# Supplementary material for: Draft Sequences of the Radish (Raphanus sativus L.) Genome
Source: PubMed Central journal article supplement (PMC4195494; doi:10.1093/dnares/dsu014), 2014-05-16
Supplement: supp_dsu014_dsu014supp_tables1.pdf [file supp_dsu014_dsu014supp_tables1.pdf]

Table S1 Statistics of the assembled scaffolds only by short-read sequences

---

|                               |             |
|-------------------------------|-------------|
| Number of scaffolds (>100 bp) | 992,801     |
| Total length (bp)             | 473,904,309 |
| Average size (bp)             | 477         |
| Maximum size (bp)             | 343,168     |
| N50 (bp)                      | 13,462      |

---

Table S2 Summary of BAC clones

---

|                             |                 |
|-----------------------------|-----------------|
| BAC clones (Number of ends) | 20,736 (41,476) |
| Number of sequenced ends    | 34,417          |
| Number of nuclear sequences | 27,904          |
| Number of chloroplast       | 6,396           |
| Number of mitochondria      | 36              |
| Number of bacteria          | 80              |
| Number of vecotor           | 1               |

---



Table S3 Linkages of both ends of scaffolds

| ID of scaffold | Size of scaffold (bp) | Name of marker | Type of DNA marker |             | Primer sequence            |                            | Restriction enzyme | Probe seq. Saya    | Hybridization condition |         | Probe seq. Aokubi  | Hybridization condition |         | Linkage |
|----------------|-----------------------|----------------|--------------------|-------------|----------------------------|----------------------------|--------------------|--------------------|-------------------------|---------|--------------------|-------------------------|---------|---------|
|                |                       |                |                    |             | Forward                    | Reverse                    |                    |                    | temperature(°C)         | SSC (x) |                    | temperature(°C)         | SSC (x) |         |
| Rsa1.0_00002.1 | 601.661               | Rsa00002_5'    | dCAPS              | co-dominant | ATCTCATTGAGAAATATAAGACCCG  | TGTATTGTGTGGCATCTC         | Hap II             | -                  | -                       | -       | -                  | -                       | -       | LK      |
|                |                       | Rsa00002_3'    | CAPS               | dominant    | GGTGACTGCATTGCTTTCCG       | TCCATCCTGACGTTCTCCTC       | Taq I              | -                  | -                       | -       | -                  | -                       | -       |         |
| Rsa1.0_00004.1 | 253.996               | Rsa00004_5'    | dCAPS              | dominant    | ATTTGTTTTTTATGTTAAATTTCCG  | GGAAAGAGTTAAGGGCACTTGT     | Taq I              | -                  | -                       | -       | -                  | -                       | -       | LK      |
|                |                       | Rsa00004_3'    | dot-blot           | dominant    | CGCCATAGCTGTTCTGATCA       | AGCTCGACCCGAAACATGTG       | -                  | ACTGGGATGATCTCTC   | 40                      | 0.5     | ACTCGGATATATCTCTC  | 40                      | 0.5     |         |
| Rsa1.0_00019.1 | 301.669               | Rsa00019_5'    | dot-blot           | co-dominant | GCTCTCCTTGTGTGCTGTC        | TCCAAGCAGATGGCCTTATC       | -                  | ACCATCATTTTATATTA  | 40                      | 0.5     | ACCATCATTTTATATTA  | 40                      | 0.5     | LK      |
|                |                       | Rsa00019_3'    | dot-blot           | dominant    | TGCTTACGGTTCATCTTTGG       | CCCTCATTTTCTACGAAGCTCTC    | -                  | ATGTAATATAAAGAGAA  | 35                      | 1       | ATGTAATATAAAGAGAA  | 40                      | 1       |         |
| Rsa1.0_00022.1 | 200.461               | Rsa00022_5'    | CAPS               | co-dominant | GAGCTGGCTCCAGAGAAA         | GTGGTCTGTGATGCTGTGAA       | Alu I              | -                  | -                       | -       | -                  | -                       | -       | LK      |
|                |                       | Rsa00022_3'    | dot-blot           | co-dominant | ACTTCTGCGTGTGCTTTG         | CATCTGCATGGGACAAAATG       | -                  | CCAGTCAAGGATTTCTGG | 40                      | 0.5     | CCAGTCAATAATTTCTGG | 40                      | 0.5     |         |
| Rsa1.0_00023.1 | 194.764               | Rsa00023_5'    | CAPS               | dominant    | GCTGCTGCGAGTTAAAGGAG       | TGGGCGCTAAGGAATTGTAG       | Kpn I              | -                  | -                       | -       | -                  | -                       | -       | LK      |
|                |                       | Rsa00023_3'    | dot-blot           | co-dominant | GATTTTCTCCCAAAAACCTC       | GGGAAGTAGCGGAAATGATG       | -                  | GTCTAACATGTTCCAGGG | 40                      | 0.5     | GTCTAACACGTTCCAGGG | 40                      | 0.2     |         |
| Rsa1.0_00025.1 | 277.312               | Rsa00025_5'    | CAPS               | dominant    | TGGTGGGAGTCTTTAG           | TCACAGTTTATGACTTAGG        | Mun I              | -                  | -                       | -       | -                  | -                       | -       | LK      |
|                |                       | Rsa00025_3'    | CAPS               | co-dominant | ATGGGGATTTTTGATCATGG       | TGGTGAATTTGGAAGGGAAG       | Ssp I              | -                  | -                       | -       | -                  | -                       | -       |         |
| Rsa1.0_00027.1 | 283.362               | Rsa00027_5'    | dot-blot           | co-dominant | GTGAATGCTAGCAGTTGTCCA      | ATACAAGTCTCCGGCACCC        | -                  | CATTGGAAGTTTAGACA  | 40                      | 0.5     | CATTGGAATTTTAGACA  | 40                      | 1       | LK      |
|                |                       | Rsa00027_3'    | dot-blot           | co-dominant | GGAAAGCGGTGATGGAGATAA      | TGGAAGGTAACCGGATCTTG       | -                  | TTTATTATGTTATTACA  | 35                      | 1       | TTTATTATGTTATTACA  | 35                      | 1       |         |
| Rsa1.0_00036.1 | 176.186               | Rsa00036_5'    | CAPS               | dominant    | TCGAACTTACCGTCGAAACC       | AAAGATCCACATTCGCAAGC       | Hae III            | -                  | -                       | -       | -                  | -                       | -       | LK      |
|                |                       | Rsa00036_3'    | dot-blot           | co-dominant | CGGTGGAAGTTGTTGTGG         | AGTGGCACTGGGAAAGACAAG      | -                  | TTAGCTTTGACTTTGAG  | 50                      | 0.5     | TTAGCTTTAAGCTTTGAG | 40                      | 0.5     |         |
| Rsa1.0_00042.1 | 171.507               | Rsa00042_5'    | dCAPS              | dominant    | AGAGAATGAGAGCGAAGATG       | CTATAGATAAAGTTTGACCAAACTCG | Taq I              | -                  | -                       | -       | -                  | -                       | -       | LK      |
|                |                       | Rsa00042_3'    | CAPS               | dominant    | CTTGGCAGAAAAATAACCTC       | TGAGAGAGTTTGGGATGTG        | Xba I              | -                  | -                       | -       | -                  | -                       | -       |         |
| Rsa1.0_00043.1 | 264.937               | Rsa00043_5'    | dCAPS              | co-dominant | GATTTGGATCGTCTCTCG         | GTTATTACCTGACAAAAGAGTGATC  | Taq I              | -                  | -                       | -       | -                  | -                       | -       | LK      |
|                |                       | Rsa00043_3'    | CAPS               | dominant    | GCTCATCGTGTACTGCTGA        | AAGCCGTTCTCATGGACTTG       | Xsp I              | -                  | -                       | -       | -                  | -                       | -       |         |
| Rsa1.0_00048.1 | 167.185               | Rsa00048_5'    | dot-blot           | co-dominant | TTGGGCTTGGGATTTGATAG       | ACGAAACACACACGACCAA        | -                  | TAACACATTAAGAAATG  | 40                      | 1       | TAACACATGAAGAAATG  | 40                      | 1       | LK      |
|                |                       | Rsa00048_3'    | dot-blot           | co-dominant | ACGTGGGCTTAAACTGAACG       | TCCACAACATGCGGTATCTC       | -                  | GCCGTCATCATTGCAGT  | 50                      | 1       | GCCGTCATCATTGCAGT  | 50                      | 1       |         |
| Rsa1.0_00065.1 | 454.616               | Rsa00065_5'    | dot-blot           | co-dominant | CGCCTTAAAAGAGCTGGTA        | TTTAGAGCGCTGGGATGAAG       | -                  | ATCAATAGGTCATATTC  | 35                      | 1       | ATCAATAGATCATATTC  | 40                      | 0.5     | LK      |
|                |                       | Rsa00065_3'    | CAPS               | co-dominant | GACACATGGTTCAGTGAOGTG      | GCCTAAGTTGGCAGCTTTAAG      | Alu I              | -                  | -                       | -       | -                  | -                       | -       |         |
| Rsa1.0_00100.1 | 249.232               | Rsa00100_5'    | SCAR               | co-dominant | AGTCACGGACACGAAATCC        | TGACACCGGAGAACGAAAG        | -                  | -                  | -                       | -       | -                  | -                       | -       | LK      |
|                |                       | Rsa00100_3'    | dot-blot           | co-dominant | AATGGATAGCCAAACAAACG       | ACACGGATTATCGCCTTCC        | -                  | TTACCATAGATCATTGC  | 35                      | 1       | TTACCATAAATCATTGC  | 35                      | 1       |         |
| Rsa1.0_00123.1 | 325.650               | Rsa00123_5'    | dot-blot           | dominant    | CCCTCCAAAATAGCGAAAGAGC     | AGAGAAGATCGGTCGGAAGG       | -                  | GCCCTAATCCTACTCGCC | 50                      | 1       | GCCCTAATCCTACTCGCC | 50                      | 1       | LK      |
|                |                       | Rsa00123_3'    | dot-blot           | co-dominant | AGAGTGCCCAACATTTTATTGATACC | GAGCGCCACACATAGGAAAC       | -                  | ATGACATGCTTATAGT   | 35                      | 1       | ATGACATGCTTATAGT   | 35                      | 1       |         |
| Rsa1.0_00125.1 | 253.043               | Rsa00125_5'    | dot-blot           | co-dominant | AGTCTTGCCTTTTGTCTCA        | AAACTCTCAGCCGTTGGAA        | -                  | CAATCTTCTGACCGATT  | 45                      | 0.5     | CAATCTTCCGACCGATT  | 45                      | 0.5     | LK      |
|                |                       | Rsa00125_3'    | dot-blot           | co-dominant | TTCGTCAACACCAAGCATTCC      | TTTTGGAGCCAAAGTTCTCA       | -                  | AGAGAACCCTTCTCTATT | 40                      | 1       | AGAGAACCCTTCTCTATT | 50                      | 1       |         |
| Rsa1.0_00134.1 | 390.219               | Rsa00134_5'    | CAPS               | co-dominant | GTCAAAAATCCAGGATTTCCAC     | AAGGTCCACCATCTCCACCAG      | Mun I              | -                  | -                       | -       | -                  | -                       | -       | LK      |
|                |                       | Rsa00134_3'    | CAPS               | co-dominant | GGCGCAAATTTGATGTTAG        | TCCAATTCACCTGATTGCAC       | Dde I              | -                  | -                       | -       | -                  | -                       | -       |         |
| Rsa1.0_00152.1 | 257.730               | Rsa00152_5'    | dot-blot           | co-dominant | AAACCCCTCAACCGTGAAG        | CGTGCACTACAAGAAACATCG      | -                  | CGAGGAAACCCCTATTGT | 50                      | 1       | CGAGGAAATCCTATTGT  | 40                      | 0.5     | LK      |
|                |                       | Rsa00152_3'    | dot-blot           | co-dominant | GCTCGCTGCTCAGTAAGAAA       | ACGGAGCATAGACATCAAA        | -                  | AGTCACAACCTCGTAAGT | 50                      | 1       | AGTCACAACCTCGTAAGT | 40                      | 0.5     |         |
| Rsa1.0_00173.1 | 288.743               | Rsa00173_5'    | dot-blot           | co-dominant | GAATCAATGGGAAATCGAAG       | TTTATCGGTTCTGGTCTGGA       | -                  | ATCGAAGACGGGTTATT  | 50                      | 1       | ATCGAAGATGGGTTATT  | 50                      | 1       | LK      |
|                |                       | Rsa00173_3'    | dCAPS              | co-dominant | AGTGTTTAGTATCGTCTCTCGAGAT  | TAGAGCCTCTGGGATTTTGG       | Mbo I              | -                  | -                       | -       | -                  | -                       | -       |         |
| Rsa1.0_00179.1 | 393.324               | Rsa00179_5'    | dCAPS              | co-dominant | GAGACACAACATACGACAAC       | CTTATGGAGTTCATGCTTTGAT     | Mbo I              | -                  | -                       | -       | -                  | -                       | -       | LK      |
|                |                       | Rsa00179_3'    | dot-blot           | co-dominant | AGTAACAAAACGACGACACA       | CAACGATGTGGTGAAGAAAG       | -                  | TTAGTTAATTAGTGATC  | 35                      | 1       | TTAGTTAAGTAGTGATC  | 40                      | 1       |         |
| Rsa1.0_00215.1 | 201.775               | Rsa00215_5'    | dot-blot           | co-dominant | TCCTTTGCCAAACCCAC          | CCTTGTGAAAACCTCCTGA        | -                  | GCATGCCTAGAGTAGGA  | 50                      | 1       | GCATGCCTGAGTAGGA   | 50                      | 0.5     | LK      |
|                |                       | Rsa00215_3'    | dot-blot           | co-dominant | ACTGAAATGCAACTGCGATG       | TGACCTTGGGAAAGATGGAG       | -                  | GTATTGAATACACTTTCA | 40                      | 0.5     | TGTATTGAACACTTTCAA | 40                      | 0.5     |         |
| Rsa1.0_00224.1 | 327.530               | Rsa00224_5'    | dot-blot           | dominant    | CTGGGCTTTGTGCAATTTT        | GCCACATTTGTGGTTCTCTC       | -                  | AATATGTGAGAAACCTGT | 40                      | 0.2     | AATATGTGTAACCTGT   | 40                      | 1       | LK      |
|                |                       | Rsa00224_3'    | dCAPS              | dominant    | GCACTCTGCAGCAGCCTGG        | TCCCTAAGCAGCGGTCAAG        | Taq I              | -                  | -                       | -       | -                  | -                       | -       |         |
| Rsa1.0_00234.1 | 197.060               | Rsa00234_5'    | CAPS               | dominant    | GGCAACATCAGACTCTTCA        | CTTCGAAAACAGAGGATTC        | Sac I              | -                  | -                       | -       | -                  | -                       | -       | LK      |
|                |                       | Rsa00234_3'    | CAPS               | co-dominant | CATCAACGCTCTGCTCTTTG       | AGAAACAAGACAGCGGTGTC       | Sph I              | -                  | -                       | -       | -                  | -                       | -       |         |
| Rsa1.0_00238.1 | 193.193               | Rsa00238_5'    | dCAPS              | co-dominant | TTCCCTTGGGGTTTTAAGTG       | GATGGTCGACTTGAATGGTAG      | Bgl II             | -                  | -                       | -       | -                  | -                       | -       | LK      |
|                |                       | Rsa00238_3'    | CAPS               | co-dominant | ATGTGACGGAGGTTCCCTTTG      | ACCGCATATTCTCATCGTC        | Hae III            | -                  | -                       | -       | -                  | -                       | -       |         |
| Rsa1.0_00255.1 | 204.967               | Rsa00255_5'    | dot-blot           | co-dominant | AGTGCTGTAATGGTGTCTC        | CTGCAAGTAGCACGACGAAAG      | -                  | TCTTGCAAGTTTATTGA  | 40                      | 0.2     | TCTTGCAAAATTTATTGA | 40                      | 0.5     | LK      |
|                |                       | Rsa00255_3'    | CAPS               | dominant    | ACAAGTGTCCAAAGGAAACC       | CGTGAAGCATGAATCAAGA        | Alu I              | -                  | -                       | -       | -                  | -                       | -       |         |
| Rsa1.0_00273.1 | 326.186               | Rsa00273_5'    | dCAPS              | dominant    | TTCCATAAATTTCACTTGTCTCTATC | GGACTTGAGCGGTTTTTATAG      | Taq I              | -                  | -                       | -       | -                  | -                       | -       | LK      |
|                |                       | Rsa00273_3'    | dot-blot           | dominant    | TTCACTACCAAGGAAAGCAG       | ACCTCCTAAAACACGTTGG        | -                  | AGAAGACTAACTTAGC   | 40                      | 1       | AGAAGACTGACTTTAGC  | 40                      | 1       |         |
| Rsa1.0_00307.1 | 199.003               | Rsa00307_5'    | CAPS               | co-dominant | GATGGGAGTTGCCAAAA          | CGGAGAATCTATTTGTGTTGAG     | Dra I              | -                  | -                       | -       | -                  | -                       | -       | LK      |
|                |                       | Rsa00307_3'    | dCAPS              | co-dominant | AAAGCATTGTTTTGATGTAC       | ATATTCAAACAGCAACCTGTA      | Bsp1407 I          | -                  | -                       | -       | -                  | -                       | -       |         |
| Rsa1.0_00344.1 | 191.774               | Rsa00344_5'    | dCAPS              | co-dominant | GAATTCAACTGCTGGACAG        | CTTACCCTACAAGTTTGTCTTG     | Taq I              | -                  | -                       | -       | -                  | -                       | -       | LK      |



|                |         |             |          |             |                          |                       |         |                   |    |     |                   |    |     |    |
|----------------|---------|-------------|----------|-------------|--------------------------|-----------------------|---------|-------------------|----|-----|-------------------|----|-----|----|
| Rsa1.0_02589.1 | 300,828 | Rsa02589_5' | dot-blot | co-dominant | CCCATGAGTTCCTCTTCCA      | AACCACCTACATCCGCAAAC  | -       | ATAGCTTAAAAGTATCA | 40 | 1   | ATAGCTTACAAGTATCA | 40 | 0.5 | LK |
|                |         | Rsa02589_3' | dot-blot | co-dominant | AAGTTTGGTTCGGGTTTCGTA    | AACCAAACCTGATCCGACTG  | -       | TAACTATCTTTATATT  | 35 | 1   | TAACTATTTTTATATT  | 35 | 1   |    |
| Rsa1.0_00021.1 | 263,655 | Rsa00021_5' | CAPS     | dominant    | TGGAGTCTCTCTTGGGGATG     | TCTTGGAGTTGGCCTTGTTTC | Taq I   | -                 | -  | -   | -                 | -  | -   | NL |
|                |         | Rsa00021_3' | CAPS     | dominant    | CGCACCTTGACAAAATACGA     | TCATTTTGATCCGTGCAAAG  | Afl II  | -                 | -  | -   | -                 | -  | -   |    |
| Rsa1.0_00915.1 | 194,446 | Rsa00915_5' | dCAPS    | co-dominant | GTGATATGGATATGCCACACAGGC | GCACGAACACCTCCAACAAC  | Hae III | -                 | -  | -   | -                 | -  | -   | NL |
|                |         | Rsa00915_3' | dot-blot | co-dominant | GGGTAAGCAGCAGAACTTCG     | GCCCTTGCCATTTAACAAA   | -       | CTGCTTCTTTCAACGTC | 50 | 1   | CTGCTTCTGTCAACGTC | 50 | 1   |    |
| Rsa1.0_00917.1 | 182,012 | Rsa00917_5' | CAPS     | co-dominant | CAGAAATTAGTAGCCGTGACA    | GCCAATGCAGATTTACAAG   | Dde I   | -                 | -  | -   | -                 | -  | -   | NL |
|                |         | Rsa00917_3' | dot-blot | dominant    | CTCACCAAAGCCAAATAA       | TTCGGAGTGCTATGTCCAAG  | -       | AGGTATGGGATGCTAAA | 40 | 0.5 | AGGTATGGATGCTAAA  | 40 | 0.5 |    |

LK, Both ends of scaffolds are linked.

NL, Both ends of scaffolds are not linked

Table S4 Genes of 80,521 predicted by Augustus.

| Query                 | vs NR (Non Redundant Database: <a href="http://blast.ncbi.nlm.nih.gov/Blast.cgi?PAGE=Proteins">http://blast.ncbi.nlm.nih.gov/Blast.cgi?PAGE=Proteins</a> )                                                                                                                                                                                                                                                               |                |                  |           |         |           |           |                                           | vs TAIR10 of <i>A. thaliana</i> |                      |                                                                                                                                                                                                                                                                                                                                                                              |       |         |           |         |           |           |
|-----------------------|--------------------------------------------------------------------------------------------------------------------------------------------------------------------------------------------------------------------------------------------------------------------------------------------------------------------------------------------------------------------------------------------------------------------------|----------------|------------------|-----------|---------|-----------|-----------|-------------------------------------------|---------------------------------|----------------------|------------------------------------------------------------------------------------------------------------------------------------------------------------------------------------------------------------------------------------------------------------------------------------------------------------------------------------------------------------------------------|-------|---------|-----------|---------|-----------|-----------|
|                       | NR                                                                                                                                                                                                                                                                                                                                                                                                                       | Length (query) | Length (subject) | E-value   | Length% | Identity% | Positive% | Product                                   | Genbank                         | Species              | Subject                                                                                                                                                                                                                                                                                                                                                                      | Query | Subject | E-value   | Length% | Identity% | Positive% |
| Rsa1.0_00001.1.g1.t1  | ref XP_002867679.1  hydrolase, alpha/beta fold family protein [Arabidopsis lyrata subsp. lyrata] gi 297313515 gb EFH43938.1  hydrolase, alpha/beta fold family protein [Arabidopsis lyrata subsp. lyrata]                                                                                                                                                                                                                | 498            | 498              | 0         | 100.0   | 88.6      | 93.4      | hydrolase, alpha/beta fold family protein | gbpln                           | Arabidopsis lyrata   | AT4G24140.1   Symbols:   alpha/beta-Hydrolases superfamily protein   chr4:12530032-12533664 REVERSE LENGTH=498                                                                                                                                                                                                                                                               | 498   | 498     | 0         | 100.0   | 88.0      | 93.4      |
| Rsa1.0_00001.1.g2.t1  | gb AAB63610.1  hypothetical protein [Arabidopsis thaliana]                                                                                                                                                                                                                                                                                                                                                               | 384            | 430              | 1.00E-128 | 112.0   | 71.1      | 78.9      | hypothetical protein                      | gbpln                           | Arabidopsis thaliana | AT4G24150.1   Symbols: AtGRF8, GRF8   growth-regulating factor 8   chr4:12535972-12539387 FORWARD LENGTH=493                                                                                                                                                                                                                                                                 | 384   | 493     | 1.00E-126 | 128.4   | 64.1      | 70.8      |
| Rsa1.0_00001.1.g3.t1  | ref XP_002869734.1  hydrolase, alpha/beta fold family protein [Arabidopsis lyrata subsp. lyrata] gi 297315570 gb EFH45993.1  hydrolase, alpha/beta fold family protein [Arabidopsis lyrata subsp. lyrata]                                                                                                                                                                                                                | 407            | 417              | 0         | 102.5   | 90.4      | 95.8      | hydrolase, alpha/beta fold family protein | gbpln                           | Arabidopsis lyrata   | AT4G24160.1   Symbols:   alpha/beta-Hydrolases superfamily protein   chr4:12539871-12542210 FORWARD LENGTH=418                                                                                                                                                                                                                                                               | 407   | 418     | 0         | 102.7   | 88.7      | 94.8      |
| Rsa1.0_00001.1.g4.t1  | emb CAB51660.1  putative protein [Arabidopsis thaliana] gi 7269267 emb CAB79327.1  putative protein [Arabidopsis thaliana]                                                                                                                                                                                                                                                                                               | 1134           | 1263             | 0         | 111.4   | 45.5      | 50.8      | putative protein                          | gbpln                           | Arabidopsis thaliana | AT4G24170.1   Symbols:   ATP binding microtubule motor family protein   chr4:12543206-12546805 FORWARD LENGTH=1004                                                                                                                                                                                                                                                           | 1134  | 1004    | 0         | 88.5    | 45.5      | 50.8      |
| Rsa1.0_00001.1.g5.t1  | ref XP_002869733.1  hypothetical protein ARALYDRAFT_492444 [Arabidopsis lyrata subsp. lyrata] gi 297315589 gb EFH45992.1  hypothetical protein ARALYDRAFT_492444 [Arabidopsis lyrata subsp. lyrata]                                                                                                                                                                                                                      | 315            | 305              | 1.00E-131 | 96.8    | 77.1      | 87.0      | hypothetical protein ARALYDRAFT_492444    | gbpln                           | Arabidopsis lyrata   | AT4G24175.1   Symbols:   unknown protein; CONTAINS InterPro DOMAIN/s: Uncharacterised protein family UPF0307 (InterPro:IPR006839); Has 30201 Blast hits to 17322 proteins in 780 species: Archae - 12; Bacteria - 1396; Metazoa - 17338; Fungi - 3422; Plants - 5037; Viruses - 0; Other Eukaryotes - 2996 (source: NCBI BLINK).   chr4:12547018-12548810 FORWARD LENGTH=306 | 315   | 306     | 1.00E-116 | 97.1    | 76.8      | 85.7      |
| Rsa1.0_00001.1.g6.t1  | gb EOA17059.1  hypothetical protein CARUB_v10005297mg [Capsella rubella]                                                                                                                                                                                                                                                                                                                                                 | 255            | 312              | 1.00E-132 | 122.4   | 89.4      | 94.9      | hypothetical protein CARUB_v10005297mg    | gbpln                           | Capsella rubella     | AT4G24180.1   Symbols: TLP1, ATTLP1   THAUMATIN-LIKE PROTEIN 1   chr4:12550356-12551221 REVERSE LENGTH=260                                                                                                                                                                                                                                                                   | 255   | 260     | 1.00E-130 | 102.0   | 88.6      | 93.3      |
| Rsa1.0_00001.1.g7.t4  | ref XP_002867675.1  hypothetical protein ARALYDRAFT_329238 [Arabidopsis lyrata subsp. lyrata] gi 297313511 gb EFH43934.1  hypothetical protein ARALYDRAFT_329238 [Arabidopsis lyrata subsp. lyrata]                                                                                                                                                                                                                      | 162            | 157              | 2.00E-61  | 96.9    | 73.5      | 82.1      | hypothetical protein ARALYDRAFT_329238    | gbpln                           | Arabidopsis lyrata   | AT4G24204.2   Symbols:   RING/U-box superfamily protein   chr4:12562069-12562646 REVERSE LENGTH=157                                                                                                                                                                                                                                                                          | 162   | 157     | 2.00E-61  | 96.9    | 71.0      | 80.9      |
| Rsa1.0_00001.1.g8.t1  | gb ACV88719.1  SLY1 F-box protein [Brassica napus]                                                                                                                                                                                                                                                                                                                                                                       | 147            | 146              | 3.00E-69  | 99.3    | 93.2      | 95.2      | SLY1 F-box protein                        | gbpln                           | Brassica napus       | AT4G24210.1   Symbols: SLY1   F-box family protein   chr4:12563658-12564113 FORWARD LENGTH=151                                                                                                                                                                                                                                                                               | 147   | 151     | 6.00E-62  | 102.7   | 78.2      | 86.4      |
| Rsa1.0_00001.1.g9.t1  | gb EOA16797.1  hypothetical protein CARUB_v10005016mg [Capsella rubella]                                                                                                                                                                                                                                                                                                                                                 | 390            | 388              | 0         | 99.5    | 85.9      | 93.1      | hypothetical protein CARUB_v10005016mg    | gbpln                           | Capsella rubella     | AT4G24220.1   Symbols: VEP1, AWI31   NAD(P)-binding Rossmann-fold superfamily protein   chr4:12565219-12566474 FORWARD LENGTH=388                                                                                                                                                                                                                                            | 390   | 388     | 0         | 99.5    | 83.6      | 92.3      |
| Rsa1.0_00001.1.g10.t1 | gb AAS21130.1  At4g24230 [Arabidopsis thaliana] gi 45773894 gb AAS76751.1  At4g24230 [Arabidopsis thaliana]                                                                                                                                                                                                                                                                                                              | 392            | 362              | 6.00E-82  | 92.3    | 56.9      | 66.3      | At4g24230                                 | gbpln                           | Arabidopsis thaliana | AT4G24230.5   Symbols: ACPB3   acyl-CoA-binding domain 3   chr4:12567240-12568754 REVERSE LENGTH=362                                                                                                                                                                                                                                                                         | 392   | 362     | 3.00E-84  | 92.3    | 56.9      | 66.3      |
| Rsa1.0_00001.1.g11.t1 | gb ACQ99198.1  WRKY7 [Brassica rapa subsp. pekinensis]                                                                                                                                                                                                                                                                                                                                                                   | 341            | 307              | 1.00E-155 | 90.0    | 81.5      | 84.8      | WRKY7                                     | gbpln                           | Brassica rapa        | AT4G24240.1   Symbols: WRKY7, ATWRKY7   WRKY DNA-binding protein 7   chr4:12571930-12573446 FORWARD LENGTH=353                                                                                                                                                                                                                                                               | 341   | 353     | 1.00E-134 | 103.5   | 77.1      | 84.5      |
| Rsa1.0_00001.1.g12.t2 | ref XP_002867673.1  hypothetical protein ARALYDRAFT_914165 [Arabidopsis lyrata subsp. lyrata] gi 297313509 gb EFH43932.1  hypothetical protein ARALYDRAFT_914165 [Arabidopsis lyrata subsp. lyrata]                                                                                                                                                                                                                      | 498            | 482              | 0         | 96.8    | 84.7      | 90.0      | hypothetical protein ARALYDRAFT_914165    | gbpln                           | Arabidopsis lyrata   | AT4G24250.1   Symbols: MLO13, ATML013   Seven transmembrane MLO family protein   chr4:12575008-12577517 REVERSE LENGTH=478                                                                                                                                                                                                                                                   | 498   | 478     | 0         | 96.0    | 83.7      | 89.2      |
| Rsa1.0_00001.1.g13.t1 | ref NP_194157.1  endoglucanase 21 [Arabidopsis thaliana] gi 75266338 sp Q9STW8.1 GUN21_ARAT H RecName: Full=Endoglucanase 21; AltName: Full=Endo-1,4-beta-glucanase 21 gi 5051768 emb CAB45061.1  endo-1,4-beta-glucanase like protein [Arabidopsis thaliana] gi 7269276 emb CAB79336.1  endo-1,4-beta-glucanase like protein [Arabidopsis thaliana] gi 332659479 gb AEE84879.1  endoglucanase 21 [Arabidopsis thaliana] | 764            | 620              | 0         | 81.2    | 58.9      | 67.7      | endoglucanase 21                          | gbpln                           | Arabidopsis thaliana | AT4G24260.1   Symbols: ATGH9A3, KOR3, GH9A3   glycosyl hydrolase 9A3   chr4:12577871-12580133 REVERSE LENGTH=620                                                                                                                                                                                                                                                             | 764   | 620     | 0         | 81.2    | 58.9      | 67.7      |

|                       |                                                                                                                                                                                                                                                                                                                                                                                                                                                                                                                                                                                                                                                                                                                                  |     |     |           |       |      |      |                                                    |       |                      |                                                                                                                                                              |     |     |           |       |      |      |
|-----------------------|----------------------------------------------------------------------------------------------------------------------------------------------------------------------------------------------------------------------------------------------------------------------------------------------------------------------------------------------------------------------------------------------------------------------------------------------------------------------------------------------------------------------------------------------------------------------------------------------------------------------------------------------------------------------------------------------------------------------------------|-----|-----|-----------|-------|------|------|----------------------------------------------------|-------|----------------------|--------------------------------------------------------------------------------------------------------------------------------------------------------------|-----|-----|-----------|-------|------|------|
| Rsa1.0_00001.1.g14.t1 | ref[XP_002867670.1] RNA recognition motif-containing protein [Arabidopsis lyrata subsp. lyrata]<br>gi 297313506 gb EFH43929.1] RNA recognition motif-containing protein [Arabidopsis lyrata subsp. lyrata]                                                                                                                                                                                                                                                                                                                                                                                                                                                                                                                       | 835 | 820 | 0         | 98.2  | 82.2 | 88.6 | RNA recognition motif-containing protein           | gbpln | Arabidopsis lyrata   | AT4G24270.1   Symbols: EMB140   EMBRYO DEFECTIVE 140   chr4:12581765-12587293 REVERSE LENGTH=816                                                             | 835 | 816 | 0         | 97.7  | 82.0 | 88.6 |
| Rsa1.0_00001.1.g15.t1 | gb EOA15374.1] hypothetical protein CARUB_v10006044mg [Capsella rubella]                                                                                                                                                                                                                                                                                                                                                                                                                                                                                                                                                                                                                                                         | 109 | 121 | 2.00E-25  | 111.0 | 67.9 | 77.1 | hypothetical protein CARUB_v10006044mg             | gbpln | Capsella rubella     | AT4G24275.1   Symbols:   Identified as a screen for stress-responsive genes.   chr4:12588579-12588959 FORWARD LENGTH=126                                     | 109 | 126 | 3.00E-22  | 115.6 | 63.3 | 74.3 |
| Rsa1.0_00001.1.g16.t1 | gb AAD25622.1]AC005287_24 Hypothetical protein [Arabidopsis thaliana]                                                                                                                                                                                                                                                                                                                                                                                                                                                                                                                                                                                                                                                            | 161 | 224 | 3.00E-24  | 139.1 | 45.3 | 61.5 | Hypothetical protein                               | gbpln | Arabidopsis thaliana | AT1G14800.1   Symbols:   Nucleic acid-binding, OB-fold-like protein   chr1:5099572-5102558 FORWARD LENGTH=384                                                | 161 | 384 | 1.00E-26  | 238.5 | 41.6 | 57.1 |
| Rsa1.0_00001.1.g17.t1 | ref[XP_002869727.1] cphsc70-1 [Arabidopsis lyrata subsp. lyrata]<br>gi 2973135563 gb EFH45986.1] cphsc70-1 [Arabidopsis lyrata subsp. lyrata]                                                                                                                                                                                                                                                                                                                                                                                                                                                                                                                                                                                    | 715 | 718 | 0         | 100.4 | 92.9 | 95.7 | cphsc70-1                                          | gbpln | Arabidopsis lyrata   | AT5G49910.1   Symbols: CPHSC70-2EAT SHOCK PROTEIN 70-2, HSC70-7, cpHsc70-2   chloroplast heat shock protein 70-2   chr5:20303470-20306295 FORWARD LENGTH=718 | 715 | 718 | 0         | 100.4 | 91.5 | 95.2 |
| Rsa1.0_00001.1.g18.t1 | ref[NP_194159.1] chloroplast heat shock protein 70-1 [Arabidopsis thaliana]<br>gi 75313889 sp Q9STW6.1]HSP7F_ARAT H RecName: Full=Heat shock 70 kDa protein 6, chloroplastic; AltName: Full=Chloroplast heat shock protein 70-1; Short=cpHsc70-1; AltName: Full=Heat shock protein 70-6; Short=ATHsp70-6; Flags: Precursor<br>gi 5051770 emb CAB45063.1] hsp 70-like protein [Arabidopsis thaliana]<br>gi 7269278 emb CAB79338.1] hsp 70-like protein [Arabidopsis thaliana]<br>gi 18175969 gb AAL59960.1] putative hsp 70 protein [Arabidopsis thaliana]<br>gi 25054945 gb AAN71949.1] putative hsp 70 protein [Arabidopsis thaliana]<br>gi 332659484 gb AEE84884.1] chloroplast heat shock protein 70-1 [Arabidopsis thaliana] | 240 | 718 | 1.00E-66  | 299.2 | 55.4 | 62.9 | chloroplast heat shock protein 70-1                | gbpln | Arabidopsis thaliana | AT4G24280.1   Symbols: cpHsc70-1   chloroplast heat shock protein 70-1   chr4:12590094-12593437 FORWARD LENGTH=718                                           | 240 | 718 | 4.00E-69  | 299.2 | 55.4 | 62.9 |
| Rsa1.0_00001.1.g19.t1 | ref[XP_002869727.1] cphsc70-1 [Arabidopsis lyrata subsp. lyrata]<br>gi 2973135563 gb EFH45986.1] cphsc70-1 [Arabidopsis lyrata subsp. lyrata]                                                                                                                                                                                                                                                                                                                                                                                                                                                                                                                                                                                    | 935 | 718 | 0         | 76.8  | 53.8 | 58.8 | cphsc70-1                                          | gbpln | Arabidopsis lyrata   | AT4G24280.1   Symbols: cpHsc70-1   chloroplast heat shock protein 70-1   chr4:12590094-12593437 FORWARD LENGTH=718                                           | 935 | 718 | 0         | 76.8  | 53.4 | 58.6 |
| Rsa1.0_00001.1.g20.t1 | gb EOA16263.1] hypothetical protein CARUB_v10004407mg [Capsella rubella]                                                                                                                                                                                                                                                                                                                                                                                                                                                                                                                                                                                                                                                         | 606 | 606 | 0         | 100.0 | 88.9 | 92.7 | hypothetical protein CARUB_v10004407mg             | gbpln | Capsella rubella     | AT4G24290.2   Symbols:   MAC/Perforin domain-containing protein   chr4:12594856-12597815 FORWARD LENGTH=606                                                  | 606 | 606 | 0         | 100.0 | 87.5 | 91.9 |
| Rsa1.0_00001.1.g21.t1 | ref[XP_002869724.1] hypothetical protein ARALYDRAFT_492419 [Arabidopsis lyrata subsp. lyrata]<br>gi 2973135560 gb EFH45983.1] hypothetical protein ARALYDRAFT_492419 [Arabidopsis lyrata subsp. lyrata]                                                                                                                                                                                                                                                                                                                                                                                                                                                                                                                          | 220 | 213 | 1.00E-103 | 96.8  | 87.7 | 90.5 | hypothetical protein ARALYDRAFT_492419             | gbpln | Arabidopsis lyrata   | AT4G24310.1   Symbols:   Protein of unknown function (DUF679)   chr4:12600900-12601541 FORWARD LENGTH=213                                                    | 220 | 213 | 1.00E-98  | 96.8  | 86.4 | 90.0 |
| Rsa1.0_00001.1.g22.t1 | ref[NP_194163.1] ubiquitin carboxyl-terminal hydrolase-like protein [Arabidopsis thaliana]<br>gi 5051774 emb CAB45067.1] putative protein [Arabidopsis thaliana]<br>gi 7269282 emb CAB79342.1] putative protein [Arabidopsis thaliana]<br>gi 91805609 gb ABE65533.1] hypothetical protein At4g24320 [Arabidopsis thaliana]<br>gi 332659489 gb AEE84889.1] ubiquitin carboxyl-terminal hydrolase-like protein [Arabidopsis thaliana]                                                                                                                                                                                                                                                                                              | 379 | 395 | 1.00E-170 | 104.2 | 80.5 | 88.7 | ubiquitin carboxyl-terminal hydrolase-like protein | gbpln | Arabidopsis thaliana | AT4G24320.1   Symbols:   Ubiquitin carboxyl-terminal hydrolase family protein   chr4:12602298-12603485 REVERSE LENGTH=395                                    | 379 | 395 | 1.00E-172 | 104.2 | 80.5 | 88.7 |
| Rsa1.0_00001.1.g23.t1 | ref[NP_194164.1] uncharacterized protein [Arabidopsis thaliana]<br>gi 5051775 emb CAB45068.1] putative protein [Arabidopsis thaliana]<br>gi 7269283 emb CAB79343.1] putative protein [Arabidopsis thaliana]<br>gi 58652054 gb AAW80852.1] At4g24330 [Arabidopsis thaliana]<br>gi 332659490 gb AEE84890.1] uncharacterized protein AT4G24330 [Arabidopsis thaliana]                                                                                                                                                                                                                                                                                                                                                               | 520 | 478 | 0         | 91.9  | 76.2 | 81.9 | uncharacterized protein                            | gbpln | Arabidopsis thaliana | AT4G24330.1   Symbols:   Protein of unknown function (DUF1682)   chr4:12603848-12606229 REVERSE LENGTH=478                                                   | 520 | 478 | 0         | 91.9  | 76.2 | 81.9 |

|                       |                                                                                                                                                                                                                                                                                                                                                                                                                                                                                                                                                                                                                                                                                                                                                                                                                                                 |      |      |           |       |      |      |                                                   |       |                      |                                                                                                                                                                                                                                                                                                                                                                                                                                                                                                                                                                                                                                     |      |     |           |       |      |      |
|-----------------------|-------------------------------------------------------------------------------------------------------------------------------------------------------------------------------------------------------------------------------------------------------------------------------------------------------------------------------------------------------------------------------------------------------------------------------------------------------------------------------------------------------------------------------------------------------------------------------------------------------------------------------------------------------------------------------------------------------------------------------------------------------------------------------------------------------------------------------------------------|------|------|-----------|-------|------|------|---------------------------------------------------|-------|----------------------|-------------------------------------------------------------------------------------------------------------------------------------------------------------------------------------------------------------------------------------------------------------------------------------------------------------------------------------------------------------------------------------------------------------------------------------------------------------------------------------------------------------------------------------------------------------------------------------------------------------------------------------|------|-----|-----------|-------|------|------|
| Rsa1.0_00001.1.g24.t1 | gb AAG51046.1 AC069473.8 gypsy/Ty-3 retroelement polyprotein; 69905-74404 [Arabidopsis thaliana]<br>gi 10998138 dbj BAB03109.1 retroelement pol polyprotein [Arabidopsis thaliana]<br>ref NP_567699.1 phosphorylase family protein [Arabidopsis thaliana]<br>gi 26453148 dbj BAC43650.1 unknown protein [Arabidopsis thaliana]<br>gi 28950909 gb AA063378.1 At4g24340 [Arabidopsis thaliana]<br>gi 332659491 gb AEE84891.1 phosphorylase family protein [Arabidopsis thaliana]                                                                                                                                                                                                                                                                                                                                                                  | 1513 | 1499 | 0         | 99.1  | 64.8 | 79.0 | gypsy/Ty-3 retroelement polyprotein; 69905-74404  | gbpln | Arabidopsis thaliana | ATMG00860.1   Symbols: ORF158   DNA/RNA polymerases superfamily protein   chrM:235916-236392 FORWARD LENGTH=158                                                                                                                                                                                                                                                                                                                                                                                                                                                                                                                     | 1513 | 158 | 7.00E-31  | 10.4  | 4.4  | 5.5  |
| Rsa1.0_00001.1.g25.t1 | gi 28950909 gb AA063378.1 At4g24340 [Arabidopsis thaliana]<br>gi 332659491 gb AEE84891.1 phosphorylase family protein [Arabidopsis thaliana]                                                                                                                                                                                                                                                                                                                                                                                                                                                                                                                                                                                                                                                                                                    | 343  | 338  | 1.00E-161 | 98.5  | 84.0 | 88.9 | phosphorylase family protein                      | gbpln | Arabidopsis thaliana | AT4G24340.1   Symbols:   Phosphorylase superfamily protein   chr4:12607475-12609148 FORWARD LENGTH=338                                                                                                                                                                                                                                                                                                                                                                                                                                                                                                                              | 343  | 338 | 1.00E-164 | 98.5  | 84.0 | 88.9 |
| Rsa1.0_00001.1.g26.t1 | gb AAM65580.1 unknown [Arabidopsis thaliana]<br>ref NP_567700.1 uncharacterized protein [Arabidopsis thaliana]<br>gi 5051779 emb CAB45072.1 hypothetical protein [Arabidopsis thaliana]<br>gi 7269287 emb CAB79347.1 hypothetical protein [Arabidopsis thaliana]<br>gi 17381050 gb AAL36337.1 unknown protein [Arabidopsis thaliana]<br>gi 21436263 gb AAM51270.1 unknown protein [Arabidopsis thaliana]<br>gi 21555804 gb AAM63937.1 unknown protein [Arabidopsis thaliana]<br>gi 332659494 gb AEE84894.1 uncharacterized protein AT4G24370 [Arabidopsis thaliana]                                                                                                                                                                                                                                                                             | 350  | 336  | 1.00E-159 | 96.0  | 78.3 | 85.4 | unknown                                           | gbpln | Arabidopsis thaliana | AT4G24350.1   Symbols:   Phosphorylase superfamily protein   chr4:12609637-12611328 FORWARD LENGTH=336                                                                                                                                                                                                                                                                                                                                                                                                                                                                                                                              | 350  | 336 | 1.00E-160 | 96.0  | 77.7 | 84.9 |
| Rsa1.0_00001.1.g27.t1 | gi 21436263 gb AAM51270.1 unknown protein [Arabidopsis thaliana]<br>gi 21555804 gb AAM63937.1 unknown protein [Arabidopsis thaliana]<br>gi 332659494 gb AEE84894.1 uncharacterized protein AT4G24370 [Arabidopsis thaliana]<br>ref NP_567701.1 uncharacterized protein [Arabidopsis thaliana]<br>gi 26451917 dbj BAC43051.1 unknown protein [Arabidopsis thaliana]<br>gi 88196765 gb ABD43025.1 At4g24380 [Arabidopsis thaliana]<br>gi 332659495 gb AEE84895.1 uncharacterized protein AT4G24380 [Arabidopsis thaliana]                                                                                                                                                                                                                                                                                                                         | 176  | 164  | 2.00E-41  | 93.2  | 65.3 | 77.3 | uncharacterized protein                           | gbpln | Arabidopsis thaliana | AT4G24370.1   Symbols:   unknown protein; Has 30201 Blast hits to 17322 proteins in 780 species: Archae - 12; Bacteria - 1396; Metazoa - 17338; Fungi - 3422; Plants - 5037; Viruses - 0; Other Eukaryotes - 2996 (source: NCBI BLINK).   chr4:12611608-12612102 REVERSE LENGTH=164                                                                                                                                                                                                                                                                                                                                                 | 176  | 164 | 7.00E-44  | 93.2  | 65.3 | 77.3 |
| Rsa1.0_00001.1.g28.t1 | ref NP_567701.1 uncharacterized protein [Arabidopsis thaliana]<br>gi 26451917 dbj BAC43051.1 unknown protein [Arabidopsis thaliana]<br>gi 88196765 gb ABD43025.1 At4g24380 [Arabidopsis thaliana]<br>gi 332659495 gb AEE84895.1 uncharacterized protein AT4G24380 [Arabidopsis thaliana]                                                                                                                                                                                                                                                                                                                                                                                                                                                                                                                                                        | 234  | 234  | 1.00E-114 | 100.0 | 84.6 | 92.3 | uncharacterized protein                           | gbpln | Arabidopsis thaliana | AT4G24380.1   Symbols:   INVOLVED IN: 10-formyltetrahydrofolate biosynthetic process, folic acid and derivative biosynthetic process; EXPRESSED IN: 24 plant structures; EXPRESSED DURING: 15 growth stages; CONTAINS InterPro DOMAIN/s: Serine hydrolase (InterPro:IPR005645); BEST Arabidopsis thaliana protein match is: alpha/beta-Hydrolases superfamily protein (TAIR:AT5G65400.1); Has 30201 Blast hits to 17322 proteins in 780 species: Archae - 12; Bacteria - 1396; Metazoa - 17338; Fungi - 3422; Plants - 5037; Viruses - 0; Other Eukaryotes - 2996 (source: NCBI BLINK).   chr4:12612554-12613586 FORWARD LENGTH=234 | 234  | 234 | 1.00E-117 | 100.0 | 84.6 | 92.3 |
| Rsa1.0_00001.1.g29.t1 | gb EOA18169.1 hypothetical protein CARUB_v10006645mg [Capsella rubella]<br>ref NP_194171.1 CBL-interacting serine/threonine-protein kinase 8 [Arabidopsis thaliana]<br>gi 75337651 sp Q9STV4.1 CIPK8_ARAT H RecName: Full=CBL-interacting serine/threonine-protein kinase 8; AltName: Full=SNF1-related kinase 3.13; AltName: Full=SOS2-like protein kinase PKS11<br>gi 19343483 gb AAK16683.2 AF290193.1 CBL-interacting protein kinase 8 [Arabidopsis thaliana]<br>gi 5051782 emb CAB45075.1 serine/threonine kinase-like protein [Arabidopsis thaliana]<br>gi 7269290 emb CAB79350.1 serine/threonine kinase-like protein [Arabidopsis thaliana]<br>gi 24030396 gb AAN41358.1 putative serine/threonine kinase [Arabidopsis thaliana]<br>gi 332659499 gb AEE84899.1 CBL-interacting serine/threonine-protein kinase 8 [Arabidopsis thaliana] | 615  | 622  | 0         | 101.1 | 85.0 | 90.9 | hypothetical protein CARUB_v10006645mg            | gbpln | Capsella rubella     | AT4G24390.1   Symbols:   RNI-like superfamily protein   chr4:12613909-12615966 REVERSE LENGTH=623                                                                                                                                                                                                                                                                                                                                                                                                                                                                                                                                   | 615  | 623 | 0         | 101.3 | 84.2 | 90.7 |
| Rsa1.0_00001.1.g30.t1 | ref NP_194171.1 CBL-interacting serine/threonine-protein kinase 8 [Arabidopsis thaliana]<br>gi 75337651 sp Q9STV4.1 CIPK8_ARAT H RecName: Full=CBL-interacting serine/threonine-protein kinase 8; AltName: Full=SNF1-related kinase 3.13; AltName: Full=SOS2-like protein kinase PKS11<br>gi 19343483 gb AAK16683.2 AF290193.1 CBL-interacting protein kinase 8 [Arabidopsis thaliana]<br>gi 5051782 emb CAB45075.1 serine/threonine kinase-like protein [Arabidopsis thaliana]<br>gi 7269290 emb CAB79350.1 serine/threonine kinase-like protein [Arabidopsis thaliana]<br>gi 24030396 gb AAN41358.1 putative serine/threonine kinase [Arabidopsis thaliana]<br>gi 332659499 gb AEE84899.1 CBL-interacting serine/threonine-protein kinase 8 [Arabidopsis thaliana]                                                                            | 454  | 445  | 0         | 98.0  | 93.0 | 95.8 | CBL-interacting serine/threonine-protein kinase 8 | gbpln | Arabidopsis thaliana | AT4G24400.1   Symbols: CIPK8, SnRK3.13, PKS11, ATCIPK8   CBL-interacting protein kinase 8   chr4:12617379-12620481 FORWARD LENGTH=445                                                                                                                                                                                                                                                                                                                                                                                                                                                                                               | 454  | 445 | 0         | 98.0  | 93.0 | 95.8 |

|                       |                                                                                                                                                                                                                                                                                                                                                                                                                                                                                                                                                                                                                                                                                                                                                                                                                                                                                                                                                                                                                                                                                                                                                                                                                                                                                                                                                                                                                                                    |     |     |           |       |      |       |                                                             |       |                      |                                                                                                                                              |     |     |           |       |      |       |
|-----------------------|----------------------------------------------------------------------------------------------------------------------------------------------------------------------------------------------------------------------------------------------------------------------------------------------------------------------------------------------------------------------------------------------------------------------------------------------------------------------------------------------------------------------------------------------------------------------------------------------------------------------------------------------------------------------------------------------------------------------------------------------------------------------------------------------------------------------------------------------------------------------------------------------------------------------------------------------------------------------------------------------------------------------------------------------------------------------------------------------------------------------------------------------------------------------------------------------------------------------------------------------------------------------------------------------------------------------------------------------------------------------------------------------------------------------------------------------------|-----|-----|-----------|-------|------|-------|-------------------------------------------------------------|-------|----------------------|----------------------------------------------------------------------------------------------------------------------------------------------|-----|-----|-----------|-------|------|-------|
| Rsa1.0_00001.1.g31.t1 | ref NP_567703.4  Rhamnogalacturonate lyase family protein [Arabidopsis thaliana] gi 5051785 emb CAB45078.1  LG27/30-like gene [Arabidopsis thaliana] gi 7269293 emb CAB79353.1  LG27/30-like gene [Arabidopsis thaliana] gi 332659503 gb AEE84903.1  Rhamnogalacturonate lyase family protein [Arabidopsis thaliana] ref NP_194179.1  transcription initiation factor IIA subunit 2 [Arabidopsis thaliana] gi 30686529 ref NP_849434.1  transcription initiation factor IIA subunit 2 [Arabidopsis thaliana] gi 297803670 ref XP_002869719.1  transcription initiation factor IIA gamma chain [Arabidopsis lyrata subsp. lyrata] gi 20141796 sp C39236.2 TZAG_ARATH RecName: Full=Transcription initiation factor IIA subunit 2; AltName: Full=General transcription factor IIA subunit 2; AltName: Full=Transcription initiation factor IIA gamma chain; Short=TFIIA-gamma gi 2826882 emb CAA11524.1  transcription factor IIA small subunit [Arabidopsis thaliana] gi 5051786 emb CAB45079.1  transcription factor IIA small subunit [Arabidopsis thaliana] gi 7269294 emb CAB79354.1  transcription factor IIA small subunit [Arabidopsis thaliana] gi 18176271 gb AAL60014.1  putative transcription factor IIA small subunit [Arabidopsis thaliana] gi 20465319 gb AAM20063.1  putative transcription factor IIA small subunit [Arabidopsis thaliana] gi 2153865 gb AAM62958.1  transcription factor IIA small subunit [Arabidopsis thaliana] | 645 | 646 | 0         | 100.2 | 88.2 | 94.0  | Rhamnogalacturonate lyase family protein                    | gbpln | Arabidopsis thaliana | AT4G24430.1   Symbols:   Rhamnogalacturonate lyase family protein   chr4:12630018-12632975 FORWARD LENGTH=646                                | 645 | 646 | 0         | 100.2 | 88.2 | 94.0  |
| Rsa1.0_00001.1.g32.t1 | transcription initiation factor IIA subunit 2 [Arabidopsis thaliana] gi 5051786 emb CAB45079.1  transcription factor IIA small subunit [Arabidopsis thaliana] gi 7269294 emb CAB79354.1  transcription factor IIA small subunit [Arabidopsis thaliana] gi 18176271 gb AAL60014.1  putative transcription factor IIA small subunit [Arabidopsis thaliana] gi 20465319 gb AAM20063.1  putative transcription factor IIA small subunit [Arabidopsis thaliana] gi 2153865 gb AAM62958.1  transcription factor IIA small subunit [Arabidopsis thaliana]                                                                                                                                                                                                                                                                                                                                                                                                                                                                                                                                                                                                                                                                                                                                                                                                                                                                                                 | 106 | 106 | 2.00E-55  | 100.0 | 99.1 | 100.0 | transcription initiation factor IIA subunit 2               | gbpln | Arabidopsis lyrata   | AT4G24440.2   Symbols:   transcription initiation factor IIA gamma chain / TFIIA-gamma (TFIIA-S)   chr4:12633460-12634553 FORWARD LENGTH=106 | 106 | 106 | 3.00E-58  | 100.0 | 99.1 | 100.0 |
| Rsa1.0_00001.1.g33.t6 | ref NP_194177.2  CRT (chloroquine-resistance transporter)-like transporter 2 [Arabidopsis thaliana] gi 334186873 ref NP_001190820.1  CRT (chloroquine-resistance transporter)-like transporter 2 [Arabidopsis thaliana] gi 119935896 gb ABM06027.1  At4g24460 [Arabidopsis thaliana] gi 332659507 gb AEE84907.1  CRT (chloroquine-resistance transporter)-like transporter 2 [Arabidopsis thaliana] gi 332659508 gb AEE84908.1  CRT (chloroquine-resistance transporter)-like transporter 2 [Arabidopsis thaliana]                                                                                                                                                                                                                                                                                                                                                                                                                                                                                                                                                                                                                                                                                                                                                                                                                                                                                                                                 | 432 | 431 | 0         | 99.8  | 82.2 | 89.4  | CRT (chloroquine-resistance transporter)-like transporter 2 | gbpln | Arabidopsis thaliana | AT4G24460.2   Symbols: CLT2   CRT (chloroquine-resistance transporter)-like transporter 2   chr4:12642888-12645310 FORWARD LENGTH=431        | 432 | 431 | 0         | 99.8  | 82.2 | 89.4  |
| Rsa1.0_00001.1.g34.t1 | gb EOA17945.1  hypothetical protein CARUB_v10006355mg [Capsella rubella]                                                                                                                                                                                                                                                                                                                                                                                                                                                                                                                                                                                                                                                                                                                                                                                                                                                                                                                                                                                                                                                                                                                                                                                                                                                                                                                                                                           | 307 | 312 | 1.00E-137 | 101.6 | 82.4 | 87.3  | hypothetical protein CARUB_v10006355mg                      | gbpln | Capsella rubella     | AT4G24470.2   Symbols: ZIM, GATA25   GATA-type zinc finger protein with TIFY domain   chr4:12645785-12647734 FORWARD LENGTH=309              | 307 | 309 | 1.00E-138 | 100.7 | 81.4 | 88.3  |
| Rsa1.0_00001.1.g35.t1 | ref NP_194179.2  protein kinase family protein [Arabidopsis thaliana] gi 332659512 gb AEE84912.1  protein kinase family protein [Arabidopsis thaliana]                                                                                                                                                                                                                                                                                                                                                                                                                                                                                                                                                                                                                                                                                                                                                                                                                                                                                                                                                                                                                                                                                                                                                                                                                                                                                             | 958 | 956 | 0         | 99.8  | 81.8 | 88.1  | protein kinase family protein                               | gbpln | Arabidopsis thaliana | AT4G24480.1   Symbols:   Protein kinase superfamily protein   chr4:12650410-12654755 FORWARD LENGTH=956                                      | 958 | 956 | 0         | 99.8  | 81.8 | 88.1  |
| Rsa1.0_00001.1.g36.t1 | ref XP_002867663.1  protein binding protein [Arabidopsis lyrata subsp. lyrata] gi 297313499 gb EFH43922.1  protein binding protein [Arabidopsis lyrata subsp. lyrata]                                                                                                                                                                                                                                                                                                                                                                                                                                                                                                                                                                                                                                                                                                                                                                                                                                                                                                                                                                                                                                                                                                                                                                                                                                                                              | 671 | 677 | 0         | 100.9 | 82.0 | 90.2  | protein binding protein                                     | gbpln | Arabidopsis lyrata   | AT4G24490.2   Symbols:   RAB geranylgeranyl transferase alpha subunit 1   chr4:12655330-12658103 REVERSE LENGTH=678                          | 671 | 678 | 0         | 101.0 | 82.0 | 90.3  |

|                       |                                                                                                                                                                                                                                                                                                                                                                                                                                                                                                                                                                                                                                                                                                                                                                                                                                                                                                                                                                                                                                                                                                                                                                                                                                                  |      |      |           |       |      |      |                                                          |       |                      |                                                                                                                                 |      |      |           |       |      |      |
|-----------------------|--------------------------------------------------------------------------------------------------------------------------------------------------------------------------------------------------------------------------------------------------------------------------------------------------------------------------------------------------------------------------------------------------------------------------------------------------------------------------------------------------------------------------------------------------------------------------------------------------------------------------------------------------------------------------------------------------------------------------------------------------------------------------------------------------------------------------------------------------------------------------------------------------------------------------------------------------------------------------------------------------------------------------------------------------------------------------------------------------------------------------------------------------------------------------------------------------------------------------------------------------|------|------|-----------|-------|------|------|----------------------------------------------------------|-------|----------------------|---------------------------------------------------------------------------------------------------------------------------------|------|------|-----------|-------|------|------|
| Rsa1.0_00001.1.g37.t1 | ref[NP_567704.1] hydroxyproline-rich glycoprotein family protein [Arabidopsis thaliana]<br>gi 334186879 ref[NP_001190822.1] hydroxyproline-rich glycoprotein family protein [Arabidopsis thaliana]<br>gi 4220540 emb CAA23013.1  hypothetical protein [Arabidopsis thaliana] gi 7269300 emb CAB79360.1  hypothetical protein [Arabidopsis thaliana] gi 23296316 gb AAN13039.1  unknown protein [Arabidopsis thaliana] gi 332659515 gb AEE84915.1  hydroxyproline-rich glycoprotein family protein [Arabidopsis thaliana] gi 332659517 gb AEE84917.1  hydroxyproline-rich glycoprotein family protein [Arabidopsis thaliana]<br>ref[XP_002869713.1] hypothetical protein ARALYDRAFT_492392 [Arabidopsis lyrata subsp. lyrata] gi 297315549 gb EFH45972.1  hypothetical protein ARALYDRAFT_492392 [Arabidopsis lyrata subsp. lyrata]<br>ref[XP_002867662.1] hypothetical protein ARALYDRAFT_492391 [Arabidopsis lyrata subsp. lyrata] gi 297313498 gb EFH43921.1  hypothetical protein ARALYDRAFT_492391 [Arabidopsis lyrata subsp. lyrata]<br>ref[XP_002867662.1] hypothetical protein ARALYDRAFT_492391 [Arabidopsis lyrata subsp. lyrata] gi 297313498 gb EFH43921.1  hypothetical protein ARALYDRAFT_492391 [Arabidopsis lyrata subsp. lyrata] | 329  | 319  | 1.00E-114 | 97.0  | 72.3 | 80.2 | hydroxyproline-rich glycoprotein family protein          | gbpln | Arabidopsis thaliana | AT4G24500.3   Symbols:   hydroxyproline-rich glycoprotein family protein   chr4:12658732-12660211 FORWARD LENGTH=319            | 329  | 319  | 1.00E-117 | 97.0  | 72.3 | 80.2 |
| Rsa1.0_00001.1.g38.t1 | ref[XP_002869713.1] hypothetical protein ARALYDRAFT_492392 [Arabidopsis lyrata subsp. lyrata] gi 297315549 gb EFH45972.1  hypothetical protein ARALYDRAFT_492392 [Arabidopsis lyrata subsp. lyrata]<br>ref[XP_002867662.1] hypothetical protein ARALYDRAFT_492391 [Arabidopsis lyrata subsp. lyrata] gi 297313498 gb EFH43921.1  hypothetical protein ARALYDRAFT_492391 [Arabidopsis lyrata subsp. lyrata]<br>ref[XP_002867662.1] hypothetical protein ARALYDRAFT_492391 [Arabidopsis lyrata subsp. lyrata] gi 297313498 gb EFH43921.1  hypothetical protein ARALYDRAFT_492391 [Arabidopsis lyrata subsp. lyrata]                                                                                                                                                                                                                                                                                                                                                                                                                                                                                                                                                                                                                                | 419  | 415  | 1.00E-180 | 99.0  | 74.9 | 85.2 | hypothetical protein ARALYDRAFT_492392                   | gbpln | Arabidopsis lyrata   | AT4G24510.1   Symbols: CER2, VC2, VC-2   HXXXD-type acyl-transferase family protein   chr4:12660929-12662537 FORWARD LENGTH=421 | 419  | 421  | 0         | 100.5 | 74.0 | 85.0 |
| Rsa1.0_00001.1.g39.t1 | ref[XP_002867662.1] hypothetical protein ARALYDRAFT_492391 [Arabidopsis lyrata subsp. lyrata] gi 297313498 gb EFH43921.1  hypothetical protein ARALYDRAFT_492391 [Arabidopsis lyrata subsp. lyrata]<br>ref[XP_002867662.1] hypothetical protein ARALYDRAFT_492391 [Arabidopsis lyrata subsp. lyrata] gi 297313498 gb EFH43921.1  hypothetical protein ARALYDRAFT_492391 [Arabidopsis lyrata subsp. lyrata]                                                                                                                                                                                                                                                                                                                                                                                                                                                                                                                                                                                                                                                                                                                                                                                                                                       | 707  | 692  | 0         | 97.9  | 84.7 | 89.7 | hypothetical protein ARALYDRAFT_492391                   | gbpln | Arabidopsis lyrata   | AT4G24520.1   Symbols: ATR1, AR1   P450 reductase 1   chr4:12663065-12667066 REVERSE LENGTH=692                                 | 707  | 692  | 0         | 97.9  | 83.9 | 89.1 |
| Rsa1.0_00001.1.g40.t1 | ref[XP_002867662.1] hypothetical protein ARALYDRAFT_492391 [Arabidopsis lyrata subsp. lyrata] gi 297313498 gb EFH43921.1  hypothetical protein ARALYDRAFT_492391 [Arabidopsis lyrata subsp. lyrata]                                                                                                                                                                                                                                                                                                                                                                                                                                                                                                                                                                                                                                                                                                                                                                                                                                                                                                                                                                                                                                              | 694  | 692  | 0         | 99.7  | 90.3 | 95.0 | hypothetical protein ARALYDRAFT_492391                   | gbpln | Arabidopsis lyrata   | AT4G24520.1   Symbols: ATR1, AR1   P450 reductase 1   chr4:12663065-12667066 REVERSE LENGTH=692                                 | 694  | 692  | 0         | 99.7  | 89.5 | 94.7 |
| Rsa1.0_00001.1.g41.t1 | gb EOA18108.1  hypothetical protein CARUB_v10006569mg [Capsella rubella]                                                                                                                                                                                                                                                                                                                                                                                                                                                                                                                                                                                                                                                                                                                                                                                                                                                                                                                                                                                                                                                                                                                                                                         | 518  | 521  | 0         | 100.6 | 90.3 | 94.6 | hypothetical protein CARUB_v10006569mg                   | gbpln | Capsella rubella     | AT4G24530.1   Symbols:   O-fucosyltransferase family protein   chr4:12667424-12669713 REVERSE LENGTH=519                        | 518  | 519  | 0         | 100.2 | 88.8 | 94.0 |
| Rsa1.0_00001.1.g42.t1 | gb AFM77900.1  MADS-box protein AGL24 [Brassica napus]                                                                                                                                                                                                                                                                                                                                                                                                                                                                                                                                                                                                                                                                                                                                                                                                                                                                                                                                                                                                                                                                                                                                                                                           | 221  | 221  | 1.00E-122 | 100.0 | 98.2 | 99.1 | MADS-box protein AGL24                                   | gbpln | Brassica napus       | AT4G24540.1   Symbols: AGL24   AGAMOUS-like 24   chr4:12671160-12673645 REVERSE LENGTH=220                                      | 221  | 220  | 1.00E-106 | 99.5  | 86.9 | 92.8 |
| Rsa1.0_00001.1.g43.t1 | ref[XP_002869712.1] clathrin adaptor complexes medium subunit family protein [Arabidopsis lyrata subsp. lyrata] gi 297315548 gb EFH45971.1  clathrin adaptor complexes medium subunit family protein [Arabidopsis lyrata subsp. lyrata]<br>ref[XP_002867659.1] ubiquitin-specific protease 16 [Arabidopsis lyrata subsp. lyrata] gi 297313495 gb EFH43918.1  ubiquitin-specific protease 16 [Arabidopsis lyrata subsp. lyrata]                                                                                                                                                                                                                                                                                                                                                                                                                                                                                                                                                                                                                                                                                                                                                                                                                   | 453  | 451  | 0         | 99.6  | 96.2 | 97.8 | clathrin adaptor complexes medium subunit family protein | gbpln | Arabidopsis lyrata   | AT4G24550.2   Symbols:   Clathrin adaptor complexes medium subunit family protein   chr4:12675873-12678903 FORWARD LENGTH=451   | 453  | 451  | 0         | 99.6  | 95.8 | 98.0 |
| Rsa1.0_00001.1.g44.t1 | ref[XP_002867659.1] ubiquitin-specific protease 16 [Arabidopsis lyrata subsp. lyrata] gi 297313495 gb EFH43918.1  ubiquitin-specific protease 16 [Arabidopsis lyrata subsp. lyrata]                                                                                                                                                                                                                                                                                                                                                                                                                                                                                                                                                                                                                                                                                                                                                                                                                                                                                                                                                                                                                                                              | 1024 | 1007 | 0         | 98.3  | 76.2 | 84.1 | ubiquitin-specific protease 16                           | gbpln | Arabidopsis lyrata   | AT4G24560.1   Symbols: UBP16   ubiquitin-specific protease 16   chr4:12679493-12684528 REVERSE LENGTH=1008                      | 1024 | 1008 | 0         | 98.4  | 75.6 | 83.1 |
| Rsa1.0_00001.1.g45.t1 | #                                                                                                                                                                                                                                                                                                                                                                                                                                                                                                                                                                                                                                                                                                                                                                                                                                                                                                                                                                                                                                                                                                                                                                                                                                                | #    | #    | #         | #     | #    | -    | ----                                                     | ----  | #                    | #                                                                                                                               | #    | #    | #         | #     | #    |      |
| Rsa1.0_00001.1.g46.t1 | ref[XP_002869711.1] hypothetical protein ARALYDRAFT_914130 [Arabidopsis lyrata subsp. lyrata] gi 297315547 gb EFH45970.1  hypothetical protein ARALYDRAFT_914130 [Arabidopsis lyrata subsp. lyrata]<br>ref[XP_002867658.1] predicted protein [Arabidopsis lyrata subsp. lyrata] gi 297313494 gb EFH43917.1  predicted protein [Arabidopsis lyrata subsp. lyrata]                                                                                                                                                                                                                                                                                                                                                                                                                                                                                                                                                                                                                                                                                                                                                                                                                                                                                 | 317  | 314  | 1.00E-153 | 99.1  | 85.8 | 90.9 | hypothetical protein ARALYDRAFT_914130                   | gbpln | Arabidopsis lyrata   | AT4G24570.1   Symbols: DIC2   dicarboxylate carrier 2   chr4:12686546-12687487 FORWARD LENGTH=313                               | 317  | 313  | 1.00E-155 | 98.7  | 86.8 | 92.4 |
| Rsa1.0_00001.1.g47.t2 | ref[XP_002867658.1] predicted protein [Arabidopsis lyrata subsp. lyrata] gi 297313494 gb EFH43917.1  predicted protein [Arabidopsis lyrata subsp. lyrata]                                                                                                                                                                                                                                                                                                                                                                                                                                                                                                                                                                                                                                                                                                                                                                                                                                                                                                                                                                                                                                                                                        | 943  | 925  | 0         | 98.1  | 79.6 | 86.0 | predicted protein                                        | gbpln | Arabidopsis lyrata   | AT4G24580.1   Symbols: REN1   Rho GTPase activation protein (RhoGAP) with PH domain   chr4:12687879-12694248 REVERSE LENGTH=933 | 943  | 933  | 0         | 98.9  | 78.0 | 85.0 |
| Rsa1.0_00001.1.g48.t1 | #                                                                                                                                                                                                                                                                                                                                                                                                                                                                                                                                                                                                                                                                                                                                                                                                                                                                                                                                                                                                                                                                                                                                                                                                                                                | #    | #    | #         | #     | #    | -    | ----                                                     | ----  | #                    | #                                                                                                                               | #    | #    | #         | #     | #    |      |



|                        |                                                                                                                                                                                                                                 |      |      |          |       |      |      |                                                            |                      |                                                                                                                                                                                                                                                                                                                                                                                                                                                                                                                                             |      |      |          |       |      |      |
|------------------------|---------------------------------------------------------------------------------------------------------------------------------------------------------------------------------------------------------------------------------|------|------|----------|-------|------|------|------------------------------------------------------------|----------------------|---------------------------------------------------------------------------------------------------------------------------------------------------------------------------------------------------------------------------------------------------------------------------------------------------------------------------------------------------------------------------------------------------------------------------------------------------------------------------------------------------------------------------------------------|------|------|----------|-------|------|------|
| Rsa1.0_00001.1.g49.t1  | gb[EOA17092.1] hypothetical protein CARUB_v10005345mg, partial [Capsella rubella]                                                                                                                                               | 236  | 303  | 2.00E-96 | 128.4 | 79.7 | 88.6 | hypothetical protein CARUB_v10005345mg, gbpln partial      | Capsella rubella     | AT4G24590.1   Symbols:   unknown protein; BEST Arabidopsis thaliana protein match is: unknown protein (TAIR:AT5G49710.3); Has 105 Blast hits to 105 proteins in 26 species: Archae - 0; Bacteria - 0; Metazoa - 8; Fungi - 3; Plants - 85; Viruses - 0; Other Eukaryotes - 9 (source: NCBI BLink).   chr4:12696651-12698036 FORWARD LENGTH=241                                                                                                                                                                                              | 236  | 241  | 4.00E-96 | 102.1 | 80.1 | 84.7 |
| Rsa1.0_00001.1.g50.t1  | gb[EOA15925.1] hypothetical protein CARUB_v10004019mg [Capsella rubella]                                                                                                                                                        | 1147 | 1152 | 0        | 100.4 | 88.8 | 93.1 | hypothetical protein CARUB_v10004019mg gbpln               | Capsella rubella     | AT4G24610.1   Symbols:   unknown protein; FUNCTIONS IN: molecular function unknown; INVOLVED IN: biological process unknown; LOCATED IN: plasma membrane; EXPRESSED IN: 20 plant structures; EXPRESSED DURING: 12 growth stages; BEST Arabidopsis thaliana protein match is: unknown protein (TAIR:AT5G65440.1); Has 820 Blast hits to 264 proteins in 74 species: Archae - 0; Bacteria - 15; Metazoa - 77; Fungi - 83; Plants - 96; Viruses - 0; Other Eukaryotes - 549 (source: NCBI BLink).   chr4:12700837-12707899 REVERSE LENGTH=1150 | 1147 | 1150 | 0        | 100.3 | 88.2 | 92.5 |
| Rsa1.0_00001.1.g51.t1  | ref[XP_002869709.1] zinc ion binding protein [Arabidopsis lyrata subsp. lyrata] gi[297315545]gb[EFH45968.1] zinc ion binding protein [Arabidopsis lyrata subsp. lyrata]                                                         | 420  | 408  | 0        | 97.1  | 81.0 | 89.8 | zinc ion binding protein gbpln                             | Arabidopsis lyrata   | AT4G24630.1   Symbols:   DHHC-type zinc finger family protein   chr4:12714919-12717111 FORWARD LENGTH=407                                                                                                                                                                                                                                                                                                                                                                                                                                   | 420  | 407  | 0        | 96.9  | 80.5 | 90.0 |
| Rsa1.0_00001.1.g52.t1  | gb[AAB48480.1] pollen-specific protein Bnm1 [Brassica napus]                                                                                                                                                                    | 187  | 182  | 5.00E-78 | 97.3  | 89.3 | 90.4 | pollen-specific protein Bnm1 gbpln                         | Brassica napus       | AT4G24640.1   Symbols: APPB1   Plant invertase/pectin methyltransferase inhibitor superfamily protein   chr4:12717851-12718804 FORWARD LENGTH=187                                                                                                                                                                                                                                                                                                                                                                                           | 187  | 187  | 7.00E-72 | 100.0 | 79.1 | 86.6 |
| Rsa1.0_00001.1.g53.t1  | dbj[BAJ3437.1] unnamed protein product [Thellungiella halophila]                                                                                                                                                                | 225  | 227  | 2.00E-99 | 100.9 | 89.8 | 93.3 | unnamed protein product                                    | ----                 | AT4G24660.1   Symbols: ATHB22, MEE68, HB22, ZHD2   homeobox protein 22   chr4:12724851-12725513 REVERSE LENGTH=220                                                                                                                                                                                                                                                                                                                                                                                                                          | 225  | 220  | 3.00E-95 | 97.8  | 85.8 | 89.3 |
| Rsa1.0_00001.1.g54.t1  | gb[EOA15502.1] hypothetical protein CARUB_v10004822mg [Capsella rubella] gi[482551310]gb[EOA15503.1] hypothetical protein CARUB_v10004822mg [Capsella rubella]                                                                  | 445  | 441  | 0        | 99.1  | 79.1 | 86.3 | hypothetical protein CARUB_v10004822mg gbpln               | Capsella rubella     | AT4G24670.2   Symbols: TAR2   tryptophan aminotransferase related 2   chr4:12727940-12730694 REVERSE LENGTH=440                                                                                                                                                                                                                                                                                                                                                                                                                             | 445  | 440  | 0        | 98.9  | 78.7 | 86.1 |
| Rsa1.0_00001.1.g55.t1  | # # # # # # # # # #                                                                                                                                                                                                             |      |      |          |       |      |      | ----                                                       | ----                 | # # # # # # # # # #                                                                                                                                                                                                                                                                                                                                                                                                                                                                                                                         |      |      |          |       |      |      |
| Rsa1.0_00001.1.g56.t1  | ref[NP_194199.4] modifier of snc1 protein [Arabidopsis thaliana] gi[332659542]gb[AEE84942.1] modifier of snc1 protein [Arabidopsis thaliana]                                                                                    | 1381 | 1427 | 0        | 103.3 | 74.7 | 82.2 | modifier of snc1 protein gbpln                             | Arabidopsis thaliana | AT4G24680.1   Symbols: MOS1   modifier of snc1   chr4:12733425-12739737 FORWARD LENGTH=1427                                                                                                                                                                                                                                                                                                                                                                                                                                                 | 1381 | 1427 | 0        | 103.3 | 74.7 | 82.2 |
| Rsa1.0_00001.1.g57.t1  | ref[XP_002869705.1] ubiquitin-associated /TS-N domain-containing protein [Arabidopsis lyrata subsp. lyrata] gi[297315541]gb[EFH45964.1] ubiquitin-associated /TS-N domain-containing protein [Arabidopsis lyrata subsp. lyrata] | 700  | 709  | 0        | 101.3 | 80.7 | 88.0 | ubiquitin-associated /TS-N domain-containing protein gbpln | Arabidopsis lyrata   | AT4G24690.1   Symbols:   ubiquitin-associated (UBA)/TS-N domain-containing protein / octicosapeptide/Phox/Bemp1 (PB1) domain-containing protein   chr4:12741191-12744202 FORWARD LENGTH=704                                                                                                                                                                                                                                                                                                                                                 | 700  | 704  | 0        | 100.6 | 80.9 | 88.1 |
| Rsa1.0_00001.1.g58.t1  | ref[XP_002867652.1] hypothetical protein ARALYDRAFT_492372 [Arabidopsis lyrata subsp. lyrata] gi[297313488]gb[EFH43911.1] hypothetical protein ARALYDRAFT_492372 [Arabidopsis lyrata subsp. lyrata]                             | 137  | 139  | 6.00E-43 | 101.5 | 77.4 | 84.7 | hypothetical protein ARALYDRAFT_492372 gbpln               | Arabidopsis lyrata   | AT4G24700.1   Symbols:   unknown protein; Has 20 Blast hits to 20 proteins in 7 species: Archae - 0; Bacteria - 0; Metazoa - 0; Fungi - 0; Plants - 20; Viruses - 0; Other Eukaryotes - 0 (source: NCBI BLink).   chr4:12744807-12745238 REVERSE LENGTH=143                                                                                                                                                                                                                                                                                 | 137  | 143  | 1.00E-42 | 104.4 | 70.1 | 73.7 |
| Rsa1.0_00001.1.g59.t1  | ref[XP_002867651.1] hypothetical protein ARALYDRAFT_492371 [Arabidopsis lyrata subsp. lyrata] gi[297313487]gb[EFH43910.1] hypothetical protein ARALYDRAFT_492371 [Arabidopsis lyrata subsp. lyrata]                             | 486  | 477  | 0        | 98.1  | 88.5 | 92.4 | hypothetical protein ARALYDRAFT_492371 gbpln               | Arabidopsis lyrata   | AT4G24710.1   Symbols:   P-loop containing nucleoside triphosphate hydrolases superfamily protein   chr4:12745752-12748995 REVERSE LENGTH=475                                                                                                                                                                                                                                                                                                                                                                                               | 486  | 475  | 0        | 97.7  | 87.9 | 92.2 |
| Rsa1.0_00001.1.g60.t1  | gb[EOA17431.1] hypothetical protein CARUB_v10005735mg [Capsella rubella]                                                                                                                                                        | 208  | 208  | 1.00E-82 | 100.0 | 71.6 | 83.2 | hypothetical protein CARUB_v10005735mg gbpln               | Capsella rubella     | AT4G24730.4   Symbols:   Calcineurin-like metallo-phosphoesterase superfamily protein   chr4:12749879-12750872 REVERSE LENGTH=231                                                                                                                                                                                                                                                                                                                                                                                                           | 208  | 231  | 2.00E-79 | 111.1 | 69.2 | 79.3 |
| Rsa1.0_00001.1.g61.t21 | gb[EOA15516.1] hypothetical protein CARUB_v10004866mg [Capsella rubella]                                                                                                                                                        | 742  | 428  | 0        | 57.7  | 53.1 | 54.9 | hypothetical protein CARUB_v10004866mg gbpln               | Capsella rubella     | AT4G24740.1   Symbols: AFC2, AME1, FC2   FUS3-complementing gene 2   chr4:12754729-12757653 REVERSE LENGTH=427                                                                                                                                                                                                                                                                                                                                                                                                                              | 742  | 427  | 0        | 57.5  | 53.0 | 54.7 |

|                       |                                                                                                                                                                                                                                                                                                                                                                                                                                                                                                              |     |     |           |       |      |      |                                        |       |                      |                                                                                                                                                                                                                                                                                                                                                                                                                                                                                                                                            |     |     |           |       |      |      |
|-----------------------|--------------------------------------------------------------------------------------------------------------------------------------------------------------------------------------------------------------------------------------------------------------------------------------------------------------------------------------------------------------------------------------------------------------------------------------------------------------------------------------------------------------|-----|-----|-----------|-------|------|------|----------------------------------------|-------|----------------------|--------------------------------------------------------------------------------------------------------------------------------------------------------------------------------------------------------------------------------------------------------------------------------------------------------------------------------------------------------------------------------------------------------------------------------------------------------------------------------------------------------------------------------------------|-----|-----|-----------|-------|------|------|
| Rsa1.0_00001.1.g62.t2 | refXP_002867646.1   hypothetical protein ARALYDRAFT_492366 [Arabidopsis lyrata subsp. lyrata] gi 297313482 gb EFH43905.1   hypothetical protein ARALYDRAFT_492366 [Arabidopsis lyrata subsp. lyrata]                                                                                                                                                                                                                                                                                                         | 366 | 365 | 0         | 99.7  | 93.7 | 97.3 | hypothetical protein ARALYDRAFT_492366 | gbpln | Arabidopsis lyrata   | AT4G24760.1   Symbols:   alpha/beta-Hydrolases superfamily protein   chr4:12761482-12763564 REVERSE LENGTH=365                                                                                                                                                                                                                                                                                                                                                                                                                             | 366 | 365 | 0         | 99.7  | 93.2 | 96.7 |
| Rsa1.0_00001.1.g63.t1 | refXP_002867645.1   RNA-binding protein cp31 [Arabidopsis lyrata subsp. lyrata] gi 297313481 gb EFH43904.1   RNA-binding protein cp31 [Arabidopsis lyrata subsp. lyrata]                                                                                                                                                                                                                                                                                                                                     | 303 | 305 | 1.00E-133 | 100.7 | 83.5 | 87.5 | RNA-binding protein cp31               | gbpln | Arabidopsis lyrata   | AT4G24770.1   Symbols: RBP31, ATRBP31, CP31, ATRBP33   31-kDa RNA binding protein   chr4:12766223-12767952 REVERSE LENGTH=329                                                                                                                                                                                                                                                                                                                                                                                                              | 303 | 329 | 1.00E-126 | 108.6 | 80.5 | 87.8 |
| Rsa1.0_00001.1.g64.t1 | refNP_567707.1   putative pectate lyase 18 [Arabidopsis thaliana] gi 334186896 ref NP_001190827.1   putative pectate lyase 18 [Arabidopsis thaliana] gi 32129908 sp Q9C5M8.2 PEL18_ARATH RecName: Full=Probable pectate lyase 18; AltName: Full=Pectate lyase A10; Flags: Precursor gi 57222166 gb AAW38990.1   At4g24780 [Arabidopsis thaliana] gi 332659555 gb AEE84955.1   putative pectate lyase 18 [Arabidopsis thaliana] gi 332659556 gb AEE84956.1   putative pectate lyase 18 [Arabidopsis thaliana] | 406 | 408 | 0         | 100.5 | 93.6 | 97.8 | putative pectate lyase 18              | gbpln | Arabidopsis thaliana | AT4G24780.2   Symbols:   Pectin lyase-like superfamily protein   chr4:12770631-12772227 REVERSE LENGTH=408                                                                                                                                                                                                                                                                                                                                                                                                                                 | 406 | 408 | 0         | 100.5 | 93.6 | 97.8 |
| Rsa1.0_00001.1.g65.t1 | refXP_002869702.1   hypothetical protein ARALYDRAFT_329184 [Arabidopsis lyrata subsp. lyrata] gi 297315538 gb EFH45961.1   hypothetical protein ARALYDRAFT_329184 [Arabidopsis lyrata subsp. lyrata]                                                                                                                                                                                                                                                                                                         | 706 | 942 | 0         | 133.4 | 85.7 | 90.5 | hypothetical protein ARALYDRAFT_329184 | gbpln | Arabidopsis lyrata   | AT4G24800.3   Symbols:   MA3 domain-containing protein   chr4:12782463-12784902 FORWARD LENGTH=702                                                                                                                                                                                                                                                                                                                                                                                                                                         | 706 | 702 | 0         | 99.4  | 86.4 | 92.1 |
| Rsa1.0_00001.1.g66.t1 | refXP_002869702.1   hypothetical protein ARALYDRAFT_329184 [Arabidopsis lyrata subsp. lyrata] gi 297315538 gb EFH45961.1   hypothetical protein ARALYDRAFT_329184 [Arabidopsis lyrata subsp. lyrata]                                                                                                                                                                                                                                                                                                         | 243 | 942 | 1.00E-113 | 387.7 | 88.1 | 94.2 | hypothetical protein ARALYDRAFT_329184 | gbpln | Arabidopsis lyrata   | AT4G24805.1   Symbols:   S-adenosyl-L-methionine-dependent methyltransferases superfamily protein   chr4:12785315-12786058 FORWARD LENGTH=247                                                                                                                                                                                                                                                                                                                                                                                              | 243 | 247 | 1.00E-111 | 101.6 | 88.1 | 94.7 |
| Rsa1.0_00001.1.g67.t1 | refXP_002867642.1   hypothetical protein ARALYDRAFT_492356 [Arabidopsis lyrata subsp. lyrata] gi 297313478 gb EFH43901.1   hypothetical protein ARALYDRAFT_492356 [Arabidopsis lyrata subsp. lyrata]                                                                                                                                                                                                                                                                                                         | 366 | 387 | 0         | 105.7 | 95.4 | 97.5 | hypothetical protein ARALYDRAFT_492356 | gbpln | Arabidopsis lyrata   | AT4G24820.2   Symbols:   26S proteasome, regulatory subunit Rpn7; Proteasome component (PCI) domain   chr4:12790471-12792599 REVERSE LENGTH=387                                                                                                                                                                                                                                                                                                                                                                                            | 366 | 387 | 0         | 105.7 | 93.7 | 96.7 |
| Rsa1.0_00001.1.g68.t1 | gb EOA16502.1   hypothetical protein CARUB_v10004661mg [Capsella rubella]                                                                                                                                                                                                                                                                                                                                                                                                                                    | 516 | 494 | 0         | 95.7  | 86.2 | 88.6 | hypothetical protein CARUB_v10004661mg | gbpln | Capsella rubella     | AT4G24830.1   Symbols:   arginosuccinate synthase family   chr4:12793085-12795857 REVERSE LENGTH=494                                                                                                                                                                                                                                                                                                                                                                                                                                       | 516 | 494 | 0         | 95.7  | 88.6 | 92.8 |
| Rsa1.0_00001.1.g69.t1 | gb EOA16079.1   hypothetical protein CARUB_v10004211mg [Capsella rubella]                                                                                                                                                                                                                                                                                                                                                                                                                                    | 758 | 754 | 0         | 99.5  | 85.4 | 91.6 | hypothetical protein CARUB_v10004211mg | gbpln | Capsella rubella     | AT4G24840.1   Symbols:   FUNCTIONS IN: molecular_function unknown; INVOLVED IN: protein transport, Golgi organization; LOCATED IN: vacuole; EXPRESSED IN: 23 plant structures; EXPRESSED DURING: 13 growth stages; CONTAINS InterPro DOMAIN/s: COG complex component, COG2 (InterPro:IPR009316); Has 30201 Blast hits to 17322 proteins in 780 species: Archae - 12; Bacteria - 1396; Metazoa - 17338; Fungi - 3422; Plants - 5037; Viruses - 0; Other Eukaryotes - 2996 (source: NCBI BLink).   chr4:12796525-12800926 REVERSE LENGTH=756 | 758 | 756 | 0         | 99.7  | 85.2 | 91.4 |
| Rsa1.0_00001.1.g70.t1 | gb EOA16242.1   hypothetical protein CARUB_v10004389mg [Capsella rubella]                                                                                                                                                                                                                                                                                                                                                                                                                                    | 616 | 617 | 0         | 100.2 | 85.7 | 93.0 | hypothetical protein CARUB_v10004389mg | gbpln | Capsella rubella     | AT4G24890.1   Symbols: ATPAP24, PAP24   purple acid phosphatase 24   chr4:12811510-12814440 REVERSE LENGTH=615                                                                                                                                                                                                                                                                                                                                                                                                                             | 616 | 615 | 0         | 99.8  | 84.3 | 91.2 |
| Rsa1.0_00001.1.g71.t1 | refNP_194220.2   uncharacterized protein [Arabidopsis thaliana] gi 332659574 gb AEE84974.1   uncharacterized protein AT4G24900 [Arabidopsis thaliana]                                                                                                                                                                                                                                                                                                                                                        | 386 | 421 | 1.00E-139 | 109.1 | 69.9 | 79.8 | uncharacterized protein                | gbpln | Arabidopsis thaliana | AT4G24900.1   Symbols:   unknown protein; Has 119 Blast hits to 96 proteins in 40 species: Archae - 0; Bacteria - 0; Metazoa - 81; Fungi - 0; Plants - 34; Viruses - 0; Other Eukaryotes - 4 (source: NCBI BLink).   chr4:12814867-12817388 FORWARD LENGTH=421                                                                                                                                                                                                                                                                             | 386 | 421 | 1.00E-142 | 109.1 | 69.9 | 79.8 |
| Rsa1.0_00001.1.g72.t1 | gb EOA15789.1   hypothetical protein CARUB_v10007135mg [Capsella rubella]                                                                                                                                                                                                                                                                                                                                                                                                                                    | 309 | 317 | 1.00E-127 | 102.6 | 79.9 | 87.4 | hypothetical protein CARUB_v10007135mg | gbpln | Capsella rubella     | AT4G24910.1   Symbols:   Protein of unknown function (DUF579)   chr4:12817954-12818901 REVERSE LENGTH=315                                                                                                                                                                                                                                                                                                                                                                                                                                  | 309 | 315 | 1.00E-128 | 101.9 | 78.3 | 86.4 |

|                       |                                                                                                                                                                                                                                                                                                                                                                                                                                                                                                                                                                                                                                                                                                                                                                                                                                                                                                                                                                                                                                                                                                                                                                                                                                                                                                                                                                                                                                                                                                                                                                                                                      |     |     |           |       |       |       |                                                 |       |                      |                                                                                                                                             |     |     |           |       |       |       |
|-----------------------|----------------------------------------------------------------------------------------------------------------------------------------------------------------------------------------------------------------------------------------------------------------------------------------------------------------------------------------------------------------------------------------------------------------------------------------------------------------------------------------------------------------------------------------------------------------------------------------------------------------------------------------------------------------------------------------------------------------------------------------------------------------------------------------------------------------------------------------------------------------------------------------------------------------------------------------------------------------------------------------------------------------------------------------------------------------------------------------------------------------------------------------------------------------------------------------------------------------------------------------------------------------------------------------------------------------------------------------------------------------------------------------------------------------------------------------------------------------------------------------------------------------------------------------------------------------------------------------------------------------------|-----|-----|-----------|-------|-------|-------|-------------------------------------------------|-------|----------------------|---------------------------------------------------------------------------------------------------------------------------------------------|-----|-----|-----------|-------|-------|-------|
| Rsa1.0_00001.1.g73.t1 | <p>ref NP_194222.1  protein transport protein sec61 subunit gamma-1 [Arabidopsis thaliana] gi 18423153 ref NP_568728.1  protein transport protein sec61 subunit gamma-1 [Arabidopsis thaliana] gi 297795847 ref XP_002865808.1  hypothetical protein ARALYDRAFT_495113 [Arabidopsis lyrata subsp. lyrata] gi 297799504 ref XP_002867636.1  hypothetical protein ARALYDRAFT_492346 [Arabidopsis lyrata subsp. lyrata] gi 408407782 sp PDI74.1 S61G1_ARAT H RecName: Full=Protein transport protein Sec61 subunit gamma-1 gi 408407793 sp PDI75.1 S61G2_ARAT H RecName: Full=Protein transport protein Sec61 subunit gamma-2 gi 13877813 gb AAK43984.1 AF370169.1 putative protein translocation complex Sec61 gamma chain [Arabidopsis thaliana] gi 4455235 emb CAB36734.1  PROTEIN TRANSPORT PROTEIN SEC61 GAMMA SUBUNIT-like [Arabidopsis thaliana] gi 7269342 emb CAB79401.1  PROTEIN TRANSPORT PROTEIN SEC61 GAMMA SUBUNIT-like [Arabidopsis thaliana] gi 9758755 dbj BAB09131.1  protein translocation complex Sec61 gamma chain [Arabidopsis thaliana] ref NP_194223.1  thylakoid luminal protein [Arabidopsis thaliana] gi 17369630 sp Q9SW33.1 TLLY_ARATH RecName: Full=Thylakoid luminal 17.9 kDa protein, chloroplastic; Flags: Precursor gi 4455236 emb CAB36735.1  hypothetical protein [Arabidopsis thaliana] gi 7269343 emb CAB79402.1  hypothetical protein [Arabidopsis thaliana] gi 20260598 gb AAM13197.1  unknown protein [Arabidopsis thaliana] gi 30023698 gb AAP13382.1  At4g24930 [Arabidopsis thaliana] gi 332659577 gb AEE84977.1  thylakoid luminal protein 17.9 [Arabidopsis thaliana]</p> | 69  | 69  | 1.00E-30  | 100.0 | 100.0 | 100.0 | protein transport protein sec61 subunit gamma-1 | gbpln | Arabidopsis lyrata   | AT5G50460.1   Symbols:   secE/sec61-gamma protein transport protein   chr5:20552168-20552509 REVERSE LENGTH=69                              | 69  | 69  | 2.00E-33  | 100.0 | 100.0 | 100.0 |
| Rsa1.0_00001.1.g74.t1 | <p>ref NP_194223.1  thylakoid luminal protein [Arabidopsis thaliana] gi 17369630 sp Q9SW33.1 TLLY_ARATH RecName: Full=Thylakoid luminal 17.9 kDa protein, chloroplastic; Flags: Precursor gi 4455236 emb CAB36735.1  hypothetical protein [Arabidopsis thaliana] gi 7269343 emb CAB79402.1  hypothetical protein [Arabidopsis thaliana] gi 20260598 gb AAM13197.1  unknown protein [Arabidopsis thaliana] gi 30023698 gb AAP13382.1  At4g24930 [Arabidopsis thaliana] gi 332659577 gb AEE84977.1  thylakoid luminal protein 17.9 [Arabidopsis thaliana]</p>                                                                                                                                                                                                                                                                                                                                                                                                                                                                                                                                                                                                                                                                                                                                                                                                                                                                                                                                                                                                                                                          | 243 | 225 | 5.00E-98  | 92.6  | 77.4  | 84.4  | thylakoid luminal protein                       | gbpln | Arabidopsis thaliana | AT4G24930.1   Symbols:   thylakoid luminal 17.9 kDa protein, chloroplast   chr4:12821496-12822389 REVERSE LENGTH=225                        | 243 | 225 | 1.00E-100 | 92.6  | 77.4  | 84.4  |
| Rsa1.0_00001.1.g75.t4 | <p>gb EOA17016.1  hypothetical protein CARUB_v10005251mg [Capsella rubella]</p>                                                                                                                                                                                                                                                                                                                                                                                                                                                                                                                                                                                                                                                                                                                                                                                                                                                                                                                                                                                                                                                                                                                                                                                                                                                                                                                                                                                                                                                                                                                                      | 738 | 322 | 1.00E-160 | 43.6  | 37.9  | 40.0  | hypothetical protein CARUB_v10005251mg          | gbpln | Capsella rubella     | AT4G24940.1   Symbols: SAE1A, AT-SAE1-1, ATSAE1A   SUMO-activating enzyme 1A   chr4:12823651-12825971 FORWARD LENGTH=322                    | 738 | 322 | 1.00E-161 | 43.6  | 37.9  | 39.3  |
| Rsa1.0_00001.1.g76.t1 | <p>dbj BAJ34072.1  unnamed protein product [Theilungiella halophila]</p>                                                                                                                                                                                                                                                                                                                                                                                                                                                                                                                                                                                                                                                                                                                                                                                                                                                                                                                                                                                                                                                                                                                                                                                                                                                                                                                                                                                                                                                                                                                                             | 121 | 181 | 1.00E-31  | 149.6 | 54.5  | 56.2  | unnamed protein product                         | ----  | ----                 | AT4G24960.1   Symbols: ATHVA22D, HVA22D   HVA22 homologue D   chr4:12828060-12828982 FORWARD LENGTH=135                                     | 121 | 135 | 5.00E-33  | 111.6 | 52.1  | 56.2  |
| Rsa1.0_00001.1.g77.t1 | <p>ref XP_002869696.1  hypothetical protein ARALYDRAFT_492340 [Arabidopsis lyrata subsp. lyrata] gi 297315532 gb EFH45955.1  hypothetical protein ARALYDRAFT_492340 [Arabidopsis lyrata subsp. lyrata]</p>                                                                                                                                                                                                                                                                                                                                                                                                                                                                                                                                                                                                                                                                                                                                                                                                                                                                                                                                                                                                                                                                                                                                                                                                                                                                                                                                                                                                           | 697 | 709 | 0         | 101.7 | 81.2  | 89.1  | hypothetical protein ARALYDRAFT_492340          | gbpln | Arabidopsis lyrata   | AT4G24970.1   Symbols:   Histidine kinase-, DNA gyrase B-, and HSP90-like ATPase family protein   chr4:12831125-12835449 FORWARD LENGTH=707 | 697 | 707 | 0         | 101.4 | 79.1  | 86.5  |
| Rsa1.0_00001.1.g78.t1 | <p>ref NP_974612.1  tapetum determinant 1 [Arabidopsis thaliana] gi 38607340 gb AAR25553.1  TPD1 [Arabidopsis thaliana] gi 332659584 gb AEE84984.1  tapetum determinant 1 [Arabidopsis thaliana]</p>                                                                                                                                                                                                                                                                                                                                                                                                                                                                                                                                                                                                                                                                                                                                                                                                                                                                                                                                                                                                                                                                                                                                                                                                                                                                                                                                                                                                                 | 172 | 176 | 2.00E-75  | 102.3 | 80.8  | 90.1  | tapetum determinant 1                           | gbpln | Arabidopsis thaliana | AT4G24972.1   Symbols: TPD1   tapetum determinant 1   chr4:12838220-12839619 FORWARD LENGTH=176                                             | 172 | 176 | 7.00E-78  | 102.3 | 80.8  | 90.1  |
| Rsa1.0_00001.1.g79.t1 | <p>ref XP_002867632.1  hypothetical protein ARALYDRAFT_492339 [Arabidopsis lyrata subsp. lyrata] gi 297313468 gb EFH43891.1  hypothetical protein ARALYDRAFT_492339 [Arabidopsis lyrata subsp. lyrata] gi 482553486 gb EOA17679.1  hypothetical protein CARUB_v10006048mg [Capsella rubella]</p>                                                                                                                                                                                                                                                                                                                                                                                                                                                                                                                                                                                                                                                                                                                                                                                                                                                                                                                                                                                                                                                                                                                                                                                                                                                                                                                     | 119 | 118 | 7.00E-58  | 99.2  | 95.8  | 96.6  | hypothetical protein ARALYDRAFT_492339          | gbpln | Arabidopsis lyrata   | AT4G24990.1   Symbols: ATGP4   Ubiquitin family protein   chr4:12849973-12851249 REVERSE LENGTH=118                                         | 119 | 118 | 8.00E-60  | 99.2  | 94.1  | 96.6  |

|                       |                                                                                                                                                                                                                                                                                                                                                                                                                                                                                                                                                                                                                                                                                                                                                                                                                                                                                                                                                                                                                                                                                                                                                                                                                                                                                                                                     |      |      |           |       |      |      |                                                     |       |                         |                                                                                                                                                                                                                                                                                                                                                                    |      |     |           |       |      |      |
|-----------------------|-------------------------------------------------------------------------------------------------------------------------------------------------------------------------------------------------------------------------------------------------------------------------------------------------------------------------------------------------------------------------------------------------------------------------------------------------------------------------------------------------------------------------------------------------------------------------------------------------------------------------------------------------------------------------------------------------------------------------------------------------------------------------------------------------------------------------------------------------------------------------------------------------------------------------------------------------------------------------------------------------------------------------------------------------------------------------------------------------------------------------------------------------------------------------------------------------------------------------------------------------------------------------------------------------------------------------------------|------|------|-----------|-------|------|------|-----------------------------------------------------|-------|-------------------------|--------------------------------------------------------------------------------------------------------------------------------------------------------------------------------------------------------------------------------------------------------------------------------------------------------------------------------------------------------------------|------|-----|-----------|-------|------|------|
| Rsa1.0_00001.1.g80.t2 | gb AAC33226.1  putative non-LTR retroelement reverse transcriptase [Arabidopsis thaliana]                                                                                                                                                                                                                                                                                                                                                                                                                                                                                                                                                                                                                                                                                                                                                                                                                                                                                                                                                                                                                                                                                                                                                                                                                                           | 1760 | 1529 | 0         | 86.9  | 40.4 | 53.2 | putative non-LTR retroelement reverse transcriptase | gbpln | Arabidopsis thaliana    | AT3G24255.1   Symbols:   RNA-directed DNA polymerase (reverse transcriptase)-related family protein   chr3:8789471-8793208 FORWARD LENGTH=746                                                                                                                                                                                                                      | 1760 | 746 | 3.00E-75  | 42.4  | 8.2  | 11.4 |
| Rsa1.0_00001.1.g81.t1 | gb EMJ11389.1  hypothetical protein PRUPE_ppa017790mg [Prunus persica]                                                                                                                                                                                                                                                                                                                                                                                                                                                                                                                                                                                                                                                                                                                                                                                                                                                                                                                                                                                                                                                                                                                                                                                                                                                              | 1180 | 1485 | 0         | 125.8 | 49.2 | 65.7 | hypothetical protein PRUPE_ppa017790mg              | gbpln | Prunus persica          | ATMG00860.1   Symbols: ORF158   DNA/RNA polymerases superfamily protein   chrM:235916-236392 FORWARD LENGTH=158                                                                                                                                                                                                                                                    | 1180 | 158 | 5.00E-27  | 13.4  | 4.7  | 7.1  |
| Rsa1.0_00001.1.g82.t1 | ref XP_002867630.1  nodulin MtN3 family protein [Arabidopsis lyrata subsp. lyrata] gi 297313466 gb EFH43889.1  nodulin MtN3 family protein [Arabidopsis lyrata subsp. lyrata]                                                                                                                                                                                                                                                                                                                                                                                                                                                                                                                                                                                                                                                                                                                                                                                                                                                                                                                                                                                                                                                                                                                                                       | 268  | 280  | 1.00E-127 | 104.5 | 86.2 | 92.9 | nodulin MtN3 family protein                         | gbpln | Arabidopsis lyrata      | AT4G25010.1   Symbols: SWEET14, AT5WEE14   Nodulin MtN3 family protein   chr4:12854630-12856351 REVERSE LENGTH=281                                                                                                                                                                                                                                                 | 268  | 281 | 1.00E-128 | 104.9 | 85.1 | 91.8 |
| Rsa1.0_00001.1.g83.t1 | gb EOA14264.1  hypothetical protein CARUB_v10027424mg, partial [Capsella rubella]<br>ref NP_194233.1  uncharacterized protein [Arabidopsis thaliana] gi 42573033 ref NP_974613.1  uncharacterized protein [Arabidopsis thaliana] gi 4455246 emb CAB36745.1  putative protein [Arabidopsis thaliana] gi 7269353 emb CAB79412.1  putative protein [Arabidopsis thaliana] gi 21553767 gb AAM62860.1  unknown [Arabidopsis thaliana] gi 89000969 gb ABD59074.1  At4g25030 [Arabidopsis thaliana] gi 110736875 dbj BAF00395.1  hypothetical protein [Arabidopsis thaliana] gi 222424032 dbj BAH19977.1  AT4G25030 [Arabidopsis thaliana] gi 332659593 gb AEE84993.1  uncharacterized protein AT4G25030 [Arabidopsis thaliana] gi 332659594 gb AEE84994.1  uncharacterized protein AT4G25030 [Arabidopsis thaliana] ref NP_195981.1  GDSL esterase/lipase [Arabidopsis thaliana] gi 75181338 sp Q9LZS7.1 GDL71_ARAT H RecName: Full=GDSL esterase/lipase At5g03610; AltName: Full=Extracellular lipase At5g03610; Flags: Precursor gi 13430834 gb AAK26039.1 AF360329_1 unknown protein [Arabidopsis thaliana] gi 7340646 emb CAB82926.1  putative protein [Arabidopsis thaliana] gi 21537326 gb AAM61667.1  putative lipase/acylhydrolase [Arabidopsis thaliana] gi 332003250 gb AED90633.1  GDSL esterase/lipase [Arabidopsis thaliana] | 79   | 103  | 3.00E-26  | 130.4 | 67.1 | 82.3 | hypothetical protein CARUB_v10027424mg, partial     | gbpln | Capsella rubella        | AT5G50810.1   Symbols: TIM8   translocase inner membrane subunit 8   chr5:20675875-20676505 REVERSE LENGTH=77                                                                                                                                                                                                                                                      | 79   | 77  | 3.00E-24  | 97.5  | 67.1 | 82.3 |
| Rsa1.0_00001.1.g84.t2 | ref NP_195981.1  GDSL esterase/lipase [Arabidopsis thaliana] gi 75181338 sp Q9LZS7.1 GDL71_ARAT H RecName: Full=GDSL esterase/lipase At5g03610; AltName: Full=Extracellular lipase At5g03610; Flags: Precursor gi 13430834 gb AAK26039.1 AF360329_1 unknown protein [Arabidopsis thaliana] gi 7340646 emb CAB82926.1  putative protein [Arabidopsis thaliana] gi 21537326 gb AAM61667.1  putative lipase/acylhydrolase [Arabidopsis thaliana] gi 332003250 gb AED90633.1  GDSL esterase/lipase [Arabidopsis thaliana]                                                                                                                                                                                                                                                                                                                                                                                                                                                                                                                                                                                                                                                                                                                                                                                                               | 361  | 344  | 3.00E-59  | 95.3  | 32.1 | 33.5 | uncharacterized protein                             | gbpln | Arabidopsis thaliana    | AT4G25030.2   Symbols:   unknown protein; BEST Arabidopsis thaliana protein match is: unknown protein (TAIR:AT5G45410.3); Has 35333 Blast hits to 34131 proteins in 2444 species: Archae - 798; Bacteria - 22429; Metazoa - 974; Fungi - 991; Plants - 531; Viruses - 0; Other Eukaryotes - 9610 (source: NCBI BLINK);   chr4:12865336-12866638 FORWARD LENGTH=344 | 361  | 344 | 7.00E-62  | 95.3  | 32.1 | 33.5 |
| Rsa1.0_00002.1.g85.t1 | ref NP_195981.1  GDSL esterase/lipase [Arabidopsis thaliana] gi 75181338 sp Q9LZS7.1 GDL71_ARAT H RecName: Full=GDSL esterase/lipase At5g03610; AltName: Full=Extracellular lipase At5g03610; Flags: Precursor gi 13430834 gb AAK26039.1 AF360329_1 unknown protein [Arabidopsis thaliana] gi 7340646 emb CAB82926.1  putative protein [Arabidopsis thaliana] gi 21537326 gb AAM61667.1  putative lipase/acylhydrolase [Arabidopsis thaliana] gi 332003250 gb AED90633.1  GDSL esterase/lipase [Arabidopsis thaliana]                                                                                                                                                                                                                                                                                                                                                                                                                                                                                                                                                                                                                                                                                                                                                                                                               | 341  | 359  | 2.00E-94  | 105.3 | 55.1 | 70.1 | GDSL esterase/lipase                                | gbpln | Arabidopsis thaliana    | AT5G03610.1   Symbols:   GDSL-like Lipase/Acylhydrolase superfamily protein   chr5:915650-918326 FORWARD LENGTH=359                                                                                                                                                                                                                                                | 341  | 359 | 6.00E-97  | 105.3 | 55.1 | 70.1 |
| Rsa1.0_00002.1.g86.t1 | gb EOA34211.1  hypothetical protein CARUB_v10021720mg [Capsella rubella]                                                                                                                                                                                                                                                                                                                                                                                                                                                                                                                                                                                                                                                                                                                                                                                                                                                                                                                                                                                                                                                                                                                                                                                                                                                            | 351  | 352  | 1.00E-96  | 100.3 | 56.7 | 70.9 | hypothetical protein CARUB_v10021720mg              | gbpln | Capsella rubella        | AT5G03610.1   Symbols:   GDSL-like Lipase/Acylhydrolase superfamily protein   chr5:915650-918326 FORWARD LENGTH=359                                                                                                                                                                                                                                                | 351  | 359 | 5.00E-98  | 102.3 | 53.3 | 68.9 |
| Rsa1.0_00002.1.g87.t1 | ref XP_003578788.1  PREDICTED: AP-2 complex subunit sigma-like [Brachypodium distachyon] gi 326523623 dbj BAJ92982.1  predicted protein [Hordeum vulgare subsp. vulgare] gi 326532016 dbj BAK01384.1  predicted protein [Hordeum vulgare subsp. vulgare]                                                                                                                                                                                                                                                                                                                                                                                                                                                                                                                                                                                                                                                                                                                                                                                                                                                                                                                                                                                                                                                                            | 84   | 142  | 1.00E-27  | 169.0 | 95.2 | 97.6 | PREDICTED: AP-2 complex subunit sigma-like          | gbpln | Brachypodium distachyon | AT1G47830.1   Symbols:   SNARE-like superfamily protein   chr1:17613346-17614784 REVERSE LENGTH=142                                                                                                                                                                                                                                                                | 84   | 142 | 3.00E-30  | 169.0 | 95.2 | 96.4 |
| Rsa1.0_00002.1.g88.t1 | #                                                                                                                                                                                                                                                                                                                                                                                                                                                                                                                                                                                                                                                                                                                                                                                                                                                                                                                                                                                                                                                                                                                                                                                                                                                                                                                                   | #    | #    | #         | #     | #    | #    | -                                                   | ----  | ----                    | #                                                                                                                                                                                                                                                                                                                                                                  | #    | #   | #         | #     | #    |      |
| Rsa1.0_00002.1.g89.t1 | gb EOA34211.1  hypothetical protein CARUB_v10021720mg [Capsella rubella]                                                                                                                                                                                                                                                                                                                                                                                                                                                                                                                                                                                                                                                                                                                                                                                                                                                                                                                                                                                                                                                                                                                                                                                                                                                            | 346  | 352  | 5.00E-92  | 101.7 | 56.4 | 69.9 | hypothetical protein CARUB_v10021720mg              | gbpln | Capsella rubella        | AT5G03610.1   Symbols:   GDSL-like Lipase/Acylhydrolase superfamily protein   chr5:915650-918326 FORWARD LENGTH=359                                                                                                                                                                                                                                                | 346  | 359 | 3.00E-90  | 103.8 | 51.4 | 67.9 |
| Rsa1.0_00002.1.g90.t1 | gb EOA13504.1  hypothetical protein CARUB_v10026565mg [Capsella rubella]                                                                                                                                                                                                                                                                                                                                                                                                                                                                                                                                                                                                                                                                                                                                                                                                                                                                                                                                                                                                                                                                                                                                                                                                                                                            | 391  | 391  | 0         | 100.0 | 95.7 | 98.0 | hypothetical protein CARUB_v10026565mg              | gbpln | Capsella rubella        | AT1G43170.8   Symbols: RP1   ribosomal protein 1   chr1:16266992-16268631 FORWARD LENGTH=389                                                                                                                                                                                                                                                                       | 391  | 389 | 0         | 99.5  | 92.1 | 96.2 |
| Rsa1.0_00002.1.g91.t1 | gb EOA12392.1  hypothetical protein CARUB_v10026693mg [Capsella rubella]                                                                                                                                                                                                                                                                                                                                                                                                                                                                                                                                                                                                                                                                                                                                                                                                                                                                                                                                                                                                                                                                                                                                                                                                                                                            | 352  | 350  | 0         | 99.4  | 93.5 | 97.2 | hypothetical protein CARUB_v10026693mg              | gbpln | Capsella rubella        | AT5G42420.1   Symbols:   Nucleotide-sugar transporter family protein   chr5:16968819-16970225 FORWARD LENGTH=350                                                                                                                                                                                                                                                   | 352  | 350 | 0         | 99.4  | 92.3 | 95.2 |
| Rsa1.0_00002.1.g92.t1 | dbj BAJ34553.1  unnamed protein product [Thellungiella halophila]                                                                                                                                                                                                                                                                                                                                                                                                                                                                                                                                                                                                                                                                                                                                                                                                                                                                                                                                                                                                                                                                                                                                                                                                                                                                   | 391  | 389  | 0         | 99.5  | 95.9 | 98.0 | unnamed protein product                             | ----  | ----                    | AT1G43170.8   Symbols: RP1   ribosomal protein 1   chr1:16266992-16268631 FORWARD LENGTH=389                                                                                                                                                                                                                                                                       | 391  | 389 | 0         | 99.5  | 92.1 | 95.9 |

|                        |                                                                                                                                                                                                                                                                                                                                                  |      |      |           |       |      |      |                                              |       |                      |                                                                                                                                   |      |      |           |       |      |      |
|------------------------|--------------------------------------------------------------------------------------------------------------------------------------------------------------------------------------------------------------------------------------------------------------------------------------------------------------------------------------------------|------|------|-----------|-------|------|------|----------------------------------------------|-------|----------------------|-----------------------------------------------------------------------------------------------------------------------------------|------|------|-----------|-------|------|------|
| Rsa1.0_00002.1.g93.t1  | refNP_199056.1  SAUR-like auxin-responsive protein [Arabidopsis thaliana] gi 9759477 dbj BAB10482.1  unnamed protein product [Arabidopsis thaliana] gi 332007424 gb AED94807.1  SAUR-like auxin-responsive protein [Arabidopsis thaliana]                                                                                                        | 123  | 111  | 2.00E-42  | 90.2  | 68.3 | 74.8 | SAUR-like auxin-responsive protein           | gbpln | Arabidopsis thaliana | AT5G42410.1   Symbols:   SAUR-like auxin-responsive protein family   chr5:16964764-16965099 FORWARD LENGTH=111                    | 123  | 111  | 4.00E-45  | 90.2  | 68.3 | 74.8 |
| Rsa1.0_00002.1.g94.t8  | gb ABV68922.1  SDG25 [Arabidopsis thaliana]                                                                                                                                                                                                                                                                                                      | 1274 | 1388 | 0         | 108.9 | 70.1 | 79.6 | SDG25                                        | gbpln | Arabidopsis thaliana | AT5G42400.1   Symbols: ATXR7, SDG25   SET domain protein 25   chr5:16954469-16960671 REVERSE LENGTH=1423                          | 1274 | 1423 | 0         | 111.7 | 52.8 | 60.9 |
| Rsa1.0_00002.1.g95.t4  | refXP_002865532.1  metalloendopeptidase [Arabidopsis lyrata subsp. lyrata] gi 297311367 gb EFH41791.1  metalloendopeptidase [Arabidopsis lyrata subsp. lyrata]                                                                                                                                                                                   | 1279 | 1275 | 0         | 99.7  | 90.2 | 94.2 | metalloendopeptidase                         | gbpln | Arabidopsis lyrata   | AT5G42390.1   Symbols:   Insulinase (Peptidase family M16) family protein   chr5:16845308-16952647 FORWARD LENGTH=1265            | 1279 | 1265 | 0         | 98.9  | 89.9 | 94.1 |
| Rsa1.0_00002.1.g96.t1  | refXP_002863793.1  hypothetical protein ARALYDRAFT_917538 [Arabidopsis lyrata subsp. lyrata] gi 297309628 gb EFH40052.1  metalloendopeptidase [Arabidopsis lyrata subsp. lyrata]                                                                                                                                                                 | 165  | 185  | 2.00E-66  | 112.1 | 81.8 | 88.5 | hypothetical protein ARALYDRAFT_917538       | gbpln | Arabidopsis lyrata   | AT5G42380.1   Symbols: CML39, CML37   calmodulin like 37   chr5:16942758-16943315 REVERSE LENGTH=185                              | 165  | 185  | 2.00E-68  | 112.1 | 81.2 | 87.9 |
| Rsa1.0_00002.1.g97.t1  | refXP_002863794.1  predicted protein [Arabidopsis lyrata subsp. lyrata] gi 297309629 gb EFH40053.1  predicted protein [Arabidopsis lyrata subsp. lyrata]                                                                                                                                                                                         | 455  | 460  | 0         | 101.1 | 83.7 | 90.3 | predicted protein                            | gbpln | Arabidopsis lyrata   | AT5G42370.1   Symbols:   Calcineurin-like metallo-phosphoesterase superfamily protein   chr5:16939329-16941463 REVERSE LENGTH=447 | 455  | 447  | 0         | 98.2  | 82.0 | 89.5 |
| Rsa1.0_00002.1.g98.t1  | refXP_002870812.1  predicted protein [Arabidopsis lyrata subsp. lyrata] gi 297316648 gb EFH47071.1  predicted protein [Arabidopsis lyrata subsp. lyrata]                                                                                                                                                                                         | 222  | 223  | 6.00E-99  | 100.5 | 80.6 | 89.2 | predicted protein                            | gbpln | Arabidopsis lyrata   | AT4G14630.1   Symbols: GLP9   germin-like protein 9   chr4:8392920-8393680 FORWARD LENGTH=222                                     | 222  | 222  | 4.00E-94  | 100.0 | 75.7 | 84.2 |
| Rsa1.0_00002.1.g99.t2  | refXP_002865539.1  kelch repeat-containing F-box family protein [Arabidopsis lyrata subsp. lyrata] gi 297311374 gb EFH41798.1  kelch repeat-containing F-box family protein [Arabidopsis lyrata subsp. lyrata]                                                                                                                                   | 556  | 561  | 0         | 100.9 | 80.6 | 88.3 | kelch repeat-containing F-box family protein | gbpln | Arabidopsis lyrata   | AT5G42350.1   Symbols:   Galactose oxidase/kelch repeat superfamily protein   chr5:16932106-16933797 FORWARD LENGTH=563           | 556  | 563  | 0         | 101.3 | 78.2 | 87.6 |
| Rsa1.0_00002.1.g100.t1 | refXP_002863798.1  binding protein [Arabidopsis lyrata subsp. lyrata] gi 297309633 gb EFH40057.1  binding protein [Arabidopsis lyrata subsp. lyrata]                                                                                                                                                                                             | 642  | 660  | 0         | 102.8 | 87.1 | 93.9 | binding protein                              | gbpln | Arabidopsis lyrata   | AT5G42340.1   Symbols: PUB15   Plant U-Box 15   chr5:16928086-16930367 REVERSE LENGTH=660                                         | 642  | 660  | 0         | 102.8 | 86.3 | 92.8 |
| Rsa1.0_00002.1.g101.t1 | gb EOA13429.1  hypothetical protein CARUB_v10026470mg [Capsella rubella]                                                                                                                                                                                                                                                                         | 433  | 423  | 0         | 97.7  | 87.3 | 91.0 | hypothetical protein CARUB_v10026470mg       | gbpln | Capsella rubella     | AT5G42320.1   Symbols:   Zn-dependent exopeptidases superfamily protein   chr5:16918651-16920845 REVERSE LENGTH=379               | 433  | 379  | 0         | 87.5  | 79.0 | 82.9 |
| Rsa1.0_00002.1.g102.t1 | #                                                                                                                                                                                                                                                                                                                                                | #    | #    | #         | #     | #    | #    | -                                            | ----  | ----                 | #                                                                                                                                 | #    | #    | #         | #     | #    |      |
| Rsa1.0_00002.1.g103.t1 | refNP_198387.2  S-locus lectin protein kinase-like protein [Arabidopsis thaliana] gi 313471789 sp O65238.2 Y5537.ARAT.H RecName: Full=G-type lectin S-receptor-like serine/threonine-protein kinase At5g35370; Flags: Precursor gi 332006576 gb AED93959.1  G-type lectin S-receptor-like serine/threonine-protein kinase [Arabidopsis thaliana] | 878  | 872  | 0         | 99.3  | 83.0 | 89.3 | S-locus lectin protein kinase-like protein   | gbpln | Arabidopsis thaliana | AT5G35370.1   Symbols:   S-locus lectin protein kinase family protein   chr5:13588564-13591182 REVERSE LENGTH=872                 | 878  | 872  | 0         | 99.3  | 83.0 | 89.3 |
| Rsa1.0_00002.1.g104.t1 | refNP_199037.2  ubiquitin family protein [Arabidopsis thaliana] gi 22654985 gb AAM98085.1  AT5g42220/K5J14.2 [Arabidopsis thaliana] gi 30102508 gb AAP21172.1  AT5g42220/K5J14.2 [Arabidopsis thaliana] gi 332007398 gb AED94781.1  ubiquitin family protein [Arabidopsis thaliana]                                                              | 811  | 879  | 0         | 108.4 | 75.8 | 83.4 | ubiquitin family protein                     | gbpln | Arabidopsis thaliana | AT5G42220.1   Symbols:   Ubiquitin-like superfamily protein   chr5:16872962-16874455 FORWARD LENGTH=879                           | 811  | 879  | 0         | 108.4 | 75.8 | 83.4 |
| Rsa1.0_00002.1.g105.t1 | refXP_002894570.1  HNH endonuclease domain-containing protein [Arabidopsis lyrata subsp. lyrata] gi 297340412 gb EFH70829.1  HNH endonuclease domain-containing protein [Arabidopsis lyrata subsp. lyrata]                                                                                                                                       | 288  | 283  | 1.00E-124 | 98.3  | 79.9 | 84.4 | HNH endonuclease domain-containing protein   | gbpln | Arabidopsis lyrata   | AT2G23840.1   Symbols:   HNH endonuclease   chr2:10153982-10155600 REVERSE LENGTH=284                                             | 288  | 284  | 1.00E-126 | 98.6  | 80.2 | 85.4 |

|                        |                                                                                                                                                                                                                                                                                                                                                                                                                                                                                                                                                                                                                                                                                                                                                                                                                                                                                                                                                                                                                                                                                           |      |      |          |       |      |      |                                             |       |                      |                                                                                                                                                |      |      |          |       |      |      |
|------------------------|-------------------------------------------------------------------------------------------------------------------------------------------------------------------------------------------------------------------------------------------------------------------------------------------------------------------------------------------------------------------------------------------------------------------------------------------------------------------------------------------------------------------------------------------------------------------------------------------------------------------------------------------------------------------------------------------------------------------------------------------------------------------------------------------------------------------------------------------------------------------------------------------------------------------------------------------------------------------------------------------------------------------------------------------------------------------------------------------|------|------|----------|-------|------|------|---------------------------------------------|-------|----------------------|------------------------------------------------------------------------------------------------------------------------------------------------|------|------|----------|-------|------|------|
| Rsa1.0_00002.1.g106.t1 | ref NP_175851.1  5'-3' exoribonuclease 4 [Arabidopsis thaliana]<br>gi 75262833 sp Q9FQ04.1 XRN4_ARATH<br>RecName: Full=5'-3' exoribonuclease 4;<br>AltName: Full=Protein AGC<br>INSENSITIVE 1; AltName: Full=Protein<br>ETHYLENE INSENSITIVE 5; AltName:<br>Full=Protein EXORIBONUCLEASE 4<br>gi 11875626 gb AA040731.1 AF286718.1<br>XRN4 [Arabidopsis thaliana]<br>gi 17381112 gb AAL36368.1  putative<br>exonuclease [Arabidopsis thaliana]<br>gi 20259665 gb AAM14350.1  putative<br>exonuclease [Arabidopsis thaliana]<br>gi 109627646 gb ABG34298.1 <br>At1g54490 [Arabidopsis thaliana]<br>gi 332194988 gb AEE33109.1  5'-3'<br>exoribonuclease 4 [Arabidopsis thaliana]                                                                                                                                                                                                                                                                                                                                                                                                           | 951  | 947  | 0        | 99.6  | 84.4 | 89.1 | 5'-3' exoribonuclease 4                     | gbpln | Arabidopsis thaliana | AT1G54490.1   Symbols: AIN1, EIN5, XRN4, ATXRN4   exoribonuclease 4   chr1:20350300-20356650 FORWARD LENGTH=947                                | 951  | 947  | 0        | 99.6  | 84.4 | 89.1 |
| Rsa1.0_00002.1.g107.t1 | gb EOA34142.1  hypothetical protein CARUB_v10021644mg [Capsella rubella]                                                                                                                                                                                                                                                                                                                                                                                                                                                                                                                                                                                                                                                                                                                                                                                                                                                                                                                                                                                                                  | 700  | 649  | 2.00E-68 | 92.7  | 26.9 | 36.3 | hypothetical protein CARUB_v10021644mg      | gbpln | Capsella rubella     | AT5G22355.1   Symbols:   Cysteine/Histidine-rich C1 domain family protein   chr5:7401762-7403756 FORWARD LENGTH=664                            | 700  | 664  | 5.00E-64 | 94.9  | 19.3 | 23.9 |
| Rsa1.0_00002.1.g108.t1 | ref XP_002894589.1  hypothetical protein ARALYDRAFT_892695 [Arabidopsis lyrata subsp. lyrata]<br>gi 297340431 gb EFH70848.1  hypothetical protein ARALYDRAFT_892695 [Arabidopsis lyrata subsp. lyrata]                                                                                                                                                                                                                                                                                                                                                                                                                                                                                                                                                                                                                                                                                                                                                                                                                                                                                    | 257  | 239  | 4.00E-99 | 93.0  | 74.3 | 83.3 | hypothetical protein ARALYDRAFT_892695      | gbpln | Arabidopsis lyrata   | AT1G54540.1   Symbols:   Late embryogenesis abundant (LEA) hydroxyproline-rich glycoprotein family   chr1:20367702-20368421 REVERSE LENGTH=239 | 257  | 239  | 2.00E-92 | 93.0  | 73.9 | 84.4 |
| Rsa1.0_00002.1.g109.t1 | ref NP_175858.1  Myosin family protein with Dil domain [Arabidopsis thaliana]<br>gi 332194997 gb AEE33118.1  Myosin family protein with Dil domain [Arabidopsis thaliana]                                                                                                                                                                                                                                                                                                                                                                                                                                                                                                                                                                                                                                                                                                                                                                                                                                                                                                                 | 1517 | 1529 | 0        | 100.8 | 92.9 | 97.2 | Myosin family protein with Dil domain       | gbpln | Arabidopsis thaliana | AT1G54560.1   Symbols: XIE, ATXIE   Myosin family protein with Dil domain   chr1:20371649-20379745 REVERSE LENGTH=1529                         | 1517 | 1529 | 0        | 100.8 | 92.9 | 97.2 |
| Rsa1.0_00002.1.g110.t1 | ref XP_002894592.1  esterase/lipase/thioesterase family protein [Arabidopsis lyrata subsp. lyrata]<br>gi 297340434 gb EFH70851.1  esterase/lipase/thioesterase family protein [Arabidopsis lyrata subsp. lyrata]<br>ref NP_175862.1  putative serine/threonine-protein kinase [Arabidopsis thaliana]<br>gi 186490957 ref NP_001117490.1  putative serine/threonine-protein kinase [Arabidopsis thaliana]<br>gi 75339093 sp Q9ZVM9.1 Y1461_ARATH<br>RecName: Full=Probable serine/threonine-protein kinase At1g54610<br>gi 13877619 gb AAK43887.1 AF370510_1<br>Unknown protein [Arabidopsis thaliana]<br>gi 3776559 gb AAC64876.1  Strong similarity to gene F14J9.26 gi 3482933 cdc2 protein kinase homolog from A. thaliana BAC gb AC003970. ESTs gb Z35332 and gb F19907 come from this gene [Arabidopsis thaliana]<br>gi 22136480 gb AAM91318.1  unknown protein [Arabidopsis thaliana]<br>gi 332195002 gb AEE33123.1  putative serine/threonine-protein kinase [Arabidopsis thaliana]<br>gi 332195004 gb AEE33125.1  putative serine/threonine-protein kinase [Arabidopsis thaliana] | 699  | 703  | 0        | 100.6 | 83.8 | 91.4 | esterase/lipase/thioesterase family protein | gbpln | Arabidopsis lyrata   | AT1G54570.1   Symbols:   Esterase/lipase/thioesterase family protein   chr1:20380649-20384953 REVERSE LENGTH=704                               | 699  | 704  | 0        | 100.7 | 84.0 | 90.7 |
| Rsa1.0_00002.1.g111.t1 | ref NP_175862.1  putative serine/threonine-protein kinase [Arabidopsis thaliana]<br>gi 186490957 ref NP_001117490.1  putative serine/threonine-protein kinase [Arabidopsis thaliana]<br>gi 75339093 sp Q9ZVM9.1 Y1461_ARATH<br>RecName: Full=Probable serine/threonine-protein kinase At1g54610<br>gi 13877619 gb AAK43887.1 AF370510_1<br>Unknown protein [Arabidopsis thaliana]<br>gi 3776559 gb AAC64876.1  Strong similarity to gene F14J9.26 gi 3482933 cdc2 protein kinase homolog from A. thaliana BAC gb AC003970. ESTs gb Z35332 and gb F19907 come from this gene [Arabidopsis thaliana]<br>gi 22136480 gb AAM91318.1  unknown protein [Arabidopsis thaliana]<br>gi 332195002 gb AEE33123.1  putative serine/threonine-protein kinase [Arabidopsis thaliana]<br>gi 332195004 gb AEE33125.1  putative serine/threonine-protein kinase [Arabidopsis thaliana]                                                                                                                                                                                                                     | 560  | 572  | 0        | 102.1 | 89.5 | 93.9 | putative serine/threonine-protein kinase    | gbpln | Arabidopsis thaliana | AT1G54610.3   Symbols:   Protein kinase superfamily protein   chr1:20393962-20396902 REVERSE LENGTH=572                                        | 560  | 572  | 0        | 102.1 | 89.5 | 93.9 |

|                        |     |     |           |       |      |      |                                                 |       |                      |                                                                                                                                    |     |     |           |       |      |      |
|------------------------|-----|-----|-----------|-------|------|------|-------------------------------------------------|-------|----------------------|------------------------------------------------------------------------------------------------------------------------------------|-----|-----|-----------|-------|------|------|
| Rsa1.0_00002.1.g112.t1 | 131 | 136 | 7.00E-51  | 103.8 | 81.7 | 90.1 | acyl carrier protein 3                          | gbpln | Arabidopsis thaliana | AT1G54630.1   Symbols: ACP3   acyl carrier protein 3   chr1:20401642-20402919 REVERSE LENGTH=136                                   | 131 | 136 | 2.00E-53  | 103.8 | 81.7 | 90.1 |
| Rsa1.0_00002.1.g113.t1 | 680 | 691 | 1.00E-152 | 101.6 | 56.3 | 69.4 | DCD (Development and Cell Death) domain protein | gbpln | Arabidopsis thaliana | AT2G32910.1   Symbols:   DCD (Development and Cell Death) domain protein   chr2:13959685-13961989 FORWARD LENGTH=691               | 680 | 691 | 1.00E-154 | 101.6 | 56.3 | 69.4 |
| Rsa1.0_00002.1.g114.t1 | 265 | 266 | 1.00E-125 | 100.4 | 81.5 | 89.1 | hypothetical protein ARALYDRAFT_470766          | gbpln | Arabidopsis lyrata   | AT1G07440.1   Symbols:   NAD(P)-binding Rossmann-fold superfamily protein   chr1:2286436-2287665 REVERSE LENGTH=266                | 265 | 266 | 1.00E-126 | 100.4 | 80.8 | 88.3 |
| Rsa1.0_00002.1.g115.t1 | 852 | 931 | 0         | 109.3 | 83.0 | 89.2 | hypothetical protein ARALYDRAFT_474746          | gbpln | Arabidopsis lyrata   | AT1G54710.1   Symbols: ATATG18H, ATG18H   homolog of yeast autophagy 18 (ATG18) H   chr1:20417019-20420733 REVERSE LENGTH=927      | 852 | 927 | 0         | 108.8 | 81.5 | 87.6 |
| Rsa1.0_00002.1.g116.t1 | 343 | 496 | 1.00E-149 | 144.6 | 74.3 | 85.7 | sugar transporter ERD6                          | gbpln | Arabidopsis thaliana | AT1G08930.2   Symbols: ERD6   Major facilitator superfamily protein   chr1:2873604-2876979 FORWARD LENGTH=496                      | 343 | 496 | 1.00E-151 | 144.6 | 74.3 | 85.7 |
| Rsa1.0_00002.1.g117.t1 | 302 | 320 | 1.00E-119 | 106.0 | 73.5 | 85.4 | hypothetical protein ARALYDRAFT_892725          | gbpln | Arabidopsis lyrata   | AT1G72210.1   Symbols:   basic helix-loop-helix (bHLH) DNA-binding superfamily protein   chr1:27180066-27182268 FORWARD LENGTH=320 | 302 | 320 | 6.00E-53  | 106.0 | 35.4 | 47.0 |
| Rsa1.0_00002.1.g118.t1 | 349 | 347 | 1.00E-179 | 99.4  | 85.1 | 92.8 | Late embryogenesis abundant-related protein     | gbpln | Arabidopsis thaliana | AT1G54990.1   Symbols:   Late embryogenesis abundant (LEA) protein-related   chr1:20463107-20464407 FORWARD LENGTH=347             | 349 | 347 | 0         | 99.4  | 85.1 | 92.8 |

|                        |                                                                                                                                                                                                                                                                                                                                                                                                                                                                                                                                                                               |     |     |           |       |      |      |                                        |       |                      |                                                                                                                                                                                                                                                                                                                                                                                                                                                                                                                             |     |     |           |       |      |      |
|------------------------|-------------------------------------------------------------------------------------------------------------------------------------------------------------------------------------------------------------------------------------------------------------------------------------------------------------------------------------------------------------------------------------------------------------------------------------------------------------------------------------------------------------------------------------------------------------------------------|-----|-----|-----------|-------|------|------|----------------------------------------|-------|----------------------|-----------------------------------------------------------------------------------------------------------------------------------------------------------------------------------------------------------------------------------------------------------------------------------------------------------------------------------------------------------------------------------------------------------------------------------------------------------------------------------------------------------------------------|-----|-----|-----------|-------|------|------|
| Rsa1.0_00002.1.g119.t1 | ref[XP_002891917.1] hypothetical protein ARALYDRAFT_474768 [Arabidopsis lyrata subsp. lyrata] gi 297337759 gb EFH68176.1  hypothetical protein ARALYDRAFT_474768 [Arabidopsis lyrata subsp. lyrata]                                                                                                                                                                                                                                                                                                                                                                           | 865 | 894 | 0         | 103.4 | 67.4 | 75.3 | hypothetical protein ARALYDRAFT_474768 | gbpln | Arabidopsis lyrata   | AT1G54920.3   Symbols:   unknown protein; FUNCTIONS IN: molecular_function unknown; INVOLVED IN: biological_process unknown; EXPRESSED IN: 23 plant structures; EXPRESSED DURING: 15 growth stages.   chr1:20470916-20474898 FORWARD LENGTH=901                                                                                                                                                                                                                                                                             | 865 | 901 | 0         | 104.2 | 66.7 | 74.7 |
| Rsa1.0_00002.1.g120.t1 | ref[NP_175890.1] GRF zinc finger / Zinc knuckle protein [Arabidopsis thaliana] gi 9857519 gb AAG00874.1 AC064840_5 Hypothetical protein [Arabidopsis thaliana] gi 12322160 gb AAG51116.1 AC069144_13 hypothetical protein [Arabidopsis thaliana] gi 332195043 gb AEE33164.1  GRF zinc finger / Zinc knuckle protein [Arabidopsis thaliana]                                                                                                                                                                                                                                    | 368 | 353 | 6.00E-57  | 95.9  | 43.5 | 56.3 | GRF zinc finger / Zinc knuckle protein | gbpln | Arabidopsis thaliana | AT1G54930.1   Symbols:   GRF zinc finger / Zinc knuckle protein   chr1:20478267-20479671 REVERSE LENGTH=353                                                                                                                                                                                                                                                                                                                                                                                                                 | 368 | 353 | 1.00E-59  | 95.9  | 43.5 | 56.3 |
| Rsa1.0_00002.1.g121.t1 | #                                                                                                                                                                                                                                                                                                                                                                                                                                                                                                                                                                             | #   | #   | #         | #     | #    | -    | ----                                   | ----  | #                    | #                                                                                                                                                                                                                                                                                                                                                                                                                                                                                                                           | #   | #   | #         | #     | #    |      |
| Rsa1.0_00002.1.g122.t1 | ref[NP_001058585.1] Os06g0715500 [Oryza sativa Japonica Group] gi 53791783 dbj BAD53577.1  putative SSR alpha subunit [Oryza sativa Japonica Group] gi 113596625 dbj BAF20499.1  Os06g0715500 [Oryza sativa Japonica Group] gi 125598503 gb EAZ38283.1  hypothetical protein OsJ_22661 [Oryza sativa Japonica Group] gi 215704734 dbj BAG94762.1  unnamed protein product [Oryza sativa Japonica Group] gi 215765401 dbj BAG87098.1  unnamed protein product [Oryza sativa Japonica Group] gi 215765644 dbj BAG87341.1  unnamed protein product [Oryza sativa Japonica Group] | 168 | 257 | 3.00E-23  | 153.0 | 31.5 | 39.3 | Os06g0715500                           | gbpln | Oryza sativa         | AT2G21160.1   Symbols:   Translocon-associated protein (TRAP), alpha subunit   chr2:9068428-9070207 FORWARD LENGTH=258                                                                                                                                                                                                                                                                                                                                                                                                      | 168 | 258 | 6.00E-19  | 153.6 | 39.9 | 43.5 |
| Rsa1.0_00002.1.g123.t1 | #                                                                                                                                                                                                                                                                                                                                                                                                                                                                                                                                                                             | #   | #   | #         | #     | #    | -    | ----                                   | ----  | #                    | #                                                                                                                                                                                                                                                                                                                                                                                                                                                                                                                           | #   | #   | #         | #     | #    |      |
| Rsa1.0_00002.1.g124.t1 | gb EOA34295.1  hypothetical protein CARUB_v10021810mg [Capsella rubella]                                                                                                                                                                                                                                                                                                                                                                                                                                                                                                      | 542 | 559 | 0         | 103.1 | 80.4 | 89.5 | hypothetical protein CARUB_v10021810mg | gbpln | Capsella rubella     | AT1G54940.1   Symbols: PGSIP4   plant glycogenin-like starch initiation protein 4   chr1:20481690-20484541 FORWARD LENGTH=557                                                                                                                                                                                                                                                                                                                                                                                               | 542 | 557 | 0         | 102.8 | 78.4 | 89.3 |
| Rsa1.0_00002.1.g125.t1 | #                                                                                                                                                                                                                                                                                                                                                                                                                                                                                                                                                                             | #   | #   | #         | #     | #    | -    | ----                                   | ----  | #                    | #                                                                                                                                                                                                                                                                                                                                                                                                                                                                                                                           | #   | #   | #         | #     | #    |      |
| Rsa1.0_00002.1.g126.t1 | ref[XP_002891939.1] hypothetical protein ARALYDRAFT_474779 [Arabidopsis lyrata subsp. lyrata] gi 297337781 gb EFH68198.1  hypothetical protein ARALYDRAFT_474779 [Arabidopsis lyrata subsp. lyrata]                                                                                                                                                                                                                                                                                                                                                                           | 873 | 845 | 0         | 96.8  | 75.8 | 82.0 | hypothetical protein ARALYDRAFT_474779 | gbpln | Arabidopsis lyrata   | AT1G55040.1   Symbols:   zinc finger (Ran-binding) family protein   chr1:20534895-20538901 FORWARD LENGTH=849                                                                                                                                                                                                                                                                                                                                                                                                               | 873 | 849 | 0         | 97.3  | 77.0 | 82.7 |
| Rsa1.0_00002.1.g127.t2 | gb EOA34587.1  hypothetical protein CARUB_v10022144mg [Capsella rubella]                                                                                                                                                                                                                                                                                                                                                                                                                                                                                                      | 329 | 349 | 1.00E-169 | 106.1 | 84.2 | 94.5 | hypothetical protein CARUB_v10022144mg | gbpln | Capsella rubella     | AT1G58725.1   Symbols:   GDSL-like Lipase/Acylhydrolase superfamily protein   chr1:21771935-21773365 REVERSE LENGTH=349                                                                                                                                                                                                                                                                                                                                                                                                     | 329 | 349 | 1.00E-172 | 106.1 | 85.1 | 94.2 |
| Rsa1.0_00002.1.g128.t1 | ref[XP_002891941.1] hypothetical protein ARALYDRAFT_474781 [Arabidopsis lyrata subsp. lyrata] gi 297337783 gb EFH68200.1  hypothetical protein ARALYDRAFT_474781 [Arabidopsis lyrata subsp. lyrata]                                                                                                                                                                                                                                                                                                                                                                           | 801 | 892 | 0         | 111.4 | 65.0 | 76.8 | hypothetical protein ARALYDRAFT_474781 | gbpln | Arabidopsis lyrata   | AT1G55050.2   Symbols:   unknown protein; FUNCTIONS IN: molecular_function unknown; INVOLVED IN: biological_process unknown; LOCATED IN: cellular_component unknown; EXPRESSED IN: cultured cell; BEST Arabidopsis thaliana protein match is: unknown protein (TAIR:AT1G09040.1); Has 30201 Blast hits to 17322 proteins in 780 species: Archae - 12; Bacteria - 1396; Metazoa - 17338; Fungi - 3422; Plants - 5037; Viruses - 0; Other Eukaryotes - 2996 (source: NCBI BLINK).   chr1:20542779-20545612 FORWARD LENGTH=915 | 801 | 915 | 0         | 114.2 | 61.9 | 73.8 |
| Rsa1.0_00002.1.g129.t1 | ref[XP_002891941.1] hypothetical protein ARALYDRAFT_474781 [Arabidopsis lyrata subsp. lyrata] gi 297337783 gb EFH68200.1  hypothetical protein ARALYDRAFT_474781 [Arabidopsis lyrata subsp. lyrata]                                                                                                                                                                                                                                                                                                                                                                           | 802 | 892 | 0         | 111.2 | 66.3 | 77.8 | hypothetical protein ARALYDRAFT_474781 | gbpln | Arabidopsis lyrata   | AT1G55050.2   Symbols:   unknown protein; FUNCTIONS IN: molecular_function unknown; INVOLVED IN: biological_process unknown; LOCATED IN: cellular_component unknown; EXPRESSED IN: cultured cell; BEST Arabidopsis thaliana protein match is: unknown protein (TAIR:AT1G09040.1); Has 30201 Blast hits to 17322 proteins in 780 species: Archae - 12; Bacteria - 1396; Metazoa - 17338; Fungi - 3422; Plants - 5037; Viruses - 0; Other Eukaryotes - 2996 (source: NCBI BLINK).   chr1:20542779-20545612 FORWARD LENGTH=915 | 802 | 915 | 0         | 114.1 | 62.2 | 74.3 |



|                        |                                                                                                                                                            |      |      |           |       |      |      |                                                                                                    |       |                      |                                                                                                                                                                                                                                                                                                                                                                                                         |      |      |           |       |      |      |
|------------------------|------------------------------------------------------------------------------------------------------------------------------------------------------------|------|------|-----------|-------|------|------|----------------------------------------------------------------------------------------------------|-------|----------------------|---------------------------------------------------------------------------------------------------------------------------------------------------------------------------------------------------------------------------------------------------------------------------------------------------------------------------------------------------------------------------------------------------------|------|------|-----------|-------|------|------|
| Rsa1.0_00002.1.g130.t1 | ref XP_002888210.1  hypothetical protein ARALYDRAFT_475383 [Arabidopsis lyrata subsp. lyrata] gi 297334051 gb EFH64469.1                                   | 309  | 350  | 1.00E-150 | 113.3 | 84.5 | 92.9 | hypothetical protein ARALYDRAFT_475383                                                             | gbpln | Arabidopsis lyrata   | AT1G58725.1   Symbols:   GDSL-like Lipase/Acylhydrolase superfamily protein   chr1:21771935-21773365 REVERSE LENGTH=349                                                                                                                                                                                                                                                                                 | 309  | 349  | 1.00E-151 | 112.9 | 84.1 | 92.2 |
| Rsa1.0_00002.1.g131.t1 | ref XP_002894623.1  hypothetical protein ARALYDRAFT_474782 [Arabidopsis lyrata subsp. lyrata] gi 297340465 gb EFH70882.1                                   | 355  | 355  | 7.00E-94  | 100.0 | 67.9 | 77.7 | hypothetical protein ARALYDRAFT_474782                                                             | gbpln | Arabidopsis lyrata   | AT1G56210.1   Symbols:   Heavy metal transport/detoxification superfamily protein   chr1:21035715-21037019 FORWARD LENGTH=364                                                                                                                                                                                                                                                                           | 355  | 364  | 2.00E-92  | 102.5 | 66.8 | 77.7 |
| Rsa1.0_00002.1.g132.t1 | ref XP_002891949.1  hypothetical protein ARALYDRAFT_892793 [Arabidopsis lyrata subsp. lyrata] gi 297337791 gb EFH68208.1                                   | 669  | 691  | 0         | 103.3 | 84.8 | 91.3 | hypothetical protein ARALYDRAFT_892793                                                             | gbpln | Arabidopsis lyrata   | AT1G56290.1   Symbols:   CwfJ-like family protein   chr1:21075939-21078608 FORWARD LENGTH=692                                                                                                                                                                                                                                                                                                           | 669  | 692  | 0         | 103.4 | 84.6 | 91.6 |
| Rsa1.0_00002.1.g133.t1 | gb EOA33719.1  hypothetical protein CARUB_v10019911mg [Capsella rubella]                                                                                   | 581  | 668  | 0         | 115.0 | 79.2 | 86.4 | hypothetical protein CARUB_v10019911mg                                                             | gbpln | Capsella rubella     | AT1G56310.1   Symbols:   Polynucleotidyl transferase, ribonuclease H-like superfamily protein   chr1:21082863-21085564 FORWARD LENGTH=589                                                                                                                                                                                                                                                               | 581  | 589  | 0         | 101.4 | 78.1 | 87.6 |
| Rsa1.0_00002.1.g134.t1 | dbj BAA78331.1  serine decarboxylase [Brassica napus]                                                                                                      | 479  | 490  | 0         | 102.3 | 93.9 | 96.2 | serine decarboxylase                                                                               | gbpln | Brassica napus       | AT1G43710.1   Symbols: emb1075   Pyridoxal phosphate (PLP)-dependent transferases superfamily protein   chr1:16486534-16488298 REVERSE LENGTH=482                                                                                                                                                                                                                                                       | 479  | 482  | 0         | 100.6 | 89.1 | 92.7 |
| Rsa1.0_00002.1.g135.t1 | sp O04267.1 SAR1B_BRAGM RecName: Full=GTP-binding protein SAR1B gi 2108347 gb AAC49717.1  small GTP-binding protein Bsar1b [Brassica rapa subsp. oleifera] | 195  | 195  | 1.00E-109 | 100.0 | 99.0 | 99.5 | RecName: Full=GTP-binding protein SAR1B gi 2108347 gb AAC49717.1  small GTP-binding protein Bsar1b | gbpln | Brassica rapa        | AT1G56330.1   Symbols: SARI, ATSAR1, ATSARA1B, ATSARIB, SAR1B   secretion-associated RAS 1B   chr1:21086845-21088478 REVERSE LENGTH=193                                                                                                                                                                                                                                                                 | 195  | 193  | 1.00E-108 | 99.0  | 97.4 | 98.5 |
| Rsa1.0_00002.1.g136.t1 | ref XP_002894642.1  pseudouridine synthase family protein [Arabidopsis lyrata subsp. lyrata] gi 297340484 gb EFH70901.1                                    | 296  | 321  | 1.00E-125 | 108.4 | 80.1 | 87.2 | pseudouridine synthase family protein                                                              | gbpln | Arabidopsis lyrata   | AT1G56345.1   Symbols:   Pseudouridine synthase family protein   chr1:21093409-21094454 REVERSE LENGTH=322                                                                                                                                                                                                                                                                                              | 296  | 322  | 1.00E-120 | 108.8 | 78.4 | 87.2 |
| Rsa1.0_00002.1.g137.t2 | ref XP_002891952.1  predicted protein [Arabidopsis lyrata subsp. lyrata] gi 297337794 gb EFH68211.1  predicted protein [Arabidopsis lyrata subsp. lyrata]  | 434  | 418  | 0         | 96.3  | 78.6 | 84.3 | predicted protein                                                                                  | gbpln | Arabidopsis lyrata   | AT1G56340.1   Symbols: CRT1, CRT1a, AtCRT1a   calreticulin 1a   chr1:21090059-21092630 REVERSE LENGTH=425                                                                                                                                                                                                                                                                                               | 434  | 425  | 1.00E-177 | 97.9  | 76.7 | 78.6 |
| Rsa1.0_00002.1.g138.t1 | ref NP_001117508.1  uncharacterized protein [Arabidopsis thaliana] gi 332195272 gb AEE33393.1 uncharacterized protein AT1G56423 [Arabidopsis thaliana]     | 270  | 270  | 1.00E-126 | 100.0 | 82.6 | 91.9 | uncharacterized protein                                                                            | gbpln | Arabidopsis thaliana | AT1G56423.1   Symbols:   unknown protein; FUNCTIONS IN: molecular_function unknown; INVOLVED IN: biological_process unknown; LOCATED IN: endomembrane system; Has 30201 Blast hits to 17322 proteins in 780 species: Archae - 12; Bacteria - 1396; Metazoa - 17338; Fungi - 3422; Plants - 5037; Viruses - 0; Other Eukaryotes - 2996 (source: NCBI BLINK).   chr1:21129075-21130558 FORWARD LENGTH=270 | 270  | 270  | 1.00E-128 | 100.0 | 82.6 | 91.9 |
| Rsa1.0_00002.1.g139.t1 | gb EOA35645.1  hypothetical protein CARUB_v10020862mg [Capsella rubella]                                                                                   | 305  | 245  | 1.00E-134 | 80.3  | 75.1 | 78.4 | hypothetical protein CARUB_v10020862mg                                                             | gbpln | Capsella rubella     | AT1G56450.1   Symbols: PBG1   20S proteasome beta subunit G1   chr1:21141970-21144186 FORWARD LENGTH=246                                                                                                                                                                                                                                                                                                | 305  | 246  | 1.00E-135 | 80.7  | 73.8 | 77.4 |
| Rsa1.0_00002.1.g140.t1 | gb AAZ67609.1  80A08_24 [Brassica rapa subsp. pekinensis]                                                                                                  | 330  | 475  | 3.00E-11  | 143.9 | 13.0 | 14.8 | 80A08_24                                                                                           | gbpln | Brassica rapa        | # # # # # # #                                                                                                                                                                                                                                                                                                                                                                                           |      |      |           |       |      |      |
| Rsa1.0_00002.1.g141.t1 | emb CAB41158.1  putative protein [Arabidopsis thaliana]                                                                                                    | 645  | 669  | 1.00E-177 | 103.7 | 54.9 | 66.4 | putative protein                                                                                   | gbpln | Arabidopsis thaliana | AT5G22355.1   Symbols:   Cysteine/Histidine-rich C1 domain family protein   chr5:7401762-7403756 FORWARD LENGTH=664                                                                                                                                                                                                                                                                                     | 645  | 664  | 1.00E-172 | 102.9 | 52.2 | 63.7 |
| Rsa1.0_00002.1.g142.t1 | ref XP_002891968.1  hypothetical protein ARALYDRAFT_892829 [Arabidopsis lyrata subsp. lyrata] gi 297337810 gb EFH68227.1                                   | 1062 | 1058 | 0         | 99.6  | 89.3 | 93.4 | hypothetical protein ARALYDRAFT_892829                                                             | gbpln | Arabidopsis lyrata   | AT1G56500.1   Symbols:   haloacid dehalogenase-like hydrolase family protein   chr1:21159775-21167092 FORWARD LENGTH=1055                                                                                                                                                                                                                                                                               | 1062 | 1055 | 0         | 99.3  | 88.6 | 92.7 |

|                        |                                                                                                                                                                                                                                                                                                                                                                                                                                                                                                                                                                                                                                                                                                                                                                                                                                                                                                                                                                                                                                                                                                                                                                                                                                                                                         |      |      |           |       |      |      |                                                        |       |                      |                                                                                                                                                                                                                                                                                                    |      |     |           |       |      |      |
|------------------------|-----------------------------------------------------------------------------------------------------------------------------------------------------------------------------------------------------------------------------------------------------------------------------------------------------------------------------------------------------------------------------------------------------------------------------------------------------------------------------------------------------------------------------------------------------------------------------------------------------------------------------------------------------------------------------------------------------------------------------------------------------------------------------------------------------------------------------------------------------------------------------------------------------------------------------------------------------------------------------------------------------------------------------------------------------------------------------------------------------------------------------------------------------------------------------------------------------------------------------------------------------------------------------------------|------|------|-----------|-------|------|------|--------------------------------------------------------|-------|----------------------|----------------------------------------------------------------------------------------------------------------------------------------------------------------------------------------------------------------------------------------------------------------------------------------------------|------|-----|-----------|-------|------|------|
| Rsa1.0_00002.1.g143.t1 | refNP_176050.1  pentatricopeptide repeat-containing protein [Arabidopsis thaliana]<br>gi 75173051 sp Q9FXA9.1 PPR83_ARAT H RecName: Full=Putative pentatricopeptide repeat-containing protein At1g56570<br>gi 9954755 gb AAG09106.1 AC009323.1 7 Hypothetical protein [Arabidopsis thaliana] gi 332195289 gb AEE33410.1  pentatricopeptide repeat-containing protein [Arabidopsis thaliana]<br>refNP_564720.1  uncharacterized protein [Arabidopsis thaliana]<br>gi 9954754 gb AAG09105.1 AC009323.1 6 Unknown protein [Arabidopsis thaliana] gi 16648669 gb AAL25527.1  At1g56580/F25P12.18 [Arabidopsis thaliana] gi 20856239 gb AAM26655.1  At1g56580/F25P12.18 [Arabidopsis thaliana] gi 332195290 gb AEE33411.1  uncharacterized protein AT1G56580 [Arabidopsis thaliana]<br>refNP_176052.3  clathrin adaptor complexes medium subunit-like protein [Arabidopsis thaliana]<br>gi 332195291 gb AEE33412.1  clathrin adaptor complexes medium subunit-like protein [Arabidopsis thaliana]<br>gb AAM19710.1 AF499723.1 galactinol synthase-like protein [Eutrema halophilum]<br>refXP_002872685.1  hypothetical protein ARALYDRAFT_490081 [Arabidopsis lyrata subsp. lyrata]<br>gi 297318522 gb EFH48944.1  hypothetical protein ARALYDRAFT_490081 [Arabidopsis lyrata subsp. lyrata] | 609  | 611  | 0         | 100.3 | 88.0 | 94.1 | pentatricopeptide repeat-containing protein            | gbpln | Arabidopsis thaliana | AT1G56570.1   Symbols:   Tetratricopeptide repeat (TPR)-like superfamily protein   chr1:21195804-21197721 FORWARD LENGTH=611                                                                                                                                                                       | 609  | 611 | 0         | 100.3 | 88.0 | 94.1 |
| Rsa1.0_00002.1.g144.t1 | refNP_564720.1  uncharacterized protein [Arabidopsis thaliana]<br>gi 9954754 gb AAG09105.1 AC009323.1 6 Unknown protein [Arabidopsis thaliana] gi 16648669 gb AAL25527.1  At1g56580/F25P12.18 [Arabidopsis thaliana] gi 20856239 gb AAM26655.1  At1g56580/F25P12.18 [Arabidopsis thaliana] gi 332195290 gb AEE33411.1  uncharacterized protein AT1G56580 [Arabidopsis thaliana]<br>refNP_176052.3  clathrin adaptor complexes medium subunit-like protein [Arabidopsis thaliana]<br>gi 332195291 gb AEE33412.1  clathrin adaptor complexes medium subunit-like protein [Arabidopsis thaliana]<br>gb AAM19710.1 AF499723.1 galactinol synthase-like protein [Eutrema halophilum]<br>refXP_002872685.1  hypothetical protein ARALYDRAFT_490081 [Arabidopsis lyrata subsp. lyrata]<br>gi 297318522 gb EFH48944.1  hypothetical protein ARALYDRAFT_490081 [Arabidopsis lyrata subsp. lyrata]                                                                                                                                                                                                                                                                                                                                                                                                | 155  | 166  | 4.00E-75  | 107.1 | 90.3 | 92.3 | uncharacterized protein                                | gbpln | Arabidopsis thaliana | AT1G56580.1   Symbols: SVB   Protein of unknown function, DUF538   chr1:21198402-21198902 REVERSE LENGTH=166                                                                                                                                                                                       | 155  | 166 | 1.00E-77  | 107.1 | 90.3 | 92.3 |
| Rsa1.0_00002.1.g145.t1 | refNP_176052.3  clathrin adaptor complexes medium subunit-like protein [Arabidopsis thaliana]<br>gi 332195291 gb AEE33412.1  clathrin adaptor complexes medium subunit-like protein [Arabidopsis thaliana]<br>gb AAM19710.1 AF499723.1 galactinol synthase-like protein [Eutrema halophilum]<br>refXP_002872685.1  hypothetical protein ARALYDRAFT_490081 [Arabidopsis lyrata subsp. lyrata]<br>gi 297318522 gb EFH48944.1  hypothetical protein ARALYDRAFT_490081 [Arabidopsis lyrata subsp. lyrata]                                                                                                                                                                                                                                                                                                                                                                                                                                                                                                                                                                                                                                                                                                                                                                                   | 435  | 415  | 0         | 95.4  | 87.4 | 91.5 | clathrin adaptor complexes medium subunit-like protein | gbpln | Arabidopsis thaliana | AT1G56590.1   Symbols: ZIP4   Clathrin adaptor complexes medium subunit family protein   chr1:21202250-21204697 REVERSE LENGTH=415                                                                                                                                                                 | 435  | 415 | 0         | 95.4  | 87.4 | 91.5 |
| Rsa1.0_00002.1.g146.t1 | refXP_002872685.1  hypothetical protein ARALYDRAFT_490081 [Arabidopsis lyrata subsp. lyrata]<br>gi 297318522 gb EFH48944.1  hypothetical protein ARALYDRAFT_490081 [Arabidopsis lyrata subsp. lyrata]                                                                                                                                                                                                                                                                                                                                                                                                                                                                                                                                                                                                                                                                                                                                                                                                                                                                                                                                                                                                                                                                                   | 331  | 337  | 1.00E-169 | 101.8 | 87.9 | 93.4 | galactinol synthase-like protein                       | gbpln | Eutrema halophilum   | AT1G56600.1   Symbols: AtGoS2, GoS2   galactinol synthase 2   chr1:21207620-21209291 FORWARD LENGTH=335                                                                                                                                                                                            | 331  | 335 | 1.00E-165 | 101.2 | 84.9 | 92.1 |
| Rsa1.0_00002.1.g147.t1 | refXP_002872685.1  hypothetical protein ARALYDRAFT_490081 [Arabidopsis lyrata subsp. lyrata]<br>gi 297318522 gb EFH48944.1  hypothetical protein ARALYDRAFT_490081 [Arabidopsis lyrata subsp. lyrata]                                                                                                                                                                                                                                                                                                                                                                                                                                                                                                                                                                                                                                                                                                                                                                                                                                                                                                                                                                                                                                                                                   | 449  | 812  | 1.00E-109 | 180.8 | 53.9 | 63.7 | hypothetical protein ARALYDRAFT_490081                 | gbpln | Arabidopsis lyrata   | AT4G04220.1   Symbols: AtRLP46, RLP46   receptor like protein 46   chr4:2033427-2035946 FORWARD LENGTH=811                                                                                                                                                                                         | 449  | 811 | 1.00E-103 | 180.6 | 53.9 | 64.6 |
| Rsa1.0_00002.1.g148.t1 | #                                                                                                                                                                                                                                                                                                                                                                                                                                                                                                                                                                                                                                                                                                                                                                                                                                                                                                                                                                                                                                                                                                                                                                                                                                                                                       | #    | #    | #         | #     | #    | #    | -                                                      | ----  | ----                 | AT1G56660.1   Symbols:   unknown protein; Has 665200 Blast hits to 205811 proteins in 4684 species: Archae - 3320; Bacteria - 107592; Metazoa - 249086; Fungi - 76753; Plants - 38542; Viruses - 3008; Other Eukaryotes - 186899 (source: NCBI BLINK).   chr1:21238809-21240377 FORWARD LENGTH=522 | 490  | 522 | 2.00E-11  | 106.5 | 11.2 | 14.3 |
| Rsa1.0_00002.1.g149.t1 | refNP_176059.1  GDSL esterase/lipase LIP-4 [Arabidopsis thaliana]<br>gi 75173058 sp Q9FXB6.1 LIP4_ARATH RecName: Full=GDSL esterase/lipase LIP-4; AltName: Full=Extracellular lipase LIP-4; Flags: Precursor<br>gi 9954747 gb AAG09098.1 AC009323.9 Similar to nodulins [Arabidopsis thaliana] gi 332195300 gb AEE33421.1  GDSL esterase/lipase LIP-4 [Arabidopsis thaliana]<br>gb AAM82604.1 AF525305.2 putative AP endonuclease/reverse transcriptase [Brassica napus]<br>refXP_002894685.1  predicted protein [Arabidopsis lyrata subsp. lyrata]<br>gi 297340527 gb EFH70944.1  predicted protein [Arabidopsis lyrata subsp. lyrata]                                                                                                                                                                                                                                                                                                                                                                                                                                                                                                                                                                                                                                                 | 92   | 373  | 1.00E-34  | 405.4 | 82.6 | 89.1 | GDSL esterase/lipase LIP-4                             | gbpln | Arabidopsis thaliana | AT1G56670.1   Symbols:   GDSL-like Lipase/Acylhydrolase superfamily protein   chr1:21241688-21243965 FORWARD LENGTH=373                                                                                                                                                                            | 92   | 373 | 2.00E-37  | 405.4 | 82.6 | 89.1 |
| Rsa1.0_00002.1.g150.t1 | refXP_002894685.1  predicted protein [Arabidopsis lyrata subsp. lyrata]<br>gi 297340527 gb EFH70944.1  predicted protein [Arabidopsis lyrata subsp. lyrata]                                                                                                                                                                                                                                                                                                                                                                                                                                                                                                                                                                                                                                                                                                                                                                                                                                                                                                                                                                                                                                                                                                                             | 1260 | 1214 | 0         | 96.3  | 34.5 | 52.2 | putative AP endonuclease/reverse transcriptase         | gbpln | Brassica napus       | AT1G43760.1   Symbols:   DNase I-like superfamily protein   chr1:16528880-16531065 REVERSE LENGTH=626                                                                                                                                                                                              | 1260 | 626 | 1.00E-76  | 49.7  | 12.5 | 19.9 |
| Rsa1.0_00002.1.g151.t1 | refXP_002894685.1  predicted protein [Arabidopsis lyrata subsp. lyrata]<br>gi 297340527 gb EFH70944.1  predicted protein [Arabidopsis lyrata subsp. lyrata]                                                                                                                                                                                                                                                                                                                                                                                                                                                                                                                                                                                                                                                                                                                                                                                                                                                                                                                                                                                                                                                                                                                             | 62   | 62   | 3.00E-21  | 100.0 | 75.8 | 91.9 | predicted protein                                      | gbpln | Arabidopsis lyrata   | #                                                                                                                                                                                                                                                                                                  | #    | #   | #         | #     | #    |      |
| Rsa1.0_00002.1.g152.t1 | gb EOA33210.1  hypothetical protein CARUB_v10019892mg [Capsella rubella]                                                                                                                                                                                                                                                                                                                                                                                                                                                                                                                                                                                                                                                                                                                                                                                                                                                                                                                                                                                                                                                                                                                                                                                                                | 328  | 692  | 1.00E-109 | 211.0 | 71.6 | 75.6 | hypothetical protein CARUB_v10019892mg                 | gbpln | Capsella rubella     | AT1G57700.1   Symbols:   Protein kinase superfamily protein   chr1:21371051-21373860 FORWARD LENGTH=692                                                                                                                                                                                            | 328  | 692 | 1.00E-111 | 211.0 | 71.0 | 75.9 |

|                        |                                                                                                                                                                                                                                                                                                                                                                                                                                                                                                                                                                                                                                                                                                                                                                                                                                                                                                                         |      |      |           |       |      |      |                                            |       |                      |                                                                                                                                                                                                                                                                                                                                                                                                                                                                                                                         |      |      |           |       |      |      |
|------------------------|-------------------------------------------------------------------------------------------------------------------------------------------------------------------------------------------------------------------------------------------------------------------------------------------------------------------------------------------------------------------------------------------------------------------------------------------------------------------------------------------------------------------------------------------------------------------------------------------------------------------------------------------------------------------------------------------------------------------------------------------------------------------------------------------------------------------------------------------------------------------------------------------------------------------------|------|------|-----------|-------|------|------|--------------------------------------------|-------|----------------------|-------------------------------------------------------------------------------------------------------------------------------------------------------------------------------------------------------------------------------------------------------------------------------------------------------------------------------------------------------------------------------------------------------------------------------------------------------------------------------------------------------------------------|------|------|-----------|-------|------|------|
| Rsa1.0_00002.1.g153.t1 | refNP_176081.1  uncharacterized protein [Arabidopsis thaliana] gi 42571907 refNP_974044.1  uncharacterized protein [Arabidopsis thaliana] gi 12321352 gb AAG50748.1 AC079733.16 hypothetical protein [Arabidopsis thaliana] gi 18176030 gb AAL59971.1  unknown protein [Arabidopsis thaliana] gi 22136846 gb AAM91767.1  unknown protein [Arabidopsis thaliana] gi 332195330 gb AEE33451.1  uncharacterized protein AT1G57680 [Arabidopsis thaliana] gi 332195331 gb AEE33452.1  uncharacterized protein AT1G57680 [Arabidopsis thaliana] refXP_002894649.1  hypothetical protein ARALYDRAFT_892826 [Arabidopsis lyrata subsp. lyrata] gi 297340491 gb EFH70908.1  hypothetical protein ARALYDRAFT_892826 [Arabidopsis lyrata subsp. lyrata] emb CAB39638.1  RNA-directed DNA polymerase-like protein [Arabidopsis thaliana] gi 7267666 emb CAB78094.1  RNA-directed DNA polymerase-like protein [Arabidopsis thaliana] | 361  | 362  | 1.00E-158 | 100.3 | 84.5 | 90.6 | uncharacterized protein                    | gbpln | Arabidopsis thaliana | AT1G57680.2   Symbols:   FUNCTIONS IN: molecular_function unknown; INVOLVED IN: biological_process unknown; LOCATED IN: endomembrane system; EXPRESSED DURING: 15 growth stages; CONTAINS InterPro DOMAIN/s: Uncharacterised conserved protein UCPO31277 (InterPro:IPR016971); Has 35333 Blast hits to 34131 proteins in 2444 species: Archae - 798; Bacteria - 22429; Metazoa - 974; Fungi - 991; Plants - 531; Viruses - 0; Other Eukaryotes - 9610 (source: NCBI BLINK).   chr1:21362749-21363837 REVERSE LENGTH=362 | 361  | 362  | 1.00E-160 | 100.3 | 84.5 | 90.6 |
| Rsa1.0_00002.1.g154.t1 | refXP_002894649.1  hypothetical protein ARALYDRAFT_892826 [Arabidopsis lyrata subsp. lyrata] gi 297340491 gb EFH70908.1  hypothetical protein ARALYDRAFT_892826 [Arabidopsis lyrata subsp. lyrata]                                                                                                                                                                                                                                                                                                                                                                                                                                                                                                                                                                                                                                                                                                                      | 345  | 352  | 1.00E-130 | 102.0 | 67.2 | 78.6 | hypothetical protein ARALYDRAFT_892826     | gbpln | Arabidopsis lyrata   | AT2G19150.1   Symbols:   Pectin lyase-like superfamily protein   chr2:8305100-8307444 FORWARD LENGTH=339                                                                                                                                                                                                                                                                                                                                                                                                                | 345  | 339  | 2.00E-66  | 98.3  | 39.7 | 51.0 |
| Rsa1.0_00002.1.g155.t1 | emb CAB39638.1  RNA-directed DNA polymerase-like protein [Arabidopsis thaliana] gi 7267666 emb CAB78094.1  RNA-directed DNA polymerase-like protein [Arabidopsis thaliana]                                                                                                                                                                                                                                                                                                                                                                                                                                                                                                                                                                                                                                                                                                                                              | 1969 | 1274 | 0         | 64.7  | 30.5 | 41.5 | RNA-directed DNA polymerase-like protein   | gbpln | Arabidopsis thaliana | AT4G29090.1   Symbols:   Ribonuclease H-like superfamily protein   chr4:14333528-14335255 FORWARD LENGTH=575                                                                                                                                                                                                                                                                                                                                                                                                            | 1969 | 575  | 1.00E-59  | 29.2  | 8.3  | 13.2 |
| Rsa1.0_00002.1.g156.t1 | #                                                                                                                                                                                                                                                                                                                                                                                                                                                                                                                                                                                                                                                                                                                                                                                                                                                                                                                       | #    | #    | #         | #     | #    | #    | -                                          | ----  | ----                 | #                                                                                                                                                                                                                                                                                                                                                                                                                                                                                                                       | #    | #    | #         | #     | #    |      |
| Rsa1.0_00002.1.g157.t1 | refXP_002888226.1  helicase domain-containing protein [Arabidopsis lyrata subsp. lyrata] gi 297334067 gb EFH64485.1  helicase domain-containing protein [Arabidopsis lyrata subsp. lyrata]                                                                                                                                                                                                                                                                                                                                                                                                                                                                                                                                                                                                                                                                                                                              | 1425 | 1458 | 0         | 102.3 | 87.4 | 93.3 | helicase domain-containing protein         | gbpln | Arabidopsis lyrata   | AT1G58060.1   Symbols:   RNA helicase family protein   chr1:21489480-21501775 REVERSE LENGTH=1459                                                                                                                                                                                                                                                                                                                                                                                                                       | 1425 | 1459 | 0         | 102.4 | 87.4 | 93.1 |
| Rsa1.0_00002.1.g158.t1 | gb ACP30602.1  disease resistance protein [Brassica rapa subsp. pekinensis]                                                                                                                                                                                                                                                                                                                                                                                                                                                                                                                                                                                                                                                                                                                                                                                                                                             | 291  | 938  | 4.00E-27  | 322.3 | 24.1 | 27.5 | disease resistance protein                 | gbpln | Brassica rapa        | AT5G18350.1   Symbols:   Disease resistance protein (TIR-NBS-LRR class) family   chr5:6074069-6078569 REVERSE LENGTH=1245                                                                                                                                                                                                                                                                                                                                                                                               | 291  | 1245 | 2.00E-13  | 427.8 | 17.5 | 21.0 |
| Rsa1.0_00002.1.g159.t1 | gb EOA34251.1  hypothetical protein CARUB_v10021763mg [Capsella rubella]                                                                                                                                                                                                                                                                                                                                                                                                                                                                                                                                                                                                                                                                                                                                                                                                                                                | 236  | 268  | 6.00E-84  | 113.6 | 78.4 | 85.6 | hypothetical protein CARUB_v10021763mg     | gbpln | Capsella rubella     | AT1G58070.1   Symbols:   unknown protein; Has 298 Blast hits to 266 proteins in 91 species: Archae - 2; Bacteria - 25; Metazoa - 90; Fungi - 19; Plants - 78; Viruses - 4; Other Eukaryotes - 68 (source: NCBI BLINK).   chr1:21502968-21503822 FORWARD LENGTH=284                                                                                                                                                                                                                                                      | 236  | 284  | 2.00E-83  | 120.3 | 78.8 | 86.4 |
| Rsa1.0_00002.1.g160.t1 | gb AAT74597.1  chloroplast ATP phosphoribosyl transferase [Alyssum montanum]                                                                                                                                                                                                                                                                                                                                                                                                                                                                                                                                                                                                                                                                                                                                                                                                                                            | 409  | 405  | 0         | 99.0  | 88.3 | 93.2 | chloroplast ATP phosphoribosyl transferase | gbpln | Alyssum montanum     | AT1G58080.1   Symbols:   ATP-PR1, HISN1A, ATP-PR1   ATP phosphoribosyl transferase 1   chr1:21504562-21507429 REVERSE LENGTH=411                                                                                                                                                                                                                                                                                                                                                                                        | 409  | 411  | 0         | 100.5 | 86.6 | 91.0 |
| Rsa1.0_00002.1.g161.t1 | refXP_002888231.1  hypothetical protein ARALYDRAFT_475419 [Arabidopsis lyrata subsp. lyrata] gi 297334072 gb EFH64490.1  hypothetical protein ARALYDRAFT_475419 [Arabidopsis lyrata subsp. lyrata]                                                                                                                                                                                                                                                                                                                                                                                                                                                                                                                                                                                                                                                                                                                      | 394  | 390  | 1.00E-126 | 99.0  | 74.1 | 78.9 | hypothetical protein ARALYDRAFT_475419     | gbpln | Arabidopsis lyrata   | AT1G58100.1   Symbols:   TCP family transcription factor   chr1:21512680-21513885 REVERSE LENGTH=401                                                                                                                                                                                                                                                                                                                                                                                                                    | 394  | 401  | 1.00E-128 | 101.8 | 75.1 | 81.0 |
| Rsa1.0_00002.1.g162.t1 | db BAJ34015.1  unnamed protein product [Theilungiella halophila]                                                                                                                                                                                                                                                                                                                                                                                                                                                                                                                                                                                                                                                                                                                                                                                                                                                        | 369  | 372  | 1.00E-170 | 100.8 | 85.4 | 91.1 | unnamed protein product                    | ----  | ----                 | AT1G58110.2   Symbols:   Basic-leucine zipper (bZIP) transcription factor family protein   chr1:21515919-21517374 REVERSE LENGTH=374                                                                                                                                                                                                                                                                                                                                                                                    | 369  | 374  | 1.00E-151 | 101.4 | 78.3 | 87.3 |
| Rsa1.0_00002.1.g163.t1 | gb AEM45875.1  hypothetical protein [Brassica rapa subsp. oleifera]                                                                                                                                                                                                                                                                                                                                                                                                                                                                                                                                                                                                                                                                                                                                                                                                                                                     | 423  | 419  | 0         | 99.1  | 87.9 | 92.9 | hypothetical protein                       | gbpln | Brassica rapa        | AT1G58120.1   Symbols:   BEST Arabidopsis thaliana protein match is: methyltransferases (TAIR:AT5G01710.1); Has 93 Blast hits to 93 proteins in 15 species: Archae - 0; Bacteria - 0; Metazoa - 1; Fungi - 0; Plants - 92; Viruses - 0; Other Eukaryotes - 0 (source: NCBI BLINK).   chr1:21520962-21522224 FORWARD LENGTH=420                                                                                                                                                                                          | 423  | 420  | 0         | 99.3  | 80.1 | 87.9 |
| Rsa1.0_00002.1.g164.t1 | gb AAG50957.1 AC073943.7 hypothetical protein [Arabidopsis thaliana]                                                                                                                                                                                                                                                                                                                                                                                                                                                                                                                                                                                                                                                                                                                                                                                                                                                    | 910  | 1195 | 0         | 131.3 | 85.2 | 90.7 | hypothetical protein                       | gbpln | Arabidopsis thaliana | AT1G58210.1   Symbols:   EMB1674   kinase interacting family protein   chr1:21553621-21558056 FORWARD LENGTH=1246                                                                                                                                                                                                                                                                                                                                                                                                       | 910  | 1246 | 0         | 136.9 | 84.7 | 90.3 |

|                        |                                                                                                                                                                                                                                                                                                                                                                                                                                                                                                                                                                  |      |      |           |       |      |      |                                         |       |                      |                                                                                                                                                            |      |      |           |       |      |      |
|------------------------|------------------------------------------------------------------------------------------------------------------------------------------------------------------------------------------------------------------------------------------------------------------------------------------------------------------------------------------------------------------------------------------------------------------------------------------------------------------------------------------------------------------------------------------------------------------|------|------|-----------|-------|------|------|-----------------------------------------|-------|----------------------|------------------------------------------------------------------------------------------------------------------------------------------------------------|------|------|-----------|-------|------|------|
| Rsa1.0_00002.1.g165.t1 | refNP_176118.2  myb family transcription factor [Arabidopsis thaliana] gi 26449358 dbj BAC41806.1  putative MYB-family transcription factor [Arabidopsis thaliana] gi 29029054 gb AA064906.1  At1g58220 [Arabidopsis thaliana] gi 41619072 gb AAS10017.1  MYB transcription factor [Arabidopsis thaliana] gi 332195394 gb AEE33515.1  myb family transcription factor [Arabidopsis thaliana]                                                                                                                                                                     | 716  | 834  | 0         | 116.5 | 71.6 | 81.1 | myb family transcription factor         | gbpln | Arabidopsis thaliana | AT1G58220.1   Symbols: Homeodomain-like superfamily protein   chr1:21558388-21562669 REVERSE LENGTH=834                                                    | 716  | 834  | 0         | 116.5 | 71.6 | 81.1 |
| Rsa1.0_00002.1.g166.t2 | refXP_002888245.1  hypothetical protein ARALYDRAFT_475439 [Arabidopsis lyrata subsp. lyrata] gi 297334086 gb EFH64504.1  hypothetical protein ARALYDRAFT_475439 [Arabidopsis lyrata subsp. lyrata]                                                                                                                                                                                                                                                                                                                                                               | 2608 | 2607 | 0         | 100.0 | 86.9 | 92.5 | hypothetical protein ARALYDRAFT_475439  | gbpln | Arabidopsis lyrata   | AT1G58250.1   Symbols: SAB   Golgi-body localisation protein domain ;RNA pol II promoter Fmp27 protein domain   chr1:21587317-21601373 REVERSE LENGTH=2607 | 2608 | 2607 | 0         | 100.0 | 87.0 | 92.4 |
| Rsa1.0_00002.1.g167.t1 | gb ACR10268.1  sulfotransferase 5b [Brassica rapa subsp. pekinensis]                                                                                                                                                                                                                                                                                                                                                                                                                                                                                             | 345  | 339  | 1.00E-177 | 98.3  | 90.7 | 94.2 | sulfotransferase 5b                     | gbpln | Brassica rapa        | AT1G74090.1   Symbols: SOT18, ATSOT18, ATST5B   desulfo-glucosinolate sulfotransferase 18   chr1:27863003-27864055 FORWARD LENGTH=350                      | 345  | 350  | 1.00E-158 | 101.4 | 77.4 | 88.1 |
| Rsa1.0_00002.1.g168.t1 | gb ACR10269.1  sulfotransferase 5b [Brassica rapa subsp. pekinensis]                                                                                                                                                                                                                                                                                                                                                                                                                                                                                             | 339  | 342  | 1.00E-169 | 100.9 | 84.4 | 92.3 | sulfotransferase 5b                     | gbpln | Brassica rapa        | AT1G74090.1   Symbols: SOT18, ATSOT18, ATST5B   desulfo-glucosinolate sulfotransferase 18   chr1:27863003-27864055 FORWARD LENGTH=350                      | 339  | 350  | 1.00E-143 | 103.2 | 71.7 | 84.7 |
| Rsa1.0_00002.1.g169.t3 | refNP_176126.1  heme oxygenase 4 [Arabidopsis thaliana] gi 75180109 sp Q9LQC0.1 HMOX4.ARA TH RecName: Full=Heme oxygenase 4, chloroplastic; Flags: Precursor gi 8979943 gb AAF82257.1 AC008051.8 Contains similarity to heme oxygenase 1 (HO1) from Arabidopsis thaliana gb AF132475 [Arabidopsis thaliana] gi 91805985 gb ABE65721.1  heme oxygenase [Arabidopsis thaliana] gi 332195412 gb AEE33533.1  heme oxygenase 4 [Arabidopsis thaliana]                                                                                                                 | 339  | 283  | 1.00E-100 | 83.5  | 57.5 | 67.6 | heme oxygenase 4                        | gbpln | Arabidopsis thaliana | AT1G58300.1   Symbols: HO4   heme oxygenase 4   chr1:21628015-21629996 REVERSE LENGTH=283                                                                  | 339  | 283  | 1.00E-102 | 83.5  | 57.5 | 67.6 |
| Rsa1.0_00002.1.g170.t1 | dbj BAJ33912.1  unnamed protein product [Theellungiella halophila]                                                                                                                                                                                                                                                                                                                                                                                                                                                                                               | 532  | 539  | 0         | 101.3 | 94.2 | 96.8 | unnamed protein product                 | ----  | ----                 | AT1G58290.1   Symbols: HEMA1   Glutamyl-tRNA reductase family protein   chr1:21624028-21626051 REVERSE LENGTH=543                                          | 532  | 543  | 0         | 102.1 | 90.6 | 95.1 |
| Rsa1.0_00002.1.g171.t4 | refXP_002880114.1  glycosyl hydrolase family 1 protein [Arabidopsis lyrata subsp. lyrata] gi 297325953 gb EFH56373.1  glycosyl hydrolase family 1 protein [Arabidopsis lyrata subsp. lyrata]                                                                                                                                                                                                                                                                                                                                                                     | 506  | 507  | 0         | 100.2 | 90.1 | 94.1 | glycosyl hydrolase family 1 protein     | gbpln | Arabidopsis lyrata   | AT2G44450.1   Symbols: BGLU15   beta glucosidase 15   chr2:18340966-18343744 FORWARD LENGTH=506                                                            | 506  | 506  | 0         | 100.0 | 92.1 | 97.0 |
| Rsa1.0_00002.1.g172.t1 | #                                                                                                                                                                                                                                                                                                                                                                                                                                                                                                                                                                | #    | #    | #         | #     | #    | -    | ----                                    | ----  | #                    | #                                                                                                                                                          | #    | #    | #         | #     | #    |      |
| Rsa1.0_00002.1.g173.t1 | #                                                                                                                                                                                                                                                                                                                                                                                                                                                                                                                                                                | #    | #    | #         | #     | #    | -    | ----                                    | ----  | #                    | #                                                                                                                                                          | #    | #    | #         | #     | #    |      |
| Rsa1.0_00002.1.g174.t1 | refXP_002888219.1  hypothetical protein ARALYDRAFT_893660 [Arabidopsis lyrata subsp. lyrata] gi 297334060 gb EFH64478.1  hypothetical protein ARALYDRAFT_893660 [Arabidopsis lyrata subsp. lyrata] refNP_564732.1  Putative serine esterase family protein [Arabidopsis thaliana] gi 186491769 ref NP_001117514.1  Putative serine esterase family protein [Arabidopsis thaliana] gi 8979939 gb AAF82253.1 AC008051.4 Identical to gene ZW18 from Arabidopsis thaliana gb AB028199 [Arabidopsis thaliana] gi 6520167 dbj BAA87940.1  ZW18 [Arabidopsis thaliana] | 531  | 532  | 0         | 100.2 | 91.1 | 95.5 | hypothetical protein ARALYDRAFT_893660  | gbpln | Arabidopsis lyrata   | AT1G58340.1   Symbols: ZF14   MATE efflux family protein   chr1:21653162-21655117 FORWARD LENGTH=532                                                       | 531  | 532  | 0         | 100.2 | 91.1 | 95.3 |
| Rsa1.0_00002.1.g175.t1 | gi 110741889 dbj BAE98886.1  hypothetical protein [Arabidopsis thaliana] gi 332195417 gb AEE33538.1  Putative serine esterase family protein [Arabidopsis thaliana] gi 332195418 gb AEE33539.1  Putative serine esterase family protein [Arabidopsis thaliana]                                                                                                                                                                                                                                                                                                   | 786  | 794  | 0         | 101.0 | 87.5 | 93.8 | Putative serine esterase family protein | gbpln | Arabidopsis thaliana | AT1G58350.2   Symbols: ZW18   Putative serine esterase family protein   chr1:21663131-21666827 REVERSE LENGTH=794                                          | 786  | 794  | 0         | 101.0 | 87.5 | 93.8 |
| Rsa1.0_00002.1.g176.t1 | #                                                                                                                                                                                                                                                                                                                                                                                                                                                                                                                                                                | #    | #    | #         | #     | #    | -    | ----                                    | ----  | #                    | #                                                                                                                                                          | #    | #    | #         | #     | #    |      |

|                        |                                                                                                                                                                                                                                                                                                                                                                                                                                                                                                                                                                                                                                                                                                                                                                                           |     |     |           |       |      |      |                                                               |       |                      |                                                                                                                                                                                                                                                              |     |      |           |       |      |      |
|------------------------|-------------------------------------------------------------------------------------------------------------------------------------------------------------------------------------------------------------------------------------------------------------------------------------------------------------------------------------------------------------------------------------------------------------------------------------------------------------------------------------------------------------------------------------------------------------------------------------------------------------------------------------------------------------------------------------------------------------------------------------------------------------------------------------------|-----|-----|-----------|-------|------|------|---------------------------------------------------------------|-------|----------------------|--------------------------------------------------------------------------------------------------------------------------------------------------------------------------------------------------------------------------------------------------------------|-----|------|-----------|-------|------|------|
| Rsa1.0_00002.1.g177.t1 | emb CAD92449.1  amino acid permease 1 [Brassica napus]                                                                                                                                                                                                                                                                                                                                                                                                                                                                                                                                                                                                                                                                                                                                    | 509 | 485 | 0         | 95.3  | 94.1 | 94.9 | amino acid permease 1                                         | gbpln | Brassica napus       | AT1G58360.1   Symbols: AAP1, NAT2   amino acid permease 1   chr1:21676623-21680313 FORWARD LENGTH=485                                                                                                                                                        | 509 | 485  | 0         | 95.3  | 87.2 | 92.3 |
| Rsa1.0_00002.1.g178.t1 | gb EOA33499.1  hypothetical protein CARUB_v10019737mg [Capsella rubella]                                                                                                                                                                                                                                                                                                                                                                                                                                                                                                                                                                                                                                                                                                                  | 919 | 941 | 0         | 102.4 | 88.7 | 93.5 | hypothetical protein CARUB_v10019737mg                        | gbpln | Capsella rubella     | AT1G58370.1   Symbols: RXF12, ATXYN1   glycosyl hydrolase family 10 protein / carbohydrate-binding domain-containing protein   chr1:21684751-21688209 FORWARD LENGTH=917                                                                                     | 919 | 917  | 0         | 99.8  | 89.4 | 93.5 |
| Rsa1.0_00002.1.g179.t1 | gb ACP30587.1  disease resistance protein [Brassica rapa subsp. pekinensis]                                                                                                                                                                                                                                                                                                                                                                                                                                                                                                                                                                                                                                                                                                               | 913 | 929 | 0         | 101.8 | 72.5 | 82.6 | disease resistance protein                                    | gbpln | Brassica rapa        | AT1G58390.1   Symbols:   Disease resistance protein (CC-NBS-LRR class) family   chr1:21690962-21693891 REVERSE LENGTH=907                                                                                                                                    | 913 | 907  | 0         | 99.3  | 55.8 | 68.6 |
| Rsa1.0_00002.1.g180.t1 | #                                                                                                                                                                                                                                                                                                                                                                                                                                                                                                                                                                                                                                                                                                                                                                                         | #   | #   | #         | #     | #    | #    | -                                                             | ----  | ----                 | #                                                                                                                                                                                                                                                            | #   | #    | #         | #     | #    |      |
| Rsa1.0_00002.1.g181.t1 | gb ABD65062.1  hypothetical protein 27.t00126 [Brassica oleracea]                                                                                                                                                                                                                                                                                                                                                                                                                                                                                                                                                                                                                                                                                                                         | 442 | 578 | 7.00E-97  | 130.8 | 48.9 | 65.4 | hypothetical protein 27.t00126                                | gbpln | Brassica oleracea    | AT4G32200.1   Symbols: ASY2   DNA-binding HORMA family protein   chr4:15548840-15554962 FORWARD LENGTH=1399                                                                                                                                                  | 442 | 1399 | 2.00E-20  | 316.5 | 10.9 | 15.4 |
| Rsa1.0_00002.1.g182.t1 | #                                                                                                                                                                                                                                                                                                                                                                                                                                                                                                                                                                                                                                                                                                                                                                                         | #   | #   | #         | #     | #    | #    | -                                                             | ----  | ----                 | #                                                                                                                                                                                                                                                            | #   | #    | #         | #     | #    |      |
| Rsa1.0_00002.1.g183.t1 | ref NP_564733.1  uncharacterized protein [Arabidopsis thaliana]   gi 12321051 gb AAG50647.1 AC082643.11   hypothetical protein [Arabidopsis thaliana]   gi 39111892 gb ABD60713.1  At1g58420 [Arabidopsis thaliana]   gi 332195426 gb AEE33547.1  uncharacterized protein AT1G58420 [Arabidopsis thaliana]   gi 343455557 gb AEM36343.1  At1g58420 [Arabidopsis thaliana]   ref XP_002896690.1  hypothetical protein ARALYDRAFT_475389 [Arabidopsis lyrata subsp. lyrata]   gi 297332531 gb EFH62949.1  hypothetical protein ARALYDRAFT_475389 [Arabidopsis lyrata subsp. lyrata]   ref XP_002898212.1  hypothetical protein ARALYDRAFT_315379 [Arabidopsis lyrata subsp. lyrata]   gi 297334053 gb EFH64471.1  hypothetical protein ARALYDRAFT_315379 [Arabidopsis lyrata subsp. lyrata] | 172 | 179 | 7.00E-60  | 104.1 | 83.7 | 90.7 | uncharacterized protein                                       | gbpln | Arabidopsis thaliana | AT1G58420.1   Symbols:   Uncharacterised conserved protein UCP031279   chr1:21707407-21707946 FORWARD LENGTH=179                                                                                                                                             | 172 | 179  | 3.00E-62  | 104.1 | 83.7 | 90.7 |
| Rsa1.0_00002.1.g184.t2 | ref XP_002896690.1  hypothetical protein ARALYDRAFT_475389 [Arabidopsis lyrata subsp. lyrata]   gi 297332531 gb EFH62949.1  hypothetical protein ARALYDRAFT_475389 [Arabidopsis lyrata subsp. lyrata]   ref XP_002898212.1  hypothetical protein ARALYDRAFT_315379 [Arabidopsis lyrata subsp. lyrata]   gi 297334053 gb EFH64471.1  hypothetical protein ARALYDRAFT_315379 [Arabidopsis lyrata subsp. lyrata]                                                                                                                                                                                                                                                                                                                                                                             | 566 | 530 | 0         | 93.6  | 85.7 | 89.6 | hypothetical protein ARALYDRAFT_475389                        | gbpln | Arabidopsis lyrata   | AT1G58440.1   Symbols: XF1, SQE1   FAD/NAD(P)-binding oxidoreductase family protein   chr1:21714094-21717246 REVERSE LENGTH=531                                                                                                                              | 566 | 531  | 0         | 93.8  | 84.6 | 88.5 |
| Rsa1.0_00002.1.g185.t1 | ref XP_002898212.1  hypothetical protein ARALYDRAFT_315379 [Arabidopsis lyrata subsp. lyrata]   gi 297334053 gb EFH64471.1  hypothetical protein ARALYDRAFT_315379 [Arabidopsis lyrata subsp. lyrata]                                                                                                                                                                                                                                                                                                                                                                                                                                                                                                                                                                                     | 152 | 150 | 4.00E-50  | 98.7  | 74.3 | 78.9 | hypothetical protein ARALYDRAFT_315379                        | gbpln | Arabidopsis lyrata   | AT1G58460.1   Symbols:   unknown protein: Hae 35 Blast hits to 35 proteins in 8 species: Archaea - 0; Bacteria - 0; Metazoa - 0; Fungi - 0; Plants - 35; Viruses - 0; Other Eukaryotes - 0 (source: NCBI BLINK).   chr1:21721404-21722429 FORWARD LENGTH=177 | 152 | 177  | 3.00E-46  | 116.4 | 73.0 | 77.0 |
| Rsa1.0_00002.1.g186.t1 | #                                                                                                                                                                                                                                                                                                                                                                                                                                                                                                                                                                                                                                                                                                                                                                                         | #   | #   | #         | #     | #    | #    | -                                                             | ----  | ----                 | #                                                                                                                                                                                                                                                            | #   | #    | #         | #     | #    |      |
| Rsa1.0_00002.1.g187.t1 | gb EOA35303.1  hypothetical protein CARUB_v10020477mg, partial [Capsella rubella]   ref NP_176403.1  Mitochondrial transcription termination factor family protein [Arabidopsis thaliana]   gi 50253494 gb AAT71949.1  At1g62120 [Arabidopsis thaliana]   gi 53850523 gb AAU95438.1  At1g62120 [Arabidopsis thaliana]   gi 332195804 gb AEE33925.1  Mitochondrial transcription termination factor family protein [Arabidopsis thaliana]                                                                                                                                                                                                                                                                                                                                                  | 362 | 377 | 1.00E-129 | 104.1 | 68.0 | 79.3 | hypothetical protein CARUB_v10020477mg, partial               | gbpln | Capsella rubella     | AT1G58470.1   Symbols: ATRBP1, RBP1   RNA-binding protein 1   chr1:21727374-21728539 FORWARD LENGTH=360                                                                                                                                                      | 362 | 360  | 1.00E-131 | 99.4  | 68.5 | 79.3 |
| Rsa1.0_00002.1.g188.t1 | ref NP_176403.1  Mitochondrial transcription termination factor family protein [Arabidopsis thaliana]   gi 50253494 gb AAT71949.1  At1g62120 [Arabidopsis thaliana]   gi 53850523 gb AAU95438.1  At1g62120 [Arabidopsis thaliana]   gi 332195804 gb AEE33925.1  Mitochondrial transcription termination factor family protein [Arabidopsis thaliana]                                                                                                                                                                                                                                                                                                                                                                                                                                      | 430 | 437 | 1.00E-150 | 101.6 | 64.9 | 79.1 | Mitochondrial transcription termination factor family protein | gbpln | Arabidopsis thaliana | AT1G62120.1   Symbols:   Mitochondrial transcription termination factor family protein   chr1:22960326-22961639 REVERSE LENGTH=437                                                                                                                           | 430 | 437  | 1.00E-153 | 101.6 | 64.9 | 79.1 |
| Rsa1.0_00002.1.g189.t1 | gb AEM36358.1  At1g59510 [Arabidopsis thaliana]   ref NP_176162.1  basic leucine-zipper 4 [Arabidopsis thaliana]   gi 8778737 gb AAF79745.1 AC009317.4 T30E16.6 [Arabidopsis thaliana]   gi 14475943 gb AAK62790.1 AC027036.1   G-box binding factor, putative [Arabidopsis thaliana]   gi 15278033 gb AAK34023.1 AF400619.1 transcription factor-like protein bZIP4 [Arabidopsis thaliana]   gi 91805987 gb ABE65722.1  bZIP transcription factor family protein [Arabidopsis thaliana]   gi 223898030 dbj BAH30347.1  hypothetical protein [Arabidopsis thaliana]   gi 332195463 gb AEE33584.1  basic leucine-zipper 4 [Arabidopsis thaliana]                                                                                                                                           | 447 | 382 | 1.00E-151 | 85.5  | 62.6 | 70.9 | At1g59510                                                     | gbpln | Arabidopsis thaliana | AT1G59510.1   Symbols: CF9   Carbohydrate-binding protein   chr1:21859768-21860913 FORWARD LENGTH=381                                                                                                                                                        | 447 | 381  | 1.00E-151 | 85.2  | 61.3 | 70.2 |
| Rsa1.0_00002.1.g190.t1 | ref NP_176162.1  basic leucine-zipper 4 [Arabidopsis thaliana]   gi 8778737 gb AAF79745.1 AC009317.4 T30E16.6 [Arabidopsis thaliana]   gi 14475943 gb AAK62790.1 AC027036.1   G-box binding factor, putative [Arabidopsis thaliana]   gi 15278033 gb AAK34023.1 AF400619.1 transcription factor-like protein bZIP4 [Arabidopsis thaliana]   gi 91805987 gb ABE65722.1  bZIP transcription factor family protein [Arabidopsis thaliana]   gi 223898030 dbj BAH30347.1  hypothetical protein [Arabidopsis thaliana]   gi 332195463 gb AEE33584.1  basic leucine-zipper 4 [Arabidopsis thaliana]                                                                                                                                                                                             | 365 | 148 | 2.00E-51  | 40.5  | 30.1 | 35.3 | basic leucine-zipper 4                                        | gbpln | Arabidopsis thaliana | AT1G59530.1   Symbols: ATBZIP4, bZIP4   basic leucine-zipper 4   chr1:21868262-21868708 FORWARD LENGTH=148                                                                                                                                                   | 365 | 148  | 5.00E-54  | 40.5  | 30.1 | 35.3 |

|                        |                                                                                                                                                                                                                                                                                                                                                                                                                                                                                                                                                                                                                                                                                                                                                                                                                                                                                                                                                                                                                                                                                                                                                                                                                                                                                                                                                                                                                                                                                                                                                                                                     |      |      |           |       |      |       |                                                           |       |                         |                                                                                                                                                                  |      |      |           |       |      |       |
|------------------------|-----------------------------------------------------------------------------------------------------------------------------------------------------------------------------------------------------------------------------------------------------------------------------------------------------------------------------------------------------------------------------------------------------------------------------------------------------------------------------------------------------------------------------------------------------------------------------------------------------------------------------------------------------------------------------------------------------------------------------------------------------------------------------------------------------------------------------------------------------------------------------------------------------------------------------------------------------------------------------------------------------------------------------------------------------------------------------------------------------------------------------------------------------------------------------------------------------------------------------------------------------------------------------------------------------------------------------------------------------------------------------------------------------------------------------------------------------------------------------------------------------------------------------------------------------------------------------------------------------|------|------|-----------|-------|------|-------|-----------------------------------------------------------|-------|-------------------------|------------------------------------------------------------------------------------------------------------------------------------------------------------------|------|------|-----------|-------|------|-------|
| Rsa1.0_00002.1.g191.t1 | ref XP_002888202.1  ZCF125<br>[Arabidopsis lyrata subsp. lyrata]<br>gi 297334043 gb EFH64461.1  ZCF125<br>[Arabidopsis lyrata subsp. lyrata]                                                                                                                                                                                                                                                                                                                                                                                                                                                                                                                                                                                                                                                                                                                                                                                                                                                                                                                                                                                                                                                                                                                                                                                                                                                                                                                                                                                                                                                        | 827  | 827  | 0         | 100.0 | 87.3 | 92.1  | ZCF125                                                    | gbpln | Arabidopsis<br>lyrata   | AT1G59540.1   Symbols: ZCF125   P-loop<br>containing nucleoside triphosphate<br>hydrolases superfamily protein  <br>chr1:21874083-21879382 FORWARD<br>LENGTH=823 | 827  | 823  | 0         | 99.5  | 86.2 | 92.0  |
| Rsa1.0_00002.1.g192.t1 | ref XP_002864007.1  predicted protein<br>[Arabidopsis lyrata subsp. lyrata]<br>gi 297309842 gb EFH40266.1  predicted<br>protein [Arabidopsis lyrata subsp.<br>lyrata]                                                                                                                                                                                                                                                                                                                                                                                                                                                                                                                                                                                                                                                                                                                                                                                                                                                                                                                                                                                                                                                                                                                                                                                                                                                                                                                                                                                                                               | 1017 | 3616 | 0         | 355.6 | 89.9 | 95.5  | predicted protein                                         | gbpln | Arabidopsis<br>lyrata   | AT1G55860.2   Symbols: UPL1   ubiquitin-<br>protein ligase 1   chr1:20879900-20892910<br>REVERSE LENGTH=3681                                                     | 1017 | 3681 | 1.00E-156 | 361.9 | 35.6 | 51.4  |
| Rsa1.0_00003.1.g193.t1 | ref XP_002870026.1  hypothetical<br>protein ARALYDRAFT_914806<br>[Arabidopsis lyrata subsp. lyrata]<br>gi 297315562 gb EFH46285.1 <br>hypothetical protein<br>ARALYDRAFT_914806 [Arabidopsis<br>lyrata subsp. lyrata]<br>ref NP_191429.1  60S ribosomal protein<br>L11-2 [Arabidopsis thaliana]<br>gi 18415161 ref NP_567563.1  60S<br>ribosomal protein L11-2 [Arabidopsis<br>thaliana] gi 30694822 ref NP_568649.2 <br>60S ribosomal protein L11-2<br>[Arabidopsis thaliana]<br>gi 27735235 sp P42794.2 RL112_ARATH<br>RecName: Full=60S ribosomal protein<br>L11-2; AltName: Full=L16<br>gi 11908058 gb AAG41458.1 AF326876.1<br>putative ribosomal protein L11<br>[Arabidopsis thaliana]<br>gi 12642874 gb AAK00379.1 AF339697.1<br>putative ribosomal protein L11<br>[Arabidopsis thaliana]<br>gi 14326537 gb AAK60313.1 AF385722.1<br>AT4g18730/F28A21.140 [Arabidopsis<br>thaliana] gi 7630065 emb CAB88287.1 <br>ribosomal protein L11-like [Arabidopsis<br>thaliana] gi 9758681 dbj BA092220.1 <br>ribosomal protein L11-like [Arabidopsis<br>thaliana] gi 14517470 gb AAK62625.1 <br>AT4g18730/F28A21.140 [Arabidopsis<br>thaliana] gi 18700224 gb AAL77722.1 <br>AT4g18730/F28A21.140 [Arabidopsis<br>thaliana] gi 21553372 gb AAM62465.1 <br>ribosomal protein L11, cytosolic<br>[Arabidopsis thaliana]<br>gi 21592421 gb AAM64372.1  ribosomal<br>protein L11, cytosolic [Arabidopsis<br>thaliana] gi 22136574 gb AAM91073.1 <br>AT4g18730/F28A21.140 [Arabidopsis<br>thaliana] gi 22136574 gb AAM91073.1 <br>AT4g18730/F28A21.140 [Arabidopsis<br>thaliana] gi 22136574 gb AAM91073.1 | 375  | 380  | 0         | 101.3 | 98.9 | 99.5  | hypothetical protein<br>ARALYDRAFT_914806                 | gbpln | Arabidopsis<br>lyrata   | AT4G18710.1   Symbols: BIN2, DWF12,<br>UCU1, ATSK21, SK21   Protein kinase<br>superfamily protein   chr4:10296474-<br>10298913 FORWARD LENGTH=380                | 375  | 380  | 0         | 101.3 | 98.7 | 99.5  |
| Rsa1.0_00003.1.g194.t1 | gi 14326537 gb AAK60313.1 AF385722.1<br>AT4g18730/F28A21.140 [Arabidopsis<br>thaliana] gi 7630065 emb CAB88287.1 <br>ribosomal protein L11-like [Arabidopsis<br>thaliana] gi 9758681 dbj BA092220.1 <br>ribosomal protein L11-like [Arabidopsis<br>thaliana] gi 14517470 gb AAK62625.1 <br>AT4g18730/F28A21.140 [Arabidopsis<br>thaliana] gi 18700224 gb AAL77722.1 <br>AT4g18730/F28A21.140 [Arabidopsis<br>thaliana] gi 21553372 gb AAM62465.1 <br>ribosomal protein L11, cytosolic<br>[Arabidopsis thaliana]<br>gi 21592421 gb AAM64372.1  ribosomal<br>protein L11, cytosolic [Arabidopsis<br>thaliana] gi 22136574 gb AAM91073.1 <br>AT4g18730/F28A21.140 [Arabidopsis<br>thaliana] gi 22136574 gb AAM91073.1 <br>AT4g18730/F28A21.140 [Arabidopsis<br>thaliana] gi 22136574 gb AAM91073.1                                                                                                                                                                                                                                                                                                                                                                                                                                                                                                                                                                                                                                                                                                                                                                                                     | 182  | 182  | 1.00E-102 | 100.0 | 99.5 | 100.0 | 60S ribosomal protein<br>L11-2                            | gbpln | Arabidopsis<br>thaliana | AT5G45775.2   Symbols:   Ribosomal L5P<br>family protein   chr5:18565281-18566496<br>REVERSE LENGTH=182                                                          | 182  | 182  | 1.00E-104 | 100.0 | 99.5 | 100.0 |
| Rsa1.0_00003.1.g195.t1 | gb EOA18242.1  hypothetical protein<br>CARUB_v10006734mg [Capsella rubella]                                                                                                                                                                                                                                                                                                                                                                                                                                                                                                                                                                                                                                                                                                                                                                                                                                                                                                                                                                                                                                                                                                                                                                                                                                                                                                                                                                                                                                                                                                                         | 385  | 432  | 1.00E-159 | 112.2 | 80.0 | 87.3  | hypothetical protein<br>CARUB_v10006734mg                 | gbpln | Capsella<br>rubella     | AT4G18770.1   Symbols: MYB98, AtMYB98  <br>myb domain protein 98   chr4:10311068-<br>10312557 FORWARD LENGTH=427                                                 | 385  | 427  | 1.00E-157 | 110.9 | 77.7 | 85.5  |
| Rsa1.0_00003.1.g196.t1 | gb ACS68199.1  cellulose synthase 8.2<br>catalytic subunit [Brassica napus]                                                                                                                                                                                                                                                                                                                                                                                                                                                                                                                                                                                                                                                                                                                                                                                                                                                                                                                                                                                                                                                                                                                                                                                                                                                                                                                                                                                                                                                                                                                         | 985  | 984  | 0         | 99.9  | 98.4 | 98.6  | cellulose synthase 8.2<br>catalytic subunit               | gbpln | Brassica<br>napus       | AT4G18780.1   Symbols: CESA8, IRX1,<br>ATCESA8, LEW2   cellulose synthase family<br>protein   chr4:10312846-10316719 REVERSE<br>LENGTH=985                       | 985  | 985  | 0         | 100.0 | 94.6 | 96.8  |
| Rsa1.0_00003.1.g197.t2 | ref XP_002867976.1  natural resistance-<br>associated macrophage protein 5<br>[Arabidopsis lyrata subsp. lyrata]<br>gi 297313812 gb EFH44235.1  natural<br>resistance-associated macrophage<br>protein 5 [Arabidopsis lyrata subsp.<br>lyrata]                                                                                                                                                                                                                                                                                                                                                                                                                                                                                                                                                                                                                                                                                                                                                                                                                                                                                                                                                                                                                                                                                                                                                                                                                                                                                                                                                      | 549  | 529  | 0         | 96.4  | 87.6 | 90.3  | natural resistance-<br>associated macrophage<br>protein 5 | gbpln | Arabidopsis<br>lyrata   | AT4G18790.1   Symbols: NRAMP5,<br>ATNRAMP5   NRAMP metal ion transporter<br>family protein   chr4:10317785-10319660<br>REVERSE LENGTH=530                        | 549  | 530  | 0         | 96.5  | 87.4 | 90.3  |
| Rsa1.0_00003.1.g198.t1 | gb EOA17416.1  hypothetical protein<br>CARUB_v10005719mg [Capsella rubella]                                                                                                                                                                                                                                                                                                                                                                                                                                                                                                                                                                                                                                                                                                                                                                                                                                                                                                                                                                                                                                                                                                                                                                                                                                                                                                                                                                                                                                                                                                                         | 215  | 214  | 1.00E-111 | 99.5  | 92.1 | 96.3  | hypothetical protein<br>CARUB_v10005719mg                 | gbpln | Capsella<br>rubella     | AT4G18800.1   Symbols: ATHSGBP,<br>ATRA11B, ATRABA1D, RABA1d   RAB<br>GTPase homolog A1D   chr4:10320156-<br>10321339 REVERSE LENGTH=214                         | 215  | 214  | 1.00E-113 | 99.5  | 92.6 | 96.7  |
| Rsa1.0_00003.1.g199.t1 | ref XP_002897691.1  nucleotide-binding<br>family protein [Arabidopsis lyrata subsp.<br>lyrata] gi 297333532 gb EFH63950.1 <br>nucleotide-binding family protein<br>[Arabidopsis lyrata subsp. lyrata]                                                                                                                                                                                                                                                                                                                                                                                                                                                                                                                                                                                                                                                                                                                                                                                                                                                                                                                                                                                                                                                                                                                                                                                                                                                                                                                                                                                               | 686  | 355  | 1.00E-160 | 51.7  | 39.5 | 45.5  | nucleotide-binding<br>family protein                      | gbpln | Arabidopsis<br>lyrata   | AT5G0960.1   Symbols: NBP35, ATNBP35  <br>nucleotide binding protein 35  <br>chr5:20734267-20735824 FORWARD<br>LENGTH=350                                        | 686  | 350  | 1.00E-158 | 51.0  | 38.9 | 45.0  |
| Rsa1.0_00003.1.g200.t1 | ref NP_191844.1  zinc finger protein-like<br>protein [Arabidopsis thaliana]<br>gi 7362765 emb CAB83135.1  putative<br>protein [Arabidopsis thaliana]<br>gi 3264688 gb AEE0402.1  zinc finger<br>protein-like protein [Arabidopsis<br>thaliana]                                                                                                                                                                                                                                                                                                                                                                                                                                                                                                                                                                                                                                                                                                                                                                                                                                                                                                                                                                                                                                                                                                                                                                                                                                                                                                                                                      | 302  | 472  | 1.00E-55  | 156.3 | 38.4 | 46.7  | zinc finger protein-like<br>protein                       | gbpln | Arabidopsis<br>thaliana | AT3G62850.1   Symbols:   zinc finger<br>protein-related   chr3:23237487-23239155<br>REVERSE LENGTH=472                                                           | 302  | 472  | 3.00E-58  | 156.3 | 38.4 | 46.7  |

|                        |                                                                                                                                                                                                     |      |      |           |        |      |      |                                                         |       |                      |                                                                                                                                                                                                                                                                                                                                                                                                                                                                         |      |      |           |        |      |      |
|------------------------|-----------------------------------------------------------------------------------------------------------------------------------------------------------------------------------------------------|------|------|-----------|--------|------|------|---------------------------------------------------------|-------|----------------------|-------------------------------------------------------------------------------------------------------------------------------------------------------------------------------------------------------------------------------------------------------------------------------------------------------------------------------------------------------------------------------------------------------------------------------------------------------------------------|------|------|-----------|--------|------|------|
| Rsa1.0_00003.1.g201.t1 | ref[XP_002883636.1] predicted protein [Arabidopsis lyrata subsp. lyrata] gi 297329476 gb EFH59895.1  predicted protein [Arabidopsis lyrata subsp. lyrata]                                           | 132  | 720  | 1.00E-26  | 545.5  | 47.0 | 54.5 | predicted protein                                       | gbpln | Arabidopsis lyrata   | AT2G04350.2   Symbols: LACS8   AMP-dependent synthetase and ligase family protein   chr2:1516086-1519178 FORWARD LENGTH=720                                                                                                                                                                                                                                                                                                                                             | 132  | 720  | 5.00E-28  | 545.5  | 46.2 | 53.0 |
| Rsa1.0_00003.1.g202.t1 | dbj BAB02990.1  retroelement pol polyprotein-like [Arabidopsis thaliana] ref[XP_002863624.1] pfkB-type carbohydrate kinase family protein [Arabidopsis thaliana]                                    | 124  | 1250 | 3.00E-25  | 1008.1 | 58.1 | 66.1 | retroelement pol polyprotein-like                       | gbpln | Arabidopsis thaliana | #                                                                                                                                                                                                                                                                                                                                                                                                                                                                       | #    | #    | #         | #      | #    |      |
| Rsa1.0_00003.1.g203.t2 | ref[XP_002863624.1] pfkB-type carbohydrate kinase family protein [Arabidopsis thaliana] gi 297309459 gb EFH39883.1  pfkB-type carbohydrate kinase family protein [Arabidopsis lyrata subsp. lyrata] | 352  | 365  | 1.00E-171 | 103.7  | 85.5 | 91.2 | pfkB-type carbohydrate kinase family protein            | gbpln | Arabidopsis lyrata   | AT5G43910.2   Symbols:   pfkB-like carbohydrate kinase family protein   chr5:17667537-17670085 REVERSE LENGTH=365                                                                                                                                                                                                                                                                                                                                                       | 352  | 365  | 1.00E-166 | 103.7  | 84.4 | 90.6 |
| Rsa1.0_00003.1.g204.t1 | gb EOA12791.1  hypothetical protein CARUB_v10025740mg [Capsella rubella]                                                                                                                            | 1507 | 1506 | 0         | 99.9   | 94.8 | 97.3 | hypothetical protein CARUB_v10025740mg                  | gbpln | Capsella rubella     | AT5G43900.1   Symbols: MYA2, ATMYA2, XI-2, XI-6   myosin 2   chr5:17657241-17666653 REVERSE LENGTH=1505                                                                                                                                                                                                                                                                                                                                                                 | 1507 | 1505 | 0         | 99.9   | 94.2 | 96.9 |
| Rsa1.0_00003.1.g205.t3 | gb AAG50806.1 AC079281.8 unknown protein [Arabidopsis thaliana]                                                                                                                                     | 1849 | 1213 | 0         | 65.6   | 23.7 | 34.5 | unknown protein                                         | gbpln | Arabidopsis thaliana | AT3G24255.1   Symbols:   RNA-directed DNA polymerase (reverse transcriptase)-related family protein   chr3:8789471-8793208 FORWARD LENGTH=746                                                                                                                                                                                                                                                                                                                           | 1849 | 746  | 2.00E-58  | 40.3   | 7.0  | 11.2 |
| Rsa1.0_00003.1.g206.t2 | gb EOA18770.1  hypothetical protein CARUB_v10007367mg [Capsella rubella]                                                                                                                            | 365  | 335  | 1.00E-35  | 91.8   | 30.1 | 42.5 | hypothetical protein CARUB_v10007367mg                  | gbpln | Capsella rubella     | AT4G19360.1   Symbols:   SCD6 protein-related   chr4:10564159-10565406 FORWARD LENGTH=268                                                                                                                                                                                                                                                                                                                                                                               | 365  | 268  | 4.00E-34  | 73.4   | 30.4 | 41.6 |
| Rsa1.0_00003.1.g207.t1 | ref[XP_002867943.1] hypothetical protein ARALYDRAFT_914728 [Arabidopsis lyrata subsp. lyrata] gi 297313779 gb EFH44202.1  hypothetical protein ARALYDRAFT_914728 [Arabidopsis lyrata subsp. lyrata] | 757  | 725  | 0         | 95.8   | 82.2 | 88.2 | hypothetical protein ARALYDRAFT_914728                  | gbpln | Arabidopsis lyrata   | AT4G19380.1   Symbols:   Long-chain fatty alcohol dehydrogenase family protein   chr4:10568427-10572288 REVERSE LENGTH=726                                                                                                                                                                                                                                                                                                                                              | 757  | 726  | 0         | 95.9   | 80.8 | 86.4 |
| Rsa1.0_00003.1.g208.t1 | emb CAB10225.1  retrovirus-related like polyprotein [Arabidopsis thaliana] gi 7268152 emb CAB78488.1  retrovirus-related like polyprotein [Arabidopsis thaliana]                                    | 1428 | 1489 | 0         | 104.3  | 55.9 | 70.5 | retrovirus-related like polyprotein                     | gbpln | Arabidopsis thaliana | AT4G23160.1   Symbols: CRK8   cysteine-rich RLK (RECEPTOR-like protein kinase) 8   chr4:12129485-12134086 FORWARD LENGTH=1262                                                                                                                                                                                                                                                                                                                                           | 1428 | 1262 | 1.00E-163 | 88.4   | 19.1 | 25.9 |
| Rsa1.0_00003.1.g209.t1 | dbj BAB08714.1  non-LTR retroelement reverse transcriptase-like protein [Arabidopsis thaliana]                                                                                                      | 599  | 1197 | 6.00E-83  | 199.8  | 30.4 | 42.6 | non-LTR retroelement reverse transcriptase-like protein | gbpln | Arabidopsis thaliana | AT4G29090.1   Symbols:   Ribonuclease H-like superfamily protein   chr4:14333528-14335255 FORWARD LENGTH=575                                                                                                                                                                                                                                                                                                                                                            | 599  | 575  | 1.00E-38  | 96.0   | 21.5 | 33.4 |
| Rsa1.0_00003.1.g210.t1 | gb AAM62450.1  unknown [Arabidopsis thaliana]                                                                                                                                                       | 169  | 160  | 8.00E-60  | 94.7   | 69.8 | 78.1 | unknown                                                 | gbpln | Arabidopsis thaliana | AT4G19430.1   Symbols:   unknown protein; FUNCTIONS IN: molecular_function unknown; INVOLVED IN: biological_process unknown; LOCATED IN: chloroplast; EXPRESSED IN: 17 plant structures; EXPRESSED DURING: 13 growth stages; Has 30201 Blast hits to 17322 proteins in 780 species: Archaea - 12; Bacteria - 1396; Metazoa - 17338; Fungi - 3422; Plants - 5037; Viruses - 0; Other Eukaryotes - 2996 (source: NCBI BLINK).   chr4:10598606-10599088 REVERSE LENGTH=160 | 169  | 160  | 1.00E-60  | 94.7   | 68.6 | 76.9 |
| Rsa1.0_00003.1.g211.t1 | #                                                                                                                                                                                                   | #    | #    | #         | #      | #    | #    | -                                                       | ----  | ----                 | AT4G19440.2   Symbols:   Tetratricopeptide repeat (TPR)-like superfamily protein   chr4:10602006-10604483 REVERSE LENGTH=825                                                                                                                                                                                                                                                                                                                                            | 53   | 825  | 1.00E-11  | 1556.6 | 60.4 | 67.9 |
| Rsa1.0_00003.1.g212.t1 | gb AAC02664.1  polyprotein [Arabidopsis thaliana]                                                                                                                                                   | 1410 | 1451 | 0         | 102.9  | 60.3 | 74.5 | polyprotein                                             | gbpln | Arabidopsis thaliana | AT4G23160.1   Symbols: CRK8   cysteine-rich RLK (RECEPTOR-like protein kinase) 8   chr4:12129485-12134086 FORWARD LENGTH=1262                                                                                                                                                                                                                                                                                                                                           | 1410 | 1262 | 1.00E-113 | 89.5   | 14.2 | 21.6 |
| Rsa1.0_00003.1.g213.t1 | #                                                                                                                                                                                                   | #    | #    | #         | #      | #    | #    | -                                                       | ----  | ----                 | #                                                                                                                                                                                                                                                                                                                                                                                                                                                                       | #    | #    | #         | #      | #    |      |
| Rsa1.0_00003.1.g214.t1 | gb EOA16195.1  hypothetical protein CARUB_v10004335mg [Capsella rubella]                                                                                                                            | 657  | 649  | 0         | 98.8   | 67.1 | 79.1 | hypothetical protein CARUB_v10004335mg                  | gbpln | Capsella rubella     | AT4G23180.1   Symbols: CRK10, RLK4   cysteine-rich RLK (RECEPTOR-like protein kinase) 10   chr4:12138171-12140780 FORWARD LENGTH=669                                                                                                                                                                                                                                                                                                                                    | 657  | 669  | 0         | 101.8  | 62.7 | 74.9 |
| Rsa1.0_00003.1.g215.t1 | gb EOA16319.1  hypothetical protein CARUB_v10004470mg [Capsella rubella]                                                                                                                            | 572  | 571  | 0         | 99.8   | 91.4 | 95.3 | hypothetical protein CARUB_v10004470mg                  | gbpln | Capsella rubella     | AT4G19450.1   Symbols:   Major facilitator superfamily protein   chr4:10606538-10609218 FORWARD LENGTH=572                                                                                                                                                                                                                                                                                                                                                              | 572  | 572  | 0         | 100.0  | 93.2 | 96.5 |
| Rsa1.0_00003.1.g216.t1 | gb EOA16458.1  hypothetical protein CARUB_v10004612mg, partial [Capsella rubella]                                                                                                                   | 492  | 510  | 0         | 103.7  | 86.6 | 92.9 | hypothetical protein CARUB_v10004612mg, partial         | gbpln | Capsella rubella     | AT4G19460.1   Symbols:   UDP-Glycosyltransferase superfamily protein   chr4:10610422-10611972 REVERSE LENGTH=516                                                                                                                                                                                                                                                                                                                                                        | 492  | 516  | 0         | 104.9  | 85.4 | 92.7 |
| Rsa1.0_00003.1.g217.t1 | gb ACP30627.1  disease resistance protein [Brassica rapa subsp. pekinensis]                                                                                                                         | 1225 | 1226 | 0         | 100.1  | 94.4 | 97.1 | disease resistance protein                              | gbpln | Brassica rapa        | AT4G12010.1   Symbols:   Disease resistance protein (TIR-NBS-LRR class) family   chr4:7197325-7201393 REVERSE LENGTH=1219                                                                                                                                                                                                                                                                                                                                               | 1225 | 1219 | 0         | 99.5   | 51.6 | 69.9 |
| Rsa1.0_00003.1.g218.t1 | gb ACP30626.1  disease resistance protein [Brassica rapa subsp. pekinensis]                                                                                                                         | 1366 | 1276 | 0         | 93.4   | 75.9 | 82.9 | disease resistance protein                              | gbpln | Brassica rapa        | AT4G19500.2   Symbols:   nucleoside-triphosphatases;transmembrane receptors;nucleotide binding;ATP binding   chr4:10627364-10631532 FORWARD LENGTH=834                                                                                                                                                                                                                                                                                                                  | 1366 | 834  | 0         | 61.1   | 30.7 | 38.3 |

|                        |                                                                                                                                                                                                                                                                                                                                                      |      |      |           |       |      |      |                                                        |       |                      |                                                                                                                                                        |      |      |           |        |      |      |
|------------------------|------------------------------------------------------------------------------------------------------------------------------------------------------------------------------------------------------------------------------------------------------------------------------------------------------------------------------------------------------|------|------|-----------|-------|------|------|--------------------------------------------------------|-------|----------------------|--------------------------------------------------------------------------------------------------------------------------------------------------------|------|------|-----------|--------|------|------|
| Rsa1.0_00003.1.g219.t1 | gb ACP30626.1  disease resistance protein [Brassica rapa subsp. pekinensis]                                                                                                                                                                                                                                                                          | 130  | 1276 | 1.00E-37  | 981.5 | 60.8 | 63.8 | disease resistance protein                             | gbpln | Brassica rapa        | AT4G19500.2   Symbols:   nucleoside-triphosphatases;transmembrane receptors;nucleotide binding;ATP binding   chr4:10627364-10631532 FORWARD LENGTH=834 | 130  | 834  | 8.00E-21  | 641.5  | 36.2 | 50.8 |
| Rsa1.0_00003.1.g220.t1 | gb ACI14393.1  WRKY28-1 transcription factor [Brassica napus]                                                                                                                                                                                                                                                                                        | 215  | 312  | 5.00E-91  | 145.1 | 79.1 | 87.0 | WRKY28-1 transcription factor                          | gbpln | Brassica napus       | AT4G18170.1   Symbols: WRKY28, ATWRKY28   WRKY DNA-binding protein 28   chr4:10061508-10062691 FORWARD LENGTH=318                                      | 215  | 318  | 2.00E-77  | 147.9  | 71.6 | 81.4 |
| Rsa1.0_00003.1.g221.t1 | ref XP_002869986.1  protein binding protein [Arabidopsis lyrata subsp. lyrata] gi 297315822 gb EFH46245.1  protein binding protein [Arabidopsis lyrata subsp. lyrata]                                                                                                                                                                                | 1182 | 1044 | 0         | 88.3  | 41.2 | 44.8 | protein binding protein                                | gbpln | Arabidopsis lyrata   | AT4G19490.2   Symbols: ATVPS54, VPS54   VPS54   chr4:10616017-10622934 FORWARD LENGTH=1034                                                             | 1182 | 1034 | 0         | 87.5   | 41.5 | 44.9 |
| Rsa1.0_00003.1.g222.t1 | emb CAB39638.1  RNA-directed DNA polymerase-like protein [Arabidopsis thaliana] gi 7267666 emb CAB78094.1  RNA-directed DNA polymerase-like protein [Arabidopsis thaliana]                                                                                                                                                                           | 1911 | 1274 | 0         | 66.7  | 34.3 | 45.7 | RNA-directed DNA polymerase-like protein               | gbpln | Arabidopsis thaliana | AT4G29090.1   Symbols:   Ribonuclease H-like superfamily protein   chr4:14333528-14335255 FORWARD LENGTH=575                                           | 1911 | 575  | 3.00E-76  | 30.1   | 9.8  | 14.4 |
| Rsa1.0_00003.1.g223.t1 | ref XP_002867933.1  hypothetical protein ARALYDRAFT_914714 [Arabidopsis lyrata subsp. lyrata] gi 297313769 gb EFH44192.1  hypothetical protein ARALYDRAFT_914714 [Arabidopsis lyrata subsp. lyrata]                                                                                                                                                  | 70   | 71   | 3.00E-25  | 101.4 | 81.4 | 87.1 | hypothetical protein ARALYDRAFT_914714                 | gbpln | Arabidopsis lyrata   | AT4G19520.1   Symbols:   disease resistance protein (TIR-NBS-LRR class) family   chr4:10639488-10647070 REVERSE LENGTH=1744                            | 70   | 1744 | 2.00E-21  | 2491.4 | 55.7 | 57.1 |
| Rsa1.0_00003.1.g224.t1 | ref NP_193687.3  TIR-NBS-LRR class disease resistance protein [Arabidopsis thaliana] gi 332658794 gb AEE84194.1  TIR-NBS-LRR class disease resistance protein [Arabidopsis thaliana]                                                                                                                                                                 | 1497 | 1744 | 0         | 116.5 | 62.0 | 73.3 | TIR-NBS-LRR class disease resistance protein           | gbpln | Arabidopsis thaliana | AT4G19520.1   Symbols:   disease resistance protein (TIR-NBS-LRR class) family   chr4:10639488-10647070 REVERSE LENGTH=1744                            | 1497 | 1744 | 0         | 116.5  | 62.0 | 73.3 |
| Rsa1.0_00003.1.g225.t1 | # # # # # # # # # #                                                                                                                                                                                                                                                                                                                                  |      |      |           |       |      |      | -                                                      | ----  | ----                 | # # # # # # #                                                                                                                                          |      |      |           |        |      |      |
| Rsa1.0_00003.1.g226.t1 | ref NP_193688.1  TIR-NBS-LRR class disease resistance protein [Arabidopsis thaliana] gi 2853080 emb CAA16930.1  TMV resistance protein N-like [Arabidopsis thaliana] gi 7268749 emb CAB78955.1  TMV resistance protein N-like [Arabidopsis thaliana] gi 332658795 gb AEE84195.1  TIR-NBS-LRR class disease resistance protein [Arabidopsis thaliana] | 1202 | 1167 | 0         | 97.1  | 64.8 | 73.3 | TIR-NBS-LRR class disease resistance protein           | gbpln | Arabidopsis thaliana | AT4G19530.1   Symbols:   disease resistance protein (TIR-NBS-LRR class) family   chr4:10651962-10657090 FORWARD LENGTH=1167                            | 1202 | 1167 | 0         | 97.1   | 64.8 | 73.3 |
| Rsa1.0_00003.1.g227.t1 | ref XP_002869558.1  hypothetical protein ARALYDRAFT_914664 [Arabidopsis lyrata subsp. lyrata] gi 297315794 gb EFH46217.1  hypothetical protein ARALYDRAFT_914664 [Arabidopsis lyrata subsp. lyrata]                                                                                                                                                  | 422  | 428  | 1.00E-121 | 101.4 | 57.3 | 69.9 | hypothetical protein ARALYDRAFT_914664                 | gbpln | Arabidopsis lyrata   | AT4G19930.1   Symbols:   F-box and associated interaction domains-containing protein   chr4:10803558-10804853 FORWARD LENGTH=431                       | 422  | 431  | 1.00E-117 | 102.1  | 55.7 | 68.7 |
| Rsa1.0_00003.1.g228.t1 | gb AAF26782.1 AC016829.6 putative trypsin inhibitor [Arabidopsis thaliana]                                                                                                                                                                                                                                                                           | 210  | 244  | 5.00E-14  | 116.2 | 34.8 | 42.9 | putative trypsin inhibitor                             | gbpln | Arabidopsis thaliana | AT3G04320.1   Symbols:   Kunitz family trypsin and protease inhibitor protein   chr3:1143815-1144426 FORWARD LENGTH=203                                | 210  | 203  | 2.00E-16  | 96.7   | 34.8 | 42.9 |
| Rsa1.0_00003.1.g229.t3 | emb CAB39638.1  RNA-directed DNA polymerase-like protein [Arabidopsis thaliana] gi 7267666 emb CAB78094.1  RNA-directed DNA polymerase-like protein [Arabidopsis thaliana]                                                                                                                                                                           | 943  | 1274 | 0         | 135.1 | 48.0 | 63.8 | RNA-directed DNA polymerase-like protein               | gbpln | Arabidopsis thaliana | AT4G29090.1   Symbols:   Ribonuclease H-like superfamily protein   chr4:14333528-14335255 FORWARD LENGTH=575                                           | 943  | 575  | 7.00E-76  | 61.0   | 17.8 | 28.8 |
| Rsa1.0_00003.1.g230.t1 | ref XP_002869970.1  iron-responsive transporter 2 [Arabidopsis lyrata subsp. lyrata] gi 297315806 gb EFH46229.1  iron-responsive transporter 2 [Arabidopsis lyrata subsp. lyrata]                                                                                                                                                                    | 357  | 349  | 0         | 97.8  | 88.2 | 93.0 | iron-responsive transporter 2                          | gbpln | Arabidopsis lyrata   | AT4G19690.2   Symbols: IRT2   iron regulated transporter 2   chr4:10703385-10704621 FORWARD LENGTH=350                                                 | 357  | 350  | 0         | 98.0   | 87.4 | 93.6 |
| Rsa1.0_00003.1.g231.t1 | gb AAD17352.1  contains similarity to retrovirus-related polyproteins [Arabidopsis thaliana] gi 7267379 emb CAB77940.1  putative polyprotein [Arabidopsis thaliana]                                                                                                                                                                                  | 1443 | 1366 | 0         | 94.7  | 39.5 | 54.9 | contains similarity to retrovirus-related polyproteins | gbpln | Arabidopsis thaliana | AT4G23160.1   Symbols: CRK8   cysteine-rich RLK (RECEPTOR-like protein kinase) 8   chr4:12129485-12134086 FORWARD LENGTH=1262                          | 1443 | 1262 | 1.00E-170 | 87.5   | 20.4 | 27.9 |
| Rsa1.0_00003.1.g232.t1 | gb AFJ05595.1  iron-regulated transporter 1 [Raphanus sativus]                                                                                                                                                                                                                                                                                       | 345  | 345  | 0         | 100.0 | 98.8 | 99.1 | iron-regulated transporter 1                           | gbpln | Raphanus sativus     | AT4G19690.2   Symbols: IRT1   iron-regulated transporter 1   chr4:10707487-10708723 FORWARD LENGTH=347                                                 | 345  | 347  | 1.00E-172 | 100.6  | 88.1 | 93.9 |
| Rsa1.0_00003.1.g233.t1 | # # # # # # # # # #                                                                                                                                                                                                                                                                                                                                  |      |      |           |       |      |      | -                                                      | ----  | ----                 | # # # # # # #                                                                                                                                          |      |      |           |        |      |      |
| Rsa1.0_00003.1.g234.t1 | gb EOA18607.1  hypothetical protein CARUB_v10007180mg [Capsella rubella]                                                                                                                                                                                                                                                                             | 345  | 345  | 0         | 100.0 | 89.6 | 96.5 | hypothetical protein CARUB_v10007180mg                 | gbpln | Capsella rubella     | AT4G19690.2   Symbols: IRT1   iron-regulated transporter 1   chr4:10707487-10708723 FORWARD LENGTH=347                                                 | 345  | 347  | 1.00E-175 | 100.6  | 89.0 | 95.9 |
| Rsa1.0_00003.1.g235.t1 | gb AAL32681.1  putative protein [Arabidopsis thaliana] gi 21387161 gb AAM47984.1  putative protein [Arabidopsis thaliana]                                                                                                                                                                                                                            | 271  | 303  | 1.00E-103 | 111.8 | 74.9 | 82.7 | putative protein                                       | gbpln | Arabidopsis thaliana | AT4G19700.1   Symbols: RING   SBP (S-ribonuclease binding protein) family protein   chr4:10713633-10714635 REVERSE LENGTH=304                          | 271  | 304  | 1.00E-106 | 112.2  | 74.9 | 82.7 |



|                        |                                                                                                                                                                                                                                                                                                     |     |      |           |       |      |      |                                                 |       |                      |                                                                                                                                                                                                                                                                                                                                                                                                                                                                          |     |     |           |       |      |      |
|------------------------|-----------------------------------------------------------------------------------------------------------------------------------------------------------------------------------------------------------------------------------------------------------------------------------------------------|-----|------|-----------|-------|------|------|-------------------------------------------------|-------|----------------------|--------------------------------------------------------------------------------------------------------------------------------------------------------------------------------------------------------------------------------------------------------------------------------------------------------------------------------------------------------------------------------------------------------------------------------------------------------------------------|-----|-----|-----------|-------|------|------|
| Rsa1.0_00003.1.g236.t1 | #                                                                                                                                                                                                                                                                                                   | #   | #    | #         | #     | #    | #    | #                                               | -     | ----                 | ----                                                                                                                                                                                                                                                                                                                                                                                                                                                                     | #   | #   | #         | #     | #    | #    |
|                        | ref NP_193723.3  Intracellular chloride channel-like protein [Arabidopsis thaliana] gi 24030218 gb AAN41287.1  unknown protein [Arabidopsis thaliana] gi 332658839 gb AEE84239.1  Intracellular chloride channel-like protein [Arabidopsis thaliana]                                                |     |      |           |       |      |      |                                                 |       |                      |                                                                                                                                                                                                                                                                                                                                                                                                                                                                          |     |     |           |       |      |      |
| Rsa1.0_00003.1.g237.t1 |                                                                                                                                                                                                                                                                                                     | 361 | 356  | 0         | 98.6  | 91.4 | 95.6 | Intracellular chloride channel-like protein     | gbpln | Arabidopsis thaliana | AT4G19880.1   Symbols:   Glutathione S-transferase family protein   chr4:10784691-10786376 REVERSE LENGTH=356                                                                                                                                                                                                                                                                                                                                                            | 361 | 356 | 0         | 98.6  | 91.4 | 95.6 |
| Rsa1.0_00003.1.g238.t5 | #                                                                                                                                                                                                                                                                                                   | #   | #    | #         | #     | #    | #    | #                                               | -     | ----                 | ----                                                                                                                                                                                                                                                                                                                                                                                                                                                                     | #   | #   | #         | #     | #    | #    |
|                        | ref XP_002869958.1  hypothetical protein ARALYDRAFT_914664 [Arabidopsis lyrata subsp. lyrata] gi 297315794 gb EFH46217.1  hypothetical protein ARALYDRAFT_914664 [Arabidopsis lyrata subsp. lyrata]                                                                                                 |     |      |           |       |      |      |                                                 |       |                      |                                                                                                                                                                                                                                                                                                                                                                                                                                                                          |     |     |           |       |      |      |
| Rsa1.0_00003.1.g239.t1 |                                                                                                                                                                                                                                                                                                     | 161 | 428  | 9.00E-30  | 265.8 | 45.3 | 64.6 | hypothetical protein ARALYDRAFT_914664          | gbpln | Arabidopsis lyrata   | AT4G19930.1   Symbols:   F-box and associated interaction domains-containing protein   chr4:10803558-10804853 FORWARD LENGTH=431                                                                                                                                                                                                                                                                                                                                         | 161 | 431 | 1.00E-25  | 267.7 | 44.1 | 59.0 |
|                        | ref NP_001190775.1  K+ uptake permease 9 [Arabidopsis thaliana] gi 38502848 sp O49423.2 POT9_ARATH RecName: Full=Potassium transporter 9; Short=AtPOT9 gi 332658852 gb AEE84252.1  K+ uptake permease 9 [Arabidopsis thaliana]                                                                      |     |      |           |       |      |      |                                                 |       |                      |                                                                                                                                                                                                                                                                                                                                                                                                                                                                          |     |     |           |       |      |      |
| Rsa1.0_00003.1.g240.t1 |                                                                                                                                                                                                                                                                                                     | 807 | 807  | 0         | 100.0 | 88.4 | 93.3 | K+ uptake permease 9                            | gbpln | Arabidopsis thaliana | AT4G19960.2   Symbols: KUP9   K+ uptake permease 9   chr4:10813807-10816997 FORWARD LENGTH=807                                                                                                                                                                                                                                                                                                                                                                           | 807 | 807 | 0         | 100.0 | 88.4 | 93.3 |
|                        | ref NP_001190775.1  K+ uptake permease 9 [Arabidopsis thaliana] gi 38502848 sp O49423.2 POT9_ARATH RecName: Full=Potassium transporter 9; Short=AtPOT9 gi 332658852 gb AEE84252.1  K+ uptake permease 9 [Arabidopsis thaliana]                                                                      |     |      |           |       |      |      |                                                 |       |                      |                                                                                                                                                                                                                                                                                                                                                                                                                                                                          |     |     |           |       |      |      |
| Rsa1.0_00003.1.g241.t1 |                                                                                                                                                                                                                                                                                                     | 801 | 807  | 0         | 100.7 | 85.4 | 92.0 | K+ uptake permease 9                            | gbpln | Arabidopsis thaliana | AT4G19960.2   Symbols: KUP9   K+ uptake permease 9   chr4:10813807-10816997 FORWARD LENGTH=807                                                                                                                                                                                                                                                                                                                                                                           | 801 | 807 | 0         | 100.7 | 85.4 | 92.0 |
|                        | ref NP_001190775.1  K+ uptake permease 9 [Arabidopsis thaliana] gi 38502848 sp O49423.2 POT9_ARATH RecName: Full=Potassium transporter 9; Short=AtPOT9 gi 332658852 gb AEE84252.1  K+ uptake permease 9 [Arabidopsis thaliana]                                                                      |     |      |           |       |      |      |                                                 |       |                      |                                                                                                                                                                                                                                                                                                                                                                                                                                                                          |     |     |           |       |      |      |
| Rsa1.0_00003.1.g242.t1 |                                                                                                                                                                                                                                                                                                     | 730 | 807  | 0         | 110.5 | 78.8 | 86.2 | K+ uptake permease 9                            | gbpln | Arabidopsis thaliana | AT4G19960.2   Symbols: KUP9   K+ uptake permease 9   chr4:10813807-10816997 FORWARD LENGTH=807                                                                                                                                                                                                                                                                                                                                                                           | 730 | 807 | 0         | 110.5 | 78.8 | 86.2 |
|                        | ref NP_001190775.1  K+ uptake permease 9 [Arabidopsis thaliana] gi 38502848 sp O49423.2 POT9_ARATH RecName: Full=Potassium transporter 9; Short=AtPOT9 gi 332658852 gb AEE84252.1  K+ uptake permease 9 [Arabidopsis thaliana]                                                                      |     |      |           |       |      |      |                                                 |       |                      |                                                                                                                                                                                                                                                                                                                                                                                                                                                                          |     |     |           |       |      |      |
| Rsa1.0_00003.1.g243.t1 | #                                                                                                                                                                                                                                                                                                   | #   | #    | #         | #     | #    | #    | #                                               | -     | ----                 | ----                                                                                                                                                                                                                                                                                                                                                                                                                                                                     | #   | #   | #         | #     | #    | #    |
|                        |                                                                                                                                                                                                                                                                                                     |     |      |           |       |      |      |                                                 |       |                      |                                                                                                                                                                                                                                                                                                                                                                                                                                                                          |     |     |           |       |      |      |
|                        | ref XP_002869958.1  hypothetical protein ARALYDRAFT_914664 [Arabidopsis lyrata subsp. lyrata] gi 297315794 gb EFH46217.1  hypothetical protein ARALYDRAFT_914664 [Arabidopsis lyrata subsp. lyrata]                                                                                                 |     |      |           |       |      |      |                                                 |       |                      |                                                                                                                                                                                                                                                                                                                                                                                                                                                                          |     |     |           |       |      |      |
| Rsa1.0_00003.1.g244.t1 |                                                                                                                                                                                                                                                                                                     | 346 | 715  | 1.00E-173 | 206.6 | 84.4 | 88.7 | hypothetical protein CARUB_v10004249mg          | gbpln | Capsella rubella     | AT4G19970.1   Symbols:   CONTAINS InterPro DOMAIN/s: Nucleotide-diphospho-sugar transferase, predicted (InterPro:IPR005069); BEST Arabidopsis thaliana protein match is: Nucleotide-diphospho-sugar transferase family protein (TAIR:AT5G44820.1); Has 801 Blast hits to 466 proteins in 35 species: Arcae - 0; Bacteria - 0; Metazoa - 2; Fungi - 0; Plants - 750; Viruses - 0; Other Eukaryotes - 49 (source: NCBI BLINK).   chr4:10818242-10825343 FORWARD LENGTH=715 | 346 | 715 | 1.00E-175 | 206.6 | 84.7 | 89.3 |
|                        | gb EOA16117.1  hypothetical protein CARUB_v10004249mg [Capsella rubella]                                                                                                                                                                                                                            |     |      |           |       |      |      |                                                 |       |                      |                                                                                                                                                                                                                                                                                                                                                                                                                                                                          |     |     |           |       |      |      |
|                        | ref XP_002869958.1  hypothetical protein ARALYDRAFT_914664 [Arabidopsis lyrata subsp. lyrata] gi 297315794 gb EFH46217.1  hypothetical protein ARALYDRAFT_914664 [Arabidopsis lyrata subsp. lyrata]                                                                                                 |     |      |           |       |      |      |                                                 |       |                      |                                                                                                                                                                                                                                                                                                                                                                                                                                                                          |     |     |           |       |      |      |
| Rsa1.0_00003.1.g245.t1 |                                                                                                                                                                                                                                                                                                     | 427 | 428  | 1.00E-126 | 100.2 | 61.1 | 73.5 | hypothetical protein ARALYDRAFT_914664          | gbpln | Arabidopsis lyrata   | AT4G19930.1   Symbols:   F-box and associated interaction domains-containing protein   chr4:10803558-10804853 FORWARD LENGTH=431                                                                                                                                                                                                                                                                                                                                         | 427 | 431 | 1.00E-121 | 100.9 | 58.8 | 70.5 |
|                        | ref XP_002869958.1  hypothetical protein ARALYDRAFT_914664 [Arabidopsis lyrata subsp. lyrata]                                                                                                                                                                                                       |     |      |           |       |      |      |                                                 |       |                      |                                                                                                                                                                                                                                                                                                                                                                                                                                                                          |     |     |           |       |      |      |
| Rsa1.0_00003.1.g246.t1 |                                                                                                                                                                                                                                                                                                     | 375 | 394  | 1.00E-157 | 105.1 | 77.9 | 84.0 | hypothetical protein CARUB_v10004988mg, partial | gbpln | Capsella rubella     | AT4G20010.1   Symbols: PTAC9, OSB2   plastid transcriptionally active 9   chr4:10842128-10843989 FORWARD LENGTH=371                                                                                                                                                                                                                                                                                                                                                      | 375 | 371 | 1.00E-157 | 98.9  | 76.8 | 83.5 |
|                        | gb EOA15545.1  hypothetical protein CARUB_v10004988mg, partial [Capsella rubella]                                                                                                                                                                                                                   |     |      |           |       |      |      |                                                 |       |                      |                                                                                                                                                                                                                                                                                                                                                                                                                                                                          |     |     |           |       |      |      |
|                        | ref NP_567595.1  Pectin lyase-like protein [Arabidopsis thaliana] gi 16226216 gb AAL16105.1 AF428273.1 AT4g20040/F18F4.140 [Arabidopsis thaliana] gi 22137222 gb AAM91456.1 AT4g20040/F18F4.140 [Arabidopsis thaliana] gi 332658865 gb AEE84265.1  Pectin lyase-like protein [Arabidopsis thaliana] |     |      |           |       |      |      |                                                 |       |                      |                                                                                                                                                                                                                                                                                                                                                                                                                                                                          |     |     |           |       |      |      |
| Rsa1.0_00003.1.g247.t1 |                                                                                                                                                                                                                                                                                                     | 813 | 483  | 0         | 59.4  | 47.2 | 51.9 | Pectin lyase-like protein                       | gbpln | Arabidopsis thaliana | AT4G20040.1   Symbols:   Pectin lyase-like superfamily protein   chr4:10847348-10848963 REVERSE LENGTH=483                                                                                                                                                                                                                                                                                                                                                               | 813 | 483 | 0         | 59.4  | 47.2 | 51.9 |
|                        | ref NP_567595.1  Pectin lyase-like protein [Arabidopsis thaliana] gi 16226216 gb AAL16105.1 AF428273.1 AT4g20040/F18F4.140 [Arabidopsis thaliana] gi 22137222 gb AAM91456.1 AT4g20040/F18F4.140 [Arabidopsis thaliana] gi 332658865 gb AEE84265.1  Pectin lyase-like protein [Arabidopsis thaliana] |     |      |           |       |      |      |                                                 |       |                      |                                                                                                                                                                                                                                                                                                                                                                                                                                                                          |     |     |           |       |      |      |
| Rsa1.0_00004.1.g248.t1 |                                                                                                                                                                                                                                                                                                     | 206 | 1142 | 3.00E-25  | 554.4 | 25.2 | 33.0 | reverse transcriptase, putative; 16838-20266    | gbpln | Arabidopsis thaliana | AT4G20909.1   Symbols:   Ribonuclease H-like superfamily protein   chr4:14333528-14335255 FORWARD LENGTH=575                                                                                                                                                                                                                                                                                                                                                             | 206 | 575 | 2.00E-17  | 279.1 | 23.3 | 37.4 |
|                        | gb AAG51783.1 AC079679.3 reverse transcriptase, putative; 16838-20266 [Arabidopsis thaliana]                                                                                                                                                                                                        |     |      |           |       |      |      |                                                 |       |                      |                                                                                                                                                                                                                                                                                                                                                                                                                                                                          |     |     |           |       |      |      |
| Rsa1.0_00004.1.g249.t1 |                                                                                                                                                                                                                                                                                                     | 310 | 332  | 1.00E-65  | 107.1 | 55.8 | 63.2 | hypothetical protein CARUB_v10021988mg          | gbpln | Capsella rubella     | AT1G68550.2   Symbols:   Integrase-type DNA-binding superfamily protein   chr1:25725810-25726784 REVERSE LENGTH=324                                                                                                                                                                                                                                                                                                                                                      | 310 | 324 | 1.00E-67  | 104.5 | 53.9 | 66.1 |
|                        | gb EOA34452.1  hypothetical protein CARUB_v10021988mg [Capsella rubella]                                                                                                                                                                                                                            |     |      |           |       |      |      |                                                 |       |                      |                                                                                                                                                                                                                                                                                                                                                                                                                                                                          |     |     |           |       |      |      |
| Rsa1.0_00004.1.g250.t1 | #                                                                                                                                                                                                                                                                                                   | #   | #    | #         | #     | #    | #    | #                                               | -     | ----                 | ----                                                                                                                                                                                                                                                                                                                                                                                                                                                                     | #   | #   | #         | #     | #    | #    |

|                        |                                                                                                                                                                                                                                                                                                                                                                                                                                               |     |      |           |       |      |      |                                                     |       |                      |                                                                                                                                                                                                                                                                                                                                                                                                                                                                                                                                    |     |      |           |       |      |      |
|------------------------|-----------------------------------------------------------------------------------------------------------------------------------------------------------------------------------------------------------------------------------------------------------------------------------------------------------------------------------------------------------------------------------------------------------------------------------------------|-----|------|-----------|-------|------|------|-----------------------------------------------------|-------|----------------------|------------------------------------------------------------------------------------------------------------------------------------------------------------------------------------------------------------------------------------------------------------------------------------------------------------------------------------------------------------------------------------------------------------------------------------------------------------------------------------------------------------------------------------|-----|------|-----------|-------|------|------|
| Rsa1.0_00004.1.g251.t1 | gb AAC33226.1  putative non-LTR retroelement reverse transcriptase [Arabidopsis thaliana]                                                                                                                                                                                                                                                                                                                                                     | 758 | 1529 | 0         | 201.7 | 46.2 | 62.4 | putative non-LTR retroelement reverse transcriptase | gbpln | Arabidopsis thaliana | AT3G24255.1   Symbols:   RNA-directed DNA polymerase (reverse transcriptase)-related family protein   chr3:8789471-8793208 FORWARD LENGTH=746                                                                                                                                                                                                                                                                                                                                                                                      | 758 | 746  | 4.00E-74  | 98.4  | 21.0 | 29.9 |
| Rsa1.0_00004.1.g252.t1 | #                                                                                                                                                                                                                                                                                                                                                                                                                                             | #   | #    | #         | #     | #    | -    | -                                                   | ----  | ----                 | #                                                                                                                                                                                                                                                                                                                                                                                                                                                                                                                                  | #   | #    | #         | #     | #    | #    |
| Rsa1.0_00004.1.g253.t1 | ref NP_177020.1  3-ketoacyl-CoA synthase 6 [Arabidopsis thaliana] gi 75315046 sp Q9XF43.1 KCS6_ARATH RecName: Full=3-ketoacyl-CoA synthase 6; Short=KCS-6; AltName: Full=Cuticular protein 1; AltName: Full=Very long-chain fatty acid condensing enzyme 6; Short=VLCFA condensing enzyme 6                                                                                                                                                   | 497 | 497  | 0         | 100.0 | 93.4 | 96.8 | 3-ketoacyl-CoA synthase 6                           | gbpln | Arabidopsis thaliana | AT1G68530.1   Symbols: CUT1, POP1, CER6, G2, KCS6   3-ketoacyl-CoA synthase 6   chr1:25712881-25714733 REVERSE LENGTH=497                                                                                                                                                                                                                                                                                                                                                                                                          | 497 | 497  | 0         | 100.0 | 93.4 | 96.8 |
| Rsa1.0_00004.1.g254.t1 | gb EOA35226.1  hypothetical protein CARUB_v10020384mg [Capsella rubella]                                                                                                                                                                                                                                                                                                                                                                      | 402 | 410  | 1.00E-170 | 102.0 | 78.9 | 88.3 | hypothetical protein CARUB_v10020384mg              | gbpln | Capsella rubella     | AT1G68520.1   Symbols:   B-box type zinc finger protein with CGT domain   chr1:25709331-25710749 REVERSE LENGTH=406                                                                                                                                                                                                                                                                                                                                                                                                                | 402 | 406  | 1.00E-170 | 101.0 | 76.6 | 86.8 |
| Rsa1.0_00004.1.g255.t1 | #                                                                                                                                                                                                                                                                                                                                                                                                                                             | #   | #    | #         | #     | #    | -    | -                                                   | ----  | ----                 | #                                                                                                                                                                                                                                                                                                                                                                                                                                                                                                                                  | #   | #    | #         | #     | #    | #    |
| Rsa1.0_00004.1.g256.t1 | #                                                                                                                                                                                                                                                                                                                                                                                                                                             | #   | #    | #         | #     | #    | -    | -                                                   | ----  | ----                 | #                                                                                                                                                                                                                                                                                                                                                                                                                                                                                                                                  | #   | #    | #         | #     | #    | #    |
| Rsa1.0_00004.1.g257.t1 | #                                                                                                                                                                                                                                                                                                                                                                                                                                             | #   | #    | #         | #     | #    | -    | -                                                   | ----  | ----                 | #                                                                                                                                                                                                                                                                                                                                                                                                                                                                                                                                  | #   | #    | #         | #     | #    | #    |
| Rsa1.0_00004.1.g258.t1 | gb EOA35949.1  hypothetical protein CARUB_v10021210mg [Capsella rubella]                                                                                                                                                                                                                                                                                                                                                                      | 87  | 93   | 7.00E-20  | 106.9 | 69.0 | 81.6 | hypothetical protein CARUB_v10021210mg              | gbpln | Capsella rubella     | AT1G68500.1   Symbols:   unknown protein; BEST Arabidopsis thaliana protein match is: unknown protein (TAIR:AT1G25422.1); Has 16 Blast hits to 16 proteins in 6 species: Archae - 0; Bacteria - 0; Metazoa - 0; Fungi - 0; Plants - 16; Viruses - 0; Other Eukaryotes - 0 (source: NCBI BLink).   chr1:25702041-25702322 FORWARD LENGTH=93                                                                                                                                                                                         | 87  | 93   | 3.00E-22  | 106.9 | 72.4 | 82.8 |
| Rsa1.0_00004.1.g259.t1 | ref NP_564931.1  uncharacterized protein [Arabidopsis thaliana] gi 12324888 gb AAG52398.1 AC011915_12 unknown protein; 35272-36292 [Arabidopsis thaliana] gi 21593205 gb AAM65154.1  unknown [Arabidopsis thaliana] gi 29028824 gb AAO64791.1  At1g68490 [Arabidopsis thaliana] gi 110736380 dbj BAF00159.1  hypothetical protein [Arabidopsis thaliana] gi 332196678 gb AEE34799.1  uncharacterized protein AT1G68490 [Arabidopsis thaliana] | 172 | 183  | 8.00E-59  | 106.4 | 77.3 | 83.7 | uncharacterized protein                             | gbpln | Arabidopsis thaliana | AT1G68490.1   Symbols:   unknown protein; FUNCTIONS IN: molecular_function unknown; INVOLVED IN: biological_process unknown; LOCATED IN: chloroplast; EXPRESSED IN: 22 plant structures; EXPRESSED DURING: 13 growth stages; BEST Arabidopsis thaliana protein match is: unknown protein (TAIR:AT1G13390.2); Has 125 Blast hits to 125 proteins in 18 species: Archae - 0; Bacteria - 0; Metazoa - 0; Fungi - 0; Plants - 125; Viruses - 0; Other Eukaryotes - 0 (source: NCBI BLink).   chr1:25693926-25694946 FORWARD LENGTH=183 | 172 | 183  | 3.00E-61  | 106.4 | 77.3 | 83.7 |
| Rsa1.0_00004.1.g260.t1 | ref XP_002878905.1  predicted protein [Arabidopsis lyrata subsp. lyrata] gi 297324744 gb EFH55164.1  predicted protein [Arabidopsis lyrata subsp. lyrata]                                                                                                                                                                                                                                                                                     | 120 | 480  | 8.00E-17  | 400.0 | 35.8 | 52.5 | predicted protein                                   | gbpln | Arabidopsis lyrata   | #                                                                                                                                                                                                                                                                                                                                                                                                                                                                                                                                  | #   | #    | #         | #     | #    | #    |
| Rsa1.0_00004.1.g261.t2 | gb AAD32759.1  putative retroelement pol polyprotein [Arabidopsis thaliana]                                                                                                                                                                                                                                                                                                                                                                   | 490 | 1356 | 1.00E-133 | 276.7 | 50.6 | 59.6 | putative retroelement pol polyprotein               | gbpln | Arabidopsis thaliana | AT4G23160.1   Symbols: CRK8   cysteine-rich RLK (RECEPTOR-like protein kinase) 8   chr4:12129485-12134086 FORWARD LENGTH=1262                                                                                                                                                                                                                                                                                                                                                                                                      | 490 | 1262 | 7.00E-38  | 257.6 | 22.9 | 34.7 |
| Rsa1.0_00004.1.g262.t2 | ref XP_002888667.1  hypothetical protein ARALYDRAFT_475967 [Arabidopsis lyrata subsp. lyrata] gi 297334508 gb EFH64926.1  hypothetical protein ARALYDRAFT_475967 [Arabidopsis lyrata subsp. lyrata]                                                                                                                                                                                                                                           | 266 | 253  | 1.00E-105 | 95.1  | 78.2 | 82.7 | hypothetical protein ARALYDRAFT_475967              | gbpln | Arabidopsis lyrata   | AT1G68480.1   Symbols: JAG   C2H2 and C2HC zinc fingers superfamily protein   chr1:25684543-25685932 REVERSE LENGTH=253                                                                                                                                                                                                                                                                                                                                                                                                            | 266 | 253  | 1.00E-105 | 95.1  | 76.3 | 81.6 |
| Rsa1.0_00004.1.g263.t1 | #                                                                                                                                                                                                                                                                                                                                                                                                                                             | #   | #    | #         | #     | #    | -    | -                                                   | ----  | ----                 | #                                                                                                                                                                                                                                                                                                                                                                                                                                                                                                                                  | #   | #    | #         | #     | #    | #    |
| Rsa1.0_00004.1.g264.t1 | ref XP_002882231.1  S-adenosylmethionine decarboxylase [Arabidopsis lyrata subsp. lyrata] gi 297328071 gb EFH58490.1  S-adenosylmethionine decarboxylase [Arabidopsis lyrata subsp. lyrata]                                                                                                                                                                                                                                                   | 181 | 366  | 1.00E-18  | 202.2 | 32.0 | 39.8 | S-adenosylmethionine decarboxylase                  | gbpln | Arabidopsis lyrata   | AT3G02470.4   Symbols:   S-adenosylmethionine decarboxylase   chr3:510223-511323 FORWARD LENGTH=366                                                                                                                                                                                                                                                                                                                                                                                                                                | 181 | 366  | 6.00E-20  | 202.2 | 30.4 | 39.2 |
| Rsa1.0_00004.1.g265.t1 | dbj BAE43826.1  isopentenyltransferase [Brassica rapa subsp. pekinensis]                                                                                                                                                                                                                                                                                                                                                                      | 297 | 348  | 1.00E-153 | 117.2 | 92.9 | 95.3 | isopentenyltransferase                              | gbpln | Brassica rapa        | AT1G68460.1   Symbols: ATIPT1, IPT1   isopentenyltransferase 1   chr1:25668976-25670049 REVERSE LENGTH=357                                                                                                                                                                                                                                                                                                                                                                                                                         | 297 | 357  | 1.00E-130 | 120.2 | 78.8 | 87.5 |

|                         |                                                                                                                                                                                                                                                                                                                                                                                                                                              |     |      |           |        |      |      |                                        |       |                      |                                                                                                                                                                                                                                                                                                                                                                                                                                                                                                                                |     |      |           |        |      |      |
|-------------------------|----------------------------------------------------------------------------------------------------------------------------------------------------------------------------------------------------------------------------------------------------------------------------------------------------------------------------------------------------------------------------------------------------------------------------------------------|-----|------|-----------|--------|------|------|----------------------------------------|-------|----------------------|--------------------------------------------------------------------------------------------------------------------------------------------------------------------------------------------------------------------------------------------------------------------------------------------------------------------------------------------------------------------------------------------------------------------------------------------------------------------------------------------------------------------------------|-----|------|-----------|--------|------|------|
| Rsa1.0_00004.1.g266.t1  | gb EOA34020.1  hypothetical protein CARUB_v10021516mg [Capsella rubella]                                                                                                                                                                                                                                                                                                                                                                     | 147 | 148  | 4.00E-49  | 100.7  | 70.1 | 79.6 | hypothetical protein CARUB_v10021516mg | gbpln | Capsella rubella     | AT1G68450.1   Symbols:   VQ motif-containing protein   chr1:25661721-25662179 REVERSE LENGTH=152                                                                                                                                                                                                                                                                                                                                                                                                                               | 147 | 152  | 3.00E-45  | 103.4  | 66.0 | 78.9 |
| Rsa1.0_00004.1.g267.t1  | ref XP_002868681.1  hypothetical protein ARALYDRAFT_916271 [Arabidopsis lyrata subsp. lyrata] gi 297314517 gb EFH44940.1  hypothetical protein ARALYDRAFT_916271 [Arabidopsis lyrata subsp. lyrata]                                                                                                                                                                                                                                          | 169 | 1168 | 4.00E-55  | 691.1  | 77.5 | 81.7 | hypothetical protein ARALYDRAFT_916271 | gbpln | Arabidopsis lyrata   | AT4G10320.1   Symbols:   tRNA synthetase class I (I, L, M and V) family protein   chr4:6397526-6404509 REVERSE LENGTH=1190                                                                                                                                                                                                                                                                                                                                                                                                     | 169 | 1190 | 3.00E-54  | 704.1  | 73.4 | 81.7 |
| Rsa1.0_00004.1.g268.t1  | #                                                                                                                                                                                                                                                                                                                                                                                                                                            | #   | #    | #         | #      | #    | -    | ----                                   | ----  | #                    | #                                                                                                                                                                                                                                                                                                                                                                                                                                                                                                                              | #   | #    | #         | #      | #    |      |
| Rsa1.0_00004.1.g269.t1  | #                                                                                                                                                                                                                                                                                                                                                                                                                                            | #   | #    | #         | #      | #    | -    | ----                                   | ----  | #                    | #                                                                                                                                                                                                                                                                                                                                                                                                                                                                                                                              | #   | #    | #         | #      | #    |      |
| Rsa1.0_00004.1.g270.t1  | ref NP_564930.1  uncharacterized protein [Arabidopsis thaliana] gi 6714347 gb AAF26038.1 AC015986.1 unknown protein; 9003-8083 [Arabidopsis thaliana] gi 16648773 gb AAL25577.1  At1g68440/T2E12.1 [Arabidopsis thaliana] gi 21592921 gb AAM64871.1  unknown [Arabidopsis thaliana] gi 21700823 gb AAM70535.1  At1g68440/T2E12.1 [Arabidopsis thaliana] gi 332196673 gb AEE34794.1  uncharacterized protein AT1G68440 [Arabidopsis thaliana] | 312 | 306  | 1.00E-103 | 98.1   | 73.4 | 84.3 | uncharacterized protein                | gbpln | Arabidopsis thaliana | AT1G68440.1   Symbols:   unknown protein; BEST Arabidopsis thaliana protein match is: unknown protein (TAIR:AT1G25400.2); Has 86 Blast hits to 86 proteins in 29 species: Archae - 0; Bacteria - 6; Metazoa - 27; Fungi - 11; Viruses - 24; Viruses - 0; Other Eukaryotes - 18 (source: NCBI BLINK).   chr1:25658115-25659035 FORWARD LENGTH=306                                                                                                                                                                               | 312 | 306  | 1.00E-105 | 98.1   | 73.4 | 84.3 |
| Rsa1.0_00004.1.g271.t1  | ref XP_002888663.1  hypothetical protein ARALYDRAFT_894609 [Arabidopsis lyrata subsp. lyrata] gi 297334504 gb EFH64922.1  hypothetical protein ARALYDRAFT_894609 [Arabidopsis lyrata subsp. lyrata]                                                                                                                                                                                                                                          | 147 | 145  | 3.00E-45  | 98.6   | 78.2 | 83.7 | hypothetical protein ARALYDRAFT_894609 | gbpln | Arabidopsis lyrata   | AT1G68430.1   Symbols:   unknown protein; FUNCTIONS IN: molecular function unknown; INVOLVED IN: biological process unknown; LOCATED IN: chloroplast; EXPRESSED IN: 21 plant structures; EXPRESSED DURING: 13 growth stages; BEST Arabidopsis thaliana protein match is: unknown protein (TAIR:AT1G66890.1); Has 35 Blast hits to 35 proteins in 6 species: Archae - 0; Bacteria - 0; Metazoa - 0; Fungi - 0; Plants - 35; Viruses - 0; Other Eukaryotes - 0 (source: NCBI BLINK).   chr1:25654989-25655429 REVERSE LENGTH=146 | 147 | 146  | 2.00E-43  | 99.3   | 78.2 | 84.4 |
| Rsa1.0_00004.1.g272.t2  | gb AAL06846.1  AT3g02470/F16B3_10 [Arabidopsis thaliana]                                                                                                                                                                                                                                                                                                                                                                                     | 171 | 366  | 5.00E-11  | 214.0  | 21.1 | 23.4 | AT3g02470/F16B3_10                     | gbpln | Arabidopsis thaliana | AT3G02470.4   Symbols:   S-adenosylmethionine decarboxylase   chr3:510223-511323 FORWARD LENGTH=366                                                                                                                                                                                                                                                                                                                                                                                                                            | 171 | 366  | 1.00E-12  | 214.0  | 20.5 | 22.8 |
| Rsa1.0_00004.1.g273.t1  | gb EOA35168.1  hypothetical protein CARUB_v10020313mg [Capsella rubella]                                                                                                                                                                                                                                                                                                                                                                     | 434 | 437  | 0         | 100.7  | 91.9 | 95.4 | hypothetical protein CARUB_v10020313mg | gbpln | Capsella rubella     | AT1G68410.2   Symbols:   Protein phosphatase 2C family protein   chr1:25650262-25652255 REVERSE LENGTH=436                                                                                                                                                                                                                                                                                                                                                                                                                     | 434 | 436  | 0         | 100.5  | 91.9 | 95.2 |
| Rsa1.0_00004.1.g274.t1  | ref XP_002892766.1  predicted protein [Arabidopsis lyrata subsp. lyrata] gi 297338608 gb EFH69025.1  predicted protein [Arabidopsis lyrata subsp. lyrata]                                                                                                                                                                                                                                                                                    | 179 | 212  | 4.00E-22  | 118.4  | 37.4 | 52.5 | predicted protein                      | gbpln | Arabidopsis lyrata   | AT2G34280.1   Symbols:   F-box and associated interaction domains-containing protein   chr2:14470335-14471510 REVERSE LENGTH=391                                                                                                                                                                                                                                                                                                                                                                                               | 179 | 391  | 1.00E-20  | 218.4  | 34.6 | 48.0 |
| Rsa1.0_00004.1.g275.t19 | ref XP_002865187.1  predicted protein [Arabidopsis lyrata subsp. lyrata] gi 297311022 gb EFH41446.1  predicted protein [Arabidopsis lyrata subsp. lyrata]                                                                                                                                                                                                                                                                                    | 95  | 1162 | 1.00E-27  | 1223.2 | 66.3 | 78.9 | predicted protein                      | gbpln | Arabidopsis lyrata   | AT5G22690.1   Symbols:   Disease resistance protein (TIR-NBS-LRR class) family   chr5:7541369-7544888 FORWARD LENGTH=1008                                                                                                                                                                                                                                                                                                                                                                                                      | 95  | 1008 | 6.00E-29  | 1061.1 | 61.1 | 80.0 |
| Rsa1.0_00004.1.g276.t1  | #                                                                                                                                                                                                                                                                                                                                                                                                                                            | #   | #    | #         | #      | #    | -    | ----                                   | ----  | #                    | #                                                                                                                                                                                                                                                                                                                                                                                                                                                                                                                              | #   | #    | #         | #      | #    |      |
| Rsa1.0_00004.1.g277.t1  | ref XP_002888661.1  At1g68400/T2E12_5 [Arabidopsis lyrata subsp. lyrata] gi 297334502 gb EFH64920.1  At1g68400/T2E12_5 [Arabidopsis lyrata subsp. lyrata]                                                                                                                                                                                                                                                                                    | 668 | 669  | 0         | 100.1  | 80.7 | 85.8 | At1g68400/T2E12_5                      | gbpln | Arabidopsis lyrata   | AT1G68400.1   Symbols:   leucine-rich repeat transmembrane protein kinase family protein   chr1:25646401-25648916 REVERSE LENGTH=670                                                                                                                                                                                                                                                                                                                                                                                           | 668 | 670  | 0         | 100.3  | 81.0 | 87.0 |
| Rsa1.0_00004.1.g278.t1  | ref XP_002897179.1  hypothetical protein ARALYDRAFT_475958 [Arabidopsis lyrata subsp. lyrata] gi 297333020 gb EFH63438.1  hypothetical protein ARALYDRAFT_475958 [Arabidopsis lyrata subsp. lyrata]                                                                                                                                                                                                                                          | 418 | 405  | 1.00E-180 | 96.9   | 78.5 | 84.2 | hypothetical protein ARALYDRAFT_475958 | gbpln | Arabidopsis lyrata   | AT1G68390.1   Symbols:   Core-2/1-branching beta-1,6-N-acetylglucosaminyltransferase family protein   chr1:25642838-25645484 FORWARD LENGTH=408                                                                                                                                                                                                                                                                                                                                                                                | 418 | 408  | 1.00E-170 | 97.6   | 78.2 | 84.0 |
| Rsa1.0_00004.1.g279.t1  | gb AAD32866.1 AC005489_4 F14N23.4 [Arabidopsis thaliana]                                                                                                                                                                                                                                                                                                                                                                                     | 186 | 1161 | 3.00E-33  | 624.2  | 46.2 | 60.8 | F14N23.4                               | gbpln | Arabidopsis thaliana | AT4G04650.1   Symbols:   RNA-directed DNA polymerase (reverse transcriptase)-related family protein   chr4:2353989-2355213 REVERSE LENGTH=332                                                                                                                                                                                                                                                                                                                                                                                  | 186 | 332  | 2.00E-31  | 178.5  | 40.9 | 51.6 |

|                        |                                                                                                                                                                                                      |     |      |           |       |      |      |                                              |       |                      |                                                                                                                                                                                                                                                                                                                                                                                                                                                                        |     |     |           |       |      |      |
|------------------------|------------------------------------------------------------------------------------------------------------------------------------------------------------------------------------------------------|-----|------|-----------|-------|------|------|----------------------------------------------|-------|----------------------|------------------------------------------------------------------------------------------------------------------------------------------------------------------------------------------------------------------------------------------------------------------------------------------------------------------------------------------------------------------------------------------------------------------------------------------------------------------------|-----|-----|-----------|-------|------|------|
| Rsa1.0_00004.1.g280.t1 | refXP_002888659.1   hypothetical protein ARALYDRAFT_894602 [Arabidopsis lyrata subsp. lyrata] gi 297334500 gb EFH64918.1   hypothetical protein ARALYDRAFT_894602 [Arabidopsis lyrata subsp. lyrata] | 302 | 410  | 2.00E-94  | 135.8 | 57.6 | 59.9 | hypothetical protein ARALYDRAFT_894602       | gbpln | Arabidopsis lyrata   | AT1G68370.1   Symbols: ARG1   Chaperone DnaJ-domain superfamily protein   chr1:25632046-25634527 REVERSE LENGTH=410                                                                                                                                                                                                                                                                                                                                                    | 302 | 410 | 1.00E-95  | 135.8 | 56.6 | 59.9 |
| Rsa1.0_00004.1.g281.t1 | gb AAG51783.1 AC079679.3 reverse transcriptase, putative; 16838-20266 [Arabidopsis thaliana]                                                                                                         | 227 | 1142 | 1.00E-46  | 503.1 | 46.3 | 59.5 | reverse transcriptase, putative; 16838-20266 | gbpln | Arabidopsis thaliana | AT2G34320.1   Symbols:   Polynucleotidyl transferase, ribonuclease H-like superfamily protein   chr2:14484959-14485837 FORWARD LENGTH=292                                                                                                                                                                                                                                                                                                                              | 227 | 292 | 1.00E-16  | 128.6 | 23.8 | 42.3 |
| Rsa1.0_00004.1.g282.t1 | #                                                                                                                                                                                                    | #   | #    | #         | #     | #    | #    | -                                            | ----  | ----                 | #                                                                                                                                                                                                                                                                                                                                                                                                                                                                      | #   | #   | #         | #     | #    | #    |
| Rsa1.0_00005.1.g283.t1 | emb CAN79339.1  hypothetical protein VITISV_044312 [Vitis vinifera]                                                                                                                                  | 129 | 354  | 9.00E-19  | 274.4 | 40.3 | 58.1 | hypothetical protein VITISV_044312           | gbpln | Vitis vinifera       | #                                                                                                                                                                                                                                                                                                                                                                                                                                                                      | #   | #   | #         | #     | #    | #    |
| Rsa1.0_00005.1.g284.t1 | gb EOA32296.1  hypothetical protein CARUB_v10015558mg [Capsella rubella]                                                                                                                             | 564 | 570  | 0         | 101.1 | 95.7 | 97.5 | hypothetical protein CARUB_v10015558mg       | gbpln | Capsella rubella     | AT3G20840.1   Symbols: PLT1   Integrase-type DNA-binding superfamily protein   chr3:7300764-7303370 FORWARD LENGTH=574                                                                                                                                                                                                                                                                                                                                                 | 564 | 574 | 0         | 101.8 | 94.3 | 95.9 |
| Rsa1.0_00005.1.g285.t1 | emb CAB39638.1  RNA-directed DNA polymerase-like protein [Arabidopsis thaliana] gi 7267666 emb CAB78094.1  RNA-directed DNA polymerase-like protein [Arabidopsis thaliana]                           | 914 | 1274 | 0         | 139.4 | 45.0 | 63.9 | RNA-directed DNA polymerase-like protein     | gbpln | Arabidopsis thaliana | AT4G20900.1   Symbols:   Ribonuclease H-like superfamily protein   chr4:14333528-14335255 FORWARD LENGTH=575                                                                                                                                                                                                                                                                                                                                                           | 914 | 575 | 3.00E-55  | 62.9  | 15.4 | 27.4 |
| Rsa1.0_00005.1.g286.t1 | #                                                                                                                                                                                                    | #   | #    | #         | #     | #    | #    | -                                            | ----  | ----                 | #                                                                                                                                                                                                                                                                                                                                                                                                                                                                      | #   | #   | #         | #     | #    | #    |
| Rsa1.0_00005.1.g287.t1 | refXP_002885407.1   hypothetical protein ARALYDRAFT_898522 [Arabidopsis lyrata subsp. lyrata] gi 297331247 gb EFH61666.1   hypothetical protein ARALYDRAFT_898522 [Arabidopsis lyrata subsp. lyrata] | 64  | 64   | 9.00E-14  | 100.0 | 64.1 | 71.9 | hypothetical protein ARALYDRAFT_898522       | gbpln | Arabidopsis lyrata   | AT3G20865.1   Symbols: AGP40   arabinogalactan protein 40   chr3:7308699-7308887 REVERSE LENGTH=62                                                                                                                                                                                                                                                                                                                                                                     | 64  | 62  | 2.00E-13  | 96.9  | 65.6 | 70.3 |
| Rsa1.0_00005.1.g288.t1 | ref NP_188724.2  WIP domain protein 4 [Arabidopsis thaliana] gi 18376500 emb CAC86168.1  WIP4 protein [Arabidopsis thaliana] gi 332642914 gb AEE76435.1  WIP domain protein 4 [Arabidopsis thaliana] | 360 | 412  | 1.00E-156 | 114.4 | 79.4 | 84.2 | WIP domain protein 4                         | gbpln | Arabidopsis thaliana | AT3G20880.1   Symbols: WIP4   WIP domain protein 4   chr3:7313759-7315792 REVERSE LENGTH=412                                                                                                                                                                                                                                                                                                                                                                           | 360 | 412 | 1.00E-159 | 114.4 | 79.4 | 84.2 |
| Rsa1.0_00005.1.g289.t1 | dbj BAB01899.1  unnamed protein product [Arabidopsis thaliana]                                                                                                                                       | 136 | 135  | 3.00E-28  | 99.3  | 60.3 | 69.9 | unnamed protein product                      | gbpln | Arabidopsis thaliana | AT3G20898.1   Symbols:   unknown protein; FUNCTIONS IN: molecular_function unknown; INVOLVED IN: biological_process unknown; LOCATED IN: cellular_component unknown; BEST Arabidopsis thaliana protein match is: unknown protein (TAIR:AT1G51355.1); Has 66 Blast hits to 66 proteins in 10 species: Archaea - 0; Bacteria - 0; Metazoa - 0; Fungi - 0; Plants - 66; Viruses - 0; Other Eukaryotes - 0 (source: NCBI BLINK).   chr3:7323796-7324203 FORWARD LENGTH=108 | 136 | 108 | 8.00E-31  | 79.4  | 56.6 | 63.2 |
| Rsa1.0_00005.1.g290.t1 | #                                                                                                                                                                                                    | #   | #    | #         | #     | #    | #    | -                                            | ----  | ----                 | AT3G20910.1   Symbols: NF-YA9   nuclear factor Y, subunit A9   chr3:7326495-7328369 FORWARD LENGTH=303                                                                                                                                                                                                                                                                                                                                                                 | 110 | 303 | 4.00E-12  | 275.5 | 50.9 | 59.1 |
| Rsa1.0_00005.1.g291.t1 | gb EOA30911.1  hypothetical protein CARUB_v10014058mg [Capsella rubella]                                                                                                                             | 337 | 356  | 1.00E-175 | 105.6 | 90.8 | 95.5 | hypothetical protein CARUB_v10014058mg       | gbpln | Capsella rubella     | AT3G20920.1   Symbols:   translocation protein-related   chr3:7328763-7330698 REVERSE LENGTH=365                                                                                                                                                                                                                                                                                                                                                                       | 337 | 365 | 1.00E-176 | 108.3 | 91.1 | 95.8 |
| Rsa1.0_00005.1.g292.t1 | emb CAB10225.1  retrovirus-related like polyprotein [Arabidopsis thaliana] gi 7268152 emb CAB78488.1  retrovirus-related like polyprotein [Arabidopsis thaliana]                                     | 366 | 1489 | 5.00E-92  | 406.8 | 49.5 | 64.2 | retrovirus-related like polyprotein          | gbpln | Arabidopsis thaliana | AT1G21280.1   Symbols:   CONTAINS InterPro DOMAIN/s: Retrotransposon gag protein (InterPro:IPR005162); Has 707 Blast hits to 705 proteins in 25 species: Archaea - 0; Bacteria - 0; Metazoa - 4; Fungi - 0; Plants - 703; Viruses - 0; Other Eukaryotes - 0 (source: NCBI BLINK).   chr1:7447690-7448403 REVERSE LENGTH=237                                                                                                                                            | 366 | 237 | 5.00E-23  | 64.8  | 15.8 | 24.6 |
| Rsa1.0_00005.1.g293.t1 | refXP_002883469.1   hypothetical protein ARALYDRAFT_898931 [Arabidopsis lyrata subsp. lyrata] gi 297329309 gb EFH59728.1   hypothetical protein ARALYDRAFT_898931 [Arabidopsis lyrata subsp. lyrata] | 266 | 242  | 5.00E-67  | 91.0  | 54.1 | 66.2 | hypothetical protein ARALYDRAFT_898931       | gbpln | Arabidopsis lyrata   | AT2G16600.1   Symbols: ROC3   rotamase CYP 3   chr2:7200862-7201383 FORWARD LENGTH=173                                                                                                                                                                                                                                                                                                                                                                                 | 266 | 173 | 2.00E-57  | 65.0  | 42.5 | 49.2 |
| Rsa1.0_00005.1.g294.t1 | dbj BAB01909.1  unnamed protein product [Arabidopsis thaliana]                                                                                                                                       | 253 | 294  | 2.00E-51  | 116.2 | 45.1 | 62.8 | unnamed protein product                      | gbpln | Arabidopsis thaliana | AT3G20980.1   Symbols:   Gag-Pol-related retrotransposon family protein   chr3:7355963-7357966 FORWARD LENGTH=405                                                                                                                                                                                                                                                                                                                                                      | 253 | 405 | 1.00E-41  | 160.1 | 37.9 | 57.3 |
| Rsa1.0_00005.1.g295.t1 | dbj BAF01392.1  hypothetical protein [Arabidopsis thaliana]                                                                                                                                          | 406 | 438  | 3.00E-78  | 107.9 | 44.8 | 64.5 | hypothetical protein                         | gbpln | Arabidopsis thaliana | AT3G21000.1   Symbols:   Gag-Pol-related retrotransposon family protein   chr3:7363921-7365138 FORWARD LENGTH=405                                                                                                                                                                                                                                                                                                                                                      | 406 | 405 | 1.00E-72  | 99.8  | 42.6 | 60.1 |

|                        |                                                                                                                                                                                                                                                                                                                                                                                                                                                                                                                                                                                                      |     |     |           |       |      |      |                                                          |       |                      |                                                                                                                         |     |     |           |       |      |      |
|------------------------|------------------------------------------------------------------------------------------------------------------------------------------------------------------------------------------------------------------------------------------------------------------------------------------------------------------------------------------------------------------------------------------------------------------------------------------------------------------------------------------------------------------------------------------------------------------------------------------------------|-----|-----|-----------|-------|------|------|----------------------------------------------------------|-------|----------------------|-------------------------------------------------------------------------------------------------------------------------|-----|-----|-----------|-------|------|------|
| Rsa1.0_00005.1.g296.t1 | dbj BAF01392.1  hypothetical protein [Arabidopsis thaliana]                                                                                                                                                                                                                                                                                                                                                                                                                                                                                                                                          | 367 | 438 | 1.00E-101 | 119.3 | 58.9 | 73.0 | hypothetical protein                                     | gbpln | Arabidopsis thaliana | AT3G21000.1   Symbols:   Gag-Pol-related retrotransposon family protein   chr3:7363921-7365138 FORWARD LENGTH=405       | 367 | 405 | 3.00E-78  | 110.4 | 46.6 | 66.2 |
| Rsa1.0_00005.1.g297.t1 | dbj BAB01447.1  gag-pol polyprotein-like [Arabidopsis thaliana]                                                                                                                                                                                                                                                                                                                                                                                                                                                                                                                                      | 418 | 420 | 3.00E-91  | 100.5 | 46.2 | 55.7 | gag-pol polyprotein-like                                 | gbpln | Arabidopsis thaliana | AT3G21000.1   Symbols:   Gag-Pol-related retrotransposon family protein   chr3:7363921-7365138 FORWARD LENGTH=405       | 418 | 405 | 3.00E-50  | 96.9  | 31.1 | 43.1 |
| Rsa1.0_00005.1.g298.t1 | ref XP_002883282.1  hypothetical protein ARALYDRAFT_318845 [Arabidopsis lyrata subsp. lyrata] gi 297329122 gb EFH59541.1  hypothetical protein ARALYDRAFT_318845 [Arabidopsis lyrata subsp. lyrata] ref NP_974347.1  NAD(H) kinase 1 [Arabidopsis thaliana] gi 94717660 sp G56YN3.2 NADK1_ARAT H RecName: Full=NAD(H) kinase 1; Short=AINADK-1                                                                                                                                                                                                                                                       | 549 | 560 | 0         | 102.0 | 89.4 | 92.9 | hypothetical protein ARALYDRAFT_318845                   | gbpln | Arabidopsis lyrata   | AT3G21060.1   Symbols:   Transducin/WD40 repeat-like superfamily protein   chr3:7377822-7379942 FORWARD LENGTH=547      | 549 | 547 | 0         | 99.6  | 86.0 | 90.3 |
| Rsa1.0_00005.1.g299.t1 | gi 39843359 gb AAR32133.1  NADK1 [Arabidopsis thaliana] gi 51970406 dbj BAD43895.1  unnamed protein product [Arabidopsis thaliana] gi 332642935 gb AEE76456.1  NAD(H) kinase 1 [Arabidopsis thaliana]                                                                                                                                                                                                                                                                                                                                                                                                | 580 | 524 | 0         | 90.3  | 66.6 | 76.6 | NAD(H) kinase 1                                          | gbpln | Arabidopsis thaliana | AT3G21070.2   Symbols: NADK1   NAD kinase 1   chr3:7380434-7383874 REVERSE LENGTH=524                                   | 580 | 524 | 0         | 90.3  | 66.6 | 76.6 |
| Rsa1.0_00005.1.g300.t1 | #                                                                                                                                                                                                                                                                                                                                                                                                                                                                                                                                                                                                    | #   | #   | #         | #     | #    | -    | ----                                                     | ----  | #                    | #                                                                                                                       | #   | #   | #         | #     | #    |      |
| Rsa1.0_00005.1.g301.t1 | ref XP_002885419.1  abc transporter family protein [Arabidopsis lyrata subsp. lyrata] gi 297331259 gb EFH61678.1  abc transporter family protein [Arabidopsis lyrata subsp. lyrata]                                                                                                                                                                                                                                                                                                                                                                                                                  | 83  | 691 | 1.00E-14  | 832.5 | 60.2 | 62.7 | abc transporter family protein                           | gbpln | Arabidopsis lyrata   | AT3G21090.1   Symbols:   ABC-2 type transporter family protein   chr3:7391497-7394933 REVERSE LENGTH=691                | 83  | 691 | 2.00E-17  | 832.5 | 60.2 | 62.7 |
| Rsa1.0_00005.1.g302.t1 | #                                                                                                                                                                                                                                                                                                                                                                                                                                                                                                                                                                                                    | #   | #   | #         | #     | #    | -    | ----                                                     | ----  | #                    | #                                                                                                                       | #   | #   | #         | #     | #    |      |
| Rsa1.0_00005.1.g303.t1 | ref XP_002883283.1  RNA recognition motif-containing protein [Arabidopsis lyrata subsp. lyrata] gi 297329123 gb EFH59542.1  RNA recognition motif-containing protein [Arabidopsis lyrata subsp. lyrata] ref NP_188748.1  phosphoribosylaminoimidazole-succinocarboxamide synthase [Arabidopsis thaliana] gi 79313319 ref NP_001030739.1  phosphoribosylaminoimidazole-succinocarboxamide synthase [Arabidopsis thaliana] gi 26454658 sp P38025.2 PUR7_ARATH RecName: Full=Phosphoribosylaminoimidazole-succinocarboxamide synthase, chloroplastic; AltName: Full=SAICAR synthetase; Flags: Precursor | 545 | 607 | 0         | 111.4 | 80.0 | 87.5 | RNA recognition motif-containing protein                 | gbpln | Arabidopsis lyrata   | AT3G21100.2   Symbols:   RNA-binding (RRM/RBD/RNP motifs) family protein   chr3:7399162-7401870 FORWARD LENGTH=602      | 545 | 602 | 0         | 110.5 | 79.6 | 87.0 |
| Rsa1.0_00005.1.g304.t1 | gi 11994271 dbj BAB01454.1  5'-phosphoribosyl-4-(N-succinocarboxamide)-5-ami noimidazole synthetase [Arabidopsis thaliana] gi 27754219 gb AAO22563.1  putative phosphoribosyamidoimidazole-succinocarboxamide synthase [Arabidopsis thaliana] gi 332642941 gb AEE76462.1  phosphoribosylaminoimidazole-succinocarboxamide synthase [Arabidopsis thaliana] gi 332642942 gb AEE76463.1  phosphoribosylaminoimidazole-succinocarboxamide synthase [Arabidopsis thaliana]                                                                                                                                | 408 | 411 | 0         | 100.7 | 93.6 | 95.8 | phosphoribosylaminoimidazole-succinocarboxamide synthase | gbpln | Arabidopsis thaliana | AT3G21110.2   Symbols: PUR7, PURC   purin 7   chr3:7402696-7405273 REVERSE LENGTH=411                                   | 408 | 411 | 0         | 100.7 | 93.6 | 95.8 |
| Rsa1.0_00005.1.g305.t1 | gb EOA30727.1  hypothetical protein CARUB_v10013865mg [Capsella rubella]                                                                                                                                                                                                                                                                                                                                                                                                                                                                                                                             | 399 | 402 | 0         | 100.8 | 90.7 | 94.0 | hypothetical protein CARUB_v10013865mg                   | gbpln | Capsella rubella     | AT1G51540.1   Symbols:   Galactose oxidase/kelch repeat superfamily protein   chr1:19115702-19117381 FORWARD LENGTH=415 | 399 | 415 | 0         | 104.0 | 88.7 | 94.0 |
| Rsa1.0_00005.1.g306.t1 | ref XP_002885421.1  FMN binding protein [Arabidopsis lyrata subsp. lyrata] gi 297331261 gb EFH61680.1  FMN binding protein [Arabidopsis lyrata subsp. lyrata]                                                                                                                                                                                                                                                                                                                                                                                                                                        | 370 | 387 | 1.00E-170 | 104.6 | 84.3 | 87.6 | FMN binding protein                                      | gbpln | Arabidopsis lyrata   | AT3G21140.1   Symbols:   Pyridoxamine 5'-phosphate oxidase family protein   chr3:7409696-7412086 REVERSE LENGTH=387     | 370 | 387 | 1.00E-170 | 104.6 | 82.7 | 86.5 |

|                         |                                                                                                                                                                                                                                                                                                                                                                                                                                                                                                                                                                                                                                                                                                                                                                                                                                                                                                          |      |      |           |       |      |      |                                                             |       |                      |                                                                                                                                                          |      |      |           |       |      |      |
|-------------------------|----------------------------------------------------------------------------------------------------------------------------------------------------------------------------------------------------------------------------------------------------------------------------------------------------------------------------------------------------------------------------------------------------------------------------------------------------------------------------------------------------------------------------------------------------------------------------------------------------------------------------------------------------------------------------------------------------------------------------------------------------------------------------------------------------------------------------------------------------------------------------------------------------------|------|------|-----------|-------|------|------|-------------------------------------------------------------|-------|----------------------|----------------------------------------------------------------------------------------------------------------------------------------------------------|------|------|-----------|-------|------|------|
| Rsa1.0_00005.1.g307.t23 | ref NP_850618.1  GATA transcription factor 24 [Arabidopsis thaliana]<br>gi 14596059 gb AAK68757.1  Unknown protein [Arabidopsis thaliana]<br>gi 17978695 gb AAL47341.1  unknown protein [Arabidopsis thaliana]<br>gi 332642950 gb AEE76471.1  GATA transcription factor 24 [Arabidopsis thaliana]                                                                                                                                                                                                                                                                                                                                                                                                                                                                                                                                                                                                        | 289  | 295  | 1.00E-126 | 102.1 | 81.0 | 87.5 | GATA transcription factor 24                                | gbpln | Arabidopsis thaliana | AT3G21175.2   Symbols: ZML1, GATA24   ZIM-like 1   chr3:7422832-7424598 FORWARD LENGTH=295                                                               | 289  | 295  | 1.00E-129 | 102.1 | 81.0 | 87.5 |
| Rsa1.0_00005.1.g308.t1  | ref XP_002885425.1  hypothetical protein ARALYDRAFT_479639 [Arabidopsis lyrata subsp. lyrata]<br>gi 297331265 gb EFH61684.1  hypothetical protein ARALYDRAFT_479639 [Arabidopsis lyrata subsp. lyrata]<br>ref NP_175576.1  ATP synthase subunit epsilon [Arabidopsis thaliana]<br>gi 2493052 sp Q96253.3 ATP5E_ARATH RecName: Full=ATP synthase subunit epsilon, mitochondrial; Short=ATPase subunit epsilon<br>gi 12321688 gb AAG50890.1 AC025294_28 epsilon subunit of mitochondrial F1-ATPase [Arabidopsis thaliana]<br>gi 1655486 db BAA13602.1  epsilon subunit of mitochondrial F1-ATPase [Arabidopsis thaliana]<br>gi 18252167 gb AAL61916.1  epsilon subunit of mitochondrial F1-ATPase [Arabidopsis thaliana]<br>gi 2138691 gb AAM47859.1  epsilon subunit of mitochondrial F1-ATPase [Arabidopsis thaliana]<br>gi 332194574 gb AEE32695.1  ATP synthase subunit epsilon [Arabidopsis thaliana] | 422  | 422  | 0         | 100.0 | 91.5 | 96.4 | hypothetical protein ARALYDRAFT_479639                      | gbpln | Arabidopsis lyrata   | AT3G21190.1   Symbols:   O-fucosyltransferase family protein   chr3:7432579-7434543 REVERSE LENGTH=422                                                   | 422  | 422  | 0         | 100.0 | 91.0 | 96.2 |
| Rsa1.0_00005.1.g309.t1  | ref NP_683592.2  RNA recognition motif-containing protein [Arabidopsis thaliana]<br>gi 13605613 gb AAK32800.1 AF361632_1 At3g21211 [Arabidopsis thaliana]<br>gi 23505943 gb AAN28831.1  At3g21211/At3g21211 [Arabidopsis thaliana]<br>gi 26451397 db BAC42798.1  unknown protein [Arabidopsis thaliana]<br>gi 110740646 db BAE98426.1  hypothetical protein [Arabidopsis thaliana]<br>gi 222423570 db BAH19754.1  AT3G21215 [Arabidopsis thaliana]<br>gi 332642956 gb AEE76477.1  RNA recognition motif-containing protein [Arabidopsis thaliana]                                                                                                                                                                                                                                                                                                                                                        | 70   | 70   | 3.00E-30  | 100.0 | 88.6 | 94.3 | ATP synthase subunit epsilon                                | gbpln | Arabidopsis thaliana | AT1G51650.1   Symbols:   ATP synthase epsilon chain, mitochondrial   chr1:19152680-19153641 FORWARD LENGTH=70                                            | 70   | 70   | 6.00E-33  | 100.0 | 88.6 | 94.3 |
| Rsa1.0_00005.1.g310.t1  | ref NP_683592.2  RNA recognition motif-containing protein [Arabidopsis thaliana]<br>gi 13605613 gb AAK32800.1 AF361632_1 At3g21211 [Arabidopsis thaliana]<br>gi 23505943 gb AAN28831.1  At3g21211/At3g21211 [Arabidopsis thaliana]<br>gi 26451397 db BAC42798.1  unknown protein [Arabidopsis thaliana]<br>gi 110740646 db BAE98426.1  hypothetical protein [Arabidopsis thaliana]<br>gi 222423570 db BAH19754.1  AT3G21215 [Arabidopsis thaliana]<br>gi 332642956 gb AEE76477.1  RNA recognition motif-containing protein [Arabidopsis thaliana]                                                                                                                                                                                                                                                                                                                                                        | 349  | 339  | 1.00E-142 | 97.1  | 88.8 | 92.0 | RNA recognition motif-containing protein                    | gbpln | Arabidopsis thaliana | AT3G21215.1   Symbols:   RNA-binding (RRM/RBD/RNP motifs) family protein   chr3:7442873-7445231 REVERSE LENGTH=339                                       | 349  | 339  | 1.00E-145 | 97.1  | 88.8 | 92.0 |
| Rsa1.0_00005.1.g311.t1  | gb ABF55665.1  double MYC-tagged mitogen activated protein kinase kinase 5 [synthetic construct]                                                                                                                                                                                                                                                                                                                                                                                                                                                                                                                                                                                                                                                                                                                                                                                                         | 332  | 380  | 1.00E-156 | 114.5 | 87.0 | 93.4 | double MYC-tagged mitogen activated protein kinase kinase 5 | gbenv | synthetic construct  | AT3G21220.1   Symbols: ATMKK5, ATMAP2K_ALPHA, MAP2K_A, MKK5, ATMEK5, MEK5   MAP kinase kinase 5   chr3:7445917-7446963 FORWARD LENGTH=348                | 332  | 348  | 1.00E-158 | 104.8 | 87.0 | 93.4 |
| Rsa1.0_00005.1.g312.t1  | gb EOA29726.1  hypothetical protein CARUB_v10012814mg [Capsella rubella]<br>gi 482565538 gb EOA29727.1  hypothetical protein CARUB_v10012814mg [Capsella rubella]                                                                                                                                                                                                                                                                                                                                                                                                                                                                                                                                                                                                                                                                                                                                        | 1494 | 1464 | 0         | 98.0  | 82.5 | 89.6 | hypothetical protein CARUB_v10012814mg                      | gbpln | Capsella rubella     | AT3G21250.2   Symbols: MRP6, ABCC8   multidrug resistance-associated protein 6   chr3:7457668-7463261 REVERSE LENGTH=1464                                | 1494 | 1464 | 0         | 98.0  | 81.9 | 89.0 |
| Rsa1.0_00005.1.g313.t1  | ref XP_002885432.1  hypothetical protein ARALYDRAFT_342275 [Arabidopsis lyrata subsp. lyrata]<br>gi 297331272 gb EFH61691.1  hypothetical protein ARALYDRAFT_342275 [Arabidopsis lyrata subsp. lyrata]<br>ref XP_002883294.1  55 kDa B regulatory subunit of phosphatase 2A [Arabidopsis lyrata subsp. lyrata]<br>gi 297329134 gb EFH59553.1  55 kDa B regulatory subunit of phosphatase 2A [Arabidopsis lyrata subsp. lyrata]                                                                                                                                                                                                                                                                                                                                                                                                                                                                           | 234  | 233  | 1.00E-110 | 99.6  | 88.9 | 94.4 | hypothetical protein ARALYDRAFT_342275                      | gbpln | Arabidopsis lyrata   | AT3G21260.3   Symbols:   Glycolipid transfer protein (GLTP) family protein   chr3:7464132-7465785 REVERSE LENGTH=233                                     | 234  | 233  | 1.00E-112 | 99.6  | 88.5 | 93.6 |
| Rsa1.0_00005.1.g314.t1  | ref XP_002883294.1  55 kDa B regulatory subunit of phosphatase 2A [Arabidopsis lyrata subsp. lyrata]<br>gi 297329134 gb EFH59553.1  55 kDa B regulatory subunit of phosphatase 2A [Arabidopsis lyrata subsp. lyrata]                                                                                                                                                                                                                                                                                                                                                                                                                                                                                                                                                                                                                                                                                     | 511  | 514  | 0         | 100.6 | 88.3 | 91.6 | 55 kDa B regulatory subunit of phosphatase 2A               | gbpln | Arabidopsis lyrata   | AT1G51690.1   Symbols: ATB_ALPHA, B_ALPHA   protein phosphatase 2A 55 kDa regulatory subunit B alpha isoform   chr1:19166218-19169974 FORWARD LENGTH=513 | 511  | 513  | 0         | 100.4 | 82.2 | 89.8 |

|                         |                                                                                                                                                                                                                              |      |      |           |       |      |      |                                                    |       |                      |                                                                                                                                                                                                                                                                                                                                                           |      |      |           |       |      |      |
|-------------------------|------------------------------------------------------------------------------------------------------------------------------------------------------------------------------------------------------------------------------|------|------|-----------|-------|------|------|----------------------------------------------------|-------|----------------------|-----------------------------------------------------------------------------------------------------------------------------------------------------------------------------------------------------------------------------------------------------------------------------------------------------------------------------------------------------------|------|------|-----------|-------|------|------|
| Rsa1.0_00005.1.g315.t1  | refXP_002883295.1   hypothetical protein ARALYDRAFT_898570 [Arabidopsis lyrata subsp. lyrata] gi 297329135 gb EFH59554.1   hypothetical protein ARALYDRAFT_898570 [Arabidopsis lyrata subsp. lyrata]                         | 207  | 199  | 3.00E-73  | 96.1  | 78.7 | 83.1 | hypothetical protein ARALYDRAFT_898570             | gbpln | Arabidopsis lyrata   | AT3G21270.1   Symbols: ADOF2, DOF2   DOF zinc finger protein 2   chr3:7474934-7475548 FORWARD LENGTH=204                                                                                                                                                                                                                                                  | 207  | 204  | 1.00E-68  | 98.6  | 78.7 | 84.5 |
| Rsa1.0_00005.1.g316.t1  | refXP_002883297.1   hypothetical protein ARALYDRAFT_479651 [Arabidopsis lyrata subsp. lyrata] gi 297329137 gb EFH59556.1   hypothetical protein ARALYDRAFT_479651 [Arabidopsis lyrata subsp. lyrata]                         | 99   | 383  | 5.00E-32  | 386.9 | 72.7 | 79.8 | hypothetical protein ARALYDRAFT_479651             | gbpln | Arabidopsis lyrata   | AT3G21310.1   Symbols:   Core-2/- branching beta-1,6-N-acetylglucosaminyltransferase family protein   chr3:7497774-7499011 FORWARD LENGTH=383                                                                                                                                                                                                             | 99   | 383  | 1.00E-33  | 386.9 | 70.7 | 77.8 |
| Rsa1.0_00005.1.g317.t1  | gb EOA30281.1   hypothetical protein CARUB_v10013409mg [Capsella rubella]                                                                                                                                                    | 537  | 538  | 0         | 100.2 | 75.6 | 84.0 | hypothetical protein CARUB_v10013409mg             | gbpln | Capsella rubella     | AT3G21320.1   Symbols:   BEST Arabidopsis thaliana protein match is: hydroxyproline-rich glycoprotein family protein (TAIR:AT2G25930.1); Has 63 Blast hits to 58 proteins in 21 species: Archae - 0; Bacteria - 0; Metazoa - 3; Fungi - 0; Plants - 58; Viruses - 0; Other Eukaryotes - 2 (source: NCBI BLINK).   chr3:7499408-7501312 REVERSE LENGTH=540 | 537  | 540  | 0         | 100.6 | 72.3 | 81.8 |
| Rsa1.0_00005.1.g318.t1  | emb CAA57913.1   beta-glucosidase [Brassica napus]                                                                                                                                                                           | 338  | 514  | 1.00E-172 | 152.1 | 88.8 | 90.5 | beta-glucosidase                                   | gbpln | Brassica napus       | AT3G21370.1   Symbols: BGLU19   beta glucosidase 19   chr3:7524286-7527579 REVERSE LENGTH=527                                                                                                                                                                                                                                                             | 338  | 527  | 1.00E-170 | 155.9 | 86.1 | 92.6 |
| Rsa1.0_00005.1.g319.t1  | dbj BAB10503.1   retroelement pol polyprotein-like [Arabidopsis thaliana]                                                                                                                                                    | 1267 | 1475 | 0         | 116.4 | 37.1 | 49.5 | retroelement pol polyprotein-like                  | gbpln | Arabidopsis thaliana | AT4G23160.1   Symbols: CRK8   cysteine-rich RLK (RECEPTOR-like protein kinase) 8   chr4:12129485-12134086 FORWARD LENGTH=1262                                                                                                                                                                                                                             | 1267 | 1262 | 1.00E-78  | 99.6  | 12.3 | 15.7 |
| Rsa1.0_00005.1.g320.t1  | refXP_002883303.1   hypothetical protein ARALYDRAFT_479659 [Arabidopsis lyrata subsp. lyrata] gi 297329143 gb EFH59562.1   hypothetical protein ARALYDRAFT_479659 [Arabidopsis lyrata subsp. lyrata]                         | 407  | 461  | 1.00E-177 | 113.3 | 81.8 | 88.9 | hypothetical protein ARALYDRAFT_479659             | gbpln | Arabidopsis lyrata   | AT3G21380.1   Symbols:   Mannose-binding lectin superfamily protein   chr3:7528478-7530457 FORWARD LENGTH=460                                                                                                                                                                                                                                             | 407  | 460  | 1.00E-175 | 113.0 | 82.3 | 89.4 |
| Rsa1.0_00005.1.g321.t1  | gb EOA30874.1   hypothetical protein CARUB_v10014020mg [Capsella rubella]                                                                                                                                                    | 428  | 364  | 0         | 85.0  | 73.6 | 76.2 | hypothetical protein CARUB_v10014020mg             | gbpln | Capsella rubella     | AT3G21420.1   Symbols:   2-oxoglutarate (2OG) and Fe(II)-dependent oxygenase superfamily protein   chr3:7541579-7543221 FORWARD LENGTH=364                                                                                                                                                                                                                | 428  | 364  | 1.00E-178 | 85.0  | 73.1 | 76.6 |
| Rsa1.0_00005.1.g322.t2  | gb ABD65050.1   hypothetical protein 27.t00005 [Brassica oleracea]                                                                                                                                                           | 129  | 236  | 7.00E-26  | 182.9 | 52.7 | 56.6 | hypothetical protein 27.t00005                     | gbpln | Brassica oleracea    | #                                                                                                                                                                                                                                                                                                                                                         | #    | #    | #         | #     | #    | #    |
| Rsa1.0_00005.1.g323.t1  | #                                                                                                                                                                                                                            | #    | #    | #         | #     | #    | #    | -                                                  | ----  | ----                 | #                                                                                                                                                                                                                                                                                                                                                         | #    | #    | #         | #     | #    | #    |
| Rsa1.0_00005.1.g324.t1  | refXP_002885441.1   electron carrier/ protein disulfide oxidoreductase [Arabidopsis lyrata subsp. lyrata] gi 297331281 gb EFH61700.1   electron carrier/ protein disulfide oxidoreductase [Arabidopsis lyrata subsp. lyrata] | 102  | 102  | 4.00E-49  | 100.0 | 92.2 | 97.1 | electron carrier/ protein disulfide oxidoreductase | gbpln | Arabidopsis lyrata   | AT3G21460.1   Symbols:   Glutaredoxin family protein   chr3:7557567-7557875 REVERSE LENGTH=102                                                                                                                                                                                                                                                            | 102  | 102  | 1.00E-51  | 100.0 | 92.2 | 97.1 |
| Rsa1.0_00005.1.g325.t1  | #                                                                                                                                                                                                                            | #    | #    | #         | #     | #    | #    | -                                                  | ----  | ----                 | #                                                                                                                                                                                                                                                                                                                                                         | #    | #    | #         | #     | #    | #    |
| Rsa1.0_00005.1.g326.t1  | refXP_002880880.1   hypothetical protein ARALYDRAFT_481599 [Arabidopsis lyrata subsp. lyrata] gi 297326719 gb EFH57139.1   hypothetical protein ARALYDRAFT_481599 [Arabidopsis lyrata subsp. lyrata]                         | 201  | 720  | 2.00E-19  | 358.2 | 40.8 | 46.3 | hypothetical protein ARALYDRAFT_481599             | gbpln | Arabidopsis lyrata   | AT2G27100.1   Symbols: SE   C2H2 zinc-finger protein SERRATE (SE)   chr2:11572587-11576357 FORWARD LENGTH=720                                                                                                                                                                                                                                             | 201  | 720  | 3.00E-20  | 358.2 | 40.8 | 45.8 |
| Rsa1.0_00005.1.g327.t10 | refXP_002515199.1   hypothetical protein RCOM_1343910 [Ricinus communis] gi 223545679 gb EEF47183.1   hypothetical protein RCOM_1343910 [Ricinus communis]                                                                   | 224  | 627  | 2.00E-23  | 279.9 | 30.8 | 43.3 | hypothetical protein RCOM_1343910                  | gbpln | Ricinus communis     | AT3G62200.1   Symbols:   Putative endonuclease or glycosyl hydrolase   chr3:23023437-23025671 REVERSE LENGTH=673                                                                                                                                                                                                                                          | 224  | 673  | 1.00E-23  | 300.4 | 29.5 | 44.6 |
| Rsa1.0_00005.1.g328.t1  | #                                                                                                                                                                                                                            | #    | #    | #         | #     | #    | #    | -                                                  | ----  | ----                 | AT3G62210.1   Symbols: EDA32   Putative endonuclease or glycosyl hydrolase   chr3:23026910-23028113 REVERSE LENGTH=279                                                                                                                                                                                                                                    | 151  | 279  | 1.00E-11  | 184.8 | 32.5 | 45.0 |
| Rsa1.0_00005.1.g329.t1  | refXP_002883306.1   predicted protein [Arabidopsis lyrata subsp. lyrata] gi 297329146 gb EFH59565.1   predicted protein [Arabidopsis lyrata subsp. lyrata]                                                                   | 137  | 387  | 5.00E-11  | 282.5 | 29.9 | 35.0 | predicted protein                                  | gbpln | Arabidopsis lyrata   | AT3G21465.1   Symbols:   unknown protein; BEST Arabidopsis thaliana protein match is: unknown protein (TAIR:AT4G15640.1); Has 38 Blast hits to 38 proteins in 14 species: Archae - 0; Bacteria - 0; Metazoa - 0; Fungi - 0; Plants - 38; Viruses - 0; Other Eukaryotes - 0 (source: NCBI BLINK).   chr3:7560750-7563202 FORWARD LENGTH=388                | 137  | 388  | 5.00E-12  | 283.2 | 28.5 | 35.0 |

|                        |                                                                                                                                                                                                           |      |      |           |       |      |      |                                           |       |                      |                                                                                                                                                                                                                                                                                                                                                                                                                                                                                                          |      |      |           |       |      |      |
|------------------------|-----------------------------------------------------------------------------------------------------------------------------------------------------------------------------------------------------------|------|------|-----------|-------|------|------|-------------------------------------------|-------|----------------------|----------------------------------------------------------------------------------------------------------------------------------------------------------------------------------------------------------------------------------------------------------------------------------------------------------------------------------------------------------------------------------------------------------------------------------------------------------------------------------------------------------|------|------|-----------|-------|------|------|
| Rsa1.0_00005.1.g330.t1 | gb EOA29492.1  hypothetical protein CARUB_v10012880mg [Capsella rubella]                                                                                                                                  | 999  | 1044 | 0         | 104.5 | 67.1 | 77.0 | hypothetical protein CARUB_v10012880mg    | gbpln | Capsella rubella     | AT3G21480.1   Symbols:   BRCT domain-containing DNA repair protein   chr3:7567730-7571990 FORWARD LENGTH=1041                                                                                                                                                                                                                                                                                                                                                                                            | 999  | 1041 | 0         | 104.2 | 65.4 | 73.9 |
| Rsa1.0_00005.1.g331.t1 | # # # # # # # # # #                                                                                                                                                                                       |      |      |           |       |      |      |                                           |       |                      |                                                                                                                                                                                                                                                                                                                                                                                                                                                                                                          |      |      |           |       |      |      |
| Rsa1.0_00005.1.g332.t1 | ref XP_002885445.1  histidine-containing phosphotransmitter 3 [Arabidopsis lyrata subsp. lyrata] gi 297331285 gb EFH61704.1  histidine-containing phosphotransmitter 3 [Arabidopsis lyrata subsp. lyrata] | 154  | 154  | 2.00E-74  | 100.0 | 96.1 | 99.4 | histidine-containing phosphotransmitter 3 | gbpln | Arabidopsis lyrata   | AT3G21510.1   Symbols: AHP1   histidine-containing phosphotransmitter 1   chr3:7578432-7579537 REVERSE LENGTH=154                                                                                                                                                                                                                                                                                                                                                                                        | 154  | 154  | 4.00E-76  | 100.0 | 95.5 | 98.7 |
| Rsa1.0_00005.1.g333.t1 | gb EOA31454.1  hypothetical protein CARUB_v10014640mg [Capsella rubella]                                                                                                                                  | 202  | 208  | 5.00E-98  | 103.0 | 88.6 | 93.6 | hypothetical protein CARUB_v10014640mg    | gbpln | Capsella rubella     | AT3G21520.1   Symbols: DMP1, AtDMP1   DUF679 domain membrane protein 1   chr3:7582000-7582623 FORWARD LENGTH=207                                                                                                                                                                                                                                                                                                                                                                                         | 202  | 207  | 2.00E-99  | 102.5 | 90.1 | 94.6 |
| Rsa1.0_00005.1.g334.t1 | ref XP_002885448.1  hypothetical protein ARALYDRAFT_898603 [Arabidopsis lyrata subsp. lyrata] gi 297331288 gb EFH61707.1  hypothetical protein ARALYDRAFT_898603 [Arabidopsis lyrata subsp. lyrata]       | 185  | 185  | 8.00E-94  | 100.0 | 90.3 | 96.8 | hypothetical protein ARALYDRAFT_898603    | gbpln | Arabidopsis lyrata   | AT3G21550.1   Symbols: DMP2, AtDMP2   DUF679 domain membrane protein 2   chr3:7591708-7592262 REVERSE LENGTH=184                                                                                                                                                                                                                                                                                                                                                                                         | 185  | 184  | 9.00E-94  | 99.5  | 88.1 | 95.1 |
| Rsa1.0_00005.1.g335.t1 | dbj BAA77394.1  SAE1-S9-protein [Brassica rapa]                                                                                                                                                           | 327  | 255  | 3.00E-73  | 78.0  | 45.9 | 53.2 | SAE1-S9-protein                           | gbpln | Brassica rapa        | AT5G18880.1   Symbols:   RNA-directed DNA polymerase (reverse transcriptase)-related family protein   chr5:6300535-6301422 REVERSE LENGTH=295                                                                                                                                                                                                                                                                                                                                                            | 327  | 295  | 1.00E-70  | 90.2  | 43.4 | 56.6 |
| Rsa1.0_00005.1.g336.t1 | emb CAS03349.1  sinapate 1-glucosyltransferase [Brassica napus var. napus] gi 226533678 emb CAS03357.1  sinapate 1-glucosyltransferase [Brassica napus var. napus]                                        | 489  | 497  | 0         | 101.6 | 93.3 | 96.5 | sinapate 1-glucosyltransferase            | gbpln | Brassica napus       | AT3G21560.1   Symbols: UGT84A2   UDP-Glycosyltransferase superfamily protein   chr3:7595884-7597374 FORWARD LENGTH=496                                                                                                                                                                                                                                                                                                                                                                                   | 489  | 496  | 0         | 101.4 | 84.3 | 92.0 |
| Rsa1.0_00005.1.g337.t1 | emb CAS03358.1  hypothetical protein [Brassica napus var. napus]                                                                                                                                          | 139  | 138  | 2.00E-57  | 99.3  | 90.6 | 93.5 | hypothetical protein                      | gbpln | Brassica napus       | AT3G21570.1   Symbols:   unknown protein; Has 43 Blast hits to 43 proteins in 13 species: Archae - 0; Bacteria - 0; Metazoa - 0; Fungi - 0; Plants - 43; Viruses - 0; Other Eukaryotes - 0 (source: NCBI BLink).   chr3:7600297-7600707 REVERSE LENGTH=136                                                                                                                                                                                                                                               | 139  | 136  | 1.00E-55  | 97.8  | 77.7 | 87.8 |
| Rsa1.0_00005.1.g338.t1 | ref NP_001185096.1  phospholipid-translocating ATPase [Arabidopsis thaliana] gi 332192532 gb AEE30653.1  putative phospholipid-transporting ATPase 12 [Arabidopsis thaliana]                              | 1164 | 1185 | 0         | 101.8 | 88.0 | 94.0 | phospholipid-translocating ATPase         | gbpln | Arabidopsis thaliana | AT1G26130.2   Symbols:   ATPase E1-E2 type family protein / haloacid dehalogenase-like hydrolase family protein   chr1:9033600-9038246 FORWARD LENGTH=1185                                                                                                                                                                                                                                                                                                                                               | 1164 | 1185 | 0         | 101.8 | 88.0 | 94.0 |
| Rsa1.0_00005.1.g339.t1 | ref XP_002885459.1  nitrate transporter [Arabidopsis lyrata subsp. lyrata] gi 297331299 gb EFH61718.1  nitrate transporter [Arabidopsis lyrata subsp. lyrata]                                             | 567  | 590  | 1.00E-111 | 104.1 | 40.4 | 43.6 | nitrate transporter                       | gbpln | Arabidopsis lyrata   | AT3G21670.1   Symbols:   Major facilitator superfamily protein   chr3:7626942-7628954 REVERSE LENGTH=590                                                                                                                                                                                                                                                                                                                                                                                                 | 567  | 590  | 1.00E-112 | 104.1 | 40.2 | 43.0 |
| Rsa1.0_00005.1.g340.t1 | gb EOA32900.1  hypothetical protein CARUB_v10016225mg [Capsella rubella]                                                                                                                                  | 112  | 125  | 3.00E-29  | 111.6 | 68.8 | 80.4 | hypothetical protein CARUB_v10016225mg    | gbpln | Capsella rubella     | AT3G21680.1   Symbols:   unknown protein; FUNCTIONS IN: molecular function unknown; INVOLVED IN: N-terminal protein myristoylation; LOCATED IN: cellular component unknown; EXPRESSED IN: root, flower, stamen; EXPRESSED DURING: 4 anthesis, petal differentiation and expansion stage; Has 34 Blast hits to 34 proteins in 7 species: Archae - 0; Bacteria - 0; Metazoa - 0; Fungi - 0; Plants - 34; Viruses - 0; Other Eukaryotes - 0 (source: NCBI BLink).   chr3:7633494-7633853 REVERSE LENGTH=119 | 112  | 119  | 1.00E-28  | 106.3 | 75.0 | 82.1 |
| Rsa1.0_00005.1.g341.t1 | dbj BAJ34540.1  unnamed protein product [Thellungiella halophila]                                                                                                                                         | 318  | 505  | 1.00E-153 | 158.8 | 91.2 | 95.0 | unnamed protein product                   |       |                      | AT3G21690.1   Symbols:   MATE efflux family protein   chr3:7638750-7641861 FORWARD LENGTH=506                                                                                                                                                                                                                                                                                                                                                                                                            | 318  | 506  | 1.00E-151 | 159.1 | 89.6 | 93.7 |
| Rsa1.0_00005.1.g342.t1 | ref XP_002883313.1  mate efflux family protein [Arabidopsis lyrata subsp. lyrata] gi 297329153 gb EFH59572.1  mate efflux family protein [Arabidopsis lyrata subsp. lyrata]                               | 156  | 506  | 1.00E-68  | 324.4 | 87.2 | 93.6 | mate efflux family protein                | gbpln | Arabidopsis lyrata   | AT3G21690.1   Symbols:   MATE efflux family protein   chr3:7638750-7641861 FORWARD LENGTH=506                                                                                                                                                                                                                                                                                                                                                                                                            | 156  | 506  | 1.00E-70  | 324.4 | 86.5 | 92.9 |
| Rsa1.0_00005.1.g343.t1 | ref XP_002883313.1  mate efflux family protein [Arabidopsis lyrata subsp. lyrata] gi 297329153 gb EFH59572.1  mate efflux family protein [Arabidopsis lyrata subsp. lyrata]                               | 548  | 506  | 0         | 92.3  | 86.1 | 88.9 | mate efflux family protein                | gbpln | Arabidopsis lyrata   | AT3G21690.1   Symbols:   MATE efflux family protein   chr3:7638750-7641861 FORWARD LENGTH=506                                                                                                                                                                                                                                                                                                                                                                                                            | 548  | 506  | 0         | 92.3  | 85.4 | 88.3 |



|                        |                                                                                                                                                                                                                                                                                                                                                                                                         |      |      |           |       |      |      |                                                |       |                      |                                                                                                                                                                                                                                                                                  |      |      |           |       |      |      |
|------------------------|---------------------------------------------------------------------------------------------------------------------------------------------------------------------------------------------------------------------------------------------------------------------------------------------------------------------------------------------------------------------------------------------------------|------|------|-----------|-------|------|------|------------------------------------------------|-------|----------------------|----------------------------------------------------------------------------------------------------------------------------------------------------------------------------------------------------------------------------------------------------------------------------------|------|------|-----------|-------|------|------|
| Rsa1.0_00005.1.g344.t1 | refNP_850622.1  Ras-related small GTP-binding family protein [Arabidopsis thaliana] gi 11994637 dbj BAB02832.1  unnamed protein product [Arabidopsis thaliana] gi 22316556 emb CAD44270.1  monomeric G-protein [Arabidopsis thaliana] gi 332643018 gb AEE76539.1  Ras-related small GTP-binding family protein [Arabidopsis thaliana]                                                                   | 278  | 292  | 1.00E-128 | 105.0 | 88.5 | 93.9 | Ras-related small GTP-binding family protein   | gbpln | Arabidopsis thaliana | AT3G21700.3   Symbols: SGP2   Ras-related small GTP-binding family protein   chr3:7644581-7646190 FORWARD LENGTH=292                                                                                                                                                             | 278  | 292  | 1.00E-131 | 105.0 | 88.5 | 93.9 |
| Rsa1.0_00005.1.g345.t1 | gb EOA31309.1  hypothetical protein CARUB_v10014480mg [Capsella rubella]                                                                                                                                                                                                                                                                                                                                | 333  | 247  | 1.00E-52  | 74.2  | 37.8 | 41.7 | hypothetical protein CARUB_v10014480mg         | gbpln | Capsella rubella     | AT3G21710.2   Symbols:   unknown protein; Has 35333 Blast hits to 34131 proteins in 2444 species: Archae - 798; Bacteria - 22429; Metazoa - 974; Fungi - 991; Plants - 531; Viruses - 0; Other Eukaryotes - 9610 (source: NCBI BLINK).   chr3:7648380-7649533 FORWARD LENGTH=211 | 333  | 211  | 2.00E-54  | 63.4  | 36.9 | 40.8 |
| Rsa1.0_00006.1.g346.t1 | gb ABG29728.1  chloroplast chlorophyll a/b binding protein [Brassica napus]                                                                                                                                                                                                                                                                                                                             | 267  | 267  | 1.00E-151 | 100.0 | 99.3 | 99.6 | chloroplast chlorophyll a/b binding protein    | gbpln | Brassica napus       | AT1G29930.1   Symbols: CAB1, AB140, CAB140, LHCB1.3   chlorophyll A/B binding protein 1   chr1:10478071-10478874 FORWARD LENGTH=267                                                                                                                                              | 267  | 267  | 1.00E-150 | 100.0 | 97.4 | 99.3 |
| Rsa1.0_00006.1.g347.t1 | ref XP_002894603.1  hypothetical protein ARALYDRAFT_896807 [Arabidopsis lyrata subsp. lyrata] gi 297330443 gb EFH60862.1  hypothetical protein ARALYDRAFT_896807 [Arabidopsis lyrata subsp. lyrata]                                                                                                                                                                                                     | 863  | 948  | 0         | 109.8 | 64.5 | 74.7 | hypothetical protein ARALYDRAFT_896807         | gbpln | Arabidopsis lyrata   | AT4G32670.1   Symbols:   RING/FYVE/PHD zinc finger superfamily protein   chr4:15759527-15762847 REVERSE LENGTH=860                                                                                                                                                               | 863  | 860  | 1.00E-174 | 99.7  | 44.6 | 59.0 |
| Rsa1.0_00006.1.g348.t3 | ref NP_174275.2  Magnesium transporter CorA-like family protein [Arabidopsis thaliana] gi 186479046 ref NP_001117384.1  Magnesium transporter CorA-like family protein [Arabidopsis thaliana] gi 332193013 gb AEE31134.1  Magnesium transporter CorA-like family protein [Arabidopsis thaliana] gi 332193014 gb AEE31135.1  Magnesium transporter CorA-like family protein [Arabidopsis thaliana]       | 738  | 540  | 0         | 73.2  | 64.2 | 68.8 | Magnesium transporter CorA-like family protein | gbpln | Arabidopsis thaliana | AT1G29820.2   Symbols:   Magnesium transporter CorA-like family protein   chr1:10438219-10440625 FORWARD LENGTH=540                                                                                                                                                              | 738  | 540  | 0         | 73.2  | 64.2 | 68.8 |
| Rsa1.0_00006.1.g349.t1 | gb EOA37993.1  hypothetical protein CARUB_v10009462mg [Capsella rubella]                                                                                                                                                                                                                                                                                                                                | 374  | 376  | 0         | 100.5 | 86.9 | 94.1 | hypothetical protein CARUB_v10009462mg         | gbpln | Capsella rubella     | AT1G29790.2   Symbols:   S-adenosyl-L-methionine-dependent methyltransferases superfamily protein   chr1:10430025-10431161 FORWARD LENGTH=378                                                                                                                                    | 374  | 378  | 0         | 101.1 | 87.7 | 94.1 |
| Rsa1.0_00006.1.g350.t1 | gb EOA36491.1  hypothetical protein CARUB_v10011144mg [Capsella rubella]                                                                                                                                                                                                                                                                                                                                | 106  | 104  | 1.00E-29  | 98.1  | 65.1 | 67.9 | hypothetical protein CARUB_v10011144mg         | gbpln | Capsella rubella     | #                                                                                                                                                                                                                                                                                | #    | #    | #         | #     | #    |      |
| Rsa1.0_00006.1.g351.t1 | ref XP_002890830.1  NLI interacting factor family protein [Arabidopsis lyrata subsp. lyrata] gi 297336672 gb EFH67089.1  NLI interacting factor family protein [Arabidopsis lyrata subsp. lyrata] ref XP_002890829.1  NLI interacting factor family protein [Arabidopsis lyrata subsp. lyrata]                                                                                                          | 230  | 221  | 3.00E-98  | 96.1  | 79.1 | 86.5 | NLI interacting factor family protein          | gbpln | Arabidopsis lyrata   | AT1G29780.1   Symbols:   Haloacid dehalogenase-like hydrolase (HAD) superfamily protein   chr1:10426950-10427615 FORWARD LENGTH=221                                                                                                                                              | 230  | 221  | 9.00E-97  | 96.1  | 76.1 | 84.3 |
| Rsa1.0_00006.1.g352.t1 | ref XP_002890829.1  NLI interacting factor family protein [Arabidopsis lyrata subsp. lyrata] gi 297336671 gb EFH67088.1  NLI interacting factor family protein [Arabidopsis lyrata subsp. lyrata] ref XP_002890828.1  hypothetical protein ARALYDRAFT_890503 [Arabidopsis lyrata subsp. lyrata] gi 297336670 gb EFH67087.1  hypothetical protein ARALYDRAFT_890503 [Arabidopsis lyrata subsp. lyrata]   | 276  | 277  | 1.00E-120 | 100.4 | 80.4 | 87.7 | NLI interacting factor family protein          | gbpln | Arabidopsis lyrata   | AT1G29770.1   Symbols:   Haloacid dehalogenase-like hydrolase (HAD) superfamily protein   chr1:10424806-10425642 FORWARD LENGTH=278                                                                                                                                              | 276  | 278  | 1.00E-120 | 100.7 | 78.6 | 86.6 |
| Rsa1.0_00006.1.g353.t1 | ref XP_002890828.1  hypothetical protein ARALYDRAFT_890503 [Arabidopsis lyrata subsp. lyrata] gi 297336670 gb EFH67087.1  hypothetical protein ARALYDRAFT_890503 [Arabidopsis lyrata subsp. lyrata] ref XP_002893580.1  hypothetical protein ARALYDRAFT_473178 [Arabidopsis lyrata subsp. lyrata] gi 297339422 gb EFH69839.1  hypothetical protein ARALYDRAFT_473178 [Arabidopsis lyrata subsp. lyrata] | 560  | 527  | 1.00E-156 | 94.1  | 56.3 | 65.4 | hypothetical protein ARALYDRAFT_890503         | gbpln | Arabidopsis lyrata   | AT1G29760.1   Symbols:   Putative adipose-regulatory protein (Seipin)   chr1:10422381-10424116 FORWARD LENGTH=526                                                                                                                                                                | 560  | 526  | 1.00E-148 | 93.9  | 47.1 | 54.8 |
| Rsa1.0_00006.1.g354.t1 | ref XP_002893580.1  hypothetical protein ARALYDRAFT_473178 [Arabidopsis lyrata subsp. lyrata] gi 297339422 gb EFH69839.1  hypothetical protein ARALYDRAFT_473178 [Arabidopsis lyrata subsp. lyrata]                                                                                                                                                                                                     | 1003 | 1023 | 0         | 102.0 | 79.9 | 88.5 | hypothetical protein ARALYDRAFT_473178         | gbpln | Arabidopsis lyrata   | AT1G29750.2   Symbols: RKF1   receptor-like kinase in flowers 1   chr1:10414071-10420469 REVERSE LENGTH=1021                                                                                                                                                                     | 1003 | 1021 | 0         | 101.8 | 80.4 | 88.6 |
| Rsa1.0_00006.1.g355.t2 | gb EOA38810.1  hypothetical protein CARUB_v10011128mg [Capsella rubella]                                                                                                                                                                                                                                                                                                                                | 109  | 1008 | 2.00E-22  | 924.8 | 55.0 | 69.7 | hypothetical protein CARUB_v10011128mg         | gbpln | Capsella rubella     | AT1G29720.1   Symbols:   Leucine-rich repeat transmembrane protein kinase   chr1:10393894-10399771 REVERSE LENGTH=1019                                                                                                                                                           | 109  | 1019 | 1.00E-23  | 934.9 | 56.0 | 70.6 |

|                         |                                                                                                                                                                                                                                                                                                                                                                                                                                                                                                                                         |      |      |           |       |      |      |                                                  |       |                      |                                                                                                                           |      |      |           |       |      |      |
|-------------------------|-----------------------------------------------------------------------------------------------------------------------------------------------------------------------------------------------------------------------------------------------------------------------------------------------------------------------------------------------------------------------------------------------------------------------------------------------------------------------------------------------------------------------------------------|------|------|-----------|-------|------|------|--------------------------------------------------|-------|----------------------|---------------------------------------------------------------------------------------------------------------------------|------|------|-----------|-------|------|------|
| Rsa1.0_00006.1.g356.t2  | ref NP_564335.3  Leucine-rich repeat transmembrane protein kinase [Arabidopsis thaliana] gi 325511374 sp Q9ASQ6.3 Y1972_ARAT H RecName: Full=Probable LRR receptor-like serine/threonine-protein kinase At1g29720; Flags: Precursor gi 332193000 gb AEE31121.1  Leucine-rich repeat transmembrane protein kinase [Arabidopsis thaliana]                                                                                                                                                                                                 | 973  | 1019 | 0         | 104.7 | 66.6 | 74.2 | Leucine-rich repeat transmembrane protein kinase | gbpln | Arabidopsis thaliana | AT1G29720.1   Symbols:   Leucine-rich repeat transmembrane protein kinase   chr1:10393894-10399771 REVERSE LENGTH=1019    | 973  | 1019 | 0         | 104.7 | 66.6 | 74.2 |
| Rsa1.0_00006.1.g357.t12 | gb EOA39568.1  hypothetical protein CARUB_v10008178mg [Capsella rubella]                                                                                                                                                                                                                                                                                                                                                                                                                                                                | 935  | 1015 | 0         | 108.6 | 70.9 | 80.0 | hypothetical protein CARUB_v10008178mg           | gbpln | Capsella rubella     | AT1G29720.1   Symbols:   Leucine-rich repeat transmembrane protein kinase   chr1:10393894-10399771 REVERSE LENGTH=1019    | 935  | 1019 | 0         | 109.0 | 71.2 | 80.4 |
| Rsa1.0_00006.1.g358.t1  | gb EOA39560.1  hypothetical protein CARUB_v10008178mg [Capsella rubella]                                                                                                                                                                                                                                                                                                                                                                                                                                                                | 1082 | 1022 | 0         | 94.5  | 65.3 | 74.3 | hypothetical protein CARUB_v10008178mg           | gbpln | Capsella rubella     | AT1G29720.1   Symbols:   Leucine-rich repeat transmembrane protein kinase   chr1:10393894-10399771 REVERSE LENGTH=1019    | 1082 | 1019 | 0         | 94.2  | 64.5 | 72.9 |
| Rsa1.0_00006.1.g359.t5  | gb EOA39560.1  hypothetical protein CARUB_v10008178mg [Capsella rubella]                                                                                                                                                                                                                                                                                                                                                                                                                                                                | 1945 | 1022 | 0         | 52.5  | 36.5 | 41.5 | hypothetical protein CARUB_v10008178mg           | gbpln | Capsella rubella     | AT1G29720.1   Symbols:   Leucine-rich repeat transmembrane protein kinase   chr1:10393894-10399771 REVERSE LENGTH=1019    | 1945 | 1019 | 0         | 52.4  | 35.9 | 41.2 |
| Rsa1.0_00006.1.g360.t1  | ref XP_002893575.1  hypothetical protein ARALYDRAFT_473173 [Arabidopsis lyrata subsp. lyrata] gi 29733941.7 gb EFH69834.1  hypothetical protein ARALYDRAFT_473173 [Arabidopsis lyrata subsp. lyrata]                                                                                                                                                                                                                                                                                                                                    | 351  | 350  | 1.00E-173 | 99.7  | 87.7 | 93.2 | hypothetical protein ARALYDRAFT_473173           | gbpln | Arabidopsis lyrata   | AT1G29700.1   Symbols:   Metallo-hydrolase/oxidoreductase superfamily protein   chr1:10385196-10386906 REVERSE LENGTH=350 | 351  | 350  | 1.00E-174 | 99.7  | 86.3 | 92.9 |
| Rsa1.0_00006.1.g361.t1  | gb EOA40030.1  hypothetical protein CARUB_v10008721mg [Capsella rubella]                                                                                                                                                                                                                                                                                                                                                                                                                                                                | 566  | 565  | 0         | 99.8  | 92.6 | 95.9 | hypothetical protein CARUB_v10008721mg           | gbpln | Capsella rubella     | AT1G29690.1   Symbols: CAD1   MAC/Perforin domain-containing protein   chr1:10379310-10381861 REVERSE LENGTH=561          | 566  | 561  | 0         | 99.1  | 91.5 | 94.7 |
| Rsa1.0_00006.1.g362.t1  | gb AGJ83937.1  GLIP [Brassica napus]                                                                                                                                                                                                                                                                                                                                                                                                                                                                                                    | 360  | 361  | 0         | 100.3 | 95.6 | 97.5 | GLIP                                             | gbpln | Brassica napus       | AT1G29670.1   Symbols:   GDSL-like Lipase/Acylhydrolase superfamily protein   chr1:10375843-10377717 FORWARD LENGTH=363   | 360  | 363  | 0         | 100.8 | 86.4 | 91.7 |
| Rsa1.0_00006.1.g363.t1  | ref NP_174259.1  GDSL esterase/lipase [Arabidopsis thaliana] gi 75169353 sp Q9C7N5.1 GDL14_ARAT H RecName: Full=GDSL esterase/lipase At1g29660; AltName: Full=Extracellular lipase At1g29660; Flags: Precursor gi 12323544 gb AAG51756.1 AC068667_35 lipase/hydrolase, putative; I14382-116051 [Arabidopsis thaliana] gi 15215769 gb AAK91429.1  At1g29660/F15D2.21 [Arabidopsis thaliana] gi 22137090 gb AAM91390.1  At1g29660/F15D2.21 [Arabidopsis thaliana] gi 332192994 gb AEE31115.1  GDSL esterase/lipase [Arabidopsis thaliana] | 386  | 364  | 0         | 94.3  | 80.3 | 86.5 | GDSL esterase/lipase                             | gbpln | Arabidopsis thaliana | AT1G29660.1   Symbols:   GDSL-like Lipase/Acylhydrolase superfamily protein   chr1:10371955-10373624 FORWARD LENGTH=364   | 386  | 364  | 0         | 94.3  | 80.3 | 86.5 |
| Rsa1.0_00006.1.g364.t1  | #                                                                                                                                                                                                                                                                                                                                                                                                                                                                                                                                       | #    | #    | #         | #     | #    | #    | -                                                | ----  | ----                 | #                                                                                                                         | #    | #    | #         | #     | #    |      |
| Rsa1.0_00006.1.g365.t1  | ref NP_174257.1  uncharacterized protein [Arabidopsis thaliana] gi 12323541 gb AAG51753.1 AC068667_32 hypothetical protein; 98808-98386 [Arabidopsis thaliana] gi 28466825 gb AAO44021.1  At1g29640 [Arabidopsis thaliana] gi 110743019 dbj BAE99402.1  hypothetical protein [Arabidopsis thaliana] gi 332192993 gb AEE31114.1  uncharacterized protein AT1G29640 [Arabidopsis thaliana]                                                                                                                                                | 139  | 140  | 5.00E-55  | 100.7 | 79.9 | 89.2 | uncharacterized protein                          | gbpln | Arabidopsis thaliana | AT1G29640.1   Symbols:   Protein of unknown function, DUF584   chr1:10355959-10356381 REVERSE LENGTH=140                  | 139  | 140  | 1.00E-57  | 100.7 | 79.9 | 89.2 |
| Rsa1.0_00006.1.g366.t1  | gb EOA38491.1  hypothetical protein CARUB_v10010257mg [Capsella rubella]                                                                                                                                                                                                                                                                                                                                                                                                                                                                | 219  | 219  | 1.00E-106 | 100.0 | 85.4 | 91.8 | hypothetical protein CARUB_v10010257mg           | gbpln | Capsella rubella     | AT1G17180.1   Symbols: ATGSTU25, GSTU25   glutathione S-transferase TAU 25   chr1:5872208-5872958 FORWARD LENGTH=221      | 219  | 221  | 1.00E-108 | 100.9 | 84.0 | 91.3 |
| Rsa1.0_00006.1.g367.t1  | gb AAG50806.1 AC079281.8 unknown protein [Arabidopsis thaliana]                                                                                                                                                                                                                                                                                                                                                                                                                                                                         | 1600 | 1213 | 0         | 75.8  | 25.6 | 38.2 | unknown protein                                  | gbpln | Arabidopsis thaliana | AT1G43760.1   Symbols:   DNase I-like superfamily protein   chr1:16528880-16531065 REVERSE LENGTH=626                     | 1600 | 626  | 1.00E-69  | 39.1  | 9.2  | 13.7 |
| Rsa1.0_00006.1.g368.t1  | #                                                                                                                                                                                                                                                                                                                                                                                                                                                                                                                                       | #    | #    | #         | #     | #    | #    | -                                                | ----  | ----                 | #                                                                                                                         | #    | #    | #         | #     | #    |      |

|                        |                                                                                                                                                                                                                                                                                                                                                                                                                                                |     |     |           |       |      |      |                                                   |       |                      |                                                                                                                                                                                                                                                                                                                                              |     |     |           |       |      |      |
|------------------------|------------------------------------------------------------------------------------------------------------------------------------------------------------------------------------------------------------------------------------------------------------------------------------------------------------------------------------------------------------------------------------------------------------------------------------------------|-----|-----|-----------|-------|------|------|---------------------------------------------------|-------|----------------------|----------------------------------------------------------------------------------------------------------------------------------------------------------------------------------------------------------------------------------------------------------------------------------------------------------------------------------------------|-----|-----|-----------|-------|------|------|
| Rsa1.0_00006.1.g369.t1 | refXP_002881330.1   hypothetical protein ARALYDRAFT_482373 [Arabidopsis lyrata subsp. lyrata]   gi297327169 gb EFH57589.1   hypothetical protein ARALYDRAFT_482373 [Arabidopsis lyrata subsp. lyrata]                                                                                                                                                                                                                                          | 235 | 241 | 9.00E-17  | 102.6 | 42.1 | 52.8 | hypothetical protein ARALYDRAFT_482373            | gbpln | Arabidopsis lyrata   | AT1G29530.1   Symbols:   unknown protein; BEST Arabidopsis thaliana protein match is: unknown protein (TAIR:AT2G34310.3); Has 84 Blast hits to 78 proteins in 24 species: Archae - 2; Bacteria - 4; Metazoa - 9; Fungi - 8; Plants - 55; Viruses - 0; Other Eukaryotes - 6 (source: NCBI BLink).   chr1:10325553-10326651 REVERSE LENGTH=236 | 235 | 236 | 3.00E-18  | 100.4 | 40.0 | 47.7 |
| Rsa1.0_00006.1.g370.t1 | gb EOA37440.1   hypothetical protein CARUB_v10011510mg [Capsella rubella]                                                                                                                                                                                                                                                                                                                                                                      | 159 | 158 | 2.00E-71  | 99.4  | 92.5 | 95.6 | hypothetical protein CARUB_v10011510mg            | gbpln | Capsella rubella     | AT1G29520.1   Symbols:   AWPm-19-like family protein   chr1:10321290-10321697 FORWARD LENGTH=158                                                                                                                                                                                                                                             | 159 | 158 | 1.00E-73  | 99.4  | 91.8 | 96.2 |
| Rsa1.0_00006.1.g371.t1 | #                                                                                                                                                                                                                                                                                                                                                                                                                                              | #   | #   | #         | #     | #    | #    | -                                                 | ----  | ----                 | #                                                                                                                                                                                                                                                                                                                                            | #   | #   | #         | #     | #    |      |
| Rsa1.0_00006.1.g372.t1 | gb ABV89641.1   auxin-induced protein [Brassica rapa]                                                                                                                                                                                                                                                                                                                                                                                          | 89  | 137 | 1.00E-17  | 153.9 | 49.4 | 53.9 | auxin-induced protein                             | gbpln | Brassica rapa        | AT1G29500.1   Symbols:   SAUR-like auxin-responsive protein family   chr1:10321290-10321697 FORWARD LENGTH=135                                                                                                                                                                                                                               | 89  | 135 | 3.00E-18  | 151.7 | 44.9 | 52.8 |
| Rsa1.0_00006.1.g373.t1 | gb ABV89665.1   auxin-responsive protein [Brassica rapa]                                                                                                                                                                                                                                                                                                                                                                                       | 138 | 139 | 4.00E-65  | 100.7 | 93.5 | 96.4 | auxin-responsive protein                          | gbpln | Brassica rapa        | AT1G29450.1   Symbols:   SAUR-like auxin-responsive protein family   chr1:10305981-10306406 REVERSE LENGTH=141                                                                                                                                                                                                                               | 138 | 141 | 2.00E-56  | 102.2 | 77.5 | 86.2 |
| Rsa1.0_00006.1.g374.t1 | refXP_002868389.1   hypothetical protein ARALYDRAFT_493566 [Arabidopsis lyrata subsp. lyrata]   gi297314225 gb EFH44648.1   hypothetical protein ARALYDRAFT_493566 [Arabidopsis lyrata subsp. lyrata]                                                                                                                                                                                                                                          | 271 | 264 | 1.00E-106 | 97.4  | 81.9 | 86.7 | hypothetical protein ARALYDRAFT_493566            | gbpln | Arabidopsis lyrata   | AT5G32440.1   Symbols:   Ubiquitin system component Cue protein   chr5:12077014-12078396 FORWARD LENGTH=264                                                                                                                                                                                                                                  | 271 | 264 | 2.00E-99  | 97.4  | 80.8 | 85.6 |
| Rsa1.0_00006.1.g375.t4 | #                                                                                                                                                                                                                                                                                                                                                                                                                                              | #   | #   | #         | #     | #    | #    | -                                                 | ----  | ----                 | #                                                                                                                                                                                                                                                                                                                                            | #   | #   | #         | #     | #    |      |
| Rsa1.0_00006.1.g376.t1 | gb EOA36053.1   hypothetical protein CARUB_v10008372mg [Capsella rubella]   gi482571867 gb EOA36054.1   hypothetical protein CARUB_v10008372mg [Capsella rubella]                                                                                                                                                                                                                                                                              | 704 | 767 | 0         | 108.9 | 90.6 | 95.3 | hypothetical protein CARUB_v10008372mg            | gbpln | Capsella rubella     | AT1G29470.2   Symbols:   S-adenosyl-L-methionine-dependent methyltransferases superfamily protein   chr1:10310424-10313369 REVERSE LENGTH=770                                                                                                                                                                                                | 704 | 770 | 0         | 109.4 | 90.2 | 95.2 |
| Rsa1.0_00006.1.g377.t1 | refNP_174231.2   carbohydrate-binding X8 domain-containing protein [Arabidopsis thaliana]   gi49823474 gb AAT68720.1   hypothetical protein At1g29380 [Arabidopsis thaliana]   gi55740509 gb AAV63847.1   hypothetical protein At1g29380 [Arabidopsis thaliana]   gi62320282 dbj BAD94579.1   beta-1,3 glucanase [Arabidopsis thaliana]   gi332192957 gb AEE31078.1   carbohydrate-binding X8 domain-containing protein [Arabidopsis thaliana] | 325 | 315 | 2.00E-83  | 96.9  | 75.4 | 79.4 | carbohydrate-binding X8 domain-containing protein | gbpln | Arabidopsis thaliana | AT1G29380.1   Symbols:   Carbohydrate-binding X8 domain superfamily protein   chr1:10284209-10285671 FORWARD LENGTH=315                                                                                                                                                                                                                      | 325 | 315 | 6.00E-86  | 96.9  | 75.4 | 79.4 |
| Rsa1.0_00006.1.g378.t1 | refNP_174229.2   uncharacterized protein [Arabidopsis thaliana]   gi332192954 gb AEE31075.1   uncharacterized protein AT1G29350 [Arabidopsis thaliana]                                                                                                                                                                                                                                                                                         | 865 | 831 | 0         | 96.1  | 73.2 | 80.3 | uncharacterized protein                           | gbpln | Arabidopsis thaliana | AT1G29350.1   Symbols:   Kinase-related protein of unknown function (DUF1296)   chr1:10268761-10273613 REVERSE LENGTH=831                                                                                                                                                                                                                    | 865 | 831 | 0         | 96.1  | 73.2 | 80.3 |
| Rsa1.0_00006.1.g379.t1 | dbj BAJ34586.1   unnamed protein product [Thellungiella halophila]                                                                                                                                                                                                                                                                                                                                                                             | 678 | 724 | 0         | 106.8 | 85.7 | 92.9 | unnamed protein product                           | ----  | ----                 | AT1G29340.1   Symbols: PUB17, ATPUB17   plant U-box 17   chr1:10264412-10266601 FORWARD LENGTH=729                                                                                                                                                                                                                                           | 678 | 729 | 0         | 107.5 | 84.7 | 92.2 |
| Rsa1.0_00006.1.g380.t1 | refXP_002893557.1   hypothetical protein ARALYDRAFT_473143 [Arabidopsis lyrata subsp. lyrata]   gi297339399 gb EFH69816.1   hypothetical protein ARALYDRAFT_473143 [Arabidopsis lyrata subsp. lyrata]                                                                                                                                                                                                                                          | 215 | 215 | 1.00E-118 | 100.0 | 95.8 | 99.1 | hypothetical protein ARALYDRAFT_473143            | gbpln | Arabidopsis lyrata   | AT1G29330.1   Symbols: ATERD2, AERD2, ERD2   ER lumen protein retaining receptor family protein   chr1:10258580-10260906 REVERSE LENGTH=215                                                                                                                                                                                                  | 215 | 215 | 1.00E-119 | 100.0 | 94.4 | 98.1 |
| Rsa1.0_00006.1.g381.t1 | refNP_174226.1   WD40 domain-containing protein [Arabidopsis thaliana]   gi111074196 gb ABH04471.1   At1g29320 [Arabidopsis thaliana]   gi332192951 gb AEE31072.1   WD40 domain-containing protein [Arabidopsis thaliana]                                                                                                                                                                                                                      | 444 | 468 | 0         | 105.4 | 84.2 | 90.5 | WD40 domain-containing protein                    | gbpln | Arabidopsis thaliana | AT1G29320.1   Symbols:   Transducin/WD40 repeat-like superfamily protein   chr1:10255355-10258238 FORWARD LENGTH=468                                                                                                                                                                                                                         | 444 | 468 | 0         | 105.4 | 84.2 | 90.5 |
| Rsa1.0_00006.1.g382.t1 | refXP_002893556.1   hypothetical protein ARALYDRAFT_473140 [Arabidopsis lyrata subsp. lyrata]   gi297339398 gb EFH69815.1   hypothetical protein ARALYDRAFT_473140 [Arabidopsis lyrata subsp. lyrata]                                                                                                                                                                                                                                          | 470 | 459 | 0         | 97.7  | 81.7 | 89.1 | hypothetical protein ARALYDRAFT_473140            | gbpln | Arabidopsis lyrata   | AT1G29300.1   Symbols: UNE1   Plant protein of unknown function (DUF641)   chr1:10248120-10249499 REVERSE LENGTH=459                                                                                                                                                                                                                         | 470 | 459 | 0         | 97.7  | 81.3 | 88.1 |

|                        |                                                                                                                                                                                                                                                                                                                                                                                                                                                                                                                                                                    |     |     |           |       |      |      |                                                    |       |                      |                                                                                                                                                                                                                                                                                                                                                                                                                                                                                                                                                                                                                    |     |     |           |       |      |      |
|------------------------|--------------------------------------------------------------------------------------------------------------------------------------------------------------------------------------------------------------------------------------------------------------------------------------------------------------------------------------------------------------------------------------------------------------------------------------------------------------------------------------------------------------------------------------------------------------------|-----|-----|-----------|-------|------|------|----------------------------------------------------|-------|----------------------|--------------------------------------------------------------------------------------------------------------------------------------------------------------------------------------------------------------------------------------------------------------------------------------------------------------------------------------------------------------------------------------------------------------------------------------------------------------------------------------------------------------------------------------------------------------------------------------------------------------------|-----|-----|-----------|-------|------|------|
| Rsa1.0_00006.1.g383.t1 | ref[XP_002890803.1] hypothetical protein ARALYDRAFT_473139 [Arabidopsis lyrata subsp. lyrata] gi 297336645 gb EFH67062.1  hypothetical protein ARALYDRAFT_473139 [Arabidopsis lyrata subsp. lyrata]                                                                                                                                                                                                                                                                                                                                                                | 106 | 107 | 1.00E-40  | 100.9 | 81.1 | 90.6 | hypothetical protein ARALYDRAFT_473139             | gbpln | Arabidopsis lyrata   | AT1G29290.1   Symbols:   unknown protein; FUNCTIONS IN: molecular.function unknown; INVOLVED IN: biological.process unknown; LOCATED IN: endomembrane system; Has 18 Blast hits to 18 proteins in 5 species: Archae - 0; Bacteria - 0; Metazoa - 0; Fungi - 0; Plants - 18; Viruses - 0; Other Eukaryotes - 0 (source: NCBI BLink).   chr1:10245055-10245378 FORWARD LENGTH=107                                                                                                                                                                                                                                    | 106 | 107 | 2.00E-43  | 100.9 | 82.1 | 90.6 |
| Rsa1.0_00006.1.g384.t1 | gb AC114404.1  WRKY65-1 transcription factor [Brassica napus]                                                                                                                                                                                                                                                                                                                                                                                                                                                                                                      | 259 | 261 | 1.00E-116 | 100.8 | 85.3 | 88.8 | WRKY65-1 transcription factor                      | gbpln | Brassica napus       | AT1G29280.1   Symbols: WRKY65, ATWRKY65   WRKY DNA-binding protein 65   chr1:10236589-10237467 FORWARD LENGTH=259                                                                                                                                                                                                                                                                                                                                                                                                                                                                                                  | 259 | 259 | 1.00E-112 | 100.0 | 84.6 | 89.2 |
| Rsa1.0_00006.1.g385.t1 | #                                                                                                                                                                                                                                                                                                                                                                                                                                                                                                                                                                  | #   | #   | #         | #     | #    | #    | -                                                  | ----  | ----                 | #                                                                                                                                                                                                                                                                                                                                                                                                                                                                                                                                                                                                                  | #   | #   | #         | #     | #    |      |
| Rsa1.0_00006.1.g386.t1 | ref[NP_174217.1] CBL-interacting serine/threonine-protein kinase 18 [Arabidopsis thaliana] gi 75335276 sp Q9LP51.1 CIPK1_ARATH RecName: Full=CBL-interacting serine/threonine-protein kinase 18; AltName: Full=SNF1-related kinase 3.20; AltName: Full=SOS2-like protein kinase PKS22 gi 9502417 gb AAF88116.1 AC021043.9 Putative protein kinase [Arabidopsis thaliana] gi 14334388 gb AAK59695.1  CBL-interacting protein kinase 18 [Arabidopsis thaliana] gi 332192942 gb AEE31063.1  CBL-interacting serine/threonine-protein kinase 18 [Arabidopsis thaliana] | 523 | 520 | 0         | 99.4  | 88.7 | 93.7 | CBL-interacting serine/threonine-protein kinase 18 | gbpln | Arabidopsis thaliana | AT1G29230.1   Symbols: CIPK18, SnRK3.20, ATWL1, WL1, ATCIPK18   CBL-interacting protein kinase 18   chr1:10214860-10216422 FORWARD LENGTH=520                                                                                                                                                                                                                                                                                                                                                                                                                                                                      | 523 | 520 | 0         | 99.4  | 88.7 | 93.7 |
| Rsa1.0_00006.1.g387.t1 | ref[XP_002890798.1] hypothetical protein ARALYDRAFT_890443 [Arabidopsis lyrata subsp. lyrata] gi 297336640 gb EFH67057.1  hypothetical protein ARALYDRAFT_890443 [Arabidopsis lyrata subsp. lyrata]                                                                                                                                                                                                                                                                                                                                                                | 500 | 574 | 1.00E-168 | 114.8 | 69.8 | 82.0 | hypothetical protein ARALYDRAFT_890443             | gbpln | Arabidopsis lyrata   | AT1G29240.1   Symbols:   Protein of unknown function (DUF688)   chr1:10217023-10218924 REVERSE LENGTH=577                                                                                                                                                                                                                                                                                                                                                                                                                                                                                                          | 500 | 577 | 1.00E-168 | 115.4 | 70.8 | 81.4 |
| Rsa1.0_00006.1.g388.t1 | ref[NP_565781.1] Alba DNA/RNA-binding protein [Arabidopsis thaliana] gi 73921087 sp O22969.1 Y2416_ARATH RecName: Full=Uncharacterized protein At2g34160 gi 2342735 gb AAB67633.1  expressed protein [Arabidopsis thaliana] gi 21536653 gb AAM60985.1  unknown [Arabidopsis thaliana] gi 26450089 dbj BAC42164.1  unknown protein [Arabidopsis thaliana] gi 111074476 gb ABH04611.1  At2g34160 [Arabidopsis thaliana] gi 330253832 gb AEC08926.1  Alba DNA/RNA-binding protein [Arabidopsis thaliana]                                                              | 130 | 130 | 1.00E-59  | 100.0 | 89.2 | 93.1 | Alba DNA/RNA-binding protein                       | gbpln | Arabidopsis thaliana | AT2G34160.1   Symbols:   Alba DNA/RNA-binding protein   chr2:14426283-14427220 FORWARD LENGTH=130                                                                                                                                                                                                                                                                                                                                                                                                                                                                                                                  | 130 | 130 | 2.00E-62  | 100.0 | 89.2 | 93.1 |
| Rsa1.0_00006.1.g389.t1 | gb ABB92566.1  peroxisomal import receptor PTS2 [Brassica napus]                                                                                                                                                                                                                                                                                                                                                                                                                                                                                                   | 317 | 317 | 1.00E-178 | 100.0 | 93.7 | 97.8 | peroxisomal import receptor PTS2                   | gbpln | Brassica napus       | AT1G29260.1   Symbols: PEX7, ATPEX7   peroxin 7   chr1:10224923-10225876 FORWARD LENGTH=317                                                                                                                                                                                                                                                                                                                                                                                                                                                                                                                        | 317 | 317 | 1.00E-180 | 100.0 | 93.1 | 97.8 |
| Rsa1.0_00006.1.g390.t1 | gb EOA37296.1  hypothetical protein CARUB_v10010917mg [Capsella rubella]                                                                                                                                                                                                                                                                                                                                                                                                                                                                                           | 172 | 184 | 4.00E-68  | 107.0 | 82.0 | 86.0 | hypothetical protein CARUB_v10010917mg             | gbpln | Capsella rubella     | AT1G29195.1   Symbols:   unknown protein; FUNCTIONS IN: molecular.function unknown; INVOLVED IN: biological.process unknown; LOCATED IN: chloroplast; EXPRESSED IN: 13 plant structures; EXPRESSED DURING: 4 anthesis, C globular stage, 4 leaf senescence stage, petal differentiation and expansion stage; BEST Arabidopsis thaliana protein match is: unknown protein (TAIR:AT2G30230.1); Has 180 Blast hits to 180 proteins in 14 species: Archae - 0; Bacteria - 0; Metazoa - 0; Fungi - 0; Plants - 180; Viruses - 0; Other Eukaryotes - 0 (source: NCBI BLink).   chr1:10202673-10203254 REVERSE LENGTH=193 | 172 | 193 | 2.00E-69  | 112.2 | 82.6 | 89.0 |
| Rsa1.0_00006.1.g391.t1 | ref[NP_001184912.1] uncharacterized protein [Arabidopsis thaliana] gi 332189732 gb AEE27853.1  uncharacterized protein AT1G05550 [Arabidopsis thaliana]                                                                                                                                                                                                                                                                                                                                                                                                            | 372 | 385 | 7.00E-88  | 103.5 | 45.7 | 58.9 | uncharacterized protein                            | gbpln | Arabidopsis thaliana | AT1G05550.3   Symbols:   Protein of unknown function (DUF295)   chr1:1641229-1643748 REVERSE LENGTH=385                                                                                                                                                                                                                                                                                                                                                                                                                                                                                                            | 372 | 385 | 2.00E-90  | 103.5 | 45.7 | 58.9 |

|                        |                                                                                                                                                                                                                                                                                                                                                                                                                                                                                           |     |      |          |       |      |      |                                             |       |                      |                                                                                                                                                                                                                                                           |     |      |          |       |      |      |
|------------------------|-------------------------------------------------------------------------------------------------------------------------------------------------------------------------------------------------------------------------------------------------------------------------------------------------------------------------------------------------------------------------------------------------------------------------------------------------------------------------------------------|-----|------|----------|-------|------|------|---------------------------------------------|-------|----------------------|-----------------------------------------------------------------------------------------------------------------------------------------------------------------------------------------------------------------------------------------------------------|-----|------|----------|-------|------|------|
| Rsa1.0_00006.1.g392.t1 | refNP_174212.2  protein SCAR3 [Arabidopsis thaliana] gi 75175509 sp Q9LP46.1 SCAR3_ARAT H RecName: Full=Protein SCAR3; Short=AtSCAR3; AltName: Full=Protein WAVE2 gi 9502422 gb AAF88121.1 AC021043_14 Hypothetical protein [Arabidopsis thaliana] gi 53801280 gb AAU93850.1  SCAR3 [Arabidopsis thaliana] gi 332192931 gb AEE31052.1  protein SCAR3 [Arabidopsis thaliana]                                                                                                               | 940 | 1020 | 0        | 108.5 | 72.4 | 80.7 | protein SCAR3                               | gbpln | Arabidopsis thaliana | AT1G29170.1   Symbols: WAVE2, ATSCAR3, SCAR3   SCAR family protein   chr1:10190352-10194900 REVERSE LENGTH=1020                                                                                                                                           | 940 | 1020 | 0        | 108.5 | 72.4 | 80.7 |
| Rsa1.0_00006.1.g393.t1 | gb EOA37128.1  hypothetical protein CARUB_v10010402mg [Capsella rubella]                                                                                                                                                                                                                                                                                                                                                                                                                  | 179 | 182  | 3.00E-79 | 101.7 | 86.6 | 89.9 | hypothetical protein CARUB_v10010402mg      | gbpln | Capsella rubella     | AT1G29160.1   Symbols:   Dof-type zinc finger DNA-binding family protein   chr1:10183797-10184324 REVERSE LENGTH=175                                                                                                                                      | 179 | 175  | 4.00E-79 | 97.8  | 87.2 | 90.5 |
| Rsa1.0_00006.1.g394.t1 | refXP_002890794.1  hypothetical protein ARALYDRAFT_336019 [Arabidopsis lyrata subsp. lyrata] gi 297336636 gb EFH67053.1  hypothetical protein ARALYDRAFT_336019 [Arabidopsis lyrata subsp. lyrata]                                                                                                                                                                                                                                                                                        | 419 | 621  | 0        | 148.2 | 96.2 | 96.9 | hypothetical protein ARALYDRAFT_336019      | gbpln | Arabidopsis lyrata   | AT1G29150.1   Symbols: ATS9, RPN6   non-ATPase subunit 9   chr1:10181240-10182499 FORWARD LENGTH=419                                                                                                                                                      | 419 | 419  | 0        | 100.0 | 97.6 | 98.6 |
| Rsa1.0_00006.1.g395.t1 | gb EOA37644.1  hypothetical protein CARUB_v10012122mg [Capsella rubella]                                                                                                                                                                                                                                                                                                                                                                                                                  | 171 | 171  | 6.00E-85 | 100.0 | 88.9 | 92.4 | hypothetical protein CARUB_v10012122mg      | gbpln | Capsella rubella     | AT1G29140.1   Symbols:   Pollen Ole e 1 allergen and extensin family protein   chr1:10179029-10179811 FORWARD LENGTH=171                                                                                                                                  | 171 | 171  | 2.00E-85 | 100.0 | 86.5 | 91.8 |
| Rsa1.0_00006.1.g396.t1 | gb EOA40380.1  hypothetical protein CARUB_v10009109mg [Capsella rubella]                                                                                                                                                                                                                                                                                                                                                                                                                  | 451 | 452  | 0        | 100.2 | 89.4 | 92.7 | hypothetical protein CARUB_v10009109mg      | gbpln | Capsella rubella     | AT1G29120.2   Symbols:   Hydrolase-like protein family   chr1:10174481-10178143 FORWARD LENGTH=455                                                                                                                                                        | 451 | 455  | 0        | 100.9 | 86.9 | 91.8 |
| Rsa1.0_00006.1.g397.t1 | refXP_002890790.1  ribosomal protein L34 family protein [Arabidopsis lyrata subsp. lyrata] gi 297336632 gb EFH67049.1  ribosomal protein L34 family protein [Arabidopsis lyrata subsp. lyrata]                                                                                                                                                                                                                                                                                            | 162 | 159  | 2.00E-51 | 98.1  | 77.8 | 84.6 | ribosomal protein L34 family protein        | gbpln | Arabidopsis lyrata   | AT1G29070.1   Symbols:   Ribosomal protein L34   chr1:10149884-10151155 FORWARD LENGTH=157                                                                                                                                                                | 162 | 157  | 2.00E-53 | 96.9  | 80.2 | 87.0 |
| Rsa1.0_00006.1.g398.t1 | refNP_567434.1  protein transport protein SFT1 [Arabidopsis thaliana] gi 75248462 sp Q8VXX9.1 BETL1_ARAT H RecName: Full=Bet1-like protein At4g14600 gi 18389246 gb AAL67066.1  unknown protein [Arabidopsis thaliana] gi 20259643 gb AAM14339.1  unknown protein [Arabidopsis thaliana] gi 21554084 gb AAM63165.1  unknown [Arabidopsis thaliana] gi 26452326 db BAC43249.1  unknown protein [Arabidopsis thaliana] gi 332658064 gb AEE83464.1  Bet1-like protein [Arabidopsis thaliana] | 137 | 137  | 2.00E-70 | 100.0 | 92.7 | 97.1 | protein transport protein SFT1              | gbpln | Arabidopsis thaliana | AT4G14600.1   Symbols:   Target SNARE coiled-coil domain protein   chr4:8376562-8378078 FORWARD LENGTH=137                                                                                                                                                | 137 | 137  | 6.00E-73 | 100.0 | 92.7 | 97.1 |
| Rsa1.0_00006.1.g399.t1 | refXP_002893542.1  F1K23.5 [Arabidopsis lyrata subsp. lyrata] gi 297339384 gb EFH69801.1  F1K23.5 [Arabidopsis lyrata subsp. lyrata]                                                                                                                                                                                                                                                                                                                                                      | 210 | 269  | 2.00E-79 | 128.1 | 79.5 | 85.7 | F1K23.5                                     | gbpln | Arabidopsis lyrata   | AT1G28960.5   Symbols: ATNUDT15, ATNUDX15, NUDX15   nudix hydrolase homolog 15   chr1:10110135-10111607 REVERSE LENGTH=293                                                                                                                                | 210 | 293  | 2.00E-78 | 139.5 | 63.8 | 64.8 |
| Rsa1.0_00006.1.g400.t1 | refXP_002890784.1  predicted protein [Arabidopsis lyrata subsp. lyrata] gi 297336626 gb EFH67043.1  predicted protein [Arabidopsis lyrata subsp. lyrata]                                                                                                                                                                                                                                                                                                                                  | 119 | 117  | 6.00E-42 | 98.3  | 71.4 | 82.4 | predicted protein                           | gbpln | Arabidopsis lyrata   | AT1G28815.1   Symbols:   unknown protein; Has 5 Blast hits to 5 proteins in 2 species: Archaea - 0; Bacteria - 0; Metazoa - 0; Fungi - 0; Plants - 5; Viruses - 0; Other Eukaryotes - 0 (source: NCBI BLINK).   chr1:10095812-10096244 FORWARD LENGTH=115 | 119 | 115  | 8.00E-40 | 96.6  | 63.9 | 79.0 |
| Rsa1.0_00006.1.g401.t1 | refNP_174190.2  pentatricopeptide repeat-containing protein [Arabidopsis thaliana] gi 193806502 sp Q1PFQ9.2 PPR62_ARA TH RecName: Full=Pentatricopeptide repeat-containing protein At1g28690, mitochondrial; Flags: Precursor gi 332192893 gb AEE31014.1  pentatricopeptide repeat-containing protein [Arabidopsis thaliana]                                                                                                                                                              | 504 | 520  | 0        | 103.2 | 81.3 | 90.5 | pentatricopeptide repeat-containing protein | gbpln | Arabidopsis thaliana | AT1G28690.1   Symbols:   Tetratricopeptide repeat (TPR)-like superfamily protein   chr1:10080042-10081604 REVERSE LENGTH=520                                                                                                                              | 504 | 520  | 0        | 103.2 | 81.3 | 90.5 |
| Rsa1.0_00006.1.g402.t4 | gb AAx62802.1  lipase 2 [Brassica napus]                                                                                                                                                                                                                                                                                                                                                                                                                                                  | 241 | 389  | 5.00E-98 | 161.4 | 72.2 | 80.9 | lipase 2                                    | gbpln | Brassica napus       | AT1G28670.1   Symbols: ARAB-1   GDSL-like Lipase/Acylhydrolase superfamily protein   chr1:10074669-10076250 REVERSE LENGTH=384                                                                                                                            | 241 | 384  | 6.00E-94 | 159.3 | 68.5 | 78.0 |
| Rsa1.0_00006.1.g403.t1 | gb AAC34342.1  Hypothetical protein [Arabidopsis thaliana]                                                                                                                                                                                                                                                                                                                                                                                                                                | 355 | 374  | 7.00E-36 | 105.4 | 26.2 | 38.0 | Hypothetical protein                        | gbpln | Arabidopsis thaliana | AT1G10000.1   Symbols:   Ribonuclease H-like superfamily protein   chr1:3263877-3264788 REVERSE LENGTH=303                                                                                                                                                | 355 | 303  | 2.00E-38 | 85.4  | 26.2 | 38.0 |
| Rsa1.0_00006.1.g404.t1 | #                                                                                                                                                                                                                                                                                                                                                                                                                                                                                         | #   | #    | #        | #     | #    | #    | -                                           | ----  | ----                 | #                                                                                                                                                                                                                                                         | #   | #    | #        | #     | #    |      |

|                        |                                                                                                                                                                                                                                                                                                                                                                                                                                                         |      |      |           |       |      |      |                                        |       |                      |                                                                                                                                                                                                                                                                                                                                                                                                      |      |      |           |       |      |      |
|------------------------|---------------------------------------------------------------------------------------------------------------------------------------------------------------------------------------------------------------------------------------------------------------------------------------------------------------------------------------------------------------------------------------------------------------------------------------------------------|------|------|-----------|-------|------|------|----------------------------------------|-------|----------------------|------------------------------------------------------------------------------------------------------------------------------------------------------------------------------------------------------------------------------------------------------------------------------------------------------------------------------------------------------------------------------------------------------|------|------|-----------|-------|------|------|
| Rsa1.0_00006.1.g405.t1 | gb ABD64987.1  hypothetical protein 26.t00003 [Brassica oleracea]                                                                                                                                                                                                                                                                                                                                                                                       | 589  | 330  | 6.00E-15  | 56.0  | 9.8  | 11.4 | hypothetical protein 26.t00003         | gbpln | Brassica oleracea    | #                                                                                                                                                                                                                                                                                                                                                                                                    | #    | #    | #         | #     | #    |      |
| Rsa1.0_00006.1.g406.t2 | gb AAF16748.1 AC010155.1 F3M18.1 [Arabidopsis thaliana]<br>gi 6691212 gb AAF24550.1 AC007508.13 F1K23.20 [Arabidopsis thaliana]                                                                                                                                                                                                                                                                                                                         | 690  | 482  | 1.00E-167 | 69.9  | 44.1 | 51.9 | F3M18.1                                | gbpln | Arabidopsis thaliana | AT1G28560.1   Symbols: SRD2   snRNA activating complex family protein   chr1:10036197-10040382 REVERSE LENGTH=375                                                                                                                                                                                                                                                                                    | 690  | 375  | 1.00E-140 | 54.3  | 36.5 | 42.9 |
| Rsa1.0_00006.1.g407.t1 | ref XP_002890782.1  hypothetical protein ARALYDRAFT_473075 [Arabidopsis lyrata subsp. lyrata]<br>gi 297336624 gb EFH67041.1  hypothetical protein ARALYDRAFT_473075 [Arabidopsis lyrata subsp. lyrata]                                                                                                                                                                                                                                                  | 115  | 104  | 1.00E-38  | 90.4  | 74.8 | 81.7 | hypothetical protein ARALYDRAFT_473075 | gbpln | Arabidopsis lyrata   | AT1G28540.1   Symbols:   unknown protein; Has 25 Blast hits to 25 proteins in 10 species: Archae - 0; Bacteria - 0; Metazoa - 0; Fungi - 0; Plants - 25; Viruses - 0; Other Eukaryotes - 0 (source: NCBI BLink).   chr1:10035696-10036007 FORWARD LENGTH=103                                                                                                                                         | 115  | 103  | 1.00E-40  | 89.6  | 74.8 | 83.5 |
| Rsa1.0_00006.1.g408.t1 | gb EOA37571.1  hypothetical protein CARUB.v10011901mg [Capsella rubella]                                                                                                                                                                                                                                                                                                                                                                                | 609  | 609  | 0         | 100.0 | 85.1 | 92.8 | hypothetical protein CARUB.v10011901mg | gbpln | Capsella rubella     | AT1G28530.2   Symbols:   unknown protein; INVOLVED IN: biological_process unknown; LOCATED IN: chloroplast; EXPRESSED IN: 19 plant structures; EXPRESSED DURING: 10 growth stages; Has 20 Blast hits to 20 proteins in 6 species: Archae - 0; Bacteria - 0; Metazoa - 0; Fungi - 0; Plants - 20; Viruses - 0; Other Eukaryotes - 0 (source: NCBI BLink).   chr1:10032127-10035496 REVERSE LENGTH=613 | 609  | 613  | 0         | 100.7 | 84.1 | 91.6 |
| Rsa1.0_00006.1.g409.t2 | gb EOA36887.1  hypothetical protein CARUB.v10009822mg [Capsella rubella]                                                                                                                                                                                                                                                                                                                                                                                | 476  | 486  | 0         | 102.1 | 85.1 | 88.2 | hypothetical protein CARUB.v10009822mg | gbpln | Capsella rubella     | AT1G28520.2   Symbols: VOZ1   vascular plant one zinc finger protein   chr1:10029713-10031479 FORWARD LENGTH=486                                                                                                                                                                                                                                                                                     | 476  | 486  | 0         | 102.1 | 84.2 | 87.8 |
| Rsa1.0_00006.1.g410.t6 | ref NP_564311.1  Optic atrophy 3 protein (OPA3) [Arabidopsis thaliana]<br>gi 6560770 gb AAF16770.1 AC010155.23 F3M18.5 [Arabidopsis thaliana]<br>gi 15724222 gb AAL06504.1 AF412051.1 At1g28510/F3M18.5 [Arabidopsis thaliana]<br>gi 18252247 gb AAL62004.1  At1g28510/F3M18.5 [Arabidopsis thaliana]<br>gi 21553821 gb AAM62914.1  unknown [Arabidopsis thaliana]<br>gi 332192864 gb AEE30985.1  Optic atrophy 3 protein (OPA3) [Arabidopsis thaliana] | 183  | 171  | 6.00E-77  | 93.4  | 78.7 | 88.0 | Optic atrophy 3 protein (OPA3)         | gbpln | Arabidopsis thaliana | AT1G28510.1   Symbols:   Optic atrophy 3 protein (OPA3)   chr1:10024036-10025939 FORWARD LENGTH=171                                                                                                                                                                                                                                                                                                  | 183  | 171  | 2.00E-79  | 93.4  | 78.7 | 88.0 |
| Rsa1.0_00006.1.g411.t1 | ref XP_002890776.1  hypothetical protein ARALYDRAFT_473063 [Arabidopsis lyrata subsp. lyrata]<br>gi 297336618 gb EFH67035.1  hypothetical protein ARALYDRAFT_473063 [Arabidopsis lyrata subsp. lyrata]                                                                                                                                                                                                                                                  | 994  | 996  | 0         | 100.2 | 83.6 | 91.3 | hypothetical protein ARALYDRAFT_473063 | gbpln | Arabidopsis lyrata   | AT1G28440.1   Symbols: HSL1   HAESA-like 1   chr1:9996914-10000171 FORWARD LENGTH=996                                                                                                                                                                                                                                                                                                                | 994  | 996  | 0         | 100.2 | 83.0 | 91.6 |
| Rsa1.0_00006.1.g412.t1 | ref XP_002890775.1  HB-1 [Arabidopsis lyrata subsp. lyrata]<br>gi 297336617 gb EFH67034.1  HB-1 [Arabidopsis lyrata subsp. lyrata]<br>ref XP_002893510.1  hypothetical protein ARALYDRAFT_890356 [Arabidopsis lyrata subsp. lyrata]<br>gi 297339352 gb EFH69769.1  hypothetical protein ARALYDRAFT_890356 [Arabidopsis lyrata subsp. lyrata]                                                                                                            | 1572 | 1705 | 0         | 108.5 | 81.7 | 88.5 | HB-1                                   | gbpln | Arabidopsis lyrata   | AT1G28420.1   Symbols: HB-1   homeobox-1   chr1:9979936-9987460 FORWARD LENGTH=1705                                                                                                                                                                                                                                                                                                                  | 1572 | 1705 | 0         | 108.5 | 80.7 | 87.3 |
| Rsa1.0_00006.1.g413.t1 | hypothetical protein ARALYDRAFT_890356 [Arabidopsis lyrata subsp. lyrata]                                                                                                                                                                                                                                                                                                                                                                               | 130  | 260  | 3.00E-37  | 200.0 | 65.4 | 69.2 | hypothetical protein ARALYDRAFT_890356 | gbpln | Arabidopsis lyrata   | AT1G28200.1   Symbols: FIP1   FH interacting protein 1   chr1:9850395-9852300 REVERSE LENGTH=259                                                                                                                                                                                                                                                                                                     | 130  | 259  | 6.00E-37  | 199.2 | 62.3 | 66.9 |

|                        |                                                                                                                                                                                                                                                                                                                                                                                                           |     |     |           |       |      |      |                                                                                                                                                                                                                                                                                                                                                                    |       |                      |                                                                                                                               |     |     |           |       |      |      |
|------------------------|-----------------------------------------------------------------------------------------------------------------------------------------------------------------------------------------------------------------------------------------------------------------------------------------------------------------------------------------------------------------------------------------------------------|-----|-----|-----------|-------|------|------|--------------------------------------------------------------------------------------------------------------------------------------------------------------------------------------------------------------------------------------------------------------------------------------------------------------------------------------------------------------------|-------|----------------------|-------------------------------------------------------------------------------------------------------------------------------|-----|-----|-----------|-------|------|------|
| Rsa1.0_00007.1.g414.t1 | sp Q43133.1 GGPPS_SINAL RecName: Full=Geranylgeranyl pyrophosphate synthase, chloroplastic/chromoplastic; Short=GGPP synthase; AltName: Full=(2E,6E)-farnesyl diphosphate synthase; AltName: Full=Dimethylallyltransferase; AltName: Full=Farnesyl diphosphate synthase; AltName: Full=Geranyltransferase; Flags: Precursor g 1419758 emb CAA67330.1 geranylgeranyl pyrophosphate synthase [Sinapis alba] | 361 | 366 | 1.00E-156 | 101.4 | 80.1 | 89.2 | RecName: Full=Geranylgeranyl pyrophosphate synthase, chloroplastic/chromoplastic; Short=GGPP synthase; AltName: Full=(2E,6E)-farnesyl diphosphate synthase; AltName: Full=Dimethylallyltransferase; AltName: Full=Farnesyl diphosphate synthase; AltName: Full=Geranyltransferase; Flags: Precursor g 1419758 emb CAA67330.1 geranylgeranyl pyrophosphate synthase | gbpln | Sinapis alba         | AT4G36810.1   Symbols: GGPS1   geranylgeranyl pyrophosphate synthase 1   chr4:17343513-17344628 FORWARD LENGTH=371            | 361 | 371 | 1.00E-156 | 102.8 | 79.2 | 86.7 |
| Rsa1.0_00007.1.g415.t1 | gb AC116426.1  RUB1-conjugation enzyme [Brassica juncea]                                                                                                                                                                                                                                                                                                                                                  | 185 | 185 | 1.00E-104 | 100.0 | 97.3 | 98.9 | RUB1-conjugation enzyme                                                                                                                                                                                                                                                                                                                                            | gbpln | Brassica juncea      | AT4G36800.2   Symbols: RCE1   RUB1 conjugating enzyme 1   chr4:17341237-17342148 REVERSE LENGTH=184                           | 185 | 184 | 1.00E-105 | 99.5  | 97.3 | 98.9 |
| Rsa1.0_00007.1.g416.t1 | dbj BAJ34484.1  unnamed protein product [Theellungiella halophila]                                                                                                                                                                                                                                                                                                                                        | 640 | 645 | 0         | 100.8 | 94.5 | 97.5 | unnamed protein product                                                                                                                                                                                                                                                                                                                                            | ----  | ----                 | AT4G36760.1   Symbols: ATAPP1, APP1   aminopeptidase P1   chr4:17326688-17329979 FORWARD LENGTH=645                           | 640 | 645 | 0         | 100.8 | 92.2 | 96.3 |
| Rsa1.0_00007.1.g417.t1 | ref XP_002866994.1  homeobox-leucine zipper protein ATHB-40 [Arabidopsis lyrata subsp. lyrata] g 297312830 gb EFH43253.1  homeobox-leucine zipper protein ATHB-40 [Arabidopsis lyrata subsp. lyrata]                                                                                                                                                                                                      | 221 | 217 | 1.00E-91  | 98.2  | 78.7 | 87.8 | homeobox-leucine zipper protein ATHB-40                                                                                                                                                                                                                                                                                                                            | gbpln | Arabidopsis lyrata   | AT4G36740.1   Symbols: HB-5, ATHB40, HB40   homeobox protein 40   chr4:17314649-17316314 REVERSE LENGTH=216                   | 221 | 216 | 5.00E-94  | 97.7  | 77.8 | 86.9 |
| Rsa1.0_00007.1.g418.t1 | # # # # # # # #                                                                                                                                                                                                                                                                                                                                                                                           | #   | #   | #         | #     | #    | #    | -                                                                                                                                                                                                                                                                                                                                                                  | ----  | ----                 | #                                                                                                                             | #   | #   | #         | #     | #    |      |
| Rsa1.0_00007.1.g419.t4 | emb CAA58774.1  G-box binding factor 1A [Brassica napus]                                                                                                                                                                                                                                                                                                                                                  | 319 | 313 | 1.00E-144 | 98.1  | 84.6 | 87.1 | G-box binding factor 1A                                                                                                                                                                                                                                                                                                                                            | gbpln | Brassica napus       | AT4G36730.1   Symbols: GBF1   G-box binding factor 1   chr4:17309850-17311752 REVERSE LENGTH=315                              | 319 | 315 | 1.00E-141 | 98.7  | 83.1 | 88.1 |
| Rsa1.0_00007.1.g420.t1 | ref XP_002869026.1  hypothetical protein ARALYDRAFT_912692 [Arabidopsis lyrata subsp. lyrata] g 297314862 gb EFH45285.1  hypothetical protein ARALYDRAFT_912692 [Arabidopsis lyrata subsp. lyrata]                                                                                                                                                                                                        | 207 | 205 | 7.00E-89  | 99.0  | 76.8 | 88.9 | hypothetical protein ARALYDRAFT_912692                                                                                                                                                                                                                                                                                                                             | gbpln | Arabidopsis lyrata   | AT4G36720.1   Symbols: HVA22K   HVA22-like protein K   chr4:17307769-17309668 FORWARD LENGTH=200                              | 207 | 200 | 1.00E-85  | 96.6  | 72.9 | 84.5 |
| Rsa1.0_00007.1.g421.t1 | ref NP_195388.2  cupin family protein [Arabidopsis thaliana] g 332661291 gb AEE86691.1  cupin family protein [Arabidopsis thaliana] ref XP_002866997.1  hypothetical protein ARALYDRAFT_490965 [Arabidopsis lyrata subsp. lyrata] g 297312833 gb EFH43256.1  hypothetical protein ARALYDRAFT_490965 [Arabidopsis lyrata subsp. lyrata]                                                                    | 579 | 522 | 0         | 90.2  | 60.4 | 68.0 | cupin family protein                                                                                                                                                                                                                                                                                                                                               | gbpln | Arabidopsis thaliana | AT4G36700.1   Symbols:   RmlC-like cupins superfamily protein   chr4:17298443-17300337 REVERSE LENGTH=522                     | 579 | 522 | 0         | 90.2  | 60.4 | 68.0 |
| Rsa1.0_00007.1.g422.t4 | ref XP_002866998.1  pentatricopeptide repeat-containing protein [Arabidopsis lyrata subsp. lyrata] g 297312834 gb EFH43257.1  pentatricopeptide repeat-containing protein [Arabidopsis lyrata subsp. lyrata]                                                                                                                                                                                              | 407 | 411 | 0         | 101.0 | 76.9 | 89.4 | pentatricopeptide repeat-containing protein                                                                                                                                                                                                                                                                                                                        | gbpln | Arabidopsis lyrata   | AT4G36680.1   Symbols:   Tetratricopeptide repeat (TPR)-like superfamily protein   chr4:17292479-17293717 REVERSE LENGTH=412  | 407 | 412 | 0         | 101.2 | 75.7 | 88.9 |
| Rsa1.0_00007.1.g424.t1 | gb EOA16170.1  hypothetical protein CARUB_v10004306mg [Capsella rubella]                                                                                                                                                                                                                                                                                                                                  | 665 | 668 | 0         | 100.5 | 82.4 | 90.5 | hypothetical protein CARUB_v10004306mg                                                                                                                                                                                                                                                                                                                             | gbpln | Capsella rubella     | AT4G38030.1   Symbols:   Rhamnogalacturonate lyase family protein   chr4:17863206-17866730 REVERSE LENGTH=667                 | 665 | 667 | 0         | 100.3 | 81.7 | 89.5 |
| Rsa1.0_00007.1.g425.t1 | gb EOA18172.1  hypothetical protein CARUB_v10006648mg [Capsella rubella]                                                                                                                                                                                                                                                                                                                                  | 508 | 493 | 0         | 97.0  | 87.8 | 93.1 | hypothetical protein CARUB_v10006648mg                                                                                                                                                                                                                                                                                                                             | gbpln | Capsella rubella     | AT4G36670.1   Symbols:   Major facilitator superfamily protein   chr4:17287680-17289483 REVERSE LENGTH=493                    | 508 | 493 | 0         | 97.0  | 86.6 | 92.5 |
| Rsa1.0_00007.1.g426.t1 | gb EOA18681.1  hypothetical protein CARUB_v10007257mg [Capsella rubella]                                                                                                                                                                                                                                                                                                                                  | 293 | 293 | 1.00E-159 | 100.0 | 90.4 | 94.9 | hypothetical protein CARUB_v10007257mg                                                                                                                                                                                                                                                                                                                             | gbpln | Capsella rubella     | AT4G36640.1   Symbols:   Sec14p-like phosphatidylinositol transfer family protein   chr4:17277187-17278447 REVERSE LENGTH=294 | 293 | 294 | 1.00E-153 | 100.3 | 85.3 | 93.2 |

|                        |                                                                                                                                                                                                                                                                                                                                                                                                                                                                                                                    |      |      |           |       |      |      |                                                                  |       |                      |                                                                                                                                                                                                                                                                                                                     |      |      |           |       |      |      |
|------------------------|--------------------------------------------------------------------------------------------------------------------------------------------------------------------------------------------------------------------------------------------------------------------------------------------------------------------------------------------------------------------------------------------------------------------------------------------------------------------------------------------------------------------|------|------|-----------|-------|------|------|------------------------------------------------------------------|-------|----------------------|---------------------------------------------------------------------------------------------------------------------------------------------------------------------------------------------------------------------------------------------------------------------------------------------------------------------|------|------|-----------|-------|------|------|
| Rsa1.0_00007.1.g427.t2 | refNP_195381.6  Vacuolar sorting protein 39 [Arabidopsis thaliana]   gi20466826 gb AAM20730.1  unknown protein [Arabidopsis thaliana]   gi332661279 gb AEE86679.1  Vacuolar sorting protein 39 [Arabidopsis thaliana]                                                                                                                                                                                                                                                                                              | 565  | 1000 | 0         | 177.0 | 71.9 | 81.2 | Vacuolar sorting protein 39                                      | gbpln | Arabidopsis thaliana | AT4G36630.1   Symbols: EMB2754   Vacuolar sorting protein 39   chr4:17272088-17276524 REVERSE LENGTH=1000                                                                                                                                                                                                           | 565  | 1000 | 0         | 177.0 | 71.9 | 81.2 |
| Rsa1.0_00007.1.g428.t1 | gb ADP95696.1  class III heme peroxidase [Brassica rapa]                                                                                                                                                                                                                                                                                                                                                                                                                                                           | 323  | 296  | 1.00E-119 | 91.6  | 65.0 | 74.0 | class III heme peroxidase                                        | gbpln | Brassica rapa        | AT4G36430.1   Symbols:   Peroxidase superfamily protein   chr4:17204648-17205917 REVERSE LENGTH=331                                                                                                                                                                                                                 | 323  | 331  | 1.00E-116 | 102.5 | 63.2 | 74.3 |
| Rsa1.0_00007.1.g429.t1 | refXP_002886383.1  hypothetical protein ARALYDRAFT_474974 [Arabidopsis lyrata subsp. lyrata]   gi297332224 gb EFH62642.1  hypothetical protein ARALYDRAFT_474974 [Arabidopsis lyrata subsp. lyrata]                                                                                                                                                                                                                                                                                                                | 1034 | 1049 | 0         | 101.5 | 87.3 | 92.6 | hypothetical protein ARALYDRAFT_474974                           | gbpln | Arabidopsis lyrata   | AT1G63810.1   Symbols:   CONTAINS InterPro DOMAIN/s: Nrap protein (InterPro:IPR005554); Has 396 Blast hits to 382 proteins in 182 species: Archae - 3; Bacteria - 2; Metazoa - 142; Fungi - 146; Plants - 43; Viruses - 0; Other Eukaryotes - 60 (source: NCBI BLINK).   chr1:23669690-23675542 REVERSE LENGTH=1053 | 1034 | 1053 | 0         | 101.8 | 86.2 | 92.2 |
| Rsa1.0_00007.1.g430.t1 | gb EOA18974.1  hypothetical protein CARUB_v10007612mg [Capsella rubella]                                                                                                                                                                                                                                                                                                                                                                                                                                           | 216  | 212  | 4.00E-86  | 98.1  | 80.6 | 87.0 | hypothetical protein CARUB_v10007612mg                           | gbpln | Capsella rubella     | AT4G36620.1   Symbols: GATA19   GATA transcription factor 19   chr4:17268906-17269662 REVERSE LENGTH=211                                                                                                                                                                                                            | 216  | 211  | 1.00E-81  | 97.7  | 82.9 | 88.4 |
| Rsa1.0_00007.1.g431.t1 | gb EOA32387.1  hypothetical protein CARUB_v10015657mg [Capsella rubella]                                                                                                                                                                                                                                                                                                                                                                                                                                           | 294  | 313  | 8.00E-99  | 106.5 | 59.5 | 79.9 | hypothetical protein CARUB_v10015657mg                           | gbpln | Capsella rubella     | AT4G36610.1   Symbols:   alpha/beta-Hydrolases superfamily protein   chr4:17265545-17267274 REVERSE LENGTH=317                                                                                                                                                                                                      | 294  | 317  | 1.00E-100 | 107.8 | 60.2 | 79.3 |
| Rsa1.0_00007.1.g432.t1 | gb EOA18452.1  hypothetical protein CARUB_v10006996mg [Capsella rubella]                                                                                                                                                                                                                                                                                                                                                                                                                                           | 456  | 465  | 1.00E-128 | 102.0 | 65.1 | 75.0 | hypothetical protein CARUB_v10006996mg                           | gbpln | Capsella rubella     | AT4G36600.1   Symbols:   Late embryogenesis abundant (LEA) protein   chr4:17263666-17264968 FORWARD LENGTH=353                                                                                                                                                                                                      | 456  | 353  | 2.00E-94  | 77.4  | 52.2 | 59.9 |
| Rsa1.0_00007.1.g433.t1 | gb EOA15655.1  hypothetical protein CARUB_v10006084mg, partial [Capsella rubella]                                                                                                                                                                                                                                                                                                                                                                                                                                  | 79   | 105  | 3.00E-37  | 132.9 | 94.9 | 96.2 | hypothetical protein CARUB_v10006084mg, partial                  | gbpln | Capsella rubella     | AT1G75250.1   Symbols: ATRL6, RSM3, RL6   RAD-like 6   chr1:28245073-28245453 REVERSE LENGTH=126                                                                                                                                                                                                                    | 79   | 126  | 2.00E-27  | 159.5 | 62.0 | 82.3 |
| Rsa1.0_00007.1.g434.t1 | # # # # # # # # # #                                                                                                                                                                                                                                                                                                                                                                                                                                                                                                | #    | #    | #         | #     | #    | #    | -                                                                | ----  | ----                 | #                                                                                                                                                                                                                                                                                                                   | #    | #    | #         | #     | #    | #    |
| Rsa1.0_00007.1.g435.t1 | refXP_002867008.1  U-box domain-containing protein 5 [Arabidopsis lyrata subsp. lyrata]   gi297312844 gb EFH43267.1  U-box domain-containing protein 5 [Arabidopsis lyrata subsp. lyrata]                                                                                                                                                                                                                                                                                                                          | 748  | 751  | 0         | 100.4 | 69.7 | 80.2 | U-box domain-containing protein 5                                | gbpln | Arabidopsis lyrata   | AT4G36550.1   Symbols:   ARM repeat superfamily protein   chr4:17245400-17247926 REVERSE LENGTH=718                                                                                                                                                                                                                 | 748  | 718  | 0         | 96.0  | 69.1 | 79.0 |
| Rsa1.0_00007.1.g436.t4 | gb EOA17086.1  hypothetical protein CARUB_v10005334mg [Capsella rubella]                                                                                                                                                                                                                                                                                                                                                                                                                                           | 299  | 304  | 1.00E-138 | 101.7 | 82.3 | 89.6 | hypothetical protein CARUB_v10005334mg                           | gbpln | Capsella rubella     | AT4G36540.1   Symbols: BEE2   BR enhanced expression 2   chr4:17243699-17244965 FORWARD LENGTH=304                                                                                                                                                                                                                  | 299  | 304  | 1.00E-139 | 101.7 | 81.6 | 87.6 |
| Rsa1.0_00007.1.g437.t1 | # # # # # # # # # #                                                                                                                                                                                                                                                                                                                                                                                                                                                                                                | #    | #    | #         | #     | #    | #    | -                                                                | ----  | ----                 | #                                                                                                                                                                                                                                                                                                                   | #    | #    | #         | #     | #    | #    |
| Rsa1.0_00007.1.g438.t1 | refNP_195368.1  uncharacterized protein [Arabidopsis thaliana]   gi2464932 emb CAB16811.1  putative protein [Arabidopsis thaliana]   gi7270598 emb CAB80316.1  putative protein [Arabidopsis thaliana]   gi28393196 gb AAO42028.1  unknown protein [Arabidopsis thaliana]   gi28827518 gb AAO50603.1  unknown protein [Arabidopsis thaliana]   gi332661263 gb AEE86663.1  uncharacterized protein AT4G36500 [Arabidopsis thaliana]                                                                                 | 428  | 122  | 7.00E-56  | 28.5  | 27.3 | 27.6 | uncharacterized protein                                          | gbpln | Arabidopsis thaliana | Arabidopsis thaliana protein match is: unknown protein (TAIRAT2G18210.1); Has 50 Blast hits to 50 proteins in 7 species: Archae - 0; Bacteria - 0; Metazoa - 0; Fungi - 0; Plants - 50; Viruses - 0; Other Eukaryotes - 0 (source: NCBI BLINK).   chr4:17226139-17226507 REVERSE LENGTH=122                         | 428  | 122  | 2.00E-58  | 28.5  | 27.3 | 27.6 |
| Rsa1.0_00007.1.g439.t1 | refNP_195365.1  S-adenosyl-L-methionine-dependent methyltransferase-like protein [Arabidopsis thaliana]   gi4006915 emb CAB16845.1  hypothetical protein [Arabidopsis thaliana]   gi7270595 emb CAB80313.1  hypothetical protein [Arabidopsis thaliana]   gi48427662 gb AAT42380.1  At4g36470 [Arabidopsis thaliana]   gi110741629 db BAE88762.1  hypothetical protein [Arabidopsis thaliana]   gi332661259 gb AEE86659.1  S-adenosyl-L-methionine-dependent methyltransferase-like protein [Arabidopsis thaliana] | 400  | 371  | 1.00E-167 | 92.8  | 72.0 | 79.8 | S-adenosyl-L-methionine-dependent methyltransferase-like protein | gbpln | Arabidopsis thaliana | AT4G36470.1   Symbols:   S-adenosyl-L-methionine-dependent methyltransferases superfamily protein   chr4:17215128-17216475 REVERSE LENGTH=371                                                                                                                                                                       | 400  | 371  | 1.00E-170 | 92.8  | 72.0 | 79.8 |



|                        |                                                                                                                                                                                                                                                                                                                                                                                                                                                                                                                                                                                                        |      |      |           |       |      |      |                                                 |       |                      |                                                                                                                                                                                                                                                                                                                                                                                                                                                                     |      |      |           |       |      |      |
|------------------------|--------------------------------------------------------------------------------------------------------------------------------------------------------------------------------------------------------------------------------------------------------------------------------------------------------------------------------------------------------------------------------------------------------------------------------------------------------------------------------------------------------------------------------------------------------------------------------------------------------|------|------|-----------|-------|------|------|-------------------------------------------------|-------|----------------------|---------------------------------------------------------------------------------------------------------------------------------------------------------------------------------------------------------------------------------------------------------------------------------------------------------------------------------------------------------------------------------------------------------------------------------------------------------------------|------|------|-----------|-------|------|------|
| Rsa1.0_00007.1.g440.t1 | refNP_176033.1  purple acid phosphatase 6 [Arabidopsis thaliana] gi 75268138 sp Q9C510.1 PPA6_ARATH RecName: Full=Purple acid phosphatase 6; Flags: Precursor gi 12321764 gb AAG50924.1 AC069159_25 purple acid phosphatase, putative [Arabidopsis thaliana] gi 12323034 gb AAG51511.1 AC058785_14 purple acid phosphatase, putative [Arabidopsis thaliana] gi 91805975 gb ABE65716.1  calcineurin-like phosphoesterase family protein [Arabidopsis thaliana] gi 11074186 gb ABH04466.1  At1g56360 [Arabidopsis thaliana] gi 332195262 gb AEE33383.1  purple acid phosphatase 6 [Arabidopsis thaliana] | 463  | 466  | 0         | 100.6 | 82.9 | 90.3 | purple acid phosphatase 6                       | gbpln | Arabidopsis thaliana | AT1G56360.1   Symbols: PAP6, ATPAP6   purple acid phosphatase 6   chr1:21098603-21100842 REVERSE LENGTH=466                                                                                                                                                                                                                                                                                                                                                         | 463  | 466  | 0         | 100.6 | 82.9 | 90.3 |
| Rsa1.0_00007.1.g441.t1 | refXP_002869039.1  ALDH3F1 [Arabidopsis lyrata subsp. lyrata] gi 297314875 gb EFH45298.1  ALDH3F1 [Arabidopsis lyrata subsp. lyrata]                                                                                                                                                                                                                                                                                                                                                                                                                                                                   | 488  | 484  | 0         | 99.2  | 86.5 | 94.7 | ALDH3F1                                         | gbpln | Arabidopsis lyrata   | AT4G36250.1   Symbols: ALDH3F1   aldehyde dehydrogenase 3F1   chr4:17151029-17153381 FORWARD LENGTH=484                                                                                                                                                                                                                                                                                                                                                             | 488  | 484  | 0         | 99.2  | 85.9 | 94.3 |
| Rsa1.0_00007.1.g442.t1 | gb ACP30631.1  disease resistance protein [Brassica rapa subsp. pekinensis]                                                                                                                                                                                                                                                                                                                                                                                                                                                                                                                            | 2009 | 1241 | 0         | 61.8  | 38.6 | 45.6 | disease resistance protein                      | gbpln | Brassica rapa        | AT4G36150.1   Symbols:   Disease resistance protein (TIR-NBS-LRR class) family   chr4:17104776-17108711 FORWARD LENGTH=1179                                                                                                                                                                                                                                                                                                                                         | 2009 | 1179 | 0         | 58.7  | 38.9 | 45.2 |
| Rsa1.0_00007.1.g443.t1 | gb ABD65084.1  hypothetical protein 27.t00096 [Brassica oleracea]                                                                                                                                                                                                                                                                                                                                                                                                                                                                                                                                      | 158  | 645  | 5.00E-28  | 408.2 | 38.6 | 45.6 | hypothetical protein 27.t00096                  | gbpln | Brassica oleracea    | #                                                                                                                                                                                                                                                                                                                                                                                                                                                                   | #    | #    | #         | #     | #    | #    |
| Rsa1.0_00007.1.g444.t2 | gb EOA23804.1  hypothetical protein CARUB_v10017017mg, partial [Capsella rubella]                                                                                                                                                                                                                                                                                                                                                                                                                                                                                                                      | 1053 | 521  | 3.00E-49  | 49.5  | 14.4 | 22.7 | hypothetical protein CARUB_v10017017mg, partial | gbpln | Capsella rubella     | AT3G31430.1   Symbols:   unknown protein; FUNCTIONS IN: molecular_function unknown; INVOLVED IN: biological_process unknown; LOCATED IN: endomembrane system; BEST Arabidopsis thaliana protein match is: unknown protein (TAIR:AT5G18636.1); Has 295 Blast hits to 291 proteins in 12 species: Archae - 0; Bacteria - 0; Metazoa - 0; Fungi - 0; Plants - 295; Viruses - 0; Other Eukaryotes - 0 (source: NCBI BLink).   chr3:12795861-12796871 REVERSE LENGTH=336 | 1053 | 336  | 1.00E-14  | 31.9  | 5.0  | 7.8  |
| Rsa1.0_00007.1.g445.t1 | #                                                                                                                                                                                                                                                                                                                                                                                                                                                                                                                                                                                                      | #    | #    | #         | #     | #    | #    | -                                               | ----  | ----                 | #                                                                                                                                                                                                                                                                                                                                                                                                                                                                   | #    | #    | #         | #     | #    | #    |
| Rsa1.0_00007.1.g446.t1 | gb EOA15885.1  hypothetical protein CARUB_v10003971mg [Capsella rubella]                                                                                                                                                                                                                                                                                                                                                                                                                                                                                                                               | 1622 | 1947 | 0         | 120.0 | 53.1 | 62.0 | hypothetical protein CARUB_v10003971mg          | gbpln | Capsella rubella     | AT4G36140.1   Symbols:   disease resistance protein (TIR-NBS-LRR class), putative   chr4:17098956-17104479 REVERSE LENGTH=1607                                                                                                                                                                                                                                                                                                                                      | 1622 | 1607 | 0         | 99.1  | 47.4 | 54.8 |
| Rsa1.0_00007.1.g447.t1 | gb ACP30632.1  disease resistance protein [Brassica rapa subsp. pekinensis]                                                                                                                                                                                                                                                                                                                                                                                                                                                                                                                            | 1027 | 1238 | 0         | 120.5 | 58.9 | 65.5 | disease resistance protein                      | gbpln | Brassica rapa        | AT4G36140.1   Symbols:   disease resistance protein (TIR-NBS-LRR class), putative   chr4:17098956-17104479 REVERSE LENGTH=1607                                                                                                                                                                                                                                                                                                                                      | 1027 | 1607 | 0         | 156.5 | 54.6 | 63.1 |
| Rsa1.0_00007.1.g448.t1 | gb ACP30631.1  disease resistance protein [Brassica rapa subsp. pekinensis]                                                                                                                                                                                                                                                                                                                                                                                                                                                                                                                            | 1268 | 1241 | 0         | 97.9  | 64.9 | 74.1 | disease resistance protein                      | gbpln | Brassica rapa        | AT4G36150.1   Symbols:   Disease resistance protein (TIR-NBS-LRR class) family   chr4:17104776-17108711 FORWARD LENGTH=1179                                                                                                                                                                                                                                                                                                                                         | 1268 | 1179 | 0         | 93.0  | 61.0 | 71.4 |
| Rsa1.0_00007.1.g449.t1 | gb EOA15885.1  hypothetical protein CARUB_v10003971mg [Capsella rubella]                                                                                                                                                                                                                                                                                                                                                                                                                                                                                                                               | 598  | 1947 | 1.00E-148 | 325.6 | 51.8 | 65.9 | hypothetical protein CARUB_v10003971mg          | gbpln | Capsella rubella     | AT3G44670.2   Symbols:   Disease resistance protein (TIR-NBS-LRR class) family   chr3:16217242-16221425 FORWARD LENGTH=1219                                                                                                                                                                                                                                                                                                                                         | 598  | 1219 | 1.00E-127 | 203.8 | 39.5 | 51.3 |
| Rsa1.0_00007.1.g450.t1 | gb EOA15884.1  hypothetical protein CARUB_v10003971mg [Capsella rubella]                                                                                                                                                                                                                                                                                                                                                                                                                                                                                                                               | 1377 | 1946 | 0         | 141.3 | 33.0 | 39.0 | hypothetical protein CARUB_v10003971mg          | gbpln | Capsella rubella     | AT4G36140.1   Symbols:   disease resistance protein (TIR-NBS-LRR class), putative   chr4:17098956-17104479 REVERSE LENGTH=1607                                                                                                                                                                                                                                                                                                                                      | 1377 | 1607 | 0         | 116.7 | 33.0 | 39.1 |
| Rsa1.0_00007.1.g451.t1 | refXP_002869043.1  60S ribosomal protein L8 [Arabidopsis lyrata subsp. lyrata] gi 297314879 gb EFH45302.1  60S ribosomal protein L8 [Arabidopsis lyrata subsp. lyrata]                                                                                                                                                                                                                                                                                                                                                                                                                                 | 258  | 258  | 1.00E-145 | 100.0 | 98.1 | 99.6 | 60S ribosomal protein L8                        | gbpln | Arabidopsis lyrata   | AT4G36130.1   Symbols:   Ribosomal protein L2 family   chr4:17097613-17098656 FORWARD LENGTH=258                                                                                                                                                                                                                                                                                                                                                                    | 258  | 258  | 1.00E-147 | 100.0 | 97.3 | 99.6 |
| Rsa1.0_00007.1.g452.t1 | gb AAM65223.1  unknown [Arabidopsis thaliana]                                                                                                                                                                                                                                                                                                                                                                                                                                                                                                                                                          | 349  | 342  | 1.00E-133 | 98.0  | 80.2 | 85.1 | unknown                                         | gbpln | Arabidopsis thaliana | AT4G24060.1   Symbols:   Dof-type zinc finger DNA-binding family protein   chr4:12503970-12505417 FORWARD LENGTH=342                                                                                                                                                                                                                                                                                                                                                | 349  | 342  | 1.00E-131 | 98.0  | 80.2 | 85.7 |
| Rsa1.0_00007.1.g453.t2 | refXP_002869754.1  UDP-D-glucose/UDP-D-galactose 4-epimerase 2 [Arabidopsis lyrata subsp. lyrata] gi 297315590 gb EFH46013.1  UDP-D-glucose/UDP-D-galactose 4-epimerase 2 [Arabidopsis lyrata subsp. lyrata]                                                                                                                                                                                                                                                                                                                                                                                           | 230  | 350  | 7.00E-57  | 152.2 | 56.1 | 63.5 | UDP-D-glucose/UDP-D-galactose 4-epimerase 2     | gbpln | Arabidopsis lyrata   | AT4G23920.1   Symbols: UGE2, ATUGE2   UDP-D-glucose/UDP-D-galactose 4-epimerase 2   chr4:12431416-12433666 FORWARD LENGTH=350                                                                                                                                                                                                                                                                                                                                       | 230  | 350  | 2.00E-59  | 152.2 | 55.7 | 63.9 |

|                        |                                                                                                                                                                                                                                                                                                                                                                                              |     |     |           |       |      |      |                                        |       |                      |                                                                                                                                                                                                                                                                                                                                                                                                                                                                                                                                   |     |     |           |       |      |      |
|------------------------|----------------------------------------------------------------------------------------------------------------------------------------------------------------------------------------------------------------------------------------------------------------------------------------------------------------------------------------------------------------------------------------------|-----|-----|-----------|-------|------|------|----------------------------------------|-------|----------------------|-----------------------------------------------------------------------------------------------------------------------------------------------------------------------------------------------------------------------------------------------------------------------------------------------------------------------------------------------------------------------------------------------------------------------------------------------------------------------------------------------------------------------------------|-----|-----|-----------|-------|------|------|
| Rsa1.0_00007.1.g454.t1 | ref[XP_002867686.1] hypothetical protein ARALYDRAFT_492479 [Arabidopsis lyrata subsp. lyrata] gi 297313522 gb EFH43945.1                                                                                                                                                                                                                                                                     | 194 | 196 | 6.00E-72  | 101.0 | 75.8 | 83.0 | hypothetical protein ARALYDRAFT_492479 | gbpln | Arabidopsis lyrata   | AT4G23880.1   Symbols:   unknown protein; Has 73 Blast hits to 69 proteins in 22 species: Archae - 0; Bacteria - 4; Metazoa - 9; Fungi - 2; Plants - 18; Viruses - 0; Other Eukaryotes - 40 (source: NCBI BLink).   chr4:12415789-12416388 REVERSE LENGTH=199                                                                                                                                                                                                                                                                     | 194 | 199 | 2.00E-70  | 102.6 | 75.3 | 83.0 |
| Rsa1.0_00007.1.g455.t1 | #                                                                                                                                                                                                                                                                                                                                                                                            | #   | #   | #         | #     | #    | #    | -                                      | ----  | ----                 | AT4G23770.1   Symbols:   unknown protein; BEST Arabidopsis thaliana protein match is: unknown protein (TAIR:AT4G23780.1); Has 17 Blast hits to 17 proteins in 6 species: Archae - 0; Bacteria - 2; Metazoa - 0; Fungi - 0; Plants - 13; Viruses - 0; Other Eukaryotes - 2 (source: NCBI BLink).   chr4:12383514-12384050 REVERSE LENGTH=138                                                                                                                                                                                       | 132 | 138 | 2.00E-12  | 104.5 | 37.1 | 53.0 |
| Rsa1.0_00007.1.g456.t1 | #                                                                                                                                                                                                                                                                                                                                                                                            | #   | #   | #         | #     | #    | #    | -                                      | ----  | ----                 | #                                                                                                                                                                                                                                                                                                                                                                                                                                                                                                                                 | #   | #   | #         | #     | #    |      |
| Rsa1.0_00007.1.g457.t1 | #                                                                                                                                                                                                                                                                                                                                                                                            | #   | #   | #         | #     | #    | #    | -                                      | ----  | ----                 | #                                                                                                                                                                                                                                                                                                                                                                                                                                                                                                                                 | #   | #   | #         | #     | #    |      |
| Rsa1.0_00008.1.g458.t1 | gb EOA30677.1  hypothetical protein CARUB_v10013815mg [Capsella rubella]                                                                                                                                                                                                                                                                                                                     | 203 | 415 | 7.00E-78  | 204.4 | 73.9 | 83.7 | hypothetical protein CARUB_v10013815mg | gbpln | Capsella rubella     | AT3G02340.1   Symbols:   RING/U-box superfamily protein   chr3:477032-478261 FORWARD LENGTH=409                                                                                                                                                                                                                                                                                                                                                                                                                                   | 203 | 409 | 1.00E-67  | 201.5 | 67.5 | 78.8 |
| Rsa1.0_00008.1.g459.t1 | gb EOA30007.1  hypothetical protein CARUB_v10013111mg [Capsella rubella]                                                                                                                                                                                                                                                                                                                     | 226 | 690 | 2.00E-16  | 305.3 | 21.7 | 23.5 | hypothetical protein CARUB_v10013111mg | gbpln | Capsella rubella     | AT3G18480.1   Symbols: AtCASP, CASP   CCAAT-displacement protein alternatively spliced product   chr3:6338924-6341596 FORWARD LENGTH=689                                                                                                                                                                                                                                                                                                                                                                                          | 226 | 689 | 1.00E-18  | 304.9 | 21.7 | 23.5 |
| Rsa1.0_00008.1.g460.t1 | ref[XP_002882224.1] hypothetical protein ARALYDRAFT_477468 [Arabidopsis lyrata subsp. lyrata] gi 297328064 gb EFH58483.1                                                                                                                                                                                                                                                                     | 544 | 561 | 0         | 103.1 | 91.4 | 94.7 | hypothetical protein ARALYDRAFT_477468 | gbpln | Arabidopsis lyrata   | AT3G02350.1   Symbols: GAUT9   galacturonosyltransferase 9   chr3:479248-481178 FORWARD LENGTH=561                                                                                                                                                                                                                                                                                                                                                                                                                                | 544 | 561 | 0         | 103.1 | 90.8 | 94.5 |
| Rsa1.0_00008.1.g461.t1 | ref[NP_187562.1] RNase H domain-containing protein [Arabidopsis thaliana] gi 6682231 gb AAF23283.1 AC016661.8 putative non-LTR reverse transcriptase [Arabidopsis thaliana] gi 332641254 gb AEE74775.1  RNase H domain-containing protein [Arabidopsis thaliana]                                                                                                                             | 343 | 484 | 4.00E-62  | 141.1 | 35.6 | 50.1 | RNase H domain-containing protein      | gbpln | Arabidopsis thaliana | AT3G09510.1   Symbols:   Ribonuclease H-like superfamily protein   chr3:2921804-2923258 FORWARD LENGTH=484                                                                                                                                                                                                                                                                                                                                                                                                                        | 343 | 484 | 1.00E-64  | 141.1 | 35.6 | 50.1 |
| Rsa1.0_00008.1.g462.t1 | ref[XP_002863143.1] hypothetical protein ARALYDRAFT_332990 [Arabidopsis lyrata subsp. lyrata] gi 297308977 gb EFH39402.1                                                                                                                                                                                                                                                                     | 416 | 428 | 0         | 102.9 | 78.8 | 89.4 | hypothetical protein ARALYDRAFT_332990 | gbpln | Arabidopsis lyrata   | AT4G13330.1   Symbols:   S-adenosyl-L-methionine-dependent methyltransferases superfamily protein   chr4:7754248-7755837 REVERSE LENGTH=428                                                                                                                                                                                                                                                                                                                                                                                       | 416 | 428 | 0         | 102.9 | 77.9 | 89.4 |
| Rsa1.0_00008.1.g463.t1 | gb EOA32415.1  hypothetical protein CARUB_v10015687mg [Capsella rubella]                                                                                                                                                                                                                                                                                                                     | 437 | 644 | 1.00E-100 | 147.4 | 53.8 | 67.0 | hypothetical protein CARUB_v10015687mg | gbpln | Capsella rubella     | AT4G14490.1   Symbols:   SMAD/FHA domain-containing protein   chr4:8332414-8333574 REVERSE LENGTH=386                                                                                                                                                                                                                                                                                                                                                                                                                             | 437 | 386 | 5.00E-67  | 88.3  | 41.4 | 56.3 |
| Rsa1.0_00008.1.g464.t3 | ref[XP_002884318.1] hypothetical protein ARALYDRAFT_896208 [Arabidopsis lyrata subsp. lyrata] gi 297330158 gb EFH60577.1                                                                                                                                                                                                                                                                     | 496 | 344 | 1.00E-141 | 69.4  | 52.4 | 55.8 | hypothetical protein ARALYDRAFT_896208 | gbpln | Arabidopsis lyrata   | AT3G02420.1   Symbols:   unknown protein; FUNCTIONS IN: molecular_function unknown; INVOLVED IN: biological_process unknown; LOCATED IN: membrane; EXPRESSED IN: 25 plant structures; EXPRESSED DURING: 15 growth stages; CONTAINS InterPro DOMAIN/s: Uncharacterised protein family UPF0121 (InterPro:IPR005344); Has 72 Blast hits to 71 proteins in 25 species: Archae - 0; Bacteria - 0; Metazoa - 2; Fungi - 2; Plants - 60; Viruses - 0; Other Eukaryotes - 8 (source: NCBI BLink).   chr3:496179-498772 REVERSE LENGTH=348 | 496 | 348 | 1.00E-141 | 70.2  | 52.6 | 56.0 |
| Rsa1.0_00008.1.g465.t1 | ref[NP_186892.1] uncharacterized protein [Arabidopsis thaliana] gi 6957706 gb AAF32450.1  hypothetical protein [Arabidopsis thaliana] gi 49660133 gb AAT68357.1  hypothetical protein At3g02430 [Arabidopsis thaliana] gi 50058917 gb AAT69203.1  hypothetical protein At3g02430 [Arabidopsis thaliana] gi 332640286 gb AEE73807.1  uncharacterized protein AT3G02430 [Arabidopsis thaliana] | 194 | 219 | 3.00E-92  | 112.9 | 85.6 | 91.2 | uncharacterized protein                | gbpln | Arabidopsis thaliana | AT3G02430.1   Symbols:   Protein of unknown function (DUF679)   chr3:499360-500019 FORWARD LENGTH=219                                                                                                                                                                                                                                                                                                                                                                                                                             | 194 | 219 | 1.00E-94  | 112.9 | 85.6 | 91.2 |

|                        |                                                                                                                                                                                                                                                                                                  |     |      |           |       |      |      |                                                                                                                       |       |                      |                                                                                                                                                                                                                                                                                                                                             |     |     |           |       |      |      |
|------------------------|--------------------------------------------------------------------------------------------------------------------------------------------------------------------------------------------------------------------------------------------------------------------------------------------------|-----|------|-----------|-------|------|------|-----------------------------------------------------------------------------------------------------------------------|-------|----------------------|---------------------------------------------------------------------------------------------------------------------------------------------------------------------------------------------------------------------------------------------------------------------------------------------------------------------------------------------|-----|-----|-----------|-------|------|------|
| Rsa1.0_00008.1.g466.t1 | gb EOA33068.1  hypothetical protein CARUB_v10016401mg [Capsella rubella]                                                                                                                                                                                                                         | 612 | 452  | 0         | 73.9  | 58.2 | 64.1 | hypothetical protein CARUB_v10016401mg                                                                                | gbpln | Capsella rubella     | AT3G02440.1   Symbols: TBL20   TRICHOME BIREFRINGENCE-LIKE 20   chr3:500804-502229 REVERSE LENGTH=373                                                                                                                                                                                                                                       | 612 | 373 | 1.00E-150 | 60.9  | 46.1 | 51.5 |
| Rsa1.0_00008.1.g467.t1 | gb AAS45435.1  S-adenosylmethionine decarboxylase [Brassica juncea]                                                                                                                                                                                                                              | 365 | 366  | 0         | 100.3 | 97.0 | 98.1 | S-adenosylmethionine decarboxylase                                                                                    | gbpln | Brassica juncea      | AT3G02470.4   Symbols:   S-adenosylmethionine decarboxylase   chr3:510223-511323 FORWARD LENGTH=366                                                                                                                                                                                                                                         | 365 | 366 | 0         | 100.3 | 94.8 | 97.5 |
| Rsa1.0_00008.1.g468.t1 | gb ABD96872.1  hypothetical protein [Cleome spinosa]                                                                                                                                                                                                                                             | 68  | 69   | 1.00E-18  | 101.5 | 72.1 | 83.8 | hypothetical protein                                                                                                  | gbpln | Cleome spinosa       | AT3G02480.1   Symbols:   Late embryogenesis abundant protein (LEA) family protein   chr3:512384-512857 FORWARD LENGTH=68                                                                                                                                                                                                                    | 68  | 68  | 7.00E-19  | 100.0 | 80.9 | 91.2 |
| Rsa1.0_00008.1.g469.t1 | #                                                                                                                                                                                                                                                                                                | #   | #    | #         | #     | #    | #    | -                                                                                                                     | ----  | ----                 | #                                                                                                                                                                                                                                                                                                                                           | #   | #   | #         | #     | #    | #    |
| Rsa1.0_00008.1.g470.t1 | gb ABD96872.1  hypothetical protein [Cleome spinosa]                                                                                                                                                                                                                                             | 68  | 69   | 2.00E-18  | 101.5 | 70.6 | 85.3 | hypothetical protein                                                                                                  | gbpln | Cleome spinosa       | AT3G02480.1   Symbols:   Late embryogenesis abundant protein (LEA) family protein   chr3:512384-512857 FORWARD LENGTH=68                                                                                                                                                                                                                    | 68  | 68  | 8.00E-20  | 100.0 | 83.8 | 92.6 |
| Rsa1.0_00008.1.g471.t1 | ref NP_186900.3  regulator of chromosome condensation domain-containing protein [Arabidopsis thaliana] gi 110735845 db BAE99899.1  hypothetical protein [Arabidopsis thaliana] gi 332640299 gb AEE73820.1  regulator of chromosome condensation domain-containing protein [Arabidopsis thaliana] | 392 | 393  | 0         | 100.3 | 93.6 | 96.7 | regulator of chromosome condensation domain-containing protein                                                        | gbpln | Arabidopsis thaliana | AT3G02510.1   Symbols:   Regulator of chromosome condensation (RCC1) family protein   chr3:522086-524536 REVERSE LENGTH=393                                                                                                                                                                                                                 | 392 | 393 | 0         | 100.3 | 93.6 | 96.7 |
| Rsa1.0_00008.1.g472.t2 | gb AAP37970.1  seed specific protein Bn15D17A [Brassica napus]                                                                                                                                                                                                                                   | 343 | 264  | 1.00E-119 | 77.0  | 69.1 | 70.3 | seed specific protein Bn15D17A                                                                                        | gbpln | Brassica napus       | AT3G02550.1   Symbols: LBD41   LOB domain-containing protein 41   chr3:536747-537850 REVERSE LENGTH=263                                                                                                                                                                                                                                     | 343 | 263 | 1.00E-117 | 76.7  | 62.1 | 66.5 |
| Rsa1.0_00008.1.g473.t1 | gb EOA31548.1  hypothetical protein CARUB_v10014739mg [Capsella rubella]                                                                                                                                                                                                                         | 172 | 185  | 1.00E-52  | 107.6 | 69.8 | 77.9 | hypothetical protein CARUB_v10014739mg                                                                                | gbpln | Capsella rubella     | AT3G02555.1   Symbols:   unknown protein; BEST Arabidopsis thaliana protein match is: unknown protein (TAIR:AT5G16110.1). Has 130 Blast hits to 130 proteins in 18 species: Archae - 0; Bacteria - 0; Metazoa - 0; Fungi - 0; Plants - 130; Viruses - 0; Other Eukaryotes - 0 (source: NCBI BLink).   chr3:540024-540955 REVERSE LENGTH=162 | 172 | 162 | 6.00E-47  | 94.2  | 66.9 | 74.4 |
| Rsa1.0_00008.1.g474.t1 | sp Q9XH45.1 RS7_BRAOL RecName: Full=40S ribosomal protein S7 gi 5532505 gb AAD44761.1 AF144752.1 40S ribosomal protein S7 homolog [Brassica oleracea]                                                                                                                                            | 191 | 191  | 1.00E-104 | 100.0 | 97.9 | 98.4 | RecName: Full=40S ribosomal protein S7 gi 5532505 gb AAD44761.1 AF144752.1 40S ribosomal protein S7 homolog           | gbpln | Brassica oleracea    | AT3G02560.2   Symbols:   Ribosomal protein S7e family protein   chr3:542341-543168 FORWARD LENGTH=191                                                                                                                                                                                                                                       | 191 | 191 | 2.00E-98  | 100.0 | 90.1 | 94.8 |
| Rsa1.0_00008.1.g475.t1 | gb EOA29607.1  hypothetical protein CARUB_v10013753mg [Capsella rubella]                                                                                                                                                                                                                         | 430 | 432  | 0         | 100.5 | 90.7 | 95.6 | hypothetical protein CARUB_v10013753mg                                                                                | gbpln | Capsella rubella     | AT3G02570.1   Symbols: MEE31, PMI1   Mannose-6-phosphate isomerase, type I   chr3:543463-545478 REVERSE LENGTH=432                                                                                                                                                                                                                          | 430 | 432 | 0         | 100.5 | 89.1 | 95.1 |
| Rsa1.0_00008.1.g476.t1 | gb AAF32472.1  hypothetical protein [Arabidopsis thaliana]                                                                                                                                                                                                                                       | 530 | 1077 | 0         | 203.2 | 77.5 | 84.5 | hypothetical protein                                                                                                  | gbpln | Arabidopsis thaliana | AT3G02645.1   Symbols:   Plant protein of unknown function (DUF247)   chr3:566271-567860 FORWARD LENGTH=529                                                                                                                                                                                                                                 | 530 | 529 | 0         | 99.8  | 81.3 | 88.7 |
| Rsa1.0_00008.1.g477.t1 | gb EOA31892.1  hypothetical protein CARUB_v10015120mg, partial [Capsella rubella]                                                                                                                                                                                                                | 569 | 582  | 0         | 102.3 | 78.4 | 86.5 | hypothetical protein CARUB_v10015120mg, partial                                                                       | gbpln | Capsella rubella     | AT3G02650.1   Symbols:   Tetratricopeptide repeat (TPR)-like superfamily protein   chr3:568135-569865 FORWARD LENGTH=576                                                                                                                                                                                                                    | 569 | 576 | 0         | 101.2 | 78.2 | 86.8 |
| Rsa1.0_00008.1.g478.t1 | ref XP_002884331.1  tRNA synthetase class I family protein [Arabidopsis lyrata subsp. lyrata] gi 297330171 gb EFH60590.1  tRNA synthetase class I family protein [Arabidopsis lyrata subsp. lyrata]                                                                                              | 509 | 511  | 0         | 100.4 | 89.8 | 95.3 | tRNA synthetase class I family protein                                                                                | gbpln | Arabidopsis lyrata   | AT3G02660.1   Symbols: emb2768   Tyrosyl-tRNA synthetase, class Ib, bacterial/mitochondrial   chr3:570221-571756 REVERSE LENGTH=511                                                                                                                                                                                                         | 509 | 511 | 0         | 100.4 | 88.2 | 94.1 |
| Rsa1.0_00008.1.g479.t1 | ref XP_002882247.1  integral membrane family protein [Arabidopsis lyrata subsp. lyrata] gi 297328087 gb EFH58506.1  integral membrane family protein [Arabidopsis lyrata subsp. lyrata]                                                                                                          | 419 | 424  | 0         | 101.2 | 86.4 | 92.8 | integral membrane family protein                                                                                      | gbpln | Arabidopsis lyrata   | AT3G02690.1   Symbols:   nodulin MnN21 /EamA-like transporter family protein   chr3:579627-581448 FORWARD LENGTH=417                                                                                                                                                                                                                        | 419 | 417 | 0         | 99.5  | 86.6 | 93.1 |
| Rsa1.0_00008.1.g480.t1 | gb EOA31304.1  hypothetical protein CARUB_v10014477mg [Capsella rubella]                                                                                                                                                                                                                         | 252 | 249  | 1.00E-125 | 98.8  | 89.3 | 94.8 | hypothetical protein CARUB_v10014477mg                                                                                | gbpln | Capsella rubella     | AT3G02700.1   Symbols:   NC domain-containing protein-related   chr3:581727-582813 REVERSE LENGTH=252                                                                                                                                                                                                                                       | 252 | 252 | 1.00E-127 | 100.0 | 87.7 | 94.8 |
| Rsa1.0_00008.1.g481.t1 | gb EOA30303.1  hypothetical protein CARUB_v10013428mg [Capsella rubella]                                                                                                                                                                                                                         | 504 | 534  | 0         | 106.0 | 91.5 | 96.8 | hypothetical protein CARUB_v10013428mg                                                                                | gbpln | Capsella rubella     | AT3G02710.1   Symbols:   ARM repeat superfamily protein   chr3:583184-585780 FORWARD LENGTH=529                                                                                                                                                                                                                                             | 504 | 529 | 0         | 105.0 | 91.9 | 96.2 |
| Rsa1.0_00008.1.g482.t1 | sp O48897.1 TRXF_BRANA RecName: Full=Thioredoxin F-type, chloroplastic; Short=Trx-F; Flags: Precursor gi 2921094 gb AAC04671.1 thioredoxin-f [Brassica napus]                                                                                                                                    | 182 | 182  | 2.00E-93  | 100.0 | 95.1 | 96.7 | RecName: Full=Thioredoxin F-type, chloroplastic; Short=Trx-F; Flags: Precursor gi 2921094 gb AAC04671.1 thioredoxin-f | gbpln | Brassica napus       | AT3G02730.1   Symbols: TRXF1, ATF1   thioredoxin F-type 1   chr3:588570-589591 REVERSE LENGTH=178                                                                                                                                                                                                                                           | 182 | 178 | 2.00E-91  | 97.8  | 89.0 | 94.5 |

|                        |                                                                                                                                                                                                                                                                                                                                                                                  |      |      |           |       |      |      |                                                                 |       |                      |                                                                                                                                                         |      |     |           |       |      |      |
|------------------------|----------------------------------------------------------------------------------------------------------------------------------------------------------------------------------------------------------------------------------------------------------------------------------------------------------------------------------------------------------------------------------|------|------|-----------|-------|------|------|-----------------------------------------------------------------|-------|----------------------|---------------------------------------------------------------------------------------------------------------------------------------------------------|------|-----|-----------|-------|------|------|
| Rsa1.0_00008.1.g483.t1 | ref NP_186923.1  aspartyl protease-like protein [Arabidopsis thaliana] gi 6728988 gb AAF26986.1 AC018363_31 putative aspartyl protease [Arabidopsis thaliana] gi 21593593 gb AAM65560.1  putative aspartyl protease [Arabidopsis thaliana] gi 332640332 gb AEE73853.1  aspartyl protease-like protein [Arabidopsis thaliana]                                                     | 377  | 488  | 1.00E-130 | 129.4 | 73.5 | 82.0 | aspartyl protease-like protein                                  | gbpln | Arabidopsis thaliana | AT3G02740.1   Symbols:   Eukaryotic aspartyl protease family protein   chr3:5950561-593089 FORWARD LENGTH=488                                           | 377  | 488 | 1.00E-132 | 129.4 | 73.5 | 82.0 |
| Rsa1.0_00008.1.g484.t1 | ref XP_002884336.1  phosphatase 2C family protein [Arabidopsis lyrata subsp. lyrata] gi 297330176 gb EFH60595.1  phosphatase 2C family protein [Arabidopsis lyrata subsp. lyrata]                                                                                                                                                                                                | 476  | 490  | 0         | 102.9 | 87.4 | 94.5 | phosphatase 2C family protein                                   | gbpln | Arabidopsis lyrata   | AT3G02750.2   Symbols:   Protein phosphatase 2C family protein   chr3:593601-595457 REVERSE LENGTH=492                                                  | 476  | 492 | 0         | 103.4 | 85.7 | 93.7 |
| Rsa1.0_00008.1.g485.t1 | gb EOA29853.1  hypothetical protein CARUB_v10012946mg [Capsella rubella]                                                                                                                                                                                                                                                                                                         | 859  | 886  | 0         | 103.1 | 77.9 | 86.7 | hypothetical protein CARUB_v10012946mg                          | gbpln | Capsella rubella     | AT3G02760.1   Symbols:   Class II aaRS and biotin synthetases superfamily protein   chr3:597588-600650 REVERSE LENGTH=883                               | 859  | 883 | 0         | 102.8 | 77.3 | 86.3 |
| Rsa1.0_00008.1.g486.t1 | ref XP_002884338.1  dimethylmenaquinone methyltransferase family protein [Arabidopsis lyrata subsp. lyrata] gi 297330176 gb EFH60597.1  dimethylmenaquinone methyltransferase family protein [Arabidopsis lyrata subsp. lyrata]                                                                                                                                                  | 166  | 166  | 7.00E-88  | 100.0 | 97.0 | 98.8 | dimethylmenaquinone methyltransferase family protein            | gbpln | Arabidopsis lyrata   | AT3G02770.1   Symbols:   Ribonuclease E inhibitor RraA/Dimethylmenaquinone methyltransferase   chr3:601017-601884 REVERSE LENGTH=166                    | 166  | 166 | 2.00E-89  | 100.0 | 95.8 | 98.2 |
| Rsa1.0_00008.1.g487.t1 | gb AAF36996.1 AF236092.1 isopentenyl pyrophosphate:dimethylallyl pyrophosphate isomerase [Brassica oleracea var. botrytis]                                                                                                                                                                                                                                                       | 261  | 281  | 1.00E-133 | 107.7 | 90.8 | 95.8 | isopentenyl pyrophosphate:dimethylallyl pyrophosphate isomerase | gbpln | Brassica oleracea    | AT3G02780.1   Symbols:   IPP2, IPIAT1, IDI2   isopentenyl pyrophosphate:dimethylallyl pyrophosphate isomerase 2   chr3:602578-604648 REVERSE LENGTH=284 | 261  | 284 | 1.00E-128 | 108.8 | 87.0 | 92.3 |
| Rsa1.0_00008.1.g488.t1 | gb AAF26980.1 AC018363_25 unknown protein [Arabidopsis thaliana] gi 34365627 gb AAQ65125.1  At3g02800 [Arabidopsis thaliana]                                                                                                                                                                                                                                                     | 204  | 199  | 2.00E-99  | 97.5  | 83.8 | 88.2 | unknown protein                                                 | gbpln | Arabidopsis thaliana | AT3G02800.1   Symbols:   Tyrosine phosphatase family protein   chr3:606638-607704 REVERSE LENGTH=203                                                    | 204  | 203 | 1.00E-102 | 99.5  | 83.8 | 88.2 |
| Rsa1.0_00008.1.g489.t1 | ref NP_180565.1  mitogen-activated protein kinase kinase kinase 14 [Arabidopsis thaliana] gi 3420047 gb AAC31848.1  putative protein kinase [Arabidopsis thaliana] gi 24030256 gb AANA1303.1  putative protein kinase [Arabidopsis thaliana] gi 330253244 gb AEC08338.1  mitogen-activated protein kinase kinase kinase 14 [Arabidopsis thaliana]                                | 422  | 463  | 1.00E-155 | 109.7 | 70.6 | 79.4 | mitogen-activated protein kinase kinase kinase 14               | gbpln | Arabidopsis thaliana | AT2G30040.1   Symbols:   MAPKKK14   mitogen-activated protein kinase kinase kinase 14   chr2:12821747-12823138 FORWARD LENGTH=463                       | 422  | 463 | 1.00E-157 | 109.7 | 70.6 | 79.4 |
| Rsa1.0_00008.1.g490.t1 | dbj BAJ34022.1  unnamed protein product [Theillungiella halophila]                                                                                                                                                                                                                                                                                                               | 370  | 395  | 1.00E-164 | 106.8 | 84.1 | 89.5 | unnamed protein product                                         | ----  | ----                 | AT2G30020.1   Symbols:   Protein phosphatase 2C family protein   chr2:12814437-12815904 FORWARD LENGTH=396                                              | 370  | 396 | 1.00E-162 | 107.0 | 81.4 | 87.6 |
| Rsa1.0_00008.1.g491.t1 | gb EMT31378.1  Zinc finger CCOH domain-containing protein 30 [Aegilops tauschii]                                                                                                                                                                                                                                                                                                 | 110  | 671  | 2.00E-59  | 610.0 | 91.8 | 93.6 | Zinc finger CCOH domain-containing protein 30                   | gbpln | Aegilops tauschii    | AT2G30000.1   Symbols:   PHF5-like protein   chr2:12804042-12804374 REVERSE LENGTH=110                                                                  | 110  | 110 | 6.00E-59  | 100.0 | 98.2 | 99.1 |
| Rsa1.0_00008.1.g492.t1 | ref NP_180560.1  NADH dehydrogenase [Arabidopsis thaliana] gi 75318710 sp O80874.1 NDA2_ARATH RecName: Full=Alternative NAD(P)H dehydrogenase 2, mitochondrial; Flags: Precursor gi 3420052 gb AAC31853.1  putative NADH dehydrogenase (ubiquinone oxidoreductase) [Arabidopsis thaliana] gi 330253238 gb AEC08332.1  alternative NAD(P)H dehydrogenase 2 [Arabidopsis thaliana] | 504  | 508  | 0         | 100.8 | 91.1 | 94.2 | NADH dehydrogenase                                              | gbpln | Arabidopsis thaliana | AT2G29990.1   Symbols:   NDA2   alternative NAD(P)H dehydrogenase 2   chr2:12793562-12795913 REVERSE LENGTH=508                                         | 504  | 508 | 0         | 100.8 | 91.1 | 94.2 |
| Rsa1.0_00008.1.g493.t1 | #                                                                                                                                                                                                                                                                                                                                                                                | #    | #    | #         | #     | #    | -    | ----                                                            | ----  | #                    | #                                                                                                                                                       | #    | #   | #         | #     | #    | #    |
| Rsa1.0_00008.1.g494.t1 | #                                                                                                                                                                                                                                                                                                                                                                                | #    | #    | #         | #     | #    | -    | ----                                                            | ----  | #                    | #                                                                                                                                                       | #    | #   | #         | #     | #    | #    |
| Rsa1.0_00008.1.g495.t1 | ref NP_001190256.1  syntaxin-132 [Arabidopsis thaliana] gi 332003861 gb AED91244.1  syntaxin-132 [Arabidopsis thaliana]                                                                                                                                                                                                                                                          | 270  | 315  | 5.00E-35  | 116.7 | 35.9 | 38.9 | syntaxin-132                                                    | gbpln | Arabidopsis thaliana | AT5G08080.3   Symbols:   SYP132   syntaxin of plants 132   chr5:2588532-2591106 FORWARD LENGTH=315                                                      | 270  | 315 | 1.00E-37  | 116.7 | 35.9 | 38.9 |
| Rsa1.0_00008.1.g496.t2 | emb CAB39638.1  RNA-directed DNA polymerase-like protein [Arabidopsis thaliana] gi 7267666 emb CAB78094.1  RNA-directed DNA polymerase-like protein [Arabidopsis thaliana]                                                                                                                                                                                                       | 2561 | 1274 | 0         | 49.7  | 24.2 | 32.7 | RNA-directed DNA polymerase-like protein                        | gbpln | Arabidopsis thaliana | AT3G02990.1   Symbols:   ATHSFA1E, HSF1A1   heat shock transcription factor A1E   chr3:673614-675988 FORWARD LENGTH=468                                 | 2561 | 468 | 0         | 18.3  | 14.7 | 15.9 |
| Rsa1.0_00008.1.g497.t1 | ref XP_002874698.1  predicted protein [Arabidopsis lyrata subsp. lyrata] gi 297320535 gb EFH50957.1  predicted protein [Arabidopsis lyrata subsp. lyrata]                                                                                                                                                                                                                        | 295  | 372  | 7.00E-49  | 126.1 | 42.0 | 58.0 | predicted protein                                               | gbpln | Arabidopsis lyrata   | AT4G11580.1   Symbols:   RNI-like superfamily protein   chr4:7006648-7007738 REVERSE LENGTH=333                                                         | 295  | 333 | 2.00E-45  | 112.9 | 40.0 | 55.3 |

|                         |                                                                                                                                                                                                                                                                                                                                                                                                                                                                                                                                                                                                                                                                                                                                   |      |      |           |       |      |      |                                        |       |                      |                                                                                                                                           |      |      |           |       |      |      |
|-------------------------|-----------------------------------------------------------------------------------------------------------------------------------------------------------------------------------------------------------------------------------------------------------------------------------------------------------------------------------------------------------------------------------------------------------------------------------------------------------------------------------------------------------------------------------------------------------------------------------------------------------------------------------------------------------------------------------------------------------------------------------|------|------|-----------|-------|------|------|----------------------------------------|-------|----------------------|-------------------------------------------------------------------------------------------------------------------------------------------|------|------|-----------|-------|------|------|
| Rsa1.0_00008.1.g498.t1  | gb EOA31596.1  hypothetical protein CARUB_v10014793mg [Capsella rubella]                                                                                                                                                                                                                                                                                                                                                                                                                                                                                                                                                                                                                                                          | 170  | 165  | 5.00E-78  | 97.1  | 88.8 | 94.7 | hypothetical protein CARUB_v10014793mg | gbpln | Capsella rubella     | AT3G03000.1   Symbols:   EF hand calcium-binding protein family   chr3:677388-677885 FORWARD LENGTH=165                                   | 170  | 165  | 3.00E-79  | 97.1  | 88.2 | 93.5 |
| Rsa1.0_00008.1.g499.t1  | gb EOA32660.1  hypothetical protein CARUB_v10015958mg [Capsella rubella]                                                                                                                                                                                                                                                                                                                                                                                                                                                                                                                                                                                                                                                          | 175  | 180  | 2.00E-74  | 102.9 | 85.7 | 90.9 | hypothetical protein CARUB_v10015958mg | gbpln | Capsella rubella     | AT3G03010.2   Symbols:   Peptidyl-tRNA hydrolase II (PTH2) family protein   chr3:678962-680137 REVERSE LENGTH=179                         | 175  | 179  | 5.00E-75  | 102.3 | 82.3 | 86.3 |
| Rsa1.0_00008.1.g500.t1  | ref NP_186953.1  F-box/LRR-repeat protein [Arabidopsis thaliana] gi 75264861 sp Q9M8U4.1 FBL41_ARAT H RecName: Full=F-box/LRR-repeat protein At3g03030 gi 6728959 gb AAF26957.1 AC018363.2 unknown protein [Arabidopsis thaliana] gi 30102686 gb AAP21261.1  At3g03030 [Arabidopsis thaliana] gi 110735742 dbj BAE99850.1  hypothetical protein [Arabidopsis thaliana] gi 33264037 gb AEE73894.1  F-box/LRR-repeat protein [Arabidopsis thaliana]                                                                                                                                                                                                                                                                                 | 457  | 474  | 1.00E-160 | 103.7 | 63.9 | 77.0 | F-box/LRR-repeat protein               | gbpln | Arabidopsis thaliana | AT3G03030.1   Symbols:   F-box/RNI-like superfamily protein   chr3:682252-683850 FORWARD LENGTH=474                                       | 457  | 474  | 1.00E-163 | 103.7 | 63.9 | 77.0 |
| Rsa1.0_00008.1.g501.t1  | gb EOA30484.1  hypothetical protein CARUB_v10013608mg [Capsella rubella]                                                                                                                                                                                                                                                                                                                                                                                                                                                                                                                                                                                                                                                          | 413  | 474  | 1.00E-130 | 114.8 | 60.5 | 75.5 | hypothetical protein CARUB_v10013608mg | gbpln | Capsella rubella     | AT3G03030.1   Symbols:   F-box/RNI-like superfamily protein   chr3:682252-683850 FORWARD LENGTH=474                                       | 413  | 474  | 1.00E-131 | 114.8 | 60.0 | 75.1 |
| Rsa1.0_00008.1.g502.t1  | gb EOA29758.1  hypothetical protein CARUB_v10012847mg [Capsella rubella]                                                                                                                                                                                                                                                                                                                                                                                                                                                                                                                                                                                                                                                          | 1160 | 1147 | 0         | 98.9  | 95.0 | 97.0 | hypothetical protein CARUB_v10012847mg | gbpln | Capsella rubella     | AT3G03050.1   Symbols:   CSLD3, KJK, ATCSLD3   cellulose synthase-like D3   chr3:687873-691629 FORWARD LENGTH=1145                        | 1160 | 1145 | 0         | 98.7  | 94.1 | 96.5 |
| Rsa1.0_00008.1.g503.t1  | ref XP_002882270.1  hypothetical protein ARALYDRAFT_340454 [Arabidopsis lyrata subsp. lyrata] gi 297328110 gb EFH58529.1  hypothetical protein ARALYDRAFT_340454 [Arabidopsis lyrata subsp. lyrata]                                                                                                                                                                                                                                                                                                                                                                                                                                                                                                                               | 639  | 642  | 0         | 100.5 | 90.5 | 93.9 | hypothetical protein ARALYDRAFT_340454 | gbpln | Arabidopsis lyrata   | AT3G03060.1   Symbols:   P-loop containing nucleoside triphosphate hydrolases superfamily protein   chr3:692188-695424 FORWARD LENGTH=628 | 639  | 628  | 0         | 98.3  | 89.2 | 92.6 |
| Rsa1.0_00008.1.g504.t1  | ref XP_002884353.1  hypothetical protein ARALYDRAFT_896292 [Arabidopsis lyrata subsp. lyrata] gi 297330193 gb EFH60612.1  hypothetical protein ARALYDRAFT_896292 [Arabidopsis lyrata subsp. lyrata]                                                                                                                                                                                                                                                                                                                                                                                                                                                                                                                               | 111  | 110  | 1.00E-54  | 99.1  | 91.9 | 97.3 | hypothetical protein ARALYDRAFT_896292 | gbpln | Arabidopsis lyrata   | AT3G03070.1   Symbols:   NADH-ubiquinone oxidoreductase-related   chr3:696593-698069 REVERSE LENGTH=110                                   | 111  | 110  | 2.00E-56  | 99.1  | 90.1 | 96.4 |
| Rsa1.0_00008.1.g505.t17 | ref NP_566192.1  putative NADH dehydrogenase [ubiquinone] 1 alpha subcomplex subunit 12 [Arabidopsis thaliana] gi 12644540 sp Q9M9M9.1 NDUAC_ARA TH RecName: Full=Probable NADH dehydrogenase [ubiquinone] 1 alpha subcomplex subunit 12 gi 6714426 gb AAF26114.1 AC012328.17 unknown protein [Arabidopsis thaliana] gi 13878173 gb AAK44164.1 AF370349.1 unknown protein [Arabidopsis thaliana] gi 17104529 gb AAL34153.1  unknown protein [Arabidopsis thaliana] gi 21593289 gb AAM65238.1  probable NADH-ubiquinone oxidoreductase subunit B17.2 (Complex I-B17.2) (CI-B17.2) [Arabidopsis thaliana] gi 332640380 gb AEE73901.1  putative NADH dehydrogenase [ubiquinone] 1 alpha subcomplex subunit 12 [Arabidopsis thaliana] | 159  | 159  | 8.00E-87  | 100.0 | 95.6 | 98.1 | putative NADH dehydrogenase            | gbpln | Arabidopsis thaliana | AT3G03100.1   Symbols:   NADH:ubiquinone oxidoreductase, 17.2kDa subunit   chr3:705564-707578 REVERSE LENGTH=159                          | 159  | 159  | 3.00E-89  | 100.0 | 95.6 | 98.1 |
| Rsa1.0_00008.1.g506.t1  | ref XP_002882274.1  hypothetical protein ARALYDRAFT_896304 [Arabidopsis lyrata subsp. lyrata] gi 297328114 gb EFH58533.1  hypothetical protein ARALYDRAFT_896304 [Arabidopsis lyrata subsp. lyrata]                                                                                                                                                                                                                                                                                                                                                                                                                                                                                                                               | 1099 | 1076 | 0         | 97.9  | 85.5 | 91.3 | hypothetical protein ARALYDRAFT_896304 | gbpln | Arabidopsis lyrata   | AT3G03110.1   Symbols:   XPO1B, CRM1B   exportin 1B   chr3:708966-716879 FORWARD LENGTH=1076                                              | 1099 | 1076 | 0         | 97.9  | 85.4 | 91.2 |
| Rsa1.0_00008.1.g507.t1  | dbj BAA97156.1  unnamed protein product [Arabidopsis thaliana]                                                                                                                                                                                                                                                                                                                                                                                                                                                                                                                                                                                                                                                                    | 174  | 329  | 3.00E-24  | 189.1 | 38.5 | 56.3 | unnamed protein product                | gbpln | Arabidopsis thaliana | AT5G42965.1   Symbols:   Polynucleotidyl transferase, ribonuclease H-like superfamily protein   chr5:17236736-17237125 FORWARD LENGTH=129 | 174  | 129  | 5.00E-11  | 74.1  | 18.4 | 29.3 |

|                        |                                                                                                                                                                                                                                                                                                                                                                                                                                                                                                   |     |     |           |       |      |      |                                             |       |                      |                                                                                                                                                                                                                                                                                                                                                                                                                                                     |     |     |           |       |      |      |
|------------------------|---------------------------------------------------------------------------------------------------------------------------------------------------------------------------------------------------------------------------------------------------------------------------------------------------------------------------------------------------------------------------------------------------------------------------------------------------------------------------------------------------|-----|-----|-----------|-------|------|------|---------------------------------------------|-------|----------------------|-----------------------------------------------------------------------------------------------------------------------------------------------------------------------------------------------------------------------------------------------------------------------------------------------------------------------------------------------------------------------------------------------------------------------------------------------------|-----|-----|-----------|-------|------|------|
| Rsa1.0_00008.1.g508.t1 | refXP_002884360.1  hypothetical protein ARALYDRAFT.477561 [Arabidopsis lyrata subsp. lyrata] gi 297330200 gb EFH60619.1  hypothetical protein ARALYDRAFT.477561 [Arabidopsis lyrata subsp. lyrata]                                                                                                                                                                                                                                                                                                | 517 | 521 | 1.00E-126 | 100.8 | 63.8 | 76.2 | hypothetical protein ARALYDRAFT.477561      | gbpln | Arabidopsis lyrata   | AT3G03130.1   Symbols:   unknown protein; BEST Arabidopsis thaliana protein match is: unknown protein (TAIR:AT5G17160.1); Has 7130 Blast hits to 3690 proteins in 504 species: Archae - 22; Bacteria - 2666; Metazoa - 1654; Fungi - 721; Plants - 246; Viruses - 56; Other Eukaryotes - 1765 (source: NCBI BLink).   chr3:721439-723564 REVERSE LENGTH=520                                                                                         | 517 | 520 | 1.00E-127 | 100.6 | 63.1 | 74.9 |
| Rsa1.0_00008.1.g509.t1 | gb EOA31218.1  hypothetical protein CARUB_v10015369mg [Capsella rubella]                                                                                                                                                                                                                                                                                                                                                                                                                          | 684 | 761 | 0         | 111.3 | 78.8 | 86.4 | hypothetical protein CARUB_v10015369mg      | gbpln | Capsella rubella     | AT3G03140.1   Symbols:   Tudor/PWIP/MBT superfamily protein   chr3:724348-727093 FORWARD LENGTH=769                                                                                                                                                                                                                                                                                                                                                 | 684 | 769 | 0         | 112.4 | 77.5 | 86.3 |
| Rsa1.0_00008.1.g510.t1 | refNP_566196.1  uncharacterized protein [Arabidopsis thaliana] gi 89001025 gb ABD59102.1  At3g03170 [Arabidopsis thaliana] gi 332640388 gb AEE73909.1  uncharacterized protein AT3G03170 [Arabidopsis thaliana]                                                                                                                                                                                                                                                                                   | 154 | 156 | 2.00E-65  | 101.3 | 87.0 | 90.9 | uncharacterized protein                     | gbpln | Arabidopsis thaliana | AT3G03170.1   Symbols:   unknown protein; BEST Arabidopsis thaliana protein match is: unknown protein (TAIR:AT5G24890.1); Has 184 Blast hits to 184 proteins in 18 species: Archae - 0; Bacteria - 0; Metazoa - 0; Fungi - 0; Plants - 184; Viruses - 0; Other Eukaryotes - 0 (source: NCBI BLink).   chr3:732066-732729 FORWARD LENGTH=156                                                                                                         | 154 | 156 | 7.00E-68  | 101.3 | 87.0 | 90.9 |
| Rsa1.0_00008.1.g511.t1 | refNP_186968.2  Got1/Sft2-like vesicle transport protein [Arabidopsis thaliana] gi 38603916 gb AAR24703.1  At3g03180 [Arabidopsis thaliana] gi 44681404 gb AAS47642.1  At3g03180 [Arabidopsis thaliana] gi 332640389 gb AEE73910.1  Got1/Sft2-like vesicle transport protein [Arabidopsis thaliana]                                                                                                                                                                                               | 140 | 140 | 5.00E-68  | 100.0 | 96.4 | 97.9 | Got1/Sft2-like vesicle transport protein    | gbpln | Arabidopsis thaliana | AT3G03180.1   Symbols:   Got1/Sft2-like vesicle transport protein family   chr3:733531-734421 FORWARD LENGTH=140                                                                                                                                                                                                                                                                                                                                    | 140 | 140 | 1.00E-70  | 100.0 | 96.4 | 97.9 |
| Rsa1.0_00008.1.g512.t1 | refXP_002884362.1  predicted protein [Arabidopsis lyrata subsp. lyrata] gi 297330202 gb EFH60621.1  predicted protein [Arabidopsis lyrata subsp. lyrata]                                                                                                                                                                                                                                                                                                                                          | 478 | 481 | 0         | 100.6 | 87.9 | 93.7 | predicted protein                           | gbpln | Arabidopsis lyrata   | AT3G03200.1   Symbols:   anac045, NAC045   NAC domain containing protein 45   chr3:736141-738527 REVERSE LENGTH=479                                                                                                                                                                                                                                                                                                                                 | 478 | 479 | 0         | 100.2 | 88.1 | 93.1 |
| Rsa1.0_00008.1.g513.t1 | #                                                                                                                                                                                                                                                                                                                                                                                                                                                                                                 | #   | #   | #         | #     | #    | #    | -                                           | ----  | ----                 | AT3G03210.1   Symbols:   unknown protein; FUNCTIONS IN: molecular_function unknown; INVOLVED IN: biological_process unknown; LOCATED IN: endomembrane system; EXPRESSED IN: 24 plant structures; EXPRESSED DURING: 15 growth stages; Has 59 Blast hits to 59 proteins in 17 species: Archae - 0; Bacteria - 0; Metazoa - 0; Fungi - 0; Plants - 56; Viruses - 0; Other Eukaryotes - 3 (source: NCBI BLink).   chr3:740987-742093 FORWARD LENGTH=368 | 77  | 368 | 2.00E-12  | 477.9 | 67.5 | 76.6 |
| Rsa1.0_00008.1.g514.t1 | refNP_566197.1  expansin A13 [Arabidopsis thaliana] gi 20138030 sp Q9M9P0.2 EXP13_ARAT H RecName: Full=Expansin-A13; Short=AtEXPA13; AltName: Full=Alpha-expansin-13; Short=At-EXP13; Short=AtEx13; AltName: Full=Ath-ExpAlpha-1.22; Flags: Precursor gi 16604575 gb AAL24089.1  putative expansin precursor protein [Arabidopsis thaliana] gi 21281243 gb AAM45038.1  putative expansin precursor protein [Arabidopsis thaliana] gi 332640393 gb AEE73914.1  expansin A13 [Arabidopsis thaliana] | 264 | 266 | 1.00E-131 | 100.8 | 89.0 | 93.6 | expansin A13                                | gbpln | Arabidopsis thaliana | AT3G03220.1   Symbols:   ATEXPA13, EXP13, ATEXP13, ATHEXP ALPHA 1.22, EXPA13   expansin A13   chr3:742655-743975 REVERSE LENGTH=266                                                                                                                                                                                                                                                                                                                 | 264 | 266 | 1.00E-134 | 100.8 | 89.0 | 93.6 |
| Rsa1.0_00008.1.g515.t1 | refXP_002884364.1  esterase/lipase/thioesterase family protein [Arabidopsis lyrata subsp. lyrata] gi 297330204 gb EFH60623.1  esterase/lipase/thioesterase family protein [Arabidopsis lyrata subsp. lyrata]                                                                                                                                                                                                                                                                                      | 583 | 332 | 1.00E-158 | 56.9  | 46.7 | 53.3 | esterase/lipase/thioesterase family protein | gbpln | Arabidopsis lyrata   | AT3G03230.1   Symbols:   alpha/beta-Hydrolases superfamily protein   chr3:744478-746009 REVERSE LENGTH=333                                                                                                                                                                                                                                                                                                                                          | 583 | 333 | 1.00E-161 | 57.1  | 46.3 | 53.5 |
| Rsa1.0_00008.1.g516.t1 | gb EOA30501.1  hypothetical protein CARUB_v10013624mg [Capsella rubella]                                                                                                                                                                                                                                                                                                                                                                                                                          | 485 | 469 | 0         | 96.7  | 91.3 | 93.2 | hypothetical protein CARUB_v10013624mg      | gbpln | Capsella rubella     | AT3G03250.1   Symbols:   UGP, UGP1, AUGP1   UDP-GLUCOSE PYROPHOSPHORYLASE 1   chr3:749761-754014 REVERSE LENGTH=469                                                                                                                                                                                                                                                                                                                                 | 485 | 469 | 0         | 96.7  | 90.7 | 92.6 |
| Rsa1.0_00008.1.g517.t1 | refNP_565646.2  RNA recognition motif-containing protein [Arabidopsis thaliana] gi 106879155 gb ABF82607.1  At2g27330 [Arabidopsis thaliana] gi 330252880 gb AEC07974.1  RNA recognition motif-containing protein [Arabidopsis thaliana]                                                                                                                                                                                                                                                          | 181 | 116 | 1.00E-11  | 64.1  | 20.4 | 21.5 | RNA recognition motif-containing protein    | gbpln | Arabidopsis thaliana | AT2G27330.1   Symbols:   RNA-binding (RBM/RND/RNP motifs) family protein   chr2:11695350-11696563 REVERSE LENGTH=116                                                                                                                                                                                                                                                                                                                                | 181 | 116 | 4.00E-14  | 64.1  | 20.4 | 21.5 |

|                         |                                                                                                                                                                                                                                                                                                                                                                                                                                                                                                                                                 |      |      |           |       |      |       |                                                       |       |                      |                                                                                                                                                                                                                                                                                                                                                              |      |      |           |       |      |       |
|-------------------------|-------------------------------------------------------------------------------------------------------------------------------------------------------------------------------------------------------------------------------------------------------------------------------------------------------------------------------------------------------------------------------------------------------------------------------------------------------------------------------------------------------------------------------------------------|------|------|-----------|-------|------|-------|-------------------------------------------------------|-------|----------------------|--------------------------------------------------------------------------------------------------------------------------------------------------------------------------------------------------------------------------------------------------------------------------------------------------------------------------------------------------------------|------|------|-----------|-------|------|-------|
| Rsa1.0_00008.1.g518.t1  | ref NP_186976.2  homeobox-leucine zipper protein HDG8 [Arabidopsis thaliana]<br>gi 187471152 sp Q9M9P4.2 HDG8_ARAT H RecName: Full=Homeobox-leucine zipper protein HDG8; AltName: Full=HD-ZIP protein HDG8; AltName: Full=Homeodomain GLABRA 2-like protein 8; AltName: Full=Homeodomain transcription factor HDG8; AltName: Full=Protein HOMEODOMAIN GLABROUS 8<br>gi 332640397 gb AEE73918.1  homeobox-leucine zipper protein HDG8 [Arabidopsis thaliana]                                                                                     | 657  | 699  | 0         | 106.4 | 64.2 | 76.0  | homeobox-leucine zipper protein HDG8                  | gbpln | Arabidopsis thaliana | AT3G03260.1   Symbols: HDG8   homeodomain GLABROUS 8   chr3:755356-759234 REVERSE LENGTH=699                                                                                                                                                                                                                                                                 | 657  | 699  | 0         | 106.4 | 64.2 | 76.0  |
| Rsa1.0_00008.1.g519.t1  | #                                                                                                                                                                                                                                                                                                                                                                                                                                                                                                                                               | #    | #    | #         | #     | #    | #     | -                                                     | ----  | ----                 | #                                                                                                                                                                                                                                                                                                                                                            | #    | #    | #         | #     | #    |       |
| Rsa1.0_00008.1.g520.t1  | ref NP_001118559.1  uncharacterized protein [Arabidopsis thaliana]<br>gi 297832990 ref XP_002884372.1  hypothetical protein ARALYDRAFT_477584 [Arabidopsis lyrata subsp. lyrata]<br>gi 89962219 gb ABF59439.1  unknown protein [Arabidopsis thaliana]<br>gi 297330212 gb EFH60631.1  hypothetical protein ARALYDRAFT_477584 [Arabidopsis lyrata subsp. lyrata]<br>gi 332640411 gb AEE73932.1  uncharacterized protein AT3G03341 [Arabidopsis thaliana]<br>gi 482567721 gb EOA31910.1  hypothetical protein CARUB_v10015139mg [Capsella rubella] | 72   | 72   | 5.00E-33  | 100.0 | 98.6 | 100.0 | uncharacterized protein                               | gbpln | Arabidopsis lyrata   | AT3G03341.1   Symbols:   unknown protein; Has 30201 Blast hits to 17322 proteins in 780 species: Archae - 12; Bacteria - 1396; Metazoa - 17338; Fungi - 3422; Plants - 5037; Viruses - 0; Other Eukaryotes - 2996 (source: NCBI BLINK).   chr3:790338-790556 REVERSE LENGTH=72                                                                               | 72   | 72   | 8.00E-36  | 100.0 | 98.6 | 100.0 |
| Rsa1.0_00008.1.g521.t38 | gb EOA29773.1  hypothetical protein CARUB_v10012864mg [Capsella rubella]                                                                                                                                                                                                                                                                                                                                                                                                                                                                        | 1202 | 1097 | 0         | 91.3  | 83.0 | 86.1  | hypothetical protein CARUB_v10012864mg                | gbpln | Capsella rubella     | AT3G03380.1   Symbols: DegP7   DegP protease 7   chr3:799720-808319 FORWARD LENGTH=1097                                                                                                                                                                                                                                                                      | 1202 | 1097 | 0         | 91.3  | 82.7 | 85.8  |
| Rsa1.0_00008.1.g522.t1  | ref XP_002884376.1  hypothetical protein ARALYDRAFT_896341 [Arabidopsis lyrata subsp. lyrata]<br>gi 297330216 gb EFH60635.1  hypothetical protein ARALYDRAFT_896341 [Arabidopsis lyrata subsp. lyrata]                                                                                                                                                                                                                                                                                                                                          | 131  | 148  | 8.00E-51  | 113.0 | 80.2 | 86.3  | hypothetical protein ARALYDRAFT_896341                | gbpln | Arabidopsis lyrata   | AT3G03400.1   Symbols:   EF hand calcium-binding protein family   chr3:808745-809158 REVERSE LENGTH=137                                                                                                                                                                                                                                                      | 131  | 137  | 2.00E-46  | 104.6 | 69.5 | 79.4  |
| Rsa1.0_00008.1.g523.t1  | gb EOA32409.1  hypothetical protein CARUB_v10015681mg [Capsella rubella]                                                                                                                                                                                                                                                                                                                                                                                                                                                                        | 131  | 131  | 4.00E-44  | 100.0 | 67.9 | 80.2  | hypothetical protein CARUB_v10015681mg                | gbpln | Capsella rubella     | AT3G03410.1   Symbols:   EF hand calcium-binding protein family   chr3:811324-811719 REVERSE LENGTH=131                                                                                                                                                                                                                                                      | 131  | 131  | 7.00E-44  | 100.0 | 64.9 | 78.6  |
| Rsa1.0_00008.1.g524.t1  | gb EOA31513.1  hypothetical protein CARUB_v10014702mg [Capsella rubella]                                                                                                                                                                                                                                                                                                                                                                                                                                                                        | 195  | 194  | 1.00E-107 | 99.5  | 94.9 | 97.4  | hypothetical protein CARUB_v10014702mg                | gbpln | Capsella rubella     | AT3G03420.1   Symbols:   Ku70-binding family protein   chr3:812527-813644 FORWARD LENGTH=194                                                                                                                                                                                                                                                                 | 195  | 194  | 1.00E-109 | 99.5  | 94.4 | 97.4  |
| Rsa1.0_00008.1.g525.t1  | pir  S65145 pollen allergen group II (clone 44) - rape                                                                                                                                                                                                                                                                                                                                                                                                                                                                                          | 83   | 83   | 8.00E-39  | 100.0 | 97.6 | 98.8  | pollen allergen group II (clone 44) - rape            | ----  | ----                 | AT3G03430.1   Symbols:   Calcium-binding EF-hand family protein   chr3:814481-814732 FORWARD LENGTH=83                                                                                                                                                                                                                                                       | 83   | 83   | 1.00E-38  | 100.0 | 90.4 | 95.2  |
| Rsa1.0_00008.1.g526.t1  | ref NP_186994.2  armadillo/beta-catenin-like repeat-containing protein [Arabidopsis thaliana]<br>gi 332640423 gb AEE73944.1  armadillo/beta-catenin-like repeat-containing protein [Arabidopsis thaliana]                                                                                                                                                                                                                                                                                                                                       | 404  | 408  | 1.00E-179 | 101.0 | 90.1 | 94.6  | armadillo/beta-catenin-like repeat-containing protein | gbpln | Arabidopsis thaliana | AT3G03440.1   Symbols:   ARM repeat superfamily protein   chr3:815709-818568 FORWARD LENGTH=408                                                                                                                                                                                                                                                              | 404  | 408  | 0         | 101.0 | 90.1 | 94.6  |
| Rsa1.0_00008.1.g527.t1  | gb EOA20745.1  hypothetical protein CARUB_v10001071mg, partial [Capsella rubella]                                                                                                                                                                                                                                                                                                                                                                                                                                                               | 340  | 414  | 2.00E-82  | 121.8 | 56.5 | 65.0  | hypothetical protein CARUB_v10001071mg, partial       | gbpln | Capsella rubella     | AT3G03460.1   Symbols:   unknown protein; BEST Arabidopsis thaliana protein match is: unknown protein (TAIR:AT5G17510.1); Has 19732 Blast hits to 8747 proteins in 456 species: Archae - 0; Bacteria - 449; Metazoa - 7438; Fungi - 2099; Plants - 1550; Viruses - 53; Other Eukaryotes - 8143 (source: NCBI BLINK).   chr3:823069-824485 REVERSE LENGTH=354 | 340  | 354  | 2.00E-83  | 104.1 | 56.2 | 65.9  |
| Rsa1.0_00008.1.g528.t1  | ref NP_187000.1  TatD related DNase [Arabidopsis thaliana]<br>gi 6017102 gb AAFO1585.1 AC009895.6 unknown protein [Arabidopsis thaliana]<br>gi 332640430 gb AEE73951.1  TatD related DNase [Arabidopsis thaliana]                                                                                                                                                                                                                                                                                                                               | 257  | 272  | 1.00E-127 | 105.8 | 87.9 | 92.6  | TatD related DNase                                    | gbpln | Arabidopsis thaliana | AT3G03500.1   Symbols:   TatD related DNase   chr3:832929-834350 FORWARD LENGTH=272                                                                                                                                                                                                                                                                          | 257  | 272  | 1.00E-130 | 105.8 | 87.9 | 92.6  |

|                        |                                                                                                                         |      |      |           |       |      |      |                                        |       |                      |                                                                                                                 |      |     |           |       |      |      |
|------------------------|-------------------------------------------------------------------------------------------------------------------------|------|------|-----------|-------|------|------|----------------------------------------|-------|----------------------|-----------------------------------------------------------------------------------------------------------------|------|-----|-----------|-------|------|------|
| Rsa1.0_00008.1.g529.t1 | refXP_002884391.1  hypothetical protein ARALYDRAFT_317234 [Arabidopsis lyrata subsp. lyrata] gi 297330231 gb EFH60650.1 | 539  | 538  | 0         | 99.8  | 88.5 | 94.8 | hypothetical protein ARALYDRAFT_317234 | gbpln | Arabidopsis lyrata   | AT3G03530.1   Symbols: NPC4   non-specific phospholipase C4   chr2:842686-844970 REVERSE LENGTH=538             | 539  | 538 | 0         | 99.8  | 87.8 | 93.9 |
| Rsa1.0_00008.1.g530.t1 | refXP_002881179.1  hypothetical protein ARALYDRAFT_902186 [Arabidopsis lyrata subsp. lyrata] gi 297327018 gb EFH57438.1 | 167  | 561  | 9.00E-54  | 335.9 | 67.7 | 68.3 | hypothetical protein ARALYDRAFT_902186 | gbpln | Arabidopsis lyrata   | AT2G31510.1   Symbols: ARI7, ATARI7   IBR domain-containing protein   chr2:13416991-13421170 REVERSE LENGTH=562 | 167  | 562 | 2.00E-55  | 336.5 | 67.1 | 67.7 |
| Rsa1.0_00008.1.g531.t1 | gb EMJ11865.1  hypothetical protein PRUPE_ppa022462mg [Prunus persica]                                                  | 206  | 606  | 3.00E-39  | 294.2 | 40.8 | 56.8 | hypothetical protein PRUPE_ppa022462mg | gbpln | Prunus persica       | #                                                                                                               | #    | #   | #         | #     | #    | #    |
| Rsa1.0_00008.1.g532.t1 | #                                                                                                                       | #    | #    | #         | #     | #    | -    | -                                      | ----  | ----                 | #                                                                                                               | #    | #   | #         | #     | #    | #    |
| Rsa1.0_00008.1.g533.t1 | refXP_002884394.1  zinc finger family protein [Arabidopsis lyrata subsp. lyrata] gi 297330234 gb EFH60653.1             | 350  | 355  | 1.00E-119 | 101.4 | 73.4 | 81.4 | zinc finger family protein             | gbpln | Arabidopsis lyrata   | AT3G03550.1   Symbols:   RING/U-box superfamily protein   chr3:850391-851461 REVERSE LENGTH=356                 | 350  | 356 | 1.00E-110 | 101.7 | 69.7 | 77.7 |
| Rsa1.0_00008.1.g534.t1 | refXP_002882299.1  hypothetical protein ARALYDRAFT_477606 [Arabidopsis lyrata subsp. lyrata] gi 297328139 gb EFH58558.1 | 322  | 322  | 1.00E-169 | 100.0 | 91.6 | 96.0 | hypothetical protein ARALYDRAFT_477606 | gbpln | Arabidopsis lyrata   | AT3G03610.1   Symbols:   ELMO/CED-12 family protein   chr3:869479-871687 FORWARD LENGTH=323                     | 322  | 323 | 1.00E-171 | 100.3 | 91.3 | 95.7 |
| Rsa1.0_00008.1.g535.t1 | gb EOA30404.1  hypothetical protein CARUB_v10013529mg [Capsella rubella]                                                | 529  | 496  | 0         | 93.8  | 77.7 | 85.1 | hypothetical protein CARUB_v10013529mg | gbpln | Capsella rubella     | AT3G03620.1   Symbols:   MATE efflux family protein   chr3:873904-876252 REVERSE LENGTH=500                     | 529  | 500 | 0         | 94.5  | 77.3 | 85.1 |
| Rsa1.0_00008.1.g536.t1 | #                                                                                                                       | #    | #    | #         | #     | #    | -    | -                                      | ----  | ----                 | #                                                                                                               | #    | #   | #         | #     | #    | #    |
| Rsa1.0_00008.1.g537.t1 | refXP_002884400.1  hypothetical protein ARALYDRAFT_896375 [Arabidopsis lyrata subsp. lyrata] gi 297330240 gb EFH60659.1 | 394  | 405  | 1.00E-175 | 102.8 | 87.1 | 91.4 | hypothetical protein ARALYDRAFT_896375 | gbpln | Arabidopsis lyrata   | AT3G03630.1   Symbols: CS26   cysteine synthase 26   chr3:878388-880400 REVERSE LENGTH=404                      | 394  | 404 | 1.00E-168 | 102.5 | 86.0 | 90.4 |
| Rsa1.0_00008.1.g538.t1 | dbj BAJ33819.1  unnamed protein product [Thellungiella halophila]                                                       | 667  | 528  | 0         | 79.2  | 69.1 | 73.3 | unnamed protein product                | ----  | ----                 | AT3G03640.1   Symbols: GLUC, BGLU25   beta glucosidase 25   chr3:881028-884028 FORWARD LENGTH=531               | 667  | 531 | 0         | 79.6  | 67.8 | 71.4 |
| Rsa1.0_00008.1.g539.t1 | ref NP_001118563.1  WUSCHEL related homeobox 11 [Arabidopsis thaliana] gi 332640448 gb AAE73969.1                       | 301  | 297  | 1.00E-121 | 98.7  | 84.1 | 90.7 | WUSCHEL related homeobox 11            | gbpln | Arabidopsis thaliana | AT3G03660.2   Symbols: WOX11   WUSCHEL related homeobox 11   chr3:889515-892162 REVERSE LENGTH=297              | 301  | 297 | 1.00E-124 | 98.7  | 84.1 | 90.7 |
| Rsa1.0_00008.1.g540.t1 | gb AAG50806.1 AC079281_8 unknown protein [Arabidopsis thaliana]                                                         | 1810 | 1213 | 0         | 67.0  | 35.9 | 46.7 | unknown protein                        | gbpln | Arabidopsis thaliana | AT1G43760.1   Symbols:   DNase I-like superfamily protein   chr1:16528880-16531065 REVERSE LENGTH=626           | 1810 | 626 | 5.00E-78  | 34.6  | 8.7  | 14.0 |
| Rsa1.0_00009.1.g541.t1 | #                                                                                                                       | #    | #    | #         | #     | #    | -    | -                                      | ----  | ----                 | #                                                                                                               | #    | #   | #         | #     | #    | #    |
| Rsa1.0_00009.1.g542.t1 | ref NP_172114.2  uncharacterized protein [Arabidopsis thaliana] gi 24030288 gb AAAN41316.1                              | 388  | 383  | 0         | 98.7  | 84.0 | 90.2 | uncharacterized protein                | gbpln | Arabidopsis thaliana | AT1G06240.1   Symbols:   Protein of unknown function DUF455   chr1:1911166-1912875 FORWARD LENGTH=383           | 388  | 383 | 0         | 98.7  | 84.0 | 90.2 |
| Rsa1.0_00009.1.g543.t1 | gb EQA39214.1  hypothetical protein CARUB_v10012192mg [Capsella rubella]                                                | 448  | 423  | 0         | 94.4  | 73.2 | 79.5 | hypothetical protein CARUB_v10012192mg | gbpln | Capsella rubella     | AT1G06250.1   Symbols:   alpha/beta-Hydrolases superfamily protein   chr1:1913339-1914850 REVERSE LENGTH=423    | 448  | 423 | 0         | 94.4  | 72.1 | 79.7 |
| Rsa1.0_00009.1.g544.t1 | ref NP_563764.1  cysteine proteinase-like protein [Arabidopsis thaliana] gi 8844131 gb AAF80223.1 AC025290_12           | 343  | 343  | 1.00E-171 | 100.0 | 82.5 | 89.8 | cysteine proteinase-like protein       | gbpln | Arabidopsis thaliana | AT1G06260.1   Symbols:   Cysteine proteinases superfamily protein   chr1:1916449-1917585 FORWARD LENGTH=343     | 343  | 343 | 1.00E-174 | 100.0 | 82.5 | 89.8 |



|                         |                                                                                                                                                                                                                                       |     |     |           |       |      |      |                                        |       |                      |                                                                                                                                                                                                                                                                                                                                                   |     |     |           |       |      |      |
|-------------------------|---------------------------------------------------------------------------------------------------------------------------------------------------------------------------------------------------------------------------------------|-----|-----|-----------|-------|------|------|----------------------------------------|-------|----------------------|---------------------------------------------------------------------------------------------------------------------------------------------------------------------------------------------------------------------------------------------------------------------------------------------------------------------------------------------------|-----|-----|-----------|-------|------|------|
| Rsa1.0_00009.1.g545.t1  | ref[XP_002892332.1] hypothetical protein ARALYDRAFT_887830 [Arabidopsis lyrata subsp. lyrata] gi 297338174 gb EFH68591.1                                                                                                              | 199 | 205 | 3.00E-92  | 103.0 | 82.4 | 87.9 | hypothetical protein ARALYDRAFT_887830 | gbpln | Arabidopsis lyrata   | AT1G06280.1   Symbols: LBD2   LOB domain-containing protein 2   chr1:1920327-1920947 REVERSE LENGTH=206                                                                                                                                                                                                                                           | 199 | 206 | 1.00E-90  | 103.5 | 82.9 | 87.9 |
| Rsa1.0_00009.1.g546.t1  | ref[NP_172121.2] uncharacterized protein [Arabidopsis thaliana] gi 91805751 gb ABE65604.1  hypothetical protein AT1G06320 [Arabidopsis thaliana] gi 332189853 gb AEE27974.1  uncharacterized protein AT1G06320 [Arabidopsis thaliana] | 198 | 195 | 4.00E-12  | 98.5  | 18.2 | 23.7 | uncharacterized protein                | gbpln | Arabidopsis thaliana | AT1G06320.1   Symbols:   unknown protein; Has 24 Blast hits to 24 proteins in 10 species: Archae - 0; Bacteria - 2; Metazoa - 0; Fungi - 0; Plants - 20; Viruses - 0; Other Eukaryotes - 2 (source: NCBI BLINK).   chr1:1930602-1931449 FORWARD LENGTH=195                                                                                        | 198 | 195 | 1.00E-14  | 98.5  | 18.2 | 23.7 |
| Rsa1.0_00009.1.g547.t1  | ref[XP_002892336.1] fatty acid desaturase family protein [Arabidopsis lyrata subsp. lyrata] gi 297338178 gb EFH68595.1  fatty acid desaturase family protein [Arabidopsis lyrata subsp. lyrata]                                       | 301 | 299 | 1.00E-143 | 99.3  | 81.4 | 88.4 | fatty acid desaturase family protein   | gbpln | Arabidopsis lyrata   | AT1G06350.1   Symbols:   Fatty acid desaturase family protein   chr1:1935510-1936789 REVERSE LENGTH=300                                                                                                                                                                                                                                           | 301 | 300 | 1.00E-142 | 99.7  | 79.7 | 88.4 |
| Rsa1.0_00009.1.g548.t1  | ref[XP_002892335.1] agenet domain-containing protein [Arabidopsis lyrata subsp. lyrata] gi 297338177 gb EFH68594.1  agenet domain-containing protein [Arabidopsis lyrata subsp. lyrata]                                               | 143 | 139 | 6.00E-36  | 97.2  | 50.3 | 67.1 | agenet domain-containing protein       | gbpln | Arabidopsis lyrata   | AT1G06340.1   Symbols:   Plant Tudor-like protein   chr1:1933583-1933987 REVERSE LENGTH=134                                                                                                                                                                                                                                                       | 143 | 134 | 2.00E-33  | 93.7  | 48.3 | 64.3 |
| Rsa1.0_00009.1.g549.t1  | ref[XP_002892337.1] fatty acid desaturase family protein [Arabidopsis lyrata subsp. lyrata] gi 297338179 gb EFH68596.1  fatty acid desaturase family protein [Arabidopsis lyrata subsp. lyrata]                                       | 299 | 299 | 1.00E-143 | 100.0 | 84.9 | 91.0 | fatty acid desaturase family protein   | gbpln | Arabidopsis lyrata   | AT1G06360.1   Symbols:   Fatty acid desaturase family protein   chr1:1939173-1940417 REVERSE LENGTH=299                                                                                                                                                                                                                                           | 299 | 299 | 1.00E-144 | 100.0 | 84.6 | 89.6 |
| Rsa1.0_00009.1.g550.t1  | ref[XP_002899602.1] hypothetical protein ARALYDRAFT_470660 [Arabidopsis lyrata subsp. lyrata] gi 297335444 gb EFH65861.1  hypothetical protein ARALYDRAFT_470660 [Arabidopsis lyrata subsp. lyrata]                                   | 852 | 851 | 0         | 99.9  | 94.5 | 97.9 | hypothetical protein ARALYDRAFT_470660 | gbpln | Arabidopsis lyrata   | AT1G06410.1   Symbols: ATTPS7, TPS7, ATTPSA   trehalose-phosphatase/synthase 7   chr1:1955413-1958153 FORWARD LENGTH=851                                                                                                                                                                                                                          | 852 | 851 | 0         | 99.9  | 94.4 | 97.3 |
| Rsa1.0_00009.1.g551.t3  | dbj BAJ33891.1  unnamed protein product [Thellungiella halophila]                                                                                                                                                                     | 695 | 693 | 0         | 99.7  | 92.8 | 95.0 | unnamed protein product                | ----  | ----                 | AT1G06430.1   Symbols: FTSH8   FTSH protease 8   chr1:1960214-1962525 REVERSE LENGTH=885                                                                                                                                                                                                                                                          | 695 | 685 | 0         | 98.6  | 89.8 | 92.7 |
| Rsa1.0_00009.1.g552.t1  | ref[XP_002889605.1] hypothetical protein ARALYDRAFT_887850 [Arabidopsis lyrata subsp. lyrata] gi 297335447 gb EFH65864.1  hypothetical protein ARALYDRAFT_887850 [Arabidopsis lyrata subsp. lyrata]                                   | 425 | 414 | 0         | 97.4  | 88.2 | 91.3 | hypothetical protein ARALYDRAFT_887850 | gbpln | Arabidopsis lyrata   | AT1G06470.2   Symbols:   Nucleotide/sugar transporter family protein   chr1:1970726-1973540 FORWARD LENGTH=414                                                                                                                                                                                                                                    | 425 | 414 | 0         | 97.4  | 87.3 | 90.8 |
| Rsa1.0_00009.1.g553.t1  | gb EOA37916.1  hypothetical protein CARUB_v10009384mg [Capsella rubella]                                                                                                                                                              | 399 | 392 | 0         | 98.2  | 82.7 | 89.2 | hypothetical protein CARUB_v10009384mg | gbpln | Capsella rubella     | AT1G06550.1   Symbols:   ATP-dependent caseinolytic (Clp) protease/crotonase family protein   chr1:2003834-2006564 REVERSE LENGTH=387                                                                                                                                                                                                             | 399 | 387 | 0         | 97.0  | 83.0 | 88.7 |
| Rsa1.0_00009.1.g554.t12 | ref[XP_002889609.1] predicted protein [Arabidopsis lyrata subsp. lyrata] gi 297335451 gb EFH65868.1  predicted protein [Arabidopsis lyrata subsp. lyrata]                                                                             | 678 | 599 | 0         | 88.3  | 77.0 | 81.0 | predicted protein                      | gbpln | Arabidopsis lyrata   | AT1G06560.1   Symbols:   NOL1/NOP2/sun family protein   chr1:2007660-2011824 FORWARD LENGTH=599                                                                                                                                                                                                                                                   | 678 | 599 | 0         | 88.3  | 76.4 | 81.0 |
| Rsa1.0_00009.1.g555.t1  | ref[XP_002892352.1] hypothetical protein ARALYDRAFT_887868 [Arabidopsis lyrata subsp. lyrata] gi 297338194 gb EFH68611.1  hypothetical protein ARALYDRAFT_887868 [Arabidopsis lyrata subsp. lyrata]                                   | 487 | 486 | 0         | 99.8  | 80.5 | 87.1 | hypothetical protein ARALYDRAFT_887868 | gbpln | Arabidopsis lyrata   | AT1G06660.1   Symbols:   unknown protein; BEST Arabidopsis thaliana protein match is: unknown protein (TAIR:AT2G30820.2). Has 166 Blast hits to 144 proteins in 35 species: Archae - 0; Bacteria - 17; Metazoa - 13; Fungi - 20; Plants - 104; Viruses - 0; Other Eukaryotes - 12 (source: NCBI BLINK).   chr1:2037461-2040148 REVERSE LENGTH=481 | 487 | 481 | 0         | 98.8  | 78.2 | 85.0 |



|                        |                                                                                                                                                                                                                                                                                                                                                                                                                                                                                                                                         |      |     |           |       |      |      |                                                                                                                                                                                                                             |       |                      |                                                                                                                                                                                                                                                                                                                                                                                                                                                                                                                                                |      |     |           |       |      |      |
|------------------------|-----------------------------------------------------------------------------------------------------------------------------------------------------------------------------------------------------------------------------------------------------------------------------------------------------------------------------------------------------------------------------------------------------------------------------------------------------------------------------------------------------------------------------------------|------|-----|-----------|-------|------|------|-----------------------------------------------------------------------------------------------------------------------------------------------------------------------------------------------------------------------------|-------|----------------------|------------------------------------------------------------------------------------------------------------------------------------------------------------------------------------------------------------------------------------------------------------------------------------------------------------------------------------------------------------------------------------------------------------------------------------------------------------------------------------------------------------------------------------------------|------|-----|-----------|-------|------|------|
| Rsa1.0_00009.1.g564.t1 | ref[XP_002892370.1] hypothetical protein ARALYDRAFT_470720 [Arabidopsis lyrata subsp. lyrata] gi 29733821.2 gb EFH68629.1  hypothetical protein ARALYDRAFT_470720 [Arabidopsis lyrata subsp. lyrata]                                                                                                                                                                                                                                                                                                                                    | 166  | 168 | 1.00E-67  | 101.2 | 88.0 | 91.6 | hypothetical protein ARALYDRAFT_470720                                                                                                                                                                                      | gbpln | Arabidopsis lyrata   | AT1G06980.1   Symbols:   unknown protein; FUNCTIONS IN: molecular_function unknown; INVOLVED IN: biological_process unknown; LOCATED IN: endomembrane system; EXPRESSED IN: sepal, male gametophyte, carpel; EXPRESSED DURING: 4 anthesis; BEST Arabidopsis thaliana protein match is: unknown protein (TAIR:AT2G30230.1); Has 159 Blast hits to 159 proteins in 13 species: Archae - 0; Bacteria - 0; Metazoa - 0; Fungi - 0; Plants - 159; Viruses - 0; Other Eukaryotes - 0 (source: NCBI BLink).   chr1:2143248-2143757 REVERSE LENGTH=169 | 166  | 169 | 4.00E-68  | 101.8 | 86.1 | 91.0 |
| Rsa1.0_00009.1.g565.t1 | gb AAC19278.1 T14P8.10 [Arabidopsis thaliana] gi 7269009 emb CAB80742.1  AT4g02490 [Arabidopsis thaliana]                                                                                                                                                                                                                                                                                                                                                                                                                               | 569  | 657 | 1.00E-152 | 115.5 | 45.5 | 58.7 | T14P8.10                                                                                                                                                                                                                    | gbpln | Arabidopsis thaliana | AT4G04650.1   Symbols:   RNA-directed DNA polymerase (reverse transcriptase)-related family protein   chr4:2353989-2355213 REVERSE LENGTH=332                                                                                                                                                                                                                                                                                                                                                                                                  | 569  | 332 | 4.00E-85  | 58.3  | 24.6 | 35.1 |
| Rsa1.0_00009.1.g566.t1 | gb AAF82217.1 AC067971_25 Strong similarity to a mitochondrial carrier protein from Ribes nigrum gb AJ007580. It contains a mitochondrial carrier protein domain PF 00153. ESTs gb T46775. gb R90539. gb AW029646 and gb AA605443 come from this gene [Arabidopsis thaliana]                                                                                                                                                                                                                                                            | 162  | 781 | 2.00E-52  | 482.1 | 70.4 | 80.2 | Strong similarity to a mitochondrial carrier protein from Ribes nigrum gb AJ007580. It contains a mitochondrial carrier protein domain PF 00153. ESTs gb T46775. gb R90539. gb AW029646 and gb AA605443 come from this gene | gbpln | Arabidopsis thaliana | AT1G07020.1   Symbols:   unknown protein; Has 39 Blast hits to 39 proteins in 17 species: Archae - 0; Bacteria - 0; Metazoa - 6; Fungi - 3; Plants - 28; Viruses - 0; Other Eukaryotes - 2 (source: NCBI BLink).   chr1:2155319-2155884 REVERSE LENGTH=147                                                                                                                                                                                                                                                                                     | 162  | 147 | 1.00E-53  | 90.7  | 70.4 | 80.2 |
| Rsa1.0_00009.1.g567.t1 | ref[XP_002892377.1] predicted protein [Arabidopsis lyrata subsp. lyrata] gi 297338219 gb EFH68636.1  predicted protein [Arabidopsis lyrata subsp. lyrata]                                                                                                                                                                                                                                                                                                                                                                               | 197  | 194 | 9.00E-66  | 98.5  | 67.0 | 78.2 | predicted protein                                                                                                                                                                                                           | gbpln | Arabidopsis lyrata   | AT1G07050.1   Symbols:   CCT motif family protein   chr1:2164327-2165133 REVERSE LENGTH=195                                                                                                                                                                                                                                                                                                                                                                                                                                                    | 197  | 195 | 1.00E-64  | 99.0  | 66.5 | 78.2 |
| Rsa1.0_00009.1.g568.t1 | ref[NP_563779.1] GILT domain-containing protein [Arabidopsis thaliana] gi 15146334 gb AAK3650.1  At g07080/F10K1_15 [Arabidopsis thaliana] gi 15809756 gb AAL06806.1  At g07080/F10K1_15 [Arabidopsis thaliana] gi 332189954 gb AEE28075.1  GILT domain-containing protein [Arabidopsis thaliana]                                                                                                                                                                                                                                       | 275  | 265 | 1.00E-118 | 96.4  | 77.1 | 84.7 | GILT domain-containing protein                                                                                                                                                                                              | gbpln | Arabidopsis thaliana | AT1G07080.1   Symbols:   Thioredoxin superfamily protein   chr1:2170069-2171861 FORWARD LENGTH=265                                                                                                                                                                                                                                                                                                                                                                                                                                             | 275  | 265 | 1.00E-120 | 96.4  | 77.1 | 84.7 |
| Rsa1.0_00009.1.g569.t4 | ref[NP_172191.1] fructose-2,6-bisphosphatase [Arabidopsis thaliana] gi 75192772 sp Q9MB58.1 F26 ARATH RecName: Full=6-phosphofructo-2-kinase/fructose-2,6-bisphosphatase; Short=6PF-2-K/Fru-2,6-P2ase; Short=AtF2KP. Short=PFK/FBPase; Includes: RecName: Full=6-phosphofructo-2-kinase; Includes: RecName: Full=Fructose-2,6-bisphosphatase gi 8117172 dbj BAA96353.1  fructose-6-phosphate,2-kinase/fructose-2,6-bisphosphatase [Arabidopsis thaliana] gi 332189956 gb AEE28077.1  fructose-2,6-bisphosphatase [Arabidopsis thaliana] | 1150 | 744 | 0         | 64.7  | 58.5 | 61.4 | fructose-2,6-bisphosphatase                                                                                                                                                                                                 | gbpln | Arabidopsis thaliana | AT1G07110.1   Symbols: F2KP, ATF2KP, FKFBP   fructose-2,6-bisphosphatase   chr1:2178363-2183980 REVERSE LENGTH=744                                                                                                                                                                                                                                                                                                                                                                                                                             | 1150 | 744 | 0         | 64.7  | 58.5 | 61.4 |
| Rsa1.0_00009.1.g570.t1 | gb EOA36273.1  hypothetical protein CARUB_v10010524mg [Capsella rubella]                                                                                                                                                                                                                                                                                                                                                                                                                                                                | 146  | 158 | 8.00E-58  | 108.2 | 75.3 | 84.2 | hypothetical protein CARUB_v10010524mg                                                                                                                                                                                      | gbpln | Capsella rubella     | AT1G07130.1   Symbols: STN1, ATSTN1   Nucleic acid-binding, OB-fold-like protein   chr1:2187928-2188410 FORWARD LENGTH=160                                                                                                                                                                                                                                                                                                                                                                                                                     | 146  | 160 | 4.00E-56  | 109.6 | 69.2 | 82.2 |
| Rsa1.0_00009.1.g571.t1 | ref[XP_002892382.1] hypothetical protein ARALYDRAFT_470734 [Arabidopsis lyrata subsp. lyrata] gi 297338224 gb EFH68641.1  hypothetical protein ARALYDRAFT_470734 [Arabidopsis lyrata subsp. lyrata]                                                                                                                                                                                                                                                                                                                                     | 278  | 145 | 8.00E-14  | 52.2  | 23.7 | 26.6 | hypothetical protein ARALYDRAFT_470734                                                                                                                                                                                      | gbpln | Arabidopsis lyrata   | AT1G07135.1   Symbols:   glycine-rich protein   chr1:2190157-2190624 REVERSE LENGTH=155                                                                                                                                                                                                                                                                                                                                                                                                                                                        | 278  | 155 | 5.00E-15  | 55.8  | 16.5 | 17.6 |
| Rsa1.0_00009.1.g572.t1 | gb ABB97039.1  unknown [Brassica rapa]                                                                                                                                                                                                                                                                                                                                                                                                                                                                                                  | 225  | 225 | 1.00E-106 | 100.0 | 91.1 | 93.8 | unknown                                                                                                                                                                                                                     | gbpln | Brassica rapa        | AT1G07140.1   Symbols: SIRANBP   Pleckstrin homology (PH) domain superfamily protein   chr1:2192360-2193688 REVERSE LENGTH=228                                                                                                                                                                                                                                                                                                                                                                                                                 | 225  | 228 | 2.00E-95  | 101.3 | 87.6 | 91.6 |

|                        |                                                                                                                                                                                                                                                                                                                                            |      |     |           |       |      |      |                                        |       |                      |                                                                                                                                                                                                                                                                                                                                                     |      |     |           |       |      |      |
|------------------------|--------------------------------------------------------------------------------------------------------------------------------------------------------------------------------------------------------------------------------------------------------------------------------------------------------------------------------------------|------|-----|-----------|-------|------|------|----------------------------------------|-------|----------------------|-----------------------------------------------------------------------------------------------------------------------------------------------------------------------------------------------------------------------------------------------------------------------------------------------------------------------------------------------------|------|-----|-----------|-------|------|------|
| Rsa1.0_00009.1.g573.t1 | ref[XP_002889635.1] hypothetical protein ARALYDRAFT_887930 [Arabidopsis lyrata subsp. lyrata] gi 297335477 gb EFH65894.1] hypothetical protein ARALYDRAFT_887930 [Arabidopsis lyrata subsp. lyrata]                                                                                                                                        | 513  | 509 | 0         | 99.2  | 90.8 | 94.7 | hypothetical protein ARALYDRAFT_887930 | gbpln | Arabidopsis lyrata   | AT1G07180.1   Symbols: ATNDI1, NDA1   alternative NAD(P)H dehydrogenase 1   chr1:2204414-2206773 FORWARD LENGTH=510                                                                                                                                                                                                                                 | 513  | 510 | 0         | 99.4  | 90.1 | 94.3 |
| Rsa1.0_00009.1.g574.t1 | gb AAF79564.1 AC022464_22 F22G5.33 [Arabidopsis thaliana]                                                                                                                                                                                                                                                                                  | 785  | 753 | 0         | 95.9  | 60.9 | 71.1 | F22G5.33                               | gbpln | Arabidopsis thaliana | AT1G07330.1   Symbols:   unknown protein; BEST Arabidopsis thaliana protein match is: unknown protein (TAIR:AT2G29620.1); Has 597 Blast hits to 536 proteins in 121 species: Archae - 2; Bacteria - 47; Metazoa - 170; Fungi - 43; Plants - 98; Viruses - 0; Other Eukaryotes - 237 (source: NCBI BLink).   chr1:2251131-2253585 FORWARD LENGTH=685 | 785  | 685 | 0         | 87.3  | 53.6 | 62.8 |
| Rsa1.0_00009.1.g575.t1 | ref[XP_002889642.1] sugar transport protein 2 [Arabidopsis lyrata subsp. lyrata] gi 297335484 gb EFH65901.1] sugar transport protein 2 [Arabidopsis lyrata subsp. lyrata]                                                                                                                                                                  | 498  | 498 | 0         | 100.0 | 84.3 | 91.0 | sugar transport protein 2              | gbpln | Arabidopsis lyrata   | AT1G07340.1   Symbols: ATSTP2, STP2   sugar transporter 2   chr1:2254873-2256712 FORWARD LENGTH=498                                                                                                                                                                                                                                                 | 498  | 498 | 0         | 100.0 | 83.5 | 90.8 |
| Rsa1.0_00009.1.g576.t1 | ref[XP_002892397.1] ceramidase family protein [Arabidopsis lyrata subsp. lyrata] gi 297338239 gb EFH68656.1] ceramidase family protein [Arabidopsis lyrata subsp. lyrata]                                                                                                                                                                  | 1224 | 776 | 0         | 63.4  | 52.7 | 56.0 | ceramidase family protein              | gbpln | Arabidopsis lyrata   | AT1G07380.1   Symbols:   Neutral/alkaline non-lysosomal ceramidase   chr1:2264829-2268306 REVERSE LENGTH=779                                                                                                                                                                                                                                        | 1224 | 779 | 0         | 63.6  | 52.7 | 56.0 |
| Rsa1.0_00009.1.g577.t1 | gb EOA37095.1] hypothetical protein CARUB_v10010276mg [Capsella rubella]                                                                                                                                                                                                                                                                   | 216  | 216 | 1.00E-119 | 100.0 | 96.8 | 98.6 | hypothetical protein CARUB_v10010276mg | gbpln | Capsella rubella     | AT1G07410.1   Symbols: ATRABA2B, RAB-A2B, ATRAB-A2B, RABA2b   RAB-GTPase homolog A2B   chr1:2276270-2277154 FORWARD LENGTH=214                                                                                                                                                                                                                      | 216  | 214 | 1.00E-119 | 99.1  | 96.8 | 97.7 |
| Rsa1.0_00009.1.g578.t1 | ref[XP_002889647.1] sterol 4-alpha-methyl-oxidase 2 [Arabidopsis lyrata subsp. lyrata] gi 297335489 gb EFH65906.1] sterol 4-alpha-methyl-oxidase 2 [Arabidopsis lyrata subsp. lyrata]                                                                                                                                                      | 277  | 266 | 1.00E-145 | 96.0  | 89.2 | 91.7 | sterol 4-alpha-methyl-oxidase 2        | gbpln | Arabidopsis lyrata   | AT1G07420.1   Symbols: ATSMO2, SMO2-1   sterol 4-alpha-methyl-oxidase 2-1   chr1:2277910-2280033 FORWARD LENGTH=266                                                                                                                                                                                                                                 | 277  | 266 | 2.33E-156 | 96.0  | 88.8 | 91.3 |
| Rsa1.0_00009.1.g579.t1 | gb AAF79572.1 AC022464_30 F22G5.19 [Arabidopsis thaliana]                                                                                                                                                                                                                                                                                  | 321  | 322 | 1.00E-122 | 100.3 | 77.3 | 86.3 | F22G5.19                               | gbpln | Arabidopsis thaliana | AT2G29220.1   Symbols:   Concanavalin A-like lectin protein kinase family protein   chr2:12562781-12564664 REVERSE LENGTH=627                                                                                                                                                                                                                       | 321  | 627 | 1.00E-103 | 195.3 | 56.7 | 69.8 |
| Rsa1.0_00009.1.g580.t1 | ref[NP_172225.1] tropine dehydrogenase [Arabidopsis thaliana] gi 20258796 gb AAM13920.1] putative tropinone reductase-1 [Arabidopsis thaliana] gi 332190006 gb AEE28127.1] tropinone reductase-like protein [Arabidopsis thaliana]                                                                                                         | 253  | 260 | 1.00E-109 | 102.8 | 75.9 | 87.4 | tropine dehydrogenase                  | gbpln | Arabidopsis thaliana | AT1G07450.1   Symbols:   NAD(P)-binding Rossmann-fold superfamily protein   chr1:2288038-2289256 REVERSE LENGTH=260                                                                                                                                                                                                                                 | 253  | 260 | 1.00E-112 | 102.8 | 75.9 | 87.4 |
| Rsa1.0_00009.1.g581.t1 | ref[NP_172225.1] tropine dehydrogenase [Arabidopsis thaliana] gi 20258796 gb AAM13920.1] putative tropinone reductase-1 [Arabidopsis thaliana] gi 332190006 gb AEE28127.1] tropinone reductase-like protein [Arabidopsis thaliana]                                                                                                         | 238  | 260 | 4.00E-99  | 109.2 | 78.6 | 87.8 | tropine dehydrogenase                  | gbpln | Arabidopsis thaliana | AT1G07450.1   Symbols:   NAD(P)-binding Rossmann-fold superfamily protein   chr1:2288038-2289256 REVERSE LENGTH=260                                                                                                                                                                                                                                 | 238  | 260 | 1.00E-101 | 109.2 | 78.6 | 87.8 |
| Rsa1.0_00009.1.g582.t1 | dbj BAJ33917.1] unnamed protein product [Theellungiella halophila]                                                                                                                                                                                                                                                                         | 464  | 375 | 1.00E-169 | 80.8  | 70.7 | 74.8 | unnamed protein product                | ----  | ----                 | AT1G07480.2   Symbols:   Transcription factor II A, alpha/beta subunit   chr1:2296706-2299215 REVERSE LENGTH=375                                                                                                                                                                                                                                    | 464  | 375 | 1.00E-160 | 80.8  | 69.4 | 73.5 |
| Rsa1.0_00009.1.g583.t1 | ref[NP_200759.2] protein rotundifolia like 5 [Arabidopsis thaliana] gi 21553697 gb AAM62790.1] unknown [Arabidopsis thaliana] gi 42822069 tpg DAA02289.1] TPA_exp: DVL18 [Arabidopsis thaliana] gi 88900382 gb ABD57503.1] At5g59510 [Arabidopsis thaliana] gi 332009816 gb AED97199.1] protein rotundifolia like 5 [Arabidopsis thaliana] | 111  | 144 | 3.00E-16  | 129.7 | 46.8 | 58.6 | protein rotundifolia like 5            | gbpln | Arabidopsis thaliana | AT5G59510.1   Symbols: RTFL5, DVL18   ROTUNDIFOLIA like 5   chr5:23990089-23990523 FORWARD LENGTH=144                                                                                                                                                                                                                                               | 111  | 144 | 4.00E-19  | 129.7 | 46.8 | 58.6 |
| Rsa1.0_00009.1.g584.t1 | gb EOA39018.1] hypothetical protein CARUB_v10011564mg [Capsella rubella]                                                                                                                                                                                                                                                                   | 98   | 78  | 5.00E-18  | 79.6  | 54.1 | 64.3 | hypothetical protein CARUB_v10011564mg | gbpln | Capsella rubella     | #                                                                                                                                                                                                                                                                                                                                                   | #    | #   | #         | #     | #    | #    |
| Rsa1.0_00009.1.g585.t1 | dbj BAJ34044.1] unnamed protein product [Theellungiella halophila]                                                                                                                                                                                                                                                                         | 764  | 772 | 0         | 101.0 | 83.4 | 88.4 | unnamed protein product                | ----  | ----                 | AT1G07530.1   Symbols: SCL14, ATGRAS2, GRAS2   SCARECROW-like 14   chr1:2313828-2316137 REVERSE LENGTH=769                                                                                                                                                                                                                                          | 764  | 769 | 0         | 100.7 | 80.4 | 87.4 |

|                        |                                                                                                                                                                                                                                                                                                                                                                                                                                                                                                          |      |      |           |       |       |       |                                                                                                         |       |                      |                                                                                                                               |      |      |           |       |      |       |
|------------------------|----------------------------------------------------------------------------------------------------------------------------------------------------------------------------------------------------------------------------------------------------------------------------------------------------------------------------------------------------------------------------------------------------------------------------------------------------------------------------------------------------------|------|------|-----------|-------|-------|-------|---------------------------------------------------------------------------------------------------------|-------|----------------------|-------------------------------------------------------------------------------------------------------------------------------|------|------|-----------|-------|------|-------|
| Rsa1.0_00009.1.g586.t1 | refNP_172234.2  telomere repeat-binding protein 5 [Arabidopsis thaliana] gi 296439813 sp Q6R0E3.2 TRP5_ARAT H RecName: Full=Telomere repeat-binding protein 5; AltName: Full=Protein TRF-LIKE 2                                                                                                                                                                                                                                                                                                          | 603  | 630  | 0         | 104.5 | 80.3  | 87.9  | telomere repeat-binding protein 5                                                                       | gbpln | Arabidopsis thaliana | AT1G07540.1   Symbols: TRFL2   TRF-like 2   chr1:2318433-2321048 REVERSE LENGTH=630                                           | 603  | 630  | 0         | 104.5 | 80.3 | 87.9  |
| Rsa1.0_00009.1.g587.t1 | gb EOA21150.1  hypothetical protein CARUB_v10001497mg [Capsella rubella]                                                                                                                                                                                                                                                                                                                                                                                                                                 | 282  | 315  | 9.00E-77  | 111.7 | 56.4  | 68.1  | hypothetical protein CARUB_v10001497mg                                                                  | gbpln | Capsella rubella     | AT4G05460.1   Symbols:   RNI-like superfamily protein   chr4:2761106-2762400 REVERSE LENGTH=302                               | 282  | 302  | 2.00E-76  | 107.1 | 56.4 | 68.1  |
| Rsa1.0_00009.1.g588.t1 | # # # # # # # #                                                                                                                                                                                                                                                                                                                                                                                                                                                                                          | #    | #    | #         | #     | #     | #     | -                                                                                                       | ----  | ----                 | # # # # # # #                                                                                                                 | #    | #    | #         | #     | #    | #     |
| Rsa1.0_00009.1.g589.t1 | gb EOA24245.1  hypothetical protein CARUB_v10017480mg [Capsella rubella]                                                                                                                                                                                                                                                                                                                                                                                                                                 | 336  | 366  | 3.00E-81  | 108.9 | 47.0  | 62.8  | hypothetical protein CARUB_v10017480mg                                                                  | gbpln | Capsella rubella     | AT5G52930.1   Symbols:   Protein of unknown function (DUF295)   chr5:21470370-21471449 FORWARD LENGTH=359                     | 336  | 359  | 5.00E-80  | 106.8 | 43.5 | 56.8  |
| Rsa1.0_00009.1.g590.t1 | gb EOA24245.1  hypothetical protein CARUB_v10017480mg [Capsella rubella]                                                                                                                                                                                                                                                                                                                                                                                                                                 | 420  | 366  | 4.00E-88  | 87.1  | 44.0  | 55.5  | hypothetical protein CARUB_v10017480mg                                                                  | gbpln | Capsella rubella     | AT5G52930.1   Symbols:   Protein of unknown function (DUF295)   chr5:21470370-21471449 FORWARD LENGTH=359                     | 420  | 359  | 1.00E-80  | 85.5  | 39.0 | 52.1  |
| Rsa1.0_00009.1.g591.t1 | gb EOA38953.1  hypothetical protein CARUB_v10011370mg [Capsella rubella]                                                                                                                                                                                                                                                                                                                                                                                                                                 | 871  | 822  | 0         | 94.4  | 60.7  | 69.3  | hypothetical protein CARUB_v10011370mg                                                                  | gbpln | Capsella rubella     | AT1G51890.2   Symbols:   Leucine-rich repeat protein kinase family protein   chr1:19274802-19278528 REVERSE LENGTH=828        | 871  | 828  | 0         | 95.1  | 44.2 | 58.9  |
| Rsa1.0_00009.1.g592.t1 | # # # # # # # #                                                                                                                                                                                                                                                                                                                                                                                                                                                                                          | #    | #    | #         | #     | #     | #     | -                                                                                                       | ----  | ----                 | # # # # # # #                                                                                                                 | #    | #    | #         | #     | #    | #     |
| Rsa1.0_00009.1.g593.t1 | gb AAF75096.1 AC007583_32 It is a member of GTP1/OBG family PF 01018 [Arabidopsis thaliana]                                                                                                                                                                                                                                                                                                                                                                                                              | 489  | 1029 | 0         | 210.4 | 80.4  | 89.4  | It is a member of GTP1/OBG family PF 01018                                                              | gbpln | Arabidopsis thaliana | AT1G07615.1   Symbols:   GTP-binding protein Obg/CgtA   chr1:2342277-2344200 REVERSE LENGTH=493                               | 489  | 493  | 0         | 100.8 | 80.2 | 89.2  |
| Rsa1.0_00009.1.g594.t2 | refNP_172241.2  GTP-binding protein Obg/CgtA [Arabidopsis thaliana] gi 332190029 gb AEE28150.1  GTP-binding protein Obg/CgtA [Arabidopsis thaliana]                                                                                                                                                                                                                                                                                                                                                      | 558  | 552  | 0         | 98.9  | 71.9  | 78.3  | GTP-binding protein Obg/CgtA                                                                            | gbpln | Arabidopsis thaliana | AT1G07620.1   Symbols: ATOBGM   GTP-binding protein Obg/CgtA   chr1:2344556-2346374 REVERSE LENGTH=552                        | 558  | 552  | 0         | 98.9  | 71.9 | 78.3  |
| Rsa1.0_00009.1.g595.t1 | gb EOA39848.1  hypothetical protein CARUB_v10008517mg [Capsella rubella]                                                                                                                                                                                                                                                                                                                                                                                                                                 | 460  | 666  | 0         | 144.8 | 84.1  | 90.9  | hypothetical protein CARUB_v10008517mg                                                                  | gbpln | Capsella rubella     | AT1G07630.1   Symbols: PLL5   pol-like 5   chr1:2349189-2351437 FORWARD LENGTH=662                                            | 460  | 662  | 0         | 143.9 | 83.0 | 90.7  |
| Rsa1.0_00009.1.g596.t1 | gb EOA38961.1  hypothetical protein CARUB_v10011378mg [Capsella rubella]                                                                                                                                                                                                                                                                                                                                                                                                                                 | 334  | 337  | 1.00E-132 | 100.9 | 79.3  | 85.0  | hypothetical protein CARUB_v10011378mg                                                                  | gbpln | Capsella rubella     | AT1G07640.3   Symbols: OBP2   Dof-type zinc finger DNA-binding family protein   chr1:2354707-2356012 REVERSE LENGTH=339       | 334  | 339  | 1.00E-128 | 101.5 | 76.9 | 85.0  |
| Rsa1.0_00009.1.g597.t1 | refNP_172246.3  Ca2+-transporting ATPase [Arabidopsis thaliana] gi 12643934 sp Q9XES1.2 ECA4_ARATH RecName: Full=Calcium-transporting ATPase 4, endoplasmic reticulum-type gi 8439902 gb AAF75088.1 AC007583_24 Strong similarity to ER-type calcium pump protein from Arabidopsis thaliana gb U93845. It is a member of Na+/K+ ATPase C-terminus PF 00690 and a member of E1-E2 ATPase PF 00122 [Arabidopsis thaliana] gi 332190039 gb AEE28160.1  calcium-transporting ATPase 4 [Arabidopsis thaliana] | 1059 | 1061 | 0         | 100.2 | 94.7  | 96.6  | Ca2+-transporting ATPase                                                                                | gbpln | Arabidopsis thaliana | AT1G07670.1   Symbols: ATECA4, ECA4   endomembrane-type CA-ATPase 4   chr1:2370305-2374196 REVERSE LENGTH=1061                | 1059 | 1061 | 0         | 100.2 | 94.7 | 96.6  |
| Rsa1.0_00009.1.g598.t1 | sp Q00332.3 RS15A_BRANA RecName: Full=40S ribosomal protein S15a; AltName: Full=PPCB8 gi 17863 emb CAA42599.1  r-protein BnS15a [Brassica napus] gi 119720818 gb ABL97979.1  40S ribosomal protein S15a [Brassica rapa]                                                                                                                                                                                                                                                                                  | 130  | 130  | 2.00E-69  | 100.0 | 100.0 | 100.0 | RecName: Full=40S ribosomal protein S15a; AltName: Full=PPCB8 gi 17863 emb CAA42599.1  r-protein BnS15a | gbpln | Brassica napus       | AT5G59850.1   Symbols:   Ribosomal protein S8 family protein   chr5:24112499-24113084 REVERSE LENGTH=130                      | 130  | 130  | 7.00E-72  | 100.0 | 99.2 | 100.0 |
| Rsa1.0_00009.1.g599.t1 | gb EOA38095.1  hypothetical protein CARUB_v10009562mg [Capsella rubella]                                                                                                                                                                                                                                                                                                                                                                                                                                 | 79   | 356  | 5.00E-29  | 450.6 | 73.4  | 81.0  | hypothetical protein CARUB_v10009562mg                                                                  | gbpln | Capsella rubella     | AT1G07750.1   Symbols:   RmlC-like cupins superfamily protein   chr1:2404300-2405863 REVERSE LENGTH=356                       | 79   | 356  | 3.00E-31  | 450.6 | 74.7 | 79.7  |
| Rsa1.0_00009.1.g600.t1 | gb AAD32898.1  putative retroelement pol polyprotein [Arabidopsis thaliana]                                                                                                                                                                                                                                                                                                                                                                                                                              | 1361 | 1307 | 0         | 96.0  | 58.6  | 73.5  | putative retroelement pol polyprotein                                                                   | gbpln | Arabidopsis thaliana | AT4G23160.1   Symbols: CRK8   cysteine-rich RLK (RECEPTOR-like protein kinase) 8   chr4:12129485-12134086 FORWARD LENGTH=1262 | 1361 | 1262 | 1.00E-100 | 92.7  | 13.8 | 22.1  |
| Rsa1.0_00009.1.g601.t1 | gb EOA38095.1  hypothetical protein CARUB_v10009562mg [Capsella rubella]                                                                                                                                                                                                                                                                                                                                                                                                                                 | 257  | 356  | 1.00E-132 | 138.5 | 90.7  | 93.8  | hypothetical protein CARUB_v10009562mg                                                                  | gbpln | Capsella rubella     | AT1G07750.1   Symbols:   RmlC-like cupins superfamily protein   chr1:2404300-2405863 REVERSE LENGTH=356                       | 257  | 356  | 1.00E-132 | 138.5 | 88.3 | 92.6  |

|                        |                                                                                                                                                                                                                                                                                                                                                                                                                                                                                                                                                                                                                                                                                                                                                                                                                                                                                                                                                          |     |     |           |       |      |      |                                                    |             |                      |                                                                                                                                                                                                                                                                                   |     |     |           |       |      |      |
|------------------------|----------------------------------------------------------------------------------------------------------------------------------------------------------------------------------------------------------------------------------------------------------------------------------------------------------------------------------------------------------------------------------------------------------------------------------------------------------------------------------------------------------------------------------------------------------------------------------------------------------------------------------------------------------------------------------------------------------------------------------------------------------------------------------------------------------------------------------------------------------------------------------------------------------------------------------------------------------|-----|-----|-----------|-------|------|------|----------------------------------------------------|-------------|----------------------|-----------------------------------------------------------------------------------------------------------------------------------------------------------------------------------------------------------------------------------------------------------------------------------|-----|-----|-----------|-------|------|------|
| Rsa1.0_00009.1.g602.t1 | ref NP_172254.2  DNA repair protein RAD51-like 4 [Arabidopsis thaliana] gi 83305360 sp g9LQ2.2 RA51D_ARAT H RecName: Full=DNA repair protein RAD51 homolog 4; Short=AtRAD51D gi 57263103 emb CAD70703.1  putative DNA recombination protein [Arabidopsis thaliana] gi 58430742 dbj BAD99165.1  AtRAD51D [Arabidopsis thaliana] gi 90969171 gb ABE02570.1  RAD51D splice variant a [Arabidopsis thaliana] gi 90969179 gb ABE02658.1  RAD51D splice variant a [Arabidopsis thaliana] gi 332190052 gb AEE28173.1  DNA repair protein RAD51-like 4 [Arabidopsis thaliana]                                                                                                                                                                                                                                                                                                                                                                                    | 67  | 322 | 1.00E-14  | 480.6 | 56.7 | 67.2 | DNA repair protein RAD51-like 4                    | gbpln       | Arabidopsis thaliana | AT1G07745.1   Symbols: ATRAD51D, RAD51D, SSN1   homolog of RAD51 D   chr1:2400797-2402842 REVERSE LENGTH=322                                                                                                                                                                      | 67  | 322 | 2.00E-17  | 480.6 | 56.7 | 67.2 |
| Rsa1.0_00009.1.g603.t1 | gb ABW81051.1  tn7 reverse transcriptase [Arabidopsis lyrata subsp. lyrata]                                                                                                                                                                                                                                                                                                                                                                                                                                                                                                                                                                                                                                                                                                                                                                                                                                                                              | 442 | 441 | 1.00E-117 | 99.8  | 47.3 | 66.5 | tn7 reverse transcriptase                          | gbpln       | Arabidopsis lyrata   | AT3G24255.1   Symbols:   RNA-directed DNA polymerase (reverse transcriptase)-related family protein   chr3:8789471-8793208 FORWARD LENGTH=746                                                                                                                                     | 442 | 746 | 5.00E-92  | 168.8 | 38.2 | 52.7 |
| Rsa1.0_00009.1.g604.t2 | gb EOA38341.1  hypothetical protein CARUB_v10009852mg, partial [Capsella rubella]                                                                                                                                                                                                                                                                                                                                                                                                                                                                                                                                                                                                                                                                                                                                                                                                                                                                        | 265 | 304 | 1.00E-119 | 114.7 | 82.3 | 90.2 | hypothetical protein CARUB_v10009852mg, partial    | gbpln       | Capsella rubella     | AT1G07745.2   Symbols: ATRAD51D, RAD51D, SSN1   homolog of RAD51 D   chr1:2400797-2402492 REVERSE LENGTH=304                                                                                                                                                                      | 265 | 304 | 1.00E-115 | 114.7 | 78.9 | 88.3 |
| Rsa1.0_00010.1.g605.t1 | #                                                                                                                                                                                                                                                                                                                                                                                                                                                                                                                                                                                                                                                                                                                                                                                                                                                                                                                                                        | #   | #   | #         | #     | #    | #    | -                                                  | ----        | ----                 | #                                                                                                                                                                                                                                                                                 | #   | #   | #         | #     | #    | #    |
| Rsa1.0_00010.1.g606.t1 | #                                                                                                                                                                                                                                                                                                                                                                                                                                                                                                                                                                                                                                                                                                                                                                                                                                                                                                                                                        | #   | #   | #         | #     | #    | #    | -                                                  | ----        | ----                 | #                                                                                                                                                                                                                                                                                 | #   | #   | #         | #     | #    | #    |
| Rsa1.0_00010.1.g607.t1 | ref XP_004245047.1  PREDICTED: uncharacterized protein LOC101267914 [Solanum lycopersicum]                                                                                                                                                                                                                                                                                                                                                                                                                                                                                                                                                                                                                                                                                                                                                                                                                                                               | 210 | 175 | 6.00E-22  | 83.3  | 26.7 | 35.2 | PREDICTED: uncharacterized protein LOC101267914    | gbpln       | Solanum lycopersicum | AT5G21910.1   Symbols:   unknown protein; Has 30201 Blast hits to 17322 proteins in 780 species; Archae - 12; Bacteria - 1396; Metazoa - 17338; Fungi - 3422; Plants - 5037; Viruses - 0; Other Eukaryotes - 2996 (source: NCBI BLINK).   chr5:7240789-7241127 FORWARD LENGTH=112 | 210 | 112 | 3.00E-17  | 53.3  | 41.0 | 42.4 |
| Rsa1.0_00010.1.g608.t1 | ref NP_001142613.1  uncharacterized protein LOC100274882 [Zea mays] gi 195607320 gb ACG25490.1  hypothetical protein [Zea mays] ref XP_002871979.1  hypothetical protein ARALYDRAFT_910174 [Arabidopsis lyrata subsp. lyrata] gi 297317816 gb EFH48238.1  hypothetical protein ARALYDRAFT_910174 [Arabidopsis lyrata subsp. lyrata]                                                                                                                                                                                                                                                                                                                                                                                                                                                                                                                                                                                                                      | 253 | 248 | 1.00E-126 | 98.0  | 90.5 | 93.7 | uncharacterized protein LOC100274882               | gbenv/gbpln | Zea mays             | AT5G21920.1   Symbols: YLMG2, ATYLMG2   YGGT family protein   chr5:7241350-7242765 REVERSE LENGTH=251                                                                                                                                                                             | 253 | 251 | 1.00E-115 | 99.2  | 81.8 | 89.7 |
| Rsa1.0_00010.1.g609.t1 | ref XP_002871979.1  hypothetical protein ARALYDRAFT_910174 [Arabidopsis lyrata subsp. lyrata] gi 297317816 gb EFH48238.1  hypothetical protein ARALYDRAFT_910174 [Arabidopsis lyrata subsp. lyrata]                                                                                                                                                                                                                                                                                                                                                                                                                                                                                                                                                                                                                                                                                                                                                      | 887 | 887 | 0         | 100.0 | 91.2 | 94.9 | hypothetical protein ARALYDRAFT_910174             | gbpln       | Arabidopsis lyrata   | AT5G21930.2   Symbols: PAA2, HMA8   P-type ATPase of Arabidopsis 2   chr5:7243129-7248721 FORWARD LENGTH=883                                                                                                                                                                      | 887 | 883 | 0         | 99.5  | 91.0 | 95.2 |
| Rsa1.0_00010.1.g610.t1 | #                                                                                                                                                                                                                                                                                                                                                                                                                                                                                                                                                                                                                                                                                                                                                                                                                                                                                                                                                        | #   | #   | #         | #     | #    | #    | -                                                  | ----        | ----                 | #                                                                                                                                                                                                                                                                                 | #   | #   | #         | #     | #    | #    |
| Rsa1.0_00010.1.g611.t1 | ref XP_002874038.1  hypothetical protein ARALYDRAFT_910177 [Arabidopsis lyrata subsp. lyrata] gi 297319875 gb EFH50297.1  hypothetical protein ARALYDRAFT_910177 [Arabidopsis lyrata subsp. lyrata]                                                                                                                                                                                                                                                                                                                                                                                                                                                                                                                                                                                                                                                                                                                                                      | 229 | 213 | 1.00E-80  | 93.0  | 72.9 | 78.2 | hypothetical protein ARALYDRAFT_910177             | gbpln       | Arabidopsis lyrata   | AT5G21960.1   Symbols:   Integrase-type DNA-binding superfamily protein   chr5:7258560-7259210 REVERSE LENGTH=216                                                                                                                                                                 | 229 | 216 | 4.00E-82  | 94.3  | 72.1 | 78.2 |
| Rsa1.0_00010.1.g612.t1 | ref NP_680185.1  ubiquitin carboxyl-terminal hydrolase-like protein [Arabidopsis thaliana] gi 13374856 emb CAC34490.1  putative protein [Arabidopsis thaliana] gi 22531217 gb AAM97112.1  unknown protein [Arabidopsis thaliana] gi 29294056 gb AAO73893.1  expressed protein [Arabidopsis thaliana] gi 110742391 dbj BAE99118.1  hypothetical protein [Arabidopsis thaliana] gi 332005579 gb AED92962.1  ubiquitin carboxyl-terminal hydrolase-like protein [Arabidopsis thaliana] ref NP_680186.1  hydroxyproline-rich glycoprotein family protein [Arabidopsis thaliana] gi 13374857 emb CAC34491.1  putative protein [Arabidopsis thaliana] gi 29294058 gb AAO73895.1  proline-rich protein family [Arabidopsis thaliana] gi 38454174 gb AAR20781.1  At5g21280 [Arabidopsis thaliana] gi 38604048 gb AAR24767.1  At5g21280 [Arabidopsis thaliana] gi 332005580 gb AED92963.1  hydroxyproline-rich glycoprotein family protein [Arabidopsis thaliana] | 446 | 449 | 0         | 100.7 | 81.4 | 87.9 | ubiquitin carboxyl-terminal hydrolase-like protein | gbpln       | Arabidopsis thaliana | AT5G21970.1   Symbols:   Ubiquitin carboxyl-terminal hydrolase family protein   chr5:7262071-7263420 FORWARD LENGTH=449                                                                                                                                                           | 446 | 449 | 0         | 100.7 | 81.4 | 87.9 |
| Rsa1.0_00010.1.g613.t1 | ref NP_680186.1  hydroxyproline-rich glycoprotein family protein [Arabidopsis thaliana] gi 13374857 emb CAC34491.1  putative protein [Arabidopsis thaliana] gi 29294058 gb AAO73895.1  proline-rich protein family [Arabidopsis thaliana] gi 38454174 gb AAR20781.1  At5g21280 [Arabidopsis thaliana] gi 38604048 gb AAR24767.1  At5g21280 [Arabidopsis thaliana] gi 332005580 gb AED92963.1  hydroxyproline-rich glycoprotein family protein [Arabidopsis thaliana]                                                                                                                                                                                                                                                                                                                                                                                                                                                                                     | 263 | 302 | 1.00E-83  | 114.8 | 77.2 | 83.7 | hydroxyproline-rich glycoprotein family protein    | gbpln       | Arabidopsis thaliana | AT5G21280.1   Symbols:   hydroxyproline-rich glycoprotein family protein   chr5:7264094-7265514 REVERSE LENGTH=302                                                                                                                                                                | 263 | 302 | 4.00E-86  | 114.8 | 77.2 | 83.7 |

|                        |                                                                                                                                                                                                                                                                                                                                                                                                                                                                                                                                                                                                                                                                                                                                                                                                                                                                                                                                                                                                                                                                                                                                                                                                                                    |      |      |           |       |      |      |                                                    |       |                      |                                                                                                                                 |      |      |           |       |      |      |
|------------------------|------------------------------------------------------------------------------------------------------------------------------------------------------------------------------------------------------------------------------------------------------------------------------------------------------------------------------------------------------------------------------------------------------------------------------------------------------------------------------------------------------------------------------------------------------------------------------------------------------------------------------------------------------------------------------------------------------------------------------------------------------------------------------------------------------------------------------------------------------------------------------------------------------------------------------------------------------------------------------------------------------------------------------------------------------------------------------------------------------------------------------------------------------------------------------------------------------------------------------------|------|------|-----------|-------|------|------|----------------------------------------------------|-------|----------------------|---------------------------------------------------------------------------------------------------------------------------------|------|------|-----------|-------|------|------|
| Rsa1.0_00010.1.g614.t1 | ref NP_680187.2  tetratricopeptide repeat domain-containing protein [Arabidopsis thaliana] gi 357580467 sp B7ZWR6.1 OEP61_ARA TH RecName: Full=Outer envelope protein 61, chloroplastic; AltName: Full=Tetratricopeptide repeat domain-containing protein 7 gi 219291100 gb ACL13985.1  At5g21990 [Arabidopsis thaliana] gi 332005581 gb AED92964.1  tetratricopeptide repeat domain-containing protein OEP61 [Arabidopsis thaliana] ref NP_568410.1  E3 ubiquitin-protein ligase RHF2A [Arabidopsis thaliana] gi 30688246 ref NP_851050.1  E3 ubiquitin-protein ligase RHF2A [Arabidopsis thaliana] gi 75315838 sp Q9ZT42.1 RHF2A_ARAT H RecName: Full=E3 ubiquitin-protein ligase RHF2A; AltName: Full=RING-H2 zinc finger protein RHF2a gi 11762136 gb AA040346.1 AF324994.1 ClC7E11 [Arabidopsis thaliana] gi 3790587 gb AAC69856.1  RING-H2 zinc finger protein RHF2a [Arabidopsis thaliana] gi 13374859 emb CAC34493.1  RING-H2 zinc finger protein RHF2a [Arabidopsis thaliana] gi 26983856 gb AAN86180.1  unknown protein [Arabidopsis thaliana] gi 332005583 gb AED92966.1  E3 ubiquitin-protein ligase RHF2A [Arabidopsis thaliana] gi 332005584 gb AED92967.1  E3 ubiquitin-protein ligase RHF2A [Arabidopsis thaliana] | 613  | 554  | 0         | 90.4  | 77.0 | 82.2 | tetratricopeptide repeat domain-containing protein | gbpln | Arabidopsis thaliana | AT5G21990.1   Symbols: TPR7   Tetratricopeptide repeat (TPR)-like superfamily protein   chr5:7273395-7276318 FORWARD LENGTH=554 | 613  | 554  | 0         | 90.4  | 77.0 | 82.2 |
| Rsa1.0_00010.1.g615.t1 | gi 13374859 emb CAC34493.1  RING-H2 zinc finger protein RHF2a [Arabidopsis thaliana] gi 13374859 emb CAC34493.1  RING-H2 zinc finger protein RHF2a [Arabidopsis thaliana] gi 26983856 gb AAN86180.1  unknown protein [Arabidopsis thaliana] gi 332005583 gb AED92966.1  E3 ubiquitin-protein ligase RHF2A [Arabidopsis thaliana] gi 332005584 gb AED92967.1  E3 ubiquitin-protein ligase RHF2A [Arabidopsis thaliana]                                                                                                                                                                                                                                                                                                                                                                                                                                                                                                                                                                                                                                                                                                                                                                                                              | 387  | 375  | 1.00E-167 | 96.9  | 83.2 | 86.8 | E3 ubiquitin-protein ligase RHF2A                  | gbpln | Arabidopsis thaliana | AT5G22000.3   Symbols: RHF2A   RING-H2 group F2A   chr5:7277436-7279553 FORWARD LENGTH=375                                      | 387  | 375  | 1.00E-170 | 96.9  | 83.2 | 86.8 |
| Rsa1.0_00010.1.g618.t1 | gb EOA19946.1  hypothetical protein CARUB_v10000196mg [Capsella rubella]                                                                                                                                                                                                                                                                                                                                                                                                                                                                                                                                                                                                                                                                                                                                                                                                                                                                                                                                                                                                                                                                                                                                                           | 1307 | 868  | 0         | 66.4  | 59.2 | 62.4 | hypothetical protein CARUB_v10000196mg             | gbpln | Capsella rubella     | AT5G22030.1   Symbols: UBP8   ubiquitin-specific protease 8   chr5:7303798-7305668 REVERSE LENGTH=913                           | 1307 | 913  | 0         | 69.9  | 59.4 | 62.4 |
| Rsa1.0_00010.1.g617.t1 | ref NP_568412.1  chaperone protein dnaJ 2 [Arabidopsis thaliana] gi 21431768 sp P42825.2 DNAJ2_ARATH RecName: Full=Chaperone protein dnaJ 2; Short=ATDJAZ; Flags: Precursor gi 13374865 emb CAC34499.1  DNAJ PROTEIN HOMOLOG ATJ [Arabidopsis thaliana] gi 26451907 dbj BAC42997.1  putative DnaJ protein homolog ATJ [Arabidopsis thaliana] gi 11074426 gb ABH04586.1  At5g22060 [Arabidopsis thaliana] gi 332005594 gb AED92977.1  chaperone protein dnaJ 2 [Arabidopsis thaliana]                                                                                                                                                                                                                                                                                                                                                                                                                                                                                                                                                                                                                                                                                                                                               | 421  | 419  | 0         | 99.5  | 91.9 | 96.2 | chaperone protein dnaJ 2                           | gbpln | Arabidopsis thaliana | AT5G22060.1   Symbols: ATJ2, J2   DNAJ homologue 2   chr5:7303798-7305668 REVERSE LENGTH=419                                    | 421  | 419  | 0         | 99.5  | 91.9 | 96.2 |
| Rsa1.0_00010.1.g618.t1 | gb EOA21400.1  hypothetical protein CARUB_v10001767mg [Capsella rubella]                                                                                                                                                                                                                                                                                                                                                                                                                                                                                                                                                                                                                                                                                                                                                                                                                                                                                                                                                                                                                                                                                                                                                           | 246  | 246  | 1.00E-132 | 100.0 | 95.1 | 97.6 | hypothetical protein CARUB_v10001767mg             | gbpln | Capsella rubella     | AT5G22080.1   Symbols:   Chaperone DnaJ-domain superfamily protein   chr5:7310600-7313540 REVERSE LENGTH=246                    | 246  | 246  | 1.00E-123 | 100.0 | 96.3 | 97.2 |
| Rsa1.0_00010.1.g619.t1 | gb AAM08751.1 AC025098_18 Putative copia-type polyprotein [Oryza sativa Japonica Group]                                                                                                                                                                                                                                                                                                                                                                                                                                                                                                                                                                                                                                                                                                                                                                                                                                                                                                                                                                                                                                                                                                                                            | 1367 | 1803 | 0         | 131.9 | 45.1 | 61.8 | Putative copia-type polyprotein                    | gbpln | Oryza sativa         | AT4G23160.1   Symbols: CRK8   cysteine-rich RLK (RECEPTOR-like protein kinase) 8   chr4:12129485-12134086 FORWARD LENGTH=1262   | 1367 | 1262 | 1.00E-112 | 92.3  | 14.6 | 22.5 |
| Rsa1.0_00010.1.g620.t1 | ref NP_680195.2  uncharacterized protein [Arabidopsis thaliana] gi 334187828 ref NP_001190360.1  uncharacterized protein [Arabidopsis thaliana] gi 122175037 sp QOV865.1 FAFL_ARAT H RecName: Full=Protein FAF-like, chloroplastic; Flags: Precursor gi 111074178 gb ABH04462.1  At5g22090 [Arabidopsis thaliana] gi 332005598 gb AED92981.1  uncharacterized protein AT5G22090 [Arabidopsis thaliana] gi 332005599 gb AED92982.1  uncharacterized protein AT5G22090 [Arabidopsis thaliana]                                                                                                                                                                                                                                                                                                                                                                                                                                                                                                                                                                                                                                                                                                                                        | 457  | 463  | 1.00E-156 | 101.3 | 76.6 | 82.7 | uncharacterized protein                            | gbpln | Arabidopsis thaliana | AT5G22090.2   Symbols:   Protein of unknown function (DUF3049)   chr5:7315003-7316394 REVERSE LENGTH=463                        | 457  | 463  | 1.00E-158 | 101.3 | 76.6 | 82.7 |
| Rsa1.0_00010.1.g621.t1 | #                                                                                                                                                                                                                                                                                                                                                                                                                                                                                                                                                                                                                                                                                                                                                                                                                                                                                                                                                                                                                                                                                                                                                                                                                                  | #    | #    | #         | #     | #    | -    | ----                                               | ----  | #                    | #                                                                                                                               | #    | #    | #         | #     | #    |      |
| Rsa1.0_00010.1.g622.t1 | #                                                                                                                                                                                                                                                                                                                                                                                                                                                                                                                                                                                                                                                                                                                                                                                                                                                                                                                                                                                                                                                                                                                                                                                                                                  | #    | #    | #         | #     | #    | -    | ----                                               | ----  | #                    | #                                                                                                                               | #    | #    | #         | #     | #    |      |

|                        |                                                                                                                                                                                                                                                |     |     |           |       |      |      |                                                             |       |                      |                                                                                                                                                                                                                                                                                                                                                                   |     |     |           |       |      |      |
|------------------------|------------------------------------------------------------------------------------------------------------------------------------------------------------------------------------------------------------------------------------------------|-----|-----|-----------|-------|------|------|-------------------------------------------------------------|-------|----------------------|-------------------------------------------------------------------------------------------------------------------------------------------------------------------------------------------------------------------------------------------------------------------------------------------------------------------------------------------------------------------|-----|-----|-----------|-------|------|------|
| Rsa1.0_00010.1.g623.t1 | refXP_002874051.1   pyridine nucleotide-disulfide oxidoreductase family protein [Arabidopsis lyrata subsp. lyrata] gi 297319888 gb EFH50310.1   pyridine nucleotide-disulfide oxidoreductase family protein [Arabidopsis lyrata subsp. lyrata] | 370 | 365 | 0         | 98.6  | 86.8 | 92.4 | pyridine nucleotide-disulfide oxidoreductase family protein | gbpln | Arabidopsis lyrata   | AT5G22140.1   Symbols:   FAD/NAD(P)-binding oxidoreductase family protein   chr5:7340284-7341657 REVERSE LENGTH=365                                                                                                                                                                                                                                               | 370 | 365 | 0         | 98.6  | 86.2 | 92.4 |
| Rsa1.0_00010.1.g624.t1 | refNP_680202.1   uncharacterized protein [Arabidopsis thaliana] gi 13374875 emb CAC34509.1   putative protein [Arabidopsis thaliana] gi 332005608 gb AED92991.1   uncharacterized protein AT5G22160 [Arabidopsis thaliana]                     | 178 | 353 | 9.00E-39  | 198.3 | 50.0 | 61.8 | uncharacterized protein                                     | gbpln | Arabidopsis thaliana | AT5G22160.1   Symbols:   unknown protein; BEST Arabidopsis thaliana protein match is: unknown protein (TAIR:AT5G22150.1); Has 30201 Blast hits to 17322 proteins in 780 species: Archae - 12; Bacteria - 1396; Metazoa - 17338; Fungi - 3422; Plants - 5037; Viruses - 0; Other Eukaryotes - 2996 (source: NCBI BLINK).   chr5:7346944-7349255 FORWARD LENGTH=353 | 178 | 353 | 4.00E-41  | 198.3 | 50.0 | 61.8 |
| Rsa1.0_00010.1.g625.t1 | refXP_002871991.1   hypothetical protein ARALYDRAFT_910206 [Arabidopsis lyrata subsp. lyrata] gi 297317828 gb EFH48250.1   hypothetical protein ARALYDRAFT_910206 [Arabidopsis lyrata subsp. lyrata]                                           | 225 | 238 | 1.00E-38  | 105.8 | 44.0 | 60.9 | hypothetical protein ARALYDRAFT_910206                      | gbpln | Arabidopsis lyrata   | AT5G22150.1   Symbols:   unknown protein; BEST Arabidopsis thaliana protein match is: unknown protein (TAIR:AT5G22160.1); Has 30201 Blast hits to 17322 proteins in 780 species: Archae - 12; Bacteria - 1396; Metazoa - 17338; Fungi - 3422; Plants - 5037; Viruses - 0; Other Eukaryotes - 2996 (source: NCBI BLINK).   chr5:7342567-7345956 FORWARD LENGTH=330 | 225 | 330 | 3.00E-36  | 146.7 | 36.9 | 48.9 |
| Rsa1.0_00010.1.g626.t1 | gb EOA22413.1   hypothetical protein CARUB_v10003052mg [Capsella rubella]                                                                                                                                                                      | 208 | 363 | 5.00E-23  | 174.5 | 34.1 | 45.7 | hypothetical protein CARUB_v10003052mg                      | gbpln | Capsella rubella     | AT5G22160.1   Symbols:   unknown protein; BEST Arabidopsis thaliana protein match is: unknown protein (TAIR:AT5G22150.1); Has 30201 Blast hits to 17322 proteins in 780 species: Archae - 12; Bacteria - 1396; Metazoa - 17338; Fungi - 3422; Plants - 5037; Viruses - 0; Other Eukaryotes - 2996 (source: NCBI BLINK).   chr5:7346944-7349255 FORWARD LENGTH=353 | 208 | 353 | 3.00E-23  | 169.7 | 37.0 | 48.6 |
| Rsa1.0_00010.1.g627.t1 | refXP_002871991.1   hypothetical protein ARALYDRAFT_910206 [Arabidopsis lyrata subsp. lyrata] gi 297317828 gb EFH48250.1   hypothetical protein ARALYDRAFT_910206 [Arabidopsis lyrata subsp. lyrata]                                           | 234 | 238 | 2.00E-65  | 101.7 | 57.3 | 72.2 | hypothetical protein ARALYDRAFT_910206                      | gbpln | Arabidopsis lyrata   | AT5G22190.1   Symbols:   unknown protein; BEST Arabidopsis thaliana protein match is: unknown protein (TAIR:AT5G22160.1); Has 30201 Blast hits to 17322 proteins in 780 species: Archae - 12; Bacteria - 1396; Metazoa - 17338; Fungi - 3422; Plants - 5037; Viruses - 0; Other Eukaryotes - 2996 (source: NCBI BLINK).   chr5:7354164-7354688 FORWARD LENGTH=117 | 234 | 117 | 3.00E-22  | 50.0  | 24.8 | 28.2 |
| Rsa1.0_00010.1.g628.t1 | gb EOA21564.1   hypothetical protein CARUB_v10001972mg [Capsella rubella]                                                                                                                                                                      | 207 | 207 | 8.00E-84  | 100.0 | 73.9 | 84.5 | hypothetical protein CARUB_v10001972mg                      | gbpln | Capsella rubella     | AT3G44220.1   Symbols:   Late embryogenesis abundant (LEA) hydroxyproline-rich glycoprotein family   chr3:15928216-15929645 FORWARD LENGTH=206                                                                                                                                                                                                                    | 207 | 206 | 4.00E-85  | 99.5  | 70.0 | 81.6 |
| Rsa1.0_00010.1.g629.t1 | emb CB128268.3   unnamed protein product [Vitis vinifera]                                                                                                                                                                                      | 80  | 181 | 1.00E-26  | 226.3 | 72.5 | 83.8 | unnamed protein product                                     | gbpln | Vitis vinifera       | AT5G2210.2   Symbols:   unknown protein; Has 35333 Blast hits to 34131 proteins in 2444 species: Archae - 798; Bacteria - 22429; Metazoa - 974; Fungi - 991; Plants - 531; Viruses - 0; Other Eukaryotes - 9610 (source: NCBI BLINK).   chr5:7359549-7359791 FORWARD LENGTH=80                                                                                    | 80  | 80  | 2.00E-27  | 100.0 | 87.5 | 92.5 |
| Rsa1.0_00010.1.g630.t1 | refNP_001031921.3   E2F transcription factor 1 [Arabidopsis thaliana] gi 332005616 gb AED92999.1   E2F transcription factor 1 [Arabidopsis thaliana]                                                                                           | 410 | 466 | 0         | 113.7 | 82.7 | 88.3 | E2F transcription factor 1                                  | gbpln | Arabidopsis thaliana | AT5G22220.3   Symbols: E2F1, E2FB, ATE2FB   E2F transcription factor 1   chr5:7360749-7364120 FORWARD LENGTH=466                                                                                                                                                                                                                                                  | 410 | 466 | 0         | 113.7 | 82.7 | 88.3 |
| Rsa1.0_00010.1.g631.t1 | refXP_002867007.1   hypothetical protein ARALYDRAFT_328110 [Arabidopsis lyrata subsp. lyrata] gi 297312843 gb EFH43266.1   hypothetical protein ARALYDRAFT_328110 [Arabidopsis lyrata subsp. lyrata]                                           | 130 | 223 | 5.00E-14  | 171.5 | 35.4 | 52.3 | hypothetical protein ARALYDRAFT_328110                      | gbpln | Arabidopsis lyrata   | AT4G36590.1   Symbols:   MADS-box transcription factor family protein   chr4:17261146-17262189 REVERSE LENGTH=248                                                                                                                                                                                                                                                 | 130 | 248 | 2.00E-15  | 190.8 | 35.4 | 52.3 |
| Rsa1.0_00010.1.g632.t1 | gb EOA21692.1   hypothetical protein CARUB_v10002117mg [Capsella rubella]                                                                                                                                                                      | 149 | 169 | 4.00E-35  | 113.4 | 49.7 | 57.0 | hypothetical protein CARUB_v10002117mg                      | gbpln | Capsella rubella     | AT5G22240.1   Symbols: ATOFP10, OFP10   Ovate family protein   chr5:7364689-7365279 FORWARD LENGTH=196                                                                                                                                                                                                                                                            | 149 | 196 | 1.00E-35  | 131.5 | 46.3 | 52.3 |
| Rsa1.0_00010.1.g633.t1 | refXP_002874054.1   hypothetical protein ARALYDRAFT_489075 [Arabidopsis lyrata subsp. lyrata] gi 297319891 gb EFH50313.1   hypothetical protein ARALYDRAFT_489075 [Arabidopsis lyrata subsp. lyrata]                                           | 286 | 274 | 1.00E-127 | 95.8  | 81.5 | 86.4 | hypothetical protein ARALYDRAFT_489075                      | gbpln | Arabidopsis lyrata   | AT5G22250.1   Symbols:   Polynucleotidyl transferase, ribonuclease H-like superfamily protein   chr5:7365605-7366441 REVERSE LENGTH=278                                                                                                                                                                                                                           | 286 | 278 | 1.00E-127 | 97.2  | 79.7 | 86.7 |



|                        |                                                                                                                                                                                                                                                                                                                                                                                                                                                                                                                                                                                                                                                                                                                                                                                                                                                     |     |     |           |       |      |      |                                              |       |                      |                                                                                                                                                                                                                                                                                                                                                                  |     |     |           |       |      |      |
|------------------------|-----------------------------------------------------------------------------------------------------------------------------------------------------------------------------------------------------------------------------------------------------------------------------------------------------------------------------------------------------------------------------------------------------------------------------------------------------------------------------------------------------------------------------------------------------------------------------------------------------------------------------------------------------------------------------------------------------------------------------------------------------------------------------------------------------------------------------------------------------|-----|-----|-----------|-------|------|------|----------------------------------------------|-------|----------------------|------------------------------------------------------------------------------------------------------------------------------------------------------------------------------------------------------------------------------------------------------------------------------------------------------------------------------------------------------------------|-----|-----|-----------|-------|------|------|
| Rsa1.0_00010.1.g634.t1 | ref NP_197618.1  RING/FYVE/PHD zinc finger-containing protein [Arabidopsis thaliana]<br>gi 75262726 sp Q9FMS5.1 MS1_ARATH RecName: Full=PHD finger protein MALE STERILITY 1<br>gi 9757806 db BAB08324.1  unnamed protein product [Arabidopsis thaliana]<br>gi 332005619 gb AED93002.1  PHD finger protein MALE STERILITY 1 [Arabidopsis thaliana]<br>ref NP_568414.1  NAC domain containing protein 89 [Arabidopsis thaliana]<br>gi 75165521 sp Q94F58.1 NAC89_ARAT H RecName: Full=NAC domain-containing protein 89; Short=ANAC089; AltName: Full=Protein FRUCTOSE-SENSING QUANTITATIVE TRAIT LOCUS 6<br>gi 14326465 gb AAK60278.1 AF385685.1 AT5g22290/MWD9.7 [Arabidopsis thaliana]<br>gi 18700194 gb AAL77707.1  AT5g22290/MWD9.7 [Arabidopsis thaliana]<br>gi 332005624 gb AED93007.1  NAC domain containing protein 89 [Arabidopsis thaliana] | 667 | 672 | 0         | 100.7 | 88.8 | 94.5 | RING/FYVE/PHD zinc finger-containing protein | gbpln | Arabidopsis thaliana | AT5G22280.1   Symbols: MS1   RING/FYVE/PHD zinc finger superfamily protein   chr5:7367707-7370192 REVERSE LENGTH=672                                                                                                                                                                                                                                             | 667 | 672 | 0         | 100.7 | 88.8 | 94.5 |
| Rsa1.0_00010.1.g635.t1 | ref XP_002874061.1  hypothetical protein ARALYDRAFT_489082 [Arabidopsis lyrata subsp. lyrata]<br>gi 297319898 gb EFH50320.1  hypothetical protein ARALYDRAFT_489082 [Arabidopsis lyrata subsp. lyrata]                                                                                                                                                                                                                                                                                                                                                                                                                                                                                                                                                                                                                                              | 490 | 492 | 0         | 100.4 | 76.1 | 84.1 | hypothetical protein ARALYDRAFT_489082       | gbpln | Arabidopsis lyrata   | AT5G22310.1   Symbols:   unknown protein; BEST Arabidopsis thaliana protein match is: unknown protein (TAIR:AT3G1590.1); Has 30201 Blast hits to 17322 proteins in 780 species: Archae - 12; Bacteria - 1396; Metazoa - 17338; Fungi - 3422; Plants - 5037; Viruses - 0; Other Eukaryotes - 2996 (source: NCBI BLINK).   chr5:7383742-7385345 REVERSE LENGTH=481 | 490 | 481 | 1.00E-180 | 98.2  | 75.7 | 83.3 |
| Rsa1.0_00010.1.g637.t1 | ref NP_568416.1  leucine-rich repeat-containing protein [Arabidopsis thaliana]<br>gi 9757812 db BAB08330.1  unnamed protein product [Arabidopsis thaliana]<br>gi 15912299 gb AAL08283.1  AT5g22320/MWD9.11 [Arabidopsis thaliana]<br>gi 19699236 gb AAL90984.1  AT5g22320/MWD9.11 [Arabidopsis thaliana]<br>gi 332005627 gb AED93010.1  leucine-rich repeat-containing protein [Arabidopsis thaliana]                                                                                                                                                                                                                                                                                                                                                                                                                                               | 458 | 452 | 1.00E-178 | 98.7  | 81.2 | 90.6 | leucine-rich repeat-containing protein       | gbpln | Arabidopsis thaliana | AT5G22320.1   Symbols:   Leucine-rich repeat (LRR) family protein   chr5:7388175-7390426 REVERSE LENGTH=452                                                                                                                                                                                                                                                      | 458 | 452 | 0         | 98.7  | 81.2 | 90.6 |
| Rsa1.0_00010.1.g638.t1 | ref XP_002874064.1  ATTIP49A/RIN1 [Arabidopsis lyrata subsp. lyrata]<br>gi 297319901 gb EFH50323.1  ATTIP49A/RIN1 [Arabidopsis lyrata subsp. lyrata]                                                                                                                                                                                                                                                                                                                                                                                                                                                                                                                                                                                                                                                                                                | 458 | 458 | 0         | 100.0 | 98.7 | 99.6 | ATTIP49A/RIN1                                | gbpln | Arabidopsis lyrata   | AT5G22330.1   Symbols: ATTIP49A, RIN1   P-loop containing nucleoside triphosphate hydrolases superfamily protein   chr5:7391026-7394071 REVERSE LENGTH=458                                                                                                                                                                                                       | 458 | 458 | 0         | 100.0 | 98.3 | 99.6 |
| Rsa1.0_00010.1.g639.t1 | ref XP_002874065.1  hypothetical protein ARALYDRAFT_910225 [Arabidopsis lyrata subsp. lyrata]<br>gi 297319902 gb EFH50324.1  hypothetical protein ARALYDRAFT_910225 [Arabidopsis lyrata subsp. lyrata]                                                                                                                                                                                                                                                                                                                                                                                                                                                                                                                                                                                                                                              | 421 | 427 | 0         | 101.4 | 92.4 | 97.1 | hypothetical protein ARALYDRAFT_910225       | gbpln | Arabidopsis lyrata   | AT5G22350.1   Symbols: ELM1   Protein of unknown function (DUF1022)   chr5:7397762-7400746 REVERSE LENGTH=427                                                                                                                                                                                                                                                    | 421 | 427 | 0         | 101.4 | 91.4 | 96.4 |
| Rsa1.0_00010.1.g640.t1 | ref XP_002874066.1  vesicle-associated membrane protein 714 [Arabidopsis lyrata subsp. lyrata]<br>gi 297319903 gb EFH50325.1  vesicle-associated membrane protein 714 [Arabidopsis lyrata subsp. lyrata]                                                                                                                                                                                                                                                                                                                                                                                                                                                                                                                                                                                                                                            | 222 | 221 | 1.00E-120 | 99.5  | 95.0 | 97.7 | vesicle-associated membrane protein 714      | gbpln | Arabidopsis lyrata   | AT5G22360.1   Symbols: ATVAMP714, VAMP714   vesicle-associated membrane protein 714   chr5:7404379-7405654 REVERSE LENGTH=221                                                                                                                                                                                                                                    | 222 | 221 | 1.00E-121 | 99.5  | 92.8 | 97.7 |
| Rsa1.0_00010.1.g641.t1 | ref XP_002874067.1  ANAC090 [Arabidopsis lyrata subsp. lyrata]<br>gi 297319904 gb EFH50326.1  ANAC090 [Arabidopsis lyrata subsp. lyrata]                                                                                                                                                                                                                                                                                                                                                                                                                                                                                                                                                                                                                                                                                                            | 235 | 235 | 1.00E-115 | 100.0 | 85.1 | 91.1 | ANAC090                                      | gbpln | Arabidopsis lyrata   | AT5G22380.1   Symbols: anac090, NAC090   NAC domain containing protein 90   chr5:7408924-7410038 REVERSE LENGTH=235                                                                                                                                                                                                                                              | 235 | 235 | 1.00E-115 | 100.0 | 83.0 | 89.4 |
| Rsa1.0_00010.1.g642.t1 | ref XP_002874068.1  hypothetical protein ARALYDRAFT_489095 [Arabidopsis lyrata subsp. lyrata]<br>gi 297319905 gb EFH50327.1  hypothetical protein ARALYDRAFT_489095 [Arabidopsis lyrata subsp. lyrata]                                                                                                                                                                                                                                                                                                                                                                                                                                                                                                                                                                                                                                              | 186 | 194 | 4.00E-65  | 104.3 | 74.2 | 83.3 | hypothetical protein ARALYDRAFT_489095       | gbpln | Arabidopsis lyrata   | AT5G22390.1   Symbols:   Protein of unknown function (DUF3049)   chr5:7418383-7418991 REVERSE LENGTH=202                                                                                                                                                                                                                                                         | 186 | 202 | 9.00E-64  | 108.6 | 68.8 | 80.1 |
| Rsa1.0_00010.1.g643.t1 | gb EOA12263.1  hypothetical protein CARUB_v10007993mg [Capsella rubella]                                                                                                                                                                                                                                                                                                                                                                                                                                                                                                                                                                                                                                                                                                                                                                            | 173 | 493 | 6.00E-63  | 285.0 | 66.5 | 79.2 | hypothetical protein CARUB_v10007993mg       | gbpln | Capsella rubella     | AT3G44550.1   Symbols: FAR5   fatty acid reductase 5   chr3:16138060-16141409 FORWARD LENGTH=496                                                                                                                                                                                                                                                                 | 173 | 496 | 3.00E-62  | 286.7 | 66.5 | 78.6 |

|                        |                                                                                                                                                                                                                                                                                                                                            |      |      |           |       |      |      |                                             |       |                      |                                                                                                                                                                                                                                                                                                                                                                                                                                                                                                                                                                            |      |      |           |       |      |      |
|------------------------|--------------------------------------------------------------------------------------------------------------------------------------------------------------------------------------------------------------------------------------------------------------------------------------------------------------------------------------------|------|------|-----------|-------|------|------|---------------------------------------------|-------|----------------------|----------------------------------------------------------------------------------------------------------------------------------------------------------------------------------------------------------------------------------------------------------------------------------------------------------------------------------------------------------------------------------------------------------------------------------------------------------------------------------------------------------------------------------------------------------------------------|------|------|-----------|-------|------|------|
| Rsa1.0_00010.1.g644.t3 | refNP_197634.1  putative fatty acyl-CoA reductase 7 [Arabidopsis thaliana] gi 75171715 sp Q9FMQ9.1 FACR7_ARAT H RecName: Full=Putative fatty acyl-CoA reductase 7 gi 9757823 dbj BAB08341.1  acyl CoA reductase-like protein [Arabidopsis thaliana] gi 332005641 gb AED93024.1  putative fatty acyl-CoA reductase 7 [Arabidopsis thaliana] | 266  | 409  | 1.00E-103 | 153.8 | 67.3 | 81.6 | putative fatty acyl-CoA reductase 7         | gbpln | Arabidopsis thaliana | AT5G22420.1   Symbols: FAR7   fatty acid reductase 7   chr5:7429903-7432586 FORWARD LENGTH=409                                                                                                                                                                                                                                                                                                                                                                                                                                                                             | 266  | 409  | 1.00E-106 | 153.8 | 67.3 | 81.6 |
| Rsa1.0_00010.1.g645.t1 | gb EOA21532.1  hypothetical protein CARUB_v10001937mg [Capsella rubella]                                                                                                                                                                                                                                                                   | 212  | 217  | 1.00E-103 | 102.4 | 97.2 | 99.1 | hypothetical protein CARUB_v10001937mg      | gbpln | Capsella rubella     | AT5G22440.2   Symbols:   Ribosomal protein L1p/L10e family   chr5:7435328-7436486 REVERSE LENGTH=217<br>AT5G22450.1   Symbols:   unknown protein; LOCATED IN: chloroplast; EXPRESSED IN: 22 plant structures; EXPRESSED DURING: 13 growth stages; BEST Arabidopsis thaliana protein match is: unknown protein (TAIR:AT2G19390.1); Has 30201 Blast hits to 17322 proteins in 780 species: Archae - 12; Bacteria - 1396; Metazoa - 17338; Fungi - 3422; Plants - 5037; Viruses - 0; Other Eukaryotes - 2996 (source: NCBI BLink).   chr5:7437145-7442856 REVERSE LENGTH=1154 | 212  | 217  | 1.00E-106 | 102.4 | 97.6 | 98.1 |
| Rsa1.0_00010.1.g646.t1 | dbj BAB08344.1  unnamed protein product [Arabidopsis thaliana]                                                                                                                                                                                                                                                                             | 1207 | 1180 | 0         | 97.8  | 82.5 | 87.9 | unnamed protein product                     | gbpln | Arabidopsis thaliana | AT5G22460.2   Symbols:   alpha/beta-Hydrolases superfamily protein   chr5:7443659-7445269 REVERSE LENGTH=340                                                                                                                                                                                                                                                                                                                                                                                                                                                               | 1207 | 1154 | 0         | 95.6  | 81.9 | 87.3 |
| Rsa1.0_00010.1.g647.t1 | refXP_002874071.1  esterase/lipase/thioesterase family protein [Arabidopsis lyrata subsp. lyrata] gi 297319908 gb EFH50330.1  esterase/lipase/thioesterase family protein [Arabidopsis lyrata subsp. lyrata]                                                                                                                               | 341  | 340  | 1.00E-167 | 99.7  | 81.5 | 90.6 | esterase/lipase/thioesterase family protein | gbpln | Arabidopsis lyrata   | AT5G22470.1   Symbols:   NAD+ ADP-ribosyltransferases;NAD+ ADP-ribosyltransferases   chr5:7447045-7450743 FORWARD LENGTH=814                                                                                                                                                                                                                                                                                                                                                                                                                                               | 341  | 340  | 1.00E-167 | 99.7  | 79.8 | 90.0 |
| Rsa1.0_00010.1.g648.t1 | dbj BAB09119.1  seed maturation protein PM38 protein [Arabidopsis thaliana]                                                                                                                                                                                                                                                                | 811  | 815  | 0         | 100.5 | 92.8 | 96.8 | seed maturation protein PM38 protein        | gbpln | Arabidopsis thaliana | AT5G17080.1   Symbols:   Cysteine proteinases superfamily protein   chr5:5619594-5620949 FORWARD LENGTH=298                                                                                                                                                                                                                                                                                                                                                                                                                                                                | 811  | 814  | 0         | 100.4 | 92.7 | 96.7 |
| Rsa1.0_00010.1.g649.t1 | refXP_002884569.1  hypothetical protein ARALYDRAFT_896743 [Arabidopsis lyrata subsp. lyrata] gi 297330409 gb EFH60828.1  hypothetical protein ARALYDRAFT_896743 [Arabidopsis lyrata subsp. lyrata]                                                                                                                                         | 236  | 280  | 1.00E-27  | 118.6 | 29.7 | 48.7 | hypothetical protein ARALYDRAFT_896743      | gbpln | Arabidopsis lyrata   | AT1G03710.2   Symbols:   Cystatin/monellin superfamily protein   chr1:923492-924287 FORWARD LENGTH=202                                                                                                                                                                                                                                                                                                                                                                                                                                                                     | 236  | 298  | 2.00E-21  | 126.3 | 25.8 | 40.3 |
| Rsa1.0_00010.1.g650.t1 | refXP_002889471.1  hypothetical protein ARALYDRAFT_470343 [Arabidopsis lyrata subsp. lyrata] gi 297335313 gb EFH65730.1  hypothetical protein ARALYDRAFT_470343 [Arabidopsis lyrata subsp. lyrata]                                                                                                                                         | 229  | 219  | 1.00E-25  | 95.6  | 38.4 | 52.0 | hypothetical protein ARALYDRAFT_470343      | gbpln | Arabidopsis lyrata   | AT5G37340.3   Symbols:   ZPR1 zinc-finger domain protein   chr5:14787488-14792373 REVERSE LENGTH=493                                                                                                                                                                                                                                                                                                                                                                                                                                                                       | 229  | 202  | 2.00E-23  | 88.2  | 37.6 | 50.7 |
| Rsa1.0_00010.1.g651.t3 | refXP_002874072.1  zinc finger (ZPR1-type) family protein [Arabidopsis lyrata subsp. lyrata] gi 297319909 gb EFH50331.1  zinc finger (ZPR1-type) family protein [Arabidopsis lyrata subsp. lyrata]                                                                                                                                         | 487  | 493  | 0         | 101.2 | 86.2 | 89.7 | zinc finger (ZPR1-type) family protein      | gbpln | Arabidopsis lyrata   | AT5G22500.1   Symbols: FAR1   fatty acid reductase 1   chr5:7470541-7473916 FORWARD LENGTH=491                                                                                                                                                                                                                                                                                                                                                                                                                                                                             | 487  | 493  | 0         | 101.2 | 85.2 | 88.7 |
| Rsa1.0_00010.1.g652.t1 | refXP_002872004.1  hypothetical protein ARALYDRAFT_910242 [Arabidopsis lyrata subsp. lyrata] gi 297317841 gb EFH48263.1  hypothetical protein ARALYDRAFT_910242 [Arabidopsis lyrata subsp. lyrata]                                                                                                                                         | 493  | 491  | 0         | 99.6  | 86.6 | 94.1 | hypothetical protein ARALYDRAFT_910242      | gbpln | Arabidopsis lyrata   | AT4G29260.1   Symbols:   HAD superfamily, subfamily IIIB acid phosphatase   chr4:14422310-14423409 REVERSE LENGTH=255                                                                                                                                                                                                                                                                                                                                                                                                                                                      | 493  | 491  | 0         | 99.6  | 86.0 | 94.5 |
| Rsa1.0_00011.1.g653.t1 | # # # # # # # # - ---- ---- # # # # # # #                                                                                                                                                                                                                                                                                                  |      |      |           |       |      |      |                                             |       |                      |                                                                                                                                                                                                                                                                                                                                                                                                                                                                                                                                                                            |      |      |           |       |      |      |
| Rsa1.0_00011.1.g654.t1 | gb EOA17296.1  hypothetical protein CARUB_v10005568mg [Capsella rubella]                                                                                                                                                                                                                                                                   | 263  | 253  | 1.00E-116 | 96.2  | 79.8 | 86.7 | hypothetical protein CARUB_v10005568mg      | gbpln | Capsella rubella     | AT4G29240.1   Symbols:   Leucine-rich repeat (LRR) family protein   chr4:14418826-14420073 FORWARD LENGTH=415                                                                                                                                                                                                                                                                                                                                                                                                                                                              | 263  | 255  | 1.00E-117 | 97.0  | 78.3 | 85.2 |
| Rsa1.0_00011.1.g655.t1 | gb EOA16729.1  hypothetical protein CARUB_v10004932mg [Capsella rubella]                                                                                                                                                                                                                                                                   | 406  | 413  | 1.00E-175 | 101.7 | 84.0 | 90.1 | hypothetical protein CARUB_v10004932mg      | gbpln | Capsella rubella     | AT1G43760.1   Symbols:   DNase I-like superfamily protein   chr1:16528880-16531065 REVERSE LENGTH=626                                                                                                                                                                                                                                                                                                                                                                                                                                                                      | 406  | 415  | 1.00E-173 | 102.2 | 72.2 | 78.1 |
| Rsa1.0_00011.1.g656.t1 | gb AAG50806.1 AC079281_8 unknown protein [Arabidopsis thaliana]                                                                                                                                                                                                                                                                            | 1166 | 1213 | 0         | 104.0 | 37.3 | 55.4 | unknown protein                             | gbpln | Arabidopsis thaliana |                                                                                                                                                                                                                                                                                                                                                                                                                                                                                                                                                                            | 1166 | 626  | 2.00E-66  | 53.7  | 13.0 | 21.5 |

|                        |                                                                                                                                                                                                                                                                                                                                                                                                                                                                                                                                                                                             |      |      |           |       |      |      |                                                             |       |                      |                                                                                                                       |      |     |           |       |      |      |
|------------------------|---------------------------------------------------------------------------------------------------------------------------------------------------------------------------------------------------------------------------------------------------------------------------------------------------------------------------------------------------------------------------------------------------------------------------------------------------------------------------------------------------------------------------------------------------------------------------------------------|------|------|-----------|-------|------|------|-------------------------------------------------------------|-------|----------------------|-----------------------------------------------------------------------------------------------------------------------|------|-----|-----------|-------|------|------|
| Rsa1.0_00011.1.g657.t1 | refNP_194652.1   NAC domain containing protein 75 [Arabidopsis thaliana] gi 7269821 emb CAB79681.1  putative protein [Arabidopsis thaliana] gi 332660205 gb AEE85605.1   NAC domain containing protein 75 [Arabidopsis thaliana]                                                                                                                                                                                                                                                                                                                                                            | 523  | 498  | 0         | 95.2  | 86.4 | 89.1 | NAC domain containing protein 75                            | gbpln | Arabidopsis thaliana | AT4G29230.1   Symbols: anac075, NAC075   NAC domain containing protein 75   chr4:14410338-14414956 FORWARD LENGTH=498 | 523  | 498 | 0         | 95.2  | 86.4 | 89.1 |
| Rsa1.0_00011.1.g658.t4 | gb AAM91591.1  pyrophosphate-dependent phosphofructo-1-kinase-like protein [Arabidopsis thaliana]                                                                                                                                                                                                                                                                                                                                                                                                                                                                                           | 88   | 473  | 2.00E-13  | 537.5 | 44.3 | 48.9 | pyrophosphate-dependent phosphofructo-1-kinase-like protein | gbpln | Arabidopsis thaliana | AT4G29220.1   Symbols: PFK1   phosphofructokinase 1   chr4:14403621-14406071 REVERSE LENGTH=473                       | 88   | 473 | 4.00E-16  | 537.5 | 44.3 | 48.9 |
| Rsa1.0_00011.1.g659.t1 | dbj BAD22536.1  gamma-glutamyl transferase [Raphanus sativus]                                                                                                                                                                                                                                                                                                                                                                                                                                                                                                                               | 639  | 635  | 0         | 99.4  | 79.3 | 88.4 | gamma-glutamyl transferase                                  | gbpln | Raphanus sativus     | AT4G29210.1   Symbols: GGT3, GGT4   gamma-glutamyl transpeptidase 4   chr4:14400990-14403319 FORWARD LENGTH=637       | 639  | 637 | 0         | 99.7  | 78.7 | 87.5 |
| Rsa1.0_00011.1.g660.t1 | ref XP_002330525.1  predicted protein [Populus trichocarpa] gi 222872459 gb EEF09590.1  predicted protein [Populus trichocarpa]                                                                                                                                                                                                                                                                                                                                                                                                                                                             | 640  | 605  | 1.00E-168 | 94.5  | 48.3 | 63.4 | predicted protein                                           | gbpln | Populus trichocarpa  | AT4G29210.1   Symbols: GGT3, GGT4   gamma-glutamyl transpeptidase 4   chr4:14400990-14403319 FORWARD LENGTH=637       | 640  | 637 | 1.00E-164 | 99.5  | 47.7 | 61.1 |
| Rsa1.0_00011.1.g661.t1 | dbj BAJ33902.1  unnamed protein product [Thellungiella halophila]                                                                                                                                                                                                                                                                                                                                                                                                                                                                                                                           | 344  | 365  | 1.00E-168 | 106.1 | 86.6 | 92.2 | unnamed protein product                                     | ----  | ----                 | AT4G29190.1   Symbols:   Zinc finger C-x8-C-x5-C-x3-H type family protein   chr4:14392233-14393303 REVERSE LENGTH=356 | 344  | 356 | 1.00E-160 | 103.5 | 83.4 | 88.4 |
| Rsa1.0_00011.1.g662.t1 | ref NP_001190865.1  protein root hair specific 16 [Arabidopsis thaliana] gi 264664523 sp COLGR6.2 Y4291_ARAT H RecName: Full=Probable LRR receptor-like serine/threonine-protein kinase At4g29180; Flags: Precursor gi 332660199 gb AEE85599.1  probable LRR receptor-like serine/threonine-protein kinase [Arabidopsis thaliana] ref NP_194646.2  meiotic nuclear division protein 1-like protein [Arabidopsis thaliana] gi 75151407 sp Q8GYD2.1 MND1_ARAT H RecName: Full=Meiotic nuclear division protein 1 homolog; Short=AtMND1; AltName: Full=Meiotic nuclear division 1-like protein | 908  | 913  | 0         | 100.6 | 85.9 | 92.4 | protein root hair specific 16                               | gbpln | Arabidopsis thaliana | AT4G29180.2   Symbols: RHS16   root hair specific 16   chr4:14385631-14389524 FORWARD LENGTH=913                      | 908  | 913 | 0         | 100.6 | 85.9 | 92.4 |
| Rsa1.0_00011.1.g663.t1 | gi 28973061 gb AA063855.1  unknown protein [Arabidopsis thaliana] gi 82408770 gb ABB73190.1  meiotic nuclear division 1-like protein [Arabidopsis thaliana] gi 82775232 emb CAJ44238.1  AtMnd1 protein [Arabidopsis thaliana] gi 332660196 gb AEE85596.1  meiotic nuclear division protein 1-like protein [Arabidopsis thaliana]                                                                                                                                                                                                                                                            | 256  | 230  | 1.00E-100 | 89.8  | 75.0 | 78.5 | meiotic nuclear division protein 1-like protein             | gbpln | Arabidopsis thaliana | AT4G29170.1   Symbols: ATMND1   Mnd1 family protein   chr4:14382985-14385128 FORWARD LENGTH=230                       | 256  | 230 | 1.00E-102 | 89.8  | 75.0 | 78.5 |
| Rsa1.0_00011.1.g664.t1 | gb EOA17400.1  hypothetical protein CARUB_v10005703mg [Capsella rubella] gi 482553208 gb EOA17401.1  hypothetical protein CARUB_v10005703mg [Capsella rubella]                                                                                                                                                                                                                                                                                                                                                                                                                              | 215  | 218  | 6.00E-96  | 101.4 | 96.3 | 98.1 | hypothetical protein CARUB_v10005703mg                      | gbpln | Capsella rubella     | AT4G29160.3   Symbols: SNF7.1   SNF7 family protein   chr4:14381019-14382342 FORWARD LENGTH=219                       | 215  | 219 | 2.00E-92  | 101.9 | 92.6 | 94.4 |
| Rsa1.0_00011.1.g665.t1 | ref XP_002869449.1  hypothetical protein ARALYDRAFT_491843 [Arabidopsis lyrata subsp. lyrata] gi 297315285 gb EFH45708.1  hypothetical protein ARALYDRAFT_491843 [Arabidopsis lyrata subsp. lyrata]                                                                                                                                                                                                                                                                                                                                                                                         | 388  | 385  | 1.00E-176 | 99.2  | 85.8 | 91.0 | hypothetical protein ARALYDRAFT_491843                      | gbpln | Arabidopsis lyrata   | AT4G29150.1   Symbols: IQD25   IQ-domain 25   chr4:14378770-14380340 FORWARD LENGTH=399                               | 388  | 399 | 1.00E-174 | 102.8 | 85.1 | 90.2 |
| Rsa1.0_00011.1.g666.t1 | #                                                                                                                                                                                                                                                                                                                                                                                                                                                                                                                                                                                           | #    | #    | #         | #     | #    | #    | -                                                           | ----  | ----                 | #                                                                                                                     | #    | #   | #         | #     | #    |      |
| Rsa1.0_00011.1.g667.t1 | dbj BAB08714.1  non-LTR retroelement reverse transcriptase-like protein [Arabidopsis thaliana]                                                                                                                                                                                                                                                                                                                                                                                                                                                                                              | 1032 | 1197 | 1.00E-110 | 116.0 | 18.9 | 25.3 | non-LTR retroelement reverse transcriptase-like protein     | gbpln | Arabidopsis thaliana | AT5G36228.1   Symbols:   nucleic acid binding:zinc ion binding   chr5:14271691-14272776 FORWARD LENGTH=361            | 1032 | 361 | 8.00E-19  | 35.0  | 5.4  | 7.4  |
| Rsa1.0_00011.1.g668.t1 | emb CAB39638.1  RNA-directed DNA polymerase-like protein [Arabidopsis thaliana] gi 7267666 emb CAB78094.1  RNA-directed DNA polymerase-like protein [Arabidopsis thaliana]                                                                                                                                                                                                                                                                                                                                                                                                                  | 779  | 1274 | 0         | 163.5 | 49.4 | 65.2 | RNA-directed DNA polymerase-like protein                    | gbpln | Arabidopsis thaliana | AT4G29090.1   Symbols:   Ribonuclease H-like superfamily protein   chr4:14333528-14335255 FORWARD LENGTH=575          | 779  | 575 | 1.00E-74  | 73.8  | 23.4 | 35.7 |
| Rsa1.0_00011.1.g669.t1 | ref XP_002869450.1  hypothetical protein ARALYDRAFT_913597 [Arabidopsis lyrata subsp. lyrata] gi 297315286 gb EFH45709.1  hypothetical protein ARALYDRAFT_913597 [Arabidopsis lyrata subsp. lyrata]                                                                                                                                                                                                                                                                                                                                                                                         | 538  | 533  | 0         | 99.1  | 88.1 | 93.5 | hypothetical protein ARALYDRAFT_913597                      | gbpln | Arabidopsis lyrata   | AT4G29140.1   Symbols:   MATE efflux family protein   chr4:14369148-14370746 FORWARD LENGTH=532                       | 538  | 532 | 0         | 98.9  | 85.7 | 91.6 |



|                        |                                                                                                                                                                                                                                                                                                                                                                                                                                |     |      |           |       |      |      |                                        |       |                      |                                                                                                                                                                                                                                                                                                                                                                                                                                                          |     |      |           |       |      |      |
|------------------------|--------------------------------------------------------------------------------------------------------------------------------------------------------------------------------------------------------------------------------------------------------------------------------------------------------------------------------------------------------------------------------------------------------------------------------|-----|------|-----------|-------|------|------|----------------------------------------|-------|----------------------|----------------------------------------------------------------------------------------------------------------------------------------------------------------------------------------------------------------------------------------------------------------------------------------------------------------------------------------------------------------------------------------------------------------------------------------------------------|-----|------|-----------|-------|------|------|
| Rsa1.0_00011.1.g679.t1 | ref[XP_002869459.1] hypothetical protein ARALYDRAFT_491858 [Arabidopsis lyrata subsp. lyrata] gi 297315295 gb EFH45718.1                                                                                                                                                                                                                                                                                                       | 525 | 601  | 0         | 114.5 | 77.5 | 84.6 | hypothetical protein ARALYDRAFT_491858 | gbpln | Arabidopsis lyrata   | AT4G29000.1   Symbols:   Tesmin/TSO1-like CXC domain-containing protein   chr4:14293957-14296602 FORWARD LENGTH=603                                                                                                                                                                                                                                                                                                                                      | 525 | 603  | 0         | 114.9 | 75.6 | 82.7 |
| Rsa1.0_00011.1.g680.t1 | hypothetical protein ARALYDRAFT_491858 [Arabidopsis lyrata subsp. lyrata] ref[NP_194628.1] RNA-binding-related protein [Arabidopsis thaliana] gi 4972045 emb CAB4391.1  putative protein [Arabidopsis thaliana] gi 7269797 emb CAB79657.1  putative protein [Arabidopsis thaliana] gi 115646852 gb ABJ17140.1  At4g28990 [Arabidopsis thaliana] gi 332660169 gb AEE85569.1  RNA-binding-related protein [Arabidopsis thaliana] | 337 | 347  | 1.00E-80  | 103.0 | 63.5 | 70.9 | RNA-binding-related protein            | gbpln | Arabidopsis thaliana | AT4G28990.1   Symbols:   RNA-binding protein-related   chr4:14291205-14293018 FORWARD LENGTH=347                                                                                                                                                                                                                                                                                                                                                         | 337 | 347  | 3.00E-83  | 103.0 | 63.5 | 70.9 |
| Rsa1.0_00011.1.g681.t1 | ref[XP_002517802.1] DNA topoisomerase II, putative [Ricinus communis] gi 223543074 gb IEEF44609.1  DNA topoisomerase II, putative [Ricinus communis]                                                                                                                                                                                                                                                                           | 170 | 1212 | 2.00E-16  | 712.9 | 35.9 | 46.5 | DNA topoisomerase II, putative         | gbpln | Ricinus communis     | AT3G23890.2   Symbols: TOPII, ATTOPII   topoisomerase II   chr3:8624931-8631106 FORWARD LENGTH=1438                                                                                                                                                                                                                                                                                                                                                      | 170 | 1438 | 2.00E-12  | 845.9 | 24.7 | 28.8 |
| Rsa1.0_00011.1.g682.t1 | ref[XP_002869463.1] hypothetical protein ARALYDRAFT_491863 [Arabidopsis lyrata subsp. lyrata] gi 297315299 gb EFH45722.1  hypothetical protein ARALYDRAFT_491863 [Arabidopsis lyrata subsp. lyrata]                                                                                                                                                                                                                            | 350 | 348  | 1.00E-167 | 99.4  | 82.9 | 91.1 | hypothetical protein ARALYDRAFT_491863 | gbpln | Arabidopsis lyrata   | AT4G28940.1   Symbols:   Phosphorylase superfamily protein   chr4:14274414-14276920 FORWARD LENGTH=348                                                                                                                                                                                                                                                                                                                                                   | 350 | 348  | 1.00E-169 | 99.4  | 82.6 | 90.6 |
| Rsa1.0_00011.1.g683.t1 | ref[XP_002867431.1] predicted protein [Arabidopsis lyrata subsp. lyrata] gi 297313267 gb EFH43690.1  predicted protein [Arabidopsis lyrata subsp. lyrata]                                                                                                                                                                                                                                                                      | 330 | 329  | 1.00E-121 | 99.7  | 67.6 | 80.3 | predicted protein                      | gbpln | Arabidopsis lyrata   | AT4G28920.1   Symbols:   Protein of unknown function (DUF626)   chr4:14268415-14269885 REVERSE LENGTH=292                                                                                                                                                                                                                                                                                                                                                | 330 | 292  | 2.00E-65  | 88.5  | 44.2 | 56.1 |
| Rsa1.0_00011.1.g684.t1 | ref[XP_002867431.1] predicted protein [Arabidopsis lyrata subsp. lyrata] gi 297313267 gb EFH43690.1  predicted protein [Arabidopsis lyrata subsp. lyrata]                                                                                                                                                                                                                                                                      | 336 | 329  | 1.00E-123 | 97.9  | 67.6 | 81.5 | predicted protein                      | gbpln | Arabidopsis lyrata   | AT4G28920.1   Symbols:   Protein of unknown function (DUF626)   chr4:14268415-14269885 REVERSE LENGTH=292                                                                                                                                                                                                                                                                                                                                                | 336 | 292  | 6.00E-62  | 86.9  | 43.2 | 53.9 |
| Rsa1.0_00011.1.g685.t1 | ref[XP_002869465.1] predicted protein [Arabidopsis lyrata subsp. lyrata] gi 297315301 gb EFH45724.1  predicted protein [Arabidopsis lyrata subsp. lyrata]                                                                                                                                                                                                                                                                      | 301 | 280  | 2.00E-84  | 93.0  | 55.8 | 64.8 | predicted protein                      | gbpln | Arabidopsis lyrata   | AT3G19515.2   Symbols:   CONTAINS InterPro DOMAIN/s: Apoptosis inhibitory 5 (InterPro:IPR008383); BEST Arabidopsis thaliana protein match is: unknown protein (TAIR:AT1G23935.1); Has 546 Blast hits to 394 proteins in 84 species: Archae - 0; Bacteria - 3; Metazoa - 210; Fungi - 15; Plants - 143; Viruses - 0; Other Eukaryotes - 175 (source: NCBI BLINK).   chr3:6766872-6771078 REVERSE LENGTH=805                                               | 301 | 805  | 2.00E-28  | 267.4 | 23.9 | 39.5 |
| Rsa1.0_00011.1.g686.t1 | gb EOA16694.1  hypothetical protein CARUB_v10004886mg [Capsella rubella]                                                                                                                                                                                                                                                                                                                                                       | 403 | 424  | 1.00E-157 | 105.2 | 78.4 | 84.9 | hypothetical protein CARUB_v10004886mg | gbpln | Capsella rubella     | AT4G28910.3   Symbols: NINJA   novel interactor of JAZ   chr4:14264330-14265680 REVERSE LENGTH=425                                                                                                                                                                                                                                                                                                                                                       | 403 | 425  | 1.00E-155 | 105.5 | 75.4 | 82.6 |
| Rsa1.0_00011.1.g687.t1 | ref[XP_002867435.1] ring-H2 finger protein ATL4J precursor [Arabidopsis lyrata subsp. lyrata] gi 297313271 gb EFH43694.1  ring-H2 finger protein ATL4J precursor [Arabidopsis lyrata subsp. lyrata]                                                                                                                                                                                                                            | 596 | 435  | 1.00E-162 | 73.0  | 52.0 | 56.9 | ring-H2 finger protein ATL4J precursor | gbpln | Arabidopsis lyrata   | AT4G28890.1   Symbols:   RING/U-box superfamily protein   chr4:14256437-14257735 REVERSE LENGTH=432                                                                                                                                                                                                                                                                                                                                                      | 596 | 432  | 1.00E-163 | 72.5  | 52.3 | 56.5 |
| Rsa1.0_00011.1.g688.t1 | gb EOA16720.1  hypothetical protein CARUB_v10004924mg [Capsella rubella]                                                                                                                                                                                                                                                                                                                                                       | 421 | 415  | 0         | 98.6  | 91.4 | 94.8 | hypothetical protein CARUB_v10004924mg | gbpln | Capsella rubella     | AT4G28880.1   Symbols: ckI3   casein kinase I-like 3   chr4:14251351-14254048 FORWARD LENGTH=415                                                                                                                                                                                                                                                                                                                                                         | 421 | 415  | 0         | 98.6  | 91.7 | 94.8 |
| Rsa1.0_00011.1.g689.t1 | gb EOA18729.1  hypothetical protein CARUB_v10007311mg [Capsella rubella]                                                                                                                                                                                                                                                                                                                                                       | 150 | 198  | 2.00E-55  | 132.0 | 73.3 | 79.3 | hypothetical protein CARUB_v10007311mg | gbpln | Capsella rubella     | AT4G28840.1   Symbols:   unknown protein; FUNCTIONS IN: molecular function unknown; INVOLVED IN: biological process unknown; LOCATED IN: chloroplast; BEST Arabidopsis thaliana protein match is: unknown protein (TAIR:AT2G20080.1); Has 71 Blast hits to 69 proteins in 15 species: Archae - 0; Bacteria - 0; Metazoa - 2; Fungi - 0; Plants - 67; Viruses - 0; Other Eukaryotes - 2 (source: NCBI BLINK).   chr4:14240867-14242513 FORWARD LENGTH=193 | 150 | 193  | 7.00E-54  | 128.7 | 70.7 | 76.0 |
| Rsa1.0_00011.1.g690.t1 | gb EOA17434.1  hypothetical protein CARUB_v10005737mg [Capsella rubella]                                                                                                                                                                                                                                                                                                                                                       | 208 | 208  | 1.00E-107 | 100.0 | 94.7 | 98.6 | hypothetical protein CARUB_v10005737mg | gbpln | Capsella rubella     | AT4G28830.1   Symbols:   S-adenosyl-L-methionine-dependent, methyltransferases superfamily protein   chr4:14232490-14233917 FORWARD LENGTH=208                                                                                                                                                                                                                                                                                                           | 208 | 208  | 1.00E-109 | 100.0 | 94.7 | 98.1 |

|                        |                                                                                                                                                                                                                                                                                                                                                                                       |     |     |           |       |      |      |                                        |       |                      |                                                                                                                                                                                                                                                                                                                                                                                                                                                                                                                                                                                                                                                               |     |     |           |       |      |      |
|------------------------|---------------------------------------------------------------------------------------------------------------------------------------------------------------------------------------------------------------------------------------------------------------------------------------------------------------------------------------------------------------------------------------|-----|-----|-----------|-------|------|------|----------------------------------------|-------|----------------------|---------------------------------------------------------------------------------------------------------------------------------------------------------------------------------------------------------------------------------------------------------------------------------------------------------------------------------------------------------------------------------------------------------------------------------------------------------------------------------------------------------------------------------------------------------------------------------------------------------------------------------------------------------------|-----|-----|-----------|-------|------|------|
| Rsa1.0_00011.1.g691.t1 | ref NP_194611.2  HIT-type zinc finger protein [Arabidopsis thaliana]<br>gi 92856590 gb ABE77404.1  At4g28820 [Arabidopsis thaliana]<br>gi 332660149 gb AEE85549.1  HIT-type zinc finger protein [Arabidopsis thaliana]                                                                                                                                                                | 198 | 173 | 9.00E-30  | 87.4  | 43.4 | 50.0 | HIT-type zinc finger protein           | gbpln | Arabidopsis thaliana | AT4G28820.1   Symbols:   HIT-type Zinc finger family protein   chr4:14230815-14232287 REVERSE LENGTH=173                                                                                                                                                                                                                                                                                                                                                                                                                                                                                                                                                      | 198 | 173 | 3.00E-32  | 87.4  | 43.4 | 50.0 |
| Rsa1.0_00011.1.g692.t1 | ref XP_002869474.1  expressed protein [Arabidopsis lyrata subsp. lyrata]<br>gi 297315310 gb EFH45733.1  expressed protein [Arabidopsis lyrata subsp. lyrata]                                                                                                                                                                                                                          | 119 | 139 | 1.00E-35  | 116.8 | 61.3 | 78.2 | expressed protein                      | gbpln | Arabidopsis lyrata   | AT4G28775.1   Symbols:   unknown protein; FUNCTIONS IN: molecular_function unknown; INVOLVED IN: biological_process unknown; LOCATED IN: cellular_component unknown; Has 30201 Blast hits to 17322 proteins in 780 species: Archae - 12; Bacteria - 1396; Metazoa - 17338; Fungi - 3422; Plants - 5037; Viruses - 0; Other Eukaryotes - 2996 (source: NCBI ELink).   chr4:14214817-14215233 FORWARD LENGTH=138                                                                                                                                                                                                                                                | 119 | 138 | 3.00E-37  | 116.0 | 61.3 | 76.5 |
| Rsa1.0_00011.1.g693.t1 | gb EOA30311.1  hypothetical protein CARUB_v10013437mg [Capsella rubella]                                                                                                                                                                                                                                                                                                              | 544 | 532 | 0         | 97.8  | 80.9 | 86.2 | hypothetical protein CARUB_v10013437mg | gbpln | Capsella rubella     | AT3G24430.1   Symbols:   HCF101   ATP binding   chr3:8868731-8872154 REVERSE LENGTH=532                                                                                                                                                                                                                                                                                                                                                                                                                                                                                                                                                                       | 544 | 532 | 0         | 97.8  | 78.9 | 82.0 |
| Rsa1.0_00011.1.g694.t1 | ref XP_002869474.1  expressed protein [Arabidopsis lyrata subsp. lyrata]<br>gi 297315310 gb EFH45733.1  expressed protein [Arabidopsis lyrata subsp. lyrata]                                                                                                                                                                                                                          | 138 | 139 | 8.00E-46  | 100.7 | 68.1 | 82.6 | expressed protein                      | gbpln | Arabidopsis lyrata   | AT4G28775.1   Symbols:   unknown protein; FUNCTIONS IN: molecular_function unknown; INVOLVED IN: biological_process unknown; LOCATED IN: cellular_component unknown; Has 30201 Blast hits to 17322 proteins in 780 species: Archae - 12; Bacteria - 1396; Metazoa - 17338; Fungi - 3422; Plants - 5037; Viruses - 0; Other Eukaryotes - 2996 (source: NCBI ELink).   chr4:14214817-14215233 FORWARD LENGTH=138                                                                                                                                                                                                                                                | 138 | 138 | 8.00E-45  | 100.0 | 60.9 | 72.5 |
| Rsa1.0_00011.1.g695.t1 | ref XP_002869476.1  hypothetical protein ARALYDRAFT_913640 [Arabidopsis lyrata subsp. lyrata]<br>gi 297315312 gb EFH45735.1  hypothetical protein ARALYDRAFT_913640 [Arabidopsis lyrata subsp. lyrata]                                                                                                                                                                                | 338 | 328 | 1.00E-164 | 97.0  | 86.1 | 89.6 | hypothetical protein ARALYDRAFT_913640 | gbpln | Arabidopsis lyrata   | AT4G28740.1   Symbols:   FUNCTIONS IN: molecular_function unknown; INVOLVED IN: biological_process unknown; LOCATED IN: chloroplast; EXPRESSED IN: 21 plant structures; EXPRESSED DURING: 13 growth stages; CONTAINS InterPro DOMAIN/s: Protein of unknown function DUF3493 (InterPro:IPRO21883); BEST Arabidopsis thaliana protein match is: tetratricopeptide repeat (TPR)-containing protein (TAIR:AT1G02910.1); Has 30201 Blast hits to 17322 proteins in 780 species: Archae - 12; Bacteria - 1396; Metazoa - 17338; Fungi - 3422; Plants - 5037; Viruses - 0; Other Eukaryotes - 2996 (source: NCBI ELink).   chr4:14201051-14202542 FORWARD LENGTH=347 | 338 | 347 | 1.00E-166 | 102.7 | 84.3 | 89.3 |
| Rsa1.0_00011.1.g696.t1 | ref NP_194602.2  glutaredoxin-C5 [Arabidopsis thaliana]<br>gi 75151040 sp Q8GWS0.1 GRXC5_ARA TH RecName: Full=Glutaredoxin-C5, chloroplastic; Short=AtGrxC5; Flags: Precursor gi 26452363 dtj BA043267.1  unknown protein [Arabidopsis thaliana]<br>gi 28372898 gb AA039931.1  At4g28730 [Arabidopsis thaliana]<br>gi 332660135 gb AEE85535.1  glutaredoxin-C5 [Arabidopsis thaliana] | 184 | 174 | 7.00E-67  | 94.6  | 79.3 | 84.8 | glutaredoxin-C5                        | gbpln | Arabidopsis thaliana | AT4G28730.1   Symbols:   Glutaredoxin family protein   chr4:14199174-14200712 FORWARD LENGTH=174                                                                                                                                                                                                                                                                                                                                                                                                                                                                                                                                                              | 184 | 174 | 2.00E-69  | 94.6  | 79.3 | 84.8 |
| Rsa1.0_00011.1.g697.t1 | ref XP_002869437.1  hypothetical protein ARALYDRAFT_913571 [Arabidopsis lyrata subsp. lyrata]<br>gi 297315273 gb EFH45696.1  hypothetical protein ARALYDRAFT_913571 [Arabidopsis lyrata subsp. lyrata]                                                                                                                                                                                | 402 | 394 | 5.00E-94  | 98.0  | 48.3 | 61.9 | hypothetical protein ARALYDRAFT_913571 | gbpln | Arabidopsis lyrata   | AT5G39560.1   Symbols:   Galactose oxidase/kelch repeat superfamily protein   chr5:15841885-15843096 REVERSE LENGTH=403                                                                                                                                                                                                                                                                                                                                                                                                                                                                                                                                       | 402 | 403 | 1.00E-70  | 100.2 | 47.5 | 61.4 |
| Rsa1.0_00011.1.g698.t1 | gb EOA18879.1  hypothetical protein CARUB_v10007502mg [Capsella rubella]                                                                                                                                                                                                                                                                                                              | 511 | 506 | 0         | 99.0  | 89.0 | 95.3 | hypothetical protein CARUB_v10007502mg | gbpln | Capsella rubella     | AT4G28700.1   Symbols:   AMT1.4   ammonium transporter 1.4   chr4:14161681-14163195 FORWARD LENGTH=504                                                                                                                                                                                                                                                                                                                                                                                                                                                                                                                                                        | 511 | 504 | 0         | 98.6  | 87.9 | 95.3 |

|                        |                                                                                                                                                                                                                                                                                                                                                                              |     |      |           |       |      |      |                                              |       |                      |                                                                                                                                                                                                                                                                                                                                                 |     |      |           |       |      |      |
|------------------------|------------------------------------------------------------------------------------------------------------------------------------------------------------------------------------------------------------------------------------------------------------------------------------------------------------------------------------------------------------------------------|-----|------|-----------|-------|------|------|----------------------------------------------|-------|----------------------|-------------------------------------------------------------------------------------------------------------------------------------------------------------------------------------------------------------------------------------------------------------------------------------------------------------------------------------------------|-----|------|-----------|-------|------|------|
| Rsa1.0_00011.1.g699.t1 | ref NP_567814.1  photosystem II reaction center PSB28 protein [Arabidopsis thaliana] gi 75161816 sp Q8W0Y8.1 PSB28_ARAT H RecName: Full=Photosystem II reaction center PSB28 protein, chloroplastic; AltName: Full=Photosystem II protein W-like; Flags: Precursor                                                                                                           | 152 | 183  | 7.00E-72  | 120.4 | 88.8 | 92.1 | photosystem II reaction center PSB28 protein | gbpln | Arabidopsis thaliana | AT4G28660.1   Symbols: PSB28   photosystem II reaction center PSB28 protein   chr4:14150008-14150933 FORWARD LENGTH=183                                                                                                                                                                                                                         | 152 | 183  | 2.00E-74  | 120.4 | 88.8 | 92.1 |
| Rsa1.0_00011.1.g700.t2 | dbj BAJ34152.1  unnamed protein product [Theilungella halophila]                                                                                                                                                                                                                                                                                                             | 184 | 246  | 3.00E-35  | 133.7 | 52.2 | 56.0 | unnamed protein product                      | ----  | ----                 | AT4G28640.2   Symbols: IAA11   indole-3-acetic acid inducible 11   chr4:14142288-14143928 FORWARD LENGTH=302                                                                                                                                                                                                                                    | 184 | 302  | 3.00E-33  | 164.1 | 48.9 | 51.1 |
| Rsa1.0_00011.1.g701.t1 | # # # # # # # # -                                                                                                                                                                                                                                                                                                                                                            | #   | #    | #         | #     | #    | #    | -                                            | ----  | ----                 | # # # # # # # #                                                                                                                                                                                                                                                                                                                                 | #   | #    | #         | #     | #    | #    |
| Rsa1.0_00011.1.g702.t1 | ref XP_002869492.1  hypothetical protein ARALYDRAFT_491906 [Arabidopsis lyrata subsp. lyrata] gi 297315328 gb EFH45751.1  hypothetical protein ARALYDRAFT_491906 [Arabidopsis lyrata subsp. lyrata]                                                                                                                                                                          | 748 | 748  | 0         | 100.0 | 82.4 | 89.8 | hypothetical protein ARALYDRAFT_491906       | gbpln | Arabidopsis lyrata   | AT4G28570.1   Symbols:   Long-chain fatty alcohol dehydrogenase family protein   chr4:14119548-14121923 FORWARD LENGTH=748                                                                                                                                                                                                                      | 748 | 748  | 0         | 100.0 | 82.1 | 88.9 |
| Rsa1.0_00012.1.g703.t1 | gb AAP74222.1  RST1 [Arabidopsis thaliana]                                                                                                                                                                                                                                                                                                                                   | 291 | 1841 | 4.00E-44  | 632.6 | 34.4 | 38.1 | RST1                                         | gbpln | Arabidopsis thaliana | AT3G27670.1   Symbols: RST1   ARM repeat superfamily protein   chr3:10245338-10253158 FORWARD LENGTH=1841                                                                                                                                                                                                                                       | 291 | 1841 | 1.00E-46  | 632.6 | 34.4 | 38.1 |
| Rsa1.0_00012.1.g704.t1 | gb EOA35360.1  hypothetical protein CARUB_v10020554mg [Capsella rubella]                                                                                                                                                                                                                                                                                                     | 304 | 353  | 1.00E-118 | 116.1 | 73.0 | 83.6 | hypothetical protein CARUB_v10020554mg       | gbpln | Capsella rubella     | AT1G69523.1   Symbols:   S-adenosyl-L-methionine-dependent methyltransferases superfamily protein   chr1:26129827-26131157 FORWARD LENGTH=300                                                                                                                                                                                                   | 304 | 300  | 1.00E-109 | 98.7  | 65.5 | 79.6 |
| Rsa1.0_00012.1.g705.t1 | gb EOA35360.1  hypothetical protein CARUB_v10020554mg [Capsella rubella]                                                                                                                                                                                                                                                                                                     | 289 | 353  | 1.00E-91  | 122.1 | 67.8 | 80.3 | hypothetical protein CARUB_v10020554mg       | gbpln | Capsella rubella     | AT1G69523.1   Symbols:   S-adenosyl-L-methionine-dependent methyltransferases superfamily protein   chr1:26129827-26131157 FORWARD LENGTH=300                                                                                                                                                                                                   | 289 | 300  | 4.00E-85  | 103.8 | 59.2 | 74.0 |
| Rsa1.0_00012.1.g706.t9 | ref XP_002871663.1  predicted protein [Arabidopsis lyrata subsp. lyrata] gi 297317500 gb EFH47922.1  predicted protein [Arabidopsis lyrata subsp. lyrata]                                                                                                                                                                                                                    | 568 | 593  | 0         | 104.4 | 73.1 | 83.3 | predicted protein                            | gbpln | Arabidopsis lyrata   | AT5G15380.1   Symbols: DRM1   domains rearranged methylase 1   chr5:4991347-4994826 FORWARD LENGTH=624                                                                                                                                                                                                                                          | 568 | 624  | 0         | 109.9 | 71.3 | 82.2 |
| Rsa1.0_00012.1.g707.t1 | gb AFI56994.1  NAC2, partial [Brassica napus]                                                                                                                                                                                                                                                                                                                                | 269 | 244  | 1.00E-134 | 90.7  | 86.2 | 87.4 | NAC2, partial                                | gbpln | Brassica napus       | AT1G69490.1   Symbols: NAP, ANAC029, ATNAP   NAC-like, activated by AP3/PI   chr1:26122233-26123222 FORWARD LENGTH=268                                                                                                                                                                                                                          | 269 | 268  | 1.00E-131 | 99.6  | 84.0 | 89.6 |
| Rsa1.0_00012.1.g708.t1 | ref XP_002887236.1  predicted protein [Arabidopsis lyrata subsp. lyrata] gi 297333077 gb EFH63495.1  predicted protein [Arabidopsis lyrata subsp. lyrata]                                                                                                                                                                                                                    | 342 | 348  | 1.00E-156 | 101.8 | 81.3 | 86.5 | predicted protein                            | gbpln | Arabidopsis lyrata   | AT1G69430.1   Symbols:   unknown protein; BEST Arabidopsis thaliana protein match is: unknown protein (TAIR:AT1G26650.1); Has 216 Blast hits to 215 proteins in 17 species: Archae - 0; Bacteria - 0; Metazoa - 0; Fungi - 0; Plants - 216; Viruses - 0; Other Eukaryotes - 0 (source: NCBI BLink).   chr1:26098025-26099077 FORWARD LENGTH=350 | 342 | 350  | 1.00E-152 | 102.3 | 81.6 | 86.3 |
| Rsa1.0_00012.1.g709.t1 | ref NP_177107.2  phosphate transporter PHO1-10 [Arabidopsis thaliana] gi 75127834 sp O6R8G0.1 PHO1A_ARAT H RecName: Full=Phosphate transporter PHO1 homolog 10; AltName: Full=Protein PHO1 homolog 10; Short=AtPHO1;H10 gi 41079301 gb AAR99492.1  PHO1-like protein [Arabidopsis thaliana] gi 332196809 gb AEE34930.1  phosphate transporter PHO1-10 [Arabidopsis thaliana] | 756 | 777  | 0         | 102.8 | 85.4 | 91.3 | phosphate transporter PHO1-10                | gbpln | Arabidopsis thaliana | AT1G69480.1   Symbols:   EXS (ERD1/XPR1/SYG1) family protein   chr1:26114187-26117479 REVERSE LENGTH=777                                                                                                                                                                                                                                        | 756 | 777  | 0         | 102.8 | 85.4 | 91.3 |

|                        |                                                                                                                                                                                                                                                                                                                                                                                                                                                                                                                                                                                                            |     |      |           |       |      |      |                                                       |       |                      |                                                                                                                              |     |     |           |       |      |      |
|------------------------|------------------------------------------------------------------------------------------------------------------------------------------------------------------------------------------------------------------------------------------------------------------------------------------------------------------------------------------------------------------------------------------------------------------------------------------------------------------------------------------------------------------------------------------------------------------------------------------------------------|-----|------|-----------|-------|------|------|-------------------------------------------------------|-------|----------------------|------------------------------------------------------------------------------------------------------------------------------|-----|-----|-----------|-------|------|------|
| Rsa1.0_00012.1.g710.t1 | ref NP_177105.2  emp24/gp25L/p24 family/GOLD domain-containing protein [Arabidopsis thaliana] gi 75304433 sp Q8VY92.1 P24DA_ARAT H RecName: Full=Transmembrane emp24 domain-containing protein p24delta10; AltName: Full=p24 family protein delta10; Short=p24delta10; AltName: Full=p24 family protein delta2d; Short=p24delta2d; Flags: Precursor gi 18252235 gb AAL61950.1  unknown protein [Arabidopsis thaliana] gi 21387027 gb AAM47917.1  unknown protein [Arabidopsis thaliana] gi 332196807 gb AEE34928.1  emp24/gp25L/p24 family/GOLD domain-containing protein [Arabidopsis thaliana]           | 216 | 214  | 1.00E-105 | 99.1  | 83.3 | 94.0 | emp24/gp25L/p24 family/GOLD domain-containing protein | gbpln | Arabidopsis thaliana | AT1G69460.1   Symbols:   emp24/gp25L/p24 family/GOLD family protein   chr1:26112054-26113160 REVERSE LENGTH=214              | 216 | 214 | 1.00E-108 | 99.1  | 83.3 | 94.0 |
| Rsa1.0_00012.1.g711.t1 | gb EOA33694.1  hypothetical protein CARUB_v10019875mg [Capsella rubella]                                                                                                                                                                                                                                                                                                                                                                                                                                                                                                                                   | 720 | 709  | 0         | 98.5  | 87.4 | 92.8 | hypothetical protein CARUB_v10019875mg                | gbpln | Capsella rubella     | AT1G69450.2   Symbols:   Early-responsive to dehydration stress protein (ERD4)   chr1:26107120-26110006 REVERSE LENGTH=711   | 720 | 711 | 0         | 98.8  | 86.3 | 91.9 |
| Rsa1.0_00012.1.g712.t1 | ref NP_177101.2  putative S-acyltransferase [Arabidopsis thaliana] gi 42572047 ref NP_974114.1  putative S-acyltransferase [Arabidopsis thaliana] gi 223635846 sp Q9C533.2 ZDHC1_ARATH RecName: Full=Probable S-acyltransferase At1g69420; AltName: Full=Probable palmitoyltransferase At1g69420; AltName: Full=Zinc finger DHC domain-containing protein At1g69420 gi 332196801 gb AEE34922.1  putative S-acyltransferase [Arabidopsis thaliana] gi 332196802 gb AEE34923.1  putative S-acyltransferase [Arabidopsis thaliana]                                                                            | 597 | 596  | 0         | 99.8  | 89.6 | 94.5 | putative S-acyltransferase                            | gbpln | Arabidopsis thaliana | AT1G69420.1   Symbols:   DHC-type zinc finger family protein   chr1:26093690-26096736 FORWARD LENGTH=596                     | 597 | 596 | 0         | 99.8  | 89.6 | 94.5 |
| Rsa1.0_00012.1.g713.t3 | ref NP_177100.1  translation initiation factor eIF-5A [Arabidopsis thaliana] gi 20138712 sp Q9C505.1 IF5A3_ARATH RecName: Full=Eukaryotic translation initiation factor 5A-3; Short=eIF-5A-3 gi 12325087 gb AAG52496.1 AC018364_14 putative eukaryotic initiation factor 5A (eIF-5A); 7607-6714 [Arabidopsis thaliana] gi 12597798 gb AAG60110.1 AC073178_21 Eukaryotic initiation factor 5A , putative [Arabidopsis thaliana] gi 21592652 gb AAM64601.1  initiation factor 5A-3 (eIF-5A 3) [Arabidopsis thaliana] gi 332196800 gb AEE34921.1  translation initiation factor eIF-5A [Arabidopsis thaliana] | 161 | 158  | 2.00E-83  | 98.1  | 95.0 | 96.3 | translation initiation factor eIF-5A                  | gbpln | Arabidopsis thaliana | AT1G69410.1   Symbols:   ATELF5A-3, ELF5A-3   eukaryotic elongation factor 5A-3   chr1:26089301-26090194 FORWARD LENGTH=158  | 161 | 158 | 8.00E-86  | 98.1  | 95.0 | 96.3 |
| Rsa1.0_00012.1.g714.t1 | gb AAZ23773.1  plastid division regulator MinE [Brassica napus]                                                                                                                                                                                                                                                                                                                                                                                                                                                                                                                                            | 210 | 224  | 4.00E-93  | 106.7 | 88.1 | 91.9 | plastid division regulator MinE                       | gbpln | Brassica napus       | AT1G69390.1   Symbols:   ATMINE1, MINE1, ARC12   homologue of bacterial MinE 1   chr1:26084721-26086284 FORWARD LENGTH=229   | 210 | 229 | 2.00E-86  | 109.0 | 81.9 | 89.5 |
| Rsa1.0_00012.1.g715.t1 | ref XP_002888717.1  hypothetical protein ARALYDRAFT_476065 [Arabidopsis lyrata subsp. lyrata] gi 297334558 gb EFH64976.1  hypothetical protein ARALYDRAFT_476065 [Arabidopsis lyrata subsp. lyrata]                                                                                                                                                                                                                                                                                                                                                                                                        | 368 | 373  | 1.00E-176 | 101.4 | 84.5 | 90.8 | hypothetical protein ARALYDRAFT_476065                | gbpln | Arabidopsis lyrata   | AT1G69380.1   Symbols:   Protein of unknown function (DUF155)   chr1:26081729-26083431 REVERSE LENGTH=373                    | 368 | 373 | 1.00E-177 | 101.4 | 83.2 | 90.8 |
| Rsa1.0_00012.1.g716.t1 | gb EOA35466.1  hypothetical protein CARUB_v10020675mg [Capsella rubella]                                                                                                                                                                                                                                                                                                                                                                                                                                                                                                                                   | 311 | 317  | 1.00E-155 | 101.9 | 88.4 | 92.6 | hypothetical protein CARUB_v10020675mg                | gbpln | Capsella rubella     | AT1G69370.1   Symbols:   CM3, cm-3   chorismate mutase 3   chr1:26080098-26081559 FORWARD LENGTH=316                         | 311 | 316 | 1.00E-152 | 101.6 | 86.5 | 91.0 |
| Rsa1.0_00012.1.g717.t1 | ref XP_002888716.1  predicted protein [Arabidopsis lyrata subsp. lyrata] gi 297334557 gb EFH64975.1  predicted protein [Arabidopsis lyrata subsp. lyrata]                                                                                                                                                                                                                                                                                                                                                                                                                                                  | 851 | 905  | 0         | 106.3 | 70.0 | 79.6 | predicted protein                                     | gbpln | Arabidopsis lyrata   | AT1G69360.1   Symbols:   Plant protein of unknown function (DUF863)   chr1:26072520-26075420 REVERSE LENGTH=896              | 851 | 896 | 0         | 105.3 | 69.2 | 78.3 |
| Rsa1.0_00012.1.g718.t1 | ref XP_002887230.1  hypothetical protein ARALYDRAFT_476061 [Arabidopsis lyrata subsp. lyrata] gi 297333071 gb EFH63489.1  hypothetical protein ARALYDRAFT_476061 [Arabidopsis lyrata subsp. lyrata]                                                                                                                                                                                                                                                                                                                                                                                                        | 788 | 1347 | 0         | 170.9 | 81.6 | 90.4 | hypothetical protein ARALYDRAFT_476061                | gbpln | Arabidopsis lyrata   | AT1G69350.1   Symbols:   Tetratricopeptide repeat (TPR)-like superfamily protein   chr1:26069882-26072245 FORWARD LENGTH=787 | 788 | 787 | 0         | 99.9  | 80.7 | 89.5 |



|                        |                                                                                                                                                                                                                                                                                                                                                                                                                                                                                                                |     |      |           |        |      |      |                                                 |       |                      |                                                                                                                                                                                                                                                                                                                                                   |     |     |           |        |      |      |
|------------------------|----------------------------------------------------------------------------------------------------------------------------------------------------------------------------------------------------------------------------------------------------------------------------------------------------------------------------------------------------------------------------------------------------------------------------------------------------------------------------------------------------------------|-----|------|-----------|--------|------|------|-------------------------------------------------|-------|----------------------|---------------------------------------------------------------------------------------------------------------------------------------------------------------------------------------------------------------------------------------------------------------------------------------------------------------------------------------------------|-----|-----|-----------|--------|------|------|
| Rsa1.0_00012.1.g719.t1 | ref[XP_002887229.1] appr-1-p processing enzyme family protein [Arabidopsis lyrata subsp. lyrata] gi 297333070 gb EFH63488.1  appr-1-p processing enzyme family protein [Arabidopsis lyrata subsp. lyrata]                                                                                                                                                                                                                                                                                                      | 570 | 562  | 0         | 98.6   | 89.1 | 91.9 | appr-1-p processing enzyme family protein       | gbpln | Arabidopsis lyrata   | AT1G69340.1   Symbols:   appr-1-p processing enzyme family protein   chr1:26066298-26069644 FORWARD LENGTH=562                                                                                                                                                                                                                                    | 570 | 562 | 0         | 98.6   | 88.6 | 91.6 |
| Rsa1.0_00012.1.g720.t1 | ref[XP_002888715.1] hypothetical protein ARALYDRAFT.476060 [Arabidopsis lyrata subsp. lyrata] gi 297334556 gb EFH64974.1  hypothetical protein ARALYDRAFT.476060 [Arabidopsis lyrata subsp. lyrata]                                                                                                                                                                                                                                                                                                            | 266 | 264  | 1.00E-91  | 99.2   | 68.8 | 76.7 | hypothetical protein ARALYDRAFT.476060          | gbpln | Arabidopsis lyrata   | AT1G69330.1   Symbols:   RING/U-box superfamily protein   chr1:26064138-26064950 REVERSE LENGTH=270                                                                                                                                                                                                                                               | 266 | 270 | 1.00E-91  | 101.5  | 67.7 | 76.7 |
| Rsa1.0_00012.1.g721.t1 | gb EOA35903.1  hypothetical protein CARUB_v10021160mg, partial [Capsella rubella]                                                                                                                                                                                                                                                                                                                                                                                                                              | 143 | 121  | 3.00E-34  | 84.6   | 54.5 | 65.7 | hypothetical protein CARUB_v10021160mg, partial | gbpln | Capsella rubella     | AT1G69325.1   Symbols:   Remorin family protein   chr1:26063205-26063736 FORWARD LENGTH=120                                                                                                                                                                                                                                                       | 143 | 120 | 2.00E-30  | 83.9   | 51.0 | 59.4 |
| Rsa1.0_00012.1.g722.t1 | ref[NP_564958.2] protein CLAVATA3/ESR-related 10 [Arabidopsis thaliana] gi 75339321 sp Q4PSX1.1 CLE10_ARATH RecName: Full=CLAVATA3/ESR (CLE)-related protein 10; Contains: RecName: Full=CLE10p; Flags: Precursor: gi 67833494 gb AA78671.1  putative CLE10 [Arabidopsis thaliana] gi 332196789 gb AEE34910.1  protein CLAVATA3/ESR-related 10 [Arabidopsis thaliana]                                                                                                                                          | 107 | 107  | 9.00E-37  | 100.0  | 76.6 | 86.9 | protein CLAVATA3/ESR-related 10                 | gbpln | Arabidopsis thaliana | AT1G69320.1   Symbols: CLE10   CLAVATA3/ESR-RELATED 10   chr1:26061925-26062248 FORWARD LENGTH=107                                                                                                                                                                                                                                                | 107 | 107 | 1.00E-39  | 100.0  | 76.6 | 86.9 |
| Rsa1.0_00012.1.g723.t1 | ref[XP_002888714.1] hypothetical protein ARALYDRAFT.476056 [Arabidopsis lyrata subsp. lyrata] gi 297334555 gb EFH64973.1  hypothetical protein ARALYDRAFT.476056 [Arabidopsis lyrata subsp. lyrata]                                                                                                                                                                                                                                                                                                            | 296 | 285  | 1.00E-105 | 96.3   | 75.0 | 83.1 | hypothetical protein ARALYDRAFT.476056          | gbpln | Arabidopsis lyrata   | AT1G69310.2   Symbols: WRKY57, ATWRKY57   WRKY DNA-binding protein 57   chr1:26056118-26057909 REVERSE LENGTH=287                                                                                                                                                                                                                                 | 296 | 287 | 1.00E-105 | 97.0   | 76.7 | 83.1 |
| Rsa1.0_00012.1.g724.t1 | gb EOA33837.1  hypothetical protein CARUB_v10021318mg, partial [Capsella rubella]                                                                                                                                                                                                                                                                                                                                                                                                                              | 280 | 290  | 3.00E-32  | 103.6  | 25.7 | 38.6 | hypothetical protein CARUB_v10021318mg, partial | gbpln | Capsella rubella     | AT4G04650.1   Symbols:   RNA-directed DNA polymerase (reverse transcriptase)-related family protein   chr4:2353989-2355213 REVERSE LENGTH=332                                                                                                                                                                                                     | 280 | 332 | 2.00E-28  | 118.6  | 21.4 | 32.9 |
| Rsa1.0_00012.1.g725.t1 | gb EOA35673.1  hypothetical protein CARUB_v10020897mg [Capsella rubella]                                                                                                                                                                                                                                                                                                                                                                                                                                       | 281 | 228  | 1.00E-62  | 81.1   | 62.6 | 70.8 | hypothetical protein CARUB_v10020897mg          | gbpln | Capsella rubella     | AT1G69295.1   Symbols: PDCB4   plasmodesmata callose-binding protein 4   chr1:26050492-26051843 REVERSE LENGTH=222                                                                                                                                                                                                                                | 281 | 222 | 2.00E-47  | 79.0   | 30.6 | 33.8 |
| Rsa1.0_00012.1.g726.t3 | ref[XP_002888712.1] hypothetical protein ARALYDRAFT.339164 [Arabidopsis lyrata subsp. lyrata] gi 297334553 gb EFH64971.1  hypothetical protein ARALYDRAFT.339164 [Arabidopsis lyrata subsp. lyrata]                                                                                                                                                                                                                                                                                                            | 490 | 1042 | 4.00E-75  | 212.7  | 35.7 | 40.8 | hypothetical protein ARALYDRAFT.339164          | gbpln | Arabidopsis lyrata   | AT1G69280.1   Symbols:   unknown protein; BEST Arabidopsis thaliana protein match is: unknown protein (TAIR:AT2G03630.1); Has 885 Blast hits to 474 proteins in 40 species: Archae - 0; Bacteria - 4; Metazoa - 731; Fungi - 9; Plants - 68; Viruses - 0; Other Eukaryotes - 73 (source: NCBI BLINK).   chr1:26045290-26046670 REVERSE LENGTH=400 | 490 | 400 | 2.00E-75  | 81.6   | 35.1 | 40.6 |
| Rsa1.0_00012.1.g727.t1 | ref[NP_564956.1] Ninja-family protein AFP1 [Arabidopsis thaliana] gi 75180089 sp Q9LQ98.1 AFP1_ARATH RecName: Full=Ninja-family protein AFP1; AltName: Full=ABI five-binding protein 1; Short=AB15-binding protein 1 gi 6730641 gb AAAF27062.1 AC008262_11 F4N2.22 [Arabidopsis thaliana] gi 22531038 gb AAM97023.1  expressed protein [Arabidopsis thaliana] gi 23197982 gb AAN15518.1  expressed protein [Arabidopsis thaliana] gi 332196782 gb AEE34903.1  Ninja-family protein AFP1 [Arabidopsis thaliana] | 336 | 345  | 1.00E-108 | 102.7  | 70.5 | 78.0 | Ninja-family protein AFP1                       | gbpln | Arabidopsis thaliana | AT1G69260.1   Symbols: AFP1   ABI five binding protein   chr1:26039314-26040570 FORWARD LENGTH=345                                                                                                                                                                                                                                                | 336 | 345 | 1.00E-110 | 102.7  | 70.5 | 78.0 |
| Rsa1.0_00012.1.g728.t1 | ref[XP_002887226.1] hypothetical protein ARALYDRAFT.894705 [Arabidopsis lyrata subsp. lyrata] gi 297333067 gb EFH63485.1  hypothetical protein ARALYDRAFT.894705 [Arabidopsis lyrata subsp. lyrata]                                                                                                                                                                                                                                                                                                            | 442 | 446  | 1.00E-104 | 100.9  | 52.5 | 67.4 | hypothetical protein ARALYDRAFT.894705          | gbpln | Arabidopsis lyrata   | AT1G69250.1   Symbols:   Nuclear transport factor 2 (NTF2) family protein with RNA binding (RRM-RBD-RNP motifs) domain   chr1:26033163-26035301 FORWARD LENGTH=427                                                                                                                                                                                | 442 | 427 | 8.00E-99  | 96.6   | 48.0 | 63.8 |
| Rsa1.0_00012.1.g729.t1 | # # # # # # # # - ----                                                                                                                                                                                                                                                                                                                                                                                                                                                                                         |     |      |           |        |      |      |                                                 |       |                      |                                                                                                                                                                                                                                                                                                                                                   |     |     |           |        |      |      |
| Rsa1.0_00012.1.g730.t1 | gb EOA18595.1  hypothetical protein CARUB_v10007167mg [Capsella rubella]                                                                                                                                                                                                                                                                                                                                                                                                                                       | 62  | 763  | 1.00E-13  | 1230.6 | 58.1 | 62.9 | hypothetical protein CARUB_v10007167mg          | gbpln | Capsella rubella     | AT4G15430.2   Symbols:   ERD (early-responsive to dehydration stress) family protein   chr4:8828214-8831354 FORWARD LENGTH=760                                                                                                                                                                                                                    | 62  | 760 | 2.00E-16  | 1225.8 | 58.1 | 62.9 |

|                        |                                                                                                                                                                                                                                                                                                                                                                                                                                                    |      |      |           |       |      |      |                                                                                                                |       |                      |                                                                                                                                                                                                                                                                                                                                                   |      |      |           |       |      |      |
|------------------------|----------------------------------------------------------------------------------------------------------------------------------------------------------------------------------------------------------------------------------------------------------------------------------------------------------------------------------------------------------------------------------------------------------------------------------------------------|------|------|-----------|-------|------|------|----------------------------------------------------------------------------------------------------------------|-------|----------------------|---------------------------------------------------------------------------------------------------------------------------------------------------------------------------------------------------------------------------------------------------------------------------------------------------------------------------------------------------|------|------|-----------|-------|------|------|
| Rsa1.0_00012.1.g731.t1 | ref[XP_002511619.1] conserved hypothetical protein [Ricinus communis] gi 223548799 gb EF50288.1  conserved hypothetical protein [Ricinus communis]                                                                                                                                                                                                                                                                                                 | 127  | 276  | 2.00E-15  | 217.3 | 38.6 | 50.4 | conserved hypothetical protein                                                                                 | gbpln | Ricinus communis     | #                                                                                                                                                                                                                                                                                                                                                 | #    | #    | #         | #     | #    |      |
| Rsa1.0_00012.1.g732.t2 | ref[XP_002887225.1] pfkB-type carbohydrate kinase family protein [Arabidopsis lyrata subsp. lyrata] gi 297333066 gb EFH63484.1  pfkB-type carbohydrate kinase family protein [Arabidopsis lyrata subsp. lyrata]                                                                                                                                                                                                                                    | 604  | 612  | 0         | 101.3 | 82.8 | 88.1 | pfkB-type carbohydrate kinase family protein                                                                   | gbpln | Arabidopsis lyrata   | AT1G69200.1   Symbols: FLN2   fructokinase-like 2   chr1:26016018-26018365 FORWARD LENGTH=616                                                                                                                                                                                                                                                     | 604  | 616  | 0         | 102.0 | 81.6 | 88.4 |
| Rsa1.0_00012.1.g733.t3 | gb AAZ23116.1  transcription factor CRC [Brassica juncea] gi 48256995 gb EOA34139.1  hypothetical protein CARUB_v10021641mg [Capsella rubella]                                                                                                                                                                                                                                                                                                     | 171  | 179  | 2.00E-87  | 104.7 | 95.9 | 97.7 | transcription factor CRC                                                                                       | gbpln | Brassica juncea      | AT1G69180.1   Symbols: CRC   Plant-specific transcription factor YABBY family protein   chr1:26007734-26008940 REVERSE LENGTH=181                                                                                                                                                                                                                 | 171  | 181  | 4.00E-82  | 105.8 | 95.9 | 97.7 |
| Rsa1.0_00012.1.g734.t1 | gb ACG60678.1  unknown protein [Brassica oleracea var. alboglabra]                                                                                                                                                                                                                                                                                                                                                                                 | 325  | 327  | 1.00E-101 | 100.6 | 70.8 | 77.5 | unknown protein                                                                                                | gbpln | Brassica oleracea    | AT1G69170.1   Symbols:   Squamosa promoter-binding protein-like (SBP domain) transcription factor family protein   chr1:26005626-26007041 FORWARD LENGTH=405                                                                                                                                                                                      | 325  | 405  | 1.00E-102 | 124.6 | 70.8 | 81.5 |
| Rsa1.0_00012.1.g735.t1 | gb ACG60677.1  hypothetical protein BoB028L01.120 [Brassica oleracea var. alboglabra]                                                                                                                                                                                                                                                                                                                                                              | 324  | 322  | 1.00E-152 | 99.4  | 93.8 | 96.3 | hypothetical protein BoB028L01.120                                                                             | gbpln | Brassica oleracea    | AT1G69160.1   Symbols:   unknown protein; BEST Arabidopsis thaliana protein match is: unknown protein (TAIR:AT3G13980.1); Has 173 Blast hits to 172 proteins in 54 species: Archae - 0; Bacteria - 0; Metazoa - 25; Fungi - 33; Plants - 84; Viruses - 2; Other Eukaryotes - 29 (source: NCBI BLINK).   chr1:26000315-26001280 FORWARD LENGTH=321 | 324  | 321  | 1.00E-111 | 99.1  | 77.2 | 83.6 |
| Rsa1.0_00012.1.g736.t1 | #                                                                                                                                                                                                                                                                                                                                                                                                                                                  | #    | #    | #         | #     | #    | -    | RecName: Full=Floral homeotic protein APETALA 1; Short=BcpAP1; AltName: Full=Agamous-like MADS-box protein AP1 | ----  | ----                 | #                                                                                                                                                                                                                                                                                                                                                 | #    | #    | #         | #     | #    |      |
| Rsa1.0_00012.1.g737.t1 | sp P0DI14.1 AP1_BRARP RecName: Full=Floral homeotic protein APETALA 1; Short=BcpAP1; AltName: Full=Agamous-like MADS-box protein AP1                                                                                                                                                                                                                                                                                                               | 255  | 256  | 1.00E-139 | 100.4 | 97.3 | 99.6 | Short=BcpAP1; AltName: Full=Agamous-like MADS-box protein AP1                                                  | ----  | ----                 | AT1G69120.1   Symbols: AP1, AGL7   K-box region and MADS-box transcription factor family protein   chr1:25982576-25986102 REVERSE LENGTH=256                                                                                                                                                                                                      | 255  | 256  | 1.00E-126 | 100.4 | 93.3 | 98.0 |
| Rsa1.0_00013.1.g738.t1 | ref[XP_002879065.1] aldehyde oxidase [Arabidopsis lyrata subsp. lyrata] gi 297324904 gb EFH55324.1  aldehyde oxidase [Arabidopsis lyrata subsp. lyrata]                                                                                                                                                                                                                                                                                            | 1328 | 1320 | 0         | 99.4  | 81.9 | 88.9 | aldehyde oxidase                                                                                               | gbpln | Arabidopsis lyrata   | AT2G27150.2   Symbols: AAO3, At-AO3, AOdelta, AtAAO3   abscisic aldehyde oxidase 3   chr2:11601952-11607014 FORWARD LENGTH=1332                                                                                                                                                                                                                   | 1328 | 1332 | 0         | 100.3 | 82.0 | 89.1 |
| Rsa1.0_00013.1.g739.t1 | ref[NP_190471.1] FBD-associated F-box protein [Arabidopsis thaliana] gi 75337428 sp Q9SMT9.1 FBD9_ARATH RecName: Full=FBD-associated F-box protein At3g49020 gi 6522564 emb CAB62008.1  putative protein [Arabidopsis thaliana] gi 67633680 gb AA78764.1  F-box family protein [Arabidopsis thaliana] gi 111074508 gb ABH04627.1  At3g49020 [Arabidopsis thaliana] gi 332644966 gb AAE78487.1  FBD-associated F-box protein [Arabidopsis thaliana] | 386  | 447  | 1.00E-118 | 115.8 | 63.5 | 74.4 | FBD-associated F-box protein                                                                                   | gbpln | Arabidopsis thaliana | AT3G49020.1   Symbols:   FBD, F-box and Leucine Rich Repeat domains containing protein   chr3:18169079-18170660 FORWARD LENGTH=447                                                                                                                                                                                                                | 386  | 447  | 1.00E-120 | 115.8 | 63.5 | 74.4 |
| Rsa1.0_00013.1.g740.t1 | ref[XP_002875956.1] F-box family protein [Arabidopsis lyrata subsp. lyrata] gi 297321794 gb EFH52215.1  F-box family protein [Arabidopsis lyrata subsp. lyrata]                                                                                                                                                                                                                                                                                    | 611  | 448  | 1.00E-137 | 73.3  | 45.2 | 52.0 | F-box family protein                                                                                           | gbpln | Arabidopsis lyrata   | AT3G49020.1   Symbols:   FBD, F-box and Leucine Rich Repeat domains containing protein   chr3:18169079-18170660 FORWARD LENGTH=447                                                                                                                                                                                                                | 611  | 447  | 1.00E-135 | 73.2  | 44.5 | 53.4 |
| Rsa1.0_00013.1.g741.t1 | gb EOA27572.1  hypothetical protein CARUB_v10023709mg, partial [Capsella rubella]                                                                                                                                                                                                                                                                                                                                                                  | 249  | 304  | 1.00E-142 | 122.1 | 98.8 | 99.6 | hypothetical protein CARUB_v10023709mg, partial                                                                | gbpln | Capsella rubella     | AT2G27020.1   Symbols: PAG1   20S proteasome alpha subunit G1   chr2:11528515-11530858 REVERSE LENGTH=249                                                                                                                                                                                                                                         | 249  | 249  | 1.00E-145 | 100.0 | 99.2 | 99.6 |
| Rsa1.0_00013.1.g742.t1 | ref[NP_850095.2] CBL-interacting serine/threonine-protein kinase 3 [Arabidopsis thaliana] gi 330252823 gb AEC07917.1  CBL-interacting serine/threonine-protein kinase 3 [Arabidopsis thaliana]                                                                                                                                                                                                                                                     | 440  | 451  | 0         | 102.5 | 95.9 | 97.7 | CBL-interacting serine/threonine-protein kinase 3                                                              | gbpln | Arabidopsis thaliana | AT2G26980.4   Symbols: CIPK3   CBL-interacting protein kinase 3   chr2:11515234-11518426 REVERSE LENGTH=451                                                                                                                                                                                                                                       | 440  | 451  | 0         | 102.5 | 95.9 | 97.7 |

|                        |                                                                                                                                                                                                                                                                                                                                                                                                                                                                                                                                       |      |      |           |       |      |      |                                                     |       |                      |                                                                                                                                                           |      |      |           |       |      |      |
|------------------------|---------------------------------------------------------------------------------------------------------------------------------------------------------------------------------------------------------------------------------------------------------------------------------------------------------------------------------------------------------------------------------------------------------------------------------------------------------------------------------------------------------------------------------------|------|------|-----------|-------|------|------|-----------------------------------------------------|-------|----------------------|-----------------------------------------------------------------------------------------------------------------------------------------------------------|------|------|-----------|-------|------|------|
| Rsa1.0_00013.1.g743.t1 | refNP_180259.1   ABC transporter G family member 32 [Arabidopsis thaliana] gi 75318727 sp O81016.1 AB32G_ARAT H RecName: Full=ABC transporter G family member 32; Short=ABC transporter ABCG32; Short=AtABCG32; AltName: Full=Probable pleiotropic drug resistance protein 4 gi 3426037 gb AAC32236.1  putative ABC transporter [Arabidopsis thaliana] gi 28144347 tpg DAA00872.1  TPA_exp: PDR4 ABC transporter [Arabidopsis thaliana] gi 330252812 gb AEC07906.1  ABC transporter G family member 32 [Arabidopsis thaliana]         | 1420 | 1420 | 0         | 100.0 | 93.0 | 97.3 | ABC transporter G family member 32                  | gbpln | Arabidopsis thaliana | AT2G26910.1   Symbols: PDR4, ATPDR4   pleiotropic drug resistance 4   chr2:11481623-11487874 FORWARD LENGTH=1420                                          | 1420 | 1420 | 0         | 100.0 | 93.0 | 97.3 |
| Rsa1.0_00013.1.g744.t1 | refXP_002880842.1   phosphoesterase family protein [Arabidopsis lyrata subsp. lyrata] gi 297326681 gb EFH57101.1   phosphoesterase family protein [Arabidopsis lyrata subsp. lyrata]                                                                                                                                                                                                                                                                                                                                                  | 519  | 514  | 0         | 99.0  | 87.5 | 92.9 | phosphoesterase family protein                      | gbpln | Arabidopsis lyrata   | AT2G26870.1   Symbols: NPC2   non-specific phospholipase C2   chr2:11457117-11459355 REVERSE LENGTH=514                                                   | 519  | 514  | 0         | 99.0  | 87.1 | 92.9 |
| Rsa1.0_00013.1.g745.t1 | refNP_180238.2   protein pinoid2 [Arabidopsis thaliana] gi 75253187 sp Q64FQ2.1 PID2_ARATH RecName: Full=Protein kinase PINOID 2; AltName: Full=Protein kinase AGC1-10 gi 51944867 gb AAU14162.1  AGC1-10 [Arabidopsis thaliana] gi 51944869 gb AAU14163.1  AGC1-10 [Arabidopsis thaliana] gi 330252783 gb AEC07877.1  protein kinase PINOID 2 [Arabidopsis thaliana]                                                                                                                                                                 | 525  | 525  | 0         | 100.0 | 89.5 | 94.1 | protein pinoid2                                     | gbpln | Arabidopsis thaliana | AT2G26700.1   Symbols: PID2   AGC (cAMP-dependent, cGMP-dependent and protein kinase C) kinase family protein   chr2:11368613-11370951 FORWARD LENGTH=525 | 525  | 525  | 0         | 100.0 | 89.5 | 94.1 |
| Rsa1.0_00013.1.g746.t1 | refXP_002892763.1   predicted protein [Arabidopsis lyrata subsp. lyrata] gi 297338605 gb EFH69022.1  predicted protein [Arabidopsis lyrata subsp. lyrata]                                                                                                                                                                                                                                                                                                                                                                             | 150  | 804  | 3.00E-21  | 536.0 | 46.0 | 52.0 | predicted protein                                   | gbpln | Arabidopsis lyrata   | AT1G13630.2   Symbols:   Tetratricopeptide repeat (TPR)-like superfamily protein   chr1:4670178-4672826 REVERSE LENGTH=798                                | 150  | 798  | 3.00E-20  | 532.0 | 29.3 | 34.0 |
| Rsa1.0_00013.1.g747.t1 | refNP_180241.1   putative inactive receptor kinase [Arabidopsis thaliana] gi 75219509 sp O48788.1 Y2267_ARATH RecName: Full=Probable inactive receptor kinase At2g26730; Flags: Precursor gi 2760839 gb AAB95307.1  putative receptor-like protein kinase [Arabidopsis thaliana] gi 60543329 gb AAJ22262.1  At2g26730 [Arabidopsis thaliana] gi 224589527 gb ACN59297.1  leucine-rich repeat receptor-like protein kinase [Arabidopsis thaliana] gi 330252786 gb AEC07880.1  putative inactive receptor kinase [Arabidopsis thaliana] | 818  | 658  | 0         | 80.4  | 69.8 | 73.5 | putative inactive receptor kinase                   | gbpln | Arabidopsis thaliana | AT2G26730.1   Symbols:   Leucine-rich repeat protein kinase family protein   chr2:11388621-11391286 FORWARD LENGTH=658                                    | 818  | 658  | 0         | 80.4  | 69.8 | 73.5 |
| Rsa1.0_00013.1.g748.t1 | refNP_180217.1   WD40 domain-containing protein [Arabidopsis thaliana] gi 2739374 gb AAC14498.1  En/Spm-like transposon protein [Arabidopsis thaliana] gi 50253512 gb AAT71958.1  At2g26490 [Arabidopsis thaliana] gi 53850519 gb AAU95436.1  At2g26490 [Arabidopsis thaliana] gi 330252750 gb AEC07844.1  WD40 domain-containing protein [Arabidopsis thaliana]                                                                                                                                                                      | 453  | 465  | 0         | 102.6 | 90.3 | 94.7 | WD40 domain-containing protein                      | gbpln | Arabidopsis thaliana | AT2G26490.1   Symbols:   Transducin/WD40 repeat-like superfamily protein   chr2:11268035-11269432 FORWARD LENGTH=465                                      | 453  | 465  | 0         | 102.6 | 90.3 | 94.7 |
| Rsa1.0_00013.1.g749.t1 | emb CAD30841.1  soluble epoxide hydrolase [Brassica napus]                                                                                                                                                                                                                                                                                                                                                                                                                                                                            | 318  | 318  | 1.00E-176 | 100.0 | 92.8 | 97.2 | soluble epoxide hydrolase                           | gbpln | Brassica napus       | AT2G26740.1   Symbols: ATSEH, SEH   soluble epoxide hydrolase   chr2:11393148-11394257 REVERSE LENGTH=321                                                 | 318  | 321  | 1.00E-154 | 100.9 | 83.6 | 94.0 |
| Rsa1.0_00013.1.g750.t1 | refXP_002878977.1   hypothetical protein ARALYDRAFT_481517 [Arabidopsis lyrata subsp. lyrata] gi 297324816 gb EFH55236.1  hypothetical protein ARALYDRAFT_481517 [Arabidopsis lyrata subsp. lyrata]                                                                                                                                                                                                                                                                                                                                   | 695  | 794  | 0         | 114.2 | 75.5 | 81.3 | hypothetical protein ARALYDRAFT_481517              | gbpln | Arabidopsis lyrata   | AT2G26570.1   Symbols: WEB1   Plant protein of unknown function (DUF827)   chr2:11299565-11302076 FORWARD LENGTH=807                                      | 695  | 807  | 0         | 116.1 | 75.1 | 82.4 |
| Rsa1.0_00013.1.g751.t1 | gb ABV89757.1  purple acid phosphatase 12 protein family isoform 7 [Brassica napus] gi 157849936 gb ABV89759.1  purple acid phosphatase 12 protein family isoform 7 [Brassica napus]                                                                                                                                                                                                                                                                                                                                                  | 471  | 469  | 0         | 99.6  | 93.0 | 97.0 | purple acid phosphatase 12 protein family isoform 7 | gbpln | Brassica napus       | AT2G27190.1   Symbols: PAP1, ATPAP1, PAP12, ATPAP12   purple acid phosphatase 12   chr2:11621400-11623438 REVERSE LENGTH=469                              | 471  | 469  | 0         | 99.6  | 87.3 | 91.3 |

|                        |                                                                                                                                                                                                                                                                                                                                                                                                                                    |     |     |           |       |      |      |                                           |       |                      |                                                                                                                                                                                                                                                                                                                                                                                                                                                                          |     |     |           |       |      |      |
|------------------------|------------------------------------------------------------------------------------------------------------------------------------------------------------------------------------------------------------------------------------------------------------------------------------------------------------------------------------------------------------------------------------------------------------------------------------|-----|-----|-----------|-------|------|------|-------------------------------------------|-------|----------------------|--------------------------------------------------------------------------------------------------------------------------------------------------------------------------------------------------------------------------------------------------------------------------------------------------------------------------------------------------------------------------------------------------------------------------------------------------------------------------|-----|-----|-----------|-------|------|------|
| Rsa1.0_00013.1.g752.t1 | gb EOA27281.1  hypothetical protein CARUB_v10023399mg [Capsella rubella]                                                                                                                                                                                                                                                                                                                                                           | 382 | 388 | 1.00E-162 | 101.6 | 78.5 | 85.3 | hypothetical protein CARUB_v10023399mg    | gbpln | Capsella rubella     | AT2G26360.1   Symbols:   Mitochondrial substrate carrier family protein   chr2:11221603-11223160 REVERSE LENGTH=387                                                                                                                                                                                                                                                                                                                                                      | 382 | 387 | 1.00E-157 | 101.3 | 75.9 | 83.0 |
| Rsa1.0_00013.1.g753.t1 | ref NP_180199.3  chalcone-flavanone isomerase-like protein [Arabidopsis thaliana]<br>gi 487524115 sp Q84RK2.2 FAP2_ARATH RecName: Full=Fatty-acid-binding protein 2; Short=AtFAP2; AltName: Full=Chalcone-flavanone isomerase family protein 2<br>gi 61742610 gb AAX55126.1  hypothetical protein At2g26310 [Arabidopsis thaliana]<br>gi 330252727 gb AEC07821.1  chalcone-flavanone isomerase-like protein [Arabidopsis thaliana] | 381 | 398 | 1.00E-154 | 104.5 | 74.8 | 83.5 | chalcone-flavanone isomerase-like protein | gbpln | Arabidopsis thaliana | AT2G26310.1   Symbols:   Chalcone-flavanone isomerase family protein   chr2:11201770-11203919 FORWARD LENGTH=398                                                                                                                                                                                                                                                                                                                                                         | 381 | 398 | 1.00E-156 | 104.5 | 74.8 | 83.5 |
| Rsa1.0_00013.1.g754.t1 | ref NP_180197.1  root-specific kinase 1 [Arabidopsis thaliana]<br>gi 3075390 gb AAC14522.1  putative protein kinase [Arabidopsis thaliana]<br>gi 330252725 gb AEC07819.1  root-specific kinase 1 [Arabidopsis thaliana]                                                                                                                                                                                                            | 424 | 424 | 0         | 100.0 | 87.5 | 94.3 | root-specific kinase 1                    | gbpln | Arabidopsis thaliana | AT2G26290.1   Symbols: ARSK1   root-specific kinase 1   chr2:11192237-11194259 REVERSE LENGTH=424                                                                                                                                                                                                                                                                                                                                                                        | 424 | 424 | 0         | 100.0 | 87.5 | 94.3 |
| Rsa1.0_00013.1.g755.t1 | ref NP_180705.1  F-box protein DOR [Arabidopsis thaliana]<br>gi 229807544 sp Q5BPS3.2 DOR_ARATH RecName: Full=F-box protein DOR; AltName: Full=Protein DROUGHT TOLERANCE REPRESSOR<br>gi 4589954 gb AAD26472.1  hypothetical protein [Arabidopsis thaliana]<br>gi 330253458 gb AEC08552.1  F-box protein DOR [Arabidopsis thaliana]                                                                                                | 406 | 387 | 3.00E-90  | 95.3  | 47.8 | 61.1 | F-box protein DOR                         | gbpln | Arabidopsis thaliana | AT2G31470.1   Symbols: DOR   F-box and associated interaction domains-containing protein   chr2:13407492-13408655 REVERSE LENGTH=387                                                                                                                                                                                                                                                                                                                                     | 406 | 387 | 8.00E-93  | 95.3  | 47.8 | 61.1 |
| Rsa1.0_00013.1.g756.t1 | gb EOA26905.1  hypothetical protein CARUB_v10022901mg [Capsella rubella]<br>gi 482562617 gb EOA26807.1  hypothetical protein CARUB_v10022901mg [Capsella rubella]<br>gi 482562618 gb EOA26808.1  hypothetical protein CARUB_v10022901mg [Capsella rubella]                                                                                                                                                                         | 447 | 574 | 1.00E-167 | 128.4 | 78.1 | 85.5 | hypothetical protein CARUB_v10022901mg    | gbpln | Capsella rubella     | AT2G26280.1   Symbols: CID7   CTC-interacting domain 7   chr2:11188143-11190579 REVERSE LENGTH=567                                                                                                                                                                                                                                                                                                                                                                       | 447 | 567 | 1.00E-149 | 126.8 | 63.1 | 69.6 |
| Rsa1.0_00013.1.g757.t1 | gb EOA26905.1  hypothetical protein CARUB_v10022994mg [Capsella rubella]                                                                                                                                                                                                                                                                                                                                                           | 519 | 525 | 0         | 101.2 | 82.1 | 87.5 | hypothetical protein CARUB_v10022994mg    | gbpln | Capsella rubella     | AT2G26270.1   Symbols:   FUNCTIONS IN: molecular_function unknown; INVOLVED IN: biological_process unknown; LOCATED IN: endomembrane system; BEST Arabidopsis thaliana protein match is: BRCT domain-containing DNA repair protein (TAIR:AT3G43930.1); Has 29 Blast hits to 29 proteins in 9 species: Archae - 0; Bacteria - 0; Metazoa - 0; Fungi - 0; Plants - 29; Viruses - 0; Other Eukaryotes - 0 (source: NCBI BLINK).   chr2:11184739-11187659 FORWARD LENGTH=470 | 519 | 470 | 0         | 90.6  | 68.4 | 74.4 |

|                        |                                                                                                                                                                                                                                                                                                                                                                                                                                                                                                                                                                                                                                                                                                                                                                                                                                                                                                                                                                                |     |     |           |       |      |      |                                                                               |       |                      |                                                                                                                                                                                                                                                                                                                                                                                                                                                        |     |     |           |       |      |      |
|------------------------|--------------------------------------------------------------------------------------------------------------------------------------------------------------------------------------------------------------------------------------------------------------------------------------------------------------------------------------------------------------------------------------------------------------------------------------------------------------------------------------------------------------------------------------------------------------------------------------------------------------------------------------------------------------------------------------------------------------------------------------------------------------------------------------------------------------------------------------------------------------------------------------------------------------------------------------------------------------------------------|-----|-----|-----------|-------|------|------|-------------------------------------------------------------------------------|-------|----------------------|--------------------------------------------------------------------------------------------------------------------------------------------------------------------------------------------------------------------------------------------------------------------------------------------------------------------------------------------------------------------------------------------------------------------------------------------------------|-----|-----|-----------|-------|------|------|
| Rsa1.0_00013.1.g758.t1 | ref NP_180193.1  3-ketoacyl-CoA synthase 10 [Arabidopsis thaliana] gi 1141494 sp Q570B4.2 KCS10_ARATH RecName: Full=3-ketoacyl-CoA synthase 10; Short=KCS-10; AltName: Full=Protein FIDDLEHEAD; AltName: Full=Very long-chain fatty acid condensing enzyme 10; Short=VLCFA condensing enzyme 10 gi 8177699 gb AAF73973.1 AF214490.1 fiddlehead protein [Arabidopsis thaliana] gi 12597467 gb AAG60062.1 AF337910.1 putative beta-ketoacyl-CoA synthase FIDDLEHEAD [Arabidopsis thaliana] gi 3075394 gb AAC14526.1 beta-ketoacyl-CoA synthase [FIDDLEHEAD] [Arabidopsis thaliana] gi 3559809 emb CAA09311.1  fiddlehead protein [Arabidopsis thaliana] gi 14517456 gb AAK62618.1  At2g26250/TID16.11 [Arabidopsis thaliana] gi 23506207 gb AAN31115.1  At2g26250/TID16.11 [Arabidopsis thaliana] gi 26983882 gb AAN86193.1  putative beta-ketoacyl-CoA synthase FIDDLEHEAD [Arabidopsis thaliana] gi 330252719 gb AEC07813.1  3-ketoacyl-CoA synthase 10 [Arabidopsis thaliana] | 550 | 550 | 0         | 100.0 | 95.3 | 97.3 | 3-ketoacyl-CoA synthase 10                                                    | gbpln | Arabidopsis thaliana | AT2G26250.1   Symbols: FDH, KCS10   3-ketoacyl-CoA synthase 10   chr2:11170799-11173059 REVERSE LENGTH=550                                                                                                                                                                                                                                                                                                                                             | 550 | 550 | 0         | 100.0 | 95.3 | 97.3 |
| Rsa1.0_00013.1.g759.t1 | ref NP_850076.1  Ankyrin repeat family protein [Arabidopsis thaliana] gi 17644149 gb AAL38772.1  unknown protein [Arabidopsis thaliana] gi 20465459 gb AAM20189.1  unknown protein [Arabidopsis thaliana] gi 330252714 gb AEC07808.1  Ankyrin repeat family protein [Arabidopsis thaliana]                                                                                                                                                                                                                                                                                                                                                                                                                                                                                                                                                                                                                                                                                     | 161 | 190 | 3.00E-65  | 118.0 | 79.5 | 88.8 | Ankyrin repeat family protein                                                 | gbpln | Arabidopsis thaliana | AT2G26210.1   Symbols:   Ankyrin repeat family protein   chr2:11157854-11159016 FORWARD LENGTH=190                                                                                                                                                                                                                                                                                                                                                     | 161 | 190 | 1.00E-67  | 118.0 | 79.5 | 88.8 |
| Rsa1.0_00013.1.g760.t1 | ref NP_850075.2  S-adenosyl-L-methionine-dependent methyltransferase domain-containing protein [Arabidopsis thaliana] gi 20197178 gb AAC14529.2  hypothetical protein [Arabidopsis thaliana] gi 330252713 gb AEC07807.1  S-adenosyl-L-methionine-dependent methyltransferase domain-containing protein [Arabidopsis thaliana]                                                                                                                                                                                                                                                                                                                                                                                                                                                                                                                                                                                                                                                  | 532 | 565 | 0         | 106.2 | 87.2 | 91.9 | S-adenosyl-L-methionine-dependent methyltransferase domain-containing protein | gbpln | Arabidopsis thaliana | AT2G26200.1   Symbols:   S-adenosyl-L-methionine-dependent methyltransferases superfamily protein   chr2:11152875-11156330 FORWARD LENGTH=565                                                                                                                                                                                                                                                                                                          | 532 | 565 | 0         | 106.2 | 87.2 | 91.9 |
| Rsa1.0_00013.1.g761.t1 | ref NP_565618.1  calmodulin-binding-like protein [Arabidopsis thaliana] gi 16930469 gb AAL31920.1 AF419588.1 At2g26190/TID16.17 [Arabidopsis thaliana] gi 3075398 gb AAC14530.1  expressed protein [Arabidopsis thaliana] gi 20453237 gb AAM19857.1  At2g26190/TID16.17 [Arabidopsis thaliana] gi 22135809 gb AAM9109.1  At2g26190/TID16.17 [Arabidopsis thaliana] gi 330252712 gb AEC07806.1  calmodulin-binding-like protein [Arabidopsis thaliana]                                                                                                                                                                                                                                                                                                                                                                                                                                                                                                                          | 531 | 532 | 0         | 100.2 | 83.6 | 89.6 | calmodulin-binding-like protein                                               | gbpln | Arabidopsis thaliana | AT2G26190.1   Symbols:   calmodulin-binding family protein   chr2:11147901-11150082 REVERSE LENGTH=532                                                                                                                                                                                                                                                                                                                                                 | 531 | 532 | 0         | 100.2 | 83.6 | 89.6 |
| Rsa1.0_00013.1.g762.t1 | ref NP_001078039.1  uncharacterized protein [Arabidopsis thaliana] gi 330254959 gb AEC10053.1  uncharacterized protein AT2G41945 [Arabidopsis thaliana]                                                                                                                                                                                                                                                                                                                                                                                                                                                                                                                                                                                                                                                                                                                                                                                                                        | 123 | 166 | 2.00E-23  | 135.0 | 61.8 | 69.1 | uncharacterized protein                                                       | gbpln | Arabidopsis thaliana | AT2G41945.2   Symbols:   unknown protein; FUNCTIONS IN: molecular_function unknown; INVOLVED IN: biological_process unknown; LOCATED IN: membrane; BEST Arabidopsis thaliana protein match is: unknown protein (TAIR:AT3G04040.1); Has 57 Blast hits to 57 proteins in 12 species: Archaea - 0; Bacteria - 0; Metazoa - 0; Fungi - 0; Plants - 57; Viruses - 0; Other Eukaryotes - 0 (source: NCBI BLINK).   chr2:17509933-17512898 REVERSE LENGTH=166 | 123 | 166 | 3.00E-26  | 135.0 | 61.8 | 69.1 |
| Rsa1.0_00013.1.g763.t1 | ref XP_002880762.1  IQ-domain 6 [Arabidopsis lyrata subsp. lyrata] gi 297326601 gb EFH57021.1  IQ-domain 6 [Arabidopsis lyrata subsp. lyrata]                                                                                                                                                                                                                                                                                                                                                                                                                                                                                                                                                                                                                                                                                                                                                                                                                                  | 396 | 417 | 1.00E-158 | 105.3 | 85.4 | 90.9 | IQ-domain 6                                                                   | gbpln | Arabidopsis lyrata   | AT2G26180.1   Symbols: IQD6   IQ-domain 6   chr2:11143433-11144982 REVERSE LENGTH=416                                                                                                                                                                                                                                                                                                                                                                  | 396 | 416 | 1.00E-157 | 105.1 | 83.8 | 88.6 |
| Rsa1.0_00013.1.g764.t1 | dbj BAJ33733.1  unnamed protein product [Thellungiella halophila]                                                                                                                                                                                                                                                                                                                                                                                                                                                                                                                                                                                                                                                                                                                                                                                                                                                                                                              | 720 | 717 | 0         | 99.6  | 93.1 | 96.3 | unnamed protein product                                                       | ----  | ----                 | AT2G26140.1   Symbols: ftsH4   FTSH protease 4   chr2:11131939-11135126 REVERSE LENGTH=717                                                                                                                                                                                                                                                                                                                                                             | 720 | 717 | 0         | 99.6  | 88.9 | 93.5 |

|                        |                                                                                                                                                                                                                                                                                                                                                                                                                                                                                                                                                                                                                                         |      |      |           |       |      |      |                                              |       |                      |                                                                                                                                                                                                                                                                                                                                                                                                                                                                                                                                              |      |      |           |       |      |      |
|------------------------|-----------------------------------------------------------------------------------------------------------------------------------------------------------------------------------------------------------------------------------------------------------------------------------------------------------------------------------------------------------------------------------------------------------------------------------------------------------------------------------------------------------------------------------------------------------------------------------------------------------------------------------------|------|------|-----------|-------|------|------|----------------------------------------------|-------|----------------------|----------------------------------------------------------------------------------------------------------------------------------------------------------------------------------------------------------------------------------------------------------------------------------------------------------------------------------------------------------------------------------------------------------------------------------------------------------------------------------------------------------------------------------------------|------|------|-----------|-------|------|------|
| Rsa1.0_00013.1.g765.t2 | gb AAD19784.1  putative retroelement pol polyprotein [Arabidopsis thaliana]                                                                                                                                                                                                                                                                                                                                                                                                                                                                                                                                                             | 1511 | 1501 | 0         | 99.3  | 32.0 | 40.2 | putative retroelement pol polyprotein        | gbpln | Arabidopsis thaliana | AT4G23160.1   Symbols: CRK8   cysteine-rich RLK (RECEPTOR-like protein kinase) 8   chr4:12129485-12134086 FORWARD LENGTH=1262                                                                                                                                                                                                                                                                                                                                                                                                                | 1511 | 1262 | 1.00E-142 | 83.5  | 16.5 | 23.8 |
| Rsa1.0_00013.1.g766.t1 | ref XP_002324769.1  predicted protein [Populus trichocarpa] gi 118482835 gb ABK93333.1  unknown [Populus trichocarpa] gi 118486784 gb ABK95227.1  unknown [Populus trichocarpa] gi 222866203 gb EEF03334.1  predicted protein [Populus trichocarpa]                                                                                                                                                                                                                                                                                                                                                                                     | 289  | 276  | 3.00E-60  | 95.5  | 48.4 | 65.7 | predicted protein                            | gbpln | Populus trichocarpa  | AT5G11890.1   Symbols:   FUNCTIONS IN: molecular_function unknown; LOCATED IN: plasma membrane; EXPRESSED IN: 12 plant structures; EXPRESSED DURING: 6 growth stages; BEST Arabidopsis thaliana protein match is: Late embryogenesis abundant (LEA) hydroxyproline-rich glycoprotein family (TAIR:AT1G17620.1); Has 1807 Blast hits to 1807 proteins in 277 species: Archae - 0; Bacteria - 0; Metazoa - 736; Fungi - 347; Plants - 385; Viruses - 0; Other Eukaryotes - 339 (source: NCBI BLINK).   chr5:3831770-3832633 FORWARD LENGTH=267 | 289  | 287  | 3.00E-50  | 99.3  | 43.9 | 58.5 |
| Rsa1.0_00013.1.g767.t1 | gb AAF79479.1 AC022492.23 F1L3.27 [Arabidopsis thaliana]                                                                                                                                                                                                                                                                                                                                                                                                                                                                                                                                                                                | 300  | 201  | 5.00E-71  | 67.0  | 49.3 | 55.0 | F1L3.27                                      | gbpln | Arabidopsis thaliana | AT1G17560.1   Symbols: HLL   Ribosomal protein L14p/L23e family protein   chr1:6037635-6038574 REVERSE LENGTH=196                                                                                                                                                                                                                                                                                                                                                                                                                            | 300  | 196  | 6.00E-73  | 65.3  | 49.0 | 54.7 |
| Rsa1.0_00013.1.g768.t1 | ref XP_002880742.1  galactosyltransferase family protein [Arabidopsis lyrata subsp. lyrata] gi 297326581 gb EFH57001.1  galactosyltransferase family protein [Arabidopsis lyrata subsp. lyrata]                                                                                                                                                                                                                                                                                                                                                                                                                                         | 366  | 367  | 1.00E-175 | 100.3 | 87.7 | 94.0 | galactosyltransferase family protein         | gbpln | Arabidopsis lyrata   | AT2G26100.1   Symbols:   Galactosyltransferase family protein   chr2:11116212-11118129 REVERSE LENGTH=371                                                                                                                                                                                                                                                                                                                                                                                                                                    | 366  | 371  | 1.00E-172 | 101.4 | 86.3 | 93.2 |
| Rsa1.0_00013.1.g769.t1 | #                                                                                                                                                                                                                                                                                                                                                                                                                                                                                                                                                                                                                                       | #    | #    | #         | #     | #    | #    | -                                            | ----  | ----                 | #                                                                                                                                                                                                                                                                                                                                                                                                                                                                                                                                            | #    | #    | #         | #     | #    | #    |
| Rsa1.0_00013.1.g770.t1 | ref XP_002880729.1  hypothetical protein ARALYDRAFT_481452 [Arabidopsis lyrata subsp. lyrata] gi 297326568 gb EFH56988.1  hypothetical protein ARALYDRAFT_481452 [Arabidopsis lyrata subsp. lyrata] ref NP_565614.1  uncharacterized protein [Arabidopsis thaliana] gi 20197269 gb AAC31240.2  expressed protein [Arabidopsis thaliana] gi 20197367 gb AAM19044.1  expressed protein [Arabidopsis thaliana] gi 21593506 gb AAM65473.1  unknown [Arabidopsis thaliana] gi 29028814 gb AO64786.1  At2g25950 [Arabidopsis thaliana] gi 110742984 dbj BAE99386.1                                                                            | 711  | 634  | 1.00E-126 | 89.2  | 35.7 | 37.4 | hypothetical protein ARALYDRAFT_481452       | gbpln | Arabidopsis lyrata   | AT2G25970.1   Symbols:   KH domain-containing protein   chr2:11071844-11075604 REVERSE LENGTH=632                                                                                                                                                                                                                                                                                                                                                                                                                                            | 711  | 632  | 1.00E-125 | 88.9  | 35.7 | 37.7 |
| Rsa1.0_00013.1.g771.t1 | ref NP_565614.1  uncharacterized protein [Arabidopsis thaliana] gi 20197269 gb AAC31240.2  expressed protein [Arabidopsis thaliana] gi 20197367 gb AAM19044.1  expressed protein [Arabidopsis thaliana] gi 21593506 gb AAM65473.1  unknown [Arabidopsis thaliana] gi 29028814 gb AO64786.1  At2g25950 [Arabidopsis thaliana] gi 110742984 dbj BAE99386.1                                                                                                                                                                                                                                                                                | 224  | 204  | 1.00E-99  | 91.1  | 82.1 | 84.8 | uncharacterized protein                      | gbpln | Arabidopsis thaliana | AT2G25950.1   Symbols:   Protein of unknown function (DUF1000)   chr2:11068735-11070524 FORWARD LENGTH=204                                                                                                                                                                                                                                                                                                                                                                                                                                   | 224  | 204  | 1.00E-102 | 91.1  | 82.1 | 84.8 |
| Rsa1.0_00013.1.g772.t1 | gb AAG51783.1 AC079679.3 reverse transcriptase, putative: 16838-20266 [Arabidopsis thaliana]                                                                                                                                                                                                                                                                                                                                                                                                                                                                                                                                            | 1956 | 1142 | 0         | 58.4  | 28.3 | 37.1 | reverse transcriptase, putative: 16838-20266 | gbpln | Arabidopsis thaliana | AT4G29090.1   Symbols:   Ribonuclease H-like superfamily protein   chr4:14333528-14335255 FORWARD LENGTH=575                                                                                                                                                                                                                                                                                                                                                                                                                                 | 1956 | 575  | 1.00E-91  | 29.4  | 9.7  | 15.3 |
| Rsa1.0_00013.1.g773.t1 | gb EOA34405.1  hypothetical protein CARUB_v10021933mg [Capsella rubella]                                                                                                                                                                                                                                                                                                                                                                                                                                                                                                                                                                | 657  | 566  | 0         | 86.1  | 51.8 | 60.3 | hypothetical protein CARUB_v10021933mg       | gbpln | Capsella rubella     | AT1G65630.1   Symbols: DegP3   DegP protease 3   chr1:24406542-24409068 REVERSE LENGTH=559                                                                                                                                                                                                                                                                                                                                                                                                                                                   | 657  | 559  | 0         | 85.1  | 51.0 | 60.9 |
| Rsa1.0_00013.1.g774.t1 | ref XP_002878908.1  hypothetical protein ARALYDRAFT_481449 [Arabidopsis lyrata subsp. lyrata] gi 297324747 gb EFH5167.1  hypothetical protein ARALYDRAFT_481449 [Arabidopsis lyrata subsp. lyrata] ref NP_127504.1  ORF I polyprotein [Petunia vein clearing virus] gi 82061579 sp Q91DM0.1 POLG_PVCoV1 RecName: Full=Genome polyprotein; Contains: RecName: Full=Movement protein; Short=MP; Contains: RecName: Full=Capsid protein; Short=CP; Contains: RecName: Full=Aspartic protease; Short=PR; Contains: RecName: Full=Reverse transcriptase; Short=RT gi 14574598 gb AAK68664.1  ORF I polyprotein [petunia vein clearing virus] | 605  | 686  | 1.00E-160 | 113.4 | 65.5 | 74.7 | hypothetical protein ARALYDRAFT_481449       | gbpln | Arabidopsis lyrata   | AT2G25930.1   Symbols: ELF3, PYK20   hydroxyproline-rich glycoprotein family protein   chr2:11059459-11063178 FORWARD LENGTH=695                                                                                                                                                                                                                                                                                                                                                                                                             | 605  | 695  | 1.00E-154 | 114.9 | 64.8 | 74.4 |
| Rsa1.0_00013.1.g775.t1 | ref NP_127504.1  ORF I polyprotein [Petunia vein clearing virus] gi 82061579 sp Q91DM0.1 POLG_PVCoV1 RecName: Full=Genome polyprotein; Contains: RecName: Full=Movement protein; Short=MP; Contains: RecName: Full=Capsid protein; Short=CP; Contains: RecName: Full=Aspartic protease; Short=PR; Contains: RecName: Full=Reverse transcriptase; Short=RT gi 14574598 gb AAK68664.1  ORF I polyprotein [petunia vein clearing virus]                                                                                                                                                                                                    | 1445 | 2179 | 1.00E-137 | 150.8 | 16.4 | 21.9 | ORF I polyprotein                            | gbvrl | Petunia vein #       | #                                                                                                                                                                                                                                                                                                                                                                                                                                                                                                                                            | #    | #    | #         | #     | #    | #    |

|                        |                                                                                                                                                                                                                                                                                                                                                                                                                                                                            |     |     |           |       |      |      |                                        |       |                      |                                                                                                                                                                                        |     |     |           |       |      |      |
|------------------------|----------------------------------------------------------------------------------------------------------------------------------------------------------------------------------------------------------------------------------------------------------------------------------------------------------------------------------------------------------------------------------------------------------------------------------------------------------------------------|-----|-----|-----------|-------|------|------|----------------------------------------|-------|----------------------|----------------------------------------------------------------------------------------------------------------------------------------------------------------------------------------|-----|-----|-----------|-------|------|------|
| Rsa1.0_00013.1.g776.t1 | refXP_002880724.1   hypothetical protein ARALYDRAFT_481448 [Arabidopsis lyrata subsp. lyrata] gi 297326563 gb EFH56983.1   hypothetical protein ARALYDRAFT_481448 [Arabidopsis lyrata subsp. lyrata]                                                                                                                                                                                                                                                                       | 333 | 342 | 1.00E-178 | 102.7 | 91.6 | 94.9 | hypothetical protein ARALYDRAFT_481448 | gbpln | Arabidopsis lyrata   | AT2G25910.1   Symbols:   3'-5' exonuclease domain-containing protein / K homology domain-containing protein / KH domain-containing protein   chr2:11049379-11051997 REVERSE LENGTH=341 | 333 | 341 | 1.00E-180 | 102.4 | 90.1 | 94.3 |
| Rsa1.0_00013.1.g777.t1 | refXP_002886495.1   hypothetical protein ARALYDRAFT_315184 [Arabidopsis lyrata subsp. lyrata] gi 297323236 gb EFH62754.1   hypothetical protein ARALYDRAFT_315184 [Arabidopsis lyrata subsp. lyrata]                                                                                                                                                                                                                                                                       | 644 | 648 | 0         | 100.6 | 67.7 | 80.0 | hypothetical protein ARALYDRAFT_315184 | gbpln | Arabidopsis lyrata   | AT2G46450.1   Symbols: ATCNGC12, CNGC12   cyclic nucleotide-gated channel 12   chr2:19065845-19068364 FORWARD LENGTH=649                                                               | 644 | 649 | 0         | 100.8 | 67.5 | 79.2 |
| Rsa1.0_00013.1.g778.t1 | refXP_002878899.1   hypothetical protein ARALYDRAFT_901265 [Arabidopsis lyrata subsp. lyrata] gi 297324738 gb EFH55158.1   hypothetical protein ARALYDRAFT_901265 [Arabidopsis lyrata subsp. lyrata]                                                                                                                                                                                                                                                                       | 145 | 143 | 6.00E-50  | 98.6  | 78.6 | 85.5 | hypothetical protein ARALYDRAFT_901265 | gbpln | Arabidopsis lyrata   | AT2G25890.1   Symbols:   Oleosin family protein   chr2:11037435-11037884 FORWARD LENGTH=149                                                                                            | 145 | 149 | 9.00E-49  | 102.8 | 73.8 | 80.7 |
| Rsa1.0_00013.1.g779.t1 | refXP_002878897.1   hypothetical protein ARALYDRAFT_901259 [Arabidopsis lyrata subsp. lyrata] gi 297324736 gb EFH55156.1   hypothetical protein ARALYDRAFT_901259 [Arabidopsis lyrata subsp. lyrata]                                                                                                                                                                                                                                                                       | 608 | 584 | 0         | 96.1  | 85.7 | 90.1 | hypothetical protein ARALYDRAFT_901259 | gbpln | Arabidopsis lyrata   | AT2G25870.1   Symbols:   haloacid dehalogenase-like hydrolase family protein   chr2:11031159-11034302 FORWARD LENGTH=584                                                               | 608 | 584 | 0         | 96.1  | 84.2 | 89.8 |
| Rsa1.0_00013.1.g780.t1 | ref NP_187216.1   receptor like protein 32 [Arabidopsis thaliana] gi 6714445 gb AAF26132.1 AC011620.8 putative disease resistance protein [Arabidopsis thaliana] gi 332640751 gb AEE74272.1   receptor like protein 32 [Arabidopsis thaliana]                                                                                                                                                                                                                              | 883 | 868 | 0         | 98.3  | 72.5 | 80.3 | receptor like protein 32               | gbpln | Arabidopsis thaliana | AT3G05650.1   Symbols: AtRLP32, RLP32   receptor like protein 32   chr3:1645884-1648490 REVERSE LENGTH=868                                                                             | 883 | 868 | 0         | 98.3  | 72.5 | 80.3 |
| Rsa1.0_00013.1.g781.t1 | refXP_002878896.1   predicted protein [Arabidopsis lyrata subsp. lyrata] gi 297324735 gb EFH55155.1   predicted protein [Arabidopsis lyrata subsp. lyrata]                                                                                                                                                                                                                                                                                                                 | 180 | 411 | 1.00E-50  | 228.3 | 51.1 | 56.7 | predicted protein                      | gbpln | Arabidopsis lyrata   | AT2G25840.1   Symbols: OVA4   Nucleotidyl transferase superfamily protein   chr2:11021924-11025158 FORWARD LENGTH=408                                                                  | 180 | 408 | 1.00E-50  | 226.7 | 48.3 | 55.6 |
| Rsa1.0_00013.1.g782.t1 | ref NP_175150.1   F-box protein [Arabidopsis thaliana] gi 75268184 sp Q9C627.1 FB36_ARATH RecName: Full=Putative F-box protein At1g46984 gi 12321006 gb AAG50624.1 AC083835_9 hypothetical protein [Arabidopsis thaliana] gi 332194012 gb AEE32133.1   F-box protein [Arabidopsis thaliana]                                                                                                                                                                                | 378 | 370 | 5.00E-84  | 97.9  | 45.2 | 61.9 | F-box protein                          | gbpln | Arabidopsis thaliana | AT1G46984.1   Symbols:   F-box family protein   chr1:17274722-17275834 FORWARD LENGTH=370                                                                                              | 378 | 370 | 1.00E-86  | 97.9  | 45.2 | 61.9 |
| Rsa1.0_00013.1.g783.t1 | refXP_002883380.1   hypothetical protein ARALYDRAFT_479795 [Arabidopsis lyrata subsp. lyrata] gi 297329220 gb EFH59639.1   hypothetical protein ARALYDRAFT_479795 [Arabidopsis lyrata subsp. lyrata]                                                                                                                                                                                                                                                                       | 74  | 214 | 2.00E-23  | 289.2 | 73.0 | 79.7 | hypothetical protein ARALYDRAFT_479795 | gbpln | Arabidopsis lyrata   | AT3G22845.1   Symbols:   emp24/gp25L/p24 family/GOLD family protein   chr3:8087373-8088550 FORWARD LENGTH=214                                                                          | 74  | 214 | 4.00E-26  | 289.2 | 73.0 | 79.7 |
| Rsa1.0_00013.1.g784.t4 | ref NP_565611.1   poly(A) polymerase 2 [Arabidopsis thaliana] gi 31747891 gb AAF66438.2 AF255297_1 nuclear poly(A) polymerase [Arabidopsis thaliana] gi 14532700 gb AAK64151.1   putative poly(A) polymerase [Arabidopsis thaliana] gi 18491197 gb AAL69501.1   putative poly(A) polymerase [Arabidopsis thaliana] gi 20197361 gb AAC42245.2   putative poly(A) polymerase [Arabidopsis thaliana] gi 330252667 gb AEC07761.1   poly(A) polymerase 2 [Arabidopsis thaliana] | 801 | 800 | 0         | 99.9  | 77.4 | 84.3 | poly(A) polymerase 2                   | gbpln | Arabidopsis thaliana | AT2G25850.2   Symbols: PAPS2   poly(A) polymerase 2   chr2:11026123-11030440 REVERSE LENGTH=800                                                                                        | 801 | 800 | 0         | 99.9  | 77.4 | 84.3 |
| Rsa1.0_00013.1.g785.t1 | ref NP_565610.1   YebC-related protein [Arabidopsis thaliana] gi 22096384 sp O82314.2 U082_ARATH RecName: Full=Probable transcriptional regulatory protein At2g25830 gi 20197365 gb AAC42247.2   expressed protein [Arabidopsis thaliana] gi 330252663 gb AEC07757.1   probable transcriptional regulatory protein [Arabidopsis thaliana]                                                                                                                                  | 330 | 331 | 1.00E-147 | 100.3 | 86.4 | 92.7 | YebC-related protein                   | gbpln | Arabidopsis thaliana | AT2G25830.1   Symbols:   YebC-related   chr2:11019091-11021665 REVERSE LENGTH=331                                                                                                      | 330 | 331 | 1.00E-150 | 100.3 | 86.4 | 92.7 |

| Rsa1.0_00013.1.g786.t1 | #                                                                                                                                                                                                                                                                                                                                                                                                                                                                                                                                                                                                                                               | #   | #    | #         | #      | #    | #    | -                                                   | ----  | ----                 | #                                                                                                                                                                                                                                                             | #   | #    | #         | #      | #    |      |
|------------------------|-------------------------------------------------------------------------------------------------------------------------------------------------------------------------------------------------------------------------------------------------------------------------------------------------------------------------------------------------------------------------------------------------------------------------------------------------------------------------------------------------------------------------------------------------------------------------------------------------------------------------------------------------|-----|------|-----------|--------|------|------|-----------------------------------------------------|-------|----------------------|---------------------------------------------------------------------------------------------------------------------------------------------------------------------------------------------------------------------------------------------------------------|-----|------|-----------|--------|------|------|
| Rsa1.0_00013.1.g787.t1 | #                                                                                                                                                                                                                                                                                                                                                                                                                                                                                                                                                                                                                                               | #   | #    | #         | #      | #    | #    | -                                                   | ----  | ----                 | #                                                                                                                                                                                                                                                             | #   | #    | #         | #      | #    |      |
| Rsa1.0_00014.1.g788.t1 | gb EOA35551.1  hypothetical protein CARUB_v10020757mg [Capsella rubella]                                                                                                                                                                                                                                                                                                                                                                                                                                                                                                                                                                        | 271 | 280  | 2.00E-54  | 103.3  | 52.8 | 62.7 | hypothetical protein CARUB_v10020757mg              | gbpln | Capsella rubella     | AT1G75360.1   Symbols:   unknown protein; Has 74 Blast hits to 71 proteins in 15 species: Archae - 0; Bacteria - 4; Metazoa - 4; Fungi - 0; Plants - 54; Viruses - 0; Other Eukaryotes - 12 (source: NCBI BLINK).   chr1:28275084-28275956 FORWARD LENGTH=290 | 271 | 290  | 3.00E-45  | 107.0  | 49.1 | 58.7 |
| Rsa1.0_00014.1.g789.t1 | ref XP_002887591.1  bZIP transcription factor family protein [Arabidopsis lyrata subsp. lyrata]<br>gi 297333432 gb EFH63850.1  bZIP transcription factor family protein [Arabidopsis lyrata subsp. lyrata]                                                                                                                                                                                                                                                                                                                                                                                                                                      | 416 | 173  | 4.00E-27  | 41.6   | 18.3 | 21.6 | bZIP transcription factor family protein            | gbpln | Arabidopsis lyrata   | AT1G75390.1   Symbols: AtbZIP44, bZIP44   basic leucine-zipper 44   chr1:28292224-28292745 FORWARD LENGTH=173                                                                                                                                                 | 416 | 173  | 3.00E-29  | 41.6   | 17.8 | 21.2 |
| Rsa1.0_00014.1.g790.t1 | gb EOA33370.1  hypothetical protein CARUB_v10020274mg [Capsella rubella]<br>gi 482569183 gb EOA33371.1  hypothetical protein CARUB_v10020274mg [Capsella rubella]                                                                                                                                                                                                                                                                                                                                                                                                                                                                               | 479 | 456  | 1.00E-180 | 95.2   | 77.9 | 82.7 | hypothetical protein CARUB_v10020274mg              | gbpln | Capsella rubella     | AT1G75400.1   Symbols:   RING/U-box superfamily protein   chr1:28297609-28298464 FORWARD LENGTH=455                                                                                                                                                           | 479 | 455  | 0         | 95.0   | 78.7 | 82.7 |
| Rsa1.0_00014.1.g791.t1 | ref NP_973745.1  beta glucosidase 11 [Arabidopsis thaliana]<br>gi 332189360 gb AEE27481.1  beta glucosidase 11 [Arabidopsis thaliana]<br>ref NP_173217.1  PEP1 receptor 2 [Arabidopsis thaliana]<br>gi 75334548 sp Q9FZ59.1 PEPR2_ARAT H RecName: Full=Leucine-rich repeat receptor-like protein kinase PEPR2; AltName: Full=Elicitor peptide 1 receptor 2; Short=PEP1 receptor 2;                                                                                                                                                                                                                                                              | 149 | 473  | 2.00E-25  | 317.4  | 41.6 | 49.0 | beta glucosidase 11                                 | gbpln | Arabidopsis thaliana | AT1G02850.3   Symbols: BGLU11   beta glucosidase 11   chr1:630569-633085 FORWARD LENGTH=473                                                                                                                                                                   | 149 | 473  | 5.00E-28  | 317.4  | 41.6 | 49.0 |
| Rsa1.0_00014.1.g792.t1 | Flags: Precursor<br>gi 9802748 gb AAF99817.1 AC034257_9 Unknown protein [Arabidopsis thaliana]<br>gi 224589394 gb ACN59231.1  leucine-rich repeat receptor-like protein kinase [Arabidopsis thaliana]<br>gi 332191511 gb AEE29632.1  PEP1 receptor 2 [Arabidopsis thaliana]<br>ref NP_177674.1  BEL1-like homeodomain 3 [Arabidopsis thaliana]<br>gi 145327251 ref NP_001077827.1  BEL1-like homeodomain 3 [Arabidopsis thaliana]<br>gi 75263117 sp Q9FWS9.1 BLH3_ARATH RecName: Full=BEL1-like homeodomain protein 3; Short=BEL1-like protein 3<br>gi 10120440 gb AAG13065.1 AC023754_3 Similar to homeodomain proteins [Arabidopsis thaliana] | 92  | 1088 | 2.00E-24  | 1182.6 | 67.4 | 78.3 | PEP1 receptor 2                                     | gbpln | Arabidopsis thaliana | AT1G17750.1   Symbols: PEPR2, AtPEPR2   PEP1 receptor 2   chr1:6106656-6110008 FORWARD LENGTH=1088                                                                                                                                                            | 92  | 1088 | 3.00E-27  | 1182.6 | 67.4 | 78.3 |
| Rsa1.0_00014.1.g793.t1 | gi 13877515 gb AAK43835.1 AF353093.1 BEL1-like homeodomain 3 [Arabidopsis thaliana]<br>gi 21553417 gb AAM62510.1  homeodomain protein BELL1, putative [Arabidopsis thaliana]<br>gi 47059794 gb AAT09418.1  BEL1-like homeodomain 3 protein [Arabidopsis thaliana]<br>gi 332197595 gb AEE35716.1  BEL1-like homeodomain 3 [Arabidopsis thaliana]<br>gi 332197596 gb AEE35717.1  BEL1-like homeodomain 3 [Arabidopsis thaliana]                                                                                                                                                                                                                   | 505 | 524  | 0         | 103.8  | 80.8 | 86.9 | BEL1-like homeodomain 3                             | gbpln | Arabidopsis thaliana | AT1G75410.2   Symbols: BLH3   BEL1-like homeodomain 3   chr1:28300095-28301890 REVERSE LENGTH=524                                                                                                                                                             | 505 | 524  | 0         | 103.8  | 80.8 | 86.9 |
| Rsa1.0_00014.1.g794.t1 | gb AAD22286.1  putative non-LTR retroelement reverse transcriptase [Arabidopsis thaliana]                                                                                                                                                                                                                                                                                                                                                                                                                                                                                                                                                       | 101 | 1311 | 9.00E-13  | 1298.0 | 41.6 | 53.5 | putative non-LTR retroelement reverse transcriptase | gbpln | Arabidopsis thaliana | AT4G09490.1   Symbols:   Polynucleotidyl transferase, ribonuclease H-like superfamily protein   chr4:6015583-6016575 REVERSE LENGTH=170                                                                                                                       | 101 | 170  | 6.00E-12  | 168.3  | 35.6 | 49.5 |
| Rsa1.0_00014.1.g795.t1 | gb ADA60976.1  short internode related sequence 5 [Brassica rapa subsp. pekinensis]                                                                                                                                                                                                                                                                                                                                                                                                                                                                                                                                                             | 336 | 345  | 1.00E-159 | 102.7  | 93.2 | 96.1 | short internode related sequence 5                  | gbpln | Brassica rapa        | AT1G75520.1   Symbols: SRS5   SHI-related sequence 5   chr1:28351779-28353179 REVERSE LENGTH=346                                                                                                                                                              | 336 | 346  | 1.00E-156 | 103.0  | 86.0 | 89.9 |
| Rsa1.0_00014.1.g796.t1 | emb CAB39638.1  RNA-directed DNA polymerase-like protein [Arabidopsis thaliana]<br>gi 7267666 emb CAB78094.1  RNA-directed DNA polymerase-like protein [Arabidopsis thaliana]                                                                                                                                                                                                                                                                                                                                                                                                                                                                   | 927 | 1274 | 0         | 137.4  | 49.3 | 65.8 | RNA-directed DNA polymerase-like protein            | gbpln | Arabidopsis thaliana | AT4G29090.1   Symbols:   Ribonuclease H-like superfamily protein   chr4:14333528-14335255 FORWARD LENGTH=575                                                                                                                                                  | 927 | 575  | 7.00E-59  | 62.0   | 17.8 | 27.3 |



|                        |                                                                                                                                                                                                                                                                                                                                                                                                                    |      |      |           |       |      |      |                                                                                                                                                     |       |                      |                                                                                                                                |      |      |           |       |      |      |
|------------------------|--------------------------------------------------------------------------------------------------------------------------------------------------------------------------------------------------------------------------------------------------------------------------------------------------------------------------------------------------------------------------------------------------------------------|------|------|-----------|-------|------|------|-----------------------------------------------------------------------------------------------------------------------------------------------------|-------|----------------------|--------------------------------------------------------------------------------------------------------------------------------|------|------|-----------|-------|------|------|
| Rsa1.0_00014.1.g797.t1 | ref NP_177685.1  Forkhead-associated (FHA) domain-containing protein [Arabidopsis thaliana] gi 332197609 gb AEE35730.1  Forkhead-associated (FHA) domain-containing protein [Arabidopsis thaliana]                                                                                                                                                                                                                 | 548  | 555  | 2.33E-156 | 101.3 | 58.0 | 69.7 | Forkhead-associated (FHA) domain-containing protein                                                                                                 | gbpln | Arabidopsis thaliana | AT1G75530.1   Symbols:   Forkhead-associated (FHA) domain-containing protein   chr1:28359309-28361815 FORWARD LENGTH=555       | 548  | 555  | 1.00E-149 | 101.3 | 58.0 | 69.7 |
| Rsa1.0_00014.1.g798.t1 | pir  S65812 RNA-directed DNA polymerase (EC 2.7.7.49) (clone DW15) - Arabidopsis thaliana retrotransposon Ta11-1 gi 976278 gb AAA75254.1  reverse transcriptase [Arabidopsis thaliana]                                                                                                                                                                                                                             | 1748 | 1333 | 0         | 76.3  | 35.4 | 46.2 | RNA-directed DNA polymerase (EC 2.7.7.49) (clone DW15) - Arabidopsis thaliana retrotransposon Ta11-1 gi 976278 gb AAA75254.1  reverse transcriptase | gbpln | Arabidopsis thaliana | AT4G2090.1   Symbols:   Ribonuclease H-like superfamily protein   chr4:14333528-14332555 FORWARD LENGTH=75                     | 1748 | 575  | 3.00E-97  | 32.9  | 11.0 | 17.0 |
| Rsa1.0_00014.1.g799.t1 | ref NP_177686.1  putative salt tolerance-like protein [Arabidopsis thaliana] gi 17433066 sp Q9LQZ7.1 STHX_ARATH RecName: Full=Probable salt tolerance-like protein At1g75540 gi 9369377 gb AAF87126.1 AC006434.22 F10A5.24 [Arabidopsis thaliana] gi 225898084 dbj BAH30374.1  hypothetical protein [Arabidopsis thaliana] gi 332197610 gb AEE35731.1  putative salt tolerance-like protein [Arabidopsis thaliana] | 319  | 331  | 1.00E-134 | 103.8 | 82.8 | 89.3 | putative salt tolerance-like protein                                                                                                                | gbpln | Arabidopsis thaliana | AT1G75540.1   Symbols: STH2   salt tolerance homolog2   chr1:28366059-28367398 FORWARD LENGTH=331                              | 319  | 331  | 1.00E-137 | 103.8 | 82.8 | 89.3 |
| Rsa1.0_00014.1.g800.t1 | ref NP_177687.1  glycine-rich protein [Arabidopsis thaliana] gi 9369369 gb AAF87126.1 AC006434.14 F10A5.23 [Arabidopsis thaliana] gi 332197611 gb AEE35732.1  glycine-rich protein [Arabidopsis thaliana]                                                                                                                                                                                                          | 165  | 167  | 4.00E-44  | 101.2 | 85.5 | 90.9 | glycine-rich protein                                                                                                                                | gbpln | Arabidopsis thaliana | AT1G75550.1   Symbols:   glycine-rich protein   chr1:28369437-28369940 REVERSE LENGTH=167                                      | 165  | 167  | 1.00E-46  | 101.2 | 85.5 | 90.9 |
| Rsa1.0_00014.1.g801.t1 | gb EOA35562.1  hypothetical protein CARUB_v10020768mg, partial [Capsella rubella]                                                                                                                                                                                                                                                                                                                                  | 271  | 278  | 1.00E-108 | 102.6 | 77.5 | 80.4 | hypothetical protein CARUB_v10020768mg, partial                                                                                                     | gbpln | Capsella rubella     | AT1G75560.2   Symbols:   zinc knuckle (CCHC-type) family protein   chr1:28371420-28372717 REVERSE LENGTH=257                   | 271  | 257  | 1.00E-103 | 94.8  | 76.0 | 78.6 |
| Rsa1.0_00014.1.g802.t1 | ref XP_002887604.1  hypothetical protein ARALYDRAFT.476705 [Arabidopsis lyrata subsp. lyrata] gi 297333445 gb EFH63863.1  hypothetical protein ARALYDRAFT.476705 [Arabidopsis lyrata subsp. lyrata]                                                                                                                                                                                                                | 108  | 108  | 2.00E-54  | 100.0 | 95.4 | 96.3 | hypothetical protein ARALYDRAFT.476705                                                                                                              | gbpln | Arabidopsis lyrata   | AT1G75580.1   Symbols:   SAUR-like auxin-responsive protein family   chr1:28377530-28377856 FORWARD LENGTH=108                 | 108  | 108  | 2.00E-56  | 100.0 | 94.4 | 95.4 |
| Rsa1.0_00014.1.g803.t1 | # # # # # # # #                                                                                                                                                                                                                                                                                                                                                                                                    |      |      |           |       |      |      | -                                                                                                                                                   | ----  | ----                 | # # # # # # # #                                                                                                                |      |      |           |       |      |      |
| Rsa1.0_00014.1.g804.t1 | dbj BAJ34271.1  unnamed protein product [Thellungiella halophila]                                                                                                                                                                                                                                                                                                                                                  | 147  | 152  | 3.00E-61  | 103.4 | 86.4 | 91.2 | unnamed protein product                                                                                                                             | ----  | ----                 | AT1G75590.1   Symbols:   SAUR-like auxin-responsive protein family   chr1:28383250-28383714 REVERSE LENGTH=154                 | 147  | 154  | 5.00E-62  | 104.8 | 86.4 | 92.5 |
| Rsa1.0_00014.1.g805.t1 | gb EOA33194.1  hypothetical protein CARUB_v10021300mg [Capsella rubella]                                                                                                                                                                                                                                                                                                                                           | 552  | 547  | 0         | 99.1  | 78.3 | 86.8 | hypothetical protein CARUB_v10021300mg                                                                                                              | gbpln | Capsella rubella     | AT1G75620.1   Symbols:   glyoxal oxidase-related protein   chr1:28394951-28396594 REVERSE LENGTH=547                           | 552  | 547  | 0         | 99.1  | 77.9 | 87.1 |
| Rsa1.0_00014.1.g806.t1 | ref XP_002889035.1  leucine-rich repeat family protein [Arabidopsis lyrata subsp. lyrata] gi 297334876 gb EFH65294.1  leucine-rich repeat family protein [Arabidopsis lyrata subsp. lyrata]                                                                                                                                                                                                                        | 1144 | 1141 | 0         | 99.7  | 86.1 | 92.4 | leucine-rich repeat family protein                                                                                                                  | gbpln | Arabidopsis lyrata   | AT1G75640.1   Symbols:   Leucine-rich receptor-like protein kinase family protein   chr1:28403600-28407022 REVERSE LENGTH=1140 | 1144 | 1140 | 0         | 99.7  | 85.2 | 91.6 |
| Rsa1.0_00014.1.g807.t2 | gb EOA33199.1  hypothetical protein CARUB_v10019710mg [Capsella rubella]                                                                                                                                                                                                                                                                                                                                           | 996  | 1024 | 0         | 102.8 | 83.5 | 88.5 | hypothetical protein CARUB_v10019710mg                                                                                                              | gbpln | Capsella rubella     | AT1G75660.1   Symbols: XRN3, AtXRN3   5'-3' exoribonuclease 3   chr1:28408289-28414825 FORWARD LENGTH=1020                     | 996  | 1020 | 0         | 102.4 | 84.8 | 89.8 |
| Rsa1.0_00014.1.g808.t1 | gb AAM63477.1  endo-beta-1,4-glucanase, putative [Arabidopsis thaliana]                                                                                                                                                                                                                                                                                                                                            | 527  | 525  | 0         | 99.6  | 84.6 | 91.1 | endo-beta-1,4-glucanase, putative                                                                                                                   | gbpln | Arabidopsis thaliana | AT1G75680.1   Symbols: AtGH9B7, GH9B7   glycosyl hydrolase 9B7   chr1:28417215-28419231 REVERSE LENGTH=525                     | 527  | 525  | 0         | 99.6  | 84.6 | 91.3 |
| Rsa1.0_00014.1.g809.t1 | gb EOA35847.1  hypothetical protein CARUB_v10021088mg [Capsella rubella]                                                                                                                                                                                                                                                                                                                                           | 159  | 155  | 5.00E-75  | 97.5  | 88.1 | 93.7 | hypothetical protein CARUB_v10021088mg                                                                                                              | gbpln | Capsella rubella     | AT1G75690.1   Symbols:   DnaJ/Hsp40 cysteine-rich domain superfamily protein   chr1:28422273-28423170 REVERSE LENGTH=154       | 159  | 154  | 2.00E-76  | 96.9  | 89.9 | 93.1 |
| Rsa1.0_00014.1.g810.t1 | ref NP_177699.4  HVA22-like protein G [Arabidopsis thaliana] gi 334302815 sp Q9LR09.2 HA22G_ARATH RecName: Full=Putative HVA22-like protein g; Short=AtHVA22g gi 332197626 gb AEE35747.1  HVA22-like protein G [Arabidopsis thaliana]                                                                                                                                                                              | 187  | 177  | 1.00E-81  | 94.7  | 75.9 | 84.5 | HVA22-like protein G                                                                                                                                | gbpln | Arabidopsis thaliana | AT1G75700.1   Symbols: HVA22G   HVA22-like protein G   chr1:28423956-28424931 FORWARD LENGTH=177                               | 187  | 177  | 4.00E-84  | 94.7  | 75.9 | 84.5 |
| Rsa1.0_00014.1.g811.t1 | ref XP_002887608.1  zinc finger family protein [Arabidopsis lyrata subsp. lyrata] gi 297333449 gb EFH63867.1  zinc finger family protein [Arabidopsis lyrata subsp. lyrata]                                                                                                                                                                                                                                        | 456  | 461  | 0         | 101.1 | 87.3 | 90.4 | zinc finger family protein                                                                                                                          | gbpln | Arabidopsis lyrata   | AT1G75710.1   Symbols:   C2H2-like zinc finger protein   chr1:28428806-28431128 FORWARD LENGTH=462                             | 456  | 462  | 0         | 101.3 | 85.3 | 88.4 |

|                        |                                                                                                                                                                                                                                                                                                                                                                                       |      |      |           |       |       |       |                                                                                                                                                                       |       |                      |                                                                                                                                                                                                                                                                                                                                                                                                               |      |      |           |       |      |      |
|------------------------|---------------------------------------------------------------------------------------------------------------------------------------------------------------------------------------------------------------------------------------------------------------------------------------------------------------------------------------------------------------------------------------|------|------|-----------|-------|-------|-------|-----------------------------------------------------------------------------------------------------------------------------------------------------------------------|-------|----------------------|---------------------------------------------------------------------------------------------------------------------------------------------------------------------------------------------------------------------------------------------------------------------------------------------------------------------------------------------------------------------------------------------------------------|------|------|-----------|-------|------|------|
| Rsa1.0_00014.1.g812.t1 | gb ABK28083.1  unknown [Arabidopsis thaliana]                                                                                                                                                                                                                                                                                                                                         | 89   | 95   | 3.00E-21  | 106.7 | 80.9  | 88.8  | unknown                                                                                                                                                               | gbpln | Arabidopsis thaliana | AT1G75717.1   Symbols:   unknown protein; FUNCTIONS IN: molecular_function unknown; INVOLVED IN: biological_process unknown; LOCATED IN: cellular_component unknown; Has 30201 Blast hits to 17322 proteins in 780 species: Archae - 12; Bacteria - 1396; Metazoa - 17338; Fungi - 3422; Plants - 5037; Viruses - 0; Other Eukaryotes - 2996 (source: NCBI BLink);   chr1:28433977-28434261 FORWARD LENGTH=94 | 89   | 94   | 6.00E-24  | 105.6 | 80.9 | 88.8 |
| Rsa1.0_00014.1.g813.t1 | ref XP_002889039.1  hypothetical protein ARALYDRAFT_316499 [Arabidopsis lyrata subsp. lyrata] gi 297334880 gb EFH65298.1  hypothetical protein ARALYDRAFT_316499 [Arabidopsis lyrata subsp. lyrata]                                                                                                                                                                                   | 227  | 202  | 6.00E-65  | 89.0  | 63.9  | 70.5  | hypothetical protein ARALYDRAFT_316499                                                                                                                                | gbpln | Arabidopsis lyrata   | AT1G75720.2   Symbols:   Plant protein of unknown function (DUF827)   chr1:28434648-28435321 REVERSE LENGTH=193                                                                                                                                                                                                                                                                                               | 227  | 193  | 5.00E-66  | 85.0  | 65.6 | 71.4 |
| Rsa1.0_00014.1.g814.t1 | dbj BAD42907.1  hypothetical protein [Arabidopsis thaliana]                                                                                                                                                                                                                                                                                                                           | 507  | 589  | 2.33E-156 | 116.2 | 69.0  | 78.3  | hypothetical protein                                                                                                                                                  | gbpln | Arabidopsis thaliana | AT1G75730.2   Symbols:   unknown protein; FUNCTIONS IN: molecular_function unknown; INVOLVED IN: biological_process unknown; EXPRESSED IN: 22 plant structures; EXPRESSED DURING: 12 growth stages.   chr1:28435991-28438983 REVERSE LENGTH=589                                                                                                                                                               | 507  | 589  | 1.00E-148 | 116.2 | 69.0 | 78.3 |
| Rsa1.0_00014.1.g815.t1 | ref NP_565116.1  gibberellin-regulated protein 1 [Arabidopsis thaliana] gi 21431770 sp P46689.2 GASA1_ARAT H RecName: Full=Gibberellin-regulated protein 1; AltName: Full=GAST1 protein homolog 1; Flags: Precursor gi 18087524 gb AAL58896.1 AF462801.1 At1g75750/F10A5.16 [Arabidopsis thaliana] gi 332197633 gb AEE35754.1  gibberellin-regulated protein 1 [Arabidopsis thaliana] | 98   | 98   | 6.00E-34  | 100.0 | 88.8  | 91.8  | gibberellin-regulated protein 1                                                                                                                                       | gbpln | Arabidopsis thaliana | AT1G75750.1   Symbols: GASA1   GAST1 protein homolog 1   chr1:28441813-28442284 REVERSE LENGTH=98                                                                                                                                                                                                                                                                                                             | 98   | 98   | 1.00E-36  | 100.0 | 88.8 | 91.8 |
| Rsa1.0_00014.1.g816.t1 | gb ACP30598.1  disease resistance protein [Brassica rapa subsp. pekinensis]                                                                                                                                                                                                                                                                                                           | 1494 | 2301 | 0         | 154.0 | 67.9  | 80.6  | disease resistance protein                                                                                                                                            | gbpln | Brassica rapa        | AT4G23160.1   Symbols: CRK8   cysteine-rich RLK (RECEPTOR-like protein kinase) 8   chr4:12129485-12134086 FORWARD LENGTH=1262                                                                                                                                                                                                                                                                                 | 1494 | 1262 | 1.00E-108 | 84.5  | 13.1 | 19.9 |
| Rsa1.0_00014.1.g817.t1 | gb EOA35576.1  hypothetical protein CARUB_v10020786mg [Capsella rubella]                                                                                                                                                                                                                                                                                                              | 272  | 272  | 2.33E-156 | 100.0 | 91.5  | 96.7  | hypothetical protein CARUB_v10020786mg                                                                                                                                | gbpln | Capsella rubella     | AT1G75760.1   Symbols:   ER lumen protein retaining receptor family protein   chr1:28446940-28448421 REVERSE LENGTH=272                                                                                                                                                                                                                                                                                       | 272  | 272  | 2.33E-156 | 100.0 | 89.7 | 96.0 |
| Rsa1.0_00014.1.g818.t1 | ref XP_002873500.1  predicted protein [Arabidopsis lyrata subsp. lyrata] gi 297319337 gb EFH49759.1  predicted protein [Arabidopsis lyrata subsp. lyrata]                                                                                                                                                                                                                             | 887  | 959  | 0         | 108.1 | 69.9  | 77.5  | predicted protein                                                                                                                                                     | gbpln | Arabidopsis lyrata   | AT5G11210.1   Symbols: ATGLR2.5, GLR2.5   glutamate receptor 2.5   chr5:3571214-3574537 REVERSE LENGTH=829                                                                                                                                                                                                                                                                                                    | 887  | 829  | 0         | 93.5  | 67.0 | 75.6 |
| Rsa1.0_00014.1.g819.t1 | # # # # # # # # - ----                                                                                                                                                                                                                                                                                                                                                                |      |      |           |       |       |       |                                                                                                                                                                       |       |                      | # # # # # # # #                                                                                                                                                                                                                                                                                                                                                                                               |      |      |           |       |      |      |
| Rsa1.0_00014.1.g820.t1 | ref XP_002887610.1  predicted protein [Arabidopsis lyrata subsp. lyrata] gi 297333451 gb EFH63869.1  predicted protein [Arabidopsis lyrata subsp. lyrata]                                                                                                                                                                                                                             | 239  | 236  | 2.00E-55  | 98.7  | 58.2  | 69.0  | predicted protein                                                                                                                                                     | gbpln | Arabidopsis lyrata   | AT1G75770.1   Symbols:   unknown protein; Has 6 Blast hits to 5 proteins in 2 species: Archae - 0; Bacteria - 0; Metazoa - 0; Fungi - 0; Plants - 6; Viruses - 0; Other Eukaryotes - 0 (source: NCBI BLink);   chr1:28450022-28450971 FORWARD LENGTH=230                                                                                                                                                      | 239  | 230  | 5.00E-54  | 96.2  | 56.9 | 67.8 |
| Rsa1.0_00014.1.g821.t1 | dbj BAJ33829.1  unnamed protein product [Thellungiella halophila]                                                                                                                                                                                                                                                                                                                     | 447  | 447  | 0         | 100.0 | 99.6  | 99.8  | unnamed protein product                                                                                                                                               | ----  | ----                 | AT1G75780.1   Symbols: TUB1   tubulin beta-1 chain   chr1:28451378-28453602 REVERSE LENGTH=447                                                                                                                                                                                                                                                                                                                | 447  | 447  | 0         | 100.0 | 98.4 | 99.6 |
| Rsa1.0_00014.1.g822.t1 | gb ABV89616.1  pathogenesis-related thaumatin family protein [Brassica rapa] gi 157849670 gb ABV89618.1  pathogenesis-related thaumatin family protein [Brassica rapa]                                                                                                                                                                                                                | 325  | 321  | 1.00E-155 | 98.8  | 84.3  | 87.4  | pathogenesis-related thaumatin family protein                                                                                                                         | gbpln | Brassica rapa        | AT1G75800.1   Symbols:   Pathogenesis-related thaumatin superfamily protein   chr1:28458889-28460447 FORWARD LENGTH=330                                                                                                                                                                                                                                                                                       | 325  | 330  | 1.00E-153 | 101.5 | 86.2 | 89.8 |
| Rsa1.0_00014.1.g823.t1 | gb ADD64789.1  CLAVATA1 [Brassica napus]                                                                                                                                                                                                                                                                                                                                              | 980  | 987  | 0         | 100.7 | 94.9  | 97.2  | CLAVATA1                                                                                                                                                              | gbpln | Brassica napus       | AT1G75820.1   Symbols: CLV1, FAS3, FLO5, ATCLV1   Leucine-rich receptor-like protein kinase family protein   chr1:28463631-28466652 REVERSE LENGTH=980                                                                                                                                                                                                                                                        | 980  | 980  | 0         | 100.0 | 87.2 | 93.1 |
| Rsa1.0_00014.1.g824.t1 | sp O24331.1 DEF4_RAPSA RecName: Full=Defensin-like protein 4; AltName: Full=Cysteine-rich antifungal protein 4; Short=AFP4; Flags: Precursor gi 1655683 emb CAA65983.1  antifungal protein 4 [Raphanus sativus]                                                                                                                                                                       | 80   | 80   | 7.00E-40  | 100.0 | 100.0 | 100.0 | RecName: Full=Defensin-like protein 4; AltName: Full=Cysteine-rich antifungal protein 4; Short=AFP4; Flags: Precursor gi 1655683 emb CAA65983.1  antifungal protein 4 | gbpln | Raphanus sativus     | AT5G44420.1   Symbols: PDF1.2, PDF1.2A, LCR77   plant defensin 1.2   chr5:17907216-17907550 REVERSE LENGTH=80                                                                                                                                                                                                                                                                                                 | 80   | 80   | 7.00E-37  | 100.0 | 83.8 | 92.5 |

|                        |                                                                                                                                                                                                                                                                                                                                                   |      |     |           |       |       |       |                                                                                                                                                                               |       |                      |                                                                                                                                |      |     |           |       |      |      |
|------------------------|---------------------------------------------------------------------------------------------------------------------------------------------------------------------------------------------------------------------------------------------------------------------------------------------------------------------------------------------------|------|-----|-----------|-------|-------|-------|-------------------------------------------------------------------------------------------------------------------------------------------------------------------------------|-------|----------------------|--------------------------------------------------------------------------------------------------------------------------------|------|-----|-----------|-------|------|------|
| Rsa1.0_00014.1.g825.t1 | emb CAN68319.1  hypothetical protein VITISV_032191 [Vitis vinifera]                                                                                                                                                                                                                                                                               | 178  | 312 | 4.00E-13  | 175.3 | 19.1  | 21.3  | hypothetical protein VITISV_032191                                                                                                                                            | gbpln | Vitis vinifera       | AT2G18510.1   Symbols: emb2444   RNA-binding (RRM/RBD/RNP motifs) family protein   chr2:8031554-8033517 REVERSE LENGTH=363     | 178  | 363 | 2.00E-14  | 203.9 | 18.5 | 20.2 |
| Rsa1.0_00014.1.g826.t1 | #                                                                                                                                                                                                                                                                                                                                                 | #    | #   | #         | #     | #     | #     | -                                                                                                                                                                             | ----  | ----                 | #                                                                                                                              | #    | #   | #         | #     | #    |      |
| Rsa1.0_00014.1.g827.t1 | sp O24332.1 DEF3_RAPSA RecName: Full=Defensin-like protein 3; AltName: Full=Cysteine-rich antifungal protein 3; Short=AFP3; Flags: Precursor g 1655683 emb CAA65984.1  antifungal protein 3 [Raphanus sativus]                                                                                                                                    | 79   | 79  | 2.00E-38  | 100.0 | 100.0 | 100.0 | RecName: Full=Defensin-like protein 3; AltName: Full=Cysteine-rich antifungal protein 3; Short=AFP3; Flags: Precursor g 1655683 emb CAA65984.1  antifungal protein 3          | gbpln | Raphanus sativus     | AT5G44420.1   Symbols: PDF1.2, PDF1.2A, LCR77   plant defensin 1.2   chr5:17907216-17907550 REVERSE LENGTH=80                  | 79   | 80  | 5.00E-34  | 101.3 | 83.5 | 93.7 |
| Rsa1.0_00014.1.g828.t1 | sp P69241.1 DEF1_RAPSA RecName: Full=Defensin-like protein 1; AltName: Full=Cysteine-rich antifungal protein 1; Short=AFP1; Flags: Precursor g 609322 gb AAA69541.1  antifungal protein 1 preprotein [Raphanus sativus] g 115529964 gb ABJ09663.1  antifungal rafp1 [Raphanus sativus]                                                            | 80   | 80  | 7.00E-38  | 100.0 | 95.0  | 97.5  | RecName: Full=Defensin-like protein 1; AltName: Full=Cysteine-rich antifungal protein 1; Short=AFP1; Flags: Precursor g 609322 gb AAA69541.1  antifungal protein 1 preprotein | gbpln | Raphanus sativus     | AT5G44420.1   Symbols: PDF1.2, PDF1.2A, LCR77   plant defensin 1.2   chr5:17907216-17907550 REVERSE LENGTH=80                  | 80   | 80  | 5.00E-38  | 100.0 | 87.5 | 96.3 |
| Rsa1.0_00014.1.g829.t1 | sp P69241.1 DEF1_RAPSA RecName: Full=Defensin-like protein 1; AltName: Full=Cysteine-rich antifungal protein 1; Short=AFP1; Flags: Precursor g 609322 gb AAA69541.1  antifungal protein 1 preprotein [Raphanus sativus] g 115529964 gb ABJ09663.1  antifungal rafp1 [Raphanus sativus]                                                            | 83   | 80  | 5.00E-28  | 96.4  | 75.9  | 81.9  | RecName: Full=Defensin-like protein 1; AltName: Full=Cysteine-rich antifungal protein 1; Short=AFP1; Flags: Precursor g 609322 gb AAA69541.1  antifungal protein 1 preprotein | gbpln | Raphanus sativus     | AT5G44420.1   Symbols: PDF1.2, PDF1.2A, LCR77   plant defensin 1.2   chr5:17907216-17907550 REVERSE LENGTH=80                  | 83   | 80  | 4.00E-27  | 96.4  | 66.3 | 77.1 |
| Rsa1.0_00014.1.g830.t1 | pdb 2NTY C Chain C, Rop4-Gdp-Prone8 g 126031217 pdb 2NTY D Chain D, Rop4-Gdp-Prone8                                                                                                                                                                                                                                                               | 196  | 180 | 1.00E-101 | 91.8  | 90.3  | 91.8  | Chain C, Rop4-Gdp-Prone8 g 126031217 pdb 2NTY D Chain D, Rop4-Gdp-Prone8                                                                                                      | ----  | ----                 | AT1G75840.1   Symbols: ARAC5, ATPG3, ROP4, ATROP4   RAC-like GTP binding protein 5   chr1:28475964-28477377 FORWARD LENGTH=196 | 196  | 196 | 1.00E-102 | 100.0 | 95.9 | 98.0 |
| Rsa1.0_00014.1.g831.t1 | ref XP_002899047.1  hypothetical protein ARALYDRAFT_895460 [Arabidopsis lyrata subsp. lyrata] g 297334888 gb EFH65306.1  hypothetical protein ARALYDRAFT_895460 [Arabidopsis lyrata subsp. lyrata]                                                                                                                                                | 1106 | 791 | 0         | 71.5  | 68.1  | 69.9  | hypothetical protein ARALYDRAFT_895460                                                                                                                                        | gbpln | Arabidopsis lyrata   | AT1G75850.1   Symbols: VPS35B   VPS35 homolog B   chr1:28478053-28483874 REVERSE LENGTH=790                                    | 1106 | 790 | 0         | 71.4  | 68.0 | 69.8 |
| Rsa1.0_00014.1.g832.t1 | #                                                                                                                                                                                                                                                                                                                                                 | #    | #   | #         | #     | #     | #     | -                                                                                                                                                                             | ----  | ----                 | #                                                                                                                              | #    | #   | #         | #     | #    |      |
| Rsa1.0_00014.1.g833.t1 | ref NP_974149.1  GDSL esterase/lipase EXL1 [Arabidopsis thaliana] g 28393626 gb AAO42232.1  putative family II extracellular lipase 1 (EXL1) [Arabidopsis thaliana] g 28827430 gb AAO50559.1  putative family II extracellular lipase 1 (EXL1) [Arabidopsis thaliana] g 332197648 gb AEE35769.1  GDSL esterase/lipase EXL1 [Arabidopsis thaliana] | 340  | 374 | 1.00E-173 | 110.0 | 84.7  | 93.5  | GDSL esterase/lipase EXL1                                                                                                                                                     | gbpln | Arabidopsis thaliana | AT1G75880.2   Symbols:   SGNH hydrolase-type esterase superfamily protein   chr1:28490564-28492298 FORWARD LENGTH=374          | 340  | 374 | 1.00E-175 | 110.0 | 84.7 | 93.5 |
| Rsa1.0_00014.1.g834.t1 | ref XP_002887618.1  T4O12.12 [Arabidopsis lyrata subsp. lyrata] g 297333459 gb EFH63877.1  T4O12.12 [Arabidopsis lyrata subsp. lyrata]                                                                                                                                                                                                            | 346  | 673 | 1.00E-173 | 194.5 | 84.4  | 89.9  | T4O12.12                                                                                                                                                                      | gbpln | Arabidopsis lyrata   | AT1G75890.2   Symbols:   GDSL-like Lipase/Acylhydrolase superfamily protein   chr1:28493051-28495047 FORWARD LENGTH=366        | 346  | 366 | 1.00E-174 | 105.8 | 82.9 | 91.0 |
| Rsa1.0_00015.1.g835.t1 | gb ABV89658.1  UVB-resistance protein UVR8 [Brassica rapa]                                                                                                                                                                                                                                                                                        | 151  | 537 | 5.00E-31  | 355.6 | 71.5  | 76.8  | UVB-resistance protein UVR8                                                                                                                                                   | gbpln | Brassica rapa        | AT1G19880.1   Symbols:   Regulator of chromosome condensation (RCC1) family protein   chr1:6900648-6903818 REVERSE LENGTH=538  | 151  | 538 | 2.00E-29  | 356.3 | 62.9 | 72.8 |
| Rsa1.0_00015.1.g836.t1 | ref XP_002893079.1  hypothetical protein ARALYDRAFT_472215 [Arabidopsis lyrata subsp. lyrata] g 297338921 gb EFH69338.1  hypothetical protein ARALYDRAFT_472215 [Arabidopsis lyrata subsp. lyrata]                                                                                                                                                | 548  | 549 | 0         | 100.2 | 83.2  | 90.7  | hypothetical protein ARALYDRAFT_472215                                                                                                                                        | gbpln | Arabidopsis lyrata   | AT1G19900.1   Symbols:   glyoxal oxidase-related protein   chr1:6907038-6908684 REVERSE LENGTH=548                             | 548  | 548 | 0         | 100.0 | 81.0 | 89.8 |
| Rsa1.0_00015.1.g837.t1 | gb ABV89658.1  UVB-resistance protein UVR8 [Brassica rapa]                                                                                                                                                                                                                                                                                        | 535  | 537 | 0         | 100.4 | 87.9  | 93.1  | UVB-resistance protein UVR8                                                                                                                                                   | gbpln | Brassica rapa        | AT1G19880.1   Symbols:   Regulator of chromosome condensation (RCC1) family protein   chr1:6900648-6903818 REVERSE LENGTH=538  | 535  | 538 | 0         | 100.6 | 84.7 | 91.6 |

|                        |                                                                                                                                                                                                                                                                                                          |     |      |           |       |      |      |                                                                                                                                                                                                                                                  |       |                      |                                                                                                                                                                                                                                                            |     |     |           |       |      |      |
|------------------------|----------------------------------------------------------------------------------------------------------------------------------------------------------------------------------------------------------------------------------------------------------------------------------------------------------|-----|------|-----------|-------|------|------|--------------------------------------------------------------------------------------------------------------------------------------------------------------------------------------------------------------------------------------------------|-------|----------------------|------------------------------------------------------------------------------------------------------------------------------------------------------------------------------------------------------------------------------------------------------------|-----|-----|-----------|-------|------|------|
| Rsa1.0_00015.1.g838.t1 | refXP_002893077.1  protein IQ-DOMAIN 32 [Arabidopsis lyrata subsp. lyrata] gi 29733891 gb EFH69336.1  protein IQ-DOMAIN 32 [Arabidopsis lyrata subsp. lyrata]                                                                                                                                            | 766 | 792  | 0         | 103.4 | 73.8 | 81.9 | protein IQ-DOMAIN 32                                                                                                                                                                                                                             | gbpln | Arabidopsis lyrata   | AT1G19870.1   Symbols: iqd32   IQ-domain 32   chr1:6895400-6898539 REVERSE LENGTH=794                                                                                                                                                                      | 766 | 794 | 0         | 103.7 | 72.8 | 81.2 |
| Rsa1.0_00015.1.g839.t2 | refXP_002893076.1  zinc finger (CCH-type) family protein [Arabidopsis lyrata subsp. lyrata] gi 29733891 gb EFH69335.1  zinc finger (CCH-type) family protein [Arabidopsis lyrata subsp. lyrata]                                                                                                          | 448 | 411  | 1.00E-164 | 91.7  | 71.7 | 79.5 | zinc finger (CCH-type) family protein                                                                                                                                                                                                            | gbpln | Arabidopsis lyrata   | AT1G19860.1   Symbols:   Zinc finger C-x8-C-x5-C-x3-H type family protein   chr1:6891654-6894400 REVERSE LENGTH=413                                                                                                                                        | 448 | 413 | 1.00E-164 | 92.2  | 71.0 | 79.9 |
| Rsa1.0_00015.1.g840.t1 | dbj BAJ34343.1  unnamed protein product [Thellungiella halophila]                                                                                                                                                                                                                                        | 819 | 901  | 0         | 110.0 | 89.3 | 93.8 | unnamed protein product                                                                                                                                                                                                                          | ----  | ----                 | AT1G19850.1   Symbols: MP, ARF5, IAA24   Transcriptional factor B3 family protein / auxin-responsive factor AUX/IAA-related   chr1:6887353-6891182 FORWARD LENGTH=902                                                                                      | 819 | 902 | 0         | 110.1 | 87.3 | 92.8 |
| Rsa1.0_00015.1.g841.t1 | gb EOA18064.1  hypothetical protein CARUB_v10006510mg, partial [Capsella rubella]                                                                                                                                                                                                                        | 92  | 555  | 5.00E-16  | 603.3 | 48.9 | 69.6 | hypothetical protein CARUB_v10006510mg, partial                                                                                                                                                                                                  | gbpln | Capsella rubella     | AT1G52950.1   Symbols:   Nucleic acid-binding, OB-fold-like protein   chr1:19725483-19728007 FORWARD LENGTH=566                                                                                                                                            | 92  | 566 | 1.00E-11  | 615.2 | 34.8 | 63.0 |
| Rsa1.0_00015.1.g842.t1 | dbj BAD95408.1  hypothetical protein [Arabidopsis thaliana]                                                                                                                                                                                                                                              | 217 | 478  | 1.00E-47  | 220.3 | 44.7 | 65.4 | hypothetical protein                                                                                                                                                                                                                             | gbpln | Arabidopsis thaliana | AT3G24255.1   Symbols:   RNA-directed DNA polymerase (reverse transcriptase)-related family protein   chr3:8789471-8793208 FORWARD LENGTH=746                                                                                                              | 217 | 746 | 3.00E-29  | 343.8 | 33.2 | 47.5 |
| Rsa1.0_00015.1.g843.t2 | emb CAB39638.1  RNA-directed DNA polymerase-like protein [Arabidopsis thaliana] gi 267666 emb CAB78094.1  RNA-directed DNA polymerase-like protein [Arabidopsis thaliana]                                                                                                                                | 997 | 1274 | 0         | 127.8 | 56.0 | 71.7 | RNA-directed DNA polymerase-like protein                                                                                                                                                                                                         | gbpln | Arabidopsis thaliana | AT4G29090.1   Symbols:   Ribonuclease H-like superfamily protein   chr4:14333528-14335255 FORWARD LENGTH=575                                                                                                                                               | 997 | 575 | 3.00E-61  | 57.7  | 15.4 | 25.8 |
| Rsa1.0_00015.1.g844.t1 | sp Q9SBK6.1 JMT_BRARP RecName: Full=Jasmonate O-methyltransferase; AltName: Full=Floral nectary-specific protein 1; AltName: Full=S-adenosyl-L-methionine:jasmonic acid carboxyl methyltransferase gi 6651395 gb AAF22289.1 AF179222.1 floral nectary-specific protein [Brassica rapa subsp. pekinensis] | 230 | 392  | 1.00E-113 | 170.4 | 85.7 | 91.7 | RecName: Full=Jasmonate O-methyltransferase; AltName: Full=Floral nectary-specific protein 1; AltName: Full=S-adenosyl-L-methionine:jasmonic acid carboxyl methyltransferase gi 6651395 gb AAF22289.1 AF179222.1 floral nectary-specific protein | gbpln | Brassica rapa        | AT1G19640.1   Symbols: JMT   jasmonic acid carboxyl methyltransferase   chr1:6789166-6791708 REVERSE LENGTH=389                                                                                                                                            | 230 | 389 | 1.00E-105 | 169.1 | 80.0 | 88.3 |
| Rsa1.0_00015.1.g845.t1 | gb EOA38300.1  hypothetical protein CARUB_v10009793mg [Capsella rubella]                                                                                                                                                                                                                                 | 312 | 315  | 1.00E-40  | 101.0 | 42.6 | 57.1 | hypothetical protein CARUB_v10009793mg                                                                                                                                                                                                           | gbpln | Capsella rubella     | AT1G19620.1   Symbols:   unknown protein; Has 44 Blast hits to 24 proteins in 12 species: Archae - 0; Bacteria - 8; Metazoa - 22; Fungi - 0; Plants - 6; Viruses - 0; Other Eukaryotes - 8 (source: NCBI BLINK).   chr1:6784020-6785075 FORWARD LENGTH=317 | 312 | 317 | 7.00E-28  | 101.6 | 34.9 | 44.9 |
| Rsa1.0_00015.1.g846.t1 | gb AAF18538.1 AC006551_24 Very similar to retrotransposon reverse transcriptase [Arabidopsis thaliana]                                                                                                                                                                                                   | 768 | 1231 | 0         | 160.3 | 46.9 | 64.2 | Very similar to retrotransposon reverse transcriptase                                                                                                                                                                                            | gbpln | Arabidopsis thaliana | AT4G29090.1   Symbols:   Ribonuclease H-like superfamily protein   chr4:14333528-14335255 FORWARD LENGTH=575                                                                                                                                               | 768 | 575 | 5.00E-98  | 74.9  | 24.9 | 38.7 |
| Rsa1.0_00015.1.g847.t1 | dbj BAJ33664.1  unnamed protein product [Thellungiella halophila]                                                                                                                                                                                                                                        | 358 | 355  | 0         | 99.2  | 89.9 | 94.4 | unnamed protein product                                                                                                                                                                                                                          | ----  | ----                 | AT1G19600.1   Symbols:   pfkB-like carbohydrate kinase family protein   chr1:6779085-6780898 FORWARD LENGTH=355                                                                                                                                            | 358 | 355 | 0         | 99.2  | 89.4 | 93.3 |
| Rsa1.0_00015.1.g848.t1 | ref XP_002890347.1  F18O14.34 [Arabidopsis lyrata subsp. lyrata] gi 297336189 gb EFH66606.1  F18O14.34 [Arabidopsis lyrata subsp. lyrata]                                                                                                                                                                | 138 | 299  | 9.00E-24  | 216.7 | 46.4 | 55.8 | F18O14.34                                                                                                                                                                                                                                        | gbpln | Arabidopsis lyrata   | AT1G19580.1   Symbols: GAMMA CA1   gamma carbonic anhydrase 1   chr1:6774937-6777092 FORWARD LENGTH=275                                                                                                                                                    | 138 | 275 | 1.00E-24  | 199.3 | 44.9 | 54.3 |
| Rsa1.0_00015.1.g849.t1 | #                                                                                                                                                                                                                                                                                                        | #   | #    | #         | #     | #    | #    | -                                                                                                                                                                                                                                                | ----  | ----                 | #                                                                                                                                                                                                                                                          | #   | #   | #         | #     | #    | #    |
| Rsa1.0_00015.1.g850.t1 | ref XP_002893054.1  hypothetical protein ARALYDRAFT.472181 [Arabidopsis lyrata subsp. lyrata] gi 297338896 gb EFH69313.1  hypothetical protein ARALYDRAFT.472181 [Arabidopsis lyrata subsp. lyrata]                                                                                                      | 213 | 213  | 1.00E-99  | 100.0 | 85.0 | 90.6 | hypothetical protein ARALYDRAFT.472181                                                                                                                                                                                                           | gbpln | Arabidopsis lyrata   | AT1G19570.1   Symbols: DHAR1, ATDHAR1, DHAR5   dehydroascorbate reductase   chr1:6773462-6774413 REVERSE LENGTH=213                                                                                                                                        | 213 | 213 | 1.00E-101 | 100.0 | 84.5 | 90.1 |
| Rsa1.0_00015.1.g851.t7 | ref XP_002890346.1  hypothetical protein ARALYDRAFT.472180 [Arabidopsis lyrata subsp. lyrata] gi 297336188 gb EFH66605.1  hypothetical protein ARALYDRAFT.472180 [Arabidopsis lyrata subsp. lyrata]                                                                                                      | 597 | 308  | 1.00E-142 | 51.6  | 41.5 | 46.4 | hypothetical protein ARALYDRAFT.472180                                                                                                                                                                                                           | gbpln | Arabidopsis lyrata   | AT1G19540.1   Symbols:   NmrA-like negative transcriptional regulator family protein   chr1:6765713-6767247 FORWARD LENGTH=310                                                                                                                             | 597 | 310 | 1.00E-142 | 51.9  | 41.0 | 46.6 |

|                        |                                                                                                                                                                                                                                                                                                                                                                                                                                                                                                                       |     |      |           |       |      |      |                                                 |       |                      |                                                                                                                                                                                                                                                                                                                                                                                                                                                                                                                                                                                                                              |     |     |           |       |      |      |
|------------------------|-----------------------------------------------------------------------------------------------------------------------------------------------------------------------------------------------------------------------------------------------------------------------------------------------------------------------------------------------------------------------------------------------------------------------------------------------------------------------------------------------------------------------|-----|------|-----------|-------|------|------|-------------------------------------------------|-------|----------------------|------------------------------------------------------------------------------------------------------------------------------------------------------------------------------------------------------------------------------------------------------------------------------------------------------------------------------------------------------------------------------------------------------------------------------------------------------------------------------------------------------------------------------------------------------------------------------------------------------------------------------|-----|-----|-----------|-------|------|------|
| Rsa1.0_00015.1.g852.t1 | gb EOA38689.1  hypothetical protein CARUB_v10010689mg [Capsella rubella]                                                                                                                                                                                                                                                                                                                                                                                                                                              | 110 | 116  | 4.00E-49  | 105.5 | 88.2 | 92.7 | hypothetical protein CARUB_v10010689mg          | gbpln | Capsella rubella     | AT1G19530.1   Symbols:   unknown protein; FUNCTIONS IN: molecular function unknown; INVOLVED IN: N-terminal protein myristoylation, anaerobic respiration; LOCATED IN: cellular_component unknown; EXPRESSED IN: leaf apex, inflorescence meristem, hypocotyl, root, flower; EXPRESSED DURING: petal differentiation and expansion stage; Has 47 Blast hits to 47 proteins in 13 species: Archae - 0; Bacteria - 0; Metazoa - 0; Fungi - 0; Plants - 47; Viruses - 0; Other Eukaryotes - 0 (source: NCBI BLINK).   chr1:6763976-6764686 FORWARD LENGTH=117                                                                   | 110 | 117 | 6.00E-42  | 106.4 | 80.9 | 89.1 |
| Rsa1.0_00015.1.g853.t1 | ref NP_564088.2  pentatricopeptide repeat-containing protein [Arabidopsis thaliana]<br>gi 8778424 gb AAF79432.1 AC025808.14 F18O14.27 [Arabidopsis thaliana]<br>gi 332191742 gb AEE29863.1  pentatricopeptide repeat-containing protein [Arabidopsis thaliana]<br>ref NP_564087.2  RAD-like 5 protein [Arabidopsis thaliana]<br>gi 75328898 sp Q8GW75.1 RADL5_ARATH RecName: Full=Protein RADIALIS-like 5; Short=AtRL5; Short=Protein RAD-like 5; AltName: Full=Protein RADIALIS-LIKE SAINT/MYB 4; Short=Protein RSM4 | 717 | 725  | 0         | 101.1 | 78.7 | 87.6 | pentatricopeptide repeat-containing protein     | gbpln | Arabidopsis thaliana | AT1G19520.1   Symbols: NFD5   pentatricopeptide (PPR) repeat-containing protein   chr1:6760032-6762581 FORWARD LENGTH=725                                                                                                                                                                                                                                                                                                                                                                                                                                                                                                    | 717 | 725 | 0         | 101.1 | 78.7 | 87.6 |
| Rsa1.0_00015.1.g854.t1 | gi 26453068 db BAC43610.1  putative myb-related protein [Arabidopsis thaliana]<br>gi 28973505 gb AAO64077.1  putative myb family transcription factor [Arabidopsis thaliana]<br>gi 41618974 gb AAS09994.1  MYB transcription factor [Arabidopsis thaliana]<br>gi 871133605 gb ABD24443.1  RAD-like protein 5 [Arabidopsis thaliana]<br>gi 332191741 gb AEE29862.1  protein RADIALIS-like 5 [Arabidopsis thaliana]                                                                                                     | 90  | 100  | 2.00E-36  | 111.1 | 81.1 | 85.6 | RAD-like 5 protein                              | gbpln | Arabidopsis thaliana | AT1G19510.1   Symbols: ATRL5, RSM4, RL5   RAD-like 5   chr1:6756483-6757290 REVERSE LENGTH=100                                                                                                                                                                                                                                                                                                                                                                                                                                                                                                                               | 90  | 100 | 4.00E-39  | 111.1 | 81.1 | 85.6 |
| Rsa1.0_00015.1.g855.t1 | gb EOA36128.1  hypothetical protein CARUB_v10012246mg, partial [Capsella rubella]                                                                                                                                                                                                                                                                                                                                                                                                                                     | 90  | 88   | 1.00E-23  | 97.8  | 64.4 | 74.4 | hypothetical protein CARUB_v10012246mg, partial | gbpln | Capsella rubella     | AT1G19500.1   Symbols:   unknown protein; FUNCTIONS IN: molecular function unknown; INVOLVED IN: biological process unknown; LOCATED IN: endomembrane system; EXPRESSED IN: 9 plant structures; EXPRESSED DURING: L mature pollen stage, M germinated pollen stage, 4 anthesis, C globular stage, petal differentiation and expansion stage; BEST Arabidopsis thaliana protein match is: unknown protein (TAIR:AT2G35765.1); Has 9 Blast hits to 9 proteins in 2 species: Archae - 0; Bacteria - 0; Metazoa - 0; Fungi - 9; Viruses - 0; Other Eukaryotes - 0 (source: NCBI BLINK).   chr1:6754952-6755536 REVERSE LENGTH=80 | 90  | 80  | 1.00E-24  | 88.9  | 63.3 | 72.2 |
| Rsa1.0_00015.1.g856.t1 | ref XP_002893053.1  hypothetical protein ARALYDRAFT_312884 [Arabidopsis lyrata subsp. lyrata]<br>gi 297338895 gb EFH69312.1  hypothetical protein ARALYDRAFT_312884 [Arabidopsis lyrata subsp. lyrata]                                                                                                                                                                                                                                                                                                                | 466 | 647  | 1.00E-169 | 138.8 | 78.3 | 84.8 | hypothetical protein ARALYDRAFT_312884          | gbpln | Arabidopsis lyrata   | AT1G19490.1   Symbols:   Basic-leucine zipper (bZIP) transcription factor family protein   chr1:6751953-6753959 REVERSE LENGTH=471                                                                                                                                                                                                                                                                                                                                                                                                                                                                                           | 466 | 471 | 1.00E-171 | 101.1 | 79.4 | 85.8 |
| Rsa1.0_00015.1.g857.t1 | ref XP_002890343.1  predicted protein [Arabidopsis lyrata subsp. lyrata]<br>gi 297336185 gb EFH66602.1  predicted protein [Arabidopsis lyrata subsp. lyrata]                                                                                                                                                                                                                                                                                                                                                          | 811 | 1262 | 0         | 155.6 | 78.3 | 86.4 | predicted protein                               | gbpln | Arabidopsis lyrata   | AT1G19485.2   Symbols:   Transducin/WD40 repeat-like superfamily protein   chr1:6747167-6751443 FORWARD LENGTH=815                                                                                                                                                                                                                                                                                                                                                                                                                                                                                                           | 811 | 815 | 0         | 100.5 | 76.9 | 85.2 |
| Rsa1.0_00015.1.g858.t1 | gb AAF79431.1 AC025808.13 F18O14.25 [Arabidopsis thaliana]                                                                                                                                                                                                                                                                                                                                                                                                                                                            | 362 | 1314 | 1.00E-150 | 363.0 | 78.7 | 87.0 | F18O14.25                                       | gbpln | Arabidopsis thaliana | AT1G19480.2   Symbols:   DNA glycosylase superfamily protein   chr1:6744520-6745653 FORWARD LENGTH=377                                                                                                                                                                                                                                                                                                                                                                                                                                                                                                                       | 362 | 377 | 1.00E-152 | 104.1 | 78.7 | 87.0 |

|                        |                                                                                                                                                                                                                                                                                                                                                                                                                                                                                                                                                                                                                                 |     |     |           |       |      |      |                                                      |       |                      |                                                                                                                                             |     |     |           |       |      |      |
|------------------------|---------------------------------------------------------------------------------------------------------------------------------------------------------------------------------------------------------------------------------------------------------------------------------------------------------------------------------------------------------------------------------------------------------------------------------------------------------------------------------------------------------------------------------------------------------------------------------------------------------------------------------|-----|-----|-----------|-------|------|------|------------------------------------------------------|-------|----------------------|---------------------------------------------------------------------------------------------------------------------------------------------|-----|-----|-----------|-------|------|------|
| Rsa1.0_00015.1.g859.t1 | refNP_173377.1  sugar transporter ERD6-like 4 [Arabidopsis thaliana] gi 75331761 sp Q93YP9.1 ERDL4_ARAT H RecName: Full=Sugar transporter ERD6-like 4 gi 16648957 gb AAL24330.1  similar to integral membrane protein [Arabidopsis thaliana] gi 20259852 gb AAM13273.1  similar to integral membrane protein [Arabidopsis thaliana] gi 332191732 gb AEE29853.1  sugar transporter ERD6-like 4 [Arabidopsis thaliana]                                                                                                                                                                                                            | 487 | 488 | 0         | 100.2 | 95.7 | 98.4 | sugar transporter ERD6-like 4                        | gbpln | Arabidopsis thaliana | AT1G19450.1   Symbols:   Major facilitator superfamily protein   chr1:6731671-6734633 REVERSE LENGTH=488                                    | 487 | 488 | 0         | 100.2 | 95.7 | 98.4 |
| Rsa1.0_00015.1.g860.t1 | gb EOA37579.1  hypothetical protein CARUB_v10011929mg [Capsella rubella]                                                                                                                                                                                                                                                                                                                                                                                                                                                                                                                                                        | 515 | 512 | 0         | 99.4  | 91.8 | 96.5 | hypothetical protein CARUB_v10011929mg               | gbpln | Capsella rubella     | AT1G19440.1   Symbols: KCS4   3-ketoacyl-CoA synthase 4   chr1:6729119-6730669 FORWARD LENGTH=516                                           | 515 | 516 | 0         | 100.2 | 91.5 | 95.7 |
| Rsa1.0_00015.1.g861.t1 | refNP_564084.1  putative methyltransferase PMT28 [Arabidopsis thaliana] gi 75174900 sp Q9LN50.1 PMTS_ARATH RecName: Full=Probable methyltransferase PMT28 gi 8778438 gb AAF79446.1 ACO25808.28 F18O14.20 [Arabidopsis thaliana] gi 15810125 gb AAL07206.1  unknown protein [Arabidopsis thaliana] gi 25054951 gb AAN71952.1  unknown protein [Arabidopsis thaliana] gi 332191730 gb AEE29851.1  putative methyltransferase PMT28 [Arabidopsis thaliana]                                                                                                                                                                         | 694 | 724 | 0         | 104.3 | 90.5 | 95.0 | putative methyltransferase PMT28                     | gbpln | Arabidopsis thaliana | AT1G19430.1   Symbols:   S-adenosyl-L-methionine-dependent methyltransferases superfamily protein   chr1:6724669-6727533 REVERSE LENGTH=724 | 694 | 724 | 0         | 104.3 | 90.5 | 95.0 |
| Rsa1.0_00015.1.g862.t1 | refNP_173373.2  Erythronate-4-phosphate dehydrogenase family protein [Arabidopsis thaliana] gi 30686353 refNP_850946.1  Erythronate-4-phosphate dehydrogenase family protein [Arabidopsis thaliana] gi 18176223 gb AAL60006.1  unknown protein [Arabidopsis thaliana] gi 20465771 gb AAM20374.1  unknown protein [Arabidopsis thaliana] gi 110740824 db BAE98509.1  hypothetical protein [Arabidopsis thaliana] gi 332191727 gb AEE29848.1  Erythronate-4-phosphate dehydrogenase family protein [Arabidopsis thaliana] gi 332191728 gb AEE29849.1  Erythronate-4-phosphate dehydrogenase family protein [Arabidopsis thaliana] | 299 | 303 | 1.00E-147 | 101.3 | 87.6 | 91.3 | Erythronate-4-phosphate dehydrogenase family protein | gbpln | Arabidopsis thaliana | AT1G19400.2   Symbols:   Erythronate-4-phosphate dehydrogenase family protein   chr1:6712222-6713676 REVERSE LENGTH=303                     | 299 | 303 | 1.00E-150 | 101.3 | 87.6 | 91.3 |
| Rsa1.0_00015.1.g863.t1 | refXP_002893045.1  hypothetical protein ARALYDRAFT_889371 [Arabidopsis lyrata subsp. lyrata] gi 297338887 gb EFH69304.1  hypothetical protein ARALYDRAFT_889371 [Arabidopsis lyrata subsp. lyrata]                                                                                                                                                                                                                                                                                                                                                                                                                              | 789 | 791 | 0         | 100.3 | 75.3 | 86.2 | hypothetical protein ARALYDRAFT_889371               | gbpln | Arabidopsis lyrata   | AT1G19390.1   Symbols:   Wall-associated kinase family protein   chr1:6700772-6703368 REVERSE LENGTH=788                                    | 789 | 788 | 0         | 99.9  | 74.5 | 84.5 |
| Rsa1.0_00015.1.g864.t1 | refXP_002890050.1  hypothetical protein ARALYDRAFT_312432 [Arabidopsis lyrata subsp. lyrata] gi 297338892 gb EFH69309.1  hypothetical protein ARALYDRAFT_312432 [Arabidopsis lyrata subsp. lyrata]                                                                                                                                                                                                                                                                                                                                                                                                                              | 96  | 431 | 1.00E-24  | 449.0 | 56.3 | 60.4 | hypothetical protein ARALYDRAFT_312432               | gbpln | Arabidopsis lyrata   | AT1G14340.1   Symbols:   RNA-binding (RRM/RBD/RNP motifs) family protein   chr1:4897709-4898776 FORWARD LENGTH=244                          | 96  | 244 | 7.00E-27  | 254.2 | 59.4 | 63.5 |
| Rsa1.0_00015.1.g865.t2 | refXP_002893045.1  hypothetical protein ARALYDRAFT_889371 [Arabidopsis lyrata subsp. lyrata] gi 297338887 gb EFH69304.1  hypothetical protein ARALYDRAFT_889371 [Arabidopsis lyrata subsp. lyrata]                                                                                                                                                                                                                                                                                                                                                                                                                              | 719 | 791 | 0         | 110.0 | 75.5 | 84.6 | hypothetical protein ARALYDRAFT_889371               | gbpln | Arabidopsis lyrata   | AT1G19390.1   Symbols:   Wall-associated kinase family protein   chr1:6700772-6703368 REVERSE LENGTH=788                                    | 719 | 788 | 0         | 109.6 | 75.1 | 85.0 |

|                        |                                                                                                                                                                                                     |      |      |           |       |      |      |                                                     |       |                      |                                                                                                                                                                                                                                                                                                                                                                                                                                                                                                                                                 |      |     |           |       |      |      |
|------------------------|-----------------------------------------------------------------------------------------------------------------------------------------------------------------------------------------------------|------|------|-----------|-------|------|------|-----------------------------------------------------|-------|----------------------|-------------------------------------------------------------------------------------------------------------------------------------------------------------------------------------------------------------------------------------------------------------------------------------------------------------------------------------------------------------------------------------------------------------------------------------------------------------------------------------------------------------------------------------------------|------|-----|-----------|-------|------|------|
| Rsa1.0_00015.1.g866.t1 | gb EOA39384.1  hypothetical protein CARUB_v10012465mg [Capsella rubella]                                                                                                                            | 599  | 609  | 0         | 101.7 | 84.8 | 92.0 | hypothetical protein CARUB_v10012465mg              | gbpln | Capsella rubella     | AT1G19370.1   Symbols:   unknown protein; LOCATED IN: endoplasmic reticulum; EXPRESSED IN: 22 plant structures; EXPRESSED DURING: 13 growth stages; BEST Arabidopsis thaliana protein match is: unknown protein (TAIRAT1G75140.1); Has 45 Blast hits to 43 proteins in 15 species: Archae - 0; Bacteria - 0; Metazoa - 0; Fungi - 0; Plants - 44; Viruses - 0; Other Eukaryotes - 1 (source: NCBI BLink).   chr1:6692904-6694721 REVERSE LENGTH=605                                                                                             | 599  | 605 | 0         | 101.0 | 85.1 | 91.8 |
| Rsa1.0_00015.1.g867.t1 | ref XP_002893043.1  hypothetical protein ARALYDRAFT_472163 [Arabidopsis lyrata subsp. lyrata] gi 297338885 gb EFH69302.1  hypothetical protein ARALYDRAFT_472163 [Arabidopsis lyrata subsp. lyrata] | 423  | 428  | 0         | 101.2 | 91.3 | 95.5 | hypothetical protein ARALYDRAFT_472163              | gbpln | Arabidopsis lyrata   | AT1G19360.1   Symbols:   Nucleotide-diphospho-sugar transferase family protein   chr1:6690672-6692211 REVERSE LENGTH=428                                                                                                                                                                                                                                                                                                                                                                                                                        | 423  | 428 | 0         | 101.2 | 91.0 | 95.0 |
| Rsa1.0_00015.1.g868.t1 | db BAJ33837.1  unnamed protein product [Theellungiella halophila]                                                                                                                                   | 336  | 329  | 1.00E-145 | 97.9  | 89.9 | 92.0 | unnamed protein product                             | ----  | ----                 | AT1G19350.3   Symbols: BES1, BZR2   Brassinosteroid signalling positive regulator (BZR1) family protein   chr1:6688680-6690165 FORWARD LENGTH=357                                                                                                                                                                                                                                                                                                                                                                                               | 336  | 357 | 1.00E-140 | 106.3 | 87.2 | 91.4 |
| Rsa1.0_00015.1.g869.t1 | ref XP_002890329.1  hypothetical protein ARALYDRAFT_472157 [Arabidopsis lyrata subsp. lyrata] gi 297336171 gb EFH66588.1  hypothetical protein ARALYDRAFT_472157 [Arabidopsis lyrata subsp. lyrata] | 416  | 410  | 0         | 98.6  | 80.5 | 87.5 | hypothetical protein ARALYDRAFT_472157              | gbpln | Arabidopsis lyrata   | AT1G19340.1   Symbols:   Methyltransferase MT-A70 family protein   chr1:6684798-6686798 FORWARD LENGTH=414                                                                                                                                                                                                                                                                                                                                                                                                                                      | 416  | 414 | 0         | 99.5  | 78.8 | 86.3 |
| Rsa1.0_00015.1.g870.t1 | ref XP_002893042.1  hypothetical protein ARALYDRAFT_472155 [Arabidopsis lyrata subsp. lyrata] gi 297338884 gb EFH69301.1  hypothetical protein ARALYDRAFT_472155 [Arabidopsis lyrata subsp. lyrata] | 244  | 248  | 1.00E-117 | 101.6 | 88.9 | 93.0 | hypothetical protein ARALYDRAFT_472155              | gbpln | Arabidopsis lyrata   | AT1G19330.2   Symbols:   unknown protein; FUNCTIONS IN: molecular_function unknown; INVOLVED IN: biological_process unknown; LOCATED IN: cellular_component unknown; EXPRESSED IN: 22 plant structures; EXPRESSED DURING: 13 growth stages; BEST Arabidopsis thaliana protein match is: unknown protein (TAIRAT1G75060.1); Has 145 Blast hits to 145 proteins in 43 species: Archae - 0; Bacteria - 0; Metazoa - 40; Fungi - 0; Plants - 104; Viruses - 0; Other Eukaryotes - 1 (source: NCBI BLink).   chr1:6680824-6683290 REVERSE LENGTH=242 | 244  | 242 | 1.00E-117 | 99.2  | 89.8 | 94.3 |
| Rsa1.0_00015.1.g871.t2 | ref XP_002878802.1  predicted protein [Arabidopsis lyrata subsp. lyrata] gi 297324641 gb EFH55061.1  predicted protein [Arabidopsis lyrata subsp. lyrata]                                           | 117  | 263  | 2.00E-37  | 224.8 | 67.5 | 76.9 | predicted protein                                   | gbpln | Arabidopsis lyrata   | AT1G19320.1   Symbols:   Pathogenesis-related thaumatin superfamily protein   chr1:6679327-6680178 FORWARD LENGTH=247                                                                                                                                                                                                                                                                                                                                                                                                                           | 117  | 247 | 2.00E-37  | 211.1 | 67.5 | 73.5 |
| Rsa1.0_00015.1.g872.t2 | gb EOA38204.1  hypothetical protein CARUB_v10010116mg [Capsella rubella]                                                                                                                            | 66   | 246  | 1.00E-25  | 372.7 | 89.4 | 93.9 | hypothetical protein CARUB_v10010116mg              | gbpln | Capsella rubella     | AT1G19330.2   Symbols:   unknown protein; FUNCTIONS IN: molecular_function unknown; INVOLVED IN: biological_process unknown; LOCATED IN: cellular_component unknown; EXPRESSED IN: 22 plant structures; EXPRESSED DURING: 13 growth stages; BEST Arabidopsis thaliana protein match is: unknown protein (TAIRAT1G75060.1); Has 145 Blast hits to 145 proteins in 43 species: Archae - 0; Bacteria - 0; Metazoa - 40; Fungi - 0; Plants - 104; Viruses - 0; Other Eukaryotes - 1 (source: NCBI BLink).   chr1:6680824-6683290 REVERSE LENGTH=242 | 66   | 242 | 3.00E-27  | 366.7 | 84.8 | 92.4 |
| Rsa1.0_00015.1.g873.t1 | ref XP_002890328.1  hypothetical protein ARALYDRAFT_472154 [Arabidopsis lyrata subsp. lyrata] gi 297336170 gb EFH66587.1  hypothetical protein ARALYDRAFT_472154 [Arabidopsis lyrata subsp. lyrata] | 246  | 244  | 6.00E-94  | 99.2  | 69.9 | 78.0 | hypothetical protein ARALYDRAFT_472154              | gbpln | Arabidopsis lyrata   | AT1G19320.1   Symbols:   Pathogenesis-related thaumatin superfamily protein   chr1:6679327-6680178 FORWARD LENGTH=247                                                                                                                                                                                                                                                                                                                                                                                                                           | 246  | 247 | 4.00E-96  | 100.4 | 69.9 | 78.0 |
| Rsa1.0_00015.1.g874.t1 | gb AAD21778.1  putative non-LTR retroelement reverse transcriptase [Arabidopsis thaliana]                                                                                                           | 1399 | 1715 | 0         | 122.6 | 42.5 | 60.3 | putative non-LTR retroelement reverse transcriptase | gbpln | Arabidopsis thaliana | AT3G25270.1   Symbols:   Ribonuclease H-like superfamily protein   chr3:9203934-9204965 REVERSE LENGTH=343                                                                                                                                                                                                                                                                                                                                                                                                                                      | 1399 | 343 | 1.00E-76  | 24.5  | 10.0 | 15.0 |
| Rsa1.0_00015.1.g875.t1 | ref XP_002893041.1  zinc finger family protein [Arabidopsis lyrata subsp. lyrata] gi 297338883 gb EFH69300.1  zinc finger family protein [Arabidopsis lyrata subsp. lyrata]                         | 229  | 226  | 2.00E-96  | 98.7  | 82.5 | 86.5 | zinc finger family protein                          | gbpln | Arabidopsis lyrata   | AT1G19310.1   Symbols:   RING/U-box superfamily protein   chr1:6676424-6677104 REVERSE LENGTH=226                                                                                                                                                                                                                                                                                                                                                                                                                                               | 229  | 226 | 5.00E-93  | 98.7  | 81.7 | 86.9 |

|                        |                                                                                                                                                                                                                                                                                                                                                                                                                        |      |      |           |       |      |      |                                                                                                                   |       |                      |                                                                                                                                                                                                                                                                  |      |      |           |       |      |      |
|------------------------|------------------------------------------------------------------------------------------------------------------------------------------------------------------------------------------------------------------------------------------------------------------------------------------------------------------------------------------------------------------------------------------------------------------------|------|------|-----------|-------|------|------|-------------------------------------------------------------------------------------------------------------------|-------|----------------------|------------------------------------------------------------------------------------------------------------------------------------------------------------------------------------------------------------------------------------------------------------------|------|------|-----------|-------|------|------|
| Rsa1.0_00015.1.g876.t1 | ref[XP_002893040.1] hypothetical protein ARALYDRAFT_472152 [Arabidopsis lyrata subsp. lyrata] gi 297338882 gb EFH6299.1                                                                                                                                                                                                                                                                                                | 349  | 350  | 1.00E-167 | 100.3 | 91.4 | 95.1 | hypothetical protein ARALYDRAFT_472152                                                                            | gbpln | Arabidopsis lyrata   | AT1G19300.1   Symbols: GATL1, PARVUS, GLZ1, ATGATL1   Nucleotide-diphospho-<br>sugar transferases superfamily protein  <br>chr1:6671451-6672506 REVERSE<br>LENGTH=351                                                                                            | 349  | 351  | 1.00E-166 | 100.6 | 87.7 | 91.1 |
| Rsa1.0_00015.1.g877.t1 | ref[NP_173361.1] protein DA1 [Arabidopsis thaliana] gi 193806611 sp POC708.1 DA1_ARATH<br>RecName: Full=Protein DA1; AltName: Full=Protein SUPPRESSOR OF LARGE SEED AND ORGAN PHENOTYPES OF DA1-1 1 gi 332191704 gb AEE29825.1  protein DA1 [Arabidopsis thaliana]                                                                                                                                                     | 545  | 532  | 0         | 97.6  | 86.8 | 91.6 | protein DA1                                                                                                       | gbpln | Arabidopsis thaliana | AT1G19270.1   Symbols: DA1   DA1  <br>chr1:6663327-6665845 FORWARD<br>LENGTH=532                                                                                                                                                                                 | 545  | 532  | 0         | 97.6  | 86.8 | 91.6 |
| Rsa1.0_00015.1.g878.t1 | gb AAF91318.1 AF242848.1 beta-ketoacyl-acyl carrier protein synthase [Brassica napus]                                                                                                                                                                                                                                                                                                                                  | 514  | 543  | 0         | 105.6 | 94.4 | 96.1 | beta-ketoacyl-acyl carrier protein synthase                                                                       | gbpln | Brassica napus       | AT1G74960.3   Symbols: FAB1   fatty acid biosynthesis 1   chr1:28152564-28155948 REVERSE LENGTH=541                                                                                                                                                              | 514  | 541  | 0         | 105.3 | 81.5 | 88.1 |
| Rsa1.0_00015.1.g879.t1 | gb EOA40127.1  hypothetical protein CARUB_v10008834mg [Capsella rubella]                                                                                                                                                                                                                                                                                                                                               | 525  | 528  | 0         | 100.6 | 91.0 | 95.6 | hypothetical protein CARUB_v10008834mg                                                                            | gbpln | Capsella rubella     | AT1G19250.1   Symbols: FMO1   flavin-dependent monooxygenase 1  <br>chr1:6650556-6653053 REVERSE<br>LENGTH=530                                                                                                                                                   | 525  | 530  | 0         | 101.0 | 89.5 | 95.0 |
| Rsa1.0_00015.1.g880.t1 | gb AAM61590.1  unknown [Arabidopsis thaliana]                                                                                                                                                                                                                                                                                                                                                                          | 103  | 104  | 3.00E-36  | 101.0 | 82.5 | 93.2 | unknown                                                                                                           | gbpln | Arabidopsis thaliana | AT1G19240.1   Symbols:   unknown protein; Has 24 Blast hits to 24 proteins in 11 species: Archae - 0; Bacteria - 0; Metazoa - 0; Fungi - 0; Plants - 24; Viruses - 0; Other Eukaryotes - 0 (source: NCBI BLINK).  <br>chr1:6649562-6650384 REVERSE<br>LENGTH=104 | 103  | 104  | 2.00E-38  | 101.0 | 81.6 | 92.2 |
| Rsa1.0_00015.1.g881.t1 | ref[XP_002890325.1] hypothetical protein ARALYDRAFT_312861 [Arabidopsis lyrata subsp. lyrata] gi 297336167 gb EFH6584.1                                                                                                                                                                                                                                                                                                | 1009 | 946  | 0         | 93.8  | 81.9 | 86.1 | hypothetical protein ARALYDRAFT_312861                                                                            | gbpln | Arabidopsis lyrata   | AT1G19230.2   Symbols:   Riboflavin synthase-like superfamily protein  <br>chr1:6644189-6649149 FORWARD<br>LENGTH=934                                                                                                                                            | 1009 | 934  | 0         | 92.6  | 78.7 | 83.2 |
| Rsa1.0_00015.1.g882.t1 | gb AFD01318.1  auxin response factor 19-2 [Brassica rapa subsp. pekinensis]                                                                                                                                                                                                                                                                                                                                            | 1074 | 1049 | 0         | 97.7  | 91.9 | 93.0 | auxin response factor 19-2                                                                                        | gbpln | Brassica rapa        | AT1G19220.1   Symbols: ARF19, IAA22, ARF11   auxin response factor 19  <br>chr1:6628395-6632779 REVERSE<br>LENGTH=1086                                                                                                                                           | 1074 | 1086 | 0         | 101.1 | 87.9 | 90.4 |
| Rsa1.0_00015.1.g883.t1 | ref[XP_002893033.1] hypothetical protein ARALYDRAFT_472144 [Arabidopsis lyrata subsp. lyrata] gi 297338875 gb EFH69292.1                                                                                                                                                                                                                                                                                               | 161  | 186  | 4.00E-53  | 115.5 | 70.8 | 83.9 | hypothetical protein ARALYDRAFT_472144                                                                            | gbpln | Arabidopsis lyrata   | AT1G19210.1   Symbols:   Integrase-type DNA-binding superfamily protein  <br>chr1:6626973-6627530 REVERSE<br>LENGTH=185                                                                                                                                          | 161  | 185  | 5.00E-55  | 114.9 | 71.4 | 82.0 |
| Rsa1.0_00015.1.g884.t1 | ref[NP_567546.1] AT hook motif DNA-binding family protein [Arabidopsis thaliana] gi 15451060 gb AAK96801.1  putative protein [Arabidopsis thaliana] gi 20148333 gb AAM10057.1  putative protein [Arabidopsis thaliana] gi 119657370 tpd FAA00284.1  TPA: AT-hook motif nuclear localized protein 13 [Arabidopsis thaliana] gi 332658571 gb AEE83971.1  AT hook motif DNA-binding family protein [Arabidopsis thaliana] | 294  | 439  | 6.00E-41  | 149.3 | 42.2 | 53.7 | AT hook motif DNA-binding family protein                                                                          | gbpln | Arabidopsis thaliana | AT4G17950.1   Symbols:   AT hook motif DNA-binding family protein  <br>chr4:9967295-9969007 REVERSE LENGTH=439                                                                                                                                                   | 294  | 439  | 2.00E-43  | 149.3 | 42.2 | 53.7 |
| Rsa1.0_00015.1.g885.t1 | ref[NP_567546.1] AT hook motif DNA-binding family protein [Arabidopsis thaliana] gi 15451060 gb AAK96801.1  putative protein [Arabidopsis thaliana] gi 20148333 gb AAM10057.1  putative protein [Arabidopsis thaliana] gi 119657370 tpd FAA00284.1  TPA: AT-hook motif nuclear localized protein 13 [Arabidopsis thaliana] gi 332658571 gb AEE83971.1  AT hook motif DNA-binding family protein [Arabidopsis thaliana] | 306  | 439  | 3.00E-44  | 143.5 | 53.3 | 66.7 | AT hook motif DNA-binding family protein                                                                          | gbpln | Arabidopsis thaliana | AT4G17950.1   Symbols:   AT hook motif DNA-binding family protein  <br>chr4:9967295-9969007 REVERSE LENGTH=439                                                                                                                                                   | 306  | 439  | 7.00E-47  | 143.5 | 53.3 | 66.7 |
| Rsa1.0_00015.1.g886.t1 | gb AAF82231.1 AC069143.7 Contains similarity to a hypothetical protein F9E10.21 gi 6646770 from Arabidopsis thaliana BAC F9E10 gb AC013258 [Arabidopsis thaliana]                                                                                                                                                                                                                                                      | 225  | 222  | 1.00E-54  | 98.7  | 56.0 | 71.1 | Contains similarity to a hypothetical protein F9E10.21 gi 6646770 from Arabidopsis thaliana BAC F9E10 gb AC013258 | gbpln | Arabidopsis thaliana | AT1G19200.1   Symbols:   Protein of unknown function (DUF581)  <br>chr1:6625104-6625856 REVERSE LENGTH=215                                                                                                                                                       | 225  | 215  | 5.00E-57  | 95.6  | 56.0 | 71.1 |



|                        |                                                                                                                                                                                                                                                                                                                                                                                                                                                                                                    |     |     |           |       |      |      |                                                                                  |       |                         |                                                                                                                                                                                                                                                                                                                                                                                                                                                                                                                                                                                                          |     |     |           |       |      |      |
|------------------------|----------------------------------------------------------------------------------------------------------------------------------------------------------------------------------------------------------------------------------------------------------------------------------------------------------------------------------------------------------------------------------------------------------------------------------------------------------------------------------------------------|-----|-----|-----------|-------|------|------|----------------------------------------------------------------------------------|-------|-------------------------|----------------------------------------------------------------------------------------------------------------------------------------------------------------------------------------------------------------------------------------------------------------------------------------------------------------------------------------------------------------------------------------------------------------------------------------------------------------------------------------------------------------------------------------------------------------------------------------------------------|-----|-----|-----------|-------|------|------|
| Rsa1.0_00015.1.g887.t1 | ref NP_173353.1  alpha/beta-hydrolase-like protein [Arabidopsis thaliana]<br>gi 75335190 sp Q9LMA7.1 CXE1_ARATH<br>RecName: Full=Probable<br>carboxylesterase 1; AltName:<br>Full=AtCXE1<br>gi 8954057 gb AAF82230.1 AC069143.6<br>Contains similarity to a P <sub>1</sub> MC3 from<br>Pinus radiata gb AF110333 [Arabidopsis<br>thaliana] gi 119360077 gb ABL66767.1 <br>At1g19190 [Arabidopsis thaliana]<br>gi 332191695 gb AEE29816.1  probable<br>carboxylesterase 1 [Arabidopsis<br>thaliana] | 320 | 318 | 1.00E-125 | 99.4  | 69.1 | 83.1 | alpha/beta-hydrolase-<br>like protein                                            | gbpln | Arabidopsis<br>thaliana | AT1G19190.1   Symbols:   alpha/beta-<br>Hydrolases superfamily protein  <br>chr1:6623876-6624832 FORWARD<br>LENGTH=318                                                                                                                                                                                                                                                                                                                                                                                                                                                                                   | 320 | 318 | 1.00E-127 | 99.4  | 69.1 | 83.1 |
| Rsa1.0_00015.1.g888.t1 | gb EOA38428.1  hypothetical protein<br>CARUB_v10010018mg [Capsella rubella]                                                                                                                                                                                                                                                                                                                                                                                                                        | 254 | 268 | 6.00E-93  | 105.5 | 74.8 | 84.3 | hypothetical protein<br>CARUB_v10010018mg                                        | gbpln | Capsella<br>rubella     | AT1G19180.1   Symbols: JAZ1, TIFY10A  <br>jasmonate-zim-domain protein 1  <br>chr1:6622312-6623271 FORWARD<br>LENGTH=253                                                                                                                                                                                                                                                                                                                                                                                                                                                                                 | 254 | 253 | 1.00E-93  | 99.6  | 76.0 | 81.5 |
| Rsa1.0_00015.1.g889.t1 | ref NP_564074.1  uncharacterized<br>protein [Arabidopsis thaliana]<br>gi 8954052 gb AAF82225.1 AC069143.1<br>Contains similarity to a HSPC326<br>mRNA from Homo sapiens<br>gb AF161444. EST gb AI997162 comes<br>from this gene [Arabidopsis thaliana]<br>gi 332191689 gb AEE29810.1 <br>uncharacterized protein AT1G19140<br>[Arabidopsis thaliana]                                                                                                                                               | 312 | 311 | 1.00E-151 | 99.7  | 86.2 | 91.7 | uncharacterized<br>protein                                                       | gbpln | Arabidopsis<br>thaliana | AT1G19140.1   Symbols:   FUNCTIONS IN:<br>molecular function unknown; INVOLVED IN:<br>ubiquinone biosynthetic process; LOCATED<br>IN: mitochondrion; EXPRESSED IN: 24 plant<br>structures; EXPRESSED DURING: 15 growth<br>stages; CONTAINS InterPro DOMAIN/s:<br>COQ9 (InterPro:IPR013718). Ubiquinone<br>biosynthesis protein COQ9<br>(InterPro:IPR012762); Has 748 Blast hits to<br>748 proteins in 260 species: Archae - 0;<br>Bacteria - 218; Metazoa - 126; Fungi - 101;<br>Plants - 39; Viruses - 0; Other Eukaryotes -<br>264 (source: NCBI BLINK).   chr1:6611026-<br>6612414 REVERSE LENGTH=311 | 312 | 311 | 1.00E-154 | 99.7  | 86.2 | 91.7 |
| Rsa1.0_00015.1.g890.t1 | ref NP_173345.2  inter-alpha-trypsin<br>inhibitor heavy chain-like protein<br>[Arabidopsis thaliana]<br>gi 22531102 gb AAM97055.1  unknown<br>protein [Arabidopsis thaliana]<br>gi 23197960 gb AAN15507.1  unknown<br>protein [Arabidopsis thaliana]<br>gi 332191682 gb AEE29803.1  inter-<br>alpha-trypsin inhibitor heavy chain-like<br>protein [Arabidopsis thaliana]                                                                                                                           | 756 | 754 | 0         | 99.7  | 88.2 | 94.2 | inter-alpha-trypsin<br>inhibitor heavy chain-<br>like protein                    | gbpln | Arabidopsis<br>thaliana | AT1G19110.1   Symbols:   inter-alpha-<br>trypsin inhibitor heavy chain-related  <br>chr1:6602270-6605766 FORWARD<br>LENGTH=754                                                                                                                                                                                                                                                                                                                                                                                                                                                                           | 756 | 754 | 0         | 99.7  | 88.2 | 94.2 |
| Rsa1.0_00015.1.g891.t1 | ref NP_173344.2  Histidine kinase-, DNA<br>gyrase B-, and HSP90-like ATPase<br>family protein [Arabidopsis thaliana]<br>gi 82320246 db BAD94510.1 <br>hypothetical protein [Arabidopsis<br>thaliana] gi 332191681 gb AEE29802.1 <br>Histidine kinase-, DNA gyrase B-, and<br>HSP90-like ATPase family protein<br>[Arabidopsis thaliana]                                                                                                                                                            | 696 | 663 | 0         | 95.3  | 79.3 | 84.5 | Histidine kinase-, DNA<br>gyrase B-, and HSP90-<br>like ATPase family<br>protein | gbpln | Arabidopsis<br>thaliana | AT1G19100.1   Symbols:   Histidine kinase-,<br>DNA gyrase B-, and HSP90-like ATPase<br>family protein   chr1:6595560-6601159<br>FORWARD LENGTH=663                                                                                                                                                                                                                                                                                                                                                                                                                                                       | 696 | 663 | 0         | 95.3  | 79.3 | 84.5 |
| Rsa1.0_00015.1.g892.t1 | gb EOA39914.1  hypothetical protein<br>CARUB_v10008603mg [Capsella rubella]                                                                                                                                                                                                                                                                                                                                                                                                                        | 617 | 616 | 0         | 99.8  | 80.6 | 88.2 | hypothetical protein<br>CARUB_v10008603mg                                        | gbpln | Capsella<br>rubella     | AT1G19090.1   Symbols: RKF2, CRK1  <br>receptor-like serine/threonine kinase 2  <br>chr1:6590350-6592615 FORWARD<br>LENGTH=600                                                                                                                                                                                                                                                                                                                                                                                                                                                                           | 617 | 600 | 0         | 97.2  | 76.3 | 84.4 |
| Rsa1.0_00015.1.g893.t1 | ref XP_002893028.1  hypothetical<br>protein ARALYDRAFT_889335<br>[Arabidopsis lyrata subsp. lyrata]<br>gi 297338870 gb EFH69287.1 <br>hypothetical protein<br>ARALYDRAFT_889335 [Arabidopsis<br>lyrata subsp. lyrata]                                                                                                                                                                                                                                                                              | 215 | 209 | 1.00E-89  | 97.2  | 84.7 | 91.2 | hypothetical protein<br>ARALYDRAFT_889335                                        | gbpln | Arabidopsis<br>lyrata   | AT1G19050.1   Symbols: ARR7   response<br>regulator 7   chr1:6577919-6579078<br>REVERSE LENGTH=206                                                                                                                                                                                                                                                                                                                                                                                                                                                                                                       | 215 | 206 | 1.00E-87  | 95.8  | 78.6 | 87.0 |
| Rsa1.0_00015.1.g894.t1 | gb EOA36368.1  hypothetical protein<br>CARUB_v10010768mg [Capsella rubella]                                                                                                                                                                                                                                                                                                                                                                                                                        | 86  | 87  | 3.00E-30  | 101.2 | 82.6 | 87.2 | hypothetical protein<br>CARUB_v10010768mg                                        | gbpln | Capsella<br>rubella     | AT1G19020.1   Symbols:   unknown protein;<br>BEST Arabidopsis thaliana protein match is:<br>unknown protein (TAIR:AT3G48180.1); Has<br>88 Blast hits to 88 proteins in 15 species:<br>Archae - 0; Bacteria - 0; Metazoa - 0; Fungi<br>- 0; Plants - 88; Viruses - 0; Other<br>Eukaryotes - 0 (sources: NCBI BLINK).  <br>chr1:6568142-6568402 FORWARD<br>LENGTH=86                                                                                                                                                                                                                                       | 86  | 86  | 3.00E-31  | 100.0 | 83.7 | 88.4 |
| Rsa1.0_00015.1.g895.t1 | ref NP_173333.1  uncharacterized<br>protein [Arabidopsis thaliana]<br>gi 8778293 gb AAF79302.1 AC068602.25<br>F14D16.14 [Arabidopsis thaliana]<br>gi 27754600 gb AAO22746.1  unknown<br>protein [Arabidopsis thaliana]<br>gi 332191666 gb AEE29787.1 <br>uncharacterized protein AT1G18990<br>[Arabidopsis thaliana]                                                                                                                                                                               | 510 | 524 | 0         | 102.7 | 84.9 | 92.4 | uncharacterized<br>protein                                                       | gbpln | Arabidopsis<br>thaliana | AT1G18990.1   Symbols:   Protein of<br>unknown function, DUF593   chr1:6558778-<br>6560432 REVERSE LENGTH=524                                                                                                                                                                                                                                                                                                                                                                                                                                                                                            | 510 | 524 | 0         | 102.7 | 84.9 | 92.4 |

|                        |                                                                                                                                                                                                                                                                                                                                                                                                                                                                                                                                                                                                                                                                                                                                                                        |      |      |           |       |      |      |                                                        |       |                      |                                                                                                                                                                                                                                                                                                                                                                                                                                             |      |      |           |       |      |      |
|------------------------|------------------------------------------------------------------------------------------------------------------------------------------------------------------------------------------------------------------------------------------------------------------------------------------------------------------------------------------------------------------------------------------------------------------------------------------------------------------------------------------------------------------------------------------------------------------------------------------------------------------------------------------------------------------------------------------------------------------------------------------------------------------------|------|------|-----------|-------|------|------|--------------------------------------------------------|-------|----------------------|---------------------------------------------------------------------------------------------------------------------------------------------------------------------------------------------------------------------------------------------------------------------------------------------------------------------------------------------------------------------------------------------------------------------------------------------|------|------|-----------|-------|------|------|
| Rsa1.0_00015.1.g896.t1 | refNP_173332.1  germin-like protein subfamily T member 2 [Arabidopsis thaliana]<br>gi 18203242 sp Q9LMC9.1 GLT2_ARATH RecName: Full=Germin-like protein subfamily T member 2; Flags: Precursor gi 8778294 gb AAF79303.1 AC068602_26 F14D16.13 [Arabidopsis thaliana] gi 21537092 gb AAM61433.1  germin, putative [Arabidopsis thaliana] gi 89111904 gb ABD60724.1  At1g18980 [Arabidopsis thaliana] gi 332191665 gb AEE29786.1  germin-like protein subfamily T member 2 [Arabidopsis thaliana] gb AAF97281.1 AC010164.3 Hypothetical protein [Arabidopsis thaliana]                                                                                                                                                                                                   | 214  | 220  | 1.00E-103 | 102.8 | 89.3 | 92.5 | germin-like protein subfamily T member 2               | gbpln | Arabidopsis thaliana | AT1G18980.1   Symbols:   RmlC-like cupins superfamily protein   chr1:6557364-6558026 REVERSE LENGTH=220                                                                                                                                                                                                                                                                                                                                     | 214  | 220  | 1.00E-106 | 102.8 | 89.3 | 92.5 |
| Rsa1.0_00015.1.g897.t1 | gi 12324507 gb AAG52212.1 AC022288_11 putative gag-pol polyprotein: 76173-77576 [Arabidopsis thaliana]<br>refNP_173329.2  DDT domain-containing protein [Arabidopsis thaliana] gi 332191662 gb AEE29783.1  DDT domain-containing protein [Arabidopsis thaliana]                                                                                                                                                                                                                                                                                                                                                                                                                                                                                                        | 221  | 467  | 1.00E-73  | 211.3 | 62.4 | 79.2 | Hypothetical protein                                   | gbpln | Arabidopsis thaliana | #                                                                                                                                                                                                                                                                                                                                                                                                                                           | #    | #    | #         | #     | #    |      |
| Rsa1.0_00015.1.g898.t3 | refNP_173329.2  DDT domain-containing protein [Arabidopsis thaliana] gi 332191662 gb AEE29783.1  DDT domain-containing protein [Arabidopsis thaliana]                                                                                                                                                                                                                                                                                                                                                                                                                                                                                                                                                                                                                  | 815  | 750  | 0         | 92.0  | 75.6 | 81.0 | DDT domain-containing protein                          | gbpln | Arabidopsis thaliana | AT1G18950.1   Symbols:   DDT domain superfamily   chr1:6546539-6551549 FORWARD LENGTH=750                                                                                                                                                                                                                                                                                                                                                   | 815  | 750  | 0         | 92.0  | 75.6 | 81.0 |
| Rsa1.0_00015.1.g899.t1 | gb EOA40010.1  hypothetical protein CARUB.v10008700mg [Capsella rubella]                                                                                                                                                                                                                                                                                                                                                                                                                                                                                                                                                                                                                                                                                               | 526  | 575  | 0         | 109.3 | 86.5 | 92.8 | hypothetical protein CARUB.v10008700mg                 | gbpln | Capsella rubella     | AT1G18940.1   Symbols:   Nodulin-like / Major Facilitator Superfamily protein   chr1:6543852-6545592 FORWARD LENGTH=526                                                                                                                                                                                                                                                                                                                     | 526  | 526  | 0         | 100.0 | 86.3 | 94.1 |
| Rsa1.0_00015.1.g900.t1 | refXP_002893023.1  F14D16.3 [Arabidopsis lyrata subsp. lyrata] gi 297338865 gb EFH69282.1  F14D16.3 [Arabidopsis lyrata subsp. lyrata]<br>refNP_173324.1  pentatricopeptide repeat-containing protein [Arabidopsis thaliana] gi 42571539 refNP_973860.1  pentatricopeptide repeat-containing protein [Arabidopsis thaliana] gi 75151479 sp Q8GYP6.1 PPR49_ARATH RecName: Full=Pentatricopeptide repeat-containing protein At1g18900 gi 26450017 dbj BAC42129.1  unknown protein [Arabidopsis thaliana] gi 28827402 gb AAO50545.1  unknown protein [Arabidopsis thaliana] gi 332191657 gb AEE29778.1  pentatricopeptide repeat-containing protein [Arabidopsis thaliana] gi 332191658 gb AEE29779.1  pentatricopeptide repeat-containing protein [Arabidopsis thaliana] | 1189 | 1260 | 0         | 106.0 | 81.6 | 87.7 | F14D16.3                                               | gbpln | Arabidopsis lyrata   | AT1G18910.1   Symbols:   zinc ion binding; zinc ion binding   chr1:6532706-6537993 REVERSE LENGTH=1254                                                                                                                                                                                                                                                                                                                                      | 1189 | 1254 | 0         | 105.5 | 80.7 | 87.6 |
| Rsa1.0_00015.1.g901.t1 | gi 26450017 dbj BAC42129.1  unknown protein [Arabidopsis thaliana] gi 28827402 gb AAO50545.1  unknown protein [Arabidopsis thaliana] gi 332191657 gb AEE29778.1  pentatricopeptide repeat-containing protein [Arabidopsis thaliana] gi 332191658 gb AEE29779.1  pentatricopeptide repeat-containing protein [Arabidopsis thaliana]                                                                                                                                                                                                                                                                                                                                                                                                                                     | 857  | 860  | 0         | 100.4 | 83.1 | 89.0 | pentatricopeptide repeat-containing protein            | gbpln | Arabidopsis thaliana | AT1G18900.2   Symbols:   Pentatricopeptide repeat (PPR) superfamily protein   chr1:6529778-6532360 FORWARD LENGTH=860                                                                                                                                                                                                                                                                                                                       | 857  | 860  | 0         | 100.4 | 83.1 | 89.0 |
| Rsa1.0_00015.1.g902.t1 | dbj BAJ34189.1  unnamed protein product [Thellungiella halophila]                                                                                                                                                                                                                                                                                                                                                                                                                                                                                                                                                                                                                                                                                                      | 548  | 545  | 0         | 99.5  | 90.3 | 94.3 | unnamed protein product                                | ----  | ----                 | AT1G18890.1   Symbols:   ATCDPK1, CPK10, CDPK1, AtCPK10   calcium-dependent protein kinase 1   chr1:6523468-6525736 REVERSE LENGTH=545                                                                                                                                                                                                                                                                                                      | 548  | 545  | 0         | 99.5  | 88.9 | 94.0 |
| Rsa1.0_00015.1.g903.t1 | refXP_002890304.1  proton-dependent oligopeptide transport family protein [Arabidopsis lyrata subsp. lyrata] gi 297336146 gb EFH66563.1  proton-dependent oligopeptide transport family protein [Arabidopsis lyrata subsp. lyrata]                                                                                                                                                                                                                                                                                                                                                                                                                                                                                                                                     | 613  | 587  | 0         | 95.8  | 84.2 | 87.8 | proton-dependent oligopeptide transport family protein | gbpln | Arabidopsis lyrata   | AT1G18880.1   Symbols:   Major facilitator superfamily protein   chr1:6520800-6523241 FORWARD LENGTH=587                                                                                                                                                                                                                                                                                                                                    | 613  | 587  | 0         | 95.8  | 83.2 | 86.9 |
| Rsa1.0_00015.1.g904.t1 | gb EOA40359.1  hypothetical protein CARUB.v10009088mg, partial [Capsella rubella]                                                                                                                                                                                                                                                                                                                                                                                                                                                                                                                                                                                                                                                                                      | 417  | 457  | 1.00E-179 | 109.6 | 75.5 | 85.9 | hypothetical protein CARUB.v10009088mg, partial        | gbpln | Capsella rubella     | AT1G18850.1   Symbols:   unknown protein; FUNCTIONS IN: molecular.function unknown; INVOLVED IN: biological.process unknown; LOCATED IN: nucleolus; EXPRESSED IN: 22 plant structures; EXPRESSED DURING: 13 growth stages; Has 40 Blast hits to 40 proteins in 13 species: Archae - 0; Bacteria - 0; Metazoa - 0; Fungi - 0; Plants - 40; Viruses - 0; Other Eukaryotes - 0 (source: NCBI BLINK).   chr1:6504928-6506127 REVERSE LENGTH=399 | 417  | 399  | 1.00E-173 | 95.7  | 73.6 | 83.0 |
| Rsa1.0_00015.1.g905.t2 | dbj BAJ33816.1  unnamed protein product [Thellungiella halophila]                                                                                                                                                                                                                                                                                                                                                                                                                                                                                                                                                                                                                                                                                                      | 635  | 571  | 0         | 89.9  | 73.4 | 79.8 | unnamed protein product                                | ----  | ----                 | AT1G18840.2   Symbols:   IQD30   IQ-domain 30   chr1:6501068-6503435 REVERSE LENGTH=572                                                                                                                                                                                                                                                                                                                                                     | 635  | 572  | 0         | 90.1  | 69.8 | 77.3 |

|                        |                                                                                                                                                                                                                                                                                                                                                                   |      |      |           |       |      |      |                                        |       |                      |                                                                                                                                               |      |      |           |       |      |      |
|------------------------|-------------------------------------------------------------------------------------------------------------------------------------------------------------------------------------------------------------------------------------------------------------------------------------------------------------------------------------------------------------------|------|------|-----------|-------|------|------|----------------------------------------|-------|----------------------|-----------------------------------------------------------------------------------------------------------------------------------------------|------|------|-----------|-------|------|------|
| Rsa1.0_00015.1.g906.t1 | ref[XP_002893019.1] predicted protein [Arabidopsis lyrata subsp. lyrata] gi 297338861 gb EFH69278.1  predicted protein [Arabidopsis lyrata subsp. lyrata]                                                                                                                                                                                                         | 94   | 104  | 7.00E-27  | 110.6 | 80.9 | 86.2 | predicted protein                      | gbpln | Arabidopsis lyrata   | #                                                                                                                                             | #    | #    | #         | #     | #    | #    |
| Rsa1.0_00015.1.g907.t1 | ref[XP_002893018.1] hypothetical protein ARALYDRAFT_472107 [Arabidopsis lyrata subsp. lyrata] gi 297338860 gb EFH69277.1  hypothetical protein ARALYDRAFT_472107 [Arabidopsis lyrata subsp. lyrata]                                                                                                                                                               | 88   | 88   | 9.00E-39  | 100.0 | 89.8 | 92.0 | hypothetical protein ARALYDRAFT_472107 | gbpln | Arabidopsis lyrata   | AT1G18835.1   Symbols: MIF3   mini zinc finger   chr1:6496106-6496372 REVERSE LENGTH=88                                                       | 88   | 88   | 6.00E-37  | 100.0 | 90.9 | 93.2 |
| Rsa1.0_00015.1.g908.t1 | dbj BAC42657.1  unknown protein [Arabidopsis thaliana] gi 28950777 gb AA063312.1  At1g18800 [Arabidopsis thaliana]                                                                                                                                                                                                                                                | 258  | 228  | 1.00E-112 | 88.4  | 79.1 | 83.3 | unknown protein                        | gbpln | Arabidopsis thaliana | AT1G18800.1   Symbols: NRP2   NAP1-related protein 2   chr1:6481466-6483463 REVERSE LENGTH=256                                                | 258  | 256  | 1.00E-112 | 99.2  | 77.5 | 81.0 |
| Rsa1.0_00015.1.g909.t1 | #                                                                                                                                                                                                                                                                                                                                                                 | #    | #    | #         | #     | #    | -    | ----                                   | ----  | ----                 | #                                                                                                                                             | #    | #    | #         | #     | #    | #    |
| Rsa1.0_00015.1.g910.t1 | gb EOA36433.1  hypothetical protein CARUB_v10010970mg [Capsella rubella]                                                                                                                                                                                                                                                                                          | 166  | 210  | 3.00E-23  | 126.5 | 42.8 | 57.8 | hypothetical protein CARUB_v10010970mg | gbpln | Capsella rubella     | AT1G18760.1   Symbols:   Zinc finger, C3HC4 type (RING finger) family protein   chr1:6471150-6471824 REVERSE LENGTH=224                       | 166  | 224  | 2.00E-17  | 134.9 | 39.2 | 58.4 |
| Rsa1.0_00015.1.g911.t1 | gb ACP30591.1  disease resistance protein [Brassica rapa subsp. pekinensis]                                                                                                                                                                                                                                                                                       | 237  | 1555 | 7.00E-36  | 656.1 | 38.4 | 48.1 | disease resistance protein             | gbpln | Brassica rapa        | AT4G09490.1   Symbols:   Polynucleotidyl transferase, ribonuclease H-like superfamily protein   chr4:6015583-6016575 REVERSE LENGTH=170       | 237  | 170  | 2.00E-18  | 71.7  | 21.1 | 32.5 |
| Rsa1.0_00015.1.g912.t1 | #                                                                                                                                                                                                                                                                                                                                                                 | #    | #    | #         | #     | #    | -    | ----                                   | ----  | ----                 | #                                                                                                                                             | #    | #    | #         | #     | #    | #    |
| Rsa1.0_00015.1.g913.t1 | ref[XP_002882812.1] hypothetical protein ARALYDRAFT_341444 [Arabidopsis lyrata subsp. lyrata] gi 297326652 gb EFH59071.1  hypothetical protein ARALYDRAFT_341444 [Arabidopsis lyrata subsp. lyrata]                                                                                                                                                               | 147  | 315  | 1.00E-19  | 214.3 | 43.5 | 56.5 | hypothetical protein ARALYDRAFT_341444 | gbpln | Arabidopsis lyrata   | AT3G13228.1   Symbols:   RING/U-box superfamily protein   chr3:4267075-4268052 FORWARD LENGTH=325                                             | 147  | 325  | 2.00E-15  | 221.1 | 40.1 | 55.8 |
| Rsa1.0_00015.1.g914.t1 | ref[XP_002882812.1] hypothetical protein ARALYDRAFT_341444 [Arabidopsis lyrata subsp. lyrata] gi 297326652 gb EFH59071.1  hypothetical protein ARALYDRAFT_341444 [Arabidopsis lyrata subsp. lyrata]                                                                                                                                                               | 221  | 315  | 1.00E-50  | 142.5 | 51.6 | 65.2 | hypothetical protein ARALYDRAFT_341444 | gbpln | Arabidopsis lyrata   | AT3G13228.1   Symbols:   RING/U-box superfamily protein   chr3:4267075-4268052 FORWARD LENGTH=325                                             | 221  | 325  | 2.00E-45  | 147.1 | 47.1 | 61.5 |
| Rsa1.0_00015.1.g915.t1 | ref[XP_002890300.1] AGL102 [Arabidopsis lyrata subsp. lyrata] gi 297336142 gb EFH66559.1  AGL102 [Arabidopsis lyrata subsp. lyrata]                                                                                                                                                                                                                               | 153  | 383  | 3.00E-37  | 250.3 | 52.9 | 57.5 | AGL102                                 | gbpln | Arabidopsis lyrata   | AT1G18750.1   Symbols: AGL65   AGAMOUS-like 65   chr1:6467266-6469640 FORWARD LENGTH=389                                                      | 153  | 389  | 2.00E-39  | 254.2 | 52.9 | 57.5 |
| Rsa1.0_00015.1.g916.t1 | ref[XP_002890299.1] hypothetical protein ARALYDRAFT_472100 [Arabidopsis lyrata subsp. lyrata] gi 297336141 gb EFH66558.1  hypothetical protein ARALYDRAFT_472100 [Arabidopsis lyrata subsp. lyrata]                                                                                                                                                               | 363  | 382  | 1.00E-170 | 105.2 | 85.1 | 91.2 | hypothetical protein ARALYDRAFT_472100 | gbpln | Arabidopsis lyrata   | AT1G18740.1   Symbols:   Protein of unknown function (DUF793)   chr1:6464125-6465273 FORWARD LENGTH=382                                       | 363  | 382  | 1.00E-170 | 105.2 | 84.8 | 91.2 |
| Rsa1.0_00015.1.g917.t1 | ref NP_173308.2  NDH dependent flow 6 protein [Arabidopsis thaliana] gi 19310578 gb AAL85020.1  unknown protein [Arabidopsis thaliana] gi 21436079 gb AAM51240.1  unknown protein [Arabidopsis thaliana] gi 110741088 dbj BAE98638.1  hypothetical protein [Arabidopsis thaliana] gi 332191632 gb AEE29753.1  NDH dependent flow 6 protein [Arabidopsis thaliana] | 176  | 175  | 2.00E-92  | 99.4  | 93.2 | 95.5 | NDH dependent flow 6 protein           | gbpln | Arabidopsis thaliana | AT1G18730.1   Symbols: NDF6   NDH dependent flow 6   chr1:6460625-6462107 FORWARD LENGTH=175                                                  | 176  | 175  | 9.00E-95  | 99.4  | 93.2 | 95.5 |
| Rsa1.0_00015.1.g918.t1 | dbj BAD95408.1  hypothetical protein [Arabidopsis thaliana]                                                                                                                                                                                                                                                                                                       | 447  | 478  | 2.00E-83  | 106.9 | 33.1 | 45.9 | hypothetical protein                   | gbpln | Arabidopsis thaliana | AT3G24255.1   Symbols:   RNA-directed DNA polymerase (reverse transcriptase)-related family protein   chr3:8789471-8793208 FORWARD LENGTH=746 | 447  | 746  | 5.00E-70  | 166.9 | 27.7 | 38.7 |
| Rsa1.0_00015.1.g919.t1 | ref[XP_002890296.1] hypothetical protein ARALYDRAFT_335127 [Arabidopsis lyrata subsp. lyrata] gi 297336138 gb EFH66555.1  hypothetical protein ARALYDRAFT_335127 [Arabidopsis lyrata subsp. lyrata]                                                                                                                                                               | 266  | 258  | 1.00E-97  | 97.0  | 69.5 | 79.3 | hypothetical protein ARALYDRAFT_335127 | gbpln | Arabidopsis lyrata   | AT1G18710.1   Symbols: AtMYB47, MYB47   myb domain protein 47   chr1:6450781-6452986 FORWARD LENGTH=267                                       | 266  | 267  | 2.00E-70  | 100.4 | 54.1 | 68.8 |
| Rsa1.0_00015.1.g920.t1 | #                                                                                                                                                                                                                                                                                                                                                                 | #    | #    | #         | #     | #    | -    | ----                                   | ----  | ----                 | #                                                                                                                                             | #    | #    | #         | #     | #    | #    |
| Rsa1.0_00015.1.g921.t1 | #                                                                                                                                                                                                                                                                                                                                                                 | #    | #    | #         | #     | #    | -    | ----                                   | ----  | ----                 | #                                                                                                                                             | #    | #    | #         | #     | #    | #    |
| Rsa1.0_00015.1.g922.t1 | gb AAC02664.1  polyprotein [Arabidopsis thaliana]                                                                                                                                                                                                                                                                                                                 | 1370 | 1451 | 0         | 105.9 | 66.6 | 78.4 | polyprotein                            | gbpln | Arabidopsis thaliana | AT4G23160.1   Symbols: CRK8   cysteine-rich RLK (RECEPTOR-like protein kinase) 8   chr4:12129485-12134086 FORWARD LENGTH=1262                 | 1370 | 1262 | 1.00E-110 | 92.1  | 14.5 | 20.8 |

|                         |                                                                                                                                                                                                                                                                                                                                                                                                                                                                                                                                                                                                                                                                                                                                                                                                                                                                                           |     |     |           |       |      |      |                                                          |       |                      |                                                                                                                      |     |     |           |       |      |      |
|-------------------------|-------------------------------------------------------------------------------------------------------------------------------------------------------------------------------------------------------------------------------------------------------------------------------------------------------------------------------------------------------------------------------------------------------------------------------------------------------------------------------------------------------------------------------------------------------------------------------------------------------------------------------------------------------------------------------------------------------------------------------------------------------------------------------------------------------------------------------------------------------------------------------------------|-----|-----|-----------|-------|------|------|----------------------------------------------------------|-------|----------------------|----------------------------------------------------------------------------------------------------------------------|-----|-----|-----------|-------|------|------|
| Rsa1.0_00015.1.g923.t1  | ref[NP_173304.2] putative glycosyltransferase 4 [Arabidopsis thaliana]<br>gi 46576343 sp Q9M9U0.1 GT4_ARATH<br>RecName: Full=Putative glycosyltransferase 4; Short=AtGT4<br>gi 6730715 gb AAF27110.1 AC011809_19<br>Similar to galactosyltransferase [Arabidopsis thaliana]<br>gi 332191625 gb AEE29746.1  putative glycosyltransferase 4 [Arabidopsis thaliana]                                                                                                                                                                                                                                                                                                                                                                                                                                                                                                                          | 508 | 513 | 0         | 101.0 | 78.5 | 83.9 | putative glycosyltransferase 4                           | gbpln | Arabidopsis thaliana | AT1G18690.1   Symbols: Galactosyl transferase GMA12/MNN10 family protein   chr1:6435153-6436694 FORWARD LENGTH=513   | 508 | 513 | 0         | 101.0 | 78.5 | 83.9 |
| Rsa1.0_00015.1.g924.t4  | ref[XP_002890292.1] zinc finger family protein [Arabidopsis lyrata subsp. lyrata] gi 297336134 gb EFH66551.1  zinc finger family protein [Arabidopsis lyrata subsp. lyrata]<br>ref[NP_973858.1] phosphoserine phosphatase [Arabidopsis thaliana] gi 62900892 sp O82796.2 SERB_ARATH<br>RecName: Full=Phosphoserine phosphatase, chloroplastic; Short=PSP; Short=PSPase; AltName: Full=O-phosphoserine phosphohydrolase; Flags: Precursor<br>gi 9795592 gb AAF98410.1 AC026238.2<br>3-phosphoserine phosphatase [Arabidopsis thaliana]<br>gi 17529132 gb AAL38792.1  putative 3-phosphoserine phosphatase [Arabidopsis thaliana]<br>gi 20465705 gb AAM20321.1  putative 3-phosphoserine phosphatase [Arabidopsis thaliana]<br>gi 21592996 gb AM64935.1  3-phosphoserine phosphatase [Arabidopsis thaliana]<br>gi 332191617 gb AEE29738.1  phosphoserine phosphatase [Arabidopsis thaliana] | 555 | 476 | 0         | 85.8  | 78.9 | 81.3 | zinc finger family protein                               | gbpln | Arabidopsis lyrata   | AT1G18660.1   Symbols: zinc finger (C3HC4-type RING finger) family protein   chr1:6421433-6425565 FORWARD LENGTH=486 | 555 | 486 | 0         | 87.6  | 78.2 | 80.9 |
| Rsa1.0_00015.1.g925.t17 | ref[NP_173298.1] glycine-rich RNA-binding protein 6 [Arabidopsis thaliana] gi 75334552 sp Q9FZ84.1 RBG6_ARATH<br>RecName: Full=Glycine-rich RNA-binding protein 6, mitochondrial; Short=AtRBG6; Flags: Precursor<br>gi 9795594 gb AAF98412.1 AC026238.4<br>Similar to glycine-rich RNA-binding proteins [Arabidopsis thaliana] gi 29029110 gb AAO64934.1  At1g18630 [Arabidopsis thaliana]<br>gi 110743184 dbj BAE99483.1  hypothetical protein [Arabidopsis thaliana] gi 332191616 gb AEE29737.1  glycine-rich RNA-binding protein 6 [Arabidopsis thaliana]                                                                                                                                                                                                                                                                                                                              | 547 | 295 | 1.00E-149 | 53.9  | 49.7 | 51.4 | phosphoserine phosphatase                                | gbpln | Arabidopsis thaliana | AT1G18640.2   Symbols: PSP   3-phosphoserine phosphatase   chr1:6416524-6416245 REVERSE LENGTH=295                   | 547 | 295 | 1.00E-151 | 53.9  | 49.7 | 51.4 |
| Rsa1.0_00015.1.g926.t1  | ref[XP_002888967.1] leucine-rich repeat family protein [Arabidopsis lyrata subsp. lyrata] gi 297334808 gb EFH65226.1  leucine-rich repeat family protein [Arabidopsis lyrata subsp. lyrata]<br>ref[XP_002888967.1] leucine-rich repeat family protein [Arabidopsis lyrata subsp. lyrata] gi 297334808 gb EFH65226.1  leucine-rich repeat family protein [Arabidopsis lyrata subsp. lyrata]                                                                                                                                                                                                                                                                                                                                                                                                                                                                                                | 149 | 155 | 2.00E-47  | 104.0 | 61.1 | 71.1 | glycine-rich RNA-binding protein 6                       | gbpln | Arabidopsis thaliana | AT1G18630.1   Symbols: GR-RBP6   glycine-rich RNA-binding protein 6   chr1:6415226-6416283 FORWARD LENGTH=155        | 149 | 155 | 5.00E-50  | 104.0 | 61.1 | 71.1 |
| Rsa1.0_00015.1.g927.t3  | ref[XP_002888967.1] leucine-rich repeat family protein [Arabidopsis lyrata subsp. lyrata] gi 297334808 gb EFH65226.1  leucine-rich repeat family protein [Arabidopsis lyrata subsp. lyrata]                                                                                                                                                                                                                                                                                                                                                                                                                                                                                                                                                                                                                                                                                               | 945 | 966 | 0         | 102.2 | 63.9 | 78.1 | leucine-rich repeat family protein                       | gbpln | Arabidopsis lyrata   | AT1G74190.1   Symbols: AtRLP15, RLP15   receptor like protein 15   chr1:27902590-27906158 REVERSE LENGTH=965         | 945 | 966 | 0         | 102.1 | 62.4 | 77.7 |
| Rsa1.0_00015.1.g928.t2  | ref[XP_002888967.1] leucine-rich repeat family protein [Arabidopsis lyrata subsp. lyrata] gi 297334808 gb EFH65226.1  leucine-rich repeat family protein [Arabidopsis lyrata subsp. lyrata]                                                                                                                                                                                                                                                                                                                                                                                                                                                                                                                                                                                                                                                                                               | 932 | 966 | 0         | 103.6 | 63.1 | 76.5 | leucine-rich repeat family protein                       | gbpln | Arabidopsis lyrata   | AT1G74190.1   Symbols: AtRLP15, RLP15   receptor like protein 15   chr1:27902590-27906158 REVERSE LENGTH=965         | 932 | 966 | 0         | 103.5 | 61.6 | 76.6 |
| Rsa1.0_00015.1.g929.t1  | ref[NP_173296.3] galactose oxidase/kelch repeat domain-containing protein [Arabidopsis thaliana] gi 9795595 gb AAF98413.1 AC026238.5<br>Hypothetical protein [Arabidopsis thaliana] gi 332191613 gb AEE29734.1  galactose oxidase/kelch repeat domain-containing protein [Arabidopsis thaliana]                                                                                                                                                                                                                                                                                                                                                                                                                                                                                                                                                                                           | 509 | 556 | 0         | 109.2 | 84.7 | 91.6 | galactose oxidase/kelch repeat domain-containing protein | gbpln | Arabidopsis thaliana | AT1G18610.1   Symbols: Galactose oxidase/kelch repeat superfamily protein   chr1:6405779-6408831 FORWARD LENGTH=556  | 509 | 556 | 0         | 109.2 | 84.7 | 91.6 |

|                        |                                                                                                                                                                                                                                                                                                                                                                                                                                                                                                                                                                                                                                       |     |     |           |       |      |      |                                        |       |                      |                                                                                                              |     |     |           |       |      |      |
|------------------------|---------------------------------------------------------------------------------------------------------------------------------------------------------------------------------------------------------------------------------------------------------------------------------------------------------------------------------------------------------------------------------------------------------------------------------------------------------------------------------------------------------------------------------------------------------------------------------------------------------------------------------------|-----|-----|-----------|-------|------|------|----------------------------------------|-------|----------------------|--------------------------------------------------------------------------------------------------------------|-----|-----|-----------|-------|------|------|
| Rsa1.0_00015.1.g930.t1 | refNP_564058.1   RHOMBOLD-like protein 12 [Arabidopsis thaliana] gi 9795596 gb AAF98414.1 AC026238.6 Hypothetical protein [Arabidopsis thaliana] gi 13877607 gb AAK43881.1 AF370504.1 Unknown protein [Arabidopsis thaliana] gi 20148713 gb AAM10247.1  unknown protein [Arabidopsis thaliana] gi 21592397 gb AAM64348.1  unknown [Arabidopsis thaliana] gi 332191612 gb AEE29733.1  RHOMBOLD-like protein 12 [Arabidopsis thaliana]                                                                                                                                                                                                  | 347 | 336 | 1.00E-144 | 96.8  | 82.1 | 88.5 | RHOMBOLD-like protein 12               | gbpln | Arabidopsis thaliana | AT1G18600.1   Symbols: ATRBL12, RBL12   RHOMBOLD-like protein 12   chr1:6400647-6402587 FORWARD LENGTH=336   | 347 | 336 | 1.00E-147 | 96.8  | 82.1 | 88.5 |
| Rsa1.0_00015.1.g931.t1 | # # # # # # # - ----                                                                                                                                                                                                                                                                                                                                                                                                                                                                                                                                                                                                                  |     |     |           |       |      |      |                                        |       |                      | # # # # # # #                                                                                                |     |     |           |       |      |      |
| Rsa1.0_00015.1.g932.t1 | refXP_002862798.1   hypothetical protein ARALYDRAFT_497292 [Arabidopsis lyrata subsp. lyrata] gi 297308526 gb EFH39056.1  hypothetical protein ARALYDRAFT_497292 [Arabidopsis lyrata subsp. lyrata]                                                                                                                                                                                                                                                                                                                                                                                                                                   | 723 | 842 | 1.00E-179 | 116.5 | 55.5 | 67.6 | hypothetical protein ARALYDRAFT_497292 | gbpln | Arabidopsis lyrata   | AT1G71400.1   Symbols: AtRLP12, RLP12   receptor like protein 12   chr1:26909905-26912448 FORWARD LENGTH=847 | 723 | 847 | 1.00E-180 | 117.2 | 54.8 | 67.5 |
| Rsa1.0_00015.1.g933.t1 | refNP_188953.1   receptor like protein 38 [Arabidopsis thaliana] gi 9294202 db BAB02104.1  disease resistance protein [Arabidopsis thaliana] gi 332643199 gb AEE76720.1  receptor like protein 38 [Arabidopsis thaliana]                                                                                                                                                                                                                                                                                                                                                                                                              | 744 | 784 | 0         | 105.4 | 56.0 | 69.5 | receptor like protein 38               | gbpln | Arabidopsis thaliana | AT3G23120.1   Symbols: AtRLP38, RLP38   receptor like protein 38   chr3:8227222-8229576 REVERSE LENGTH=784   | 744 | 784 | 0         | 105.4 | 56.0 | 69.5 |
| Rsa1.0_00016.1.g934.t1 | refNP_196791.1   transcription factor MYB46 [Arabidopsis thaliana] gi 75335627 sp Q9LXV2.1 MYB46, ARATH RecName: Full=Transcription factor MYB46; AltName: Full=Myb-related protein 46; Short=AtMYB46 gi 7630043 emb CAB8825.1  putative transcription factor (MYB46) [Arabidopsis thaliana] gi 23306410 gb AAN17432.1  putative transcription factor (MYB46) [Arabidopsis thaliana] gi 27311887 gb AAO00909.1  putative transcription factor (MYB46) [Arabidopsis thaliana] gi 41619388 gb AAS10091.1  MYB transcription factor [Arabidopsis thaliana] gi 332004441 gb AED91824.1  transcription factor MYB46 [Arabidopsis thaliana] | 279 | 280 | 1.00E-126 | 100.4 | 84.9 | 90.7 | transcription factor MYB46             | gbpln | Arabidopsis thaliana | AT5G12870.1   Symbols: ATMYB46, MYB46   myb domain protein 46   chr5:4062939-4064939 REVERSE LENGTH=280      | 279 | 280 | 1.00E-128 | 100.4 | 84.9 | 90.7 |
| Rsa1.0_00016.1.g935.t1 | refNP_568283.2   dicarboxylate transporter 1 [Arabidopsis thaliana] gi 75180949 sp Q9LXV3.1 DIT1_ARATH RecName: Full=Dicarboxylate transporter 1, chloroplastic; AltName: Full=2-oxoglutarate/malate translocator 1; Short=AtpOMT1; Flags: Precursor gi 7630042 emb CAB8825.1  2-oxoglutarate/malate translocator precursor-like protein [Arabidopsis thaliana] gi 332004439 gb AED91822.1  dicarboxylate transporter 1 [Arabidopsis thaliana]                                                                                                                                                                                        | 596 | 557 | 0         | 93.5  | 86.9 | 99.1 | dicarboxylate transporter 1            | gbpln | Arabidopsis thaliana | AT5G12860.1   Symbols: DIT1   dicarboxylate transporter 1   chr5:4059927-4061919 REVERSE LENGTH=557          | 596 | 557 | 0         | 93.5  | 86.9 | 89.1 |

|                         |                                                                                                                                                                                                                                                                                                                                                                                                                                                                                                                                                                                                                                                                                                                                                                                                                                                                                                                                                                                                                                                                                                                                                              |      |      |           |       |      |      |                                                      |       |                      |                                                                                                                                 |      |      |           |       |      |      |
|-------------------------|--------------------------------------------------------------------------------------------------------------------------------------------------------------------------------------------------------------------------------------------------------------------------------------------------------------------------------------------------------------------------------------------------------------------------------------------------------------------------------------------------------------------------------------------------------------------------------------------------------------------------------------------------------------------------------------------------------------------------------------------------------------------------------------------------------------------------------------------------------------------------------------------------------------------------------------------------------------------------------------------------------------------------------------------------------------------------------------------------------------------------------------------------------------|------|------|-----------|-------|------|------|------------------------------------------------------|-------|----------------------|---------------------------------------------------------------------------------------------------------------------------------|------|------|-----------|-------|------|------|
| Rsa1.0_00016.1.g936.t1  | ref[NP_568282.1] nuclear transcription factor Y subunit A-1 [Arabidopsis thaliana] gi 42573353 ref[NP_974773.1] nuclear transcription factor Y subunit A-1 [Arabidopsis thaliana] gi 75180950 sp Q9LXV5.1 NFYA1_ARAT H RecName: Full=Nuclear transcription factor Y subunit A-1; Short=AtNF-YA-1; AltName: Full=Protein EMBRYO DEFECTIVE 2220; AltName: Full=Transcriptional activator HAP2A gi 7630040 emb CAB88248.1  CCAAT box binding factor/ transcription factor Hap2a [Arabidopsis thaliana] gi 107738403 gb ABF83691.1  At5g12840 [Arabidopsis thaliana] gi 332004434 gb AED91817.1  nuclear transcription factor Y subunit A-1 [Arabidopsis thaliana] gi 332004437 gb AED91820.1  nuclear transcription factor Y subunit A-1 [Arabidopsis thaliana] ref[XP_002873580.1] calmodulin-domain protein kinase 7 [Arabidopsis lyrata subsp. lyrata] gi 297319417 gb EFH49839.1  calmodulin-domain protein kinase 7 [Arabidopsis lyrata subsp. lyrata] ref[XP_002873579.1] hypothetical protein ARALYDRAFT_909228 [Arabidopsis lyrata subsp. lyrata] gi 297319416 gb EFH49838.1  hypothetical protein ARALYDRAFT_909228 [Arabidopsis lyrata subsp. lyrata] | 290  | 272  | 1.00E-116 | 93.8  | 76.6 | 82.1 | nuclear transcription factor Y subunit A-1           | gbpln | Arabidopsis thaliana | AT5G12840.3   Symbols: HAP2A, ATHAP2A, NF-YA1   nuclear factor Y, subunit A1   chr5:4051147-4052961 REVERSE LENGTH=272          | 290  | 272  | 1.00E-118 | 93.8  | 76.6 | 82.1 |
| Rsa1.0_00016.1.g937.t1  | ref[XP_002873580.1] calmodulin-domain protein kinase 7 [Arabidopsis lyrata subsp. lyrata] gi 297319417 gb EFH49839.1  calmodulin-domain protein kinase 7 [Arabidopsis lyrata subsp. lyrata] ref[XP_002873579.1] hypothetical protein ARALYDRAFT_909228 [Arabidopsis lyrata subsp. lyrata] gi 297319416 gb EFH49838.1  hypothetical protein ARALYDRAFT_909228 [Arabidopsis lyrata subsp. lyrata]                                                                                                                                                                                                                                                                                                                                                                                                                                                                                                                                                                                                                                                                                                                                                              | 531  | 535  | 0         | 100.8 | 94.4 | 97.0 | calmodulin-domain protein kinase 7                   | gbpln | Arabidopsis lyrata   | AT5G12480.1   Symbols: CPK7   calmodulin-domain protein kinase 7   chr5:4047817-4050035 REVERSE LENGTH=535                      | 531  | 535  | 0         | 100.8 | 94.0 | 96.8 |
| Rsa1.0_00016.1.g938.t1  | ref[XP_002873579.1] hypothetical protein ARALYDRAFT_909228 [Arabidopsis lyrata subsp. lyrata] gi 297319416 gb EFH49838.1  hypothetical protein ARALYDRAFT_909228 [Arabidopsis lyrata subsp. lyrata]                                                                                                                                                                                                                                                                                                                                                                                                                                                                                                                                                                                                                                                                                                                                                                                                                                                                                                                                                          | 380  | 385  | 1.00E-175 | 101.3 | 86.1 | 92.1 | hypothetical protein ARALYDRAFT_909228               | gbpln | Arabidopsis lyrata   | AT5G12470.1   Symbols:   Protein of unknown function (DUF3411)   chr5:4044950-4047290 REVERSE LENGTH=386                        | 380  | 386  | 1.00E-175 | 101.6 | 84.2 | 91.6 |
| Rsa1.0_00016.1.g939.t1  | gb EOA19606.1  hypothetical protein CARUB_v10002857mg [Capsella rubella]                                                                                                                                                                                                                                                                                                                                                                                                                                                                                                                                                                                                                                                                                                                                                                                                                                                                                                                                                                                                                                                                                     | 868  | 442  | 0         | 50.9  | 39.9 | 43.1 | hypothetical protein CARUB_v10002857mg               | gbpln | Capsella rubella     | AT5G12460.1   Symbols:   Protein of unknown function (DUF604)   chr5:4043057-4044583 FORWARD LENGTH=441                         | 868  | 441  | 0         | 50.8  | 38.4 | 41.9 |
| Rsa1.0_00016.1.g940.t5  | ref[XP_002314081.1] predicted protein [Populus trichocarpa] gi 222850489 gb EEE88036.1  predicted protein [Populus trichocarpa]                                                                                                                                                                                                                                                                                                                                                                                                                                                                                                                                                                                                                                                                                                                                                                                                                                                                                                                                                                                                                              | 926  | 418  | 1.00E-134 | 45.1  | 24.2 | 32.0 | predicted protein                                    | gbpln | Populus trichocarpa  | AT5G12460.1   Symbols:   Protein of unknown function (DUF604)   chr5:4043057-4044583 FORWARD LENGTH=441                         | 926  | 441  | 1.00E-116 | 47.6  | 21.9 | 30.3 |
| Rsa1.0_00016.1.g941.t1  | ref[XP_002314081.1] predicted protein [Populus trichocarpa] gi 222850489 gb EEE88036.1  predicted protein [Populus trichocarpa]                                                                                                                                                                                                                                                                                                                                                                                                                                                                                                                                                                                                                                                                                                                                                                                                                                                                                                                                                                                                                              | 467  | 418  | 1.00E-138 | 89.5  | 49.5 | 65.3 | predicted protein                                    | gbpln | Populus trichocarpa  | AT5G12460.1   Symbols:   Protein of unknown function (DUF604)   chr5:4043057-4044583 FORWARD LENGTH=441                         | 467  | 441  | 1.00E-119 | 94.4  | 43.3 | 60.8 |
| Rsa1.0_00016.1.g942.t1  | gb EOA21902.1  hypothetical protein CARUB_v10002383mg [Capsella rubella]                                                                                                                                                                                                                                                                                                                                                                                                                                                                                                                                                                                                                                                                                                                                                                                                                                                                                                                                                                                                                                                                                     | 74   | 74   | 1.00E-21  | 100.0 | 81.1 | 89.2 | hypothetical protein CARUB_v10002383mg               | gbpln | Capsella rubella     | #                                                                                                                               | #    | #    | #         | #     | #    |      |
| Rsa1.0_00016.1.g943.t1  | gb EOA20141.1  hypothetical protein CARUB_v10000430mg [Capsella rubella]                                                                                                                                                                                                                                                                                                                                                                                                                                                                                                                                                                                                                                                                                                                                                                                                                                                                                                                                                                                                                                                                                     | 639  | 645  | 0         | 100.9 | 72.0 | 80.3 | hypothetical protein CARUB_v10000430mg               | gbpln | Capsella rubella     | AT5G12440.3   Symbols:   CCH-type zinc fingerfamily protein with RNA-binding domain   chr5:4035891-4038604 REVERSE LENGTH=650   | 639  | 650  | 0         | 101.7 | 70.0 | 78.7 |
| Rsa1.0_00016.1.g944.t1  | ref[XP_002873572.1] DNAJ heat shock N-terminal domain-containing protein [Arabidopsis lyrata subsp. lyrata] gi 297319409 gb EFH49831.1  DNAJ heat shock N-terminal domain-containing protein [Arabidopsis lyrata subsp. lyrata]                                                                                                                                                                                                                                                                                                                                                                                                                                                                                                                                                                                                                                                                                                                                                                                                                                                                                                                              | 1157 | 1163 | 0         | 100.5 | 76.0 | 84.4 | DNAJ heat shock N-terminal domain-containing protein | gbpln | Arabidopsis lyrata   | AT5G12430.1   Symbols: TPR16   Heat shock protein DnaJ with tetratricopeptide repeat   chr5:4028475-4034086 REVERSE LENGTH=1165 | 1157 | 1165 | 0         | 100.7 | 75.0 | 83.7 |
| Rsa1.0_00016.1.g945.t1  | gb EOA19414.1  hypothetical protein CARUB_v10001152mg, partial [Capsella rubella]                                                                                                                                                                                                                                                                                                                                                                                                                                                                                                                                                                                                                                                                                                                                                                                                                                                                                                                                                                                                                                                                            | 363  | 387  | 1.00E-163 | 106.6 | 84.6 | 90.4 | hypothetical protein CARUB_v10001152mg, partial      | gbpln | Capsella rubella     | AT5G12410.1   Symbols:   THUMP domain-containing protein   chr5:4021974-4023950 REVERSE LENGTH=376                              | 363  | 376  | 1.00E-160 | 103.6 | 82.9 | 90.9 |
| Rsa1.0_00016.1.g946.t12 | ref[NP_568273.2] PHD-finger and DNA binding domain-containing protein [Arabidopsis thaliana] gi 332004422 gb AED91805.1  PHD-finger and DNA binding domain-containing protein [Arabidopsis thaliana]                                                                                                                                                                                                                                                                                                                                                                                                                                                                                                                                                                                                                                                                                                                                                                                                                                                                                                                                                         | 1191 | 1602 | 0         | 134.5 | 65.8 | 76.7 | PHD-finger and DNA binding domain-containing protein | gbpln | Arabidopsis thaliana | AT5G12400.1   Symbols:   DNA binding; zinc ion binding; DNA binding   chr5:4013813-4021018 FORWARD LENGTH=1602                  | 1191 | 1602 | 0         | 134.5 | 65.8 | 76.7 |
| Rsa1.0_00016.1.g947.t1  | gb AFO66516.1  putative 17.9 kDa class II heat shock protein [Brassica napus]                                                                                                                                                                                                                                                                                                                                                                                                                                                                                                                                                                                                                                                                                                                                                                                                                                                                                                                                                                                                                                                                                | 154  | 154  | 2.00E-71  | 100.0 | 94.2 | 98.7 | putative 17.9 kDa class II heat shock protein        | gbpln | Brassica napus       | AT5G12020.1   Symbols: HSP17.6II   17.6 kDa class II heat shock protein   chr5:3882409-3882876 REVERSE LENGTH=155               | 154  | 155  | 3.00E-69  | 100.6 | 90.3 | 95.5 |

|                        |                                                                                                                                                                                                                             |      |      |           |       |      |      |                                                                       |       |                      |                                                                                                                                                                                                                                                                                                                                                                                                                                                                                                                                              |      |     |           |       |      |      |
|------------------------|-----------------------------------------------------------------------------------------------------------------------------------------------------------------------------------------------------------------------------|------|------|-----------|-------|------|------|-----------------------------------------------------------------------|-------|----------------------|----------------------------------------------------------------------------------------------------------------------------------------------------------------------------------------------------------------------------------------------------------------------------------------------------------------------------------------------------------------------------------------------------------------------------------------------------------------------------------------------------------------------------------------------|------|-----|-----------|-------|------|------|
| Rsa1.0_00016.1.g948.t1 | gb AFO66517.1  putative kinase [Brassica napus]                                                                                                                                                                             | 503  | 1266 | 0         | 251.7 | 89.5 | 92.4 | putative kinase                                                       | gbpln | Brassica napus       | AT5G12010.1   Symbols:   unknown protein; INVOLVED IN: response to salt stress; LOCATED IN: chloroplast, plasma membrane, membrane; EXPRESSED IN: 23 plant structures; EXPRESSED DURING: 13 growth stages; BEST Arabidopsis thaliana protein match is: unknown protein (TAIR:AT4G29780.1); Has 1807 Blast hits to 1807 proteins in 277 species: Archae - 0; Bacteria - 0; Metazoa - 736; Fungi - 347; Plants - 385; Viruses - 0; Other Eukaryotes - 339 (source: NCBI BLINK).   chr5:3877975-3879483 REVERSE LENGTH=502                      | 503  | 502 | 0         | 99.8  | 83.7 | 89.5 |
| Rsa1.0_00016.1.g949.t1 | gb AFO66517.1  putative kinase [Brassica napus]                                                                                                                                                                             | 698  | 1266 | 0         | 181.4 | 93.6 | 96.3 | putative kinase                                                       | gbpln | Brassica napus       | AT5G12000.1   Symbols:   Protein kinase protein with adenine nucleotide alpha hydrolases-like domain   chr5:3874151-3876780 REVERSE LENGTH=701                                                                                                                                                                                                                                                                                                                                                                                               | 698  | 701 | 0         | 100.4 | 83.8 | 90.4 |
| Rsa1.0_00016.1.g950.t1 | ref NP_196760.1  proline-rich family protein [Arabidopsis thaliana]<br>gi 7573366 emb CAB87672.1  putative protein [Arabidopsis thaliana]<br>gi 332004365 gb AED91748.1  proline-rich family protein [Arabidopsis thaliana] | 249  | 181  | 2.00E-26  | 72.7  | 52.2 | 57.4 | proline-rich family protein                                           | gbpln | Arabidopsis thaliana | AT5G11990.1   Symbols:   proline-rich family protein   chr5:3872651-3873196 REVERSE LENGTH=181                                                                                                                                                                                                                                                                                                                                                                                                                                               | 249  | 181 | 5.00E-29  | 72.7  | 52.2 | 57.4 |
| Rsa1.0_00016.1.g951.t1 | gb AFO66519.1  putative ABC superfamily ATP binding cassette transporter [Brassica napus]                                                                                                                                   | 103  | 356  | 8.00E-41  | 345.6 | 83.5 | 88.3 | putative ABC superfamily ATP binding cassette transporter             | gbpln | Brassica napus       | AT5G11970.1   Symbols:   Protein of unknown function (DUF3511)   chr5:3863289-3863606 REVERSE LENGTH=105                                                                                                                                                                                                                                                                                                                                                                                                                                     | 103  | 105 | 1.00E-41  | 101.9 | 86.4 | 90.3 |
| Rsa1.0_00016.1.g952.t1 | gb EOA20897.1  hypothetical protein CARUB_v10001232mg, partial [Capsella rubella]                                                                                                                                           | 384  | 364  | 1.00E-141 | 94.8  | 67.4 | 68.2 | hypothetical protein CARUB_v10001232mg, partial                       | gbpln | Capsella rubella     | AT5G11960.1   Symbols:   Protein of unknown function (DUF803)   chr5:3858852-3861462 REVERSE LENGTH=344                                                                                                                                                                                                                                                                                                                                                                                                                                      | 384  | 344 | 1.00E-141 | 89.6  | 66.1 | 67.2 |
| Rsa1.0_00016.1.g953.t1 | gb AFO66505.1  putative homodimerization protein [Brassica napus]                                                                                                                                                           | 218  | 216  | 1.00E-119 | 99.1  | 95.4 | 97.2 | putative homodimerization protein                                     | gbpln | Brassica napus       | AT5G11950.2   Symbols:   Putative lysine decarboxylase family protein   chr5:38355072-3856815 FORWARD LENGTH=216                                                                                                                                                                                                                                                                                                                                                                                                                             | 218  | 216 | 1.00E-117 | 99.1  | 92.2 | 96.3 |
| Rsa1.0_00016.1.g954.t1 | #                                                                                                                                                                                                                           | #    | #    | #         | #     | #    | #    | -                                                                     | ----  | ----                 | #                                                                                                                                                                                                                                                                                                                                                                                                                                                                                                                                            | #    | #   | #         | #     | #    |      |
| Rsa1.0_00016.1.g955.t1 | gb EOA22071.1  hypothetical protein CARUB_v10002611mg [Capsella rubella]                                                                                                                                                    | 137  | 147  | 2.00E-46  | 107.3 | 82.5 | 89.8 | hypothetical protein CARUB_v10002611mg                                | gbpln | Capsella rubella     | AT5G11930.1   Symbols:   Thioredoxin superfamily protein   chr5:3845165-3845611 REVERSE LENGTH=148                                                                                                                                                                                                                                                                                                                                                                                                                                           | 137  | 148 | 3.00E-48  | 108.0 | 81.0 | 87.6 |
| Rsa1.0_00016.1.g956.t1 | gb AFO66503.1  putative fructan 1-exohydrolase [Brassica napus]                                                                                                                                                             | 515  | 524  | 0         | 101.7 | 93.2 | 95.9 | putative fructan 1-exohydrolase                                       | gbpln | Brassica napus       | AT5G11920.1   Symbols:   AtcwINV6, cwINV6   6-&1-fructan exohydrolase   chr5:3839490-3842206 FORWARD LENGTH=550                                                                                                                                                                                                                                                                                                                                                                                                                              | 515  | 550 | 0         | 106.8 | 77.5 | 88.2 |
| Rsa1.0_00016.1.g957.t1 | ref XP_002873537.1  esterase/lipase/thioesterase family protein [Arabidopsis lyrata subsp. lyrata] gi 29719974 gb EFH49796.1  esterase/lipase/thioesterase family protein [Arabidopsis lyrata subsp. lyrata]                | 297  | 297  | 1.00E-150 | 100.0 | 87.9 | 92.9 | esterase/lipase/thioesterase family protein                           | gbpln | Arabidopsis lyrata   | AT5G11910.1   Symbols:   alpha/beta-Hydrolases superfamily protein   chr5:3836560-3838182 REVERSE LENGTH=297                                                                                                                                                                                                                                                                                                                                                                                                                                 | 297  | 297 | 2.33E-156 | 100.0 | 84.2 | 91.2 |
| Rsa1.0_00016.1.g958.t1 | gb AFO66502.1  putative eukaryotic translation initiation factor SUI1 family protein [Brassica napus]                                                                                                                       | 200  | 198  | 1.00E-105 | 99.0  | 97.0 | 98.0 | putative eukaryotic translation initiation factor SUI1 family protein | gbpln | Brassica napus       | AT5G11900.1   Symbols:   Translation initiation factor SUI1 family protein   chr5:3834154-3836023 FORWARD LENGTH=198                                                                                                                                                                                                                                                                                                                                                                                                                         | 200  | 198 | 1.00E-106 | 99.0  | 95.0 | 97.5 |
| Rsa1.0_00016.1.g959.t1 | gb AFO66501.1  putative harpin-induced 1 [Brassica napus]                                                                                                                                                                   | 290  | 284  | 1.00E-121 | 97.9  | 89.0 | 92.4 | putative harpin-induced 1                                             | gbpln | Brassica napus       | AT5G11890.1   Symbols:   FUNCTIONS IN: molecular function unknown; LOCATED IN: plasma membrane; EXPRESSED IN: 12 plant structures; EXPRESSED DURING: 6 growth stages; BEST Arabidopsis thaliana protein match is: Late embryogenesis abundant (LEA) hydroxyproline-rich glycoprotein family (TAIR:AT1G17620.1); Has 1807 Blast hits to 1807 proteins in 277 species: Archae - 0; Bacteria - 0; Metazoa - 736; Fungi - 347; Plants - 385; Viruses - 0; Other Eukaryotes - 339 (source: NCBI BLINK).   chr5:3831770-3832633 FORWARD LENGTH=287 | 290  | 287 | 1.00E-111 | 99.0  | 79.7 | 87.6 |
| Rsa1.0_00016.1.g960.t2 | gb AFO66500.1  putative cf-9 protein precursor [Brassica napus]                                                                                                                                                             | 1114 | 919  | 0         | 82.5  | 46.7 | 49.4 | putative cf-9 protein precursor                                       | gbpln | Brassica napus       | AT3G05650.1   Symbols:   AtRLP32, RLP32   receptor like protein 32   chr3:1645884-1648490 REVERSE LENGTH=868                                                                                                                                                                                                                                                                                                                                                                                                                                 | 1114 | 868 | 0         | 77.9  | 38.1 | 44.0 |
| Rsa1.0_00016.1.g961.t1 | gb AFO66534.1  putative diaminopimelate decarboxylase [Brassica napus]                                                                                                                                                      | 485  | 485  | 0         | 100.0 | 96.3 | 98.1 | putative diaminopimelate decarboxylase                                | gbpln | Brassica napus       | AT5G11880.1   Symbols:   Pyridoxal-dependent decarboxylase family protein   chr5:3827806-3829942 REVERSE LENGTH=489                                                                                                                                                                                                                                                                                                                                                                                                                          | 485  | 489 | 0         | 100.8 | 92.2 | 95.9 |
| Rsa1.0_00016.1.g962.t2 | gb AFO66499.1  putative membrane protein [Brassica napus]                                                                                                                                                                   | 192  | 202  | 6.00E-88  | 105.2 | 85.4 | 89.1 | putative membrane protein                                             | gbpln | Brassica napus       | AT5G11870.1   Symbols:   Alkaline phytyceramidase (aPHC)   chr5:3825720-3827241 FORWARD LENGTH=262                                                                                                                                                                                                                                                                                                                                                                                                                                           | 192  | 262 | 6.00E-83  | 136.5 | 78.1 | 85.4 |

|                        |                                                                                                                                                                                                                            |      |      |           |       |      |      |                                                  |       |                      |                                                                                                                                                                                                                                                                                                                                                                                                                                                                                                                              |      |      |           |       |      |      |
|------------------------|----------------------------------------------------------------------------------------------------------------------------------------------------------------------------------------------------------------------------|------|------|-----------|-------|------|------|--------------------------------------------------|-------|----------------------|------------------------------------------------------------------------------------------------------------------------------------------------------------------------------------------------------------------------------------------------------------------------------------------------------------------------------------------------------------------------------------------------------------------------------------------------------------------------------------------------------------------------------|------|------|-----------|-------|------|------|
| Rsa1.0_00016.1.g963.t2 | gb AFO66533.1  putative NLI interacting factor family protein [Brassica napus]                                                                                                                                             | 326  | 477  | 1.00E-144 | 146.3 | 85.0 | 89.3 | putative NLI interacting factor family protein   | gbpln | Brassica napus       | AT5G11860.4   Symbols:   SCP1-like small phosphatase 5   chr5:3822024-3823395 REVERSE LENGTH=305                                                                                                                                                                                                                                                                                                                                                                                                                             | 326  | 305  | 1.00E-144 | 93.6  | 83.4 | 88.3 |
| Rsa1.0_00016.1.g964.t1 | gb AFO66525.1  putative Myo28B1 [Brassica napus]                                                                                                                                                                           | 305  | 303  | 1.00E-156 | 99.3  | 89.8 | 95.7 | putative Myo28B1                                 | gbpln | Brassica napus       | AT5G11810.1   Symbols:   unknown protein; Has 1807 Blast hits to 1807 proteins in 277 species: Archae - 0; Bacteria - 0; Metazoa - 736; Fungi - 347; Plants - 385; Viruses - 0; Other Eukaryotes - 339 (source: NCBI BLink).   chr5:3808739-3810440 FORWARD LENGTH=306                                                                                                                                                                                                                                                       | 305  | 306  | 1.00E-144 | 100.3 | 82.6 | 91.5 |
| Rsa1.0_00016.1.g965.t1 | gb AFO66532.1  putative potassium ion transmembrane transporter [Brassica napus]                                                                                                                                           | 840  | 580  | 0         | 69.0  | 66.1 | 66.3 | putative potassium ion transmembrane transporter | gbpln | Brassica napus       | AT5G11800.1   Symbols: KEA6, ATKEA6   K+ efflux antiporter 6   chr5:3803635-3808069 REVERSE LENGTH=597                                                                                                                                                                                                                                                                                                                                                                                                                       | 840  | 597  | 0         | 71.1  | 62.4 | 64.9 |
| Rsa1.0_00016.1.g966.t1 | gb AFO66497.1  putative SNF2 domain-containing protein [Brassica napus]                                                                                                                                                    | 523  | 490  | 0         | 93.7  | 79.5 | 83.6 | putative SNF2 domain-containing protein          | gbpln | Brassica napus       | AT5G11780.1   Symbols:   unknown protein; Has 37 Blast hits to 37 proteins in 12 species: Archae - 0; Bacteria - 0; Metazoa - 0; Fungi - 3; Plants - 34; Viruses - 0; Other Eukaryotes - 0 (source: NCBI BLink).   chr5:3793928-3795983 FORWARD LENGTH=504                                                                                                                                                                                                                                                                   | 523  | 504  | 0         | 96.4  | 67.9 | 77.4 |
| Rsa1.0_00016.1.g967.t1 | sp P42027.1 NDUS7_BRAOL RecName: Full=NADH dehydrogenase [ubiquinone] iron-sulfur protein 7, mitochondrial; Flags: Precursor gi 562282 emb CAA57725.1  PSST subunit of NADH: ubiquinone oxidoreductase [Brassica oleracea] | 217  | 215  | 1.00E-121 | 99.1  | 97.7 | 98.6 | RecName: Full=NADH dehydrogenase                 | gbpln | Brassica oleracea    | AT5G11770.1   Symbols:   NADH-ubiquinone oxidoreductase 20 kDa subunit, mitochondrial   chr5:3791148-3792929 REVERSE LENGTH=218                                                                                                                                                                                                                                                                                                                                                                                              | 217  | 218  | 1.00E-112 | 100.5 | 94.9 | 96.8 |
| Rsa1.0_00016.1.g968.t1 | gb AFO66495.1  hypothetical protein [Brassica napus]                                                                                                                                                                       | 64   | 59   | 2.00E-19  | 92.2  | 92.2 | 92.2 | hypothetical protein                             | gbpln | Brassica napus       | AT5G11740.1   Symbols: AGP15, ATAGP15   arabinogalactan protein 15   chr5:3784318-3784503 FORWARD LENGTH=61                                                                                                                                                                                                                                                                                                                                                                                                                  | 64   | 61   | 1.00E-10  | 95.3  | 79.7 | 85.9 |
| Rsa1.0_00016.1.g969.t1 | gb AFO66494.1  hypothetical protein [Brassica napus]                                                                                                                                                                       | 451  | 386  | 0         | 85.6  | 80.7 | 84.0 | hypothetical protein                             | gbpln | Brassica napus       | AT5G11730.1   Symbols:   Core-2/l-branching beta-1,6-N-acetylglucosaminyltransferase family protein   chr5:3780963-3782473 FORWARD LENGTH=386                                                                                                                                                                                                                                                                                                                                                                                | 451  | 386  | 0         | 85.6  | 76.1 | 81.8 |
| Rsa1.0_00016.1.g970.t1 | ref NP_001154709.2  uncharacterized protein [Arabidopsis thaliana] gi 332004329 gb AED91712.1  uncharacterized protein AT5G11700 [Arabidopsis thaliana]                                                                    | 1429 | 1476 | 0         | 103.3 | 93.0 | 95.9 | uncharacterized protein                          | gbpln | Arabidopsis thaliana | AT5G11700.2   Symbols:   BEST Arabidopsis thaliana protein match is: glycine-rich protein (TAIR:AT4G32920.3); Has 8203 Blast hits to 3102 proteins in 389 species: Archae - 3; Bacteria - 6624; Metazoa - 852; Fungi - 139; Plants - 704; Viruses - 77; Other Eukaryotes - 804 (source: NCBI BLink).   chr5:3762961-3771123 REVERSE LENGTH=1476                                                                                                                                                                              | 1429 | 1476 | 0         | 103.3 | 93.0 | 95.9 |
| Rsa1.0_00016.1.g971.t1 | gb EOA19413.1  hypothetical protein CARUB_v10001131mg [Capsella rubella]                                                                                                                                                   | 394  | 396  | 0         | 100.5 | 90.4 | 93.1 | hypothetical protein CARUB_v10001131mg           | gbpln | Capsella rubella     | AT5G11650.1   Symbols:   alpha/beta-Hydrolases superfamily protein   chr5:3745069-3746816 FORWARD LENGTH=390                                                                                                                                                                                                                                                                                                                                                                                                                 | 394  | 390  | 0         | 99.0  | 88.6 | 92.1 |
| Rsa1.0_00016.1.g972.t1 | ref NP_196724.3  uncharacterized protein [Arabidopsis thaliana] gi 7573377 emb CAB87681.1  putative protein [Arabidopsis thaliana] gi 332004320 gb AED91703.1  uncharacterized protein AT5G11630 [Arabidopsis thaliana]    | 93   | 93   | 7.00E-39  | 100.0 | 89.2 | 95.7 | uncharacterized protein                          | gbpln | Arabidopsis thaliana | AT5G11630.1   Symbols:   unknown protein; FUNCTIONS IN: molecular_function unknown; INVOLVED IN: biological_process unknown; LOCATED IN: chloroplast; EXPRESSED IN: 22 plant structures; EXPRESSED DURING: 13 growth stages; BEST Arabidopsis thaliana protein match is: unknown protein (TAIR:AT4G17310.1); Has 90 Blast hits to 90 proteins in 10 species: Archae - 0; Bacteria - 0; Metazoa - 0; Fungi - 0; Plants - 90; Viruses - 0; Other Eukaryotes - 0 (source: NCBI BLink).   chr5:3740545-3740909 FORWARD LENGTH=93 | 93   | 93   | 1.00E-41  | 100.0 | 89.2 | 95.7 |
| Rsa1.0_00016.1.g973.t1 | ref XP_002873525.1  hypothetical protein ARALYDRAFT_350357 [Arabidopsis lyrata subsp. lyrata] gi 297319362 gb EFH49784.1  hypothetical protein ARALYDRAFT_350357 [Arabidopsis lyrata subsp. lyrata]                        | 277  | 272  | 1.00E-112 | 98.2  | 76.2 | 84.5 | hypothetical protein ARALYDRAFT_350357           | gbpln | Arabidopsis lyrata   | AT5G11620.1   Symbols:   SWIM zinc finger family protein / mitogen-activated protein kinase kinase kinase (MAPKKK)-related   chr5:3739076-3740127 REVERSE LENGTH=273                                                                                                                                                                                                                                                                                                                                                         | 277  | 273  | 1.00E-112 | 98.6  | 75.5 | 84.1 |
| Rsa1.0_00016.1.g974.t1 | ref XP_002873524.1  exostosin family protein [Arabidopsis lyrata subsp. lyrata] gi 297319361 gb EFH49783.1  exostosin family protein [Arabidopsis lyrata subsp. lyrata]                                                    | 523  | 546  | 0         | 104.4 | 82.0 | 90.8 | exostosin family protein                         | gbpln | Arabidopsis lyrata   | AT5G11610.1   Symbols:   Exostosin family protein   chr5:3735569-3737952 REVERSE LENGTH=546                                                                                                                                                                                                                                                                                                                                                                                                                                  | 523  | 546  | 0         | 104.4 | 80.5 | 88.9 |
| Rsa1.0_00016.1.g975.t1 | #                                                                                                                                                                                                                          | #    | #    | #         | #     | #    | #    | -                                                | ----  | ----                 | #                                                                                                                                                                                                                                                                                                                                                                                                                                                                                                                            | #    | #    | #         | #     | #    |      |



|                        |                                                                                                                                                                                                                           |      |      |           |       |      |      |                                        |       |                      |                                                                                                                                              |      |      |           |       |      |      |
|------------------------|---------------------------------------------------------------------------------------------------------------------------------------------------------------------------------------------------------------------------|------|------|-----------|-------|------|------|----------------------------------------|-------|----------------------|----------------------------------------------------------------------------------------------------------------------------------------------|------|------|-----------|-------|------|------|
| Rsa1.0_00016.1.g976.t1 | ref[XP_002873522.1] hypothetical protein ARALYDRAFT_487996 [Arabidopsis lyrata subsp. lyrata] gi 297319359 gb EFH49781.1                                                                                                  | 234  | 236  | 5.00E-96  | 100.9 | 79.9 | 88.5 | hypothetical protein ARALYDRAFT_487996 | gbpln | Arabidopsis lyrata   | AT5G11590.1   Symbols: TINY2   Integrase-type DNA-binding superfamily protein   chr5:3727789-3728499 REVERSE LENGTH=236                      | 234  | 236  | 1.00E-94  | 100.9 | 79.5 | 88.5 |
| Rsa1.0_00016.1.g977.t1 | ref[NP_196717.3] PQQ DH domain-containing protein [Arabidopsis thaliana] gi 332004312 gb AED91695.1  PQQ DH domain-containing protein [Arabidopsis thaliana]                                                              | 1549 | 982  | 0         | 63.4  | 57.4 | 60.4 | PQQ DH domain-containing protein       | gbpln | Arabidopsis thaliana | AT5G11560.1   Symbols:   catalytics   chr5:3709734-3713994 REVERSE LENGTH=982                                                                | 1549 | 982  | 0         | 63.4  | 57.4 | 60.4 |
| Rsa1.0_00016.1.g978.t1 | ref[XP_002873518.1] FAD-binding domain-containing protein [Arabidopsis lyrata subsp. lyrata] gi 297319355 gb EFH49777.1  FAD-binding domain-containing protein [Arabidopsis lyrata subsp. lyrata]                         | 541  | 584  | 0         | 107.9 | 84.7 | 91.9 | FAD-binding domain-containing protein  | gbpln | Arabidopsis lyrata   | AT5G11540.1   Symbols:   D-arabinono-1,4-lactone oxidase family protein   chr5:3703002-3704981 REVERSE LENGTH=585                            | 541  | 585  | 0         | 108.1 | 83.5 | 91.9 |
| Rsa1.0_00016.1.g979.t1 | gb[EOA19844.1] hypothetical protein CARUB_v10000092mg [Capsella rubella]                                                                                                                                                  | 1052 | 1094 | 2.00E-34  | 104.0 | 12.5 | 16.1 | hypothetical protein CARUB_v10000092mg | gbpln | Capsella rubella     | AT5G11530.1   Symbols: EMF1   embryonic flower 1 (EMF1)   chr5:3697140-3700930 FORWARD LENGTH=1096                                           | 1052 | 1096 | 3.00E-33  | 104.2 | 12.5 | 16.7 |
| Rsa1.0_00016.1.g980.t1 | ref[XP_002871478.1] hypothetical protein ARALYDRAFT_487987 [Arabidopsis lyrata subsp. lyrata] gi 297317315 gb EFH47737.1                                                                                                  | 1127 | 960  | 0         | 85.2  | 63.9 | 71.1 | hypothetical protein ARALYDRAFT_487987 | gbpln | Arabidopsis lyrata   | AT5G11510.1   Symbols: MYB3R-4, ATMYB3R4   myb domain protein 3r-4   chr5:3680452-3684684 FORWARD LENGTH=961                                 | 1127 | 961  | 0         | 85.3  | 63.0 | 70.0 |
| Rsa1.0_00016.1.g981.t1 | gb[EOA21135.1] hypothetical protein CARUB_v10001479mg [Capsella rubella]                                                                                                                                                  | 310  | 318  | 1.00E-148 | 102.6 | 90.3 | 94.5 | hypothetical protein CARUB_v10001479mg | gbpln | Capsella rubella     | AT5G11480.1   Symbols:   P-loop containing nucleoside triphosphate hydrolases superfamily protein   chr5:3669350-3671471 REVERSE LENGTH=318  | 310  | 318  | 1.00E-144 | 102.6 | 87.1 | 92.3 |
| Rsa1.0_00016.1.g982.t1 | ref[XP_002873515.1] hypothetical protein ARALYDRAFT_487983 [Arabidopsis lyrata subsp. lyrata] gi 297319352 gb EFH49774.1                                                                                                  | 655  | 695  | 0         | 106.1 | 63.2 | 75.0 | hypothetical protein ARALYDRAFT_487983 | gbpln | Arabidopsis lyrata   | AT5G11470.1   Symbols:   bromo-adjacent homology (BAH) domain-containing protein   chr5:3662757-3667041 REVERSE LENGTH=757                   | 655  | 757  | 0         | 115.6 | 64.4 | 77.1 |
| Rsa1.0_00016.1.g983.t1 | #                                                                                                                                                                                                                         | #    | #    | #         | #     | #    | -    | ----                                   | ----  | #                    | #                                                                                                                                            | #    | #    | #         | #     | #    |      |
| Rsa1.0_00016.1.g984.t1 | #                                                                                                                                                                                                                         | #    | #    | #         | #     | #    | -    | ----                                   | ----  | #                    | #                                                                                                                                            | #    | #    | #         | #     | #    |      |
| Rsa1.0_00016.1.g985.t1 | gb[EOA21007.1] hypothetical protein CARUB_v10001342mg [Capsella rubella]                                                                                                                                                  | 275  | 343  | 2.00E-82  | 124.7 | 65.1 | 77.8 | hypothetical protein CARUB_v10001342mg | gbpln | Capsella rubella     | AT5G11460.1   Symbols:   Protein of unknown function (DUF581)   chr5:3657064-3658388 REVERSE LENGTH=344                                      | 275  | 344  | 2.00E-70  | 125.1 | 65.8 | 76.4 |
| Rsa1.0_00016.1.g986.t2 | ref[XP_002871475.1] hypothetical protein ARALYDRAFT_487981 [Arabidopsis lyrata subsp. lyrata] gi 297317312 gb EFH47734.1                                                                                                  | 306  | 297  | 1.00E-122 | 97.1  | 78.8 | 84.3 | hypothetical protein ARALYDRAFT_487981 | gbpln | Arabidopsis lyrata   | AT5G11450.1   Symbols:   Mog1/PsbP/DUF1795-like photosystem II reaction center PsbP family protein   chr5:3654475-3656357 FORWARD LENGTH=297 | 306  | 297  | 1.00E-124 | 97.1  | 78.8 | 84.0 |
| Rsa1.0_00016.1.g987.t1 | ref[XP_002873513.1] CID5/IPD1 [Arabidopsis lyrata subsp. lyrata] gi 297319350 gb EFH49772.1                                                                                                                               | 164  | 165  | 2.00E-53  | 100.6 | 73.2 | 82.3 | CID5/IPD1                              | gbpln | Arabidopsis lyrata   | AT5G11440.1   Symbols: CID5, IPD1   CTC-interacting domain 5   chr5:3653060-3653607 REVERSE LENGTH=155                                       | 164  | 155  | 1.00E-54  | 94.5  | 72.6 | 81.7 |
| Rsa1.0_00016.1.g988.t1 | gb[EOA19945.1] hypothetical protein CARUB_v10000195mg [Capsella rubella]                                                                                                                                                  | 901  | 869  | 0         | 96.4  | 74.6 | 82.6 | hypothetical protein CARUB_v10000195mg | gbpln | Capsella rubella     | AT5G11430.1   Symbols:   SPOC domain / Transcription elongation factor S-II protein   chr5:3648469-3652256 FORWARD LENGTH=873                | 901  | 873  | 0         | 96.9  | 73.6 | 83.1 |
| Rsa1.0_00016.1.g989.t1 | ref[XP_002871473.1] hypothetical protein ARALYDRAFT_487977 [Arabidopsis lyrata subsp. lyrata] gi 297317310 gb EFH47732.1                                                                                                  | 340  | 366  | 0         | 107.6 | 92.1 | 98.2 | hypothetical protein ARALYDRAFT_487977 | gbpln | Arabidopsis lyrata   | AT5G11420.1   Symbols:   Protein of unknown function, DUF642   chr5:3644655-3646991 FORWARD LENGTH=366                                       | 340  | 366  | 0         | 107.6 | 91.5 | 97.9 |
| Rsa1.0_00016.1.g990.t1 | ref[NP_196702.1] protein kinase family protein [Arabidopsis thaliana] gi 8953403 emb CAB96676.1  putative protein [Arabidopsis thaliana] gi 332004291 gb AED91674.1  protein kinase family protein [Arabidopsis thaliana] | 609  | 336  | 2.00E-81  | 55.2  | 28.4 | 35.5 | protein kinase family protein          | gbpln | Arabidopsis thaliana | AT5G11410.1   Symbols:   Protein kinase superfamily protein   chr5:3638431-3639883 REVERSE LENGTH=336                                        | 609  | 336  | 6.00E-84  | 55.2  | 28.4 | 35.5 |
| Rsa1.0_00016.1.g991.t1 | gb[EOA20067.1] hypothetical protein CARUB_v10000340mg [Capsella rubella]                                                                                                                                                  | 694  | 709  | 0         | 102.2 | 80.3 | 89.0 | hypothetical protein CARUB_v10000340mg | gbpln | Capsella rubella     | AT5G11390.1   Symbols: WIT1   WPP domain-interacting protein 1   chr5:3633971-3636418 FORWARD LENGTH=703                                     | 694  | 703  | 0         | 101.3 | 80.0 | 88.6 |

|                         |                                                                                                                                                                                                                    |      |      |           |       |      |      |                                            |       |                      |                                                                                                                                                                                                                                                                                                                                                                   |      |      |           |       |      |      |
|-------------------------|--------------------------------------------------------------------------------------------------------------------------------------------------------------------------------------------------------------------|------|------|-----------|-------|------|------|--------------------------------------------|-------|----------------------|-------------------------------------------------------------------------------------------------------------------------------------------------------------------------------------------------------------------------------------------------------------------------------------------------------------------------------------------------------------------|------|------|-----------|-------|------|------|
| Rsa1.0_00016.1.g992.t2  | refNP_196699.1   1--deoxy-D-xylulose 5-phosphate synthase 3 [Arabidopsis thaliana] gi8953400[emb CAB9673.1] 1--D-deoxyxylulose 5-phosphate synthase-like protein [Arabidopsis thaliana] gi332004286[gb AED91669.1] | 1465 | 700  | 0         | 47.8  | 42.4 | 44.6 | 1--deoxy-D-xylulose 5-phosphate synthase 3 | gbpln | Arabidopsis thaliana | AT5G11380.1   Symbols: DXPS3   1--deoxy-D-xylulose 5-phosphate synthase 3   chr5:3630172-36233250 FORWARD LENGTH=700                                                                                                                                                                                                                                              | 1465 | 700  | 0         | 47.8  | 42.4 | 44.6 |
| Rsa1.0_00016.1.g993.t1  | refXP_002871470.1   hypothetical protein ARALYDRAFT_909096 [Arabidopsis lyrata subsp. lyrata] gi297317307[gb EFH47729.1]                                                                                           | 164  | 164  | 6.00E-89  | 100.0 | 95.7 | 99.4 | hypothetical protein ARALYDRAFT_909096     | gbpln | Arabidopsis lyrata   | AT5G11340.1   Symbols:   Acyl-CoA N-acyltransferases (NAT) superfamily protein   chr5:3619226-3621068 FORWARD LENGTH=164                                                                                                                                                                                                                                          | 164  | 164  | 4.00E-88  | 100.0 | 92.1 | 97.6 |
| Rsa1.0_00016.1.g994.t1  | gb EOA20763.1   hypothetical protein CARUB_v10001092mg [Capsella rubella]                                                                                                                                          | 406  | 408  | 0         | 100.5 | 84.7 | 91.4 | hypothetical protein CARUB_v10001092mg     | gbpln | Capsella rubella     | AT5G11330.1   Symbols:   FAD/NAD(P)-binding oxidoreductase family protein   chr5:3617342-3618861 REVERSE LENGTH=408                                                                                                                                                                                                                                               | 406  | 408  | 0         | 100.5 | 85.0 | 91.1 |
| Rsa1.0_00016.1.g995.t1  | gb EOA19559.1   hypothetical protein CARUB_v10002580mg [Capsella rubella]                                                                                                                                          | 412  | 412  | 0         | 100.0 | 84.5 | 88.8 | hypothetical protein CARUB_v10002580mg     | gbpln | Capsella rubella     | AT5G11320.1   Symbols: YUC4   Flavin-binding monooxygenase family protein   chr5:3611429-3613361 REVERSE LENGTH=411                                                                                                                                                                                                                                               | 412  | 411  | 0         | 99.8  | 83.3 | 88.6 |
| Rsa1.0_00016.1.g996.t1  | gb EOA19373.1   hypothetical protein CARUB_v10000508mg [Capsella rubella]                                                                                                                                          | 593  | 605  | 0         | 102.0 | 80.9 | 88.7 | hypothetical protein CARUB_v10000508mg     | gbpln | Capsella rubella     | AT5G11310.1   Symbols:   Pentatricopeptide repeat (PPR) superfamily protein   chr5:3606490-3608409 FORWARD LENGTH=602                                                                                                                                                                                                                                             | 593  | 602  | 0         | 101.5 | 79.3 | 86.3 |
| Rsa1.0_00016.1.g997.t1  | refXP_002873505.1   hypothetical protein ARALYDRAFT_350326 [Arabidopsis lyrata subsp. lyrata] gi297319342[gb EFH49764.1]                                                                                           | 435  | 436  | 0         | 100.2 | 84.1 | 91.5 | hypothetical protein ARALYDRAFT_350326     | gbpln | Arabidopsis lyrata   | AT5G11300.1   Symbols: CYC3B, CYC2BAT, CYCA2.2   mitotic-like cyclin 3B from Arabidopsis   chr5:3601811-3604466 REVERSE LENGTH=436                                                                                                                                                                                                                                | 435  | 436  | 0         | 100.2 | 83.7 | 90.8 |
| Rsa1.0_00016.1.g998.t1  | gb EOA21558.1   hypothetical protein CARUB_v10001967mg [Capsella rubella]                                                                                                                                          | 210  | 209  | 1.00E-102 | 99.5  | 87.6 | 95.2 | hypothetical protein CARUB_v10001967mg     | gbpln | Capsella rubella     | AT5G11280.1   Symbols:   unknown protein; BEST Arabidopsis thaliana protein match is: unknown protein (TAIR:AT1G80200.1); Has 30201 Blast hits to 17322 proteins in 780 species: Archae - 12; Bacteria - 1396; Metazoa - 17338; Fungi - 3422; Plants - 5037; Viruses - 0; Other Eukaryotes - 2996 (source: NCBI BLINK).   chr5:3597321-3598347 FORWARD LENGTH=209 | 210  | 209  | 1.00E-103 | 99.5  | 86.7 | 94.3 |
| Rsa1.0_00016.1.g999.t1  | refXP_002873503.1   hypothetical protein ARALYDRAFT_487959 [Arabidopsis lyrata subsp. lyrata] gi297319340[gb EFH49762.1]                                                                                           | 349  | 352  | 1.00E-130 | 100.9 | 82.2 | 88.8 | hypothetical protein ARALYDRAFT_487959     | gbpln | Arabidopsis lyrata   | AT5G11270.1   Symbols: OCP3   overexpressor of cationic peroxidase 3   chr5:3595557-3597076 REVERSE LENGTH=354                                                                                                                                                                                                                                                    | 349  | 354  | 1.00E-116 | 101.4 | 75.1 | 82.8 |
| Rsa1.0_00016.1.g1000.t1 | refXP_002873502.1   hypothetical protein ARALYDRAFT_909087 [Arabidopsis lyrata subsp. lyrata] gi297319339[gb EFH49761.1]                                                                                           | 169  | 167  | 1.00E-66  | 98.8  | 88.8 | 91.7 | hypothetical protein ARALYDRAFT_909087     | gbpln | Arabidopsis lyrata   | AT5G11260.1   Symbols: HY5, TED 5   Basic-leucine zipper (bZIP) transcription factor family protein   chr5:3593583-3594800 REVERSE LENGTH=168                                                                                                                                                                                                                     | 169  | 168  | 8.00E-66  | 99.4  | 89.9 | 92.3 |
| Rsa1.0_00016.1.g1001.t2 | gb ACP30577.1   disease resistance protein [Brassica rapa subsp. pekinensis]                                                                                                                                       | 485  | 1235 | 8.00E-91  | 254.6 | 48.9 | 63.3 | disease resistance protein                 | gbpln | Brassica rapa        | AT5G11250.1   Symbols:   Disease resistance protein (TIR-NBS-LRR class)   chr5:3587978-3591960 REVERSE LENGTH=1189                                                                                                                                                                                                                                                | 485  | 1189 | 5.00E-88  | 245.2 | 37.3 | 43.9 |
| Rsa1.0_00016.1.g1002.t1 | gb EOA20202.1   hypothetical protein CARUB_v10000497mg [Capsella rubella]                                                                                                                                          | 606  | 612  | 0         | 101.0 | 86.3 | 92.4 | hypothetical protein CARUB_v10000497mg     | gbpln | Capsella rubella     | AT5G11240.1   Symbols:   transducin family protein / WD-40 repeat family protein   chr5:3582949-3586782 FORWARD LENGTH=615                                                                                                                                                                                                                                        | 606  | 615  | 0         | 101.5 | 86.0 | 91.4 |
| Rsa1.0_00016.1.g1003.t1 | #                                                                                                                                                                                                                  | #    | #    | #         | #     | #    | #    | -                                          | ----  | ----                 | #                                                                                                                                                                                                                                                                                                                                                                 | #    | #    | #         | #     | #    | #    |
| Rsa1.0_00016.1.g1004.t1 | gb EOA22882.1   hypothetical protein CARUB_v10003614mg [Capsella rubella]                                                                                                                                          | 353  | 349  | 0         | 98.9  | 92.9 | 96.0 | hypothetical protein CARUB_v10003614mg     | gbpln | Capsella rubella     | AT5G25400.1   Symbols:   Nucleotide-sugar transporter family protein   chr5:8823283-8824332 FORWARD LENGTH=349                                                                                                                                                                                                                                                    | 353  | 349  | 0         | 98.9  | 89.5 | 94.1 |
| Rsa1.0_00016.1.g1005.t1 | refXP_002866774.1   hypothetical protein ARALYDRAFT_893811 [Arabidopsis lyrata subsp. lyrata] gi297332615[gb EFH63033.1]                                                                                           | 310  | 303  | 1.00E-102 | 97.7  | 60.6 | 73.2 | hypothetical protein ARALYDRAFT_893811     | gbpln | Arabidopsis lyrata   | AT1G64870.1   Symbols:   unknown protein; BEST Arabidopsis thaliana protein match is: unknown protein (TAIR:AT3G45200.1); Has 99 Blast hits to 91 proteins in 10 species: Archae - 0; Bacteria - 0; Metazoa - 0; Fungi - 0; Plants - 99; Viruses - 0; Other Eukaryotes - 0 (source: NCBI BLINK).   chr1:24102917-24103831 FORWARD LENGTH=304                      | 310  | 304  | 1.00E-102 | 98.1  | 60.6 | 71.6 |

|                         |                                                                                                                                                                                                                                                                                                                                                                                                                                                                                                                                                                                                                                                        |      |      |           |       |      |      |                                             |       |                      |                                                                                                                                                                                                                                                                        |      |      |           |       |      |      |
|-------------------------|--------------------------------------------------------------------------------------------------------------------------------------------------------------------------------------------------------------------------------------------------------------------------------------------------------------------------------------------------------------------------------------------------------------------------------------------------------------------------------------------------------------------------------------------------------------------------------------------------------------------------------------------------------|------|------|-----------|-------|------|------|---------------------------------------------|-------|----------------------|------------------------------------------------------------------------------------------------------------------------------------------------------------------------------------------------------------------------------------------------------------------------|------|------|-----------|-------|------|------|
| Rsa1.0_00016.1.g1006.t1 | refNP_196670.1  serine-rich protein-like protein [Arabidopsis thaliana] gi 9795161 emb CAC03457.1  putative protein [Arabidopsis thaliana] gi 21592828 gb AAM64778.1  serine-rich protein [Arabidopsis thaliana] gi 28466931 gb AAO44074.1  At5g11090 [Arabidopsis thaliana] gi 110743766 dbj BAE9719.1  hypothetical protein [Arabidopsis thaliana] gi 332004251 gb AED91634.1  serine-rich protein-like protein [Arabidopsis thaliana]                                                                                                                                                                                                               | 271  | 217  | 5.00E-76  | 80.1  | 62.0 | 66.4 | serine-rich protein-like protein            | gbpln | Arabidopsis thaliana | AT5G11090.1   Symbols:   serine-rich protein-related   chr5:3524796-3525449 FORWARD LENGTH=217                                                                                                                                                                         | 271  | 217  | 1.00E-78  | 80.1  | 62.0 | 66.4 |
| Rsa1.0_00016.1.g1007.t1 | refNP_175758.2  peptidase-S24/S26 domain-containing protein [Arabidopsis thaliana] gi 44681348 gb AAS47614.1  At1g53530 [Arabidopsis thaliana] gi 45773848 gb AAS76728.1  At1g53530 [Arabidopsis thaliana] gi 110738199 dbj BAF01030.1  hypothetical protein [Arabidopsis thaliana] gi 332194831 gb AEE32952.1  peptidase-S24/S26 domain-containing protein [Arabidopsis thaliana]                                                                                                                                                                                                                                                                     | 182  | 168  | 6.00E-79  | 92.3  | 81.3 | 86.3 | peptidase-S24/S26 domain-containing protein | gbpln | Arabidopsis thaliana | AT1G53530.1   Symbols:   Peptidase S24/S26A/S26B/S26C family protein   chr1:19978249-19979778 FORWARD LENGTH=168                                                                                                                                                       | 182  | 168  | 2.00E-81  | 92.3  | 81.3 | 86.3 |
| Rsa1.0_00016.1.g1008.t1 | refNP_196668.1  uncharacterized protein [Arabidopsis thaliana] gi 9795159 emb CAC03455.1  putative protein [Arabidopsis thaliana] gi 21593765 gb AAM65732.1  unknown [Arabidopsis thaliana] gi 110740693 dbj BAE98448.1  hypothetical protein [Arabidopsis thaliana] gi 332004248 gb AED91631.1  uncharacterized protein AT5G11070 [Arabidopsis thaliana]                                                                                                                                                                                                                                                                                              | 132  | 152  | 8.00E-53  | 115.2 | 79.5 | 87.1 | uncharacterized protein                     | gbpln | Arabidopsis thaliana | AT5G11070.1   Symbols:   unknown protein; Has 1807 Blast hits to 1807 proteins in 277 species: Archae - 0; Bacteria - 0; Metazoa - 736; Fungi - 347; Plants - 385; Viruses - 0; Other Eukaryotes - 339 (source: NCBI BLINK).   chr5:3516440-3516898 REVERSE LENGTH=152 | 132  | 152  | 2.00E-55  | 115.2 | 79.5 | 87.1 |
| Rsa1.0_00016.1.g1009.t1 | refXP_002871450.1  hypothetical protein ARALYDRAFT_487936 [Arabidopsis lyrata subsp. lyrata] gi 297317287 gb EFH47709.1  hypothetical protein ARALYDRAFT_487936 [Arabidopsis lyrata subsp. lyrata]                                                                                                                                                                                                                                                                                                                                                                                                                                                     | 1183 | 1186 | 0         | 100.3 | 95.7 | 97.4 | hypothetical protein ARALYDRAFT_487936      | gbpln | Arabidopsis lyrata   | AT5G11040.1   Symbols: TRS120, AtTRS120   TRS120   chr5:3495332-3500610 FORWARD LENGTH=1186                                                                                                                                                                            | 1183 | 1186 | 0         | 100.3 | 95.3 | 97.0 |
| Rsa1.0_00016.1.g1010.t1 | refXP_002873494.1  predicted protein [Arabidopsis lyrata subsp. lyrata] gi 297319331 gb EFH49753.1  predicted protein [Arabidopsis lyrata subsp. lyrata]                                                                                                                                                                                                                                                                                                                                                                                                                                                                                               | 588  | 592  | 0         | 100.7 | 69.0 | 78.6 | predicted protein                           | gbpln | Arabidopsis lyrata   | AT5G11030.2   Symbols: ALF4   aberrant lateral root formation 4   chr5:3490993-3495078 REVERSE LENGTH=602                                                                                                                                                              | 588  | 602  | 0         | 102.4 | 66.0 | 76.2 |
| Rsa1.0_00016.1.g1011.t1 | gb EOA20670.1  hypothetical protein CARUB_v10000982mg [Capsella rubella]                                                                                                                                                                                                                                                                                                                                                                                                                                                                                                                                                                               | 438  | 438  | 0         | 100.0 | 83.3 | 89.0 | hypothetical protein CARUB_v10000982mg      | gbpln | Capsella rubella     | AT5G11020.1   Symbols:   Protein kinase superfamily protein   chr5:3486439-3488983 REVERSE LENGTH=433                                                                                                                                                                  | 438  | 433  | 0         | 98.9  | 81.1 | 88.6 |
| Rsa1.0_00016.1.g1012.t1 | refNP_850805.1  Pre-mRNA cleavage complex II protein family [Arabidopsis thaliana] gi 42573337 refNP_974765.1  Pre-mRNA cleavage complex II protein family [Arabidopsis thaliana] gi 75161516 sp Q8VYP6.1 NOL9_ARATH RecName: Full=Polynucleotide 5'-hydroxyl-kinase NOL9; AltName: Full=Nucleolar protein 9 homolog gi 17979299 gb AAL49875.1  unknown protein [Arabidopsis thaliana] gi 20465981 gb AAM20212.1  unknown protein [Arabidopsis thaliana] gi 332004238 gb AED91621.1  Pre-mRNA cleavage complex II protein family [Arabidopsis thaliana] gi 332004239 gb AED91622.1  Pre-mRNA cleavage complex II protein family [Arabidopsis thaliana] | 370  | 368  | 1.00E-170 | 99.5  | 80.5 | 87.8 | Pre-mRNA cleavage complex II protein family | gbpln | Arabidopsis thaliana | AT5G11010.3   Symbols:   Pre-mRNA cleavage complex II protein family   chr5:3484176-3486067 FORWARD LENGTH=368                                                                                                                                                         | 370  | 368  | 1.00E-172 | 99.5  | 80.5 | 87.8 |
| Rsa1.0_00016.1.g1013.t1 | gb EOA21927.1  hypothetical protein CARUB_v10002414mg [Capsella rubella]                                                                                                                                                                                                                                                                                                                                                                                                                                                                                                                                                                               | 222  | 390  | 1.00E-52  | 175.7 | 62.6 | 67.6 | hypothetical protein CARUB_v10002414mg      | gbpln | Capsella rubella     | AT5G11000.1   Symbols:   Plant protein of unknown function (DUF868)   chr5:3479166-3480335 REVERSE LENGTH=389                                                                                                                                                          | 222  | 389  | 1.00E-46  | 175.2 | 63.1 | 69.4 |
| Rsa1.0_00016.1.g1014.t1 | gb EOA19498.1  hypothetical protein CARUB_v10002201mg [Capsella rubella]                                                                                                                                                                                                                                                                                                                                                                                                                                                                                                                                                                               | 148  | 149  | 8.00E-71  | 100.7 | 89.2 | 92.6 | hypothetical protein CARUB_v10002201mg      | gbpln | Capsella rubella     | AT5G10990.1   Symbols:   SAUR-like auxin-responsive protein family   chr5:3476884-3477330 FORWARD LENGTH=148                                                                                                                                                           | 148  | 148  | 2.00E-72  | 100.0 | 87.2 | 90.5 |
| Rsa1.0_00016.1.g1015.t1 | gb EOA22648.1  hypothetical protein CARUB_v10003340mg [Capsella rubella]                                                                                                                                                                                                                                                                                                                                                                                                                                                                                                                                                                               | 251  | 272  | 1.00E-101 | 108.4 | 76.9 | 84.5 | hypothetical protein CARUB_v10003340mg      | gbpln | Capsella rubella     | AT5G10970.1   Symbols:   C2H2 and C2HC zinc fingers superfamily protein   chr5:3469268-3470086 FORWARD LENGTH=272                                                                                                                                                      | 251  | 272  | 1.00E-100 | 108.4 | 72.9 | 82.9 |

|                         |                                                                                                                                                                                                                                                                                                                                                                                                                                                                                          |      |      |           |       |      |      |                                                   |       |                      |                                                                                                                                         |      |      |           |       |      |      |
|-------------------------|------------------------------------------------------------------------------------------------------------------------------------------------------------------------------------------------------------------------------------------------------------------------------------------------------------------------------------------------------------------------------------------------------------------------------------------------------------------------------------------|------|------|-----------|-------|------|------|---------------------------------------------------|-------|----------------------|-----------------------------------------------------------------------------------------------------------------------------------------|------|------|-----------|-------|------|------|
| Rsa1.0_00016.1.g1016.t1 | refXP_002871445.1   hypothetical protein ARALYDRAFT_487926 [Arabidopsis lyrata subsp. lyrata] gi 297317282 gb EFH47704.1                                                                                                                                                                                                                                                                                                                                                                 | 275  | 276  | 1.00E-142 | 100.4 | 88.4 | 96.0 | hypothetical protein ARALYDRAFT_487926            | gbpln | Arabidopsis lyrata   | AT5G10960.1   Symbols:   Polynucleotidyl transferase, ribonuclease H-like superfamily protein   chr5:3464581-3465414 FORWARD LENGTH=277 | 275  | 277  | 1.00E-143 | 100.7 | 88.0 | 95.3 |
| Rsa1.0_00016.1.g1017.t1 | emb CAB39638.1  RNA-directed DNA polymerase-like protein [Arabidopsis thaliana] gi 7267666 emb CAB78094.1  RNA-directed DNA polymerase-like protein [Arabidopsis thaliana]                                                                                                                                                                                                                                                                                                               | 1987 | 1274 | 0         | 64.1  | 30.5 | 41.9 | RNA-directed DNA polymerase-like protein          | gbpln | Arabidopsis thaliana | AT4G29090.1   Symbols:   Ribonuclease H-like superfamily protein   chr4:14333528-14335255 FORWARD LENGTH=575                            | 1987 | 575  | 1.00E-76  | 28.9  | 8.9  | 13.9 |
| Rsa1.0_00016.1.g1018.t1 | emb CAN83015.1  hypothetical protein VITISV_041694 [Vitis vinifera]                                                                                                                                                                                                                                                                                                                                                                                                                      | 243  | 1099 | 2.00E-88  | 452.3 | 63.4 | 76.1 | hypothetical protein VITISV_041694                | gbpln | Vitis vinifera       | AT4G23160.1   Symbols: CRK8   cysteine-rich RLK (RECEPTOR-like protein kinase) 8   chr4:12129485-12134086 FORWARD LENGTH=1262           | 243  | 1262 | 5.00E-43  | 519.3 | 33.3 | 52.3 |
| Rsa1.0_00016.1.g1019.t1 | refXP_002873486.1   hypothetical protein ARALYDRAFT_487925 [Arabidopsis lyrata subsp. lyrata] gi 297319323 gb EFH49745.1   hypothetical protein ARALYDRAFT_487925 [Arabidopsis lyrata subsp. lyrata] ref NP_568241.2  CBL-interacting serine/threonine-protein kinase 5 [Arabidopsis thaliana] gi 75334907 sp O9LEU7.1 CIPK5_ARATH RecName: Full=CBL-interacting serine/threonine-protein kinase 5; AltName: Full=SNF1-related kinase 3.24; AltName: Full=SOS2-like protein kinase PKS19 | 754  | 755  | 0         | 100.1 | 89.0 | 94.3 | hypothetical protein ARALYDRAFT_487925            | gbpln | Arabidopsis lyrata   | AT5G10940.2   Symbols:   transducin family protein / WD-40 repeat family protein   chr5:3448890-3454127 REVERSE LENGTH=754              | 754  | 754  | 0         | 100.0 | 88.9 | 94.0 |
| Rsa1.0_00016.1.g1020.t1 | gi 19424694 gb AAF86504.2 AF285105_1 CBL-interacting protein kinase 5 [Arabidopsis thaliana] gi 8979727 emb CAB96848.1  serine/threonine protein kinase-like protein [Arabidopsis thaliana] gi 17065378 gb AAL32843.1  serine/threonine protein kinase-like protein [Arabidopsis thaliana] gi 332004227 gb AED91610.1  CBL-interacting serine/threonine-protein kinase 5 [Arabidopsis thaliana]                                                                                          | 440  | 445  | 0         | 101.1 | 85.0 | 90.9 | CBL-interacting serine/threonine-protein kinase 5 | gbpln | Arabidopsis thaliana | AT5G10930.1   Symbols: CIPK5, SnRK3.24   CBL-interacting protein kinase 5   chr5:3445569-3446906 REVERSE LENGTH=445                     | 440  | 445  | 0         | 101.1 | 85.0 | 90.9 |
| Rsa1.0_00016.1.g1021.t3 | gb EOA20415.1  hypothetical protein CARUB_v10000724mg [Capsella rubella]                                                                                                                                                                                                                                                                                                                                                                                                                 | 519  | 518  | 0         | 99.8  | 91.9 | 95.2 | hypothetical protein CARUB_v10000724mg            | gbpln | Capsella rubella     | AT5G10920.1   Symbols:   L-Aspartase-like family protein   chr5:3443030-3443892 FORWARD LENGTH=517                                      | 519  | 517  | 0         | 99.6  | 92.5 | 96.0 |
| Rsa1.0_00016.1.g1022.t1 | refXP_002873483.1   predicted protein [Arabidopsis lyrata subsp. lyrata] gi 297319320 gb EFH49742.1  predicted protein [Arabidopsis lyrata subsp. lyrata]                                                                                                                                                                                                                                                                                                                                | 317  | 303  | 6.00E-89  | 95.6  | 60.6 | 73.8 | predicted protein                                 | gbpln | Arabidopsis lyrata   | AT5G10890.1   Symbols:   myosin heavy chain-related   chr5:3434030-3435067 REVERSE LENGTH=295                                           | 317  | 295  | 4.00E-88  | 93.1  | 58.4 | 71.6 |
| Rsa1.0_00016.1.g1023.t1 | gb EOA21983.1  hypothetical protein CARUB_v10002490mg [Capsella rubella]                                                                                                                                                                                                                                                                                                                                                                                                                 | 207  | 206  | 1.00E-108 | 99.5  | 93.7 | 96.1 | hypothetical protein CARUB_v10002490mg            | gbpln | Capsella rubella     | AT5G10860.1   Symbols:   Cystathionine beta-synthase (CBS) family protein   chr5:3429173-3430142 REVERSE LENGTH=206                     | 207  | 206  | 1.00E-109 | 99.5  | 92.8 | 95.2 |
| Rsa1.0_00016.1.g1024.t1 | # # # # # # # # - ----                                                                                                                                                                                                                                                                                                                                                                                                                                                                   |      |      |           |       |      |      |                                                   |       |                      | AT5G10790.1   Symbols: UBP22   ubiquitin-specific protease 22   chr5:3410638-3412559 FORWARD LENGTH=557                                 | 134  | 557  | 3.00E-12  | 415.7 | 22.4 | 23.9 |
| Rsa1.0_00016.1.g1025.t1 | gb AAF79677.1 AC022314_18 F9C16.26 [Arabidopsis thaliana]                                                                                                                                                                                                                                                                                                                                                                                                                                | 566  | 1902 | 3.00E-47  | 336.0 | 17.8 | 25.1 | F9C16.26                                          | gbpln | Arabidopsis thaliana | AT5G32613.1   Symbols:   Zinc knuckle (GCHC-type) family protein   chr5:12263255-12265041 FORWARD LENGTH=457                            | 566  | 457  | 1.00E-15  | 80.7  | 8.0  | 11.8 |
| Rsa1.0_00016.1.g1026.t1 | gb EOA20535.1  hypothetical protein CARUB_v10000848mg [Capsella rubella]                                                                                                                                                                                                                                                                                                                                                                                                                 | 140  | 481  | 4.00E-17  | 343.6 | 42.1 | 53.6 | hypothetical protein CARUB_v10000848mg            | gbpln | Capsella rubella     | AT5G10760.1   Symbols:   Eukaryotic aspartyl protease family protein   chr5:3400671-3402165 REVERSE LENGTH=464                          | 140  | 464  | 7.00E-18  | 331.4 | 44.3 | 62.9 |
| Rsa1.0_00016.1.g1027.t1 | refXP_002873476.1   hypothetical protein ARALYDRAFT_325615 [Arabidopsis lyrata subsp. lyrata] gi 297319313 gb EFH49735.1   hypothetical protein ARALYDRAFT_325615 [Arabidopsis lyrata subsp. lyrata]                                                                                                                                                                                                                                                                                     | 479  | 475  | 1.00E-178 | 99.2  | 70.1 | 81.6 | hypothetical protein ARALYDRAFT_325615            | gbpln | Arabidopsis lyrata   | AT5G10770.1   Symbols:   Eukaryotic aspartyl protease family protein   chr5:3403331-3405331 REVERSE LENGTH=474                          | 479  | 474  | 1.00E-172 | 99.0  | 68.3 | 77.9 |
| Rsa1.0_00016.1.g1028.t1 | refXP_002873473.1   hypothetical protein ARALYDRAFT_487908 [Arabidopsis lyrata subsp. lyrata] gi 297319310 gb EFH49732.1   hypothetical protein ARALYDRAFT_487908 [Arabidopsis lyrata subsp. lyrata]                                                                                                                                                                                                                                                                                     | 328  | 373  | 1.00E-157 | 113.7 | 86.0 | 92.1 | hypothetical protein ARALYDRAFT_487908            | gbpln | Arabidopsis lyrata   | AT5G10740.1   Symbols:   Protein phosphatase 2C family protein   chr5:3393797-3395848 REVERSE LENGTH=354                                | 328  | 354  | 1.00E-158 | 107.9 | 86.6 | 92.4 |

|                         |                                                                                                                                                                                                                                                                                                                                                                                                                                                                                       |     |     |           |       |      |      |                                         |       |                      |                                                                                                                                                                                                                                                                                                                                                                  |     |     |           |       |      |      |
|-------------------------|---------------------------------------------------------------------------------------------------------------------------------------------------------------------------------------------------------------------------------------------------------------------------------------------------------------------------------------------------------------------------------------------------------------------------------------------------------------------------------------|-----|-----|-----------|-------|------|------|-----------------------------------------|-------|----------------------|------------------------------------------------------------------------------------------------------------------------------------------------------------------------------------------------------------------------------------------------------------------------------------------------------------------------------------------------------------------|-----|-----|-----------|-------|------|------|
| Rsa1.0_00016.1.g1029.t1 | gb EOA25676.1  hypothetical protein CARUB_v10019028mg [Capsella rubella]                                                                                                                                                                                                                                                                                                                                                                                                              | 479 | 476 | 0         | 99.4  | 76.2 | 87.5 | hypothetical protein CARUB_v10019028mg  | gbpln | Capsella rubella     | AT3G28600.1   Symbols:   P-loop containing nucleoside triphosphate hydrolases superfamily protein   chr3:10722437-10723870 FORWARD LENGTH=477                                                                                                                                                                                                                    | 479 | 477 | 0         | 99.6  | 76.0 | 86.2 |
| Rsa1.0_00016.1.g1030.t1 | ref XP_002873472.1  catalytic/coenzyme binding protein [Arabidopsis lyrata subsp. lyrata]   g 297319309 gb EFH449731.1  catalytic/coenzyme binding protein [Arabidopsis lyrata subsp. lyrata]                                                                                                                                                                                                                                                                                         | 289 | 287 | 1.00E-151 | 99.3  | 95.2 | 97.6 | catalytic/coenzyme binding protein      | gbpln | Arabidopsis lyrata   | AT5G10730.1   Symbols:   NAD(P)-binding Rossmann-fold superfamily protein   chr5:3390822-3392947 REVERSE LENGTH=287                                                                                                                                                                                                                                              | 289 | 287 | 1.00E-150 | 99.3  | 95.2 | 97.6 |
| Rsa1.0_00016.1.g1031.t1 | ref XP_002871436.1  hypothetical protein ARALYDRAFT_909030 [Arabidopsis lyrata subsp. lyrata]   g 297317273 gb EFH47695.1  hypothetical protein ARALYDRAFT_909030 [Arabidopsis lyrata subsp. lyrata]                                                                                                                                                                                                                                                                                  | 911 | 923 | 0         | 101.3 | 87.9 | 93.3 | hypothetical protein ARALYDRAFT_909030  | gbpln | Arabidopsis lyrata   | AT5G10720.1   Symbols: AHK5, CK12, HK5   histidine kinase 5   chr5:3386835-3390541 FORWARD LENGTH=922                                                                                                                                                                                                                                                            | 911 | 922 | 0         | 101.2 | 87.7 | 92.9 |
| Rsa1.0_00016.1.g1032.t1 | ref NP_568234.1  uncharacterized protein [Arabidopsis thaliana]   g 19347741 gb AAL86296.1  unknown protein [Arabidopsis thaliana]   g 24030282 gb AAN41313.1  unknown protein [Arabidopsis thaliana]   g 332004199 gb AED91582.1  uncharacterized protein AT5G10695 [Arabidopsis thaliana]                                                                                                                                                                                           | 67  | 67  | 4.00E-27  | 100.0 | 86.6 | 89.6 | uncharacterized protein                 | gbpln | Arabidopsis thaliana | AT5G10695.1   Symbols:   unknown protein; BEST Arabidopsis thaliana protein match is: unknown protein (TAIR:AT5G57123.1); Has 30201 Blast hits to 17322 proteins in 780 species: Archae - 12; Bacteria - 1396; Metazoa - 17338; Fungi - 3422; Plants - 5037; Viruses - 0; Other Eukaryotes - 2996 (source: NCBI BLINK).   chr5:3377817-3378020 FORWARD LENGTH=67 | 67  | 67  | 7.00E-30  | 100.0 | 86.6 | 89.6 |
| Rsa1.0_00016.1.g1033.t1 | ref NP_196627.1  calmodulin-binding protein-like protein [Arabidopsis thaliana]   g 10129644 emb CAC08240.1  vacuolar calcium binding protein-like [Arabidopsis thaliana]   g 53828561 gb AAU94390.1  At5g10660 [Arabidopsis thaliana]   g 55733763 gb AAV59278.1  At5g10660 [Arabidopsis thaliana]   g 332004195 gb AED91578.1  calmodulin-binding protein-like protein [Arabidopsis thaliana]                                                                                       | 355 | 407 | 3.00E-94  | 114.6 | 69.0 | 79.4 | calmodulin-binding protein-like protein | gbpln | Arabidopsis thaliana | AT5G10660.1   Symbols:   calmodulin-binding protein-related   chr5:3370553-3371776 FORWARD LENGTH=407                                                                                                                                                                                                                                                            | 355 | 407 | 7.00E-97  | 114.6 | 69.0 | 79.4 |
| Rsa1.0_00016.1.g1034.t1 | ref NP_196626.2  RING/U-box domain-containing protein [Arabidopsis thaliana]   g 79327651 ref NP_001031869.1  RING/U-box domain-containing protein [Arabidopsis thaliana]   g 63850555 gb AAU95454.1  At5g10650 [Arabidopsis thaliana]   g 58652060 gb AAW80855.1  At5g10650 [Arabidopsis thaliana]   g 332004193 gb AED91576.1  RING/U-box domain-containing protein [Arabidopsis thaliana]   g 332004194 gb AED91577.1  RING/U-box domain-containing protein [Arabidopsis thaliana] | 521 | 525 | 0         | 100.8 | 74.7 | 83.7 | RING/U-box domain-containing protein    | gbpln | Arabidopsis thaliana | AT5G10650.2   Symbols:   RING/U-box superfamily protein   chr5:3365237-3367263 REVERSE LENGTH=525                                                                                                                                                                                                                                                                | 521 | 525 | 0         | 100.8 | 74.7 | 83.7 |
| Rsa1.0_00016.1.g1035.t1 | #                                                                                                                                                                                                                                                                                                                                                                                                                                                                                     | #   | #   | #         | #     | #    | #    | -                                       | ----  | ----                 | AT5G10630.2   Symbols:   Translation elongation factor EF1A/initiation factor IF2gamma family protein   chr5:3360561-3364414 FORWARD LENGTH=668                                                                                                                                                                                                                  | 97  | 668 | 2.00E-11  | 688.7 | 32.0 | 35.1 |
| Rsa1.0_00016.1.g1036.t1 | #                                                                                                                                                                                                                                                                                                                                                                                                                                                                                     | #   | #   | #         | #     | #    | #    | -                                       | ----  | ----                 | #                                                                                                                                                                                                                                                                                                                                                                | #   | #   | #         | #     | #    |      |
| Rsa1.0_00016.1.g1037.t1 | emb CAB89379.1  putative protein [Arabidopsis thaliana]                                                                                                                                                                                                                                                                                                                                                                                                                               | 109 | 804 | 5.00E-52  | 737.6 | 88.1 | 91.7 | putative protein                        | gbpln | Arabidopsis thaliana | AT5G10625.1   Symbols:   BEST Arabidopsis thaliana protein match is: flowering promoting factor 1 (TAIR:AT5G24860.1); Has 35333 Blast hits to 34131 proteins in 2444 species: Archae - 798; Bacteria - 22429; Metazoa - 974; Fungi - 991; Plants - 531; Viruses - 0; Other Eukaryotes - 9610 (source: NCBI BLINK).   chr5:3358934-3359272 FORWARD LENGTH=112     | 109 | 112 | 2.00E-53  | 102.8 | 91.7 | 96.3 |
| Rsa1.0_00016.1.g1038.t1 | ref NP_196624.1  putative RNA methyltransferase [Arabidopsis thaliana]   g 32171918 sc O9LXB4.1 Y5620_ARATH RefName: Full=Putative RNA methyltransferase At5g10620   g 7671441 emb CAB89381.1  putative protein [Arabidopsis thaliana]   g 332004189 gb AED91572.1  putative RNA methyltransferase [Arabidopsis thaliana]                                                                                                                                                             | 195 | 193 | 6.00E-99  | 99.0  | 87.7 | 91.3 | putative RNA methyltransferase          | gbpln | Arabidopsis thaliana | AT5G10620.1   Symbols:   methyltransferases   chr5:3355466-3356615 REVERSE LENGTH=193                                                                                                                                                                                                                                                                            | 195 | 193 | 1.00E-101 | 99.0  | 87.7 | 91.3 |

|                         |                                                                                                                                                                                                                                                                     |      |      |           |       |       |       |                                                  |             |                         |                                                                                                                                                                                                                                                                              |      |      |           |       |       |       |
|-------------------------|---------------------------------------------------------------------------------------------------------------------------------------------------------------------------------------------------------------------------------------------------------------------|------|------|-----------|-------|-------|-------|--------------------------------------------------|-------------|-------------------------|------------------------------------------------------------------------------------------------------------------------------------------------------------------------------------------------------------------------------------------------------------------------------|------|------|-----------|-------|-------|-------|
| Rsa1.0_00016.1.g1039.t1 | ref[XP_002871428.1] CYP81K1<br>[Arabidopsis lyrata subsp. lyrata]<br>gi 297317265 gb EFH47687.1  CYP81K1<br>[Arabidopsis lyrata subsp. lyrata]                                                                                                                      | 498  | 500  | 0         | 100.4 | 86.1  | 92.4  | CYP81K1                                          | gbpln       | Arabidopsis<br>lyrata   | AT5G10610.1   Symbols: CYP81K1  <br>cytochrome P450, family 81, subfamily K,<br>polypeptide 1   chr5:3353518-3355020<br>FORWARD LENGTH=500                                                                                                                                   | 498  | 500  | 0         | 100.4 | 85.5  | 92.0  |
| Rsa1.0_00016.1.g1040.t1 | ref[XP_002871428.1] CYP81K1<br>[Arabidopsis lyrata subsp. lyrata]<br>gi 297317265 gb EFH47687.1  CYP81K1<br>[Arabidopsis lyrata subsp. lyrata]                                                                                                                      | 499  | 500  | 0         | 100.2 | 80.6  | 89.2  | CYP81K1                                          | gbpln       | Arabidopsis<br>lyrata   | AT5G10610.1   Symbols: CYP81K1  <br>cytochrome P450, family 81, subfamily K,<br>polypeptide 1   chr5:3353518-3355020<br>FORWARD LENGTH=500                                                                                                                                   | 499  | 500  | 0         | 100.2 | 80.0  | 88.2  |
| Rsa1.0_00016.1.g1041.t1 | gb EOA21978.1  hypothetical protein<br>CARUB_v10002483mg [Capsella rubella]                                                                                                                                                                                         | 169  | 247  | 3.00E-79  | 146.2 | 86.4  | 93.5  | hypothetical protein<br>CARUB_v10002483mg        | gbpln       | Capsella<br>rubella     | AT5G10580.1   Symbols:   Protein of<br>unknown function, DUF599   chr5:3347511-<br>3348657 FORWARD LENGTH=246                                                                                                                                                                | 169  | 246  | 2.00E-81  | 145.6 | 86.4  | 92.9  |
| Rsa1.0_00016.1.g1042.t1 | gb EOA21164.1  hypothetical protein<br>CARUB_v10001512mg [Capsella rubella]                                                                                                                                                                                         | 302  | 313  | 1.00E-110 | 103.6 | 68.5  | 77.2  | hypothetical protein<br>CARUB_v10001512mg        | gbpln       | Capsella<br>rubella     | AT5G10440.1   Symbols: CYCD4.2   cyclin<br>d4.2   chr5:3280611-3282342 REVERSE<br>LENGTH=298                                                                                                                                                                                 | 302  | 298  | 1.00E-109 | 98.7  | 69.5  | 77.2  |
| Rsa1.0_00016.1.g1043.t1 | #                                                                                                                                                                                                                                                                   | #    | #    | #         | #     | #     | #     | -                                                | ----        | ----                    | #                                                                                                                                                                                                                                                                            | #    | #    | #         | #     | #     | #     |
| Rsa1.0_00016.1.g1044.t1 | gb AAZ66942.1  117M18_23 [Brassica<br>rapa]                                                                                                                                                                                                                         | 483  | 518  | 0         | 107.2 | 78.3  | 89.0  | 117M18_23                                        | gbpln       | Brassica<br>rapa        | AT5G44050.1   Symbols:   MATE efflux family<br>protein   chr5:17722484-17726209<br>FORWARD LENGTH=491                                                                                                                                                                        | 483  | 491  | 0         | 101.7 | 76.6  | 86.3  |
| Rsa1.0_00016.1.g1045.t3 | gb AAZ66942.1  117M18_23 [Brassica<br>rapa]                                                                                                                                                                                                                         | 469  | 518  | 0         | 110.4 | 86.4  | 94.2  | 117M18_23                                        | gbpln       | Brassica<br>rapa        | AT5G44050.1   Symbols:   MATE efflux family<br>protein   chr5:17722484-17726209<br>FORWARD LENGTH=491                                                                                                                                                                        | 469  | 491  | 0         | 104.7 | 80.4  | 91.0  |
| Rsa1.0_00016.1.g1046.t1 | ref[NP_199218.1] mate efflux domain-<br>containing protein [Arabidopsis thaliana]<br>gi 9758564 dbj BAB09065.1  unnamed<br>protein product [Arabidopsis thaliana]<br>gi 332007669 gb AED95052.1  mate<br>efflux domain-containing protein<br>[Arabidopsis thaliana] | 453  | 491  | 0         | 108.4 | 76.4  | 86.8  | mate efflux domain-<br>containing protein        | gbpln       | Arabidopsis<br>thaliana | AT5G44050.1   Symbols:   MATE efflux family<br>protein   chr5:17722484-17726209<br>FORWARD LENGTH=491                                                                                                                                                                        | 453  | 491  | 0         | 108.4 | 76.4  | 86.8  |
| Rsa1.0_00016.1.g1047.t1 | #                                                                                                                                                                                                                                                                   | #    | #    | #         | #     | #     | #     | -                                                | ----        | ----                    | #                                                                                                                                                                                                                                                                            | #    | #    | #         | #     | #     | #     |
| Rsa1.0_00016.1.g1048.t1 | ref[NP_199218.1] mate efflux domain-<br>containing protein [Arabidopsis thaliana]<br>gi 9758564 dbj BAB09065.1  unnamed<br>protein product [Arabidopsis thaliana]<br>gi 332007669 gb AED95052.1  mate<br>efflux domain-containing protein<br>[Arabidopsis thaliana] | 506  | 491  | 0         | 97.0  | 80.0  | 87.5  | mate efflux domain-<br>containing protein        | gbpln       | Arabidopsis<br>thaliana | AT5G44050.1   Symbols:   MATE efflux family<br>protein   chr5:17722484-17726209<br>FORWARD LENGTH=491                                                                                                                                                                        | 506  | 491  | 0         | 97.0  | 80.0  | 87.5  |
| Rsa1.0_00016.1.g1049.t1 | gb EOA20878.1  hypothetical protein<br>CARUB_v10001215mg [Capsella rubella]                                                                                                                                                                                         | 352  | 369  | 1.00E-143 | 104.8 | 74.1  | 84.7  | hypothetical protein<br>CARUB_v10001215mg        | gbpln       | Capsella<br>rubella     | AT5G10410.1   Symbols:   ENTH/ANTH/VHS<br>superfamily protein   chr5:3271952-3273082<br>FORWARD LENGTH=338                                                                                                                                                                   | 352  | 338  | 1.00E-139 | 96.0  | 69.0  | 79.8  |
| Rsa1.0_00016.1.g1050.t1 | tpg DAA55311.1  TPA: histone H3.2<br>[Zea mays]                                                                                                                                                                                                                     | 136  | 245  | 1.00E-72  | 180.1 | 100.0 | 100.0 | TPA: histone H3.2                                | gbenv/gbpln | Zea mays                | AT5G65360.1   Symbols:   Histone<br>superfamily protein   chr5:26120099-<br>26120509 REVERSE LENGTH=136                                                                                                                                                                      | 136  | 136  | 5.00E-74  | 100.0 | 100.0 | 100.0 |
| Rsa1.0_00016.1.g1051.t1 | gb AAG51247.1 AC055769.6 copia-type<br>polyprotein, putative; 28768-32772<br>[Arabidopsis thaliana]                                                                                                                                                                 | 1341 | 1334 | 0         | 99.5  | 67.3  | 80.2  | copia-type polyprotein,<br>putative; 28768-32772 | gbpln       | Arabidopsis<br>thaliana | AT4G23160.1   Symbols: CRK8   cysteine-<br>rich RLK (RECEPTOR-like protein kinase) 8  <br>chr4:12129485-12134086 FORWARD<br>LENGTH=1262                                                                                                                                      | 1341 | 1262 | 4.00E-97  | 94.1  | 13.3  | 21.4  |
| Rsa1.0_00016.1.g1052.t1 | ref[XP_002871419.1] hypothetical<br>protein ARALYDRAFT_350245<br>[Arabidopsis lyrata subsp. lyrata]<br>gi 297317256 gb EFH47678.1 <br>hypothetical protein<br>ARALYDRAFT_350245 [Arabidopsis<br>lyrata subsp. lyrata]                                               | 386  | 306  | 3.00E-67  | 79.3  | 46.4  | 54.9  | hypothetical protein<br>ARALYDRAFT_350245        | gbpln       | Arabidopsis<br>lyrata   | AT5G10380.1   Symbols: RING1, ATRING1  <br>RING/U-box superfamily protein  <br>chr5:3267819-3268724 FORWARD<br>LENGTH=301                                                                                                                                                    | 386  | 301  | 7.00E-65  | 78.0  | 45.6  | 55.2  |
| Rsa1.0_00016.1.g1053.t1 | gb AAZ66938.1  117M18_19 [Brassica<br>rapa]                                                                                                                                                                                                                         | 1775 | 1755 | 0         | 98.9  | 82.4  | 89.7  | 117M18_19                                        | gbpln       | Brassica<br>rapa        | AT5G10370.1   Symbols:   helicase domain-<br>containing protein / IBR domain-containing<br>protein / zinc finger protein-related  <br>chr5:3261245-3267188 FORWARD<br>LENGTH=1775                                                                                            | 1775 | 1775 | 0         | 100.0 | 77.4  | 87.2  |
| Rsa1.0_00016.1.g1054.t2 | gb AAZ67614.1  80A08_29 [Brassica<br>rapa subsp. pekinensis]                                                                                                                                                                                                        | 191  | 402  | 3.00E-32  | 210.5 | 44.5  | 51.3  | 80A08_29                                         | gbpln       | Brassica<br>rapa        | AT5G10320.1   Symbols:   unknown protein;<br>Has 54 Blast hits to 53 proteins in 19<br>species: Archae - 0; Bacteria - 4; Metazoa -<br>0; Fungi - 0; Plants - 50; Viruses - 0; Other<br>Eukaryotes - 0 (source: NCBI BLINK).  <br>chr5:3244180-3246603 REVERSE<br>LENGTH=403 | 191  | 403  | 2.00E-25  | 211.0 | 37.2  | 47.6  |
| Rsa1.0_00016.1.g1055.t1 | gb AAZ66937.1  117M18_18 [Brassica<br>rapa]                                                                                                                                                                                                                         | 249  | 249  | 1.00E-138 | 100.0 | 98.4  | 99.6  | 117M18_18                                        | gbpln       | Brassica<br>rapa        | AT5G10360.1   Symbols: EMB3010, RPS6B  <br>Ribosomal protein S6e   chr5:3258734-<br>3260142 REVERSE LENGTH=249                                                                                                                                                               | 249  | 249  | 1.00E-136 | 100.0 | 95.6  | 97.6  |
| Rsa1.0_00016.1.g1056.t1 | gb AAZ67615.1  80A08_30 [Brassica<br>rapa subsp. pekinensis]                                                                                                                                                                                                        | 225  | 223  | 1.00E-123 | 99.1  | 97.3  | 97.8  | 80A08_30                                         | gbpln       | Brassica<br>rapa        | AT5G65270.1   Symbols: AtRABA4a,<br>RABA4a   RAB GTPase homolog A4A  <br>chr5:26083437-26084550 FORWARD<br>LENGTH=226                                                                                                                                                        | 225  | 226  | 1.00E-114 | 100.4 | 86.7  | 91.1  |

|                         |                                                                                                                                                                                                                                                                                                                                                                                                                                                                                                                                                                                                                                                                                                                                                                                                                                                                                                                                                                                                                                                                                                                                                                                                                                                                                                                                                                                                                                                                                                                                                                                                                                                                                  |     |     |           |       |      |      |                       |       |                      |                                                                                                                                                                                                                                                                                                                                                                                                                                                                                                                                                   |     |     |           |       |      |      |
|-------------------------|----------------------------------------------------------------------------------------------------------------------------------------------------------------------------------------------------------------------------------------------------------------------------------------------------------------------------------------------------------------------------------------------------------------------------------------------------------------------------------------------------------------------------------------------------------------------------------------------------------------------------------------------------------------------------------------------------------------------------------------------------------------------------------------------------------------------------------------------------------------------------------------------------------------------------------------------------------------------------------------------------------------------------------------------------------------------------------------------------------------------------------------------------------------------------------------------------------------------------------------------------------------------------------------------------------------------------------------------------------------------------------------------------------------------------------------------------------------------------------------------------------------------------------------------------------------------------------------------------------------------------------------------------------------------------------|-----|-----|-----------|-------|------|------|-----------------------|-------|----------------------|---------------------------------------------------------------------------------------------------------------------------------------------------------------------------------------------------------------------------------------------------------------------------------------------------------------------------------------------------------------------------------------------------------------------------------------------------------------------------------------------------------------------------------------------------|-----|-----|-----------|-------|------|------|
| Rsa1.0_00016.1.g1057.t1 | gb AAZ67614.1  80A08_29 [Brassica rapa subsp. pekinensis]                                                                                                                                                                                                                                                                                                                                                                                                                                                                                                                                                                                                                                                                                                                                                                                                                                                                                                                                                                                                                                                                                                                                                                                                                                                                                                                                                                                                                                                                                                                                                                                                                        | 397 | 402 | 0         | 101.3 | 90.9 | 94.2 | 80A08_29              | gbpln | Brassica rapa        | AT5G10320.1   Symbols:   unknown protein; Has 54 Blast hits to 53 proteins in 19 species: Archae - 0; Bacteria - 4; Metazoa - 0; Fungi - 0; Plants - 50; Viruses - 0; Other Eukaryotes - 0 (source: NCBI BLink).   chr5:3244180-3246603 REVERSE LENGTH=403                                                                                                                                                                                                                                                                                        | 397 | 403 | 1.00E-180 | 101.5 | 80.4 | 90.2 |
| Rsa1.0_00016.1.g1058.t1 | gb AAZ67613.1  80A08_28 [Brassica rapa subsp. pekinensis]                                                                                                                                                                                                                                                                                                                                                                                                                                                                                                                                                                                                                                                                                                                                                                                                                                                                                                                                                                                                                                                                                                                                                                                                                                                                                                                                                                                                                                                                                                                                                                                                                        | 121 | 120 | 9.00E-58  | 99.2  | 92.6 | 95.0 | 80A08_28              | gbpln | Brassica rapa        | AT5G10310.1   Symbols:   unknown protein; FUNCTIONS IN: molecular_function unknown; INVOLVED IN: biological_process unknown; LOCATED IN: endomembrane system; EXPRESSED IN: 17 plant structures; EXPRESSED DURING: 10 growth stages; BEST Arabidopsis thaliana protein match is: unknown protein (TAIR:AT3G13898.1); Has 1807 Blast hits to 1807 proteins in 277 species: Archae - 0; Bacteria - 0; Metazoa - 736; Fungi - 347; Plants - 385; Viruses - 0; Other Eukaryotes - 339 (source: NCBI BLink).   chr5:3241666-3242127 REVERSE LENGTH=122 | 121 | 122 | 2.00E-50  | 100.8 | 74.4 | 78.5 |
| Rsa1.0_00016.1.g1059.t1 | ref NP_196592.1  methyl esterase 5 [Arabidopsis thaliana] gi 75334959 sp Q9LFT6.1 HNL_ARATH RecName: Full=Alpha-hydroxynitrile lyase; Short=AtHNL; AltName: Full=(R)-hydroxynitrile lyase; AltName: Full=(R)-oxynitrilase; AltName: Full=Methyl esterase 5; Short=AtMES5 gi 254220946 pdb 3DQZ A Chain A. Structure Of The Hydroxynitrile Lyase From Arabidopsis Thaliana gi 254220947 pdb 3DQZ B Chain B. Structure Of The Hydroxynitrile Lyase From Arabidopsis Thaliana gi 254220948 pdb 3DQZ C Chain C. Structure Of The Hydroxynitrile Lyase From Arabidopsis Thaliana gi 254220949 pdb 3DQZ D Chain D. Structure Of The Hydroxynitrile Lyase From Arabidopsis Thaliana gi 8953411 emb CAB96686.1  alpha-hydroxynitrile lyase-like protein [Arabidopsis thaliana] gi 20147249 gb AAM10338.1  AT5g10300/F18D22_70 [Arabidopsis thaliana] gi 23296322 gb AAN13041.1  putative alpha-hydroxynitrile lyase [Arabidopsis thaliana] gi 110740625 dbj BAE98416.1  alpha-hydroxynitrile lyase-like protein [Arabidopsis thaliana] gi 332004135 gb AED91518.1  methyl esterase 5 [Arabidopsis thaliana] ref NP_196590.1  myb domain protein 92 [Arabidopsis thaliana] gi 3941524 gb AAC83638.1  putative transcription factor [Arabidopsis thaliana] gi 8953409 emb CAB96684.1  putative transcription factor MYB92 [Arabidopsis thaliana] gi 27754493 gb AAO22694.1  putative myb family transcription factor [Arabidopsis thaliana] gi 28393977 gb AAO42396.1  putative myb family transcription factor [Arabidopsis thaliana] gi 41619378 gb AAS10089.1  MYB transcription factor [Arabidopsis thaliana] gi 332004133 gb AED91516.1  myb domain protein 92 [Arabidopsis thaliana] | 258 | 258 | 1.00E-133 | 100.0 | 87.2 | 93.0 | methyl esterase 5     | gbpln | Arabidopsis thaliana | AT5G10300.1   Symbols: ATMES5, MES5, HNL   methyl esterase 5   chr5:3239684-3240724 FORWARD LENGTH=258                                                                                                                                                                                                                                                                                                                                                                                                                                            | 258 | 258 | 1.00E-135 | 100.0 | 87.2 | 93.0 |
| Rsa1.0_00016.1.g1060.t1 | gi 27754493 gb AAO22694.1  putative myb family transcription factor [Arabidopsis thaliana] gi 28393977 gb AAO42396.1  putative myb family transcription factor [Arabidopsis thaliana] gi 41619378 gb AAS10089.1  MYB transcription factor [Arabidopsis thaliana] gi 332004133 gb AED91516.1  myb domain protein 92 [Arabidopsis thaliana]                                                                                                                                                                                                                                                                                                                                                                                                                                                                                                                                                                                                                                                                                                                                                                                                                                                                                                                                                                                                                                                                                                                                                                                                                                                                                                                                        | 337 | 334 | 1.00E-151 | 99.1  | 80.4 | 87.8 | myb domain protein 92 | gbpln | Arabidopsis thaliana | AT5G10280.1   Symbols: MYB92, ATMYB92, ATMYB64   myb domain protein 92   chr5:3232776-3233956 FORWARD LENGTH=334                                                                                                                                                                                                                                                                                                                                                                                                                                  | 337 | 334 | 1.00E-154 | 99.1  | 80.4 | 87.8 |
| Rsa1.0_00016.1.g1061.t1 | gb AAZ67608.1  80A08_23 [Brassica rapa subsp. pekinensis]                                                                                                                                                                                                                                                                                                                                                                                                                                                                                                                                                                                                                                                                                                                                                                                                                                                                                                                                                                                                                                                                                                                                                                                                                                                                                                                                                                                                                                                                                                                                                                                                                        | 510 | 543 | 0         | 106.5 | 95.5 | 96.7 | 80A08_23              | gbpln | Brassica rapa        | AT5G10270.1   Symbols: CDKC1   cyclin-dependent kinase C;1   chr5:3221715-3224674 REVERSE LENGTH=505                                                                                                                                                                                                                                                                                                                                                                                                                                              | 510 | 505 | 0         | 99.0  | 86.9 | 91.6 |
| Rsa1.0_00016.1.g1062.t1 | gb AAZ67607.1  80A08_22 [Brassica rapa subsp. pekinensis]                                                                                                                                                                                                                                                                                                                                                                                                                                                                                                                                                                                                                                                                                                                                                                                                                                                                                                                                                                                                                                                                                                                                                                                                                                                                                                                                                                                                                                                                                                                                                                                                                        | 205 | 206 | 1.00E-110 | 100.5 | 97.1 | 97.6 | 80A08_22              | gbpln | Brassica rapa        | AT5G10260.1   Symbols: AtRABH1e, RABH1e   RAB GTPase homolog H1E   chr5:3219991-3221301 FORWARD LENGTH=207                                                                                                                                                                                                                                                                                                                                                                                                                                        | 205 | 207 | 1.00E-107 | 101.0 | 91.7 | 97.6 |
| Rsa1.0_00016.1.g1063.t1 | gb AAZ67606.1  80A08_21 [Brassica rapa subsp. pekinensis]                                                                                                                                                                                                                                                                                                                                                                                                                                                                                                                                                                                                                                                                                                                                                                                                                                                                                                                                                                                                                                                                                                                                                                                                                                                                                                                                                                                                                                                                                                                                                                                                                        | 656 | 630 | 0         | 96.0  | 88.1 | 91.9 | 80A08_21              | gbpln | Brassica rapa        | AT5G10250.1   Symbols: DOT3   Phototropic-responsive NPH3 family protein   chr5:3217028-3219368 REVERSE LENGTH=607                                                                                                                                                                                                                                                                                                                                                                                                                                | 656 | 607 | 0         | 92.5  | 73.6 | 81.7 |

|                         |                                                                                                                                                                                                                                                                                                                                                   |      |      |           |       |      |      |                                          |       |                      |                                                                                                                                                                                                                                                                                                                                                                                                                                 |      |     |           |       |      |      |
|-------------------------|---------------------------------------------------------------------------------------------------------------------------------------------------------------------------------------------------------------------------------------------------------------------------------------------------------------------------------------------------|------|------|-----------|-------|------|------|------------------------------------------|-------|----------------------|---------------------------------------------------------------------------------------------------------------------------------------------------------------------------------------------------------------------------------------------------------------------------------------------------------------------------------------------------------------------------------------------------------------------------------|------|-----|-----------|-------|------|------|
| Rsa1.0_00016.1.g1064.t1 | gb AAZ67605.1  80A08_20 [Brassica rapa subsp. pekinensis]                                                                                                                                                                                                                                                                                         | 316  | 316  | 0         | 100.0 | 97.5 | 98.7 | 80A08_20                                 | gbpln | Brassica rapa        | AT5G10230.1   Symbols: ANNAT7, ANN7   annexin 7   chr5:3209738-3211396 REVERSE LENGTH=316                                                                                                                                                                                                                                                                                                                                       | 316  | 316 | 1.00E-170 | 100.0 | 89.2 | 94.6 |
| Rsa1.0_00016.1.g1065.t1 | emb CAB39638.1  RNA-directed DNA polymerase-like protein [Arabidopsis thaliana]   g 7267668 emb CAB78094.1  RNA-directed DNA polymerase-like protein [Arabidopsis thaliana]                                                                                                                                                                       | 2157 | 1274 | 0         | 59.1  | 28.2 | 38.2 | RNA-directed DNA polymerase-like protein | gbpln | Arabidopsis thaliana | AT5G10220.1   Symbols: ANN6, ANNAT6   annexin 6   chr5:3206980-3208784 REVERSE LENGTH=318                                                                                                                                                                                                                                                                                                                                       | 2157 | 318 | 1.00E-151 | 14.7  | 11.9 | 12.9 |
| Rsa1.0_00016.1.g1066.t1 | ref NP_196583.1  uncharacterized protein [Arabidopsis thaliana]   g 7960740 emb CAB92062.1  putative protein [Arabidopsis thaliana]   g 38564316 gb AR23737.1  At5g10210 [Arabidopsis thaliana]   g 38604056 gb AR24771.1  At5g10210 [Arabidopsis thaliana]   g 332004125 gb AED91508.1  uncharacterized protein AT5G10210 [Arabidopsis thaliana] | 190  | 197  | 8.00E-82  | 103.7 | 80.5 | 91.1 | uncharacterized protein                  | gbpln | Arabidopsis thaliana | AT5G10210.1   Symbols:   CONTAINS InterPro DOMAIN/s: C2 calcium-dependent membrane targeting (InterPro:IPR000008); BEST Arabidopsis thaliana protein match is: unknown protein (TAIR:AT5G5030.1); Has 1807 Blast hits to 1807 proteins in 277 species: Archaea - 0; Bacteria - 0; Metazoa - 736; Fungi - 347; Plants - 385; Viruses - 0; Other Eukaryotes - 339 (source: NCBI BLINK).   chr5:3206236-3206829 FORWARD LENGTH=197 | 190  | 197 | 3.00E-84  | 103.7 | 80.5 | 91.1 |
| Rsa1.0_00016.1.g1067.t1 | gb AAZ67602.1  80A08_17 [Brassica rapa subsp. pekinensis]                                                                                                                                                                                                                                                                                         | 633  | 631  | 0         | 99.7  | 95.6 | 98.1 | 80A08_17                                 | gbpln | Brassica rapa        | AT5G10200.1   Symbols:   ARM-repeat/Tetratricopeptide repeat (TPR)-like protein   chr5:3202378-3204367 FORWARD LENGTH=631                                                                                                                                                                                                                                                                                                       | 633  | 631 | 0         | 99.7  | 94.6 | 97.9 |
| Rsa1.0_00017.1.g1068.t1 | #                                                                                                                                                                                                                                                                                                                                                 | #    | #    | #         | #     | #    | #    | -                                        | ----  | ----                 | #                                                                                                                                                                                                                                                                                                                                                                                                                               | #    | #   | #         | #     | #    | #    |
| Rsa1.0_00017.1.g1069.t1 | ref XP_002869338.1  hypothetical protein ARALYDRAFT_491614 [Arabidopsis lyrata subsp. lyrata]   g 297315174 gb EFH45597.1  hypothetical protein ARALYDRAFT_491614 [Arabidopsis lyrata subsp. lyrata]                                                                                                                                              | 261  | 227  | 1.00E-122 | 87.0  | 82.8 | 85.1 | hypothetical protein ARALYDRAFT_491614   | gbpln | Arabidopsis lyrata   | AT4G31290.1   Symbols:   ChaC-like family protein   chr4:15186851-15188278 FORWARD LENGTH=227                                                                                                                                                                                                                                                                                                                                   | 261  | 227 | 1.00E-124 | 87.0  | 82.8 | 84.7 |
| Rsa1.0_00017.1.g1070.t1 | ref XP_002869337.1  hypothetical protein ARALYDRAFT_328593 [Arabidopsis lyrata subsp. lyrata]   g 297315173 gb EFH45596.1  hypothetical protein ARALYDRAFT_328593 [Arabidopsis lyrata subsp. lyrata]                                                                                                                                              | 247  | 234  | 1.00E-131 | 94.7  | 93.9 | 94.3 | hypothetical protein ARALYDRAFT_328593   | gbpln | Arabidopsis lyrata   | AT4G31300.2   Symbols: PBA1   N-terminal nucleophile aminohydrolases (Ntn hydrolases) superfamily protein   chr4:15188927-15190935 FORWARD LENGTH=234                                                                                                                                                                                                                                                                           | 247  | 234 | 1.00E-132 | 94.7  | 93.1 | 93.9 |
| Rsa1.0_00017.1.g1071.t1 | gb EOA18510.1  hypothetical protein CARUB_v10007062mg [Capsella rubella]                                                                                                                                                                                                                                                                          | 188  | 191  | 7.00E-84  | 101.6 | 81.9 | 87.2 | hypothetical protein CARUB_v10007062mg   | gbpln | Capsella rubella     | AT4G31320.1   Symbols:   SAUR-like auxin-responsive protein family   chr4:15193993-15194562 REVERSE LENGTH=189                                                                                                                                                                                                                                                                                                                  | 188  | 189 | 2.00E-83  | 100.5 | 79.8 | 86.2 |
| Rsa1.0_00017.1.g1072.t2 | ref NP_567872.1  uncharacterized protein [Arabidopsis thaliana]   g 13507569 gb AAK28647.1 AF360350.1 unknown protein [Arabidopsis thaliana]   g 15293233 gb AAK93727.1  unknown protein [Arabidopsis thaliana]   g 332660492 gb AEE85892.1  uncharacterized protein AT4G31330 [Arabidopsis thaliana]                                             | 382  | 239  | 1.00E-125 | 62.6  | 56.5 | 61.0 | uncharacterized protein                  | gbpln | Arabidopsis thaliana | AT4G31330.1   Symbols:   Protein of unknown function, DUF599   chr4:15202354-15203151 FORWARD LENGTH=239                                                                                                                                                                                                                                                                                                                        | 382  | 239 | 1.00E-127 | 62.6  | 56.5 | 61.0 |
| Rsa1.0_00017.1.g1073.t1 | #                                                                                                                                                                                                                                                                                                                                                 | #    | #    | #         | #     | #    | #    | -                                        | ----  | ----                 | #                                                                                                                                                                                                                                                                                                                                                                                                                               | #    | #   | #         | #     | #    | #    |
| Rsa1.0_00017.1.g1074.t2 | ref NP_567873.1  myosin heavy chain-related protein [Arabidopsis thaliana]   g 26983878 gb AAN86191.1  unknown protein [Arabidopsis thaliana]   g 222423518 dbs BAH19729.1  AT4G31340 [Arabidopsis thaliana]   g 332660493 gb AEE85893.1  myosin heavy chain-related protein [Arabidopsis thaliana]                                               | 412  | 437  | 0         | 106.1 | 80.6 | 88.1 | myosin heavy chain-related protein       | gbpln | Arabidopsis thaliana | AT4G31340.1   Symbols:   myosin heavy chain-related   chr4:15205662-15208950 FORWARD LENGTH=437                                                                                                                                                                                                                                                                                                                                 | 412  | 437 | 0         | 106.1 | 80.6 | 88.1 |
| Rsa1.0_00017.1.g1075.t1 | emb CAA16538.1  predicted protein [Arabidopsis thaliana]   g 7270037 emb CAB79853.1  predicted protein [Arabidopsis thaliana]                                                                                                                                                                                                                     | 344  | 711  | 2.00E-20  | 206.7 | 20.3 | 29.1 | predicted protein                        | gbpln | Arabidopsis thaliana | #                                                                                                                                                                                                                                                                                                                                                                                                                               | #    | #   | #         | #     | #    | #    |
| Rsa1.0_00017.1.g1076.t1 | #                                                                                                                                                                                                                                                                                                                                                 | #    | #    | #         | #     | #    | #    | -                                        | ----  | ----                 | #                                                                                                                                                                                                                                                                                                                                                                                                                               | #    | #   | #         | #     | #    | #    |



|                         |                                                                                                                                                                                                                                                                                                                                                                                                                                                                                                                                                                                                                                                                                                                   |     |     |           |       |      |      |                                                                            |       |                      |                                                                                                                                                                                                                                                                                                                                                                                        |     |     |           |       |      |      |
|-------------------------|-------------------------------------------------------------------------------------------------------------------------------------------------------------------------------------------------------------------------------------------------------------------------------------------------------------------------------------------------------------------------------------------------------------------------------------------------------------------------------------------------------------------------------------------------------------------------------------------------------------------------------------------------------------------------------------------------------------------|-----|-----|-----------|-------|------|------|----------------------------------------------------------------------------|-------|----------------------|----------------------------------------------------------------------------------------------------------------------------------------------------------------------------------------------------------------------------------------------------------------------------------------------------------------------------------------------------------------------------------------|-----|-----|-----------|-------|------|------|
| Rsa1.0_00017.1.g1077.t1 | refNP_001154280.1 Core-2/1-branching beta-1,6-N-acetylglucosaminyltransferase family protein [Arabidopsis thaliana] gi 240256111 ref NP_194863.4  Core-2/1-branching beta-1,6-N-acetylglucosaminyltransferase family protein [Arabidopsis thaliana] gi 26452247 dbj BAC4321.1.1  unknown protein [Arabidopsis thaliana] gi 27311797 gb AA000864.1  Unknown protein [Arabidopsis thaliana] gi 30725618 gb AAP37831.1  At4g31350 [Arabidopsis thaliana] gi 332660495 gb AEE85895.1  Core-2/1-branching beta-1,6-N-acetylglucosaminyltransferase family protein [Arabidopsis thaliana] gi 332660496 gb AEE85896.1  Core-2/1-branching beta-1,6-N-acetylglucosaminyltransferase family protein [Arabidopsis thaliana] | 376 | 376 | 0         | 100.0 | 93.1 | 97.3 | Core-2/1-branching beta-1,6-N-acetylglucosaminyltransferase family protein | gbpln | Arabidopsis thaliana | AT4G31350.2   Symbols:   Core-2/1-branching beta-1,6-N-acetylglucosaminyltransferase family protein   chr4:15213133-15215651 FORWARD LENGTH=376                                                                                                                                                                                                                                        | 376 | 376 | 0         | 100.0 | 93.1 | 97.3 |
| Rsa1.0_00017.1.g1078.t1 | refXP_002869331.1  hypothetical protein ARALYDRAFT_913334 [Arabidopsis lyrata subsp. lyrata] gi 297315167 gb EFH45590.1  hypothetical protein ARALYDRAFT_913334 [Arabidopsis lyrata subsp. lyrata]                                                                                                                                                                                                                                                                                                                                                                                                                                                                                                                | 187 | 179 | 2.00E-58  | 95.7  | 73.8 | 77.5 | hypothetical protein ARALYDRAFT_913334                                     | gbpln | Arabidopsis lyrata   | AT4G31360.1   Symbols:   selenium binding   chr4:15221945-15223310 FORWARD LENGTH=186                                                                                                                                                                                                                                                                                                  | 187 | 186 | 1.00E-60  | 99.5  | 73.3 | 77.5 |
| Rsa1.0_00017.1.g1079.t1 | refNP_194866.2  protein kinase family protein [Arabidopsis thaliana] gi 55978825 gb AAV68874.1  hypothetical protein AT4G31380 [Arabidopsis thaliana] gi 60547875 gb AA23901.1  hypothetical protein AT4g31380 [Arabidopsis thaliana] gi 332660502 gb AEE85902.1  protein kinase family protein [Arabidopsis thaliana]                                                                                                                                                                                                                                                                                                                                                                                            | 124 | 181 | 3.00E-55  | 146.0 | 94.4 | 97.6 | protein kinase family protein                                              | gbpln | Arabidopsis thaliana | AT4G31380.1   Symbols: FLP1   FPF1-like protein 1   chr4:15229837-15230382 FORWARD LENGTH=181                                                                                                                                                                                                                                                                                          | 124 | 181 | 5.00E-58  | 146.0 | 94.4 | 97.6 |
| Rsa1.0_00017.1.g1080.t1 | refXP_002869329.1  ABC1 family protein [Arabidopsis lyrata subsp. lyrata] gi 297315165 gb EFH45588.1  ABC1 family protein [Arabidopsis lyrata subsp. lyrata]                                                                                                                                                                                                                                                                                                                                                                                                                                                                                                                                                      | 674 | 682 | 0         | 101.2 | 92.1 | 95.3 | ABC1 family protein                                                        | gbpln | Arabidopsis lyrata   | AT4G31390.1   Symbols:   Protein kinase superfamily protein   chr4:15233126-15236764 FORWARD LENGTH=682                                                                                                                                                                                                                                                                                | 674 | 682 | 0         | 101.2 | 92.1 | 95.0 |
| Rsa1.0_00017.1.g1081.t1 | gb EOA17077.1  hypothetical protein CARUB_v10005326mg [Capsella rubella]                                                                                                                                                                                                                                                                                                                                                                                                                                                                                                                                                                                                                                          | 326 | 306 | 1.00E-120 | 93.9  | 74.5 | 79.4 | hypothetical protein CARUB_v10005326mg                                     | gbpln | Capsella rubella     | AT4G31410.2   Symbols:   Protein of unknown function (DUF1644)   chr4:15244259-15245474 FORWARD LENGTH=308                                                                                                                                                                                                                                                                             | 326 | 308 | 1.00E-122 | 94.5  | 74.2 | 79.8 |
| Rsa1.0_00017.1.g1082.t1 | dbj BAJ34316.1  unnamed protein product [Theilungiella halophila]                                                                                                                                                                                                                                                                                                                                                                                                                                                                                                                                                                                                                                                 | 396 | 402 | 0         | 101.5 | 87.4 | 93.7 | unnamed protein product                                                    | ----  | ----                 | AT4G31420.1   Symbols:   Zinc finger protein 622   chr4:15245987-15247763 REVERSE LENGTH=404                                                                                                                                                                                                                                                                                           | 396 | 404 | 0         | 102.0 | 83.1 | 91.9 |
| Rsa1.0_00017.1.g1083.t1 | refXP_002869326.1  predicted protein [Arabidopsis lyrata subsp. lyrata] gi 297315162 gb EFH45585.1  predicted protein [Arabidopsis lyrata subsp. lyrata]                                                                                                                                                                                                                                                                                                                                                                                                                                                                                                                                                          | 529 | 571 | 1.00E-151 | 107.9 | 70.7 | 77.5 | predicted protein                                                          | gbpln | Arabidopsis lyrata   | AT4G31430.2   Symbols:   unknown protein; LOCATED IN: plasma membrane; EXPRESSED IN: 25 plant structures; EXPRESSED DURING: 15 growth stages; Has 35333 Blast hits to 34131 proteins in 2444 species: Archae - 798; Bacteria - 22429; Metazoa - 974; Fungi - 991; Plants - 531; Viruses - 0; Other Eukaryotes - 9610 (source: NCBI BLINK).   chr4:15248510-15252204 FORWARD LENGTH=574 | 529 | 574 | 1.00E-145 | 108.5 | 66.5 | 75.8 |
| Rsa1.0_00017.1.g1084.t1 | refXP_002869325.1  hypothetical protein ARALYDRAFT_491593 [Arabidopsis lyrata subsp. lyrata] gi 297315161 gb EFH45584.1  hypothetical protein ARALYDRAFT_491593 [Arabidopsis lyrata subsp. lyrata]                                                                                                                                                                                                                                                                                                                                                                                                                                                                                                                | 382 | 394 | 1.00E-148 | 103.1 | 74.6 | 82.5 | hypothetical protein ARALYDRAFT_491593                                     | gbpln | Arabidopsis lyrata   | AT4G31440.1   Symbols:   unknown protein; BEST Arabidopsis thaliana protein match is: unknown protein (TAIR:AT2G4530.1); Has 210 Blast hits to 209 proteins in 55 species: Archae - 0; Bacteria - 72; Metazoa - 2; Fungi - 6; Plants - 128; Viruses - 0; Other Eukaryotes - 2 (source: NCBI BLINK).   chr4:15253731-15254870 FORWARD LENGTH=379                                        | 382 | 379 | 1.00E-138 | 99.2  | 70.2 | 77.5 |
| Rsa1.0_00017.1.g1085.t1 | #                                                                                                                                                                                                                                                                                                                                                                                                                                                                                                                                                                                                                                                                                                                 | #   | #   | #         | #     | #    | -    | ----                                                                       | ----  | ----                 | #                                                                                                                                                                                                                                                                                                                                                                                      | #   | #   | #         | #     | #    |      |
| Rsa1.0_00017.1.g1086.t1 | gb EOA22078.1  hypothetical protein CARUB_v10002618mg [Capsella rubella]                                                                                                                                                                                                                                                                                                                                                                                                                                                                                                                                                                                                                                          | 164 | 892 | 3.00E-17  | 543.9 | 31.1 | 43.9 | hypothetical protein CARUB_v10002618mg                                     | gbpln | Capsella rubella     | AT4G32670.1   Symbols:   RING/FYVE/PHD zinc finger superfamily protein   chr4:15759527-15762847 REVERSE LENGTH=860                                                                                                                                                                                                                                                                     | 164 | 860 | 1.00E-19  | 524.4 | 31.7 | 44.5 |

|                         |                                                                                                                                                                                                                                                                                                                                                          |      |      |           |       |      |      |                                        |       |                      |                                                                                                                                                                                                                                                                                                                                                                                                                           |      |      |           |       |      |      |
|-------------------------|----------------------------------------------------------------------------------------------------------------------------------------------------------------------------------------------------------------------------------------------------------------------------------------------------------------------------------------------------------|------|------|-----------|-------|------|------|----------------------------------------|-------|----------------------|---------------------------------------------------------------------------------------------------------------------------------------------------------------------------------------------------------------------------------------------------------------------------------------------------------------------------------------------------------------------------------------------------------------------------|------|------|-----------|-------|------|------|
| Rsa1.0_00017.1.g1087.t2 | ref[XP_002867301.1] ribosomal protein L28 family protein [Arabidopsis lyrata subsp. lyrata]<br>gi 297313137 gb EFH43560.1  ribosomal protein L28 family protein [Arabidopsis lyrata subsp. lyrata]<br>ref[NP_194876.2] coatomer subunit beta-1 [Arabidopsis thaliana]<br>gi 334187063 ref[NP_001190880.1] coatomer subunit beta-1 [Arabidopsis thaliana] | 217  | 212  | 2.00E-92  | 97.7  | 81.1 | 85.7 | ribosomal protein L28 family protein   | gbpln | Arabidopsis lyrata   | AT4G31460.1   Symbols:   Ribosomal L28 family   chr4:15259773-15260847 REVERSE LENGTH=212                                                                                                                                                                                                                                                                                                                                 | 217  | 212  | 9.00E-95  | 97.7  | 81.1 | 86.6 |
| Rsa1.0_00017.1.g1088.t1 | gi 146286090 sp Q9SV21.2 COPB1_ARA TH RecName: Full=Coatomer subunit beta-1; AltName: Full=Beta-coat protein 1; Short=Beta-COP 1<br>gi 332660518 gb AEE85918.1  coatomer subunit beta-1 [Arabidopsis thaliana]<br>gi 332660519 gb AEE85919.1  coatomer subunit beta-1 [Arabidopsis thaliana]                                                             | 948  | 948  | 0         | 100.0 | 97.2 | 98.5 | coatomer subunit beta-1                | gbpln | Arabidopsis thaliana | AT4G31480.2   Symbols:   Coatomer, beta subunit   chr4:15264145-15267384 FORWARD LENGTH=948                                                                                                                                                                                                                                                                                                                               | 948  | 948  | 0         | 100.0 | 97.2 | 98.5 |
| Rsa1.0_00017.1.g1089.t1 | ref[XP_002889985.1] CYP71B2 [Arabidopsis lyrata subsp. lyrata]<br>gi 297335827 gb EFH66244.1  CYP71B2 [Arabidopsis lyrata subsp. lyrata]                                                                                                                                                                                                                 | 513  | 502  | 0         | 97.9  | 72.7 | 83.6 | CYP71B2                                | gbpln | Arabidopsis lyrata   | AT1G13080.1   Symbols: CYP71B2   cytochrome P450, family 71, subfamily B, polypeptide 2   chr1:4459212-4460807 FORWARD LENGTH=502                                                                                                                                                                                                                                                                                         | 513  | 502  | 0         | 97.9  | 72.1 | 82.5 |
| Rsa1.0_00017.1.g1090.t1 | ref[XP_002889985.1] CYP71B2 [Arabidopsis lyrata subsp. lyrata]<br>gi 297335827 gb EFH66244.1  CYP71B2 [Arabidopsis lyrata subsp. lyrata]                                                                                                                                                                                                                 | 510  | 502  | 0         | 98.4  | 73.7 | 85.5 | CYP71B2                                | gbpln | Arabidopsis lyrata   | AT1G13080.1   Symbols: CYP71B2   cytochrome P450, family 71, subfamily B, polypeptide 2   chr1:4459212-4460807 FORWARD LENGTH=502                                                                                                                                                                                                                                                                                         | 510  | 502  | 0         | 98.4  | 72.4 | 82.9 |
| Rsa1.0_00017.1.g1091.t1 | ref[NP_194882.2] exocyst complex component 7 [Arabidopsis thaliana]<br>gi 32347268 gb AAP31853.1  EXO70-G1 protein [Arabidopsis thaliana]<br>gi 332660526 gb AEE85926.1  exocyst subunit exo70 family protein G1 [Arabidopsis thaliana]                                                                                                                  | 673  | 687  | 0         | 102.1 | 90.6 | 95.2 | exocyst complex component 7            | gbpln | Arabidopsis thaliana | AT4G31540.1   Symbols: ATEXO70G1, EXO70G1   exocyst subunit exo70 family protein G1   chr4:15284739-15286802 REVERSE LENGTH=687                                                                                                                                                                                                                                                                                           | 673  | 687  | 0         | 102.1 | 90.6 | 95.2 |
| Rsa1.0_00017.1.g1092.t1 | gb ACQ76798.1  WRKY transcription factor 11 [Brassica napus]                                                                                                                                                                                                                                                                                             | 325  | 327  | 1.00E-164 | 100.6 | 89.8 | 94.5 | WRKY transcription factor 11           | gbpln | Brassica napus       | AT4G31550.2   Symbols: WRKY11, ATWRKY11   WRKY DNA-binding protein 11   chr4:15290065-15291458 REVERSE LENGTH=324                                                                                                                                                                                                                                                                                                         | 325  | 324  | 1.00E-149 | 99.7  | 79.7 | 88.0 |
| Rsa1.0_00017.1.g1093.t1 | gb ABD65000.1  hypothetical protein 26.t00020 [Brassica oleracea]                                                                                                                                                                                                                                                                                        | 447  | 302  | 2.00E-81  | 67.6  | 34.9 | 42.5 | hypothetical protein 26.t00020         | gbpln | Brassica oleracea    | AT3G47680.1   Symbols:   DNA binding   chr3:17577483-17578391 REVERSE LENGTH=302                                                                                                                                                                                                                                                                                                                                          | 447  | 302  | 6.00E-58  | 67.6  | 27.5 | 38.0 |
| Rsa1.0_00017.1.g1094.t1 | gb ABD64939.1  hypothetical protein 24.t00017 [Brassica oleracea]                                                                                                                                                                                                                                                                                        | 439  | 442  | 0         | 100.7 | 76.5 | 86.1 | hypothetical protein 24.t00017         | gbpln | Brassica oleracea    | AT2G13770.1   Symbols:   CONTAINS InterPro DOMAIN/s: Putative harbinger transposase-derived nuclease (InterPro:IPR006912); Has 451 Blast hits to 352 proteins in 33 species: Archae - 0; Bacteria - 0; Metazoa - 28; Fungi - 8; Plants - 388; Viruses - 0; Other Eukaryotes - 27 (source: NCBI BLINK).   chr2:5736603-5737847 FORWARD LENGTH=343                                                                          | 439  | 343  | 4.00E-33  | 78.1  | 13.7 | 17.8 |
| Rsa1.0_00017.1.g1095.t1 | ref[XP_002862560.1] hypothetical protein ARALYDRAFT_497397 [Arabidopsis lyrata subsp. lyrata]<br>gi 297308158 gb EFH38818.1  hypothetical protein ARALYDRAFT_497397 [Arabidopsis lyrata subsp. lyrata]                                                                                                                                                   | 134  | 137  | 1.00E-53  | 102.2 | 80.6 | 85.8 | hypothetical protein ARALYDRAFT_497397 | gbpln | Arabidopsis lyrata   | AT4G31560.1   Symbols: HCF153   high chlorophyll fluorescence 153   chr4:15295219-15296028 FORWARD LENGTH=137                                                                                                                                                                                                                                                                                                             | 134  | 137  | 6.00E-56  | 102.2 | 79.9 | 85.8 |
| Rsa1.0_00017.1.g1096.t2 | ref[NP_194885.2] uncharacterized protein [Arabidopsis thaliana]<br>gi 332660530 gb AEE85930.1  uncharacterized protein AT4G31570 [Arabidopsis thaliana]                                                                                                                                                                                                  | 2708 | 2730 | 0         | 100.8 | 78.6 | 86.9 | uncharacterized protein                | gbpln | Arabidopsis thaliana | AT4G31570.1   Symbols:   CONTAINS InterPro DOMAIN/s: Prefoldin (InterPro:IPR009053); BEST Arabidopsis thaliana protein match is: unknown protein (TAIR:AT1G24460.1); Has 194354 Blast hits to 66887 proteins in 3244 species: Archae - 3688; Bacteria - 38556; Metazoa - 84828; Fungi - 17265; Plants - 10589; Viruses - 805; Other Eukaryotes - 38623 (source: NCBI BLINK).   chr4:15297061-15306036 FORWARD LENGTH=2730 | 2708 | 2730 | 0         | 100.8 | 78.6 | 86.9 |

|                         |                                                                                                                                                                                                                                                                                                                                                                                                                                                                                                                                                                                                                                     |     |     |           |       |      |      |                                                                                                                                                                                                                                                                                                                                                  |       |                      |                                                                                                                                  |     |     |           |       |      |      |
|-------------------------|-------------------------------------------------------------------------------------------------------------------------------------------------------------------------------------------------------------------------------------------------------------------------------------------------------------------------------------------------------------------------------------------------------------------------------------------------------------------------------------------------------------------------------------------------------------------------------------------------------------------------------------|-----|-----|-----------|-------|------|------|--------------------------------------------------------------------------------------------------------------------------------------------------------------------------------------------------------------------------------------------------------------------------------------------------------------------------------------------------|-------|----------------------|----------------------------------------------------------------------------------------------------------------------------------|-----|-----|-----------|-------|------|------|
| Rsa1.0_00017.1.g1097.t1 | ref NP_194887.1  putative xyloglucan glycosyltransferase 5 [Arabidopsis thaliana]<br>gi 75201904 sp Q9SB75.1 CSLC5_ARAT H RecName: Full=Probable xyloglucan glycosyltransferase 5; AltName: Full=Cellulose synthase-like protein C5; Short=AtCslC5<br>gi 3281868 emb CAA19764.1  putative protein [Arabidopsis thaliana]<br>gi 7270062 emb CAB79877.1  putative protein [Arabidopsis thaliana]<br>gi 28058784 gb AAO29953.1  putative protein [Arabidopsis thaliana]<br>gi 30725520 gb AAP37782.1  At4g31590 [Arabidopsis thaliana]<br>gi 332660533 gb AEE85933.1  putative xyloglucan glycosyltransferase 5 [Arabidopsis thaliana] | 690 | 692 | 0         | 100.3 | 95.8 | 97.8 | putative xyloglucan glycosyltransferase 5                                                                                                                                                                                                                                                                                                        | gbpln | Arabidopsis thaliana | AT4G31590.1   Symbols: ATCSLC05, CSLC05, ATCSLC5, CSLC5   Cellulose-synthase-like C5   chr4:15309889-15312336 REVERSE LENGTH=692 | 690 | 692 | 0         | 100.3 | 95.8 | 97.8 |
| Rsa1.0_00017.1.g1098.t1 | sp O65098.1 REM1_BRAOB RecName: Full=B3 domain-containing protein REM1; AltName: Full=Protein REPRODUCTIVE MERISTEM 1; Short=BoREM1<br>gi 3170424 gb AAC18082.1  reproductive meristem gene 1 [Brassica oleracea var. botrytis]                                                                                                                                                                                                                                                                                                                                                                                                     | 492 | 497 | 1.00E-176 | 101.0 | 72.0 | 80.5 | RecName: Full=B3 domain-containing protein REM1; AltName: Full=Protein REPRODUCTIVE MERISTEM 1; Short=BoREM1<br>gi 3170424 gb AAC18082.1  reproductive meristem gene 1<br>RecName: Full=B3 domain-containing protein REM1; AltName: Full=Protein REPRODUCTIVE MERISTEM 1; Short=BoREM1<br>gi 3170424 gb AAC18082.1  reproductive meristem gene 1 | gbpln | Brassica oleracea    | AT4G31610.1   Symbols: REM1, ATREM1   Transcriptional factor B3 family protein   chr4:15317700-15319776 FORWARD LENGTH=517       | 492 | 517 | 1.00E-122 | 105.1 | 54.1 | 68.1 |
| Rsa1.0_00017.1.g1099.t1 | sp O65098.1 REM1_BRAOB RecName: Full=B3 domain-containing protein REM1; AltName: Full=Protein REPRODUCTIVE MERISTEM 1; Short=BoREM1<br>gi 3170424 gb AAC18082.1  reproductive meristem gene 1 [Brassica oleracea var. botrytis]                                                                                                                                                                                                                                                                                                                                                                                                     | 488 | 497 | 0         | 101.8 | 72.3 | 81.1 | RecName: Full=B3 domain-containing protein REM1; AltName: Full=Protein REPRODUCTIVE MERISTEM 1; Short=BoREM1<br>gi 3170424 gb AAC18082.1  reproductive meristem gene 1                                                                                                                                                                           | gbpln | Brassica oleracea    | AT4G31610.1   Symbols: REM1, ATREM1   Transcriptional factor B3 family protein   chr4:15317700-15319776 FORWARD LENGTH=517       | 488 | 517 | 1.00E-133 | 105.9 | 58.8 | 72.1 |
| Rsa1.0_00017.1.g1100.t1 | gb EOA16495.1  hypothetical protein CARUB_v10004653mg [Capsella rubella]                                                                                                                                                                                                                                                                                                                                                                                                                                                                                                                                                            | 530 | 496 | 1.00E-165 | 93.6  | 59.1 | 71.3 | hypothetical protein CARUB_v10004653mg                                                                                                                                                                                                                                                                                                           | gbpln | Capsella rubella     | AT4G31630.1   Symbols:   Transcriptional factor B3 family protein   chr4:15325343-15327220 REVERSE LENGTH=512                    | 530 | 512 | 1.00E-157 | 96.6  | 57.7 | 71.1 |
| Rsa1.0_00017.1.g1101.t1 | ref XP_002867286.1  hypothetical protein ARALYDRAFT_913300 [Arabidopsis lyrata subsp. lyrata]<br>gi 297313122 gb EFH43545.1  hypothetical protein ARALYDRAFT_913300 [Arabidopsis lyrata subsp. lyrata]                                                                                                                                                                                                                                                                                                                                                                                                                              | 507 | 632 | 1.00E-115 | 124.7 | 44.2 | 50.9 | hypothetical protein ARALYDRAFT_913300                                                                                                                                                                                                                                                                                                           | gbpln | Arabidopsis lyrata   | AT4G31680.1   Symbols:   Transcriptional factor B3 family protein   chr4:15340289-15342080 REVERSE LENGTH=462                    | 507 | 462 | 1.00E-115 | 91.1  | 40.8 | 50.3 |
| Rsa1.0_00017.1.g1102.t1 | dbj BAD44466.1  unknown protein [Arabidopsis thaliana]                                                                                                                                                                                                                                                                                                                                                                                                                                                                                                                                                                              | 615 | 631 | 0         | 102.6 | 80.5 | 87.0 | unknown protein                                                                                                                                                                                                                                                                                                                                  | gbpln | Arabidopsis thaliana | AT4G31670.1   Symbols: UBP18   ubiquitin-specific protease 18   chr4:15336007-15339506 REVERSE LENGTH=631                        | 615 | 631 | 0         | 102.6 | 80.7 | 87.2 |
| Rsa1.0_00017.1.g1103.t1 | ref XP_002867286.1  hypothetical protein ARALYDRAFT_913300 [Arabidopsis lyrata subsp. lyrata]<br>gi 297313122 gb EFH43545.1  hypothetical protein ARALYDRAFT_913300 [Arabidopsis lyrata subsp. lyrata]                                                                                                                                                                                                                                                                                                                                                                                                                              | 473 | 632 | 1.00E-152 | 133.6 | 61.5 | 73.6 | hypothetical protein ARALYDRAFT_913300                                                                                                                                                                                                                                                                                                           | gbpln | Arabidopsis lyrata   | AT4G31680.1   Symbols:   Transcriptional factor B3 family protein   chr4:15340289-15342080 REVERSE LENGTH=462                    | 473 | 462 | 1.00E-140 | 97.7  | 58.4 | 70.6 |
| Rsa1.0_00017.1.g1104.t1 | gb AAZ66937.1  117M18_18 [Brassica rapa]                                                                                                                                                                                                                                                                                                                                                                                                                                                                                                                                                                                            | 250 | 249 | 1.00E-137 | 99.6  | 97.2 | 98.4 | 117M18_18                                                                                                                                                                                                                                                                                                                                        | gbpln | Brassica rapa        | AT5G10360.1   Symbols: EMB3010, RPS6B   Ribosomal protein S6e   chr5:3258734-3260142 REVERSE LENGTH=249                          | 250 | 249 | 1.00E-134 | 99.6  | 94.4 | 96.4 |

|                         |                                                                                                                                                                                                                                                                                                                                                                                                                                                                                                                                                                                                                                                                                                                                                                                                                                                                                                                                                                                                                              |     |     |           |       |      |      |                                                 |       |                      |                                                                                                                          |     |     |           |       |      |      |
|-------------------------|------------------------------------------------------------------------------------------------------------------------------------------------------------------------------------------------------------------------------------------------------------------------------------------------------------------------------------------------------------------------------------------------------------------------------------------------------------------------------------------------------------------------------------------------------------------------------------------------------------------------------------------------------------------------------------------------------------------------------------------------------------------------------------------------------------------------------------------------------------------------------------------------------------------------------------------------------------------------------------------------------------------------------|-----|-----|-----------|-------|------|------|-------------------------------------------------|-------|----------------------|--------------------------------------------------------------------------------------------------------------------------|-----|-----|-----------|-------|------|------|
| Rsa1.0_00017.1.g1105.t1 | ref[NP_194900.1] TBP-associated factor II 15 [Arabidopsis thaliana]<br>gi 30689137 ref[NP_849481.1] TBP-associated factor II 15 [Arabidopsis thaliana]<br>gi 13492648 gb AAK28290.1 AF344879.1 putative TBP-associated 15 kDa subunit protein [Arabidopsis thaliana]<br>gi 13549156 gb AAK29671.1 AF352813.1 putative TBP associated factor 15kDa subunit [Arabidopsis thaliana]<br>gi 2072626 emb CAA73389.1<br>hypothetical protein [Arabidopsis thaliana] gi 3281856 emb CAA19751.1<br>Transcription factor II homolog [Arabidopsis thaliana]<br>gi 7270075 emb CAB79890.1<br>Transcription factor II homolog [Arabidopsis thaliana]<br>gi 21554584 gb AAM63623.1 <br>Transcription factor II homolog [Arabidopsis thaliana]<br>gi 39545934 gb AAR28030.1  TAF10 [Arabidopsis thaliana]<br>gi 222424014 dbj BAH19968.1  AT4G31720 [Arabidopsis thaliana]<br>gi 332660549 gb AEE85949.1  TBP-associated factor II 15 [Arabidopsis thaliana] gi 332660550 gb AEE85950.1  TBP-associated factor II 15 [Arabidopsis thaliana] | 134 | 134 | 3.00E-72  | 100.0 | 99.3 | 99.3 | TBP-associated factor II 15                     | gbpln | Arabidopsis thaliana | AT4G31720.1   Symbols: TAFII15, TAF10, STG1   TBP-associated factor II 15   chr4:15354223-15355704 REVERSE LENGTH=134    | 134 | 134 | 7.00E-75  | 100.0 | 99.3 | 99.3 |
| Rsa1.0_00017.1.g1106.t1 | gb EOA15643.1  hypothetical protein CARUB_v10005898mg [Capsella rubella]                                                                                                                                                                                                                                                                                                                                                                                                                                                                                                                                                                                                                                                                                                                                                                                                                                                                                                                                                     | 166 | 168 | 6.00E-60  | 101.2 | 69.9 | 79.5 | hypothetical protein CARUB_v10005898mg          | gbpln | Capsella rubella     | AT4G31730.1   Symbols: GDU1   glutamine dumper 1   chr4:15361207-15361683 FORWARD LENGTH=158                             | 166 | 158 | 7.00E-58  | 95.2  | 68.7 | 77.7 |
| Rsa1.0_00017.1.g1107.t1 | ref[XP_002869315.1] ADP-ribosylation factor 3 [Arabidopsis lyrata subsp. lyrata] gi 297315151 gb EFH45574.1  ADP-ribosylation factor 3 [Arabidopsis lyrata subsp. lyrata]<br>ref[XP_002867281.1] hypothetical protein ARALYDRAFT_491566 [Arabidopsis lyrata subsp. lyrata] gi 297313117 gb EFH43540.1                                                                                                                                                                                                                                                                                                                                                                                                                                                                                                                                                                                                                                                                                                                        | 204 | 182 | 1.00E-102 | 89.2  | 88.7 | 89.2 | ADP-ribosylation factor 3                       | gbpln | Arabidopsis lyrata   | AT2G24765.1   Symbols: ARF3, ARL1, ATARL1   ADP-ribosylation factor 3   chr2:10562822-10564961 FORWARD LENGTH=182        | 204 | 182 | 1.00E-103 | 89.2  | 86.3 | 89.2 |
| Rsa1.0_00017.1.g1108.t1 | ref[XP_002867281.1] hypothetical protein ARALYDRAFT_491566 [Arabidopsis lyrata subsp. lyrata]<br>ref[NP_194906.1] Monogalactosyldiacylglycerol synthase 1 [Arabidopsis thaliana] gi 75100403 sp O81770.1 MGDG1_ARAT H RecName: Full=Monogalactosyldiacylglycerol synthase 1, chloroplastic; Short=AtMGD1; AltName: Full=MGDG synthase type A; Flags: Precursor gi 3281850 emb CAA19745.1  monogalactosyldiacylglycerol synthase - like protein [Arabidopsis thaliana] gi 7270081 emb CAB79896.1  monogalactosyldiacylglycerol synthase-like protein [Arabidopsis thaliana] gi 7621497 gb AAF65066.1                                                                                                                                                                                                                                                                                                                                                                                                                          | 307 | 311 | 1.00E-167 | 101.3 | 96.1 | 97.7 | hypothetical protein ARALYDRAFT_491566          | gbpln | Arabidopsis lyrata   | AT4G31750.1   Symbols: WIN2   HOPW1-1-interacting 2   chr4:15364657-15367207 REVERSE LENGTH=311                          | 307 | 311 | 1.00E-169 | 101.3 | 95.4 | 97.7 |
| Rsa1.0_00017.1.g1109.t1 | ref[NP_194906.1] Monogalactosyldiacylglycerol synthase 1 [Arabidopsis thaliana] gi 75100403 sp O81770.1 MGDG1_ARAT H RecName: Full=Monogalactosyldiacylglycerol synthase 1, chloroplastic; Short=AtMGD1; AltName: Full=MGDG synthase type A; Flags: Precursor gi 3281850 emb CAA19745.1  monogalactosyldiacylglycerol synthase - like protein [Arabidopsis thaliana] gi 7270081 emb CAB79896.1  monogalactosyldiacylglycerol synthase-like protein [Arabidopsis thaliana] gi 7621497 gb AAF65066.1 <br>monogalactosyldiacylglycerol synthase [Arabidopsis thaliana] gi 9927297 dbj BAB12042.1  MGDG synthase type A [Arabidopsis thaliana] gi 20260132 gb AAM12964.1  strong similarity to monogalactosyldiacylglycerol synthase, Cucumis sativus, PID:gi1805254 [Arabidopsis thaliana] gi 31711946 gb AAP68329.1  At4g31780 [Arabidopsis thaliana] gi 332660556 gb AEE85956.1  Monogalactosyldiacylglycerol synthase 1 [Arabidopsis thaliana]                                                                               | 526 | 533 | 0         | 101.3 | 88.4 | 93.7 | Monogalactosyldiacylglycerol synthase 1         | gbpln | Arabidopsis thaliana | AT4G31780.2   Symbols: MGD1, MGDA   monogalactosyl diacylglycerol synthase 1   chr4:15374222-15376961 FORWARD LENGTH=533 | 526 | 533 | 0         | 101.3 | 88.4 | 93.7 |
| Rsa1.0_00017.1.g1110.t1 | gb EOA17067.1  hypothetical protein CARUB_v10005307mg, partial [Capsella rubella]                                                                                                                                                                                                                                                                                                                                                                                                                                                                                                                                                                                                                                                                                                                                                                                                                                                                                                                                            | 277 | 310 | 1.00E-152 | 111.9 | 93.5 | 96.8 | hypothetical protein CARUB_v10005307mg, partial | gbpln | Capsella rubella     | AT4G31790.2   Symbols:   Tetrapyrrole (Corrin/Porphyrin) Methylases   chr4:15377479-15378530 FORWARD LENGTH=277          | 277 | 277 | 1.00E-152 | 100.0 | 92.1 | 97.1 |

|                         |                                                                                                                                                                                                                                                                                                                                                                                                                                                                                                  |      |      |           |       |      |      |                                        |       |                      |                                                                                                                                                                                                                                                                                                                                                                                                                                                                                        |      |      |           |       |      |      |
|-------------------------|--------------------------------------------------------------------------------------------------------------------------------------------------------------------------------------------------------------------------------------------------------------------------------------------------------------------------------------------------------------------------------------------------------------------------------------------------------------------------------------------------|------|------|-----------|-------|------|------|----------------------------------------|-------|----------------------|----------------------------------------------------------------------------------------------------------------------------------------------------------------------------------------------------------------------------------------------------------------------------------------------------------------------------------------------------------------------------------------------------------------------------------------------------------------------------------------|------|------|-----------|-------|------|------|
| Rsa1.0_00017.1.g1111.t1 | gb AAS13378.1  WRKY1 [Brassica rapa subsp. chinensis]                                                                                                                                                                                                                                                                                                                                                                                                                                            | 313  | 308  | 1.00E-134 | 98.4  | 78.3 | 84.7 | WRKY1                                  | gbpln | Brassica rapa        | AT4G31800.1   Symbols: WRKY18, ATWRKY18   WRKY DNA-binding protein 18   chr4:15383296-15384812 FORWARD LENGTH=310                                                                                                                                                                                                                                                                                                                                                                      | 313  | 310  | 1.00E-132 | 99.0  | 78.0 | 85.3 |
| Rsa1.0_00017.1.g1112.t1 | #                                                                                                                                                                                                                                                                                                                                                                                                                                                                                                | #    | #    | #         | #     | #    | -    |                                        | ----  | ----                 | #                                                                                                                                                                                                                                                                                                                                                                                                                                                                                      | #    | #    | #         | #     | #    | #    |
| Rsa1.0_00017.1.g1113.t1 | gb EOA16845.1  hypothetical protein CARUB_v10005068mg [Capsella rubella]                                                                                                                                                                                                                                                                                                                                                                                                                         | 349  | 372  | 7.00E-25  | 106.6 | 29.8 | 47.6 | hypothetical protein CARUB_v10005068mg | gbpln | Capsella rubella     | AT4G14905.2   Symbols:   Galactose oxidase/kelch repeat superfamily protein   chr4:8526879-8527997 REVERSE LENGTH=372                                                                                                                                                                                                                                                                                                                                                                  | 349  | 372  | 1.00E-23  | 106.6 | 26.9 | 47.0 |
| Rsa1.0_00017.1.g1114.t1 | ref NP_189957.1  putative F-box/kelch-repeat protein [Arabidopsis thaliana]   gi 75182779 sp Q9M2B5.1 FBK72_ARAT H RecName: Full=Putative F-box/kelch-repeat protein At3g43710   gi 7362796 emb CAB83072.1  putative protein [Arabidopsis thaliana]   gi 332644299 gb AEE77820.1  putative F-box/kelch-repeat protein [Arabidopsis thaliana]                                                                                                                                                     | 370  | 378  | 1.00E-115 | 102.2 | 58.4 | 70.5 | putative F-box/kelch-repeat protein    | gbpln | Arabidopsis thaliana | AT3G43710.1   Symbols:   Galactose oxidase/kelch repeat superfamily protein   chr3:15605608-15606744 FORWARD LENGTH=378                                                                                                                                                                                                                                                                                                                                                                | 370  | 378  | 1.00E-118 | 102.2 | 58.4 | 70.5 |
| Rsa1.0_00017.1.g1115.t1 | #                                                                                                                                                                                                                                                                                                                                                                                                                                                                                                | #    | #    | #         | #     | #    | -    |                                        | ----  | ----                 | #                                                                                                                                                                                                                                                                                                                                                                                                                                                                                      | #    | #    | #         | #     | #    | #    |
| Rsa1.0_00017.1.g1116.t1 | dbj BAJ34065.1  unnamed protein product [Theilingiella halophila]                                                                                                                                                                                                                                                                                                                                                                                                                                | 573  | 579  | 0         | 101.0 | 85.7 | 89.0 | unnamed protein product                | ----  | ----                 | AT4G31820.1   Symbols: ENP, NPY1, MAB4   Phototropic-responsive NPH3 family protein   chr4:15390788-15393627 REVERSE LENGTH=571                                                                                                                                                                                                                                                                                                                                                        | 573  | 571  | 0         | 99.7  | 83.9 | 88.3 |
| Rsa1.0_00017.1.g1117.t1 | ref XP_002867277.1  hypothetical protein ARALYDRAFT_913282 [Arabidopsis lyrata subsp. lyrata]   gi 297313113 gb EFH43536.1  hypothetical protein ARALYDRAFT_913282 [Arabidopsis lyrata subsp. lyrata]                                                                                                                                                                                                                                                                                            | 100  | 100  | 1.00E-48  | 100.0 | 96.0 | 99.0 | hypothetical protein ARALYDRAFT_913282 | gbpln | Arabidopsis lyrata   | AT4G31830.1   Symbols:   unknown protein; Has 42 Blast hits to 42 proteins in 10 species: Archae - 0; Bacteria - 0; Metazoa - 0; Fungi - 0; Plants - 42; Viruses - 0; Other Eukaryotes - 0 (source: NCBI BLink).   chr4:15400803-15401105 REVERSE LENGTH=100                                                                                                                                                                                                                           | 100  | 100  | 3.00E-51  | 100.0 | 96.0 | 98.0 |
| Rsa1.0_00017.1.g1118.t1 | ref XP_002869310.1  hypothetical protein ARALYDRAFT_491553 [Arabidopsis lyrata subsp. lyrata]   gi 297315146 gb EFH45569.1  hypothetical protein ARALYDRAFT_491553 [Arabidopsis lyrata subsp. lyrata]                                                                                                                                                                                                                                                                                            | 174  | 177  | 8.00E-83  | 101.7 | 90.2 | 97.1 | hypothetical protein ARALYDRAFT_491553 | gbpln | Arabidopsis lyrata   | AT4G31840.1   Symbols: ENODL15, ATENODL15   early nodulin-like protein 15   chr4:15401798-15402426 FORWARD LENGTH=177                                                                                                                                                                                                                                                                                                                                                                  | 174  | 177  | 6.00E-83  | 101.7 | 88.5 | 94.8 |
| Rsa1.0_00017.1.g1119.t1 | ref NP_194913.1  proton gradient regulation 3 [Arabidopsis thaliana]   gi 75213543 sp Q9S252.1 PP344_ARAT H RecName: Full=Pentatricopeptide repeat-containing protein At4g31850, chloroplastic; AltName: Full=Protein PROTON GRADIENT REGULATION 3; Flags: Precursor   gi 4584524 emb CAB40755.1  putative protein [Arabidopsis thaliana]   gi 7270088 emb CAB79903.1  putative protein [Arabidopsis thaliana]   gi 332660567 gb AEE85967.1  proton gradient regulation 3 [Arabidopsis thaliana] | 1122 | 1112 | 0         | 99.1  | 83.7 | 91.3 | proton gradient regulation 3           | gbpln | Arabidopsis thaliana | AT4G31850.1   Symbols: PGR3   proton gradient regulation 3   chr4:15403020-15406358 FORWARD LENGTH=1112                                                                                                                                                                                                                                                                                                                                                                                | 1122 | 1112 | 0         | 99.1  | 83.7 | 91.3 |
| Rsa1.0_00017.1.g1120.t1 | #                                                                                                                                                                                                                                                                                                                                                                                                                                                                                                | #    | #    | #         | #     | #    | -    |                                        | ----  | ----                 | #                                                                                                                                                                                                                                                                                                                                                                                                                                                                                      | #    | #    | #         | #     | #    | #    |
| Rsa1.0_00017.1.g1121.t2 | ref NP_194916.2  uncharacterized protein [Arabidopsis thaliana]   gi 26983792 gb AAN86148.1  unknown protein [Arabidopsis thaliana]   gi 332660572 gb AEE85972.1  uncharacterized protein AT4G31880 [Arabidopsis thaliana]                                                                                                                                                                                                                                                                       | 869  | 873  | 0         | 100.5 | 63.4 | 71.3 | uncharacterized protein                | gbpln | Arabidopsis thaliana | AT4G31880.1   Symbols:   LOCATED IN: cytosol, chloroplast; EXPRESSED IN: 24 plant structures; EXPRESSED DURING: 14 growth stages; BEST Arabidopsis thaliana protein match is: Tudor/PWWP/MBT superfamily protein (TAIR:AT1G15940.1); Has 137162 Blast hits to 70781 proteins in 2973 species: Archae - 289; Bacteria - 24182; Metazoa - 56725; Fungi - 20130; Plants - 6559; Viruses - 758; Other Eukaryotes - 28519 (source: NCBI BLink).   chr4:15419435-15423939 REVERSE LENGTH=873 | 869  | 873  | 0         | 100.5 | 63.4 | 71.3 |

|                         |                                                                                                                                                                                                                                                                                                                                                                                                                                                                                                                                                                                                                                                                                                           |      |      |          |       |      |      |                                                       |       |                      |                                                                                                                                                                                                                                                                                                                                                                                                                                                                                                                                                                                                                                                                                                                                                    |      |     |          |       |      |      |
|-------------------------|-----------------------------------------------------------------------------------------------------------------------------------------------------------------------------------------------------------------------------------------------------------------------------------------------------------------------------------------------------------------------------------------------------------------------------------------------------------------------------------------------------------------------------------------------------------------------------------------------------------------------------------------------------------------------------------------------------------|------|------|----------|-------|------|------|-------------------------------------------------------|-------|----------------------|----------------------------------------------------------------------------------------------------------------------------------------------------------------------------------------------------------------------------------------------------------------------------------------------------------------------------------------------------------------------------------------------------------------------------------------------------------------------------------------------------------------------------------------------------------------------------------------------------------------------------------------------------------------------------------------------------------------------------------------------------|------|-----|----------|-------|------|------|
| Rsa1.0_00017.1.g1122.t1 | ref NP_194917.1  armadillo/beta-catenin-like repeat-containing protein [Arabidopsis thaliana] gi 334187073 ref NP_001190883.1  armadillo/beta-catenin-like repeat-containing protein [Arabidopsis thaliana] gi 4584528 emb CAB40759.1  putative protein [Arabidopsis thaliana] gi 7270092 emb CAB78907.1  putative protein [Arabidopsis thaliana] gi 110736926 dbj BAF00420.1  hypothetical protein [Arabidopsis thaliana] gi 190341119 gb ACE74718.1  At4g31890 [Arabidopsis thaliana] gi 332660574 gb AEE85974.1  armadillo/beta-catenin-like repeat-containing protein [Arabidopsis thaliana] gi 332660575 gb AEE85975.1  armadillo/beta-catenin-like repeat-containing protein [Arabidopsis thaliana] | 509  | 518  | 0        | 101.8 | 89.0 | 93.1 | armadillo/beta-catenin-like repeat-containing protein | gbpln | Arabidopsis thaliana | AT4G31890.2   Symbols:   ARM repeat superfamily protein   chr4:15427290-15429049 REVERSE LENGTH=518                                                                                                                                                                                                                                                                                                                                                                                                                                                                                                                                                                                                                                                | 509  | 518 | 0        | 101.8 | 89.0 | 93.1 |
| Rsa1.0_00017.1.g1123.t1 | emb CAB39638.1  RNA-directed DNA polymerase-like protein [Arabidopsis thaliana] gi 7267666 emb CAB78094.1  RNA-directed DNA polymerase-like protein [Arabidopsis thaliana] ref XP_002879859.1  hypothetical protein ARALYDRAFT_903307 [Arabidopsis lyrata subsp. lyrata] gi 297325698 gb EFH56118.1  hypothetical protein ARALYDRAFT_903307 [Arabidopsis lyrata subsp. lyrata]                                                                                                                                                                                                                                                                                                                            | 1913 | 1274 | 0        | 66.6  | 32.3 | 44.5 | RNA-directed DNA polymerase-like protein              | gbpln | Arabidopsis thaliana | AT4G29090.1   Symbols:   Ribonuclease H-like superfamily protein   chr4:14333528-14335255 FORWARD LENGTH=575                                                                                                                                                                                                                                                                                                                                                                                                                                                                                                                                                                                                                                       | 1913 | 575 | 1.00E-67 | 30.1  | 9.2  | 14.3 |
| Rsa1.0_00017.1.g1124.t1 | emb CAB39638.1  RNA-directed DNA polymerase-like protein [Arabidopsis thaliana] gi 7267666 emb CAB78094.1  RNA-directed DNA polymerase-like protein [Arabidopsis thaliana]                                                                                                                                                                                                                                                                                                                                                                                                                                                                                                                                | 316  | 304  | 1.00E-78 | 96.2  | 52.5 | 64.6 | hypothetical protein ARALYDRAFT_903307                | gbpln | Arabidopsis lyrata   | AT2G20620.1   Symbols:   Protein of unknown function (DUF225)   chr2:8891929-889244 REVERSE LENGTH=286                                                                                                                                                                                                                                                                                                                                                                                                                                                                                                                                                                                                                                             | 316  | 286 | 1.00E-52 | 90.5  | 32.9 | 47.5 |
| Rsa1.0_00017.1.g1125.t4 | emb CAB39638.1  RNA-directed DNA polymerase-like protein [Arabidopsis thaliana] gi 7267666 emb CAB78094.1  RNA-directed DNA polymerase-like protein [Arabidopsis thaliana]                                                                                                                                                                                                                                                                                                                                                                                                                                                                                                                                | 346  | 1274 | 3.00E-77 | 368.2 | 46.0 | 62.1 | RNA-directed DNA polymerase-like protein              | gbpln | Arabidopsis thaliana | AT1G10000.1   Symbols:   Ribonuclease H-like superfamily protein   chr1:3263877-3264788 REVERSE LENGTH=303                                                                                                                                                                                                                                                                                                                                                                                                                                                                                                                                                                                                                                         | 346  | 303 | 7.00E-55 | 87.6  | 35.5 | 49.4 |
| Rsa1.0_00017.1.g1126.t1 | dbj BAJ34619.1  unnamed protein product [Thellungiella halophila]                                                                                                                                                                                                                                                                                                                                                                                                                                                                                                                                                                                                                                         | 92   | 539  | 2.00E-19 | 585.9 | 57.6 | 58.7 | unnamed protein product                               | ----  | ----                 | AT4G31920.1   Symbols: ARR10, RR10   response regulator 10   chr4:15444290-15446766 REVERSE LENGTH=552<br>AT4G31980.1   Symbols:   unknown protein; CONTAINS InterPro DOMAIN/s: Protein of unknown function DUF247, plant (InterPro:IPR004158), Protein of unknown function DUF862, eukaryotic (InterPro:IPR008580); BEST Arabidopsis thaliana protein match is: Plant protein of unknown function (DUF247) (TAIR:AT5G11290.1); Has 1967 Blast hits to 1844 proteins in 183 species: Archae - 0; Bacteria - 6; Metazoa - 223; Fungi - 83; Plants - 1477; Viruses - 0; Other Eukaryotes - 178 (source: NCBI BLINK).   chr4:15464905-15469204 FORWARD LENGTH=680                                                                                     | 92   | 552 | 3.00E-15 | 600.0 | 43.5 | 52.2 |
| Rsa1.0_00017.1.g1127.t1 | gb EOA18383.1  hypothetical protein CARUB_v10006919mg [Capsella rubella]                                                                                                                                                                                                                                                                                                                                                                                                                                                                                                                                                                                                                                  | 232  | 660  | 4.00E-91 | 284.5 | 75.0 | 83.6 | hypothetical protein CARUB_v10006919mg                | gbpln | Capsella rubella     | AT4G32000.1   Symbols:   Protein kinase superfamily protein   chr4:15474083-15476655 REVERSE LENGTH=418<br>AT4G32010.1   Symbols: HSL1, HSI2-L1, VAL2   HSI2-like 1   chr4:15481231-15484897 FORWARD LENGTH=780<br>AT4G32020.1   Symbols:   unknown protein; FUNCTIONS IN: molecular_function unknown; INVOLVED IN: biological_process unknown; LOCATED IN: chloroplast; EXPRESSED IN: 24 plant structures; EXPRESSED DURING: 15 growth stages; BEST Arabidopsis thaliana protein match is: unknown protein (TAIR:AT2G25250.1); Has 65 Blast hits to 65 proteins in 19 species: Archae - 0; Bacteria - 0; Metazoa - 3; Fungi - 8; Plants - 54; Viruses - 0; Other Eukaryotes - 0 (source: NCBI BLINK).   chr4:15488076-15488621 FORWARD LENGTH=181 | 232  | 680 | 2.00E-92 | 293.1 | 75.0 | 84.5 |
| Rsa1.0_00017.1.g1128.t1 | #                                                                                                                                                                                                                                                                                                                                                                                                                                                                                                                                                                                                                                                                                                         | #    | #    | #        | #     | #    | #    | -                                                     | ----  | ----                 | #                                                                                                                                                                                                                                                                                                                                                                                                                                                                                                                                                                                                                                                                                                                                                  | #    | #   | #        | #     | #    |      |
| Rsa1.0_00017.1.g1129.t3 | gb EOA16711.1  hypothetical protein CARUB_v10004912mg [Capsella rubella]                                                                                                                                                                                                                                                                                                                                                                                                                                                                                                                                                                                                                                  | 410  | 418  | 0        | 102.0 | 87.3 | 92.9 | hypothetical protein CARUB_v10004912mg                | gbpln | Capsella rubella     | AT4G32000.1   Symbols:   Protein kinase superfamily protein   chr4:15474083-15476655 REVERSE LENGTH=418                                                                                                                                                                                                                                                                                                                                                                                                                                                                                                                                                                                                                                            | 410  | 418 | 0        | 102.0 | 85.1 | 90.0 |
| Rsa1.0_00017.1.g1130.t1 | gb EOA16061.1  hypothetical protein CARUB_v10004194mg [Capsella rubella]                                                                                                                                                                                                                                                                                                                                                                                                                                                                                                                                                                                                                                  | 131  | 775  | 3.00E-51 | 591.6 | 74.8 | 83.2 | hypothetical protein CARUB_v10004194mg                | gbpln | Capsella rubella     | AT4G32010.1   Symbols: HSL1, HSI2-L1, VAL2   HSI2-like 1   chr4:15481231-15484897 FORWARD LENGTH=780                                                                                                                                                                                                                                                                                                                                                                                                                                                                                                                                                                                                                                               | 131  | 780 | 4.00E-51 | 595.4 | 76.3 | 83.2 |
| Rsa1.0_00017.1.g1131.t1 | gb EOA15616.1  hypothetical protein CARUB_v10005750mg [Capsella rubella]                                                                                                                                                                                                                                                                                                                                                                                                                                                                                                                                                                                                                                  | 190  | 205  | 2.00E-60 | 107.9 | 77.9 | 85.8 | hypothetical protein CARUB_v10005750mg                | gbpln | Capsella rubella     | AT4G32020.1   Symbols:   unknown protein; FUNCTIONS IN: molecular_function unknown; INVOLVED IN: biological_process unknown; LOCATED IN: chloroplast; EXPRESSED IN: 24 plant structures; EXPRESSED DURING: 15 growth stages; BEST Arabidopsis thaliana protein match is: unknown protein (TAIR:AT2G25250.1); Has 65 Blast hits to 65 proteins in 19 species: Archae - 0; Bacteria - 0; Metazoa - 3; Fungi - 8; Plants - 54; Viruses - 0; Other Eukaryotes - 0 (source: NCBI BLINK).   chr4:15488076-15488621 FORWARD LENGTH=181                                                                                                                                                                                                                    | 190  | 181 | 6.00E-49 | 95.3  | 64.7 | 70.5 |

|                         |                                                                                                                                                                                                                                                                                                                                                                                                                                                                                                                                                                                                                                                                                                                           |     |     |           |       |      |      |                                                      |       |                      |                                                                                                                                 |     |     |           |       |      |      |
|-------------------------|---------------------------------------------------------------------------------------------------------------------------------------------------------------------------------------------------------------------------------------------------------------------------------------------------------------------------------------------------------------------------------------------------------------------------------------------------------------------------------------------------------------------------------------------------------------------------------------------------------------------------------------------------------------------------------------------------------------------------|-----|-----|-----------|-------|------|------|------------------------------------------------------|-------|----------------------|---------------------------------------------------------------------------------------------------------------------------------|-----|-----|-----------|-------|------|------|
| Rsa1.0_00017.1.g1132.t1 | ref[XP_002867262.1] predicted protein [Arabidopsis lyrata subsp. lyrata] g[297313098]gb[EFH43521.1] predicted protein [Arabidopsis lyrata subsp. lyrata]                                                                                                                                                                                                                                                                                                                                                                                                                                                                                                                                                                  | 82  | 107 | 3.00E-16  | 130.5 | 54.9 | 64.6 | predicted protein                                    | gbpln | Arabidopsis lyrata   | AT4G32100.1   Symbols:   Beta-1,3-N-Acetylglucosaminyltransferase family protein   chr4:15511757-15512218 REVERSE LENGTH=122    | 82  | 122 | 2.00E-17  | 148.8 | 51.2 | 63.4 |
| Rsa1.0_00017.1.g1133.t1 | ref[XP_002867258.1] galactosyltransferase family protein [Arabidopsis lyrata subsp. lyrata] g[297313094]gb[EFH43517.1] galactosyltransferase family protein [Arabidopsis lyrata subsp. lyrata]                                                                                                                                                                                                                                                                                                                                                                                                                                                                                                                            | 385 | 345 | 0         | 89.6  | 81.8 | 85.7 | galactosyltransferase family protein                 | gbpln | Arabidopsis lyrata   | AT4G32120.1   Symbols:   Galactosyltransferase family protein   chr4:15517230-15519687 REVERSE LENGTH=345                       | 385 | 345 | 0         | 89.6  | 81.0 | 84.4 |
| Rsa1.0_00017.1.g1134.t5 | ref[XP_002867255.1] vesicle-associated membrane protein 7C [Arabidopsis lyrata subsp. lyrata] g[297313091]gb[EFH43514.1] vesicle-associated membrane protein 7C [Arabidopsis lyrata subsp. lyrata]                                                                                                                                                                                                                                                                                                                                                                                                                                                                                                                        | 540 | 219 | 1.00E-103 | 40.6  | 33.9 | 34.6 | vesicle-associated membrane protein 7C               | gbpln | Arabidopsis lyrata   | AT4G32150.1   Symbols: VAMP711, ATVAMP711   vesicle-associated membrane protein 711   chr4:15528407-15527651 REVERSE LENGTH=219 | 540 | 219 | 1.00E-105 | 40.6  | 33.5 | 34.4 |
| Rsa1.0_00017.1.g1135.t6 | ref[NP_567888.2] Phox (PX) domain-containing protein [Arabidopsis thaliana] g[332660612]gb[AEE86012.1] Phox (PX) domain-containing protein [Arabidopsis thaliana]                                                                                                                                                                                                                                                                                                                                                                                                                                                                                                                                                         | 764 | 723 | 0         | 94.6  | 82.5 | 88.7 | Phox (PX) domain-containing protein                  | gbpln | Arabidopsis thaliana | AT4G32160.1   Symbols:   Phox (PX) domain-containing protein   chr4:15529056-15532892 FORWARD LENGTH=723                        | 764 | 723 | 0         | 94.6  | 82.5 | 88.7 |
| Rsa1.0_00017.1.g1136.t1 | ref[XP_002867254.1] ATPANK2 [Arabidopsis lyrata subsp. lyrata] g[297313090]gb[EFH43513.1] ATPANK2 [Arabidopsis lyrata subsp. lyrata]                                                                                                                                                                                                                                                                                                                                                                                                                                                                                                                                                                                      | 915 | 902 | 0         | 98.6  | 94.9 | 96.7 | ATPANK2                                              | gbpln | Arabidopsis lyrata   | AT4G32180.1   Symbols: ATPANK2, PANK2   pantothenate kinase 2   chr4:15537724-15543715 REVERSE LENGTH=901                       | 915 | 901 | 0         | 98.5  | 94.2 | 96.6 |
| Rsa1.0_00017.1.g1137.t1 | gb[EOA16055.1] hypothetical protein CARUB_v10004187mg [Capsella rubella]                                                                                                                                                                                                                                                                                                                                                                                                                                                                                                                                                                                                                                                  | 758 | 780 | 0         | 102.9 | 77.4 | 89.1 | hypothetical protein CARUB_v10004187mg               | gbpln | Capsella rubella     | AT4G32190.1   Symbols:   Myosin heavy chain-related protein   chr4:15545052-15547689 FORWARD LENGTH=783                         | 758 | 783 | 0         | 103.3 | 78.4 | 88.5 |
| Rsa1.0_00017.1.g1138.t1 | ref[NP_194953.1] F-type H <sup>+</sup> -transporting ATPase subunit b [Arabidopsis thaliana] g[2864617]emb[CAA16964.1] H <sup>+</sup> -transporting ATP synthase chain9 - like protein [Arabidopsis thaliana] g[5730141]emb[CAB52473.1] ATP synthase beta chain precursor (subunit II) [Arabidopsis thaliana] g[7270130]emb[CAB79944.1] H <sup>+</sup> -transporting ATP synthase chain 9-like protein [Arabidopsis thaliana] g[16604406]gb[AAL24209.1] AT4G32260/F10M6.100 [Arabidopsis thaliana] g[21554175]gb[AAM63254.1] H <sup>+</sup> -transporting ATP synthase chain 9-like protein [Arabidopsis thaliana] g[332660627]gb[AEE86027.1] F-type H <sup>+</sup> -transporting ATPase subunit b [Arabidopsis thaliana] | 287 | 219 | 2.00E-85  | 76.3  | 64.1 | 68.3 | F-type H <sup>+</sup> -transporting ATPase subunit b | gbpln | Arabidopsis thaliana | AT4G32260.1   Symbols:   ATPase, F0 complex, subunit B/B', bacterial/chloroplast   chr4:15573859-15574586 REVERSE LENGTH=219    | 287 | 219 | 4.00E-88  | 76.3  | 64.1 | 68.3 |
| Rsa1.0_00017.1.g1139.t1 | gb[EOA16255.1] hypothetical protein CARUB_v10004401mg [Capsella rubella] g[482552063]gb[EOA16256.1] hypothetical protein CARUB_v10004401mg [Capsella rubella]                                                                                                                                                                                                                                                                                                                                                                                                                                                                                                                                                             | 613 | 611 | 0         | 99.7  | 89.7 | 94.3 | hypothetical protein CARUB_v10004401mg               | gbpln | Capsella rubella     | AT4G32250.3   Symbols:   Protein kinase superfamily protein   chr4:15570285-15572528 REVERSE LENGTH=611                         | 613 | 611 | 0         | 99.7  | 89.2 | 94.1 |
| Rsa1.0_00017.1.g1140.t2 | ref[XP_002867250.1] hypothetical protein ARALYDRAFT_491506 [Arabidopsis lyrata subsp. lyrata] g[297313086]gb[EFH43509.1] hypothetical protein ARALYDRAFT_491506 [Arabidopsis lyrata subsp. lyrata]                                                                                                                                                                                                                                                                                                                                                                                                                                                                                                                        | 248 | 237 | 1.00E-106 | 95.6  | 77.8 | 84.7 | hypothetical protein ARALYDRAFT_491506               | gbpln | Arabidopsis lyrata   | AT4G32270.1   Symbols:   Ubiquitin-like superfamily protein   chr4:15575015-15576360 REVERSE LENGTH=239                         | 248 | 239 | 1.00E-103 | 96.4  | 75.4 | 82.7 |
| Rsa1.0_00017.1.g1141.t1 | gb[EOA19749.1] hypothetical protein CARUB_v10003892mg [Capsella rubella]                                                                                                                                                                                                                                                                                                                                                                                                                                                                                                                                                                                                                                                  | 450 | 457 | 6.00E-82  | 101.6 | 46.4 | 61.6 | hypothetical protein CARUB_v10003892mg               | gbpln | Capsella rubella     | AT5G22730.1   Symbols:   F-box/RNI-like/FBD-like domains-containing protein   chr5:7551632-7553219 REVERSE LENGTH=466           | 450 | 466 | 4.00E-76  | 103.6 | 45.3 | 57.8 |
| Rsa1.0_00017.1.g1142.t1 | ref[XP_002869286.1] hypothetical protein ARALYDRAFT_328503 [Arabidopsis lyrata subsp. lyrata] g[297315122]gb[EFH45545.1] hypothetical protein ARALYDRAFT_328503 [Arabidopsis lyrata subsp. lyrata]                                                                                                                                                                                                                                                                                                                                                                                                                                                                                                                        | 171 | 845 | 7.00E-56  | 494.2 | 73.1 | 83.6 | hypothetical protein ARALYDRAFT_328503               | gbpln | Arabidopsis lyrata   | AT4G32280.1   Symbols: IAA29   indole-3-acetic acid inducible 29   chr4:15583479-15584628 FORWARD LENGTH=251                    | 171 | 251 | 8.00E-52  | 146.8 | 70.8 | 80.7 |
| Rsa1.0_00017.1.g1143.t1 | gb[EOA16210.1] hypothetical protein CARUB_v10004350mg [Capsella rubella]                                                                                                                                                                                                                                                                                                                                                                                                                                                                                                                                                                                                                                                  | 633 | 637 | 0         | 100.6 | 90.7 | 94.2 | hypothetical protein CARUB_v10004350mg               | gbpln | Capsella rubella     | AT4G32285.2   Symbols:   ENTH/ANTH/VHS superfamily protein   chr4:15586003-15587910 FORWARD LENGTH=635                          | 633 | 635 | 0         | 100.3 | 89.6 | 93.7 |

|                         |                                                                                                                                                                                                                                                                                                                                                                                                                                                                                                                                                                       |     |     |           |       |      |      |                                                                 |       |                      |                                                                                                                                                                                                                                                                                                                                              |     |     |           |       |      |      |
|-------------------------|-----------------------------------------------------------------------------------------------------------------------------------------------------------------------------------------------------------------------------------------------------------------------------------------------------------------------------------------------------------------------------------------------------------------------------------------------------------------------------------------------------------------------------------------------------------------------|-----|-----|-----------|-------|------|------|-----------------------------------------------------------------|-------|----------------------|----------------------------------------------------------------------------------------------------------------------------------------------------------------------------------------------------------------------------------------------------------------------------------------------------------------------------------------------|-----|-----|-----------|-------|------|------|
| Rsa1.0_00017.1.g1144.t1 | refXP_002867248.1   hypothetical protein ARALYDRAFT_491501 [Arabidopsis lyrata subsp. lyrata] gi 297313084 gb EFH43507.1   hypothetical protein ARALYDRAFT_491501 [Arabidopsis lyrata subsp. lyrata]                                                                                                                                                                                                                                                                                                                                                                  | 384 | 385 | 1.00E-177 | 100.3 | 81.3 | 88.0 | hypothetical protein ARALYDRAFT_491501                          | gbpln | Arabidopsis lyrata   | AT4G32290.1   Symbols:   Core-2/-branching beta-1,6-N-acetylglucosaminyltransferase family protein   chr4:15589839-15590993 REVERSE LENGTH=384                                                                                                                                                                                               | 384 | 384 | 1.00E-171 | 100.0 | 79.2 | 88.0 |
| Rsa1.0_00017.1.g1145.t1 | refNP_680756.1   uncharacterized protein [Arabidopsis thaliana] gi 28392894 gb AAO41883.1   unknown protein [Arabidopsis thaliana] gi 28827750 gb AAO50719.1   unknown protein [Arabidopsis thaliana] gi 332660636 gb AEE86036.1   uncharacterized protein AT4G32295 [Arabidopsis thaliana]                                                                                                                                                                                                                                                                           | 265 | 238 | 1.00E-106 | 89.8  | 79.6 | 82.6 | uncharacterized protein                                         | gbpln | Arabidopsis thaliana | AT4G32295.1   Symbols:   unknown protein; BEST Arabidopsis thaliana protein match is: unknown protein (TAIR:AT3G24150.1); Has 39 Blast hits to 39 proteins in 10 species: Archae - 0; Bacteria - 0; Metazoa - 0; Fungi - 0; Plants - 39; Viruses - 0; Other Eukaryotes - 0 (source: NCBI BLink).   chr4:15592960-15594080 FORWARD LENGTH=238 | 265 | 238 | 1.00E-109 | 89.8  | 79.6 | 82.6 |
| Rsa1.0_00017.1.g1146.t1 | refXP_002869284.1   lectin protein kinase family protein [Arabidopsis lyrata subsp. lyrata] gi 297315120 gb EFH45543.1   lectin protein kinase family protein [Arabidopsis lyrata subsp. lyrata]                                                                                                                                                                                                                                                                                                                                                                      | 828 | 825 | 0         | 99.6  | 84.5 | 91.1 | lectin protein kinase family protein                            | gbpln | Arabidopsis lyrata   | AT4G32300.1   Symbols: SD2-5   S-domain-2 5   chr4:15599970-15602435 FORWARD LENGTH=821                                                                                                                                                                                                                                                      | 828 | 821 | 0         | 99.2  | 84.4 | 91.1 |
| Rsa1.0_00017.1.g1147.t1 | refXP_002869284.1   lectin protein kinase family protein [Arabidopsis lyrata subsp. lyrata] gi 297315120 gb EFH45543.1   lectin protein kinase family protein [Arabidopsis lyrata subsp. lyrata]                                                                                                                                                                                                                                                                                                                                                                      | 247 | 825 | 1.00E-60  | 334.0 | 55.1 | 64.4 | lectin protein kinase family protein                            | gbpln | Arabidopsis lyrata   | AT4G32300.1   Symbols: SD2-5   S-domain-2 5   chr4:15599970-15602435 FORWARD LENGTH=821                                                                                                                                                                                                                                                      | 247 | 821 | 2.00E-61  | 332.4 | 54.3 | 63.6 |
| Rsa1.0_00017.1.g1148.t1 | refNP_567893.1   TPX2 (targeting protein for Xklp2) protein family [Arabidopsis thaliana] gi 186515493 refNP_001119094.1   TPX2 (targeting protein for Xklp2) protein family [Arabidopsis thaliana] gi 14334556 gb AAK59686.1   unknown protein [Arabidopsis thaliana] gi 21280971 gb AAM44942.1   unknown protein [Arabidopsis thaliana] gi 332660640 gb AEE86040.1   TPX2 (targeting protein for Xklp2) protein family [Arabidopsis thaliana] gi 332660642 gb AEE86042.1   TPX2 (targeting protein for Xklp2) protein family [Arabidopsis thaliana]                 | 432 | 437 | 1.00E-168 | 101.2 | 76.4 | 85.0 | TPX2 (targeting protein for Xklp2) protein family               | gbpln | Arabidopsis thaliana | AT4G32330.3   Symbols:   TPX2 (targeting protein for Xklp2) protein family   chr4:15609801-15611867 FORWARD LENGTH=437                                                                                                                                                                                                                       | 432 | 437 | 1.00E-170 | 101.2 | 76.4 | 85.0 |
| Rsa1.0_00017.1.g1149.t1 | refNP_194960.1   tetratricopeptide repeat domain-containing protein-like protein [Arabidopsis thaliana] gi 2864610 emb CAA16957.1   putative protein [Arabidopsis thaliana] gi 4049336 emb CAA22561.1   putative protein [Arabidopsis thaliana] gi 7270138 emb CAB79951.1   putative protein [Arabidopsis thaliana] gi 21592985 gb AAM64934.1   unknown [Arabidopsis thaliana] gi 23297278 gb AAN12931.1   unknown protein [Arabidopsis thaliana] gi 332660643 gb AEE86043.1   tetratricopeptide repeat domain-containing protein-like protein [Arabidopsis thaliana] | 244 | 238 | 7.00E-77  | 97.5  | 72.1 | 79.9 | tetratricopeptide repeat domain-containing protein-like protein | gbpln | Arabidopsis thaliana | AT4G32340.1   Symbols:   Tetratricopeptide repeat (TPR)-like superfamily protein   chr4:15612741-15614219 REVERSE LENGTH=238                                                                                                                                                                                                                 | 244 | 238 | 2.00E-79  | 97.5  | 72.1 | 79.9 |
| Rsa1.0_00017.1.g1150.t1 | gb EOA16104.1   hypothetical protein CARUB_v10004237mg [Capsella rubella]                                                                                                                                                                                                                                                                                                                                                                                                                                                                                             | 643 | 724 | 0         | 112.6 | 73.6 | 83.0 | hypothetical protein CARUB_v10004237mg                          | gbpln | Capsella rubella     | AT4G32350.1   Symbols:   Regulator of Vps4 activity in the MVB pathway protein   chr4:15617634-15620642 FORWARD LENGTH=732                                                                                                                                                                                                                   | 643 | 732 | 0         | 113.8 | 72.0 | 81.6 |
| Rsa1.0_00017.1.g1151.t1 | refNP_194965.1   Nucleotide-sugar transporter family protein [Arabidopsis thaliana] gi 75209423 sp Q9SUV2.1 PT432 ARAT H RecName: Full=Probable sugar phosphate/phosphate translocator At4g32390 gi 4049341 emb CAA22566.1   putative protein [Arabidopsis thaliana] gi 7270143 emb CAB79956.1   putative protein [Arabidopsis thaliana] gi 332660651 gb AEE86051.1   Nucleotide-sugar transporter family protein [Arabidopsis thaliana]                                                                                                                              | 350 | 350 | 0         | 100.0 | 95.4 | 98.0 | Nucleotide-sugar transporter family protein                     | gbpln | Arabidopsis thaliana | AT4G32390.1   Symbols:   Nucleotide-sugar transporter family protein   chr4:15636550-15637602 FORWARD LENGTH=350                                                                                                                                                                                                                             | 350 | 350 | 0         | 100.0 | 95.4 | 98.0 |



|                          |                                                                                                                                                                                                                                                                                                                                                                                                                                             |      |      |           |       |      |      |                                                 |       |                      |                                                                                                                                                |      |      |           |       |      |      |
|--------------------------|---------------------------------------------------------------------------------------------------------------------------------------------------------------------------------------------------------------------------------------------------------------------------------------------------------------------------------------------------------------------------------------------------------------------------------------------|------|------|-----------|-------|------|------|-------------------------------------------------|-------|----------------------|------------------------------------------------------------------------------------------------------------------------------------------------|------|------|-----------|-------|------|------|
| Rsa1.0_00017.1.g1152.t1  | ref XP_002869275.1  mitochondrial substrate carrier family protein [Arabidopsis lyrata subsp. lyrata] gi 297315111 gb EFH45534.1  mitochondrial substrate carrier family protein [Arabidopsis lyrata subsp. lyrata]                                                                                                                                                                                                                         | 396  | 391  | 1.00E-180 | 98.7  | 85.6 | 89.9 | mitochondrial substrate carrier family protein  | gbpln | Arabidopsis lyrata   | AT4G32400.1   Symbols: EMB104, SHS1, EMB42, ATBT1   Mitochondrial substrate carrier family protein   chr4:15638686-15640238 FORWARD LENGTH=392 | 396  | 392  | 0         | 99.0  | 84.3 | 88.4 |
| Rsa1.0_00017.1.g1153.t1  | gb ACS68190.1  cellulose synthase 1.2 catalytic subunit [Brassica napus]                                                                                                                                                                                                                                                                                                                                                                    | 1079 | 1083 | 0         | 100.4 | 97.3 | 99.1 | cellulose synthase 1.2 catalytic subunit        | gbpln | Brassica napus       | AT4G32410.1   Symbols: CESA1, RSW1, ATCESA1   cellulose synthase 1   chr4:15641009-15646388 REVERSE LENGTH=1081                                | 1079 | 1081 | 0         | 100.2 | 94.5 | 97.6 |
| Rsa1.0_00017.1.g1154.t10 | ref XP_002867244.1  hypothetical protein ARALYDRAFT_491484 [Arabidopsis lyrata subsp. lyrata] gi 297313080 gb EFH43503.1  hypothetical protein ARALYDRAFT_491484 [Arabidopsis lyrata subsp. lyrata]                                                                                                                                                                                                                                         | 860  | 845  | 1.00E-160 | 98.3  | 55.8 | 62.2 | hypothetical protein ARALYDRAFT_491484          | gbpln | Arabidopsis lyrata   | AT4G32420.3   Symbols:   Cyclophilin-like peptidyl-prolyl cis-trans isomerase family protein   chr4:15647550-15652103 REVERSE LENGTH=837       | 860  | 837  | 1.00E-128 | 97.3  | 38.1 | 43.7 |
| Rsa1.0_00017.1.g1155.t1  | ref NP_194969.2  pentatricopeptide repeat-containing protein [Arabidopsis thaliana] gi 75147159 sp Q84MA3.1 PP345_ARAT H RecName: Full=Pentatricopeptide repeat-containing protein AT4g32430, mitochondrial; Flags: Precursor gi 30102674 gb AAP21255.1  At4g32430 [Arabidopsis thaliana]                                                                                                                                                   | 769  | 763  | 0         | 99.2  | 79.7 | 88.6 | pentatricopeptide repeat-containing protein     | gbpln | Arabidopsis thaliana | AT4G32430.1   Symbols:   Pentatricopeptide repeat (PPR) superfamily protein   chr4:15652982-15655273 FORWARD LENGTH=763                        | 769  | 763  | 0         | 99.2  | 79.7 | 88.6 |
| Rsa1.0_00017.1.g1156.t1  | gi 110742925 db BAE99358.1  hypothetical protein [Arabidopsis thaliana] gi 332660658 gb AEE86058.1  pentatricopeptide repeat-containing protein [Arabidopsis thaliana]                                                                                                                                                                                                                                                                      | #    | #    | #         | #     | #    | #    | -                                               | ----  | ----                 | #                                                                                                                                              | #    | #    | #         | #     | #    |      |
| Rsa1.0_00017.1.g1157.t1  | gb EOA17836.1  hypothetical protein CARUB_v10006237mg [Capsella rubella]                                                                                                                                                                                                                                                                                                                                                                    | 430  | 390  | 1.00E-151 | 90.7  | 65.1 | 68.6 | hypothetical protein CARUB_v10006237mg          | gbpln | Capsella rubella     | AT4G32440.2   Symbols:   Plant Tudor-like RNA-binding protein   chr4:15657295-15658354 FORWARD LENGTH=393                                      | 430  | 393  | 1.00E-152 | 91.4  | 66.5 | 72.3 |
| Rsa1.0_00017.1.g1158.t1  | db BAD43544.1  putative protein [Arabidopsis thaliana]                                                                                                                                                                                                                                                                                                                                                                                      | 557  | 537  | 0         | 96.4  | 68.9 | 79.5 | putative protein                                | gbpln | Arabidopsis thaliana | AT4G32450.1   Symbols:   Pentatricopeptide repeat (PPR) superfamily protein   chr4:15661092-15662705 FORWARD LENGTH=537                        | 557  | 537  | 0         | 96.4  | 68.9 | 79.5 |
| Rsa1.0_00017.1.g1159.t1  | ref NP_567894.1  uncharacterized protein [Arabidopsis thaliana] gi 42573129 ref NP_974661.1  uncharacterized protein [Arabidopsis thaliana] gi 21593257 gb AAM65206.1  unknown [Arabidopsis thaliana] gi 94442427 gb ABF19001.1  At4g32460 [Arabidopsis thaliana] gi 332660663 gb AEE86063.1  uncharacterized protein AT4G32460 [Arabidopsis thaliana] gi 332660664 gb AEE86064.1  uncharacterized protein AT4G32460 [Arabidopsis thaliana] | 365  | 365  | 0         | 100.0 | 92.6 | 96.7 | uncharacterized protein                         | gbpln | Arabidopsis thaliana | AT4G32460.2   Symbols:   Protein of unknown function, DUF642   chr4:15663036-15664859 REVERSE LENGTH=365                                       | 365  | 365  | 0         | 100.0 | 92.6 | 96.7 |
| Rsa1.0_00017.1.g1160.t1  | gb EOA17665.1  hypothetical protein CARUB_v10006035mg [Capsella rubella]                                                                                                                                                                                                                                                                                                                                                                    | 122  | 122  | 1.00E-57  | 100.0 | 89.3 | 95.9 | hypothetical protein CARUB_v10006035mg          | gbpln | Capsella rubella     | AT4G32470.1   Symbols:   Cytochrome bd ubiquinol oxidase, 14kDa subunit   chr4:15669641-15671095 REVERSE LENGTH=122                            | 122  | 122  | 2.00E-59  | 100.0 | 87.7 | 95.9 |
| Rsa1.0_00017.1.g1161.t1  | gb EOA18796.1  hypothetical protein CARUB_v10007410mg [Capsella rubella]                                                                                                                                                                                                                                                                                                                                                                    | 872  | 880  | 0         | 100.9 | 88.4 | 93.1 | hypothetical protein CARUB_v10007410mg          | gbpln | Capsella rubella     | AT4G32500.1   Symbols: AKT5, KT5   K+ transporter 5   chr4:15681122-15685214 FORWARD LENGTH=880                                                | 872  | 880  | 0         | 100.9 | 88.5 | 92.9 |
| Rsa1.0_00017.1.g1162.t1  | gb EOA16174.1  hypothetical protein CARUB_v10004311mg, partial [Capsella rubella]                                                                                                                                                                                                                                                                                                                                                           | 674  | 666  | 0         | 98.8  | 90.2 | 93.3 | hypothetical protein CARUB_v10004311mg, partial | gbpln | Capsella rubella     | AT4G32510.1   Symbols:   HCO3- transporter family   chr4:15685903-15688811 REVERSE LENGTH=673                                                  | 674  | 673  | 0         | 99.9  | 90.2 | 93.9 |
| Rsa1.0_00017.1.g1163.t1  | gb EOA16417.1  hypothetical protein CARUB_v10004571mg [Capsella rubella]                                                                                                                                                                                                                                                                                                                                                                    | 525  | 529  | 0         | 100.8 | 90.1 | 94.9 | hypothetical protein CARUB_v10004571mg          | gbpln | Capsella rubella     | AT4G32520.2   Symbols: SHM3   serine hydroxymethyltransferase 3   chr4:15689642-15692334 REVERSE LENGTH=529                                    | 525  | 529  | 0         | 100.8 | 88.6 | 93.3 |
| Rsa1.0_00017.1.g1164.t1  | ref XP_002880688.1  H+-transporting two-sector ATPase [Arabidopsis lyrata subsp. lyrata] gi 297326527 gb EFH56947.1  H+-transporting two-sector ATPase [Arabidopsis lyrata subsp. lyrata]                                                                                                                                                                                                                                                   | 177  | 179  | 8.00E-89  | 101.1 | 98.9 | 99.4 | H+-transporting two-sector ATPase               | gbpln | Arabidopsis lyrata   | AT2G25610.1   Symbols:   ATPase, F0/V0 complex, subunit C protein   chr2:10901585-10902494 REVERSE LENGTH=178                                  | 177  | 178  | 3.00E-91  | 100.6 | 98.3 | 99.4 |
| Rsa1.0_00017.1.g1165.t1  | ref NP_567826.1  HXXXD-type acyl-transferase-like protein [Arabidopsis thaliana] gi 332660207 gb AEE85607.1  HXXXD-type acyl-transferase-like protein [Arabidopsis thaliana]                                                                                                                                                                                                                                                                | 458  | 460  | 0         | 100.4 | 82.3 | 88.6 | HXXXD-type acyl-transferase-like protein        | gbpln | Arabidopsis thaliana | AT4G29250.1   Symbols:   HXXXD-type acyl-transferase family protein   chr4:14420713-14422177 FORWARD LENGTH=460                                | 458  | 460  | 0         | 100.4 | 82.3 | 88.6 |

|                          |                                                                                                                                                                                                                                                         |      |      |           |       |      |      |                                                                 |       |                      |                                                                                                                                                |      |      |           |       |      |      |
|--------------------------|---------------------------------------------------------------------------------------------------------------------------------------------------------------------------------------------------------------------------------------------------------|------|------|-----------|-------|------|------|-----------------------------------------------------------------|-------|----------------------|------------------------------------------------------------------------------------------------------------------------------------------------|------|------|-----------|-------|------|------|
| Rsa1.0_00017.1.g1166.t1  | refNP_189279.1  transducin/WD40 domain-containing protein [Arabidopsis thaliana] gi 9294307 dbj BAB02209.1  unnamed protein product [Arabidopsis thaliana] gi 332643644 gb AEE77165.1  transducin/WD40 domain-containing protein [Arabidopsis thaliana] | 760  | 764  | 0         | 100.5 | 70.7 | 81.3 | transducin/WD40 domain-containing protein                       | gbpln | Arabidopsis thaliana | AT3G26480.1   Symbols:   Transducin family protein / WD-40 repeat family protein   chr3:9687273-9690827 REVERSE LENGTH=764                     | 760  | 764  | 0         | 100.5 | 70.7 | 81.3 |
| Rsa1.0_00017.1.g1167.t1  | gb AAC28221.1  similar to reverse transcriptases (PFam: rvt.hmm, score: 60.13) [Arabidopsis thaliana]                                                                                                                                                   | 221  | 1164 | 4.00E-43  | 526.7 | 42.1 | 57.9 | similar to reverse transcriptases (PFam: rvt.hmm, score: 60.13) | gbpln | Arabidopsis thaliana | AT3G25720.1   Symbols:   RNA-directed DNA polymerase (reverse transcriptase)-related family protein   chr3:9380234-9381405 FORWARD LENGTH=282  | 221  | 282  | 4.00E-31  | 127.6 | 32.1 | 38.0 |
| Rsa1.0_00017.1.g1168.t1  | refXP_002869265.1  hypothetical protein ARALYDRAFT_353573 [Arabidopsis lyrata subsp. lyrata] gi 297315101 gb EFH45524.1  hypothetical protein ARALYDRAFT_353573 [Arabidopsis lyrata subsp. lyrata]                                                      | 424  | 414  | 0         | 97.6  | 84.9 | 89.9 | hypothetical protein ARALYDRAFT_353573                          | gbpln | Arabidopsis lyrata   | AT4G32540.1   Symbols: YUC, YUC1   Flavin-binding monooxygenase family protein   chr4:15700904-15702870 FORWARD LENGTH=414                     | 424  | 414  | 0         | 97.6  | 83.5 | 89.4 |
| Rsa1.0_00017.1.g1169.t1  | gb AAG50806.1 AC079281.8 unknown protein [Arabidopsis thaliana]                                                                                                                                                                                         | 1855 | 1213 | 0         | 65.4  | 23.9 | 34.4 | unknown protein                                                 | gbpln | Arabidopsis thaliana | AT1G43760.1   Symbols:   DNase I-like superfamily protein   chr1:1652890-16531065 REVERSE LENGTH=626                                           | 1855 | 626  | 5.00E-70  | 33.7  | 7.8  | 12.0 |
| Rsa1.0_00017.1.g1170.t1  | refXP_002869264.1  hypothetical protein ARALYDRAFT_491464 [Arabidopsis lyrata subsp. lyrata] gi 297315100 gb EFH45523.1  hypothetical protein ARALYDRAFT_491464 [Arabidopsis lyrata subsp. lyrata]                                                      | 941  | 920  | 0         | 97.8  | 69.5 | 73.5 | hypothetical protein ARALYDRAFT_491464                          | gbpln | Arabidopsis lyrata   | AT4G32551.1   Symbols: LUG, RON2   LisH dimerisation motif/WD40/YVTN repeat-like-containing domain   chr4:15707863-15713359 FORWARD LENGTH=931 | 941  | 931  | 0         | 98.9  | 69.1 | 73.5 |
| Rsa1.0_00017.1.g1171.t20 | refNP_001031771.1  paramyosin-related protein [Arabidopsis thaliana] gi 227202856 dbj BAH56901.1  AT4G32560 [Arabidopsis thaliana] gi 332660680 gb AEE86080.1  paramyosin-related protein [Arabidopsis thaliana]                                        | 539  | 304  | 1.00E-103 | 56.4  | 40.8 | 43.4 | paramyosin-related protein                                      | gbpln | Arabidopsis thaliana | AT4G32560.3   Symbols:   paramyosin-related   chr4:15713866-15716035 FORWARD LENGTH=304                                                        | 539  | 304  | 1.00E-106 | 56.4  | 40.8 | 43.4 |
| Rsa1.0_00017.1.g1172.t1  | refNP_567898.1  protein TIFY 8 [Arabidopsis thaliana] gi 75147164 sp Q84MB2.1 TIF8_ARATH RecName: Full=Protein TIFY 8 gi 30102642 gb AAP21239.1  At4g32570 [Arabidopsis thaliana] gi 332660681 gb AEE86081.1  protein TIFY 8 [Arabidopsis thaliana]     | 360  | 361  | 1.00E-129 | 100.3 | 75.3 | 81.7 | protein TIFY 8                                                  | gbpln | Arabidopsis thaliana | AT4G32570.1   Symbols: TIFY8   TIFY domain protein 8   chr4:15716433-15718702 REVERSE LENGTH=361                                               | 360  | 361  | 1.00E-132 | 100.3 | 75.3 | 81.7 |
| Rsa1.0_00017.1.g1173.t1  | gb AAG50751.1 AC079733.19 polyprotein, putative [Arabidopsis thaliana]                                                                                                                                                                                  | 1447 | 1468 | 0         | 101.5 | 50.9 | 67.6 | polyprotein, putative                                           | gbpln | Arabidopsis thaliana | AT4G23160.1   Symbols: CRK8   cysteine-rich RLK (RECEPTOR-like protein kinase) 8   chr4:12129485-12134086 FORWARD LENGTH=1262                  | 1447 | 1262 | 1.00E-139 | 87.2  | 17.6 | 25.2 |
| Rsa1.0_00017.1.g1174.t1  | refXP_002869262.1  hypothetical protein ARALYDRAFT_913185 [Arabidopsis lyrata subsp. lyrata] gi 297315098 gb EFH45521.1  hypothetical protein ARALYDRAFT_913185 [Arabidopsis lyrata subsp. lyrata]                                                      | 155  | 175  | 3.00E-59  | 112.9 | 84.5 | 91.0 | hypothetical protein ARALYDRAFT_913185                          | gbpln | Arabidopsis lyrata   | AT4G32590.1   Symbols:   2Fe-2S ferredoxin-like superfamily protein   chr4:15721417-15722776 FORWARD LENGTH=173                                | 155  | 173  | 4.00E-60  | 111.6 | 82.6 | 89.7 |
| Rsa1.0_00017.1.g1175.t2  | refXP_002869261.1  hypothetical protein ARALYDRAFT_328473 [Arabidopsis lyrata subsp. lyrata] gi 297315097 gb EFH45520.1  hypothetical protein ARALYDRAFT_328473 [Arabidopsis lyrata subsp. lyrata]                                                      | 464  | 489  | 0         | 105.4 | 82.8 | 88.6 | hypothetical protein ARALYDRAFT_328473                          | gbpln | Arabidopsis lyrata   | AT4G32600.1   Symbols:   RING/U-box superfamily protein   chr4:15724010-15725737 FORWARD LENGTH=453                                            | 464  | 453  | 0         | 97.6  | 81.5 | 86.9 |
| Rsa1.0_00017.1.g1176.t1  | emb CAA18600.1  putative protein [Arabidopsis thaliana] gi 7270165 emb CAB79978.1  putative protein [Arabidopsis thaliana]                                                                                                                              | 167  | 557  | 2.00E-71  | 333.5 | 88.0 | 94.0 | putative protein                                                | gbpln | Arabidopsis thaliana | AT4G32605.1   Symbols:   Mitochondrial glycoprotein family protein   chr4:15726429-15727864 REVERSE LENGTH=227                                 | 167  | 227  | 3.00E-73  | 135.9 | 88.0 | 94.0 |
| Rsa1.0_00017.1.g1177.t1  | dbj BAA97156.1  unnamed protein product [Arabidopsis thaliana]                                                                                                                                                                                          | 156  | 329  | 1.00E-17  | 210.9 | 37.2 | 52.6 | unnamed protein product                                         | gbpln | Arabidopsis thaliana | # # # # # # #                                                                                                                                  | #    | #    | #         | #     | #    | #    |
| Rsa1.0_00017.1.g1178.t1  | refNP_194987.2  copper ion binding protein [Arabidopsis thaliana] gi 110743171 dbj BAE99477.1  hypothetical protein [Arabidopsis thaliana] gi 332660689 gb AEE86089.1  copper ion binding protein [Arabidopsis thaliana]                                | 318  | 315  | 1.00E-65  | 99.1  | 74.5 | 82.4 | copper ion binding protein                                      | gbpln | Arabidopsis thaliana | AT4G32610.1   Symbols:   copper ion binding   chr4:15728376-15729897 REVERSE LENGTH=315                                                        | 318  | 315  | 3.00E-68  | 99.1  | 74.5 | 82.4 |
| Rsa1.0_00017.1.g1179.t1  | refXP_002869260.1  nucleic acid binding protein [Arabidopsis lyrata subsp. lyrata] gi 297315096 gb EFH45519.1  nucleic acid binding protein [Arabidopsis lyrata subsp. lyrata]                                                                          | 1409 | 1550 | 0         | 110.0 | 42.2 | 46.4 | nucleic acid binding protein                                    | gbpln | Arabidopsis lyrata   | AT4G32620.2   Symbols:   Enhancer of polycomb-like transcription factor protein   chr4:15731968-15737222 FORWARD LENGTH=1540                   | 1409 | 1540 | 0         | 109.3 | 41.4 | 45.7 |

|                         |                                                                                                                                                                                                                                                                                                                                                                                                                                                                                                                                                                                                                                                                                                                                                                                                                                                |      |      |           |       |      |      |                                        |       |                      |                                                                                                                                                                                                                                                                                                                                                                     |      |      |           |       |      |      |
|-------------------------|------------------------------------------------------------------------------------------------------------------------------------------------------------------------------------------------------------------------------------------------------------------------------------------------------------------------------------------------------------------------------------------------------------------------------------------------------------------------------------------------------------------------------------------------------------------------------------------------------------------------------------------------------------------------------------------------------------------------------------------------------------------------------------------------------------------------------------------------|------|------|-----------|-------|------|------|----------------------------------------|-------|----------------------|---------------------------------------------------------------------------------------------------------------------------------------------------------------------------------------------------------------------------------------------------------------------------------------------------------------------------------------------------------------------|------|------|-----------|-------|------|------|
| Rsa1.0_00017.1.g1180.t1 | ref XP_002869259.1  hypothetical protein ARALYDRAFT_491451 [Arabidopsis lyrata subsp. lyrata] gi 297315095 gb EFH45518.1  hypothetical protein ARALYDRAFT_491451 [Arabidopsis lyrata subsp. lyrata]                                                                                                                                                                                                                                                                                                                                                                                                                                                                                                                                                                                                                                            | 630  | 631  | 0         | 100.2 | 70.0 | 78.3 | hypothetical protein ARALYDRAFT_491451 | gbpln | Arabidopsis lyrata   | AT4G32630.2   Symbols:   ArfGap/RecO-like zinc finger domain-containing protein   chr4:15738315-15741412 FORWARD LENGTH=628                                                                                                                                                                                                                                         | 630  | 628  | 0         | 99.7  | 67.8 | 77.3 |
| Rsa1.0_00017.1.g1181.t1 | dbj BAM76809.1  Sec24-like transport protein [Arabidopsis thaliana]                                                                                                                                                                                                                                                                                                                                                                                                                                                                                                                                                                                                                                                                                                                                                                            | 1083 | 1092 | 0         | 100.8 | 89.2 | 93.3 | Sec24-like transport protein           | gbpln | Arabidopsis thaliana | AT4G32640.2   Symbols:   Sec23/Sec24 protein transport family protein   chr4:15742661-15750424 FORWARD LENGTH=1080                                                                                                                                                                                                                                                  | 1083 | 1080 | 0         | 99.7  | 88.1 | 92.1 |
| Rsa1.0_00017.1.g1182.t1 | ref NP_194991.1  Potassium channel KAT3 [Arabidopsis thaliana] gi 44888078 sp P92960.1 KAT3_ARATH RecName: Full=Potassium channel KAT3; AltName: Full=AKT4; AltName: Full=AtKC1; AltName: Full=Potassium channel TKC gi 1708777 emb CAB05669.1  potassium channel [Arabidopsis thaliana] gi 3063705 emb CAA18596.1  potassium channel protein [Arabidopsis thaliana] gi 4090537 gb AAC98810.1  K+ inward rectifying channel protein [Arabidopsis thaliana] gi 4098949 gb AAD00503.1  K+ inward rectifying channel [Arabidopsis thaliana] gi 7270169 emb CAB79982.1  potassium channel protein AtKC [Arabidopsis thaliana] gi 15529218 gb AAK97703.1  At4g32650/F4D11.150 [Arabidopsis thaliana] gi 2777708 gb AAO23890.1  At4g32650/F4D11.150 [Arabidopsis thaliana] gi 332660697 gb AEE86097.1  Potassium channel KAT3 [Arabidopsis thaliana] | 723  | 662  | 0         | 91.6  | 74.7 | 82.2 | Potassium channel KAT3                 | gbpln | Arabidopsis thaliana | AT4G32650.1   Symbols: ATKC1, KAT3, KC1, ALK1   potassium channel in Arabidopsis thaliana 3   chr4:15751482-15754797 REVERSE LENGTH=662                                                                                                                                                                                                                             | 723  | 662  | 0         | 91.6  | 74.7 | 82.2 |
| Rsa1.0_00017.1.g1183.t1 | ref NP_194992.1  serine/threonine-protein kinase AFC3 [Arabidopsis thaliana] gi 5915680 sp P51568.2 AFC3_ARATH RecName: Full=Serine/threonine-protein kinase AFC3 gi 642134 dbj BAA08216.1  protein kinase [Arabidopsis thaliana] gi 3063704 emb CAA18595.1  protein kinase AME3 [Arabidopsis thaliana] gi 7270170 emb CAB79983.1  protein kinase AME3 [Arabidopsis thaliana] gi 119935963 gb ABM06046.1  At4g32660 [Arabidopsis thaliana] gi 332660700 gb AEE86100.1  serine/threonine-protein kinase AFC3 [Arabidopsis thaliana]                                                                                                                                                                                                                                                                                                             | 398  | 400  | 0         | 100.5 | 91.5 | 96.0 | serine/threonine-protein kinase AFC3   | gbpln | Arabidopsis thaliana | AT4G32660.1   Symbols: AME3   Protein kinase superfamily protein   chr4:15756396-15759107 FORWARD LENGTH=400                                                                                                                                                                                                                                                        | 398  | 400  | 0         | 100.5 | 91.5 | 96.0 |
| Rsa1.0_00017.1.g1184.t1 | ref XP_002867231.1  hypothetical protein ARALYDRAFT_491441 [Arabidopsis lyrata subsp. lyrata] gi 297313067 gb EFH43490.1  hypothetical protein ARALYDRAFT_491441 [Arabidopsis lyrata subsp. lyrata]                                                                                                                                                                                                                                                                                                                                                                                                                                                                                                                                                                                                                                            | 741  | 861  | 1.00E-152 | 116.2 | 36.8 | 44.5 | hypothetical protein ARALYDRAFT_491441 | gbpln | Arabidopsis lyrata   | AT4G32670.1   Symbols:   RING/FYVE/PHD zinc finger superfamily protein   chr4:15759527-15762847 REVERSE LENGTH=860                                                                                                                                                                                                                                                  | 741  | 860  | 1.00E-152 | 116.1 | 36.6 | 44.5 |
| Rsa1.0_00017.1.g1185.t1 | ref NP_567900.1  uncharacterized protein [Arabidopsis thaliana] gi 332660703 gb AEE86103.1  uncharacterized protein AT4G32680 [Arabidopsis thaliana]                                                                                                                                                                                                                                                                                                                                                                                                                                                                                                                                                                                                                                                                                           | 280  | 282  | 1.00E-103 | 100.7 | 75.4 | 83.9 | uncharacterized protein                | gbpln | Arabidopsis thaliana | AT4G32680.1   Symbols:   unknown protein; BEST Arabidopsis thaliana protein match is: unknown protein (TAIR:AT1G52343.1); Has 30201 Blast hits to 17322 proteins in 780 species: Archae - 12; Bacteria - 1396; Metazoa - 17338; Fungi - 3422; Plants - 5037; Viruses - 0; Other Eukaryotes - 2996 (source: NCBI BLINK).   chr4:15763462-15765039 REVERSE LENGTH=282 | 280  | 282  | 1.00E-105 | 100.7 | 75.4 | 83.9 |
| Rsa1.0_00017.1.g1186.t1 | ref XP_002869254.1  predicted protein [Arabidopsis lyrata subsp. lyrata] gi 297315090 gb EFH45513.1  predicted protein [Arabidopsis lyrata subsp. lyrata]                                                                                                                                                                                                                                                                                                                                                                                                                                                                                                                                                                                                                                                                                      | 2151 | 2147 | 0         | 99.8  | 86.5 | 90.9 | predicted protein                      | gbpln | Arabidopsis lyrata   | AT4G32700.2   Symbols:   helicases;ATP-dependent helicases;nucleic acid binding;ATP binding;DNA-directed DNA polymerases;DNA binding   chr4:15767440-15779185 FORWARD LENGTH=2154                                                                                                                                                                                   | 2151 | 2154 | 0         | 100.1 | 85.7 | 90.6 |

|                         |                                                                                                                                                                                                                                                                                                                                                                                                                                                                                                                                                                                                                                           |     |     |           |       |      |      |                                                                                                                                                                                        |       |                      |                                                                                                                                                                                                                                                                                     |     |     |           |       |      |      |
|-------------------------|-------------------------------------------------------------------------------------------------------------------------------------------------------------------------------------------------------------------------------------------------------------------------------------------------------------------------------------------------------------------------------------------------------------------------------------------------------------------------------------------------------------------------------------------------------------------------------------------------------------------------------------------|-----|-----|-----------|-------|------|------|----------------------------------------------------------------------------------------------------------------------------------------------------------------------------------------|-------|----------------------|-------------------------------------------------------------------------------------------------------------------------------------------------------------------------------------------------------------------------------------------------------------------------------------|-----|-----|-----------|-------|------|------|
| Rsa1.0_00017.1.g1187.t1 | sp O65530.1 PEK14_ARATH RecName: Full=Proline-rich receptor-like protein kinase PERK14; AltName: Full=Proline-rich extensin-like receptor kinase 14; Short=AtPERK14 g 3063699 emb CAA18590.1  putative protein [Arabidopsis thaliana] g 7270175 emb CAB79988.1  putative protein kinase [Arabidopsis thaliana]                                                                                                                                                                                                                                                                                                                            | 705 | 731 | 0         | 103.7 | 72.5 | 77.7 | RecName: Full=Proline-rich receptor-like protein kinase PERK14; AltName: Full=Proline-rich extensin-like receptor kinase 14; Short=AtPERK14 g 3063699 emb CAA18590.1  putative protein | gbpln | Arabidopsis thaliana | AT4G32710.1   Symbols:   Protein kinase superfamily protein   chr4:15781362-15783242 FORWARD LENGTH=388                                                                                                                                                                             | 705 | 388 | 0         | 55.0  | 45.7 | 49.1 |
| Rsa1.0_00017.1.g1188.t1 | # # # # # # # #                                                                                                                                                                                                                                                                                                                                                                                                                                                                                                                                                                                                                           |     |     |           |       |      | -    |                                                                                                                                                                                        | ----  | ----                 | #                                                                                                                                                                                                                                                                                   | #   | #   | #         | #     | #    | #    |
| Rsa1.0_00017.1.g1189.t1 | ref XP_002869250.1  RNA recognition motif-containing protein [Arabidopsis lyrata subsp. lyrata] g 297315086 gb EFH45509.1  RNA recognition motif-containing protein [Arabidopsis lyrata subsp. lyrata]                                                                                                                                                                                                                                                                                                                                                                                                                                    | 435 | 433 | 0         | 99.5  | 87.1 | 92.4 | RNA recognition motif-containing protein                                                                                                                                               | gbpln | Arabidopsis lyrata   | AT4G32720.1   Symbols: AtLa1, La1   La protein 1   chr4:15787313-15789683 FORWARD LENGTH=433                                                                                                                                                                                        | 435 | 433 | 0         | 99.5  | 86.7 | 91.7 |
| Rsa1.0_00017.1.g1190.t1 | ref NP_974718.1  myb-related protein 3R-1 [Arabidopsis thaliana] g 332660712 gb AE86112.1  myb-related protein 3R-1 [Arabidopsis thaliana]                                                                                                                                                                                                                                                                                                                                                                                                                                                                                                | 874 | 995 | 0         | 113.8 | 79.5 | 85.7 | myb-related protein 3R-1                                                                                                                                                               | gbpln | Arabidopsis thaliana | AT4G32730.2   Symbols: PC-MYB1, MYB3R-1, ATMYB3R-1, ATMYB3R1   Homeodomain-like protein   chr4:15791039-15795643 FORWARD LENGTH=995                                                                                                                                                 | 874 | 995 | 0         | 113.8 | 79.5 | 85.7 |
| Rsa1.0_00017.1.g1191.t1 | gb EOA17128.1  hypothetical protein CARUB_v10005389mg [Capsella rubella]                                                                                                                                                                                                                                                                                                                                                                                                                                                                                                                                                                  | 284 | 292 | 1.00E-132 | 102.8 | 83.5 | 90.1 | hypothetical protein CARUB_v10005389mg                                                                                                                                                 | gbpln | Capsella rubella     | AT4G32750.1   Symbols:   unknown protein; Has 30201 Blast hits to 17322 proteins in 780 species: Archae - 12; Bacteria - 1396; Metazoa - 17338; Fungi - 3422; Plants - 5037; Viruses - 0; Other Eukaryotes - 2996 (source: NCBI BLINK);   chr4:15796415-15798091 REVERSE LENGTH=293 | 284 | 293 | 1.00E-133 | 103.2 | 83.5 | 91.2 |
| Rsa1.0_00017.1.g1192.t1 | ref NP_001190892.1  ENTH/VHS/GAT family protein [Arabidopsis thaliana] g 332660715 gb AE86115.1  ENTH/VHS/GAT family protein [Arabidopsis thaliana]                                                                                                                                                                                                                                                                                                                                                                                                                                                                                       | 659 | 676 | 0         | 102.6 | 86.0 | 90.1 | ENTH/VHS/GAT family protein                                                                                                                                                            | gbpln | Arabidopsis thaliana | AT4G32760.2   Symbols:   ENTH/VHS/GAT family protein   chr4:15799376-15803832 FORWARD LENGTH=676                                                                                                                                                                                    | 659 | 676 | 0         | 102.6 | 86.0 | 90.1 |
| Rsa1.0_00017.1.g1193.t1 | gb EOA16698.1  hypothetical protein CARUB_v10004890mg [Capsella rubella]                                                                                                                                                                                                                                                                                                                                                                                                                                                                                                                                                                  | 550 | 424 | 0         | 77.1  | 66.2 | 70.7 | hypothetical protein CARUB_v10004890mg                                                                                                                                                 | gbpln | Capsella rubella     | AT4G32780.1   Symbols:   phosphoinositide binding   chr4:15808926-15810907 FORWARD LENGTH=270                                                                                                                                                                                       | 550 | 270 | 1.00E-101 | 49.1  | 39.8 | 42.5 |
| Rsa1.0_00017.1.g1194.t1 | ref NP_195006.1  ethylene-responsive transcription factor ERF043 [Arabidopsis thaliana] g 75264505 sp Q9M080.1 ERF43 ARAT H RecName: Full=Ethylene-responsive transcription factor ERF043 g 7270227 emb CAB79997.1  transcription factor TINY homolog [Arabidopsis thaliana] g 21618174 gb AAM67224.1  transcription factor TINY homolog [Arabidopsis thaliana] g 27754586 gb AA022740.1  putative transcription factor TINY [Arabidopsis thaliana] g 28393859 gb AA042337.1  putative transcription factor TINY [Arabidopsis thaliana] g 332660720 gb AEE86120.1  ethylene-responsive transcription factor ERF043 [Arabidopsis thaliana] | 231 | 221 | 9.00E-73  | 95.7  | 70.6 | 79.7 | ethylene-responsive transcription factor ERF043                                                                                                                                        | gbpln | Arabidopsis thaliana | AT4G32800.1   Symbols:   Integrase-type DNA-binding superfamily protein   chr4:15819812-15820477 FORWARD LENGTH=221                                                                                                                                                                 | 231 | 221 | 3.00E-75  | 95.7  | 70.6 | 79.7 |
| Rsa1.0_00017.1.g1195.t1 | ref NP_195032.2  peptidyl-prolyl cis-trans isomerase SDCCAG10 [Arabidopsis thaliana] g 45680878 gb AAS75308.1  multidomain cyclophilin type peptidyl-prolyl cis-trans isomerase [Arabidopsis thaliana] g 95147300 gb ABF57285.1  At4g33060 [Arabidopsis thaliana] g 332660768 gb AEE86168.1  peptidyl-prolyl cis-trans isomerase CYP57 [Arabidopsis thaliana]                                                                                                                                                                                                                                                                             | 124 | 504 | 7.00E-31  | 406.5 | 75.8 | 83.9 | peptidyl-prolyl cis-trans isomerase SDCCAG10                                                                                                                                           | gbpln | Arabidopsis thaliana | AT4G33060.1   Symbols:   Cyclophilin-like peptidyl-prolyl cis-trans isomerase family protein   chr4:15948535-15951954 FORWARD LENGTH=504                                                                                                                                            | 124 | 504 | 1.00E-33  | 406.5 | 75.8 | 83.9 |
| Rsa1.0_00017.1.g1196.t1 | ref XP_002869241.1  hypothetical protein ARALYDRAFT_353547 [Arabidopsis lyrata subsp. lyrata] g 297315077 gb EFH45500.1  hypothetical protein ARALYDRAFT_353547 [Arabidopsis lyrata subsp. lyrata]                                                                                                                                                                                                                                                                                                                                                                                                                                        | 557 | 570 | 0         | 102.3 | 89.8 | 94.3 | hypothetical protein ARALYDRAFT_353547                                                                                                                                                 | gbpln | Arabidopsis lyrata   | AT4G32810.1   Symbols: CCD8, MAX4, ATCCD8   carotenoid cleavage dioxygenase 8   chr4:15828348-15831299 FORWARD LENGTH=570                                                                                                                                                           | 557 | 570 | 0         | 102.3 | 88.5 | 93.9 |

|                         |                                                                                                                                                                                                                                                                                                                                                                                                                                                                                                                                                                                                                                                                                                                                                                                                                                                                                                                                                              |      |      |           |       |      |      |                                                    |       |                      |                                                                                                                                                                                                                                                              |      |      |           |       |      |      |
|-------------------------|--------------------------------------------------------------------------------------------------------------------------------------------------------------------------------------------------------------------------------------------------------------------------------------------------------------------------------------------------------------------------------------------------------------------------------------------------------------------------------------------------------------------------------------------------------------------------------------------------------------------------------------------------------------------------------------------------------------------------------------------------------------------------------------------------------------------------------------------------------------------------------------------------------------------------------------------------------------|------|------|-----------|-------|------|------|----------------------------------------------------|-------|----------------------|--------------------------------------------------------------------------------------------------------------------------------------------------------------------------------------------------------------------------------------------------------------|------|------|-----------|-------|------|------|
| Rsa1.0_00017.1.g1197.t1 | ref NP_195008.6  tetratricopeptide repeat domain-containing protein [Arabidopsis thaliana] gi 332660722 gb AE86122.1  tetratricopeptide repeat domain-containing protein [Arabidopsis thaliana]                                                                                                                                                                                                                                                                                                                                                                                                                                                                                                                                                                                                                                                                                                                                                              | 1868 | 1863 | 0         | 99.7  | 86.3 | 91.5 | tetratricopeptide repeat domain-containing protein | gbpln | Arabidopsis thaliana | AT4G32820.1   Symbols:   Tetratricopeptide repeat (TPR)-like superfamily protein   chr4:15831679-15841454 REVERSE LENGTH=1863                                                                                                                                | 1868 | 1863 | 0         | 99.7  | 86.3 | 91.5 |
| Rsa1.0_00017.1.g1198.t1 | ref XP_002869240.1  hypothetical protein ARALYDRAFT_913154 [Arabidopsis lyrata subsp. lyrata] gi 297315076 gb EFH45499.1  hypothetical protein ARALYDRAFT_913154 [Arabidopsis lyrata subsp. lyrata]                                                                                                                                                                                                                                                                                                                                                                                                                                                                                                                                                                                                                                                                                                                                                          | 295  | 290  | 1.00E-161 | 98.3  | 94.6 | 96.3 | hypothetical protein ARALYDRAFT_913154             | gbpln | Arabidopsis lyrata   | AT4G32830.1   Symbols: AtAUR1, AUR1   ataurora1   chr4:15842557-15844354 FORWARD LENGTH=294                                                                                                                                                                  | 295  | 294  | 1.00E-161 | 99.7  | 93.6 | 96.9 |
| Rsa1.0_00017.1.g1199.t1 | ref NP_195010.1  6-phosphofructokinase 6 [Arabidopsis thaliana] gi 75181422 sp Q9M076.1 K6PF6_ARAT H RecName: Full=6-phosphofructokinase 6; AltName: Full=Phosphofructokinase 6; AltName: Full=Phosphohexokinase 6 gi 7270231 emb CAB80001.1  putative pyrophosphate-fructose-6-phosphate 1-phosphotransferase [Arabidopsis thaliana] gi 29029114 gb AAO64936.1  At4g32840 [Arabidopsis thaliana] gi 110743163 dbj BAE99473.1  putative pyrophosphate-fructose-6-phosphate 1-phosphotransferase [Arabidopsis thaliana] gi 332660725 gb AE86125.1  6-phosphofructokinase 6 [Arabidopsis thaliana]                                                                                                                                                                                                                                                                                                                                                             | 464  | 462  | 0         | 99.6  | 92.9 | 96.1 | 6-phosphofructokinase 6                            | gbpln | Arabidopsis thaliana | AT4G32840.1   Symbols: PFK6   phosphofructokinase 6   chr4:15845010-15848305 REVERSE LENGTH=462                                                                                                                                                              | 464  | 462  | 0         | 99.6  | 92.9 | 96.1 |
| Rsa1.0_00017.1.g1200.t1 | gb EOA16057.1  hypothetical protein CARUB_v10004188mg [Capsella rubella]                                                                                                                                                                                                                                                                                                                                                                                                                                                                                                                                                                                                                                                                                                                                                                                                                                                                                     | 779  | 780  | 0         | 100.1 | 85.1 | 89.3 | hypothetical protein CARUB_v10004188mg             | gbpln | Capsella rubella     | AT4G32850.8   Symbols: nPAP   nuclear poly(a) polymerase   chr4:15850134-15854443 FORWARD LENGTH=765                                                                                                                                                         | 779  | 765  | 0         | 98.2  | 84.6 | 88.6 |
| Rsa1.0_00017.1.g1201.t1 | emb CAB80003.1  putative protein [Arabidopsis thaliana]                                                                                                                                                                                                                                                                                                                                                                                                                                                                                                                                                                                                                                                                                                                                                                                                                                                                                                      | 188  | 193  | 1.00E-84  | 102.7 | 84.0 | 90.4 | putative protein                                   | gbpln | Arabidopsis thaliana | AT4G32860.1   Symbols:   unknown protein; Has 46 Blast hits to 46 proteins in 10 species: Archae - 0; Bacteria - 0; Metazoa - 0; Fungi - 0; Plants - 46; Viruses - 0; Other Eukaryotes - 0 (source: NCBI BLINK).   chr4:15856710-15857309 REVERSE LENGTH=199 | 188  | 199  | 6.00E-87  | 105.9 | 84.0 | 90.4 |
| Rsa1.0_00017.1.g1202.t1 | ref XP_002869238.1  hypothetical protein ARALYDRAFT_491409 [Arabidopsis lyrata subsp. lyrata] gi 297315074 gb EFH45497.1  hypothetical protein ARALYDRAFT_491409 [Arabidopsis lyrata subsp. lyrata] ref NP_195014.1  homeobox-leucine zipper protein ATHB-8 [Arabidopsis thaliana] gi 75220729 sp Q39123.1 ATHB8_ARAT H RecName: Full=Homeobox-leucine zipper protein ATHB-8; AltName: Full=HD-ZIP protein ATHB-8; AltName: Full=Homeodomain transcription factor ATHB-8 gi 1149569 emb CAA90703.1  HD-zip [Arabidopsis thaliana] gi 7270233 emb CAB80005.1  HD-zip transcription factor (athb-8) [Arabidopsis thaliana] gi 20152536 emb CAD29660.1  homeodomain-leucine zipper protein 8 [Arabidopsis thaliana] gi 20466330 gb AAM20482.1  HD-zip transcription factor (athb-8) [Arabidopsis thaliana] gi 31711762 gb AAP68237.1  At4g32880 [Arabidopsis thaliana] gi 332660738 gb AE86138.1  homeobox-leucine zipper protein ATHB-8 [Arabidopsis thaliana] | 164  | 157  | 3.00E-67  | 95.7  | 75.6 | 86.0 | hypothetical protein ARALYDRAFT_491409             | gbpln | Arabidopsis lyrata   | AT4G32870.1   Symbols:   Polyketide cyclase/dehydrase and lipid transport superfamily protein   chr4:15862168-15862641 FORWARD LENGTH=157                                                                                                                    | 164  | 157  | 6.00E-67  | 95.7  | 72.6 | 84.8 |
| Rsa1.0_00017.1.g1203.t1 | ref NP_195014.1  homeobox-leucine zipper protein ATHB-8 [Arabidopsis thaliana] gi 75220729 sp Q39123.1 ATHB8_ARAT H RecName: Full=Homeobox-leucine zipper protein ATHB-8; AltName: Full=HD-ZIP protein ATHB-8; AltName: Full=Homeodomain transcription factor ATHB-8 gi 1149569 emb CAA90703.1  HD-zip [Arabidopsis thaliana] gi 7270233 emb CAB80005.1  HD-zip transcription factor (athb-8) [Arabidopsis thaliana] gi 20152536 emb CAD29660.1  homeodomain-leucine zipper protein 8 [Arabidopsis thaliana] gi 20466330 gb AAM20482.1  HD-zip transcription factor (athb-8) [Arabidopsis thaliana] gi 31711762 gb AAP68237.1  At4g32880 [Arabidopsis thaliana] gi 332660738 gb AE86138.1  homeobox-leucine zipper protein ATHB-8 [Arabidopsis thaliana]                                                                                                                                                                                                     | 833  | 833  | 0         | 100.0 | 97.0 | 99.2 | homeobox-leucine zipper protein ATHB-8             | gbpln | Arabidopsis thaliana | AT4G32880.1   Symbols: ATHB-8, ATHB8, HB-8   homeobox gene 8   chr4:15863587-15867822 REVERSE LENGTH=833                                                                                                                                                     | 833  | 833  | 0         | 100.0 | 97.0 | 99.2 |

|                         |                                                                                                                                                                                                                                                                                                                                                                                                                                                                                                          |      |      |           |       |      |      |                                                 |       |                      |                                                                                                                                                                                                                                                                                                                                                                                      |      |      |           |       |      |      |
|-------------------------|----------------------------------------------------------------------------------------------------------------------------------------------------------------------------------------------------------------------------------------------------------------------------------------------------------------------------------------------------------------------------------------------------------------------------------------------------------------------------------------------------------|------|------|-----------|-------|------|------|-------------------------------------------------|-------|----------------------|--------------------------------------------------------------------------------------------------------------------------------------------------------------------------------------------------------------------------------------------------------------------------------------------------------------------------------------------------------------------------------------|------|------|-----------|-------|------|------|
| Rsa1.0_00017.1.g1204.t1 | refNP_195015.1  GATA transcription factor 9 [Arabidopsis thaliana]<br>gi 71159362 sp Q82632.1 GATA9_ARAT H RecName: Full=GATA transcription factor 9 gi 3688170 emb CAA21198.1  putative protein [Arabidopsis thaliana] gi 7270236 emb CA880006.1  putative protein [Arabidopsis thaliana] gi 26449440 dbj BAC41847.1  unknown protein [Arabidopsis thaliana] gi 30725358 gb AAP37701.1  At4g32890 [Arabidopsis thaliana] gi 332660739 gb AEE86139.1  GATA transcription factor 9 [Arabidopsis thaliana] | 320  | 308  | 1.00E-128 | 96.3  | 75.0 | 84.7 | GATA transcription factor 9                     | gbpln | Arabidopsis thaliana | AT4G32890.1   Symbols: GATA9   GATA transcription factor 9   chr4:15875598-15876615 FORWARD LENGTH=308                                                                                                                                                                                                                                                                               | 320  | 308  | 1.00E-131 | 96.3  | 75.0 | 84.7 |
| Rsa1.0_00017.1.g1205.t1 | gb EOA17472.1  hypothetical protein CARUB_v10005799mg [Capsella rubella]                                                                                                                                                                                                                                                                                                                                                                                                                                 | 193  | 193  | 1.00E-91  | 100.0 | 85.0 | 92.7 | hypothetical protein CARUB_v10005799mg          | gbpln | Capsella rubella     | AT4G32900.2   Symbols:   Peptidyl-tRNA hydrolase II (PTH2) family protein   chr4:15878944-15880979 REVERSE LENGTH=193                                                                                                                                                                                                                                                                | 193  | 193  | 3.00E-92  | 100.0 | 84.5 | 91.2 |
| Rsa1.0_00017.1.g1206.t1 | refNP_567908.1  uncharacterized protein [Arabidopsis thaliana] gi 75158853 sp Q8RXH2.1 NUP85_ARAT H RecName: Full=Nuclear pore complex protein Nup85; AltName: Full=Nucleoporin Nup85 gi 19698819 gb AAL91145.1  putative protein [Arabidopsis thaliana] gi 332660742 gb AEE86142.1  uncharacterized protein AT4G32910 [Arabidopsis thaliana]                                                                                                                                                            | 814  | 716  | 0         | 88.0  | 79.1 | 83.8 | uncharacterized protein                         | gbpln | Arabidopsis thaliana | AT4G32910.1   Symbols:   CONTAINS InterPro DOMAIN/s: Nuclear pore complex protein, Nucleoporin Nup85-like (InterPro:IPR011502); Has 30201 Blast hits to 17322 proteins in 780 species: Archae - 12; Bacteria - 1396; Metazoa - 17338; Fungi - 3422; Plants - 5037; Viruses - 0; Other Eukaryotes - 2996 (source: NCBI BLINK).   chr4:15881364-15885210 FORWARD LENGTH=716            | 814  | 716  | 0         | 88.0  | 79.1 | 83.8 |
| Rsa1.0_00017.1.g1207.t1 | refXP_002867220.1  glycine-rich protein [Arabidopsis lyrata subsp. lyrata] gi 297313056 gb EFH43479.1  glycine-rich protein [Arabidopsis lyrata subsp. lyrata]                                                                                                                                                                                                                                                                                                                                           | 1435 | 1424 | 0         | 99.2  | 86.8 | 92.9 | glycine-rich protein                            | gbpln | Arabidopsis lyrata   | AT4G32920.3   Symbols:   glycine-rich protein   chr4:15888153-15896006 REVERSE LENGTH=1432                                                                                                                                                                                                                                                                                           | 1435 | 1432 | 0         | 99.8  | 86.8 | 92.8 |
| Rsa1.0_00017.1.g1208.t2 | emb CAA21202.1  putative protein [Arabidopsis thaliana] gi 7270240 emb CAB80010.1  putative protein [Arabidopsis thaliana]                                                                                                                                                                                                                                                                                                                                                                               | 195  | 181  | 8.00E-87  | 92.8  | 82.6 | 86.2 | putative protein                                | gbpln | Arabidopsis thaliana | AT4G32930.1   Symbols:   unknown protein; CONTAINS InterPro DOMAIN/s: Protein of unknown function DUF866, eukaryotic (InterPro:IPR008584); Has 30201 Blast hits to 17322 proteins in 780 species: Archae - 12; Bacteria - 1396; Metazoa - 17338; Fungi - 3422; Plants - 5037; Viruses - 0; Other Eukaryotes - 2996 (source: NCBI BLINK).   chr4:15898878-15900185 FORWARD LENGTH=167 | 195  | 167  | 2.00E-87  | 85.6  | 82.1 | 84.1 |
| Rsa1.0_00017.1.g1209.t1 | dbj BAJ33795.1  unnamed protein product [Thellungiella halophila]                                                                                                                                                                                                                                                                                                                                                                                                                                        | 489  | 478  | 0         | 97.8  | 86.1 | 91.2 | unnamed protein product                         | ----  | ----                 | AT4G32940.1   Symbols: GAMMA-VPE, GAMMAVPE   gamma vacuolar processing enzyme   chr4:15900557-15903161 REVERSE LENGTH=494                                                                                                                                                                                                                                                            | 489  | 494  | 0         | 101.0 | 85.5 | 89.0 |
| Rsa1.0_00017.1.g1210.t1 | #                                                                                                                                                                                                                                                                                                                                                                                                                                                                                                        | #    | #    | #         | #     | #    | #    | -                                               | ----  | ----                 | #                                                                                                                                                                                                                                                                                                                                                                                    | #    | #    | #         | #     | #    | #    |
| Rsa1.0_00017.1.g1211.t1 | #                                                                                                                                                                                                                                                                                                                                                                                                                                                                                                        | #    | #    | #         | #     | #    | #    | -                                               | ----  | ----                 | #                                                                                                                                                                                                                                                                                                                                                                                    | #    | #    | #         | #     | #    | #    |
| Rsa1.0_00017.1.g1212.t1 | #                                                                                                                                                                                                                                                                                                                                                                                                                                                                                                        | #    | #    | #         | #     | #    | #    | -                                               | ----  | ----                 | #                                                                                                                                                                                                                                                                                                                                                                                    | #    | #    | #         | #     | #    | #    |
| Rsa1.0_00017.1.g1213.t1 | refXP_002867215.1  hypothetical protein ARALYDRAFT_491396 [Arabidopsis lyrata subsp. lyrata] gi 297313051 gb EFH43474.1  hypothetical protein ARALYDRAFT_491396 [Arabidopsis lyrata subsp. lyrata]                                                                                                                                                                                                                                                                                                       | 455  | 472  | 0         | 103.7 | 80.0 | 86.2 | hypothetical protein ARALYDRAFT_491396          | gbpln | Arabidopsis lyrata   | AT4G32980.1   Symbols: ATH1   homeobox gene 1   chr4:15914865-15916873 REVERSE LENGTH=473                                                                                                                                                                                                                                                                                            | 455  | 473  | 0         | 104.0 | 78.2 | 85.7 |
| Rsa1.0_00017.1.g1214.t1 | gb EOA17824.1  hypothetical protein CARUB_v10006225mg, partial [Capsella rubella]                                                                                                                                                                                                                                                                                                                                                                                                                        | 195  | 241  | 2.00E-95  | 123.6 | 88.2 | 91.8 | hypothetical protein CARUB_v10006225mg, partial | gbpln | Capsella rubella     | AT4G33000.2   Symbols: CBL10, SCABP8, ATCBL10   calineurin B-like protein 10   chr4:15924821-15926398 FORWARD LENGTH=246                                                                                                                                                                                                                                                             | 195  | 246  | 7.00E-95  | 126.2 | 84.6 | 90.8 |
| Rsa1.0_00017.1.g1215.t1 | refXP_002867212.1  hypothetical protein ARALYDRAFT_491390 [Arabidopsis lyrata subsp. lyrata] gi 297313048 gb EFH43471.1  hypothetical protein ARALYDRAFT_491390 [Arabidopsis lyrata subsp. lyrata]                                                                                                                                                                                                                                                                                                       | 1043 | 1037 | 0         | 99.4  | 90.4 | 94.9 | hypothetical protein ARALYDRAFT_491390          | gbpln | Arabidopsis lyrata   | AT4G33010.1   Symbols: AtGLDP1, GLDP1   glycine decarboxylase P-protein 1   chr4:15926852-15931150 REVERSE LENGTH=1037                                                                                                                                                                                                                                                               | 1043 | 1037 | 0         | 99.4  | 90.3 | 94.5 |
| Rsa1.0_00017.1.g1216.t1 | gb EOA16962.1  hypothetical protein CARUB_v10005191mg [Capsella rubella]                                                                                                                                                                                                                                                                                                                                                                                                                                 | 390  | 340  | 1.00E-163 | 87.2  | 78.7 | 81.5 | hypothetical protein CARUB_v10005191mg          | gbpln | Capsella rubella     | AT4G33020.1   Symbols: ZIP9, ATZIP9   ZIP metal ion transporter family   chr4:15932603-15934267 REVERSE LENGTH=344                                                                                                                                                                                                                                                                   | 390  | 344  | 1.00E-163 | 88.2  | 77.4 | 81.3 |

|                         |                                                                                                                                                                                                                                                                                                                                                                                                                                                                                                                                                                                                                                                                        |     |     |           |       |      |      |                                              |       |                      |                                                                                                                                                                                                                                                                                                                                                              |     |     |           |       |      |      |
|-------------------------|------------------------------------------------------------------------------------------------------------------------------------------------------------------------------------------------------------------------------------------------------------------------------------------------------------------------------------------------------------------------------------------------------------------------------------------------------------------------------------------------------------------------------------------------------------------------------------------------------------------------------------------------------------------------|-----|-----|-----------|-------|------|------|----------------------------------------------|-------|----------------------|--------------------------------------------------------------------------------------------------------------------------------------------------------------------------------------------------------------------------------------------------------------------------------------------------------------------------------------------------------------|-----|-----|-----------|-------|------|------|
| Rsa1.0_00017.1.g1217.t1 | refXP_002869229.1   hypothetical protein ARALYDRAFT_491388 [Arabidopsis lyrata subsp. lyrata] gi 297315065 gb EFH45488.1                                                                                                                                                                                                                                                                                                                                                                                                                                                                                                                                               | 482 | 475 | 0         | 98.5  | 92.9 | 95.0 | hypothetical protein ARALYDRAFT_491388       | gbpln | Arabidopsis lyrata   | AT4G33030.1   Symbols: SQD1   sulfoquinovosyl(diacetyl)glycerol 1   chr4:15936051-15937566 FORWARD LENGTH=477                                                                                                                                                                                                                                                | 482 | 477 | 0         | 99.0  | 91.9 | 94.8 |
| Rsa1.0_00017.1.g1218.t1 | hypothetical protein ARALYDRAFT_491388 [Arabidopsis lyrata subsp. lyrata] refNP_195030.1   glutaredoxin-C6 [Arabidopsis thaliana] gi 119370639 sp Q8L9S3.2 GRXC6_ARA_TH RecName: Full=Glutaredoxin-C6; Short=AtGrxC6; AltName: Full=Protein ROXY 21 gi 3688185 emb CAA21213.1   putative protein [Arabidopsis thaliana] gi 7270251 emb CAB80021.1   putative protein [Arabidopsis thaliana] gi 18377674 gb AAL66987.1   unknown protein [Arabidopsis thaliana] gi 20258937 gb AAM14184.1   unknown protein [Arabidopsis thaliana] gi 226348218 gb ACO50425.1   glutaredoxin [Arabidopsis thaliana] gi 332660763 gb AEE86163.1   glutaredoxin-C6 [Arabidopsis thaliana] | 144 | 144 | 2.00E-67  | 100.0 | 91.0 | 94.4 | glutaredoxin-C6                              | gbpln | Arabidopsis thaliana | AT4G33040.1   Symbols:   Thioredoxin superfamily protein   chr4:15940779-15941213 REVERSE LENGTH=144                                                                                                                                                                                                                                                         | 144 | 144 | 5.00E-70  | 100.0 | 91.0 | 94.4 |
| Rsa1.0_00017.1.g1219.t1 | gb EOA16526.1   hypothetical protein CARUB_v10004685mg [Capsella rubella]                                                                                                                                                                                                                                                                                                                                                                                                                                                                                                                                                                                              | 465 | 487 | 0         | 104.7 | 90.5 | 94.2 | hypothetical protein CARUB_v10004685mg       | gbpln | Capsella rubella     | AT4G33050.3   Symbols: EDA39   calmodulin-binding family protein   chr4:15944604-15946736 REVERSE LENGTH=488                                                                                                                                                                                                                                                 | 465 | 488 | 0         | 104.9 | 90.8 | 94.8 |
| Rsa1.0_00017.1.g1220.t1 | refNP_195032.2   peptidyl-prolyl cis-trans isomerase SDCCAG10 [Arabidopsis thaliana] gi 45680878 gb AAS75308.1   multidomain cyclophilin type peptidyl-prolyl cis-trans isomerase [Arabidopsis thaliana] gi 95147300 gb ABF57285.1   At4g33060 [Arabidopsis thaliana] gi 332660768 gb AEE86168.1   peptidyl-prolyl cis-trans isomerase CYP57 [Arabidopsis thaliana]                                                                                                                                                                                                                                                                                                    | 492 | 504 | 0         | 102.4 | 87.2 | 93.5 | peptidyl-prolyl cis-trans isomerase SDCCAG10 | gbpln | Arabidopsis thaliana | AT4G33060.1   Symbols:   Cyclophilin-like peptidyl-prolyl cis-trans isomerase family protein   chr4:15948535-15951954 FORWARD LENGTH=504                                                                                                                                                                                                                     | 492 | 504 | 0         | 102.4 | 87.2 | 93.5 |
| Rsa1.0_00017.1.g1221.t1 | dbj BAC76896.1   protein kinase [Raphanus sativus]                                                                                                                                                                                                                                                                                                                                                                                                                                                                                                                                                                                                                     | 518 | 518 | 0         | 100.0 | 99.6 | 99.6 | protein kinase                               | gbpln | Raphanus sativus     | AT4G33080.1   Symbols:   AGC (cAMP-dependent, cGMP-dependent and protein kinase C) kinase family protein   chr4:15960146-15964296 FORWARD LENGTH=519                                                                                                                                                                                                         | 518 | 519 | 0         | 100.2 | 95.4 | 96.9 |
| Rsa1.0_00017.1.g1222.t1 | refNP_195035.2   aminopeptidase M1 [Arabidopsis thaliana] gi 17473511 gb AAL38379.1   AT4g33090/F4110.20 [Arabidopsis thaliana] gi 24209879 gb AAN41401.1   aminopeptidase M [Arabidopsis thaliana] gi 29028734 gb AA064746.1   At4g33090/F4110.20 [Arabidopsis thaliana] gi 110742477 dbj BAE99157.1   aminopeptidase like protein [Arabidopsis thaliana] gi 332660772 gb AEE86172.1   aminopeptidase M1 [Arabidopsis thaliana]                                                                                                                                                                                                                                       | 871 | 879 | 0         | 100.9 | 93.2 | 96.7 | aminopeptidase M1                            | gbpln | Arabidopsis thaliana | AT4G33090.1   Symbols: APM1, ATAPM1   aminopeptidase M1   chr4:15965915-15970418 REVERSE LENGTH=879                                                                                                                                                                                                                                                          | 871 | 879 | 0         | 100.9 | 93.2 | 96.7 |
| Rsa1.0_00017.1.g1223.t1 | refNP_195036.1   uncharacterized protein [Arabidopsis thaliana] gi 9910632 sp Q9SMZ9.1 Y4331_ARATH RecName: Full=Uncharacterized protein At4g33100 gi 4455324 emb CAB36784.1   putative protein [Arabidopsis thaliana] gi 7270257 emb CAB80027.1   putative protein [Arabidopsis thaliana] gi 37202052 gb AAQ89641.1   At4g33100 [Arabidopsis thaliana] gi 51969658 dbj BAD43021.1   putative protein [Arabidopsis thaliana] gi 51969698 dbj BAD43641.1   putative protein [Arabidopsis thaliana] gi 332660773 gb AEE86173.1   uncharacterized protein AT4G33100 [Arabidopsis thaliana]                                                                                | 84  | 92  | 2.00E-35  | 109.5 | 86.9 | 90.5 | uncharacterized protein                      | gbpln | Arabidopsis thaliana | AT4G33100.1   Symbols:   CONTAINS InterPro DOMAIN/s: Mitochondrial distribution/morphology family 35/apoptosis (InterPro:IPR007918); Has 214 Blast hits to 214 proteins in 102 species: Archae - 0; Bacteria - 0; Metazoa - 110; Fungi - 69; Plants - 29; Viruses - 0; Other Eukaryotes - 6 (source: NCBI BLINK).   chr4:15971701-15972342 FORWARD LENGTH=82 | 84  | 92  | 4.00E-38  | 109.5 | 86.9 | 90.5 |
| Rsa1.0_00017.1.g1224.t1 | refXP_002867201.1   coclaurine N-methyltransferase [Arabidopsis lyrata subsp. lyrata] gi 297313037 gb EFH43460.1   coclaurine N-methyltransferase [Arabidopsis lyrata subsp. lyrata]                                                                                                                                                                                                                                                                                                                                                                                                                                                                                   | 322 | 355 | 1.00E-166 | 110.2 | 89.1 | 95.3 | coclaurine N-methyltransferase               | gbpln | Arabidopsis lyrata   | AT4G33110.2   Symbols:   S-adenosyl-L-methionine-dependent methyltransferases superfamily protein   chr4:15972497-15974531 REVERSE LENGTH=355                                                                                                                                                                                                                | 322 | 355 | 1.00E-165 | 110.2 | 86.6 | 94.4 |

|                         |                                                                                                                                                                                                                                                                                                                                          |      |      |           |       |      |      |                                                                               |       |                      |                                                                                                                                                                                                                                                                                                                                                                                                                                                                                                                                                                                                                                           |      |      |           |       |      |      |
|-------------------------|------------------------------------------------------------------------------------------------------------------------------------------------------------------------------------------------------------------------------------------------------------------------------------------------------------------------------------------|------|------|-----------|-------|------|------|-------------------------------------------------------------------------------|-------|----------------------|-------------------------------------------------------------------------------------------------------------------------------------------------------------------------------------------------------------------------------------------------------------------------------------------------------------------------------------------------------------------------------------------------------------------------------------------------------------------------------------------------------------------------------------------------------------------------------------------------------------------------------------------|------|------|-----------|-------|------|------|
| Rsa1.0_00017.1.g1225.t1 | gb AAC02672.1  polyprotein [Arabidopsis arenosa]                                                                                                                                                                                                                                                                                         | 168  | 1390 | 1.00E-48  | 827.4 | 57.1 | 70.2 | polyprotein                                                                   | gbpln | Arabidopsis arenosa  | #                                                                                                                                                                                                                                                                                                                                                                                                                                                                                                                                                                                                                                         | #    | #    | #         | #     | #    |      |
| Rsa1.0_00017.1.g1226.t1 | dbj BAB10876.1  polyprotein [Arabidopsis thaliana]                                                                                                                                                                                                                                                                                       | 1546 | 1429 | 0         | 92.4  | 44.6 | 54.5 | polyprotein                                                                   | gbpln | Arabidopsis thaliana | AT4G23160.1   Symbols: CRK8   cysteine-rich RLK (RECEPTOR-like protein kinase) 8   chr4:12129485-12134086 FORWARD LENGTH=1262                                                                                                                                                                                                                                                                                                                                                                                                                                                                                                             | 1546 | 1262 | 1.00E-115 | 81.6  | 13.3 | 19.7 |
| Rsa1.0_00017.1.g1227.t1 | ref NP_200901.2  kinesin family member 4/7/21/27 [Arabidopsis thaliana] gi 332010015 gb AED97398.1  kinesin family member 4/7/21/27 [Arabidopsis thaliana]                                                                                                                                                                               | 719  | 1294 | 1.00E-144 | 180.0 | 45.3 | 57.2 | kinesin family member 4/7/21/27                                               | gbpln | Arabidopsis thaliana | AT5G60930.1   Symbols:   P-loop containing nucleoside triphosphate hydrolases superfamily protein   chr5:24515398-24522511 REVERSE LENGTH=1294                                                                                                                                                                                                                                                                                                                                                                                                                                                                                            | 719  | 1294 | 1.00E-147 | 180.0 | 45.3 | 57.2 |
| Rsa1.0_00017.1.g1227.t4 | ref NP_195039.6  uncharacterized protein [Arabidopsis thaliana] gi 33266077 gb AEE86177.1  uncharacterized protein AT4G33130 [Arabidopsis thaliana]                                                                                                                                                                                      | 225  | 222  | 1.00E-101 | 98.7  | 82.7 | 93.8 | uncharacterized protein                                                       | gbpln | Arabidopsis thaliana | AT4G33130.1   Symbols:   unknown protein; FUNCTIONS IN: molecular_function unknown; INVOLVED IN: biological_process unknown; LOCATED IN: chloroplast; EXPRESSED IN: 9 plant structures; EXPRESSED DURING: 6 growth stages; BEST Arabidopsis thaliana protein match is: Protein of unknown function, DJF547 (TAIR:AT1G16750.1); Has 192 Blast hits to 192 proteins in 18 species: Archae - 0; Bacteria - 0; Metazoa - 1; Fungi - 0; Plants - 189; Viruses - 0; Other Eukaryotes - 2 (source: NCBI BLINK).   chr4:15979437-15980655 REVERSE LENGTH=222                                                                                      | 225  | 222  | 1.00E-104 | 98.7  | 82.7 | 93.8 |
| Rsa1.0_00017.1.g1229.t1 | gb EOA16925.1  hypothetical protein CARUB_v10005149mg [Capsella rubella]                                                                                                                                                                                                                                                                 | 343  | 351  | 1.00E-143 | 102.3 | 80.5 | 86.0 | hypothetical protein CARUB_v10005149mg                                        | gbpln | Capsella rubella     | AT4G33140.1   Symbols:   Haloacid dehalogenase-like hydrolase (HAD) superfamily protein   chr4:15981648-15984135 FORWARD LENGTH=353                                                                                                                                                                                                                                                                                                                                                                                                                                                                                                       | 343  | 353  | 1.00E-140 | 102.9 | 77.8 | 82.8 |
| Rsa1.0_00017.1.g1230.t1 | gb AAB96826.1  lysine-ketoglutarate reductase/saccharopine dehydrogenase bifunctional enzyme [Arabidopsis thaliana]                                                                                                                                                                                                                      | 1072 | 1064 | 0         | 99.3  | 90.9 | 95.4 | lysine-ketoglutarate reductase/saccharopine dehydrogenase bifunctional enzyme | gbpln | Arabidopsis thaliana | AT4G33150.2   Symbols:   lysine-ketoglutarate reductase/saccharopine dehydrogenase bifunctional enzyme   chr4:15985479-15991069 REVERSE LENGTH=1064                                                                                                                                                                                                                                                                                                                                                                                                                                                                                       | 1072 | 1064 | 0         | 99.3  | 90.8 | 95.3 |
| Rsa1.0_00018.1.g1231.t1 | gb EOA38120.1  hypothetical protein CARUB_v10009590mg [Capsella rubella]                                                                                                                                                                                                                                                                 | 287  | 351  | 2.00E-75  | 122.3 | 55.7 | 69.3 | hypothetical protein CARUB_v10009590mg                                        | gbpln | Capsella rubella     | AT2G03810.4   Symbols:   18S pre-ribosomal assembly protein gar2-related   chr2:1162703-1164286 FORWARD LENGTH=439                                                                                                                                                                                                                                                                                                                                                                                                                                                                                                                        | 287  | 439  | 9.00E-42  | 153.0 | 48.8 | 63.8 |
| Rsa1.0_00018.1.g1232.t1 | ref NP_563930.1  phosphatidylinositol 3- and 4-kinase-like protein [Arabidopsis thaliana] gi 16974596 gb AAL31202.1  At1g13640/F21F23.7 [Arabidopsis thaliana] gi 23506173 gb AAN31098.1  At1g13640/F21F23.7 [Arabidopsis thaliana] gi 332190932 gb AEE29053.1  phosphatidylinositol 3- and 4-kinase-like protein [Arabidopsis thaliana] | 617  | 622  | 0         | 100.8 | 85.7 | 92.4 | phosphatidylinositol 3- and 4-kinase-like protein                             | gbpln | Arabidopsis thaliana | AT1G13640.1   Symbols:   Phosphatidylinositol 3- and 4-kinase family protein   chr1:4677276-4679144 REVERSE LENGTH=622                                                                                                                                                                                                                                                                                                                                                                                                                                                                                                                    | 617  | 622  | 0         | 100.8 | 85.7 | 92.4 |
| Rsa1.0_00018.1.g1233.t1 | gb EOA36932.1  hypothetical protein CARUB_v10009802mg [Capsella rubella]                                                                                                                                                                                                                                                                 | 302  | 314  | 1.00E-148 | 104.0 | 91.7 | 95.0 | hypothetical protein CARUB_v10009802mg                                        | gbpln | Capsella rubella     | AT1G13635.2   Symbols:   DNA glycosylase superfamily protein   chr1:4674248-4675784 FORWARD LENGTH=311                                                                                                                                                                                                                                                                                                                                                                                                                                                                                                                                    | 302  | 311  | 1.00E-144 | 103.0 | 89.4 | 93.0 |
| Rsa1.0_00018.1.g1234.t2 | gb EOA39669.1  hypothetical protein CARUB_v10008310mg [Capsella rubella] gi 482575483 gb EOA39670.1  hypothetical protein CARUB_v10008310mg [Capsella rubella]                                                                                                                                                                           | 873  | 835  | 0         | 95.6  | 71.6 | 81.3 | hypothetical protein CARUB_v10008310mg                                        | gbpln | Capsella rubella     | AT1G13630.1   Symbols:   Tetratricopeptide repeat (TPR)-like superfamily protein   chr1:4669784-4672826 REVERSE LENGTH=806                                                                                                                                                                                                                                                                                                                                                                                                                                                                                                                | 873  | 806  | 0         | 92.3  | 64.7 | 73.7 |
| Rsa1.0_00018.1.g1235.t1 | gb EOA36406.1  hypothetical protein CARUB_v10010856mg [Capsella rubella]                                                                                                                                                                                                                                                                 | 104  | 110  | 7.00E-26  | 105.8 | 60.6 | 69.2 | hypothetical protein CARUB_v10010856mg                                        | gbpln | Capsella rubella     | AT1G13620.1   Symbols: RGF2   Encodes a root meristem growth factor (RGF). Belongs to a family of functionally redundant homologous peptides that are secreted, tyrosine-sulfated, and expressed mainly in the stem cell area and the innermost layer of central columella cells. RGFs are required for maintenance of the root stem cell niche and transit amplifying cell proliferation. Members of this family include: At5g60810 (RGF1), At1g13620 (RGF2), At2g04025 (RGF3), At3g30350 (RGF4), At5g51451 (RGF5), At4g16515 (RGF6), At3g02240 (RGF7), At2g03830 (RGF8) and At5g64770 (RGF9).   chr1:4668494-4669225 FORWARD LENGTH=109 | 104  | 109  | 9.00E-22  | 104.8 | 63.5 | 70.2 |
| Rsa1.0_00018.1.g1236.t1 | ref XP_002892762.1  hypothetical protein ARALYDRAFT_471522 [Arabidopsis lyrata subsp. lyrata] gi 297338604 gb EFH69021.1  hypothetical protein ARALYDRAFT_471522 [Arabidopsis lyrata subsp. lyrata]                                                                                                                                      | 538  | 360  | 1.00E-165 | 66.9  | 52.6 | 57.6 | hypothetical protein ARALYDRAFT_471522                                        | gbpln | Arabidopsis lyrata   | AT1G13610.1   Symbols:   alpha/beta-Hydrolases superfamily protein   chr1:4664008-4665975 REVERSE LENGTH=358                                                                                                                                                                                                                                                                                                                                                                                                                                                                                                                              | 538  | 358  | 1.00E-161 | 66.5  | 51.3 | 56.3 |



|                         |                                                                                                                                                                                                                                                                                                                                                                                                                                                                                                                                                                                                                                                                                                                                                                                                                                                                                                                                                                                                                           |     |     |          |       |      |      |                                                                                                                    |       |                      |                                                                                                                                             |     |     |          |       |      |      |
|-------------------------|---------------------------------------------------------------------------------------------------------------------------------------------------------------------------------------------------------------------------------------------------------------------------------------------------------------------------------------------------------------------------------------------------------------------------------------------------------------------------------------------------------------------------------------------------------------------------------------------------------------------------------------------------------------------------------------------------------------------------------------------------------------------------------------------------------------------------------------------------------------------------------------------------------------------------------------------------------------------------------------------------------------------------|-----|-----|----------|-------|------|------|--------------------------------------------------------------------------------------------------------------------|-------|----------------------|---------------------------------------------------------------------------------------------------------------------------------------------|-----|-----|----------|-------|------|------|
| Rsa1.0_00018.1.g1237.t1 | gb[EOA29050.1] hypothetical protein CARUB_v10025304mg [Capsella rubella]                                                                                                                                                                                                                                                                                                                                                                                                                                                                                                                                                                                                                                                                                                                                                                                                                                                                                                                                                  | 83  | 105 | 9.00E-14 | 126.5 | 51.8 | 63.9 | hypothetical protein CARUB_v10025304mg                                                                             | gbpln | Capsella rubella     | AT2G25185.1   Symbols:   Defensin-like (DEFL) family protein   chr2:10731622-10732024 FORWARD LENGTH=102                                    | 83  | 102 | 2.00E-15 | 122.9 | 48.2 | 60.2 |
| Rsa1.0_00018.1.g1238.t1 | gb[EOA29050.1] hypothetical protein CARUB_v10025304mg [Capsella rubella]                                                                                                                                                                                                                                                                                                                                                                                                                                                                                                                                                                                                                                                                                                                                                                                                                                                                                                                                                  | 83  | 105 | 7.00E-13 | 126.5 | 49.4 | 63.9 | hypothetical protein CARUB_v10025304mg                                                                             | gbpln | Capsella rubella     | AT2G25185.1   Symbols:   Defensin-like (DEFL) family protein   chr2:10731622-10732024 FORWARD LENGTH=102                                    | 83  | 102 | 3.00E-15 | 122.9 | 48.2 | 60.2 |
| Rsa1.0_00018.1.g1239.t1 | gb[EOA14018.1] hypothetical protein CARUB_v10027151mg [Capsella rubella]<br>ref[NP_172817.2] basic leucine-zipper 58 [Arabidopsis thaliana]<br>gi 8920564 gb AAF81286.1 AC027656.3 Contains similarity to bZIP DNA-binding protein HBF-1 - soybean from Glycine max gb Y10685. It contains a bZIP transcription factor PF 00170. EST gb N37717 comes from this gene [Arabidopsis thaliana]                                                                                                                                                                                                                                                                                                                                                                                                                                                                                                                                                                                                                                | 134 | 204 | 9.00E-28 | 152.2 | 44.8 | 47.8 | hypothetical protein CARUB_v10027151mg                                                                             | gbpln | Capsella rubella     | AT5G54500.2   Symbols: FQR1   flavodoxin-like quinone reductase 1   chr5:22124674-22126435 FORWARD LENGTH=244                               | 134 | 244 | 5.00E-29 | 182.1 | 41.8 | 44.8 |
| Rsa1.0_00018.1.g1240.t1 | gi 9802757 gb AAF9826.1 AC027134.8 Hypothetical protein [Arabidopsis thaliana]<br>gi 12083268 gb AAG48793.1 AF332430.1 putative bZIP transcription factor [Arabidopsis thaliana]<br>gi 225897922 db BAH30293.1  hypothetical protein [Arabidopsis thaliana] gi 332190919 gb AEE29040.1  basic leucine-zipper 58 [Arabidopsis thaliana]<br>ref[NP_172816.2] phytylsulfokine-beta [Arabidopsis thaliana]<br>gi 41019236 sp Q9LMY9.3 PSK1_ARATH RecName: Full=Phytosulfokines 1; Short=AtPSK1; Contains: RecName: Full=Phytosulfokine-alpha; Short=PSK-alpha; Short=Phytosulfokine-a; Contains: RecName: Full=Phytosulfokine-beta; Short=PSK-beta; Short=Phytosulfokine-b; Flags: Precursor gi 23466369 tpg DAA00275.1  TPA_exp: putative phytosulfokine peptide precursor [Arabidopsis thaliana] gi 27529964 db BAB72176.2  phytosulfokine precursor 1 [Arabidopsis thaliana] gi 51970324 db BAD43854.1  hypothetical protein [Arabidopsis thaliana] gi 332190918 gb AEE29039.1  phytosulfokine-beta [Arabidopsis thaliana] | 196 | 196 | 4.00E-84 | 100.0 | 84.2 | 93.4 | basic leucine-zipper 58                                                                                            | gbpln | Arabidopsis thaliana | AT1G13600.1   Symbols: AtbZIP58, bZIP58   basic leucine-zipper 58   chr1:4650787-4651377 REVERSE LENGTH=196                                 | 196 | 196 | 1.00E-86 | 100.0 | 84.2 | 93.4 |
| Rsa1.0_00018.1.g1241.t1 | ref[XP_002892759.1] F-box family protein [Arabidopsis thaliana]<br>gi 297338601 gb EFH69018.1  F-box family protein [Arabidopsis lyrata subsp. lyrata]<br>ref[XP_002892758.1] hypothetical protein ARALYDRAFT_471515 [Arabidopsis lyrata subsp. lyrata]<br>gi 297338600 gb EFH69017.1  hypothetical protein ARALYDRAFT_471515 [Arabidopsis lyrata subsp. lyrata]                                                                                                                                                                                                                                                                                                                                                                                                                                                                                                                                                                                                                                                          | 91  | 87  | 6.00E-26 | 95.6  | 70.3 | 80.2 | phytylsulfokine-beta                                                                                               | gbpln | Arabidopsis thaliana | AT1G13590.1   Symbols: ATPSK1, PSK1   phytosulfokine 1 precursor   chr1:4647979-4648612 FORWARD LENGTH=87                                   | 91  | 87  | 9.00E-29 | 95.6  | 70.3 | 80.2 |
| Rsa1.0_00018.1.g1242.t1 | ref[XP_002892759.1] F-box family protein [Arabidopsis thaliana]<br>gi 297338601 gb EFH69018.1  F-box family protein [Arabidopsis lyrata subsp. lyrata]<br>ref[XP_002892758.1] hypothetical protein ARALYDRAFT_471515 [Arabidopsis lyrata subsp. lyrata]<br>gi 297338600 gb EFH69017.1  hypothetical protein ARALYDRAFT_471515 [Arabidopsis lyrata subsp. lyrata]                                                                                                                                                                                                                                                                                                                                                                                                                                                                                                                                                                                                                                                          | 416 | 416 | 0        | 100.0 | 92.1 | 96.9 | F-box family protein                                                                                               | gbpln | Arabidopsis lyrata   | AT1G13570.1   Symbols:   F-box/RNI-like superfamily protein   chr1:4642528-4643930 REVERSE LENGTH=416                                       | 416 | 416 | 0        | 100.0 | 90.9 | 95.7 |
| Rsa1.0_00018.1.g1243.t1 | ref[XP_002892758.1] hypothetical protein ARALYDRAFT_471515 [Arabidopsis lyrata subsp. lyrata]<br>gi 297338600 gb EFH69017.1  hypothetical protein ARALYDRAFT_471515 [Arabidopsis lyrata subsp. lyrata]                                                                                                                                                                                                                                                                                                                                                                                                                                                                                                                                                                                                                                                                                                                                                                                                                    | 389 | 389 | 0        | 100.0 | 98.5 | 99.2 | hypothetical protein ARALYDRAFT_471515                                                                             | gbpln | Arabidopsis lyrata   | AT1G13560.1   Symbols: AAPT1, ATAAPT1   aminoalcoholphosphotransferase 1   chr1:4638834-4641691 REVERSE LENGTH=389                          | 389 | 389 | 0        | 100.0 | 97.9 | 99.2 |
| Rsa1.0_00018.1.g1244.t1 | gb[EOA36528.1] hypothetical protein CARUB_v10011549mg [Capsella rubella]                                                                                                                                                                                                                                                                                                                                                                                                                                                                                                                                                                                                                                                                                                                                                                                                                                                                                                                                                  | 387 | 385 | 0        | 99.5  | 85.8 | 90.4 | hypothetical protein CARUB_v10011549mg                                                                             | gbpln | Capsella rubella     | AT1G13530.1   Symbols:   Protein of unknown function (DUF1262)   chr1:4633740-4635129 REVERSE LENGTH=385                                    | 387 | 385 | 0        | 99.5  | 82.4 | 89.9 |
| Rsa1.0_00018.1.g1245.t1 | gb[EOA40223.1] hypothetical protein CARUB_v10008945mg [Capsella rubella]                                                                                                                                                                                                                                                                                                                                                                                                                                                                                                                                                                                                                                                                                                                                                                                                                                                                                                                                                  | 497 | 495 | 0        | 99.6  | 83.7 | 89.7 | hypothetical protein CARUB_v10008945mg                                                                             | gbpln | Capsella rubella     | AT1G13460.2   Symbols:   Protein phosphatase 2A regulatory B subunit family protein   chr1:4616504-4618180 FORWARD LENGTH=492               | 497 | 492 | 0        | 99.0  | 84.9 | 90.7 |
| Rsa1.0_00018.1.g1246.t1 | gb ABV89646.1  DNA binding protein GT-1 [Brassica rapa]                                                                                                                                                                                                                                                                                                                                                                                                                                                                                                                                                                                                                                                                                                                                                                                                                                                                                                                                                                   | 395 | 399 | 0        | 101.0 | 92.9 | 94.7 | DNA binding protein GT-1                                                                                           | gbpln | Brassica rapa        | AT1G13450.1   Symbols: GT-1   Homeodomain-like superfamily protein   chr1:4612899-4615115 REVERSE LENGTH=406                                | 395 | 406 | 0        | 102.8 | 84.3 | 89.9 |
| Rsa1.0_00018.1.g1247.t3 | sp P04796.2 G3PC.SINAL RecName: Full=Glyceraldehyde-3-phosphate dehydrogenase, cytosolic gi 21143 emb CAA27844.1  unnamed protein product [Sinapis alba]                                                                                                                                                                                                                                                                                                                                                                                                                                                                                                                                                                                                                                                                                                                                                                                                                                                                  | 579 | 338 | 0        | 58.4  | 54.9 | 55.1 | RecName: Full=Glyceraldehyde-3-phosphate dehydrogenase, cytosolic gi 21143 emb CAA27844.1  unnamed protein product | gbpln | Sinapis alba         | AT3G04120.1   Symbols: GAPC, GAPC-1, GAPC1   glyceraldehyde-3-phosphate dehydrogenase C subunit 1   chr3:1081077-1083131 FORWARD LENGTH=338 | 579 | 338 | 0        | 58.4  | 53.5 | 54.6 |

|                         |                                                                                                                                                                                                                                                                                                                                                                                                                                 |     |     |           |       |      |      |                                                                    |       |                      |                                                                                                                                                                                                                                                                                                                                                                                                                                                                                       |     |     |           |       |      |      |
|-------------------------|---------------------------------------------------------------------------------------------------------------------------------------------------------------------------------------------------------------------------------------------------------------------------------------------------------------------------------------------------------------------------------------------------------------------------------|-----|-----|-----------|-------|------|------|--------------------------------------------------------------------|-------|----------------------|---------------------------------------------------------------------------------------------------------------------------------------------------------------------------------------------------------------------------------------------------------------------------------------------------------------------------------------------------------------------------------------------------------------------------------------------------------------------------------------|-----|-----|-----------|-------|------|------|
| Rsa1.0_00018.1.g1248.t1 | ref[XP_002892660.1] pentatricopeptide repeat-containing protein [Arabidopsis lyrata subsp. lyrata] gi 297338502 gb EFH68919.1  pentatricopeptide repeat-containing protein [Arabidopsis lyrata subsp. lyrata]                                                                                                                                                                                                                   | 348 | 367 | 1.00E-141 | 105.5 | 74.7 | 84.2 | pentatricopeptide repeat-containing protein                        | gbpln | Arabidopsis lyrata   | AT1G11900.1   Symbols:   Tetratricopeptide repeat (TPR)-like superfamily protein   chr1:4013166-4014630 REVERSE LENGTH=367                                                                                                                                                                                                                                                                                                                                                            | 348 | 367 | 1.00E-143 | 105.5 | 73.9 | 83.3 |
| Rsa1.0_00018.1.g1249.t1 | ref[XP_002869525.1] pentatricopeptide repeat-containing protein [Arabidopsis lyrata subsp. lyrata] gi 297315361 gb EFH45784.1  pentatricopeptide repeat-containing protein [Arabidopsis lyrata subsp. lyrata]                                                                                                                                                                                                                   | 686 | 707 | 0         | 103.1 | 75.2 | 86.6 | pentatricopeptide repeat-containing protein                        | gbpln | Arabidopsis lyrata   | AT4G28010.1   Symbols:   Tetratricopeptide repeat (TPR)-like superfamily protein   chr4:13930379-13932493 FORWARD LENGTH=704                                                                                                                                                                                                                                                                                                                                                          | 686 | 704 | 0         | 102.6 | 75.1 | 86.9 |
| Rsa1.0_00018.1.g1250.t1 | ref[XP_002880840.1] F-box family protein [Arabidopsis lyrata subsp. lyrata] gi 297326679 gb EFH57099.1  F-box family protein [Arabidopsis lyrata subsp. lyrata]                                                                                                                                                                                                                                                                 | 371 | 371 | 1.00E-177 | 100.0 | 80.3 | 89.2 | F-box family protein                                               | gbpln | Arabidopsis lyrata   | AT2G32560.1   Symbols:   F-box family protein   chr2:13824820-13826761 FORWARD LENGTH=371                                                                                                                                                                                                                                                                                                                                                                                             | 371 | 371 | 1.00E-177 | 100.0 | 81.9 | 89.8 |
| Rsa1.0_00018.1.g1251.t1 | ref[NP_564794.1] octicosapeptide/Phox/Be.1 domain-containing protein [Arabidopsis thaliana] gi 7940289 gb AAF70848.1 AC003113.15 F2401.12 [Arabidopsis thaliana] gi 19423968 gb AAL87265.1  unknown protein [Arabidopsis thaliana] gi 21281131 gb AAM45044.1  unknown protein [Arabidopsis thaliana] gi 332195840 gb AEE33961.1  octicosapeptide/Phox/Be.1 domain-containing protein [Arabidopsis thaliana]                     | 740 | 751 | 0         | 101.5 | 75.9 | 84.2 | octicosapeptide/Phox/Be.1 domain-containing protein                | gbpln | Arabidopsis thaliana | AT1G62390.1   Symbols: Phox2   Octicosapeptide/Phox/Bem1p (PB1) domain-containing protein / tetratricopeptide repeat (TPR)-containing protein   chr1:23084632-23086887 REVERSE LENGTH=751                                                                                                                                                                                                                                                                                             | 740 | 751 | 0         | 101.5 | 75.9 | 84.2 |
| Rsa1.0_00018.1.g1252.t1 | #                                                                                                                                                                                                                                                                                                                                                                                                                               | #   | #   | #         | #     | #    | #    | -                                                                  | ---   | ---                  | #                                                                                                                                                                                                                                                                                                                                                                                                                                                                                     | #   | #   | #         | #     | #    | #    |
| Rsa1.0_00018.1.g1253.t1 | ref[XP_002889903.1] hypothetical protein ARALYDRAFT_471341 [Arabidopsis lyrata subsp. lyrata] gi 297335745 gb EFH6162.1  hypothetical protein ARALYDRAFT_471341 [Arabidopsis lyrata subsp. lyrata]                                                                                                                                                                                                                              | 234 | 329 | 1.00E-112 | 140.6 | 91.5 | 96.2 | hypothetical protein ARALYDRAFT_471341                             | gbpln | Arabidopsis lyrata   | AT1G11915.1   Symbols:   unknown protein; FUNCTIONS IN: molecular_function unknown; INVOLVED IN: biological_process unknown; LOCATED IN: endomembrane system; EXPRESSED IN: root; BEST Arabidopsis thaliana protein match is: unknown protein (TAIR:AT3G17350.1); Has 261 Blast hits to 261 proteins in 13 species: Archae - 0; Bacteria - 0; Metazoa - 0; Fungi - 0; Plants - 261; Viruses - 0; Other Eukaryotes - 0 (source: NCBI ELink).   chr1:4021830-4023084 FORWARD LENGTH=329 | 234 | 329 | 1.00E-113 | 140.6 | 89.7 | 95.7 |
| Rsa1.0_00018.1.g1254.t1 | gb EOA36500.1  hypothetical protein CARUB_v10011187mg [Capsella rubella]                                                                                                                                                                                                                                                                                                                                                        | 372 | 385 | 1.00E-168 | 103.5 | 78.2 | 85.2 | hypothetical protein CARUB_v10011187mg                             | gbpln | Capsella rubella     | AT1G11920.1   Symbols:   Pectin lyase-like superfamily protein   chr1:4023667-4025097 REVERSE LENGTH=384                                                                                                                                                                                                                                                                                                                                                                              | 372 | 384 | 1.00E-170 | 103.2 | 78.2 | 85.5 |
| Rsa1.0_00018.1.g1255.t1 | gb EOA36500.1  hypothetical protein CARUB_v10011187mg [Capsella rubella]                                                                                                                                                                                                                                                                                                                                                        | 384 | 385 | 0         | 100.3 | 91.9 | 95.6 | hypothetical protein CARUB_v10011187mg                             | gbpln | Capsella rubella     | AT1G11920.1   Symbols:   Pectin lyase-like superfamily protein   chr1:4023667-4025097 REVERSE LENGTH=384                                                                                                                                                                                                                                                                                                                                                                              | 384 | 384 | 0         | 100.0 | 91.7 | 96.1 |
| Rsa1.0_00018.1.g1256.t1 | gb EOA38666.1  hypothetical protein CARUB_v10010604mg [Capsella rubella]                                                                                                                                                                                                                                                                                                                                                        | 140 | 140 | 1.00E-51  | 100.0 | 72.1 | 83.6 | hypothetical protein CARUB_v10010604mg                             | gbpln | Capsella rubella     | AT1G11925.1   Symbols:   Stigma-specific Stig1 family protein   chr1:4026195-4026617 REVERSE LENGTH=140                                                                                                                                                                                                                                                                                                                                                                               | 140 | 140 | 4.00E-52  | 100.0 | 70.7 | 82.1 |
| Rsa1.0_00018.1.g1257.t1 | ref[NP_172660.5] putative ERD4 protein [Arabidopsis thaliana] gi 204324149 gb AC01072.1  putative membrane protein [Arabidopsis thaliana] gi 332190700 gb AEE28821.1  putative ERD4 protein [Arabidopsis thaliana]                                                                                                                                                                                                              | 768 | 771 | 0         | 100.4 | 90.2 | 96.0 | putative ERD4 protein                                              | gbpln | Arabidopsis thaliana | AT1G11960.1   Symbols:   ERD (early-responsive to dehydration stress) family protein   chr1:4039871-4043143 REVERSE LENGTH=771                                                                                                                                                                                                                                                                                                                                                        | 768 | 771 | 0         | 100.4 | 90.2 | 96.0 |
| Rsa1.0_00018.1.g1258.t1 | ref[NP_172662.1] NEDD8-like protein RUB3 [Arabidopsis thaliana] gi 38258406 sp O65381.1 RUB3_ARATH RecName: Full=NEDD8-like protein RUB3; AltName: Full=Ubiquitin-related protein 3; Short=ATRUB3; Flags: Precursor gi 3157940 gb AAC17623.1  Contains similarity to Ubiquitin-like protein NEDD8 gb D10918 from Mus musculus [Arabidopsis thaliana] gi 332190702 gb AEE28823.1  NEDD8-like protein RUB3 [Arabidopsis thaliana] | 90  | 78  | 2.00E-26  | 86.7  | 67.8 | 74.4 | NEDD8-like protein RUB3                                            | gbpln | Arabidopsis thaliana | AT1G11980.1   Symbols: RUB3   ubiquitin-related protein 3   chr1:4045619-4045855 FORWARD LENGTH=78                                                                                                                                                                                                                                                                                                                                                                                    | 90  | 78  | 4.00E-29  | 86.7  | 67.8 | 74.4 |
| Rsa1.0_00018.1.g1259.t1 | gb AAC17628.1  Contains similarity to axi 1 gene gb X80301 from Nicotiana tabacum [Arabidopsis thaliana]                                                                                                                                                                                                                                                                                                                        | 622 | 627 | 0         | 100.8 | 78.3 | 86.3 | Contains similarity to axi 1 gene gb X80301 from Nicotiana tabacum | gbpln | Arabidopsis thaliana | AT1G11990.1   Symbols:   O-fucosyltransferase family protein   chr1:4046246-4049060 REVERSE LENGTH=590                                                                                                                                                                                                                                                                                                                                                                                | 622 | 590 | 0         | 94.9  | 74.3 | 81.2 |

|                         |                                                                                                                                                                                                                                                                                                                                                                                                                                                                                                                                                                                      |     |     |           |       |      |      |                                                 |       |                      |                                                                                                                                                                                                                                                                                                                                            |     |     |           |       |      |      |
|-------------------------|--------------------------------------------------------------------------------------------------------------------------------------------------------------------------------------------------------------------------------------------------------------------------------------------------------------------------------------------------------------------------------------------------------------------------------------------------------------------------------------------------------------------------------------------------------------------------------------|-----|-----|-----------|-------|------|------|-------------------------------------------------|-------|----------------------|--------------------------------------------------------------------------------------------------------------------------------------------------------------------------------------------------------------------------------------------------------------------------------------------------------------------------------------------|-----|-----|-----------|-------|------|------|
| Rsa1.0_00018.1.g1260.t1 | gb EOA40028.1  hypothetical protein CARUB_v10008719mg [Capsella rubella]                                                                                                                                                                                                                                                                                                                                                                                                                                                                                                             | 567 | 567 | 0         | 100.0 | 95.6 | 97.9 | hypothetical protein CARUB_v10008719mg          | gbpln | Capsella rubella     | AT1G12000.1   Symbols:   Phosphofruktokinase family protein   chr1:4050159-4053727 REVERSE LENGTH=566                                                                                                                                                                                                                                      | 567 | 566 | 0         | 99.8  | 95.6 | 97.5 |
| Rsa1.0_00018.1.g1261.t7 | dbj BAJ33770.1  unnamed protein product [Theellungiella halophila]                                                                                                                                                                                                                                                                                                                                                                                                                                                                                                                   | 278 | 416 | 1.00E-53  | 149.6 | 43.2 | 46.0 | unnamed protein product                         | ----  | ----                 | AT5G57630.1   Symbols: CIPK21, SnRK3.4   CBL-interacting protein kinase 21   chr5:23341092-23343143 REVERSE LENGTH=416                                                                                                                                                                                                                     | 278 | 416 | 2.00E-53  | 149.6 | 41.0 | 46.4 |
| Rsa1.0_00018.1.g1262.t1 | emb CAA57285.1  ACC oxidase [Brassica oleracea]                                                                                                                                                                                                                                                                                                                                                                                                                                                                                                                                      | 320 | 321 | 1.00E-179 | 100.3 | 95.0 | 97.5 | ACC oxidase                                     | gbpln | Brassica oleracea    | AT1G12010.1   Symbols:   2-oxoglutarate (2OG) and Fe(II)-dependent oxygenase superfamily protein   chr1:4056274-4057670 FORWARD LENGTH=320                                                                                                                                                                                                 | 320 | 320 | 1.00E-175 | 100.0 | 90.9 | 94.7 |
| Rsa1.0_00018.1.g1263.t1 | gb EOA37066.1  hypothetical protein CARUB_v10010193mg [Capsella rubella]                                                                                                                                                                                                                                                                                                                                                                                                                                                                                                             | 231 | 231 | 5.00E-80  | 100.0 | 73.6 | 82.3 | hypothetical protein CARUB_v10010193mg          | gbpln | Capsella rubella     | AT1G12020.1   Symbols:   unknown protein; BEST Arabidopsis thaliana protein match is: unknown protein (TAIR:AT1G62422.1); Has 89 Blast hits to 88 proteins in 16 species: Archae - 0; Bacteria - 0; Metazoa - 0; Fungi - 0; Plants - 87; Viruses - 0; Other Eukaryotes - 2 (source: NCBI BLink).   chr1:4062625-4063305 REVERSE LENGTH=226 | 231 | 226 | 1.00E-78  | 97.8  | 71.4 | 78.8 |
| Rsa1.0_00018.1.g1264.t1 | gb EOA38371.1  hypothetical protein CARUB_v10009904mg [Capsella rubella]                                                                                                                                                                                                                                                                                                                                                                                                                                                                                                             | 292 | 291 | 1.00E-116 | 99.7  | 78.1 | 83.9 | hypothetical protein CARUB_v10009904mg          | gbpln | Capsella rubella     | AT1G12030.1   Symbols:   Protein of unknown function (DUF506)   chr1:4064751-4066319 REVERSE LENGTH=295                                                                                                                                                                                                                                    | 292 | 295 | 1.00E-110 | 101.0 | 75.0 | 83.9 |
| Rsa1.0_00018.1.g1265.t2 | ref XP_002889911.1  hypothetical protein ARALYDRAFT_471353 [Arabidopsis lyrata subsp. lyrata] gi 297335753 gb EFH66170.1  hypothetical protein ARALYDRAFT_471353 [Arabidopsis lyrata subsp. lyrata]                                                                                                                                                                                                                                                                                                                                                                                  | 450 | 421 | 0         | 93.6  | 84.0 | 86.2 | hypothetical protein ARALYDRAFT_471353          | gbpln | Arabidopsis lyrata   | AT1G12050.1   Symbols:   fumarylacetoacetase, putative   chr1:4072904-4075856 FORWARD LENGTH=421                                                                                                                                                                                                                                           | 450 | 421 | 0         | 93.6  | 82.2 | 86.0 |
| Rsa1.0_00018.1.g1266.t1 | gb EOA37704.1  hypothetical protein CARUB_v10012423mg [Capsella rubella]                                                                                                                                                                                                                                                                                                                                                                                                                                                                                                             | 311 | 223 | 1.00E-106 | 71.7  | 64.3 | 67.8 | hypothetical protein CARUB_v10012423mg          | gbpln | Capsella rubella     | AT1G12070.1   Symbols:   Immunoglobulin E-set superfamily protein   chr1:4078913-4080106 REVERSE LENGTH=223                                                                                                                                                                                                                                | 311 | 223 | 1.00E-107 | 71.7  | 63.7 | 67.8 |
| Rsa1.0_00018.1.g1267.t1 | #                                                                                                                                                                                                                                                                                                                                                                                                                                                                                                                                                                                    | #   | #   | #         | #     | #    | #    | -                                               | ----  | ----                 | #                                                                                                                                                                                                                                                                                                                                          | #   | #   | #         | #     | #    | #    |
| Rsa1.0_00018.1.g1268.t1 | #                                                                                                                                                                                                                                                                                                                                                                                                                                                                                                                                                                                    | #   | #   | #         | #     | #    | #    | -                                               | ----  | ----                 | #                                                                                                                                                                                                                                                                                                                                          | #   | #   | #         | #     | #    | #    |
| Rsa1.0_00018.1.g1269.t1 | gb AAK30571.1 AF346659.1 extensin-like protein [Brassica napus]                                                                                                                                                                                                                                                                                                                                                                                                                                                                                                                      | 137 | 137 | 3.00E-46  | 100.0 | 94.2 | 97.1 | extensin-like protein                           | gbpln | Brassica napus       | AT1G12090.1   Symbols: ELP   extensin-like protein   chr1:4090176-4090589 REVERSE LENGTH=137                                                                                                                                                                                                                                               | 137 | 137 | 2.00E-45  | 100.0 | 95.6 | 97.8 |
| Rsa1.0_00018.1.g1270.t1 | #                                                                                                                                                                                                                                                                                                                                                                                                                                                                                                                                                                                    | #   | #   | #         | #     | #    | #    | -                                               | ----  | ----                 | #                                                                                                                                                                                                                                                                                                                                          | #   | #   | #         | #     | #    | #    |
| Rsa1.0_00018.1.g1271.t1 | gb AEA35415.1  nitrate transporter [Brassica rapa subsp. chinensis]                                                                                                                                                                                                                                                                                                                                                                                                                                                                                                                  | 590 | 589 | 0         | 99.8  | 93.4 | 97.3 | nitrate transporter                             | gbpln | Brassica rapa        | AT1G12110.1   Symbols: NRT1.1, CHL1-1, NRT1, B-1, ATNRT1, CHL1   nitrate transporter 1.1   chr1:4105341-4109290 FORWARD LENGTH=590                                                                                                                                                                                                         | 590 | 590 | 0         | 100.0 | 92.2 | 95.9 |
| Rsa1.0_00018.1.g1272.t1 | gb EOA40154.1  hypothetical protein CARUB_v10008871mg, partial [Capsella rubella]                                                                                                                                                                                                                                                                                                                                                                                                                                                                                                    | 410 | 516 | 1.00E-123 | 125.9 | 69.3 | 77.6 | hypothetical protein CARUB_v10008871mg, partial | gbpln | Capsella rubella     | AT1G12120.1   Symbols:   Plant protein of unknown function (DUF863)   chr1:4114933-4116469 REVERSE LENGTH=483                                                                                                                                                                                                                              | 410 | 483 | 1.00E-119 | 117.8 | 68.3 | 75.1 |
| Rsa1.0_00018.1.g1273.t1 | ref NP_172679.1  uncharacterized protein [Arabidopsis thaliana] gi 75172923 sp Q9FWW5.1 Y1215_ARAT H RecName: Full=WEB family protein At1g12150 gi 10086518 gb AAG12578.1 AC022522.11 Hypothetical protein [Arabidopsis thaliana] gi 332190722 gb AEE28843.1  uncharacterized protein AT1G12150 [Arabidopsis thaliana]                                                                                                                                                                                                                                                               | 63  | 548 | 2.00E-12  | 869.8 | 58.7 | 61.9 | uncharacterized protein                         | gbpln | Arabidopsis thaliana | AT1G12150.1   Symbols:   Plant protein of unknown function (DUF827)   chr1:4123530-4125328 REVERSE LENGTH=548                                                                                                                                                                                                                              | 63  | 548 | 3.00E-15  | 869.8 | 58.7 | 61.9 |
| Rsa1.0_00018.1.g1274.t1 | ref NP_172684.1  dimethylaniline monooxygenase (N-oxide forming) [Arabidopsis thaliana] gi 75172924 sp Q9FWW9.1 GSXL2_ARAT H RecName: Full=Flavin-containing monooxygenase FMO GS-OX-like 2; AltName: Full=Flavin-monooxygenase glucosinolate S-oxygenase-like 2 gi 10086514 gb AAG12574.1 AC022522.7 Unknown protein [Arabidopsis thaliana] gi 20258836 gb AAM13900.1  unknown protein [Arabidopsis thaliana] gi 22136992 gb AAM91725.1  unknown protein [Arabidopsis thaliana] gi 332190727 gb AEE28848.1  flavin-containing monooxygenase FMO GS-OX-like 2 [Arabidopsis thaliana] | 463 | 465 | 0         | 100.4 | 90.9 | 95.2 | dimethylaniline monooxygenase (N-oxide forming) | gbpln | Arabidopsis thaliana | AT1G12200.1   Symbols:   Flavin-binding monooxygenase family protein   chr1:4137627-4139835 FORWARD LENGTH=465                                                                                                                                                                                                                             | 463 | 465 | 0         | 100.4 | 90.9 | 95.2 |

|                         |                                                                                                                                                                                                                                                                                                                                                                                                                                                                                                                                                                                                                                                                                                                                                                                                                                                                                                                                                  |     |     |          |       |      |      |                                        |       |                      |                                                                                                                                                                                                                                                                                                                                                                                                                                                                                          |     |     |          |       |      |      |
|-------------------------|--------------------------------------------------------------------------------------------------------------------------------------------------------------------------------------------------------------------------------------------------------------------------------------------------------------------------------------------------------------------------------------------------------------------------------------------------------------------------------------------------------------------------------------------------------------------------------------------------------------------------------------------------------------------------------------------------------------------------------------------------------------------------------------------------------------------------------------------------------------------------------------------------------------------------------------------------|-----|-----|----------|-------|------|------|----------------------------------------|-------|----------------------|------------------------------------------------------------------------------------------------------------------------------------------------------------------------------------------------------------------------------------------------------------------------------------------------------------------------------------------------------------------------------------------------------------------------------------------------------------------------------------------|-----|-----|----------|-------|------|------|
| Rsa1.0_00018.1.g1275.t1 | refNP_563900.1  transaldolase [Arabidopsis thaliana] gi 1008651 gb AAG12571.1 AC022522.4 Similar to transaldolase [Arabidopsis thaliana] gi 25083140 gb AA72047.1  expressed protein [Arabidopsis thaliana] gi 30725648 gb AAP37846.1  At1g12230 [Arabidopsis thaliana] gi 332190732 gb AEE28853.1  transaldolase [Arabidopsis thaliana]                                                                                                                                                                                                                                                                                                                                                                                                                                                                                                                                                                                                         | 409 | 405 | 0        | 99.0  | 91.0 | 96.6 | transaldolase                          | gbpln | Arabidopsis thaliana | AT1G12230.1   Symbols:   Aldolase superfamily protein   chr1:4148050-4150708 FORWARD LENGTH=405                                                                                                                                                                                                                                                                                                                                                                                          | 409 | 405 | 0        | 99.0  | 91.0 | 96.6 |
| Rsa1.0_00018.1.g1276.t2 | gb AAG36943.1 AF274299.1 acid invertase [Brassica oleracea]                                                                                                                                                                                                                                                                                                                                                                                                                                                                                                                                                                                                                                                                                                                                                                                                                                                                                      | 665 | 662 | 0        | 99.5  | 95.6 | 97.0 | acid invertase                         | gbpln | Brassica oleracea    | AT1G12240.1   Symbols: ATBETAFRUCT4, VAC-INV   Glycosyl hydrolases family 32 protein   chr1:4153699-4157457 FORWARD LENGTH=664                                                                                                                                                                                                                                                                                                                                                           | 665 | 664 | 0        | 99.8  | 88.6 | 93.7 |
| Rsa1.0_00018.1.g1277.t1 | refXP_002892680.1  hypothetical protein ARALYDRAFT_471376 [Arabidopsis lyrata subsp. lyrata] gi 297338522 gb EFH68939.1  hypothetical protein ARALYDRAFT_471376 [Arabidopsis lyrata subsp. lyrata]                                                                                                                                                                                                                                                                                                                                                                                                                                                                                                                                                                                                                                                                                                                                               | 396 | 395 | 0        | 99.7  | 88.1 | 91.2 | hypothetical protein ARALYDRAFT_471376 | gbpln | Arabidopsis lyrata   | AT1G12260.1   Symbols: VND4, EMB2749, ANAC007, NAC007   NAC 007   chr1:4163058-4164486 REVERSE LENGTH=395                                                                                                                                                                                                                                                                                                                                                                                | 396 | 395 | 0        | 99.7  | 88.1 | 91.2 |
| Rsa1.0_00018.1.g1278.t1 | #                                                                                                                                                                                                                                                                                                                                                                                                                                                                                                                                                                                                                                                                                                                                                                                                                                                                                                                                                | #   | #   | #        | #     | #    | -    | ----                                   | ----  | #                    | #                                                                                                                                                                                                                                                                                                                                                                                                                                                                                        | #   | #   | #        | #     | #    |      |
| Rsa1.0_00018.1.g1279.t1 | #                                                                                                                                                                                                                                                                                                                                                                                                                                                                                                                                                                                                                                                                                                                                                                                                                                                                                                                                                | #   | #   | #        | #     | #    | -    | ----                                   | ----  | #                    | #                                                                                                                                                                                                                                                                                                                                                                                                                                                                                        | #   | #   | #        | #     | #    |      |
| Rsa1.0_00018.1.g1280.t1 | refNP_172686.1  disease resistance protein RPS5 [Arabidopsis thaliana] gi 334182494 refNP_001184970.1  disease resistance protein RPS5 [Arabidopsis thaliana] gi 46396675 sp O64973.2 RPS5_ARATH RecName: Full=Disease resistance protein RPS5; AltName: Full=Resistance to Pseudomonas syringae protein 5; AltName: Full=pNd3/pNd10 gi 10086512 gb AAG12572.1 AC022522.5 resistance to Pseudomonas syringae protein 5 [Arabidopsis thaliana] gi 3309620 gb AAC26126.1  resistance to Pseudomonas syringae protein 5 [Arabidopsis thaliana] gi 34849895 gb AAQ82844.1  At1g12220 [Arabidopsis thaliana] gi 62319935 dbj BAD94018.1  NBS/LRR disease resistance protein [Arabidopsis thaliana] gi 77632414 gb ABB00204.1  disease resistance protein [Arabidopsis thaliana] gi 332190730 gb AEE28851.1  disease resistance protein RPS5 [Arabidopsis thaliana] gi 332190731 gb AEE28852.1  disease resistance protein RPS5 [Arabidopsis thaliana] | 327 | 889 | 3.00E-67 | 271.9 | 41.6 | 52.6 | disease resistance protein RPS5        | gbpln | Arabidopsis thaliana | AT1G12220.2   Symbols: RPS5   Disease resistance protein (CC-NBS-LRR class) family   chr1:4145011-4147680 FORWARD LENGTH=889                                                                                                                                                                                                                                                                                                                                                             | 327 | 889 | 9.00E-70 | 271.9 | 41.6 | 52.6 |
| Rsa1.0_00018.1.g1281.t1 | refXP_002879162.1  hypothetical protein ARALYDRAFT_320641 [Arabidopsis lyrata subsp. lyrata] gi 297325001 gb EFH55421.1  hypothetical protein ARALYDRAFT_320641 [Arabidopsis lyrata subsp. lyrata]                                                                                                                                                                                                                                                                                                                                                                                                                                                                                                                                                                                                                                                                                                                                               | 279 | 709 | 3.00E-47 | 254.1 | 35.8 | 52.7 | hypothetical protein ARALYDRAFT_320641 | gbpln | Arabidopsis lyrata   | AT1G12220.2   Symbols: RPS5   Disease resistance protein (CC-NBS-LRR class) family   chr1:4145011-4147680 FORWARD LENGTH=889                                                                                                                                                                                                                                                                                                                                                             | 279 | 889 | 1.00E-47 | 318.6 | 39.1 | 50.5 |
| Rsa1.0_00018.1.g1282.t1 | gb ACP30557.1  disease resistance protein [Brassica rapa subsp. pekinensis]                                                                                                                                                                                                                                                                                                                                                                                                                                                                                                                                                                                                                                                                                                                                                                                                                                                                      | 885 | 886 | 0        | 100.1 | 67.3 | 78.8 | disease resistance protein             | gbpln | Brassica rapa        | AT1G12210.1   Symbols: RFL1   RPS5-like 1   chr1:4140948-4143605 FORWARD LENGTH=885                                                                                                                                                                                                                                                                                                                                                                                                      | 885 | 885 | 0        | 100.0 | 66.1 | 78.0 |
| Rsa1.0_00018.1.g1283.t1 | gb AAF79658.1 AC025416.32 F5O11.4 [Arabidopsis thaliana]                                                                                                                                                                                                                                                                                                                                                                                                                                                                                                                                                                                                                                                                                                                                                                                                                                                                                         | 148 | 975 | 1.00E-78 | 658.8 | 96.6 | 98.6 | F5O11.4                                | gbpln | Arabidopsis thaliana | AT1G12310.1   Symbols:   Calcium-binding EF-hand family protein   chr1:4187500-4187946 REVERSE LENGTH=148                                                                                                                                                                                                                                                                                                                                                                                | 148 | 148 | 2.00E-80 | 100.0 | 97.3 | 99.3 |
| Rsa1.0_00018.1.g1284.t1 | refXP_002889928.1  hypothetical protein ARALYDRAFT_471382 [Arabidopsis lyrata subsp. lyrata] gi 297335770 gb EFH66187.1  hypothetical protein ARALYDRAFT_471382 [Arabidopsis lyrata subsp. lyrata]                                                                                                                                                                                                                                                                                                                                                                                                                                                                                                                                                                                                                                                                                                                                               | 506 | 504 | 0        | 99.6  | 86.6 | 91.1 | hypothetical protein ARALYDRAFT_471382 | gbpln | Arabidopsis lyrata   | AT1G12330.1   Symbols:   unknown protein; INVOLVED IN: biological process unknown; LOCATED IN: chloroplast; EXPRESSED IN: 21 plant structures; EXPRESSED DURING: 12 growth stages; BEST Arabidopsis thaliana protein match is: unknown protein (TAIR:ATSG12900.1); Has 249 Blast hits to 249 proteins in 27 species: Archae - 0; Bacteria - 0; Metazoa - 7; Fungi - 14; Plants - 217; Viruses - 0; Other Eukaryotes - 11 (source: NCBI BLink).   chr1:4194673-4196627 FORWARD LENGTH=505 | 506 | 505 | 0        | 99.8  | 86.6 | 90.7 |
| Rsa1.0_00018.1.g1285.t6 | gb EOA38925.1  hypothetical protein CARUB_v10011323mg [Capsella rubella]                                                                                                                                                                                                                                                                                                                                                                                                                                                                                                                                                                                                                                                                                                                                                                                                                                                                         | 699 | 666 | 0        | 95.3  | 87.3 | 90.4 | hypothetical protein CARUB_v10011323mg | gbpln | Capsella rubella     | AT1G12360.1   Symbols: KEU   Sec1/munc18-like (SM) proteins superfamily   chr1:4201172-4206144 FORWARD LENGTH=666                                                                                                                                                                                                                                                                                                                                                                        | 699 | 666 | 0        | 95.3  | 86.4 | 90.0 |

| Rsa1.0_00018.1.g1286.t1                                                                                                                                                                             | #                                                                                                                                                                                                                                                                                                                                                                                                                                                                                                                                                                 | #   | #   | #         | #     | #    | #    | -                                                      | ----  | ----                 | #                                                                                                                                                                                                                                                                                                                                             | #   | #         | #     | #    | #    |  |
|-----------------------------------------------------------------------------------------------------------------------------------------------------------------------------------------------------|-------------------------------------------------------------------------------------------------------------------------------------------------------------------------------------------------------------------------------------------------------------------------------------------------------------------------------------------------------------------------------------------------------------------------------------------------------------------------------------------------------------------------------------------------------------------|-----|-----|-----------|-------|------|------|--------------------------------------------------------|-------|----------------------|-----------------------------------------------------------------------------------------------------------------------------------------------------------------------------------------------------------------------------------------------------------------------------------------------------------------------------------------------|-----|-----------|-------|------|------|--|
| ref XP_002892685.1  hypothetical protein ARALYDRAFT_888561 [Arabidopsis lyrata subsp. lyrata] gi 297335774 gb EFH68944.1  hypothetical protein ARALYDRAFT_888561 [Arabidopsis lyrata subsp. lyrata] |                                                                                                                                                                                                                                                                                                                                                                                                                                                                                                                                                                   |     |     |           |       |      |      |                                                        |       |                      | AT1G12380.1   Symbols:   unknown protein; BEST Arabidopsis thaliana protein match is: unknown protein (TAIR:AT1G2870.1); Has 173 Blast hits to 170 proteins in 34 species: Archae - 0; Bacteria - 4; Metazoa - 25; Fungi - 8; Plants - 123; Viruses - 7; Other Eukaryotes - 6 (source: NCBI BLINK).   chr1:4214499-4216880 REVERSE LENGTH=793 |     |           |       |      |      |  |
| Rsa1.0_00018.1.g1287.t1                                                                                                                                                                             |                                                                                                                                                                                                                                                                                                                                                                                                                                                                                                                                                                   | 769 | 792 | 0         | 103.0 | 86.0 | 90.8 | hypothetical protein ARALYDRAFT_888561                 | gbpln | Arabidopsis lyrata   | 769                                                                                                                                                                                                                                                                                                                                           | 793 | 0         | 103.1 | 86.0 | 91.5 |  |
| Rsa1.0_00018.1.g1288.t2                                                                                                                                                                             | ref XP_002889932.1  cornichon family protein [Arabidopsis lyrata subsp. lyrata] gi 297335774 gb EFH66191.1  cornichon family protein [Arabidopsis lyrata subsp. lyrata]                                                                                                                                                                                                                                                                                                                                                                                           | 137 | 137 | 9.00E-69  | 100.0 | 93.4 | 96.4 | cornichon family protein                               | gbpln | Arabidopsis lyrata   | 137                                                                                                                                                                                                                                                                                                                                           | 137 | 5.00E-71  | 100.0 | 92.7 | 95.6 |  |
| Rsa1.0_00018.1.g1289.t1                                                                                                                                                                             | gb EOA38397.1  hypothetical protein CARUB_v10009963mg [Capsella rubella]                                                                                                                                                                                                                                                                                                                                                                                                                                                                                          | 279 | 279 | 1.00E-156 | 100.0 | 95.0 | 97.8 | hypothetical protein CARUB_v10009963mg                 | gbpln | Capsella rubella     | 279                                                                                                                                                                                                                                                                                                                                           | 279 | 1.00E-158 | 100.0 | 94.6 | 97.8 |  |
| Rsa1.0_00018.1.g1290.t1                                                                                                                                                                             | gb EOA40435.1  hypothetical protein CARUB_v10009162mg [Capsella rubella]                                                                                                                                                                                                                                                                                                                                                                                                                                                                                          | 441 | 441 | 0         | 100.0 | 93.7 | 95.9 | hypothetical protein CARUB_v10009162mg                 | gbpln | Capsella rubella     | 441                                                                                                                                                                                                                                                                                                                                           | 441 | 0         | 100.0 | 93.7 | 95.9 |  |
| Rsa1.0_00018.1.g1291.t1                                                                                                                                                                             | ref XP_002887985.1  hypothetical protein ARALYDRAFT_893174 [Arabidopsis lyrata subsp. lyrata] gi 297333826 gb EFH64244.1  hypothetical protein ARALYDRAFT_893174 [Arabidopsis lyrata subsp. lyrata]                                                                                                                                                                                                                                                                                                                                                               | 267 | 300 | 1.00E-128 | 112.4 | 85.0 | 92.9 | hypothetical protein ARALYDRAFT_893174                 | gbpln | Arabidopsis lyrata   | 267                                                                                                                                                                                                                                                                                                                                           | 301 | 1.00E-127 | 112.7 | 85.0 | 92.9 |  |
| Rsa1.0_00018.1.g1292.t1                                                                                                                                                                             | gb AAF88098.1 AC025417.26 T12C24.11 [Arabidopsis thaliana]                                                                                                                                                                                                                                                                                                                                                                                                                                                                                                        | 535 | 549 | 0         | 102.6 | 92.7 | 96.6 | T12C24.11                                              | gbpln | Arabidopsis thaliana | 535                                                                                                                                                                                                                                                                                                                                           | 572 | 0         | 106.9 | 92.7 | 96.6 |  |
| Rsa1.0_00018.1.g1293.t1                                                                                                                                                                             | ref NP_172721.1  dehydration-responsive element-binding protein 1F [Arabidopsis thaliana] gi 47605747 sp Q9LN86.1 DRE1F_ARATH RecName: Full=Dehydration-responsive element-binding protein 1F; Short=Protein DREB1F gi 9502389 gb AAF88096.1 AC025417.24 T12C24.14 [Arabidopsis thaliana] gi 48479384 gb AAT44959.1  putative AP2/EREBP transcription factor [Arabidopsis thaliana] gi 110736358 dbj BAF00148.1  hypothetical protein [Arabidopsis thaliana] gi 332190780 gb AEE28901.1  dehydration-responsive element-binding protein 1F [Arabidopsis thaliana] | 231 | 209 | 4.00E-83  | 90.5  | 73.6 | 77.9 | dehydration-responsive element-binding protein 1F      | gbpln | Arabidopsis thaliana | 231                                                                                                                                                                                                                                                                                                                                           | 209 | 1.00E-85  | 90.5  | 73.6 | 77.9 |  |
| Rsa1.0_00018.1.g1294.t1                                                                                                                                                                             | ref NP_172724.2  MBOAT (membrane bound O-acyl transferase)-like protein [Arabidopsis thaliana] gi 332190783 gb AEE28904.1  MBOAT (membrane bound O-acyl transferase)-like protein [Arabidopsis thaliana]                                                                                                                                                                                                                                                                                                                                                          | 465 | 462 | 0         | 99.4  | 92.3 | 95.9 | MBOAT (membrane bound O-acyl transferase)-like protein | gbpln | Arabidopsis thaliana | 465                                                                                                                                                                                                                                                                                                                                           | 462 | 0         | 99.4  | 92.3 | 95.9 |  |
| Rsa1.0_00018.1.g1295.t1                                                                                                                                                                             | gb EOA37663.1  hypothetical protein CARUB_v10012242mg, partial [Capsella rubella]                                                                                                                                                                                                                                                                                                                                                                                                                                                                                 | 133 | 137 | 6.00E-18  | 103.0 | 33.8 | 46.6 | hypothetical protein CARUB_v10012242mg, partial        | gbpln | Capsella rubella     | 133                                                                                                                                                                                                                                                                                                                                           | 137 | 2.00E-12  | 103.0 | 28.6 | 38.3 |  |
| Rsa1.0_00018.1.g1296.t1                                                                                                                                                                             | gb EOA40316.1  hypothetical protein CARUB_v10009041mg [Capsella rubella]                                                                                                                                                                                                                                                                                                                                                                                                                                                                                          | 451 | 470 | 0         | 104.2 | 86.9 | 91.6 | hypothetical protein CARUB_v10009041mg                 | gbpln | Capsella rubella     | 451                                                                                                                                                                                                                                                                                                                                           | 470 | 0         | 104.2 | 85.8 | 90.5 |  |
| Rsa1.0_00018.1.g1297.t1                                                                                                                                                                             | gb EOA36152.1  hypothetical protein CARUB_v10009895mg [Capsella rubella]                                                                                                                                                                                                                                                                                                                                                                                                                                                                                          | 284 | 294 | 1.00E-135 | 103.5 | 83.5 | 88.7 | hypothetical protein CARUB_v10009895mg                 | gbpln | Capsella rubella     | 284                                                                                                                                                                                                                                                                                                                                           | 291 | 1.00E-136 | 102.5 | 83.8 | 88.4 |  |
| Rsa1.0_00018.1.g1298.t1                                                                                                                                                                             | ref XP_002889964.1  T12C24.27 [Arabidopsis lyrata subsp. lyrata] gi 297335806 gb EFH66223.1  T12C24.27 [Arabidopsis lyrata subsp. lyrata]                                                                                                                                                                                                                                                                                                                                                                                                                         | 478 | 478 | 0         | 100.0 | 92.3 | 95.2 | T12C24.27                                              | gbpln | Arabidopsis lyrata   | 478                                                                                                                                                                                                                                                                                                                                           | 472 | 0         | 98.7  | 91.6 | 94.6 |  |
| Rsa1.0_00018.1.g1299.t1                                                                                                                                                                             | gb EOA37577.1  hypothetical protein CARUB_v10011917mg [Capsella rubella]                                                                                                                                                                                                                                                                                                                                                                                                                                                                                          | 304 | 304 | 1.00E-138 | 100.0 | 78.3 | 89.1 | hypothetical protein CARUB_v10011917mg                 | gbpln | Capsella rubella     | 304                                                                                                                                                                                                                                                                                                                                           | 307 | 1.00E-133 | 101.0 | 73.0 | 86.2 |  |

|                         |                                                                                                                                                                                                                                                                                                                                                                                                                        |      |      |           |       |      |      |                                        |       |                      |                                                                                                                                                                                                                                                                                                              |      |      |           |       |      |      |
|-------------------------|------------------------------------------------------------------------------------------------------------------------------------------------------------------------------------------------------------------------------------------------------------------------------------------------------------------------------------------------------------------------------------------------------------------------|------|------|-----------|-------|------|------|----------------------------------------|-------|----------------------|--------------------------------------------------------------------------------------------------------------------------------------------------------------------------------------------------------------------------------------------------------------------------------------------------------------|------|------|-----------|-------|------|------|
| Rsa1.0_00018.1.g1300.t1 | gb EOA37885.1  hypothetical protein CARUB_v10009353mg [Capsella rubella]                                                                                                                                                                                                                                                                                                                                               | 407  | 397  | 1.00E-163 | 97.5  | 80.1 | 84.8 | hypothetical protein CARUB_v10009353mg | gbpln | Capsella rubella     | AT1G12760.1   Symbols:   Zinc finger, C3HC4 type (RING finger) family protein   chr1:4348728-4350512 FORWARD LENGTH=408                                                                                                                                                                                      | 407  | 408  | 1.00E-161 | 100.2 | 77.4 | 81.1 |
| Rsa1.0_00018.1.g1301.t1 | gb EOA38122.1  hypothetical protein CARUB_v10009592mg [Capsella rubella]                                                                                                                                                                                                                                                                                                                                               | 351  | 351  | 0         | 100.0 | 96.0 | 98.3 | hypothetical protein CARUB_v10009592mg | gbpln | Capsella rubella     | AT1G12780.1   Symbols: UGE1, ATUGE1   UDP-D-glucose/UDP-D-galactose 4-epimerase 1   chr1:4356124-4358120 REVERSE LENGTH=351                                                                                                                                                                                  | 351  | 351  | 0         | 100.0 | 95.4 | 97.4 |
| Rsa1.0_00018.1.g1302.t1 | gb AAM65961.1  DNA ligase-like protein [Arabidopsis thaliana]                                                                                                                                                                                                                                                                                                                                                          | 219  | 250  | 3.00E-97  | 114.2 | 84.9 | 92.2 | DNA ligase-like protein                | gbpln | Arabidopsis thaliana | AT1G12790.1   Symbols:   CONTAINS InterPro DOMAIN/s: RuvA domain 2-like (InterPro:IPR010994); Has 29 Blast hits to 29 proteins in 9 species: Archae - 0; Bacteria - 2; Metazoa - 0; Fungi - 0; Plants - 27; Viruses - 0; Other Eukaryotes - 0 (source: NCBI BLINK)   chr1:4359597-4361222 REVERSE LENGTH=250 | 219  | 250  | 2.00E-98  | 114.2 | 84.5 | 91.3 |
| Rsa1.0_00019.1.g1303.t2 | ref NP_195532.1  cellulose synthase-like protein D4 [Arabidopsis thaliana]<br>gi 75213628 sp O9SZL9.1 CSLD4_ARATH RecName: Full=Cellulose synthase-like protein D4; Short=AtCslD4<br>gi 4467125 emb CAB37559.1  putative protein [Arabidopsis thaliana]<br>gi 7270803 emb CAB80484.1  putative protein [Arabidopsis thaliana]<br>gi 332661491 gb AEE86891.1  cellulose synthase-like protein D4 [Arabidopsis thaliana] | 1232 | 1111 | 0         | 90.2  | 87.7 | 88.7 | cellulose synthase-like protein D4     | gbpln | Arabidopsis thaliana | AT4G38190.1   Symbols: ATCSLD4, CSLD4   cellulose synthase like D4   chr4:17910096-17913641 REVERSE LENGTH=1111                                                                                                                                                                                              | 1232 | 1111 | 0         | 90.2  | 87.7 | 88.7 |
| Rsa1.0_00019.1.g1304.t1 | gb EOA15893.1  hypothetical protein CARUB_v10003980mg [Capsella rubella]                                                                                                                                                                                                                                                                                                                                               | 1749 | 1688 | 0         | 96.5  | 86.8 | 91.7 | hypothetical protein CARUB_v10003980mg | gbpln | Capsella rubella     | AT4G38200.1   Symbols:   SEC7-like guanine nucleotide exchange family protein   chr4:17915293-17922502 FORWARD LENGTH=1687                                                                                                                                                                                   | 1749 | 1687 | 0         | 96.5  | 86.8 | 91.1 |
| Rsa1.0_00019.1.g1305.t1 | ref XP_002868837.1  ATEXPA20 [Arabidopsis lyrata subsp. lyrata]<br>gi 297314673 gb EFH45096.1  ATEXPA20 [Arabidopsis lyrata subsp. lyrata]                                                                                                                                                                                                                                                                             | 256  | 256  | 1.00E-135 | 100.0 | 93.0 | 95.7 | ATEXPA20                               | gbpln | Arabidopsis lyrata   | AT4G38210.1   Symbols: ATEXPA20, EXP20, ATEXP20, ATHEXP ALPHA 1.23, EXPA20   expansin A20   chr4:17922975-17923821 REVERSE LENGTH=256                                                                                                                                                                        | 256  | 256  | 1.00E-137 | 100.0 | 92.6 | 95.3 |
| Rsa1.0_00019.1.g1306.t2 | ref NP_568036.2  Peptidase M20/M25/M40 family protein [Arabidopsis thaliana]<br>gi 18650600 gb AAL75900.1  AT4g38220/F20D10.340 [Arabidopsis thaliana] gi 332661494 gb AEE86894.1  Peptidase M20/M25/M40 family protein [Arabidopsis thaliana]                                                                                                                                                                         | 559  | 430  | 0         | 76.9  | 63.1 | 66.7 | Peptidase M20/M25/M40 family protein   | gbpln | Arabidopsis thaliana | AT4G38220.1   Symbols:   Peptidase M20/M25/M40 family protein   chr4:17925251-17926919 FORWARD LENGTH=430                                                                                                                                                                                                    | 559  | 430  | 0         | 76.9  | 63.1 | 66.7 |
| Rsa1.0_00019.1.g1307.t1 | gb EOA18945.1  hypothetical protein CARUB_v10007579mg [Capsella rubella]                                                                                                                                                                                                                                                                                                                                               | 467  | 483  | 0         | 103.4 | 87.8 | 91.9 | hypothetical protein CARUB_v10007579mg | gbpln | Capsella rubella     | AT4G38360.2   Symbols: LAZ1   Protein of unknown function (DUF300)   chr4:17967389-17969798 FORWARD LENGTH=485                                                                                                                                                                                               | 467  | 485  | 0         | 103.9 | 87.8 | 91.2 |
| Rsa1.0_00019.1.g1308.t1 | gb EOA17245.1  hypothetical protein CARUB_v10005519mg [Capsella rubella]                                                                                                                                                                                                                                                                                                                                               | 269  | 263  | 1.00E-123 | 97.8  | 80.7 | 88.5 | hypothetical protein CARUB_v10005519mg | gbpln | Capsella rubella     | AT3G45970.1   Symbols: ATEXLA1, EXPL1, ATEXPL1, ATHEXP BETA 2.1, EXLA1   expansin-like A1   chr3:16896238-16897189 FORWARD LENGTH=265                                                                                                                                                                        | 269  | 265  | 1.00E-121 | 98.5  | 82.9 | 89.2 |

|                         |                                                                                                                                                                                                                                                                                                                                                                                                                                                                                                                                                                                                                                                                                                                                                                                                                                                                                                                                                                                                                                                                                                                                                                                                                                              |     |     |           |       |      |       |                                                 |       |                      |                                                                                                                                                                                                                                                                                                                              |     |     |           |       |      |      |
|-------------------------|----------------------------------------------------------------------------------------------------------------------------------------------------------------------------------------------------------------------------------------------------------------------------------------------------------------------------------------------------------------------------------------------------------------------------------------------------------------------------------------------------------------------------------------------------------------------------------------------------------------------------------------------------------------------------------------------------------------------------------------------------------------------------------------------------------------------------------------------------------------------------------------------------------------------------------------------------------------------------------------------------------------------------------------------------------------------------------------------------------------------------------------------------------------------------------------------------------------------------------------------|-----|-----|-----------|-------|------|-------|-------------------------------------------------|-------|----------------------|------------------------------------------------------------------------------------------------------------------------------------------------------------------------------------------------------------------------------------------------------------------------------------------------------------------------------|-----|-----|-----------|-------|------|------|
| Rsa1.0_00019.1.g1309.t1 | ref[NP_195558.1] geranylgeranyl diphosphate synthase, type II [Arabidopsis thaliana] gi 85680919 sp Q39108.2 GGR_ARATH RecName: Full=Heterodimeric geranylgeranyl pyrophosphate synthase small subunit, chloroplastic; Flags: Precursor gi 11908118 gb AAG41488.1 AF326906.1 putative geranylgeranyl pyrophosphate synthase-related protein [Arabidopsis thaliana] gi 12642930 gb AAK00407.1 AF339725.1 putative geranylgeranyl pyrophosphate synthase-related protein [Arabidopsis thaliana] gi 13926334 gb AAK49631.1 AF372915.1 AT4g38460/F20M13.20 [Arabidopsis thaliana] gi 4467133 emb CAB37502.1 geranylgeranyl pyrophosphate synthase-related protein [Arabidopsis thaliana] gi 7270829 emb CAB80510.1 geranylgeranyl pyrophosphate synthase-related protein [Arabidopsis thaliana] gi 16323260 gb AAL15364.1 AT4g38460/F20M13.20 [Arabidopsis thaliana] gi 21555524 gb AAM63877.1 geranylgeranyl pyrophosphate synthase-related protein [Arabidopsis thaliana] gi 332661530 gb AEE86930.1 geranylgeranyl reductase [Arabidopsis thaliana] ref[NP_568041.1] ACT-like protein tyrosine kinase family protein [Arabidopsis thaliana] gi 332661531 gb AEE86931.1 ACT-like protein tyrosine kinase family protein [Arabidopsis thaliana] | 329 | 326 | 1.00E-126 | 99.1  | 76.3 | 84.5  | geranylgeranyl diphosphate synthase, type II    | gbpln | Arabidopsis thaliana | AT4G38460.1   Symbols: GGR   geranylgeranyl reductase   chr4:17994849-17995974 FORWARD LENGTH=326                                                                                                                                                                                                                            | 329 | 326 | 1.00E-129 | 99.1  | 76.3 | 84.5 |
| Rsa1.0_00019.1.g1310.t1 | ref[NP_568041.1] ACT-like protein tyrosine kinase family protein [Arabidopsis thaliana] gi 332661531 gb AEE86931.1 ACT-like protein tyrosine kinase family protein [Arabidopsis thaliana]                                                                                                                                                                                                                                                                                                                                                                                                                                                                                                                                                                                                                                                                                                                                                                                                                                                                                                                                                                                                                                                    | 564 | 575 | 0         | 102.0 | 85.5 | 91.1  | ACT-like protein tyrosine kinase family protein | gbpln | Arabidopsis thaliana | AT4G38470.1   Symbols:   ACT-like protein tyrosine kinase family protein   chr4:17999432-18003551 FORWARD LENGTH=575                                                                                                                                                                                                         | 564 | 575 | 0         | 102.0 | 85.5 | 91.1 |
| Rsa1.0_00019.1.g1311.t1 | gb EOA18127.1  hypothetical protein CARUB_v10006588mg [Capsella rubella]                                                                                                                                                                                                                                                                                                                                                                                                                                                                                                                                                                                                                                                                                                                                                                                                                                                                                                                                                                                                                                                                                                                                                                     | 117 | 123 | 9.00E-47  | 105.1 | 79.5 | 87.2  | hypothetical protein CARUB_v10006588mg          | gbpln | Capsella rubella     | AT4G38495.1   Symbols:   CONTAINS InterPro DOMAIN/s: YL1 nuclear, C-terminal (InterPro:IPR013272); Has 279 Blast hits to 279 proteins in 147 species: Archae - 0; Bacteria - 0; Metazoa - 94; Fungi - 133; Plants - 35; Viruses - 0; Other Eukaryotes - 17 (source: NCBI BLINK).   chr4:18007466-18008025 REVERSE LENGTH=124 | 117 | 124 | 1.00E-47  | 106.0 | 76.9 | 86.3 |
| Rsa1.0_00019.1.g1312.t2 | gb EOA17176.1  hypothetical protein CARUB_v10005442mg [Capsella rubella]                                                                                                                                                                                                                                                                                                                                                                                                                                                                                                                                                                                                                                                                                                                                                                                                                                                                                                                                                                                                                                                                                                                                                                     | 273 | 281 | 1.00E-139 | 102.9 | 90.8 | 93.4  | hypothetical protein CARUB_v10005442mg          | gbpln | Capsella rubella     | AT4G38670.3   Symbols:   Pathogenesis-related thaumatin superfamily protein   chr4:18069856-18071227 REVERSE LENGTH=281                                                                                                                                                                                                      | 273 | 281 | 1.00E-140 | 102.9 | 89.4 | 92.7 |
| Rsa1.0_00019.1.g1313.t1 | gb EOA18006.1  hypothetical protein CARUB_v10006441mg [Capsella rubella]                                                                                                                                                                                                                                                                                                                                                                                                                                                                                                                                                                                                                                                                                                                                                                                                                                                                                                                                                                                                                                                                                                                                                                     | 98  | 98  | 3.00E-40  | 100.0 | 88.8 | 94.9  | hypothetical protein CARUB_v10006441mg          | gbpln | Capsella rubella     | AT4G38840.1   Symbols:   SAUR-like auxin-responsive protein family   chr4:18125174-18125473 REVERSE LENGTH=99                                                                                                                                                                                                                | 98  | 99  | 7.00E-39  | 101.0 | 83.7 | 93.9 |
| Rsa1.0_00019.1.g1314.t1 | gb EOA15659.1  hypothetical protein CARUB_v10006088mg [Capsella rubella]                                                                                                                                                                                                                                                                                                                                                                                                                                                                                                                                                                                                                                                                                                                                                                                                                                                                                                                                                                                                                                                                                                                                                                     | 105 | 105 | 4.00E-53  | 100.0 | 96.2 | 100.0 | hypothetical protein CARUB_v10006088mg          | gbpln | Capsella rubella     | AT4G38860.1   Symbols:   SAUR-like auxin-responsive protein family   chr4:18130357-18130674 FORWARD LENGTH=105                                                                                                                                                                                                               | 105 | 105 | 4.00E-55  | 100.0 | 95.2 | 99.0 |
| Rsa1.0_00019.1.g1315.t1 | ref[NP_195599.1] amidophosphoribosyltransferase [Arabidopsis thaliana] gi 75213783 sp Q9T0J5.1 ASE3_ARATH RecName: Full=Amidophosphoribosyltransferase 3, chloroplastic; Short=AtATase3; Short=PRPP3; AltName: Full=Glutamine phosphoribosylpyrophosphate amidotransferase 3; Short=AtGPRAT3; Flags: Precursor gi 4490340 emb CAB38622.1 amidophosphoribosyltransferase-like protein [Arabidopsis thaliana] gi 7270871 emb CAB80551.1 amidophosphoribosyltransferase-like protein [Arabidopsis thaliana] gi 332661586 gb AEE86986.1 amidophosphoribosyltransferase 3 [Arabidopsis thaliana] ref[XP_002868869.1] dihydrouridine synthase family protein [Arabidopsis lyrata subsp. lyrata] gi 297314705 gb EFH45128.1 dihydrouridine synthase family protein [Arabidopsis lyrata subsp. lyrata]                                                                                                                                                                                                                                                                                                                                                                                                                                               | 531 | 532 | 0         | 100.2 | 84.9 | 91.1  | amidophosphoribosyltransferase                  | gbpln | Arabidopsis thaliana | AT4G38880.1   Symbols: ATASE3, ASE3   GLN phosphoribosyl pyrophosphate amidotransferase 3   chr4:18134116-18135714 FORWARD LENGTH=532                                                                                                                                                                                        | 531 | 532 | 0         | 100.2 | 84.9 | 91.1 |
| Rsa1.0_00019.1.g1316.t1 | ref[XP_002868869.1] dihydrouridine synthase family protein [Arabidopsis lyrata subsp. lyrata] gi 297314705 gb EFH45128.1 dihydrouridine synthase family protein [Arabidopsis lyrata subsp. lyrata]                                                                                                                                                                                                                                                                                                                                                                                                                                                                                                                                                                                                                                                                                                                                                                                                                                                                                                                                                                                                                                           | 692 | 691 | 0         | 99.9  | 83.2 | 88.2  | dihydrouridine synthase family protein          | gbpln | Arabidopsis lyrata   | AT4G38890.1   Symbols:   FMN-linked oxidoreductases superfamily protein   chr4:18135909-18139100 REVERSE LENGTH=691                                                                                                                                                                                                          | 692 | 691 | 0         | 99.9  | 82.9 | 88.2 |

|                         |                                                                                                                                                                                                                                                                                                                                                                                                                                                                                                                                                                                                                                                                                                            |     |     |           |       |      |      |                                                       |       |                      |                                                                                                                           |     |     |           |       |      |      |
|-------------------------|------------------------------------------------------------------------------------------------------------------------------------------------------------------------------------------------------------------------------------------------------------------------------------------------------------------------------------------------------------------------------------------------------------------------------------------------------------------------------------------------------------------------------------------------------------------------------------------------------------------------------------------------------------------------------------------------------------|-----|-----|-----------|-------|------|------|-------------------------------------------------------|-------|----------------------|---------------------------------------------------------------------------------------------------------------------------|-----|-----|-----------|-------|------|------|
| Rsa1.0_00019.1.g1317.t1 | gb ABU63288.1  GAGA-motif binding transcriptional activator, partial [Cardamine pratensis]<br>ref NP_195606.2  ATP binding microtubule motor family protein [Arabidopsis thaliana]<br>gi 186517568 ref NP_001119143.1  ATP binding microtubule motor family protein [Arabidopsis thaliana]<br>gi 332661597 gb AEE86997.1  ATP binding microtubule motor family protein [Arabidopsis thaliana]<br>gi 332661598 gb AEE86998.1  ATP binding microtubule motor family protein [Arabidopsis thaliana]<br>ref XP_002868874.1  hypothetical protein ARALYDRAFT_490667 [Arabidopsis lyrata subsp. lyrata]<br>gi 297314710 gb EFH45133.1  hypothetical protein ARALYDRAFT_490667 [Arabidopsis lyrata subsp. lyrata] | 265 | 275 | 1.00E-123 | 103.8 | 80.8 | 90.9 | GAGA-motif binding transcriptional activator, partial | gbpln | Cardamine pratensis  | AT4G38910.2   Symbols: BPC5   basic pentacysteine 5   chr4:18145478-18146429 REVERSE LENGTH=283                           | 265 | 283 | 1.00E-116 | 106.8 | 76.6 | 87.5 |
| Rsa1.0_00019.1.g1318.t1 | gb EOA18196.1  hypothetical protein CARUB_v10006679mg [Capsella rubella]                                                                                                                                                                                                                                                                                                                                                                                                                                                                                                                                                                                                                                   | 800 | 836 | 0         | 104.5 | 85.8 | 91.3 | ATP binding microtubule motor family protein          | gbpln | Arabidopsis thaliana | AT4G38950.2   Symbols:   ATP binding microtubule motor family protein   chr4:18154606-18158461 REVERSE LENGTH=836         | 800 | 836 | 0         | 104.5 | 85.8 | 91.3 |
| Rsa1.0_00019.1.g1319.t1 | gb EOA16494.1  hypothetical protein CARUB_v10004652mg [Capsella rubella]                                                                                                                                                                                                                                                                                                                                                                                                                                                                                                                                                                                                                                   | 237 | 393 | 5.00E-72  | 165.8 | 54.4 | 56.1 | hypothetical protein ARALYDRAFT_490667                | gbpln | Arabidopsis lyrata   | AT4G38970.1   Symbols: FBA2   fructose-bisphosphate aldolase 2   chr4:18163714-18165659 REVERSE LENGTH=398                | 237 | 398 | 1.00E-73  | 167.9 | 55.3 | 56.5 |
| Rsa1.0_00019.1.g1320.t1 | ref XP_002868828.1  hypothetical protein ARALYDRAFT_490671 [Arabidopsis lyrata subsp. lyrata]<br>gi 297312654 gb EFH43087.1  hypothetical protein ARALYDRAFT_490671 [Arabidopsis lyrata subsp. lyrata]<br>ref XP_002868882.1  zinc finger (B-box type) family protein [Arabidopsis lyrata subsp. lyrata]<br>gi 297314718 gb EFH45141.1  zinc finger (B-box type) family protein [Arabidopsis lyrata subsp. lyrata]                                                                                                                                                                                                                                                                                         | 443 | 493 | 0         | 111.3 | 81.0 | 87.1 | hypothetical protein CARUB_v10006679mg                | gbpln | Capsella rubella     | AT4G39000.1   Symbols: AtGH9B17, GH9B17   glycosyl hydrolase 9B17   chr4:18171722-18173797 REVERSE LENGTH=493             | 443 | 493 | 0         | 111.3 | 76.5 | 86.7 |
| Rsa1.0_00019.1.g1322.t1 | gb EOA19105.1  hypothetical protein CARUB_v10007773mg [Capsella rubella]                                                                                                                                                                                                                                                                                                                                                                                                                                                                                                                                                                                                                                   | 472 | 496 | 0         | 105.1 | 92.2 | 95.8 | hypothetical protein CARUB_v10004652mg                | gbpln | Capsella rubella     | AT4G39010.1   Symbols: AtGH9B18, GH9B18   glycosyl hydrolase 9B18   chr4:18176162-18179102 REVERSE LENGTH=497             | 472 | 497 | 0         | 105.3 | 92.6 | 95.3 |
| Rsa1.0_00019.1.g1323.t1 | ref XP_002868883.1  hypothetical protein ARALYDRAFT_490677 [Arabidopsis lyrata subsp. lyrata]<br>gi 297314719 gb EFH45142.1  hypothetical protein ARALYDRAFT_490677 [Arabidopsis lyrata subsp. lyrata]                                                                                                                                                                                                                                                                                                                                                                                                                                                                                                     | 514 | 541 | 0         | 105.3 | 86.4 | 92.6 | hypothetical protein ARALYDRAFT_490671                | gbpln | Arabidopsis lyrata   | AT4G39030.1   Symbols: EDS5, SID1   MATE efflux family protein   chr4:18185740-18188898 FORWARD LENGTH=543                | 514 | 543 | 0         | 105.6 | 86.4 | 91.4 |
| Rsa1.0_00019.1.g1324.t1 | gb EOA1823.1  hypothetical protein CARUB_v10007437mg [Capsella rubella]                                                                                                                                                                                                                                                                                                                                                                                                                                                                                                                                                                                                                                    | 234 | 238 | 2.00E-97  | 101.7 | 83.3 | 88.0 | zinc finger (B-box type) family protein               | gbpln | Arabidopsis lyrata   | AT4G39070.1   Symbols:   B-box zinc finger family protein   chr4:18205061-18206421 REVERSE LENGTH=242                     | 234 | 242 | 1.00E-100 | 103.4 | 82.9 | 88.5 |
| Rsa1.0_00019.1.g1325.t1 | gb EOA18763.1  hypothetical protein CARUB_v10007359mg [Capsella rubella]                                                                                                                                                                                                                                                                                                                                                                                                                                                                                                                                                                                                                                   | 794 | 819 | 0         | 103.1 | 92.7 | 96.9 | hypothetical protein CARUB_v10007773mg                | gbpln | Capsella rubella     | AT4G39080.1   Symbols: VHA-A3   vacuolar proton ATPase A3   chr4:18209513-18214752 FORWARD LENGTH=821                     | 794 | 821 | 0         | 103.4 | 90.7 | 95.0 |
| Rsa1.0_00019.1.g1326.t1 | ref NP_195624.1  Dehydrin family protein [Arabidopsis thaliana]<br>gi 4914425 emb CAB43628.1  putative protein [Arabidopsis thaliana]<br>gi 7270896 emb CAB80576.1  putative protein [Arabidopsis thaliana]<br>gi 21592637 gb AAM64586.1  unknown [Arabidopsis thaliana]<br>gi 332661621 gb AEE87021.1  Dehydrin family protein [Arabidopsis thaliana]                                                                                                                                                                                                                                                                                                                                                     | 371 | 368 | 0         | 99.2  | 87.9 | 92.2 | hypothetical protein ARALYDRAFT_490677                | gbpln | Arabidopsis lyrata   | AT4G39090.1   Symbols: RD19, RD19A   Papain family cysteine protease   chr4:18215826-18217326 REVERSE LENGTH=368          | 371 | 368 | 0         | 99.2  | 85.4 | 90.8 |
| Rsa1.0_00019.1.g1327.t1 | gb EOA15554.1  hypothetical protein CARUB_v10005169mg [Capsella rubella]<br>gi 482551362 gb EOA15555.1  hypothetical protein CARUB_v10005169mg [Capsella rubella]                                                                                                                                                                                                                                                                                                                                                                                                                                                                                                                                          | 110 | 110 | 2.00E-38  | 100.0 | 83.6 | 90.9 | hypothetical protein CARUB_v10007437mg                | gbpln | Capsella rubella     | # # # # # # #                                                                                                             | #   | #   | #         | #     | #    | #    |
| Rsa1.0_00019.1.g1328.t1 | ref NP_195624.1  Dehydrin family protein [Arabidopsis thaliana]<br>gi 4914425 emb CAB43628.1  putative protein [Arabidopsis thaliana]<br>gi 7270896 emb CAB80576.1  putative protein [Arabidopsis thaliana]<br>gi 21592637 gb AAM64586.1  unknown [Arabidopsis thaliana]<br>gi 332661621 gb AEE87021.1  Dehydrin family protein [Arabidopsis thaliana]                                                                                                                                                                                                                                                                                                                                                     | 877 | 882 | 0         | 100.6 | 92.4 | 95.9 | hypothetical protein CARUB_v10007359mg                | gbpln | Capsella rubella     | AT4G39110.1   Symbols:   Malectin/receptor-like protein kinase family protein   chr4:18222483-18225119 REVERSE LENGTH=878 | 877 | 878 | 0         | 100.1 | 91.6 | 95.3 |
| Rsa1.0_00019.1.g1329.t1 | gb EOA1823.1  hypothetical protein CARUB_v10007437mg [Capsella rubella]                                                                                                                                                                                                                                                                                                                                                                                                                                                                                                                                                                                                                                    | 277 | 151 | 2.00E-44  | 54.5  | 34.3 | 40.8 | Dehydrin family protein                               | gbpln | Arabidopsis thaliana | AT4G39130.1   Symbols:   Dehydrin family protein   chr4:18228183-18228844 REVERSE LENGTH=151                              | 277 | 151 | 7.00E-47  | 54.5  | 34.3 | 40.8 |
| Rsa1.0_00019.1.g1329.t1 | gb EOA15554.1  hypothetical protein CARUB_v10005169mg [Capsella rubella]<br>gi 482551362 gb EOA15555.1  hypothetical protein CARUB_v10005169mg [Capsella rubella]                                                                                                                                                                                                                                                                                                                                                                                                                                                                                                                                          | 344 | 344 | 0         | 100.0 | 88.4 | 95.6 | hypothetical protein CARUB_v10005169mg                | gbpln | Capsella rubella     | AT4G39150.2   Symbols:   DNAJ heat shock N-terminal domain-containing protein   chr4:18233651-18235740 REVERSE LENGTH=345 | 344 | 345 | 1.00E-180 | 100.3 | 87.5 | 95.3 |



|                         |                                                                                                                                                                                                                                                                                                                                                                                                                                                                                                                                                                                                                                                                                     |      |      |           |       |      |      |                                                                                                             |       |                      |                                                                                                                                                                                                                                                                                                                                             |      |      |           |       |      |      |
|-------------------------|-------------------------------------------------------------------------------------------------------------------------------------------------------------------------------------------------------------------------------------------------------------------------------------------------------------------------------------------------------------------------------------------------------------------------------------------------------------------------------------------------------------------------------------------------------------------------------------------------------------------------------------------------------------------------------------|------|------|-----------|-------|------|------|-------------------------------------------------------------------------------------------------------------|-------|----------------------|---------------------------------------------------------------------------------------------------------------------------------------------------------------------------------------------------------------------------------------------------------------------------------------------------------------------------------------------|------|------|-----------|-------|------|------|
| Rsa1.0_00019.1.g1330.t1 | ref NP_195631.1  40S ribosomal protein S25-4 [Arabidopsis thaliana] gi 30580493 sp Q9T029.1 RS254_ARATH RecName: Full=40S ribosomal protein S25-4 gi 4914432 emb CAB43635.1 ribosomal protein S25 [Arabidopsis thaliana] gi 7270903 emb CAB80583.1 ribosomal protein S25 [Arabidopsis thaliana] gi 14335026 gb AAK59777.1 AT4g39200.T22F8.100 [Arabidopsis thaliana] gi 16323232 gb AAL15350.1 AT4g39200.T22F8.100 [Arabidopsis thaliana] gi 21553704 gb AAM62797.1 ribosomal protein S25 [Arabidopsis thaliana] gi 332661636 gb AEE87036.1 40S ribosomal protein S25-4 [Arabidopsis thaliana] gi 482553510 gb EOA17703.1 hypothetical protein CARUB.v10006075mg [Capsella rubella] | 108  | 108  | 3.00E-55  | 100.0 | 99.1 | 99.1 | 40S ribosomal protein S25-4                                                                                 | gbpln | Arabidopsis thaliana | AT4G39200.1   Symbols:   Ribosomal protein S25 family protein   chr4:18257464-18258464 FORWARD LENGTH=108                                                                                                                                                                                                                                   | 108  | 108  | 5.00E-58  | 100.0 | 99.1 | 99.1 |
| Rsa1.0_00019.1.g1331.t1 | gb EOA17728.1  hypothetical protein CARUB.v10006110mg [Capsella rubella]                                                                                                                                                                                                                                                                                                                                                                                                                                                                                                                                                                                                            | 82   | 100  | 2.00E-30  | 122.0 | 89.0 | 95.1 | hypothetical protein CARUB.v10006110mg                                                                      | gbpln | Capsella rubella     | AT4G39250.1   Symbols: ATRL1, RSM2, RL1   RAD-like 1   chr4:18271457-18271857 REVERSE LENGTH=100                                                                                                                                                                                                                                            | 82   | 100  | 1.00E-32  | 122.0 | 86.6 | 91.5 |
| Rsa1.0_00019.1.g1332.t1 | sp Q05966.1 GRP10_BRANA RecName: Full=Glycine-rich RNA-binding protein 10 gi 17819 emb CAA78513.1  glycine-rich RNA binding protein [Brassica napus]                                                                                                                                                                                                                                                                                                                                                                                                                                                                                                                                | 163  | 169  | 5.00E-40  | 103.7 | 48.5 | 50.3 | RecName: Full=Glycine-rich RNA-binding protein 10 gi 17819 emb CAA78513.1  glycine-rich RNA binding protein | gbpln | Brassica napus       | AT4G39260.3   Symbols: CCR1, ATGRP8, GR-RBP8, GRP8   cold, circadian rhythm, and RNA binding 1   chr4:18274166-18274958 REVERSE LENGTH=92                                                                                                                                                                                                   | 163  | 92   | 2.00E-43  | 56.4  | 49.7 | 54.0 |
| Rsa1.0_00019.1.g1333.t1 | ref XP_002866840.1  hypothetical protein ARALYDRAFT_912391 [Arabidopsis lyrata subsp. lyrata] gi 297312676 gb EFH43099.1  hypothetical protein ARALYDRAFT_912391 [Arabidopsis lyrata subsp. lyrata]                                                                                                                                                                                                                                                                                                                                                                                                                                                                                 | 152  | 173  | 1.00E-39  | 113.8 | 65.1 | 78.3 | hypothetical protein ARALYDRAFT_912391                                                                      | gbpln | Arabidopsis lyrata   | AT4G39320.1   Symbols:   microtubule-associated protein-related   chr4:18289102-18289702 FORWARD LENGTH=166                                                                                                                                                                                                                                 | 152  | 166  | 4.00E-36  | 109.2 | 59.9 | 73.7 |
| Rsa1.0_00019.1.g1334.t1 | ref NP_195644.1  uncharacterized protein [Arabidopsis thaliana] gi 75213705 sp Q9T039.1 EC14_ARATH RecName: Full=Egg cell-secreted protein 1.4; Flags: Precursor gi 4914446 emb CAB43649.1  hypothetical protein [Arabidopsis thaliana] gi 7270918 emb CAB80597.1  hypothetical protein [Arabidopsis thaliana] gi 91805627 gb ABE65542.1  hypothetical protein At4g39340 [Arabidopsis thaliana] gi 332661658 gb AEE87058.1  uncharacterized protein AT4G39340 [Arabidopsis thaliana]                                                                                                                                                                                                | 129  | 127  | 6.00E-53  | 98.4  | 79.8 | 86.8 | uncharacterized protein                                                                                     | gbpln | Arabidopsis thaliana | AT4G39340.1   Symbols:   Protein of unknown function (DUF1278)   chr4:18293129-18293512 REVERSE LENGTH=127                                                                                                                                                                                                                                  | 129  | 127  | 1.00E-55  | 98.4  | 79.8 | 86.8 |
| Rsa1.0_00019.1.g1335.t1 | gb EOA18118.1  hypothetical protein CARUB.v10006579mg [Capsella rubella]                                                                                                                                                                                                                                                                                                                                                                                                                                                                                                                                                                                                            | 115  | 136  | 4.00E-29  | 118.3 | 62.6 | 75.7 | hypothetical protein CARUB.v10006579mg                                                                      | gbpln | Capsella rubella     | AT4G39360.1   Symbols:   unknown protein; BEST Arabidopsis thaliana protein match is: unknown protein (TAIRAT2G21780.1). Has 13 Blast hits to 13 proteins in 2 species: Archaea - 0; Bacteria - 0; Metazoa - 0; Fungi - 0; Plants - 13; Viruses - 0; Other Eukaryotes - 0 (source: NCBI BLINK).   chr4:18303031-18303435 FORWARD LENGTH=134 | 115  | 134  | 1.00E-26  | 116.5 | 62.6 | 73.9 |
| Rsa1.0_00019.1.g1336.t1 | ref NP_568059.1  nucleotide sugar transporter-KT 1 [Arabidopsis thaliana] gi 30692341 ref NP_849527.1  nucleotide sugar transporter-KT 1 [Arabidopsis thaliana] gi 20259516 gb AAM13878.1  unknown protein [Arabidopsis thaliana] gi 23296523 gb AANI3117.1  unknown protein [Arabidopsis thaliana] gi 332661666 gb AEE87066.1  nucleotide sugar transporter-KT 1 [Arabidopsis thaliana] gi 332661667 gb AEE87067.1  nucleotide sugar transporter-KT 1 [Arabidopsis thaliana]                                                                                                                                                                                                       | 339  | 337  | 1.00E-171 | 99.4  | 92.3 | 95.0 | nucleotide sugar transporter-KT 1                                                                           | gbpln | Arabidopsis thaliana | AT4G39390.2   Symbols: ATNST-KT1, NST-K1   nucleotide sugar transporter-KT 1   chr4:18316278-18317854 FORWARD LENGTH=337                                                                                                                                                                                                                    | 339  | 337  | 1.00E-174 | 99.4  | 92.3 | 95.0 |
| Rsa1.0_00019.1.g1337.t1 | ref XP_002866847.1  hypothetical protein ARALYDRAFT_912402 [Arabidopsis lyrata subsp. lyrata] gi 297312683 gb EFH43106.1  hypothetical protein ARALYDRAFT_912402 [Arabidopsis lyrata subsp. lyrata]                                                                                                                                                                                                                                                                                                                                                                                                                                                                                 | 1193 | 1195 | 0         | 100.2 | 89.3 | 93.6 | hypothetical protein ARALYDRAFT_912402                                                                      | gbpln | Arabidopsis lyrata   | AT4G39400.1   Symbols: BRI1, CBB2, DWF2, BIN1, ATBRI1   Leucine-rich receptor-like protein kinase family protein   chr4:18324826-18328416 FORWARD LENGTH=1196                                                                                                                                                                               | 1193 | 1196 | 0         | 100.3 | 88.5 | 93.1 |

|                         |                                                                                                                                                                                                                                                                                                                                                                                                                                                                                                                                                                                                                                                                                                                                                                                                                                                                                                                                                                                                                     |      |      |           |       |      |      |                                                         |       |                      |                                                                                                                                                                                                                                                                                                                                                                                                                                          |      |      |           |       |      |      |
|-------------------------|---------------------------------------------------------------------------------------------------------------------------------------------------------------------------------------------------------------------------------------------------------------------------------------------------------------------------------------------------------------------------------------------------------------------------------------------------------------------------------------------------------------------------------------------------------------------------------------------------------------------------------------------------------------------------------------------------------------------------------------------------------------------------------------------------------------------------------------------------------------------------------------------------------------------------------------------------------------------------------------------------------------------|------|------|-----------|-------|------|------|---------------------------------------------------------|-------|----------------------|------------------------------------------------------------------------------------------------------------------------------------------------------------------------------------------------------------------------------------------------------------------------------------------------------------------------------------------------------------------------------------------------------------------------------------------|------|------|-----------|-------|------|------|
| Rsa1.0_00019.1.g1338.t1 | <p>ref[NP_195651.1] putative WRKY transcription factor 13 [Arabidopsis thaliana]</p> <p>gi 29839686 sp Q9SVB7.1 WRK13_ARAT H RecName: Full=Probable WRKY transcription factor 13; AltName: Full=WRKY DNA-binding protein 13</p> <p>gi 15991730 gb AAL13042.1 AF421153.1 WRKY transcription factor 13 [Arabidopsis thaliana]</p> <p>gi 5042157 emb CAB44676.1  putative WRKY DNA-binding protein [Arabidopsis thaliana]</p> <p>gi 7270925 emb CAB80604.1  putative WRKY DNA-binding protein [Arabidopsis thaliana]</p> <p>gi 225898873 dbj BAH30567.1  hypothetical protein [Arabidopsis thaliana]</p> <p>gi 332661671 gb AEE87071.1  putative WRKY transcription factor 13 [Arabidopsis thaliana]</p>                                                                                                                                                                                                                                                                                                               | 295  | 304  | 1.00E-102 | 103.1 | 73.9 | 82.7 | putative WRKY transcription factor 13                   | gbpln | Arabidopsis thaliana | AT4G39410.1   Symbols: WRKY13, ATWRKY13   WRKY DNA-binding protein 13   chr4:18332937-18334789 REVERSE LENGTH=304                                                                                                                                                                                                                                                                                                                        | 295  | 304  | 1.00E-105 | 103.1 | 73.9 | 82.7 |
| Rsa1.0_00019.1.g1339.t8 | <p>ref[NP_001154293.2] uncharacterized protein [Arabidopsis thaliana]</p> <p>gi 332661673 gb AEB87073.1  uncharacterized protein AT4G39420 [Arabidopsis thaliana]</p>                                                                                                                                                                                                                                                                                                                                                                                                                                                                                                                                                                                                                                                                                                                                                                                                                                               | 3143 | 3184 | 0         | 101.3 | 87.0 | 92.2 | uncharacterized protein                                 | gbpln | Arabidopsis thaliana | AT4G39420.2   Symbols:   unknown protein; INVOLVED IN: biological_process unknown; LOCATED IN: cellular_component unknown; EXPRESSED IN: leaf; EXPRESSED DURING: LP.04 four leaves visible; LP.02 two leaves visible; Has 20 Blast hits to 19 proteins in 8 species: Archae - 0; Bacteria - 0; Metazoa - 0; Fungi - 0; Plants - 20; Viruses - 0; Other Eukaryotes - 0 (source: NCBI BLINK).   chr4:18339731-18354701 FORWARD LENGTH=3184 | 3143 | 3184 | 0         | 101.3 | 87.0 | 92.2 |
| Rsa1.0_00019.1.g1340.t1 | <p>gb EOA12720.1  hypothetical protein CARUB_v10028124mg [Capsella rubella]</p>                                                                                                                                                                                                                                                                                                                                                                                                                                                                                                                                                                                                                                                                                                                                                                                                                                                                                                                                     | 507  | 514  | 0         | 101.4 | 69.6 | 84.6 | hypothetical protein CARUB_v10028124mg                  | gbpln | Capsella rubella     | AT4G32170.1   Symbols: CYP96A2   cytochrome P450, family 96, subfamily A, polypeptide 2   chr4:15533772-15535292 FORWARD LENGTH=506                                                                                                                                                                                                                                                                                                      | 507  | 506  | 0         | 99.8  | 65.9 | 79.7 |
| Rsa1.0_00019.1.g1341.t1 | <p>ref[NP_195661.1] cytochrome P450, family 96, subfamily A, polypeptide 12 [Arabidopsis thaliana]</p> <p>gi 5042167 emb CAB44686.1  cytochrome P450-like protein [Arabidopsis thaliana]</p> <p>gi 7270935 emb CAB80614.1  cytochrome P450-like protein [Arabidopsis thaliana]</p> <p>gi 16604438 gb AAL24225.1  AT4g39510/F23K16.140 [Arabidopsis thaliana]</p> <p>gi 27764938 gb AAO23590.1  AT4g39510/F23K16.140 [Arabidopsis thaliana]</p> <p>gi 332661680 gb AEE87080.1  cytochrome P450, family 96, subfamily A, polypeptide 12 [Arabidopsis thaliana]</p> <p>ref[NP_195662.1] GTP-binding protein-relatedlike protein [Arabidopsis thaliana]</p> <p>gi 5042168 emb CAB44687.1  GTP-binding-like protein [Arabidopsis thaliana]</p> <p>gi 7270936 emb CAB80615.1  GTP-binding-like protein [Arabidopsis thaliana]</p> <p>gi 14334722 gb AAK59539.1  putative GTP-binding protein [Arabidopsis thaliana]</p> <p>gi 332661681 gb AEE87081.1  GTP-binding protein-relatedlike protein [Arabidopsis thaliana]</p> | 500  | 508  | 0         | 101.6 | 76.8 | 88.2 | cytochrome P450, family 96, subfamily A, polypeptide 12 | gbpln | Arabidopsis thaliana | AT4G39510.1   Symbols: CYP96A12   cytochrome P450, family 96, subfamily A, polypeptide 12   chr4:18368945-18370471 REVERSE LENGTH=508                                                                                                                                                                                                                                                                                                    | 500  | 508  | 0         | 101.6 | 76.8 | 88.2 |
| Rsa1.0_00019.1.g1342.t1 | <p>ref[NP_195664.2] shikimate kinase 2 [Arabidopsis thaliana]</p> <p>gi 42573237 ref NP_974715.1  shikimate kinase 2 [Arabidopsis thaliana]</p> <p>gi 75151384 sp Q8GY88.1 SK2_ARATH RecName: Full=Shikimate kinase 2, chloroplastic; Short=AtSK2; Flags: Precursor gi 26450651 dbj BAC42436.1  putative shikimate kinase [Arabidopsis thaliana]</p> <p>gi 28950863 gb AAO63355.1  At4g39540 [Arabidopsis thaliana]</p> <p>gi 332661683 gb AEE87083.1  shikimate kinase 2 [Arabidopsis thaliana]</p> <p>gi 332661684 gb AEE87084.1  shikimate kinase 2 [Arabidopsis thaliana]</p>                                                                                                                                                                                                                                                                                                                                                                                                                                   | 369  | 369  | 0         | 100.0 | 97.0 | 98.4 | GTP-binding protein-relatedlike protein                 | gbpln | Arabidopsis thaliana | AT4G39520.1   Symbols:   GTP-binding protein-related   chr4:18371329-18374000 REVERSE LENGTH=369                                                                                                                                                                                                                                                                                                                                         | 369  | 369  | 0         | 100.0 | 97.0 | 98.4 |
| Rsa1.0_00019.1.g1343.t1 | <p>ref[NP_195664.2] shikimate kinase 2 [Arabidopsis thaliana]</p> <p>gi 42573237 ref NP_974715.1  shikimate kinase 2 [Arabidopsis thaliana]</p> <p>gi 75151384 sp Q8GY88.1 SK2_ARATH RecName: Full=Shikimate kinase 2, chloroplastic; Short=AtSK2; Flags: Precursor gi 26450651 dbj BAC42436.1  putative shikimate kinase [Arabidopsis thaliana]</p> <p>gi 28950863 gb AAO63355.1  At4g39540 [Arabidopsis thaliana]</p> <p>gi 332661683 gb AEE87083.1  shikimate kinase 2 [Arabidopsis thaliana]</p> <p>gi 332661684 gb AEE87084.1  shikimate kinase 2 [Arabidopsis thaliana]</p>                                                                                                                                                                                                                                                                                                                                                                                                                                   | 256  | 300  | 1.00E-111 | 117.2 | 84.4 | 89.8 | shikimate kinase 2                                      | gbpln | Arabidopsis thaliana | AT4G39540.2   Symbols: SK2, ATSK2   shikimate kinase 2   chr4:18378561-18380253 FORWARD LENGTH=300                                                                                                                                                                                                                                                                                                                                       | 256  | 300  | 1.00E-113 | 117.2 | 84.4 | 89.8 |

|                         |                                                                                                                                                                                                                                                                                                                                                                                                                                                                                                                                                                                                                                                                                                                        |      |      |           |       |      |      |                                              |       |                      |                                                                                                                                                  |      |      |           |       |      |      |
|-------------------------|------------------------------------------------------------------------------------------------------------------------------------------------------------------------------------------------------------------------------------------------------------------------------------------------------------------------------------------------------------------------------------------------------------------------------------------------------------------------------------------------------------------------------------------------------------------------------------------------------------------------------------------------------------------------------------------------------------------------|------|------|-----------|-------|------|------|----------------------------------------------|-------|----------------------|--------------------------------------------------------------------------------------------------------------------------------------------------|------|------|-----------|-------|------|------|
| Rsa1.0_00019.1.g1344.t1 | ref[XP_002868913.1] kelch repeat-containing F-box family protein [Arabidopsis lyrata subsp. lyrata] gi 297314749 gb EFH45172.1  kelch repeat-containing F-box family protein [Arabidopsis lyrata subsp. lyrata] ref[XP_002868918.1] hypothetical protein ARALYDRAFT_490739 [Arabidopsis lyrata subsp. lyrata] gi 297314754 gb EFH45177.1  hypothetical protein ARALYDRAFT_490739 [Arabidopsis lyrata subsp. lyrata]                                                                                                                                                                                                                                                                                                    | 400  | 389  | 1.00E-119 | 97.3  | 56.8 | 69.5 | kelch repeat-containing F-box family protein | gbpln | Arabidopsis lyrata   | AT4G39550.1   Symbols: Galactose oxidase/kelch repeat superfamily protein   chr4:18380681-18381859 REVERSE LENGTH=392                            | 400  | 392  | 1.00E-121 | 98.0  | 60.5 | 72.8 |
| Rsa1.0_00019.1.g1345.t1 | ref[XP_002868918.1] hypothetical protein ARALYDRAFT_490739 [Arabidopsis lyrata subsp. lyrata] gi 297314754 gb EFH45177.1  hypothetical protein ARALYDRAFT_490739 [Arabidopsis lyrata subsp. lyrata]                                                                                                                                                                                                                                                                                                                                                                                                                                                                                                                    | 391  | 400  | 7.00E-93  | 102.3 | 53.2 | 66.0 | hypothetical protein ARALYDRAFT_490739       | gbpln | Arabidopsis lyrata   | AT4G39590.1   Symbols: Galactose oxidase/kelch repeat superfamily protein   chr4:18387515-18388723 REVERSE LENGTH=402                            | 391  | 402  | 4.00E-90  | 102.8 | 52.2 | 63.4 |
| Rsa1.0_00019.1.g1346.t1 | #                                                                                                                                                                                                                                                                                                                                                                                                                                                                                                                                                                                                                                                                                                                      | #    | #    | #         | #     | #    | #    | -                                            | ----  | ----                 | #                                                                                                                                                | #    | #    | #         | #     | #    | #    |
| Rsa1.0_00019.1.g1347.t1 | gb[EOA39864.1] hypothetical protein CARUB_v10008540mg [Capsella rubella] gi 482575678 gb EOA39865.1  hypothetical protein CARUB_v10008540mg [Capsella rubella] gi 482575679 gb EOA39866.1  hypothetical protein CARUB_v10008540mg [Capsella rubella]                                                                                                                                                                                                                                                                                                                                                                                                                                                                   | 111  | 654  | 6.00E-11  | 589.2 | 39.6 | 46.8 | hypothetical protein CARUB_v10008540mg       | gbpln | Capsella rubella     | AT1G14380.3   Symbols: IQD28   IQ-domain 28   chr1:4918279-4920761 REVERSE LENGTH=664                                                            | 111  | 664  | 3.00E-13  | 598.2 | 39.6 | 45.9 |
| Rsa1.0_00019.1.g1348.t1 | gb[EOA34391.1] hypothetical protein CARUB_v10021918mg [Capsella rubella]                                                                                                                                                                                                                                                                                                                                                                                                                                                                                                                                                                                                                                               | 407  | 403  | 7.00E-96  | 99.0  | 52.8 | 65.6 | hypothetical protein CARUB_v10021918mg       | gbpln | Capsella rubella     | AT1G61540.1   Symbols: Galactose oxidase/kelch repeat superfamily protein   chr1:22702498-22703706 FORWARD LENGTH=402                            | 407  | 402  | 2.00E-96  | 98.8  | 53.1 | 63.9 |
| Rsa1.0_00019.1.g1349.t1 | ref[NP_195665.1] F-box/kelch-repeat protein [Arabidopsis thaliana] gi 75210850 sp Q9SVA3.1 FBK98_ARAT H RecName: Full=F-box/kelch-repeat protein At4g39550 gi 5042171 emb CAB44690.1  putative protein [Arabidopsis thaliana] gi 7270939 emb CAB80618.1  putative protein [Arabidopsis thaliana] gi 27808596 gb AAO24578.1  At4g39550 [Arabidopsis thaliana] gi 110736223 dbj BAF0082.1  hypothetical protein [Arabidopsis thaliana] gi 332661686 gb AEE87086.1  F-box/kelch-repeat protein [Arabidopsis thaliana] ref[XP_002868918.1] hypothetical protein ARALYDRAFT_490739 [Arabidopsis lyrata subsp. lyrata] gi 297314754 gb EFH45177.1  hypothetical protein ARALYDRAFT_490739 [Arabidopsis lyrata subsp. lyrata] | 392  | 392  | 1.00E-138 | 100.0 | 69.4 | 80.1 | F-box/kelch-repeat protein                   | gbpln | Arabidopsis thaliana | AT4G39550.1   Symbols: Galactose oxidase/kelch repeat superfamily protein   chr4:18380681-18381859 REVERSE LENGTH=392                            | 392  | 392  | 1.00E-140 | 100.0 | 69.4 | 80.1 |
| Rsa1.0_00019.1.g1350.t1 | ref[XP_002868918.1] hypothetical protein ARALYDRAFT_490739 [Arabidopsis lyrata subsp. lyrata] gi 297314754 gb EFH45177.1  hypothetical protein ARALYDRAFT_490739 [Arabidopsis lyrata subsp. lyrata]                                                                                                                                                                                                                                                                                                                                                                                                                                                                                                                    | 385  | 400  | 1.00E-93  | 103.9 | 49.4 | 65.5 | hypothetical protein ARALYDRAFT_490739       | gbpln | Arabidopsis lyrata   | AT4G39590.1   Symbols: Galactose oxidase/kelch repeat superfamily protein   chr4:18387515-18388723 REVERSE LENGTH=402                            | 385  | 402  | 3.00E-94  | 104.4 | 51.4 | 66.5 |
| Rsa1.0_00019.1.g1351.t1 | gb[EOA34391.1] hypothetical protein CARUB_v10021918mg [Capsella rubella]                                                                                                                                                                                                                                                                                                                                                                                                                                                                                                                                                                                                                                               | 412  | 403  | 5.00E-93  | 97.8  | 50.2 | 63.8 | hypothetical protein CARUB_v10021918mg       | gbpln | Capsella rubella     | AT1G61540.1   Symbols: Galactose oxidase/kelch repeat superfamily protein   chr1:22702498-22703706 FORWARD LENGTH=402                            | 412  | 402  | 2.00E-93  | 97.6  | 50.0 | 64.3 |
| Rsa1.0_00019.1.g1352.t1 | #                                                                                                                                                                                                                                                                                                                                                                                                                                                                                                                                                                                                                                                                                                                      | #    | #    | #         | #     | #    | #    | -                                            | ----  | ----                 | #                                                                                                                                                | #    | #    | #         | #     | #    | #    |
| Rsa1.0_00019.1.g1353.t1 | ref[NP_179734.1] coatomer subunit alpha-2 [Arabidopsis thaliana] gi 75337326 sp Q9SJT9.1 COPA2_ARAT H RecName: Full=Coatomer subunit alpha-2; AltName: Full=Alpha-coat protein 2; Short=Alpha-COP 2 gi 4567286 gb AAD23699.1  coatomer alpha subunit [Arabidopsis thaliana] gi 110737300 dbj BAF00596.1  coatomer alpha subunit [Arabidopsis thaliana] gi 330252079 gb AECO7173.1  coatomer subunit alpha-2 [Arabidopsis thaliana]                                                                                                                                                                                                                                                                                     | 1136 | 1218 | 0         | 107.2 | 79.2 | 86.4 | coatomer subunit alpha-2                     | gbpln | Arabidopsis thaliana | AT2G21390.1   Symbols: Coatomer, alpha subunit   chr2:9152428-9156577 FORWARD LENGTH=1218                                                        | 1136 | 1218 | 0         | 107.2 | 79.2 | 86.4 |
| Rsa1.0_00019.1.g1354.t1 | gb[EOA16490.1] hypothetical protein CARUB_v10004648mg [Capsella rubella]                                                                                                                                                                                                                                                                                                                                                                                                                                                                                                                                                                                                                                               | 500  | 497  | 0         | 99.4  | 85.6 | 90.4 | hypothetical protein CARUB_v10004648mg       | gbpln | Capsella rubella     | AT4G39620.1   Symbols: EMB2453, ATPPR5   Tetratricopeptide repeat (TPR)-like superfamily protein   chr4:18395294-18397578 FORWARD LENGTH=563     | 500  | 563  | 0         | 112.6 | 83.8 | 88.8 |
| Rsa1.0_00019.1.g1355.t1 | gb[ACJ65004.1] myo-inositol 1-phosphate synthase type 2 [Brassica napus]                                                                                                                                                                                                                                                                                                                                                                                                                                                                                                                                                                                                                                               | 510  | 510  | 0         | 100.0 | 98.8 | 99.6 | myo-inositol 1-phosphate synthase type 2     | gbpln | Brassica napus       | AT4G39800.1   Symbols: MI-1-P SYNTHASE, MIPS1, ATMIPS1, ATIPS1   myo-inositol-1-phosphate synthase 1   chr4:18469659-18471893 REVERSE LENGTH=511 | 510  | 511  | 0         | 100.2 | 95.1 | 98.2 |
| Rsa1.0_00019.1.g1356.t1 | #                                                                                                                                                                                                                                                                                                                                                                                                                                                                                                                                                                                                                                                                                                                      | #    | #    | #         | #     | #    | #    | -                                            | ----  | ----                 | #                                                                                                                                                | #    | #    | #         | #     | #    | #    |

|                         |                                                                                                                                                                                                                                                                                                                                                                                                                                                                                                                                                                                                                                                                                                                                                                                                                                                                                                                                                                                                                                     |      |      |           |       |      |      |                                             |       |                      |                                                                                                                                                                                                                                                                                                                                                                                                                                                                                    |      |      |           |       |      |      |
|-------------------------|-------------------------------------------------------------------------------------------------------------------------------------------------------------------------------------------------------------------------------------------------------------------------------------------------------------------------------------------------------------------------------------------------------------------------------------------------------------------------------------------------------------------------------------------------------------------------------------------------------------------------------------------------------------------------------------------------------------------------------------------------------------------------------------------------------------------------------------------------------------------------------------------------------------------------------------------------------------------------------------------------------------------------------------|------|------|-----------|-------|------|------|---------------------------------------------|-------|----------------------|------------------------------------------------------------------------------------------------------------------------------------------------------------------------------------------------------------------------------------------------------------------------------------------------------------------------------------------------------------------------------------------------------------------------------------------------------------------------------------|------|------|-----------|-------|------|------|
| Rsa1.0_00019.1.g1357.t1 | ref[XP_002866887.1] hypothetical protein ARALYDRAFT_490769 [Arabidopsis lyrata subsp. lyrata] gi 297312723 gb EFH43146.1  hypothetical protein ARALYDRAFT_490769 [Arabidopsis lyrata subsp. lyrata]                                                                                                                                                                                                                                                                                                                                                                                                                                                                                                                                                                                                                                                                                                                                                                                                                                 | 446  | 449  | 1.00E-166 | 100.7 | 83.2 | 88.3 | hypothetical protein ARALYDRAFT_490769      | gbpln | Arabidopsis lyrata   | AT4G39840.1   Symbols:   unknown protein; FUNCTIONS IN: molecular_function unknown; INVOLVED IN: biological_process unknown; LOCATED IN: endomembrane system; EXPRESSED DURING: 23 plant structures; EXPRESSED DURING: 13 growth stages; Has 20719 Blast hits to 6096 proteins in 607 species: Archae - 22; Bacteria - 3243; Metazoa - 4364; Fungi - 2270; Plants - 237; Viruses - 128; Other Eukaryotes - 10455 (source: NCBI BLINK).   chr4:18485268-18486623 FORWARD LENGTH=451 | 446  | 451  | 1.00E-156 | 101.1 | 83.4 | 89.2 |
| Rsa1.0_00019.1.g1358.t1 | ref[XP_002866889.1] hypothetical protein ARALYDRAFT_912474 [Arabidopsis lyrata subsp. lyrata] gi 297312725 gb EFH43148.1  hypothetical protein ARALYDRAFT_912474 [Arabidopsis lyrata subsp. lyrata]                                                                                                                                                                                                                                                                                                                                                                                                                                                                                                                                                                                                                                                                                                                                                                                                                                 | 621  | 297  | 1.00E-152 | 47.8  | 43.6 | 45.4 | hypothetical protein ARALYDRAFT_912474      | gbpln | Arabidopsis lyrata   | AT4G39860.1   Symbols:   unknown protein; BEST Arabidopsis thaliana protein match is: unknown protein (TAIR:AT2G22270.1); Has 152 Blast hits to 146 proteins in 19 species: Archae - 0; Bacteria - 0; Metazoa - 0; Fungi - 2; Plants - 146; Viruses - 0; Other Eukaryotes - 4 (source: NCBI BLINK).   chr4:18499909-18501472 FORWARD LENGTH=299                                                                                                                                    | 621  | 299  | 1.00E-150 | 48.1  | 43.5 | 45.4 |
| Rsa1.0_00019.1.g1359.t1 | gb AAM63197.1  unknown [Arabidopsis thaliana]                                                                                                                                                                                                                                                                                                                                                                                                                                                                                                                                                                                                                                                                                                                                                                                                                                                                                                                                                                                       | 180  | 178  | 2.00E-81  | 98.9  | 87.2 | 92.8 | unknown                                     | gbpln | Arabidopsis thaliana | AT4G39880.1   Symbols:   Ribosomal protein L23/L15e family protein   chr4:18504601-18505137 FORWARD LENGTH=178                                                                                                                                                                                                                                                                                                                                                                     | 180  | 178  | 2.00E-76  | 98.9  | 85.0 | 90.6 |
| Rsa1.0_00019.1.g1360.t1 | ref[XP_002868935.1] hypothetical protein ARALYDRAFT_912479 [Arabidopsis lyrata subsp. lyrata] gi 297314771 gb EFH45194.1  hypothetical protein ARALYDRAFT_912479 [Arabidopsis lyrata subsp. lyrata] ref[NP_568074.1] ubiquitin carboxyl-terminal hydrolase 3 [Arabidopsis thaliana] gi 62901126 sp O24454.1 UBP3_ARATH RecName: Full=Ubiquitin carboxyl-terminal hydrolase 3; AltName: Full=Deubiquitinating enzyme 3; Short=AtUBP3; AltName: Full=Ubiquitin thioesterase 3; AltName: Full=Ubiquitin-specific-processing protease 3 gi 2347098 gb AAB67966.1  ubiquitin-specific protease [Arabidopsis thaliana] gi 4490742 emb CAB38904.1  ubiquitin-specific protease (AtUBP3) [Arabidopsis thaliana] gi 7271046 emb CAB80654.1  ubiquitin-specific protease (AtUBP3) [Arabidopsis thaliana] gi 16604539 gb AAL24275.1  AT4g39910/T5J17.80 [Arabidopsis thaliana] gi 18958042 gb AAL79594.1  AT4g39910/T5J17.80 [Arabidopsis thaliana] gi 332661736 gb AEE87136.1  ubiquitin carboxyl-terminal hydrolase 3 [Arabidopsis thaliana] | 231  | 244  | 2.00E-90  | 105.6 | 78.4 | 87.4 | hypothetical protein ARALYDRAFT_912479      | gbpln | Arabidopsis lyrata   | AT4G39900.1   Symbols:   unknown protein; Has 30201 Blast hits to 17322 proteins in 780 species: Archae - 12; Bacteria - 1396; Metazoa - 17338; Fungi - 3422; Plants - 5037; Viruses - 0; Other Eukaryotes - 2996 (source: NCBI BLINK).   chr4:18508569-18510289 REVERSE LENGTH=245                                                                                                                                                                                                | 231  | 245  | 9.00E-92  | 106.1 | 77.1 | 84.4 |
| Rsa1.0_00019.1.g1361.t1 | ref[NP_568074.1] ubiquitin carboxyl-terminal hydrolase 3 [Arabidopsis thaliana] gi 62901126 sp O24454.1 UBP3_ARATH RecName: Full=Ubiquitin carboxyl-terminal hydrolase 3; AltName: Full=Deubiquitinating enzyme 3; Short=AtUBP3; AltName: Full=Ubiquitin thioesterase 3; AltName: Full=Ubiquitin-specific-processing protease 3 gi 2347098 gb AAB67966.1  ubiquitin-specific protease [Arabidopsis thaliana] gi 4490742 emb CAB38904.1  ubiquitin-specific protease (AtUBP3) [Arabidopsis thaliana] gi 7271046 emb CAB80654.1  ubiquitin-specific protease (AtUBP3) [Arabidopsis thaliana] gi 16604539 gb AAL24275.1  AT4g39910/T5J17.80 [Arabidopsis thaliana] gi 18958042 gb AAL79594.1  AT4g39910/T5J17.80 [Arabidopsis thaliana] gi 332661736 gb AEE87136.1  ubiquitin carboxyl-terminal hydrolase 3 [Arabidopsis thaliana]                                                                                                                                                                                                     | 370  | 371  | 0         | 100.3 | 95.7 | 97.8 | ubiquitin carboxyl-terminal hydrolase 3     | gbpln | Arabidopsis thaliana | AT4G39910.1   Symbols: ATUBP3, UBP3   ubiquitin-specific protease 3   chr4:18511858-18514139 REVERSE LENGTH=371                                                                                                                                                                                                                                                                                                                                                                    | 370  | 371  | 0         | 100.3 | 95.7 | 97.8 |
| Rsa1.0_00019.1.g1362.t1 | ref[XP_002866895.1] aps-kinase 2 [Arabidopsis lyrata subsp. lyrata] gi 297312731 gb EFH43154.1  aps-kinase 2 [Arabidopsis lyrata subsp. lyrata]                                                                                                                                                                                                                                                                                                                                                                                                                                                                                                                                                                                                                                                                                                                                                                                                                                                                                     | 293  | 292  | 1.00E-147 | 99.7  | 87.0 | 92.2 | aps-kinase 2                                | gbpln | Arabidopsis lyrata   | AT4G39940.1   Symbols: AKN2, APK2   APS-kinase 2   chr4:18519787-18521276 FORWARD LENGTH=293                                                                                                                                                                                                                                                                                                                                                                                       | 293  | 293  | 1.00E-148 | 100.0 | 87.7 | 92.8 |
| Rsa1.0_00019.1.g1363.t1 | gb AAN76810.1 AF453287.1 cytochrome P450 [Brassica napus]                                                                                                                                                                                                                                                                                                                                                                                                                                                                                                                                                                                                                                                                                                                                                                                                                                                                                                                                                                           | 540  | 540  | 0         | 100.0 | 98.0 | 98.7 | cytochrome P450                             | gbpln | Brassica napus       | AT4G39950.1   Symbols: CYP79B2   cytochrome P450, family 79, subfamily B, polypeptide 2   chr4:18525311-18527284 FORWARD LENGTH=541                                                                                                                                                                                                                                                                                                                                                | 540  | 541  | 0         | 100.2 | 93.5 | 97.4 |
| Rsa1.0_00019.1.g1364.t1 | ref[NP_680777.2] pentatricopeptide repeat-containing protein [Arabidopsis thaliana] gi 223635624 sp Q3E9N1.2 PP359_ARATH RecName: Full=Pentatricopeptide repeat-containing protein At4g39952, mitochondrial; Flags: Precursor gi 332661744 gb AEE87144.1  pentatricopeptide repeat-containing protein [Arabidopsis thaliana]                                                                                                                                                                                                                                                                                                                                                                                                                                                                                                                                                                                                                                                                                                        | 781  | 775  | 0         | 99.2  | 82.1 | 89.4 | pentatricopeptide repeat-containing protein | gbpln | Arabidopsis thaliana | AT4G39952.1   Symbols:   Pentatricopeptide repeat (PPR) superfamily protein   chr4:18527690-18530007 FORWARD LENGTH=775                                                                                                                                                                                                                                                                                                                                                            | 781  | 775  | 0         | 99.2  | 82.1 | 89.4 |
| Rsa1.0_00019.1.g1365.t1 | gb ACP30598.1  disease resistance protein [Brassica rapa subsp. pekinensis]                                                                                                                                                                                                                                                                                                                                                                                                                                                                                                                                                                                                                                                                                                                                                                                                                                                                                                                                                         | 1459 | 2301 | 0         | 157.7 | 82.5 | 89.1 | disease resistance protein                  | gbpln | Brassica rapa        | AT4G23160.1   Symbols: CRK8   cysteine-rich RLK (RECEPTOR-like protein kinase) 8   chr4:12129485-12134086 FORWARD LENGTH=1262                                                                                                                                                                                                                                                                                                                                                      | 1459 | 1262 | 1.00E-108 | 86.5  | 13.9 | 21.2 |

|                         |                                                                                                                                                                                                                               |     |     |           |       |      |      |                                                                  |             |                      |                                                                                                                                                                                                                                                                                                                                                                                                                                                                                                                                                          |     |     |           |       |      |      |
|-------------------------|-------------------------------------------------------------------------------------------------------------------------------------------------------------------------------------------------------------------------------|-----|-----|-----------|-------|------|------|------------------------------------------------------------------|-------------|----------------------|----------------------------------------------------------------------------------------------------------------------------------------------------------------------------------------------------------------------------------------------------------------------------------------------------------------------------------------------------------------------------------------------------------------------------------------------------------------------------------------------------------------------------------------------------------|-----|-----|-----------|-------|------|------|
| Rsa1.0_00019.1.g1366.t1 | refXP_002866900.1   DNAJ heat shock family protein [Arabidopsis lyrata subsp. lyrata] gi 297312736 gb EFH43159.1   DNAJ heat shock family protein [Arabidopsis lyrata subsp. lyrata]                                          | 450 | 447 | 0         | 99.3  | 93.1 | 95.3 | DNAJ heat shock family protein                                   | gbpln       | Arabidopsis lyrata   | AT4G39960.1   Symbols:   Molecular chaperone Hsp40/DnaJ family protein   chr4:18534194-18536320 FORWARD LENGTH=447                                                                                                                                                                                                                                                                                                                                                                                                                                       | 450 | 447 | 0         | 99.3  | 92.9 | 95.3 |
| Rsa1.0_00019.1.g1367.t1 | refXP_002866901.1   3-deoxy-D-arabino-heptulosonate 7-phosphate synthase 1 [Arabidopsis lyrata subsp. lyrata]                                                                                                                 | 528 | 528 | 0         | 100.0 | 93.9 | 95.8 | 3-deoxy-D-arabino-heptulosonate 7-phosphate synthase 1           | gbpln       | Arabidopsis lyrata   | AT4G39980.1   Symbols: DHS1   3-deoxy-D-arabino-heptulosonate 7-phosphate synthase 1   chr4:18539654-18541832 FORWARD LENGTH=525                                                                                                                                                                                                                                                                                                                                                                                                                         | 528 | 525 | 0         | 99.4  | 93.6 | 95.3 |
| Rsa1.0_00019.1.g1368.t1 | gb EOA17314.1   hypothetical protein CARUB_v10005586mg, partial [Capsella rubella]                                                                                                                                            | 224 | 250 | 1.00E-114 | 111.6 | 88.4 | 93.8 | hypothetical protein CARUB_v10005586mg, partial                  | gbpln       | Capsella rubella     | AT4G39990.1   Symbols: ATRABA4B, ATRAB11G, ATGB3, RABA4B   RAB GTPase homolog A4B   chr4:18542722-18543779 FORWARD LENGTH=224                                                                                                                                                                                                                                                                                                                                                                                                                            | 224 | 224 | 1.00E-116 | 100.0 | 86.6 | 93.3 |
| Rsa1.0_00019.1.g1369.t1 | refXP_002865966.1   hypothetical protein ARALYDRAFT_357572 [Arabidopsis lyrata subsp. lyrata] gi 297311801 gb EFH42225.1   hypothetical protein ARALYDRAFT_357572 [Arabidopsis lyrata subsp. lyrata]                          | 429 | 455 | 1.00E-74  | 106.1 | 44.1 | 55.0 | hypothetical protein ARALYDRAFT_357572                           | gbpln       | Arabidopsis lyrata   | AT1G30790.1   Symbols:   F-box and associated interaction domains-containing protein   chr1:10932713-10933912 FORWARD LENGTH=399                                                                                                                                                                                                                                                                                                                                                                                                                         | 429 | 399 | 6.00E-62  | 93.0  | 34.5 | 45.0 |
| Rsa1.0_00019.1.g1370.t1 | refXP_002866878.1   hypothetical protein ARALYDRAFT_490751 [Arabidopsis lyrata subsp. lyrata] gi 297312714 gb EFH43137.1   hypothetical protein ARALYDRAFT_490751 [Arabidopsis lyrata subsp. lyrata]                          | 133 | 657 | 1.00E-12  | 494.0 | 45.9 | 64.7 | hypothetical protein ARALYDRAFT_490751                           | gbpln       | Arabidopsis lyrata   | AT4G39690.1   Symbols:   FUNCTIONS IN: molecular_function unknown; INVOLVED IN: biological_process unknown; LOCATED IN: mitochondrion; EXPRESSED IN: 26 plant structures; EXPRESSED DURING: 14 growth stages; CONTAINS InterPro DOMAIN/s: Mitochondrial inner membrane protein Mitofilin (InterPro:IPR019133); Has 30201 Blast hits to 17322 proteins in 780 species: Archae - 12; Bacteria - 1396; Metazoa - 17338; Fungi - 3422; Plants - 5037; Viruses - 0; Other Eukaryotes - 2996 (source: NCBI BLINK).   chr4:18417755-18421633 FORWARD LENGTH=650 | 133 | 650 | 3.00E-14  | 488.7 | 45.9 | 63.2 |
| Rsa1.0_00019.1.g1371.t1 | gb EOA37553.1   hypothetical protein CARUB_v10011820mg, partial [Capsella rubella]                                                                                                                                            | 380 | 374 | 1.00E-70  | 98.4  | 40.8 | 51.8 | hypothetical protein CARUB_v10011820mg, partial                  | gbpln       | Capsella rubella     | AT1G30790.1   Symbols:   F-box and associated interaction domains-containing protein   chr1:10932713-10933912 FORWARD LENGTH=399                                                                                                                                                                                                                                                                                                                                                                                                                         | 380 | 399 | 2.00E-64  | 105.0 | 39.2 | 51.6 |
| Rsa1.0_00019.1.g1372.t1 | refNP_195710.3   S-adenosyl-L-methionine-dependent methyltransferase-like protein [Arabidopsis thaliana] gi 332661751 gb AEE87151.1   S-adenosyl-L-methionine-dependent methyltransferase-like protein [Arabidopsis thaliana] | 747 | 783 | 0         | 104.8 | 81.4 | 88.9 | S-adenosyl-L-methionine-dependent methyltransferase-like protein | gbpln       | Arabidopsis thaliana | AT4G40000.1   Symbols:   S-adenosyl-L-methionine-dependent methyltransferases superfamily protein   chr4:18543989-18547443 REVERSE LENGTH=783                                                                                                                                                                                                                                                                                                                                                                                                            | 747 | 783 | 0         | 104.8 | 81.4 | 88.9 |
| Rsa1.0_00019.1.g1373.t1 | refXP_002868939.1   hypothetical protein ARALYDRAFT_353011 [Arabidopsis lyrata subsp. lyrata] gi 297314775 gb EFH45198.1   hypothetical protein ARALYDRAFT_353011 [Arabidopsis lyrata subsp. lyrata]                          | 350 | 350 | 1.00E-168 | 100.0 | 87.1 | 92.0 | hypothetical protein ARALYDRAFT_353011                           | gbpln       | Arabidopsis lyrata   | AT4G40010.1   Symbols: SNRK2-7, SNRK2.7, SRK2F   SNF1-related protein kinase 2.7   chr4:18548704-18551056 REVERSE LENGTH=350                                                                                                                                                                                                                                                                                                                                                                                                                             | 350 | 350 | 1.00E-165 | 100.0 | 88.0 | 91.4 |
| Rsa1.0_00019.1.g1374.t1 | refXP_002868940.1   hypothetical protein ARALYDRAFT_912494 [Arabidopsis lyrata subsp. lyrata] gi 297314776 gb EFH45199.1   hypothetical protein ARALYDRAFT_912494 [Arabidopsis lyrata subsp. lyrata]                          | 591 | 618 | 0         | 104.6 | 73.3 | 85.8 | hypothetical protein ARALYDRAFT_912494                           | gbpln       | Arabidopsis lyrata   | AT4G40020.1   Symbols:   Myosin heavy chain-related protein   chr4:18553453-18555300 REVERSE LENGTH=615                                                                                                                                                                                                                                                                                                                                                                                                                                                  | 591 | 615 | 0         | 104.1 | 71.9 | 84.9 |
| Rsa1.0_00019.1.g1375.t1 | gb AFW86017.1   histone H3 [Zea mays]                                                                                                                                                                                         | 149 | 227 | 7.00E-73  | 152.3 | 91.3 | 91.9 | histone H3                                                       | gbenv/gbpln | Zea mays             | AT4G40030.2   Symbols:   Histone superfamily protein   chr4:18555840-18556827 REVERSE LENGTH=164                                                                                                                                                                                                                                                                                                                                                                                                                                                         | 149 | 164 | 5.00E-75  | 110.1 | 91.3 | 92.6 |
| Rsa1.0_00019.1.g1376.t1 | gb EOA17741.1   hypothetical protein CARUB_v10006125mg [Capsella rubella]                                                                                                                                                     | 91  | 92  | 6.00E-37  | 101.1 | 81.3 | 85.7 | hypothetical protein CARUB_v10006125mg                           | gbpln       | Capsella rubella     | AT4G40042.1   Symbols:   Microsomal signal peptidase 12 kDa subunit (SPG12)   chr4:18559289-18559570 FORWARD LENGTH=93                                                                                                                                                                                                                                                                                                                                                                                                                                   | 91  | 93  | 3.00E-37  | 102.2 | 76.9 | 82.4 |

|                         |                                                                                                                                                                                                                                                                                                                                                                                                                                                                                                                                                                                                                                                                                                                                                                                             |     |     |          |       |      |      |                                        |       |                      |                                                                                                                                                                                                                                                                                     |     |     |          |       |      |      |
|-------------------------|---------------------------------------------------------------------------------------------------------------------------------------------------------------------------------------------------------------------------------------------------------------------------------------------------------------------------------------------------------------------------------------------------------------------------------------------------------------------------------------------------------------------------------------------------------------------------------------------------------------------------------------------------------------------------------------------------------------------------------------------------------------------------------------------|-----|-----|----------|-------|------|------|----------------------------------------|-------|----------------------|-------------------------------------------------------------------------------------------------------------------------------------------------------------------------------------------------------------------------------------------------------------------------------------|-----|-----|----------|-------|------|------|
| Rsa1.0_00019.1.g1377.t1 | refNP_568078.1  uncharacterized protein [Arabidopsis thaliana] gi 15450922 gb AAK96732.1  Unknown protein [Arabidopsis thaliana] gi 17978747 gb AAL47367.1  unknown protein [Arabidopsis thaliana] gi 21592335 gb AAM64286.1  unknown [Arabidopsis thaliana] gi 110742774 dbj BAE99292.1  hypothetical protein [Arabidopsis thaliana] gi 332661761 gb AEE87161.1  uncharacterized protein AT4G40045 [Arabidopsis thaliana]                                                                                                                                                                                                                                                                                                                                                                  | 141 | 140 | 2.00E-52 | 99.3  | 80.1 | 87.2 | uncharacterized protein                | gbpln | Arabidopsis thaliana | AT4G40045.1   Symbols:   unknown protein; Has 30201 Blast hits to 17322 proteins in 780 species: Archae - 12; Bacteria - 1396; Metazoa - 17338; Fungi - 3422; Plants - 5037; Viruses - 0; Other Eukaryotes - 2996 (source: NCBI BLINK).   chr4:18559926-18560348 REVERSE LENGTH=140 | 141 | 140 | 4.00E-55 | 99.3  | 80.1 | 87.2 |
| Rsa1.0_00019.1.g1378.t1 | refXP_002866906.1  hypothetical protein ARALYDRAFT_490794 [Arabidopsis lyrata subsp. lyrata] gi 297312742 gb EFH43165.1  hypothetical protein ARALYDRAFT_490794 [Arabidopsis lyrata subsp. lyrata]                                                                                                                                                                                                                                                                                                                                                                                                                                                                                                                                                                                          | 595 | 603 | 0        | 101.3 | 90.4 | 95.0 | hypothetical protein ARALYDRAFT_490794 | gbpln | Arabidopsis lyrata   | AT4G40050.1   Symbols:   Protein of unknown function (DUF3550/UPF0682)   chr4:18561206-18563727 REVERSE LENGTH=599                                                                                                                                                                  | 595 | 599 | 0        | 100.7 | 88.4 | 94.3 |
| Rsa1.0_00020.1.g1379.t1 | #                                                                                                                                                                                                                                                                                                                                                                                                                                                                                                                                                                                                                                                                                                                                                                                           | #   | #   | #        | #     | #    | -    | ----                                   | ----  | #                    | #                                                                                                                                                                                                                                                                                   | #   | #   | #        | #     | #    |      |
| Rsa1.0_00020.1.g1380.t1 | #                                                                                                                                                                                                                                                                                                                                                                                                                                                                                                                                                                                                                                                                                                                                                                                           | #   | #   | #        | #     | #    | -    | ----                                   | ----  | #                    | #                                                                                                                                                                                                                                                                                   | #   | #   | #        | #     | #    |      |
| Rsa1.0_00020.1.g1381.t1 | refNP_172777.1  actin-related protein 3 [Arabidopsis thaliana] gi 75313139 sp Q9SAF1.1 ARP3_ARATH RecName: Full=Actin-related protein 3; AltName: Full=Protein DISTORTED TRICHOMES 1 gi 4850401 gb AAD31071.1 AC007357.20 Strong similarity to gb U29610 Actin-like protein (Arp3) from Acanthamoeba castellanii and is a member of the PF 00022 Actin family [Arabidopsis thaliana] gi 21427461 gb AAM53243.1 AF507911.1 actin-related protein 3 [Arabidopsis thaliana] gi 20260500 gb AAM13148.1  similar to actin-like protein [Arabidopsis thaliana] gi 21489929 ppg DAA00033.1  TPA exp: actin-related protein 3; AtARP3 [Arabidopsis thaliana] gi 30387525 gb AAP31928.1  At1g13180 [Arabidopsis thaliana] gi 332190859 gb AEE28980.1  actin-related protein 3 [Arabidopsis thaliana] | 427 | 427 | 0        | 100.0 | 95.1 | 97.2 | actin-related protein 3                | gbpln | Arabidopsis thaliana | AT1G13180.1   Symbols: DIS1, ARP3, ATARP3   Actin-like ATPase superfamily protein   chr1:4495394-4498204 FORWARD LENGTH=427                                                                                                                                                         | 427 | 427 | 0        | 100.0 | 95.1 | 97.2 |
| Rsa1.0_00020.1.g1382.t1 | gb AAK31592.1  cytochrome P450 [Brassica rapa subsp. pekinensis]                                                                                                                                                                                                                                                                                                                                                                                                                                                                                                                                                                                                                                                                                                                            | 526 | 525 | 0        | 99.8  | 91.1 | 95.1 | cytochrome P450                        | gbpln | Brassica rapa        | AT1G13150.1   Symbols: CYP86C4   cytochrome P450, family 86, subfamily C, polypeptide 4   chr1:4481995-4483584 REVERSE LENGTH=529                                                                                                                                                   | 526 | 529 | 0        | 100.6 | 86.1 | 92.8 |
| Rsa1.0_00020.1.g1383.t1 | refNP_172767.1  cytochrome P450 71B2 [Arabidopsis thaliana] gi 38503391 sp O65788.2 C71B2_ARATH RecName: Full=Cytochrome P450 71B2 gi 4850391 gb AAD31061.1 AC007357_10 Identical to gb D78605 cytochrome P450 monooxygenase from Arabidopsis thaliana and is a member of the PF 00067 Cytochrome P450 family. ESTs gb Z18072. gb Z35218 and gb T43466 come from this gene [Arabidopsis thaliana] gi 28392854 gb AAO41864.1  putative cytochrome P450 monooxygenase [Arabidopsis thaliana] gi 332190846 gb AEE28967.1  cytochrome P450 71B2 [Arabidopsis thaliana]                                                                                                                                                                                                                          | 502 | 502 | 0        | 100.0 | 81.7 | 92.0 | cytochrome P450 71B2                   | gbpln | Arabidopsis thaliana | AT1G13080.1   Symbols: CYP71B2   cytochrome P450, family 71, subfamily B, polypeptide 2   chr1:4459212-4460807 FORWARD LENGTH=502                                                                                                                                                   | 502 | 502 | 0        | 100.0 | 81.7 | 92.0 |
| Rsa1.0_00020.1.g1384.t1 | gb EOA40203.1  hypothetical protein CARUB_v10008923mg [Capsella rubella]                                                                                                                                                                                                                                                                                                                                                                                                                                                                                                                                                                                                                                                                                                                    | 462 | 502 | 0        | 108.7 | 76.2 | 86.4 | hypothetical protein CARUB_v10008923mg | gbpln | Capsella rubella     | AT1G13080.1   Symbols: CYP71B2   cytochrome P450, family 71, subfamily B, polypeptide 2   chr1:4459212-4460807 FORWARD LENGTH=502                                                                                                                                                   | 462 | 502 | 0        | 108.7 | 75.5 | 86.1 |

|                         |                                                                                                                                                                                                                                                                                                                                                                                                                                                                                                                                                                                                                                                                                                                        |     |     |           |       |      |       |                                             |       |                      |                                                                                                                                                                                                                                                                                                                                                   |     |     |           |       |      |      |
|-------------------------|------------------------------------------------------------------------------------------------------------------------------------------------------------------------------------------------------------------------------------------------------------------------------------------------------------------------------------------------------------------------------------------------------------------------------------------------------------------------------------------------------------------------------------------------------------------------------------------------------------------------------------------------------------------------------------------------------------------------|-----|-----|-----------|-------|------|-------|---------------------------------------------|-------|----------------------|---------------------------------------------------------------------------------------------------------------------------------------------------------------------------------------------------------------------------------------------------------------------------------------------------------------------------------------------------|-----|-----|-----------|-------|------|------|
| Rsa1.0_00020.1.g1385.t1 | ref NP_172767.1  cytochrome P450 71B2 [Arabidopsis thaliana]<br>gi 38503391 sp O65788.2 C71B2_ARATH<br>RecName: Full=Cytochrome P450 71B2<br>gi 4850391 gb AAD31061.1 AC007357.10<br>Identical to gb D78605  cytochrome P450 monooxygenase from Arabidopsis thaliana and is a member of the PF 00067  Cytochrome P450 family. ESTs gb Z18072. gb Z35218 and gb T43466 come from this gene [Arabidopsis thaliana]<br>gi 28392854 gb AAO41864.1  putative cytochrome P450 monooxygenase [Arabidopsis thaliana]<br>gi 332190846 gb AEE28967.1  cytochrome P450 71B2 [Arabidopsis thaliana]                                                                                                                                | 476 | 502 | 0         | 105.5 | 77.5 | 88.7  | cytochrome P450 71B2                        | gbpln | Arabidopsis thaliana | AT1G13080.1   Symbols: CYP71B2   cytochrome P450, family 71, subfamily B, polypeptide 2   chr1:4459212-4460807 FORWARD LENGTH=502                                                                                                                                                                                                                 | 476 | 502 | 0         | 105.5 | 77.5 | 88.7 |
| Rsa1.0_00020.1.g1386.t1 | ref NP_189265.1  proteasome subunit beta type-5-B [Arabidopsis thaliana]<br>gi 75273433 sp Q9LIP2.1 PS5B5_ARATH<br>RecName: Full=Proteasome subunit beta type-5-B; AltName: Full=20S proteasome beta subunit E-2; AltName: Full=Proteasome epsilon-2 chain; Flags: Precursor<br>gi 16612308 gb AAL27514.1 AF439846.1<br>AT3g26340/F20C19.6 [Arabidopsis thaliana]<br>gi 9294292 dbj BAB02194.1  proteasome epsilon chain precursor [Arabidopsis thaliana]<br>gi 21553804 gb AAM62897.1  26S proteasome beta subunit, putative [Arabidopsis thaliana]<br>gi 21928101 gb AAM78079.1 <br>AT3g26340/F20C19.6 [Arabidopsis thaliana]<br>gi 332643626 gb AEE77147.1  proteasome subunit beta type-5-B [Arabidopsis thaliana] | 274 | 273 | 1.00E-149 | 99.6  | 93.8 | 96.0  | proteasome subunit beta type-5-B            | gbpln | Arabidopsis thaliana | AT3G26340.1   Symbols:   N-terminal nucleophile aminohydrolases (Ntn hydrolases) superfamily protein   chr3:9650600-9652572 REVERSE LENGTH=273                                                                                                                                                                                                    | 274 | 273 | 1.00E-152 | 99.6  | 93.8 | 96.0 |
| Rsa1.0_00020.1.g1387.t1 | gb EOA36472.1  hypothetical protein CARUB_v10011087mg [Capsella rubella]                                                                                                                                                                                                                                                                                                                                                                                                                                                                                                                                                                                                                                               | 320 | 317 | 1.00E-137 | 99.1  | 81.3 | 87.5  | hypothetical protein CARUB_v10011087mg      | gbpln | Capsella rubella     | AT1G13050.1   Symbols:   unknown protein; BEST Arabidopsis thaliana protein match is: unknown protein (TAIR:AT3G26350.1); Has 538 Blast hits to 510 proteins in 88 species: Archae - 0; Bacteria - 23; Metazoa - 81; Fungi - 36; Plants - 361; Viruses - 8; Other Eukaryotes - 29 (source: NCBI BLink).   chr1:4450568-4451521 FORWARD LENGTH=317 | 320 | 317 | 1.00E-134 | 99.1  | 82.2 | 88.1 |
| Rsa1.0_00020.1.g1388.t1 | ref XP_002889980.1  pentatricopeptide repeat-containing protein [Arabidopsis lyrata subsp. lyrata]<br>gi 297335822 gb EFH66239.1  pentatricopeptide repeat-containing protein [Arabidopsis lyrata subsp. lyrata]                                                                                                                                                                                                                                                                                                                                                                                                                                                                                                       | 520 | 517 | 0         | 99.4  | 88.3 | 94.4  | pentatricopeptide repeat-containing protein | gbpln | Arabidopsis lyrata   | AT1G13040.1   Symbols:   Pentatricopeptide repeat (PPR-like) superfamily protein   chr1:4447647-4448200 FORWARD LENGTH=517                                                                                                                                                                                                                        | 520 | 517 | 0         | 99.4  | 87.7 | 94.2 |
| Rsa1.0_00020.1.g1389.t1 | gb EOA39000.1  hypothetical protein CARUB_v10011529mg [Capsella rubella]                                                                                                                                                                                                                                                                                                                                                                                                                                                                                                                                                                                                                                               | 519 | 519 | 0         | 100.0 | 91.1 | 96.0  | hypothetical protein CARUB_v10011529mg      | gbpln | Capsella rubella     | AT1G12950.1   Symbols: RSH2   root hair specific 2   chr1:4419849-4422462 FORWARD LENGTH=522                                                                                                                                                                                                                                                      | 519 | 522 | 0         | 100.6 | 88.8 | 94.6 |
| Rsa1.0_00020.1.g1390.t1 | # # # # # # # # # #                                                                                                                                                                                                                                                                                                                                                                                                                                                                                                                                                                                                                                                                                                    | #   | #   | #         | #     | #    | #     | -                                           | ----  | ----                 | # # # # # # # #                                                                                                                                                                                                                                                                                                                                   | #   | #   | #         | #     | #    | #    |
| Rsa1.0_00020.1.g1391.t1 | gb EOA40211.1  hypothetical protein CARUB_v10008932mg [Capsella rubella]                                                                                                                                                                                                                                                                                                                                                                                                                                                                                                                                                                                                                                               | 503 | 500 | 0         | 99.4  | 92.2 | 96.2  | hypothetical protein CARUB_v10008932mg      | gbpln | Capsella rubella     | AT1G12940.1   Symbols: ATNRT2.5, NRT2.5   nitrate transporter2.5   chr1:4416405-4418337 FORWARD LENGTH=502                                                                                                                                                                                                                                        | 503 | 502 | 0         | 99.8  | 90.5 | 95.8 |
| Rsa1.0_00020.1.g1392.t1 | gb ACZ71034.1  eukaryotic release factor 1-2 [Brassica oleracea var. botrytis]                                                                                                                                                                                                                                                                                                                                                                                                                                                                                                                                                                                                                                         | 435 | 435 | 0         | 100.0 | 99.8 | 100.0 | eukaryotic release factor 1-2               | gbpln | Brassica oleracea    | AT1G12920.1   Symbols: ERF1-2   eukaryotic release factor 1-2   chr1:4396555-4397859 REVERSE LENGTH=434                                                                                                                                                                                                                                           | 435 | 434 | 0         | 99.8  | 97.0 | 98.6 |
| Rsa1.0_00020.1.g1393.t1 | gb EOA40353.1  hypothetical protein CARUB_v10009081mg [Capsella rubella]                                                                                                                                                                                                                                                                                                                                                                                                                                                                                                                                                                                                                                               | 446 | 461 | 1.00E-175 | 103.4 | 78.9 | 85.0  | hypothetical protein CARUB_v10009081mg      | gbpln | Capsella rubella     | AT1G12860.1   Symbols: SCRM2, ICE2   basic helix-loop-helix (bHLH) DNA-binding superfamily protein   chr1:4384758-4386392 FORWARD LENGTH=450                                                                                                                                                                                                      | 446 | 450 | 1.00E-168 | 100.9 | 78.3 | 84.5 |
| Rsa1.0_00020.1.g1394.t1 | ref NP_563918.1  phosphoglycerate mutase-like protein [Arabidopsis thaliana]<br>gi 14517376 gb AAK62579.1 <br>At1g12850/F13K23.8 [Arabidopsis thaliana]<br>gi 21360535 gb AAM47383.1 <br>At1g12850/F13K23.8 [Arabidopsis thaliana]<br>gi 332190817 gb AEE28938.1  phosphoglycerate mutase-like protein [Arabidopsis thaliana]                                                                                                                                                                                                                                                                                                                                                                                          | 403 | 405 | 1.00E-173 | 100.5 | 85.6 | 89.3  | phosphoglycerate mutase-like protein        | gbpln | Arabidopsis thaliana | AT1G12850.1   Symbols:   Phosphoglycerate mutase family protein   chr1:4380022-4381577 REVERSE LENGTH=405                                                                                                                                                                                                                                         | 403 | 405 | 1.00E-175 | 100.5 | 85.6 | 89.3 |

|                         |                                                                                                                                                                                                                                                                                                                                                                                                                                                                                                                                                                                                                                                                                                                                                                                                                                                                                                                                                                                                                                                                          |      |      |          |       |      |      |                                                         |       |                      |                                                                                                                                                                                                                                                                                                                                                                                                                                                                                          |      |     |          |       |      |      |
|-------------------------|--------------------------------------------------------------------------------------------------------------------------------------------------------------------------------------------------------------------------------------------------------------------------------------------------------------------------------------------------------------------------------------------------------------------------------------------------------------------------------------------------------------------------------------------------------------------------------------------------------------------------------------------------------------------------------------------------------------------------------------------------------------------------------------------------------------------------------------------------------------------------------------------------------------------------------------------------------------------------------------------------------------------------------------------------------------------------|------|------|----------|-------|------|------|---------------------------------------------------------|-------|----------------------|------------------------------------------------------------------------------------------------------------------------------------------------------------------------------------------------------------------------------------------------------------------------------------------------------------------------------------------------------------------------------------------------------------------------------------------------------------------------------------------|------|-----|----------|-------|------|------|
| Rsa1.0_00020.1.g1395.t1 | ref XP_002892717.1  hypothetical protein ARALYDRAFT_334590 [Arabidopsis lyrata subsp. lyrata] gi 297338559 gb EFH68976.1  hypothetical protein ARALYDRAFT_334590 [Arabidopsis lyrata subsp. lyrata]                                                                                                                                                                                                                                                                                                                                                                                                                                                                                                                                                                                                                                                                                                                                                                                                                                                                      | 108  | 563  | 4.00E-35 | 521.3 | 74.1 | 79.6 | hypothetical protein ARALYDRAFT_334590                  | gbpln | Arabidopsis lyrata   | AT1G12845.1   Symbols:   unknown protein; FUNCTIONS IN: molecular_function unknown; INVOLVED IN: biological_process unknown; LOCATED IN: endomembrane system; EXPRESSED IN: 22 plant structures; EXPRESSED DURING: 13 growth stages; Has 8 Blast hits to 8 proteins in 4 species: Archae - 0; Bacteria - 0; Metazoa - 0; Fungi - 0; Plants - 8; Viruses - 0; Other Eukaryotes - 0 (source: NCBI BLink).   chr1:4379023-4379382 REVERSE LENGTH=119                                        | 108  | 119 | 1.00E-35 | 110.2 | 72.2 | 77.8 |
| Rsa1.0_00020.1.g1396.t1 | ref NP_563916.1  V-type proton ATPase subunit C [Arabidopsis thaliana] gi 12585488 sp Q9SDS7.1 VATC_ARATH RecName: Full=V-type proton ATPase subunit C; Short=V-ATPase subunit C; AltName: Full=Vacuolar H(+)-ATPase subunit C; AltName: Full=Vacuolar proton pump subunit C gi 6636332 gb AAF20146.1 AF208261.1 vacuolar ATP synthase subunit C [Arabidopsis thaliana] gi 8698731 gb AAF78489.1 AC012187.9 Identical to vacuolar ATP synthase subunit C (DET3) from Arabidopsis thaliana gb AF208261. ESTs gb AA067533, gb Z37481, gb AA721838, gb Z37180, gb T21206 come from this gene [Arabidopsis thaliana] gi 12248023 gb AAG50103.1 AF334725.1 putative vacuolar ATP synthase subunit C [Arabidopsis thaliana] gi 16649005 gb AAL24354.1  Identical to vacuolar ATP synthase subunit C (DET3) [Arabidopsis thaliana] gi 20259972 gb AAM13333.1  vacuolar ATP synthase subunit C [Arabidopsis thaliana] gi 225897918 dbj BAH30291.1  hypothetical protein [Arabidopsis thaliana] gi 332190815 gb AEE28936.1  V-type proton ATPase subunit C [Arabidopsis thaliana] | 376  | 375  | 0        | 99.7  | 94.9 | 97.6 | V-type proton ATPase subunit C                          | gbpln | Arabidopsis thaliana | AT1G12840.1   Symbols: DET3, ATVHA-C   vacuolar ATP synthase subunit C (VATC) / V-ATPase C subunit / vacuolar proton pump C subunit (DET3)   chr1:4375584-4378220 FORWARD LENGTH=375                                                                                                                                                                                                                                                                                                     | 376  | 375 | 0        | 99.7  | 94.9 | 97.6 |
| Rsa1.0_00020.1.g1397.t1 | ref XP_002892716.1  hypothetical protein ARALYDRAFT_471437 [Arabidopsis lyrata subsp. lyrata] gi 297338556 gb EFH68975.1  hypothetical protein ARALYDRAFT_471437 [Arabidopsis lyrata subsp. lyrata]                                                                                                                                                                                                                                                                                                                                                                                                                                                                                                                                                                                                                                                                                                                                                                                                                                                                      | 192  | 212  | 2.00E-38 | 110.4 | 64.1 | 77.6 | hypothetical protein ARALYDRAFT_471437                  | gbpln | Arabidopsis lyrata   | AT1G12830.1   Symbols:   unknown protein; FUNCTIONS IN: molecular_function unknown; INVOLVED IN: biological_process unknown; LOCATED IN: cellular_component unknown; EXPRESSED IN: 23 plant structures; EXPRESSED DURING: 13 growth stages; Has 39778 Blast hits to 22088 proteins in 1060 species: Archae - 152; Bacteria - 6161; Metazoa - 14109; Fungi - 6144; Plants - 2156; Viruses - 601; Other Eukaryotes - 10455 (source: NCBI BLink).   chr1:4374412-4375053 REVERSE LENGTH=213 | 192  | 213 | 5.00E-39 | 110.9 | 64.6 | 73.4 |
| Rsa1.0_00020.1.g1398.t1 | dbj BAB09379.1  non-LTR retroelement reverse transcriptase-like protein [Arabidopsis thaliana]                                                                                                                                                                                                                                                                                                                                                                                                                                                                                                                                                                                                                                                                                                                                                                                                                                                                                                                                                                           | 1594 | 1223 | 0        | 76.7  | 34.3 | 47.0 | non-LTR retroelement reverse transcriptase-like protein | gbpln | Arabidopsis thaliana | AT3G24255.1   Symbols:   RNA-directed DNA polymerase (reverse transcriptase)-related family protein   chr3:8789471-8793208 FORWARD LENGTH=746                                                                                                                                                                                                                                                                                                                                            | 1594 | 746 | 1.00E-84 | 46.8  | 10.6 | 14.8 |
| Rsa1.0_00020.1.g1399.t1 | gb ABQ50554.1  hypothetical protein [Brassica rapa]                                                                                                                                                                                                                                                                                                                                                                                                                                                                                                                                                                                                                                                                                                                                                                                                                                                                                                                                                                                                                      | 595  | 590  | 0        | 99.2  | 93.4 | 95.5 | hypothetical protein                                    | gbpln | Brassica rapa        | AT1G12820.1   Symbols: AFB3   auxin signaling F-box 3   chr1:4368879-4370780 REVERSE LENGTH=577                                                                                                                                                                                                                                                                                                                                                                                          | 595  | 577 | 0        | 97.0  | 86.1 | 91.9 |
| Rsa1.0_00020.1.g1400.t1 | #                                                                                                                                                                                                                                                                                                                                                                                                                                                                                                                                                                                                                                                                                                                                                                                                                                                                                                                                                                                                                                                                        | #    | #    | #        | #     | #    | -    | ----                                                    | ----  | #                    | #                                                                                                                                                                                                                                                                                                                                                                                                                                                                                        | #    | #   | #        | #     | #    |      |
| Rsa1.0_00020.1.g1401.t1 | #                                                                                                                                                                                                                                                                                                                                                                                                                                                                                                                                                                                                                                                                                                                                                                                                                                                                                                                                                                                                                                                                        | #    | #    | #        | #     | #    | -    | ----                                                    | ----  | #                    | #                                                                                                                                                                                                                                                                                                                                                                                                                                                                                        | #    | #   | #        | #     | #    |      |
| Rsa1.0_00020.1.g1402.t1 | dbj BAH20409.1  AT1G12800 [Arabidopsis thaliana]                                                                                                                                                                                                                                                                                                                                                                                                                                                                                                                                                                                                                                                                                                                                                                                                                                                                                                                                                                                                                         | 80   | 525  | 3.00E-25 | 656.3 | 76.3 | 80.0 | AT1G12800                                               | gbpln | Arabidopsis thaliana | AT1G12800.1   Symbols:   Nucleic acid-binding, OB-fold-like protein   chr1:4361778-4365189 REVERSE LENGTH=767                                                                                                                                                                                                                                                                                                                                                                            | 80   | 767 | 6.00E-28 | 958.8 | 76.3 | 80.0 |
| Rsa1.0_00020.1.g1403.t1 | #                                                                                                                                                                                                                                                                                                                                                                                                                                                                                                                                                                                                                                                                                                                                                                                                                                                                                                                                                                                                                                                                        | #    | #    | #        | #     | #    | -    | ----                                                    | ----  | #                    | #                                                                                                                                                                                                                                                                                                                                                                                                                                                                                        | #    | #   | #        | #     | #    |      |
| Rsa1.0_00020.1.g1404.t1 | gb ABQ50560.1  hypothetical protein [Brassica rapa]                                                                                                                                                                                                                                                                                                                                                                                                                                                                                                                                                                                                                                                                                                                                                                                                                                                                                                                                                                                                                      | 73   | 74   | 5.00E-30 | 101.4 | 86.3 | 94.5 | hypothetical protein                                    | gbpln | Brassica rapa        | AT1G12805.1   Symbols:   nucleotide binding   chr1:4366728-4366955 FORWARD LENGTH=75                                                                                                                                                                                                                                                                                                                                                                                                     | 73   | 75  | 1.00E-23 | 102.7 | 68.5 | 83.6 |
| Rsa1.0_00020.1.g1405.t1 | ref XP_002892712.1  UDP-D-glucose/UDP-D-galactose 4-epimerase 1 [Arabidopsis lyrata subsp. lyrata] gi 297338554 gb EFH68971.1  UDP-D-glucose/UDP-D-galactose 4-epimerase 1 [Arabidopsis lyrata subsp. lyrata]                                                                                                                                                                                                                                                                                                                                                                                                                                                                                                                                                                                                                                                                                                                                                                                                                                                            | 351  | 351  | 0        | 100.0 | 94.9 | 96.9 | UDP-D-glucose/UDP-D-galactose 4-epimerase 1             | gbpln | Arabidopsis lyrata   | AT1G12780.1   Symbols: UGE1, ATUGE1   UDP-D-glucose/UDP-D-galactose 4-epimerase 1   chr1:4356124-4358120 REVERSE LENGTH=351                                                                                                                                                                                                                                                                                                                                                              | 351  | 351 | 0        | 100.0 | 94.3 | 96.3 |



|                         |                                                                                                                                                                                                                                                                                                                                                                                                                                                                                                                                                                    |      |     |           |       |      |      |                                                   |       |                      |                                                                                                                                                           |      |     |           |       |      |      |
|-------------------------|--------------------------------------------------------------------------------------------------------------------------------------------------------------------------------------------------------------------------------------------------------------------------------------------------------------------------------------------------------------------------------------------------------------------------------------------------------------------------------------------------------------------------------------------------------------------|------|-----|-----------|-------|------|------|---------------------------------------------------|-------|----------------------|-----------------------------------------------------------------------------------------------------------------------------------------------------------|------|-----|-----------|-------|------|------|
| Rsa1.0_00020.1.g1406.t1 | gb ABQ50546.1  hypothetical protein [Brassica rapa]                                                                                                                                                                                                                                                                                                                                                                                                                                                                                                                | 1163 | 650 | 0         | 55.9  | 37.2 | 45.8 | hypothetical protein                              | gbpln | Brassica rapa        | AT1G12770.1   Symbols: ISE1, EMB1586   P-loop containing nucleoside triphosphate hydrolases superfamily protein   chr1:4351888-4353543 FORWARD LENGTH=551 | 1163 | 551 | 0         | 47.4  | 39.1 | 40.8 |
| Rsa1.0_00020.1.g1407.t1 | gb EOA36065.1  hypothetical protein CARUB_v10008555mg [Capsella rubella]                                                                                                                                                                                                                                                                                                                                                                                                                                                                                           | 634  | 641 | 0         | 101.1 | 71.6 | 83.6 | hypothetical protein CARUB_v10008555mg            | gbpln | Capsella rubella     | AT1G12300.1   Symbols:   Tetratricopeptide repeat (TPR)-like superfamily protein   chr1:4184163-4186076 REVERSE LENGTH=637                                | 634  | 637 | 0         | 100.5 | 69.6 | 82.0 |
| Rsa1.0_00020.1.g1408.t1 | ref NP_172694.1  pentatricopeptide repeat-containing protein [Arabidopsis thaliana]<br>gi 122242333 sp QDQWKV3.1 PPR36_ARA TH RecName: Full=Pentatricopeptide repeat-containing protein At1g12300, mitochondrial; Flags: Precursor<br>gi 110741411 dbj BAF02254.1  hypothetical protein [Arabidopsis thaliana] gi 332190743 gb AEE28864.1  pentatricopeptide repeat-containing protein [Arabidopsis thaliana]                                                                                                                                                      | 566  | 637 | 0         | 112.5 | 67.3 | 82.5 | pentatricopeptide repeat-containing protein       | gbpln | Arabidopsis thaliana | AT1G12300.1   Symbols:   Tetratricopeptide repeat (TPR)-like superfamily protein   chr1:4184163-4186076 REVERSE LENGTH=637                                | 566  | 637 | 0         | 112.5 | 67.3 | 82.5 |
| Rsa1.0_00020.1.g1409.t1 | gb EOA37885.1  hypothetical protein CARUB_v10009353mg [Capsella rubella]                                                                                                                                                                                                                                                                                                                                                                                                                                                                                           | 402  | 397 | 1.00E-162 | 98.8  | 83.3 | 87.1 | hypothetical protein CARUB_v10009353mg            | gbpln | Capsella rubella     | AT1G12760.1   Symbols:   Zinc finger, C3HC4 type (RING finger) family protein   chr1:4348728-4350512 FORWARD LENGTH=408                                   | 402  | 408 | 1.00E-160 | 101.5 | 77.9 | 81.3 |
| Rsa1.0_00020.1.g1410.t1 | gb EOA40316.1  hypothetical protein CARUB_v10009041mg [Capsella rubella]                                                                                                                                                                                                                                                                                                                                                                                                                                                                                           | 467  | 470 | 0         | 100.6 | 89.9 | 94.6 | hypothetical protein CARUB_v10009041mg            | gbpln | Capsella rubella     | AT1G12680.1   Symbols: PEPKR2   phosphoenolpyruvate carboxylase-related kinase 2   chr1:4320123-4322269 REVERSE LENGTH=470                                | 467  | 470 | 0         | 100.6 | 87.8 | 92.9 |
| Rsa1.0_00020.1.g1411.t1 | ref XP_002889943.1  DNA binding protein [Arabidopsis lyrata subsp. lyrata] gi 297335785 gb EFH66202.1  DNA binding protein [Arabidopsis lyrata subsp. lyrata]                                                                                                                                                                                                                                                                                                                                                                                                      | 191  | 192 | 2.00E-67  | 100.5 | 77.5 | 86.4 | DNA binding protein                               | gbpln | Arabidopsis lyrata   | AT1G12630.1   Symbols:   Integrase-type DNA-binding superfamily protein   chr1:4298897-4299475 FORWARD LENGTH=192                                         | 191  | 192 | 8.00E-62  | 100.5 | 74.9 | 83.8 |
| Rsa1.0_00020.1.g1412.t1 | ref XP_002885504.1  pentatricopeptide repeat-containing protein [Arabidopsis lyrata subsp. lyrata] gi 297331344 gb EFH61763.1  pentatricopeptide repeat-containing protein [Arabidopsis lyrata subsp. lyrata]                                                                                                                                                                                                                                                                                                                                                      | 603  | 618 | 0         | 102.5 | 67.7 | 82.6 | pentatricopeptide repeat-containing protein       | gbpln | Arabidopsis lyrata   | AT1G12300.1   Symbols:   Tetratricopeptide repeat (TPR)-like superfamily protein   chr1:4184163-4186076 REVERSE LENGTH=637                                | 603  | 637 | 0         | 105.6 | 68.7 | 83.7 |
| Rsa1.0_00020.1.g1413.t1 | ref NP_563911.1  pentatricopeptide repeat-containing protein [Arabidopsis thaliana] gi 75167758 sp Q9ASZ8.1 PPR37_ARAT H RecName: Full=Pentatricopeptide repeat-containing protein At1g12620 gi 13605503 gb AAK32746.1 AF361578_1 At1g12820/T12C24.25 [Arabidopsis thaliana] gi 24111307 gb AAN46777.1  At1g12820/T12C24.25 [Arabidopsis thaliana] gi 332190781 gb AEE28902.1  pentatricopeptide repeat-containing protein [Arabidopsis thaliana]                                                                                                                  | 580  | 621 | 0         | 107.1 | 67.9 | 82.6 | pentatricopeptide repeat-containing protein       | gbpln | Arabidopsis thaliana | AT1G12620.1   Symbols:   Pentatricopeptide repeat (PPR) superfamily protein   chr1:4294883-4296748 REVERSE LENGTH=621                                     | 580  | 621 | 0         | 107.1 | 67.9 | 82.6 |
| Rsa1.0_00020.1.g1414.t1 | ref NP_172721.1  dehydration-responsive element-binding protein 1F [Arabidopsis thaliana] gi 47605747 sp Q9LN86.1 DRE1F_ARAT H RecName: Full=Dehydration-responsive element-binding protein 1F; Short=Protein DREB1F gi 9502389 gb AAF88096.1 AC025417_24 T12C24.14 [Arabidopsis thaliana] gi 48479384 gb AAT44959.1  putative AP2/EREBP transcription factor [Arabidopsis thaliana] gi 110736359 dbj BAF00148.1  hypothetical protein [Arabidopsis thaliana] gi 332190780 gb AEE28901.1  dehydration-responsive element-binding protein 1F [Arabidopsis thaliana] | 202  | 209 | 4.00E-84  | 103.5 | 82.2 | 87.6 | dehydration-responsive element-binding protein 1F | gbpln | Arabidopsis thaliana | AT1G12610.1   Symbols: DDF1   Integrase-type DNA-binding superfamily protein   chr1:4290205-4290834 REVERSE LENGTH=209                                    | 202  | 209 | 1.00E-86  | 103.5 | 82.2 | 87.6 |

|                         |                                                                                                                                                                                                                                                                                                                                                                                                                                                                                                                                                                                                                                                                                                                                                                                                                                                                 |      |     |           |       |      |      |                                                       |       |                      |                                                                                                                                 |      |     |           |       |      |      |
|-------------------------|-----------------------------------------------------------------------------------------------------------------------------------------------------------------------------------------------------------------------------------------------------------------------------------------------------------------------------------------------------------------------------------------------------------------------------------------------------------------------------------------------------------------------------------------------------------------------------------------------------------------------------------------------------------------------------------------------------------------------------------------------------------------------------------------------------------------------------------------------------------------|------|-----|-----------|-------|------|------|-------------------------------------------------------|-------|----------------------|---------------------------------------------------------------------------------------------------------------------------------|------|-----|-----------|-------|------|------|
| Rsa1.0_00020.1.g1415.t3 | refNP_172720.1  UDP-N-acetylglucosamine transporter-like protein [Arabidopsis thaliana]<br>gi 75173863 sp Q9LDX3.1 UTR4_ARATH<br>RecName: Full=UDP-galactose/UDP-glucose transporter 4; Short=AtUTR4<br>gi 8778639 gb AAF79647.1 AC025416.21<br>F5011.33 [Arabidopsis thaliana]<br>gi 9502390 gb AAF88097.1 AC025417.25<br>T12C24.13 [Arabidopsis thaliana]<br>gi 55978703 gb AAV68813.1 <br>hypothetical protein AT1G12600<br>[Arabidopsis thaliana]<br>gi 60547555 gb AAX23741.1 <br>hypothetical protein At1g12600<br>[Arabidopsis thaliana]<br>gi 332190779 gb AEE28900.1  UDP-galactose/UDP-glucose transporter 4<br>[Arabidopsis thaliana]<br>refXP_002889942.1  hypothetical protein ARALYDRAFT_471407<br>[Arabidopsis lyrata subsp. lyrata]<br>gi 297335784 gb EFH66201.1 <br>hypothetical protein ARALYDRAFT_471407 [Arabidopsis lyrata subsp. lyrata] | 536  | 349 | 1.00E-177 | 65.1  | 59.5 | 61.0 | UDP-N-acetylglucosamine transporter-like protein      | gbpln | Arabidopsis thaliana | AT1G12600.1   Symbols:   UDP-N-acetylglucosamine (UAA) transporter family   chr1:4286414-4288959 REVERSE LENGTH=349             | 536  | 349 | 1.00E-179 | 65.1  | 59.5 | 61.0 |
| Rsa1.0_00020.1.g1416.t1 | refXP_002889942.1  hypothetical protein ARALYDRAFT_471407<br>[Arabidopsis lyrata subsp. lyrata]<br>gi 297335784 gb EFH66201.1 <br>hypothetical protein ARALYDRAFT_471407 [Arabidopsis lyrata subsp. lyrata]                                                                                                                                                                                                                                                                                                                                                                                                                                                                                                                                                                                                                                                     | 533  | 522 | 0         | 97.9  | 86.7 | 91.6 | hypothetical protein ARALYDRAFT_471407                | gbpln | Arabidopsis lyrata   | AT1G12580.1   Symbols: PEPKR1   phosphoenolpyruvate carboxylase-related kinase 1   chr1:4283635-4285675 FORWARD LENGTH=522      | 533  | 522 | 0         | 97.9  | 86.1 | 91.7 |
| Rsa1.0_00020.1.g1417.t1 | gb AAF79648.1 AC025416.22 F5011.31<br>[Arabidopsis thaliana]                                                                                                                                                                                                                                                                                                                                                                                                                                                                                                                                                                                                                                                                                                                                                                                                    | 537  | 539 | 0         | 100.4 | 93.1 | 96.6 | F5011.31                                              | gbpln | Arabidopsis thaliana | AT1G12570.1   Symbols:   Glucose-methanol-choline (GMC) oxidoreductase family protein   chr1:4278192-4280753 REVERSE LENGTH=572 | 537  | 572 | 0         | 106.5 | 93.1 | 96.6 |
| Rsa1.0_00020.1.g1418.t1 | gb EOA36118.1  hypothetical protein CARUB_v10011828mg [Capsella rubella]                                                                                                                                                                                                                                                                                                                                                                                                                                                                                                                                                                                                                                                                                                                                                                                        | 263  | 263 | 1.00E-144 | 100.0 | 92.8 | 97.7 | hypothetical protein CARUB_v10011828mg                | gbpln | Capsella rubella     | AT1G12560.1   Symbols: ATEXPA7, EXP7, ATEXP7, ATHEXP ALPHA 1.26, EXPA7   expansin A7   chr1:4276557-4277693 FORWARD LENGTH=262  | 263  | 262 | 1.00E-140 | 99.6  | 90.5 | 94.7 |
| Rsa1.0_00020.1.g1419.t1 | refXP_002892693.1  Cu/Zn-superoxide dismutase copper chaperone precursor [Arabidopsis lyrata subsp. lyrata]<br>gi 297338535 gb EFH68952.1  Cu/Zn-superoxide dismutase copper chaperone precursor [Arabidopsis lyrata subsp. lyrata]                                                                                                                                                                                                                                                                                                                                                                                                                                                                                                                                                                                                                             | 316  | 318 | 1.00E-148 | 100.6 | 80.7 | 84.5 | Cu/Zn-superoxide dismutase copper chaperone precursor | gbpln | Arabidopsis lyrata   | AT1G12520.1   Symbols: ATCCS, CCS   copper chaperone for SOD1   chr1:4267277-4268900 REVERSE LENGTH=320                         | 316  | 320 | 1.00E-145 | 101.3 | 87.7 | 91.8 |
| Rsa1.0_00020.1.g1420.t1 | refNP_172712.1  Nucleotide-sugar transporter family protein [Arabidopsis thaliana]<br>gi 75173828 sp Q9LDH3.1 PT112_ARATH<br>RecName: Full=Probable sugar phosphate/phosphate translocator At1g12500<br>gi 8778643 gb AAF79651.1 AC025416.25<br>F5011.25 [Arabidopsis thaliana]<br>gi 9502394 gb AAF88101.1 AC025417.29<br>T12C24.5 [Arabidopsis thaliana]<br>gi 26449593 dbj BAC41922.1  unknown protein [Arabidopsis thaliana]<br>gi 332190769 gb AEE28890.1 <br>Nucleotide-sugar transporter family protein [Arabidopsis thaliana]                                                                                                                                                                                                                                                                                                                           | 361  | 361 | 0         | 100.0 | 96.7 | 98.9 | Nucleotide-sugar transporter family protein           | gbpln | Arabidopsis thaliana | AT1G12500.1   Symbols:   Nucleotide-sugar transporter family protein   chr1:4263542-4264957 REVERSE LENGTH=361                  | 361  | 361 | 0         | 100.0 | 96.7 | 98.9 |
| Rsa1.0_00020.1.g1421.t1 | gb EOA39582.1  hypothetical protein CARUB_v10008200mg [Capsella rubella]                                                                                                                                                                                                                                                                                                                                                                                                                                                                                                                                                                                                                                                                                                                                                                                        | 1148 | 988 | 0         | 86.1  | 80.1 | 83.2 | hypothetical protein CARUB_v10008200mg                | gbpln | Capsella rubella     | AT1G12470.1   Symbols:   zinc ion binding   chr1:4251359-4257201 FORWARD LENGTH=988                                             | 1148 | 988 | 0         | 86.1  | 79.2 | 82.8 |
| Rsa1.0_00020.1.g1422.t1 | refNP_172707.1  SNARE associated Golgi protein family [Arabidopsis thaliana] gi 34222066 gb AAQ62869.1 <br>At1g12450 [Arabidopsis thaliana]<br>gi 62320872 dbj BAD93843.1 <br>hypothetical protein [Arabidopsis thaliana] gi 332190763 gb AEE28884.1 <br>SNARE associated Golgi protein family [Arabidopsis thaliana]                                                                                                                                                                                                                                                                                                                                                                                                                                                                                                                                           | 290  | 303 | 2.33E-156 | 104.5 | 90.0 | 95.5 | SNARE associated Golgi protein family                 | gbpln | Arabidopsis thaliana | AT1G12450.1   Symbols:   SNARE associated Golgi protein family   chr1:4244496-4245808 FORWARD LENGTH=303                        | 290  | 303 | 1.00E-148 | 104.5 | 90.0 | 95.5 |
| Rsa1.0_00020.1.g1423.t1 | refNP_172704.1  ACT domain repeat 8 protein [Arabidopsis thaliana]<br>gi 8778647 gb AAF79655.1 AC025416.29<br>F5011.14 [Arabidopsis thaliana]<br>gi 22138106 gb AM93433.1  ACR8<br>[Arabidopsis thaliana]<br>gi 11073729 dbj BAF00592.1 <br>hypothetical protein [Arabidopsis thaliana] gi 111074504 gb ABH04625.1 <br>At1g12420 [Arabidopsis thaliana]<br>gi 332190757 gb AEE28878.1  ACT domain repeat 8 protein [Arabidopsis thaliana]                                                                                                                                                                                                                                                                                                                                                                                                                       | 441  | 441 | 0         | 100.0 | 89.8 | 95.2 | ACT domain repeat 8 protein                           | gbpln | Arabidopsis thaliana | AT1G12420.1   Symbols: ACR8   ACT domain repeat 8   chr1:4226673-4228917 REVERSE LENGTH=441                                     | 441  | 441 | 0         | 100.0 | 89.8 | 95.2 |

|                         |                                                                                                                                                                                                                                                                                                                                                                                                                             |     |     |           |       |      |      |                                        |       |                      |                                                                                                                                                                                                                                                                                                                                                                                                                                                                                          |     |     |           |       |      |      |
|-------------------------|-----------------------------------------------------------------------------------------------------------------------------------------------------------------------------------------------------------------------------------------------------------------------------------------------------------------------------------------------------------------------------------------------------------------------------|-----|-----|-----------|-------|------|------|----------------------------------------|-------|----------------------|------------------------------------------------------------------------------------------------------------------------------------------------------------------------------------------------------------------------------------------------------------------------------------------------------------------------------------------------------------------------------------------------------------------------------------------------------------------------------------------|-----|-----|-----------|-------|------|------|
| Rsa1.0_00020.1.g1424.t1 | ref[NP_172701.2] protein cornichon-4 [Arabidopsis thaliana] gi 75148636 sp Q84W04.1 CNIH4_ARAT H RecName: Full=Protein cornichon homolog 4 gi 28416577 gb AAQ42819.1  At1g12390 [Arabidopsis thaliana] gi 11074321 dbj BAE99496.1  hypothetical protein [Arabidopsis thaliana] gi 332190753 gb AEE28874.1  protein cornichon-4 [Arabidopsis thaliana]                                                                       | 219 | 137 | 5.00E-63  | 62.6  | 55.3 | 58.0 | protein cornichon-4                    | gbpln | Arabidopsis thaliana | AT1G12390.1   Symbols:   Cornichon family protein   chr1:4220347-4221481 FORWARD LENGTH=137                                                                                                                                                                                                                                                                                                                                                                                              | 219 | 137 | 2.00E-65  | 62.6  | 55.3 | 58.0 |
| Rsa1.0_00020.1.g1425.t1 | ref[XP_002892685.1] hypothetical protein ARALYDRAFT_888561 [Arabidopsis lyrata subsp. lyrata] gi 297338527 gb EFH68944.1  hypothetical protein ARALYDRAFT_888561 [Arabidopsis lyrata subsp. lyrata]                                                                                                                                                                                                                         | 765 | 792 | 0         | 103.5 | 86.1 | 90.3 | hypothetical protein ARALYDRAFT_888561 | gbpln | Arabidopsis lyrata   | AT1G12380.1   Symbols:   unknown protein; BEST Arabidopsis thaliana protein match is: unknown protein (TAIR:AT1G62870.1); Has 173 Blast hits to 170 proteins in 34 species: Archae - 0; Bacteria - 4; Metazoa - 25; Fungi - 8; Plants - 123; Viruses - 7; Other Eukaryotes - 6 (source: NCBI BLink).   chr1:4214499-4216880 REVERSE LENGTH=793                                                                                                                                           | 765 | 793 | 0         | 103.7 | 87.3 | 92.2 |
| Rsa1.0_00020.1.g1426.t2 | ref[XP_002892684.1] hypothetical protein ARALYDRAFT_471385 [Arabidopsis lyrata subsp. lyrata] gi 297338526 gb EFH68943.1  hypothetical protein ARALYDRAFT_471385 [Arabidopsis lyrata subsp. lyrata]                                                                                                                                                                                                                         | 493 | 496 | 0         | 100.6 | 89.5 | 93.9 | hypothetical protein ARALYDRAFT_471385 | gbpln | Arabidopsis lyrata   | AT1G12370.2   Symbols: PHR1, UVR2   photolase 1   chr1:4206500-4208842 REVERSE LENGTH=496                                                                                                                                                                                                                                                                                                                                                                                                | 493 | 496 | 0         | 100.6 | 88.4 | 93.5 |
| Rsa1.0_00020.1.g1427.t1 | ref[XP_002876578.1] hypothetical protein ARALYDRAFT_486544 [Arabidopsis lyrata subsp. lyrata] gi 297322416 gb EFH52837.1  hypothetical protein ARALYDRAFT_486544 [Arabidopsis lyrata subsp. lyrata]                                                                                                                                                                                                                         | 252 | 287 | 1.00E-112 | 113.9 | 80.6 | 82.5 | hypothetical protein ARALYDRAFT_486544 | gbpln | Arabidopsis lyrata   | AT3G60720.1   Symbols: PDLP8   plasmodesmata-located protein 8   chr3:22442035-22443608 FORWARD LENGTH=279                                                                                                                                                                                                                                                                                                                                                                               | 252 | 279 | 1.00E-113 | 110.7 | 81.0 | 82.9 |
| Rsa1.0_00020.1.g1428.t1 | ref[XP_002899928.1] hypothetical protein ARALYDRAFT_471382 [Arabidopsis lyrata subsp. lyrata] gi 297335770 gb EFH66187.1  hypothetical protein ARALYDRAFT_471382 [Arabidopsis lyrata subsp. lyrata]                                                                                                                                                                                                                         | 514 | 504 | 0         | 98.1  | 79.4 | 86.6 | hypothetical protein ARALYDRAFT_471382 | gbpln | Arabidopsis lyrata   | AT1G12330.1   Symbols:   unknown protein; INVOLVED IN: biological_process unknown; LOCATED IN: chloroplast; EXPRESSED IN: 21 plant structures; EXPRESSED DURING: 12 growth stages; BEST Arabidopsis thaliana protein match is: unknown protein (TAIR:AT5G12900.1); Has 249 Blast hits to 249 proteins in 27 species: Archae - 0; Bacteria - 0; Metazoa - 7; Fungi - 14; Plants - 217; Viruses - 0; Other Eukaryotes - 11 (source: NCBI BLink).   chr1:4194673-4196627 FORWARD LENGTH=505 | 514 | 505 | 0         | 98.2  | 79.4 | 86.2 |
| Rsa1.0_00020.1.g1429.t1 | ref[XP_002889927.1] hypothetical protein ARALYDRAFT_471381 [Arabidopsis lyrata subsp. lyrata] gi 297335769 gb EFH66186.1  hypothetical protein ARALYDRAFT_471381 [Arabidopsis lyrata subsp. lyrata]                                                                                                                                                                                                                         | 218 | 213 | 4.00E-95  | 97.7  | 84.4 | 90.4 | hypothetical protein ARALYDRAFT_471381 | gbpln | Arabidopsis lyrata   | AT1G12320.1   Symbols:   Protein of unknown function (DUF1442)   chr1:4189424-4190209 FORWARD LENGTH=212                                                                                                                                                                                                                                                                                                                                                                                 | 218 | 212 | 6.00E-93  | 97.2  | 83.0 | 89.4 |
| Rsa1.0_00020.1.g1430.t1 | gb AAF79658.1 AC025416.32 F5O11.4 [Arabidopsis thaliana]                                                                                                                                                                                                                                                                                                                                                                    | 148 | 975 | 5.00E-78  | 658.8 | 95.9 | 98.6 | F5O11.4                                | gbpln | Arabidopsis thaliana | AT1G12310.1   Symbols:   Calcium-binding EF-hand family protein   chr1:4187500-4187946 REVERSE LENGTH=148                                                                                                                                                                                                                                                                                                                                                                                | 148 | 148 | 1.00E-79  | 100.0 | 96.6 | 99.3 |
| Rsa1.0_00020.1.g1431.t1 | ref[NP_172690.1] NAC domain-containing protein 7 [Arabidopsis thaliana] gi 238065075 sp Q9FWX2.2 NAC7_ARAT H RecName: Full=NAC domain-containing protein 7; Short=ANAC007; AltName: Full=Protein EMBRYO DEFECTIVE 2749; AltName: Full=Protein VASCULAR RELATED NAC-DOMAIN 4 gi 119935909 gb ABM06031.1  At1g12260 [Arabidopsis thaliana] gi 332190738 gb AEE28859.1  NAC domain-containing protein 7 [Arabidopsis thaliana] | 391 | 395 | 0         | 101.0 | 89.3 | 92.6 | NAC domain-containing protein 7        | gbpln | Arabidopsis thaliana | AT1G12260.1   Symbols: VND4, EMB2749, ANAC007, NAC007   NAC 007   chr1:4163058-4164486 REVERSE LENGTH=395                                                                                                                                                                                                                                                                                                                                                                                | 391 | 395 | 0         | 101.0 | 89.3 | 92.6 |
| Rsa1.0_00020.1.g1432.t1 | #                                                                                                                                                                                                                                                                                                                                                                                                                           | #   | #   | #         | #     | #    | -    | ----                                   | ----  | #                    | #                                                                                                                                                                                                                                                                                                                                                                                                                                                                                        | #   | #   | #         | #     | #    |      |
| Rsa1.0_00020.1.g1433.t1 | gb AAK30571.1 AF346659.1 extensin-like protein [Brassica napus]                                                                                                                                                                                                                                                                                                                                                             | 137 | 137 | 7.00E-47  | 100.0 | 96.4 | 98.5 | extensin-like protein                  | gbpln | Brassica napus       | AT1G12090.1   Symbols: ELP   extensin-like protein   chr1:4090176-4090589 REVERSE LENGTH=137                                                                                                                                                                                                                                                                                                                                                                                             | 137 | 137 | 4.00E-45  | 100.0 | 95.6 | 98.5 |

|                         |                                                                                                                                                                                                                                                                                                                                                                                                                                                                                                                                                 |      |      |           |       |      |      |                                        |       |                      |                                                                                                                                                                                                                                                                                                                                                                                                                                                                                                                                                       |      |      |           |       |      |      |
|-------------------------|-------------------------------------------------------------------------------------------------------------------------------------------------------------------------------------------------------------------------------------------------------------------------------------------------------------------------------------------------------------------------------------------------------------------------------------------------------------------------------------------------------------------------------------------------|------|------|-----------|-------|------|------|----------------------------------------|-------|----------------------|-------------------------------------------------------------------------------------------------------------------------------------------------------------------------------------------------------------------------------------------------------------------------------------------------------------------------------------------------------------------------------------------------------------------------------------------------------------------------------------------------------------------------------------------------------|------|------|-----------|-------|------|------|
| Rsa1.0_00021.1.g1434.t1 | ref NP_564293.1  transcription factor bHLH54 [Arabidopsis thaliana] gi 75301354 sp Q8LEG1.1 BH054_ARATH RecName: Full=Transcription factor bHLH54; AltName: Full=Basic helix-loop-helix protein 54; Short=AtbHLH54; Short=bHLH 54; AltName: Full=Transcription factor EN 114; AltName: Full=bHLH transcription factor bHLH054 gi 21553570 gb AAM62663.1  unknown [Arabidopsis thaliana] gi 225897974 dbj BAH30319.1  hypothetical protein [Arabidopsis thaliana] gi 332192750 gb AEE30871.1  transcription factor bHLH54 [Arabidopsis thaliana] | 255  | 258  | 1.00E-120 | 101.2 | 88.6 | 92.9 | transcription factor bHLH54            | gbpln | Arabidopsis thaliana | AT1G27740.1   Symbols: RSL4   root hair defective 6-like 4   chr1:9654753-9655806 FORWARD LENGTH=258                                                                                                                                                                                                                                                                                                                                                                                                                                                  | 255  | 258  | 1.00E-122 | 101.2 | 88.6 | 92.9 |
| Rsa1.0_00021.1.g1435.t2 | gb AAF24949.1 AC012375.12 T22C5.20 [Arabidopsis thaliana]                                                                                                                                                                                                                                                                                                                                                                                                                                                                                       | 1115 | 1840 | 0         | 165.0 | 73.1 | 78.5 | T22C5.20                               | gbpln | Arabidopsis thaliana | AT1G27750.1   Symbols:   nucleic acid binding   chr1:9657425-9661750 FORWARD LENGTH=1075                                                                                                                                                                                                                                                                                                                                                                                                                                                              | 1115 | 1075 | 0         | 96.4  | 65.5 | 69.5 |
| Rsa1.0_00021.1.g1436.t1 | ref XP_002890749.1  hypothetical protein ARALYDRAFT_472983 [Arabidopsis lyrata subsp. lyrata] gi 297336591 gb EFH67008.1  hypothetical protein ARALYDRAFT_472983 [Arabidopsis lyrata subsp. lyrata]                                                                                                                                                                                                                                                                                                                                             | 443  | 442  | 0         | 99.8  | 87.6 | 93.0 | hypothetical protein ARALYDRAFT_472983 | gbpln | Arabidopsis lyrata   | AT1G27760.3   Symbols: SAT32, ATSAT32   interferon-related developmental regulator family protein / IFRD protein family   chr1:9668895-9671322 FORWARD LENGTH=441                                                                                                                                                                                                                                                                                                                                                                                     | 443  | 441  | 0         | 99.5  | 87.1 | 92.3 |
| Rsa1.0_00021.1.g1437.t1 | ref XP_002893491.1  ATCSA-1 [Arabidopsis lyrata subsp. lyrata] gi 297339333 gb EFH69750.1  ATCSA-1 [Arabidopsis lyrata subsp. lyrata]                                                                                                                                                                                                                                                                                                                                                                                                           | 460  | 450  | 0         | 97.8  | 85.7 | 91.7 | ATCSA-1                                | gbpln | Arabidopsis lyrata   | AT1G27840.1   Symbols: ATCSA-1   Transducin/WD40 repeat-like superfamily protein   chr1:9693332-9696257 REVERSE LENGTH=450                                                                                                                                                                                                                                                                                                                                                                                                                            | 460  | 450  | 0         | 97.8  | 84.6 | 90.9 |
| Rsa1.0_00021.1.g1438.t1 | gb EOA36789.1  hypothetical protein CARUB_v10008135mg [Capsella rubella]                                                                                                                                                                                                                                                                                                                                                                                                                                                                        | 1038 | 1149 | 0         | 110.7 | 50.8 | 53.9 | hypothetical protein CARUB_v10008135mg | gbpln | Capsella rubella     | AT1G27850.1   Symbols:   unknown protein; FUNCTIONS IN: molecular function unknown; INVOLVED IN: biological process unknown; LOCATED IN: plasma membrane; EXPRESSED IN: 22 plant structures; EXPRESSED DURING: 13 growth stages; BEST Arabidopsis thaliana protein match is: unknown protein (TAIR:AT2G40070.1); Has 9215 Blast hits to 5316 proteins in 473 species: Archae - 6; Bacteria - 773; Metazoa - 3392; Fungi - 1710; Plants - 539; Viruses - 143; Other Eukaryotes - 2652 (source: NCBI BLINK).   chr1:9699265-9703701 FORWARD LENGTH=1148 | 1038 | 1148 | 0         | 110.6 | 50.6 | 53.3 |
| Rsa1.0_00021.1.g1439.t1 | gb EOA39726.1  hypothetical protein CARUB_v10008370mg [Capsella rubella]                                                                                                                                                                                                                                                                                                                                                                                                                                                                        | 770  | 768  | 0         | 99.7  | 90.5 | 94.7 | hypothetical protein CARUB_v10008370mg | gbpln | Capsella rubella     | AT1G27910.1   Symbols: PUB45, ATPUB45   plant U-box 45   chr1:9720962-9723975 REVERSE LENGTH=768                                                                                                                                                                                                                                                                                                                                                                                                                                                      | 770  | 768  | 0         | 99.7  | 89.9 | 94.9 |
| Rsa1.0_00021.1.g1440.t2 | gb AAG51477.1 AC069471.8 hypothetical protein [Arabidopsis thaliana]                                                                                                                                                                                                                                                                                                                                                                                                                                                                            | 584  | 592  | 0         | 101.4 | 81.2 | 86.5 | hypothetical protein                   | gbpln | Arabidopsis thaliana | AT1G27920.1   Symbols: MAP65-8   microtubule-associated protein 65-8   chr1:9727106-9729848 FORWARD LENGTH=562                                                                                                                                                                                                                                                                                                                                                                                                                                        | 584  | 562  | 0         | 96.2  | 79.1 | 84.1 |
| Rsa1.0_00021.1.g1441.t1 | gb AAM61740.1  unknown [Arabidopsis thaliana]                                                                                                                                                                                                                                                                                                                                                                                                                                                                                                   | 289  | 289  | 1.00E-150 | 100.0 | 91.0 | 95.5 | unknown                                | gbpln | Arabidopsis thaliana | AT1G27930.1   Symbols:   Protein of unknown function (DUF579)   chr1:9731510-9732379 REVERSE LENGTH=289                                                                                                                                                                                                                                                                                                                                                                                                                                               | 289  | 289  | 1.00E-153 | 100.0 | 91.0 | 95.2 |
| Rsa1.0_00021.1.g1442.t1 | ref XP_002893495.1  P-glycoprotein 13 [Arabidopsis lyrata subsp. lyrata] gi 297339337 gb EFH69754.1  P-glycoprotein 13 [Arabidopsis lyrata subsp. lyrata]                                                                                                                                                                                                                                                                                                                                                                                       | 1167 | 1246 | 0         | 106.8 | 89.4 | 94.0 | P-glycoprotein 13                      | gbpln | Arabidopsis lyrata   | AT1G27940.1   Symbols: PGP13   P-glycoprotein 13   chr1:9733597-9738129 REVERSE LENGTH=1245                                                                                                                                                                                                                                                                                                                                                                                                                                                           | 1167 | 1245 | 0         | 106.7 | 88.9 | 93.6 |
| Rsa1.0_00021.1.g1443.t1 | ref XP_002890752.1  hypothetical protein ARALYDRAFT_890328 [Arabidopsis lyrata subsp. lyrata] gi 297336594 gb EFH67011.1  hypothetical protein ARALYDRAFT_890328 [Arabidopsis lyrata subsp. lyrata]                                                                                                                                                                                                                                                                                                                                             | 194  | 197  | 5.00E-78  | 101.5 | 82.0 | 89.2 | hypothetical protein ARALYDRAFT_890328 | gbpln | Arabidopsis lyrata   | AT1G27950.1   Symbols: LTPG1   glycosylphosphatidylinositol-anchored lipid protein transfer 1   chr1:9740740-9741991 FORWARD LENGTH=193                                                                                                                                                                                                                                                                                                                                                                                                               | 194  | 193  | 6.00E-76  | 99.5  | 77.3 | 86.6 |
| Rsa1.0_00021.1.g1444.t1 | # # # # # # # # - - - - # # # # # #                                                                                                                                                                                                                                                                                                                                                                                                                                                                                                             |      |      |           |       |      |      |                                        |       |                      |                                                                                                                                                                                                                                                                                                                                                                                                                                                                                                                                                       |      |      |           |       |      |      |
| Rsa1.0_00021.1.g1445.t1 | ref NP_174118.1  nuclear transport factor 2B [Arabidopsis thaliana] gi 15214148 sp Q9C7F5.1 NTF2_ARATH RecName: Full=Nuclear transport factor 2; Short=NTF-2 gi 12323001 gb AAG51491.1 AC069471.22 nuclear transport factor 2, putative [Arabidopsis thaliana] gi 98961065 gb ABF59016.1  At1g27970 [Arabidopsis thaliana] gi 332192775 gb AEE30896.1  nuclear transport factor 2B [Arabidopsis thaliana]                                                                                                                                       | 128  | 126  | 8.00E-66  | 98.4  | 93.8 | 96.1 | nuclear transport factor 2B            | gbpln | Arabidopsis thaliana | AT1G27970.1   Symbols: NTF2B   nuclear transport factor 2B   chr1:9746921-9747787 FORWARD LENGTH=126                                                                                                                                                                                                                                                                                                                                                                                                                                                  | 128  | 126  | 2.00E-68  | 98.4  | 93.8 | 96.1 |

|                         |                                                                                                                                                                                                      |      |      |           |       |      |      |                                                                              |       |                      |                                                                                                                                                                                                                                                                                                                                                                                                                                                                                                                                    |      |      |           |       |      |      |
|-------------------------|------------------------------------------------------------------------------------------------------------------------------------------------------------------------------------------------------|------|------|-----------|-------|------|------|------------------------------------------------------------------------------|-------|----------------------|------------------------------------------------------------------------------------------------------------------------------------------------------------------------------------------------------------------------------------------------------------------------------------------------------------------------------------------------------------------------------------------------------------------------------------------------------------------------------------------------------------------------------------|------|------|-----------|-------|------|------|
| Rsa1.0_00021.1.g1446.t1 | gb EOA37782.1  hypothetical protein CARUB_v10012601mg [Capsella rubella]                                                                                                                             | 187  | 544  | 4.00E-34  | 290.9 | 55.1 | 62.0 | hypothetical protein CARUB_v10012601mg                                       | gbpln | Capsella rubella     | AT1G27980.1   Symbols: DPL1, ATDPL1   dihydrosphingosine phosphate lyase   chr1:9748512-9752618 FORWARD LENGTH=544                                                                                                                                                                                                                                                                                                                                                                                                                 | 187  | 544  | 6.00E-36  | 290.9 | 54.5 | 61.5 |
| Rsa1.0_00021.1.g1447.t1 | gb EOA37464.1  hypothetical protein CARUB_v10011574mg [Capsella rubella]                                                                                                                             | 271  | 270  | 1.00E-134 | 99.6  | 89.7 | 94.5 | hypothetical protein CARUB_v10011574mg                                       | gbpln | Capsella rubella     | AT1G27990.1   Symbols:   unknown protein; BEST Arabidopsis thaliana protein match is: unknown protein (TAIR:AT5G52420.1). Has 86 Blast hits to 86 proteins in 15 species: Archae - 0; Bacteria - 0; Metazoa - 0; Fungi - 0; Plants - 84; Viruses - 0; Other Eukaryotes - 2 (source: NCBI BLink).   chr1:9752799-9753919 REVERSE LENGTH=271                                                                                                                                                                                         | 271  | 271  | 1.00E-132 | 100.0 | 89.3 | 94.8 |
| Rsa1.0_00021.1.g1448.t1 | gb EOA17180.1  hypothetical protein CARUB_v10005451mg [Capsella rubella]                                                                                                                             | 289  | 278  | 9.00E-76  | 96.2  | 51.6 | 67.5 | hypothetical protein CARUB_v10005451mg                                       | gbpln | Capsella rubella     | AT4G17700.1   Symbols:   unknown protein; BEST Arabidopsis thaliana protein match is: unknown protein (TAIR:AT4G17990.1). Has 30201 Blast hits to 17322 proteins in 780 species: Archae - 12; Bacteria - 1396; Metazoa - 17338; Fungi - 3422; Plants - 5037; Viruses - 0; Other Eukaryotes - 2996 (source: NCBI BLink).   chr4:9854322-9855227 FORWARD LENGTH=164                                                                                                                                                                  | 289  | 164  | 7.00E-43  | 56.7  | 28.7 | 38.4 |
| Rsa1.0_00021.1.g1449.t1 | sp Q9C7F1.2 PPR61_ARATH RecName: Full=Putative pentatricopeptide repeat-containing protein At1g28020                                                                                                 | 564  | 566  | 1.00E-169 | 100.4 | 57.8 | 69.5 | RecName: Full=Putative pentatricopeptide repeat-containing protein At1g28020 | ----  | ----                 | AT1G28020.1   Symbols:   Tetratricopeptide repeat (TPR)-like superfamily protein   chr1:9768395-9771157 REVERSE LENGTH=612                                                                                                                                                                                                                                                                                                                                                                                                         | 564  | 612  | 1.00E-163 | 108.5 | 55.1 | 66.7 |
| Rsa1.0_00021.1.g1450.t1 | gb AAG51783.1 AC079679.3 reverse transcriptase, putative; 16838-20266 [Arabidopsis thaliana]                                                                                                         | 141  | 1142 | 1.00E-25  | 809.9 | 44.0 | 49.6 | reverse transcriptase, putative; 16838-20266                                 | gbpln | Arabidopsis thaliana | #                                                                                                                                                                                                                                                                                                                                                                                                                                                                                                                                  | #    | #    | #         | #     | #    | #    |
| Rsa1.0_00021.1.g1451.t1 | gb EOA39175.1  hypothetical protein CARUB_v10012135mg [Capsella rubella]                                                                                                                             | 423  | 410  | 1.00E-120 | 96.9  | 56.0 | 67.1 | hypothetical protein CARUB_v10012135mg                                       | gbpln | Capsella rubella     | AT1G28000.1   Symbols:   Pentatricopeptide repeat (PPR) superfamily protein   chr1:9756674-9757947 REVERSE LENGTH=388                                                                                                                                                                                                                                                                                                                                                                                                              | 423  | 388  | 1.00E-118 | 91.7  | 51.3 | 61.9 |
| Rsa1.0_00021.1.g1452.t1 | gb EOA39175.1  hypothetical protein CARUB_v10012135mg [Capsella rubella]                                                                                                                             | 304  | 410  | 1.00E-84  | 134.9 | 53.0 | 62.8 | hypothetical protein CARUB_v10012135mg                                       | gbpln | Capsella rubella     | AT1G28000.1   Symbols:   Pentatricopeptide repeat (PPR) superfamily protein   chr1:9756674-9757947 REVERSE LENGTH=388                                                                                                                                                                                                                                                                                                                                                                                                              | 304  | 388  | 7.00E-84  | 127.6 | 53.9 | 62.8 |
| Rsa1.0_00021.1.g1453.t1 | gb EOA36857.1  hypothetical protein CARUB_v10008803mg [Capsella rubella]                                                                                                                             | 515  | 536  | 9.00E-68  | 104.1 | 23.9 | 31.3 | hypothetical protein CARUB_v10008803mg                                       | gbpln | Capsella rubella     | AT5G28823.1   Symbols:   FUNCTIONS IN: molecular_function unknown; INVOLVED IN: biological_process unknown; LOCATED IN: cellular_component unknown; EXPRESSED IN: cultured cell; BEST Arabidopsis thaliana protein match is: Zinc knuckle (CCHC-type) family protein (TAIR:AT2G07760.1); Has 30201 Blast hits to 17322 proteins in 780 species: Archae - 12; Bacteria - 1396; Metazoa - 17338; Fungi - 3422; Plants - 5037; Viruses - 0; Other Eukaryotes - 2996 (source: NCBI BLink).   chr5:10837849-10839826 REVERSE LENGTH=568 | 515  | 568  | 8.00E-47  | 110.3 | 26.8 | 38.1 |
| Rsa1.0_00021.1.g1454.t1 | #                                                                                                                                                                                                    | #    | #    | #         | #     | #    | #    | -                                                                            | ----  | ----                 | #                                                                                                                                                                                                                                                                                                                                                                                                                                                                                                                                  | #    | #    | #         | #     | #    | #    |
| Rsa1.0_00021.1.g1455.t1 | ref XP_002890755.1  P-glycoprotein 14 [Arabidopsis lyrata subsp. lyrata]   g 297336597 gb EFH67014.1  P-glycoprotein 14 [Arabidopsis lyrata subsp. lyrata]                                           | 1243 | 1248 | 0         | 100.4 | 88.2 | 94.0 | P-glycoprotein 14                                                            | gbpln | Arabidopsis lyrata   | AT1G28010.1   Symbols: PGP14, ATABCB14, ABCB14   P-glycoprotein 14   chr1:9763436-9767917 FORWARD LENGTH=1247                                                                                                                                                                                                                                                                                                                                                                                                                      | 1243 | 1247 | 0         | 100.3 | 87.4 | 93.7 |
| Rsa1.0_00021.1.g1456.t1 | ref XP_002868101.1  hypothetical protein ARALYDRAFT_915040 [Arabidopsis lyrata subsp. lyrata]   g 297313937 gb EFH44360.1  hypothetical protein ARALYDRAFT_915040 [Arabidopsis lyrata subsp. lyrata] | 277  | 495  | 4.00E-70  | 178.7 | 52.7 | 69.7 | hypothetical protein ARALYDRAFT_915040                                       | gbpln | Arabidopsis lyrata   | AT1G28020.1   Symbols:   Tetratricopeptide repeat (TPR)-like superfamily protein   chr1:9768395-9771157 REVERSE LENGTH=612                                                                                                                                                                                                                                                                                                                                                                                                         | 277  | 612  | 4.00E-49  | 220.9 | 39.0 | 47.7 |
| Rsa1.0_00021.1.g1457.t1 | gb ABD64987.1  hypothetical protein 26.t00003 [Brassica oleracea]                                                                                                                                    | 468  | 330  | 2.00E-15  | 70.5  | 11.8 | 13.0 | hypothetical protein 26.t00003                                               | gbpln | Brassica oleracea    | #                                                                                                                                                                                                                                                                                                                                                                                                                                                                                                                                  | #    | #    | #         | #     | #    | #    |
| Rsa1.0_00021.1.g1458.t1 | ref XP_002893501.1  predicted protein [Arabidopsis lyrata subsp. lyrata]   g 297339343 gb EFH69760.1  predicted protein [Arabidopsis lyrata subsp. lyrata]                                           | 395  | 667  | 1.00E-112 | 168.9 | 61.0 | 72.7 | predicted protein                                                            | gbpln | Arabidopsis lyrata   | AT1G28020.1   Symbols:   Tetratricopeptide repeat (TPR)-like superfamily protein   chr1:9768395-9771157 REVERSE LENGTH=612                                                                                                                                                                                                                                                                                                                                                                                                         | 395  | 612  | 1.00E-110 | 154.9 | 58.7 | 69.4 |
| Rsa1.0_00021.1.g1459.t1 | gb EOA39175.1  hypothetical protein CARUB_v10012135mg [Capsella rubella]                                                                                                                             | 375  | 410  | 1.00E-108 | 109.3 | 56.8 | 68.8 | hypothetical protein CARUB_v10012135mg                                       | gbpln | Capsella rubella     | AT1G28000.1   Symbols:   Pentatricopeptide repeat (PPR) superfamily protein   chr1:9756674-9757947 REVERSE LENGTH=388                                                                                                                                                                                                                                                                                                                                                                                                              | 375  | 388  | 1.00E-105 | 103.5 | 50.1 | 60.5 |
| Rsa1.0_00021.1.g1460.t1 | gb AAG50751.1 AC079733.19 polyprotein, putative [Arabidopsis thaliana]                                                                                                                               | 1407 | 1468 | 0         | 104.3 | 55.4 | 70.5 | polyprotein, putative                                                        | gbpln | Arabidopsis thaliana | AT4G23160.1   Symbols: CRK8   cysteine-rich RLK (RECEPTOR-like protein kinase) 8   chr4:12129485-12134086 FORWARD LENGTH=1262                                                                                                                                                                                                                                                                                                                                                                                                      | 1407 | 1262 | 1.00E-140 | 89.7  | 17.2 | 25.3 |

|                         |                                                                                                                                                                                                                                                                                                                                                                                                                                                                                                                                                                                           |     |      |           |       |      |      |                                                 |       |                      |                                                                                                                                                                                                                                                                                                                                                                                                                                                                                                                                                        |     |     |           |       |      |      |
|-------------------------|-------------------------------------------------------------------------------------------------------------------------------------------------------------------------------------------------------------------------------------------------------------------------------------------------------------------------------------------------------------------------------------------------------------------------------------------------------------------------------------------------------------------------------------------------------------------------------------------|-----|------|-----------|-------|------|------|-------------------------------------------------|-------|----------------------|--------------------------------------------------------------------------------------------------------------------------------------------------------------------------------------------------------------------------------------------------------------------------------------------------------------------------------------------------------------------------------------------------------------------------------------------------------------------------------------------------------------------------------------------------------|-----|-----|-----------|-------|------|------|
| Rsa1.0_00021.1.g1461.t1 | gb[EOA39702.1] hypothetical protein CARUB_v10008347mg [Capsella rubella]                                                                                                                                                                                                                                                                                                                                                                                                                                                                                                                  | 773 | 787  | 0         | 101.8 | 74.9 | 82.7 | hypothetical protein CARUB_v10008347mg          | gbpln | Capsella rubella     | AT1G28060.1   Symbols:   Pre-mRNA-splicing factor 3   chr1:9779167-9782486 FORWARD LENGTH=786                                                                                                                                                                                                                                                                                                                                                                                                                                                          | 773 | 786 | 0         | 101.7 | 74.3 | 82.3 |
| Rsa1.0_00021.1.g1462.t1 | ref[NP_174128.1] uncharacterized protein [Arabidopsis thaliana] gi 12323006 gb AAG51495.1 AC069471.26 hypothetical protein [Arabidopsis thaliana] gi 44681470 gb AAS47675.1  At1g28070 [Arabidopsis thaliana] gi 82318580 dbj BAD94977.1  hypothetical protein [Arabidopsis thaliana] gi 332192787 gb AEE30908.1  uncharacterized protein AT1G28070 [Arabidopsis thaliana]                                                                                                                                                                                                                | 149 | 176  | 4.00E-38  | 118.1 | 63.1 | 77.2 | uncharacterized protein                         | gbpln | Arabidopsis thaliana | AT1G28070.1   Symbols:   unknown protein; BEST Arabidopsis thaliana protein match is: unknown protein (TAIR:AT2G33510.1). Has 85 Blast hits to 77 proteins in 15 species: Archae - 0; Bacteria - 0; Metazoa - 0; Fungi - 0; Plants - 85; Viruses - 0; Other Eukaryotes - 0 (source: NCBI BLink).   chr1:9783082-9783864 FORWARD LENGTH=176                                                                                                                                                                                                             | 149 | 176 | 1.00E-40  | 118.1 | 63.1 | 77.2 |
| Rsa1.0_00021.1.g1463.t1 | emb[CAN60947.1] hypothetical protein VITISV_015758 [Vitis vinifera]                                                                                                                                                                                                                                                                                                                                                                                                                                                                                                                       | 336 | 1306 | 1.00E-102 | 388.7 | 61.9 | 69.3 | hypothetical protein VITISV_015758              | gbpln | Vitis vinifera       | #                                                                                                                                                                                                                                                                                                                                                                                                                                                                                                                                                      | #   | #   | #         | #     | #    |      |
| Rsa1.0_00021.1.g1464.t1 | ref[XP_002890758.1] hypothetical protein ARALYDRAFT_313512 [Arabidopsis lyrata subsp. lyrata] gi 297336600 gb EFH67017.1  hypothetical protein ARALYDRAFT_313512 [Arabidopsis lyrata subsp. lyrata]                                                                                                                                                                                                                                                                                                                                                                                       | 258 | 296  | 3.00E-91  | 114.7 | 71.7 | 81.4 | hypothetical protein ARALYDRAFT_313512          | gbpln | Arabidopsis lyrata   | AT1G28080.1   Symbols:   RING finger protein   chr1:9789826-9790918 FORWARD LENGTH=291                                                                                                                                                                                                                                                                                                                                                                                                                                                                 | 258 | 291 | 7.00E-86  | 112.8 | 65.9 | 76.0 |
| Rsa1.0_00021.1.g1465.t1 | gb[EOA40088.1] hypothetical protein CARUB_v10008782mg [Capsella rubella]                                                                                                                                                                                                                                                                                                                                                                                                                                                                                                                  | 540 | 543  | 0         | 100.6 | 86.3 | 94.1 | hypothetical protein CARUB_v10008782mg          | gbpln | Capsella rubella     | AT1G28090.1   Symbols:   Polynucleotide adenyllyltransferase family protein   chr1:9795826-9798891 FORWARD LENGTH=541                                                                                                                                                                                                                                                                                                                                                                                                                                  | 540 | 541 | 0         | 100.2 | 85.0 | 93.7 |
| Rsa1.0_00021.1.g1466.t1 | gb[EOA36155.1] hypothetical protein CARUB_v10009948mg [Capsella rubella]                                                                                                                                                                                                                                                                                                                                                                                                                                                                                                                  | 337 | 282  | 1.00E-119 | 83.7  | 66.2 | 71.5 | hypothetical protein CARUB_v10009948mg          | gbpln | Capsella rubella     | AT1G28100.2   Symbols:   unknown protein; Has 64 Blast hits to 64 proteins in 27 species: Archae - 0; Bacteria - 14; Metazoa - 0; Fungi - 6; Plants - 42; Viruses - 0; Other Eukaryotes - 2 (source: NCBI BLink).   chr1:9802120-9803981 FORWARD LENGTH=282                                                                                                                                                                                                                                                                                            | 337 | 282 | 1.00E-121 | 83.7  | 66.2 | 71.8 |
| Rsa1.0_00021.1.g1467.t1 | gb[EOA37308.1] hypothetical protein CARUB_v10010972mg [Capsella rubella]                                                                                                                                                                                                                                                                                                                                                                                                                                                                                                                  | 428 | 459  | 0         | 107.2 | 94.6 | 97.0 | hypothetical protein CARUB_v10010972mg          | gbpln | Capsella rubella     | AT1G28110.2   Symbols:   SCPL45   serine carboxypeptidase-like 45   chr1:9804153-9806832 REVERSE LENGTH=461                                                                                                                                                                                                                                                                                                                                                                                                                                            | 428 | 461 | 0         | 107.7 | 93.7 | 96.5 |
| Rsa1.0_00021.1.g1468.t1 | #                                                                                                                                                                                                                                                                                                                                                                                                                                                                                                                                                                                         | #   | #    | #         | #     | #    | -    | ----                                            | ----  | ----                 | AT1G30890.2   Symbols:   Integral membrane HRF1 family protein   chr1:10994890-10995999 FORWARD LENGTH=269                                                                                                                                                                                                                                                                                                                                                                                                                                             | 231 | 269 | 1.00E-12  | 116.5 | 13.4 | 13.9 |
| Rsa1.0_00021.1.g1469.t1 | #                                                                                                                                                                                                                                                                                                                                                                                                                                                                                                                                                                                         | #   | #    | #         | #     | #    | -    | ----                                            | ----  | ----                 | #                                                                                                                                                                                                                                                                                                                                                                                                                                                                                                                                                      | #   | #   | #         | #     | #    |      |
| Rsa1.0_00021.1.g1470.t1 | gb[EOA36105.1] hypothetical protein CARUB_v10011293mg [Capsella rubella]                                                                                                                                                                                                                                                                                                                                                                                                                                                                                                                  | 595 | 608  | 0         | 102.2 | 94.3 | 98.2 | hypothetical protein CARUB_v10011293mg          | gbpln | Capsella rubella     | AT1G28130.1   Symbols:   GH3.17   Auxin-responsive GH3 family protein   chr1:9825431-9827883 FORWARD LENGTH=609                                                                                                                                                                                                                                                                                                                                                                                                                                        | 595 | 609 | 0         | 102.4 | 94.1 | 98.7 |
| Rsa1.0_00021.1.g1471.t3 | gb AAG51484.1 AC069471.15 unknown protein [Arabidopsis thaliana]                                                                                                                                                                                                                                                                                                                                                                                                                                                                                                                          | 292 | 295  | 1.00E-122 | 101.0 | 80.1 | 87.0 | unknown protein                                 | gbpln | Arabidopsis thaliana | AT1G28140.1   Symbols:   unknown protein; FUNCTIONS IN: molecular_function unknown; INVOLVED IN: biological_process unknown; LOCATED IN: chloroplast; EXPRESSED IN: 22 plant structures; EXPRESSED DURING: 13 growth stages; CONTAINS InterPro DOMAIN/s; Protein of unknown function DUF2301, transmembrane (InterPro:IPR019275). Has 140 Blast hits to 140 proteins in 72 species: Archae - 0; Bacteria - 86; Metazoa - 10; Fungi - 0; Plants - 41; Viruses - 0; Other Eukaryotes - 3 (source: NCBI BLink).   chr1:9833029-9834390 REVERSE LENGTH=280 | 292 | 280 | 1.00E-124 | 95.9  | 80.1 | 87.0 |
| Rsa1.0_00021.1.g1472.t1 | ref[NP_174138.1] ethylene-responsive transcription factor ERF087 [Arabidopsis thaliana] gi 75263257 sp Q9FZ90.1 ERF87_ARATH RecName: Full=Ethylene-responsive transcription factor ERF087 gi 9795622 gb AAF98440.1 AC021044.19 Hypothetical protein [Arabidopsis thaliana] gi 12323000 gb AAG51490.1 AC069471.21 AP2 domain transcription factor, putative [Arabidopsis thaliana] gi 91805861 gb ABE56569.1  ethylene-responsive element-binding family protein [Arabidopsis thaliana] gi 332192805 gb AEE30926.1  ethylene-responsive transcription factor ERF087 [Arabidopsis thaliana] | 242 | 245  | 1.00E-97  | 101.2 | 82.2 | 88.4 | ethylene-responsive transcription factor ERF087 | gbpln | Arabidopsis thaliana | AT1G28160.1   Symbols:   Integrase-type DNA-binding superfamily protein   chr1:9839387-9840124 FORWARD LENGTH=245                                                                                                                                                                                                                                                                                                                                                                                                                                      | 242 | 245 | 1.00E-100 | 101.2 | 82.2 | 88.4 |

|                         |                                                                                                                                                                                                                                                                                                                                                                                                                                                                                                       |     |     |           |       |      |      |                                        |       |                      |                                                                                                                                                                                                                                                                                                                                                                    |     |     |           |       |      |      |
|-------------------------|-------------------------------------------------------------------------------------------------------------------------------------------------------------------------------------------------------------------------------------------------------------------------------------------------------------------------------------------------------------------------------------------------------------------------------------------------------------------------------------------------------|-----|-----|-----------|-------|------|------|----------------------------------------|-------|----------------------|--------------------------------------------------------------------------------------------------------------------------------------------------------------------------------------------------------------------------------------------------------------------------------------------------------------------------------------------------------------------|-----|-----|-----------|-------|------|------|
| Rsa1.0_00021.1.g1473.t1 | refXP_002893509.1   hypothetical protein ARALYDRAFT_890355 [Arabidopsis lyrata subsp. lyrata] gi 297339351 gb EFH69768.1   hypothetical protein ARALYDRAFT_890355 [Arabidopsis lyrata subsp. lyrata]                                                                                                                                                                                                                                                                                                  | 315 | 263 | 1.00E-88  | 83.5  | 59.7 | 66.3 | hypothetical protein ARALYDRAFT_890355 | gbpln | Arabidopsis lyrata   | AT1G28190.1   Symbols:   unknown protein; BEST Arabidopsis thaliana protein match is: unknown protein (TAIR:AT5G12340.1); Has 166 Blast hits to 162 proteins in 36 species: Archaee - 0; Bacteria - 2; Metazoa - 15; Fungi - 5; Plants - 124; Viruses - 0; Other Eukaryotes - 20 (source: NCBI BLINK).   chr1:9847015-9847815 REVERSE LENGTH=266                   | 315 | 266 | 8.00E-89  | 84.4  | 54.6 | 60.3 |
| Rsa1.0_00021.1.g1474.t1 | refXP_002873866.1   hypothetical protein ARALYDRAFT_909803 [Arabidopsis lyrata subsp. lyrata] gi 297319703 gb EFH50125.1   hypothetical protein ARALYDRAFT_909803 [Arabidopsis lyrata subsp. lyrata]                                                                                                                                                                                                                                                                                                  | 369 | 384 | 1.00E-79  | 104.1 | 51.2 | 64.8 | hypothetical protein ARALYDRAFT_909803 | gbpln | Arabidopsis lyrata   | AT5G18160.1   Symbols:   F-box and associated interaction domains-containing protein   chr5:6002770-6003909 FORWARD LENGTH=379                                                                                                                                                                                                                                     | 369 | 379 | 4.00E-56  | 102.7 | 38.2 | 54.2 |
| Rsa1.0_00021.1.g1475.t1 | refXP_002873866.1   hypothetical protein ARALYDRAFT_909803 [Arabidopsis lyrata subsp. lyrata] gi 297319703 gb EFH50125.1   hypothetical protein ARALYDRAFT_909803 [Arabidopsis lyrata subsp. lyrata]                                                                                                                                                                                                                                                                                                  | 376 | 384 | 6.00E-53  | 102.1 | 39.4 | 52.7 | hypothetical protein ARALYDRAFT_909803 | gbpln | Arabidopsis lyrata   | AT1G50870.1   Symbols:   F-box and associated interaction domains-containing protein   chr1:18855147-18856337 FORWARD LENGTH=396                                                                                                                                                                                                                                   | 376 | 396 | 3.00E-37  | 105.3 | 31.1 | 44.4 |
| Rsa1.0_00022.1.g1476.t1 | db BAJ33863.1   unnamed protein product [Thellungiella halophila]                                                                                                                                                                                                                                                                                                                                                                                                                                     | 101 | 196 | 9.00E-32  | 194.1 | 69.3 | 77.2 | unnamed protein product                | ----  | ----                 | AT5G65060.1   Symbols: MAF3, FCL3, AGL70   K-box region and MADS-box transcription factor family protein   chr5:25987527-25991065 FORWARD LENGTH=196                                                                                                                                                                                                               | 101 | 196 | 1.00E-30  | 194.1 | 64.4 | 73.3 |
| Rsa1.0_00022.1.g1477.t1 | db BAJ33863.1   unnamed protein product [Thellungiella halophila]                                                                                                                                                                                                                                                                                                                                                                                                                                     | 62  | 196 | 8.00E-24  | 316.1 | 88.7 | 95.2 | unnamed protein product                | ----  | ----                 | AT5G65050.2   Symbols: AGL31, MAF2   AGAMOUS-like 31   chr5:25982415-25985743 FORWARD LENGTH=178                                                                                                                                                                                                                                                                   | 62  | 178 | 7.00E-25  | 287.1 | 85.5 | 91.9 |
| Rsa1.0_00022.1.g1478.t1 | gb EOA14245.1   hypothetical protein CARUB_v10027399mg [Capsella rubella]                                                                                                                                                                                                                                                                                                                                                                                                                             | 115 | 114 | 3.00E-44  | 99.1  | 76.5 | 85.2 | hypothetical protein CARUB_v10027399mg | gbpln | Capsella rubella     | AT5G65040.1   Symbols:   Protein of unknown function (DUF581)   chr5:25977864-25978350 REVERSE LENGTH=113                                                                                                                                                                                                                                                          | 115 | 113 | 2.00E-45  | 98.3  | 75.7 | 84.3 |
| Rsa1.0_00022.1.g1479.t1 | # # # # # # # # -                                                                                                                                                                                                                                                                                                                                                                                                                                                                                     |     |     |           |       |      |      |                                        | ----  | ----                 | AT5G19270.1   Symbols:   unknown protein; BEST Arabidopsis thaliana protein match is: unknown protein (TAIR:AT4G03566.1); Has 30201 Blast hits to 17322 proteins in 780 species: Archaee - 12; Bacteria - 1396; Metazoa - 17338; Fungi - 3422; Plants - 5037; Viruses - 0; Other Eukaryotes - 2996 (source: NCBI BLINK).   chr5:6485617-6487009 REVERSE LENGTH=365 | 154 | 365 | 7.00E-12  | 237.0 | 28.6 | 39.0 |
| Rsa1.0_00022.1.g1480.t1 | gb ABD47519.1   annexin 2 [Brassica juncea] gi 124001973 gb ABM87935.1   annexin 2 [Brassica juncea]                                                                                                                                                                                                                                                                                                                                                                                                  | 316 | 316 | 1.00E-173 | 100.0 | 93.4 | 97.2 | annexin 2                              | gbpln | Brassica juncea      | AT5G65020.1   Symbols: ANNAT2   annexin 2   chr5:25973915-25975554 FORWARD LENGTH=317                                                                                                                                                                                                                                                                              | 316 | 317 | 1.00E-170 | 100.3 | 89.9 | 96.2 |
| Rsa1.0_00022.1.g1481.t1 | gb EOA15086.1   hypothetical protein CARUB_v10028454mg [Capsella rubella]                                                                                                                                                                                                                                                                                                                                                                                                                             | 414 | 427 | 0         | 103.1 | 84.5 | 91.5 | hypothetical protein CARUB_v10028454mg | gbpln | Capsella rubella     | AT5G64970.1   Symbols:   Mitochondrial substrate carrier family protein   chr5:25958806-25960443 REVERSE LENGTH=428                                                                                                                                                                                                                                                | 414 | 428 | 0         | 103.4 | 82.4 | 89.4 |
| Rsa1.0_00022.1.g1482.t1 | ref NP_201301.1   cyclin-dependent kinase C-2 [Arabidopsis thaliana] gi 152013386 sp Q8W4P1.2 CDKC2_ARA TH RecName: Full=Cyclin-dependent kinase C-2; Short=CDKC2 gi 13430444 gb AAK25844.1 AF360134.1 putative cdc2 protein kinase [Arabidopsis thaliana] gi 8843760 db BAA97308.1   cdc2-like protein kinase [Arabidopsis thaliana] gi 14532732 gb AAK64067.1   putative cdc2 protein kinase [Arabidopsis thaliana] gi 332010592 gb AED97975.1   cyclin-dependent kinase C-2 [Arabidopsis thaliana] | 574 | 513 | 0         | 89.4  | 82.8 | 84.5 | cyclin-dependent kinase C-2            | gbpln | Arabidopsis thaliana | AT5G64960.1   Symbols: CDKC2, CDKC2   cyclin dependent kinase group C2   chr5:25955497-25958427 FORWARD LENGTH=513                                                                                                                                                                                                                                                 | 574 | 513 | 0         | 89.4  | 82.8 | 84.5 |
| Rsa1.0_00022.1.g1483.t1 | ref NP_569001.1   elicitor peptide 1 [Arabidopsis thaliana] gi 75180610 sp Q9LV87.1 PEP1_ARATH RecName: Full=Elicitor peptide 1; Flags: Precursor gi 8843754 db BAA97302.1   unnamed protein product [Arabidopsis thaliana] gi 17065508 gb AAL32908.1   Unknown protein [Arabidopsis thaliana] gi 20148667 gb AAM10224.1   unknown protein [Arabidopsis thaliana] gi 332010583 gb AED97966.1   elicitor peptide 1 [Arabidopsis thaliana]                                                              | 109 | 92  | 8.00E-20  | 84.4  | 53.2 | 67.9 | elicitor peptide 1                     | gbpln | Arabidopsis thaliana | AT5G64900.1   Symbols: PROPEP1, ATPEP1, PEP1   precursor of peptide 1   chr5:25937253-25937939 FORWARD LENGTH=92                                                                                                                                                                                                                                                   | 109 | 92  | 1.00E-22  | 84.4  | 53.2 | 67.9 |

|                         |                                                                                                                                                                                                                                                                                                                                                                                                                                                                                                                                                                                                                                                                                                                                         |     |     |          |       |      |      |                                         |       |                      |                                                                                                                                                                                                                                                                                                                                                                                                                                                                                                                                                                                                                                            |     |     |          |       |      |      |
|-------------------------|-----------------------------------------------------------------------------------------------------------------------------------------------------------------------------------------------------------------------------------------------------------------------------------------------------------------------------------------------------------------------------------------------------------------------------------------------------------------------------------------------------------------------------------------------------------------------------------------------------------------------------------------------------------------------------------------------------------------------------------------|-----|-----|----------|-------|------|------|-----------------------------------------|-------|----------------------|--------------------------------------------------------------------------------------------------------------------------------------------------------------------------------------------------------------------------------------------------------------------------------------------------------------------------------------------------------------------------------------------------------------------------------------------------------------------------------------------------------------------------------------------------------------------------------------------------------------------------------------------|-----|-----|----------|-------|------|------|
| Rsa1.0_00022.1.g1484.t1 | refXP_002866640.1  hypothetical protein ARALYDRAFT_496707 [Arabidopsis lyrata subsp. lyrata] gi 297312475 gb EFH42899.1                                                                                                                                                                                                                                                                                                                                                                                                                                                                                                                                                                                                                 | 471 | 479 | 0        | 101.7 | 89.6 | 95.5 | hypothetical protein ARALYDRAFT_496707  | gbpln | Arabidopsis lyrata   | AT5G64870.1   Symbols:   SPFH/Band 7/PHB domain-containing membrane-associated protein family   chr5:25929776-25931308 REVERSE LENGTH=479                                                                                                                                                                                                                                                                                                                                                                                                                                                                                                  | 471 | 479 | 0        | 101.7 | 91.3 | 96.6 |
| Rsa1.0_00022.1.g1485.t1 | hypothetical protein ARALYDRAFT_496707 [Arabidopsis lyrata subsp. lyrata] ref NP_201291.1  4-alpha-glucanotransferase-like protein [Arabidopsis thaliana] gi 75180614 sp Q9LV91.1 DPE1_ARATH RecName: Full=4-alpha-glucanotransferase DPE1, chloroplastic; amyloplastic; AltName: Full=Amylomaltase; AltName: Full=Disproportionating enzyme; Short=D-enzyme; AltName: Full=Protein DISPROPORTIONATING ENZYME 1; Flags: Precursor gi 8843750 dbj BAA97298.1  4-alpha-glucanotransferase [Arabidopsis thaliana] gi 14335104 gb AAK59831.1  AT5g64860/MXK3_9 [Arabidopsis thaliana] gi 19548067 gb AAL87397.1  AT5g64860/MXK3_9 [Arabidopsis thaliana] gi 332010579 gb AED97962.1  4-alpha-glucanotransferase DPE1 [Arabidopsis thaliana] | 94  | 576 | 2.00E-27 | 612.8 | 64.9 | 69.1 | 4-alpha-glucanotransferase-like protein | gbpln | Arabidopsis thaliana | AT5G64860.1   Symbols: DPE1   disproportionating enzyme   chr5:25925373-25928788 REVERSE LENGTH=576                                                                                                                                                                                                                                                                                                                                                                                                                                                                                                                                        | 94  | 576 | 4.00E-30 | 612.8 | 64.9 | 69.1 |
| Rsa1.0_00022.1.g1486.t1 | refXP_002864926.1  hypothetical protein ARALYDRAFT_496705 [Arabidopsis lyrata subsp. lyrata] gi 297310761 gb EFH41185.1                                                                                                                                                                                                                                                                                                                                                                                                                                                                                                                                                                                                                 | 119 | 114 | 4.00E-31 | 95.8  | 63.9 | 70.6 | hypothetical protein ARALYDRAFT_496705  | gbpln | Arabidopsis lyrata   | AT5G64850.1   Symbols:   FUNCTIONS IN: molecular_function unknown; INVOLVED IN: biological_process unknown; LOCATED IN: plasma membrane; EXPRESSED IN: 22 plant structures; EXPRESSED DURING: 13 growth stages; CONTAINS InterPro DOMAIN/s: RPM1-interacting protein 4, defence response (InterPro:IPRO08700); BEST Arabidopsis thaliana protein match is: unknown protein (TAIR:AT5G09960.1); Has 30201 Blast hits to 17322 proteins in 780 species: Archae - 12; Bacteria - 1396; Metazoa - 17338; Fungi - 3422; Plants - 5037; Viruses - 0; Other Eukaryotes - 2996 (source: NCBI BLink).   chr5:25921585-25923038 FORWARD LENGTH=114   | 119 | 114 | 6.00E-33 | 95.8  | 58.0 | 63.9 |
| Rsa1.0_00022.1.g1487.t1 | refXP_002866638.1  ATGCN5 [Arabidopsis lyrata subsp. lyrata] gi 297312473 gb EFH42897.1  ATGCN5 [Arabidopsis lyrata subsp. lyrata]                                                                                                                                                                                                                                                                                                                                                                                                                                                                                                                                                                                                      | 690 | 694 | 0        | 100.6 | 93.2 | 97.4 | ATGCN5                                  | gbpln | Arabidopsis lyrata   | AT5G64840.1   Symbols: GCN5, ATGCN5   general control non-repressible 5   chr5:25916956-25919693 REVERSE LENGTH=692                                                                                                                                                                                                                                                                                                                                                                                                                                                                                                                        | 690 | 692 | 0        | 100.3 | 92.2 | 97.0 |
| Rsa1.0_00022.1.g1488.t1 | refXP_002866636.1  hypothetical protein ARALYDRAFT_332703 [Arabidopsis lyrata subsp. lyrata] gi 297312471 gb EFH42895.1                                                                                                                                                                                                                                                                                                                                                                                                                                                                                                                                                                                                                 | 143 | 149 | 7.00E-61 | 104.2 | 86.7 | 90.9 | hypothetical protein ARALYDRAFT_332703  | gbpln | Arabidopsis lyrata   | AT5G64820.1   Symbols:   unknown protein; FUNCTIONS IN: molecular_function unknown; INVOLVED IN: biological_process unknown; LOCATED IN: endomembrane system; BEST Arabidopsis thaliana protein match is: unknown protein (TAIR:AT1G16850.1); Has 1807 Blast hits to 1807 proteins in 277 species: Archae - 0; Bacteria - 0; Metazoa - 736; Fungi - 347; Plants - 385; Viruses - 0; Other Eukaryotes - 339 (source: NCBI BLink).   chr5:25913999-25914523 REVERSE LENGTH=145                                                                                                                                                               | 143 | 145 | 1.00E-59 | 101.4 | 82.5 | 89.5 |
| Rsa1.0_00022.1.g1489.t1 | refXP_002864921.1  glycosyl hydrolase family 17 protein [Arabidopsis lyrata subsp. lyrata] gi 297310756 gb EFH41180.1  glycosyl hydrolase family 17 protein [Arabidopsis lyrata subsp. lyrata]                                                                                                                                                                                                                                                                                                                                                                                                                                                                                                                                          | 671 | 485 | 0        | 72.3  | 60.8 | 65.9 | glycosyl hydrolase family 17 protein    | gbpln | Arabidopsis lyrata   | AT5G64790.1   Symbols:   O-Glycosyl hydrolases family 17 protein   chr5:25902713-25904559 FORWARD LENGTH=485                                                                                                                                                                                                                                                                                                                                                                                                                                                                                                                               | 671 | 485 | 0        | 72.3  | 60.8 | 65.9 |
| Rsa1.0_00022.1.g1490.t1 | refNP_201282.1  uncharacterized protein [Arabidopsis thaliana] gi 75170417 sp Q9FGF6.1 RGF9_ARATH RecName: Full=Root meristem growth factor 9; Short=AtRGF9; Flags: Precursor gi 10177208 dbj BAB10310.1  unnamed protein product [Arabidopsis thaliana] gi 27311821 gb AAO00876.1  unknown protein [Arabidopsis thaliana] gi 30102780 gb AAP21308.1  At5g64770 [Arabidopsis thaliana] gi 332010566 gb AED97949.1  uncharacterized protein AT5G64770 [Arabidopsis thaliana]                                                                                                                                                                                                                                                             | 79  | 79  | 5.00E-25 | 100.0 | 72.2 | 83.5 | uncharacterized protein                 | gbpln | Arabidopsis thaliana | AT5G64770.1   Symbols: RGF9   Encodes a root meristem growth factor (RGF). Belongs to a family of functionally redundant homologous peptides that are secreted, tyrosine-sulfated, and expressed mainly in the stem cell area and the innermost layer of central columella cells. RGFs are required for maintenance of the root stem cell niche and transit amplifying cell proliferation. Members of this family include: At5g60810 (RGF1), At1g13620 (RGF2), At2g04025 (RGF3), At3g30350 (RGF4), At5g51451 (RGF5), At4g16515 (RGF6), At3g02240 (RGF7), At2g03830 (RGF8) and At5g64770 (RGF9).   chr5:25897681-25898085 REVERSE LENGTH=79 | 79  | 79  | 8.00E-28 | 100.0 | 72.2 | 83.5 |



|                         |                                                                                                                                                                                                                                                                                                                                                                                                                                                                                                                                       |      |      |           |       |      |      |                                          |       |                      |                                                                                                                                                                                                                                                                                                                                                                                                                                                          |      |      |           |       |      |      |
|-------------------------|---------------------------------------------------------------------------------------------------------------------------------------------------------------------------------------------------------------------------------------------------------------------------------------------------------------------------------------------------------------------------------------------------------------------------------------------------------------------------------------------------------------------------------------|------|------|-----------|-------|------|------|------------------------------------------|-------|----------------------|----------------------------------------------------------------------------------------------------------------------------------------------------------------------------------------------------------------------------------------------------------------------------------------------------------------------------------------------------------------------------------------------------------------------------------------------------------|------|------|-----------|-------|------|------|
| Rsa1.0_00022.1.g1491.t1 | ref[XP_002864920.1] hypothetical protein ARALYDRAFT_496690 [Arabidopsis lyrata subsp. lyrata] gi 297310755 gb EFH41179.1] hypothetical protein ARALYDRAFT_496690 [Arabidopsis lyrata subsp. lyrata]                                                                                                                                                                                                                                                                                                                                   | 380  | 392  | 1.00E-122 | 103.2 | 78.4 | 83.4 | hypothetical protein ARALYDRAFT_496690   | gbpln | Arabidopsis lyrata   | AT5G64750.1   Symbols: ABR1   Integrase-type DNA-binding superfamily protein   chr5:25891679-25893656 FORWARD LENGTH=391                                                                                                                                                                                                                                                                                                                                 | 380  | 391  | 1.00E-118 | 102.9 | 77.1 | 81.6 |
| Rsa1.0_00022.1.g1492.t1 | ref[NP_201279.1] cellulose synthase A catalytic subunit 6 [UDP-forming] [Arabidopsis thaliana] gi 73917714 sp Q94JG6.2 CESA6_ARAT H RecName: Full=Cellulose synthase A catalytic subunit 6 [UDP-forming]; Short=AtCesA6; AltName: Full=AraxCelA; AltName: Full=Isoxaben-resistant protein 2; AltName: Full=Protein PROCUSTE 1; AltName: Full=Protein QULL                                                                                                                                                                             | 1079 | 1084 | 0         | 100.5 | 96.4 | 98.6 | cellulose synthase A catalytic subunit 6 | gbpln | Arabidopsis thaliana | AT5G64740.1   Symbols: CESA6, IXR2, E112, PRC1   cellulose synthase 6   chr5:25881555-25886333 FORWARD LENGTH=1084                                                                                                                                                                                                                                                                                                                                       | 1079 | 1084 | 0         | 100.5 | 96.4 | 98.6 |
| Rsa1.0_00022.1.g1493.t1 | gi 10177205 dbj BAB10307.1] cellulose synthase catalytic subunit [Arabidopsis thaliana] gi 332010562 gb AED97945.1] cellulose synthase A catalytic subunit 6 [UDP-formin] [Arabidopsis thaliana] ref[XP_002864917.1] hypothetical protein ARALYDRAFT_919795 [Arabidopsis lyrata subsp. lyrata] gi 297310752 gb EFH41176.1] hypothetical protein ARALYDRAFT_919795 [Arabidopsis lyrata subsp. lyrata]                                                                                                                                  | 721  | 860  | 0         | 119.3 | 64.9 | 80.0 | hypothetical protein ARALYDRAFT_919795   | gbpln | Arabidopsis lyrata   | AT5G64710.1   Symbols:   Putative endonuclease or glycosyl hydrolase   chr5:25869368-25872092 FORWARD LENGTH=841                                                                                                                                                                                                                                                                                                                                         | 721  | 841  | 0         | 116.6 | 64.4 | 77.8 |
| Rsa1.0_00022.1.g1494.t1 | #                                                                                                                                                                                                                                                                                                                                                                                                                                                                                                                                     | #    | #    | #         | #     | #    | #    | -                                        | ----  | ----                 | #                                                                                                                                                                                                                                                                                                                                                                                                                                                        | #    | #    | #         | #     | #    |      |
| Rsa1.0_00022.1.g1495.t1 | gi EOA12539.1] hypothetical protein CARUB_v10026529mg [Capsella rubella]                                                                                                                                                                                                                                                                                                                                                                                                                                                              | 440  | 400  | 4.00E-82  | 90.9  | 54.8 | 64.5 | hypothetical protein CARUB_v10026529mg   | gbpln | Capsella rubella     | AT5G64690.1   Symbols:   neurofilament triplet H protein-related   chr5:25862969-25864521 FORWARD LENGTH=344                                                                                                                                                                                                                                                                                                                                             | 440  | 344  | 3.00E-64  | 78.2  | 40.5 | 49.1 |
| Rsa1.0_00022.1.g1496.t1 | ref[NP_201273.1] uncharacterized protein [Arabidopsis thaliana] gi 30698059 ref NP_851270.1] uncharacterized protein [Arabidopsis thaliana] gi 10178071 dbj BAB11435.1] unnamed protein product [Arabidopsis thaliana] gi 26452974 dbj BAC43563.1] unknown protein [Arabidopsis thaliana] gi 28973531 gb AA064090.1] unknown protein [Arabidopsis thaliana] gi 332010553 gb AED97936.1] uncharacterized protein AT5G64680 [Arabidopsis thaliana] gi 332010554 gb AED97937.1] uncharacterized protein AT5G64680 [Arabidopsis thaliana] | 200  | 203  | 2.00E-43  | 101.5 | 50.0 | 63.5 | uncharacterized protein                  | gbpln | Arabidopsis thaliana | AT5G64680.2   Symbols:   unknown protein; FUNCTIONS IN: molecular_function unknown; INVOLVED IN: biological_process unknown; LOCATED IN: nucleolus; EXPRESSED IN: 23 plant structures; EXPRESSED DURING: 13 growth stages; Has 1807 Blast hits to 1807 proteins in 277 species: Archae - 0; Bacteria - 0; Metazoa - 736; Fungi - 347; Plants - 385; Viruses - 0; Other Eukaryotes - 339 (source: NCBI BLINK)   chr5:25854433-25855331 FORWARD LENGTH=203 | 200  | 203  | 9.00E-46  | 101.5 | 50.0 | 63.5 |
| Rsa1.0_00022.1.g1497.t1 | dbj BAE44362.1] alpha-L-arabinofuranosidase [Raphanus sativus]                                                                                                                                                                                                                                                                                                                                                                                                                                                                        | 778  | 780  | 0         | 100.3 | 91.0 | 94.5 | alpha-L-arabinofuranosidase              | gbpln | Raphanus sativus     | AT5G64570.1   Symbols: XYL4, ATBXL4   beta-D-xylosidase 4   chr5:25810227-25813309 REVERSE LENGTH=784                                                                                                                                                                                                                                                                                                                                                    | 778  | 784  | 0         | 100.8 | 89.5 | 94.2 |
| Rsa1.0_00022.1.g1498.t2 | ref[XP_002866621.1] hypothetical protein ARALYDRAFT_496668 [Arabidopsis lyrata subsp. lyrata] gi 297312456 gb EFH42880.1] hypothetical protein ARALYDRAFT_496668 [Arabidopsis lyrata subsp. lyrata]                                                                                                                                                                                                                                                                                                                                   | 660  | 395  | 1.00E-155 | 59.8  | 45.0 | 49.4 | hypothetical protein ARALYDRAFT_496668   | gbpln | Arabidopsis lyrata   | AT5G64560.1   Symbols: MGT9, MRS2-2, ATMGT9   magnesium transporter 9   chr5:25807025-25809395 REVERSE LENGTH=394                                                                                                                                                                                                                                                                                                                                        | 660  | 394  | 1.00E-152 | 59.7  | 44.8 | 49.2 |
| Rsa1.0_00022.1.g1499.t1 | ref[XP_002866619.1] hypothetical protein ARALYDRAFT_358659 [Arabidopsis lyrata subsp. lyrata] gi 297312454 gb EFH42878.1] hypothetical protein ARALYDRAFT_358659 [Arabidopsis lyrata subsp. lyrata]                                                                                                                                                                                                                                                                                                                                   | 574  | 1082 | 0         | 188.5 | 89.9 | 93.4 | hypothetical protein ARALYDRAFT_358659   | gbpln | Arabidopsis lyrata   | AT5G64550.1   Symbols:   Ioricrin-related   chr5:25801794-25803698 REVERSE LENGTH=634                                                                                                                                                                                                                                                                                                                                                                    | 574  | 634  | 0         | 110.5 | 89.2 | 93.7 |
| Rsa1.0_00022.1.g1500.t1 | ref[NP_201258.2] xylem NAC domain 1 [Arabidopsis thaliana] gi 26452583 dbj BAC43376.1] unknown protein [Arabidopsis thaliana] gi 107738104 gb ABF83636.1] At5g64530 [Arabidopsis thaliana] gi 332010530 gb AED97913.1] xylem NAC domain 1 [Arabidopsis thaliana]                                                                                                                                                                                                                                                                      | 185  | 187  | 1.00E-88  | 101.1 | 89.7 | 94.6 | xylem NAC domain 1                       | gbpln | Arabidopsis thaliana | AT5G64530.1   Symbols: ANAC104, XND1   xylem NAC domain 1   chr5:25795360-25796699 FORWARD LENGTH=187                                                                                                                                                                                                                                                                                                                                                    | 185  | 187  | 5.00E-91  | 101.1 | 89.7 | 94.6 |

|                         |                                                                                                                                                                                                                                                                                                                                                                                                                                                                                                                                                                                                      |     |      |           |       |      |      |                                        |       |                      |                                                                                                                                                                                                                                                                                                                                                |     |      |           |       |      |      |
|-------------------------|------------------------------------------------------------------------------------------------------------------------------------------------------------------------------------------------------------------------------------------------------------------------------------------------------------------------------------------------------------------------------------------------------------------------------------------------------------------------------------------------------------------------------------------------------------------------------------------------------|-----|------|-----------|-------|------|------|----------------------------------------|-------|----------------------|------------------------------------------------------------------------------------------------------------------------------------------------------------------------------------------------------------------------------------------------------------------------------------------------------------------------------------------------|-----|------|-----------|-------|------|------|
| Rsa1.0_00022.1.g1501.t1 | refXP_002864749.1   hypothetical protein ARALYDRAFT_496339 [Arabidopsis lyrata subsp. lyrata] gi 297310584 gb EFH41008.1                                                                                                                                                                                                                                                                                                                                                                                                                                                                             | 390 | 390  | 6.00E-90  | 100.0 | 48.7 | 62.6 | hypothetical protein ARALYDRAFT_496339 | gbpln | Arabidopsis lyrata   | AT5G61720.1   Symbols:   Protein of unknown function (DUF1216)   chr5:24801621-24803006 FORWARD LENGTH=390                                                                                                                                                                                                                                     | 390 | 390  | 5.00E-91  | 100.0 | 47.7 | 63.1 |
| Rsa1.0_00022.1.g1502.t2 | hypothetical protein ARALYDRAFT_496339 [Arabidopsis lyrata subsp. lyrata] refXP_002864902.1   N-acylethanolamine amidohydrolase [Arabidopsis lyrata subsp. lyrata] gi 297310737 gb EFH41161.1   N-acylethanolamine amidohydrolase [Arabidopsis lyrata subsp. lyrata]                                                                                                                                                                                                                                                                                                                                 | 632 | 607  | 0         | 96.0  | 81.2 | 88.9 | N-acylethanolamine amidohydrolase      | gbpln | Arabidopsis lyrata   | AT5G64440.1   Symbols: AtFAAH, FAAH   fatty acid amide hydrolase   chr5:25766229-25770260 FORWARD LENGTH=607                                                                                                                                                                                                                                   | 632 | 607  | 0         | 96.0  | 80.9 | 88.0 |
| Rsa1.0_00022.1.g1503.t1 | gb EOA12745.1   hypothetical protein CARUB_v10028367mg [Capsella rubella]                                                                                                                                                                                                                                                                                                                                                                                                                                                                                                                            | 486 | 503  | 0         | 103.5 | 77.2 | 84.0 | hypothetical protein CARUB_v10028367mg | gbpln | Capsella rubella     | AT5G64430.1   Symbols:   Octicosapeptide/Phox/Bem1p family protein   chr5:25762540-25764081 REVERSE LENGTH=513                                                                                                                                                                                                                                 | 486 | 513  | 1.00E-174 | 105.6 | 79.2 | 85.6 |
| Rsa1.0_00022.1.g1504.t1 | gb EOA12796.1   hypothetical protein CARUB_v10025747mg [Capsella rubella]                                                                                                                                                                                                                                                                                                                                                                                                                                                                                                                            | 178 | 1306 | 2.00E-37  | 733.7 | 41.6 | 47.8 | hypothetical protein CARUB_v10025747mg | gbpln | Capsella rubella     | AT5G64420.1   Symbols:   DNA polymerase V family   chr5:25756416-25761122 FORWARD LENGTH=1306                                                                                                                                                                                                                                                  | 178 | 1306 | 1.00E-39  | 733.7 | 40.4 | 47.2 |
| Rsa1.0_00022.1.g1505.t1 | gb AAM64614.1   Isp4-like protein [Arabidopsis thaliana]                                                                                                                                                                                                                                                                                                                                                                                                                                                                                                                                             | 729 | 729  | 0         | 100.0 | 94.1 | 97.4 | Isp4-like protein                      | gbpln | Arabidopsis thaliana | AT5G64410.1   Symbols: ATOPT4, OPT4   oligopeptide transporter 4   chr5:25750921-25754974 REVERSE LENGTH=729                                                                                                                                                                                                                                   | 729 | 729  | 0         | 100.0 | 94.1 | 97.1 |
| Rsa1.0_00022.1.g1506.t1 | gb EOA12386.1   hypothetical protein CARUB_v10026348mg [Capsella rubella] gi 492548193 gb EOA12387.1   hypothetical protein CARUB_v10026348mg [Capsella rubella]                                                                                                                                                                                                                                                                                                                                                                                                                                     | 381 | 469  | 1.00E-138 | 123.1 | 74.3 | 82.7 | hypothetical protein CARUB_v10026348mg | gbpln | Capsella rubella     | AT5G64360.4   Symbols:   Chaperone DnaJ-domain superfamily protein   chr5:25737208-25738602 REVERSE LENGTH=464                                                                                                                                                                                                                                 | 381 | 464  | 1.00E-132 | 121.8 | 73.2 | 80.8 |
| Rsa1.0_00022.1.g1507.t1 | dbj BAB11643.1   unnamed protein product [Arabidopsis thaliana]                                                                                                                                                                                                                                                                                                                                                                                                                                                                                                                                      | 675 | 711  | 0         | 105.3 | 54.5 | 67.9 | unnamed protein product                | gbpln | Arabidopsis thaliana | AT5G37210.1   Symbols:   Cysteine/Histidine-rich C1 domain family protein   chr5:14729225-14731508 REVERSE LENGTH=677                                                                                                                                                                                                                          | 675 | 677  | 0         | 100.3 | 54.5 | 66.8 |
| Rsa1.0_00022.1.g1508.t1 | # # # # # # # #                                                                                                                                                                                                                                                                                                                                                                                                                                                                                                                                                                                      |     |      |           |       |      |      | -                                      | ----  | ----                 | # # # # # # #                                                                                                                                                                                                                                                                                                                                  |     |      |           |       |      |      |
| Rsa1.0_00022.1.g1509.t1 | ref XP_002866611.1   FK506-binding protein 12 kD [Arabidopsis lyrata subsp. lyrata] gi 297312446 gb EFH42870.1   FK506-binding protein 12 kD [Arabidopsis lyrata subsp. lyrata]                                                                                                                                                                                                                                                                                                                                                                                                                      | 126 | 112  | 3.00E-42  | 88.9  | 65.9 | 68.3 | FK506-binding protein 12 kD            | gbpln | Arabidopsis lyrata   | AT5G64350.1   Symbols: FKBP12, ATFKBP12   FK506-binding protein 12   chr5:25734810-25735990 REVERSE LENGTH=112                                                                                                                                                                                                                                 | 126 | 112  | 4.00E-43  | 88.9  | 64.3 | 65.9 |
| Rsa1.0_00022.1.g1510.t1 | dbj BAJ34099.1   unnamed protein product [Thellungiella halophila]                                                                                                                                                                                                                                                                                                                                                                                                                                                                                                                                   | 270 | 329  | 6.00E-88  | 121.9 | 73.0 | 84.8 | unnamed protein product                | ----  | ----                 | AT5G64340.1   Symbols: SAC51   sequence-specific DNA binding transcription factor:transcription regulators   chr5:25730890-25731936 REVERSE LENGTH=348                                                                                                                                                                                         | 270 | 348  | 1.00E-87  | 128.9 | 74.8 | 85.6 |
| Rsa1.0_00022.1.g1511.t1 | gb EOA12443.1   hypothetical protein CARUB_v10028516mg [Capsella rubella]                                                                                                                                                                                                                                                                                                                                                                                                                                                                                                                            | 818 | 728  | 0         | 89.0  | 69.8 | 77.5 | hypothetical protein CARUB_v10028516mg | gbpln | Capsella rubella     | AT5G64320.1   Symbols:   Pentatricopeptide repeat (PPR) superfamily protein   chr5:25723247-25725439 REVERSE LENGTH=730                                                                                                                                                                                                                        | 818 | 730  | 0         | 89.2  | 69.3 | 76.8 |
| Rsa1.0_00022.1.g1512.t1 | ref NP_201233.1   dicarboxylate transporter 2.2 [Arabidopsis thaliana] gi 75171657 sp Q9FMF8.1 DIT22_ARATH RecName: Full=Dicarboxylate transporter 2.2, chloroplastic; AltName: Full=AtpDCT2; Flags: Precursor gi 9759404 dbj BAB09859.1   2-oxoglutarate/malate translocator [Arabidopsis thaliana] gi 15028073 gb AAK76567.1   putative 2-oxoglutarate/malate translocator protein [Arabidopsis thaliana] gi 22136830 gb AAM91759.1   putative 2-oxoglutarate/malate translocator protein [Arabidopsis thaliana] gi 332010482 gb AED97865.1   dicarboxylate transporter 2.2 [Arabidopsis thaliana] | 558 | 549  | 0         | 98.4  | 85.8 | 91.9 | dicarboxylate transporter 2.2          | gbpln | Arabidopsis thaliana | AT5G64280.1   Symbols: DIT2.2   dicarboxylate transporter 2.2   chr5:25711330-25713411 REVERSE LENGTH=549                                                                                                                                                                                                                                      | 558 | 549  | 0         | 98.4  | 85.8 | 91.9 |
| Rsa1.0_00022.1.g1513.t1 | gb ABD65112.1   hypothetical protein 31.t00014 [Brassica oleracea]                                                                                                                                                                                                                                                                                                                                                                                                                                                                                                                                   | 102 | 122  | 8.00E-18  | 119.6 | 49.0 | 66.7 | hypothetical protein 31.t00014         | gbpln | Brassica oleracea    | # # # # # # #                                                                                                                                                                                                                                                                                                                                  |     |      |           |       |      |      |
| Rsa1.0_00022.1.g1514.t1 | dbj BAJ33879.1   unnamed protein product [Thellungiella halophila]                                                                                                                                                                                                                                                                                                                                                                                                                                                                                                                                   | 301 | 304  | 2.33E-156 | 101.0 | 86.0 | 91.0 | unnamed protein product                | ----  | ----                 | AT5G64260.1   Symbols: EXL2   EXORDIUM like 2   chr5:25703980-25704897 FORWARD LENGTH=305                                                                                                                                                                                                                                                      | 301 | 305  | 2.33E-156 | 101.3 | 84.1 | 90.0 |
| Rsa1.0_00022.1.g1515.t1 | gb ABD64939.1   hypothetical protein 24.t00017 [Brassica oleracea]                                                                                                                                                                                                                                                                                                                                                                                                                                                                                                                                   | 348 | 442  | 1.00E-136 | 127.0 | 69.0 | 77.9 | hypothetical protein 24.t00017         | gbpln | Brassica oleracea    | AT2G13770.1   Symbols:   CONTAINS InterPro DOMAIN/s: Putative harbing transposase-derived nuclease (InterPro:IPR006912); Has 451 Blast hits to 352 proteins in 33 species: Archae - 0; Bacteria - 0; Metazoa - 28; Fungi - 8; Plants - 388; Viruses - 0; Other Eukaryotes - 27 (source: NCBI BLINK).   chr2:5736603-5737847 FORWARD LENGTH=343 | 348 | 343  | 1.00E-32  | 98.6  | 17.5 | 22.7 |

|                         |                                                                                                                                                                                                                                                                                                                                                                                                                                                                                                                                                                                                                                                                                                                                                                                                                                                                                           |      |      |           |       |      |      |                                                |       |                         |                                                                                                                                                                                                                                                                                                                                                                                                                                                                                                                                                                                                                                             |      |      |           |       |      |      |
|-------------------------|-------------------------------------------------------------------------------------------------------------------------------------------------------------------------------------------------------------------------------------------------------------------------------------------------------------------------------------------------------------------------------------------------------------------------------------------------------------------------------------------------------------------------------------------------------------------------------------------------------------------------------------------------------------------------------------------------------------------------------------------------------------------------------------------------------------------------------------------------------------------------------------------|------|------|-----------|-------|------|------|------------------------------------------------|-------|-------------------------|---------------------------------------------------------------------------------------------------------------------------------------------------------------------------------------------------------------------------------------------------------------------------------------------------------------------------------------------------------------------------------------------------------------------------------------------------------------------------------------------------------------------------------------------------------------------------------------------------------------------------------------------|------|------|-----------|-------|------|------|
| Rsa1.0_00022.1.g1516.t1 | ref[NP_201229.1] metacaspase 3<br>[Arabidopsis thaliana]<br>gi 75262715 sp Q9FMG1.1 MCA3_ARAT<br>H RecName: Full=Metacaspase-3;<br>Short=AtMC3; AltName:<br>Full=Metacaspase 1a; Short=AtMCP1a<br>gi 9759400 dbj BAB09855.1  unnamed<br>protein product [Arabidopsis thaliana]<br>gi 21592565 gb AAM64514.1  latex-<br>abundant protein, putative [Arabidopsis<br>thaliana] gi 27311579 gb AAO00755.1 <br>putative protein [Arabidopsis thaliana]<br>gi 32482816 gb AAP84708.1 <br>metacaspase 3 [Arabidopsis thaliana]<br>gi 34098865 gb AAQ56815.1  At5g64240<br>[Arabidopsis thaliana]<br>gi 332010477 gb AED97860.1 <br>metacaspase 3 [Arabidopsis thaliana]<br>ref[XP_002870617.1] hypothetical<br>protein ARALYDRAFT_916024<br>[Arabidopsis lyrata subsp. lyrata]<br>gi 297316453 gb EFH46876.1 <br>hypothetical protein<br>ARALYDRAFT_916024 [Arabidopsis<br>lyrata subsp. lyrata] | 386  | 362  | 1.00E-158 | 93.8  | 72.3 | 79.0 | metacaspase 3                                  | gbpln | Arabidopsis<br>thaliana | AT5G64240.2   Symbols: AtMC3, MC3  <br>metacaspase 3   chr5:25695836-25697249<br>FORWARD LENGTH=362                                                                                                                                                                                                                                                                                                                                                                                                                                                                                                                                         | 386  | 362  | 1.00E-160 | 93.8  | 72.3 | 79.0 |
| Rsa1.0_00022.1.g1517.t1 | ref[XP_002870617.1] hypothetical<br>protein ARALYDRAFT_916024<br>[Arabidopsis lyrata subsp. lyrata]<br>gi 297316453 gb EFH46876.1 <br>hypothetical protein<br>ARALYDRAFT_916024 [Arabidopsis<br>lyrata subsp. lyrata]                                                                                                                                                                                                                                                                                                                                                                                                                                                                                                                                                                                                                                                                     | 679  | 704  | 0         | 103.7 | 76.4 | 86.7 | hypothetical protein<br>ARALYDRAFT_916024      | gbpln | Arabidopsis<br>lyrata   | AT5G41770.1   Symbols:   crooked neck<br>protein, putative / cell cycle protein,<br>putative   chr5:16718021-16720936<br>FORWARD LENGTH=705                                                                                                                                                                                                                                                                                                                                                                                                                                                                                                 | 679  | 705  | 0         | 103.8 | 76.7 | 86.9 |
| Rsa1.0_00022.1.g1518.t1 | ref[NP_568987.2] uncharacterized<br>protein [Arabidopsis thaliana]<br>gi 332010475 gb AED97858.1 <br>uncharacterized protein AT5G64230<br>[Arabidopsis thaliana]                                                                                                                                                                                                                                                                                                                                                                                                                                                                                                                                                                                                                                                                                                                          | 371  | 379  | 1.00E-150 | 102.2 | 77.6 | 86.0 | uncharacterized<br>protein                     | gbpln | Arabidopsis<br>thaliana | AT5G64230.1   Symbols:   unknown protein;<br>FUNCTIONS IN: molecular_function unknown;<br>INVOLVED IN: biological_process unknown;<br>LOCATED IN: endomembrane system;<br>EXPRESSED IN: 9 plant structures;<br>EXPRESSED DURING: 4 anthesis, petal<br>differentiation and expansion stage; BEST<br>Arabidopsis thaliana protein match is:<br>unknown protein (TAIR:AT3G19920.1). Has<br>35333 Blast hits to 34131 proteins in 2444<br>species: Archae - 798; Bacteria - 22429;<br>Metazoa - 974; Fungi - 991; Plants - 531;<br>Viruses - 0; Other Eukaryotes - 9610<br>(source: NCBI BLINK)   chr5:25692572-<br>25693909 FORWARD LENGTH=379 | 371  | 379  | 1.00E-153 | 102.2 | 77.6 | 86.0 |
| Rsa1.0_00022.1.g1519.t1 | ref[XP_002866597.1] hypothetical<br>protein ARALYDRAFT_496610<br>[Arabidopsis lyrata subsp. lyrata]<br>gi 297312432 gb EFH42856.1 <br>hypothetical protein<br>ARALYDRAFT_496610 [Arabidopsis<br>lyrata subsp. lyrata]                                                                                                                                                                                                                                                                                                                                                                                                                                                                                                                                                                                                                                                                     | 113  | 118  | 2.00E-47  | 104.4 | 88.5 | 91.2 | hypothetical protein<br>ARALYDRAFT_496610      | gbpln | Arabidopsis<br>lyrata   | AT5G64130.1   Symbols:   cAMP-regulated<br>phosphoprotein 19-related protein  <br>chr5:25664547-25665339 REVERSE<br>LENGTH=115                                                                                                                                                                                                                                                                                                                                                                                                                                                                                                              | 113  | 115  | 5.00E-50  | 101.8 | 87.6 | 90.3 |
| Rsa1.0_00022.1.g1520.t2 | #                                                                                                                                                                                                                                                                                                                                                                                                                                                                                                                                                                                                                                                                                                                                                                                                                                                                                         | #    | #    | #         | #     | #    | -    | ----                                           | ----  | #                       | #                                                                                                                                                                                                                                                                                                                                                                                                                                                                                                                                                                                                                                           | #    | #    | #         | #     | #    |      |
| Rsa1.0_00022.1.g1521.t1 | gb EOA13703.1  hypothetical protein<br>CARUB_v10026774mg [Capsella rubella]                                                                                                                                                                                                                                                                                                                                                                                                                                                                                                                                                                                                                                                                                                                                                                                                               | 328  | 328  | 1.00E-163 | 100.0 | 86.3 | 91.8 | hypothetical protein<br>CARUB_v10026774mg      | gbpln | Capsella<br>rubella     | AT5G64120.1   Symbols:   Peroxidase<br>superfamily protein   chr5:25659551-<br>25660946 REVERSE LENGTH=328                                                                                                                                                                                                                                                                                                                                                                                                                                                                                                                                  | 328  | 328  | 1.00E-163 | 100.0 | 84.8 | 91.5 |
| Rsa1.0_00023.1.g1522.t2 | ref[NP_564728.3] WD40 and Beach<br>domain-containing protein [Arabidopsis<br>thaliana] gi 332195397 gb AEE33518.1 <br>WD40 and Beach domain-containing<br>protein [Arabidopsis thaliana]                                                                                                                                                                                                                                                                                                                                                                                                                                                                                                                                                                                                                                                                                                  | 2615 | 2604 | 0         | 99.6  | 90.6 | 94.7 | WD40 and Beach<br>domain-containing<br>protein | gbpln | Arabidopsis<br>thaliana | AT1G58230.1   Symbols:   binding  <br>chr1:21566331-21578865 FORWARD<br>LENGTH=2604                                                                                                                                                                                                                                                                                                                                                                                                                                                                                                                                                         | 2615 | 2604 | 0         | 99.6  | 90.6 | 94.7 |
| Rsa1.0_00023.1.g1523.t1 | #                                                                                                                                                                                                                                                                                                                                                                                                                                                                                                                                                                                                                                                                                                                                                                                                                                                                                         | #    | #    | #         | #     | #    | -    | ----                                           | ----  | #                       | #                                                                                                                                                                                                                                                                                                                                                                                                                                                                                                                                                                                                                                           | #    | #    | #         | #     | #    |      |
| Rsa1.0_00023.1.g1524.t1 | #                                                                                                                                                                                                                                                                                                                                                                                                                                                                                                                                                                                                                                                                                                                                                                                                                                                                                         | #    | #    | #         | #     | #    | -    | ----                                           | ----  | #                       | #                                                                                                                                                                                                                                                                                                                                                                                                                                                                                                                                                                                                                                           | #    | #    | #         | #     | #    |      |
| Rsa1.0_00023.1.g1525.t1 | gb ACG60682.1  transposon-like ORF<br>[Brassica oleracea var. alboglabra]                                                                                                                                                                                                                                                                                                                                                                                                                                                                                                                                                                                                                                                                                                                                                                                                                 | 553  | 704  | 1.00E-104 | 127.3 | 32.7 | 34.4 | transposon-like ORF                            | gbpln | Brassica<br>oleracea    | #                                                                                                                                                                                                                                                                                                                                                                                                                                                                                                                                                                                                                                           | #    | #    | #         | #     | #    |      |
| Rsa1.0_00023.1.g1526.t1 | gb ABD65073.1  hypothetical protein<br>27.t00059 [Brassica oleracea]                                                                                                                                                                                                                                                                                                                                                                                                                                                                                                                                                                                                                                                                                                                                                                                                                      | 334  | 341  | 7.00E-21  | 102.1 | 14.4 | 17.4 | hypothetical protein<br>27.t00059              | gbpln | Brassica<br>oleracea    | #                                                                                                                                                                                                                                                                                                                                                                                                                                                                                                                                                                                                                                           | #    | #    | #         | #     | #    |      |
| Rsa1.0_00023.1.g1527.t1 | emb CAB39638.1  RNA-directed DNA<br>polymerase-like protein [Arabidopsis<br>thaliana] gi 7267666 emb CAB78094.1 <br>RNA-directed DNA polymerase-like<br>protein [Arabidopsis thaliana]                                                                                                                                                                                                                                                                                                                                                                                                                                                                                                                                                                                                                                                                                                    | 508  | 1274 | 1.00E-131 | 250.8 | 51.0 | 63.4 | RNA-directed DNA<br>polymerase-like<br>protein | gbpln | Arabidopsis<br>thaliana | AT4G29090.1   Symbols:   Ribonuclease H-<br>like superfamily protein   chr4:14333528-<br>14335255 FORWARD LENGTH=575                                                                                                                                                                                                                                                                                                                                                                                                                                                                                                                        | 508  | 575  | 1.00E-61  | 113.2 | 32.1 | 49.0 |
| Rsa1.0_00023.1.g1528.t1 | gb AAG50957.1 AC073943.7<br>hypothetical protein [Arabidopsis<br>thaliana]                                                                                                                                                                                                                                                                                                                                                                                                                                                                                                                                                                                                                                                                                                                                                                                                                | 940  | 1195 | 0         | 127.1 | 80.4 | 87.1 | hypothetical protein                           | gbpln | Arabidopsis<br>thaliana | AT1G58210.1   Symbols: EMB1674   kinase<br>interacting family protein   chr1:21553621-<br>21558056 FORWARD LENGTH=1246                                                                                                                                                                                                                                                                                                                                                                                                                                                                                                                      | 940  | 1246 | 0         | 132.6 | 79.9 | 86.7 |
| Rsa1.0_00023.1.g1529.t1 | ref[XP_002886709.1] EMB1674<br>[Arabidopsis lyrata subsp. lyrata]<br>gi 297332550 gb EFH62968.1  EMB1674<br>[Arabidopsis lyrata subsp. lyrata]                                                                                                                                                                                                                                                                                                                                                                                                                                                                                                                                                                                                                                                                                                                                            | 271  | 1287 | 2.00E-63  | 474.9 | 52.8 | 64.2 | EMB1674                                        | gbpln | Arabidopsis<br>lyrata   | AT1G58210.1   Symbols: EMB1674   kinase<br>interacting family protein   chr1:21553621-<br>21558056 FORWARD LENGTH=1246                                                                                                                                                                                                                                                                                                                                                                                                                                                                                                                      | 271  | 1246 | 2.00E-62  | 459.8 | 53.9 | 67.5 |

|                         |                                                                                                                                                                                                                                                                                                                                                                                                                                                                                                                                             |     |      |           |       |      |      |                                        |       |                      |                                                                                                                                                                                                                                                                                                                                                                                                                                                                                                                                                            |     |     |           |       |      |      |
|-------------------------|---------------------------------------------------------------------------------------------------------------------------------------------------------------------------------------------------------------------------------------------------------------------------------------------------------------------------------------------------------------------------------------------------------------------------------------------------------------------------------------------------------------------------------------------|-----|------|-----------|-------|------|------|----------------------------------------|-------|----------------------|------------------------------------------------------------------------------------------------------------------------------------------------------------------------------------------------------------------------------------------------------------------------------------------------------------------------------------------------------------------------------------------------------------------------------------------------------------------------------------------------------------------------------------------------------------|-----|-----|-----------|-------|------|------|
| Rsa1.0_00023.1.g1530.t2 | refXP_002888236.1  hypothetical protein ARALYDRAFT_475431 [Arabidopsis lyrata subsp. lyrata] gi 297334077 gb EFH64495.1  hypothetical protein ARALYDRAFT_475431 [Arabidopsis lyrata subsp. lyrata]                                                                                                                                                                                                                                                                                                                                          | 618 | 671  | 0         | 108.6 | 84.1 | 89.8 | hypothetical protein ARALYDRAFT_475431 | gbpln | Arabidopsis lyrata   | AT1G58200.2   Symbols: MSL3   MSCS-like 3   chr1:21548370-21552488 REVERSE LENGTH=678                                                                                                                                                                                                                                                                                                                                                                                                                                                                      | 618 | 678 | 0         | 109.7 | 82.4 | 89.0 |
| Rsa1.0_00023.1.g1531.t1 | gb AAG50756.1 AC079131.1 hypothetical protein [Arabidopsis thaliana]                                                                                                                                                                                                                                                                                                                                                                                                                                                                        | 831 | 1784 | 0         | 214.7 | 73.3 | 82.4 | hypothetical protein                   | gbpln | Arabidopsis thaliana | AT1G58190.1   Symbols: AtRLP9, RLP9   receptor like protein 9   chr1:21540720-21544330 FORWARD LENGTH=932                                                                                                                                                                                                                                                                                                                                                                                                                                                  | 831 | 932 | 0         | 112.2 | 73.3 | 82.4 |
| Rsa1.0_00023.1.g1532.t1 | gb AAD15321.1  putative reverse transcriptase [Arabidopsis thaliana] gi 7270688 emb CAB77850.1  putative reverse transcriptase [Arabidopsis thaliana]                                                                                                                                                                                                                                                                                                                                                                                       | 358 | 839  | 2.00E-27  | 234.4 | 19.8 | 30.4 | putative reverse transcriptase         | gbpln | Arabidopsis thaliana | #                                                                                                                                                                                                                                                                                                                                                                                                                                                                                                                                                          | #   | #   | #         | #     | #    | #    |
| Rsa1.0_00023.1.g1533.t1 | #                                                                                                                                                                                                                                                                                                                                                                                                                                                                                                                                           | #   | #    | #         | #     | #    | #    | -                                      | ----  | ----                 | #                                                                                                                                                                                                                                                                                                                                                                                                                                                                                                                                                          | #   | #   | #         | #     | #    | #    |
| Rsa1.0_00023.1.g1534.t1 | gb EOA35530.1  hypothetical protein CARUB_v10020737mg [Capsella rubella]                                                                                                                                                                                                                                                                                                                                                                                                                                                                    | 290 | 290  | 1.00E-151 | 100.0 | 87.6 | 94.5 | hypothetical protein CARUB_v10020737mg | gbpln | Capsella rubella     | AT1G58180.4   Symbols: BCA6   beta carbonic anhydrase 6   chr1:21538010-21539711 REVERSE LENGTH=290                                                                                                                                                                                                                                                                                                                                                                                                                                                        | 290 | 290 | 1.00E-151 | 100.0 | 86.6 | 92.4 |
| Rsa1.0_00023.1.g1535.t1 | gb EOA34327.1  hypothetical protein CARUB_v10021847mg [Capsella rubella]                                                                                                                                                                                                                                                                                                                                                                                                                                                                    | 420 | 422  | 0         | 100.5 | 86.4 | 91.4 | hypothetical protein CARUB_v10021847mg | gbpln | Capsella rubella     | AT1G58120.1   Symbols:   BEST Arabidopsis thaliana protein match is: methyltransferases (TAIR:AT5G01710.1); Has 93 Blast hits to 93 proteins in 15 species: Archae - 0; Bacteria - 0; Metazoa - 1; Fungi - 0; Plants - 92; Viruses - 0; Other Eukaryotes - 0 (source: NCBI BLINK).   chr1:21520962-21522224 FORWARD LENGTH=420                                                                                                                                                                                                                             | 420 | 420 | 0         | 100.0 | 86.9 | 92.4 |
| Rsa1.0_00023.1.g1536.t2 | refXP_002888232.1  predicted protein [Arabidopsis lyrata subsp. lyrata] gi 297334073 gb EFH64491.1  predicted protein [Arabidopsis lyrata subsp. lyrata]                                                                                                                                                                                                                                                                                                                                                                                    | 359 | 372  | 1.00E-131 | 103.6 | 75.8 | 82.7 | predicted protein                      | gbpln | Arabidopsis lyrata   | AT1G58110.2   Symbols:   Basic-leucine zipper (bZIP) transcription factor family protein   chr1:21515919-21517374 REVERSE LENGTH=374                                                                                                                                                                                                                                                                                                                                                                                                                       | 359 | 374 | 1.00E-133 | 104.2 | 76.0 | 82.7 |
| Rsa1.0_00023.1.g1537.t2 | ref NP_191684.1  myb domain protein 17 [Arabidopsis thaliana] gi 6850892 emb CAB71055.1  putative transcription factor (MYB17) [Arabidopsis thaliana] gi 41619302 gb AAS10071.1  MYB transcription factor [Arabidopsis thaliana] gi 193885153 gb ACF28390.1  At3g61250 [Arabidopsis thaliana] gi 332646659 gb AEE80179.1  myb domain protein 17 [Arabidopsis thaliana]                                                                                                                                                                      | 436 | 299  | 3.00E-65  | 68.6  | 35.3 | 43.1 | myb domain protein 17                  | gbpln | Arabidopsis thaliana | AT3G61250.1   Symbols: AtMYB17, MYB17   myb domain protein 17   chr3:22671306-22672551 FORWARD LENGTH=299                                                                                                                                                                                                                                                                                                                                                                                                                                                  | 436 | 299 | 8.00E-68  | 68.6  | 35.3 | 43.1 |
| Rsa1.0_00023.1.g1538.t1 | gb EOA34940.1  hypothetical protein CARUB_v10020024mg [Capsella rubella]                                                                                                                                                                                                                                                                                                                                                                                                                                                                    | 576 | 592  | 0         | 102.8 | 68.8 | 77.3 | hypothetical protein CARUB_v10020024mg | gbpln | Capsella rubella     | AT1G58025.1   Symbols:   DNA-binding bromodomain-containing protein   chr1:21458219-21461757 REVERSE LENGTH=572                                                                                                                                                                                                                                                                                                                                                                                                                                            | 576 | 572 | 0         | 99.3  | 67.7 | 76.2 |
| Rsa1.0_00023.1.g1539.t1 | refXP_002879419.1  hypothetical protein ARALYDRAFT_902347 [Arabidopsis lyrata subsp. lyrata] gi 297325258 gb EFH55678.1  hypothetical protein ARALYDRAFT_902347 [Arabidopsis lyrata subsp. lyrata]                                                                                                                                                                                                                                                                                                                                          | 173 | 336  | 2.00E-33  | 194.2 | 56.1 | 65.9 | hypothetical protein ARALYDRAFT_902347 | gbpln | Arabidopsis lyrata   | AT2G32820.1   Symbols:   Transcription elongation factor (TFIIS) family protein   chr2:13926037-13926786 FORWARD LENGTH=249                                                                                                                                                                                                                                                                                                                                                                                                                                | 173 | 249 | 3.00E-35  | 143.9 | 56.1 | 71.7 |
| Rsa1.0_00023.1.g1540.t1 | #                                                                                                                                                                                                                                                                                                                                                                                                                                                                                                                                           | #   | #    | #         | #     | #    | #    | -                                      | ----  | ----                 | #                                                                                                                                                                                                                                                                                                                                                                                                                                                                                                                                                          | #   | #   | #         | #     | #    | #    |
| Rsa1.0_00023.1.g1541.t1 | ref NP_176081.1  uncharacterized protein [Arabidopsis thaliana] gi 42571907 ref NP_974044.1  uncharacterized protein [Arabidopsis thaliana] gi 12321352 gb AAG50748.1 AC079733_16 hypothetical protein [Arabidopsis thaliana] gi 18176030 gb AAL59971.1  unknown protein [Arabidopsis thaliana] gi 22136846 gb AAM91767.1  unknown protein [Arabidopsis thaliana] gi 332195330 gb AEE33451.1  uncharacterized protein AT1G57680 [Arabidopsis thaliana] gi 332195331 gb AEE33452.1  uncharacterized protein AT1G57680 [Arabidopsis thaliana] | 354 | 362  | 1.00E-159 | 102.3 | 87.6 | 93.8 | uncharacterized protein                | gbpln | Arabidopsis thaliana | AT1G57680.2   Symbols:   FUNCTIONS IN: molecular_function unknown; INVOLVED IN: biological_process unknown; LOCATED IN: endomembrane system; EXPRESSED IN: 24 plant structures; EXPRESSED DURING: 15 growth stages; CONTAINS InterPro DOMAIN/s: Uncharacterised conserved protein UCP031277 (InterPro:IPR016971); Has 35333 Blast hits to 34131 proteins in 2444 species: Archae - 798; Bacteria - 22429; Metazoa - 974; Fungi - 991; Plants - 531; Viruses - 0; Other Eukaryotes - 9610 (source: NCBI BLINK).   chr1:21362749-21363837 REVERSE LENGTH=362 | 354 | 362 | 1.00E-161 | 102.3 | 87.6 | 93.8 |
| Rsa1.0_00023.1.g1542.t1 | ref NP_176083.2  protein kinase-like protein [Arabidopsis thaliana] gi 332195333 gb AEE33454.1  protein kinase-like protein [Arabidopsis thaliana]                                                                                                                                                                                                                                                                                                                                                                                          | 683 | 692  | 0         | 101.3 | 84.6 | 91.1 | protein kinase-like protein            | gbpln | Arabidopsis thaliana | AT1G57700.1   Symbols:   Protein kinase superfamily protein   chr1:21371051-21373860 FORWARD LENGTH=692                                                                                                                                                                                                                                                                                                                                                                                                                                                    | 683 | 692 | 0         | 101.3 | 84.6 | 91.1 |

|                         |                                                                                                                                                                                                                                                                                                                                                                                                                                                                                                                                                                                                                                                                                                                                                                                                                                                                                                                                                                                                                                                                                                                                                                                                                                                                                                                                                                                                                                                                                                                                                                                                                                                                                                                                                                                                                                                                                                                                                                                                                                                                                        |     |      |           |       |      |      |                                        |       |                      |                                                                                                                               |     |      |           |       |      |      |
|-------------------------|----------------------------------------------------------------------------------------------------------------------------------------------------------------------------------------------------------------------------------------------------------------------------------------------------------------------------------------------------------------------------------------------------------------------------------------------------------------------------------------------------------------------------------------------------------------------------------------------------------------------------------------------------------------------------------------------------------------------------------------------------------------------------------------------------------------------------------------------------------------------------------------------------------------------------------------------------------------------------------------------------------------------------------------------------------------------------------------------------------------------------------------------------------------------------------------------------------------------------------------------------------------------------------------------------------------------------------------------------------------------------------------------------------------------------------------------------------------------------------------------------------------------------------------------------------------------------------------------------------------------------------------------------------------------------------------------------------------------------------------------------------------------------------------------------------------------------------------------------------------------------------------------------------------------------------------------------------------------------------------------------------------------------------------------------------------------------------------|-----|------|-----------|-------|------|------|----------------------------------------|-------|----------------------|-------------------------------------------------------------------------------------------------------------------------------|-----|------|-----------|-------|------|------|
|                         | ref NP_176084.1  elongation factor EF-1 gamma subunit [Arabidopsis thaliana] gi 79320145 ref NP_001031202.1  elongation factor EF-1 gamma subunit [Arabidopsis thaliana] gi 13626393 sp Q9FVT2.1 EF1G2_ARAT H RecName: Full=Probable elongation factor 1-gamma 2; Short=EF-1-gamma 2; AltName: Full=eEF-1B gamma 2 gi 12321359 gb AAG50755.1 AC079733_23 elongation factor 1B gamma, putative [Arabidopsis thaliana] gi 13677603 gb AAK43879.1 AF370502_1 Unknown protein [Arabidopsis thaliana] gi 15983511 gb AAL11623.1 AF424630_1 At1g57720/T8L23_18 [Arabidopsis thaliana] gi 16226841 gb AAL16277.1 AF428347_1 At1g57720/T8L23_18 [Arabidopsis thaliana] gi 17978699 gb AAL47343.1  unknown protein [Arabidopsis thaliana] gi 21360471 gb AAM47351.1  At1g57720/T8L23_18 [Arabidopsis thaliana] gi 21553395 gb AAM62488.1  elongation factor 1B gamma, putative [Arabidopsis thaliana] gi 24030437 gb AAN41373.1  putative elongation factor 1B gamma [Arabidopsis thaliana] gi 332195334 gb AEE33455.1  elongation factor EF-1 gamma subunit [Arabidopsis thaliana] gi 332195335 gb AEE33456.1  elongation factor EF-1 gamma subunit [Arabidopsis thaliana] gi AAC97237.1  putative TNP2-like transposon protein [Arabidopsis thaliana] ref NP_187098.2  endoribonuclease [Arabidopsis thaliana] gi 332640566 gb AEE74087.1  endoribonuclease [Arabidopsis thaliana] ref XP_002884447.1  hypothetical protein ARALYDRAFT_896485 [Arabidopsis lyrata subsp. lyrata] gi 297330287 gb EFH60706.1  hypothetical protein ARALYDRAFT_896485 [Arabidopsis lyrata subsp. lyrata] ref NP_564725.1  F-box protein [Arabidopsis thaliana] gi 75172668 sp Q9FV51.1 FBK23_ARAT H RecName: Full=F-box/kelch-repeat protein At1g57790 gi 11079521 gb AAG29231.1 AC079732_2 hypothetical protein [Arabidopsis thaliana] gi 20466201 gb AAM20418.1  unknown protein [Arabidopsis thaliana] gi 30984578 gb AAP42752.1  At1g57790 [Arabidopsis thaliana] gi 332195346 gb AEE33467.1  F-box protein [Arabidopsis thaliana] gb EOA25688.1  hypothetical protein CARUB_v10019041mg [Capsella rubella] | 413 | 413  | 0         | 100.0 | 93.0 | 96.6 | elongation factor EF-1 gamma subunit   | gbpln | Arabidopsis thaliana | AT1G57720.2   Symbols:   Translation elongation factor EF1B, gamma chain   chr1:21377873-21380114 FORWARD LENGTH=413          | 413 | 413  | 0         | 100.0 | 93.0 | 96.6 |
| Rsa1.0_00023.1.g1543.t1 |                                                                                                                                                                                                                                                                                                                                                                                                                                                                                                                                                                                                                                                                                                                                                                                                                                                                                                                                                                                                                                                                                                                                                                                                                                                                                                                                                                                                                                                                                                                                                                                                                                                                                                                                                                                                                                                                                                                                                                                                                                                                                        |     |      |           |       |      |      |                                        |       |                      |                                                                                                                               |     |      |           |       |      |      |
| Rsa1.0_00023.1.g1544.t1 | gb AAC97237.1  putative TNP2-like transposon protein [Arabidopsis thaliana]                                                                                                                                                                                                                                                                                                                                                                                                                                                                                                                                                                                                                                                                                                                                                                                                                                                                                                                                                                                                                                                                                                                                                                                                                                                                                                                                                                                                                                                                                                                                                                                                                                                                                                                                                                                                                                                                                                                                                                                                            | 107 | 889  | 3.00E-30  | 830.8 | 55.1 | 71.0 | putative TNP2-like transposon protein  | gbpln | Arabidopsis thaliana | #                                                                                                                             | #   | #    | #         | #     | #    |      |
| Rsa1.0_00023.1.g1545.t1 | ref NP_187098.2  endoribonuclease [Arabidopsis thaliana] gi 332640566 gb AEE74087.1  endoribonuclease [Arabidopsis thaliana] ref XP_002884447.1  hypothetical protein ARALYDRAFT_896485 [Arabidopsis lyrata subsp. lyrata] gi 297330287 gb EFH60706.1  hypothetical protein ARALYDRAFT_896485 [Arabidopsis lyrata subsp. lyrata] ref NP_564725.1  F-box protein [Arabidopsis thaliana] gi 75172668 sp Q9FV51.1 FBK23_ARAT H RecName: Full=F-box/kelch-repeat protein At1g57790 gi 11079521 gb AAG29231.1 AC079732_2 hypothetical protein [Arabidopsis thaliana] gi 20466201 gb AAM20418.1  unknown protein [Arabidopsis thaliana] gi 30984578 gb AAP42752.1  At1g57790 [Arabidopsis thaliana] gi 332195346 gb AEE33467.1  F-box protein [Arabidopsis thaliana]                                                                                                                                                                                                                                                                                                                                                                                                                                                                                                                                                                                                                                                                                                                                                                                                                                                                                                                                                                                                                                                                                                                                                                                                                                                                                                                         | 379 | 718  | 1.00E-101 | 189.4 | 49.3 | 51.5 | endoribonuclease                       | gbpln | Arabidopsis thaliana | AT3G04480.1   Symbols:   endoribonucleases   chr3:1193988-1197320 REVERSE LENGTH=718                                          | 379 | 718  | 1.00E-104 | 189.4 | 49.3 | 51.5 |
| Rsa1.0_00023.1.g1546.t1 | ref XP_002884447.1  hypothetical protein ARALYDRAFT_896485 [Arabidopsis lyrata subsp. lyrata] gi 297330287 gb EFH60706.1  hypothetical protein ARALYDRAFT_896485 [Arabidopsis lyrata subsp. lyrata] ref NP_564725.1  F-box protein [Arabidopsis thaliana] gi 75172668 sp Q9FV51.1 FBK23_ARAT H RecName: Full=F-box/kelch-repeat protein At1g57790 gi 11079521 gb AAG29231.1 AC079732_2 hypothetical protein [Arabidopsis thaliana] gi 20466201 gb AAM20418.1  unknown protein [Arabidopsis thaliana] gi 30984578 gb AAP42752.1  At1g57790 [Arabidopsis thaliana] gi 332195346 gb AEE33467.1  F-box protein [Arabidopsis thaliana]                                                                                                                                                                                                                                                                                                                                                                                                                                                                                                                                                                                                                                                                                                                                                                                                                                                                                                                                                                                                                                                                                                                                                                                                                                                                                                                                                                                                                                                      | 227 | 371  | 6.00E-28  | 163.4 | 31.7 | 39.2 | hypothetical protein ARALYDRAFT_896485 | gbpln | Arabidopsis lyrata   | AT5G19170.1   Symbols:   Protein of Unknown Function (DUF239)   chr5:6445245-6447305 FORWARD LENGTH=391                       | 227 | 391  | 1.00E-24  | 172.2 | 25.6 | 35.2 |
| Rsa1.0_00023.1.g1547.t1 | ref NP_564725.1  F-box protein [Arabidopsis thaliana] gi 75172668 sp Q9FV51.1 FBK23_ARAT H RecName: Full=F-box/kelch-repeat protein At1g57790 gi 11079521 gb AAG29231.1 AC079732_2 hypothetical protein [Arabidopsis thaliana] gi 20466201 gb AAM20418.1  unknown protein [Arabidopsis thaliana] gi 30984578 gb AAP42752.1  At1g57790 [Arabidopsis thaliana] gi 332195346 gb AEE33467.1  F-box protein [Arabidopsis thaliana]                                                                                                                                                                                                                                                                                                                                                                                                                                                                                                                                                                                                                                                                                                                                                                                                                                                                                                                                                                                                                                                                                                                                                                                                                                                                                                                                                                                                                                                                                                                                                                                                                                                          | 331 | 352  | 1.00E-134 | 106.3 | 68.6 | 82.5 | F-box protein                          | gbpln | Arabidopsis thaliana | AT1G57790.1   Symbols:   F-box family protein   chr1:21404578-21405636 REVERSE LENGTH=352                                     | 331 | 352  | 1.00E-136 | 106.3 | 68.6 | 82.5 |
| Rsa1.0_00023.1.g1548.t1 | gb EOA25688.1  hypothetical protein CARUB_v10019041mg [Capsella rubella]                                                                                                                                                                                                                                                                                                                                                                                                                                                                                                                                                                                                                                                                                                                                                                                                                                                                                                                                                                                                                                                                                                                                                                                                                                                                                                                                                                                                                                                                                                                                                                                                                                                                                                                                                                                                                                                                                                                                                                                                               | 236 | 203  | 8.00E-67  | 86.0  | 52.5 | 59.3 | hypothetical protein CARUB_v10019041mg | gbpln | Capsella rubella     | AT2G03300.1   Symbols:   Toll-Interleukin-Resistance (TIR) domain family protein   chr2:1003468-1004222 REVERSE LENGTH=203    | 236 | 203  | 8.00E-69  | 86.0  | 55.5 | 61.9 |
| Rsa1.0_00023.1.g1549.t3 | gb AA67380.1  Hypothetical protein T15F17J [Arabidopsis thaliana]                                                                                                                                                                                                                                                                                                                                                                                                                                                                                                                                                                                                                                                                                                                                                                                                                                                                                                                                                                                                                                                                                                                                                                                                                                                                                                                                                                                                                                                                                                                                                                                                                                                                                                                                                                                                                                                                                                                                                                                                                      | 998 | 1141 | 1.00E-158 | 114.3 | 27.4 | 32.3 | Hypothetical protein T15F17J           | gbpln | Arabidopsis thaliana | AT4G23160.1   Symbols: CRK8   cysteine-rich RLK (RECEPTOR-like protein kinase) 8   chr4:12129485-12134086 FORWARD LENGTH=1262 | 998 | 1262 | 1.00E-14  | 126.5 | 5.8  | 9.9  |
| Rsa1.0_00023.1.g1550.t1 | #                                                                                                                                                                                                                                                                                                                                                                                                                                                                                                                                                                                                                                                                                                                                                                                                                                                                                                                                                                                                                                                                                                                                                                                                                                                                                                                                                                                                                                                                                                                                                                                                                                                                                                                                                                                                                                                                                                                                                                                                                                                                                      | #   | #    | #         | #     | #    | #    | -                                      | ----  | ----                 | #                                                                                                                             | #   | #    | #         | #     | #    |      |
| Rsa1.0_00023.1.g1551.t1 | gb EOA35713.1  hypothetical protein CARUB_v10020940mg [Capsella rubella]                                                                                                                                                                                                                                                                                                                                                                                                                                                                                                                                                                                                                                                                                                                                                                                                                                                                                                                                                                                                                                                                                                                                                                                                                                                                                                                                                                                                                                                                                                                                                                                                                                                                                                                                                                                                                                                                                                                                                                                                               | 215 | 215  | 1.00E-101 | 100.0 | 80.9 | 87.9 | hypothetical protein CARUB_v10020940mg | gbpln | Capsella rubella     | AT1G57620.1   Symbols:   emp24_gp25L/p24 family/GOLD family protein   chr1:21342863-21344581 FORWARD LENGTH=212               | 215 | 212  | 1.00E-102 | 98.6  | 82.3 | 90.2 |

|                         |                                                                                                                                                                                                                                                                                                                                                                                 |     |     |           |       |      |      |                                                                                 |       |                      |                                                                                                                                     |     |     |           |       |      |      |
|-------------------------|---------------------------------------------------------------------------------------------------------------------------------------------------------------------------------------------------------------------------------------------------------------------------------------------------------------------------------------------------------------------------------|-----|-----|-----------|-------|------|------|---------------------------------------------------------------------------------|-------|----------------------|-------------------------------------------------------------------------------------------------------------------------------------|-----|-----|-----------|-------|------|------|
| Rsa1.0_00023.1.g1552.t1 | refNP_176074.2  uncharacterized protein [Arabidopsis thaliana] gi42571905 refNP_974043.1  uncharacterized protein [Arabidopsis thaliana] gi17979163 gb AAL49777.1  unknown protein [Arabidopsis thaliana] gi332195320 gb AE33441.1  uncharacterized protein AT1G57610 [Arabidopsis thaliana] gi332195321 gb AE33442.1  uncharacterized protein AT1G57610 [Arabidopsis thaliana] | 292 | 293 | 1.00E-125 | 100.3 | 79.8 | 87.3 | uncharacterized protein                                                         | gbpln | Arabidopsis thaliana | AT1G57610.2   Symbols:   Protein of unknown function (DUF607)   chr1:21337449-21338412 REVERSE LENGTH=293                           | 292 | 293 | 1.00E-128 | 100.3 | 79.8 | 87.3 |
| Rsa1.0_00023.1.g1553.t1 | gb EOA35193.1  hypothetical protein CARUB_v10020343mg [Capsella rubella]                                                                                                                                                                                                                                                                                                        | 391 | 425 | 1.00E-167 | 108.7 | 73.1 | 80.8 | hypothetical protein CARUB_v10020343mg                                          | gbpln | Capsella rubella     | AT1G57590.1   Symbols:   Pectinacetyltransferase family protein   chr1:21327458-21329707 REVERSE LENGTH=444                         | 391 | 444 | 1.00E-164 | 113.6 | 71.1 | 79.8 |
| Rsa1.0_00024.1.g1554.t1 | gb EOA13735.1  hypothetical protein CARUB_v10026813mg [Capsella rubella]                                                                                                                                                                                                                                                                                                        | 312 | 312 | 1.00E-162 | 100.0 | 89.4 | 94.2 | hypothetical protein CARUB_v10026813mg                                          | gbpln | Capsella rubella     | AT5G57330.1   Symbols:   Galactose mutarotase-like superfamily protein   chr5:23218392-23220664 FORWARD LENGTH=312                  | 312 | 312 | 1.00E-163 | 100.0 | 88.1 | 93.6 |
| Rsa1.0_00024.1.g1555.t1 | gb EOA15125.1  hypothetical protein CARUB_v10028500mg [Capsella rubella]                                                                                                                                                                                                                                                                                                        | 965 | 982 | 0         | 101.8 | 86.8 | 93.0 | hypothetical protein CARUB_v10028500mg                                          | gbpln | Capsella rubella     | AT5G57320.1   Symbols: VLN5   villin, putative   chr5:23212890-23217549 FORWARD LENGTH=962                                          | 965 | 962 | 0         | 99.7  | 86.4 | 92.2 |
| Rsa1.0_00024.1.g1556.t1 | ref XP_002866199.1  hypothetical protein ARALYDRAFT_918901 [Arabidopsis lyrata subsp. lyrata] gi297312034 gb EFH42458.1  hypothetical protein ARALYDRAFT_918901 [Arabidopsis lyrata subsp. lyrata]                                                                                                                                                                              | 120 | 120 | 2.00E-30  | 100.0 | 94.2 | 95.8 | hypothetical protein ARALYDRAFT_918901                                          | gbpln | Arabidopsis lyrata   | AT5G57290.1   Symbols:   60S acidic ribosomal protein family   chr5:23207049-23207835 REVERSE LENGTH=120                            | 120 | 120 | 2.00E-31  | 100.0 | 93.3 | 95.0 |
| Rsa1.0_00024.1.g1557.t1 | gb EOA13062.1  hypothetical protein CARUB_v10026062mg [Capsella rubella]                                                                                                                                                                                                                                                                                                        | 269 | 646 | 8.00E-59  | 240.1 | 40.5 | 54.3 | hypothetical protein CARUB_v10026062mg                                          | gbpln | Capsella rubella     | AT5G60250.1   Symbols:   zinc finger (G3HC4-type RING finger) family protein   chr5:24252226-24254710 FORWARD LENGTH=655            | 269 | 655 | 2.00E-60  | 243.5 | 40.9 | 53.2 |
| Rsa1.0_00024.1.g1558.t1 | gb EOA22836.1  hypothetical protein CARUB_v10003560mg [Capsella rubella]                                                                                                                                                                                                                                                                                                        | 162 | 406 | 2.00E-26  | 250.6 | 50.6 | 64.8 | hypothetical protein CARUB_v10003560mg                                          | gbpln | Capsella rubella     | AT4G11000.1   Symbols:   Ankyrin repeat family protein   chr4:6731020-6732464 FORWARD LENGTH=406                                    | 162 | 406 | 3.00E-28  | 250.6 | 48.8 | 64.2 |
| Rsa1.0_00024.1.g1559.t1 | emb CAR63886.1  cytochrome P450 monooxygenase [Arabidopsis thaliana]                                                                                                                                                                                                                                                                                                            | 493 | 491 | 0         | 99.6  | 87.0 | 93.3 | cytochrome P450 monooxygenase                                                   | gbpln | Arabidopsis thaliana | AT5G57220.1   Symbols: CYP81F2   cytochrome P450, family 81, subfamily F, polypeptide 2   chr5:23187911-23189681 FORWARD LENGTH=491 | 493 | 491 | 0         | 99.6  | 86.6 | 93.1 |
| Rsa1.0_00024.1.g1560.t1 | gb AAC33958.1  contains similarity to Zea mays embryogenesis transmembrane protein (GB:X97570) [Arabidopsis thaliana]                                                                                                                                                                                                                                                           | 475 | 417 | 1.00E-142 | 87.8  | 56.6 | 68.0 | contains similarity to Zea mays embryogenesis transmembrane protein (GB:X97570) | gbpln | Arabidopsis thaliana | AT4G11000.1   Symbols:   Ankyrin repeat family protein   chr4:6731020-6732464 FORWARD LENGTH=406                                    | 475 | 406 | 1.00E-106 | 85.5  | 46.3 | 58.5 |
| Rsa1.0_00024.1.g1561.t4 | gb EOA14132.1  hypothetical protein CARUB_v10027277mg [Capsella rubella]                                                                                                                                                                                                                                                                                                        | 259 | 160 | 6.00E-33  | 61.8  | 26.3 | 28.2 | hypothetical protein CARUB_v10027277mg                                          | gbpln | Capsella rubella     | AT5G57230.1   Symbols:   Thioredoxin superfamily protein   chr5:23190572-23191485 FORWARD LENGTH=160                                | 259 | 160 | 2.00E-35  | 61.8  | 26.3 | 27.8 |
| Rsa1.0_00024.1.g1562.t1 | ref XP_002864506.1  CYP81F2 [Arabidopsis lyrata subsp. lyrata] gi297310341 gb EFH40765.1  CYP81F2 [Arabidopsis lyrata subsp. lyrata]                                                                                                                                                                                                                                            | 493 | 497 | 0         | 100.8 | 89.9 | 94.5 | CYP81F2                                                                         | gbpln | Arabidopsis lyrata   | AT5G57220.1   Symbols: CYP81F2   cytochrome P450, family 81, subfamily F, polypeptide 2   chr5:23187911-23189681 FORWARD LENGTH=491 | 493 | 491 | 0         | 99.6  | 88.2 | 93.7 |
| Rsa1.0_00024.1.g1563.t1 | ref XP_002864505.1  predicted protein [Arabidopsis lyrata subsp. lyrata] gi297310340 gb EFH40764.1  predicted protein [Arabidopsis lyrata subsp. lyrata]                                                                                                                                                                                                                        | 594 | 590 | 0         | 99.3  | 91.2 | 95.3 | predicted protein                                                               | gbpln | Arabidopsis lyrata   | AT5G57200.1   Symbols:   ENTH/ANTH/VHS superfamily protein   chr5:23177696-23180601 FORWARD LENGTH=591                              | 594 | 591 | 0         | 99.5  | 89.9 | 93.8 |
| Rsa1.0_00024.1.g1564.t1 | #                                                                                                                                                                                                                                                                                                                                                                               | #   | #   | #         | #     | #    | -    | ----                                                                            | ----  | #                    | #                                                                                                                                   | #   | #   | #         | #     | #    | #    |
| Rsa1.0_00024.1.g1565.t1 | ref XP_002864503.1  hypothetical protein ARALYDRAFT_495815 [Arabidopsis lyrata subsp. lyrata] gi297310338 gb EFH40762.1  hypothetical protein ARALYDRAFT_495815 [Arabidopsis lyrata subsp. lyrata]                                                                                                                                                                              | 373 | 426 | 7.00E-94  | 114.2 | 63.5 | 77.2 | hypothetical protein ARALYDRAFT_495815                                          | gbpln | Arabidopsis lyrata   | AT5G57180.2   Symbols: CIA2   chloroplast import apparatus 2   chr5:23168393-23170763 FORWARD LENGTH=435                            | 373 | 435 | 2.00E-95  | 116.6 | 63.3 | 77.5 |
| Rsa1.0_00024.1.g1566.t3 | #                                                                                                                                                                                                                                                                                                                                                                               | #   | #   | #         | #     | #    | -    | ----                                                                            | ----  | #                    | #                                                                                                                                   | #   | #   | #         | #     | #    | #    |
| Rsa1.0_00024.1.g1567.t1 | ref XP_002864502.1  basic helix-loop-helix family protein [Arabidopsis lyrata subsp. lyrata] gi297310337 gb EFH40761.1  basic helix-loop-helix family protein [Arabidopsis lyrata subsp. lyrata]                                                                                                                                                                                | 244 | 247 | 1.00E-125 | 101.2 | 92.6 | 96.7 | basic helix-loop-helix family protein                                           | gbpln | Arabidopsis lyrata   | AT5G57150.1   Symbols:   basic helix-loop-helix (bHLH) DNA-binding superfamily protein   chr5:23152361-23154872 FORWARD LENGTH=247  | 244 | 247 | 1.00E-127 | 101.2 | 92.6 | 96.7 |
| Rsa1.0_00024.1.g1568.t1 | ref XP_002864501.1  ATPAP28/PAP28 [Arabidopsis lyrata subsp. lyrata] gi297310336 gb EFH40760.1  ATPAP28/PAP28 [Arabidopsis lyrata subsp. lyrata]                                                                                                                                                                                                                                | 426 | 400 | 1.00E-172 | 93.9  | 69.2 | 76.5 | ATPAP28/PAP28                                                                   | gbpln | Arabidopsis lyrata   | AT5G57140.1   Symbols: ATPAP28, PAP28   purple acid phosphatase 28   chr5:23149926-23151370 FORWARD LENGTH=397                      | 426 | 397 | 1.00E-171 | 93.2  | 68.5 | 75.6 |

|                         |                                                                                                                                                                                                                                                                                                                                                                                                                                                                                                                                                                                                                                                                                                                                                                                                         |      |      |           |       |      |      |                                                 |       |                      |                                                                                                                                                                                                                                                                                                                                                                                                                                                                                                                                                                              |      |      |           |       |      |      |
|-------------------------|---------------------------------------------------------------------------------------------------------------------------------------------------------------------------------------------------------------------------------------------------------------------------------------------------------------------------------------------------------------------------------------------------------------------------------------------------------------------------------------------------------------------------------------------------------------------------------------------------------------------------------------------------------------------------------------------------------------------------------------------------------------------------------------------------------|------|------|-----------|-------|------|------|-------------------------------------------------|-------|----------------------|------------------------------------------------------------------------------------------------------------------------------------------------------------------------------------------------------------------------------------------------------------------------------------------------------------------------------------------------------------------------------------------------------------------------------------------------------------------------------------------------------------------------------------------------------------------------------|------|------|-----------|-------|------|------|
| Rsa1.0_00024.1.g1569.t1 | gb EOA13758.1  hypothetical protein CARUB_v10026851mg [Capsella rubella]                                                                                                                                                                                                                                                                                                                                                                                                                                                                                                                                                                                                                                                                                                                                | 364  | 304  | 3.00E-79  | 83.5  | 54.9 | 65.7 | hypothetical protein CARUB_v10026851mg          | gbpln | Capsella rubella     | AT5G57120.1   Symbols:   FUNCTIONS IN: molecular_function unknown; INVOLVED IN: biological_process unknown; LOCATED IN: nucleolus; EXPRESSED IN: 21 plant structures; EXPRESSED DURING: 13 growth stages; CONTAINS InterPro DOMAIN/s: LisH dimerisation motif (InterPro:IPRO06594), SRP40, C-terminal (InterPro:IPRO07718); Has 101969 Blast hits to 55488 proteins in 2506 species: Archae - 424; Bacteria - 13843; Metazoa - 37674; Fungi - 9726; Plants - 4941; Viruses - 569; Other Eukaryotes - 34792 (source: NCBI BLink).   chr5:23122767-23124400 REVERSE LENGTH=330 | 364  | 330  | 4.00E-73  | 90.7  | 59.6 | 71.7 |
| Rsa1.0_00024.1.g1570.t1 | #                                                                                                                                                                                                                                                                                                                                                                                                                                                                                                                                                                                                                                                                                                                                                                                                       | #    | #    | #         | #     | #    | #    | -                                               | ----  | ----                 | #                                                                                                                                                                                                                                                                                                                                                                                                                                                                                                                                                                            | #    | #    | #         | #     | #    |      |
| Rsa1.0_00024.1.g1571.t4 | dbj BAJ34212.1  unnamed protein product [Theellungiella halophila]                                                                                                                                                                                                                                                                                                                                                                                                                                                                                                                                                                                                                                                                                                                                      | 1131 | 1073 | 0         | 94.9  | 89.4 | 92.0 | unnamed protein product                         | ----  | ----                 | AT5G57110.2   Symbols: ACA8, AT-ACA8   autoinhibited Ca2+ -ATPase, isoform 8   chr5:23109729-23116857 REVERSE LENGTH=1074                                                                                                                                                                                                                                                                                                                                                                                                                                                    | 1131 | 1074 | 0         | 95.0  | 87.9 | 91.1 |
| Rsa1.0_00024.1.g1572.t1 | gb EOA13053.1  hypothetical protein CARUB_v10026053mg [Capsella rubella]                                                                                                                                                                                                                                                                                                                                                                                                                                                                                                                                                                                                                                                                                                                                | 636  | 655  | 0         | 103.0 | 95.0 | 97.5 | hypothetical protein CARUB_v10026053mg          | gbpln | Capsella rubella     | AT5G57090.1   Symbols: EIR1, WAV6, ATPIN2, PIN2, AGR, AGR1   Auxin efflux carrier family protein   chr5:23100765-23104456 FORWARD LENGTH=647                                                                                                                                                                                                                                                                                                                                                                                                                                 | 636  | 647  | 0         | 101.7 | 91.5 | 95.1 |
| Rsa1.0_00024.1.g1573.t1 | #                                                                                                                                                                                                                                                                                                                                                                                                                                                                                                                                                                                                                                                                                                                                                                                                       | #    | #    | #         | #     | #    | #    | -                                               | ----  | ----                 | #                                                                                                                                                                                                                                                                                                                                                                                                                                                                                                                                                                            | #    | #    | #         | #     | #    |      |
| Rsa1.0_00024.1.g1574.t1 | ref NP_200517.2  hydroxyproline-rich glycoprotein family protein [Arabidopsis thaliana] gi 332009460 gb AED96843.1  hydroxyproline-rich glycoprotein family protein [Arabidopsis thaliana] ref NP_180929.1  DEAD-box ATP-dependent RNA helicase 21 [Arabidopsis thaliana] gi 75319077 sp P93008.1 RH21_ARATH RecName: Full=DEAD-box ATP-dependent RNA helicase 21 gi 1707017 gb AAC69128.1  putative U5 small nuclear ribonucleoprotein, an RNA helicase [Arabidopsis thaliana] gi 17473908 gb AAL38370.1  putative U5 small nuclear ribonucleoprotein, an RNA helicase [Arabidopsis thaliana] gi 20259792 gb AAM13243.1  putative U5 small nuclear ribonucleoprotein, an RNA helicase [Arabidopsis thaliana] gi 330253781 gb AEC08875.1  DEAD-box ATP-dependent RNA helicase 21 [Arabidopsis thaliana] | 83   | 575  | 2.00E-27  | 692.8 | 72.3 | 80.7 | hydroxyproline-rich glycoprotein family protein | gbpln | Arabidopsis thaliana | AT5G57070.1   Symbols:   hydroxyproline-rich glycoprotein family protein   chr5:23096221-23097948 FORWARD LENGTH=575                                                                                                                                                                                                                                                                                                                                                                                                                                                         | 83   | 575  | 3.00E-30  | 692.8 | 72.3 | 80.7 |
| Rsa1.0_00024.1.g1575.t1 | gi 1707017 gb AAC69128.1  putative U5 small nuclear ribonucleoprotein, an RNA helicase [Arabidopsis thaliana] gi 17473908 gb AAL38370.1  putative U5 small nuclear ribonucleoprotein, an RNA helicase [Arabidopsis thaliana] gi 20259792 gb AAM13243.1  putative U5 small nuclear ribonucleoprotein, an RNA helicase [Arabidopsis thaliana] gi 330253781 gb AEC08875.1  DEAD-box ATP-dependent RNA helicase 21 [Arabidopsis thaliana]                                                                                                                                                                                                                                                                                                                                                                   | 1187 | 733  | 7.00E-69  | 61.8  | 12.0 | 13.6 | DEAD-box ATP-dependent RNA helicase 21          | gbpln | Arabidopsis thaliana | AT2G33730.1   Symbols:   P-loop containing nucleoside triphosphate hydrolases superfamily protein   chr2:14265679-14267880 REVERSE LENGTH=733                                                                                                                                                                                                                                                                                                                                                                                                                                | 1187 | 733  | 2.00E-71  | 61.8  | 12.0 | 13.6 |
| Rsa1.0_00024.1.g1576.t1 | dbj BAA97357.1  unnamed protein product [Arabidopsis thaliana]                                                                                                                                                                                                                                                                                                                                                                                                                                                                                                                                                                                                                                                                                                                                          | 372  | 607  | 1.00E-101 | 163.2 | 72.6 | 81.2 | unnamed protein product                         | gbpln | Arabidopsis thaliana | AT5G57070.1   Symbols:   hydroxyproline-rich glycoprotein family protein   chr5:23096221-23097948 FORWARD LENGTH=575                                                                                                                                                                                                                                                                                                                                                                                                                                                         | 372  | 575  | 1.00E-103 | 154.6 | 72.6 | 81.2 |
| Rsa1.0_00024.1.g1577.t1 | #                                                                                                                                                                                                                                                                                                                                                                                                                                                                                                                                                                                                                                                                                                                                                                                                       | #    | #    | #         | #     | #    | #    | -                                               | ----  | ----                 | #                                                                                                                                                                                                                                                                                                                                                                                                                                                                                                                                                                            | #    | #    | #         | #     | #    |      |
| Rsa1.0_00024.1.g1578.t1 | gb EOA15144.1  hypothetical protein CARUB_v10028520mg [Capsella rubella]                                                                                                                                                                                                                                                                                                                                                                                                                                                                                                                                                                                                                                                                                                                                | 420  | 435  | 0         | 103.6 | 91.0 | 94.8 | hypothetical protein CARUB_v10028520mg          | gbpln | Capsella rubella     | AT5G57015.1   Symbols: ckl12   casein kinase I-like 12   chr5:23071508-23074577 FORWARD LENGTH=435                                                                                                                                                                                                                                                                                                                                                                                                                                                                           | 420  | 435  | 0         | 103.6 | 90.5 | 94.5 |
| Rsa1.0_00024.1.g1579.t1 | gb EOA13247.1  hypothetical protein CARUB_v10026276mg [Capsella rubella]                                                                                                                                                                                                                                                                                                                                                                                                                                                                                                                                                                                                                                                                                                                                | 511  | 499  | 0         | 97.7  | 83.6 | 90.2 | hypothetical protein CARUB_v10026276mg          | gbpln | Capsella rubella     | AT5G57010.1   Symbols:   calmodulin-binding family protein   chr5:23068207-23070203 FORWARD LENGTH=495                                                                                                                                                                                                                                                                                                                                                                                                                                                                       | 511  | 495  | 0         | 96.9  | 83.8 | 89.6 |
| Rsa1.0_00024.1.g1580.t1 | gb EOA14040.1  hypothetical protein CARUB_v10027175mg [Capsella rubella]                                                                                                                                                                                                                                                                                                                                                                                                                                                                                                                                                                                                                                                                                                                                | 192  | 195  | 8.00E-64  | 101.6 | 72.9 | 81.8 | hypothetical protein CARUB_v10027175mg          | gbpln | Capsella rubella     | AT5G57000.1   Symbols:   unknown protein; FUNCTIONS IN: molecular_function unknown; INVOLVED IN: biological_process unknown; LOCATED IN: cellular_component unknown; EXPRESSED IN: 24 plant structures; EXPRESSED DURING: 15 growth stages; BEST Arabidopsis thaliana protein match is: unknown protein (TAIRAT1G72690.1); Has 153 Blast hits to 116 proteins in 29 species: Archae - 0; Bacteria - 6; Metazoa - 33; Fungi - 7; Plants - 82; Viruses - 0; Other Eukaryotes - 25 (source: NCBI BLink).   chr5:23063870-23065203 REVERSE LENGTH=187                            | 192  | 187  | 2.00E-56  | 97.4  | 68.8 | 77.6 |

|                          |                                                                                                                                                                                                                                                                                                                                                                                                                                                                                                                                                                                                                                                                                                                                                                                |     |      |           |       |      |       |                                   |       |                      |                                                                                                                                                                                                                                                                                                                                                                                                                                                                                                                                                                |     |     |           |       |      |      |
|--------------------------|--------------------------------------------------------------------------------------------------------------------------------------------------------------------------------------------------------------------------------------------------------------------------------------------------------------------------------------------------------------------------------------------------------------------------------------------------------------------------------------------------------------------------------------------------------------------------------------------------------------------------------------------------------------------------------------------------------------------------------------------------------------------------------|-----|------|-----------|-------|------|-------|-----------------------------------|-------|----------------------|----------------------------------------------------------------------------------------------------------------------------------------------------------------------------------------------------------------------------------------------------------------------------------------------------------------------------------------------------------------------------------------------------------------------------------------------------------------------------------------------------------------------------------------------------------------|-----|-----|-----------|-------|------|------|
| Rsa1.0_00024.1.g1581.t1  | ref[XP_002866176.1] AT5g56980/MHM17.10 [Arabidopsis lyrata subsp. lyrata] gi 29731201 gb EFH42435.1  AT5g56980/MHM17.10 [Arabidopsis lyrata subsp. lyrata]                                                                                                                                                                                                                                                                                                                                                                                                                                                                                                                                                                                                                     | 371 | 375  | 1.00E-150 | 101.1 | 82.5 | 88.9  | AT5g56980/MHM17.10                | gbpln | Arabidopsis lyrata   | AT5G56980.1   Symbols:   unknown protein; FUNCTIONS IN: molecular_function unknown; INVOLVED IN: biological_process unknown; LOCATED IN: endomembrane system; EXPRESSED IN: 18 plant structures; EXPRESSED DURING: 12 growth stages; BEST Arabidopsis thaliana protein match is: unknown protein (TAIR:AT4G26130.1); Has 30201 Blast hits to 17322 proteins in 780 species: Archae - 12; Bacteria - 1396; Metazoa - 17338; Fungi - 3422; Plants - 5037; Viruses - 0; Other Eukaryotes - 2996 (source: NCBI BLINK).   chr5:23056574-23057713 REVERSE LENGTH=379 | 371 | 379 | 1.00E-149 | 102.2 | 83.6 | 88.7 |
| Rsa1.0_00024.1.g1582.t1  | gb AAG09097.1 AC009323.8 Putative retroelement polyprotein [Arabidopsis thaliana]                                                                                                                                                                                                                                                                                                                                                                                                                                                                                                                                                                                                                                                                                              | 362 | 1486 | 3.00E-60  | 410.5 | 35.9 | 51.7  | Putative retroelement polyprotein | gbpln | Arabidopsis thaliana | AT1G21280.1   Symbols:   CONTAINS InterPro DOMAIN/s: Retrotransposon gag protein (InterPro:IPR005162); Has 707 Blast hits to 705 proteins in 25 species: Archae - 0; Bacteria - 0; Metazoa - 4; Fungi - 0; Plants - 703; Viruses - 0; Other Eukaryotes - 0 (source: NCBI BLINK).   chr1:7447690-7448403 REVERSE LENGTH=237                                                                                                                                                                                                                                     | 362 | 237 | 3.00E-22  | 65.5  | 14.6 | 25.1 |
| Rsa1.0_00025.1.g1583.t1  | ref[NP_565516.1] uncharacterized protein [Arabidopsis thaliana] gi 20198097 gb AAM15398.1  Expressed protein [Arabidopsis thaliana] gi 88900416 gb ABD57520.1  At2g21655 [Arabidopsis thaliana] gi 91806234 gb ABE65845.1  unknown [Arabidopsis thaliana] gi 33025214 gb AEC07208.1  uncharacterized protein AT2G21655 [Arabidopsis thaliana]                                                                                                                                                                                                                                                                                                                                                                                                                                  | 161 | 156  | 2.00E-28  | 96.9  | 37.3 | 58.4  | uncharacterized protein           | gbpln | Arabidopsis thaliana | AT2G21655.1   Symbols:   Protein of unknown function (DUF784)   chr2:9263584-9264054 FORWARD LENGTH=156                                                                                                                                                                                                                                                                                                                                                                                                                                                        | 161 | 156 | 8.00E-31  | 96.9  | 37.3 | 58.4 |
| Rsa1.0_00025.1.g1584.t25 | gb AAG51069.1 AC069472.9 unknown protein; 47773-46410 [Arabidopsis thaliana] gi 15795151 dbj BAB03139.1  unnamed protein product [Arabidopsis thaliana]                                                                                                                                                                                                                                                                                                                                                                                                                                                                                                                                                                                                                        | 154 | 238  | 6.00E-50  | 154.5 | 66.9 | 70.8  | unknown protein; 47773-46410      | gbpln | Arabidopsis thaliana | AT3G12300.1   Symbols:   unknown protein; FUNCTIONS IN: molecular_function unknown; INVOLVED IN: biological_process unknown; LOCATED IN: endomembrane system; EXPRESSED IN: 23 plant structures; EXPRESSED DURING: 15 growth stages; CONTAINS InterPro DOMAIN/s: Protein of unknown function DUF667 (InterPro:IPR007714); Has 373 Blast hits to 371 proteins in 116 species: Archae - 0; Bacteria - 0; Metazoa - 213; Fungi - 4; Plants - 71; Viruses - 0; Other Eukaryotes - 85 (source: NCBI BLINK).   chr3:3921787-3923092 REVERSE LENGTH=190               | 154 | 190 | 9.00E-52  | 123.4 | 66.2 | 70.1 |
| Rsa1.0_00025.1.g1585.t1  | ref[XP_002868305.1] binding protein [Arabidopsis lyrata subsp. lyrata] gi 297314141 gb EFH44564.1  binding protein [Arabidopsis lyrata subsp. lyrata]                                                                                                                                                                                                                                                                                                                                                                                                                                                                                                                                                                                                                          | 494 | 502  | 0         | 101.6 | 71.1 | 81.6  | binding protein                   | gbpln | Arabidopsis lyrata   | AT4G14190.1   Symbols:   Pentatricopeptide repeat (PPR) superfamily protein   chr4:8183594-8185180 REVERSE LENGTH=501                                                                                                                                                                                                                                                                                                                                                                                                                                          | 494 | 501 | 0         | 101.4 | 72.5 | 81.6 |
| Rsa1.0_00025.1.g1586.t1  | ref[XP_002884895.1] complex 1 family protein [Arabidopsis lyrata subsp. lyrata] gi 297330735 gb EFH61154.1  complex 1 family protein [Arabidopsis lyrata subsp. lyrata]                                                                                                                                                                                                                                                                                                                                                                                                                                                                                                                                                                                                        | 133 | 133  | 2.00E-71  | 100.0 | 95.5 | 100.0 | complex 1 family protein          | gbpln | Arabidopsis lyrata   | AT3G12260.1   Symbols:   LYR family of Fe/S cluster biogenesis protein   chr3:3909252-3910337 REVERSE LENGTH=133                                                                                                                                                                                                                                                                                                                                                                                                                                               | 133 | 133 | 2.00E-73  | 100.0 | 94.7 | 99.2 |
| Rsa1.0_00025.1.g1587.t2  | ref[NP_566415.3] transcription factor TGA6 [Arabidopsis thaliana] gi 42572393 ref[NP_974292.1] transcription factor TGA6 [Arabidopsis thaliana] gi 44888355 sp Q39140.2 TGA6_ARATH RecName: Full=Transcription factor TGA6; AltName: Full=bZIP transcription factor 45; Short=AtbZIP45 gi 12322056 gb AAG51079.1 AC069472_19 transcription factor HBP-1B-like; 31032-33264 [Arabidopsis thaliana] gi 14571607 emb CAC42807.1  transcription factor TGA6 [Arabidopsis thaliana] gi 119360085 gb ABL66771.1  At3g12250 [Arabidopsis thaliana] gi 225898635 dbj BAH30448.1  hypothetical protein [Arabidopsis thaliana] gi 332641651 gb AEE75172.1  transcription factor TGA6 [Arabidopsis thaliana] gi 332641652 gb AEE75173.1  transcription factor TGA6 [Arabidopsis thaliana] | 321 | 330  | 1.00E-165 | 102.8 | 95.6 | 96.9  | transcription factor TGA6         | gbpln | Arabidopsis thaliana | AT3G12250.2   Symbols: TGA6, BZIP45   TGACG motif-binding factor 6   chr3:3906351-3908583 FORWARD LENGTH=330                                                                                                                                                                                                                                                                                                                                                                                                                                                   | 321 | 330 | 1.00E-167 | 102.8 | 95.6 | 96.9 |



|                         |                                                                                                                                                                                                                                                                                                                                                                                                                                                                                                                                                                                                                                                                                                                                                                                         |     |      |           |       |      |      |                                                      |       |                      |                                                                                                                                         |     |      |           |       |      |      |
|-------------------------|-----------------------------------------------------------------------------------------------------------------------------------------------------------------------------------------------------------------------------------------------------------------------------------------------------------------------------------------------------------------------------------------------------------------------------------------------------------------------------------------------------------------------------------------------------------------------------------------------------------------------------------------------------------------------------------------------------------------------------------------------------------------------------------------|-----|------|-----------|-------|------|------|------------------------------------------------------|-------|----------------------|-----------------------------------------------------------------------------------------------------------------------------------------|-----|------|-----------|-------|------|------|
| Rsa1.0_00025.1.g1588.t1 | ref XP_002884894.1  hypothetical protein ARALYDRAFT_897434 [Arabidopsis lyrata subsp. lyrata] gi 297330734 gb EFH61153.1                                                                                                                                                                                                                                                                                                                                                                                                                                                                                                                                                                                                                                                                | 711 | 435  | 1.00E-132 | 61.2  | 34.9 | 40.2 | hypothetical protein ARALYDRAFT_897434               | gbpln | Arabidopsis lyrata   | AT3G12240.1   Symbols: SCPL15   serine carboxypeptidase-like 15   chr3:3902436-3904918 REVERSE LENGTH=436                               | 711 | 436  | 1.00E-134 | 61.3  | 35.0 | 39.2 |
| Rsa1.0_00025.1.g1589.t1 | #                                                                                                                                                                                                                                                                                                                                                                                                                                                                                                                                                                                                                                                                                                                                                                                       | #   | #    | #         | #     | #    | #    | -                                                    | ----  | ----                 | #                                                                                                                                       | #   | #    | #         | #     | #    | #    |
| Rsa1.0_00025.1.g1590.t6 | ref XP_002884894.1  hypothetical protein ARALYDRAFT_897434 [Arabidopsis lyrata subsp. lyrata] gi 297330734 gb EFH61153.1  hypothetical protein ARALYDRAFT_897434 [Arabidopsis lyrata subsp. lyrata]                                                                                                                                                                                                                                                                                                                                                                                                                                                                                                                                                                                     | 983 | 435  | 1.00E-177 | 44.3  | 31.4 | 36.1 | hypothetical protein ARALYDRAFT_897434               | gbpln | Arabidopsis lyrata   | AT3G12240.1   Symbols: SCPL15   serine carboxypeptidase-like 15   chr3:3902436-3904918 REVERSE LENGTH=436                               | 983 | 436  | 1.00E-177 | 44.4  | 31.0 | 36.1 |
| Rsa1.0_00025.1.g1591.t2 | ref XP_002884892.1  kinase family protein [Arabidopsis lyrata subsp. lyrata] gi 297330732 gb EFH61151.1  kinase family protein [Arabidopsis lyrata subsp. lyrata]                                                                                                                                                                                                                                                                                                                                                                                                                                                                                                                                                                                                                       | 530 | 570  | 0         | 107.5 | 81.1 | 87.4 | kinase family protein                                | gbpln | Arabidopsis lyrata   | AT3G12200.1   Symbols: AtNek7, Nek7   NIMA-related kinase 7   chr3:3887173-3890550 REVERSE LENGTH=571                                   | 530 | 571  | 0         | 107.7 | 81.3 | 87.4 |
| Rsa1.0_00025.1.g1592.t1 | ref XP_002882768.1  DNAJ heat shock N-terminal domain-containing protein [Arabidopsis lyrata subsp. lyrata] gi 297328608 gb EFH59027.1  DNAJ heat shock N-terminal domain-containing protein [Arabidopsis lyrata subsp. lyrata]                                                                                                                                                                                                                                                                                                                                                                                                                                                                                                                                                         | 396 | 262  | 1.00E-123 | 66.2  | 56.1 | 60.4 | DNAJ heat shock N-terminal domain-containing protein | gbpln | Arabidopsis lyrata   | AT3G12170.1   Symbols:   Chaperone DnaJ-domain superfamily protein   chr3:3881021-3882655 FORWARD LENGTH=262                            | 396 | 262  | 1.00E-125 | 66.2  | 55.6 | 60.4 |
| Rsa1.0_00025.1.g1593.t1 | ref NP_187823.1  RAB GTPase-like protein A4D [Arabidopsis thaliana] gi 297834018 ref XP_002884891.1  predicted protein [Arabidopsis lyrata subsp. lyrata] gi 75334990 sp Q9LH50.1 RAA4D_ARAT H RecName: Full=Ras-related protein RABA4d; Short=AtRABA4d gi 12322042 gb AAG51065.1 AC069472_5 ras-related GTP-binding protein; 5118-4176 [Arabidopsis thaliana] gi 9294115 dbj BAB01966.1  GTP-binding protein-like [Arabidopsis thaliana] gi 67633628 gb AA78738.1  Ras-related GTP-binding family protein [Arabidopsis thaliana] gi 297330731 gb EFH61150.1  predicted protein [Arabidopsis lyrata subsp. lyrata] gi 332641639 gb AAE75160.1  RAB GTPase-like protein A4D [Arabidopsis thaliana] gi 482567210 gb EOA31399.1  hypothetical protein CARUB_v10014578mg [Capsella rubella] | 222 | 222  | 1.00E-125 | 100.0 | 97.7 | 99.5 | RAB GTPase-like protein A4D                          | gbpln | Arabidopsis lyrata   | AT3G12160.1   Symbols: ATRABA4D, RABA4D   RAB GTPase homolog A4D   chr3:3879495-3880437 REVERSE LENGTH=222                              | 222 | 222  | 1.00E-128 | 100.0 | 97.7 | 99.5 |
| Rsa1.0_00025.1.g1594.t1 | gb ACX42230.1  polygalacturonase inhibitory protein [Brassica rapa subsp. oleifera]                                                                                                                                                                                                                                                                                                                                                                                                                                                                                                                                                                                                                                                                                                     | 325 | 325  | 1.00E-169 | 100.0 | 93.2 | 97.5 | polygalacturonase inhibitory protein                 | gbpln | Brassica rapa        | AT3G12145.1   Symbols: FLR1, FLOR1   Leucine-rich repeat (LRR) family protein   chr3:3874764-3876075 REVERSE LENGTH=325                 | 325 | 325  | 1.00E-152 | 100.0 | 80.3 | 89.2 |
| Rsa1.0_00025.1.g1595.t1 | gb AAF63175.1 AC010657_11 T5E21.11 [Arabidopsis thaliana]                                                                                                                                                                                                                                                                                                                                                                                                                                                                                                                                                                                                                                                                                                                               | 141 | 1115 | 2.00E-36  | 790.8 | 58.2 | 66.7 | T5E21.11                                             | gbpln | Arabidopsis thaliana | AT1G14610.1   Symbols: TWN2, VALRS   valyl-tRNA synthetase / valine-tRNA ligase (VALRS)   chr1:5008502-5014486 REVERSE LENGTH=1108      | 141 | 1108 | 2.00E-38  | 785.8 | 56.7 | 65.2 |
| Rsa1.0_00025.1.g1596.t1 | gb EOA31025.1  hypothetical protein CARUB_v10014171mg [Capsella rubella]                                                                                                                                                                                                                                                                                                                                                                                                                                                                                                                                                                                                                                                                                                                | 328 | 327  | 1.00E-149 | 99.7  | 86.3 | 91.2 | hypothetical protein CARUB_v10014171mg               | gbpln | Capsella rubella     | AT3G12140.2   Symbols:   Emsy N Terminus (ENT)/ plant Tudor-like domains-containing protein   chr3:3868947-3870964 REVERSE LENGTH=327   | 328 | 327  | 1.00E-151 | 99.7  | 86.0 | 90.9 |
| Rsa1.0_00025.1.g1597.t1 | dbj BAJ34617.1  unnamed protein product [Thellungiella halophila]                                                                                                                                                                                                                                                                                                                                                                                                                                                                                                                                                                                                                                                                                                                       | 258 | 244  | 1.00E-115 | 94.6  | 89.9 | 92.2 | unnamed protein product                              | ----  | ----                 | AT3G12130.1   Symbols:   KH domain-containing protein / zinc finger (CCH type) family protein   chr3:3864486-3866406 REVERSE LENGTH=248 | 258 | 248  | 1.00E-112 | 96.1  | 85.7 | 91.9 |
| Rsa1.0_00025.1.g1598.t1 | gb AFC41106.1  FAD2-1 [Brassica oleracea]                                                                                                                                                                                                                                                                                                                                                                                                                                                                                                                                                                                                                                                                                                                                               | 386 | 384  | 0         | 99.5  | 90.2 | 95.9 | FAD2-1                                               | gbpln | Brassica oleracea    | AT3G12120.2   Symbols: FAD2   fatty acid desaturase 2   chr3:3860592-3861743 REVERSE LENGTH=383                                         | 386 | 383  | 0         | 99.2  | 85.0 | 92.5 |
| Rsa1.0_00025.1.g1599.t1 | gb AAC19278.1  T14P8.10 [Arabidopsis thaliana] gi 7269009 emb CAB80742.1  AT4g02490 [Arabidopsis thaliana]                                                                                                                                                                                                                                                                                                                                                                                                                                                                                                                                                                                                                                                                              | 841 | 657  | 0         | 78.1  | 43.0 | 53.3 | T14P8.10                                             | gbpln | Arabidopsis thaliana | AT1G43760.1   Symbols:   DNase I-like superfamily protein   chr1:16528880-16531065 REVERSE LENGTH=626                                   | 841 | 626  | 4.00E-83  | 74.4  | 17.8 | 25.9 |
| Rsa1.0_00025.1.g1600.t1 | dbj BAB01957.1  senescence-associated protein-like [Arabidopsis thaliana]                                                                                                                                                                                                                                                                                                                                                                                                                                                                                                                                                                                                                                                                                                               | 282 | 270  | 1.00E-141 | 95.7  | 88.7 | 93.6 | senescence-associated protein-like                   | gbpln | Arabidopsis thaliana | AT3G12090.1   Symbols: TET6   tetraspanin6   chr3:3852326-3853714 REVERSE LENGTH=282                                                    | 282 | 282  | 1.00E-143 | 100.0 | 92.9 | 97.9 |

|                         |                                                                                                                                                                                                                                                                                                                                                                                                                                                                                                                                            |      |      |           |       |      |      |                                                  |       |                      |                                                                                                                                          |      |      |           |       |      |      |
|-------------------------|--------------------------------------------------------------------------------------------------------------------------------------------------------------------------------------------------------------------------------------------------------------------------------------------------------------------------------------------------------------------------------------------------------------------------------------------------------------------------------------------------------------------------------------------|------|------|-----------|-------|------|------|--------------------------------------------------|-------|----------------------|------------------------------------------------------------------------------------------------------------------------------------------|------|------|-----------|-------|------|------|
| Rsa1.0_00025.1.g1601.t1 | ref[XP_002882764.1] predicted protein [Arabidopsis lyrata subsp. lyrata] gi 297328604 gb EFH59023.1  predicted protein [Arabidopsis lyrata subsp. lyrata]                                                                                                                                                                                                                                                                                                                                                                                  | 524  | 559  | 0         | 106.7 | 75.8 | 85.5 | predicted protein                                | gbpln | Arabidopsis lyrata   | AT3G12060.1   Symbols: TBL1   Plant protein of unknown function (DUF828)   chr:3:3843142-3845150 FORWARD LENGTH=556                      | 524  | 556  | 0         | 106.1 | 74.8 | 84.9 |
| Rsa1.0_00025.1.g1602.t1 | ref[XP_002871226.1] hypothetical protein ARALYDRAFT_908596 [Arabidopsis lyrata subsp. lyrata] gi 297317063 gb EFH47485.1  hypothetical protein ARALYDRAFT_908596 [Arabidopsis lyrata subsp. lyrata]                                                                                                                                                                                                                                                                                                                                        | 196  | 196  | 8.00E-96  | 100.0 | 93.9 | 98.0 | hypothetical protein ARALYDRAFT_908596           | gbpln | Arabidopsis lyrata   | AT5G06660.1   Symbols:   Protein of unknown function DUF106, transmembrane   chr:5:2046863-2047453 FORWARD LENGTH=196                    | 196  | 196  | 7.00E-98  | 100.0 | 93.9 | 98.0 |
| Rsa1.0_00025.1.g1603.t1 | gb ABO14927.1  male sterility 2 [Brassica rapa subsp. chinensis]                                                                                                                                                                                                                                                                                                                                                                                                                                                                           | 610  | 616  | 0         | 101.0 | 95.9 | 97.7 | male sterility 2                                 | gbpln | Brassica rapa        | AT3G11980.1   Symbols: MS2, FAR2   Jajoba acyl CoA reductase-related male sterility protein   chr:3:3814484-3816927 FORWARD LENGTH=616   | 610  | 616  | 0         | 101.0 | 90.5 | 95.4 |
| Rsa1.0_00025.1.g1604.t1 | ref[NP_187803.4] RNA binding protein [Arabidopsis thaliana] gi 332641610 gb AEE75131.1  RNA binding protein [Arabidopsis thaliana]                                                                                                                                                                                                                                                                                                                                                                                                         | 1913 | 1896 | 0         | 99.1  | 84.9 | 91.2 | RNA binding protein                              | gbpln | Arabidopsis thaliana | AT3G11964.1   Symbols:   RNA binding;RNA binding   chr:3:3793957-3806626 REVERSE LENGTH=1896                                             | 1913 | 1896 | 0         | 99.1  | 84.9 | 91.2 |
| Rsa1.0_00025.1.g1605.t1 | gb EOA31455.1  hypothetical protein CARUB_v10014641mg [Capsella rubella]                                                                                                                                                                                                                                                                                                                                                                                                                                                                   | 207  | 207  | 1.00E-114 | 100.0 | 97.1 | 98.6 | hypothetical protein CARUB_v10014641mg           | gbpln | Capsella rubella     | AT2G37270.2   Symbols: ATRPS5B, RPS5B   ribosomal protein 5B   chr2:15647883-15649042 REVERSE LENGTH=207                                 | 207  | 207  | 1.00E-116 | 100.0 | 96.1 | 99.0 |
| Rsa1.0_00025.1.g1606.t1 | ref[NP_001030675.1] adenine nucleotide alpha hydrolases-like protein [Arabidopsis thaliana] gi 332641601 gb AEE75122.1  adenine nucleotide alpha hydrolases-like protein [Arabidopsis thaliana]                                                                                                                                                                                                                                                                                                                                            | 200  | 201  | 5.00E-96  | 100.5 | 85.5 | 94.5 | adenine nucleotide alpha hydrolases-like protein | gbpln | Arabidopsis thaliana | AT3G11930.4   Symbols:   Adenine nucleotide alpha hydrolases-like superfamily protein   chr:3:3776371-3777393 FORWARD LENGTH=201         | 200  | 201  | 2.00E-98  | 100.5 | 85.5 | 94.5 |
| Rsa1.0_00025.1.g1607.t1 | #                                                                                                                                                                                                                                                                                                                                                                                                                                                                                                                                          | #    | #    | #         | #     | #    | -    | ----                                             | ----  | #                    | #                                                                                                                                        | #    | #    | #         | #     | #    |      |
| Rsa1.0_00025.1.g1608.t1 | #                                                                                                                                                                                                                                                                                                                                                                                                                                                                                                                                          | #    | #    | #         | #     | #    | -    | ----                                             | ----  | #                    | #                                                                                                                                        | #    | #    | #         | #     | #    |      |
| Rsa1.0_00025.1.g1609.t2 | ref[XP_002882755.1] predicted protein [Arabidopsis lyrata subsp. lyrata] gi 297328595 gb EFH59014.1  predicted protein [Arabidopsis lyrata subsp. lyrata]                                                                                                                                                                                                                                                                                                                                                                                  | 612  | 629  | 0         | 102.8 | 73.0 | 80.7 | predicted protein                                | gbpln | Arabidopsis lyrata   | AT3G11920.1   Symbols:   glutaredoxin-related   chr:3:3772311-3774887 FORWARD LENGTH=630                                                 | 612  | 630  | 0         | 102.9 | 72.5 | 79.7 |
| Rsa1.0_00025.1.g1610.t1 | ref[NP_187791.1] uncharacterized protein [Arabidopsis thaliana] gi 42572387 ref[NP_974289.1] uncharacterized protein [Arabidopsis thaliana] gi 6671941 gb AAF23201.1 AC016795_14 hypothetical protein [Arabidopsis thaliana] gi 20466598 gb AAM20616.1  unknown protein [Arabidopsis thaliana] gi 22136430 gb AAM91293.1  unknown protein [Arabidopsis thaliana] gi 332641587 gb AEE75108.1  uncharacterized protein AT3G11850 [Arabidopsis thaliana] gi 332641588 gb AEE75109.1  uncharacterized protein AT3G11850 [Arabidopsis thaliana] | 410  | 504  | 1.00E-106 | 122.9 | 58.3 | 71.7 | uncharacterized protein                          | gbpln | Arabidopsis thaliana | AT3G11850.2   Symbols:   Protein of unknown function; DUF593   chr:3:3739222-3741101 REVERSE LENGTH=504                                  | 410  | 504  | 1.00E-109 | 122.9 | 58.3 | 71.7 |
| Rsa1.0_00025.1.g1611.t1 | ref[NP_566402.1] plant U-box 24 protein [Arabidopsis thaliana] gi 332641586 gb AEE75107.1  E3 ubiquitin-protein ligase PUB24 [Arabidopsis thaliana]                                                                                                                                                                                                                                                                                                                                                                                        | 447  | 470  | 0         | 105.1 | 76.5 | 88.6 | plant U-box 24 protein                           | gbpln | Arabidopsis thaliana | AT3G11840.1   Symbols: PUB24   plant U-box 24   chr:3:3736578-3738250 REVERSE LENGTH=470                                                 | 447  | 470  | 0         | 105.1 | 76.5 | 88.6 |
| Rsa1.0_00025.1.g1612.t1 | ref[NP_187789.1] TCP-1/cpn60 chaperonin family protein [Arabidopsis thaliana] gi 6671939 gb AAF23199.1 AC016795_12 putative T-complex protein 1, ETA subunit [Arabidopsis thaliana] gi 17979243 gb AAL49938.1  AT3g11830/F26K24.12 [Arabidopsis thaliana] gi 20857172 gb AAM26704.1  AT3g11830/F26K24.12 [Arabidopsis thaliana] gi 332641584 gb AEE75105.1  TCP-1/cpn60 chaperonin family protein [Arabidopsis thaliana]                                                                                                                   | 548  | 557  | 0         | 101.6 | 94.7 | 95.4 | TCP-1/cpn60 chaperonin family protein            | gbpln | Arabidopsis thaliana | AT3G11830.1   Symbols:   TCP-1/cpn60 chaperonin family protein   chr:3:3732734-3736156 FORWARD LENGTH=557                                | 548  | 557  | 0         | 101.6 | 94.7 | 95.4 |
| Rsa1.0_00025.1.g1613.t1 | ref[XP_002884864.1] hypothetical protein ARALYDRAFT_897381 [Arabidopsis lyrata subsp. lyrata] gi 297330704 gb EFH61123.1  hypothetical protein ARALYDRAFT_897381 [Arabidopsis lyrata subsp. lyrata]                                                                                                                                                                                                                                                                                                                                        | 235  | 200  | 7.00E-97  | 85.1  | 74.0 | 78.3 | hypothetical protein ARALYDRAFT_897381           | gbpln | Arabidopsis lyrata   | AT3G11770.1   Symbols:   Polynucleotidyl transferase, ribonuclease H-like superfamily protein   chr:3:3721490-3722092 REVERSE LENGTH=200 | 235  | 200  | 3.00E-98  | 85.1  | 72.8 | 77.4 |

|                         |                                                                                                                                                                                                                                                                                                                                                                                                                                                                                                                                                                                                                         |     |     |           |       |      |      |                                                 |       |                      |                                                                                                                                                                                                                                                                                                                                                                                                                                                                                                                                              |     |     |           |       |      |      |
|-------------------------|-------------------------------------------------------------------------------------------------------------------------------------------------------------------------------------------------------------------------------------------------------------------------------------------------------------------------------------------------------------------------------------------------------------------------------------------------------------------------------------------------------------------------------------------------------------------------------------------------------------------------|-----|-----|-----------|-------|------|------|-------------------------------------------------|-------|----------------------|----------------------------------------------------------------------------------------------------------------------------------------------------------------------------------------------------------------------------------------------------------------------------------------------------------------------------------------------------------------------------------------------------------------------------------------------------------------------------------------------------------------------------------------------|-----|-----|-----------|-------|------|------|
| Rsa1.0_00025.1.g1614.t1 | gb EOA32949.1  hypothetical protein CARUB_v10016277mg [Capsella rubella]                                                                                                                                                                                                                                                                                                                                                                                                                                                                                                                                                | 706 | 704 | 0         | 99.7  | 82.7 | 87.7 | hypothetical protein CARUB_v10016277mg          | gbpln | Capsella rubella     | AT3G11760.1   Symbols:   unknown protein; FUNCTIONS IN: molecular_function unknown; INVOLVED IN: biological_process unknown; LOCATED IN: cellular_component unknown; EXPRESSED IN: 23 plant structures; EXPRESSED DURING: 14 growth stages; BEST Arabidopsis thaliana protein match is: unknown protein (TAIR:AT5G04860.1); Has 84 Blast hits to 73 proteins in 13 species: Archae - 0; Bacteria - 0; Metazoa - 0; Fungi - 0; Plants - 84; Viruses - 0; Other Eukaryotes - 0 (source: NCBI BLink).   chr3:3718529-3721123 FORWARD LENGTH=702 | 706 | 702 | 0         | 99.4  | 81.7 | 87.1 |
| Rsa1.0_00025.1.g1615.t1 | ref XP_002884863.1  hypothetical protein ARALYDRAFT_478521 [Arabidopsis lyrata subsp. lyrata] gi 297330703 gb EFH61122.1  hypothetical protein ARALYDRAFT_478521 [Arabidopsis lyrata subsp. lyrata]                                                                                                                                                                                                                                                                                                                                                                                                                     | 153 | 146 | 2.00E-60  | 95.4  | 77.8 | 86.3 | hypothetical protein ARALYDRAFT_478521          | gbpln | Arabidopsis lyrata   | AT3G11750.1   Symbols: FOLB1   Dihydroneopterin aldolase   chr3:3715071-3715904 REVERSE LENGTH=146                                                                                                                                                                                                                                                                                                                                                                                                                                           | 153 | 146 | 1.00E-61  | 95.4  | 76.5 | 86.3 |
| Rsa1.0_00025.1.g1616.t1 | ref XP_002882745.1  hypothetical protein ARALYDRAFT_478520 [Arabidopsis lyrata subsp. lyrata] gi 297328585 gb EFH59004.1  hypothetical protein ARALYDRAFT_478520 [Arabidopsis lyrata subsp. lyrata]                                                                                                                                                                                                                                                                                                                                                                                                                     | 194 | 193 | 5.00E-99  | 99.5  | 88.7 | 95.4 | hypothetical protein ARALYDRAFT_478520          | gbpln | Arabidopsis lyrata   | AT3G11740.1   Symbols:   Protein of unknown function (DUF567)   chr3:3712427-3713389 FORWARD LENGTH=194                                                                                                                                                                                                                                                                                                                                                                                                                                      | 194 | 194 | 1.00E-100 | 100.0 | 87.6 | 95.4 |
| Rsa1.0_00025.1.g1617.t1 | ref NP_187779.1  Ras-related protein RABD1 [Arabidopsis thaliana] gi 75338904 sp Q9ZRE2.1 RABD1_ARAT H RecName: Full=Ras-related protein RABD1; Short=AtRABD1; AltName: Full=Ras-related protein ATFP8 gi 6671929 gb AAF23189.1 AC016795.2 putative GTP-binding protein (ATFP8) [Arabidopsis thaliana] gi 4097557 gb AAD00111.1  ATFP8 [Arabidopsis thaliana] gi 26451349 dbj BAC42775.1  putative GTP-binding protein ATFP8 [Arabidopsis thaliana] gi 28973343 gb AAO63996.1  putative GTP-binding protein (ATFP8) [Arabidopsis thaliana] gi 332641569 gb AEE75090.1  Ras-related protein RABD1 [Arabidopsis thaliana] | 206 | 205 | 1.00E-109 | 99.5  | 93.2 | 95.6 | Ras-related protein RABD1                       | gbpln | Arabidopsis thaliana | AT3G11730.1   Symbols: ATFP8, ATRABD1, RABD1   Ras-related small GTP-binding family protein   chr3:3709490-3711397 REVERSE LENGTH=205                                                                                                                                                                                                                                                                                                                                                                                                        | 206 | 205 | 1.00E-112 | 99.5  | 93.2 | 95.6 |
| Rsa1.0_00025.1.g1618.t1 | ref XP_002884859.1  hypothetical protein ARALYDRAFT_478516 [Arabidopsis lyrata subsp. lyrata] gi 297330699 gb EFH61118.1  hypothetical protein ARALYDRAFT_478516 [Arabidopsis lyrata subsp. lyrata]                                                                                                                                                                                                                                                                                                                                                                                                                     | 605 | 625 | 0         | 103.3 | 90.9 | 95.0 | hypothetical protein ARALYDRAFT_478516          | gbpln | Arabidopsis lyrata   | AT3G11710.1   Symbols: ATKRS-1   lysyl-tRNA synthetase 1   chr3:3702359-3705613 REVERSE LENGTH=626                                                                                                                                                                                                                                                                                                                                                                                                                                           | 605 | 626 | 0         | 103.5 | 87.9 | 93.9 |
| Rsa1.0_00025.1.g1619.t1 | gb EOA30537.1  hypothetical protein CARUB_v10013670mg [Capsella rubella]                                                                                                                                                                                                                                                                                                                                                                                                                                                                                                                                                | 443 | 457 | 0         | 103.2 | 91.6 | 94.4 | hypothetical protein CARUB_v10013670mg          | gbpln | Capsella rubella     | AT3G11700.1   Symbols: FLA18   FASCICLIN-like arabinogalactan protein 18 precursor   chr3:3698992-3700971 FORWARD LENGTH=462                                                                                                                                                                                                                                                                                                                                                                                                                 | 443 | 462 | 0         | 104.3 | 92.3 | 94.1 |
| Rsa1.0_00025.1.g1620.t1 | ref XP_002882743.1  hypothetical protein ARALYDRAFT_478514 [Arabidopsis lyrata subsp. lyrata] gi 297328583 gb EFH59002.1  hypothetical protein ARALYDRAFT_478514 [Arabidopsis lyrata subsp. lyrata]                                                                                                                                                                                                                                                                                                                                                                                                                     | 259 | 251 | 3.00E-80  | 96.9  | 74.9 | 83.4 | hypothetical protein ARALYDRAFT_478514          | gbpln | Arabidopsis lyrata   | AT3G11690.1   Symbols:   unknown protein; FUNCTIONS IN: molecular_function unknown; INVOLVED IN: biological_process unknown; LOCATED IN: chloroplast; EXPRESSED IN: 24 plant structures; EXPRESSED DURING: 15 growth stages; BEST Arabidopsis thaliana protein match is: unknown protein (TAIR:AT5G06380.1); Has 84 Blast hits to 84 proteins in 12 species: Archae - 0; Bacteria - 0; Metazoa - 0; Fungi - 0; Plants - 84; Viruses - 0; Other Eukaryotes - 0 (source: NCBI BLink).   chr3:3695484-3696242 FORWARD LENGTH=252                | 259 | 252 | 2.00E-77  | 97.3  | 69.5 | 76.4 |
| Rsa1.0_00025.1.g1621.t1 | gb EOA32513.1  hypothetical protein CARUB_v10015793mg [Capsella rubella]                                                                                                                                                                                                                                                                                                                                                                                                                                                                                                                                                | 500 | 487 | 0         | 97.4  | 78.8 | 85.8 | hypothetical protein CARUB_v10015793mg          | gbpln | Capsella rubella     | AT3G11680.1   Symbols:   Aluminium activated malate transporter family protein   chr3:3686895-3689329 REVERSE LENGTH=488                                                                                                                                                                                                                                                                                                                                                                                                                     | 500 | 488 | 0         | 97.6  | 77.6 | 85.6 |
| Rsa1.0_00025.1.g1622.t1 | gb EOA33837.1  hypothetical protein CARUB_v10021318mg, partial [Capsella rubella]                                                                                                                                                                                                                                                                                                                                                                                                                                                                                                                                       | 261 | 290 | 2.00E-49  | 111.1 | 42.5 | 60.9 | hypothetical protein CARUB_v10021318mg, partial | gbpln | Capsella rubella     | AT4G04650.1   Symbols:   RNA-directed DNA polymerase (reverse transcriptase)-related family protein   chr4:2353989-2355213 REVERSE LENGTH=332                                                                                                                                                                                                                                                                                                                                                                                                | 261 | 332 | 9.00E-49  | 127.2 | 35.6 | 54.8 |

|                         |                                                                                                                                                                                                                                                                                                                                                                                                                                                                                                                                                                                                                                                                          |      |      |           |       |      |      |                                               |       |                      |                                                                                                                                                                                                                                                                                                                                                |      |     |           |       |      |      |
|-------------------------|--------------------------------------------------------------------------------------------------------------------------------------------------------------------------------------------------------------------------------------------------------------------------------------------------------------------------------------------------------------------------------------------------------------------------------------------------------------------------------------------------------------------------------------------------------------------------------------------------------------------------------------------------------------------------|------|------|-----------|-------|------|------|-----------------------------------------------|-------|----------------------|------------------------------------------------------------------------------------------------------------------------------------------------------------------------------------------------------------------------------------------------------------------------------------------------------------------------------------------------|------|-----|-----------|-------|------|------|
| Rsa1.0_00025.1.g1623.t1 | ref NP_566396.1  NDR1/HIN1-Like protein 1 [Arabidopsis thaliana]<br>gi 6041819 gb AAAF02134.1 AC009918.6 unknown protein [Arabidopsis thaliana]<br>gi 9502172 gb AAAF8021.1 AF264697.1 NDR1/HIN1-Like protein 1 [Arabidopsis thaliana]<br>gi 2159560 gb AAAM6116  harpin-induced protein-like [Arabidopsis thaliana]<br>gi 5638191 gb AAV85674.1  At3g11680 [Arabidopsis thaliana]<br>gi 58331799 gb AAW70397.1  At3g11660 [Arabidopsis thaliana]<br>gi 332641559 gb AEE75080.1  NDR1/HIN1-Like protein 1 [Arabidopsis thaliana]                                                                                                                                         | 211  | 209  | 1.00E-102 | 99.1  | 85.3 | 91.0 | NDR1/HIN1-Like protein 1                      | gbpln | Arabidopsis thaliana | AT3G11660.1   Symbols: NHL1   NDR1/HIN1-like 1   chr3:3679031-3679660 REVERSE LENGTH=209                                                                                                                                                                                                                                                       | 211  | 209 | 1.00E-104 | 99.1  | 85.3 | 91.0 |
| Rsa1.0_00025.1.g1624.t1 | gb EOA32680.1  hypothetical protein CARUB_v10015978mg [Capsella rubella]                                                                                                                                                                                                                                                                                                                                                                                                                                                                                                                                                                                                 | 490  | 442  | 0         | 90.2  | 74.9 | 80.4 | hypothetical protein CARUB_v10015978mg        | gbpln | Capsella rubella     | AT3G11490.1   Symbols:   rac GTPase activating protein   chr3:3617523-3619567 REVERSE LENGTH=435                                                                                                                                                                                                                                               | 490  | 435 | 0         | 88.8  | 75.9 | 80.4 |
| Rsa1.0_00025.1.g1625.t1 | ref XP_002882732.1  hypothetical protein ARALYDRAFT.478481 [Arabidopsis lyrata subsp. lyrata]<br>gi 297328572 gb EFH58991.1  hypothetical protein ARALYDRAFT.478481 [Arabidopsis lyrata subsp. lyrata]                                                                                                                                                                                                                                                                                                                                                                                                                                                                   | 500  | 551  | 0         | 110.2 | 74.8 | 80.6 | hypothetical protein ARALYDRAFT.478481        | gbpln | Arabidopsis lyrata   | AT3G11440.1   Symbols: ATMYB65, MYB65   myb domain protein 65   chr3:3603056-3604929 FORWARD LENGTH=553                                                                                                                                                                                                                                        | 500  | 553 | 0         | 110.6 | 73.0 | 80.0 |
| Rsa1.0_00025.1.g1626.t1 | ref XP_002882731.1  glycerol-3-phosphate acyltransferase 5 [Arabidopsis lyrata subsp. lyrata]<br>gi 297328571 gb EFH58990.1  glycerol-3-phosphate acyltransferase 5 [Arabidopsis lyrata subsp. lyrata]<br>emb CAB39638.1  RNA-directed DNA polymerase-like protein [Arabidopsis thaliana]<br>gi 7267666 emb CAB78094.1  RNA-directed DNA polymerase-like protein [Arabidopsis thaliana]                                                                                                                                                                                                                                                                                  | 500  | 502  | 0         | 100.4 | 87.8 | 94.4 | glycerol-3-phosphate acyltransferase 5        | gbpln | Arabidopsis lyrata   | AT3G11430.1   Symbols: ATGPAT5, GPAT5   glycerol-3-phosphate acyltransferase 5   chr3:3595911-3597678 FORWARD LENGTH=502                                                                                                                                                                                                                       | 500  | 502 | 0         | 100.4 | 87.2 | 93.8 |
| Rsa1.0_00025.1.g1627.t1 | ref XP_002882730.1  hypothetical protein ARALYDRAFT.478479 [Arabidopsis lyrata subsp. lyrata]<br>gi 297328570 gb EFH58989.1  hypothetical protein ARALYDRAFT.478479 [Arabidopsis lyrata subsp. lyrata]                                                                                                                                                                                                                                                                                                                                                                                                                                                                   | 1306 | 1274 | 0         | 97.5  | 43.3 | 58.3 | RNA-directed DNA polymerase-like protein      | gbpln | Arabidopsis thaliana | AT4G29090.1   Symbols:   Ribonuclease H-like superfamily protein   chr4:14333528-14335255 FORWARD LENGTH=575                                                                                                                                                                                                                                   | 1306 | 575 | 7.00E-74  | 44.0  | 13.7 | 21.8 |
| Rsa1.0_00025.1.g1628.t1 | ref XP_002882730.1  hypothetical protein ARALYDRAFT.478479 [Arabidopsis lyrata subsp. lyrata]                                                                                                                                                                                                                                                                                                                                                                                                                                                                                                                                                                            | 508  | 505  | 0         | 99.4  | 84.4 | 90.7 | hypothetical protein ARALYDRAFT.478479        | gbpln | Arabidopsis lyrata   | AT3G11420.1   Symbols:   Protein of unknown function (DUF604)   chr3:3591834-3594323 FORWARD LENGTH=505                                                                                                                                                                                                                                        | 508  | 505 | 0         | 99.4  | 83.7 | 91.1 |
| Rsa1.0_00025.1.g1629.t1 | # # # # # # # # # #                                                                                                                                                                                                                                                                                                                                                                                                                                                                                                                                                                                                                                                      |      |      |           |       |      |      |                                               |       |                      |                                                                                                                                                                                                                                                                                                                                                |      |     |           |       |      |      |
| Rsa1.0_00025.1.g1630.t1 | ref XP_002884844.1  AHG3/ATPP2CA [Arabidopsis lyrata subsp. lyrata]<br>gi 297330684 gb EFH61103.1  AHG3/ATPP2CA [Arabidopsis lyrata subsp. lyrata]                                                                                                                                                                                                                                                                                                                                                                                                                                                                                                                       | 388  | 396  | 1.00E-160 | 102.1 | 80.7 | 88.9 | AHG3/ATPP2CA                                  | gbpln | Arabidopsis lyrata   | AT3G11410.1   Symbols: ATPP2CA, AHG3, PP2CA   protein phosphatase 2CA   chr3:3584181-3585649 REVERSE LENGTH=399                                                                                                                                                                                                                                | 388  | 399 | 1.00E-160 | 102.8 | 80.2 | 88.1 |
| Rsa1.0_00025.1.g1631.t1 | ref NP_187747.1  translation initiation factor eIF-3 subunit 4 [Arabidopsis thaliana]<br>gi 12322907 gb AAG51445.1 AC008153.1 putative eukaryotic translation initiation factor 3 subunit: 21071-22901 [Arabidopsis thaliana]<br>gi 18226341 gb AAL16140.1 AF428308.1 AT3g11400/F24K9.7 [Arabidopsis thaliana]<br>gi 9755847 emb CAC01929.1  translation initiation factor 3, subunit g (eIF3g) [Arabidopsis thaliana]<br>gi 18377870 gb AAL67121.1  AT3g11400/F24K9.7 [Arabidopsis thaliana]<br>gi 22137220 gb AAM91455.1  AT3g11400/F24K9.7 [Arabidopsis thaliana]<br>gi 332641520 gb AEE75041.1  translation initiation factor eIF-3 subunit 4 [Arabidopsis thaliana] | 296  | 294  | 1.00E-157 | 99.3  | 91.2 | 94.9 | translation initiation factor eIF-3 subunit 4 | gbpln | Arabidopsis thaliana | AT3G11400.1   Symbols: EIF3G1, ATEIF3G1   eukaryotic translation initiation factor 3G1   chr3:3578536-3580366 FORWARD LENGTH=294                                                                                                                                                                                                               | 296  | 294 | 1.00E-159 | 99.3  | 91.2 | 94.9 |
| Rsa1.0_00025.1.g1632.t1 | gb EOA32620.1  hypothetical protein CARUB_v10015914mg [Capsella rubella]                                                                                                                                                                                                                                                                                                                                                                                                                                                                                                                                                                                                 | 385  | 293  | 3.00E-59  | 76.1  | 29.9 | 33.0 | hypothetical protein CARUB_v10015914mg        | gbpln | Capsella rubella     | AT2G15710.1   Symbols:   TRAF-like family protein   chr2:6842648-6845103 FORWARD LENGTH=365                                                                                                                                                                                                                                                    | 385  | 365 | 2.00E-50  | 94.8  | 26.2 | 31.2 |
| Rsa1.0_00025.1.g1633.t1 | ref NP_566390.1  uncharacterized protein [Arabidopsis thaliana]<br>gi 110736642 dbj BAF02085.1  hypothetical protein [Arabidopsis thaliana]<br>gi 332641505 gb AEE75026.1  uncharacterized protein AT3G11290 [Arabidopsis thaliana]                                                                                                                                                                                                                                                                                                                                                                                                                                      | 499  | 460  | 1.00E-176 | 92.2  | 64.1 | 76.8 | uncharacterized protein                       | gbpln | Arabidopsis thaliana | AT3G11290.1   Symbols:   unknown protein; BEST Arabidopsis thaliana protein match is: unknown protein (TAIR:AT3G11310.1). Has 720 Blast hits to 435 proteins in 28 species: Archae - 0; Bacteria - 2; Metazoa - 0; Fungi - 32; Plants - 682; Viruses - 0; Other Eukaryotes - 4 (source: NCBI BLINK).   chr3:3535766-3537295 REVERSE LENGTH=460 | 499  | 460 | 1.00E-179 | 92.2  | 64.1 | 76.8 |

|                         |                                                                                                                                                                                                                                                                                                                                                                                                                                                                                                                                                                                                                                                                                                                                                                                                                                                                                                                                                                                                          |      |      |           |       |      |      |                                                                  |       |                      |                                                                                                                                                      |      |      |           |       |      |      |
|-------------------------|----------------------------------------------------------------------------------------------------------------------------------------------------------------------------------------------------------------------------------------------------------------------------------------------------------------------------------------------------------------------------------------------------------------------------------------------------------------------------------------------------------------------------------------------------------------------------------------------------------------------------------------------------------------------------------------------------------------------------------------------------------------------------------------------------------------------------------------------------------------------------------------------------------------------------------------------------------------------------------------------------------|------|------|-----------|-------|------|------|------------------------------------------------------------------|-------|----------------------|------------------------------------------------------------------------------------------------------------------------------------------------------|------|------|-----------|-------|------|------|
| Rsa1.0_00025.1.g1634.t1 | ref NP_187737.1  duplicated SANT DNA-binding domain-containing protein [Arabidopsis thaliana] gi 30681667 ref NP_850558.1  duplicated SANT DNA-binding domain-containing protein [Arabidopsis thaliana] gi 12321867 gb AAG50963.1 AC073395.5 MYB-family transcription factor, putative; alternative splicing isoform 1 of 2:71559-70643 [Arabidopsis thaliana] gi 12321868 gb AAG50964.1 AC073395.6 MYB-family transcription factor, putative; alternative splicing isoform 2 of 2:71559-70643 [Arabidopsis thaliana] gi 15810283 gb AAL07029.1  putative MYB-family transcription factor [Arabidopsis thaliana] gi 20258977 gb AAM14204.1  putative MYB-family transcription factor [Arabidopsis thaliana] gi 45357120 gb AAS58519.1  MYB transcription factor [Arabidopsis thaliana] gi 332641503 gb AEE75024.1  duplicated SANT DNA-binding domain-containing protein [Arabidopsis thaliana] gi 332641504 gb AEE75025.1  duplicated SANT DNA-binding domain-containing protein [Arabidopsis thaliana] | 259  | 263  | 1.00E-120 | 101.5 | 81.9 | 87.3 | duplicated SANT DNA-binding domain-containing protein            | gbpln | Arabidopsis thaliana | AT3G11280.2   Symbols:   Duplicated homeodomain-like superfamily protein   chr3:3533477-3534393 REVERSE LENGTH=263                                   | 259  | 263  | 1.00E-123 | 101.5 | 81.9 | 87.3 |
| Rsa1.0_00025.1.g1635.t1 | ref NP_567015.1  splicing factor 3B subunit 3 [Arabidopsis thaliana] gi 18410226 ref NP_567016.1  putative splicing factor [Arabidopsis thaliana] gi 7019653 emb CAB75754.1  spliceosomal-like protein [Arabidopsis thaliana] gi 7019655 emb CAB75756.1  spliceosomal-like protein [Arabidopsis thaliana] gi 332645831 gb AEE79352.1  spliceosomal associated protein 130A [Arabidopsis thaliana] gi 332645833 gb AEE79354.1  spliceosome-associated protein 130B [Arabidopsis thaliana]                                                                                                                                                                                                                                                                                                                                                                                                                                                                                                                 | 1214 | 1214 | 0         | 100.0 | 95.4 | 98.4 | splicing factor 3B subunit 3                                     | gbpln | Arabidopsis thaliana | AT3G55200.1   Symbols:   Cleavage and polyadenylation specificity factor (CPSF) A subunit protein   chr3:20460533-20464361 FORWARD LENGTH=1214       | 1214 | 1214 | 0         | 100.0 | 95.4 | 98.4 |
| Rsa1.0_00025.1.g1636.t1 | ref NP_001078135.1  yippee-like protein [Arabidopsis thaliana] gi 332641497 gb AEE75018.1  yippee-like protein [Arabidopsis thaliana]                                                                                                                                                                                                                                                                                                                                                                                                                                                                                                                                                                                                                                                                                                                                                                                                                                                                    | 129  | 162  | 4.00E-61  | 125.6 | 87.6 | 93.8 | yippee-like protein                                              | gbpln | Arabidopsis thaliana | AT3G11230.2   Symbols:   Yippee family putative zinc-binding protein   chr3:3516683-3518193 FORWARD LENGTH=162                                       | 129  | 162  | 9.00E-64  | 125.6 | 87.6 | 93.8 |
| Rsa1.0_00026.1.g1637.t1 | dbj BAJ33984.1  unnamed protein product [Thellungiella halophila]                                                                                                                                                                                                                                                                                                                                                                                                                                                                                                                                                                                                                                                                                                                                                                                                                                                                                                                                        | 696  | 699  | 0         | 100.4 | 96.7 | 99.1 | unnamed protein product                                          | ----  | ----                 | AT5G56000.1   Symbols:   Hsp81.4, AtHsp90.4   HEAT SHOCK PROTEIN 81.4   chr5:22677602-22680067 REVERSE LENGTH=699                                    | 696  | 699  | 0         | 100.4 | 94.5 | 98.9 |
| Rsa1.0_00026.1.g1638.t1 | gb EOA12588.1  hypothetical protein CARUB_v10027067mg [Capsella rubella]                                                                                                                                                                                                                                                                                                                                                                                                                                                                                                                                                                                                                                                                                                                                                                                                                                                                                                                                 | 226  | 226  | 1.00E-124 | 100.0 | 96.5 | 98.7 | hypothetical protein CARUB_v10027067mg                           | gbpln | Capsella rubella     | AT5G55990.1   Symbols:   CBL2, ATCBL2   calcineurin B-like protein 2   chr5:22672189-22673579 FORWARD LENGTH=226                                     | 226  | 226  | 1.00E-126 | 100.0 | 96.0 | 98.2 |
| Rsa1.0_00026.1.g1639.t1 | gb EOA12638.1  hypothetical protein CARUB_v10027572mg [Capsella rubella]                                                                                                                                                                                                                                                                                                                                                                                                                                                                                                                                                                                                                                                                                                                                                                                                                                                                                                                                 | 753  | 758  | 0         | 100.7 | 92.8 | 97.5 | hypothetical protein CARUB_v10027572mg                           | gbpln | Capsella rubella     | AT5G55930.1   Symbols:   ATOPT1, OPT1   oligopeptide transporter 1   chr5:22652988-22655827 FORWARD LENGTH=755                                       | 753  | 755  | 0         | 100.3 | 92.4 | 96.7 |
| Rsa1.0_00026.1.g1640.t1 | ref NP_850927.1  S-adenosyl-L-methionine-dependent methyltransferase-like protein [Arabidopsis thaliana] gi 9758212 dbj BAB08657.1  nucleolar protein-like [Arabidopsis thaliana] gi 332009316 gb AED96699.1  S-adenosyl-L-methionine-dependent methyltransferase-like protein [Arabidopsis thaliana]                                                                                                                                                                                                                                                                                                                                                                                                                                                                                                                                                                                                                                                                                                    | 663  | 682  | 0         | 102.9 | 75.9 | 87.0 | S-adenosyl-L-methionine-dependent methyltransferase-like protein | gbpln | Arabidopsis thaliana | AT5G55920.1   Symbols:   OL12   S-adenosyl-L-methionine-dependent methyltransferases superfamily protein   chr5:22645742-22649383 REVERSE LENGTH=682 | 663  | 682  | 0         | 102.9 | 75.9 | 87.0 |
| Rsa1.0_00026.1.g1641.t1 | dbj BAJ33984.1  unnamed protein product [Thellungiella halophila]                                                                                                                                                                                                                                                                                                                                                                                                                                                                                                                                                                                                                                                                                                                                                                                                                                                                                                                                        | 696  | 699  | 0         | 100.4 | 96.4 | 99.0 | unnamed protein product                                          | ----  | ----                 | AT5G56000.1   Symbols:   Hsp81.4, AtHsp90.4   HEAT SHOCK PROTEIN 81.4   chr5:22677602-22680067 REVERSE LENGTH=699                                    | 696  | 699  | 0         | 100.4 | 94.4 | 98.9 |
| Rsa1.0_00026.1.g1642.t1 | ref XP_002864413.1  hypothetical protein ARALYDRAFT_495666 [Arabidopsis lyrata subsp. lyrata] gi 297310248 gb EFH40672.1  hypothetical protein ARALYDRAFT_495666 [Arabidopsis lyrata subsp. lyrata]                                                                                                                                                                                                                                                                                                                                                                                                                                                                                                                                                                                                                                                                                                                                                                                                      | 71   | 102  | 3.00E-28  | 143.7 | 87.3 | 91.5 | hypothetical protein ARALYDRAFT_495666                           | gbpln | Arabidopsis lyrata   | AT5G58550.1   Symbols:   NOI   RPM1-interacting protein 4 (RIN4) family protein   chr5:22603617-22604951 FORWARD LENGTH=114                          | 71   | 114  | 8.00E-31  | 160.6 | 85.9 | 90.1 |
| Rsa1.0_00026.1.g1643.t1 | #                                                                                                                                                                                                                                                                                                                                                                                                                                                                                                                                                                                                                                                                                                                                                                                                                                                                                                                                                                                                        | #    | #    | #         | #     | #    | #    | -                                                                | ----  | ----                 | #                                                                                                                                                    | #    | #    | #         | #     | #    |      |

|                         |                                                                                                                                                                                                                                                                                                                                                                                                                                                                                                                                       |      |      |           |       |      |      |                                                                             |       |                      |                                                                                                                                                                                                                                                                                                                                                                                                                                                                                                                                                                                     |      |      |           |       |      |      |
|-------------------------|---------------------------------------------------------------------------------------------------------------------------------------------------------------------------------------------------------------------------------------------------------------------------------------------------------------------------------------------------------------------------------------------------------------------------------------------------------------------------------------------------------------------------------------|------|------|-----------|-------|------|------|-----------------------------------------------------------------------------|-------|----------------------|-------------------------------------------------------------------------------------------------------------------------------------------------------------------------------------------------------------------------------------------------------------------------------------------------------------------------------------------------------------------------------------------------------------------------------------------------------------------------------------------------------------------------------------------------------------------------------------|------|------|-----------|-------|------|------|
| Rsa1.0_00026.1.g1644.t2 | gb[EOA13370.1] hypothetical protein CARUB_v10026407mg, partial [Capsella rubella]                                                                                                                                                                                                                                                                                                                                                                                                                                                     | 407  | 443  | 1.00E-167 | 108.8 | 81.6 | 90.7 | hypothetical protein CARUB_v10026407mg, partial                             | gbpln | Capsella rubella     | AT5G55730.2   Symbols: FLA1   FASCICLIN-like arabinogalactan 1   chr5:22558375-22560392 REVERSE LENGTH=424                                                                                                                                                                                                                                                                                                                                                                                                                                                                          | 407  | 424  | 1.00E-163 | 104.2 | 79.4 | 86.0 |
| Rsa1.0_00026.1.g1645.t1 | ref[XP_002864408.1] pectate lyase family protein [Arabidopsis lyrata subsp. lyrata] gi 287310243 gb EFH40667.1  pectate lyase family protein [Arabidopsis lyrata subsp. lyrata]                                                                                                                                                                                                                                                                                                                                                       | 385  | 391  | 0         | 101.6 | 87.8 | 93.8 | pectate lyase family protein                                                | gbpln | Arabidopsis lyrata   | AT5G55720.1   Symbols:   Pectin lyase-like superfamily protein   chr5:22556047-22557496 FORWARD LENGTH=392                                                                                                                                                                                                                                                                                                                                                                                                                                                                          | 385  | 392  | 0         | 101.8 | 85.5 | 92.7 |
| Rsa1.0_00026.1.g1646.t1 | gb[EOA14333.1] hypothetical protein CARUB_v10027511mg [Capsella rubella]                                                                                                                                                                                                                                                                                                                                                                                                                                                              | 211  | 209  | 4.00E-97  | 99.1  | 88.2 | 91.5 | hypothetical protein CARUB_v10027511mg                                      | gbpln | Capsella rubella     | AT5G55710.1   Symbols:   FUNCTIONS IN: molecular_function unknown; INVOLVED IN: biological_process unknown; LOCATED IN: chloroplast thylakoid membrane, chloroplast; EXPRESSED IN: 23 plant structures; EXPRESSED DURING: 14 growth stages; BEST Arabidopsis thaliana protein match is: Uncharacterised conserved protein ycf60 (TAIR:AT2G47840.1); Has 1807 Blast hits to 1807 proteins in 277 species: Archaee - 0; Bacteria - 0; Metazoa - 736; Fungi - 347; Plants - 385; Viruses - 0; Other Eukaryotes - 339 (source: NCBI BLINK).   chr5:22554995-22555624 REVERSE LENGTH=209 | 211  | 209  | 2.00E-97  | 99.1  | 87.2 | 90.5 |
| Rsa1.0_00026.1.g1647.t1 | ref[NP_568829.2] inactive beta-amylase 4 [Arabidopsis thaliana] gi 75334054 sp Q9FM68.1 BAM4_ARATH RecName: Full=Inactive beta-amylase 4, chloroplastic; AltName: Full=Inactive beta-amylase 6; Flags: Precursor gi 9758604 dbj BAB09237.1  beta-amylase [Arabidopsis thaliana] gi 332009286 gb AED96669.1  inactive beta-amylase 4 [Arabidopsis thaliana]                                                                                                                                                                            | 534  | 531  | 0         | 99.4  | 90.1 | 94.2 | inactive beta-amylase 4                                                     | gbpln | Arabidopsis thaliana | AT5G55700.1   Symbols: BMY6, BAM4   beta-amylase 4   chr5:22551873-22554702 FORWARD LENGTH=531                                                                                                                                                                                                                                                                                                                                                                                                                                                                                      | 534  | 531  | 0         | 99.4  | 90.1 | 94.2 |
| Rsa1.0_00026.1.g1648.t5 | gb[EOA12471.1] hypothetical protein CARUB_v10025902mg [Capsella rubella]                                                                                                                                                                                                                                                                                                                                                                                                                                                              | 1233 | 804  | 0         | 65.2  | 40.2 | 46.9 | hypothetical protein CARUB_v10025902mg                                      | gbpln | Capsella rubella     | AT5G55660.1   Symbols:   DEK domain-containing chromatin associated protein   chr5:22539375-22543142 FORWARD LENGTH=778                                                                                                                                                                                                                                                                                                                                                                                                                                                             | 1233 | 778  | 1.00E-174 | 63.1  | 38.9 | 44.5 |
| Rsa1.0_00026.1.g1649.t1 | ref[NP_200370.1] pectinesterase QRT1 [Arabidopsis thaliana] gi 75171621 sp Q9FM79.1 PME62_ARATH RecName: Full=Pectinesterase QRT1; Short=AtQRT1; Short=PE QRT1; AltName: Full=Pectin methyltransferase 62; Short=AtPME62; AltName: Full=Pectin methyltransferase QRT1; AltName: Full=Protein QUARTET 1; Flags: Precursor gi 9758593 dbj BAB09226.1  unnamed protein product [Arabidopsis thaliana] gi 115490609 gb AB197858.1  quartet1 [Arabidopsis thaliana] gi 332009270 gb AED96653.1  pectinesterase QRT1 [Arabidopsis thaliana] | 392  | 380  | 1.00E-137 | 96.9  | 64.5 | 77.6 | pectinesterase QRT1                                                         | gbpln | Arabidopsis thaliana | AT5G55590.1   Symbols: QRT1   Pectin lyase-like superfamily protein   chr5:22519911-22521699 FORWARD LENGTH=380                                                                                                                                                                                                                                                                                                                                                                                                                                                                     | 392  | 380  | 1.00E-140 | 96.9  | 64.5 | 77.6 |
| Rsa1.0_00026.1.g1650.t1 | gb[AAC33963.1] contains similarity to reverse transcriptases (Pfam; rvt.hmm, score: 11.19) [Arabidopsis thaliana]                                                                                                                                                                                                                                                                                                                                                                                                                     | 1916 | 1633 | 0         | 85.2  | 51.0 | 59.0 | contains similarity to reverse transcriptases (Pfam; rvt.hmm, score: 11.19) | gbpln | Arabidopsis thaliana | AT4G23160.1   Symbols: CRK8   cysteine-rich RLK (RECEPTOR-like protein kinase) 8   chr4:12129485-12134086 FORWARD LENGTH=1262                                                                                                                                                                                                                                                                                                                                                                                                                                                       | 1916 | 1262 | 1.00E-179 | 65.9  | 15.3 | 20.0 |
| Rsa1.0_00026.1.g1651.t1 | ref[NP_201434.1] leucine-rich repeat-containing protein [Arabidopsis thaliana] gi 10177427 dbj BAB10712.1  unnamed protein product [Arabidopsis thaliana] gi 17529198 gb AAL38825.1  unknown protein [Arabidopsis thaliana] gi 21436283 gb AAM51280.1  unknown protein [Arabidopsis thaliana] gi 332010817 gb AED98200.1  leucine-rich repeat-containing protein [Arabidopsis thaliana]                                                                                                                                               | 360  | 418  | 1.00E-134 | 116.1 | 69.7 | 76.9 | leucine-rich repeat-containing protein                                      | gbpln | Arabidopsis thaliana | AT5G66330.1   Symbols:   Leucine-rich repeat (LRR) family protein   chr5:26500531-26501787 REVERSE LENGTH=418                                                                                                                                                                                                                                                                                                                                                                                                                                                                       | 360  | 418  | 1.00E-137 | 116.1 | 69.7 | 76.9 |
| Rsa1.0_00026.1.g1652.t1 | #                                                                                                                                                                                                                                                                                                                                                                                                                                                                                                                                     | #    | #    | #         | #     | #    | #    | -                                                                           | ----  | ----                 | #                                                                                                                                                                                                                                                                                                                                                                                                                                                                                                                                                                                   | #    | #    | #         | #     | #    |      |
| Rsa1.0_00026.1.g1653.t1 | gb[EOA12552.1] hypothetical protein CARUB_v10026802mg [Capsella rubella]                                                                                                                                                                                                                                                                                                                                                                                                                                                              | 308  | 316  | 1.00E-149 | 102.6 | 83.4 | 88.3 | hypothetical protein CARUB_v10026802mg                                      | gbpln | Capsella rubella     | AT5G55560.1   Symbols:   Protein kinase superfamily protein   chr5:22506477-22507757 REVERSE LENGTH=314                                                                                                                                                                                                                                                                                                                                                                                                                                                                             | 308  | 314  | 1.00E-149 | 101.9 | 82.1 | 87.3 |

|                         |                                                                                                                                                                                                                                                                                                                                                                                                                           |      |      |           |       |      |      |                                                                       |       |                      |                                                                                                                                                                                                                                                                                                                                                                                                                                                                                                                                                        |      |      |           |       |      |      |
|-------------------------|---------------------------------------------------------------------------------------------------------------------------------------------------------------------------------------------------------------------------------------------------------------------------------------------------------------------------------------------------------------------------------------------------------------------------|------|------|-----------|-------|------|------|-----------------------------------------------------------------------|-------|----------------------|--------------------------------------------------------------------------------------------------------------------------------------------------------------------------------------------------------------------------------------------------------------------------------------------------------------------------------------------------------------------------------------------------------------------------------------------------------------------------------------------------------------------------------------------------------|------|------|-----------|-------|------|------|
| Rsa1.0_00026.1.g1654.t1 | ref[XP_002866100.1] predicted protein [Arabidopsis lyrata subsp. lyrata] gi 297311935 gb EFH42359.1  predicted protein [Arabidopsis lyrata subsp. lyrata]                                                                                                                                                                                                                                                                 | 788  | 790  | 0         | 100.3 | 77.8 | 84.8 | predicted protein                                                     | gbpln | Arabidopsis lyrata   | AT5G55520.2   Symbols:   CONTAINS InterPro DOMAIN/s: Kinesin-related protein (InterPro:IPR010544); BEST Arabidopsis thaliana protein match is: unknown protein (TAIR:AT4G26660.1); Has 31032 Blast hits to 19733 proteins in 1535 species: Archae - 330; Bacteria - 3150; Metazoa - 16413; Fungi - 2511; Plants - 1475; Viruses - 48; Other Eukaryotes - 7105 (source: NCBI BLink).   chr5:22488205-22491187 REVERSE LENGTH=801                                                                                                                        | 788  | 801  | 0         | 101.6 | 77.8 | 85.3 |
| Rsa1.0_00026.1.g1655.t1 | ref[NP_174635.1] terpene cyclase, C1 domain-containing protein [Arabidopsis thaliana] gi 317412196 sp Q9LQ27.2 TPS22_ARA TH RecName: Full=Terpenoid synthase 22; Short=AtTPS22 gi 332193499 gb AEE31620.1  terpenoid synthase 22 [Arabidopsis thaliana]                                                                                                                                                                   | 655  | 603  | 0         | 92.1  | 67.0 | 77.4 | terpene cyclase, C1 domain-containing protein                         | gbpln | Arabidopsis thaliana | AT1G33750.1   Symbols:   Terpenoid cyclases/Protein prenyltransferases superfamily protein   chr1:12233769-12236348 FORWARD LENGTH=603                                                                                                                                                                                                                                                                                                                                                                                                                 | 655  | 603  | 0         | 92.1  | 67.0 | 77.4 |
| Rsa1.0_00026.1.g1656.t1 | gb AAZ66923.1  117M18.4 [Brassica rapa]                                                                                                                                                                                                                                                                                                                                                                                   | 380  | 424  | 1.00E-129 | 111.6 | 65.5 | 78.4 | 117M18.4                                                              | gbpln | Brassica rapa        | AT5G10010.1   Symbols:   unknown protein; FUNCTIONS IN: molecular_function unknown; INVOLVED IN: biological_process unknown; LOCATED IN: nucleolus; EXPRESSED IN: 25 plant structures; EXPRESSED DURING: 15 growth stages; BEST Arabidopsis thaliana protein match is: unknown protein (TAIR:AT5G64910.1); Has 33260 Blast hits to 16857 proteins in 1270 species: Archae - 88; Bacteria - 3040; Metazoa - 11915; Fungi - 3137; Plants - 1371; Viruses - 424; Other Eukaryotes - 13285 (source: NCBI BLink).   chr5:3128098-3131452 FORWARD LENGTH=434 | 380  | 434  | 1.00E-121 | 114.2 | 57.1 | 67.9 |
| Rsa1.0_00026.1.g1657.t1 | gb EOA14260.1  hypothetical protein CARUB_v10027418mg [Capsella rubella]                                                                                                                                                                                                                                                                                                                                                  | 118  | 106  | 6.00E-25  | 89.8  | 50.0 | 68.6 | hypothetical protein CARUB_v10027418mg                                | gbpln | Capsella rubella     | AT5G55450.1   Symbols:   Bifunctional inhibitor/lipid-transfer protein/seed storage 2S albumin superfamily protein   chr5:22467560-22467874 FORWARD LENGTH=104                                                                                                                                                                                                                                                                                                                                                                                         | 118  | 104  | 2.00E-25  | 88.1  | 54.2 | 67.8 |
| Rsa1.0_00026.1.g1658.t1 | ref[XP_002864390.1] protease inhibitor/seed storage/lipid transfer protein family protein [Arabidopsis lyrata subsp. lyrata] gi 297310225 gb EFH40649.1  protease inhibitor/seed storage/lipid transfer protein family protein [Arabidopsis lyrata subsp. lyrata]                                                                                                                                                         | 107  | 107  | 3.00E-40  | 100.0 | 75.7 | 83.2 | protease inhibitor/seed storage/lipid transfer protein family protein | gbpln | Arabidopsis lyrata   | AT5G55410.1   Symbols:   Bifunctional inhibitor/lipid-transfer protein/seed storage 2S albumin superfamily protein   chr5:22460677-22461081 FORWARD LENGTH=107                                                                                                                                                                                                                                                                                                                                                                                         | 107  | 107  | 7.00E-42  | 100.0 | 72.9 | 81.3 |
| Rsa1.0_00026.1.g1659.t1 | gb EOA12364.1  hypothetical protein CARUB_v10025745mg, partial [Capsella rubella]                                                                                                                                                                                                                                                                                                                                         | 1325 | 1349 | 0         | 101.8 | 74.7 | 84.6 | hypothetical protein CARUB_v10025745mg, partial                       | gbpln | Capsella rubella     | AT5G55390.2   Symbols: EDM2   ENHANCED DOWNY MILDEW 2   chr5:22448152-22454414 REVERSE LENGTH=1297                                                                                                                                                                                                                                                                                                                                                                                                                                                     | 1325 | 1297 | 0         | 97.9  | 74.5 | 83.6 |
| Rsa1.0_00026.1.g1660.t1 | ref[XP_002866093.1] hypothetical protein ARALYDRAFT_495621 [Arabidopsis lyrata subsp. lyrata] gi 297311928 gb EFH42352.1  hypothetical protein ARALYDRAFT_495621 [Arabidopsis lyrata subsp. lyrata]                                                                                                                                                                                                                       | 347  | 346  | 1.00E-152 | 99.7  | 76.7 | 84.1 | hypothetical protein ARALYDRAFT_495621                                | gbpln | Arabidopsis lyrata   | AT5G55380.1   Symbols:   MBOAT (membrane bound O-acyl transferase) family protein   chr5:22446846-22447871 REVERSE LENGTH=341                                                                                                                                                                                                                                                                                                                                                                                                                          | 347  | 341  | 1.00E-148 | 98.3  | 75.5 | 83.3 |
| Rsa1.0_00026.1.g1661.t1 | ref[NP_200348.1] putative long-chain-alcohol O-fatty-acyltransferase 2 [Arabidopsis thaliana] gi 75170973 sp Q9FJ73.1 WAXS2_ARAT H RecName: Full=Probable long-chain-alcohol O-fatty-acyltransferase 2; AltName: Full=Wax synthase 2 gi 9758169 dbj BAB08554.1  wax synthase-like protein [Arabidopsis thaliana] gi 332009238 gb AED96621.1  putative long-chain-alcohol O-fatty-acyltransferase 2 [Arabidopsis thaliana] | 489  | 343  | 1.00E-138 | 70.1  | 50.1 | 57.7 | putative long-chain-alcohol O-fatty-acyltransferase 2                 | gbpln | Arabidopsis thaliana | AT5G55370.1   Symbols:   MBOAT (membrane bound O-acyl transferase) family protein   chr5:22445085-22446116 REVERSE LENGTH=343                                                                                                                                                                                                                                                                                                                                                                                                                          | 489  | 343  | 1.00E-140 | 70.1  | 50.1 | 57.7 |
| Rsa1.0_00026.1.g1662.t1 | # # # # # # # # # # # # # # # # # # # # # #                                                                                                                                                                                                                                                                                                                                                                               |      |      |           |       |      |      |                                                                       |       |                      |                                                                                                                                                                                                                                                                                                                                                                                                                                                                                                                                                        |      |      |           |       |      |      |
| Rsa1.0_00026.1.g1663.t1 | gb EOA25182.1  hypothetical protein CARUB_v10018494mg [Capsella rubella]                                                                                                                                                                                                                                                                                                                                                  | 181  | 282  | 7.00E-25  | 155.8 | 41.4 | 53.0 | hypothetical protein CARUB_v10018494mg                                | gbpln | Capsella rubella     | AT4G09490.1   Symbols:   Polynucleotidyl transferase, ribonuclease H-like superfamily protein   chr4:6015583-6016575 REVERSE LENGTH=170                                                                                                                                                                                                                                                                                                                                                                                                                | 181  | 170  | 1.00E-19  | 93.9  | 29.3 | 40.9 |
| Rsa1.0_00026.1.g1664.t1 | ref[XP_002882965.1] hypothetical protein ARALYDRAFT_897881 [Arabidopsis lyrata subsp. lyrata] gi 297328805 gb EFH59224.1  hypothetical protein ARALYDRAFT_897881 [Arabidopsis lyrata subsp. lyrata]                                                                                                                                                                                                                       | 235  | 301  | 4.00E-95  | 128.1 | 71.5 | 83.4 | hypothetical protein ARALYDRAFT_897881                                | gbpln | Arabidopsis lyrata   | AT3G15820.1   Symbols: ROD1   phosphatidic acid phosphatase-related / PAP2-related   chr3:5351217-5353573 FORWARD LENGTH=301                                                                                                                                                                                                                                                                                                                                                                                                                           | 235  | 301  | 2.00E-96  | 128.1 | 70.6 | 82.1 |

|                         |                                                                                                                                                                                                                                                                             |      |      |           |       |      |      |                                              |       |                      |                                                                                                                                                                                                                                                                                    |      |     |           |       |      |      |
|-------------------------|-----------------------------------------------------------------------------------------------------------------------------------------------------------------------------------------------------------------------------------------------------------------------------|------|------|-----------|-------|------|------|----------------------------------------------|-------|----------------------|------------------------------------------------------------------------------------------------------------------------------------------------------------------------------------------------------------------------------------------------------------------------------------|------|-----|-----------|-------|------|------|
| Rsa1.0_00026.1.g1665.t1 | emb[CAB39638.1] RNA-directed DNA polymerase-like protein [Arabidopsis thaliana] gi 7267666 emb[CAB78094.1] RNA-directed DNA polymerase-like protein [Arabidopsis thaliana]<br>ref XP_002866092.1  hypothetical protein ARALYDRAFT_495620 [Arabidopsis lyrata subsp. lyrata] | 812  | 1274 | 4.00E-90  | 156.9 | 25.4 | 36.2 | RNA-directed DNA polymerase-like protein     | gbpln | Arabidopsis thaliana | AT5G55340.1   Symbols:   MBOAT (membrane bound O-acyl transferase) family protein   chr5:22439985-22440986 REVERSE LENGTH=333                                                                                                                                                      | 812  | 333 | 4.00E-57  | 41.0  | 13.7 | 17.9 |
| Rsa1.0_00026.1.g1666.t1 | gi 297311927 gb EFH42351.1  hypothetical protein ARALYDRAFT_495620 [Arabidopsis lyrata subsp. lyrata]                                                                                                                                                                       | 339  | 345  | 1.00E-121 | 101.8 | 63.7 | 75.8 | hypothetical protein ARALYDRAFT_495620       | gbpln | Arabidopsis lyrata   | AT5G55350.1   Symbols:   MBOAT (membrane bound O-acyl transferase) family protein   chr5:22442356-22443393 REVERSE LENGTH=345                                                                                                                                                      | 339  | 345 | 1.00E-122 | 101.8 | 62.8 | 76.1 |
| Rsa1.0_00026.1.g1667.t6 | gb EOA12470.1  hypothetical protein CARUB_v10025842mg [Capsella rubella]                                                                                                                                                                                                    | 1720 | 923  | 0         | 53.7  | 39.5 | 44.6 | hypothetical protein CARUB_v10025842mg       | gbpln | Capsella rubella     | AT5G55300.2   Symbols: TOP1ALPHA   DNA topoisomerase 1 alpha   chr5:22424701-22429045 REVERSE LENGTH=933                                                                                                                                                                           | 1720 | 933 | 0         | 54.2  | 39.5 | 44.5 |
| Rsa1.0_00026.1.g1668.t1 | gb ACG70179.1  chloroplast FtsZ1-1 [Brassica oleracea var. botrytis]                                                                                                                                                                                                        | 425  | 425  | 0         | 100.0 | 92.5 | 94.8 | chloroplast FtsZ1-1                          | gbpln | Brassica oleracea    | AT5G55280.1   Symbols: FTSZ1-1, ATFTSZ1-1, CPFTSZ   homolog of bacterial cytokinesis Z-ring protein FTSZ 1-1   chr5:22420740-22422527 REVERSE LENGTH=433                                                                                                                           | 425  | 433 | 0         | 101.9 | 90.1 | 94.4 |
| Rsa1.0_00026.1.g1669.t1 | ref XP_002864385.1  atmap65-1 [Arabidopsis lyrata subsp. lyrata] gi 297310220 gb EFH40644.1  atmap65-1 [Arabidopsis lyrata subsp. lyrata]<br>ref XP_002864384.1  trigger factor type chaperone family protein [Arabidopsis lyrata subsp. lyrata]                            | 584  | 587  | 0         | 100.5 | 91.6 | 94.2 | atmap65-1                                    | gbpln | Arabidopsis lyrata   | AT5G55230.1   Symbols: ATMAP65-1, MAP65-1   microtubule-associated proteins 65-1   chr5:22402716-22405182 FORWARD LENGTH=587                                                                                                                                                       | 584  | 587 | 0         | 100.5 | 90.8 | 94.0 |
| Rsa1.0_00026.1.g1670.t1 | gi 297310219 gb EFH40643.1  trigger factor type chaperone family protein [Arabidopsis lyrata subsp. lyrata]                                                                                                                                                                 | 548  | 551  | 0         | 100.5 | 85.6 | 92.0 | trigger factor type chaperone family protein | gbpln | Arabidopsis lyrata   | AT5G55220.1   Symbols:   trigger factor type chaperone family protein   chr5:22397677-22400678 FORWARD LENGTH=547                                                                                                                                                                  | 548  | 547 | 0         | 99.8  | 85.6 | 92.2 |
| Rsa1.0_00026.1.g1671.t1 | #                                                                                                                                                                                                                                                                           | #    | #    | #         | #     | #    | #    | -                                            | ----  | ----                 | #                                                                                                                                                                                                                                                                                  | #    | #   | #         | #     | #    | #    |
| Rsa1.0_00026.1.g1672.t1 | gb EMJ23759.1  hypothetical protein PRUPE_ppa008371mg [Prunus persica]                                                                                                                                                                                                      | 221  | 335  | 1.00E-130 | 151.6 | 99.1 | 99.5 | hypothetical protein PRUPE_ppa008371mg       | gbpln | Prunus persica       | AT5G55190.1   Symbols: RAN3, ATRAN3   RAN GTPase 3   chr5:22392285-22393957 FORWARD LENGTH=221                                                                                                                                                                                     | 221  | 221 | 1.00E-130 | 100.0 | 99.1 | 99.5 |
| Rsa1.0_00026.1.g1673.t1 | ref XP_002862436.1  predicted protein [Arabidopsis lyrata subsp. lyrata] gi 297307949 gb EFH38694.1  predicted protein [Arabidopsis lyrata subsp. lyrata]                                                                                                                   | 544  | 530  | 1.00E-40  | 97.4  | 18.9 | 25.7 | predicted protein                            | gbpln | Arabidopsis lyrata   | AT2G07760.1   Symbols:   Zinc knuckle (COHC-type) family protein   chr2:3584420-3586278 REVERSE LENGTH=530                                                                                                                                                                         | 544  | 530 | 7.00E-17  | 97.4  | 7.7  | 13.2 |
| Rsa1.0_00026.1.g1674.t1 | gb AAG50806.1 AC079281.8 unknown protein [Arabidopsis thaliana]                                                                                                                                                                                                             | 1177 | 1213 | 0         | 103.1 | 38.2 | 56.2 | unknown protein                              | gbpln | Arabidopsis thaliana | AT1G43760.1   Symbols:   DNase I-like superfamily protein   chr1:16528880-16531065 REVERSE LENGTH=626                                                                                                                                                                              | 1177 | 626 | 4.00E-69  | 53.2  | 13.3 | 20.2 |
| Rsa1.0_00026.1.g1675.t1 | ref XP_002864380.1  glycosyl hydrolase family 17 protein [Arabidopsis lyrata subsp. lyrata] gi 297310215 gb EFH40639.1  glycosyl hydrolase family 17 protein [Arabidopsis lyrata subsp. lyrata]                                                                             | 475  | 461  | 0         | 97.1  | 81.7 | 87.4 | glycosyl hydrolase family 17 protein         | gbpln | Arabidopsis lyrata   | AT5G55180.1   Symbols:   O-Glycosyl hydrolases family 17 protein   chr5:22388834-22390950 FORWARD LENGTH=460                                                                                                                                                                       | 475  | 460 | 0         | 96.8  | 83.8 | 90.5 |
| Rsa1.0_00026.1.g1676.t3 | ref XP_002866078.1  F-box family protein [Arabidopsis lyrata subsp. lyrata] gi 297311913 gb EFH42337.1  F-box family protein [Arabidopsis lyrata subsp. lyrata]                                                                                                             | 381  | 375  | 1.00E-140 | 98.4  | 68.8 | 78.0 | F-box family protein                         | gbpln | Arabidopsis lyrata   | AT5G55150.1   Symbols:   Protein of unknown function (DUF295)   chr5:22382275-22383392 REVERSE LENGTH=360                                                                                                                                                                          | 381  | 360 | 1.00E-132 | 94.5  | 65.4 | 74.8 |
| Rsa1.0_00026.1.g1677.t2 | ref NP_680438.1  uncharacterized protein [Arabidopsis thaliana] gi 91807044 gb ABE66249.1  hypothetical protein At5g55135 [Arabidopsis thaliana] gi 332009207 gb AED96590.1  uncharacterized protein AT5G55135 [Arabidopsis thaliana]                                       | 112  | 112  | 2.00E-33  | 100.0 | 68.8 | 81.3 | uncharacterized protein                      | gbpln | Arabidopsis thaliana | AT5G55135.1   Symbols:   unknown protein; Has 30201 Blast hits to 17322 proteins in 780 species: Archae - 12; Bacteria - 1396; Metazoa - 17338; Fungi - 3422; Plants - 5037; Viruses - 0; Other Eukaryotes - 2996 (source: NCBI BLINK)   chr5:22379959-22380386 FORWARD LENGTH=112 | 112  | 112 | 3.00E-36  | 100.0 | 68.8 | 81.3 |
| Rsa1.0_00026.1.g1678.t1 | #                                                                                                                                                                                                                                                                           | #    | #    | #         | #     | #    | #    | -                                            | ----  | ----                 | #                                                                                                                                                                                                                                                                                  | #    | #   | #         | #     | #    | #    |
| Rsa1.0_00026.1.g1679.t1 | gb EOA14782.1  hypothetical protein CARUB_v10028082mg [Capsella rubella]                                                                                                                                                                                                    | 57   | 76   | 1.00E-13  | 133.3 | 64.9 | 66.7 | hypothetical protein CARUB_v10028082mg       | gbpln | Capsella rubella     | AT5G55125.2   Symbols:   Ribosomal protein L31   chr5:22372737-22372967 FORWARD LENGTH=76                                                                                                                                                                                          | 57   | 76  | 2.00E-15  | 133.3 | 63.2 | 64.9 |
| Rsa1.0_00026.1.g1680.t1 | emb CAN62821.1  hypothetical protein VITISV_013041 [Vitis vinifera]                                                                                                                                                                                                         | 1091 | 1357 | 1.00E-145 | 124.4 | 35.2 | 54.6 | hypothetical protein VITISV_013041           | gbpln | Vitis vinifera       | ATMG00860.1   Symbols: ORF158   DNA/RNA polymerases superfamily protein   chrM:235916-236392 FORWARD LENGTH=158                                                                                                                                                                    | 1091 | 158 | 2.00E-28  | 14.5  | 5.6  | 7.0  |
| Rsa1.0_00026.1.g1681.t1 | ref NP_192687.1  RNase H domain-containing protein [Arabidopsis thaliana] gi 7267644 emb CAB78072.1  putative proteins [Arabidopsis thaliana] gi 332657356 gb AEE82756.1  RNase H domain-containing protein [Arabidopsis thaliana]                                          | 90   | 170  | 8.00E-12  | 188.9 | 45.6 | 56.7 | RNase H domain-containing protein            | gbpln | Arabidopsis thaliana | AT4G09490.1   Symbols:   Polynucleotidyl transferase, ribonuclease H-like superfamily protein   chr4:6015583-6016575 REVERSE LENGTH=170                                                                                                                                            | 90   | 170 | 1.00E-14  | 188.9 | 45.6 | 56.7 |
| Rsa1.0_00026.1.g1682.t1 | gb EOA14764.1  hypothetical protein CARUB_v10028061mg [Capsella rubella]                                                                                                                                                                                                    | 345  | 164  | 3.00E-59  | 47.5  | 34.8 | 36.5 | hypothetical protein CARUB_v10028061mg       | gbpln | Capsella rubella     | AT5G55110.1   Symbols:   Stigma-specific Stig1 family protein   chr5:22367870-22368361 FORWARD LENGTH=163                                                                                                                                                                          | 345  | 163 | 6.00E-59  | 47.2  | 32.5 | 34.5 |



|                         |                                                                                                                                                                                                                                                                                                                                                                          |      |      |           |       |      |      |                                                                   |       |                      |                                                                                                                                                                                                                                                                                                                                                                                                                                                                                                                                        |      |     |           |       |      |      |
|-------------------------|--------------------------------------------------------------------------------------------------------------------------------------------------------------------------------------------------------------------------------------------------------------------------------------------------------------------------------------------------------------------------|------|------|-----------|-------|------|------|-------------------------------------------------------------------|-------|----------------------|----------------------------------------------------------------------------------------------------------------------------------------------------------------------------------------------------------------------------------------------------------------------------------------------------------------------------------------------------------------------------------------------------------------------------------------------------------------------------------------------------------------------------------------|------|-----|-----------|-------|------|------|
| Rsa1.0_00026.1.g1683.t1 | ref[XP_002866076.1] swap (Suppressor-of-White-APricot)/surp domain-containing protein [Arabidopsis lyrata subsp. lyrata] gi 29731191 gb EFH42335.1  swap (Suppressor-of-White-APricot)/surp domain-containing protein [Arabidopsis lyrata subsp. lyrata]                                                                                                                 | 868  | 852  | 0         | 98.2  | 76.3 | 83.6 | swap (Suppressor-of-White-APricot)/surp domain-containing protein | gbpln | Arabidopsis lyrata   | AT5G55100.2   Symbols:   SWAP (Suppressor-of-White-APricot)/surp domain-containing protein   chr5:22361401-22364664 REVERSE LENGTH=844                                                                                                                                                                                                                                                                                                                                                                                                 | 868  | 844 | 0         | 97.2  | 74.8 | 82.7 |
| Rsa1.0_00026.1.g1684.t1 | #                                                                                                                                                                                                                                                                                                                                                                        | #    | #    | #         | #     | #    | -    | ----                                                              | ----  | #                    | #                                                                                                                                                                                                                                                                                                                                                                                                                                                                                                                                      | #    | #   | #         | #     | #    | #    |
| Rsa1.0_00026.1.g1685.t1 | ref[NP_200320.1] mitogen-activated protein kinase kinase kinase 15 [Arabidopsis thaliana] gi 9758106 dbj BAB08578.1  unnamed protein product [Arabidopsis thaliana] gi 332009196 gb AED96579.1  mitogen-activated protein kinase kinase kinase 15 [Arabidopsis thaliana]                                                                                                 | 448  | 448  | 1.00E-176 | 100.0 | 73.2 | 81.3 | mitogen-activated protein kinase kinase kinase 15                 | gbpln | Arabidopsis thaliana | AT5G55090.1   Symbols:   MAPKKK15   mitogen-activated protein kinase kinase 15   chr5:22356852-22358198 REVERSE LENGTH=448                                                                                                                                                                                                                                                                                                                                                                                                             | 448  | 448 | 1.00E-179 | 100.0 | 73.2 | 81.3 |
| Rsa1.0_00026.1.g1686.t3 | gb[EOA13330.1] hypothetical protein CARUB_v10026364mg [Capsella rubella]                                                                                                                                                                                                                                                                                                 | 531  | 462  | 0         | 87.0  | 79.3 | 82.1 | hypothetical protein CARUB_v10026364mg                            | gbpln | Capsella rubella     | AT5G55070.1   Symbols:   Dihydrolipoamide succinyltransferase   chr5:22347637-22350409 FORWARD LENGTH=464                                                                                                                                                                                                                                                                                                                                                                                                                              | 531  | 464 | 0         | 87.4  | 76.8 | 79.5 |
| Rsa1.0_00026.1.g1687.t1 | #                                                                                                                                                                                                                                                                                                                                                                        | #    | #    | #         | #     | #    | -    | ----                                                              | ----  | #                    | #                                                                                                                                                                                                                                                                                                                                                                                                                                                                                                                                      | #    | #   | #         | #     | #    | #    |
| Rsa1.0_00026.1.g1688.t1 | ref[XP_002864371.1] GDSL-motif lipase/hydrolase family protein [Arabidopsis lyrata subsp. lyrata] gi 297310206 gb EFH40630.1  GDSL-motif lipase/hydrolase family protein [Arabidopsis lyrata subsp. lyrata]                                                                                                                                                              | 136  | 376  | 3.00E-50  | 276.5 | 67.6 | 77.9 | GDSL-motif lipase/hydrolase family protein                        | gbpln | Arabidopsis lyrata   | AT5G55050.1   Symbols:   GDSL-like Lipase/Acylhydrolase superfamily protein   chr5:22337745-22339741 FORWARD LENGTH=376                                                                                                                                                                                                                                                                                                                                                                                                                | 136  | 376 | 2.00E-50  | 276.5 | 64.0 | 77.2 |
| Rsa1.0_00026.1.g1689.t1 | gb[EOA13535.1] hypothetical protein CARUB_v10026598mg [Capsella rubella]                                                                                                                                                                                                                                                                                                 | 377  | 378  | 1.00E-171 | 100.3 | 79.0 | 89.7 | hypothetical protein CARUB_v10026598mg                            | gbpln | Capsella rubella     | AT5G55050.1   Symbols:   GDSL-like Lipase/Acylhydrolase superfamily protein   chr5:22337745-22339741 FORWARD LENGTH=376                                                                                                                                                                                                                                                                                                                                                                                                                | 377  | 376 | 1.00E-168 | 99.7  | 78.8 | 90.7 |
| Rsa1.0_00026.1.g1690.t1 | ref[NP_200310.1] RING/U-box domain-containing protein [Arabidopsis thaliana] gi 9758279 dbj BAB08778.1  unnamed protein product [Arabidopsis thaliana] gi 332009183 gb AED96566.1  RING/U-box domain-containing protein [Arabidopsis thaliana]                                                                                                                           | 282  | 226  | 1.00E-47  | 80.1  | 43.6 | 52.5 | RING/U-box domain-containing protein                              | gbpln | Arabidopsis thaliana | AT5G54990.1   Symbols:   RING/U-box superfamily protein   chr5:22317505-22318185 FORWARD LENGTH=226                                                                                                                                                                                                                                                                                                                                                                                                                                    | 282  | 226 | 4.00E-50  | 80.1  | 43.6 | 52.5 |
| Rsa1.0_00026.1.g1691.t1 | ref[NP_200310.1] RING/U-box domain-containing protein [Arabidopsis thaliana] gi 9758279 dbj BAB08778.1  unnamed protein product [Arabidopsis thaliana] gi 332009183 gb AED96566.1  RING/U-box domain-containing protein [Arabidopsis thaliana]                                                                                                                           | 249  | 226  | 7.00E-24  | 90.8  | 34.9 | 47.0 | RING/U-box domain-containing protein                              | gbpln | Arabidopsis thaliana | AT5G54990.1   Symbols:   RING/U-box superfamily protein   chr5:22317505-22318185 FORWARD LENGTH=226                                                                                                                                                                                                                                                                                                                                                                                                                                    | 249  | 226 | 2.00E-26  | 90.8  | 34.9 | 47.0 |
| Rsa1.0_00026.1.g1692.t1 | dbj BAJ3377.1  unnamed protein product [Thellungiella halophila]                                                                                                                                                                                                                                                                                                         | 569  | 552  | 0         | 97.0  | 85.4 | 88.9 | unnamed protein product                                           | ----  | ----                 | AT3G02020.1   Symbols:   AK3   aspartate kinase 3   chr3:340739-343410 REVERSE LENGTH=559                                                                                                                                                                                                                                                                                                                                                                                                                                              | 569  | 559 | 0         | 98.2  | 82.8 | 88.9 |
| Rsa1.0_00026.1.g1693.t2 | ref[NP_568814.2] DTW domain-containing protein [Arabidopsis thaliana] gi 9758286 dbj BAB08767.1  unnamed protein product [Arabidopsis thaliana] gi 15450589 gb AAK96566.1  AT5g54880/MBG8_15 [Arabidopsis thaliana] gi 24797048 gb AAN64536.1  AT5g54880/MBG8_15 [Arabidopsis thaliana] gi 332009169 gb AED96552.1  DTW domain-containing protein [Arabidopsis thaliana] | 313  | 394  | 1.00E-124 | 125.9 | 77.6 | 86.9 | DTW domain-containing protein                                     | gbpln | Arabidopsis thaliana | AT5G54880.1   Symbols:   DTW domain-containing protein   chr5:22291920-22293104 FORWARD LENGTH=394                                                                                                                                                                                                                                                                                                                                                                                                                                     | 313  | 394 | 1.00E-126 | 125.9 | 77.6 | 86.9 |
| Rsa1.0_00026.1.g1694.t1 | gb[EOA13149.1] hypothetical protein CARUB_v10026167mg, partial [Capsella rubella]                                                                                                                                                                                                                                                                                        | 530  | 563  | 0         | 106.2 | 89.4 | 93.2 | hypothetical protein CARUB_v10026167mg, partial                   | gbpln | Capsella rubella     | AT5G54870.1   Symbols:   unknown protein; FUNCTIONS IN: molecular_function unknown; INVOLVED IN: biological_process unknown; LOCATED IN: vacuole; EXPRESSED IN: 24 plant structures; EXPRESSED DURING: 15 growth stages; BEST Arabidopsis thaliana protein match is: unknown protein (TAIR:AT4G2020.1); Has 1807 Blast hits to 1807 proteins in 277 species: Archae - 0; Bacteria - 0; Metazoa - 736; Fungi - 347; Plants - 385; Viruses - 0; Other Eukaryotes - 339 (source: NCBI BLink).   chr5:22289149-22291604 FORWARD LENGTH=531 | 530  | 531 | 0         | 100.2 | 87.4 | 91.1 |
| Rsa1.0_00026.1.g1695.t1 | gb[AA63844.1] putative non-LTR retroelement reverse transcriptase [Arabidopsis thaliana]                                                                                                                                                                                                                                                                                 | 1769 | 1231 | 0         | 69.6  | 36.8 | 45.8 | putative non-LTR retroelement reverse transcriptase               | gbpln | Arabidopsis thaliana | AT2G01050.1   Symbols:   zinc ion binding/nucleic acid binding   chr2:68337-69884 REVERSE LENGTH=515                                                                                                                                                                                                                                                                                                                                                                                                                                   | 1769 | 515 | 1.00E-124 | 29.1  | 13.6 | 18.1 |
| Rsa1.0_00026.1.g1696.t1 | gb[AA21699.1] Contains reverse transcriptase domain (rvt) PF00078 [Arabidopsis thaliana]                                                                                                                                                                                                                                                                                 | 226  | 1253 | 3.00E-28  | 554.4 | 24.3 | 35.4 | Contains reverse transcriptase domain (rvt) PF00078               | gbpln | Arabidopsis thaliana | AT1G60720.1   Symbols:   RNA-directed DNA polymerase (reverse transcriptase)-related family protein   chr1:22357072-22357941 FORWARD LENGTH=289                                                                                                                                                                                                                                                                                                                                                                                        | 226  | 289 | 2.00E-27  | 127.9 | 24.3 | 33.6 |

|                         |                                                                                                                                                                                                                                                                                                                                                                                                                                                                                                                                                                                                                                                                                                                                                                                                                                                                                                                                                                                                                                                                                                                                                                                                                                                                  |      |      |          |       |      |      |                                                   |       |                      |                                                                                                                                                                                                                                                                                                                                                                                                               |      |      |          |       |      |      |
|-------------------------|------------------------------------------------------------------------------------------------------------------------------------------------------------------------------------------------------------------------------------------------------------------------------------------------------------------------------------------------------------------------------------------------------------------------------------------------------------------------------------------------------------------------------------------------------------------------------------------------------------------------------------------------------------------------------------------------------------------------------------------------------------------------------------------------------------------------------------------------------------------------------------------------------------------------------------------------------------------------------------------------------------------------------------------------------------------------------------------------------------------------------------------------------------------------------------------------------------------------------------------------------------------|------|------|----------|-------|------|------|---------------------------------------------------|-------|----------------------|---------------------------------------------------------------------------------------------------------------------------------------------------------------------------------------------------------------------------------------------------------------------------------------------------------------------------------------------------------------------------------------------------------------|------|------|----------|-------|------|------|
| Rsa1.0_00026.1.g1697.t2 | emb CAB81573.1  putative protein [Arabidopsis thaliana]                                                                                                                                                                                                                                                                                                                                                                                                                                                                                                                                                                                                                                                                                                                                                                                                                                                                                                                                                                                                                                                                                                                                                                                                          | 321  | 510  | 7.00E-22 | 158.9 | 17.4 | 25.2 | putative protein                                  | gbpln | Arabidopsis thaliana | AT2G07760.1   Symbols:   Zinc knuckle (CCHC-type) family protein   chr2:3584420-3586278 REVERSE LENGTH=530                                                                                                                                                                                                                                                                                                    | 321  | 530  | 1.00E-12 | 165.1 | 13.1 | 21.5 |
| Rsa1.0_00026.1.g1698.t2 | gb AAG51873.1 ACO79678_3 disease resistance protein, putative; 11609-15699 [Arabidopsis thaliana]                                                                                                                                                                                                                                                                                                                                                                                                                                                                                                                                                                                                                                                                                                                                                                                                                                                                                                                                                                                                                                                                                                                                                                | 1057 | 1068 | 0        | 101.0 | 63.6 | 73.4 | disease resistance protein, putative; 11609-15699 | gbpln | Arabidopsis thaliana | AT1G74170.1   Symbols: ARLP13, RLP13   receptor like protein 13   chr1:27891555-27895441 REVERSE LENGTH=1000                                                                                                                                                                                                                                                                                                  | 1057 | 1000 | 0        | 94.6  | 59.6 | 68.6 |
| Rsa1.0_00027.1.g1699.t1 | gb EOA36095.1  hypothetical protein CARUB_v10010848mg, partial [Capsella rubella]                                                                                                                                                                                                                                                                                                                                                                                                                                                                                                                                                                                                                                                                                                                                                                                                                                                                                                                                                                                                                                                                                                                                                                                | 134  | 134  | 9.00E-14 | 100.0 | 32.1 | 50.0 | hypothetical protein CARUB_v10010848mg, partial   | gbpln | Capsella rubella     | AT4G09490.1   Symbols:   Polynucleotidyl transferase, ribonuclease H-like superfamily protein   chr4:6015583-6016575 REVERSE LENGTH=170                                                                                                                                                                                                                                                                       | 134  | 170  | 1.00E-11 | 126.9 | 25.4 | 40.3 |
| Rsa1.0_00027.1.g1700.t1 | gb EOA18568.1  hypothetical protein CARUB_v10007127mg [Capsella rubella]                                                                                                                                                                                                                                                                                                                                                                                                                                                                                                                                                                                                                                                                                                                                                                                                                                                                                                                                                                                                                                                                                                                                                                                         | 973  | 969  | 0        | 99.6  | 93.7 | 96.9 | hypothetical protein CARUB_v10007127mg            | gbpln | Capsella rubella     | AT4G30160.1   Symbols: VLN4, ATVLN4   villin 4   chr4:14754528-14759511 FORWARD LENGTH=974                                                                                                                                                                                                                                                                                                                    | 973  | 974  | 0        | 100.1 | 92.3 | 96.6 |
| Rsa1.0_00027.1.g1701.t1 | gb EOA17560.1  hypothetical protein CARUB_v10005921mg [Capsella rubella]                                                                                                                                                                                                                                                                                                                                                                                                                                                                                                                                                                                                                                                                                                                                                                                                                                                                                                                                                                                                                                                                                                                                                                                         | 159  | 159  | 2.00E-43 | 100.0 | 69.2 | 78.0 | hypothetical protein CARUB_v10005921mg            | gbpln | Capsella rubella     | AT2G18969.1   Symbols:   BEST Arabidopsis thaliana protein match is: sequence-specific DNA binding transcription factors;transcription regulators (TAIR:AT4G30180.1); Has 30201 Blast hits to 17322 proteins in 780 species: Archae - 12; Bacteria - 1396; Metazoa - 17338; Fungi - 3422; Plants - 5037; Viruses - 0; Other Eukaryotes - 2996 (source: NCBI BLink).   chr2:8229047-8229574 REVERSE LENGTH=175 | 159  | 175  | 3.00E-42 | 110.1 | 60.4 | 73.6 |
| Rsa1.0_00027.1.g1702.t1 | ref NP_194748.1  H(+)-ATPase 2 [Arabidopsis thaliana]<br>gi 114335 sp P19456.2 PMA2_ARATH<br>RecName: Full=ATPase 2, plasma membrane-type; AltName: Full=Proton pump 2 gi 166629 gb AAA32751.1  H+-ATPase [Arabidopsis thaliana]<br>gi 5730129 emb CAB52463.1  H+-transporting ATPase type 2, plasma membrane [Arabidopsis thaliana]<br>gi 7269919 emb CAB81012.1  H+-transporting ATPase type 2, plasma membrane [Arabidopsis thaliana]<br>gi 14334804 gb AAK59580.1  putative H+-transporting ATPase [Arabidopsis thaliana] gi 23397277 gb AAN31920.1  putative H+-transporting ATPase type 2 [Arabidopsis thaliana]<br>gi 25055009 gb AAN71968.1  putative H+-transporting ATPase [Arabidopsis thaliana] gi 33266033 gb AEE85731.1  H(+)-ATPase 2 [Arabidopsis thaliana]<br>ref NP_194749.1  vernalization5/VIN3-like protein [Arabidopsis thaliana]<br>gi 5730130 emb CAB52464.1  putative protein [Arabidopsis thaliana]<br>gi 7269920 emb CAB81013.1  putative protein [Arabidopsis thaliana]<br>gi 11177137 dbj BAB17836.1  nuclear coiled-coil protein AT4g30200 [Arabidopsis thaliana]<br>gi 118566356 gb ABL01539.1  VIN3-like 2 protein [Arabidopsis thaliana]<br>gi 332660335 gb AEE85735.1  vernalization5/VIN3-like protein [Arabidopsis thaliana] | 947  | 948  | 0        | 100.1 | 97.5 | 99.0 | H(+)-ATPase 2                                     | gbpln | Arabidopsis thaliana | AT4G30190.1   Symbols: AHA2, PMA2, HA2   H(+)-ATPase 2   chr4:14770820-14775920 REVERSE LENGTH=948                                                                                                                                                                                                                                                                                                            | 947  | 948  | 0        | 100.1 | 97.5 | 99.0 |
| Rsa1.0_00027.1.g1703.t1 | gi 11177137 dbj BAB17836.1  nuclear coiled-coil protein AT4g30200 [Arabidopsis thaliana]<br>gi 118566356 gb ABL01539.1  VIN3-like 2 protein [Arabidopsis thaliana]<br>gi 332660335 gb AEE85735.1  vernalization5/VIN3-like protein [Arabidopsis thaliana]                                                                                                                                                                                                                                                                                                                                                                                                                                                                                                                                                                                                                                                                                                                                                                                                                                                                                                                                                                                                        | 670  | 714  | 0        | 106.6 | 80.3 | 88.5 | vernalization5/VIN3-like protein                  | gbpln | Arabidopsis thaliana | AT4G30200.2   Symbols: VEL1, VIL2   vernalization5/VIN3-like   chr4:14786852-14790070 REVERSE LENGTH=714                                                                                                                                                                                                                                                                                                      | 670  | 714  | 0        | 106.6 | 80.3 | 88.5 |
| Rsa1.0_00027.1.g1704.t1 | gb AAB88009.1  heat shock cognate protein HSC70 [Brassica napus]                                                                                                                                                                                                                                                                                                                                                                                                                                                                                                                                                                                                                                                                                                                                                                                                                                                                                                                                                                                                                                                                                                                                                                                                 | 647  | 645  | 0        | 99.7  | 96.3 | 98.6 | heat shock cognate protein HSC70                  | gbpln | Brassica napus       | AT5G02500.1   Symbols: HSC70-1, HSP70-1, AT-HSC70-1, HSC70   heat shock cognate protein 70-1   chr5:554055-556334 REVERSE LENGTH=651                                                                                                                                                                                                                                                                          | 647  | 651  | 0        | 100.6 | 96.1 | 98.6 |
| Rsa1.0_00027.1.g1705.t2 | dbj BAJ33878.1  unnamed protein product [Theilungiella halophila]                                                                                                                                                                                                                                                                                                                                                                                                                                                                                                                                                                                                                                                                                                                                                                                                                                                                                                                                                                                                                                                                                                                                                                                                | 244  | 711  | 2.00E-73 | 291.4 | 65.2 | 73.4 | unnamed protein product                           | ----  | ----                 | AT4G30210.2   Symbols: ATR2, AR2   P450 reductase 2   chr4:14796900-14800578 FORWARD LENGTH=711                                                                                                                                                                                                                                                                                                               | 244  | 711  | 3.00E-71 | 291.4 | 59.0 | 69.3 |

|                         |                                                                                                                                                                                                                                                                                                                                                                                                                                                                                                                                                                                                                                                                                                                                                                                                               |     |      |           |       |      |      |                                          |       |                      |                                                                                                                                               |     |     |           |       |      |      |  |  |
|-------------------------|---------------------------------------------------------------------------------------------------------------------------------------------------------------------------------------------------------------------------------------------------------------------------------------------------------------------------------------------------------------------------------------------------------------------------------------------------------------------------------------------------------------------------------------------------------------------------------------------------------------------------------------------------------------------------------------------------------------------------------------------------------------------------------------------------------------|-----|------|-----------|-------|------|------|------------------------------------------|-------|----------------------|-----------------------------------------------------------------------------------------------------------------------------------------------|-----|-----|-----------|-------|------|------|--|--|
|                         | ref NP_194751.1  small nuclear ribonucleoprotein F [Arabidopsis thaliana]<br>gi 297798954 ref XP_002867361.1  hypothetical protein ARALYDRAFT_913456 [Arabidopsis lyrata subsp. lyrata]<br>gi 297838060 ref XP_002885912.1  hypothetical protein ARALYDRAFT_899645 [Arabidopsis lyrata subsp. lyrata]<br>gi 10720264 sp Q9SUM2.1 RUXF ARAT H<br>RecName: Full=Probable small nuclear ribonucleoprotein F; Short=snRNP-F; AltName: Full=Sm protein F; Short=Sm-F; Short=SmF                                                                                                                                                                                                                                                                                                                                    |     |      |           |       |      |      |                                          |       |                      |                                                                                                                                               |     |     |           |       |      |      |  |  |
| Rsa1.0_00027.1.g1706.t1 | gi 5730132 emb CAB52466.1  snRNP Sm protein F-like [Arabidopsis thaliana]<br>gi 7269922 emb CAB81015.1  snRNP Sm protein F-like [Arabidopsis thaliana]<br>gi 21593208 gb AAM65157.1  snRNP Sm protein F-like [Arabidopsis thaliana]<br>gi 30102544 gb AAP21190.1  At4g30220 [Arabidopsis thaliana]<br>gi 110743810 dbj BAE99740.1  snRNP Sm protein F-like [Arabidopsis thaliana]<br>gi 297313197 gb EFH43620.1  hypothetical protein ARALYDRAFT_913456 [Arabidopsis lyrata subsp. lyrata]<br>gi 297331752 gb EFH62171.1  hypothetical protein ARALYDRAFT_899645 [Arabidopsis lyrata subsp. lyrata]                                                                                                                                                                                                           | 88  | 88   | 8.00E-43  | 100.0 | 97.7 | 98.9 | small nuclear ribonucleoprotein F        | gbpln | Arabidopsis lyrata   | AT4G30220.1   Symbols: RUXF   small nuclear ribonucleoprotein F   chr4:14803100-14804259 REVERSE LENGTH=88                                    | 88  | 88  | 1.00E-45  | 100.0 | 97.7 | 98.9 |  |  |
| Rsa1.0_00027.1.g1707.t1 | ref NP_567842.1  Syntaxin/t-SNARE family protein [Arabidopsis thaliana]<br>gi 1622657 gb AL16225.1 AF428456.1 AT4g30240/F9N11.90 [Arabidopsis thaliana]<br>gi 22137126 gb AAM91408.1  At4g30240/F9N11.90 [Arabidopsis thaliana]<br>gi 332660342 gb AEE85742.1  Syntaxin/t-SNARE family protein [Arabidopsis thaliana]                                                                                                                                                                                                                                                                                                                                                                                                                                                                                         | 278 | 300  | 1.00E-108 | 107.9 | 73.7 | 83.8 | Syntaxin/t-SNARE family protein          | gbpln | Arabidopsis thaliana | AT4G30240.1   Symbols:   Syntaxin/t-SNARE family protein   chr4:14808359-14809745 REVERSE LENGTH=300                                          | 278 | 300 | 1.00E-110 | 107.9 | 73.7 | 83.8 |  |  |
| Rsa1.0_00027.1.g1708.t1 | gb EOA15588.1  hypothetical protein CARUB_v10005446mg [Capsella rubella]                                                                                                                                                                                                                                                                                                                                                                                                                                                                                                                                                                                                                                                                                                                                      | 284 | 280  | 1.00E-117 | 98.6  | 91.2 | 94.0 | hypothetical protein CARUB_v10005446mg   | gbpln | Capsella rubella     | AT2G18840.1   Symbols:   Integral membrane Yip1 family protein   chr2:8158288-8159848 FORWARD LENGTH=281                                      | 284 | 281 | 1.00E-115 | 98.9  | 86.3 | 90.1 |  |  |
| Rsa1.0_00027.1.g1709.t1 | gb AEX07595.1  xyloglucosyl transferase 2, partial [Brassica juncea]                                                                                                                                                                                                                                                                                                                                                                                                                                                                                                                                                                                                                                                                                                                                          | 282 | 265  | 1.00E-144 | 94.0  | 85.8 | 89.4 | xyloglucosyl transferase 2, partial      | gbpln | Brassica juncea      | AT4G30270.1   Symbols: MERI5B, MERI-5, XTH24, SEN4   xyloglucan endotransglucosylase/hydrolase 24   chr4:14819445-14820448 REVERSE LENGTH=269 | 282 | 269 | 1.00E-142 | 95.4  | 84.8 | 89.4 |  |  |
| Rsa1.0_00027.1.g1710.t1 | emb CAB39638.1  RNA-directed DNA polymerase-like protein [Arabidopsis thaliana]<br>gi 7267666 emb CAB78094.1  RNA-directed DNA polymerase-like protein [Arabidopsis thaliana]                                                                                                                                                                                                                                                                                                                                                                                                                                                                                                                                                                                                                                 | 345 | 1274 | 2.00E-51  | 369.3 | 35.1 | 51.0 | RNA-directed DNA polymerase-like protein | gbpln | Arabidopsis thaliana | AT4G29090.1   Symbols:   Ribonuclease H-like superfamily protein   chr4:14333528-14335255 FORWARD LENGTH=575                                  | 345 | 575 | 9.00E-30  | 166.7 | 26.4 | 47.2 |  |  |
| Rsa1.0_00027.1.g1711.t1 | ref NP_176710.1  xyloglucan:xyloglucosyl transferase [Arabidopsis thaliana]<br>gi 38605119 sp O80803.1 XTH17_ARATH<br>RecName: Full=Probable xyloglucan endotransglucosylase/hydrolase protein 17; Short=At-XTH17; Short=XTH-17; Flags: Precursor<br>gi 13877725 gb AAK43940.1 AF370621.1 xyloglucan endo-transglycosylase-like protein [Arabidopsis thaliana]<br>gi 3335340 gb AAC27142.1  Strong similarity to xyloglucan endo-transglycosylase (TCH4) gene<br>gb U27609, first exon contains strong similarity to meri 5 gene<br>gb Z17989 from A. thaliana. EST gb N37583 comes from this gene [Arabidopsis thaliana]<br>gi 124300988 gb ABN04746.1  At1g65310 [Arabidopsis thaliana]<br>gi 332196236 gb AEE34357.1  probable xyloglucan endotransglucosylase/hydrolase protein 17 [Arabidopsis thaliana] | 97  | 282  | 2.00E-44  | 290.7 | 86.6 | 91.8 | xyloglucan:xyloglucosyl transferase      | gbpln | Arabidopsis thaliana | AT1G65310.1   Symbols: ATXTH17, XTH17   xyloglucan endotransglucosylase/hydrolase 17   chr1:24257262-24258319 FORWARD LENGTH=282              | 97  | 282 | 3.00E-47  | 290.7 | 86.6 | 91.8 |  |  |

|                         |                                                                                                                                                                                                                                                                                                                                                                                                                                                                                                                                                                                                        |     |     |           |       |      |      |                                                              |       |                      |                                                                                                                                               |     |     |           |       |      |      |
|-------------------------|--------------------------------------------------------------------------------------------------------------------------------------------------------------------------------------------------------------------------------------------------------------------------------------------------------------------------------------------------------------------------------------------------------------------------------------------------------------------------------------------------------------------------------------------------------------------------------------------------------|-----|-----|-----------|-------|------|------|--------------------------------------------------------------|-------|----------------------|-----------------------------------------------------------------------------------------------------------------------------------------------|-----|-----|-----------|-------|------|------|
| Rsa1.0_00027.1.g1712.t1 | ref NP_199618.1  xyloglucan endotransglucosylase/hydrolase protein 20 [Arabidopsis thaliana] gi 38605469 sp Q9F13.1 XTH20_ARATH RecName: Full=Xyloglucan endotransglucosylase/hydrolase protein 20; Short=At-XTH20; Short=XTH-20; Flags: Precursor gi 10177758 dbj BAB11071.1  xyloglucan endo-1,4-beta-D-glucanase [Arabidopsis thaliana] gi 45825157 gb AAS77486.1  At5g48070 [Arabidopsis thaliana] gi 62320256 dbj BAD94531.1  xyloglucan endo-1,4-beta-D-glucanase [Arabidopsis thaliana] gi 332008233 gb AED95616.1  xyloglucan endotransglucosylase/hydrolase protein 20 [Arabidopsis thaliana] | 280 | 282 | 1.00E-133 | 100.7 | 81.8 | 87.5 | xyloglucan endotransglucosylase/hydrolase protein 20         | gbpln | Arabidopsis thaliana | AT5G48070.1   Symbols: ATXTH20, XTH20   xyloglucan endotransglucosylase/hydrolase 20   chr5:19482158-19483231 FORWARD LENGTH=282              | 280 | 282 | 1.00E-136 | 100.7 | 81.8 | 87.5 |
| Rsa1.0_00027.1.g1713.t1 | ref XP_002867352.1  zinc finger family protein [Arabidopsis lyrata subsp. lyrata] gi 297313188 gb EFH43611.1  zinc finger family protein [Arabidopsis lyrata subsp. lyrata]                                                                                                                                                                                                                                                                                                                                                                                                                            | 153 | 169 | 2.00E-37  | 110.5 | 64.7 | 74.5 | zinc finger family protein                                   | gbpln | Arabidopsis lyrata   | AT4G30370.1   Symbols:   RING/U-box superfamily protein   chr4:14858743-14859273 REVERSE LENGTH=176                                           | 153 | 176 | 3.00E-39  | 115.0 | 64.1 | 75.8 |
| Rsa1.0_00027.1.g1714.t3 | #                                                                                                                                                                                                                                                                                                                                                                                                                                                                                                                                                                                                      | #   | #   | #         | #     | #    | #    | -                                                            | ----  | ----                 | #                                                                                                                                             | #   | #   | #         | #     | #    | #    |
| Rsa1.0_00027.1.g1715.t1 | gb EOA17519.1  hypothetical protein CARUB_v10005852mg [Capsella rubella]                                                                                                                                                                                                                                                                                                                                                                                                                                                                                                                               | 180 | 180 | 1.00E-81  | 100.0 | 87.2 | 95.0 | hypothetical protein CARUB_v10005852mg                       | gbpln | Capsella rubella     | AT4G30410.1   Symbols:   sequence-specific DNA binding transcription factors   chr4:14871309-14871851 REVERSE LENGTH=180                      | 180 | 180 | 2.00E-81  | 100.0 | 88.9 | 94.4 |
| Rsa1.0_00027.1.g1716.t1 | #                                                                                                                                                                                                                                                                                                                                                                                                                                                                                                                                                                                                      | #   | #   | #         | #     | #    | #    | -                                                            | ----  | ----                 | #                                                                                                                                             | #   | #   | #         | #     | #    | #    |
| Rsa1.0_00027.1.g1717.t3 | ref NP_194771.1  nodulin MtN21 /EamA-like transporter family protein [Arabidopsis thaliana] gi 75181441 sp Q9M0B8.1 WTR37_ARATH RecName: Full=WAT1--related protein At4g30420 gi 7269943 emb CAB79760.1  nodulin-like protein [Arabidopsis thaliana] gi 332660363 gb AEE85763.1  nodulin MtN21 /EamA-like transporter family protein [Arabidopsis thaliana]                                                                                                                                                                                                                                            | 390 | 373 | 1.00E-179 | 95.6  | 80.5 | 85.9 | nodulin MtN21 /EamA-like transporter family protein          | gbpln | Arabidopsis thaliana | AT4G30420.1   Symbols:   nodulin MtN21 /EamA-like transporter family protein   chr4:14877069-14878914 FORWARD LENGTH=373                      | 390 | 373 | 0         | 95.6  | 80.5 | 85.9 |
| Rsa1.0_00027.1.g1718.t1 | gb AAD22330.1  putative non-LTR retroelement reverse transcriptase [Arabidopsis thaliana]                                                                                                                                                                                                                                                                                                                                                                                                                                                                                                              | 213 | 631 | 1.00E-30  | 296.2 | 34.7 | 53.1 | putative non-LTR retroelement reverse transcriptase          | gbpln | Arabidopsis thaliana | AT3G24255.1   Symbols:   RNA-directed DNA polymerase (reverse transcriptase)-related family protein   chr3:8789471-8793208 FORWARD LENGTH=746 | 213 | 746 | 9.00E-29  | 350.2 | 32.9 | 43.7 |
| Rsa1.0_00027.1.g1719.t1 | ref NP_194782.1  class I glutamine amidotransferase domain-containing protein [Arabidopsis thaliana] gi 15294152 gb AAK95253.1 AF410267.1 AT4g30530/F17I23.130 [Arabidopsis thaliana] gi 7269954 emb CAB79771.1  putative protein [Arabidopsis thaliana] gi 20147269 gb AAM10348.1  AT4g30530/F17I23.130 [Arabidopsis thaliana] gi 33266037 gb AEE85777.1  class I glutamine amidotransferase domain-containing protein [Arabidopsis thaliana]                                                                                                                                                         | 250 | 250 | 1.00E-129 | 100.0 | 88.8 | 93.6 | class I glutamine amidotransferase domain-containing protein | gbpln | Arabidopsis thaliana | AT4G30530.1   Symbols:   Class I glutamine amidotransferase-like superfamily protein   chr4:14920605-14922286 FORWARD LENGTH=250              | 250 | 250 | 1.00E-132 | 100.0 | 88.8 | 93.6 |
| Rsa1.0_00027.1.g1720.t1 | gb EOA17311.1  hypothetical protein CARUB_v10005590mg [Capsella rubella]                                                                                                                                                                                                                                                                                                                                                                                                                                                                                                                               | 253 | 249 | 1.00E-124 | 98.4  | 83.4 | 91.3 | hypothetical protein CARUB_v10005590mg                       | gbpln | Capsella rubella     | AT4G30550.1   Symbols:   Class I glutamine amidotransferase-like superfamily protein   chr4:14925618-14926713 FORWARD LENGTH=249              | 253 | 249 | 1.00E-125 | 98.4  | 85.4 | 91.7 |
| Rsa1.0_00027.1.g1721.t1 | gb EOA18329.1  hypothetical protein CARUB_v10006846mg [Capsella rubella]                                                                                                                                                                                                                                                                                                                                                                                                                                                                                                                               | 191 | 187 | 6.00E-68  | 97.9  | 71.7 | 78.5 | hypothetical protein CARUB_v10006846mg                       | gbpln | Capsella rubella     | AT4G30590.1   Symbols: ENODL12, AENODL12   early nodulin-like protein 12   chr4:14935760-14936469 REVERSE LENGTH=190                          | 191 | 190 | 1.00E-64  | 99.5  | 73.3 | 80.6 |
| Rsa1.0_00027.1.g1722.t1 | ref XP_002867336.1  hypothetical protein ARALYDRAFT_913413 [Arabidopsis lyrata subsp. lyrata] gi 297313172 gb EFH43595.1  hypothetical protein ARALYDRAFT_913413 [Arabidopsis lyrata subsp. lyrata]                                                                                                                                                                                                                                                                                                                                                                                                    | 182 | 181 | 2.00E-85  | 99.5  | 91.8 | 94.5 | hypothetical protein ARALYDRAFT_913413                       | gbpln | Arabidopsis lyrata   | AT4G30620.1   Symbols:   Uncharacterised BCR_YbaB family COG0718   chr4:14948724-14950035 REVERSE LENGTH=180                                  | 182 | 180 | 5.00E-87  | 98.9  | 90.1 | 92.9 |
| Rsa1.0_00027.1.g1723.t1 | gb EOA18905.1  hypothetical protein CARUB_v10007535mg [Capsella rubella]                                                                                                                                                                                                                                                                                                                                                                                                                                                                                                                               | 301 | 301 | 1.00E-133 | 100.0 | 74.8 | 84.7 | hypothetical protein CARUB_v10007535mg                       | gbpln | Capsella rubella     | AT4G30640.1   Symbols:   RNI-like superfamily protein   chr4:14952670-14953682 FORWARD LENGTH=301                                             | 301 | 301 | 1.00E-127 | 100.0 | 70.8 | 83.1 |
| Rsa1.0_00027.1.g1724.t1 | #                                                                                                                                                                                                                                                                                                                                                                                                                                                                                                                                                                                                      | #   | #   | #         | #     | #    | #    | -                                                            | ----  | ----                 | #                                                                                                                                             | #   | #   | #         | #     | #    | #    |

|                         |                                                                                                                                                                                                                                                                                                                                                                                                                               |      |      |           |       |      |      |                                        |       |                      |                                                                                                                                                                                                                                                                                                                                                                                                                                                                                                 |      |      |           |       |      |      |
|-------------------------|-------------------------------------------------------------------------------------------------------------------------------------------------------------------------------------------------------------------------------------------------------------------------------------------------------------------------------------------------------------------------------------------------------------------------------|------|------|-----------|-------|------|------|----------------------------------------|-------|----------------------|-------------------------------------------------------------------------------------------------------------------------------------------------------------------------------------------------------------------------------------------------------------------------------------------------------------------------------------------------------------------------------------------------------------------------------------------------------------------------------------------------|------|------|-----------|-------|------|------|
| Rsa1.0_00027.1.g1725.t1 | ref[XP_002869411.1] predicted protein [Arabidopsis lyrata subsp. lyrata] gi 297315247 gb EFH45670.1  predicted protein [Arabidopsis lyrata subsp. lyrata]                                                                                                                                                                                                                                                                     | 272  | 280  | 2.00E-72  | 102.9 | 51.8 | 69.5 | predicted protein                      | gbpln | Arabidopsis lyrata   | AT4G29760.1   Symbols:   unknown protein; BEST Arabidopsis thaliana protein match is: unknown protein (TAIR:AT4G29770.2); Has 63 Blast hits to 63 proteins in 2 species: Archae - 0; Bacteria - 0; Metazoa - 0; Fungi - 0; Plants - 63; Viruses - 0; Other Eukaryotes - 0 (source: NCBI BLink).   chr4:14574114-14575148 FORWARD LENGTH=280                                                                                                                                                     | 272  | 280  | 1.00E-71  | 102.9 | 50.7 | 68.0 |
| Rsa1.0_00027.1.g1726.t1 | ref[XP_002869411.1] predicted protein [Arabidopsis lyrata subsp. lyrata] gi 297315247 gb EFH45670.1  predicted protein [Arabidopsis lyrata subsp. lyrata]                                                                                                                                                                                                                                                                     | 270  | 280  | 2.00E-81  | 103.7 | 57.8 | 72.2 | predicted protein                      | gbpln | Arabidopsis lyrata   | AT4G29760.1   Symbols:   unknown protein; BEST Arabidopsis thaliana protein match is: unknown protein (TAIR:AT4G29770.2); Has 63 Blast hits to 63 proteins in 2 species: Archae - 0; Bacteria - 0; Metazoa - 0; Fungi - 0; Plants - 63; Viruses - 0; Other Eukaryotes - 0 (source: NCBI BLink).   chr4:14574114-14575148 FORWARD LENGTH=280                                                                                                                                                     | 270  | 280  | 1.00E-79  | 103.7 | 56.7 | 71.5 |
| Rsa1.0_00027.1.g1727.t6 | ref[XP_002867329.1] hypothetical protein ARALYDRAFT_913400 [Arabidopsis lyrata subsp. lyrata] gi 297313165 gb EFH43588.1  hypothetical protein ARALYDRAFT_913400 [Arabidopsis lyrata subsp. lyrata]                                                                                                                                                                                                                           | 149  | 157  | 9.00E-67  | 105.4 | 87.9 | 91.9 | hypothetical protein ARALYDRAFT_913400 | gbpln | Arabidopsis lyrata   | AT4G30770.1   Symbols:   Putative membrane lipoprotein   chr4:14986140-14986613 REVERSE LENGTH=157                                                                                                                                                                                                                                                                                                                                                                                              | 149  | 157  | 2.00E-61  | 105.4 | 86.6 | 90.6 |
| Rsa1.0_00027.1.g1728.t1 | gb EOA16289.1  hypothetical protein CARUB_v10004435mg [Capsella rubella]                                                                                                                                                                                                                                                                                                                                                      | 543  | 586  | 0         | 107.9 | 82.3 | 89.7 | hypothetical protein CARUB_v10004435mg | gbpln | Capsella rubella     | AT4G30780.1   Symbols:   unknown protein; BEST Arabidopsis thaliana protein match is: unknown protein (TAIR:AT2G24100.1); Has 109 Blast hits to 109 proteins in 18 species: Archae - 0; Bacteria - 0; Metazoa - 1; Fungi - 0; Plants - 95; Viruses - 0; Other Eukaryotes - 13 (source: NCBI BLink).   chr4:14990523-14992855 FORWARD LENGTH=589                                                                                                                                                 | 543  | 589  | 0         | 108.5 | 81.6 | 89.9 |
| Rsa1.0_00027.1.g1729.t1 | #                                                                                                                                                                                                                                                                                                                                                                                                                             | #    | #    | #         | #     | #    | #    | -                                      | ----  | ----                 | #                                                                                                                                                                                                                                                                                                                                                                                                                                                                                               | #    | #    | #         | #     | #    |      |
| Rsa1.0_00027.1.g1730.t2 | gb EOA15927.1  hypothetical protein CARUB_v10004021mg [Capsella rubella]                                                                                                                                                                                                                                                                                                                                                      | 267  | 1147 | 9.00E-34  | 429.6 | 31.8 | 41.6 | hypothetical protein CARUB_v10004021mg | gbpln | Capsella rubella     | AT4G30790.1   Symbols:   INVOLVED IN: autophagy; EXPRESSED IN: 24 plant structures; EXPRESSED DURING: 15 growth stages; CONTAINS InterPro DOMAIN/s: Autophagy-related protein 17 (InterPro:IPR007240), Autophagy-related protein 11 (InterPro:IPR019460); Has 8793 Blast hits to 6268 proteins in 570 species: Archae - 89; Bacteria - 657; Metazoa - 4844; Fungi - 808; Plants - 441; Viruses - 15; Other Eukaryotes - 1939 (source: NCBI BLink).   chr4:14993383-14997785 REVERSE LENGTH=1148 | 267  | 1148 | 2.00E-31  | 430.0 | 33.0 | 41.9 |
| Rsa1.0_00027.1.g1731.t1 | ref[NP_567854.1] carboxypeptidase D [Arabidopsis thaliana] gi 75332010 sp Q949Q7.1 SCP29_ARAT H RecName: Full=Serine carboxypeptidase-like 29; Flags: Precursor gi 15293049 gb AAK93635.1  putative serine carboxypeptidase II [Arabidopsis thaliana] gi 22136958 gb AAM91708.1  putative serine carboxypeptidase II [Arabidopsis thaliana] gi 33266041 gb AEE85811.1  serine carboxypeptidase-like 29 [Arabidopsis thaliana] | 472  | 479  | 0         | 101.5 | 85.6 | 92.2 | carboxypeptidase D                     | gbpln | Arabidopsis thaliana | AT4G30810.1   Symbols: scp 29   serine carboxypeptidase-like 29   chr4:15003474-15006017 FORWARD LENGTH=479                                                                                                                                                                                                                                                                                                                                                                                     | 472  | 479  | 0         | 101.5 | 85.6 | 92.2 |
| Rsa1.0_00027.1.g1732.t1 | gb EOA23552.1  hypothetical protein CARUB_v10016746mg [Capsella rubella]                                                                                                                                                                                                                                                                                                                                                      | 502  | 722  | 2.00E-98  | 143.8 | 49.0 | 61.2 | hypothetical protein CARUB_v10016746mg | gbpln | Capsella rubella     | AT5G11250.1   Symbols:   Disease resistance protein (TIR-NBS-LRR class)   chr5:3587978-3591960 REVERSE LENGTH=1189                                                                                                                                                                                                                                                                                                                                                                              | 502  | 1189 | 1.00E-97  | 236.9 | 46.2 | 60.6 |
| Rsa1.0_00027.1.g1733.t1 | gb AAD32898.1  putative retroelement pol polyprotein [Arabidopsis thaliana]                                                                                                                                                                                                                                                                                                                                                   | 1382 | 1307 | 0         | 94.6  | 58.1 | 72.8 | putative retroelement pol polyprotein  | gbpln | Arabidopsis thaliana | AT4G23160.1   Symbols: CRK8   cysteine-rich RLK (RECEPTOR-like protein kinase) 8   chr4:12129485-12134086 FORWARD LENGTH=1262                                                                                                                                                                                                                                                                                                                                                                   | 1382 | 1262 | 1.00E-103 | 91.3  | 14.5 | 22.5 |
| Rsa1.0_00027.1.g1734.t1 | ref[XP_002870849.1] predicted protein [Arabidopsis lyrata subsp. lyrata] gi 297316685 gb EFH47108.1  predicted protein [Arabidopsis lyrata subsp. lyrata]                                                                                                                                                                                                                                                                     | 394  | 1225 | 1.00E-143 | 310.9 | 61.9 | 74.4 | predicted protein                      | gbpln | Arabidopsis lyrata   | AT5G11250.1   Symbols:   Disease resistance protein (TIR-NBS-LRR class)   chr5:3587978-3591960 REVERSE LENGTH=1189                                                                                                                                                                                                                                                                                                                                                                              | 394  | 1189 | 1.00E-140 | 301.8 | 57.9 | 72.1 |
| Rsa1.0_00027.1.g1735.t1 | #                                                                                                                                                                                                                                                                                                                                                                                                                             | #    | #    | #         | #     | #    | #    | -                                      | ----  | ----                 | #                                                                                                                                                                                                                                                                                                                                                                                                                                                                                               | #    | #    | #         | #     | #    |      |

|                         |                                                                                                                                                                                    |      |      |           |       |      |      |                                                                                                                         |       |                      |                                                                                                                                                                                                                                                                                                                                                                                                                                                                     |      |      |           |       |      |      |
|-------------------------|------------------------------------------------------------------------------------------------------------------------------------------------------------------------------------|------|------|-----------|-------|------|------|-------------------------------------------------------------------------------------------------------------------------|-------|----------------------|---------------------------------------------------------------------------------------------------------------------------------------------------------------------------------------------------------------------------------------------------------------------------------------------------------------------------------------------------------------------------------------------------------------------------------------------------------------------|------|------|-----------|-------|------|------|
| Rsa1.0_00027.1.g1736.t1 | ref[XP_002869360.1] hypothetical protein ARALYDRAFT_491672 [Arabidopsis lyrata subsp. lyrata] gi 297315196 gb EFH45619.1                                                           | 183  | 182  | 3.00E-73  | 99.5  | 74.9 | 80.9 | hypothetical protein ARALYDRAFT_491672                                                                                  | gbpln | Arabidopsis lyrata   | AT4G30820.3   Symbols:   cyclin-dependent kinase-activating kinase assembly factor-related / CDK-activating kinase assembly factor-related   chr4:15007144-15008378 FORWARD LENGTH=178                                                                                                                                                                                                                                                                              | 183  | 178  | 6.00E-67  | 97.3  | 71.6 | 79.2 |
| Rsa1.0_00027.1.g1737.t1 | ref[XP_002869358.1] SET domain-containing protein [Arabidopsis lyrata subsp. lyrata] gi 297315194 gb EFH45617.1   SET domain-containing protein [Arabidopsis lyrata subsp. lyrata] | 503  | 497  | 0         | 98.8  | 84.5 | 89.7 | SET domain-containing protein                                                                                           | gbpln | Arabidopsis lyrata   | AT4G30860.1   Symbols: ASHR3, SDG4   SET domain group 4   chr4:15024546-15027427 FORWARD LENGTH=497                                                                                                                                                                                                                                                                                                                                                                 | 503  | 497  | 0         | 98.8  | 82.9 | 88.7 |
| Rsa1.0_00027.1.g1738.t1 | gb[EOA17813.1] hypothetical protein CARUB_v10006211mg [Capsella rubella]                                                                                                           | 110  | 109  | 8.00E-46  | 99.1  | 82.7 | 90.9 | hypothetical protein CARUB_v10006211mg                                                                                  | gbpln | Capsella rubella     | AT4G30890.1   Symbols:   Bifunctional inhibitor/lipid-transfer protein/seed storage 2S albumin superfamily protein   chr4:15035229-15035750 FORWARD LENGTH=109                                                                                                                                                                                                                                                                                                      | 110  | 109  | 3.00E-47  | 99.1  | 82.7 | 87.3 |
| Rsa1.0_00027.1.g1739.t3 | gb[EOA16186.1] hypothetical protein CARUB_v10004326mg [Capsella rubella]                                                                                                           | 569  | 551  | 0         | 96.8  | 79.1 | 84.5 | hypothetical protein CARUB_v10004326mg                                                                                  | gbpln | Capsella rubella     | AT4G30890.3   Symbols: UBP24   ubiquitin-specific protease 24   chr4:15035383-15038825 REVERSE LENGTH=551                                                                                                                                                                                                                                                                                                                                                           | 569  | 551  | 0         | 96.8  | 76.4 | 82.2 |
| Rsa1.0_00027.1.g1740.t1 | ref[XP_002867320.1] hypothetical protein ARALYDRAFT_328625 [Arabidopsis lyrata subsp. lyrata] gi 297313156 gb EFH43579.1                                                           | 732  | 770  | 0         | 105.2 | 70.4 | 76.6 | hypothetical protein ARALYDRAFT_328625                                                                                  | gbpln | Arabidopsis lyrata   | AT4G30935.1   Symbols: WRKY32, ATWRKY32   WRKY DNA-binding protein 32   chr4:15051916-15053908 REVERSE LENGTH=466                                                                                                                                                                                                                                                                                                                                                   | 732  | 466  | 1.00E-159 | 63.7  | 42.8 | 46.9 |
| Rsa1.0_00027.1.g1741.t1 | ref[NP_178356.1] RNA-directed DNA polymerase (reverse transcriptase)-related family protein [Arabidopsis thaliana] gi 3184287 gb AAC18934.1                                        | 195  | 211  | 1.00E-41  | 108.2 | 40.0 | 57.9 | RNA-directed DNA polymerase (reverse transcriptase)-related family protein                                              | gbpln | Arabidopsis thaliana | AT2G02520.1   Symbols:   RNA-directed DNA polymerase (reverse transcriptase)-related family protein   chr2:676771-678145 REVERSE LENGTH=211                                                                                                                                                                                                                                                                                                                         | 195  | 211  | 4.00E-44  | 108.2 | 40.0 | 57.9 |
| Rsa1.0_00027.1.g1742.t1 | sp P48627.1 FAD6C_BRANA RecName: Full=Omega-6 fatty acid desaturase, chloroplast; Flags: Precursor gi 457631 gb AAA50157.1   omega-6 desaturase [Brassica napus]                   | 446  | 443  | 0         | 99.3  | 95.7 | 97.8 | RecName: Full=Omega-6 fatty acid desaturase, chloroplast; Flags: Precursor gi 457631 gb AAA50157.1   omega-6 desaturase | gbpln | Brassica napus       | AT4G30950.1   Symbols: FAD6, FADC, SFD4   fatty acid desaturase 6   chr4:15057278-15059673 REVERSE LENGTH=448                                                                                                                                                                                                                                                                                                                                                       | 446  | 448  | 0         | 100.4 | 91.7 | 96.4 |
| Rsa1.0_00027.1.g1743.t1 | ref[XP_002864803.1] predicted protein [Arabidopsis lyrata subsp. lyrata] gi 297310638 gb EFH41062.1   predicted protein [Arabidopsis lyrata subsp. lyrata]                         | 158  | 607  | 2.00E-12  | 384.2 | 31.6 | 35.4 | predicted protein                                                                                                       | gbpln | Arabidopsis lyrata   | AT5G62580.1   Symbols:   ARM repeat superfamily protein   chr5:25120010-25122259 FORWARD LENGTH=615                                                                                                                                                                                                                                                                                                                                                                 | 158  | 615  | 7.00E-15  | 389.2 | 29.7 | 32.3 |
| Rsa1.0_00027.1.g1744.t1 | #                                                                                                                                                                                  | #    | #    | #         | #     | #    | -    | -                                                                                                                       | ----  | ----                 | #                                                                                                                                                                                                                                                                                                                                                                                                                                                                   | #    | #    | #         | #     | #    |      |
| Rsa1.0_00027.1.g1745.t1 | #                                                                                                                                                                                  | #    | #    | #         | #     | #    | -    | -                                                                                                                       | ----  | ----                 | #                                                                                                                                                                                                                                                                                                                                                                                                                                                                   | #    | #    | #         | #     | #    |      |
| Rsa1.0_00027.1.g1746.t1 | gb AAG52094.1 AC012680_5 putative Mutator-like transposase; 12516-14947 [Arabidopsis thaliana]                                                                                     | 771  | 761  | 0         | 98.7  | 49.8 | 63.6 | putative Mutator-like transposase; 12516-14947                                                                          | gbpln | Arabidopsis thaliana | AT3G30370.1   Symbols:   CONTAINS InterPro DOMAIN/s: Transposase, MuDR, plant (InterPro:IPR004332); BEST Arabidopsis thaliana protein match is: SWAP (Suppressor-of-White-Apicoat)/surp RNA-binding domain-containing protein (TAIR:AT1G18050.1); Has 35 Blast hits to 35 proteins in 4 species: Archae - 0; Bacteria - 0; Metazoa - 0; Fungi - 0; Plants - 35; Viruses - 0; Other Eukaryotes - 0 (source: NCBI BLINK).   chr3:11965180-11965719 REVERSE LENGTH=179 | 771  | 179  | 5.00E-20  | 23.2  | 7.1  | 10.0 |
| Rsa1.0_00027.1.g1747.t1 | gb[EOA18341.1] hypothetical protein CARUB_v10006862mg [Capsella rubella]                                                                                                           | 424  | 448  | 0         | 105.7 | 92.0 | 96.2 | hypothetical protein CARUB_v10006862mg                                                                                  | gbpln | Capsella rubella     | AT4G30960.1   Symbols: CIPK6, SIP3, SNRK3.14, ATCIPK6   SOS3-interacting protein 3   chr4:15067400-15068725 FORWARD LENGTH=441                                                                                                                                                                                                                                                                                                                                      | 424  | 441  | 0         | 104.0 | 92.0 | 96.2 |
| Rsa1.0_00027.1.g1748.t2 | ref[XP_002884524.1] protein binding protein [Arabidopsis lyrata subsp. lyrata] gi 297330364 gb EFH60783.1   protein binding protein [Arabidopsis lyrata subsp. lyrata]             | 573  | 442  | 1.00E-170 | 77.1  | 56.4 | 60.4 | protein binding protein                                                                                                 | gbpln | Arabidopsis lyrata   | AT3G05675.1   Symbols:   BTB/POZ domain-containing protein   chr3:1658425-1659859 REVERSE LENGTH=441                                                                                                                                                                                                                                                                                                                                                                | 573  | 441  | 1.00E-169 | 77.0  | 54.3 | 59.3 |
| Rsa1.0_00027.1.g1749.t2 | gb ACP30603.1] disease resistance protein [Brassica rapa subsp. pekinensis]                                                                                                        | 1111 | 1056 | 0         | 95.0  | 68.0 | 75.4 | disease resistance protein                                                                                              | gbpln | Brassica rapa        | AT5G18370.1   Symbols:   Disease resistance protein (TIR-NBS-LRR class) family   chr5:6085036-6088926 REVERSE LENGTH=1210                                                                                                                                                                                                                                                                                                                                           | 1111 | 1210 | 0         | 108.9 | 48.7 | 61.7 |
| Rsa1.0_00027.1.g1750.t1 | #                                                                                                                                                                                  | #    | #    | #         | #     | #    | -    | -                                                                                                                       | ----  | ----                 | #                                                                                                                                                                                                                                                                                                                                                                                                                                                                   | #    | #    | #         | #     | #    |      |

|                         |                                                                                                                                                                                                                                                                                                                                                                                                                                                                                                                                                                                                                                                                                                              |     |      |           |       |      |      |                                                     |       |                      |                                                                                                                                                                                                                                                                                                                                                                                                                                                                                                                                                                                                           |     |      |           |       |      |      |
|-------------------------|--------------------------------------------------------------------------------------------------------------------------------------------------------------------------------------------------------------------------------------------------------------------------------------------------------------------------------------------------------------------------------------------------------------------------------------------------------------------------------------------------------------------------------------------------------------------------------------------------------------------------------------------------------------------------------------------------------------|-----|------|-----------|-------|------|------|-----------------------------------------------------|-------|----------------------|-----------------------------------------------------------------------------------------------------------------------------------------------------------------------------------------------------------------------------------------------------------------------------------------------------------------------------------------------------------------------------------------------------------------------------------------------------------------------------------------------------------------------------------------------------------------------------------------------------------|-----|------|-----------|-------|------|------|
| Rsa1.0_00027.1.g1751.t3 | gb ACP30603.1  disease resistance protein [Brassica rapa subsp. pekinensis]                                                                                                                                                                                                                                                                                                                                                                                                                                                                                                                                                                                                                                  | 938 | 1056 | 0         | 112.6 | 66.2 | 74.3 | disease resistance protein                          | gbpln | Brassica rapa        | AT5G44510.1   Symbols: TAO1   target of AVRb operation1   chr5:17929673-17934188 REVERSE LENGTH=1187                                                                                                                                                                                                                                                                                                                                                                                                                                                                                                      | 938 | 1187 | 1.00E-132 | 126.5 | 36.6 | 49.5 |
| Rsa1.0_00027.1.g1752.t1 | ref XP_002882430.1  hypothetical protein ARALYDRAFT_477858 [Arabidopsis lyrata subsp. lyrata] gi 297328270 gb EFH58689.1  hypothetical protein ARALYDRAFT_477858 [Arabidopsis lyrata subsp. lyrata] ref NP_683531.2  tetratricopeptide repeat-containing protein [Arabidopsis thaliana] gi 27311659 gb AAO00795.1  Unknown protein [Arabidopsis thaliana] gi 30023732 gb AAP13399.1  At3g05825 [Arabidopsis thaliana] gi 332640747 gb AEE74268.1  tetratricopeptide repeat-containing protein [Arabidopsis thaliana]                                                                                                                                                                                         | 860 | 869  | 0         | 101.0 | 77.4 | 84.2 | hypothetical protein ARALYDRAFT_477858              | gbpln | Arabidopsis lyrata   | AT3G05670.1   Symbols:   RING/U-box protein   chr3:1653888-1657022 FORWARD LENGTH=883                                                                                                                                                                                                                                                                                                                                                                                                                                                                                                                     | 860 | 883  | 0         | 102.7 | 77.8 | 85.2 |
| Rsa1.0_00027.1.g1753.t1 | ref NP_683531.2  tetratricopeptide repeat-containing protein [Arabidopsis thaliana] gi 27311659 gb AAO00795.1  Unknown protein [Arabidopsis thaliana] gi 30023732 gb AAP13399.1  At3g05825 [Arabidopsis thaliana] gi 332640747 gb AEE74268.1  tetratricopeptide repeat-containing protein [Arabidopsis thaliana]                                                                                                                                                                                                                                                                                                                                                                                             | 259 | 257  | 1.00E-135 | 99.2  | 88.4 | 94.6 | tetratricopeptide repeat-containing protein         | gbpln | Arabidopsis thaliana | AT3G05625.1   Symbols:   Tetratricopeptide repeat (TPR)-like superfamily protein   chr3:1632408-1633912 FORWARD LENGTH=257                                                                                                                                                                                                                                                                                                                                                                                                                                                                                | 259 | 257  | 1.00E-137 | 99.2  | 88.4 | 94.6 |
| Rsa1.0_00027.1.g1754.t1 | gb EOA32651.1  hypothetical protein CARUB_v10015948mg [Capsella rubella]                                                                                                                                                                                                                                                                                                                                                                                                                                                                                                                                                                                                                                     | 772 | 702  | 0         | 90.9  | 71.0 | 78.0 | hypothetical protein CARUB_v10015948mg              | gbpln | Capsella rubella     | AT3G05610.1   Symbols:   Plant invertase/pectin methyltransferase inhibitor superfamily   chr3:1625876-1627976 REVERSE LENGTH=669                                                                                                                                                                                                                                                                                                                                                                                                                                                                         | 772 | 669  | 0         | 86.7  | 68.8 | 76.2 |
| Rsa1.0_00027.1.g1755.t1 | ref XP_002882427.1  hypothetical protein ARALYDRAFT_477850 [Arabidopsis lyrata subsp. lyrata] gi 297328267 gb EFH58686.1  hypothetical protein ARALYDRAFT_477850 [Arabidopsis lyrata subsp. lyrata]                                                                                                                                                                                                                                                                                                                                                                                                                                                                                                          | 187 | 187  | 1.00E-100 | 100.0 | 97.3 | 98.9 | hypothetical protein ARALYDRAFT_477850              | gbpln | Arabidopsis lyrata   | AT3G05590.1   Symbols: RPL18   ribosomal protein L18   chr3:1621511-1622775 FORWARD LENGTH=187                                                                                                                                                                                                                                                                                                                                                                                                                                                                                                            | 187 | 187  | 1.00E-102 | 100.0 | 97.3 | 98.4 |
| Rsa1.0_00027.1.g1756.t1 | gb EOA31060.1  hypothetical protein CARUB_v10014212mg [Capsella rubella]                                                                                                                                                                                                                                                                                                                                                                                                                                                                                                                                                                                                                                     | 203 | 318  | 1.00E-109 | 156.7 | 94.1 | 98.5 | hypothetical protein CARUB_v10014212mg              | gbpln | Capsella rubella     | AT3G05580.1   Symbols:   Calcineurin-like metallo-phosphoesterase superfamily protein   chr3:1618216-1619850 REVERSE LENGTH=318<br>AT5G48830.1   Symbols:   unknown protein; FUNCTIONS IN: molecular_function unknown; INVOLVED IN: biological_process unknown; LOCATED IN: chloroplast; EXPRESSED IN: 22 plant structures; EXPRESSED DURING: 13 growth stages; Has 30201 Blast hits to 17322 proteins in 780 species; Archae - 12; Bacteria - 1396; Metazoa - 17338; Fungi - 3422; Plants - 5037; Viruses - 0; Other Eukaryotes - 2996 (source: NCBI ELink).   chr5:19800269-19802625 REVERSE LENGTH=511 | 203 | 318  | 1.00E-112 | 156.7 | 93.6 | 98.5 |
| Rsa1.0_00028.1.g1757.t1 | gb EOA12688.1  hypothetical protein CARUB_v10027918mg [Capsella rubella]                                                                                                                                                                                                                                                                                                                                                                                                                                                                                                                                                                                                                                     | 267 | 515  | 2.00E-97  | 192.9 | 71.9 | 79.0 | hypothetical protein CARUB_v10027918mg              | gbpln | Capsella rubella     | AT5G48830.1   Symbols:   unknown protein; FUNCTIONS IN: molecular_function unknown; INVOLVED IN: biological_process unknown; LOCATED IN: chloroplast; EXPRESSED IN: 22 plant structures; EXPRESSED DURING: 13 growth stages; Has 30201 Blast hits to 17322 proteins in 780 species; Archae - 12; Bacteria - 1396; Metazoa - 17338; Fungi - 3422; Plants - 5037; Viruses - 0; Other Eukaryotes - 2996 (source: NCBI ELink).   chr5:19800269-19802625 REVERSE LENGTH=511                                                                                                                                    | 267 | 511  | 4.00E-78  | 191.4 | 66.3 | 76.4 |
| Rsa1.0_00028.1.g1758.t1 | gb EOA12563.1  hypothetical protein CARUB_v10026830mg [Capsella rubella]                                                                                                                                                                                                                                                                                                                                                                                                                                                                                                                                                                                                                                     | 117 | 308  | 1.00E-24  | 263.2 | 47.0 | 52.1 | hypothetical protein CARUB_v10026830mg              | gbpln | Capsella rubella     | AT5G48850.1   Symbols: ATSD11   Tetratricopeptide repeat (TPR)-like superfamily protein   chr5:19805576-19807699 REVERSE LENGTH=306                                                                                                                                                                                                                                                                                                                                                                                                                                                                       | 117 | 306  | 3.00E-21  | 261.5 | 37.6 | 41.9 |
| Rsa1.0_00028.1.g1759.t1 | gb EOA12563.1  hypothetical protein CARUB_v10026830mg [Capsella rubella]                                                                                                                                                                                                                                                                                                                                                                                                                                                                                                                                                                                                                                     | 382 | 308  | 1.00E-145 | 80.6  | 64.1 | 68.1 | hypothetical protein CARUB_v10026830mg              | gbpln | Capsella rubella     | AT5G48850.1   Symbols: ATSD11   Tetratricopeptide repeat (TPR)-like superfamily protein   chr5:19805576-19807699 REVERSE LENGTH=306                                                                                                                                                                                                                                                                                                                                                                                                                                                                       | 382 | 306  | 2.33E-156 | 80.1  | 66.8 | 69.6 |
| Rsa1.0_00028.1.g1760.t1 | # # # # # # # # # # # # # # # #                                                                                                                                                                                                                                                                                                                                                                                                                                                                                                                                                                                                                                                                              |     |      |           |       |      |      |                                                     |       |                      |                                                                                                                                                                                                                                                                                                                                                                                                                                                                                                                                                                                                           |     |      |           |       |      |      |
| Rsa1.0_00028.1.g1761.t1 | ref NP_199698.1  U6 snRNA-associated Sm-like protein LSM5 [Arabidopsis thaliana] gi 9758886 dbj BAB09440.1  U6 snRNA-associated Sm-like protein-like [Arabidopsis thaliana] gi 16554971 gb AAK61592.1  Sm-like protein [Arabidopsis thaliana] gi 106879147 gb ABF82603.1  At5g48870 [Arabidopsis thaliana] gi 332008352 gb AED95735.1  U6 snRNA-associated Sm-like protein LSM5 [Arabidopsis thaliana] gi 386305005 gb AFJ05005.1  hypothetical protein [Arabidopsis thaliana] ref XP_002865685.1  KATS/PKT1/PKT2 peroxisomal 3-keto-acyl-CoA thiolase [Arabidopsis lyrata subsp. lyrata] gi 297311520 gb EFH41944.1  KATS/PKT1/PKT2 peroxisomal 3-keto-acyl-CoA thiolase [Arabidopsis lyrata subsp. lyrata] | 141 | 88   | 1.00E-31  | 62.4  | 56.7 | 58.9 | U6 snRNA-associated Sm-like protein LSM5            | gbpln | Arabidopsis thaliana | AT5G48870.1   Symbols: SAD1   Small nuclear ribonucleoprotein family protein   chr5:19813407-19814362 FORWARD LENGTH=88                                                                                                                                                                                                                                                                                                                                                                                                                                                                                   | 141 | 88   | 4.00E-34  | 62.4  | 56.7 | 58.9 |
| Rsa1.0_00028.1.g1762.t1 | ref XP_002865685.1  KATS/PKT1/PKT2 peroxisomal 3-keto-acyl-CoA thiolase [Arabidopsis lyrata subsp. lyrata] gi 297311520 gb EFH41944.1  KATS/PKT1/PKT2 peroxisomal 3-keto-acyl-CoA thiolase [Arabidopsis lyrata subsp. lyrata]                                                                                                                                                                                                                                                                                                                                                                                                                                                                                | 461 | 457  | 0         | 99.1  | 89.2 | 94.1 | KATS/PKT1/PKT2 peroxisomal 3-keto-acyl-CoA thiolase | gbpln | Arabidopsis lyrata   | AT5G48880.3   Symbols:   peroxisomal 3-keto-acyl-CoA thiolase 2   chr5:19814576-19817021 REVERSE LENGTH=457                                                                                                                                                                                                                                                                                                                                                                                                                                                                                               | 461 | 457  | 0         | 99.1  | 89.2 | 93.9 |

|                         |                                                                                                                                                                                                                                                                                                                                                                                                                                                                                                                                                                      |      |      |          |       |      |      |                                          |       |                      |                                                                                                                                                                                                                                                                                                                                                                                                                                                                                                                                                                                                                                                                                                                                                                     |      |      |          |       |      |      |
|-------------------------|----------------------------------------------------------------------------------------------------------------------------------------------------------------------------------------------------------------------------------------------------------------------------------------------------------------------------------------------------------------------------------------------------------------------------------------------------------------------------------------------------------------------------------------------------------------------|------|------|----------|-------|------|------|------------------------------------------|-------|----------------------|---------------------------------------------------------------------------------------------------------------------------------------------------------------------------------------------------------------------------------------------------------------------------------------------------------------------------------------------------------------------------------------------------------------------------------------------------------------------------------------------------------------------------------------------------------------------------------------------------------------------------------------------------------------------------------------------------------------------------------------------------------------------|------|------|----------|-------|------|------|
| Rsa1.0_00028.1.g1763.t1 | ref NP_199700.1  C2H2-like zinc finger protein [Arabidopsis thaliana]<br>gi 9758888 db BAB09442.1  unnamed protein product [Arabidopsis thaliana]<br>gi 332008356 gb AED95739.1  C2H2-like zinc finger protein [Arabidopsis thaliana]                                                                                                                                                                                                                                                                                                                                | 167  | 173  | 1.00E-54 | 103.6 | 72.5 | 79.6 | C2H2-like zinc finger protein            | gbpln | Arabidopsis thaliana | AT5G48890.1   Symbols: C2H2-like zinc finger protein   chr5:19820353-19820874 FORWARD LENGTH=173                                                                                                                                                                                                                                                                                                                                                                                                                                                                                                                                                                                                                                                                    | 167  | 173  | 6.00E-57 | 103.6 | 72.5 | 79.6 |
| Rsa1.0_00028.1.g1764.t1 | gb EOA13438.1  hypothetical protein CARUB_v10026482mg [Capsella rubella]                                                                                                                                                                                                                                                                                                                                                                                                                                                                                             | 417  | 417  | 0        | 100.0 | 93.5 | 95.4 | hypothetical protein CARUB_v10026482mg   | gbpln | Capsella rubella     | AT5G48900.1   Symbols: Pectin lyase-like superfamily protein   chr5:19825240-19828909 FORWARD LENGTH=417                                                                                                                                                                                                                                                                                                                                                                                                                                                                                                                                                                                                                                                            | 417  | 417  | 0        | 100.0 | 94.7 | 97.4 |
| Rsa1.0_00028.1.g1765.t1 | ref XP_002876919.1  hypothetical protein ARALYDRAFT_904719 [Arabidopsis lyrata subsp. lyrata]<br>gi 297322757 gb EFH53178.1  hypothetical protein ARALYDRAFT_904719 [Arabidopsis lyrata subsp. lyrata]                                                                                                                                                                                                                                                                                                                                                               | 328  | 330  | 2.00E-63 | 100.6 | 44.2 | 55.5 | hypothetical protein ARALYDRAFT_904719   | gbpln | Arabidopsis lyrata   | AT3G19520.2   Symbols: Protein of unknown function (DUF626)   chr3:6772773-6774209 FORWARD LENGTH=312                                                                                                                                                                                                                                                                                                                                                                                                                                                                                                                                                                                                                                                               | 328  | 312  | 3.00E-50 | 95.1  | 35.7 | 51.8 |
| Rsa1.0_00028.1.g1766.t1 | #                                                                                                                                                                                                                                                                                                                                                                                                                                                                                                                                                                    | #    | #    | #        | #     | #    | #    | -                                        | ----  | ----                 | #                                                                                                                                                                                                                                                                                                                                                                                                                                                                                                                                                                                                                                                                                                                                                                   | #    | #    | #        | #     | #    | #    |
| Rsa1.0_00028.1.g1767.t3 | emb CAA54075.1  phytochrome E [Arabidopsis thaliana]<br>gi 5816999 emb CAB53654.1  phytochrome E [Arabidopsis thaliana]<br>gi 7268606 emb CAB78815.1  phytochrome E [Arabidopsis thaliana]                                                                                                                                                                                                                                                                                                                                                                           | 262  | 1112 | 6.00E-33 | 424.4 | 32.4 | 34.4 | phytochrome E                            | gbpln | Arabidopsis thaliana | AT4G18130.1   Symbols: PHYE   phytochrome E   chr4:10042312-10045948 REVERSE LENGTH=1112                                                                                                                                                                                                                                                                                                                                                                                                                                                                                                                                                                                                                                                                            | 262  | 1112 | 2.00E-35 | 424.4 | 32.4 | 34.4 |
| Rsa1.0_00028.1.g1768.t1 | gb AAL32602.1  Unknown protein [Arabidopsis thaliana]                                                                                                                                                                                                                                                                                                                                                                                                                                                                                                                | 607  | 642  | 0        | 105.8 | 94.2 | 96.5 | Unknown protein                          | gbpln | Arabidopsis thaliana | AT5G48960.1   Symbols: HAD-superfamily hydrolase, subfamily 1G, 5'-nucleotidase   chr5:19849645-19853382 FORWARD LENGTH=642                                                                                                                                                                                                                                                                                                                                                                                                                                                                                                                                                                                                                                         | 607  | 642  | 0        | 105.8 | 94.2 | 96.5 |
| Rsa1.0_00028.1.g1769.t1 | ref XP_002865696.1  hypothetical protein ARALYDRAFT_917838 [Arabidopsis lyrata subsp. lyrata]<br>gi 297311531 gb EFH41955.1  hypothetical protein ARALYDRAFT_917838 [Arabidopsis lyrata subsp. lyrata]                                                                                                                                                                                                                                                                                                                                                               | 107  | 107  | 9.00E-50 | 100.0 | 86.0 | 95.3 | hypothetical protein ARALYDRAFT_917838   | gbpln | Arabidopsis lyrata   | AT5G24860.1   Symbols: PPF1, ATPPF1   flowering promoting factor 1   chr5:8541822-8542154 FORWARD LENGTH=110                                                                                                                                                                                                                                                                                                                                                                                                                                                                                                                                                                                                                                                        | 107  | 110  | 1.00E-31 | 102.8 | 58.9 | 77.6 |
| Rsa1.0_00028.1.g1770.t1 | ref NP_199713.2  histone-arginine methyltransferase CARM1 [Arabidopsis thaliana]<br>gi 152013379 sp A3KPF2.1 ANM14_ARA TH RecName: Full=Probable histone-arginine methyltransferase 1.4; Short=AtPRMT14; AltName: Full=Coactivator-associated methyltransferase 1B; AltName: Full=Protein arginine N-methyltransferase 4A; Short=AtPRMT4A<br>gi 126352276 gb ABO09883.1  At5g49020 [Arabidopsis thaliana]<br>gi 126352282 gb ABO09886.1  At5g49020 [Arabidopsis thaliana]<br>gi 332008378 gb AED9576.1  protein arginine methyltransferase 4A [Arabidopsis thaliana] | 526  | 528  | 0        | 100.4 | 89.0 | 92.0 | histone-arginine methyltransferase CARM1 | gbpln | Arabidopsis thaliana | AT5G49020.1   Symbols: ATPRMT4A, PRMT4A   protein arginine methyltransferase 4A   chr5:19871341-19874683 FORWARD LENGTH=528                                                                                                                                                                                                                                                                                                                                                                                                                                                                                                                                                                                                                                         | 526  | 528  | 0        | 100.4 | 89.0 | 92.0 |
| Rsa1.0_00028.1.g1771.t1 | ref NP_001190497.1  isoleucyl-tRNA synthetase [Arabidopsis thaliana]<br>gi 332008381 gb AED95764.1  isoleucyl-tRNA synthetase [Arabidopsis thaliana]                                                                                                                                                                                                                                                                                                                                                                                                                 | 1048 | 1279 | 0        | 122.0 | 93.4 | 97.2 | isoleucyl-tRNA synthetase                | gbpln | Arabidopsis thaliana | AT5G49030.3   Symbols: OVA2   tRNA synthetase class 1 (I, L, M and V) family protein   chr5:19875091-19883251 REVERSE LENGTH=1279<br>AT5G49050.1   Symbols: FUNCTIONS IN: molecular function unknown; INVOLVED IN: response to stress; LOCATED IN: cellular component unknown; CONTAINS InterPro DOMAINs: UspA (InterPro:IPR006016), Rossmann-like alpha/beta/alpha sandwich fold (InterPro:IPR014729); BEST Arabidopsis thaliana protein match is: Adenine nucleotide alpha hydrolases-like superfamily protein (TAIR:AT2G47710.1); Has 1807 Blast hits to 1807 proteins in 277 species: Archae - 0; Bacteria - 0; Metazoa - 736; Fungi - 347; Plants - 385; Viruses - 0; Other Eukaryotes - 339 (source: NCBI BLINK).   chr5:19883929-19884381 FORWARD LENGTH=150 | 1048 | 1279 | 0        | 122.0 | 93.4 | 97.2 |
| Rsa1.0_00028.1.g1772.t1 | ref XP_002863949.1  hypothetical protein ARALYDRAFT_917855 [Arabidopsis lyrata subsp. lyrata]<br>gi 297309784 gb EFH40208.1  hypothetical protein ARALYDRAFT_917855 [Arabidopsis lyrata subsp. lyrata]                                                                                                                                                                                                                                                                                                                                                               | 167  | 167  | 3.00E-79 | 100.0 | 85.6 | 92.8 | hypothetical protein ARALYDRAFT_917855   | gbpln | Arabidopsis lyrata   | AT5G49070.1   Symbols: KCS21   3-ketoacyl-CoA synthase 21   chr5:19888751-19890145 REVERSE LENGTH=464                                                                                                                                                                                                                                                                                                                                                                                                                                                                                                                                                                                                                                                               | 167  | 150  | 1.00E-54 | 89.8  | 58.7 | 65.9 |
| Rsa1.0_00028.1.g1773.t1 | gb EOA14459.1  hypothetical protein CARUB_v10027668mg [Capsella rubella]                                                                                                                                                                                                                                                                                                                                                                                                                                                                                             | 404  | 465  | 0        | 115.1 | 84.9 | 93.3 | hypothetical protein CARUB_v10027668mg   | gbpln | Capsella rubella     | AT5G49070.1   Symbols: KCS21   3-ketoacyl-CoA synthase 21   chr5:19888751-19890145 REVERSE LENGTH=464                                                                                                                                                                                                                                                                                                                                                                                                                                                                                                                                                                                                                                                               | 404  | 464  | 0        | 114.9 | 83.9 | 93.3 |



|                         |                                                                                                                                                                                                                                                                                                                                                                                                         |      |      |           |       |      |      |                                                                                      |       |                      |                                                                                                                                                                                                                                                                                                                                                                                                    |      |      |           |       |      |      |
|-------------------------|---------------------------------------------------------------------------------------------------------------------------------------------------------------------------------------------------------------------------------------------------------------------------------------------------------------------------------------------------------------------------------------------------------|------|------|-----------|-------|------|------|--------------------------------------------------------------------------------------|-------|----------------------|----------------------------------------------------------------------------------------------------------------------------------------------------------------------------------------------------------------------------------------------------------------------------------------------------------------------------------------------------------------------------------------------------|------|------|-----------|-------|------|------|
| Rsa1.0_00028.1.g1774.t1 | refXP_002865709.1  hypothetical protein ARALYDRAFT_917876 [Arabidopsis lyrata subsp. lyrata] gi 297311544 gb EFH41968.1  hypothetical protein ARALYDRAFT_917876 [Arabidopsis lyrata subsp. lyrata]                                                                                                                                                                                                      | 372  | 384  | 1.00E-109 | 103.2 | 71.0 | 78.2 | hypothetical protein ARALYDRAFT_917876                                               | gbpln | Arabidopsis lyrata   | AT5G49100.1   Symbols:   unknown protein; BEST Arabidopsis thaliana protein match is: unknown protein (TAIR:AT3G06868.1); Has 30201 Blast hits to 17322 proteins in 780 species: Archae - 12; Bacteria - 1396; Metazoa - 17338; Fungi - 3422; Plants - 5037; Viruses - 0; Other Eukaryotes - 2996 (source: NCBI BLink).   chr5:19897700-19898890 REVERSE LENGTH=396                                | 372  | 396  | 1.00E-107 | 106.5 | 72.6 | 81.2 |
| Rsa1.0_00028.1.g1775.t2 | refXP_002863960.1  hypothetical protein ARALYDRAFT_917877 [Arabidopsis lyrata subsp. lyrata] gi 297309795 gb EFH40219.1  hypothetical protein ARALYDRAFT_917877 [Arabidopsis lyrata subsp. lyrata]                                                                                                                                                                                                      | 1444 | 1450 | 0         | 100.4 | 83.2 | 90.1 | hypothetical protein ARALYDRAFT_917877                                               | gbpln | Arabidopsis lyrata   | AT5G49110.1   Symbols:   unknown protein; INVOLVED IN: biological_process unknown; LOCATED IN: cellular_component unknown; EXPRESSED IN: cultured cell; Has 30201 Blast hits to 17322 proteins in 780 species: Archae - 12; Bacteria - 1396; Metazoa - 17338; Fungi - 3422; Plants - 5037; Viruses - 0; Other Eukaryotes - 2996 (source: NCBI BLink).   chr5:19900203-19905925 FORWARD LENGTH=1469 | 1444 | 1469 | 0         | 101.7 | 82.7 | 90.1 |
| Rsa1.0_00028.1.g1776.t1 | refXP_002863963.1  hypothetical protein ARALYDRAFT_917882 [Arabidopsis lyrata subsp. lyrata] gi 297309798 gb EFH40222.1  hypothetical protein ARALYDRAFT_917882 [Arabidopsis lyrata subsp. lyrata]                                                                                                                                                                                                      | 1086 | 921  | 0         | 84.8  | 70.2 | 76.2 | hypothetical protein ARALYDRAFT_917882                                               | gbpln | Arabidopsis lyrata   | AT5G49150.1   Symbols: ATGEX2, GEX2   gamete expressed 2   chr5:19924760-19928527 FORWARD LENGTH=914                                                                                                                                                                                                                                                                                               | 1086 | 914  | 0         | 84.2  | 69.0 | 75.2 |
| Rsa1.0_00028.1.g1777.t1 | refNP_199728.1  uncharacterized protein [Arabidopsis thaliana] gi 110737324 dbj BAF00608.1  hypothetical protein [Arabidopsis thaliana] gi 332008395 gb AED95778.1  uncharacterized protein AT5G49170 [Arabidopsis thaliana]                                                                                                                                                                            | 175  | 185  | 1.00E-53  | 105.7 | 69.1 | 75.4 | uncharacterized protein                                                              | gbpln | Arabidopsis thaliana | AT5G49170.1   Symbols:   unknown protein; BEST Arabidopsis thaliana protein match is: unknown protein (TAIR:AT3G06840.1); Has 1807 Blast hits to 1807 proteins in 277 species: Archae - 0; Bacteria - 0; Metazoa - 736; Fungi - 347; Plants - 385; Viruses - 0; Other Eukaryotes - 339 (source: NCBI BLink).   chr5:19938839-19939482 REVERSE LENGTH=185                                           | 175  | 185  | 6.00E-56  | 105.7 | 69.1 | 75.4 |
| Rsa1.0_00028.1.g1778.t1 | gb ABB97028.1  unknown [Brassica rapa]                                                                                                                                                                                                                                                                                                                                                                  | 198  | 193  | 5.00E-89  | 97.5  | 82.8 | 91.4 | unknown                                                                              | gbpln | Brassica rapa        | AT5G49210.2   Symbols:   unknown protein; Has 30201 Blast hits to 17322 proteins in 780 species: Archae - 12; Bacteria - 1396; Metazoa - 17338; Fungi - 3422; Plants - 5037; Viruses - 0; Other Eukaryotes - 2996 (source: NCBI BLink).   chr5:19950093-19951464 FORWARD LENGTH=195                                                                                                                | 198  | 195  | 1.00E-76  | 98.5  | 72.2 | 85.9 |
| Rsa1.0_00028.1.g1779.t1 | refNP_680409.1  glycoside hydrolase family 28 protein / polygalacturonase (pectinase) family protein [Arabidopsis thaliana] gi 20258821 gb AAM14020.1  unknown protein [Arabidopsis thaliana] gi 22136814 gb AAM91751.1  unknown protein [Arabidopsis thaliana] gi 332008401 gb AED95784.1  glycoside hydrolase family 28 protein / polygalacturonase (pectinase) family protein [Arabidopsis thaliana] | 444  | 449  | 0         | 101.1 | 83.1 | 89.2 | glycoside hydrolase family 28 protein / polygalacturonase (pectinase) family protein | gbpln | Arabidopsis thaliana | AT5G49215.1   Symbols:   Pectin lyase-like superfamily protein   chr5:19953670-19955874 FORWARD LENGTH=449                                                                                                                                                                                                                                                                                         | 444  | 449  | 0         | 101.1 | 83.1 | 89.2 |
| Rsa1.0_00028.1.g1780.t1 | refXP_002863975.1  hypothetical protein ARALYDRAFT_494985 [Arabidopsis lyrata subsp. lyrata] gi 297309810 gb EFH40234.1  hypothetical protein ARALYDRAFT_494985 [Arabidopsis lyrata subsp. lyrata]                                                                                                                                                                                                      | 409  | 418  | 2.33E-156 | 102.2 | 75.1 | 81.4 | hypothetical protein ARALYDRAFT_494985                                               | gbpln | Arabidopsis lyrata   | AT5G49220.1   Symbols:   Protein of unknown function (DUF789)   chr5:19956627-19958453 FORWARD LENGTH=409                                                                                                                                                                                                                                                                                          | 409  | 409  | 1.00E-144 | 100.0 | 72.1 | 79.0 |
| Rsa1.0_00028.1.g1781.t1 | refXP_002863976.1  hypothetical protein ARALYDRAFT_357174 [Arabidopsis lyrata subsp. lyrata] gi 297309811 gb EFH40235.1  hypothetical protein ARALYDRAFT_357174 [Arabidopsis lyrata subsp. lyrata]                                                                                                                                                                                                      | 496  | 280  | 4.00E-78  | 56.5  | 31.9 | 40.1 | hypothetical protein ARALYDRAFT_357174                                               | gbpln | Arabidopsis lyrata   | AT5G49240.1   Symbols: APRR4, PRR4   pseudo-response regulator 4   chr5:19962934-19964351 FORWARD LENGTH=292                                                                                                                                                                                                                                                                                       | 496  | 292  | 2.00E-77  | 58.9  | 30.0 | 38.7 |
| Rsa1.0_00028.1.g1782.t1 | refXP_002865724.1  hypothetical protein ARALYDRAFT_494989 [Arabidopsis lyrata subsp. lyrata] gi 297311559 gb EFH41983.1  hypothetical protein ARALYDRAFT_494989 [Arabidopsis lyrata subsp. lyrata]                                                                                                                                                                                                      | 167  | 161  | 2.00E-24  | 96.4  | 72.5 | 76.0 | hypothetical protein ARALYDRAFT_494989                                               | gbpln | Arabidopsis lyrata   | AT5G49280.1   Symbols:   hydroxyproline-rich glycoprotein family protein   chr5:19976842-19977330 REVERSE LENGTH=162                                                                                                                                                                                                                                                                               | 167  | 162  | 1.00E-12  | 97.0  | 18.6 | 19.8 |
| Rsa1.0_00028.1.g1783.t1 | #                                                                                                                                                                                                                                                                                                                                                                                                       | #    | #    | #         | #     | #    | -    | ----                                                                                 | ----  | #                    | #                                                                                                                                                                                                                                                                                                                                                                                                  | #    | #    | #         | #     | #    |      |



|                         |                                                                                                                                                                                                                                                                                                                                                                                                                                                                                                                                                                                                                               |     |     |           |       |      |      |                                                            |       |                      |                                                                                                                           |                                                                                                    |     |           |          |       |      |      |
|-------------------------|-------------------------------------------------------------------------------------------------------------------------------------------------------------------------------------------------------------------------------------------------------------------------------------------------------------------------------------------------------------------------------------------------------------------------------------------------------------------------------------------------------------------------------------------------------------------------------------------------------------------------------|-----|-----|-----------|-------|------|------|------------------------------------------------------------|-------|----------------------|---------------------------------------------------------------------------------------------------------------------------|----------------------------------------------------------------------------------------------------|-----|-----------|----------|-------|------|------|
| Rsa1.0_00028.1.g1798.t1 | #                                                                                                                                                                                                                                                                                                                                                                                                                                                                                                                                                                                                                             | #   | #   | #         | #     | #    | #    | #                                                          | -     | ----                 | ----                                                                                                                      | AT1G10430.1   Symbols: PP2A-2   protein phosphatase 2A-2   chr1:3428705-3430437 REVERSE LENGTH=306 | 141 | 306       | 8.00E-11 | 217.0 | 35.5 | 44.0 |
| Rsa1.0_00028.1.g1799.t3 | #                                                                                                                                                                                                                                                                                                                                                                                                                                                                                                                                                                                                                             | #   | #   | #         | #     | #    | #    | #                                                          | -     | ----                 | ----                                                                                                                      | #                                                                                                  | #   | #         | #        | #     | #    |      |
| Rsa1.0_00028.1.g1800.t1 | ref NP_199763.1  putative WRKY transcription factor 48 [Arabidopsis thaliana]<br>gi 20978785 sp O9FGZ4.1 WRK48_ARAT H RecName: Full=Probable WRKY transcription factor 48; AltName: Full=WRKY DNA-binding protein 48 gi 17064166 gb AAL35290.1 AF442397.1 WRKY transcription factor 48 [Arabidopsis thaliana]<br>gi 10177618 dbj BAE10765.1 unnamed protein product [Arabidopsis thaliana]<br>gi 17380792 gb AAL36226.1 unknown protein [Arabidopsis thaliana]<br>gi 20259613 gb AAM14163.1 unknown protein [Arabidopsis thaliana]<br>gi 332008441 gb AED95824.1 putative WRKY transcription factor 48 [Arabidopsis thaliana] | 390 | 399 | 1.00E-125 | 102.3 | 77.4 | 85.9 | putative WRKY transcription factor 48                      | gbpln | Arabidopsis thaliana | AT5G49520.1   Symbols: WRKY48, ATWRKY48   WRKY DNA-binding protein 48   chr5:20090890-20092867 FORWARD LENGTH=399         | 390                                                                                                | 399 | 1.00E-128 | 102.3    | 77.4  | 85.9 |      |
| Rsa1.0_00028.1.g1801.t2 | gb EOA12473.1  hypothetical protein CARUB_v10025904mg [Capsella rubella]                                                                                                                                                                                                                                                                                                                                                                                                                                                                                                                                                      | 613 | 800 | 5.00E-92  | 130.5 | 32.0 | 37.7 | hypothetical protein CARUB_v10025904mg                     | gbpln | Capsella rubella     | AT5G59560.2   Symbols: SRR1   sensitivity to red light reduced protein (SRR1)   chr5:24000747-24001574 REVERSE LENGTH=275 | 613                                                                                                | 275 | 6.00E-94  | 44.9     | 28.1  | 33.3 |      |
| Rsa1.0_00028.1.g1802.t1 | ref XP_002864001.1  hypothetical protein ARALYDRAFT_917948 [Arabidopsis lyrata subsp. lyrata]<br>gi 297309836 gb EFH40260.1  hypothetical protein ARALYDRAFT_917948 [Arabidopsis lyrata subsp. lyrata]                                                                                                                                                                                                                                                                                                                                                                                                                        | 172 | 172 | 1.00E-72  | 100.0 | 82.0 | 89.5 | hypothetical protein ARALYDRAFT_917948                     | gbpln | Arabidopsis lyrata   | AT5G49600.1   Symbols:   Protein of unknown function. DUF538   chr5:20130780-20131295 FORWARD LENGTH=171                  | 172                                                                                                | 171 | 4.00E-72  | 99.4     | 76.7  | 81.4 |      |
| Rsa1.0_00028.1.g1803.t1 | gb AAM60856.1  unknown [Arabidopsis thaliana]                                                                                                                                                                                                                                                                                                                                                                                                                                                                                                                                                                                 | 359 | 359 | 1.00E-172 | 100.0 | 83.3 | 89.1 | unknown                                                    | gbpln | Arabidopsis thaliana | AT5G49610.1   Symbols:   F-box family protein   chr5:20131448-20132527 REVERSE LENGTH=359                                 | 359                                                                                                | 359 | 1.00E-174 | 100.0    | 83.3  | 89.1 |      |
| Rsa1.0_00028.1.g1804.t1 | #                                                                                                                                                                                                                                                                                                                                                                                                                                                                                                                                                                                                                             | #   | #   | #         | #     | #    | #    | -                                                          | ----  | ----                 | #                                                                                                                         | #                                                                                                  | #   | #         | #        | #     |      |      |
| Rsa1.0_00028.1.g1805.t1 | ref XP_002865745.1  AtMYB78 [Arabidopsis lyrata subsp. lyrata]<br>gi 297311580 gb EFH42004.1  AtMYB78 [Arabidopsis lyrata subsp. lyrata]                                                                                                                                                                                                                                                                                                                                                                                                                                                                                      | 318 | 306 | 1.00E-119 | 96.2  | 74.2 | 84.9 | AtMYB78                                                    | gbpln | Arabidopsis lyrata   | AT5G49620.1   Symbols: AtMYB78, MYB78   myb domain protein 78   chr5:20137491-20139384 REVERSE LENGTH=307                 | 318                                                                                                | 307 | 1.00E-118 | 96.5     | 71.1  | 83.0 |      |
| Rsa1.0_00028.1.g1806.t1 | #                                                                                                                                                                                                                                                                                                                                                                                                                                                                                                                                                                                                                             | #   | #   | #         | #     | #    | #    | -                                                          | ----  | ----                 | #                                                                                                                         | #                                                                                                  | #   | #         | #        | #     |      |      |
| Rsa1.0_00028.1.g1807.t1 | ref XP_002872333.1  predicted protein [Arabidopsis lyrata subsp. lyrata]<br>gi 297318170 gb EFH48592.1  predicted protein [Arabidopsis lyrata subsp. lyrata]                                                                                                                                                                                                                                                                                                                                                                                                                                                                  | 238 | 238 | 1.00E-129 | 100.0 | 91.2 | 96.6 | predicted protein                                          | gbpln | Arabidopsis lyrata   | AT5G29560.1   Symbols:   caleosin-related family protein   chr5:11190543-11191963 REVERSE LENGTH=220                      | 238                                                                                                | 220 | 1.00E-111 | 92.4     | 80.3  | 87.8 |      |
| Rsa1.0_00028.1.g1808.t1 | ref NP_568512.3  myb family transcription factor [Arabidopsis thaliana]<br>gi 75328846 sp O8GUN5.1 PHL1_ARATH RecName: Full=Protein PHR1-LIKE 1; AltName: Full=Myb-like transcription factor 1 gi 26983850 gb AAN86177.1  unknown protein [Arabidopsis thaliana]<br>gi 332006474 gb AED93857.1  myb family transcription factor [Arabidopsis thaliana]                                                                                                                                                                                                                                                                        | 410 | 413 | 1.00E-159 | 100.7 | 77.1 | 84.1 | myb family transcription factor                            | gbpln | Arabidopsis thaliana | AT5G29000.2   Symbols: PHL1   Homeodomain-like superfamily protein   chr5:11022336-11024229 REVERSE LENGTH=413            | 410                                                                                                | 413 | 1.00E-161 | 100.7    | 77.1  | 84.1 |      |
| Rsa1.0_00028.1.g1809.t1 | ref NP_568509.1  protein phosphatase 2 (formerly 2A), regulatory subunit B' [Arabidopsis thaliana]<br>gi 42740922 gb AAS44557.1  protein phosphatase 2A beta [Arabidopsis thaliana]<br>gi 332006463 gb AED93846.1  protein phosphatase 2A B' beta [Arabidopsis thaliana]                                                                                                                                                                                                                                                                                                                                                      | 458 | 536 | 0         | 117.0 | 77.5 | 86.5 | protein phosphatase 2 (formerly 2A), regulatory subunit B' | gbpln | Arabidopsis thaliana | AT5G28850.2   Symbols:   Calcium-binding EF-hand family protein   chr5:10877360-10881278 REVERSE LENGTH=536               | 458                                                                                                | 536 | 0         | 117.0    | 77.5  | 86.5 |      |
| Rsa1.0_00028.1.g1810.t7 | ref XP_002872330.1  calcium-binding EF hand family protein [Arabidopsis lyrata subsp. lyrata]<br>gi 297318167 gb EFH48589.1  calcium-binding EF hand family protein [Arabidopsis lyrata subsp. lyrata]                                                                                                                                                                                                                                                                                                                                                                                                                        | 625 | 536 | 0         | 85.8  | 70.9 | 75.2 | calcium-binding EF hand family protein                     | gbpln | Arabidopsis lyrata   | AT5G28900.1   Symbols:   Calcium-binding EF-hand family protein   chr5:10925852-10929892 FORWARD LENGTH=536               | 625                                                                                                | 536 | 0         | 85.8     | 70.6  | 75.0 |      |
| Rsa1.0_00028.1.g1811.t1 | gb AET14213.1  GDP-D-mannose-3,5-epimerase [Brassica rapa subsp. chinensis]                                                                                                                                                                                                                                                                                                                                                                                                                                                                                                                                                   | 379 | 379 | 0         | 100.0 | 96.6 | 98.4 | GDP-D-mannose-3,5-epimerase                                | gbpln | Brassica rapa        | AT5G28840.2   Symbols: GME   GDP-D-mannose 3'5'-epimerase   chr5:10862472-10864024 REVERSE LENGTH=377                     | 379                                                                                                | 377 | 0         | 99.5     | 96.3  | 97.6 |      |
| Rsa1.0_00028.1.g1812.t1 | dbj BAJ34351.1  unnamed protein product [Thellungiella halophila]                                                                                                                                                                                                                                                                                                                                                                                                                                                                                                                                                             | 354 | 319 | 1.00E-136 | 90.1  | 75.1 | 79.1 | unnamed protein product                                    | ----  | ----                 | AT5G28770.2   Symbols: BZO2H3   bZIP transcription factor family protein   chr5:10796648-10798147 REVERSE LENGTH=314      | 354                                                                                                | 314 | 1.00E-125 | 88.7     | 71.5  | 74.0 |      |

|                         |                                                                                                                                                                                                                                                                                                                         |     |      |           |        |      |      |                                                                                                      |       |                       |                                                                                                                                                                                                                                                                                                                                                                                                               |     |     |           |       |      |      |
|-------------------------|-------------------------------------------------------------------------------------------------------------------------------------------------------------------------------------------------------------------------------------------------------------------------------------------------------------------------|-----|------|-----------|--------|------|------|------------------------------------------------------------------------------------------------------|-------|-----------------------|---------------------------------------------------------------------------------------------------------------------------------------------------------------------------------------------------------------------------------------------------------------------------------------------------------------------------------------------------------------------------------------------------------------|-----|-----|-----------|-------|------|------|
| Rsa1.0_00028.1.g1813.t1 | gb[EOA19859.1] hypothetical protein CARUB_v10000110mg, partial [Capsella rubella]                                                                                                                                                                                                                                       | 844 | 1050 | 0         | 124.4  | 71.4 | 74.4 | hypothetical protein CARUB_v10000110mg, partial                                                      | gbpln | Capsella rubella      | AT5G28740.1   Symbols:   Tetratricopeptide repeat (TPR)-like superfamily protein   chr5:10780774-10783772 FORWARD LENGTH=917                                                                                                                                                                                                                                                                                  | 844 | 917 | 0         | 108.6 | 71.4 | 74.6 |
| Rsa1.0_00028.1.g1814.t1 | gb[EOA22561.1] hypothetical protein CARUB_v10003221mg [Capsella rubella]                                                                                                                                                                                                                                                | 854 | 859  | 0         | 100.6  | 88.5 | 94.6 | hypothetical protein CARUB_v10003221mg                                                               | gbpln | Capsella rubella      | AT5G28680.1   Symbols: ANX2   Malectin/receptor-like protein kinase family protein   chr5:10719437-10722013 REVERSE LENGTH=858                                                                                                                                                                                                                                                                                | 854 | 858 | 0         | 100.5 | 87.2 | 94.1 |
| Rsa1.0_00029.1.g1815.t2 | ref[XP_002881778.1] predicted protein [Arabidopsis lyrata subsp. lyrata]   g[297327617]gb[EFH58037.1] predicted protein [Arabidopsis lyrata subsp. lyrata]                                                                                                                                                              | 428 | 326  | 1.00E-166 | 76.2   | 65.4 | 69.6 | predicted protein                                                                                    | gbpln | Arabidopsis lyrata    | AT2G41480.1   Symbols:   Peroxidase superfamily protein   chr2:17296986-17298729 REVERSE LENGTH=341                                                                                                                                                                                                                                                                                                           | 428 | 341 | 1.00E-167 | 79.7  | 65.4 | 69.4 |
| Rsa1.0_00029.1.g1816.t1 | ref[XP_002879932.1] apurinic endonuclease-redox protein [Arabidopsis lyrata subsp. lyrata]   g[297325771]gb[EFH56191.1] apurinic endonuclease-redox protein [Arabidopsis lyrata subsp. lyrata]                                                                                                                          | 522 | 550  | 0         | 105.4  | 81.8 | 89.3 | apurinic endonuclease-redox protein                                                                  | gbpln | Arabidopsis lyrata    | AT2G41460.1   Symbols: ARP   apurinic endonuclease-redox protein   chr2:17285731-17288769 FORWARD LENGTH=536                                                                                                                                                                                                                                                                                                  | 522 | 536 | 0         | 102.7 | 80.1 | 87.9 |
| Rsa1.0_00029.1.g1817.t1 | gb[ADP37978.1] ERD15 protein [Brassica napus]                                                                                                                                                                                                                                                                           | 143 | 157  | 2.00E-61  | 109.8  | 87.4 | 94.4 | ERD15 protein                                                                                        | gbpln | Brassica napus        | AT2G41430.5   Symbols: ERD15   dehydration-induced protein (ERD15)   chr2:17269736-17270314 FORWARD LENGTH=163                                                                                                                                                                                                                                                                                                | 143 | 163 | 1.00E-52  | 114.0 | 83.2 | 88.8 |
| Rsa1.0_00029.1.g1818.t1 | #                                                                                                                                                                                                                                                                                                                       | #   | #    | #         | #      | #    | #    | -                                                                                                    | ----  | ----                  | #                                                                                                                                                                                                                                                                                                                                                                                                             | #   | #   | #         | #     | #    | #    |
| Rsa1.0_00029.1.g1819.t1 | ref[XP_002492787.1] Protein involved in positive regulation of both 1,3-beta-glucan synthesis and the Pkc1p-MAPK pathway [Komagataella pastoris GS115]   g[238032585]emb[CAY70608.1] Protein involved in positive regulation of both 1,3-beta-glucan synthesis and the Pkc1p-MAPK pathway [Komagataella pastoris GS115] | 77  | 1338 | 5.00E-11  | 1737.7 | 48.1 | 48.1 | Protein involved in positive regulation of both 1,3-beta-glucan synthesis and the Pkc1p-MAPK pathway | gbpln | Komagataella pastoris | #                                                                                                                                                                                                                                                                                                                                                                                                             | #   | #   | #         | #     | #    | #    |
| Rsa1.0_00029.1.g1820.t1 | #                                                                                                                                                                                                                                                                                                                       | #   | #    | #         | #      | #    | #    | -                                                                                                    | ----  | ----                  | #                                                                                                                                                                                                                                                                                                                                                                                                             | #   | #   | #         | #     | #    | #    |
| Rsa1.0_00029.1.g1821.t1 | gb[EOA29383.1] hypothetical protein CARUB_v10025670mg [Capsella rubella]                                                                                                                                                                                                                                                | 295 | 298  | 1.00E-155 | 101.0  | 91.5 | 96.6 | hypothetical protein CARUB_v10025670mg                                                               | gbpln | Capsella rubella      | AT2G41350.1   Symbols:   unknown protein; BEST Arabidopsis thaliana protein match is: unknown protein (TAIR:AT2G21980.1); Has 188 Blast hits to 188 proteins in 66 species: Archae - 0; Bacteria - 12; Metazoa - 90; Fungi - 15; Plants - 54; Viruses - 0; Other Eukaryotes - 17 (source: NCBI BLINK).   chr2:17231565-17233458 FORWARD LENGTH=298                                                            | 295 | 298 | 1.00E-156 | 101.0 | 90.8 | 96.3 |
| Rsa1.0_00029.1.g1822.t1 | gb[ABK28027.1] unknown [Arabidopsis thaliana]                                                                                                                                                                                                                                                                           | 82  | 83   | 5.00E-26  | 101.2  | 76.8 | 81.7 | unknown                                                                                              | gbpln | Arabidopsis thaliana  | AT2G41342.1   Symbols:   unknown protein; FUNCTIONS IN: molecular_function unknown; INVOLVED IN: biological_process unknown; LOCATED IN: cellular_component unknown; Has 30201 Blast hits to 17322 proteins in 780 species: Archae - 12; Bacteria - 1396; Metazoa - 17338; Fungi - 3422; Plants - 5037; Viruses - 0; Other Eukaryotes - 2996 (source: NCBI BLINK).   chr2:17230650-17230898 REVERSE LENGTH=82 | 82  | 82  | 4.00E-28  | 100.0 | 75.6 | 80.5 |
| Rsa1.0_00029.1.g1823.t1 | ref[XP_002879920.1] hypothetical protein ARALYDRAFT_903442 [Arabidopsis lyrata subsp. lyrata]   g[297325759]gb[EFH56179.1] hypothetical protein ARALYDRAFT_903442 [Arabidopsis lyrata subsp. lyrata]                                                                                                                    | 49  | 67   | 4.00E-13  | 136.7  | 75.5 | 77.6 | hypothetical protein ARALYDRAFT_903442                                                               | gbpln | Arabidopsis lyrata    | AT3G57062.2   Symbols:   unknown protein; FUNCTIONS IN: molecular_function unknown; INVOLVED IN: biological_process unknown; LOCATED IN: endomembrane system.   chr3:21121443-21121589 FORWARD LENGTH=48                                                                                                                                                                                                      | 49  | 48  | 1.00E-12  | 98.0  | 61.2 | 73.5 |
| Rsa1.0_00029.1.g1824.t1 | ref[XP_002881767.1] hypothetical protein ARALYDRAFT_321816 [Arabidopsis lyrata subsp. lyrata]   g[297327606]gb[EFH58026.1] hypothetical protein ARALYDRAFT_321816 [Arabidopsis lyrata subsp. lyrata]                                                                                                                    | 369 | 370  | 0         | 100.3  | 88.3 | 94.9 | hypothetical protein ARALYDRAFT_321816                                                               | gbpln | Arabidopsis lyrata    | AT2G41300.1   Symbols: SSL1   strictosidine synthase-like 1   chr2:17214312-17216292 REVERSE LENGTH=394                                                                                                                                                                                                                                                                                                       | 369 | 394 | 1.00E-171 | 106.8 | 77.0 | 81.8 |
| Rsa1.0_00029.1.g1825.t1 | ref[XP_002881766.1] hypothetical protein ARALYDRAFT_483200 [Arabidopsis lyrata subsp. lyrata]   g[297327605]gb[EFH58025.1] hypothetical protein ARALYDRAFT_483200 [Arabidopsis lyrata subsp. lyrata]                                                                                                                    | 375 | 376  | 0         | 100.3  | 84.0 | 92.0 | hypothetical protein ARALYDRAFT_483200                                                               | gbpln | Arabidopsis lyrata    | AT2G41290.1   Symbols: SSL2   strictosidine synthase-like 2   chr2:17210599-17212904 REVERSE LENGTH=376                                                                                                                                                                                                                                                                                                       | 375 | 376 | 0         | 100.3 | 83.2 | 90.1 |

|                         |                                                                                                                                                                                                                                                                                                                                                                                                                                                                                                                                                                                                                                                                           |      |      |          |       |      |      |                                                          |       |                      |                                                                                                                                                                                                                                                              |      |      |          |       |      |      |
|-------------------------|---------------------------------------------------------------------------------------------------------------------------------------------------------------------------------------------------------------------------------------------------------------------------------------------------------------------------------------------------------------------------------------------------------------------------------------------------------------------------------------------------------------------------------------------------------------------------------------------------------------------------------------------------------------------------|------|------|----------|-------|------|------|----------------------------------------------------------|-------|----------------------|--------------------------------------------------------------------------------------------------------------------------------------------------------------------------------------------------------------------------------------------------------------|------|------|----------|-------|------|------|
| Rsa1.0_00029.1.g1826.t1 | refXP_002879918.1   hypothetical protein ARALYDRAFT_345920 [Arabidopsis lyrata subsp. lyrata] gi 297325757 gb EFH56177.1   hypothetical protein ARALYDRAFT_345920 [Arabidopsis lyrata subsp. lyrata]                                                                                                                                                                                                                                                                                                                                                                                                                                                                      | 207  | 156  | 5.00E-18 | 75.4  | 37.7 | 43.5 | hypothetical protein ARALYDRAFT_345920                   | gbpln | Arabidopsis lyrata   | AT2G41280.1   Symbols: M10, ATM10   late embryogenesis abundant protein (M10) / LEA protein M10   chr2:17209763-17210211 FORWARD LENGTH=107                                                                                                                  | 207  | 107  | 1.00E-10 | 51.7  | 31.4 | 36.2 |
| Rsa1.0_00029.1.g1827.t1 | #                                                                                                                                                                                                                                                                                                                                                                                                                                                                                                                                                                                                                                                                         | #    | #    | #        | #     | #    | -    | ----                                                     | ----  | ----                 | #                                                                                                                                                                                                                                                            | #    | #    | #        | #     | #    | #    |
| Rsa1.0_00029.1.g1828.t1 | gb AAF97969.1 AC000103.19 F21J9.30 [Arabidopsis thaliana]                                                                                                                                                                                                                                                                                                                                                                                                                                                                                                                                                                                                                 | 1632 | 1270 | 0        | 77.8  | 34.5 | 47.1 | F21J9.30                                                 | gbpln | Arabidopsis thaliana | AT4G29090.1   Symbols:   Ribonuclease H-like superfamily protein   chr4:14333528-14335255 FORWARD LENGTH=575                                                                                                                                                 | 1632 | 575  | 6.00E-81 | 35.2  | 10.5 | 16.8 |
| Rsa1.0_00029.1.g1829.t1 | #                                                                                                                                                                                                                                                                                                                                                                                                                                                                                                                                                                                                                                                                         | #    | #    | #        | #     | #    | -    | ----                                                     | ----  | ----                 | #                                                                                                                                                                                                                                                            | #    | #    | #        | #     | #    | #    |
| Rsa1.0_00029.1.g1830.t1 | #                                                                                                                                                                                                                                                                                                                                                                                                                                                                                                                                                                                                                                                                         | #    | #    | #        | #     | #    | -    | ----                                                     | ----  | ----                 | #                                                                                                                                                                                                                                                            | #    | #    | #        | #     | #    | #    |
| Rsa1.0_00029.1.g1831.t1 | gb EOA30627.1  hypothetical protein CARUB_v10013762mg [Capsella rubella]                                                                                                                                                                                                                                                                                                                                                                                                                                                                                                                                                                                                  | 284  | 428  | 5.00E-42 | 150.7 | 31.7 | 34.9 | hypothetical protein CARUB_v10013762mg                   | gbpln | Capsella rubella     | AT3G03950.3   Symbols: ECT1   evolutionarily conserved C-terminal region 1   chr3:1021502-1023767 FORWARD LENGTH=428                                                                                                                                         | 284  | 428  | 4.00E-44 | 150.7 | 31.7 | 33.8 |
| Rsa1.0_00029.1.g1832.t1 | refXP_002879915.1   phosphatidylinositol-4-phosphate 5-kinase family protein [Arabidopsis lyrata subsp. lyrata] gi 297325754 gb EFH56174.1   phosphatidylinositol-4-phosphate 5-kinase family protein [Arabidopsis lyrata subsp. lyrata]                                                                                                                                                                                                                                                                                                                                                                                                                                  | 773  | 772  | 0        | 99.9  | 93.0 | 97.4 | phosphatidylinositol-4-phosphate 5-kinase family protein | gbpln | Arabidopsis lyrata   | AT2G41210.1   Symbols: PIP5K5   phosphatidylinositol-4-phosphate 5-kinase 5   chr2:17173627-17176575 FORWARD LENGTH=772                                                                                                                                      | 773  | 772  | 0        | 99.9  | 93.3 | 97.7 |
| Rsa1.0_00029.1.g1833.t1 | refXP_002879914.1   hypothetical protein ARALYDRAFT_483189 [Arabidopsis lyrata subsp. lyrata] gi 297325753 gb EFH56173.1   hypothetical protein ARALYDRAFT_483189 [Arabidopsis lyrata subsp. lyrata]                                                                                                                                                                                                                                                                                                                                                                                                                                                                      | 140  | 161  | 3.00E-68 | 115.0 | 89.3 | 95.7 | hypothetical protein ARALYDRAFT_483189                   | gbpln | Arabidopsis lyrata   | AT2G41200.1   Symbols:   unknown protein; Has 26 Blast hits to 26 proteins in 11 species: Archae - 0; Bacteria - 0; Metazoa - 0; Fungi - 0; Plants - 26; Viruses - 0; Other Eukaryotes - 0 (source: NCBI BLINK).   chr2:17171657-17172929 FORWARD LENGTH=161 | 140  | 161  | 2.00E-63 | 115.0 | 88.6 | 95.7 |
| Rsa1.0_00029.1.g1834.t1 | #                                                                                                                                                                                                                                                                                                                                                                                                                                                                                                                                                                                                                                                                         | #    | #    | #        | #     | #    | -    | ----                                                     | ----  | ----                 | AT3G18000.1   Symbols: NMT1, XPL1, PEAMT   S-adenosyl-L-methionine-dependent methyltransferases superfamily protein   chr3:6154578-6157331 FORWARD LENGTH=491                                                                                                | 136  | 491  | 2.00E-11 | 361.0 | 23.5 | 27.9 |
| Rsa1.0_00029.1.g1835.t1 | ref NP_030664.1  transmembrane amino acid transporter-like protein [Arabidopsis thaliana] gi 14532708 gb AAK64155.1  unknown protein [Arabidopsis thaliana] gi 19310729 gb AAL85095.1  unknown protein [Arabidopsis thaliana] gi 20197120 gb AAD11993.2  expressed protein [Arabidopsis thaliana] gi 330254849 gb AEC09942.1  transmembrane amino acid transporter-like protein [Arabidopsis thaliana]                                                                                                                                                                                                                                                                    | 544  | 536  | 0        | 98.5  | 78.5 | 83.1 | transmembrane amino acid transporter-like protein        | gbpln | Arabidopsis thaliana | AT2G41190.1   Symbols:   Transmembrane amino acid transporter family protein   chr2:17167561-17170145 REVERSE LENGTH=536                                                                                                                                     | 544  | 536  | 0        | 98.5  | 78.5 | 83.1 |
| Rsa1.0_00029.1.g1836.t1 | refXP_002879913.1   hypothetical protein ARALYDRAFT_483187 [Arabidopsis lyrata subsp. lyrata] gi 297325752 gb EFH56172.1   hypothetical protein ARALYDRAFT_483187 [Arabidopsis lyrata subsp. lyrata]                                                                                                                                                                                                                                                                                                                                                                                                                                                                      | 138  | 140  | 3.00E-52 | 101.4 | 80.4 | 87.0 | hypothetical protein ARALYDRAFT_483187                   | gbpln | Arabidopsis lyrata   | AT2G41180.1   Symbols:   VQ motif-containing protein   chr2:17165242-17165667 FORWARD LENGTH=141                                                                                                                                                             | 138  | 141  | 7.00E-52 | 102.2 | 77.5 | 84.1 |
| Rsa1.0_00029.1.g1837.t2 | gb ABO36622.1  copia LTR rider [Solanum lycopersicum] gi 133711819 gb ABO36636.1  copia LTR rider [Solanum lycopersicum]                                                                                                                                                                                                                                                                                                                                                                                                                                                                                                                                                  | 957  | 1307 | 0        | 136.6 | 59.6 | 69.4 | copia LTR rider                                          | gbpln | Solanum lycopersicum | AT4G23160.1   Symbols: CRK8   cysteine-rich RLK (RECEPTOR-like protein kinase) 8   chr4:12129485-12134086 FORWARD LENGTH=1262                                                                                                                                | 957  | 1262 | 2.00E-52 | 131.9 | 12.4 | 18.8 |
| Rsa1.0_00029.1.g1838.t1 | ref NP_181647.1  CDPK-related kinase 1 [Arabidopsis thaliana] gi 75318680 sp O80673.1 CAMK1_ARATH ResName: Full=CDPK-related kinase 1; Short=AtCRK1; AltName: Full=Calcium/calmodulin-dependent protein kinase 3; AltName: Full=Calmodulin-binding protein kinase 3; Short=AtCBK3; Short=CaM-binding protein kinase 3 gi 5020366 gb AAD38058.1 AF153351.1 CDPK-related kinase 1 [Arabidopsis thaliana] gi 16904218 gb AAL30816.1 AF435448.1 calcium/calmodulin-dependent protein kinase CaMK3 [Arabidopsis thaliana] gi 3402722 gb AAD12016.1 CPDK-related protein kinase [Arabidopsis thaliana] gi 330254842 gb AEC09936.1  CDPK-related kinase 1 [Arabidopsis thaliana] | 520  | 576  | 0        | 110.8 | 94.8 | 96.7 | CDPK-related kinase 1                                    | gbpln | Arabidopsis thaliana | AT2G41140.1   Symbols: CRK1, ATCRK1, ATCBK3   CDPK-related kinase 1   chr2:17150492-17153378 FORWARD LENGTH=576                                                                                                                                              | 520  | 576  | 0        | 110.8 | 94.8 | 96.7 |

|                         |                                                                                                                                                                                                                                                                                                                                                 |      |      |           |       |      |      |                                                   |       |                      |                                                                                                                                                                                                                                                                                                                            |      |      |           |       |      |      |
|-------------------------|-------------------------------------------------------------------------------------------------------------------------------------------------------------------------------------------------------------------------------------------------------------------------------------------------------------------------------------------------|------|------|-----------|-------|------|------|---------------------------------------------------|-------|----------------------|----------------------------------------------------------------------------------------------------------------------------------------------------------------------------------------------------------------------------------------------------------------------------------------------------------------------------|------|------|-----------|-------|------|------|
| Rsa1.0_00029.1.g1839.t1 | dbj BAB09923.1  copia-like retrotransposable element [Arabidopsis thaliana]                                                                                                                                                                                                                                                                     | 1534 | 1342 | 0         | 87.5  | 43.5 | 60.6 | copia-like retrotransposable element              | gbpln | Arabidopsis thaliana | AT4G23160.1   Symbols: CRK8   cysteine-rich RLK (RECEPTOR-like protein kinase) 8   chr4:12129485-12134086 FORWARD LENGTH=1262                                                                                                                                                                                              | 1534 | 1262 | 2.00E-87  | 82.3  | 12.3 | 17.4 |
| Rsa1.0_00029.1.g1840.t1 | ref XP_002879910.1  basic helix-loop-helix family protein [Arabidopsis lyrata subsp. lyrata]<br>gi 297325749 gb EFH56169.1  basic helix-loop-helix family protein [Arabidopsis lyrata subsp. lyrata]                                                                                                                                            | 263  | 253  | 1.00E-110 | 96.2  | 85.2 | 90.9 | basic helix-loop-helix family protein             | gbpln | Arabidopsis lyrata   | AT2G41130.1   Symbols:   basic helix-loop-helix (bHLH) DNA-binding superfamily protein   chr2:17143360-17144686 FORWARD LENGTH=253                                                                                                                                                                                         | 263  | 253  | 1.00E-111 | 96.2  | 84.0 | 90.9 |
| Rsa1.0_00029.1.g1841.t1 | gb EOA26366.1  hypothetical protein CARUB_v10023283mg [Capsella rubella]                                                                                                                                                                                                                                                                        | 383  | 422  | 1.00E-144 | 110.2 | 67.9 | 79.4 | hypothetical protein CARUB_v10023283mg            | gbpln | Capsella rubella     | AT2G40910.1   Symbols:   F-box and associated interaction domains-containing protein   chr2:17069938-17071554 REVERSE LENGTH=449                                                                                                                                                                                           | 383  | 449  | 1.00E-138 | 117.2 | 62.9 | 78.9 |
| Rsa1.0_00029.1.g1842.t1 | #                                                                                                                                                                                                                                                                                                                                               | #    | #    | #         | #     | #    | #    | -                                                 | ----  | ----                 | #                                                                                                                                                                                                                                                                                                                          | #    | #    | #         | #     | #    | #    |
| Rsa1.0_00029.1.g1843.t2 | gb EOA26366.1  hypothetical protein CARUB_v10023283mg [Capsella rubella]                                                                                                                                                                                                                                                                        | 179  | 422  | 4.00E-28  | 235.8 | 41.3 | 53.6 | hypothetical protein CARUB_v10023283mg            | gbpln | Capsella rubella     | AT2G40910.1   Symbols:   F-box and associated interaction domains-containing protein   chr2:17069938-17071554 REVERSE LENGTH=449                                                                                                                                                                                           | 179  | 449  | 1.00E-29  | 250.8 | 35.8 | 45.3 |
| Rsa1.0_00029.1.g1844.t1 | #                                                                                                                                                                                                                                                                                                                                               | #    | #    | #         | #     | #    | #    | -                                                 | ----  | ----                 | #                                                                                                                                                                                                                                                                                                                          | #    | #    | #         | #     | #    | #    |
| Rsa1.0_00029.1.g1845.t1 | ref XP_002881746.1  hypothetical protein ARALYDRAFT_321778 [Arabidopsis lyrata subsp. lyrata]<br>gi 297327585 gb EFH58005.1  hypothetical protein ARALYDRAFT_321778 [Arabidopsis lyrata subsp. lyrata]                                                                                                                                          | 385  | 449  | 1.00E-134 | 116.6 | 62.6 | 77.4 | hypothetical protein ARALYDRAFT_321778            | gbpln | Arabidopsis lyrata   | AT2G40910.1   Symbols:   F-box and associated interaction domains-containing protein   chr2:17069938-17071554 REVERSE LENGTH=449                                                                                                                                                                                           | 385  | 449  | 1.00E-132 | 116.6 | 61.0 | 77.7 |
| Rsa1.0_00029.1.g1846.t1 | ref NP_181623.2  F-box protein [Arabidopsis thaliana]<br>gi 122215015 sp Q3EB17.1 FB130_ARATH RecName: Full=F-box protein At2g40910<br>gi 330254802 gb AEC09896.1  F-box protein [Arabidopsis thaliana]                                                                                                                                         | 391  | 449  | 1.00E-82  | 114.8 | 43.0 | 54.5 | F-box protein                                     | gbpln | Arabidopsis thaliana | AT2G40910.1   Symbols:   F-box and associated interaction domains-containing protein   chr2:17069938-17071554 REVERSE LENGTH=449                                                                                                                                                                                           | 391  | 449  | 3.00E-85  | 114.8 | 43.0 | 54.5 |
| Rsa1.0_00029.1.g1847.t1 | dbj BAA97099.1  retroelement pol polyprotein-like [Arabidopsis thaliana]                                                                                                                                                                                                                                                                        | 361  | 1098 | 2.00E-58  | 304.2 | 30.5 | 35.5 | retroelement pol polyprotein-like                 | gbpln | Arabidopsis thaliana | AT1G21280.1   Symbols:   CONTAINS InterPro DOMAIN/s: Retrotransposon gag protein (InterPro:IPR005162); Has 707 Blast hits to 705 proteins in 25 species: Archae - 0; Bacteria - 0; Metazoa - 4; Fungi - 0; Plants - 703; Viruses - 0; Other Eukaryotes - 0 (source: NCBI BLINK).   chr1:7447690-7448403 REVERSE LENGTH=237 | 361  | 237  | 8.00E-23  | 65.7  | 16.3 | 24.7 |
| Rsa1.0_00029.1.g1848.t1 | gb EOA26681.1  hypothetical protein CARUB_v10022762mg [Capsella rubella]                                                                                                                                                                                                                                                                        | 780  | 696  | 0         | 89.2  | 76.9 | 81.8 | hypothetical protein CARUB_v10022762mg            | gbpln | Capsella rubella     | AT2G40980.1   Symbols:   Protein kinase superfamily protein   chr2:17102090-17104443 FORWARD LENGTH=617                                                                                                                                                                                                                    | 780  | 617  | 0         | 79.1  | 57.1 | 60.0 |
| Rsa1.0_00029.1.g1849.t1 | ref NP_850337.1  cytochrome P450 98A3 [Arabidopsis thaliana]<br>gi 5915859 sp O22203.1 C98A3_ARATH RecName: Full=Cytochrome P450 98A3; AltName: Full=Protein REDUCED EPIDERMAL FLUORESCENCE 8; AltName: Full=p-coumaroylshikimate/quinate 3'-hydroxylase; Short=C3'H<br>gi 330254799 gb AEC09893.1  cytochrome P450 98A3 [Arabidopsis thaliana] | 508  | 508  | 0         | 100.0 | 95.1 | 97.2 | cytochrome P450 98A3                              | gbpln | Arabidopsis thaliana | AT2G40890.1   Symbols: CYP98A3   cytochrome P450, family 98, subfamily A, polypeptide 3   chr2:17058291-17060532 REVERSE LENGTH=508                                                                                                                                                                                        | 508  | 508  | 0         | 100.0 | 95.1 | 97.2 |
| Rsa1.0_00029.1.g1850.t1 | gb AAL86314.1  putative cysteine proteinase inhibitor cystatin B [Arabidopsis thaliana]                                                                                                                                                                                                                                                         | 116  | 116  | 5.00E-19  | 100.0 | 42.2 | 44.0 | putative cysteine proteinase inhibitor cystatin B | gbpln | Arabidopsis thaliana | AT2G40880.1   Symbols: FL3-27, ATCYSA, CYSA   cystatin A   chr2:17057463-17057930 FORWARD LENGTH=125                                                                                                                                                                                                                       | 116  | 125  | 1.00E-21  | 107.8 | 42.2 | 44.0 |
| Rsa1.0_00029.1.g1851.t2 | dbj BAJ33673.1  unnamed protein product [Thellungiella halophila]                                                                                                                                                                                                                                                                               | 684  | 654  | 0         | 95.6  | 84.8 | 89.2 | unnamed protein product                           | ----  | ----                 | AT2G40860.1   Symbols:   protein kinase family protein / protein phosphatase 2C (PP2C) family protein   chr2:17053747-17057108 REVERSE LENGTH=658                                                                                                                                                                          | 684  | 658  | 0         | 96.2  | 83.6 | 89.5 |
| Rsa1.0_00029.1.g1852.t1 | ref NP_181617.1  phosphoinositide 4-kinase gamma 1 [Arabidopsis thaliana]<br>gi 2623299 gb AAB86445.1  hypothetical protein [Arabidopsis thaliana]<br>gi 330254796 gb AEC09890.1  phosphoinositide 4-kinase gamma 1 [Arabidopsis thaliana]                                                                                                      | 541  | 561  | 0         | 103.7 | 86.5 | 91.9 | phosphoinositide 4-kinase gamma 1                 | gbpln | Arabidopsis thaliana | AT2G40850.1   Symbols: ATPI4K GAMMA 1, PI4K GAMMA 1   phosphoinositide 4-kinase gamma 1   chr2:17051575-17053260 FORWARD LENGTH=561                                                                                                                                                                                        | 541  | 561  | 0         | 103.7 | 86.5 | 91.9 |
| Rsa1.0_00029.1.g1853.t1 | ref XP_002879893.1  ring-H2 finger C1A [Arabidopsis lyrata subsp. lyrata]<br>gi 297325732 gb EFH56152.1  ring-H2 finger C1A [Arabidopsis lyrata subsp. lyrata]                                                                                                                                                                                  | 310  | 329  | 1.00E-132 | 106.1 | 85.2 | 90.3 | ring-H2 finger C1A                                | gbpln | Arabidopsis lyrata   | AT2G40830.3   Symbols: RHC1A   RING-H2 finger C1A   chr2:17043642-17044628 FORWARD LENGTH=328                                                                                                                                                                                                                              | 310  | 328  | 1.00E-133 | 105.8 | 82.9 | 88.7 |

|                         |                                                                                                                                                                                                                                                                                                                                                                               |     |      |           |       |      |      |                                        |       |                      |                                                                                                                                                              |     |      |           |       |      |      |
|-------------------------|-------------------------------------------------------------------------------------------------------------------------------------------------------------------------------------------------------------------------------------------------------------------------------------------------------------------------------------------------------------------------------|-----|------|-----------|-------|------|------|----------------------------------------|-------|----------------------|--------------------------------------------------------------------------------------------------------------------------------------------------------------|-----|------|-----------|-------|------|------|
| Rsa1.0_00029.1.g1854.t1 | gb AAB86442.1  hypothetical protein [Arabidopsis thaliana]                                                                                                                                                                                                                                                                                                                    | 392 | 945  | 2.00E-97  | 241.1 | 63.0 | 71.9 | hypothetical protein                   | gbpln | Arabidopsis thaliana | AT2G40815.1   Symbols:   Calcium-dependent lipid-binding (CaLB domain) family protein   chr2:17034736-17036110 REVERSE LENGTH=367                            | 392 | 367  | 3.00E-68  | 93.6  | 30.9 | 34.2 |
| Rsa1.0_00029.1.g1855.t1 | #                                                                                                                                                                                                                                                                                                                                                                             | #   | #    | #         | #     | #    | -    | -----                                  | ----- | -----                | #                                                                                                                                                            | #   | #    | #         | #     | #    | #    |
| Rsa1.0_00029.1.g1856.t1 | gb EOA28930.1  hypothetical protein CARUB_v10025177mg [Capsella rubella]                                                                                                                                                                                                                                                                                                      | 331 | 322  | 2.00E-70  | 97.3  | 41.4 | 48.0 | hypothetical protein CARUB_v10025177mg | gbpln | Capsella rubella     | AT2G40815.1   Symbols:   Calcium-dependent lipid-binding (CaLB domain) family protein   chr2:17034736-17036110 REVERSE LENGTH=367                            | 331 | 367  | 3.00E-68  | 110.9 | 44.4 | 51.1 |
| Rsa1.0_00029.1.g1857.t2 | ref XP_002879696.1  predicted protein [Arabidopsis lyrata subsp. lyrata]   gi 297325535 gb EFH55955.1  predicted protein [Arabidopsis lyrata subsp. lyrata]                                                                                                                                                                                                                   | 194 | 389  | 8.00E-12  | 200.5 | 21.1 | 22.7 | predicted protein                      | gbpln | Arabidopsis lyrata   | AT3G56440.1   Symbols: ATATG18D, ATG18D   homolog of yeast autophagy 18 (ATG18) D   chr3:20926874-20928797 FORWARD LENGTH=391                                | 194 | 391  | 2.00E-12  | 201.5 | 19.6 | 21.1 |
| Rsa1.0_00030.1.g1858.t1 | ref XP_002882450.1  basic helix-loop-helix family protein [Arabidopsis lyrata subsp. lyrata]   gi 297328290 gb EFH58709.1  basic helix-loop-helix family protein [Arabidopsis lyrata subsp. lyrata]                                                                                                                                                                           | 206 | 202  | 1.00E-100 | 98.1  | 88.8 | 93.7 | basic helix-loop-helix family protein  | gbpln | Arabidopsis lyrata   | AT3G06120.1   Symbols: MUTE   basic helix-loop-helix (bHLH) DNA-binding superfamily protein   chr3:1846531-1848016 FORWARD LENGTH=202                        | 206 | 202  | 1.00E-101 | 98.1  | 89.3 | 94.2 |
| Rsa1.0_00030.1.g1859.t1 | gb EOA30708.1  hypothetical protein CARUB_v10013845mg [Capsella rubella]                                                                                                                                                                                                                                                                                                      | 394 | 407  | 0         | 103.3 | 89.1 | 95.2 | hypothetical protein CARUB_v10013845mg | gbpln | Capsella rubella     | AT3G06190.1   Symbols: ATBPM2, BPM2   BTB-POZ and MATH domain 2   chr3:1874577-1876575 REVERSE LENGTH=406                                                    | 394 | 406  | 0         | 103.0 | 88.6 | 94.4 |
| Rsa1.0_00030.1.g1860.t1 | ref NP_187269.1  ribosomal protein L34e-like protein [Arabidopsis thaliana]   gi 8662922 gb AAF30311.1 AC018907.11 unknown protein [Arabidopsis thaliana]   gi 62867643 gb AA17425.1  At3g06180 [Arabidopsis thaliana]   gi 90962960 gb ABE02404.1  At3g06180 [Arabidopsis thaliana]   gi 332640836 gb AEE74357.1  ribosomal protein L34e-like protein [Arabidopsis thaliana] | 203 | 241  | 4.00E-73  | 118.7 | 87.2 | 93.1 | ribosomal protein L34e-like protein    | gbpln | Arabidopsis thaliana | AT3G06180.1   Symbols:   Ribosomal protein L34e superfamily protein   chr3:1871705-1873554 FORWARD LENGTH=241                                                | 203 | 241  | 1.00E-75  | 118.7 | 87.2 | 93.1 |
| Rsa1.0_00030.1.g1861.t1 | gb EOA29649.1  hypothetical protein CARUB_v10015151mg [Capsella rubella]                                                                                                                                                                                                                                                                                                      | 351 | 351  | 0         | 100.0 | 92.9 | 96.3 | hypothetical protein CARUB_v10015151mg | gbpln | Capsella rubella     | AT3G06260.1   Symbols: GATL4   galacturonosyltransferase-like 4   chr3:1893804-1894859 REVERSE LENGTH=351                                                    | 351 | 351  | 0         | 100.0 | 93.2 | 96.3 |
| Rsa1.0_00030.1.g1862.t1 | ref XP_002882459.1  hypothetical protein ARALYDRAFT_477927 [Arabidopsis lyrata subsp. lyrata]   gi 297328299 gb EFH58718.1  hypothetical protein ARALYDRAFT_477927 [Arabidopsis lyrata subsp. lyrata]                                                                                                                                                                         | 351 | 348  | 1.00E-180 | 99.1  | 89.5 | 92.6 | hypothetical protein ARALYDRAFT_477927 | gbpln | Arabidopsis lyrata   | AT3G06270.1   Symbols:   Protein phosphatase 2C family protein   chr3:1896763-1897887 FORWARD LENGTH=348                                                     | 351 | 348  | 0         | 99.1  | 88.6 | 92.0 |
| Rsa1.0_00030.1.g1863.t1 | ref XP_002882462.1  hypothetical protein ARALYDRAFT_896744 [Arabidopsis lyrata subsp. lyrata]   gi 297328302 gb EFH58721.1  hypothetical protein ARALYDRAFT_896744 [Arabidopsis lyrata subsp. lyrata]                                                                                                                                                                         | 410 | 425  | 1.00E-132 | 103.7 | 61.5 | 76.3 | hypothetical protein ARALYDRAFT_896744 | gbpln | Arabidopsis lyrata   | AT1G03710.2   Symbols:   Cystatin/monellin superfamily protein   chr1:923492-924287 FORWARD LENGTH=202                                                       | 410 | 202  | 3.00E-28  | 49.3  | 17.6 | 25.6 |
| Rsa1.0_00030.1.g1864.t1 | gb EOA30590.1  hypothetical protein CARUB_v10013722mg [Capsella rubella]                                                                                                                                                                                                                                                                                                      | 436 | 440  | 1.00E-169 | 100.9 | 77.8 | 83.3 | hypothetical protein CARUB_v10013722mg | gbpln | Capsella rubella     | AT3G06330.1   Symbols:   RING/U-box superfamily protein   chr3:1917334-1919709 FORWARD LENGTH=426                                                            | 436 | 426  | 1.00E-169 | 97.7  | 75.5 | 82.1 |
| Rsa1.0_00030.1.g1865.t1 | ref XP_002884573.1  EMB3004/MEE32 [Arabidopsis lyrata subsp. lyrata]   gi 297330413 gb EFH60832.1  EMB3004/MEE32 [Arabidopsis lyrata subsp. lyrata]                                                                                                                                                                                                                           | 604 | 603  | 0         | 99.8  | 85.6 | 91.2 | EMB3004/MEE32                          | gbpln | Arabidopsis lyrata   | AT3G06350.1   Symbols: EMB3004, MEE32   dehydroquininate dehydratase, putative / shikimate dehydrogenase, putative   chr3:1924536-1927701 REVERSE LENGTH=603 | 604 | 603  | 0         | 99.8  | 86.3 | 90.6 |
| Rsa1.0_00030.1.g1866.t1 | gb EOA31716.1  hypothetical protein CARUB_v10014924mg [Capsella rubella]                                                                                                                                                                                                                                                                                                      | 126 | 126  | 4.00E-26  | 100.0 | 60.3 | 65.9 | hypothetical protein CARUB_v10014924mg | gbpln | Capsella rubella     | AT3G06360.1   Symbols: AGP27, ATAGP27   arabinogalactan protein 27   chr3:1928976-1929353 FORWARD LENGTH=125                                                 | 126 | 125  | 8.00E-28  | 99.2  | 73.8 | 83.3 |
| Rsa1.0_00030.1.g1867.t1 | dbj BAF01676.1  hypothetical protein [Arabidopsis thaliana]                                                                                                                                                                                                                                                                                                                   | 223 | 450  | 3.00E-46  | 201.8 | 47.1 | 65.0 | hypothetical protein                   | gbpln | Arabidopsis thaliana | AT1G26540.1   Symbols:   Agenet domain-containing protein   chr1:9167783-9170795 REVERSE LENGTH=695                                                          | 223 | 695  | 1.00E-48  | 311.7 | 47.1 | 65.0 |
| Rsa1.0_00030.1.g1868.t1 | ref NP_182245.1  uncharacterized protein [Arabidopsis thaliana]   gi 2275201 gb AAB63823.1  unknown protein [Arabidopsis thaliana]   gi 330255722 gb AEC10816.1  uncharacterized protein AT2G47230 [Arabidopsis thaliana]                                                                                                                                                     | 417 | 701  | 3.00E-91  | 168.1 | 50.8 | 61.4 | uncharacterized protein                | gbpln | Arabidopsis thaliana | AT2G47230.1   Symbols: DUF6, ATDUF6   DOMAIN OF UNKNOWN FUNCTION 724 6   chr2:19387126-19390011 FORWARD LENGTH=701                                           | 417 | 701  | 8.00E-94  | 168.1 | 50.8 | 61.4 |
| Rsa1.0_00030.1.g1869.t5 | gb EOA32811.1  hypothetical protein CARUB_v10016122mg [Capsella rubella]                                                                                                                                                                                                                                                                                                      | 616 | 1058 | 0         | 171.8 | 83.4 | 85.9 | hypothetical protein CARUB_v10016122mg | gbpln | Capsella rubella     | AT3G06400.1   Symbols: CHR11   chromatin-remodeling protein 11   chr3:1941066-1946700 FORWARD LENGTH=1055                                                    | 616 | 1055 | 0         | 171.3 | 83.9 | 86.2 |

|                          |                                                                                                                                                                                                                                                                                                                                                                                                                                                                                     |     |      |           |       |      |      |                                               |       |                      |                                                                                                                                  |     |     |           |       |      |      |
|--------------------------|-------------------------------------------------------------------------------------------------------------------------------------------------------------------------------------------------------------------------------------------------------------------------------------------------------------------------------------------------------------------------------------------------------------------------------------------------------------------------------------|-----|------|-----------|-------|------|------|-----------------------------------------------|-------|----------------------|----------------------------------------------------------------------------------------------------------------------------------|-----|-----|-----------|-------|------|------|
| Rsa1.0_00030.1.g1870.t1  | gb ADK63414.1  CCOH type zinc finger protein [Brassica rapa]                                                                                                                                                                                                                                                                                                                                                                                                                        | 467 | 455  | 0         | 97.4  | 80.9 | 87.6 | CCOH type zinc finger protein                 | gbpln | Brassica rapa        | AT3G06410.1   Symbols:   Zinc finger C-x8-C-x5-C-x3-H type family protein   chr3:1947471-1949528 REVERSE LENGTH=462              | 467 | 462 | 1.00E-175 | 98.9  | 81.8 | 87.6 |
| Rsa1.0_00030.1.g1871.t1  | emb CAB39638.1  RNA-directed DNA polymerase-like protein [Arabidopsis thaliana] gi 7267666 emb CAB78094.1  RNA-directed DNA polymerase-like protein [Arabidopsis thaliana] ref XP_002882368.1  hypothetical protein ARALYDRAFT_896506 [Arabidopsis lyrata subsp. lyrata] gi 297328208 gb EFH58627.1  hypothetical protein ARALYDRAFT_896506 [Arabidopsis lyrata subsp. lyrata]                                                                                                      | 511 | 1274 | 2.00E-92  | 249.3 | 38.2 | 55.6 | RNA-directed DNA polymerase-like protein      | gbpln | Arabidopsis thaliana | AT4G29090.1   Symbols:   Ribonuclease H-like superfamily protein   chr4:14333528-14335255 FORWARD LENGTH=575                     | 511 | 575 | 8.00E-62  | 112.5 | 30.5 | 47.7 |
| Rsa1.0_00030.1.g1872.t1  | gb EOA31508.1  hypothetical protein CARUB_v10014696mg [Capsella rubella] ref NP_566284.1  putative beta-1,3-galactosyltransferase 16 [Arabidopsis thaliana] gi 75167739 sp Q9ASW1.1 B3GTG_ARA TH RecName: Full=Probable beta-1,3-galactosyltransferase 16                                                                                                                                                                                                                           | 181 | 392  | 2.00E-32  | 216.6 | 45.9 | 58.6 | hypothetical protein ARALYDRAFT_896506        | gbpln | Arabidopsis lyrata   | AT4G29970.1   Symbols:   F-box and associated interaction domains-containing protein   chr4:14662765-14663917 REVERSE LENGTH=283 | 181 | 283 | 1.00E-24  | 156.4 | 34.8 | 48.6 |
| Rsa1.0_00030.1.g1873.t1  | gb EOA31508.1  hypothetical protein CARUB_v10014696mg [Capsella rubella] ref NP_566284.1  putative beta-1,3-galactosyltransferase 16 [Arabidopsis thaliana] gi 13605629 gb AAK32808.1 AF361640.1 AT3g06440/F24P17.7 [Arabidopsis thaliana] gi 25090104 gb AAN7229.1 At3g06440/F24P17.7 [Arabidopsis thaliana] gi 332640872 gb AEE74393.1  putative beta-1,3-galactosyltransferase 16 [Arabidopsis thaliana] ref NP_187298.1  GNS1/SUR4 membrane-like protein [Arabidopsis thaliana] | 183 | 196  | 7.00E-35  | 107.1 | 45.4 | 60.1 | hypothetical protein CARUB_v10014696mg        | gbpln | Capsella rubella     | AT3G06435.1   Symbols:   Expressed protein   chr3:1970102-1970704 REVERSE LENGTH=200                                             | 183 | 200 | 3.00E-37  | 109.3 | 45.9 | 59.6 |
| Rsa1.0_00030.1.g1874.t14 | gi 13605629 gb AAK32808.1 AF361640.1 AT3g06440/F24P17.7 [Arabidopsis thaliana] gi 25090104 gb AAN7229.1 At3g06440/F24P17.7 [Arabidopsis thaliana] gi 332640872 gb AEE74393.1  putative beta-1,3-galactosyltransferase 16 [Arabidopsis thaliana] ref NP_187298.1  GNS1/SUR4 membrane-like protein [Arabidopsis thaliana]                                                                                                                                                             | 959 | 619  | 0         | 64.5  | 47.5 | 51.9 | putative beta-1,3-galactosyltransferase 16    | gbpln | Arabidopsis thaliana | AT3G06440.1   Symbols:   Galactosyltransferase family protein   chr3:1972913-1975272 REVERSE LENGTH=619                          | 959 | 619 | 0         | 64.5  | 47.5 | 51.9 |
| Rsa1.0_00030.1.g1875.t1  | gi 8437542 gb AAFO8569.1 AC011623.2 unknown protein [Arabidopsis thaliana] gi 332640878 gb AEE74399.1  GNS1/SUR4 membrane-like protein [Arabidopsis thaliana] ref XP_002882473.1  GNS1/SUR4 membrane family protein [Arabidopsis lyrata subsp. lyrata] gi 297328313 gb EFH58732.1  GNS1/SUR4 membrane family protein [Arabidopsis lyrata subsp. lyrata] ref NP_187298.1  GNS1/SUR4 membrane-like protein [Arabidopsis thaliana]                                                     | 273 | 278  | 1.00E-130 | 101.8 | 88.6 | 93.0 | GNS1/SUR4 membrane-like protein               | gbpln | Arabidopsis thaliana | AT3G06470.1   Symbols:   GNS1/SUR4 membrane protein family   chr3:1984206-1985042 FORWARD LENGTH=278                             | 273 | 278 | 1.00E-132 | 101.8 | 88.6 | 93.0 |
| Rsa1.0_00030.1.g1876.t1  | gi 297328313 gb EFH58732.1  GNS1/SUR4 membrane family protein [Arabidopsis lyrata subsp. lyrata] ref NP_187298.1  GNS1/SUR4 membrane-like protein [Arabidopsis thaliana]                                                                                                                                                                                                                                                                                                            | 294 | 278  | 1.00E-115 | 94.6  | 72.1 | 79.3 | GNS1/SUR4 membrane family protein             | gbpln | Arabidopsis lyrata   | AT3G06470.1   Symbols:   GNS1/SUR4 membrane protein family   chr3:1984206-1985042 FORWARD LENGTH=278                             | 294 | 278 | 1.00E-116 | 94.6  | 72.1 | 79.6 |
| Rsa1.0_00030.1.g1877.t1  | gi 8437542 gb AAFO8569.1 AC011623.2 unknown protein [Arabidopsis thaliana] gi 332640878 gb AEE74399.1  GNS1/SUR4 membrane-like protein [Arabidopsis thaliana]                                                                                                                                                                                                                                                                                                                       | 236 | 278  | 8.00E-91  | 117.8 | 76.3 | 86.0 | GNS1/SUR4 membrane-like protein               | gbpln | Arabidopsis thaliana | AT3G06470.1   Symbols:   GNS1/SUR4 membrane protein family   chr3:1984206-1985042 FORWARD LENGTH=278                             | 236 | 278 | 2.00E-93  | 117.8 | 76.3 | 86.0 |
| Rsa1.0_00030.1.g1878.t1  | #                                                                                                                                                                                                                                                                                                                                                                                                                                                                                   | #   | #    | #         | #     | #    | -    | ----                                          | ----  | #                    | #                                                                                                                                | #   | #   | #         | #     | #    |      |
| Rsa1.0_00030.1.g1879.t1  | ref XP_002882474.1  botrytis-susceptible1, myb domain protein 108 [Arabidopsis lyrata subsp. lyrata] gi 297328314 gb EFH58733.1  botrytis-susceptible1, myb domain protein 108 [Arabidopsis lyrata subsp. lyrata] ref NP_566285.1  beta-glucosidase-like SFR2 [Arabidopsis thaliana] gi 75305863 sp Q93Y07.1 SFR2_ARATH RecName: Full=Beta-glucosidase-like SFR2, chloroplastic; AltName: Full=Protein SENSITIVE TO FREEZING 2; Short=AtSFR2                                        | 311 | 322  | 1.00E-150 | 103.5 | 89.4 | 94.5 | botrytis-susceptible1, myb domain protein 108 | gbpln | Arabidopsis lyrata   | AT3G06490.1   Symbols: MYB108, AtMYB108, BOS1   myb domain protein 108   chr3:2004298-2006358 FORWARD LENGTH=323                 | 311 | 323 | 1.00E-144 | 103.9 | 88.7 | 94.2 |
| Rsa1.0_00030.1.g1880.t1  | gi 16649039 gb AAL24371.1  beta-glucosidase, putative [Arabidopsis thaliana] gi 22077112 emb CAD36512.1  putative beta-glucosidase [Arabidopsis thaliana] gi 25083735 gb AAN7211.1  beta-glucosidase, putative [Arabidopsis thaliana] gi 332640883 gb AEE74404.1  beta-glucosidase-like SFR2 [Arabidopsis thaliana]                                                                                                                                                                 | 570 | 622  | 0         | 109.1 | 84.4 | 91.6 | beta-glucosidase-like SFR2                    | gbpln | Arabidopsis thaliana | AT3G06510.1   Symbols: SFR2, AtSFR2   Glycosyl hydrolase superfamily protein   chr3:2016450-2019533 FORWARD LENGTH=622           | 570 | 622 | 0         | 109.1 | 84.4 | 91.6 |



|                         |                                                                                                                                                                                                                                                                                                                                                                                                                                                                                                                                    |     |     |          |       |      |      |                                                                           |       |                      |                                                                                                                                                                                                                                                                                                                                                                                                                                                                                     |     |     |          |       |      |      |
|-------------------------|------------------------------------------------------------------------------------------------------------------------------------------------------------------------------------------------------------------------------------------------------------------------------------------------------------------------------------------------------------------------------------------------------------------------------------------------------------------------------------------------------------------------------------|-----|-----|----------|-------|------|------|---------------------------------------------------------------------------|-------|----------------------|-------------------------------------------------------------------------------------------------------------------------------------------------------------------------------------------------------------------------------------------------------------------------------------------------------------------------------------------------------------------------------------------------------------------------------------------------------------------------------------|-----|-----|----------|-------|------|------|
| Rsa1.0_00030.1.g1881.t1 | refXP_002884591.1  hypothetical protein ARALYDRAFT_477961 [Arabidopsis lyrata subsp. lyrata] gi 297330431 gb EFH60850.1                                                                                                                                                                                                                                                                                                                                                                                                            | 559 | 545 | 0        | 97.5  | 89.3 | 92.5 | hypothetical protein ARALYDRAFT_477961                                    | gbpln | Arabidopsis lyrata   | AT3G06550.2   Symbols:   O-acetyltransferase family protein   chr3:2039408-2042664 REVERSE LENGTH=568                                                                                                                                                                                                                                                                                                                                                                               | 559 | 568 | 0        | 101.6 | 88.7 | 92.7 |
| Rsa1.0_00030.1.g1882.t1 | hypothetical protein ARALYDRAFT_477961 [Arabidopsis lyrata subsp. lyrata] refXP_002884593.1  hypothetical protein ARALYDRAFT_896791 [Arabidopsis lyrata subsp. lyrata] gi 297330433 gb EFH60852.1                                                                                                                                                                                                                                                                                                                                  | 496 | 496 | 0        | 100.0 | 91.5 | 95.6 | hypothetical protein ARALYDRAFT_896791                                    | gbpln | Arabidopsis lyrata   | AT3G06580.1   Symbols: GAL1, GALK   Mevalonate/galactokinase family protein   chr3:2049141-2051867 REVERSE LENGTH=496                                                                                                                                                                                                                                                                                                                                                               | 496 | 496 | 0        | 100.0 | 91.1 | 95.2 |
| Rsa1.0_00030.1.g1883.t1 | hypothetical protein ARALYDRAFT_896791 [Arabidopsis lyrata subsp. lyrata] refXP_002884594.1  hypothetical protein ARALYDRAFT_477966 [Arabidopsis lyrata subsp. lyrata] gi 297330434 gb EFH60853.1                                                                                                                                                                                                                                                                                                                                  | 229 | 217 | 8.00E-68 | 94.8  | 69.4 | 80.3 | hypothetical protein ARALYDRAFT_477966                                    | gbpln | Arabidopsis lyrata   | AT3G06590.2   Symbols:   basic helix-loop-helix (bHLH) DNA-binding superfamily protein   chr3:2054647-2055312 REVERSE LENGTH=221                                                                                                                                                                                                                                                                                                                                                    | 229 | 221 | 2.00E-64 | 96.5  | 69.4 | 79.9 |
| Rsa1.0_00030.1.g1884.t1 | hypothetical protein ARALYDRAFT_477966 [Arabidopsis lyrata subsp. lyrata] refNP_187312.1  uncharacterized protein [Arabidopsis thaliana] gi 186509849 ref NP_001118593.1  uncharacterized protein [Arabidopsis thaliana] gi 12322684 gb AAG51336.1 AC020580.16 hypothetical protein; 25909-26809 [Arabidopsis thaliana] gi 49660141 gb AAT68361.1                                                                                                                                                                                  | 193 | 193 | 4.00E-64 | 100.0 | 73.1 | 82.9 | uncharacterized protein                                                   | gbpln | Arabidopsis thaliana | AT3G06600.2   Symbols:   unknown protein; FUNCTIONS IN: molecular_function unknown; INVOLVED IN: biological_process unknown; LOCATED IN: cellular_component unknown; EXPRESSED IN: 15 plant structures; EXPRESSED DURING: 7 growth stages; Has 30201 Blast hits to 17322 proteins in 780 species: Archaee - 12; Bacteria - 1396; Metazoa - 17338; Fungi - 3422; Plants - 5037; Viruses - 0; Other Eukaryotes - 2996 (source: NCBI BLINK).   chr3:2059558-2060458 REVERSE LENGTH=193 | 193 | 193 | 1.00E-66 | 100.0 | 73.1 | 82.9 |
| Rsa1.0_00030.1.g1885.t1 | hypothetical protein At3g06600 [Arabidopsis thaliana] gi 50058941 gb AAT69215.1  hypothetical protein At3g06600 [Arabidopsis thaliana] gi 332640899 gb AEE74420.1  uncharacterized protein AT3G06600 [Arabidopsis thaliana] gi 332640900 gb AEE74421.1  uncharacterized protein AT3G06600 [Arabidopsis thaliana]                                                                                                                                                                                                                   | 115 | 115 | 2.00E-52 | 100.0 | 93.0 | 95.7 | hypothetical protein CARUB_v10014957mg                                    | gbpln | Capsella rubella     | AT3G06610.1   Symbols:   DNA-binding enhancer protein-related   chr3:2060837-2061845 FORWARD LENGTH=115                                                                                                                                                                                                                                                                                                                                                                             | 115 | 115 | 6.00E-55 | 100.0 | 91.3 | 93.9 |
| Rsa1.0_00030.1.g1886.t2 | refNP_187314.1  PAS domain-containing tyrosine kinase-like protein [Arabidopsis thaliana] gi 12322680 gb AAG51332.1 AC020580.12 protein kinase, putative; 19229-23534 [Arabidopsis thaliana] gi 20258844 gb AAM13904.1  putative protein kinase [Arabidopsis thaliana] gi 21689823 gb AAM67555.1  putative protein kinase [Arabidopsis thaliana] gi 110741529 dbj BAE98714.1  putative protein kinase [Arabidopsis thaliana] gi 332640902 gb AEE74423.1  PAS domain-containing tyrosine kinase-like protein [Arabidopsis thaliana] | 766 | 773 | 0        | 100.9 | 87.3 | 93.5 | PAS domain-containing tyrosine kinase-like protein                        | gbpln | Arabidopsis thaliana | AT3G06620.1   Symbols:   PAS domain-containing protein tyrosine kinase family protein   chr3:2062833-2067138 REVERSE LENGTH=773                                                                                                                                                                                                                                                                                                                                                     | 766 | 773 | 0        | 100.9 | 87.3 | 93.5 |
| Rsa1.0_00030.1.g1887.t2 | refNP_187314.1  PAS domain-containing tyrosine kinase-like protein [Arabidopsis thaliana] gi 12322680 gb AAG51332.1 AC020580.12 protein kinase, putative; 19229-23534 [Arabidopsis thaliana] gi 20258844 gb AAM13904.1  putative protein kinase [Arabidopsis thaliana] gi 21689823 gb AAM67555.1  putative protein kinase [Arabidopsis thaliana] gi 110741529 dbj BAE98714.1  putative protein kinase [Arabidopsis thaliana] gi 332640902 gb AEE74423.1  PAS domain-containing tyrosine kinase-like protein [Arabidopsis thaliana] | 170 | 773 | 5.00E-53 | 454.7 | 61.8 | 70.0 | PAS domain-containing tyrosine kinase-like protein                        | gbpln | Arabidopsis thaliana | AT3G06620.1   Symbols:   PAS domain-containing protein tyrosine kinase family protein   chr3:2062833-2067138 REVERSE LENGTH=773                                                                                                                                                                                                                                                                                                                                                     | 170 | 773 | 2.00E-55 | 454.7 | 61.8 | 70.0 |
| Rsa1.0_00030.1.g1888.t1 | refNP_683536.1  plant invertase/pectin methylesterase inhibitor domain-containing protein [Arabidopsis thaliana] gi 332640914 gb AEE74435.1  plant invertase/pectin methylesterase inhibitor domain-containing protein [Arabidopsis thaliana]                                                                                                                                                                                                                                                                                      | 329 | 264 | 4.00E-69 | 80.2  | 53.5 | 59.9 | plant invertase/pectin methylesterase inhibitor domain-containing protein | gbpln | Arabidopsis thaliana | AT3G36659.1   Symbols:   Plant invertase/pectin methylesterase inhibitor superfamily protein   chr3:2100189-2100983 FORWARD LENGTH=264                                                                                                                                                                                                                                                                                                                                              | 329 | 264 | 1.00E-71 | 80.2  | 53.5 | 59.9 |

|                         |                                                                                                                                                                                                                                                                                                                                                                                      |     |     |           |       |      |       |                                                           |       |                      |                                                                                                                                                                                                                                                                                                                                           |     |     |           |       |      |      |
|-------------------------|--------------------------------------------------------------------------------------------------------------------------------------------------------------------------------------------------------------------------------------------------------------------------------------------------------------------------------------------------------------------------------------|-----|-----|-----------|-------|------|-------|-----------------------------------------------------------|-------|----------------------|-------------------------------------------------------------------------------------------------------------------------------------------------------------------------------------------------------------------------------------------------------------------------------------------------------------------------------------------|-----|-----|-----------|-------|------|------|
| Rsa1.0_00030.1.g1889.t1 | ref NP_566289.1  PAPA-1-like and zinc finger-HIT domain-containing protein [Arabidopsis thaliana]<br>gi 14334462 gb AAK59429.1  unknown protein [Arabidopsis thaliana]<br>gi 21436325 gb AAM51332.1  unknown protein [Arabidopsis thaliana]<br>gi 332640915 gb AEE74436.1  PAPA-1-like and zinc finger-HIT domain-containing protein [Arabidopsis thaliana]                          | 391 | 427 | 1.00E-125 | 109.2 | 72.1 | 79.5  | PAPA-1-like and zinc finger-HIT domain-containing protein | gbpln | Arabidopsis thaliana | AT3G06660.1   Symbols:   PAPA-1-like family protein / zinc finger (HIT type) family protein   chr3:2103060-2104776 FORWARD LENGTH=427                                                                                                                                                                                                     | 391 | 427 | 1.00E-127 | 109.2 | 72.1 | 79.5 |
| Rsa1.0_00030.1.g1890.t1 | ref XP_002884605.1  binding protein [Arabidopsis lyrata subsp. lyrata]<br>gi 297330445 gb EFH60864.1  binding protein [Arabidopsis lyrata subsp. lyrata]                                                                                                                                                                                                                             | 868 | 864 | 0         | 99.5  | 91.5 | 95.6  | binding protein                                           | gbpln | Arabidopsis lyrata   | AT3G06670.1   Symbols:   binding   chr3:2105908-21113136 REVERSE LENGTH=865                                                                                                                                                                                                                                                               | 868 | 865 | 0         | 99.7  | 91.2 | 95.5 |
| Rsa1.0_00030.1.g1891.t1 | ref XP_002880967.1  60S ribosomal protein L29 [Arabidopsis lyrata subsp. lyrata]<br>gi 297326806 gb EFH57226.1  60S ribosomal protein L29 [Arabidopsis lyrata subsp. lyrata]                                                                                                                                                                                                         | 61  | 61  | 1.00E-25  | 100.0 | 95.1 | 100.0 | 60S ribosomal protein L29                                 | gbpln | Arabidopsis lyrata   | AT3G06700.3   Symbols:   Ribosomal L29e protein family   chr3:2117519-2117800 REVERSE LENGTH=61                                                                                                                                                                                                                                           | 61  | 61  | 4.00E-28  | 100.0 | 95.1 | 98.4 |
| Rsa1.0_00030.1.g1892.t1 | ref XP_002882489.1  hypothetical protein ARALYDRAFT_477988 [Arabidopsis lyrata subsp. lyrata]<br>gi 297328329 gb EFH58748.1  hypothetical protein ARALYDRAFT_477988 [Arabidopsis lyrata subsp. lyrata]                                                                                                                                                                               | 186 | 183 | 4.00E-84  | 98.4  | 84.4 | 90.9  | hypothetical protein ARALYDRAFT_477988                    | gbpln | Arabidopsis lyrata   | AT3G06730.1   Symbols:   TRX P, TRX z   Thioredoxin z   chr3:2124276-2125845 FORWARD LENGTH=183                                                                                                                                                                                                                                           | 186 | 183 | 1.00E-85  | 98.4  | 82.8 | 90.3 |
| Rsa1.0_00030.1.g1893.t1 | ref NP_566290.1  GATA transcription factor 15 [Arabidopsis thaliana]<br>gi 71660789 sp Q8LGI0.2 GAT15_ARAT H RecName: Full=GATA transcription factor 15<br>gi 17380940 gb AAL36282.1  unknown protein [Arabidopsis thaliana]<br>gi 20258947 gb AAM14189.1  unknown protein [Arabidopsis thaliana]<br>gi 332640929 gb AEE74450.1  GATA transcription factor 15 [Arabidopsis thaliana] | 142 | 149 | 8.00E-50  | 104.9 | 78.2 | 85.9  | GATA transcription factor 15                              | gbpln | Arabidopsis thaliana | AT3G06740.1   Symbols:   GATA15   GATA transcription factor 15   chr3:2126658-2127265 FORWARD LENGTH=149                                                                                                                                                                                                                                  | 142 | 149 | 2.00E-52  | 104.9 | 78.2 | 85.9 |
| Rsa1.0_00030.1.g1894.t1 | gb EOA31388.1  hypothetical protein CARUB_v10014564mg [Capsella rubella]                                                                                                                                                                                                                                                                                                             | 187 | 226 | 1.00E-57  | 120.9 | 77.0 | 83.4  | hypothetical protein CARUB_v10014564mg                    | gbpln | Capsella rubella     | AT3G06760.1   Symbols:   Drought-responsive family protein   chr3:2132971-2134355 FORWARD LENGTH=224                                                                                                                                                                                                                                      | 187 | 224 | 2.00E-56  | 119.8 | 74.3 | 81.3 |
| Rsa1.0_00030.1.g1895.t1 | ref XP_002884609.1  heat shock protein binding protein [Arabidopsis lyrata subsp. lyrata]<br>gi 297330449 gb EFH60868.1  heat shock protein binding protein [Arabidopsis lyrata subsp. lyrata]                                                                                                                                                                                       | 226 | 228 | 1.00E-106 | 100.9 | 83.6 | 90.3  | heat shock protein binding protein                        | gbpln | Arabidopsis lyrata   | AT3G06778.1   Symbols:   Chaperone DnaJ-domain superfamily protein   chr3:2140249-2141437 REVERSE LENGTH=229                                                                                                                                                                                                                              | 226 | 229 | 1.00E-107 | 101.3 | 82.7 | 88.9 |
| Rsa1.0_00030.1.g1896.t1 | ref XP_002882368.1  hypothetical protein ARALYDRAFT_896506 [Arabidopsis lyrata subsp. lyrata]<br>gi 297328208 gb EFH58627.1  hypothetical protein ARALYDRAFT_896506 [Arabidopsis lyrata subsp. lyrata]                                                                                                                                                                               | 371 | 392 | 1.00E-114 | 105.7 | 61.5 | 74.4  | hypothetical protein ARALYDRAFT_896506                    | gbpln | Arabidopsis lyrata   | AT3G04660.1   Symbols:   F-box and associated interaction domains-containing protein   chr3:1264794-1265966 FORWARD LENGTH=390                                                                                                                                                                                                            | 371 | 390 | 2.00E-78  | 105.1 | 47.7 | 62.0 |
| Rsa1.0_00030.1.g1897.t1 | gb EOA31285.1  hypothetical protein CARUB_v10014458mg, partial [Capsella rubella]                                                                                                                                                                                                                                                                                                    | 216 | 253 | 9.00E-76  | 117.1 | 69.4 | 73.1  | hypothetical protein CARUB_v10014458mg, partial           | gbpln | Capsella rubella     | AT3G06790.2   Symbols:   plastid developmental protein DAG, putative   chr3:2144564-2145743 REVERSE LENGTH=244                                                                                                                                                                                                                            | 216 | 244 | 1.00E-73  | 113.0 | 65.7 | 69.4 |
| Rsa1.0_00030.1.g1898.t1 | ref XP_002882496.1  hypothetical protein ARALYDRAFT_478003 [Arabidopsis lyrata subsp. lyrata]<br>gi 297328336 gb EFH58755.1  hypothetical protein ARALYDRAFT_478003 [Arabidopsis lyrata subsp. lyrata]                                                                                                                                                                               | 187 | 187 | 2.00E-70  | 100.0 | 78.6 | 88.2  | hypothetical protein ARALYDRAFT_478003                    | gbpln | Arabidopsis lyrata   | AT3G06840.1   Symbols:   unknown protein; BEST Arabidopsis thaliana protein match is: unknown protein (TAIR:AT5G49170.1); Has 33 Blast hits to 33 proteins in 9 species: Archae - 0; Bacteria - 0; Metazoa - 0; Fungi - 0; Plants - 33; Viruses - 0; Other Eukaryotes - 0 (source: NCBI BLINK).   chr3:2156830-2157624 FORWARD LENGTH=187 | 187 | 187 | 3.00E-72  | 100.0 | 80.2 | 88.8 |
| Rsa1.0_00030.1.g1899.t3 | ref XP_002884612.1  DIN3/LTA1 [Arabidopsis lyrata subsp. lyrata]<br>gi 297330452 gb EFH60871.1  DIN3/LTA1 [Arabidopsis lyrata subsp. lyrata]                                                                                                                                                                                                                                         | 229 | 484 | 1.00E-65  | 211.4 | 68.1 | 73.4  | DIN3/LTA1                                                 | gbpln | Arabidopsis lyrata   | AT3G06850.2   Symbols:   BCE2, LTA1, DIN3   2-oxoacid dehydrogenases acyltransferase family protein   chr3:2158212-2160465 REVERSE LENGTH=483                                                                                                                                                                                             | 229 | 483 | 2.00E-64  | 210.9 | 65.5 | 72.1 |



|                         |                                                                                                                                                                                                                                                                                                                                                                                                                                                                                                                                |      |      |           |       |      |      |                                        |       |                      |                                                                                                                                                                                                                                                                                                                                              |      |      |           |       |      |      |
|-------------------------|--------------------------------------------------------------------------------------------------------------------------------------------------------------------------------------------------------------------------------------------------------------------------------------------------------------------------------------------------------------------------------------------------------------------------------------------------------------------------------------------------------------------------------|------|------|-----------|-------|------|------|----------------------------------------|-------|----------------------|----------------------------------------------------------------------------------------------------------------------------------------------------------------------------------------------------------------------------------------------------------------------------------------------------------------------------------------------|------|------|-----------|-------|------|------|
| Rsa1.0_00030.1.g1909.t1 | ref[XP_002884625.1] predicted protein [Arabidopsis lyrata subsp. lyrata] gi 297330465 gb EFH60884.1  predicted protein [Arabidopsis lyrata subsp. lyrata]                                                                                                                                                                                                                                                                                                                                                                      | 253  | 265  | 1.00E-116 | 104.7 | 81.8 | 88.9 | predicted protein                      | gbpln | Arabidopsis lyrata   | AT3G07090.1   Symbols:   PPPDE putative thiol peptidase family protein   chr3:2243153-2244476 REVERSE LENGTH=265                                                                                                                                                                                                                             | 253  | 265  | 1.00E-118 | 104.7 | 81.4 | 90.5 |
| Rsa1.0_00030.1.g1910.t1 | ref[NP_187366.2] sec24-like transport protein [Arabidopsis thaliana] gi 78099801 sp Q9SFU0.2 SC24A_ARAT H RecName: Full=Protein transport protein Sec24-like At3g07100 gi 22531076 gb AAM97042.1  putative Sec24-like COPII protein [Arabidopsis thaliana] gi 23197930 gb AAN15492.1  putative Sec24-like COPII protein [Arabidopsis thaliana] gi 332640977 gb AEE74498.1  sec24-like transport protein [Arabidopsis thaliana]                                                                                                 | 1002 | 1038 | 0         | 103.6 | 87.1 | 91.7 | sec24-like transport protein           | gbpln | Arabidopsis thaliana | AT3G07100.1   Symbols: ERM02, SEC24A   Sec23/Sec24 protein transport family protein   chr3:2245689-2250077 REVERSE LENGTH=1038                                                                                                                                                                                                               | 1002 | 1038 | 0         | 103.6 | 87.1 | 91.7 |
| Rsa1.0_00030.1.g1911.t1 | ref[NP_187368.1] RING/U-box domain-containing protein [Arabidopsis thaliana] gi 6642653 gb AAF20234.1 AC012395.21 putative RING zinc finger protein [Arabidopsis thaliana] gi 56381891 gb AAV85664.1  At3g07120 [Arabidopsis thaliana] gi 58531344 gb AAW78594.1  At3g07120 [Arabidopsis thaliana] gi 332640980 gb AEE74501.1  RING/U-box domain-containing protein [Arabidopsis thaliana]                                                                                                                                     | 348  | 360  | 1.00E-107 | 103.4 | 72.7 | 82.5 | RING/U-box domain-containing protein   | gbpln | Arabidopsis thaliana | AT3G07120.1   Symbols:   RING/U-box superfamily protein   chr3:2254560-2255642 FORWARD LENGTH=360                                                                                                                                                                                                                                            | 348  | 360  | 1.00E-109 | 103.4 | 72.7 | 82.5 |
| Rsa1.0_00030.1.g1912.t1 | gb EOA30308.1  hypothetical protein CARUB_v10013434mg [Capsella rubella]                                                                                                                                                                                                                                                                                                                                                                                                                                                       | 541  | 532  | 0         | 98.3  | 76.9 | 86.0 | hypothetical protein CARUB_v10013434mg | gbpln | Capsella rubella     | AT3G07130.1   Symbols: ATPAP15, PAP15   purple acid phosphatase 15   chr3:2255763-2257981 REVERSE LENGTH=532                                                                                                                                                                                                                                 | 541  | 532  | 0         | 98.3  | 76.9 | 86.0 |
| Rsa1.0_00030.1.g1913.t1 | ref[NP_187372.5] callose synthase [Arabidopsis thaliana] gi 378405154 sp Q9SFU6.2 CALS9_ARATH RecName: Full=Callose synthase 9; AltName: Full=1,3-beta-glucan synthase; AltName: Full=Protein GLUCAN SYNTHASE-LIKE 10 gi 332640985 gb AEE74506.1  callose synthase 10 [Arabidopsis thaliana]                                                                                                                                                                                                                                   | 1864 | 1890 | 0         | 101.4 | 80.5 | 88.1 | callose synthase                       | gbpln | Arabidopsis thaliana | AT3G07160.1   Symbols: ATGSL10, gsl10, CALS9   glucan synthase-like 10   chr3:2265142-2273983 REVERSE LENGTH=1890                                                                                                                                                                                                                            | 1864 | 1890 | 0         | 101.4 | 80.5 | 88.1 |
| Rsa1.0_00030.1.g1914.t1 | gb EOA31542.1  hypothetical protein CARUB_v10014744mg [Capsella rubella]                                                                                                                                                                                                                                                                                                                                                                                                                                                       | 154  | 183  | 8.00E-38  | 118.8 | 54.5 | 62.3 | hypothetical protein CARUB_v10014744mg | gbpln | Capsella rubella     | AT3G07200.2   Symbols:   RING/U-box superfamily protein   chr3:2291343-2292223 FORWARD LENGTH=182                                                                                                                                                                                                                                            | 154  | 182  | 2.00E-38  | 118.2 | 53.2 | 62.3 |
| Rsa1.0_00030.1.g1915.t1 | ref[XP_002884637.1] hypothetical protein ARALYDRAFT_340917 [Arabidopsis lyrata subsp. lyrata] gi 297330477 gb EFH60896.1  hypothetical protein ARALYDRAFT_340917 [Arabidopsis lyrata subsp. lyrata]                                                                                                                                                                                                                                                                                                                            | 421  | 286  | 3.00E-77  | 67.9  | 41.3 | 47.7 | hypothetical protein ARALYDRAFT_340917 | gbpln | Arabidopsis lyrata   | AT3G07250.1   Symbols:   nuclear transport factor 2 (NTF2) family protein / RNA recognition motif (RRM)-containing protein   chr3:2300579-2308305 REVERSE LENGTH=1294                                                                                                                                                                        | 421  | 1294 | 2.00E-71  | 307.4 | 38.5 | 45.6 |
| Rsa1.0_00031.1.g1916.t1 | #                                                                                                                                                                                                                                                                                                                                                                                                                                                                                                                              | #    | #    | #         | #     | #    | #    | -                                      | ----  | ----                 | #                                                                                                                                                                                                                                                                                                                                            | #    | #    | #         | #     | #    | #    |
| Rsa1.0_00031.1.g1917.t1 | ref[XP_002878467.1] hypothetical protein ARALYDRAFT_907836 [Arabidopsis lyrata subsp. lyrata] gi 297324305 gb EFH54726.1  hypothetical protein ARALYDRAFT_907836 [Arabidopsis lyrata subsp. lyrata]                                                                                                                                                                                                                                                                                                                            | 285  | 380  | 3.00E-91  | 133.3 | 76.5 | 84.2 | hypothetical protein ARALYDRAFT_907836 | gbpln | Arabidopsis lyrata   | AT3G62630.1   Symbols:   Protein of unknown function (DUF1645)   chr3:23163937-23165079 REVERSE LENGTH=380                                                                                                                                                                                                                                   | 285  | 380  | 3.00E-92  | 133.3 | 75.4 | 82.8 |
| Rsa1.0_00031.1.g1918.t1 | gb AAD32898.1  putative retroelement pol polyprotein [Arabidopsis thaliana]                                                                                                                                                                                                                                                                                                                                                                                                                                                    | 1366 | 1307 | 0         | 95.7  | 59.7 | 73.9 | putative retroelement pol polyprotein  | gbpln | Arabidopsis thaliana | AT4G23160.1   Symbols: CRK8   cysteine-rich RLK (RECEPTOR-like protein kinase) 8   chr4:12129485-12134086 FORWARD LENGTH=1262                                                                                                                                                                                                                | 1366 | 1262 | 1.00E-100 | 92.4  | 14.2 | 22.5 |
| Rsa1.0_00031.1.g1919.t1 | ref[NP_191824.1] uncharacterized protein [Arabidopsis thaliana] gi 42572765 ref NP_974478.1  uncharacterized protein [Arabidopsis thaliana] gi 7362745 emb CAB83115.1  putative protein [Arabidopsis thaliana] gi 15450964 gb AAK96753.1  putative protein [Arabidopsis thaliana] gi 17978723 gb AAL47355.1  putative protein [Arabidopsis thaliana] gi 332646854 gb AEE80375.1  uncharacterized protein AT3G62650 [Arabidopsis thaliana] gi 332646855 gb AEE80376.1  uncharacterized protein AT3G62650 [Arabidopsis thaliana] | 147  | 152  | 5.00E-48  | 103.4 | 75.5 | 83.7 | uncharacterized protein                | gbpln | Arabidopsis thaliana | AT3G62650.1   Symbols:   unknown protein; BEST Arabidopsis thaliana protein match is: unknown protein (TAIR:AT2G47485.1); Has 57 Blast hits to 57 proteins in 13 species: Archae - 0; Bacteria - 0; Metazoa - 0; Fungi - 0; Plants - 57; Viruses - 0; Other Eukaryotes - 0 (source: NCBI BLink).   chr3:23168531-23168989 FORWARD LENGTH=152 | 147  | 152  | 1.00E-50  | 103.4 | 75.5 | 83.7 |

| Rsa1.0_00031.1.g1920.t1 | #                                                                                                                                                                                                                                                                                                                                                                                                                                                                                                                                                                                                                                                                                                                                                | #   | #   | #         | #     | #    | #    | -                                      | ----  | ----                 | #                                                                                                                             | #   | #   | #         | #     | #    |      |
|-------------------------|--------------------------------------------------------------------------------------------------------------------------------------------------------------------------------------------------------------------------------------------------------------------------------------------------------------------------------------------------------------------------------------------------------------------------------------------------------------------------------------------------------------------------------------------------------------------------------------------------------------------------------------------------------------------------------------------------------------------------------------------------|-----|-----|-----------|-------|------|------|----------------------------------------|-------|----------------------|-------------------------------------------------------------------------------------------------------------------------------|-----|-----|-----------|-------|------|------|
| Rsa1.0_00031.1.g1921.t1 | ref[XP_002891930.1] hypothetical protein ARALYDRAFT_474772 [Arabidopsis lyrata subsp. lyrata] gi 297337772 gb EFH68189.1                                                                                                                                                                                                                                                                                                                                                                                                                                                                                                                                                                                                                         | 300 | 334 | 1.00E-88  | 111.3 | 76.7 | 81.3 | hypothetical protein ARALYDRAFT_474772 | gbpln | Arabidopsis lyrata   | AT1G54970.1   Symbols: ATPRP1, RHS7, PRP1   proline-rich protein 1   chr1:20505000-20506238 FORWARD LENGTH=335                | 300 | 335 | 2.00E-90  | 111.7 | 74.3 | 80.7 |
| Rsa1.0_00031.1.g1922.t1 | gb AAF64548.1 AF110985.1 proline-rich protein 1 [Arabidopsis thaliana]                                                                                                                                                                                                                                                                                                                                                                                                                                                                                                                                                                                                                                                                           | 322 | 335 | 2.00E-25  | 104.0 | 39.8 | 43.2 | proline-rich protein 1                 | gbpln | Arabidopsis thaliana | AT1G54970.1   Symbols: ATPRP1, RHS7, PRP1   proline-rich protein 1   chr1:20505000-20506238 FORWARD LENGTH=335                | 322 | 335 | 3.00E-27  | 104.0 | 37.3 | 41.0 |
| Rsa1.0_00031.1.g1923.t1 | ref[NP_191830.1] glycosyl hydrolase-like protein [Arabidopsis thaliana] gi 7362751 emb CAB83121.1  beta-D-glucan exohydrolase-like protein [Arabidopsis thaliana] gi 17065160 gb AAL32734.1  beta-D-glucan exohydrolase-like protein [Arabidopsis thaliana] gi 20259922 gb AAM13308.1  beta-D-glucan exohydrolase-like protein [Arabidopsis thaliana] gi 332646861 gb AEE80382.1  glycosyl hydrolase-like protein [Arabidopsis thaliana]                                                                                                                                                                                                                                                                                                         | #   | #   | #         | #     | #    | #    | -                                      | ----  | ----                 | #                                                                                                                             | #   | #   | #         | #     | #    |      |
| Rsa1.0_00031.1.g1924.t1 | ref[NP_191831.1] xyloglucan 6-xylosyltransferase [Arabidopsis thaliana] gi 79316129 ref NP_001030917.1  xyloglucan 6-xylosyltransferase [Arabidopsis thaliana] gi 46577293 sp Q9LZJ3.1 XT1_ARATH RecName: Full=Xyloglucan 6-xylosyltransferase; Short=AtXT1 gi 15983426 gb AAL11581.1 AF424587.1 AT3G62720/F26K9.150 [Arabidopsis thaliana] gi 7362752 emb CAB83122.1  alpha-galactosyltransferase-like protein [Arabidopsis thaliana] gi 25141201 gb AAN73295.1  At3g62720/F26K9.150 [Arabidopsis thaliana] gi 222424476 dbj BAH20193.1  AT3G62720 [Arabidopsis thaliana] gi 332646862 gb AEE80383.1  xyloglucan 6-xylosyltransferase [Arabidopsis thaliana] gi 332646863 gb AEE80384.1  xyloglucan 6-xylosyltransferase [Arabidopsis thaliana] | 642 | 650 | 0         | 101.2 | 82.1 | 89.1 | glycosyl hydrolase-like protein        | gbpln | Arabidopsis thaliana | AT3G62710.1   Symbols:   Glycosyl hydrolase family protein   chr3:23197739-23200559 REVERSE LENGTH=650                        | 642 | 650 | 0         | 101.2 | 82.1 | 89.1 |
| Rsa1.0_00031.1.g1925.t1 | ref[NP_191831.1] xyloglucan 6-xylosyltransferase [Arabidopsis thaliana] gi 79316129 ref NP_001030917.1  xyloglucan 6-xylosyltransferase [Arabidopsis thaliana] gi 46577293 sp Q9LZJ3.1 XT1_ARATH RecName: Full=Xyloglucan 6-xylosyltransferase; Short=AtXT1 gi 15983426 gb AAL11581.1 AF424587.1 AT3G62720/F26K9.150 [Arabidopsis thaliana] gi 7362752 emb CAB83122.1  alpha-galactosyltransferase-like protein [Arabidopsis thaliana] gi 25141201 gb AAN73295.1  At3g62720/F26K9.150 [Arabidopsis thaliana] gi 222424476 dbj BAH20193.1  AT3G62720 [Arabidopsis thaliana] gi 332646862 gb AEE80383.1  xyloglucan 6-xylosyltransferase [Arabidopsis thaliana] gi 332646863 gb AEE80384.1  xyloglucan 6-xylosyltransferase [Arabidopsis thaliana] | 463 | 460 | 0         | 99.4  | 89.4 | 93.1 | xyloglucan 6-xylosyltransferase        | gbpln | Arabidopsis thaliana | AT3G62720.2   Symbols: ATXT1, XT1, XXT1   xylosyltransferase 1   chr3:23201326-23202708 FORWARD LENGTH=460                    | 463 | 460 | 0         | 99.4  | 89.4 | 93.1 |
| Rsa1.0_00031.1.g1926.t1 | dbj BAJ34035.1  unnamed protein product [Thellungiella halophila]                                                                                                                                                                                                                                                                                                                                                                                                                                                                                                                                                                                                                                                                                | 498 | 506 | 0         | 101.6 | 77.9 | 86.7 | unnamed protein product                | ----  | ----                 | AT4G27830.1   Symbols: BGLU10   beta glucosidase 10   chr4:13861794-13864489 REVERSE LENGTH=508                               | 498 | 508 | 0         | 102.0 | 76.7 | 88.2 |
| Rsa1.0_00031.1.g1927.t1 | dbj BAJ34035.1  unnamed protein product [Thellungiella halophila]                                                                                                                                                                                                                                                                                                                                                                                                                                                                                                                                                                                                                                                                                | 501 | 506 | 0         | 101.0 | 76.0 | 84.0 | unnamed protein product                | ----  | ----                 | AT4G27830.1   Symbols: BGLU10   beta glucosidase 10   chr4:13861794-13864489 REVERSE LENGTH=508                               | 501 | 508 | 0         | 101.4 | 73.1 | 84.8 |
| Rsa1.0_00031.1.g1928.t1 | ref[NP_191835.1] Glutathione S-transferase-like protein [Arabidopsis thaliana] gi 75335711 sp Q9LZ19.1 GSTFD_ARATH RecName: Full=Glutathione S-transferase F13; Short=ATGSTF13; AltName: Full=GST class-phi member 13 gi 7362756 emb CAB83126.1  Glutathione transferase III-like protein [Arabidopsis thaliana] gi 332646867 gb AEE80388.1  glutathione S-transferase F13 [Arabidopsis thaliana]                                                                                                                                                                                                                                                                                                                                                | 219 | 219 | 1.00E-115 | 100.0 | 90.0 | 95.9 | Glutathione S-transferase-like protein | gbpln | Arabidopsis thaliana | AT3G62760.1   Symbols: ATGSTF13   Glutathione S-transferase family protein   chr3:23217425-23218246 REVERSE LENGTH=219        | 219 | 219 | 1.00E-118 | 100.0 | 90.0 | 95.9 |
| Rsa1.0_00031.1.g1929.t1 | gb EOA24065.1  hypothetical protein CARUB_v10017285mg [Capsella rubella]                                                                                                                                                                                                                                                                                                                                                                                                                                                                                                                                                                                                                                                                         | 421 | 435 | 0         | 103.3 | 88.8 | 93.6 | hypothetical protein CARUB_v10017285mg | gbpln | Capsella rubella     | AT3G62770.1   Symbols: AtATG18a   Transducin/WD40 repeat-like superfamily protein   chr3:23218858-23221110 REVERSE LENGTH=425 | 421 | 425 | 0         | 101.0 | 85.7 | 90.7 |

|                         |                                                                                                                                                                                                                                                                                                                                                                                                                                                                                                                                                                                                                                                                                                                                                                                                                                                                                                            |     |     |           |       |       |       |                                                           |       |                      |                                                                                                                                                                         |     |     |           |       |       |       |
|-------------------------|------------------------------------------------------------------------------------------------------------------------------------------------------------------------------------------------------------------------------------------------------------------------------------------------------------------------------------------------------------------------------------------------------------------------------------------------------------------------------------------------------------------------------------------------------------------------------------------------------------------------------------------------------------------------------------------------------------------------------------------------------------------------------------------------------------------------------------------------------------------------------------------------------------|-----|-----|-----------|-------|-------|-------|-----------------------------------------------------------|-------|----------------------|-------------------------------------------------------------------------------------------------------------------------------------------------------------------------|-----|-----|-----------|-------|-------|-------|
| Rsa1.0_00031.1.g1930.t1 | ref NP_191837.1  calcium-dependent lipid-binding domain-containing protein [Arabidopsis thaliana]<br>gi 7362758 emb CAB83128.1  shock protein SRC2-like [Arabidopsis thaliana]<br>gi 42600565 gb AS21129.1  At3g62780 [Arabidopsis thaliana]<br>gi 45773884 gb AS576746.1  At3g62780 [Arabidopsis thaliana]<br>gi 332646870 gb AEE80391.1  calcium-dependent lipid-binding domain-containing protein [Arabidopsis thaliana]                                                                                                                                                                                                                                                                                                                                                                                                                                                                                | 273 | 298 | 3.00E-99  | 109.2 | 75.8  | 80.2  | calcium-dependent lipid-binding domain-containing protein | gbpln | Arabidopsis thaliana | AT3G62780.1   Symbols:   Calcium-dependent lipid-binding (CaLB domain) family protein   chr3:23222029-23222925 REVERSE LENGTH=298                                       | 273 | 298 | 1.00E-102 | 109.2 | 75.8  | 80.2  |
| Rsa1.0_00031.1.g1931.t1 | gb EOA24988.1  hypothetical protein CARUB_v10018285mg [Capsella rubella]<br>gi 492560799 gb EOA24989.1  hypothetical protein CARUB_v10018285mg [Capsella rubella]                                                                                                                                                                                                                                                                                                                                                                                                                                                                                                                                                                                                                                                                                                                                          | 106 | 106 | 2.00E-48  | 100.0 | 91.5  | 96.2  | hypothetical protein CARUB_v10018285mg                    | gbpln | Capsella rubella     | AT3G62810.1   Symbols:   complex 1 family protein / LVR family protein   chr3:23227763-23228180 FORWARD LENGTH=106                                                      | 106 | 106 | 4.00E-50  | 100.0 | 90.6  | 96.2  |
| Rsa1.0_00031.1.g1932.t1 | ref NP_191842.1  UDP-glucuronic acid decarboxylase [Arabidopsis thaliana]<br>gi 186511349 ref NP_001118893.1  UDP-glucuronic acid decarboxylase [Arabidopsis thaliana]<br>gi 75335709 sp Q9LZ12.1 UXS2_ARATH<br>RecName: Full=UDP-glucuronic acid decarboxylase 2; AltName: Full=UDP-XYL synthase 2; AltName: Full=UDP-glucuronate decarboxylase 2; Short=UGD; Short=UXS-2; AltName: Full=dTDP-glucose 4-6-dehydratase homolog D18<br>gi 7362763 emb CAB83133.1  dTDP-glucose 4-6-dehydratase homolog D18 [Arabidopsis thaliana]<br>gi 23505953 gb AAN28836.1  At3g62830/F26K9_260 [Arabidopsis thaliana]<br>gi 332646877 gb AEE80398.1  UDP-glucuronic acid decarboxylase [Arabidopsis thaliana]<br>gi 332646878 gb AEE80399.1  UDP-glucuronic acid decarboxylase [Arabidopsis thaliana]                                                                                                                  | 423 | 445 | 0         | 105.2 | 89.6  | 94.1  | UDP-glucuronic acid decarboxylase                         | gbpln | Arabidopsis thaliana | AT3G62830.2   Symbols: UXS2, ATUXS2   NAD(P)-binding Rossmann-fold superfamily protein   chr3:23232539-23235353 FORWARD LENGTH=445                                      | 423 | 445 | 0         | 105.2 | 89.6  | 94.1  |
| Rsa1.0_00031.1.g1933.t4 | ref NP_850477.1  small nuclear ribonucleoprotein D2 [Arabidopsis thaliana]<br>gi 42571273 ref NP_973710.1  small nuclear ribonucleoprotein D2 [Arabidopsis thaliana]<br>gi 145332931 ref NP_001078331.1  small nuclear ribonucleoprotein D2 [Arabidopsis thaliana]<br>gi 7362764 emb CAB83134.1  small nuclear ribonucleoprotein-like protein [Arabidopsis thaliana]<br>gi 28468881 gb AAO44049.1  At2g47640 [Arabidopsis thaliana]<br>gi 110743879 dbj BAE99774.1  putative small nuclear ribonucleoprotein D2 [Arabidopsis thaliana]<br>gi 330255774 gb AEC10868.1  small nuclear ribonucleoprotein D2 [Arabidopsis thaliana]<br>gi 330255775 gb AEC10869.1  small nuclear ribonucleoprotein D2 [Arabidopsis thaliana]<br>gi 332646880 gb AEE80401.1  small nuclear ribonucleoprotein D2 [Arabidopsis thaliana]<br>gi 482563987 gb EOA28177.1  hypothetical protein CARUB_v10024367mg [Capsella rubella] | 104 | 108 | 3.00E-53  | 103.8 | 100.0 | 100.0 | small nuclear ribonucleoprotein D2                        | gbpln | Arabidopsis thaliana | AT3G62840.2   Symbols:   Small nuclear ribonucleoprotein family protein   chr3:23235727-23236615 REVERSE LENGTH=108                                                     | 104 | 108 | 5.00E-56  | 103.8 | 100.0 | 100.0 |
| Rsa1.0_00031.1.g1934.t1 | gb EOA27436.1  hypothetical protein CARUB_v10023573mg [Capsella rubella]                                                                                                                                                                                                                                                                                                                                                                                                                                                                                                                                                                                                                                                                                                                                                                                                                                   | 256 | 338 | 1.00E-141 | 132.0 | 96.9  | 97.7  | hypothetical protein CARUB_v10023573mg                    | gbpln | Capsella rubella     | AT3G62870.1   Symbols:   Ribosomal protein L7Ae/L30e/S12e/Gadd45 family protein   chr3:23242862-23244273 REVERSE LENGTH=256                                             | 256 | 256 | 1.00E-140 | 100.0 | 94.1  | 97.3  |
| Rsa1.0_00031.1.g1935.t1 | gb EOA26198.1  hypothetical protein CARUB_v10019636mg [Capsella rubella]                                                                                                                                                                                                                                                                                                                                                                                                                                                                                                                                                                                                                                                                                                                                                                                                                                   | 142 | 134 | 5.00E-50  | 94.4  | 78.2  | 85.9  | hypothetical protein CARUB_v10019636mg                    | gbpln | Capsella rubella     | AT3G62880.2   Symbols: ATOEP16-4   Mitochondrial import inner membrane translocase subunit Tim17/Tim22/Tim23 family protein   chr3:23245103-23246002 REVERSE LENGTH=136 | 142 | 136 | 2.00E-49  | 95.8  | 74.6  | 82.4  |

|                         |                                                                                                                                                                                                                                                                                                                                                                                                                                                                                                                                                                                                                                                                                                                                                                                                                                                                                                                                                     |     |     |           |       |      |       |                                        |       |                      |                                                                                                                                                                                                                                                                                                                                              |     |     |           |       |      |       |
|-------------------------|-----------------------------------------------------------------------------------------------------------------------------------------------------------------------------------------------------------------------------------------------------------------------------------------------------------------------------------------------------------------------------------------------------------------------------------------------------------------------------------------------------------------------------------------------------------------------------------------------------------------------------------------------------------------------------------------------------------------------------------------------------------------------------------------------------------------------------------------------------------------------------------------------------------------------------------------------------|-----|-----|-----------|-------|------|-------|----------------------------------------|-------|----------------------|----------------------------------------------------------------------------------------------------------------------------------------------------------------------------------------------------------------------------------------------------------------------------------------------------------------------------------------------|-----|-----|-----------|-------|------|-------|
| Rsa1.0_00031.1.g1936.t1 | gb[EOA24179.1] hypothetical protein CARUB_v10017414mg [Capsella rubella]                                                                                                                                                                                                                                                                                                                                                                                                                                                                                                                                                                                                                                                                                                                                                                                                                                                                            | 392 | 391 | 1.00E-172 | 99.7  | 78.8 | 86.0  | hypothetical protein CARUB_v10017414mg | gbpln | Capsella rubella     | AT1G21150.1   Symbols:   Mitochondrial transcription termination factor family protein   chr1:7406406-7407578 REVERSE LENGTH=390                                                                                                                                                                                                             | 392 | 390 | 1.00E-124 | 99.5  | 60.2 | 74.7  |
| Rsa1.0_00031.1.g1937.t1 | gb[EOA24095.1] hypothetical protein CARUB_v10017325mg [Capsella rubella]                                                                                                                                                                                                                                                                                                                                                                                                                                                                                                                                                                                                                                                                                                                                                                                                                                                                            | 411 | 422 | 0         | 102.7 | 92.0 | 95.9  | hypothetical protein CARUB_v10017325mg | gbpln | Capsella rubella     | AT3G62910.1   Symbols: APG3   Peptide chain release factor 1   chr3:23257661-23260386 REVERSE LENGTH=422                                                                                                                                                                                                                                     | 411 | 422 | 0         | 102.7 | 91.5 | 95.9  |
| Rsa1.0_00031.1.g1938.t1 | gb[EOA23343.1] hypothetical protein CARUB_v10019414mg [Capsella rubella]                                                                                                                                                                                                                                                                                                                                                                                                                                                                                                                                                                                                                                                                                                                                                                                                                                                                            | 102 | 102 | 2.00E-49  | 100.0 | 93.1 | 98.0  | hypothetical protein CARUB_v10019414mg | gbpln | Capsella rubella     | AT3G62930.1   Symbols:   Thioredoxin superfamily protein   chr3:23261538-23261846 REVERSE LENGTH=102                                                                                                                                                                                                                                         | 102 | 102 | 1.00E-50  | 100.0 | 89.2 | 95.1  |
| Rsa1.0_00031.1.g1939.t1 | ref[XP_002878488.1] hypothetical protein ARALYDRAFT_486799 [Arabidopsis lyrata subsp. lyrata] gi[297324326]gb[EFH54747.1] hypothetical protein ARALYDRAFT_486799 [Arabidopsis lyrata subsp. lyrata] ref[NP_191854.1] glutaredoxin-C11 [Arabidopsis thaliana] gi[297817626]ref[XP_002876696.1] glutaredoxin family protein [Arabidopsis lyrata subsp. lyrata] gi[75264377]sp[Q9LYG6.1]GRC11_ARAT H RecName: Full=Glutaredoxin-C11; Short=AtGrxC11; AltName: Full=Protein ROXY 4 gi[7573424]emb[CAB87740.1]                                                                                                                                                                                                                                                                                                                                                                                                                                           | 314 | 326 | 1.00E-138 | 103.8 | 84.1 | 91.1  | hypothetical protein ARALYDRAFT_486799 | gbpln | Arabidopsis lyrata   | AT3G62940.3   Symbols:   Cysteine proteinases superfamily protein   chr3:23263106-23264245 REVERSE LENGTH=332                                                                                                                                                                                                                                | 314 | 332 | 1.00E-138 | 105.7 | 86.9 | 93.0  |
| Rsa1.0_00031.1.g1940.t1 | glutaredoxin-like protein [Arabidopsis thaliana] gi[50253460]gb[AAT71932.1] At3g62950 [Arabidopsis thaliana] gi[51972084]gb[AU15146.1] At3g62950 [Arabidopsis thaliana] gi[226348186]gb[ACO50409.1] glutaredoxin [Arabidopsis thaliana] gi[297322534]gb[EFH52955.1] glutaredoxin family protein [Arabidopsis lyrata subsp. lyrata] gi[332646895]gb[AEE80416.1] glutaredoxin-C11 [Arabidopsis thaliana] ref[NP_191855.1] glutaredoxin-C14 [Arabidopsis thaliana] gi[75181054]sp[Q9LYC5.1]GRC14_ARAT H RecName: Full=Glutaredoxin-C14; Short=AtGrxC14; AltName: Full=Protein ROXY 8 gi[7573425]emb[CAB87741.1] glutaredoxin-like protein [Arabidopsis thaliana] gi[88900350]gb[ABD57487.1] At3g62960 [Arabidopsis thaliana] gi[226348194]gb[ACO50413.1] glutaredoxin [Arabidopsis thaliana] gi[332646896]gb[AEE80417.1] glutaredoxin-C14 [Arabidopsis thaliana] gi[482560809]gb[EOA25000.1] hypothetical protein CARUB_v10018297mg [Capsella rubella] | 103 | 103 | 4.00E-53  | 100.0 | 99.0 | 100.0 | glutaredoxin-C11                       | gbpln | Arabidopsis lyrata   | AT3G62950.1   Symbols:   Thioredoxin superfamily protein   chr3:23266303-23266614 FORWARD LENGTH=103                                                                                                                                                                                                                                         | 103 | 103 | 6.00E-56  | 100.0 | 99.0 | 100.0 |
| Rsa1.0_00031.1.g1941.t1 | glutaredoxin-like protein [Arabidopsis thaliana] gi[88900350]gb[ABD57487.1] At3g62960 [Arabidopsis thaliana] gi[226348194]gb[ACO50413.1] glutaredoxin [Arabidopsis thaliana] gi[332646896]gb[AEE80417.1] glutaredoxin-C14 [Arabidopsis thaliana] gi[482560809]gb[EOA25000.1] hypothetical protein CARUB_v10018297mg [Capsella rubella]                                                                                                                                                                                                                                                                                                                                                                                                                                                                                                                                                                                                              | 102 | 102 | 1.00E-51  | 100.0 | 97.1 | 98.0  | glutaredoxin-C14                       | gbpln | Arabidopsis thaliana | AT3G62960.1   Symbols:   Thioredoxin superfamily protein   chr3:23268780-23269088 FORWARD LENGTH=102                                                                                                                                                                                                                                         | 102 | 102 | 2.00E-54  | 100.0 | 97.1 | 98.0  |
| Rsa1.0_00031.1.g1942.t1 | ref[NP_001190481.1] phosphatidylinositol glycan, class X [Arabidopsis thaliana] gi[332008052]gb[AED95435.1] uncharacterized protein AT5G46850 [Arabidopsis thaliana]                                                                                                                                                                                                                                                                                                                                                                                                                                                                                                                                                                                                                                                                                                                                                                                | 132 | 325 | 5.00E-28  | 246.2 | 53.0 | 65.9  | phosphatidylinositol glycan, class X   | gbpln | Arabidopsis thaliana | AT5G46850.2   Symbols:   FUNCTIONS IN: molecular_function unknown; INVOLVED IN: GPI anchor biosynthetic process; LOCATED IN: endoplasmic reticulum membrane; EXPRESSED IN: 22 plant structures; EXPRESSED DURING: 13 growth stages; CONTAINS InterPro DOMAIN/s: PIG-X/PBN1 (InterPro:IPR013233).   chr5:19010714-19012010 FORWARD LENGTH=325 | 132 | 325 | 1.00E-30  | 246.2 | 53.0 | 65.9  |
| Rsa1.0_00031.1.g1943.t1 | gb[EOA23690.1] hypothetical protein CARUB_v10016894mg [Capsella rubella]                                                                                                                                                                                                                                                                                                                                                                                                                                                                                                                                                                                                                                                                                                                                                                                                                                                                            | 597 | 594 | 0         | 99.5  | 93.6 | 96.5  | hypothetical protein CARUB_v10016894mg | gbpln | Capsella rubella     | AT3G62980.1   Symbols: TIR1   F-box/RNI-like superfamily protein   chr3:23273479-23276181 REVERSE LENGTH=594                                                                                                                                                                                                                                 | 597 | 594 | 0         | 99.5  | 92.6 | 96.5  |
| Rsa1.0_00031.1.g1944.t1 | # # # # # # # # # #                                                                                                                                                                                                                                                                                                                                                                                                                                                                                                                                                                                                                                                                                                                                                                                                                                                                                                                                 | #   | #   | #         | #     | #    | #     | -                                      | ----  | ----                 | # # # # # # #                                                                                                                                                                                                                                                                                                                                | #   | #   | #         | #     | #    | #     |
| Rsa1.0_00031.1.g1945.t1 | gb[EOA24114.1] hypothetical protein CARUB_v10017347mg [Capsella rubella]                                                                                                                                                                                                                                                                                                                                                                                                                                                                                                                                                                                                                                                                                                                                                                                                                                                                            | 414 | 413 | 0         | 99.8  | 90.1 | 96.9  | hypothetical protein CARUB_v10017347mg | gbpln | Capsella rubella     | AT3G63000.1   Symbols: NPL41   NPL4-like protein 1   chr3:23283836-23285357 FORWARD LENGTH=413                                                                                                                                                                                                                                               | 414 | 413 | 0         | 99.8  | 90.3 | 96.9  |
| Rsa1.0_00031.1.g1946.t1 | gb[ADT78692.1] gibberellin receptor 1B [Brassica napus]                                                                                                                                                                                                                                                                                                                                                                                                                                                                                                                                                                                                                                                                                                                                                                                                                                                                                             | 364 | 358 | 0         | 98.4  | 91.8 | 95.6  | gibberellin receptor 1B                | gbpln | Brassica napus       | AT3G63010.1   Symbols: ATGID1B, GID1B   alpha/beta-Hydrolases superfamily protein   chr3:23289717-23290998 FORWARD LENGTH=358                                                                                                                                                                                                                | 364 | 358 | 0         | 98.4  | 87.6 | 93.1  |

|                         |                                                                                                                                                                                                                    |      |      |           |       |      |      |                                                          |       |                      |                                                                                                                                                                                                                                                                                                                                                                              |      |      |           |       |      |      |
|-------------------------|--------------------------------------------------------------------------------------------------------------------------------------------------------------------------------------------------------------------|------|------|-----------|-------|------|------|----------------------------------------------------------|-------|----------------------|------------------------------------------------------------------------------------------------------------------------------------------------------------------------------------------------------------------------------------------------------------------------------------------------------------------------------------------------------------------------------|------|------|-----------|-------|------|------|
| Rsa1.0_00031.1.g1947.t1 | ref[XP_002876703.1] methyl-CpG-binding domain 4 [Arabidopsis lyrata subsp. lyrata]<br>gi 297322541 gb EFH52962.1  methyl-CpG-binding domain 4 [Arabidopsis lyrata subsp. lyrata]                                   | 327  | 182  | 7.00E-71  | 55.7  | 37.9 | 42.8 | methyl-CpG-binding domain 4                              | gbpln | Arabidopsis lyrata   | AT3G63030.1   Symbols: MBD4   methyl-CpG-binding domain 4   chr3:23295394-23296425 FORWARD LENGTH=186                                                                                                                                                                                                                                                                        | 327  | 186  | 1.00E-71  | 56.9  | 36.4 | 41.6 |
| Rsa1.0_00031.1.g1948.t1 | gb EOA25199.1  hypothetical protein CARUB_v10018512mg [Capsella rubella]                                                                                                                                           | 117  | 179  | 1.00E-12  | 153.0 | 41.0 | 52.1 | hypothetical protein CARUB_v10018512mg                   | gbpln | Capsella rubella     | AT3G63040.1   Symbols:   unknown protein; FUNCTIONS IN: molecular_function unknown; INVOLVED IN: biological_process unknown; LOCATED IN: endomembrane system; Has 5 Blast hits to 5 proteins in 2 species: Archae - 0; Bacteria - 0; Metazoa - 0; Fungi - 0; Plants - 5; Viruses - 0; Other Eukaryotes - 0 (source: NCBI BLINK).   chr3:23296646-23297209 REVERSE LENGTH=187 | 117  | 187  | 4.00E-14  | 159.8 | 40.2 | 49.6 |
| Rsa1.0_00031.1.g1949.t1 | ref[XP_002878491.1] hypothetical protein ARALYDRAFT_486808 [Arabidopsis lyrata subsp. lyrata]<br>gi 297324329 gb EFH54750.1  hypothetical protein ARALYDRAFT_486808 [Arabidopsis lyrata subsp. lyrata]             | 131  | 135  | 2.00E-23  | 103.1 | 55.7 | 70.2 | hypothetical protein ARALYDRAFT_486808                   | gbpln | Arabidopsis lyrata   | AT3G63050.1   Symbols:   unknown protein; BEST Arabidopsis thaliana protein match is: unknown protein (TAIR:AT2G48075.1); Has 30201 Blast hits to 17322 proteins in 780 species: Archae - 12; Bacteria - 1396; Metazoa - 17338; Fungi - 3422; Plants - 5037; Viruses - 0; Other Eukaryotes - 2996 (source: NCBI BLINK).   chr3:23297950-23298372 REVERSE LENGTH=140          | 131  | 140  | 9.00E-26  | 106.9 | 56.5 | 70.2 |
| Rsa1.0_00031.1.g1950.t1 | gb AAF79749.1 AC009317.8 T30E16.12 [Arabidopsis thaliana]                                                                                                                                                          | 351  | 341  | 1.00E-100 | 97.2  | 54.7 | 68.4 | T30E16.12                                                | gbpln | Arabidopsis thaliana | AT1G59560.1   Symbols: ZCF61, DAL2   E3 Ubiquitin ligase family protein   chr1:21881741-21883632 FORWARD LENGTH=338                                                                                                                                                                                                                                                          | 351  | 338  | 1.00E-101 | 96.3  | 54.7 | 68.4 |
| Rsa1.0_00031.1.g1951.t1 | gb EOA25934.1  hypothetical protein CARUB_v10019315mg [Capsella rubella]                                                                                                                                           | 1583 | 1353 | 0         | 85.5  | 60.7 | 68.3 | hypothetical protein CARUB_v10019315mg                   | gbpln | Capsella rubella     | AT2G48160.1   Symbols:   Tudor/PWP/MBT domain-containing protein   chr2:19689784-19696584 REVERSE LENGTH=1366                                                                                                                                                                                                                                                                | 1583 | 1366 | 0         | 86.3  | 51.0 | 60.5 |
| Rsa1.0_00031.1.g1952.t1 | ref NP_001078333.1  tetratricopeptide repeat-containing protein-like protein [Arabidopsis thaliana]<br>gi 332646914 gb AEE80435.1  tetratricopeptide repeat-containing protein-like protein [Arabidopsis thaliana] | 258  | 250  | 6.00E-16  | 96.9  | 15.9 | 17.8 | tetratricopeptide repeat-containing protein-like protein | gbpln | Arabidopsis thaliana | AT3G63095.1   Symbols:   Tetratricopeptide repeat (TPR)-like superfamily protein   chr3:23315506-23316258 FORWARD LENGTH=250                                                                                                                                                                                                                                                 | 258  | 250  | 2.00E-18  | 96.9  | 15.9 | 17.8 |
| Rsa1.0_00031.1.g1953.t1 | ref[XP_002878496.1] ATIPT3 [Arabidopsis lyrata subsp. lyrata]<br>gi 297324334 gb EFH54755.1  ATIPT3 [Arabidopsis lyrata subsp. lyrata]                                                                             | 334  | 336  | 1.00E-167 | 100.6 | 86.8 | 92.8 | ATIPT3                                                   | gbpln | Arabidopsis lyrata   | AT3G63110.1   Symbols: ATIPT3, IPT3   isopenityltransferase 3   chr3:23318437-23319447 REVERSE LENGTH=336                                                                                                                                                                                                                                                                    | 334  | 336  | 1.00E-168 | 100.6 | 85.0 | 93.1 |
| Rsa1.0_00031.1.g1954.t1 | gb EOA25999.1  hypothetical protein CARUB_v10019395mg [Capsella rubella]                                                                                                                                           | 528  | 535  | 0         | 101.3 | 80.3 | 89.0 | hypothetical protein CARUB_v10019395mg                   | gbpln | Capsella rubella     | AT3G63130.2   Symbols: RANGAP1   RAN GTPase activating protein 1   chr3:23325108-23326715 FORWARD LENGTH=535                                                                                                                                                                                                                                                                 | 528  | 535  | 0         | 101.3 | 79.5 | 88.1 |
| Rsa1.0_00031.1.g1955.t1 | gb EOA24136.1  hypothetical protein CARUB_v10017370mg [Capsella rubella]                                                                                                                                           | 449  | 404  | 0         | 90.0  | 78.4 | 81.3 | hypothetical protein CARUB_v10017370mg                   | gbpln | Capsella rubella     | AT3G63140.1   Symbols: CSP41A   chloroplast stem-loop binding protein of 41 kDa   chr3:23327006-23328620 REVERSE LENGTH=406                                                                                                                                                                                                                                                  | 449  | 406  | 0         | 90.4  | 78.8 | 82.0 |
| Rsa1.0_00031.1.g1956.t1 | ref NP_567139.1  MIRO-related GTP-ase 2 [Arabidopsis thaliana]<br>gi 332646920 gb AEE80441.1  MIRO-related GTP-ase 2 [Arabidopsis thaliana]                                                                        | 646  | 643  | 0         | 99.5  | 90.4 | 94.9 | MIRO-related GTP-ase 2                                   | gbpln | Arabidopsis thaliana | AT3G63150.1   Symbols: MIRO2, ATCBG   MIRO-related GTP-ase 2   chr3:23329200-23332692 REVERSE LENGTH=643                                                                                                                                                                                                                                                                     | 646  | 643  | 0         | 99.5  | 90.4 | 94.9 |
| Rsa1.0_00031.1.g1957.t1 | ref[XP_002876711.1] hypothetical protein ARALYDRAFT_486819 [Arabidopsis lyrata subsp. lyrata]<br>gi 297322549 gb EFH52970.1  hypothetical protein ARALYDRAFT_486819 [Arabidopsis lyrata subsp. lyrata]             | 283  | 279  | 1.00E-132 | 98.6  | 83.0 | 90.5 | hypothetical protein ARALYDRAFT_486819                   | gbpln | Arabidopsis lyrata   | AT3G63170.1   Symbols:   Chalcone-flavanone isomerase family protein   chr3:23334675-23335993 FORWARD LENGTH=279                                                                                                                                                                                                                                                             | 283  | 279  | 1.00E-128 | 98.6  | 83.7 | 90.8 |
| Rsa1.0_00032.1.g1958.t2 | #                                                                                                                                                                                                                  | #    | #    | #         | #     | #    | -    | ----                                                     | ----  | ----                 | #                                                                                                                                                                                                                                                                                                                                                                            | #    | #    | #         | #     | #    | #    |
| Rsa1.0_00032.1.g1959.t2 | ref[XP_002882851.1] hypothetical protein ARALYDRAFT_478784 [Arabidopsis lyrata subsp. lyrata]<br>gi 297328691 gb EFH59110.1  hypothetical protein ARALYDRAFT_478784 [Arabidopsis lyrata subsp. lyrata]             | 498  | 507  | 0         | 101.8 | 81.7 | 89.2 | hypothetical protein ARALYDRAFT_478784                   | gbpln | Arabidopsis lyrata   | AT3G13810.1   Symbols: AtIDD11, IDD11   indeterminate(D)-domain 11   chr3:4544941-4547300 FORWARD LENGTH=513                                                                                                                                                                                                                                                                 | 498  | 513  | 0         | 103.0 | 80.7 | 87.3 |
| Rsa1.0_00032.1.g1960.t1 | gb EOA31706.1  hypothetical protein CARUB_v10014912mg [Capsella rubella]                                                                                                                                           | 70   | 130  | 2.00E-13  | 185.7 | 88.6 | 90.0 | hypothetical protein CARUB_v10014912mg                   | gbpln | Capsella rubella     | #                                                                                                                                                                                                                                                                                                                                                                            | #    | #    | #         | #     | #    | #    |



|                         |                                                                                                                                                                                                                                                                                                                                                                                                                                                                                                                                                                                                                                                                                                                                                                                                                                                                                                                                                                                                                                                                                                                                                                                                                                                                                                    |      |      |           |       |      |      |                                                     |       |                      |                                                                                                                                                            |      |      |           |       |      |      |
|-------------------------|----------------------------------------------------------------------------------------------------------------------------------------------------------------------------------------------------------------------------------------------------------------------------------------------------------------------------------------------------------------------------------------------------------------------------------------------------------------------------------------------------------------------------------------------------------------------------------------------------------------------------------------------------------------------------------------------------------------------------------------------------------------------------------------------------------------------------------------------------------------------------------------------------------------------------------------------------------------------------------------------------------------------------------------------------------------------------------------------------------------------------------------------------------------------------------------------------------------------------------------------------------------------------------------------------|------|------|-----------|-------|------|------|-----------------------------------------------------|-------|----------------------|------------------------------------------------------------------------------------------------------------------------------------------------------------|------|------|-----------|-------|------|------|
| Rsa1.0_00032.1.g1961.t1 | refNP_188001.1  LOB domain-containing protein 22 [Arabidopsis thaliana]<br>gi 29428016 sp Q9LRW1.1 LBD22_ARATH<br>H RecName: Full=LOB domain-containing protein 22; AltName: Full=ASYMMETRIC LEAVES 2-like protein 30; Short=AS2-like protein 30<br>gi 9294609 dbj BAB02910.1  unnamed protein product [Arabidopsis thaliana]<br>gi 219807136 dbj BAH10574.1  ASYMMETRIC LEAVES2-like 30 protein [Arabidopsis thaliana]<br>gi 332641904 gb AEE75425.1  LOB domain-containing protein 22 [Arabidopsis thaliana]<br>refNP_188003.1  Root hair defective 3 GTP-binding protein RHD3 [Arabidopsis thaliana]<br>gi 75279781 sp P93042.1 RHD3_ARATH<br>RecName: Full=Protein ROOT HAIR DEFECTIVE 3; AltName: Full=Protein FRAGILE FIBER 4; AltName: Full=Protein SEY1 homolog 1<br>gi 1839188 gb AA58375.1  root hair defective 3 [Arabidopsis thaliana]<br>gi 20260178 gb AAM12987.1  unknown protein [Arabidopsis thaliana]<br>gi 22136246 gb AAM91201.1  unknown protein [Arabidopsis thaliana]<br>gi 332641908 gb AEE75429.1  Root hair defective 3 GTP-binding protein RHD3 [Arabidopsis thaliana]<br>refXP_002882857.1  structural constituent of ribosome [Arabidopsis lyrata subsp. lyrata]<br>gi 297328697 gb EFH59116.1  structural constituent of ribosome [Arabidopsis lyrata subsp. lyrata] | 259  | 268  | 1.00E-112 | 103.5 | 80.3 | 90.3 | LOB domain-containing protein 22                    | gbpln | Arabidopsis thaliana | AT3G13850.1   Symbols: LBD22   LOB domain-containing protein 22   chr3:4559910-4560716 FORWARD LENGTH=268                                                  | 259  | 268  | 1.00E-115 | 103.5 | 80.3 | 90.3 |
| Rsa1.0_00032.1.g1962.t2 | gi 1839188 gb AA58375.1  root hair defective 3 [Arabidopsis thaliana]<br>gi 20260178 gb AAM12987.1  unknown protein [Arabidopsis thaliana]<br>gi 22136246 gb AAM91201.1  unknown protein [Arabidopsis thaliana]<br>gi 332641908 gb AEE75429.1  Root hair defective 3 GTP-binding protein RHD3 [Arabidopsis thaliana]<br>refXP_002882857.1  structural constituent of ribosome [Arabidopsis lyrata subsp. lyrata]<br>gi 297328697 gb EFH59116.1  structural constituent of ribosome [Arabidopsis lyrata subsp. lyrata]                                                                                                                                                                                                                                                                                                                                                                                                                                                                                                                                                                                                                                                                                                                                                                              | 851  | 802  | 0         | 94.2  | 86.0 | 90.4 | Root hair defective 3 GTP-binding protein RHD3      | gbpln | Arabidopsis thaliana | AT3G13870.1   Symbols: RHD3   Root hair defective 3 GTP-binding protein (RHD3)   chr3:4565762-4571109 REVERSE LENGTH=802                                   | 851  | 802  | 0         | 94.2  | 86.0 | 90.4 |
| Rsa1.0_00032.1.g1963.t1 | refXP_002882857.1  structural constituent of ribosome [Arabidopsis lyrata subsp. lyrata]<br>gi 297328697 gb EFH59116.1  structural constituent of ribosome [Arabidopsis lyrata subsp. lyrata]                                                                                                                                                                                                                                                                                                                                                                                                                                                                                                                                                                                                                                                                                                                                                                                                                                                                                                                                                                                                                                                                                                      | 147  | 147  | 8.00E-65  | 100.0 | 89.1 | 92.5 | structural constituent of ribosome                  | gbpln | Arabidopsis lyrata   | AT3G13882.1   Symbols:   Ribosomal protein L34   chr3:4574600-4575852 FORWARD LENGTH=147                                                                   | 147  | 147  | 4.00E-66  | 100.0 | 87.1 | 91.8 |
| Rsa1.0_00032.1.g1964.t2 | gb EOA32487.1  hypothetical protein CARUB_v10015767mg [Capsella rubella]                                                                                                                                                                                                                                                                                                                                                                                                                                                                                                                                                                                                                                                                                                                                                                                                                                                                                                                                                                                                                                                                                                                                                                                                                           | 346  | 357  | 1.00E-128 | 103.2 | 77.7 | 84.4 | hypothetical protein CARUB_v10015767mg              | gbpln | Capsella rubella     | AT3G13890.2   Symbols: MYB26   myb domain protein 26   chr3:4576744-4578027 REVERSE LENGTH=358                                                             | 346  | 358  | 1.00E-128 | 103.5 | 75.4 | 82.1 |
| Rsa1.0_00032.1.g1965.t7 | gb AAC95175.1  putative non-LTR retroelement reverse transcriptase [Arabidopsis thaliana]                                                                                                                                                                                                                                                                                                                                                                                                                                                                                                                                                                                                                                                                                                                                                                                                                                                                                                                                                                                                                                                                                                                                                                                                          | 1663 | 1352 | 1.00E-180 | 81.3  | 23.6 | 34.2 | putative non-LTR retroelement reverse transcriptase | gbpln | Arabidopsis thaliana | AT3G24255.1   Symbols:   RNA-directed DNA polymerase (reverse transcriptase)-related family protein   chr3:8789471-8793208 FORWARD LENGTH=746              | 1663 | 746  | 5.00E-50  | 44.9  | 7.6  | 10.6 |
| Rsa1.0_00032.1.g1966.t1 | # # # # # # # # # #                                                                                                                                                                                                                                                                                                                                                                                                                                                                                                                                                                                                                                                                                                                                                                                                                                                                                                                                                                                                                                                                                                                                                                                                                                                                                |      |      |           |       |      |      | -                                                   | ----  | ----                 | # # # # # # # #                                                                                                                                            |      |      |           |       |      |      |
| Rsa1.0_00032.1.g1967.t1 | refXP_002893400.1  predicted protein [Arabidopsis lyrata subsp. lyrata]<br>gi 297339242 gb EFH69659.1  predicted protein [Arabidopsis lyrata subsp. lyrata]<br>refXP_002882859.1  hypothetical protein ARALYDRAFT_341522 [Arabidopsis lyrata subsp. lyrata]<br>gi 297328699 gb EFH59118.1  hypothetical protein ARALYDRAFT_341522 [Arabidopsis lyrata subsp. lyrata]                                                                                                                                                                                                                                                                                                                                                                                                                                                                                                                                                                                                                                                                                                                                                                                                                                                                                                                               | 222  | 196  | 1.00E-52  | 88.3  | 48.2 | 52.3 | predicted protein                                   | gbpln | Arabidopsis lyrata   | AT2G46230.1   Symbols:   PIN domain-like family protein   chr2:18984459-18985850 REVERSE LENGTH=196                                                        | 222  | 196  | 2.00E-52  | 88.3  | 45.9 | 50.9 |
| Rsa1.0_00032.1.g1968.t4 | refXP_002882859.1  hypothetical protein ARALYDRAFT_341522 [Arabidopsis lyrata subsp. lyrata]<br>gi 297328699 gb EFH59118.1  hypothetical protein ARALYDRAFT_341522 [Arabidopsis lyrata subsp. lyrata]                                                                                                                                                                                                                                                                                                                                                                                                                                                                                                                                                                                                                                                                                                                                                                                                                                                                                                                                                                                                                                                                                              | 1253 | 1243 | 0         | 99.2  | 92.6 | 95.7 | hypothetical protein ARALYDRAFT_341522              | gbpln | Arabidopsis lyrata   | AT3G13900.1   Symbols:   ATPase E1-E2 type family protein / haloacid dehalogenase-like hydrolase family protein   chr3:4586151-4590681 FORWARD LENGTH=1243 | 1253 | 1243 | 0         | 99.2  | 92.2 | 95.7 |
| Rsa1.0_00032.1.g1969.t1 | gb EOA31757.1  hypothetical protein CARUB_v10014974mg [Capsella rubella]                                                                                                                                                                                                                                                                                                                                                                                                                                                                                                                                                                                                                                                                                                                                                                                                                                                                                                                                                                                                                                                                                                                                                                                                                           | 92   | 106  | 1.00E-33  | 115.2 | 84.8 | 91.3 | hypothetical protein CARUB_v10014974mg              | gbpln | Capsella rubella     | AT3G13910.1   Symbols:   Protein of unknown function (DUF3511)   chr3:4591124-4591432 REVERSE LENGTH=102                                                   | 92   | 102  | 5.00E-32  | 110.9 | 69.6 | 72.8 |
| Rsa1.0_00032.1.g1970.t1 | gb EOA30691.1  hypothetical protein CARUB_v10013828mg [Capsella rubella]                                                                                                                                                                                                                                                                                                                                                                                                                                                                                                                                                                                                                                                                                                                                                                                                                                                                                                                                                                                                                                                                                                                                                                                                                           | 422  | 412  | 0         | 97.6  | 96.0 | 97.2 | hypothetical protein CARUB_v10013828mg              | gbpln | Capsella rubella     | AT3G13920.1   Symbols: EIF4A1, RH4, TIF4A1   eukaryotic translation initiation factor 4A1   chr3:4592635-4594128 REVERSE LENGTH=412                        | 422  | 412  | 0         | 97.6  | 95.0 | 97.2 |

|                          |                                                                                                                                                                                                                                                                                                                                                                                                                                                                                                                                                                                                                                                                                                                                                                                                                                                                                                                                                                                                                                                     |     |     |           |       |      |      |                                                                                             |       |                      |                                                                                                                                                                                                                                                                                                                                                      |     |     |           |       |      |      |
|--------------------------|-----------------------------------------------------------------------------------------------------------------------------------------------------------------------------------------------------------------------------------------------------------------------------------------------------------------------------------------------------------------------------------------------------------------------------------------------------------------------------------------------------------------------------------------------------------------------------------------------------------------------------------------------------------------------------------------------------------------------------------------------------------------------------------------------------------------------------------------------------------------------------------------------------------------------------------------------------------------------------------------------------------------------------------------------------|-----|-----|-----------|-------|------|------|---------------------------------------------------------------------------------------------|-------|----------------------|------------------------------------------------------------------------------------------------------------------------------------------------------------------------------------------------------------------------------------------------------------------------------------------------------------------------------------------------------|-----|-----|-----------|-------|------|------|
| Rsa1.0_00032.1.g1971.t15 | ref[NP_566470.1] dihydrolipoyllysine-residue acetyltransferase component 2 of pyruvate dehydrogenase complex [Arabidopsis thaliana] gi 118573090 sp Q8RWN9.2 OPD22_ARA TH RecName: Full=Dihydrolipoyllysine-residue acetyltransferase component 2 of pyruvate dehydrogenase complex, mitochondrial; AltName: Full=Dihydrolipoamide S-acetyltransferase component 2 of pyruvate dehydrogenase complex; AltName: Full=Pyruvate dehydrogenase complex component E2 2; Short=PDC-E2 2; Short=PDC-E2 2; Precursor gi 13605807 gb AAK32889.1 AF367302.1 AT3g13930/MDC16.5 [Arabidopsis thaliana] gi 20147147 gb AAM10290.1  AT3g13930/MDC16.5 [Arabidopsis thaliana] gi 23308389 gb AAN17421.1  putative acetyltransferase [Arabidopsis thaliana] gi 23397124 gb AAN31846.1  putative acetyltransferase [Arabidopsis thaliana] gi 24899791 gb AAN65110.1  putative acetyltransferase [Arabidopsis thaliana] gi 33264192 gb AEE75442.1  dihydrolipoyllysine-residue acetyltransferase component 2 of pyruvate dehydrogenase complex [Arabidopsis thaliana] | 868 | 539 | 0         | 62.1  | 49.1 | 52.4 | dihydrolipoyllysine-residue acetyltransferase component 2 of pyruvate dehydrogenase complex | gbpln | Arabidopsis thaliana | AT3G13930.1   Symbols:   Dihydrolipoamide acetyltransferase, long form protein   chr3:4596240-4600143 FORWARD LENGTH=539                                                                                                                                                                                                                             | 868 | 539 | 0         | 62.1  | 49.1 | 52.4 |
| Rsa1.0_00032.1.g1972.t1  | #                                                                                                                                                                                                                                                                                                                                                                                                                                                                                                                                                                                                                                                                                                                                                                                                                                                                                                                                                                                                                                                   | #   | #   | #         | #     | #    | -    | ----                                                                                        | ----  | #                    | #                                                                                                                                                                                                                                                                                                                                                    | #   | #   | #         | #     | #    |      |
| Rsa1.0_00032.1.g1973.t1  | ref[XP_002862273.1] predicted protein [Arabidopsis lyrata subsp. lyrata] gi 297307605 gb EFH38531.1  predicted protein [Arabidopsis lyrata subsp. lyrata]                                                                                                                                                                                                                                                                                                                                                                                                                                                                                                                                                                                                                                                                                                                                                                                                                                                                                           | 203 | 219 | 3.00E-68  | 107.9 | 64.0 | 68.5 | predicted protein                                                                           | gbpln | Arabidopsis lyrata   | AT3G13950.1   Symbols:   unknown protein; BEST Arabidopsis thaliana protein match is: unknown protein (TAIR:AT4G13266.1). Has 339 Blast hits to 265 proteins in 12 species: Archae - 0; Bacteria - 0; Metazoa - 0; Fungi - 0; Plants - 339; Viruses - 0; Other Eukaryotes - 0 (source: NCBI BLink).   chr3:4604149-4605195 FORWARD LENGTH=207        | 203 | 207 | 4.00E-69  | 102.0 | 62.6 | 69.0 |
| Rsa1.0_00032.1.g1974.t1  | gb[EOA30723.1] hypothetical protein CARUB_v10013860mg [Capsella rubella]                                                                                                                                                                                                                                                                                                                                                                                                                                                                                                                                                                                                                                                                                                                                                                                                                                                                                                                                                                            | 405 | 403 | 1.00E-175 | 99.5  | 81.5 | 88.9 | hypothetical protein CARUB_v10013860mg                                                      | gbpln | Capsella rubella     | AT3G13960.1   Symbols: AtGRF5, GRF5   growth-regulating factor 5   chr3:4608526-4610160 FORWARD LENGTH=397                                                                                                                                                                                                                                           | 405 | 397 | 1.00E-154 | 98.0  | 80.2 | 88.1 |
| Rsa1.0_00032.1.g1975.t1  | ref[XP_002884999.1] hypothetical protein ARALYDRAFT_318183 [Arabidopsis lyrata subsp. lyrata] gi 297330839 gb EFH61258.1  hypothetical protein ARALYDRAFT_318183 [Arabidopsis lyrata subsp. lyrata]                                                                                                                                                                                                                                                                                                                                                                                                                                                                                                                                                                                                                                                                                                                                                                                                                                                 | 177 | 180 | 7.00E-22  | 101.7 | 58.2 | 63.3 | hypothetical protein ARALYDRAFT_318183                                                      | gbpln | Arabidopsis lyrata   | #                                                                                                                                                                                                                                                                                                                                                    | #   | #   | #         | #     | #    |      |
| Rsa1.0_00032.1.g1976.t1  | gb[EOA37234.1] hypothetical protein CARUB_v10010750mg [Capsella rubella]                                                                                                                                                                                                                                                                                                                                                                                                                                                                                                                                                                                                                                                                                                                                                                                                                                                                                                                                                                            | 94  | 94  | 8.00E-45  | 100.0 | 93.6 | 95.7 | hypothetical protein CARUB_v10010750mg                                                      | gbpln | Capsella rubella     | AT3G13970.1   Symbols: APG12, APG12B   Ubiquitin-like superfamily protein   chr3:4613696-4614794 REVERSE LENGTH=94                                                                                                                                                                                                                                   | 94  | 94  | 3.00E-46  | 100.0 | 90.4 | 95.7 |
| Rsa1.0_00032.1.g1977.t1  | #                                                                                                                                                                                                                                                                                                                                                                                                                                                                                                                                                                                                                                                                                                                                                                                                                                                                                                                                                                                                                                                   | #   | #   | #         | #     | #    | -    | ----                                                                                        | ----  | #                    | #                                                                                                                                                                                                                                                                                                                                                    | #   | #   | #         | #     | #    |      |
| Rsa1.0_00032.1.g1978.t1  | ref[NP_188014.1] uncharacterized protein [Arabidopsis thaliana] gi 11994369 dbj BAB02328.1  unnamed protein product [Arabidopsis thaliana] gi 332641926 gb AEE75447.1  uncharacterized protein AT3G13980 [Arabidopsis thaliana]                                                                                                                                                                                                                                                                                                                                                                                                                                                                                                                                                                                                                                                                                                                                                                                                                     | 371 | 357 | 1.00E-108 | 96.2  | 73.9 | 81.4 | uncharacterized protein                                                                     | gbpln | Arabidopsis thaliana | AT3G13980.1   Symbols:   unknown protein; BEST Arabidopsis thaliana protein match is: unknown protein (TAIR:AT1G54200.1). Has 1485 Blast hits to 418 proteins in 98 species: Archae - 0; Bacteria - 6; Metazoa - 246; Fungi - 61; Plants - 107; Viruses - 6; Other Eukaryotes - 1059 (source: NCBI BLink).   chr3:4619189-4620262 REVERSE LENGTH=357 | 371 | 357 | 1.00E-110 | 96.2  | 73.9 | 81.4 |
| Rsa1.0_00032.1.g1979.t17 | ref[NP_001078149.1] uncharacterized protein [Arabidopsis thaliana] gi 110742569 dbj BAE99198.1  hypothetical protein [Arabidopsis thaliana] gi 332641928 gb AEE75449.1  uncharacterized protein AT3G13990 [Arabidopsis thaliana]                                                                                                                                                                                                                                                                                                                                                                                                                                                                                                                                                                                                                                                                                                                                                                                                                    | 934 | 847 | 0         | 90.7  | 70.6 | 77.3 | uncharacterized protein                                                                     | gbpln | Arabidopsis thaliana | AT3G13990.2   Symbols:   Kinase-related protein of unknown function (DUF1296)   chr3:4625708-4630383 REVERSE LENGTH=847                                                                                                                                                                                                                              | 934 | 847 | 0         | 90.7  | 70.6 | 77.3 |

|                          |                                                                                                                                                                                                                                                                                                                                                                                                                                                                                                                                                                   |      |      |           |       |      |      |                                              |             |                      |                                                                                                                                                                                                                                                                                                                                                                                                                                                                                                               |      |      |           |       |      |      |
|--------------------------|-------------------------------------------------------------------------------------------------------------------------------------------------------------------------------------------------------------------------------------------------------------------------------------------------------------------------------------------------------------------------------------------------------------------------------------------------------------------------------------------------------------------------------------------------------------------|------|------|-----------|-------|------|------|----------------------------------------------|-------------|----------------------|---------------------------------------------------------------------------------------------------------------------------------------------------------------------------------------------------------------------------------------------------------------------------------------------------------------------------------------------------------------------------------------------------------------------------------------------------------------------------------------------------------------|------|------|-----------|-------|------|------|
| Rsa1.0_00032.1.g1980.t1  | ref[NP_188016.2] protein Brevis radix-like 2 [Arabidopsis thaliana]<br>gi 42572427 ref[NP_974309.1] protein Brevis radix-like 2 [Arabidopsis thaliana]<br>gi 75151461 sp Q8GYL9.1 BRXL2_ARAT H RecName: Full=Protein Brevis radix-like 2; Short=AtBRXL2<br>gi 26450131 dbj BA042185.1  unknown protein [Arabidopsis thaliana]<br>gi 115311461 gb AB193911.1  At3g14000 [Arabidopsis thaliana]<br>gi 332641929 gb AEE75450.1  protein Brevis radix-like 2 [Arabidopsis thaliana]<br>gi 332641930 gb AEE75451.1  protein Brevis radix-like 2 [Arabidopsis thaliana] | 377  | 374  | 1.00E-160 | 99.2  | 81.2 | 89.1 | protein Brevis radix-like 2                  | gbpln       | Arabidopsis thaliana | AT3G14000.2   Symbols: ATBRXL2, BRX-LIKE2, LDZ (Disease resistance/zinc finger/chromosome condensation-like region) domain containing protein   chr3:4631170-4633353 REVERSE LENGTH=374                                                                                                                                                                                                                                                                                                                       | 377  | 374  | 1.00E-162 | 99.2  | 81.2 | 89.1 |
| Rsa1.0_00032.1.g1981.t19 | dbj BAB02332.1  unnamed protein product [Arabidopsis thaliana]                                                                                                                                                                                                                                                                                                                                                                                                                                                                                                    | 1337 | 596  | 1.00E-114 | 44.6  | 16.8 | 19.7 | unnamed protein product                      | gbpln       | Arabidopsis thaliana | AT3G14010.3   Symbols: CID4   CTC-interacting domain 4   chr3:4637164-4640691 FORWARD LENGTH=595                                                                                                                                                                                                                                                                                                                                                                                                              | 1337 | 595  | 1.00E-114 | 44.5  | 16.8 | 19.7 |
| Rsa1.0_00032.1.g1982.t1  | gb AFP97582.1  nodulation signalling pathway 1-like protein [Brassica ruvo]                                                                                                                                                                                                                                                                                                                                                                                                                                                                                       | 513  | 509  | 0         | 99.2  | 92.4 | 95.9 | nodulation signalling pathway 1-like protein | gbpln       | Brassica ruvo        | AT3G13840.1   Symbols:   GRAS family transcription factor   chr3:4555305-4556837 REVERSE LENGTH=510                                                                                                                                                                                                                                                                                                                                                                                                           | 513  | 510  | 0         | 99.4  | 77.0 | 86.0 |
| Rsa1.0_00032.1.g1983.t1  | ref[XP_002885006.1] hypothetical protein ARALYDRAFT_897663 [Arabidopsis lyrata subsp. lyrata]<br>gi 297330846 gb EFH61265.1  hypothetical protein ARALYDRAFT_897663 [Arabidopsis lyrata subsp. lyrata]                                                                                                                                                                                                                                                                                                                                                            | 678  | 714  | 0         | 105.3 | 88.2 | 92.9 | hypothetical protein ARALYDRAFT_897663       | gbpln       | Arabidopsis lyrata   | AT3G14050.1   Symbols: RSH2, AT-RSH2, ATRSH2   RELA/SPOT homolog 2   chr3:4650902-4653514 REVERSE LENGTH=709                                                                                                                                                                                                                                                                                                                                                                                                  | 678  | 709  | 0         | 104.6 | 87.5 | 91.6 |
| Rsa1.0_00032.1.g1984.t1  | ref[XP_002885009.1] subtilase family protein [Arabidopsis lyrata subsp. lyrata]<br>gi 297330849 gb EFH61268.1  subtilase family protein [Arabidopsis lyrata subsp. lyrata]                                                                                                                                                                                                                                                                                                                                                                                        | 778  | 777  | 0         | 99.9  | 92.5 | 95.2 | subtilase family protein                     | gbpln       | Arabidopsis lyrata   | AT3G14067.1   Symbols:   Subtilase family protein   chr3:4658421-4660754 REVERSE LENGTH=777                                                                                                                                                                                                                                                                                                                                                                                                                   | 778  | 777  | 0         | 99.9  | 92.2 | 95.2 |
| Rsa1.0_00032.1.g1985.t1  | gb EOA32738.1  hypothetical protein CARUB_v10016043mg [Capsella rubella]                                                                                                                                                                                                                                                                                                                                                                                                                                                                                          | 638  | 643  | 0         | 100.8 | 85.6 | 93.7 | hypothetical protein CARUB_v10016043mg       | gbpln       | Capsella rubella     | AT3G14070.1   Symbols: CAX9, CCX3, ATCCX3   cation exchanger 9   chr3:4661143-4663074 REVERSE LENGTH=643                                                                                                                                                                                                                                                                                                                                                                                                      | 638  | 643  | 0         | 100.8 | 84.5 | 93.3 |
| Rsa1.0_00032.1.g1986.t1  | ref[XP_002882867.1] hypothetical protein ARALYDRAFT_478821 [Arabidopsis lyrata subsp. lyrata]<br>gi 297328707 gb EFH59126.1  hypothetical protein ARALYDRAFT_478821 [Arabidopsis lyrata subsp. lyrata]<br>gi 482567523 gb EOA31712.1  hypothetical protein CARUB_v10014920mg [Capsella rubella]                                                                                                                                                                                                                                                                   | 129  | 128  | 1.00E-65  | 99.2  | 96.1 | 97.7 | hypothetical protein ARALYDRAFT_478821       | gbpln       | Arabidopsis lyrata   | AT3G14080.2   Symbols:   Small nuclear ribonucleoprotein family protein   chr3:4667717-4668989 FORWARD LENGTH=128                                                                                                                                                                                                                                                                                                                                                                                             | 129  | 128  | 2.00E-67  | 99.2  | 94.6 | 97.7 |
| Rsa1.0_00032.1.g1987.t1  | ref[NP_001147016.1] protein binding protein [Zea mays]<br>gi 195606494 gb ACG25077.1  protein binding protein [Zea mays]                                                                                                                                                                                                                                                                                                                                                                                                                                          | 617  | 618  | 0         | 100.2 | 87.5 | 91.2 | protein binding protein                      | gbenv/gbpln | Zea mays             | AT3G14090.1   Symbols: ATEXO70D3, EXO70D3   exocyst subunit exo70 family protein D3   chr3:4669508-4671379 REVERSE LENGTH=623                                                                                                                                                                                                                                                                                                                                                                                 | 617  | 623  | 0         | 101.0 | 81.7 | 88.0 |
| Rsa1.0_00032.1.g1988.t1  | ref[NP_566478.1] fluorescent in blue light protein [Arabidopsis thaliana]<br>gi 175331838 sp Q940U6.1 FLU ARATH RecName: Full=Protein FLUORESCENT IN BLUE LIGHT, chloroplastic; Flags: Precursor<br>gi 17386154 gb AAL38623.1 AF446890_1 AT3g14110/MAG2.6 [Arabidopsis thaliana]<br>gi 15450619 gb AAK96581.1  AT3g14110/MAG2.6 [Arabidopsis thaliana]<br>gi 21593122 gb AAM65071.1  unknown [Arabidopsis thaliana]<br>gi 332641949 gb AEE75470.1  fluorescent in blue light protein [Arabidopsis thaliana]                                                       | 312  | 316  | 1.00E-127 | 101.3 | 76.3 | 86.5 | fluorescent in blue light protein            | gbpln       | Arabidopsis thaliana | AT3G14110.1   Symbols: FLU   Tetratricopeptide repeat (TPR)-like superfamily protein   chr3:4676222-4677602 REVERSE LENGTH=316                                                                                                                                                                                                                                                                                                                                                                                | 312  | 316  | 1.00E-129 | 101.3 | 76.3 | 86.5 |
| Rsa1.0_00032.1.g1989.t1  | gb EOA32951.1  hypothetical protein CARUB_v10016280mg [Capsella rubella]                                                                                                                                                                                                                                                                                                                                                                                                                                                                                          | 1072 | 1077 | 0         | 100.5 | 90.8 | 95.0 | hypothetical protein CARUB_v10016280mg       | gbpln       | Capsella rubella     | AT3G14120.1   Symbols:   FUNCTIONS IN: molecular function unknown; INVOLVED IN: transport; LOCATED IN: nuclear pore; EXPRESSED IN: 23 plant structures; EXPRESSED DURING: 13 growth stages; CONTAINS InterPro DOMAIN/s: Nuclear pore protein 84/107 (InterPro:IPR007252); Has 5399 Blast hits to 5001 proteins in 612 species: Archae - 19; Bacteria - 730; Metazoa - 2186; Fungi - 823; Plants - 382; Viruses - 37; Other Eukaryotes - 1222 (source: NCBI BLINK).   chr3:4677993-4685455 FORWARD LENGTH=1101 | 1072 | 1101 | 0         | 102.7 | 90.4 | 94.8 |

|                         |                                                                                                                                                                                                                                                                                                                                                                                                                                                                                                                                                                                                                                                                                                                                                                                                                                                                                                                                                                                                                                                                                           |      |      |           |       |      |      |                                                           |                      |                                                                                                                                                                                                                                                                                                                                                                                                                                                                                               |      |      |           |       |      |      |
|-------------------------|-------------------------------------------------------------------------------------------------------------------------------------------------------------------------------------------------------------------------------------------------------------------------------------------------------------------------------------------------------------------------------------------------------------------------------------------------------------------------------------------------------------------------------------------------------------------------------------------------------------------------------------------------------------------------------------------------------------------------------------------------------------------------------------------------------------------------------------------------------------------------------------------------------------------------------------------------------------------------------------------------------------------------------------------------------------------------------------------|------|------|-----------|-------|------|------|-----------------------------------------------------------|----------------------|-----------------------------------------------------------------------------------------------------------------------------------------------------------------------------------------------------------------------------------------------------------------------------------------------------------------------------------------------------------------------------------------------------------------------------------------------------------------------------------------------|------|------|-----------|-------|------|------|
| Rsa1.0_00032.1.g1990.t1 | refNP_566479.5   2-oxoglutarate-dependent dioxygenase family protein [Arabidopsis thaliana]<br>gi 9294641 dbj BAB02980.1   unnamed protein product [Arabidopsis thaliana]<br>gi 332641958 gb AEE75479.1   2-oxoglutarate-dependent dioxygenase family protein [Arabidopsis thaliana]<br>refXP_002885015.1   hypothetical protein ARALYDRAFT.478830 [Arabidopsis lyrata subsp. lyrata]<br>gi 297330855 gb EFH61274.1   hypothetical protein ARALYDRAFT.478830 [Arabidopsis lyrata subsp. lyrata]                                                                                                                                                                                                                                                                                                                                                                                                                                                                                                                                                                                           | 457  | 455  | 1.00E-148 | 99.6  | 65.0 | 74.6 | 2-oxoglutarate-dependent dioxygenase gbpln family protein | Arabidopsis thaliana | AT3G14160.1   Symbols:   2-oxoglutarate-dependent dioxygenase family protein   chr3:4693495-4695198 FORWARD LENGTH=455                                                                                                                                                                                                                                                                                                                                                                        | 457  | 455  | 1.00E-151 | 99.6  | 65.0 | 74.6 |
| Rsa1.0_00032.1.g1991.t1 | refXP_002885015.1   hypothetical protein ARALYDRAFT.478830 [Arabidopsis lyrata subsp. lyrata]<br>gi 297330855 gb EFH61274.1   hypothetical protein ARALYDRAFT.478830 [Arabidopsis lyrata subsp. lyrata]                                                                                                                                                                                                                                                                                                                                                                                                                                                                                                                                                                                                                                                                                                                                                                                                                                                                                   | 543  | 506  | 0         | 93.2  | 74.4 | 82.3 | hypothetical protein ARALYDRAFT.478830 gbpln              | Arabidopsis lyrata   | AT3G14170.1   Symbols:   Plant protein of unknown function (DUF936)   chr3:4696115-4697989 REVERSE LENGTH=505                                                                                                                                                                                                                                                                                                                                                                                 | 543  | 505  | 0         | 93.0  | 72.6 | 81.2 |
| Rsa1.0_00032.1.g1992.t1 | refXP_002885016.1   hypothetical protein ARALYDRAFT.478831 [Arabidopsis lyrata subsp. lyrata]<br>gi 297330856 gb EFH61275.1   hypothetical protein ARALYDRAFT.478831 [Arabidopsis lyrata subsp. lyrata]                                                                                                                                                                                                                                                                                                                                                                                                                                                                                                                                                                                                                                                                                                                                                                                                                                                                                   | 1161 | 1256 | 0         | 108.2 | 79.3 | 86.3 | hypothetical protein ARALYDRAFT.478831 gbpln              | Arabidopsis lyrata   | AT3G14172.1   Symbols:   FUNCTIONS IN: molecular function unknown; INVOLVED IN: biological process unknown; LOCATED IN: cellular component unknown; BEST Arabidopsis thaliana protein match is: COP1-interacting protein-related (TAIR:AT1G72410.1); Has 30201 Blast hits to 17322 proteins in 780 species: Archae - 12; Bacteria - 1396; Metazoa - 17338; Fungi - 3422; Plants - 5037; Viruses - 0; Other Eukaryotes - 2996 (source: NCBI BLink).   chr3:4698860-4704773 REVERSE LENGTH=1270 | 1161 | 1270 | 0         | 109.4 | 78.5 | 85.3 |
| Rsa1.0_00033.1.g1993.t1 | gb EOA17573.1   hypothetical protein CARUB_v10005934mg. partial [Capsella rubella]                                                                                                                                                                                                                                                                                                                                                                                                                                                                                                                                                                                                                                                                                                                                                                                                                                                                                                                                                                                                        | 138  | 154  | 7.00E-44  | 111.6 | 67.4 | 77.5 | hypothetical protein CARUB_v10005934mg. gbpln partial     | Capsella rubella     | AT4G15990.1   Symbols:   unknown protein; BEST Arabidopsis thaliana protein match is: unknown protein (TAIR:AT4G16024.1); Has 14 Blast hits to 14 proteins in 2 species: Archae - 0; Bacteria - 0; Metazoa - 0; Fungi - 0; Plants - 14; Viruses - 0; Other Eukaryotes - 0 (source: NCBI BLink).   chr4:9061269-9061676 REVERSE LENGTH=135                                                                                                                                                     | 138  | 135  | 3.00E-46  | 97.8  | 65.9 | 78.3 |
| Rsa1.0_00033.1.g1994.t1 | gb EOA18428.1   hypothetical protein CARUB_v10006972mg [Capsella rubella]                                                                                                                                                                                                                                                                                                                                                                                                                                                                                                                                                                                                                                                                                                                                                                                                                                                                                                                                                                                                                 | 522  | 641  | 0         | 122.8 | 63.8 | 76.8 | hypothetical protein CARUB_v10006972mg gbpln              | Capsella rubella     | AT4G13992.1   Symbols:   Cysteine/Histidine-rich C1 domain family protein   chr4:8087340-8089268 FORWARD LENGTH=642                                                                                                                                                                                                                                                                                                                                                                           | 522  | 642  | 0         | 123.0 | 62.5 | 76.1 |
| Rsa1.0_00033.1.g1995.t1 | refNP_193008.1   nudix hydrolase 7 [Arabidopsis thaliana]<br>gi 30682217 ref NP_849367.1   nudix hydrolase 7 [Arabidopsis thaliana]<br>gi 30682219 ref NP_849368.1   nudix hydrolase 7 [Arabidopsis thaliana]<br>gi 68565949 sp Q9SU14.1   NUDT7_ARAT H RecName: Full=Nudix hydrolase 7; Short=AtNUDT7; AltName: Full=ADP-ribose pyrophosphatase; AltName: Full=NADH pyrophosphatase; AltName: Full=Protein GROWTH FACTOR GENE 1<br>gi 13272467 gb AAK17172.1 AF325104.1 growth factor like protein [Arabidopsis thaliana]<br>gi 13877893 gb AAK44024.1 AF370209.1 putative growth factor [Arabidopsis thaliana]<br>gi 4586248 emb CAB40989.1   growth factor like protein [Arabidopsis thaliana]<br>gi 7267973 emb CAB78314.1   growth factor like protein [Arabidopsis thaliana]<br>gi 1581061 gb AAL07193.1   putative growth factor [Arabidopsis thaliana]<br>gi 332657767 gb AEE83167.1   nudix hydrolase 7 [Arabidopsis thaliana]<br>gi 332657768 gb AEE83168.1   nudix hydrolase 7 [Arabidopsis thaliana]<br>gi 332657769 gb AEE83169.1   nudix hydrolase 7 [Arabidopsis thaliana] | 278  | 282  | 1.00E-128 | 101.4 | 75.2 | 87.8 | nudix hydrolase 7 gbpln                                   | Arabidopsis thaliana | AT4G12720.3   Symbols: AtNUDT7, GFG1, ATNUDX7   MuT/nudix family protein   chr4:7487716-7489557 FORWARD LENGTH=282                                                                                                                                                                                                                                                                                                                                                                            | 278  | 282  | 1.00E-131 | 101.4 | 75.2 | 87.8 |
| Rsa1.0_00033.1.g1996.t1 | dbj BAJ34567.1   unnamed protein product [Thellungiella halophila]                                                                                                                                                                                                                                                                                                                                                                                                                                                                                                                                                                                                                                                                                                                                                                                                                                                                                                                                                                                                                        | 99   | 97   | 2.00E-39  | 98.0  | 82.8 | 87.9 | unnamed protein product ----                              | ----                 | AT4G15910.1   Symbols: ATDI21, DI21   drought-induced 21   chr4:9028657-9029269 FORWARD LENGTH=104                                                                                                                                                                                                                                                                                                                                                                                            | 99   | 104  | 7.00E-40  | 105.1 | 83.8 | 85.9 |
| Rsa1.0_00033.1.g1997.t1 | gb EOA32197.1   hypothetical protein CARUB_v10015453mg [Capsella rubella]                                                                                                                                                                                                                                                                                                                                                                                                                                                                                                                                                                                                                                                                                                                                                                                                                                                                                                                                                                                                                 | 102  | 552  | 9.00E-20  | 541.2 | 42.2 | 66.7 | hypothetical protein CARUB_v10015453mg gbpln              | Capsella rubella     | AT1G52950.1   Symbols:   Nucleic acid-binding, OB-fold-like protein   chr1:19725483-19728007 FORWARD LENGTH=566                                                                                                                                                                                                                                                                                                                                                                               | 102  | 566  | 5.00E-14  | 554.9 | 33.3 | 52.0 |

|                         |                                                                                                                                                                                                                                                                                                                      |      |      |           |       |      |      |                                                                     |       |                      |                                                                                                                                                                                                                                                                                                                                                                                                              |      |     |           |       |      |      |
|-------------------------|----------------------------------------------------------------------------------------------------------------------------------------------------------------------------------------------------------------------------------------------------------------------------------------------------------------------|------|------|-----------|-------|------|------|---------------------------------------------------------------------|-------|----------------------|--------------------------------------------------------------------------------------------------------------------------------------------------------------------------------------------------------------------------------------------------------------------------------------------------------------------------------------------------------------------------------------------------------------|------|-----|-----------|-------|------|------|
| Rsa1.0_00033.1.g1998.t2 | refXP_002870205.1  hypothetical protein ARALYDRAFT_493299 [Arabidopsis lyrata subsp. lyrata] gi 297316041 gb EFH46464.1                                                                                                                                                                                              | 519  | 522  | 0         | 100.6 | 79.4 | 87.5 | hypothetical protein ARALYDRAFT_493299                              | gbpln | Arabidopsis lyrata   | AT4G15850.1   Symbols: ATRH1, RH1   RNA helicase 1   chr4:9001426-9004534 FORWARD LENGTH=522                                                                                                                                                                                                                                                                                                                 | 519  | 522 | 0         | 100.6 | 79.0 | 87.3 |
| Rsa1.0_00033.1.g1999.t1 | refNP_568712.1  FAD/NAD(P)-binding oxidoreductase family protein [Arabidopsis thaliana] gi 332008446 gb AE95829.1  FAD/NAD(P)-binding oxidoreductase family protein [Arabidopsis thaliana]                                                                                                                           | 566  | 556  | 0         | 98.2  | 89.6 | 93.5 | FAD/NAD(P)-binding oxidoreductase family protein                    | gbpln | Arabidopsis thaliana | AT5G49555.1   Symbols:   FAD/NAD(P)-binding oxidoreductase family protein   chr5:20107411-20110602 REVERSE LENGTH=556                                                                                                                                                                                                                                                                                        | 566  | 556 | 0         | 98.2  | 89.6 | 93.5 |
| Rsa1.0_00033.1.g2000.t1 | refNP_199767.1  Putative methyltransferase family protein [Arabidopsis thaliana] gi 10177622 dbj BAB10769.1  unnamed protein product [Arabidopsis thaliana] gi 332008447 gb AED95830.1  Putative methyltransferase family protein [Arabidopsis thaliana]                                                             | 284  | 274  | 1.00E-114 | 96.5  | 75.0 | 83.8 | Putative methyltransferase family protein                           | gbpln | Arabidopsis thaliana | AT5G49560.1   Symbols:   Putative methyltransferase family protein   chr5:20110961-20111785 REVERSE LENGTH=274                                                                                                                                                                                                                                                                                               | 284  | 274 | 1.00E-117 | 96.5  | 75.0 | 83.8 |
| Rsa1.0_00033.1.g2001.t3 | refXP_002868178.1  hypothetical protein ARALYDRAFT_355185 [Arabidopsis lyrata subsp. lyrata] gi 297314014 gb EFH44437.1  hypothetical protein ARALYDRAFT_355185 [Arabidopsis lyrata subsp. lyrata]                                                                                                                   | 1197 | 1153 | 0         | 96.3  | 57.0 | 68.3 | hypothetical protein ARALYDRAFT_355185                              | gbpln | Arabidopsis lyrata   | AT4G15810.1   Symbols:   P-loop containing nucleoside triphosphate hydrolases superfamily protein   chr4:8989162-8992591 REVERSE LENGTH=918                                                                                                                                                                                                                                                                  | 1197 | 918 | 1.00E-164 | 76.7  | 32.3 | 40.2 |
| Rsa1.0_00033.1.g2002.t1 | refNP_567475.5  uncharacterized protein [Arabidopsis thaliana] gi 18175846 gb AAL59938.1  unknown protein [Arabidopsis thaliana] gi 21689873 gb AAM67497.1  unknown protein [Arabidopsis thaliana] gi 332658252 gb AEE83652.1  uncharacterized protein AT4G15790 [Arabidopsis thaliana]                              | 146  | 147  | 7.00E-56  | 100.7 | 82.2 | 89.7 | uncharacterized protein                                             | gbpln | Arabidopsis thaliana | AT4G15790.1   Symbols:   unknown protein; INVOLVED IN: biological_process unknown; LOCATED IN: chloroplast; EXPRESSED IN: 21 plant structures; EXPRESSED DURING: 13 growth stages; Has 411 Blast hits to 380 proteins in 121 species: Archae - 4; Bacteria - 107; Metazoa - 85; Fungi - 29; Plants - 59; Viruses - 0; Other Eukaryotes - 127 (source: NCBI BLINK).   chr4:8982390-8984069 FORWARD LENGTH=147 | 146  | 147 | 2.00E-58  | 100.7 | 82.2 | 89.7 |
| Rsa1.0_00033.1.g2003.t1 | refNP_197566.1  vacuolar protein / peptidase dimerization domain-containing protein [Arabidopsis thaliana] gi 110741500 dbj BAE89701.1  24 kDa vacuolar protein - like [Arabidopsis thaliana] gi 332005489 gb AED92872.1  vacuolar protein / peptidase dimerization domain-containing protein [Arabidopsis thaliana] | 911  | 910  | 0         | 99.9  | 82.7 | 92.3 | vacuolar protein / peptidase dimerization domain-containing protein | gbpln | Arabidopsis thaliana | AT5G20660.1   Symbols:   Zn-dependent exopeptidases superfamily protein   chr5:6986402-6990947 FORWARD LENGTH=910                                                                                                                                                                                                                                                                                            | 911  | 910 | 0         | 99.9  | 82.7 | 92.3 |
| Rsa1.0_00033.1.g2004.t1 | refXP_002868180.1  hypothetical protein ARALYDRAFT_915207 [Arabidopsis lyrata subsp. lyrata] gi 297314016 gb EFH44439.1  hypothetical protein ARALYDRAFT_915207 [Arabidopsis lyrata subsp. lyrata]                                                                                                                   | 222  | 222  | 1.00E-124 | 100.0 | 96.4 | 98.2 | hypothetical protein ARALYDRAFT_915207                              | gbpln | Arabidopsis lyrata   | AT4G15780.1   Symbols: ATVAMP724, VAMP724   vesicle-associated membrane protein 724   chr4:8980081-8981697 REVERSE LENGTH=222                                                                                                                                                                                                                                                                                | 222  | 222 | 1.00E-118 | 100.0 | 96.8 | 98.6 |
| Rsa1.0_00033.1.g2005.t1 | gb EOA15832.1  hypothetical protein CARUB_v10007453mg [Capsella rubella]                                                                                                                                                                                                                                             | 187  | 187  | 1.00E-99  | 100.0 | 93.6 | 96.8 | hypothetical protein CARUB_v10007453mg                              | gbpln | Capsella rubella     | AT4G15770.1   Symbols:   RNA binding   chr4:8978060-8978623 FORWARD LENGTH=187                                                                                                                                                                                                                                                                                                                               | 187  | 187 | 1.00E-100 | 100.0 | 92.0 | 95.7 |
| Rsa1.0_00033.1.g2006.t1 | gb EOA19124.1  hypothetical protein CARUB_v10007793mg [Capsella rubella]                                                                                                                                                                                                                                             | 344  | 511  | 1.00E-151 | 148.5 | 75.0 | 86.0 | hypothetical protein CARUB_v10007793mg                              | gbpln | Capsella rubella     | AT5G24950.1   Symbols: CYP71A15   cytochrome P450, family 71, subfamily A, polypeptide 15   chr5:8595209-8597761 REVERSE LENGTH=496                                                                                                                                                                                                                                                                          | 344  | 496 | 1.00E-119 | 144.2 | 62.5 | 75.6 |
| Rsa1.0_00033.1.g2007.t1 | gb EOA19124.1  hypothetical protein CARUB_v10007793mg [Capsella rubella]                                                                                                                                                                                                                                             | 145  | 511  | 5.00E-43  | 352.4 | 57.2 | 62.1 | hypothetical protein CARUB_v10007793mg                              | gbpln | Capsella rubella     | AT4G13310.2   Symbols: CYP71A20   cytochrome P450, family 71, subfamily A, polypeptide 20   chr4:7750453-7751856 FORWARD LENGTH=390                                                                                                                                                                                                                                                                          | 145  | 390 | 5.00E-45  | 269.0 | 58.6 | 62.8 |
| Rsa1.0_00033.1.g2008.t1 | gb EOA19124.1  hypothetical protein CARUB_v10007793mg [Capsella rubella]                                                                                                                                                                                                                                             | 489  | 511  | 0         | 104.5 | 75.3 | 84.0 | hypothetical protein CARUB_v10007793mg                              | gbpln | Capsella rubella     | AT5G24950.1   Symbols: CYP71A15   cytochrome P450, family 71, subfamily A, polypeptide 15   chr5:8595209-8597761 REVERSE LENGTH=496                                                                                                                                                                                                                                                                          | 489  | 496 | 0         | 101.4 | 63.4 | 76.3 |
| Rsa1.0_00033.1.g2009.t1 | gb EOA18110.1  hypothetical protein CARUB_v10006571mg [Capsella rubella]                                                                                                                                                                                                                                             | 440  | 457  | 1.00E-163 | 103.9 | 68.4 | 78.9 | hypothetical protein CARUB_v10006571mg                              | gbpln | Capsella rubella     | AT4G15740.1   Symbols:   Calcium-dependent lipid-binding (CaLB domain) family protein   chr4:8964912-8966318 REVERSE LENGTH=468                                                                                                                                                                                                                                                                              | 440  | 468 | 1.00E-163 | 106.4 | 66.1 | 76.1 |

|                         |                                                                                                                                                                                                                                                                                                                                                                                                                                                                                                                          |     |     |           |        |      |      |                                        |       |                      |                                                                                                                                                                                                                                                                                                                                                                   |     |     |           |        |      |      |
|-------------------------|--------------------------------------------------------------------------------------------------------------------------------------------------------------------------------------------------------------------------------------------------------------------------------------------------------------------------------------------------------------------------------------------------------------------------------------------------------------------------------------------------------------------------|-----|-----|-----------|--------|------|------|----------------------------------------|-------|----------------------|-------------------------------------------------------------------------------------------------------------------------------------------------------------------------------------------------------------------------------------------------------------------------------------------------------------------------------------------------------------------|-----|-----|-----------|--------|------|------|
| Rsa1.0_00033.1.g2010.t1 | refXP_002870231.1  hypothetical protein ARALYDRAFT_915246 [Arabidopsis lyrata subsp. lyrata] gi 297316067 gb EFH46490.1  hypothetical protein ARALYDRAFT_915246 [Arabidopsis lyrata subsp. lyrata]                                                                                                                                                                                                                                                                                                                       | 334 | 335 | 1.00E-163 | 100.3  | 85.0 | 91.9 | hypothetical protein ARALYDRAFT_915246 | gbpln | Arabidopsis lyrata   | AT4G15545.1   Symbols:   unknown protein; BEST Arabidopsis thaliana protein match is: unknown protein (TAIR:AT1G16520.1). Has 30201 Blast hits to 17322 proteins in 780 species: Archae - 12; Bacteria - 1396; Metazoa - 17338; Fungi - 3422; Plants - 5037; Viruses - 0; Other Eukaryotes - 2996 (source: NCBI BLINK).   chr4:8875932-8877567 FORWARD LENGTH=337 | 334 | 337 | 1.00E-164 | 100.9  | 85.0 | 91.6 |
| Rsa1.0_00033.1.g2011.t1 | dbj BAJ34577.1  unnamed protein product [Theilungiella halophila]                                                                                                                                                                                                                                                                                                                                                                                                                                                        | 325 | 325 | 1.00E-169 | 100.0  | 88.0 | 95.7 | unnamed protein product                | ----  | ----                 | AT3G58380.1   Symbols: FTA, PLP, ATFTA, PFT,PGGT-1ALPHA   farnesyltransferase A   chr3:21944209-21945781 FORWARD LENGTH=326                                                                                                                                                                                                                                       | 325 | 326 | 1.00E-165 | 100.3  | 87.7 | 94.5 |
| Rsa1.0_00033.1.g2012.t1 | refNP_849391.2  pyruvate, phosphate dikinase 1 [Arabidopsis thaliana] gi 145333150 refNP_001078395.1  pyruvate, phosphate dikinase 1 [Arabidopsis thaliana] gi 222423813 dbj BAH19872.1  AT4G15530 [Arabidopsis thaliana] gi 332658217 gb AEE83617.1  pyruvate, phosphate dikinase 1 [Arabidopsis thaliana] gi 332658219 gb AEE83619.1  pyruvate, phosphate dikinase 1 [Arabidopsis thaliana]                                                                                                                            | 92  | 956 | 8.00E-26  | 1039.1 | 62.0 | 73.9 | pyruvate, phosphate dikinase 1         | gbpln | Arabidopsis thaliana | AT4G15530.4   Symbols: PPDK   pyruvate orthophosphate dikinase   chr4:8864828-8870727 REVERSE LENGTH=956                                                                                                                                                                                                                                                          | 92  | 956 | 1.00E-28  | 1039.1 | 62.0 | 73.9 |
| Rsa1.0_00033.1.g2013.t1 | refNP_193288.2  pyruvate, phosphate dikinase 1 [Arabidopsis thaliana] gi 222424574 dbj BAH20242.1  AT4G15530 [Arabidopsis thaliana] gi 332658216 gb AEE83616.1  pyruvate, phosphate dikinase 1 [Arabidopsis thaliana]                                                                                                                                                                                                                                                                                                    | 875 | 875 | 0         | 100.0  | 94.9 | 98.5 | pyruvate, phosphate dikinase 1         | gbpln | Arabidopsis thaliana | AT4G15530.2   Symbols: PPDK   pyruvate orthophosphate dikinase   chr4:8864828-8869183 REVERSE LENGTH=875                                                                                                                                                                                                                                                          | 875 | 875 | 0         | 100.0  | 94.9 | 98.5 |
| Rsa1.0_00033.1.g2014.t2 | refNP_567468.1  PsbP domain-containing protein 1 [Arabidopsis thaliana] gi 13959580 sp O23403.1 PPD1_ARATH RecName: Full=PsbP domain-containing protein 1, chloroplastic; AltName: Full=OEC23-like protein 3; AltName: Full=PsbP-related thylakoid lumenal protein 1; Flags: Precursor gi 2244908 emb CAB10329.1  hypothetical protein [Arabidopsis thaliana] gi 7268298 emb CAB78593.1  hypothetical protein [Arabidopsis thaliana] gi 332658213 gb AEE83613.1  PsbP domain-containing protein 1 [Arabidopsis thaliana] | 270 | 287 | 1.00E-115 | 106.3  | 80.7 | 85.9 | PsbP domain-containing protein 1       | gbpln | Arabidopsis thaliana | AT4G15510.1   Symbols:   Photosystem II reaction center PsbP family protein   chr4:8860701-8862529 FORWARD LENGTH=287                                                                                                                                                                                                                                             | 270 | 287 | 1.00E-118 | 106.3  | 80.7 | 85.9 |
| Rsa1.0_00033.1.g2015.t1 | refXP_002885447.1  transducin family protein [Arabidopsis lyrata subsp. lyrata] gi 297331287 gb EFH61706.1  transducin family protein [Arabidopsis lyrata subsp. lyrata]                                                                                                                                                                                                                                                                                                                                                 | 955 | 954 | 0         | 99.9   | 83.1 | 91.5 | transducin family protein              | gbpln | Arabidopsis lyrata   | AT3G21540.1   Symbols:   transducin family protein / WD-40 repeat family protein   chr3:7586100-7590856 REVERSE LENGTH=955                                                                                                                                                                                                                                        | 955 | 955 | 0         | 100.0  | 82.3 | 91.1 |
| Rsa1.0_00033.1.g2016.t1 | refXP_002870258.1  hypothetical protein ARALYDRAFT_493374 [Arabidopsis lyrata subsp. lyrata] gi 297316094 gb EFH46517.1  hypothetical protein ARALYDRAFT_493374 [Arabidopsis lyrata subsp. lyrata]                                                                                                                                                                                                                                                                                                                       | 330 | 451 | 2.00E-43  | 136.7  | 26.1 | 26.7 | hypothetical protein ARALYDRAFT_493374 | gbpln | Arabidopsis lyrata   | AT4G15160.2   Symbols:   Bifunctional inhibitor/lipid-transfer protein/seed storage 2S albumin superfamily protein   chr4:8646192-8647019 FORWARD LENGTH=193                                                                                                                                                                                                      | 330 | 193 | 2.00E-42  | 58.5   | 25.8 | 26.7 |
| Rsa1.0_00033.1.g2017.t1 | refNP_567450.1  SNARE associated Golgi protein [Arabidopsis thaliana] gi 53749170 gb AAU90070.1  At4g14950 [Arabidopsis thaliana] gi 332658128 gb AEE83528.1  SNARE associated Golgi protein [Arabidopsis thaliana]                                                                                                                                                                                                                                                                                                      | 441 | 416 | 0         | 94.3   | 82.8 | 85.9 | SNARE associated Golgi protein         | gbpln | Arabidopsis thaliana | AT4G14950.1   Symbols:   SNARE associated Golgi protein family   chr4:8545517-8547722 FORWARD LENGTH=416                                                                                                                                                                                                                                                          | 441 | 416 | 0         | 94.3   | 82.8 | 85.9 |
| Rsa1.0_00033.1.g2018.t1 | gb AAL47166.1 AF449459.1 diamine oxidase [Brassica juncea]                                                                                                                                                                                                                                                                                                                                                                                                                                                               | 649 | 649 | 0         | 100.0  | 96.6 | 98.6 | diamine oxidase                        | gbpln | Brassica juncea      | AT4G14940.1   Symbols: ATAO1, AO1   amine oxidase 1   chr4:8541879-8544304 FORWARD LENGTH=650                                                                                                                                                                                                                                                                     | 649 | 650 | 0         | 100.2  | 90.1 | 95.4 |
| Rsa1.0_00033.1.g2019.t1 | refNP_567449.1  5'-nucleotidase [Arabidopsis thaliana] gi 21593317 gb AAM65266.1  unknown [Arabidopsis thaliana] gi 27311791 gb AAO0861.1  expressed protein [Arabidopsis thaliana] gi 30984528 gb AAP42727.1  At4g14930 [Arabidopsis thaliana] gi 332658124 gb AEE83524.1  survival protein SurE-like phosphatase/nucleotidase [Arabidopsis thaliana]                                                                                                                                                                   | 296 | 315 | 1.00E-138 | 106.4  | 81.1 | 89.9 | 5'-nucleotidase                        | gbpln | Arabidopsis thaliana | AT4G14930.1   Symbols:   Survival protein SurE-like phosphatase/nucleotidase   chr4:8538831-8541205 FORWARD LENGTH=315                                                                                                                                                                                                                                            | 296 | 315 | 1.00E-140 | 106.4  | 81.1 | 89.9 |

|                         |                                                                                                                                                                                                                                                                                                                                                                                                                                         |     |      |           |       |      |      |                                                  |             |                      |                                                                                                                                                            |     |      |           |       |      |      |
|-------------------------|-----------------------------------------------------------------------------------------------------------------------------------------------------------------------------------------------------------------------------------------------------------------------------------------------------------------------------------------------------------------------------------------------------------------------------------------|-----|------|-----------|-------|------|------|--------------------------------------------------|-------------|----------------------|------------------------------------------------------------------------------------------------------------------------------------------------------------|-----|------|-----------|-------|------|------|
| Rsa1.0_00033.1.g2020.t1 | refNP_194638.1  Ribonuclease H-like protein [Arabidopsis thaliana] gi 4972055 emb CAB43923.1  putative protein [Arabidopsis thaliana] gi 7269807 emb CAB79667.1  putative protein [Arabidopsis thaliana] gi 67633766 gb AA78807.1  putative reverse transcriptase/RNA-dependent DNA polymerase [Arabidopsis thaliana] gi 332660185 gb AEE85585.1  Ribonuclease H-like protein [Arabidopsis thaliana]                                    | 108 | 575  | 4.00E-16  | 532.4 | 35.2 | 43.5 | Ribonuclease H-like protein                      | gbpln       | Arabidopsis thaliana | AT4G29090.1   Symbols: Ribonuclease H-like superfamily protein   chr4:14333528-14335255 FORWARD LENGTH=575                                                 | 108 | 575  | 6.00E-19  | 532.4 | 35.2 | 43.5 |
| Rsa1.0_00033.1.g2021.t1 | refXP_002876895.1  hypothetical protein ARALYDRAFT_484284 [Arabidopsis lyrata subsp. lyrata] gi 297322733 gb EFH53154.1  hypothetical protein ARALYDRAFT_484284 [Arabidopsis lyrata subsp. lyrata]                                                                                                                                                                                                                                      | 335 | 333  | 1.00E-166 | 99.4  | 84.5 | 91.3 | hypothetical protein ARALYDRAFT_484284           | gbpln       | Arabidopsis lyrata   | AT2G03750.1   Symbols: P-loop containing nucleoside triphosphate hydrolases superfamily protein   chr2:1147968-1149023 REVERSE LENGTH=351                  | 335 | 351  | 1.00E-161 | 104.8 | 82.1 | 90.1 |
| Rsa1.0_00033.1.g2022.t1 | emb CAB10271.1  hypothetical protein [Arabidopsis thaliana] gi 7268238 emb CAB78534.1  hypothetical protein [Arabidopsis thaliana]                                                                                                                                                                                                                                                                                                      | 420 | 1040 | 1.00E-106 | 247.6 | 64.0 | 75.0 | hypothetical protein                             | gbpln       | Arabidopsis thaliana | AT4G14920.1   Symbols: Acyl-CoA N-acyltransferase with RING/FYVE/PHD-type zinc finger protein   chr4:8531157-8535842 REVERSE LENGTH=1138                   | 420 | 1138 | 1.00E-108 | 271.0 | 64.0 | 75.0 |
| Rsa1.0_00033.1.g2023.t1 | refNP_001147025.1  ferredoxin [Zea mays] gi 195066586 gb ACG25123.1  ferredoxin [Zea mays]                                                                                                                                                                                                                                                                                                                                              | 151 | 151  | 1.00E-75  | 100.0 | 92.7 | 96.0 | ferredoxin                                       | gbenv/gbpln | Zea mays             | AT4G14890.1   Symbols: FdC2   2Fe-2S ferredoxin-like superfamily protein   chr4:8520887-8521351 FORWARD LENGTH=154                                         | 151 | 154  | 3.00E-72  | 102.0 | 88.7 | 94.0 |
| Rsa1.0_00033.1.g2024.t1 | gb ACX70136.1  O-acetylserine(thiol)lyase isoform A6 [Brassica rapa subsp. chinensis]                                                                                                                                                                                                                                                                                                                                                   | 322 | 322  | 1.00E-180 | 100.0 | 98.1 | 98.8 | O-acetylserine(thiol)lyase isoform A6            | gbpln       | Brassica rapa        | AT4G14880.4   Symbols: OAS1   O-acetylserine (thiol) lyase (OAS-TL) isoform A1   chr4:8518209-8520050 REVERSE LENGTH=322                                   | 322 | 322  | 1.00E-167 | 100.0 | 96.3 | 97.8 |
| Rsa1.0_00033.1.g2025.t1 | gb EOA18180.1  hypothetical protein CARUB_v10006658mg [Capsella rubella]                                                                                                                                                                                                                                                                                                                                                                | 371 | 177  | 3.00E-70  | 47.7  | 38.5 | 41.2 | hypothetical protein CARUB_v10006658mg           | gbpln       | Capsella rubella     | AT4G14870.1   Symbols: SECE1   secE/sec61-gamma protein transport protein   chr4:8517248-8517781 FORWARD LENGTH=177                                        | 371 | 177  | 1.00E-69  | 47.7  | 37.7 | 39.4 |
| Rsa1.0_00033.1.g2026.t1 | refNP_193218.1  pentatricopeptide repeat-containing protein [Arabidopsis thaliana] gi 75274931 sp O23337.1 PP311_ARATH RecName: Full=Pentatricopeptide repeat-containing protein At4g14820 gi 2244839 emb CAB10261.1  hypothetical protein [Arabidopsis thaliana] gi 7268228 emb CAB78524.1  hypothetical protein [Arabidopsis thaliana] gi 332658106 gb AEE83506.1  pentatricopeptide repeat-containing protein [Arabidopsis thaliana] | 628 | 722  | 0         | 115.0 | 78.5 | 88.5 | pentatricopeptide repeat-containing protein      | gbpln       | Arabidopsis thaliana | AT4G14820.1   Symbols: Pentatricopeptide repeat (PPR) superfamily protein   chr4:8507794-8510038 REVERSE LENGTH=722                                        | 628 | 722  | 0         | 115.0 | 78.5 | 88.5 |
| Rsa1.0_00033.1.g2027.t1 | gb EOA18115.1  hypothetical protein CARUB_v10006576mg [Capsella rubella]                                                                                                                                                                                                                                                                                                                                                                | 106 | 106  | 2.00E-45  | 100.0 | 84.9 | 87.7 | hypothetical protein CARUB_v10006576mg           | gbpln       | Capsella rubella     | AT4G14819.1   Symbols: Protein of unknown function (DUF1677)   chr4:8507365-8507679 FORWARD LENGTH=104                                                     | 106 | 104  | 1.00E-46  | 98.1  | 83.0 | 87.7 |
| Rsa1.0_00033.1.g2028.t1 | refXP_002870280.1  predicted protein [Arabidopsis lyrata subsp. lyrata] gi 297316116 gb EFH46539.1  predicted protein [Arabidopsis lyrata subsp. lyrata]                                                                                                                                                                                                                                                                                | 165 | 155  | 1.00E-53  | 93.9  | 67.3 | 75.2 | predicted protein                                | gbpln       | Arabidopsis lyrata   | AT4G14815.1   Symbols: Bifunctional inhibitor/lipid-transfer protein/seed storage 2S albumin superfamily protein   chr4:8505122-8505760 FORWARD LENGTH=156 | 165 | 156  | 1.00E-52  | 94.5  | 64.2 | 73.9 |
| Rsa1.0_00033.1.g2029.t1 | refXP_002885514.1  hypothetical protein ARALYDRAFT_898737 [Arabidopsis lyrata subsp. lyrata] gi 297331354 gb EFH61773.1  hypothetical protein ARALYDRAFT_898737 [Arabidopsis lyrata subsp. lyrata]                                                                                                                                                                                                                                      | 204 | 204  | 1.00E-111 | 100.0 | 94.1 | 99.5 | hypothetical protein ARALYDRAFT_898737           | gbpln       | Arabidopsis lyrata   | AT3G22630.1   Symbols: PBD1, PRCGB   20S proteasome beta subunit D1   chr3:8009709-8010774 REVERSE LENGTH=204                                              | 204 | 204  | 1.00E-113 | 100.0 | 93.6 | 99.0 |
| Rsa1.0_00033.1.g2030.t1 | refNP_193215.2  ATP-dependent RNA helicase, mitochondrial (SUV3) [Arabidopsis thaliana] gi 5823579 emb CAB53782.1  mitochondrial RNA helicase [Arabidopsis thaliana] gi 22655093 gb AAM98137.1  RNA helicase like protein [Arabidopsis thaliana] gi 31711986 gb AAP68349.1  At4g14790 [Arabidopsis thaliana] gi 332658099 gb AEE83499.1  ATP-dependent RNA helicase, mitochondrial (SUV3) [Arabidopsis thaliana]                        | 599 | 571  | 0         | 95.3  | 80.6 | 86.5 | ATP-dependent RNA helicase, mitochondrial (SUV3) | gbpln       | Arabidopsis thaliana | AT4G14790.1   Symbols: ATSUV3, EDA15   ATP-dependent RNA helicase, mitochondrial (SUV3)   chr4:8496351-849829 REVERSE LENGTH=571                           | 599 | 571  | 0         | 95.3  | 80.6 | 86.5 |

|                         |                                                                                                                                                                                                                                                                                                                                                                                                                                                                                                                                                                                                                                                                                                                              |      |      |           |       |      |      |                                                     |       |                      |                                                                                                                                                                                                                                                                                                                                                  |      |      |           |       |      |      |
|-------------------------|------------------------------------------------------------------------------------------------------------------------------------------------------------------------------------------------------------------------------------------------------------------------------------------------------------------------------------------------------------------------------------------------------------------------------------------------------------------------------------------------------------------------------------------------------------------------------------------------------------------------------------------------------------------------------------------------------------------------------|------|------|-----------|-------|------|------|-----------------------------------------------------|-------|----------------------|--------------------------------------------------------------------------------------------------------------------------------------------------------------------------------------------------------------------------------------------------------------------------------------------------------------------------------------------------|------|------|-----------|-------|------|------|
| Rsa1.0_00033.1.g2031.t1 | refNP_201386.1   F-box protein [Arabidopsis thaliana] gi 75170652 sp Q9FHP3.1 FB300_ARAT H RecName: Full=F-box protein At5g65850 gi 9759569 dbj BAB11132.1 unnamed protein product [Arabidopsis thaliana] gi 50253490 gb AAT71947.1  At5g65850 [Arabidopsis thaliana] gi 51972136 gb AAU15172.1  At5g65850 [Arabidopsis thaliana] gi 33201073 gb AED98114.1  F-box protein [Arabidopsis thaliana] refNP_180705.1   F-box protein DOR [Arabidopsis thaliana] gi 229807544 sp Q5BPS3.2 DOR_ARATH RecName: Full=F-box protein DOR; AltName: Full=Protein DROUGHT TOLERANCE REPRESSOR gi 4589954 gb AAD26472.1  hypothetical protein [Arabidopsis thaliana] gi 330253458 gb AEC08552.1  F-box protein DOR [Arabidopsis thaliana] | 388  | 392  | 1.00E-81  | 101.0 | 46.6 | 63.4 | F-box protein                                       | gbpln | Arabidopsis thaliana | AT5G65850.1   Symbols:   F-box and associated interaction domains-containing protein   chr5:26346317-26347495 FORWARD LENGTH=392                                                                                                                                                                                                                 | 388  | 392  | 2.00E-84  | 101.0 | 46.6 | 63.4 |
| Rsa1.0_00033.1.g2032.t1 | gb 229807544 sp Q5BPS3.2 DOR_ARATH RecName: Full=F-box protein DOR; AltName: Full=Protein DROUGHT TOLERANCE REPRESSOR gi 4589954 gb AAD26472.1  hypothetical protein [Arabidopsis thaliana] gi 330253458 gb AEC08552.1  F-box protein DOR [Arabidopsis thaliana]                                                                                                                                                                                                                                                                                                                                                                                                                                                             | 427  | 387  | 8.00E-77  | 90.6  | 43.1 | 56.7 | F-box protein DOR                                   | gbpln | Arabidopsis thaliana | AT2G31470.1   Symbols: DOR   F-box and associated interaction domains-containing protein   chr2:13407492-13408655 REVERSE LENGTH=387                                                                                                                                                                                                             | 427  | 387  | 2.00E-79  | 90.6  | 43.1 | 56.7 |
| Rsa1.0_00033.1.g2033.t3 | gb AAC63844.1  putative non-LTR retroelement reverse transcriptase [Arabidopsis thaliana]                                                                                                                                                                                                                                                                                                                                                                                                                                                                                                                                                                                                                                    | 1332 | 1231 | 0         | 92.4  | 58.0 | 70.9 | putative non-LTR retroelement reverse transcriptase | gbpln | Arabidopsis thaliana | AT5G42905.1   Symbols:   Polynucleotidyl transferase, ribonuclease H-like superfamily protein   chr5:17201414-17202323 REVERSE LENGTH=258                                                                                                                                                                                                        | 1332 | 258  | 6.00E-81  | 19.4  | 10.8 | 13.2 |
| Rsa1.0_00033.1.g2034.t1 | gb EOA15412.1  hypothetical protein CARUB_v10007448mg [Capsella rubella]                                                                                                                                                                                                                                                                                                                                                                                                                                                                                                                                                                                                                                                     | 647  | 675  | 0         | 104.3 | 75.0 | 83.3 | hypothetical protein CARUB_v10007448mg              | gbpln | Capsella rubella     | AT4G14770.1   Symbols: TCX2, ATTCX2   TESMIN/TSO1-like CXC 2   chr4:8481522-8484825 REVERSE LENGTH=674                                                                                                                                                                                                                                           | 647  | 674  | 0         | 104.2 | 75.4 | 83.6 |
| Rsa1.0_00033.1.g2035.t1 | gb EOA15328.1  hypothetical protein CARUB_v10003978mg [Capsella rubella]                                                                                                                                                                                                                                                                                                                                                                                                                                                                                                                                                                                                                                                     | 1606 | 1717 | 0         | 106.9 | 77.1 | 87.9 | hypothetical protein CARUB_v10003978mg              | gbpln | Capsella rubella     | AT4G14760.1   Symbols:   kinase interacting (KIP1-like) family protein   chr4:8475718-8481094 FORWARD LENGTH=1710                                                                                                                                                                                                                                | 1606 | 1710 | 0         | 106.5 | 77.0 | 87.4 |
| Rsa1.0_00033.1.g2036.t1 | gb AAL86322.1  unknown protein [Arabidopsis thaliana]                                                                                                                                                                                                                                                                                                                                                                                                                                                                                                                                                                                                                                                                        | 373  | 409  | 1.00E-150 | 109.7 | 78.8 | 86.3 | unknown protein                                     | gbpln | Arabidopsis thaliana | AT4G14750.1   Symbols: IQD19   IQ-domain 19   chr4:8470449-8471903 FORWARD LENGTH=387                                                                                                                                                                                                                                                            | 373  | 387  | 1.00E-152 | 103.8 | 78.8 | 86.3 |
| Rsa1.0_00033.1.g2037.t1 | ref XP_002868255.1  hypothetical protein ARALYDRAFT_493423 [Arabidopsis lyrata subsp. lyrata] gi 297314091 gb EFH44514.1  hypothetical protein ARALYDRAFT_493423 [Arabidopsis lyrata subsp. lyrata]                                                                                                                                                                                                                                                                                                                                                                                                                                                                                                                          | 201  | 214  | 1.00E-77  | 106.5 | 73.1 | 83.6 | hypothetical protein ARALYDRAFT_493423              | gbpln | Arabidopsis lyrata   | AT4G14746.1   Symbols:   CONTAINS InterPro DOMAIN/s: EGF-like (InterPro:IPR006210); Has 259 Blast hits to 234 proteins in 55 species: Archae - 0; Bacteria - 0; Metazoa - 184; Fungi - 0; Plants - 69; Viruses - 0; Other Eukaryotes - 6 (source: NCBI BLINK).   chr4:8462720-8464326 REVERSE LENGTH=212                                         | 201  | 212  | 2.00E-64  | 105.5 | 71.1 | 82.6 |
| Rsa1.0_00033.1.g2038.t1 | ref NP_193210.2  uncharacterized protein [Arabidopsis thaliana] gi 42572905 ref NP_974549.1  uncharacterized protein [Arabidopsis thaliana] gi 18377642 gb AAL66971.1  unknown protein [Arabidopsis thaliana] gi 23297568 gb AANI2896.1  unknown protein [Arabidopsis thaliana] gi 332658090 gb AEE83490.1  uncharacterized protein AT4G14740 [Arabidopsis thaliana] gi 332658091 gb AEE83491.1  uncharacterized protein AT4G14740 [Arabidopsis thaliana]                                                                                                                                                                                                                                                                    | 472  | 475  | 0         | 100.6 | 91.7 | 94.9 | uncharacterized protein                             | gbpln | Arabidopsis thaliana | AT4G14740.2   Symbols:   Plant protein of unknown function (DUF828) with plant pleckstrin homology-like region   chr4:8450567-8453946 REVERSE LENGTH=475                                                                                                                                                                                         | 472  | 475  | 0         | 100.6 | 91.7 | 94.9 |
| Rsa1.0_00033.1.g2039.t1 | gb ACJ68113.1  hypothetical protein [Brassica napus]                                                                                                                                                                                                                                                                                                                                                                                                                                                                                                                                                                                                                                                                         | 239  | 239  | 1.00E-104 | 100.0 | 88.7 | 95.4 | hypothetical protein                                | gbpln | Brassica napus       | AT4G14730.1   Symbols:   Bax inhibitor-1 family protein   chr4:8448607-8450001 FORWARD LENGTH=235                                                                                                                                                                                                                                                | 239  | 235  | 4.00E-89  | 98.3  | 71.1 | 84.1 |
| Rsa1.0_00033.1.g2040.t1 | ref NP_001031641.1  epidermal patterning factor-like protein 4 [Arabidopsis thaliana] gi 122209356 sp Q2V3J3.1 EPFL4_ARAT H RecName: Full=EPIDERMAL PATTERNING FACTOR-like protein 4; Short=EPF-like protein 4; Flags: Precursor gi 98961833 gb ABF59246.1  unknown protein [Arabidopsis thaliana] gi 332658088 gb AEE83488.1  epidermal patterning factor-like protein 4 [Arabidopsis thaliana]                                                                                                                                                                                                                                                                                                                             | 117  | 109  | 1.00E-32  | 93.2  | 62.4 | 67.5 | epidermal patterning factor-like protein 4          | gbpln | Arabidopsis thaliana | AT4G14723.1   Symbols:   BEST Arabidopsis thaliana protein match is: allergen-related (TAIR:AT3G22820.1); Has 35333 Blast hits to 34131 proteins in 2444 species: Archae - 798; Bacteria - 22429; Metazoa - 974; Fungi - 991; Plants - 531; Viruses - 0; Other Eukaryotes - 9610 (source: NCBI BLINK).   chr4:8440167-8440693 FORWARD LENGTH=109 | 117  | 109  | 2.00E-35  | 93.2  | 62.4 | 67.5 |
| Rsa1.0_00033.1.g2041.t1 | gb AAR03591.1  ARD-like protein [Brassica juncea]                                                                                                                                                                                                                                                                                                                                                                                                                                                                                                                                                                                                                                                                            | 204  | 195  | 1.00E-102 | 95.6  | 87.7 | 89.7 | ARD-like protein                                    | gbpln | Brassica juncea      | AT4G14710.2   Symbols: ATARD2   RmlC-like cupins superfamily protein   chr4:8424897-8426360 REVERSE LENGTH=199                                                                                                                                                                                                                                   | 204  | 199  | 1.00E-99  | 97.5  | 83.3 | 86.8 |



|                         |                                                                                                                                                                                                                                                                                                                                                                                                                                                                                                                                                                                                                                                                                                                                                                                                                                              |     |     |           |       |      |      |                                          |       |                      |                                                                                                                                                                                                                                                                                                                                                                                                                                                                      |     |     |           |       |      |      |
|-------------------------|----------------------------------------------------------------------------------------------------------------------------------------------------------------------------------------------------------------------------------------------------------------------------------------------------------------------------------------------------------------------------------------------------------------------------------------------------------------------------------------------------------------------------------------------------------------------------------------------------------------------------------------------------------------------------------------------------------------------------------------------------------------------------------------------------------------------------------------------|-----|-----|-----------|-------|------|------|------------------------------------------|-------|----------------------|----------------------------------------------------------------------------------------------------------------------------------------------------------------------------------------------------------------------------------------------------------------------------------------------------------------------------------------------------------------------------------------------------------------------------------------------------------------------|-----|-----|-----------|-------|------|------|
| Rsa1.0_00033.1.g2042.t1 | refNP_567438.1  early light-inducible protein 2 [Arabidopsis thaliana] gi 13878007 gb AAK44081.1 AF370266.1 unknown protein [Arabidopsis thaliana] gi 17104737 gb AL34257.1  unknown protein [Arabidopsis thaliana] gi 332658075 gb AEE83475.1  early light-inducible protein 2 [Arabidopsis thaliana]                                                                                                                                                                                                                                                                                                                                                                                                                                                                                                                                       | 127 | 193 | 6.00E-55  | 152.0 | 84.3 | 88.2 | early light-inducible protein 2          | gbpln | Arabidopsis thaliana | AT4G14690.1   Symbols: ELIP2   Chlorophyll A-B binding family protein   chr4:8418373-8419129 FORWARD LENGTH=193                                                                                                                                                                                                                                                                                                                                                      | 127 | 193 | 1.00E-57  | 152.0 | 84.3 | 88.2 |
| Rsa1.0_00033.1.g2043.t1 | gb AAR03591.1  ARD-like protein [Brassica juncea]                                                                                                                                                                                                                                                                                                                                                                                                                                                                                                                                                                                                                                                                                                                                                                                            | 195 | 195 | 1.00E-110 | 100.0 | 97.9 | 99.0 | ARD-like protein                         | gbpln | Brassica juncea      | AT4G14710.2   Symbols: ATARD2   RmlC-like cupins superfamily protein   chr4:8424897-8426360 REVERSE LENGTH=199                                                                                                                                                                                                                                                                                                                                                       | 195 | 199 | 1.00E-106 | 102.1 | 93.3 | 96.9 |
| Rsa1.0_00033.1.g2044.t1 | gb EOA18123.1  hypothetical protein CARUB_v10006584mg [Capsella rubella]                                                                                                                                                                                                                                                                                                                                                                                                                                                                                                                                                                                                                                                                                                                                                                     | 191 | 191 | 2.00E-80  | 100.0 | 85.3 | 90.1 | hypothetical protein CARUB_v10006584mg   | gbpln | Capsella rubella     | AT4G14690.1   Symbols: ELIP2   Chlorophyll A-B binding family protein   chr4:8418373-8419129 FORWARD LENGTH=193                                                                                                                                                                                                                                                                                                                                                      | 191 | 193 | 2.00E-79  | 101.0 | 85.3 | 90.6 |
| Rsa1.0_00033.1.g2045.t1 | gb ACV04807.1  ATP sulfurylase 3 [Brassica napus]                                                                                                                                                                                                                                                                                                                                                                                                                                                                                                                                                                                                                                                                                                                                                                                            | 862 | 465 | 0         | 53.9  | 50.5 | 51.5 | ATP sulfurylase 3                        | gbpln | Brassica napus       | AT4G14680.1   Symbols: APS3   Pseudouridine synthase/archaeosine transglycosylase-like family protein   chr4:8413443-8415311 REVERSE LENGTH=465                                                                                                                                                                                                                                                                                                                      | 862 | 465 | 0         | 53.9  | 47.8 | 50.7 |
| Rsa1.0_00033.1.g2046.t1 | refNP_193202.2  DNA-directed RNA polymerase II subunit G [Arabidopsis thaliana] gi 149944323 gb ABR46204.1  At4g14660 [Arabidopsis thaliana] gi 332658072 gb AEE83472.1  DNA-directed RNA polymerase NRPE7 [Arabidopsis thaliana]                                                                                                                                                                                                                                                                                                                                                                                                                                                                                                                                                                                                            | 178 | 178 | 1.00E-78  | 100.0 | 77.0 | 91.0 | DNA-directed RNA polymerase II subunit G | gbpln | Arabidopsis thaliana | AT4G14660.1   Symbols: NRPE7   RNA polymerase Rpb7-like, N-terminal domain   chr4:8406500-8407036 REVERSE LENGTH=178                                                                                                                                                                                                                                                                                                                                                 | 178 | 178 | 4.00E-81  | 100.0 | 77.0 | 91.0 |
| Rsa1.0_00033.1.g2047.t1 | refXP_002868271.1  hypothetical protein ARALYDRAFT_493441 [Arabidopsis lyrata subsp. lyrata] gi 297314107 gb EFH44530.1  hypothetical protein ARALYDRAFT_493441 [Arabidopsis lyrata subsp. lyrata]                                                                                                                                                                                                                                                                                                                                                                                                                                                                                                                                                                                                                                           | 299 | 604 | 5.00E-26  | 202.0 | 28.1 | 33.8 | hypothetical protein ARALYDRAFT_493441   | gbpln | Arabidopsis lyrata   | AT4G14650.1   Symbols:   unknown protein; FUNCTIONS IN: molecular_function unknown; INVOLVED IN: N-terminal protein myristoylation; EXPRESSED IN: 6 plant structures; EXPRESSED DURING: petal differentiation and expansion stage; Has 2407 Blast hits to 1833 proteins in 310 species: Archaea - 19; Bacteria - 223; Metazoa - 708; Fungi - 285; Plants - 140; Viruses - 42; Other Eukaryotes - 990 (source: NCBI BLINK);   chr4:8400760-8402817 REVERSE LENGTH=632 | 299 | 632 | 1.00E-25  | 211.4 | 26.1 | 33.1 |
| Rsa1.0_00033.1.g2048.t1 | refNP_188935.1  ADP-ribosylation factor C1 [Arabidopsis thaliana] gi 334185556 refNP_001189951.1  ADP-ribosylation factor C1 [Arabidopsis thaliana] gi 297788976 refXP_002862508.1  ADP-ribosylation factor C1 [Arabidopsis lyrata subsp. lyrata] gi 11994726 dbj BAB03042.1  unnamed protein product [Arabidopsis thaliana] gi 17381004 gb AAL36314.1  putative ADP-ribosylation factor [Arabidopsis thaliana] gi 20465873 gb AAM20041.1  putative ADP-ribosylation factor [Arabidopsis thaliana] gi 21592454 gb AAM64405.1  ADP-ribosylation factor, putative [Arabidopsis thaliana] gi 297308070 gb EFH38766.1  ADP-ribosylation factor C1 [Arabidopsis lyrata subsp. lyrata] gi 332643174 gb AEE76695.1  ADP-ribosylation factor C1 [Arabidopsis thaliana] gi 332643175 gb AEE76696.1  ADP-ribosylation factor C1 [Arabidopsis thaliana] | 183 | 183 | 1.00E-98  | 100.0 | 95.1 | 97.3 | ADP-ribosylation factor C1               | gbpln | Arabidopsis lyrata   | AT3G22950.2   Symbols: ARFC1   ADP-ribosylation factor C1   chr3:8136364-8137513 REVERSE LENGTH=183                                                                                                                                                                                                                                                                                                                                                                  | 183 | 183 | 1.00E-101 | 100.0 | 95.1 | 97.3 |
| Rsa1.0_00033.1.g2049.t1 | refNP_193199.2  uncharacterized protein [Arabidopsis thaliana] gi 22136618 gb AAM91628.1  unknown protein [Arabidopsis thaliana] gi 332658067 gb AEE83467.1  uncharacterized protein AT4G14620 [Arabidopsis thaliana]                                                                                                                                                                                                                                                                                                                                                                                                                                                                                                                                                                                                                        | 362 | 341 | 1.00E-125 | 94.2  | 68.2 | 77.9 | uncharacterized protein                  | gbpln | Arabidopsis thaliana | AT4G14620.1   Symbols:   Protein of unknown function (DUF506)   chr4:8389246-8390448 REVERSE LENGTH=341                                                                                                                                                                                                                                                                                                                                                              | 362 | 341 | 1.00E-127 | 94.2  | 68.2 | 77.9 |
| Rsa1.0_00033.1.g2050.t1 | gb EOA18498.1  hypothetical protein CARUB_v10007049mg [Capsella rubella]                                                                                                                                                                                                                                                                                                                                                                                                                                                                                                                                                                                                                                                                                                                                                                     | 489 | 488 | 0         | 99.8  | 85.1 | 90.4 | hypothetical protein CARUB_v10007049mg   | gbpln | Capsella rubella     | AT4G14605.1   Symbols:   Mitochondrial transcription termination factor family protein   chr4:8378815-8380564 FORWARD LENGTH=493                                                                                                                                                                                                                                                                                                                                     | 489 | 493 | 0         | 100.8 | 84.9 | 90.4 |
| Rsa1.0_00033.1.g2051.t2 | emb CAB10171.1  disease resistance Cf-2 like protein [Arabidopsis thaliana] gi 7268096 emb CAB78434.1  disease resistance Cf-2 like protein [Arabidopsis thaliana]                                                                                                                                                                                                                                                                                                                                                                                                                                                                                                                                                                                                                                                                           | 243 | 869 | 1.00E-45  | 357.6 | 44.9 | 52.7 | disease resistance Cf-2 like protein     | gbpln | Arabidopsis thaliana | AT4G13920.1   Symbols: AtRLP50, RLP50   receptor like protein 50   chr4:8043861-8046536 FORWARD LENGTH=891                                                                                                                                                                                                                                                                                                                                                           | 243 | 891 | 4.00E-48  | 366.7 | 44.9 | 52.7 |

|                         |                                                                                                                                                                                                                                                                                                                                                                                                                                                                                                                                                                                                                                                                                                          |     |     |           |       |      |       |                                              |       |                      |                                                                                                                                                                                                                                                                                                                                                    |     |     |           |       |      |       |
|-------------------------|----------------------------------------------------------------------------------------------------------------------------------------------------------------------------------------------------------------------------------------------------------------------------------------------------------------------------------------------------------------------------------------------------------------------------------------------------------------------------------------------------------------------------------------------------------------------------------------------------------------------------------------------------------------------------------------------------------|-----|-----|-----------|-------|------|-------|----------------------------------------------|-------|----------------------|----------------------------------------------------------------------------------------------------------------------------------------------------------------------------------------------------------------------------------------------------------------------------------------------------------------------------------------------------|-----|-----|-----------|-------|------|-------|
| Rsa1.0_00033.1.g2052.t1 | gb EOA15994.1  hypothetical protein CARUB_v10004113mg [Capsella rubella]                                                                                                                                                                                                                                                                                                                                                                                                                                                                                                                                                                                                                                 | 844 | 866 | 0         | 102.6 | 63.6 | 77.4  | hypothetical protein CARUB_v10004113mg       | gbpln | Capsella rubella     | AT4G13810.1   Symbols: AtRLP47, RLP47   receptor like protein 47   chr4:8005062-8007287 REVERSE LENGTH=741                                                                                                                                                                                                                                         | 844 | 741 | 0         | 87.8  | 55.8 | 67.8  |
| Rsa1.0_00034.1.g2053.t1 | gb EOA38545.1  hypothetical protein CARUB_v10010350mg [Capsella rubella]                                                                                                                                                                                                                                                                                                                                                                                                                                                                                                                                                                                                                                 | 133 | 196 | 6.00E-72  | 147.4 | 99.2 | 100.0 | hypothetical protein CARUB_v10010350mg       | gbpln | Capsella rubella     | AT1G20090.1   Symbols: ARAC4, ROP2, ATROP2, ATRAC4   RHO-related protein from plants 2   chr1:6967223-6968603 FORWARD LENGTH=195                                                                                                                                                                                                                   | 133 | 195 | 2.00E-74  | 146.6 | 99.2 | 100.0 |
| Rsa1.0_00034.1.g2054.t1 | ref XP_002893089.1  hypothetical protein ARALYDRAFT_472236 [Arabidopsis lyrata subsp. lyrata] gi 297338931 gb EFH69348.1  hypothetical protein ARALYDRAFT_472236 [Arabidopsis lyrata subsp. lyrata]                                                                                                                                                                                                                                                                                                                                                                                                                                                                                                      | 269 | 285 | 2.00E-69  | 105.9 | 67.3 | 77.7  | hypothetical protein ARALYDRAFT_472236       | gbpln | Arabidopsis lyrata   | AT1G20100.1   Symbols:   unknown protein; BEST Arabidopsis thaliana protein match is: unknown protein (TAIR:AT1G75860.1); Has 471 Blast hits to 438 proteins in 92 species: Archae - 0; Bacteria - 14; Metazoa - 217; Fungi - 43; Plants - 91; Viruses - 1; Other Eukaryotes - 105 (source: NCBI BLINK).   chr1:6969314-6970699 REVERSE LENGTH=285 | 269 | 285 | 2.00E-62  | 105.9 | 64.3 | 73.2  |
| Rsa1.0_00034.1.g2055.t1 | ref NP_564103.1  RING/FYVE/PHD zinc finger-containing protein [Arabidopsis thaliana] gi 136058333 gb AAK32902.1 AF367315.1 At1g20110/T20H2.10 [Arabidopsis thaliana] gi 16226228 gb AAL16109.1 AF428277.1 At1g20110/T20H2.10 [Arabidopsis thaliana] gi 23506043 gb AAN28881.1 At1g20110/T20H2.10 [Arabidopsis thaliana] gi 332191816 gb AEE29937.1  RING/FYVE/PHD zinc finger-containing protein [Arabidopsis thaliana]                                                                                                                                                                                                                                                                                  | 584 | 601 | 0         | 102.9 | 77.9 | 82.4  | RING/FYVE/PHD zinc finger-containing protein | gbpln | Arabidopsis thaliana | AT1G20110.1   Symbols:   RING/FYVE/PHD zinc finger superfamily protein   chr1:6971554-6974578 FORWARD LENGTH=601                                                                                                                                                                                                                                   | 584 | 601 | 0         | 102.9 | 77.9 | 82.4  |
| Rsa1.0_00034.1.g2056.t1 | gb EOA37331.1  hypothetical protein CARUB_v10011033mg [Capsella rubella]                                                                                                                                                                                                                                                                                                                                                                                                                                                                                                                                                                                                                                 | 321 | 389 | 1.00E-101 | 121.2 | 53.6 | 66.4  | hypothetical protein CARUB_v10011033mg       | gbpln | Capsella rubella     | AT1G20132.1   Symbols:   GDSL-like Lipase/Acylhydrolase superfamily protein   chr1:6981358-6983495 FORWARD LENGTH=383                                                                                                                                                                                                                              | 321 | 383 | 1.00E-101 | 119.3 | 52.6 | 64.8  |
| Rsa1.0_00034.1.g2057.t1 | ref NP_173445.2  uncharacterized protein [Arabidopsis thaliana] gi 158706505 sp Q6DYE5.2 U496K_ARA TH RecName: Full=UPF0496 protein At1g20180 gi 8778981 gb AAF79896.1 AC022472.5 Contains similarity to At14a protein from Arabidopsis thaliana gi 4589123 [Arabidopsis thaliana] gi 91805813 gb ABE65635.1  hypothetical protein At1g20180 [Arabidopsis thaliana] gi 332191826 gb AEE29947.1  uncharacterized protein AT1G20180 [Arabidopsis thaliana]                                                                                                                                                                                                                                                 | 390 | 390 | 1.00E-150 | 100.0 | 77.7 | 85.4  | uncharacterized protein                      | gbpln | Arabidopsis thaliana | AT1G20180.1   Symbols:   Protein of unknown function (DUF677)   chr1:6996354-6997779 FORWARD LENGTH=390                                                                                                                                                                                                                                            | 390 | 390 | 1.00E-153 | 100.0 | 77.7 | 85.4  |
| Rsa1.0_00034.1.g2058.t1 | ref XP_002893092.1  Alpha-expansin 11 precursor [Arabidopsis lyrata subsp. lyrata] gi 297338934 gb EFH69351.1  Alpha-expansin 11 precursor [Arabidopsis lyrata subsp. lyrata] ref NP_173447.1  26S proteasome regulatory subunit N3 [Arabidopsis thaliana] gi 30316389 sp Q9LNU4.3 PSD31_ARAT H RecName: Full=Probable 26S proteasome non-ATPase regulatory subunit 3a; Short=26S proteasome subunit S3-a; AltName: Full=26S proteasome regulatory subunit RPN3a; AltName: Full=Protein EMBRYO DEFECTIVE 2719 gi 32700016 gb AAP86658.1  26S proteasome subunit RPN3a [Arabidopsis thaliana] gi 332191829 gb AEE29950.1  probable 26S proteasome non-ATPase regulatory subunit 3a [Arabidopsis thaliana] | 213 | 252 | 1.00E-101 | 118.3 | 90.6 | 95.3  | Alpha-expansin 11 precursor                  | gbpln | Arabidopsis lyrata   | AT1G20190.1   Symbols: ATEXPA11, EXP11, ATEXP11, ATHEXP ALPHA 1.14, EXPA11   expansin 11   chr1:6998762-6999710 REVERSE LENGTH=252                                                                                                                                                                                                                 | 213 | 252 | 7.00E-99  | 118.3 | 91.1 | 95.3  |
| Rsa1.0_00034.1.g2059.t1 | ref XP_002893094.1  hypothetical protein ARALYDRAFT_312946 [Arabidopsis lyrata subsp. lyrata] gi 297338936 gb EFH69353.1  hypothetical protein ARALYDRAFT_312946 [Arabidopsis lyrata subsp. lyrata]                                                                                                                                                                                                                                                                                                                                                                                                                                                                                                      | 463 | 488 | 0         | 105.4 | 95.0 | 97.6  | 26S proteasome regulatory subunit N3         | gbpln | Arabidopsis thaliana | AT1G20200.1   Symbols: EMB2719, HAP15   PAM domain (PCI/PINT associated module) protein   chr1:7001408-7004154 REVERSE LENGTH=488                                                                                                                                                                                                                  | 463 | 488 | 0         | 105.4 | 95.0 | 97.6  |
| Rsa1.0_00034.1.g2060.t1 | ref XP_002893094.1  hypothetical protein ARALYDRAFT_312946 [Arabidopsis lyrata subsp. lyrata] gi 297338936 gb EFH69353.1  hypothetical protein ARALYDRAFT_312946 [Arabidopsis lyrata subsp. lyrata]                                                                                                                                                                                                                                                                                                                                                                                                                                                                                                      | 369 | 529 | 1.00E-72  | 143.4 | 52.8 | 57.7  | hypothetical protein ARALYDRAFT_312946       | gbpln | Arabidopsis lyrata   | AT1G76010.1   Symbols:   Alba DNA/RNA-binding protein   chr1:28528505-28530488 REVERSE LENGTH=350                                                                                                                                                                                                                                                  | 369 | 350 | 5.00E-73  | 94.9  | 53.4 | 60.2  |

|                         |                                                                                                                                                                                                                                                                                                                                                               |     |     |           |       |      |      |                                                       |       |                      |                                                                                                                                           |     |     |           |       |      |      |
|-------------------------|---------------------------------------------------------------------------------------------------------------------------------------------------------------------------------------------------------------------------------------------------------------------------------------------------------------------------------------------------------------|-----|-----|-----------|-------|------|------|-------------------------------------------------------|-------|----------------------|-------------------------------------------------------------------------------------------------------------------------------------------|-----|-----|-----------|-------|------|------|
| Rsa1.0_00034.1.g2061.t2 | ref[XP_002890376.1] hypothetical protein ARALYDRAFT_472256 [Arabidopsis lyrata subsp. lyrata] gi 297336218 gb EFH66635.1  hypothetical protein ARALYDRAFT_472256 [Arabidopsis lyrata subsp. lyrata]                                                                                                                                                           | 486 | 487 | 0         | 100.2 | 98.1 | 98.8 | hypothetical protein ARALYDRAFT_472256                | gbpln | Arabidopsis lyrata   | AT1G20260.1   Symbols:   ATPase, V1 complex, subunit B protein   chr1:7016971-7020290 FORWARD LENGTH=487                                  | 486 | 487 | 0         | 100.2 | 97.9 | 98.6 |
| Rsa1.0_00034.1.g2062.t1 | gb EOA38379.1  hypothetical protein CARUB_v10009921mg [Capsella rubella]                                                                                                                                                                                                                                                                                      | 289 | 287 | 1.00E-155 | 99.3  | 91.3 | 96.5 | hypothetical protein CARUB_v10009921mg                | gbpln | Capsella rubella     | AT1G20270.1   Symbols:   2-oxoglutarate (2OG) and Fe(D)-dependent oxygenase superfamily protein   chr1:7021383-7022923 REVERSE LENGTH=287 | 289 | 287 | 1.00E-157 | 99.3  | 91.0 | 96.2 |
| Rsa1.0_00034.1.g2063.t1 | dbj BAJ33832.1  unnamed protein product [Theillungiella halophila]                                                                                                                                                                                                                                                                                            | 165 | 167 | 5.00E-75  | 101.2 | 92.1 | 96.4 | unnamed protein product                               | ----  | ----                 | AT1G20340.1   Symbols: DRT112, PETE2   Cupredoxin superfamily protein   chr1:7042770-7043273 REVERSE LENGTH=167                           | 165 | 167 | 6.00E-71  | 101.2 | 85.5 | 92.7 |
| Rsa1.0_00034.1.g2064.t1 | gb EOA37077.1  hypothetical protein CARUB_v10010213mg, partial [Capsella rubella]                                                                                                                                                                                                                                                                             | 219 | 229 | 1.00E-74  | 104.6 | 68.9 | 78.1 | hypothetical protein CARUB_v10010213mg, partial       | gbpln | Capsella rubella     | AT1G20350.1   Symbols: ATTIM17-1, TIM17-1   translocase inner membrane subunit 17-1   chr1:7043737-7044393 FORWARD LENGTH=218             | 219 | 218 | 2.00E-69  | 99.5  | 63.5 | 76.7 |
| Rsa1.0_00034.1.g2065.t1 | gb EOA37077.1  hypothetical protein CARUB_v10010213mg, partial [Capsella rubella]                                                                                                                                                                                                                                                                             | 220 | 229 | 2.00E-60  | 104.1 | 58.6 | 70.9 | hypothetical protein CARUB_v10010213mg, partial       | gbpln | Capsella rubella     | AT1G20350.1   Symbols: ATTIM17-1, TIM17-1   translocase inner membrane subunit 17-1   chr1:7043737-7044393 FORWARD LENGTH=218             | 220 | 218 | 4.00E-54  | 99.1  | 53.6 | 66.8 |
| Rsa1.0_00034.1.g2066.t1 | ref[NP_173472.1] 4-coumarate--CoA ligase-like 2 [Arabidopsis thaliana] gi 158564049 sp Q84P25.2 4CLL2_ARAT H RecName: Full=4-coumarate--CoA ligase-like 2 gi 332191856 gb AEE29977.1  4-coumarate--CoA ligase-like 2 [Arabidopsis thaliana]                                                                                                                   | 556 | 565 | 0         | 101.6 | 80.6 | 89.0 | 4-coumarate--CoA ligase-like 2                        | gbpln | Arabidopsis thaliana | AT1G20480.1   Symbols:   AMP-dependent synthetase and ligase family protein   chr1:7094978-7097073 REVERSE LENGTH=565                     | 556 | 565 | 0         | 101.6 | 80.6 | 89.0 |
| Rsa1.0_00034.1.g2067.t1 | gb AAP03015.1  4-coumarate--CoA ligase-like protein [Arabidopsis thaliana]                                                                                                                                                                                                                                                                                    | 534 | 550 | 0         | 103.0 | 76.2 | 86.9 | 4-coumarate--CoA ligase-like protein                  | gbpln | Arabidopsis thaliana | AT5G38120.1   Symbols: 4CL8   AMP-dependent synthetase and ligase family protein   chr5:15213773-15216137 FORWARD LENGTH=550              | 534 | 550 | 0         | 103.0 | 76.0 | 86.7 |
| Rsa1.0_00034.1.g2068.t1 | ref[XP_002893114.1] opc-8:0 CoA ligase1 [Arabidopsis lyrata subsp. lyrata] gi 297338956 gb EFH69373.1  opc-8:0 CoA ligase1 [Arabidopsis lyrata subsp. lyrata]                                                                                                                                                                                                 | 548 | 546 | 0         | 99.6  | 92.2 | 96.4 | opc-8:0 CoA ligase1                                   | gbpln | Arabidopsis lyrata   | AT1G20510.1   Symbols: OPCL1   OPC-8:0 CoA ligase1   chr1:7103645-7105856 REVERSE LENGTH=546                                              | 548 | 546 | 0         | 99.6  | 91.2 | 95.8 |
| Rsa1.0_00034.1.g2069.t1 | gb EOA36143.1  hypothetical protein CARUB_v10012650mg [Capsella rubella]                                                                                                                                                                                                                                                                                      | 230 | 233 | 1.00E-100 | 101.3 | 80.0 | 91.3 | hypothetical protein CARUB_v10012650mg                | gbpln | Capsella rubella     | AT1G20520.1   Symbols:   Arabidopsis protein of unknown function (DUF241)   chr1:7106922-7107617 REVERSE LENGTH=231                       | 230 | 231 | 1.00E-102 | 100.4 | 82.6 | 91.7 |
| Rsa1.0_00034.1.g2070.t1 | ref[XP_004291296.1] PREDICTED: small nuclear ribonucleoprotein Sm D3-like [Fragaria vesca subsp. vesca]                                                                                                                                                                                                                                                       | 130 | 131 | 1.00E-61  | 100.8 | 90.8 | 94.6 | PREDICTED: small nuclear ribonucleoprotein Sm D3-like | gbpln | Fragaria vesca       | AT1G20580.1   Symbols:   Small nuclear ribonucleoprotein family protein   chr1:7128979-7130371 FORWARD LENGTH=131                         | 130 | 131 | 7.00E-60  | 100.8 | 95.4 | 96.2 |
| Rsa1.0_00034.1.g2071.t1 | ref[NP_173485.1] cyclin-B2-3 [Arabidopsis thaliana] gi 147743080 sp Q9LDM4.2 CB23_ARA TH RecName: Full=Cyclin-B2-3; AltName: Full=G2/mitotic-specific cyclin-B2-3; Short=CycB2.3 gi 119935845 gb ABM06010.1  At1g20610 [Arabidopsis thaliana] gi 332191872 gb AEE29993.1  cyclin-B2-3 [Arabidopsis thaliana]                                                  | 421 | 429 | 0         | 101.9 | 83.4 | 91.2 | cyclin-B2-3                                           | gbpln | Arabidopsis thaliana | AT1G20610.1   Symbols: CYCB2.3   Cyclin B2.3   chr1:7135073-7137273 REVERSE LENGTH=429                                                    | 421 | 429 | 0         | 101.9 | 83.4 | 91.2 |
| Rsa1.0_00034.1.g2072.t1 | gb AAD30291.2 AF139538.1 catalase 2 [Raphanus sativus]                                                                                                                                                                                                                                                                                                        | 492 | 492 | 0         | 100.0 | 99.8 | 99.8 | catalase 2                                            | gbpln | Raphanus sativus     | AT1G20620.1   Symbols: CAT3, SEN2, ATCAT3   catalase 3   chr1:7143142-7146193 FORWARD LENGTH=492                                          | 492 | 492 | 0         | 100.0 | 98.6 | 99.4 |
| Rsa1.0_00034.1.g2073.t1 | # # # # # # # # # #                                                                                                                                                                                                                                                                                                                                           | #   | #   | #         | #     | #    | #    | -                                                     | ----  | ----                 | # # # # # # #                                                                                                                             | #   | #   | #         | #     | #    | #    |
| Rsa1.0_00034.1.g2074.t1 | gb EOA39657.1  hypothetical protein CARUB_v10008300mg [Capsella rubella]                                                                                                                                                                                                                                                                                      | 780 | 844 | 0         | 108.2 | 85.8 | 91.3 | hypothetical protein CARUB_v10008300mg                | gbpln | Capsella rubella     | AT1G20640.2   Symbols:   Plant regulator RWP-RK family protein   chr1:7155201-7157986 FORWARD LENGTH=844                                  | 780 | 844 | 0         | 108.2 | 86.0 | 91.0 |
| Rsa1.0_00034.1.g2075.t1 | ref[NP_173489.2] protein kinase-like protein [Arabidopsis thaliana] gi 8778594 gb AAF79602.1 AC027665.3 F5M15.3 [Arabidopsis thaliana] gi 8886951 gb AAF80637.1 AC069251_30 F2D10.13 [Arabidopsis thaliana] gi 51971194 dbj BAD44289.1  unknown protein [Arabidopsis thaliana] gi 332191880 gb AEE30001.1  protein kinase-like protein [Arabidopsis thaliana] | 377 | 381 | 0         | 101.1 | 92.6 | 95.0 | protein kinase-like protein                           | gbpln | Arabidopsis thaliana | AT1G20650.1   Symbols:   Protein kinase superfamily protein   chr1:7158422-7160022 REVERSE LENGTH=381                                     | 377 | 381 | 0         | 101.1 | 92.6 | 95.0 |

|                         |                                                                                                                                                                                                                                                                                                                                                                                                                                                                                                                                                                                                                                                                                                       |      |      |           |       |      |      |                                                 |       |                      |                                                                                                                                                                                                                                                             |      |      |           |       |      |      |
|-------------------------|-------------------------------------------------------------------------------------------------------------------------------------------------------------------------------------------------------------------------------------------------------------------------------------------------------------------------------------------------------------------------------------------------------------------------------------------------------------------------------------------------------------------------------------------------------------------------------------------------------------------------------------------------------------------------------------------------------|------|------|-----------|-------|------|------|-------------------------------------------------|-------|----------------------|-------------------------------------------------------------------------------------------------------------------------------------------------------------------------------------------------------------------------------------------------------------|------|------|-----------|-------|------|------|
| Rsa1.0_00034.1.g2076.t2 | gb[EOA39820.1] hypothetical protein CARUB_v10008487mg, partial [Capsella rubella]                                                                                                                                                                                                                                                                                                                                                                                                                                                                                                                                                                                                                     | 667  | 685  | 0         | 102.7 | 80.5 | 85.9 | hypothetical protein CARUB_v10008487mg, partial | gbpln | Capsella rubella     | AT1G20670.1   Symbols:   DNA-binding bromodomain-containing protein   chr1:7164537-7167933 REVERSE LENGTH=652                                                                                                                                               | 667  | 652  | 0         | 97.8  | 77.4 | 83.1 |
| Rsa1.0_00034.1.g2077.t2 | ref NP_173499.1  calcium-binding EF hand-containing protein [Arabidopsis thaliana]<br>gi 8886934 gb AAF80620.1 AC069251_13 F2D10.25 [Arabidopsis thaliana]<br>gi 110742187 dbj BAE99021.1  hypothetical protein [Arabidopsis thaliana] gi 332191898 gb AEE30019.1  calcium-binding EF hand-containing protein [Arabidopsis thaliana]<br>ref NP_173500.1  uncharacterized protein [Arabidopsis thaliana]<br>gi 8886946 gb AAF80632.1 AC069251_25 F2D10.26 [Arabidopsis thaliana]<br>gi 38454150 gb AAR20769.1  At1g20770 [Arabidopsis thaliana]<br>gi 41349930 gb AAS00350.1  At1g20770 [Arabidopsis thaliana]<br>gi 332191899 gb AEE30020.1  uncharacterized protein AT1G20770 [Arabidopsis thaliana] | 1035 | 1019 | 0         | 98.5  | 84.5 | 88.2 | calcium-binding EF hand-containing protein      | gbpln | Arabidopsis thaliana | AT1G20760.1   Symbols:   Calcium-binding EF hand family protein   chr1:7209515-7214773 FORWARD LENGTH=1019                                                                                                                                                  | 1035 | 1019 | 0         | 98.5  | 84.5 | 88.2 |
| Rsa1.0_00034.1.g2078.t1 | gi 38454150 gb AAR20769.1  At1g20770 [Arabidopsis thaliana]<br>gi 41349930 gb AAS00350.1  At1g20770 [Arabidopsis thaliana]<br>gi 332191899 gb AEE30020.1  uncharacterized protein AT1G20770 [Arabidopsis thaliana]                                                                                                                                                                                                                                                                                                                                                                                                                                                                                    | 223  | 215  | 9.00E-88  | 96.4  | 78.9 | 83.9 | uncharacterized protein                         | gbpln | Arabidopsis thaliana | AT1G20770.1   Symbols:   unknown protein; Has 59 Blast hits to 59 proteins in 24 species: Archae - 0; Bacteria - 0; Metazoa - 26; Fungi - 4; Plants - 29; Viruses - 0; Other Eukaryotes - 0 (source: NCBI BLINK).   chr1:7215345-7216648 REVERSE LENGTH=215 | 223  | 215  | 3.00E-90  | 96.4  | 78.9 | 83.9 |
| Rsa1.0_00034.1.g2079.t1 | gb[EOA39893.1] hypothetical protein CARUB_v10008332mg [Capsella rubella]                                                                                                                                                                                                                                                                                                                                                                                                                                                                                                                                                                                                                              | 870  | 801  | 0         | 92.1  | 76.2 | 84.4 | hypothetical protein CARUB_v10008332mg          | gbpln | Capsella rubella     | AT1G20780.1   Symbols: PUB44, ATPUB44, SAUL1   senescence-associated E3 ubiquitin ligase 1   chr1:7217812-7220609 FORWARD LENGTH=801                                                                                                                        | 870  | 801  | 0         | 92.1  | 76.7 | 83.6 |
| Rsa1.0_00034.1.g2080.t1 | ref NP_173502.2  F-box protein [Arabidopsis thaliana]<br>gi 75264017 sp Q9LM75.1 FBK6_ARATH RecName: Full=Putative F-box/kelch-repeat protein At1g20790<br>gi 8886945 gb AAF80631.1 AC069251_24 F2D10.28 [Arabidopsis thaliana]<br>gi 332191901 gb AEE30022.1  putative F-box/kelch-repeat protein [Arabidopsis thaliana]<br>ref NP_173503.1  F-box family protein [Arabidopsis thaliana]<br>gi 332191903 gb AEE30024.1  F-box family protein [Arabidopsis thaliana]                                                                                                                                                                                                                                  | 274  | 435  | 5.00E-64  | 158.8 | 50.4 | 64.2 | F-box protein                                   | gbpln | Arabidopsis thaliana | AT1G20790.1   Symbols:   F-box family protein   chr1:7220961-7222268 REVERSE LENGTH=435                                                                                                                                                                     | 274  | 435  | 1.00E-66  | 158.8 | 50.4 | 64.2 |
| Rsa1.0_00034.1.g2081.t1 | ref NP_173503.1  F-box family protein [Arabidopsis thaliana]<br>gi 332191903 gb AEE30024.1  F-box family protein [Arabidopsis thaliana]                                                                                                                                                                                                                                                                                                                                                                                                                                                                                                                                                               | 150  | 492  | 4.00E-22  | 328.0 | 51.3 | 64.0 | F-box family protein                            | gbpln | Arabidopsis thaliana | AT1G20800.1   Symbols:   F-box family protein   chr1:7228718-7231600 REVERSE LENGTH=492                                                                                                                                                                     | 150  | 492  | 1.00E-24  | 328.0 | 51.3 | 64.0 |
| Rsa1.0_00034.1.g2082.t1 | gb[EOA36226.1] hypothetical protein CARUB_v10010177mg [Capsella rubella]                                                                                                                                                                                                                                                                                                                                                                                                                                                                                                                                                                                                                              | 194  | 234  | 1.00E-81  | 120.6 | 85.1 | 92.3 | hypothetical protein CARUB_v10010177mg          | gbpln | Capsella rubella     | AT1G20823.1   Symbols:   RING/U-box superfamily protein   chr1:7238880-7239473 FORWARD LENGTH=197                                                                                                                                                           | 194  | 197  | 4.00E-82  | 101.5 | 87.1 | 91.8 |
| Rsa1.0_00034.1.g2083.t1 | ref NP_173507.1  multiple chloroplast division site 1 [Arabidopsis thaliana]<br>gi 26452945 dbj BAC43549.1  unknown protein [Arabidopsis thaliana]<br>gi 29824121 gb AAP04021.1  unknown protein [Arabidopsis thaliana]<br>gi 332191908 gb AEE30029.1  multiple chloroplast division site 1 [Arabidopsis thaliana]                                                                                                                                                                                                                                                                                                                                                                                    | 347  | 349  | 1.00E-163 | 100.6 | 82.1 | 88.8 | multiple chloroplast division site 1            | gbpln | Arabidopsis thaliana | AT1G20830.1   Symbols: MCD1   multiple chloroplast division site 1   chr1:7242933-7244736 FORWARD LENGTH=349                                                                                                                                                | 347  | 349  | 1.00E-166 | 100.6 | 82.1 | 88.8 |
| Rsa1.0_00034.1.g2084.t1 | dbj BAJ33724.1  unnamed protein product [Thellungiella halophila]                                                                                                                                                                                                                                                                                                                                                                                                                                                                                                                                                                                                                                     | 730  | 733  | 0         | 100.4 | 92.7 | 95.8 | unnamed protein product                         | ----  | ----                 | AT1G20840.1   Symbols: TMT1   tonoplast monosaccharide transporter1   chr1:7245107-7247674 REVERSE LENGTH=734                                                                                                                                               | 730  | 734  | 0         | 100.5 | 91.5 | 95.6 |
| Rsa1.0_00034.1.g2085.t1 | ref XP_002890413.1  hypothetical protein ARALYDRAFT_472321 [Arabidopsis lyrata subsp. lyrata]<br>gi 297336255 gb EFH66672.1  hypothetical protein ARALYDRAFT_472321 [Arabidopsis lyrata subsp. lyrata]<br>ref XP_002893134.1  phosphate transporter family protein [Arabidopsis lyrata subsp. lyrata]<br>gi 297338976 gb EFH69393.1  phosphate transporter family protein [Arabidopsis lyrata subsp. lyrata]                                                                                                                                                                                                                                                                                          | 356  | 357  | 0         | 100.3 | 92.4 | 94.7 | hypothetical protein ARALYDRAFT_472321          | gbpln | Arabidopsis lyrata   | AT1G20850.1   Symbols: XCP2   xylem cysteine peptidase 2   chr1:7252208-7253537 FORWARD LENGTH=356                                                                                                                                                          | 356  | 356  | 0         | 100.0 | 92.4 | 95.5 |
| Rsa1.0_00034.1.g2086.t1 | ref XP_002893134.1  phosphate transporter family protein [Arabidopsis lyrata subsp. lyrata]<br>gi 297338976 gb EFH69393.1  phosphate transporter family protein [Arabidopsis lyrata subsp. lyrata]                                                                                                                                                                                                                                                                                                                                                                                                                                                                                                    | 540  | 536  | 0         | 99.3  | 88.7 | 93.3 | phosphate transporter family protein            | gbpln | Arabidopsis lyrata   | AT1G20860.1   Symbols: PHT1.8   phosphate transporter 1:8   chr1:7254007-7258677 REVERSE LENGTH=534                                                                                                                                                         | 540  | 534  | 0         | 98.9  | 86.7 | 90.7 |
| Rsa1.0_00034.1.g2087.t1 | gb[EOA35544.1] hypothetical protein CARUB_v10020749mg [Capsella rubella]                                                                                                                                                                                                                                                                                                                                                                                                                                                                                                                                                                                                                              | 262  | 285  | 1.00E-113 | 108.8 | 79.0 | 88.9 | hypothetical protein CARUB_v10020749mg          | gbpln | Capsella rubella     | AT1G76460.1   Symbols:   RNA-binding (RRM/RBD/RNP motifs) family protein   chr1:28686932-28688506 REVERSE LENGTH=285                                                                                                                                        | 262  | 285  | 1.00E-113 | 108.8 | 77.9 | 87.4 |
| Rsa1.0_00034.1.g2088.t1 | gb AAB68964.1  trypsin inhibitor propeptide [Brassica oleracea]                                                                                                                                                                                                                                                                                                                                                                                                                                                                                                                                                                                                                                       | 173  | 214  | 6.00E-29  | 123.7 | 48.0 | 61.3 | trypsin inhibitor propeptide                    | gbpln | Brassica oleracea    | AT1G73260.1   Symbols: ATKTI1, KTI1   kunitz trypsin inhibitor 1   chr1:27547410-27548057 REVERSE LENGTH=215                                                                                                                                                | 173  | 215  | 5.00E-19  | 124.3 | 38.7 | 56.1 |
| Rsa1.0_00034.1.g2089.t2 | #                                                                                                                                                                                                                                                                                                                                                                                                                                                                                                                                                                                                                                                                                                     | #    | #    | #         | #     | #    | #    | -                                               | ----  | ----                 | #                                                                                                                                                                                                                                                           | #    | #    | #         | #     | #    | #    |

|                         |                                                                                                                                                                                                                                                                                                                                                                                                                                                                                                                                                                                                                                                                                                                                                                                     |     |     |           |       |      |      |                                                 |       |                      |                                                                                                                                                                                                                                                                                                                                                                                                                                                                                                                                                                                                    |     |     |           |       |      |      |
|-------------------------|-------------------------------------------------------------------------------------------------------------------------------------------------------------------------------------------------------------------------------------------------------------------------------------------------------------------------------------------------------------------------------------------------------------------------------------------------------------------------------------------------------------------------------------------------------------------------------------------------------------------------------------------------------------------------------------------------------------------------------------------------------------------------------------|-----|-----|-----------|-------|------|------|-------------------------------------------------|-------|----------------------|----------------------------------------------------------------------------------------------------------------------------------------------------------------------------------------------------------------------------------------------------------------------------------------------------------------------------------------------------------------------------------------------------------------------------------------------------------------------------------------------------------------------------------------------------------------------------------------------------|-----|-----|-----------|-------|------|------|
| Rsa1.0_00034.1.g2090.t1 | ref NP_173514.1  putative DNA-binding protein ESCAROLA [Arabidopsis thaliana]<br>gi 20532086 sp O9S7C9.1 ESCA_ARATH<br>RecName: Full=Putative DNA-binding protein ESCAROLA<br>gi 4836899 gb AAD30602.1 AC007369.12<br>Unknown protein [Arabidopsis thaliana]<br>gi 6319180 gb AAF07197.1 AF194974.1<br>ESCAROLA [Arabidopsis thaliana]<br>gi 30102700 gb AAP21268.1 At1g20900<br>[Arabidopsis thaliana]<br>gi 110736548 dbj BAF00240.1  putative DNA-binding protein [Arabidopsis thaliana]<br>gi 119657398 tpc FAA00298.1 <br>TPA: AT-hook motif nuclear localized protein 27 [Arabidopsis thaliana]<br>gi 225897950 dbj BAH30307.1 <br>hypothetical protein [Arabidopsis thaliana]<br>gi 332191917 gb AEE30038.1 <br>putative DNA-binding protein ESCAROLA [Arabidopsis thaliana] | 314 | 311 | 1.00E-120 | 99.0  | 94.3 | 94.9 | putative DNA-binding protein ESCAROLA           | gbpln | Arabidopsis thaliana | AT1G20900.1   Symbols: ESC, ORE7, AHL27<br>  Predicted AT-hook DNA-binding family protein   chr1:7273024-7273959 FORWARD<br>LENGTH=311                                                                                                                                                                                                                                                                                                                                                                                                                                                             | 314 | 311 | 1.00E-123 | 99.0  | 94.3 | 94.9 |
| Rsa1.0_00034.1.g2091.t1 | gb EOA40571.1  hypothetical protein CARUB_v10009301mg [Capsella rubella]                                                                                                                                                                                                                                                                                                                                                                                                                                                                                                                                                                                                                                                                                                            | 374 | 410 | 1.00E-142 | 109.6 | 73.0 | 80.7 | hypothetical protein CARUB_v10009301mg          | gbpln | Capsella rubella     | AT1G20910.1   Symbols:   ARID/BRIGHT<br>DNA-binding domain-containing protein  <br>chr1:7277209-7280635 REVERSE<br>LENGTH=398                                                                                                                                                                                                                                                                                                                                                                                                                                                                      | 374 | 398 | 1.00E-140 | 106.4 | 71.7 | 79.9 |
| Rsa1.0_00034.1.g2092.t1 | gb EOA39882.1  hypothetical protein CARUB_v10008559mg, partial [Capsella rubella]                                                                                                                                                                                                                                                                                                                                                                                                                                                                                                                                                                                                                                                                                                   | 619 | 639 | 0         | 103.2 | 94.0 | 97.1 | hypothetical protein CARUB_v10008559mg, partial | gbpln | Capsella rubella     | AT1G20950.1   Symbols:  <br>Phosphofructokinase family protein  <br>chr1:7297467-7301336 REVERSE<br>LENGTH=614                                                                                                                                                                                                                                                                                                                                                                                                                                                                                     | 619 | 614 | 0         | 99.2  | 94.0 | 97.1 |
| Rsa1.0_00034.1.g2093.t1 | ref XP_002890421.1  zinc-binding family protein [Arabidopsis lyrata subsp. lyrata]<br>gi 297336263 gb EFH66680.1 <br>zinc-binding family protein [Arabidopsis lyrata subsp. lyrata]                                                                                                                                                                                                                                                                                                                                                                                                                                                                                                                                                                                                 | 243 | 246 | 1.00E-132 | 101.2 | 91.4 | 97.1 | zinc-binding family protein                     | gbpln | Arabidopsis lyrata   | AT1G21000.2   Symbols:   PLATZ<br>transcription factor family protein  <br>chr1:7338013-7333088 FORWARD<br>LENGTH=243                                                                                                                                                                                                                                                                                                                                                                                                                                                                              | 243 | 243 | 1.00E-132 | 100.0 | 90.1 | 95.9 |
| Rsa1.0_00034.1.g2094.t1 | gb EOA36953.1  hypothetical protein CARUB_v10009886mg [Capsella rubella]                                                                                                                                                                                                                                                                                                                                                                                                                                                                                                                                                                                                                                                                                                            | 209 | 296 | 4.00E-81  | 141.6 | 79.9 | 89.0 | hypothetical protein CARUB_v10009886mg          | gbpln | Capsella rubella     | AT1G21010.1   Symbols:   unknown protein;<br>FUNCTIONS IN: molecular, function unknown;<br>INVOLVED IN: N-terminal protein<br>myristoylation; LOCATED IN:<br>cellular, component unknown; EXPRESSED<br>IN: 24 plant structures; EXPRESSED<br>DURING: 14 growth stages; BEST<br>Arabidopsis thaliana protein match is:<br>unknown protein (TAIR:AT1G76600.1); Has<br>206 Blast hits to 206 proteins in 13 species:<br>Archae - 0; Bacteria - 0; Metazoa - 0; Fungi<br>- 0; Plants - 206; Viruses - 0; Other<br>Eukaryotes - 0 (source: NCBI BLINK).  <br>chr1:7346239-7346871 FORWARD<br>LENGTH=210 | 209 | 210 | 3.00E-80  | 100.5 | 78.0 | 87.1 |
| Rsa1.0_00034.1.g2095.t1 | dbj BAJ33623.1  unnamed protein product [Theillungiella halophila]                                                                                                                                                                                                                                                                                                                                                                                                                                                                                                                                                                                                                                                                                                                  | 471 | 471 | 0         | 100.0 | 89.2 | 94.3 | unnamed protein product                         | ----  | ----                 | AT1G21400.1   Symbols:   Thiamin<br>diphosphate-binding fold (THDP-binding)<br>superfamily protein   chr1:7493482-7496240<br>FORWARD LENGTH=472                                                                                                                                                                                                                                                                                                                                                                                                                                                    | 471 | 472 | 0         | 100.2 | 88.1 | 93.8 |
| Rsa1.0_00034.1.g2096.t1 | ref NP_564139.1  F-box protein SKP2A [Arabidopsis thaliana]<br>gi 75177240 sp Q9LPL4.1 SKP2A_ARATH<br>H RecName: Full=F-box protein SKP2A;<br>AltName: Full=FBL5-like protein;<br>Short=AtFBL5; AltName: Full=SKP2-like<br>protein 1; Short=AtSKP2.1<br>gi 8454572 gb AAF87895.1 AC015447.5<br>Unknown protein [Arabidopsis thaliana]<br>gi 16604366 gb AAL24189.1 <br>At1g21410/F24J8.17 [Arabidopsis<br>thaliana]<br>gi 19699206 gb AAL90969.1 <br>At1g21410/F24J8.17 [Arabidopsis<br>thaliana]<br>gi 332191979 gb AEE30100.1 <br>F-box protein SKP2A [Arabidopsis<br>thaliana]                                                                                                                                                                                                   | 284 | 360 | 1.00E-145 | 126.8 | 91.2 | 93.3 | F-box protein SKP2A                             | gbpln | Arabidopsis thaliana | AT1G21410.1   Symbols: SKP2A   F-<br>box/RN1-like superfamily protein  <br>chr1:7497479-7499386 FORWARD<br>LENGTH=360                                                                                                                                                                                                                                                                                                                                                                                                                                                                              | 284 | 360 | 1.00E-148 | 126.8 | 91.2 | 93.3 |

|                         |                                                                                                                                                                                                                                                                                                                                                                                                                                                                                    |     |      |           |       |      |      |                                                          |       |                      |                                                                                                                                     |     |     |           |       |      |      |
|-------------------------|------------------------------------------------------------------------------------------------------------------------------------------------------------------------------------------------------------------------------------------------------------------------------------------------------------------------------------------------------------------------------------------------------------------------------------------------------------------------------------|-----|------|-----------|-------|------|------|----------------------------------------------------------|-------|----------------------|-------------------------------------------------------------------------------------------------------------------------------------|-----|-----|-----------|-------|------|------|
| Rsa1.0_00034.1.g2097.t1 | refNP_564140.1   Nodulin MtN3-like protein [Arabidopsis thaliana]<br>gi 75154590 sp Q8L9J7.1 SWET1_ARAT H RecName: Full=Bidirectional sugar transporter SWEET1; Short=AtSWEET1<br>gi 21594011 gb AAM65929.1  unknown [Arabidopsis thaliana]<br>gi 28393568 gb AAO42204.1  unknown protein [Arabidopsis thaliana]<br>gi 28973143 gb AAO63896.1  unknown protein [Arabidopsis thaliana]<br>gi 332191983 gb AEE30104.1  bidirectional sugar transporter SWEET1 [Arabidopsis thaliana] | 250 | 247  | 1.00E-128 | 98.8  | 92.0 | 95.6 | Nodulin MtN3-like protein                                | gbpln | Arabidopsis thaliana | AT1G21460.1   Symbols: SWEET1, AtSWEET1   Nodulin MtN3 family protein   chr1:7512030-7513281 REVERSE LENGTH=247                     | 250 | 247 | 1.00E-130 | 98.8  | 92.0 | 95.6 |
| Rsa1.0_00034.1.g2098.t1 | #                                                                                                                                                                                                                                                                                                                                                                                                                                                                                  | #   | #    | #         | #     | #    | #    | -                                                        | ----  | ----                 | #                                                                                                                                   | #   | #   | #         | #     | #    |      |
| Rsa1.0_00034.1.g2099.t1 | refNP_564141.1   exostosin-like protein [Arabidopsis thaliana]<br>gi 332191985 gb AEE30106.1  exostosin-like protein [Arabidopsis thaliana]                                                                                                                                                                                                                                                                                                                                        | 466 | 462  | 0         | 99.1  | 92.7 | 95.5 | exostosin-like protein                                   | gbpln | Arabidopsis thaliana | AT1G21480.1   Symbols:   Exostosin family protein   chr1:7519116-7521426 REVERSE LENGTH=462                                         | 466 | 462 | 0         | 99.1  | 92.7 | 95.5 |
| Rsa1.0_00034.1.g2100.t1 | gb EMJ00939.1  hypothetical protein PRUPE_ppa002697mg [Prunus persica]                                                                                                                                                                                                                                                                                                                                                                                                             | 642 | 644  | 0         | 100.3 | 73.7 | 85.4 | hypothetical protein PRUPE_ppa002697mg                   | gbpln | Prunus persica       | AT1G77130.1   Symbols: PGSIP2, GUX3   plant glycogenin-like starch initiation protein 2   chr1:28979066-28981228 REVERSE LENGTH=618 | 642 | 618 | 0         | 96.3  | 73.4 | 82.7 |
| Rsa1.0_00034.1.g2101.t1 | #                                                                                                                                                                                                                                                                                                                                                                                                                                                                                  | #   | #    | #         | #     | #    | #    | -                                                        | ----  | ----                 | #                                                                                                                                   | #   | #   | #         | #     | #    |      |
| Rsa1.0_00034.1.g2102.t1 | refXP_002893172.1   hypothetical protein ARALYDRAFT_472389 [Arabidopsis lyrata subsp. lyrata]<br>gi 297339014 gb EFH69431.1  hypothetical protein ARALYDRAFT_472389 [Arabidopsis lyrata subsp. lyrata]                                                                                                                                                                                                                                                                             | 73  | 71   | 2.00E-13  | 97.3  | 60.3 | 72.6 | hypothetical protein ARALYDRAFT_472389                   | gbpln | Arabidopsis lyrata   | #                                                                                                                                   | #   | #   | #         | #     | #    |      |
| Rsa1.0_00035.1.g2103.t2 | refNP_176277.1   AP-1 complex subunit mu [Arabidopsis thaliana]<br>gi 2462748 gb AAB71967.1  putative Clathrin Coat Assembly protein [Arabidopsis thaliana]<br>gi 20466372 gb AAM20503.1  clathrin adaptor medium chain protein MU1B, putative [Arabidopsis thaliana]<br>gi 25084014 gb AAN72155.1  clathrin adaptor medium chain protein MU1B, putative [Arabidopsis thaliana]<br>gi 332195610 gb AEE33731.1  protein HAPLESS 13 [Arabidopsis thaliana]                           | 888 | 428  | 0         | 48.2  | 45.9 | 46.7 | AP-1 complex subunit mu                                  | gbpln | Arabidopsis thaliana | AT1G60780.1   Symbols: HAP13   Clathrin adaptor complexes medium subunit family protein   chr1:22369289-22371885 REVERSE LENGTH=428 | 888 | 428 | 0         | 48.2  | 45.9 | 46.7 |
| Rsa1.0_00035.1.g2104.t2 | #                                                                                                                                                                                                                                                                                                                                                                                                                                                                                  | #   | #    | #         | #     | #    | #    | -                                                        | ----  | ----                 | #                                                                                                                                   | #   | #   | #         | #     | #    |      |
| Rsa1.0_00035.1.g2105.t1 | gb AF067891.1  leucine-rich repeat receptor-like kinase (mitochondrion) [Brassica rapa subsp. oleifera]                                                                                                                                                                                                                                                                                                                                                                            | 635 | 635  | 0         | 100.0 | 96.4 | 98.6 | leucine-rich repeat receptor-like kinase (mitochondrion) | gbpln | Brassica rapa        | AT1G60800.1   Symbols: NIK3   NSP-interacting kinase 3   chr1:22383601-22386931 REVERSE LENGTH=632                                  | 635 | 632 | 0         | 99.5  | 91.8 | 96.2 |
| Rsa1.0_00035.1.g2106.t1 | gb AAG51783.1 AC079679.3 reverse transcriptase, putative; 16838-20266 [Arabidopsis thaliana]                                                                                                                                                                                                                                                                                                                                                                                       | 260 | 1142 | 5.00E-55  | 439.2 | 40.0 | 55.0 | reverse transcriptase, putative; 16838-20266             | gbpln | Arabidopsis thaliana | AT4G29090.1   Symbols:   Ribonuclease H-like superfamily protein   chr4:14333528-14335255 FORWARD LENGTH=575                        | 260 | 575 | 3.00E-25  | 221.2 | 29.2 | 42.7 |
| Rsa1.0_00035.1.g2107.t1 | refXP_002894699.1   D-alanine--D-alanine ligase family [Arabidopsis lyrata subsp. lyrata]<br>gi 297330539 gb EFH60958.1  D-alanine--D-alanine ligase family [Arabidopsis lyrata subsp. lyrata]                                                                                                                                                                                                                                                                                     | 950 | 943  | 0         | 99.3  | 79.9 | 87.8 | D-alanine--D-alanine ligase family                       | gbpln | Arabidopsis lyrata   | AT3G08840.2   Symbols:   D-alanine--D-alanine ligase family   chr3:2679648-2686157 REVERSE LENGTH=937                               | 950 | 937 | 0         | 98.6  | 79.7 | 88.3 |
| Rsa1.0_00035.1.g2108.t1 | gb EOA34924.1  hypothetical protein CARUB_v10020009mg [Capsella rubella]                                                                                                                                                                                                                                                                                                                                                                                                           | 612 | 603  | 0         | 98.5  | 60.8 | 63.1 | hypothetical protein CARUB_v10020009mg                   | gbpln | Capsella rubella     | AT1G60900.1   Symbols:   U2 snRNP auxiliary factor, large subunit, splicing factor   chr1:22424008-22427806 FORWARD LENGTH=589      | 612 | 589 | 0         | 96.2  | 60.0 | 62.6 |
| Rsa1.0_00035.1.g2109.t1 | gb AAM67112.1  putative serine/threonine-protein kinase [Arabidopsis thaliana]                                                                                                                                                                                                                                                                                                                                                                                                     | 352 | 361  | 1.00E-176 | 102.6 | 89.8 | 93.8 | putative serine/threonine-protein kinase                 | gbpln | Arabidopsis thaliana | AT1G60940.2   Symbols: SNRK2-10, SNRK2.10, SRK2B   SNF1-related protein kinase 2.10   chr1:22439398-22441896 REVERSE LENGTH=361     | 352 | 361 | 1.00E-178 | 102.6 | 89.5 | 93.5 |
| Rsa1.0_00035.1.g2110.t1 | gb EOA37821.1  hypothetical protein CARUB_v10011995mg [Capsella rubella]                                                                                                                                                                                                                                                                                                                                                                                                           | 598 | 589  | 0         | 98.5  | 88.1 | 91.5 | hypothetical protein CARUB_v10011995mg                   | gbpln | Capsella rubella     | AT1G10950.1   Symbols: TMN1, AtTMN1   transmembrane nine 1   chr1:3659322-3663622 FORWARD LENGTH=589                                | 598 | 589 | 0         | 98.5  | 87.3 | 91.3 |
| Rsa1.0_00035.1.g2111.t1 | dbj BAJ33728.1  unnamed protein product [Thellungiella halophila]                                                                                                                                                                                                                                                                                                                                                                                                                  | 148 | 148  | 3.00E-75  | 100.0 | 92.6 | 97.3 | unnamed protein product                                  | ----  | ----                 | AT1G60950.1   Symbols: FED A, ATFD2   2Fe-2S ferredoxin-like superfamily protein   chr1:22444565-22445011 FORWARD LENGTH=148        | 148 | 148 | 7.00E-77  | 100.0 | 92.6 | 96.6 |
| Rsa1.0_00035.1.g2112.t1 | gb AAK69430.1 AF275752.1 ZIP-like zinc transporter [Noccaea caerulea]                                                                                                                                                                                                                                                                                                                                                                                                              | 416 | 422  | 0         | 101.4 | 86.5 | 90.4 | ZIP-like zinc transporter                                | gbpln | Noccaea caerulea     | AT1G60960.1   Symbols: IRT3, ATIRT3   iron regulated transporter 3   chr1:22445410-22447060 REVERSE LENGTH=425                      | 416 | 425 | 0         | 102.2 | 85.3 | 90.6 |

|                         |                                                                                                                                                                                                                                                                                                                                                                                                                                                                                                                                                             |     |     |           |       |      |      |                                        |       |                      |                                                                                                                                                                                                                                                                                                                                                                                                                                                                                                                |     |     |           |       |      |      |
|-------------------------|-------------------------------------------------------------------------------------------------------------------------------------------------------------------------------------------------------------------------------------------------------------------------------------------------------------------------------------------------------------------------------------------------------------------------------------------------------------------------------------------------------------------------------------------------------------|-----|-----|-----------|-------|------|------|----------------------------------------|-------|----------------------|----------------------------------------------------------------------------------------------------------------------------------------------------------------------------------------------------------------------------------------------------------------------------------------------------------------------------------------------------------------------------------------------------------------------------------------------------------------------------------------------------------------|-----|-----|-----------|-------|------|------|
| Rsa1.0_00035.1.g2113.t1 | refNP_568221.1   Protein kinase family protein [Arabidopsis thaliana]<br>gi 14334482 gb AAK59439.1   putative protein kinase [Arabidopsis thaliana]<br>gi 15147869 dbj BAB62845.1   Ndr kinase [Arabidopsis thaliana]<br>gi 16323450 gb AAL15219.1   putative protein kinase [Arabidopsis thaliana]<br>gi 332004078 gb AED91461.1   Protein kinase family protein [Arabidopsis thaliana]                                                                                                                                                                    | 525 | 515 | 0         | 98.1  | 90.1 | 93.5 | Protein kinase family protein          | gbpln | Arabidopsis thaliana | AT5G09890.1   Symbols:   Protein kinase family protein   chr5:3085810-3088842 REVERSE LENGTH=515                                                                                                                                                                                                                                                                                                                                                                                                               | 525 | 515 | 0         | 98.1  | 90.1 | 93.5 |
| Rsa1.0_00035.1.g2114.t1 | refNP_176294.1   gibberellin 20-oxidase 4 [Arabidopsis thaliana]<br>gi 12323345 gb AAG51653.1 AC018908.19 putative gibberellin 20-oxidase; 47658-49225 [Arabidopsis thaliana]<br>gi 67633472 gb AAY78660.1   putative gibberellin 20-oxidase [Arabidopsis thaliana]<br>gi 332195634 gb AEE33755.1   gibberellin 20-oxidase 4 [Arabidopsis thaliana]                                                                                                                                                                                                         | 369 | 376 | 1.00E-126 | 101.9 | 61.5 | 69.1 | gibberellin 20-oxidase 4               | gbpln | Arabidopsis thaliana | AT1G60980.1   Symbols: ATGA20OX4, GA20OX4   gibberellin 20-oxidase 4   chr1:22452573-22454140 FORWARD LENGTH=376                                                                                                                                                                                                                                                                                                                                                                                               | 369 | 376 | 1.00E-129 | 101.9 | 61.5 | 69.1 |
| Rsa1.0_00035.1.g2115.t2 | gb ACY30421.1   C.BANa [Brassica napus]                                                                                                                                                                                                                                                                                                                                                                                                                                                                                                                     | 135 | 338 | 2.00E-29  | 250.4 | 60.7 | 69.6 | C.BANa                                 | gbpln | Brassica napus       | AT1G61720.1   Symbols: BAN   NAD(P)-binding Rossmann-fold superfamily protein   chr1:22791326-22792757 REVERSE LENGTH=340                                                                                                                                                                                                                                                                                                                                                                                      | 135 | 340 | 2.00E-29  | 251.9 | 57.0 | 67.4 |
| Rsa1.0_00035.1.g2116.t1 | gb EOA34094.1   hypothetical protein CARUB_v10021594mg [Capsella rubella]                                                                                                                                                                                                                                                                                                                                                                                                                                                                                   | 439 | 441 | 1.00E-175 | 100.5 | 76.3 | 83.8 | hypothetical protein CARUB_v10021594mg | gbpln | Capsella rubella     | AT1G61050.1   Symbols:   alpha 1.4-glycosyltransferase family protein   chr1:22486736-22488043 FORWARD LENGTH=435                                                                                                                                                                                                                                                                                                                                                                                              | 439 | 435 | 1.00E-171 | 99.1  | 76.8 | 84.1 |
| Rsa1.0_00035.1.g2117.t1 | refXP_002888111.1  <br>At1g61040/T7P1_17 [Arabidopsis lyrata subsp. lyrata]<br>gi 297333952 gb EFH64370.1  <br>At1g61040/T7P1_17 [Arabidopsis lyrata subsp. lyrata]                                                                                                                                                                                                                                                                                                                                                                                         | 643 | 643 | 0         | 100.0 | 86.0 | 89.6 | At1g61040/T7P1_17                      | gbpln | Arabidopsis lyrata   | AT1G61040.1   Symbols: VIP5   plus-3 domain-containing protein   chr1:22483817-22485748 FORWARD LENGTH=643                                                                                                                                                                                                                                                                                                                                                                                                     | 643 | 643 | 0         | 100.0 | 85.7 | 89.9 |
| Rsa1.0_00035.1.g2118.t1 | gb EOA33209.1   hypothetical protein CARUB_v10019868mg [Capsella rubella]                                                                                                                                                                                                                                                                                                                                                                                                                                                                                   | 693 | 725 | 0         | 104.6 | 94.5 | 97.1 | hypothetical protein CARUB_v10019868mg | gbpln | Capsella rubella     | AT1G61010.3   Symbols: CPSF73-1   cleavage and polyadenylation specificity factor 73-1   chr1:22474954-22477660 REVERSE LENGTH=693                                                                                                                                                                                                                                                                                                                                                                             | 693 | 693 | 0         | 100.0 | 93.7 | 96.5 |
| Rsa1.0_00035.1.g2119.t1 | refXP_002886570.1   hypothetical protein ARALYDRAFT.475227 [Arabidopsis lyrata subsp. lyrata]<br>gi 29733241 gb EFH62829.1  <br>hypothetical protein ARALYDRAFT.475227 [Arabidopsis lyrata subsp. lyrata]                                                                                                                                                                                                                                                                                                                                                   | 618 | 623 | 0         | 100.8 | 88.0 | 91.9 | hypothetical protein ARALYDRAFT.475227 | gbpln | Arabidopsis lyrata   | AT1G60995.1   Symbols:   FUNCTIONS IN: molecular_function unknown; INVOLVED IN: biological_process unknown; LOCATED IN: cellular_component unknown; EXPRESSED IN: 20 plant structures; EXPRESSED DURING: 10 growth stages; CONTAINS InterPro DOMAIN/s: Membralin (InterPro:IPR019144); Has 172 Blast hits to 170 proteins in 70 species: Archae - 0; Bacteria - 0; Metazoa - 110; Fungi - 0; Plants - 38; Viruses - 0; Other Eukaryotes - 24 (source: NCBI BLINK);   chr1:22465768-22470575 REVERSE LENGTH=623 | 618 | 623 | 0         | 100.8 | 87.9 | 91.6 |
| Rsa1.0_00035.1.g2120.t3 | refNP_176295.3   aminomethyltransferase [Arabidopsis thaliana]<br>gi 145326078 refNP_001077748.1   aminomethyltransferase [Arabidopsis thaliana]<br>gi 186492130 refNP_001117522.1   aminomethyltransferase [Arabidopsis thaliana]<br>gi 51969110 dbj BAD43247.1   unnamed protein product [Arabidopsis thaliana]<br>gi 332195639 gb AEE33760.1   aminomethyltransferase [Arabidopsis thaliana]<br>gi 332195640 gb AEE33761.1   aminomethyltransferase [Arabidopsis thaliana]<br>gi 332195641 gb AEE33762.1   aminomethyltransferase [Arabidopsis thaliana] | 418 | 432 | 0         | 103.3 | 87.3 | 91.1 | aminomethyltransferase                 | gbpln | Arabidopsis thaliana | AT1G60990.3   Symbols:   Glycine cleavage T-protein family   chr1:22462771-22465416 REVERSE LENGTH=432                                                                                                                                                                                                                                                                                                                                                                                                         | 418 | 432 | 0         | 103.3 | 87.3 | 91.1 |
| Rsa1.0_00035.1.g2121.t1 | gb EOA39455.1   hypothetical protein CARUB_v10012652mg [Capsella rubella]                                                                                                                                                                                                                                                                                                                                                                                                                                                                                   | 340 | 320 | 1.00E-140 | 94.1  | 72.1 | 82.4 | hypothetical protein CARUB_v10012652mg | gbpln | Capsella rubella     | AT1G05250.1   Symbols:   Peroxidase superfamily protein   chr1:1525924-1527169 REVERSE LENGTH=325                                                                                                                                                                                                                                                                                                                                                                                                              | 340 | 325 | 1.00E-132 | 95.6  | 65.0 | 77.4 |

|                         |                                                                                                                                                                                                                                                                                                                                                                                                                                                                                          |      |      |           |       |      |       |                                                             |       |                      |                                                                                                                                                                                                                                                                                                                                                                                                                                                                                                                                                                                                                                                         |      |      |           |       |      |      |
|-------------------------|------------------------------------------------------------------------------------------------------------------------------------------------------------------------------------------------------------------------------------------------------------------------------------------------------------------------------------------------------------------------------------------------------------------------------------------------------------------------------------------|------|------|-----------|-------|------|-------|-------------------------------------------------------------|-------|----------------------|---------------------------------------------------------------------------------------------------------------------------------------------------------------------------------------------------------------------------------------------------------------------------------------------------------------------------------------------------------------------------------------------------------------------------------------------------------------------------------------------------------------------------------------------------------------------------------------------------------------------------------------------------------|------|------|-----------|-------|------|------|
| Rsa1.0_00035.1.g2122.t1 | refNP_001031213.1  defensin-like protein 245 [Arabidopsis thaliana] gi 55584174 sp P82623.2 DF245_ARATH RecName: Full=Defensin-like protein 245; AltName: Full=S locus cysteine-rich-like protein 4; Short=Protein SCRL4; Short-SCR-like protein 4; Flags: Precursor gi 113204420 gb ABI34004.1  unknown [Arabidopsis thaliana] gi 332195637 gb AEE33758.1  defensin-like protein 245 [Arabidopsis thaliana] refXP_002886566.1  protease inhibitor II [Arabidopsis lyrata subsp. lyrata] | 96   | 97   | 9.00E-30  | 101.0 | 68.8 | 79.2  | defensin-like protein 245                                   | gbpln | Arabidopsis thaliana | AT1G60986.1   Symbols: SCRL4   SCR-like 4   chr1:22459072-22459468 FORWARD LENGTH=97                                                                                                                                                                                                                                                                                                                                                                                                                                                                                                                                                                    | 96   | 97   | 2.00E-32  | 101.0 | 68.8 | 79.2 |
| Rsa1.0_00035.1.g2123.t1 | refXP_002886566.1  protease inhibitor II [Arabidopsis lyrata subsp. lyrata]                                                                                                                                                                                                                                                                                                                                                                                                              | 77   | 76   | 2.00E-25  | 98.7  | 74.0 | 87.0  | protease inhibitor II                                       | gbpln | Arabidopsis lyrata   | AT2G02130.1   Symbols: PDF2.3, LCR68   low-molecular-weight cysteine-rich 68   chr2:540071-540407 FORWARD LENGTH=77                                                                                                                                                                                                                                                                                                                                                                                                                                                                                                                                     | 77   | 77   | 1.00E-25  | 100.0 | 64.9 | 74.0 |
| Rsa1.0_00035.1.g2124.t1 | refXP_002886565.1  hypothetical protein ARALYDRAFT_475218 [Arabidopsis lyrata subsp. lyrata] gi 297332406 gb EFH62824.1  hypothetical protein ARALYDRAFT_475218 [Arabidopsis lyrata subsp. lyrata]                                                                                                                                                                                                                                                                                       | 858  | 879  | 1.00E-127 | 102.4 | 33.2 | 34.6  | hypothetical protein ARALYDRAFT_475218                      | gbpln | Arabidopsis lyrata   | AT1G61080.1   Symbols:   Hydroxyproline-rich glycoprotein family protein   chr1:22493194-22497019 REVERSE LENGTH=907                                                                                                                                                                                                                                                                                                                                                                                                                                                                                                                                    | 858  | 907  | 1.00E-129 | 105.7 | 32.3 | 33.8 |
| Rsa1.0_00035.1.g2125.t1 | dbj BAJ34413.1  unnamed protein product [Theilingiella halophila]                                                                                                                                                                                                                                                                                                                                                                                                                        | 770  | 809  | 0         | 105.1 | 80.1 | 87.0  | unnamed protein product                                     | ----  | ----                 | AT1G61100.2   Symbols:   disease resistance protein (TIR class), putative   chr1:22508831-22512122 REVERSE LENGTH=807                                                                                                                                                                                                                                                                                                                                                                                                                                                                                                                                   | 770  | 807  | 0         | 104.8 | 77.8 | 85.6 |
| Rsa1.0_00035.1.g2126.t1 | refNP_974060.1  Toll-Interleukin-Resistance (TIR) domain-containing protein [Arabidopsis thaliana] gi 332195661 gb AEE33782.1  Toll-Interleukin-Resistance (TIR) domain-containing protein [Arabidopsis thaliana]                                                                                                                                                                                                                                                                        | 216  | 188  | 4.00E-81  | 87.0  | 67.1 | 74.5  | Toll-Interleukin-Resistance (TIR) domain-containing protein | gbpln | Arabidopsis thaliana | AT1G61105.1   Symbols:   Toll-Interleukin-Resistance (TIR) domain family protein   chr1:22513616-22514492 REVERSE LENGTH=188                                                                                                                                                                                                                                                                                                                                                                                                                                                                                                                            | 216  | 188  | 1.00E-83  | 87.0  | 67.1 | 74.5 |
| Rsa1.0_00035.1.g2127.t2 | gb EOA34398.1  hypothetical protein CARUB_v10021926mg [Capsella rubella]                                                                                                                                                                                                                                                                                                                                                                                                                 | 448  | 462  | 0         | 103.1 | 80.6 | 87.9  | hypothetical protein CARUB_v10021926mg                      | gbpln | Capsella rubella     | AT1G61130.1   Symbols: SCPL32   serine carboxypeptidase-like 32   chr1:22529024-22531784 REVERSE LENGTH=463                                                                                                                                                                                                                                                                                                                                                                                                                                                                                                                                             | 448  | 463  | 0         | 103.3 | 73.7 | 83.5 |
| Rsa1.0_00035.1.g2128.t1 | gb EOA11936.1  hypothetical protein CARUB_v10016547mg, partial [Capsella rubella]                                                                                                                                                                                                                                                                                                                                                                                                        | 116  | 149  | 4.00E-24  | 128.4 | 42.2 | 63.8  | hypothetical protein CARUB_v10016547mg, partial             | gbpln | Capsella rubella     | AT2G34320.1   Symbols:   Polynucleotidyl transferase, ribonuclease H-like superfamily protein   chr2:14484959-14485837 FORWARD LENGTH=292                                                                                                                                                                                                                                                                                                                                                                                                                                                                                                               | 116  | 292  | 3.00E-12  | 251.7 | 30.2 | 51.7 |
| Rsa1.0_00035.1.g2129.t1 | refNP_176309.2  SNF2, helicase and zinc finger domain-containing protein [Arabidopsis thaliana] gi 332195665 gb AEE33786.1  SNF2, helicase and zinc finger domain-containing protein [Arabidopsis thaliana]                                                                                                                                                                                                                                                                              | 1173 | 1280 | 0         | 109.1 | 74.9 | 83.8  | SNF2, helicase and zinc finger domain-containing protein    | gbpln | Arabidopsis thaliana | AT1G61140.1   Symbols: EDA16   SNF2 domain-containing protein / helicase domain-containing protein / zinc finger protein-related   chr1:22535038-22540610 REVERSE LENGTH=1280                                                                                                                                                                                                                                                                                                                                                                                                                                                                           | 1173 | 1280 | 0         | 109.1 | 74.9 | 83.8 |
| Rsa1.0_00035.1.g2130.t1 | gb EOA33443.1  hypothetical protein CARUB_v10020867mg [Capsella rubella]                                                                                                                                                                                                                                                                                                                                                                                                                 | 226  | 226  | 1.00E-124 | 100.0 | 96.9 | 100.0 | hypothetical protein CARUB_v10020867mg                      | gbpln | Capsella rubella     | AT1G61150.6   Symbols:   LisH and RanBPM domains containing protein   chr1:22542979-22544355 FORWARD LENGTH=226                                                                                                                                                                                                                                                                                                                                                                                                                                                                                                                                         | 226  | 226  | 1.00E-125 | 100.0 | 95.1 | 99.1 |
| Rsa1.0_00035.1.g2131.t2 | refNP_001154324.1  uncharacterized protein [Arabidopsis thaliana] gi 332190567 gb AEE28688.1  uncharacterized protein AT1G11120 [Arabidopsis thaliana]                                                                                                                                                                                                                                                                                                                                   | 109  | 161  | 7.00E-26  | 147.7 | 63.3 | 78.0  | uncharacterized protein                                     | gbpln | Arabidopsis thaliana | AT1G11120.2   Symbols:   unknown protein; FUNCTIONS IN: molecular.function unknown; INVOLVED IN: biological.process unknown; LOCATED IN: cellular.component unknown; EXPRESSED IN: 10 plant structures; EXPRESSED DURING: 4 anthesis, F mature embryo stage, petal differentiation and expansion stage, E expanded cotyledon stage, D bilateral stage; BEST Arabidopsis thaliana protein match is: unknown protein (TAIR:AT4G28170.1); Has 94 Blast hits to 94 proteins in 13 species: Archae - 0; Bacteria - 0; Metazoa - 0; Fungi - 0; Plants - 94; Viruses - 0; Other Eukaryotes - 0 (source: NCBI BLINK).   chr1:3715229-3717320 FORWARD LENGTH=161 | 109  | 161  | 1.00E-28  | 147.7 | 63.3 | 78.0 |
| Rsa1.0_00035.1.g2132.t1 | #                                                                                                                                                                                                                                                                                                                                                                                                                                                                                        | #    | #    | #         | #     | #    | #     | -                                                           | ----  | ----                 | #                                                                                                                                                                                                                                                                                                                                                                                                                                                                                                                                                                                                                                                       | #    | #    | #         | #     | #    | #    |



|                         |                                                                                                                                                                                                                                                                                                                                                           |     |      |           |       |      |      |                                          |       |                      |                                                                                                                                                                                                                                                                                                                                                                                                                                                                                                                                                       |     |     |           |       |      |      |
|-------------------------|-----------------------------------------------------------------------------------------------------------------------------------------------------------------------------------------------------------------------------------------------------------------------------------------------------------------------------------------------------------|-----|------|-----------|-------|------|------|------------------------------------------|-------|----------------------|-------------------------------------------------------------------------------------------------------------------------------------------------------------------------------------------------------------------------------------------------------------------------------------------------------------------------------------------------------------------------------------------------------------------------------------------------------------------------------------------------------------------------------------------------------|-----|-----|-----------|-------|------|------|
| Rsa1.0_00035.1.g2133.t1 | ref[NP_564773.1] uncharacterized protein [Arabidopsis thaliana] gi 2443885 gb AAB71478.1  Unknown protein [Arabidopsis thaliana] gi 3001722 gb AAP12847.1  At1g61170 [Arabidopsis thaliana] gi 110735914 dbj BAE99932.1  hypothetical protein [Arabidopsis thaliana] gi 332195677 gb AEE33798.1  uncharacterized protein AT1G61170 [Arabidopsis thaliana] | 245 | 251  | 2.00E-82  | 102.4 | 78.4 | 84.1 | uncharacterized protein                  | gbpln | Arabidopsis thaliana | AT1G61170.1   Symbols:   unknown protein; FUNCTIONS IN: molecular function unknown; INVOLVED IN: N-terminal protein myristoylation; LOCATED IN: cellular component unknown; EXPRESSED IN: 19 plant structures; EXPRESSED DURING: 12 growth stages; BEST Arabidopsis thaliana protein match is: unknown protein (TAIRAT1G11125.1); Has 54 Blast hits to 54 proteins in 15 species: Archae - 0; Bacteria - 0; Metazoa - 17; Fungi - 0; Plants - 34; Viruses - 1; Other Eukaryotes - 2 (source: NCBI BLink).   chr1:22549718-22550473 FORWARD LENGTH=251 | 245 | 251 | 6.00E-85  | 102.4 | 78.4 | 84.1 |
| Rsa1.0_00035.1.g2134.t1 | #                                                                                                                                                                                                                                                                                                                                                         | #   | #    | #         | #     | #    | -    | ----                                     | ----  | #                    | #                                                                                                                                                                                                                                                                                                                                                                                                                                                                                                                                                     | #   | #   | #         | #     |      |      |
| Rsa1.0_00036.1.g2135.t1 | ref[XP_002887662.1] F-box family protein [Arabidopsis lyrata subsp. lyrata] gi 297333503 gb EFH63921.1  F-box family protein [Arabidopsis lyrata subsp. lyrata]                                                                                                                                                                                           | 366 | 374  | 0         | 102.2 | 90.4 | 94.0 | F-box family protein                     | gbpln | Arabidopsis lyrata   | AT1G76920.1   Symbols:   F-box family protein   chr1:28892295-28893419 FORWARD LENGTH=374                                                                                                                                                                                                                                                                                                                                                                                                                                                             | 366 | 374 | 0         | 102.2 | 89.6 | 94.0 |
| Rsa1.0_00036.1.g2136.t1 | gb EOA36857.1  hypothetical protein CARUB_v10008803mg [Capsella rubella]                                                                                                                                                                                                                                                                                  | 600 | 536  | 1.00E-86  | 89.3  | 32.0 | 41.0 | hypothetical protein CARUB_v10008803mg   | gbpln | Capsella rubella     | AT2G07760.1   Symbols:   Zinc knuckle (CCHC-type) family protein   chr2:3584420-3586278 REVERSE LENGTH=530                                                                                                                                                                                                                                                                                                                                                                                                                                            | 600 | 530 | 9.00E-50  | 88.3  | 16.5 | 20.3 |
| Rsa1.0_00036.1.g2137.t1 | ref[NP_177835.2] peroxidase 13 [Arabidopsis thaliana] gi 2829914 gb AAC00622.1  putative peroxidase [Arabidopsis thaliana] gi 332197814 gb AEE35935.1  peroxidase 13 [Arabidopsis thaliana]                                                                                                                                                               | 319 | 336  | 1.00E-152 | 105.3 | 81.8 | 89.0 | peroxidase 13                            | gbpln | Arabidopsis thaliana | AT1G77100.1   Symbols:   Peroxidase superfamily protein   chr1:28965772-28967066 REVERSE LENGTH=336                                                                                                                                                                                                                                                                                                                                                                                                                                                   | 319 | 336 | 1.00E-154 | 105.3 | 81.8 | 89.0 |
| Rsa1.0_00036.1.g2138.t1 | emb CAB39638.1  RNA-directed DNA polymerase-like protein [Arabidopsis thaliana] gi 7267666 emb CAB78094.1  RNA-directed DNA polymerase-like protein [Arabidopsis thaliana]                                                                                                                                                                                | 242 | 1274 | 1.00E-29  | 526.4 | 40.1 | 53.3 | RNA-directed DNA polymerase-like protein | gbpln | Arabidopsis thaliana | AT1G10000.1   Symbols:   Ribonuclease H-like superfamily protein   chr1:3263877-3264788 REVERSE LENGTH=303                                                                                                                                                                                                                                                                                                                                                                                                                                            | 242 | 303 | 2.00E-18  | 125.2 | 31.0 | 48.3 |
| Rsa1.0_00036.1.g2139.t1 | #                                                                                                                                                                                                                                                                                                                                                         | #   | #    | #         | #     | #    | -    | ----                                     | ----  | #                    | #                                                                                                                                                                                                                                                                                                                                                                                                                                                                                                                                                     | #   | #   | #         | #     |      |      |
| Rsa1.0_00036.1.g2140.t1 | ref[XP_002887671.1] hypothetical protein ARALYDRAFT_476877 [Arabidopsis lyrata subsp. lyrata] gi 297333512 gb EFH63930.1  hypothetical protein ARALYDRAFT_476877 [Arabidopsis lyrata subsp. lyrata]                                                                                                                                                       | 569 | 569  | 0         | 100.0 | 96.7 | 98.1 | hypothetical protein ARALYDRAFT_476877   | gbpln | Arabidopsis lyrata   | AT1G77140.1   Symbols: VPS45, ATVPS45   vacuolar protein sorting 45   chr1:28984163-28987681 FORWARD LENGTH=569                                                                                                                                                                                                                                                                                                                                                                                                                                       | 569 | 569 | 0         | 100.0 | 95.8 | 97.9 |
| Rsa1.0_00036.1.g2141.t1 | ref[XP_002889128.1] hypothetical protein ARALYDRAFT_476882 [Arabidopsis lyrata subsp. lyrata] gi 297334969 gb EFH65387.1  hypothetical protein ARALYDRAFT_476882 [Arabidopsis lyrata subsp. lyrata]                                                                                                                                                       | 496 | 610  | 0         | 123.0 | 78.0 | 86.3 | hypothetical protein ARALYDRAFT_476882   | gbpln | Arabidopsis lyrata   | AT1G77180.2   Symbols: SKIP   chromatin protein family   chr1:28999791-29001632 REVERSE LENGTH=613                                                                                                                                                                                                                                                                                                                                                                                                                                                    | 496 | 613 | 0         | 123.6 | 74.8 | 84.9 |
| Rsa1.0_00036.1.g2142.t1 | ref[XP_002889129.1] hypothetical protein ARALYDRAFT_476884 [Arabidopsis lyrata subsp. lyrata] gi 297334970 gb EFH65388.1  hypothetical protein ARALYDRAFT_476884 [Arabidopsis lyrata subsp. lyrata]                                                                                                                                                       | 224 | 247  | 6.00E-82  | 110.3 | 83.5 | 86.6 | hypothetical protein ARALYDRAFT_476884   | gbpln | Arabidopsis lyrata   | AT1G77200.1   Symbols:   Integrase-type DNA-binding superfamily protein   chr1:29004357-29005091 REVERSE LENGTH=244                                                                                                                                                                                                                                                                                                                                                                                                                                   | 224 | 244 | 9.00E-81  | 108.9 | 79.5 | 83.0 |
| Rsa1.0_00036.1.g2143.t1 | ref[XP_002890504.1] hypothetical protein ARALYDRAFT_889727 [Arabidopsis lyrata subsp. lyrata] gi 297336346 gb EFH66763.1  hypothetical protein ARALYDRAFT_889727 [Arabidopsis lyrata subsp. lyrata]                                                                                                                                                       | 419 | 426  | 1.00E-100 | 101.7 | 53.5 | 69.7 | hypothetical protein ARALYDRAFT_889727   | gbpln | Arabidopsis lyrata   | AT1G25150.1   Symbols:   F-box family protein   chr1:8821027-8822328 FORWARD LENGTH=433                                                                                                                                                                                                                                                                                                                                                                                                                                                               | 419 | 433 | 1.00E-102 | 103.3 | 53.2 | 68.0 |
| Rsa1.0_00036.1.g2144.t1 | ref[XP_002893432.1] predicted protein [Arabidopsis lyrata subsp. lyrata] gi 297339274 gb EFH66961.1  predicted protein [Arabidopsis lyrata subsp. lyrata]                                                                                                                                                                                                 | 412 | 414  | 5.00E-88  | 100.5 | 50.0 | 64.6 | predicted protein                        | gbpln | Arabidopsis lyrata   | AT1G25150.1   Symbols:   F-box family protein   chr1:8821027-8822328 FORWARD LENGTH=433                                                                                                                                                                                                                                                                                                                                                                                                                                                               | 412 | 433 | 1.00E-89  | 105.1 | 50.0 | 63.6 |

|                         |                                                                                                                                                                                                                                                                                                                                                                                                                                                                                                                                                                                                                                                                                                                                                                                                                                                                                                                                                                                                                                                                                                                                                                                            |     |      |           |       |      |      |                                                                      |       |                      |                                                                                                                                                                                                                                                                                                                                                      |     |     |           |       |      |      |
|-------------------------|--------------------------------------------------------------------------------------------------------------------------------------------------------------------------------------------------------------------------------------------------------------------------------------------------------------------------------------------------------------------------------------------------------------------------------------------------------------------------------------------------------------------------------------------------------------------------------------------------------------------------------------------------------------------------------------------------------------------------------------------------------------------------------------------------------------------------------------------------------------------------------------------------------------------------------------------------------------------------------------------------------------------------------------------------------------------------------------------------------------------------------------------------------------------------------------------|-----|------|-----------|-------|------|------|----------------------------------------------------------------------|-------|----------------------|------------------------------------------------------------------------------------------------------------------------------------------------------------------------------------------------------------------------------------------------------------------------------------------------------------------------------------------------------|-----|-----|-----------|-------|------|------|
| Rsa1.0_00036.1.g2145.t1 | <p>ref NP_001117347.1  F-box protein [Arabidopsis thaliana]</p> <p>gi 186478848 ref NP_001117348.1  F-box protein [Arabidopsis thaliana]</p> <p>gi 186478854 ref NP_001117350.1  F-box protein [Arabidopsis thaliana]</p> <p>gi 186478863 ref NP_001117352.1  F-box protein [Arabidopsis thaliana]</p> <p>gi 334182847 ref NP_001185091.1  F-box family protein [Arabidopsis thaliana]</p> <p>gi 380876887 sp PDI02.1 FBK10_ARAT H RecName: Full=F-box/kelch-repeat protein At1g24800</p> <p>gi 380876888 sp PDI03.1 FBK11_ARAT H RecName: Full=F-box/kelch-repeat protein At1g24881</p> <p>gi 380876889 sp PDI04.1 FBK12_ARAT H RecName: Full=F-box/kelch-repeat protein At1g25055</p> <p>gi 380876890 sp PDI05.1 FBK13_ARAT H RecName: Full=F-box/kelch-repeat protein At1g25150</p> <p>gi 380876891 sp PDI06.1 FBK14_ARAT H RecName: Full=F-box/kelch-repeat protein At1g25211</p> <p>gi 23297235 gb AANI2922.1  unknown protein [Arabidopsis thaliana]</p> <p>gi 26452089 dbj BAC43134.1  unknown protein [Arabidopsis thaliana]</p> <p>gi 33942045 gb AAQ55275.1  At1g24880 [Arabidopsis thaliana]</p> <p>gi 62320789 dbj BAD93716.1  hypothetical protein [Arabidopsis thaliana]</p> | 422 | 433  | 1.00E-105 | 102.6 | 55.7 | 70.4 | F-box protein                                                        | gbpln | Arabidopsis thaliana | AT1G25150.1   Symbols:   F-box family protein   chr1:8821027-8822328 FORWARD LENGTH=433                                                                                                                                                                                                                                                              | 422 | 433 | 1.00E-107 | 102.6 | 55.7 | 70.4 |
| Rsa1.0_00036.1.g2146.t1 | <p>gb AAG50806.1 AC079281.8 unknown protein [Arabidopsis thaliana]</p>                                                                                                                                                                                                                                                                                                                                                                                                                                                                                                                                                                                                                                                                                                                                                                                                                                                                                                                                                                                                                                                                                                                     | 317 | 1213 | 9.00E-35  | 382.6 | 27.8 | 42.3 | unknown protein                                                      | gbpln | Arabidopsis thaliana | AT1G43760.1   Symbols:   DNAse I-like superfamily protein   chr1:16528880-16531065 REVERSE LENGTH=626                                                                                                                                                                                                                                                | 317 | 626 | 1.00E-29  | 197.5 | 21.8 | 38.2 |
| Rsa1.0_00036.1.g2147.t1 | <p>ref XP_002863741.1  hypothetical protein ARALYDRAFT_917455 [Arabidopsis lyrata subsp. lyrata]</p> <p>gi 297309576 gb EFH40000.1  hypothetical protein ARALYDRAFT_917455 [Arabidopsis lyrata subsp. lyrata]</p>                                                                                                                                                                                                                                                                                                                                                                                                                                                                                                                                                                                                                                                                                                                                                                                                                                                                                                                                                                          | 186 | 390  | 8.00E-31  | 209.7 | 38.2 | 54.8 | hypothetical protein ARALYDRAFT_917455                               | gbpln | Arabidopsis lyrata   | AT4G04650.1   Symbols:   RNA-directed DNA polymerase (reverse transcriptase)-related family protein   chr4:2353989-2355213 REVERSE LENGTH=332                                                                                                                                                                                                        | 186 | 332 | 1.00E-26  | 178.5 | 32.3 | 52.7 |
| Rsa1.0_00036.1.g2148.t1 | <p>ref XP_002887672.1  hypothetical protein ARALYDRAFT_895607 [Arabidopsis lyrata subsp. lyrata]</p> <p>gi 297333513 gb EFH63931.1  hypothetical protein ARALYDRAFT_895607 [Arabidopsis lyrata subsp. lyrata]</p>                                                                                                                                                                                                                                                                                                                                                                                                                                                                                                                                                                                                                                                                                                                                                                                                                                                                                                                                                                          | 487 | 484  | 0         | 99.4  | 89.1 | 94.7 | hypothetical protein ARALYDRAFT_895607                               | gbpln | Arabidopsis lyrata   | AT1G77220.1   Symbols:   Protein of unknown function (DUF300)   chr1:29017958-29019595 REVERSE LENGTH=484                                                                                                                                                                                                                                            | 487 | 484 | 0         | 99.4  | 88.5 | 94.3 |
| Rsa1.0_00036.1.g2149.t1 | <p>emb CAA64328.1  amp-binding protein [Brassica napus]</p>                                                                                                                                                                                                                                                                                                                                                                                                                                                                                                                                                                                                                                                                                                                                                                                                                                                                                                                                                                                                                                                                                                                                | 553 | 552  | 0         | 99.8  | 94.9 | 96.7 | amp-binding protein                                                  | gbpln | Brassica napus       | AT1G77240.1   Symbols:   AMP-dependent synthetase and ligase family protein   chr1:29017958-29019595 REVERSE LENGTH=545                                                                                                                                                                                                                              | 553 | 545 | 0         | 98.6  | 85.2 | 91.3 |
| Rsa1.0_00036.1.g2150.t1 | #                                                                                                                                                                                                                                                                                                                                                                                                                                                                                                                                                                                                                                                                                                                                                                                                                                                                                                                                                                                                                                                                                                                                                                                          | #   | #    | #         | #     | #    | #    | -                                                                    | ----  | ----                 | #                                                                                                                                                                                                                                                                                                                                                    | #   | #   | #         | #     | #    |      |
| Rsa1.0_00036.1.g2151.t1 | <p>gb EOA33584.1  hypothetical protein CARUB_v10019729mg [Capsella rubella]</p>                                                                                                                                                                                                                                                                                                                                                                                                                                                                                                                                                                                                                                                                                                                                                                                                                                                                                                                                                                                                                                                                                                            | 547 | 969  | 1.00E-90  | 177.1 | 44.4 | 61.2 | hypothetical protein CARUB_v10019729mg                               | gbpln | Capsella rubella     | AT1G77270.1   Symbols:   unknown protein; BEST Arabidopsis thaliana protein match is: unknown protein (TAIR:AT3G07730.1). Has 428 Blast hits to 388 proteins in 92 species: Archae - 0; Bacteria - 31; Metazoa - 189; Fungi - 10; Plants - 97; Viruses - 0; Other Eukaryotes - 101 (source: NCBI BLINK).   chr1:29028342-29031068 FORWARD LENGTH=682 | 547 | 682 | 5.00E-86  | 124.7 | 42.2 | 58.0 |
| Rsa1.0_00036.1.g2152.t1 | <p>ref NP_177852.2  adenine nucleotide alpha hydrolases-domain containing protein kinase [Arabidopsis thaliana]</p> <p>gi 332197836 gb AAE35957.1  adenine nucleotide alpha hydrolases-domain containing protein kinase [Arabidopsis thaliana]</p>                                                                                                                                                                                                                                                                                                                                                                                                                                                                                                                                                                                                                                                                                                                                                                                                                                                                                                                                         | 723 | 794  | 0         | 109.8 | 80.5 | 88.1 | adenine nucleotide alpha hydrolases-domain containing protein kinase | gbpln | Arabidopsis thaliana | AT1G77280.1   Symbols:   Protein kinase protein with adenine nucleotide alpha hydrolases-like domain   chr1:29031468-29035882 REVERSE LENGTH=794                                                                                                                                                                                                     | 723 | 794 | 0         | 109.8 | 80.5 | 88.1 |
| Rsa1.0_00036.1.g2153.t1 | #                                                                                                                                                                                                                                                                                                                                                                                                                                                                                                                                                                                                                                                                                                                                                                                                                                                                                                                                                                                                                                                                                                                                                                                          | #   | #    | #         | #     | #    | #    | -                                                                    | ----  | ----                 | #                                                                                                                                                                                                                                                                                                                                                    | #   | #   | #         | #     | #    |      |
| Rsa1.0_00036.1.g2154.t1 | <p>gb EOA33259.1  hypothetical protein CARUB_v10022136mg [Capsella rubella]</p>                                                                                                                                                                                                                                                                                                                                                                                                                                                                                                                                                                                                                                                                                                                                                                                                                                                                                                                                                                                                                                                                                                            | 136 | 266  | 5.00E-25  | 195.6 | 56.6 | 64.0 | hypothetical protein CARUB_v10022136mg                               | gbpln | Capsella rubella     | AT1G77290.2   Symbols:   Glutathione S-transferase family protein   chr1:29038917-29039815 FORWARD LENGTH=266                                                                                                                                                                                                                                        | 136 | 266 | 6.00E-27  | 195.6 | 56.6 | 64.0 |

|                         |                                                                                                                                                                                                                                                                                                                                                                                                                                                    |      |      |           |        |      |      |                                          |             |                      |                                                                                                                                                                                                                                                                                                                                                                                                                                                          |      |      |           |        |      |      |
|-------------------------|----------------------------------------------------------------------------------------------------------------------------------------------------------------------------------------------------------------------------------------------------------------------------------------------------------------------------------------------------------------------------------------------------------------------------------------------------|------|------|-----------|--------|------|------|------------------------------------------|-------------|----------------------|----------------------------------------------------------------------------------------------------------------------------------------------------------------------------------------------------------------------------------------------------------------------------------------------------------------------------------------------------------------------------------------------------------------------------------------------------------|------|------|-----------|--------|------|------|
| Rsa1.0_00036.1.g2155.t1 | ref NP_177854.6  histone-lysine N-methyltransferase SETD2 [Arabidopsis thaliana] gi 157734196 gb ABV68921.1 SDG8 [Arabidopsis thaliana] gi 332197839 gb AE35960.1  histone-lysine N-methyltransferase SETD2 [Arabidopsis thaliana]                                                                                                                                                                                                                 | 1527 | 1805 | 0         | 118.2  | 72.1 | 79.2 | histone-lysine N-methyltransferase SETD2 | gbpln       | Arabidopsis thaliana | AT1G77300.1   Symbols: EFS, SDG8, CCR1, ASHH2, LAZ2   histone methyltransferases(H3-K4 specific);histone methyltransferases(H3-K36 specific)   chr1:29040160-29048810 REVERSE LENGTH=1805                                                                                                                                                                                                                                                                | 1527 | 1805 | 0         | 118.2  | 72.1 | 79.2 |
| Rsa1.0_00036.1.g2156.t1 | gb EOA15566.1  hypothetical protein CARUB_v10005224mg [Capsella rubella]                                                                                                                                                                                                                                                                                                                                                                           | 187  | 329  | 1.00E-41  | 175.9  | 62.0 | 72.2 | hypothetical protein CARUB_v10005224mg   | gbpln       | Capsella rubella     | AT4G28430.1   Symbols:   Reticulon family protein   chr1:14057846-14059772 FORWARD LENGTH=457                                                                                                                                                                                                                                                                                                                                                            | 187  | 457  | 9.00E-39  | 244.4  | 56.7 | 66.3 |
| Rsa1.0_00036.1.g2157.t1 | gb EJP69747.1  hypothetical protein BBA_01712 [Beauveria bassiana ARSEF 2860]                                                                                                                                                                                                                                                                                                                                                                      | 251  | 318  | 2.00E-67  | 126.7  | 48.6 | 68.9 | hypothetical protein BBA_01712           | gbenv/gbpln | Beauveria bassiana   | #                                                                                                                                                                                                                                                                                                                                                                                                                                                        | #    | #    | #         | #      | #    |      |
| Rsa1.0_00036.1.g2158.t2 | gb AAC34358.1  Hypothetical protein [Arabidopsis thaliana]                                                                                                                                                                                                                                                                                                                                                                                         | 98   | 1767 | 3.00E-19  | 1803.1 | 53.1 | 55.1 | Hypothetical protein                     | gbpln       | Arabidopsis thaliana | AT1G77300.1   Symbols: EFS, SDG8, CCR1, ASHH2, LAZ2   histone methyltransferases(H3-K4 specific);histone methyltransferases(H3-K36 specific)   chr1:29040160-29048810 REVERSE LENGTH=1805                                                                                                                                                                                                                                                                | 98   | 1805 | 4.00E-22  | 1841.8 | 53.1 | 55.1 |
| Rsa1.0_00036.1.g2159.t2 | ref NP_177855.4  uncharacterized protein [Arabidopsis thaliana] gi 332197841 gb AE35962.1  uncharacterized protein AT1G77310 [Arabidopsis thaliana]                                                                                                                                                                                                                                                                                                | 670  | 717  | 0         | 107.0  | 65.8 | 76.0 | uncharacterized protein                  | gbpln       | Arabidopsis thaliana | AT1G77310.1   Symbols:   BEST Arabidopsis thaliana protein match is: wound-responsive family protein (TAIR:AT1G21610.1); Has 493 Blast hits to 482 proteins in 163 species: Archae - 0; Bacteria - 100; Metazoa - 172; Fungi - 66; Plants - 65; Viruses - 7; Other Eukaryotes - 83 (source: NCBI BLink).   chr1:29051671-29056179 FORWARD LENGTH=717                                                                                                     | 670  | 717  | 0         | 107.0  | 65.8 | 76.0 |
| Rsa1.0_00036.1.g2160.t1 | ref NP_565154.1  aminocyclopropanecarboxylate oxidase [Arabidopsis thaliana] gi 122246564 sp QOWPW4.1 ACCO5_AR ATH RecName: Full=1-aminocyclopropane-1-carboxylate oxidase 5; Short=ACC oxidase 5; Short=AAACO5 gi 110737793 db BAF00835.1  hypothetical protein [Arabidopsis thaliana] gi 111074356 gb ABH04551.1  At1g77330 [Arabidopsis thaliana] gi 332197844 gb AE35965.1  1-aminocyclopropane-1-carboxylate oxidase 5 [Arabidopsis thaliana] | 314  | 307  | 1.00E-170 | 97.8   | 93.3 | 96.2 | aminocyclopropanecarb oxylate oxidase    | gbpln       | Arabidopsis thaliana | AT1G77330.1   Symbols:   2-oxoglutarate (2OG) and Fe(II)-dependent oxygenase superfamily protein   chr1:29063215-29064447 REVERSE LENGTH=307                                                                                                                                                                                                                                                                                                             | 314  | 307  | 1.00E-173 | 97.8   | 93.3 | 96.2 |
| Rsa1.0_00036.1.g2161.t1 | #                                                                                                                                                                                                                                                                                                                                                                                                                                                  | #    | #    | #         | #      | #    | -    | ----                                     | ----        | #                    | #                                                                                                                                                                                                                                                                                                                                                                                                                                                        | #    | #    | #         | #      | #    |      |
| Rsa1.0_00036.1.g2162.t1 | gb EJP69747.1  hypothetical protein BBA_01712 [Beauveria bassiana ARSEF 2860]                                                                                                                                                                                                                                                                                                                                                                      | 248  | 318  | 5.00E-66  | 128.2  | 48.4 | 67.7 | hypothetical protein BBA_01712           | gbenv/gbpln | Beauveria bassiana   | #                                                                                                                                                                                                                                                                                                                                                                                                                                                        | #    | #    | #         | #      | #    |      |
| Rsa1.0_00036.1.g2163.t1 | ref NP_194638.1  Ribonuclease H-like protein [Arabidopsis thaliana] gi 4972055 emb CAB43923.1  putative protein [Arabidopsis thaliana] gi 7269807 emb CAB79667.1  putative protein [Arabidopsis thaliana] gi 67633766 gb AA78807.1  putative reverse transcriptase/RNA-dependent DNA polymerase [Arabidopsis thaliana] gi 332660185 gb AE35585.1  Ribonuclease H-like protein [Arabidopsis thaliana]                                               | 300  | 575  | 5.00E-30  | 191.7  | 33.0 | 51.0 | Ribonuclease H-like protein              | gbpln       | Arabidopsis thaliana | AT4G29090.1   Symbols:   Ribonuclease H-like superfamily protein   chr4:14333528-14335255 FORWARD LENGTH=575                                                                                                                                                                                                                                                                                                                                             | 300  | 575  | 1.00E-32  | 191.7  | 33.0 | 51.0 |
| Rsa1.0_00036.1.g2164.t1 | gb AAG29201.1 AC078898_11 hypothetical protein [Arabidopsis thaliana]                                                                                                                                                                                                                                                                                                                                                                              | 476  | 481  | 0         | 101.1  | 86.3 | 93.5 | hypothetical protein                     | gbpln       | Arabidopsis thaliana | AT1G77360.1   Symbols:   Tetratricopeptide repeat (TPR)-like superfamily protein   chr1:29071983-29073536 REVERSE LENGTH=517                                                                                                                                                                                                                                                                                                                             | 476  | 517  | 0         | 108.6  | 86.3 | 93.5 |
| Rsa1.0_00036.1.g2165.t1 | ref NP_177864.1  uncharacterized protein [Arabidopsis thaliana] gi 11079486 gb AAG29198.1 AC078898_8 hypothetical protein [Arabidopsis thaliana] gi 28466875 gb AAD44046.1  At1g77400 [Arabidopsis thaliana] gi 51971947 db BAD44638.1  At1g77400 [Arabidopsis thaliana] gi 11073609 db BAF00022.1  hypothetical protein [Arabidopsis thaliana] gi 332197852 gb AE35973.1  uncharacterized protein AT1G77400 [Arabidopsis thaliana]                | 190  | 232  | 6.00E-50  | 122.1  | 83.2 | 85.3 | uncharacterized protein                  | gbpln       | Arabidopsis thaliana | AT1G77400.1   Symbols:   CONTAINS InterPro DOMAIN/s: Protein of unknown function DUF688 (InterPro:IPR007789); BEST Arabidopsis thaliana protein match is: hydroxyproline-rich glycoprotein family protein (TAIR:AT1G21695.1); Has 328 Blast hits to 314 proteins in 61 species: Archae - 0; Bacteria - 12; Metazoa - 130; Fungi - 28; Plants - 92; Viruses - 10; Other Eukaryotes - 56 (source: NCBI BLink).   chr1:29085881-29086579 FORWARD LENGTH=232 | 190  | 232  | 2.00E-52  | 122.1  | 83.2 | 85.3 |
| Rsa1.0_00036.1.g2166.t1 | ref XP_002887681.1  binding protein [Arabidopsis lyrata subsp. lyrata] gi 29733352 gb EFH63940.1  binding protein [Arabidopsis lyrata subsp. lyrata]                                                                                                                                                                                                                                                                                               | 447  | 459  | 0         | 102.7  | 86.6 | 91.5 | binding protein                          | gbpln       | Arabidopsis lyrata   | AT1G77405.1   Symbols:   Pentatricopeptide repeat (PPR) superfamily protein   chr1:29087145-29088521 FORWARD LENGTH=458                                                                                                                                                                                                                                                                                                                                  | 447  | 458  | 0         | 102.5  | 85.2 | 90.2 |

|                         |                                                                                                                                                                                                                                                                                             |      |      |           |        |      |      |                                                 |             |                      |                                                                                                                                |      |      |           |       |      |      |
|-------------------------|---------------------------------------------------------------------------------------------------------------------------------------------------------------------------------------------------------------------------------------------------------------------------------------------|------|------|-----------|--------|------|------|-------------------------------------------------|-------------|----------------------|--------------------------------------------------------------------------------------------------------------------------------|------|------|-----------|-------|------|------|
| Rsa1.0_00036.1.g2167.t1 | refXP_002889142.1   hypothetical protein ARALYDRAFT_476906 [Arabidopsis lyrata subsp. lyrata]   g 297334983 gb EFH65401.1   hypothetical protein ARALYDRAFT_476906 [Arabidopsis lyrata subsp. lyrata]                                                                                       | 818  | 818  | 0         | 100.0  | 84.5 | 91.1 | hypothetical protein ARALYDRAFT_476906          | gbpln       | Arabidopsis lyrata   | AT1G77410.1   Symbols: BGAL16   beta-galactosidase 16   chr1:29088771-29093148 REVERSE LENGTH=815                              | 818  | 815  | 0         | 99.6  | 83.6 | 90.6 |
| Rsa1.0_00036.1.g2168.t1 | gb EOA35294.1   hypothetical protein CARUB_v10020464mg [Capsella rubella]                                                                                                                                                                                                                   | 394  | 382  | 0         | 97.0   | 80.2 | 87.6 | hypothetical protein CARUB_v10020464mg          | gbpln       | Capsella rubella     | AT1G77420.1   Symbols:   alpha/beta-Hydrolases superfamily protein   chr1:29093641-29095442 FORWARD LENGTH=382                 | 394  | 382  | 0         | 97.0  | 79.9 | 86.8 |
| Rsa1.0_00036.1.g2169.t1 | gb AAP35055.1   NAC-domain protein 14 [Brassica napus]                                                                                                                                                                                                                                      | 261  | 260  | 1.00E-142 | 99.6   | 93.9 | 96.6 | NAC-domain protein 14                           | gbpln       | Brassica napus       | AT1G77450.1   Symbols: anac032, NAC032   NAC domain containing protein 32   chr1:29100029-29100981 FORWARD LENGTH=253          | 261  | 253  | 1.00E-119 | 96.9  | 83.9 | 87.0 |
| Rsa1.0_00036.1.g2170.t1 | gb EOA30101.1   hypothetical protein CARUB_v10013211mg, partial [Capsella rubella]                                                                                                                                                                                                          | 92   | 628  | 5.00E-33  | 682.6  | 75.0 | 87.0 | hypothetical protein CARUB_v10013211mg, partial | gbpln       | Capsella rubella     | AT3G10050.1   Symbols: OMR1   L-O-methylthreonine resistant 1   chr3:3099164-3101741 REVERSE LENGTH=592                        | 92   | 592  | 9.00E-36  | 643.5 | 73.9 | 87.0 |
| Rsa1.0_00036.1.g2171.t1 | refXP_002889143.1   hypothetical protein ARALYDRAFT_476911 [Arabidopsis lyrata subsp. lyrata]   g 297334984 gb EFH65402.1   hypothetical protein ARALYDRAFT_476911 [Arabidopsis lyrata subsp. lyrata]                                                                                       | 368  | 369  | 0         | 100.3  | 91.8 | 94.3 | hypothetical protein ARALYDRAFT_476911          | gbpln       | Arabidopsis lyrata   | AT1G77470.1   Symbols: RFC3, RFC5   replication factor C subunit 3   chr1:29112194-29114323 REVERSE LENGTH=369                 | 368  | 369  | 0         | 100.3 | 89.1 | 93.5 |
| Rsa1.0_00036.1.g2172.t1 | gb EJP69747.1   hypothetical protein BBA_01712 [Beauveria bassiana ARSEF 2860]                                                                                                                                                                                                              | 251  | 318  | 2.00E-62  | 126.7  | 48.2 | 64.9 | hypothetical protein BBA_01712                  | gbenv/gbpln | Beauveria bassiana   | #                                                                                                                              | #    | #    | #         | #     | #    | #    |
| Rsa1.0_00036.1.g2173.t1 | gb ABB17025.1   protein disulfide isomerase [Brassica carinata]                                                                                                                                                                                                                             | 511  | 509  | 0         | 99.6   | 84.9 | 91.6 | protein disulfide isomerase                     | gbpln       | Brassica carinata    | AT1G77510.1   Symbols: ATPDIL1-2, PDI6, ATPD16, PDIL1-2   PDI-like 1-2   chr1:29126742-29129433 FORWARD LENGTH=508             | 511  | 508  | 0         | 99.4  | 82.0 | 89.2 |
| Rsa1.0_00036.1.g2174.t1 | refNP_177876.1   O-methyltransferase family protein [Arabidopsis thaliana]   g 12323395 gb AAG51676.1   AC010704_20 putative caffeic acid 3-O-methyltransferase; 41078-42528 [Arabidopsis thaliana]   g 332197867 gb AEE35988.1   O-methyltransferase family protein [Arabidopsis thaliana] | 339  | 381  | 1.00E-152 | 112.4  | 80.2 | 87.0 | O-methyltransferase family protein              | gbpln       | Arabidopsis thaliana | AT1G77520.1   Symbols:   O-methyltransferase family protein   chr1:29130557-29132007 FORWARD LENGTH=381                        | 339  | 381  | 1.00E-155 | 112.4 | 80.2 | 87.0 |
| Rsa1.0_00037.1.g2175.t1 | refXP_002867032.1   hypothetical protein ARALYDRAFT_491017 [Arabidopsis lyrata subsp. lyrata]   g 297312868 gb EFH43291.1   hypothetical protein ARALYDRAFT_491017 [Arabidopsis lyrata subsp. lyrata]                                                                                       | 377  | 376  | 0         | 99.7   | 85.9 | 92.3 | hypothetical protein ARALYDRAFT_491017          | gbpln       | Arabidopsis lyrata   | AT4G36160.1   Symbols: ANAC076, VND2, NAC076   NAC domain containing protein 76   chr4:17110877-17112891 REVERSE LENGTH=377    | 377  | 377  | 0         | 100.0 | 85.9 | 91.0 |
| Rsa1.0_00037.1.g2176.t2 | #                                                                                                                                                                                                                                                                                           | #    | #    | #         | #      | #    | #    | -                                               | ----        | ----                 | #                                                                                                                              | #    | #    | #         | #     | #    | #    |
| Rsa1.0_00037.1.g2177.t1 | refXP_002867031.1   hypothetical protein ARALYDRAFT_491015 [Arabidopsis lyrata subsp. lyrata]   g 297312867 gb EFH43290.1   hypothetical protein ARALYDRAFT_491015 [Arabidopsis lyrata subsp. lyrata]                                                                                       | 1120 | 1132 | 0         | 101.1  | 88.5 | 93.8 | hypothetical protein ARALYDRAFT_491015          | gbpln       | Arabidopsis lyrata   | AT4G36180.1   Symbols:   Leucine-rich receptor-like protein kinase family protein   chr4:17120209-17123698 REVERSE LENGTH=1136 | 1120 | 1136 | 0         | 101.4 | 87.5 | 93.8 |
| Rsa1.0_00037.1.g2178.t1 | gb EOA16518.1   hypothetical protein CARUB_v10004677mg [Capsella rubella]                                                                                                                                                                                                                   | 473  | 489  | 0         | 103.4  | 88.2 | 93.0 | hypothetical protein CARUB_v10004677mg          | gbpln       | Capsella rubella     | AT4G36195.3   Symbols:   Serine carboxypeptidase S28 family protein   chr4:17127202-17129787 FORWARD LENGTH=488                | 473  | 488  | 0         | 103.2 | 87.3 | 94.7 |
| Rsa1.0_00037.1.g2179.t1 | refNP_001078500.2   uncharacterized protein [Arabidopsis thaliana]   g 332661235 gb AEE86635.1   uncharacterized protein AT4G36210 [Arabidopsis thaliana]                                                                                                                                   | 676  | 672  | 0         | 99.4   | 90.1 | 95.4 | uncharacterized protein                         | gbpln       | Arabidopsis thaliana | AT4G36210.3   Symbols:   Protein of unknown function (DUF726)   chr4:17130354-17134302 FORWARD LENGTH=672                      | 676  | 672  | 0         | 99.4  | 90.1 | 95.4 |
| Rsa1.0_00037.1.g2180.t1 | gb ACP30591.1   disease resistance protein [Brassica rapa subsp. pekinensis]                                                                                                                                                                                                                | 106  | 1555 | 5.00E-17  | 1467.0 | 49.1 | 61.3 | disease resistance protein                      | gbpln       | Brassica rapa        | #                                                                                                                              | #    | #    | #         | #     | #    | #    |
| Rsa1.0_00037.1.g2181.t1 | gb AAG14961.1   AF214007_1 cytochrome p450-dependent monooxygenase [Brassica napus]                                                                                                                                                                                                         | 520  | 520  | 0         | 100.0  | 97.3 | 98.7 | cytochrome p450-dependent monooxygenase         | gbpln       | Brassica napus       | AT4G36220.1   Symbols: FAH1, CYP84A1   ferulic acid 5-hydroxylase 1   chr4:17137584-17139619 REVERSE LENGTH=520                | 520  | 520  | 0         | 100.0 | 92.9 | 96.7 |

|                         |                                                                                                                                                                                                                                                                                                                                                                                                                                                                                                                              |      |      |           |       |      |      |                                                 |       |                      |                                                                                                                                                                                                                                                                                                                                                                                                                                                                                                                            |      |     |           |       |      |      |
|-------------------------|------------------------------------------------------------------------------------------------------------------------------------------------------------------------------------------------------------------------------------------------------------------------------------------------------------------------------------------------------------------------------------------------------------------------------------------------------------------------------------------------------------------------------|------|------|-----------|-------|------|------|-------------------------------------------------|-------|----------------------|----------------------------------------------------------------------------------------------------------------------------------------------------------------------------------------------------------------------------------------------------------------------------------------------------------------------------------------------------------------------------------------------------------------------------------------------------------------------------------------------------------------------------|------|-----|-----------|-------|------|------|
| Rsa1.0_00037.1.g2182.t1 | ref NP_195346.1  uncharacterized protein [Arabidopsis thaliana]<br>gi 2961382 emb CAA18129.1  putative glycine-rich cell wall protein [Arabidopsis thaliana]<br>gi 7270576 emb CAB80294.1  putative glycine-rich cell wall protein [Arabidopsis thaliana]<br>gi 332661237 gb AEE86637.1  uncharacterized protein AT4G36230 [Arabidopsis thaliana]                                                                                                                                                                            | 220  | 221  | 3.00E-11  | 100.5 | 20.0 | 25.0 | uncharacterized protein                         | gbpln | Arabidopsis thaliana | AT4G36230.1   Symbols:   unknown protein; FUNCTIONS IN: molecular_function unknown; INVOLVED IN: biological_process unknown; LOCATED IN: endomembrane system; EXPRESSED IN: leaf apex, hypocotyl, flower; EXPRESSED DURING: petal differentiation and expansion stage; Has 250444 Blast hits to 52918 proteins in 2611 species: Archae - 614; Bacteria - 68464; Metazoa - 90603; Fungi - 16312; Plants - 24752; Viruses - 3701; Other Eukaryotes - 45998 (source: NCBI BLINK).   chr4:17145586-17146251 FORWARD LENGTH=221 | 220  | 221 | 9.00E-14  | 100.5 | 20.0 | 25.0 |
| Rsa1.0_00037.1.g2183.t1 | ref NP_195347.1  GATA transcription factor 7 [Arabidopsis thaliana]<br>gi 71660767 sp O65515.1 GATA7_ARAT H RecName: Full=GATA transcription factor 7 gi 2961383 emb CAA18130.1  putative protein [Arabidopsis thaliana]<br>gi 7270577 emb CAB80295.1  putative protein [Arabidopsis thaliana]<br>gi 18252999 gb AAL62426.1  putative protein [Arabidopsis thaliana]<br>gi 21389681 gb AAM48039.1  putative protein [Arabidopsis thaliana]<br>gi 332661238 gb AEE86638.1  GATA transcription factor 7 [Arabidopsis thaliana] | 236  | 238  | 2.00E-91  | 100.8 | 74.2 | 80.1 | GATA transcription factor 7                     | gbpln | Arabidopsis thaliana | AT4G36240.1   Symbols: GATA7   GATA transcription factor 7   chr4:17147376-17148211 REVERSE LENGTH=238                                                                                                                                                                                                                                                                                                                                                                                                                     | 236  | 238 | 7.00E-94  | 100.8 | 74.2 | 80.1 |
| Rsa1.0_00037.1.g2184.t1 | gb EOA16534.1  hypothetical protein CARUB_v10004694mg [Capsella rubella]                                                                                                                                                                                                                                                                                                                                                                                                                                                     | 481  | 485  | 0         | 100.8 | 87.1 | 95.8 | hypothetical protein CARUB_v10004694mg          | gbpln | Capsella rubella     | AT4G36250.1   Symbols: ALDH3F1   aldehyde dehydrogenase 3F1   chr4:17151029-17153381 FORWARD LENGTH=484                                                                                                                                                                                                                                                                                                                                                                                                                    | 481  | 484 | 0         | 100.6 | 85.7 | 94.6 |
| Rsa1.0_00037.1.g2185.t1 | gb ADA60974.1  stylish 2b [Brassica rapa subsp. pekinensis]                                                                                                                                                                                                                                                                                                                                                                                                                                                                  | 312  | 321  | 1.00E-125 | 102.9 | 88.5 | 92.6 | stylish 2b                                      | gbpln | Brassica rapa        | AT4G36260.1   Symbols: STY2, SRS2   Lateral root primordium (LRP) protein-related   chr4:17155705-17157006 REVERSE LENGTH=322                                                                                                                                                                                                                                                                                                                                                                                              | 312  | 322 | 1.00E-119 | 103.2 | 86.9 | 91.0 |
| Rsa1.0_00037.1.g2186.t2 | ref XP_002867022.1  predicted protein [Arabidopsis lyrata subsp. lyrata]<br>gi 297312858 gb EFH43281.1  predicted protein [Arabidopsis lyrata subsp. lyrata]                                                                                                                                                                                                                                                                                                                                                                 | 1325 | 631  | 0         | 47.6  | 38.4 | 42.4 | predicted protein                               | gbpln | Arabidopsis lyrata   | AT4G36290.1   Symbols: CRT1   compromised recognition of TCV 1   chr4:17168669-17173187 REVERSE LENGTH=635                                                                                                                                                                                                                                                                                                                                                                                                                 | 1325 | 635 | 0         | 47.9  | 37.1 | 41.5 |
| Rsa1.0_00037.1.g2187.t1 | dbj BAJ34544.1  unnamed protein product [Thellungiella halophila]                                                                                                                                                                                                                                                                                                                                                                                                                                                            | 846  | 856  | 0         | 101.2 | 92.6 | 96.0 | unnamed protein product                         | ----  | ----                 | AT4G36360.1   Symbols: BGAL3   beta-galactosidase 3   chr4:17176840-17181143 REVERSE LENGTH=856                                                                                                                                                                                                                                                                                                                                                                                                                            | 846  | 856 | 0         | 101.2 | 91.6 | 95.6 |
| Rsa1.0_00037.1.g2188.t1 | #                                                                                                                                                                                                                                                                                                                                                                                                                                                                                                                            | #    | #    | #         | #     | #    | #    | -                                               | ----  | ----                 | #                                                                                                                                                                                                                                                                                                                                                                                                                                                                                                                          | #    | #   | #         | #     | #    |      |
| Rsa1.0_00037.1.g2189.t1 | #                                                                                                                                                                                                                                                                                                                                                                                                                                                                                                                            | #    | #    | #         | #     | #    | #    | -                                               | ----  | ----                 | #                                                                                                                                                                                                                                                                                                                                                                                                                                                                                                                          | #    | #   | #         | #     | #    |      |
| Rsa1.0_00037.1.g2190.t1 | ref XP_002867019.1  cytochrome P450 [Arabidopsis lyrata subsp. lyrata]<br>gi 297312855 gb EFH43278.1  cytochrome P450 [Arabidopsis lyrata subsp. lyrata]                                                                                                                                                                                                                                                                                                                                                                     | 527  | 525  | 0         | 99.6  | 86.3 | 92.4 | cytochrome P450                                 | gbpln | Arabidopsis lyrata   | AT4G36380.1   Symbols: ROT3   Cytochrome P450 superfamily protein   chr4:17187973-17192202 REVERSE LENGTH=524                                                                                                                                                                                                                                                                                                                                                                                                              | 527  | 524 | 0         | 99.4  | 85.6 | 91.3 |
| Rsa1.0_00037.1.g2191.t1 | #                                                                                                                                                                                                                                                                                                                                                                                                                                                                                                                            | #    | #    | #         | #     | #    | #    | -                                               | ----  | ----                 | #                                                                                                                                                                                                                                                                                                                                                                                                                                                                                                                          | #    | #   | #         | #     | #    |      |
| Rsa1.0_00037.1.g2192.t1 | emb CAA18234.1  putative protein [Arabidopsis thaliana]<br>gi 7269488 emb CAB79491.1  putative protein [Arabidopsis thaliana]                                                                                                                                                                                                                                                                                                                                                                                                | 368  | 1141 | 1.00E-58  | 310.1 | 34.5 | 52.7 | putative protein                                | gbpln | Arabidopsis thaliana | AT1G43760.1   Symbols:   DNase I-like superfamily protein   chr1:16528880-16531065 REVERSE LENGTH=626                                                                                                                                                                                                                                                                                                                                                                                                                      | 368  | 626 | 1.00E-37  | 170.1 | 25.8 | 38.9 |
| Rsa1.0_00037.1.g2193.t1 | ref NP_001190937.1  Splicing factor U2af large subunit A [Arabidopsis thaliana]<br>gi 332661290 gb AEE86890.1  Splicing factor U2af large subunit A [Arabidopsis thaliana]                                                                                                                                                                                                                                                                                                                                                   | 525  | 551  | 0         | 105.0 | 83.4 | 88.8 | Splicing factor U2af large subunit A            | gbpln | Arabidopsis thaliana | AT4G36690.4   Symbols: ATU2AF65A   U2 snRNP auxiliary factor, large subunit, splicing factor   chr4:17294139-17297609 REVERSE LENGTH=551                                                                                                                                                                                                                                                                                                                                                                                   | 525  | 551 | 0         | 105.0 | 83.4 | 88.8 |
| Rsa1.0_00037.1.g2194.t4 | gb EOA16541.1  hypothetical protein CARUB_v10004700mg [Capsella rubella]                                                                                                                                                                                                                                                                                                                                                                                                                                                     | 685  | 483  | 0         | 70.5  | 63.4 | 66.3 | hypothetical protein CARUB_v10004700mg          | gbpln | Capsella rubella     | AT4G36710.1   Symbols:   GRAS family transcription factor   chr4:17306060-17307520 FORWARD LENGTH=486                                                                                                                                                                                                                                                                                                                                                                                                                      | 685  | 486 | 0         | 70.9  | 62.5 | 65.7 |
| Rsa1.0_00037.1.g2195.t1 | emb CAA58774.1  G-box binding factor 1A [Brassica napus]                                                                                                                                                                                                                                                                                                                                                                                                                                                                     | 311  | 313  | 1.00E-155 | 100.6 | 92.6 | 95.2 | G-box binding factor 1A                         | gbpln | Brassica napus       | AT4G36730.1   Symbols: GBF1   G-box binding factor 1   chr4:17309850-17311752 REVERSE LENGTH=315                                                                                                                                                                                                                                                                                                                                                                                                                           | 311  | 315 | 1.00E-147 | 101.3 | 86.8 | 92.6 |
| Rsa1.0_00037.1.g2196.t1 | ref XP_002866994.1  homeobox-leucine zipper protein ATHB-40 [Arabidopsis lyrata subsp. lyrata]<br>gi 297312830 gb EFH43253.1  homeobox-leucine zipper protein ATHB-40 [Arabidopsis lyrata subsp. lyrata]                                                                                                                                                                                                                                                                                                                     | 217  | 217  | 1.00E-106 | 100.0 | 90.8 | 95.4 | homeobox-leucine zipper protein ATHB-40         | gbpln | Arabidopsis lyrata   | AT4G36740.1   Symbols: HB-5, ATHB40, HB40   homeobox protein 40   chr4:17314649-17316314 REVERSE LENGTH=216                                                                                                                                                                                                                                                                                                                                                                                                                | 217  | 216 | 1.00E-103 | 99.5  | 88.0 | 94.5 |
| Rsa1.0_00037.1.g2197.t1 | gb EOA33837.1  hypothetical protein CARUB_v10021318mg, partial [Capsella rubella]                                                                                                                                                                                                                                                                                                                                                                                                                                            | 194  | 290  | 1.00E-48  | 149.5 | 52.1 | 67.0 | hypothetical protein CARUB_v10021318mg, partial | gbpln | Capsella rubella     | AT4G04650.1   Symbols:   RNA-directed DNA polymerase (reverse transcriptase)-related family protein   chr4:2353989-2355213 REVERSE LENGTH=332                                                                                                                                                                                                                                                                                                                                                                              | 194  | 332 | 3.00E-41  | 171.1 | 41.8 | 53.1 |

|                         |                                                                                                                                                                                                                                                                                                                                                                                                               |     |     |           |       |      |      |                                                                                                                                                                                                                                                                                                                                                                        |       |                      |                                                                                                                                 |     |     |           |       |      |      |
|-------------------------|---------------------------------------------------------------------------------------------------------------------------------------------------------------------------------------------------------------------------------------------------------------------------------------------------------------------------------------------------------------------------------------------------------------|-----|-----|-----------|-------|------|------|------------------------------------------------------------------------------------------------------------------------------------------------------------------------------------------------------------------------------------------------------------------------------------------------------------------------------------------------------------------------|-------|----------------------|---------------------------------------------------------------------------------------------------------------------------------|-----|-----|-----------|-------|------|------|
| Rsa1.0_00037.1.g2198.t1 | gb EOA18652.1  hypothetical protein CARUB_v10007228mg [Capsella rubella]                                                                                                                                                                                                                                                                                                                                      | 257 | 273 | 1.00E-123 | 106.2 | 88.7 | 92.2 | hypothetical protein CARUB_v10007228mg                                                                                                                                                                                                                                                                                                                                 | gbpln | Capsella rubella     | AT4G36750.1   Symbols: Quinone reductase family protein   chr4:17324642-17326215 FORWARD LENGTH=273                             | 257 | 273 | 1.00E-119 | 106.2 | 85.6 | 89.1 |
| Rsa1.0_00037.1.g2199.t1 | db BAJ34484.1  unnamed protein product [Theellungiella halophila]                                                                                                                                                                                                                                                                                                                                             | 583 | 645 | 0         | 110.6 | 89.2 | 93.7 | unnamed protein product                                                                                                                                                                                                                                                                                                                                                | ----  | ----                 | AT4G36760.1   Symbols: ATAPP1, APP1   aminopeptidase P1   chr4:17326689-17329979 FORWARD LENGTH=645                             | 583 | 645 | 0         | 110.6 | 87.5 | 92.5 |
| Rsa1.0_00037.1.g2200.t1 | ref XP_002866993.1  UDP-glucoronosyl/UDP-glucosyl transferase family protein [Arabidopsis lyrata subsp. lyrata]   gi 297312829 gb EFH43252.1  UDP-glucoronosyl/UDP-glucosyl transferase family protein [Arabidopsis lyrata subsp. lyrata]                                                                                                                                                                     | 462 | 457 | 0         | 98.9  | 83.8 | 91.1 | UDP-glucoronosyl/UDP-glucosyl transferase family protein                                                                                                                                                                                                                                                                                                               | gbpln | Arabidopsis lyrata   | AT4G36770.1   Symbols: UDP-Glycosyltransferase superfamily protein   chr4:17330217-17331590 REVERSE LENGTH=457                  | 462 | 457 | 0         | 98.9  | 83.5 | 90.0 |
| Rsa1.0_00037.1.g2201.t1 | #                                                                                                                                                                                                                                                                                                                                                                                                             | #   | #   | #         | #     | #    | #    | -                                                                                                                                                                                                                                                                                                                                                                      | ----  | ----                 | #                                                                                                                               | #   | #   | #         | #     | #    | #    |
| Rsa1.0_00037.1.g2202.t1 | gb EOA17023.1  hypothetical protein CARUB_v10005257mg [Capsella rubella]                                                                                                                                                                                                                                                                                                                                      | 312 | 322 | 1.00E-135 | 103.2 | 89.4 | 92.3 | hypothetical protein CARUB_v10005257mg                                                                                                                                                                                                                                                                                                                                 | gbpln | Capsella rubella     | AT4G36780.1   Symbols: BEH2   BES1/BZR1 homolog 2   chr4:17332989-17334212 REVERSE LENGTH=265                                   | 312 | 265 | 5.00E-78  | 84.9  | 59.6 | 60.9 |
| Rsa1.0_00037.1.g2203.t1 | ref XP_002869023.1  predicted protein [Arabidopsis lyrata subsp. lyrata]   gi 297314859 gb EFH45282.1  predicted protein [Arabidopsis lyrata subsp. lyrata]                                                                                                                                                                                                                                                   | 433 | 489 | 0         | 112.9 | 93.3 | 96.5 | predicted protein                                                                                                                                                                                                                                                                                                                                                      | gbpln | Arabidopsis lyrata   | AT4G36790.1   Symbols: Major facilitator superfamily protein   chr4:17336360-17338304 FORWARD LENGTH=489                        | 433 | 489 | 0         | 112.9 | 92.6 | 95.8 |
| Rsa1.0_00037.1.g2204.t1 | gb AC116426.1  RUB1-conjugation enzyme [Brassica juncea]                                                                                                                                                                                                                                                                                                                                                      | 185 | 185 | 1.00E-103 | 100.0 | 96.8 | 98.9 | RUB1-conjugation enzyme                                                                                                                                                                                                                                                                                                                                                | gbpln | Brassica juncea      | AT4G36800.2   Symbols: RCE1   RUB1 conjugating enzyme 1   chr4:17341237-17342148 REVERSE LENGTH=184                             | 185 | 184 | 1.00E-105 | 99.5  | 97.8 | 98.9 |
| Rsa1.0_00037.1.g2205.t1 | sp Q43133.1 GGPPS_SINAL RecName: Full=Geranylgeranyl pyrophosphate synthase, chloroplastic/chromoplastic; Short=GGPP synthase; AltName: Full=(2E,6E)-farnesyl diphosphate synthase; AltName: Full=Dimethylallyltransferase; AltName: Full=Farnesyl diphosphate synthase; AltName: Full=Geranyltransferase; Flags: Precursor   gi 1419758 emb CAA67330.1  geranylgeranyl pyrophosphate synthase [Sinapis alba] | 368 | 366 | 0         | 99.5  | 92.7 | 97.3 | RecName: Full=Geranylgeranyl pyrophosphate synthase, chloroplastic/chromoplastic; Short=GGPP synthase; AltName: Full=(2E,6E)-farnesyl diphosphate synthase; AltName: Full=Dimethylallyltransferase; AltName: Full=Farnesyl diphosphate synthase; AltName: Full=Geranyltransferase; Flags: Precursor   gi 1419758 emb CAA67330.1  geranylgeranyl pyrophosphate synthase | gbpln | Sinapis alba         | AT4G36810.1   Symbols: GGPS1   geranylgeranyl pyrophosphate synthase 1   chr4:17343513-17344628 FORWARD LENGTH=371              | 368 | 371 | 1.00E-173 | 100.8 | 86.1 | 91.6 |
| Rsa1.0_00037.1.g2206.t1 | #                                                                                                                                                                                                                                                                                                                                                                                                             | #   | #   | #         | #     | #    | #    | -                                                                                                                                                                                                                                                                                                                                                                      | ----  | ----                 | #                                                                                                                               | #   | #   | #         | #     | #    | #    |
| Rsa1.0_00037.1.g2207.t2 | gb EOA16793.1  hypothetical protein CARUB_v10005013mg, partial [Capsella rubella]                                                                                                                                                                                                                                                                                                                             | 313 | 388 | 1.00E-139 | 124.0 | 79.6 | 87.5 | hypothetical protein CARUB_v10005013mg, partial                                                                                                                                                                                                                                                                                                                        | gbpln | Capsella rubella     | AT4G36820.1   Symbols: Protein of unknown function (DUF607)   chr4:17346889-17347994 FORWARD LENGTH=338                         | 313 | 338 | 1.00E-131 | 108.0 | 74.1 | 85.3 |
| Rsa1.0_00037.1.g2208.t1 | ref NP_568009.5  PQ-loop repeat family protein / transmembrane family protein [Arabidopsis thaliana]   gi 15028159 gb AAK76703.1  unknown protein [Arabidopsis thaliana]   gi 332661309 gb AEE86709.1  PQ-loop repeat family protein / transmembrane family protein [Arabidopsis thaliana]                                                                                                                    | 384 | 392 | 0         | 102.1 | 88.3 | 92.2 | PQ-loop repeat family protein / transmembrane family protein                                                                                                                                                                                                                                                                                                           | gbpln | Arabidopsis thaliana | AT4G36850.1   Symbols: PQ-loop repeat family protein / transmembrane family protein   chr4:17353415-17355822 REVERSE LENGTH=392 | 384 | 392 | 0         | 102.1 | 88.3 | 92.2 |
| Rsa1.0_00037.1.g2209.t3 | ref XP_002866988.1  hypothetical protein ARALYDRAFT_328082 [Arabidopsis lyrata subsp. lyrata]   gi 297312824 gb EFH43247.1  hypothetical protein ARALYDRAFT_328082 [Arabidopsis lyrata subsp. lyrata]                                                                                                                                                                                                         | 584 | 558 | 0         | 95.5  | 87.8 | 92.5 | hypothetical protein ARALYDRAFT_328082                                                                                                                                                                                                                                                                                                                                 | gbpln | Arabidopsis lyrata   | AT4G36860.1   Symbols: LIM domain-containing protein   chr4:17358580-17361189 REVERSE LENGTH=553                                | 584 | 553 | 0         | 94.7  | 86.5 | 91.1 |
| Rsa1.0_00037.1.g2210.t2 | gb AAD51349.1  bel1-like homeodomain 2 [Arabidopsis thaliana]   gi 15215857 gb AAK91472.1  AT4g36870/G7A10_490 [Arabidopsis thaliana]                                                                                                                                                                                                                                                                         | 636 | 739 | 0         | 116.2 | 84.0 | 87.6 | bel1-like homeodomain 2                                                                                                                                                                                                                                                                                                                                                | gbpln | Arabidopsis thaliana | AT4G36870.2   Symbols: BLH2, SAW1   BEL1-like homeodomain 2   chr4:17369423-17373723 FORWARD LENGTH=739                         | 636 | 739 | 0         | 116.2 | 83.8 | 87.4 |

|                          |                                                                                                                                                                                                                                                                                                                         |      |      |           |       |      |      |                                                 |       |                      |                                                                                                                                                                                                                                                                                                                                                                                                                                                                                                                                                                              |      |      |           |       |      |      |
|--------------------------|-------------------------------------------------------------------------------------------------------------------------------------------------------------------------------------------------------------------------------------------------------------------------------------------------------------------------|------|------|-----------|-------|------|------|-------------------------------------------------|-------|----------------------|------------------------------------------------------------------------------------------------------------------------------------------------------------------------------------------------------------------------------------------------------------------------------------------------------------------------------------------------------------------------------------------------------------------------------------------------------------------------------------------------------------------------------------------------------------------------------|------|------|-----------|-------|------|------|
| Rsa1.0_00037.1.g2211.t1  | ref[XP_002867047.1] hypothetical protein ARALYDRAFT_328161 [Arabidopsis lyrata subsp. lyrata] gi 297312883 gb EFH43306.1                                                                                                                                                                                                | 457  | 459  | 0         | 100.4 | 85.3 | 91.9 | hypothetical protein ARALYDRAFT_328161          | gbpln | Arabidopsis lyrata   | AT4G35910.1   Symbols:   Adenine nucleotide alpha hydrolases-like superfamily protein   chr4:17008817-17011014 REVERSE LENGTH=458                                                                                                                                                                                                                                                                                                                                                                                                                                            | 457  | 458  | 0         | 100.2 | 84.0 | 91.2 |
| Rsa1.0_00037.1.g2212.t1  | #                                                                                                                                                                                                                                                                                                                       | #    | #    | #         | #     | #    | #    | -                                               | ----  | ----                 | #                                                                                                                                                                                                                                                                                                                                                                                                                                                                                                                                                                            | #    | #    | #         | #     | #    |      |
| Rsa1.0_00037.1.g2213.t1  | gb EOA15637.1  hypothetical protein CARUB_v10005881mg [Capsella rubella]                                                                                                                                                                                                                                                | 171  | 173  | 2.00E-67  | 101.2 | 82.5 | 87.7 | hypothetical protein CARUB_v10005881mg          | gbpln | Capsella rubella     | AT4G37240.1   Symbols:   unknown protein; FUNCTIONS IN: molecular_function unknown; INVOLVED IN: N-terminal protein myristoylation; LOCATED IN: cellular_component unknown; EXPRESSED IN: 22 plant structures; EXPRESSED DURING: 13 growth stages; BEST Arabidopsis thaliana protein match is: unknown protein (TAIR:AT2G23690.1); Has 30201 Blast hits to 17322 proteins in 780 species: Archae - 12; Bacteria - 1396; Metazoa - 17338; Fungi - 3422; Plants - 5037; Viruses - 0; Other Eukaryotes - 2996 (source: NCBI BLINK).   chr4:17524546-17525052 FORWARD LENGTH=168 | 171  | 168  | 9.00E-63  | 98.2  | 79.5 | 87.1 |
| Rsa1.0_00037.1.g2214.t1  | gb AAM08751.1 AC025098_18 Putative copia-type polyprotein [Oryza sativa Japonica Group]                                                                                                                                                                                                                                 | 1074 | 1803 | 0         | 167.9 | 45.7 | 60.2 | Putative copia-type polyprotein                 | gbpln | Oryza sativa         | AT4G23160.1   Symbols: CRK8   cysteine-rich RLK (RECEPTOR-like protein kinase) 8   chr4:12129485-12134086 FORWARD LENGTH=1262                                                                                                                                                                                                                                                                                                                                                                                                                                                | 1074 | 1262 | 2.00E-85  | 117.5 | 15.7 | 23.1 |
| Rsa1.0_00037.1.g2215.t1  | ref[XP_002866981.1] tetratricopeptide repeat-containing protein [Arabidopsis lyrata subsp. lyrata] gi 297312817 gb EFH43240.1                                                                                                                                                                                           | 450  | 498  | 1.00E-161 | 110.7 | 76.4 | 85.3 | tetratricopeptide repeat-containing protein     | gbpln | Arabidopsis lyrata   | AT4G37210.1   Symbols:   Tetratricopeptide repeat (TPR)-like superfamily protein   chr4:17512376-17514421 FORWARD LENGTH=492                                                                                                                                                                                                                                                                                                                                                                                                                                                 | 450  | 492  | 1.00E-153 | 109.3 | 73.8 | 82.2 |
| Rsa1.0_00037.1.g2216.t13 | gb EOA17278.1  hypothetical protein CARUB_v10005573mg [Capsella rubella]                                                                                                                                                                                                                                                | 294  | 252  | 1.00E-107 | 85.7  | 68.7 | 73.5 | hypothetical protein CARUB_v10005573mg          | gbpln | Capsella rubella     | AT4G37200.1   Symbols: HCF164   Thioredoxin superfamily protein   chr4:17508936-17511230 REVERSE LENGTH=261                                                                                                                                                                                                                                                                                                                                                                                                                                                                  | 294  | 261  | 1.00E-106 | 88.8  | 68.0 | 73.1 |
| Rsa1.0_00037.1.g2217.t1  | ref NP_568018.1  myb family transcription factor [Arabidopsis thaliana] gi 115311427 gb ABI93894.1  At4g37180 [Arabidopsis thaliana] gi 332661353 gb AEE68763.1  myb family transcription factor [Arabidopsis thaliana]                                                                                                 | 342  | 356  | 1.00E-127 | 104.1 | 76.9 | 86.0 | myb family transcription factor                 | gbpln | Arabidopsis thaliana | AT4G37180.1   Symbols:   Homeodomain-like superfamily protein   chr4:17504648-17506107 FORWARD LENGTH=356                                                                                                                                                                                                                                                                                                                                                                                                                                                                    | 342  | 356  | 1.00E-130 | 104.1 | 76.9 | 86.0 |
| Rsa1.0_00037.1.g2218.t1  | ref[XP_002869013.1] pentatricopeptide repeat-containing protein [Arabidopsis lyrata subsp. lyrata] gi 297314849 gb EFH45272.1  pentatricopeptide repeat-containing protein [Arabidopsis lyrata subsp. lyrata]                                                                                                           | 1202 | 693  | 0         | 57.7  | 48.0 | 52.5 | pentatricopeptide repeat-containing protein     | gbpln | Arabidopsis lyrata   | AT4G37170.1   Symbols:   Pentatricopeptide repeat (PPR) superfamily protein   chr4:17498580-17500655 REVERSE LENGTH=691                                                                                                                                                                                                                                                                                                                                                                                                                                                      | 1202 | 691  | 0         | 57.5  | 47.8 | 52.0 |
| Rsa1.0_00037.1.g2219.t1  | ref[XP_002869010.1] hypothetical protein ARALYDRAFT_912657 [Arabidopsis lyrata subsp. lyrata] gi 297314846 gb EFH45269.1  hypothetical protein ARALYDRAFT_912657 [Arabidopsis lyrata subsp. lyrata]                                                                                                                     | 257  | 261  | 1.00E-124 | 101.6 | 82.1 | 90.3 | hypothetical protein ARALYDRAFT_912657          | gbpln | Arabidopsis lyrata   | AT4G37150.1   Symbols: ATMES9, MES9   methyl esterase 9   chr4:17492985-17494057 REVERSE LENGTH=256                                                                                                                                                                                                                                                                                                                                                                                                                                                                          | 257  | 256  | 1.00E-116 | 99.6  | 75.5 | 85.2 |
| Rsa1.0_00037.1.g2220.t1  | ref NP_195430.2  hydroxyproline-rich glycoprotein family protein [Arabidopsis thaliana] gi 20260346 gb AAM13071.1  unknown protein [Arabidopsis thaliana] gi 31711924 gb AP69318.1  At4g37130 [Arabidopsis thaliana] gi 332661357 gb AEE68757.1  hydroxyproline-rich glycoprotein family protein [Arabidopsis thaliana] | 510  | 513  | 0         | 100.6 | 75.9 | 79.8 | hydroxyproline-rich glycoprotein family protein | gbpln | Arabidopsis thaliana | AT4G37130.1   Symbols:   hydroxyproline-rich glycoprotein family protein   chr4:17489567-17491773 FORWARD LENGTH=513                                                                                                                                                                                                                                                                                                                                                                                                                                                         | 510  | 513  | 0         | 100.6 | 75.9 | 79.8 |
| Rsa1.0_00037.1.g2221.t1  | gb EOA16987.1  hypothetical protein CARUB_v10005219mg [Capsella rubella]                                                                                                                                                                                                                                                | 323  | 332  | 1.00E-140 | 102.8 | 75.9 | 87.0 | hypothetical protein CARUB_v10005219mg          | gbpln | Capsella rubella     | AT4G25900.1   Symbols:   Galactose mutarotase-like superfamily protein   chr4:13161487-13163397 FORWARD LENGTH=318                                                                                                                                                                                                                                                                                                                                                                                                                                                           | 323  | 318  | 1.00E-135 | 98.5  | 73.4 | 83.3 |
| Rsa1.0_00037.1.g2222.t1  | ref[XP_002869009.1] hypothetical protein ARALYDRAFT_490927 [Arabidopsis lyrata subsp. lyrata] gi 297314845 gb EFH45268.1  hypothetical protein ARALYDRAFT_490927 [Arabidopsis lyrata subsp. lyrata]                                                                                                                     | 410  | 430  | 1.00E-150 | 104.9 | 72.4 | 82.4 | hypothetical protein ARALYDRAFT_490927          | gbpln | Arabidopsis lyrata   | AT4G37110.1   Symbols:   Zinc-finger domain of monoamine-oxidase A repressor R1   chr4:17484343-17486197 REVERSE LENGTH=417                                                                                                                                                                                                                                                                                                                                                                                                                                                  | 410  | 417  | 1.00E-138 | 101.7 | 67.3 | 79.0 |

|                          |                                                                                                                                                                                                                                                                                                                                                                     |     |     |           |       |      |      |                                                |       |                      |                                                                                                                                                                                                                                                                                                                               |     |     |           |       |      |      |
|--------------------------|---------------------------------------------------------------------------------------------------------------------------------------------------------------------------------------------------------------------------------------------------------------------------------------------------------------------------------------------------------------------|-----|-----|-----------|-------|------|------|------------------------------------------------|-------|----------------------|-------------------------------------------------------------------------------------------------------------------------------------------------------------------------------------------------------------------------------------------------------------------------------------------------------------------------------|-----|-----|-----------|-------|------|------|
| Rsa1.0_00037.1.g2223.t1  | refNP_195427.1  catalytic/ pyridoxal phosphate binding protein [Arabidopsis thaliana] gi 4006867 emb CAB16785.1  putative protein [Arabidopsis thaliana] gi 7270659 emb CAB80376.1  putative protein [Arabidopsis thaliana] gi 332661354 gb AEE86754.1  catalytic/ pyridoxal phosphate binding protein [Arabidopsis thaliana]                                       | 882 | 896 | 0         | 101.6 | 84.8 | 90.8 | catalytic/ pyridoxal phosphate binding protein | gbpln | Arabidopsis thaliana | AT4G37100.1   Symbols:   Pyridoxal phosphate (PLP)-dependent transferases superfamily protein   chr4:17479173-17481863 REVERSE LENGTH=896                                                                                                                                                                                     | 882 | 896 | 0         | 101.6 | 84.8 | 90.8 |
| Rsa1.0_00037.1.g2224.t2  | gb EOA16265.1  hypothetical protein CARUB_v10004409mg [Capsella rubella]                                                                                                                                                                                                                                                                                            | 590 | 605 | 0         | 102.5 | 87.8 | 91.9 | hypothetical protein CARUB_v10004409mg         | gbpln | Capsella rubella     | AT4G37080.3   Symbols:   Protein of unknown function. DUF547   chr4:17473719-17476716 FORWARD LENGTH=610                                                                                                                                                                                                                      | 590 | 610 | 0         | 103.4 | 88.1 | 91.5 |
| Rsa1.0_00037.1.g2225.t1  | gb EOA18418.1  hypothetical protein CARUB_v10006962mg [Capsella rubella]                                                                                                                                                                                                                                                                                            | 408 | 414 | 0         | 101.5 | 83.6 | 93.9 | hypothetical protein CARUB_v10006962mg         | gbpln | Capsella rubella     | AT4G37070.2   Symbols: PLP1, PLA IVA, AtPLAIVA   Acyl transferase/acyl hydrolase/lysophospholipase superfamily protein   chr4:17464916-17467058 REVERSE LENGTH=414                                                                                                                                                            | 408 | 414 | 0         | 101.5 | 82.6 | 93.1 |
| Rsa1.0_00037.1.g2226.t1  | gb EOA18418.1  hypothetical protein CARUB_v10006962mg [Capsella rubella]                                                                                                                                                                                                                                                                                            | 336 | 414 | 1.00E-105 | 123.2 | 56.0 | 64.3 | hypothetical protein CARUB_v10006962mg         | gbpln | Capsella rubella     | AT4G37070.2   Symbols: PLP1, PLA IVA, AtPLAIVA   Acyl transferase/acyl hydrolase/lysophospholipase superfamily protein   chr4:17464916-17467058 REVERSE LENGTH=414                                                                                                                                                            | 336 | 414 | 1.00E-106 | 123.2 | 55.4 | 65.2 |
| Rsa1.0_00037.1.g2227.t1  | ref XP_002869006.1  hypothetical protein ARALYDRAFT_490916 [Arabidopsis lyrata subsp. lyrata] gi 297314842 gb EFH45265.1  hypothetical protein ARALYDRAFT_490916 [Arabidopsis lyrata subsp. lyrata]                                                                                                                                                                 | 412 | 412 | 0         | 100.0 | 77.4 | 87.9 | hypothetical protein ARALYDRAFT_490916         | gbpln | Arabidopsis lyrata   | AT4G37050.1   Symbols: PLP4, PLA V, AtPLAIVC   PATATIN-like protein 4   chr4:17457261-17459642 REVERSE LENGTH=428                                                                                                                                                                                                             | 412 | 428 | 0         | 103.9 | 76.7 | 86.7 |
| Rsa1.0_00037.1.g2228.t1  | ref XP_002866973.1  hypothetical protein ARALYDRAFT_912645 [Arabidopsis lyrata subsp. lyrata] gi 297312809 gb EFH43232.1  hypothetical protein ARALYDRAFT_912645 [Arabidopsis lyrata subsp. lyrata]                                                                                                                                                                 | 351 | 350 | 0         | 99.7  | 91.2 | 95.4 | hypothetical protein ARALYDRAFT_912645         | gbpln | Arabidopsis lyrata   | AT4G37040.1   Symbols: MAP1D   methionine aminopeptidase 1D   chr4:17455175-17457085 FORWARD LENGTH=350                                                                                                                                                                                                                       | 351 | 350 | 0         | 99.7  | 90.3 | 94.9 |
| Rsa1.0_00037.1.g2229.t1  | gb ABV89640.1  heat shock factor 4 [Brassica rapa]                                                                                                                                                                                                                                                                                                                  | 277 | 285 | 1.00E-138 | 102.9 | 93.1 | 94.9 | heat shock factor 4                            | gbpln | Brassica rapa        | AT4G36990.1   Symbols: HSF4, HSF1, AT-HSF1, ATHSF4   heat shock factor 4   chr4:17440660-17441706 FORWARD LENGTH=284                                                                                                                                                                                                          | 277 | 284 | 1.00E-117 | 102.5 | 80.9 | 88.1 |
| Rsa1.0_00037.1.g2230.t3  | ref XP_002869003.1  hypothetical protein ARALYDRAFT_490906 [Arabidopsis lyrata subsp. lyrata] gi 297314839 gb EFH45262.1  hypothetical protein ARALYDRAFT_490906 [Arabidopsis lyrata subsp. lyrata]                                                                                                                                                                 | 547 | 505 | 0         | 92.3  | 75.5 | 80.6 | hypothetical protein ARALYDRAFT_490906         | gbpln | Arabidopsis lyrata   | AT4G36980.4   Symbols:   FUNCTIONS IN: molecular_function unknown; INVOLVED IN: biological_process unknown; EXPRESSED IN: 22 plant structures; EXPRESSED DURING: 13 growth stages; CONTAINS InterPro DOMAIN/s: Splicing factor, suppressor of white apricot (InterPro:IPR019147).   chr4:17433861-17437012 REVERSE LENGTH=556 | 547 | 556 | 0         | 101.6 | 75.1 | 80.6 |
| Rsa1.0_00038.1.g2231.t1  | ref XP_002891171.1  predicted protein [Arabidopsis lyrata subsp. lyrata] gi 297337013 gb EFH67430.1  predicted protein [Arabidopsis lyrata subsp. lyrata]                                                                                                                                                                                                           | 133 | 151 | 2.00E-45  | 113.5 | 67.7 | 75.2 | predicted protein                              | gbpln | Arabidopsis lyrata   | AT1G35260.1   Symbols: MLP165   MLP-like protein 165   chr1:12937059-12937689 REVERSE LENGTH=152                                                                                                                                                                                                                              | 133 | 152 | 2.00E-45  | 114.3 | 65.4 | 77.4 |
| Rsa1.0_00038.1.g2232.t1  | ref XP_002875142.1  pectate lyase family protein [Arabidopsis lyrata subsp. lyrata] gi 297320980 gb EFH51401.1  pectate lyase family protein [Arabidopsis lyrata subsp. lyrata]                                                                                                                                                                                     | 459 | 455 | 0         | 99.1  | 81.0 | 88.9 | pectate lyase family protein                   | gbpln | Arabidopsis lyrata   | AT2G02720.1   Symbols:   Pectate lyase family protein   chr2:763173-764834 FORWARD LENGTH=455                                                                                                                                                                                                                                 | 459 | 455 | 0         | 99.1  | 81.3 | 88.5 |
| Rsa1.0_00038.1.g2233.t14 | ref NP_178378.1  pentatricopeptide repeat-containing protein [Arabidopsis thaliana] gi 218546778 sp Q1PFA6.2 PP144, ARA TH RecName: Full=Pentatricopeptide repeat-containing protein At2g02750 gi 2947066 gb AAC05347.1  hypothetical protein [Arabidopsis thaliana] gi 330250526 gb AEC05620.1  pentatricopeptide repeat-containing protein [Arabidopsis thaliana] | 638 | 613 | 0         | 96.1  | 76.3 | 84.2 | pentatricopeptide repeat-containing protein    | gbpln | Arabidopsis thaliana | AT2G02750.1   Symbols:   Pentatricopeptide repeat (PPR) superfamily protein   chr2:771641-773482 REVERSE LENGTH=613                                                                                                                                                                                                           | 638 | 613 | 0         | 96.1  | 76.3 | 84.2 |



|                         |                                                                                                                                                                                                                                                                                                                                                                                                                                                                                                                                                                                                                                                                                                                                                                                                                                                                                                                                                                                                                                                                                                                                                                                                                                             |      |      |           |       |       |       |                                                    |       |                      |                                                                                                                                                 |      |      |           |       |       |       |
|-------------------------|---------------------------------------------------------------------------------------------------------------------------------------------------------------------------------------------------------------------------------------------------------------------------------------------------------------------------------------------------------------------------------------------------------------------------------------------------------------------------------------------------------------------------------------------------------------------------------------------------------------------------------------------------------------------------------------------------------------------------------------------------------------------------------------------------------------------------------------------------------------------------------------------------------------------------------------------------------------------------------------------------------------------------------------------------------------------------------------------------------------------------------------------------------------------------------------------------------------------------------------------|------|------|-----------|-------|-------|-------|----------------------------------------------------|-------|----------------------|-------------------------------------------------------------------------------------------------------------------------------------------------|------|------|-----------|-------|-------|-------|
| Rsa1.0_00038.1.g2234.t1 | ref NP_565289.1 ubiquitin-conjugating enzyme E2 A [Arabidopsis thaliana] gi 297814522 ref XP_002875144.1 ubiquitin-conjugating enzyme 2 [Arabidopsis lyrata subsp. lyrata] gi 1174844 sp P42745.1 UBC2_ARATH RecName: Full=Ubiquitin-conjugating enzyme E2 2; AltName: Full=Ubiquitin carrier protein 2; AltName: Full=Ubiquitin-conjugating enzyme E2-17 kDa 2; AltName: Full=Ubiquitin-protein ligase 2 gi 13899127 gb AAK48985.1 AF370558.1 putative ubiquitin-conjugating enzyme E2 [Arabidopsis thaliana] gi 431284 gb AAA32899.1 ubiquitin conjugating enzyme [Arabidopsis thaliana] gi 2689243 emb CAA73476.1 ubiquitin conjugating enzyme [Arabidopsis thaliana] gi 2947065 gb AAC05346.1 E2, ubiquitin-conjugating enzyme 2 (UBC2) [Arabidopsis thaliana] gi 18377456 gb AAL66894.1 putative ubiquitin-conjugating enzyme E2 [Arabidopsis thaliana] gi 66354400 gb AAY44843.1 ubiquitinating enzyme [Arabidopsis thaliana] gi 118197458 gb ABK78692.1 ubiquitin conjugating enzyme [Brassica rapa] gi 297320982 gb EFH51403.1 ubiquitin-conjugating enzyme 2 [Arabidopsis lyrata subsp. lyrata] ref NP_178382.2 protein IQ-domain 29 [Arabidopsis thaliana] gi 330250530 gb AEC05624.1 protein IQ-domain 29 [Arabidopsis thaliana] | 126  | 152  | 9.00E-64  | 120.6 | 100.0 | 100.0 | ubiquitin-conjugating enzyme E2 A                  | gbpln | Arabidopsis lyrata   | AT2G02760.1   Symbols: ATUBC2, UBC2   ubiquitin-conjugating enzyme 2   chr2:774271-775149 FORWARD LENGTH=152                                    | 126  | 152  | 2.00E-66  | 120.6 | 100.0 | 100.0 |
| Rsa1.0_00038.1.g2235.t1 | ref NP_178382.2 protein IQ-domain 29 [Arabidopsis thaliana] gi 330250530 gb AEC05624.1 protein IQ-domain 29 [Arabidopsis thaliana]                                                                                                                                                                                                                                                                                                                                                                                                                                                                                                                                                                                                                                                                                                                                                                                                                                                                                                                                                                                                                                                                                                          | 595  | 636  | 0         | 106.9 | 71.6  | 81.8  | protein IQ-domain 29                               | gbpln | Arabidopsis thaliana | AT2G02790.1   Symbols: IQD29   IQ-domain 29   chr2:788708-790946 FORWARD LENGTH=636                                                             | 595  | 636  | 0         | 106.9 | 71.6  | 81.8  |
| Rsa1.0_00038.1.g2236.t1 | gb EOA23949.1 hypothetical protein CARUB_v10017166mg [Capsella rubella]                                                                                                                                                                                                                                                                                                                                                                                                                                                                                                                                                                                                                                                                                                                                                                                                                                                                                                                                                                                                                                                                                                                                                                     | 418  | 472  | 0         | 112.9 | 87.8  | 93.1  | hypothetical protein CARUB_v10017166mg             | gbpln | Capsella rubella     | AT2G02870.3   Symbols:   Galactose oxidase/kelch repeat superfamily protein   chr2:838378-839781 FORWARD LENGTH=467                             | 418  | 467  | 0         | 111.7 | 87.6  | 93.5  |
| Rsa1.0_00038.1.g2237.t1 | gb AAD39033.1 AF149053.1 phytochrome kinase substrate 1 [Arabidopsis thaliana]                                                                                                                                                                                                                                                                                                                                                                                                                                                                                                                                                                                                                                                                                                                                                                                                                                                                                                                                                                                                                                                                                                                                                              | 401  | 439  | 1.00E-138 | 109.5 | 73.1  | 81.5  | phytochrome kinase substrate 1                     | gbpln | Arabidopsis thaliana | AT2G02950.1   Symbols: PKS1   phytochrome kinase substrate 1   chr2:855149-856468 REVERSE LENGTH=439                                            | 401  | 439  | 1.00E-140 | 109.5 | 72.8  | 81.5  |
| Rsa1.0_00038.1.g2238.t1 | ref XP_002875185.1 predicted protein [Arabidopsis lyrata subsp. lyrata] gi 297321023 gb EFH51444.1 predicted protein [Arabidopsis lyrata subsp. lyrata]                                                                                                                                                                                                                                                                                                                                                                                                                                                                                                                                                                                                                                                                                                                                                                                                                                                                                                                                                                                                                                                                                     | 416  | 376  | 1.00E-159 | 90.4  | 71.6  | 76.7  | predicted protein                                  | gbpln | Arabidopsis lyrata   | AT2G03060.2   Symbols: AGL30   AGAMOUS-like 30   chr2:901614-903569 FORWARD LENGTH=386                                                          | 416  | 386  | 1.00E-154 | 92.8  | 71.4  | 76.9  |
| Rsa1.0_00038.1.g2239.t1 | gb EOA24327.1 hypothetical protein CARUB_v10017566mg [Capsella rubella]                                                                                                                                                                                                                                                                                                                                                                                                                                                                                                                                                                                                                                                                                                                                                                                                                                                                                                                                                                                                                                                                                                                                                                     | 339  | 344  | 1.00E-171 | 101.5 | 91.4  | 95.0  | hypothetical protein CARUB_v10017566mg             | gbpln | Capsella rubella     | AT2G03120.1   Symbols: ATSP, SPP   signal peptide peptidase   chr2:937554-940083 FORWARD LENGTH=344                                             | 339  | 344  | 1.00E-173 | 101.5 | 91.2  | 94.1  |
| Rsa1.0_00038.1.g2240.t1 | ref XP_002875191.1 EMB1579 [Arabidopsis lyrata subsp. lyrata] gi 297321029 gb EFH51450.1 EMB1579 [Arabidopsis lyrata subsp. lyrata]                                                                                                                                                                                                                                                                                                                                                                                                                                                                                                                                                                                                                                                                                                                                                                                                                                                                                                                                                                                                                                                                                                         | 1285 | 1333 | 0         | 103.7 | 53.3  | 58.3  | EMB1579                                            | gbpln | Arabidopsis lyrata   | AT2G03150.1   Symbols: emb1579   ATP/GTP-binding protein family   chr2:952313-959004 FORWARD LENGTH=1340                                        | 1285 | 1340 | 0         | 104.3 | 53.0  | 58.8  |
| Rsa1.0_00038.1.g2241.t1 | gb AAF82795.1 AF274864.1 SKP1gamma1 protein [Brassica napus]                                                                                                                                                                                                                                                                                                                                                                                                                                                                                                                                                                                                                                                                                                                                                                                                                                                                                                                                                                                                                                                                                                                                                                                | 156  | 159  | 3.00E-59  | 101.9 | 73.1  | 82.7  | SKP1gamma1 protein                                 | gbpln | Brassica napus       | AT2G03170.1   Symbols: ASK14, SK14   SKP1-like 14   chr2:961322-961771 FORWARD LENGTH=149                                                       | 156  | 149  | 4.00E-45  | 95.5  | 59.0  | 73.7  |
| Rsa1.0_00038.1.g2242.t2 | ref XP_002875234.1 hypothetical protein ARALYDRAFT_484298 [Arabidopsis lyrata subsp. lyrata] gi 297321072 gb EFH51493.1 hypothetical protein ARALYDRAFT_484298 [Arabidopsis lyrata subsp. lyrata] ref XP_002875236.1 phosphatidylinositol 3-and 4-kinase family protein [Arabidopsis lyrata subsp. lyrata] gi 297321074 gb EFH51495.1 phosphatidylinositol 3-and 4-kinase family protein [Arabidopsis lyrata subsp. lyrata]                                                                                                                                                                                                                                                                                                                                                                                                                                                                                                                                                                                                                                                                                                                                                                                                                 | 181  | 99   | 3.00E-43  | 54.7  | 49.7  | 50.3  | hypothetical protein ARALYDRAFT_484298             | gbpln | Arabidopsis lyrata   | AT2G03870.1   Symbols:   Small nuclear ribonucleoprotein family protein   chr2:1180306-1181256 FORWARD LENGTH=99                                | 181  | 99   | 3.00E-45  | 54.7  | 49.2  | 49.2  |
| Rsa1.0_00038.1.g2243.t1 | ref XP_002875234.1 hypothetical protein ARALYDRAFT_484298 [Arabidopsis lyrata subsp. lyrata] gi 297321074 gb EFH51495.1 phosphatidylinositol 3-and 4-kinase family protein [Arabidopsis lyrata subsp. lyrata]                                                                                                                                                                                                                                                                                                                                                                                                                                                                                                                                                                                                                                                                                                                                                                                                                                                                                                                                                                                                                               | 627  | 650  | 0         | 103.7 | 86.6  | 92.3  | phosphatidylinositol 3-and 4-kinase family protein | gbpln | Arabidopsis lyrata   | AT2G03890.1   Symbols: ATP14K GAMMA 7, UBDK GAMMA 7, PI4K GAMMA 7   phosphoinositide 4-kinase gamma 7   chr2:1186199-1188151 FORWARD LENGTH=650 | 627  | 650  | 0         | 103.7 | 86.3  | 92.3  |
| Rsa1.0_00038.1.g2244.t1 | #                                                                                                                                                                                                                                                                                                                                                                                                                                                                                                                                                                                                                                                                                                                                                                                                                                                                                                                                                                                                                                                                                                                                                                                                                                           | #    | #    | #         | #     | #     | #     | -                                                  | ----  | ----                 | #                                                                                                                                               | #    | #    | #         | #     | #     |       |

|                         |                                                                                                                                                                                                                                                                                                                                                                                                                                                                                                                                                                                                                                                          |     |     |           |       |      |      |                                            |       |                      |                                                                                                                                                                                                                                                                                                                                                                                                                                                              |     |     |           |       |      |      |
|-------------------------|----------------------------------------------------------------------------------------------------------------------------------------------------------------------------------------------------------------------------------------------------------------------------------------------------------------------------------------------------------------------------------------------------------------------------------------------------------------------------------------------------------------------------------------------------------------------------------------------------------------------------------------------------------|-----|-----|-----------|-------|------|------|--------------------------------------------|-------|----------------------|--------------------------------------------------------------------------------------------------------------------------------------------------------------------------------------------------------------------------------------------------------------------------------------------------------------------------------------------------------------------------------------------------------------------------------------------------------------|-----|-----|-----------|-------|------|------|
| Rsa1.0_00038.1.g2245.t1 | refXP_002875239.1   GDSL-motif lipase/hydrolase family protein [Arabidopsis lyrata subsp. lyrata] gi 297321077 gb EFH51498.1   GDSL-motif lipase/hydrolase family protein [Arabidopsis lyrata subsp. lyrata]                                                                                                                                                                                                                                                                                                                                                                                                                                             | 365 | 366 | 1.00E-159 | 100.3 | 74.5 | 81.6 | GDSL-motif lipase/hydrolase family protein | gbpln | Arabidopsis lyrata   | AT2G03980.1   Symbols:   GDSL-like Lipase/Acylhydrolase superfamily protein   chr2:1260907-1262408 FORWARD LENGTH=367                                                                                                                                                                                                                                                                                                                                        | 365 | 367 | 1.00E-157 | 100.5 | 70.7 | 81.9 |
| Rsa1.0_00038.1.g2246.t1 | refXP_002875239.1   GDSL-motif lipase/hydrolase family protein [Arabidopsis lyrata subsp. lyrata] gi 297321077 gb EFH51498.1   GDSL-motif lipase/hydrolase family protein [Arabidopsis lyrata subsp. lyrata]                                                                                                                                                                                                                                                                                                                                                                                                                                             | 365 | 366 | 1.00E-159 | 100.3 | 74.0 | 82.7 | GDSL-motif lipase/hydrolase family protein | gbpln | Arabidopsis lyrata   | AT2G03980.1   Symbols:   GDSL-like Lipase/Acylhydrolase superfamily protein   chr2:1260907-1262408 FORWARD LENGTH=367                                                                                                                                                                                                                                                                                                                                        | 365 | 367 | 1.00E-155 | 100.5 | 69.9 | 81.4 |
| Rsa1.0_00038.1.g2247.t1 | gb EOA25349.1  hypothetical protein CARUB_v10018672mg [Capsella rubella]                                                                                                                                                                                                                                                                                                                                                                                                                                                                                                                                                                                 | 779 | 781 | 0         | 100.3 | 92.8 | 95.3 | hypothetical protein CARUB_v10018672mg     | gbpln | Capsella rubella     | AT2G04030.1   Symbols: CR88, EMB1956, HSP90.5, Hsp88.1, AtHsp90.5   Chaperone protein htpG family protein   chr2:1281983-1285909 FORWARD LENGTH=780                                                                                                                                                                                                                                                                                                          | 779 | 780 | 0         | 100.1 | 91.8 | 94.4 |
| Rsa1.0_00038.1.g2248.t1 | #                                                                                                                                                                                                                                                                                                                                                                                                                                                                                                                                                                                                                                                        | #   | #   | #         | #     | #    | -    | ----                                       | ----  | ----                 | #                                                                                                                                                                                                                                                                                                                                                                                                                                                            | #   | #   | #         | #     | #    | #    |
| Rsa1.0_00038.1.g2249.t1 | ref NP_178489.1  basic leucine-zipper 48 [Arabidopsis thaliana] gi 20198170 gb AAM15441.1  bZIP protein (AtbZIP48) [Arabidopsis thaliana] gi 225898102 dbj BAH30383.1  hypothetical protein [Arabidopsis thaliana] gi 330250693 gb AEC05787.1  basic leucine-zipper 48 [Arabidopsis thaliana]                                                                                                                                                                                                                                                                                                                                                            | 185 | 166 | 1.00E-54  | 89.7  | 77.8 | 82.7 | basic leucine-zipper 48                    | gbpln | Arabidopsis thaliana | AT2G04038.1   Symbols: AtbZIP48, bZIP48   basic leucine-zipper 48   chr2:1331919-1332419 FORWARD LENGTH=166                                                                                                                                                                                                                                                                                                                                                  | 185 | 166 | 4.00E-57  | 89.7  | 77.8 | 82.7 |
| Rsa1.0_00038.1.g2250.t1 | gb EOA24583.1  hypothetical protein CARUB_v10017846mg [Capsella rubella]                                                                                                                                                                                                                                                                                                                                                                                                                                                                                                                                                                                 | 174 | 265 | 6.00E-47  | 152.3 | 60.9 | 70.1 | hypothetical protein CARUB_v10017846mg     | gbpln | Capsella rubella     | AT3G25545.1   Symbols:   unknown protein; FUNCTIONS IN: molecular_function unknown; INVOLVED IN: biological_process unknown; LOCATED IN: cellular_component unknown; EXPRESSED IN: 23 plant structures; EXPRESSED DURING: 13 growth stages; Has 38 Blast hits to 38 proteins in 14 species: Archae - 0; Bacteria - 0; Metazoa - 0; Fungi - 0; Plants - 38; Viruses - 0; Other Eukaryotes - 0 (source: NCBI BLINK).   chr3:9277837-9278440 FORWARD LENGTH=267 | 174 | 267 | 1.00E-48  | 153.4 | 63.2 | 68.4 |
| Rsa1.0_00038.1.g2251.t1 | gb ADK13078.1  phytocystatin 5-3 [Brassica rapa subsp. pekinensis]                                                                                                                                                                                                                                                                                                                                                                                                                                                                                                                                                                                       | 120 | 120 | 9.00E-52  | 100.0 | 80.8 | 93.3 | phytocystatin 5-3                          | gbpln | Brassica rapa        | AT5G47550.1   Symbols:   Cystatin/monellin superfamily protein   chr5:19286596-19286964 REVERSE LENGTH=122                                                                                                                                                                                                                                                                                                                                                   | 120 | 122 | 4.00E-31  | 101.7 | 50.8 | 67.5 |
| Rsa1.0_00038.1.g2252.t1 | ref XP_002875263.1  hypothetical protein ARALYDRAFT_904723 [Arabidopsis lyrata subsp. lyrata] gi 297321101 gb EFH51522.1  hypothetical protein ARALYDRAFT_904723 [Arabidopsis lyrata subsp. lyrata]                                                                                                                                                                                                                                                                                                                                                                                                                                                      | 330 | 423 | 1.00E-117 | 128.2 | 78.8 | 85.2 | hypothetical protein ARALYDRAFT_904723     | gbpln | Arabidopsis lyrata   | AT3G25590.1   Symbols:   unknown protein; Has 149 Blast hits to 140 proteins in 44 species: Archae - 0; Bacteria - 6; Metazoa - 40; Fungi - 6; Plants - 39; Viruses - 0; Other Eukaryotes - 58 (source: NCBI BLINK).   chr3:9302271-9303542 FORWARD LENGTH=423                                                                                                                                                                                               | 330 | 423 | 1.00E-115 | 128.2 | 76.1 | 82.1 |
| Rsa1.0_00038.1.g2253.t1 | ref NP_189188.4  putative calcium-binding protein CML16 [Arabidopsis thaliana] gi 332278174 sp Q9L184.2 CML16_ARAT H RecName: Full=Probable calcium-binding protein CML16; AltName: Full=Calmmodulin-like protein 16 gi 28393082 gb AAO41975.1  putative calmodulin [Arabidopsis thaliana] gi 48310609 gb AAT41852.1  At3g25600 [Arabidopsis thaliana] gi 332643520 gb AEE77041.1  putative calcium-binding protein CML16 [Arabidopsis thaliana]                                                                                                                                                                                                         | 161 | 161 | 7.00E-83  | 100.0 | 93.8 | 96.9 | putative calcium-binding protein CML16     | gbpln | Arabidopsis thaliana | AT3G25600.1   Symbols:   Calcium-binding EF-hand family protein   chr3:9307367-9307852 FORWARD LENGTH=161                                                                                                                                                                                                                                                                                                                                                    | 161 | 161 | 3.00E-85  | 100.0 | 93.8 | 96.9 |
| Rsa1.0_00038.1.g2254.t1 | ref NP_189194.1  Amidase family protein [Arabidopsis thaliana] gi 75273321 sp Q9L177.1 GATA_ARATH RecName: Full=Glutamyl-tRNA(Gln) amidotransferase subunit A, chloroplastic/mitochondrial; Short=Glu-AdT subunit A; Flags: Precursor gi 11994757 dbj BAB03086.1  glutamyl tRNA amidotransferase, subunit A [Arabidopsis thaliana] gi 15010726 gb AAK74022.1  AT3g25660/T5M7.8 [Arabidopsis thaliana] gi 23308481 gb AANI8210.1  At3g25660/T5M7.8 [Arabidopsis thaliana] gi 110741094 dbj BAE98641.1  putative glutamyl-tRNA amidotransferase subunit A [Arabidopsis thaliana] gi 332643527 gb AEE77048.1  Amidase family protein [Arabidopsis thaliana] | 542 | 537 | 0         | 99.1  | 91.0 | 95.8 | Amidase family protein                     | gbpln | Arabidopsis thaliana | AT3G25660.1   Symbols:   Amidase family protein   chr3:9339640-9342044 REVERSE LENGTH=537                                                                                                                                                                                                                                                                                                                                                                    | 542 | 537 | 0         | 99.1  | 91.0 | 95.8 |

|                         |                                                                                                                                                                                                                                                                                                                                                                                                                                                    |     |     |           |       |      |       |                                                         |       |                      |                                                                                                                                                                                                                                                                                                                                                                                                                                                                                                                                                                                                       |     |     |           |       |      |       |
|-------------------------|----------------------------------------------------------------------------------------------------------------------------------------------------------------------------------------------------------------------------------------------------------------------------------------------------------------------------------------------------------------------------------------------------------------------------------------------------|-----|-----|-----------|-------|------|-------|---------------------------------------------------------|-------|----------------------|-------------------------------------------------------------------------------------------------------------------------------------------------------------------------------------------------------------------------------------------------------------------------------------------------------------------------------------------------------------------------------------------------------------------------------------------------------------------------------------------------------------------------------------------------------------------------------------------------------|-----|-----|-----------|-------|------|-------|
| Rsa1.0_00038.1.g2255.t1 | ref[XP_002875269.1] hypothetical protein ARALYDRAFT_904734 [Arabidopsis lyrata subsp. lyrata] gi 297321107 gb EFH51528.1  hypothetical protein ARALYDRAFT_904734 [Arabidopsis lyrata subsp. lyrata]                                                                                                                                                                                                                                                | 552 | 558 | 0         | 101.1 | 78.1 | 88.4  | hypothetical protein ARALYDRAFT_904734                  | gbpln | Arabidopsis lyrata   | AT3G25680.1   Symbols:   FUNCTIONS IN: molecular function unknown; INVOLVED IN: biological process unknown; LOCATED IN: chloroplast; EXPRESSED IN: 21 plant structures; EXPRESSED DURING: 13 growth stages; CONTAINS InterPro DOMAIN/s: S-layer homology domain (InterPro:IPR01119); BEST Arabidopsis thaliana protein match is: unknown protein (TAIRAT5G23890.1); Has 2454 Blast hits to 2065 proteins in 355 species: Archae - 39; Bacteria - 284; Metazoa - 1081; Fungi - 166; Plants - 264; Viruses - 45; Other Eukaryotes - 575 (source: NCBI BLink).   chr3:9349693-9352258 FORWARD LENGTH=558 | 552 | 558 | 0         | 101.1 | 76.4 | 87.0  |
| Rsa1.0_00038.1.g2256.t1 | ref[NP_850631.2] protein rotundifolia like 16 [Arabidopsis thaliana] gi 42822045 tpg DAA02277.1  TPA_exp: DVL6 [Arabidopsis thaliana] gi 332643537 gb AE77058.1  protein rotundifolia like 16 [Arabidopsis thaliana]                                                                                                                                                                                                                               | 40  | 40  | 4.00E-13  | 100.0 | 97.5 | 100.0 | protein rotundifolia like 16                            | gbpln | Arabidopsis thaliana | AT3G25717.1   Symbols: RTFL16, DVL6   ROTUNDIFOLIA like 16   chr3:9375472-9375594 REVERSE LENGTH=40                                                                                                                                                                                                                                                                                                                                                                                                                                                                                                   | 40  | 40  | 7.00E-16  | 100.0 | 97.5 | 100.0 |
| Rsa1.0_00038.1.g2257.t1 | gb EOA24619.1  hypothetical protein CARUB_v10017888mg [Capsella rubella]                                                                                                                                                                                                                                                                                                                                                                           | 253 | 254 | 1.00E-121 | 100.4 | 86.2 | 92.9  | hypothetical protein CARUB_v10017888mg                  | gbpln | Capsella rubella     | AT3G25770.1   Symbols: AOC2   allene oxide cyclase 2   chr3:9406975-9407839 FORWARD LENGTH=253                                                                                                                                                                                                                                                                                                                                                                                                                                                                                                        | 253 | 253 | 1.00E-121 | 100.0 | 85.0 | 91.7  |
| Rsa1.0_00038.1.g2258.t1 | gb ACY74379.1  allene oxidase cyclase [Brassica napus]                                                                                                                                                                                                                                                                                                                                                                                             | 253 | 253 | 1.00E-139 | 100.0 | 95.7 | 97.2  | allene oxidase cyclase                                  | gbpln | Brassica napus       | AT3G25780.1   Symbols: AOC3   allene oxide cyclase 3   chr3:9409362-9410409 FORWARD LENGTH=258                                                                                                                                                                                                                                                                                                                                                                                                                                                                                                        | 253 | 258 | 1.00E-121 | 102.0 | 89.3 | 93.3  |
| Rsa1.0_00038.1.g2259.t1 | ref[XP_002875280.1] myb family transcription factor [Arabidopsis lyrata subsp. lyrata] gi 297321118 gb EFH51539.1  myb family transcription factor [Arabidopsis lyrata subsp. lyrata]                                                                                                                                                                                                                                                              | 366 | 354 | 1.00E-132 | 96.7  | 68.9 | 80.1  | myb family transcription factor                         | gbpln | Arabidopsis lyrata   | AT3G25790.1   Symbols:   myb-like transcription factor family protein   chr3:9413196-9414951 FORWARD LENGTH=357                                                                                                                                                                                                                                                                                                                                                                                                                                                                                       | 366 | 357 | 1.00E-130 | 97.5  | 68.3 | 79.0  |
| Rsa1.0_00038.1.g2260.t3 | gb EMJ15110.1  hypothetical protein PRUPE_ppa005492mg [Prunus persica]                                                                                                                                                                                                                                                                                                                                                                             | 268 | 458 | 3.00E-26  | 170.9 | 20.9 | 21.6  | hypothetical protein PRUPE_ppa005492mg                  | gbpln | Prunus persica       | AT1G30270.1   Symbols: CIPK23, SnRK3.23, ATOIPK23, LKS1   CBL-interacting protein kinase 23   chr1:1065270-1065824 FORWARD LENGTH=482                                                                                                                                                                                                                                                                                                                                                                                                                                                                 | 268 | 482 | 9.00E-29  | 179.9 | 20.9 | 21.3  |
| Rsa1.0_00038.1.g2261.t1 | ref[XP_002876929.1] hypothetical protein ARALYDRAFT_904748 [Arabidopsis lyrata subsp. lyrata] gi 297322757 gb EFH53188.1  hypothetical protein ARALYDRAFT_904748 [Arabidopsis lyrata subsp. lyrata]                                                                                                                                                                                                                                                | 586 | 587 | 0         | 100.2 | 96.1 | 99.0  | hypothetical protein ARALYDRAFT_904748                  | gbpln | Arabidopsis lyrata   | AT3G25800.1   Symbols: PDF1, PR 65, PP2AA2   protein phosphatase 2A subunit A2   chr3:9422822-9425783 REVERSE LENGTH=587                                                                                                                                                                                                                                                                                                                                                                                                                                                                              | 586 | 587 | 0         | 100.2 | 95.6 | 98.8  |
| Rsa1.0_00038.1.g2262.t1 | ref[NP_566779.1] uncharacterized protein [Arabidopsis thaliana] gi 13877955 gb AAK44055.1 AF370240.1 unknown protein [Arabidopsis thaliana] gi 17065628 gb AAL33808.1  unknown protein [Arabidopsis thaliana] gi 332643550 gb AE77071.1  uncharacterized protein AT3G25805 [Arabidopsis thaliana]                                                                                                                                                  | 338 | 335 | 1.00E-156 | 99.1  | 80.5 | 87.6  | uncharacterized protein                                 | gbpln | Arabidopsis thaliana | AT3G25805.1   Symbols:   unknown protein; Has 98 Blast hits to 98 proteins in 45 species: Archae - 0; Bacteria - 51; Metazoa - 0; Fungi - 0; Plants - 43; Viruses - 0; Other Eukaryotes = 4 (source: NCBI BLink).   chr3:9426354-9428169 REVERSE LENGTH=335                                                                                                                                                                                                                                                                                                                                           | 338 | 335 | 1.00E-158 | 99.1  | 80.5 | 87.6  |
| Rsa1.0_00038.1.g2263.t2 | gb EOA23468.1  hypothetical protein CARUB_v10016659mg [Capsella rubella]                                                                                                                                                                                                                                                                                                                                                                           | 929 | 916 | 0         | 98.6  | 74.8 | 81.5  | hypothetical protein CARUB_v10016659mg                  | gbpln | Capsella rubella     | AT3G25840.1   Symbols:   Protein kinase superfamily protein   chr3:9452993-9457446 REVERSE LENGTH=935                                                                                                                                                                                                                                                                                                                                                                                                                                                                                                 | 929 | 935 | 0         | 100.6 | 75.1 | 81.9  |
| Rsa1.0_00038.1.g2264.t1 | ref[NP_189215.1] 2-oxoacid dehydrogenases acyltransferase family protein [Arabidopsis thaliana] gi 5881963 gb AAD5139.1 AF066079.1 dihydroipoamide S-acetyltransferase [Arabidopsis thaliana] gi 14335169 gb AAK59863.1  AT325380/MPE11.1 [Arabidopsis thaliana] gi 26983849 gb AAN6176.1  putative dihydroipoamide S-acetyltransferase [Arabidopsis thaliana] gi 332643559 gb AE77080.1  pyruvate decarboxylase E2 subunit [Arabidopsis thaliana] | 479 | 480 | 0         | 100.2 | 85.2 | 89.4  | 2-oxoacid dehydrogenases acyltransferase family protein | gbpln | Arabidopsis thaliana | AT3G25860.1   Symbols: LTA2, PLE2   2-oxoacid dehydrogenases acyltransferase family protein   chr3:9460632-9462585 FORWARD LENGTH=480                                                                                                                                                                                                                                                                                                                                                                                                                                                                 | 479 | 480 | 0         | 100.2 | 85.2 | 89.4  |
| Rsa1.0_00038.1.g2265.t1 | ref[XP_002893783.1] predicted protein [Arabidopsis lyrata subsp. lyrata] gi 297339625 gb EFH70042.1  predicted protein [Arabidopsis lyrata subsp. lyrata]                                                                                                                                                                                                                                                                                          | 296 | 276 | 2.00E-31  | 93.2  | 30.1 | 38.2  | predicted protein                                       | gbpln | Arabidopsis lyrata   | AT3G25882.1   Symbols: NIMIN-2   NIM1-interacting 2   chr3:9470521-9470889 REVERSE LENGTH=122                                                                                                                                                                                                                                                                                                                                                                                                                                                                                                         | 296 | 122 | 1.00E-28  | 41.2  | 24.3 | 28.4  |
| Rsa1.0_00038.1.g2266.t1 | gb EOA24563.1  hypothetical protein CARUB_v10017825mg [Capsella rubella]                                                                                                                                                                                                                                                                                                                                                                           | 272 | 273 | 1.00E-125 | 100.4 | 86.4 | 91.5  | hypothetical protein CARUB_v10017825mg                  | gbpln | Capsella rubella     | AT3G25920.1   Symbols: RPL15   ribosomal protein L15   chr3:9491268-9492558 REVERSE LENGTH=277                                                                                                                                                                                                                                                                                                                                                                                                                                                                                                        | 272 | 277 | 1.00E-121 | 101.8 | 81.3 | 87.5  |

|                         |                                                                                                                                                                                                                                                                                                                                                                                                                                                                                                                                                                                                                          |     |     |           |       |      |      |                                                        |       |                      |                                                                                                                                   |     |     |           |       |      |      |
|-------------------------|--------------------------------------------------------------------------------------------------------------------------------------------------------------------------------------------------------------------------------------------------------------------------------------------------------------------------------------------------------------------------------------------------------------------------------------------------------------------------------------------------------------------------------------------------------------------------------------------------------------------------|-----|-----|-----------|-------|------|------|--------------------------------------------------------|-------|----------------------|-----------------------------------------------------------------------------------------------------------------------------------|-----|-----|-----------|-------|------|------|
| Rsa1.0_00038.1.g2267.t1 | refNP_189227.1  mitotic spindle checkpoint protein MAD2 [Arabidopsis thaliana]<br>gi 12230292 sp Q9LU93.1 MAD2_ARATH<br>RecName: Full=Mitotic spindle checkpoint protein MAD2<br>gi 9279603 dbj BAB01061.1  cell cycle checkpoint protein MAD2-like [Arabidopsis thaliana]<br>gi 37202030 gb AA089630.1  At3g25980 [Arabidopsis thaliana]<br>gi 51968734 dbj BAD43059.1  putative mitotic checkpoint protein [Arabidopsis thaliana] gi 51970868 dbj BAD44126.1  putative mitotic checkpoint protein [Arabidopsis thaliana]<br>gi 332643576 gb AEE77097.1  mitotic spindle checkpoint protein MAD2 [Arabidopsis thaliana] | 209 | 209 | 1.00E-115 | 100.0 | 95.7 | 99.0 | mitotic spindle checkpoint protein MAD2                | gbpln | Arabidopsis thaliana | AT3G25980.1   Symbols: MAD2   DNA-binding HORMA family protein   chr3:9503232-9504402 FORWARD LENGTH=209                          | 209 | 209 | 1.00E-118 | 100.0 | 95.7 | 99.0 |
| Rsa1.0_00038.1.g2268.t1 | gb EOA24007.1  hypothetical protein CARUB_v10017220mg [Capsella rubella]<br>gi 48255981.7 gb EOA24008.1  hypothetical protein CARUB_v10017220mg [Capsella rubella]                                                                                                                                                                                                                                                                                                                                                                                                                                                       | 418 | 455 | 1.00E-167 | 108.9 | 78.2 | 85.9 | hypothetical protein CARUB_v10017220mg                 | gbpln | Capsella rubella     | AT3G26000.1   Symbols:   Ribonuclease inhibitor   chr3:9507042-9508542 REVERSE LENGTH=453                                         | 418 | 453 | 1.00E-155 | 108.4 | 72.0 | 81.8 |
| Rsa1.0_00038.1.g2269.t1 | dbj BAB01067.1  acetyltransferase-like protein [Arabidopsis thaliana]                                                                                                                                                                                                                                                                                                                                                                                                                                                                                                                                                    | 458 | 455 | 0         | 99.3  | 82.3 | 90.6 | acetyltransferase-like protein                         | gbpln | Arabidopsis thaliana | AT3G26040.1   Symbols:   HXXXD-type acyltransferase family protein   chr3:9519741-9521069 FORWARD LENGTH=442                      | 458 | 442 | 0         | 96.5  | 79.9 | 88.0 |
| Rsa1.0_00038.1.g2270.t1 | refNP_189238.2  regulator of G-protein signaling 1 [Arabidopsis thaliana]<br>gi 75299756 sp Q8H1F2.1 RGS1_ARATH<br>RecName: Full=Regulator of G-protein signaling 1; Short=ATRGS1; AltName: Full=Putative uncharacterized protein At3g26090 gi 23297446 gb AAN12971.1  unknown protein [Arabidopsis thaliana]<br>gi 332643595 gb AEE77116.1  regulator of G-protein signaling 1 [Arabidopsis thaliana]                                                                                                                                                                                                                   | 470 | 459 | 0         | 97.7  | 79.8 | 86.4 | regulator of G-protein signaling 1                     | gbpln | Arabidopsis thaliana | AT3G26090.1   Symbols: RGS1, ATRGS1   G-protein coupled receptors:GTPase activators   chr3:9532883-9535410 FORWARD LENGTH=459     | 470 | 459 | 0         | 97.7  | 79.8 | 86.4 |
| Rsa1.0_00038.1.g2271.t1 | refXP_002875307.1  regulator of chromosome condensation family protein [Arabidopsis lyrata subsp. lyrata]<br>gi 297321145 gb EFH51566.1  regulator of chromosome condensation family protein [Arabidopsis lyrata subsp. lyrata]                                                                                                                                                                                                                                                                                                                                                                                          | 541 | 533 | 0         | 98.5  | 88.0 | 93.7 | regulator of chromosome condensation family protein    | gbpln | Arabidopsis lyrata   | AT3G26100.2   Symbols:   Regulator of chromosome condensation (RCC1) family protein   chr3:9538063-9540149 FORWARD LENGTH=532     | 541 | 532 | 0         | 98.3  | 86.7 | 93.0 |
| Rsa1.0_00038.1.g2272.t1 | refXP_002875308.1  hypothetical protein ARALYDRAFT_484375 [Arabidopsis lyrata subsp. lyrata]<br>gi 297321146 gb EFH51567.1  hypothetical protein ARALYDRAFT_484375 [Arabidopsis lyrata subsp. lyrata]                                                                                                                                                                                                                                                                                                                                                                                                                    | 121 | 128 | 2.00E-17  | 105.8 | 60.3 | 66.9 | hypothetical protein ARALYDRAFT_484375                 | gbpln | Arabidopsis lyrata   | AT3G26110.1   Symbols:   Anther-specific protein agp1-like   chr3:9541573-9541959 FORWARD LENGTH=128                              | 121 | 128 | 6.00E-17  | 105.8 | 61.2 | 67.8 |
| Rsa1.0_00038.1.g2273.t1 | gb ABD64939.1  hypothetical protein 24.t00017 [Brassica oleracea]                                                                                                                                                                                                                                                                                                                                                                                                                                                                                                                                                        | 139 | 442 | 3.00E-35  | 318.0 | 56.8 | 71.9 | hypothetical protein 24.t00017                         | gbpln | Brassica oleracea    | # # # # # # #                                                                                                                     |     |     |           |       |      |      |
| Rsa1.0_00038.1.g2274.t3 | gb ABD65099.1  hypothetical protein 31.t00074 [Brassica oleracea]                                                                                                                                                                                                                                                                                                                                                                                                                                                                                                                                                        | 365 | 258 | 4.00E-46  | 70.7  | 27.9 | 34.2 | hypothetical protein 31.t00074                         | gbpln | Brassica oleracea    | AT5G41220.1   Symbols: ATGSTT3, GST10C, GSTT3   glutathione S-transferase THETA 3   chr5:16494560-16496969 REVERSE LENGTH=590     | 365 | 590 | 2.00E-41  | 161.6 | 24.7 | 29.6 |
| Rsa1.0_00038.1.g2275.t1 | refNP_189243.1  cytochrome P450, family 86, subfamily C, polypeptide 2 [Arabidopsis thaliana]<br>gi 11994429 dbj BAB02431.1  cytochrome P-450-like protein [Arabidopsis thaliana]<br>gi 332643602 gb AEE77123.1  cytochrome P450, family 86, subfamily C, polypeptide 2 [Arabidopsis thaliana]                                                                                                                                                                                                                                                                                                                           | 533 | 541 | 0         | 101.5 | 89.1 | 94.4 | cytochrome P450, family 86, subfamily C, polypeptide 2 | gbpln | Arabidopsis thaliana | AT3G26125.1   Symbols: CYP86C2   cytochrome P450, family 86, subfamily C, polypeptide 2   chr3:9551812-9553437 FORWARD LENGTH=541 | 533 | 541 | 0         | 101.5 | 89.1 | 94.4 |
| Rsa1.0_00038.1.g2276.t1 | refXP_002876956.1  CYP71B4 [Arabidopsis lyrata subsp. lyrata]<br>gi 297322794 gb EFH53215.1  CYP71B4 [Arabidopsis lyrata subsp. lyrata]                                                                                                                                                                                                                                                                                                                                                                                                                                                                                  | 499 | 502 | 0         | 100.6 | 69.5 | 81.2 | CYP71B4                                                | gbpln | Arabidopsis lyrata   | AT3G26280.1   Symbols: CYP71B4   cytochrome P450, family 71, subfamily B, polypeptide 4   chr3:9630358-9631970 REVERSE LENGTH=504 | 499 | 504 | 0         | 101.0 | 69.9 | 82.2 |
| Rsa1.0_00038.1.g2277.t1 | refXP_002876956.1  CYP71B4 [Arabidopsis lyrata subsp. lyrata]<br>gi 297322794 gb EFH53215.1  CYP71B4 [Arabidopsis lyrata subsp. lyrata]                                                                                                                                                                                                                                                                                                                                                                                                                                                                                  | 499 | 502 | 0         | 100.6 | 71.3 | 82.8 | CYP71B4                                                | gbpln | Arabidopsis lyrata   | AT3G26280.1   Symbols: CYP71B4   cytochrome P450, family 71, subfamily B, polypeptide 4   chr3:9630358-9631970 REVERSE LENGTH=504 | 499 | 504 | 0         | 101.0 | 70.1 | 83.0 |
| Rsa1.0_00038.1.g2278.t1 | gb EOA26964.1  hypothetical protein CARUB_v10023060mg [Capsella rubella]                                                                                                                                                                                                                                                                                                                                                                                                                                                                                                                                                 | 247 | 502 | 1.00E-71  | 203.2 | 55.9 | 66.8 | hypothetical protein CARUB_v10023060mg                 | gbpln | Capsella rubella     | AT2G38110.1   Symbols: ATPAT6, GPAT6   glycerol-3-phosphate acyltransferase 6   chr2:15952816-15955364 REVERSE LENGTH=501         | 247 | 501 | 5.00E-73  | 202.8 | 57.1 | 68.8 |

|                         |                                                                                                                                                                                                                                                                                                                                                                                                                             |     |     |           |       |      |      |                                        |       |                      |                                                                                                                                                                                                                                                                                                                                                                                                                                                                                                                                                        |     |     |           |       |      |      |
|-------------------------|-----------------------------------------------------------------------------------------------------------------------------------------------------------------------------------------------------------------------------------------------------------------------------------------------------------------------------------------------------------------------------------------------------------------------------|-----|-----|-----------|-------|------|------|----------------------------------------|-------|----------------------|--------------------------------------------------------------------------------------------------------------------------------------------------------------------------------------------------------------------------------------------------------------------------------------------------------------------------------------------------------------------------------------------------------------------------------------------------------------------------------------------------------------------------------------------------------|-----|-----|-----------|-------|------|------|
| Rsa1.0_00038.1.g2279.t1 | refNP_189260.1  cytochrome P450 71B26 [Arabidopsis thaliana]<br>gi 13878380 sp Q9LTL0.1 [C71BQ_ARAT H RecName: Full=Cytochrome P450 71B26 gi 11994450 db BAB02452.1  cytochrome P450 [Arabidopsis thaliana] gi 22136028 gb AAM91596.1  cytochrome P450, putative [Arabidopsis thaliana] gi 31711908 gb AAP68310.1  At3g26290 [Arabidopsis thaliana] gi 33264362 gb AAE77142.1  cytochrome P450 71B26 [Arabidopsis thaliana] | 500 | 500 | 0         | 100.0 | 78.6 | 86.6 | cytochrome P450 71B26                  | gbpln | Arabidopsis thaliana | AT3G26290.1   Symbols: CYP71B26   cytochrome P450, family 71, subfamily B, polypeptide 26   chr3:9632770-9634439 REVERSE LENGTH=500                                                                                                                                                                                                                                                                                                                                                                                                                    | 500 | 500 | 0         | 100.0 | 78.6 | 86.6 |
| Rsa1.0_00038.1.g2280.t1 | gb ABD64987.1  hypothetical protein 26.t00003 [Brassica oleracea]                                                                                                                                                                                                                                                                                                                                                           | 234 | 330 | 1.00E-20  | 141.0 | 23.1 | 25.2 | hypothetical protein 26.t00003         | gbpln | Brassica oleracea    | AT1G10000.1   Symbols:   Ribonuclease H-like superfamily protein   chr1:3263877-3264788 REVERSE LENGTH=303                                                                                                                                                                                                                                                                                                                                                                                                                                             | 234 | 303 | 7.00E-17  | 129.5 | 22.6 | 31.2 |
| Rsa1.0_00038.1.g2281.t1 | gb EOA25173.1  hypothetical protein CARUB_v10018485mg [Capsella rubella]                                                                                                                                                                                                                                                                                                                                                    | 235 | 499 | 5.00E-71  | 212.3 | 57.0 | 61.7 | hypothetical protein CARUB_v10018485mg | gbpln | Capsella rubella     | AT3G26330.1   Symbols: CYP71B37   cytochrome P450, family 71, subfamily B, polypeptide 37   chr3:9646873-9648536 REVERSE LENGTH=500                                                                                                                                                                                                                                                                                                                                                                                                                    | 235 | 500 | 8.00E-68  | 212.8 | 53.2 | 58.7 |
| Rsa1.0_00038.1.g2282.t4 | ref NP_177511.1  mate efflux-like protein [Arabidopsis thaliana]<br>gi 12324218 gb AAG52084.1 AC012679.22 putative integral membrane protein; 47574-45498 [Arabidopsis thaliana] gi 332197378 gb AAE35499.1  mate efflux-like protein [Arabidopsis thaliana]                                                                                                                                                                | 462 | 476 | 1.00E-128 | 103.0 | 55.2 | 57.4 | mate efflux-like protein               | gbpln | Arabidopsis thaliana | AT1G37700.1   Symbols:   MATE efflux family protein   chr1:27717554-27719630 REVERSE LENGTH=476                                                                                                                                                                                                                                                                                                                                                                                                                                                        | 462 | 476 | 1.00E-131 | 103.0 | 55.2 | 57.4 |
| Rsa1.0_00039.1.g2283.t1 | gb EOA14133.1  hypothetical protein CARUB_v10027278mg [Capsella rubella]                                                                                                                                                                                                                                                                                                                                                    | 161 | 160 | 3.00E-78  | 99.4  | 87.6 | 93.2 | hypothetical protein CARUB_v10027278mg | gbpln | Capsella rubella     | AT5G63070.1   Symbols:   Ribosomal protein S19 family protein   chr5:25299178-25299660 REVERSE LENGTH=160                                                                                                                                                                                                                                                                                                                                                                                                                                              | 161 | 160 | 5.00E-78  | 99.4  | 85.7 | 91.9 |
| Rsa1.0_00039.1.g2284.t1 | # # # # # # # # # #                                                                                                                                                                                                                                                                                                                                                                                                         | #   | #   | #         | #     | #    | #    | -                                      | ----  | ----                 | #                                                                                                                                                                                                                                                                                                                                                                                                                                                                                                                                                      | #   | #   | #         | #     | #    |      |
| Rsa1.0_00039.1.g2285.t1 | ref XP_002864835.1  predicted protein [Arabidopsis lyrata subsp. lyrata] gi 297310670 gb EFH41094.1  predicted protein [Arabidopsis lyrata subsp. lyrata]                                                                                                                                                                                                                                                                   | 80  | 82  | 2.00E-18  | 102.5 | 68.8 | 80.0 | predicted protein                      | gbpln | Arabidopsis lyrata   | AT5G63085.1   Symbols:   Plant thionin family protein   chr5:25302862-25303230 FORWARD LENGTH=81                                                                                                                                                                                                                                                                                                                                                                                                                                                       | 80  | 81  | 3.00E-14  | 101.3 | 61.3 | 70.0 |
| Rsa1.0_00039.1.g2286.t1 | gb EOA13869.1  hypothetical protein CARUB_v10026971mg [Capsella rubella]                                                                                                                                                                                                                                                                                                                                                    | 247 | 263 | 1.00E-125 | 106.5 | 90.7 | 96.0 | hypothetical protein CARUB_v10026971mg | gbpln | Capsella rubella     | AT5G63060.1   Symbols:   Sec14p-like phosphatidylinositol transfer family protein   chr5:25295082-25296714 REVERSE LENGTH=263                                                                                                                                                                                                                                                                                                                                                                                                                          | 247 | 263 | 1.00E-125 | 106.5 | 89.1 | 96.4 |
| Rsa1.0_00039.1.g2287.t1 | gb EOA13639.1  hypothetical protein CARUB_v10026710mg [Capsella rubella]                                                                                                                                                                                                                                                                                                                                                    | 346 | 345 | 1.00E-173 | 99.7  | 81.5 | 91.3 | hypothetical protein CARUB_v10026710mg | gbpln | Capsella rubella     | AT5G63050.1   Symbols: EMB2759   embryo defective 2759   chr5:25293109-25294799 FORWARD LENGTH=345                                                                                                                                                                                                                                                                                                                                                                                                                                                     | 346 | 345 | 1.00E-170 | 99.7  | 79.8 | 89.6 |
| Rsa1.0_00039.1.g2288.t1 | ref XP_002884098.1  hypothetical protein ARALYDRAFT_343424 [Arabidopsis lyrata subsp. lyrata] gi 297329938 gb EFH60357.1  hypothetical protein ARALYDRAFT_343424 [Arabidopsis lyrata subsp. lyrata]                                                                                                                                                                                                                         | 355 | 407 | 1.00E-144 | 114.6 | 75.8 | 81.1 | hypothetical protein ARALYDRAFT_343424 | gbpln | Arabidopsis lyrata   | AT5G63040.1   Symbols:   unknown protein; FUNCTIONS IN: molecular function unknown; INVOLVED IN: biological process unknown; LOCATED IN: chloroplast; EXPRESSED IN: 25 plant structures; EXPRESSED DURING: 15 growth stages; BEST Arabidopsis thaliana protein match is: unknown protein (TAIR:AT1G48460.1); Has 30201 Blast hits to 17322 proteins in 780 species: Archae - 12; Bacteria - 1396; Metazoa - 17338; Fungi - 3422; Plants - 5037; Viruses - 0; Other Eukaryotes - 2996 (source: NCBI BLINK).   chr5:25288504-25290326 FORWARD LENGTH=366 | 355 | 366 | 1.00E-143 | 103.1 | 76.9 | 82.3 |
| Rsa1.0_00039.1.g2289.t1 | ref XP_002866529.1  hypothetical protein ARALYDRAFT_919585 [Arabidopsis lyrata subsp. lyrata] gi 297312364 gb EFH42788.1  hypothetical protein ARALYDRAFT_919585 [Arabidopsis lyrata subsp. lyrata]                                                                                                                                                                                                                         | 125 | 125 | 2.00E-65  | 100.0 | 96.8 | 98.4 | hypothetical protein ARALYDRAFT_919585 | gbpln | Arabidopsis lyrata   | AT5G63030.1   Symbols:   Thioredoxin superfamily protein   chr5:25286352-25287517 FORWARD LENGTH=125                                                                                                                                                                                                                                                                                                                                                                                                                                                   | 125 | 125 | 6.00E-66  | 100.0 | 92.8 | 98.4 |
| Rsa1.0_00039.1.g2290.t1 | ref XP_002864830.1  EMB1692 [Arabidopsis lyrata subsp. lyrata] gi 297310665 gb EFH41089.1  EMB1692 [Arabidopsis lyrata subsp. lyrata]                                                                                                                                                                                                                                                                                       | 488 | 492 | 0         | 100.8 | 82.8 | 90.4 | EMB1692                                | gbpln | Arabidopsis lyrata   | AT5G62990.1   Symbols: emb1692   Ubiquitin carboxyl-terminal hydrolase family protein   chr5:25277828-25279312 FORWARD LENGTH=494                                                                                                                                                                                                                                                                                                                                                                                                                      | 488 | 494 | 0         | 101.2 | 78.5 | 86.3 |
| Rsa1.0_00039.1.g2291.t1 | # # # # # # # # # #                                                                                                                                                                                                                                                                                                                                                                                                         | #   | #   | #         | #     | #    | #    | -                                      | ----  | ----                 | #                                                                                                                                                                                                                                                                                                                                                                                                                                                                                                                                                      | #   | #   | #         | #     | #    |      |
| Rsa1.0_00039.1.g2292.t1 | ref XP_002866526.1  predicted protein [Arabidopsis lyrata subsp. lyrata] gi 297312361 gb EFH42785.1  predicted protein [Arabidopsis lyrata subsp. lyrata]                                                                                                                                                                                                                                                                   | 100 | 177 | 9.00E-23  | 177.0 | 57.0 | 66.0 | predicted protein                      | gbpln | Arabidopsis lyrata   | #                                                                                                                                                                                                                                                                                                                                                                                                                                                                                                                                                      | #   | #   | #         | #     | #    |      |

|                         |                                                                                                                                                                                                                                                                                                                                                                                                                                                                                                                                                                                                                                    |      |      |           |       |      |      |                                        |       |                      |                                                                                                                                                                                                                                                                                                                                                                    |      |      |           |       |      |      |
|-------------------------|------------------------------------------------------------------------------------------------------------------------------------------------------------------------------------------------------------------------------------------------------------------------------------------------------------------------------------------------------------------------------------------------------------------------------------------------------------------------------------------------------------------------------------------------------------------------------------------------------------------------------------|------|------|-----------|-------|------|------|----------------------------------------|-------|----------------------|--------------------------------------------------------------------------------------------------------------------------------------------------------------------------------------------------------------------------------------------------------------------------------------------------------------------------------------------------------------------|------|------|-----------|-------|------|------|
| Rsa1.0_00039.1.g2293.t1 | dbj BAB08839.1  unnamed protein product [Arabidopsis thaliana]                                                                                                                                                                                                                                                                                                                                                                                                                                                                                                                                                                     | 334  | 317  | 1.00E-133 | 94.9  | 77.2 | 80.8 | unnamed protein product                | gbpln | Arabidopsis thaliana | AT5G62960.1   Symbols:   unknown protein; BEST Arabidopsis thaliana protein match is: unknown protein (TAIR:AT1G10660.1); Has 35333 Blast hits to 34131 proteins in 2444 species: Archae - 798; Bacteria - 22429; Metazoa - 974; Fungi - 991; Plants - 531; Viruses - 0; Other Eukaryotes - 9610 (source: NCBI BLINK).   chr5:25269444-25271533 FORWARD LENGTH=347 | 334  | 347  | 1.00E-127 | 103.9 | 66.2 | 69.2 |
| Rsa1.0_00039.1.g2294.t1 | ref NP_201100.1  RNA polymerase II, Rpb4, core protein [Arabidopsis thaliana]<br>gi 334188590 ref NP_001190602.1  RNA polymerase II, Rpb4, core protein [Arabidopsis thaliana]<br>gi 32815911 gb AAP88340.1  At5g62950 [Arabidopsis thaliana]<br>gi 110743157 dbj BAE99470.1  hypothetical protein [Arabidopsis thaliana] gi 332010294 gb AED97677.1  RNA polymerase II, Rpb4, core protein [Arabidopsis thaliana]<br>gi 332010296 gb AED97679.1  RNA polymerase II, Rpb4, core protein [Arabidopsis thaliana]                                                                                                                     | 160  | 139  | 2.00E-32  | 86.9  | 53.1 | 61.3 | RNA polymerase II, Rpb4, core protein  | gbpln | Arabidopsis thaliana | AT5G62950.3   Symbols:   RNA polymerase II, Rpb4, core protein   chr5:25262355-25263033 REVERSE LENGTH=139                                                                                                                                                                                                                                                         | 160  | 139  | 9.00E-35  | 86.9  | 53.1 | 61.3 |
| Rsa1.0_00039.1.g2295.t1 | ref XP_002866523.1  hypothetical protein ARALYDRAFT_919576 [Arabidopsis lyrata subsp. lyrata]<br>gi 297312358 gb EFH42782.1  hypothetical protein ARALYDRAFT_919576 [Arabidopsis lyrata subsp. lyrata]<br>ref NP_201094.1  nucleobase-ascorbate transporter 6 [Arabidopsis thaliana]<br>gi 79600443 ref NP_851251.2  nucleobase-ascorbate transporter 6 [Arabidopsis thaliana]<br>gi 145323680 ref NP_001032127.2  nucleobase-ascorbate transporter 6 [Arabidopsis thaliana]<br>gi 122064607 sp Q27G13.2 NAT6_ARATH RecName: Full=Nucleobase-ascorbate transporter 6; Short=AtNAT6                                                 | 394  | 375  | 1.00E-120 | 95.2  | 62.7 | 68.5 | hypothetical protein ARALYDRAFT_919576 | gbpln | Arabidopsis lyrata   | AT5G62940.1   Symbols: HCA2, DOF5.6   Dof-type zinc finger DNA-binding family protein   chr5:25257183-25258504 REVERSE LENGTH=372                                                                                                                                                                                                                                  | 394  | 372  | 1.00E-117 | 94.4  | 63.2 | 68.5 |
| Rsa1.0_00039.1.g2296.t3 | gi 21326025 gb AAM47573.1 AF466198_1 putative permease 1 [Arabidopsis thaliana] gi 10177467 dbj BAB10858.1  permease 1 [Arabidopsis thaliana]<br>gi 332010285 gb AED97668.1  nucleobase-ascorbate transporter 6 [Arabidopsis thaliana]<br>gi 332010286 gb AED97669.1  nucleobase-ascorbate transporter 6 [Arabidopsis thaliana]<br>gi 332010287 gb AED97670.1  nucleobase-ascorbate transporter 6 [Arabidopsis thaliana]<br>ref XP_002866520.1  hypothetical protein ARALYDRAFT_919569 [Arabidopsis lyrata subsp. lyrata]<br>gi 297312355 gb EFH42779.1  hypothetical protein ARALYDRAFT_919569 [Arabidopsis lyrata subsp. lyrata] | 563  | 532  | 0         | 94.5  | 89.3 | 90.6 | nucleobase-ascorbate transporter 6     | gbpln | Arabidopsis thaliana | AT5G62890.3   Symbols:   Xanthine/uracil permease family protein   chr5:25243723-25247075 FORWARD LENGTH=532                                                                                                                                                                                                                                                       | 563  | 532  | 0         | 94.5  | 89.3 | 90.6 |
| Rsa1.0_00039.1.g2297.t1 | ref XP_002866520.1  hypothetical protein ARALYDRAFT_919569 [Arabidopsis lyrata subsp. lyrata]<br>gi 297312355 gb EFH42779.1  hypothetical protein ARALYDRAFT_919569 [Arabidopsis lyrata subsp. lyrata]                                                                                                                                                                                                                                                                                                                                                                                                                             | 1500 | 1597 | 0         | 106.5 | 78.7 | 86.0 | hypothetical protein ARALYDRAFT_919569 | gbpln | Arabidopsis lyrata   | AT3G48050.2   Symbols:   BAH domain ;TFIIS helical bundle-like domain   chr3:17734270-17739412 REVERSE LENGTH=1613                                                                                                                                                                                                                                                 | 1500 | 1613 | 0         | 107.5 | 26.9 | 32.7 |
| Rsa1.0_00039.1.g2298.t1 | ref XP_002866520.1  hypothetical protein ARALYDRAFT_919569 [Arabidopsis lyrata subsp. lyrata]<br>gi 297312355 gb EFH42779.1  hypothetical protein ARALYDRAFT_919569 [Arabidopsis lyrata subsp. lyrata]                                                                                                                                                                                                                                                                                                                                                                                                                             | 1398 | 1597 | 0         | 114.2 | 47.7 | 52.8 | hypothetical protein ARALYDRAFT_919569 | gbpln | Arabidopsis lyrata   | AT3G48050.2   Symbols:   BAH domain ;TFIIS helical bundle-like domain   chr3:17734270-17739412 REVERSE LENGTH=1613                                                                                                                                                                                                                                                 | 1398 | 1613 | 0         | 115.4 | 26.0 | 28.5 |

|                         |                                                                                                                                                                                                                                                                                                                                                                                                                                                                                                                                                                                                                                                                                                                                                                                                                                                                                                                                                                                                                                                                                                                                                                                                                                                                                                                                                                                                                                                                                                                                                                                                                                                                                                                                                              |     |     |           |       |      |      |                                                 |       |                      |                                                                                                                                  |     |     |           |       |      |      |
|-------------------------|--------------------------------------------------------------------------------------------------------------------------------------------------------------------------------------------------------------------------------------------------------------------------------------------------------------------------------------------------------------------------------------------------------------------------------------------------------------------------------------------------------------------------------------------------------------------------------------------------------------------------------------------------------------------------------------------------------------------------------------------------------------------------------------------------------------------------------------------------------------------------------------------------------------------------------------------------------------------------------------------------------------------------------------------------------------------------------------------------------------------------------------------------------------------------------------------------------------------------------------------------------------------------------------------------------------------------------------------------------------------------------------------------------------------------------------------------------------------------------------------------------------------------------------------------------------------------------------------------------------------------------------------------------------------------------------------------------------------------------------------------------------|-----|-----|-----------|-------|------|------|-------------------------------------------------|-------|----------------------|----------------------------------------------------------------------------------------------------------------------------------|-----|-----|-----------|-------|------|------|
| Rsa1.0_00039.1.g2299.t1 | <p>refNP_201093.1  Rac-like GTP-binding protein ARAC10 [Arabidopsis thaliana] gi 297793877 refXP_002864823.1  hypothetical protein ARALYDRAFT_496470 [Arabidopsis lyrata subsp. lyrata] gi 51701730 sp O82481.1 RAC10_ARAT H RecName: Full=Rac-like GTP-binding protein ARAC10; AltName: Full=GTPase protein ROP11 gi 7211193 gb AAF40238.1 AF115467.1 Arac10 [Arabidopsis thaliana] gi 3702964 gb AAC63014.1  rac GTP binding protein Arac10 [Arabidopsis thaliana] gi 10177466 dbj BAB10857.1  rac GTP binding protein Arac10 [Arabidopsis thaliana] gi 27754724 gb AAO22805.1  putative GTP binding protein Arac10 [Arabidopsis thaliana] gi 28394091 gb AAO42453.1  putative GTP binding protein Arac10 [Arabidopsis thaliana] gi 51971983 dbj BAD44656.1  Arac10 [Arabidopsis thaliana] gi 297310658 gb EFH41082.1  hypothetical protein ARALYDRAFT_496470 [Arabidopsis lyrata subsp. lyrata] gi 332010284 gb AED97667.1  Rac-like GTP-binding protein ARAC10 [Arabidopsis thaliana] refNP_201091.2  nodulin MtN3-like protein [Arabidopsis thaliana] gi 322967651 sp Q9FM10.2 SWET5_ARA TH RecName: Full=Bidirectional sugar transporter SWEET5; Short=AtSWEET5; AltName: Full=Protein VEGETATIVE CELL EXPRESSED 1; Short=AtVEX1 gi 332010281 gb AED97664.1  bidirectional sugar transporter SWEET5 [Arabidopsis thaliana] refXP_002864820.1  hypothetical protein ARALYDRAFT_496464 [Arabidopsis lyrata subsp. lyrata] gi 297310655 gb EFH41079.1  hypothetical protein ARALYDRAFT_496464 [Arabidopsis lyrata subsp. lyrata] refXP_002866510.1  1-deoxy-D-xylulose-5-phosphate reductoisomerase [Arabidopsis lyrata subsp. lyrata] gi 297312345 gb EFH42769.1  1-deoxy-D-xylulose-5-phosphate reductoisomerase [Arabidopsis lyrata subsp. lyrata]</p> | 216 | 215 | 1.00E-113 | 99.5  | 97.7 | 99.5 | Rac-like GTP-binding protein ARAC10             | gbpln | Arabidopsis lyrata   | AT5G62880.1   Symbols: ARAC10, ATRAC10, ATROP11, RAC10   RAC-like 10   chr5:25237236-25238939 FORWARD LENGTH=215                 | 216 | 215 | 1.00E-116 | 99.5  | 97.7 | 99.5 |
| Rsa1.0_00039.1.g2300.t1 | <p>refNP_201091.2  nodulin MtN3-like protein [Arabidopsis thaliana] gi 322967651 sp Q9FM10.2 SWET5_ARA TH RecName: Full=Bidirectional sugar transporter SWEET5; Short=AtSWEET5; AltName: Full=Protein VEGETATIVE CELL EXPRESSED 1; Short=AtVEX1 gi 332010281 gb AED97664.1  bidirectional sugar transporter SWEET5 [Arabidopsis thaliana]</p>                                                                                                                                                                                                                                                                                                                                                                                                                                                                                                                                                                                                                                                                                                                                                                                                                                                                                                                                                                                                                                                                                                                                                                                                                                                                                                                                                                                                                | 240 | 240 | 1.00E-123 | 100.0 | 87.9 | 95.8 | nodulin MtN3-like protein                       | gbpln | Arabidopsis thaliana | AT5G62850.1   Symbols: AtVEX1, SWEET5, AtSWEET5   Nodulin MtN3 family protein   chr5:25230204-25231527 REVERSE LENGTH=240        | 240 | 240 | 1.00E-126 | 100.0 | 87.9 | 95.8 |
| Rsa1.0_00039.1.g2301.t1 | <p>refXP_002864820.1  hypothetical protein ARALYDRAFT_496464 [Arabidopsis lyrata subsp. lyrata] gi 297310655 gb EFH41079.1  hypothetical protein ARALYDRAFT_496464 [Arabidopsis lyrata subsp. lyrata] refXP_002866510.1  1-deoxy-D-xylulose-5-phosphate reductoisomerase [Arabidopsis lyrata subsp. lyrata] gi 297312345 gb EFH42769.1  1-deoxy-D-xylulose-5-phosphate reductoisomerase [Arabidopsis lyrata subsp. lyrata]</p>                                                                                                                                                                                                                                                                                                                                                                                                                                                                                                                                                                                                                                                                                                                                                                                                                                                                                                                                                                                                                                                                                                                                                                                                                                                                                                                               | 493 | 515 | 0         | 104.5 | 79.5 | 86.8 | hypothetical protein ARALYDRAFT_496464          | gbpln | Arabidopsis lyrata   | AT5G62810.1   Symbols: PEX14, ATPEX14, PED2   peroxin 14   chr5:25220323-25223571 FORWARD LENGTH=507                             | 493 | 507 | 0         | 102.8 | 79.5 | 85.8 |
| Rsa1.0_00039.1.g2302.t2 | <p>refXP_002866510.1  1-deoxy-D-xylulose-5-phosphate reductoisomerase [Arabidopsis lyrata subsp. lyrata] gi 297312345 gb EFH42769.1  1-deoxy-D-xylulose-5-phosphate reductoisomerase [Arabidopsis lyrata subsp. lyrata]</p>                                                                                                                                                                                                                                                                                                                                                                                                                                                                                                                                                                                                                                                                                                                                                                                                                                                                                                                                                                                                                                                                                                                                                                                                                                                                                                                                                                                                                                                                                                                                  | 472 | 476 | 0         | 100.8 | 96.0 | 98.1 | 1-deoxy-D-xylulose-5-phosphate reductoisomerase | gbpln | Arabidopsis lyrata   | AT5G62790.1   Symbols: DXR, PDE129   1-deoxy-D-xylulose 5-phosphate reductoisomerase   chr5:25214358-25217292 REVERSE LENGTH=477 | 472 | 477 | 0         | 101.1 | 96.4 | 98.3 |
| Rsa1.0_00039.1.g2303.t1 | <p>dbj BAE99884.1  hypothetical protein [Arabidopsis thaliana]</p>                                                                                                                                                                                                                                                                                                                                                                                                                                                                                                                                                                                                                                                                                                                                                                                                                                                                                                                                                                                                                                                                                                                                                                                                                                                                                                                                                                                                                                                                                                                                                                                                                                                                                           | 223 | 268 | 4.00E-71  | 120.2 | 72.6 | 80.7 | hypothetical protein                            | gbpln | Arabidopsis thaliana | AT5G62770.1   Symbols:   Protein of unknown function (DUF1645)   chr5:25210564-25211370 FORWARD LENGTH=268                       | 223 | 268 | 5.00E-65  | 120.2 | 72.6 | 81.2 |
| Rsa1.0_00039.1.g2304.t1 | <p>gb EOA13897.1  hypothetical protein CARUB_v10027013mg [Capsella rubella]</p>                                                                                                                                                                                                                                                                                                                                                                                                                                                                                                                                                                                                                                                                                                                                                                                                                                                                                                                                                                                                                                                                                                                                                                                                                                                                                                                                                                                                                                                                                                                                                                                                                                                                              | 255 | 243 | 8.00E-98  | 95.3  | 77.6 | 84.7 | hypothetical protein CARUB_v10027013mg          | gbpln | Capsella rubella     | AT5G62720.1   Symbols:   Integral membrane HPP family protein   chr5:25191969-25194845 FORWARD LENGTH=243                        | 255 | 243 | 1.00E-99  | 95.3  | 76.1 | 83.9 |
| Rsa1.0_00039.1.g2305.t2 | <p>refNP_201077.2  leucine-rich repeat protein kinase-like protein [Arabidopsis thaliana] gi 26451750 dbj BAC42970.1  putative receptor like protein kinase [Arabidopsis thaliana] gi 224589741 gb ACN59402.1  leucine-rich repeat receptor-like protein kinase [Arabidopsis thaliana] gi 332010262 gb AED97645.1  leucine-rich repeat protein kinase-like protein [Arabidopsis thaliana]</p>                                                                                                                                                                                                                                                                                                                                                                                                                                                                                                                                                                                                                                                                                                                                                                                                                                                                                                                                                                                                                                                                                                                                                                                                                                                                                                                                                                | 193 | 604 | 5.00E-32  | 313.0 | 37.3 | 38.9 | leucine-rich repeat protein kinase-like protein | gbpln | Arabidopsis thaliana | AT5G62710.1   Symbols:   Leucine-rich repeat protein kinase family protein   chr5:25187438-25190325 FORWARD LENGTH=604           | 193 | 604 | 2.00E-34  | 313.0 | 37.3 | 38.9 |

|                         |                                                                                                                                                                                                                                                                                                                                                                                                                |      |      |           |       |      |      |                                                 |       |                      |                                                                                                                                    |      |     |           |       |      |      |
|-------------------------|----------------------------------------------------------------------------------------------------------------------------------------------------------------------------------------------------------------------------------------------------------------------------------------------------------------------------------------------------------------------------------------------------------------|------|------|-----------|-------|------|------|-------------------------------------------------|-------|----------------------|------------------------------------------------------------------------------------------------------------------------------------|------|-----|-----------|-------|------|------|
| Rsa1.0_00039.1.g2306.t1 | refNP_201074.1  putative peptide/nitrate transporter [Arabidopsis thaliana]<br>gi 75180586 sp Q9LV10.1 PTR53_ARAT H RecName: Full=Probable peptide/nitrate transporter At5g62680 gi 8809664 db BAA97215.1  peptide transporter [Arabidopsis thaliana] gi 222423295 db BAH19623.1  AT5G62680 [Arabidopsis thaliana] gi 332010259 gb AED97642.1  probable peptide/nitrate transporter [Arabidopsis thaliana]     | 600  | 616  | 0         | 102.7 | 86.8 | 93.2 | putative peptide/nitrate transporter            | gbpln | Arabidopsis thaliana | AT5G62680.1   Symbols:   Major facilitator superfamily protein   chr5:25165430-25167822 REVERSE LENGTH=616                         | 600  | 616 | 0         | 102.7 | 86.8 | 93.2 |
| Rsa1.0_00039.1.g2307.t1 | #                                                                                                                                                                                                                                                                                                                                                                                                              | #    | #    | #         | #     | #    | #    | -                                               | ----  | ----                 | #                                                                                                                                  | #    | #   | #         | #     | #    | #    |
| Rsa1.0_00039.1.g2308.t1 | gb EOA13406.1  hypothetical protein CARUB_v10026444mg, partial [Capsella rubella]                                                                                                                                                                                                                                                                                                                              | 416  | 430  | 1.00E-114 | 103.4 | 55.8 | 68.0 | hypothetical protein CARUB_v10026444mg, partial | gbpln | Capsella rubella     | AT5G62660.1   Symbols:   F-box and associated interaction domains-containing protein   chr5:25156326-25157465 REVERSE LENGTH=379   | 416  | 379 | 1.00E-112 | 91.1  | 50.7 | 62.7 |
| Rsa1.0_00039.1.g2309.t1 | ref XP_002866500.1  basic helix-loop-helix family protein [Arabidopsis lyrata subsp. lyrata]<br>gi 297312335 gb EFH42759.1  basic helix-loop-helix family protein [Arabidopsis lyrata subsp. lyrata]<br>ref XP_002866534.1  hypothetical protein ARALYDRAFT_315221 [Arabidopsis lyrata subsp. lyrata]<br>gi 297332375 gb EFH62793.1  hypothetical protein ARALYDRAFT_315221 [Arabidopsis lyrata subsp. lyrata] | 118  | 282  | 3.00E-28  | 239.0 | 54.2 | 59.3 | basic helix-loop-helix family protein           | gbpln | Arabidopsis lyrata   | AT5G62610.1   Symbols:   basic helix-loop-helix (bHLH) DNA-binding superfamily protein   chr5:25133117-25134600 REVERSE LENGTH=281 | 118  | 281 | 4.00E-30  | 238.1 | 53.4 | 58.5 |
| Rsa1.0_00039.1.g2310.t1 | ref XP_002866534.1  hypothetical protein ARALYDRAFT_315221 [Arabidopsis lyrata subsp. lyrata]<br>gi 297332375 gb EFH62793.1  hypothetical protein ARALYDRAFT_315221 [Arabidopsis lyrata subsp. lyrata]                                                                                                                                                                                                         | 586  | 586  | 0         | 100.0 | 84.8 | 91.3 | hypothetical protein ARALYDRAFT_315221          | gbpln | Arabidopsis lyrata   | AT1G61560.1   Symbols: MLO6, ATML06   Seven transmembrane MLO family protein   chr1:22708875-22712032 REVERSE LENGTH=583           | 586  | 583 | 0         | 99.5  | 84.6 | 91.3 |
| Rsa1.0_00039.1.g2311.t1 | #                                                                                                                                                                                                                                                                                                                                                                                                              | #    | #    | #         | #     | #    | #    | -                                               | ----  | ----                 | #                                                                                                                                  | #    | #   | #         | #     | #    | #    |
| Rsa1.0_00039.1.g2312.t1 | ref XP_002866531.1  hypothetical protein ARALYDRAFT_893358 [Arabidopsis lyrata subsp. lyrata]<br>gi 297332372 gb EFH62790.1  hypothetical protein ARALYDRAFT_893358 [Arabidopsis lyrata subsp. lyrata]                                                                                                                                                                                                         | 75   | 80   | 3.00E-18  | 106.7 | 62.7 | 73.3 | hypothetical protein ARALYDRAFT_893358          | gbpln | Arabidopsis lyrata   | AT1G61566.1   Symbols: RALFL9   ralf-like 9   chr1:22717265-22717492 REVERSE LENGTH=75                                             | 75   | 75  | 1.00E-20  | 100.0 | 64.0 | 70.7 |
| Rsa1.0_00039.1.g2313.t1 | gb EOA35572.1  hypothetical protein CARUB_v10020781mg [Capsella rubella]                                                                                                                                                                                                                                                                                                                                       | 271  | 273  | 1.00E-140 | 100.7 | 95.9 | 98.2 | hypothetical protein CARUB_v10020781mg          | gbpln | Capsella rubella     | AT1G61520.3   Symbols: LHCA3   photosystem I light harvesting complex gene 3   chr1:22700152-22701149 FORWARD LENGTH=273           | 271  | 273 | 1.00E-141 | 100.7 | 94.5 | 98.2 |
| Rsa1.0_00039.1.g2314.t1 | ref NP_176343.2  S-locus lectin protein kinase-like protein [Arabidopsis thaliana]<br>gi 313471784 sp O64771.2 Y1148_ARAT H RecName: Full=G-type lectin S-receptor-like serine/threonine-protein kinase At1g61480; Flags: Precursor gi 332195722 gb AEE33843.1  G-type lectin S-receptor-like serine/threonine-protein kinase [Arabidopsis thaliana]                                                           | 806  | 809  | 0         | 100.4 | 77.9 | 86.6 | S-locus lectin protein kinase-like protein      | gbpln | Arabidopsis thaliana | AT1G61480.1   Symbols:   S-locus lectin protein kinase family protein   chr1:22681420-22684404 REVERSE LENGTH=809                  | 806  | 809 | 0         | 100.4 | 77.9 | 86.6 |
| Rsa1.0_00039.1.g2315.t1 | ref XP_004295385.1  PREDICTED: uncharacterized protein LOC101312912 [Fragaria vesca subsp. vesca]                                                                                                                                                                                                                                                                                                              | 1628 | 1583 | 0         | 97.2  | 47.5 | 62.0 | PREDICTED: uncharacterized protein LOC101312912 | gbpln | Fragaria vesca       | AT1G61490.1   Symbols:   S-locus lectin protein kinase family protein   chr1:22685154-22688267 REVERSE LENGTH=804                  | 1628 | 804 | 0         | 49.4  | 37.6 | 41.6 |
| Rsa1.0_00039.1.g2316.t1 | ref NP_176334.1  putative S-locus protein kinase [Arabidopsis thaliana]<br>gi 75099193 sp O64781.1 Y1639_ARATH RecName: Full=G-type lectin S-receptor-like serine/threonine-protein kinase At1g61390; Flags: Precursor gi 3056591 gb AAC13902.1 AAC13902 T1F9.12 [Arabidopsis thaliana]<br>gi 332195709 gb AEE33830.1  putative S-locus protein kinase [Arabidopsis thaliana]                                  | 783  | 831  | 0         | 106.1 | 83.1 | 90.5 | putative S-locus protein kinase                 | gbpln | Arabidopsis thaliana | AT1G61390.1   Symbols:   S-locus lectin protein kinase family protein   chr1:22650338-22653639 REVERSE LENGTH=831                  | 783  | 831 | 0         | 106.1 | 83.1 | 90.5 |



|                          |                                                                                                                                                                                                                                                                                                                                                                                                                                                                                                                                                                                                                                                                                                                                                                                                                                                                                                |     |      |           |        |      |      |                                                     |       |                      |                                                                                                                                                                                                                                                                                                                                  |     |      |           |       |      |      |
|--------------------------|------------------------------------------------------------------------------------------------------------------------------------------------------------------------------------------------------------------------------------------------------------------------------------------------------------------------------------------------------------------------------------------------------------------------------------------------------------------------------------------------------------------------------------------------------------------------------------------------------------------------------------------------------------------------------------------------------------------------------------------------------------------------------------------------------------------------------------------------------------------------------------------------|-----|------|-----------|--------|------|------|-----------------------------------------------------|-------|----------------------|----------------------------------------------------------------------------------------------------------------------------------------------------------------------------------------------------------------------------------------------------------------------------------------------------------------------------------|-----|------|-----------|-------|------|------|
| Rsa1.0_00039.1.g2317.t1  | ref[NP_564775.1] protein S-domain-1 29 [Arabidopsis thaliana] gi 75099194 sp O64782.1 SD129_ARATH RecName: Full=G-type lectin S-receptor-like serine/threonine-protein kinase SD1-29; AltName: Full=S-domain-1 (SD1) receptor kinase 29; Short=SD1-29; Flags: Precursor gi 3056592 gb AAC13903.1 AAC13903 T1F9.13 [Arabidopsis thaliana] gi 19699075 gb AAL90905.1 At1g61380/T1F9_13 [Arabidopsis thaliana] gi 23308469 gb AANI8204.1 At1g61380/T1F9_13 [Arabidopsis thaliana] gi 332195708 gb AEE33829.1 G-type lectin S-receptor-like serine/threonine-protein kinase SD1-29 [Arabidopsis thaliana]                                                                                                                                                                                                                                                                                          | 813 | 805  | 0         | 99.0   | 78.8 | 86.3 | protein S-domain-1 29                               | gbpln | Arabidopsis thaliana | AT1G61380.1   Symbols: SD1-29   S-domain-1 29   chr1:22646277-22649401 REVERSE LENGTH=805                                                                                                                                                                                                                                        | 813 | 805  | 0         | 99.0  | 78.8 | 86.3 |
| Rsa1.0_00039.1.g2318.t1  | ref[XP_002888089.1] armadillo/beta-catenin repeat family protein [Arabidopsis lyrata subsp. lyrata] gi 297332394 gb EFH64348.1] armadillo/beta-catenin repeat family protein [Arabidopsis lyrata subsp. lyrata]                                                                                                                                                                                                                                                                                                                                                                                                                                                                                                                                                                                                                                                                                | 650 | 572  | 0         | 88.0   | 73.5 | 81.1 | armadillo/beta-catenin repeat family protein        | gbpln | Arabidopsis lyrata   | AT1G61350.1   Symbols:   ARM repeat superfamily protein   chr1:22634099-22635820 FORWARD LENGTH=573                                                                                                                                                                                                                              | 650 | 573  | 0         | 88.2  | 73.4 | 80.5 |
| Rsa1.0_00039.1.g2319.t1  | ref[XP_002886553.1] hypothetical protein ARALYDRAFT_893390 [Arabidopsis lyrata subsp. lyrata] gi 297332394 gb EFH62812.1] hypothetical protein ARALYDRAFT_893390 [Arabidopsis lyrata subsp. lyrata]                                                                                                                                                                                                                                                                                                                                                                                                                                                                                                                                                                                                                                                                                            | 127 | 352  | 4.00E-52  | 277.2  | 81.9 | 86.6 | hypothetical protein ARALYDRAFT_893390              | gbpln | Arabidopsis lyrata   | AT1G61260.1   Symbols:   Protein of unknown function (DUF761)   chr1:22593756-22594986 REVERSE LENGTH=344                                                                                                                                                                                                                        | 127 | 344  | 1.00E-54  | 270.9 | 81.9 | 87.4 |
| Rsa1.0_00039.1.g2320.t1  | gb[EOA35839.1] hypothetical protein CARUB_v10021081mg [Capsella rubella]                                                                                                                                                                                                                                                                                                                                                                                                                                                                                                                                                                                                                                                                                                                                                                                                                       | 113 | 158  | 3.00E-22  | 139.8  | 76.1 | 80.5 | hypothetical protein CARUB_v10021081mg              | gbpln | Capsella rubella     | AT1G61255.1   Symbols:   BEST Arabidopsis thaliana protein match is: glycine-rich protein (TAIR:AT4G21620.2); Has 58 Blast hits to 58 proteins in 12 species: Archae - 0; Bacteria - 2; Metazoa - 0; Fungi - 0; Plants - 56; Viruses - 0; Other Eukaryotes - 0 (source: NCBI BLINK);   chr1:22589260-22589691 REVERSE LENGTH=143 | 113 | 143  | 3.00E-19  | 126.5 | 56.6 | 61.1 |
| Rsa1.0_00039.1.g2321.t1  | ref[NP_176320.1] secretory carrier-associated membrane protein 3 [Arabidopsis thaliana] gi 75185086 sp O9M5P2.1 SCAM3_ARATH RecName: Full=Secretory carrier-associated membrane protein 3; Short=AtSC3; Short=Secretory carrier membrane protein 3 gi 7109228 gb AAF36686.1 AF225920.1 secretory carrier membrane protein [Arabidopsis thaliana] gi 15027863 gb AAK76462.1] putative secretory carrier membrane protein [Arabidopsis thaliana] gi 19310673 gb AAL85067.1] putative secretory carrier membrane protein [Arabidopsis thaliana] gi 21555163 gb AAM63793.1] secretory carrier membrane protein [Arabidopsis thaliana] gi 332195690 gb AEE33811.1] secretory carrier-associated membrane protein 3 [Arabidopsis thaliana] ref[XP_002888099.1] predicted protein [Arabidopsis lyrata subsp. lyrata] gi 297333940 gb EFH64358.1] predicted protein [Arabidopsis lyrata subsp. lyrata] | 292 | 289  | 1.00E-154 | 99.0   | 91.1 | 95.2 | secretory carrier-associated membrane protein 3     | gbpln | Arabidopsis thaliana | AT1G61250.1   Symbols: SC3   secretory carrier 3   chr1:22586035-22588664 FORWARD LENGTH=289                                                                                                                                                                                                                                     | 292 | 289  | 1.00E-156 | 99.0  | 91.1 | 95.2 |
| Rsa1.0_00039.1.g2322.t1  | ref[XP_002888099.1] predicted protein [Arabidopsis lyrata subsp. lyrata] gi 297333940 gb EFH64358.1] predicted protein [Arabidopsis lyrata subsp. lyrata]                                                                                                                                                                                                                                                                                                                                                                                                                                                                                                                                                                                                                                                                                                                                      | 365 | 588  | 1.00E-160 | 161.1  | 75.3 | 85.8 | predicted protein                                   | gbpln | Arabidopsis lyrata   | AT1G57570.1   Symbols:   Mannose-binding lectin superfamily protein   chr1:21321717-21324284 FORWARD LENGTH=614                                                                                                                                                                                                                  | 365 | 614  | 1.00E-148 | 168.2 | 69.6 | 82.7 |
| Rsa1.0_00039.1.g2323.t1  | gb[EOA33627.1] hypothetical protein CARUB_v10019789mg [Capsella rubella]                                                                                                                                                                                                                                                                                                                                                                                                                                                                                                                                                                                                                                                                                                                                                                                                                       | 861 | 846  | 0         | 98.3   | 61.8 | 73.4 | hypothetical protein CARUB_v10019789mg              | gbpln | Capsella rubella     | AT1G61190.1   Symbols:   LRR and NB-ARC domains-containing disease resistance protein   chr1:22557602-22560687 FORWARD LENGTH=967                                                                                                                                                                                                | 861 | 967  | 0         | 112.3 | 63.4 | 74.2 |
| Rsa1.0_00039.1.g2324.t1  | # # # # # # # # # # # # # # # #                                                                                                                                                                                                                                                                                                                                                                                                                                                                                                                                                                                                                                                                                                                                                                                                                                                                | #   | #    | #         | #      | #    | #    | -                                                   | ----  | ----                 | # # # # # # # # # #                                                                                                                                                                                                                                                                                                              | #   | #    | #         | #     | #    | #    |
| Rsa1.0_00039.1.g2325.t3  | gb[AAD24652.1] putative non-LTR retroelement reverse transcriptase [Arabidopsis thaliana]                                                                                                                                                                                                                                                                                                                                                                                                                                                                                                                                                                                                                                                                                                                                                                                                      | 994 | 977  | 4.00E-75  | 98.3   | 20.4 | 29.9 | putative non-LTR retroelement reverse transcriptase | gbpln | Arabidopsis thaliana | AT5G41550.1   Symbols:   Disease resistance protein (TIR-NBS-LRR class) family   chr5:16617232-16620785 REVERSE LENGTH=1085                                                                                                                                                                                                      | 994 | 1085 | 2.00E-64  | 109.2 | 11.6 | 14.1 |
| Rsa1.0_00039.1.g2326.t16 | # # # # # # # # # # # # # # # #                                                                                                                                                                                                                                                                                                                                                                                                                                                                                                                                                                                                                                                                                                                                                                                                                                                                | #   | #    | #         | #      | #    | #    | -                                                   | ----  | ----                 | # # # # # # # # # #                                                                                                                                                                                                                                                                                                              | #   | #    | #         | #     | #    | #    |
| Rsa1.0_00039.1.g2327.t1  | gb[AAG50806.1]AC079281_8 unknown protein [Arabidopsis thaliana]                                                                                                                                                                                                                                                                                                                                                                                                                                                                                                                                                                                                                                                                                                                                                                                                                                | 104 | 1213 | 7.00E-15  | 1166.3 | 45.2 | 68.3 | unknown protein                                     | gbpln | Arabidopsis thaliana | AT1G60720.1   Symbols:   RNA-directed DNA polymerase (reverse transcriptase)-related family protein   chr1:22357072-22357941 FORWARD LENGTH=289                                                                                                                                                                                  | 104 | 289  | 6.00E-16  | 277.9 | 40.4 | 64.4 |

|                         |                                                                                                                                                                                                                                                                                                                                                                                                                                                            |     |     |           |       |      |      |                                                                       |       |                         |                                                                                                                                                                                                                                                                                                                                                                                                    |     |     |           |       |      |      |
|-------------------------|------------------------------------------------------------------------------------------------------------------------------------------------------------------------------------------------------------------------------------------------------------------------------------------------------------------------------------------------------------------------------------------------------------------------------------------------------------|-----|-----|-----------|-------|------|------|-----------------------------------------------------------------------|-------|-------------------------|----------------------------------------------------------------------------------------------------------------------------------------------------------------------------------------------------------------------------------------------------------------------------------------------------------------------------------------------------------------------------------------------------|-----|-----|-----------|-------|------|------|
| Rsa1.0_00039.1.g2328.t1 | refXP_002888109.1  ANAC025<br>[Arabidopsis lyrata subsp. lyrata]<br>gi 297333950 gb EFH64368.1  ANAC025<br>[Arabidopsis lyrata subsp. lyrata]                                                                                                                                                                                                                                                                                                              | 319 | 326 | 1.00E-161 | 102.2 | 93.7 | 97.2 | ANAC025                                                               | gbpln | Arabidopsis<br>lyrata   | AT1G61110.1   Symbols: anac025, NAC025  <br>NAC domain containing protein 25  <br>chr1:22516730-22518055 FORWARD<br>LENGTH=323                                                                                                                                                                                                                                                                     | 319 | 323 | 1.00E-163 | 101.3 | 94.7 | 97.8 |
| Rsa1.0_00039.1.g2329.t1 | #                                                                                                                                                                                                                                                                                                                                                                                                                                                          | #   | #   | #         | #     | #    | #    | -                                                                     | ----  | ----                    | AT3G61860.1   Symbols: ATRSP31, RSP31,<br>At-RS31, RS31   RNA-binding<br>(RRM/RBD/RNP motifs) family protein  <br>chr3:22900311-22902159 REVERSE<br>LENGTH=264                                                                                                                                                                                                                                     | 191 | 264 | 4.00E-11  | 138.2 | 16.8 | 19.4 |
| Rsa1.0_00039.1.g2330.t1 | refNP_974060.1  Toll-Interleukin-<br>Resistance (TIR) domain-containing<br>protein [Arabidopsis thaliana]<br>gi 332195661 gb AEE33782.1  Toll-<br>Interleukin-Resistance (TIR) domain-<br>containing protein [Arabidopsis thaliana]                                                                                                                                                                                                                        | 198 | 188 | 3.00E-83  | 94.9  | 76.3 | 83.3 | Toll-Interleukin-<br>Resistance (TIR)<br>domain-containing<br>protein | gbpln | Arabidopsis<br>thaliana | AT1G61105.1   Symbols:   Toll-Interleukin-<br>Resistance (TIR) domain family protein  <br>chr1:22513616-22514492 REVERSE<br>LENGTH=188                                                                                                                                                                                                                                                             | 198 | 188 | 9.00E-86  | 94.9  | 76.3 | 83.3 |
| Rsa1.0_00039.1.g2331.t1 | #                                                                                                                                                                                                                                                                                                                                                                                                                                                          | #   | #   | #         | #     | #    | #    | -                                                                     | ----  | ----                    | #                                                                                                                                                                                                                                                                                                                                                                                                  | #   | #   | #         | #     | #    |      |
| Rsa1.0_00039.1.g2332.t1 | refXP_002317226.1  predicted protein<br>[Populus trichocarpa]<br>gi 222860291 gb EEE97838.1  predicted<br>protein [Populus trichocarpa]                                                                                                                                                                                                                                                                                                                    | 911 | 792 | 1.00E-170 | 86.9  | 45.0 | 58.2 | predicted protein                                                     | gbpln | Populus<br>trichocarpa  | AT1G61080.1   Symbols:   Hydroxyproline-<br>rich glycoprotein family protein  <br>chr1:22493194-22497019 REVERSE<br>LENGTH=907                                                                                                                                                                                                                                                                     | 911 | 907 | 1.00E-142 | 99.6  | 33.2 | 34.5 |
| Rsa1.0_00039.1.g2333.t1 | gb EOA34094.1  hypothetical protein<br>CARUB_v10021594mg [Capsella rubella]                                                                                                                                                                                                                                                                                                                                                                                | 440 | 441 | 1.00E-178 | 100.2 | 78.6 | 86.6 | hypothetical protein<br>CARUB_v10021594mg                             | gbpln | Capsella<br>rubella     | AT1G61050.1   Symbols:   alpha 1.4-<br>glycosyltransferase family protein  <br>chr1:22486736-22488043 FORWARD<br>LENGTH=435                                                                                                                                                                                                                                                                        | 440 | 435 | 1.00E-176 | 98.9  | 78.4 | 86.6 |
| Rsa1.0_00039.1.g2334.t1 | refNP_564767.1  coatomer subunit<br>zeta-1 [Arabidopsis thaliana]<br>gi 75163941 sp Q940S5.1 COPZ1_ARAT<br>H RecName: Full=Coatomer subunit<br>zeta-1; AltName: Full=Zeta-1-coat<br>protein; AltName: Full=Zeta-COP 1<br>gi 15450727 gb AAK96635.1<br>At1g60970/T7P1_11 [Arabidopsis<br>thaliana] gi 22137000 gb AAM91345.1<br>At1g60970/T7P1_11 [Arabidopsis<br>thaliana] gi 332195633 gb AEE33754.1<br>coatomer subunit zeta-1 [Arabidopsis<br>thaliana] | 177 | 177 | 8.00E-89  | 100.0 | 90.4 | 95.5 | coatomer subunit<br>zeta-1                                            | gbpln | Arabidopsis<br>thaliana | AT1G60970.1   Symbols:   SNARE-like<br>superfamily protein   chr1:22448008-<br>22449387 REVERSE LENGTH=177                                                                                                                                                                                                                                                                                         | 177 | 177 | 3.00E-91  | 100.0 | 90.4 | 95.5 |
| Rsa1.0_00039.1.g2335.t1 | refXP_002886573.1  hypothetical<br>protein ARALYDRAFT_315258<br>[Arabidopsis lyrata subsp. lyrata]<br>gi 297332414 gb EFH62832.1 <br>hypothetical protein<br>ARALYDRAFT_315258 [Arabidopsis<br>lyrata subsp. lyrata]                                                                                                                                                                                                                                       | 372 | 429 | 1.00E-177 | 115.3 | 90.6 | 95.7 | hypothetical protein<br>ARALYDRAFT_315258                             | gbpln | Arabidopsis<br>lyrata   | AT1G60960.1   Symbols: IRT3, ATIRT3   iron<br>regulated transporter 3   chr1:22445410-<br>22447060 REVERSE LENGTH=425                                                                                                                                                                                                                                                                              | 372 | 425 | 1.00E-176 | 114.2 | 88.7 | 93.8 |
| Rsa1.0_00039.1.g2336.t1 | #                                                                                                                                                                                                                                                                                                                                                                                                                                                          | #   | #   | #         | #     | #    | #    | -                                                                     | ----  | ----                    | #                                                                                                                                                                                                                                                                                                                                                                                                  | #   | #   | #         | #     | #    |      |
| Rsa1.0_00039.1.g2337.t1 | dbj BAJ33728.1  unnamed protein<br>product [Thellungiella halophila]                                                                                                                                                                                                                                                                                                                                                                                       | 148 | 148 | 2.00E-74  | 100.0 | 91.9 | 96.6 | unnamed protein<br>product                                            | ----  | ----                    | AT1G60950.1   Symbols: FED A, ATFD2  <br>2Fe-2S ferredoxin-like superfamily protein  <br>chr1:22444565-22445011 FORWARD<br>LENGTH=148                                                                                                                                                                                                                                                              | 148 | 148 | 4.00E-76  | 100.0 | 91.9 | 95.9 |
| Rsa1.0_00039.1.g2338.t1 | gb EOA37821.1  hypothetical protein<br>CARUB_v10011995mg [Capsella rubella]                                                                                                                                                                                                                                                                                                                                                                                | 668 | 589 | 0         | 88.2  | 78.3 | 81.7 | hypothetical protein<br>CARUB_v10011995mg                             | gbpln | Capsella<br>rubella     | AT1G10950.1   Symbols: TMN1, AtTMN1  <br>transmembrane nme 1   chr1:3659322-<br>3663622 FORWARD LENGTH=589                                                                                                                                                                                                                                                                                         | 668 | 589 | 0         | 88.2  | 77.5 | 81.6 |
| Rsa1.0_00040.1.g2339.t1 | refXP_002873716.1  predicted protein<br>[Arabidopsis lyrata subsp. lyrata]<br>gi 297319553 gb EFH49975.1  predicted<br>protein [Arabidopsis lyrata subsp.<br>lyrata]                                                                                                                                                                                                                                                                                       | 219 | 685 | 7.00E-76  | 312.8 | 68.9 | 77.2 | predicted protein                                                     | gbpln | Arabidopsis<br>lyrata   | AT5G15250.1   Symbols: FTSH6, ATFTSH6  <br>FTSH protease 6   chr5:4950411-4952777<br>REVERSE LENGTH=688                                                                                                                                                                                                                                                                                            | 219 | 688 | 2.00E-77  | 314.2 | 67.6 | 76.7 |
| Rsa1.0_00040.1.g2340.t1 | refXP_002873717.1  structural<br>constituent of ribosome [Arabidopsis<br>lyrata subsp. lyrata]<br>gi 297319554 gb EFH49976.1  structural<br>constituent of ribosome [Arabidopsis<br>lyrata subsp. lyrata]                                                                                                                                                                                                                                                  | 215 | 235 | 1.00E-86  | 109.3 | 79.1 | 86.5 | structural constituent<br>of ribosome                                 | gbpln | Arabidopsis<br>lyrata   | AT5G15260.1   Symbols:   Ribosomal protein<br>L34e superfamily protein   chr5:4953646-<br>4954350 REVERSE LENGTH=234                                                                                                                                                                                                                                                                               | 215 | 234 | 2.00E-87  | 108.8 | 78.1 | 87.0 |
| Rsa1.0_00040.1.g2341.t4 | refNP_001078588.1  uncharacterized<br>protein [Arabidopsis thaliana]<br>gi 62319943 dbj BAD94032.1 <br>hypothetical protein [Arabidopsis<br>thaliana] gi 332004757 gb AED92140.1 <br>uncharacterized protein AT5G15265<br>[Arabidopsis thaliana]                                                                                                                                                                                                           | 59  | 83  | 4.00E-16  | 140.7 | 67.8 | 81.4 | uncharacterized<br>protein                                            | gbpln | Arabidopsis<br>thaliana | AT5G15265.1   Symbols:   unknown protein;<br>FUNCTIONS IN: molecular_function unknown;<br>INVOLVED IN: biological_process unknown;<br>LOCATED IN: endomembrane system; Has 5<br>Blast hits to 5 proteins in 3 species: Archae<br>- 0; Bacteria - 0; Metazoa - 0; Fungi - 0;<br>Plants - 5; Viruses - 0; Other Eukaryotes -<br>0 (source: NCBI BLINK).   chr5:4956505-<br>4957351 FORWARD LENGTH=83 | 59  | 83  | 7.00E-19  | 140.7 | 67.8 | 81.4 |

|                         |                                                                                                                                                                                                                                                                                                                                                                                                          |      |      |           |       |      |      |                                                   |       |                      |                                                                                                                                                                                                                                                                                                                                                                                                                                                                                                                                      |      |      |           |       |      |      |
|-------------------------|----------------------------------------------------------------------------------------------------------------------------------------------------------------------------------------------------------------------------------------------------------------------------------------------------------------------------------------------------------------------------------------------------------|------|------|-----------|-------|------|------|---------------------------------------------------|-------|----------------------|--------------------------------------------------------------------------------------------------------------------------------------------------------------------------------------------------------------------------------------------------------------------------------------------------------------------------------------------------------------------------------------------------------------------------------------------------------------------------------------------------------------------------------------|------|------|-----------|-------|------|------|
| Rsa1.0_00040.1.g2342.t1 | ref[XP_002873718.1] pentatricopeptide repeat-containing protein [Arabidopsis lyrata subsp. lyrata]<br>gi 297319555 gb EFH49977.1  pentatricopeptide repeat-containing protein [Arabidopsis lyrata subsp. lyrata]                                                                                                                                                                                         | 537  | 548  | 0         | 102.0 | 85.8 | 93.3 | pentatricopeptide repeat-containing protein       | gbpln | Arabidopsis lyrata   | AT5G15300.1   Symbols:   Pentatricopeptide repeat (PPR) superfamily protein   chr5:4968384-4970030 REVERSE LENGTH=548                                                                                                                                                                                                                                                                                                                                                                                                                | 537  | 548  | 0         | 102.0 | 85.8 | 93.3 |
| Rsa1.0_00040.1.g2343.t1 | dbj BAJ34432.1  unnamed protein product [Theilungiella halophila]                                                                                                                                                                                                                                                                                                                                        | 314  | 326  | 1.00E-147 | 103.8 | 87.3 | 91.7 | unnamed protein product                           | ----  | ----                 | AT5G15310.1   Symbols: ATMYB16, ATMXITA, MYB16   myb domain protein 16   chr5:4974894-4976106 FORWARD LENGTH=326                                                                                                                                                                                                                                                                                                                                                                                                                     | 314  | 326  | 1.00E-142 | 103.8 | 84.4 | 90.1 |
| Rsa1.0_00040.1.g2344.t1 | ref[NP_197036.2] uncharacterized protein [Arabidopsis thaliana]<br>gi 26451598 dbj BAC42896.1  GPI-anchored protein [Arabidopsis thaliana]<br>gi 88010805 gb ABD38855.1  At5g15320 [Arabidopsis thaliana]<br>gi 332004765 gb AED92148.1  uncharacterized protein AT5G15320 [Arabidopsis thaliana]                                                                                                        | 51   | 53   | 6.00E-12  | 103.9 | 78.4 | 86.3 | uncharacterized protein                           | gbpln | Arabidopsis thaliana | AT5G15320.1   Symbols:   unknown protein; FUNCTIONS IN: molecular function unknown; INVOLVED IN: biological process unknown; LOCATED IN: endomembrane system; EXPRESSED IN: 23 plant structures; EXPRESSED DURING: 15 growth stages; BEST Arabidopsis thaliana protein match is: unknown protein (TAIR:AT3G01130.1); Has 64 Blast hits to 64 proteins in 11 species: Archae - 0; Bacteria - 0; Metazoa - 0; Fungi - 0; Plants - 64; Viruses - 0; Other Eukaryotes - 0 (source: NCBI BLink).   chr5:4977647-4978658 FORWARD LENGTH=53 | 51   | 53   | 1.00E-14  | 103.9 | 78.4 | 86.3 |
| Rsa1.0_00040.1.g2345.t1 | ref[XP_002882199.1] hypothetical protein ARALYDRAFT_477417 [Arabidopsis lyrata subsp. lyrata]<br>gi 297328039 gb EFH58458.1  hypothetical protein ARALYDRAFT_477417 [Arabidopsis lyrata subsp. lyrata]                                                                                                                                                                                                   | 417  | 564  | 1.00E-176 | 135.3 | 72.2 | 81.8 | hypothetical protein ARALYDRAFT_477417            | gbpln | Arabidopsis lyrata   | AT3G01120.1   Symbols: MTO1, CGS, ATCYS1, CGS1   Pyridoxal phosphate (PLP)-dependent transferases superfamily protein   chr3:39234-41865 REVERSE LENGTH=563                                                                                                                                                                                                                                                                                                                                                                          | 417  | 563  | 1.00E-179 | 135.0 | 71.9 | 82.0 |
| Rsa1.0_00040.1.g2346.t1 | gb EOA21138.1  hypothetical protein CARUB_v10001482mg [Capsella rubella]                                                                                                                                                                                                                                                                                                                                 | 320  | 318  | 1.00E-154 | 99.4  | 87.5 | 92.2 | hypothetical protein CARUB_v10001482mg            | gbpln | Capsella rubella     | AT5G15330.1   Symbols: ATSPX4, SPX4   SPX domain gene 4   chr5:4980595-4982043 FORWARD LENGTH=318                                                                                                                                                                                                                                                                                                                                                                                                                                    | 320  | 318  | 1.00E-153 | 99.4  | 87.2 | 92.5 |
| Rsa1.0_00040.1.g2347.t1 | ref[NP_197038.1] pentatricopeptide repeat-containing protein [Arabidopsis thaliana]<br>gi 75180838 sp Q9LXE8.1 PP386 ARAT H RecName: Full=Pentatricopeptide repeat-containing protein At5g15340, mitochondrial; Flags: Precursor<br>gi 7671503 emb CAB89344.1  putative protein [Arabidopsis thaliana]<br>gi 332004768 gb AED92151.1  pentatricopeptide repeat-containing protein [Arabidopsis thaliana] | 774  | 623  | 0         | 80.5  | 68.0 | 72.9 | pentatricopeptide repeat-containing protein       | gbpln | Arabidopsis thaliana | AT5G15340.1   Symbols:   Pentatricopeptide repeat (PPR) superfamily protein   chr5:4982273-4984144 REVERSE LENGTH=623                                                                                                                                                                                                                                                                                                                                                                                                                | 774  | 623  | 0         | 80.5  | 68.0 | 72.9 |
| Rsa1.0_00040.1.g2348.t1 | ref[NP_197043.1] tRNA/rRNA methyltransferase (SpoU) family protein [Arabidopsis thaliana]<br>gi 7671508 emb CAB89349.1  rRNA methylase-like protein [Arabidopsis thaliana]<br>gi 110737570 dbj BAF00727.1  rRNA methylase - like protein [Arabidopsis thaliana]<br>gi 332004772 gb AED92155.1  tRNA/rRNA methyltransferase (SpoU) family protein [Arabidopsis thaliana]                                  | 364  | 350  | 1.00E-145 | 96.2  | 76.1 | 81.0 | tRNA/rRNA methyltransferase (SpoU) family protein | gbpln | Arabidopsis thaliana | AT5G15390.1   Symbols:   tRNA/rRNA methyltransferase (SpoU) family protein   chr5:4995333-4997255 FORWARD LENGTH=350                                                                                                                                                                                                                                                                                                                                                                                                                 | 364  | 350  | 1.00E-147 | 96.2  | 76.1 | 81.0 |
| Rsa1.0_00040.1.g2349.t1 | gb ABG89128.1  UFD2 [synthetic construct]                                                                                                                                                                                                                                                                                                                                                                | 1077 | 1037 | 0         | 96.3  | 87.3 | 91.6 | UFD2                                              | gbenv | synthetic construct  | AT5G15400.1   Symbols:   U-box domain-containing protein   chr5:4997764-5002907 REVERSE LENGTH=1038                                                                                                                                                                                                                                                                                                                                                                                                                                  | 1077 | 1038 | 0         | 96.4  | 87.3 | 91.6 |
| Rsa1.0_00040.1.g2350.t1 | dbj BAJ33868.1  unnamed protein product [Theilungiella halophila]                                                                                                                                                                                                                                                                                                                                        | 733  | 722  | 0         | 98.5  | 92.1 | 94.8 | unnamed protein product                           | ----  | ----                 | AT5G15410.1   Symbols: DND1, ATCNGC2, CNGC2   Cyclic nucleotide-regulated ion channel family protein   chr5:5003460-5006763 REVERSE LENGTH=726                                                                                                                                                                                                                                                                                                                                                                                       | 733  | 726  | 0         | 99.0  | 91.5 | 95.1 |
| Rsa1.0_00040.1.g2351.t1 | ref[NP_197051.2] alpha-1,4-galacturonosyltransferase [Arabidopsis thaliana]<br>gi 75151049 sp Q8GWT1.1 GAUTE_ARA TH RecName: Full=Probable galacturonosyltransferase 14<br>gi 26452322 dbj BAC43247.1  unknown protein [Arabidopsis thaliana]<br>gi 29028910 gb AAO64834.1  At5g15470 [Arabidopsis thaliana]<br>gi 332004782 gb AED92165.1  probable galacturonosyltransferase 14 [Arabidopsis thaliana] | 562  | 532  | 0         | 94.7  | 85.1 | 89.3 | alpha-1,4-galacturonosyltransferase               | gbpln | Arabidopsis thaliana | AT5G15470.1   Symbols: GAUT14   galacturonosyltransferase 14   chr5:5021433-5024168 REVERSE LENGTH=532                                                                                                                                                                                                                                                                                                                                                                                                                               | 562  | 532  | 0         | 94.7  | 85.1 | 89.3 |

|                         |                                                                                                                                                                                                                                                                                                                                                                                                                                                                                                                                                                                                            |      |      |           |       |      |      |                                                  |       |                      |                                                                                                                                |      |      |           |       |      |      |
|-------------------------|------------------------------------------------------------------------------------------------------------------------------------------------------------------------------------------------------------------------------------------------------------------------------------------------------------------------------------------------------------------------------------------------------------------------------------------------------------------------------------------------------------------------------------------------------------------------------------------------------------|------|------|-----------|-------|------|------|--------------------------------------------------|-------|----------------------|--------------------------------------------------------------------------------------------------------------------------------|------|------|-----------|-------|------|------|
| Rsa1.0_00040.1.g2352.t1 | gb EOA20540.1  hypothetical protein CARUB_v10000855mg [Capsella rubella] gi 482556349 gb EOA20541.1  hypothetical protein CARUB_v10000855mg [Capsella rubella] gi 482556350 gb EOA20542.1  hypothetical protein CARUB_v10000855mg [Capsella rubella]                                                                                                                                                                                                                                                                                                                                                       | 480  | 480  | 0         | 100.0 | 98.5 | 99.4 | hypothetical protein CARUB_v10000855mg           | gbpln | Capsella rubella     | AT5G15490.1   Symbols:   UDP-glucose 6-dehydrogenase family protein   chr5:5027872-5029314 REVERSE LENGTH=480                  | 480  | 480  | 0         | 100.0 | 97.3 | 99.2 |
| Rsa1.0_00040.1.g2353.t1 | gb AEI16468.1  acetyl-CoA carboxylase biotin-containing subunit [Brassica rapa]                                                                                                                                                                                                                                                                                                                                                                                                                                                                                                                            | 248  | 257  | 1.00E-117 | 103.6 | 90.7 | 94.8 | acetyl-CoA carboxylase biotin-containing subunit | gbpln | Brassica rapa        | AT5G15530.1   Symbols: BCCP2, CAC1-B   biotin carboxyl carrier protein 2   chr5:5038955-5040437 FORWARD LENGTH=255             | 248  | 255  | 3.00E-94  | 102.8 | 78.2 | 84.7 |
| Rsa1.0_00040.1.g2354.t1 | ref XP_002873731.1  sister chromatid cohesion 2 [Arabidopsis lyrata subsp. lyrata] gi 297319568 gb EFH49990.1  sister chromatid cohesion 2 [Arabidopsis lyrata subsp. lyrata]                                                                                                                                                                                                                                                                                                                                                                                                                              | 1842 | 1847 | 0         | 100.3 | 86.5 | 91.5 | sister chromatid cohesion 2                      | gbpln | Arabidopsis lyrata   | AT5G15540.1   Symbols: EMB2773, ATSCC2, SCC2   PHD finger family protein   chr5:5047887-5057411 REVERSE LENGTH=1846            | 1842 | 1846 | 0         | 100.2 | 85.5 | 90.8 |
| Rsa1.0_00040.1.g2355.t1 | #                                                                                                                                                                                                                                                                                                                                                                                                                                                                                                                                                                                                          | #    | #    | #         | #     | #    | -    | ----                                             | ----  | ----                 | #                                                                                                                              | #    | #    | #         | #     | #    |      |
| Rsa1.0_00040.1.g2356.t1 | gb EMJ16100.1  hypothetical protein PRUPE_ppa000160mg [Prunus persica]                                                                                                                                                                                                                                                                                                                                                                                                                                                                                                                                     | 846  | 1582 | 4.00E-56  | 187.0 | 20.9 | 27.8 | hypothetical protein PRUPE_ppa000160mg           | gbpln | Prunus persica       | AT5G07980.1   Symbols:   dentin sialophosphoprotein-related   chr5:2549432-2554669 REVERSE LENGTH=1501                         | 846  | 1501 | 9.00E-44  | 177.4 | 12.5 | 18.4 |
| Rsa1.0_00040.1.g2357.t1 | ref NP_197059.1  transducin/WD40 domain-containing protein [Arabidopsis thaliana] gi 9755810 emb CAC01754.1  putative protein [Arabidopsis thaliana] gi 17381110 gb AAL36367.1  unknown protein [Arabidopsis thaliana] gi 20258961 gb AAM14196.1  unknown protein [Arabidopsis thaliana] gi 332004793 gb AED92176.1  transducin/WD40 domain-containing protein [Arabidopsis thaliana]                                                                                                                                                                                                                      | 414  | 433  | 0         | 104.6 | 82.9 | 90.8 | transducin/WD40 domain-containing protein        | gbpln | Arabidopsis thaliana | AT5G15550.1   Symbols:   Transducin/WD40 repeat-like superfamily protein   chr5:5059501-5062003 REVERSE LENGTH=433             | 414  | 433  | 0         | 104.6 | 82.9 | 90.8 |
| Rsa1.0_00040.1.g2358.t1 | ref XP_002871671.1  hypothetical protein ARALYDRAFT_909531 [Arabidopsis lyrata subsp. lyrata] gi 297317508 gb EFH47930.1  hypothetical protein ARALYDRAFT_909531 [Arabidopsis lyrata subsp. lyrata]                                                                                                                                                                                                                                                                                                                                                                                                        | 362  | 380  | 1.00E-147 | 105.0 | 75.4 | 83.4 | hypothetical protein ARALYDRAFT_909531           | gbpln | Arabidopsis lyrata   | AT5G15570.1   Symbols:   Bromodomain transcription factor   chr5:5066851-5067996 FORWARD LENGTH=381                            | 362  | 381  | 1.00E-148 | 105.2 | 74.9 | 83.1 |
| Rsa1.0_00040.1.g2359.t1 | gb EOA19910.1  hypothetical protein CARUB_v10000160mg [Capsella rubella]                                                                                                                                                                                                                                                                                                                                                                                                                                                                                                                                   | 913  | 931  | 0         | 102.0 | 83.7 | 90.5 | hypothetical protein CARUB_v10000160mg           | gbpln | Capsella rubella     | AT5G15580.1   Symbols: LNG1   longifolia1   chr5:5068495-5071930 REVERSE LENGTH=927                                            | 913  | 927  | 0         | 101.5 | 81.9 | 89.3 |
| Rsa1.0_00040.1.g2360.t1 | ref NP_198644.1  PR5-like receptor kinase [Arabidopsis thaliana] gi 10177803 dbj BAB11294.1  receptor serine/threonine kinase [Arabidopsis thaliana] gi 332006906 gb AED94289.1  PR5-like receptor kinase [Arabidopsis thaliana]                                                                                                                                                                                                                                                                                                                                                                           | 948  | 665  | 0         | 70.1  | 37.3 | 44.7 | PR5-like receptor kinase                         | gbpln | Arabidopsis thaliana | AT5G38280.1   Symbols: PR5K   PR5-like receptor kinase   chr5:15293325-15295838 REVERSE LENGTH=665                             | 948  | 665  | 0         | 70.1  | 37.3 | 44.7 |
| Rsa1.0_00040.1.g2361.t1 | gb EOA21793.1  hypothetical protein CARUB_v10002258mg [Capsella rubella] gi 482557602 gb EOA21794.1  hypothetical protein CARUB_v10002258mg [Capsella rubella]                                                                                                                                                                                                                                                                                                                                                                                                                                             | 130  | 127  | 3.00E-40  | 97.7  | 78.5 | 86.9 | hypothetical protein CARUB_v10002258mg           | gbpln | Capsella rubella     | AT5G15600.1   Symbols: SP1L4   SPIRAL1-like4   chr5:5078405-5078863 FORWARD LENGTH=127                                         | 130  | 127  | 1.00E-42  | 97.7  | 80.8 | 86.2 |
| Rsa1.0_00040.1.g2362.t1 | ref NP_197069.1  reversibly glycosylated polypeptide 2 [Arabidopsis thaliana] gi 75174193 sp Q9LFW1.1  RGP2_ARATH RecName: Full=UDP-arabinopyranose mutase 2; AltName: Full=Reversibly glycosylated polypeptide 2; Short=AtRGP2; AltName: Full=UDP-L-arabinose mutase 2 gi 9755610 emb CAC01764.1  reversibly glycosylated polypeptide-2 (ATRGP) [Arabidopsis thaliana] gi 14532444 gb AAK63950.1  AT5g15650/F14F8.30 [Arabidopsis thaliana] gi 21464559 gb AAM52234.1  AT5g15650/F14F8.30 [Arabidopsis thaliana] gi 332004805 gb AED92188.1  reversibly glycosylated polypeptide 2 [Arabidopsis thaliana] | 357  | 360  | 0         | 100.8 | 96.6 | 98.6 | reversibly glycosylated polypeptide 2            | gbpln | Arabidopsis thaliana | AT5G15650.1   Symbols: RGP2, ATRGP2   reversibly glycosylated polypeptide 2   chr5:5092203-5094093 FORWARD LENGTH=360          | 357  | 360  | 0         | 100.8 | 96.6 | 98.6 |
| Rsa1.0_00040.1.g2363.t1 | ref XP_002890654.1  F-box family protein [Arabidopsis lyrata subsp. lyrata] gi 297336496 gb EFH66913.1  F-box family protein [Arabidopsis lyrata subsp. lyrata]                                                                                                                                                                                                                                                                                                                                                                                                                                            | 398  | 665  | 2.00E-80  | 167.1 | 44.0 | 58.8 | F-box family protein                             | gbpln | Arabidopsis lyrata   | AT5G15660.1   Symbols:   F-box and associated interaction domains-containing protein   chr5:5095652-5097041 FORWARD LENGTH=438 | 398  | 438  | 9.00E-82  | 110.1 | 46.5 | 61.6 |

|                         |                                                                                                                                                                                                                                                                                                                                                                                                                                                                                                                                                                                                                                |     |     |           |       |      |      |                                        |       |                      |                                                                                                                                |     |     |           |       |      |      |
|-------------------------|--------------------------------------------------------------------------------------------------------------------------------------------------------------------------------------------------------------------------------------------------------------------------------------------------------------------------------------------------------------------------------------------------------------------------------------------------------------------------------------------------------------------------------------------------------------------------------------------------------------------------------|-----|-----|-----------|-------|------|------|----------------------------------------|-------|----------------------|--------------------------------------------------------------------------------------------------------------------------------|-----|-----|-----------|-------|------|------|
| Rsa1.0_00040.1.g2364.t1 | ref NP_197070.1  putative F-box protein [Arabidopsis thaliana] gi 75174192 sp Q9LFW0.1 FB257_ARAT H RecName: Full=Putative F-box protein At5g15660 gi 9755611 emb CAC01765.1  putative protein [Arabidopsis thaliana] gi 332004806 gb AED92189.1  putative F-box protein [Arabidopsis thaliana]                                                                                                                                                                                                                                                                                                                                | 386 | 438 | 1.00E-90  | 113.5 | 49.7 | 66.6 | putative F-box protein                 | gbpln | Arabidopsis thaliana | AT5G15660.1   Symbols:   F-box and associated interaction domains-containing protein   chr5:5095652-5097041 FORWARD LENGTH=438 | 386 | 438 | 2.00E-93  | 113.5 | 49.7 | 66.6 |
| Rsa1.0_00040.1.g2365.t1 | ref XP_002871678.1  F-box family protein [Arabidopsis lyrata subsp. lyrata] gi 297317515 gb EFH47937.1  F-box family protein [Arabidopsis lyrata subsp. lyrata]                                                                                                                                                                                                                                                                                                                                                                                                                                                                | 440 | 430 | 8.00E-77  | 97.7  | 39.8 | 52.3 | F-box family protein                   | gbpln | Arabidopsis lyrata   | AT5G15660.1   Symbols:   F-box and associated interaction domains-containing protein   chr5:5095652-5097041 FORWARD LENGTH=438 | 440 | 438 | 3.00E-79  | 99.5  | 39.8 | 54.5 |
| Rsa1.0_00040.1.g2366.t1 | ref XP_002877486.1  predicted protein [Arabidopsis lyrata subsp. lyrata] gi 297323324 gb EFH53745.1  predicted protein [Arabidopsis lyrata subsp. lyrata]                                                                                                                                                                                                                                                                                                                                                                                                                                                                      | 461 | 362 | 1.00E-108 | 78.5  | 45.8 | 53.1 | predicted protein                      | gbpln | Arabidopsis lyrata   | AT1G09650.1   Symbols:   F-box and associated interaction domains-containing protein   chr1:3125978-3127126 FORWARD LENGTH=382 | 461 | 382 | 1.00E-102 | 82.9  | 48.4 | 58.1 |
| Rsa1.0_00040.1.g2367.t1 | gb EOA20674.1  hypothetical protein CARUB_v10000986mg [Capsella rubella]                                                                                                                                                                                                                                                                                                                                                                                                                                                                                                                                                       | 452 | 437 | 0         | 96.7  | 87.4 | 92.3 | hypothetical protein CARUB_v10000986mg | gbpln | Capsella rubella     | AT5G15730.2   Symbols: CRLK2, AtCRLK2   Protein kinase superfamily protein   chr5:5131284-5133046 FORWARD LENGTH=436           | 452 | 436 | 0         | 96.5  | 86.5 | 89.4 |
| Rsa1.0_00040.1.g2368.t1 | ref NP_197078.2  O-fucosyltransferase family protein [Arabidopsis thaliana] gi 66792694 gb AA56449.1  At5g15740 [Arabidopsis thaliana] gi 110743719 dbj BAE99696.1  hypothetical protein [Arabidopsis thaliana] gi 332004817 gb AED92200.1  O-fucosyltransferase family protein [Arabidopsis thaliana]                                                                                                                                                                                                                                                                                                                         | 509 | 508 | 0         | 99.8  | 91.4 | 96.3 | O-fucosyltransferase family protein    | gbpln | Arabidopsis thaliana | AT5G15740.1   Symbols:   O-fucosyltransferase family protein   chr5:5134788-5136956 REVERSE LENGTH=508                         | 509 | 508 | 0         | 99.8  | 91.4 | 96.3 |
| Rsa1.0_00040.1.g2369.t1 | ref XP_002871683.1  hypothetical protein ARALYDRAFT_488420 [Arabidopsis lyrata subsp. lyrata] gi 297317520 gb EFH47942.1  hypothetical protein ARALYDRAFT_488420 [Arabidopsis lyrata subsp. lyrata]                                                                                                                                                                                                                                                                                                                                                                                                                            | 174 | 183 | 3.00E-67  | 105.2 | 81.6 | 87.9 | hypothetical protein ARALYDRAFT_488420 | gbpln | Arabidopsis lyrata   | AT5G15760.1   Symbols:   Ribosomal protein PSRP-3/Ycf65   chr5:5143100-5143905 FORWARD LENGTH=183                              | 174 | 183 | 4.00E-68  | 105.2 | 79.3 | 86.8 |
| Rsa1.0_00040.1.g2370.t1 | ref XP_002873740.1  hypothetical protein ARALYDRAFT_909552 [Arabidopsis lyrata subsp. lyrata] gi 297319577 gb EFH49999.1  hypothetical protein ARALYDRAFT_909552 [Arabidopsis lyrata subsp. lyrata]                                                                                                                                                                                                                                                                                                                                                                                                                            | 159 | 149 | 6.00E-66  | 93.7  | 76.1 | 84.9 | hypothetical protein ARALYDRAFT_909552 | gbpln | Arabidopsis lyrata   | AT5G15770.1   Symbols: AtGNA1, GNA1   glucose-6-phosphate acetyltransferase 1   chr5:5144093-5144542 REVERSE LENGTH=149        | 159 | 149 | 8.00E-67  | 93.7  | 74.8 | 83.6 |
| Rsa1.0_00040.1.g2371.t1 | ref XP_002873740.1  hypothetical protein ARALYDRAFT_909552 [Arabidopsis lyrata subsp. lyrata] gi 297319577 gb EFH49999.1  hypothetical protein ARALYDRAFT_909552 [Arabidopsis lyrata subsp. lyrata]                                                                                                                                                                                                                                                                                                                                                                                                                            | 160 | 149 | 1.00E-65  | 93.1  | 74.4 | 84.4 | hypothetical protein ARALYDRAFT_909552 | gbpln | Arabidopsis lyrata   | AT5G15770.1   Symbols: AtGNA1, GNA1   glucose-6-phosphate acetyltransferase 1   chr5:5144093-5144542 REVERSE LENGTH=149        | 160 | 149 | 4.00E-67  | 93.1  | 73.8 | 83.8 |
| Rsa1.0_00040.1.g2372.t1 | ref XP_002873741.1  hypothetical protein ARALYDRAFT_488422 [Arabidopsis lyrata subsp. lyrata] gi 297319578 gb EFH50000.1  hypothetical protein ARALYDRAFT_488422 [Arabidopsis lyrata subsp. lyrata]                                                                                                                                                                                                                                                                                                                                                                                                                            | 361 | 363 | 2.00E-92  | 100.6 | 55.1 | 61.5 | hypothetical protein ARALYDRAFT_488422 | gbpln | Arabidopsis lyrata   | AT5G15780.1   Symbols:   Pollen Ole e 1 allergen and extensin family protein   chr5:5144898-5146297 REVERSE LENGTH=401         | 361 | 401 | 2.00E-87  | 111.1 | 44.0 | 47.9 |
| Rsa1.0_00040.1.g2373.t1 | ref NP_197083.1  RING/U-box domain-containing protein [Arabidopsis thaliana] gi 4257337 ref NP_974785.1  RING/U-box domain-containing protein [Arabidopsis thaliana] gi 9755624 emb CAC01778.1  putative protein [Arabidopsis thaliana] gi 22655214 gb AAM98197.1  unknown protein [Arabidopsis thaliana] gi 30023690 gb AAP13378.1  At5g15790 [Arabidopsis thaliana] gi 110738178 dbj BAF01020.1  hypothetical protein [Arabidopsis thaliana] gi 332004822 gb AED92205.1  RING/U-box domain-containing protein [Arabidopsis thaliana] gi 332004823 gb AED92206.1  RING/U-box domain-containing protein [Arabidopsis thaliana] | 231 | 232 | 4.00E-98  | 100.4 | 79.7 | 90.9 | RING/U-box domain-containing protein   | gbpln | Arabidopsis thaliana | AT5G15790.2   Symbols:   RING/U-box superfamily protein   chr5:5149800-5150964 FORWARD LENGTH=232                              | 231 | 232 | 1.00E-100 | 100.4 | 79.7 | 90.9 |

|                         |                                                                                                                                                                                                                                                                                                                                                                                                                                                                                                                                                                                                                                                                                                                                                                                                                                                                                                                                                                                                                                                                                                                                                             |     |     |           |       |      |      |                                        |       |                       |                                                                                                                                                                                                                                                                                                                                                                               |     |     |           |       |      |      |
|-------------------------|-------------------------------------------------------------------------------------------------------------------------------------------------------------------------------------------------------------------------------------------------------------------------------------------------------------------------------------------------------------------------------------------------------------------------------------------------------------------------------------------------------------------------------------------------------------------------------------------------------------------------------------------------------------------------------------------------------------------------------------------------------------------------------------------------------------------------------------------------------------------------------------------------------------------------------------------------------------------------------------------------------------------------------------------------------------------------------------------------------------------------------------------------------------|-----|-----|-----------|-------|------|------|----------------------------------------|-------|-----------------------|-------------------------------------------------------------------------------------------------------------------------------------------------------------------------------------------------------------------------------------------------------------------------------------------------------------------------------------------------------------------------------|-----|-----|-----------|-------|------|------|
| Rsa1.0_00040.1.g2374.t1 | gb AAA3Z/J3Z.1  transcription factor [Arabidopsis thaliana]<br>gi 52547968 gb AAU81987.1 <br>SEPALATA1 [Arabidopsis thaliana]<br>gi 52547972 gb AAU81989.1 <br>SEPALATA1 [Arabidopsis thaliana]<br>gi 52547974 gb AAU81990.1 <br>SEPALATA1 [Arabidopsis thaliana]<br>gi 52547976 gb AAU81991.1 <br>SEPALATA1 [Arabidopsis thaliana]<br>gi 52547978 gb AAU81992.1 <br>SEPALATA1 [Arabidopsis thaliana]<br>gi 52547980 gb AAU81993.1 <br>SEPALATA1 [Arabidopsis thaliana]<br>gi 52547982 gb AAU81994.1 <br>SEPALATA1 [Arabidopsis thaliana]<br>gi 52547984 gb AAU81995.1 <br>SEPALATA1 [Arabidopsis thaliana]<br>gi 52547986 gb AAU81996.1 <br>SEPALATA1 [Arabidopsis thaliana]<br>gi 52547988 gb AAU81997.1 <br>SEPALATA1 [Arabidopsis thaliana]<br>gi 52547990 gb AAU81998.1 <br>SEPALATA1 [Arabidopsis thaliana]<br>gi 52547992 gb AAU81999.1 <br>SEPALATA1 [Arabidopsis thaliana]<br>gi 52547994 gb AAU82000.1 <br>SEPALATA1 [Arabidopsis thaliana]<br>gi 52547996 gb AAU82001.1 <br>SEPALATA1 [Arabidopsis thaliana]<br>gi 52547998 gb AAU82002.1 <br>SEPALATA1 [Arabidopsis thaliana]<br>gi 52548002 gb AAU82004.1 <br>SEPALATA1 [Arabidopsis thaliana] | 105 | 248 | 3.00E-49  | 236.2 | 90.5 | 94.3 | transcription factor                   | gbpln | Arabidopsis thaliana  | AT5G15800.1   Symbols: SEP1, AGL2   K-box region and MADS-box transcription factor family protein   chr5:5151594-5153767 REVERSE LENGTH=251                                                                                                                                                                                                                                   | 105 | 251 | 4.00E-42  | 239.0 | 92.4 | 96.2 |
| Rsa1.0_00040.1.g2375.t1 | gb ADR83588.1  Sepallata 1-like protein [Platanus x acerifolia]                                                                                                                                                                                                                                                                                                                                                                                                                                                                                                                                                                                                                                                                                                                                                                                                                                                                                                                                                                                                                                                                                             | 62  | 244 | 1.00E-27  | 393.5 | 98.4 | 98.4 | Sepallata 1-like protein               | gbpln | Platanus x acerifolia | AT2G03710.3   Symbols: SEP4, AGL3   K-box region and MADS-box transcription factor family protein   chr2:1129622-1131242 FORWARD LENGTH=187                                                                                                                                                                                                                                   | 62  | 187 | 5.00E-29  | 301.6 | 91.9 | 96.8 |
| Rsa1.0_00040.1.g2376.t1 | ref NP_850827.1  uncharacterized protein [Arabidopsis thaliana]<br>gi 297811719 ref XP_002873743.1 <br>hypothetical protein<br>ARALYDRAFT_326030 [Arabidopsis lyrata subsp. lyrata]<br>gi 26450077 dbj BA042158.1  unknown protein [Arabidopsis thaliana]<br>gi 28827744 gb AA050716.1  unknown protein [Arabidopsis thaliana]<br>gi 297319580 gb EFH50002.1 <br>hypothetical protein<br>ARALYDRAFT_326030 [Arabidopsis lyrata subsp. lyrata]<br>gi 332004826 gb AED92209.1 <br>uncharacterized protein AT5G15802 [Arabidopsis thaliana]                                                                                                                                                                                                                                                                                                                                                                                                                                                                                                                                                                                                                    | 101 | 99  | 1.00E-41  | 98.0  | 86.1 | 90.1 | uncharacterized protein                | gbpln | Arabidopsis lyrata    | AT5G15802.1   Symbols:   unknown protein; FUNCTIONS IN: molecular function unknown; INVOLVED IN: biological process unknown; LOCATED IN: endomembrane system; Has 35 Blast hits to 35 proteins in 15 species: Archae - 0; Bacteria - 4; Metazoa - 0; Fungi - 0; Plants - 31; Viruses - 0; Other Eukaryotes - 0 (source: NCBI BLINK).   chr5:5156578-5157520 REVERSE LENGTH=99 | 101 | 99  | 2.00E-44  | 98.0  | 86.1 | 90.1 |
| Rsa1.0_00040.1.g2377.t1 | gb EOA20072.1  hypothetical protein CARUB_v10000341mg [Capsella rubella]                                                                                                                                                                                                                                                                                                                                                                                                                                                                                                                                                                                                                                                                                                                                                                                                                                                                                                                                                                                                                                                                                    | 589 | 709 | 0         | 120.4 | 89.8 | 93.7 | hypothetical protein CARUB_v10000341mg | gbpln | Capsella rubella      | AT5G15810.1   Symbols:   N2.N2-dimethylguanosine tRNA methyltransferase   chr5:5157798-5161121 FORWARD LENGTH=691                                                                                                                                                                                                                                                             | 589 | 691 | 0         | 117.3 | 90.0 | 94.4 |
| Rsa1.0_00040.1.g2378.t1 | gb EOA21044.1  hypothetical protein CARUB_v10001383mg [Capsella rubella]                                                                                                                                                                                                                                                                                                                                                                                                                                                                                                                                                                                                                                                                                                                                                                                                                                                                                                                                                                                                                                                                                    | 334 | 336 | 2.00E-44  | 100.6 | 43.7 | 57.8 | hypothetical protein CARUB_v10001383mg | gbpln | Capsella rubella      | AT5G15820.1   Symbols:   RING/U-box superfamily protein   chr5:5161787-5162833 FORWARD LENGTH=348                                                                                                                                                                                                                                                                             | 334 | 348 | 5.00E-36  | 104.2 | 39.5 | 52.7 |
| Rsa1.0_00040.1.g2379.t1 | dbj BAJ33807.1  unnamed protein product [Theellungiella halophila]                                                                                                                                                                                                                                                                                                                                                                                                                                                                                                                                                                                                                                                                                                                                                                                                                                                                                                                                                                                                                                                                                          | 189 | 190 | 7.00E-77  | 100.5 | 81.0 | 90.5 | unnamed protein product                | ----  | ----                  | AT5G15830.1   Symbols: AtbZIP3, bZIP3   basic leucine-zipper 3   chr5:5168591-5169151 FORWARD LENGTH=186                                                                                                                                                                                                                                                                      | 189 | 186 | 4.00E-69  | 98.4  | 78.8 | 88.9 |
| Rsa1.0_00040.1.g2380.t1 | # # # # # # # # # #                                                                                                                                                                                                                                                                                                                                                                                                                                                                                                                                                                                                                                                                                                                                                                                                                                                                                                                                                                                                                                                                                                                                         | #   | #   | #         | #     | #    | #    | -                                      | ----  | ----                  | # # # # # # #                                                                                                                                                                                                                                                                                                                                                                 | #   | #   | #         | #     | #    | #    |
| Rsa1.0_00040.1.g2381.t1 | gb AAG27546.1  constans-like protein [Brassica nigra]                                                                                                                                                                                                                                                                                                                                                                                                                                                                                                                                                                                                                                                                                                                                                                                                                                                                                                                                                                                                                                                                                                       | 375 | 380 | 0         | 101.3 | 92.5 | 96.3 | constans-like protein                  | gbpln | Brassica nigra        | AT5G15840.1   Symbols: CO, FG   B-box type zinc finger protein with CCT domain   chr5:5171343-5172697 REVERSE LENGTH=373                                                                                                                                                                                                                                                      | 375 | 373 | 1.00E-151 | 99.5  | 75.2 | 84.0 |
| Rsa1.0_00040.1.g2382.t1 | gb AAN09808.1  COL1 protein [Brassica nigra] gi 22854912 gb AAN09811.1 <br>COL1 protein [Brassica nigra]<br>gi 22854914 gb AAN09812.1  COL1 protein [Brassica nigra]<br>gi 22854918 gb AAN09814.1  COL1 protein [Brassica nigra]                                                                                                                                                                                                                                                                                                                                                                                                                                                                                                                                                                                                                                                                                                                                                                                                                                                                                                                            | 354 | 348 | 1.00E-175 | 98.3  | 89.5 | 93.2 | COL1 protein                           | gbpln | Brassica nigra        | AT5G15850.1   Symbols: COL1, ATCOL1   CONSTANS-like 1   chr5:5176297-5177473 REVERSE LENGTH=355                                                                                                                                                                                                                                                                               | 354 | 355 | 1.00E-131 | 100.3 | 74.3 | 81.9 |
| Rsa1.0_00040.1.g2383.t1 | gb AAP42646.1  putative beta-glucan elicitor receptor [Brassica napus]                                                                                                                                                                                                                                                                                                                                                                                                                                                                                                                                                                                                                                                                                                                                                                                                                                                                                                                                                                                                                                                                                      | 759 | 752 | 0         | 99.1  | 93.1 | 95.7 | putative beta-glucan elicitor receptor | gbpln | Brassica napus        | AT5G15870.1   Symbols:   glycosyl hydrolase family 81 protein   chr5:5182641-5184878 REVERSE LENGTH=745                                                                                                                                                                                                                                                                       | 759 | 745 | 0         | 98.2  | 83.1 | 89.5 |

|                         |                                                                                                                                                                                                                                                                                                                                                       |     |     |           |       |      |      |                                        |       |                      |                                                                                                                                                                                                                                                                                                                                                                   |     |     |           |       |      |      |
|-------------------------|-------------------------------------------------------------------------------------------------------------------------------------------------------------------------------------------------------------------------------------------------------------------------------------------------------------------------------------------------------|-----|-----|-----------|-------|------|------|----------------------------------------|-------|----------------------|-------------------------------------------------------------------------------------------------------------------------------------------------------------------------------------------------------------------------------------------------------------------------------------------------------------------------------------------------------------------|-----|-----|-----------|-------|------|------|
| Rsa1.0_00040.1.g2384.t1 | refNP_197092.1  uncharacterized protein [Arabidopsis thaliana] gi 9755634 emb CAC01787.1  putative protein [Arabidopsis thaliana] gi 20466278 gb AAM20456.1  putative protein [Arabidopsis thaliana] gi 31711832 gb AAP68272.1  At5G15880 [Arabidopsis thaliana] gi 332004837 gb AED92220.1  uncharacterized protein AT5G15880 [Arabidopsis thaliana] | 216 | 348 | 5.00E-48  | 161.1 | 61.6 | 67.1 | uncharacterized protein                | gbpln | Arabidopsis thaliana | AT5G15880.1   Symbols:   unknown protein; Has 1807 Blast hits to 1807 proteins in 277 species: Archae - 0; Bacteria - 0; Metazoa - 736; Fungi - 347; Plants - 385; Viruses - 0; Other Eukaryotes - 339 (source: NCBI BLink).   chr5:5185788-5187461 FORWARD LENGTH=348                                                                                            | 216 | 348 | 2.00E-50  | 161.1 | 61.6 | 67.1 |
| Rsa1.0_00040.1.g2385.t1 | gb EOA22444.1  hypothetical protein CARUB_v10003090mg [Capsella rubella]                                                                                                                                                                                                                                                                              | 460 | 517 | 0         | 112.4 | 79.8 | 88.7 | hypothetical protein CARUB_v10003090mg | gbpln | Capsella rubella     | AT5G15890.1   Symbols: TBL21   TRICHOME BIREFRINGENCE-LIKE 21   chr5:5187687-5189348 REVERSE LENGTH=526                                                                                                                                                                                                                                                           | 460 | 526 | 0         | 114.3 | 78.3 | 88.0 |
| Rsa1.0_00040.1.g2386.t1 | refXP_002873749.1  hypothetical protein ARALYDRAFT.488438 [Arabidopsis lyrata subsp. lyrata] gi 297319586 gb EFH50008.1  hypothetical protein ARALYDRAFT.488438 [Arabidopsis lyrata subsp. lyrata]                                                                                                                                                    | 425 | 426 | 0         | 100.2 | 83.1 | 92.0 | hypothetical protein ARALYDRAFT.488438 | gbpln | Arabidopsis lyrata   | AT5G15900.1   Symbols: TBL19   TRICHOME BIREFRINGENCE-LIKE 19   chr5:5189524-5192070 REVERSE LENGTH=426                                                                                                                                                                                                                                                           | 425 | 426 | 0         | 100.2 | 81.2 | 90.4 |
| Rsa1.0_00040.1.g2387.t2 | gb AAR15894.1  S-adenosyl-L-methionine decarboxylase [Brassica juncea]                                                                                                                                                                                                                                                                                | 617 | 369 | 0         | 59.8  | 54.1 | 56.2 | S-adenosyl-L-methionine decarboxylase  | gbpln | Brassica juncea      | AT5G15950.2   Symbols:   Adenosylmethionine decarboxylase family protein   chr5:5206706-5207794 FORWARD LENGTH=362                                                                                                                                                                                                                                                | 617 | 362 | 0         | 58.7  | 52.4 | 55.4 |
| Rsa1.0_00040.1.g2388.t1 | gb AAG13408.1 AF297472.1 BN28b [Brassica napus]                                                                                                                                                                                                                                                                                                       | 65  | 65  | 4.00E-25  | 100.0 | 92.3 | 98.5 | BN28b                                  | gbpln | Brassica napus       | #                                                                                                                                                                                                                                                                                                                                                                 | #   | #   | #         | #     | #    |      |
| Rsa1.0_00040.1.g2389.t1 | gb EOA20115.1  hypothetical protein CARUB_v10000394mg [Capsella rubella]                                                                                                                                                                                                                                                                              | 662 | 670 | 0         | 101.2 | 73.0 | 84.0 | hypothetical protein CARUB_v10000394mg | gbpln | Capsella rubella     | AT5G15980.1   Symbols:   Pentatricopeptide repeat (PPR) superfamily protein   chr5:5213290-5215296 FORWARD LENGTH=668                                                                                                                                                                                                                                             | 662 | 668 | 0         | 100.9 | 71.8 | 82.6 |
| Rsa1.0_00040.1.g2390.t1 | refXP_002871697.1  nsp-interacting kinase 1 [Arabidopsis lyrata subsp. lyrata] gi 297317534 gb EFH47956.1  nsp-interacting kinase 1 [Arabidopsis lyrata subsp. lyrata]                                                                                                                                                                                | 645 | 638 | 0         | 98.9  | 91.3 | 94.3 | nsp-interacting kinase 1               | gbpln | Arabidopsis lyrata   | AT5G16000.1   Symbols: NIK1   NSP-interacting kinase 1   chr5:5224264-5227003 FORWARD LENGTH=638                                                                                                                                                                                                                                                                  | 645 | 638 | 0         | 98.9  | 91.3 | 93.6 |
| Rsa1.0_00040.1.g2391.t1 | gb EOA34948.1  hypothetical protein CARUB_v10020033mg [Capsella rubella]                                                                                                                                                                                                                                                                              | 604 | 591 | 0         | 97.8  | 81.1 | 89.4 | hypothetical protein CARUB_v10020033mg | gbpln | Capsella rubella     | AT1G72550.1   Symbols:   tRNA synthetase beta subunit family protein   chr1:27319947-27323908 REVERSE LENGTH=598                                                                                                                                                                                                                                                  | 604 | 598 | 0         | 99.0  | 78.8 | 88.9 |
| Rsa1.0_00040.1.g2392.t1 | refXP_002871699.1  hypothetical protein ARALYDRAFT.488440 [Arabidopsis lyrata subsp. lyrata] gi 297317536 gb EFH47958.1  hypothetical protein ARALYDRAFT.488440 [Arabidopsis lyrata subsp. lyrata]                                                                                                                                                    | 938 | 640 | 0         | 68.2  | 56.6 | 60.7 | hypothetical protein ARALYDRAFT.488440 | gbpln | Arabidopsis lyrata   | AT5G16020.1   Symbols: GEX3   gamete-expressed 3   chr5:5229692-5232241 FORWARD LENGTH=641                                                                                                                                                                                                                                                                        | 938 | 641 | 0         | 68.3  | 54.7 | 59.1 |
| Rsa1.0_00040.1.g2393.t1 | refXP_002871700.1  predicted protein [Arabidopsis lyrata subsp. lyrata] gi 297317537 gb EFH47959.1  predicted protein [Arabidopsis lyrata subsp. lyrata]                                                                                                                                                                                              | 350 | 338 | 1.00E-135 | 96.6  | 74.9 | 86.0 | predicted protein                      | gbpln | Arabidopsis lyrata   | AT5G16030.1   Symbols:   unknown protein; BEST Arabidopsis thaliana protein match is: unknown protein (TAIR:AT3G02500.1); Has 30201 Blast hits to 17322 proteins in 780 species: Archae - 12; Bacteria - 1396; Metazoa - 17338; Fungi - 3422; Plants - 5037; Viruses - 0; Other Eukaryotes - 2996 (source: NCBI BLink).   chr5:5238242-5240578 FORWARD LENGTH=339 | 350 | 339 | 1.00E-136 | 96.9  | 76.0 | 86.0 |
| Rsa1.0_00040.1.g2394.t1 | gb EOA19527.1  hypothetical protein CARUB_v10002448mg [Capsella rubella]                                                                                                                                                                                                                                                                              | 413 | 396 | 0         | 95.9  | 89.6 | 92.0 | hypothetical protein CARUB_v10002448mg | gbpln | Capsella rubella     | AT5G16040.1   Symbols:   Regulator of chromosome condensation (RCC1) family protein   chr5:5240860-5243308 REVERSE LENGTH=396                                                                                                                                                                                                                                     | 413 | 396 | 0         | 95.9  | 89.6 | 91.8 |
| Rsa1.0_00040.1.g2395.t1 | refXP_002871701.1  hypothetical protein ARALYDRAFT.488456 [Arabidopsis lyrata subsp. lyrata] gi 297317538 gb EFH47960.1  hypothetical protein ARALYDRAFT.488456 [Arabidopsis lyrata subsp. lyrata]                                                                                                                                                    | 96  | 95  | 3.00E-44  | 99.0  | 90.6 | 93.8 | hypothetical protein ARALYDRAFT.488456 | gbpln | Arabidopsis lyrata   | AT5G16060.1   Symbols:   Cytochrome c oxidase biogenesis protein Cmc1-like   chr5:5246161-5247209 FORWARD LENGTH=95                                                                                                                                                                                                                                               | 96  | 95  | 2.00E-46  | 99.0  | 89.6 | 92.7 |
| Rsa1.0_00040.1.g2396.t1 | refXP_002884325.1  hypothetical protein ARALYDRAFT.477487 [Arabidopsis lyrata subsp. lyrata] gi 297330165 gb EFH60584.1  hypothetical protein ARALYDRAFT.477487 [Arabidopsis lyrata subsp. lyrata]                                                                                                                                                    | 536 | 535 | 0         | 99.8  | 97.2 | 99.1 | hypothetical protein ARALYDRAFT.477487 | gbpln | Arabidopsis lyrata   | AT5G16070.1   Symbols:   TCP-1/cpn60 chaperonin family protein   chr5:5247549-5251050 REVERSE LENGTH=535                                                                                                                                                                                                                                                          | 536 | 535 | 0         | 99.8  | 97.9 | 98.7 |

|                         |                                                                                                                                                                                                                                                                                                                                                                                                                                                             |     |     |           |       |      |       |                                                 |       |                      |                                                                                                                                                                                                                                                                                                                                                                                                                                                                                                                                 |     |     |           |       |      |       |
|-------------------------|-------------------------------------------------------------------------------------------------------------------------------------------------------------------------------------------------------------------------------------------------------------------------------------------------------------------------------------------------------------------------------------------------------------------------------------------------------------|-----|-----|-----------|-------|------|-------|-------------------------------------------------|-------|----------------------|---------------------------------------------------------------------------------------------------------------------------------------------------------------------------------------------------------------------------------------------------------------------------------------------------------------------------------------------------------------------------------------------------------------------------------------------------------------------------------------------------------------------------------|-----|-----|-----------|-------|------|-------|
| Rsa1.0_00040.1.g2397.t1 | ref XP_002873755.1  hypothetical protein ARALYDRAFT_488458 [Arabidopsis lyrata subsp. lyrata] gi 297319592 gb EFH50014.1                                                                                                                                                                                                                                                                                                                                    | 338 | 343 | 1.00E-170 | 101.5 | 87.6 | 93.2  | hypothetical protein ARALYDRAFT_488458          | gbpln | Arabidopsis lyrata   | AT5G16080.1   Symbols: AtCXE17, CXE17   carboxylesterase 17   chr5:5252533-5253567 REVERSE LENGTH=344                                                                                                                                                                                                                                                                                                                                                                                                                           | 338 | 344 | 1.00E-170 | 101.8 | 85.8 | 92.6  |
| Rsa1.0_00040.1.g2398.t1 | hypothetical protein ARALYDRAFT_488458 [Arabidopsis lyrata subsp. lyrata] gb ABY66298.1  RAD23-like protein [Brassica napus]                                                                                                                                                                                                                                                                                                                                | 70  | 357 | 3.00E-15  | 510.0 | 52.9 | 57.1  | RAD23-like protein                              | gbpln | Brassica napus       | #                                                                                                                                                                                                                                                                                                                                                                                                                                                                                                                               | #   | #   | #         | #     | #    |       |
| Rsa1.0_00040.1.g2399.t1 | gb ABY66298.1  RAD23-like protein [Brassica napus]                                                                                                                                                                                                                                                                                                                                                                                                          | 310 | 357 | 9.00E-98  | 115.2 | 66.1 | 76.5  | RAD23-like protein                              | gbpln | Brassica napus       | AT5G38470.2   Symbols: RAD23D   Rad23 UV excision repair protein family   chr5:15404720-15407251 FORWARD LENGTH=332                                                                                                                                                                                                                                                                                                                                                                                                             | 310 | 332 | 1.00E-38  | 107.1 | 36.1 | 51.0  |
| Rsa1.0_00040.1.g2400.t3 | gb ABY66298.1  RAD23-like protein [Brassica napus]                                                                                                                                                                                                                                                                                                                                                                                                          | 420 | 357 | 1.00E-114 | 85.0  | 58.8 | 69.8  | RAD23-like protein                              | gbpln | Brassica napus       | AT5G38470.1   Symbols: RAD23D   Rad23 UV excision repair protein family   chr5:15404720-15407500 FORWARD LENGTH=378                                                                                                                                                                                                                                                                                                                                                                                                             | 420 | 378 | 6.00E-37  | 90.0  | 32.9 | 46.9  |
| Rsa1.0_00040.1.g2401.t5 | gb ABY66299.1  DNA repair protein RAD23 [Brassica napus]                                                                                                                                                                                                                                                                                                                                                                                                    | 236 | 327 | 3.00E-53  | 138.6 | 64.4 | 75.0  | DNA repair protein RAD23                        | gbpln | Brassica napus       | AT5G38470.2   Symbols: RAD23D   Rad23 UV excision repair protein family   chr5:15404720-15407251 FORWARD LENGTH=332                                                                                                                                                                                                                                                                                                                                                                                                             | 236 | 332 | 8.00E-20  | 140.7 | 23.7 | 29.2  |
| Rsa1.0_00040.1.g2402.t1 | gb EOA12107.1  hypothetical protein CARUB_v10000012mg, partial [Capsella rubella]                                                                                                                                                                                                                                                                                                                                                                           | 189 | 238 | 3.00E-66  | 125.9 | 82.0 | 86.2  | hypothetical protein CARUB_v10000012mg, partial | gbpln | Capsella rubella     | AT5G16110.1   Symbols:   unknown protein; FUNCTIONS IN: molecular function unknown; INVOLVED IN: biological process unknown; LOCATED IN: chloroplast; EXPRESSED IN: 24 plant structures; EXPRESSED DURING: 15 growth stages; BEST Arabidopsis thaliana protein match is: unknown protein (TAIRAT3G02555.1); Has 133 Blast hits to 133 proteins in 18 species: Archae - 0; Bacteria - 0; Metazoa - 0; Fungi - 0; Plants - 133; Viruses - 0; Other Eukaryotes - 0 (source: NCBI BLink).   chr5:5261171-5262668 REVERSE LENGTH=244 | 189 | 244 | 9.00E-68  | 129.1 | 81.0 | 86.2  |
| Rsa1.0_00040.1.g2403.t3 | ref NP_197117.1  40S ribosomal protein S7-3 [Arabidopsis thaliana] gi 115311860 sp Q8LD03.2 RS73_ARAT_H RecName: Full=40S ribosomal protein S7-3 gi 9755823 emb CA01854.1  40S ribosomal protein S7-like [Arabidopsis thaliana] gi 90568000 gb ABD94070.1  At5g16130 [Arabidopsis thaliana] gi 110742740 dbj BAE99279.1  40S ribosomal protein S7-like [Arabidopsis thaliana] gi 332004867 gb AED92250.1  40S ribosomal protein S7-3 [Arabidopsis thaliana] | 190 | 190 | 1.00E-100 | 100.0 | 93.7 | 96.8  | 40S ribosomal protein S7-3                      | gbpln | Arabidopsis thaliana | AT5G16130.1   Symbols:   Ribosomal protein S7e family protein   chr5:5268984-5269912 FORWARD LENGTH=190                                                                                                                                                                                                                                                                                                                                                                                                                         | 190 | 190 | 1.00E-103 | 100.0 | 93.7 | 96.8  |
| Rsa1.0_00040.1.g2404.t1 | gb EOA21457.1  hypothetical protein CARUB_v10001847mg [Capsella rubella]                                                                                                                                                                                                                                                                                                                                                                                    | 241 | 239 | 1.00E-125 | 99.2  | 90.0 | 95.0  | hypothetical protein CARUB_v10001847mg          | gbpln | Capsella rubella     | AT5G16140.2   Symbols:   Peptidyl-tRNA hydrolase family protein   chr5:5270308-5271517 REVERSE LENGTH=240                                                                                                                                                                                                                                                                                                                                                                                                                       | 241 | 240 | 1.00E-123 | 99.6  | 88.8 | 92.9  |
| Rsa1.0_00040.1.g2405.t1 | ref XP_002871705.1  GLT1 [Arabidopsis lyrata subsp. lyrata] gi 297317542 gb EFH47964.1  GLT1 [Arabidopsis lyrata subsp. lyrata]                                                                                                                                                                                                                                                                                                                             | 530 | 545 | 0         | 102.8 | 93.0 | 95.3  | GLT1                                            | gbpln | Arabidopsis lyrata   | AT5G16150.3   Symbols: GLT1, PGLCT   plastidic GLC translocator   chr5:5272904-5275678 FORWARD LENGTH=546                                                                                                                                                                                                                                                                                                                                                                                                                       | 530 | 546 | 0         | 103.0 | 92.8 | 95.7  |
| Rsa1.0_00040.1.g2406.t1 | gb EOA20743.1  hypothetical protein CARUB_v10001069mg [Capsella rubella]                                                                                                                                                                                                                                                                                                                                                                                    | 312 | 414 | 1.00E-155 | 132.7 | 86.5 | 92.9  | hypothetical protein CARUB_v10001069mg          | gbpln | Capsella rubella     | AT5G16170.1   Symbols:   Core-2/I-branching beta-1,6-N-acetylglucosaminyltransferase family protein   chr5:5277926-5279751 FORWARD LENGTH=411                                                                                                                                                                                                                                                                                                                                                                                   | 312 | 411 | 1.00E-154 | 131.7 | 83.7 | 91.3  |
| Rsa1.0_00040.1.g2407.t4 | gb EOA20451.1  hypothetical protein CARUB_v10000762mg [Capsella rubella]                                                                                                                                                                                                                                                                                                                                                                                    | 505 | 507 | 0         | 100.4 | 88.1 | 94.5  | hypothetical protein CARUB_v10000762mg          | gbpln | Capsella rubella     | AT4G13410.1   Symbols: ATCSLA15, CSLA15   Nucleotide-diphospho-sugar transferases superfamily protein   chr4:7792219-7795824 REVERSE LENGTH=537                                                                                                                                                                                                                                                                                                                                                                                 | 505 | 537 | 0         | 106.3 | 82.6 | 90.5  |
| Rsa1.0_00041.1.g2408.t1 | gb EOA31480.1  hypothetical protein CARUB_v10014673mg [Capsella rubella]                                                                                                                                                                                                                                                                                                                                                                                    | 203 | 200 | 4.00E-78  | 98.5  | 79.8 | 84.2  | hypothetical protein CARUB_v10014673mg          | gbpln | Capsella rubella     | AT3G04510.1   Symbols: LSH2   Protein of unknown function (DUF640)   chr3:1215812-1216417 REVERSE LENGTH=201                                                                                                                                                                                                                                                                                                                                                                                                                    | 203 | 201 | 9.00E-76  | 99.0  | 79.3 | 83.7  |
| Rsa1.0_00041.1.g2409.t1 | gb EOA31608.1  hypothetical protein CARUB_v10014805mg, partial [Capsella rubella]                                                                                                                                                                                                                                                                                                                                                                           | 103 | 161 | 1.00E-33  | 156.3 | 74.8 | 77.7  | hypothetical protein CARUB_v10014805mg, partial | gbpln | Capsella rubella     | AT3G04400.1   Symbols: emb2171   Ribosomal protein L14p/L23e family protein   chr3:1167339-1168308 FORWARD LENGTH=140                                                                                                                                                                                                                                                                                                                                                                                                           | 103 | 140 | 4.00E-36  | 135.9 | 74.8 | 77.7  |
| Rsa1.0_00041.1.g2410.t1 | gb EOA31608.1  hypothetical protein CARUB_v10014805mg, partial [Capsella rubella]                                                                                                                                                                                                                                                                                                                                                                           | 140 | 161 | 1.00E-74  | 115.0 | 99.3 | 100.0 | hypothetical protein CARUB_v10014805mg, partial | gbpln | Capsella rubella     | AT3G04400.1   Symbols: emb2171   Ribosomal protein L14p/L23e family protein   chr3:1167339-1168308 FORWARD LENGTH=140                                                                                                                                                                                                                                                                                                                                                                                                           | 140 | 140 | 1.00E-76  | 100.0 | 99.3 | 100.0 |
| Rsa1.0_00041.1.g2411.t1 | gb EOA31980.1  hypothetical protein CARUB_v10015223mg [Capsella rubella]                                                                                                                                                                                                                                                                                                                                                                                    | 564 | 567 | 0         | 100.5 | 84.8 | 91.8  | hypothetical protein CARUB_v10015223mg          | gbpln | Capsella rubella     | AT3G04350.1   Symbols:   Plant protein of unknown function (DUF946)   chr3:1153972-1156469 REVERSE LENGTH=567                                                                                                                                                                                                                                                                                                                                                                                                                   | 564 | 567 | 0         | 100.5 | 86.5 | 93.8  |



|                         |                                                                                                                                                                                                                                                                                                                                                                                                                                                                                                                                                                                                                                                                                                                                                                                                                                                                                                         |     |     |           |       |      |      |                                                                              |       |                      |                                                                                                                                             |     |     |           |       |      |      |
|-------------------------|---------------------------------------------------------------------------------------------------------------------------------------------------------------------------------------------------------------------------------------------------------------------------------------------------------------------------------------------------------------------------------------------------------------------------------------------------------------------------------------------------------------------------------------------------------------------------------------------------------------------------------------------------------------------------------------------------------------------------------------------------------------------------------------------------------------------------------------------------------------------------------------------------------|-----|-----|-----------|-------|------|------|------------------------------------------------------------------------------|-------|----------------------|---------------------------------------------------------------------------------------------------------------------------------------------|-----|-----|-----------|-------|------|------|
| Rsa1.0_00041.1.g2412.t1 | gb EOA30270.1  hypothetical protein CARUB_v10013391mg [Capsella rubella]                                                                                                                                                                                                                                                                                                                                                                                                                                                                                                                                                                                                                                                                                                                                                                                                                                | 552 | 548 | 0         | 99.3  | 88.9 | 94.0 | hypothetical protein CARUB_v10013391mg                                       | gbpln | Capsella rubella     | AT5G18480.1   Symbols: PGSIP6   plant glycogenin-like starch initiation protein 6   chr5:6131307-6133787 REVERSE LENGTH=537                 | 552 | 537 | 0         | 97.3  | 80.6 | 88.2 |
| Rsa1.0_00041.1.g2413.t1 | ref NP_187076.2  plastid transcriptionally active 3 [Arabidopsis thaliana] gi 332640537 gb AEE74058.1  plastid transcriptionally active 3 [Arabidopsis thaliana]                                                                                                                                                                                                                                                                                                                                                                                                                                                                                                                                                                                                                                                                                                                                        | 908 | 910 | 0         | 100.2 | 91.3 | 95.0 | plastid transcriptionally active 3                                           | gbpln | Arabidopsis thaliana | AT3G04260.1   Symbols: PTAC3   plastid transcriptionally active 3   chr3:1123231-1127515 REVERSE LENGTH=910                                 | 908 | 910 | 0         | 100.2 | 91.3 | 95.0 |
| Rsa1.0_00041.1.g2414.t1 | gb AAN08437.1  hypothetical protein [Arabidopsis thaliana]                                                                                                                                                                                                                                                                                                                                                                                                                                                                                                                                                                                                                                                                                                                                                                                                                                              | 620 | 538 | 1.00E-133 | 86.8  | 43.2 | 53.4 | hypothetical protein                                                         | gbpln | Arabidopsis thaliana | AT2G43220.1   Symbols:   Cysteine/Histidine-rich C1 domain family protein   chr2:17964340-17965956 FORWARD LENGTH=538                       | 620 | 538 | 1.00E-135 | 86.8  | 42.6 | 52.6 |
| Rsa1.0_00041.1.g2415.t1 | ref NP_187074.1  putative UDP-N-acetylglucosamine-peptide N-acetylglucosaminyltransferase SEC [Arabidopsis thaliana] gi 75336082 sp Q9M8Y0.1 SEC_ARATH RecName: Full=Probable UDP-N-acetylglucosamine-peptide N-acetylglucosaminyltransferase SEC; AltName: Full=Protein SECRET AGENT gi 6721161 gb AAF26789.1 AC016829.13 putative O-linked GlcNAc transferase [Arabidopsis thaliana] gi 18139887 gb AAL60196.1 AF441079.1 O-linked N-acetyl glucosamine transferase [Arabidopsis thaliana] gi 20259324 gb AAM13988.1  putative O-linked GlcNAc transferase [Arabidopsis thaliana] gi 21436429 gb AAM51415.1  putative O-linked GlcNAc transferase [Arabidopsis thaliana] gi 110742062 dbj BAE98963.1  O-linked GlcNAc transferase like protein [Arabidopsis thaliana] gi 332640535 gb AEE74056.1  putative UDP-N-acetylglucosamine-peptide N-acetylglucosaminyltransferase SEC [Arabidopsis thaliana] | 980 | 977 | 0         | 99.7  | 93.5 | 96.0 | putative UDP-N-acetylglucosamine-peptide N-acetylglucosaminyltransferase SEC | gbpln | Arabidopsis thaliana | AT3G04240.1   Symbols: SEC   Tetratricopeptide repeat (TPR)-like superfamily protein   chr3:1114187-1120722 REVERSE LENGTH=977              | 980 | 977 | 0         | 99.7  | 93.5 | 96.0 |
| Rsa1.0_00041.1.g2416.t1 | gb EOA17608.1  hypothetical protein CARUB_v10005968mg [Capsella rubella] gi 482557559 gb EOA21751.1  hypothetical protein CARUB_v10002207mg [Capsella rubella]                                                                                                                                                                                                                                                                                                                                                                                                                                                                                                                                                                                                                                                                                                                                          | 146 | 146 | 5.00E-74  | 100.0 | 93.2 | 95.2 | hypothetical protein CARUB_v10005968mg                                       | gbpln | Capsella rubella     | AT5G18380.1   Symbols:   Ribosomal protein S5 domain 2-like superfamily protein   chr5:6090253-6090693 REVERSE LENGTH=146                   | 146 | 146 | 6.00E-76  | 100.0 | 92.5 | 95.2 |
| Rsa1.0_00041.1.g2417.t1 | #                                                                                                                                                                                                                                                                                                                                                                                                                                                                                                                                                                                                                                                                                                                                                                                                                                                                                                       | #   | #   | #         | #     | #    | #    | -                                                                            | ----  | ----                 | #                                                                                                                                           | #   | #   | #         | #     | #    |      |
| Rsa1.0_00041.1.g2418.t1 | dbj BAJ33926.1  unnamed protein product [Thellungiella halophila]                                                                                                                                                                                                                                                                                                                                                                                                                                                                                                                                                                                                                                                                                                                                                                                                                                       | 338 | 338 | 0         | 100.0 | 96.7 | 98.5 | unnamed protein product                                                      | ----  | ----                 | AT3G04120.1   Symbols: GAPC, GAPC-1, GAPC1   glyceraldehyde-3-phosphate dehydrogenase C subunit 1   chr3:1081077-1083131 FORWARD LENGTH=338 | 338 | 338 | 0         | 100.0 | 95.6 | 98.2 |
| Rsa1.0_00041.1.g2419.t2 | ref NP_187061.1  glutamate receptor 1.1 [Arabidopsis thaliana] gi 41017234 sp Q9M8W7.1 GLR1.1_ARATH RecName: Full=Glutamate receptor 1.1; Short=AtGLR1; AltName: Full=Ligand-gated ion channel 1.1; Flags: Precursor gi 6721174 gb AAF26802.1 AC016829.26 putative glutamate receptor (GLR1) [Arabidopsis thaliana] gi 26450250 dbj BAC42242.1  putative glutamate receptor GLR1 [Arabidopsis thaliana] gi 332640517 gb AEE74038.1  glutamate receptor 1.1 [Arabidopsis thaliana]                                                                                                                                                                                                                                                                                                                                                                                                                       | 796 | 808 | 0         | 101.5 | 70.1 | 80.9 | glutamate receptor 1.1                                                       | gbpln | Arabidopsis thaliana | AT3G04110.1   Symbols: GLR1, ATGLR1.1, GLR1.1   glutamate receptor 1.1   chr3:1077361-1080236 FORWARD LENGTH=808                            | 796 | 808 | 0         | 101.5 | 70.1 | 80.9 |
| Rsa1.0_00041.1.g2420.t1 | ref XP_002882329.1  MADS-box family protein [Arabidopsis lyrata subsp. lyrata] gi 297328169 gb EFH58588.1  MADS-box family protein [Arabidopsis lyrata subsp. lyrata]                                                                                                                                                                                                                                                                                                                                                                                                                                                                                                                                                                                                                                                                                                                                   | 187 | 205 | 2.00E-45  | 109.6 | 56.7 | 70.6 | MADS-box family protein                                                      | gbpln | Arabidopsis lyrata   | AT3G04100.1   Symbols: AGL57   AGAMOUS-like 57   chr3:1075299-1075922 FORWARD LENGTH=207                                                    | 187 | 207 | 1.00E-43  | 110.7 | 51.9 | 67.9 |
| Rsa1.0_00041.1.g2421.t1 | ref NP_197329.4  nucleoside-triphosphatase [Arabidopsis thaliana] gi 332005149 gb AED92532.1  nucleoside-triphosphatase [Arabidopsis thaliana]                                                                                                                                                                                                                                                                                                                                                                                                                                                                                                                                                                                                                                                                                                                                                          | 749 | 578 | 0         | 77.2  | 56.2 | 61.8 | nucleoside-triphosphatase                                                    | gbpln | Arabidopsis thaliana | AT5G18280.1   Symbols: ATAPY2, APY2   apyrase 2   chr5:6050799-6054875 REVERSE LENGTH=578                                                   | 749 | 578 | 0         | 77.2  | 56.2 | 61.8 |

|                         |                                                                                                                                                                                                                                                                                                          |      |      |           |       |       |      |                                  |                                              |                      |                                                                                                                     |                                                                                                                      |      |           |       |       |      |      |
|-------------------------|----------------------------------------------------------------------------------------------------------------------------------------------------------------------------------------------------------------------------------------------------------------------------------------------------------|------|------|-----------|-------|-------|------|----------------------------------|----------------------------------------------|----------------------|---------------------------------------------------------------------------------------------------------------------|----------------------------------------------------------------------------------------------------------------------|------|-----------|-------|-------|------|------|
| Rsa1.0_00041.1.g2422.t1 | refNP_187057.2  NAC domain containing protein 47 [Arabidopsis thaliana] gi 29029082 gb AAO64920.1  AT3g04070 [Arabidopsis thaliana] gi 110743057 dbj BAE99421.1  NAM-like protein [Arabidopsis thaliana] gi 332640512 gb AEE74033.1  NAC domain containing protein 47 [Arabidopsis thaliana]             | 356  | 359  | 1.00E-166 | 100.8 | 82.6  | 89.0 | NAC domain containing protein 47 | gbpln                                        | Arabidopsis thaliana | AT3G04070.1   Symbols: anac047, NAC047   NAC domain containing protein 47   chr3:1061573-1062976 REVERSE LENGTH=359 | 356                                                                                                                  | 359  | 1.00E-168 | 100.8 | 82.6  | 89.0 |      |
| Rsa1.0_00041.1.g2423.t1 | refXP_002884425.1  ANAC046 [Arabidopsis lyrata subsp. lyrata] gi 297330265 gb EFH60684.1  ANAC046 [Arabidopsis lyrata subsp. lyrata]                                                                                                                                                                     | 342  | 342  | 1.00E-164 | 100.0 | 82.5  | 88.6 | ANAC046                          | gbpln                                        | Arabidopsis lyrata   | AT3G04060.1   Symbols: anac046, NAC046   NAC domain containing protein 46   chr3:1053625-1054952 REVERSE LENGTH=338 | 342                                                                                                                  | 338  | 1.00E-164 | 98.8  | 82.5  | 87.1 |      |
| Rsa1.0_00041.1.g2424.t1 | #                                                                                                                                                                                                                                                                                                        | #    | #    | #         | #     | #     | #    | -                                | ----                                         | ----                 | #                                                                                                                   | #                                                                                                                    | #    | #         | #     | #     | #    |      |
| Rsa1.0_00041.1.g2425.t1 | refXP_002882328.1  hypothetical protein ARALYDRAFT_340564 [Arabidopsis lyrata subsp. lyrata] gi 297328168 gb EFH58587.1  hypothetical protein ARALYDRAFT_340564 [Arabidopsis lyrata subsp. lyrata]                                                                                                       | 487  | 510  |           | 0     | 104.7 | 80.3 | 88.7                             | hypothetical protein ARALYDRAFT_340564       | gbpln                | Arabidopsis lyrata                                                                                                  | AT3G04050.1   Symbols:   Pyruvate kinase family protein   chr3:1049795-1051522 FORWARD LENGTH=510                    | 487  | 510       | 0     | 104.7 | 79.9 | 88.5 |
| Rsa1.0_00041.1.g2426.t1 | refXP_002863119.1  predicted protein [Arabidopsis lyrata subsp. lyrata] gi 297308943 gb EFH39378.1  predicted protein [Arabidopsis lyrata subsp. lyrata]                                                                                                                                                 | 1394 | 1121 |           | 0     | 80.4  | 43.7 | 51.9                             | predicted protein                            | gbpln                | Arabidopsis lyrata                                                                                                  | AT5G11250.1   Symbols:   Disease resistance protein (TIR-NBS-LRR class)   chr5:3587978-3591960 REVERSE LENGTH=1189   | 1394 | 1189      | 0     | 85.3  | 42.0 | 51.6 |
| Rsa1.0_00041.1.g2427.t1 | refXP_002863119.1  predicted protein [Arabidopsis lyrata subsp. lyrata] gi 297308943 gb EFH39378.1  predicted protein [Arabidopsis lyrata subsp. lyrata]                                                                                                                                                 | 1100 | 1121 |           | 0     | 101.9 | 56.9 | 70.1                             | predicted protein                            | gbpln                | Arabidopsis lyrata                                                                                                  | AT5G11250.1   Symbols:   Disease resistance protein (TIR-NBS-LRR class)   chr5:3587978-3591960 REVERSE LENGTH=1189   | 1100 | 1189      | 0     | 108.1 | 56.4 | 69.7 |
| Rsa1.0_00041.1.g2428.t1 | refNP_187048.1  3-oxoacyl-[acyl-carrier protein] reductase [Arabidopsis thaliana] gi 6223643 gb AAF05857.1 AC011698.8 putative short-chain type dehydrogenase/reductase [Arabidopsis thaliana] gi 332640501 gb AEE74022.1  NAD(P)-binding Rossmann-fold domain-containing protein [Arabidopsis thaliana] | 263  | 270  | 1.00E-126 | 102.7 | 86.3  | 93.5 | 3-oxoacyl-                       | gbpln                                        | Arabidopsis thaliana | AT3G03980.1   Symbols:   NAD(P)-binding Rossmann-fold superfamily protein   chr3:1031786-1033081 FORWARD LENGTH=270 | 263                                                                                                                  | 270  | 1.00E-129 | 102.7 | 86.3  | 93.5 |      |
| Rsa1.0_00041.1.g2429.t1 | gb ACP30572.1  disease resistance protein [Brassica rapa subsp. pekinensis]                                                                                                                                                                                                                              | 1266 | 1184 |           | 0     | 93.5  | 44.6 | 56.8                             | disease resistance protein                   | gbpln                | Brassica rapa                                                                                                       | AT5G11250.1   Symbols:   Disease resistance protein (TIR-NBS-LRR class)   chr5:3587978-3591960 REVERSE LENGTH=1189   | 1266 | 1189      | 0     | 93.9  | 46.1 | 57.7 |
| Rsa1.0_00041.1.g2430.t1 | refNP_196686.1  TIR-NBS-LRR class disease resistance protein [Arabidopsis thaliana] gi 8953387 emb CAB96660.1  RPP1 disease resistance protein-like [Arabidopsis thaliana] gi 332004269 gb AED91652.1  TIR-NBS-LRR class disease resistance protein [Arabidopsis thaliana]                               | 1644 | 1189 |           | 0     | 72.3  | 41.0 | 50.5                             | TIR-NBS-LRR class disease resistance protein | gbpln                | Arabidopsis thaliana                                                                                                | AT5G11250.1   Symbols:   Disease resistance protein (TIR-NBS-LRR class)   chr5:3587978-3591960 REVERSE LENGTH=1189   | 1644 | 1189      | 0     | 72.3  | 41.0 | 50.5 |
| Rsa1.0_00041.1.g2431.t1 | gb EOA32860.1  hypothetical protein CARUB_v10016174mg [Capsella rubella]                                                                                                                                                                                                                                 | 567  | 549  |           | 0     | 96.8  | 93.3 | 94.9                             | hypothetical protein CARUB_v10016174mg       | gbpln                | Capsella rubella                                                                                                    | AT3G03960.1   Symbols:   TCP-1/cpn60 chaperonin family protein   chr3:1024432-1027604 FORWARD LENGTH=549             | 567  | 549       | 0     | 96.8  | 92.9 | 94.9 |
| Rsa1.0_00041.1.g2432.t1 | refXP_002882321.1  hypothetical protein ARALYDRAFT_477648 [Arabidopsis lyrata subsp. lyrata] gi 297328161 gb EFH58580.1  hypothetical protein ARALYDRAFT_477648 [Arabidopsis lyrata subsp. lyrata]                                                                                                       | 415  | 428  |           | 0     | 103.1 | 84.8 | 90.8                             | hypothetical protein ARALYDRAFT_477648       | gbpln                | Arabidopsis lyrata                                                                                                  | AT3G03950.3   Symbols: ECT1   evolutionarily conserved C-terminal region 1   chr3:1021502-1023767 FORWARD LENGTH=428 | 415  | 428       | 0     | 103.1 | 83.1 | 89.4 |
| Rsa1.0_00041.1.g2433.t1 | refNP_196686.1  TIR-NBS-LRR class disease resistance protein [Arabidopsis thaliana] gi 8953387 emb CAB96660.1  RPP1 disease resistance protein-like [Arabidopsis thaliana] gi 332004269 gb AED91652.1  TIR-NBS-LRR class disease resistance protein [Arabidopsis thaliana]                               | 1078 | 1189 |           | 0     | 110.3 | 57.4 | 71.5                             | TIR-NBS-LRR class disease resistance protein | gbpln                | Arabidopsis thaliana                                                                                                | AT5G11250.1   Symbols:   Disease resistance protein (TIR-NBS-LRR class)   chr5:3587978-3591960 REVERSE LENGTH=1189   | 1078 | 1189      | 0     | 110.3 | 57.4 | 71.5 |
| Rsa1.0_00041.1.g2434.t1 | refNP_187044.1  protein kinase-like protein [Arabidopsis thaliana] gi 6223639 gb AAF05853.1 AC011698.4 putative casein kinase [Arabidopsis thaliana] gi 332640493 gb AEE74014.1  protein kinase-like protein [Arabidopsis thaliana]                                                                      | 704  | 701  |           | 0     | 99.6  | 92.6 | 96.3                             | protein kinase-like protein                  | gbpln                | Arabidopsis thaliana                                                                                                | AT3G03940.1   Symbols:   Protein kinase family protein   chr3:1014412-1018244 REVERSE LENGTH=701                     | 704  | 701       | 0     | 99.6  | 92.6 | 96.3 |

|                         |                                                                                                                                                                                                                                                                                                                                                                                                                                                                                                                                             |     |     |           |       |      |      |                                           |       |                      |                                                                                                                                                                                                                                                                                                                                          |     |     |           |       |      |      |
|-------------------------|---------------------------------------------------------------------------------------------------------------------------------------------------------------------------------------------------------------------------------------------------------------------------------------------------------------------------------------------------------------------------------------------------------------------------------------------------------------------------------------------------------------------------------------------|-----|-----|-----------|-------|------|------|-------------------------------------------|-------|----------------------|------------------------------------------------------------------------------------------------------------------------------------------------------------------------------------------------------------------------------------------------------------------------------------------------------------------------------------------|-----|-----|-----------|-------|------|------|
| Rsa1.0_00041.1.g2435.t1 | refNP_566217.1   H/ACA ribonucleoprotein complex subunit 1 [Arabidopsis thaliana] gi 68565918 sp Q8VZT0.1 NLAL1_ARAT H RecName: Full=Putative H/ACA ribonucleoprotein complex subunit 1-like protein 1 gi 17380836 gb AAL36230.1  putative GAR1 protein [Arabidopsis thaliana] gi 20259633 gb AAM14173.1  putative GAR1 protein [Arabidopsis thaliana] gi 33264049 gb AEE74012.1  H/ACA ribonucleoprotein complex, subunit Gar1/Naf1 protein [Arabidopsis thaliana]                                                                         | 208 | 202 | 4.00E-51  | 97.1  | 58.2 | 59.6 | H/ACA ribonucleoprotein complex subunit 1 | gbpln | Arabidopsis thaliana | AT3G03920.1   Symbols:   H/ACA ribonucleoprotein complex, subunit Gar1/Naf1 protein   chr3:1009123-1010379 REVERSE LENGTH=202                                                                                                                                                                                                            | 208 | 202 | 1.00E-53  | 97.1  | 58.2 | 59.6 |
| Rsa1.0_00041.1.g2436.t1 | #                                                                                                                                                                                                                                                                                                                                                                                                                                                                                                                                           | #   | #   | #         | #     | #    | #    | -                                         | ----  | ----                 | AT3G03910.1   Symbols: GDH3   glutamate dehydrogenase 3   chr3:1006913-1008846 FORWARD LENGTH=411                                                                                                                                                                                                                                        | 37  | 411 | 5.00E-13  | 110.8 | 81.1 | 83.8 |
| Rsa1.0_00041.1.g2437.t1 | gb EOA32962.1  hypothetical protein CARUB_v10016292mg [Capsella rubella]                                                                                                                                                                                                                                                                                                                                                                                                                                                                    | 411 | 411 | 0         | 100.0 | 94.6 | 98.3 | hypothetical protein CARUB_v10016292mg    | gbpln | Capsella rubella     | AT3G03910.1   Symbols: GDH3   glutamate dehydrogenase 3   chr3:1006913-1008846 FORWARD LENGTH=411                                                                                                                                                                                                                                        | 411 | 411 | 0         | 100.0 | 93.9 | 98.1 |
| Rsa1.0_00041.1.g2438.t1 | #                                                                                                                                                                                                                                                                                                                                                                                                                                                                                                                                           | #   | #   | #         | #     | #    | #    | -                                         | ----  | ----                 | #                                                                                                                                                                                                                                                                                                                                        | #   | #   | #         | #     | #    | #    |
| Rsa1.0_00041.1.g2439.t1 | gb EOA31260.1  hypothetical protein CARUB_v10014432mg [Capsella rubella]                                                                                                                                                                                                                                                                                                                                                                                                                                                                    | 286 | 260 | 5.00E-92  | 90.9  | 64.3 | 72.7 | hypothetical protein CARUB_v10014432mg    | gbpln | Capsella rubella     | AT3G03870.2   Symbols:   unknown protein; BEST Arabidopsis thaliana protein match is: unknown protein (TAIR:AT5G18130.1); Has 47 Blast hits to 47 proteins in 13 species: Archae - 0; Bacteria - 0; Metazoa - 2; Fungi - 0; Plants - 45; Viruses - 0; Other Eukaryotes - 0 (source: NCBI BLINK).   chr3:995520-997180 FORWARD LENGTH=266 | 286 | 266 | 2.00E-91  | 93.0  | 65.7 | 72.7 |
| Rsa1.0_00041.1.g2440.t1 | ref XP_002882315.1  hypothetical protein ARALYDRAFT_477638 [Arabidopsis lyrata subsp. lyrata] gi 297328155 gb EFH58574.1  hypothetical protein ARALYDRAFT_477638 [Arabidopsis lyrata subsp. lyrata]                                                                                                                                                                                                                                                                                                                                         | 302 | 300 | 1.00E-137 | 99.3  | 80.5 | 89.4 | hypothetical protein ARALYDRAFT_477638    | gbpln | Arabidopsis lyrata   | AT3G03860.1   Symbols: ATAPRL5, APRL5   APR-like 5   chr3:992465-994315 FORWARD LENGTH=300                                                                                                                                                                                                                                               | 302 | 300 | 1.00E-140 | 99.3  | 80.5 | 89.4 |
| Rsa1.0_00041.1.g2441.t1 | ref XP_002884412.1  hypothetical protein ARALYDRAFT_477634 [Arabidopsis lyrata subsp. lyrata] gi 297330252 gb EFH60671.1  hypothetical protein ARALYDRAFT_477634 [Arabidopsis lyrata subsp. lyrata]                                                                                                                                                                                                                                                                                                                                         | 656 | 656 | 0         | 100.0 | 91.8 | 95.9 | hypothetical protein ARALYDRAFT_477634    | gbpln | Arabidopsis lyrata   | AT3G03810.1   Symbols: EDA30   O-fucosyltransferase family protein   chr3:972190-975901 REVERSE LENGTH=656                                                                                                                                                                                                                               | 656 | 656 | 0         | 100.0 | 91.2 | 95.4 |
| Rsa1.0_00041.1.g2442.t1 | ref NP_187030.1  syntaxin 1B/2/3 [Arabidopsis thaliana] gi 26390139 sp Q9SRV7.1 SY131_ARAT H RecName: Full=Putative syntaxin-131; Short=ATSYP131 gi 6006972 gb AAAF00648.1 AC009540_25 s-syntaxin-like protein [Arabidopsis thaliana] gi 33264047 gb AEE73995.1  putative syntaxin-131 [Arabidopsis thaliana]                                                                                                                                                                                                                               | 278 | 306 | 1.00E-135 | 110.1 | 91.7 | 95.7 | syntaxin 1B/2/3                           | gbpln | Arabidopsis thaliana | AT3G03800.1   Symbols: SYP131, ATSYP131   syntaxin of plants 131   chr3:969314-971460 FORWARD LENGTH=306                                                                                                                                                                                                                                 | 278 | 306 | 1.00E-137 | 110.1 | 91.7 | 95.7 |
| Rsa1.0_00041.1.g2443.t1 | gb ACP30600.1  disease resistance protein [Brassica rapa subsp. pekinensis]                                                                                                                                                                                                                                                                                                                                                                                                                                                                 | 645 | 909 | 1.00E-167 | 140.9 | 49.9 | 66.7 | disease resistance protein                | gbpln | Brassica rapa        | AT5G18360.1   Symbols:   Disease resistance protein (TIR-NBS-LRR class) family   chr5:6080049-6083027 REVERSE LENGTH=900                                                                                                                                                                                                                 | 645 | 900 | 1.00E-169 | 139.5 | 50.1 | 66.8 |
| Rsa1.0_00041.1.g2444.t1 | ref NP_683525.2  HSP20-like chaperon-like protein [Arabidopsis thaliana] gi 73921112 sp O61D70.1 Y3377_ARATH RecName: Full=Uncharacterized protein At3g03773. gi 48310264 gb AAT41786.1  At3g03773 [Arabidopsis thaliana] gi 49823520 gb AAT68743.1  hypothetical protein At3g03773 [Arabidopsis thaliana] gi 50198936 gb AAT70471.1  At3g03773 [Arabidopsis thaliana] gi 61742697 gb AAX55169.1  hypothetical protein At3g03773 [Arabidopsis thaliana] gi 332640465 gb AEE73986.1  HSP20-like chaperon-like protein [Arabidopsis thaliana] | 150 | 150 | 8.00E-75  | 100.0 | 90.7 | 96.0 | HSP20-like chaperon-like protein          | gbpln | Arabidopsis thaliana | AT3G03773.1   Symbols:   HSP20-like chaperones superfamily protein   chr3:951885-953490 FORWARD LENGTH=150                                                                                                                                                                                                                               | 150 | 150 | 3.00E-77  | 100.0 | 90.7 | 96.0 |
| Rsa1.0_00041.1.g2445.t1 | ref XP_002877469.1  predicted protein [Arabidopsis lyrata subsp. lyrata] gi 297323307 gb EFH53728.1  predicted protein [Arabidopsis lyrata subsp. lyrata]                                                                                                                                                                                                                                                                                                                                                                                   | 336 | 328 | 1.00E-43  | 97.6  | 27.1 | 37.2 | predicted protein                         | gbpln | Arabidopsis lyrata   | AT1G60720.1   Symbols:   RNA-directed DNA polymerase (reverse transcriptase)-related family protein   chr1:22357072-22357941 FORWARD LENGTH=289                                                                                                                                                                                          | 336 | 289 | 1.00E-31  | 86.0  | 22.3 | 28.6 |

|                         |                                                                                                                                                                                                                                                                                                                                                                                                                                                                       |     |     |           |       |      |      |                                                     |       |                      |                                                                                                                                          |     |     |           |       |      |      |
|-------------------------|-----------------------------------------------------------------------------------------------------------------------------------------------------------------------------------------------------------------------------------------------------------------------------------------------------------------------------------------------------------------------------------------------------------------------------------------------------------------------|-----|-----|-----------|-------|------|------|-----------------------------------------------------|-------|----------------------|------------------------------------------------------------------------------------------------------------------------------------------|-----|-----|-----------|-------|------|------|
| Rsa1.0_00041.1.g2446.t1 | ref[XP_002882305.1] LOB domain protein 20 [Arabidopsis lyrata subsp. lyrata] gi 297328145 gb EFH58564.1  LOB domain protein 20 [Arabidopsis lyrata subsp. lyrata]                                                                                                                                                                                                                                                                                                     | 273 | 281 | 1.00E-117 | 102.9 | 83.9 | 87.5 | LOB domain protein 20                               | gbpln | Arabidopsis lyrata   | AT3G03760.1   Symbols: LBD20   LOB domain-containing protein 20   chr3:943632-944673 FORWARD LENGTH=273                                  | 273 | 273 | 1.00E-116 | 100.0 | 86.4 | 89.4 |
| Rsa1.0_00042.1.g2447.t1 | gb AAD10829.1  putative inositol polyphosphate 5-phosphatase At5P2 [Arabidopsis thaliana]                                                                                                                                                                                                                                                                                                                                                                             | 646 | 646 | 0         | 100.0 | 86.8 | 90.7 | putative inositol polyphosphate 5-phosphatase At5P2 | gbpln | Arabidopsis thaliana | AT4G18010.1   Symbols: IP5PII, AT5PTASE2, 5PTASE2   myo-inositol polyphosphate 5-phosphatase 2   chr4:9991194-9994099 REVERSE LENGTH=646 | 646 | 646 | 0         | 100.0 | 86.8 | 90.7 |
| Rsa1.0_00042.1.g2448.t1 | gb EMJ12169.1  hypothetical protein PRUPE_ppa022548mg [Prunus persica]                                                                                                                                                                                                                                                                                                                                                                                                | 792 | 495 | 1.00E-167 | 62.5  | 38.4 | 45.1 | hypothetical protein PRUPE_ppa022548mg              | gbpln | Prunus persica       | AT5G46570.1   Symbols: BSK2   BR-signaling kinase 2   chr5:1894687-18897198 FORWARD LENGTH=489                                           | 792 | 489 | 1.00E-169 | 61.7  | 38.6 | 46.1 |
| Rsa1.0_00042.1.g2449.t1 | ref[XP_002868027.1] predicted protein [Arabidopsis lyrata subsp. lyrata] gi 297313863 gb EFH44286.1  predicted protein [Arabidopsis lyrata subsp. lyrata]                                                                                                                                                                                                                                                                                                             | 286 | 261 | 1.00E-126 | 91.3  | 78.0 | 81.1 | predicted protein                                   | gbpln | Arabidopsis lyrata   | AT4G17980.1   Symbols: anac071, NAC071   NAC domain containing protein 71   chr4:9978850-9980038 REVERSE LENGTH=262                      | 286 | 262 | 1.00E-120 | 91.6  | 75.2 | 79.0 |
| Rsa1.0_00042.1.g2450.t1 | #                                                                                                                                                                                                                                                                                                                                                                                                                                                                     | #   | #   | #         | #     | #    | #    | -                                                   | ----  | ----                 | #                                                                                                                                        | #   | #   | #         | #     | #    | #    |
| Rsa1.0_00042.1.g2451.t1 | ref[NP_193531.1] aluminum-activated, malate transporter 12 [Arabidopsis thaliana] gi 75219677 sp O49696.1 ALMTC_ARAT H RecName: Full=Aluminum-activated malate transporter 12; Short=AtALMT12; AltName: Full=Quick anion channel 1 gi 2894606 emb CAA17140.1  putative protein [Arabidopsis thaliana] gi 7268549 emb CAB78799.1  putative protein [Arabidopsis thaliana] gi 332658573 gb AEE83973.1  aluminum-activated, malate transporter 12 [Arabidopsis thaliana] | 536 | 560 | 0         | 104.5 | 90.5 | 94.2 | aluminum-activated, malate transporter 12           | gbpln | Arabidopsis thaliana | AT4G17970.1   Symbols: ALMT12, ATALMT12   aluminum-activated, malate transporter 12   chr4:9975482-9977722 FORWARD LENGTH=560            | 536 | 560 | 0         | 104.5 | 90.5 | 94.2 |
| Rsa1.0_00042.1.g2452.t1 | ref[NP_567546.1] AT hook motif DNA-binding family protein [Arabidopsis thaliana] gi 15451060 gb AAK96801.1  putative protein [Arabidopsis thaliana] gi 20148333 gb AAM10057.1  putative protein [Arabidopsis thaliana] gi 119657370 tpd FAA00284.1  TPA: AT-hook motif nuclear localized protein 13 [Arabidopsis thaliana] gi 332658571 gb AEE83971.1  AT hook motif DNA-binding family protein [Arabidopsis thaliana]                                                | 346 | 439 | 5.00E-57  | 126.9 | 48.0 | 58.7 | AT hook motif DNA-binding family protein            | gbpln | Arabidopsis thaliana | AT4G17950.1   Symbols:   AT hook motif DNA-binding family protein   chr4:9967295-9969007 REVERSE LENGTH=439                              | 346 | 439 | 1.00E-59  | 126.9 | 48.0 | 58.7 |
| Rsa1.0_00042.1.g2453.t1 | ref[XP_002885689.1] hypothetical protein ARALYDRAFT_319176 [Arabidopsis lyrata subsp. lyrata] gi 297331509 gb EFH61928.1  hypothetical protein ARALYDRAFT_319176 [Arabidopsis lyrata subsp. lyrata]                                                                                                                                                                                                                                                                   | 485 | 467 | 1.00E-132 | 96.3  | 52.2 | 63.5 | hypothetical protein ARALYDRAFT_319176              | gbpln | Arabidopsis lyrata   | AT3G62850.1   Symbols:   zinc finger protein-related   chr3:23237487-23239155 REVERSE LENGTH=472                                         | 485 | 472 | 1.00E-132 | 97.3  | 49.7 | 61.6 |
| Rsa1.0_00042.1.g2454.t1 | ref[NP_567546.1] AT hook motif DNA-binding family protein [Arabidopsis thaliana] gi 15451060 gb AAK96801.1  putative protein [Arabidopsis thaliana] gi 20148333 gb AAM10057.1  putative protein [Arabidopsis thaliana] gi 119657370 tpd FAA00284.1  TPA: AT-hook motif nuclear localized protein 13 [Arabidopsis thaliana] gi 332658571 gb AEE83971.1  AT hook motif DNA-binding family protein [Arabidopsis thaliana]                                                | 306 | 439 | 4.00E-57  | 143.5 | 54.2 | 67.6 | AT hook motif DNA-binding family protein            | gbpln | Arabidopsis thaliana | AT4G17950.1   Symbols:   AT hook motif DNA-binding family protein   chr4:9967295-9969007 REVERSE LENGTH=439                              | 306 | 439 | 1.00E-59  | 143.5 | 54.2 | 67.6 |

|                         |                                                                                                                                                                                                                                                                                                                                                                                                                                                                                                                                                                                                                                                                                                                                                                                                                                                                                                                                                                                                                                                                           |     |      |           |       |      |      |                                                                              |       |                      |                                                                                                                                     |     |     |           |       |      |      |  |
|-------------------------|---------------------------------------------------------------------------------------------------------------------------------------------------------------------------------------------------------------------------------------------------------------------------------------------------------------------------------------------------------------------------------------------------------------------------------------------------------------------------------------------------------------------------------------------------------------------------------------------------------------------------------------------------------------------------------------------------------------------------------------------------------------------------------------------------------------------------------------------------------------------------------------------------------------------------------------------------------------------------------------------------------------------------------------------------------------------------|-----|------|-----------|-------|------|------|------------------------------------------------------------------------------|-------|----------------------|-------------------------------------------------------------------------------------------------------------------------------------|-----|-----|-----------|-------|------|------|--|
| Rsa1.0_00042.1.g2455.t2 | ref[NP_195449.1] cytochrome P450, family 81, subfamily D, polypeptide 5 [Arabidopsis thaliana]<br>gi 4376088 emb CAB16770.1  cytochrome P450-like protein [Arabidopsis thaliana]<br>gi 7270715 emb CAB80398.1  cytochrome P450-like protein [Arabidopsis thaliana]<br>gi 27754487 gb AAO22691.1  putative cytochrome p450 family protein [Arabidopsis thaliana]<br>gi 28394071 gb AAO42443.1  putative cytochrome p450 family protein [Arabidopsis thaliana]<br>gi 332661381 gb AEE86781.1  cytochrome P450, family 81, subfamily D, polypeptide 5 [Arabidopsis thaliana]<br>ref[XP_002868029.1] zinc finger family protein [Arabidopsis lyrata subsp. lyrata] gi 297313865 gb EFH44288.1  zinc finger family protein [Arabidopsis lyrata subsp. lyrata]                                                                                                                                                                                                                                                                                                                  | 474 | 495  | 0         | 104.4 | 79.3 | 87.6 | cytochrome P450, family 81, subfamily D, polypeptide 5                       | gbpln | Arabidopsis thaliana | AT4G37320.1   Symbols: CYP81D5   cytochrome P450, family 81, subfamily D, polypeptide 5   chr4:17559742-17561690 REVERSE LENGTH=495 | 474 | 495 | 0         | 104.4 | 79.3 | 87.6 |  |
| Rsa1.0_00042.1.g2456.t1 | ref[XP_002868029.1] zinc finger family protein [Arabidopsis lyrata subsp. lyrata] gi 297313865 gb EFH44288.1  zinc finger family protein [Arabidopsis lyrata subsp. lyrata]                                                                                                                                                                                                                                                                                                                                                                                                                                                                                                                                                                                                                                                                                                                                                                                                                                                                                               | 298 | 294  | 1.00E-118 | 98.7  | 73.5 | 78.9 | zinc finger family protein                                                   | gbpln | Arabidopsis lyrata   | AT4G17920.1   Symbols:   RING/U-box superfamily protein   chr4:9963221-9964090 REVERSE LENGTH=289                                   | 298 | 289 | 1.00E-116 | 97.0  | 74.8 | 81.2 |  |
| Rsa1.0_00042.1.g2457.t1 | sp P0C043.1 PP318 ARATH RecName: Full=Putative pentatricopeptide repeat-containing protein At4g17915                                                                                                                                                                                                                                                                                                                                                                                                                                                                                                                                                                                                                                                                                                                                                                                                                                                                                                                                                                      | 464 | 463  | 0         | 99.8  | 88.8 | 95.3 | RecName: Full=Putative pentatricopeptide repeat-containing protein At4g17915 | ----  | ----                 | AT5G46680.1   Symbols:   Pentatricopeptide repeat (PPR-like) superfamily protein   chr5:18941118-18942524 FORWARD LENGTH=468        | 464 | 468 | 0         | 100.9 | 68.5 | 84.1 |  |
| Rsa1.0_00042.1.g2458.t1 | gb EOA17250.1  hypothetical protein CARUB_v10005524mg, partial [Capsella rubella]                                                                                                                                                                                                                                                                                                                                                                                                                                                                                                                                                                                                                                                                                                                                                                                                                                                                                                                                                                                         | 350 | 262  | 1.00E-118 | 74.9  | 58.3 | 60.0 | hypothetical protein CARUB_v10005524mg, partial                              | gbpln | Capsella rubella     | AT4G17900.1   Symbols:   PLATZ transcription factor family protein   chr4:9946046-9947697 FORWARD LENGTH=227                        | 350 | 227 | 1.00E-120 | 64.9  | 58.3 | 59.4 |  |
| Rsa1.0_00042.1.g2459.t1 | # # # # # # # # # #                                                                                                                                                                                                                                                                                                                                                                                                                                                                                                                                                                                                                                                                                                                                                                                                                                                                                                                                                                                                                                                       |     |      |           |       |      |      | -                                                                            | ----  | ----                 | # # # # # # # #                                                                                                                     |     |     |           |       |      |      |  |
| Rsa1.0_00042.1.g2460.t1 | ref[XP_002870079.1] hypothetical protein ARALYDRAFT_329738 [Arabidopsis lyrata subsp. lyrata] gi 297315915 gb EFH46338.1  hypothetical protein ARALYDRAFT_329738 [Arabidopsis lyrata subsp. lyrata]<br>ref[NP_567543.1] putative ADP-ribosylation factor GTPase-activating protein AGD8 [Arabidopsis thaliana] gi 75244593 sp Q8H100.1 AGD8 ARATH RecName: Full=Probable ADP-ribosylation factor GTPase-activating protein AGD8; Short=ARF GAP AGD8; AltName: Full=Protein ARF-GAP DOMAIN 8; Short=AtAGD8<br>gi 24030421 gb AAN41368.1  unknown protein [Arabidopsis thaliana]<br>gi 51970716 dbj BAD44050.1  unknown protein [Arabidopsis thaliana]<br>gi 51971433 dbj BAD44381.1  unknown protein [Arabidopsis thaliana]<br>gi 62319827 dbj BAD93852.1  hypothetical protein [Arabidopsis thaliana] gi 62320091 dbj BAD94263.1  hypothetical protein [Arabidopsis thaliana] gi 110739292 dbj BAFD1559.1  hypothetical protein [Arabidopsis thaliana] gi 332658561 gb AEE83961.1  putative ADP-ribosylation factor GTPase-activating protein AGD8 [Arabidopsis thaliana] | 685 | 1082 | 0         | 158.0 | 58.7 | 68.2 | hypothetical protein ARALYDRAFT_329738                                       | gbpln | Arabidopsis lyrata   | AT4G17895.1   Symbols: UBP20   ubiquitin-specific protease 20   chr4:9939914-9942698 FORWARD LENGTH=695                             | 685 | 695 | 1.00E-175 | 101.5 | 57.5 | 68.3 |  |
| Rsa1.0_00042.1.g2461.t1 | gi 24030421 gb AAN41368.1  unknown protein [Arabidopsis thaliana]<br>gi 51970716 dbj BAD44050.1  unknown protein [Arabidopsis thaliana]<br>gi 51971433 dbj BAD44381.1  unknown protein [Arabidopsis thaliana]<br>gi 62319827 dbj BAD93852.1  hypothetical protein [Arabidopsis thaliana] gi 62320091 dbj BAD94263.1  hypothetical protein [Arabidopsis thaliana] gi 110739292 dbj BAFD1559.1  hypothetical protein [Arabidopsis thaliana] gi 332658561 gb AEE83961.1  putative ADP-ribosylation factor GTPase-activating protein AGD8 [Arabidopsis thaliana]                                                                                                                                                                                                                                                                                                                                                                                                                                                                                                              | 409 | 413  | 0         | 101.0 | 86.6 | 92.2 | putative ADP-ribosylation factor GTPase-activating protein AGD8              | gbpln | Arabidopsis thaliana | AT4G17890.1   Symbols: AGD8   ARF-GAP domain 8   chr4:9937121-9939146 FORWARD LENGTH=413                                            | 409 | 413 | 0         | 101.0 | 86.6 | 92.2 |  |
| Rsa1.0_00042.1.g2462.t2 | # # # # # # # # # #                                                                                                                                                                                                                                                                                                                                                                                                                                                                                                                                                                                                                                                                                                                                                                                                                                                                                                                                                                                                                                                       |     |      |           |       |      |      | -                                                                            | ----  | ----                 | # # # # # # # #                                                                                                                     |     |     |           |       |      |      |  |
| Rsa1.0_00042.1.g2463.t1 | # # # # # # # # # #                                                                                                                                                                                                                                                                                                                                                                                                                                                                                                                                                                                                                                                                                                                                                                                                                                                                                                                                                                                                                                                       |     |      |           |       |      |      | -                                                                            | ----  | ----                 | # # # # # # # #                                                                                                                     |     |     |           |       |      |      |  |

|                         |                                                                                                                                                                                                       |     |     |           |       |      |      |                                                |       |                    |                                                                                                                                                                                                                                                                                                                                                                                                                                                                                                                                                                                                                            |     |     |           |       |      |      |
|-------------------------|-------------------------------------------------------------------------------------------------------------------------------------------------------------------------------------------------------|-----|-----|-----------|-------|------|------|------------------------------------------------|-------|--------------------|----------------------------------------------------------------------------------------------------------------------------------------------------------------------------------------------------------------------------------------------------------------------------------------------------------------------------------------------------------------------------------------------------------------------------------------------------------------------------------------------------------------------------------------------------------------------------------------------------------------------------|-----|-----|-----------|-------|------|------|
| Rsa1.0_00042.1.g2464.t1 | gb ABD65174.1  hypothetical protein 40.t00061 [Brassica oleracea]                                                                                                                                     | 404 | 407 | 0         | 100.7 | 90.6 | 92.8 | hypothetical protein 40.t00061                 | gbpln | Brassica oleracea  | AT4G17840.1   Symbols:   FUNCTIONS IN: molecular function unknown; INVOLVED IN: biological process unknown; LOCATED IN: chloroplast, membrane; EXPRESSED IN: 23 plant structures; EXPRESSED DURING: 13 growth stages; CONTAINS InterPro DOMAIN/s: Abortive infection protein (InterPro:IPR003675); BEST Arabidopsis thaliana protein match is: unknown protein (TAIR:AT2G35260.1); Has 30201 Blast hits to 17322 proteins in 780 species: Archae - 12; Bacteria - 1396; Metazoa - 17338; Fungi - 3422; Plants - 5037; Viruses - 0; Other Eukaryotes - 2996 (source: NCBI BLink).   chr4:9918222-9920190 REVERSE LENGTH=422 | 404 | 422 | 0         | 104.5 | 87.9 | 91.6 |
| Rsa1.0_00042.1.g2465.t1 | gb ABD65175.1  Streptomyces cyclase/dehydrase family protein [Brassica oleracea]                                                                                                                      | 191 | 191 | 1.00E-105 | 100.0 | 96.3 | 98.4 | Streptomyces cyclase/dehydrase family protein  | gbpln | Brassica oleracea  | AT4G17870.1   Symbols: PYR1, RCAR11   Polyketide cyclase/dehydrase and lipid transport superfamily protein   chr4:9928792-9929367 FORWARD LENGTH=191                                                                                                                                                                                                                                                                                                                                                                                                                                                                       | 191 | 191 | 1.00E-101 | 100.0 | 90.1 | 94.8 |
| Rsa1.0_00042.1.g2466.t1 | gb ABD65173.1  acetylornithine decetylase, putative [Brassica oleracea]                                                                                                                               | 438 | 437 | 0         | 99.8  | 98.6 | 99.1 | acetylornithine decetylase, putative           | gbpln | Brassica oleracea  | AT4G17830.1   Symbols:   Peptidase M20/M25/M40 family protein   chr4:9915916-9918049 FORWARD LENGTH=440                                                                                                                                                                                                                                                                                                                                                                                                                                                                                                                    | 438 | 440 | 0         | 100.5 | 90.4 | 95.7 |
| Rsa1.0_00042.1.g2467.t1 | gb EOA38196.1  hypothetical protein CARUB_v10009673mg [Capsella rubella]   gi 482574009 gb EOA38196.1  hypothetical protein CARUB_v10009673mg [Capsella rubella]                                      | 87  | 336 | 2.00E-15  | 386.2 | 66.7 | 71.3 | hypothetical protein CARUB_v10009673mg         | gbpln | Capsella rubella   | AT1G06850.1   Symbols: AtbZIP52, bZIP52   basic leucine-zipper 52   chr1:2105233-2106518 FORWARD LENGTH=337                                                                                                                                                                                                                                                                                                                                                                                                                                                                                                                | 87  | 337 | 4.00E-16  | 387.4 | 62.1 | 67.8 |
| Rsa1.0_00042.1.g2468.t1 | gb ABD65171.1  zinc finger (C2H2 type) containing protein [Brassica oleracea]                                                                                                                         | 206 | 200 | 1.00E-107 | 97.1  | 90.3 | 92.7 | zinc finger (C2H2 type) containing protein     | gbpln | Brassica oleracea  | AT4G17810.1   Symbols:   C2H2 and C2HC zinc fingers superfamily protein   chr4:9906918-9907532 FORWARD LENGTH=204                                                                                                                                                                                                                                                                                                                                                                                                                                                                                                          | 206 | 204 | 1.00E-93  | 99.0  | 81.6 | 87.4 |
| Rsa1.0_00042.1.g2469.t1 | #                                                                                                                                                                                                     | #   | #   | #         | #     | #    | -    | -                                              | ----  | ----               | #                                                                                                                                                                                                                                                                                                                                                                                                                                                                                                                                                                                                                          | #   | #   | #         | #     | #    |      |
| Rsa1.0_00042.1.g2470.t1 | #                                                                                                                                                                                                     | #   | #   | #         | #     | #    | -    | -                                              | ----  | ----               | #                                                                                                                                                                                                                                                                                                                                                                                                                                                                                                                                                                                                                          | #   | #   | #         | #     | #    |      |
| Rsa1.0_00042.1.g2471.t1 | ref XP_002863741.1  hypothetical protein ARALYDRAFT_917455 [Arabidopsis lyrata subsp. lyrata]   gi 297309576 gb EFH40000.1  hypothetical protein ARALYDRAFT_917455 [Arabidopsis lyrata subsp. lyrata] | 469 | 390 | 2.00E-80  | 83.2  | 37.1 | 49.0 | hypothetical protein ARALYDRAFT_917455         | gbpln | Arabidopsis lyrata | AT3G24255.1   Symbols:   RNA-directed DNA polymerase (reverse transcriptase)-related family protein   chr3:8789471-8793208 FORWARD LENGTH=746                                                                                                                                                                                                                                                                                                                                                                                                                                                                              | 469 | 746 | 4.00E-63  | 159.1 | 28.4 | 37.5 |
| Rsa1.0_00042.1.g2472.t1 | gb ABD65169.1  hypothetical protein 40.t00056 [Brassica oleracea]                                                                                                                                     | 270 | 293 | 1.00E-139 | 108.5 | 95.2 | 95.6 | hypothetical protein 40.t00056                 | gbpln | Brassica oleracea  | AT4G17800.1   Symbols:   Predicted AT-hook DNA-binding family protein   chr4:9895549-9896427 REVERSE LENGTH=292                                                                                                                                                                                                                                                                                                                                                                                                                                                                                                            | 270 | 292 | 1.00E-101 | 108.1 | 90.0 | 91.5 |
| Rsa1.0_00042.1.g2473.t1 | gb ABD65614.1  hypothetical protein 23.t00026 [Brassica oleracea]                                                                                                                                     | 264 | 257 | 1.00E-125 | 97.3  | 88.3 | 91.3 | hypothetical protein 23.t00026                 | gbpln | Brassica oleracea  | AT4G17790.1   Symbols:   SNARE associated Golgi protein family   chr4:9891425-9892675 FORWARD LENGTH=264                                                                                                                                                                                                                                                                                                                                                                                                                                                                                                                   | 264 | 264 | 1.00E-125 | 100.0 | 85.2 | 89.0 |
| Rsa1.0_00042.1.g2474.t1 | gb ABD65167.1  myb family transcription factor [Brassica oleracea]                                                                                                                                    | 341 | 337 | 1.00E-168 | 98.8  | 85.0 | 90.0 | myb family transcription factor                | gbpln | Brassica oleracea  | AT4G17785.1   Symbols: MYB39   myb domain protein 39   chr4:9881867-9883368 REVERSE LENGTH=360                                                                                                                                                                                                                                                                                                                                                                                                                                                                                                                             | 341 | 360 | 1.00E-150 | 105.6 | 78.6 | 85.9 |
| Rsa1.0_00042.1.g2475.t1 | gb ABD65165.1  trehalose-6-phosphate synthase, putative [Brassica oleracea]                                                                                                                           | 861 | 857 | 0         | 99.5  | 95.0 | 96.9 | trehalose-6-phosphate synthase, putative       | gbpln | Brassica oleracea  | AT4G17770.1   Symbols: ATTP55, TPS5   trehalose phosphatase/synthase 5   chr4:9877055-9880084 FORWARD LENGTH=862                                                                                                                                                                                                                                                                                                                                                                                                                                                                                                           | 861 | 862 | 0         | 100.1 | 92.5 | 96.1 |
| Rsa1.0_00042.1.g2476.t1 | gb ABD65164.1  hypothetical protein 40.t00049 [Brassica oleracea]                                                                                                                                     | 297 | 297 | 1.00E-169 | 100.0 | 97.0 | 97.6 | hypothetical protein 40.t00049                 | gbpln | Brassica oleracea  | AT4G17760.1   Symbols:   damaged DNA binding:exodeoxyribonuclease IIIs   chr4:9871820-9873257 FORWARD LENGTH=300                                                                                                                                                                                                                                                                                                                                                                                                                                                                                                           | 297 | 300 | 1.00E-167 | 101.0 | 93.9 | 95.3 |
| Rsa1.0_00042.1.g2477.t1 | ref XP_002868041.1  hypothetical protein ARALYDRAFT_329753 [Arabidopsis lyrata subsp. lyrata]   gi 297313877 gb EFH44300.1  hypothetical protein ARALYDRAFT_329753 [Arabidopsis lyrata subsp. lyrata] | 510 | 515 | 0         | 101.0 | 91.0 | 95.1 | hypothetical protein ARALYDRAFT_329753         | gbpln | Arabidopsis lyrata | AT4G17740.1   Symbols:   Peptidase S41 family protein   chr4:9867088-9869719 REVERSE LENGTH=515                                                                                                                                                                                                                                                                                                                                                                                                                                                                                                                            | 510 | 515 | 0         | 101.0 | 90.6 | 94.3 |
| Rsa1.0_00042.1.g2478.t1 | gb ABD65159.1  syntxin, putative [Brassica oleracea]                                                                                                                                                  | 281 | 303 | 1.00E-130 | 107.8 | 90.0 | 93.6 | syntxin, putative                              | gbpln | Brassica oleracea  | AT4G17730.2   Symbols: SYP23, ATSYP23   syntxin of plants 23   chr4:9865351-9866717 FORWARD LENGTH=262                                                                                                                                                                                                                                                                                                                                                                                                                                                                                                                     | 281 | 262 | 1.00E-114 | 93.2  | 78.3 | 85.1 |
| Rsa1.0_00042.1.g2479.t2 | gb ABD65158.1  RNA recognition motif (RRM)-containing protein [Brassica oleracea]                                                                                                                     | 312 | 300 | 1.00E-151 | 96.2  | 87.8 | 88.5 | RNA recognition motif (RRM)-containing protein | gbpln | Brassica oleracea  | AT4G17720.1   Symbols:   RNA-binding (RRM/RBD/RNP motifs) family protein   chr4:9862660-9864498 REVERSE LENGTH=313                                                                                                                                                                                                                                                                                                                                                                                                                                                                                                         | 312 | 313 | 1.00E-152 | 100.3 | 87.5 | 90.4 |

|                         |                                                                                                                                                                                                                                                                                                                                                                                                                                                                                                                                                                                                                                                                                                                                                                                |      |      |           |       |      |      |                                                          |       |                      |                                                                                                                                                                                                                                                                                                                                                                                                                                                                             |      |      |           |       |      |      |
|-------------------------|--------------------------------------------------------------------------------------------------------------------------------------------------------------------------------------------------------------------------------------------------------------------------------------------------------------------------------------------------------------------------------------------------------------------------------------------------------------------------------------------------------------------------------------------------------------------------------------------------------------------------------------------------------------------------------------------------------------------------------------------------------------------------------|------|------|-----------|-------|------|------|----------------------------------------------------------|-------|----------------------|-----------------------------------------------------------------------------------------------------------------------------------------------------------------------------------------------------------------------------------------------------------------------------------------------------------------------------------------------------------------------------------------------------------------------------------------------------------------------------|------|------|-----------|-------|------|------|
| Rsa1.0_00042.1.g2480.t1 | gb ABD65155.1  hypothetical protein 40.t00037 [Brassica oleracea] gi 89257700 gb ABD65187.1  hypothetical protein 40.t00083 [Brassica oleracea]                                                                                                                                                                                                                                                                                                                                                                                                                                                                                                                                                                                                                                | 99   | 101  | 2.00E-28  | 102.0 | 67.7 | 73.7 | hypothetical protein 40.t00037                           | gbpln | Brassica oleracea    | AT4G17718.1   Symbols:   Defensin-like (DEFL) family protein   chr4:9861596-9861995 REVERSE LENGTH=101                                                                                                                                                                                                                                                                                                                                                                      | 99   | 101  | 1.00E-28  | 102.0 | 59.6 | 73.7 |
| Rsa1.0_00042.1.g2481.t1 | gb ABD65154.1  hypothetical protein 40.t00036 [Brassica oleracea] gi 89257699 gb ABD65186.1  hypothetical protein 40.t00081 [Brassica oleracea]                                                                                                                                                                                                                                                                                                                                                                                                                                                                                                                                                                                                                                | 95   | 161  | 1.00E-30  | 169.5 | 71.6 | 75.8 | hypothetical protein 40.t00036                           | gbpln | Brassica oleracea    | AT4G17718.1   Symbols:   Defensin-like (DEFL) family protein   chr4:9861596-9861995 REVERSE LENGTH=101                                                                                                                                                                                                                                                                                                                                                                      | 95   | 101  | 9.00E-29  | 106.3 | 66.3 | 74.7 |
| Rsa1.0_00042.1.g2482.t1 | gb ABD65151.1  peroxidase, putative [Brassica oleracea]                                                                                                                                                                                                                                                                                                                                                                                                                                                                                                                                                                                                                                                                                                                        | 329  | 329  | 0         | 100.0 | 96.0 | 98.5 | peroxidase, putative                                     | gbpln | Brassica oleracea    | AT4G17690.1   Symbols:   Peroxidase superfamily protein   chr4:9846127-9847107 FORWARD LENGTH=326                                                                                                                                                                                                                                                                                                                                                                           | 329  | 326  | 1.00E-160 | 99.1  | 82.4 | 92.1 |
| Rsa1.0_00043.1.g2483.t1 | gb ABE65512.1  hypothetical protein At4g04650 [Arabidopsis thaliana]                                                                                                                                                                                                                                                                                                                                                                                                                                                                                                                                                                                                                                                                                                           | 225  | 296  | 2.00E-52  | 131.6 | 47.6 | 68.0 | hypothetical protein At4g04650                           | gbpln | Arabidopsis thaliana | AT1G43730.1   Symbols:   RNA-directed DNA polymerase (reverse transcriptase)-related family protein   chr1:16508723-16509784 REVERSE LENGTH=320                                                                                                                                                                                                                                                                                                                             | 225  | 320  | 2.00E-54  | 142.2 | 46.2 | 65.3 |
| Rsa1.0_00043.1.g2484.t1 | gb EOA38594.1  hypothetical protein CARUB_v10010427mg [Capsella rubella]                                                                                                                                                                                                                                                                                                                                                                                                                                                                                                                                                                                                                                                                                                       | 176  | 178  | 1.00E-68  | 101.1 | 75.6 | 83.5 | hypothetical protein CARUB_v10010427mg                   | gbpln | Capsella rubella     | AT1G32583.1   Symbols:   FUNCTIONS IN: molecular_function unknown; INVOLVED IN: biological_process unknown; LOCATED IN: endomembrane system; BEST Arabidopsis thaliana protein match is: tapetum determinant 1 (TAIR:AT4G24972.1); Has 35333 Blast hits to 34131 proteins in 2444 species: Archae - 798; Bacteria - 22429; Metazoa - 974; Fungi - 991; Plants - 531; Viruses - 0; Other Eukaryotes - 9610 (source: NCBI BLINK).   chr1:11787351-11788103 FORWARD LENGTH=179 | 176  | 179  | 3.00E-65  | 101.7 | 71.0 | 81.8 |
| Rsa1.0_00043.1.g2485.t1 | ref XP_004288454.1  PREDICTED: MATH domain-containing protein At5g43560-like [Fragaria vesca subsp. vesca] ref NP_174539.1  hydroxyproline-rich glycoprotein-like protein [Arabidopsis thaliana] gi 79319084 ref NP_001031129.1  hydroxyproline-rich glycoprotein-like protein [Arabidopsis thaliana] gi 6714285 gb AAAF25981.1 AC017118_18 F0N18.2 [Arabidopsis thaliana] gi 34146860 gb AAQ62438.1  At1g32610 [Arabidopsis thaliana] gi 51969172 dbj BAD43278.1  unknown protein [Arabidopsis thaliana] gi 51971371 dbj BAD44350.1  unknown protein [Arabidopsis thaliana] gi 332193389 gb AEE31510.1  hydroxyproline-rich glycoprotein-like protein [Arabidopsis thaliana] gi 332193390 gb AEE31511.1  hydroxyproline-rich glycoprotein-like protein [Arabidopsis thaliana] | 410  | 1138 | 1.00E-121 | 277.6 | 54.4 | 66.8 | PREDICTED: MATH domain-containing protein At5g43560-like | gbpln | Fragaria vesca       | AT1G04300.1   Symbols:   TRAF-like superfamily protein   chr1:1148818-1153895 REVERSE LENGTH=1074                                                                                                                                                                                                                                                                                                                                                                           | 410  | 1074 | 1.00E-118 | 262.0 | 55.4 | 64.9 |
| Rsa1.0_00043.1.g2486.t1 | gi 34146860 gb AAQ62438.1  At1g32610 [Arabidopsis thaliana] gi 51969172 dbj BAD43278.1  unknown protein [Arabidopsis thaliana] gi 51971371 dbj BAD44350.1  unknown protein [Arabidopsis thaliana] gi 332193389 gb AEE31510.1  hydroxyproline-rich glycoprotein-like protein [Arabidopsis thaliana] gi 332193390 gb AEE31511.1  hydroxyproline-rich glycoprotein-like protein [Arabidopsis thaliana]                                                                                                                                                                                                                                                                                                                                                                            | 199  | 291  | 5.00E-15  | 146.2 | 49.2 | 57.3 | hydroxyproline-rich glycoprotein-like protein            | gbpln | Arabidopsis thaliana | AT1G32610.2   Symbols:   hydroxyproline-rich glycoprotein family protein   chr1:11795892-11796767 REVERSE LENGTH=291                                                                                                                                                                                                                                                                                                                                                        | 199  | 291  | 2.00E-17  | 146.2 | 49.2 | 57.3 |
| Rsa1.0_00043.1.g2487.t1 | gb EOA37193.1  hypothetical protein CARUB_v10010595mg [Capsella rubella]                                                                                                                                                                                                                                                                                                                                                                                                                                                                                                                                                                                                                                                                                                       | 155  | 141  | 1.00E-27  | 91.0  | 63.2 | 73.5 | hypothetical protein CARUB_v10010595mg                   | gbpln | Capsella rubella     | AT1G32630.1   Symbols:   unknown protein; Has 18 Blast hits to 18 proteins in 10 species: Archae - 0; Bacteria - 0; Metazoa - 2; Fungi - 2; Plants - 12; Viruses - 0; Other Eukaryotes - 2 (source: NCBI BLINK).   chr1:11797942-11798343 FORWARD LENGTH=133                                                                                                                                                                                                                | 155  | 133  | 7.00E-26  | 85.8  | 56.1 | 66.5 |
| Rsa1.0_00043.1.g2488.t1 | #                                                                                                                                                                                                                                                                                                                                                                                                                                                                                                                                                                                                                                                                                                                                                                              | #    | #    | #         | #     | #    | -    | ----                                                     | ----  | ----                 | #                                                                                                                                                                                                                                                                                                                                                                                                                                                                           | #    | #    | #         | #     | #    | #    |
| Rsa1.0_00043.1.g2489.t1 | gb ABS11038.1  MYC [Brassica oleracea var. gemmifera]                                                                                                                                                                                                                                                                                                                                                                                                                                                                                                                                                                                                                                                                                                                          | 614  | 610  | 0         | 99.3  | 93.5 | 95.8 | MYC                                                      | gbpln | Brassica oleracea    | AT1G32640.1   Symbols:   ATMYC2, RD22BP1, JAH1, JH1, MYC2, ZBF1   Basic helix-loop-helix (bHLH) DNA-binding family protein   chr1:11799042-11800913 REVERSE LENGTH=623                                                                                                                                                                                                                                                                                                      | 614  | 623  | 0         | 101.5 | 88.1 | 93.3 |
| Rsa1.0_00043.1.g2490.t1 | #                                                                                                                                                                                                                                                                                                                                                                                                                                                                                                                                                                                                                                                                                                                                                                              | #    | #    | #         | #     | #    | -    | ----                                                     | ----  | ----                 | #                                                                                                                                                                                                                                                                                                                                                                                                                                                                           | #    | #    | #         | #     | #    | #    |
| Rsa1.0_00043.1.g2491.t1 | emb CAB39638.1  RNA-directed DNA polymerase-like protein [Arabidopsis thaliana] gi 7267666 emb CAB78094.1  RNA-directed DNA polymerase-like protein [Arabidopsis thaliana]                                                                                                                                                                                                                                                                                                                                                                                                                                                                                                                                                                                                     | 1930 | 1274 | 0         | 66.0  | 30.8 | 43.5 | RNA-directed DNA polymerase-like protein                 | gbpln | Arabidopsis thaliana | AT4G29090.1   Symbols:   Ribonuclease H-like superfamily protein   chr4:14333528-14335255 FORWARD LENGTH=575                                                                                                                                                                                                                                                                                                                                                                | 1930 | 575  | 1.00E-69  | 29.8  | 9.3  | 14.5 |
| Rsa1.0_00043.1.g2492.t1 | #                                                                                                                                                                                                                                                                                                                                                                                                                                                                                                                                                                                                                                                                                                                                                                              | #    | #    | #         | #     | #    | -    | ----                                                     | ----  | ----                 | #                                                                                                                                                                                                                                                                                                                                                                                                                                                                           | #    | #    | #         | #     | #    | #    |
| Rsa1.0_00043.1.g2493.t1 | #                                                                                                                                                                                                                                                                                                                                                                                                                                                                                                                                                                                                                                                                                                                                                                              | #    | #    | #         | #     | #    | -    | ----                                                     | ----  | ----                 | #                                                                                                                                                                                                                                                                                                                                                                                                                                                                           | #    | #    | #         | #     | #    | #    |

|                         |                                                                                                                                                                                                                                                                                                                                                                                                                                                                                                                                                                                                                                                                                                                                               |     |     |           |       |      |      |                                                                                                                                                                      |       |                      |                                                                                                                                                                                                                                                                                                                                                                                                                                                                                                                                     |     |     |           |       |      |      |
|-------------------------|-----------------------------------------------------------------------------------------------------------------------------------------------------------------------------------------------------------------------------------------------------------------------------------------------------------------------------------------------------------------------------------------------------------------------------------------------------------------------------------------------------------------------------------------------------------------------------------------------------------------------------------------------------------------------------------------------------------------------------------------------|-----|-----|-----------|-------|------|------|----------------------------------------------------------------------------------------------------------------------------------------------------------------------|-------|----------------------|-------------------------------------------------------------------------------------------------------------------------------------------------------------------------------------------------------------------------------------------------------------------------------------------------------------------------------------------------------------------------------------------------------------------------------------------------------------------------------------------------------------------------------------|-----|-----|-----------|-------|------|------|
| Rsa1.0_00043.1.g2494.t1 | gb AAF82236.1 AC069143_12 Contains similarity to a transposable element Tip100 protein for transposase from Ipomoea purpurea gb 4063769 and is a member of the transmembrane 4 family PF 00335 [Arabidopsis thaliana]                                                                                                                                                                                                                                                                                                                                                                                                                                                                                                                         | 621 | 811 | 0         | 130.6 | 69.2 | 82.8 | Contains similarity to a transposable element Tip100 protein for transposase from Ipomoea purpurea gb 4063769 and is a member of the transmembrane 4 family PF 00335 | gbpln | Arabidopsis thaliana | AT1G19260.1   Symbols:   TTF-type zinc finger protein with HAT dimerisation domain   chr1:6657260-6659569 REVERSE LENGTH=769                                                                                                                                                                                                                                                                                                                                                                                                        | 621 | 769 | 0         | 123.8 | 69.2 | 82.8 |
| Rsa1.0_00043.1.g2495.t1 | #                                                                                                                                                                                                                                                                                                                                                                                                                                                                                                                                                                                                                                                                                                                                             | #   | #   | #         | #     | #    | #    | -                                                                                                                                                                    | ----  | ----                 | #                                                                                                                                                                                                                                                                                                                                                                                                                                                                                                                                   | #   | #   | #         | #     | #    |      |
| Rsa1.0_00043.1.g2496.t1 | ref NP_174546.1  uncharacterized protein [Arabidopsis thaliana] gi 38566628 gb AAR24204.1  At1g32690 [Arabidopsis thaliana] gi 40824115 gb AAR92349.1  At1g32690 [Arabidopsis thaliana] gi 332193396 gb AEE31517.1  uncharacterized protein AT1G32690 [Arabidopsis thaliana]                                                                                                                                                                                                                                                                                                                                                                                                                                                                  | 197 | 200 | 3.00E-69  | 101.5 | 80.2 | 87.8 | uncharacterized protein                                                                                                                                              | gbpln | Arabidopsis thaliana | AT1G32690.1   Symbols:   unknown protein; FUNCTIONS IN: molecular, function unknown; INVOLVED IN: biological process unknown; LOCATED IN: plasma membrane; EXPRESSED IN: 21 plant structures; EXPRESSED DURING: 11 growth stages; BEST Arabidopsis thaliana protein match is: unknown protein (TAIR:AT2G35200.1); Has 45 Blast hits to 45 proteins in 8 species: Archae - 0; Bacteria - 0; Metazoa - 0; Fungi - 0; Plants - 45; Viruses - 0; Other Eukaryotes - 0 (source: NCBI BLink).   chr1:11821079-11821681 REVERSE LENGTH=200 | 197 | 200 | 1.00E-71  | 101.5 | 80.2 | 87.8 |
| Rsa1.0_00043.1.g2497.t1 | ref NP_199370.1  Ulp1 protease family protein [Arabidopsis thaliana] gi 10177930 dbj BAB11195.1  unnamed protein product [Arabidopsis thaliana] gi 332007886 gb AED95269.1  Ulp1 protease family protein [Arabidopsis thaliana]                                                                                                                                                                                                                                                                                                                                                                                                                                                                                                               | 126 | 921 | 6.00E-17  | 731.0 | 27.8 | 46.8 | Ulp1 protease family protein                                                                                                                                         | gbpln | Arabidopsis thaliana | AT5G45570.1   Symbols:   Ulp1 protease family protein   chr5:18472301-18475574 FORWARD LENGTH=921                                                                                                                                                                                                                                                                                                                                                                                                                                   | 126 | 921 | 1.00E-19  | 731.0 | 27.8 | 46.8 |
| Rsa1.0_00043.1.g2498.t1 | ref NP_564407.1  uncharacterized protein [Arabidopsis thaliana] gi 6714274 gb AAF25970.1 AC017118.7 F6N18.11 [Arabidopsis thaliana] gi 21536980 gb AAM61321.1  unknown [Arabidopsis thaliana] gi 225897996 dbj BAH30330.1  hypothetical protein [Arabidopsis thaliana] gi 332193401 gb AEE31522.1  uncharacterized protein AT1G32730 [Arabidopsis thaliana]                                                                                                                                                                                                                                                                                                                                                                                   | 260 | 327 | 2.00E-93  | 125.8 | 72.7 | 83.8 | uncharacterized protein                                                                                                                                              | gbpln | Arabidopsis thaliana | AT1G32730.1   Symbols:   unknown protein; LOCATED IN: chloroplast; EXPRESSED IN: 12 plant structures; EXPRESSED DURING: 6 growth stages; CONTAINS InterPro DOMAIN/s: Protein of unknown function DUF702 (InterPro:IPR007818); Has 120 Blast hits to 118 proteins in 39 species: Archae - 0; Bacteria - 8; Metazoa - 63; Fungi - 4; Plants - 33; Viruses - 0; Other Eukaryotes - 12 (source: NCBI BLink).   chr1:11841077-11842956 FORWARD LENGTH=327                                                                                | 260 | 327 | 6.00E-96  | 125.8 | 72.7 | 83.8 |
| Rsa1.0_00043.1.g2499.t1 | #                                                                                                                                                                                                                                                                                                                                                                                                                                                                                                                                                                                                                                                                                                                                             | #   | #   | #         | #     | #    | #    | -                                                                                                                                                                    | ----  | ----                 | #                                                                                                                                                                                                                                                                                                                                                                                                                                                                                                                                   | #   | #   | #         | #     | #    |      |
| Rsa1.0_00043.1.g2500.t1 | gb EOA37570.1  hypothetical protein CARUB_v10011900mg [Capsella rubella]                                                                                                                                                                                                                                                                                                                                                                                                                                                                                                                                                                                                                                                                      | 360 | 368 | 1.00E-174 | 102.2 | 87.5 | 91.9 | hypothetical protein CARUB_v10011900mg                                                                                                                               | gbpln | Capsella rubella     | AT1G32770.1   Symbols: ANAC012, SND1, NST3, NAC012   NAC domain containing protein 12   chr1:11865343-11866950 REVERSE LENGTH=358                                                                                                                                                                                                                                                                                                                                                                                                   | 360 | 358 | 1.00E-173 | 99.4  | 85.3 | 89.2 |
| Rsa1.0_00043.1.g2501.t1 | gb EOA37905.1  hypothetical protein CARUB_v10009372mg [Capsella rubella]                                                                                                                                                                                                                                                                                                                                                                                                                                                                                                                                                                                                                                                                      | 394 | 394 | 0         | 100.0 | 90.9 | 95.7 | hypothetical protein CARUB_v10009372mg                                                                                                                               | gbpln | Capsella rubella     | AT1G32780.1   Symbols:   GroES-like zinc-binding dehydrogenase family protein   chr1:11869977-11872595 REVERSE LENGTH=394                                                                                                                                                                                                                                                                                                                                                                                                           | 394 | 394 | 0         | 100.0 | 90.9 | 94.4 |
| Rsa1.0_00043.1.g2502.t1 | #                                                                                                                                                                                                                                                                                                                                                                                                                                                                                                                                                                                                                                                                                                                                             | #   | #   | #         | #     | #    | #    | -                                                                                                                                                                    | ----  | ----                 | #                                                                                                                                                                                                                                                                                                                                                                                                                                                                                                                                   | #   | #   | #         | #     | #    |      |
| Rsa1.0_00043.1.g2503.t2 | ref XP_002891012.1  ubiquitin carboxyl-terminal hydrolase family protein [Arabidopsis lyrata subsp. lyrata] gi 297336854 gb EFH67271.1  ubiquitin carboxyl-terminal hydrolase family protein [Arabidopsis lyrata subsp. lyrata]                                                                                                                                                                                                                                                                                                                                                                                                                                                                                                               | 833 | 894 | 0         | 107.3 | 72.3 | 82.5 | ubiquitin carboxyl-terminal hydrolase family protein                                                                                                                 | gbpln | Arabidopsis lyrata   | AT1G32850.1   Symbols: UBP11   ubiquitin-specific protease 11   chr1:11902629-11906900 FORWARD LENGTH=892                                                                                                                                                                                                                                                                                                                                                                                                                           | 833 | 892 | 0         | 107.1 | 69.7 | 81.0 |
| Rsa1.0_00043.1.g2504.t1 | ref NP_174566.1  granule-bound starch synthase [Arabidopsis thaliana] gi 29337142 sp Q9MAQ0.1 SSG1_ARAT H RecName: Full=Probable granule-bound starch synthase 1, chloroplastic/amyloplastic; AltName: Full=Granule-bound starch synthase I; Short=GBSS-1; Flags: Precursor gi 6910568 gb AAF31273.1 AC006424_2 granule-bound starch synthase [Arabidopsis thaliana] gi 20453077 gb AAM19783.1  At1g32900/F9L11.8 [Arabidopsis thaliana] gi 21595154 gb AAM66076.1  starch synthase, putative [Arabidopsis thaliana] gi 21703108 gb AAM74496.1  At1g32900/F9L11.8 [Arabidopsis thaliana] gi 23506181 gb AAN31102.1  At1g32900/F9L11.8 [Arabidopsis thaliana] gi 332193416 gb AEE31537.1  granule-bound starch synthase [Arabidopsis thaliana] | 608 | 610 | 0         | 100.3 | 90.0 | 93.9 | granule-bound starch synthase                                                                                                                                        | gbpln | Arabidopsis thaliana | AT1G32900.1   Symbols:   UDP-Glycosyltransferase superfamily protein   chr1:11920592-11923506 REVERSE LENGTH=610                                                                                                                                                                                                                                                                                                                                                                                                                    | 608 | 610 | 0         | 100.3 | 90.0 | 93.9 |



|                         |                                                                                                                                                                                                                                                                                                                                                                                                                                                                                                                          |      |      |           |       |      |      |                                                 |       |                      |                                                                                                                                                                                                                                                                                                                                                                   |      |      |           |       |      |      |
|-------------------------|--------------------------------------------------------------------------------------------------------------------------------------------------------------------------------------------------------------------------------------------------------------------------------------------------------------------------------------------------------------------------------------------------------------------------------------------------------------------------------------------------------------------------|------|------|-----------|-------|------|------|-------------------------------------------------|-------|----------------------|-------------------------------------------------------------------------------------------------------------------------------------------------------------------------------------------------------------------------------------------------------------------------------------------------------------------------------------------------------------------|------|------|-----------|-------|------|------|
| Rsa1.0_00043.1.g2505.t1 | refNP_199780.1  UDP-glycosyltransferase-like protein [Arabidopsis thaliana] gi 75264223 sp Q9LTA3.1 U91C1_ARAT H RecName: Full=UDP-glycosyltransferase 91C1 gi 8978266 dbj BAA98157.1  anthocyanidin-3-glucoside rhamnosyltransferase-like [Arabidopsis thaliana] gi 26449402 dbj BAC41828.1  putative anthocyanidin-3-glucoside rhamnosyltransferase [Arabidopsis thaliana] gi 28951061 gb AAO63454.1  At5g49690 [Arabidopsis thaliana] gi 332008462 gb AED95845.1  UDP-glycosyltransferase 91C1 [Arabidopsis thaliana] | 453  | 460  | 0         | 101.5 | 75.1 | 83.7 | UDP-glycosyltransferase-like protein            | gbpln | Arabidopsis thaliana | AT5G49690.1   Symbols:   UDP-glycosyltransferase superfamily protein   chr5:20189968-20191350 REVERSE LENGTH=460                                                                                                                                                                                                                                                  | 453  | 460  | 0         | 101.5 | 75.1 | 83.7 |
| Rsa1.0_00043.1.g2506.t1 | gb EMJ11389.1  hypothetical protein PRUPE_ppa017790mg [Prunus persica]                                                                                                                                                                                                                                                                                                                                                                                                                                                   | 1466 | 1485 | 0         | 101.3 | 41.3 | 54.4 | hypothetical protein PRUPE_ppa017790mg          | gbpln | Prunus persica       | ATMG00860.1   Symbols: ORF158   DNA/RNA polymerases superfamily protein   chrM:235916-236392 FORWARD LENGTH=158                                                                                                                                                                                                                                                   | 1466 | 158  | 7.00E-28  | 10.8  | 3.8  | 5.5  |
| Rsa1.0_00043.1.g2507.t1 | refXP_002893492.1  hypothetical protein ARALYDRAFT_890322 [Arabidopsis lyrata subsp. lyrata] gi 297339334 gb EFH6751.1  hypothetical protein ARALYDRAFT_890322 [Arabidopsis lyrata subsp. lyrata]                                                                                                                                                                                                                                                                                                                        | 334  | 322  | 1.00E-81  | 96.4  | 49.1 | 68.3 | hypothetical protein ARALYDRAFT_890322          | gbpln | Arabidopsis lyrata   | AT1G61470.1   Symbols:   Polynucleotidyl transferase, ribonuclease H-like superfamily protein   chr1:22678185-22679021 FORWARD LENGTH=278                                                                                                                                                                                                                         | 334  | 278  | 4.00E-78  | 83.2  | 41.6 | 55.7 |
| Rsa1.0_00043.1.g2508.t1 | refXP_002891017.1  hypothetical protein ARALYDRAFT_473474 [Arabidopsis lyrata subsp. lyrata] gi 297336859 gb EFH67276.1  hypothetical protein ARALYDRAFT_473474 [Arabidopsis lyrata subsp. lyrata]                                                                                                                                                                                                                                                                                                                       | 78   | 82   | 7.00E-20  | 105.1 | 73.1 | 80.8 | hypothetical protein ARALYDRAFT_473474          | gbpln | Arabidopsis lyrata   | AT1G32928.1   Symbols:   unknown protein; BEST Arabidopsis thaliana protein match is: unknown protein (TAIR:AT1G32920.1); Has 35333 Blast hits to 34131 proteins in 2444 species: Archae - 798; Bacteria - 22429; Metazoa - 974; Fungi - 991; Plants - 531; Viruses - 0; Other Eukaryotes - 9610 (source: NCBI BLINK).   chr1:11931332-11931586 FORWARD LENGTH=84 | 78   | 84   | 2.00E-22  | 107.7 | 75.6 | 82.1 |
| Rsa1.0_00043.1.g2509.t1 | #                                                                                                                                                                                                                                                                                                                                                                                                                                                                                                                        | #    | #    | #         | #     | #    | #    | -                                               | ----  | ----                 | #                                                                                                                                                                                                                                                                                                                                                                 | #    | #    | #         | #     | #    |      |
| Rsa1.0_00043.1.g2510.t1 | gb EOA37890.1  hypothetical protein CARUB_v10009358mg [Capsella rubella]                                                                                                                                                                                                                                                                                                                                                                                                                                                 | 79   | 397  | 5.00E-18  | 502.5 | 63.3 | 74.7 | hypothetical protein CARUB_v10009358mg          | gbpln | Capsella rubella     | AT1G32930.1   Symbols:   Galactosyltransferase family protein   chr1:11931980-11934399 REVERSE LENGTH=399                                                                                                                                                                                                                                                         | 79   | 399  | 6.00E-20  | 505.1 | 63.3 | 73.4 |
| Rsa1.0_00043.1.g2511.t1 | refXP_002872503.1  predicted protein [Arabidopsis lyrata subsp. lyrata] gi 297318340 gb EFH48762.1  predicted protein [Arabidopsis lyrata subsp. lyrata]                                                                                                                                                                                                                                                                                                                                                                 | 86   | 89   | 1.00E-30  | 103.5 | 76.7 | 86.0 | predicted protein                               | gbpln | Arabidopsis lyrata   | AT4G10270.1   Symbols:   Wound-responsive family protein   chr4:6374805-6375077 FORWARD LENGTH=90                                                                                                                                                                                                                                                                 | 86   | 90   | 1.00E-29  | 104.7 | 74.4 | 82.6 |
| Rsa1.0_00043.1.g2512.t1 | #                                                                                                                                                                                                                                                                                                                                                                                                                                                                                                                        | #    | #    | #         | #     | #    | #    | -                                               | ----  | ----                 | #                                                                                                                                                                                                                                                                                                                                                                 | #    | #    | #         | #     | #    |      |
| Rsa1.0_00043.1.g2513.t1 | gb EOA35150.1  hypothetical protein CARUB_v10020289mg, partial [Capsella rubella]                                                                                                                                                                                                                                                                                                                                                                                                                                        | 556  | 449  | 1.00E-139 | 80.8  | 45.5 | 52.0 | hypothetical protein CARUB_v10020289mg, partial | gbpln | Capsella rubella     | AT1G73810.1   Symbols:   Core-2/I-branching beta-1,6-N-acetylglucosaminyltransferase family protein   chr1:27752506-27755208 REVERSE LENGTH=418                                                                                                                                                                                                                   | 556  | 418  | 1.00E-138 | 75.2  | 45.3 | 50.5 |
| Rsa1.0_00043.1.g2514.t1 | refNP_174606.2  tetratricopeptide repeat-containing protein [Arabidopsis thaliana] gi 332193468 gb AEE31589.1  tetratricopeptide repeat-containing protein [Arabidopsis thaliana]                                                                                                                                                                                                                                                                                                                                        | 832  | 798  | 0         | 95.9  | 78.4 | 85.9 | tetratricopeptide repeat-containing protein     | gbpln | Arabidopsis thaliana | AT1G33400.1   Symbols: TPR9   Tetratricopeptide repeat (TPR)-like superfamily protein   chr1:12104891-12109488 REVERSE LENGTH=798                                                                                                                                                                                                                                 | 832  | 798  | 0         | 95.9  | 78.4 | 85.9 |
| Rsa1.0_00043.1.g2515.t1 | refNP_001185129.1  suppressor of auxin resistance1 protein [Arabidopsis thaliana] gi 332193470 gb AEE31591.1  suppressor of auxin resistance1 protein [Arabidopsis thaliana]                                                                                                                                                                                                                                                                                                                                             | 1468 | 1504 | 0         | 102.5 | 82.2 | 89.1 | suppressor of auxin resistance1 protein         | gbpln | Arabidopsis thaliana | AT1G33410.2   Symbols: SARI   SUPPRESSOR OF AUXIN RESISTANCE1   chr1:12109769-12118828 REVERSE LENGTH=1504                                                                                                                                                                                                                                                        | 1468 | 1504 | 0         | 102.5 | 82.2 | 89.1 |
| Rsa1.0_00043.1.g2516.t1 | #                                                                                                                                                                                                                                                                                                                                                                                                                                                                                                                        | #    | #    | #         | #     | #    | #    | -                                               | ----  | ----                 | #                                                                                                                                                                                                                                                                                                                                                                 | #    | #    | #         | #     | #    |      |
| Rsa1.0_00043.1.g2517.t1 | gb EOA37671.1  hypothetical protein CARUB_v10012280mg [Capsella rubella]                                                                                                                                                                                                                                                                                                                                                                                                                                                 | 720  | 704  | 0         | 97.8  | 76.8 | 84.4 | hypothetical protein CARUB_v10012280mg          | gbpln | Capsella rubella     | AT1G33420.1   Symbols:   RING/FYVE/PHD zinc finger superfamily protein   chr1:12121063-12123346 REVERSE LENGTH=697                                                                                                                                                                                                                                                | 720  | 697  | 0         | 96.8  | 77.1 | 83.5 |
| Rsa1.0_00043.1.g2518.t1 | refXP_002885337.1  hypothetical protein ARALYDRAFT_898378 [Arabidopsis lyrata subsp. lyrata] gi 297331177 gb EFH61596.1  hypothetical protein ARALYDRAFT_898378 [Arabidopsis lyrata subsp. lyrata]                                                                                                                                                                                                                                                                                                                       | 374  | 392  | 1.00E-104 | 104.8 | 55.6 | 73.0 | hypothetical protein ARALYDRAFT_898378          | gbpln | Arabidopsis lyrata   | AT3G20030.1   Symbols:   F-box and associated interaction domains-containing protein   chr3:6990254-6991462 FORWARD LENGTH=402                                                                                                                                                                                                                                    | 374  | 402  | 3.00E-97  | 107.5 | 55.6 | 70.3 |
| Rsa1.0_00043.1.g2519.t1 | #                                                                                                                                                                                                                                                                                                                                                                                                                                                                                                                        | #    | #    | #         | #     | #    | #    | -                                               | ----  | ----                 | #                                                                                                                                                                                                                                                                                                                                                                 | #    | #    | #         | #     | #    |      |

|                         |                                                                                                                                                                                                                                                                                                                                                                                                                                                                                                                                                                                                                                                                                                                                                                                                                                                                                                                                                                                                                                                                                                                                                        |      |      |          |       |      |      |                                                               |       |                      |                                                                                                                                   |      |      |          |       |      |      |
|-------------------------|--------------------------------------------------------------------------------------------------------------------------------------------------------------------------------------------------------------------------------------------------------------------------------------------------------------------------------------------------------------------------------------------------------------------------------------------------------------------------------------------------------------------------------------------------------------------------------------------------------------------------------------------------------------------------------------------------------------------------------------------------------------------------------------------------------------------------------------------------------------------------------------------------------------------------------------------------------------------------------------------------------------------------------------------------------------------------------------------------------------------------------------------------------|------|------|----------|-------|------|------|---------------------------------------------------------------|-------|----------------------|-----------------------------------------------------------------------------------------------------------------------------------|------|------|----------|-------|------|------|
| Rsa1.0_00043.1.g2520.t1 | gb EOA37666.1  hypothetical protein CARUB_v10012254mg [Capsella rubella]                                                                                                                                                                                                                                                                                                                                                                                                                                                                                                                                                                                                                                                                                                                                                                                                                                                                                                                                                                                                                                                                               | 389  | 401  | 0        | 103.1 | 94.9 | 97.2 | hypothetical protein CARUB_v10012254mg                        | gbpln | Capsella rubella     | AT1G33430.1   Symbols: Galactosyltransferase family protein   chr1:12124438-12126052 REVERSE LENGTH=395                           | 389  | 395  | 0        | 101.5 | 93.8 | 96.9 |
| Rsa1.0_00043.1.g2521.t1 | dbj BAE79546.1  carotenoid isomerase [Chrysanthemum x morifolium]                                                                                                                                                                                                                                                                                                                                                                                                                                                                                                                                                                                                                                                                                                                                                                                                                                                                                                                                                                                                                                                                                      | 66   | 641  | 2.00E-30 | 971.2 | 92.4 | 98.5 | carotenoid isomerase                                          | gbpln | Chrysanthemum x      | AT1G06820.1   Symbols: CRTISO, CCR2   carotenoid isomerase   chr1:2093145-2096220 REVERSE LENGTH=595                              | 66   | 595  | 3.00E-25 | 901.5 | 72.7 | 75.8 |
| Rsa1.0_00044.1.g2522.t1 | gb EOA20241.1  hypothetical protein CARUB_v10000542mg [Capsella rubella]                                                                                                                                                                                                                                                                                                                                                                                                                                                                                                                                                                                                                                                                                                                                                                                                                                                                                                                                                                                                                                                                               | 584  | 588  | 0        | 100.7 | 94.5 | 97.3 | hypothetical protein CARUB_v10000542mg                        | gbpln | Capsella rubella     | AT5G25880.1   Symbols: ATNADP-ME3, NADP-ME3   NADP-malic enzyme 3   chr5:9024549-9028260 FORWARD LENGTH=588                       | 584  | 588  | 0        | 100.7 | 93.5 | 96.6 |
| Rsa1.0_00044.1.g2523.t1 | # # # # # # # # # # - - - - # # # # # # #                                                                                                                                                                                                                                                                                                                                                                                                                                                                                                                                                                                                                                                                                                                                                                                                                                                                                                                                                                                                                                                                                                              |      |      |          |       |      |      |                                                               |       |                      |                                                                                                                                   |      |      |          |       |      |      |
| Rsa1.0_00044.1.g2524.t1 | ref NP_568478.1  auxin-responsive protein IAA28 [Arabidopsis thaliana] gi 1131406 sp Q9XFM0.1 IAA28_ARATH RecName: Full=Auxin-responsive protein IAA28; AltName: Full=Indoleacetic acid-induced protein 28 gi 4929493 gb AAD34019.1 AF149816.1 IAA28 [Arabidopsis thaliana] gi 23306354 gb AAN17404.1  putative protein [Arabidopsis thaliana] gi 25084149 gb AAN72186.1  putative protein [Arabidopsis thaliana] gi 49616373 gb AAT67083.1  IAA28 [Arabidopsis thaliana] gi 110736579 dbj BAF00255.1  IAA28 [Arabidopsis thaliana] gi 284794587 gb ADB93666.1  indole-3-acetic acid inducible 28 [Arabidopsis thaliana] gi 284794589 gb ADB93667.1  indole-3-acetic acid inducible 28 [Arabidopsis thaliana] gi 284794591 gb ADB93668.1  indole-3-acetic acid inducible 28 [Arabidopsis thaliana] gi 304322548 gb ADL70761.1  indole-3-acetic acid inducible 28 [Arabidopsis thaliana] gi 304322560 gb ADL70767.1  indole-3-acetic acid inducible 28 [Arabidopsis thaliana] gi 304322566 gb ADL70770.1  indole-3-acetic acid inducible 28 [Arabidopsis thaliana] gi 304322570 gb ADL70772.1  indole-3-acetic acid inducible 28 [Arabidopsis thaliana] | 174  | 175  | 2.00E-77 | 100.6 | 89.7 | 93.1 | auxin-responsive protein IAA28                                | gbpln | Arabidopsis thaliana | AT5G25890.1   Symbols: IAA28, IAR2   indole-3-acetic acid inducible 28   chr5:9033489-9034554 FORWARD LENGTH=175                  | 174  | 175  | 6.00E-80 | 100.6 | 89.7 | 93.1 |
| Rsa1.0_00044.1.g2525.t1 | dbj BAJ33740.1  unnamed protein product [Thellungiella halophila]                                                                                                                                                                                                                                                                                                                                                                                                                                                                                                                                                                                                                                                                                                                                                                                                                                                                                                                                                                                                                                                                                      | 506  | 506  | 0        | 100.0 | 91.3 | 95.3 | unnamed protein product                                       | ----  | ----                 | AT5G25900.1   Symbols: GA3, CYP701A3, ATK01   GA requiring 3   chr5:9036073-9038278 FORWARD LENGTH=509                            | 506  | 509  | 0        | 100.6 | 89.7 | 95.3 |
| Rsa1.0_00044.1.g2526.t1 | ref XP_002872190.1  leucine-rich repeat family protein [Arabidopsis lyrata subsp. lyrata] gi 297318027 gb EFH48449.1  leucine-rich repeat family protein [Arabidopsis lyrata subsp. lyrata] ref NP_197965.1  Protein kinase family protein with leucine-rich repeat domain [Arabidopsis thaliana] gi 5107831 gb AAD40144.1 AF149413.25 contains similarity to protein kinase domains (Pfam F00069, Score=162.6, E=6.8e-45, N=1) and leucine rich repeats (Pfam PF00560, Score=210.7, E=2.2e-59, N=10) [Arabidopsis thaliana] gi 28393326 gb AAO42089.1  putative receptor protein kinase [Arabidopsis thaliana] gi 224589685 gb ACN59374.1  leucine-rich repeat receptor-like protein kinase [Arabidopsis thaliana] gi 332006119 gb AED93502.1  Protein kinase family protein with leucine-rich repeat domain [Arabidopsis thaliana] ref XP_002874288.1  hypothetical protein ARALYDRAFT_351609 [Arabidopsis lyrata subsp. lyrata] gi 297320125 gb EFH50547.1  hypothetical protein ARALYDRAFT_351609 [Arabidopsis lyrata subsp. lyrata]                                                                                                               | 1005 | 1005 | 0        | 100.0 | 81.7 | 87.7 | leucine-rich repeat family protein                            | gbpln | Arabidopsis lyrata   | AT5G25930.1   Symbols:   Protein kinase family protein with leucine-rich repeat domain   chr5:9050880-9053978 FORWARD LENGTH=1005 | 1005 | 1005 | 0        | 100.0 | 81.1 | 87.3 |
| Rsa1.0_00044.1.g2527.t1 | ref NP_197965.1  Protein kinase family protein with leucine-rich repeat domain [Arabidopsis thaliana] gi 5107831 gb AAD40144.1 AF149413.25 contains similarity to protein kinase domains (Pfam F00069, Score=162.6, E=6.8e-45, N=1) and leucine rich repeats (Pfam PF00560, Score=210.7, E=2.2e-59, N=10) [Arabidopsis thaliana] gi 28393326 gb AAO42089.1  putative receptor protein kinase [Arabidopsis thaliana] gi 224589685 gb ACN59374.1  leucine-rich repeat receptor-like protein kinase [Arabidopsis thaliana] gi 332006119 gb AED93502.1  Protein kinase family protein with leucine-rich repeat domain [Arabidopsis thaliana] ref XP_002874288.1  hypothetical protein ARALYDRAFT_351609 [Arabidopsis lyrata subsp. lyrata] gi 297320125 gb EFH50547.1  hypothetical protein ARALYDRAFT_351609 [Arabidopsis lyrata subsp. lyrata]                                                                                                                                                                                                                                                                                                           | 371  | 1005 | 2.00E-56 | 270.9 | 29.4 | 35.3 | Protein kinase family protein with leucine-rich repeat domain | gbpln | Arabidopsis thaliana | AT5G25930.1   Symbols:   Protein kinase family protein with leucine-rich repeat domain   chr5:9050880-9053978 FORWARD LENGTH=1005 | 371  | 1005 | 5.00E-59 | 270.9 | 29.4 | 35.3 |
| Rsa1.0_00044.1.g2528.t1 | ref XP_002874288.1  hypothetical protein ARALYDRAFT_351609 [Arabidopsis lyrata subsp. lyrata] gi 297320125 gb EFH50547.1  hypothetical protein ARALYDRAFT_351609 [Arabidopsis lyrata subsp. lyrata]                                                                                                                                                                                                                                                                                                                                                                                                                                                                                                                                                                                                                                                                                                                                                                                                                                                                                                                                                    | 412  | 413  | 0        | 100.2 | 79.4 | 87.6 | hypothetical protein ARALYDRAFT_351609                        | gbpln | Arabidopsis lyrata   | AT5G25950.1   Symbols:   Protein of Unknown Function (DUF239)   chr5:9057929-9059860 REVERSE LENGTH=432                           | 412  | 432  | 0        | 104.9 | 75.5 | 86.4 |
| Rsa1.0_00044.1.g2529.t1 | gb EOA19883.1  hypothetical protein CARUB_v10000132mg [Capsella rubella]                                                                                                                                                                                                                                                                                                                                                                                                                                                                                                                                                                                                                                                                                                                                                                                                                                                                                                                                                                                                                                                                               | 160  | 1006 | 1.00E-55 | 628.8 | 66.3 | 78.1 | hypothetical protein CARUB_v10000132mg                        | gbpln | Capsella rubella     | AT5G25930.1   Symbols:   Protein kinase family protein with leucine-rich repeat domain   chr5:9050880-9053978 FORWARD LENGTH=1005 | 160  | 1005 | 1.00E-57 | 628.1 | 65.0 | 78.1 |

|                         |                                                                                                                                                                                                                                                                                                                                                                                                              |     |      |           |        |      |      |                                                 |       |                      |                                                                                                                                                                                                                                                                                                                                                   |     |     |           |       |      |      |
|-------------------------|--------------------------------------------------------------------------------------------------------------------------------------------------------------------------------------------------------------------------------------------------------------------------------------------------------------------------------------------------------------------------------------------------------------|-----|------|-----------|--------|------|------|-------------------------------------------------|-------|----------------------|---------------------------------------------------------------------------------------------------------------------------------------------------------------------------------------------------------------------------------------------------------------------------------------------------------------------------------------------------|-----|-----|-----------|-------|------|------|
| Rsa1.0_00044.1.g2530.t1 | refXP_002874288.1  hypothetical protein ARALYDRAFT_351609 [Arabidopsis lyrata subsp. lyrata] gi 297320125 gb EFH50547.1                                                                                                                                                                                                                                                                                      | 412 | 413  | 0         | 100.2  | 79.6 | 89.3 | hypothetical protein ARALYDRAFT_351609          | gbpln | Arabidopsis lyrata   | AT5G25950.1   Symbols:   Protein of Unknown Function (DUF239)   chr5:9057929-9059860 REVERSE LENGTH=432                                                                                                                                                                                                                                           | 412 | 432 | 0         | 104.9 | 74.0 | 86.2 |
| Rsa1.0_00044.1.g2531.t1 | hypothetical protein ARALYDRAFT_351609 [Arabidopsis lyrata subsp. lyrata]<br>refXP_002872192.1  hypothetical protein ARALYDRAFT_910666 [Arabidopsis lyrata subsp. lyrata] gi 297318029 gb EFH48451.1                                                                                                                                                                                                         | 448 | 386  | 0         | 86.2   | 73.7 | 79.0 | hypothetical protein ARALYDRAFT_910666          | gbpln | Arabidopsis lyrata   | AT5G25970.1   Symbols:   Core-2/1-branching beta-1,6-N-acetylglucosaminyltransferase family protein   chr5:9066697-9067974 FORWARD LENGTH=387                                                                                                                                                                                                     | 448 | 387 | 0         | 86.4  | 72.5 | 78.1 |
| Rsa1.0_00044.1.g2532.t1 | gb EOA23016.1  hypothetical protein CARUB_v10003772mg [Capsella rubella]                                                                                                                                                                                                                                                                                                                                     | 338 | 331  | 1.00E-157 | 97.9   | 82.0 | 89.1 | hypothetical protein CARUB_v10003772mg          | gbpln | Capsella rubella     | AT5G26010.1   Symbols:   Protein phosphatase 2C family protein   chr5:9085512-9087372 REVERSE LENGTH=331                                                                                                                                                                                                                                          | 338 | 331 | 1.00E-158 | 97.9  | 83.7 | 89.6 |
| Rsa1.0_00044.1.g2533.t1 | refXP_002872194.1  ferrochelatase I [Arabidopsis lyrata subsp. lyrata] gi 297318031 gb EFH48453.1  ferrochelatase I [Arabidopsis lyrata subsp. lyrata]                                                                                                                                                                                                                                                       | 466 | 466  | 0         | 100.0  | 86.9 | 91.4 | ferrochelatase I                                | gbpln | Arabidopsis lyrata   | AT5G26030.2   Symbols: FC1, FC-1, ATFC-1   ferrochelatase 1   chr5:9096675-9098752 FORWARD LENGTH=466                                                                                                                                                                                                                                             | 466 | 466 | 0         | 100.0 | 85.4 | 91.2 |
| Rsa1.0_00044.1.g2534.t1 | refNP_568480.2  histone deacetylase 2 [Arabidopsis thaliana] gi 14555894.1 sp Q944K3.2 HDA2_ARAT H RecName: Full=Histone deacetylase 2 gi 332006134 gb AED93517.1  histone deacetylase 2 [Arabidopsis thaliana]                                                                                                                                                                                              | 349 | 387  | 0         | 110.9  | 88.8 | 93.4 | histone deacetylase 2                           | gbpln | Arabidopsis thaliana | AT5G26040.2   Symbols: HDA2   histone deacetylase 2   chr5:9099321-9101598 REVERSE LENGTH=387                                                                                                                                                                                                                                                     | 349 | 387 | 0         | 110.9 | 88.8 | 93.4 |
| Rsa1.0_00044.1.g2535.t1 | gb AAD40130.1 AF149413.11 T1N24.10 gene product [Arabidopsis thaliana]                                                                                                                                                                                                                                                                                                                                       | 157 | 375  | 5.00E-69  | 238.9  | 80.3 | 90.4 | T1N24.10 gene product                           | gbpln | Arabidopsis thaliana | AT5G26050.1   Symbols:   Plant self-incompatibility protein S1 family   chr5:9103395-9103877 REVERSE LENGTH=160                                                                                                                                                                                                                                   | 157 | 160 | 3.00E-70  | 101.9 | 80.3 | 90.4 |
| Rsa1.0_00044.1.g2536.t1 | refNP_568481.1  self-incompatibility S1 family protein [Arabidopsis thaliana] gi 51969422 dbj BAD43403.1  unknown protein [Arabidopsis thaliana] gi 51969814 dbj BAD43599.1  unknown protein [Arabidopsis thaliana] gi 91806910 gb ABE66182.1  S1 self-incompatibility protein-like protein [Arabidopsis thaliana] gi 332006136 gb AED93519.1  self-incompatibility S1 family protein [Arabidopsis thaliana] | 155 | 154  | 2.00E-70  | 99.4   | 79.4 | 92.3 | self-incompatibility S1 family protein          | gbpln | Arabidopsis thaliana | AT5G26060.1   Symbols:   Plant self-incompatibility protein S1 family   chr5:9105013-9105477 REVERSE LENGTH=154                                                                                                                                                                                                                                   | 155 | 154 | 5.00E-73  | 99.4  | 79.4 | 92.3 |
| Rsa1.0_00044.1.g2537.t1 | refNP_197979.1  hydroxyproline-rich glycoprotein family protein [Arabidopsis thaliana] gi 67633826 gb AAV78837.1  hydroxyproline-rich glycoprotein family protein [Arabidopsis thaliana] gi 332006137 gb AED93520.1  hydroxyproline-rich glycoprotein family protein [Arabidopsis thaliana]                                                                                                                  | 166 | 102  | 6.00E-13  | 61.4   | 47.0 | 49.4 | hydroxyproline-rich glycoprotein family protein | gbpln | Arabidopsis thaliana | AT5G26070.1   Symbols:   hydroxyproline-rich glycoprotein family protein   chr5:9106341-9106649 FORWARD LENGTH=102                                                                                                                                                                                                                                | 166 | 102 | 2.00E-15  | 61.4  | 47.0 | 49.4 |
| Rsa1.0_00044.1.g2538.t1 | gb EOA19542.1  hypothetical protein CARUB_v10002514mg [Capsella rubella]                                                                                                                                                                                                                                                                                                                                     | 194 | 398  | 1.00E-68  | 205.2  | 64.4 | 71.6 | hypothetical protein CARUB_v10002514mg          | gbpln | Capsella rubella     | AT5G26090.1   Symbols:   Plant self-incompatibility protein S1 family   chr5:9109028-9113235 REVERSE LENGTH=401                                                                                                                                                                                                                                   | 194 | 401 | 3.00E-68  | 206.7 | 59.8 | 68.6 |
| Rsa1.0_00044.1.g2539.t1 | refXP_002886410.1  ATP binding protein [Arabidopsis lyrata subsp. lyrata] gi 297332251 gb EFH62669.1  ATP binding protein [Arabidopsis lyrata subsp. lyrata]                                                                                                                                                                                                                                                 | 386 | 226  | 1.00E-110 | 58.5   | 51.0 | 53.4 | ATP binding protein                             | gbpln | Arabidopsis lyrata   | AT5G26110.1   Symbols:   Protein kinase superfamily protein   chr5:9118239-9119352 REVERSE LENGTH=226                                                                                                                                                                                                                                             | 386 | 226 | 1.00E-112 | 58.5  | 51.0 | 52.8 |
| Rsa1.0_00044.1.g2540.t1 | emb CAB39638.1  RNA-directed DNA polymerase-like protein [Arabidopsis thaliana] gi 7267666 emb CAB78094.1  RNA-directed DNA polymerase-like protein [Arabidopsis thaliana]                                                                                                                                                                                                                                   | 111 | 1274 | 3.00E-24  | 1147.7 | 49.5 | 63.1 | RNA-directed DNA polymerase-like protein        | gbpln | Arabidopsis thaliana | # # # # # #                                                                                                                                                                                                                                                                                                                                       | #   | #   | #         | #     | #    | #    |
| Rsa1.0_00044.1.g2541.t1 | refNP_197988.3  uncharacterized protein [Arabidopsis thaliana] gi 30793967 gb AAP40435.1  unknown protein [Arabidopsis thaliana] gi 110736920 dbj BAF00417.1  hypothetical protein [Arabidopsis thaliana] gi 332006148 gb AED93531.1  uncharacterized protein AT5G26160 [Arabidopsis thaliana]                                                                                                               | 926 | 976  | 0         | 105.4  | 74.4 | 83.2 | uncharacterized protein                         | gbpln | Arabidopsis thaliana | AT5G26160.1   Symbols:   unknown protein; BEST Arabidopsis thaliana protein match is: unknown protein (TAIR:AT5G20610.1); Has 197 Blast hits to 158 proteins in 44 species: Archae - 0; Bacteria - 14; Metazoa - 28; Fungi - 15; Plants - 117; Viruses - 2; Other Eukaryotes - 21 (source: NCBI BLINK).   chr5:9143269-9146312 FORWARD LENGTH=976 | 926 | 976 | 0         | 105.4 | 74.4 | 83.2 |

|                         |                                                                                                                                                                                                                                                                                                                                                                                                                                                                      |     |     |           |       |      |      |                                        |       |                      |                                                                                                                                                                                                                                                                                                                                                                                                                                                           |     |     |           |       |      |      |
|-------------------------|----------------------------------------------------------------------------------------------------------------------------------------------------------------------------------------------------------------------------------------------------------------------------------------------------------------------------------------------------------------------------------------------------------------------------------------------------------------------|-----|-----|-----------|-------|------|------|----------------------------------------|-------|----------------------|-----------------------------------------------------------------------------------------------------------------------------------------------------------------------------------------------------------------------------------------------------------------------------------------------------------------------------------------------------------------------------------------------------------------------------------------------------------|-----|-----|-----------|-------|------|------|
| Rsa1.0_00044.1.g2542.t1 | ref[NP_197989.2] putative WRKY transcription factor 50 [Arabidopsis thaliana]<br>gi 29839580 sp Q8VWQ5.1 WRK50_ARATH RecName: Full=Probable WRKY transcription factor 50; AltName: Full=WRKY DNA-binding protein 50 gi 18252111 gb AAL61857.1  WRKY transcription factor 50 [Arabidopsis thaliana] gi 225898933 dbj BAH30597.1  hypothetical protein [Arabidopsis thaliana] gi 332006149 gb AED93532.1  putative WRKY transcription factor 50 [Arabidopsis thaliana] | 177 | 173 | 3.00E-67  | 97.7  | 78.0 | 85.3 | putative WRKY transcription factor 50  | gbpln | Arabidopsis thaliana | AT5G26170.1   Symbols: WRKY50, ATWRKY50   WRKY DNA-binding protein 50   chr5:9147176-9148128 REVERSE LENGTH=173                                                                                                                                                                                                                                                                                                                                           | 177 | 173 | 1.00E-69  | 97.7  | 78.0 | 85.3 |
| Rsa1.0_00044.1.g2543.t1 | #                                                                                                                                                                                                                                                                                                                                                                                                                                                                    | #   | #   | #         | #     | #    | #    | -                                      | ----  | ----                 | #                                                                                                                                                                                                                                                                                                                                                                                                                                                         | #   | #   | #         | #     | #    |      |
| Rsa1.0_00044.1.g2544.t1 | gb EOA22853.1  hypothetical protein CARUB_v10003583mg [Capsella rubella]                                                                                                                                                                                                                                                                                                                                                                                             | 340 | 344 | 1.00E-174 | 101.2 | 87.9 | 94.7 | hypothetical protein CARUB_v10003583mg | gbpln | Capsella rubella     | AT5G26200.1   Symbols:   Mitochondrial substrate carrier family protein   chr5:9157268-9158296 FORWARD LENGTH=342                                                                                                                                                                                                                                                                                                                                         | 340 | 342 | 1.00E-174 | 100.6 | 86.5 | 94.7 |
| Rsa1.0_00044.1.g2545.t1 | ref XP_002516111.1  DNA binding protein, putative [Ricinus communis] gi 223544597 gb EEF46113.1  DNA binding protein, putative [Ricinus communis]                                                                                                                                                                                                                                                                                                                    | 260 | 251 | 1.00E-107 | 96.5  | 79.6 | 88.5 | DNA binding protein, putative          | gbpln | Ricinus communis     | AT5G26210.1   Symbols: AL4   alfin-like 4   chr5:9158566-9160221 REVERSE LENGTH=255                                                                                                                                                                                                                                                                                                                                                                       | 260 | 255 | 5.00E-97  | 98.1  | 88.8 | 93.5 |
| Rsa1.0_00044.1.g2546.t1 | ref NP_198719.1  putative receptor-like protein kinase [Arabidopsis thaliana] gi 75333904 sp O9FID5.1 Y5393_ARATH RecName: Full=Probable receptor-like protein kinase At5g39030; Flags: Precursor gi 10177548 dbj BAB10827.1  receptor protein kinase-like protein [Arabidopsis thaliana] gi 332007006 gb AED94389.1  putative receptor-like protein kinase [Arabidopsis thaliana]                                                                                   | 780 | 806 | 0         | 103.3 | 64.5 | 76.4 | putative receptor-like protein kinase  | gbpln | Arabidopsis thaliana | AT5G39030.1   Symbols:   Protein kinase superfamily protein   chr5:15620066-15622486 FORWARD LENGTH=806                                                                                                                                                                                                                                                                                                                                                   | 780 | 806 | 0         | 103.3 | 64.5 | 76.4 |
| Rsa1.0_00044.1.g2547.t1 | #                                                                                                                                                                                                                                                                                                                                                                                                                                                                    | #   | #   | #         | #     | #    | #    | -                                      | ----  | ----                 | #                                                                                                                                                                                                                                                                                                                                                                                                                                                         | #   | #   | #         | #     | #    |      |
| Rsa1.0_00044.1.g2548.t1 | ref NP_197995.1  uncharacterized protein [Arabidopsis thaliana] gi 122214260 sp G3E936.1 MAKR1_ARATH RecName: Full=Probable membrane-associated kinase regulator 1 gi 332006156 gb AED93539.1  uncharacterized protein AT5G26230 [Arabidopsis thaliana]                                                                                                                                                                                                              | 331 | 341 | 1.00E-105 | 103.0 | 78.5 | 85.8 | uncharacterized protein                | gbpln | Arabidopsis thaliana | AT5G26230.1   Symbols:   unknown protein; FUNCTIONS IN: molecular function unknown; INVOLVED IN: biological process unknown; LOCATED IN: chloroplast; EXPRESSED IN: 22 plant structures; EXPRESSED DURING: 13 growth stages; Has 1807 Blast hits to 1807 proteins in 277 species: Archae - 0; Bacteria - 0; Metazoa - 736; Fungi - 347; Plants - 385; Viruses - 0; Other Eukaryotes - 339 (source: NCBI BLink).   chr5:9173517-9174542 REVERSE LENGTH=341 | 331 | 341 | 1.00E-108 | 103.0 | 78.5 | 85.8 |
| Rsa1.0_00044.1.g2549.t1 | #                                                                                                                                                                                                                                                                                                                                                                                                                                                                    | #   | #   | #         | #     | #    | #    | -                                      | ----  | ----                 | #                                                                                                                                                                                                                                                                                                                                                                                                                                                         | #   | #   | #         | #     | #    |      |
| Rsa1.0_00044.1.g2550.t1 | ref NP_197996.1  chloride channel protein CLC-d [Arabidopsis thaliana] gi 41688458 sp P92943.2 CLCD_ARATH RecName: Full=Chloride channel protein CLC-d; Short=ATCLC-d; AltName: Full=CBS domain-containing protein CBSCLC2 gi 332006157 gb AED93540.1  chloride channel protein CLC-d [Arabidopsis thaliana]                                                                                                                                                         | 793 | 792 | 0         | 99.9  | 96.3 | 97.9 | chloride channel protein CLC-d         | gbpln | Arabidopsis thaliana | AT5G26240.1   Symbols: CLC-D, ATCLC-D   chloride channel D   chr5:9189622-9194347 FORWARD LENGTH=792                                                                                                                                                                                                                                                                                                                                                      | 793 | 792 | 0         | 99.9  | 96.3 | 97.9 |
| Rsa1.0_00044.1.g2551.t1 | gb EOA22969.1  hypothetical protein CARUB_v10003709mg [Capsella rubella]                                                                                                                                                                                                                                                                                                                                                                                             | 499 | 507 | 0         | 101.6 | 83.6 | 92.0 | hypothetical protein CARUB_v10003709mg | gbpln | Capsella rubella     | AT5G26250.1   Symbols:   Major facilitator superfamily protein   chr5:9196758-9198681 FORWARD LENGTH=507                                                                                                                                                                                                                                                                                                                                                  | 499 | 507 | 0         | 101.6 | 83.6 | 92.0 |
| Rsa1.0_00044.1.g2552.t1 | ref XP_002872211.1  hypothetical protein ARALYDRAFT_489472 [Arabidopsis lyrata subsp. lyrata] gi 297318048 gb EFH48470.1  hypothetical protein ARALYDRAFT_489472 [Arabidopsis lyrata subsp. lyrata]                                                                                                                                                                                                                                                                  | 350 | 350 | 1.00E-174 | 100.0 | 86.0 | 89.7 | hypothetical protein ARALYDRAFT_489472 | gbpln | Arabidopsis lyrata   | AT5G26280.1   Symbols:   TRAF-like family protein   chr5:9208724-9210403 FORWARD LENGTH=350                                                                                                                                                                                                                                                                                                                                                               | 350 | 350 | 1.00E-176 | 100.0 | 85.4 | 90.0 |
| Rsa1.0_00044.1.g2553.t3 | ref XP_002872211.1  hypothetical protein ARALYDRAFT_489472 [Arabidopsis lyrata subsp. lyrata] gi 297318048 gb EFH48470.1  hypothetical protein ARALYDRAFT_489472 [Arabidopsis lyrata subsp. lyrata]                                                                                                                                                                                                                                                                  | 357 | 350 | 1.00E-158 | 98.0  | 79.0 | 85.2 | hypothetical protein ARALYDRAFT_489472 | gbpln | Arabidopsis lyrata   | AT5G26280.1   Symbols:   TRAF-like family protein   chr5:9208724-9210403 FORWARD LENGTH=350                                                                                                                                                                                                                                                                                                                                                               | 357 | 350 | 1.00E-157 | 98.0  | 76.8 | 84.6 |

|                         |                                                                                                                                                                                                                                                                                                                                                                                                                                                                                                                                                                                                                                                                                                                                    |      |      |           |       |      |      |                                                     |       |                      |                                                                                                                                                                                                                                                                                                                                                                                                              |      |     |           |       |      |      |
|-------------------------|------------------------------------------------------------------------------------------------------------------------------------------------------------------------------------------------------------------------------------------------------------------------------------------------------------------------------------------------------------------------------------------------------------------------------------------------------------------------------------------------------------------------------------------------------------------------------------------------------------------------------------------------------------------------------------------------------------------------------------|------|------|-----------|-------|------|------|-----------------------------------------------------|-------|----------------------|--------------------------------------------------------------------------------------------------------------------------------------------------------------------------------------------------------------------------------------------------------------------------------------------------------------------------------------------------------------------------------------------------------------|------|-----|-----------|-------|------|------|
|                         | ref[NP_198006.1] sugar transport protein 13 [Arabidopsis thaliana]   g[185701281]   sp[G94AZ2.2]   STP13 ARAT H RecName: Full=Sugar transport protein 13; AltName: Full=Hexose transporter 13; AltName: Full=Multicopy suppressor of snf4 deficiency protein 1   g[19965739]   gb AAG10146.1 AF250340.1 putative hexose transporter MSS1 [Arabidopsis thaliana]   g[3319354]   gb AAC26243.1  contains similarity to sugar transporters (Pfam: sugar_tr.hmm, score: 395.39) [Arabidopsis thaliana]   g[15450649]   gb AAK96596.1  AT5g26340/F9D12.17 [Arabidopsis thaliana]   g[15487259]   emb CAG69074.1  STP13 protein [Arabidopsis thaliana]   g[332006170]   gb AED93553.1  sugar transport protein 13 [Arabidopsis thaliana] | 349  | 526  | 1.00E-153 | 150.7 | 76.5 | 81.4 | sugar transport protein 13                          | gbpln | Arabidopsis thaliana | AT5G26340.1   Symbols: MSS1, STP13, ATSTP13   Major facilitator superfamily protein   chr5:9243851-9246994 REVERSE LENGTH=526                                                                                                                                                                                                                                                                                | 349  | 526 | 1.00E-155 | 150.7 | 76.5 | 81.4 |
| Rsa1.0_00044.1.g2554.t1 | gb EOA20395.1  hypothetical protein CARUB_v10000707mg [Capsella rubella]                                                                                                                                                                                                                                                                                                                                                                                                                                                                                                                                                                                                                                                           | 196  | 525  | 6.00E-92  | 267.9 | 88.8 | 92.9 | hypothetical protein CARUB_v10000707mg              | gbpln | Capsella rubella     | AT5G26340.1   Symbols: MSS1, STP13, ATSTP13   Major facilitator superfamily protein   chr5:9243851-9246994 REVERSE LENGTH=526                                                                                                                                                                                                                                                                                | 196  | 526 | 3.00E-92  | 268.4 | 85.7 | 90.3 |
| Rsa1.0_00044.1.g2556.t8 | gb AAD21778.1  putative non-LTR retroelement reverse transcriptase [Arabidopsis thaliana]                                                                                                                                                                                                                                                                                                                                                                                                                                                                                                                                                                                                                                          | 1831 | 1715 | 0         | 93.7  | 32.4 | 46.5 | putative non-LTR retroelement reverse transcriptase | gbpln | Arabidopsis thaliana | AT5G26667.3   Symbols: PYR6   P-loop containing nucleoside triphosphate hydrolases superfamily protein   chr5:9276659-9278091 FORWARD LENGTH=202                                                                                                                                                                                                                                                             | 1831 | 202 | 1.00E-105 | 11.0  | 10.3 | 10.6 |
| Rsa1.0_00044.1.g2557.t1 | emb CAA09196.1  RNA helicase [Arabidopsis thaliana]                                                                                                                                                                                                                                                                                                                                                                                                                                                                                                                                                                                                                                                                                | 813  | 748  | 0         | 92.0  | 83.8 | 87.2 | RNA helicase                                        | gbpln | Arabidopsis thaliana | AT5G26742.2   Symbols: emb1138   DEAD box RNA helicase (RH3)   chr5:9285540-9288871 REVERSE LENGTH=748                                                                                                                                                                                                                                                                                                       | 813  | 748 | 0         | 92.0  | 83.8 | 87.2 |
| Rsa1.0_00044.1.g2558.t1 | gb EOA20719.1  hypothetical protein CARUB_v10001039mg [Capsella rubella]                                                                                                                                                                                                                                                                                                                                                                                                                                                                                                                                                                                                                                                           | 420  | 422  | 0         | 100.5 | 92.6 | 94.5 | hypothetical protein CARUB_v10001039mg              | gbpln | Capsella rubella     | AT5G26740.3   Symbols:   Protein of unknown function (DUF300)   chr5:9292436-9294407 FORWARD LENGTH=422                                                                                                                                                                                                                                                                                                      | 420  | 422 | 0         | 100.5 | 91.7 | 94.0 |
| Rsa1.0_00044.1.g2559.t1 | gb AAM64547.1  unknown [Arabidopsis thaliana]                                                                                                                                                                                                                                                                                                                                                                                                                                                                                                                                                                                                                                                                                      | 101  | 99   | 6.00E-22  | 98.0  | 60.4 | 64.4 | unknown                                             | gbpln | Arabidopsis thaliana | AT5G26731.1   Symbols:   unknown protein; Has 30201 Blast hits to 17322 proteins in 780 species: Archae - 12; Bacteria - 1396; Metazoa - 17338; Fungi - 3422; Plants - 5037; Viruses - 0; Other Eukaryotes - 2996 (source: NCBI BLINK).   chr5:9295676-9295975 FORWARD LENGTH=99                                                                                                                             | 101  | 99  | 1.00E-24  | 98.0  | 60.4 | 64.4 |
| Rsa1.0_00044.1.g2560.t1 | gb EOA19490.1  hypothetical protein CARUB_v10002163mg, partial [Capsella rubella]                                                                                                                                                                                                                                                                                                                                                                                                                                                                                                                                                                                                                                                  | 100  | 158  | 3.00E-37  | 158.0 | 80.0 | 93.0 | hypothetical protein CARUB_v10002163mg, partial     | gbpln | Capsella rubella     | AT3G05936.1   Symbols:   unknown protein; FUNCTIONS IN: molecular_function unknown; INVOLVED IN: biological_process unknown; LOCATED IN: cellular_component unknown; Has 30201 Blast hits to 17322 proteins in 780 species: Archae - 12; Bacteria - 1396; Metazoa - 17338; Fungi - 3422; Plants - 5037; Viruses - 0; Other Eukaryotes - 2996 (source: NCBI BLINK).   chr3:1774062-1774403 REVERSE LENGTH=113 | 100  | 113 | 1.00E-28  | 113.0 | 61.0 | 75.0 |
| Rsa1.0_00044.1.g2561.t1 | ref[NP_850872.1] Fasciclin-like arabinogalactan family protein [Arabidopsis thaliana]   g[332006188]   gb AED93571.1  Fasciclin-like arabinogalactan family protein [Arabidopsis thaliana]                                                                                                                                                                                                                                                                                                                                                                                                                                                                                                                                         | 105  | 268  | 3.00E-40  | 255.2 | 89.5 | 95.2 | Fasciclin-like arabinogalactan family protein       | gbpln | Arabidopsis thaliana | AT5G26730.1   Symbols:   Fasciclin-like arabinogalactan family protein   chr5:9300422-9301990 FORWARD LENGTH=268                                                                                                                                                                                                                                                                                             | 105  | 268 | 4.00E-43  | 255.2 | 89.5 | 95.2 |
| Rsa1.0_00044.1.g2562.t1 | ref[XP_002872222.1] hypothetical protein ARALYDRAFT_351658 [Arabidopsis lyrata subsp. lyrata]   g[297318059]   gb EFH48481.1  hypothetical protein ARALYDRAFT_351658 [Arabidopsis lyrata subsp. lyrata]                                                                                                                                                                                                                                                                                                                                                                                                                                                                                                                            | 147  | 285  | 1.00E-52  | 193.9 | 66.7 | 85.0 | hypothetical protein ARALYDRAFT_351658              | gbpln | Arabidopsis lyrata   | AT5G26730.1   Symbols:   Fasciclin-like arabinogalactan family protein   chr5:9300422-9301990 FORWARD LENGTH=268                                                                                                                                                                                                                                                                                             | 147  | 268 | 7.00E-55  | 182.3 | 66.7 | 85.0 |
| Rsa1.0_00044.1.g2563.t2 | ref[NP_850873.1] uncharacterized protein [Arabidopsis thaliana]   g[26451568]   dbj BAC42881.1  unknown protein [Arabidopsis thaliana]   g[28827232]   gb AAO50460.1  unknown protein [Arabidopsis thaliana]   g[332006189]   gb AED93572.1  uncharacterized protein AT5G26720 [Arabidopsis thaliana]                                                                                                                                                                                                                                                                                                                                                                                                                              | 376  | 134  | 3.00E-25  | 35.6  | 23.4 | 28.5 | uncharacterized protein                             | gbpln | Arabidopsis thaliana | AT5G26720.1   Symbols:   unknown protein; Has 15 Blast hits to 15 proteins in 5 species: Archae - 0; Bacteria - 0; Metazoa - 0; Fungi - 0; Plants - 15; Viruses - 0; Other Eukaryotes - 0 (source: NCBI BLINK).   chr5:9304105-9304509 FORWARD LENGTH=134                                                                                                                                                    | 376  | 134 | 7.00E-28  | 35.6  | 23.4 | 28.5 |
| Rsa1.0_00044.1.g2564.t1 | gb AAM61454.1  unknown [Arabidopsis thaliana]                                                                                                                                                                                                                                                                                                                                                                                                                                                                                                                                                                                                                                                                                      | 126  | 126  | 1.00E-28  | 100.0 | 56.3 | 73.0 | unknown                                             | gbpln | Arabidopsis thaliana | AT3G05920.1   Symbols:   Heavy metal transport/detoxification superfamily protein   chr3:1768991-1769522 REVERSE LENGTH=126                                                                                                                                                                                                                                                                                  | 126  | 126 | 3.00E-31  | 100.0 | 56.3 | 73.0 |

|                         |                                                                                                                                                                                                                                                                                                                                                                                                                                                                                                                                                        |      |      |           |       |      |      |                                                                                                                                                                  |       |                      |                                                                                                                                                                                                                                                                                                                                                                                                            |      |      |           |       |      |      |
|-------------------------|--------------------------------------------------------------------------------------------------------------------------------------------------------------------------------------------------------------------------------------------------------------------------------------------------------------------------------------------------------------------------------------------------------------------------------------------------------------------------------------------------------------------------------------------------------|------|------|-----------|-------|------|------|------------------------------------------------------------------------------------------------------------------------------------------------------------------|-------|----------------------|------------------------------------------------------------------------------------------------------------------------------------------------------------------------------------------------------------------------------------------------------------------------------------------------------------------------------------------------------------------------------------------------------------|------|------|-----------|-------|------|------|
| Rsa1.0_00044.1.g2565.t1 | refXP_002874315.1   hypothetical protein ARALYDRAFT_489493 [Arabidopsis lyrata subsp. lyrata] gi 297320152 gb EFH50574.1   hypothetical protein ARALYDRAFT_489493 [Arabidopsis lyrata subsp. lyrata]                                                                                                                                                                                                                                                                                                                                                   | 417  | 448  | 0         | 107.4 | 90.9 | 95.2 | hypothetical protein ARALYDRAFT_489493                                                                                                                           | gbpln | Arabidopsis lyrata   | AT5G26680.2   Symbols:   5'-3' exonuclease family protein   chr5:9311882-9315458 REVERSE LENGTH=383                                                                                                                                                                                                                                                                                                        | 417  | 383  | 0         | 91.8  | 82.5 | 85.4 |
| Rsa1.0_00044.1.g2566.t1 | refNP_850878.2   Pectinacetylase family protein [Arabidopsis thaliana] gi 51536518 gb AAU05497.1   At5g26670 [Arabidopsis thaliana] gi 332006195 gb AED93578.1   Pectinacetylase family protein [Arabidopsis thaliana]                                                                                                                                                                                                                                                                                                                                 | 416  | 416  | 0         | 100.0 | 92.8 | 96.6 | Pectinacetylase family protein                                                                                                                                   | gbpln | Arabidopsis thaliana | AT5G26670.1   Symbols:   Pectinacetylase family protein   chr5:9318456-9320816 FORWARD LENGTH=416                                                                                                                                                                                                                                                                                                          | 416  | 416  | 0         | 100.0 | 92.8 | 96.6 |
| Rsa1.0_00044.1.g2567.t1 | gb AAG50806.1 AC079281.8 unknown protein [Arabidopsis thaliana]                                                                                                                                                                                                                                                                                                                                                                                                                                                                                        | 1755 | 1213 | 0         | 69.1  | 25.2 | 37.9 | unknown protein                                                                                                                                                  | gbpln | Arabidopsis thaliana | AT1G43760.1   Symbols:   DNase I-like superfamily protein   chr1:16528880-16531065 REVERSE LENGTH=626                                                                                                                                                                                                                                                                                                      | 1755 | 626  | 2.00E-62  | 35.7  | 9.2  | 15.2 |
| Rsa1.0_00044.1.g2568.t1 | refNP_850879.1   transcription factor MYB86 [Arabidopsis thaliana] gi 56749347 sp Q8LPH6.1 MYB86_ARATH RecName: Full=Transcription factor MYB86; AltName: Full=Myb homolog 4; Short=AtMyb4; AltName: Full=Myb-related protein 86; Short=AtMYB86 gi 20466622 gb AAM20628.1   transcription factor ATMYB4 [Arabidopsis thaliana] gi 30984580 gb AAP42753.1   At5g26655 [Arabidopsis thaliana] gi 41619424 gb AAS10099.1   MYB transcription factor [Arabidopsis thaliana] gi 332006197 gb AED93580.1   transcription factor MYB86 [Arabidopsis thaliana] | 355  | 352  | 1.00E-159 | 99.2  | 85.9 | 90.4 | transcription factor MYB86                                                                                                                                       | gbpln | Arabidopsis thaliana | AT5G26660.1   Symbols: ATMYB86, MYB86   myb domain protein 86   chr5:9331775-9333044 REVERSE LENGTH=352                                                                                                                                                                                                                                                                                                    | 355  | 352  | 1.00E-162 | 99.2  | 85.9 | 90.4 |
| Rsa1.0_00044.1.g2569.t2 | gb AAD21687.1  Strong similarity to gi 3600044 T12H20.12 protease homolog from Arabidopsis thaliana BAC gb AF080119 and is a member of the reverse transcriptase family PF00078 [Arabidopsis thaliana]                                                                                                                                                                                                                                                                                                                                                 | 1188 | 1415 | 0         | 119.1 | 37.4 | 44.9 | Strong similarity to gi 3600044 T12H20.12 protease homolog from Arabidopsis thaliana BAC gb AF080119 and is a member of the reverse transcriptase family PF00078 | gbpln | Arabidopsis thaliana | AT4G23160.1   Symbols: CRK8   cysteine-rich RLK (RECEPTOR-like protein kinase) 8   chr4:12129485-12134086 FORWARD LENGTH=1262                                                                                                                                                                                                                                                                              | 1188 | 1262 | 9.00E-86  | 106.2 | 14.3 | 21.9 |
| Rsa1.0_00044.1.g2570.t1 | refNP_174444.1   agamous-like MADS-box protein AGL86 [Arabidopsis thaliana] gi 75333444 sp Q9C6V3.1 AGL86_ARATH RecName: Full=Agamous-like MADS-box protein AGL86 gi 12597831 gb AAG60141.1 AC074360.6 MADS-box protein, putative [Arabidopsis thaliana] gi 67633410 gb AA78630.1   MADS-box family protein [Arabidopsis thaliana] gi 332193257 gb AEE31378.1   agamous-like MADS-box protein AGL86 [Arabidopsis thaliana]                                                                                                                             | 364  | 339  | 7.00E-45  | 93.1  | 35.7 | 49.2 | agamous-like MADS-box protein AGL86                                                                                                                              | gbpln | Arabidopsis thaliana | AT1G31630.1   Symbols: AGL86   AGAMOUS-like 86   chr1:11318528-11319547 REVERSE LENGTH=339                                                                                                                                                                                                                                                                                                                 | 364  | 339  | 2.00E-47  | 93.1  | 35.7 | 49.2 |
| Rsa1.0_00044.1.g2571.t1 | gb EAY96485.1   hypothetical protein Os_18385 [Oryza sativa Indica Group] gi 222630128 gb EEE62260.1   hypothetical protein Os_17047 [Oryza sativa Japonica Group]                                                                                                                                                                                                                                                                                                                                                                                     | 62   | 92   | 3.00E-19  | 148.4 | 77.4 | 83.9 | hypothetical protein Os_18385                                                                                                                                    | gbpln | Oryza sativa         | AT3G05880.1   Symbols: RC12A   Low temperature and salt responsive protein family   chr3:1756195-1756494 REVERSE LENGTH=54                                                                                                                                                                                                                                                                                 | 62   | 54   | 2.00E-18  | 87.1  | 67.7 | 75.8 |
| Rsa1.0_00044.1.g2572.t1 | refXP_004287934.1   PREDICTED: anaphase-promoting complex subunit 11-like isoform 2 [Fragaria vesca subsp. vesca]                                                                                                                                                                                                                                                                                                                                                                                                                                      | 95   | 92   | 9.00E-42  | 96.8  | 87.4 | 92.6 | PREDICTED: anaphase-promoting complex subunit 11-like isoform 2                                                                                                  | gbpln | Fragaria vesca       | AT3G05870.2   Symbols: APC11   anaphase-promoting complex/cyclosome 11   chr3:1753961-1754802 FORWARD LENGTH=87                                                                                                                                                                                                                                                                                            | 95   | 87   | 7.00E-44  | 91.6  | 88.4 | 90.5 |
| Rsa1.0_00044.1.g2573.t1 | gb EOA19465.1   hypothetical protein CARUB_v10001920mg [Capsella rubella]                                                                                                                                                                                                                                                                                                                                                                                                                                                                              | 218  | 220  | 1.00E-48  | 100.9 | 51.8 | 68.3 | hypothetical protein CARUB_v10001920mg                                                                                                                           | gbpln | Capsella rubella     | AT5G26630.1   Symbols:   MADS-box transcription factor family protein   chr5:9350815-9351471 FORWARD LENGTH=218                                                                                                                                                                                                                                                                                            | 218  | 218  | 2.00E-47  | 100.0 | 48.6 | 66.5 |
| Rsa1.0_00044.1.g2574.t1 | refXP_002883989.1   hypothetical protein ARALYDRAFT_899939 [Arabidopsis lyrata subsp. lyrata] gi 297329829 gb EFH60248.1   hypothetical protein ARALYDRAFT_899939 [Arabidopsis lyrata subsp. lyrata]                                                                                                                                                                                                                                                                                                                                                   | 240  | 352  | 3.00E-33  | 146.7 | 32.5 | 44.6 | hypothetical protein ARALYDRAFT_899939                                                                                                                           | gbpln | Arabidopsis lyrata   | AT3G19515.2   Symbols:   CONTAINS InterPro DOMAIN/s: Apoptosis inhibitory 5 (InterPro:IPR008383); BEST Arabidopsis thaliana protein match is: unknown protein (TAIR:AT1G23935.1); Has 546 Blast hits to 394 proteins in 84 species: Archae - 0; Bacteria - 3; Metazoa - 210; Fungi - 15; Plants - 143; Viruses - 0; Other Eukaryotes - 175 (source: NCBI BLINK).   chr3:6766872-6771078 REVERSE LENGTH=805 | 240  | 805  | 2.00E-11  | 335.4 | 22.9 | 38.3 |
| Rsa1.0_00044.1.g2575.t1 | #                                                                                                                                                                                                                                                                                                                                                                                                                                                                                                                                                      | #    | #    | #         | #     | #    | #    | -                                                                                                                                                                | ----  | ----                 | #                                                                                                                                                                                                                                                                                                                                                                                                          | #    | #    | #         | #     | #    |      |

|                         |                                                                                                                                                                                                                                                                                                                                            |     |     |           |       |      |      |                                                                                                                                                                                          |             |                      |                                                                                                                                                                                                                                                                                                                                                                                                                                                                                             |     |     |           |       |      |      |
|-------------------------|--------------------------------------------------------------------------------------------------------------------------------------------------------------------------------------------------------------------------------------------------------------------------------------------------------------------------------------------|-----|-----|-----------|-------|------|------|------------------------------------------------------------------------------------------------------------------------------------------------------------------------------------------|-------------|----------------------|---------------------------------------------------------------------------------------------------------------------------------------------------------------------------------------------------------------------------------------------------------------------------------------------------------------------------------------------------------------------------------------------------------------------------------------------------------------------------------------------|-----|-----|-----------|-------|------|------|
| Rsa1.0_00044.1.g2576.t1 | gb ABE65560.1  hypothetical protein At5g26620 [Arabidopsis thaliana]                                                                                                                                                                                                                                                                       | 86  | 88  | 2.00E-35  | 102.3 | 90.7 | 94.2 | hypothetical protein At5g26620                                                                                                                                                           | gbpln       | Arabidopsis thaliana | AT3G05858.1   Symbols:   unknown protein; FUNCTIONS IN: molecular_function unknown; INVOLVED IN: biological_process unknown; LOCATED IN: cellular_component unknown; BEST Arabidopsis thaliana protein match is: unknown protein (TAIR:AT5G26620.1); Has 30201 Blast hits to 17322 proteins in 780 species: Archae - 12; Bacteria - 1396; Metazoa - 17338; Fungi - 3422; Plants - 5037; Viruses - 0; Other Eukaryotes - 2996 (source: NCBI BLINK).   chr3:1749464-1749736 FORWARD LENGTH=90 | 86  | 90  | 6.00E-30  | 104.7 | 80.2 | 86.0 |
| Rsa1.0_00044.1.g2577.t1 | ref XP_002886053.1  hypothetical protein ARALYDRAFT_899963 [Arabidopsis lyrata subsp. lyrata] gi 297331893 gb EFH62312.1  hypothetical protein ARALYDRAFT_899963 [Arabidopsis lyrata subsp. lyrata]                                                                                                                                        | 320 | 288 | 9.00E-49  | 90.0  | 36.9 | 50.0 | hypothetical protein ARALYDRAFT_899963                                                                                                                                                   | gbpln       | Arabidopsis lyrata   | AT1G22090.1   Symbols: emb2204   Protein of unknown function (DUF626)   chr1:7795721-7797252 FORWARD LENGTH=329                                                                                                                                                                                                                                                                                                                                                                             | 320 | 329 | 3.00E-32  | 102.8 | 29.7 | 43.4 |
| Rsa1.0_00044.1.g2578.t1 | gb EOA20562.1  hypothetical protein CARUB_v10000875mg [Capsella rubella]                                                                                                                                                                                                                                                                   | 475 | 473 | 0         | 99.6  | 83.8 | 90.5 | hypothetical protein CARUB_v10000875mg                                                                                                                                                   | gbpln       | Capsella rubella     | AT5G26600.1   Symbols:   Pyridoxal phosphate (PLP)-dependent transferases superfamily protein   chr5:9377455-9378882 FORWARD LENGTH=475                                                                                                                                                                                                                                                                                                                                                     | 475 | 475 | 0         | 100.0 | 82.7 | 90.3 |
| Rsa1.0_00044.1.g2579.t1 | gb EOA22823.1  hypothetical protein CARUB_v10003541mg [Capsella rubella]                                                                                                                                                                                                                                                                   | 406 | 409 | 0         | 100.7 | 96.6 | 97.3 | hypothetical protein CARUB_v10003541mg                                                                                                                                                   | gbpln       | Capsella rubella     | AT5G26751.1   Symbols: ATSK11, SK 11   shaggy-related kinase 11   chr5:939582-9401839 REVERSE LENGTH=405                                                                                                                                                                                                                                                                                                                                                                                    | 406 | 405 | 0         | 99.8  | 96.3 | 97.3 |
| Rsa1.0_00044.1.g2580.t1 | ref NP_974839.1  uncharacterized protein [Arabidopsis thaliana] gi 380877125 sp F4K1B1.1 RPAP2_ARA TH RecName: Full=Putative RNA polymerase II subunit B1 CTD phosphatase RPAP2 homolog; AltName: Full=RNA polymerase II-associated protein 2 homolog gi 332006215 gb AED93598.1  uncharacterized protein AT5G26760 [Arabidopsis thaliana] | 82  | 735 | 1.00E-22  | 896.3 | 63.4 | 75.6 | uncharacterized protein                                                                                                                                                                  | gbpln       | Arabidopsis thaliana | AT5G26760.2   Symbols:   unknown protein; CONTAINS InterPro DOMAIN/s: Protein of unknown function DUF408 (InterPro:IPR007308); Has 35333 Blast hits to 34131 proteins in 2444 species: Archae - 798; Bacteria - 22429; Metazoa - 974; Fungi - 991; Plants - 531; Viruses - 0; Other Eukaryotes - 9610 (source: NCBI BLINK).   chr5:9403869-9407170 REVERSE LENGTH=735                                                                                                                       | 82  | 735 | 2.00E-25  | 896.3 | 63.4 | 75.6 |
| Rsa1.0_00044.1.g2581.t1 | ref NP_568487.1  uncharacterized protein [Arabidopsis thaliana] gi 42573487 ref NP_974840.1  uncharacterized protein [Arabidopsis thaliana] gi 332006216 gb AED93599.1  uncharacterized protein AT5G26770 [Arabidopsis thaliana] gi 332006217 gb AED93600.1  uncharacterized protein AT5G26770 [Arabidopsis thaliana]                      | 331 | 335 | 1.00E-158 | 101.2 | 84.9 | 92.7 | uncharacterized protein                                                                                                                                                                  | gbpln       | Arabidopsis thaliana | AT5G26770.1   Symbols:   unknown protein; BEST Arabidopsis thaliana protein match is: unknown protein (TAIR:AT3G05830.1); Has 30201 Blast hits to 17322 proteins in 780 species: Archae - 12; Bacteria - 1396; Metazoa - 17338; Fungi - 3422; Plants - 5037; Viruses - 0; Other Eukaryotes - 2996 (source: NCBI BLINK).   chr5:9407981-9409735 REVERSE LENGTH=335                                                                                                                           | 331 | 335 | 1.00E-160 | 101.2 | 84.9 | 92.7 |
| Rsa1.0_00045.1.g2582.t1 | ref XP_002874373.1  zinc finger family protein [Arabidopsis lyrata subsp. lyrata] gi 297320210 gb EFH50632.1  zinc finger family protein [Arabidopsis lyrata subsp. lyrata]                                                                                                                                                                | 358 | 370 | 1.00E-141 | 103.4 | 72.9 | 79.9 | zinc finger family protein                                                                                                                                                               | gbpln       | Arabidopsis lyrata   | AT5G27420.1   Symbols: CNI1, ATL31   carbon/nitrogen insensitive 1   chr5:9684119-9685225 FORWARD LENGTH=368                                                                                                                                                                                                                                                                                                                                                                                | 358 | 368 | 1.00E-138 | 102.8 | 70.7 | 77.7 |
| Rsa1.0_00045.1.g2583.t1 | ref NP_001190410.1  branched-chain-amino-acid aminotransferase-like protein 2 [Arabidopsis thaliana] gi 332006301 gb AED93684.1  branched-chain-amino-acid aminotransferase-like protein 2 [Arabidopsis thaliana]                                                                                                                          | 528 | 936 | 0         | 177.3 | 83.3 | 90.9 | branched-chain-amino-acid aminotransferase-like protein 2                                                                                                                                | gbpln       | Arabidopsis thaliana | AT5G27410.2   Symbols:   D-aminoacid aminotransferase-like PLP-dependent enzymes superfamily protein   chr5:9676362-9682468 FORWARD LENGTH=936                                                                                                                                                                                                                                                                                                                                              | 528 | 936 | 0         | 177.3 | 83.3 | 90.9 |
| Rsa1.0_00045.1.g2584.t1 | tpg DAA63922.1  TPA: hypothetical protein ZEAMMB73_644873 [Zea mays]                                                                                                                                                                                                                                                                       | 92  | 194 | 1.00E-11  | 210.9 | 41.3 | 57.6 | TPA: hypothetical protein ZEAMMB73_644873                                                                                                                                                | gbenv/gbpln | Zea mays             | AT5G27395.2   Symbols:   Mitochondrial inner membrane translocase complex, subunit Tim44-related protein   chr5:9671845-9674085 REVERSE LENGTH=296                                                                                                                                                                                                                                                                                                                                          | 92  | 296 | 6.00E-14  | 321.7 | 40.2 | 41.3 |
| Rsa1.0_00045.1.g2585.t1 | sp O23732.1 GSHB_BRAJU RecName: Full=Glutathione synthetase, chloroplastic; Short=GSH synthetase; Short=GSH-S; Short=Glutathione synthetase; Flags: Precursor gi 2243118 emb CAA71878.1  glutathione synthetase [Brassica juncea]                                                                                                          | 530 | 530 | 0         | 100.0 | 94.0 | 95.8 | RecName: Full=Glutathione synthetase, chloroplastic; Short=GSH synthetase; Short=GSH-S; Short=Glutathione synthetase; Flags: Precursor gi 2243118 emb CAA71878.1  glutathione synthetase | gbpln       | Brassica juncea      | AT5G27380.1   Symbols: GSH2, GSHB   glutathione synthetase 2   chr5:968211-9670912 REVERSE LENGTH=539                                                                                                                                                                                                                                                                                                                                                                                       | 530 | 539 | 0         | 101.7 | 77.2 | 84.9 |

|                          |                                                                                                                                                                                                                                                                                                                                                                                                    |      |      |           |       |      |      |                                                                            |       |                      |                                                                                                                                     |      |      |           |       |      |      |  |
|--------------------------|----------------------------------------------------------------------------------------------------------------------------------------------------------------------------------------------------------------------------------------------------------------------------------------------------------------------------------------------------------------------------------------------------|------|------|-----------|-------|------|------|----------------------------------------------------------------------------|-------|----------------------|-------------------------------------------------------------------------------------------------------------------------------------|------|------|-----------|-------|------|------|--|
| Rsa1.0_00045.1.g2586.t3  | ref NP_187148.2  DHHC-type zinc finger-containing protein [Arabidopsis thaliana]<br>gi 122214962 sp Q3EBC2.1 ZDHC5_ARA TH RecName: Full=Probable S-acyltransferase At3g04970; AltName: Full=Probable palmitoyltransferase At3g04970; AltName: Full=Zinc finger DHHC domain-containing protein At3g04970 gi 332640648 gb AE74169.1  DHHC-type zinc finger-containing protein [Arabidopsis thaliana] | 381  | 397  | 1.00E-167 | 104.2 | 77.2 | 86.1 | DHHC-type zinc finger-containing protein                                   | gbpln | Arabidopsis thaliana | AT3G04970.1   Symbols:   DHHC-type zinc finger family protein   chr3:1376240-1378339 FORWARD LENGTH=397                             | 381  | 397  | 1.00E-169 | 104.2 | 77.2 | 86.1 |  |
| Rsa1.0_00045.1.g2587.t1  | ref NP_198076.1  DNAJ heat shock N-terminal domain-containing protein [Arabidopsis thaliana]<br>gi 332006279 gb AED93662.1  DNAJ heat shock N-terminal domain-containing protein [Arabidopsis thaliana]                                                                                                                                                                                            | 1063 | 1104 | 0         | 103.9 | 63.1 | 75.2 | DNAJ heat shock N-terminal domain-containing protein                       | gbpln | Arabidopsis thaliana | AT5G27240.1   Symbols:   DNAJ heat shock N-terminal domain-containing protein   chr5:9597552-9600866 FORWARD LENGTH=1104            | 1063 | 1104 | 0         | 103.9 | 63.1 | 75.2 |  |
| Rsa1.0_00045.1.g2588.t1  | gb EOA19886.1  hypothetical protein CARUB_v10000134mg [Capsella rubella]                                                                                                                                                                                                                                                                                                                           | 866  | 1000 | 0         | 115.5 | 63.0 | 77.4 | hypothetical protein CARUB_v10000134mg                                     | gbpln | Capsella rubella     | AT5G27230.1   Symbols:   Frigida-like protein   chr5:9584255-9587838 FORWARD LENGTH=948                                             | 866  | 948  | 0         | 109.5 | 62.4 | 77.4 |  |
| Rsa1.0_00045.1.g2589.t1  | ref XP_002874392.1  hypothetical protein ARALYDRAFT_910868 [Arabidopsis lyrata subsp. lyrata]<br>gi 297320229 gb EFH50651.1  hypothetical protein ARALYDRAFT_910868 [Arabidopsis lyrata subsp. lyrata]                                                                                                                                                                                             | 855  | 994  | 0         | 116.3 | 65.7 | 79.3 | hypothetical protein ARALYDRAFT_910868                                     | gbpln | Arabidopsis lyrata   | AT5G27230.1   Symbols:   Frigida-like protein   chr5:9584255-9587838 FORWARD LENGTH=948                                             | 855  | 948  | 0         | 110.9 | 65.3 | 78.0 |  |
| Rsa1.0_00045.1.g2590.t1  | ref XP_002874393.1  predicted protein [Arabidopsis lyrata subsp. lyrata]<br>gi 297320230 gb EFH50652.1  predicted protein [Arabidopsis lyrata subsp. lyrata]                                                                                                                                                                                                                                       | 1192 | 1191 | 0         | 99.9  | 56.9 | 72.0 | predicted protein                                                          | gbpln | Arabidopsis lyrata   | AT5G27220.1   Symbols:   Frigida-like protein   chr5:9578757-9582752 FORWARD LENGTH=1181                                            | 1192 | 1181 | 0         | 99.1  | 54.6 | 69.6 |  |
| Rsa1.0_00045.1.g2591.t2  | gb AAC33961.1  contains similarity to reverse transcriptase (Pfam: rvt.hmm, score: 42.57) [Arabidopsis thaliana]                                                                                                                                                                                                                                                                                   | 1154 | 1662 | 0         | 144.0 | 37.2 | 55.4 | contains similarity to reverse transcriptase (Pfam: rvt.hmm, score: 42.57) | gbpln | Arabidopsis thaliana | AT4G29090.1   Symbols:   Ribonuclease H-like superfamily protein   chr4:14333528-14335255 FORWARD LENGTH=575                        | 1154 | 575  | 3.00E-37  | 49.8  | 6.4  | 10.7 |  |
| Rsa1.0_00045.1.g2592.t1  | # # # # # # # # # # # # # # # # # # # # # #                                                                                                                                                                                                                                                                                                                                                        |      |      |           |       |      |      |                                                                            | ----  | ----                 | # # # # # # # # # # # # # # # #                                                                                                     |      |      |           |       |      |      |  |
| Rsa1.0_00045.1.g2593.t2  | ref XP_002874393.1  predicted protein [Arabidopsis lyrata subsp. lyrata]<br>gi 297320230 gb EFH50652.1  predicted protein [Arabidopsis lyrata subsp. lyrata]                                                                                                                                                                                                                                       | 561  | 1191 | 8.00E-40  | 212.3 | 19.1 | 22.8 | predicted protein                                                          | gbpln | Arabidopsis lyrata   | AT5G27220.1   Symbols:   Frigida-like protein   chr5:9578757-9582752 FORWARD LENGTH=1181                                            | 561  | 1181 | 3.00E-42  | 210.5 | 18.7 | 23.0 |  |
| Rsa1.0_00045.1.g2594.t1  | ref XP_002866462.1  hypothetical protein ARALYDRAFT_496364 [Arabidopsis lyrata subsp. lyrata]<br>gi 297312297 gb EFH42721.1  hypothetical protein ARALYDRAFT_496364 [Arabidopsis lyrata subsp. lyrata]                                                                                                                                                                                             | 146  | 400  | 1.00E-25  | 274.0 | 37.7 | 43.8 | hypothetical protein ARALYDRAFT_496364                                     | gbpln | Arabidopsis lyrata   | AT5G61930.2   Symbols: APO3   Arabidopsis thaliana protein of unknown function (DUF794)   chr5:24866230-24867665 REVERSE LENGTH=402 | 146  | 402  | 1.00E-27  | 275.3 | 37.0 | 43.2 |  |
| Rsa1.0_00045.1.g2595.t6  | gb EOA13406.1  hypothetical protein CARUB_v10026444mg, partial [Capsella rubella]                                                                                                                                                                                                                                                                                                                  | 929  | 430  | 1.00E-107 | 46.3  | 24.4 | 29.9 | hypothetical protein CARUB_v10026444mg, partial                            | gbpln | Capsella rubella     | AT5G62660.1   Symbols:   F-box and associated interaction domains-containing protein   chr5:25156326-25157465 REVERSE LENGTH=379    | 929  | 379  | 1.00E-101 | 40.8  | 21.6 | 26.6 |  |
| Rsa1.0_00045.1.g2596.t25 | ref XP_002874217.1  hypothetical protein ARALYDRAFT_489332 [Arabidopsis lyrata subsp. lyrata]<br>gi 297320054 gb EFH50476.1  hypothetical protein ARALYDRAFT_489332 [Arabidopsis lyrata subsp. lyrata]                                                                                                                                                                                             | 1281 | 1376 | 0         | 107.4 | 84.9 | 89.0 | hypothetical protein ARALYDRAFT_489332                                     | gbpln | Arabidopsis lyrata   | AT5G24710.1   Symbols:   Transducin/WD40 repeat-like superfamily protein   chr5:8459148-8467920 REVERSE LENGTH=1377                 | 1281 | 1377 | 0         | 107.5 | 84.9 | 89.1 |  |
| Rsa1.0_00045.1.g2597.t1  | # # # # # # # # # # # # # # # # # # # # # #                                                                                                                                                                                                                                                                                                                                                        |      |      |           |       |      |      |                                                                            | ----  | ----                 | # # # # # # # # # # # # # # # #                                                                                                     |      |      |           |       |      |      |  |
| Rsa1.0_00045.1.g2598.t1  | ref NP_198074.1  Frigida-like protein [Arabidopsis thaliana]<br>gi 2191186 gb AAB31071.1  contains similarity to tropomyosin and kinesin [Arabidopsis thaliana]<br>gi 332006276 gb AED93659.1  Frigida-like protein [Arabidopsis thaliana]                                                                                                                                                         | 1421 | 1181 | 1.00E-177 | 83.1  | 35.4 | 48.9 | Frigida-like protein                                                       | gbpln | Arabidopsis thaliana | AT5G27220.1   Symbols:   Frigida-like protein   chr5:9578757-9582752 FORWARD LENGTH=1181                                            | 1421 | 1181 | 1.00E-180 | 83.1  | 35.4 | 48.9 |  |
| Rsa1.0_00045.1.g2599.t1  | ref XP_002874393.1  predicted protein [Arabidopsis lyrata subsp. lyrata]<br>gi 297320230 gb EFH50652.1  predicted protein [Arabidopsis lyrata subsp. lyrata]                                                                                                                                                                                                                                       | 869  | 1191 | 0         | 137.1 | 51.9 | 69.6 | predicted protein                                                          | gbpln | Arabidopsis lyrata   | AT5G27220.1   Symbols:   Frigida-like protein   chr5:9578757-9582752 FORWARD LENGTH=1181                                            | 869  | 1181 | 0         | 135.9 | 50.7 | 67.9 |  |



|                         |                                                                                                                                                                                                                                                                                                                                                                                                                                                                                                                                                                                                                                    |     |     |           |       |      |      |                                                 |       |                      |                                                                                                                                                                                                                                                                                                                                                                                                                                                                                                                                                      |     |     |           |       |      |      |
|-------------------------|------------------------------------------------------------------------------------------------------------------------------------------------------------------------------------------------------------------------------------------------------------------------------------------------------------------------------------------------------------------------------------------------------------------------------------------------------------------------------------------------------------------------------------------------------------------------------------------------------------------------------------|-----|-----|-----------|-------|------|------|-------------------------------------------------|-------|----------------------|------------------------------------------------------------------------------------------------------------------------------------------------------------------------------------------------------------------------------------------------------------------------------------------------------------------------------------------------------------------------------------------------------------------------------------------------------------------------------------------------------------------------------------------------------|-----|-----|-----------|-------|------|------|
| Rsa1.0_00045.1.g2600.t1 | refNP_198073.1   uncharacterized protein [Arabidopsis thaliana] gi 332006275 gb AED93658.1   uncharacterized protein AT5G27210 [Arabidopsis thaliana]                                                                                                                                                                                                                                                                                                                                                                                                                                                                              | 331 | 297 | 1.00E-140 | 89.7  | 77.9 | 82.5 | uncharacterized protein                         | gbpln | Arabidopsis thaliana | AT5G27210.1   Symbols:   Protein of unknown function, transmembrane-40   chr5:9572333-9574075 REVERSE LENGTH=297                                                                                                                                                                                                                                                                                                                                                                                                                                     | 331 | 297 | 1.00E-143 | 89.7  | 77.9 | 82.5 |
| Rsa1.0_00045.1.g2601.t1 | gb ACZ92142.1   Na <sup>+</sup> /H <sup>+</sup> antiporter [Brassica napus]                                                                                                                                                                                                                                                                                                                                                                                                                                                                                                                                                        | 546 | 542 | 0         | 99.3  | 96.3 | 97.8 | Na <sup>+</sup> /H <sup>+</sup> antiporter      | gbpln | Brassica napus       | AT5G27150.1   Symbols: NHX1, ATNHX, AT-NHX1, ATNHX1   Na <sup>+</sup> /H <sup>+</sup> exchanger 1   chr5:9554251-9557266 FORWARD LENGTH=538                                                                                                                                                                                                                                                                                                                                                                                                          | 546 | 538 | 0         | 98.5  | 90.7 | 95.1 |
| Rsa1.0_00045.1.g2602.t1 | refNP_198064.1   putative nucleolar protein 5-1 [Arabidopsis thaliana] gi 14744575 sp O04658.2 NOP5A_ARA TH RecName: Full=Probable nucleolar protein 5-1; AltName: Full=MAR-binding NOP56/58 homolog 1; AltName: Full=NOP58-like protein F108; AltName: Full=Nucleolar protein 58-1 gi 11878188 gb AAG40836.1 AF302490.1 NOP58-like protein F108 [Arabidopsis thaliana] gi 18377656 gb AAL66978.1   putative SAR DNA-binding protein [Arabidopsis thaliana] gi 20465699 gb AAM20318.1   putative SAR DNA-binding protein [Arabidopsis thaliana] gi 332006269 gb AED93652.1   putative nucleolar protein 5-1 [Arabidopsis thaliana] | 532 | 533 | 0         | 100.2 | 75.6 | 79.9 | putative nucleolar protein 5-1                  | gbpln | Arabidopsis thaliana | AT5G27120.1   Symbols:   NOP56-like pre RNA processing ribonucleoprotein   chr5:9541287-9543684 FORWARD LENGTH=533                                                                                                                                                                                                                                                                                                                                                                                                                                   | 532 | 533 | 0         | 100.2 | 75.6 | 79.9 |
| Rsa1.0_00045.1.g2603.t1 | refXP_002874409.1   seed maturation family protein [Arabidopsis lyrata subsp. lyrata] gi 297320246 gb EFH50668.1   seed maturation family protein [Arabidopsis lyrata subsp. lyrata]                                                                                                                                                                                                                                                                                                                                                                                                                                               | 185 | 192 | 1.00E-73  | 103.8 | 87.0 | 90.8 | seed maturation family protein                  | gbpln | Arabidopsis lyrata   | AT5G27980.1   Symbols:   Seed maturation protein   chr5:10015883-10016676 REVERSE LENGTH=192                                                                                                                                                                                                                                                                                                                                                                                                                                                         | 185 | 192 | 9.00E-76  | 103.8 | 87.0 | 90.8 |
| Rsa1.0_00045.1.g2604.t1 | gb EOA21519.1   hypothetical protein CARUB_v10001923mg, partial [Capsella rubella]                                                                                                                                                                                                                                                                                                                                                                                                                                                                                                                                                 | 194 | 220 | 8.00E-58  | 113.4 | 63.4 | 76.3 | hypothetical protein CARUB_v10001923mg, partial | gbpln | Capsella rubella     | AT5G27990.1   Symbols:   Pre-rRNA-processing protein TSR2, conserved region   chr5:10017358-10018265 FORWARD LENGTH=184                                                                                                                                                                                                                                                                                                                                                                                                                              | 194 | 184 | 2.00E-96  | 94.8  | 59.8 | 70.6 |
| Rsa1.0_00045.1.g2605.t1 | emb CAA71799.1   O-acetylserine(thiol) lyase [Brassica juncea]                                                                                                                                                                                                                                                                                                                                                                                                                                                                                                                                                                     | 323 | 345 | 1.00E-163 | 106.8 | 94.4 | 97.8 | O-acetylserine(thiol) lyase                     | gbpln | Brassica juncea      | AT5G28020.6   Symbols: CYSD2, ATCYSD2   cysteine synthase D2   chr5:10026395-10028166 REVERSE LENGTH=323                                                                                                                                                                                                                                                                                                                                                                                                                                             | 323 | 323 | 1.00E-156 | 100.0 | 88.2 | 94.7 |
| Rsa1.0_00045.1.g2606.t1 | dbj BAJ34422.1   unnamed protein product [Thellungiella halophila]                                                                                                                                                                                                                                                                                                                                                                                                                                                                                                                                                                 | 323 | 323 | 1.00E-161 | 100.0 | 93.5 | 98.5 | unnamed protein product                         | ----  | ----                 | AT5G28030.1   Symbols: DES1   L-cysteine desulfhydrase 1   chr5:10030493-10032285 REVERSE LENGTH=323                                                                                                                                                                                                                                                                                                                                                                                                                                                 | 323 | 323 | 1.00E-154 | 100.0 | 89.5 | 95.4 |
| Rsa1.0_00045.1.g2607.t1 | dbj BAC42632.1   unknown protein [Arabidopsis thaliana] gi 28950993 gb AA063420.1   At5g28040 [Arabidopsis thaliana]                                                                                                                                                                                                                                                                                                                                                                                                                                                                                                               | 387 | 427 | 1.00E-132 | 110.3 | 72.9 | 81.7 | unknown protein                                 | gbpln | Arabidopsis thaliana | AT5G28040.1   Symbols:   DNA-binding storekeeper protein-related transcriptional regulator   chr5:10037654-10038937 REVERSE LENGTH=427                                                                                                                                                                                                                                                                                                                                                                                                               | 387 | 427 | 1.00E-135 | 110.3 | 72.9 | 82.2 |
| Rsa1.0_00045.1.g2608.t1 | refXP_002882383.1   40S ribosomal protein S24 [Arabidopsis lyrata subsp. lyrata] gi 297328223 gb EFH58642.1   40S ribosomal protein S24 [Arabidopsis lyrata subsp. lyrata]                                                                                                                                                                                                                                                                                                                                                                                                                                                         | 133 | 133 | 8.00E-69  | 100.0 | 99.2 | 99.2 | 40S ribosomal protein S24                       | gbpln | Arabidopsis lyrata   | AT3G04920.1   Symbols:   Ribosomal protein S24e family protein   chr3:1360989-1362065 FORWARD LENGTH=133                                                                                                                                                                                                                                                                                                                                                                                                                                             | 133 | 133 | 1.00E-70  | 100.0 | 98.5 | 98.5 |
| Rsa1.0_00045.1.g2609.t1 | gb EOA20484.1   hypothetical protein CARUB_v10000796mg [Capsella rubella]                                                                                                                                                                                                                                                                                                                                                                                                                                                                                                                                                          | 446 | 498 | 1.00E-150 | 111.7 | 67.7 | 78.9 | hypothetical protein CARUB_v10000796mg          | gbpln | Capsella rubella     | AT3G04910.1   Symbols: WNK1, ZIK4, ATWNK1   with no lysine (K) kinase 1   chr3:1355084-1358057 FORWARD LENGTH=700                                                                                                                                                                                                                                                                                                                                                                                                                                    | 446 | 700 | 1.00E-121 | 157.0 | 45.3 | 50.9 |
| Rsa1.0_00045.1.g2610.t1 | gb EOA12246.1   hypothetical protein CARUB_v10012686mg [Capsella rubella]                                                                                                                                                                                                                                                                                                                                                                                                                                                                                                                                                          | 417 | 417 | 0         | 100.0 | 95.7 | 97.4 | hypothetical protein CARUB_v10012686mg          | gbpln | Capsella rubella     | AT5G30510.1   Symbols: RPS1, ARRPS1   ribosomal protein S1   chr5:11619262-11621223 REVERSE LENGTH=416                                                                                                                                                                                                                                                                                                                                                                                                                                               | 417 | 416 | 0         | 99.8  | 96.2 | 98.6 |
| Rsa1.0_00045.1.g2611.t1 | gb EOA12248.1   hypothetical protein CARUB_v10012688mg [Capsella rubella]                                                                                                                                                                                                                                                                                                                                                                                                                                                                                                                                                          | 241 | 237 | 3.00E-71  | 98.3  | 78.0 | 83.0 | hypothetical protein CARUB_v10012688mg          | gbpln | Capsella rubella     | AT5G30490.2   Symbols:   FUNCTIONS IN: molecular_function unknown; INVOLVED IN: biological_process unknown; LOCATED IN: cellular_component unknown; EXPRESSED IN: 22 plant structures; EXPRESSED DURING: 13 growth stages; CONTAINS InterPro DOMAIN/s: Craniofacial development protein 1/Bucentaur (InterPro:IPR011421); Has 333 Blast hits to 324 proteins in 149 species: Archae - 0; Bacteria - 18; Metazoa - 117; Fungi - 96; Plants - 49; Viruses - 0; Other Eukaryotes - 53 (source: NCBI BLINK).   chr5:11612199-11614271 FORWARD LENGTH=236 | 241 | 236 | 1.00E-73  | 97.9  | 77.2 | 82.6 |
| Rsa1.0_00045.1.g2612.t1 | refXP_002872334.1   hypothetical protein ARALYDRAFT_489677 [Arabidopsis lyrata subsp. lyrata] gi 297318171 gb EFH48593.1   hypothetical protein ARALYDRAFT_489677 [Arabidopsis lyrata subsp. lyrata]                                                                                                                                                                                                                                                                                                                                                                                                                               | 198 | 196 | 4.00E-84  | 99.0  | 77.3 | 87.9 | hypothetical protein ARALYDRAFT_489677          | gbpln | Arabidopsis lyrata   | AT5G30495.1   Symbols:   FcF2 pre-rRNA processing protein   chr5:11380190-11381391 FORWARD LENGTH=196                                                                                                                                                                                                                                                                                                                                                                                                                                                | 198 | 196 | 3.00E-85  | 99.0  | 75.8 | 87.4 |

|                         |                                                                                                                                                                                                                                                                                                                                                        |     |      |           |       |      |      |                                              |       |                      |                                                                                                                                                                                                                                                                                                                                                                                                                                |     |     |           |       |      |      |
|-------------------------|--------------------------------------------------------------------------------------------------------------------------------------------------------------------------------------------------------------------------------------------------------------------------------------------------------------------------------------------------------|-----|------|-----------|-------|------|------|----------------------------------------------|-------|----------------------|--------------------------------------------------------------------------------------------------------------------------------------------------------------------------------------------------------------------------------------------------------------------------------------------------------------------------------------------------------------------------------------------------------------------------------|-----|-----|-----------|-------|------|------|
| Rsa1.0_00045.1.g2613.t1 | refNP_568512.3  myb family transcription factor [Arabidopsis thaliana]<br>gi 75328846 sp Q8GUN5.1 PHL1_ARATH RecName: Full=Protein PHR1-LIKE 1; AltName: Full=Myb-like transcription factor 1 gi 26983850 gb AA86177.1  unknown protein [Arabidopsis thaliana] gi 332006474 gb AED93857.1  myb family transcription factor [Arabidopsis thaliana]      | 429 | 413  | 1.00E-174 | 96.3  | 75.1 | 81.4 | myb family transcription factor              | gbpln | Arabidopsis thaliana | AT5G29000.2   Symbols: PHL1   Homeodomain-like superfamily protein   chr5:11022336-11024229 REVERSE LENGTH=413                                                                                                                                                                                                                                                                                                                 | 429 | 413 | 1.00E-177 | 96.3  | 75.1 | 81.4 |
| Rsa1.0_00045.1.g2614.t1 | refXP_002874460.1  hypothetical protein ARALYDRAFT_489671 [Arabidopsis lyrata subsp. lyrata] gi 297320297 gb EFH50719.1  hypothetical protein ARALYDRAFT_489671 [Arabidopsis lyrata subsp. lyrata]                                                                                                                                                     | 531 | 533  | 0         | 100.4 | 83.8 | 91.7 | hypothetical protein ARALYDRAFT_489671       | gbpln | Arabidopsis lyrata   | AT5G28910.2   Symbols:   unknown protein; FUNCTIONS IN: molecular function unknown; INVOLVED IN: biological process unknown; BEST Arabidopsis thaliana protein match is: unknown protein (TAIRAT5G28960.1); Has 82 Blast hits to 80 proteins in 14 species: Archae - 0; Bacteria - 0; Metazoa - 1; Fungi - 0; Plants - 78; Viruses - 0; Other Eukaryotes - 3 (source: NCBI BLink).   chr5:10930633-10932575 REVERSE LENGTH=535 | 531 | 535 | 0         | 100.8 | 83.6 | 90.8 |
| Rsa1.0_00045.1.g2615.t1 | refXP_002884444.1  hypothetical protein ARALYDRAFT_896477 [Arabidopsis lyrata subsp. lyrata] gi 297330284 gb EFH6703.1  hypothetical protein ARALYDRAFT_896477 [Arabidopsis lyrata subsp. lyrata]                                                                                                                                                      | 634 | 640  | 0         | 100.9 | 78.5 | 86.3 | hypothetical protein ARALYDRAFT_896477       | gbpln | Arabidopsis lyrata   | AT3G04470.1   Symbols:   Ankyrin repeat family protein   chr3:1189841-1191853 REVERSE LENGTH=640                                                                                                                                                                                                                                                                                                                               | 634 | 640 | 0         | 100.9 | 75.7 | 82.6 |
| Rsa1.0_00045.1.g2616.t1 | refXP_002872330.1  calcium-binding EF hand family protein [Arabidopsis lyrata subsp. lyrata] gi 297318167 gb EFH48589.1  calcium-binding EF hand family protein [Arabidopsis lyrata subsp. lyrata]                                                                                                                                                     | 509 | 536  | 0         | 105.3 | 88.6 | 95.3 | calcium-binding EF hand family protein       | gbpln | Arabidopsis lyrata   | AT5G28900.1   Symbols:   Calcium-binding EF-hand family protein   chr5:10925852-10929892 FORWARD LENGTH=536                                                                                                                                                                                                                                                                                                                    | 509 | 536 | 0         | 105.3 | 87.4 | 94.9 |
| Rsa1.0_00045.1.g2617.t1 | gb EOA21064.1  hypothetical protein CARUB_v10001403mg [Capsella rubella]                                                                                                                                                                                                                                                                               | 330 | 331  | 1.00E-141 | 100.3 | 76.4 | 87.6 | hypothetical protein CARUB_v10001403mg       | gbpln | Capsella rubella     | AT5G28830.1   Symbols:   calcium-binding EF hand family protein   chr5:10856801-10858394 FORWARD LENGTH=324                                                                                                                                                                                                                                                                                                                    | 330 | 324 | 1.00E-140 | 98.2  | 77.0 | 87.3 |
| Rsa1.0_00045.1.g2618.t1 | gb EOA21752.1  hypothetical protein CARUB_v10002208mg [Capsella rubella]                                                                                                                                                                                                                                                                               | 142 | 146  | 8.00E-50  | 102.8 | 90.1 | 91.5 | hypothetical protein CARUB_v10002208mg       | gbpln | Capsella rubella     | AT5G28750.1   Symbols:   Bacterial sec-independent translocation protein mttA/Hcf106   chr5:10784142-10785677 REVERSE LENGTH=147                                                                                                                                                                                                                                                                                               | 142 | 147 | 1.00E-45  | 103.5 | 71.1 | 73.9 |
| Rsa1.0_00045.1.g2619.t1 | refNP_187113.1  Alba DNA/RNA-binding protein [Arabidopsis thaliana] gi 6175166 gb AAF04892.1 AC011437.7 unknown protein [Arabidopsis thaliana] gi 38454036 gb AAR20712.1  At3g04620 [Arabidopsis thaliana] gi 38604012 gb AAR24749.1  At3g04620 [Arabidopsis thaliana] gi 332640586 gb AEE74107.1  Alba DNA/RNA-binding protein [Arabidopsis thaliana] | 159 | 164  | 6.00E-45  | 103.1 | 61.6 | 67.9 | Alba DNA/RNA-binding protein                 | gbpln | Arabidopsis thaliana | AT3G04620.1   Symbols:   Alba DNA/RNA-binding protein   chr3:1255660-1256739 REVERSE LENGTH=164                                                                                                                                                                                                                                                                                                                                | 159 | 164 | 2.00E-47  | 103.1 | 61.6 | 67.9 |
| Rsa1.0_00045.1.g2620.t1 | gb AAF88010.1  Hypothetical protein T10118.2 [Arabidopsis thaliana]                                                                                                                                                                                                                                                                                    | 143 | 131  | 3.00E-25  | 91.6  | 67.8 | 78.3 | Hypothetical protein T10118.2                | gbpln | Arabidopsis thaliana | AT5G28610.1   Symbols:   BEST Arabidopsis thaliana protein match is: glycine-rich protein (TAIR:AT5G28630.1); Has 1536 Blast hits to 1202 proteins in 136 species: Archae - 0; Bacteria - 8; Metazoa - 888; Fungi - 120; Plants - 71; Viruses - 39; Other Eukaryotes - 410 (source: NCBI BLink).   chr5:10610976-10611347 FORWARD LENGTH=123                                                                                   | 143 | 123 | 6.00E-24  | 86.0  | 63.6 | 73.4 |
| Rsa1.0_00045.1.g2621.t1 | refXP_002874429.1  hypothetical protein ARALYDRAFT_489653 [Arabidopsis lyrata subsp. lyrata] gi 297320266 gb EFH50688.1  hypothetical protein ARALYDRAFT_489653 [Arabidopsis lyrata subsp. lyrata]                                                                                                                                                     | 159 | 217  | 3.00E-25  | 136.5 | 41.5 | 46.5 | hypothetical protein ARALYDRAFT_489653       | gbpln | Arabidopsis lyrata   | AT5G28590.1   Symbols:   DNA-binding family protein   chr5:10579446-10581559 REVERSE LENGTH=216                                                                                                                                                                                                                                                                                                                                | 159 | 216 | 2.00E-25  | 135.8 | 41.5 | 45.3 |
| Rsa1.0_00045.1.g2622.t1 | #                                                                                                                                                                                                                                                                                                                                                      | #   | #    | #         | #     | #    | #    | -                                            | ----  | ----                 | #                                                                                                                                                                                                                                                                                                                                                                                                                              | #   | #   | #         | #     | #    |      |
| Rsa1.0_00045.1.g2623.t2 | gb AAG51783.1 AC079679.3 reverse transcriptase, putative; 16838-20266 [Arabidopsis thaliana]                                                                                                                                                                                                                                                           | 473 | 1142 | 1.00E-38  | 241.4 | 20.3 | 29.6 | reverse transcriptase, putative; 16838-20266 | gbpln | Arabidopsis thaliana | AT2G22440.1   Symbols:   BEST Arabidopsis thaliana protein match is: Ribonuclease H-like superfamily protein (TAIR:AT4G29090.1); Has 208 Blast hits to 191 proteins in 10 species: Archae - 0; Bacteria - 0; Metazoa - 0; Fungi - 0; Plants - 208; Viruses - 0; Other Eukaryotes - 0 (source: NCBI BLink).   chr2:9528910-9529917 FORWARD LENGTH=256                                                                           | 473 | 256 | 2.00E-17  | 54.1  | 11.4 | 15.6 |
| Rsa1.0_00045.1.g2624.t1 | #                                                                                                                                                                                                                                                                                                                                                      | #   | #    | #         | #     | #    | #    | -                                            | ----  | ----                 | #                                                                                                                                                                                                                                                                                                                                                                                                                              | #   | #   | #         | #     | #    |      |

|                         |                                                                                                                                                                                                                                                                                                |      |      |           |       |      |      |                                                       |       |                      |                                                                                                                                                                      |      |      |           |       |      |      |
|-------------------------|------------------------------------------------------------------------------------------------------------------------------------------------------------------------------------------------------------------------------------------------------------------------------------------------|------|------|-----------|-------|------|------|-------------------------------------------------------|-------|----------------------|----------------------------------------------------------------------------------------------------------------------------------------------------------------------|------|------|-----------|-------|------|------|
| Rsa1.0_00045.1.g2625.t2 | gb AAF18538.1 AC006551.24 Very similar to retrotransposon reverse transcriptase [Arabidopsis thaliana] ref XP_002874426.1  light-dependent short hypocotyls 1 [Arabidopsis lyrata subsp. lyrata]                                                                                               | 358  | 1231 | 7.00E-72  | 343.9 | 44.7 | 62.8 | Very similar to retrotransposon reverse transcriptase | gbpln | Arabidopsis thaliana | AT4G29090.1   Symbols:   Ribonuclease H-like superfamily protein   chr4:14333528-14335255 FORWARD LENGTH=575                                                         | 358  | 575  | 3.00E-42  | 160.6 | 27.1 | 45.5 |
| Rsa1.0_00045.1.g2626.t1 | gi 297320283 gb EFH50685.1  light-dependent short hypocotyls 1 [Arabidopsis lyrata subsp. lyrata]                                                                                                                                                                                              | 192  | 192  | 6.00E-81  | 100.0 | 88.5 | 92.7 | light-dependent short hypocotyls 1                    | gbpln | Arabidopsis lyrata   | AT5G28490.1   Symbols: LSH1   Protein of unknown function (DUF640)   chr5:10454541-10455113 REVERSE LENGTH=190                                                       | 192  | 190  | 3.00E-82  | 99.0  | 89.6 | 93.8 |
| Rsa1.0_00045.1.g2627.t1 | emb CAB75932.1  putative protein [Arabidopsis thaliana]                                                                                                                                                                                                                                        | 1175 | 1339 | 0         | 114.0 | 72.3 | 79.2 | putative protein                                      | gbpln | Arabidopsis thaliana | AT4G23160.1   Symbols: CRK8   cysteine-rich RLK (RECEPTOR-like protein kinase) 8   chr4:12129485-12134086 FORWARD LENGTH=1262                                        | 1175 | 1262 | 7.00E-58  | 107.4 | 10.2 | 15.7 |
| Rsa1.0_00045.1.g2628.t1 | ref NP_568711.1  uncharacterized protein [Arabidopsis thaliana] gi 363579829 sp F4K657.1 BL1S2.ARAT H RecName: Full=Biogenesis of lysosome-related organelles complex 1 subunit 2; Short=BLOC-1 subunit 2 gi 332008445 gb AED95828.1  uncharacterized protein AT5G49550 [Arabidopsis thaliana] | 126  | 127  | 3.00E-55  | 100.8 | 88.9 | 93.7 | uncharacterized protein                               | gbpln | Arabidopsis thaliana | AT5G49550.1   Symbols: BLOC2   Putative homolog of mammalian BLOC-1 Subunit 2. Protein - protein interaction with BLOS1.   chr5:20106702-20107156 REVERSE LENGTH=127 | 126  | 127  | 6.00E-58  | 100.8 | 88.9 | 93.7 |
| Rsa1.0_00045.1.g2629.t1 | gb EOA31472.1  hypothetical protein CARUB_v10014658mg [Capsella rubella]                                                                                                                                                                                                                       | 194  | 204  | 4.00E-60  | 105.2 | 62.4 | 75.8 | hypothetical protein CARUB_v10014658mg                | gbpln | Capsella rubella     | AT3G04320.1   Symbols:   Kunitz family trypsin and protease inhibitor protein   chr3:1143815-1144426 FORWARD LENGTH=203                                              | 194  | 203  | 5.00E-58  | 104.6 | 57.2 | 72.7 |
| Rsa1.0_00045.1.g2630.t2 | ref NP_187083.1  Kunitz family trypsin and protease inhibitor protein [Arabidopsis thaliana] gi 6721153 gb AAF26781.1 AC016829.5 putative trypsin inhibitor [Arabidopsis thaliana] gi 332640546 gb AEE74067.1  Kunitz family trypsin and protease inhibitor protein [Arabidopsis thaliana]     | 295  | 202  | 3.00E-43  | 68.5  | 33.9 | 42.0 | Kunitz family trypsin and protease inhibitor protein  | gbpln | Arabidopsis thaliana | AT3G04330.1   Symbols:   Kunitz family trypsin and protease inhibitor protein   chr3:1145757-1146365 FORWARD LENGTH=202                                              | 295  | 202  | 7.00E-46  | 68.5  | 33.9 | 42.0 |
| Rsa1.0_00045.1.g2631.t1 | gb EOA14246.1  hypothetical protein CARUB_v10027400mg [Capsella rubella]                                                                                                                                                                                                                       | 124  | 114  | 2.00E-51  | 91.9  | 83.1 | 85.5 | hypothetical protein CARUB_v10027400mg                | gbpln | Capsella rubella     | AT5G49540.1   Symbols:   Rab5-interacting family protein   chr5:20104804-20105609 REVERSE LENGTH=114                                                                 | 124  | 114  | 7.00E-53  | 91.9  | 80.6 | 83.9 |
| Rsa1.0_00045.1.g2632.t1 | ref XP_002863991.1  hypothetical protein ARALYDRAFT_917932 [Arabidopsis lyrata subsp. lyrata] gi 297309826 gb EFH40250.1  hypothetical protein ARALYDRAFT_917932 [Arabidopsis lyrata subsp. lyrata]                                                                                            | 382  | 396  | 1.00E-118 | 103.7 | 78.5 | 85.9 | hypothetical protein ARALYDRAFT_917932                | gbpln | Arabidopsis lyrata   | AT5G49520.1   Symbols: WRKY48, ATWRKY48   WRKY DNA-binding protein 48   chr5:20090890-20092867 FORWARD LENGTH=399                                                    | 382  | 399  | 1.00E-118 | 104.5 | 73.3 | 79.1 |
| Rsa1.0_00045.1.g2633.t3 | #                                                                                                                                                                                                                                                                                              | #    | #    | #         | #     | #    | #    | -                                                     | ----  | ----                 | #                                                                                                                                                                    | #    | #    | #         | #     | #    | #    |
| Rsa1.0_00045.1.g2634.t1 | ref XP_002863987.1  hypothetical protein ARALYDRAFT_495005 [Arabidopsis lyrata subsp. lyrata] gi 297309822 gb EFH40246.1  hypothetical protein ARALYDRAFT_495005 [Arabidopsis lyrata subsp. lyrata]                                                                                            | 161  | 161  | 8.00E-61  | 100.0 | 82.0 | 85.1 | hypothetical protein ARALYDRAFT_495005                | gbpln | Arabidopsis lyrata   | AT5G49480.1   Symbols: ATCP1, CP1   Ca2+-binding protein 1   chr5:20070812-20071294 FORWARD LENGTH=160                                                               | 161  | 160  | 5.00E-63  | 99.4  | 80.7 | 83.9 |
| Rsa1.0_00045.1.g2635.t1 | #                                                                                                                                                                                                                                                                                              | #    | #    | #         | #     | #    | #    | -                                                     | ----  | ----                 | #                                                                                                                                                                    | #    | #    | #         | #     | #    | #    |
| Rsa1.0_00045.1.g2636.t1 | ref NP_001190501.1  PAS domain-containing protein tyrosine kinase [Arabidopsis thaliana] gi 332008435 gb AED95818.1  PAS domain-containing protein tyrosine kinase [Arabidopsis thaliana]                                                                                                      | 624  | 770  | 0         | 123.4 | 89.1 | 95.0 | PAS domain-containing protein tyrosine kinase         | gbpln | Arabidopsis thaliana | AT5G49470.3   Symbols:   PAS domain-containing protein tyrosine kinase family protein   chr5:20063616-20068311 FORWARD LENGTH=770                                    | 624  | 770  | 0         | 123.4 | 89.1 | 95.0 |
| Rsa1.0_00045.1.g2637.t1 | ref XP_002863985.1  kinase family protein [Arabidopsis lyrata subsp. lyrata] gi 297309820 gb EFH40244.1  kinase family protein [Arabidopsis lyrata subsp. lyrata]                                                                                                                              | 130  | 856  | 3.00E-41  | 658.5 | 76.9 | 81.5 | kinase family protein                                 | gbpln | Arabidopsis lyrata   | AT5G49470.2   Symbols:   PAS domain-containing protein tyrosine kinase family protein   chr5:20063616-20068311 FORWARD LENGTH=831                                    | 130  | 831  | 6.00E-44  | 639.2 | 75.4 | 80.8 |
| Rsa1.0_00045.1.g2638.t1 | ref XP_002863984.1  ATP-citrate lyase B-2 [Arabidopsis lyrata subsp. lyrata] gi 297309819 gb EFH40243.1  ATP-citrate lyase B-2 [Arabidopsis lyrata subsp. lyrata]                                                                                                                              | 608  | 608  | 0         | 100.0 | 99.2 | 99.8 | ATP-citrate lyase B-2                                 | gbpln | Arabidopsis lyrata   | AT5G49460.1   Symbols: ACLB-2   ATP citrate lyase subunit B 2   chr5:20055048-20058195 FORWARD LENGTH=608                                                            | 608  | 608  | 0         | 100.0 | 98.5 | 99.5 |
| Rsa1.0_00045.1.g2639.t1 | #                                                                                                                                                                                                                                                                                              | #    | #    | #         | #     | #    | #    | -                                                     | ----  | ----                 | #                                                                                                                                                                    | #    | #    | #         | #     | #    | #    |
| Rsa1.0_00045.1.g2640.t1 | db BAJ33845.1  unnamed protein product [Thellungiella halophila]                                                                                                                                                                                                                               | 140  | 141  | 4.00E-59  | 100.7 | 85.7 | 92.9 | unnamed protein product                               | ----  | ----                 | AT5G49450.1   Symbols: AtbZIP1, bZIP1   basic leucine-zipper 1   chr5:20052145-20052582 FORWARD LENGTH=145                                                           | 140  | 145  | 1.00E-58  | 103.6 | 83.6 | 90.7 |
| Rsa1.0_00045.1.g2641.t1 | #                                                                                                                                                                                                                                                                                              | #    | #    | #         | #     | #    | #    | -                                                     | ----  | ----                 | #                                                                                                                                                                    | #    | #    | #         | #     | #    | #    |

|                         |                                                                                                                                                                                                                                                                                                                                                                                                                  |     |      |           |       |      |      |                                        |       |                      |                                                                                                                                                                              |     |     |           |       |      |      |
|-------------------------|------------------------------------------------------------------------------------------------------------------------------------------------------------------------------------------------------------------------------------------------------------------------------------------------------------------------------------------------------------------------------------------------------------------|-----|------|-----------|-------|------|------|----------------------------------------|-------|----------------------|------------------------------------------------------------------------------------------------------------------------------------------------------------------------------|-----|-----|-----------|-------|------|------|
| Rsa1.0_00045.1.g2642.t1 | ref NP_199747.1  beta-xylosidase 1 [Arabidopsis thaliana]<br>gi 75262458 sp Q9FGY1.1 BXL1_ARATH RecName: Full=Beta-D-xylosidase 1; Short=AtBXL1; AltName: Full=Alpha-L-arabinofuranosidase; Flags: Precursor gi 9759419 dbj BAB09906.1  xylosidase [Arabidopsis thaliana]<br>gi 21539545 gb AAM5325.1  xylosidase [Arabidopsis thaliana]<br>gi 332008419 gb AED95802.1  beta-xylosidase 1 [Arabidopsis thaliana] | 562 | 774  | 0         | 137.7 | 90.9 | 94.5 | beta-xylosidase 1                      | gbpln | Arabidopsis thaliana | AT5G49380.1   Symbols: BXL1, ATBXL1   beta-xylosidase 1   chr5:20012179-20016659 REVERSE LENGTH=774                                                                          | 562 | 774 | 0         | 137.7 | 90.9 | 94.5 |
| Rsa1.0_00045.1.g2643.t1 | gb ABD65099.1  hypothetical protein 31.t00074 [Brassica oleracea]                                                                                                                                                                                                                                                                                                                                                | 261 | 258  | 5.00E-57  | 98.9  | 51.7 | 67.8 | hypothetical protein 31.t00074         | gbpln | Brassica oleracea    | AT3G47680.1   Symbols:   DNA binding   chr3:17577483-17578391 REVERSE LENGTH=302                                                                                             | 261 | 302 | 2.00E-47  | 115.7 | 43.7 | 64.0 |
| Rsa1.0_00045.1.g2644.t1 | gb ABD64939.1  hypothetical protein 24.t00017 [Brassica oleracea]                                                                                                                                                                                                                                                                                                                                                | 611 | 442  | 1.00E-157 | 72.3  | 43.5 | 51.2 | hypothetical protein 24.t00017         | gbpln | Brassica oleracea    | AT5G49360.1   Symbols: BXL1, ATBXL1   beta-xylosidase 1   chr5:20012179-20016659 REVERSE LENGTH=774                                                                          | 611 | 774 | 1.00E-111 | 126.7 | 31.8 | 34.0 |
| Rsa1.0_00045.1.g2645.t1 | ref XP_002865730.1  hypothetical protein ARALYDRAFT_331346 [Arabidopsis lyrata subsp. lyrata]<br>gi 297311585 gb EFH41989.1  hypothetical protein ARALYDRAFT_331346 [Arabidopsis lyrata subsp. lyrata]                                                                                                                                                                                                           | 279 | 459  | 4.00E-63  | 164.5 | 44.8 | 50.5 | hypothetical protein ARALYDRAFT_331346 | gbpln | Arabidopsis lyrata   | AT5G49340.1   Symbols: TBL4   TRICHOME BIRREFRINGENCE-LIKE 4   chr5:20007348-20009038 REVERSE LENGTH=457                                                                     | 279 | 457 | 8.00E-64  | 163.8 | 43.0 | 50.5 |
| Rsa1.0_00045.1.g2646.t1 | gb ADZ98865.1  MYB domain protein 111 [Brassica rapa subsp. rapa]                                                                                                                                                                                                                                                                                                                                                | 341 | 343  | 1.00E-149 | 100.6 | 79.2 | 86.2 | MYB domain protein 111                 | gbpln | Brassica rapa        | AT5G49330.1   Symbols: MYB111, ATM YB111, PFG3   myb domain protein 111   chr5:1999147-20001293 REVERSE LENGTH=342                                                           | 341 | 342 | 1.00E-143 | 100.3 | 77.1 | 83.9 |
| Rsa1.0_00045.1.g2647.t1 | gb EOA14118.1  hypothetical protein CARUB_v10027260mg [Capsella rubella]                                                                                                                                                                                                                                                                                                                                         | 164 | 166  | 2.00E-25  | 101.2 | 69.5 | 76.8 | hypothetical protein CARUB_v10027260mg | gbpln | Capsella rubella     | AT5G49280.1   Symbols:   hydroxyproline-rich glycoprotein family protein   chr5:19976842-19977330 REVERSE LENGTH=162                                                         | 164 | 162 | 1.00E-12  | 98.8  | 18.3 | 20.7 |
| Rsa1.0_00045.1.g2648.t1 | ref XP_002865723.1  hypothetical protein ARALYDRAFT_494988 [Arabidopsis lyrata subsp. lyrata]<br>gi 297311558 gb EFH41982.1  hypothetical protein ARALYDRAFT_494988 [Arabidopsis lyrata subsp. lyrata]                                                                                                                                                                                                           | 663 | 661  | 0         | 99.7  | 85.4 | 91.6 | hypothetical protein ARALYDRAFT_494988 | gbpln | Arabidopsis lyrata   | AT5G49270.1   Symbols: SHV2, DER9, MRH4, COBL9   COBRA-like extracellular glycosyl-phosphatidyl inositol-anchored protein family   chr5:19972021-19974398 REVERSE LENGTH=663 | 663 | 663 | 0         | 100.0 | 85.8 | 92.2 |
| Rsa1.0_00045.1.g2649.t1 | ref NP_196810.5  ARMADILLO BTB protein 1 [Arabidopsis thaliana]<br>gi 325529879 sp B7U179.1 ABAP1_ARATH RecName: Full=ARMADILLO BTB ARMADILLO PROTEIN 1; Short=ABAP1<br>gi 213391123 gb ACJ46331.1  ABAP1 [Arabidopsis thaliana]<br>gi 332004463 gb AED91846.1  ARMADILLO BTB protein 1 [Arabidopsis thaliana]                                                                                                   | 717 | 737  | 0         | 102.8 | 84.4 | 90.9 | ARMADILLO BTB protein 1                | gbpln | Arabidopsis thaliana | AT5G13060.1   Symbols: ABAP1   ARMADILLO BTB protein 1   chr5:4142958-4146952 FORWARD LENGTH=737                                                                             | 717 | 737 | 0         | 102.8 | 84.4 | 90.9 |
| Rsa1.0_00045.1.g2650.t1 | gb AEK67480.1  ZZ [Arabidopsis thaliana]                                                                                                                                                                                                                                                                                                                                                                         | 154 | 206  | 2.00E-46  | 133.8 | 73.4 | 82.5 | ZZ                                     | gbpln | Arabidopsis thaliana | AT5G49230.1   Symbols: HRB1   Drought-responsive family protein   chr5:19959048-19960422 REVERSE LENGTH=211                                                                  | 154 | 211 | 2.00E-48  | 137.0 | 73.4 | 82.5 |
| Rsa1.0_00045.1.g2651.t1 | #                                                                                                                                                                                                                                                                                                                                                                                                                | #   | #    | #         | #     | #    | -    | ----                                   | ----  | ----                 | #                                                                                                                                                                            | #   | #   | #         | #     | #    |      |
| Rsa1.0_00045.1.g2652.t1 | ref XP_002863962.1  predicted protein [Arabidopsis lyrata subsp. lyrata]<br>gi 297309797 gb EFH40221.1  predicted protein [Arabidopsis lyrata subsp. lyrata]                                                                                                                                                                                                                                                     | 414 | 501  | 1.00E-139 | 121.0 | 60.9 | 63.3 | predicted protein                      | gbpln | Arabidopsis lyrata   | AT5G49130.1   Symbols:   MATE efflux family protein   chr5:19915904-19917525 FORWARD LENGTH=502                                                                              | 414 | 502 | 1.00E-138 | 121.3 | 59.2 | 62.6 |
| Rsa1.0_00045.1.g2653.t1 | gb AAG50806.1 AC079281.8 unknown protein [Arabidopsis thaliana]                                                                                                                                                                                                                                                                                                                                                  | 386 | 1213 | 3.00E-92  | 314.2 | 48.7 | 65.3 | unknown protein                        | gbpln | Arabidopsis thaliana | AT1G60720.1   Symbols:   RNA-directed DNA polymerase (reverse transcriptase)-related family protein   chr1:22357072-22357941 FORWARD LENGTH=289                              | 386 | 289 | 1.00E-51  | 74.9  | 28.5 | 41.5 |
| Rsa1.0_00046.1.g2654.t1 | gb AAB68964.1  trypsin inhibitor propeptide [Brassica oleracea]                                                                                                                                                                                                                                                                                                                                                  | 209 | 214  | 8.00E-62  | 102.4 | 64.1 | 73.2 | trypsin inhibitor propeptide           | gbpln | Brassica oleracea    | AT1G73260.1   Symbols: ATKTI1, KTI1   kunitz trypsin inhibitor 1   chr1:27547410-27548057 REVERSE LENGTH=215                                                                 | 209 | 215 | 3.00E-54  | 102.9 | 58.4 | 67.9 |
| Rsa1.0_00046.1.g2655.t1 | gb AAB68964.1  trypsin inhibitor propeptide [Brassica oleracea]                                                                                                                                                                                                                                                                                                                                                  | 211 | 214  | 3.00E-66  | 101.4 | 66.4 | 73.9 | trypsin inhibitor propeptide           | gbpln | Brassica oleracea    | AT1G73260.1   Symbols: ATKTI1, KTI1   kunitz trypsin inhibitor 1   chr1:27547410-27548057 REVERSE LENGTH=215                                                                 | 211 | 215 | 9.00E-56  | 101.9 | 55.5 | 70.1 |
| Rsa1.0_00046.1.g2656.t1 | ref NP_565061.1  kunitz trypsin inhibitor 1 [Arabidopsis thaliana]<br>gi 19698953 gb AAL91212.1  putative trypsin inhibitor [Arabidopsis thaliana]<br>gi 27311885 gb AAO00908.1  putative trypsin inhibitor [Arabidopsis thaliana]<br>gi 110740417 dbj BAF02103.1  putative trypsin inhibitor [Arabidopsis thaliana]<br>gi 332197314 gb AEE35435.1  kunitz trypsin inhibitor 1 [Arabidopsis thaliana]            | 202 | 215  | 2.00E-89  | 106.4 | 78.7 | 88.6 | kunitz trypsin inhibitor 1             | gbpln | Arabidopsis thaliana | AT1G73260.1   Symbols: ATKTI1, KTI1   kunitz trypsin inhibitor 1   chr1:27547410-27548057 REVERSE LENGTH=215                                                                 | 202 | 215 | 7.00E-92  | 106.4 | 78.7 | 88.6 |

|                         |                                                                                                                                                                                                                                                                                                                                                                                                                                                                                                                                                                                                                                                                                                                                                                                                                                                     |     |     |           |       |      |      |                                                       |       |                      |                                                                                                                                                                                                                                                                                                                            |     |     |           |       |      |      |
|-------------------------|-----------------------------------------------------------------------------------------------------------------------------------------------------------------------------------------------------------------------------------------------------------------------------------------------------------------------------------------------------------------------------------------------------------------------------------------------------------------------------------------------------------------------------------------------------------------------------------------------------------------------------------------------------------------------------------------------------------------------------------------------------------------------------------------------------------------------------------------------------|-----|-----|-----------|-------|------|------|-------------------------------------------------------|-------|----------------------|----------------------------------------------------------------------------------------------------------------------------------------------------------------------------------------------------------------------------------------------------------------------------------------------------------------------------|-----|-----|-----------|-------|------|------|
| Rsa1.0_00046.1.g2657.t1 | refXP_002888917.1   GDP-4-keto-6-deoxymannose-3,5-epimerase-4-reductase 1 [Arabidopsis lyrata subsp. lyrata] gi 29733475 gb EFH65176.1   GDP-4-keto-6-deoxymannose-3,5-epimerase-4-reductase 1 [Arabidopsis lyrata subsp. lyrata]                                                                                                                                                                                                                                                                                                                                                                                                                                                                                                                                                                                                                   | 313 | 323 | 1.00E-171 | 103.2 | 91.4 | 95.8 | GDP-4-keto-6-deoxymannose-3,5-epimerase-4-reductase 1 | gbpln | Arabidopsis lyrata   | AT1G73250.1   Symbols: ATFX, GER1   GDP-4-keto-6-deoxymannose-3,5-epimerase-4-reductase 1   chr1:27545213-27546360 REVERSE LENGTH=323                                                                                                                                                                                      | 313 | 323 | 1.00E-174 | 103.2 | 91.4 | 95.8 |
| Rsa1.0_00046.1.g2658.t1 | refXP_002888916.1   hypothetical protein ARALYDRAFT_476456 [Arabidopsis lyrata subsp. lyrata] gi 29733475 gb EFH65175.1   hypothetical protein ARALYDRAFT_476456 [Arabidopsis lyrata subsp. lyrata]                                                                                                                                                                                                                                                                                                                                                                                                                                                                                                                                                                                                                                                 | 507 | 519 | 0         | 102.4 | 86.4 | 93.5 | hypothetical protein ARALYDRAFT_476456                | gbpln | Arabidopsis lyrata   | AT1G73240.1   Symbols:   CONTAINS InterPro DOMAIN/s: Nucleoporin protein Ndc1-Nup (InterPro:IPR019049); Has 36 Blast hits to 36 proteins in 17 species: Archae - 0; Bacteria - 0; Metazoa - 1; Fungi - 0; Plants - 35; Viruses - 0; Other Eukaryotes - 0 (source: NCBI BLink).   chr1:27542397-27544668 REVERSE LENGTH=519 | 507 | 519 | 0         | 102.4 | 86.2 | 93.1 |
| Rsa1.0_00046.1.g2659.t1 | refNP_177466.1   nascent polypeptide-associated complex subunit beta [Arabidopsis thaliana] gi 297842067 ref XP_002888915.1   nascent polypeptide-associated complex domain-containing protein [Arabidopsis lyrata subsp. lyrata] gi 12324314 gb AAG52123.1 AC010556_5 putative transcription factor BTF3 (RNA polymerase B transcription factor 3); 26343-27201 [Arabidopsis thaliana] gi 13877981 gb AAK44068.1 AF370253.1 putative RNA polymerase B transcription factor BTF3 [Arabidopsis thaliana] gi 17104709 gb AAL34243.1   putative RNA polymerase B transcription factor 3 [Arabidopsis thaliana] gi 29733475 gb EFH65174.1   nascent polypeptide-associated complex domain-containing protein [Arabidopsis lyrata subsp. lyrata] gi 332197311 gb AEE35432.1   nascent polypeptide-associated complex subunit beta [Arabidopsis thaliana] | 167 | 165 | 1.00E-73  | 98.8  | 91.6 | 94.0 | nascent polypeptide-associated complex subunit beta   | gbpln | Arabidopsis lyrata   | AT1G73230.1   Symbols:   Nascent polypeptide-associated complex NAC   chr1:27540506-27541364 REVERSE LENGTH=165                                                                                                                                                                                                            | 167 | 165 | 5.00E-76  | 98.8  | 91.6 | 94.0 |
| Rsa1.0_00046.1.g2660.t1 | refNP_565059.2   organic cation/carnitine transporter1 [Arabidopsis thaliana] gi 75262291 sp Q9GAT6.1 OCT1_ARATH RecName: Full=Organic cation/carnitine transporter 1; Short=AtOCT1 gi 12324316 gb AAG52125.1 AC010556_7 putative transporter; 29320-27598 [Arabidopsis thaliana] gi 27311699 gb AA000815.1   putative transporter [Arabidopsis thaliana] gi 31711954 gb AAP69333.1   At1g73220 [Arabidopsis thaliana] gi 332197310 gb AEE35431.1   organic cation/carnitine transporter1 [Arabidopsis thaliana]                                                                                                                                                                                                                                                                                                                                    | 556 | 539 | 0         | 96.9  | 83.6 | 89.6 | organic cation/carnitine transporter1                 | gbpln | Arabidopsis thaliana | AT1G73220.1   Symbols: AtOCT1, 1-Oct   organic cation/carnitine transporter1   chr1:27528397-27540109 FORWARD LENGTH=539                                                                                                                                                                                                   | 556 | 539 | 0         | 96.9  | 83.6 | 89.6 |
| Rsa1.0_00046.1.g2661.t1 | refNP_177464.1   uncharacterized protein [Arabidopsis thaliana] gi 12324319 gb AAG52128.1 AC010556_10 hypothetical protein; 37254-39279 [Arabidopsis thaliana] gi 53828629 gb AAU94424.1   At1g73210 [Arabidopsis thaliana] gi 332197308 gb AEE35429.1   uncharacterized protein AT1G73210 [Arabidopsis thaliana]                                                                                                                                                                                                                                                                                                                                                                                                                                                                                                                                   | 312 | 314 | 1.00E-157 | 100.6 | 86.9 | 92.9 | uncharacterized protein                               | gbpln | Arabidopsis thaliana | AT1G73210.1   Symbols:   Protein of unknown function (DUF789)   chr1:27528428-27530453 REVERSE LENGTH=314                                                                                                                                                                                                                  | 312 | 314 | 1.00E-159 | 100.6 | 86.9 | 92.9 |
| Rsa1.0_00046.1.g2662.t1 | refXP_002888912.1   hypothetical protein ARALYDRAFT_895179 [Arabidopsis lyrata subsp. lyrata] gi 297334753 gb EFH65171.1   hypothetical protein ARALYDRAFT_895179 [Arabidopsis lyrata subsp. lyrata]                                                                                                                                                                                                                                                                                                                                                                                                                                                                                                                                                                                                                                                | 763 | 779 | 0         | 102.1 | 79.4 | 87.8 | hypothetical protein ARALYDRAFT_895179                | gbpln | Arabidopsis lyrata   | AT1G73200.1   Symbols:   Putative integral membrane protein conserved region (DUF2404)   chr1:27523454-27526573 REVERSE LENGTH=779                                                                                                                                                                                         | 763 | 779 | 0         | 102.1 | 78.5 | 87.3 |
| Rsa1.0_00046.1.g2663.t1 | gb EOA34775.1   hypothetical protein CARUB_v10022350mg [Capsella rubella]                                                                                                                                                                                                                                                                                                                                                                                                                                                                                                                                                                                                                                                                                                                                                                           | 267 | 265 | 1.00E-130 | 99.3  | 93.3 | 97.0 | hypothetical protein CARUB_v10022350mg                | gbpln | Capsella rubella     | AT1G73190.1   Symbols: ALPHA-TIP, TIP3;1   Aquaporin-like superfamily protein   chr1:27522155-27523171 FORWARD LENGTH=268                                                                                                                                                                                                  | 267 | 268 | 1.00E-129 | 100.4 | 91.4 | 95.9 |

|                         |                                                                                                                                                                                                                                                                                                                                                                                                   |      |      |           |       |      |      |                                        |       |                      |                                                                                                                                                                                                                                                                                                                                                                                    |      |     |           |       |      |      |
|-------------------------|---------------------------------------------------------------------------------------------------------------------------------------------------------------------------------------------------------------------------------------------------------------------------------------------------------------------------------------------------------------------------------------------------|------|------|-----------|-------|------|------|----------------------------------------|-------|----------------------|------------------------------------------------------------------------------------------------------------------------------------------------------------------------------------------------------------------------------------------------------------------------------------------------------------------------------------------------------------------------------------|------|-----|-----------|-------|------|------|
| Rsa1.0_00046.1.g2664.t1 | refNP_177455.1   uncharacterized protein [Arabidopsis thaliana]<br>gi 12324324 gb AAG52133.1 AC010556_15 hypothetical protein; 69822-70342 [Arabidopsis thaliana]<br>gi 26449662 dbj BAC41955.1   unknown protein [Arabidopsis thaliana]<br>gi 28416835 gb AAO42948.1   At1g73120 [Arabidopsis thaliana]<br>gi 332197295 gb AEE35416.1   uncharacterized protein AT1G73120 [Arabidopsis thaliana] | 110  | 109  | 7.00E-46  | 99.1  | 81.8 | 90.0 | uncharacterized protein                | gbpln | Arabidopsis thaliana | AT1G73120.1   Symbols:   unknown protein; FUNCTIONS IN: molecular_function unknown; INVOLVED IN: response to oxidative stress; EXPRESSED IN: root, cultured cell; Has 36 Blast hits to 36 proteins in 8 species: Archae - 0; Bacteria - 0; Metazoa - 0; Fungi - 0; Plants - 36; Viruses - 0; Other Eukaryotes - 0 (source: NCBI BLINK)   chr1:27497365-27497885 REVERSE LENGTH=109 | 110  | 109 | 1.00E-48  | 99.1  | 81.8 | 90.0 |
| Rsa1.0_00046.1.g2665.t2 | refNP_177454.1   putative Rubisco activase 2 [Arabidopsis thaliana]<br>gi 13605706 gb AAK32846.1 AF361834.1   At1g73110/F3N23.39 [Arabidopsis thaliana]<br>gi 18700270 gb AAL77745.1   At1g73110/F3N23.39 [Arabidopsis thaliana]<br>gi 26452888 dbj BAC43522.1   unknown protein [Arabidopsis thaliana]<br>gi 332197294 gb AEE35415.1   putative Rubisco activase 2 [Arabidopsis thaliana]        | 435  | 432  | 0         | 99.3  | 90.6 | 94.0 | putative Rubisco activase 2            | gbpln | Arabidopsis thaliana | AT1G73110.1   Symbols:   P-loop containing nucleoside triphosphate hydrolases superfamily protein   chr1:27494344-27496844 REVERSE LENGTH=432                                                                                                                                                                                                                                      | 435  | 432 | 0         | 99.3  | 90.6 | 94.0 |
| Rsa1.0_00046.1.g2666.t1 | refXP_002887472.1   hypothetical protein ARALYDRAFT_895166 [Arabidopsis lyrata subsp. lyrata]<br>gi 29733331 gb EFH63731.1   hypothetical protein ARALYDRAFT_895166 [Arabidopsis lyrata subsp. lyrata]                                                                                                                                                                                            | 672  | 669  | 0         | 99.6  | 81.7 | 88.1 | hypothetical protein ARALYDRAFT_895166 | gbpln | Arabidopsis lyrata   | AT1G73100.1   Symbols: SUVH3, SDG19   SU(VAR)3-9 homolog 3   chr1:27491970-27493979 FORWARD LENGTH=669                                                                                                                                                                                                                                                                             | 672  | 669 | 0         | 99.6  | 79.9 | 86.9 |
| Rsa1.0_00046.1.g2667.t1 | refNP_00117591.1   Leucine-rich repeat family protein [Arabidopsis thaliana]<br>gi 5903096 gb AAD55654.1 AC008017.27   Highly similar to receptor-like protein kinase [Arabidopsis thaliana]<br>gi 26449861 dbj BAC42053.1   unknown protein [Arabidopsis thaliana]<br>gi 332197289 gb AEE35410.1   Leucine-rich repeat family protein [Arabidopsis thaliana]                                     | 951  | 598  | 0         | 62.9  | 49.8 | 54.4 | Leucine-rich repeat family protein     | gbpln | Arabidopsis thaliana | AT1G73066.1   Symbols:   Leucine-rich repeat family protein   chr1:27481785-27483581 FORWARD LENGTH=598                                                                                                                                                                                                                                                                            | 951  | 598 | 0         | 62.9  | 49.8 | 54.4 |
| Rsa1.0_00046.1.g2668.t1 | gb EOA33724.1   hypothetical protein CARUB_v10019915mg [Capsella rubella]                                                                                                                                                                                                                                                                                                                         | 660  | 664  | 0         | 100.6 | 91.5 | 95.9 | hypothetical protein CARUB_v10019915mg | gbpln | Capsella rubella     | AT1G73020.2   Symbols:   unknown protein; FUNCTIONS IN: molecular_function unknown; INVOLVED IN: biological_process unknown; LOCATED IN: cellular_component unknown; EXPRESSED IN: 22 plant structures; EXPRESSED DURING: 13 growth stages; CONTAINS InterPro DOMAIN/s: Protein of unknown function DUF590 (InterPro:IPR007632)   chr1:27469714-27473181 REVERSE LENGTH=665        | 660  | 665 | 0         | 100.8 | 90.5 | 95.2 |
| Rsa1.0_00046.1.g2669.t1 | refXP_002888902.1   hypothetical protein ARALYDRAFT_476431 [Arabidopsis lyrata subsp. lyrata]<br>gi 297334743 gb EFH65161.1   hypothetical protein ARALYDRAFT_476431 [Arabidopsis lyrata subsp. lyrata]                                                                                                                                                                                           | 292  | 294  | 1.00E-139 | 100.7 | 86.0 | 91.8 | hypothetical protein ARALYDRAFT_476431 | gbpln | Arabidopsis lyrata   | AT1G73010.1   Symbols: ATPS2, PS2   phosphate starvation-induced gene 2   chr1:27464780-27466180 REVERSE LENGTH=295                                                                                                                                                                                                                                                                | 292  | 295 | 1.00E-139 | 101.0 | 84.2 | 90.8 |
| Rsa1.0_00046.1.g2670.t1 | gb EOA20703.1   hypothetical protein CARUB_v10001020mg [Capsella rubella]                                                                                                                                                                                                                                                                                                                         | 145  | 427  | 7.00E-32  | 294.5 | 52.4 | 55.2 | hypothetical protein CARUB_v10001020mg | gbpln | Capsella rubella     | AT5G25220.1   Symbols: KNAT3   KNOTTED1-like homeobox gene 3   chr5:58736208-6738115 FORWARD LENGTH=431                                                                                                                                                                                                                                                                            | 145  | 431 | 2.00E-34  | 297.2 | 52.4 | 55.2 |
| Rsa1.0_00046.1.g2671.t1 | gb EOA33560.1   hypothetical protein CARUB_v10019685mg [Capsella rubella]                                                                                                                                                                                                                                                                                                                         | 1159 | 1170 | 0         | 100.9 | 84.8 | 92.1 | hypothetical protein CARUB_v10019685mg | gbpln | Capsella rubella     | AT1G72960.1   Symbols:   Root hair defective 3 GTP-binding protein (RHD3)   chr1:27446263-27450862 FORWARD LENGTH=795                                                                                                                                                                                                                                                              | 1159 | 795 | 0         | 68.6  | 61.8 | 65.3 |
| Rsa1.0_00046.1.g2672.t5 | gb EOA31387.1   hypothetical protein CARUB_v10014563mg [Capsella rubella]                                                                                                                                                                                                                                                                                                                         | 129  | 226  | 2.00E-16  | 175.2 | 51.9 | 61.2 | hypothetical protein CARUB_v10014563mg | gbpln | Capsella rubella     | AT3G16770.1   Symbols: RAP2.3, ATEBP, ERF72, EBP   ethylene-responsive element binding protein   chr3:5705784-5706768 FORWARD LENGTH=248                                                                                                                                                                                                                                           | 129  | 248 | 7.00E-13  | 192.2 | 26.4 | 27.9 |
| Rsa1.0_00046.1.g2673.t1 | gb ACP30576.1   disease resistance protein [Brassica rapa subsp. pekinensis]                                                                                                                                                                                                                                                                                                                      | 437  | 426  | 0         | 97.5  | 81.7 | 87.6 | disease resistance protein             | gbpln | Brassica rapa        | AT1G72890.1   Symbols:   Disease resistance protein (TIR-NBS class)   chr1:27429947-27431717 FORWARD LENGTH=438                                                                                                                                                                                                                                                                    | 437  | 438 | 1.00E-173 | 100.2 | 71.2 | 83.1 |
| Rsa1.0_00046.1.g2674.t2 | #                                                                                                                                                                                                                                                                                                                                                                                                 | #    | #    | #         | #     | #    | -    | ----                                   | ----  | ----                 | #                                                                                                                                                                                                                                                                                                                                                                                  | #    | #   | #         | #     | #    |      |
| Rsa1.0_00046.1.g2675.t1 | gb EOA35268.1   hypothetical protein CARUB_v10020451mg [Capsella rubella]                                                                                                                                                                                                                                                                                                                         | 381  | 385  | 0         | 101.0 | 86.4 | 92.9 | hypothetical protein CARUB_v10020451mg | gbpln | Capsella rubella     | AT1G72880.1   Symbols:   Survival protein SurE-like phosphatase/nucleotidase   chr1:27423679-27425928 REVERSE LENGTH=385                                                                                                                                                                                                                                                           | 381  | 385 | 0         | 101.0 | 86.1 | 91.6 |

|                         |                                                                                                                                                                                                                                                                                                                                                                                                                                                                                                                                                                                                                                                                                          |      |      |           |       |      |      |                                              |       |                      |                                                                                                                             |      |      |           |       |      |      |
|-------------------------|------------------------------------------------------------------------------------------------------------------------------------------------------------------------------------------------------------------------------------------------------------------------------------------------------------------------------------------------------------------------------------------------------------------------------------------------------------------------------------------------------------------------------------------------------------------------------------------------------------------------------------------------------------------------------------------|------|------|-----------|-------|------|------|----------------------------------------------|-------|----------------------|-----------------------------------------------------------------------------------------------------------------------------|------|------|-----------|-------|------|------|
| Rsa1.0_00046.1.g2676.t2 | refXP_002887456.1   hypothetical protein ARALYDRAFT_895140 [Arabidopsis lyrata subsp. lyrata] gi 297333297 gb EFH63715.1                                                                                                                                                                                                                                                                                                                                                                                                                                                                                                                                                                 | 676  | 409  | 1.00E-68  | 60.5  | 22.2 | 28.6 | hypothetical protein ARALYDRAFT_895140       | gbpln | Arabidopsis lyrata   | AT1G72870.1   Symbols:   Disease resistance protein (TIR-NBS class)   chr1:27421086-27422999 FORWARD LENGTH=512             | 676  | 512  | 2.00E-54  | 75.7  | 24.4 | 37.4 |
| Rsa1.0_00046.1.g2677.t1 | refXP_002888896.1   predicted protein [Arabidopsis lyrata subsp. lyrata] gi 297334737 gb EFH65155.1   predicted protein [Arabidopsis lyrata subsp. lyrata]                                                                                                                                                                                                                                                                                                                                                                                                                                                                                                                               | 154  | 1169 | 1.00E-66  | 759.1 | 81.8 | 89.6 | predicted protein                            | gbpln | Arabidopsis lyrata   | AT1G72860.1   Symbols:   Disease resistance protein (TIR-NBS-LRR class) family   chr1:27417096-27420778 REVERSE LENGTH=1163 | 154  | 1163 | 1.00E-48  | 755.2 | 55.8 | 71.4 |
| Rsa1.0_00046.1.g2678.t1 | refXP_002888896.1   predicted protein [Arabidopsis lyrata subsp. lyrata] gi 297334737 gb EFH65155.1   predicted protein [Arabidopsis lyrata subsp. lyrata]                                                                                                                                                                                                                                                                                                                                                                                                                                                                                                                               | 922  | 1169 | 0         | 126.8 | 74.0 | 83.9 | predicted protein                            | gbpln | Arabidopsis lyrata   | AT4G09360.1   Symbols:   NB-ARC domain-containing disease resistance protein   chr4:5940186-5943280 FORWARD LENGTH=853      | 922  | 853  | 0         | 92.5  | 56.6 | 66.6 |
| Rsa1.0_00046.1.g2679.t1 | ref NP_192680.1   TIR-NBS class of disease resistance protein [Arabidopsis thaliana] gi 7267504 emb CAD78065.1   putative protein [Arabidopsis thaliana] gi 21689643 gb AAM67443.1   unknown protein [Arabidopsis thaliana] gi 332657346 gb AEE82746.1   TIR-NBS class of disease resistance protein [Arabidopsis thaliana]                                                                                                                                                                                                                                                                                                                                                              | 450  | 457  | 1.00E-126 | 101.6 | 57.6 | 73.1 | TIR-NBS class of disease resistance protein  | gbpln | Arabidopsis thaliana | AT4G09420.1   Symbols:   Disease resistance protein (TIR-NBS class)   chr4:5962319-5963776 REVERSE LENGTH=457               | 450  | 457  | 1.00E-129 | 101.6 | 57.6 | 73.1 |
| Rsa1.0_00046.1.g2680.t1 | ref NP_177427.2   TIR-NBS-LRR class disease resistance protein [Arabidopsis thaliana] gi 110737528 dtb BAF00706.1   hypothetical protein [Arabidopsis thaliana] gi 332197259 gb AEE35380.1   TIR-NBS-LRR class disease resistance protein [Arabidopsis thaliana] ref NP_565049.1   nuclear transcription factor Y subunit A-3 [Arabidopsis thaliana]                                                                                                                                                                                                                                                                                                                                     | 1017 | 1042 | 0         | 102.5 | 53.2 | 65.0 | TIR-NBS-LRR class disease resistance protein | gbpln | Arabidopsis thaliana | AT1G72840.1   Symbols:   Disease resistance protein (TIR-NBS-LRR class)   chr1:27410020-27413485 REVERSE LENGTH=1042        | 1017 | 1042 | 0         | 102.5 | 53.2 | 65.0 |
| Rsa1.0_00046.1.g2681.t1 | ref NP_565049.1   nuclear transcription factor Y subunit A-3 [Arabidopsis thaliana] gi 81174954 sp Q93ZH2.2 NFYA3_ARAT H RecName: Full=Nuclear transcription factor Y subunit A-3; Short=AtNF-YA-3; AltName: Full=Transcriptional activator HAP2C gi 5903072 gb AAD55630.1 AC008017.3 Transcription Factor [Arabidopsis thaliana] gi 22655158 gb AAM98169.1  CCAAT-binding factor B subunit-like protein, putative [Arabidopsis thaliana] gi 31711816 gb AAP68264.1  At1g72830 [Arabidopsis thaliana] gi 332197257 gb AEE35378.1   nuclear transcription factor Y subunit A-3 [Arabidopsis thaliana] ref NP_565049.1   nuclear transcription factor Y subunit A-3 [Arabidopsis thaliana] | 302  | 340  | 1.00E-137 | 112.6 | 84.8 | 91.1 | nuclear transcription factor Y subunit A-3   | gbpln | Arabidopsis thaliana | AT1G72830.1   Symbols: HAP2C, ATHAP2C, NF-YA3   nuclear factor Y, subunit A3   chr1:27405699-27407088 REVERSE LENGTH=340    | 302  | 340  | 1.00E-140 | 112.6 | 84.8 | 91.1 |
| Rsa1.0_00046.1.g2682.t1 | ref NP_565049.1   nuclear transcription factor Y subunit A-3 [Arabidopsis thaliana] gi 81174954 sp Q93ZH2.2 NFYA3_ARAT H RecName: Full=Nuclear transcription factor Y subunit A-3; Short=AtNF-YA-3; AltName: Full=Transcriptional activator HAP2C gi 5903072 gb AAD55630.1 AC008017.3 Transcription Factor [Arabidopsis thaliana] gi 22655158 gb AAM98169.1  CCAAT-binding factor B subunit-like protein, putative [Arabidopsis thaliana] gi 31711816 gb AAP68264.1  At1g72830 [Arabidopsis thaliana] gi 332197257 gb AEE35378.1   nuclear transcription factor Y subunit A-3 [Arabidopsis thaliana]                                                                                     | 116  | 340  | 4.00E-37  | 293.1 | 75.9 | 83.6 | nuclear transcription factor Y subunit A-3   | gbpln | Arabidopsis thaliana | AT1G72830.1   Symbols: HAP2C, ATHAP2C, NF-YA3   nuclear factor Y, subunit A3   chr1:27405699-27407088 REVERSE LENGTH=340    | 116  | 340  | 6.00E-40  | 293.1 | 75.9 | 83.6 |
| Rsa1.0_00046.1.g2683.t1 | gb EOA35384.1   hypothetical protein CARUB_v10020581mg [Capsella rubella] gi 482571197 gb EOA35385.1   hypothetical protein CARUB_v10020581mg [Capsella rubella]                                                                                                                                                                                                                                                                                                                                                                                                                                                                                                                         | 350  | 346  | 0         | 98.9  | 91.1 | 94.3 | hypothetical protein CARUB_v10020581mg       | gbpln | Capsella rubella     | AT1G72820.1   Symbols:   Mitochondrial substrate carrier family protein   chr1:27403457-27404506 FORWARD LENGTH=349         | 350  | 349  | 1.00E-179 | 99.7  | 91.1 | 94.9 |
| Rsa1.0_00046.1.g2684.t1 | gb EOA35815.1   hypothetical protein CARUB_v10021053mg [Capsella rubella] gi 482571628 gb EOA35816.1   hypothetical protein CARUB_v10021053mg [Capsella rubella]                                                                                                                                                                                                                                                                                                                                                                                                                                                                                                                         | 156  | 166  | 2.00E-68  | 106.4 | 84.6 | 89.7 | hypothetical protein CARUB_v10021053mg       | gbpln | Capsella rubella     | AT1G72510.2   Symbols:   Protein of unknown function (DUF1677)   chr1:27303906-27304403 FORWARD LENGTH=165                  | 156  | 165  | 1.00E-70  | 105.8 | 84.0 | 91.0 |

|                         |                                                                                                                                                                                                                                                                                                                                                                                                                                                                                                                      |      |     |           |       |      |      |                                        |       |                      |                                                                                                                                                                                                                                                                                                                                        |      |     |           |       |      |      |
|-------------------------|----------------------------------------------------------------------------------------------------------------------------------------------------------------------------------------------------------------------------------------------------------------------------------------------------------------------------------------------------------------------------------------------------------------------------------------------------------------------------------------------------------------------|------|-----|-----------|-------|------|------|----------------------------------------|-------|----------------------|----------------------------------------------------------------------------------------------------------------------------------------------------------------------------------------------------------------------------------------------------------------------------------------------------------------------------------------|------|-----|-----------|-------|------|------|
| Rsa1.0_00047.1.g2685.t1 | ref NP_568344.2  myb family transcription factor [Arabidopsis thaliana] gi 332005027 gb AED92410.1  myb family transcription factor [Arabidopsis thaliana]                                                                                                                                                                                                                                                                                                                                                           | 372  | 387 | 1.00E-132 | 104.0 | 75.5 | 82.3 | myb family transcription factor        | gbpln | Arabidopsis thaliana | AT5G17300.1   Symbols: RVE1   Homeodomain-like superfamily protein   chr5:5690435-5692435 REVERSE LENGTH=387                                                                                                                                                                                                                           | 372  | 387 | 1.00E-135 | 104.0 | 75.5 | 82.3 |
| Rsa1.0_00047.1.g2686.t1 | ref NP_197231.1  autophagy protein 5 [Arabidopsis thaliana] gi 75170235 sp O9FF12.1 ATG5_ARATH RecName: Full=Autophagy protein 5; AltName: Full=Protein autophagy 5; Short=AtAPG5 gi 10177074 dbj BAB10516.1  APG5 (autophagy 5)-like protein [Arabidopsis thaliana] gi 26450229 dbj BAC42232.1  APG5 (autophagy 5) like protein [Arabidopsis thaliana] gi 28827579 gb AA050633.1  putative APG5 (autophagy 5) protein [Arabidopsis thaliana] gi 332005026 gb AED92409.1  autophagy protein 5 [Arabidopsis thaliana] | 334  | 337 | 1.00E-175 | 100.9 | 89.2 | 95.2 | autophagy protein 5                    | gbpln | Arabidopsis thaliana | AT5G17290.1   Symbols: ATG5, APG5, ATATG5   autophagy protein ApG5 family   chr5:5687160-5689821 REVERSE LENGTH=337                                                                                                                                                                                                                    | 334  | 337 | 1.00E-177 | 100.9 | 89.2 | 95.2 |
| Rsa1.0_00047.1.g2687.t5 | gb EOA22499.1  hypothetical protein CARUB_v10003154mg [Capsella rubella]                                                                                                                                                                                                                                                                                                                                                                                                                                             | 134  | 143 | 2.00E-25  | 106.7 | 63.4 | 68.7 | hypothetical protein CARUB_v10003154mg | gbpln | Capsella rubella     | AT5G17280.1   Symbols:   CONTAINS InterPro DOMAIN/s: Oxidoreductase-like, N-terminal (InterProJPR019180); Has 1807 Blast hits to 1807 proteins in 277 species: Archae - 0; Bacteria - 0; Metazoa - 736; Fungi - 347; Plants - 385; Viruses - 0; Other Eukaryotes - 339 (source: NCBI BLINK).   chr5:5686355-5686762 FORWARD LENGTH=135 | 134  | 135 | 2.00E-26  | 100.7 | 58.2 | 65.7 |
| Rsa1.0_00047.1.g2688.t1 | gb EOA23087.1  hypothetical protein CARUB_v10003869mg [Capsella rubella]                                                                                                                                                                                                                                                                                                                                                                                                                                             | 498  | 489 | 0         | 98.2  | 78.9 | 85.1 | hypothetical protein CARUB_v10003869mg | gbpln | Capsella rubella     | AT5G17260.1   Symbols: anac086, NAC086   NAC domain containing protein 86   chr5:5675323-5677912 REVERSE LENGTH=476                                                                                                                                                                                                                    | 498  | 476 | 0         | 95.6  | 76.7 | 83.5 |
| Rsa1.0_00047.1.g2689.t1 | ref NP_197227.4  alkaline-phosphatase-like protein [Arabidopsis thaliana] gi 332005021 gb AED92404.1  alkaline-phosphatase-like protein [Arabidopsis thaliana]                                                                                                                                                                                                                                                                                                                                                       | 1088 | 925 | 0         | 85.0  | 74.2 | 78.4 | alkaline-phosphatase-like protein      | gbpln | Arabidopsis thaliana | AT5G17250.1   Symbols:   Alkaline-phosphatase-like family protein   chr5:5668993-5673516 REVERSE LENGTH=925                                                                                                                                                                                                                            | 1088 | 925 | 0         | 85.0  | 74.2 | 78.4 |
| Rsa1.0_00047.1.g2690.t1 | gb AEX31286.1  phytoene synthase [Brassica oleracea] gi 371486488 gb AEX31289.1  phytoene synthase [Brassica napus]                                                                                                                                                                                                                                                                                                                                                                                                  | 423  | 424 | 0         | 100.2 | 95.3 | 97.6 | phytoene synthase                      | gbpln | Brassica napus       | AT5G17230.2   Symbols: PSY   PHYTOENE SYNTHASE   chr5:5659839-5662087 REVERSE LENGTH=422                                                                                                                                                                                                                                               | 423  | 422 | 0         | 99.8  | 89.4 | 92.2 |
| Rsa1.0_00047.1.g2691.t1 | dbj BAJ34302.1  unnamed protein product [Thellungiella halophila]                                                                                                                                                                                                                                                                                                                                                                                                                                                    | 213  | 214 | 1.00E-108 | 100.5 | 87.8 | 93.9 | unnamed protein product                | ----  | ----                 | AT5G17220.1   Symbols: ATGSTF12, GST26, TT19, GSTF12   glutathione S-transferase phi 12   chr5:5658528-5659322 FORWARD LENGTH=214                                                                                                                                                                                                      | 213  | 214 | 1.00E-104 | 100.5 | 83.1 | 92.0 |
| Rsa1.0_00047.1.g2692.t1 | ref XP_002871754.1  hypothetical protein ARALYDRAFT_488583 [Arabidopsis lyrata subsp. lyrata] gi 297317591 gb EFH48013.1  hypothetical protein ARALYDRAFT_488583 [Arabidopsis lyrata subsp. lyrata]                                                                                                                                                                                                                                                                                                                  | 215  | 212 | 4.00E-91  | 98.6  | 74.9 | 87.4 | hypothetical protein ARALYDRAFT_488583 | gbpln | Arabidopsis lyrata   | AT5G17210.1   Symbols:   Protein of unknown function (DUF1218)   chr5:5656519-5657970 FORWARD LENGTH=209                                                                                                                                                                                                                               | 215  | 209 | 8.00E-92  | 97.2  | 73.0 | 85.1 |
| Rsa1.0_00047.1.g2693.t1 | ref NP_197222.1  polygalacturonase [Arabidopsis thaliana] gi 10177065 dbj BAB10507.1  polygalacturonase-like protein [Arabidopsis thaliana] gi 332005012 gb AED92395.1  pectin lyase-like superfamily protein [Arabidopsis thaliana]                                                                                                                                                                                                                                                                                 | 428  | 421 | 1.00E-161 | 98.4  | 68.0 | 78.7 | polygalacturonase                      | gbpln | Arabidopsis thaliana | AT5G17200.1   Symbols:   Pectin lyase-like superfamily protein   chr5:5653524-5655336 REVERSE LENGTH=421                                                                                                                                                                                                                               | 428  | 421 | 1.00E-164 | 98.4  | 68.0 | 78.7 |
| Rsa1.0_00047.1.g2694.t1 | ref NP_197220.1  uncharacterized protein [Arabidopsis thaliana] gi 10177063 dbj BAB10505.1  unnamed protein product [Arabidopsis thaliana] gi 117168077 gb ABK32121.1  At5g17180 [Arabidopsis thaliana] gi 332005010 gb AED92393.1  uncharacterized protein AT5G17180 [Arabidopsis thaliana]                                                                                                                                                                                                                         | 124  | 123 | 8.00E-14  | 99.2  | 37.9 | 48.4 | uncharacterized protein                | gbpln | Arabidopsis thaliana | AT5G17180.1   Symbols:   unknown protein; Has 1807 Blast hits to 1807 proteins in 277 species: Archae - 0; Bacteria - 0; Metazoa - 736; Fungi - 347; Plants - 385; Viruses - 0; Other Eukaryotes - 339 (source: NCBI BLINK).   chr5:5651436-5651807 FORWARD LENGTH=123                                                                 | 124  | 123 | 2.00E-16  | 99.2  | 37.9 | 48.4 |



|                         |                                                                                                                                                                                                                                                                                              |      |      |           |       |      |      |                                        |       |                      |                                                                                                                                                                                                                                                                                                                                                                                                                                                                       |      |      |           |       |      |      |
|-------------------------|----------------------------------------------------------------------------------------------------------------------------------------------------------------------------------------------------------------------------------------------------------------------------------------------|------|------|-----------|-------|------|------|----------------------------------------|-------|----------------------|-----------------------------------------------------------------------------------------------------------------------------------------------------------------------------------------------------------------------------------------------------------------------------------------------------------------------------------------------------------------------------------------------------------------------------------------------------------------------|------|------|-----------|-------|------|------|
| Rsa1.0_00047.1.g2695.t1 | ref XP_002873815.1  hypothetical protein ARALYDRAFT_909708 [Arabidopsis lyrata subsp. lyrata] gi 297319652 gb EFH50074.1  hypothetical protein ARALYDRAFT_909708 [Arabidopsis lyrata subsp. lyrata]                                                                                          | 123  | 120  | 1.00E-46  | 97.6  | 78.0 | 85.4 | hypothetical protein ARALYDRAFT_909708 | gbpln | Arabidopsis lyrata   | AT5G17165.1   Symbols:   unknown protein; FUNCTIONS IN: molecular_function unknown; INVOLVED IN: biological_process unknown; LOCATED IN: cellular_component unknown; BEST Arabidopsis thaliana protein match is: unknown protein (TAIR:AT3G03150.1); Has 39 Blast hits to 39 proteins in 11 species: Archae - 0; Bacteria - 0; Metazoa - 0; Fungi - 0; Plants - 39; Viruses - 0; Other Eukaryotes - 0 (source: NCBI BLink).   chr5:5643143-5647702 REVERSE LENGTH=116 | 123  | 116  | 5.00E-45  | 94.3  | 73.2 | 83.7 |
| Rsa1.0_00047.1.g2696.t1 | ref XP_002873814.1  hypothetical protein ARALYDRAFT_488576 [Arabidopsis lyrata subsp. lyrata] gi 297319651 gb EFH50073.1  hypothetical protein ARALYDRAFT_488576 [Arabidopsis lyrata subsp. lyrata]                                                                                          | 767  | 568  | 1.00E-111 | 74.1  | 34.2 | 40.3 | hypothetical protein ARALYDRAFT_488576 | gbpln | Arabidopsis lyrata   | AT5G17160.1   Symbols:   unknown protein; BEST Arabidopsis thaliana protein match is: unknown protein (TAIR:AT3G03130.1); Has 14330 Blast hits to 10381 proteins in 896 species: Archae - 94; Bacteria - 2881; Metazoa - 4019; Fungi - 1576; Plants - 515; Viruses - 110; Other Eukaryotes - 5135 (source: NCBI BLink).   chr5:5639843-5642427 REVERSE LENGTH=569                                                                                                     | 767  | 569  | 1.00E-113 | 74.2  | 33.4 | 40.4 |
| Rsa1.0_00047.1.g2697.t1 | gb AAM19705.1 AF499718.1 protein phosphatase 2c-like protein [Eutrema halophilum]                                                                                                                                                                                                            | 233  | 378  | 8.00E-16  | 162.2 | 22.3 | 26.6 | protein phosphatase 2c-like protein    | gbpln | Eutrema halophilum   | AT3G51370.2   Symbols:   Protein phosphatase 2C family protein   chr3:19070387-19071975 FORWARD LENGTH=294                                                                                                                                                                                                                                                                                                                                                            | 233  | 294  | 1.00E-15  | 126.2 | 20.6 | 25.3 |
| Rsa1.0_00047.1.g2698.t3 | ref XP_002871747.1  hypothetical protein ARALYDRAFT_488569 [Arabidopsis lyrata subsp. lyrata] gi 297317584 gb EFH48006.1  hypothetical protein ARALYDRAFT_488569 [Arabidopsis lyrata subsp. lyrata] gi 482557425 gb EOA21617.1  hypothetical protein CARUB_v10002030mg [Capsella rubella]    | 211  | 192  | 1.00E-105 | 91.0  | 90.0 | 91.0 | hypothetical protein ARALYDRAFT_488569 | gbpln | Arabidopsis lyrata   | AT5G17060.1   Symbols: ATARFB1B, ARFB1B   ADP-ribosylation factor B1B   chr5:5611056-5612639 FORWARD LENGTH=192                                                                                                                                                                                                                                                                                                                                                       | 211  | 192  | 1.00E-106 | 91.0  | 89.6 | 90.5 |
| Rsa1.0_00047.1.g2699.t6 | ref XP_002871746.1  hypothetical protein ARALYDRAFT_909689 [Arabidopsis lyrata subsp. lyrata] gi 297317583 gb EFH48005.1  hypothetical protein ARALYDRAFT_909689 [Arabidopsis lyrata subsp. lyrata]                                                                                          | 1072 | 1076 | 0         | 100.4 | 94.5 | 96.5 | hypothetical protein ARALYDRAFT_909689 | gbpln | Arabidopsis lyrata   | AT5G17020.1   Symbols: XPO1A, ATORM1, ATPXO1, XPO1, HIT2   exportin 1A   chr5:5594904-5602467 FORWARD LENGTH=1075                                                                                                                                                                                                                                                                                                                                                     | 1072 | 1075 | 0         | 100.3 | 94.2 | 96.4 |
| Rsa1.0_00047.1.g2700.t1 | dbj BAJ33830.1  unnamed protein product [Theilungiella halophila]                                                                                                                                                                                                                            | 352  | 351  | 0         | 99.7  | 90.3 | 96.0 | unnamed protein product                | ----  | ----                 | AT5G16970.1   Symbols: AT-AER, AER   alkenal reductase   chr5:5576291-5578001 REVERSE LENGTH=345                                                                                                                                                                                                                                                                                                                                                                      | 352  | 345  | 1.00E-178 | 98.0  | 84.4 | 90.9 |
| Rsa1.0_00047.1.g2701.t1 | ref NP_197195.2  AAA-type ATPase family protein [Arabidopsis thaliana] gi 19424059 gb AAL87351.1  unknown protein [Arabidopsis thaliana] gi 22136966 gb AAM91712.1  unknown protein [Arabidopsis thaliana] gi 332004976 gb AED92359.1  AAA-type ATPase family protein [Arabidopsis thaliana] | 663  | 644  | 0         | 97.1  | 87.6 | 92.0 | AAA-type ATPase family protein         | gbpln | Arabidopsis thaliana | AT5G16930.1   Symbols:   AAA-type ATPase family protein   chr5:5568578-5571565 FORWARD LENGTH=644                                                                                                                                                                                                                                                                                                                                                                     | 663  | 644  | 0         | 97.1  | 87.6 | 92.0 |
| Rsa1.0_00047.1.g2702.t1 | ref XP_002871742.1  hypothetical protein ARALYDRAFT_488554 [Arabidopsis lyrata subsp. lyrata] gi 297317579 gb EFH48001.1  hypothetical protein ARALYDRAFT_488554 [Arabidopsis lyrata subsp. lyrata]                                                                                          | 1135 | 1143 | 0         | 100.7 | 89.1 | 93.5 | hypothetical protein ARALYDRAFT_488554 | gbpln | Arabidopsis lyrata   | AT5G16910.1   Symbols: ATCSLD2, CSLD2   cellulose-synthase like D2   chr5:5561679-5565290 FORWARD LENGTH=1145                                                                                                                                                                                                                                                                                                                                                         | 1135 | 1145 | 0         | 100.9 | 87.8 | 92.4 |
| Rsa1.0_00047.1.g2703.t1 | gb EOA22278.1  hypothetical protein CARUB_v10002876mg [Capsella rubella]                                                                                                                                                                                                                     | 505  | 513  | 0         | 101.6 | 86.7 | 91.7 | hypothetical protein CARUB_v10002876mg | gbpln | Capsella rubella     | AT5G16890.1   Symbols:   Exostosin family protein   chr5:5551664-5554741 FORWARD LENGTH=511                                                                                                                                                                                                                                                                                                                                                                           | 505  | 511  | 0         | 101.2 | 84.8 | 89.3 |
| Rsa1.0_00047.1.g2704.t1 | ref XP_002870649.1  hypothetical protein ARALYDRAFT_355852 [Arabidopsis lyrata subsp. lyrata] gi 297316485 gb EFH46908.1  hypothetical protein ARALYDRAFT_355852 [Arabidopsis lyrata subsp. lyrata]                                                                                          | 756  | 634  | 1.00E-121 | 83.9  | 37.0 | 45.4 | hypothetical protein ARALYDRAFT_355852 | gbpln | Arabidopsis lyrata   | AT5G41690.1   Symbols:   RNA-binding (RRM/RBD/RNP motifs) family protein   chr5:16670126-16674189 REVERSE LENGTH=567                                                                                                                                                                                                                                                                                                                                                  | 756  | 567  | 1.00E-106 | 75.0  | 32.8 | 41.4 |

|                         |                                                                                                                                                                                                                                                                                                                                                                                                                                                                                                                                                                                                                                                                                                                                                                                                                                                                                                                                                                                                                                                                                                                                                                                                                                   |      |      |           |       |      |      |                                                        |       |                      |                                                                                                                                |      |      |           |       |      |      |
|-------------------------|-----------------------------------------------------------------------------------------------------------------------------------------------------------------------------------------------------------------------------------------------------------------------------------------------------------------------------------------------------------------------------------------------------------------------------------------------------------------------------------------------------------------------------------------------------------------------------------------------------------------------------------------------------------------------------------------------------------------------------------------------------------------------------------------------------------------------------------------------------------------------------------------------------------------------------------------------------------------------------------------------------------------------------------------------------------------------------------------------------------------------------------------------------------------------------------------------------------------------------------|------|------|-----------|-------|------|------|--------------------------------------------------------|-------|----------------------|--------------------------------------------------------------------------------------------------------------------------------|------|------|-----------|-------|------|------|
| Rsa1.0_00047.1.g2705.t1 | ref[NP_197190.1] Target of Myb protein 1 [Arabidopsis thaliana]<br>gi 30686076 ref[NP_850833.1] Target of Myb protein 1 [Arabidopsis thaliana]<br>gi 9755689 emb[CAC01701.1] TOM (target of myb1)-like protein [Arabidopsis thaliana]<br>gi 15983761 gb AAL10477.1  AT5g16880/F2K13.30 [Arabidopsis thaliana] gi 17065128 gb AAL32718.1  TOM (target of myb1)-like protein [Arabidopsis thaliana]<br>gi 21537352 gb AAM61693.1  TOM (target of myb1)-like protein [Arabidopsis thaliana]<br>gi 27311895 gb AAO00913.1  TOM (target of myb1)-like protein [Arabidopsis thaliana]<br>gi 332004970 gb AED92353.1  Target of Myb protein 1 [Arabidopsis thaliana]<br>gi 332004971 gb AED92354.1  Target of Myb protein 1 [Arabidopsis thaliana]<br>ref[NP_568340.1] Peptidyl-tRNA hydrolase II (PTH2) family protein [Arabidopsis thaliana]<br>gi 89960911 gb ABF58939.1  At5g16870 [Arabidopsis thaliana]<br>gi 332004968 gb AED92351.1  Peptidyl-tRNA hydrolase II (PTH2) family protein [Arabidopsis thaliana]<br>ref[XP_002871739.1] pentatricopeptide repeat-containing protein [Arabidopsis lyrata subsp. lyrata]<br>gi 297317576 gb EFH47998.1  pentatricopeptide repeat-containing protein [Arabidopsis lyrata subsp. lyrata] | 408  | 407  | 0         | 99.8  | 89.7 | 93.9 | Target of Myb protein 1                                | gbpln | Arabidopsis thaliana | AT5G16880.2   Symbols:   Target of Myb protein 1   chr5:5549658-5551274 FORWARD LENGTH=407                                     | 408  | 407  | 0         | 99.8  | 89.7 | 93.9 |
| Rsa1.0_00047.1.g2706.t2 | ref[NP_568340.1] Peptidyl-tRNA hydrolase II (PTH2) family protein [Arabidopsis thaliana]<br>gi 89960911 gb ABF58939.1  At5g16870 [Arabidopsis thaliana]<br>gi 332004968 gb AED92351.1  Peptidyl-tRNA hydrolase II (PTH2) family protein [Arabidopsis thaliana]<br>ref[XP_002871739.1] pentatricopeptide repeat-containing protein [Arabidopsis lyrata subsp. lyrata]<br>gi 297317576 gb EFH47998.1  pentatricopeptide repeat-containing protein [Arabidopsis lyrata subsp. lyrata]                                                                                                                                                                                                                                                                                                                                                                                                                                                                                                                                                                                                                                                                                                                                                | 175  | 169  | 7.00E-79  | 96.6  | 89.7 | 90.9 | Peptidyl-tRNA hydrolase II (PTH2) family protein       | gbpln | Arabidopsis thaliana | AT5G16870.1   Symbols:   Peptidyl-tRNA hydrolase II (PTH2) family protein   chr5:5546875-5548542 REVERSE LENGTH=169            | 175  | 169  | 3.00E-81  | 96.6  | 89.7 | 90.9 |
| Rsa1.0_00047.1.g2707.t1 | ref[XP_002871739.1] pentatricopeptide repeat-containing protein [Arabidopsis lyrata subsp. lyrata]<br>gi 297317576 gb EFH47998.1  pentatricopeptide repeat-containing protein [Arabidopsis lyrata subsp. lyrata]                                                                                                                                                                                                                                                                                                                                                                                                                                                                                                                                                                                                                                                                                                                                                                                                                                                                                                                                                                                                                  | 837  | 850  | 0         | 101.6 | 85.7 | 92.5 | pentatricopeptide repeat-containing protein            | gbpln | Arabidopsis lyrata   | AT5G16860.1   Symbols:   Tetratricopeptide repeat (TPR)-like superfamily protein   chr5:5543834-5546386 FORWARD LENGTH=850     | 837  | 850  | 0         | 101.6 | 84.9 | 91.8 |
| Rsa1.0_00047.1.g2708.t2 | gb AAD54276.1 AF172097.1 telomerase reverse transcriptase catalytic subunit [Arabidopsis thaliana]                                                                                                                                                                                                                                                                                                                                                                                                                                                                                                                                                                                                                                                                                                                                                                                                                                                                                                                                                                                                                                                                                                                                | 1066 | 1123 | 0         | 105.3 | 74.2 | 81.9 | telomerase reverse transcriptase catalytic subunit     | gbpln | Arabidopsis thaliana | AT5G16850.1   Symbols: ATTERT, TERT   telomerase reverse transcriptase   chr5:5538323-5543444 REVERSE LENGTH=1123              | 1066 | 1123 | 0         | 105.3 | 74.2 | 81.9 |
| Rsa1.0_00047.1.g2709.t1 | gb EOA19437.1  hypothetical protein CARUB_v10001749mg [Capsella rubella]<br>ref[XP_002887653.1] 12-oxophytodienoate reductase 1 [Arabidopsis lyrata subsp. lyrata]<br>gi 297333494 gb EFH63912.1  12-oxophytodienoate reductase 1 [Arabidopsis lyrata subsp. lyrata]                                                                                                                                                                                                                                                                                                                                                                                                                                                                                                                                                                                                                                                                                                                                                                                                                                                                                                                                                              | 262  | 260  | 1.00E-118 | 99.2  | 84.7 | 90.5 | hypothetical protein CARUB_v10001749mg                 | gbpln | Capsella rubella     | AT5G16840.1   Symbols: BPA1   binding partner of acd1 1   chr5:5536042-5538026 FORWARD LENGTH=259                              | 262  | 259  | 1.00E-119 | 98.9  | 85.9 | 92.4 |
| Rsa1.0_00047.1.g2710.t1 | ref[XP_002887653.1] 12-oxophytodienoate reductase 1 [Arabidopsis lyrata subsp. lyrata]<br>gi 297333494 gb EFH63912.1  12-oxophytodienoate reductase 1 [Arabidopsis lyrata subsp. lyrata]                                                                                                                                                                                                                                                                                                                                                                                                                                                                                                                                                                                                                                                                                                                                                                                                                                                                                                                                                                                                                                          | 369  | 372  | 0         | 100.8 | 89.7 | 93.8 | 12-oxophytodienoate reductase 1                        | gbpln | Arabidopsis lyrata   | AT1G76680.1   Symbols: OPR1, ATOPR1   12-oxophytodienoate reductase 1   chr1:28776982-28778271 FORWARD LENGTH=372              | 369  | 372  | 0         | 100.8 | 88.6 | 93.0 |
| Rsa1.0_00047.1.g2711.t1 | gb ABB83612.1  syntxin-like protein [Brassica oleracea]                                                                                                                                                                                                                                                                                                                                                                                                                                                                                                                                                                                                                                                                                                                                                                                                                                                                                                                                                                                                                                                                                                                                                                           | 281  | 276  | 1.00E-141 | 98.2  | 89.3 | 92.9 | syntxin-like protein                                   | gbpln | Brassica oleracea    | AT5G16830.1   Symbols: SYP21, ATSYP21, PEP12, ATPEP12, PEP12P   syntxin of plants 21   chr5:5533076-5535152 REVERSE LENGTH=279 | 281  | 279  | 1.00E-130 | 99.3  | 81.1 | 89.0 |
| Rsa1.0_00047.1.g2712.t1 | gb EOA22596.1  hypothetical protein CARUB_v10003259mg [Capsella rubella]<br>ref[XP_002873791.1] hypothetical protein ARALYDRAFT_488536 [Arabidopsis lyrata subsp. lyrata]<br>gi 297319628 gb EFH50050.1  hypothetical protein ARALYDRAFT_488536 [Arabidopsis lyrata subsp. lyrata]                                                                                                                                                                                                                                                                                                                                                                                                                                                                                                                                                                                                                                                                                                                                                                                                                                                                                                                                                | 468  | 478  | 0         | 102.1 | 73.5 | 82.5 | hypothetical protein CARUB_v10003259mg                 | gbpln | Capsella rubella     | AT5G16820.2   Symbols: HSF3, HSFA1B, ATHSFA1B   heat shock factor 3   chr5:5530446-5532497 FORWARD LENGTH=481                  | 468  | 481  | 1.00E-179 | 102.8 | 72.0 | 80.1 |
| Rsa1.0_00047.1.g2713.t2 | ref[NP_974793.1] GCN5-related N-acetyltransferase (GNAT) family protein [Arabidopsis thaliana]<br>gi 44681356 gb AAS47618.1  At5g16800 [Arabidopsis thaliana]<br>gi 45773876 gb AAS76742.1  At5g16800 [Arabidopsis thaliana]<br>gi 332004956 gb AED92339.1  GCN5-related N-acetyltransferase (GNAT) family protein [Arabidopsis thaliana]<br>ref[XP_002873791.1] hypothetical protein ARALYDRAFT_488536 [Arabidopsis lyrata subsp. lyrata]<br>gi 297319628 gb EFH50050.1  hypothetical protein ARALYDRAFT_488536 [Arabidopsis lyrata subsp. lyrata]                                                                                                                                                                                                                                                                                                                                                                                                                                                                                                                                                                                                                                                                               | 257  | 270  | 1.00E-132 | 105.1 | 88.3 | 93.8 | GCN5-related N-acetyltransferase (GNAT) family protein | gbpln | Arabidopsis thaliana | AT5G16800.2   Symbols:   Acyl-CoA N-acyltransferases (NAT) superfamily protein   chr5:5524509-5526295 REVERSE LENGTH=270       | 257  | 270  | 1.00E-134 | 105.1 | 88.3 | 93.8 |
| Rsa1.0_00047.1.g2714.t1 | ref[XP_002873791.1] hypothetical protein ARALYDRAFT_488536 [Arabidopsis lyrata subsp. lyrata]<br>gi 297319628 gb EFH50050.1  hypothetical protein ARALYDRAFT_488536 [Arabidopsis lyrata subsp. lyrata]                                                                                                                                                                                                                                                                                                                                                                                                                                                                                                                                                                                                                                                                                                                                                                                                                                                                                                                                                                                                                            | 812  | 812  | 0         | 100.0 | 82.8 | 89.5 | hypothetical protein ARALYDRAFT_488536                 | gbpln | Arabidopsis lyrata   | AT5G16780.1   Symbols: DOT2, MDF   SART-1 family   chr5:5517784-5521566 REVERSE LENGTH=820                                     | 812  | 820  | 0         | 101.0 | 82.4 | 89.2 |
| Rsa1.0_00047.1.g2715.t1 | emb[CAC01841.1] putative transcription factor (MYB9) [Arabidopsis thaliana]                                                                                                                                                                                                                                                                                                                                                                                                                                                                                                                                                                                                                                                                                                                                                                                                                                                                                                                                                                                                                                                                                                                                                       | 328  | 325  | 1.00E-156 | 99.1  | 83.8 | 89.6 | putative transcription factor (MYB9)                   | gbpln | Arabidopsis thaliana | AT5G16770.2   Symbols: AtMYB9, MYB9   myb domain protein 9   chr5:5515209-5516734 FORWARD LENGTH=336                           | 328  | 336  | 1.00E-158 | 102.4 | 83.8 | 89.6 |

|                         |                                                                                                                                                                                                                                                                                                                                                                                                                                                                                                                                                                                                                                                                                                                                                                                                                                                                                                         |      |      |           |       |      |      |                                        |       |                      |                                                                                                                                                                                                                                                                                                                                                                                                                                                                                                                               |      |      |           |       |      |      |
|-------------------------|---------------------------------------------------------------------------------------------------------------------------------------------------------------------------------------------------------------------------------------------------------------------------------------------------------------------------------------------------------------------------------------------------------------------------------------------------------------------------------------------------------------------------------------------------------------------------------------------------------------------------------------------------------------------------------------------------------------------------------------------------------------------------------------------------------------------------------------------------------------------------------------------------------|------|------|-----------|-------|------|------|----------------------------------------|-------|----------------------|-------------------------------------------------------------------------------------------------------------------------------------------------------------------------------------------------------------------------------------------------------------------------------------------------------------------------------------------------------------------------------------------------------------------------------------------------------------------------------------------------------------------------------|------|------|-----------|-------|------|------|
| Rsa1.0_00047.1.g2716.t1 | ref NP_197178.1  inositol-tetrakisphosphate 1-kinase 1 [Arabidopsis thaliana] gi 75202063 sp Q9SBA5.1 TPK1_ARAT H RecName: Full=Inositol-tetrakisphosphate 1-kinase 1; AltName: Full=Inositol 1,3,4-trisphosphate 5/6-kinase 1; Short=AtItpk-1; Short=Inositol-triphosphate 5/6-kinase 1; Short=Ins(1,3,4)P(3) 5/6-kinase 1 gi 3660465 emb CAA04976.1  Inositol 1,3,4-Trisphosphate 5/6 kinase [Arabidopsis thaliana] gi 9755728 emb CAC01840.1  Inositol 1,3,4-Trisphosphate 5/6 kinase [Arabidopsis thaliana] gi 18176069 gb AAL59978.1  putative Inositol 1,3,4-Trisphosphate 5/6 kinase [Arabidopsis thaliana] gi 20465297 gb AAM20052.1  putative inositol 1,3,4-trisphosphate 5/6 kinase [Arabidopsis thaliana] gi 21592636 gb AAM64585.1  inositol 1,3,4-Trisphosphate 5/6 kinase [Arabidopsis thaliana] gi 33200495 gb AED92334.1  inositol-tetrakisphosphate 1-kinase 1 [Arabidopsis thaliana] | 326  | 319  | 1.00E-158 | 97.9  | 86.5 | 92.3 | inositol-tetrakisphosphate 1-kinase 1  | gbpln | Arabidopsis thaliana | AT5G16760.1   Symbols:   Inositol 1,3,4-trisphosphate 5/6-kinase family protein   chr5:5509890-5510849 FORWARD LENGTH=319                                                                                                                                                                                                                                                                                                                                                                                                     | 326  | 319  | 1.00E-161 | 97.9  | 86.5 | 92.3 |
| Rsa1.0_00047.1.g2717.t1 | gb EOA19941.1  hypothetical protein CARUB_v10000193mg [Capsella rubella]                                                                                                                                                                                                                                                                                                                                                                                                                                                                                                                                                                                                                                                                                                                                                                                                                                | 872  | 876  | 0         | 100.5 | 92.3 | 96.3 | hypothetical protein CARUB_v10000193mg | gbpln | Capsella rubella     | AT5G16750.1   Symbols: TOZ   Transducin family protein / WD-40 repeat family protein   chr5:5504541-5509266 REVERSE LENGTH=876                                                                                                                                                                                                                                                                                                                                                                                                | 872  | 876  | 0         | 100.5 | 91.2 | 95.6 |
| Rsa1.0_00047.1.g2718.t1 | ref NP_178413.2  alpha/beta-hydrolases-like protein [Arabidopsis thaliana] gi 330250573 gb AEC05667.1  alpha/beta-hydrolases-like protein [Arabidopsis thaliana]                                                                                                                                                                                                                                                                                                                                                                                                                                                                                                                                                                                                                                                                                                                                        | 1754 | 1797 | 0         | 102.5 | 73.2 | 83.1 | alpha/beta-hydrolases-like protein     | gbpln | Arabidopsis thaliana | AT2G03140.1   Symbols:   alpha/beta-Hydrolases superfamily protein   chr2:942000-949337 FORWARD LENGTH=1797                                                                                                                                                                                                                                                                                                                                                                                                                   | 1754 | 1797 | 0         | 102.5 | 73.2 | 83.1 |
| Rsa1.0_00047.1.g2719.t1 | gb EOA19951.1  hypothetical protein CARUB_v10000202mg [Capsella rubella]                                                                                                                                                                                                                                                                                                                                                                                                                                                                                                                                                                                                                                                                                                                                                                                                                                | 816  | 857  | 0         | 105.0 | 78.2 | 89.7 | hypothetical protein CARUB_v10000202mg | gbpln | Capsella rubella     | AT5G16730.1   Symbols:   Plant protein of unknown function (DUF827)   chr5:5497890-5500775 FORWARD LENGTH=853                                                                                                                                                                                                                                                                                                                                                                                                                 | 816  | 853  | 0         | 104.5 | 76.7 | 87.5 |
| Rsa1.0_00047.1.g2720.t1 | ref XP_002871733.1  hypothetical protein ARALYDRAFT_909657 [Arabidopsis lyrata subsp. lyrata] gi 297317570 gb EFH47992.1  hypothetical protein ARALYDRAFT_909657 [Arabidopsis lyrata subsp. lyrata]                                                                                                                                                                                                                                                                                                                                                                                                                                                                                                                                                                                                                                                                                                     | 684  | 688  | 0         | 100.6 | 74.9 | 83.5 | hypothetical protein ARALYDRAFT_909657 | gbpln | Arabidopsis lyrata   | AT5G16720.1   Symbols:   Protein of unknown function, DUF593   chr5:5494309-5496562 FORWARD LENGTH=675                                                                                                                                                                                                                                                                                                                                                                                                                        | 684  | 675  | 0         | 98.7  | 74.4 | 83.6 |
| Rsa1.0_00047.1.g2721.t1 | gb EOA19901.1  hypothetical protein CARUB_v10000149mg [Capsella rubella]                                                                                                                                                                                                                                                                                                                                                                                                                                                                                                                                                                                                                                                                                                                                                                                                                                | 1284 | 975  | 0         | 75.9  | 71.7 | 73.5 | hypothetical protein CARUB_v10000149mg | gbpln | Capsella rubella     | AT5G16715.1   Symbols: EMB2247   ATP binding:valine-tRNA ligases:aminoacyl-tRNA ligases:nucleotide binding:ATP binding:aminoacyl-tRNA ligases   chr5:5485353-5493229 FORWARD LENGTH=974                                                                                                                                                                                                                                                                                                                                       | 1284 | 974  | 0         | 75.9  | 71.4 | 73.4 |
| Rsa1.0_00047.1.g2722.t1 | ref NP_197172.1  glycosyl hydrolase family 5 protein [Arabidopsis thaliana] gi 9755722 emb CAC01834.1  putative protein [Arabidopsis thaliana] gi 332004944 gb AED92327.1  glycosyl hydrolase family 5 protein [Arabidopsis thaliana]                                                                                                                                                                                                                                                                                                                                                                                                                                                                                                                                                                                                                                                                   | 291  | 488  | 1.00E-113 | 167.7 | 72.2 | 78.7 | glycosyl hydrolase family 5 protein    | gbpln | Arabidopsis thaliana | AT5G16700.1   Symbols:   Glycosyl hydrolase superfamily protein   chr5:5480763-5483045 FORWARD LENGTH=488                                                                                                                                                                                                                                                                                                                                                                                                                     | 291  | 488  | 1.00E-116 | 167.7 | 72.2 | 78.7 |
| Rsa1.0_00048.1.g2723.t1 | ref XP_002869161.1  hypothetical protein ARALYDRAFT_912968 [Arabidopsis lyrata subsp. lyrata] gi 297314997 gb EFH45420.1  hypothetical protein ARALYDRAFT_912968 [Arabidopsis lyrata subsp. lyrata]                                                                                                                                                                                                                                                                                                                                                                                                                                                                                                                                                                                                                                                                                                     | 723  | 844  | 0         | 116.7 | 89.6 | 95.6 | hypothetical protein ARALYDRAFT_912968 | gbpln | Arabidopsis lyrata   | AT4G34260.1   Symbols: FUC95A   1,2-alpha-L-fucosidases   chr4:16398130-16401591 FORWARD LENGTH=843                                                                                                                                                                                                                                                                                                                                                                                                                           | 723  | 843  | 0         | 116.6 | 90.0 | 95.4 |
| Rsa1.0_00048.1.g2724.t1 | ref XP_002869160.1  hypothetical protein ARALYDRAFT_491242 [Arabidopsis lyrata subsp. lyrata] gi 297314996 gb EFH45419.1  hypothetical protein ARALYDRAFT_491242 [Arabidopsis lyrata subsp. lyrata]                                                                                                                                                                                                                                                                                                                                                                                                                                                                                                                                                                                                                                                                                                     | 101  | 94   | 8.00E-34  | 93.1  | 77.2 | 82.2 | hypothetical protein ARALYDRAFT_491242 | gbpln | Arabidopsis lyrata   | AT2G15000.5   Symbols:   unknown protein; FUNCTIONS IN: molecular function unknown; INVOLVED IN: biological process unknown; LOCATED IN: chloroplast; EXPRESSED IN: 22 plant structures; EXPRESSED DURING: 13 growth stages; BEST Arabidopsis thaliana protein match is: unknown protein (TAIR:AT4G34265.2); Has 80 Blast hits to 80 proteins in 11 species: Archae - 0; Bacteria - 0; Metazoa - 0; Fungi - 0; Plants - 80; Viruses - 0; Other Eukaryotes - 0 (source: NCBI BLINK).   chr2:6481839-6482316 REVERSE LENGTH=101 | 101  | 101  | 1.00E-35  | 100.0 | 75.2 | 87.1 |

|                         |                                                                                                                                                                                                     |      |      |           |       |      |      |                                                     |       |                      |                                                                                                                                                                                                                                                                                                                                     |      |      |           |       |      |      |
|-------------------------|-----------------------------------------------------------------------------------------------------------------------------------------------------------------------------------------------------|------|------|-----------|-------|------|------|-----------------------------------------------------|-------|----------------------|-------------------------------------------------------------------------------------------------------------------------------------------------------------------------------------------------------------------------------------------------------------------------------------------------------------------------------------|------|------|-----------|-------|------|------|
| Rsa1.0_00048.1.g2725.t1 | ref[XP_002867124.1] hypothetical protein ARALYDRAFT_491240 [Arabidopsis lyrata subsp. lyrata] gi 297312960 gb EFH43383.1  hypothetical protein ARALYDRAFT_491240 [Arabidopsis lyrata subsp. lyrata] | 290  | 290  | 1.00E-150 | 100.0 | 89.3 | 94.5 | hypothetical protein ARALYDRAFT_491240              | gbpln | Arabidopsis lyrata   | AT4G34270.1   Symbols:   TIP41-like family protein   chr4:16404138-16406153 REVERSE LENGTH=290                                                                                                                                                                                                                                      | 290  | 290  | 1.00E-150 | 100.0 | 87.6 | 94.1 |
| Rsa1.0_00048.1.g2726.t1 | gb EOA24746.1  hypothetical protein CARUB_v10018023mg [Capsella rubella]                                                                                                                            | 210  | 210  | 1.00E-109 | 100.0 | 91.0 | 96.2 | hypothetical protein CARUB_v10018023mg              | gbpln | Capsella rubella     | AT3G25580.1   Symbols:   Thioredoxin superfamily protein   chr3:9292557-9294148 FORWARD LENGTH=210                                                                                                                                                                                                                                  | 210  | 210  | 1.00E-108 | 100.0 | 89.0 | 95.2 |
| Rsa1.0_00048.1.g2727.t1 | ref[XP_002869159.1] transducin family protein [Arabidopsis lyrata subsp. lyrata] gi 297314995 gb EFH45418.1  transducin family protein [Arabidopsis lyrata subsp. lyrata]                           | 739  | 785  | 0         | 106.2 | 79.8 | 88.4 | transducin family protein                           | gbpln | Arabidopsis lyrata   | AT4G34280.1   Symbols:   transducin family protein / WD-40 repeat family protein   chr4:16407084-16410644 FORWARD LENGTH=783                                                                                                                                                                                                        | 739  | 783  | 0         | 106.0 | 78.9 | 87.4 |
| Rsa1.0_00048.1.g2728.t1 | gb EOA19159.1  hypothetical protein CARUB_v10007836mg [Capsella rubella]                                                                                                                            | 139  | 150  | 4.00E-56  | 107.9 | 84.2 | 91.4 | hypothetical protein CARUB_v10007836mg              | gbpln | Capsella rubella     | AT4G34290.1   Symbols:   SWIB/MDM2 domain superfamily protein   chr4:16410883-16412122 FORWARD LENGTH=144                                                                                                                                                                                                                           | 139  | 144  | 8.00E-56  | 103.6 | 81.3 | 87.8 |
| Rsa1.0_00048.1.g2729.t1 | ref[XP_002869156.1] binding protein [Arabidopsis lyrata subsp. lyrata] gi 297314992 gb EFH45415.1  binding protein [Arabidopsis lyrata subsp. lyrata]                                               | 1221 | 1228 | 0         | 100.6 | 91.0 | 94.1 | binding protein                                     | gbpln | Arabidopsis lyrata   | AT4G34310.1   Symbols:   alpha/beta-Hydrolases superfamily protein   chr4:16414113-16419542 FORWARD LENGTH=1228                                                                                                                                                                                                                     | 1221 | 1228 | 0         | 100.6 | 90.2 | 93.9 |
| Rsa1.0_00048.1.g2730.t1 | gb AAB82639.1  putative non-LTR retroelement reverse transcriptase [Arabidopsis thaliana]                                                                                                           | 1327 | 1374 | 0         | 103.5 | 54.6 | 72.6 | putative non-LTR retroelement reverse transcriptase | gbpln | Arabidopsis thaliana | AT4G29090.1   Symbols:   Ribonuclease H-like superfamily protein   chr4:14333528-14335255 FORWARD LENGTH=575                                                                                                                                                                                                                        | 1327 | 575  | 1.00E-180 | 43.3  | 21.9 | 31.3 |
| Rsa1.0_00048.1.g2731.t1 | ref[XP_002867123.1] hypothetical protein ARALYDRAFT_491232 [Arabidopsis lyrata subsp. lyrata] gi 297312959 gb EFH43382.1  hypothetical protein ARALYDRAFT_491232 [Arabidopsis lyrata subsp. lyrata] | 355  | 355  | 1.00E-125 | 100.0 | 73.5 | 83.1 | hypothetical protein ARALYDRAFT_491232              | gbpln | Arabidopsis lyrata   | AT4G34340.1   Symbols: TAF8   TBP-associated factor 8   chr4:16426771-16427832 REVERSE LENGTH=353                                                                                                                                                                                                                                   | 355  | 353  | 1.00E-126 | 99.4  | 72.4 | 82.8 |
| Rsa1.0_00048.1.g2732.t1 | ref[XP_002885880.1] hypothetical protein ARALYDRAFT_899583 [Arabidopsis lyrata subsp. lyrata] gi 297331720 gb EFH62139.1  hypothetical protein ARALYDRAFT_899583 [Arabidopsis lyrata subsp. lyrata] | 166  | 183  | 1.00E-11  | 110.2 | 30.1 | 41.0 | hypothetical protein ARALYDRAFT_899583              | gbpln | Arabidopsis lyrata   | AT5G33330.1   Symbols:   Polynucleotidyl transferase, ribonuclease H-like superfamily protein   chr5:12591754-12592896 REVERSE LENGTH=183                                                                                                                                                                                           | 166  | 183  | 2.00E-11  | 110.2 | 21.1 | 31.3 |
| Rsa1.0_00048.1.g2733.t1 | gb EOA16580.1  hypothetical protein CARUB_v10004745mg [Capsella rubella]                                                                                                                            | 466  | 467  | 0         | 100.2 | 93.6 | 97.4 | hypothetical protein CARUB_v10004745mg              | gbpln | Capsella rubella     | AT4G34350.1   Symbols: CLB6, ISPH, HDR   4-hydroxy-3-methylbut-2-enyl diphosphate reductase   chr4:16428681-16431038 REVERSE LENGTH=466                                                                                                                                                                                             | 466  | 466  | 0         | 100.0 | 92.5 | 96.4 |
| Rsa1.0_00048.1.g2734.t1 | gb EOA17276.1  hypothetical protein CARUB_v10005548mg [Capsella rubella]                                                                                                                            | 257  | 256  | 1.00E-129 | 99.6  | 87.9 | 93.4 | hypothetical protein CARUB_v10005548mg              | gbpln | Capsella rubella     | AT4G34360.1   Symbols:   S-adenosyl-L-methionine-dependent methyltransferases superfamily protein   chr4:16432011-16433752 FORWARD LENGTH=248                                                                                                                                                                                       | 257  | 248  | 1.00E-127 | 96.5  | 85.6 | 89.5 |
| Rsa1.0_00048.1.g2735.t1 | ref[XP_002869152.1] IBR domain-containing protein [Arabidopsis lyrata subsp. lyrata] gi 297314988 gb EFH45411.1  IBR domain-containing protein [Arabidopsis lyrata subsp. lyrata]                   | 592  | 597  | 0         | 100.8 | 83.6 | 91.7 | IBR domain-containing protein                       | gbpln | Arabidopsis lyrata   | AT4G34370.1   Symbols: ATARI1, ARI1   RING/U-box superfamily protein   chr4:16434547-16437037 FORWARD LENGTH=597                                                                                                                                                                                                                    | 592  | 597  | 0         | 100.8 | 82.4 | 91.7 |
| Rsa1.0_00048.1.g2736.t1 | gb EOA18995.1  hypothetical protein CARUB_v10007640mg [Capsella rubella]                                                                                                                            | 527  | 492  | 0         | 93.4  | 75.9 | 83.5 | hypothetical protein CARUB_v10007640mg              | gbpln | Capsella rubella     | AT4G34380.1   Symbols:   Transducin/WD40 repeat-like superfamily protein   chr4:16438835-16440322 FORWARD LENGTH=495                                                                                                                                                                                                                | 527  | 495  | 0         | 93.9  | 74.6 | 82.5 |
| Rsa1.0_00048.1.g2737.t1 | ref[XP_002869151.1] extra-large GTP-binding protein 2 [Arabidopsis lyrata subsp. lyrata] gi 297314987 gb EFH45410.1  extra-large GTP-binding protein 2 [Arabidopsis lyrata subsp. lyrata]           | 842  | 859  | 0         | 102.0 | 76.7 | 85.6 | extra-large GTP-binding protein 2                   | gbpln | Arabidopsis lyrata   | AT4G34390.1   Symbols: XLG2   extra-large GTP-binding protein 2   chr4:16441579-16444840 FORWARD LENGTH=861                                                                                                                                                                                                                         | 842  | 861  | 0         | 102.3 | 77.3 | 85.3 |
| Rsa1.0_00048.1.g2738.t1 | gb EOA15869.1  hypothetical protein CARUB_v10007825mg [Capsella rubella]                                                                                                                            | 276  | 272  | 1.00E-100 | 98.6  | 80.4 | 87.7 | hypothetical protein CARUB_v10007825mg              | gbpln | Capsella rubella     | AT4G34410.1   Symbols: RRTF1   redox responsive transcription factor 1   chr4:16451992-16452798 FORWARD LENGTH=268                                                                                                                                                                                                                  | 276  | 268  | 1.00E-92  | 97.1  | 79.0 | 85.5 |
| Rsa1.0_00048.1.g2739.t1 | gb EOA17538.1  hypothetical protein CARUB_v10005889mg [Capsella rubella]                                                                                                                            | 98   | 172  | 3.00E-38  | 175.5 | 78.6 | 89.8 | hypothetical protein CARUB_v10005889mg              | gbpln | Capsella rubella     | AT4G34412.1   Symbols:   CONTAINS InterPro DOMAIN/s: Kinase binding protein CGI-121 (InterPro:IPRO13926); Has 275 Blast hits to 275 proteins in 139 species: Archae - 0; Bacteria - 5; Metazoa - 98; Fungi - 109; Plants - 42; Viruses - 0; Other Eukaryotes - 21 (source: NCBI BLINK).   chr4:16453099-16454515 REVERSE LENGTH=172 | 98   | 172  | 5.00E-40  | 175.5 | 78.6 | 88.8 |

|                         |                                                                                                                                                                                                                                                                                                                                                                                                                                                                |     |     |           |       |      |      |                                                             |       |                      |                                                                                                                                                                       |     |     |           |       |      |      |
|-------------------------|----------------------------------------------------------------------------------------------------------------------------------------------------------------------------------------------------------------------------------------------------------------------------------------------------------------------------------------------------------------------------------------------------------------------------------------------------------------|-----|-----|-----------|-------|------|------|-------------------------------------------------------------|-------|----------------------|-----------------------------------------------------------------------------------------------------------------------------------------------------------------------|-----|-----|-----------|-------|------|------|
| Rsa1.0_00048.1.g2740.t1 | ref NP_001190912.1  uncharacterized protein [Arabidopsis thaliana] gi 51970964 dbj BAD44174.1  hypothetical protein [Arabidopsis thaliana] gi 332660971 gb AEE86371.1  uncharacterized protein AT4G34419 [Arabidopsis thaliana]                                                                                                                                                                                                                                | 129 | 129 | 5.00E-61  | 100.0 | 87.6 | 93.0 | uncharacterized protein                                     | gbpln | Arabidopsis thaliana | AT4G34419.1   Symbols:   unknown protein; BEST Arabidopsis thaliana protein match is: unknown protein (TAIR:AT3G19200.1).   chr4:16456597-16456986 FORWARD LENGTH=129 | 129 | 129 | 1.00E-63  | 100.0 | 87.6 | 93.0 |
| Rsa1.0_00048.1.g2741.t1 | gb EOA15557.1  hypothetical protein CARUB_v10005172mg [Capsella rubella]                                                                                                                                                                                                                                                                                                                                                                                       | 343 | 344 | 0         | 100.3 | 88.6 | 94.2 | hypothetical protein CARUB_v10005172mg                      | gbpln | Capsella rubella     | AT4G34420.1   Symbols:   P-loop containing nucleoside triphosphate hydrolases superfamily protein   chr4:16458430-16460526 FORWARD LENGTH=342                         | 343 | 342 | 0         | 99.7  | 87.8 | 93.6 |
| Rsa1.0_00048.1.g2742.t1 | ref XP_002869145.1  predicted protein [Arabidopsis lyrata subsp. lyrata] gi 297314981 gb EFH45404.1  predicted protein [Arabidopsis lyrata subsp. lyrata]                                                                                                                                                                                                                                                                                                      | 677 | 669 | 0         | 98.8  | 83.0 | 89.1 | predicted protein                                           | gbpln | Arabidopsis lyrata   | AT4G34440.1   Symbols:   Protein kinase superfamily protein   chr4:16466008-16468748 FORWARD LENGTH=670                                                               | 677 | 670 | 0         | 99.0  | 80.9 | 87.7 |
| Rsa1.0_00048.1.g2743.t1 | ref NP_195171.2  coatomer subunit gamma [Arabidopsis thaliana] gi 146286094 sp Q0WW26.2 COPG_ARA TH RecName: Full=Coatomer subunit gamma; AltName: Full=Gamma-coat protein; Short=Gamma-COP gi 222424705 dbj BAH20306.1  AT4G34450 [Arabidopsis thaliana] gi 332660978 gb AEE86378.1  coatomer subunit gamma [Arabidopsis thaliana]                                                                                                                            | 886 | 886 | 0         | 100.0 | 96.5 | 98.8 | coatomer subunit gamma                                      | gbpln | Arabidopsis thaliana | AT4G34450.1   Symbols:   coatomer gamma-2 subunit, putative / gamma-2 coat protein, putative / gamma-2 COP, putative   chr4:16471956-16476795 FORWARD LENGTH=886      | 886 | 886 | 0         | 100.0 | 96.5 | 98.8 |
| Rsa1.0_00048.1.g2744.t1 | dbj BAJ34135.1  unnamed protein product [Theilingiella halophila]                                                                                                                                                                                                                                                                                                                                                                                              | 411 | 377 | 0         | 91.7  | 88.3 | 90.3 | unnamed protein product                                     | ----  | ----                 | AT4G34460.1   Symbols: AGB1, ELK4, ATAGB1   GTP binding protein beta 1   chr4:16477393-16479266 REVERSE LENGTH=377                                                    | 411 | 377 | 0         | 91.7  | 86.1 | 89.1 |
| Rsa1.0_00048.1.g2745.t1 | ref NP_195174.6  glucan endo-1,3-beta-glucosidase 7 [Arabidopsis thaliana] gi 259016223 sp Q9M069.2 E137_ARATH RecName: Full=Glucan endo-1,3-beta-glucosidase 7; AltName: Full=(1-3)-beta-glucan endohydrolase 7; Short=(1-3)-beta-glucanase 7; AltName: Full=Beta-1,3-endoglucanase 7; Short=Beta-1,3-glucanase 7; Flags: Precursor gi 332660984 gb AEE86384.1  glucan endo-1,3-beta-glucosidase 7 [Arabidopsis thaliana]                                     | 509 | 504 | 0         | 99.0  | 81.7 | 87.6 | glucan endo-1,3-beta-glucosidase 7                          | gbpln | Arabidopsis thaliana | AT4G34480.1   Symbols:   O-Glycosyl hydrolases family 17 protein   chr4:16481147-16483988 REVERSE LENGTH=504                                                          | 509 | 504 | 0         | 99.0  | 81.7 | 87.6 |
| Rsa1.0_00048.1.g2746.t1 | ref NP_195175.1  cyclase associated protein 1 [Arabidopsis thaliana] gi 3096918 emb CAA18828.1  putative cyclase associated protein CAP [Arabidopsis thaliana] gi 3169136 dbj BAA28621.1  Atcap1 [Arabidopsis thaliana] gi 7270399 emb CAB80166.1  putative cyclase associated protein CAP [Arabidopsis thaliana] gi 115646727 gb ABJ17096.1  At4g34490 [Arabidopsis thaliana] gi 332660985 gb AEE86385.1  cyclase associated protein 1 [Arabidopsis thaliana] | 479 | 476 | 0         | 99.4  | 93.3 | 97.3 | cyclase associated protein 1                                | gbpln | Arabidopsis thaliana | AT4G34490.1   Symbols: ATCAP1, CAP 1, CAP1   cyclase associated protein 1   chr4:16484896-16487355 REVERSE LENGTH=476                                                 | 479 | 476 | 0         | 99.4  | 93.3 | 97.3 |
| Rsa1.0_00048.1.g2747.t1 | gb EOA16482.1  hypothetical protein CARUB_v10004641mg, partial [Capsella rubella]                                                                                                                                                                                                                                                                                                                                                                              | 442 | 499 | 0         | 112.9 | 85.7 | 90.3 | hypothetical protein CARUB_v10004641mg, partial             | gbpln | Capsella rubella     | AT4G34500.1   Symbols:   Protein kinase superfamily protein   chr4:16488005-16490792 REVERSE LENGTH=437                                                               | 442 | 437 | 0         | 98.9  | 87.3 | 91.6 |
| Rsa1.0_00048.1.g2748.t1 | gb AAG51228.1 AC035249_3 Tam3-like transposon protein; 93317-95488 [Arabidopsis thaliana] gi 12323055 gb AAG51515.1 AC068324_3 hAT-element transposase, putative [Arabidopsis thaliana]                                                                                                                                                                                                                                                                        | 691 | 723 | 0         | 104.6 | 57.0 | 73.8 | Tam3-like transposon protein; 93317-95488                   | gbpln | Arabidopsis thaliana | AT3G42170.1   Symbols:   BED zinc finger hAT family dimerisation domain   chr3:14321838-14323928 FORWARD LENGTH=696                                                   | 691 | 696 | 7.00E-45  | 100.7 | 19.7 | 37.6 |
| Rsa1.0_00048.1.g2749.t1 | ref NP_195180.1  NmrA-like negative transcriptional regulator family protein [Arabidopsis thaliana] gi 3641839 emb CAA18833.1  isoflavone reductase-like protein [Arabidopsis thaliana] gi 7270404 emb CAB80171.1  isoflavone reductase-like protein [Arabidopsis thaliana] gi 332660990 gb AEE86390.1  NmrA-like negative transcriptional regulator family protein [Arabidopsis thaliana]                                                                     | 672 | 306 | 2.33E-156 | 45.5  | 38.1 | 41.5 | NmrA-like negative transcriptional regulator family protein | gbpln | Arabidopsis thaliana | AT4G34540.1   Symbols:   NmrA-like negative transcriptional regulator family protein   chr4:16500506-16501932 FORWARD LENGTH=306                                      | 672 | 306 | 1.00E-149 | 45.5  | 38.1 | 41.5 |

|                         |                                                                                                                                                                                                                                                                                                                                                                                                                                                                               |     |     |          |       |      |      |                                                          |       |                      |                                                                                                                                                                                                                                                                                                                                                                                                                                                                                                                                                                                                                          |     |     |          |       |      |      |
|-------------------------|-------------------------------------------------------------------------------------------------------------------------------------------------------------------------------------------------------------------------------------------------------------------------------------------------------------------------------------------------------------------------------------------------------------------------------------------------------------------------------|-----|-----|----------|-------|------|------|----------------------------------------------------------|-------|----------------------|--------------------------------------------------------------------------------------------------------------------------------------------------------------------------------------------------------------------------------------------------------------------------------------------------------------------------------------------------------------------------------------------------------------------------------------------------------------------------------------------------------------------------------------------------------------------------------------------------------------------------|-----|-----|----------|-------|------|------|
| Rsa1.0_00048.1.g2750.t1 | gb EOA17396.1  hypothetical protein CARUB_v10005690mg [Capsella rubella]                                                                                                                                                                                                                                                                                                                                                                                                      | 216 | 221 | 3.00E-75 | 102.3 | 75.5 | 85.2 | hypothetical protein CARUB_v10005690mg                   | gbpln | Capsella rubella     | AT4G34560.1   Symbols:   unknown protein; BEST Arabidopsis thaliana protein match is: unknown protein (TAIR:AT5G66440.1). Has 67 Blast hits to 66 proteins in 11 species: Archae - 0; Bacteria - 0; Metazoa - 0; Fungi - 0; Plants - 67; Viruses - 0; Other Eukaryotes - 0 (source: NCBI BLink).   chr4:16507923-16508588 FORWARD LENGTH=221                                                                                                                                                                                                                                                                             | 216 | 221 | 2.00E-69 | 102.3 | 73.1 | 81.9 |
| Rsa1.0_00048.1.g2751.t1 | ref NP_195183.2  thymidylate synthase [Arabidopsis thaliana]<br>gi 150421542 sp Q05763.2 DRTS2_ARATH RecName: Full=Bifunctional dihydrofolate reductase-thymidylate synthase 2; Short=DHFR-TS 2; Includes: RecName: Full=Dihydrofolate reductase; Includes: RecName: Full=Thymidylate synthase<br>gi 110743754 dbj BAE99713.1  dihydrofolate reductase-thymidylate synthase [Arabidopsis thaliana]<br>gi 332660994 gb AEE86394.1  thymidylate synthase [Arabidopsis thaliana] | 559 | 565 | 0        | 101.1 | 87.8 | 93.0 | thymidylate synthase                                     | gbpln | Arabidopsis thaliana | AT4G34570.1   Symbols: THY-2   thymidylate synthase 2   chr4:16511129-16514110 REVERSE LENGTH=565                                                                                                                                                                                                                                                                                                                                                                                                                                                                                                                        | 559 | 565 | 0        | 101.1 | 87.8 | 93.0 |
| Rsa1.0_00048.1.g2752.t1 | #                                                                                                                                                                                                                                                                                                                                                                                                                                                                             | #   | #   | #        | #     | #    | #    | -                                                        | ----  | ----                 | #                                                                                                                                                                                                                                                                                                                                                                                                                                                                                                                                                                                                                        | #   | #   | #        | #     | #    |      |
| Rsa1.0_00048.1.g2753.t1 | ref XP_002883443.1  hypothetical protein ARALYDRAFT_342502 [Arabidopsis lyrata subsp. lyrata]<br>gi 297329283 gb EFH59702.1  hypothetical protein ARALYDRAFT_342502 [Arabidopsis lyrata subsp. lyrata]                                                                                                                                                                                                                                                                        | 326 | 454 | 2.00E-19 | 139.3 | 21.8 | 35.0 | hypothetical protein ARALYDRAFT_342502                   | gbpln | Arabidopsis lyrata   | AT1G01355.1   Symbols:   Putative endonuclease or glycosyl hydrolase   chr1:138513-139568 FORWARD LENGTH=228                                                                                                                                                                                                                                                                                                                                                                                                                                                                                                             | 326 | 228 | 4.00E-12 | 69.9  | 19.0 | 27.6 |
| Rsa1.0_00048.1.g2754.t2 | ref NP_195184.2  Sec14p-like phosphatidylinositol transfer family protein [Arabidopsis thaliana]<br>gi 332660995 gb AEE86395.1  Sec14p-like phosphatidylinositol transfer family protein [Arabidopsis thaliana]                                                                                                                                                                                                                                                               | 551 | 554 | 0        | 100.5 | 91.1 | 95.3 | Sec14p-like phosphatidylinositol transfer family protein | gbpln | Arabidopsis thaliana | AT4G34580.1   Symbols: COW1, SRH1   Sec14p-like phosphatidylinositol transfer family protein   chr4:16515422-16518527 FORWARD LENGTH=554                                                                                                                                                                                                                                                                                                                                                                                                                                                                                 | 551 | 554 | 0        | 100.5 | 91.1 | 95.3 |
| Rsa1.0_00048.1.g2755.t1 | gb EOA17614.1  hypothetical protein CARUB_v10005978mg [Capsella rubella]                                                                                                                                                                                                                                                                                                                                                                                                      | 154 | 143 | 1.00E-59 | 92.9  | 77.3 | 81.2 | hypothetical protein CARUB_v10005978mg                   | gbpln | Capsella rubella     | AT4G34590.1   Symbols: ATB2, GBF6, AtbZIP11, BZIP11   G-box binding factor 6   chr4:16522449-16522928 FORWARD LENGTH=159                                                                                                                                                                                                                                                                                                                                                                                                                                                                                                 | 154 | 159 | 1.00E-59 | 103.2 | 74.7 | 81.2 |
| Rsa1.0_00048.1.g2756.t2 | #                                                                                                                                                                                                                                                                                                                                                                                                                                                                             | #   | #   | #        | #     | #    | #    | -                                                        | ----  | ----                 | #                                                                                                                                                                                                                                                                                                                                                                                                                                                                                                                                                                                                                        | #   | #   | #        | #     | #    |      |
| Rsa1.0_00048.1.g2757.t1 | ref NP_195186.1  uncharacterized protein [Arabidopsis thaliana]<br>gi 3096929 emb CAA18839.1  putative protein [Arabidopsis thaliana]<br>gi 7270410 emb CAB80177.1  putative protein [Arabidopsis thaliana]<br>gi 38566572 gb AAR24176.1  At4g34600 [Arabidopsis thaliana]<br>gi 47550671 gb AAT35234.1  At4g34600 [Arabidopsis thaliana]<br>gi 332660998 gb AEE86398.1  uncharacterized protein AT4G34600 [Arabidopsis thaliana]                                             | 80  | 83  | 2.00E-28 | 103.8 | 83.8 | 92.5 | uncharacterized protein                                  | gbpln | Arabidopsis thaliana | AT4G34600.1   Symbols:   unknown protein; FUNCTIONS IN: molecular function unknown; INVOLVED IN: pollen tube growth; LOCATED IN: endomembrane system; EXPRESSED IN: 11 plant structures; EXPRESSED DURING: M germinated pollen stage, LP.04 four leaves visible, 4 anthesis, petal differentiation and expansion stage; BEST Arabidopsis thaliana protein match is: unknown protein (TAIR:AT2G16385.1). Has 17 Blast hits to 17 proteins in 4 species: Archae - 0; Bacteria - 0; Metazoa - 0; Fungi - 0; Plants - 17; Viruses - 0; Other Eukaryotes - 0 (source: NCBI BLink).   chr4:16529280-16529958 FORWARD LENGTH=83 | 80  | 83  | 3.00E-31 | 103.8 | 83.8 | 92.5 |
| Rsa1.0_00048.1.g2758.t1 | gb EOA39417.1  hypothetical protein CARUB_v10012524mg [Capsella rubella]                                                                                                                                                                                                                                                                                                                                                                                                      | 169 | 535 | 7.00E-25 | 316.6 | 33.7 | 40.8 | hypothetical protein CARUB_v10012524mg                   | gbpln | Capsella rubella     | AT1G48920.1   Symbols: ATNUC-L1, PARL1, NUC-L1   nucleolin like 1   chr1:18098186-18101422 FORWARD LENGTH=557                                                                                                                                                                                                                                                                                                                                                                                                                                                                                                            | 169 | 557 | 2.00E-26 | 329.6 | 34.3 | 41.4 |
| Rsa1.0_00048.1.g2759.t1 | #                                                                                                                                                                                                                                                                                                                                                                                                                                                                             | #   | #   | #        | #     | #    | #    | -                                                        | ----  | ----                 | #                                                                                                                                                                                                                                                                                                                                                                                                                                                                                                                                                                                                                        | #   | #   | #        | #     | #    |      |
| Rsa1.0_00048.1.g2760.t1 | ref XP_002867110.1  hypothetical protein ARALYDRAFT_912923 [Arabidopsis lyrata subsp. lyrata]<br>gi 297312946 gb EFH43369.1  hypothetical protein ARALYDRAFT_912923 [Arabidopsis lyrata subsp. lyrata]                                                                                                                                                                                                                                                                        | 113 | 113 | 7.00E-58 | 100.0 | 94.7 | 99.1 | hypothetical protein ARALYDRAFT_912923                   | gbpln | Arabidopsis lyrata   | AT4G34620.1   Symbols: SSR16   small subunit ribosomal protein 16   chr4:16535084-16536092 REVERSE LENGTH=113                                                                                                                                                                                                                                                                                                                                                                                                                                                                                                            | 113 | 113 | 2.00E-57 | 100.0 | 89.4 | 96.5 |
| Rsa1.0_00048.1.g2761.t1 | ref XP_002867109.1  hypothetical protein ARALYDRAFT_491192 [Arabidopsis lyrata subsp. lyrata]<br>gi 297312945 gb EFH43368.1  hypothetical protein ARALYDRAFT_491192 [Arabidopsis lyrata subsp. lyrata]                                                                                                                                                                                                                                                                        | 221 | 210 | 4.00E-67 | 95.0  | 67.9 | 76.0 | hypothetical protein ARALYDRAFT_491192                   | gbpln | Arabidopsis lyrata   | AT4G34630.1   Symbols:   unknown protein; Has 30 Blast hits to 30 proteins in 10 species: Archae - 0; Bacteria - 2; Metazoa - 0; Fungi - 0; Plants - 24; Viruses - 0; Other Eukaryotes - 4 (source: NCBI BLink).   chr4:16537093-16537692 REVERSE LENGTH=199                                                                                                                                                                                                                                                                                                                                                             | 221 | 199 | 2.00E-56 | 90.0  | 61.5 | 70.6 |

|                         |                                                                                                                                                                                                                                                                                                                                                                        |      |      |           |       |      |      |                                                 |       |                         |                                                                                                                                                                                                                                                                                                                                                                                                                                                                                                                                                               |      |      |           |       |      |      |
|-------------------------|------------------------------------------------------------------------------------------------------------------------------------------------------------------------------------------------------------------------------------------------------------------------------------------------------------------------------------------------------------------------|------|------|-----------|-------|------|------|-------------------------------------------------|-------|-------------------------|---------------------------------------------------------------------------------------------------------------------------------------------------------------------------------------------------------------------------------------------------------------------------------------------------------------------------------------------------------------------------------------------------------------------------------------------------------------------------------------------------------------------------------------------------------------|------|------|-----------|-------|------|------|
| Rsa1.0_00048.1.g2762.t1 | ref[XP_002869133.1] hypothetical protein ARALYDRAFT_912921 [Arabidopsis lyrata subsp. lyrata] gi 297314969 gb EFH45392.1                                                                                                                                                                                                                                               | 396  | 412  | 0         | 104.0 | 81.3 | 84.8 | hypothetical protein ARALYDRAFT_912921          | gbpln | Arabidopsis lyrata      | AT4G34640.1   Symbols: SQS1, ERG9   squalene synthase 1   chr4:16538489-16541655 FORWARD LENGTH=410                                                                                                                                                                                                                                                                                                                                                                                                                                                           | 396  | 410  | 0         | 103.5 | 79.8 | 84.1 |
| Rsa1.0_00048.1.g2763.t1 | hypothetical protein ARALYDRAFT_912921 [Arabidopsis lyrata subsp. lyrata]<br>ref[NP_195191.2] squalene synthase 2 [Arabidopsis thaliana] gi 5678626 emb CAA18844.2 putative squalene synthase [Arabidopsis thaliana] gi 7270415 emb CAB80182.1 putative squalene synthase [Arabidopsis thaliana] gi 332661004 gb AEE86404.1 squalene synthase 2 [Arabidopsis thaliana] | 416  | 413  | 0         | 99.3  | 84.1 | 91.3 | squalene synthase 2                             | gbpln | Arabidopsis thaliana    | AT4G34650.1   Symbols: SQS2   squalene synthase 2   chr4:16542377-16544915 FORWARD LENGTH=413                                                                                                                                                                                                                                                                                                                                                                                                                                                                 | 416  | 413  | 0         | 99.3  | 84.1 | 91.3 |
| Rsa1.0_00048.1.g2764.t1 | gb EOA16836.1  hypothetical protein CARUB_v10005057mg [Capsella rubella]                                                                                                                                                                                                                                                                                               | 375  | 377  | 0         | 100.5 | 94.4 | 98.1 | hypothetical protein CARUB_v10005057mg          | gbpln | Capsella rubella        | AT4G34660.1   Symbols:   SH3 domain-containing protein   chr4:16545595-16548294 REVERSE LENGTH=368                                                                                                                                                                                                                                                                                                                                                                                                                                                            | 375  | 368  | 0         | 98.1  | 92.3 | 96.0 |
| Rsa1.0_00048.1.g2765.t1 | gb EOA17249.1  hypothetical protein CARUB_v10005523mg [Capsella rubella]                                                                                                                                                                                                                                                                                               | 262  | 262  | 1.00E-138 | 100.0 | 93.9 | 98.5 | hypothetical protein CARUB_v10005523mg          | gbpln | Capsella rubella        | AT4G34670.1   Symbols:   Ribosomal protein S3Ae   chr4:16548724-16550222 FORWARD LENGTH=262                                                                                                                                                                                                                                                                                                                                                                                                                                                                   | 262  | 262  | 1.00E-139 | 100.0 | 93.9 | 96.9 |
| Rsa1.0_00048.1.g2766.t2 | gb EOA17609.1  hypothetical protein CARUB_v10005980mg, partial [Capsella rubella]                                                                                                                                                                                                                                                                                      | 143  | 140  | 4.00E-56  | 97.9  | 75.5 | 77.6 | hypothetical protein CARUB_v10005980mg, partial | gbpln | Capsella rubella        | AT4G34700.1   Symbols: CIB22, AtCIB22   LYR family of Fe/S cluster biogenesis protein   chr4:16556874-16558362 FORWARD LENGTH=117                                                                                                                                                                                                                                                                                                                                                                                                                             | 143  | 117  | 4.00E-58  | 81.8  | 73.4 | 74.1 |
| Rsa1.0_00048.1.g2767.t1 | gb AAR08423.1  arginine decarboxylase 2 [Pringlea antiscorbutica]                                                                                                                                                                                                                                                                                                      | 275  | 711  | 1.00E-120 | 258.5 | 81.5 | 88.7 | arginine decarboxylase 2                        | gbpln | Pringlea antiscorbutica | AT4G34710.2   Symbols: ADC2, SPE2, ATADC2   arginine decarboxylase 2   chr4:16560315-16562450 REVERSE LENGTH=711                                                                                                                                                                                                                                                                                                                                                                                                                                              | 275  | 711  | 1.00E-114 | 258.5 | 78.9 | 86.5 |
| Rsa1.0_00049.1.g2768.t1 | dbj BAJ33888.1  unnamed protein product [Thellungiella halophila]                                                                                                                                                                                                                                                                                                      | 243  | 245  | 1.00E-81  | 100.8 | 90.1 | 93.0 | unnamed protein product                         | ----  | ----                    | AT4G20260.3   Symbols: ATPCAP1, PCAP1   plasma-membrane associated cation-binding protein 1   chr4:10941593-10943227 FORWARD LENGTH=225                                                                                                                                                                                                                                                                                                                                                                                                                       | 243  | 225  | 1.00E-76  | 92.6  | 79.0 | 83.1 |
| Rsa1.0_00049.1.g2769.t1 | gb EOA19016.1  hypothetical protein CARUB_v10007667mg [Capsella rubella]                                                                                                                                                                                                                                                                                               | 595  | 557  | 0         | 93.6  | 66.6 | 73.6 | hypothetical protein CARUB_v10007667mg          | gbpln | Capsella rubella        | AT4G20200.1   Symbols:   Terpenoid cyclases/Protein prenyltransferases superfamily protein   chr4:10908672-10911151 REVERSE LENGTH=604                                                                                                                                                                                                                                                                                                                                                                                                                        | 595  | 604  | 0         | 101.5 | 50.6 | 64.5 |
| Rsa1.0_00049.1.g2770.t2 | ref[XP_002867888.1] hypothetical protein ARALYDRAFT_492849 [Arabidopsis lyrata subsp. lyrata] gi 297313724 gb EFH44147.1 hypothetical protein ARALYDRAFT_492849 [Arabidopsis lyrata subsp. lyrata]                                                                                                                                                                     | 393  | 394  | 1.00E-174 | 100.3 | 84.5 | 91.1 | hypothetical protein ARALYDRAFT_492849          | gbpln | Arabidopsis lyrata      | AT4G20190.1   Symbols:   unknown protein; BEST Arabidopsis thaliana protein match is: unknown protein (TAIR:AT5G44660.1); Has 271 Blast hits to 209 proteins in 52 species: Archae - 0; Bacteria - 15; Metazoa - 63; Fungi - 14; Plants - 48; Viruses - 3; Other Eukaryotes - 128 (source: NCBI BLINK).   chr4:10906508-10907677 REVERSE LENGTH=389                                                                                                                                                                                                           | 393  | 389  | 1.00E-174 | 99.0  | 83.2 | 89.3 |
| Rsa1.0_00049.1.g2771.t1 | ref[NP_193750.1] uncharacterized protein [Arabidopsis thaliana] gi 2982434 emb CAA18242.1 putative protein [Arabidopsis thaliana] gi 7268812 emb CAB79017.1 putative protein [Arabidopsis thaliana] gi 332658882 gb AEE84282.1 uncharacterized protein AT4G20170 [Arabidopsis thaliana]                                                                                | 504  | 504  | 0         | 100.0 | 84.9 | 90.9 | uncharacterized protein                         | gbpln | Arabidopsis thaliana    | AT4G20170.1   Symbols:   Domain of unknown function (DUF23)   chr4:10896810-10898794 FORWARD LENGTH=504                                                                                                                                                                                                                                                                                                                                                                                                                                                       | 504  | 504  | 0         | 100.0 | 84.9 | 90.9 |
| Rsa1.0_00049.1.g2772.t1 | ref[NP_193749.1] uncharacterized protein [Arabidopsis thaliana] gi 2982433 emb CAA18241.1 Glu-rich protein [Arabidopsis thaliana] gi 7268811 emb CAB79016.1 Glu-rich protein [Arabidopsis thaliana] gi 332658881 gb AEE84281.1 uncharacterized protein AT4G20160 [Arabidopsis thaliana]                                                                                | 1223 | 1188 | 0         | 97.1  | 57.4 | 67.9 | uncharacterized protein                         | gbpln | Arabidopsis thaliana    | AT4G20160.1   Symbols:   LOCATED IN: chloroplast; EXPRESSED IN: 6 plant structures; EXPRESSED DURING: L mature pollen stage, M germinated pollen stage, 4 anthesis, petal differentiation and expansion stage; BEST Arabidopsis thaliana protein match is: RING/U-box superfamily protein (TAIR:AT1G30860.1); Has 64917 Blast hits to 39974 proteins in 1949 species: Archae - 279; Bacteria - 7425; Metazoa - 26604; Fungi - 5788; Plants - 3193; Viruses - 275; Other Eukaryotes - 21353 (source: NCBI BLINK).   chr4:10890983-10894971 FORWARD LENGTH=1188 | 1223 | 1188 | 0         | 97.1  | 57.4 | 67.9 |
| Rsa1.0_00049.1.g2773.t2 | ref[XP_002869946.1] hypothetical protein ARALYDRAFT_354732 [Arabidopsis lyrata subsp. lyrata] gi 297315782 gb EFH46205.1 hypothetical protein ARALYDRAFT_354732 [Arabidopsis lyrata subsp. lyrata]                                                                                                                                                                     | 1144 | 1252 | 0         | 109.4 | 41.6 | 44.0 | hypothetical protein ARALYDRAFT_354732          | gbpln | Arabidopsis lyrata      | AT4G20140.1   Symbols: GSO1   Leucine-rich repeat transmembrane protein kinase   chr4:10884220-10888045 FORWARD LENGTH=1249                                                                                                                                                                                                                                                                                                                                                                                                                                   | 1144 | 1249 | 0         | 109.2 | 40.9 | 43.9 |

|                         |                                                                                                                                                                                                                                                                                                                                                                        |      |      |           |       |      |      |                                        |       |                      |                                                                                                                                                                                                                                                                                                                                                                                                                                                            |      |      |           |       |      |      |
|-------------------------|------------------------------------------------------------------------------------------------------------------------------------------------------------------------------------------------------------------------------------------------------------------------------------------------------------------------------------------------------------------------|------|------|-----------|-------|------|------|----------------------------------------|-------|----------------------|------------------------------------------------------------------------------------------------------------------------------------------------------------------------------------------------------------------------------------------------------------------------------------------------------------------------------------------------------------------------------------------------------------------------------------------------------------|------|------|-----------|-------|------|------|
| Rsa1.0_00049.1.g2774.t1 | refXP_002869946.1   hypothetical protein ARALYDRAFT_354732 [Arabidopsis lyrata subsp. lyrata] gi 297315782 gb EFH46205.1   hypothetical protein ARALYDRAFT_354732 [Arabidopsis lyrata subsp. lyrata]                                                                                                                                                                   | 1255 | 1252 | 0         | 99.8  | 87.6 | 92.6 | hypothetical protein ARALYDRAFT_354732 | gbpln | Arabidopsis lyrata   | AT4G20140.1   Symbols: GSO1   Leucine-rich repeat transmembrane protein kinase   chr4:10884220-10888045 FORWARD LENGTH=1249                                                                                                                                                                                                                                                                                                                                | 1255 | 1249 | 0         | 99.5  | 85.9 | 91.4 |
| Rsa1.0_00049.1.g2775.t1 | refXP_002869948.1   hypothetical protein ARALYDRAFT_492857 [Arabidopsis lyrata subsp. lyrata] gi 297315784 gb EFH46207.1   hypothetical protein ARALYDRAFT_492857 [Arabidopsis lyrata subsp. lyrata]                                                                                                                                                                   | 631  | 625  | 0         | 99.0  | 89.2 | 95.4 | hypothetical protein ARALYDRAFT_492857 | gbpln | Arabidopsis lyrata   | AT4G20110.1   Symbols: VSR7, VSR3.1, BP80-3.1   VAGUOLAR SORTING RECEPTOR 7   chr4:10875567-10878545 FORWARD LENGTH=625                                                                                                                                                                                                                                                                                                                                    | 631  | 625  | 0         | 99.0  | 88.7 | 95.1 |
| Rsa1.0_00049.1.g2776.t1 | refXP_002867892.1   EMB1025 [Arabidopsis lyrata subsp. lyrata] gi 297313728 gb EFH44151.1   EMB1025 [Arabidopsis lyrata subsp. lyrata]                                                                                                                                                                                                                                 | 612  | 658  | 0         | 107.5 | 81.5 | 89.4 | EMB1025                                | gbpln | Arabidopsis lyrata   | AT4G20090.1   Symbols: EMB1025   Pentatricopeptide repeat (PPR) superfamily protein   chr4:10868400-10870382 REVERSE LENGTH=660                                                                                                                                                                                                                                                                                                                            | 612  | 660  | 0         | 107.8 | 80.6 | 88.9 |
| Rsa1.0_00049.1.g2777.t1 | refXP_002867893.1   EMB1895 [Arabidopsis lyrata subsp. lyrata] gi 297313729 gb EFH44152.1   EMB1895 [Arabidopsis lyrata subsp. lyrata]                                                                                                                                                                                                                                 | 1131 | 1134 | 0         | 100.3 | 79.0 | 87.5 | EMB1895                                | gbpln | Arabidopsis lyrata   | AT4G20060.1   Symbols: EMB1895   ARM repeat superfamily protein   chr4:10854790-10859330 REVERSE LENGTH=1134                                                                                                                                                                                                                                                                                                                                               | 1131 | 1134 | 0         | 100.3 | 78.7 | 87.5 |
| Rsa1.0_00049.1.g2778.t1 | gb AFL69960.1   polygalacturonase [Brassica napus]                                                                                                                                                                                                                                                                                                                     | 475  | 475  | 0         | 100.0 | 93.5 | 95.6 | polygalacturonase                      | gbpln | Brassica napus       | AT4G20050.2   Symbols: QRT3   Pectin lyase-like superfamily protein   chr4:10849911-10852090 REVERSE LENGTH=481                                                                                                                                                                                                                                                                                                                                            | 475  | 481  | 0         | 101.3 | 87.4 | 94.9 |
| Rsa1.0_00049.1.g2779.t2 | gb EOA18460.1   hypothetical protein CARUB_v10007004mg [Capsella rubella]                                                                                                                                                                                                                                                                                              | 466  | 485  | 0         | 104.1 | 81.8 | 90.1 | hypothetical protein CARUB_v10007004mg | gbpln | Capsella rubella     | AT4G20040.1   Symbols:   Pectin lyase-like superfamily protein   chr4:10847348-10848963 REVERSE LENGTH=483                                                                                                                                                                                                                                                                                                                                                 | 466  | 483  | 0         | 103.6 | 79.8 | 87.6 |
| Rsa1.0_00049.1.g2780.t1 | gb EOA17585.1   hypothetical protein CARUB_v10005947mg [Capsella rubella]                                                                                                                                                                                                                                                                                              | 154  | 152  | 6.00E-68  | 98.7  | 83.8 | 90.9 | hypothetical protein CARUB_v10005947mg | gbpln | Capsella rubella     | AT4G20030.1   Symbols:   RNA-binding (RRM/RBD/RNP motifs) family protein   chr4:10846362-10847246 FORWARD LENGTH=152                                                                                                                                                                                                                                                                                                                                       | 154  | 152  | 3.00E-69  | 98.7  | 82.5 | 89.6 |
| Rsa1.0_00049.1.g2781.t1 | ref NP_193735.1   uncharacterized protein [Arabidopsis thaliana] gi 2827656 emb CAA16610.1   DAG-like protein [Arabidopsis thaliana] gi 7268797 emb CAB79002.1   DAG-like protein [Arabidopsis thaliana] gi 27754272 gb AAO25589.1   putative DAG protein [Arabidopsis thaliana] gi 332658862 gb AEE84262.1   uncharacterized protein AT4G20020 [Arabidopsis thaliana] | 381  | 419  | 1.00E-154 | 110.0 | 78.5 | 85.3 | uncharacterized protein                | gbpln | Arabidopsis thaliana | AT4G20020.1   Symbols:   unknown protein; BEST Arabidopsis thaliana protein match is: unknown protein (TAIR:AT5G44780.1); Has 28928 Blast hits to 16023 species in 1033 species: Archae - 4; Bacteria - 4155; Metazoa - 15463; Fungi - 2938; Plants - 3091; Viruses - 205; Other Eukaryotes - 3072 (source: NCBI BLink).   chr4:10844433-10846085 REVERSE LENGTH=419                                                                                       | 381  | 419  | 1.00E-157 | 110.0 | 78.5 | 85.3 |
| Rsa1.0_00049.1.g2782.t1 | refXP_002867898.1   VQ motif-containing protein [Arabidopsis lyrata subsp. lyrata] gi 297313734 gb EFH44157.1   VQ motif-containing protein [Arabidopsis lyrata subsp. lyrata]                                                                                                                                                                                         | 211  | 209  | 9.00E-73  | 99.1  | 72.5 | 82.0 | VQ motif-containing protein            | gbpln | Arabidopsis lyrata   | AT4G20000.1   Symbols:   VQ motif-containing protein   chr4:10838367-10838993 FORWARD LENGTH=208                                                                                                                                                                                                                                                                                                                                                           | 211  | 208  | 4.00E-67  | 98.6  | 67.8 | 78.2 |
| Rsa1.0_00049.1.g2783.t1 | dbj BAJ33925.1   unnamed protein product [Theillungiella halophila]                                                                                                                                                                                                                                                                                                    | 858  | 752  | 0         | 87.6  | 69.2 | 74.9 | unnamed protein product                | ----  | ----                 | AT4G19990.2   Symbols: FRS1   FAR1-related sequence 1   chr4:10832848-10835559 FORWARD LENGTH=774                                                                                                                                                                                                                                                                                                                                                          | 858  | 774  | 0         | 90.2  | 66.0 | 71.7 |
| Rsa1.0_00049.1.g2784.t1 | refXP_002867900.1   hypothetical protein ARALYDRAFT_492876 [Arabidopsis lyrata subsp. lyrata] gi 297313736 gb EFH44159.1   hypothetical protein ARALYDRAFT_492876 [Arabidopsis lyrata subsp. lyrata]                                                                                                                                                                   | 240  | 236  | 9.00E-99  | 98.3  | 79.2 | 82.5 | hypothetical protein ARALYDRAFT_492876 | gbpln | Arabidopsis lyrata   | AT4G19985.1   Symbols:   Acyl-CoA N-acyltransferases (NAT) superfamily protein   chr4:10830542-10831711 REVERSE LENGTH=237                                                                                                                                                                                                                                                                                                                                 | 240  | 237  | 4.00E-95  | 98.8  | 75.8 | 80.0 |
| Rsa1.0_00049.1.g2785.t1 | gb EOA17660.1   hypothetical protein CARUB_v10006027mg [Capsella rubella]                                                                                                                                                                                                                                                                                              | 127  | 125  | 3.00E-46  | 98.4  | 79.5 | 81.1 | hypothetical protein CARUB_v10006027mg | gbpln | Capsella rubella     | AT4G19980.1   Symbols:   unknown protein; FUNCTIONS IN: molecular function unknown; INVOLVED IN: biological process unknown; LOCATED IN: chloroplast; EXPRESSED IN: root, pedicel; EXPRESSED DURING: 4 anthesis; Has 30201 Blast hits to 17322 proteins in 780 species: Archae - 12; Bacteria - 1396; Metazoa - 17338; Fungi - 3422; Plants - 5037; Viruses - 0; Other Eukaryotes - 2996 (source: NCBI BLink).   chr4:10828153-10828536 REVERSE LENGTH=127 | 127  | 127  | 2.00E-43  | 100.0 | 74.0 | 81.1 |



|                         |                                                                                                                                                                                                                                                                                                                                                                                                                                                                                |      |      |           |       |      |      |                                                     |       |                      |                                                                                                                                                                                                                                                                                                                                                                                                                                                                           |      |      |           |       |      |      |
|-------------------------|--------------------------------------------------------------------------------------------------------------------------------------------------------------------------------------------------------------------------------------------------------------------------------------------------------------------------------------------------------------------------------------------------------------------------------------------------------------------------------|------|------|-----------|-------|------|------|-----------------------------------------------------|-------|----------------------|---------------------------------------------------------------------------------------------------------------------------------------------------------------------------------------------------------------------------------------------------------------------------------------------------------------------------------------------------------------------------------------------------------------------------------------------------------------------------|------|------|-----------|-------|------|------|
| Rsa1.0_00049.1.g2786.t1 | dbj BAJ34335.1  unnamed protein product [Theilungiella halophila]                                                                                                                                                                                                                                                                                                                                                                                                              | 374  | 374  | 0         | 100.0 | 89.8 | 94.7 | unnamed protein product                             | ----- | -----                | AT4G19970.1   Symbols:   CONTAINS InterPro DOMAIN/s: Nucleotide-diphospho-sugar transferase, predicted (InterPro:IPR005069); BEST Arabidopsis thaliana protein match is: Nucleotide-diphospho-sugar transferase family protein (TAIR:AT5G44820.1); Has 801 Blast hits to 466 proteins in 35 species: Archae - 0; Bacteria - 0; Metazoa - 2; Fungi - 0; Plants - 750; Viruses - 0; Other Eukaryotes - 49 (source: NCBI BLink).   chr4:10818242-10825343 FORWARD LENGTH=715 | 374  | 715  | 0         | 191.2 | 86.1 | 90.9 |
| Rsa1.0_00049.1.g2787.t2 | gb EOA16028.1  hypothetical protein CARUB_v10004157mg [Capsella rubella]                                                                                                                                                                                                                                                                                                                                                                                                       | 812  | 812  | 0         | 100.0 | 87.9 | 92.7 | hypothetical protein CARUB_v10004157mg              | gbpln | Capsella rubella     | AT4G19960.2   Symbols: KUP9   K+ uptake permease 9   chr4:10813807-10816997 FORWARD LENGTH=807                                                                                                                                                                                                                                                                                                                                                                            | 812  | 807  | 0         | 99.4  | 87.9 | 92.1 |
| Rsa1.0_00049.1.g2788.t1 | ref NP_193728.2  uncharacterized protein [Arabidopsis thaliana] gi 50253430 gb AAT71917.1  At4g19950 [Arabidopsis thaliana] gi 51972070 gb AAU15139.1  At4g19950 [Arabidopsis thaliana] gi 332658850 gb AEE84250.1  uncharacterized protein AT4G19950 [Arabidopsis thaliana]                                                                                                                                                                                                   | 318  | 321  | 1.00E-147 | 100.9 | 85.5 | 93.1 | uncharacterized protein                             | gbpln | Arabidopsis thaliana | AT4G19950.1   Symbols:   unknown protein; BEST Arabidopsis thaliana protein match is: unknown protein (TAIR:AT5G44860.1); Has 338 Blast hits to 330 proteins in 72 species: Archae - 2; Bacteria - 94; Metazoa - 7; Fungi - 0; Plants - 232; Viruses - 0; Other Eukaryotes - 3 (source: NCBI BLink).   chr4:10809977-10810942 FORWARD LENGTH=321                                                                                                                          | 318  | 321  | 1.00E-150 | 100.9 | 85.5 | 93.1 |
| Rsa1.0_00049.1.g2789.t1 | ref NP_001190774.1  Pentatricopeptide repeat domain-containing protein [Arabidopsis thaliana] gi 223635614 sp P0C8Q3.1 PP326_ARATH RecName: Full=Pentatricopeptide repeat-containing protein AT4g19890 gi 332658842 gb AEE84242.1  Pentatricopeptide repeat domain-containing protein [Arabidopsis thaliana]                                                                                                                                                                   | 700  | 701  | 0         | 100.1 | 89.4 | 94.1 | Pentatricopeptide repeat domain-containing protein  | gbpln | Arabidopsis thaliana | AT4G19890.1   Symbols:   Pentatricopeptide repeat (PPR-like) superfamily protein   chr4:10786948-10789053 REVERSE LENGTH=701                                                                                                                                                                                                                                                                                                                                              | 700  | 701  | 0         | 100.1 | 89.4 | 94.1 |
| Rsa1.0_00049.1.g2790.t2 | gb EOA33274.1  hypothetical protein CARUB_v10019647mg [Capsella rubella]                                                                                                                                                                                                                                                                                                                                                                                                       | 2355 | 2361 | 0         | 100.3 | 97.9 | 98.9 | hypothetical protein CARUB_v10019647mg              | gbpln | Capsella rubella     | AT1G80070.1   Symbols: SUS2, EMB33, EMB177, EMB14   Pre-mRNA-processing-splicing factor   chr1:30118052-30127574 FORWARD LENGTH=2359                                                                                                                                                                                                                                                                                                                                      | 2355 | 2359 | 0         | 100.2 | 97.6 | 98.6 |
| Rsa1.0_00049.1.g2791.t1 | ref XP_002867917.1  lecithin:cholesterol acyltransferase family protein [Arabidopsis lyrata subsp. lyrata] gi 297313753 gb EFH44176.1  lecithin:cholesterol acyltransferase family protein [Arabidopsis lyrata subsp. lyrata]                                                                                                                                                                                                                                                  | 533  | 535  | 0         | 100.4 | 90.6 | 95.1 | lecithin:cholesterol acyltransferase family protein | gbpln | Arabidopsis lyrata   | AT4G19860.1   Symbols:   alpha/beta-Hydrolases superfamily protein   chr4:10777655-10780260 REVERSE LENGTH=535                                                                                                                                                                                                                                                                                                                                                            | 533  | 535  | 0         | 100.4 | 90.2 | 95.1 |
| Rsa1.0_00049.1.g2792.t1 | ref NP_001154254.2  protein PHLOEM protein 2-LIKE A2 [Arabidopsis thaliana] gi 332658834 gb AEE84234.1  protein PHLOEM protein 2-LIKE A2 [Arabidopsis thaliana] ref NP_193719.1  protein PHLOEM protein 2-LIKE A1 [Arabidopsis thaliana]                                                                                                                                                                                                                                       | 221  | 220  | 3.00E-66  | 99.5  | 62.0 | 68.3 | protein PHLOEM protein 2-LIKE A2                    | gbpln | Arabidopsis thaliana | AT4G19850.2   Symbols:   lectin-related   chr4:10776657-10777588 FORWARD LENGTH=220                                                                                                                                                                                                                                                                                                                                                                                       | 221  | 220  | 1.00E-68  | 99.5  | 62.0 | 68.3 |
| Rsa1.0_00049.1.g2793.t1 | gi 75100453 sp O81865.1 P2A01_ARATH RecName: Full=Protein PHLOEM PROTEIN 2-LIKE A1; Short=AtPP2-A1 gi 3250693 emb CAA19701.1  lectin like protein [Arabidopsis thaliana] gi 7268780 emb CAB78986.1  lectin like protein [Arabidopsis thaliana] gi 19699298 gb AAL91260.1  AT4g19840/T16H5_200 [Arabidopsis thaliana] gi 21689635 gb AAM67439.1  AT4g19840/T16H5_200 [Arabidopsis thaliana] gi 332658832 gb AEE84232.1  protein PHLOEM protein 2-LIKE A1 [Arabidopsis thaliana] | 217  | 246  | 2.00E-73  | 113.4 | 71.4 | 80.6 | protein PHLOEM protein 2-LIKE A1                    | gbpln | Arabidopsis thaliana | AT4G19840.1   Symbols: ATPP2-A1, ATPP2A-1, PP2-A1   phloem protein 2-A1   chr4:10774336-10775701 FORWARD LENGTH=246                                                                                                                                                                                                                                                                                                                                                       | 217  | 246  | 7.00E-76  | 113.4 | 71.4 | 80.6 |
| Rsa1.0_00049.1.g2794.t1 | gb EOA16822.1  hypothetical protein CARUB_v10005044mg [Capsella rubella]                                                                                                                                                                                                                                                                                                                                                                                                       | 380  | 380  | 0         | 100.0 | 90.0 | 94.5 | hypothetical protein CARUB_v10005044mg              | gbpln | Capsella rubella     | AT4G19810.1   Symbols:   Glycosyl hydrolase family protein with chitinase insertion domain   chr4:10764151-10765753 REVERSE LENGTH=379                                                                                                                                                                                                                                                                                                                                    | 380  | 379  | 0         | 99.7  | 89.5 | 93.7 |
| Rsa1.0_00049.1.g2795.t1 | gb EOA15450.1  hypothetical protein CARUB_v10004092mg [Capsella rubella]                                                                                                                                                                                                                                                                                                                                                                                                       | 923  | 920  | 0         | 99.7  | 94.1 | 96.5 | hypothetical protein CARUB_v10004092mg              | gbpln | Capsella rubella     | AT4G19710.2   Symbols: AK-HSDH II, AK-HSDH   aspartate kinase-homoserine dehydrogenase ii   chr4:10725229-10729536 FORWARD LENGTH=916                                                                                                                                                                                                                                                                                                                                     | 923  | 916  | 0         | 99.2  | 93.4 | 96.3 |
| Rsa1.0_00049.1.g2796.t1 | #                                                                                                                                                                                                                                                                                                                                                                                                                                                                              | #    | #    | #         | #     | #    | -    | -----                                               | ----- | #                    | #                                                                                                                                                                                                                                                                                                                                                                                                                                                                         | #    | #    | #         | #     | #    |      |
| Rsa1.0_00050.1.g2797.t1 | ref XP_002893450.1  protein binding protein [Arabidopsis lyrata subsp. lyrata] gi 297339292 gb EFH69709.1  protein binding protein [Arabidopsis lyrata subsp. lyrata]                                                                                                                                                                                                                                                                                                          | 253  | 251  | 1.00E-133 | 99.2  | 91.3 | 95.3 | protein binding protein                             | gbpln | Arabidopsis lyrata   | AT1G24440.1   Symbols:   RING/U-box superfamily protein   chr1:8662340-8663777 FORWARD LENGTH=251                                                                                                                                                                                                                                                                                                                                                                         | 253  | 251  | 1.00E-135 | 99.2  | 90.9 | 94.9 |

|                         |                                                                                                                                                                                                                                                                                                                                                                                                                                                                                                                         |      |      |           |       |      |      |                                        |       |                      |                                                                                                                                                                                                                                                                                                                                                                                                                                                                                                                                                                                |      |      |           |       |      |      |
|-------------------------|-------------------------------------------------------------------------------------------------------------------------------------------------------------------------------------------------------------------------------------------------------------------------------------------------------------------------------------------------------------------------------------------------------------------------------------------------------------------------------------------------------------------------|------|------|-----------|-------|------|------|----------------------------------------|-------|----------------------|--------------------------------------------------------------------------------------------------------------------------------------------------------------------------------------------------------------------------------------------------------------------------------------------------------------------------------------------------------------------------------------------------------------------------------------------------------------------------------------------------------------------------------------------------------------------------------|------|------|-----------|-------|------|------|
| Rsa1.0_00050.1.g2798.t1 | ref[XP_002893449.1] hypothetical protein ARALYDRAFT_472903 [Arabidopsis lyrata subsp. lyrata] gi 297339291 gb EFH69708.1  hypothetical protein ARALYDRAFT_472903 [Arabidopsis lyrata subsp. lyrata]                                                                                                                                                                                                                                                                                                                     | 190  | 190  | 3.00E-73  | 100.0 | 74.7 | 85.3 | hypothetical protein ARALYDRAFT_472903 | gbpln | Arabidopsis lyrata   | AT1G24450.1   Symbols: NFD2   Ribonuclease III family protein   chr1:8664201-8665077 FORWARD LENGTH=191                                                                                                                                                                                                                                                                                                                                                                                                                                                                        | 190  | 191  | 2.00E-74  | 100.5 | 74.7 | 85.3 |
| Rsa1.0_00050.1.g2799.t2 | gb EOA37586.1  hypothetical protein CARUB_v10011938mg [Capsella rubella]                                                                                                                                                                                                                                                                                                                                                                                                                                                | 1792 | 1772 | 0         | 98.9  | 76.0 | 85.8 | hypothetical protein CARUB_v10011938mg | gbpln | Capsella rubella     | AT1G24460.1   Symbols:   unknown protein; FUNCTIONS IN: molecular_function unknown; INVOLVED IN: biological_process unknown; LOCATED IN: cellular_component unknown; EXPRESSED IN: 23 plant structures; EXPRESSED DURING: 14 growth stages; BEST Arabidopsis thaliana protein match is: unknown protein (TAIR:AT4G31570.1); Has 181008 Blast hits to 85359 proteins in 3551 species: Archae - 3290; Bacteria - 48304; Metazoa - 70793; Fungi - 13943; Plants - 10118; Viruses - 785; Other Eukaryotes - 33775 (source: NCBI BLINK).   chr1:8666072-8672338 FORWARD LENGTH=1807 | 1792 | 1807 | 0         | 100.8 | 75.3 | 84.8 |
| Rsa1.0_00050.1.g2800.t1 | gb EOA38309.1  hypothetical protein CARUB_v10009809mg [Capsella rubella]                                                                                                                                                                                                                                                                                                                                                                                                                                                | 318  | 313  | 1.00E-151 | 98.4  | 84.3 | 88.1 | hypothetical protein CARUB_v10009809mg | gbpln | Capsella rubella     | AT1G24470.1   Symbols: KCR2, ATKCR2   beta-ketoacyl reductase 2   chr1:8674056-8676277 FORWARD LENGTH=312                                                                                                                                                                                                                                                                                                                                                                                                                                                                      | 318  | 312  | 1.00E-152 | 98.1  | 84.3 | 88.1 |
| Rsa1.0_00050.1.g2801.t1 | #                                                                                                                                                                                                                                                                                                                                                                                                                                                                                                                       | #    | #    | #         | #     | #    | #    | -                                      | ----  | ----                 | #                                                                                                                                                                                                                                                                                                                                                                                                                                                                                                                                                                              | #    | #    | #         | #     | #    |      |
| Rsa1.0_00050.1.g2802.t1 | gb AAD19784.1  putative retroelement pol polyprotein [Arabidopsis thaliana]                                                                                                                                                                                                                                                                                                                                                                                                                                             | 1389 | 1501 | 0         | 108.1 | 57.0 | 71.6 | putative retroelement pol polyprotein  | gbpln | Arabidopsis thaliana | AT4G23160.1   Symbols: CRK8   cysteine-rich RLK (RECEPTOR-like protein kinase) 8   chr4:12128485-12134086 FORWARD LENGTH=1262                                                                                                                                                                                                                                                                                                                                                                                                                                                  | 1389 | 1262 | 1.00E-130 | 90.9  | 16.4 | 24.7 |
| Rsa1.0_00050.1.g2803.t1 | ref[XP_002880790.1] ania-6a type cyclin [Arabidopsis lyrata subsp. lyrata] gi 297326629 gb EFH57049.1  ania-6a type cyclin [Arabidopsis lyrata subsp. lyrata]                                                                                                                                                                                                                                                                                                                                                           | 413  | 415  | 0         | 100.5 | 86.9 | 91.8 | ania-6a type cyclin                    | gbpln | Arabidopsis lyrata   | AT2G26430.1   Symbols: RCY1, ATRCY1   arginine-rich cyclin 1   chr2:11243433-11245504 REVERSE LENGTH=416                                                                                                                                                                                                                                                                                                                                                                                                                                                                       | 413  | 416  | 0         | 100.7 | 82.3 | 89.1 |
| Rsa1.0_00050.1.g2804.t1 | ref[NP_173858.5] ALBINO3-like protein 1 [Arabidopsis thaliana] gi 223590242 sp Q9FYL3.3 ALB31_ARAT H RecName: Full=ALBINO3-like protein 1, chloroplastic; AltName: Full=Arabidopsis thaliana envelope membrane integrase; AltName: Full=Protein ALBINA 4; Short=AtH4; AltName: Full=Protein ARTEMIS; Flags: Precursor gi 91680591 emb CAJ45566.1  Alb protein [Arabidopsis thaliana] gi 332192418 gb AEE30539.1  ALBINO3-like protein 1 [Arabidopsis thaliana]                                                          | 485  | 499  | 0         | 102.9 | 86.0 | 92.2 | ALBINO3-like protein 1                 | gbpln | Arabidopsis thaliana | AT1G24490.1   Symbols: ALB4, ARTEMIS   OxaA/VidC-like membrane insertion protein   chr1:8682364-8684966 FORWARD LENGTH=499                                                                                                                                                                                                                                                                                                                                                                                                                                                     | 485  | 499  | 0         | 102.9 | 86.0 | 92.2 |
| Rsa1.0_00050.1.g2805.t1 | ref[NP_173859.1] T-complex protein 1 subunit epsilon [Arabidopsis thaliana] gi 3024697 sp O04450.1 TCPE_ARATH RecName: Full=T-complex protein 1 subunit epsilon; Short=TCP-1-epsilon; AltName: Full=CCT-epsilon gi 9743353 gb AAF97977.1 AC000103.27 F21J9.17 [Arabidopsis thaliana] gi 19715605 gb AAL91625.1  At1g24510/F21J9_150 [Arabidopsis thaliana] gi 23463047 gb AAN33193.1  At1g24510/F21J9_150 [Arabidopsis thaliana] gi 332192420 gb AEE30541.1  T-complex protein 1 subunit epsilon [Arabidopsis thaliana] | 535  | 535  | 0         | 100.0 | 97.6 | 99.4 | T-complex protein 1 subunit epsilon    | gbpln | Arabidopsis thaliana | AT1G24510.1   Symbols:   TCP-1/cpn60 chaperonin family protein   chr1:8685504-8688101 REVERSE LENGTH=535                                                                                                                                                                                                                                                                                                                                                                                                                                                                       | 535  | 535  | 0         | 100.0 | 97.6 | 99.4 |
| Rsa1.0_00050.1.g2806.t1 | emb CAA48292.1  bgp1 [Brassica rapa] gi 448272 prf 1916399A Bgp1 gene                                                                                                                                                                                                                                                                                                                                                                                                                                                   | 108  | 119  | 3.00E-12  | 110.2 | 62.0 | 70.4 | bgp1                                   | gbpln | Brassica rapa        | AT1G24520.1   Symbols: BCP1   homolog of Brassica campestris pollen protein 1   chr1:8688699-8689058 FORWARD LENGTH=119                                                                                                                                                                                                                                                                                                                                                                                                                                                        | 108  | 119  | 7.00E-13  | 110.2 | 51.9 | 62.0 |
| Rsa1.0_00050.1.g2807.t1 | ref[XP_002893441.1] hypothetical protein ARALYDRAFT_472892 [Arabidopsis lyrata subsp. lyrata] gi 297339283 gb EFH69700.1  hypothetical protein ARALYDRAFT_472892 [Arabidopsis lyrata subsp. lyrata]                                                                                                                                                                                                                                                                                                                     | 700  | 679  | 0         | 97.0  | 82.0 | 88.9 | hypothetical protein ARALYDRAFT_472892 | gbpln | Arabidopsis lyrata   | AT1G24560.1   Symbols:   unknown protein; BEST Arabidopsis thaliana protein match is: unknown protein (TAIR:AT3G49055.1); Has 71940 Blast hits to 38124 proteins in 2481 species: Archae - 1358; Bacteria - 12126; Metazoa - 32861; Fungi - 6786; Plants - 4024; Viruses - 195; Other Eukaryotes - 14590 (source: NCBI BLINK).   chr1:8702644-8705640 FORWARD LENGTH=678                                                                                                                                                                                                       | 700  | 678  | 0         | 96.9  | 82.0 | 88.3 |

|                         |                                                                                                                                                                                                                                                                                                                                                                                                                                                                                                                                                                                                                                                                                                                                             |     |     |          |       |      |      |                                                 |       |                      |                                                                                                                                                                                                                                                                                                                                          |     |     |           |       |      |      |
|-------------------------|---------------------------------------------------------------------------------------------------------------------------------------------------------------------------------------------------------------------------------------------------------------------------------------------------------------------------------------------------------------------------------------------------------------------------------------------------------------------------------------------------------------------------------------------------------------------------------------------------------------------------------------------------------------------------------------------------------------------------------------------|-----|-----|----------|-------|------|------|-------------------------------------------------|-------|----------------------|------------------------------------------------------------------------------------------------------------------------------------------------------------------------------------------------------------------------------------------------------------------------------------------------------------------------------------------|-----|-----|-----------|-------|------|------|
| Rsa1.0_00050.1.g2808.t5 | refXP_002893440.1  hypothetical protein ARALYDRAFT_313424 [Arabidopsis lyrata subsp. lyrata] gi 297339282 gb EFH69699.1                                                                                                                                                                                                                                                                                                                                                                                                                                                                                                                                                                                                                     | 396 | 363 | 0        | 91.7  | 77.8 | 84.1 | hypothetical protein ARALYDRAFT_313424          | gbpln | Arabidopsis lyrata   | AT1G24570.1   Symbols:   Protein of unknown function (DUF707)   chr1:8707197-8709491 FORWARD LENGTH=381                                                                                                                                                                                                                                  | 396 | 381 | 0         | 96.2  | 79.3 | 86.6 |
| Rsa1.0_00050.1.g2809.t1 | hypothetical protein ARALYDRAFT_313424 [Arabidopsis lyrata subsp. lyrata] refNP_564220.1  uncharacterized protein [Arabidopsis thaliana] gi 21593326 gb AAM65275.1  unknown [Arabidopsis thaliana] gi 56236092 gb AAV84502.1  At1g24575 [Arabidopsis thaliana] gi 57222124 gb AAW38969.1  At1g24575 [Arabidopsis thaliana] gi 88900286 gb ABD57455.1  At1g24575 [Arabidopsis thaliana] gi 332192428 gb AEE30549.1  uncharacterized protein AT1G24575 [Arabidopsis thaliana]                                                                                                                                                                                                                                                                 | 78  | 88  | 1.00E-11 | 112.8 | 48.7 | 62.8 | uncharacterized protein                         | gbpln | Arabidopsis thaliana | AT1G24575.1   Symbols:   unknown protein; Has 7 Blast hits to 7 proteins in 2 species: Archae - 0; Bacteria - 0; Metazoa - 0; Fungi - 0; Plants - 7; Viruses - 0; Other Eukaryotes - 0 (source: NCBI BLink).   chr1:8711211-8711477 REVERSE LENGTH=88                                                                                    | 78  | 88  | 2.00E-14  | 112.8 | 48.7 | 62.8 |
| Rsa1.0_00050.1.g2810.t1 | refXP_002893438.1  hypothetical protein ARALYDRAFT_890209 [Arabidopsis lyrata subsp. lyrata] gi 297339280 gb EFH69697.1  hypothetical protein ARALYDRAFT_890209 [Arabidopsis lyrata subsp. lyrata]                                                                                                                                                                                                                                                                                                                                                                                                                                                                                                                                          | 70  | 72  | 3.00E-14 | 102.9 | 65.7 | 77.1 | hypothetical protein ARALYDRAFT_890209          | gbpln | Arabidopsis lyrata   | AT1G24600.1   Symbols:   unknown protein; BEST Arabidopsis thaliana protein match is: unknown protein (TAIR:AT1G67920.1); Has 18 Blast hits to 18 proteins in 5 species: Archae - 0; Bacteria - 0; Metazoa - 0; Fungi - 0; Plants - 18; Viruses - 0; Other Eukaryotes - 0 (source: NCBI BLink).   chr1:8720375-8720593 FORWARD LENGTH=72 | 70  | 72  | 9.00E-15  | 102.9 | 61.4 | 74.3 |
| Rsa1.0_00050.1.g2811.t1 | gb EOA40117.1  hypothetical protein CARUB_v10008819mg. partial [Capsella rubella] gi 482575931 gb EOA40118.1  hypothetical protein CARUB_v10008819mg. partial [Capsella rubella]                                                                                                                                                                                                                                                                                                                                                                                                                                                                                                                                                            | 475 | 532 | 0        | 112.0 | 86.1 | 93.3 | hypothetical protein CARUB_v10008819mg. partial | gbpln | Capsella rubella     | AT1G24610.1   Symbols:   Rubisco methyltransferase family protein   chr1:8720906-8722711 REVERSE LENGTH=476                                                                                                                                                                                                                              | 475 | 476 | 0         | 100.2 | 87.6 | 94.3 |
| Rsa1.0_00050.1.g2812.t1 | refNP_173866.1  putative calcium-binding protein CML25 [Arabidopsis thaliana] gi 75334522 sp Q9FYK2.1 CML25_ARAT H RecName: Full=Probable calcium-binding protein CML25; AltName: Full=Calmmodulin-like protein 25 gi 9743349 gb AAF97973.1 AC000103.23 F21J9.28 [Arabidopsis thaliana] gi 91805849 gb ABE65653.1  polcalcin [Arabidopsis thaliana] gi 332192433 gb AEE30554.1  putative calcium-binding protein CML25 [Arabidopsis thaliana]                                                                                                                                                                                                                                                                                               | 187 | 186 | 6.00E-87 | 99.5  | 89.3 | 90.9 | putative calcium-binding protein CML25          | gbpln | Arabidopsis thaliana | AT1G24620.1   Symbols:   EF hand calcium-binding protein family   chr1:8723893-8724453 REVERSE LENGTH=186                                                                                                                                                                                                                                | 187 | 186 | 2.00E-89  | 99.5  | 89.3 | 90.9 |
| Rsa1.0_00050.1.g2813.t1 | #                                                                                                                                                                                                                                                                                                                                                                                                                                                                                                                                                                                                                                                                                                                                           | #   | #   | #        | #     | #    | -    | ----                                            | ----  | ----                 | #                                                                                                                                                                                                                                                                                                                                        | #   | #   | #         | #     | #    |      |
| Rsa1.0_00050.1.g2814.t1 | refXP_002890697.1  At1g68060/T23K23.9 [Arabidopsis lyrata subsp. lyrata] gi 297336539 gb EFH66956.1  At1g68060/T23K23.9 [Arabidopsis lyrata subsp. lyrata] refNP_173893.1  anthranilate synthase beta subunit 1 [Arabidopsis thaliana] gi 11067285 gb AAG28813.1 AC079374_16 anthranilate synthase beta subunit [Arabidopsis thaliana] gi 403434 gb AAA32742.1  anthranilate synthase beta subunit [Arabidopsis thaliana] gi 20466736 gb AAM20685.1  anthranilate synthase beta subunit [Arabidopsis thaliana] gi 30023756 gb AAP13411.1  At1g25220 [Arabidopsis thaliana] gi 110741096 dbj BAE98642.1  hypothetical protein [Arabidopsis thaliana] gi 332192466 gb AEE30589.1  anthranilate synthase beta subunit 1 [Arabidopsis thaliana] | 632 | 634 | 0        | 100.3 | 91.3 | 94.9 | At1g68060/T23K23.9                              | gbpln | Arabidopsis lyrata   | AT1G24764.1   Symbols:   ATMAP70-2, MAP70-2   microtubule-associated proteins 70-2   chr1:8760001-8763256 REVERSE LENGTH=634                                                                                                                                                                                                             | 632 | 634 | 0         | 100.3 | 90.3 | 94.6 |
| Rsa1.0_00050.1.g2815.t1 | refXP_002893431.1  hypothetical protein ARALYDRAFT_890187 [Arabidopsis lyrata subsp. lyrata] gi 297339273 gb EFH69690.1  hypothetical protein ARALYDRAFT_890187 [Arabidopsis lyrata subsp. lyrata]                                                                                                                                                                                                                                                                                                                                                                                                                                                                                                                                          | 475 | 376 | 0        | 79.2  | 68.6 | 73.9 | hypothetical protein ARALYDRAFT_890187          | gbpln | Arabidopsis lyrata   | AT1G25220.1   Symbols:   ASB1, TRP4, WE17   anthranilate synthase beta subunit 1   chr1:8837430-8839478 REVERSE LENGTH=276                                                                                                                                                                                                               | 475 | 376 | 1.00E-125 | 105.3 | 87.0 | 92.0 |
| Rsa1.0_00050.1.g2816.t1 | refXP_002893431.1  hypothetical protein ARALYDRAFT_890187 [Arabidopsis lyrata subsp. lyrata] gi 297339273 gb EFH69690.1  hypothetical protein ARALYDRAFT_890187 [Arabidopsis lyrata subsp. lyrata]                                                                                                                                                                                                                                                                                                                                                                                                                                                                                                                                          | 475 | 376 | 0        | 79.2  | 68.6 | 73.9 | hypothetical protein ARALYDRAFT_890187          | gbpln | Arabidopsis lyrata   | AT1G25240.1   Symbols:   ENTH/VHS/GAT family protein   chr1:8845231-8846361 FORWARD LENGTH=376                                                                                                                                                                                                                                           | 475 | 376 | 0         | 79.2  | 67.8 | 73.7 |

|                         |                                                                                                                                                                                                                                                                                                                                                                                                        |      |      |           |       |      |      |                                                                                                                                                                   |       |                      |                                                                                                                                                                 |      |     |           |       |      |      |
|-------------------------|--------------------------------------------------------------------------------------------------------------------------------------------------------------------------------------------------------------------------------------------------------------------------------------------------------------------------------------------------------------------------------------------------------|------|------|-----------|-------|------|------|-------------------------------------------------------------------------------------------------------------------------------------------------------------------|-------|----------------------|-----------------------------------------------------------------------------------------------------------------------------------------------------------------|------|-----|-----------|-------|------|------|
| Rsa1.0_00050.1.g2817.t1 | ref XP_002893430.1  predicted protein [Arabidopsis lyrata subsp. lyrata] gi 297339272 gb EFH69689.1  predicted protein [Arabidopsis lyrata subsp. lyrata]                                                                                                                                                                                                                                              | 382  | 385  | 1.00E-170 | 100.8 | 81.4 | 88.0 | predicted protein                                                                                                                                                 | gbpln | Arabidopsis lyrata   | AT1G25250.1   Symbols: AtIDD16, IDD16   indeterminate(DD)-domain 16   chr1:8849549-8851520 FORWARD LENGTH=362                                                   | 382  | 362 | 1.00E-156 | 94.8  | 73.6 | 79.8 |
| Rsa1.0_00050.1.g2818.t8 | gb AAD21687.1  Strong similarity to gi 3600044 T12H20.12 protease homolog from Arabidopsis thaliana BAC gb AF080119 and is a member of the reverse transcriptase family PF 00078 [Arabidopsis thaliana]                                                                                                                                                                                                | 241  | 1415 | 4.00E-65  | 587.1 | 53.5 | 68.0 | Strong similarity to gi 3600044 T12H20.12 protease homolog from Arabidopsis thaliana BAC gb AF080119 and is a member of the reverse transcriptase family PF 00078 | gbpln | Arabidopsis thaliana | #                                                                                                                                                               | #    | #   | #         | #     | #    |      |
| Rsa1.0_00050.1.g2819.t1 | ref NP_564226.1  Ribosomal protein L10 family protein [Arabidopsis thaliana] gi 15028333 gb AAK76643.1  unknown protein [Arabidopsis thaliana] gi 19310645 gb AAL85053.1  unknown protein [Arabidopsis thaliana] gi 21593993 gb AAM65913.1  unknown [Arabidopsis thaliana] gi 332192473 gb AEE30594.1  Ribosomal protein L10 family protein [Arabidopsis thaliana]                                     | 287  | 235  | 1.00E-106 | 81.9  | 67.2 | 71.4 | Ribosomal protein L10 family protein                                                                                                                              | gbpln | Arabidopsis thaliana | AT1G25260.1   Symbols:   Ribosomal protein L10 family protein   chr1:8854163-8855766 REVERSE LENGTH=235                                                         | 287  | 235 | 1.00E-109 | 81.9  | 67.2 | 71.4 |
| Rsa1.0_00050.1.g2820.t1 | ref NP_173898.2  putative MtN21 nodulin protein [Arabidopsis thaliana] gi 75339341 sp G4PT23.1 WTR6_ARATH RecName: Full=WAT1-related protein At1g25270 gi 67633390 gb AA78620.1  nodulin MtN21 family protein [Arabidopsis thaliana] gi 332192474 gb AEE30595.1  WAT1-related protein [Arabidopsis thaliana]                                                                                           | 364  | 355  | 1.00E-160 | 97.5  | 76.1 | 87.9 | putative MtN21 nodulin protein                                                                                                                                    | gbpln | Arabidopsis thaliana | AT1G25270.1   Symbols:   nodulin MtN21 /EamA-like transporter family protein   chr1:8857726-8859909 FORWARD LENGTH=355                                          | 364  | 355 | 1.00E-163 | 97.5  | 76.1 | 87.9 |
| Rsa1.0_00050.1.g2821.t1 | gb EOA40428.1  hypothetical protein CARUB_v10009152mg [Capsella rubella]                                                                                                                                                                                                                                                                                                                               | 442  | 442  | 0         | 100.0 | 88.7 | 92.8 | hypothetical protein CARUB_v10009152mg                                                                                                                            | gbpln | Capsella rubella     | AT1G25280.1   Symbols: AtTLP10, TLP10   tubby like protein 10   chr1:8864961-8866608 FORWARD LENGTH=445                                                         | 442  | 445 | 0         | 100.7 | 87.3 | 92.3 |
| Rsa1.0_00050.1.g2822.t1 | gb EOA40428.1  hypothetical protein CARUB_v10009152mg [Capsella rubella]                                                                                                                                                                                                                                                                                                                               | 209  | 442  | 1.00E-24  | 211.5 | 28.2 | 28.7 | hypothetical protein CARUB_v10009152mg                                                                                                                            | gbpln | Capsella rubella     | AT1G25280.3   Symbols: AtTLP10, TLP10   tubby like protein 10   chr1:8865676-8866608 FORWARD LENGTH=267                                                         | 209  | 267 | 2.00E-23  | 127.8 | 27.3 | 27.8 |
| Rsa1.0_00050.1.g2823.t1 | gb AAG50806.1 AC079281.8 unknown protein [Arabidopsis thaliana]                                                                                                                                                                                                                                                                                                                                        | 1167 | 1213 | 0         | 103.9 | 37.0 | 56.7 | unknown protein                                                                                                                                                   | gbpln | Arabidopsis thaliana | AT1G43760.1   Symbols:   DNase I-like superfamily protein   chr1:16528890-16531065 REVERSE LENGTH=626                                                           | 1167 | 626 | 1.00E-60  | 53.6  | 11.5 | 20.4 |
| Rsa1.0_00050.1.g2824.t1 | ref XP_002862436.1  predicted protein [Arabidopsis lyrata subsp. lyrata] gi 297307949 gb EFH38694.1  predicted protein [Arabidopsis lyrata subsp. lyrata]                                                                                                                                                                                                                                              | 647  | 530  | 3.00E-39  | 81.9  | 12.2 | 17.5 | predicted protein                                                                                                                                                 | gbpln | Arabidopsis lyrata   | AT2G07760.1   Symbols:   Zinc knuckle (CCHC-type) family protein   chr2:3584420-3586278 REVERSE LENGTH=530                                                      | 647  | 530 | 2.00E-12  | 81.9  | 5.7  | 11.3 |
| Rsa1.0_00050.1.g2825.t1 | gb EOA39802.1  hypothetical protein CARUB_v10008465mg [Capsella rubella]                                                                                                                                                                                                                                                                                                                               | 700  | 700  | 0         | 100.0 | 84.7 | 92.4 | hypothetical protein CARUB_v10008465mg                                                                                                                            | gbpln | Capsella rubella     | AT1G25320.1   Symbols:   Leucine-rich repeat protein kinase family protein   chr1:8877988-8880180 FORWARD LENGTH=702                                            | 700  | 702 | 0         | 100.3 | 85.7 | 92.3 |
| Rsa1.0_00050.1.g2826.t1 | ref NP_564230.1  myb domain protein 116 [Arabidopsis thaliana] gi 15375295 gb AAK25748.2 AF334815.1 putative transcription factor MYB116 [Arabidopsis thaliana] gi 41619120 gb AAS10028.1  MYB transcription factor [Arabidopsis thaliana] gi 91805853 gb ABE65655.1  myb family transcription factor [Arabidopsis thaliana] gi 332192487 gb AEE30608.1  myb domain protein 116 [Arabidopsis thaliana] | 287  | 283  | 1.00E-120 | 98.6  | 75.3 | 84.0 | myb domain protein 116                                                                                                                                            | gbpln | Arabidopsis thaliana | AT1G25340.1   Symbols: MYB116, AtMYB116   myb domain protein 116   chr1:8885210-8886271 FORWARD LENGTH=283                                                      | 287  | 283 | 1.00E-122 | 98.6  | 75.3 | 84.0 |
| Rsa1.0_00050.1.g2827.t1 | ref NP_173906.2  putative tRNA-glutamine synthetase [Arabidopsis thaliana] gi 17065036 gb AAL32672.1  Unknown protein [Arabidopsis thaliana] gi 21387137 gb AAM47972.1  unknown protein [Arabidopsis thaliana] gi 332192489 gb AEE30610.1  putative tRNA-glutamine synthetase [Arabidopsis thaliana]                                                                                                   | 818  | 795  | 0         | 97.2  | 86.6 | 91.2 | putative tRNA-glutamine synthetase                                                                                                                                | gbpln | Arabidopsis thaliana | AT1G25350.1   Symbols: OVA9   glutamine-tRNA ligase, putative / glutamyl-tRNA synthetase, putative / GlnRS, putative   chr1:8899280-88994205 REVERSE LENGTH=795 | 818  | 795 | 0         | 97.2  | 86.6 | 91.2 |
| Rsa1.0_00050.1.g2828.t1 | pir F86383 hypothetical protein F4F7.22 - Arabidopsis thaliana                                                                                                                                                                                                                                                                                                                                         | 277  | 767  | 8.00E-62  | 276.9 | 57.8 | 65.3 | hypothetical protein F4F7.22 - Arabidopsis thaliana                                                                                                               | ----  | ----                 | AT1G25370.1   Symbols:   Protein of unknown function (DUF1639)   chr1:8898046-8898934 REVERSE LENGTH=263                                                        | 277  | 263 | 1.00E-63  | 94.9  | 57.8 | 65.3 |

|                         |                                                                                                                                                                                                                                                                                                                                                                                                              |     |     |           |       |      |      |                                                  |       |                      |                                                                                                                                                                                                                                                                                                                                                                                                                                                                      |     |     |           |       |      |      |
|-------------------------|--------------------------------------------------------------------------------------------------------------------------------------------------------------------------------------------------------------------------------------------------------------------------------------------------------------------------------------------------------------------------------------------------------------|-----|-----|-----------|-------|------|------|--------------------------------------------------|-------|----------------------|----------------------------------------------------------------------------------------------------------------------------------------------------------------------------------------------------------------------------------------------------------------------------------------------------------------------------------------------------------------------------------------------------------------------------------------------------------------------|-----|-----|-----------|-------|------|------|
| Rsa1.0_00050.1.g2829.t1 | refNP_564232.1  Metallo-beta-lactamase domain-containing protein [Arabidopsis thaliana]<br>gi 51968784 dbj BA043084.1  unknown protein [Arabidopsis thaliana]<br>gi 332192493 gb AEE30614.1  Metallo-beta-lactamase domain-containing protein [Arabidopsis thaliana]                                                                                                                                         | 589 | 524 | 0         | 89.0  | 70.5 | 76.7 | Metallo-beta-lactamase domain-containing protein | gbpln | Arabidopsis thaliana | AT1G25375.1   Symbols:   Metallo-hydrolase/oxidoreductase superfamily protein   chr1:8900279-8903220 REVERSE LENGTH=524                                                                                                                                                                                                                                                                                                                                              | 589 | 524 | 0         | 89.0  | 70.5 | 76.7 |
| Rsa1.0_00050.1.g2830.t1 | refXP_002893428.1  mitochondrial substrate carrier family protein [Arabidopsis lyrata subsp. lyrata]<br>gi 297339270 gb EFH69687.1  mitochondrial substrate carrier family protein [Arabidopsis lyrata subsp. lyrata]                                                                                                                                                                                        | 360 | 364 | 1.00E-171 | 101.1 | 87.5 | 95.3 | mitochondrial substrate carrier family protein   | gbpln | Arabidopsis lyrata   | AT1G25380.1   Symbols: ATNDT2, NDT2   NAD+ transporter 2   chr1:8903726-8905818 FORWARD LENGTH=363                                                                                                                                                                                                                                                                                                                                                                   | 360 | 363 | 1.00E-171 | 100.8 | 86.1 | 94.4 |
| Rsa1.0_00050.1.g2831.t1 | refNP_173910.1  protein kinase-like protein [Arabidopsis thaliana]<br>gi 12321510 gb AAG50813.1 AC079281_15 wall-associated kinase, putative [Arabidopsis thaliana]<br>gi 332192495 gb AEE30616.1  protein kinase-like protein [Arabidopsis thaliana]                                                                                                                                                        | 609 | 629 | 0         | 103.3 | 77.8 | 85.4 | protein kinase-like protein                      | gbpln | Arabidopsis thaliana | AT1G25390.1   Symbols:   Protein kinase superfamily protein   chr1:8906640-8908800 REVERSE LENGTH=629                                                                                                                                                                                                                                                                                                                                                                | 609 | 629 | 0         | 103.3 | 77.8 | 85.4 |
| Rsa1.0_00050.1.g2832.t1 | refXP_002887289.1  hypothetical protein ARALYDRAFT.476148 [Arabidopsis lyrata subsp. lyrata]<br>gi 297333130 gb EFH63548.1  hypothetical protein ARALYDRAFT.476148 [Arabidopsis lyrata subsp. lyrata]                                                                                                                                                                                                        | 687 | 801 | 1.00E-120 | 116.6 | 33.2 | 38.0 | hypothetical protein ARALYDRAFT.476148           | gbpln | Arabidopsis lyrata   | AT1G25390.1   Symbols:   Protein kinase superfamily protein   chr1:8906640-8908800 REVERSE LENGTH=629                                                                                                                                                                                                                                                                                                                                                                | 687 | 629 | 1.00E-118 | 91.6  | 35.7 | 47.6 |
| Rsa1.0_00050.1.g2833.t1 | gb ABK28015.1  unknown [Arabidopsis thaliana]                                                                                                                                                                                                                                                                                                                                                                | 84  | 108 | 3.00E-21  | 128.6 | 60.7 | 67.9 | unknown                                          | gbpln | Arabidopsis thaliana | AT1G25422.1   Symbols:   unknown protein; FUNCTIONS IN: molecular_function unknown; INVOLVED IN: biological_process unknown; LOCATED IN: cellular_component unknown; BEST Arabidopsis thaliana protein match is: unknown protein (TAIR:AT1G68500.1); Has 16 Blast hits to 16 proteins in 6 species: Archae - 0; Bacteria - 0; Metazoa - 0; Fungi - 0; Plants - 16; Viruses - 0; Other Eukaryotes - 0 (source: NCBI BLink).   chr1:8919087-8919410 FORWARD LENGTH=107 | 84  | 107 | 5.00E-24  | 127.4 | 60.7 | 67.9 |
| Rsa1.0_00050.1.g2834.t1 | gb ABK28016.1  unknown [Arabidopsis thaliana]                                                                                                                                                                                                                                                                                                                                                                | 96  | 97  | 3.00E-31  | 101.0 | 77.1 | 88.5 | unknown                                          | gbpln | Arabidopsis thaliana | AT1G25425.1   Symbols: CLE43   CLAVATA3/ESR-RELATED 43   chr1:8922832-8923122 FORWARD LENGTH=96                                                                                                                                                                                                                                                                                                                                                                      | 96  | 96  | 6.00E-34  | 100.0 | 77.1 | 88.5 |
| Rsa1.0_00050.1.g2835.t1 | refNP_173915.2  zinc finger protein CONSTANS-LIKE 16 [Arabidopsis thaliana]<br>gi 52782786 sp Q8RWD0.2 COL16_ARAT H RecName: Full=Zinc finger protein CONSTANS-LIKE 16<br>gi 53749166 gb AAU90068.1  At1g25440 [Arabidopsis thaliana]<br>gi 110740969 dbj BAE98579.1  hypothetical protein [Arabidopsis thaliana]<br>gi 332192504 gb AEE30625.1  zinc finger protein CONSTANS-LIKE 16 [Arabidopsis thaliana] | 414 | 417 | 1.00E-179 | 100.7 | 82.4 | 89.1 | zinc finger protein CONSTANS-LIKE 16             | gbpln | Arabidopsis thaliana | AT1G25440.1   Symbols:   B-box type zinc finger protein with OCT domain   chr1:8933939-8935284 REVERSE LENGTH=417                                                                                                                                                                                                                                                                                                                                                    | 414 | 417 | 0         | 100.7 | 82.4 | 89.1 |
| Rsa1.0_00051.1.g2836.t1 | refNP_197839.1  large subunit ribosomal protein LP1 [Arabidopsis thaliana]<br>gi 10177851 dbj BAB11203.1  60S acidic ribosomal protein P1 [Arabidopsis thaliana]<br>gi 67633816 gb AAAY78832.1  putative 60S acidic ribosomal protein P1 [Arabidopsis thaliana]<br>gi 332005935 gb AED93318.1  60S acidic ribosomal protein family [Arabidopsis thaliana]                                                    | 111 | 111 | 5.00E-38  | 100.0 | 72.1 | 82.0 | large subunit ribosomal protein LP1              | gbpln | Arabidopsis thaliana | AT5G24510.1   Symbols:   60S acidic ribosomal protein family   chr5:8369295-8369866 REVERSE LENGTH=111                                                                                                                                                                                                                                                                                                                                                               | 111 | 111 | 8.00E-41  | 100.0 | 72.1 | 82.0 |
| Rsa1.0_00051.1.g2837.t1 | refNP_001154738.1  DNA-binding protein BIN4 [Arabidopsis thaliana]<br>gi 332005958 gb AED9334.1  DNA-binding protein BIN4 [Arabidopsis thaliana]                                                                                                                                                                                                                                                             | 419 | 446 | 1.00E-107 | 106.4 | 62.3 | 71.8 | DNA-binding protein BIN4                         | gbpln | Arabidopsis thaliana | AT5G24630.5   Symbols: BIN4   double-stranded DNA binding   chr5:8432523-8435682 REVERSE LENGTH=446                                                                                                                                                                                                                                                                                                                                                                  | 419 | 446 | 1.00E-109 | 106.4 | 62.3 | 71.8 |

|                         |                                                                                                                                                                                                                                                                                                                                                                                   |      |      |           |       |      |      |                                                                                                              |       |                      |                                                                                                                                                                                                                                                                                                                                                                                                                                                                                                                                                         |      |      |           |       |      |      |
|-------------------------|-----------------------------------------------------------------------------------------------------------------------------------------------------------------------------------------------------------------------------------------------------------------------------------------------------------------------------------------------------------------------------------|------|------|-----------|-------|------|------|--------------------------------------------------------------------------------------------------------------|-------|----------------------|---------------------------------------------------------------------------------------------------------------------------------------------------------------------------------------------------------------------------------------------------------------------------------------------------------------------------------------------------------------------------------------------------------------------------------------------------------------------------------------------------------------------------------------------------------|------|------|-----------|-------|------|------|
| Rsa1.0_00051.1.g2838.t1 | refNP_193753.1   terpene cyclase, C1 domain-containing protein [Arabidopsis thaliana]<br>gi 317412200 sp O65434.2 TPS07_ARATH RecName: Full=Putative terpenoid synthase 7; Short=AtTPS07<br>gi 332658884 gb AE84284.1   putative terpenoid synthase 7 [Arabidopsis thaliana]                                                                                                      | 559  | 604  | 1.00E-179 | 108.1 | 57.2 | 72.3 | terpene cyclase, C1 domain-containing protein                                                                | gbpln | Arabidopsis thaliana | AT4G20200.1   Symbols:   Terpenoid cyclases/Protein prenyltransferases superfamily protein   chr4:10908672-10911151 REVERSE LENGTH=604                                                                                                                                                                                                                                                                                                                                                                                                                  | 559  | 604  | 0         | 108.1 | 57.2 | 72.3 |
| Rsa1.0_00051.1.g2839.t1 | refXP_002874216.1   hypothetical protein ARALYDRAFT_910514 [Arabidopsis lyrata subsp. lyrata]<br>gi 297320053 gb EFH50475.1   hypothetical protein ARALYDRAFT_910514 [Arabidopsis lyrata subsp. lyrata]                                                                                                                                                                           | 535  | 520  | 0         | 97.2  | 83.0 | 89.2 | hypothetical protein ARALYDRAFT_910514                                                                       | gbpln | Arabidopsis lyrata   | AT5G24690.1   Symbols:   Protein of unknown function (DUF3411)   chr5:8455783-8458513 REVERSE LENGTH=521                                                                                                                                                                                                                                                                                                                                                                                                                                                | 535  | 521  | 0         | 97.4  | 82.8 | 88.8 |
| Rsa1.0_00051.1.g2840.t3 | refXP_002874217.1   hypothetical protein ARALYDRAFT_489332 [Arabidopsis lyrata subsp. lyrata]<br>gi 297320054 gb EFH50476.1   hypothetical protein ARALYDRAFT_489332 [Arabidopsis lyrata subsp. lyrata]                                                                                                                                                                           | 1419 | 1376 | 0         | 97.0  | 84.9 | 88.9 | hypothetical protein ARALYDRAFT_489332                                                                       | gbpln | Arabidopsis lyrata   | AT5G24710.1   Symbols:   Transducin/WD40 repeat-like superfamily protein   chr5:8459148-8467920 REVERSE LENGTH=1377                                                                                                                                                                                                                                                                                                                                                                                                                                     | 1419 | 1377 | 0         | 97.0  | 84.6 | 88.7 |
| Rsa1.0_00051.1.g2841.t2 | sp Q84KJ5.2 CRYD_ARATH RecName: Full=Cryptochrome DASH, chloroplastic/mitochondrial; AltName: Full=Cryptochrome-3; Flags: Precursor                                                                                                                                                                                                                                               | 128  | 569  | 2.00E-47  | 444.5 | 75.0 | 78.9 | RecName: Full=Cryptochrome DASH, chloroplastic/mitochondrial; AltName: Full=Cryptochrome-3; Flags: Precursor | ----  | ----                 | AT5G24850.1   Symbols: CRY3   cryptochrome 3   chr5:8535399-8538016 REVERSE LENGTH=526                                                                                                                                                                                                                                                                                                                                                                                                                                                                  | 128  | 526  | 4.00E-50  | 410.9 | 75.0 | 78.9 |
| Rsa1.0_00051.1.g2842.t1 | gb EOA23031.1   hypothetical protein CARUB_v10003797mg [Capsella rubella]                                                                                                                                                                                                                                                                                                         | 108  | 108  | 7.00E-51  | 100.0 | 90.7 | 95.4 | hypothetical protein CARUB_v10003797mg                                                                       | gbpln | Capsella rubella     | AT5G24860.1   Symbols: FPF1, ATPPF1   flowering promoting factor 1   chr5:8541822-8542154 FORWARD LENGTH=110                                                                                                                                                                                                                                                                                                                                                                                                                                            | 108  | 110  | 1.00E-51  | 101.9 | 89.8 | 94.4 |
| Rsa1.0_00051.1.g2843.t1 | gb EOA21407.1   hypothetical protein CARUB_v10001780mg [Capsella rubella]                                                                                                                                                                                                                                                                                                         | 206  | 255  | 2.00E-65  | 123.8 | 77.7 | 85.4 | hypothetical protein CARUB_v10001780mg                                                                       | gbpln | Capsella rubella     | AT5G24890.1   Symbols:   unknown protein; FUNCTIONS IN: molecular function unknown; INVOLVED IN: biological process unknown; LOCATED IN: cellular component unknown; EXPRESSED IN: 24 plant structures; EXPRESSED DURING: 13 growth stages; BEST Arabidopsis thaliana protein match is: unknown protein (TAIR:AT2G4550.1). Has 1807 Blast hits to 1807 proteins in 277 species: Archae - 0; Bacteria - 0; Metazoa - 736; Fungi - 347; Plants - 385; Viruses - 0; Other Eukaryotes - 339 (source: NCBI BLINK).   chr5:8558357-8559172 REVERSE LENGTH=240 | 206  | 240  | 7.00E-67  | 116.5 | 76.2 | 84.0 |
| Rsa1.0_00051.1.g2844.t1 | refXP_002872134.1   hypothetical protein ARALYDRAFT_489353 [Arabidopsis lyrata subsp. lyrata]<br>gi 297317971 gb EFH48393.1   hypothetical protein ARALYDRAFT_489353 [Arabidopsis lyrata subsp. lyrata]                                                                                                                                                                           | 348  | 360  | 1.00E-165 | 103.4 | 89.7 | 94.3 | hypothetical protein ARALYDRAFT_489353                                                                       | gbpln | Arabidopsis lyrata   | AT5G24930.1   Symbols: ATCOL4, COL4   CONSTANS-like 4   chr5:8589325-8590949 FORWARD LENGTH=406                                                                                                                                                                                                                                                                                                                                                                                                                                                         | 348  | 406  | 1.00E-165 | 116.7 | 89.7 | 94.5 |
| Rsa1.0_00051.1.g2845.t1 | refXP_002874237.1   RNA recognition motif-containing protein [Arabidopsis lyrata subsp. lyrata]<br>gi 297320074 gb EFH50496.1   RNA recognition motif-containing protein [Arabidopsis lyrata subsp. lyrata]                                                                                                                                                                       | 947  | 948  | 0         | 100.1 | 87.8 | 93.9 | RNA recognition motif-containing protein                                                                     | gbpln | Arabidopsis lyrata   | AT5G25060.1   Symbols:   RNA recognition motif (RRM)-containing protein   chr5:8634219-8639984 REVERSE LENGTH=946                                                                                                                                                                                                                                                                                                                                                                                                                                       | 947  | 946  | 0         | 99.9  | 87.9 | 93.8 |
| Rsa1.0_00051.1.g2846.t1 | refNP_197890.1   Sas10/Utp3/C1D family protein [Arabidopsis thaliana]<br>gi 14190385 gb AAK55673.1 AF378870.1 AT5g25080/T11H3.90 [Arabidopsis thaliana]<br>gi 15215877 gb AAK91482.1 AT5g25080/T11H3.90 [Arabidopsis thaliana]<br>gi 21593008 gb AAM64957.1   unknown [Arabidopsis thaliana]<br>gi 332006014 gb AED93397.1   Sas10/Utp3/C1D family protein [Arabidopsis thaliana] | 181  | 217  | 5.00E-72  | 119.9 | 71.8 | 83.4 | Sas10/Utp3/C1D family protein                                                                                | gbpln | Arabidopsis thaliana | AT5G25080.1   Symbols:   Sas10/Utp3/C1D family   chr5:8643782-8646306 FORWARD LENGTH=217                                                                                                                                                                                                                                                                                                                                                                                                                                                                | 181  | 217  | 2.00E-74  | 119.9 | 71.8 | 83.4 |
| Rsa1.0_00051.1.g2847.t1 | gb EOA21643.1   hypothetical protein CARUB_v10002061mg [Capsella rubella]                                                                                                                                                                                                                                                                                                         | 187  | 184  | 3.00E-68  | 98.4  | 76.5 | 81.8 | hypothetical protein CARUB_v10002061mg                                                                       | gbpln | Capsella rubella     | AT5G25090.1   Symbols: ENODL13, AtENODL13   early nodulin-like protein 13   chr5:8647117-8647755 REVERSE LENGTH=186                                                                                                                                                                                                                                                                                                                                                                                                                                     | 187  | 186  | 1.00E-62  | 99.5  | 74.3 | 82.9 |
| Rsa1.0_00051.1.g2848.t1 | #                                                                                                                                                                                                                                                                                                                                                                                 | #    | #    | #         | #     | #    | #    | -                                                                                                            | ----  | ----                 | #                                                                                                                                                                                                                                                                                                                                                                                                                                                                                                                                                       | #    | #    | #         | #     | #    | #    |
| Rsa1.0_00051.1.g2849.t1 | refXP_002872140.1   CYP71B11 [Arabidopsis lyrata subsp. lyrata]<br>gi 297317971 gb EFH48399.1   CYP71B11 [Arabidopsis lyrata subsp. lyrata]                                                                                                                                                                                                                                       | 468  | 496  | 0         | 106.0 | 77.4 | 87.8 | CYP71B11                                                                                                     | gbpln | Arabidopsis lyrata   | AT5G25140.1   Symbols: CYP71B13   cytochrome P450, family 71, subfamily B, polypeptide 13   chr5:8672989-8674557 FORWARD LENGTH=496                                                                                                                                                                                                                                                                                                                                                                                                                     | 468  | 496  | 0         | 106.0 | 77.8 | 87.6 |

|                         |                                                                                                                                                                                                                                                                                                                                                                                                                                                                           |     |     |          |       |      |      |                                        |       |                      |                                                                                                                                                                                                                                                                                                                                                                                                                                                                                                                               |     |     |          |       |      |      |
|-------------------------|---------------------------------------------------------------------------------------------------------------------------------------------------------------------------------------------------------------------------------------------------------------------------------------------------------------------------------------------------------------------------------------------------------------------------------------------------------------------------|-----|-----|----------|-------|------|------|----------------------------------------|-------|----------------------|-------------------------------------------------------------------------------------------------------------------------------------------------------------------------------------------------------------------------------------------------------------------------------------------------------------------------------------------------------------------------------------------------------------------------------------------------------------------------------------------------------------------------------|-----|-----|----------|-------|------|------|
| Rsa1.0_00051.1.g2850.t1 | gb[EOA19571.1] hypothetical protein CARUB_v10002639mg [Capsella rubella]                                                                                                                                                                                                                                                                                                                                                                                                  | 674 | 668 | 0        | 99.1  | 92.0 | 95.3 | hypothetical protein CARUB_v10002639mg | gbpln | Capsella rubella     | AT5G25150.1   Symbols: TAF5   TBP-associated factor 5   chr5:8677117-8682058 FORWARD LENGTH=669                                                                                                                                                                                                                                                                                                                                                                                                                               | 674 | 669 | 0        | 99.3  | 91.4 | 95.0 |
| Rsa1.0_00051.1.g2851.t1 | ref[XP_002872142.1] hypothetical protein ARALYDRAFT_910560 [Arabidopsis lyrata subsp. lyrata] g[297317979]gb[EFH48401.1] hypothetical protein ARALYDRAFT_910560 [Arabidopsis lyrata subsp. lyrata] ref[XP_002874244.1] hypothetical protein ARALYDRAFT_489371 [Arabidopsis lyrata subsp. lyrata] g[297320063]gb[EFH50503.1] hypothetical protein ARALYDRAFT_489371 [Arabidopsis lyrata subsp. lyrata]                                                                     | 247 | 232 | 6.00E-91 | 93.9  | 69.6 | 78.9 | hypothetical protein ARALYDRAFT_910560 | gbpln | Arabidopsis lyrata   | AT5G25160.1   Symbols: ZFP3   zinc finger protein 3   chr5:8687524-8688231 FORWARD LENGTH=235                                                                                                                                                                                                                                                                                                                                                                                                                                 | 247 | 235 | 7.00E-88 | 95.1  | 69.2 | 78.9 |
| Rsa1.0_00051.1.g2852.t1 | ref[XP_002874244.1] hypothetical protein ARALYDRAFT_489371 [Arabidopsis lyrata subsp. lyrata] g[297320063]gb[EFH50503.1] hypothetical protein ARALYDRAFT_489371 [Arabidopsis lyrata subsp. lyrata]                                                                                                                                                                                                                                                                        | 180 | 183 | 2.00E-70 | 101.7 | 81.7 | 87.2 | hypothetical protein ARALYDRAFT_489371 | gbpln | Arabidopsis lyrata   | AT5G25190.1   Symbols:   Integrase-type DNA-binding superfamily protein   chr5:8707007-8707655 REVERSE LENGTH=181                                                                                                                                                                                                                                                                                                                                                                                                             | 180 | 181 | 2.00E-71 | 100.6 | 77.2 | 82.8 |
| Rsa1.0_00051.1.g2853.t1 | ref[NP_197906.1] uncharacterized protein [Arabidopsis thaliana] g[26450052]dbj[BAC42146.1] unknown protein [Arabidopsis thaliana] g[28827680]gb[AA050684.1] unknown protein [Arabidopsis thaliana] g[332006033]gb[AED93416.1] uncharacterized protein AT5G25240 [Arabidopsis thaliana]                                                                                                                                                                                    | 124 | 131 | 3.00E-44 | 105.6 | 77.4 | 87.1 | uncharacterized protein                | gbpln | Arabidopsis thaliana | AT5G25240.1   Symbols:   unknown protein; FUNCTIONS IN: molecular_function unknown; INVOLVED IN: biological_process unknown; LOCATED IN: cellular_component unknown; EXPRESSED IN: 23 plant structures; EXPRESSED DURING: 13 growth stages; Has 1807 Blast hits to 1807 proteins in 277 species: Archae - 0; Bacteria - 0; Metazoa - 736; Fungi - 347; Plants - 385; Viruses - 0; Other Eukaryotes - 339 (source: NCBI BLINK).   chr5:8746779-8747174 REVERSE LENGTH=131                                                      | 124 | 131 | 5.00E-47 | 105.6 | 77.4 | 87.1 |
| Rsa1.0_00051.1.g2854.t1 | #                                                                                                                                                                                                                                                                                                                                                                                                                                                                         | #   | #   | #        | #     | #    | #    | -                                      | ----  | ----                 | #                                                                                                                                                                                                                                                                                                                                                                                                                                                                                                                             | #   | #   | #        | #     | #    |      |
| Rsa1.0_00051.1.g2855.t1 | ref[XP_002874247.1] hypothetical protein ARALYDRAFT_910571 [Arabidopsis lyrata subsp. lyrata] g[297320084]gb[EFH50506.1] hypothetical protein ARALYDRAFT_910571 [Arabidopsis lyrata subsp. lyrata]                                                                                                                                                                                                                                                                        | 357 | 367 | 0        | 102.8 | 89.4 | 95.0 | hypothetical protein ARALYDRAFT_910571 | gbpln | Arabidopsis lyrata   | AT5G25265.1   Symbols:   unknown protein; FUNCTIONS IN: molecular_function unknown; INVOLVED IN: biological_process unknown; LOCATED IN: plasma membrane, membrane; EXPRESSED IN: cultured cell, leaf; BEST Arabidopsis thaliana protein match is: unknown protein (TAIR:AT2G25260.1); Has 30201 Blast hits to 17322 proteins in 780 species: Archae - 12; Bacteria - 1396; Metazoa - 1738; Fungi - 3422; Plants - 5037; Viruses - 0; Other Eukaryotes - 2996 (source: NCBI BLINK).   chr5:8754794-8756855 REVERSE LENGTH=366 | 357 | 366 | 0        | 102.5 | 89.4 | 94.4 |
| Rsa1.0_00051.1.g2856.t1 | ref[NP_566112.1] uncharacterized protein [Arabidopsis thaliana] g[75100577]sp[O82251.1]TI202_ARATH RecName: Full=Protein TIC 20-II, chloroplastic; AltName: Full=Translocon at the inner envelope membrane of chloroplasts 20-II; Short=AT1C20-II; Flags: Precursor g[3738296]gb[AA063638.1] expressed protein [Arabidopsis thaliana] g[330255801]gb[AEC10895.1] protein TIC 20-II [Arabidopsis thaliana]                                                                 | 206 | 208 | 3.00E-96 | 101.0 | 89.3 | 93.2 | uncharacterized protein                | gbpln | Arabidopsis thaliana | AT2G47840.1   Symbols:   Uncharacterised conserved protein ycf60   chr2:19594331-19594957 REVERSE LENGTH=208                                                                                                                                                                                                                                                                                                                                                                                                                  | 206 | 208 | 1.00E-98 | 101.0 | 89.3 | 93.2 |
| Rsa1.0_00051.1.g2857.t1 | #                                                                                                                                                                                                                                                                                                                                                                                                                                                                         | #   | #   | #        | #     | #    | #    | -                                      | ----  | ----                 | #                                                                                                                                                                                                                                                                                                                                                                                                                                                                                                                             | #   | #   | #        | #     | #    |      |
| Rsa1.0_00051.1.g2858.t1 | gb[ABL97972.1] serine-rich protein [Brassica rapa]                                                                                                                                                                                                                                                                                                                                                                                                                        | 200 | 193 | 1.00E-78 | 96.5  | 85.0 | 88.5 | serine-rich protein                    | gbpln | Brassica rapa        | AT5G25280.2   Symbols:   serine-rich protein-related   chr5:8773882-8774544 FORWARD LENGTH=220                                                                                                                                                                                                                                                                                                                                                                                                                                | 200 | 220 | 1.00E-69 | 110.0 | 66.0 | 70.5 |
| Rsa1.0_00051.1.g2859.t2 | ref[NP_197917.1] EIN3-binding F-box protein 2 [Arabidopsis thaliana] g[15325708]sp[O708Y0.1]EBF2_ARATH RecName: Full=EIN3-binding F-box protein 2 g[38705081]gb[AAR27072.1] EIN3-binding F-box protein 2 [Arabidopsis thaliana] g[40641627]emb[CAE75865.1] F-box protein [Arabidopsis thaliana] g[110735710]dbj[BAE99835.1] leucine-rich repeats containing protein [Arabidopsis thaliana] g[332006046]gb[AED93429.1] EIN3-binding F-box protein 2 [Arabidopsis thaliana] | 600 | 623 | 0        | 103.8 | 86.8 | 93.5 | EIN3-binding F-box protein 2           | gbpln | Arabidopsis thaliana | AT5G25350.1   Symbols: EBF2   EIN3-binding F box protein 2   chr5:8794842-8796882 REVERSE LENGTH=623                                                                                                                                                                                                                                                                                                                                                                                                                          | 600 | 623 | 0        | 103.8 | 86.8 | 93.5 |

|                          |                                                                                                                                                                                                    |      |     |           |       |      |      |                                                 |       |                    |                                                                                                                                                                                                                                                                                                                                                                                                                                                                                                                                                      |      |     |           |       |      |      |
|--------------------------|----------------------------------------------------------------------------------------------------------------------------------------------------------------------------------------------------|------|-----|-----------|-------|------|------|-------------------------------------------------|-------|--------------------|------------------------------------------------------------------------------------------------------------------------------------------------------------------------------------------------------------------------------------------------------------------------------------------------------------------------------------------------------------------------------------------------------------------------------------------------------------------------------------------------------------------------------------------------------|------|-----|-----------|-------|------|------|
| Rsa1.0_00051.1.g2860.t1  | refXP_002874256.1  hypothetical protein ARALYDRAFT_326806 [Arabidopsis lyrata subsp. lyrata] gi 297320093 gb EFH50515.1  hypothetical protein ARALYDRAFT_326806 [Arabidopsis lyrata subsp. lyrata] | 185  | 189 | 1.00E-82  | 102.2 | 83.8 | 88.6 | hypothetical protein ARALYDRAFT_326806          | gbpln | Arabidopsis lyrata | AT5G25390.2   Symbols: SHN2   Integrase-type DNA-binding superfamily protein   chr5:8820637-8821741 FORWARD LENGTH=189                                                                                                                                                                                                                                                                                                                                                                                                                               | 185  | 189 | 1.00E-84  | 102.2 | 82.7 | 88.6 |
| Rsa1.0_00051.1.g2861.t1  | refXP_002869301.1  predicted protein [Arabidopsis lyrata subsp. lyrata] gi 297315137 gb EFH45560.1  predicted protein [Arabidopsis lyrata subsp. lyrata]                                           | 418  | 677 | 1.00E-154 | 162.0 | 67.9 | 79.2 | predicted protein                               | gbpln | Arabidopsis lyrata | AT4G31980.1   Symbols:   unknown protein; CONTAINS InterPro DOMAIN/s: Protein of unknown function DUF247, plant (InterPro:IPR004158), Protein of unknown function DUF862, eukaryotic (InterPro:IPR008580); BEST Arabidopsis thaliana protein match is: Plant protein of unknown function (DUF247) (TAIR:AT5G11290.1); Has 1967 Blast hits to 1844 proteins in 183 species: Archae - 0; Bacteria - 6; Metazoa - 223; Fungi - 83; Plants - 1477; Viruses - 0; Other Eukaryotes - 178 (source: NCBI BLINK).   chr4:15464905-15469204 FORWARD LENGTH=680 | 418  | 680 | 1.00E-153 | 162.7 | 67.5 | 78.0 |
| Rsa1.0_00051.1.g2862.t1  | refXP_002869301.1  predicted protein [Arabidopsis lyrata subsp. lyrata] gi 297315137 gb EFH45560.1  predicted protein [Arabidopsis lyrata subsp. lyrata]                                           | 421  | 677 | 1.00E-161 | 160.8 | 67.9 | 80.8 | predicted protein                               | gbpln | Arabidopsis lyrata | AT4G31980.1   Symbols:   unknown protein; CONTAINS InterPro DOMAIN/s: Protein of unknown function DUF247, plant (InterPro:IPR004158), Protein of unknown function DUF862, eukaryotic (InterPro:IPR008580); BEST Arabidopsis thaliana protein match is: Plant protein of unknown function (DUF247) (TAIR:AT5G11290.1); Has 1967 Blast hits to 1844 proteins in 183 species: Archae - 0; Bacteria - 6; Metazoa - 223; Fungi - 83; Plants - 1477; Viruses - 0; Other Eukaryotes - 178 (source: NCBI BLINK).   chr4:15464905-15469204 FORWARD LENGTH=680 | 421  | 680 | 1.00E-157 | 161.5 | 66.3 | 79.6 |
| Rsa1.0_00051.1.g2863.t1  | refXP_002874258.1  CYCA2.1 [Arabidopsis lyrata subsp. lyrata] gi 297320095 gb EFH50517.1  CYCA2.1 [Arabidopsis lyrata subsp. lyrata]                                                               | 104  | 433 | 4.00E-16  | 416.3 | 55.8 | 65.4 | CYCA2.1                                         | gbpln | Arabidopsis lyrata | AT5G25380.1   Symbols: CYCA2.1   cyclin a2.1   chr5:8815230-8817566 FORWARD LENGTH=437                                                                                                                                                                                                                                                                                                                                                                                                                                                               | 104  | 437 | 8.00E-18  | 420.2 | 53.8 | 64.4 |
| Rsa1.0_00051.1.g2864.t1  | gb EOA18383.1  hypothetical protein CARUB_v10006919mg [Capsella rubella]                                                                                                                           | 437  | 660 | 1.00E-141 | 151.0 | 57.7 | 67.0 | hypothetical protein CARUB_v10006919mg          | gbpln | Capsella rubella   | AT4G31980.1   Symbols:   unknown protein; CONTAINS InterPro DOMAIN/s: Protein of unknown function DUF247, plant (InterPro:IPR004158), Protein of unknown function DUF862, eukaryotic (InterPro:IPR008580); BEST Arabidopsis thaliana protein match is: Plant protein of unknown function (DUF247) (TAIR:AT5G11290.1); Has 1967 Blast hits to 1844 proteins in 183 species: Archae - 0; Bacteria - 6; Metazoa - 223; Fungi - 83; Plants - 1477; Viruses - 0; Other Eukaryotes - 178 (source: NCBI BLINK).   chr4:15464905-15469204 FORWARD LENGTH=680 | 437  | 680 | 1.00E-138 | 155.6 | 56.1 | 65.4 |
| Rsa1.0_00051.1.g2865.t10 | refXP_002874259.1  predicted protein [Arabidopsis lyrata subsp. lyrata] gi 297320096 gb EFH50518.1  predicted protein [Arabidopsis lyrata subsp. lyrata]                                           | 1459 | 547 | 0         | 37.5  | 32.1 | 34.0 | predicted protein                               | gbpln | Arabidopsis lyrata | AT1G65550.1   Symbols:   Xanthine/uracil permease family protein   chr1:24367694-24370800 REVERSE LENGTH=541                                                                                                                                                                                                                                                                                                                                                                                                                                         | 1459 | 541 | 0         | 37.1  | 31.3 | 33.2 |
| Rsa1.0_00051.1.g2866.t1  | gb EOA13406.1  hypothetical protein CARUB_v10026444mg, partial [Capsella rubella]                                                                                                                  | 411  | 430 | 1.00E-108 | 104.6 | 58.2 | 68.6 | hypothetical protein CARUB_v10026444mg, partial | gbpln | Capsella rubella   | AT5G62510.1   Symbols:   F-box family protein   chr5:25095373-25096635 REVERSE LENGTH=420                                                                                                                                                                                                                                                                                                                                                                                                                                                            | 411  | 420 | 1.00E-100 | 102.2 | 53.8 | 64.5 |
| Rsa1.0_00051.1.g2867.t1  | refXP_002874263.1  predicted protein [Arabidopsis lyrata subsp. lyrata] gi 297320100 gb EFH50522.1  predicted protein [Arabidopsis lyrata subsp. lyrata]                                           | 258  | 280 | 9.00E-70  | 108.5 | 59.3 | 71.7 | predicted protein                               | gbpln | Arabidopsis lyrata | AT5G25475.4   Symbols:   AP2/B3-like transcriptional factor family protein   chr5:8867920-8869492 REVERSE LENGTH=324                                                                                                                                                                                                                                                                                                                                                                                                                                 | 258  | 324 | 6.00E-71  | 125.6 | 58.1 | 74.0 |
| Rsa1.0_00051.1.g2868.t1  | refXP_002874266.1  hypothetical protein ARALYDRAFT_489409 [Arabidopsis lyrata subsp. lyrata] gi 297320103 gb EFH50525.1  hypothetical protein ARALYDRAFT_489409 [Arabidopsis lyrata subsp. lyrata] | 492  | 499 | 0         | 101.4 | 85.4 | 92.7 | hypothetical protein ARALYDRAFT_489409          | gbpln | Arabidopsis lyrata | AT5G25510.1   Symbols:   Protein phosphatase 2A regulatory B subunit family protein   chr5:8882728-8884325 REVERSE LENGTH=500                                                                                                                                                                                                                                                                                                                                                                                                                        | 492  | 500 | 0         | 101.6 | 86.6 | 93.9 |
| Rsa1.0_00051.1.g2869.t1  | gb EOA20666.1  hypothetical protein CARUB_v10000978mg, partial [Capsella rubella]                                                                                                                  | 439  | 439 | 0         | 100.0 | 83.6 | 88.4 | hypothetical protein CARUB_v10000978mg, partial | gbpln | Capsella rubella   | AT5G25620.2   Symbols: YUC6   Flavin-binding monooxygenase family protein   chr5:8935312-8938200 REVERSE LENGTH=426                                                                                                                                                                                                                                                                                                                                                                                                                                  | 439  | 426 | 0         | 97.0  | 83.4 | 86.6 |



|                          |                                                                                                                                                                                                                                                                                                                                                                                                                                                                                                                                                                                                                                                                                              |     |      |           |       |      |      |                                                                                              |       |                      |                                                                                                                                                          |     |     |           |       |      |      |
|--------------------------|----------------------------------------------------------------------------------------------------------------------------------------------------------------------------------------------------------------------------------------------------------------------------------------------------------------------------------------------------------------------------------------------------------------------------------------------------------------------------------------------------------------------------------------------------------------------------------------------------------------------------------------------------------------------------------------------|-----|------|-----------|-------|------|------|----------------------------------------------------------------------------------------------|-------|----------------------|----------------------------------------------------------------------------------------------------------------------------------------------------------|-----|-----|-----------|-------|------|------|
| Rsa1.0_00051.1.g2870.t1  | gb EOA19383.1  hypothetical protein CARUB_v10000581mg [Capsella rubella]                                                                                                                                                                                                                                                                                                                                                                                                                                                                                                                                                                                                                     | 571 | 571  | 0         | 100.0 | 87.2 | 92.5 | hypothetical protein CARUB_v10000581mg                                                       | gbpln | Capsella rubella     | AT5G25630.1   Symbols:   Tetratricopeptide repeat (TPR)-like superfamily protein   chr5:8947426-8949424 FORWARD LENGTH=574                               | 571 | 574 | 0         | 100.5 | 85.8 | 92.1 |
| Rsa1.0_00051.1.g2871.t1  | ref XP_002874282.1  predicted protein [Arabidopsis lyrata subsp. lyrata]   gi 297320119 gb EFH50541.1  predicted protein [Arabidopsis lyrata subsp. lyrata]                                                                                                                                                                                                                                                                                                                                                                                                                                                                                                                                  | 925 | 402  | 0         | 43.5  | 33.3 | 36.2 | predicted protein                                                                            | gbpln | Arabidopsis lyrata   | AT5G25770.3   Symbols:   alpha/beta-Hydrolases superfamily protein   chr5:8969308-8971806 REVERSE LENGTH=421                                             | 925 | 421 | 0         | 45.5  | 32.5 | 36.3 |
| Rsa1.0_00052.1.g2872.t13 | gb EOA30455.1  hypothetical protein CARUB_v10013580mg [Capsella rubella]                                                                                                                                                                                                                                                                                                                                                                                                                                                                                                                                                                                                                     | 770 | 481  | 0         | 62.5  | 50.8 | 53.8 | hypothetical protein CARUB_v10013580mg                                                       | gbpln | Capsella rubella     | AT3G22810.1   Symbols:   Plant protein of unknown function (DUF828) with plant pleckstrin homology-like region   chr3:8068595-8071559 FORWARD LENGTH=472 | 770 | 472 | 0         | 61.3  | 49.1 | 52.5 |
| Rsa1.0_00052.1.g2873.t1  | #                                                                                                                                                                                                                                                                                                                                                                                                                                                                                                                                                                                                                                                                                            | #   | #    | #         | #     | #    | #    | -                                                                                            | ----  | ----                 | #                                                                                                                                                        | #   | #   | #         | #     | #    | #    |
| Rsa1.0_00052.1.g2874.t1  | ref XP_002885525.1  hypothetical protein ARALYDRAFT_479793 [Arabidopsis lyrata subsp. lyrata]   gi 297331365 gb EFH61784.1  hypothetical protein ARALYDRAFT_479793 [Arabidopsis lyrata subsp. lyrata]                                                                                                                                                                                                                                                                                                                                                                                                                                                                                        | 117 | 108  | 2.00E-32  | 92.3  | 60.7 | 70.1 | hypothetical protein ARALYDRAFT_479793                                                       | gbpln | Arabidopsis lyrata   | AT3G22820.1   Symbols:   allergen-related   chr3:8073451-8074061 REVERSE LENGTH=107                                                                      | 117 | 107 | 3.00E-32  | 91.5  | 63.2 | 71.8 |
| Rsa1.0_00052.1.g2875.t1  | gb AAF97279.1 AC010164.1 Hypothetical protein [Arabidopsis thaliana]                                                                                                                                                                                                                                                                                                                                                                                                                                                                                                                                                                                                                         | 117 | 352  | 7.00E-13  | 300.9 | 34.2 | 52.1 | Hypothetical protein                                                                         | gbpln | Arabidopsis thaliana | #                                                                                                                                                        | #   | #   | #         | #     | #    | #    |
| Rsa1.0_00052.1.g2876.t4  | gb AAF06087.1 AC007918.11 Similar to gi 4325351 T25H8.2 TNP2 protein homolog from Arabidopsis thaliana BAC gb AF128394 [Arabidopsis thaliana]                                                                                                                                                                                                                                                                                                                                                                                                                                                                                                                                                | 307 | 1121 | 3.00E-45  | 365.1 | 42.0 | 58.0 | Similar to gi 4325351 T25H8.2 TNP2 protein homolog from Arabidopsis thaliana BAC gb AF128394 | gbpln | Arabidopsis thaliana | #                                                                                                                                                        | #   | #   | #         | #     | #    | #    |
| Rsa1.0_00052.1.g2877.t1  | gb ABD65636.1  hypothetical protein Z3.t00055 [Brassica oleracea]                                                                                                                                                                                                                                                                                                                                                                                                                                                                                                                                                                                                                            | 412 | 414  | 1.00E-104 | 100.5 | 58.0 | 64.3 | hypothetical protein Z3.t00055                                                               | gbpln | Brassica oleracea    | #                                                                                                                                                        | #   | #   | #         | #     | #    | #    |
| Rsa1.0_00052.1.g2878.t1  | gb EOA30671.1  hypothetical protein CARUB_v10013808mg [Capsella rubella]                                                                                                                                                                                                                                                                                                                                                                                                                                                                                                                                                                                                                     | 398 | 417  | 1.00E-163 | 104.8 | 76.6 | 86.7 | hypothetical protein CARUB_v10013808mg                                                       | gbpln | Capsella rubella     | AT3G22830.1   Symbols: AT-HSFA6B, HSFA6B   heat shock transcription factor A6B   chr3:8078981-8080895 FORWARD LENGTH=406                                 | 398 | 406 | 1.00E-164 | 102.0 | 78.1 | 86.4 |
| Rsa1.0_00052.1.g2879.t1  | #                                                                                                                                                                                                                                                                                                                                                                                                                                                                                                                                                                                                                                                                                            | #   | #    | #         | #     | #    | #    | -                                                                                            | ----  | ----                 | #                                                                                                                                                        | #   | #   | #         | #     | #    | #    |
| Rsa1.0_00052.1.g2880.t1  | gb AAR11456.1  ELIP [Brassica rapa subsp. pekinensis]                                                                                                                                                                                                                                                                                                                                                                                                                                                                                                                                                                                                                                        | 196 | 194  | 3.00E-94  | 99.0  | 96.4 | 96.9 | ELIP                                                                                         | gbpln | Brassica rapa        | AT3G22840.1   Symbols: ELIP1, ELIP   Chlorophyll A-B binding family protein   chr3:8084628-8085445 REVERSE LENGTH=195                                    | 196 | 195 | 5.00E-84  | 99.5  | 88.3 | 90.8 |
| Rsa1.0_00052.1.g2881.t1  | gb EOA26720.1  hypothetical protein CARUB_v10022808mg [Capsella rubella]                                                                                                                                                                                                                                                                                                                                                                                                                                                                                                                                                                                                                     | 71  | 645  | 9.00E-15  | 908.5 | 64.8 | 73.2 | hypothetical protein CARUB_v10022808mg                                                       | gbpln | Capsella rubella     | AT2G35610.1   Symbols: XEG113   xyloglucanase 113   chr2:14947617-14951106 REVERSE LENGTH=644                                                            | 71  | 644 | 4.00E-16  | 907.0 | 66.2 | 73.2 |
| Rsa1.0_00052.1.g2882.t1  | ref NP_188924.3  emp24/gp25L/p24 family/GOLD domain-containing protein [Arabidopsis thaliana]   gi 75273406 sp Q9LIL4.1 P24B3_ARATH RecName: Full=Transmembrane emp24 domain-containing protein p24beta3; AltName: Full=p24 family protein beta2; Short=p24beta2; AltName: Full=p24 family protein beta3; Short=p24beta3; Flags: Precursor   gi 1194713 dbj BAB03029.1  coated vesicle membrane protein-like [Arabidopsis thaliana]   gi 17979492 gb AAL50082.1  AT3g22845/MW123.22 [Arabidopsis thaliana]   gi 20147305 gb AAM10366.1  AT3g22845/MW123.22 [Arabidopsis thaliana]   gi 332643162 gb AEE76683.1  emp24/gp25L/p24 family/GOLD domain-containing protein [Arabidopsis thaliana] | 218 | 214  | 1.00E-114 | 98.2  | 91.3 | 95.9 | emp24/gp25L/p24 family/GOLD domain-containing protein                                        | gbpln | Arabidopsis thaliana | AT3G22845.1   Symbols:   emp24/gp25L/p24 family/GOLD family protein   chr3:8087373-8088550 FORWARD LENGTH=214                                            | 218 | 214 | 1.00E-116 | 98.2  | 91.3 | 95.9 |
| Rsa1.0_00052.1.g2883.t1  | #                                                                                                                                                                                                                                                                                                                                                                                                                                                                                                                                                                                                                                                                                            | #   | #    | #         | #     | #    | #    | -                                                                                            | ----  | ----                 | #                                                                                                                                                        | #   | #   | #         | #     | #    | #    |
| Rsa1.0_00052.1.g2884.t1  | gb EOA32024.1  hypothetical protein CARUB_v10015267mg [Capsella rubella]                                                                                                                                                                                                                                                                                                                                                                                                                                                                                                                                                                                                                     | 402 | 729  | 6.00E-62  | 181.3 | 41.3 | 55.0 | hypothetical protein CARUB_v10015267mg                                                       | gbpln | Capsella rubella     | AT3G14950.1   Symbols: TTL2   tetratricopeptide-repeat thioredoxin-like 2   chr3:5030216-5032892 REVERSE LENGTH=721                                      | 402 | 721 | 1.00E-63  | 179.4 | 39.8 | 53.0 |
| Rsa1.0_00052.1.g2885.t1  | ref XP_002883384.1  RNA polymerase Rpb7 N-terminal domain-containing protein [Arabidopsis lyrata subsp. lyrata]   gi 297329224 gb EFH59643.1  RNA polymerase Rpb7 N-terminal domain-containing protein [Arabidopsis lyrata subsp. lyrata]                                                                                                                                                                                                                                                                                                                                                                                                                                                    | 175 | 174  | 8.00E-65  | 99.4  | 68.6 | 82.9 | RNA polymerase Rpb7 N-terminal domain-containing protein                                     | gbpln | Arabidopsis lyrata   | AT3G22900.1   Symbols: NRPD7   RNA polymerase Rpb7-like, N-terminal domain   chr3:8115645-8116169 FORWARD LENGTH=174                                     | 175 | 174 | 9.00E-67  | 99.4  | 68.6 | 82.9 |

|                         |                                                                                                                                                                                                                                                                                                                                                                                                                                                                                                                                                                                                                                                                                                                                                                                                     |      |      |          |       |      |      |                                        |       |                      |                                                                                                                                                                                                                                              |      |      |          |       |      |      |
|-------------------------|-----------------------------------------------------------------------------------------------------------------------------------------------------------------------------------------------------------------------------------------------------------------------------------------------------------------------------------------------------------------------------------------------------------------------------------------------------------------------------------------------------------------------------------------------------------------------------------------------------------------------------------------------------------------------------------------------------------------------------------------------------------------------------------------------------|------|------|----------|-------|------|------|----------------------------------------|-------|----------------------|----------------------------------------------------------------------------------------------------------------------------------------------------------------------------------------------------------------------------------------------|------|------|----------|-------|------|------|
| Rsa1.0_00052.1.g2886.t1 | ref XP_002885529.1  hypothetical protein ARALYDRAFT_898774 [Arabidopsis lyrata subsp. lyrata] gi 297331369 gb EFH61788.1                                                                                                                                                                                                                                                                                                                                                                                                                                                                                                                                                                                                                                                                            | 1021 | 1022 | 0        | 100.1 | 91.7 | 95.6 | hypothetical protein ARALYDRAFT_898774 | gbpln | Arabidopsis lyrata   | AT3G22910.1   Symbols:   ATPase E1-E2 type family protein / haloacid dehalogenase-like hydrolase family protein   chr3:8116335-8119388 REVERSE LENGTH=1017                                                                                   | 1021 | 1017 | 0        | 99.6  | 90.7 | 94.5 |
| Rsa1.0_00052.1.g2887.t1 | hypothetical protein ARALYDRAFT_898774 [Arabidopsis lyrata subsp. lyrata] ref NP_188933.1  calmodulin-like protein 11 [Arabidopsis thaliana] gi 75335042 sp Q9LJK5.1 CML11_ARATH RecName: Full=Calmodulin-like protein 11 gi 16226344 gb AAL16141.1 AF428309.1 AT3g22930/F5N5_10 [Arabidopsis thaliana] gi 11994722 dbj BAB03038.1  unnamed protein product [Arabidopsis thaliana] gi 21436047 gb AAM51601.1  AT3g22930/F5N5_10 [Arabidopsis thaliana] gi 33264317 gb AEE76692.1  calmodulin-like protein 11 [Arabidopsis thaliana]                                                                                                                                                                                                                                                                 | 205  | 173  | 4.00E-75 | 84.4  | 68.3 | 70.2 | calmodulin-like protein 11             | gbpln | Arabidopsis thaliana | AT3G22930.1   Symbols: CML11   calmodulin-like 11   chr3:8124286-8125835 REVERSE LENGTH=173                                                                                                                                                  | 205  | 173  | 1.00E-77 | 84.4  | 68.3 | 70.2 |
| Rsa1.0_00052.1.g2888.t1 | ref NP_191135.1  uncharacterized protein [Arabidopsis thaliana] gi 30694316 ref NP_850708.1  uncharacterized protein [Arabidopsis thaliana] gi 334186001 ref NP_001190098.1  uncharacterized protein [Arabidopsis thaliana] gi 58652076 gb AAW80863.1  At3g55760 [Arabidopsis thaliana] gi 332645910 gb AEE79431.1  uncharacterized protein AT3G55760 [Arabidopsis thaliana] gi 332645912 gb AEE79433.1  uncharacterized protein AT3G55760 [Arabidopsis thaliana] ref NP_850746.1  G-protein gamma subunit 2 [Arabidopsis thaliana] gi 75163105 sp Q93V47.1 GG2_ARATH RecName: Full=Guanine nucleotide-binding protein subunit gamma 2; AltName: Full=Ggamma-subunit 2; AltName: Full=Heterotrimeric G protein gamma-subunit 2; Short=ATAGG2; Flags: Precursor gi 14625852 gb AAK71536.1 AF347077.1 | 566  | 578  | 0        | 102.1 | 82.9 | 89.6 | uncharacterized protein                | gbpln | Arabidopsis thaliana | AT3G55760.3   Symbols:   unknown protein; EXPRESSED IN: 16 plant structures; EXPRESSED DURING: 10 growth stages; BEST Arabidopsis thaliana protein match is: unknown protein (TAIR:AT1G42430.2).   chr3:20700648-20702886 FORWARD LENGTH=578 | 566  | 578  | 0        | 102.1 | 82.9 | 89.6 |
| Rsa1.0_00052.1.g2889.t1 | heterotrimeric G-protein gamma subunit 2 [Arabidopsis thaliana] gi 14625854 gb AAK71537.1 AF347078.1 heterotrimeric G-protein gamma subunit 2 [Arabidopsis thaliana] gi 88900340 gb ABD57482.1  At3g22942 [Arabidopsis thaliana] gi 110736567 dbj BAF00249.1  hypothetical protein [Arabidopsis thaliana] gi 332643173 gb AEE76694.1  G-protein gamma subunit 2 [Arabidopsis thaliana] ref NP_566720.1  Pyruvate kinase family protein [Arabidopsis thaliana] gi 75311203 sp Q9LJK0.1 PKP1_ARATH RecName: Full=Plastidial pyruvate kinase 1, chloroplastic; Short=PK1; Short=PKo1; AltName: Full=Pyruvate kinase II; AltName: Full=Pyruvate kinase isozyme A; Short=PKP-ALPHA; Flags: Precursor gi 11994727 dbj BAB03043.1                                                                          | 143  | 100  | 6.00E-35 | 69.9  | 59.4 | 61.5 | G-protein gamma subunit 2              | gbpln | Arabidopsis thaliana | AT3G22942.1   Symbols: AGG2   G-protein gamma subunit 2   chr3:8134475-8135667 FORWARD LENGTH=100                                                                                                                                            | 143  | 100  | 2.00E-37 | 69.9  | 59.4 | 61.5 |
| Rsa1.0_00052.1.g2890.t1 | pyruvate kinase [Arabidopsis thaliana] gi 15983775 gb AAL10484.1  AT3g22960/F5N5_15 [Arabidopsis thaliana] gi 16604372 gb AAL24192.1  AT3g22960/F5N5_15 [Arabidopsis thaliana] gi 26983820 gb AAN86162.1  putative pyruvate kinase [Arabidopsis thaliana] gi 332643176 gb AEE76697.1  Pyruvate kinase family protein [Arabidopsis thaliana]                                                                                                                                                                                                                                                                                                                                                                                                                                                         | 606  | 596  | 0        | 98.3  | 85.1 | 89.3 | Pyruvate kinase family protein         | gbpln | Arabidopsis thaliana | AT3G22960.1   Symbols: PKP1, PKP-ALPHA   Pyruvate kinase family protein   chr3:8139369-8141771 FORWARD LENGTH=596                                                                                                                            | 606  | 596  | 0        | 98.3  | 85.1 | 89.3 |

|                         |                                                                                                                                                                                                                                                                                                                                                                                                                                                                                                                                                                                                                                                                                                                                                                                                                                                                                                                                                                              |     |     |          |       |      |      |                                                         |       |                      |                                                                                                                                           |     |     |          |       |      |      |
|-------------------------|------------------------------------------------------------------------------------------------------------------------------------------------------------------------------------------------------------------------------------------------------------------------------------------------------------------------------------------------------------------------------------------------------------------------------------------------------------------------------------------------------------------------------------------------------------------------------------------------------------------------------------------------------------------------------------------------------------------------------------------------------------------------------------------------------------------------------------------------------------------------------------------------------------------------------------------------------------------------------|-----|-----|----------|-------|------|------|---------------------------------------------------------|-------|----------------------|-------------------------------------------------------------------------------------------------------------------------------------------|-----|-----|----------|-------|------|------|
| Rsa1.0_00052.1.g2891.t1 | gb EOA20393.1  hypothetical protein CARUB_v10000704mg [Capsella rubella]                                                                                                                                                                                                                                                                                                                                                                                                                                                                                                                                                                                                                                                                                                                                                                                                                                                                                                     | 517 | 525 | 0        | 101.5 | 74.3 | 84.7 | hypothetical protein CARUB_v10000704mg                  | gbpln | Capsella rubella     | AT5G22110.1   Symbols: ATDPB2, CYL2, DPB2   DNA polymerase epsilon subunit B2   chr5:7331071-7334178 REVERSE LENGTH=526                   | 517 | 526 | 0        | 101.7 | 73.3 | 83.2 |
| Rsa1.0_00052.1.g2892.t1 | ref NP_00118679.1  uncharacterized protein [Arabidopsis thaliana]<br>gi 11994728 dbj BAB03044.1  unnamed protein product [Arabidopsis thaliana]<br>gi 332643177 gb AEE76698.1  uncharacterized protein AT3G22961 [Arabidopsis thaliana]                                                                                                                                                                                                                                                                                                                                                                                                                                                                                                                                                                                                                                                                                                                                      | 285 | 223 | 8.00E-28 | 78.2  | 31.9 | 44.9 | uncharacterized protein                                 | gbpln | Arabidopsis thaliana | AT3G22961.1   Symbols:   Paired amphipathic helix (PAH2) superfamily protein   chr3:8142138-8142809 FORWARD LENGTH=223                    | 285 | 223 | 2.00E-30 | 78.2  | 31.9 | 44.9 |
| Rsa1.0_00052.1.g2893.t1 | # # # # # # # # # # # # # # # #                                                                                                                                                                                                                                                                                                                                                                                                                                                                                                                                                                                                                                                                                                                                                                                                                                                                                                                                              |     |     |          |       |      |      |                                                         |       |                      |                                                                                                                                           |     |     |          |       |      |      |
| Rsa1.0_00052.1.g2894.t1 | ref NP_188940.1  CBL-interacting serine/threonine-protein kinase 7 [Arabidopsis thaliana]<br>gi 75338665 sp O9XW0.1 CIPK7_ARATH<br>RefName: Full=CBL-interacting serine/threonine-protein kinase 7; AltName: Full=SNF1-related kinase 3.10; AltName: Full=SOS2-like protein kinase PKS7; AltName: Full=Serine/threonine-protein kinase SR2; Short=AtSR2; Short=AtSRPK1<br>gi 13249113 gb AAK16682.1 AF290192.1 CBL-interacting protein kinase 7 [Arabidopsis thaliana]<br>gi 13448039 gb AAK26846.1 AF339148.1 SOS2-like protein kinase PKS7 [Arabidopsis thaliana]<br>gi 5478791 dbj BAA77716.2  SNF1 related protein kinase [Arabidopsis thaliana]<br>gi 9294189 dbj BAB02091.1  SNF1 related protein kinase [Arabidopsis thaliana]<br>gi 57222172 gb AAW38993.1  At3g23000 [Arabidopsis thaliana]<br>gi 114213519 gb ABI54342.1  At3g23000 [Arabidopsis thaliana]<br>gi 332643183 gb AEE76704.1  CBL-interacting serine/threonine-protein kinase 7 [Arabidopsis thaliana] | 413 | 429 | 0        | 103.9 | 82.6 | 90.3 | CBL-interacting serine/threonine-protein kinase 7       | gbpln | Arabidopsis thaliana | AT3G23000.1   Symbols: CIPK7, SnRK3.10, PKS7, ATSRPK1, ATSR2   CBL-interacting protein kinase 7   chr3:8172654-8173943 FORWARD LENGTH=429 | 413 | 429 | 0        | 103.9 | 82.6 | 90.3 |
| Rsa1.0_00052.1.g2895.t1 | emb CCD74510.1  unknown, partial [Arabidopsis halleri subsp. halleri]                                                                                                                                                                                                                                                                                                                                                                                                                                                                                                                                                                                                                                                                                                                                                                                                                                                                                                        | 172 | 300 | 3.00E-27 | 174.4 | 35.5 | 52.9 | unknown, partial                                        | gbpln | Arabidopsis halleri  | AT4G29090.1   Symbols:   Ribonuclease H-like superfamily protein   chr4:14333528-14335255 FORWARD LENGTH=575                              | 172 | 575 | 6.00E-12 | 334.3 | 26.2 | 45.9 |
| Rsa1.0_00052.1.g2896.t1 | ref XP_002885542.1  indoleacetic acid-induced protein 2 [Arabidopsis lyrata subsp. lyrata]<br>gi 297331382 gb EFH61801.1  indoleacetic acid-induced protein 2 [Arabidopsis lyrata subsp. lyrata]                                                                                                                                                                                                                                                                                                                                                                                                                                                                                                                                                                                                                                                                                                                                                                             | 172 | 174 | 2.00E-79 | 101.2 | 89.0 | 91.9 | indoleacetic acid-induced protein 2                     | gbpln | Arabidopsis lyrata   | AT3G23030.1   Symbols: IAA2   indole-3-acetic acid inducible 2   chr3:8181069-8181685 REVERSE LENGTH=174                                  | 172 | 174 | 2.00E-81 | 101.2 | 87.2 | 91.9 |
| Rsa1.0_00053.1.g2897.t1 | ref XP_002886390.1  hypothetical protein ARALYDRAFT_893070 [Arabidopsis lyrata subsp. lyrata]<br>gi 297332231 gb EFH62649.1  hypothetical protein ARALYDRAFT_893070 [Arabidopsis lyrata subsp. lyrata]                                                                                                                                                                                                                                                                                                                                                                                                                                                                                                                                                                                                                                                                                                                                                                       | 262 | 298 | 6.00E-90 | 113.7 | 61.8 | 79.0 | hypothetical protein ARALYDRAFT_893070                  | gbpln | Arabidopsis lyrata   | AT2G42470.1   Symbols:   TRAF-like family protein   chr2:17679887-17685187 REVERSE LENGTH=898                                             | 262 | 898 | 2.00E-73 | 342.7 | 53.1 | 73.3 |
| Rsa1.0_00053.1.g2898.t1 | ref NP_198882.1  ATP synthase mitochondrial F1 complex assembly factor 2 [Arabidopsis thaliana]<br>gi 14517426 gb AAK62603.1  AT5g40660/MNF13.180 [Arabidopsis thaliana]<br>gi 22655442 gb AAM98313.1  AT5g40660/MNF13.180 [Arabidopsis thaliana]<br>gi 332007196 gb AED94579.1  ATP12 protein-related [Arabidopsis thaliana]                                                                                                                                                                                                                                                                                                                                                                                                                                                                                                                                                                                                                                                | 114 | 325 | 1.00E-35 | 285.1 | 71.1 | 75.4 | ATP synthase mitochondrial F1 complex assembly factor 2 | gbpln | Arabidopsis thaliana | AT5G40660.1   Symbols:   ATP12 protein-related   chr5:16283650-16285161 REVERSE LENGTH=325                                                | 114 | 325 | 2.00E-38 | 285.1 | 71.1 | 75.4 |
| Rsa1.0_00053.1.g2899.t1 | gb EOA35049.1  hypothetical protein CARUB_v10020154mg [Capsella rubella]                                                                                                                                                                                                                                                                                                                                                                                                                                                                                                                                                                                                                                                                                                                                                                                                                                                                                                     | 399 | 514 | 2.00E-38 | 128.8 | 20.1 | 24.8 | hypothetical protein CARUB_v10020154mg                  | gbpln | Capsella rubella     | AT1G80710.1   Symbols: DRS1   DROUGHT SENSITIVE 1   chr1:30333499-30335796 REVERSE LENGTH=516                                             | 399 | 516 | 7.00E-41 | 129.3 | 20.3 | 24.6 |
| Rsa1.0_00053.1.g2900.t1 | ref NP_564758.2  Pectin lyase-like protein [Arabidopsis thaliana]<br>gi 2462753 gb AAB71972.1  putative polygalacturonase [Arabidopsis thaliana]<br>gi 332195579 gb AEE33700.1  Pectin lyase-like protein [Arabidopsis thaliana]                                                                                                                                                                                                                                                                                                                                                                                                                                                                                                                                                                                                                                                                                                                                             | 538 | 540 | 0        | 100.4 | 83.6 | 88.8 | Pectin lyase-like protein                               | gbpln | Arabidopsis thaliana | AT1G60590.1   Symbols:   Pectin lyase-like superfamily protein   chr1:22314426-22316867 REVERSE LENGTH=540                                | 538 | 540 | 0        | 100.4 | 83.6 | 88.8 |

|                          |                                                                                                                                                                                                                                                                                                                                                                                                                                                                                                                 |      |      |           |       |      |      |                                                                                                                      |       |                      |                                                                                                                   |      |     |           |       |      |       |
|--------------------------|-----------------------------------------------------------------------------------------------------------------------------------------------------------------------------------------------------------------------------------------------------------------------------------------------------------------------------------------------------------------------------------------------------------------------------------------------------------------------------------------------------------------|------|------|-----------|-------|------|------|----------------------------------------------------------------------------------------------------------------------|-------|----------------------|-------------------------------------------------------------------------------------------------------------------|------|-----|-----------|-------|------|-------|
| Rsa1.0_00053.1.g2901.t1  | ref[XP_002886390.1] hypothetical protein ARALYDRAFT_893070 [Arabidopsis lyrata subsp. lyrata] gi 297332231 gb EFH62649.1]                                                                                                                                                                                                                                                                                                                                                                                       | 318  | 298  | 3.00E-97  | 93.7  | 55.7 | 73.9 | hypothetical protein ARALYDRAFT_893070                                                                               | gbpln | Arabidopsis lyrata   | AT2G42470.1   Symbols:   TRAF-like family protein   chr2:17679887-17685187 REVERSE LENGTH=898                     | 318  | 898 | 2.00E-80  | 282.4 | 49.7 | 67.6  |
| Rsa1.0_00053.1.g2902.t1  | hypothetical protein ARALYDRAFT_893070 [Arabidopsis lyrata subsp. lyrata] ref[NP_176255.2] naphthoate synthase [Arabidopsis thaliana] gi 327488386 sp Q8GY9N.2 [MENB_ARAT H RecName: Full=1,4-Dihydroxy-2-naphthoyl-CoA synthase, peroxisomal; Short=DHNS; AltName: Full=Enoyl-CoA hydratase/isomerase D; Short=ECHID; AltName: Full=Naphthoate synthase gi 192571726 gb ACF04808.1] At1g60550 [Arabidopsis thaliana] gi 332195575 gb AEE33696.1  1,4-Dihydroxy-2-naphthoyl-CoA synthase [Arabidopsis thaliana] | 338  | 337  | 1.00E-174 | 99.7  | 87.3 | 93.5 | naphthoate synthase                                                                                                  | gbpln | Arabidopsis thaliana | AT1G60550.1   Symbols: ECHID, DHNS   enoyl-CoA hydratase/isomerase D   chr1:22305988-22308092 REVERSE LENGTH=337  | 338  | 337 | 1.00E-177 | 99.7  | 87.3 | 93.5  |
| Rsa1.0_00053.1.g2903.t1  | ref[XP_002888139.1] dynamin family protein [Arabidopsis lyrata subsp. lyrata] gi 297333980 gb EFH64398.1] dynamin family protein [Arabidopsis lyrata subsp. lyrata]                                                                                                                                                                                                                                                                                                                                             | 659  | 659  | 0         | 100.0 | 86.0 | 91.0 | dynamin family protein                                                                                               | gbpln | Arabidopsis lyrata   | AT1G60500.1   Symbols: DRP4C   Dynamin related protein 4C   chr1:22291582-22293822 FORWARD LENGTH=669             | 659  | 669 | 0         | 101.5 | 82.5 | 90.0  |
| Rsa1.0_00053.1.g2904.t1  | ref[XP_002888139.1] dynamin family protein [Arabidopsis lyrata subsp. lyrata] gi 297333980 gb EFH64398.1] dynamin family protein [Arabidopsis lyrata subsp. lyrata]                                                                                                                                                                                                                                                                                                                                             | 677  | 659  | 0         | 97.3  | 85.5 | 90.3 | dynamin family protein                                                                                               | gbpln | Arabidopsis lyrata   | AT1G60500.1   Symbols: DRP4C   Dynamin related protein 4C   chr1:22291582-22293822 FORWARD LENGTH=669             | 677  | 669 | 0         | 98.8  | 81.2 | 89.1  |
| Rsa1.0_00053.1.g2905.t10 | emb[CBI39638.3] unnamed protein product [Vitis vinifera]                                                                                                                                                                                                                                                                                                                                                                                                                                                        | 181  | 591  | 1.00E-102 | 326.5 | 98.9 | 99.4 | unnamed protein product                                                                                              | gbpln | Vitis vinifera       | AT1G10630.1   Symbols: ATARFA1F, ARFA1F   ADP-ribosylation factor A1F   chr1:3513189-3514230 REVERSE LENGTH=181   | 181  | 181 | 1.00E-104 | 100.0 | 98.9 | 100.0 |
| Rsa1.0_00053.1.g2906.t1  | gb[EOA35424.1] hypothetical protein CARUB_v10020626mg [Capsella rubella]                                                                                                                                                                                                                                                                                                                                                                                                                                        | 332  | 334  | 1.00E-177 | 100.6 | 90.4 | 95.2 | hypothetical protein CARUB_v10020626mg                                                                               | gbpln | Capsella rubella     | AT1G60470.1   Symbols: AtGolS4, GolS4   galactinol synthase 4   chr1:22279181-22280454 REVERSE LENGTH=334         | 332  | 334 | 1.00E-179 | 100.6 | 91.0 | 95.5  |
| Rsa1.0_00053.1.g2907.t1  | gb[AAC24075.1] Strong similarity to water stress-induced protein, WSI76 isolog T08113.2 gb 2275196 from A. thaliana BAC gb AC002337 [Arabidopsis thaliana]                                                                                                                                                                                                                                                                                                                                                      | 49   | 345  | 6.00E-16  | 704.1 | 73.5 | 85.7 | Strong similarity to water stress-induced protein, WSI76 isolog T08113.2 gb 2275196 from A. thaliana BAC gb AC002337 | gbpln | Arabidopsis thaliana | AT1G60450.1   Symbols: AtGolS7, GolS7   galactinol synthase 7   chr1:22271226-22273214 REVERSE LENGTH=332         | 49   | 332 | 1.00E-18  | 677.6 | 73.5 | 85.7  |
| Rsa1.0_00053.1.g2908.t11 | ref[XP_002886619.1] ATCOAA/ATPANK1 [Arabidopsis lyrata subsp. lyrata] gi 297332460 gb EFH62878.1] ATCOAA/ATPANK1 [Arabidopsis lyrata subsp. lyrata]                                                                                                                                                                                                                                                                                                                                                             | 607  | 384  | 0         | 63.3  | 55.4 | 57.7 | ATCOAA/ATPANK1                                                                                                       | gbpln | Arabidopsis lyrata   | AT1G60440.1   Symbols: ATCOAA, ATPANK1, PANK1   pantothenate kinase 1   chr1:22266653-22269070 REVERSE LENGTH=383 | 607  | 383 | 0         | 63.1  | 56.0 | 58.0  |
| Rsa1.0_00053.1.g2909.t1  | #                                                                                                                                                                                                                                                                                                                                                                                                                                                                                                               | #    | #    | #         | #     | #    | -    | ----                                                                                                                 | ----  | #                    | #                                                                                                                 | #    | #   | #         | #     | #    | #     |
| Rsa1.0_00053.1.g2910.t1  | #                                                                                                                                                                                                                                                                                                                                                                                                                                                                                                               | #    | #    | #         | #     | #    | -    | ----                                                                                                                 | ----  | #                    | #                                                                                                                 | #    | #   | #         | #     | #    | #     |
| Rsa1.0_00053.1.g2911.t1  | ref[XP_002889769.1] MYB transcription factor [Arabidopsis lyrata subsp. lyrata] gi 29733561 gb EFH66028.1] MYB transcription factor [Arabidopsis lyrata subsp. lyrata]                                                                                                                                                                                                                                                                                                                                          | 230  | 844  | 1.00E-102 | 367.0 | 84.3 | 90.4 | MYB transcription factor                                                                                             | gbpln | Arabidopsis lyrata   | AT1G09770.1   Symbols: ATCDC5, CDC5, ATMYBCDC5   cell division cycle 5   chr1:3162002-3165122 FORWARD LENGTH=844  | 230  | 844 | 1.00E-104 | 367.0 | 84.3 | 90.4  |
| Rsa1.0_00053.1.g2912.t1  | emb[CCD74525.1] polygalacturonase 1 [Arabidopsis halleri subsp. halleri]                                                                                                                                                                                                                                                                                                                                                                                                                                        | 625  | 626  | 0         | 100.2 | 81.9 | 89.9 | polygalacturonase 1                                                                                                  | gbpln | Arabidopsis halleri  | AT1G60390.1   Symbols: PG1   polygalacturonase 1   chr1:22247611-22249556 REVERSE LENGTH=624                      | 625  | 624 | 0         | 99.8  | 81.0 | 89.0  |
| Rsa1.0_00053.1.g2913.t1  | ref[XP_002886632.1] radical SAM domain-containing protein [Arabidopsis lyrata subsp. lyrata] gi 297332473 gb EFH62891.1] radical SAM domain-containing protein [Arabidopsis lyrata subsp. lyrata]                                                                                                                                                                                                                                                                                                               | 447  | 458  | 0         | 102.5 | 90.4 | 95.1 | radical SAM domain-containing protein                                                                                | gbpln | Arabidopsis lyrata   | AT1G60230.1   Symbols:   Radical SAM superfamily protein   chr1:22212233-22214346 REVERSE LENGTH=458              | 447  | 458 | 0         | 102.5 | 89.5 | 94.2  |
| Rsa1.0_00053.1.g2914.t2  | gb[EOA34334.1] hypothetical protein CARUB_v10021854mg [Capsella rubella]                                                                                                                                                                                                                                                                                                                                                                                                                                        | 593  | 593  | 0         | 100.0 | 64.8 | 77.1 | hypothetical protein CARUB_v10021854mg                                                                               | gbpln | Capsella rubella     | AT1G60220.1   Symbols: OTS1, ULP1D   UB-like protease ID   chr1:22208332-22211910 FORWARD LENGTH=584              | 593  | 584 | 0         | 98.5  | 65.6 | 75.9  |
| Rsa1.0_00053.1.g2915.t1  | #                                                                                                                                                                                                                                                                                                                                                                                                                                                                                                               | #    | #    | #         | #     | #    | -    | ----                                                                                                                 | ----  | #                    | #                                                                                                                 | #    | #   | #         | #     | #    | #     |
| Rsa1.0_00053.1.g2916.t1  | ref[XP_002886636.1] predicted protein [Arabidopsis lyrata subsp. lyrata] gi 297332477 gb EFH62895.1] predicted protein [Arabidopsis lyrata subsp. lyrata]                                                                                                                                                                                                                                                                                                                                                       | 301  | 302  | 1.00E-153 | 100.3 | 89.4 | 93.7 | predicted protein                                                                                                    | gbpln | Arabidopsis lyrata   | AT1G60080.1   Symbols:   3'-5'-exoribonuclease family protein   chr1:22152605-22154339 REVERSE LENGTH=302         | 301  | 302 | 1.00E-145 | 100.3 | 87.7 | 93.4  |
| Rsa1.0_00053.1.g2917.t1  | gb[AAC63844.1] putative non-LTR retroelement reverse transcriptase [Arabidopsis thaliana]                                                                                                                                                                                                                                                                                                                                                                                                                       | 1769 | 1231 | 0         | 69.6  | 40.4 | 50.2 | putative non-LTR retroelement reverse transcriptase                                                                  | gbpln | Arabidopsis thaliana | AT2G01050.1   Symbols:   zinc ion binding/nucleic acid binding   chr2:68337-68884 REVERSE LENGTH=515              | 1769 | 515 | 1.00E-117 | 29.1  | 13.7 | 18.4  |

|                         |                                                                                                                                                                                                                                                                                                                                                                                                                                          |     |     |           |       |      |      |                                                                      |       |                      |                                                                                                                                                                                                                                                                                                                                                                                                                                                                                                                                                          |     |     |           |       |      |      |
|-------------------------|------------------------------------------------------------------------------------------------------------------------------------------------------------------------------------------------------------------------------------------------------------------------------------------------------------------------------------------------------------------------------------------------------------------------------------------|-----|-----|-----------|-------|------|------|----------------------------------------------------------------------|-------|----------------------|----------------------------------------------------------------------------------------------------------------------------------------------------------------------------------------------------------------------------------------------------------------------------------------------------------------------------------------------------------------------------------------------------------------------------------------------------------------------------------------------------------------------------------------------------------|-----|-----|-----------|-------|------|------|
| Rsa1.0_00053.1.g2918.t1 | refNP_564753.1   serine/threonine-protein kinase WNK (With No lysine)-related protein [Arabidopsis thaliana] gi 4249385 gb AAD14482.1 AAD14482 T2K10.11 [Arabidopsis thaliana] gi 2153701 gb AAM61352.1  unknown [Arabidopsis thaliana] gi 225898034 dbj BAH30349.1  hypothetical protein [Arabidopsis thaliana] gi 332195533 gb AEE33654.1  serine/threonine-protein kinase WNK (With No lysine)-related protein [Arabidopsis thaliana] | 364 | 386 | 1.00E-159 | 106.0 | 79.7 | 82.4 | serine/threonine-protein kinase WNK (With No lysine)-related protein | gbpln | Arabidopsis thaliana | AT1G60060.1   Symbols:   Serine/threonine-protein kinase WNK (With No Lysine)-related   chr1:22121550-22141585 FORWARD LENGTH=386                                                                                                                                                                                                                                                                                                                                                                                                                        | 364 | 386 | 1.00E-161 | 106.0 | 79.7 | 82.4 |
| Rsa1.0_00053.1.g2919.t1 | #                                                                                                                                                                                                                                                                                                                                                                                                                                        | #   | #   | #         | #     | #    | #    | -                                                                    | ----  | ----                 | #                                                                                                                                                                                                                                                                                                                                                                                                                                                                                                                                                        | #   | #   | #         | #     | #    |      |
| Rsa1.0_00053.1.g2920.t1 | refXP_002886638.1   hypothetical protein ARALYDRAFT_315326 [Arabidopsis lyrata subsp. lyrata] gi 297332479 gb EFH62897.1  hypothetical protein ARALYDRAFT_315326 [Arabidopsis lyrata subsp. lyrata]                                                                                                                                                                                                                                      | 373 | 373 | 0         | 100.0 | 89.3 | 93.0 | hypothetical protein ARALYDRAFT_315326                               | gbpln | Arabidopsis lyrata   | AT1G60050.1   Symbols:   Nodulin MtN21 /EamA-like transporter family protein   chr1:22121550-22123702 REVERSE LENGTH=374                                                                                                                                                                                                                                                                                                                                                                                                                                 | 373 | 374 | 0         | 100.3 | 90.6 | 94.1 |
| Rsa1.0_00053.1.g2921.t1 | refNP_564752.1   uncharacterized protein [Arabidopsis thaliana] gi 4249380 gb AAD14477.1  ESTs gb Z37637.gb AA042498 and gb AA042269 come from this gene [Arabidopsis thaliana] gi 26450481 dbj BAC42354.1  unknown protein [Arabidopsis thaliana] gi 28827334 gb AAO50511.1  unknown protein [Arabidopsis thaliana] gi 332195529 gb AEE33650.1  uncharacterized protein AT1G60010 [Arabidopsis thaliana]                                | 169 | 173 | 3.00E-74  | 102.4 | 82.2 | 92.9 | uncharacterized protein                                              | gbpln | Arabidopsis thaliana | AT1G60010.1   Symbols:   unknown protein; FUNCTIONS IN: molecular function unknown; INVOLVED IN: N-terminal protein myristoylation; LOCATED IN: cellular component unknown; EXPRESSED IN: 22 plant structures; EXPRESSED DURING: 13 growth stages; BEST Arabidopsis thaliana protein match is: unknown protein (TAIR:AT1G10530.1); Has 185 Blast hits to 185 proteins in 18 species: Archae - 0; Bacteria - 0; Metazoa - 0; Fungi - 3; Plants - 180; Viruses - 0; Other Eukaryotes - 2 (source: NCBI BLink).   chr1:22095660-22096434 REVERSE LENGTH=173 | 169 | 173 | 1.00E-76  | 102.4 | 82.2 | 92.9 |
| Rsa1.0_00053.1.g2922.t1 | gb EOA35601.1  hypothetical protein CARUB_v10020814mg [Capsella rubella]                                                                                                                                                                                                                                                                                                                                                                 | 255 | 262 | 1.00E-116 | 102.7 | 84.3 | 90.2 | hypothetical protein CARUB_v10020814mg                               | gbpln | Capsella rubella     | AT1G60000.1   Symbols:   RNA-binding (RRM/RBD/RNP motifs) family protein   chr1:22093678-22094540 REVERSE LENGTH=258                                                                                                                                                                                                                                                                                                                                                                                                                                     | 255 | 258 | 1.00E-118 | 101.2 | 82.7 | 89.0 |
| Rsa1.0_00053.1.g2923.t1 | #                                                                                                                                                                                                                                                                                                                                                                                                                                        | #   | #   | #         | #     | #    | #    | -                                                                    | ----  | ----                 | #                                                                                                                                                                                                                                                                                                                                                                                                                                                                                                                                                        | #   | #   | #         | #     | #    |      |
| Rsa1.0_00053.1.g2924.t1 | refXP_002888160.1   hypothetical protein ARALYDRAFT_475312 [Arabidopsis lyrata subsp. lyrata] gi 297334001 gb EFH64419.1  hypothetical protein ARALYDRAFT_475312 [Arabidopsis lyrata subsp. lyrata]                                                                                                                                                                                                                                      | 597 | 418 | 1.00E-177 | 70.0  | 53.8 | 56.1 | hypothetical protein ARALYDRAFT_475312                               | gbpln | Arabidopsis lyrata   | AT1G59980.1   Symbols:   ATDJC39. ARL2   ARG1-like 2   chr1:22081069-22083491 FORWARD LENGTH=414                                                                                                                                                                                                                                                                                                                                                                                                                                                         | 597 | 414 | 1.00E-175 | 69.3  | 52.8 | 55.4 |
| Rsa1.0_00053.1.g2925.t1 | refXP_002891550.1   hypothetical protein ARALYDRAFT_474131 [Arabidopsis lyrata subsp. lyrata] gi 297337392 gb EFH67809.1  hypothetical protein ARALYDRAFT_474131 [Arabidopsis lyrata subsp. lyrata]                                                                                                                                                                                                                                      | 429 | 422 | 2.00E-96  | 98.4  | 49.7 | 65.7 | hypothetical protein ARALYDRAFT_474131                               | gbpln | Arabidopsis lyrata   | AT1G49990.1   Symbols:   F-box family protein   chr1:18513696-18514988 FORWARD LENGTH=430                                                                                                                                                                                                                                                                                                                                                                                                                                                                | 429 | 430 | 2.00E-97  | 100.2 | 49.2 | 66.2 |
| Rsa1.0_00053.1.g2926.t1 | refXP_002888162.1   predicted protein [Arabidopsis lyrata subsp. lyrata] gi 297334003 gb EFH64421.1  predicted protein [Arabidopsis lyrata subsp. lyrata]                                                                                                                                                                                                                                                                                | 359 | 351 | 1.00E-152 | 97.8  | 74.9 | 83.8 | predicted protein                                                    | gbpln | Arabidopsis lyrata   | AT1G59970.1   Symbols:   Matrixin family protein   chr1:22073601-22074683 FORWARD LENGTH=360                                                                                                                                                                                                                                                                                                                                                                                                                                                             | 359 | 360 | 1.00E-154 | 100.3 | 73.8 | 84.1 |
| Rsa1.0_00053.1.g2927.t1 | refNP_176204.1   putative Aldo/keto reductase [Arabidopsis thaliana] gi 5080826 gb AAD39335.1 AC007258.24 Putative Aldo/keto reductase [Arabidopsis thaliana] gi 15451098 gb AAK96820.1  Putative Aldo/keto reductase [Arabidopsis thaliana] gi 18377508 gb AAL66920.1  putative aldo/keto reductase [Arabidopsis thaliana] gi 332195523 gb AEE33644.1  putative Aldo/keto reductase [Arabidopsis thaliana]                              | 323 | 326 | 1.00E-162 | 100.9 | 85.8 | 92.9 | putative Aldo/keto reductase                                         | gbpln | Arabidopsis thaliana | AT1G59960.1   Symbols:   NAD(P)-linked oxidoreductase superfamily protein   chr1:22071410-22073067 REVERSE LENGTH=326                                                                                                                                                                                                                                                                                                                                                                                                                                    | 323 | 326 | 1.00E-164 | 100.9 | 85.8 | 92.9 |

|                         |                                                                                                                                                                                                                                                                                                                                                                                                                                                                                                                                  |      |      |           |       |      |      |                                                        |       |                      |                                                                                                                            |      |      |           |       |      |      |
|-------------------------|----------------------------------------------------------------------------------------------------------------------------------------------------------------------------------------------------------------------------------------------------------------------------------------------------------------------------------------------------------------------------------------------------------------------------------------------------------------------------------------------------------------------------------|------|------|-----------|-------|------|------|--------------------------------------------------------|-------|----------------------|----------------------------------------------------------------------------------------------------------------------------|------|------|-----------|-------|------|------|
| Rsa1.0_00053.1.g2928.t2 | refNP_683446.1 putative disease resistance protein RDL5/RF45 [Arabidopsis thaliana] gi 387942479 sp F4IBE4.1 DRL10_ARAT H RecName: Full=Probable disease resistance protein RF45 gi 387942481 sp P0D116.1 DRL44_ARAT H RecName: Full=Probable disease resistance protein RDL5 gi 332195441 gb AEE33562.1 putative disease resistance protein RDL5/RF45 [Arabidopsis thaliana]                                                                                                                                                    | 1129 | 1017 | 0         | 90.1  | 50.5 | 64.0 | putative disease resistance protein RDL5/RF45          | gbpln | Arabidopsis thaliana | AT1G58807.1   Symbols:   Disease resistance protein (CC-NBS-LRR class) family   chr1:21780574-21783793 FORWARD LENGTH=1017 | 1129 | 1017 | 0         | 90.1  | 50.5 | 64.0 |
| Rsa1.0_00053.1.g2929.t1 | refXP_002886657.1 predicted protein [Arabidopsis lyrata subsp. lyrata] gi 297332498 gb EFH62916.1 predicted protein [Arabidopsis lyrata subsp. lyrata]                                                                                                                                                                                                                                                                                                                                                                           | 334  | 608  | 2.00E-72  | 182.0 | 49.4 | 60.8 | predicted protein                                      | gbpln | Arabidopsis lyrata   | AT5G35450.1   Symbols:   Disease resistance protein (CC-NBS-LRR class) family   chr5:13667809-13670685 FORWARD LENGTH=901  | 334  | 901  | 5.00E-75  | 269.8 | 46.7 | 60.2 |
| Rsa1.0_00053.1.g2930.t1 | gb EOA33570.1  hypothetical protein CARUB_v10019704mg [Capsella rubella]                                                                                                                                                                                                                                                                                                                                                                                                                                                         | 379  | 1046 | 0         | 276.0 | 92.9 | 95.5 | hypothetical protein CARUB_v10019704mg                 | gbpln | Capsella rubella     | AT1G59760.1   Symbols:   RNA helicase, ATP-dependent, SK12/DOB1 protein   chr1:21984571-21990110 REVERSE LENGTH=988        | 379  | 988  | 0         | 260.7 | 91.8 | 95.8 |
| Rsa1.0_00053.1.g2931.t1 | gb EOA33570.1  hypothetical protein CARUB_v10019704mg [Capsella rubella]                                                                                                                                                                                                                                                                                                                                                                                                                                                         | 564  | 1046 | 0         | 185.5 | 92.6 | 96.3 | hypothetical protein CARUB_v10019704mg                 | gbpln | Capsella rubella     | AT1G59760.1   Symbols:   RNA helicase, ATP-dependent, SK12/DOB1 protein   chr1:21984571-21990110 REVERSE LENGTH=988        | 564  | 988  | 0         | 175.2 | 93.4 | 97.2 |
| Rsa1.0_00053.1.g2932.t1 | refXP_002888185.1 proton-dependent oligopeptide transport family protein [Arabidopsis lyrata subsp. lyrata] gi 297334026 gb EFH64444.1 proton-dependent oligopeptide transport family protein [Arabidopsis lyrata subsp. lyrata]                                                                                                                                                                                                                                                                                                 | 739  | 592  | 0         | 80.1  | 71.6 | 75.0 | proton-dependent oligopeptide transport family protein | gbpln | Arabidopsis lyrata   | AT1G59740.1   Symbols:   Major facilitator superfamily protein   chr1:21968227-21972312 FORWARD LENGTH=591                 | 739  | 591  | 0         | 80.0  | 71.3 | 74.8 |
| Rsa1.0_00053.1.g2933.t1 | refXP_002886664.1 thioredoxin H-type 7 [Arabidopsis lyrata subsp. lyrata] gi 297332505 gb EFH62923.1 thioredoxin H-type 7 [Arabidopsis lyrata subsp. lyrata]                                                                                                                                                                                                                                                                                                                                                                     | 128  | 128  | 3.00E-61  | 100.0 | 89.1 | 93.8 | thioredoxin H-type 7                                   | gbpln | Arabidopsis lyrata   | AT1G59730.1   Symbols: ATH7, TH7   thioredoxin H-type 7   chr1:21952759-21953392 REVERSE LENGTH=129                        | 128  | 129  | 5.00E-61  | 100.8 | 87.5 | 91.4 |
| Rsa1.0_00053.1.g2934.t1 | refNP_172506.1 putative DNAJ heat-shock protein [Arabidopsis thaliana] gi 4914337 gb AAD32885.1 AC005489_23 F14N23.23 [Arabidopsis thaliana] gi 13430680 gb AAK25962.1 AF360252_1 putative heat-shock protein [Arabidopsis thaliana] gi 14532888 gb AAK64126.1 putative heat-shock protein [Arabidopsis thaliana] gi 332190448 gb AEE28569.1 putative DNAJ heat-shock protein [Arabidopsis thaliana]                                                                                                                             | 424  | 349  | 1.00E-121 | 82.3  | 57.8 | 66.7 | putative DNAJ heat-shock protein                       | gbpln | Arabidopsis thaliana | AT1G10350.1   Symbols:   DNAJ heat shock family protein   chr1:3393595-3394860 REVERSE LENGTH=349                          | 424  | 349  | 1.00E-123 | 82.3  | 57.8 | 66.7 |
| Rsa1.0_00053.1.g2935.t1 | gb EOA35526.1  hypothetical protein CARUB_v10020734mg [Capsella rubella]                                                                                                                                                                                                                                                                                                                                                                                                                                                         | 291  | 293  | 1.00E-154 | 100.7 | 91.1 | 95.5 | hypothetical protein CARUB_v10020734mg                 | gbpln | Capsella rubella     | AT1G59710.1   Symbols:   Protein of unknown function (DUF569)   chr1:21938623-21939673 FORWARD LENGTH=300                  | 291  | 300  | 1.00E-143 | 103.1 | 89.3 | 95.2 |
| Rsa1.0_00053.1.g2936.t1 | refNP_176178.1 glutathione S-transferase TAU 16 [Arabidopsis thaliana] gi 75338642 sp Q9XIF8.1 GSTUG_ARAT H RecName: Full=Glutathione S-transferase U16; Short=AtGSTU16; AltName: Full=GST class-tau member 16 gi 5080803 gb AAD39312.1 AC007258_1 Similar to glutathione transferase [Arabidopsis thaliana] gi 8778752 gb AAF79760.1 AC009317_19 T30E16.30 [Arabidopsis thaliana] gi 48310666 gb AAT41863.1 At1g59700 [Arabidopsis thaliana] gi 332195484 gb AEE33605.1 glutathione S-transferase TAU 16 [Arabidopsis thaliana] | 267  | 234  | 1.00E-107 | 87.6  | 74.2 | 81.3 | glutathione S-transferase TAU 16                       | gbpln | Arabidopsis thaliana | AT1G59700.1   Symbols: ATGSTU16, GSTU16   glutathione S-transferase TAU 16   chr1:21936459-21937763 FORWARD LENGTH=234     | 267  | 234  | 1.00E-110 | 87.6  | 74.2 | 81.3 |
| Rsa1.0_00053.1.g2937.t1 | gb EOA13425.1  hypothetical protein CARUB_v10026465mg [Capsella rubella] gi 482549232 gb EOA13426.1  hypothetical protein CARUB_v10026465mg [Capsella rubella]                                                                                                                                                                                                                                                                                                                                                                   | 112  | 423  | 2.00E-12  | 377.7 | 33.0 | 48.2 | hypothetical protein CARUB_v10026465mg                 | gbpln | Capsella rubella     | AT5G56420.2   Symbols:   F-box/RNI-like/FBD-like domains-containing protein   chr5:22850863-22852334 REVERSE LENGTH=422    | 112  | 422  | 1.00E-13  | 376.8 | 32.1 | 47.3 |

|                         |                                                                                                                                                                                                                         |      |      |           |       |      |      |                                                 |       |                      |                                                                                                                                                                                                                                                                                                                                                                                                                                                         |      |      |           |       |      |      |
|-------------------------|-------------------------------------------------------------------------------------------------------------------------------------------------------------------------------------------------------------------------|------|------|-----------|-------|------|------|-------------------------------------------------|-------|----------------------|---------------------------------------------------------------------------------------------------------------------------------------------------------------------------------------------------------------------------------------------------------------------------------------------------------------------------------------------------------------------------------------------------------------------------------------------------------|------|------|-----------|-------|------|------|
| Rsa1.0_00053.1.g2938.t1 | ref NP_189971.1  uncharacterized protein [Arabidopsis thaliana] gi 7362785 emb CAB83157.1  putative protein [Arabidopsis thaliana] gi 332644314 gb AEE77835.1  uncharacterized protein AT3G43850 [Arabidopsis thaliana] | 134  | 270  | 4.00E-33  | 201.5 | 53.0 | 60.4 | uncharacterized protein                         | gbpln | Arabidopsis thaliana | AT3G43850.1   Symbols:   unknown protein; FUNCTIONS IN: molecular_function unknown; INVOLVED IN: biological_process unknown; LOCATED IN: vacuole; BEST Arabidopsis thaliana protein match is: unknown protein (TAIR:AT5G21940.1); Has 215 Blast hits to 215 proteins in 19 species: Archae - 0; Bacteria - 0; Metazoa - 0; Fungi - 0; Plants - 213; Viruses - 0; Other Eukaryotes - 2 (source: NCBI BLINK).   chr3:15702085-15704152 REVERSE LENGTH=270 | 134  | 270  | 1.00E-35  | 201.5 | 53.0 | 60.4 |
| Rsa1.0_00053.1.g2939.t1 | dbj BAJ34445.1  unnamed protein product [Thellungiella halophila]                                                                                                                                                       | 231  | 229  | 1.00E-101 | 99.1  | 77.5 | 87.9 | unnamed protein product                         | ----  | ----                 | AT1G59700.1   Symbols: ATGSTU16, GSTU16   glutathione S-transferase TAU 16   chr1:21936459-21937763 FORWARD LENGTH=234                                                                                                                                                                                                                                                                                                                                  | 231  | 234  | 1.00E-102 | 101.3 | 75.3 | 84.8 |
| Rsa1.0_00053.1.g2940.t1 | gb EOA34239.1  hypothetical protein CARUB_v10021751mg, partial [Capsella rubella]                                                                                                                                       | 970  | 978  | 0         | 100.8 | 61.9 | 70.7 | hypothetical protein CARUB_v10021751mg, partial | gbpln | Capsella rubella     | AT1G59660.1   Symbols:   Nucleoporin autopeptidase   chr1:21924693-21929233 FORWARD LENGTH=997                                                                                                                                                                                                                                                                                                                                                          | 970  | 997  | 0         | 102.8 | 60.5 | 68.9 |
| Rsa1.0_00053.1.g2941.t1 | gb EOA35051.1  hypothetical protein CARUB_v10020162mg [Capsella rubella]                                                                                                                                                | 511  | 511  | 0         | 100.0 | 89.0 | 92.6 | hypothetical protein CARUB_v10020162mg          | gbpln | Capsella rubella     | AT1G59650.1   Symbols: CW14   Protein of unknown function (DUF1336)   chr1:21920099-21922670 FORWARD LENGTH=492                                                                                                                                                                                                                                                                                                                                         | 511  | 492  | 0         | 96.3  | 86.5 | 89.8 |
| Rsa1.0_00053.1.g2942.t6 | gb AEM36350.1  At1g58602 [Arabidopsis thaliana]                                                                                                                                                                         | 1190 | 1133 | 0         | 95.2  | 40.2 | 51.8 | At1g58602                                       | gbpln | Arabidopsis thaliana | AT1G58602.2   Symbols:   LRR and NB-ARC domains-containing disease resistance protein   chr1:21760167-21763765 FORWARD LENGTH=1138                                                                                                                                                                                                                                                                                                                      | 1190 | 1138 | 0         | 95.6  | 40.1 | 51.7 |
| Rsa1.0_00054.1.g2943.t1 | #                                                                                                                                                                                                                       | #    | #    | #         | #     | #    | #    | -                                               | ----  | ----                 | #                                                                                                                                                                                                                                                                                                                                                                                                                                                       | #    | #    | #         | #     | #    |      |
| Rsa1.0_00054.1.g2944.t1 | gb EOA29338.1  hypothetical protein CARUB_v10025620mg [Capsella rubella]                                                                                                                                                | 208  | 198  | 3.00E-32  | 95.2  | 40.9 | 57.7 | hypothetical protein CARUB_v10025620mg          | gbpln | Capsella rubella     | AT3G28620.1   Symbols:   Zinc finger, C3HC4 type (RING finger) family protein   chr3:10727826-10728461 FORWARD LENGTH=211                                                                                                                                                                                                                                                                                                                               | 208  | 211  | 2.00E-30  | 101.4 | 39.9 | 55.3 |
| Rsa1.0_00054.1.g2945.t1 | ref XP_002880588.1  ATRPA2/ROR1/RPA2 [Arabidopsis lyrata subsp. lyrata] gi 297326427 gb EFH56847.1  ATRPA2/ROR1/RPA2 [Arabidopsis lyrata subsp. lyrata]                                                                 | 273  | 279  | 1.00E-132 | 102.2 | 85.0 | 92.7 | ATRPA2/ROR1/RPA2                                | gbpln | Arabidopsis lyrata   | AT2G24480.2   Symbols: RPA2, ATRPA2, ROR1, ATRPA32A, RPA32A   replicon protein A2   chr2:10398651-10400416 REVERSE LENGTH=279                                                                                                                                                                                                                                                                                                                           | 273  | 279  | 1.00E-132 | 102.2 | 83.5 | 91.6 |
| Rsa1.0_00054.1.g2946.t2 | gb ACP30611.1  disease resistance protein [Brassica rapa subsp. pekinensis]                                                                                                                                             | 1069 | 1050 | 0         | 98.2  | 38.4 | 49.8 | disease resistance protein                      | gbpln | Brassica rapa        | AT5G22690.1   Symbols:   Disease resistance protein (TIR-NBS-LRR class) family   chr5:7541369-7544888 FORWARD LENGTH=1008                                                                                                                                                                                                                                                                                                                               | 1069 | 1008 | 0         | 94.3  | 37.3 | 48.1 |
| Rsa1.0_00054.1.g2947.t1 | dbj BAJ34463.1  unnamed protein product [Thellungiella halophila]                                                                                                                                                       | 382  | 403  | 1.00E-172 | 105.5 | 85.3 | 90.6 | unnamed protein product                         | ----  | ----                 | AT2G24500.1   Symbols: FZF   Zinc finger protein 622   chr2:10401259-10402805 REVERSE LENGTH=395                                                                                                                                                                                                                                                                                                                                                        | 382  | 395  | 1.00E-167 | 103.4 | 82.2 | 87.2 |
| Rsa1.0_00054.1.g2948.t1 | gb ACG60669.1  copia-type polyprotein-like protein [Brassica oleracea var. alboglabra]                                                                                                                                  | 112  | 196  | 2.00E-40  | 175.0 | 71.4 | 83.0 | copia-type polyprotein-like protein             | gbpln | Brassica oleracea    | #                                                                                                                                                                                                                                                                                                                                                                                                                                                       | #    | #    | #         | #     | #    |      |
| Rsa1.0_00054.1.g2949.t1 | ref XP_002878766.1  hypothetical protein ARALYDRAFT_900997 [Arabidopsis lyrata subsp. lyrata] gi 297324605 gb EFH55025.1  hypothetical protein ARALYDRAFT_900997 [Arabidopsis lyrata subsp. lyrata]                     | 328  | 409  | 1.00E-108 | 124.7 | 72.0 | 81.7 | hypothetical protein ARALYDRAFT_900997          | gbpln | Arabidopsis lyrata   | AT2G24530.1   Symbols:   unknown protein; BEST Arabidopsis thaliana protein match is: unknown protein (TAIR:AT4G31440.1); Has 30201 Blast hits to 17322 proteins in 780 species: Archae - 12; Bacteria - 1396; Metazoa - 17338; Fungi - 3422; Plants - 5037; Viruses - 0; Other Eukaryotes - 2996 (source: NCBI BLINK).   chr2:10422597-10423820 FORWARD LENGTH=407                                                                                     | 328  | 407  | 1.00E-110 | 124.1 | 70.4 | 81.4 |
| Rsa1.0_00054.1.g2950.t1 | gb EOA29338.1  hypothetical protein CARUB_v10025620mg [Capsella rubella]                                                                                                                                                | 210  | 198  | 4.00E-34  | 94.3  | 41.0 | 57.6 | hypothetical protein CARUB_v10025620mg          | gbpln | Capsella rubella     | AT2G24480.1   Symbols:   Zinc finger, C3HC4 type (RING finger) family protein   chr2:10397588-10398184 FORWARD LENGTH=198                                                                                                                                                                                                                                                                                                                               | 210  | 198  | 4.00E-34  | 94.3  | 39.5 | 58.6 |
| Rsa1.0_00054.1.g2951.t1 | ref XP_002878766.1  hypothetical protein ARALYDRAFT_900997 [Arabidopsis lyrata subsp. lyrata] gi 297324605 gb EFH55025.1  hypothetical protein ARALYDRAFT_900997 [Arabidopsis lyrata subsp. lyrata]                     | 264  | 409  | 9.00E-54  | 154.9 | 46.6 | 53.0 | hypothetical protein ARALYDRAFT_900997          | gbpln | Arabidopsis lyrata   | AT2G24530.1   Symbols:   unknown protein; BEST Arabidopsis thaliana protein match is: unknown protein (TAIR:AT4G31440.1); Has 30201 Blast hits to 17322 proteins in 780 species: Archae - 12; Bacteria - 1396; Metazoa - 17338; Fungi - 3422; Plants - 5037; Viruses - 0; Other Eukaryotes - 2996 (source: NCBI BLINK).   chr2:10422597-10423820 FORWARD LENGTH=407                                                                                     | 264  | 407  | 2.00E-55  | 154.2 | 45.8 | 52.7 |
| Rsa1.0_00054.1.g2952.t1 | gb EOA29338.1  hypothetical protein CARUB_v10025620mg [Capsella rubella]                                                                                                                                                | 210  | 198  | 4.00E-34  | 94.3  | 41.4 | 58.1 | hypothetical protein CARUB_v10025620mg          | gbpln | Capsella rubella     | AT2G24480.1   Symbols:   Zinc finger, C3HC4 type (RING finger) family protein   chr2:10397588-10398184 FORWARD LENGTH=198                                                                                                                                                                                                                                                                                                                               | 210  | 198  | 6.00E-32  | 94.3  | 38.6 | 56.7 |

|                         |                                                                                                                                                                                                                                                                                                                                                                                                                                                                                                                                                                                                                                              |     |     |           |       |      |      |                                                      |       |                      |                                                                                                                                                  |     |     |           |       |      |      |
|-------------------------|----------------------------------------------------------------------------------------------------------------------------------------------------------------------------------------------------------------------------------------------------------------------------------------------------------------------------------------------------------------------------------------------------------------------------------------------------------------------------------------------------------------------------------------------------------------------------------------------------------------------------------------------|-----|-----|-----------|-------|------|------|------------------------------------------------------|-------|----------------------|--------------------------------------------------------------------------------------------------------------------------------------------------|-----|-----|-----------|-------|------|------|
| Rsa1.0_00054.1.g2953.t1 | refXP_002880584.1   hypothetical protein ARALYDRAFT_481301 [Arabidopsis lyrata subsp. lyrata] gi 297326423 gb EFH56843.1   hypothetical protein ARALYDRAFT_481301 [Arabidopsis lyrata subsp. lyrata] ref NP_565570.1   selenium binding protein [Arabidopsis thaliana] gi 4337201 gb AAD18115.1   expressed protein [Arabidopsis thaliana] gi 21553632 gb AAM62725.1   unknown [Arabidopsis thaliana] gi 21805670 gb AAM76749.1   hypothetical protein [Arabidopsis thaliana] gi 50058859 gb AAT69174.1   hypothetical protein At2g24440 [Arabidopsis thaliana] gi 330252484 gb AEC07578.1   selenium binding protein [Arabidopsis thaliana] | 288 | 279 | 1.00E-118 | 96.9  | 81.6 | 89.9 | hypothetical protein ARALYDRAFT_481301               | gbpln | Arabidopsis lyrata   | AT2G24450.1   Symbols: FLA3   FASCICLIN-like arabinogalactan protein 3 precursor   chr2:10393019-10393861 REVERSE LENGTH=280                     | 288 | 280 | 1.00E-114 | 97.2  | 80.6 | 88.5 |
| Rsa1.0_00054.1.g2954.t1 | ref NP_565570.1   selenium binding protein [Arabidopsis thaliana] gi 4337201 gb AAD18115.1   expressed protein [Arabidopsis thaliana] gi 21553632 gb AAM62725.1   unknown [Arabidopsis thaliana] gi 21805670 gb AAM76749.1   hypothetical protein [Arabidopsis thaliana] gi 50058859 gb AAT69174.1   hypothetical protein At2g24440 [Arabidopsis thaliana] gi 330252484 gb AEC07578.1   selenium binding protein [Arabidopsis thaliana]                                                                                                                                                                                                      | 191 | 183 | 8.00E-32  | 95.8  | 37.2 | 44.0 | selenium binding protein                             | gbpln | Arabidopsis thaliana | AT2G24440.1   Symbols:   selenium binding   chr2:10391124-10392492 FORWARD LENGTH=183                                                            | 191 | 183 | 3.00E-34  | 95.8  | 37.2 | 44.0 |
| Rsa1.0_00054.1.g2955.t1 | gb EOA12673.1   hypothetical protein CARUB_v10027827mg, partial [Capsella rubella]                                                                                                                                                                                                                                                                                                                                                                                                                                                                                                                                                           | 497 | 438 | 1.00E-137 | 88.1  | 52.9 | 66.0 | hypothetical protein CARUB_v10027827mg, partial      | gbpln | Capsella rubella     | AT3G49020.1   Symbols:   FBD, F-box and Leucine Rich Repeat domains containing protein   chr3:18169079-18170660 FORWARD LENGTH=447               | 497 | 447 | 1.00E-136 | 89.9  | 53.9 | 65.6 |
| Rsa1.0_00054.1.g2956.t1 | gb EOA29236.1   hypothetical protein CARUB_v10025508mg [Capsella rubella]                                                                                                                                                                                                                                                                                                                                                                                                                                                                                                                                                                    | 317 | 318 | 1.00E-172 | 100.3 | 94.3 | 97.2 | hypothetical protein CARUB_v10025508mg               | gbpln | Capsella rubella     | AT2G24430.2   Symbols: ANAC039   NAC domain containing protein 38   chr2:10383517-10386386 REVERSE LENGTH=316                                    | 317 | 316 | 1.00E-172 | 99.7  | 94.3 | 96.5 |
| Rsa1.0_00054.1.g2957.t1 | ref NP_200800.1   cysteine/histidine-rich C1 domain-containing protein [Arabidopsis thaliana] gi 17225050 gb AL37222.1 AF321919.1 UL13 [Arabidopsis thaliana] gi 332009868 gb AED97251.1   cysteine/histidine-rich C1 domain-containing protein [Arabidopsis thaliana]                                                                                                                                                                                                                                                                                                                                                                       | 716 | 710 | 0         | 99.2  | 50.8 | 62.2 | cysteine/histidine-rich C1 domain-containing protein | gbpln | Arabidopsis thaliana | AT5G59920.1   Symbols: UL13   Cysteine/Histidine-rich C1 domain family protein   chr5:24128756-24130888 FORWARD LENGTH=710                       | 716 | 710 | 0         | 99.2  | 50.8 | 62.2 |
| Rsa1.0_00054.1.g2958.t1 | # # # # # # # -                                                                                                                                                                                                                                                                                                                                                                                                                                                                                                                                                                                                                              | #   | #   | #         | #     | #    | #    | -                                                    | ----  | ----                 | AT4G23630.1   Symbols: BT11, RTNLB1   VIRB2-interacting protein 1   chr4:12318070-12319574 FORWARD LENGTH=275                                    | 88  | 275 | 7.00E-12  | 312.5 | 35.2 | 43.2 |
| Rsa1.0_00054.1.g2959.t1 | dbj BAB08360.1   Ta11-like non-LTR retroelement protein-like [Arabidopsis thaliana]                                                                                                                                                                                                                                                                                                                                                                                                                                                                                                                                                          | 648 | 655 | 0         | 101.1 | 57.3 | 71.3 | Ta11-like non-LTR retroelement protein-like          | gbpln | Arabidopsis thaliana | AT5G59920.1   Symbols: UL13   Cysteine/Histidine-rich C1 domain family protein   chr5:24128756-24130888 FORWARD LENGTH=710                       | 648 | 710 | 0         | 109.6 | 55.7 | 69.6 |
| Rsa1.0_00054.1.g2960.t1 | # # # # # # # -                                                                                                                                                                                                                                                                                                                                                                                                                                                                                                                                                                                                                              | #   | #   | #         | #     | #    | #    | -                                                    | ----  | ----                 | # # # # # # #                                                                                                                                    | #   | #   | #         | #     | #    | #    |
| Rsa1.0_00054.1.g2961.t1 | ref NP_180016.1   SAUR-like auxin-responsive protein [Arabidopsis thaliana] gi 4337198 gb AAD18112.1   putative auxin-regulated protein [Arabidopsis thaliana] gi 38566584 gb AAR24182.1   At2g24400 [Arabidopsis thaliana] gi 40824022 gb AAR92327.1   At2g24400 [Arabidopsis thaliana] gi 330252478 gb AEC07572.1   SAUR-like auxin-responsive protein [Arabidopsis thaliana]                                                                                                                                                                                                                                                              | 178 | 178 | 7.00E-80  | 100.0 | 86.0 | 91.6 | SAUR-like auxin-responsive protein                   | gbpln | Arabidopsis thaliana | AT2G24400.1   Symbols:   SAUR-like auxin-responsive protein family   chr2:10377993-10378529 REVERSE LENGTH=178                                   | 178 | 178 | 3.00E-82  | 100.0 | 86.0 | 91.6 |
| Rsa1.0_00054.1.g2962.t1 | ref NP_850052.1   chaperone protein dnaJ-related protein [Arabidopsis thaliana] gi 44917527 gb AAS49088.1   At2g24395 [Arabidopsis thaliana] gi 82321035 dbj BA094100.1   hypothetical protein [Arabidopsis thaliana] gi 330252477 gb AEC07571.1   chaperone protein dnaJ-related protein [Arabidopsis thaliana]                                                                                                                                                                                                                                                                                                                             | 132 | 132 | 5.00E-44  | 100.0 | 70.5 | 81.8 | chaperone protein dnaJ-related protein               | gbpln | Arabidopsis thaliana | AT2G24395.1   Symbols:   chaperone protein dnaJ-related   chr2:10375497-10376081 FORWARD LENGTH=132                                              | 132 | 132 | 1.00E-46  | 100.0 | 70.5 | 81.8 |
| Rsa1.0_00054.1.g2963.t1 | gb EOA27992.1   hypothetical protein CARUB_v10024168mg [Capsella rubella]                                                                                                                                                                                                                                                                                                                                                                                                                                                                                                                                                                    | 153 | 175 | 2.00E-71  | 114.4 | 82.4 | 90.2 | hypothetical protein CARUB_v10024168mg               | gbpln | Capsella rubella     | AT2G24390.1   Symbols:   AIG2-like (avirulence induced gene) family protein   chr2:10373796-10374654 FORWARD LENGTH=152                          | 153 | 152 | 1.00E-70  | 99.3  | 79.1 | 89.5 |
| Rsa1.0_00054.1.g2964.t1 | gb EOA29306.1   hypothetical protein CARUB_v10025585mg [Capsella rubella]                                                                                                                                                                                                                                                                                                                                                                                                                                                                                                                                                                    | 763 | 806 | 0         | 105.6 | 90.0 | 96.6 | hypothetical protein CARUB_v10025585mg               | gbpln | Capsella rubella     | AT2G24370.1   Symbols:   Protein kinase protein with adenine nucleotide alpha hydrolases-like domain   chr2:10369979-10373063 REVERSE LENGTH=788 | 763 | 788 | 0         | 103.3 | 88.2 | 94.6 |





|                         |                                                                                                                                                                                                       |     |      |           |       |       |       |                                                 |       |                      |                                                                                                                                                                                                                                                                                                                                                                                                                                                                                                                                                                                                                                                                        |     |     |           |       |       |       |
|-------------------------|-------------------------------------------------------------------------------------------------------------------------------------------------------------------------------------------------------|-----|------|-----------|-------|-------|-------|-------------------------------------------------|-------|----------------------|------------------------------------------------------------------------------------------------------------------------------------------------------------------------------------------------------------------------------------------------------------------------------------------------------------------------------------------------------------------------------------------------------------------------------------------------------------------------------------------------------------------------------------------------------------------------------------------------------------------------------------------------------------------------|-----|-----|-----------|-------|-------|-------|
| Rsa1.0_00055.1.g2982.t1 | gb EOA31608.1  hypothetical protein CARUB_v10014805mg, partial [Capsella rubella]                                                                                                                     | 135 | 161  | 6.00E-72  | 119.3 | 100.0 | 100.0 | hypothetical protein CARUB_v10014805mg, partial | gbpln | Capsella rubella     | AT3G04400.1   Symbols: emb2171   Ribosomal protein L14p/L23e family protein   chr3:1167339-1168308 FORWARD LENGTH=140                                                                                                                                                                                                                                                                                                                                                                                                                                                                                                                                                  | 135 | 140 | 4.00E-74  | 103.7 | 100.0 | 100.0 |
| Rsa1.0_00055.1.g2983.t1 | gb EOA30756.1  hypothetical protein CARUB_v10013898mg [Capsella rubella]                                                                                                                              | 393 | 393  | 0         | 100.0 | 93.6  | 97.5  | hypothetical protein CARUB_v10013898mg          | gbpln | Capsella rubella     | AT3G04460.1   Symbols: PEX12, ATPEX12, APM4   peroxin-12   chr3:1186641-1189094 FORWARD LENGTH=393                                                                                                                                                                                                                                                                                                                                                                                                                                                                                                                                                                     | 393 | 393 | 0         | 100.0 | 92.9  | 96.7  |
| Rsa1.0_00055.1.g2984.t1 | gb EOA29968.1  hypothetical protein CARUB_v10013071mg [Capsella rubella]                                                                                                                              | 711 | 721  | 0         | 101.4 | 85.8  | 92.8  | hypothetical protein CARUB_v10013071mg          | gbpln | Capsella rubella     | AT3G04480.1   Symbols:   endoribonucleases   chr3:1193988-1197320 REVERSE LENGTH=718<br>AT3G60380.1   Symbols:   FUNCTIONS IN: molecular_function unknown; INVOLVED IN: biological_process unknown; LOCATED IN: cellular_component unknown; EXPRESSED IN: 24 plant structures; EXPRESSED DURING: 13 growth stages; BEST Arabidopsis thaliana protein match is: hydroxyproline-rich glycoprotein family protein (TAIR:AT4G16790.1); Has 6102 Blast hits to 3981 proteins in 424 species: Archae - 6; Bacteria - 372; Metazoa - 2603; Fungi - 655; Plants - 291; Viruses - 28; Other Eukaryotes - 2147 (source: NCBI BLINK).   chr3:22316913-22319144 REVERSE LENGTH=743 | 711 | 718 | 0         | 101.0 | 85.7  | 92.1  |
| Rsa1.0_00055.1.g2985.t1 | ref XP_002878332.1  hypothetical protein ARALYDRAFT_907560 [Arabidopsis lyrata subsp. lyrata]   gi 297324170 gb EFH54591.1  hypothetical protein ARALYDRAFT_907560 [Arabidopsis lyrata subsp. lyrata] | 388 | 741  | 1.00E-57  | 191.0 | 35.1  | 38.4  | hypothetical protein ARALYDRAFT_907560          | gbpln | Arabidopsis lyrata   | AT3G04510.1   Symbols: LSH2   Protein of unknown function (DUF640)   chr3:1215812-1216417 REVERSE LENGTH=201                                                                                                                                                                                                                                                                                                                                                                                                                                                                                                                                                           | 388 | 743 | 2.00E-46  | 191.5 | 34.0  | 37.4  |
| Rsa1.0_00055.1.g2986.t1 | gb EOA31480.1  hypothetical protein CARUB_v10014673mg [Capsella rubella]                                                                                                                              | 191 | 200  | 2.00E-78  | 104.7 | 86.9  | 90.6  | hypothetical protein CARUB_v10014673mg          | gbpln | Capsella rubella     | AT2G34320.1   Symbols:   Polynucleotidyl transferase, ribonuclease H-like superfamily protein   chr2:14484959-14485837 FORWARD LENGTH=292                                                                                                                                                                                                                                                                                                                                                                                                                                                                                                                              | 191 | 201 | 1.00E-77  | 105.2 | 84.3  | 89.0  |
| Rsa1.0_00055.1.g2987.t1 | gb AAG51783.1 AC079679.3 reverse transcriptase, putative: 16838-20266 [Arabidopsis thaliana]                                                                                                          | 818 | 1142 | 0         | 139.6 | 47.6  | 61.7  | reverse transcriptase, putative: 16838-20266    | gbpln | Arabidopsis thaliana | AT3G04600.3   Symbols:   Nucleotidyl transferase superfamily protein   chr3:1243152-1245958 FORWARD LENGTH=402                                                                                                                                                                                                                                                                                                                                                                                                                                                                                                                                                         | 818 | 292 | 8.00E-32  | 35.7  | 9.8   | 16.3  |
| Rsa1.0_00055.1.g2988.t1 | ref XP_002882364.1  tRNA synthetase class I family protein [Arabidopsis lyrata subsp. lyrata]   gi 297328204 gb EFH58623.1  tRNA synthetase class I family protein [Arabidopsis lyrata subsp. lyrata] | 155 | 402  | 5.00E-80  | 259.4 | 94.8  | 98.1  | tRNA synthetase class I family protein          | gbpln | Arabidopsis lyrata   | AT5G59920.1   Symbols: UL13   Cysteine/Histidine-rich C1 domain family protein   chr5:24128756-24130888 FORWARD LENGTH=710                                                                                                                                                                                                                                                                                                                                                                                                                                                                                                                                             | 155 | 402 | 2.00E-81  | 259.4 | 93.5  | 98.1  |
| Rsa1.0_00055.1.g2989.t1 | db BAB08360.1  Ta11-like non-LTR retroelement protein-like [Arabidopsis thaliana]                                                                                                                     | 643 | 655  | 0         | 101.9 | 59.3  | 70.8  | Ta11-like non-LTR retroelement protein-like     | gbpln | Arabidopsis thaliana | AT5G59920.1   Symbols: UL13   Cysteine/Histidine-rich C1 domain family protein   chr5:24128756-24130888 FORWARD LENGTH=710                                                                                                                                                                                                                                                                                                                                                                                                                                                                                                                                             | 643 | 710 | 0         | 110.4 | 57.2  | 68.4  |
| Rsa1.0_00055.1.g2990.t1 | gb EOA14327.1  hypothetical protein CARUB_v10027503mg [Capsella rubella]                                                                                                                              | 542 | 655  | 1.00E-123 | 120.8 | 47.2  | 56.1  | hypothetical protein CARUB_v10027503mg          | gbpln | Capsella rubella     | AT1G64260.1   Symbols:   MuDR family transposase   chr1:23847756-23849915 FORWARD LENGTH=719                                                                                                                                                                                                                                                                                                                                                                                                                                                                                                                                                                           | 542 | 710 | 1.00E-125 | 131.0 | 46.5  | 55.4  |
| Rsa1.0_00055.1.g2991.t1 | gb EOA29585.1  hypothetical protein CARUB_v10013041mg [Capsella rubella]                                                                                                                              | 746 | 750  | 0         | 100.5 | 91.4  | 95.7  | hypothetical protein CARUB_v10013041mg          | gbpln | Capsella rubella     | AT1G03670.1   Symbols:   ankyrin repeat family protein   chr1:914222-916222 REVERSE LENGTH=616                                                                                                                                                                                                                                                                                                                                                                                                                                                                                                                                                                         | 746 | 719 | 9.00E-42  | 96.4  | 17.2  | 29.9  |
| Rsa1.0_00055.1.g2992.t1 | gb EOA30196.1  hypothetical protein CARUB_v10013313mg [Capsella rubella]                                                                                                                              | 577 | 582  | 0         | 100.9 | 74.2  | 83.7  | hypothetical protein CARUB_v10013313mg          | gbpln | Capsella rubella     | AT3G04610.1   Symbols: FLK   RNA-binding KH domain-containing protein   chr3:1250762-1254272 REVERSE LENGTH=577                                                                                                                                                                                                                                                                                                                                                                                                                                                                                                                                                        | 577 | 616 | 3.00E-48  | 106.8 | 25.8  | 44.0  |
| Rsa1.0_00055.1.g2993.t1 | gb EOA30206.1  hypothetical protein CARUB_v10013322mg [Capsella rubella]                                                                                                                              | 637 | 577  | 0         | 90.6  | 72.7  | 78.3  | hypothetical protein CARUB_v10013322mg          | gbpln | Capsella rubella     | AT3G04620.1   Symbols:   Alba DNA/RNA-binding protein   chr3:1255660-1256739 REVERSE LENGTH=164                                                                                                                                                                                                                                                                                                                                                                                                                                                                                                                                                                        | 637 | 577 | 0         | 90.6  | 64.7  | 73.3  |
| Rsa1.0_00055.1.g2994.t1 | ref XP_002884455.1  nucleic acid binding protein [Arabidopsis lyrata subsp. lyrata]   gi 297330295 gb EFH60714.1  nucleic acid binding protein [Arabidopsis lyrata subsp. lyrata]                     | 203 | 164  | 4.00E-53  | 80.8  | 66.5  | 71.9  | nucleic acid binding protein                    | gbpln | Arabidopsis lyrata   | AT3G04630.3   Symbols: WDL1   WVD2-like 1   chr3:1259231-1260652 FORWARD LENGTH=286                                                                                                                                                                                                                                                                                                                                                                                                                                                                                                                                                                                    | 203 | 164 | 5.00E-55  | 80.8  | 66.0  | 71.9  |
| Rsa1.0_00055.1.g2995.t1 | db BAH19881.1  AT3G04630 [Arabidopsis thaliana]                                                                                                                                                       | 279 | 286  | 1.00E-109 | 102.5 | 79.6  | 87.5  | AT3G04630                                       | gbpln | Arabidopsis thaliana | AT3G04650.1   Symbols:   FAD/NAD(P)-binding oxidoreductase family protein   chr3:1262017-1264343 FORWARD LENGTH=486                                                                                                                                                                                                                                                                                                                                                                                                                                                                                                                                                    | 279 | 286 | 1.00E-111 | 102.5 | 79.2  | 87.1  |
| Rsa1.0_00055.1.g2996.t1 | gb EOA30431.1  hypothetical protein CARUB_v10013555mg [Capsella rubella]                                                                                                                              | 491 | 487  | 0         | 99.2  | 90.6  | 94.7  | hypothetical protein CARUB_v10013555mg          | gbpln | Capsella rubella     | AT3G04670.1   Symbols: WRKY39, ATWRKY39   WRKY DNA-binding protein 39   chr3:1266330-1267691 REVERSE LENGTH=330                                                                                                                                                                                                                                                                                                                                                                                                                                                                                                                                                        | 491 | 486 | 0         | 99.0  | 89.0  | 92.5  |
| Rsa1.0_00055.1.g2997.t1 | db BAJ34400.1  unnamed protein product [Thellungiella halophila]                                                                                                                                      | 320 | 330  | 1.00E-150 | 103.1 | 85.6  | 90.9  | unnamed protein product                         | ----  | ----                 | AT3G04680.2   Symbols: CLPS3   CLP-similar protein 3   chr3:1270053-1272415 REVERSE LENGTH=444                                                                                                                                                                                                                                                                                                                                                                                                                                                                                                                                                                         | 320 | 330 | 1.00E-151 | 103.1 | 85.0  | 91.3  |
| Rsa1.0_00055.1.g2998.t1 | gb EOA33128.1  hypothetical protein CARUB_v10016466mg [Capsella rubella]                                                                                                                              | 459 | 445  | 0         | 96.9  | 85.4  | 91.9  | hypothetical protein CARUB_v10016466mg          | gbpln | Capsella rubella     |                                                                                                                                                                                                                                                                                                                                                                                                                                                                                                                                                                                                                                                                        | 459 | 444 | 0         | 96.7  | 85.6  | 91.5  |

|                         |                                                                                                                                                                                                                                                                                                                                                                                                                                                      |     |      |           |        |      |      |                                        |       |                      |                                                                                                                                   |     |      |           |        |      |      |
|-------------------------|------------------------------------------------------------------------------------------------------------------------------------------------------------------------------------------------------------------------------------------------------------------------------------------------------------------------------------------------------------------------------------------------------------------------------------------------------|-----|------|-----------|--------|------|------|----------------------------------------|-------|----------------------|-----------------------------------------------------------------------------------------------------------------------------------|-----|------|-----------|--------|------|------|
| Rsa1.0_00055.1.g2999.t1 | ref XP_002882370.1  hypothetical protein ARALYDRAFT_477736 [Arabidopsis lyrata subsp. lyrata] gi 297328210 gb EFH58629.1  hypothetical protein ARALYDRAFT_477736 [Arabidopsis lyrata subsp. lyrata]                                                                                                                                                                                                                                                  | 192 | 191  | 1.00E-77  | 99.5   | 81.8 | 88.5 | hypothetical protein ARALYDRAFT_477736 | gbpln | Arabidopsis lyrata   | AT3G04700.1   Symbols:   Protein of unknown function (DUF1685)   chr3:1276948-1277607 FORWARD LENGTH=191                          | 192 | 191  | 5.00E-79  | 99.5   | 80.2 | 87.5 |
| Rsa1.0_00055.1.g3000.t1 | gb EOA30549.1  hypothetical protein CARUB_v10013671mg [Capsella rubella]                                                                                                                                                                                                                                                                                                                                                                             | 251 | 456  | 1.00E-118 | 181.7  | 84.5 | 90.8 | hypothetical protein CARUB_v10013671mg | gbpln | Capsella rubella     | AT3G04710.3   Symbols: TPR10   ankyrin repeat family protein   chr3:1276948-1280942 FORWARD LENGTH=680                            | 251 | 680  | 1.00E-119 | 270.9  | 83.3 | 90.0 |
| Rsa1.0_00055.1.g3003.t1 | ref NP_001189808.1  ankyrin repeat family protein [Arabidopsis thaliana] gi 332640603 gb AEE74124.1  ankyrin repeat family protein [Arabidopsis thaliana]                                                                                                                                                                                                                                                                                            | 249 | 680  | 2.00E-93  | 273.1  | 72.7 | 77.5 | ankyrin repeat family protein          | gbpln | Arabidopsis thaliana | AT3G04710.3   Symbols: TPR10   ankyrin repeat family protein   chr3:1276948-1280942 FORWARD LENGTH=680                            | 249 | 680  | 7.00E-96  | 273.1  | 72.7 | 77.5 |
| Rsa1.0_00055.1.g3002.t1 | gb EOA31668.1  hypothetical protein CARUB_v10014871mg [Capsella rubella]                                                                                                                                                                                                                                                                                                                                                                             | 141 | 141  | 1.00E-71  | 100.0  | 90.1 | 96.5 | hypothetical protein CARUB_v10014871mg | gbpln | Capsella rubella     | AT3G04720.1   Symbols: PR4, HEL_PR-4   pathogenesis-related 4   chr3:1285691-1286531 REVERSE LENGTH=212                           | 141 | 212  | 5.00E-47  | 150.4  | 58.9 | 68.8 |
| Rsa1.0_00055.1.g3003.t1 | gb AAN23106.2  PR4-type protein [Brassica rapa subsp. pekinensis] gi 195536976 dbj BAG68208.1  PR4 protein [Brassica rapa subsp. chinensis] gi 244539681 dbj BAH82748.1  pathogenesis related protein 4 [Brassica rapa subsp. chinensis]                                                                                                                                                                                                             | 141 | 140  | 3.00E-72  | 99.3   | 95.0 | 96.5 | PR4-type protein                       | gbpln | Brassica rapa        | AT3G04720.1   Symbols: PR4, HEL_PR-4   pathogenesis-related 4   chr3:1285691-1286531 REVERSE LENGTH=212                           | 141 | 212  | 5.00E-51  | 150.4  | 63.8 | 72.3 |
| Rsa1.0_00055.1.g3004.t1 | dbj BAJ33708.1  unnamed protein product [Thellungiella halophila]                                                                                                                                                                                                                                                                                                                                                                                    | 213 | 214  | 1.00E-104 | 100.5  | 85.9 | 90.6 | unnamed protein product                | ----  | ----                 | AT3G04720.1   Symbols: PR4, HEL_PR-4   pathogenesis-related 4   chr3:1285691-1286531 REVERSE LENGTH=212                           | 213 | 212  | 1.00E-100 | 99.5   | 87.8 | 92.0 |
| Rsa1.0_00055.1.g3005.t1 | ref XP_002882372.1  hypothetical protein ARALYDRAFT_477743 [Arabidopsis lyrata subsp. lyrata] gi 297328212 gb EFH58631.1  hypothetical protein ARALYDRAFT_477743 [Arabidopsis lyrata subsp. lyrata]                                                                                                                                                                                                                                                  | 283 | 1702 | 1.00E-61  | 601.4  | 51.6 | 54.1 | hypothetical protein ARALYDRAFT_477743 | gbpln | Arabidopsis lyrata   | AT3G04740.1   Symbols: SWP, MED14, ATMED14   RNA polymerase II transcription mediators   chr3:1294037-1300555 FORWARD LENGTH=1703 | 283 | 1703 | 2.00E-60  | 601.8  | 50.2 | 53.0 |
| Rsa1.0_00055.1.g3006.t1 | gb EOA39027.1  hypothetical protein CARUB_v10011597mg [Capsella rubella]                                                                                                                                                                                                                                                                                                                                                                             | 173 | 186  | 2.00E-11  | 107.5  | 27.2 | 48.0 | hypothetical protein CARUB_v10011597mg | gbpln | Capsella rubella     | #                                                                                                                                 | #   | #    | #         | #      | #    | #    |
| Rsa1.0_00055.1.g3007.t1 | gb ABD65090.1  hypothetical protein 27.t00116 [Brassica oleracea]                                                                                                                                                                                                                                                                                                                                                                                    | 250 | 484  | 1.00E-82  | 193.6  | 65.2 | 78.4 | hypothetical protein 27.t00116         | gbpln | Brassica oleracea    | AT1G14800.1   Symbols:   Nucleic acid-binding, OB-fold-like protein   chr1:5099572-5102558 FORWARD LENGTH=384                     | 250 | 384  | 4.00E-11  | 153.6  | 13.6 | 26.4 |
| Rsa1.0_00055.1.g3008.t1 | ref XP_002882372.1  hypothetical protein ARALYDRAFT_477743 [Arabidopsis lyrata subsp. lyrata] gi 297328212 gb EFH58631.1  hypothetical protein ARALYDRAFT_477743 [Arabidopsis lyrata subsp. lyrata]                                                                                                                                                                                                                                                  | 119 | 1702 | 1.00E-11  | 1430.3 | 34.5 | 39.5 | hypothetical protein ARALYDRAFT_477743 | gbpln | Arabidopsis lyrata   | AT3G04740.1   Symbols: SWP, MED14, ATMED14   RNA polymerase II transcription mediators   chr3:1294037-1300555 FORWARD LENGTH=1703 | 119 | 1703 | 2.00E-14  | 1431.1 | 34.5 | 39.5 |
| Rsa1.0_00055.1.g3009.t1 | ref NP_566238.1  uncharacterized protein [Arabidopsis thaliana] gi 65701293 sp Q9SQ29.2 PITH1_ARAT H RecName: Full=PITH domain-containing protein At3g04780 gi 16648681 gb AAL25533.1  AT3g04780/F7018.27 [Arabidopsis thaliana] gi 20147247 gb AAM10337.1  AT3g04780/F7018.27 [Arabidopsis thaliana] gi 21593799 gb AAM65766.1  unknown [Arabidopsis thaliana] gi 332640614 gb AEE74135.1  uncharacterized protein AT3G04780 [Arabidopsis thaliana] | 64  | 176  | 9.00E-18  | 275.0  | 75.0 | 76.6 | uncharacterized protein                | gbpln | Arabidopsis thaliana | AT3G04780.1   Symbols:   Protein of unknown function (DUF1000)   chr3:1311447-1313013 REVERSE LENGTH=176                          | 64  | 176  | 1.00E-20  | 275.0  | 75.0 | 76.6 |

|                         |                                                                                                                                                                                                                                                                                                                                                                                                                                                                                                                                                                                                                                                                                                                                                                                                                                                                                                                                                                                     |     |      |           |       |      |      |                                        |       |                      |                                                                                                                                                                                                                                                                                                                    |     |      |           |       |      |      |
|-------------------------|-------------------------------------------------------------------------------------------------------------------------------------------------------------------------------------------------------------------------------------------------------------------------------------------------------------------------------------------------------------------------------------------------------------------------------------------------------------------------------------------------------------------------------------------------------------------------------------------------------------------------------------------------------------------------------------------------------------------------------------------------------------------------------------------------------------------------------------------------------------------------------------------------------------------------------------------------------------------------------------|-----|------|-----------|-------|------|------|----------------------------------------|-------|----------------------|--------------------------------------------------------------------------------------------------------------------------------------------------------------------------------------------------------------------------------------------------------------------------------------------------------------------|-----|------|-----------|-------|------|------|
| Rsa1.0_00055.1.g3010.t1 | refNP_187132.1  serine/threonine-protein kinase Nek2 [Arabidopsis thaliana] gi 79607883 refNP_974221.2  serine/threonine-protein kinase Nek2 [Arabidopsis thaliana] gi 75333670 sp Q9CAU7.1 NEK2_ARATH<br>RecName: Full=Serine/threonine-protein kinase Nek2; AltName: Full=NimA-related protein kinase 2; Short=AtNek2<br>gi 12322861 gb AAG51423.1 AC009465_23 putative kinase; 86849-83844 [Arabidopsis thaliana] gi 24030188 gb AAN41275.1  putative kinase [Arabidopsis thaliana] gi 332640617 gb AEE74138.1  serine/threonine-protein kinase Nek2 [Arabidopsis thaliana] gi 332640618 gb AEE74139.1  serine/threonine-protein kinase Nek2 [Arabidopsis thaliana]<br>refNP_187133.3  pseudouridine synthase [Arabidopsis thaliana] gi 52354299 gb AAU44470.1  hypothetical protein AT3G04820 [Arabidopsis thaliana] gi 61742699 gb AAX55170.1  hypothetical protein At3g04820 [Arabidopsis thaliana] gi 332640619 gb AEE74140.1  pseudouridine synthase [Arabidopsis thaliana] | 572 | 606  | 0         | 105.9 | 92.0 | 94.8 | serine/threonine-protein kinase Nek2   | gbpln | Arabidopsis thaliana | AT3G04810.2   Symbols: ATNEK2, NEK2   NIMA-related kinase 2   chr3:1318096-1321101 FORWARD LENGTH=606                                                                                                                                                                                                              | 572 | 606  | 0         | 105.9 | 92.0 | 94.8 |
| Rsa1.0_00055.1.g3011.t1 | refNP_187133.3  pseudouridine synthase [Arabidopsis thaliana] gi 52354299 gb AAU44470.1  hypothetical protein AT3G04820 [Arabidopsis thaliana] gi 61742699 gb AAX55170.1  hypothetical protein At3g04820 [Arabidopsis thaliana] gi 332640619 gb AEE74140.1  pseudouridine synthase [Arabidopsis thaliana]                                                                                                                                                                                                                                                                                                                                                                                                                                                                                                                                                                                                                                                                           | 663 | 715  | 0         | 107.8 | 88.7 | 94.0 | pseudouridine synthase                 | gbpln | Arabidopsis thaliana | AT3G04820.1   Symbols:   Pseudouridine synthase family protein   chr3:1321453-1325949 REVERSE LENGTH=715                                                                                                                                                                                                           | 663 | 715  | 0         | 107.8 | 88.7 | 94.0 |
| Rsa1.0_00055.1.g3012.t1 | gb EOA31103.1  hypothetical protein CARUB_v10014256mg [Capsella rubella]                                                                                                                                                                                                                                                                                                                                                                                                                                                                                                                                                                                                                                                                                                                                                                                                                                                                                                            | 302 | 304  | 1.00E-166 | 100.7 | 94.7 | 98.3 | hypothetical protein CARUB_v10014256mg | gbpln | Capsella rubella     | AT3G04830.1   Symbols:   Protein prenyltransferase superfamily protein   chr3:1326289-1329132 FORWARD LENGTH=303                                                                                                                                                                                                   | 302 | 303  | 1.00E-166 | 100.3 | 92.7 | 97.7 |
| Rsa1.0_00055.1.g3013.t3 | refXP_002882386.1  hypothetical protein ARALYDRAFT_477772 [Arabidopsis lyrata subsp. lyrata] gi 297328226 gb EFH58645.1  hypothetical protein ARALYDRAFT_477772 [Arabidopsis lyrata subsp. lyrata]                                                                                                                                                                                                                                                                                                                                                                                                                                                                                                                                                                                                                                                                                                                                                                                  | 250 | 230  | 1.00E-101 | 92.0  | 75.6 | 80.8 | hypothetical protein ARALYDRAFT_477772 | gbpln | Arabidopsis lyrata   | AT3G04950.1   Symbols:   CONTAINS InterPro DOMAIN/s: SEC-C motif (InterPro:IPR004027); Has 583 Blast hits to 583 proteins in 248 species: Archae - 0; Bacteria - 488; Metazoa - 0; Fungi - 0; Plants - 34; Viruses - 0; Other Eukaryotes - 61 (source: NCBI BLINK).   chr3:1371786-1373300 FORWARD LENGTH=231      | 250 | 231  | 1.00E-104 | 92.4  | 76.8 | 81.2 |
| Rsa1.0_00055.1.g3014.t1 | emb CAA31519.1  ACP preprotein [Brassica napus]                                                                                                                                                                                                                                                                                                                                                                                                                                                                                                                                                                                                                                                                                                                                                                                                                                                                                                                                     | 133 | 134  | 1.00E-55  | 100.8 | 85.7 | 91.7 | ACP preprotein                         | gbpln | Brassica napus       | AT3G05020.1   Symbols: ACP1, ACP   acyl carrier protein 1   chr3:1391863-1392878 REVERSE LENGTH=137                                                                                                                                                                                                                | 133 | 137  | 2.00E-52  | 103.0 | 82.0 | 90.2 |
| Rsa1.0_00055.1.g3015.t1 | refXP_002882392.1  hypothetical protein ARALYDRAFT_477790 [Arabidopsis lyrata subsp. lyrata] gi 297328232 gb EFH58651.1  hypothetical protein ARALYDRAFT_477790 [Arabidopsis lyrata subsp. lyrata]                                                                                                                                                                                                                                                                                                                                                                                                                                                                                                                                                                                                                                                                                                                                                                                  | 140 | 144  | 5.00E-56  | 102.9 | 83.6 | 91.4 | hypothetical protein ARALYDRAFT_477790 | gbpln | Arabidopsis lyrata   | AT3G05070.1   Symbols:   CONTAINS InterPro DOMAIN/s: mRNA splicing factor, CwF18 (InterPro:IPR013169); Has 292 Blast hits to 292 proteins in 153 species: Archae - 0; Bacteria - 118; Fungi - 83; Plants - 38; Viruses - 11; Other Eukaryotes - 42 (source: NCBI BLINK).   chr3:1416480-1417533 FORWARD LENGTH=144 | 140 | 144  | 3.00E-57  | 102.9 | 82.1 | 91.4 |
| Rsa1.0_00055.1.g3016.t2 | gb ACY38730.1  salt-induced WD protein 1 [Brassica napus]                                                                                                                                                                                                                                                                                                                                                                                                                                                                                                                                                                                                                                                                                                                                                                                                                                                                                                                           | 757 | 754  | 0         | 99.6  | 94.6 | 97.5 | salt-induced WD protein 1              | gbpln | Brassica napus       | AT3G05090.2   Symbols: LRS1   Transducin/WD40 repeat-like superfamily protein   chr3:1418573-1422723 REVERSE LENGTH=753                                                                                                                                                                                            | 757 | 753  | 0         | 99.5  | 91.3 | 95.5 |
| Rsa1.0_00055.1.g3017.t1 | refXP_002882393.1  hypothetical protein ARALYDRAFT_317378 [Arabidopsis lyrata subsp. lyrata] gi 297328233 gb EFH58652.1  hypothetical protein ARALYDRAFT_317378 [Arabidopsis lyrata subsp. lyrata]                                                                                                                                                                                                                                                                                                                                                                                                                                                                                                                                                                                                                                                                                                                                                                                  | 369 | 341  | 1.00E-159 | 92.4  | 77.2 | 82.4 | hypothetical protein ARALYDRAFT_317378 | gbpln | Arabidopsis lyrata   | AT3G05100.1   Symbols:   S-adenosyl-L-methionine-dependent methyltransferases superfamily protein   chr3:1424155-1425667 FORWARD LENGTH=336                                                                                                                                                                        | 369 | 336  | 1.00E-156 | 91.1  | 76.4 | 81.6 |
| Rsa1.0_00055.1.g3018.t1 | dbj BAJ33907.1  unnamed protein product [Thellungiella halophila]                                                                                                                                                                                                                                                                                                                                                                                                                                                                                                                                                                                                                                                                                                                                                                                                                                                                                                                   | 552 | 595  | 0         | 107.8 | 91.5 | 93.1 | unnamed protein product                | ----  | ----                 | AT5G60790.1   Symbols: ATGCN1, GCN1   ABC transporter family protein   chr5:24453760-24455767 REVERSE LENGTH=595                                                                                                                                                                                                   | 552 | 595  | 0         | 107.8 | 89.9 | 92.2 |
| Rsa1.0_00055.1.g3019.t9 | refXP_002866393.1  hypothetical protein ARALYDRAFT_332324 [Arabidopsis lyrata subsp. lyrata] gi 297312228 gb EFH42652.1  hypothetical protein ARALYDRAFT_332324 [Arabidopsis lyrata subsp. lyrata]                                                                                                                                                                                                                                                                                                                                                                                                                                                                                                                                                                                                                                                                                                                                                                                  | 394 | 1109 | 1.00E-172 | 281.5 | 80.2 | 84.8 | hypothetical protein ARALYDRAFT_332324 | gbpln | Arabidopsis lyrata   | AT5G60740.1   Symbols:   ABC transporter family protein   chr5:24425824-24430269 REVERSE LENGTH=1109                                                                                                                                                                                                               | 394 | 1109 | 1.00E-174 | 281.5 | 79.9 | 84.5 |
| Rsa1.0_00055.1.g3020.t1 | gb EOA20112.1  hypothetical protein CARUB_v10000391mg [Capsella rubella]                                                                                                                                                                                                                                                                                                                                                                                                                                                                                                                                                                                                                                                                                                                                                                                                                                                                                                            | 416 | 672  | 1.00E-139 | 161.5 | 64.4 | 75.5 | hypothetical protein CARUB_v10000391mg | gbpln | Capsella rubella     | AT3G62310.1   Symbols:   RNA helicase family protein   chr3:23057516-23060561 REVERSE LENGTH=726                                                                                                                                                                                                                   | 416 | 726  | 1.00E-137 | 174.5 | 63.2 | 76.9 |

|                         |                                                                                                                                                                                                                                                                                                                                                                                                                                                                                                                                                                                                                                                             |      |      |           |        |      |      |                                                       |       |                      |                                                                                                                                 |      |      |           |        |      |      |
|-------------------------|-------------------------------------------------------------------------------------------------------------------------------------------------------------------------------------------------------------------------------------------------------------------------------------------------------------------------------------------------------------------------------------------------------------------------------------------------------------------------------------------------------------------------------------------------------------------------------------------------------------------------------------------------------------|------|------|-----------|--------|------|------|-------------------------------------------------------|-------|----------------------|---------------------------------------------------------------------------------------------------------------------------------|------|------|-----------|--------|------|------|
| Rsa1.0_00055.1.g3021.t1 | gb EOA32865.1  hypothetical protein CARUB_v10016180mg [Capsella rubella]                                                                                                                                                                                                                                                                                                                                                                                                                                                                                                                                                                                    | 71   | 922  | 1.00E-13  | 1298.6 | 62.0 | 74.6 | hypothetical protein CARUB_v10016180mg                | gbpln | Capsella rubella     | AT3G03710.1   Symbols: RIF10, PNP   polyribonucleotide nucleotidyltransferase, putative   chr3:919542-924906 FORWARD LENGTH=922 | 71   | 922  | 1.00E-13  | 1298.6 | 63.4 | 70.4 |
| Rsa1.0_00055.1.g3022.t1 | # # # # # # # #                                                                                                                                                                                                                                                                                                                                                                                                                                                                                                                                                                                                                                             |      |      |           |        |      |      |                                                       |       |                      |                                                                                                                                 |      |      |           |        |      |      |
| Rsa1.0_00055.1.g3023.t1 | ref XP_002884492.1  kinase family protein [Arabidopsis lyrata subsp. lyrata] gi 297330332 gb EFH60751.1  kinase family protein [Arabidopsis lyrata subsp. lyrata]                                                                                                                                                                                                                                                                                                                                                                                                                                                                                           | 501  | 469  | 0         | 93.6   | 79.6 | 86.0 | kinase family protein                                 | gbpln | Arabidopsis lyrata   | AT3G05140.1   Symbols: RBK2   ROP binding protein kinases 2   chr3:1435817-1437800 REVERSE LENGTH=460                           | 501  | 460  | 0         | 91.8   | 77.8 | 84.6 |
| Rsa1.0_00055.1.g3024.t1 | ref NP_566249.1  E3 ubiquitin-protein ligase ATL6 [Arabidopsis thaliana] gi 68565231 sp Q8RXX9.2 ATL6_ARATH RecName: Full=E3 ubiquitin-protein ligase ATL6; AltName: Full=RING-H2 finger protein ATL6; Flags: Precursor gi 70905101 gb AAZ14076.1  At3g05200 [Arabidopsis thaliana] gi 332640683 gb AEE74204.1  E3 ubiquitin-protein ligase ATL6 [Arabidopsis thaliana]                                                                                                                                                                                                                                                                                     | 384  | 398  | 0         | 103.6  | 87.2 | 91.7 | E3 ubiquitin-protein ligase ATL6                      | gbpln | Arabidopsis thaliana | AT3G05200.1   Symbols: ATL6   RING/U-box superfamily protein   chr3:1477377-1478573 FORWARD LENGTH=398                          | 384  | 398  | 0         | 103.6  | 87.2 | 91.7 |
| Rsa1.0_00055.1.g3025.t1 | gb EOA30233.1  hypothetical protein CARUB_v10013356mg [Capsella rubella]                                                                                                                                                                                                                                                                                                                                                                                                                                                                                                                                                                                    | 501  | 565  | 1.00E-55  | 112.8  | 63.1 | 68.7 | hypothetical protein CARUB_v10013356mg                | gbpln | Capsella rubella     | AT3G05220.1   Symbols:   Heavy metal transport/detoxification superfamily protein   chr3:1488808-1491171 FORWARD LENGTH=577     | 501  | 577  | 8.00E-43  | 115.2  | 23.8 | 25.7 |
| Rsa1.0_00055.1.g3026.t1 | ref XP_002882405.1  signal peptidase subunit family protein [Arabidopsis lyrata subsp. lyrata] gi 297328245 gb EFH58664.1  signal peptidase subunit family protein [Arabidopsis lyrata subsp. lyrata] ref NP_566558.1  F-box/kelch-repeat protein [Arabidopsis thaliana] gi 75274278 sp Q9LUQ9.1 FBK56_ARATH RecName: Full=F-box/kelch-repeat protein At3g16740 gi 11994629 db BAB02766.1  unnamed protein product [Arabidopsis thaliana] gi 28466967 gb AAO44092.1  At3g16740 [Arabidopsis thaliana] gi 110743773 db BAE99722.1  hypothetical protein [Arabidopsis thaliana] gi 332642338 gb AEE75859.1  F-box/kelch-repeat protein [Arabidopsis thaliana] | 167  | 167  | 8.00E-89  | 100.0  | 92.2 | 97.0 | signal peptidase subunit family protein               | gbpln | Arabidopsis lyrata   | AT3G05230.1   Symbols:   Signal peptidase subunit   chr3:1492304-1493452 FORWARD LENGTH=167                                     | 167  | 167  | 3.00E-90  | 100.0  | 91.0 | 97.0 |
| Rsa1.0_00055.1.g3027.t1 | ref NP_187179.2  Integral membrane Yip1-like protein [Arabidopsis thaliana] gi 26452921 db BAC43533.1  unknown protein [Arabidopsis thaliana] gi 28973139 gb AAO63894.1  unknown protein [Arabidopsis thaliana] gi 332640694 gb AEE74215.1  Integral membrane Yip1-like protein [Arabidopsis thaliana]                                                                                                                                                                                                                                                                                                                                                      | 396  | 391  | 1.00E-122 | 98.7   | 59.1 | 74.0 | F-box/kelch-repeat protein                            | gbpln | Arabidopsis thaliana | AT3G16740.1   Symbols:   F-box and associated interaction domains-containing protein   chr3:5699476-5700651 FORWARD LENGTH=391  | 396  | 391  | 1.00E-124 | 98.7   | 59.1 | 74.0 |
| Rsa1.0_00055.1.g3028.t1 | ref NP_187179.2  Integral membrane Yip1-like protein [Arabidopsis thaliana] gi 26452921 db BAC43533.1  unknown protein [Arabidopsis thaliana] gi 28973139 gb AAO63894.1  unknown protein [Arabidopsis thaliana] gi 332640694 gb AEE74215.1  Integral membrane Yip1-like protein [Arabidopsis thaliana]                                                                                                                                                                                                                                                                                                                                                      | 445  | 281  | 1.00E-149 | 63.1   | 60.2 | 62.2 | Integral membrane Yip1-like protein                   | gbpln | Arabidopsis thaliana | AT3G05280.1   Symbols:   Integral membrane Yip1 family protein   chr3:1503992-1505554 REVERSE LENGTH=281                        | 445  | 281  | 1.00E-152 | 63.1   | 60.2 | 62.2 |
| Rsa1.0_00055.1.g3029.t1 | ref XP_002884499.1  mitochondrial substrate carrier family protein [Arabidopsis lyrata subsp. lyrata] gi 297330339 gb EFH60758.1  mitochondrial substrate carrier family protein [Arabidopsis lyrata subsp. lyrata]                                                                                                                                                                                                                                                                                                                                                                                                                                         | 321  | 322  | 1.00E-156 | 100.3  | 87.9 | 93.1 | mitochondrial substrate carrier family protein        | gbpln | Arabidopsis lyrata   | AT3G05290.1   Symbols: PNC1   peroxisomal adenine nucleotide carrier   chr3:1506129-1507614 REVERSE LENGTH=322                  | 321  | 322  | 1.00E-158 | 100.3  | 87.2 | 93.1 |
| Rsa1.0_00055.1.g3030.t3 | ref XP_002882407.1  hypothetical protein ARALYDRAFT.477819 [Arabidopsis lyrata subsp. lyrata] gi 297328247 gb EFH58666.1  hypothetical protein ARALYDRAFT.477819 [Arabidopsis lyrata subsp. lyrata]                                                                                                                                                                                                                                                                                                                                                                                                                                                         | 641  | 647  | 0         | 100.9  | 62.1 | 78.0 | hypothetical protein ARALYDRAFT.477819                | gbpln | Arabidopsis lyrata   | AT3G05310.1   Symbols: MIRO3   MIRO-related GTP-ase 3   chr3:1510160-1513301 FORWARD LENGTH=648                                 | 641  | 648  | 0         | 101.1  | 61.0 | 77.7 |
| Rsa1.0_00055.1.g3031.t1 | ref XP_002882412.1  acyl-CoA binding protein 4, acyl-CoA-binding domain 4 [Arabidopsis lyrata subsp. lyrata] gi 297328252 gb EFH58671.1  acyl-CoA binding protein 4, acyl-CoA-binding domain 4 [Arabidopsis lyrata subsp. lyrata]                                                                                                                                                                                                                                                                                                                                                                                                                           | 267  | 669  | 1.00E-127 | 250.6  | 80.9 | 87.6 | acyl-CoA binding protein 4, acyl-CoA-binding domain 4 | gbpln | Arabidopsis lyrata   | AT3G05420.1   Symbols: ACBP4   acyl-CoA binding protein 4   chr3:1561880-1567047 FORWARD LENGTH=668                             | 267  | 668  | 1.00E-128 | 250.2  | 80.1 | 88.0 |
| Rsa1.0_00055.1.g3032.t3 | gb ACP30603.1  disease resistance protein [Brassica rapa subsp. pekinensis]                                                                                                                                                                                                                                                                                                                                                                                                                                                                                                                                                                                 | 2468 | 1056 | 0         | 42.8   | 31.5 | 34.8 | disease resistance protein                            | gbpln | Brassica rapa        | AT5G18370.1   Symbols:   Disease resistance protein (TR-NBS-LRR class) family   chr5:6085036-6088926 REVERSE LENGTH=1210        | 2468 | 1210 | 0         | 49.0   | 22.6 | 29.1 |

|                          |                                                                                                                                                                                                                                                                                                                                                                                                                                                                                                                                                                                                                                                                                                                                                                                                                |      |      |           |        |      |      |                                        |       |                      |                                                                                                                                                                                                                                                                                                                                                                                                                                                                                             |      |      |           |       |      |      |
|--------------------------|----------------------------------------------------------------------------------------------------------------------------------------------------------------------------------------------------------------------------------------------------------------------------------------------------------------------------------------------------------------------------------------------------------------------------------------------------------------------------------------------------------------------------------------------------------------------------------------------------------------------------------------------------------------------------------------------------------------------------------------------------------------------------------------------------------------|------|------|-----------|--------|------|------|----------------------------------------|-------|----------------------|---------------------------------------------------------------------------------------------------------------------------------------------------------------------------------------------------------------------------------------------------------------------------------------------------------------------------------------------------------------------------------------------------------------------------------------------------------------------------------------------|------|------|-----------|-------|------|------|
| Rsa1.0_00055.1.g3033.t22 | ref[NP_187219.5] embryo defective 2016 protein [Arabidopsis thaliana] gi 332640756 gb AE74277.1  embryo defective 2016 protein [Arabidopsis thaliana]                                                                                                                                                                                                                                                                                                                                                                                                                                                                                                                                                                                                                                                          | 2601 | 2138 | 0         | 82.2   | 71.4 | 75.3 | embryo defective 2016 protein          | gbpln | Arabidopsis thaliana | AT3G05680.1   Symbols: EMB2016   embryo defective 2016   chr3:1660802-1672015 REVERSE LENGTH=2138                                                                                                                                                                                                                                                                                                                                                                                           | 2601 | 2138 | 0         | 82.2  | 71.4 | 75.3 |
| Rsa1.0_00055.1.g3034.t1  | emb[CA74049.1] Transcription factor [Arabidopsis thaliana]                                                                                                                                                                                                                                                                                                                                                                                                                                                                                                                                                                                                                                                                                                                                                     | 286  | 295  | 1.00E-128 | 103.1  | 80.1 | 86.4 | Transcription factor                   | gbpln | Arabidopsis thaliana | AT3G05690.1   Symbols: UNE8, ATHAP2B, HAP2B, NF-YA2   nuclear factor Y, subunit A2   chr3:1678922-1678324 REVERSE LENGTH=295                                                                                                                                                                                                                                                                                                                                                                | 286  | 295  | 1.00E-130 | 103.1 | 80.1 | 86.4 |
| Rsa1.0_00055.1.g3035.t1  | gb[EOA32343.1] hypothetical protein CARUB_v10015609mg [Capsella rubella]                                                                                                                                                                                                                                                                                                                                                                                                                                                                                                                                                                                                                                                                                                                                       | 454  | 444  | 3.00E-56  | 97.8   | 33.5 | 43.6 | hypothetical protein CARUB_v10015609mg | gbpln | Capsella rubella     | AT3G05770.1   Symbols:   unknown protein; BEST Arabidopsis thaliana protein match is: unknown protein (TAIR:AT1G54300.1); Has 105 Blast hits to 105 proteins in 16 species: Archae - 0; Bacteria - 0; Metazoa - 0; Fungi - 0; Plants - 99; Viruses - 0; Other Eukaryotes - 6 (source: NCBI BLink).   chr3:1710328-1712165 REVERSE LENGTH=410                                                                                                                                                | 454  | 410  | 3.00E-54  | 90.3  | 30.6 | 35.5 |
| Rsa1.0_00055.1.g3036.t1  | ref[NP_566260.1] transcription factor bHLH150 [Arabidopsis thaliana] gi 75191236 sp Q9M9L6.1 BH150. ARAT H RecName: Full=Transcription factor bHLH150; AltName: Full=ATBS1 interacting factor 1; AltName: Full=Basic helix-loop-helix protein 150; Short=AtbHLH150; Short=bHLH 150; AltName: Full=Transcription factor EN 145; AltName: Full=bHLH transcription factor bHLH150 gi 6714393 gb AAF26082.1 AC012393.8 hypothetical protein [Arabidopsis thaliana] gi 21554259 gb AAM63334.1  unknown [Arabidopsis thaliana] gi 51971903 dbj BAD44616.1  unknown protein [Arabidopsis thaliana] gi 94442469 gb ABF19022.1  At3g05800 [Arabidopsis thaliana] gi 22589862 dbj BAH30441.1  hypothetical protein [Arabidopsis thaliana] gi 33264077 gb AEE74298.1  transcription factor bHLH150 [Arabidopsis thaliana] | 182  | 211  | 2.00E-61  | 115.9  | 78.0 | 84.1 | transcription factor bHLH150           | gbpln | Arabidopsis thaliana | AT3G05800.1   Symbols: AIF1   AtBS1(activation-tagged BRI1 suppressor 1)-interacting factor 1   chr3:1727476-1728111 FORWARD LENGTH=211                                                                                                                                                                                                                                                                                                                                                     | 182  | 211  | 8.00E-64  | 115.9 | 78.0 | 84.1 |
| Rsa1.0_00055.1.g3037.t1  | #                                                                                                                                                                                                                                                                                                                                                                                                                                                                                                                                                                                                                                                                                                                                                                                                              | #    | #    | #         | #      | #    | #    | -                                      | ----  | ----                 | #                                                                                                                                                                                                                                                                                                                                                                                                                                                                                           | #    | #    | #         | #     | #    |      |
| Rsa1.0_00055.1.g3038.t1  | ref[XP_002882438.1] hypothetical protein ARALYDRAFT_477878 [Arabidopsis lyrata subsp. lyrata] gi 297328278 gb EFH58697.1  hypothetical protein ARALYDRAFT_477878 [Arabidopsis lyrata subsp. lyrata]                                                                                                                                                                                                                                                                                                                                                                                                                                                                                                                                                                                                            | 476  | 409  | 0         | 85.9   | 80.3 | 82.6 | hypothetical protein ARALYDRAFT_477878 | gbpln | Arabidopsis lyrata   | AT3G05840.1   Symbols: ATSK12   Protein kinase superfamily protein   chr3:1740793-1742927 FORWARD LENGTH=409                                                                                                                                                                                                                                                                                                                                                                                | 476  | 409  | 0         | 85.9  | 79.8 | 82.4 |
| Rsa1.0_00055.1.g3039.t1  | ref[XP_002882439.1] hypothetical protein ARALYDRAFT_896682 [Arabidopsis lyrata subsp. lyrata] gi 297328279 gb EFH58698.1  hypothetical protein ARALYDRAFT_896682 [Arabidopsis lyrata subsp. lyrata]                                                                                                                                                                                                                                                                                                                                                                                                                                                                                                                                                                                                            | 90   | 90   | 1.00E-39  | 100.0  | 93.3 | 95.6 | hypothetical protein ARALYDRAFT_896682 | gbpln | Arabidopsis lyrata   | AT3G05858.1   Symbols:   unknown protein; FUNCTIONS IN: molecular.function unknown; INVOLVED IN: biological.process unknown; LOCATED IN: cellular.component unknown; BEST Arabidopsis thaliana protein match is: unknown protein (TAIR:AT5G26620.1); Has 30201 Blast hits to 17322 proteins in 780 species: Archae - 12; Bacteria - 1396; Metazoa - 17338; Fungi - 3422; Plants - 5037; Viruses - 0; Other Eukaryotes - 2996 (source: NCBI BLink).   chr3:1749464-1749736 FORWARD LENGTH=90 | 90   | 90   | 1.00E-41  | 100.0 | 92.2 | 93.3 |
| Rsa1.0_00055.1.g3040.t1  | #                                                                                                                                                                                                                                                                                                                                                                                                                                                                                                                                                                                                                                                                                                                                                                                                              | #    | #    | #         | #      | #    | #    | -                                      | ----  | ----                 | #                                                                                                                                                                                                                                                                                                                                                                                                                                                                                           | #    | #    | #         | #     | #    |      |
| Rsa1.0_00055.1.g3041.t1  | gb[AFC41201.1] PM-YC3.6-Lti6b [Binary expression vector PM-YC3.6-LTi6b]                                                                                                                                                                                                                                                                                                                                                                                                                                                                                                                                                                                                                                                                                                                                        | 83   | 726  | 5.00E-15  | 874.7  | 49.4 | 62.7 | PM-YC3.6-Lti6b                         | ----  | ----                 | AT3G05890.1   Symbols: RC12B   Low temperature and salt responsive protein family   chr3:1758179-1758452 REVERSE LENGTH=54                                                                                                                                                                                                                                                                                                                                                                  | 83   | 54   | 2.00E-14  | 65.1  | 43.4 | 50.6 |
| Rsa1.0_00055.1.g3042.t1  | gb[AFC41201.1] PM-YC3.6-Lti6b [Binary expression vector PM-YC3.6-LTi6b]                                                                                                                                                                                                                                                                                                                                                                                                                                                                                                                                                                                                                                                                                                                                        | 55   | 726  | 6.00E-22  | 1320.0 | 85.5 | 92.7 | PM-YC3.6-Lti6b                         | ----  | ----                 | AT3G05890.1   Symbols: RC12B   Low temperature and salt responsive protein family   chr3:1758179-1758452 REVERSE LENGTH=54                                                                                                                                                                                                                                                                                                                                                                  | 55   | 54   | 7.00E-21  | 98.2  | 85.5 | 92.7 |

|                         |                                                                                                                                                                                                                                                                                                                                                                                                                                                                                                |     |     |          |       |      |      |                                                      |       |                      |                                                                                                                                                                                                                                                                                  |     |     |          |       |      |      |
|-------------------------|------------------------------------------------------------------------------------------------------------------------------------------------------------------------------------------------------------------------------------------------------------------------------------------------------------------------------------------------------------------------------------------------------------------------------------------------------------------------------------------------|-----|-----|----------|-------|------|------|------------------------------------------------------|-------|----------------------|----------------------------------------------------------------------------------------------------------------------------------------------------------------------------------------------------------------------------------------------------------------------------------|-----|-----|----------|-------|------|------|
| Rsa1.0_00055.1.g3043.t1 | refNP_566263.1  Pectin lyase-like protein [Arabidopsis thaliana] gi 6671966 gb AAF23225.1 AC013454.12 putative pectinacetyltransferase [Arabidopsis thaliana] gi 16226325 gb AAL16135.1 AF428303.1 AT3g05910/F2O10.3 [Arabidopsis thaliana] gi 15292827 gb AAK92782.1  putative pectinacetyltransferase [Arabidopsis thaliana] gi 20465793 gb AAM20385.1  putative pectinacetyltransferase [Arabidopsis thaliana] gi 332640793 gb AEE74314.1  Pectin lyase-like protein [Arabidopsis thaliana] | 416 | 415 | 0        | 99.8  | 93.0 | 96.6 | Pectin lyase-like protein                            | gbpln | Arabidopsis thaliana | AT3G05910.1   Symbols:   Pectinacetyltransferase family protein   chr3:1764509-1767240 REVERSE LENGTH=415                                                                                                                                                                        | 416 | 415 | 0        | 99.8  | 93.0 | 96.6 |
| Rsa1.0_00055.1.g3044.t1 | refXP_002882441.1  hypothetical protein ARALYDRAFT_896692 [Arabidopsis lyrata subsp. lyrata] gi 297328281 gb EFH58700.1  hypothetical protein ARALYDRAFT_896692 [Arabidopsis lyrata subsp. lyrata]                                                                                                                                                                                                                                                                                             | 218 | 219 | 9.00E-97 | 100.5 | 80.7 | 88.5 | hypothetical protein ARALYDRAFT_896692               | gbpln | Arabidopsis lyrata   | AT3G05930.1   Symbols: GLP8   germin-like protein 8   chr3:1770377-1771183 FORWARD LENGTH=219                                                                                                                                                                                    | 218 | 219 | 2.00E-98 | 100.5 | 80.3 | 88.5 |
| Rsa1.0_00055.1.g3045.t1 | refXP_002884544.1  hypothetical protein ARALYDRAFT_896695 [Arabidopsis lyrata subsp. lyrata] gi 297330384 gb EFH60803.1  hypothetical protein ARALYDRAFT_896695 [Arabidopsis lyrata subsp. lyrata]                                                                                                                                                                                                                                                                                             | 103 | 101 | 2.00E-21 | 98.1  | 80.6 | 82.5 | hypothetical protein ARALYDRAFT_896695               | gbpln | Arabidopsis lyrata   | AT5G26731.1   Symbols:   unknown protein; Has 30201 Blast hits to 17322 proteins in 780 species: Archae - 12; Bacteria - 1396; Metazoa - 17338; Fungi - 3422; Plants - 5037; Viruses - 0; Other Eukaryotes - 2996 (source: NCBI BLINK).   chr5:9295676-9295975 FORWARD LENGTH=99 | 103 | 99  | 4.00E-17 | 96.1  | 44.7 | 53.4 |
| Rsa1.0_00055.1.g3046.t1 | refNP_198008.1  TCP-1/cpn60 chaperonin family protein [Arabidopsis thaliana] gi 27754225 gb AAO22566.1  putative chaperonin gamma chain [Arabidopsis thaliana] gi 332006171 gb AED93554.1  TCP-1/cpn60 chaperonin family protein [Arabidopsis thaliana]                                                                                                                                                                                                                                        | 559 | 555 | 0        | 99.3  | 94.1 | 97.5 | TCP-1/cpn60 chaperonin family protein                | gbpln | Arabidopsis thaliana | AT5G26360.1   Symbols:   TCP-1/cpn60 chaperonin family protein   chr5:9255561-9256891 REVERSE LENGTH=555                                                                                                                                                                         | 559 | 555 | 0        | 99.3  | 94.1 | 97.5 |
| Rsa1.0_00055.1.g3047.t1 | refNP_187247.1  sugar transport protein 6 [Arabidopsis thaliana] gi 75337175 sp Q9SFG0.1 STP6_ARATH RecName: Full=Sugar transport protein 6; AltName: Full=Hexose transporter 6 gi 6671961 gb AAF23220.1 AC013454.7 putative hexose transporter [Arabidopsis thaliana] gi 15487256 emb CAC69073.1  STP6 protein [Arabidopsis thaliana] gi 332640802 gb AEE74323.1  sugar transport protein 6 [Arabidopsis thaliana]                                                                            | 508 | 507 | 0        | 99.8  | 89.0 | 94.7 | sugar transport protein 6                            | gbpln | Arabidopsis thaliana | AT3G05960.1   Symbols: ATSTP6, STP6   sugar transporter 6   chr3:1783587-1785334 REVERSE LENGTH=507                                                                                                                                                                              | 508 | 507 | 0        | 99.8  | 89.0 | 94.7 |
| Rsa1.0_00055.1.g3048.t1 | emb CAA96522.1  AMP-binding protein [Brassica napus]                                                                                                                                                                                                                                                                                                                                                                                                                                           | 686 | 677 | 0        | 98.7  | 95.0 | 96.8 | AMP-binding protein                                  | gbpln | Brassica napus       | AT3G05970.1   Symbols: LACS6, ATLACS6   long-chain acyl-CoA synthetase 6   chr3:1786510-1791746 REVERSE LENGTH=701                                                                                                                                                               | 686 | 701 | 0        | 102.2 | 92.9 | 95.5 |
| Rsa1.0_00055.1.g3049.t1 | refXP_002882446.1  hypothetical protein ARALYDRAFT_896708 [Arabidopsis lyrata subsp. lyrata] gi 297328286 gb EFH58705.1  hypothetical protein ARALYDRAFT_896708 [Arabidopsis lyrata subsp. lyrata]                                                                                                                                                                                                                                                                                             | 246 | 299 | 5.00E-63 | 121.5 | 69.5 | 78.5 | hypothetical protein ARALYDRAFT_896708               | gbpln | Arabidopsis lyrata   | AT3G06020.1   Symbols:   Protein of unknown function (DUF3049)   chr3:1813267-1814169 FORWARD LENGTH=300                                                                                                                                                                         | 246 | 300 | 3.00E-64 | 122.0 | 72.0 | 81.7 |
| Rsa1.0_00055.1.g3050.t1 | refNP_566267.1  glycoprotein membrane precursor GPI-anchored protein [Arabidopsis thaliana] gi 34395875 sp Q84MC0.1 UGPI4_ARATH RecName: Full=Uncharacterized GPI-anchored protein At3g06035; Flags: Precursor gi 30102608 gb AAP21222.1  At3g06035 [Arabidopsis thaliana] gi 110735987 db BAE9958.1  hypothetical protein [Arabidopsis thaliana] gi 332640812 gb AEE74333.1  glycoprotein membrane precursor GPI-anchored protein [Arabidopsis thaliana]                                      | 342 | 200 | 2.00E-70 | 58.5  | 38.3 | 44.2 | glycoprotein membrane precursor GPI-anchored protein | gbpln | Arabidopsis thaliana | AT3G06035.1   Symbols:   Glycoprotein membrane precursor GPI-anchored   chr3:1823172-1824110 REVERSE LENGTH=200                                                                                                                                                                  | 342 | 200 | 6.00E-73 | 58.5  | 38.3 | 44.2 |

|                         |                                                                                                                                                                                                                                                                                                                                                                                                                                                                                                                                                                                                                                                                                                                                                                     |     |     |           |       |      |      |                                        |       |                      |                                                                                                                                                                                                                                                                                                                                            |     |     |           |       |      |      |
|-------------------------|---------------------------------------------------------------------------------------------------------------------------------------------------------------------------------------------------------------------------------------------------------------------------------------------------------------------------------------------------------------------------------------------------------------------------------------------------------------------------------------------------------------------------------------------------------------------------------------------------------------------------------------------------------------------------------------------------------------------------------------------------------------------|-----|-----|-----------|-------|------|------|----------------------------------------|-------|----------------------|--------------------------------------------------------------------------------------------------------------------------------------------------------------------------------------------------------------------------------------------------------------------------------------------------------------------------------------------|-----|-----|-----------|-------|------|------|
| Rsa1.0_00055.1.g3051.t1 | ref[XP_002884557.1] predicted protein [Arabidopsis lyrata subsp. lyrata] gi 297330397 gb EFH60816.1  predicted protein [Arabidopsis lyrata subsp. lyrata]                                                                                                                                                                                                                                                                                                                                                                                                                                                                                                                                                                                                           | 148 | 152 | 9.00E-52  | 102.7 | 75.0 | 87.2 | predicted protein                      | gbpln | Arabidopsis lyrata   | AT3G06070.1   Symbols:   unknown protein; BEST Arabidopsis thaliana protein match is: unknown protein (TAIR:AT5G19190.1); Has 33 Blast hits to 33 proteins in 12 species: Archae - 0; Bacteria - 0; Metazoa - 1; Fungi - 0; Plants - 32; Viruses - 0; Other Eukaryotes - 0 (source: NCBI BLink).   chr3:1831305-1831846 REVERSE LENGTH=151 | 148 | 151 | 4.00E-52  | 102.0 | 74.3 | 85.8 |
| Rsa1.0_00055.1.g3052.t1 | gb EOA30487.1  hypothetical protein CARUB_v10013611mg [Capsella rubella]                                                                                                                                                                                                                                                                                                                                                                                                                                                                                                                                                                                                                                                                                            | 458 | 473 | 0         | 103.3 | 84.9 | 91.5 | hypothetical protein CARUB_v10013611mg | gbpln | Capsella rubella     | AT3G06080.2   Symbols:   Plant protein of unknown function (DUF828)   chr3:1834959-1837524 REVERSE LENGTH=469                                                                                                                                                                                                                              | 458 | 469 | 0         | 102.4 | 83.8 | 90.4 |
| Rsa1.0_00055.1.g3053.t1 | ref[NP_187263.1] transcription factor MUTE [Arabidopsis thaliana] gi 75312289 sp Q9M8K6.1 MUTE_ARATH RecName: Full=Transcription factor MUTE; AltName: Full=Basic helix-loop-helix protein 45; Short=AtbHLH45; Short=bHLH 45; AltName: Full=Transcription factor EN 20; AltName: Full=bHLH transcription factor bHLH045 gi 6862916 gb AAF30305.1 AC018907.5 putative helix-loop-helix DNA-binding protein [Arabidopsis thaliana] gi 91806385 gb ABE65920.1  basic helix-loop-helix family protein [Arabidopsis thaliana] gi 113206517 gb ABI34465.1  basic helix-loop-helix protein [Arabidopsis thaliana] gi 114446460 gb ABI74926.1  helix-loop-helix protein [Arabidopsis thaliana] gi 332640826 gb AEE74347.1  transcription factor MUTE [Arabidopsis thaliana] | 205 | 202 | 1.00E-102 | 98.5  | 91.2 | 95.1 | transcription factor MUTE              | gbpln | Arabidopsis thaliana | AT3G06120.1   Symbols: MUTE   basic helix-loop-helix (bHLH) DNA-binding superfamily protein   chr3:1846531-1848016 FORWARD LENGTH=202                                                                                                                                                                                                      | 205 | 202 | 1.00E-104 | 98.5  | 91.2 | 95.1 |
| Rsa1.0_00055.1.g3054.t1 | ref[XP_002884560.1] hypothetical protein ARALYDRAFT_477915 [Arabidopsis lyrata subsp. lyrata] gi 297330400 gb EFH60819.1  hypothetical protein ARALYDRAFT_477915 [Arabidopsis lyrata subsp. lyrata]                                                                                                                                                                                                                                                                                                                                                                                                                                                                                                                                                                 | 469 | 445 | 1.00E-68  | 94.9  | 38.0 | 41.6 | hypothetical protein ARALYDRAFT_477915 | gbpln | Arabidopsis lyrata   | AT3G06130.2   Symbols:   Heavy metal transport/detoxification superfamily protein   chr3:1853193-1854673 REVERSE LENGTH=349                                                                                                                                                                                                                | 469 | 349 | 5.00E-66  | 74.4  | 36.7 | 40.5 |
| Rsa1.0_00055.1.g3055.t1 | ref[NP_187266.1] uncharacterized protein [Arabidopsis thaliana] gi 6862919 gb AAF30308.1 AC018907.8 unknown protein [Arabidopsis thaliana] gi 332640832 gb AEE74353.1  uncharacterized protein AT3G06150 [Arabidopsis thaliana]                                                                                                                                                                                                                                                                                                                                                                                                                                                                                                                                     | 586 | 594 | 0         | 101.4 | 80.5 | 89.8 | uncharacterized protein                | gbpln | Arabidopsis thaliana | AT3G06150.1   Symbols:   unknown protein; BEST Arabidopsis thaliana protein match is: unknown protein (TAIR:AT5G19060.1); Has 61 Blast hits to 59 proteins in 10 species: Archae - 0; Bacteria - 0; Metazoa - 3; Fungi - 0; Plants - 58; Viruses - 0; Other Eukaryotes - 0 (source: NCBI BLink).   chr3:1861971-1863755 REVERSE LENGTH=594 | 586 | 594 | 0         | 101.4 | 80.5 | 89.8 |
| Rsa1.0_00055.1.g3056.t1 | gb EOA30708.1  hypothetical protein CARUB_v10013845mg [Capsella rubella]                                                                                                                                                                                                                                                                                                                                                                                                                                                                                                                                                                                                                                                                                            | 400 | 407 | 0         | 101.8 | 93.0 | 96.5 | hypothetical protein CARUB_v10013845mg | gbpln | Capsella rubella     | AT3G06190.1   Symbols: ATBPM2, BPM2   BTB-POZ and MATH domain 2   chr3:1874577-1876575 REVERSE LENGTH=406                                                                                                                                                                                                                                  | 400 | 406 | 0         | 101.5 | 91.5 | 95.5 |
| Rsa1.0_00055.1.g3057.t1 | ref[NP_566277.2] F-box/kelch-repeat protein [Arabidopsis thaliana] gi 75151183 sp Q8GX7.1 FBK50_ARATH RecName: Full=F-box/kelch-repeat protein At3g06240 gi 26451648 dbj BAC42921.1  unknown protein [Arabidopsis thaliana] gi 29824145 gb AAP04033.1  putative F-box protein family [Arabidopsis thaliana] gi 332640843 gb AEE74364.1  F-box/kelch-repeat protein [Arabidopsis thaliana]                                                                                                                                                                                                                                                                                                                                                                           | 405 | 427 | 1.00E-127 | 105.4 | 61.7 | 74.6 | F-box/kelch-repeat protein             | gbpln | Arabidopsis thaliana | AT3G06240.1   Symbols:   F-box family protein   chr3:1887336-1888619 FORWARD LENGTH=427                                                                                                                                                                                                                                                    | 405 | 427 | 1.00E-129 | 105.4 | 61.7 | 74.6 |
| Rsa1.0_00055.1.g3058.t1 | ref[NP_566277.2] F-box/kelch-repeat protein [Arabidopsis thaliana] gi 75151183 sp Q8GX7.1 FBK50_ARATH RecName: Full=F-box/kelch-repeat protein At3g06240 gi 26451648 dbj BAC42921.1  unknown protein [Arabidopsis thaliana] gi 29824145 gb AAP04033.1  putative F-box protein family [Arabidopsis thaliana] gi 332640843 gb AEE74364.1  F-box/kelch-repeat protein [Arabidopsis thaliana]                                                                                                                                                                                                                                                                                                                                                                           | 411 | 427 | 1.00E-144 | 103.9 | 67.9 | 78.8 | F-box/kelch-repeat protein             | gbpln | Arabidopsis thaliana | AT3G06240.1   Symbols:   F-box family protein   chr3:1887336-1888619 FORWARD LENGTH=427                                                                                                                                                                                                                                                    | 411 | 427 | 2.33E-156 | 103.9 | 67.9 | 78.8 |



|                         |                                                                                                                                                                                                                                                                                                                               |     |      |           |       |      |      |                                                         |       |                      |                                                                                                                                                                                                                                                                                                                                                                                                                                                                                                |     |     |           |       |      |      |
|-------------------------|-------------------------------------------------------------------------------------------------------------------------------------------------------------------------------------------------------------------------------------------------------------------------------------------------------------------------------|-----|------|-----------|-------|------|------|---------------------------------------------------------|-------|----------------------|------------------------------------------------------------------------------------------------------------------------------------------------------------------------------------------------------------------------------------------------------------------------------------------------------------------------------------------------------------------------------------------------------------------------------------------------------------------------------------------------|-----|-----|-----------|-------|------|------|
| Rsa1.0_00055.1.g3059.t1 | ref[XP_002869401.1] aspartyl protease family [Arabidopsis lyrata subsp. lyrata] gi 297315237 gb EFH45660.1  aspartyl protease family [Arabidopsis lyrata subsp. lyrata]                                                                                                                                                       | 399 | 438  | 1.00E-35  | 109.8 | 28.3 | 42.9 | aspartyl protease family                                | gbpln | Arabidopsis lyrata   | AT4G30030.1   Symbols:   Eukaryotic aspartyl protease family protein   chr4:14682210-14683484 REVERSE LENGTH=424                                                                                                                                                                                                                                                                                                                                                                               | 399 | 424 | 6.00E-31  | 106.3 | 25.6 | 41.9 |
| Rsa1.0_00055.1.g3060.t1 | dbj BAB08714.1  non-LTR retroelement reverse transcriptase-like protein [Arabidopsis thaliana]                                                                                                                                                                                                                                | 137 | 1197 | 2.00E-13  | 873.7 | 27.7 | 46.7 | non-LTR retroelement reverse transcriptase-like protein | gbpln | Arabidopsis thaliana | #                                                                                                                                                                                                                                                                                                                                                                                                                                                                                              | #   | #   | #         | #     | #    | #    |
| Rsa1.0_00055.1.g3061.t1 | gb AAD22286.1  putative non-LTR retroelement reverse transcriptase [Arabidopsis thaliana]                                                                                                                                                                                                                                     | 153 | 1311 | 1.00E-14  | 856.9 | 30.1 | 43.8 | putative non-LTR retroelement reverse transcriptase     | gbpln | Arabidopsis thaliana | AT1G10000.1   Symbols:   Ribonuclease H-like superfamily protein   chr1:3263877-3264788 REVERSE LENGTH=303                                                                                                                                                                                                                                                                                                                                                                                     | 153 | 303 | 2.00E-11  | 198.0 | 27.5 | 44.4 |
| Rsa1.0_00055.1.g3062.t1 | ref[XP_002882653.1] predicted protein [Arabidopsis lyrata subsp. lyrata] gi 297328493 gb EFH58912.1  predicted protein [Arabidopsis lyrata subsp. lyrata]                                                                                                                                                                     | 260 | 173  | 4.00E-20  | 66.5  | 26.9 | 36.2 | predicted protein                                       | gbpln | Arabidopsis lyrata   | #                                                                                                                                                                                                                                                                                                                                                                                                                                                                                              | #   | #   | #         | #     | #    | #    |
| Rsa1.0_00055.1.g3063.t1 | ref NP_187318.2  fip1 motif-containing protein [Arabidopsis thaliana] gi 334185148 ref NP_001189830.1  fip1 motif-containing protein [Arabidopsis thaliana] gi 332640906 gb AEE74427.1  fip1 motif-containing protein [Arabidopsis thaliana] gi 332640907 gb AEE74428.1  fip1 motif-containing protein [Arabidopsis thaliana] | 991 | 997  | 0         | 100.6 | 58.1 | 68.5 | fip1 motif-containing protein                           | gbpln | Arabidopsis thaliana | AT3G66652.2   Symbols:   fip1 motif-containing protein   chr3:2084030-2087556 FORWARD LENGTH=997                                                                                                                                                                                                                                                                                                                                                                                               | 991 | 997 | 0         | 100.6 | 58.1 | 68.5 |
| Rsa1.0_00056.1.g3064.t1 | dbj BAH56865.1  AT5G61660 [Arabidopsis thaliana]                                                                                                                                                                                                                                                                              | 141 | 113  | 1.00E-25  | 80.1  | 62.4 | 64.5 | AT5G61660                                               | gbpln | Arabidopsis thaliana | AT5G61660.1   Symbols:   glycine-rich protein   chr5:24779458-24779862 REVERSE LENGTH=134                                                                                                                                                                                                                                                                                                                                                                                                      | 141 | 134 | 1.00E-27  | 95.0  | 42.6 | 44.7 |
| Rsa1.0_00056.1.g3065.t1 | gb ADF57182.1  AP2/ERF transcription factor [Brassica napus]                                                                                                                                                                                                                                                                  | 204 | 200  | 2.00E-87  | 98.0  | 83.8 | 89.2 | AP2/ERF transcription factor                            | gbpln | Brassica napus       | AT5G61590.1   Symbols:   Integrase-type DNA-binding superfamily protein   chr5:24764653-24765258 REVERSE LENGTH=201                                                                                                                                                                                                                                                                                                                                                                            | 204 | 201 | 1.00E-84  | 98.5  | 83.3 | 87.7 |
| Rsa1.0_00056.1.g3066.t1 | gb EOA14619.1  hypothetical protein CARUB_v10027877mg [Capsella rubella]                                                                                                                                                                                                                                                      | 264 | 849  | 1.00E-142 | 321.6 | 92.0 | 95.1 | hypothetical protein CARUB_v10027877mg                  | gbpln | Capsella rubella     | AT5G61550.1   Symbols:   U-box domain-containing protein kinase family protein   chr5:24748325-24751558 FORWARD LENGTH=845                                                                                                                                                                                                                                                                                                                                                                     | 264 | 845 | 1.00E-139 | 320.1 | 88.6 | 93.6 |
| Rsa1.0_00056.1.g3067.t1 | gb EOA14619.1  hypothetical protein CARUB_v10027877mg [Capsella rubella]                                                                                                                                                                                                                                                      | 794 | 849  | 0         | 106.9 | 81.4 | 87.8 | hypothetical protein CARUB_v10027877mg                  | gbpln | Capsella rubella     | AT5G61550.2   Symbols:   U-box domain-containing protein kinase family protein   chr5:24748325-24751805 FORWARD LENGTH=860                                                                                                                                                                                                                                                                                                                                                                     | 794 | 860 | 0         | 108.3 | 78.2 | 86.9 |
| Rsa1.0_00056.1.g3068.t1 | ref[XP_002864736.1] small G protein family protein [Arabidopsis lyrata subsp. lyrata] gi 297310571 gb EFH40995.1  small G protein family protein [Arabidopsis lyrata subsp. lyrata]                                                                                                                                           | 376 | 376  | 0         | 100.0 | 93.4 | 96.8 | small G protein family protein                          | gbpln | Arabidopsis lyrata   | AT5G61530.1   Symbols:   small G protein family protein / RhoGAP family protein   chr5:24742630-24744586 FORWARD LENGTH=376                                                                                                                                                                                                                                                                                                                                                                    | 376 | 376 | 0         | 100.0 | 91.5 | 96.0 |
| Rsa1.0_00056.1.g3069.t1 | gb EOA15037.1  hypothetical protein CARUB_v10028392mg [Capsella rubella]                                                                                                                                                                                                                                                      | 411 | 400  | 0         | 97.3  | 85.2 | 90.5 | hypothetical protein CARUB_v10028392mg                  | gbpln | Capsella rubella     | AT5G61510.1   Symbols:   GroES-like zinc-binding alcohol dehydrogenase family protein   chr5:24737084-24738975 REVERSE LENGTH=406                                                                                                                                                                                                                                                                                                                                                              | 411 | 406 | 0         | 98.8  | 86.6 | 90.8 |
| Rsa1.0_00056.1.g3070.t1 | gb AAO85536.1  terpene synthase [Arabidopsis thaliana]                                                                                                                                                                                                                                                                        | 546 | 603  | 0         | 110.4 | 60.4 | 79.7 | terpene synthase                                        | gbpln | Arabidopsis thaliana | AT3G29410.1   Symbols:   Terpenoid cyclases/Protein prenyltransferases superfamily protein   chr3:11302574-11305060 REVERSE LENGTH=603                                                                                                                                                                                                                                                                                                                                                         | 546 | 603 | 0         | 110.4 | 61.0 | 78.8 |
| Rsa1.0_00056.1.g3071.t1 | gb ACR48179.1  MYB domain protein 28-2 [Brassica rapa subsp. pekinensis]                                                                                                                                                                                                                                                      | 361 | 357  | 0         | 98.9  | 90.6 | 93.1 | MYB domain protein 28-2                                 | gbpln | Brassica rapa        | AT5G61420.2   Symbols: MYB28, HAG1   myb domain protein 28   chr5:24689475-24690795 REVERSE LENGTH=366                                                                                                                                                                                                                                                                                                                                                                                         | 361 | 366 | 1.00E-166 | 101.4 | 80.9 | 88.6 |
| Rsa1.0_00056.1.g3072.t1 | #                                                                                                                                                                                                                                                                                                                             | #   | #    | #         | #     | #    | #    | -                                                       | ----  | ----                 | AT5G61412.1   Symbols:   unknown protein; FUNCTIONS IN: molecular_function unknown; INVOLVED IN: biological_process unknown; LOCATED IN: cellular_component unknown; BEST Arabidopsis thaliana protein match is: unknown protein (TAIR:AT4G33145.1); Has 30201 Blast hits to 17322 proteins in 780 species: Archaea - 12; Bacteria - 1396; Metazoa - 17338; Fungi - 3422; Plants - 5037; Viruses - 0; Other Eukaryotes - 2996 (source: NCBI BLINK).   chr5:24686761-24686994 REVERSE LENGTH=77 | 76  | 77  | 3.00E-13  | 101.3 | 43.4 | 46.1 |
| Rsa1.0_00056.1.g3073.t1 | ref[XP_002864731.1] pentatricopeptide repeat-containing protein [Arabidopsis lyrata subsp. lyrata] gi 297310566 gb EFH40990.1  pentatricopeptide repeat-containing protein [Arabidopsis lyrata subsp. lyrata]                                                                                                                 | 645 | 732  | 0         | 113.5 | 76.4 | 86.7 | pentatricopeptide repeat-containing protein             | gbpln | Arabidopsis lyrata   | AT5G61400.1   Symbols:   Pentatricopeptide repeat (PPR) superfamily protein   chr5:24681550-24683514 FORWARD LENGTH=654                                                                                                                                                                                                                                                                                                                                                                        | 645 | 654 | 0         | 101.4 | 76.0 | 85.4 |
| Rsa1.0_00056.1.g3074.t1 | #                                                                                                                                                                                                                                                                                                                             | #   | #    | #         | #     | #    | #    | -                                                       | ----  | ----                 | #                                                                                                                                                                                                                                                                                                                                                                                                                                                                                              | #   | #   | #         | #     | #    | #    |

|                         |                                                                                                                                                                                                        |     |     |           |       |      |      |                                                 |       |                      |                                                                                                                                                                                                                                                                                                                                                                      |     |     |           |       |      |      |  |
|-------------------------|--------------------------------------------------------------------------------------------------------------------------------------------------------------------------------------------------------|-----|-----|-----------|-------|------|------|-------------------------------------------------|-------|----------------------|----------------------------------------------------------------------------------------------------------------------------------------------------------------------------------------------------------------------------------------------------------------------------------------------------------------------------------------------------------------------|-----|-----|-----------|-------|------|------|--|
| Rsa1.0_00056.1.g3075.t1 | refNP_200947.3  exonuclease-like protein [Arabidopsis thaliana] gi111074224 gb ABH04485.1  At5g61390 [Arabidopsis thaliana] gi332010078 gb AED97461.1  exonuclease-like protein [Arabidopsis thaliana] | 335 | 487 | 1.00E-145 | 145.4 | 77.3 | 84.8 | exonuclease-like protein                        | gbpln | Arabidopsis thaliana | AT5G61390.1   Symbols:   Polynucleotidyl transferase, ribonuclease H-like superfamily protein   chr5:24678802-24680857 REVERSE LENGTH=487                                                                                                                                                                                                                            | 335 | 487 | 1.00E-148 | 145.4 | 77.3 | 84.8 |  |
| Rsa1.0_00056.1.g3076.t1 | gb ADA58344.1  pseudo-response regulator 1b [Brassica rapa]                                                                                                                                            | 549 | 509 | 0         | 92.7  | 83.6 | 86.2 | pseudo-response regulator 1b                    | gbpln | Brassica rapa        | AT5G61380.1   Symbols: TOC1, APRR1, PRR1, AtTOC1   CCT motif-containing response regulator protein   chr5:24675540-24678176 FORWARD LENGTH=618                                                                                                                                                                                                                       | 549 | 618 | 0         | 112.6 | 84.3 | 89.8 |  |
| Rsa1.0_00056.1.g3077.t1 | gb EOA14352.1  hypothetical protein CARUB_v10027533mg [Capsella rubella]                                                                                                                               | 836 | 842 | 0         | 100.7 | 88.2 | 93.9 | hypothetical protein CARUB_v10027533mg          | gbpln | Capsella rubella     | AT5G61350.1   Symbols:   Protein kinase superfamily protein   chr5:24667973-24670501 FORWARD LENGTH=842                                                                                                                                                                                                                                                              | 836 | 842 | 0         | 100.7 | 87.6 | 92.9 |  |
| Rsa1.0_00056.1.g3078.t1 | gb EOA13720.1  hypothetical protein CARUB_v10026789mg [Capsella rubella]                                                                                                                               | 319 | 322 | 1.00E-131 | 100.9 | 80.3 | 89.7 | hypothetical protein CARUB_v10026789mg          | gbpln | Capsella rubella     | AT5G61340.1   Symbols:   unknown protein; BEST Arabidopsis thaliana protein match is: unknown protein (TAIR-AT1G26650.1); Has 30201 Blast hits to 17322 proteins in 780 species: Archaea - 12; Bacteria - 1396; Metazoa - 17338; Fungi - 3422; Plants - 5037; Viruses - 0; Other Eukaryotes - 2996 (source: NCBI BLINK).   chr5:24662064-24663044 REVERSE LENGTH=326 | 319 | 326 | 1.00E-132 | 102.2 | 82.4 | 89.7 |  |
| Rsa1.0_00056.1.g3079.t1 | gb EOA15044.1  hypothetical protein CARUB_v10028402mg [Capsella rubella]                                                                                                                               | 190 | 447 | 2.00E-19  | 235.3 | 23.7 | 24.7 | hypothetical protein CARUB_v10028402mg          | gbpln | Capsella rubella     | AT5G61330.1   Symbols:   rRNA processing protein-related   chr5:24657287-24660103 REVERSE LENGTH=436                                                                                                                                                                                                                                                                 | 190 | 436 | 3.00E-21  | 229.5 | 23.2 | 23.7 |  |
| Rsa1.0_00056.1.g3080.t1 | gb EOA13427.1  hypothetical protein CARUB_v10026466mg [Capsella rubella]                                                                                                                               | 390 | 423 | 1.00E-82  | 108.5 | 51.5 | 65.4 | hypothetical protein CARUB_v10026466mg          | gbpln | Capsella rubella     | AT5G62510.1   Symbols:   F-box family protein   chr5:25095373-25096635 REVERSE LENGTH=420                                                                                                                                                                                                                                                                            | 390 | 420 | 3.00E-80  | 107.7 | 49.2 | 62.6 |  |
| Rsa1.0_00056.1.g3081.t1 | # # # # # # # #                                                                                                                                                                                        |     |     |           |       |      |      | -                                               | ----  | ----                 | # # # # # # # #                                                                                                                                                                                                                                                                                                                                                      |     |     |           |       |      |      |  |
| Rsa1.0_00056.1.g3082.t1 | gb AGJ70091.1  LRR-like disease resistance protein [Brassica oleracea var. italica]                                                                                                                    | 327 | 326 | 1.00E-178 | 99.7  | 93.3 | 95.4 | LRR-like disease resistance protein             | gbpln | Brassica oleracea    | AT5G61240.1   Symbols:   Leucine-rich repeat (LRR) family protein   chr5:24629485-24631958 FORWARD LENGTH=326                                                                                                                                                                                                                                                        | 327 | 326 | 1.00E-179 | 99.7  | 92.0 | 95.1 |  |
| Rsa1.0_00056.1.g3083.t1 | gb EOA14101.1  hypothetical protein CARUB_v10027241mg [Capsella rubella]                                                                                                                               | 241 | 173 | 4.00E-81  | 71.8  | 60.2 | 63.1 | hypothetical protein CARUB_v10027241mg          | gbpln | Capsella rubella     | AT5G61230.1   Symbols:   Ankyrin repeat family protein   chr5:24628254-24628778 FORWARD LENGTH=174                                                                                                                                                                                                                                                                   | 241 | 174 | 5.00E-81  | 72.2  | 58.1 | 61.4 |  |
| Rsa1.0_00056.1.g3084.t2 | ref XP_002864722.1  hypothetical protein ARALYDRAFT_496271 [Arabidopsis lyrata subsp. lyrata] gi 297310557 gb EFH40981.1  hypothetical protein ARALYDRAFT_496271 [Arabidopsis lyrata subsp. lyrata]    | 707 | 955 | 1.00E-165 | 135.1 | 59.1 | 68.7 | hypothetical protein ARALYDRAFT_496271          | gbpln | Arabidopsis lyrata   | AT5G61190.1   Symbols:   putative endonuclease or glycosyl hydrolase with C2H2-type zinc finger domain   chr5:24615480-24619886 FORWARD LENGTH=995                                                                                                                                                                                                                   | 707 | 995 | 1.00E-143 | 140.7 | 50.4 | 59.7 |  |
| Rsa1.0_00056.1.g3085.t1 | gb EOA14082.1  hypothetical protein CARUB_v10027219mg, partial [Capsella rubella]                                                                                                                      | 143 | 180 | 1.00E-75  | 125.9 | 95.8 | 96.5 | hypothetical protein CARUB_v10027219mg, partial | gbpln | Capsella rubella     | AT5G61170.1   Symbols:   Ribosomal protein S19e family protein   chr5:24611158-24612202 FORWARD LENGTH=143                                                                                                                                                                                                                                                           | 143 | 143 | 9.00E-78  | 100.0 | 96.5 | 96.5 |  |
| Rsa1.0_00056.1.g3086.t2 | gb EOA13076.1  hypothetical protein CARUB_v10026081mg [Capsella rubella]                                                                                                                               | 661 | 626 | 0         | 94.7  | 76.7 | 83.1 | hypothetical protein CARUB_v10026081mg          | gbpln | Capsella rubella     | AT5G61150.2   Symbols: VIP4   leo1-like family protein   chr5:24603846-24607528 REVERSE LENGTH=623                                                                                                                                                                                                                                                                   | 661 | 623 | 0         | 94.3  | 75.6 | 82.6 |  |
| Rsa1.0_00056.1.g3087.t1 | gb EOA14034.1  hypothetical protein CARUB_v10027167mg [Capsella rubella]                                                                                                                               | 199 | 198 | 3.00E-78  | 99.5  | 76.4 | 84.4 | hypothetical protein CARUB_v10027167mg          | gbpln | Capsella rubella     | AT5G61130.1   Symbols: PDCB1   plasmodesmata callose-binding protein 1   chr5:24587438-24589369 REVERSE LENGTH=201                                                                                                                                                                                                                                                   | 199 | 201 | 1.00E-67  | 101.0 | 74.4 | 80.4 |  |
| Rsa1.0_00056.1.g3088.t1 | ref XP_002866412.1  hypothetical protein ARALYDRAFT_919345 [Arabidopsis lyrata subsp. lyrata] gi 297312247 gb EFH42671.1  hypothetical protein ARALYDRAFT_919345 [Arabidopsis lyrata subsp. lyrata]    | 681 | 660 | 0         | 96.9  | 79.0 | 85.5 | hypothetical protein ARALYDRAFT_919345          | gbpln | Arabidopsis lyrata   | AT5G61060.1   Symbols: HDA05, HDA5, ATHDA5   histone deacetylase 5   chr5:24567137-24570917 REVERSE LENGTH=660                                                                                                                                                                                                                                                       | 681 | 660 | 0         | 96.9  | 78.1 | 85.3 |  |
| Rsa1.0_00056.1.g3089.t1 | ref XP_002866412.1  hypothetical protein ARALYDRAFT_919345 [Arabidopsis lyrata subsp. lyrata] gi 297312247 gb EFH42671.1  hypothetical protein ARALYDRAFT_919345 [Arabidopsis lyrata subsp. lyrata]    | 223 | 660 | 8.00E-96  | 296.0 | 73.1 | 84.3 | hypothetical protein ARALYDRAFT_919345          | gbpln | Arabidopsis lyrata   | AT5G61060.2   Symbols: HDA05   histone deacetylase 5   chr5:24567137-24570917 REVERSE LENGTH=664                                                                                                                                                                                                                                                                     | 223 | 664 | 3.00E-98  | 297.8 | 74.0 | 84.3 |  |
| Rsa1.0_00056.1.g3090.t1 | gb EOA13791.1  hypothetical protein CARUB_v10026886mg [Capsella rubella]                                                                                                                               | 254 | 295 | 5.00E-55  | 116.1 | 41.3 | 44.9 | hypothetical protein CARUB_v10026886mg          | gbpln | Capsella rubella     | AT5G61030.1   Symbols: GR-RBP3   glycine-rich RNA-binding protein 3   chr5:24560870-24562152 FORWARD LENGTH=309                                                                                                                                                                                                                                                      | 254 | 309 | 2.00E-55  | 121.7 | 41.3 | 45.7 |  |

|                         |                                                                                                                                                                                                                                                                                                                                                                                                                                                                           |     |      |           |       |      |      |                                                                                                                                                  |       |                      |                                                                                                                                                                    |     |     |           |       |      |      |
|-------------------------|---------------------------------------------------------------------------------------------------------------------------------------------------------------------------------------------------------------------------------------------------------------------------------------------------------------------------------------------------------------------------------------------------------------------------------------------------------------------------|-----|------|-----------|-------|------|------|--------------------------------------------------------------------------------------------------------------------------------------------------|-------|----------------------|--------------------------------------------------------------------------------------------------------------------------------------------------------------------|-----|-----|-----------|-------|------|------|
| Rsa1.0_00056.1.g3091.t1 | refNP_200908.1   Replication factor-A protein 1-like protein [Arabidopsis thaliana] gi 10177323 dbj BAB10649.1 replication protein A1 [Arabidopsis thaliana] gi 28393124 gb AAO41995.1 putative RNA helicase [Arabidopsis thaliana] gi 332010026 gb AED97409.1 Replication factor-A protein 1-like protein [Arabidopsis thaliana]                                                                                                                                         | 626 | 629  | 0         | 100.5 | 90.3 | 95.7 | Replication factor-A protein 1-like protein                                                                                                      | gbpln | Arabidopsis thaliana | AT5G61000.1   Symbols: RPA70D, ATRPA70D   Replication factor-A protein 1-related   chr5:24549682-24552641 REVERSE LENGTH=629                                       | 626 | 629 | 0         | 100.5 | 90.3 | 95.7 |
| Rsa1.0_00056.1.g3092.t1 | refNP_200906.2   nuclear transport factor 2 and RNA recognition motif domain-containing protein [Arabidopsis thaliana] gi 10177321 dbj BAB10647.1 unnamed protein product [Arabidopsis thaliana] gi 17063173 gb AAL32982.1 AT5g60980/MSL3.100 [Arabidopsis thaliana] gi 27764908 gb AAO23575.1 At5g60980/MSL3.100 [Arabidopsis thaliana] gi 332010024 gb AED97407.1 nuclear transport factor 2 and RNA recognition motif domain-containing protein [Arabidopsis thaliana] | 460 | 460  | 1.00E-171 | 100.0 | 77.8 | 84.3 | nuclear transport factor 2 and RNA recognition motif domain-containing protein                                                                   | gbpln | Arabidopsis thaliana | AT5G60980.2   Symbols:   Nuclear transport factor 2 (NTF2) family protein with RNA binding (RRM-RBD-RNP motifs) domain   chr5:24543988-24546027 FORWARD LENGTH=460 | 460 | 460 | 1.00E-173 | 100.0 | 77.8 | 84.3 |
| Rsa1.0_00056.1.g3093.t1 | gb EOA13591.1  hypothetical protein CARUB_v10026656mg [Capsella rubella]                                                                                                                                                                                                                                                                                                                                                                                                  | 341 | 359  | 1.00E-145 | 105.3 | 83.0 | 88.3 | hypothetical protein CARUB_v10026656mg                                                                                                           | gbpln | Capsella rubella     | AT5G60970.1   Symbols: TCP5   TEOSINTE BRANCHED 1, cycloidea and PCF transcription factor 5   chr5:24535570-24536652 REVERSE LENGTH=360                            | 341 | 360 | 1.00E-138 | 105.6 | 80.6 | 86.8 |
| Rsa1.0_00056.1.g3094.t1 | gb EOA14836.1  hypothetical protein CARUB_v10028146mg [Capsella rubella]                                                                                                                                                                                                                                                                                                                                                                                                  | 206 | 204  | 3.00E-89  | 99.0  | 75.7 | 82.5 | hypothetical protein CARUB_v10028146mg                                                                                                           | gbpln | Capsella rubella     | AT5G60950.1   Symbols: COBL5   COBRA-like protein 5 precursor   chr5:24527157-24528005 REVERSE LENGTH=204                                                          | 206 | 204 | 3.00E-89  | 99.0  | 74.8 | 84.0 |
| Rsa1.0_00056.1.g3095.t1 | gb EOA13179.1  hypothetical protein CARUB_v10026206mg, partial [Capsella rubella]                                                                                                                                                                                                                                                                                                                                                                                         | 456 | 537  | 0         | 117.8 | 92.8 | 96.3 | hypothetical protein CARUB_v10026206mg, partial                                                                                                  | gbpln | Capsella rubella     | AT5G60920.1   Symbols: COB   COBRA-like extracellular glycosyl-phosphatidylinositol-anchored protein family   chr5:24511466-24513932 REVERSE LENGTH=456            | 456 | 456 | 0         | 100.0 | 90.8 | 94.1 |
| Rsa1.0_00056.1.g3096.t3 | ref XP_002899590.1  hypothetical protein ARALYDRAFT_887817 [Arabidopsis lyrata subsp. lyrata] gi 297335432 gb EFH65849.1  hypothetical protein ARALYDRAFT_887817 [Arabidopsis lyrata subsp. lyrata]                                                                                                                                                                                                                                                                       | 431 | 341  | 2.00E-53  | 79.1  | 32.5 | 37.6 | hypothetical protein ARALYDRAFT_887817                                                                                                           | gbpln | Arabidopsis lyrata   | #                                                                                                                                                                  | #   | #   | #         | #     | #    | #    |
| Rsa1.0_00056.1.g3097.t1 | gb AAC28221.1  similar to reverse transcriptases (PFam: rvt.hmm, score: 60.13) [Arabidopsis thaliana]                                                                                                                                                                                                                                                                                                                                                                     | 522 | 1164 | 1.00E-105 | 223.0 | 37.4 | 54.6 | similar to reverse transcriptases (PFam: rvt.hmm, score: 60.13)                                                                                  | gbpln | Arabidopsis thaliana | AT3G24255.1   Symbols:   RNA-directed DNA polymerase (reverse transcriptase)-related family protein   chr3:8789471-8793208 FORWARD LENGTH=746                      | 522 | 746 | 2.00E-51  | 142.9 | 23.9 | 36.4 |
| Rsa1.0_00056.1.g3098.t1 | emb CAD47852.1  MADS-box protein FUL-d [Brassica oleracea var. botrytis] gi 89279392 gb ADD67165.1  FUL-like protein [Brassica napus]                                                                                                                                                                                                                                                                                                                                     | 162 | 242  | 4.00E-85  | 149.4 | 98.1 | 98.1 | MADS-box protein FUL-d                                                                                                                           | gbpln | Brassica napus       | AT5G60910.1   Symbols: AGL8, FUL   AGAMOUS-like 8   chr5:24502736-24506013 REVERSE LENGTH=242                                                                      | 162 | 242 | 2.00E-86  | 149.4 | 96.3 | 97.5 |
| Rsa1.0_00056.1.g3099.t1 | sp Q39202.2 RLK1_ARATH RecName: Full=G-type lectin S-receptor-like serine/threonine-protein kinase RLK1; AltName: Full=Receptor-like protein kinase 1; Flags: Precursor                                                                                                                                                                                                                                                                                                   | 821 | 832  | 0         | 101.3 | 68.5 | 79.4 | RecName: Full=G-type lectin S-receptor-like serine/threonine-protein kinase RLK1; AltName: Full=Receptor-like protein kinase 1; Flags: Precursor | ----  | ----                 | AT5G60900.1   Symbols: RLK1   receptor-like protein kinase 1   chr5:24498467-24501494 REVERSE LENGTH=748                                                           | 821 | 748 | 0         | 91.1  | 64.3 | 74.1 |
| Rsa1.0_00056.1.g3100.t1 | ref XP_002866401.1  hypothetical protein ARALYDRAFT_496241 [Arabidopsis lyrata subsp. lyrata] gi 297312236 gb EFH42680.1  hypothetical protein ARALYDRAFT_496241 [Arabidopsis lyrata subsp. lyrata]                                                                                                                                                                                                                                                                       | 467 | 758  | 1.00E-162 | 162.3 | 64.5 | 73.4 | hypothetical protein ARALYDRAFT_496241                                                                                                           | gbpln | Arabidopsis lyrata   | AT5G60900.1   Symbols: RLK1   receptor-like protein kinase 1   chr5:24498467-24501494 REVERSE LENGTH=748                                                           | 467 | 748 | 1.00E-152 | 160.2 | 60.2 | 70.4 |
| Rsa1.0_00056.1.g3101.t1 | #                                                                                                                                                                                                                                                                                                                                                                                                                                                                         | #   | #    | #         | #     | #    | -    | ----                                                                                                                                             | ----  | #                    | #                                                                                                                                                                  | #   | #   | #         | #     | #    |      |
| Rsa1.0_00056.1.g3102.t1 | gb ACR48184.1  MYB domain protein 34-1 [Brassica rapa subsp. pekinensis]                                                                                                                                                                                                                                                                                                                                                                                                  | 299 | 302  | 1.00E-143 | 101.0 | 87.0 | 91.6 | MYB domain protein 34-1                                                                                                                          | gbpln | Brassica rapa        | AT5G60890.1   Symbols: ATMYB34, ATR1, MYB34   myb domain protein 34   chr5:24495029-24496220 FORWARD LENGTH=295                                                    | 299 | 295 | 1.00E-117 | 98.7  | 75.3 | 82.6 |
| Rsa1.0_00056.1.g3103.t1 | ref XP_002866400.1  hypothetical protein ARALYDRAFT_919327 [Arabidopsis lyrata subsp. lyrata] gi 297312235 gb EFH42659.1  hypothetical protein ARALYDRAFT_919327 [Arabidopsis lyrata subsp. lyrata]                                                                                                                                                                                                                                                                       | 255 | 264  | 7.00E-91  | 103.5 | 80.0 | 85.9 | hypothetical protein ARALYDRAFT_919327                                                                                                           | gbpln | Arabidopsis lyrata   | AT5G60880.1   Symbols: BASL   breaking of asymmetry in the stomatal lineage   chr5:24488553-24489703 REVERSE LENGTH=262                                            | 255 | 262 | 4.00E-92  | 102.7 | 76.9 | 83.9 |

|                         |                                                                                                                                                                                                                                                                                                                                                                                                                                                                                                               |     |     |           |       |      |      |                                                  |       |                      |                                                                                                                                                                                                                                                                                                                                                  |     |     |           |       |      |      |
|-------------------------|---------------------------------------------------------------------------------------------------------------------------------------------------------------------------------------------------------------------------------------------------------------------------------------------------------------------------------------------------------------------------------------------------------------------------------------------------------------------------------------------------------------|-----|-----|-----------|-------|------|------|--------------------------------------------------|-------|----------------------|--------------------------------------------------------------------------------------------------------------------------------------------------------------------------------------------------------------------------------------------------------------------------------------------------------------------------------------------------|-----|-----|-----------|-------|------|------|
| Rsa1.0_00056.1.g3104.t1 | refNP_200893.1   Dof zinc finger protein DOF5.4 [Arabidopsis thaliana] gi 55584037 sp Q8LDR0.2 DOF54_ARATH RecName: Full=Dof zinc finger protein DOF5.4; Short=AtDOF5.4; AltName: Full=OBF-binding protein 4 gi 10176912 dbj BAB10105.1   zinc finger protein [Arabidopsis thaliana] gi 15912271 gb AAL08269.1 AT5g60850/mae1_100 [Arabidopsis thaliana] gi 19547997 gb AAL87362.1 AT5g60850/mae1_100 [Arabidopsis thaliana] gi 332010003 gb AED97386.1 Dof zinc finger protein DOF5.4 [Arabidopsis thaliana] | 252 | 307 | 2.00E-77  | 121.8 | 74.6 | 81.0 | Dof zinc finger protein DOF5.4                   | gbpln | Arabidopsis thaliana | AT5G60850.1   Symbols: OBP4   OBF binding protein 4   chr5:24480578-24481501 FORWARD LENGTH=307                                                                                                                                                                                                                                                  | 252 | 307 | 5.00E-80  | 121.8 | 74.6 | 81.0 |
| Rsa1.0_00056.1.g3105.t1 | gb EOA14747.1   hypothetical protein CARUB_v10028041mg [Capsella rubella]                                                                                                                                                                                                                                                                                                                                                                                                                                     | 183 | 204 | 1.00E-64  | 111.5 | 72.1 | 82.5 | hypothetical protein CARUB_v10028041mg           | gbpln | Capsella rubella     | AT5G60830.1   Symbols: AtbZIP70, bZIP70   basic leucine-zipper 70   chr5:24472639-24473319 FORWARD LENGTH=206                                                                                                                                                                                                                                    | 183 | 206 | 2.00E-65  | 112.6 | 72.1 | 82.0 |
| Rsa1.0_00056.1.g3106.t1 | ref XP_002872033.1   hypothetical protein ARALYDRAFT_910314 [Arabidopsis lyrata subsp. lyrata] gi 297317870 gb EFH48292.1   hypothetical protein ARALYDRAFT_910314 [Arabidopsis lyrata subsp. lyrata] ref XP_002874111.1   hypothetical protein ARALYDRAFT_489162 [Arabidopsis lyrata subsp. lyrata] gi 297319948 gb EFH50370.1   hypothetical protein ARALYDRAFT_489162 [Arabidopsis lyrata subsp. lyrata]                                                                                                   | 251 | 281 | 1.00E-101 | 112.0 | 74.5 | 83.3 | hypothetical protein ARALYDRAFT_910314           | gbpln | Arabidopsis lyrata   | AT5G23070.1   Symbols:   Thymidine kinase   chr5:7741979-7742827 FORWARD LENGTH=282                                                                                                                                                                                                                                                              | 251 | 282 | 1.00E-101 | 112.4 | 75.3 | 83.7 |
| Rsa1.0_00056.1.g3107.t1 | ref XP_002874111.1   hypothetical protein ARALYDRAFT_489162 [Arabidopsis lyrata subsp. lyrata] gi 297319948 gb EFH50370.1   hypothetical protein ARALYDRAFT_489162 [Arabidopsis lyrata subsp. lyrata]                                                                                                                                                                                                                                                                                                         | 942 | 944 | 0         | 100.2 | 78.3 | 83.9 | hypothetical protein ARALYDRAFT_489162           | gbpln | Arabidopsis lyrata   | AT5G23080.1   Symbols: TGH   SWAP (Suppressor-of-White-Apricot)/surp domain-containing protein   chr5:7743226-7748889 REVERSE LENGTH=930                                                                                                                                                                                                         | 942 | 930 | 0         | 98.7  | 80.4 | 86.7 |
| Rsa1.0_00056.1.g3108.t1 | ref NP_001031927.1   protein Dr1-like protein [Arabidopsis thaliana] gi 332005738 gb AED93121.1   protein Dr1-like protein [Arabidopsis thaliana] ref XP_002872035.1   hypothetical protein ARALYDRAFT_910318 [Arabidopsis lyrata subsp. lyrata] gi 297317872 gb EFH48294.1   hypothetical protein ARALYDRAFT_910318 [Arabidopsis lyrata subsp. lyrata]                                                                                                                                                       | 163 | 158 | 9.00E-81  | 96.9  | 92.0 | 93.9 | protein Dr1-like protein                         | gbpln | Arabidopsis thaliana | AT5G23090.4   Symbols: NF-YB13   nuclear factor Y, subunit B13   chr5:7749391-7750203 FORWARD LENGTH=158                                                                                                                                                                                                                                         | 163 | 158 | 3.00E-83  | 96.9  | 92.0 | 93.9 |
| Rsa1.0_00056.1.g3109.t1 | ref XP_002872035.1   hypothetical protein ARALYDRAFT_910318 [Arabidopsis lyrata subsp. lyrata] gi 297317872 gb EFH48294.1   hypothetical protein ARALYDRAFT_910318 [Arabidopsis lyrata subsp. lyrata]                                                                                                                                                                                                                                                                                                         | 253 | 278 | 1.00E-113 | 109.9 | 87.4 | 92.9 | hypothetical protein ARALYDRAFT_910318           | gbpln | Arabidopsis lyrata   | AT5G23100.1   Symbols:   Protein of unknown function, DUF617   chr5:7753557-7754390 FORWARD LENGTH=277                                                                                                                                                                                                                                           | 253 | 277 | 1.00E-111 | 109.5 | 86.6 | 90.1 |
| Rsa1.0_00056.1.g3110.t1 | #                                                                                                                                                                                                                                                                                                                                                                                                                                                                                                             | #   | #   | #         | #     | #    | #    | -                                                | ----  | ----                 | #                                                                                                                                                                                                                                                                                                                                                | #   | #   | #         | #     | #    | #    |
| Rsa1.0_00056.1.g3111.t1 | #                                                                                                                                                                                                                                                                                                                                                                                                                                                                                                             | #   | #   | #         | #     | #    | #    | -                                                | ----  | ----                 | #                                                                                                                                                                                                                                                                                                                                                | #   | #   | #         | #     | #    | #    |
| Rsa1.0_00056.1.g3112.t1 | gb ABD64939.1   hypothetical protein 24.t00017 [Brassica oleracea]                                                                                                                                                                                                                                                                                                                                                                                                                                            | 664 | 442 | 1.00E-153 | 66.6  | 39.8 | 47.4 | hypothetical protein 24.t00017                   | gbpln | Brassica oleracea    | AT2G13770.1   Symbols:   CONTAINS InterPro DOMAIN/s: Putative harbinger transposase-derived nuclease (InterPro:IPR006912). Has 451 Blast hits to 352 proteins in 33 species: Archae - 0; Bacteria - 0; Metazoa - 28; Fungi - 8; Plants - 388; Viruses - 0; Other Eukaryotes - 27 (source: NCBI BLINK).   chr2:5736603-5737847 FORWARD LENGTH=343 | 664 | 343 | 2.00E-32  | 51.7  | 9.2  | 11.6 |
| Rsa1.0_00056.1.g3113.t1 | #                                                                                                                                                                                                                                                                                                                                                                                                                                                                                                             | #   | #   | #         | #     | #    | #    | -                                                | ----  | ----                 | #                                                                                                                                                                                                                                                                                                                                                | #   | #   | #         | #     | #    | #    |
| Rsa1.0_00056.1.g3114.t1 | gb AEF32147.1   MADS-box DNA-binding domain transcription factor [Brassica napus]                                                                                                                                                                                                                                                                                                                                                                                                                             | 231 | 244 | 1.00E-105 | 105.6 | 86.6 | 91.8 | MADS-box DNA-binding domain transcription factor | gbpln | Brassica napus       | AT5G23260.3   Symbols: TT16, ABS, AGL32   K-box region and MADS-box transcription factor family protein   chr5:7836442-7838340 FORWARD LENGTH=238                                                                                                                                                                                                | 231 | 238 | 1.00E-99  | 103.0 | 77.1 | 90.0 |
| Rsa1.0_00056.1.g3115.t1 | ref NP_197719.1   transcription factor TCP7 [Arabidopsis thaliana] gi 75171749 sp Q9FMX2.1 TCP7_ARATH RecName: Full=Transcription factor TCP7 gi 10177817 dbj BAB11183.1   unnamed protein product [Arabidopsis thaliana] gi 332005764 gb AED93147.1   transcription factor TCP7 [Arabidopsis thaliana]                                                                                                                                                                                                       | 209 | 250 | 9.00E-81  | 119.6 | 82.3 | 86.6 | transcription factor TCP7                        | gbpln | Arabidopsis thaliana | AT5G23280.1   Symbols:   TCP family transcription factor   chr5:7843017-7843769 FORWARD LENGTH=250                                                                                                                                                                                                                                               | 209 | 250 | 3.00E-83  | 119.6 | 82.3 | 86.6 |
| Rsa1.0_00056.1.g3116.t1 | gb EOA21748.1   hypothetical protein CARUB_v10002195mg [Capsella rubella]                                                                                                                                                                                                                                                                                                                                                                                                                                     | 153 | 151 | 6.00E-72  | 98.7  | 89.5 | 94.8 | hypothetical protein CARUB_v10002195mg           | gbpln | Capsella rubella     | AT5G23290.1   Symbols: PFD5   prefoldin 5   chr5:7846144-7847428 FORWARD LENGTH=151                                                                                                                                                                                                                                                              | 153 | 151 | 2.00E-74  | 98.7  | 89.5 | 94.8 |
| Rsa1.0_00056.1.g3117.t1 | gb EOA20609.1   hypothetical protein CARUB_v10000920mg [Capsella rubella]                                                                                                                                                                                                                                                                                                                                                                                                                                     | 459 | 460 | 0         | 100.2 | 94.1 | 96.1 | hypothetical protein CARUB_v10000920mg           | gbpln | Capsella rubella     | AT5G23300.1   Symbols: PYRD   pyrimidine d   chr5:7847792-7850243 REVERSE LENGTH=460                                                                                                                                                                                                                                                             | 459 | 460 | 0         | 100.2 | 93.2 | 96.1 |



|                         |                                                                                                                                                                                                                                                                                                                                                                                                                                                                                                                                                                                                                                                                                                                                                                                                                                                                                                                                                                                                                                                                                                                                                                                                                                                                                                                                                                                                                                                                                                                                                                                                                                                                                |     |      |           |       |       |                                                     |                                        |                      |                                                                                                                                                                   |                                                                                                  |     |          |          |       |       |      |
|-------------------------|--------------------------------------------------------------------------------------------------------------------------------------------------------------------------------------------------------------------------------------------------------------------------------------------------------------------------------------------------------------------------------------------------------------------------------------------------------------------------------------------------------------------------------------------------------------------------------------------------------------------------------------------------------------------------------------------------------------------------------------------------------------------------------------------------------------------------------------------------------------------------------------------------------------------------------------------------------------------------------------------------------------------------------------------------------------------------------------------------------------------------------------------------------------------------------------------------------------------------------------------------------------------------------------------------------------------------------------------------------------------------------------------------------------------------------------------------------------------------------------------------------------------------------------------------------------------------------------------------------------------------------------------------------------------------------|-----|------|-----------|-------|-------|-----------------------------------------------------|----------------------------------------|----------------------|-------------------------------------------------------------------------------------------------------------------------------------------------------------------|--------------------------------------------------------------------------------------------------|-----|----------|----------|-------|-------|------|
| Rsa1.0_00056.1.g3128.t1 | ref NP_680212.1  50S ribosomal protein L24-like protein [Arabidopsis thaliana] gi 297808355 ref XP_002872061.1  KOW domain-containing protein [Arabidopsis lyrata subsp. lyrata] gi 8809706 dbj BAA97247.1  50S ribosomal protein L24 [Arabidopsis thaliana] gi 44681334 gb AAS47607.1  At5g23535 [Arabidopsis thaliana] gi 4573844 gb AAS76726.1  At5g23535 [Arabidopsis thaliana] gi 110735795 dbj BAE99874.1  50S ribosomal protein L24 [Arabidopsis thaliana] gi 297317898 gb EFH48320.1  KOW domain-containing protein [Arabidopsis lyrata subsp. lyrata] gi 332005797 gb AED93180.1  50S ribosomal protein L24-like protein [Arabidopsis thaliana] ref NP_197745.1  26S proteasome non-ATPase regulatory subunit 14 [Arabidopsis thaliana] gi 51701846 sp Q9LT08.1 PSDE_ARATH RecName: Full=26S proteasome non-ATPase regulatory subunit 14. AltName: Full=26S proteasome regulatory subunit rpn11 gi 8809705 dbj BAA97246.1  26S proteasome, non-ATPase regulatory subunit [Arabidopsis thaliana] gi 17979145 gb AAL49768.1  putative 26S proteasome, non-ATPase regulatory subunit [Arabidopsis thaliana] gi 20259105 gb AAM14268.1  putative 26S proteasome, non-ATPase regulatory subunit [Arabidopsis thaliana] gi 32700040 gb AAP86670.1  26S proteasome subunit RPN11A [Arabidopsis thaliana] gi 32700042 gb AAP86671.1  26S proteasome subunit RPN11a [Arabidopsis thaliana] gi 32700044 gb AAP86672.1  26S proteasome subunit RPN11 [Arabidopsis thaliana] gi 110737189 dbj BAF00543.1  26S proteasome, non-ATPase regulatory subunit [Arabidopsis thaliana] gi 332005798 gb AED93181.1  26S proteasome non-ATPase regulatory subunit 14 [Arabidopsis thaliana] | 201 | 159  | 6.00E-86  | 79.1  | 78.6  | 78.6                                                | 50S ribosomal protein L24-like protein | gbpln                | Arabidopsis lyrata                                                                                                                                                | AT5G23535.1   Symbols:   KOW domain-containing protein   chr5:7935871-7937127 FORWARD LENGTH=159 | 201 | 159      | 2.00E-88 | 79.1  | 78.6  | 78.6 |
| Rsa1.0_00056.1.g3129.t1 | ref NP_197745.1  26S proteasome non-ATPase regulatory subunit 14 [Arabidopsis thaliana] gi 51701846 sp Q9LT08.1 PSDE_ARATH RecName: Full=26S proteasome non-ATPase regulatory subunit 14. AltName: Full=26S proteasome regulatory subunit rpn11 gi 8809705 dbj BAA97246.1  26S proteasome, non-ATPase regulatory subunit [Arabidopsis thaliana] gi 17979145 gb AAL49768.1  putative 26S proteasome, non-ATPase regulatory subunit [Arabidopsis thaliana] gi 20259105 gb AAM14268.1  putative 26S proteasome, non-ATPase regulatory subunit [Arabidopsis thaliana] gi 32700040 gb AAP86670.1  26S proteasome subunit RPN11A [Arabidopsis thaliana] gi 32700042 gb AAP86671.1  26S proteasome subunit RPN11a [Arabidopsis thaliana] gi 32700044 gb AAP86672.1  26S proteasome subunit RPN11 [Arabidopsis thaliana] gi 110737189 dbj BAF00543.1  26S proteasome, non-ATPase regulatory subunit [Arabidopsis thaliana] gi 332005798 gb AED93181.1  26S proteasome non-ATPase regulatory subunit 14 [Arabidopsis thaliana]                                                                                                                                                                                                                                                                                                                                                                                                                                                                                                                                                                                                                                                          | 308 | 308  | 0         | 100.0 | 100.0 | 26S proteasome non-ATPase regulatory subunit 14     | gbpln                                  | Arabidopsis thaliana | AT5G23540.1   Symbols:   Mov34/MPN/PAD-1 family protein   chr5:7937772-7939339 FORWARD LENGTH=308                                                                 | 308                                                                                              | 308 | 0        | 100.0    | 100.0 | 100.0 |      |
| Rsa1.0_00056.1.g3130.t4 | gb EOA19564.1  hypothetical protein CARUB_v10002585mg [Capsella rubella]                                                                                                                                                                                                                                                                                                                                                                                                                                                                                                                                                                                                                                                                                                                                                                                                                                                                                                                                                                                                                                                                                                                                                                                                                                                                                                                                                                                                                                                                                                                                                                                                       | 210 | 175  | 1.00E-75  | 83.3  | 73.3  | hypothetical protein CARUB_v10002585mg              | gbpln                                  | Capsella rubella     | AT5G23550.1   Symbols:   Gct1/Sft2-like vesicle transport protein family   chr5:7939914-7941479 REVERSE LENGTH=175                                                | 210                                                                                              | 175 | 7.00E-76 | 83.3     | 71.4  | 77.1  |      |
| Rsa1.0_00056.1.g3131.t1 | gb EOA20190.1  hypothetical protein CARUB_v10000486mg [Capsella rubella]                                                                                                                                                                                                                                                                                                                                                                                                                                                                                                                                                                                                                                                                                                                                                                                                                                                                                                                                                                                                                                                                                                                                                                                                                                                                                                                                                                                                                                                                                                                                                                                                       | 331 | 616  | 1.00E-33  | 186.1 | 34.4  | hypothetical protein CARUB_v10000486mg              | gbpln                                  | Capsella rubella     | AT5G23570.1   Symbols:   SGS3, ATSGS3   XS domain-containing protein / XS zinc finger domain-containing protein-related   chr5:7943621-7945874 FORWARD LENGTH=625 | 331                                                                                              | 625 | 1.00E-28 | 188.8    | 19.9  | 24.8  |      |
| Rsa1.0_00056.1.g3132.t3 | ref NP_680213.1  transmembrane CLPTM1 family protein [Arabidopsis thaliana] gi 17381232 gb AAL36035.1  AT5g08500/MAH20.6 [Arabidopsis thaliana] gi 23506007 gb AAN28863.1  At5g08500/MAH20.6 [Arabidopsis thaliana] gi 332005802 gb AED93185.1  transmembrane CLPTM1 family protein [Arabidopsis thaliana] ref XP_002874139.1  calcium-dependent protein kinase 9 [Arabidopsis lyrata subsp. lyrata] gi 297319976 gb EFH50398.1  calcium-dependent protein kinase 9 [Arabidopsis lyrata subsp. lyrata]                                                                                                                                                                                                                                                                                                                                                                                                                                                                                                                                                                                                                                                                                                                                                                                                                                                                                                                                                                                                                                                                                                                                                                         | 519 | 593  | 1.00E-179 | 114.3 | 70.5  | transmembrane CLPTM1 family protein                 | gbpln                                  | Arabidopsis thaliana | AT5G23575.1   Symbols:   Transmembrane CLPTM1 family protein   chr5:7946563-7950041 FORWARD LENGTH=593                                                            | 519                                                                                              | 593 | 0        | 114.3    | 70.5  | 78.4  |      |
| Rsa1.0_00056.1.g3133.t1 | ref XP_002874139.1  calcium-dependent protein kinase 9 [Arabidopsis lyrata subsp. lyrata] gi 297319976 gb EFH50398.1  calcium-dependent protein kinase 9 [Arabidopsis lyrata subsp. lyrata]                                                                                                                                                                                                                                                                                                                                                                                                                                                                                                                                                                                                                                                                                                                                                                                                                                                                                                                                                                                                                                                                                                                                                                                                                                                                                                                                                                                                                                                                                    | 96  | 489  | 1.00E-39  | 509.4 | 84.4  | calcium-dependent protein kinase 9                  | gbpln                                  | Arabidopsis lyrata   | AT5G23580.1   Symbols:   CDPK9, ATGDPK9, CPK12, ATCPK12   calmodulin-like domain protein kinase 9   chr5:7950388-7952433 REVERSE LENGTH=490                       | 96                                                                                               | 490 | 2.00E-42 | 510.4    | 84.4  | 95.8  |      |
| Rsa1.0_00056.1.g3134.t1 | gb AAD15471.1  putative non-LTR retroelement reverse transcriptase [Arabidopsis thaliana]                                                                                                                                                                                                                                                                                                                                                                                                                                                                                                                                                                                                                                                                                                                                                                                                                                                                                                                                                                                                                                                                                                                                                                                                                                                                                                                                                                                                                                                                                                                                                                                      | 230 | 1277 | 1.00E-24  | 555.2 | 24.3  | putative non-LTR retroelement reverse transcriptase | gbpln                                  | Arabidopsis thaliana | AT3G24255.1   Symbols:   RNA-directed DNA polymerase (reverse transcriptase)-related family protein   chr3:8789471-8793208 FORWARD LENGTH=746                     | 230                                                                                              | 746 | 4.00E-26 | 324.3    | 22.2  | 26.5  |      |
| Rsa1.0_00057.1.g3135.t1 | #                                                                                                                                                                                                                                                                                                                                                                                                                                                                                                                                                                                                                                                                                                                                                                                                                                                                                                                                                                                                                                                                                                                                                                                                                                                                                                                                                                                                                                                                                                                                                                                                                                                                              | #   | #    | #         | #     | #     | -                                                   | ----                                   | ----                 | #                                                                                                                                                                 | #                                                                                                | #   | #        | #        | #     | #     |      |

|                         |                                                                                                                                                                                                                                                                                                                           |      |      |           |       |      |      |                                                 |       |                      |                                                                                                                                                              |      |     |           |       |      |      |
|-------------------------|---------------------------------------------------------------------------------------------------------------------------------------------------------------------------------------------------------------------------------------------------------------------------------------------------------------------------|------|------|-----------|-------|------|------|-------------------------------------------------|-------|----------------------|--------------------------------------------------------------------------------------------------------------------------------------------------------------|------|-----|-----------|-------|------|------|
| Rsa1.0_00057.1.g3136.t1 | gb EOA14510.1  hypothetical protein CARUB_v10027730mg [Capsella rubella]                                                                                                                                                                                                                                                  | 417  | 237  | 7.00E-75  | 56.8  | 36.0 | 45.1 | hypothetical protein CARUB_v10027730mg          | gbpln | Capsella rubella     | AT5G43650.1   Symbols: BHLH92   basic helix-loop-helix (bHLH) DNA-binding superfamily protein   chr5:17533310-17534758 REVERSE LENGTH=247                    | 417  | 247 | 3.00E-77  | 59.2  | 37.9 | 45.8 |
| Rsa1.0_00057.1.g3137.t1 | #                                                                                                                                                                                                                                                                                                                         | #    | #    | #         | #     | #    | #    | -                                               | ----  | ----                 | #                                                                                                                                                            | #    | #   | #         | #     | #    | #    |
| Rsa1.0_00057.1.g3138.t1 | #                                                                                                                                                                                                                                                                                                                         | #    | #    | #         | #     | #    | #    | -                                               | ----  | ----                 | #                                                                                                                                                            | #    | #   | #         | #     | #    | #    |
| Rsa1.0_00057.1.g3139.t1 | gb EOA12931.1  hypothetical protein CARUB_v10025910mg [Capsella rubella] gi 482548738 gb EOA12932.1  hypothetical protein CARUB_v10025910mg [Capsella rubella]                                                                                                                                                            | 754  | 791  | 0         | 104.9 | 88.1 | 93.8 | hypothetical protein CARUB_v10025910mg          | gbpln | Capsella rubella     | AT5G43670.1   Symbols:   Sec23/Sec24 protein transport family protein   chr5:17539025-17541733 REVERSE LENGTH=794                                            | 754  | 794 | 0         | 105.3 | 88.3 | 93.8 |
| Rsa1.0_00057.1.g3140.t1 | #                                                                                                                                                                                                                                                                                                                         | #    | #    | #         | #     | #    | #    | -                                               | ----  | ----                 | #                                                                                                                                                            | #    | #   | #         | #     | #    | #    |
| Rsa1.0_00057.1.g3141.t1 | #                                                                                                                                                                                                                                                                                                                         | #    | #    | #         | #     | #    | #    | -                                               | ----  | ----                 | #                                                                                                                                                            | #    | #   | #         | #     | #    | #    |
| Rsa1.0_00057.1.g3142.t1 | emb CAN60947.1  hypothetical protein VITISV_015758 [Vitis vinifera] gb AAG10810.1 AC018460.4 Hypothetical protein [Arabidopsis thaliana]                                                                                                                                                                                  | 275  | 1306 | 5.00E-61  | 474.9 | 48.0 | 64.7 | hypothetical protein VITISV_015758              | gbpln | Vitis vinifera       | #                                                                                                                                                            | #    | #   | #         | #     | #    | #    |
| Rsa1.0_00057.1.g3143.t1 | gi 12320956 gb AAG50601.1 AC079605_6 hypothetical protein [Arabidopsis thaliana]                                                                                                                                                                                                                                          | 156  | 484  | 1.00E-55  | 310.3 | 63.5 | 71.8 | Hypothetical protein                            | gbpln | Arabidopsis thaliana | #                                                                                                                                                            | #    | #   | #         | #     | #    | #    |
| Rsa1.0_00057.1.g3144.t5 | emb CAB39638.1  RNA-directed DNA polymerase-like protein [Arabidopsis thaliana] gi 7267666 emb CAB78094.1  RNA-directed DNA polymerase-like protein [Arabidopsis thaliana] ref XP_002865424.1  hypothetical protein ARALYDRAFT_494656 [Arabidopsis lyrata subsp. lyrata] gi 297311259 gb EFH41683.1                       | 1785 | 1274 | 0         | 71.4  | 30.5 | 42.4 | RNA-directed DNA polymerase-like protein        | gbpln | Arabidopsis thaliana | AT5G43680.2   Symbols:   unknown protein; EXPRESSED IN: 21 plant structures; EXPRESSED DURING: 13 growth stages.   chr5:17544074-17545354 FORWARD LENGTH=232 | 1785 | 232 | 2.00E-79  | 13.0  | 8.7  | 9.9  |
| Rsa1.0_00057.1.g3145.t1 | hypothetical protein ARALYDRAFT_494656 [Arabidopsis lyrata subsp. lyrata]                                                                                                                                                                                                                                                 | 174  | 379  | 4.00E-35  | 217.8 | 54.6 | 66.7 | hypothetical protein ARALYDRAFT_494656          | gbpln | Arabidopsis lyrata   | AT5G43420.1   Symbols:   RING/U-box superfamily protein   chr5:17451790-17452917 FORWARD LENGTH=375                                                          | 174  | 375 | 2.00E-35  | 215.5 | 51.1 | 64.4 |
| Rsa1.0_00057.1.g3146.t4 | gb AAF99785.1 AC012463.2 T2E6.4 [Arabidopsis thaliana]                                                                                                                                                                                                                                                                    | 569  | 740  | 7.00E-46  | 130.1 | 22.3 | 29.5 | T2E6.4                                          | gbpln | Arabidopsis thaliana | #                                                                                                                                                            | #    | #   | #         | #     | #    | #    |
| Rsa1.0_00057.1.g3147.t1 | gb EOA13697.1  hypothetical protein CARUB_v10026768mg, partial [Capsella rubella]                                                                                                                                                                                                                                         | 346  | 330  | 1.00E-130 | 95.4  | 73.7 | 78.9 | hypothetical protein CARUB_v10026768mg, partial | gbpln | Capsella rubella     | AT5G43720.1   Symbols:   Protein of unknown function (DUF2381)   chr5:17557431-17559238 REVERSE LENGTH=329                                                   | 346  | 329 | 1.00E-127 | 95.1  | 73.1 | 76.0 |
| Rsa1.0_00057.1.g3148.t1 | ref XP_002882671.1  hypothetical protein ARALYDRAFT_897225 [Arabidopsis lyrata subsp. lyrata] gi 29732851 gb EFH58930.1  hypothetical protein ARALYDRAFT_897225 [Arabidopsis lyrata subsp. lyrata]                                                                                                                        | 262  | 136  | 4.00E-25  | 51.9  | 21.8 | 28.6 | hypothetical protein ARALYDRAFT_897225          | gbpln | Arabidopsis lyrata   | AT1G09245.1   Symbols:   Plant self-incompatibility protein S1 family   chr1:2986948-2987367 REVERSE LENGTH=139                                              | 262  | 139 | 2.00E-15  | 53.1  | 15.3 | 22.1 |
| Rsa1.0_00057.1.g3149.t1 | dbj BAB09269.1  unnamed protein product [Arabidopsis thaliana]                                                                                                                                                                                                                                                            | 554  | 422  | 1.00E-115 | 76.2  | 36.8 | 50.2 | unnamed protein product                         | gbpln | Arabidopsis thaliana | AT3G24255.1   Symbols:   RNA-directed DNA polymerase (reverse transcriptase)-related family protein   chr3:8789471-8793208 FORWARD LENGTH=746                | 554  | 746 | 3.00E-27  | 134.7 | 13.4 | 24.4 |
| Rsa1.0_00057.1.g3150.t1 | gb AAF79618.1 AC027665_19 F5M15.26 [Arabidopsis thaliana] ref NP_199189.1  3-ketoacyl-CoA synthase 19 [Arabidopsis thaliana] gi 75262422 sp Q9FG87.1 KCS19_ARAT H RecName: Full=3-ketoacyl-CoA synthase 19; Short=KCS-19; AltName: Full=Very long-chain fatty acid condensing enzyme 19; Short=VLCFA condensing enzyme 19 | 258  | 1838 | 2.00E-59  | 712.4 | 43.0 | 50.4 | F5M15.26                                        | gbpln | Arabidopsis thaliana | #                                                                                                                                                            | #    | #   | #         | #     | #    | #    |
| Rsa1.0_00057.1.g3151.t1 | gi 15983491 gb AAL11613.1 AF424620_1 AT5g43760/MQD19_11 [Arabidopsis thaliana] gi 10177945 dbj BAB11304.1  beta-ketoacyl-CoA synthase [Arabidopsis thaliana] gi 23297625 gb AANI2994.1  beta-ketoacyl-CoA synthase [Arabidopsis thaliana] gi 332007624 gb AED95007.1  3-ketoacyl-CoA synthase 19 [Arabidopsis thaliana]   | 704  | 529  | 0         | 75.1  | 69.9 | 71.9 | 3-ketoacyl-CoA synthase 19                      | gbpln | Arabidopsis thaliana | AT5G43760.1   Symbols: KCS20   3-ketoacyl-CoA synthase 20   chr5:17585903-17588486 FORWARD LENGTH=529                                                        | 704  | 529 | 0         | 75.1  | 69.9 | 71.9 |
| Rsa1.0_00057.1.g3152.t1 | emb CAA11416.1  ATP sulfurylase [Brassica juncea]                                                                                                                                                                                                                                                                         | 469  | 470  | 0         | 100.2 | 95.9 | 97.7 | ATP sulfurylase                                 | gbpln | Brassica juncea      | AT5G43780.1   Symbols: APS4   Pseudouridine synthase/archaeosine transglycosylase-like family protein   chr5:17589631-17591480 REVERSE LENGTH=469            | 469  | 469 | 0         | 100.0 | 88.7 | 93.4 |

|                         |                                                                                                                                                                                                                                                                                                                                                                                                                                                                                                                                                                                                                               |      |      |           |       |      |      |                                                         |             |                      |                                                                                                                                                                                                                                                                                                                                                                                                                                                                                                                                                             |      |      |          |       |      |      |
|-------------------------|-------------------------------------------------------------------------------------------------------------------------------------------------------------------------------------------------------------------------------------------------------------------------------------------------------------------------------------------------------------------------------------------------------------------------------------------------------------------------------------------------------------------------------------------------------------------------------------------------------------------------------|------|------|-----------|-------|------|------|---------------------------------------------------------|-------------|----------------------|-------------------------------------------------------------------------------------------------------------------------------------------------------------------------------------------------------------------------------------------------------------------------------------------------------------------------------------------------------------------------------------------------------------------------------------------------------------------------------------------------------------------------------------------------------------|------|------|----------|-------|------|------|
| Rsa1.0_00057.1.g3153.t1 | dbj BAB08714.1  non-LTR retroelement reverse transcriptase-like protein [Arabidopsis thaliana]                                                                                                                                                                                                                                                                                                                                                                                                                                                                                                                                | 377  | 1197 | 3.00E-37  | 317.5 | 27.6 | 39.5 | non-LTR retroelement reverse transcriptase-like protein | gbpln       | Arabidopsis thaliana | AT2G06845.1   Symbols:   Beta-galactosidase related protein   chr2:2754666-2756008 FORWARD LENGTH=315                                                                                                                                                                                                                                                                                                                                                                                                                                                       | 377  | 315  | 3.00E-29 | 83.6  | 21.0 | 26.5 |
| Rsa1.0_00057.1.g3154.t1 | # # # # # # # #                                                                                                                                                                                                                                                                                                                                                                                                                                                                                                                                                                                                               |      |      |           |       |      |      | -                                                       | ----        | ----                 | # # # # # # # #                                                                                                                                                                                                                                                                                                                                                                                                                                                                                                                                             |      |      |          |       |      |      |
| Rsa1.0_00057.1.g3155.t1 | gb AAF18641.1 AC006228.12 F5J5.16 [Arabidopsis thaliana]                                                                                                                                                                                                                                                                                                                                                                                                                                                                                                                                                                      | 124  | 1024 | 6.00E-15  | 825.8 | 45.2 | 57.3 | F5J5.16                                                 | gbpln       | Arabidopsis thaliana | #                                                                                                                                                                                                                                                                                                                                                                                                                                                                                                                                                           | #    | #    | #        | #     | #    | #    |
| Rsa1.0_00057.1.g3156.t1 | # # # # # # # #                                                                                                                                                                                                                                                                                                                                                                                                                                                                                                                                                                                                               |      |      |           |       |      |      | -                                                       | ----        | ----                 | # # # # # # # #                                                                                                                                                                                                                                                                                                                                                                                                                                                                                                                                             |      |      |          |       |      |      |
| Rsa1.0_00057.1.g3157.t2 | gb AAF69169.1 AC007915.21 F27F5.21 [Arabidopsis thaliana]                                                                                                                                                                                                                                                                                                                                                                                                                                                                                                                                                                     | 536  | 1023 | 4.00E-65  | 190.9 | 26.5 | 35.6 | F27F5.21                                                | gbpln       | Arabidopsis thaliana | AT4G29090.1   Symbols:   Ribonuclease H-like superfamily protein   chr4:14333528-14335255 FORWARD LENGTH=575                                                                                                                                                                                                                                                                                                                                                                                                                                                | 536  | 575  | 4.00E-25 | 107.3 | 13.4 | 18.7 |
| Rsa1.0_00057.1.g3158.t1 | ref XP_002865401.1  hypothetical protein ARALYDRAFT_917259 [Arabidopsis lyrata subsp. lyrata] gi 297311236 gb EFH41660.1  hypothetical protein ARALYDRAFT_917259 [Arabidopsis lyrata subsp. lyrata]                                                                                                                                                                                                                                                                                                                                                                                                                           | 984  | 983  | 0         | 99.9  | 94.1 | 96.3 | hypothetical protein ARALYDRAFT_917259                  | gbpln       | Arabidopsis lyrata   | AT5G43810.2   Symbols: ZLL   Stabilizer of iron transporter SuFD / Polynucleotidyl transferase   chr5:17611939-17616562 FORWARD LENGTH=988                                                                                                                                                                                                                                                                                                                                                                                                                  | 984  | 988  | 0        | 100.4 | 93.8 | 96.3 |
| Rsa1.0_00057.1.g3159.t1 | dbj BAB11311.1  unnamed protein product [Arabidopsis thaliana]                                                                                                                                                                                                                                                                                                                                                                                                                                                                                                                                                                | 731  | 680  | 0         | 93.0  | 73.5 | 82.1 | unnamed protein product                                 | gbpln       | Arabidopsis thaliana | AT5G43820.1   Symbols:   Pentatricopeptide repeat (PPR) superfamily protein   chr5:17618948-17620588 FORWARD LENGTH=546                                                                                                                                                                                                                                                                                                                                                                                                                                     | 731  | 546  | 0        | 74.7  | 58.5 | 65.0 |
| Rsa1.0_00058.1.g3160.t1 | ref XP_002862428.1  predicted protein [Arabidopsis lyrata subsp. lyrata] gi 297307936 gb EFH38686.1  predicted protein [Arabidopsis lyrata subsp. lyrata]                                                                                                                                                                                                                                                                                                                                                                                                                                                                     | 209  | 218  | 2.00E-76  | 104.3 | 77.0 | 83.3 | predicted protein                                       | gbpln       | Arabidopsis lyrata   | AT5G08480.2   Symbols:   VQ motif-containing protein   chr5:2744486-2745007 FORWARD LENGTH=173                                                                                                                                                                                                                                                                                                                                                                                                                                                              | 209  | 173  | 4.00E-70 | 82.8  | 71.3 | 75.6 |
| Rsa1.0_00058.1.g3161.t1 | gb AAG44817.1  peroxisome biogenesis protein PEX1 [Arabidopsis thaliana]                                                                                                                                                                                                                                                                                                                                                                                                                                                                                                                                                      | 1125 | 1119 | 0         | 99.5  | 88.0 | 93.2 | peroxisome biogenesis protein PEX1                      | gbpln       | Arabidopsis thaliana | AT5G08470.1   Symbols: PEX1   peroxisome 1   chr5:2735925-2742731 FORWARD LENGTH=1130                                                                                                                                                                                                                                                                                                                                                                                                                                                                       | 1125 | 1130 | 0        | 100.4 | 88.0 | 93.2 |
| Rsa1.0_00058.1.g3162.t1 | ref XP_002871339.1  predicted protein [Arabidopsis lyrata subsp. lyrata] gi 297317176 gb EFH47598.1  predicted protein [Arabidopsis lyrata subsp. lyrata]                                                                                                                                                                                                                                                                                                                                                                                                                                                                     | 373  | 383  | 0         | 102.7 | 86.1 | 91.2 | predicted protein                                       | gbpln       | Arabidopsis lyrata   | AT5G08460.1   Symbols:   GDSL-like Lipase/Acylhydrolase superfamily protein   chr5:2733220-2735351 FORWARD LENGTH=385                                                                                                                                                                                                                                                                                                                                                                                                                                       | 373  | 385  | 0        | 103.2 | 85.3 | 91.4 |
| Rsa1.0_00058.1.g3163.t1 | ref NP_196462.2  uncharacterized protein [Arabidopsis thaliana] gi 30682392 ref NP_851033.1  uncharacterized protein [Arabidopsis thaliana] gi 79327334 ref NP_001031857.1  uncharacterized protein [Arabidopsis thaliana] gi 20259547 gb AAM13893.1  unknown protein [Arabidopsis thaliana] gi 21689693 gb AAM67468.1  unknown protein [Arabidopsis thaliana] gi 332003920 gb AED91303.1  uncharacterized protein AT5G08450 [Arabidopsis thaliana] gi 332003921 gb AED91304.1  uncharacterized protein AT5G08450 [Arabidopsis thaliana] gi 332003922 gb AED91305.1  uncharacterized protein AT5G08450 [Arabidopsis thaliana] | 474  | 918  | 1.00E-180 | 193.7 | 66.7 | 69.8 | uncharacterized protein                                 | gbpln       | Arabidopsis thaliana | AT5G08450.3   Symbols:   FUNCTIONS IN: molecular_function unknown; INVOLVED IN: biological_process unknown; LOCATED IN: cellular_component unknown; EXPRESSED IN: 25 plant structures; EXPRESSED DURING: 15 growth stages; CONTAINS InterPro DOMAIN/s: Histone deacetylation protein Rxt3 (InterPro:IPRO13951); Has 34444 Blast hits to 20801 proteins in 1175 species: Archae - 64; Bacteria - 2390; Metazoa - 15568; Fungi - 3729; Plants - 1886; Viruses - 208; Other Eukaryotes - 10599 (source: NCBI BLINK).   chr5:2727970-2732572 REVERSE LENGTH=918 | 474  | 918  | 0        | 193.7 | 66.7 | 69.8 |
| Rsa1.0_00058.1.g3164.t1 | ref XP_003534058.1  PREDICTED: uncharacterized protein LOC100811756 [Glycine max]                                                                                                                                                                                                                                                                                                                                                                                                                                                                                                                                             | 453  | 481  | 1.00E-133 | 106.2 | 57.0 | 73.3 | PREDICTED: uncharacterized protein LOC100811756         | gbenv/gbpln | Glycine max          | AT5G41980.1   Symbols:   CONTAINS InterPro DOMAIN/s: Putative harbinger transposase-derived nuclease (InterPro:IPRO06912); BEST Arabidopsis thaliana protein match is: unknown protein (TAIR:AT1G43722.1); Has 1807 Blast hits to 1807 proteins in 277 species: Archae - 0; Bacteria - 0; Metazoa - 736; Fungi - 347; Plants - 385; Viruses - 0; Other Eukaryotes - 339 (source: NCBI BLINK).   chr5:16793765-16794889 FORWARD LENGTH=374                                                                                                                   | 453  | 374  | 1.00E-58 | 82.6  | 31.6 | 42.8 |
| Rsa1.0_00058.1.g3165.t1 | ref XP_002871327.1  hypothetical protein ARALYDRAFT_325441 [Arabidopsis lyrata subsp. lyrata] gi 297317164 gb EFH47586.1  hypothetical protein ARALYDRAFT_325441 [Arabidopsis lyrata subsp. lyrata]                                                                                                                                                                                                                                                                                                                                                                                                                           | 720  | 724  | 0         | 100.6 | 83.6 | 89.2 | hypothetical protein ARALYDRAFT_325441                  | gbpln       | Arabidopsis lyrata   | AT5G08440.1   Symbols:   unknown protein; FUNCTIONS IN: molecular_function unknown; INVOLVED IN: biological_process unknown; LOCATED IN: plasma membrane; EXPRESSED IN: 21 plant structures; EXPRESSED DURING: 13 growth stages; BEST Arabidopsis thaliana protein match is: unknown protein (TAIR:AT5G23490.1); Has 141 Blast hits to 139 proteins in 35 species: Archae - 0; Bacteria - 9; Metazoa - 21; Fungi - 6; Plants - 94; Viruses - 0; Other Eukaryotes - 11 (source: NCBI BLINK).   chr5:2721037-2726970 FORWARD LENGTH=726                       | 720  | 726  | 0        | 100.8 | 84.0 | 90.0 |



|                         |                                                                                                                                                                                                        |      |      |           |       |      |       |                                              |       |                      |                                                                                                                                                                                                                                                                                                                                             |      |      |           |       |      |       |
|-------------------------|--------------------------------------------------------------------------------------------------------------------------------------------------------------------------------------------------------|------|------|-----------|-------|------|-------|----------------------------------------------|-------|----------------------|---------------------------------------------------------------------------------------------------------------------------------------------------------------------------------------------------------------------------------------------------------------------------------------------------------------------------------------------|------|------|-----------|-------|------|-------|
| Rsa1.0_00058.1.g3166.t1 | refXP_002871325.1   hypothetical protein ARALYDRAFT_487679 [Arabidopsis lyrata subsp. lyrata]   gi 297317162 gb EFH47584.1   hypothetical protein ARALYDRAFT_487679 [Arabidopsis lyrata subsp. lyrata] | 554  | 391  | 1.00E-153 | 70.6  | 53.6 | 60.8  | hypothetical protein ARALYDRAFT_487679       | gbpln | Arabidopsis lyrata   | AT5G08420.1   Symbols:   RNA-binding KH domain-containing protein   chr5:2713555-2716064 FORWARD LENGTH=391                                                                                                                                                                                                                                 | 554  | 391  | 1.00E-152 | 70.6  | 55.1 | 61.4  |
| Rsa1.0_00058.1.g3167.t1 | gb EOA21459.1   hypothetical protein CARUB_v10001850mg [Capsella rubella]                                                                                                                              | 230  | 238  | 8.00E-91  | 103.5 | 83.5 | 88.3  | hypothetical protein CARUB_v10001850mg       | gbpln | Capsella rubella     | AT5G08330.1   Symbols:   TCP family transcription factor   chr5:2680828-2681547 FORWARD LENGTH=239                                                                                                                                                                                                                                          | 230  | 239  | 1.00E-88  | 103.9 | 80.9 | 85.2  |
| Rsa1.0_00058.1.g3168.t1 | gb AAG51783.1 AC079679.3 reverse transcriptase, putative: 16838-20266 [Arabidopsis thaliana]                                                                                                           | 145  | 1142 | 6.00E-26  | 787.6 | 49.7 | 62.1  | reverse transcriptase, putative: 16838-20266 | gbpln | Arabidopsis thaliana | #                                                                                                                                                                                                                                                                                                                                           | #    | #    | #         | #     | #    | #     |
| Rsa1.0_00058.1.g3169.t1 | gb EOA15137.1   hypothetical protein CARUB_v10028512mg [Capsella rubella]                                                                                                                              | 80   | 81   | 3.00E-27  | 101.3 | 73.8 | 85.0  | hypothetical protein CARUB_v10028512mg       | gbpln | Capsella rubella     | AT5G08315.1   Symbols:   Defensin-like (DEFL) family protein   chr5:2676177-2676590 REVERSE LENGTH=82                                                                                                                                                                                                                                       | 80   | 82   | 5.00E-28  | 102.5 | 72.5 | 82.5  |
| Rsa1.0_00058.1.g3170.t1 | gb EOA19347.1   hypothetical protein CARUB_v10000227mg [Capsella rubella]                                                                                                                              | 892  | 830  | 0         | 93.0  | 74.0 | 82.4  | hypothetical protein CARUB_v10000227mg       | gbpln | Capsella rubella     | AT5G08310.1   Symbols:   Tetratricopeptide repeat (TPR)-like superfamily protein   chr5:2672756-2675254 REVERSE LENGTH=832                                                                                                                                                                                                                  | 892  | 832  | 0         | 93.3  | 74.7 | 82.3  |
| Rsa1.0_00058.1.g3171.t1 | refXP_002871316.1   hypothetical protein ARALYDRAFT_487662 [Arabidopsis lyrata subsp. lyrata]   gi 297317153 gb EFH47575.1   hypothetical protein ARALYDRAFT_487662 [Arabidopsis lyrata subsp. lyrata] | 345  | 347  | 0         | 100.6 | 95.9 | 98.3  | hypothetical protein ARALYDRAFT_487662       | gbpln | Arabidopsis lyrata   | AT5G08300.1   Symbols:   Succinyl-CoA ligase, alpha subunit   chr5:2667579-2669672 FORWARD LENGTH=347                                                                                                                                                                                                                                       | 345  | 347  | 0         | 100.6 | 95.7 | 98.3  |
| Rsa1.0_00058.1.g3172.t1 | gb EEC67208.1   hypothetical protein Osl_34094 [Oryza sativa Indica Group]                                                                                                                             | 142  | 274  | 9.00E-79  | 193.0 | 96.5 | 100.0 | hypothetical protein Osl_34094               | gbpln | Oryza sativa         | AT5G08290.1   Symbols:   YLS8   mRNA splicing factor, thioredoxin-like U5 snRNP   chr5:2666043-2666936 FORWARD LENGTH=142                                                                                                                                                                                                                   | 142  | 142  | 7.00E-81  | 100.0 | 97.9 | 100.0 |
| Rsa1.0_00058.1.g3173.t2 | refXP_002873350.1   hypothetical protein ARALYDRAFT_908776 [Arabidopsis lyrata subsp. lyrata]   gi 297319187 gb EFH49609.1   hypothetical protein ARALYDRAFT_908776 [Arabidopsis lyrata subsp. lyrata] | 379  | 382  | 0         | 100.8 | 92.6 | 95.5  | hypothetical protein ARALYDRAFT_908776       | gbpln | Arabidopsis lyrata   | AT5G08280.1   Symbols:   HEMC   hydroxymethylbilane synthase   chr5:2663763-2665596 REVERSE LENGTH=382                                                                                                                                                                                                                                      | 379  | 382  | 0         | 100.8 | 91.3 | 95.0  |
| Rsa1.0_00058.1.g3174.t1 | refXP_002871313.1   hypothetical protein ARALYDRAFT_908774 [Arabidopsis lyrata subsp. lyrata]   gi 297317150 gb EFH47572.1   hypothetical protein ARALYDRAFT_908774 [Arabidopsis lyrata subsp. lyrata] | 825  | 479  | 0         | 58.1  | 46.5 | 50.4  | hypothetical protein ARALYDRAFT_908774       | gbpln | Arabidopsis lyrata   | AT5G08260.1   Symbols:   scpl35   serine carboxypeptidase-like 35   chr5:2657236-2661272 FORWARD LENGTH=480                                                                                                                                                                                                                                 | 825  | 480  | 0         | 58.2  | 45.8 | 50.1  |
| Rsa1.0_00058.1.g3175.t2 | gb EOA20528.1   hypothetical protein CARUB_v10000841mg [Capsella rubella]                                                                                                                              | 560  | 483  | 1.00E-125 | 86.3  | 40.4 | 45.7  | hypothetical protein CARUB_v10000841mg       | gbpln | Capsella rubella     | AT5G08260.1   Symbols:   scpl35   serine carboxypeptidase-like 35   chr5:2657236-2661272 FORWARD LENGTH=480                                                                                                                                                                                                                                 | 560  | 480  | 1.00E-126 | 85.7  | 39.8 | 45.2  |
| Rsa1.0_00058.1.g3176.t1 | refXP_002873348.1   predicted protein [Arabidopsis lyrata subsp. lyrata]   gi 297319185 gb EFH49607.1   predicted protein [Arabidopsis lyrata subsp. lyrata]                                           | 263  | 252  | 4.00E-96  | 95.8  | 70.7 | 81.0  | predicted protein                            | gbpln | Arabidopsis lyrata   | AT5G08240.1   Symbols:   unknown protein; BEST Arabidopsis thaliana protein match is: unknown protein (TAIR:AT5G23160.1); Has 69 Blast hits to 69 proteins in 10 species: Archaea - 0; Bacteria - 1; Metazoa - 0; Fungi - 0; Plants - 68; Viruses - 0; Other Eukaryotes - 0 (source: NCBI BLINK).   chr5:2651382-2652336 REVERSE LENGTH=258 | 263  | 258  | 2.00E-98  | 98.1  | 72.2 | 83.3  |
| Rsa1.0_00058.1.g3177.t1 | gb EOA19452.1   hypothetical protein CARUB_v10001842mg [Capsella rubella]                                                                                                                              | 238  | 240  | 1.00E-124 | 100.8 | 90.3 | 95.4  | hypothetical protein CARUB_v10001842mg       | gbpln | Capsella rubella     | AT5G23140.1   Symbols:   CLPP2, NCLPP7   nuclear-encoded CLP protease P7   chr5:7783811-7784826 FORWARD LENGTH=241                                                                                                                                                                                                                          | 238  | 241  | 1.00E-126 | 101.3 | 89.5 | 94.1  |
| Rsa1.0_00058.1.g3178.t1 | gb EOA19796.1   hypothetical protein CARUB_v10000043mg [Capsella rubella]   gi 48255605 gb EOA19797.1   hypothetical protein CARUB_v10000043mg [Capsella rubella]                                      | 1399 | 1392 | 0         | 99.5  | 57.8 | 67.3  | hypothetical protein CARUB_v10000043mg       | gbpln | Capsella rubella     | AT5G08230.1   Symbols:   Tudor/PWWP/MBT domain-containing protein   chr5:2643846-2649788 REVERSE LENGTH=1445                                                                                                                                                                                                                                | 1399 | 1445 | 0         | 103.3 | 49.0 | 55.2  |
| Rsa1.0_00058.1.g3179.t1 | refXP_002871312.1   hypothetical protein ARALYDRAFT_487656 [Arabidopsis lyrata subsp. lyrata]   gi 297317149 gb EFH47571.1   hypothetical protein ARALYDRAFT_487656 [Arabidopsis lyrata subsp. lyrata] | 419  | 407  | 0         | 97.1  | 85.2 | 90.7  | hypothetical protein ARALYDRAFT_487656       | gbpln | Arabidopsis lyrata   | AT5G08200.1   Symbols:   peptidoglycan-binding LysM domain-containing protein   chr5:2638385-2640508 FORWARD LENGTH=409                                                                                                                                                                                                                     | 419  | 409  | 0         | 97.6  | 84.7 | 90.0  |
| Rsa1.0_00058.1.g3180.t1 | gb EOA21718.1   hypothetical protein CARUB_v10002155mg [Capsella rubella]                                                                                                                              | 164  | 160  | 2.00E-79  | 97.6  | 86.0 | 92.1  | hypothetical protein CARUB_v10002155mg       | gbpln | Capsella rubella     | AT5G23090.1   Symbols:   NF-YB13   nuclear factor Y, subunit B13   chr5:7749391-7750203 FORWARD LENGTH=159                                                                                                                                                                                                                                  | 164  | 159  | 1.00E-80  | 97.0  | 86.0 | 91.5  |

|                         |                                                                                                                                                                                                                                                                                                                                                                                                                                                                                                                             |      |      |           |       |      |      |                                                         |       |                      |                                                                                                                                                                                                                                                                                                                                                                                                                                                 |      |      |           |       |      |      |
|-------------------------|-----------------------------------------------------------------------------------------------------------------------------------------------------------------------------------------------------------------------------------------------------------------------------------------------------------------------------------------------------------------------------------------------------------------------------------------------------------------------------------------------------------------------------|------|------|-----------|-------|------|------|---------------------------------------------------------|-------|----------------------|-------------------------------------------------------------------------------------------------------------------------------------------------------------------------------------------------------------------------------------------------------------------------------------------------------------------------------------------------------------------------------------------------------------------------------------------------|------|------|-----------|-------|------|------|
| Rsa1.0_00058.1.g3181.t1 | refXP_002873346.1 ribosomal protein L7Ae/L30e/S12e/Gadd45 family protein [Arabidopsis lyrata subsp. lyrata] gi 297319183 gb EFH49605.1 ribosomal protein L7Ae/L30e/S12e/Gadd45 family protein [Arabidopsis lyrata subsp. lyrata]                                                                                                                                                                                                                                                                                            | 156  | 156  | 3.00E-77  | 100.0 | 92.3 | 97.4 | ribosomal protein L7Ae/L30e/S12e/Gad d45 family protein | gbpln | Arabidopsis lyrata   | AT5G08180.2   Symbols:   Ribosomal protein L7Ae/L30e/S12e/Gadd45 family protein   chr5:2631843-2633374 REVERSE LENGTH=156                                                                                                                                                                                                                                                                                                                       | 156  | 156  | 3.00E-79  | 100.0 | 91.7 | 96.8 |
| Rsa1.0_00058.1.g3182.t1 | refNP_196433.1 serine/threonine protein kinase 3 [Arabidopsis thaliana] gi 11762274 gb AAG40409.1 AF325057.1 AT5g08160 [Arabidopsis thaliana] gi 2109293 gb AAB69123.1  serine/threonine protein kinase [Arabidopsis thaliana] gi 8346553 emb CAB93717.1  serine/threonine protein kinase [Arabidopsis thaliana] gi 24417498 gb AAN60359.1  unknown [Arabidopsis thaliana] gi 94442405 gb ABF19990.1  At5g08160 [Arabidopsis thaliana] gi 332003876 gb AED91259.1  serine/threonine protein kinase 3 [Arabidopsis thaliana] | 340  | 347  | 0         | 102.1 | 93.2 | 95.9 | serine/threonine protein kinase 3                       | gbpln | Arabidopsis thaliana | AT5G08160.1   Symbols: ATPK3, PK3   serine/threonine protein kinase 3   chr5:2625903-2627942 REVERSE LENGTH=347                                                                                                                                                                                                                                                                                                                                 | 340  | 347  | 0         | 102.1 | 93.2 | 95.9 |
| Rsa1.0_00058.1.g3183.t1 | refXP_002873343.1  hypothetical protein ARALYDRAFT_908765 [Arabidopsis lyrata subsp. lyrata] gi 297319180 gb EFH49602.1  hypothetical protein ARALYDRAFT_908765 [Arabidopsis lyrata subsp. lyrata]                                                                                                                                                                                                                                                                                                                          | 134  | 140  | 4.00E-31  | 104.5 | 75.4 | 83.6 | hypothetical protein ARALYDRAFT_908765                  | gbpln | Arabidopsis lyrata   | AT5G08150.1   Symbols: SOB5   suppressor of phytochrome b 5   chr5:2622164-2622598 REVERSE LENGTH=144                                                                                                                                                                                                                                                                                                                                           | 134  | 144  | 8.00E-26  | 107.5 | 71.6 | 80.6 |
| Rsa1.0_00058.1.g3184.t1 | emb CAB93715.1  putative protein [Arabidopsis thaliana]                                                                                                                                                                                                                                                                                                                                                                                                                                                                     | 379  | 530  | 5.00E-93  | 139.8 | 59.9 | 71.8 | putative protein                                        | gbpln | Arabidopsis thaliana | AT5G08139.1   Symbols:   RING/U-box superfamily protein   chr5:2616487-2617617 FORWARD LENGTH=376                                                                                                                                                                                                                                                                                                                                               | 379  | 376  | 2.00E-94  | 99.2  | 60.2 | 72.0 |
| Rsa1.0_00058.1.g3185.t1 | refXP_002873342.1  hypothetical protein ARALYDRAFT_908762 [Arabidopsis lyrata subsp. lyrata] gi 297319179 gb EFH49601.1  hypothetical protein ARALYDRAFT_908762 [Arabidopsis lyrata subsp. lyrata]                                                                                                                                                                                                                                                                                                                          | 551  | 540  | 0         | 98.0  | 82.4 | 86.8 | hypothetical protein ARALYDRAFT_908762                  | gbpln | Arabidopsis lyrata   | AT5G08130.4   Symbols: BIM1   basic helix-loop-helix (bHLH) DNA-binding superfamily protein   chr5:2606655-2609571 REVERSE LENGTH=529                                                                                                                                                                                                                                                                                                           | 551  | 529  | 0         | 96.0  | 79.7 | 84.6 |
| Rsa1.0_00058.1.g3186.t1 | refNP_196429.1  movement protein binding protein 2C [Arabidopsis thaliana] gi 13877923 gb AAK44039.1 AF370224.1 putative myosin heavy chain [Arabidopsis thaliana] gi 8346549 emb CAB93713.1  myosin heavy chain-like protein [Arabidopsis thaliana] gi 21436331 gb AAM51335.1  putative myosin heavy chain [Arabidopsis thaliana] gi 332003866 gb AED91249.1  movement protein binding protein 2C [Arabidopsis thaliana]                                                                                                   | 329  | 326  | 1.00E-157 | 99.1  | 83.3 | 92.7 | movement protein binding protein 2C                     | gbpln | Arabidopsis thaliana | AT5G08120.1   Symbols: MPB2C   movement protein binding protein 2C   chr5:2600743-2602678 REVERSE LENGTH=326                                                                                                                                                                                                                                                                                                                                    | 329  | 326  | 1.00E-160 | 99.1  | 83.3 | 92.7 |
| Rsa1.0_00058.1.g3187.t1 | gb EOA22920.1  hypothetical protein CARUB_v10003654mg [Capsella rubella]                                                                                                                                                                                                                                                                                                                                                                                                                                                    | 1498 | 1153 | 0         | 77.0  | 56.9 | 64.3 | hypothetical protein CARUB_v10003654mg                  | gbpln | Capsella rubella     | AT5G08110.1   Symbols:   nucleic acid binding:ATP-dependent helicases:ATP binding:helicases:ATP-dependent helicases   chr5:2594854-2600114 REVERSE LENGTH=1141                                                                                                                                                                                                                                                                                  | 1498 | 1141 | 0         | 76.2  | 54.9 | 62.2 |
| Rsa1.0_00058.1.g3188.t1 | gb EOA21213.1  hypothetical protein CARUB_v10001560mg [Capsella rubella]                                                                                                                                                                                                                                                                                                                                                                                                                                                    | 465  | 304  | 1.00E-101 | 65.4  | 46.7 | 49.2 | hypothetical protein CARUB_v10001560mg                  | gbpln | Capsella rubella     | AT5G08080.1   Symbols: SYP132, ATSYP132   syntaxin of plants 132   chr5:2588532-2591106 FORWARD LENGTH=304                                                                                                                                                                                                                                                                                                                                      | 465  | 304  | 1.00E-102 | 65.4  | 46.0 | 49.0 |
| Rsa1.0_00058.1.g3189.t1 | gb AAM64394.1  unknown [Arabidopsis thaliana]                                                                                                                                                                                                                                                                                                                                                                                                                                                                               | 130  | 131  | 2.00E-60  | 100.8 | 83.1 | 93.1 | unknown                                                 | gbpln | Arabidopsis thaliana | AT5G08060.1   Symbols:   unknown protein; FUNCTIONS IN: molecular.function unknown; INVOLVED IN: biological.process unknown; LOCATED IN: mitochondrion; EXPRESSED IN: 24 plant structures; EXPRESSED DURING: 16 growth stages; Has 42 Blast hits to 42 proteins in 17 species: Archae - 0; Bacteria - 0; Metazoa - 0; Fungi - 0; Plants - 41; Viruses - 0; Other Eukaryotes - 1 (source: NCBI BLINK).   chr5:2580588-2580983 FORWARD LENGTH=131 | 130  | 131  | 6.00E-63  | 100.8 | 83.1 | 93.1 |
| Rsa1.0_00058.1.g3190.t1 | dbj BAF81519.1  glycerophosphodiester phosphodiesterase [Brassica rapa]                                                                                                                                                                                                                                                                                                                                                                                                                                                     | 379  | 372  | 0         | 98.2  | 94.7 | 95.8 | glycerophosphodiester phosphodiesterase                 | gbpln | Brassica rapa        | AT5G08030.1   Symbols:   PLC-like phosphodiesterases superfamily protein   chr5:2575152-2576770 REVERSE LENGTH=372                                                                                                                                                                                                                                                                                                                              | 379  | 372  | 0         | 98.2  | 84.4 | 89.7 |

|                         |                                                                                                                                                                                                                                                                                                                                                                                                                                                                     |     |     |           |       |      |      |                                                  |       |                      |                                                                                                                                                                                                                                                                                                                                                              |     |     |           |       |      |      |
|-------------------------|---------------------------------------------------------------------------------------------------------------------------------------------------------------------------------------------------------------------------------------------------------------------------------------------------------------------------------------------------------------------------------------------------------------------------------------------------------------------|-----|-----|-----------|-------|------|------|--------------------------------------------------|-------|----------------------|--------------------------------------------------------------------------------------------------------------------------------------------------------------------------------------------------------------------------------------------------------------------------------------------------------------------------------------------------------------|-----|-----|-----------|-------|------|------|
| Rsa1.0_00058.1.g3191.t1 | gb EOA20180.1  hypothetical protein CARUB_v10000503mg [Capsella rubella]                                                                                                                                                                                                                                                                                                                                                                                            | 423 | 607 | 1.00E-180 | 143.5 | 73.3 | 78.5 | hypothetical protein CARUB_v10000503mg           | gbpln | Capsella rubella     | AT5G08020.1   Symbols: ATRPA70B, RPA70B   RPA70-kDa subunit B   chr5:2572107-2574879 FORWARD LENGTH=604                                                                                                                                                                                                                                                      | 423 | 604 | 0         | 142.8 | 73.3 | 78.7 |
| Rsa1.0_00058.1.g3192.t1 | ref XP_002871301.1  hypothetical protein ARALYDRAFT_487634 [Arabidopsis lyrata subsp. lyrata] gi 297317138 gb EFH47560.1  hypothetical protein ARALYDRAFT_487634 [Arabidopsis lyrata subsp. lyrata]                                                                                                                                                                                                                                                                 | 573 | 571 | 1.00E-175 | 99.7  | 70.0 | 78.5 | hypothetical protein ARALYDRAFT_487634           | gbpln | Arabidopsis lyrata   | AT5G08010.1   Symbols:   unknown protein; BEST Arabidopsis thaliana protein match is: unknown protein (TAIR:AT5G61040.1). Has 5732 Blast hits to 4319 proteins in 440 species: Archae - 66; Bacteria - 397; Metazoa - 2437; Fungi - 292; Plants - 238; Viruses - 35; Other Eukaryotes - 2267 (source: NCBI BLINK).   chr5:2569606-2571613 FORWARD LENGTH=566 | 573 | 566 | 1.00E-169 | 98.8  | 68.8 | 76.6 |
| Rsa1.0_00058.1.g3193.t2 | ref XP_002871299.1  hypothetical protein ARALYDRAFT_350051 [Arabidopsis lyrata subsp. lyrata] gi 297317136 gb EFH47558.1  hypothetical protein ARALYDRAFT_350051 [Arabidopsis lyrata subsp. lyrata]                                                                                                                                                                                                                                                                 | 198 | 194 | 6.00E-75  | 98.0  | 81.8 | 87.9 | hypothetical protein ARALYDRAFT_350051           | gbpln | Arabidopsis lyrata   | AT5G08000.1   Symbols: E13L3, PDCE2   glucan endo-1,3-beta-glucosidase-like protein 3   chr5:2563684-2565282 FORWARD LENGTH=194                                                                                                                                                                                                                              | 198 | 194 | 4.00E-73  | 98.0  | 76.3 | 82.8 |
| Rsa1.0_00058.1.g3194.t1 | gb ABC58722.1  flavonoid 3'-hydroxylase [Brassica napus] gi 84380743 gb ABC58723.1  flavonoid 3'-hydroxylase [Brassica napus]                                                                                                                                                                                                                                                                                                                                       | 511 | 511 | 0         | 100.0 | 97.7 | 98.8 | flavonoid 3'-hydroxylase                         | gbpln | Brassica napus       | AT5G07990.1   Symbols: TT7, CYP75B1, D501   Cytochrome P450 superfamily protein   chr5:2560437-2562859 FORWARD LENGTH=513                                                                                                                                                                                                                                    | 511 | 513 | 0         | 100.4 | 89.0 | 94.3 |
| Rsa1.0_00059.1.g3195.t1 | ref NP_177241.3  MLP-like protein 31 [Arabidopsis thaliana] gi 148872485 sp Q941R6.2 MLP31_ARAT H RecName: Full=MLP-like protein 31 gi 19424013 gb AAL87294.1  unknown protein [Arabidopsis thaliana] gi 21689799 gb AAM67543.1  unknown protein [Arabidopsis thaliana] gi 110740998 dbj BAE98593.1  hypothetical protein [Arabidopsis thaliana] gi 332197005 gb AEE35126.1  MLP-like protein 31 [Arabidopsis thaliana]                                             | 182 | 171 | 2.00E-60  | 94.0  | 61.5 | 75.3 | MLP-like protein 31                              | gbpln | Arabidopsis thaliana | AT1G70840.1   Symbols: MLP31   MLP-like protein 31   chr1:26713170-26714014 REVERSE LENGTH=171                                                                                                                                                                                                                                                               | 182 | 171 | 9.00E-63  | 94.0  | 61.5 | 75.3 |
| Rsa1.0_00059.1.g3196.t1 | # # # # # # # # - ----                                                                                                                                                                                                                                                                                                                                                                                                                                              |     |     |           |       |      |      |                                                  |       |                      |                                                                                                                                                                                                                                                                                                                                                              |     |     |           |       |      |      |
| Rsa1.0_00059.1.g3197.t1 | gb EOA39173.1  hypothetical protein CARUB_v10012133mg [Capsella rubella]                                                                                                                                                                                                                                                                                                                                                                                            | 632 | 631 | 0         | 99.8  | 94.5 | 98.1 | hypothetical protein CARUB_v10012133mg           | gbpln | Capsella rubella     | AT1G23090.1   Symbols: AST91, SULTR3.3   sulfate transporter 91   chr1:8185238-8188954 REVERSE LENGTH=631                                                                                                                                                                                                                                                    | 632 | 631 | 0         | 99.8  | 93.4 | 97.5 |
| Rsa1.0_00059.1.g3198.t1 | ref XP_002890553.1  hypothetical protein ARALYDRAFT_472555 [Arabidopsis lyrata subsp. lyrata] gi 297336395 gb EFH66812.1  hypothetical protein ARALYDRAFT_472555 [Arabidopsis lyrata subsp. lyrata]                                                                                                                                                                                                                                                                 | 136 | 158 | 7.00E-35  | 116.2 | 77.2 | 83.8 | hypothetical protein ARALYDRAFT_472555           | gbpln | Arabidopsis lyrata   | AT1G23050.1   Symbols:   hydroxyproline-rich glycoprotein family protein   chr1:8168631-8168116 FORWARD LENGTH=161                                                                                                                                                                                                                                           | 136 | 161 | 1.00E-32  | 118.4 | 73.5 | 81.6 |
| Rsa1.0_00059.1.g3199.t1 | ref NP_564187.1  hydroxyproline-rich glycoprotein family protein [Arabidopsis thaliana] gi 2462823 gb AAB72158.1  unknown [Arabidopsis thaliana] gi 2829907 gb AAC00615.1  Unknown protein [Arabidopsis thaliana] gi 98960877 gb ABF58922.1  At1g23040 [Arabidopsis thaliana] gi 110738822 dbj BAF01334.1  predicted GPI-anchored protein [Arabidopsis thaliana] gi 332192205 gb AEE30326.1  hydroxyproline-rich glycoprotein family protein [Arabidopsis thaliana] | 144 | 144 | 4.00E-41  | 100.0 | 80.6 | 86.8 | hydroxyproline-rich glycoprotein family protein  | gbpln | Arabidopsis thaliana | AT1G23040.1   Symbols:   hydroxyproline-rich glycoprotein family protein   chr1:8165025-8165459 FORWARD LENGTH=144                                                                                                                                                                                                                                           | 144 | 144 | 1.00E-43  | 100.0 | 80.6 | 86.8 |
| Rsa1.0_00059.1.g3200.t1 | ref XP_002890550.1  armadillo/beta-catenin repeat family protein [Arabidopsis lyrata subsp. lyrata] gi 297336392 gb EFH66809.1  armadillo/beta-catenin repeat family protein [Arabidopsis lyrata subsp. lyrata]                                                                                                                                                                                                                                                     | 613 | 612 | 0         | 99.8  | 89.7 | 94.1 | armadillo/beta-catenin repeat family protein     | gbpln | Arabidopsis lyrata   | AT1G23030.1   Symbols:   ARM repeat superfamily protein   chr1:8156745-8158842 FORWARD LENGTH=612                                                                                                                                                                                                                                                            | 613 | 612 | 0         | 99.8  | 88.9 | 93.5 |
| Rsa1.0_00059.1.g3201.t1 | gb ABG81320.1  low-phosphate root 1 [Arabidopsis thaliana]                                                                                                                                                                                                                                                                                                                                                                                                          | 566 | 581 | 0         | 102.7 | 88.7 | 93.1 | low-phosphate root 1                             | gbpln | Arabidopsis thaliana | AT1G23010.1   Symbols: LPR1   Cupredoxin superfamily protein   chr1:8147353-8149580 FORWARD LENGTH=581                                                                                                                                                                                                                                                       | 566 | 581 | 0         | 102.7 | 88.7 | 93.1 |
| Rsa1.0_00059.1.g3202.t1 | ref NP_173713.1  heavy-metal-associated domain-containing protein [Arabidopsis thaliana] gi 124301010 gb ABN04757.1  At1g23000 [Arabidopsis thaliana] gi 332192199 gb AEE30320.1  heavy-metal-associated domain-containing protein [Arabidopsis thaliana]                                                                                                                                                                                                           | 356 | 358 | 1.00E-103 | 100.6 | 72.8 | 81.5 | heavy-metal-associated domain-containing protein | gbpln | Arabidopsis thaliana | AT1G23000.1   Symbols:   Heavy metal transport/detoxification superfamily protein   chr1:8143614-8144865 FORWARD LENGTH=358                                                                                                                                                                                                                                  | 356 | 358 | 1.00E-106 | 100.6 | 72.8 | 81.5 |

|                         |                                                                                                                                                                                                                                                                                                                                                                                                                                     |      |      |           |       |      |      |                                                                                                                                                                                                                                                                                                                                                                                             |       |                      |                                                                                                                                                                                                                                                                                                                                                 |      |      |           |       |      |      |
|-------------------------|-------------------------------------------------------------------------------------------------------------------------------------------------------------------------------------------------------------------------------------------------------------------------------------------------------------------------------------------------------------------------------------------------------------------------------------|------|------|-----------|-------|------|------|---------------------------------------------------------------------------------------------------------------------------------------------------------------------------------------------------------------------------------------------------------------------------------------------------------------------------------------------------------------------------------------------|-------|----------------------|-------------------------------------------------------------------------------------------------------------------------------------------------------------------------------------------------------------------------------------------------------------------------------------------------------------------------------------------------|------|------|-----------|-------|------|------|
| Rsa1.0_00059.1.g3203.t1 | gb AAN23108.2  putative farnesylated protein [Brassica rapa subsp. pekinensis]                                                                                                                                                                                                                                                                                                                                                      | 152  | 152  | 1.00E-82  | 100.0 | 97.4 | 98.7 | putative farnesylated protein                                                                                                                                                                                                                                                                                                                                                               | gbpln | Brassica rapa        | AT1G22990.1   Symbols: HIP22   Heavy metal transport/detoxification superfamily protein   chr1:8139221-8140045 FORWARD LENGTH=152                                                                                                                                                                                                               | 152  | 152  | 7.00E-83  | 100.0 | 93.4 | 98.0 |
| Rsa1.0_00059.1.g3204.t1 | ref XP_002893254.1  hypothetical protein ARALYDRAFT_472548 [Arabidopsis lyrata subsp. lyrata] gi 297339096 gb EFH69513.1  hypothetical protein ARALYDRAFT_472548 [Arabidopsis lyrata subsp. lyrata]                                                                                                                                                                                                                                 | 356  | 355  | 1.00E-161 | 99.7  | 83.4 | 90.7 | hypothetical protein ARALYDRAFT_472548                                                                                                                                                                                                                                                                                                                                                      | gbpln | Arabidopsis lyrata   | AT1G22970.1   Symbols:   unknown protein; BEST Arabidopsis thaliana protein match is: unknown protein (TAIR:AT1G71150.1). Has 134 Blast hits to 132 proteins in 48 species: Archae - 0; Bacteria - 0; Metazoa - 66; Fungi - 10; Plants - 48; Viruses - 0; Other Eukaryotes - 10 (source: NCBI BLINK).   chr1:8130840-8132199 REVERSE LENGTH=357 | 356  | 357  | 1.00E-159 | 100.3 | 82.9 | 90.7 |
| Rsa1.0_00059.1.g3205.t1 | gb EOA36686.1  hypothetical protein CARUB_v10011979mg [Capsella rubella]                                                                                                                                                                                                                                                                                                                                                            | 748  | 720  | 0         | 96.3  | 67.1 | 77.8 | hypothetical protein CARUB_v10011979mg                                                                                                                                                                                                                                                                                                                                                      | gbpln | Capsella rubella     | AT1G22960.1   Symbols:   Pentatricopeptide repeat (PPR) superfamily protein   chr1:8128086-8130242 REVERSE LENGTH=718                                                                                                                                                                                                                           | 748  | 718  | 0         | 96.0  | 68.2 | 78.6 |
| Rsa1.0_00059.1.g3206.t2 | ref NP_173708.3  uncharacterized PKHD-type hydroxylase [Arabidopsis thaliana] gi 193806639 sp Q3ED68.2 Y1295.ARAT.H RecName: Full=Uncharacterized PKHD-type hydroxylase At1g22950 gi 332192193 gb AE30314.1  uncharacterized PKHD-type hydroxylase [Arabidopsis thaliana]                                                                                                                                                           | 389  | 397  | 1.00E-176 | 102.1 | 77.9 | 87.7 | uncharacterized PKHD-type hydroxylase                                                                                                                                                                                                                                                                                                                                                       | gbpln | Arabidopsis thaliana | AT1G22950.1   Symbols:   2-oxoglutarate (2OG) and Fe(II)-dependent oxygenase superfamily protein   chr1:8125291-8127168 REVERSE LENGTH=397                                                                                                                                                                                                      | 389  | 397  | 1.00E-179 | 102.1 | 77.9 | 87.7 |
| Rsa1.0_00059.1.g3207.t1 | sp O48881.1 TPS1.BRANA RecName: Full=Thiamine biosynthetic bifunctional enzyme BTH1, chloroplastic; Includes: RecName: Full=Thiamine-phosphate synthase; Short=TP synthase; Short=TPS; AltName: Full=Thiamine-phosphate pyrophosphorylase; Short=TMP pyrophosphorylase; Short=TMP-PPase; Includes: RecName: Full=Hydroxymethylpyrimidine kinase; Short=HMP kinase; Flags: Precursor gi 2746079 gb AAC31298.1  BTH1 [Brassica napus] | 526  | 523  | 0         | 99.4  | 94.1 | 97.0 | RecName: Full=Thiamine biosynthetic bifunctional enzyme BTH1, chloroplastic; Includes: RecName: Full=Thiamine-phosphate synthase; Short=TP synthase; Short=TPS; AltName: Full=Thiamine-phosphate pyrophosphorylase; Short=TMP pyrophosphorylase; Short=TMP-PPase; Includes: RecName: Full=Hydroxymethylpyrimidine kinase; Short=HMP kinase; Flags: Precursor gi 2746079 gb AAC31298.1  BTH1 | gbpln | Brassica napus       | AT1G22940.1   Symbols: TH1, TH-1, THIE   thiamin biosynthesis protein, putative   chr1:8122384-8124908 FORWARD LENGTH=522                                                                                                                                                                                                                       | 526  | 522  | 0         | 99.2  | 90.5 | 94.9 |
| Rsa1.0_00059.1.g3208.t1 | ref XP_002890962.1  hypothetical protein ARALYDRAFT_890756 [Arabidopsis lyrata subsp. lyrata] gi 297336804 gb EFH67221.1  hypothetical protein ARALYDRAFT_890756 [Arabidopsis lyrata subsp. lyrata]                                                                                                                                                                                                                                 | 160  | 159  | 2.00E-53  | 99.4  | 67.5 | 76.9 | hypothetical protein ARALYDRAFT_890756                                                                                                                                                                                                                                                                                                                                                      | gbpln | Arabidopsis lyrata   | AT1G56270.1   Symbols:   unknown protein; Has 38 Blast hits to 38 proteins in 3 species: Archae - 0; Bacteria - 0; Metazoa - 0; Fungi - 0; Plants - 38; Viruses - 0; Other Eukaryotes - 0 (source: NCBI BLINK).   chr1:21071148-21071636 REVERSE LENGTH=162                                                                                     | 160  | 162  | 1.00E-22  | 101.3 | 40.0 | 57.5 |
| Rsa1.0_00059.1.g3209.t1 | ref XP_002890545.1  T-complex protein 11 [Arabidopsis lyrata subsp. lyrata] gi 297336387 gb EFH66804.1  T-complex protein 11 [Arabidopsis lyrata subsp. lyrata]                                                                                                                                                                                                                                                                     | 1203 | 1130 | 0         | 93.9  | 78.3 | 84.3 | T-complex protein 11                                                                                                                                                                                                                                                                                                                                                                        | gbpln | Arabidopsis lyrata   | AT1G22930.1   Symbols:   T-complex protein 11   chr1:8117521-8121854 FORWARD LENGTH=1131                                                                                                                                                                                                                                                        | 1203 | 1131 | 0         | 94.0  | 77.4 | 83.2 |
| Rsa1.0_00059.1.g3210.t2 | ref XP_002893252.1  hypothetical protein ARALYDRAFT_472541 [Arabidopsis lyrata subsp. lyrata] gi 297339094 gb EFH69511.1  hypothetical protein ARALYDRAFT_472541 [Arabidopsis lyrata subsp. lyrata]                                                                                                                                                                                                                                 | 384  | 357  | 0         | 93.0  | 85.4 | 88.5 | hypothetical protein ARALYDRAFT_472541                                                                                                                                                                                                                                                                                                                                                      | gbpln | Arabidopsis lyrata   | AT1G22920.1   Symbols: CSN5A, JAB1, AUH1   COP9 signalosome 5A   chr1:8109882-8111895 REVERSE LENGTH=357                                                                                                                                                                                                                                        | 384  | 357  | 1.00E-180 | 93.0  | 84.1 | 87.8 |
| Rsa1.0_00059.1.g3211.t1 | #                                                                                                                                                                                                                                                                                                                                                                                                                                   | #    | #    | #         | #     | #    | #    | -                                                                                                                                                                                                                                                                                                                                                                                           | ----  | ----                 | #                                                                                                                                                                                                                                                                                                                                               | #    | #    | #         | #     | #    | #    |
| Rsa1.0_00059.1.g3212.t1 | ref XP_002890544.1  hypothetical protein ARALYDRAFT_889804 [Arabidopsis lyrata subsp. lyrata] gi 297336386 gb EFH66803.1  hypothetical protein ARALYDRAFT_889804 [Arabidopsis lyrata subsp. lyrata]                                                                                                                                                                                                                                 | 244  | 252  | 1.00E-109 | 103.3 | 88.1 | 91.4 | hypothetical protein ARALYDRAFT_889804                                                                                                                                                                                                                                                                                                                                                      | gbpln | Arabidopsis lyrata   | AT1G22910.1   Symbols:   RNA-binding (RRM/TRM/RNP motifs) family protein   chr1:8105808-8107659 FORWARD LENGTH=249                                                                                                                                                                                                                              | 244  | 249  | 1.00E-111 | 102.0 | 88.5 | 91.0 |
| Rsa1.0_00059.1.g3213.t1 | #                                                                                                                                                                                                                                                                                                                                                                                                                                   | #    | #    | #         | #     | #    | #    | -                                                                                                                                                                                                                                                                                                                                                                                           | ----  | ----                 | #                                                                                                                                                                                                                                                                                                                                               | #    | #    | #         | #     | #    | #    |

|                         |                                                                                                                                                                                                                                                                                                                                                                                                                                                 |      |      |           |       |      |      |                                                 |       |                    |                                                                                                                                                                                                                                                                                                                                                                                                                                                                                                                                                         |      |      |           |       |      |      |
|-------------------------|-------------------------------------------------------------------------------------------------------------------------------------------------------------------------------------------------------------------------------------------------------------------------------------------------------------------------------------------------------------------------------------------------------------------------------------------------|------|------|-----------|-------|------|------|-------------------------------------------------|-------|--------------------|---------------------------------------------------------------------------------------------------------------------------------------------------------------------------------------------------------------------------------------------------------------------------------------------------------------------------------------------------------------------------------------------------------------------------------------------------------------------------------------------------------------------------------------------------------|------|------|-----------|-------|------|------|
| Rsa1.0_00059.1.g3214.t1 | refXP_002863772.1   disease resistance-responsive family protein [Arabidopsis lyrata subsp. lyrata] gi 297791781 ref XP_002863775.1   disease resistance-responsive family protein [Arabidopsis lyrata subsp. lyrata] gi 297309607 gb EFH40031.1   disease resistance-responsive family protein [Arabidopsis lyrata subsp. lyrata] gi 297309610 gb EFH40034.1   disease resistance-responsive family protein [Arabidopsis lyrata subsp. lyrata] | 185  | 185  | 8.00E-82  | 100.0 | 80.5 | 88.1 | disease resistance-responsive family protein    | gbpln | Arabidopsis lyrata | AT5G42500.1   Symbols:   Disease resistance-responsive (dirigent-like protein) family protein   chr5:16994359-16994916 REVERSE LENGTH=185                                                                                                                                                                                                                                                                                                                                                                                                               | 185  | 185  | 1.00E-79  | 100.0 | 80.5 | 89.2 |
| Rsa1.0_00059.1.g3215.t1 | refXP_002863772.1   disease resistance-responsive family protein [Arabidopsis lyrata subsp. lyrata] gi 297791781 ref XP_002863775.1   disease resistance-responsive family protein [Arabidopsis lyrata subsp. lyrata] gi 297309607 gb EFH40031.1   disease resistance-responsive family protein [Arabidopsis lyrata subsp. lyrata] gi 297309610 gb EFH40034.1   disease resistance-responsive family protein [Arabidopsis lyrata subsp. lyrata] | 185  | 185  | 1.00E-74  | 100.0 | 76.8 | 83.8 | disease resistance-responsive family protein    | gbpln | Arabidopsis lyrata | AT5G42500.1   Symbols:   Disease resistance-responsive (dirigent-like protein) family protein   chr5:16994359-16994916 REVERSE LENGTH=185                                                                                                                                                                                                                                                                                                                                                                                                               | 185  | 185  | 1.00E-69  | 100.0 | 75.1 | 83.2 |
| Rsa1.0_00059.1.g3216.t1 | gb EOA39826.1   hypothetical protein CARUB_v10008493mg [Capsella rubella]                                                                                                                                                                                                                                                                                                                                                                       | 680  | 681  | 0         | 100.1 | 74.1 | 81.5 | hypothetical protein CARUB_v10008493mg          | gbpln | Capsella rubella   | AT1G22882.1   Symbols:   Galactose-binding protein   chr1:8099150-8101220 FORWARD LENGTH=660                                                                                                                                                                                                                                                                                                                                                                                                                                                            | 680  | 660  | 0         | 97.1  | 71.6 | 79.3 |
| Rsa1.0_00059.1.g3217.t8 | gb EOA36793.1   hypothetical protein CARUB_v10008204mg [Capsella rubella]                                                                                                                                                                                                                                                                                                                                                                       | 1812 | 983  | 0         | 54.2  | 48.0 | 50.8 | hypothetical protein CARUB_v10008204mg          | gbpln | Capsella rubella   | AT1G22860.1   Symbols:   Vacuolar sorting protein 39   chr1:8083400-8088867 FORWARD LENGTH=961                                                                                                                                                                                                                                                                                                                                                                                                                                                          | 1812 | 961  | 0         | 53.0  | 46.1 | 49.1 |
| Rsa1.0_00059.1.g3218.t1 | gb EOA38177.1   hypothetical protein CARUB_v10009653mg [Capsella rubella]                                                                                                                                                                                                                                                                                                                                                                       | 326  | 340  | 1.00E-124 | 104.3 | 81.0 | 85.0 | hypothetical protein CARUB_v10009653mg          | gbpln | Capsella rubella   | AT1G22850.1   Symbols:   SNARE associated Golgi protein family   chr1:8080671-8082816 REVERSE LENGTH=344                                                                                                                                                                                                                                                                                                                                                                                                                                                | 326  | 344  | 1.00E-126 | 105.5 | 82.2 | 86.5 |
| Rsa1.0_00059.1.g3219.t1 | gb EOA38639.1   hypothetical protein CARUB_v10010544mg, partial [Capsella rubella]                                                                                                                                                                                                                                                                                                                                                              | 112  | 154  | 7.00E-59  | 137.5 | 97.3 | 99.1 | hypothetical protein CARUB_v10010544mg, partial | gbpln | Capsella rubella   | AT1G22840.1   Symbols: CYTC-1, ATCYTC-A   CYTOCHROME C-1   chr1:8079384-8080286 FORWARD LENGTH=114                                                                                                                                                                                                                                                                                                                                                                                                                                                      | 112  | 114  | 8.00E-60  | 101.8 | 94.6 | 98.2 |
| Rsa1.0_00059.1.g3220.t1 | gb EOA37595.1   hypothetical protein CARUB_v10011955mg [Capsella rubella]                                                                                                                                                                                                                                                                                                                                                                       | 130  | 147  | 4.00E-58  | 113.1 | 88.5 | 96.2 | hypothetical protein CARUB_v10011955mg          | gbpln | Capsella rubella   | AT1G22810.1   Symbols:   Integrase-type DNA-binding superfamily protein   chr1:8074535-8074969 REVERSE LENGTH=144                                                                                                                                                                                                                                                                                                                                                                                                                                       | 130  | 144  | 2.00E-57  | 110.8 | 86.2 | 93.1 |
| Rsa1.0_00059.1.g3221.t2 | ref XP_002890535.1   hypothetical protein ARALYDRAFT_889792 [Arabidopsis lyrata subsp. lyrata] gi 297336377 gb EFH66794.1   hypothetical protein ARALYDRAFT_889792 [Arabidopsis lyrata subsp. lyrata]                                                                                                                                                                                                                                           | 357  | 355  | 1.00E-177 | 99.4  | 86.6 | 92.4 | hypothetical protein ARALYDRAFT_889792          | gbpln | Arabidopsis lyrata | AT1G22800.1   Symbols:   S-adenosyl-L-methionine-dependent methyltransferases superfamily protein   chr1:8072020-8074039 FORWARD LENGTH=355                                                                                                                                                                                                                                                                                                                                                                                                             | 357  | 355  | 1.00E-179 | 99.4  | 87.1 | 91.9 |
| Rsa1.0_00059.1.g3222.t1 | refXP_002890534.1   hypothetical protein ARALYDRAFT_889791 [Arabidopsis lyrata subsp. lyrata] gi 297336376 gb EFH66793.1   hypothetical protein ARALYDRAFT_889791 [Arabidopsis lyrata subsp. lyrata]                                                                                                                                                                                                                                            | 214  | 214  | 5.00E-55  | 100.0 | 65.4 | 72.0 | hypothetical protein ARALYDRAFT_889791          | gbpln | Arabidopsis lyrata | AT1G22790.2   Symbols:   unknown protein; FUNCTIONS IN: molecular_function unknown; INVOLVED IN: biological_process unknown; LOCATED IN: plasma membrane; EXPRESSED IN: 22 plant structures; EXPRESSED DURING: 13 growth stages; BEST Arabidopsis thaliana protein match is: unknown protein (TAIR:AT1G34010.1). Has 35333 Blast hits to 34131 proteins in 2444 species: Archae - 798; Bacteria - 22429; Metazoa - 974; Fungi - 991; Plants - 531; Viruses - 0; Other Eukaryotes - 9610 (source: NCBI BLINK).   chr1:8070271-8071292 FORWARD LENGTH=216 | 214  | 216  | 1.00E-53  | 100.9 | 64.0 | 70.1 |
| Rsa1.0_00059.1.g3223.t1 | gb AEB33730.1   GIGANTEA [Brassica rapa]                                                                                                                                                                                                                                                                                                                                                                                                        | 1177 | 1183 | 0         | 100.5 | 95.7 | 97.0 | GIGANTEA                                        | gbpln | Brassica rapa      | AT1G22770.1   Symbols: GI, FB   gigantea protein (GI)   chr1:8062398-8067447 FORWARD LENGTH=1173                                                                                                                                                                                                                                                                                                                                                                                                                                                        | 1177 | 1173 | 0         | 99.7  | 91.8 | 94.2 |
| Rsa1.0_00059.1.g3224.t2 | refXP_002890530.1   hypothetical protein ARALYDRAFT_472519 [Arabidopsis lyrata subsp. lyrata] gi 297336372 gb EFH66789.1   hypothetical protein ARALYDRAFT_472519 [Arabidopsis lyrata subsp. lyrata]                                                                                                                                                                                                                                            | 451  | 256  | 1.00E-113 | 56.8  | 45.7 | 48.8 | hypothetical protein ARALYDRAFT_472519          | gbpln | Arabidopsis lyrata | AT1G22750.1   Symbols:   unknown protein; FUNCTIONS IN: molecular_function unknown; INVOLVED IN: biological_process unknown; LOCATED IN: vacuole; EXPRESSED IN: 23 plant structures; EXPRESSED DURING: 15 growth stages; CONTAINS InterPro DOMAIN/s: Protein of unknown function DJUF1475 (InterPro:IPRO09943); Has 185 Blast hits to 155 proteins in 21 species: Archae - 0; Bacteria - 8; Metazoa - 3; Fungi - 0; Plants - 64; Viruses - 0; Other Eukaryotes - 110 (source: NCBI BLINK).   chr1:8050911-8052618 FORWARD LENGTH=244                    | 451  | 244  | 1.00E-114 | 54.1  | 45.7 | 48.3 |

|                         |                                                                                                                                                                                                                                                                                                                                                                                                                                   |      |      |           |       |      |      |                                                          |       |                      |                                                                                                                            |      |      |           |       |      |      |
|-------------------------|-----------------------------------------------------------------------------------------------------------------------------------------------------------------------------------------------------------------------------------------------------------------------------------------------------------------------------------------------------------------------------------------------------------------------------------|------|------|-----------|-------|------|------|----------------------------------------------------------|-------|----------------------|----------------------------------------------------------------------------------------------------------------------------|------|------|-----------|-------|------|------|
| Rsa1.0_00059.1.g3225.t1 | ref NP_173687.1  MA3 domain-containing protein [Arabidopsis thaliana]<br>gi 3287683 gb AAC2511.1  Similar to apoptosis protein MA-3 gb D50465 from Mus musculus [Arabidopsis thaliana]<br>gi 14334598 gb AAK59477.1  putative topoisomerase [Arabidopsis thaliana]<br>gi 22136820 gb AM91754.1  putative topoisomerase [Arabidopsis thaliana]<br>gi 332192157 gb AEE30278.1  MA3 domain-containing protein [Arabidopsis thaliana] | 687  | 693  | 0         | 100.9 | 82.5 | 88.9 | MA3 domain-containing protein                            | gbpln | Arabidopsis thaliana | AT1G22730.1   Symbols:   MA3 domain-containing protein   chr1:8046511-8048769 FORWARD LENGTH=693                           | 687  | 693  | 0         | 100.9 | 82.5 | 88.9 |
| Rsa1.0_00059.1.g3226.t1 | ref XP_002893745.1  hypothetical protein ARALYDRAFT_336372 [Arabidopsis lyrata subsp. lyrata]<br>gi 297339587 gb EFH70004.1  hypothetical protein ARALYDRAFT_336372 [Arabidopsis lyrata subsp. lyrata]                                                                                                                                                                                                                            | 176  | 180  | 4.00E-75  | 102.3 | 82.4 | 90.9 | hypothetical protein ARALYDRAFT_336372                   | gbpln | Arabidopsis lyrata   | AT3G03773.1   Symbols:   HSP20-like chaperones superfamily protein   chr3:951885-953490 FORWARD LENGTH=150                 | 176  | 150  | 3.00E-29  | 85.2  | 33.5 | 46.0 |
| Rsa1.0_00060.1.g3227.t1 | gb EOA23115.1  hypothetical protein CARUB_v10003908mg [Capsella rubella]                                                                                                                                                                                                                                                                                                                                                          | 531  | 1282 | 5.00E-73  | 241.4 | 31.6 | 52.0 | hypothetical protein CARUB_v10003908mg                   | gbpln | Capsella rubella     | AT4G09420.1   Symbols:   Disease resistance protein (TIR-NBS class)   chr4:3962319-5963776 REVERSE LENGTH=457              | 531  | 457  | 1.00E-72  | 86.1  | 35.0 | 50.5 |
| Rsa1.0_00060.1.g3228.t1 | # # # # # # # # # #                                                                                                                                                                                                                                                                                                                                                                                                               |      |      |           |       |      |      | -                                                        | ----  | ----                 | # # # # # # # #                                                                                                            |      |      |           |       |      |      |
| Rsa1.0_00060.1.g3229.t1 | gb AAD49099.1 AF177535_3 contains similarity to maize transposon MuDR (GB.M76978) [Arabidopsis thaliana]                                                                                                                                                                                                                                                                                                                          | 619  | 664  | 5.00E-60  | 107.3 | 26.8 | 41.7 | contains similarity to maize transposon MuDR (GB.M76978) | gbpln | Arabidopsis thaliana | AT1G49920.1   Symbols:   MuDR family transposase   chr1:18481798-18484233 REVERSE LENGTH=785                               | 619  | 785  | 7.00E-19  | 126.8 | 11.1 | 19.2 |
| Rsa1.0_00060.1.g3230.t1 | gb AAG51783.1 AC079679_3 reverse transcriptase, putative: 16838-20266 [Arabidopsis thaliana]                                                                                                                                                                                                                                                                                                                                      | 350  | 1142 | 3.00E-88  | 326.3 | 48.3 | 63.7 | reverse transcriptase, putative: 16838-20266             | gbpln | Arabidopsis thaliana | AT4G29090.1   Symbols:   Ribonuclease H-like superfamily protein   chr4:14333528-14335255 FORWARD LENGTH=575               | 350  | 575  | 3.00E-34  | 164.3 | 29.1 | 48.6 |
| Rsa1.0_00060.1.g3231.t1 | ref XP_002888896.1  predicted protein [Arabidopsis lyrata subsp. lyrata]<br>gi 297334737 gb EFH65155.1  predicted protein [Arabidopsis lyrata subsp. lyrata]                                                                                                                                                                                                                                                                      | 1140 | 1169 | 0         | 102.5 | 50.2 | 64.7 | predicted protein                                        | gbpln | Arabidopsis lyrata   | AT1G72840.2   Symbols:   Disease resistance protein (TIR-NBS-LRR class)   chr1:27409504-27413485 REVERSE LENGTH=1183       | 1140 | 1183 | 0         | 103.8 | 48.1 | 62.8 |
| Rsa1.0_00060.1.g3232.t1 | ref XP_002887455.1  predicted protein [Arabidopsis lyrata subsp. lyrata]<br>gi 297333296 gb EFH63714.1  predicted protein [Arabidopsis lyrata subsp. lyrata]                                                                                                                                                                                                                                                                      | 419  | 412  | 1.00E-145 | 98.3  | 65.9 | 77.1 | predicted protein                                        | gbpln | Arabidopsis lyrata   | AT1G72850.1   Symbols:   Disease resistance protein (TIR-NBS class)   chr1:27413971-27415335 FORWARD LENGTH=422            | 419  | 422  | 1.00E-130 | 100.7 | 59.9 | 73.7 |
| Rsa1.0_00060.1.g3233.t1 | ref NP_001185386.1  TIR-NBS-LRR class disease resistance protein [Arabidopsis thaliana]<br>gi 332197260 gb AEE35381.1  TIR-NBS-LRR class disease resistance protein [Arabidopsis thaliana]                                                                                                                                                                                                                                        | 1087 | 1183 | 0         | 108.8 | 52.3 | 66.1 | TIR-NBS-LRR class disease resistance protein             | gbpln | Arabidopsis thaliana | AT1G72840.2   Symbols:   Disease resistance protein (TIR-NBS-LRR class)   chr1:27409504-27413485 REVERSE LENGTH=1183       | 1087 | 1183 | 0         | 108.8 | 52.3 | 66.1 |
| Rsa1.0_00060.1.g3234.t1 | emb CAA74050.1  Transcription factor [Arabidopsis thaliana]                                                                                                                                                                                                                                                                                                                                                                       | 336  | 340  | 1.00E-134 | 101.2 | 76.5 | 83.0 | Transcription factor                                     | gbpln | Arabidopsis thaliana | AT1G72830.1   Symbols:   HAP2C, ATHAP2C, NF-YA3   nuclear factor Y, subunit A3   chr1:27405699-27407088 REVERSE LENGTH=340 | 336  | 340  | 1.00E-137 | 101.2 | 76.8 | 83.6 |
| Rsa1.0_00060.1.g3235.t1 | gb EOA35384.1  hypothetical protein CARUB_v10020581mg [Capsella rubella]<br>gi 482571197 gb EOA35385.1  hypothetical protein CARUB_v10020581mg [Capsella rubella]                                                                                                                                                                                                                                                                 | 342  | 346  | 0         | 101.2 | 91.8 | 95.0 | hypothetical protein CARUB_v10020581mg                   | gbpln | Capsella rubella     | AT1G72820.1   Symbols:   Mitochondrial substrate carrier family protein   chr1:27403457-27404506 FORWARD LENGTH=349        | 342  | 349  | 0         | 102.0 | 93.6 | 96.5 |
| Rsa1.0_00060.1.g3236.t1 | gb EOA34998.1  hypothetical protein CARUB_v10020090mg [Capsella rubella]                                                                                                                                                                                                                                                                                                                                                          | 532  | 550  | 1.00E-166 | 103.4 | 74.6 | 82.3 | hypothetical protein CARUB_v10020090mg                   | gbpln | Capsella rubella     | AT1G72790.1   Symbols:   hydroxyproline-rich glycoprotein family protein   chr1:27384848-27396533 FORWARD LENGTH=561       | 532  | 561  | 1.00E-166 | 105.5 | 73.9 | 81.4 |

|                         |                                                                                                                                                                                                                                                                                                                                                                                                                                                                                                                                                                                                                                                                                                                                                                                                                                                                                                                                                                                                                                                                                                                                                                             |     |     |           |       |      |      |                                          |       |                      |                                                                                                                 |     |     |           |       |      |      |
|-------------------------|-----------------------------------------------------------------------------------------------------------------------------------------------------------------------------------------------------------------------------------------------------------------------------------------------------------------------------------------------------------------------------------------------------------------------------------------------------------------------------------------------------------------------------------------------------------------------------------------------------------------------------------------------------------------------------------------------------------------------------------------------------------------------------------------------------------------------------------------------------------------------------------------------------------------------------------------------------------------------------------------------------------------------------------------------------------------------------------------------------------------------------------------------------------------------------|-----|-----|-----------|-------|------|------|------------------------------------------|-------|----------------------|-----------------------------------------------------------------------------------------------------------------|-----|-----|-----------|-------|------|------|
| Rsa1.0_00060.1.g3237.t1 | ref NP_177417.1  translation initiation factor 4A-3 [Arabidopsis thaliana]<br>gi 75333652 sp Q9CAI7.1 IF4A3_ARATH<br>RecName: Full=Eukaryotic initiation factor 4A-3; Short=eIF-4A-3; AltName: Full=ATP-dependent RNA helicase eIF4A-3; AltName: Full=DEAD-box ATP-dependent RNA helicase 23<br>gi 12323781 gb AA651861.1 AC010926.24 putative Eukaryotic initiation factor 4A: 30924-32477 [Arabidopsis thaliana]<br>gi 16974629 gb AAL31217.1 At1g72730/F28P22.8 [Arabidopsis thaliana] gi 21593752 gb AAM65719.1  putative Eukaryotic initiation factor 4A [Arabidopsis thaliana]<br>gi 22655476 gb AAM98330.1 At1g72730/F28P22.8 [Arabidopsis thaliana] gi 332197244 gb AEE35365.1  translation initiation factor 4A-3 [Arabidopsis thaliana]<br>ref NP_177411.1  IQ-domain 8 protein [Arabidopsis thaliana]<br>gi 12323773 gb AA651853.1 AC010926.16 hypothetical protein; 51860-53619 [Arabidopsis thaliana]<br>gi 38016019 gb AAR07516.1 At1g72670 [Arabidopsis thaliana]<br>gi 51969960 db BAD43672.1  unknown protein [Arabidopsis thaliana]<br>gi 332197238 gb AEE35359.1  IQ-domain 8 protein [Arabidopsis thaliana]                                             | 108 | 414 | 5.00E-17  | 383.3 | 35.2 | 40.7 | translation initiation factor 4A-3       | gbpln | Arabidopsis thaliana | AT1G72730.1   Symbols:   DEA(D/H)-box RNA helicase family protein   chr1:27378040-27379593 REVERSE LENGTH=414   | 108 | 414 | 8.00E-20  | 383.3 | 35.2 | 40.7 |
| Rsa1.0_00060.1.g3238.t1 | ref XP_002897444.1  hypothetical protein ARALYDRAFT_476400 [Arabidopsis lyrata subsp. lyrata]<br>gi 297333285 gb EFH63703.1  hypothetical protein ARALYDRAFT_476400 [Arabidopsis lyrata subsp. lyrata]                                                                                                                                                                                                                                                                                                                                                                                                                                                                                                                                                                                                                                                                                                                                                                                                                                                                                                                                                                      | 165 | 414 | 2.00E-28  | 250.9 | 58.8 | 68.5 | IQ-domain 8 protein                      | gbpln | Arabidopsis thaliana | AT1G72670.1   Symbols:   iqd8   IQ-domain 8   chr1:27356898-27358657 REVERSE LENGTH=414                         | 165 | 414 | 6.00E-31  | 250.9 | 58.8 | 68.5 |
| Rsa1.0_00060.1.g3239.t1 | ref XP_002897444.1  hypothetical protein ARALYDRAFT_476400 [Arabidopsis lyrata subsp. lyrata]<br>gi 297333285 gb EFH63703.1  hypothetical protein ARALYDRAFT_476400 [Arabidopsis lyrata subsp. lyrata]                                                                                                                                                                                                                                                                                                                                                                                                                                                                                                                                                                                                                                                                                                                                                                                                                                                                                                                                                                      | 576 | 627 | 0         | 108.9 | 70.7 | 78.5 | hypothetical protein ARALYDRAFT_476400   | gbpln | Arabidopsis lyrata   | AT1G72650.2   Symbols:   TRFL6   TRF-like 6   chr1:27350253-27353483 FORWARD LENGTH=630                         | 576 | 630 | 0         | 109.4 | 69.1 | 78.3 |
| Rsa1.0_00060.1.g3240.t1 | gb EOA33816.1  hypothetical protein CARUB_v10021290mg [Capsella rubella]                                                                                                                                                                                                                                                                                                                                                                                                                                                                                                                                                                                                                                                                                                                                                                                                                                                                                                                                                                                                                                                                                                    | 337 | 338 | 1.00E-159 | 100.3 | 81.0 | 92.3 | hypothetical protein CARUB_v10021290mg   | gbpln | Capsella rubella     | AT1G72620.1   Symbols:   alpha/beta-Hydrolases superfamily protein   chr1:27341079-27342401 FORWARD LENGTH=335  | 337 | 335 | 1.00E-159 | 99.4  | 80.7 | 91.7 |
| Rsa1.0_00060.1.g3241.t1 | ref NP_11405.1  germin-like protein subfamily 3 member 1 [Arabidopsis thaliana]<br>gi 18202460 sp P94040.1 GL31_ARATH<br>RecName: Full=Germin-like protein subfamily 3 member 1; Short=At-GERM1; Short=AtGER1; Short=AtGLP1;<br>Flags: Precursor<br>gi 12323768 gb AA651848.1 AC010926.11 germin-like protein; 70589-71215 [Arabidopsis thaliana]<br>gi 1755156 gb AAB51567.1  germin-like protein [Arabidopsis thaliana]<br>gi 1755158 gb AAB51568.1  germin-like protein [Arabidopsis thaliana]<br>gi 1755170 gb AAB51574.1  germin-like protein [Arabidopsis thaliana]<br>gi 1755172 gb AAB51575.1  germin-like protein [Arabidopsis thaliana]<br>gi 1755180 gb AAB51579.1  germin-like protein [Arabidopsis thaliana]<br>gi 1755190 gb AAB51584.1  germin-like protein [Arabidopsis thaliana]<br>gi 1934728 gb AAB51751.1  germin-like protein [Arabidopsis thaliana]<br>gi 4154285 gb AAD05223.1  germin-like protein 1 [Arabidopsis thaliana]<br>gi 4666248 db BAA77207.1  germin-like protein precursor [Arabidopsis thaliana]<br>gi 21554080 gb AAM63161.1  germin-like protein [Arabidopsis thaliana]<br>gi 24417314 gb AAN60267.1  unknown [Arabidopsis thaliana] | 208 | 208 | 5.00E-98  | 100.0 | 91.8 | 94.7 | germin-like protein subfamily 3 member 1 | gbpln | Arabidopsis thaliana | AT1G72610.1   Symbols:   GLP1, ATGER1, GER1   germin-like protein 1   chr1:27339302-27339928 REVERSE LENGTH=208 | 208 | 208 | 1.00E-100 | 100.0 | 91.8 | 94.7 |
| Rsa1.0_00060.1.g3242.t1 | gb EOA34366.1  hypothetical protein CARUB_v10021890mg [Capsella rubella]                                                                                                                                                                                                                                                                                                                                                                                                                                                                                                                                                                                                                                                                                                                                                                                                                                                                                                                                                                                                                                                                                                    | 392 | 448 | 0         | 114.3 | 86.2 | 94.1 | hypothetical protein CARUB_v10021890mg   | gbpln | Capsella rubella     | AT1G72540.1   Symbols:   Protein kinase superfamily protein   chr1:27314932-27316669 REVERSE LENGTH=450         | 392 | 450 | 0         | 114.8 | 87.2 | 94.9 |

|                         |                                                                                                                                                                                                                                        |      |      |           |       |      |      |                                                                                                                                                                |       |                      |                                                                                                                                                                                                                                                                                                                                                |      |      |           |       |      |      |
|-------------------------|----------------------------------------------------------------------------------------------------------------------------------------------------------------------------------------------------------------------------------------|------|------|-----------|-------|------|------|----------------------------------------------------------------------------------------------------------------------------------------------------------------|-------|----------------------|------------------------------------------------------------------------------------------------------------------------------------------------------------------------------------------------------------------------------------------------------------------------------------------------------------------------------------------------|------|------|-----------|-------|------|------|
| Rsa1.0_00060.1.g3243.t1 | gb EOA35762.1  hypothetical protein CARUB_v10020995mg [Capsella rubella]                                                                                                                                                               | 295  | 188  | 7.00E-54  | 63.7  | 34.6 | 37.6 | hypothetical protein CARUB_v10020995mg                                                                                                                         | gbpln | Capsella rubella     | AT1G72530.1   Symbols:   plastid developmental protein DAG, putative   chr1:27312999-27313937 FORWARD LENGTH=188                                                                                                                                                                                                                               | 295  | 188  | 2.00E-55  | 63.7  | 33.2 | 38.0 |
| Rsa1.0_00060.1.g3244.t1 | gb AAD32898.1  putative retroelement pol polyprotein [Arabidopsis thaliana]                                                                                                                                                            | 1362 | 1307 | 0         | 96.0  | 60.4 | 74.0 | putative retroelement pol polyprotein                                                                                                                          | gbpln | Arabidopsis thaliana | AT4G23160.1   Symbols: CRK8   cysteine-rich RLK (RECEPTOR-like protein kinase) 8   chr4:12129485-12134086 FORWARD LENGTH=1262                                                                                                                                                                                                                  | 1362 | 1262 | 1.00E-102 | 92.7  | 14.3 | 22.5 |
| Rsa1.0_00060.1.g3245.t1 | gb EOA35532.1  hypothetical protein CARUB_v10020740mg [Capsella rubella]                                                                                                                                                               | 291  | 288  | 1.00E-135 | 99.0  | 85.6 | 90.7 | hypothetical protein CARUB_v10020740mg                                                                                                                         | gbpln | Capsella rubella     | AT1G72490.1   Symbols:   unknown protein; BEST Arabidopsis thaliana protein match is: unknown protein (TAIR:AT1G17400.1); Has 75 Blast hits to 75 proteins in 21 species: Archae - 0; Bacteria - 0; Metazoa - 3; Fungi - 4; Plants - 58; Viruses - 0; Other: Eukaryotes - 10 (source: NCBI BLINK).   chr1:27289435-27290732 REVERSE LENGTH=287 | 291  | 287  | 1.00E-134 | 98.6  | 83.5 | 89.7 |
| Rsa1.0_00060.1.g3246.t1 | ref NP_177391.1  exocyst subunit exo70-D1 [Arabidopsis thaliana] gi 12325284 gb AAG52591.1 AC016529.22 unknown protein; 29470-27569 [Arabidopsis thaliana] gi 332197207 gb AEE35328.1  exocyst subunit exo70-D1 [Arabidopsis thaliana] | 629  | 633  | 0         | 100.6 | 89.7 | 96.0 | exocyst subunit exo70-D1                                                                                                                                       | gbpln | Arabidopsis thaliana | AT1G72470.1   Symbols: ATEXO70D1, EXO70D1   exocyst subunit exo70 family protein D1   chr1:27283759-27285660 FORWARD LENGTH=633                                                                                                                                                                                                                | 629  | 633  | 0         | 100.6 | 89.7 | 96.0 |
| Rsa1.0_00060.1.g3247.t1 | gb EOA34527.1  hypothetical protein CARUB_v10022071mg [Capsella rubella]                                                                                                                                                               | 649  | 644  | 0         | 99.2  | 75.7 | 86.1 | hypothetical protein CARUB_v10022071mg                                                                                                                         | gbpln | Capsella rubella     | AT1G72460.1   Symbols:   Leucine-rich repeat protein kinase family protein   chr1:27279510-27281533 FORWARD LENGTH=644                                                                                                                                                                                                                         | 649  | 644  | 0         | 99.2  | 74.7 | 85.7 |
| Rsa1.0_00060.1.g3248.t1 | gb AFC38438.1  small auxin up RNA protein [Sinapis alba]                                                                                                                                                                               | 118  | 118  | 5.00E-62  | 100.0 | 98.3 | 99.2 | small auxin up RNA protein                                                                                                                                     | gbpln | Sinapis alba         | AT1G72430.1   Symbols:   SAUR-like auxin-responsive protein family   chr1:27265150-27265509 REVERSE LENGTH=119                                                                                                                                                                                                                                 | 118  | 119  | 3.00E-61  | 100.8 | 94.9 | 97.5 |
| Rsa1.0_00060.1.g3249.t1 | sp Q9ZSR8.1 RSSA_BRANA RecName: Full=40S ribosomal protein SA; AltName: Full=Laminin receptor-like protein; AltName: Full=p40 gi 3769681 gb AAC97937.1  laminin receptor-like protein [Brassica napus]                                 | 350  | 292  | 1.00E-160 | 83.4  | 78.9 | 79.7 | RecName: Full=40S ribosomal protein SA; AltName: Full=Laminin receptor-like protein; AltName: Full=p40 gi 3769681 gb AAC97937.1  laminin receptor-like protein | gbpln | Brassica napus       | AT1G72370.1   Symbols: P40, AP40, RP40, RPSAA   40s ribosomal protein SA   chr1:27243148-27244842 REVERSE LENGTH=298                                                                                                                                                                                                                           | 350  | 298  | 1.00E-137 | 85.1  | 67.4 | 68.9 |
| Rsa1.0_00060.1.g3250.t1 | ref NP_001117587.1  ethylene-responsive transcription factor ERF073 [Arabidopsis thaliana] gi 332197191 gb AEE35312.1  ethylene-responsive transcription factor ERF073 [Arabidopsis thaliana]                                          | 262  | 260  | 4.00E-61  | 99.2  | 55.7 | 69.1 | ethylene-responsive transcription factor ERF073                                                                                                                | gbpln | Arabidopsis thaliana | AT1G72360.3   Symbols: HRE1   Integrase-type DNA-binding superfamily protein   chr1:27241904-27242777 FORWARD LENGTH=260                                                                                                                                                                                                                       | 262  | 260  | 1.00E-63  | 99.2  | 55.7 | 69.1 |
| Rsa1.0_00060.1.g3251.t1 | gb EOA34308.1  hypothetical protein CARUB_v10021825mg [Capsella rubella]                                                                                                                                                               | 213  | 222  | 1.00E-71  | 104.2 | 65.3 | 75.6 | hypothetical protein CARUB_v10021825mg                                                                                                                         | gbpln | Capsella rubella     | AT1G72350.1   Symbols:   MADS-box transcription factor family protein   chr1:27239273-27239947 REVERSE LENGTH=224                                                                                                                                                                                                                              | 213  | 224  | 1.00E-70  | 105.2 | 67.1 | 77.0 |
| Rsa1.0_00060.1.g3252.t1 | gb EOA33336.1  hypothetical protein CARUB_v10020102mg [Capsella rubella]                                                                                                                                                               | 181  | 543  | 7.00E-22  | 300.0 | 31.5 | 33.7 | hypothetical protein CARUB_v10020102mg                                                                                                                         | gbpln | Capsella rubella     | AT1G72330.3   Symbols: ALAAT2   alanine aminotransferase 2   chr1:27233637-27236571 FORWARD LENGTH=553                                                                                                                                                                                                                                         | 181  | 553  | 3.00E-24  | 305.5 | 31.5 | 33.1 |
| Rsa1.0_00060.1.g3253.t1 | ref XP_002887428.1  hypothetical protein ARALYDRAFT.476359 [Arabidopsis lyrata subsp. lyrata] gi 297333269 gb EFH63687.1  hypothetical protein ARALYDRAFT.476359 [Arabidopsis lyrata subsp. lyrata]                                    | 163  | 324  | 1.00E-26  | 198.8 | 46.0 | 54.0 | hypothetical protein ARALYDRAFT.476359                                                                                                                         | gbpln | Arabidopsis lyrata   | AT1G72310.1   Symbols: ATL3   RING/U-box superfamily protein   chr1:27226405-27227379 FORWARD LENGTH=324                                                                                                                                                                                                                                       | 163  | 324  | 7.00E-25  | 198.8 | 40.5 | 47.2 |
| Rsa1.0_00060.1.g3254.t1 | emb CAB39638.1  RNA-directed DNA polymerase-like protein [Arabidopsis thaliana] gi 7267666 emb CAB78094.1  RNA-directed DNA polymerase-like protein [Arabidopsis thaliana]                                                             | 1357 | 1274 | 0         | 93.9  | 45.3 | 61.2 | RNA-directed DNA polymerase-like protein                                                                                                                       | gbpln | Arabidopsis thaliana | AT4G29090.1   Symbols:   Ribonuclease H-like superfamily protein   chr4:14333528-14335255 FORWARD LENGTH=575                                                                                                                                                                                                                                   | 1357 | 575  | 2.00E-64  | 42.4  | 12.3 | 19.5 |



|                         |                                                                                                                                                                                                                                                                                                                                                                                                                                                                                                                                                                                                                                                                                                                                                   |     |      |           |       |      |      |                                          |       |                      |                                                                                                                                    |     |     |           |       |      |      |
|-------------------------|---------------------------------------------------------------------------------------------------------------------------------------------------------------------------------------------------------------------------------------------------------------------------------------------------------------------------------------------------------------------------------------------------------------------------------------------------------------------------------------------------------------------------------------------------------------------------------------------------------------------------------------------------------------------------------------------------------------------------------------------------|-----|------|-----------|-------|------|------|------------------------------------------|-------|----------------------|------------------------------------------------------------------------------------------------------------------------------------|-----|-----|-----------|-------|------|------|
| Rsa1.0_00060.1.g3255.t1 | ref[NP_177366.1] transcription factor bHLH96 [Arabidopsis thaliana] gi 75308860 sp Q9C7T4.1 BH096_ARAT H RecName: Full=Transcription factor bHLH96; AltName: Full=Basic helix-loop-helix protein 96; Short=AtbHLH96; Short=bHLH 96; AltName: Full=Transcription factor EN 15; AltName: Full=bHLH transcription factor bHLH096 gi 12323671 gb AAG51804.1 AC067754_20 unknown protein; 44011-46213 [Arabidopsis thaliana] gi 20520637 emb CAD30833.1 basic-helix-loop-helix transcription factor [Arabidopsis thaliana] gi 28392970 gb AAO41920.1 putative bHLH protein [Arabidopsis thaliana] gi 29824221 gb AAP04071.1 putative bHLH protein [Arabidopsis thaliana] gi 332197168 gb AEE35289.1 transcription factor bHLH96 [Arabidopsis thaliana] | 323 | 320  | 1.00E-142 | 99.1  | 81.4 | 89.2 | transcription factor bHLH96              | gbpln | Arabidopsis thaliana | AT1G72210.1   Symbols:   basic helix-loop-helix (bHLH) DNA-binding superfamily protein   chr1:27180066-27182268 FORWARD LENGTH=320 | 323 | 320 | 1.00E-144 | 99.1  | 81.4 | 89.2 |
| Rsa1.0_00060.1.g3256.t1 | gb EOA34977.1  hypothetical protein CARUB_v10020065mg [Capsella rubella]                                                                                                                                                                                                                                                                                                                                                                                                                                                                                                                                                                                                                                                                          | 525 | 567  | 0         | 108.0 | 81.1 | 86.5 | hypothetical protein CARUB_v10020065mg   | gbpln | Capsella rubella     | AT1G72150.1   Symbols:   PATL1   PATELLIN 1   chr1:27148558-27150652 FORWARD LENGTH=573                                            | 525 | 573 | 0         | 109.1 | 77.0 | 83.6 |
| Rsa1.0_00060.1.g3257.t1 | gb EOA34991.1  hypothetical protein CARUB_v10020083mg [Capsella rubella]                                                                                                                                                                                                                                                                                                                                                                                                                                                                                                                                                                                                                                                                          | 552 | 556  | 0         | 100.7 | 81.2 | 90.9 | hypothetical protein CARUB_v10020083mg   | gbpln | Capsella rubella     | AT1G72140.1   Symbols:   Major facilitator superfamily protein   chr1:27141877-27144346 FORWARD LENGTH=555                         | 552 | 555 | 0         | 100.5 | 81.7 | 90.6 |
| Rsa1.0_00060.1.g3258.t1 | ref XP_002887414.1  hypothetical protein ARALYDRAFT_316182 [Arabidopsis lyrata subsp. lyrata] gi 297333255 gb EFH63673.1  hypothetical protein ARALYDRAFT_316182 [Arabidopsis lyrata subsp. lyrata]                                                                                                                                                                                                                                                                                                                                                                                                                                                                                                                                               | 527 | 535  | 0         | 101.5 | 76.7 | 87.5 | hypothetical protein ARALYDRAFT_316182   | gbpln | Arabidopsis lyrata   | AT1G72130.1   Symbols:   Major facilitator superfamily protein   chr1:27137201-27139223 FORWARD LENGTH=538                         | 527 | 538 | 0         | 102.1 | 74.8 | 87.3 |
| Rsa1.0_00060.1.g3259.t1 | ref XP_002887414.1  hypothetical protein ARALYDRAFT_316182 [Arabidopsis lyrata subsp. lyrata] gi 297333255 gb EFH63673.1  hypothetical protein ARALYDRAFT_316182 [Arabidopsis lyrata subsp. lyrata]                                                                                                                                                                                                                                                                                                                                                                                                                                                                                                                                               | 529 | 535  | 0         | 101.1 | 73.5 | 84.5 | hypothetical protein ARALYDRAFT_316182   | gbpln | Arabidopsis lyrata   | AT1G72130.1   Symbols:   Major facilitator superfamily protein   chr1:27137201-27139223 FORWARD LENGTH=538                         | 529 | 538 | 0         | 101.7 | 73.0 | 84.7 |
| Rsa1.0_00060.1.g3260.t1 | ref XP_002887414.1  hypothetical protein ARALYDRAFT_316182 [Arabidopsis lyrata subsp. lyrata] gi 297333255 gb EFH63673.1  hypothetical protein ARALYDRAFT_316182 [Arabidopsis lyrata subsp. lyrata]                                                                                                                                                                                                                                                                                                                                                                                                                                                                                                                                               | 547 | 535  | 0         | 97.8  | 75.7 | 82.6 | hypothetical protein ARALYDRAFT_316182   | gbpln | Arabidopsis lyrata   | AT1G72130.1   Symbols:   Major facilitator superfamily protein   chr1:27137201-27139223 FORWARD LENGTH=538                         | 547 | 538 | 0         | 98.4  | 72.6 | 81.7 |
| Rsa1.0_00060.1.g3261.t1 | ref NP_001117585.1  putative peptide/nitrate transporter [Arabidopsis thaliana] gi 310947338 sp QOWSZ6.2 PTR23_ARATH RecName: Full=Probable peptide/nitrate transporter At1g72125 gi 332197156 gb AEE35277.1  probable peptide/nitrate transporter [Arabidopsis thaliana]                                                                                                                                                                                                                                                                                                                                                                                                                                                                         | 557 | 561  | 0         | 100.7 | 81.3 | 89.2 | putative peptide/nitrate transporter     | gbpln | Arabidopsis thaliana | AT1G72125.1   Symbols:   Major facilitator superfamily protein   chr1:27134168-27136257 FORWARD LENGTH=561                         | 557 | 561 | 0         | 100.7 | 81.3 | 89.2 |
| Rsa1.0_00060.1.g3262.t1 | dbj BAJ33896.1  unnamed protein product [Thellungiella halophila]                                                                                                                                                                                                                                                                                                                                                                                                                                                                                                                                                                                                                                                                                 | 479 | 467  | 0         | 97.5  | 81.0 | 88.7 | unnamed protein product                  | ----  | ----                 | AT1G72110.1   Symbols:   O-acyltransferase (WSD1-like) family protein   chr1:27129253-27131354 REVERSE LENGTH=479                  | 479 | 479 | 0         | 100.0 | 78.9 | 89.4 |
| Rsa1.0_00060.1.g3263.t2 | gb EOA34693.1  hypothetical protein CARUB_v10022259mg [Capsella rubella]                                                                                                                                                                                                                                                                                                                                                                                                                                                                                                                                                                                                                                                                          | 402 | 401  | 1.00E-176 | 99.8  | 78.4 | 85.1 | hypothetical protein CARUB_v10022259mg   | gbpln | Capsella rubella     | AT1G72050.2   Symbols:   TFIIIA   transcription factor IIIA   chr1:27115082-27117228 FORWARD LENGTH=412                            | 402 | 412 | 1.00E-178 | 102.5 | 77.6 | 84.1 |
| Rsa1.0_00060.1.g3264.t1 | ref XP_002868530.1  predicted protein [Arabidopsis lyrata subsp. lyrata] gi 297314366 gb EFH44789.1  predicted protein [Arabidopsis lyrata subsp. lyrata]                                                                                                                                                                                                                                                                                                                                                                                                                                                                                                                                                                                         | 731 | 851  | 0         | 116.4 | 70.6 | 81.4 | predicted protein                        | gbpln | Arabidopsis lyrata   | AT1G15890.1   Symbols:   Disease resistance protein (CC-NBS-LRR class) family   chr1:5461406-5463961 FORWARD LENGTH=851            | 731 | 851 | 0         | 116.4 | 66.3 | 76.2 |
| Rsa1.0_00060.1.g3265.t1 | gb AET08927.1  sucrose transporter [Brassica napus]                                                                                                                                                                                                                                                                                                                                                                                                                                                                                                                                                                                                                                                                                               | 447 | 514  | 0         | 115.0 | 92.8 | 94.9 | sucrose transporter                      | gbpln | Brassica napus       | AT1G71880.1   Symbols:   SUC1, AT5UC1   sucrose-proton symporter   chr1:27054334-27056100 FORWARD LENGTH=513                       | 447 | 513 | 0         | 114.8 | 84.3 | 90.6 |
| Rsa1.0_00060.1.g3266.t1 | emb CAB39638.1  RNA-directed DNA polymerase-like protein [Arabidopsis thaliana] gi 7267666 emb CAB78094.1  RNA-directed DNA polymerase-like protein [Arabidopsis thaliana]                                                                                                                                                                                                                                                                                                                                                                                                                                                                                                                                                                        | 261 | 1274 | 5.00E-21  | 488.1 | 31.0 | 42.5 | RNA-directed DNA polymerase-like protein | gbpln | Arabidopsis thaliana | # # # # # #                                                                                                                        | #   | #   | #         | #     | #    | #    |

|                         |                                                                                                                                                                                                                                                                                                                                                                                                                                                                                                                                                                                                                                                                                                                                                                                                                                        |     |     |          |       |      |      |                                                                                                                                               |       |                      |                                                                                                                                                                                                                                                                                                                                                                                                                                                           |     |     |          |       |      |      |
|-------------------------|----------------------------------------------------------------------------------------------------------------------------------------------------------------------------------------------------------------------------------------------------------------------------------------------------------------------------------------------------------------------------------------------------------------------------------------------------------------------------------------------------------------------------------------------------------------------------------------------------------------------------------------------------------------------------------------------------------------------------------------------------------------------------------------------------------------------------------------|-----|-----|----------|-------|------|------|-----------------------------------------------------------------------------------------------------------------------------------------------|-------|----------------------|-----------------------------------------------------------------------------------------------------------------------------------------------------------------------------------------------------------------------------------------------------------------------------------------------------------------------------------------------------------------------------------------------------------------------------------------------------------|-----|-----|----------|-------|------|------|
| Rsa1.0.00060.1.g3267.t1 | refNP_173802.1  AP-1 complex subunit gamma-1 [Arabidopsis thaliana]<br>gi 30688616 refNP_849701.1  AP-1 complex subunit gamma-1 [Arabidopsis thaliana]<br>gi 75146766 sp Q84K16.1 AP1G1_ARAT H RecName: Full=AP-1 complex subunit gamma-1; AltName: Full=Adaptor-related protein complex 1 subunit gamma-1; AltName: Full=Adaptor protein complex AP-1 large subunit gamma-1; AltName: Full=Clathrin assembly protein complex 1 gamma-1 large chain; Short=At-g-Ad; Short=At-gamma-Ad; AltName: Full=Gamma-adaptin 1 gi 28393791 gb AAO42305.1  putative gamma-adaptin [Arabidopsis thaliana] gi 28973305 gb AAO63977.1  putative gamma-adaptin [Arabidopsis thaliana] gi 332192327 gb AEE30448.1  AP-1 complex subunit gamma-1 [Arabidopsis thaliana] gi 332192328 gb AEE30449.1  AP-1 complex subunit gamma-1 [Arabidopsis thaliana] | 160 | 876 | 4.00E-28 | 547.5 | 40.6 | 42.5 | AP-1 complex subunit gamma-1                                                                                                                  | gbpln | Arabidopsis thaliana | AT1G23900.2   Symbols: GAMMA-ADAPTIN 1   gamma-adaptin 1   chr1:8441379-8441752 FORWARD LENGTH=876                                                                                                                                                                                                                                                                                                                                                        | 160 | 876 | 2.00E-30 | 547.5 | 40.6 | 42.5 |
| Rsa1.0.00060.1.g3268.t1 | refNP_849877.1  uncharacterized protein [Arabidopsis thaliana]<br>gi 26453012 dbj BAC43582.1  unknown protein [Arabidopsis thaliana]<br>gi 28973253 gb AAO63951.1  unknown protein [Arabidopsis thaliana]<br>gi 332197123 gb AEE35244.1  uncharacterized protein AT1G71865 [Arabidopsis thaliana]                                                                                                                                                                                                                                                                                                                                                                                                                                                                                                                                      | 101 | 99  | 2.00E-32 | 98.0  | 88.1 | 89.1 | uncharacterized protein                                                                                                                       | gbpln | Arabidopsis thaliana | AT1G71865.1   Symbols:   unknown protein; FUNCTIONS IN: molecular.function unknown; INVOLVED IN: biological.process unknown; LOCATED IN: chloroplast; Has 33 Blast hits to 33 proteins in 11 species: Archae - 0; Bacteria - 0; Metazoa - 0; Fungi - 0; Plants - 33; Viruses - 0; Other Eukaryotes - 0 (source: NCBI BLink).   chr1:27030117-27030416 FORWARD LENGTH=99                                                                                   | 101 | 99  | 3.00E-35 | 98.0  | 88.1 | 89.1 |
| Rsa1.0.00060.1.g3269.t1 | gb AAF43237.1 AC012654.21 Contains similarity to the vegetative incompatibility protein HET-E-1 from Podospora ansering gi 3023956; It contains 5 WD40 domains PF 00400 [Arabidopsis thaliana]                                                                                                                                                                                                                                                                                                                                                                                                                                                                                                                                                                                                                                         | 119 | 370 | 3.00E-32 | 310.9 | 58.0 | 61.3 | Contains similarity to the vegetative incompatibility protein HET-E-1 from Podospora ansering gi 3023956; It contains 5 WD40 domains PF 00400 | gbpln | Arabidopsis thaliana | AT1G71840.1   Symbols:   transducin family protein / WD-40 repeat family protein   chr1:27022424-27024380 FORWARD LENGTH=407                                                                                                                                                                                                                                                                                                                              | 119 | 407 | 6.00E-35 | 342.0 | 58.0 | 61.3 |
| Rsa1.0.00060.1.g3270.t1 | refNP_850465.1  cytochrome P450, family 709, subfamily B, polypeptide 1 [Arabidopsis thaliana]<br>gi 330255683 gb AEC10777.1  cytochrome P450, family 709, subfamily B, polypeptide 1 [Arabidopsis thaliana]                                                                                                                                                                                                                                                                                                                                                                                                                                                                                                                                                                                                                           | 200 | 403 | 5.00E-89 | 201.5 | 75.5 | 87.5 | cytochrome P450, family 709, subfamily B, polypeptide 1                                                                                       | gbpln | Arabidopsis thaliana | AT2G46960.1   Symbols: CYP709B1   cytochrome P450, family 709, subfamily B, polypeptide 1   chr2:19292295-19293765 REVERSE LENGTH=403                                                                                                                                                                                                                                                                                                                     | 200 | 403 | 2.00E-91 | 201.5 | 75.5 | 87.5 |
| Rsa1.0.00060.1.g3271.t3 | gb AAF43237.1 AC012654.21 Contains similarity to the vegetative incompatibility protein HET-E-1 from Podospora ansering gi 3023956; It contains 5 WD40 domains PF 00400 [Arabidopsis thaliana]                                                                                                                                                                                                                                                                                                                                                                                                                                                                                                                                                                                                                                         | 379 | 370 | 0        | 97.6  | 86.0 | 92.9 | Contains similarity to the vegetative incompatibility protein HET-E-1 from Podospora ansering gi 3023956; It contains 5 WD40 domains PF 00400 | gbpln | Arabidopsis thaliana | AT1G71840.1   Symbols:   transducin family protein / WD-40 repeat family protein   chr1:27022424-27024380 FORWARD LENGTH=407                                                                                                                                                                                                                                                                                                                              | 379 | 407 | 0        | 107.4 | 85.2 | 91.8 |
| Rsa1.0.00060.1.g3272.t1 | refXP_002887391.1  hypothetical protein ARALYDRAFT.476305 [Arabidopsis lyrata subsp. lyrata]<br>gi 297333232 gb EFH63650.1  hypothetical protein ARALYDRAFT.476305 [Arabidopsis lyrata subsp. lyrata]                                                                                                                                                                                                                                                                                                                                                                                                                                                                                                                                                                                                                                  | 851 | 785 | 0        | 92.2  | 85.1 | 87.7 | hypothetical protein ARALYDRAFT.476305                                                                                                        | gbpln | Arabidopsis lyrata   | AT1G71820.1   Symbols: SEC6   SEC6   chr1:27010022-27016745 FORWARD LENGTH=752                                                                                                                                                                                                                                                                                                                                                                            | 851 | 752 | 0        | 88.4  | 84.3 | 86.1 |
| Rsa1.0.00060.1.g3273.t1 | gb EOA34351.1  hypothetical protein CARUB_v10021875mg [Capsella rubella]                                                                                                                                                                                                                                                                                                                                                                                                                                                                                                                                                                                                                                                                                                                                                               | 453 | 458 | 0        | 101.1 | 85.9 | 91.2 | hypothetical protein CARUB_v10021875mg                                                                                                        | gbpln | Capsella rubella     | AT1G71800.1   Symbols: CSTF64   cleavage stimulating factor 64   chr1:26999606-27001850 FORWARD LENGTH=461                                                                                                                                                                                                                                                                                                                                                | 453 | 461 | 0        | 101.8 | 82.6 | 89.2 |
| Rsa1.0.00060.1.g3274.t1 | gb EOA35753.1  hypothetical protein CARUB_v10020985mg [Capsella rubella]                                                                                                                                                                                                                                                                                                                                                                                                                                                                                                                                                                                                                                                                                                                                                               | 233 | 194 | 1.00E-46 | 83.3  | 40.8 | 45.1 | hypothetical protein CARUB_v10020985mg                                                                                                        | gbpln | Capsella rubella     | AT1G71780.1   Symbols:   unknown protein; FUNCTIONS IN: molecular.function unknown; INVOLVED IN: biological.process unknown; LOCATED IN: endoplasmic reticulum; EXPRESSED IN: 25 plant structures; EXPRESSED DURING: 15 growth stages; Has 34 Blast hits to 34 proteins in 11 species: Archae - 0; Bacteria - 0; Metazoa - 0; Fungi - 0; Plants - 34; Viruses - 0; Other Eukaryotes - 0 (source: NCBI BLink).   chr1:26995406-26996638 REVERSE LENGTH=197 | 233 | 197 | 9.00E-47 | 84.5  | 39.9 | 45.1 |

|                         |                                                                                                                                                                                                                                                                                                                                                                                                                                                                                                                                                 |     |     |           |       |      |      |                                        |       |                      |                                                                                                                         |     |     |           |       |      |      |
|-------------------------|-------------------------------------------------------------------------------------------------------------------------------------------------------------------------------------------------------------------------------------------------------------------------------------------------------------------------------------------------------------------------------------------------------------------------------------------------------------------------------------------------------------------------------------------------|-----|-----|-----------|-------|------|------|----------------------------------------|-------|----------------------|-------------------------------------------------------------------------------------------------------------------------|-----|-----|-----------|-------|------|------|
| Rsa1.0_00060.1.g3275.t1 | ref XP_002888846.1  hypothetical protein ARALYDRAFT_339396 [Arabidopsis lyrata subsp. lyrata] gi 297334687 gb EFH65105.1  hypothetical protein ARALYDRAFT_339396 [Arabidopsis lyrata subsp. lyrata]                                                                                                                                                                                                                                                                                                                                             | 662 | 685 | 0         | 103.5 | 83.1 | 89.6 | hypothetical protein ARALYDRAFT_339396 | gbpln | Arabidopsis lyrata   | AT1G71770.2   Symbols: PAB5   poly(A)-binding protein 5   chr1:26990777-26993489 REVERSE LENGTH=682                     | 662 | 682 | 0         | 103.0 | 79.6 | 87.5 |
| Rsa1.0_00060.1.g3276.t1 | ref NP_177295.1  receptor like protein 11 [Arabidopsis thaliana] gi 12323717 gb AAG51813.1 AC016163_2 putative disease resistance protein: 69620-67266 [Arabidopsis thaliana] gi 332197075 gb AEE35196.1  receptor like protein 11 [Arabidopsis thaliana]                                                                                                                                                                                                                                                                                       | 740 | 784 | 0         | 105.9 | 68.9 | 79.5 | receptor like protein 11               | gbpln | Arabidopsis thaliana | AT1G71390.1   Symbols: AtRLP11, RLP11   receptor like protein 11   chr1:26906453-26908807 FORWARD LENGTH=784            | 740 | 784 | 0         | 105.9 | 68.9 | 79.5 |
| Rsa1.0_00060.1.g3277.t1 | gb EOA15757.1  hypothetical protein CARUB_v10006835mg [Capsella rubella]                                                                                                                                                                                                                                                                                                                                                                                                                                                                        | 441 | 438 | 0         | 99.3  | 93.0 | 96.1 | hypothetical protein CARUB_v10006835mg | gbpln | Capsella rubella     | AT5G42090.1   Symbols:   Lung seven transmembrane receptor family protein   chr5:16826830-16828149 FORWARD LENGTH=439   | 441 | 439 | 0         | 99.5  | 91.4 | 95.5 |
| Rsa1.0_00060.1.g3278.t1 | ref XP_002887372.1  hypothetical protein ARALYDRAFT_476271 [Arabidopsis lyrata subsp. lyrata] gi 297333213 gb EFH63631.1  hypothetical protein ARALYDRAFT_476271 [Arabidopsis lyrata subsp. lyrata]                                                                                                                                                                                                                                                                                                                                             | 206 | 832 | 3.00E-76  | 403.9 | 71.8 | 81.1 | hypothetical protein ARALYDRAFT_476271 | gbpln | Arabidopsis lyrata   | AT1G71390.1   Symbols: AtRLP11, RLP11   receptor like protein 11   chr1:26906453-26908807 FORWARD LENGTH=784            | 206 | 784 | 4.00E-73  | 380.6 | 68.0 | 80.1 |
| Rsa1.0_00060.1.g3279.t1 | gb EOA34941.1  hypothetical protein CARUB_v10020025mg [Capsella rubella]                                                                                                                                                                                                                                                                                                                                                                                                                                                                        | 569 | 592 | 0         | 104.0 | 75.4 | 83.1 | hypothetical protein CARUB_v10020025mg | gbpln | Capsella rubella     | AT1G71360.1   Symbols:   Galactose-binding protein   chr1:26892214-26894166 REVERSE LENGTH=596                          | 569 | 596 | 0         | 104.7 | 72.9 | 82.6 |
| Rsa1.0_00060.1.g3280.t1 | ref NP_851080.1  serine hydroxymethyltransferase 2 [Arabidopsis thaliana] gi 227202628 dbj BAH56787.1  AT5G26780 [Arabidopsis thaliana] gi 332006219 gb AED93602.1  serine hydroxymethyltransferase 2 [Arabidopsis thaliana]                                                                                                                                                                                                                                                                                                                    | 539 | 517 | 0         | 95.9  | 88.3 | 91.3 | serine hydroxymethyltransferase 2      | gbpln | Arabidopsis thaliana | AT5G26780.1   Symbols: SHM2   serine hydroxymethyltransferase 2   chr5:9418299-9421725 FORWARD LENGTH=517               | 539 | 517 | 0         | 95.9  | 88.3 | 91.3 |
| Rsa1.0_00060.1.g3281.t1 | ref XP_002887361.1  hydrolase/ zinc ion binding protein [Arabidopsis lyrata subsp. lyrata] gi 297333202 gb EFH63620.1  hydrolase/ zinc ion binding protein [Arabidopsis lyrata subsp. lyrata]                                                                                                                                                                                                                                                                                                                                                   | 420 | 400 | 0         | 95.2  | 77.6 | 82.4 | hydrolase/ zinc ion binding protein    | gbpln | Arabidopsis lyrata   | AT5G24670.1   Symbols:   Cytidine/deoxycytidylate deaminase family protein   chr5:8448880-8451046 FORWARD LENGTH=400    | 420 | 400 | 0         | 95.2  | 75.2 | 81.2 |
| Rsa1.0_00060.1.g3282.t1 | ref NP_177287.1  cobalt ion binding protein [Arabidopsis thaliana] gi 30698791 ref NP_849876.1  cobalt ion binding protein [Arabidopsis thaliana] gi 12323832 gb AAG51886.1 AC016162_7 hypothetical protein: 63020-64147 [Arabidopsis thaliana] gi 22135986 gb AAM91575.1  unknown protein [Arabidopsis thaliana] gi 23198344 gb AAN15699.1  unknown protein [Arabidopsis thaliana] gi 332197065 gb AEE35186.1  cobalt ion binding protein [Arabidopsis thaliana] gi 332197066 gb AEE35187.1  cobalt ion binding protein [Arabidopsis thaliana] | 179 | 176 | 3.00E-79  | 98.3  | 81.0 | 87.7 | cobalt ion binding protein             | gbpln | Arabidopsis thaliana | AT1G71310.1   Symbols:   cobalt ion binding protein   chr1:26878717-26879844 REVERSE LENGTH=176                         | 179 | 176 | 1.00E-81  | 98.3  | 81.0 | 87.7 |
| Rsa1.0_00060.1.g3283.t1 | ref XP_002887358.1  predicted protein [Arabidopsis lyrata subsp. lyrata] gi 297333199 gb EFH63617.1  predicted protein [Arabidopsis lyrata subsp. lyrata]                                                                                                                                                                                                                                                                                                                                                                                       | 347 | 374 | 1.00E-163 | 107.8 | 83.3 | 91.4 | predicted protein                      | gbpln | Arabidopsis lyrata   | AT1G71250.1   Symbols:   GDSL-like Lipase/Acylhydrolase superfamily protein   chr1:26860125-26861582 FORWARD LENGTH=374 | 347 | 374 | 1.00E-165 | 107.8 | 81.8 | 91.1 |

|                         |                                                                                                                                                                                                                                                                                                                                                                                                                                                                                                                                                                                                                                                                                                                                                                                                                         |     |     |           |       |      |      |                                                                                                                                                                                                                                       |       |                      |                                                                                                                                                                                                                                                                                                                                                                     |     |     |           |       |      |      |
|-------------------------|-------------------------------------------------------------------------------------------------------------------------------------------------------------------------------------------------------------------------------------------------------------------------------------------------------------------------------------------------------------------------------------------------------------------------------------------------------------------------------------------------------------------------------------------------------------------------------------------------------------------------------------------------------------------------------------------------------------------------------------------------------------------------------------------------------------------------|-----|-----|-----------|-------|------|------|---------------------------------------------------------------------------------------------------------------------------------------------------------------------------------------------------------------------------------------|-------|----------------------|---------------------------------------------------------------------------------------------------------------------------------------------------------------------------------------------------------------------------------------------------------------------------------------------------------------------------------------------------------------------|-----|-----|-----------|-------|------|------|
| Rsa1.0_00061.1.g3284.t1 | ref[NP_192117.1] GTP-binding protein SAR1A [Arabidopsis thaliana]<br>gi3334323 sp O04834.1 SAR1A_ARATH<br>RecName: Full=GTP-binding protein SAR1A<br>gi1314880 gb AA99827.1  Sar1 homolog [Arabidopsis thaliana]<br>gi2104532 gb AAC78700.1  SAR1/GTP-binding secretory factor [Arabidopsis thaliana]<br>gi2104550 gb AAB57799.1  AGAA4 [Arabidopsis thaliana]<br>gi7268592 emb CAB80701.1  SAR1/GTP-binding secretory factor [Arabidopsis thaliana]<br>gi17529144 gb AAL38798.1  putative SAR1/GTP-binding secretory factor [Arabidopsis thaliana]<br>gi20465729 gb AAM20333.1  putative SAR1/GTP-binding secretory factor [Arabidopsis thaliana]<br>gi21618030 gb AAM67080.1  SAR1/GTP-binding secretory factor [Arabidopsis thaliana]<br>gi332656722 gb AEE82122.1  GTP-binding protein SAR1A [Arabidopsis thaliana] | 458 | 193 | 1.00E-101 | 42.1  | 41.3 | 41.7 | GTP-binding protein SAR1A                                                                                                                                                                                                             | gbpln | Arabidopsis thaliana | AT4G02080.1   Symbols: ASAR1, AT SAR1C, AT SAR2, SAR2   secretion-associated RAS super family 2   chr4:921554-922547 FORWARD LENGTH=193                                                                                                                                                                                                                             | 458 | 193 | 1.00E-104 | 42.1  | 41.3 | 41.7 |
| Rsa1.0_00061.1.g3285.t1 | sp P34794.1 RUB2_BRANA RecName: Full=RubisCO large subunit-binding protein subunit alpha, chloroplastic; AltName: Full=60 kDa chaperonin subunit alpha; AltName: Full=CPN-60 alpha; Flags: Precursor<br>gi415925 emb CAA81736.1  chaperonin-60 alpha subunit [Brassica napus]                                                                                                                                                                                                                                                                                                                                                                                                                                                                                                                                           | 183 | 583 | 5.00E-60  | 318.6 | 63.9 | 66.7 | RecName: Full=RubisCO large subunit-binding protein subunit alpha, chloroplastic; AltName: Full=60 kDa chaperonin subunit alpha; AltName: Full=CPN-60 alpha; Flags: Precursor<br>gi415925 emb CAA81736.1  chaperonin-60 alpha subunit | gbpln | Brassica napus       | AT2G28000.1   Symbols: CPN60A, CH-CPN60A, SLP   chaperonin-60alpha   chr2:11926603-11929184 FORWARD LENGTH=586                                                                                                                                                                                                                                                      | 183 | 586 | 4.00E-55  | 320.2 | 57.9 | 60.7 |
| Rsa1.0_00061.1.g3286.t1 | #                                                                                                                                                                                                                                                                                                                                                                                                                                                                                                                                                                                                                                                                                                                                                                                                                       | #   | #   | #         | #     | #    | #    | -                                                                                                                                                                                                                                     | ----  | ----                 | #                                                                                                                                                                                                                                                                                                                                                                   | #   | #   | #         | #     | #    |      |
| Rsa1.0_00061.1.g3287.t1 | #                                                                                                                                                                                                                                                                                                                                                                                                                                                                                                                                                                                                                                                                                                                                                                                                                       | #   | #   | #         | #     | #    | #    | -                                                                                                                                                                                                                                     | ----  | ----                 | #                                                                                                                                                                                                                                                                                                                                                                   | #   | #   | #         | #     | #    |      |
| Rsa1.0_00061.1.g3288.t1 | gb EOA21485.1  hypothetical protein CARUB_v10001882mg [Capsella rubella]                                                                                                                                                                                                                                                                                                                                                                                                                                                                                                                                                                                                                                                                                                                                                | 214 | 230 | 1.00E-71  | 107.5 | 76.6 | 86.4 | hypothetical protein CARUB_v10001882mg                                                                                                                                                                                                | gbpln | Capsella rubella     | AT4G02075.1   Symbols: PIT1   RING/FYVE/PHD zinc finger superfamily protein   chr4:913555-916414 REVERSE LENGTH=218                                                                                                                                                                                                                                                 | 214 | 218 | 4.00E-74  | 101.9 | 77.6 | 86.9 |
| Rsa1.0_00061.1.g3289.t1 | db BAJ33893.1  unnamed protein product [Thellungiella halophila]                                                                                                                                                                                                                                                                                                                                                                                                                                                                                                                                                                                                                                                                                                                                                        | 718 | 716 | 0         | 99.7  | 96.2 | 97.9 | unnamed protein product                                                                                                                                                                                                               | ----  | ----                 | AT4G02060.2   Symbols: PRL   Minichromosome maintenance (MCM2/3/5) family protein   chr4:901484-905297 FORWARD LENGTH=716                                                                                                                                                                                                                                           | 718 | 716 | 0         | 99.7  | 94.7 | 97.4 |
| Rsa1.0_00061.1.g3290.t1 | ref XP_002872859.1  hypothetical protein ARALYDRAFT_327595 [Arabidopsis lyrata subsp. lyrata]<br>gi297318696 gb EFH49118.1  hypothetical protein ARALYDRAFT_327595 [Arabidopsis lyrata subsp. lyrata]                                                                                                                                                                                                                                                                                                                                                                                                                                                                                                                                                                                                                   | 511 | 515 | 0         | 100.8 | 92.4 | 96.5 | hypothetical protein ARALYDRAFT_327595                                                                                                                                                                                                | gbpln | Arabidopsis lyrata   | AT4G02050.1   Symbols: STP7   sugar transporter protein 7   chr4:898387-900095 REVERSE LENGTH=513                                                                                                                                                                                                                                                                   | 511 | 513 | 0         | 100.4 | 92.0 | 95.9 |
| Rsa1.0_00061.1.g3291.t1 | ref XP_002874944.1  hypothetical protein ARALYDRAFT_490376 [Arabidopsis lyrata subsp. lyrata]<br>gi297320781 gb EFH51203.1  hypothetical protein ARALYDRAFT_490376 [Arabidopsis lyrata subsp. lyrata]                                                                                                                                                                                                                                                                                                                                                                                                                                                                                                                                                                                                                   | 152 | 154 | 6.00E-35  | 101.3 | 59.9 | 71.7 | hypothetical protein ARALYDRAFT_490376                                                                                                                                                                                                | gbpln | Arabidopsis lyrata   | AT4G02040.1   Symbols:   unknown protein; FUNCTIONS IN: molecular_function unknown; INVOLVED IN: biological_process unknown; LOCATED IN: chloroplast; Has 30 Blast hits to 30 proteins in 6 species: Archae - 0; Bacteria - 0; Metazoa - 0; Fungi - 0; Plants - 30; Viruses - 0; Other Eukaryotes - 0 (source: NCBI BLINK),   chr4:897563-898021 FORWARD LENGTH=152 | 152 | 152 | 3.00E-34  | 100.0 | 57.2 | 70.4 |
| Rsa1.0_00061.1.g3292.t1 | gb EOA19997.1  hypothetical protein CARUB_v10000264mg [Capsella rubella]                                                                                                                                                                                                                                                                                                                                                                                                                                                                                                                                                                                                                                                                                                                                                | 759 | 786 | 0         | 103.6 | 91.0 | 94.5 | hypothetical protein CARUB_v10000264mg                                                                                                                                                                                                | gbpln | Capsella rubella     | AT4G02030.1   Symbols:   Vps51/Vps67 family (components of vesicular transport) protein   chr4:892262-891743 FORWARD LENGTH=780                                                                                                                                                                                                                                     | 759 | 780 | 0         | 102.8 | 90.8 | 94.3 |
| Rsa1.0_00061.1.g3293.t6 | ref XP_002874946.1  swinger [Arabidopsis lyrata subsp. lyrata]<br>gi297320783 gb EFH51205.1  swinger [Arabidopsis lyrata subsp. lyrata]                                                                                                                                                                                                                                                                                                                                                                                                                                                                                                                                                                                                                                                                                 | 908 | 846 | 0         | 93.2  | 69.6 | 75.3 | swinger                                                                                                                                                                                                                               | gbpln | Arabidopsis lyrata   | AT4G02020.1   Symbols: EZA1, SWN, SDG10   SET domain-containing protein   chr4:886693-891743 FORWARD LENGTH=856                                                                                                                                                                                                                                                     | 908 | 856 | 0         | 94.3  | 69.2 | 76.1 |
| Rsa1.0_00061.1.g3294.t1 | gb ADQ20113.1  stachyose synthase [Brassica napus]                                                                                                                                                                                                                                                                                                                                                                                                                                                                                                                                                                                                                                                                                                                                                                      | 874 | 873 | 0         | 99.9  | 92.6 | 97.0 | stachyose synthase                                                                                                                                                                                                                    | gbpln | Brassica napus       | AT4G01970.1   Symbols: AtSTS, STS   stachyose synthase   chr4:854073-856953 REVERSE LENGTH=876                                                                                                                                                                                                                                                                      | 874 | 876 | 0         | 100.2 | 84.8 | 93.1 |

|                         |                                                                                                                                                                                                                                                                                                                                                                                                                                                                                                                                              |      |      |           |       |      |      |                                                 |       |                      |                                                                                                                                                                                                                                                                                                                                          |      |      |           |       |      |      |
|-------------------------|----------------------------------------------------------------------------------------------------------------------------------------------------------------------------------------------------------------------------------------------------------------------------------------------------------------------------------------------------------------------------------------------------------------------------------------------------------------------------------------------------------------------------------------------|------|------|-----------|-------|------|------|-------------------------------------------------|-------|----------------------|------------------------------------------------------------------------------------------------------------------------------------------------------------------------------------------------------------------------------------------------------------------------------------------------------------------------------------------|------|------|-----------|-------|------|------|
| Rsa1.0_00061.1.g3295.t1 | ref NP_192105.1  uncharacterized protein [Arabidopsis thaliana] gi 4558565 gb AAD2658.1 AC007138.22 predicted protein of unknown function [Arabidopsis thaliana] gi 7268580 emb CAB80689.1  predicted protein of unknown function [Arabidopsis thaliana] gi 21537343 gb AAM61684.1  unknown [Arabidopsis thaliana] gi 88196763 gb ABD43024.1  At4g01960 [Arabidopsis thaliana] gi 110738203 dbj BAF01032.1  hypothetical protein [Arabidopsis thaliana] gi 332656705 gb AEE82105.1  uncharacterized protein AT4G01960 [Arabidopsis thaliana] | 229  | 236  | 2.00E-81  | 103.1 | 80.8 | 89.1 | uncharacterized protein                         | gbpln | Arabidopsis thaliana | AT4G01960.1   Symbols:   unknown protein; BEST Arabidopsis thaliana protein match is: unknown protein (TAIR:AT1G02380.1); Has 67 Blast hits to 67 proteins in 11 species: Archae - 0; Bacteria - 0; Metazoa - 0; Fungi - 0; Plants - 67; Viruses - 0; Other Eukaryotes - 0 (source: NCBI BLink).   chr4:851387-852441 REVERSE LENGTH=236 | 229  | 236  | 7.00E-84  | 103.1 | 80.8 | 89.1 |
| Rsa1.0_00061.1.g3296.t1 | gb AAG51783.1 AC079679.3 reverse transcriptase, putative; 16838-20266 [Arabidopsis thaliana]                                                                                                                                                                                                                                                                                                                                                                                                                                                 | 1454 | 1142 | 0         | 78.5  | 22.8 | 32.1 | reverse transcriptase, putative; 16838-20266    | gbpln | Arabidopsis thaliana | AT4G29090.1   Symbols:   Ribonuclease H-like superfamily protein   chr4:14333528-14335255 FORWARD LENGTH=575                                                                                                                                                                                                                             | 1454 | 575  | 1.00E-40  | 39.5  | 5.8  | 9.1  |
| Rsa1.0_00061.1.g3297.t1 | dbj BAJ34109.1  unnamed protein product [Theilungiella halophila]                                                                                                                                                                                                                                                                                                                                                                                                                                                                            | 521  | 521  | 0         | 100.0 | 88.1 | 93.7 | unnamed protein product                         | ----  | ----                 | AT4G01950.1   Symbols: ATGPAT3, GPAT3   glycerol-3-phosphate acyltransferase 3   chr4:844597-846710 REVERSE LENGTH=520                                                                                                                                                                                                                   | 521  | 520  | 0         | 99.8  | 87.1 | 93.5 |
| Rsa1.0_00061.1.g3298.t1 | gb EOA22935.1  hypothetical protein CARUB_v10003671mg, partial [Capsella rubella]                                                                                                                                                                                                                                                                                                                                                                                                                                                            | 517  | 145  | 5.00E-17  | 28.0  | 9.9  | 13.3 | hypothetical protein CARUB_v10003671mg, partial | gbpln | Capsella rubella     | #                                                                                                                                                                                                                                                                                                                                        | #    | #    | #         | #     | #    | #    |
| Rsa1.0_00061.1.g3299.t1 | gb EOA30146.1  hypothetical protein CARUB_v10013253mg [Capsella rubella]                                                                                                                                                                                                                                                                                                                                                                                                                                                                     | 104  | 609  | 4.00E-44  | 585.6 | 83.7 | 87.5 | hypothetical protein CARUB_v10013253mg          | gbpln | Capsella rubella     | AT3G18060.1   Symbols:   transducin family protein / WD-40 repeat family protein   chr3:6183880-6186788 FORWARD LENGTH=609                                                                                                                                                                                                               | 104  | 609  | 7.00E-47  | 585.6 | 83.7 | 86.5 |
| Rsa1.0_00061.1.g3300.t1 | gb AAF98181.1 AC000107.4 F17F8.5 [Arabidopsis thaliana]                                                                                                                                                                                                                                                                                                                                                                                                                                                                                      | 301  | 872  | 7.00E-70  | 289.7 | 49.2 | 67.4 | F17F8.5                                         | gbpln | Arabidopsis thaliana | AT3G24255.1   Symbols:   RNA-directed DNA polymerase (reverse transcriptase)-related family protein   chr3:8789471-8793208 FORWARD LENGTH=746                                                                                                                                                                                            | 301  | 746  | 4.00E-46  | 247.8 | 38.5 | 54.2 |
| Rsa1.0_00061.1.g3301.t1 | ref XP_002872902.1  hypothetical protein ARALYDRAFT_912111 [Arabidopsis lyrata subsp. lyrata] gi 297318739 gb EFH49161.1                                                                                                                                                                                                                                                                                                                                                                                                                     | 348  | 356  | 1.00E-144 | 102.3 | 74.7 | 81.9 | hypothetical protein ARALYDRAFT_912111          | gbpln | Arabidopsis lyrata   | AT4G01220.1   Symbols:   Nucleotide-diphospho-sugar transferase family protein   chr4:513431-515648 REVERSE LENGTH=360                                                                                                                                                                                                                   | 348  | 360  | 1.00E-144 | 103.4 | 70.4 | 77.3 |
| Rsa1.0_00061.1.g3302.t1 | #                                                                                                                                                                                                                                                                                                                                                                                                                                                                                                                                            | #    | #    | #         | #     | #    | -    | ----                                            | ----  | ----                 | #                                                                                                                                                                                                                                                                                                                                        | #    | #    | #         | #     | #    | #    |
| Rsa1.0_00061.1.g3303.t1 | ref XP_002872902.1  hypothetical protein ARALYDRAFT_912111 [Arabidopsis lyrata subsp. lyrata] gi 297318739 gb EFH49161.1  hypothetical protein ARALYDRAFT_912111 [Arabidopsis lyrata subsp. lyrata]                                                                                                                                                                                                                                                                                                                                          | 342  | 356  | 1.00E-145 | 104.1 | 72.8 | 78.9 | hypothetical protein ARALYDRAFT_912111          | gbpln | Arabidopsis lyrata   | AT4G01220.1   Symbols:   Nucleotide-diphospho-sugar transferase family protein   chr4:513431-515648 REVERSE LENGTH=360                                                                                                                                                                                                                   | 342  | 360  | 1.00E-145 | 105.3 | 71.9 | 78.7 |
| Rsa1.0_00061.1.g3304.t2 | ref XP_002874954.1  hypothetical protein ARALYDRAFT_327611 [Arabidopsis lyrata subsp. lyrata] gi 297320791 gb EFH51213.1                                                                                                                                                                                                                                                                                                                                                                                                                     | 386  | 226  | 3.00E-93  | 58.5  | 47.4 | 49.5 | hypothetical protein ARALYDRAFT_327611          | gbpln | Arabidopsis lyrata   | AT4G01883.1   Symbols:   Polyketide cyclase / dehydrase and lipid transport protein   chr4:813162-814800 FORWARD LENGTH=224                                                                                                                                                                                                              | 386  | 224  | 1.00E-90  | 58.0  | 45.9 | 49.2 |
| Rsa1.0_00061.1.g3305.t1 | ref NP_192095.2  transducin/WD40 domain-containing protein [Arabidopsis thaliana] gi 30678983 ref NP_849536.1  transducin/WD40 domain-containing protein [Arabidopsis thaliana] gi 19699003 gb AAL91237.1  unknown protein [Arabidopsis thaliana] gi 32306503 gb AAP78935.1  At4g01860 [Arabidopsis thaliana] gi 332656686 gb AEE82086.1  transducin/WD40 domain-containing protein [Arabidopsis thaliana] gi 332656687 gb AEE82087.1  transducin/WD40 domain-containing protein [Arabidopsis thaliana]                                      | 1615 | 1308 | 0         | 81.0  | 67.2 | 72.3 | transducin/WD40 domain-containing protein       | gbpln | Arabidopsis thaliana | AT4G01860.2   Symbols:   Transducin family protein / WD-40 repeat family protein   chr4:801713-808018 REVERSE LENGTH=1308                                                                                                                                                                                                                | 1615 | 1308 | 0         | 81.0  | 67.2 | 72.3 |

|                         |                                                                                                                                                                                                                                                                                                                                                                                                                                                                                                                                                                                                                                                                                                                                                                                                                                                                                       |      |      |          |       |      |       |                                                                                                                                                                                                                                                                                                                                                                                                                                    |       |                         |                                                                                                                                                         |      |     |           |       |      |      |
|-------------------------|---------------------------------------------------------------------------------------------------------------------------------------------------------------------------------------------------------------------------------------------------------------------------------------------------------------------------------------------------------------------------------------------------------------------------------------------------------------------------------------------------------------------------------------------------------------------------------------------------------------------------------------------------------------------------------------------------------------------------------------------------------------------------------------------------------------------------------------------------------------------------------------|------|------|----------|-------|------|-------|------------------------------------------------------------------------------------------------------------------------------------------------------------------------------------------------------------------------------------------------------------------------------------------------------------------------------------------------------------------------------------------------------------------------------------|-------|-------------------------|---------------------------------------------------------------------------------------------------------------------------------------------------------|------|-----|-----------|-------|------|------|
| Rsa1.0_00061.1.g3306.t1 | sp Q5DNB1.1 METK BRARP<br>Full=S-adenosylmethionine synthase;<br>Short=AdoMet synthase; AltName:<br>Full=Methionine adenosyltransferase;<br>Short=MAT<br>gi 75306462 sp Q94FA4.1 METK5_BRAJ<br>U RecName: Full=S-adenosylmethionine<br>synthase 5; Short=AdoMet synthase 5;<br>AltName: Full=Methionine<br>adenosyltransferase 5; Short=MAT 5<br>gi 14600072 gb AAK71235.1  S-<br>adenosylmethionine synthetase<br>[Brassica juncea]<br>gi 56130947 gb AAV80205.1  S-<br>adenosyl-L-methionine synthetase<br>[Brassica rapa subsp. pekinensis]                                                                                                                                                                                                                                                                                                                                        | 393  | 393  | 0        | 100.0 | 99.7 | 100.0 | RecName: Full=S-<br>adenosylmethionine<br>synthase;<br>Short=AdoMet<br>synthase; AltName:<br>Full=Methionine<br>adenosyltransferase;<br>Short=MAT<br>gi 75306462 sp Q94FA4<br>.1 METK5_BRAJU<br>RecName: Full=S-<br>adenosylmethionine<br>synthase 5;<br>Short=AdoMet<br>synthase 5; AltName:<br>Full=Methionine<br>adenosyltransferase 5;<br>Short=MAT 5<br>gi 14600072 gb AAK712<br>35.1  S-<br>adenosylmethionine<br>svnthetase | gbpln | Brassica<br>juncea      | AT4G01850.2   Symbols: SAM-2, MAT2,<br>SAM2, AtSAM2   S-adenosylmethionine<br>synthetase 2   chr4:796298-797479<br>REVERSE LENGTH=393                   | 393  | 393 | 0         | 100.0 | 99.2 | 99.7 |
| Rsa1.0_00061.1.g3307.t1 | gb EOA20795.1  hypothetical protein<br>CARUB_v10001130mg [Capsella rubella]                                                                                                                                                                                                                                                                                                                                                                                                                                                                                                                                                                                                                                                                                                                                                                                                           | 401  | 396  | 0        | 98.8  | 84.0 | 89.0  | hypothetical protein<br>CARUB_v10001130mg                                                                                                                                                                                                                                                                                                                                                                                          | gbpln | Capsella<br>rubella     | AT4G01840.1   Symbols: KCO5, ATTPK5,<br>ATKCO5, TPK5   Ca2+ activated outward<br>rectifying K+ channel 5   chr4:793403-<br>794933 FORWARD LENGTH=408    | 401  | 408 | 1.00E-178 | 101.7 | 81.5 | 87.5 |
| Rsa1.0_00061.1.g3308.t1 | ref XP_002872875.1  hypothetical<br>protein ARALYDRAFT_490398<br>[Arabidopsis lyrata subsp. lyrata]<br>gi 297318712 gb EFH49134.1 <br>hypothetical protein<br>ARALYDRAFT_490398 [Arabidopsis<br>lyrata subsp. lyrata]                                                                                                                                                                                                                                                                                                                                                                                                                                                                                                                                                                                                                                                                 | 651  | 882  | 0        | 135.5 | 67.7 | 69.3  | hypothetical protein<br>ARALYDRAFT_490398                                                                                                                                                                                                                                                                                                                                                                                          | gbpln | Arabidopsis<br>lyrata   | AT4G01810.1   Symbols:   Sec23/Sec24<br>protein transport family protein  <br>chr4:776734-779802 REVERSE<br>LENGTH=880                                  | 651  | 880 | 0         | 135.2 | 67.6 | 69.3 |
| Rsa1.0_00061.1.g3309.t1 | gb EOA22935.1  hypothetical protein<br>CARUB_v10003671mg, partial [Capsella<br>rubella]<br>ref NP_192081.1  putative WRKY<br>transcription factor 47 [Arabidopsis<br>thaliana]<br>gi 20978798 sp Q9ZS17.2 WRK47_ARATH<br>RecName: Full=Probable WRKY<br>transcription factor 47; AltName:<br>Full=WRKY DNA-binding protein 47<br>gi 19172392 gb AAL85881.1 AF480165.1<br>WRKY transcription factor 47<br>[Arabidopsis thaliana]<br>gi 7268215 emb CAB77742.1  putative<br>DNA-binding protein [Arabidopsis<br>thaliana] gi 30794136 gb AAP40510.1 <br>putative WRKY family transcription<br>factor [Arabidopsis thaliana]<br>gi 110738911 dbj BAF01377.1  putative<br>DNA-binding protein [Arabidopsis<br>thaliana] gi 115311505 gb ABI93933.1 <br>At4g01720 [Arabidopsis thaliana]<br>gi 332656669 gb AEE82069.1  putative<br>WRKY transcription factor 47<br>[Arabidopsis thaliana] | 600  | 145  | 7.00E-19 | 24.2  | 9.2  | 14.3  | hypothetical protein<br>CARUB_v10003671mg,<br>partial                                                                                                                                                                                                                                                                                                                                                                              | gbpln | Capsella<br>rubella     | #                                                                                                                                                       | #    | #   | #         | #     | #    | #    |
| Rsa1.0_00061.1.g3310.t1 | gi 7268215 emb CAB77742.1  putative<br>DNA-binding protein [Arabidopsis<br>thaliana] gi 30794136 gb AAP40510.1 <br>putative WRKY family transcription<br>factor [Arabidopsis thaliana]<br>gi 110738911 dbj BAF01377.1  putative<br>DNA-binding protein [Arabidopsis<br>thaliana] gi 115311505 gb ABI93933.1 <br>At4g01720 [Arabidopsis thaliana]<br>gi 332656669 gb AEE82069.1  putative<br>WRKY transcription factor 47<br>[Arabidopsis thaliana]                                                                                                                                                                                                                                                                                                                                                                                                                                    | 488  | 489  | 0        | 100.2 | 79.9 | 87.5  | putative WRKY<br>transcription factor 47                                                                                                                                                                                                                                                                                                                                                                                           | gbpln | Arabidopsis<br>thaliana | AT4G01720.1   Symbols: WRKY47,<br>AtWRKY47   WRKY family transcription<br>factor   chr4:744949-748219 FORWARD<br>LENGTH=489                             | 488  | 489 | 0         | 100.2 | 79.9 | 87.5 |
| Rsa1.0_00062.1.g3311.t1 | #                                                                                                                                                                                                                                                                                                                                                                                                                                                                                                                                                                                                                                                                                                                                                                                                                                                                                     | #    | #    | #        | #     | #    | -     | ----                                                                                                                                                                                                                                                                                                                                                                                                                               | ----  | #                       | #                                                                                                                                                       | #    | #   | #         | #     | #    |      |
| Rsa1.0_00062.1.g3312.t1 | gb AAF24531.1 AC007534_12 F7F22.17<br>[Arabidopsis thaliana]                                                                                                                                                                                                                                                                                                                                                                                                                                                                                                                                                                                                                                                                                                                                                                                                                          | 629  | 1799 | 7.00E-92 | 286.0 | 29.1 | 39.7  | F7F22.17                                                                                                                                                                                                                                                                                                                                                                                                                           | gbpln | Arabidopsis<br>thaliana | #                                                                                                                                                       | #    | #   | #         | #     | #    |      |
| Rsa1.0_00062.1.g3313.t1 | #                                                                                                                                                                                                                                                                                                                                                                                                                                                                                                                                                                                                                                                                                                                                                                                                                                                                                     | #    | #    | #        | #     | #    | -     | ----                                                                                                                                                                                                                                                                                                                                                                                                                               | ----  | #                       | #                                                                                                                                                       | #    | #   | #         | #     | #    |      |
| Rsa1.0_00062.1.g3314.t1 | gb EOA28006.1  hypothetical protein<br>CARUB_v10024183mg [Capsella rubella]                                                                                                                                                                                                                                                                                                                                                                                                                                                                                                                                                                                                                                                                                                                                                                                                           | 69   | 170  | 2.00E-19 | 246.4 | 69.6 | 72.5  | hypothetical protein<br>CARUB_v10024183mg                                                                                                                                                                                                                                                                                                                                                                                          | gbpln | Capsella<br>rubella     | AT5G37070.1   Symbols:   Protein of<br>unknown function, DUF538   chr5:14651091-<br>14652147 FORWARD LENGTH=170                                         | 69   | 170 | 8.00E-22  | 246.4 | 66.7 | 75.4 |
| Rsa1.0_00062.1.g3315.t1 | dbj BAJ33618.1  unnamed protein<br>product [Thellungiella halophila]                                                                                                                                                                                                                                                                                                                                                                                                                                                                                                                                                                                                                                                                                                                                                                                                                  | 508  | 510  | 0        | 100.4 | 90.4 | 93.3  | unnamed protein<br>product                                                                                                                                                                                                                                                                                                                                                                                                         | ----  | ----                    | AT3G50660.1   Symbols: DWF4, CYP90B1,<br>CLM, SNP2, SAV1, PSC1   Cytochrome<br>P450 superfamily protein   chr3:18814262-<br>18817168 REVERSE LENGTH=513 | 508  | 513 | 0         | 101.0 | 87.6 | 90.9 |
| Rsa1.0_00062.1.g3316.t1 | gb AAG50806.1 AC079281_8 unknown<br>protein [Arabidopsis thaliana]                                                                                                                                                                                                                                                                                                                                                                                                                                                                                                                                                                                                                                                                                                                                                                                                                    | 1878 | 1213 | 0        | 64.6  | 31.1 | 40.7  | unknown protein                                                                                                                                                                                                                                                                                                                                                                                                                    | gbpln | Arabidopsis<br>thaliana | AT1G43760.1   Symbols:   DNase I-like<br>superfamily protein   chr1:16528890-<br>16531065 REVERSE LENGTH=626                                            | 1878 | 626 | 5.00E-74  | 33.3  | 7.9  | 12.1 |
| Rsa1.0_00062.1.g3317.t1 | #                                                                                                                                                                                                                                                                                                                                                                                                                                                                                                                                                                                                                                                                                                                                                                                                                                                                                     | #    | #    | #        | #     | #    | -     | ----                                                                                                                                                                                                                                                                                                                                                                                                                               | ----  | #                       | #                                                                                                                                                       | #    | #   | #         | #     | #    |      |
| Rsa1.0_00062.1.g3318.t1 | dbj BAB01972.1  copia-like<br>retrotransposable element [Arabidopsis<br>thaliana]                                                                                                                                                                                                                                                                                                                                                                                                                                                                                                                                                                                                                                                                                                                                                                                                     | 169  | 1499 | 4.00E-25 | 887.0 | 35.5 | 50.3  | copia-like<br>retrotransposable<br>element                                                                                                                                                                                                                                                                                                                                                                                         | gbpln | Arabidopsis<br>thaliana | #                                                                                                                                                       | #    | #   | #         | #     | #    |      |

|                         |                                                                                                                                                                                                                                                                                                                                                                                |     |     |           |       |      |      |                                           |       |                      |                                                                                                                                                                                                                                                                                                                                               |     |     |           |        |      |      |
|-------------------------|--------------------------------------------------------------------------------------------------------------------------------------------------------------------------------------------------------------------------------------------------------------------------------------------------------------------------------------------------------------------------------|-----|-----|-----------|-------|------|------|-------------------------------------------|-------|----------------------|-----------------------------------------------------------------------------------------------------------------------------------------------------------------------------------------------------------------------------------------------------------------------------------------------------------------------------------------------|-----|-----|-----------|--------|------|------|
| Rsa1.0_00062.1.g3319.t1 | ref[XP_002877765.1] UDP-glucosyl transferase 72E1 [Arabidopsis lyrata subsp. lyrata] gi 297323603 gb EFH54024.1  UDP-glucosyl transferase 72E1 [Arabidopsis lyrata subsp. lyrata]                                                                                                                                                                                              | 488 | 487 | 0         | 99.8  | 76.6 | 86.9 | UDP-glucosyl transferase 72E1             | gbpln | Arabidopsis lyrata   | AT3G50740.1   Symbols: UGT72E1   UDP-glucosyl transferase 72E1   chr3:18855348-18856811 REVERSE LENGTH=487                                                                                                                                                                                                                                    | 488 | 487 | 0         | 99.8   | 75.4 | 86.9 |
| Rsa1.0_00062.1.g3320.t1 | #                                                                                                                                                                                                                                                                                                                                                                              | #   | #   | #         | #     | #    | -    | -                                         | ----  | ----                 | #                                                                                                                                                                                                                                                                                                                                             | #   | #   | #         | #      | #    |      |
| Rsa1.0_00062.1.g3321.t1 | ref[NP_566938.1] coniferyl-alcohol glucosyltransferase [Arabidopsis thaliana] gi 75306318 sp Q94A64.1 U72E1_ARATH RecName: Full=UDP-glucosyltransferase 72E1 gi 15146272 gb AAK83619.1  AT3g50740/T3A5_120 [Arabidopsis thaliana] gi 53749150 gb AAU90060.1  At3g50740 [Arabidopsis thaliana] gi 332645182 gb AEE78703.1  UDP-glucosyl transferase 72E1 [Arabidopsis thaliana] | 482 | 487 | 0         | 101.0 | 80.1 | 90.0 | coniferyl-alcohol glucosyltransferase     | gbpln | Arabidopsis thaliana | AT3G50740.1   Symbols: UGT72E1   UDP-glucosyl transferase 72E1   chr3:18855348-18856811 REVERSE LENGTH=487                                                                                                                                                                                                                                    | 482 | 487 | 0         | 101.0  | 80.1 | 90.0 |
| Rsa1.0_00062.1.g3322.t1 | #                                                                                                                                                                                                                                                                                                                                                                              | #   | #   | #         | #     | #    | -    | -                                         | ----  | ----                 | AT2G23450.1   Symbols:   Protein kinase superfamily protein   chr2:9988926-9991244 REVERSE LENGTH=706                                                                                                                                                                                                                                         | 62  | 708 | 2.00E-11  | 1141.9 | 54.8 | 67.7 |
| Rsa1.0_00062.1.g3323.t1 | #                                                                                                                                                                                                                                                                                                                                                                              | #   | #   | #         | #     | #    | -    | -                                         | ----  | ----                 | #                                                                                                                                                                                                                                                                                                                                             | #   | #   | #         | #      | #    |      |
| Rsa1.0_00062.1.g3324.t1 | ref[NP_001154670.1] PLATZ transcription factor family protein [Arabidopsis thaliana] gi 254801606 sp POCB19.1 Y3081_ARATH RecName: Full=Uncharacterized protein At3g50808 gi 332645191 gb AEE78712.1  PLATZ transcription factor family protein [Arabidopsis thaliana]                                                                                                         | 226 | 110 | 5.00E-27  | 48.7  | 25.2 | 36.3 | PLATZ transcription factor family protein | gbpln | Arabidopsis thaliana | AT3G50808.1   Symbols:   PLATZ transcription factor family protein   chr3:18887614-18888047 REVERSE LENGTH=110                                                                                                                                                                                                                                | 226 | 110 | 2.00E-29  | 48.7   | 25.2 | 36.3 |
| Rsa1.0_00062.1.g3325.t1 | #                                                                                                                                                                                                                                                                                                                                                                              | #   | #   | #         | #     | #    | -    | -                                         | ----  | ----                 | #                                                                                                                                                                                                                                                                                                                                             | #   | #   | #         | #      | #    |      |
| Rsa1.0_00062.1.g3326.t1 | ref[XP_002877774.1] photosystem II subunit O-2 [Arabidopsis lyrata subsp. lyrata] gi 297323612 gb EFH54033.1  photosystem II subunit O-2 [Arabidopsis lyrata subsp. lyrata] gb AAG51228.1 AC035249_3 Tam3-like transposon protein: 93317-95488 [Arabidopsis thaliana] gi 12323055 gb AAG51515.1 AC068324_3 hAT-element transposase, putative [Arabidopsis thaliana]            | 333 | 331 | 0         | 99.4  | 96.4 | 97.6 | photosystem II subunit O-2                | gbpln | Arabidopsis lyrata   | AT3G50820.1   Symbols: PSBO2, PSBO-2, OEC33   photosystem II subunit O-2   chr3:18891008-18892311 REVERSE LENGTH=331                                                                                                                                                                                                                          | 333 | 331 | 0         | 99.4   | 95.5 | 97.0 |
| Rsa1.0_00062.1.g3327.t1 | #                                                                                                                                                                                                                                                                                                                                                                              | #   | #   | #         | #     | #    | -    | -                                         | ----  | ----                 | AT3G42170.1   Symbols:   BED zinc finger hAT family dimerisation domain   chr3:14321838-14323928 FORWARD LENGTH=696                                                                                                                                                                                                                           | 689 | 696 | 5.00E-46  | 101.0  | 21.2 | 37.7 |
| Rsa1.0_00062.1.g3328.t1 | #                                                                                                                                                                                                                                                                                                                                                                              | #   | #   | #         | #     | #    | -    | -                                         | ----  | ----                 | #                                                                                                                                                                                                                                                                                                                                             | #   | #   | #         | #      | #    |      |
| Rsa1.0_00062.1.g3329.t1 | #                                                                                                                                                                                                                                                                                                                                                                              | #   | #   | #         | #     | #    | -    | -                                         | ----  | ----                 | #                                                                                                                                                                                                                                                                                                                                             | #   | #   | #         | #      | #    |      |
| Rsa1.0_00062.1.g3330.t1 | ref[XP_002876050.1] predicted protein [Arabidopsis lyrata subsp. lyrata] gi 297321888 gb EFH52309.1  predicted protein [Arabidopsis lyrata subsp. lyrata]                                                                                                                                                                                                                      | 283 | 294 | 1.00E-113 | 103.9 | 80.9 | 87.3 | predicted protein                         | gbpln | Arabidopsis lyrata   | AT3G50870.1   Symbols: MNP, HAN, GATA18   GATA type zinc finger transcription factor family protein   chr3:18911112-18912369 FORWARD LENGTH=295                                                                                                                                                                                               | 283 | 295 | 1.00E-115 | 104.2  | 79.5 | 86.6 |
| Rsa1.0_00062.1.g3331.t1 | ref[XP_002876053.1] hypothetical protein ARALYDRAFT_906429 [Arabidopsis lyrata subsp. lyrata] gi 297321891 gb EFH52312.1  hypothetical protein ARALYDRAFT_906429 [Arabidopsis lyrata subsp. lyrata]                                                                                                                                                                            | 108 | 114 | 7.00E-40  | 105.6 | 77.8 | 85.2 | hypothetical protein ARALYDRAFT_906429    | gbpln | Arabidopsis lyrata   | AT3G50900.1   Symbols:   unknown protein; BEST Arabidopsis thaliana protein match is: unknown protein (TAIR:AT5G66490.1); Has 45 Blast hits to 45 proteins in 7 species: Archae - 0; Bacteria - 0; Metazoa - 0; Fungi - 0; Plants - 45; Viruses - 0; Other Eukaryotes - 0 (source: NCBI BLink).   chr3:18918122-18918466 FORWARD LENGTH=114   | 108 | 114 | 2.00E-42  | 105.6  | 75.9 | 84.3 |
| Rsa1.0_00062.1.g3332.t1 | gb EOA23929.1  hypothetical protein CARUB_v10017143mg [Capsella rubella]                                                                                                                                                                                                                                                                                                       | 199 | 444 | 6.00E-33  | 223.1 | 37.7 | 43.2 | hypothetical protein CARUB_v10017143mg    | gbpln | Capsella rubella     | AT3G50910.1   Symbols:   unknown protein; BEST Arabidopsis thaliana protein match is: unknown protein (TAIR:AT5G66480.1); Has 76 Blast hits to 75 proteins in 28 species: Archae - 0; Bacteria - 10; Metazoa - 7; Fungi - 2; Plants - 49; Viruses - 0; Other Eukaryotes - 8 (source: NCBI BLink).   chr3:18920189-18921999 FORWARD LENGTH=447 | 199 | 447 | 1.00E-32  | 224.6  | 36.2 | 41.7 |
| Rsa1.0_00062.1.g3333.t1 | #                                                                                                                                                                                                                                                                                                                                                                              | #   | #   | #         | #     | #    | -    | -                                         | ----  | ----                 | #                                                                                                                                                                                                                                                                                                                                             | #   | #   | #         | #      | #    |      |

|                         |                                                                                                                                                                                                                                                                                                                                                            |      |      |           |       |      |      |                                          |       |                      |                                                                                                                                                                                                                                                                                                                                                                                                                                                                                                                                                                |      |      |           |       |      |      |
|-------------------------|------------------------------------------------------------------------------------------------------------------------------------------------------------------------------------------------------------------------------------------------------------------------------------------------------------------------------------------------------------|------|------|-----------|-------|------|------|------------------------------------------|-------|----------------------|----------------------------------------------------------------------------------------------------------------------------------------------------------------------------------------------------------------------------------------------------------------------------------------------------------------------------------------------------------------------------------------------------------------------------------------------------------------------------------------------------------------------------------------------------------------|------|------|-----------|-------|------|------|
| Rsa1.0_00062.1.g3334.t1 | ref XP_002876055.1  hypothetical protein ARALYDRAFT_906432 [Arabidopsis lyrata subsp. lyrata] gi 297321893 gb EFH52314.1  hypothetical protein ARALYDRAFT_906432 [Arabidopsis lyrata subsp. lyrata]                                                                                                                                                        | 222  | 268  | 2.00E-60  | 120.7 | 66.7 | 75.2 | hypothetical protein ARALYDRAFT_906432   | gbpln | Arabidopsis lyrata   | AT5G66440.1   Symbols:   unknown protein; BEST Arabidopsis thaliana protein match is: unknown protein (TAIR:AT4G34560.1); Has 1807 Blast hits to 1807 proteins in 277 species: Archae - 0; Bacteria - 0; Metazoa - 736; Fungi - 347; Plants - 385; Viruses - 0; Other Eukaryotes - 339 (source: NCBI BLink).   chr5:26530274-26531032 REVERSE LENGTH=252                                                                                                                                                                                                       | 222  | 252  | 2.00E-51  | 113.5 | 54.1 | 68.0 |
| Rsa1.0_00062.1.g3335.t1 | ref NP_568344.2  myb family transcription factor [Arabidopsis thaliana] gi 332005027 gb AED92410.1  myb family transcription factor [Arabidopsis thaliana]                                                                                                                                                                                                 | 378  | 387  | 1.00E-147 | 102.4 | 78.8 | 85.2 | myb family transcription factor          | gbpln | Arabidopsis thaliana | AT5G17300.1   Symbols: RVE1   Homeodomain-like superfamily protein   chr5:5690435-5692435 REVERSE LENGTH=387                                                                                                                                                                                                                                                                                                                                                                                                                                                   | 378  | 387  | 1.00E-149 | 102.4 | 78.8 | 85.2 |
| Rsa1.0_00062.1.g3336.t1 | #                                                                                                                                                                                                                                                                                                                                                          | #    | #    | #         | #     | #    | -    | ----                                     | ----  | ----                 | #                                                                                                                                                                                                                                                                                                                                                                                                                                                                                                                                                              | #    | #    | #         | #     | #    |      |
| Rsa1.0_00062.1.g3337.t1 | gb EOA19553.1  hypothetical protein CARUB_v10002574mg [Capsella rubella]                                                                                                                                                                                                                                                                                   | 1061 | 724  | 0         | 68.2  | 41.0 | 49.3 | hypothetical protein CARUB_v10002574mg   | gbpln | Capsella rubella     | AT5G17320.1   Symbols: HDG9   homeodomain GLABROUS 9   chr5:5703380-5707637 REVERSE LENGTH=718                                                                                                                                                                                                                                                                                                                                                                                                                                                                 | 1061 | 718  | 0         | 67.7  | 40.1 | 48.6 |
| Rsa1.0_00062.1.g3338.t3 | gb ACB59199.1  copia-like protein [Brassica oleracea]                                                                                                                                                                                                                                                                                                      | 829  | 975  | 1.00E-121 | 117.6 | 31.7 | 40.4 | copia-like protein                       | gbpln | Brassica oleracea    | AT4G23160.1   Symbols: CRK8   cysteine-rich RLK (RECEPTOR-like protein kinase) 8   chr4:12129485-12134086 FORWARD LENGTH=1262                                                                                                                                                                                                                                                                                                                                                                                                                                  | 829  | 1262 | 5.00E-37  | 152.2 | 11.8 | 18.3 |
| Rsa1.0_00062.1.g3339.t1 | gb EOA20468.1  hypothetical protein CARUB_v10000781mg [Capsella rubella]                                                                                                                                                                                                                                                                                   | 195  | 502  | 4.00E-58  | 257.4 | 64.1 | 70.3 | hypothetical protein CARUB_v10000781mg   | gbpln | Capsella rubella     | AT5G17330.1   Symbols: GAD, GAD1   glutamate decarboxylase   chr5:5711141-5714839 FORWARD LENGTH=502                                                                                                                                                                                                                                                                                                                                                                                                                                                           | 195  | 502  | 9.00E-60  | 257.4 | 62.6 | 70.8 |
| Rsa1.0_00062.1.g3340.t2 | gb ABA70759.1  baby boom interacting protein 1B [Brassica napus]                                                                                                                                                                                                                                                                                           | 116  | 711  | 6.00E-20  | 612.9 | 39.7 | 44.8 | baby boom interacting protein 1B         | gbpln | Brassica napus       | AT1G73360.1   Symbols: HDG11, EDT1, ATHDG11   homeodomain GLABROUS 11   chr1:27578893-27581820 REVERSE LENGTH=722                                                                                                                                                                                                                                                                                                                                                                                                                                              | 116  | 722  | 1.00E-21  | 622.4 | 37.9 | 44.8 |
| Rsa1.0_00062.1.g3341.t1 | ref NP_197236.1  Putative membrane lipoprotein [Arabidopsis thaliana] gi 10177079 dbj BAB10521.1  unnamed protein product [Arabidopsis thaliana] gi 62867603 gb AA17405.1  At5g17340 [Arabidopsis thaliana] gi 66841346 gb AA57310.1  At5g17340 [Arabidopsis thaliana] gi 332005032 gb AED92415.1  Putative membrane lipoprotein [Arabidopsis thaliana]    | 164  | 160  | 6.00E-52  | 97.6  | 70.7 | 82.9 | Putative membrane lipoprotein            | gbpln | Arabidopsis thaliana | AT5G17340.1   Symbols:   Putative membrane lipoprotein   chr5:5715736-5716218 REVERSE LENGTH=160                                                                                                                                                                                                                                                                                                                                                                                                                                                               | 164  | 160  | 2.00E-54  | 97.6  | 70.7 | 82.9 |
| Rsa1.0_00062.1.g3342.t1 | #                                                                                                                                                                                                                                                                                                                                                          | #    | #    | #         | #     | #    | -    | ----                                     | ----  | ----                 | #                                                                                                                                                                                                                                                                                                                                                                                                                                                                                                                                                              | #    | #    | #         | #     | #    |      |
| Rsa1.0_00062.1.g3343.t1 | ref NP_197237.1  uncharacterized protein [Arabidopsis thaliana] gi 9755758 emb CAC01730.1  putative protein [Arabidopsis thaliana] gi 21537084 gb AAM61425.1  unknown [Arabidopsis thaliana] gi 110737524 dbj BAF00704.1  hypothetical protein [Arabidopsis thaliana] gi 332005033 gb AED92416.1  uncharacterized protein AT5G17350 [Arabidopsis thaliana] | 186  | 183  | 5.00E-69  | 98.4  | 78.0 | 84.4 | uncharacterized protein                  | gbpln | Arabidopsis thaliana | AT5G17350.1   Symbols:   unknown protein; FUNCTIONS IN: molecular function unknown; INVOLVED IN: N-terminal protein myristoylation; LOCATED IN: cellular component unknown; EXPRESSED IN: 15 plant structures; EXPRESSED DURING: 8 growth stages; BEST Arabidopsis thaliana protein match is: unknown protein (TAIR:AT3G03280.1); Has 1807 Blast hits to 1807 proteins in 277 species: Archae - 0; Bacteria - 0; Metazoa - 736; Fungi - 347; Plants - 385; Viruses - 0; Other Eukaryotes - 339 (source: NCBI BLink).   chr5:5718853-5719404 FORWARD LENGTH=183 | 186  | 183  | 2.00E-71  | 98.4  | 78.0 | 84.4 |
| Rsa1.0_00062.1.g3344.t1 | gb EOA20498.1  hypothetical protein CARUB_v10000811mg [Capsella rubella]                                                                                                                                                                                                                                                                                   | 536  | 492  | 0         | 91.8  | 69.8 | 78.7 | hypothetical protein CARUB_v10000811mg   | gbpln | Capsella rubella     | AT5G17370.1   Symbols:   Transducin/WD40 repeat-like superfamily protein   chr5:5721801-5724719 REVERSE LENGTH=529                                                                                                                                                                                                                                                                                                                                                                                                                                             | 536  | 529  | 0         | 98.7  | 69.6 | 77.8 |
| Rsa1.0_00062.1.g3345.t5 | gb ACS68197.1  cellulose synthase 7.1 catalytic subunit [Brassica napus]                                                                                                                                                                                                                                                                                   | 1016 | 1031 | 0         | 101.5 | 98.2 | 99.0 | cellulose synthase 7.1 catalytic subunit | gbpln | Brassica napus       | AT5G17420.1   Symbols: IRX3, CESA7, ATCESA7, MUR10   Cellulose synthase family protein   chr5:5736859-5741407 REVERSE LENGTH=1026                                                                                                                                                                                                                                                                                                                                                                                                                              | 1016 | 1026 | 0         | 101.0 | 95.2 | 97.2 |
| Rsa1.0_00062.1.g3346.t1 | ref XP_002873828.1  predicted protein [Arabidopsis lyrata subsp. lyrata] gi 297319665 gb EFH50087.1  predicted protein [Arabidopsis lyrata subsp. lyrata]                                                                                                                                                                                                  | 579  | 587  | 0         | 101.4 | 80.1 | 86.2 | predicted protein                        | gbpln | Arabidopsis lyrata   | AT5G17430.1   Symbols: BBM   Integrase-type DNA-binding superfamily protein   chr5:5742542-5745568 REVERSE LENGTH=584                                                                                                                                                                                                                                                                                                                                                                                                                                          | 579  | 584  | 0         | 100.9 | 77.4 | 83.4 |
| Rsa1.0_00062.1.g3347.t1 | ref NP_568347.1  LUC7 related protein [Arabidopsis thaliana] gi 15450599 gb AAK96571.1  AT5g17440/K3M1.6.10 [Arabidopsis thaliana] gi 17380624 gb AAL36075.1  AT5g17440/K3M1.6.10 [Arabidopsis thaliana] gi 332005043 gb AED92426.1  LUC7 related protein [Arabidopsis thaliana]                                                                           | 406  | 404  | 1.00E-174 | 99.5  | 73.4 | 76.4 | LUC7 related protein                     | gbpln | Arabidopsis thaliana | AT5G17440.1   Symbols:   LUC7 related protein   chr5:5749849-5753415 FORWARD LENGTH=404                                                                                                                                                                                                                                                                                                                                                                                                                                                                        | 406  | 404  | 1.00E-177 | 99.5  | 73.4 | 76.4 |



|                         |                                                                                                                                                                                                                                                                                                                                                                                                                                                                                                                                                                                                                                                                                                                                                                                                                                             |     |     |           |       |      |      |                                                                                                                                                                                                                                                                                                                            |       |                    |                                                                                                                                                                                                                                                                                                                                                                                               |     |     |           |       |      |      |
|-------------------------|---------------------------------------------------------------------------------------------------------------------------------------------------------------------------------------------------------------------------------------------------------------------------------------------------------------------------------------------------------------------------------------------------------------------------------------------------------------------------------------------------------------------------------------------------------------------------------------------------------------------------------------------------------------------------------------------------------------------------------------------------------------------------------------------------------------------------------------------|-----|-----|-----------|-------|------|------|----------------------------------------------------------------------------------------------------------------------------------------------------------------------------------------------------------------------------------------------------------------------------------------------------------------------------|-------|--------------------|-----------------------------------------------------------------------------------------------------------------------------------------------------------------------------------------------------------------------------------------------------------------------------------------------------------------------------------------------------------------------------------------------|-----|-----|-----------|-------|------|------|
| Rsa1.0_00062.1.g3348.t2 | gb EOA37750.1  hypothetical protein CARUB_v10012565mg [Capsella rubella]                                                                                                                                                                                                                                                                                                                                                                                                                                                                                                                                                                                                                                                                                                                                                                    | 549 | 679 | 1.00E-114 | 123.7 | 45.9 | 66.1 | hypothetical protein CARUB_v10012565mg                                                                                                                                                                                                                                                                                     | gbpln | Capsella rubella   | AT3G42170.1   Symbols:   BED zinc finger ;hAT family dimerisation domain   chr3:14321838-14323928 FORWARD LENGTH=696                                                                                                                                                                                                                                                                          | 549 | 696 | 3.00E-21  | 126.8 | 14.4 | 23.7 |
| Rsa1.0_00062.1.g3349.t2 | ref NP_197247.1  heavy metal transport/detoxification domain-containing protein [Arabidopsis thaliana] gi 297807767 ref XP_002871767.1  hypothetical protein ARALYDRAFT_488611 [Arabidopsis lyrata subsp. lyrata] gi 9755769 emb CAC01889.1  farnesylated protein ATPF6-like protein [Arabidopsis thaliana] gi 117168109 gb ABK32137.1  At5g17450 [Arabidopsis thaliana] gi 297317604 gb EFH48026.1  hypothetical protein ARALYDRAFT_488611 [Arabidopsis lyrata subsp. lyrata] gi 332005044 gb AED92427.1  heavy metal transport/detoxification domain-containing protein [Arabidopsis thaliana] gi 48255303 gb EOA19495.1  hypothetical protein CARUB_v10002198mg [Capsella rubella]                                                                                                                                                       | 149 | 149 | 4.00E-73  | 100.0 | 94.6 | 96.0 | heavy metal transport/detoxification domain-containing protein                                                                                                                                                                                                                                                             | gbpln | Arabidopsis lyrata | AT5G17450.1   Symbols: HIPP21   Heavy metal transport/detoxification superfamily protein   chr5:5755386-5756743 FORWARD LENGTH=149                                                                                                                                                                                                                                                            | 149 | 149 | 1.00E-75  | 100.0 | 94.6 | 96.0 |
| Rsa1.0_00062.1.g3350.t1 | ref XP_002873829.1  hypothetical protein ARALYDRAFT_909741 [Arabidopsis lyrata subsp. lyrata] gi 297319666 gb EFH50088.8  hypothetical protein ARALYDRAFT_909741 [Arabidopsis lyrata subsp. lyrata]                                                                                                                                                                                                                                                                                                                                                                                                                                                                                                                                                                                                                                         | 305 | 309 | 1.00E-135 | 101.3 | 87.5 | 90.8 | hypothetical protein ARALYDRAFT_909741                                                                                                                                                                                                                                                                                     | gbpln | Arabidopsis lyrata | AT5G17460.1   Symbols:   unknown protein; FUNCTIONS IN: molecular, function unknown; INVOLVED IN: response to salt stress; LOCATED IN: mitochondrion; Has 30201 Blast hits to 17322 proteins in 780 species: Archae - 12; Bacteria - 1396; Metazoa - 17338; Fungi - 3422; Plants - 5037; Viruses - 0; Other Eukaryotes - 2996 (source: NCBI BLink).   chr5:5757582-5758867 REVERSE LENGTH=309 | 305 | 309 | 1.00E-137 | 101.3 | 86.9 | 90.8 |
| Rsa1.0_00062.1.g3351.t1 | sp P69196.1 POLC1_BRANA RecName: Full=Polcalcin Bra n 1; AltName: Full=Calcium-binding pollen allergen Bra n 1; AltName: Allergen=Bra n 1 gi 59900144 sp P69197.1 POLC1_BRARA RecName: Full=Polcalcin Bra r 1; AltName: Full=Calcium-binding pollen allergen Bra r 1; AltName: Allergen=Bra r 1 gi 1255536 dbj BAA09632.1  calcium-binding protein [Brassica napus] gi 1255540 dbj BAA09634.1  calcium-binding protein [Brassica rapa] gi 7415719 dbj BAA93509.1  pollen calcium-binding protein [Brassica rapa]                                                                                                                                                                                                                                                                                                                            | 80  | 79  | 9.00E-34  | 98.8  | 91.3 | 93.8 | RecName: Full=Polcalcin Bra n 1; AltName: Full=Calcium-binding pollen allergen Bra n 1; AltName: Allergen=Bra n 1 gi 59900144 sp P69197.1 POLC1_BRARA RecName: Full=Polcalcin Bra r 1; AltName: Full=Calcium-binding pollen allergen Bra r 1; AltName: Allergen=Bra r 1 gi 1255536 dbj BAA09632.1  calcium-binding protein | gbpln | Brassica napus     | AT5G17480.1   Symbols: APC1, PC1   pollen calcium-binding protein 1   chr5:5762689-5762940 FORWARD LENGTH=83                                                                                                                                                                                                                                                                                  | 80  | 83  | 4.00E-33  | 103.8 | 83.8 | 90.0 |
| Rsa1.0_00063.1.g3352.t1 | ref NP_172188.1  60S ribosomal protein L35a-1 [Arabidopsis thaliana] gi 297843500 ref XP_002889631.1  60S ribosomal protein L35a [Arabidopsis lyrata subsp. lyrata] gi 75174783 sp Q9LLMK0.1 R35A1_ARATH RecName: Full=60S ribosomal protein L35a-1 gi 8954039 gb AAF82213.1 AC067971_21 Strong similarity to a ribosomal protein from Arabidopsis thaliana gb AL161667. It contains a ribosomal protein L35Ae domain PF01247 [Arabidopsis thaliana] gi 21555376 gb AAM63844.1  ribosomal protein, putative [Arabidopsis thaliana] gi 26453120 dbj BAC43636.1  unknown protein [Arabidopsis thaliana] gi 28416859 gb AOC42960.1  At1g07070 [Arabidopsis thaliana] gi 297335473 gb EFH65890.1  60S ribosomal protein L35a [Arabidopsis lyrata subsp. lyrata] gi 332189953 gb AEE28074.1  60S ribosomal protein L35a-1 [Arabidopsis thaliana] | 242 | 112 | 4.00E-57  | 46.3  | 43.4 | 44.6 | 60S ribosomal protein L35a-1                                                                                                                                                                                                                                                                                               | gbpln | Arabidopsis lyrata | AT1G07070.1   Symbols:   Ribosomal protein L35Ae family protein   chr1:2168652-2169703 FORWARD LENGTH=112                                                                                                                                                                                                                                                                                     | 242 | 112 | 1.00E-59  | 46.3  | 43.4 | 44.6 |

|                         |                                                                                                                                                                                                                                                                                                                                                                                                                                                                                                                                                                                                                                                             |      |      |           |       |      |      |                                                            |       |                      |                                                                                                                                                                                                                                                                                                                                                               |      |      |           |       |      |      |
|-------------------------|-------------------------------------------------------------------------------------------------------------------------------------------------------------------------------------------------------------------------------------------------------------------------------------------------------------------------------------------------------------------------------------------------------------------------------------------------------------------------------------------------------------------------------------------------------------------------------------------------------------------------------------------------------------|------|------|-----------|-------|------|------|------------------------------------------------------------|-------|----------------------|---------------------------------------------------------------------------------------------------------------------------------------------------------------------------------------------------------------------------------------------------------------------------------------------------------------------------------------------------------------|------|------|-----------|-------|------|------|
| Rsa1.0_00063.1.g3353.t1 | gb EOA33304.1  hypothetical protein CARUB_v10019953mg [Capsella rubella]                                                                                                                                                                                                                                                                                                                                                                                                                                                                                                                                                                                    | 619  | 634  | 0         | 102.4 | 78.8 | 87.4 | hypothetical protein CARUB_v10019953mg                     | gbpln | Capsella rubella     | AT1G74250.1   Symbols:   DNAJ heat shock N-terminal domain-containing protein   chr1:27920328-27922414 FORWARD LENGTH=630                                                                                                                                                                                                                                     | 619  | 630  | 0         | 101.8 | 76.7 | 88.0 |
| Rsa1.0_00063.1.g3354.t1 | ref XP_002887533.1  hypothetical protein ARALYDRAFT_339621 [Arabidopsis lyrata subsp. lyrata] gi 297333374 gb EFH63792.1  hypothetical protein ARALYDRAFT_339621 [Arabidopsis lyrata subsp. lyrata]                                                                                                                                                                                                                                                                                                                                                                                                                                                         | 333  | 364  | 1.00E-131 | 109.3 | 73.3 | 80.2 | hypothetical protein ARALYDRAFT_339621                     | gbpln | Arabidopsis lyrata   | AT1G74240.1   Symbols:   Mitochondrial substrate carrier family protein   chr1:27917437-27919987 FORWARD LENGTH=364                                                                                                                                                                                                                                           | 333  | 364  | 1.00E-126 | 109.3 | 66.7 | 71.2 |
| Rsa1.0_00063.1.g3355.t1 | gb ABB97027.1  unknown [Brassica rapa]                                                                                                                                                                                                                                                                                                                                                                                                                                                                                                                                                                                                                      | 261  | 208  | 2.00E-56  | 79.7  | 41.0 | 41.8 | unknown                                                    | gbpln | Brassica rapa        | AT1G74230.1   Symbols: GR-RBP5   glycine-rich RNA-binding protein 5   chr1:27915346-27916857 FORWARD LENGTH=289                                                                                                                                                                                                                                               | 261  | 289  | 1.00E-55  | 110.7 | 40.2 | 41.8 |
| Rsa1.0_00063.1.g3356.t3 | ref XP_002888967.1  leucine-rich repeat family protein [Arabidopsis lyrata subsp. lyrata] gi 297334808 gb EFH65226.1  leucine-rich repeat family protein [Arabidopsis lyrata subsp. lyrata] ref NP_565084.1  putative LRR receptor-like serine/threonine-protein kinase [Arabidopsis thaliana] gi 264664459 sp COLGJ1.1 Y1743_ARAT H RecName: Full=Probable LRR receptor-like serine/threonine-protein kinase At1g74360; Flags: Precursor gi 224589455 gb ACN59276.1  leucine-rich repeat receptor-like protein kinase [Arabidopsis thaliana] gi 332197461 gb AEE35582.1  putative LRR receptor-like serine/threonine-protein kinase [Arabidopsis thaliana] | 689  | 966  | 1.00E-134 | 140.2 | 46.3 | 56.9 | leucine-rich repeat family protein                         | gbpln | Arabidopsis lyrata   | AT1G74190.1   Symbols: AtRLP15, RLP15   receptor like protein 15   chr1:27902590-27906158 REVERSE LENGTH=965                                                                                                                                                                                                                                                  | 689  | 965  | 1.00E-132 | 140.1 | 45.7 | 56.2 |
| Rsa1.0_00063.1.g3357.t1 | ref XP_002888967.1  leucine-rich repeat family protein [Arabidopsis lyrata subsp. lyrata] gi 297334808 gb EFH65226.1  leucine-rich repeat receptor-like protein kinase [Arabidopsis thaliana] gi 332197461 gb AEE35582.1  putative LRR receptor-like serine/threonine-protein kinase [Arabidopsis thaliana] ref XP_002888967.1  leucine-rich repeat family protein [Arabidopsis lyrata subsp. lyrata] gi 297334808 gb EFH65226.1  leucine-rich repeat family protein [Arabidopsis lyrata subsp. lyrata]                                                                                                                                                     | 771  | 1106 | 0         | 143.5 | 70.7 | 78.1 | putative LRR receptor-like serine/threonine-protein kinase | gbpln | Arabidopsis thaliana | AT1G74360.1   Symbols:   Leucine-rich repeat protein kinase family protein   chr1:27954299-27957911 FORWARD LENGTH=1106                                                                                                                                                                                                                                       | 771  | 1106 | 0         | 143.5 | 70.7 | 78.1 |
| Rsa1.0_00063.1.g3358.t2 | ref XP_002888967.1  leucine-rich repeat family protein [Arabidopsis lyrata subsp. lyrata] gi 297334808 gb EFH65226.1  leucine-rich repeat family protein [Arabidopsis lyrata subsp. lyrata]                                                                                                                                                                                                                                                                                                                                                                                                                                                                 | 932  | 966  | 0         | 103.6 | 77.3 | 87.4 | leucine-rich repeat family protein                         | gbpln | Arabidopsis lyrata   | AT1G74190.1   Symbols: AtRLP15, RLP15   receptor like protein 15   chr1:27902590-27906158 REVERSE LENGTH=965                                                                                                                                                                                                                                                  | 932  | 965  | 0         | 103.5 | 76.1 | 85.7 |
| Rsa1.0_00063.1.g3359.t1 | ref XP_002888967.1  leucine-rich repeat family protein [Arabidopsis lyrata subsp. lyrata] gi 297334808 gb EFH65226.1  leucine-rich repeat family protein [Arabidopsis lyrata subsp. lyrata] ref NP_177559.1  receptor like protein 15 [Arabidopsis thaliana] gi 12323812 gb AAG51871.1 AC079678_1 disease resistance protein, putative; 1096-4664 [Arabidopsis thaliana] gi 332197443 gb AEE35564.1  receptor like protein 15 [Arabidopsis thaliana]                                                                                                                                                                                                        | 136  | 966  | 2.00E-39  | 710.3 | 69.9 | 80.9 | leucine-rich repeat family protein                         | gbpln | Arabidopsis lyrata   | AT1G54470.1   Symbols: RPP27   RNI-like superfamily protein   chr1:20344738-20347339 FORWARD LENGTH=457                                                                                                                                                                                                                                                       | 136  | 457  | 7.00E-38  | 336.0 | 58.1 | 71.3 |
| Rsa1.0_00063.1.g3360.t1 | gi 12323812 gb AAG51871.1 AC079678_1 disease resistance protein, putative; 1096-4664 [Arabidopsis thaliana] gi 332197443 gb AEE35564.1  receptor like protein 15 [Arabidopsis thaliana]                                                                                                                                                                                                                                                                                                                                                                                                                                                                     | 594  | 965  | 1.00E-150 | 162.5 | 52.2 | 64.6 | receptor like protein 15                                   | gbpln | Arabidopsis thaliana | AT1G74190.1   Symbols: AtRLP15, RLP15   receptor like protein 15   chr1:27902590-27906158 REVERSE LENGTH=965                                                                                                                                                                                                                                                  | 594  | 965  | 1.00E-153 | 162.5 | 52.2 | 64.6 |
| Rsa1.0_00063.1.g3361.t1 | #                                                                                                                                                                                                                                                                                                                                                                                                                                                                                                                                                                                                                                                           | #    | #    | #         | #     | #    | #    | -                                                          | ----  | ----                 | #                                                                                                                                                                                                                                                                                                                                                             | #    | #    | #         | #     | #    | #    |
| Rsa1.0_00063.1.g3362.t1 | #                                                                                                                                                                                                                                                                                                                                                                                                                                                                                                                                                                                                                                                           | #    | #    | #         | #     | #    | #    | -                                                          | ----  | ----                 | #                                                                                                                                                                                                                                                                                                                                                             | #    | #    | #         | #     | #    | #    |
| Rsa1.0_00063.1.g3363.t1 | gb EOA33578.1  hypothetical protein CARUB_v10019719mg, partial [Capsella rubella] ref XP_002888967.1  leucine-rich repeat family protein [Arabidopsis lyrata subsp. lyrata] gi 297334808 gb EFH65226.1  leucine-rich repeat family protein [Arabidopsis lyrata subsp. lyrata]                                                                                                                                                                                                                                                                                                                                                                               | 212  | 984  | 9.00E-64  | 464.2 | 63.2 | 72.6 | hypothetical protein CARUB_v10019719mg, partial            | gbpln | Capsella rubella     | AT2G25470.1   Symbols: AtRLP21, RLP21   receptor like protein 21   chr2:10838420-10841881 FORWARD LENGTH=935                                                                                                                                                                                                                                                  | 212  | 935  | 2.00E-54  | 441.0 | 52.8 | 65.1 |
| Rsa1.0_00063.1.g3364.t1 | ref XP_002887529.1  hypothetical protein ARALYDRAFT_476557 [Arabidopsis lyrata subsp. lyrata] gi 297333370 gb EFH63788.1  hypothetical protein ARALYDRAFT_476557 [Arabidopsis lyrata subsp. lyrata]                                                                                                                                                                                                                                                                                                                                                                                                                                                         | 788  | 966  | 0         | 122.6 | 56.6 | 67.1 | leucine-rich repeat family protein                         | gbpln | Arabidopsis lyrata   | AT1G74190.1   Symbols: AtRLP15, RLP15   receptor like protein 15   chr1:27902590-27906158 REVERSE LENGTH=965                                                                                                                                                                                                                                                  | 788  | 965  | 0         | 122.5 | 56.7 | 66.1 |
| Rsa1.0_00063.1.g3365.t1 | ref XP_002887529.1  hypothetical protein ARALYDRAFT_476557 [Arabidopsis lyrata subsp. lyrata] gi 297333370 gb EFH63788.1  hypothetical protein ARALYDRAFT_476557 [Arabidopsis lyrata subsp. lyrata]                                                                                                                                                                                                                                                                                                                                                                                                                                                         | 1007 | 1029 | 0         | 102.2 | 81.9 | 87.4 | hypothetical protein ARALYDRAFT_476557                     | gbpln | Arabidopsis lyrata   | AT1G74160.1   Symbols:   unknown protein; BEST Arabidopsis thaliana protein match is: unknown protein (TAIR:AT1G8620.1); Has 3407 Blast hits to 2217 proteins in 314 species: Archae - 0; Bacteria - 264; Metazoa - 1296; Fungi - 318; Plants - 346; Viruses - 34; Other Eukaryotes - 1149 (source: NCBI BLINK).   chr1:27887164-27891151 FORWARD LENGTH=1025 | 1007 | 1025 | 0         | 101.8 | 81.5 | 86.8 |
| Rsa1.0_00063.1.g3366.t1 | ref XP_002887528.1  hypothetical protein ARALYDRAFT_316360 [Arabidopsis lyrata subsp. lyrata] gi 297333389 gb EFH63787.1  hypothetical protein ARALYDRAFT_316360 [Arabidopsis lyrata subsp. lyrata]                                                                                                                                                                                                                                                                                                                                                                                                                                                         | 486  | 567  | 0         | 116.7 | 70.4 | 77.8 | hypothetical protein ARALYDRAFT_316360                     | gbpln | Arabidopsis lyrata   | AT1G74150.1   Symbols:   Galactose oxidase/kelch repeat superfamily protein   chr1:27880528-27883626 FORWARD LENGTH=569                                                                                                                                                                                                                                       | 486  | 569  | 0         | 117.1 | 70.2 | 77.0 |
| Rsa1.0_00063.1.g3367.t2 | gb EOA34985.1  hypothetical protein CARUB_v10020076mg [Capsella rubella]                                                                                                                                                                                                                                                                                                                                                                                                                                                                                                                                                                                    | 429  | 561  | 1.00E-141 | 130.8 | 56.9 | 63.9 | hypothetical protein CARUB_v10020076mg                     | gbpln | Capsella rubella     | AT1G74150.1   Symbols:   Galactose oxidase/kelch repeat superfamily protein   chr1:27880528-27883626 FORWARD LENGTH=569                                                                                                                                                                                                                                       | 429  | 569  | 1.00E-143 | 132.6 | 57.3 | 64.1 |

|                         |                                                                                                                                                                                                                                                                                                                                                                                                                                                                                                                                                                                               |      |      |           |       |      |      |                                                                 |       |                      |                                                                                                                                          |      |      |           |       |      |      |
|-------------------------|-----------------------------------------------------------------------------------------------------------------------------------------------------------------------------------------------------------------------------------------------------------------------------------------------------------------------------------------------------------------------------------------------------------------------------------------------------------------------------------------------------------------------------------------------------------------------------------------------|------|------|-----------|-------|------|------|-----------------------------------------------------------------|-------|----------------------|------------------------------------------------------------------------------------------------------------------------------------------|------|------|-----------|-------|------|------|
| Rsa1.0_00063.1.g3368.t1 | gb ADW54463.1  sulfotransferase [Brassica oleracea var. botrytis]                                                                                                                                                                                                                                                                                                                                                                                                                                                                                                                             | 337  | 337  | 0         | 100.0 | 95.3 | 97.6 | sulfotransferase                                                | gbpln | Brassica oleracea    | AT1G74100.1   Symbols: SOT16, ATSOT16, CORI-7, ATST5A   sulfotransferase 16   chr1:27864489-27865505 REVERSE LENGTH=338                  | 337  | 338  | 0         | 100.3 | 94.1 | 96.1 |
| Rsa1.0_00063.1.g3369.t1 | gb ADW54463.1  sulfotransferase [Brassica oleracea var. botrytis]                                                                                                                                                                                                                                                                                                                                                                                                                                                                                                                             | 339  | 337  | 0         | 99.4  | 90.9 | 95.6 | sulfotransferase                                                | gbpln | Brassica oleracea    | AT1G74100.1   Symbols: SOT16, ATSOT16, CORI-7, ATST5A   sulfotransferase 16   chr1:27864489-27865505 REVERSE LENGTH=338                  | 339  | 338  | 0         | 99.7  | 89.7 | 95.0 |
| Rsa1.0_00063.1.g3370.t1 | #                                                                                                                                                                                                                                                                                                                                                                                                                                                                                                                                                                                             | #    | #    | #         | #     | #    | -    | -                                                               | ----  | ----                 | #                                                                                                                                        | #    | #    | #         | #     | #    |      |
| Rsa1.0_00063.1.g3371.t1 | ref NP_177548.1  myb domain protein 122 [Arabidopsis thaliana] gi 12325142 gb AAG52518.1 AC016662_12 putative transcription factor; 17206-15746 [Arabidopsis thaliana] gi 14161427 gb AAK54746.1 AF371983.1 putative transcription factor MYB122 [Arabidopsis thaliana] gi 114050657 gb ABI49478.1  At1g74080 [Arabidopsis thaliana] gi 225898078 dbj BAH30371.1  hypothetical protein [Arabidopsis thaliana] gi 332197425 gb AEE35546.1  myb domain protein 122 [Arabidopsis thaliana]                                                                                                       | 106  | 333  | 3.00E-25  | 314.2 | 56.6 | 64.2 | myb domain protein 122                                          | gbpln | Arabidopsis thaliana | AT1G74080.1   Symbols: ATMYB122, MYB122   myb domain protein 122   chr1:27855972-27857432 FORWARD LENGTH=333                             | 106  | 333  | 4.00E-28  | 314.2 | 56.6 | 64.2 |
| Rsa1.0_00063.1.g3372.t2 | gb AAD15534.1  putative retroelement pol polyprotein [Arabidopsis thaliana]                                                                                                                                                                                                                                                                                                                                                                                                                                                                                                                   | 759  | 1664 | 1.00E-180 | 219.2 | 45.7 | 58.4 | putative retroelement pol polyprotein                           | gbpln | Arabidopsis thaliana | AT4G23160.1   Symbols: CRK8   cysteine-rich RLK (RECEPTOR-like protein kinase) 8   chr4:12129485-12134086 FORWARD LENGTH=1262            | 759  | 1262 | 4.00E-24  | 166.3 | 7.4  | 10.0 |
| Rsa1.0_00063.1.g3373.t1 | #                                                                                                                                                                                                                                                                                                                                                                                                                                                                                                                                                                                             | #    | #    | #         | #     | #    | -    | -                                                               | ----  | ----                 | #                                                                                                                                        | #    | #    | #         | #     | #    |      |
| Rsa1.0_00063.1.g3374.t1 | gb AAD32898.1  putative retroelement pol polyprotein [Arabidopsis thaliana]                                                                                                                                                                                                                                                                                                                                                                                                                                                                                                                   | 921  | 1307 | 1.00E-166 | 141.9 | 33.3 | 42.2 | putative retroelement pol polyprotein                           | gbpln | Arabidopsis thaliana | AT4G23160.1   Symbols: CRK8   cysteine-rich RLK (RECEPTOR-like protein kinase) 8   chr4:12129485-12134086 FORWARD LENGTH=1262            | 921  | 1262 | 8.00E-71  | 137.0 | 17.5 | 28.2 |
| Rsa1.0_00063.1.g3375.t1 | gb AAC28221.1  similar to reverse transcriptases (PFam: rvt.hmm, score: 60.13) [Arabidopsis thaliana] ref NP_177548.1  myb domain protein 122 [Arabidopsis thaliana] gi 12325142 gb AAG52518.1 AC016662_12 putative transcription factor; 17206-15746 [Arabidopsis thaliana] gi 14161427 gb AAK54746.1 AF371983.1 putative transcription factor MYB122 [Arabidopsis thaliana] gi 114050657 gb ABI49478.1  At1g74080 [Arabidopsis thaliana] gi 225898078 dbj BAH30371.1  hypothetical protein [Arabidopsis thaliana] gi 332197425 gb AEE35546.1  myb domain protein 122 [Arabidopsis thaliana] | 1272 | 1164 | 1.00E-180 | 91.5  | 28.4 | 39.4 | similar to reverse transcriptases (PFam: rvt.hmm, score: 60.13) | gbpln | Arabidopsis thaliana | AT1G43760.1   Symbols:   DNase I-like superfamily protein   chr1:16528880-16531065 REVERSE LENGTH=626                                    | 1272 | 626  | 5.00E-51  | 49.2  | 8.4  | 13.8 |
| Rsa1.0_00063.1.g3376.t1 | gb EAO35264.1  hypothetical protein CARUB_v10020433mg [Capsella rubella]                                                                                                                                                                                                                                                                                                                                                                                                                                                                                                                      | 322  | 362  | 1.00E-138 | 112.4 | 80.1 | 87.6 | hypothetical protein CARUB_v10020433mg                          | gbpln | Capsella rubella     | AT1G74070.1   Symbols:   Cyclophilin-like peptidyl-prolyl cis-trans isomerase family protein   chr1:27851749-27852861 REVERSE LENGTH=317 | 322  | 317  | 1.00E-139 | 98.4  | 82.0 | 89.1 |
| Rsa1.0_00063.1.g3377.t1 | #                                                                                                                                                                                                                                                                                                                                                                                                                                                                                                                                                                                             | #    | #    | #         | #     | #    | -    | -                                                               | ----  | ----                 | #                                                                                                                                        | #    | #    | #         | #     | #    |      |
| Rsa1.0_00063.1.g3379.t1 | gb EOA33232.1  hypothetical protein CARUB_v10021263mg [Capsella rubella]                                                                                                                                                                                                                                                                                                                                                                                                                                                                                                                      | 321  | 233  | 1.00E-109 | 72.6  | 66.0 | 69.2 | hypothetical protein CARUB_v10021263mg                          | gbpln | Capsella rubella     | AT1G74050.1   Symbols:   Ribosomal protein L6 family protein   chr1:27847256-27848680 REVERSE LENGTH=233                                 | 321  | 233  | 1.00E-109 | 72.6  | 66.4 | 68.5 |
| Rsa1.0_00063.1.g3380.t1 | dbj BAJ34366.1  unnamed protein product [Theilungella halophila]                                                                                                                                                                                                                                                                                                                                                                                                                                                                                                                              | 328  | 328  | 1.00E-169 | 100.0 | 93.6 | 97.3 | unnamed protein product                                         | ----  | ----                 | AT1G74020.1   Symbols: SS2   strictosidine synthase 2   chr1:27835289-27837277 REVERSE LENGTH=335                                        | 328  | 335  | 1.00E-169 | 102.1 | 88.7 | 91.5 |
| Rsa1.0_00063.1.g3381.t1 | ref XP_002888957.1  strictosidine synthase family protein [Arabidopsis lyrata subsp. lyrata] gi 297334798 gb EFH65216.1  strictosidine synthase family protein [Arabidopsis lyrata subsp. lyrata] ref XP_002888956.1  hypothetical protein ARALYDRAFT_476540 [Arabidopsis lyrata subsp. lyrata] gi 297334797 gb EFH65215.1  hypothetical protein ARALYDRAFT_476540 [Arabidopsis lyrata subsp. lyrata]                                                                                                                                                                                         | 327  | 326  | 1.00E-154 | 99.7  | 86.2 | 91.7 | strictosidine synthase family protein                           | gbpln | Arabidopsis lyrata   | AT1G74010.1   Symbols:   Calcium-dependent phosphotriesterase superfamily protein   chr1:27832432-27834017 REVERSE LENGTH=325            | 327  | 325  | 1.00E-153 | 99.4  | 85.3 | 90.2 |
| Rsa1.0_00063.1.g3382.t1 | gb EOA33232.1  hypothetical protein CARUB_v10019219mg [Capsella rubella]                                                                                                                                                                                                                                                                                                                                                                                                                                                                                                                      | 431  | 444  | 1.00E-112 | 103.0 | 50.1 | 63.8 | hypothetical protein CARUB_v10019219mg                          | gbpln | Capsella rubella     | AT1G74000.1   Symbols: SS3   strictosidine synthase 3   chr1:27829266-27831401 REVERSE LENGTH=329                                        | 431  | 436  | 3.00E-72  | 101.2 | 37.4 | 53.4 |
| Rsa1.0_00063.1.g3383.t1 | gb EOA23321.1  hypothetical protein CARUB_v10019219mg [Capsella rubella]                                                                                                                                                                                                                                                                                                                                                                                                                                                                                                                      | 431  | 444  | 1.00E-112 | 103.0 | 50.1 | 63.8 | hypothetical protein CARUB_v10019219mg                          | gbpln | Capsella rubella     | AT2G40920.1   Symbols:   F-box and associated interaction domains-containing protein   chr2:17072586-17074012 REVERSE LENGTH=436         | 431  | 436  | 3.00E-72  | 101.2 | 37.4 | 53.4 |

|                         |                                                                                                                                                                                                                                                                                                                     |     |     |           |       |      |      |                                                        |       |                      |                                                                                                                                                                                                                  |     |      |           |        |      |      |
|-------------------------|---------------------------------------------------------------------------------------------------------------------------------------------------------------------------------------------------------------------------------------------------------------------------------------------------------------------|-----|-----|-----------|-------|------|------|--------------------------------------------------------|-------|----------------------|------------------------------------------------------------------------------------------------------------------------------------------------------------------------------------------------------------------|-----|------|-----------|--------|------|------|
| Rsa1.0_00064.1.g3384.t1 | refXP_002880263.1   hypothetical protein ARALYDRAFT_346489 [Arabidopsis lyrata subsp. lyrata] gi 297326102 gb EFH56522.1   hypothetical protein ARALYDRAFT_346489 [Arabidopsis lyrata subsp. lyrata]                                                                                                                | 328 | 334 | 1.00E-112 | 101.8 | 76.2 | 80.8 | hypothetical protein ARALYDRAFT_346489                 | gbpln | Arabidopsis lyrata   | AT2G46780.1   Symbols:   RNA-binding (RRM/RB/RNP motifs) family protein   chr2:19229516-19231043 FORWARD LENGTH=336                                                                                              | 328 | 336  | 1.00E-115 | 102.4  | 83.8 | 87.2 |
| Rsa1.0_00064.1.g3385.t1 | dbj BAJ34373.1   unnamed protein product [Theilungella halophila]                                                                                                                                                                                                                                                   | 431 | 486 | 0         | 112.8 | 81.2 | 87.7 | unnamed protein product                                | ----  | ----                 | AT2G46790.1   Symbols: APRR9, PRR9, TL1   pseudo-response regulator 9   chr2:19232874-19234901 FORWARD LENGTH=468                                                                                                | 431 | 468  | 1.00E-173 | 108.6  | 75.9 | 85.4 |
| Rsa1.0_00064.1.g3386.t1 | gb AAO83658.1   cation-efflux transporter [Brassica juncea]                                                                                                                                                                                                                                                         | 389 | 387 | 1.00E-180 | 99.5  | 88.4 | 90.7 | cation-efflux transporter                              | gbpln | Brassica juncea      | AT2G46800.2   Symbols: ZAT, ATMP1, MTP1, ZAT1, ATCDF1   zinc transporter of Arabidopsis thaliana   chr2:19238128-19239324 FORWARD LENGTH=398                                                                     | 389 | 398  | 1.00E-172 | 102.3  | 84.3 | 87.9 |
| Rsa1.0_00064.1.g3387.t1 | #                                                                                                                                                                                                                                                                                                                   | #   | #   | #         | #     | #    | #    | -                                                      | ----  | ----                 | AT2G47000.1   Symbols: MDR4, PGP4, ABCB4, ATPGP4   ATP binding cassette subfamily B4   chr2:19310008-19314750 REVERSE LENGTH=1286                                                                                | 100 | 1286 | 9.00E-12  | 1286.0 | 34.0 | 41.0 |
| Rsa1.0_00064.1.g3388.t3 | refXP_002864330.1   hypothetical protein ARALYDRAFT_495521 [Arabidopsis lyrata subsp. lyrata] gi 297310165 gb EFH40589.1   hypothetical protein ARALYDRAFT_495521 [Arabidopsis lyrata subsp. lyrata]                                                                                                                | 559 | 356 | 1.00E-115 | 63.7  | 38.5 | 46.3 | hypothetical protein ARALYDRAFT_495521                 | gbpln | Arabidopsis lyrata   | AT5G54330.1   Symbols:   Protein of unknown function (DUF295)   chr5:22064993-22066063 FORWARD LENGTH=356                                                                                                        | 559 | 356  | 1.00E-118 | 63.7   | 38.5 | 46.3 |
| Rsa1.0_00064.1.g3389.t1 | ref NP_001189765.1   uncharacterized protein [Arabidopsis thaliana] gi 330255688 gb AEC10782.1   uncharacterized protein AT2G46980 [Arabidopsis thaliana]                                                                                                                                                           | 119 | 790 | 4.00E-23  | 663.9 | 52.1 | 54.6 | uncharacterized protein                                | gbpln | Arabidopsis thaliana | AT2G46980.3   Symbols:   unknown protein; FUNCTIONS IN: molecular_function unknown; INVOLVED IN: biological_process unknown; LOCATED IN: cellular_component unknown.   chr2:19299868-19303429 REVERSE LENGTH=790 | 119 | 790  | 7.00E-26  | 663.9  | 52.1 | 54.6 |
| Rsa1.0_00064.1.g3390.t1 | ref NP_001189765.1   uncharacterized protein [Arabidopsis thaliana] gi 330255688 gb AEC10782.1   uncharacterized protein AT2G46980 [Arabidopsis thaliana]                                                                                                                                                           | 401 | 790 | 1.00E-45  | 197.0 | 34.4 | 39.4 | uncharacterized protein                                | gbpln | Arabidopsis thaliana | AT2G46980.3   Symbols:   unknown protein; FUNCTIONS IN: molecular_function unknown; INVOLVED IN: biological_process unknown; LOCATED IN: cellular_component unknown.   chr2:19299868-19303429 REVERSE LENGTH=790 | 401 | 790  | 3.00E-48  | 197.0  | 34.4 | 39.4 |
| Rsa1.0_00064.1.g3391.t1 | ref NP_001031550.1   homeobox-leucine zipper protein ATHB-7 [Arabidopsis thaliana] gi 330255646 gb AEC10740.1   homeobox-leucine zipper protein ATHB-7 [Arabidopsis thaliana]                                                                                                                                       | 71  | 256 | 1.00E-27  | 360.6 | 85.9 | 91.5 | homeobox-leucine zipper protein ATHB-7                 | gbpln | Arabidopsis thaliana | AT2G46680.2   Symbols: ATHB-7, ATHB7, HB-7   homeobox 7   chr2:19165777-19166773 REVERSE LENGTH=256                                                                                                              | 71  | 256  | 2.00E-30  | 360.6  | 85.9 | 91.5 |
| Rsa1.0_00064.1.g3392.t1 | ref NP_200244.1   uncharacterized protein [Arabidopsis thaliana] gi 9759506 dbj BAB10756.1   unnamed protein product [Arabidopsis thaliana] gi 93007389 gb ABE97197.1   hypothetical protein At5g54330 [Arabidopsis thaliana] gi 332009102 gb AED96485.1   uncharacterized protein AT5G54330 [Arabidopsis thaliana] | 380 | 356 | 1.00E-113 | 93.7  | 56.8 | 68.7 | uncharacterized protein                                | gbpln | Arabidopsis thaliana | AT5G54330.1   Symbols:   Protein of unknown function (DUF295)   chr5:22064993-22066063 FORWARD LENGTH=356                                                                                                        | 380 | 356  | 1.00E-115 | 93.7   | 56.8 | 68.7 |
| Rsa1.0_00064.1.g3393.t1 | dbj BAM14091.1   basic helix-loop-helix DNA-binding superfamily protein [Arabidopsis thaliana]                                                                                                                                                                                                                      | 325 | 359 | 1.00E-110 | 110.5 | 75.1 | 86.2 | basic helix-loop-helix DNA-binding superfamily protein | gbpln | Arabidopsis thaliana | AT2G46810.1   Symbols:   basic helix-loop-helix (bHLH) DNA-binding superfamily protein   chr2:19239694-19242373 FORWARD LENGTH=371                                                                               | 325 | 371  | 1.00E-109 | 114.2  | 72.3 | 85.2 |
| Rsa1.0_00064.1.g3394.t1 | gb EOA27989.1   hypothetical protein CARUB_v10024165mg [Capsella rubella]                                                                                                                                                                                                                                           | 181 | 175 | 4.00E-67  | 96.7  | 76.8 | 87.3 | hypothetical protein CARUB_v10024165mg                 | gbpln | Capsella rubella     | AT2G46820.2   Symbols: PTAC8, TMP14, PSAP, PSI-P   photosystem I P subunit   chr2:19243729-19244870 FORWARD LENGTH=174                                                                                           | 181 | 174  | 1.00E-54  | 96.1   | 71.8 | 83.4 |
| Rsa1.0_00064.1.g3395.t2 | refXP_002880270.1   hypothetical protein ARALYDRAFT_483853 [Arabidopsis lyrata subsp. lyrata] gi 297326109 gb EFH56529.1   hypothetical protein ARALYDRAFT_483853 [Arabidopsis lyrata subsp. lyrata]                                                                                                                | 220 | 216 | 1.00E-118 | 98.2  | 93.6 | 95.9 | hypothetical protein ARALYDRAFT_483853                 | gbpln | Arabidopsis lyrata   | AT2G46860.1   Symbols: AtPpa3, PPa3   pyrophosphorylase 3   chr2:19253843-19255060 FORWARD LENGTH=216                                                                                                            | 220 | 216  | 1.00E-119 | 98.2   | 92.3 | 95.0 |

|                         |                                                                                                                                                                                                                                                                                                                                                                                                                                                                                                                                                                                                                                                                                                                                                   |     |     |           |       |      |      |                                                |       |                      |                                                                                                                                                                                                                                                                                                                                                  |     |     |           |       |      |      |
|-------------------------|---------------------------------------------------------------------------------------------------------------------------------------------------------------------------------------------------------------------------------------------------------------------------------------------------------------------------------------------------------------------------------------------------------------------------------------------------------------------------------------------------------------------------------------------------------------------------------------------------------------------------------------------------------------------------------------------------------------------------------------------------|-----|-----|-----------|-------|------|------|------------------------------------------------|-------|----------------------|--------------------------------------------------------------------------------------------------------------------------------------------------------------------------------------------------------------------------------------------------------------------------------------------------------------------------------------------------|-----|-----|-----------|-------|------|------|
| Rsa1.0_00064.1.g3396.t1 | ref[NP_566089.1] B3 domain-containing transcription factor NGA1 [Arabidopsis thaliana]<br>gi 75100798 sp O82799.1 NGA1_ARATH<br>RecName: Full=B3 domain-containing transcription factor NGA1; AltName: Full=Protein NGATHA 1<br>gi 3522951 gb AAC34233.1  putative RAV-like B3 domain DNA binding protein [Arabidopsis thaliana]<br>gi 20197317 gb AAM15018.1  putative RAV-like B3 domain DNA binding protein [Arabidopsis thaliana]<br>gi 26451145 dbj BAC42676.1  putative RAV-like B3 domain DNA binding protein [Arabidopsis thaliana]<br>gi 30793817 gb AAP40361.1  putative RAV B3 domain DNA binding protein [Arabidopsis thaliana]<br>gi 33025567.1 gb AEC10765.1  B3 domain-containing transcription factor NGA1 [Arabidopsis thaliana] | 298 | 310 | 1.00E-118 | 104.0 | 78.9 | 85.2 | B3 domain-containing transcription factor NGA1 | gbpln | Arabidopsis thaliana | AT2G46870.1   Symbols: NGA1   AP2/B3-like transcriptional factor family protein   chr2:19261313-19262245 FORWARD LENGTH=310                                                                                                                                                                                                                      | 298 | 310 | 1.00E-120 | 104.0 | 78.9 | 85.2 |
| Rsa1.0_00064.1.g3397.t1 | ref[NP_182211.2] purple acid phosphatase 14 [Arabidopsis thaliana]<br>gi 75272080 sp Q84LR6.1 PPA14_ARATH<br>RecName: Full=Probable inactive purple acid phosphatase 14; Flags: Precursor gi 30267807 gb AAP21684.1  hypothetical protein [Arabidopsis thaliana]<br>gi 50058953 gb AAT69221.1  hypothetical protein At2g46880 [Arabidopsis thaliana]<br>gi 330255673 gb AEC10767.1  purple acid phosphatase 14 [Arabidopsis thaliana]                                                                                                                                                                                                                                                                                                             | 394 | 401 | 1.00E-179 | 101.8 | 79.4 | 87.3 | purple acid phosphatase 14                     | gbpln | Arabidopsis thaliana | AT2G46880.1   Symbols: ATPAP14, PAP14   purple acid phosphatase 14   chr2:19264910-19266412 REVERSE LENGTH=401                                                                                                                                                                                                                                   | 394 | 401 | 0         | 101.8 | 79.4 | 87.3 |
| Rsa1.0_00064.1.g3398.t1 | ref[XP_002882091.1] hypothetical protein ARALYDRAFT_904159 [Arabidopsis lyrata subsp. lyrata]<br>gi 297327930 gb EFH58350.1  hypothetical protein ARALYDRAFT_904159 [Arabidopsis lyrata subsp. lyrata]                                                                                                                                                                                                                                                                                                                                                                                                                                                                                                                                            | 325 | 322 | 1.00E-165 | 99.1  | 90.2 | 95.1 | hypothetical protein ARALYDRAFT_904159         | gbpln | Arabidopsis lyrata   | AT2G46890.1   Symbols:   Protein of unknown function (DUF1295)   chr2:19266879-19268134 REVERSE LENGTH=322                                                                                                                                                                                                                                       | 325 | 322 | 1.00E-160 | 99.1  | 88.3 | 93.5 |
| Rsa1.0_00064.1.g3399.t1 | ref[NP_566090.1] uncharacterized protein [Arabidopsis thaliana]<br>gi 3522948 gb AAC34230.1  expressed protein [Arabidopsis thaliana]<br>gi 14532608 gb AAK64032.1  unknown protein [Arabidopsis thaliana]<br>gi 23296678 gb AANI13144.1  unknown protein [Arabidopsis thaliana]<br>gi 330255675 gb AEC10769.1  uncharacterized protein AT2G46900 [Arabidopsis thaliana]                                                                                                                                                                                                                                                                                                                                                                          | 108 | 627 | 2.00E-28  | 580.6 | 59.3 | 65.7 | uncharacterized protein                        | gbpln | Arabidopsis thaliana | AT2G46900.1   Symbols:   CONTAINS InterPro DOMAIN/s: Basic helix-loop-helix, Nulp1-type (InterPro:IPR006994); Has 2929 Blast hits to 2464 proteins in 333 species: Archae - 2; Bacteria - 151; Metazoa - 913; Fungi - 372; Plants - 141; Viruses - 47; Other Eukaryotes - 1303 (source: NCBI BLink).   chr2:19269678-19271987 FORWARD LENGTH=627 | 108 | 627 | 3.00E-31  | 580.6 | 59.3 | 65.7 |
| Rsa1.0_00064.1.g3400.t1 | ref[XP_002885669.1] hypothetical protein ARALYDRAFT_319176 [Arabidopsis lyrata subsp. lyrata]<br>gi 297331509 gb EFH61928.1  hypothetical protein ARALYDRAFT_319176 [Arabidopsis lyrata subsp. lyrata]                                                                                                                                                                                                                                                                                                                                                                                                                                                                                                                                            | 448 | 467 | 1.00E-113 | 104.2 | 51.3 | 62.5 | hypothetical protein ARALYDRAFT_319176         | gbpln | Arabidopsis lyrata   | AT3G62850.1   Symbols:   zinc finger protein-related   chr3:23237487-23239155 REVERSE LENGTH=472                                                                                                                                                                                                                                                 | 448 | 472 | 1.00E-112 | 105.4 | 49.1 | 61.2 |
| Rsa1.0_00064.1.g3401.t1 | ref[XP_002880272.1] hypothetical protein ARALYDRAFT_483858 [Arabidopsis lyrata subsp. lyrata]<br>gi 297326111 gb EFH56531.1  hypothetical protein ARALYDRAFT_483858 [Arabidopsis lyrata subsp. lyrata]                                                                                                                                                                                                                                                                                                                                                                                                                                                                                                                                            | 577 | 634 | 0         | 109.9 | 74.4 | 84.6 | hypothetical protein ARALYDRAFT_483858         | gbpln | Arabidopsis lyrata   | AT2G46900.1   Symbols:   CONTAINS InterPro DOMAIN/s: Basic helix-loop-helix, Nulp1-type (InterPro:IPR006994); Has 2929 Blast hits to 2464 proteins in 333 species: Archae - 2; Bacteria - 151; Metazoa - 913; Fungi - 372; Plants - 141; Viruses - 47; Other Eukaryotes - 1303 (source: NCBI BLink).   chr2:19269678-19271987 FORWARD LENGTH=627 | 577 | 627 | 0         | 108.7 | 72.1 | 82.8 |
| Rsa1.0_00064.1.g3402.t1 | ref[XP_002880273.1] plastid-lipid associated protein pap [Arabidopsis lyrata subsp. lyrata]<br>gi 297326112 gb EFH56532.1  plastid-lipid associated protein pap [Arabidopsis lyrata subsp. lyrata]                                                                                                                                                                                                                                                                                                                                                                                                                                                                                                                                                | 281 | 283 | 1.00E-143 | 100.7 | 88.6 | 94.3 | plastid-lipid associated protein pap           | gbpln | Arabidopsis lyrata   | AT2G46910.1   Symbols:   Plastid-lipid associated protein PAP / fibrillin family protein   chr2:19272427-19273856 FORWARD LENGTH=284                                                                                                                                                                                                             | 281 | 284 | 1.00E-141 | 101.1 | 87.2 | 93.6 |
| Rsa1.0_00064.1.g3403.t2 | gb[EOA26563.1] hypothetical protein CARUB_v10022621mg [Capsella rubella]                                                                                                                                                                                                                                                                                                                                                                                                                                                                                                                                                                                                                                                                          | 854 | 858 | 0         | 100.5 | 91.1 | 95.1 | hypothetical protein CARUB_v10022621mg         | gbpln | Capsella rubella     | AT2G46920.2   Symbols: POL   Protein phosphatase 2C family protein   chr2:19278106-19280921 REVERSE LENGTH=856                                                                                                                                                                                                                                   | 854 | 856 | 0         | 100.2 | 89.8 | 94.8 |

|                         |                                                                                                                                                                                                                                |      |      |           |       |      |      |                                                 |       |                      |                                                                                                                                                                                                                                                                                                                                                                                                                                                                                                                                         |      |      |           |       |      |      |
|-------------------------|--------------------------------------------------------------------------------------------------------------------------------------------------------------------------------------------------------------------------------|------|------|-----------|-------|------|------|-------------------------------------------------|-------|----------------------|-----------------------------------------------------------------------------------------------------------------------------------------------------------------------------------------------------------------------------------------------------------------------------------------------------------------------------------------------------------------------------------------------------------------------------------------------------------------------------------------------------------------------------------------|------|------|-----------|-------|------|------|
| Rsa1.0_00064.1.g3404.t1 | refXP_002880274.1   hypothetical protein ARALYDRAFT_483863 [Arabidopsis lyrata subsp. lyrata] gi 297326113 gb EFH56533.1   hypothetical protein ARALYDRAFT_483863 [Arabidopsis lyrata subsp. lyrata]                           | 419  | 417  | 0         | 99.5  | 85.4 | 90.5 | hypothetical protein ARALYDRAFT_483863          | gbpln | Arabidopsis lyrata   | AT2G46930.1   Symbols:   Pectinacetyltransferase family protein   chr2:19283625-19286090 FORWARD LENGTH=416                                                                                                                                                                                                                                                                                                                                                                                                                             | 419  | 416  | 0         | 99.3  | 84.0 | 89.7 |
| Rsa1.0_00064.1.g3405.t1 | refNP_182217.4   uncharacterized protein [Arabidopsis thaliana] gi 330255681 gb AEC10775.1   uncharacterized protein AT2G46940 [Arabidopsis thaliana]                                                                          | 249  | 252  | 4.00E-81  | 101.2 | 74.7 | 80.7 | uncharacterized protein                         | gbpln | Arabidopsis thaliana | AT2G46940.1   Symbols:   unknown protein; BEST Arabidopsis thaliana protein match is: unknown protein (TAIR:AT3G62070.1); Has 143 Blast hits to 141 proteins in 14 species: Archae - 0; Bacteria - 0; Metazoa - 4; Fungi - 0; Plants - 139; Viruses - 0; Other Eukaryotes - 0 (source: NCBI BLink).   chr2:19286658-19287505 REVERSE LENGTH=252                                                                                                                                                                                         | 249  | 252  | 1.00E-83  | 101.2 | 74.7 | 80.7 |
| Rsa1.0_00064.1.g3406.t1 | refXP_002882095.1   predicted protein [Arabidopsis lyrata subsp. lyrata] gi 297327934 gb EFH58354.1   predicted protein [Arabidopsis lyrata subsp. lyrata]                                                                     | 520  | 517  | 0         | 99.4  | 81.5 | 91.0 | predicted protein                               | gbpln | Arabidopsis lyrata   | AT2G46950.1   Symbols: CYP709B2   cytochrome P450, family 709, subfamily B, polypeptide 2   chr2:19289466-19291541 REVERSE LENGTH=572                                                                                                                                                                                                                                                                                                                                                                                                   | 520  | 572  | 0         | 110.0 | 79.8 | 89.8 |
| Rsa1.0_00064.1.g3407.t2 | refXP_002882098.1   hypothetical protein ARALYDRAFT_904169 [Arabidopsis lyrata subsp. lyrata] gi 297327937 gb EFH58357.1   hypothetical protein ARALYDRAFT_904169 [Arabidopsis lyrata subsp. lyrata]                           | 384  | 413  | 1.00E-153 | 107.6 | 74.5 | 84.6 | hypothetical protein ARALYDRAFT_904169          | gbpln | Arabidopsis lyrata   | AT2G46970.1   Symbols: PIL1   phytochrome interacting factor 3-like 1   chr2:19295617-19297678 REVERSE LENGTH=416                                                                                                                                                                                                                                                                                                                                                                                                                       | 384  | 416  | 1.00E-154 | 108.3 | 71.9 | 81.0 |
| Rsa1.0_00064.1.g3408.t1 | refXP_002889561.1   hypothetical protein ARALYDRAFT_470580 [Arabidopsis lyrata subsp. lyrata] gi 297335403 gb EFH65820.1   hypothetical protein ARALYDRAFT_470580 [Arabidopsis lyrata subsp. lyrata]                           | 132  | 149  | 3.00E-30  | 112.9 | 48.5 | 51.5 | hypothetical protein ARALYDRAFT_470580          | gbpln | Arabidopsis lyrata   | AT1G05730.1   Symbols:   Eukaryotic protein of unknown function (DUF842)   chr1:1719107-1720159 FORWARD LENGTH=149                                                                                                                                                                                                                                                                                                                                                                                                                      | 132  | 149  | 8.00E-33  | 112.9 | 48.5 | 51.5 |
| Rsa1.0_00064.1.g3409.t1 | gb EOA33837.1   hypothetical protein CARUB_v10021318mg, partial [Capsella rubella]                                                                                                                                             | 197  | 290  | 1.00E-48  | 147.2 | 48.2 | 62.9 | hypothetical protein CARUB_v10021318mg, partial | gbpln | Capsella rubella     | AT4G04650.1   Symbols:   RNA-directed DNA polymerase (reverse transcriptase)-related family protein   chr4:2353989-2355213 REVERSE LENGTH=332                                                                                                                                                                                                                                                                                                                                                                                           | 197  | 332  | 5.00E-39  | 168.5 | 37.1 | 50.3 |
| Rsa1.0_00064.1.g3410.t1 | gb EOA28335.1   hypothetical protein CARUB_v10024536mg [Capsella rubella]                                                                                                                                                      | 437  | 441  | 2.00E-74  | 100.9 | 43.7 | 58.8 | hypothetical protein CARUB_v10024536mg          | gbpln | Capsella rubella     | AT3G60960.1   Symbols:   Tetratricopeptide repeat (TPR)-like superfamily protein   chr3:22535729-22536940 FORWARD LENGTH=403                                                                                                                                                                                                                                                                                                                                                                                                            | 437  | 403  | 9.00E-71  | 92.2  | 39.6 | 55.8 |
| Rsa1.0_00064.1.g3411.t1 | refXP_002882048.1   hypothetical protein ARALYDRAFT_904059 [Arabidopsis lyrata subsp. lyrata] gi 297327887 gb EFH58307.1   hypothetical protein ARALYDRAFT_904059 [Arabidopsis lyrata subsp. lyrata]                           | 436  | 448  | 9.00E-70  | 102.8 | 33.7 | 40.1 | hypothetical protein ARALYDRAFT_904059          | gbpln | Arabidopsis lyrata   | AT1G10270.1   Symbols: GRP23   glutamine-rich protein 23   chr1:3363535-3366276 FORWARD LENGTH=913                                                                                                                                                                                                                                                                                                                                                                                                                                      | 436  | 913  | 2.00E-21  | 209.4 | 15.1 | 22.0 |
| Rsa1.0_00064.1.g3412.t7 | refNP_850466.2   uncharacterized protein [Arabidopsis thaliana] gi 110736851 db BAF00383.1   hypothetical protein [Arabidopsis thaliana] gi 330255687 gb AEC10781.1   uncharacterized protein AT2G46980 [Arabidopsis thaliana] | 872  | 793  | 0         | 90.9  | 67.9 | 75.0 | uncharacterized protein                         | gbpln | Arabidopsis thaliana | AT2G46980.2   Symbols:   unknown protein; Has 3995 Blast hits to 3325 proteins in 374 species: Archae - 19; Bacteria - 205; Metazoa - 2201; Fungi - 364; Plants - 149; Viruses - 22; Other Eukaryotes - 1035 (source: NCBI BLink).   chr2:19299868-19303429 REVERSE LENGTH=793                                                                                                                                                                                                                                                          | 872  | 793  | 0         | 90.9  | 67.9 | 75.0 |
| Rsa1.0_00064.1.g3413.t1 | refXP_002882100.1   P-glycoprotein 4, P-glycoprotein4 [Arabidopsis lyrata subsp. lyrata] gi 297327939 gb EFH58359.1   P-glycoprotein 4, P-glycoprotein4 [Arabidopsis lyrata subsp. lyrata]                                     | 1262 | 1286 | 0         | 101.9 | 93.1 | 97.4 | P-glycoprotein 4, P-glycoprotein4               | gbpln | Arabidopsis lyrata   | AT2G47000.1   Symbols: MDR4, PGP4, ABCB4, ATPGP4   ATP binding cassette subfamily B4   chr2:19310008-19314750 REVERSE LENGTH=1286                                                                                                                                                                                                                                                                                                                                                                                                       | 1262 | 1286 | 0         | 101.9 | 93.6 | 97.3 |
| Rsa1.0_00064.1.g3414.t1 | refXP_002880277.1   At2g47010/F14M4.16 [Arabidopsis lyrata subsp. lyrata] gi 297326116 gb EFH56536.1   At2g47010/F14M4.16 [Arabidopsis lyrata subsp. lyrata]                                                                   | 478  | 493  | 0         | 103.1 | 88.3 | 93.3 | At2g47010/F14M4.16                              | gbpln | Arabidopsis lyrata   | AT2G47010.2   Symbols:   unknown protein; FUNCTIONS IN: molecular_function unknown; INVOLVED IN: biological_process unknown; LOCATED IN: endomembrane system; EXPRESSED IN: 17 plant structures; EXPRESSED DURING: 10 growth stages; BEST Arabidopsis thaliana protein match is: unknown protein (TAIR:AT1G17030.1); Has 72 Blast hits to 72 proteins in 13 species: Archae - 0; Bacteria - 0; Metazoa - 0; Fungi - 0; Plants - 71; Viruses - 0; Other Eukaryotes - 1 (source: NCBI BLink).   chr2:19317505-19319252 FORWARD LENGTH=493 | 478  | 493  | 0         | 103.1 | 86.8 | 92.9 |
| Rsa1.0_00064.1.g3415.t1 | gb EOA27206.1   hypothetical protein CARUB_v10023316mg [Capsella rubella]                                                                                                                                                      | 418  | 412  | 0         | 98.6  | 84.9 | 90.2 | hypothetical protein CARUB_v10023316mg          | gbpln | Capsella rubella     | AT2G47020.1   Symbols:   Peptide chain release factor 1   chr2:19320090-19322279 REVERSE LENGTH=413                                                                                                                                                                                                                                                                                                                                                                                                                                     | 418  | 413  | 0         | 98.8  | 84.9 | 89.7 |

|                         |                                                                                                                                                                                                                                                                                                                                                                                                                                                                                                                                                                                                                                                   |     |     |           |       |      |      |                                                 |       |                      |                                                                                                                                                                                                                                                         |     |     |           |       |      |      |
|-------------------------|---------------------------------------------------------------------------------------------------------------------------------------------------------------------------------------------------------------------------------------------------------------------------------------------------------------------------------------------------------------------------------------------------------------------------------------------------------------------------------------------------------------------------------------------------------------------------------------------------------------------------------------------------|-----|-----|-----------|-------|------|------|-------------------------------------------------|-------|----------------------|---------------------------------------------------------------------------------------------------------------------------------------------------------------------------------------------------------------------------------------------------------|-----|-----|-----------|-------|------|------|
| Rsa1.0_00064.1.g3416.t1 | gb EOA28312.1  hypothetical protein CARUB_v10024512mg [Capsella rubella]                                                                                                                                                                                                                                                                                                                                                                                                                                                                                                                                                                          | 595 | 595 | 0         | 100.0 | 86.1 | 93.9 | hypothetical protein CARUB_v10024512mg          | gbpln | Capsella rubella     | AT2G47040.1   Symbols: VGD1   Plant invertase/pectin methyltransferase inhibitor superfamily   chr2:19328186-19330060 REVERSE LENGTH=595                                                                                                                | 595 | 595 | 0         | 100.0 | 86.1 | 93.6 |
| Rsa1.0_00064.1.g3417.t1 | gb EOA28856.1  hypothetical protein CARUB_v10025101mg [Capsella rubella]                                                                                                                                                                                                                                                                                                                                                                                                                                                                                                                                                                          | 216 | 216 | 1.00E-106 | 100.0 | 84.3 | 92.6 | hypothetical protein CARUB_v10025101mg          | gbpln | Capsella rubella     | AT2G47050.1   Symbols:   Plant invertase/pectin methyltransferase inhibitor superfamily protein   chr2:19331927-19332577 REVERSE LENGTH=216                                                                                                             | 216 | 216 | 1.00E-108 | 100.0 | 84.7 | 92.1 |
| Rsa1.0_00064.1.g3418.t1 | gb EOA27227.1  hypothetical protein CARUB_v10023336mg, partial [Capsella rubella]                                                                                                                                                                                                                                                                                                                                                                                                                                                                                                                                                                 | 362 | 407 | 0         | 112.4 | 95.6 | 97.0 | hypothetical protein CARUB_v10023336mg, partial | gbpln | Capsella rubella     | AT2G47060.4   Symbols:   Protein kinase superfamily protein   chr2:19333116-19334759 REVERSE LENGTH=397                                                                                                                                                 | 362 | 397 | 0         | 109.7 | 93.1 | 95.6 |
| Rsa1.0_00064.1.g3419.t1 | ref XP_002880278.1  hypothetical protein ARALYDRAFT_483883 [Arabidopsis lyrata subsp. lyrata] gi 297326117 gb EFH56537.1  hypothetical protein ARALYDRAFT_483883 [Arabidopsis lyrata subsp. lyrata]                                                                                                                                                                                                                                                                                                                                                                                                                                               | 925 | 899 | 0         | 97.2  | 82.5 | 89.0 | hypothetical protein ARALYDRAFT_483883          | gbpln | Arabidopsis lyrata   | AT2G47070.1   Symbols: SPL1   squamosa promoter binding protein-like 1   chr2:19337144-19340552 FORWARD LENGTH=881                                                                                                                                      | 925 | 881 | 0         | 95.2  | 81.1 | 87.1 |
| Rsa1.0_00064.1.g3420.t1 | gb EOA27267.1  hypothetical protein CARUB_v10023387mg [Capsella rubella]                                                                                                                                                                                                                                                                                                                                                                                                                                                                                                                                                                          | 391 | 391 | 0         | 100.0 | 98.7 | 99.5 | hypothetical protein CARUB_v10023387mg          | gbpln | Capsella rubella     | AT1G02500.2   Symbols: SAM1, SAM-1, MATT1, AtSAM1   S-adenosylmethionine synthetase 1   chr1:519037-520218 FORWARD LENGTH=393                                                                                                                           | 391 | 393 | 0         | 100.5 | 93.1 | 96.4 |
| Rsa1.0_00064.1.g3421.t1 | ref XP_002882106.1  nucleic acid binding protein [Arabidopsis lyrata subsp. lyrata] gi 297327945 gb EFH58365.1  nucleic acid binding protein [Arabidopsis lyrata subsp. lyrata]                                                                                                                                                                                                                                                                                                                                                                                                                                                                   | 681 | 735 | 0         | 107.9 | 72.4 | 80.8 | nucleic acid binding protein                    | gbpln | Arabidopsis lyrata   | AT2G47090.1   Symbols:   zinc ion binding/nucleic acid binding   chr2:19341444-19344297 REVERSE LENGTH=766                                                                                                                                              | 681 | 766 | 0         | 112.5 | 73.3 | 82.1 |
| Rsa1.0_00064.1.g3422.t1 | ref XP_002882109.1  predicted protein [Arabidopsis lyrata subsp. lyrata] gi 297327948 gb EFH58368.1  predicted protein [Arabidopsis lyrata subsp. lyrata]                                                                                                                                                                                                                                                                                                                                                                                                                                                                                         | 262 | 257 | 1.00E-130 | 98.1  | 87.8 | 93.9 | predicted protein                               | gbpln | Arabidopsis lyrata   | AT2G47140.1   Symbols:   NAD(P)-binding Rossmann-fold superfamily protein   chr2:19350970-19352059 REVERSE LENGTH=257                                                                                                                                   | 262 | 257 | 1.00E-131 | 98.1  | 86.6 | 92.7 |
| Rsa1.0_00064.1.g3423.t1 | ref NP_850737.1  putative protein phosphatase 2C 49 [Arabidopsis thaliana] gi 122214683 sp Q3EAF9.1 P2C49_ARAT H RecName: Full=Probable protein phosphatase 2C 49; Short=AtPP2C49 gi 332646807 gb AEE80328.1  putative protein phosphatase 2C 49 [Arabidopsis thaliana]                                                                                                                                                                                                                                                                                                                                                                           | 387 | 384 | 1.00E-143 | 99.2  | 67.7 | 80.4 | putative protein phosphatase 2C 49              | gbpln | Arabidopsis thaliana | AT3G62260.2   Symbols:   Protein phosphatase 2C family protein   chr3:23038516-23040391 REVERSE LENGTH=384                                                                                                                                              | 387 | 384 | 1.00E-145 | 99.2  | 67.7 | 80.4 |
| Rsa1.0_00064.1.g3424.t1 | # # # # # # # - ---- # # # # #                                                                                                                                                                                                                                                                                                                                                                                                                                                                                                                                                                                                                    |     |     |           |       |      |      |                                                 |       |                      |                                                                                                                                                                                                                                                         |     |     |           |       |      |      |
| Rsa1.0_00064.1.g3425.t1 | ref NP_182241.1  myb domain protein 2 [Arabidopsis thaliana] gi 506189 dbj BA03534.1  ATMYB2 [Arabidopsis thaliana] gi 2275197 gb AAB63819.1  MYB transcription factor (Atmyb2) [Arabidopsis thaliana] gi 14970986 dbj BAB62128.1  MYB transcription factor Atmyb2 [Arabidopsis thaliana] gi 38603964 gb AAR24727.1  At2g47190 [Arabidopsis thaliana] gi 41619210 gb AAS10049.1  MYB transcription factor [Arabidopsis thaliana] gi 44681444 gb AAS47662.1  At2g47190 [Arabidopsis thaliana] gi 110738166 dbj BAF01014.1  MYB transcription factor [Arabidopsis thaliana] gi 330255718 gb AEC10812.1  myb domain protein 2 [Arabidopsis thaliana] | 275 | 273 | 1.00E-135 | 99.3  | 86.5 | 93.5 | myb domain protein 2                            | gbpln | Arabidopsis thaliana | AT2G47190.1   Symbols: ATMYB2, MYB2   myb domain protein 2   chr2:19376284-19377297 FORWARD LENGTH=273                                                                                                                                                  | 275 | 273 | 1.00E-138 | 99.3  | 86.5 | 93.5 |
| Rsa1.0_00064.1.g3426.t1 | ref XP_002882113.1  hypothetical protein ARALYDRAFT_322367 [Arabidopsis lyrata subsp. lyrata] gi 297327952 gb EFH58372.1  hypothetical protein ARALYDRAFT_322367 [Arabidopsis lyrata subsp. lyrata]                                                                                                                                                                                                                                                                                                                                                                                                                                               | 86  | 89  | 2.00E-27  | 103.5 | 74.4 | 82.6 | hypothetical protein ARALYDRAFT_322367          | gbpln | Arabidopsis lyrata   | AT2G47200.1   Symbols:   unknown protein; Has 3 Blast hits to 3 proteins in 1 species: Archae - 0; Bacteria - 0; Metazoa - 0; Fungi - 0; Plants - 3; Viruses - 0; Other Eukaryotes - 0 (source: NCBI BLINK).   chr2:19377884-19378150 REVERSE LENGTH=88 | 86  | 88  | 1.00E-27  | 102.3 | 68.6 | 79.1 |
| Rsa1.0_00064.1.g3427.t1 | dbj BAJ34105.1  unnamed protein product [Theleungiella halophila]                                                                                                                                                                                                                                                                                                                                                                                                                                                                                                                                                                                 | 433 | 439 | 0         | 101.4 | 93.5 | 96.5 | unnamed protein product                         | ----  | ----                 | AT2G47210.1   Symbols:   myb-like transcription factor family protein   chr2:19379039-19382204 FORWARD LENGTH=441                                                                                                                                       | 433 | 441 | 0         | 101.8 | 91.5 | 95.2 |
| Rsa1.0_00064.1.g3428.t1 | gb EOA40254.1  hypothetical protein CARUB_v10008975mg [Capsella rubella]                                                                                                                                                                                                                                                                                                                                                                                                                                                                                                                                                                          | 482 | 487 | 1.00E-140 | 101.0 | 62.4 | 72.4 | hypothetical protein CARUB_v10008975mg          | gbpln | Capsella rubella     | AT1G48400.1   Symbols:   F-box/RNI-like/FBD-like domains-containing protein   chr1:17882136-17883855 REVERSE LENGTH=513                                                                                                                                 | 482 | 513 | 1.00E-138 | 106.4 | 61.4 | 72.6 |

|                         |                                                                                                                                                                                                                                                                                                                                                                                                                                                                                                                                                                                                                                                                                                                                                                                                                                                                                                                                                                                                                                                                                                                            |     |     |           |       |      |      |                                                  |       |                      |                                                                                                                                                                                                                                                                                                                                             |     |     |           |       |      |      |
|-------------------------|----------------------------------------------------------------------------------------------------------------------------------------------------------------------------------------------------------------------------------------------------------------------------------------------------------------------------------------------------------------------------------------------------------------------------------------------------------------------------------------------------------------------------------------------------------------------------------------------------------------------------------------------------------------------------------------------------------------------------------------------------------------------------------------------------------------------------------------------------------------------------------------------------------------------------------------------------------------------------------------------------------------------------------------------------------------------------------------------------------------------------|-----|-----|-----------|-------|------|------|--------------------------------------------------|-------|----------------------|---------------------------------------------------------------------------------------------------------------------------------------------------------------------------------------------------------------------------------------------------------------------------------------------------------------------------------------------|-----|-----|-----------|-------|------|------|
| Rsa1.0_00064.1.g3429.t1 | gb EOA37307.1  hypothetical protein CARUB_v10010977mg [Capsella rubella]                                                                                                                                                                                                                                                                                                                                                                                                                                                                                                                                                                                                                                                                                                                                                                                                                                                                                                                                                                                                                                                   | 151 | 711 | 1.00E-28  | 470.9 | 51.7 | 72.2 | hypothetical protein CARUB_v10010977mg           | gbpln | Capsella rubella     | AT1G26540.1   Symbols:   Agenet domain-containing protein   chr1:9167783-9170795 REVERSE LENGTH=695                                                                                                                                                                                                                                         | 151 | 695 | 1.00E-29  | 460.3 | 49.7 | 70.9 |
| Rsa1.0_00064.1.g3430.t3 | gb EOA36732.1  hypothetical protein CARUB_v10012522mg [Capsella rubella]                                                                                                                                                                                                                                                                                                                                                                                                                                                                                                                                                                                                                                                                                                                                                                                                                                                                                                                                                                                                                                                   | 416 | 617 | 4.00E-48  | 148.3 | 21.9 | 26.2 | hypothetical protein CARUB_v10012522mg           | gbpln | Capsella rubella     | AT1G26540.1   Symbols:   Agenet domain-containing protein   chr1:9167783-9170795 REVERSE LENGTH=695                                                                                                                                                                                                                                         | 416 | 695 | 2.00E-50  | 167.1 | 21.2 | 26.2 |
| Rsa1.0_00064.1.g3431.t2 | ref XP_002880290.1  long-chain-fatty-acid--CoA ligase family protein [Arabidopsis lyrata subsp. lyrata] gi 297326129 gb EFH56549.1  long-chain-fatty-acid--CoA ligase family protein [Arabidopsis lyrata subsp. lyrata]                                                                                                                                                                                                                                                                                                                                                                                                                                                                                                                                                                                                                                                                                                                                                                                                                                                                                                    | 636 | 660 | 0         | 103.8 | 82.1 | 88.4 | long-chain-fatty-acid--CoA ligase family protein | gbpln | Arabidopsis lyrata   | AT2G47240.2   Symbols: LACS1   AMP-dependent synthetase and ligase family protein   chr2:19393835-19397616 FORWARD LENGTH=660                                                                                                                                                                                                               | 636 | 660 | 0         | 103.8 | 79.7 | 86.5 |
| Rsa1.0_00064.1.g3432.t1 | ref XP_002882114.1  predicted protein [Arabidopsis lyrata subsp. lyrata] gi 297327953 gb EFH58373.1  predicted protein [Arabidopsis lyrata subsp. lyrata]                                                                                                                                                                                                                                                                                                                                                                                                                                                                                                                                                                                                                                                                                                                                                                                                                                                                                                                                                                  | 317 | 337 | 1.00E-121 | 106.3 | 81.1 | 87.7 | predicted protein                                | gbpln | Arabidopsis lyrata   | AT2G47260.1   Symbols: WRKY23. ATWRKY23   WRKY DNA-binding protein 23   chr2:19405045-19406446 REVERSE LENGTH=337                                                                                                                                                                                                                           | 317 | 337 | 1.00E-114 | 106.3 | 80.4 | 86.8 |
| Rsa1.0_00064.1.g3433.t1 | ref NP_566098.1  transcription factor bHLH151 [Arabidopsis thaliana] gi 75097628 sp O22901.1 BH151_ARATH RecName: Full=Transcription factor UPBEAT1; AltName: Full=Basic helix-loop-helix protein 151; Short=AtbHLH151; Short=bHLH 151; AltName: Full=Transcription factor EN 146; AltName: Full=bHLH transcription factor bHLH151 gi 2275205 gb AAB63827.1  expressed protein [Arabidopsis thaliana] gi 89111836 gb ABD0690.1  At2g47270 [Arabidopsis thaliana] gi 225898607 dbj BAH30434.1  hypothetical protein [Arabidopsis thaliana] gi 330255728 gb AEC10822.1  transcription factor bHLH151 [Arabidopsis thaliana] ref NP_566099.1  DEAD-box ATP-dependent RNA helicase 24 [Arabidopsis thaliana] gi 75318047 sp O22907.2 RH24_ARATH RecName: Full=DEAD-box ATP-dependent RNA helicase 24 gi 16323192 gb AAL15330.1  At2g47330/T8113.17 [Arabidopsis thaliana] gi 20196880 gb AAB63833.2  putative ATP-dependent RNA helicase [Arabidopsis thaliana] gi 21700913 gb AAM70580.1  At2g47330/T8113.17 [Arabidopsis thaliana] gi 330255734 gb AEC10828.1  DEAD-box ATP-dependent RNA helicase 24 [Arabidopsis thaliana] | 102 | 102 | 5.00E-47  | 100.0 | 90.2 | 98.0 | transcription factor bHLH151                     | gbpln | Arabidopsis thaliana | AT2G47270.1   Symbols: UPB1   sequence-specific DNA binding transcription factor:transcription regulators   chr2:19411741-19412049 REVERSE LENGTH=102                                                                                                                                                                                       | 102 | 102 | 9.00E-50  | 100.0 | 90.2 | 98.0 |
| Rsa1.0_00064.1.g3434.t1 | ref XP_002880296.1  hypothetical protein ARALYDRAFT_904210 [Arabidopsis lyrata subsp. lyrata] gi 297326135 gb EFH56555.1  hypothetical protein ARALYDRAFT_904210 [Arabidopsis lyrata subsp. lyrata]                                                                                                                                                                                                                                                                                                                                                                                                                                                                                                                                                                                                                                                                                                                                                                                                                                                                                                                        | 472 | 487 | 0         | 103.2 | 77.8 | 86.2 | hypothetical protein ARALYDRAFT_904210           | gbpln | Arabidopsis lyrata   | AT2G47350.1   Symbols:   HIT zinc finger ;PAPA-1-like conserved region   chr2:19434588-19437045 FORWARD LENGTH=486                                                                                                                                                                                                                          | 472 | 486 | 0         | 103.0 | 76.9 | 84.7 |
| Rsa1.0_00064.1.g3436.t1 | ref XP_002880297.1  hypothetical protein ARALYDRAFT_904211 [Arabidopsis lyrata subsp. lyrata] gi 297326136 gb EFH56556.1  hypothetical protein ARALYDRAFT_904211 [Arabidopsis lyrata subsp. lyrata]                                                                                                                                                                                                                                                                                                                                                                                                                                                                                                                                                                                                                                                                                                                                                                                                                                                                                                                        | 308 | 305 | 1.00E-124 | 99.0  | 83.4 | 89.9 | hypothetical protein ARALYDRAFT_904211           | gbpln | Arabidopsis lyrata   | AT2G47360.1   Symbols:   unknown protein; BEST Arabidopsis thaliana protein match is: unknown protein (TAIR:AT1G02570.1); Has 58 Blast hits to 55 proteins in 6 species: Archae - 0; Bacteria - 0; Metazoa - 0; Fungi - 0; Plants - 58; Viruses - 0; Other Eukaryotes - 0 (source: NCBI BLink).   chr2:19437820-19438731 FORWARD LENGTH=303 | 308 | 303 | 1.00E-125 | 98.4  | 83.4 | 89.9 |
| Rsa1.0_00064.1.g3435.t1 | ref NP_566099.1  DEAD-box ATP-dependent RNA helicase 24 [Arabidopsis thaliana] gi 75318047 sp O22907.2 RH24_ARATH RecName: Full=DEAD-box ATP-dependent RNA helicase 24 gi 16323192 gb AAL15330.1  At2g47330/T8113.17 [Arabidopsis thaliana] gi 20196880 gb AAB63833.2  putative ATP-dependent RNA helicase [Arabidopsis thaliana] gi 21700913 gb AAM70580.1  At2g47330/T8113.17 [Arabidopsis thaliana] gi 330255734 gb AEC10828.1  DEAD-box ATP-dependent RNA helicase 24 [Arabidopsis thaliana]                                                                                                                                                                                                                                                                                                                                                                                                                                                                                                                                                                                                                           | 727 | 760 | 0         | 104.5 | 88.3 | 92.8 | DEAD-box ATP-dependent RNA helicase 24           | gbpln | Arabidopsis thaliana | AT2G47330.1   Symbols:   P-loop containing nucleoside triphosphate hydrolases superfamily protein   chr2:19429083-19431617 REVERSE LENGTH=760                                                                                                                                                                                               | 727 | 760 | 0         | 104.5 | 88.3 | 92.8 |



|                         |                                                                                                                                                                                                                                                                                                                                                                                                                                                                       |      |      |           |       |      |      |                                                   |       |                      |                                                                                                                                                                                                                                                                                                                                                                                                                                                                                                                                                                                                                                                                |      |      |           |       |      |      |
|-------------------------|-----------------------------------------------------------------------------------------------------------------------------------------------------------------------------------------------------------------------------------------------------------------------------------------------------------------------------------------------------------------------------------------------------------------------------------------------------------------------|------|------|-----------|-------|------|------|---------------------------------------------------|-------|----------------------|----------------------------------------------------------------------------------------------------------------------------------------------------------------------------------------------------------------------------------------------------------------------------------------------------------------------------------------------------------------------------------------------------------------------------------------------------------------------------------------------------------------------------------------------------------------------------------------------------------------------------------------------------------------|------|------|-----------|-------|------|------|
| Rsa1.0_00064.1.g3437.t1 | refNP_565392.1   calcium-dependent phosphotriesterase-like protein [Arabidopsis thaliana] gi 4581119 gb AAD24609.1   expressed protein [Arabidopsis thaliana] gi 21537036 gb AAM61377.1   unknown [Arabidopsis thaliana] gi 26451541 dbj BA042868.1   unknown protein [Arabidopsis thaliana] gi 28973387 gb AAO64018.1   unknown protein [Arabidopsis thaliana] gi 330251441 gb AEC06535.1   calcium-dependent phosphotriesterase-like protein [Arabidopsis thaliana] | 334  | 327  | 1.00E-161 | 97.9  | 85.9 | 92.2 | calcium-dependent phosphotriesterase-like protein | gbpln | Arabidopsis thaliana | AT2G16760.1   Symbols:   Calcium-dependent phosphotriesterase superfamily protein   chr2:7275739-7277122 FORWARD LENGTH=327                                                                                                                                                                                                                                                                                                                                                                                                                                                                                                                                    | 334  | 327  | 1.00E-163 | 97.9  | 85.9 | 92.2 |
| Rsa1.0_00064.1.g3438.t2 | gb EOA34962.1   hypothetical protein CARUB_v10020048mg [Capsella rubella] gi 482570775 gb EOA34963.1   hypothetical protein CARUB_v10020048mg [Capsella rubella]                                                                                                                                                                                                                                                                                                      | 716  | 575  | 0         | 80.3  | 52.5 | 59.8 | hypothetical protein CARUB_v10020048mg            | gbpln | Capsella rubella     | AT3G09360.1   Symbols:   Cyclin/Brf1-like TBP-binding protein   chr3:2873796-2878432 FORWARD LENGTH=604                                                                                                                                                                                                                                                                                                                                                                                                                                                                                                                                                        | 716  | 604  | 1.00E-164 | 84.4  | 43.4 | 53.2 |
| Rsa1.0_00064.1.g3439.t1 | refNP_182264.1   dimethyladenosine transferase [Arabidopsis thaliana] gi 2529685 gb AAC62868.1   putative dimethyladenosine transferase [Arabidopsis thaliana] gi 14532650 gb AAK64053.1   putative dimethyladenosine transferase [Arabidopsis thaliana] gi 21280901 gb AAM44912.1   putative dimethyladenosine transferase [Arabidopsis thaliana] gi 330255745 gb AEC10839.1   dimethyladenosine transferase [Arabidopsis thaliana]                                  | 347  | 353  | 1.00E-166 | 101.7 | 91.1 | 94.5 | dimethyladenosine transferase                     | gbpln | Arabidopsis thaliana | AT2G47420.1   Symbols:   Ribosomal RNA adenine dimethylase family protein   chr2:19457574-19458777 FORWARD LENGTH=353                                                                                                                                                                                                                                                                                                                                                                                                                                                                                                                                          | 347  | 353  | 1.00E-169 | 101.7 | 91.1 | 94.5 |
| Rsa1.0_00064.1.g3440.t1 | refNP_182265.1   histidine kinase CKI1 [Arabidopsis thaliana] gi 75097396 sp O22267.1 CKI1_ARATH RecName: Full=Histidine kinase CKI1; AltName: Full=Protein CYTOKININ-INDEPENDENT 1 gi 1679803 dbj BAA13416.1   histidine kinase homolog [Arabidopsis thaliana] gi 2529684 gb AAC62867.1   putative histidine kinase [Arabidopsis thaliana] gi 330255746 gb AEC10840.1   histidine kinase CKI1 [Arabidopsis thaliana]                                                 | 1093 | 1122 | 0         | 102.7 | 72.0 | 80.6 | histidine kinase CKI1                             | gbpln | Arabidopsis thaliana | AT2G47430.1   Symbols: CKI1   Signal transduction histidine kinase   chr2:19459167-19463122 REVERSE LENGTH=1122                                                                                                                                                                                                                                                                                                                                                                                                                                                                                                                                                | 1093 | 1122 | 0         | 102.7 | 72.0 | 80.6 |
| Rsa1.0_00065.1.g3441.t1 | refXP_002892917.1   hypothetical protein ARALYDRAFT_471862 [Arabidopsis lyrata subsp. lyrata] gi 297338759 gb EFH69176.1   hypothetical protein ARALYDRAFT_471862 [Arabidopsis lyrata subsp. lyrata]                                                                                                                                                                                                                                                                  | 830  | 823  | 0         | 99.2  | 62.3 | 73.1 | hypothetical protein ARALYDRAFT_471862            | gbpln | Arabidopsis lyrata   | AT1G16630.1   Symbols:   unknown protein; LOCATED IN: chloroplast; BEST Arabidopsis thaliana protein match is: unknown protein (TAIR:AT2G16270.1); Has 10587 Blast hits to 5736 proteins in 617 species: Archae - 88; Bacteria - 963; Metazoa - 3686; Fungi - 820; Plants - 541; Viruses - 438; Other Eukaryotes - 4051 (source: NCBI BLink).   chr1:5682212-5684749 REVERSE LENGTH=845                                                                                                                                                                                                                                                                        | 830  | 845  | 0         | 101.8 | 62.5 | 72.5 |
| Rsa1.0_00065.1.g3442.t1 | refXP_002890176.1   hypothetical protein ARALYDRAFT_889054 [Arabidopsis lyrata subsp. lyrata] gi 297336018 gb EFH6435.1   hypothetical protein ARALYDRAFT_889054 [Arabidopsis lyrata subsp. lyrata]                                                                                                                                                                                                                                                                   | 813  | 770  | 0         | 94.7  | 77.4 | 82.5 | hypothetical protein ARALYDRAFT_889054            | gbpln | Arabidopsis lyrata   | AT1G79090.2   Symbols:   FUNCTIONS IN: molecular_function unknown; INVOLVED IN: biological_process unknown; LOCATED IN: cellular_component unknown; EXPRESSED IN: 25 plant structures; EXPRESSED DURING: 15 growth stages; CONTAINS InterPro DOMAIN/s: Topoisomerase II-associated protein PAT1 (InterPro:IPR019167); BEST Arabidopsis thaliana protein match is: Topoisomerase II-associated protein PAT1 (TAIR:AT3G22270.1); Has 1260 Blast hits to 1163 proteins in 186 species: Archae - 0; Bacteria - 32; Metazoa - 596; Fungi - 277; Plants - 212; Viruses - 0; Other Eukaryotes - 143 (source: NCBI BLink).   chr1:29749551-29752945 REVERSE LENGTH=793 | 813  | 793  | 0         | 97.5  | 65.6 | 75.5 |
| Rsa1.0_00065.1.g3443.t2 | gb EOA40545.1   hypothetical protein CARUB_v10009275mg [Capsella rubella] gi 482576359 gb EOA40546.1   hypothetical protein CARUB_v10009275mg [Capsella rubella]                                                                                                                                                                                                                                                                                                      | 459  | 416  | 2.00E-82  | 90.6  | 43.8 | 46.0 | hypothetical protein CARUB_v10009275mg            | gbpln | Capsella rubella     | AT1G16610.3   Symbols: SR45   arginine/serine-rich 45   chr1:5675925-5678686 REVERSE LENGTH=425                                                                                                                                                                                                                                                                                                                                                                                                                                                                                                                                                                | 459  | 425  | 2.00E-72  | 92.6  | 37.3 | 39.4 |
| Rsa1.0_00065.1.g3444.t1 | gb EOA39738.1   hypothetical protein CARUB_v10008384mg [Capsella rubella]                                                                                                                                                                                                                                                                                                                                                                                             | 728  | 761  | 0         | 104.5 | 80.6 | 89.3 | hypothetical protein CARUB_v10008384mg            | gbpln | Capsella rubella     | AT1G78960.1   Symbols: ATLUP2, LUP2   lupal synthase 2   chr1:29696722-29701024 FORWARD LENGTH=763                                                                                                                                                                                                                                                                                                                                                                                                                                                                                                                                                             | 728  | 763  | 0         | 104.8 | 74.2 | 85.3 |

|                         |                                                                                                                                                                                                                                                                                                                                                                                                                                                                                                                                                                                                                     |     |     |           |       |      |      |                                                    |       |                      |                                                                                                                                                                                                                                                                                                                                                                                                                                                                                                                                        |     |     |           |       |      |      |
|-------------------------|---------------------------------------------------------------------------------------------------------------------------------------------------------------------------------------------------------------------------------------------------------------------------------------------------------------------------------------------------------------------------------------------------------------------------------------------------------------------------------------------------------------------------------------------------------------------------------------------------------------------|-----|-----|-----------|-------|------|------|----------------------------------------------------|-------|----------------------|----------------------------------------------------------------------------------------------------------------------------------------------------------------------------------------------------------------------------------------------------------------------------------------------------------------------------------------------------------------------------------------------------------------------------------------------------------------------------------------------------------------------------------------|-----|-----|-----------|-------|------|------|
| Rsa1.0_00065.1.g3445.t1 | ref[XP_002892915.1] predicted protein [Arabidopsis lyrata subsp. lyrata] gi 297338757 gb EFH69174.1  predicted protein [Arabidopsis lyrata subsp. lyrata]                                                                                                                                                                                                                                                                                                                                                                                                                                                           | 457 | 465 | 0         | 101.8 | 93.7 | 96.7 | predicted protein                                  | gbpln | Arabidopsis lyrata   | AT1G16570.1   Symbols:   UDP-Glycosyltransferase superfamily protein   chr1:5670763-5673423 REVERSE LENGTH=465                                                                                                                                                                                                                                                                                                                                                                                                                         | 457 | 465 | 0         | 101.8 | 92.8 | 95.6 |
| Rsa1.0_00065.1.g3446.t2 | gb EOA38074.1  hypothetical protein CARUB_v10009543mg.partial [Capsella rubella]                                                                                                                                                                                                                                                                                                                                                                                                                                                                                                                                    | 344 | 358 | 1.00E-179 | 104.1 | 88.4 | 93.3 | hypothetical protein CARUB_v10009543mg.partial     | gbpln | Capsella rubella     | AT1G16560.3   Symbols:   Per1-like family protein   chr1:5668945-5670343 FORWARD LENGTH=342                                                                                                                                                                                                                                                                                                                                                                                                                                            | 344 | 342 | 1.00E-173 | 99.4  | 84.6 | 90.7 |
| Rsa1.0_00065.1.g3447.t1 | ref[NP_564001.1] Molybdenum cofactor sulfurase [Arabidopsis thaliana] gi 75169006 sp Q9C5X8.1 MOCOS_ARATH RecName: Full=Molybdenum cofactor sulfurase; Short=MOS; Short=MoCo sulfurase; AltName: Full=Abscisic acid protein 3; AltName: Full=Low expression of osmotically expressive genes protein 5; AltName: Full=Molybdenum cofactor sulfurtransferase gi 13123673 gb AAK12939.1 AF325457.1 molybdenum cofactor sulfurase [Arabidopsis thaliana] gi 15407262 gb AAK58888.1 molybdenum cofactor sulfurase [Arabidopsis thaliana] gi 332191346 gb AEE29467.1 Molybdenum cofactor sulfurase [Arabidopsis thaliana] | 821 | 819 | 0         | 99.8  | 86.4 | 92.2 | Molybdenum cofactor sulfurase                      | gbpln | Arabidopsis thaliana | AT1G16540.1   Symbols: SIR3, LOS5, ABA3, ATABA3, ACI2   molybdenum cofactor sulfurase (LOSS) (ABA3)   chr1:5659465-5665201 FORWARD LENGTH=819                                                                                                                                                                                                                                                                                                                                                                                          | 821 | 819 | 0         | 99.8  | 86.4 | 92.2 |
| Rsa1.0_00065.1.g3448.t1 | ref[XP_002892914.1] predicted protein [Arabidopsis lyrata subsp. lyrata] gi 297338756 gb EFH69173.1  predicted protein [Arabidopsis lyrata subsp. lyrata]                                                                                                                                                                                                                                                                                                                                                                                                                                                           | 166 | 164 | 5.00E-77  | 98.8  | 83.1 | 89.8 | predicted protein                                  | gbpln | Arabidopsis lyrata   | AT1G16530.1   Symbols: LBD3, ASL9   ASYMMETRIC LEAVES 2-like 9   chr1:5651470-5652839 REVERSE LENGTH=165                                                                                                                                                                                                                                                                                                                                                                                                                               | 166 | 165 | 1.00E-74  | 99.4  | 78.9 | 87.3 |
| Rsa1.0_00065.1.g3449.t1 | ref[XP_002890170.1] hypothetical protein ARALYDRAFT_471850 [Arabidopsis lyrata subsp. lyrata] gi 297336012 gb EFH66429.1  hypothetical protein ARALYDRAFT_471850 [Arabidopsis lyrata subsp. lyrata]                                                                                                                                                                                                                                                                                                                                                                                                                 | 319 | 325 | 1.00E-152 | 101.9 | 86.8 | 90.9 | hypothetical protein ARALYDRAFT_471850             | gbpln | Arabidopsis lyrata   | AT1G16520.1   Symbols:   unknown protein; FUNCTIONS IN: molecular function unknown; INVOLVED IN: biological process unknown; LOCATED IN: plasma membrane; EXPRESSED IN: 22 plant structures; EXPRESSED DURING: 13 growth stages; BEST Arabidopsis thaliana protein match is: unknown protein (TAIR:AT1G56080.1); Has 243 Blast hits to 234 proteins in 69 species: Archae - 2; Bacteria - 2; Metazoa - 61; Fungi - 9; Plants - 125; Viruses - 0; Other Eukaryotes - 44 (source: NCBI BLink).   chr1:5648904-5650998 FORWARD LENGTH=325 | 319 | 325 | 1.00E-152 | 101.9 | 88.4 | 92.5 |
| Rsa1.0_00065.1.g3450.t1 | #                                                                                                                                                                                                                                                                                                                                                                                                                                                                                                                                                                                                                   | #   | #   | #         | #     | #    | #    | -                                                  | ---   | ---                  | #                                                                                                                                                                                                                                                                                                                                                                                                                                                                                                                                      | #   | #   | #         | #     | #    |      |
| Rsa1.0_00065.1.g3451.t1 | gb ADP37974.1  auxin-responsive family protein [Brassica napus]                                                                                                                                                                                                                                                                                                                                                                                                                                                                                                                                                     | 145 | 145 | 6.00E-76  | 100.0 | 97.9 | 98.6 | auxin-responsive family protein                    | gbpln | Brassica napus       | AT1G16510.1   Symbols:   SAUR-like auxin-responsive protein family   chr1:5644784-5645227 REVERSE LENGTH=147                                                                                                                                                                                                                                                                                                                                                                                                                           | 145 | 147 | 2.00E-67  | 101.4 | 87.6 | 93.1 |
| Rsa1.0_00065.1.g3452.t1 | ref[XP_002863230.1] RNA recognition motif-containing protein [Arabidopsis lyrata subsp. lyrata] gi 297309064 gb EFH39489.1  RNA recognition motif-containing protein [Arabidopsis lyrata subsp. lyrata]                                                                                                                                                                                                                                                                                                                                                                                                             | 802 | 817 | 0         | 101.9 | 76.6 | 83.9 | RNA recognition motif-containing protein           | gbpln | Arabidopsis lyrata   | AT4G12640.1   Symbols:   RNA recognition motif (RRM)-containing protein   chr4:7462697-7467630 FORWARD LENGTH=823                                                                                                                                                                                                                                                                                                                                                                                                                      | 802 | 823 | 0         | 102.6 | 74.8 | 83.2 |
| Rsa1.0_00065.1.g3453.t1 | ref[XP_002889235.1] hypothetical protein ARALYDRAFT_316812 [Arabidopsis lyrata subsp. lyrata] gi 297335076 gb EFH65494.1  hypothetical protein ARALYDRAFT_316812 [Arabidopsis lyrata subsp. lyrata]                                                                                                                                                                                                                                                                                                                                                                                                                 | 249 | 238 | 7.00E-71  | 95.6  | 63.5 | 70.7 | hypothetical protein ARALYDRAFT_316812             | gbpln | Arabidopsis lyrata   | AT1G16500.1   Symbols:   unknown protein; BEST Arabidopsis thaliana protein match is: unknown protein (TAIR:AT1G79160.1); Has 136 Blast hits to 134 proteins in 17 species: Archae - 0; Bacteria - 0; Metazoa - 0; Fungi - 4; Plants - 131; Viruses - 1; Other Eukaryotes - 0 (source: NCBI BLink).   chr1:5639079-5639995 FORWARD LENGTH=259                                                                                                                                                                                          | 249 | 259 | 2.00E-70  | 104.0 | 66.7 | 77.5 |
| Rsa1.0_00065.1.g3454.t1 | gb AAM62687.1  putative myb-related transcription factor [Arabidopsis thaliana]                                                                                                                                                                                                                                                                                                                                                                                                                                                                                                                                     | 326 | 272 | 5.00E-98  | 83.4  | 53.4 | 59.2 | putative myb-related transcription factor          | gbpln | Arabidopsis thaliana | AT1G16490.1   Symbols: ATMYB58, MYB58   myb domain protein 58   chr1:5629859-5630844 REVERSE LENGTH=274                                                                                                                                                                                                                                                                                                                                                                                                                                | 326 | 274 | 1.00E-100 | 84.0  | 53.4 | 59.2 |
| Rsa1.0_00065.1.g3455.t1 | gb ACB59214.1  cytoplasmic thiosulfate:cyanide sulfur transferase [Brassica oleracea]                                                                                                                                                                                                                                                                                                                                                                                                                                                                                                                               | 378 | 379 | 0         | 100.3 | 93.9 | 98.4 | cytoplasmic thiosulfate:cyanide sulfur transferase | gbpln | Brassica oleracea    | AT1G9230.1   Symbols: ST1, ATMST1, MST1, ATRDH1, STR1   mercaptopyruvate sulfurtransferase 1   chr1:29800824-29803679 FORWARD LENGTH=379                                                                                                                                                                                                                                                                                                                                                                                               | 378 | 379 | 1.00E-178 | 100.3 | 78.6 | 87.8 |
| Rsa1.0_00065.1.g3456.t1 | ref[NP_173094.4] protein root hair specific 3 [Arabidopsis thaliana] gi 332191330 gb AEE29451.1  protein root hair specific 3 [Arabidopsis thaliana]                                                                                                                                                                                                                                                                                                                                                                                                                                                                | 646 | 499 | 0         | 77.2  | 62.5 | 67.3 | protein root hair specific 3                       | gbpln | Arabidopsis thaliana | AT1G16440.1   Symbols: RSH3   root hair specific 3   chr1:5615841-5617632 FORWARD LENGTH=499                                                                                                                                                                                                                                                                                                                                                                                                                                           | 646 | 499 | 0         | 77.2  | 62.5 | 67.3 |

|                         |                                                                                                                                                                                                                                                                                                                                                                                                                                                                                                                                                                      |     |     |           |       |      |      |                                        |       |                      |                                                                                                                                  |     |     |           |       |      |      |
|-------------------------|----------------------------------------------------------------------------------------------------------------------------------------------------------------------------------------------------------------------------------------------------------------------------------------------------------------------------------------------------------------------------------------------------------------------------------------------------------------------------------------------------------------------------------------------------------------------|-----|-----|-----------|-------|------|------|----------------------------------------|-------|----------------------|----------------------------------------------------------------------------------------------------------------------------------|-----|-----|-----------|-------|------|------|
| Rsa1.0_00065.1.g3457.t1 | gb ACR10252.1  cytochrome P450 79f1 [Brassica rapa subsp. pekinensis]                                                                                                                                                                                                                                                                                                                                                                                                                                                                                                | 540 | 537 | 0         | 99.4  | 95.9 | 98.0 | cytochrome P450 79f1                   | gbpln | Brassica rapa        | AT1G16410.1   Symbols: CYP79F1, BUS1, SPS1   cytochrome p450 79f1   chr1:5608862-5611118 FORWARD LENGTH=538                      | 540 | 538 | 0         | 99.6  | 83.1 | 90.2 |
| Rsa1.0_00065.1.g3458.t1 | gb ACB59211.1  antiporter family protein [Brassica oleracea]                                                                                                                                                                                                                                                                                                                                                                                                                                                                                                         | 790 | 756 | 0         | 95.7  | 90.9 | 93.0 | antiporter family protein              | gbpln | Brassica oleracea    | AT1G16380.1   Symbols: ATCHX1, CHX1   Cation/hydrogen exchanger family protein   chr1:5598453-5601367 REVERSE LENGTH=785         | 790 | 785 | 0         | 99.4  | 85.6 | 91.6 |
| Rsa1.0_00065.1.g3459.t1 | ref NP_173087.1  organic cation/carnitine transporter 6 [Arabidopsis thaliana]<br>gi 75265503 sp Q9SA36.1 OCT6_ARATH<br>RecName: Full=Organic cation/carnitine transporter 6; Short=AtOCT6<br>gi 4966358 gb AAD34689.1 AC006341_17<br>Is a member of the PF00083 sugar transporter family [Arabidopsis thaliana]<br>gi 110738583 dbj BAF01217.1  putative transport protein [Arabidopsis thaliana]<br>gi 332191322 gb AEE29443.1  organic cation/carnitine transporter 6 [Arabidopsis thaliana]                                                                      | 521 | 521 | 0         | 100.0 | 85.4 | 91.9 | organic cation/carnitine transporter 6 | gbpln | Arabidopsis thaliana | AT1G16370.1   Symbols: ATOCT6, OCT6   organic cation/carnitine transporter 6   chr1:5596762-5598327 FORWARD LENGTH=521           | 521 | 521 | 0         | 100.0 | 85.4 | 91.9 |
| Rsa1.0_00065.1.g3460.t1 | dbj BAJ33639.1  unnamed protein product [Thellungiella halophila]<br>ref NP_173087.1  organic cation/carnitine transporter 6 [Arabidopsis thaliana]<br>gi 75265503 sp Q9SA36.1 OCT6_ARATH<br>RecName: Full=Organic cation/carnitine transporter 6; Short=AtOCT6<br>gi 4966358 gb AAD34689.1 AC006341_17<br>Is a member of the PF00083 sugar transporter family [Arabidopsis thaliana]<br>gi 110738583 dbj BAF01217.1  putative transport protein [Arabidopsis thaliana]<br>gi 332191322 gb AEE29443.1  organic cation/carnitine transporter 6 [Arabidopsis thaliana] | 119 | 176 | 2.00E-11  | 147.9 | 31.1 | 37.8 | unnamed protein product                | ----  | ----                 | #                                                                                                                                | #   | #   | #         | #     | #    | #    |
| Rsa1.0_00065.1.g3461.t1 | ref NP_173085.1  IMP dehydrogenase [Arabidopsis thaliana]<br>gi 14194878 sp Q9SA34.1 IMDH2_ARATH<br>RecName: Full=Inosine-5'-monophosphate dehydrogenase 2; Short=IMP dehydrogenase 2; Short=IMPDH 2<br>gi 4966356 gb AAD34687.1 AC006341_15<br>Strong similarity to gb L34684 inosine monophosphate dehydrogenase (IMPDH) from Arabidopsis thaliana and is a member of the PF00478 IMP dehydrogenase family [Arabidopsis thaliana] gi 332191320 gb AEE29441.1  IMP dehydrogenase [Arabidopsis thaliana]                                                             | 524 | 521 | 0         | 99.4  | 80.5 | 90.3 | organic cation/carnitine transporter 6 | gbpln | Arabidopsis thaliana | AT1G16370.1   Symbols: ATOCT6, OCT6   organic cation/carnitine transporter 6   chr1:5596762-5598327 FORWARD LENGTH=521           | 524 | 521 | 0         | 99.4  | 80.5 | 90.3 |
| Rsa1.0_00065.1.g3462.t1 | gi 4966356 gb AAD34687.1 AC006341_15<br>Strong similarity to gb L34684 inosine monophosphate dehydrogenase (IMPDH) from Arabidopsis thaliana and is a member of the PF00478 IMP dehydrogenase family [Arabidopsis thaliana] gi 332191320 gb AEE29441.1  IMP dehydrogenase [Arabidopsis thaliana]                                                                                                                                                                                                                                                                     | 521 | 502 | 0         | 96.4  | 90.6 | 93.9 | IMP dehydrogenase                      | gbpln | Arabidopsis thaliana | AT1G16350.1   Symbols:   Aldolase-type TIM barrel family protein   chr1:5590951-5592872 FORWARD LENGTH=502                       | 521 | 502 | 0         | 96.4  | 90.6 | 93.9 |
| Rsa1.0_00065.1.g3463.t1 | gb EOA37727.1  hypothetical protein CARUB_v10012501mg [Capsella rubella]                                                                                                                                                                                                                                                                                                                                                                                                                                                                                             | 608 | 646 | 0         | 106.3 | 76.8 | 84.7 | hypothetical protein CARUB_v10012501mg | gbpln | Capsella rubella     | AT1G16330.1   Symbols: CYOB3;1   cyclin b3;1   chr1:5582387-5587391 REVERSE LENGTH=648                                           | 608 | 648 | 0         | 106.6 | 75.3 | 84.0 |
| Rsa1.0_00065.1.g3464.t1 | gb EOA38416.1  hypothetical protein CARUB_v10009990mg [Capsella rubella]                                                                                                                                                                                                                                                                                                                                                                                                                                                                                             | 275 | 274 | 1.00E-120 | 99.6  | 81.1 | 90.5 | hypothetical protein CARUB_v10009990mg | gbpln | Capsella rubella     | AT1G16320.1   Symbols:   Uncharacterized conserved protein (DUF2358)   chr1:5580951-5581932 FORWARD LENGTH=273                   | 275 | 273 | 1.00E-122 | 99.3  | 81.8 | 90.5 |
| Rsa1.0_00065.1.g3465.t1 | gb AAD34683.1 AC006341_11 F309.11 [Arabidopsis thaliana]<br>gi 17529248 gb AAL38851.1  unknown protein [Arabidopsis thaliana]                                                                                                                                                                                                                                                                                                                                                                                                                                        | 398 | 398 | 0         | 100.0 | 95.0 | 97.5 | F309.11                                | gbpln | Arabidopsis thaliana | AT1G16310.1   Symbols:   Cation efflux family protein   chr1:5578435-5580585 FORWARD LENGTH=428                                  | 398 | 428 | 0         | 107.5 | 95.0 | 97.5 |
| Rsa1.0_00065.1.g3466.t1 | ref XP_002890157.1  GAPCP-2 [Arabidopsis lyrata subsp. lyrata]<br>gi 297335999 gb EFH66416.1  GAPCP-2 [Arabidopsis lyrata subsp. lyrata]                                                                                                                                                                                                                                                                                                                                                                                                                             | 420 | 420 | 0         | 100.0 | 93.6 | 96.7 | GAPCP-2                                | gbpln | Arabidopsis lyrata   | AT1G16300.1   Symbols: GAPCP-2   glyceraldehyde-3-phosphate dehydrogenase of plastid 2   chr1:5574433-5577406 FORWARD LENGTH=420 | 420 | 420 | 0         | 100.0 | 94.0 | 96.9 |

|                         |                                                                                                                                                                                                                                                                                                                                                                                                                                                                                                                                                                                                                                                                                                                                           |      |      |           |       |      |      |                                        |       |                      |                                                                                                                                                                                                                                                                                                                                                                                                                                                                                                                                    |      |      |           |       |      |      |
|-------------------------|-------------------------------------------------------------------------------------------------------------------------------------------------------------------------------------------------------------------------------------------------------------------------------------------------------------------------------------------------------------------------------------------------------------------------------------------------------------------------------------------------------------------------------------------------------------------------------------------------------------------------------------------------------------------------------------------------------------------------------------------|------|------|-----------|-------|------|------|----------------------------------------|-------|----------------------|------------------------------------------------------------------------------------------------------------------------------------------------------------------------------------------------------------------------------------------------------------------------------------------------------------------------------------------------------------------------------------------------------------------------------------------------------------------------------------------------------------------------------------|------|------|-----------|-------|------|------|
| Rsa1.0_00065.1.g3467.t1 | ref[XP_002892901.1] hypothetical protein ARALYDRAFT_312606 [Arabidopsis lyrata subsp. lyrata] gi 297338743 gb EFH69160.1  hypothetical protein ARALYDRAFT_312606 [Arabidopsis lyrata subsp. lyrata]                                                                                                                                                                                                                                                                                                                                                                                                                                                                                                                                       | 433  | 458  | 0         | 105.8 | 88.0 | 92.6 | hypothetical protein ARALYDRAFT_312606 | gbpln | Arabidopsis lyrata   | AT1G16290.1   Symbols:   FUNCTIONS IN: molecular function unknown; INVOLVED IN: biological process unknown; LOCATED IN: chloroplast, vacuole; EXPRESSED IN: 19 plant structures; EXPRESSED DURING: 11 growth stages; CONTAINS InterPro DOMAIN/s: Lytic transglycosylase-like, catalytic (InterPro:IPR008258); Has 171 Blast hits to 155 proteins in 40 species: Archae - 0; Bacteria - 54; Metazoa - 0; Fungi - 0; Plants - 55; Viruses - 0; Other Eukaryotes - 62 (source: NCBI BLink).   chr1:5570938-5573538 REVERSE LENGTH=419 | 433  | 419  | 0         | 96.8  | 84.1 | 90.3 |
| Rsa1.0_00065.1.g3468.t1 | gb EOA16203.1  hypothetical protein CARUB_v10004342mg [Capsella rubella]                                                                                                                                                                                                                                                                                                                                                                                                                                                                                                                                                                                                                                                                  | 294  | 637  | 8.00E-29  | 216.7 | 25.5 | 31.0 | hypothetical protein CARUB_v10004342mg | gbpln | Capsella rubella     | AT4G12670.1   Symbols:   Homeodomain-like superfamily protein   chr4:7472530-7474519 FORWARD LENGTH=499                                                                                                                                                                                                                                                                                                                                                                                                                            | 294  | 499  | 9.00E-29  | 169.7 | 22.1 | 25.5 |
| Rsa1.0_00065.1.g3469.t1 | gb EOA36788.1  hypothetical protein CARUB_v10008134mg [Capsella rubella]                                                                                                                                                                                                                                                                                                                                                                                                                                                                                                                                                                                                                                                                  | 1130 | 1156 | 0         | 102.3 | 80.3 | 85.9 | hypothetical protein CARUB_v10008134mg | gbpln | Capsella rubella     | AT1G16270.2   Symbols:   Protein kinase superfamily protein with octicosapeptide/Phox/Bem1p domain   chr1:5563890-5568145 FORWARD LENGTH=1147                                                                                                                                                                                                                                                                                                                                                                                      | 1130 | 1147 | 0         | 101.5 | 80.0 | 85.2 |
| Rsa1.0_00065.1.g3470.t1 | ref[NP_173075.3] F-box/kelch-repeat protein [Arabidopsis thaliana] gi 12242689 sp Q0WW40.1 FBK5_ARAT H RecName: Full=F-box/kelch-repeat protein At g16250 gi 110741130 db BAE98658.1  hypothetical protein [Arabidopsis thaliana] gi 119360151 gb ABL66804.1  At g16250 [Arabidopsis thaliana] gi 332191305 gb AEE29426.1  F-box/kelch-repeat protein [Arabidopsis thaliana] ref[NP_563994.1] syntaxin-51 [Arabidopsis thaliana] gi 79318036 ref NP_001031054.1  syntaxin-51 [Arabidopsis thaliana] gi 28380164 sp Q9SA23.1 SYP51_ARAT H RecName: Full=Syntaxin-51; Short=AtSYP51 gi 4966344 gb AAD34675.1 AC006341_3 ESTs gb F15498, gb H37515, gb T41906, gb T22448, gb W43356 and gb T20739 come from this gene [Arabidopsis thaliana] | 435  | 383  | 1.00E-156 | 88.0  | 66.2 | 73.3 | F-box/kelch-repeat protein             | gbpln | Arabidopsis thaliana | AT1G16250.1   Symbols:   Galactose oxidase/kelch repeat superfamily protein   chr1:5557214-5558697 FORWARD LENGTH=383                                                                                                                                                                                                                                                                                                                                                                                                              | 435  | 383  | 1.00E-159 | 88.0  | 66.2 | 73.3 |
| Rsa1.0_00065.1.g3471.t1 | gi 13811644 gb AAK40223.1 AF355755.1 syntaxin of plants 51 [Arabidopsis thaliana] gi 18650630 gb AAL75885.1  At g16240/F309.4 [Arabidopsis thaliana] gi 20453319 gb AAM19898.1  At g16240/F309.4 [Arabidopsis thaliana] gi 21553458 gb AAM62551.1  unknown [Arabidopsis thaliana] gi 222424478 db BAH20194.1  AT1G16240 [Arabidopsis thaliana] gi 332191302 gb AEE29423.1  syntaxin-51 [Arabidopsis thaliana] gi 332191303 gb AEE29424.1  syntaxin-51 [Arabidopsis thaliana]                                                                                                                                                                                                                                                              | 233  | 232  | 1.00E-116 | 99.6  | 88.0 | 95.7 | syntaxin-51                            | gbpln | Arabidopsis thaliana | AT1G16240.2   Symbols: SYP51, ATSYP51   syntaxin of plants 51   chr1:5555183-5556340 REVERSE LENGTH=232                                                                                                                                                                                                                                                                                                                                                                                                                            | 233  | 232  | 1.00E-118 | 99.6  | 88.0 | 95.7 |
| Rsa1.0_00065.1.g3472.t1 | ref[NP_173072.1] putative protein phosphatase 2C 6 [Arabidopsis thaliana] gi 75200039 sp Q9SA22.1 P2C06_ARAT H RecName: Full=Probable protein phosphatase 2C 6; Short=AtP2C06 gi 4966343 gb AAD34674.1 AC006341_2 Is a member of PFI00481 Protein phosphatase 2C family [Arabidopsis thaliana] gi 332191299 gb AEE29420.1  putative protein phosphatase 2C 6 [Arabidopsis thaliana]                                                                                                                                                                                                                                                                                                                                                       | 492  | 491  | 0         | 99.8  | 84.3 | 90.0 | putative protein phosphatase 2C 6      | gbpln | Arabidopsis thaliana | AT1G16220.1   Symbols:   Protein phosphatase 2C family protein   chr1:5548653-5550553 FORWARD LENGTH=491                                                                                                                                                                                                                                                                                                                                                                                                                           | 492  | 491  | 0         | 99.8  | 84.3 | 90.0 |
| Rsa1.0_00065.1.g3473.t1 | gb EOA39107.1  hypothetical protein CARUB_v10011879mg [Capsella rubella]                                                                                                                                                                                                                                                                                                                                                                                                                                                                                                                                                                                                                                                                  | 366  | 368  | 1.00E-174 | 100.5 | 85.5 | 91.5 | hypothetical protein CARUB_v10011879mg | gbpln | Capsella rubella     | AT1G16190.1   Symbols: RAD23A   Rad23 UV excision repair protein family   chr1:5543267-5545892 FORWARD LENGTH=368                                                                                                                                                                                                                                                                                                                                                                                                                  | 366  | 368  | 1.00E-174 | 100.5 | 85.5 | 91.5 |
| Rsa1.0_00065.1.g3474.t1 | gb EOA14759.1  hypothetical protein CARUB_v10028056mg [Capsella rubella]                                                                                                                                                                                                                                                                                                                                                                                                                                                                                                                                                                                                                                                                  | 258  | 270  | 9.00E-49  | 104.7 | 40.3 | 47.7 | hypothetical protein CARUB_v10028056mg | gbpln | Capsella rubella     | AT5G45220.1   Symbols:   Disease resistance protein (TIR-NBS-LRR class) family   chr5:18298926-18301069 REVERSE LENGTH=546                                                                                                                                                                                                                                                                                                                                                                                                         | 258  | 546  | 1.00E-35  | 211.6 | 30.2 | 41.1 |

|                         |                                                                                                                                                                                                                                                                                                                                                                                                                                                                                           |     |     |           |       |      |      |                                        |       |                      |                                                                                                                                                                                                                                                                                                                                                                                                                                                                                                                                                                     |     |     |           |       |      |      |
|-------------------------|-------------------------------------------------------------------------------------------------------------------------------------------------------------------------------------------------------------------------------------------------------------------------------------------------------------------------------------------------------------------------------------------------------------------------------------------------------------------------------------------|-----|-----|-----------|-------|------|------|----------------------------------------|-------|----------------------|---------------------------------------------------------------------------------------------------------------------------------------------------------------------------------------------------------------------------------------------------------------------------------------------------------------------------------------------------------------------------------------------------------------------------------------------------------------------------------------------------------------------------------------------------------------------|-----|-----|-----------|-------|------|------|
| Rsa1.0_00065.1.g3475.t2 | gb EOA40567.1  hypothetical protein CARUB_v10009295mg [Capsella rubella]                                                                                                                                                                                                                                                                                                                                                                                                                  | 185 | 412 | 7.00E-50  | 222.7 | 69.2 | 73.0 | hypothetical protein CARUB_v10009295mg | gbpln | Capsella rubella     | AT1G16180.2   Symbols:   Serinc-domain containing serine and sphingolipid biosynthesis protein   chr1:5540905-5542670 FORWARD LENGTH=412                                                                                                                                                                                                                                                                                                                                                                                                                            | 185 | 412 | 1.00E-50  | 222.7 | 69.2 | 73.5 |
| Rsa1.0_00065.1.g3476.t1 | gb EOA33804.1  hypothetical protein CARUB_v10021275mg [Capsella rubella]                                                                                                                                                                                                                                                                                                                                                                                                                  | 91  | 93  | 1.00E-30  | 102.2 | 76.9 | 90.1 | hypothetical protein CARUB_v10021275mg | gbpln | Capsella rubella     | AT1G79660.1   Symbols:   unknown protein; BEST Arabidopsis thaliana protein match is: unknown protein (TAIR:AT1G16170.1). Has 30201 Blast hits to 17322 proteins in 780 species: Archae - 12; Bacteria - 1396; Metazoa - 17338; Fungi - 3422; Plants - 5037; Viruses - 0; Other Eukaryotes - 2996 (source: NCBI BLink).   chr1:29976294-29976575 FORWARD LENGTH=93                                                                                                                                                                                                  | 91  | 93  | 3.00E-33  | 102.2 | 76.9 | 87.9 |
| Rsa1.0_00065.1.g3477.t1 | gb EOA33654.1  hypothetical protein CARUB_v10019823mg [Capsella rubella]                                                                                                                                                                                                                                                                                                                                                                                                                  | 716 | 794 | 0         | 110.9 | 59.9 | 71.8 | hypothetical protein CARUB_v10019823mg | gbpln | Capsella rubella     | AT1G79670.1   Symbols: RFO1, WAKL22   Wall-associated kinase family protein   chr1:29976887-29979337 REVERSE LENGTH=751                                                                                                                                                                                                                                                                                                                                                                                                                                             | 716 | 751 | 0         | 104.9 | 57.5 | 71.8 |
| Rsa1.0_00065.1.g3478.t1 | gb EOA38313.1  hypothetical protein CARUB_v10009813mg [Capsella rubella]                                                                                                                                                                                                                                                                                                                                                                                                                  | 310 | 312 | 1.00E-155 | 100.6 | 88.4 | 94.5 | hypothetical protein CARUB_v10009813mg | gbpln | Capsella rubella     | AT1G16080.1   Symbols:   unknown protein; LOCATED IN: apoplast, chloroplast stroma, chloroplast, chloroplast envelope; EXPRESSED IN: 23 plant structures; EXPRESSED DURING: 14 growth stages; Has 81 Blast hits to 81 proteins in 28 species: Archae - 0; Bacteria - 2; Metazoa - 0; Fungi - 0; Plants - 62; Viruses - 0; Other Eukaryotes - 17 (source: NCBI BLink).   chr1:5514394-5515761 FORWARD LENGTH=313                                                                                                                                                     | 310 | 313 | 1.00E-151 | 101.0 | 87.1 | 92.6 |
| Rsa1.0_00065.1.g3479.t1 | ref XP_002892894.1  hypothetical protein ARALYDRAFT.471808 [Arabidopsis lyrata subsp. lyrata]   g 297338736 gb EFH69153.1  hypothetical protein ARALYDRAFT.471808 [Arabidopsis lyrata subsp. lyrata]                                                                                                                                                                                                                                                                                      | 398 | 397 | 0         | 99.7  | 89.4 | 95.0 | hypothetical protein ARALYDRAFT.471808 | gbpln | Arabidopsis lyrata   | AT1G16070.1   Symbols: AtTLP8, TLP8   tubby like protein 8   chr1:5511899-5513779 REVERSE LENGTH=397                                                                                                                                                                                                                                                                                                                                                                                                                                                                | 398 | 397 | 0         | 99.7  | 88.2 | 94.0 |
| Rsa1.0_00065.1.g3480.t1 | ref XP_002890145.1  hypothetical protein ARALYDRAFT.471806 [Arabidopsis lyrata subsp. lyrata]   g 297335987 gb EFH66404.1  hypothetical protein ARALYDRAFT.471806 [Arabidopsis lyrata subsp. lyrata]                                                                                                                                                                                                                                                                                      | 338 | 332 | 2.33E-156 | 98.2  | 84.0 | 90.8 | hypothetical protein ARALYDRAFT.471806 | gbpln | Arabidopsis lyrata   | AT1G16060.1   Symbols: ADAP   ARIA-interacting double AP2 domain protein   chr1:5508563-5511609 FORWARD LENGTH=345                                                                                                                                                                                                                                                                                                                                                                                                                                                  | 338 | 345 | 1.00E-149 | 102.1 | 84.3 | 92.0 |
| Rsa1.0_00065.1.g3481.t1 | ref XP_002890143.1  predicted protein [Arabidopsis lyrata subsp. lyrata]   g 297335985 gb EFH66402.1  predicted protein [Arabidopsis lyrata subsp. lyrata]                                                                                                                                                                                                                                                                                                                                | 231 | 228 | 4.00E-93  | 98.7  | 74.9 | 84.0 | predicted protein                      | gbpln | Arabidopsis lyrata   | AT1G16040.1   Symbols:   FUNCTIONS IN: molecular function unknown; INVOLVED IN: GPI anchor biosynthetic process; LOCATED IN: integral to membrane, endoplasmic reticulum membrane; EXPRESSED IN: 24 plant structures; EXPRESSED DURING: 13 growth stages; CONTAINS InterPro DOMAIN/s: GPI biosynthesis protein Pig-F (InterPro:IPR009580). Has 280 Blast hits to 280 proteins in 133 species: Archae - 0; Bacteria - 0; Metazoa - 113; Fungi - 111; Plants - 44; Viruses - 0; Other Eukaryotes - 12 (source: NCBI BLink).   chr1:5504747-5506456 FORWARD LENGTH=226 | 231 | 226 | 3.00E-81  | 97.8  | 68.8 | 81.8 |
| Rsa1.0_00065.1.g3482.t1 | dbj BAJ34597.1  unnamed protein product [Theellungiella halophila]                                                                                                                                                                                                                                                                                                                                                                                                                        | 649 | 647 | 0         | 99.7  | 94.9 | 97.7 | unnamed protein product                | ----  | ----                 | AT1G16030.1   Symbols: Hsp70b   heat shock protein 70B   chr1:5502386-5504326 REVERSE LENGTH=646                                                                                                                                                                                                                                                                                                                                                                                                                                                                    | 649 | 646 | 0         | 99.5  | 93.1 | 97.4 |
| Rsa1.0_00065.1.g3483.t1 | ref NP_173051.1  cyclic nucleotide gated channel 7 [Arabidopsis thaliana]   g 332191272 gb AE29393.1  cyclic nucleotide gated channel 7 [Arabidopsis thaliana]                                                                                                                                                                                                                                                                                                                            | 713 | 709 | 0         | 99.4  | 94.2 | 97.2 | cyclic nucleotide gated channel 7      | gbpln | Arabidopsis thaliana | AT1G15990.1   Symbols: ATONGC7, CNGC7   cyclic nucleotide gated channel 7   chr1:5491304-5493772 REVERSE LENGTH=709                                                                                                                                                                                                                                                                                                                                                                                                                                                 | 713 | 709 | 0         | 99.4  | 94.2 | 97.2 |
| Rsa1.0_00065.1.g3484.t1 | ref NP_563986.1  NDH-dependent cyclic electron flow 1 [Arabidopsis thaliana]   g 6587804 gb AAF18495.1 AC010924.8 ESTs   g T43280, gb AA395195 come from this gene [Arabidopsis thaliana]   g 16323198 gb AL15333.1  At1g15980/T24D18.8 [Arabidopsis thaliana]   g 21537196 gb AAM61527.1  unknown [Arabidopsis thaliana]   g 2170082.1 gb AAM70584.1  At1g15980/T24D18.8 [Arabidopsis thaliana]   g 332191271 gb AEE29392.1  NDH-dependent cyclic electron flow 1 [Arabidopsis thaliana] | 461 | 461 | 0         | 100.0 | 89.4 | 94.1 | NDH-dependent cyclic electron flow 1   | gbpln | Arabidopsis thaliana | AT1G15980.1   Symbols: NDF1, NDH48   NDH-dependent cyclic electron flow 1   chr1:5489314-5491199 FORWARD LENGTH=461                                                                                                                                                                                                                                                                                                                                                                                                                                                 | 461 | 461 | 0         | 100.0 | 89.4 | 94.1 |
| Rsa1.0_00065.1.g3485.t1 | #                                                                                                                                                                                                                                                                                                                                                                                                                                                                                         | #   | #   | #         | #     | #    | #    | -                                      | ----  | ----                 | #                                                                                                                                                                                                                                                                                                                                                                                                                                                                                                                                                                   | #   | #   | #         | #     | #    | #    |
| Rsa1.0_00065.1.g3486.t1 | #                                                                                                                                                                                                                                                                                                                                                                                                                                                                                         | #   | #   | #         | #     | #    | #    | -                                      | ----  | ----                 | #                                                                                                                                                                                                                                                                                                                                                                                                                                                                                                                                                                   | #   | #   | #         | #     | #    | #    |

|                         |                                                                                                                                                                                                                                                                                                                                                                                       |     |      |           |       |      |      |                                                                                                                                                     |       |                      |                                                                                                                                                                                                                                                            |     |     |           |       |      |      |
|-------------------------|---------------------------------------------------------------------------------------------------------------------------------------------------------------------------------------------------------------------------------------------------------------------------------------------------------------------------------------------------------------------------------------|-----|------|-----------|-------|------|------|-----------------------------------------------------------------------------------------------------------------------------------------------------|-------|----------------------|------------------------------------------------------------------------------------------------------------------------------------------------------------------------------------------------------------------------------------------------------------|-----|-----|-----------|-------|------|------|
| Rsa1.0_00065.1.g3487.t5 | ref NP_173048.3  metal transporter Nramp6 [Arabidopsis thaliana] gi 30173130 sp Q9S9N8.2 NRAM6_ARAT H RecName: Full=Metal transporter Nramp6; Short=AtNramp6 gi 12666983 emb CAC28123.1  putative metal transporter [Arabidopsis thaliana] gi 332191269 gb AEE29390.1  metal transporter Nramp6 [Arabidopsis thaliana]                                                                | 475 | 527  | 0         | 110.9 | 92.2 | 94.9 | metal transporter Nramp6                                                                                                                            | gbpln | Arabidopsis thaliana | AT1G15960.1   Symbols: NRAM6, ATNRAMP6   NRAMP metal ion transporter 6   chr1:5482202-5485066 REVERSE LENGTH=527                                                                                                                                           | 475 | 527 | 0         | 110.9 | 92.2 | 94.9 |
| Rsa1.0_00065.1.g3488.t1 | gb ADC40029.1  cinnamoyl-CoA reductase [Isatis tinctoria]                                                                                                                                                                                                                                                                                                                             | 344 | 341  | 0         | 99.1  | 94.2 | 96.5 | cinnamoyl-CoA reductase                                                                                                                             | gbpln | Isatis tinctoria     | AT1G15950.1   Symbols: CCR1, IRX4, ATCCR1   cinnamoyl coa reductase 1   chr1:5478855-5481915 FORWARD LENGTH=344                                                                                                                                            | 344 | 344 | 0         | 100.0 | 95.3 | 96.8 |
| Rsa1.0_00065.1.g3489.t1 | ref NP_173046.2  aspartyl beta-hydroxylase N-terminal region domain-containing protein [Arabidopsis thaliana] gi 6567800 gb AAF18491.1 ACO10924.4 T24D18.4 [Arabidopsis thaliana] gi 332191266 gb AEE29387.1  aspartyl beta-hydroxylase N-terminal region domain-containing protein [Arabidopsis thaliana]                                                                            | 836 | 990  | 0         | 118.4 | 50.5 | 62.4 | aspartyl beta-hydroxylase N-terminal region domain-containing protein                                                                               | gbpln | Arabidopsis thaliana | AT1G15940.1   Symbols:   Tudor/PWPP/MBT superfamily protein   chr1:5473672-5478050 FORWARD LENGTH=990                                                                                                                                                      | 836 | 990 | 0         | 118.4 | 50.5 | 62.4 |
| Rsa1.0_00065.1.g3490.t1 | gb EOA36301.1  hypothetical protein CARUB_v10010589mg [Capsella rubella]                                                                                                                                                                                                                                                                                                              | 144 | 142  | 5.00E-71  | 98.6  | 95.8 | 97.9 | hypothetical protein CARUB_v10010589mg                                                                                                              | gbpln | Capsella rubella     | AT2G32060.2   Symbols:   Ribosomal protein L7Ae/L30e/S12e/Gadd45 family protein   chr2:13639228-13640104 REVERSE LENGTH=144                                                                                                                                | 144 | 144 | 6.00E-63  | 100.0 | 84.0 | 91.7 |
| Rsa1.0_00065.1.g3491.t5 | ref XP_002890135.1  hypothetical protein ARALYDRAFT_312580 [Arabidopsis lyrata subsp. lyrata] gi 297335977 gb EFH66394.1  hypothetical protein ARALYDRAFT_312580 [Arabidopsis lyrata subsp. lyrata]                                                                                                                                                                                   | 119 | 113  | 4.00E-41  | 95.0  | 82.4 | 89.1 | hypothetical protein ARALYDRAFT_312580                                                                                                              | gbpln | Arabidopsis lyrata   | AT1G15900.1   Symbols:   unknown protein; Has 19 Blast hits to 19 proteins in 10 species: Archae - 0; Bacteria - 2; Metazoa - 0; Fungi - 0; Plants - 15; Viruses - 0; Other Eukaryotes - 2 (source: NCBI BLINK).   chr1:5464356-5464697 FORWARD LENGTH=113 | 119 | 113 | 1.00E-42  | 95.0  | 81.5 | 86.6 |
| Rsa1.0_00065.1.g3492.t1 | ref NP_173041.1  CC-NBS-LRR class disease resistance protein [Arabidopsis thaliana] gi 374095383 sp Q9LMP6.2 DRL3_ARAT H RecName: Full=Probable disease resistance protein At1g15890 gi 332191259 gb AEE29380.1  CC-NBS-LRR class disease resistance protein [Arabidopsis thaliana]                                                                                                   | 867 | 851  | 0         | 98.2  | 67.7 | 78.9 | CC-NBS-LRR class disease resistance protein                                                                                                         | gbpln | Arabidopsis thaliana | AT1G15890.1   Symbols:   Disease resistance protein (CC-NBS-LRR class) family   chr1:5461406-5463961 FORWARD LENGTH=851                                                                                                                                    | 867 | 851 | 0         | 98.2  | 67.7 | 78.9 |
| Rsa1.0_00065.1.g3493.t1 | gb EOA36249.1  hypothetical protein CARUB_v10010239mg [Capsella rubella]                                                                                                                                                                                                                                                                                                              | 263 | 223  | 2.00E-95  | 84.8  | 67.3 | 69.2 | hypothetical protein CARUB_v10010239mg                                                                                                              | gbpln | Capsella rubella     | AT1G15880.1   Symbols: GOS11, atgos11   golgi snare 11   chr1:5458718-5460089 REVERSE LENGTH=223                                                                                                                                                           | 263 | 223 | 1.00E-97  | 84.8  | 66.9 | 69.6 |
| Rsa1.0_00065.1.g3494.t1 | ref NP_001154344.1  uncharacterized protein [Arabidopsis thaliana] gi 240254082 ref NP_563983.4  uncharacterized protein [Arabidopsis thaliana] gi 32815875 gb AAP88334.1  At1g15860 [Arabidopsis thaliana] gi 332191253 gb AEE29374.1  uncharacterized protein AT1G15860 [Arabidopsis thaliana] gi 332191254 gb AEE29375.1  uncharacterized protein AT1G15860 [Arabidopsis thaliana] | 229 | 227  | 1.00E-110 | 99.1  | 82.5 | 87.8 | uncharacterized protein                                                                                                                             | gbpln | Arabidopsis thaliana | AT1G15860.2   Symbols:   Domain of unknown function (DUF298)   chr1:5455055-5456741 FORWARD LENGTH=227                                                                                                                                                     | 229 | 227 | 1.00E-112 | 99.1  | 82.5 | 87.8 |
| Rsa1.0_00065.1.g3495.t1 | gb EOA38586.1  hypothetical protein CARUB_v10010411mg [Capsella rubella]                                                                                                                                                                                                                                                                                                              | 197 | 181  | 6.00E-39  | 91.9  | 51.8 | 70.6 | hypothetical protein CARUB_v10010411mg                                                                                                              | gbpln | Capsella rubella     | AT4G00420.2   Symbols:   Double-stranded RNA-binding domain (DsRBD)-containing protein   chr4:181518-182629 REVERSE LENGTH=190                                                                                                                             | 197 | 190 | 1.00E-39  | 96.4  | 49.2 | 62.4 |
| Rsa1.0_00065.1.g3496.t1 | gb AAF82153.1 AC034256_17 Contains similarity to extensin (atExt1) from Arabidopsis thaliana gb U43627 and is rich in proline and glycine. EST gb Z37262 comes from this gene [Arabidopsis thaliana]                                                                                                                                                                                  | 711 | 1006 | 4.00E-72  | 141.5 | 34.7 | 39.7 | Contains similarity to extensin (atExt1) from Arabidopsis thaliana gb U43627 and is rich in proline and glycine. EST gb Z37262 comes from this gene | gbpln | Arabidopsis thaliana | AT1G15825.1   Symbols:   hydroxyproline-rich glycoprotein family protein   chr1:5448149-5448529 REVERSE LENGTH=126                                                                                                                                         | 711 | 126 | 2.00E-37  | 17.7  | 13.1 | 14.8 |
| Rsa1.0_00065.1.g3497.t1 | ref XP_002892885.1  Lhcb6 protein [Arabidopsis lyrata subsp. lyrata] gi 297338727 gb EFH69144.1  Lhcb6 protein [Arabidopsis lyrata subsp. lyrata]                                                                                                                                                                                                                                     | 256 | 256  | 1.00E-134 | 100.0 | 94.1 | 96.5 | Lhcb6 protein                                                                                                                                       | gbpln | Arabidopsis lyrata   | AT1G15820.1   Symbols: LHCB6, CP24   light harvesting complex photosystem II subunit 6   chr1:5446685-5447676 REVERSE LENGTH=258                                                                                                                           | 256 | 258 | 1.00E-134 | 100.8 | 93.0 | 95.7 |

|                         |                                                                                                                                                                                                                                                                                                                                                                                                                                                                                                                                      |      |      |           |       |      |      |                                                |       |                      |                                                                                                                                                                                                                                                                                                                                           |      |      |           |       |      |      |
|-------------------------|--------------------------------------------------------------------------------------------------------------------------------------------------------------------------------------------------------------------------------------------------------------------------------------------------------------------------------------------------------------------------------------------------------------------------------------------------------------------------------------------------------------------------------------|------|------|-----------|-------|------|------|------------------------------------------------|-------|----------------------|-------------------------------------------------------------------------------------------------------------------------------------------------------------------------------------------------------------------------------------------------------------------------------------------------------------------------------------------|------|------|-----------|-------|------|------|
| Rsa1.0_00065.1.g3498.t1 | refNP_563982.1  S15/NS1, RNA-binding protein [Arabidopsis thaliana] gi 8927660 gb AAF82151.1 AC034256_15 Contains similarity to an unknown protein T21F1.5 gi 6730725 from Arabidopsis thaliana BAC T21F11 gb AC018849 and contains a Ribosomal Protein S15 PF 00312 domain [Arabidopsis thaliana] gi 13605577 gb AAK32782.1 AF361614.1 At g15810/F7H2.23 [Arabidopsis thaliana] gi 22137170 gb AAM91430.1  At g15810/F7H2.23 [Arabidopsis thaliana] gi 332191247 gb AEE29368.1  S15/NS1, RNA-binding protein [Arabidopsis thaliana] | 418  | 419  | 1.00E-124 | 100.2 | 64.6 | 73.9 | S15/NS1, RNA-binding protein                   | gbpln | Arabidopsis thaliana | AT1G15810.1   Symbols:   S15/NS1, RNA-binding protein   chr1:5444496-5446271 FORWARD LENGTH=419                                                                                                                                                                                                                                           | 418  | 419  | 1.00E-127 | 100.2 | 64.6 | 73.9 |
| Rsa1.0_00065.1.g3499.t1 | refXP_002892884.1  hypothetical protein ARALYDRAFT_312568 [Arabidopsis lyrata subsp. lyrata] gi 297338726 gb EFH69143.1  hypothetical protein ARALYDRAFT_312568 [Arabidopsis lyrata subsp. lyrata]                                                                                                                                                                                                                                                                                                                                   | 143  | 308  | 6.00E-35  | 215.4 | 62.9 | 67.8 | hypothetical protein ARALYDRAFT_312568         | gbpln | Arabidopsis lyrata   | AT1G15800.1   Symbols:   unknown protein; BEST Arabidopsis thaliana protein match is: unknown protein (TAIR:AT1G80610.1); Has 56 Blast hits to 52 proteins in 9 species: Archae - 0; Bacteria - 0; Metazoa - 0; Fungi - 0; Plants - 56; Viruses - 0; Other Eukaryotes - 0 (source: NCBI BLink).   chr1:5441425-5443584 REVERSE LENGTH=207 | 143  | 207  | 4.00E-33  | 144.8 | 59.4 | 62.9 |
| Rsa1.0_00065.1.g3500.t1 | dbj BAM73280.1  gibberellin 3 oxidase 1 [Raphanus sativus]                                                                                                                                                                                                                                                                                                                                                                                                                                                                           | 359  | 359  | 0         | 100.0 | 99.2 | 99.4 | gibberellin 3 oxidase 1                        | gbpln | Raphanus sativus     | AT1G15550.1   Symbols: GA4, ATGA3OX1, GA3OX1   gibberellin 3-oxidase 1   chr1:5344569-5346078 REVERSE LENGTH=358                                                                                                                                                                                                                          | 359  | 358  | 0         | 99.7  | 88.0 | 92.8 |
| Rsa1.0_00065.1.g3501.t1 | refXP_002890109.1  predicted protein [Arabidopsis lyrata subsp. lyrata] gi 297335951 gb EFH66368.1  predicted protein [Arabidopsis lyrata subsp. lyrata]                                                                                                                                                                                                                                                                                                                                                                             | 322  | 322  | 1.00E-166 | 100.0 | 84.2 | 92.9 | predicted protein                              | gbpln | Arabidopsis lyrata   | AT1G15540.1   Symbols:   2-oxoglutarate (2OG) and Fe(II)-dependent oxygenase superfamily protein   chr1:5342587-5343705 FORWARD LENGTH=320                                                                                                                                                                                                | 322  | 320  | 1.00E-160 | 99.4  | 85.7 | 92.2 |
| Rsa1.0_00065.1.g3502.t1 | refNP_173005.1  ABC transporter G family member 40 [Arabidopsis thaliana] gi 75336094 sp Q9M9E.1 AB40G_ARAT H RecName: Full=ABC transporter G family member 40; Short=ABC transporter ABCG40; Short=AtABCG40; AltName: Full=Pleiotropic drug resistance protein 12                                                                                                                                                                                                                                                                   | 1414 | 1423 | 0         | 100.6 | 94.2 | 97.8 | ABC transporter G family member 40             | gbpln | Arabidopsis thaliana | AT1G15520.1   Symbols: PDR12, ATPDR12, ABCG40, ATABCG40   pleiotropic drug resistance 12   chr1:5331993-5338175 REVERSE LENGTH=1423                                                                                                                                                                                                       | 1414 | 1423 | 0         | 100.6 | 94.2 | 97.8 |
| Rsa1.0_00065.1.g3503.t1 | gi 8072390 gb AAF71978.1 AC013453_3 Putative ABC transporter [Arabidopsis thaliana] gi 28144321 pg DAA00800.1  TPA_exp: FDR12 ABC transporter [Arabidopsis thaliana] gi 332191211 gb AEE29332.1  ABC transporter: G family member 40 [Arabidopsis thaliana] refNP_173004.1  pentatricopeptide repeat-containing protein [Arabidopsis thaliana] gi 75191104 sp Q9M9E2.1 PPR45_ARAT H RecName: Full=Pentatricopeptide repeat-containing protein At g15510, chloroplastic; Flags: Precursor                                             | 865  | 866  | 0         | 100.1 | 89.2 | 95.1 | pentatricopeptide repeat-containing protein    | gbpln | Arabidopsis thaliana | AT1G15510.1   Symbols: ATECB2, ECB2, VAC1   Tetatricopeptide repeat (TPR)-like superfamily protein   chr1:5329111-5331711 FORWARD LENGTH=866                                                                                                                                                                                              | 865  | 866  | 0         | 100.1 | 89.2 | 95.1 |
| Rsa1.0_00065.1.g3504.t1 | gi 8072389 gb AAF71977.1 AC013453_2 Hypothetical protein [Arabidopsis thaliana] gi 300825685 gb ADK35876.1  chloroplast vanilla cream 1 [Arabidopsis thaliana] gi 332191210 gb AEE29331.1  pentatricopeptide repeat-containing protein [Arabidopsis thaliana]                                                                                                                                                                                                                                                                        | 608  | 618  | 0         | 101.6 | 92.4 | 95.7 | hypothetical protein CARUB_v10008598mg         | gbpln | Capsella rubella     | AT1G15500.1   Symbols: ATNTT2   TLC ATP/ADP transporter   chr1:5326426-5328688 FORWARD LENGTH=618                                                                                                                                                                                                                                         | 608  | 618  | 0         | 101.6 | 92.8 | 95.2 |
| Rsa1.0_00065.1.g3505.t1 | refNP_173002.1  alpha/beta-hydrolase domain-containing protein [Arabidopsis thaliana] gi 5103847 gb AAD39677.1 AC007591_42 Contains PF 00561 alpha/beta hydrolase fold [Arabidopsis thaliana] gi 17529298 gb AL38876.1  unknown protein [Arabidopsis thaliana] gi 26983390 gb AAN86197.1  unknown protein [Arabidopsis thaliana] gi 332191208 gb AEE29329.1  alpha/beta-hydrolase domain-containing protein [Arabidopsis thaliana]                                                                                                   | 636  | 648  | 0         | 101.9 | 85.4 | 89.0 | alpha/beta-hydrolase domain-containing protein | gbpln | Arabidopsis thaliana | AT1G15490.1   Symbols:   alpha/beta-Hydrolases superfamily protein   chr1:5320859-5323422 REVERSE LENGTH=648                                                                                                                                                                                                                              | 636  | 648  | 0         | 101.9 | 85.4 | 89.0 |

|                         |                                                                                                                                                                                                                                                                                                                                                                                                                                                                                                                                                                                                                                                                                                                                                                                                                                                                                                                                                                                                                                        |     |     |           |       |      |      |                                                     |       |                      |                                                                                                                                                                                                                                                                                                                                                                                                                                                                                                                                   |     |     |           |       |      |      |
|-------------------------|----------------------------------------------------------------------------------------------------------------------------------------------------------------------------------------------------------------------------------------------------------------------------------------------------------------------------------------------------------------------------------------------------------------------------------------------------------------------------------------------------------------------------------------------------------------------------------------------------------------------------------------------------------------------------------------------------------------------------------------------------------------------------------------------------------------------------------------------------------------------------------------------------------------------------------------------------------------------------------------------------------------------------------------|-----|-----|-----------|-------|------|------|-----------------------------------------------------|-------|----------------------|-----------------------------------------------------------------------------------------------------------------------------------------------------------------------------------------------------------------------------------------------------------------------------------------------------------------------------------------------------------------------------------------------------------------------------------------------------------------------------------------------------------------------------------|-----|-----|-----------|-------|------|------|
| Rsa1.0_00065.1.g3506.t1 | ref NP_563978.1  serine-threonine kinase receptor-associated protein [Arabidopsis thaliana] gi 5103845 gb AAD39675.1 AC007591_40 Strong similarity to gb AF096285 serine-threonine kinase receptor-associated protein from Mus musculus and contains 5 PF 00400 WD40, G-beta repeat domains. EST gb F14050 comes from this gene [Arabidopsis thaliana] gi 21536836 gb AAM61168.1  Similar to un-interacting protein and contains WD40 domains [Arabidopsis thaliana] gi 24030339 gb AAN41335.1  unknown protein [Arabidopsis thaliana] gi 332191206 gb AEE29327.1  transducin/WD40 repeat-like superfamily protein [Arabidopsis thaliana] ref NP_172999.1  boron transporter 4 [Arabidopsis thaliana] gi 75215622 sp Q9XI23.1 BOR4_ARATH RecName: Full=Boron transporter 4 gi 5103843 gb AAD39673.1 AC007591_38 Is a member of the PF 00955 Anion exchanger family [Arabidopsis thaliana] gi 17978949 gb AAL47440.1  At1g15460/T16N11.24 [Arabidopsis thaliana] gi 332191205 gb AEE29326.1  boron transporter 4 [Arabidopsis thaliana] | 335 | 333 | 0         | 99.4  | 94.0 | 96.7 | serine-threonine kinase receptor-associated protein | gbpln | Arabidopsis thaliana | AT1G15470.1   Symbols:   Transducin/WD40 repeat-like superfamily protein   chr1:5315838-5317696 FORWARD LENGTH=333                                                                                                                                                                                                                                                                                                                                                                                                                | 335 | 333 | 0         | 99.4  | 94.0 | 96.7 |
| Rsa1.0_00065.1.g3507.t1 | gb EOA37299.1  hypothetical protein CARUB_v10010935mg [Capsella rubella]                                                                                                                                                                                                                                                                                                                                                                                                                                                                                                                                                                                                                                                                                                                                                                                                                                                                                                                                                               | 678 | 683 | 0         | 100.7 | 91.4 | 95.4 | boron transporter 4                                 | gbpln | Arabidopsis thaliana | AT1G15460.1   Symbols: ATBOR4, BOR4   HCO3- transporter family   chr1:5310196-5313376 REVERSE LENGTH=683                                                                                                                                                                                                                                                                                                                                                                                                                          | 678 | 683 | 0         | 100.7 | 91.4 | 95.4 |
| Rsa1.0_00065.1.g3508.t1 | gb EOA39629.1  hypothetical protein CARUB_v10008260mg [Capsella rubella]                                                                                                                                                                                                                                                                                                                                                                                                                                                                                                                                                                                                                                                                                                                                                                                                                                                                                                                                                               | 888 | 900 | 0         | 101.4 | 89.6 | 95.0 | hypothetical protein CARUB_v10008260mg              | gbpln | Capsella rubella     | AT1G15440.1   Symbols: PWP2, ATPWP2   periodic tryptophan protein 2   chr1:5306159-5309460 REVERSE LENGTH=900                                                                                                                                                                                                                                                                                                                                                                                                                     | 888 | 900 | 0         | 101.4 | 88.3 | 95.3 |
| Rsa1.0_00065.1.g3509.t1 | gb EOA36181.1  hypothetical protein CARUB_v10010051mg [Capsella rubella]                                                                                                                                                                                                                                                                                                                                                                                                                                                                                                                                                                                                                                                                                                                                                                                                                                                                                                                                                               | 268 | 260 | 1.00E-100 | 97.0  | 71.3 | 81.3 | hypothetical protein CARUB_v10010051mg              | gbpln | Capsella rubella     | AT1G15430.2   Symbols:   Protein of unknown function (DUF1644)   chr1:5305011-5305790 FORWARD LENGTH=259                                                                                                                                                                                                                                                                                                                                                                                                                          | 268 | 259 | 1.00E-98  | 96.6  | 68.3 | 79.9 |
| Rsa1.0_00065.1.g3510.t1 | ref NP_172994.1  uncharacterized protein [Arabidopsis thaliana] gi 5103841 gb AAD39671.1 AC007591_36 F9L1.37 [Arabidopsis thaliana] gi 332191199 gb AEE29320.1  uncharacterized protein AT1G15415 [Arabidopsis thaliana]                                                                                                                                                                                                                                                                                                                                                                                                                                                                                                                                                                                                                                                                                                                                                                                                               | 101 | 96  | 6.00E-36  | 95.0  | 78.2 | 86.1 | uncharacterized protein                             | gbpln | Arabidopsis thaliana | AT1G15415.1   Symbols:   The protein encoded by this gene was identified as a part of pollen proteome by mass spec analysis. It has weak homology to LEA (late embryo abundant) proteins. Encodes protein phosphatase 2A (PP2A) B'gamma subunit. Targeted to nucleus and cytosol.   chr1:5300931-5301412 REVERSE LENGTH=96                                                                                                                                                                                                        | 101 | 96  | 1.00E-38  | 95.0  | 78.2 | 86.1 |
| Rsa1.0_00065.1.g3511.t1 | ref NP_172993.1  aspartate-glutamate racemase-like protein [Arabidopsis thaliana] gi 5103839 gb AAD39669.1 AC007591_34 Is a member of the PF 01177 Aspartate-glutamate racemase family. EST gb T43554 comes from this gene [Arabidopsis thaliana] gi 26983862 gb AAN86183.1  unknown protein [Arabidopsis thaliana] gi 332191198 gb AEE29319.1  aspartate-glutamate racemase-like protein [Arabidopsis thaliana]                                                                                                                                                                                                                                                                                                                                                                                                                                                                                                                                                                                                                       | 330 | 330 | 1.00E-158 | 100.0 | 83.9 | 89.7 | aspartate-glutamate racemase-like protein           | gbpln | Arabidopsis thaliana | AT1G15410.1   Symbols:   aspartate-glutamate racemase family   chr1:5299577-5300681 FORWARD LENGTH=330                                                                                                                                                                                                                                                                                                                                                                                                                            | 330 | 330 | 1.00E-160 | 100.0 | 83.9 | 89.7 |
| Rsa1.0_00065.1.g3512.t1 | #                                                                                                                                                                                                                                                                                                                                                                                                                                                                                                                                                                                                                                                                                                                                                                                                                                                                                                                                                                                                                                      | #   | #   | #         | #     | #    | -    | ----                                                | ----  | #                    | #                                                                                                                                                                                                                                                                                                                                                                                                                                                                                                                                 | #   | #   | #         | #     | #    |      |
| Rsa1.0_00065.1.g3513.t1 | gb EOA37299.1  hypothetical protein CARUB_v10010935mg [Capsella rubella]                                                                                                                                                                                                                                                                                                                                                                                                                                                                                                                                                                                                                                                                                                                                                                                                                                                                                                                                                               | 145 | 148 | 4.00E-50  | 102.1 | 74.5 | 85.5 | hypothetical protein CARUB_v10010935mg              | gbpln | Capsella rubella     | AT1G15400.3   Symbols:   unknown protein; FUNCTIONS IN: molecular_function unknown; INVOLVED IN: biological_process unknown; LOCATED IN: plasma membrane; EXPRESSED IN: 23 plant structures; EXPRESSED DURING: 13 growth stages; BEST Arabidopsis thaliana protein match is: unknown protein (TAIR:AT1G80180.1). Has 84 Blast hits to 84 proteins in 17 species: Archae - 0; Bacteria - 6; Metazoa - 0; Fungi - 0; Plants - 75; Viruses - 0; Other Eukaryotes - 3 (source: NCBI BLINK).   chr1:5296019-5296824 REVERSE LENGTH=148 | 145 | 148 | 2.00E-46  | 102.1 | 66.9 | 77.2 |



|                         |                                                                                                                                                                                                                                                                                                                                                                                                                                                                                                                                                    |     |     |           |       |      |      |                                                                           |       |                      |                                                                                                                                                                                                                                                                                                                                                                                                                                                                                 |     |     |           |       |      |      |
|-------------------------|----------------------------------------------------------------------------------------------------------------------------------------------------------------------------------------------------------------------------------------------------------------------------------------------------------------------------------------------------------------------------------------------------------------------------------------------------------------------------------------------------------------------------------------------------|-----|-----|-----------|-------|------|------|---------------------------------------------------------------------------|-------|----------------------|---------------------------------------------------------------------------------------------------------------------------------------------------------------------------------------------------------------------------------------------------------------------------------------------------------------------------------------------------------------------------------------------------------------------------------------------------------------------------------|-----|-----|-----------|-------|------|------|
| Rsa1.0_00065.1.g3514.t1 | refXP_002890102.1  hypothetical protein ARALYDRAFT_334826 [Arabidopsis lyrata subsp. lyrata] gi 297335944 gb EFH66361.1  hypothetical protein ARALYDRAFT_334826 [Arabidopsis lyrata subsp. lyrata]                                                                                                                                                                                                                                                                                                                                                 | 265 | 270 | 1.00E-121 | 101.9 | 84.5 | 90.6 | hypothetical protein ARALYDRAFT_334826                                    | gbpln | Arabidopsis lyrata   | AT1G15390.1   Symbols: PDF1A, ATDEF1   peptide deformylase 1A   chr1:5294653-5295625 FORWARD LENGTH=269                                                                                                                                                                                                                                                                                                                                                                         | 265 | 269 | 1.00E-123 | 101.5 | 83.8 | 89.8 |
| Rsa1.0_00065.1.g3515.t1 | gb ABD65019.1  Sulfite oxidase, putative [Brassica oleracea]                                                                                                                                                                                                                                                                                                                                                                                                                                                                                       | 389 | 404 | 0         | 103.9 | 95.9 | 99.2 | Sulfite oxidase, putative                                                 | gbpln | Brassica oleracea    | AT3G01910.1   Symbols: SOX, AT-SO, AtSO   sulfite oxidase   chr3:314919-317274 REVERSE LENGTH=393                                                                                                                                                                                                                                                                                                                                                                               | 389 | 393 | 0         | 101.0 | 91.8 | 97.2 |
| Rsa1.0_00065.1.g3516.t1 | refXP_002892864.1  hypothetical protein ARALYDRAFT_888930 [Arabidopsis lyrata subsp. lyrata] gi 297338706 gb EFH69123.1  hypothetical protein ARALYDRAFT_888930 [Arabidopsis lyrata subsp. lyrata]                                                                                                                                                                                                                                                                                                                                                 | 74  | 76  | 9.00E-22  | 102.7 | 73.0 | 74.3 | hypothetical protein ARALYDRAFT_888930                                    | gbpln | Arabidopsis lyrata   | AT1G15385.1   Symbols:   unknown protein; CONTAINS InterPro DOMAIN/s: Protein of unknown function DUF761, plant (InterPro:IPR008490); Has 6 Blast hits to 6 proteins in 3 species: Archae - 0; Bacteria - 0; Metazoa - 0; Fungi - 0; Plants - 6; Viruses - 0; Other Eukaryotes - 0 (source: NCBI BLINK).   chr1:5292976-5293197 REVERSE LENGTH=73                                                                                                                               | 74  | 73  | 4.00E-22  | 98.6  | 67.6 | 70.3 |
| Rsa1.0_00065.1.g3517.t1 | gb EOA38607.1  hypothetical protein CARUB_v10010450mg [Capsella rubella]                                                                                                                                                                                                                                                                                                                                                                                                                                                                           | 174 | 174 | 1.00E-87  | 100.0 | 88.5 | 94.3 | hypothetical protein CARUB_v10010450mg                                    | gbpln | Capsella rubella     | AT1G15380.2   Symbols:   Lactoylglutathione lyase / glyoxalase I family protein   chr1:5290955-5292287 FORWARD LENGTH=174                                                                                                                                                                                                                                                                                                                                                       | 174 | 174 | 8.00E-87  | 100.0 | 86.2 | 93.1 |
| Rsa1.0_00066.1.g3518.t1 | refXP_002876205.1  hypothetical protein ARALYDRAFT_485718 [Arabidopsis lyrata subsp. lyrata] gi 297322043 gb EFH52464.1  hypothetical protein ARALYDRAFT_485718 [Arabidopsis lyrata subsp. lyrata]                                                                                                                                                                                                                                                                                                                                                 | 504 | 515 | 1.00E-133 | 102.2 | 61.5 | 71.2 | hypothetical protein ARALYDRAFT_485718                                    | gbpln | Arabidopsis lyrata   | AT3G53440.2   Symbols:   Homeodomain-like superfamily protein   chr3:19810936-19812474 FORWARD LENGTH=512                                                                                                                                                                                                                                                                                                                                                                       | 504 | 512 | 1.00E-126 | 101.6 | 59.3 | 69.8 |
| Rsa1.0_00066.1.g3519.t1 | gb EOA25801.1  hypothetical protein CARUB_v10019168mg [Capsella rubella]                                                                                                                                                                                                                                                                                                                                                                                                                                                                           | 216 | 215 | 1.00E-114 | 99.5  | 93.1 | 96.8 | hypothetical protein CARUB_v10019168mg                                    | gbpln | Capsella rubella     | AT3G53450.1   Symbols:   Putative lysine decarboxylase family protein   chr3:19812977-19815430 REVERSE LENGTH=215                                                                                                                                                                                                                                                                                                                                                               | 216 | 215 | 1.00E-117 | 99.5  | 93.5 | 96.3 |
| Rsa1.0_00066.1.g3520.t1 | dbj BAA06519.1  RNA-binding protein cp29 [Arabidopsis thaliana]                                                                                                                                                                                                                                                                                                                                                                                                                                                                                    | 330 | 326 | 1.00E-110 | 98.8  | 78.2 | 83.3 | RNA-binding protein cp29                                                  | gbpln | Arabidopsis thaliana | AT3G53460.3   Symbols: CP29   chloroplast RNA-binding protein 29   chr3:19819738-19821423 REVERSE LENGTH=342                                                                                                                                                                                                                                                                                                                                                                    | 330 | 342 | 1.00E-110 | 103.6 | 75.8 | 80.6 |
| Rsa1.0_00066.1.g3521.t1 | ref NP_190915.1  uncharacterized protein [Arabidopsis thaliana] gi 6729498 emb CAB67654.1  putative protein [Arabidopsis thaliana] gi 26450564 dbj BAC42394.1  unknown protein [Arabidopsis thaliana] gi 28416887 gb AA042974.1  At3g53470 [Arabidopsis thaliana] gi 332645573 gb AEE79094.1  uncharacterized protein AT3G53470 [Arabidopsis thaliana]                                                                                                                                                                                             | 134 | 135 | 6.00E-44  | 100.7 | 77.6 | 84.3 | uncharacterized protein                                                   | gbpln | Arabidopsis thaliana | AT3G53470.1   Symbols:   unknown protein; FUNCTIONS IN: molecular_function unknown; INVOLVED IN: biological_process unknown; LOCATED IN: chloroplast thylakoid membrane, chloroplast; EXPRESSED IN: 22 plant structures; EXPRESSED DURING: 13 growth stages; Has 35 Blast hits to 35 proteins in 13 species: Archae - 0; Bacteria - 0; Metazoa - 0; Fungi - 0; Plants - 35; Viruses - 0; Other Eukaryotes - 0 (source: NCBI BLINK).   chr3:19822813-19823298 FORWARD LENGTH=135 | 134 | 135 | 1.00E-46  | 100.7 | 77.6 | 84.3 |
| Rsa1.0_00066.1.g3522.t1 | ref NP_190918.3  RNA recognition motif and CCHC-type zinc finger domain-containing protein [Arabidopsis thaliana] gi 75334513 sp Q9FYB7.1 RSZ32_ARAT H RecName: Full=Serine/arginine-rich splicing factor RS2Z32; AltName: Full=RS-containing zinc finger protein 32; Short=At-RS2Z32; Short=At-RS2Z32 gi 9795142 emb CAB67657.2  splicing factor-like protein [Arabidopsis thaliana] gi 222422875 dbj BAH19424.1  AT3G53500 [Arabidopsis thaliana] gi 332645577 gb AEE79098.1  serine/arginine-rich splicing factor RS2Z32 [Arabidopsis thaliana] | 316 | 284 | 1.00E-114 | 89.9  | 81.6 | 85.1 | RNA recognition motif and CCHC-type zinc finger domain-containing protein | gbpln | Arabidopsis thaliana | AT3G53500.2   Symbols: RSZ32, RS2Z32, At-RS2Z   RNA-binding (RRM/RBD/RNP motifs) family protein with retrovirus zinc finger-like domain   chr3:19834557-19836507 REVERSE LENGTH=284                                                                                                                                                                                                                                                                                             | 316 | 284 | 1.00E-116 | 89.9  | 81.6 | 85.1 |
| Rsa1.0_00066.1.g3523.t1 | gb EOA26043.1  hypothetical protein CARUB_v10019457mg, partial [Capsella rubella]                                                                                                                                                                                                                                                                                                                                                                                                                                                                  | 419 | 489 | 0         | 116.7 | 95.9 | 97.6 | hypothetical protein CARUB_v10019457mg, partial                           | gbpln | Capsella rubella     | AT3G53520.1   Symbols: UXS1, ATUXS1   UDP-glucuronic acid decarboxylase 1   chr3:19841635-19844057 FORWARD LENGTH=435                                                                                                                                                                                                                                                                                                                                                           | 419 | 435 | 0         | 103.8 | 95.0 | 97.1 |
| Rsa1.0_00066.1.g3524.t1 | emb CAB67660.1  putative protein [Arabidopsis thaliana]                                                                                                                                                                                                                                                                                                                                                                                                                                                                                            | 256 | 250 | 1.00E-103 | 97.7  | 76.6 | 83.6 | putative protein                                                          | gbpln | Arabidopsis thaliana | AT3G53530.1   Symbols: NAKR3   Chloroplast-targeted copper chaperone protein   chr3:19845199-19846583 FORWARD LENGTH=247                                                                                                                                                                                                                                                                                                                                                        | 256 | 247 | 1.00E-103 | 96.5  | 75.4 | 82.4 |

|                           |                                                                                                                                                                                                                                                                                                                                                                                                                                                                                                                      |     |     |           |       |      |      |                                                |       |                      |                                                                                                                                                                                                                                                                                                                                                                                                                                                                                                                                                                           |     |     |           |       |      |      |
|---------------------------|----------------------------------------------------------------------------------------------------------------------------------------------------------------------------------------------------------------------------------------------------------------------------------------------------------------------------------------------------------------------------------------------------------------------------------------------------------------------------------------------------------------------|-----|-----|-----------|-------|------|------|------------------------------------------------|-------|----------------------|---------------------------------------------------------------------------------------------------------------------------------------------------------------------------------------------------------------------------------------------------------------------------------------------------------------------------------------------------------------------------------------------------------------------------------------------------------------------------------------------------------------------------------------------------------------------------|-----|-----|-----------|-------|------|------|
| Rsa1.0_00066.1.g3525.t1   | ref[NP_190922.3] uncharacterized protein [Arabidopsis thaliana] gi 332645585 gb AEE79106.1  uncharacterized protein AT3G53540 [Arabidopsis thaliana]                                                                                                                                                                                                                                                                                                                                                                 | 897 | 924 | 0         | 103.0 | 78.6 | 86.6 | uncharacterized protein                        | gbpln | Arabidopsis thaliana | AT3G53540.1   Symbols:   unknown protein; LOCATED IN: plasma membrane; EXPRESSED IN: 24 plant structures; EXPRESSED DURING: 14 growth stages; CONTAINS InterPro DOMAIN/s: Protein of unknown function DUF3741 (InterPro:IPR022212); BEST Arabidopsis thaliana protein match is: Protein of unknown function (DUF3741) (TAIR:AT4G28760.2); Has 1710 Blast hits to 868 proteins in 206 species: Archae - 2; Bacteria - 409; Metazoa - 304; Fungi - 204; Plants - 304; Viruses - 2; Other Eukaryotes - 485 (source: NCBI BLINK).   chr3:19846805-19850670 REVERSE LENGTH=924 | 897 | 924 | 0         | 103.0 | 78.6 | 86.6 |
| Rsa1.0_00066.1.g3526.t1   | gb EOA22416.1  hypothetical protein CARUB_v10003055mg.partial [Capsella rubella]                                                                                                                                                                                                                                                                                                                                                                                                                                     | 512 | 466 | 1.00E-110 | 91.0  | 47.1 | 58.2 | hypothetical protein CARUB_v10003055mg.partial | gbpln | Capsella rubella     | AT1G22000.1   Symbols:   FBD, F-box and Leucine Rich Repeat domains containing protein   chr1:7744189-7747123 FORWARD LENGTH=717                                                                                                                                                                                                                                                                                                                                                                                                                                          | 512 | 717 | 1.00E-98  | 140.0 | 43.4 | 56.1 |
| Rsa1.0_00066.1.g3527.t1   | emb CAB67663.1  putative protein [Arabidopsis thaliana]                                                                                                                                                                                                                                                                                                                                                                                                                                                              | 324 | 388 | 4.00E-94  | 119.8 | 62.7 | 78.7 | putative protein                               | gbpln | Arabidopsis thaliana | AT3G53560.1   Symbols:   Tetratricopeptide repeat (TPR)-like superfamily protein   chr3:19859954-19860976 REVERSE LENGTH=340                                                                                                                                                                                                                                                                                                                                                                                                                                              | 324 | 340 | 1.00E-96  | 104.9 | 62.7 | 78.7 |
| Rsa1.0_00066.1.g3528.t1f5 | ref XP_002877927.1  fus3-complementing gene 1 [Arabidopsis lyrata subsp. lyrata] gi 297323765 gb EFH54186.1  fus3-complementing gene 1 [Arabidopsis lyrata subsp. lyrata]                                                                                                                                                                                                                                                                                                                                            | 496 | 469 | 0         | 94.6  | 88.7 | 90.9 | fus3-complementing gene 1                      | gbpln | Arabidopsis lyrata   | AT3G5370.4   Symbols: AFC1, AME2, FC1   FUS3-complementing gene 1   chr3:19861449-19864125 REVERSE LENGTH=467                                                                                                                                                                                                                                                                                                                                                                                                                                                             | 496 | 467 | 0         | 94.2  | 89.3 | 91.1 |
| Rsa1.0_00066.1.g3529.t1   | ref NP_190926.1  diaminopimelate epimerase [Arabidopsis thaliana] gi 75263858 sp Q9LFG2.1 DAPF_ARATH RecName: Full=Diaminopimelate epimerase, chloroplastic; Short=DAP epimerase; Flags: Precursor gi 6729509 emb CAB67665.1  diaminopimelate epimerase-like protein [Arabidopsis thaliana] gi 22022530 gb AAM83223.1  AT3g53580/F4P12.280 [Arabidopsis thaliana] gi 23505901 gb AAN28810.1  At3g53580/F4P12.280 [Arabidopsis thaliana] gi 332645592 gb AEE79113.1  diaminopimelate epimerase [Arabidopsis thaliana] | 366 | 362 | 0         | 98.9  | 87.7 | 92.3 | diaminopimelate epimerase                      | gbpln | Arabidopsis thaliana | AT3G53580.1   Symbols:   diaminopimelate epimerase family protein   chr3:19864784-19866907 FORWARD LENGTH=362                                                                                                                                                                                                                                                                                                                                                                                                                                                             | 366 | 362 | 0         | 98.9  | 87.7 | 92.3 |
| Rsa1.0_00066.1.g3530.t1   | gb EOA16369.1  hypothetical protein CARUB_v10004519mg [Capsella rubella]                                                                                                                                                                                                                                                                                                                                                                                                                                             | 541 | 550 | 0         | 101.7 | 81.3 | 89.8 | hypothetical protein CARUB_v10004519mg         | gbpln | Capsella rubella     | AT4G31180.2   Symbols:   Class II aminoacyl-tRNA and biotin synthetases superfamily protein   chr4:15156696-15159362 FORWARD LENGTH=558                                                                                                                                                                                                                                                                                                                                                                                                                                   | 541 | 558 | 0         | 103.1 | 79.5 | 88.4 |
| Rsa1.0_00066.1.g3531.t6   | emb CAA90080.1  small GTP-binding protein [Pisum sativum]                                                                                                                                                                                                                                                                                                                                                                                                                                                            | 216 | 216 | 1.00E-116 | 100.0 | 92.1 | 98.1 | small GTP-binding protein                      | gbpln | Pisum sativum        | AT3G53610.3   Symbols: ATRAB8, RAB8   RAB GTPase homolog 8   chr3:19876531-19878264 REVERSE LENGTH=216                                                                                                                                                                                                                                                                                                                                                                                                                                                                    | 216 | 216 | 1.00E-115 | 100.0 | 91.7 | 94.0 |
| Rsa1.0_00066.1.g3532.t1f  | ref NP_190930.1  pyrophosphorylase 4 [Arabidopsis thaliana] gi 6729513 emb CAB67669.1  inorganic pyrophosphatase-like protein [Arabidopsis thaliana] gi 110741493 dbj BAE98700.1  inorganic pyrophosphatase-like protein [Arabidopsis thaliana] gi 332645599 gb AEE79120.1  pyrophosphorylase 4 [Arabidopsis thaliana]                                                                                                                                                                                               | 217 | 216 | 1.00E-116 | 99.5  | 93.5 | 96.8 | pyrophosphorylase 4                            | gbpln | Arabidopsis thaliana | AT3G53620.1   Symbols: AtPPa4, PPa4   pyrophosphorylase 4   chr3:19881491-19883308 FORWARD LENGTH=216                                                                                                                                                                                                                                                                                                                                                                                                                                                                     | 217 | 216 | 1.00E-119 | 99.5  | 93.5 | 96.8 |
| Rsa1.0_00066.1.g3533.t1f  | ref XP_002876217.1  hypothetical protein ARALYDRAFT_485749 [Arabidopsis lyrata subsp. lyrata] gi 297322055 gb EFH52476.1  hypothetical protein ARALYDRAFT_485749 [Arabidopsis lyrata subsp. lyrata]                                                                                                                                                                                                                                                                                                                  | 187 | 192 | 1.00E-66  | 102.7 | 81.3 | 87.2 | hypothetical protein ARALYDRAFT_485749         | gbpln | Arabidopsis lyrata   | AT3G53630.1   Symbols:   unknown protein; BEST Arabidopsis thaliana protein match is: unknown protein (TAIR:AT4G18692.1); Has 42 Blast hits to 42 proteins in 10 species: Archae - 0; Bacteria - 0; Metazoa - 0; Fungi - 0; Plants - 42; Viruses - 0; Other Eukaryotes - 0 (source: NCBI BLINK).   chr3:19883986-19885568 FORWARD LENGTH=194                                                                                                                                                                                                                              | 187 | 194 | 3.00E-68  | 103.7 | 80.7 | 86.6 |
| Rsa1.0_00066.1.g3534.t1f  | ref XP_002532621.1  histone h2b, putative [Ricinus communis] gi 223527641 gb EEF29752.1  histone h2b, putative [Ricinus communis]                                                                                                                                                                                                                                                                                                                                                                                    | 138 | 141 | 3.00E-62  | 102.2 | 93.5 | 98.6 | histone h2b, putative                          | gbpln | Ricinus communis     | AT2G37470.1   Symbols:   Histone superfamily protein   chr2:15736832-15737248 FORWARD LENGTH=138                                                                                                                                                                                                                                                                                                                                                                                                                                                                          | 138 | 138 | 5.00E-64  | 100.0 | 95.7 | 97.8 |

|                         |                                                                                                                                                                                                                                                                                                                                                                                                                                                                                                                                                                                                                                                                                                                                                                                                                                      |     |      |          |       |       |       |                                                                                          |             |                      |                                                                                                                                                                                                                                                                                                                                                                                                                               |     |     |          |       |       |       |
|-------------------------|--------------------------------------------------------------------------------------------------------------------------------------------------------------------------------------------------------------------------------------------------------------------------------------------------------------------------------------------------------------------------------------------------------------------------------------------------------------------------------------------------------------------------------------------------------------------------------------------------------------------------------------------------------------------------------------------------------------------------------------------------------------------------------------------------------------------------------------|-----|------|----------|-------|-------|-------|------------------------------------------------------------------------------------------|-------------|----------------------|-------------------------------------------------------------------------------------------------------------------------------------------------------------------------------------------------------------------------------------------------------------------------------------------------------------------------------------------------------------------------------------------------------------------------------|-----|-----|----------|-------|-------|-------|
| Rsa1.0_00066.1.g3535.t1 | refNP_190935.1  uncharacterized protein [Arabidopsis thaliana] gi 334185954 refNP_001190081.1  uncharacterized protein [Arabidopsis thaliana] gi 14423470 gb AAK62417.1 AF386972.1 putative protein [Arabidopsis thaliana] gi 6729518 emb CAE67674.1  putative protein [Arabidopsis thaliana] gi 18377574 gb AAL66953.1  putative protein [Arabidopsis thaliana] gi 332645603 gb AEE79124.1  uncharacterized protein AT3G53670 [Arabidopsis thaliana] gi 332645604 gb AEE79125.1  uncharacterized protein AT3G53670 [Arabidopsis thaliana]                                                                                                                                                                                                                                                                                           | 209 | 203  | 1.00E-56 | 97.1  | 67.0  | 76.1  | uncharacterized protein                                                                  | gbpln       | Arabidopsis thaliana | AT3G53670.2   Symbols:   unknown protein; FUNCTIONS IN: molecular_function unknown; INVOLVED IN: biological_process unknown; LOCATED IN: cellular_component unknown; EXPRESSED IN: sperm cell, male gametophyte, pollen tube; EXPRESSED DURING: L mature pollen stage, M germinated pollen stage; BEST Arabidopsis thaliana protein match is: unknown protein (TAIR:AT2G37480.1).   chr3:19891104-19892214 FORWARD LENGTH=203 | 209 | 203 | 3.00E-59 | 97.1  | 67.0  | 76.1  |
| Rsa1.0_00066.1.g3536.t1 | refNP_190936.2  Acyl-CoA N-acyltransferase with RING/FYVE/PHD-type zinc finger domain-containing protein [Arabidopsis thaliana] gi 225898713 dbj BAH30487.1  hypothetical protein [Arabidopsis thaliana] gi 332645606 gb AEE79127.1  Acyl-CoA N-acyltransferase with RING/FYVE/PHD-type zinc finger domain-containing protein [Arabidopsis thaliana]                                                                                                                                                                                                                                                                                                                                                                                                                                                                                 | 858 | 841  | 0        | 98.0  | 68.2  | 74.6  | Acyl-CoA N-acyltransferase with RING/FYVE/PHD-type zinc finger domain-containing protein | gbpln       | Arabidopsis thaliana | AT3G53680.1   Symbols:   Acyl-CoA N-acyltransferase with RING/FYVE/PHD-type zinc finger domain   chr3:19892863-19897412 REVERSE LENGTH=841                                                                                                                                                                                                                                                                                    | 858 | 841 | 0        | 98.0  | 68.2  | 74.6  |
| Rsa1.0_00066.1.g3537.t1 | refNP_190940.1  cation/H(+) antiporter 20 [Arabidopsis thaliana] gi 75311818 sp Q9M353.1 CHX20_ARAT H RecName: Full=Cation/H(+) antiporter 20; AltName: Full=Protein CATION/H+ EXCHANGER 20; Short=AtCHX20 gi 7629992 emb CAB88334.1  putative protein [Arabidopsis thaliana] gi 27311847 gb AA000889.1  putative protein [Arabidopsis thaliana] gi 38603806 gb AAR24648.1  At3g53720 [Arabidopsis thaliana] gi 110742710 dbj BAE99266.1  hypothetical protein [Arabidopsis thaliana] gi 332645611 gb AEE79132.1  cation/H(+) antiporter 20 [Arabidopsis thaliana]                                                                                                                                                                                                                                                                   | 834 | 842  | 0        | 101.0 | 90.0  | 94.6  | cation/H(+) antiporter 20                                                                | gbpln       | Arabidopsis thaliana | AT3G53720.1   Symbols:   ATCHX20, CHX20   cation/H+ exchanger 20   chr3:19905826-19910027 REVERSE LENGTH=842                                                                                                                                                                                                                                                                                                                  | 834 | 842 | 0        | 101.0 | 90.0  | 94.6  |
| Rsa1.0_00066.1.g3538.t1 | #                                                                                                                                                                                                                                                                                                                                                                                                                                                                                                                                                                                                                                                                                                                                                                                                                                    | #   | #    | #        | #     | #     | #     | -                                                                                        | ----        | ----                 | #                                                                                                                                                                                                                                                                                                                                                                                                                             | #   | #   | #        | #     | #     |       |
| Rsa1.0_00066.1.g3539.t1 | gb AAC28221.1  similar to reverse transcriptases (PFam: rvt.hmm, score: 60.13) [Arabidopsis thaliana]                                                                                                                                                                                                                                                                                                                                                                                                                                                                                                                                                                                                                                                                                                                                | 583 | 1164 | 2.00E-84 | 199.7 | 26.9  | 40.8  | similar to reverse transcriptases (PFam: rvt.hmm, score: 60.13)                          | gbpln       | Arabidopsis thaliana | AT3G24255.1   Symbols:   RNA-directed DNA polymerase (reverse transcriptase)-related family protein   chr3:8789471-8793208 FORWARD LENGTH=746                                                                                                                                                                                                                                                                                 | 583 | 746 | 3.00E-64 | 128.0 | 26.4  | 38.9  |
| Rsa1.0_00066.1.g3540.t1 | tpg DAA40122.1  TPA: histone H4.3 [Zea mays]                                                                                                                                                                                                                                                                                                                                                                                                                                                                                                                                                                                                                                                                                                                                                                                         | 103 | 248  | 3.00E-52 | 240.8 | 100.0 | 100.0 | TPA: histone H4.3                                                                        | gbenv/gbpln | Zea mays             | AT5G59970.1   Symbols:   Histone superfamily protein   chr5:24146352-24146663 REVERSE LENGTH=103                                                                                                                                                                                                                                                                                                                              | 103 | 103 | 2.00E-52 | 100.0 | 100.0 | 100.0 |
| Rsa1.0_00066.1.g3541.t1 | refNP_850697.1  60S ribosomal protein L36-2 [Arabidopsis thaliana] gi 79314916 refNP_001030855.1  60S ribosomal protein L36-2 [Arabidopsis thaliana] gi 145332827 refNP_001078279.1  60S ribosomal protein L36-2 [Arabidopsis thaliana] gi 17865567 sp Q9M352.1 RL362_ARAT H RecName: Full=60S ribosomal protein L36-2 gi 7629994 emb CAB88336.1  60S RIBOSOMAL PROTEIN L36 homolog [Arabidopsis thaliana] gi 17065430 gb AAL32869.1  60S RIBOSOMAL PROTEIN L36 homolog [Arabidopsis thaliana] gi 20148501 gb AAM10141.1  60S ribosomal protein L36-like protein [Arabidopsis thaliana] gi 332645614 gb AEE79135.1  60S ribosomal protein L36-2 [Arabidopsis thaliana] gi 332645615 gb AEE79136.1  60S ribosomal protein L36-2 [Arabidopsis thaliana] gi 332645616 gb AEE79137.1  60S ribosomal protein L36-2 [Arabidopsis thaliana] | 112 | 112  | 7.00E-52 | 100.0 | 94.6  | 99.1  | 60S ribosomal protein L36-2                                                              | gbpln       | Arabidopsis thaliana | AT3G53740.4   Symbols:   Ribosomal protein L36e family protein   chr3:19913921-19914813 REVERSE LENGTH=112                                                                                                                                                                                                                                                                                                                    | 112 | 112 | 1.00E-54 | 100.0 | 94.6  | 99.1  |

|                         |                                                                                                                                                                                                                                                                                                                                                                                                                                                                                                                                                                                                                                                                                                                                                                                                                                                                                                                                                                                 |     |      |           |       |      |      |                                                     |       |                      |                                                                                                                                               |     |     |           |       |      |      |
|-------------------------|---------------------------------------------------------------------------------------------------------------------------------------------------------------------------------------------------------------------------------------------------------------------------------------------------------------------------------------------------------------------------------------------------------------------------------------------------------------------------------------------------------------------------------------------------------------------------------------------------------------------------------------------------------------------------------------------------------------------------------------------------------------------------------------------------------------------------------------------------------------------------------------------------------------------------------------------------------------------------------|-----|------|-----------|-------|------|------|-----------------------------------------------------|-------|----------------------|-----------------------------------------------------------------------------------------------------------------------------------------------|-----|-----|-----------|-------|------|------|
| Rsa1.0_00066.1.g3542.t1 | ref NP_566988.1  actin 3 [Arabidopsis thaliana] gi 30687201 ref NP_850284.1  actin 1 [Arabidopsis thaliana] gi 79324605 ref NP_001031504.1  actin 1 [Arabidopsis thaliana] gi 460415910 ref XP_004253296.1  PREDICTED: actin-1-like [Solanum lycopersicum] gi 317374840 sp POCJ46.1 ACT1_ARAT H RecName: Full=Actin-1 gi 317374841 sp POCJ47.1 ACT3_ARAT H RecName: Full=Actin-3 gi 1145695 gb AAA98562.1  actin 3 [Arabidopsis thaliana] gi 15146304 gb AAK83635.1  AT3G53750/F5K20.50 [Arabidopsis thaliana] gi 18650648 gb AAL75893.1  At2g37620/F13M22.12 [Arabidopsis thaliana] gi 20147351 gb AAM10400.1  At2g37620/F13M22.12 [Arabidopsis thaliana] gi 21554576 gb AAM63620.1  actin (ACT3) [Arabidopsis thaliana] gi 25090278 gb AAN72268.1  At3g53750/F5K20.50 [Arabidopsis thaliana] gi 330254332 gb AEC09426.1  actin 1 [Arabidopsis thaliana] gi 330254333 gb AEC09427.1  actin 1 [Arabidopsis thaliana] gi 332645617 gb AEE79138.1  actin 3 [Arabidopsis thaliana] | 377 | 377  | 0         | 100.0 | 99.5 | 99.7 | actin 3                                             | gbpln | Arabidopsis thaliana | AT3G53750.1   Symbols: ACT3   actin 3   chr3:19915924-19917371 FORWARD LENGTH=377                                                             | 377 | 377 | 0         | 100.0 | 99.5 | 99.7 |
| Rsa1.0_00066.1.g3543.t1 | gb EOA23531.1  hypothetical protein CARUB_v10016729mg [Capsella rubella]                                                                                                                                                                                                                                                                                                                                                                                                                                                                                                                                                                                                                                                                                                                                                                                                                                                                                                        | 748 | 745  | 0         | 99.6  | 92.1 | 94.9 | hypothetical protein CARUB_v10016729mg              | gbpln | Capsella rubella     | AT3G53760.1   Symbols: GCP4, ATGCP4   GAMMA-TUBULIN COMPLEX PROTEIN 4   chr3:19918182-19922264 REVERSE LENGTH=745                             | 748 | 745 | 0         | 99.6  | 91.6 | 94.8 |
| Rsa1.0_00066.1.g3544.t1 | gb EOA24166.1  hypothetical protein CARUB_v10017398mg [Capsella rubella]                                                                                                                                                                                                                                                                                                                                                                                                                                                                                                                                                                                                                                                                                                                                                                                                                                                                                                        | 392 | 396  | 0         | 101.0 | 90.6 | 95.4 | hypothetical protein CARUB_v10017398mg              | gbpln | Capsella rubella     | AT3G53780.2   Symbols: ATRBL4, RBL4   RHOMBROID-like protein 4   chr3:19924729-19926648 REVERSE LENGTH=394                                    | 392 | 394 | 0         | 100.5 | 88.5 | 94.6 |
| Rsa1.0_00066.1.g3545.t1 | ref NP_190948.1  hsp70-interacting protein [Arabidopsis thaliana] gi 7630000 emb CAB88342.1  putative protein [Arabidopsis thaliana] gi 21593297 gb AAM65246.1  unknown [Arabidopsis thaliana] gi 332645624 gb AEE79145.1  hsp70-interacting protein FES1B-like protein [Arabidopsis thaliana]                                                                                                                                                                                                                                                                                                                                                                                                                                                                                                                                                                                                                                                                                  | 363 | 363  | 0         | 100.0 | 88.7 | 93.7 | hsp70-interacting protein                           | gbpln | Arabidopsis thaliana | AT3G53800.1   Symbols: Fes1B   Fes1B   chr3:19930942-19932719 FORWARD LENGTH=363                                                              | 363 | 363 | 0         | 100.0 | 88.7 | 93.7 |
| Rsa1.0_00066.1.g3546.t1 | gb EOA25977.1  hypothetical protein CARUB_v10019366mg [Capsella rubella]                                                                                                                                                                                                                                                                                                                                                                                                                                                                                                                                                                                                                                                                                                                                                                                                                                                                                                        | 677 | 723  | 0         | 106.8 | 85.2 | 92.0 | hypothetical protein CARUB_v10019366mg              | gbpln | Capsella rubella     | AT3G53810.1   Symbols:   Concanavalin A-like lectin protein kinase family protein   chr3:19933153-19935186 REVERSE LENGTH=677                 | 677 | 677 | 0         | 100.0 | 84.6 | 91.6 |
| Rsa1.0_00066.1.g3547.t1 | gb AAC33226.1  putative non-LTR retroelement reverse transcriptase [Arabidopsis thaliana]                                                                                                                                                                                                                                                                                                                                                                                                                                                                                                                                                                                                                                                                                                                                                                                                                                                                                       | 553 | 1529 | 4.00E-99  | 276.5 | 38.5 | 55.0 | putative non-LTR retroelement reverse transcriptase | gbpln | Arabidopsis thaliana | AT3G24255.1   Symbols:   RNA-directed DNA polymerase (reverse transcriptase)-related family protein   chr3:8789471-8793208 FORWARD LENGTH=746 | 553 | 746 | 3.00E-63  | 134.9 | 27.1 | 36.5 |
| Rsa1.0_00066.1.g3548.t1 | ref XP_002876227.1  zinc finger family protein [Arabidopsis lyrata subsp. lyrata] gi 297322065 gb EFH52486.1  zinc finger family protein [Arabidopsis lyrata subsp. lyrata]                                                                                                                                                                                                                                                                                                                                                                                                                                                                                                                                                                                                                                                                                                                                                                                                     | 180 | 142  | 5.00E-53  | 78.9  | 57.8 | 67.8 | zinc finger family protein                          | gbpln | Arabidopsis lyrata   | AT3G53820.1   Symbols:   C2H2 and C2HC zinc fingers superfamily protein   chr3:19938706-19939134 FORWARD LENGTH=142                           | 180 | 142 | 2.00E-54  | 78.9  | 57.8 | 66.7 |
| Rsa1.0_00066.1.g3549.t1 | gb EOA23633.1  hypothetical protein CARUB_v10016831mg [Capsella rubella]                                                                                                                                                                                                                                                                                                                                                                                                                                                                                                                                                                                                                                                                                                                                                                                                                                                                                                        | 644 | 638  | 0         | 99.1  | 82.9 | 89.1 | hypothetical protein CARUB_v10016831mg              | gbpln | Capsella rubella     | AT3G53840.1   Symbols:   Protein kinase superfamily protein   chr3:19945571-19947719 FORWARD LENGTH=639                                       | 644 | 639 | 0         | 99.2  | 81.5 | 87.7 |
| Rsa1.0_00066.1.g3550.t1 | ref NP_566990.1  uncharacterized protein [Arabidopsis thaliana] gi 75164334 sp Q945M8.1 CSPLI_ARAT H RecName: Full=CASP-like protein At3g53850 gi 15724236 gb AAL06511.1 AF412058.1 AT4g31460/F3L17.30 [Arabidopsis thaliana] gi 21464571 gb AAM52240.1  AT4g31460/F3L17.30 [Arabidopsis thaliana] gi 332645629 gb AEE79150.1  uncharacterized protein AT3G53850 [Arabidopsis thaliana]                                                                                                                                                                                                                                                                                                                                                                                                                                                                                                                                                                                         | 167 | 154  | 5.00E-42  | 92.2  | 55.7 | 64.7 | uncharacterized protein                             | gbpln | Arabidopsis thaliana | AT3G53850.1   Symbols:   Uncharacterised protein family (UPF0497)   chr3:19948262-19948994 REVERSE LENGTH=154                                 | 167 | 154 | 2.00E-44  | 92.2  | 55.7 | 64.7 |
| Rsa1.0_00066.1.g3551.t1 | gb EOA24417.1  hypothetical protein CARUB_v10017668mg [Capsella rubella]                                                                                                                                                                                                                                                                                                                                                                                                                                                                                                                                                                                                                                                                                                                                                                                                                                                                                                        | 289 | 315  | 1.00E-150 | 109.0 | 93.4 | 96.2 | hypothetical protein CARUB_v10017668mg              | gbpln | Capsella rubella     | AT3G53880.1   Symbols:   NAD(P)-linked oxidoreductase superfamily protein   chr3:19953238-19955171 FORWARD LENGTH=315                         | 289 | 315 | 1.00E-151 | 109.0 | 91.3 | 95.8 |
| Rsa1.0_00066.1.g3552.t1 | gb EOA25028.1  hypothetical protein CARUB_v10018334mg [Capsella rubella]                                                                                                                                                                                                                                                                                                                                                                                                                                                                                                                                                                                                                                                                                                                                                                                                                                                                                                        | 82  | 82   | 1.00E-39  | 100.0 | 95.1 | 97.6 | hypothetical protein CARUB_v10018334mg              | gbpln | Capsella rubella     | AT5G27700.1   Symbols:   Ribosomal protein S21e   chr5:9807541-9808048 REVERSE LENGTH=82                                                      | 82  | 82  | 1.00E-41  | 100.0 | 93.9 | 96.3 |

|                         |                                                                                                                                                                                                                                                                                                                                                                                                                                                                                                    |     |      |           |       |      |      |                                                                 |       |                      |                                                                                                                                                                                                                                                                                                                                                                                                                                 |     |     |           |       |      |      |
|-------------------------|----------------------------------------------------------------------------------------------------------------------------------------------------------------------------------------------------------------------------------------------------------------------------------------------------------------------------------------------------------------------------------------------------------------------------------------------------------------------------------------------------|-----|------|-----------|-------|------|------|-----------------------------------------------------------------|-------|----------------------|---------------------------------------------------------------------------------------------------------------------------------------------------------------------------------------------------------------------------------------------------------------------------------------------------------------------------------------------------------------------------------------------------------------------------------|-----|-----|-----------|-------|------|------|
| Rsa1.0_00066.1.g3553.t1 | ref[XP_002877946.1] hypothetical protein ARALYDRAFT_323928 [Arabidopsis lyrata subsp. lyrata] gi 297323784 gb EFH54205.1                                                                                                                                                                                                                                                                                                                                                                           | 328 | 295  | 1.00E-131 | 89.9  | 75.3 | 79.9 | hypothetical protein ARALYDRAFT_323928                          | gbpln | Arabidopsis lyrata   | AT3G53900.2   Symbols: UPP, PYRR   uracil phosphoribosyltransferase   chr3:19956914-19959006 REVERSE LENGTH=296                                                                                                                                                                                                                                                                                                                 | 328 | 296 | 1.00E-133 | 90.2  | 75.0 | 80.2 |
| Rsa1.0_00066.1.g3554.t1 | gb[EOA23672.1] hypothetical protein CARUB_v10016879mg [Capsella rubella]                                                                                                                                                                                                                                                                                                                                                                                                                           | 593 | 602  | 0         | 101.5 | 83.3 | 92.4 | hypothetical protein CARUB_v10016879mg                          | gbpln | Capsella rubella     | AT3G53960.1   Symbols:   Major facilitator superfamily protein   chr3:19978306-19980886 REVERSE LENGTH=602                                                                                                                                                                                                                                                                                                                      | 593 | 602 | 0         | 101.5 | 82.3 | 91.7 |
| Rsa1.0_00067.1.g3555.t1 | ref[NP_173609.1] ethylene-responsive transcription factor ERF012 [Arabidopsis thaliana] gi 75265793 sp Q9SFE4.1 ERF12_ARATH RecName: Full=Ethylene-responsive transcription factor ERF012 gi 6552733 gb AAFI6532.1 AC013482.6 T26F17.14 [Arabidopsis thaliana] gi 51971555 dbj BAD44442.1  TINY like protein [Arabidopsis thaliana] gi 88196743 gb ABD43014.1  At1g21910 [Arabidopsis thaliana] gi 332192050 gb AEE30171.1  ethylene-responsive transcription factor ERF012 [Arabidopsis thaliana] | 227 | 230  | 2.00E-70  | 101.3 | 74.4 | 84.6 | ethylene-responsive transcription factor ERF012                 | gbpln | Arabidopsis thaliana | AT1G21910.1   Symbols: DREB26   Integrase-type DNA-binding superfamily protein   chr1:7696655-7697347 FORWARD LENGTH=230                                                                                                                                                                                                                                                                                                        | 227 | 230 | 5.00E-73  | 101.3 | 74.4 | 84.6 |
| Rsa1.0_00067.1.g3556.t1 | gb[AAC28221.1] similar to reverse transcriptases (PFam: rvt.hmm, score: 60.13) [Arabidopsis thaliana]                                                                                                                                                                                                                                                                                                                                                                                              | 142 | 1164 | 6.00E-11  | 819.7 | 26.1 | 39.4 | similar to reverse transcriptases (PFam: rvt.hmm, score: 60.13) | gbpln | Arabidopsis thaliana | #                                                                                                                                                                                                                                                                                                                                                                                                                               | #   | #   | #         | #     | #    |      |
| Rsa1.0_00067.1.g3557.t1 | ref[XP_002893188.1] emp24/gp25L/p24 family protein [Arabidopsis lyrata subsp. lyrata] gi 297339030 gb EFH69447.1  emp24/gp25L/p24 family protein [Arabidopsis lyrata subsp. lyrata]                                                                                                                                                                                                                                                                                                                | 224 | 216  | 1.00E-103 | 96.4  | 80.8 | 87.1 | emp24/gp25L/p24 family protein                                  | gbpln | Arabidopsis lyrata   | AT1G21900.1   Symbols:   emp24/gp25L/p24 family/GOLD family protein   chr1:76911165-7692327 REVERSE LENGTH=216                                                                                                                                                                                                                                                                                                                  | 224 | 216 | 1.00E-103 | 96.4  | 79.5 | 84.8 |
| Rsa1.0_00067.1.g3558.t1 | gb[EOA40579.1] hypothetical protein CARUB_v10009309mg, partial [Capsella rubella]                                                                                                                                                                                                                                                                                                                                                                                                                  | 387 | 409  | 0         | 105.7 | 90.7 | 95.1 | hypothetical protein CARUB_v10009309mg, partial                 | gbpln | Capsella rubella     | AT1G21890.1   Symbols:   nodulin MN21 /EamA-like transporter family protein   chr1:7682809-7685561 REVERSE LENGTH=389                                                                                                                                                                                                                                                                                                           | 387 | 389 | 0         | 100.5 | 89.4 | 93.3 |
| Rsa1.0_00067.1.g3559.t1 | ref[NP_564153.1] LysM domain-containing GPI-anchored protein 1 [Arabidopsis thaliana] gi 38258218 sp Q93ZH0.1 LYM1_ARATH RecName: Full=LysM domain-containing GPI-anchored protein 1; Flags: Precursor gi 15882870 gb JAL09782.1  At1g21880/T26F17.5 [Arabidopsis thaliana] gi 53749174 gb AAU90072.1  At1g21880 [Arabidopsis thaliana] gi 332192047 gb AEE30168.1  LysM domain-containing GPI-anchored protein 1 [Arabidopsis thaliana]                                                           | 447 | 416  | 0         | 93.1  | 81.4 | 87.9 | LysM domain-containing GPI-anchored protein 1                   | gbpln | Arabidopsis thaliana | AT1G21880.2   Symbols: LYM1   lysm domain GPI-anchored protein 1 precursor   chr1:7680689-7682526 FORWARD LENGTH=416                                                                                                                                                                                                                                                                                                            | 447 | 416 | 0         | 93.1  | 81.4 | 87.9 |
| Rsa1.0_00067.1.g3560.t1 | ref[XP_002893185.1] hypothetical protein ARALYDRAFT_313074 [Arabidopsis lyrata subsp. lyrata] gi 297339027 gb EFH69444.1                                                                                                                                                                                                                                                                                                                                                                           | 273 | 205  | 9.00E-73  | 75.1  | 60.4 | 62.6 | hypothetical protein ARALYDRAFT_313074                          | gbpln | Arabidopsis lyrata   | AT1G21830.1   Symbols:   unknown protein; CONTAINS InterPro DOMAIN/s: Protein of unknown function DUF740 (InterPro:IPR008004); BEST Arabidopsis thaliana protein match is: unknown protein (TAIR:AT1G44608.1); Has 49 Blast hits to 49 proteins in 12 species: Archae - 0; Bacteria - 0; Metazoa - 0; Fungi - 0; Plants - 49; Viruses - 0; Other Eukaryotes - 0 (source: NCBI BLINK).   chr1:7661429-7662521 REVERSE LENGTH=206 | 273 | 206 | 6.00E-73  | 75.5  | 59.7 | 62.6 |
| Rsa1.0_00067.1.g3561.t1 | ref[XP_002890465.1] hypothetical protein ARALYDRAFT_472418 [Arabidopsis lyrata subsp. lyrata] gi 297336307 gb EFH66724.1                                                                                                                                                                                                                                                                                                                                                                           | 280 | 288  | 1.00E-144 | 102.9 | 90.7 | 93.9 | hypothetical protein ARALYDRAFT_472418                          | gbpln | Arabidopsis lyrata   | AT1G21790.1   Symbols:   TRAM, LAG1 and CLN8 (TLG) lipid-sensing domain containing protein   chr1:7654357-7655691 FORWARD LENGTH=288                                                                                                                                                                                                                                                                                            | 280 | 288 | 1.00E-144 | 102.9 | 90.0 | 93.6 |
| Rsa1.0_00067.1.g3562.t1 | ref[XP_002890464.1] BTB/POZ domain-containing protein [Arabidopsis lyrata subsp. lyrata] gi 297336306 gb EFH66723.1  BTB/POZ domain-containing protein [Arabidopsis lyrata subsp. lyrata]                                                                                                                                                                                                                                                                                                          | 384 | 326  | 0         | 84.9  | 80.2 | 82.8 | BTB/POZ domain-containing protein                               | gbpln | Arabidopsis lyrata   | AT1G21780.2   Symbols:   BTB/POZ domain-containing protein   chr1:7652476-7653866 FORWARD LENGTH=326                                                                                                                                                                                                                                                                                                                            | 384 | 326 | 0         | 84.9  | 79.9 | 82.6 |
| Rsa1.0_00067.1.g3563.t1 | gb[EOA38692.1] hypothetical protein CARUB_v10010702mg [Capsella rubella]                                                                                                                                                                                                                                                                                                                                                                                                                           | 104 | 110  | 7.00E-42  | 105.8 | 82.7 | 91.3 | hypothetical protein CARUB_v10010702mg                          | gbpln | Capsella rubella     | AT1G21770.1   Symbols:   Acyl-CoA N-acyltransferases (NAT) superfamily protein   chr1:7651843-7652249 REVERSE LENGTH=111                                                                                                                                                                                                                                                                                                        | 104 | 111 | 2.00E-43  | 106.7 | 81.7 | 88.5 |

|                         |                                                                                                                                                                                                                                                                                                                                                                                                                                                                                                                                                                                      |     |     |           |       |      |       |                                                                  |             |                      |                                                                                                                                                                                                                                                                                                                                                                                                                                                                       |     |      |           |       |      |       |
|-------------------------|--------------------------------------------------------------------------------------------------------------------------------------------------------------------------------------------------------------------------------------------------------------------------------------------------------------------------------------------------------------------------------------------------------------------------------------------------------------------------------------------------------------------------------------------------------------------------------------|-----|-----|-----------|-------|------|-------|------------------------------------------------------------------|-------------|----------------------|-----------------------------------------------------------------------------------------------------------------------------------------------------------------------------------------------------------------------------------------------------------------------------------------------------------------------------------------------------------------------------------------------------------------------------------------------------------------------|-----|------|-----------|-------|------|-------|
| Rsa1.0_00067.1.g3564.t1 | refXP_002890463.1   F-box family protein [Arabidopsis lyrata subsp. lyrata] gi 297336305 gb EFH66722.1   F-box family protein [Arabidopsis lyrata subsp. lyrata]                                                                                                                                                                                                                                                                                                                                                                                                                     | 323 | 328 | 1.00E-179 | 101.5 | 94.7 | 96.9  | F-box family protein                                             | gbpln       | Arabidopsis lyrata   | AT1G21760.1   Symbols: ATFBP7, FBP7   F-box protein 7   chr1:7649324-7651613 FORWARD LENGTH=328                                                                                                                                                                                                                                                                                                                                                                       | 323 | 328  | 1.00E-179 | 101.5 | 92.6 | 96.9  |
| Rsa1.0_00067.1.g3565.t1 | tpgDAA63284.1   TPA: hypothetical protein ZEAMMB73.434507 [Zea mays]                                                                                                                                                                                                                                                                                                                                                                                                                                                                                                                 | 292 | 704 | 3.00E-25  | 241.1 | 30.1 | 54.8  | TPA: hypothetical protein ZEAMMB73.434507                        | gbenv/gbpln | Zea mays             | AT5G19820.1   Symbols: emb2734   ARM repeat superfamily protein   chr5:6695731-6701247 REVERSE LENGTH=1116                                                                                                                                                                                                                                                                                                                                                            | 292 | 1116 | 2.00E-26  | 382.2 | 30.1 | 55.1  |
| Rsa1.0_00067.1.g3566.t1 | refXP_002890462.1   hypothetical protein ARALYDRAFT_889647 [Arabidopsis lyrata subsp. lyrata] gi 297336304 gb EFH66721.1   hypothetical protein ARALYDRAFT_889647 [Arabidopsis lyrata subsp. lyrata]                                                                                                                                                                                                                                                                                                                                                                                 | 495 | 501 | 0         | 101.2 | 80.6 | 88.3  | hypothetical protein ARALYDRAFT_889647                           | gbpln       | Arabidopsis lyrata   | AT1G21750.1   Symbols: ATPDIL1-1, ATPD15, PD15, PDIL1-1   PDI-like 1-1   chr1:7645767-7648514 FORWARD LENGTH=501                                                                                                                                                                                                                                                                                                                                                      | 495 | 501  | 0         | 101.2 | 79.6 | 87.5  |
| Rsa1.0_00067.1.g3567.t1 | refXP_002890461.1   hypothetical protein ARALYDRAFT_472413 [Arabidopsis lyrata subsp. lyrata] gi 297336303 gb EFH66720.1   hypothetical protein ARALYDRAFT_472413 [Arabidopsis lyrata subsp. lyrata]                                                                                                                                                                                                                                                                                                                                                                                 | 934 | 942 | 0         | 100.9 | 81.9 | 88.0  | hypothetical protein ARALYDRAFT_472413                           | gbpln       | Arabidopsis lyrata   | AT1G21740.1   Symbols:   Protein of unknown function (DUF630 and DUF632)   chr1:7641580-7645078 FORWARD LENGTH=953                                                                                                                                                                                                                                                                                                                                                    | 934 | 953  | 0         | 102.0 | 82.0 | 88.3  |
| Rsa1.0_00067.1.g3568.t1 | refNP_173592.3   P-loop containing nucleoside triphosphate hydrolase-like protein [Arabidopsis thaliana] gi 16902292 dbj BAB71851.1   kinesin-related protein [Arabidopsis thaliana] gi 332192027 gb AEE30148.1   P-loop containing nucleoside triphosphate hydrolase-like protein [Arabidopsis thaliana]                                                                                                                                                                                                                                                                            | 925 | 890 | 0         | 96.2  | 83.4 | 87.8  | P-loop containing nucleoside triphosphate hydrolase-like protein | gbpln       | Arabidopsis thaliana | AT1G21730.1   Symbols:   P-loop containing nucleoside triphosphate hydrolases superfamily protein   chr1:7630365-7636247 FORWARD LENGTH=890                                                                                                                                                                                                                                                                                                                           | 925 | 890  | 0         | 96.2  | 83.4 | 87.8  |
| Rsa1.0_00067.1.g3569.t1 | gb EOA36141.1   hypothetical protein CARUB_v10012612mg [Capsella rubella]                                                                                                                                                                                                                                                                                                                                                                                                                                                                                                            | 224 | 229 | 8.00E-86  | 102.2 | 77.7 | 87.5  | hypothetical protein CARUB_v10012612mg                           | gbpln       | Capsella rubella     | AT1G21722.1   Symbols:   unknown protein; FUNCTIONS IN: molecular_function unknown; INVOLVED IN: biological_process unknown; LOCATED IN: cellular_component unknown; BEST Arabidopsis thaliana protein match is: unknown protein (TAIR:AT1G78922.1). Has 47 Blast hits to 47 proteins in 13 species: Archae - 0; Bacteria - 0; Metazoa - 1; Fungi - 1; Plants - 42; Viruses - 0; Other Eukaryotes - 3 (source: NCBI BLINK).   chr1:7628456-7629252 FORWARD LENGTH=233 | 224 | 233  | 1.00E-86  | 104.0 | 77.7 | 86.6  |
| Rsa1.0_00067.1.g3570.t1 | refNP_564149.1   proteasome subunit beta type-3-A [Arabidopsis thaliana] gi 28858823 sp Q9XI05.2 PSB3A_ARATH RecName: Full=Proteasome subunit beta type-3-A; AltName: Full=20S proteasome beta subunit C-1; AltName: Full=Proteasome component T gi 17473525 gb AAL38246.1   proteasome subunit [Arabidopsis thaliana] gi 21387087 gb AAM47947.1   proteasome subunit [Arabidopsis thaliana] gi 110740894 dbj BAE98543.1   20S proteasome beta subunit PBC2 like protein [Arabidopsis thaliana] gi 332192025 gb AEE30146.1   proteasome subunit beta type-3-A [Arabidopsis thaliana] | 204 | 204 | 1.00E-116 | 100.0 | 99.0 | 100.0 | proteasome subunit beta type-3-A                                 | gbpln       | Arabidopsis thaliana | AT1G21720.1   Symbols: PBC1   proteasome beta subunit C1   chr1:7626394-7628070 FORWARD LENGTH=204                                                                                                                                                                                                                                                                                                                                                                    | 204 | 204  | 1.00E-118 | 100.0 | 99.0 | 100.0 |
| Rsa1.0_00067.1.g3571.t1 | gb EOA36733.1   hypothetical protein CARUB_v10012527mg, partial [Capsella rubella]                                                                                                                                                                                                                                                                                                                                                                                                                                                                                                   | 778 | 833 | 0         | 107.1 | 82.3 | 89.2  | hypothetical protein CARUB_v10012527mg, partial                  | gbpln       | Capsella rubella     | AT1G21700.1   Symbols: ATSWI3C, CHB4, SWI3C   SWITCH/sucrose nonfermenting 3C   chr1:7620156-7623978 REVERSE LENGTH=807                                                                                                                                                                                                                                                                                                                                               | 778 | 807  | 0         | 103.7 | 82.6 | 88.6  |
| Rsa1.0_00067.1.g3572.t1 | refXP_002890454.1   hypothetical protein ARALYDRAFT_472409 [Arabidopsis lyrata subsp. lyrata] gi 297336296 gb EFH66713.1   hypothetical protein ARALYDRAFT_472409 [Arabidopsis lyrata subsp. lyrata]                                                                                                                                                                                                                                                                                                                                                                                 | 211 | 205 | 7.00E-36  | 97.2  | 55.0 | 64.0  | hypothetical protein ARALYDRAFT_472409                           | gbpln       | Arabidopsis lyrata   | AT1G21695.1   Symbols:   hydroxyproline-rich glycoprotein family protein   chr1:7619132-7619785 FORWARD LENGTH=217                                                                                                                                                                                                                                                                                                                                                    | 211 | 217  | 1.00E-29  | 102.8 | 53.6 | 63.0  |
| Rsa1.0_00067.1.g3573.t1 | refXP_002890453.1   EMB1968 [Arabidopsis lyrata subsp. lyrata] gi 297336295 gb EFH66712.1   EMB1968 [Arabidopsis lyrata subsp. lyrata]                                                                                                                                                                                                                                                                                                                                                                                                                                               | 339 | 339 | 0         | 100.0 | 93.2 | 96.8  | EMB1968                                                          | gbpln       | Arabidopsis lyrata   | AT1G21690.1   Symbols: EMB1968, RFC4   ATPase family associated with various cellular activities (AAA)   chr1:7615675-7618362 FORWARD LENGTH=339                                                                                                                                                                                                                                                                                                                      | 339 | 339  | 0         | 100.0 | 92.9 | 96.5  |

|                         |                                                                                                                                                                                  |      |      |           |       |      |      |                                            |       |                      |                                                                                                                                                                                                                                                                                                                                                                                                                                                                                                                                                                                                                         |      |      |           |       |      |      |
|-------------------------|----------------------------------------------------------------------------------------------------------------------------------------------------------------------------------|------|------|-----------|-------|------|------|--------------------------------------------|-------|----------------------|-------------------------------------------------------------------------------------------------------------------------------------------------------------------------------------------------------------------------------------------------------------------------------------------------------------------------------------------------------------------------------------------------------------------------------------------------------------------------------------------------------------------------------------------------------------------------------------------------------------------------|------|------|-----------|-------|------|------|
| Rsa1.0_00067.1.g3574.t1 | ref[XP_002890452.1] hypothetical protein ARALYDRAFT_472406 [Arabidopsis lyrata subsp. lyrata] gi 297336294 gb EFH66711.1                                                         | 665  | 706  | 0         | 106.2 | 86.5 | 92.8 | hypothetical protein ARALYDRAFT_472406     | gbpln | Arabidopsis lyrata   | AT1G21680.1   Symbols:   DPP6 N-terminal domain-like protein   chr1:7613028-7615148 FORWARD LENGTH=706                                                                                                                                                                                                                                                                                                                                                                                                                                                                                                                  | 665  | 706  | 0         | 106.2 | 85.6 | 91.3 |
| Rsa1.0_00067.1.g3575.t1 | dbj BAF01687.1  hypothetical protein [Arabidopsis thaliana]                                                                                                                      | 657  | 1072 | 1.00E-134 | 163.2 | 39.9 | 57.2 | hypothetical protein                       | gbpln | Arabidopsis thaliana | AT3G24255.1   Symbols:   RNA-directed DNA polymerase (reverse transcriptase)-related family protein   chr3:8789471-8793208 FORWARD LENGTH=746                                                                                                                                                                                                                                                                                                                                                                                                                                                                           | 657  | 746  | 2.00E-60  | 113.5 | 21.3 | 31.5 |
| Rsa1.0_00067.1.g3576.t1 | #                                                                                                                                                                                | #    | #    | #         | #     | #    | -    | ----                                       | ----  | ----                 | #                                                                                                                                                                                                                                                                                                                                                                                                                                                                                                                                                                                                                       | #    | #    | #         | #     | #    |      |
| Rsa1.0_00067.1.g3577.t2 | gb AAG51081.1 AC027032.1 hypothetical protein [Arabidopsis thaliana]                                                                                                             | 1327 | 1678 | 0         | 126.5 | 38.4 | 49.9 | hypothetical protein                       | gbpln | Arabidopsis thaliana | AT3G51690.1   Symbols:   PIF1 helicase   chr3:19176731-19178107 REVERSE LENGTH=331                                                                                                                                                                                                                                                                                                                                                                                                                                                                                                                                      | 1327 | 331  | 5.00E-57  | 24.9  | 8.4  | 11.5 |
| Rsa1.0_00067.1.g3578.t1 | ref[XP_002890451.1] hypothetical protein ARALYDRAFT_472405 [Arabidopsis lyrata subsp. lyrata] gi 297336293 gb EFH66710.1                                                         | 705  | 703  | 0         | 99.7  | 78.9 | 87.1 | hypothetical protein ARALYDRAFT_472405     | gbpln | Arabidopsis lyrata   | AT1G21670.1   Symbols:   LOCATED IN: cell wall, plant-type cell wall; EXPRESSED IN: 23 plant structures; EXPRESSED DURING: 14 growth stages; CONTAINS InterPro DOMAIN/s: WD40-like Beta Propeller (InterPro:IPR011659), Six-bladed beta-propeller, TolB-like (InterPro:IPR011042); BEST Arabidopsis thaliana protein match is: DPP6 N-terminal domain-like protein (TAIR:AT1G21680.1); Has 8461 Blast hits to 5060 proteins in 1257 species: Archae - 79; Bacteria - 5567; Metazoa - 37; Fungi - 70; Plants - 117; Viruses - 0; Other Eukaryotes - 2591 (source: NCBI BLINK).   chr1:7610409-7612520 FORWARD LENGTH=703 | 705  | 703  | 0         | 99.7  | 76.6 | 85.1 |
| Rsa1.0_00067.1.g3579.t9 | gb EOA40087.1  hypothetical protein CARUB_v10008781mg [Capsella rubella]                                                                                                         | 539  | 544  | 1.00E-176 | 100.9 | 67.7 | 76.3 | hypothetical protein CARUB_v10008781mg     | gbpln | Capsella rubella     | AT1G21660.1   Symbols:   Chaperone DnaJ-domain superfamily protein   chr1:7605924-7608835 FORWARD LENGTH=523                                                                                                                                                                                                                                                                                                                                                                                                                                                                                                            | 539  | 523  | 1.00E-170 | 97.0  | 65.9 | 74.0 |
| Rsa1.0_00067.1.g3580.t1 | gb EOA35901.1  hypothetical protein CARUB_v10021156mg [Capsella rubella]                                                                                                         | 147  | 121  | 2.00E-49  | 82.3  | 71.4 | 78.9 | hypothetical protein CARUB_v10021156mg     | gbpln | Capsella rubella     | AT1G77350.2   Symbols:   unknown protein; FUNCTIONS IN: molecular_function unknown; INVOLVED IN: biological_process unknown; LOCATED IN: endomembrane system; EXPRESSED IN: 23 plant structures; EXPRESSED DURING: 13 growth stages; CONTAINS InterPro DOMAIN/s: Protein of unknown function KRTCAP2 (InterPro:IPR018614). Has 35333 Blast hits to 34131 proteins in 2444 species: Archae - 798; Bacteria - 22429; Metazoa - 974; Fungi - 991; Plants - 531; Viruses - 0; Other Eukaryotes - 9610 (source: NCBI BLINK).   chr1:29070497-29071545 FORWARD LENGTH=122                                                     | 147  | 122  | 2.00E-51  | 83.0  | 72.8 | 80.3 |
| Rsa1.0_00067.1.g3581.t1 | gb EOA39091.1  hypothetical protein CARUB_v10011823mg [Capsella rubella]                                                                                                         | 806  | 1799 | 0         | 223.2 | 73.6 | 83.9 | hypothetical protein CARUB_v10011823mg     | gbpln | Capsella rubella     | AT1G21650.3   Symbols: SECA2   Preprotein translocase SecA family protein   chr1:7592891-7604152 REVERSE LENGTH=1805                                                                                                                                                                                                                                                                                                                                                                                                                                                                                                    | 806  | 1805 | 0         | 223.9 | 73.4 | 84.9 |
| Rsa1.0_00067.1.g3582.t1 | ref[XP_002890449.1] hypothetical protein ARALYDRAFT_889629 [Arabidopsis lyrata subsp. lyrata] gi 297336291 gb EFH66708.1                                                         | 1009 | 983  | 0         | 97.4  | 85.5 | 90.4 | hypothetical protein ARALYDRAFT_889629     | gbpln | Arabidopsis lyrata   | AT1G21640.1   Symbols: NADK2, ATNADK2   NAD kinase 2   chr1:7588726-7592669 FORWARD LENGTH=985                                                                                                                                                                                                                                                                                                                                                                                                                                                                                                                          | 1009 | 985  | 0         | 97.6  | 84.9 | 89.6 |
| Rsa1.0_00067.1.g3583.t1 | ref NP_173582.2  calcium-binding EF-hand-containing protein [Arabidopsis thaliana] gi 332192007 gb AEE30128.1  calcium-binding EF-hand-containing protein [Arabidopsis thaliana] | 1228 | 1218 | 0         | 99.2  | 83.0 | 87.5 | calcium-binding EF-hand-containing protein | gbpln | Arabidopsis thaliana | AT1G21630.1   Symbols:   Calcium-binding EF hand family protein   chr1:7581457-7587796 FORWARD LENGTH=1218                                                                                                                                                                                                                                                                                                                                                                                                                                                                                                              | 1228 | 1218 | 0         | 99.2  | 83.0 | 87.5 |
| Rsa1.0_00067.1.g3584.t2 | ref[XP_002893178.1] hypothetical protein ARALYDRAFT_472396 [Arabidopsis lyrata subsp. lyrata] gi 297339020 gb EFH69437.1                                                         | 334  | 328  | 1.00E-162 | 98.2  | 90.1 | 92.2 | hypothetical protein ARALYDRAFT_472396     | gbpln | Arabidopsis lyrata   | AT1G21600.2   Symbols: PTAC6   plastid transcriptionally active 6   chr1:7571514-7573782 REVERSE LENGTH=328                                                                                                                                                                                                                                                                                                                                                                                                                                                                                                             | 334  | 328  | 1.00E-150 | 98.2  | 85.0 | 87.7 |
| Rsa1.0_00067.1.g3585.t3 | ref NP_173577.2  zinc finger CCH domain-containing protein [Arabidopsis thaliana] gi 332191999 gb AEE30120.1  zinc finger CCH domain-containing protein [Arabidopsis thaliana]   | 2016 | 2166 | 0         | 107.4 | 64.7 | 74.6 | zinc finger CCH domain-containing protein  | gbpln | Arabidopsis thaliana | AT1G21580.1   Symbols:   Zinc finger C-x8-C-x5-C-x3-H type family protein   chr1:7557822-7565655 REVERSE LENGTH=2166                                                                                                                                                                                                                                                                                                                                                                                                                                                                                                    | 2016 | 2166 | 0         | 107.4 | 64.7 | 74.6 |

|                         |                                                                                                                                                                                                     |     |     |           |       |      |      |                                        |       |                      |                                                                                                                                                                                                                                                                                                                                                                                                                             |     |     |           |       |      |      |
|-------------------------|-----------------------------------------------------------------------------------------------------------------------------------------------------------------------------------------------------|-----|-----|-----------|-------|------|------|----------------------------------------|-------|----------------------|-----------------------------------------------------------------------------------------------------------------------------------------------------------------------------------------------------------------------------------------------------------------------------------------------------------------------------------------------------------------------------------------------------------------------------|-----|-----|-----------|-------|------|------|
| Rsa1.0_00067.1.g3586.t1 | ref[XP_002890445.1] hypothetical protein ARALYDRAFT_889619 [Arabidopsis lyrata subsp. lyrata] gi 297336287 gb EFH66704.1  hypothetical protein ARALYDRAFT_889619 [Arabidopsis lyrata subsp. lyrata] | 379 | 394 | 7.00E-86  | 104.0 | 53.3 | 64.4 | hypothetical protein ARALYDRAFT_889619 | gbpln | Arabidopsis lyrata   | AT1G21560.3   Symbols:   unknown protein; FUNCTIONS IN: molecular_function unknown; INVOLVED IN: biological_process unknown; LOCATED IN: cellular_component unknown; EXPRESSED IN: 22 plant structures; EXPRESSED DURING: 13 growth stages; BEST Arabidopsis thaliana protein match is: unknown protein (TAIR:AT4G01170.1).   chr1:7555208-7556789 FORWARD LENGTH=399                                                       | 379 | 399 | 5.00E-83  | 105.3 | 51.7 | 64.1 |
| Rsa1.0_00067.1.g3587.t1 | gb[EOA39012.1] hypothetical protein CARUB_v10011959mg [Capsella rubella]                                                                                                                            | 142 | 159 | 1.00E-56  | 112.0 | 78.2 | 85.9 | hypothetical protein CARUB_v10011959mg | gbpln | Capsella rubella     | AT1G21550.1   Symbols:   Calcium-binding EF-hand family protein   chr1:7553317-7553784 REVERSE LENGTH=155                                                                                                                                                                                                                                                                                                                   | 142 | 155 | 2.00E-58  | 109.2 | 76.1 | 87.3 |
| Rsa1.0_00067.1.g3588.t1 | ref[XP_002893174.1] hypothetical protein ARALYDRAFT_889616 [Arabidopsis lyrata subsp. lyrata] gi 297339016 gb EFH69433.1  hypothetical protein ARALYDRAFT_889616 [Arabidopsis lyrata subsp. lyrata] | 550 | 550 | 0         | 100.0 | 94.4 | 97.6 | hypothetical protein ARALYDRAFT_889616 | gbpln | Arabidopsis lyrata   | AT1G21540.1   Symbols:   AMP-dependent synthetase and ligase family protein   chr1:7548758-7550521 REVERSE LENGTH=550                                                                                                                                                                                                                                                                                                       | 550 | 550 | 0         | 100.0 | 92.7 | 97.3 |
| Rsa1.0_00067.1.g3589.t1 | gb[EOA36652.1] hypothetical protein CARUB_v10011926mg [Capsella rubella]                                                                                                                            | 69  | 72  | 1.00E-14  | 104.3 | 71.0 | 78.3 | hypothetical protein CARUB_v10011926mg | gbpln | Capsella rubella     | AT1G21528.1   Symbols:   unknown protein; Has 2 Blast hits to 2 proteins in 1 species: Archae - 0; Bacteria - 0; Metazoa - 0; Fungi - 0; Plants - 2; Viruses - 0; Other Eukaryotes - 0 (source: NCBI BLINK).   chr1:7542830-7543039 REVERSE LENGTH=69                                                                                                                                                                       | 69  | 69  | 7.00E-16  | 100.0 | 65.2 | 75.4 |
| Rsa1.0_00067.1.g3590.t1 | ref[XP_002893172.1] hypothetical protein ARALYDRAFT_472389 [Arabidopsis lyrata subsp. lyrata] gi 297339014 gb EFH69431.1  hypothetical protein ARALYDRAFT_472389 [Arabidopsis lyrata subsp. lyrata] | 70  | 71  | 3.00E-16  | 101.4 | 68.6 | 81.4 | hypothetical protein ARALYDRAFT_472389 | gbpln | Arabidopsis lyrata   | #                                                                                                                                                                                                                                                                                                                                                                                                                           | #   | #   | #         | #     | #    | #    |
| Rsa1.0_00067.1.g3591.t1 | ref[XP_002893172.1] hypothetical protein ARALYDRAFT_472389 [Arabidopsis lyrata subsp. lyrata] gi 297339014 gb EFH69431.1  hypothetical protein ARALYDRAFT_472389 [Arabidopsis lyrata subsp. lyrata] | 73  | 71  | 2.00E-19  | 97.3  | 72.6 | 79.5 | hypothetical protein ARALYDRAFT_472389 | gbpln | Arabidopsis lyrata   | #                                                                                                                                                                                                                                                                                                                                                                                                                           | #   | #   | #         | #     | #    | #    |
| Rsa1.0_00067.1.g3592.t1 | ref[XP_002893171.1] hypothetical protein ARALYDRAFT_889613 [Arabidopsis lyrata subsp. lyrata] gi 297339013 gb EFH69430.1  hypothetical protein ARALYDRAFT_889613 [Arabidopsis lyrata subsp. lyrata] | 59  | 66  | 5.00E-12  | 111.9 | 72.9 | 79.7 | hypothetical protein ARALYDRAFT_889613 | gbpln | Arabidopsis lyrata   | AT1G21520.1   Symbols:   unknown protein; Has 9 Blast hits to 9 proteins in 2 species: Archae - 0; Bacteria - 0; Metazoa - 0; Fungi - 0; Plants - 9; Viruses - 0; Other Eukaryotes - 0 (source: NCBI BLINK).   chr1:7534533-7534733 REVERSE LENGTH=66                                                                                                                                                                       | 59  | 66  | 2.00E-13  | 111.9 | 71.2 | 76.3 |
| Rsa1.0_00067.1.g3593.t1 | ref[XP_002893170.1] hypothetical protein ARALYDRAFT_472387 [Arabidopsis lyrata subsp. lyrata] gi 297339012 gb EFH69429.1  hypothetical protein ARALYDRAFT_472387 [Arabidopsis lyrata subsp. lyrata] | 325 | 326 | 1.00E-117 | 100.3 | 75.7 | 84.0 | hypothetical protein ARALYDRAFT_472387 | gbpln | Arabidopsis lyrata   | AT1G21510.1   Symbols:   unknown protein; FUNCTIONS IN: molecular_function unknown; INVOLVED IN: N-terminal protein myristoylation; LOCATED IN: cellular_component unknown; EXPRESSED IN: cotyledon; Has 380 Blast hits to 286 proteins in 63 species: Archae - 0; Bacteria - 6; Metazoa - 254; Fungi - 44; Plants - 13; Viruses - 5; Other Eukaryotes - 58 (source: NCBI BLINK).   chr1:7531534-7532505 REVERSE LENGTH=323 | 325 | 323 | 1.00E-110 | 99.4  | 71.7 | 82.5 |
| Rsa1.0_00067.1.g3594.t9 | sp[Q9LNF6.3]FB48_ARATH RecName: Full=F-box protein At1g48060                                                                                                                                        | 256 | 365 | 2.00E-30  | 142.6 | 39.5 | 59.8 | RecName: Full=F-box protein At1g48060  | ----  | ----                 | AT1G48060.1   Symbols:   F-box and associated interaction domains-containing protein   chr1:17728295-17729448 FORWARD LENGTH=353                                                                                                                                                                                                                                                                                            | 256 | 353 | 7.00E-33  | 137.9 | 39.5 | 59.8 |
| Rsa1.0_00067.1.g3595.t1 | gb[EOA39248.1] hypothetical protein CARUB_v10012244mg [Capsella rubella]                                                                                                                            | 114 | 253 | 4.00E-12  | 221.9 | 43.0 | 51.8 | hypothetical protein CARUB_v10012244mg | gbpln | Capsella rubella     | #                                                                                                                                                                                                                                                                                                                                                                                                                           | #   | #   | #         | #     | #    |      |
| Rsa1.0_00067.1.g3596.t1 | ref[NP_564141.1] exostosin-like protein [Arabidopsis thaliana] gi 332191985 gb AE30106.1  exostosin-like protein [Arabidopsis thaliana]                                                             | 445 | 462 | 0         | 103.8 | 92.6 | 96.2 | exostosin-like protein                 | gbpln | Arabidopsis thaliana | AT1G21480.1   Symbols:   Exostosin family protein   chr1:7519116-7521426 REVERSE LENGTH=462                                                                                                                                                                                                                                                                                                                                 | 445 | 462 | 0         | 103.8 | 92.6 | 96.2 |
| Rsa1.0_00067.1.g3597.t1 | ref[XP_002893163.1] nodulin MtN3 family protein [Arabidopsis lyrata subsp. lyrata] gi 297339005 gb EFH69422.1  nodulin MtN3 family protein [Arabidopsis lyrata subsp. lyrata]                       | 247 | 247 | 1.00E-126 | 100.0 | 91.1 | 95.1 | nodulin MtN3 family protein            | gbpln | Arabidopsis lyrata   | AT1G21460.1   Symbols: SWEET1, A1SWEET1   Nodulin MtN3 family protein   chr1:7512030-7513281 REVERSE LENGTH=247                                                                                                                                                                                                                                                                                                             | 247 | 247 | 1.00E-126 | 100.0 | 89.5 | 94.3 |
| Rsa1.0_00067.1.g3598.t1 | dbj[BAJ33657.1] unnamed protein product [Theilingella halophila]                                                                                                                                    | 571 | 595 | 0         | 104.2 | 87.4 | 93.3 | unnamed protein product                | ----  | ----                 | AT1G21450.1   Symbols: SCL1   SCARECROW-like 1   chr1:7509721-7511502 FORWARD LENGTH=593                                                                                                                                                                                                                                                                                                                                    | 571 | 593 | 0         | 103.9 | 85.1 | 91.6 |



|                         |                                                                                                                                                                                                                                                                                                                                                                                                                                                                                                                                                                                                                                                                                                                                                                                                    |     |     |           |       |      |      |                                                 |       |                      |                                                                                                                                                                                                                                                                                                                                                                       |     |     |           |       |      |      |
|-------------------------|----------------------------------------------------------------------------------------------------------------------------------------------------------------------------------------------------------------------------------------------------------------------------------------------------------------------------------------------------------------------------------------------------------------------------------------------------------------------------------------------------------------------------------------------------------------------------------------------------------------------------------------------------------------------------------------------------------------------------------------------------------------------------------------------------|-----|-----|-----------|-------|------|------|-------------------------------------------------|-------|----------------------|-----------------------------------------------------------------------------------------------------------------------------------------------------------------------------------------------------------------------------------------------------------------------------------------------------------------------------------------------------------------------|-----|-----|-----------|-------|------|------|
| Rsa1.0_00067.1.g3599.t1 | refNP_191713.1   peptidase family protein [Arabidopsis thaliana] gi 8850845 emb CAB71084.1   prolyl aminopeptidase-like protein [Arabidopsis thaliana] gi 15450667 gb AAK96605.1   AT3g61540/F2A19_140 [Arabidopsis thaliana] gi 17380608 gb AAL36067.1   AT3g61540/F2A19_140 [Arabidopsis thaliana] gi 332646699 gb AEE80220.1   peptidase family protein [Arabidopsis thaliana]                                                                                                                                                                                                                                                                                                                                                                                                                  | 93  | 515 | 9.00E-36  | 553.8 | 78.5 | 82.8 | peptidase family protein                        | gbpln | Arabidopsis thaliana | AT3G61540.1   Symbols:   alpha/beta-Hydrolases superfamily protein   chr3:22773399-22775699 FORWARD LENGTH=515                                                                                                                                                                                                                                                        | 93  | 515 | 1.00E-38  | 553.8 | 78.5 | 82.8 |
| Rsa1.0_00067.1.g3600.t1 | gb EOA38182.1   hypothetical protein CARUB_v10009659mg [Capsella rubella]                                                                                                                                                                                                                                                                                                                                                                                                                                                                                                                                                                                                                                                                                                                          | 352 | 338 | 1.00E-159 | 96.0  | 81.0 | 84.9 | hypothetical protein CARUB_v10009659mg          | gbpln | Capsella rubella     | AT1G21440.1   Symbols:   Phosphoenolpyruvate carboxylase family protein   chr1:7502325-7504103 REVERSE LENGTH=336                                                                                                                                                                                                                                                     | 352 | 336 | 1.00E-161 | 95.5  | 81.0 | 84.7 |
| Rsa1.0_00067.1.g3601.t1 | gb EOA37849.1   hypothetical protein CARUB_v10011440mg [Capsella rubella]                                                                                                                                                                                                                                                                                                                                                                                                                                                                                                                                                                                                                                                                                                                          | 382 | 390 | 0         | 102.1 | 82.2 | 89.8 | hypothetical protein CARUB_v10011440mg          | gbpln | Capsella rubella     | AT1G21430.1   Symbols: YUC11   Flavine-binding monooxygenase family protein   chr1:7500845-7502186 FORWARD LENGTH=391                                                                                                                                                                                                                                                 | 382 | 391 | 0         | 102.4 | 79.3 | 87.4 |
| Rsa1.0_00067.1.g3602.t1 | db BAJ33623.1   unnamed protein product [TheIllungiella halophila]                                                                                                                                                                                                                                                                                                                                                                                                                                                                                                                                                                                                                                                                                                                                 | 472 | 471 | 0         | 99.8  | 91.5 | 94.1 | unnamed protein product                         | ----  | ----                 | AT1G21400.1   Symbols:   Thiamin diphosphate-binding fold (THDP-binding) superfamily protein   chr1:7493492-7496240 FORWARD LENGTH=472                                                                                                                                                                                                                                | 472 | 472 | 0         | 100.0 | 91.1 | 94.7 |
| Rsa1.0_00067.1.g3603.t3 | gb EOA38425.1   hypothetical protein CARUB_v10010005mg, partial [Capsella rubella]                                                                                                                                                                                                                                                                                                                                                                                                                                                                                                                                                                                                                                                                                                                 | 215 | 271 | 3.00E-66  | 126.0 | 65.1 | 76.3 | hypothetical protein CARUB_v10010005mg, partial | gbpln | Capsella rubella     | AT1G21390.1   Symbols: emb2170   embryo defective 2170   chr1:7489385-7490554 REVERSE LENGTH=246                                                                                                                                                                                                                                                                      | 215 | 248 | 3.00E-64  | 115.3 | 65.6 | 74.9 |
| Rsa1.0_00067.1.g3604.t1 | refXP_002890439.1   hypothetical protein ARALYDRAFT_472372 [Arabidopsis lyrata subsp. lyrata] gi 297336281 gb EFH66698.1   hypothetical protein ARALYDRAFT_472372 [Arabidopsis lyrata subsp. lyrata]                                                                                                                                                                                                                                                                                                                                                                                                                                                                                                                                                                                               | 334 | 341 | 1.00E-163 | 102.1 | 83.8 | 91.3 | hypothetical protein ARALYDRAFT_472372          | gbpln | Arabidopsis lyrata   | AT1G21370.2   Symbols:   unknown protein; CONTAINS InterPro DOMAIN/s: Protein of unknown function DUF218 (InterPro:IPR003848); Has 35333 Blast hits to 34131 proteins in 2444 species: Archae - 798; Bacteria - 22429; Metazoa - 974; Fungi - 991; Plants - 531; Viruses - 0; Other Eukaryotes - 9610 (source: NCBI BLINK).   chr1:7484250-7485451 FORWARD LENGTH=342 | 334 | 342 | 1.00E-161 | 102.4 | 82.3 | 91.0 |
| Rsa1.0_00067.1.g3605.t1 | refXP_002890438.1   predicted protein [Arabidopsis lyrata subsp. lyrata] gi 297336280 gb EFH66697.1   predicted protein [Arabidopsis lyrata subsp. lyrata]                                                                                                                                                                                                                                                                                                                                                                                                                                                                                                                                                                                                                                         | 222 | 222 | 1.00E-109 | 100.0 | 86.5 | 91.9 | predicted protein                               | gbpln | Arabidopsis lyrata   | AT1G21360.1   Symbols: GLTP2   glycolipid transfer protein 2   chr1:7481365-7483237 FORWARD LENGTH=223                                                                                                                                                                                                                                                                | 222 | 223 | 1.00E-109 | 100.5 | 84.2 | 91.0 |
| Rsa1.0_00067.1.g3606.t1 | refXP_002893159.1   electron carrier/ oxidoreductase [Arabidopsis lyrata subsp. lyrata] gi 297339001 gb EFH69418.1   electron carrier/ oxidoreductase [Arabidopsis lyrata subsp. lyrata]                                                                                                                                                                                                                                                                                                                                                                                                                                                                                                                                                                                                           | 254 | 253 | 1.00E-121 | 99.6  | 84.3 | 89.4 | electron carrier/ oxidoreductase                | gbpln | Arabidopsis lyrata   | AT1G21350.3   Symbols:   Thioredoxin superfamily protein   chr1:7477376-7479012 REVERSE LENGTH=252                                                                                                                                                                                                                                                                    | 254 | 252 | 1.00E-119 | 99.2  | 81.5 | 89.0 |
| Rsa1.0_00067.1.g3607.t1 | gb EOA38986.1   hypothetical protein CARUB_v10011507mg [Capsella rubella]                                                                                                                                                                                                                                                                                                                                                                                                                                                                                                                                                                                                                                                                                                                          | 256 | 260 | 1.00E-116 | 101.6 | 84.0 | 90.6 | hypothetical protein CARUB_v10011507mg          | gbpln | Capsella rubella     | AT1G21340.1   Symbols:   Dof-type zinc finger DNA-binding family protein   chr1:7476087-7476869 FORWARD LENGTH=260                                                                                                                                                                                                                                                    | 256 | 260 | 1.00E-118 | 101.6 | 84.4 | 89.5 |
| Rsa1.0_00067.1.g3608.t1 | gb EOA36400.1   hypothetical protein CARUB_v10010842mg [Capsella rubella]                                                                                                                                                                                                                                                                                                                                                                                                                                                                                                                                                                                                                                                                                                                          | 204 | 237 | 1.00E-43  | 116.2 | 64.2 | 75.5 | hypothetical protein CARUB_v10010842mg          | gbpln | Capsella rubella     | AT1G21326.1   Symbols:   VQ motif-containing protein   chr1:7469002-7469721 REVERSE LENGTH=239                                                                                                                                                                                                                                                                        | 204 | 239 | 8.00E-37  | 117.2 | 57.8 | 70.1 |
| Rsa1.0_00067.1.g3609.t1 | refNP_001154354.1   nucleic acid/nucleotide binding protein [Arabidopsis thaliana] gi 332191964 gb AEE30085.1   nucleic acid/nucleotide binding protein [Arabidopsis thaliana] refNP_173553.1   extensin 3 [Arabidopsis thaliana] gi 334302912 sp Q9FS16.3 EXTN3_ARA TH RecName: Full=Extensin-3; Short=AtExt3; Short=AtExt5; Flags: Precursor gi 8920638 gb AAF81360.1 AC036104.9 Contains similarity to Extensin (atExt1) from Arabidopsis thaliana gb U43627 and contains 12 concatamers of 28 amino acids rich in proline. ESTs gb AA597816, gb AA712635, gb N65860, gb AA598180, gb H77085, gb AA394416, gb AA394413, gb AA650774, gb AA650748, gb Z25975, gb AA597958, gb AA597955 come from this gene [Arabidopsis thaliana] gi 332191962 gb AEE30083.1   extensin 3 [Arabidopsis thaliana] | 230 | 253 | 4.00E-80  | 110.0 | 73.5 | 82.2 | nucleic acid/nucleotide binding protein         | gbpln | Arabidopsis thaliana | AT1G21320.2   Symbols:   nucleotide binding/nucleic acid binding   chr1:7462834-7466164 REVERSE LENGTH=253                                                                                                                                                                                                                                                            | 230 | 253 | 1.00E-82  | 110.0 | 73.5 | 82.2 |
| Rsa1.0_00067.1.g3610.t1 | refNP_173553.1   extensin 3 [Arabidopsis thaliana] gi 334302912 sp Q9FS16.3 EXTN3_ARA TH RecName: Full=Extensin-3; Short=AtExt3; Short=AtExt5; Flags: Precursor gi 8920638 gb AAF81360.1 AC036104.9 Contains similarity to Extensin (atExt1) from Arabidopsis thaliana gb U43627 and contains 12 concatamers of 28 amino acids rich in proline. ESTs gb AA597816, gb AA712635, gb N65860, gb AA598180, gb H77085, gb AA394416, gb AA394413, gb AA650774, gb AA650748, gb Z25975, gb AA597958, gb AA597955 come from this gene [Arabidopsis thaliana] gi 332191962 gb AEE30083.1   extensin 3 [Arabidopsis thaliana]                                                                                                                                                                                | 449 | 431 | 1.00E-98  | 96.0  | 94.4 | 94.9 | extensin 3                                      | gbpln | Arabidopsis thaliana | AT1G21310.1   Symbols: ATEXT3, RSH, EXT3   extensin 3   chr1:7453693-7454988 REVERSE LENGTH=431                                                                                                                                                                                                                                                                       | 449 | 431 | 1.00E-101 | 96.0  | 94.4 | 94.9 |

|                         |                                                                                                                                                                                                                                                                                                                                                                                                                                                                                                                                                                                                                                                                                                                                                                                                                                                                          |     |     |           |       |      |      |                                        |       |                      |                                                                                                                                                                                                                                                                                                                            |     |     |           |       |      |      |
|-------------------------|--------------------------------------------------------------------------------------------------------------------------------------------------------------------------------------------------------------------------------------------------------------------------------------------------------------------------------------------------------------------------------------------------------------------------------------------------------------------------------------------------------------------------------------------------------------------------------------------------------------------------------------------------------------------------------------------------------------------------------------------------------------------------------------------------------------------------------------------------------------------------|-----|-----|-----------|-------|------|------|----------------------------------------|-------|----------------------|----------------------------------------------------------------------------------------------------------------------------------------------------------------------------------------------------------------------------------------------------------------------------------------------------------------------------|-----|-----|-----------|-------|------|------|
| Rsa1.0_00067.1.g3611.t1 | refNP_173550.1  uncharacterized protein [Arabidopsis thaliana] gi 28393025 gb AAO41947.1  unknown protein [Arabidopsis thaliana] gi 28827240 gb AAO50464.1  unknown protein [Arabidopsis thaliana] gi 55740501 gb AAV63843.1  hypothetical protein At1g21280 [Arabidopsis thaliana] gi 332191960 gb AEE30081.1  uncharacterized protein AT1G21280 [Arabidopsis thaliana] refNP_173546.1  wall-associated receptor kinase 5 [Arabidopsis thaliana] gi 75174802 sp Q9LMN7.1 WAK5_ARATH RecName: Full=Wall-associated receptor kinase 5; Flags: Precursor gi 8920637 gb AAF81359.1 AC036104.8 Strong similarity to wall-associated kinase 1 from Arabidopsis thaliana gb AJ009696 and contains Eukaryotic protein kinase PF 00069 and EGF-like PF 00008 domains [Arabidopsis thaliana] gi 332191955 gb AEE30076.1  wall-associated receptor kinase 5 [Arabidopsis thaliana] | 170 | 237 | 4.00E-32  | 139.4 | 50.6 | 64.7 | uncharacterized protein                | gbpln | Arabidopsis thaliana | AT1G21280.1   Symbols:   CONTAINS InterPro DOMAIN/s: Retrotransposon gag protein (InterPro:IPR005162); Has 707 Blast hits to 705 proteins in 25 species: Archae - 0; Bacteria - 0; Metazoa - 4; Fungi - 0; Plants - 703; Viruses - 0; Other Eukaryotes - 0 (source: NCBI BLINK).   chr1:7447690-7448403 REVERSE LENGTH=237 | 170 | 237 | 2.00E-34  | 139.4 | 50.6 | 64.7 |
| Rsa1.0_00067.1.g3612.t1 | gb EOA39743.1  hypothetical protein CARUB_v10008400mg [Capsella rubella]                                                                                                                                                                                                                                                                                                                                                                                                                                                                                                                                                                                                                                                                                                                                                                                                 | 737 | 733 | 0         | 99.5  | 70.7 | 81.3 | wall-associated receptor kinase 5      | gbpln | Arabidopsis thaliana | AT1G21230.1   Symbols: WAK5   wall associated kinase 5   chr1:7429980-7432346 FORWARD LENGTH=733                                                                                                                                                                                                                           | 737 | 733 | 0         | 99.5  | 70.7 | 81.3 |
| Rsa1.0_00067.1.g3613.t1 | gb EOA39743.1  hypothetical protein CARUB_v10008400mg [Capsella rubella]                                                                                                                                                                                                                                                                                                                                                                                                                                                                                                                                                                                                                                                                                                                                                                                                 | 738 | 740 | 0         | 100.3 | 72.1 | 82.4 | hypothetical protein CARUB_v10008400mg | gbpln | Capsella rubella     | AT1G21270.1   Symbols: WAK2   wall-associated kinase 2   chr1:7444997-7447345 FORWARD LENGTH=732                                                                                                                                                                                                                           | 738 | 732 | 0         | 99.2  | 69.5 | 80.4 |
| Rsa1.0_00067.1.g3614.t1 | gb EOA39743.1  hypothetical protein CARUB_v10008400mg [Capsella rubella]                                                                                                                                                                                                                                                                                                                                                                                                                                                                                                                                                                                                                                                                                                                                                                                                 | 690 | 740 | 0         | 107.2 | 73.6 | 83.3 | hypothetical protein CARUB_v10008400mg | gbpln | Capsella rubella     | AT1G21230.1   Symbols: WAK5   wall associated kinase 5   chr1:7429980-7432346 FORWARD LENGTH=733                                                                                                                                                                                                                           | 690 | 733 | 0         | 106.2 | 70.1 | 81.6 |
| Rsa1.0_00067.1.g3615.t1 | gb EOA39743.1  hypothetical protein CARUB_v10008400mg [Capsella rubella]                                                                                                                                                                                                                                                                                                                                                                                                                                                                                                                                                                                                                                                                                                                                                                                                 | 737 | 740 | 0         | 100.4 | 72.5 | 82.8 | hypothetical protein CARUB_v10008400mg | gbpln | Capsella rubella     | AT1G21270.1   Symbols: WAK2   wall-associated kinase 2   chr1:7444997-7447345 FORWARD LENGTH=732                                                                                                                                                                                                                           | 737 | 732 | 0         | 99.3  | 70.1 | 80.7 |
| Rsa1.0_00067.1.g3616.t2 | gb EOA39743.1  hypothetical protein CARUB_v10008400mg [Capsella rubella]                                                                                                                                                                                                                                                                                                                                                                                                                                                                                                                                                                                                                                                                                                                                                                                                 | 717 | 740 | 0         | 103.2 | 80.6 | 90.2 | hypothetical protein CARUB_v10008400mg | gbpln | Capsella rubella     | AT1G21270.1   Symbols: WAK2   wall-associated kinase 2   chr1:7444997-7447345 FORWARD LENGTH=732                                                                                                                                                                                                                           | 717 | 732 | 0         | 102.1 | 72.2 | 82.4 |
| Rsa1.0_00067.1.g3617.t1 | gb EOA40426.1  hypothetical protein CARUB_v10009151mg [Capsella rubella] gi 482576240 gb EOA40427.1  hypothetical protein CARUB_v10009151mg [Capsella rubella]                                                                                                                                                                                                                                                                                                                                                                                                                                                                                                                                                                                                                                                                                                           | 416 | 442 | 0         | 106.3 | 84.6 | 91.3 | hypothetical protein CARUB_v10009151mg | gbpln | Capsella rubella     | AT1G21200.1   Symbols:   sequence-specific DNA binding transcription factors   chr1:7421463-7422814 FORWARD LENGTH=443                                                                                                                                                                                                     | 416 | 443 | 1.00E-180 | 106.5 | 82.9 | 90.4 |
| Rsa1.0_00067.1.g3618.t1 | ref XP_002893156.1  hypothetical protein ARALYDRAFT_472357 [Arabidopsis lyrata subsp. lyrata] gi 297338998 gb EFH69415.1  hypothetical protein ARALYDRAFT_472357 [Arabidopsis lyrata subsp. lyrata] ref NP_189952.1  vacuolar iron transporter-like protein [Arabidopsis thaliana] gi 75182792 sp Q9M2C0.1 VITH4_ARATH RecName: Full=Vacuolar iron transporter homolog 4; AltName: Full=Protein NODULIN-LIKE 4                                                                                                                                                                                                                                                                                                                                                                                                                                                           | 292 | 98  | 8.00E-32  | 33.6  | 24.3 | 24.3 | hypothetical protein ARALYDRAFT_472357 | gbpln | Arabidopsis lyrata   | AT1G21190.1   Symbols:   Small nuclear ribonucleoprotein family protein   chr1:7419989-7420856 REVERSE LENGTH=97                                                                                                                                                                                                           | 292 | 97  | 3.00E-34  | 33.2  | 24.0 | 24.3 |
| Rsa1.0_00067.1.g3619.t1 | gi 7362791 emb CAB83067.1  nodulin-like protein [Arabidopsis thaliana] gi 34365643 gb AAO65133.1  At3g43660 [Arabidopsis thaliana] gi 51970300 dbj BAD43842.1  nodulin-like protein [Arabidopsis thaliana] gi 332644295 gb AEE77816.1  vacuolar iron transporter homolog 4 [Arabidopsis thaliana]                                                                                                                                                                                                                                                                                                                                                                                                                                                                                                                                                                        | 201 | 198 | 3.00E-92  | 98.5  | 83.1 | 91.0 | vacuolar iron transporter-like protein | gbpln | Arabidopsis thaliana | AT3G43660.1   Symbols:   Vacuolar iron transporter (VIT) family protein   chr3:15565332-15565928 FORWARD LENGTH=198                                                                                                                                                                                                        | 201 | 198 | 1.00E-94  | 98.5  | 83.1 | 91.0 |
| Rsa1.0_00067.1.g3620.t1 | gb AAM67269.1  O-methyltransferase, putative [Arabidopsis thaliana]                                                                                                                                                                                                                                                                                                                                                                                                                                                                                                                                                                                                                                                                                                                                                                                                      | 345 | 373 | 1.00E-173 | 108.1 | 91.6 | 95.7 | O-methyltransferase, putative          | gbpln | Arabidopsis thaliana | AT1G21130.1   Symbols:   O-methyltransferase family protein   chr1:7399170-7400470 REVERSE LENGTH=373                                                                                                                                                                                                                      | 345 | 373 | 1.00E-175 | 108.1 | 91.3 | 95.1 |



|                         |                                                                                                                                                                                                                                                                                                                                                                                                                                                                                                        |      |      |           |       |      |      |                                                 |       |                      |                                                                                                                                                                                                                                                                                                                                             |      |      |           |       |      |      |
|-------------------------|--------------------------------------------------------------------------------------------------------------------------------------------------------------------------------------------------------------------------------------------------------------------------------------------------------------------------------------------------------------------------------------------------------------------------------------------------------------------------------------------------------|------|------|-----------|-------|------|------|-------------------------------------------------|-------|----------------------|---------------------------------------------------------------------------------------------------------------------------------------------------------------------------------------------------------------------------------------------------------------------------------------------------------------------------------------------|------|------|-----------|-------|------|------|
| Rsa1.0_00068.1.g3632.t1 | gb EOA25480.1  hypothetical protein CARUB_v10018819mg [Capsella rubella]                                                                                                                                                                                                                                                                                                                                                                                                                               | 101  | 191  | 2.00E-35  | 189.1 | 81.2 | 91.1 | hypothetical protein CARUB_v10018819mg          | gbpln | Capsella rubella     | AT2G01580.1   Symbols:   unknown protein; BEST Arabidopsis thaliana protein match is: unknown protein (TAIR:AT3G07510.2). Has 129 Blast hits to 129 proteins in 12 species: Archae - 0; Bacteria - 0; Metazoa - 0; Fungi - 0; Plants - 129; Viruses - 0; Other Eukaryotes - 0 (source: NCBI BLINK).   chr2:265181-265756 REVERSE LENGTH=191 | 101  | 191  | 5.00E-34  | 189.1 | 72.3 | 79.2 |
| Rsa1.0_00068.1.g3633.t1 | ref NP_973517.1  serine carboxypeptidase-like 9 [Arabidopsis thaliana]   gi 330252302 gb AEC07396.1  serine carboxypeptidase-like 9 [Arabidopsis thaliana]                                                                                                                                                                                                                                                                                                                                             | 163  | 437  | 5.00E-67  | 268.1 | 75.5 | 87.1 | serine carboxypeptidase-like 9                  | gbpln | Arabidopsis thaliana | AT2G23010.2   Symbols: SCPL9   serine carboxypeptidase-like 9   chr2:9798843-9802485 FORWARD LENGTH=437                                                                                                                                                                                                                                     | 163  | 437  | 2.00E-69  | 268.1 | 75.5 | 87.1 |
| Rsa1.0_00068.1.g3634.t5 | # # # # # # # - ----                                                                                                                                                                                                                                                                                                                                                                                                                                                                                   | #    | #    | #         | #     | #    | #    | -                                               | ----  | ----                 | #                                                                                                                                                                                                                                                                                                                                           | #    | #    | #         | #     | #    |      |
| Rsa1.0_00068.1.g3635.t1 | ref NP_179884.1  serine carboxypeptidase-like 9 [Arabidopsis thaliana]   gi 75099209 sp O64811.1 SCP9_ARATH RecName: Full=Serine carboxypeptidase-like 9; AltName: Full=Sinapoylglucose--sinapoylglucose O--sinapoyltransferase; Short=SST; AltName: Full=Sinapoylglucose--sinapoylglucose acyltransferase; Flags: Precursor   gi 3169175 gb AAC17818.1  putative serine carboxypeptidase I [Arabidopsis thaliana]   gi 330252303 gb AEC07397.1  serine carboxypeptidase-like 9 [Arabidopsis thaliana] | 158  | 437  | 5.00E-47  | 276.6 | 55.1 | 59.5 | serine carboxypeptidase-like 9                  | gbpln | Arabidopsis thaliana | AT2G23010.1   Symbols: SCPL9   serine carboxypeptidase-like 9   chr2:9798843-9802485 FORWARD LENGTH=437                                                                                                                                                                                                                                     | 158  | 437  | 2.00E-49  | 276.6 | 55.1 | 59.5 |
| Rsa1.0_00068.1.g3637.t1 | ref XP_002875182.1  pentatricopeptide repeat-containing protein [Arabidopsis lyrata subsp. lyrata]   gi 297321020 gb EFH51441.1  pentatricopeptide repeat-containing protein [Arabidopsis lyrata subsp. lyrata]                                                                                                                                                                                                                                                                                        | 607  | 605  | 0         | 99.7  | 82.9 | 89.0 | pentatricopeptide repeat-containing protein     | gbpln | Arabidopsis lyrata   | AT2G02980.1   Symbols: OTP85   Pentatricopeptide repeat (PPR) superfamily protein   chr2:868468-870279 FORWARD LENGTH=603                                                                                                                                                                                                                   | 607  | 603  | 0         | 99.3  | 80.4 | 89.1 |
| Rsa1.0_00068.1.g3637.t1 | gb AFI98882.1  phytochrome kinase substrate [Brassica juncea var. tumida]                                                                                                                                                                                                                                                                                                                                                                                                                              | 434  | 376  | 1.00E-171 | 86.6  | 74.2 | 76.5 | phytochrome kinase substrate                    | gbpln | Brassica juncea      | AT2G02950.1   Symbols: PKS1   phytochrome kinase substrate 1   chr2:855149-856468 REVERSE LENGTH=439                                                                                                                                                                                                                                        | 434  | 439  | 1.00E-150 | 101.2 | 70.7 | 80.6 |
| Rsa1.0_00068.1.g3638.t1 | gb AAD32898.1  putative retroelement pol polyprotein [Arabidopsis thaliana]                                                                                                                                                                                                                                                                                                                                                                                                                            | 1320 | 1307 | 0         | 99.0  | 60.2 | 75.0 | putative retroelement pol polyprotein           | gbpln | Arabidopsis thaliana | AT4G23160.1   Symbols: CRK8   cysteine-rich RLK (RECEPTOR-like protein kinase) 8   chr4:12129485-12134086 FORWARD LENGTH=1262                                                                                                                                                                                                               | 1320 | 1262 | 2.00E-91  | 95.6  | 13.0 | 19.9 |
| Rsa1.0_00068.1.g3639.t1 | ref XP_002876849.1  hypothetical protein ARALYDRAFT_484201 [Arabidopsis lyrata subsp. lyrata]   gi 297322687 gb EFH53108.1  hypothetical protein ARALYDRAFT_484201 [Arabidopsis lyrata subsp. lyrata]                                                                                                                                                                                                                                                                                                  | 472  | 468  | 0         | 99.2  | 88.1 | 94.1 | hypothetical protein ARALYDRAFT_484201          | gbpln | Arabidopsis lyrata   | AT2G02910.1   Symbols:   Protein of unknown function (DUF616)   chr2:847335-849371 REVERSE LENGTH=460                                                                                                                                                                                                                                       | 472  | 460  | 0         | 97.5  | 85.8 | 91.3 |
| Rsa1.0_00068.1.g3640.t1 | gb EOA24405.1  hypothetical protein CARUB_v10017635mg, partial [Capsella rubella]                                                                                                                                                                                                                                                                                                                                                                                                                      | 344  | 321  | 1.00E-128 | 93.3  | 71.8 | 78.5 | hypothetical protein CARUB_v10017635mg, partial | gbpln | Capsella rubella     | AT2G02880.1   Symbols:   mucin-related   chr2:841303-843151 FORWARD LENGTH=314                                                                                                                                                                                                                                                              | 344  | 314  | 1.00E-126 | 91.3  | 71.8 | 77.3 |

|                         |                                                                                                                                                                                                                                                                                                                                                                                                                                                                                                                                                                                                                                                                                                                                                                                                                                                                                                                                                                                                                                                                                                                                                                                                                                                                                                                                                                                                                                                                                                                                                                                                                                                                                                                    |     |     |           |       |      |      |                                        |       |                      |                                                                                                                    |     |     |          |       |      |      |
|-------------------------|--------------------------------------------------------------------------------------------------------------------------------------------------------------------------------------------------------------------------------------------------------------------------------------------------------------------------------------------------------------------------------------------------------------------------------------------------------------------------------------------------------------------------------------------------------------------------------------------------------------------------------------------------------------------------------------------------------------------------------------------------------------------------------------------------------------------------------------------------------------------------------------------------------------------------------------------------------------------------------------------------------------------------------------------------------------------------------------------------------------------------------------------------------------------------------------------------------------------------------------------------------------------------------------------------------------------------------------------------------------------------------------------------------------------------------------------------------------------------------------------------------------------------------------------------------------------------------------------------------------------------------------------------------------------------------------------------------------------|-----|-----|-----------|-------|------|------|----------------------------------------|-------|----------------------|--------------------------------------------------------------------------------------------------------------------|-----|-----|----------|-------|------|------|
| Rsa1.0_00068.1.g3641.t1 | refNP_178390.1   F-box/kelch-repeat protein SKIP11 [Arabidopsis thaliana] gi 79316620 refNP_001030959.1   F-box/kelch-repeat protein SKIP11 [Arabidopsis thaliana] gi 79316634 refNP_001030960.1   F-box/kelch-repeat protein SKIP11 [Arabidopsis thaliana] gi 142994697 sp Q8L736.2 SKI11_ARATH RecName: Full=F-box/kelch-repeat protein SKIP11; AltName: Full=SKP1-interacting partner 11 gi 3461814 gb AAC32908.1   predicted by genefinder and gensec [Arabidopsis thaliana] gi 16974560 gb AAL31196.1   At2g02870/T17M13.4 [Arabidopsis thaliana] gi 25090100 gb AAN72228.1   At2g02870/T17M13.4 [Arabidopsis thaliana] gi 22242327 dbj BAH19879.1   AT2G02870 [Arabidopsis thaliana] gi 330250542 gb AEC05636.1   F-box/kelch-repeat protein SKIP11 [Arabidopsis thaliana] gi 330250543 gb AEC05637.1   F-box/kelch-repeat protein SKIP11 [Arabidopsis thaliana] gi 330250544 gb AEC05638.1   F-box/kelch-repeat protein SKIP11 [Arabidopsis thaliana] refNP_178389.1   sucrose transport protein SUC3 [Arabidopsis thaliana] gi 75232209 sp O80605.1 SUC3_ARATH RecName: Full=Sucrose transport protein SUC3; AltName: Full=Sucrose permease 3; AltName: Full=Sucrose transporter 2; AltName: Full=Sucrose-proton symporter 3 gi 3461813 gb AAC32907.1   putative sucrose/H+ symporter [Arabidopsis thaliana] gi 8052190 emb CAB92307.1   sucrose transporter [Arabidopsis thaliana] gi 110742223 dbj BAE99038.1   Sucrose transporter [Arabidopsis thaliana] gi 330250541 gb AEC05635.1   sucrose transport protein SUC3 [Arabidopsis thaliana] refXP_002876842.1   predicted protein [Arabidopsis lyrata subsp. lyrata] gi 297322680 gb EFH53101.1   predicted protein [Arabidopsis lyrata subsp. lyrata] | 441 | 467 | 0         | 105.9 | 85.3 | 90.0 | F-box/kelch-repeat protein SKIP11      | gbpln | Arabidopsis thaliana | AT2G02870.3   Symbols: Galactose oxidase/kelch repeat superfamily protein   chr2:838378-839781 FORWARD LENGTH=467  | 441 | 467 | 0        | 105.9 | 85.3 | 90.0 |
| Rsa1.0_00068.1.g3642.t2 | refNP_178389.1   sucrose transport protein SUC3 [Arabidopsis thaliana] gi 75232209 sp O80605.1 SUC3_ARATH RecName: Full=Sucrose transport protein SUC3; AltName: Full=Sucrose permease 3; AltName: Full=Sucrose transporter 2; AltName: Full=Sucrose-proton symporter 3 gi 3461813 gb AAC32907.1   putative sucrose/H+ symporter [Arabidopsis thaliana] gi 8052190 emb CAB92307.1   sucrose transporter [Arabidopsis thaliana] gi 110742223 dbj BAE99038.1   Sucrose transporter [Arabidopsis thaliana] gi 330250541 gb AEC05635.1   sucrose transport protein SUC3 [Arabidopsis thaliana] refXP_002876842.1   predicted protein [Arabidopsis lyrata subsp. lyrata] gi 297322680 gb EFH53101.1   predicted protein [Arabidopsis lyrata subsp. lyrata]                                                                                                                                                                                                                                                                                                                                                                                                                                                                                                                                                                                                                                                                                                                                                                                                                                                                                                                                                              | 592 | 594 | 0         | 100.3 | 87.0 | 91.6 | sucrose transport protein SUC3         | gbpln | Arabidopsis thaliana | AT2G02860.1   Symbols: SUT2, ATSUC3, SUC3, AT.SUT2   sucrose transporter 2   chr2:828546-832296 REVERSE LENGTH=594 | 592 | 594 | 0        | 100.3 | 87.0 | 91.6 |
| Rsa1.0_00068.1.g3643.t1 | refXP_002876842.1   predicted protein [Arabidopsis lyrata subsp. lyrata] gi 297322680 gb EFH53101.1   predicted protein [Arabidopsis lyrata subsp. lyrata]                                                                                                                                                                                                                                                                                                                                                                                                                                                                                                                                                                                                                                                                                                                                                                                                                                                                                                                                                                                                                                                                                                                                                                                                                                                                                                                                                                                                                                                                                                                                                         | 129 | 129 | 1.00E-58  | 100.0 | 82.9 | 91.5 | predicted protein                      | gbpln | Arabidopsis lyrata   | AT2G02850.1   Symbols: ARPN   plantacyanin   chr2:826630-827720 REVERSE LENGTH=129                                 | 129 | 129 | 5.00E-60 | 100.0 | 81.4 | 88.4 |
| Rsa1.0_00068.1.g3644.t1 | # # # # # # # # # #                                                                                                                                                                                                                                                                                                                                                                                                                                                                                                                                                                                                                                                                                                                                                                                                                                                                                                                                                                                                                                                                                                                                                                                                                                                                                                                                                                                                                                                                                                                                                                                                                                                                                                | #   | #   | #         | #     | #    | -    | ----                                   | ----  | #                    | #                                                                                                                  | #   | #   | #        | #     | #    |      |
| Rsa1.0_00068.1.g3645.t1 | gb AAC19278.1   T14P8.10 [Arabidopsis thaliana] gi 7269009 emb CAB80742.1   AT4g02490 [Arabidopsis thaliana]                                                                                                                                                                                                                                                                                                                                                                                                                                                                                                                                                                                                                                                                                                                                                                                                                                                                                                                                                                                                                                                                                                                                                                                                                                                                                                                                                                                                                                                                                                                                                                                                       | 312 | 657 | 3.00E-17  | 210.6 | 19.6 | 28.8 | T14P8.10                               | gbpln | Arabidopsis thaliana | AT1G43760.1   Symbols: DNase I-like superfamily protein   chr1:16528880-16531065 REVERSE LENGTH=626                | 312 | 626 | 7.00E-13 | 200.6 | 13.1 | 20.8 |
| Rsa1.0_00068.1.g3646.t1 | # # # # # # # # # #                                                                                                                                                                                                                                                                                                                                                                                                                                                                                                                                                                                                                                                                                                                                                                                                                                                                                                                                                                                                                                                                                                                                                                                                                                                                                                                                                                                                                                                                                                                                                                                                                                                                                                | #   | #   | #         | #     | #    | -    | ----                                   | ----  | #                    | #                                                                                                                  | #   | #   | #        | #     | #    |      |
| Rsa1.0_00068.1.g3647.t1 | gb EOA23904.1   hypothetical protein CARUB_v10017119mg [Capsella rubella]                                                                                                                                                                                                                                                                                                                                                                                                                                                                                                                                                                                                                                                                                                                                                                                                                                                                                                                                                                                                                                                                                                                                                                                                                                                                                                                                                                                                                                                                                                                                                                                                                                          | 465 | 483 | 0         | 103.9 | 77.8 | 86.2 | hypothetical protein CARUB_v10017119mg | gbpln | Capsella rubella     | AT2G02820.2   Symbols: MYB88   myb domain protein 88   chr2:804716-807139 REVERSE LENGTH=484                       | 465 | 484 | 0        | 104.1 | 80.0 | 88.4 |
| Rsa1.0_00068.1.g3648.t1 | gb EOA24258.1   hypothetical protein CARUB_v10017499mg [Capsella rubella]                                                                                                                                                                                                                                                                                                                                                                                                                                                                                                                                                                                                                                                                                                                                                                                                                                                                                                                                                                                                                                                                                                                                                                                                                                                                                                                                                                                                                                                                                                                                                                                                                                          | 332 | 363 | 1.00E-180 | 109.3 | 95.2 | 97.9 | hypothetical protein CARUB_v10017499mg | gbpln | Capsella rubella     | AT2G02810.1   Symbols: ATUTR1, UTR1   UDP-galactose transporter 1   chr2:801643-803289 FORWARD LENGTH=332          | 332 | 332 | 0        | 100.0 | 94.3 | 97.9 |
| Rsa1.0_00068.1.g3649.t1 | refXP_002876829.1   hypothetical protein ARALYDRAFT_484186 [Arabidopsis lyrata subsp. lyrata] gi 297322667 gb EFH53088.1   hypothetical protein ARALYDRAFT_484186 [Arabidopsis lyrata subsp. lyrata]                                                                                                                                                                                                                                                                                                                                                                                                                                                                                                                                                                                                                                                                                                                                                                                                                                                                                                                                                                                                                                                                                                                                                                                                                                                                                                                                                                                                                                                                                                               | 472 | 426 | 0         | 90.3  | 86.0 | 88.1 | hypothetical protein ARALYDRAFT_484186 | gbpln | Arabidopsis lyrata   | AT2G02800.2   Symbols: APK2B   protein kinase 2B   chr2:796889-799250 REVERSE LENGTH=426                           | 472 | 426 | 0        | 90.3  | 85.4 | 88.1 |
| Rsa1.0_00068.1.g3650.t1 | gb EOA23708.1   hypothetical protein CARUB_v10016916mg [Capsella rubella]                                                                                                                                                                                                                                                                                                                                                                                                                                                                                                                                                                                                                                                                                                                                                                                                                                                                                                                                                                                                                                                                                                                                                                                                                                                                                                                                                                                                                                                                                                                                                                                                                                          | 565 | 584 | 0         | 103.4 | 77.2 | 87.1 | hypothetical protein CARUB_v10016916mg | gbpln | Capsella rubella     | AT2G02790.1   Symbols: IQD29   IQ-domain 29   chr2:788708-790946 FORWARD LENGTH=636                                | 565 | 636 | 0        | 112.6 | 76.5 | 86.0 |
| Rsa1.0_00068.1.g3651.t1 | # # # # # # # # # #                                                                                                                                                                                                                                                                                                                                                                                                                                                                                                                                                                                                                                                                                                                                                                                                                                                                                                                                                                                                                                                                                                                                                                                                                                                                                                                                                                                                                                                                                                                                                                                                                                                                                                | #   | #   | #         | #     | #    | -    | ----                                   | ----  | #                    | #                                                                                                                  | #   | #   | #        | #     | #    |      |
| Rsa1.0_00068.1.g3652.t1 | refNP_196645.2   endomembrane family protein 70 [Arabidopsis thaliana] gi 332004219 gb AED91602.1   endomembrane family protein 70 [Arabidopsis thaliana]                                                                                                                                                                                                                                                                                                                                                                                                                                                                                                                                                                                                                                                                                                                                                                                                                                                                                                                                                                                                                                                                                                                                                                                                                                                                                                                                                                                                                                                                                                                                                          | 606 | 648 | 0         | 106.9 | 93.4 | 96.7 | endomembrane family protein 70         | gbpln | Arabidopsis thaliana | AT5G10840.1   Symbols: Endomembrane protein 70 protein family   chr5:3424910-3427797 REVERSE LENGTH=648            | 606 | 648 | 0        | 106.9 | 93.4 | 96.7 |

|                         |                                                                                                                                                                                                                                                                                                                                                                                                                                                                                                                                                                                                                                                                                                                                                                                                                                                                                                                                                                                                                                                                                                                                                                                                                                                                                                                                                                                                                                            |      |      |          |       |      |       |                                                               |       |                      |                                                                                                                                         |      |      |          |       |      |       |
|-------------------------|--------------------------------------------------------------------------------------------------------------------------------------------------------------------------------------------------------------------------------------------------------------------------------------------------------------------------------------------------------------------------------------------------------------------------------------------------------------------------------------------------------------------------------------------------------------------------------------------------------------------------------------------------------------------------------------------------------------------------------------------------------------------------------------------------------------------------------------------------------------------------------------------------------------------------------------------------------------------------------------------------------------------------------------------------------------------------------------------------------------------------------------------------------------------------------------------------------------------------------------------------------------------------------------------------------------------------------------------------------------------------------------------------------------------------------------------|------|------|----------|-------|------|-------|---------------------------------------------------------------|-------|----------------------|-----------------------------------------------------------------------------------------------------------------------------------------|------|------|----------|-------|------|-------|
| Rsa1.0_00068.1.g3653.t1 | <p>ref NP_565289.1  ubiquitin-conjugating enzyme E2 A [Arabidopsis thaliana] gi 297814522 ref XP_002875144.1  ubiquitin-conjugating enzyme 2 [Arabidopsis lyrata subsp. lyrata] gi 1174844 sp P42745.1 UBC2_ARATH RecName: Full=Ubiquitin-conjugating enzyme E2 2; AltName: Full=Ubiquitin carrier protein 2; AltName: Full=Ubiquitin-conjugating enzyme E2-17 kDa 2; AltName: Full=Ubiquitin-protein ligase 2 gi 13899127 gb AAK48985.1 AF370558.1 putative ubiquitin-conjugating enzyme E2 [Arabidopsis thaliana] gi 431284 gb AAA32899.1  ubiquitin-conjugating enzyme [Arabidopsis thaliana] gi 2689243 emb CAA73476.1  ubiquitin conjugating enzyme [Arabidopsis thaliana] gi 2947065 gb AAC05346.1  E2, ubiquitin-conjugating enzyme 2 (UBC2) [Arabidopsis thaliana] gi 18377456 gb AAL66894.1  putative ubiquitin-conjugating enzyme E2 [Arabidopsis thaliana] gi 66354400 gb AAY44843.1  ubiquitinating enzyme [Arabidopsis thaliana] gi 118197458 gb ABK78692.1  ubiquitin conjugating enzyme [Brassica rapa] gi 297320982 gb EFH51403.1  ubiquitin-conjugating enzyme 2 [Arabidopsis lyrata subsp. lyrata]</p>                                                                                                                                                                                                                                                                                                                   | 152  | 152  | 3.00E-84 | 100.0 | 99.3 | 100.0 | ubiquitin-conjugating enzyme E2 A                             | gbpln | Arabidopsis lyrata   | AT2G02760.1   Symbols: ATUBC2, UBC2   ubiquitin-conjugating enzyme 2   chr2:774271-775149 FORWARD LENGTH=152                            | 152  | 152  | 1.00E-86 | 100.0 | 99.3 | 100.0 |
| Rsa1.0_00068.1.g3654.t1 | #                                                                                                                                                                                                                                                                                                                                                                                                                                                                                                                                                                                                                                                                                                                                                                                                                                                                                                                                                                                                                                                                                                                                                                                                                                                                                                                                                                                                                                          | #    | #    | #        | #     | #    | #     | -                                                             | ---   | ---                  | #                                                                                                                                       | #    | #    | #        | #     | #    |       |
| Rsa1.0_00068.1.g3655.t1 | <p>ref NP_178375.1  putative pectate lyase 6 [Arabidopsis thaliana] gi 32129832 sp O64510.1 PEL6_ARATH RecName: Full=Probable pectate lyase 6; Flags: Precursor gi 2947069 gb AAC05350.1  putative pectate lyase [Arabidopsis thaliana] gi 28973690 gb AAO64162.1  putative pectate lyase [Arabidopsis thaliana] gi 54606856 gb AAV34776.1  At2g02720 [Arabidopsis thaliana] gi 33025052.1 gb AEC05615.1  putative pectate lyase 6 [Arabidopsis thaliana] ref NP_564190.1  polyketide cyclase/dehydrase and lipid transport-like protein [Arabidopsis thaliana] gi 2929899 gb AAC00607.1  similar to ripening-induced protein, gp AJ001449 2465015 and major latex protein, gp X91961 1107495 [Arabidopsis thaliana] gi 14517378 gb AAK62580.1  At1g23130/T26J12.10 [Arabidopsis thaliana] gi 15450533 gb AAK96444.1  At1g23130/T26J12.10 [Arabidopsis thaliana] gi 33219222 gb AEE30343.1  polyketide cyclase/dehydrase and lipid transport-like protein [Arabidopsis thaliana] ref NP_563620.1  L-fucokinase/GDP-L-fucose pyrophosphorylase [Arabidopsis thaliana] gi 332313388 sp Q9LNU9.2 FKGP_ARATH RecName: Full=Bifunctional fucokinase/fucose pyrophosphorylase; Short=AtFKGP; Includes: RecName: Full=L-fucokinase; Includes: RecName: Full=Fucose-1-phosphate guanylyltransferase; AltName: Full=GDP-fucose pyrophosphorylase gi 332189134 gb AEE27255.1  L-fucokinase/GDP-L-fucose pyrophosphorylase [Arabidopsis thaliana]</p> | 457  | 455  | 0        | 99.6  | 83.8 | 90.6  | putative pectate lyase 6                                      | gbpln | Arabidopsis thaliana | AT2G02720.1   Symbols:   Pectate lyase family protein   chr2:763173-764834 FORWARD LENGTH=455                                           | 457  | 455  | 0        | 99.6  | 83.8 | 90.6  |
| Rsa1.0_00068.1.g3656.t1 | <p>ref NP_564190.1  polyketide cyclase/dehydrase and lipid transport-like protein [Arabidopsis thaliana] gi 2929899 gb AAC00607.1  similar to ripening-induced protein, gp AJ001449 2465015 and major latex protein, gp X91961 1107495 [Arabidopsis thaliana] gi 14517378 gb AAK62580.1  At1g23130/T26J12.10 [Arabidopsis thaliana] gi 15450533 gb AAK96444.1  At1g23130/T26J12.10 [Arabidopsis thaliana] gi 33219222 gb AEE30343.1  polyketide cyclase/dehydrase and lipid transport-like protein [Arabidopsis thaliana] ref NP_563620.1  L-fucokinase/GDP-L-fucose pyrophosphorylase [Arabidopsis thaliana] gi 332313388 sp Q9LNU9.2 FKGP_ARATH RecName: Full=Bifunctional fucokinase/fucose pyrophosphorylase; Short=AtFKGP; Includes: RecName: Full=L-fucokinase; Includes: RecName: Full=Fucose-1-phosphate guanylyltransferase; AltName: Full=GDP-fucose pyrophosphorylase gi 332189134 gb AEE27255.1  L-fucokinase/GDP-L-fucose pyrophosphorylase [Arabidopsis thaliana]</p>                                                                                                                                                                                                                                                                                                                                                                                                                                                        | 161  | 160  | 4.00E-58 | 99.4  | 67.1 | 83.2  | polyketide cyclase/dehydrase and lipid transport-like protein | gbpln | Arabidopsis thaliana | AT1G23130.1   Symbols:   Polyketide cyclase/dehydrase and lipid transport superfamily protein   chr1:8200434-8200997 FORWARD LENGTH=160 | 161  | 160  | 1.00E-60 | 99.4  | 67.1 | 83.2  |
| Rsa1.0_00069.1.g3657.t3 | <p>ref NP_563620.1  L-fucokinase/GDP-L-fucose pyrophosphorylase [Arabidopsis thaliana] gi 332313388 sp Q9LNU9.2 FKGP_ARATH RecName: Full=Bifunctional fucokinase/fucose pyrophosphorylase; Short=AtFKGP; Includes: RecName: Full=L-fucokinase; Includes: RecName: Full=Fucose-1-phosphate guanylyltransferase; AltName: Full=GDP-fucose pyrophosphorylase gi 332189134 gb AEE27255.1  L-fucokinase/GDP-L-fucose pyrophosphorylase [Arabidopsis thaliana]</p>                                                                                                                                                                                                                                                                                                                                                                                                                                                                                                                                                                                                                                                                                                                                                                                                                                                                                                                                                                               | 1369 | 1055 | 0        | 77.1  | 70.5 | 73.3  | L-fucokinase/GDP-L-fucose pyrophosphorylase                   | gbpln | Arabidopsis thaliana | AT1G01220.1   Symbols: FKGP, AtFKGP   L-fucokinase/GDP-L-fucose pyrophosphorylase   chr1:91750-95552 FORWARD LENGTH=1055                | 1369 | 1055 | 0        | 77.1  | 70.5 | 73.3  |
| Rsa1.0_00069.1.g3658.t1 | <p>ref XP_002892079.1  ORMDL family protein [Arabidopsis lyrata subsp. lyrata] gi 297337921 gb EFH68338.1  ORMDL family protein [Arabidopsis lyrata subsp. lyrata]</p>                                                                                                                                                                                                                                                                                                                                                                                                                                                                                                                                                                                                                                                                                                                                                                                                                                                                                                                                                                                                                                                                                                                                                                                                                                                                     | 157  | 157  | 7.00E-80 | 100.0 | 88.5 | 94.9  | ORMDL family protein                                          | gbpln | Arabidopsis lyrata   | AT1G01230.1   Symbols:   ORMDL family protein   chr1:97620-99046 FORWARD LENGTH=157                                                     | 157  | 157  | 5.00E-82 | 100.0 | 87.9 | 94.9  |

|                         |                                                                                                                                                                                                                                                                                                                                                                                                                                                                                                                                                                                                                                                                                                                                                                                                                                                                                                                                                                                                                                                                                                             |     |     |           |       |       |       |                                                 |       |                      |                                                                                                                                                                                                                                                                                                                                                                 |     |     |           |       |      |      |
|-------------------------|-------------------------------------------------------------------------------------------------------------------------------------------------------------------------------------------------------------------------------------------------------------------------------------------------------------------------------------------------------------------------------------------------------------------------------------------------------------------------------------------------------------------------------------------------------------------------------------------------------------------------------------------------------------------------------------------------------------------------------------------------------------------------------------------------------------------------------------------------------------------------------------------------------------------------------------------------------------------------------------------------------------------------------------------------------------------------------------------------------------|-----|-----|-----------|-------|-------|-------|-------------------------------------------------|-------|----------------------|-----------------------------------------------------------------------------------------------------------------------------------------------------------------------------------------------------------------------------------------------------------------------------------------------------------------------------------------------------------------|-----|-----|-----------|-------|------|------|
| Rsa1.0_00069.1.g3659.t1 | ref XP_002892078.1  hypothetical protein ARALYDRAFT.470152 [Arabidopsis lyrata subsp. lyrata] gi 297337920 gb EFH68337.1  hypothetical protein ARALYDRAFT.470152 [Arabidopsis lyrata subsp. lyrata]                                                                                                                                                                                                                                                                                                                                                                                                                                                                                                                                                                                                                                                                                                                                                                                                                                                                                                         | 345 | 334 | 1.00E-127 | 96.8  | 76.8  | 85.8  | hypothetical protein ARALYDRAFT.470152          | gbpln | Arabidopsis lyrata   | AT1G01240.3   Symbols:   unknown protein; BEST Arabidopsis thaliana protein match is: unknown protein (TAIR:AT2G46550.1). Has 35333 Blast hits to 34131 proteins in 2444 species: Archaea - 798; Bacteria - 22429; Metazoa - 974; Fungi - 991; Plants - 531; Viruses - 0; Other Eukaryotes - 9610 (source: NCBI BLINK).   chr1:100683-101678 FORWARD LENGTH=331 | 345 | 331 | 1.00E-129 | 95.9  | 77.7 | 85.8 |
| Rsa1.0_00069.1.g3660.t1 | #                                                                                                                                                                                                                                                                                                                                                                                                                                                                                                                                                                                                                                                                                                                                                                                                                                                                                                                                                                                                                                                                                                           | #   | #   | #         | #     | #     | -     | ----                                            | ----  | #                    | #                                                                                                                                                                                                                                                                                                                                                               | #   | #   | #         | #     |      |      |
| Rsa1.0_00069.1.g3661.t1 | ref NP_188299.1  ethylene-responsive transcription factor RAP2-3 [Arabidopsis thaliana] gi 27735162 sp P42736.2 RAP23_ARATH RecName: Full=Ethylene-responsive transcription factor RAP2-3; AltName: Full=Cadmium-induced protein AS30; AltName: Full=Ethylene response factor 72; Short=ERF72; AltName: Full=Ethylene-responsive element binding protein; Short=AEBP; AltName: Full=Protein RELATED TO APETALA2 3; Short=Related to AP2 3 gi 2281631 gb AAC49769.1  AP2 domain containing protein RAP2.3 [Arabidopsis thaliana] gi 11994632 dbj BAB02769.1  AP2 domain transcription factor RAP2.3 [Arabidopsis thaliana] gi 14334854 gb AAK59605.1  putative AP2 domain containing protein RAP2.3 [Arabidopsis thaliana] gi 16649095 gb AAL24399.1  AP2 domain transcription factor RAP2.3 [Arabidopsis thaliana] gi 21593082 gb AAM65031.1  AP2 domain containing protein RAP2.3 [Arabidopsis thaliana] gi 2329661 gb AAN13131.1  putative AP2 domain containing protein RAP2.3 [Arabidopsis thaliana] gi 332642342 gb AEE75863.1  ethylene-responsive transcription factor RAP2-3 [Arabidopsis thaliana] | 155 | 248 | 7.00E-28  | 160.0 | 49.7  | 51.6  | ethylene-responsive transcription factor RAP2-3 | gbpln | Arabidopsis thaliana | AT3G16770.1   Symbols: RAP2.3, ATEBP, ERF72, EBP   ethylene-responsive element binding protein   chr3:5705784-5706768 FORWARD LENGTH=248                                                                                                                                                                                                                        | 155 | 248 | 2.00E-30  | 160.0 | 49.7 | 51.6 |
| Rsa1.0_00069.1.g3662.t1 | dbj BAJ34192.1  unnamed protein product [Thellungiella halophila]                                                                                                                                                                                                                                                                                                                                                                                                                                                                                                                                                                                                                                                                                                                                                                                                                                                                                                                                                                                                                                           | 184 | 197 | 6.00E-81  | 107.1 | 89.1  | 94.6  | unnamed protein product                         | ----  | ----                 | AT1G01250.1   Symbols:   Integrase-type DNA-binding superfamily protein   chr1:104731-105309 REVERSE LENGTH=192                                                                                                                                                                                                                                                 | 184 | 192 | 6.00E-80  | 104.3 | 86.4 | 90.8 |
| Rsa1.0_00069.1.g3663.t1 | gb EOA38419.1  hypothetical protein CARUB_v10009994mg, partial [Capsella rubella] gi 482574233 gb EOA38420.1  hypothetical protein CARUB_v10009994mg, partial [Capsella rubella] gi 482574234 gb EOA38421.1  hypothetical protein CARUB_v10009994mg, partial [Capsella rubella]                                                                                                                                                                                                                                                                                                                                                                                                                                                                                                                                                                                                                                                                                                                                                                                                                             | 238 | 273 | 1.00E-109 | 114.7 | 86.1  | 93.7  | hypothetical protein CARUB_v10009994mg, partial | gbpln | Capsella rubella     | AT1G01290.2   Symbols: CNX3   cofactor of nitrate reductase and xanthine dehydrogenase 3   chr1:114299-115296 FORWARD LENGTH=270                                                                                                                                                                                                                                | 238 | 270 | 1.00E-108 | 113.4 | 84.5 | 90.8 |
| Rsa1.0_00069.1.g3664.t1 | ref XP_002892072.1  hypothetical protein ARALYDRAFT.470143 [Arabidopsis lyrata subsp. lyrata] gi 297337914 gb EFH68331.1  hypothetical protein ARALYDRAFT.470143 [Arabidopsis lyrata subsp. lyrata]                                                                                                                                                                                                                                                                                                                                                                                                                                                                                                                                                                                                                                                                                                                                                                                                                                                                                                         | 240 | 241 | 3.00E-93  | 100.4 | 74.2  | 80.8  | hypothetical protein ARALYDRAFT.470143          | gbpln | Arabidopsis lyrata   | AT1G01310.1   Symbols:   CAP (Cysteine-rich secretory proteins, Antigen 5, and Pathogenesis-related 1 protein) superfamily protein   chr1:120221-120946 FORWARD LENGTH=241                                                                                                                                                                                      | 240 | 241 | 8.00E-91  | 100.4 | 72.9 | 79.6 |
| Rsa1.0_00069.1.g3665.t1 | gb EOA38162.1  hypothetical protein CARUB_v10009639mg [Capsella rubella]                                                                                                                                                                                                                                                                                                                                                                                                                                                                                                                                                                                                                                                                                                                                                                                                                                                                                                                                                                                                                                    | 327 | 342 | 1.00E-166 | 104.6 | 89.3  | 94.8  | hypothetical protein CARUB_v10009639mg          | gbpln | Capsella rubella     | AT1G01350.1   Symbols:   Zinc finger (CCH-type/C3HC4-type RING finger) family protein   chr1:136732-137970 FORWARD LENGTH=343                                                                                                                                                                                                                                   | 327 | 343 | 1.00E-159 | 104.9 | 88.1 | 93.3 |
| Rsa1.0_00069.1.g3666.t1 | dbj BAF49733.1  centromeric histone H3-like protein_1 [Raphanus sativus]                                                                                                                                                                                                                                                                                                                                                                                                                                                                                                                                                                                                                                                                                                                                                                                                                                                                                                                                                                                                                                    | 178 | 178 | 7.00E-98  | 100.0 | 100.0 | 100.0 | centromeric histone H3-like protein_1           | gbpln | Raphanus sativus     | AT1G01370.2   Symbols: HTR12, CENH3   Histone superfamily protein   chr1:143773-145400 FORWARD LENGTH=178                                                                                                                                                                                                                                                       | 178 | 178 | 2.00E-65  | 100.0 | 70.2 | 83.7 |
| Rsa1.0_00069.1.g3667.t1 | gb EOA38963.1  hypothetical protein CARUB_v10011382mg [Capsella rubella]                                                                                                                                                                                                                                                                                                                                                                                                                                                                                                                                                                                                                                                                                                                                                                                                                                                                                                                                                                                                                                    | 79  | 85  | 6.00E-30  | 107.6 | 79.7  | 86.1  | hypothetical protein CARUB_v10011382mg          | gbpln | Capsella rubella     | AT4G01060.1   Symbols: ETC3, CPL3   CAPRICE-like MYB3   chr4:460534-460967 FORWARD LENGTH=77                                                                                                                                                                                                                                                                    | 79  | 77  | 2.00E-26  | 97.5  | 72.2 | 84.8 |
| Rsa1.0_00069.1.g3668.t1 | ref XP_002889366.1  predicted protein [Arabidopsis lyrata subsp. lyrata] gi 297335208 gb EFH65625.1  predicted protein [Arabidopsis lyrata subsp. lyrata]                                                                                                                                                                                                                                                                                                                                                                                                                                                                                                                                                                                                                                                                                                                                                                                                                                                                                                                                                   | 689 | 970 | 0         | 140.8 | 83.3  | 91.1  | predicted protein                               | gbpln | Arabidopsis lyrata   | AT1G01450.1   Symbols:   Protein kinase superfamily protein   chr1:164105-165517 REVERSE LENGTH=470                                                                                                                                                                                                                                                             | 689 | 470 | 0         | 68.2  | 52.2 | 57.2 |

|                         |                                                                                                                                                                                                                                                                                                                                                                               |     |      |           |       |      |      |                                                                                                                                             |       |                      |                                                                                                                                             |     |     |           |       |      |      |
|-------------------------|-------------------------------------------------------------------------------------------------------------------------------------------------------------------------------------------------------------------------------------------------------------------------------------------------------------------------------------------------------------------------------|-----|------|-----------|-------|------|------|---------------------------------------------------------------------------------------------------------------------------------------------|-------|----------------------|---------------------------------------------------------------------------------------------------------------------------------------------|-----|-----|-----------|-------|------|------|
| Rsa1.0_00069.1.g3669.t1 | gb AAF81309.1 AC061957.5 Contains a weak similarity to a farnesylated protein GMFP5 mRNA from Glycine max gb U64916. ESTs gb A1993148, gb T44360 come from this gene [Arabidopsis thaliana]                                                                                                                                                                                   | 162 | 203  | 2.00E-32  | 125.3 | 83.3 | 85.2 | Contains a weak similarity to a farnesylated protein GMFP5 mRNA from Glycine max gb U64916. ESTs gb A1993148, gb T44360 come from this gene | gbpln | Arabidopsis thaliana | AT1G01490.2   Symbols: Heavy metal transport/detoxification superfamily protein   chr1:180401-182066 REVERSE LENGTH=177                     | 162 | 177 | 3.00E-34  | 109.3 | 83.3 | 85.2 |
| Rsa1.0_00069.1.g3670.t1 | #                                                                                                                                                                                                                                                                                                                                                                             | #   | #    | #         | #     | #    | #    | -                                                                                                                                           | ----  | ----                 | #                                                                                                                                           | #   | #   | #         | #     | #    |      |
| Rsa1.0_00069.1.g3671.t1 | ref XP_002892061.1  hypothetical protein ARALYDRAFT_311286 [Arabidopsis lyrata subsp. lyrata] gi 297337903 gb EFH68320.1  hypothetical protein ARALYDRAFT_311286 [Arabidopsis lyrata subsp. lyrata]                                                                                                                                                                           | 315 | 1248 | 1.00E-136 | 396.2 | 79.4 | 83.8 | hypothetical protein ARALYDRAFT_311286                                                                                                      | gbpln | Arabidopsis lyrata   | AT1G01500.1   Symbols: Erythronate-4-phosphate dehydrogenase family protein   chr1:185260-186573 FORWARD LENGTH=327                         | 315 | 327 | 1.00E-134 | 103.8 | 78.1 | 83.2 |
| Rsa1.0_00069.1.g3672.t1 | ref NP_563629.1  Rossmann-fold NAD(P)-binding domain-containing protein [Arabidopsis thaliana] gi 75274951 sp O23702.1 CTBP-ARATH RecName: Full=C-terminal binding protein AN; Short=CtBP; AltName: Full=Protein ANGSTIFOLIA gi 2505877 emb CAA73306.1  dehydrogenase [Arabidopsis thaliana] gi 332189177 gb AEE27298.1  C-terminal binding protein AN [Arabidopsis thaliana] | 628 | 636  | 0         | 101.3 | 90.6 | 94.1 | Rossmann-fold NAD(P)-binding domain-containing protein                                                                                      | gbpln | Arabidopsis thaliana | AT1G01510.1   Symbols: AN   NAD(P)-binding Rossmann-fold superfamily protein   chr1:187235-189836 FORWARD LENGTH=636                        | 628 | 636 | 0         | 101.3 | 90.6 | 94.1 |
| Rsa1.0_00069.1.g3673.t1 | ref XP_002892058.1  kinase family protein [Arabidopsis lyrata subsp. lyrata] gi 297337900 gb EFH68317.1  kinase family protein [Arabidopsis lyrata subsp. lyrata]                                                                                                                                                                                                             | 397 | 472  | 0         | 118.9 | 93.7 | 95.7 | kinase family protein                                                                                                                       | gbpln | Arabidopsis lyrata   | AT1G01540.2   Symbols: Protein kinase superfamily protein   chr1:195980-198383 FORWARD LENGTH=472                                           | 397 | 472 | 0         | 118.9 | 93.5 | 95.5 |
| Rsa1.0_00069.1.g3674.t1 | gb EOA38922.1  hypothetical protein CARUB_v10011320mg [Capsella rubella]                                                                                                                                                                                                                                                                                                      | 111 | 568  | 4.00E-37  | 511.7 | 73.9 | 79.3 | hypothetical protein CARUB_v10011320mg                                                                                                      | gbpln | Capsella rubella     | AT1G04890.1   Symbols: Protein of unknown function, DUF593   chr1:1381116-1382546 REVERSE LENGTH=411                                        | 111 | 411 | 2.00E-36  | 370.3 | 75.7 | 82.0 |
| Rsa1.0_00069.1.g3675.t1 | gb AAC19278.1  T14P8.10 [Arabidopsis thaliana] gi 7269009 emb CAB80742.1  AT4g02490 [Arabidopsis thaliana]                                                                                                                                                                                                                                                                    | 682 | 657  | 0         | 96.3  | 49.9 | 64.1 | T14P8.10                                                                                                                                    | gbpln | Arabidopsis thaliana | AT4G04650.1   Symbols: RNA-directed DNA polymerase (reverse transcriptase)-related family protein   chr4:2353989-2355213 REVERSE LENGTH=332 | 682 | 332 | 1.00E-56  | 48.7  | 15.5 | 22.3 |
| Rsa1.0_00069.1.g3676.t1 | gb AAD32866.1 AC005489_4 F14N23.4 [Arabidopsis thaliana]                                                                                                                                                                                                                                                                                                                      | 813 | 1161 | 3.00E-99  | 142.8 | 22.1 | 30.9 | F14N23.4                                                                                                                                    | gbpln | Arabidopsis thaliana | AT1G43760.1   Symbols: DNase I-like superfamily protein   chr1:16528880-16531065 REVERSE LENGTH=626                                         | 813 | 626 | 1.00E-74  | 77.0  | 19.2 | 28.3 |
| Rsa1.0_00069.1.g3677.t1 | ref XP_002892053.1  hypothetical protein ARALYDRAFT_470119 [Arabidopsis lyrata subsp. lyrata] gi 297337895 gb EFH68312.1  hypothetical protein ARALYDRAFT_470119 [Arabidopsis lyrata subsp. lyrata]                                                                                                                                                                           | 707 | 725  | 0         | 102.5 | 85.4 | 92.1 | hypothetical protein ARALYDRAFT_470119                                                                                                      | gbpln | Arabidopsis lyrata   | AT1G01580.1   Symbols: FRO2, FRD1, ATFRO2   ferric reduction oxidase 2   chr1:208395-212810 FORWARD LENGTH=725                              | 707 | 725 | 0         | 102.5 | 84.3 | 91.1 |
| Rsa1.0_00069.1.g3678.t2 | gb AFH02721.1  sn-glycerol-3-phosphate acyltransferase 4 isoform C1, partial [Brassica napus] gi 383289233 gb AFH02724.1  sn-glycerol-3-phosphate acyltransferase 4 isoform C1, partial [Brassica napus]                                                                                                                                                                      | 298 | 505  | 1.00E-158 | 169.5 | 96.3 | 97.0 | sn-glycerol-3-phosphate acyltransferase 4 isoform C1, partial                                                                               | gbpln | Brassica napus       | AT4G00400.1   Symbols: GPAT8, AtGPAT8   glycerol-3-phosphate acyltransferase 8   chr4:174312-176734 REVERSE LENGTH=500                      | 298 | 500 | 1.00E-157 | 167.8 | 89.6 | 92.3 |
| Rsa1.0_00069.1.g3679.t1 | dbj BAJ34288.1  unnamed protein product [Theellungiella halophila]                                                                                                                                                                                                                                                                                                            | 286 | 286  | 1.00E-160 | 100.0 | 96.5 | 99.7 | unnamed protein product                                                                                                                     | ----  | ----                 | AT4G00430.1   Symbols: TMP-C, PIP1,4, PIP1E   plasma membrane intrinsic protein 1:4   chr4:186143-187531 REVERSE LENGTH=287                 | 286 | 287 | 1.00E-160 | 100.3 | 96.2 | 99.3 |
| Rsa1.0_00069.1.g3680.t1 | ref XP_002892050.1  hypothetical protein ARALYDRAFT_470113 [Arabidopsis lyrata subsp. lyrata] gi 297337892 gb EFH68309.1  hypothetical protein ARALYDRAFT_470113 [Arabidopsis lyrata subsp. lyrata]                                                                                                                                                                           | 268 | 256  | 1.00E-123 | 95.5  | 76.5 | 84.7 | hypothetical protein ARALYDRAFT_470113                                                                                                      | gbpln | Arabidopsis lyrata   | AT1G01630.1   Symbols: Sec14p-like phosphatidylinositol transfer family protein   chr1:229206-230675 FORWARD LENGTH=255                     | 268 | 255 | 1.00E-125 | 95.1  | 76.1 | 84.3 |
| Rsa1.0_00069.1.g3681.t1 | ref XP_00289358.1  peptidase [Arabidopsis lyrata subsp. lyrata] gi 297335200 gb EFH65617.1  peptidase [Arabidopsis lyrata subsp. lyrata]                                                                                                                                                                                                                                      | 516 | 540  | 0         | 104.7 | 92.4 | 95.3 | peptidase                                                                                                                                   | gbpln | Arabidopsis lyrata   | AT1G01650.1   Symbols: SPPL4, ATSPPL4   SIGNAL PEPTIDE PEPTIDASE-LIKE 4   chr1:233188-237647 REVERSE LENGTH=540                             | 516 | 540 | 0         | 104.7 | 91.9 | 94.8 |
| Rsa1.0_00069.1.g3682.t1 | ref XP_002453623.1  hypothetical protein SORBIDRAFT_04g009135 [Sorghum bicolor] gi 241933454 gb EE506599.1  hypothetical protein SORBIDRAFT_04g009135 [Sorghum bicolor]                                                                                                                                                                                                       | 147 | 801  | 3.00E-21  | 544.9 | 39.5 | 49.7 | hypothetical protein SORBIDRAFT_04g009135                                                                                                   | gbpln | Sorghum bicolor      | ATMG00810.1   Symbols: ORF240B   DNA/RNA polymerases superfamily protein   chrM:227709-228431 REVERSE LENGTH=240                            | 147 | 240 | 1.00E-13  | 163.3 | 23.8 | 33.3 |



|                         |                                                                                                                                                                                                                                                                                                                                                                                                                                                           |      |      |           |       |      |      |                                                                             |       |                      |                                                                                                                                                                                                                                                                                                                                                            |      |      |           |       |      |      |
|-------------------------|-----------------------------------------------------------------------------------------------------------------------------------------------------------------------------------------------------------------------------------------------------------------------------------------------------------------------------------------------------------------------------------------------------------------------------------------------------------|------|------|-----------|-------|------|------|-----------------------------------------------------------------------------|-------|----------------------|------------------------------------------------------------------------------------------------------------------------------------------------------------------------------------------------------------------------------------------------------------------------------------------------------------------------------------------------------------|------|------|-----------|-------|------|------|
| Rsa1.0_00069.1.g3683.t1 | ref[NP_00117211.1] Phosphatidylinositol N-acetylglucosaminyltransferase subunit P-like protein [Arabidopsis thaliana] gi 332189202 gb AE27323.1 Phosphatidylinositol N-acetylglucosaminyltransferase subunit P-like protein [Arabidopsis thaliana]                                                                                                                                                                                                        | 437  | 433  | 1.00E-90  | 99.1  | 50.8 | 64.8 | Phosphatidylinositol N-acetylglucosaminyltransferase subunit P-like protein | gbpln | Arabidopsis thaliana | AT1G01695.1   Symbols:   Phosphatidylinositol N-acetylglucosaminyltransferase subunit P-related   chr1:252947-254495 FORWARD LENGTH=433                                                                                                                                                                                                                    | 437  | 433  | 3.00E-93  | 99.1  | 50.8 | 64.8 |
| Rsa1.0_00069.1.g3684.t1 | gb EOA37536.1  hypothetical protein CARUB_v10011760mg [Capsella rubella]                                                                                                                                                                                                                                                                                                                                                                                  | 368  | 140  | 3.00E-73  | 38.0  | 35.9 | 37.0 | hypothetical protein CARUB_v10011760mg                                      | gbpln | Capsella rubella     | AT1G01750.1   Symbols: ADF11   actin depolymerizing factor 11   chr1:275528-276126 FORWARD LENGTH=140                                                                                                                                                                                                                                                      | 368  | 140  | 6.00E-75  | 38.0  | 35.3 | 37.0 |
| Rsa1.0_00069.1.g3685.t1 | # # # # # # # #                                                                                                                                                                                                                                                                                                                                                                                                                                           | #    | #    | #         | #     | #    | #    | -                                                                           | ----  | ----                 | #                                                                                                                                                                                                                                                                                                                                                          | #    | #    | #         | #     | #    | #    |
| Rsa1.0_00069.1.g3686.t1 | ref[XP_002892044.1] hypothetical protein ARALYDRAFT_470098 [Arabidopsis lyrata subsp. lyrata] gi 297337886 gb EFH68303.1 hypothetical protein ARALYDRAFT_470098 [Arabidopsis lyrata subsp. lyrata]                                                                                                                                                                                                                                                        | 686  | 634  | 0         | 92.4  | 80.5 | 85.4 | hypothetical protein ARALYDRAFT_470098                                      | gbpln | Arabidopsis lyrata   | AT1G01770.1   Symbols:   unknown protein; CONTAINS InterPro DOMAIN/s: Protein of unknown function DUF1446 (InterPro:IPR010839); Has 1597 Blast hits to 1509 proteins in 306 species: Archae - 4; Bacteria - 843; Metazoa - 22; Fungi - 131; Plants - 31; Viruses - 0; Other Eukaryotes - 566 (source: NCBI BLINK).   chr1:278759-282490 FORWARD LENGTH=632 | 686  | 632  | 0         | 92.1  | 80.0 | 84.8 |
| Rsa1.0_00069.1.g3687.t1 | gb EOA37281.1  hypothetical protein CARUB_v10010886mg [Capsella rubella]                                                                                                                                                                                                                                                                                                                                                                                  | 205  | 205  | 1.00E-111 | 100.0 | 93.7 | 96.6 | hypothetical protein CARUB_v10010886mg                                      | gbpln | Capsella rubella     | AT1G01780.1   Symbols:   GATA type zinc finger transcription factor family protein   chr1:282919-284082 FORWARD LENGTH=205                                                                                                                                                                                                                                 | 205  | 205  | 1.00E-112 | 100.0 | 92.7 | 96.1 |
| Rsa1.0_00069.1.g3688.t1 | # # # # # # # #                                                                                                                                                                                                                                                                                                                                                                                                                                           | #    | #    | #         | #     | #    | #    | -                                                                           | ----  | ----                 | #                                                                                                                                                                                                                                                                                                                                                          | #    | #    | #         | #     | #    | #    |
| Rsa1.0_00069.1.g3689.t1 | ref[XP_002892042.1] hypothetical protein ARALYDRAFT_311263 [Arabidopsis lyrata subsp. lyrata] gi 297337884 gb EFH6301.1 hypothetical protein ARALYDRAFT_311263 [Arabidopsis lyrata subsp. lyrata]                                                                                                                                                                                                                                                         | 1167 | 1171 | 0         | 100.3 | 83.6 | 89.4 | hypothetical protein ARALYDRAFT_311263                                      | gbpln | Arabidopsis lyrata   | AT1G01790.1   Symbols: KEA1, ATKEA1   K+ efflux antiporter 1   chr1:284781-290869 FORWARD LENGTH=1193                                                                                                                                                                                                                                                      | 1167 | 1193 | 0         | 102.2 | 83.3 | 89.3 |
| Rsa1.0_00069.1.g3690.t1 | ref[XP_00289352.1] peroxisomal biogenesis factor 11 family protein [Arabidopsis lyrata subsp. lyrata] gi 297335194 gb EFH6561.1 peroxisomal biogenesis factor 11 family protein [Arabidopsis lyrata subsp. lyrata]                                                                                                                                                                                                                                        | 237  | 235  | 1.00E-128 | 99.2  | 94.1 | 97.0 | peroxisomal biogenesis factor 11 family protein                             | gbpln | Arabidopsis lyrata   | AT1G01820.1   Symbols: PEX11C   peroxin 11c   chr1:296213-297723 REVERSE LENGTH=235                                                                                                                                                                                                                                                                        | 237  | 235  | 1.00E-129 | 99.2  | 92.8 | 96.6 |
| Rsa1.0_00069.1.g3691.t1 | ref[NP_171690.1] Ribosomal RNA adenine dimethylase family protein [Arabidopsis thaliana] gi 3005590 gb AAC09322.1 dimethyladenosine transferase [Arabidopsis thaliana] gi 26449914 dbj BAC42078.1 putative dimethyladenosine transferase [Arabidopsis thaliana] gi 28827572 gb AAO50630.1 putative dimethyladenosine transferase [Arabidopsis thaliana] gi 332189223 gb AE27344.1 Ribosomal RNA adenine dimethylase family protein [Arabidopsis thaliana] | 374  | 343  | 1.00E-149 | 91.7  | 72.7 | 76.7 | Ribosomal RNA adenine dimethylase family protein                            | gbpln | Arabidopsis thaliana | AT1G01860.1   Symbols: PFC1   Ribosomal RNA adenine dimethylase family protein   chr1:304439-306275 REVERSE LENGTH=343                                                                                                                                                                                                                                     | 374  | 343  | 1.00E-151 | 91.7  | 72.7 | 76.7 |
| Rsa1.0_00069.1.g3692.t1 | gb EOA36590.1  hypothetical protein CARUB_v10011785mg [Capsella rubella]                                                                                                                                                                                                                                                                                                                                                                                  | 599  | 597  | 0         | 99.7  | 77.8 | 86.6 | hypothetical protein CARUB_v10011785mg                                      | gbpln | Capsella rubella     | AT1G01880.1   Symbols:   5'-3' exonuclease family protein   chr1:306558-308991 REVERSE LENGTH=599                                                                                                                                                                                                                                                          | 599  | 599  | 0         | 100.0 | 77.6 | 85.5 |
| Rsa1.0_00069.1.g3693.t1 | gb EOA38113.1  hypothetical protein CARUB_v10009581mg [Capsella rubella]                                                                                                                                                                                                                                                                                                                                                                                  | 358  | 353  | 1.00E-175 | 98.6  | 89.4 | 92.2 | hypothetical protein CARUB_v10009581mg                                      | gbpln | Capsella rubella     | AT1G01910.4   Symbols:   P-loop containing nucleoside triphosphate hydrolases superfamily protein   chr1:313595-315831 REVERSE LENGTH=353                                                                                                                                                                                                                  | 358  | 353  | 1.00E-177 | 98.6  | 88.5 | 92.2 |
| Rsa1.0_00069.1.g3694.t1 | ref[NP_171694.3] SET domain-containing protein [Arabidopsis thaliana] gi 332189232 gb AE27353.1 SET domain-containing protein [Arabidopsis thaliana]                                                                                                                                                                                                                                                                                                      | 547  | 572  | 0         | 104.6 | 80.8 | 88.5 | SET domain-containing protein                                               | gbpln | Arabidopsis thaliana | AT1G01920.1   Symbols:   SET domain-containing protein   chr1:316204-319507 FORWARD LENGTH=572                                                                                                                                                                                                                                                             | 547  | 572  | 0         | 104.6 | 80.8 | 88.5 |
| Rsa1.0_00069.1.g3695.t1 | ref[XP_00289345.1] hypothetical protein ARALYDRAFT_470081 [Arabidopsis lyrata subsp. lyrata] gi 297335187 gb EFH65604.1 hypothetical protein ARALYDRAFT_470081 [Arabidopsis lyrata subsp. lyrata]                                                                                                                                                                                                                                                         | 582  | 579  | 0         | 99.5  | 80.2 | 86.9 | hypothetical protein ARALYDRAFT_470081                                      | gbpln | Arabidopsis lyrata   | AT1G01930.1   Symbols:   zinc finger protein-related   chr1:320041-322809 REVERSE LENGTH=580                                                                                                                                                                                                                                                               | 582  | 580  | 0         | 99.7  | 78.7 | 84.7 |

|                         |                                                                                                                                                                                                  |      |      |           |       |      |      |                                                                     |       |                      |                                                                                                                                    |      |      |           |       |      |      |
|-------------------------|--------------------------------------------------------------------------------------------------------------------------------------------------------------------------------------------------|------|------|-----------|-------|------|------|---------------------------------------------------------------------|-------|----------------------|------------------------------------------------------------------------------------------------------------------------------------|------|------|-----------|-------|------|------|
| Rsa1.0_00069.1.g3696.t1 | ref[XP_002892036.1] peptidyl-prolyl cis-trans isomerase cyclophilin-type family protein [Arabidopsis lyrata subsp. lyrata] gi 297337878 gb EFH68295.1                                            | 160  | 160  | 5.00E-88  | 100.0 | 96.9 | 98.8 | peptidyl-prolyl cis-trans isomerase cyclophilin-type family protein | gbpln | Arabidopsis lyrata   | AT1G01940.1   Symbols: Cyclophilin-like peptidyl-prolyl cis-trans isomerase family protein   chr1:323082-324719 FORWARD LENGTH=160 | 160  | 160  | 3.00E-90  | 100.0 | 96.9 | 98.1 |
| Rsa1.0_00069.1.g3697.t1 | ref[NP_171697.3] armadillo repeat-containing kinesin-like protein 2 [Arabidopsis thaliana] gi 193806751 sp Q9LPC6.2 ARK2_ARAT H RecName: Full=Armadillo repeat-containing kinesin-like protein 2 | 898  | 894  | 0         | 99.6  | 94.9 | 96.9 | armadillo repeat-containing kinesin-like protein 2                  | gbpln | Arabidopsis thaliana | AT1G01950.1   Symbols: ARK2   armadillo repeat kinesin 2   chr1:325473-330403 FORWARD LENGTH=894                                   | 898  | 894  | 0         | 99.6  | 94.9 | 96.9 |
| Rsa1.0_00069.1.g3698.t1 | gb[EOA36031.1] hypothetical protein CARUB_v10008079mg [Capsella rubella]                                                                                                                         | 1754 | 1780 | 0         | 101.5 | 94.0 | 97.0 | hypothetical protein CARUB_v10008079mg                              | gbpln | Capsella rubella     | AT1G01960.1   Symbols: EDA10   SEC7-like guanine nucleotide exchange family protein   chr1:330830-337582 REVERSE LENGTH=1750       | 1754 | 1750 | 0         | 99.8  | 93.4 | 96.3 |
| Rsa1.0_00069.1.g3699.t1 | dbj BAB09923.1] copia-like retrotransposable element [Arabidopsis thaliana]                                                                                                                      | 1186 | 1342 | 0         | 113.2 | 49.6 | 67.1 | copia-like retrotransposable element                                | gbpln | Arabidopsis thaliana | AT4G23160.1   Symbols: CRK8   cysteine-rich RLK (RECEPTOR-like protein kinase) 8   chr4:12129485-12134086 FORWARD LENGTH=1262      | 1186 | 1262 | 1.00E-57  | 106.4 | 11.4 | 16.9 |
| Rsa1.0_00069.1.g3700.t2 | dbj BAJ34466.1] unnamed protein product [Thellungiella halophila]                                                                                                                                | 689  | 675  | 0         | 98.0  | 90.9 | 93.8 | unnamed protein product                                             | ----  | ----                 | AT1G02010.1   Symbols: SEC1A   secretory 1A   chr1:349046-352197 FORWARD LENGTH=673                                                | 689  | 673  | 0         | 97.7  | 90.9 | 93.8 |
| Rsa1.0_00069.1.g3701.t1 | ref[XP_002889340.1] hypothetical protein ARALYDRAFT_333453 [Arabidopsis lyrata subsp. lyrata] gi 297335182 gb EFH65599.1                                                                         | 258  | 264  | 6.00E-97  | 102.3 | 80.2 | 89.5 | hypothetical protein ARALYDRAFT_333453                              | gbpln | Arabidopsis lyrata   | AT1G02040.1   Symbols: C2H2-type zinc finger family protein   chr1:358104-359078 REVERSE LENGTH=324                                | 258  | 324  | 2.00E-99  | 125.6 | 81.8 | 88.4 |
| Rsa1.0_00069.1.g3702.t1 | ref[XP_002892031.1] hypothetical protein ARALYDRAFT_470069 [Arabidopsis lyrata subsp. lyrata] gi 297337873 gb EFH68290.1                                                                         | 337  | 323  | 1.00E-100 | 95.8  | 64.1 | 70.3 | hypothetical protein ARALYDRAFT_470069                              | gbpln | Arabidopsis lyrata   | AT1G02065.1   Symbols: SPL8   squamosa promoter binding protein-like 8   chr1:365625-367149 FORWARD LENGTH=333                     | 337  | 333  | 7.00E-95  | 98.8  | 62.3 | 70.9 |
| Rsa1.0_00069.1.g3703.t3 | #                                                                                                                                                                                                | #    | #    | #         | #     | #    | #    | -                                                                   | ----  | ----                 | #                                                                                                                                  | #    | #    | #         | #     | #    | #    |
| Rsa1.0_00069.1.g3704.t1 | gb ABD65090.1] hypothetical protein 27.t00116 [Brassica oleracea]                                                                                                                                | 584  | 484  | 3.00E-91  | 82.9  | 28.3 | 34.8 | hypothetical protein 27.t00116                                      | gbpln | Brassica oleracea    | AT1G52950.1   Symbols: Nucleic acid-binding, OB-fold-like protein   chr1:19725483-19728007 FORWARD LENGTH=566                      | 584  | 566  | 2.00E-12  | 96.9  | 15.6 | 29.5 |
| Rsa1.0_00069.1.g3705.t1 | gb[EOA39027.1] hypothetical protein CARUB_v10011597mg [Capsella rubella]                                                                                                                         | 186  | 186  | 2.00E-15  | 100.0 | 26.9 | 45.2 | hypothetical protein CARUB_v10011597mg                              | gbpln | Capsella rubella     | AT5G53910.1   Symbols: RING/U-box superfamily protein   chr5:21890643-21891335 FORWARD LENGTH=230                                  | 186  | 230  | 6.00E-11  | 123.7 | 14.5 | 18.8 |
| Rsa1.0_00069.1.g3706.t1 | ref[XP_003609124.1] ATP-dependent DNA helicase PIF1 [Medicago truncatula] gi 355510179 gb AES91321.1] ATP-dependent DNA helicase PIF1 [Medicago truncatula]                                      | 1509 | 1558 | 0         | 103.2 | 44.1 | 60.8 | ATP-dependent DNA helicase PIF1                                     | gbpln | Medicago truncatula  | AT5G28780.1   Symbols: PIF1 helicase   chr5:10812907-10814173 REVERSE LENGTH=337                                                   | 1509 | 337  | 5.00E-70  | 22.3  | 8.7  | 12.2 |
| Rsa1.0_00069.1.g3707.t2 | #                                                                                                                                                                                                | #    | #    | #         | #     | #    | #    | -                                                                   | ----  | ----                 | #                                                                                                                                  | #    | #    | #         | #     | #    | #    |
| Rsa1.0_00069.1.g3708.t1 | gb AAG10809.1 AC018460_3 Similar to mutator transposase [Arabidopsis thaliana]                                                                                                                   | 436  | 884  | 7.00E-17  | 202.8 | 19.0 | 30.5 | Similar to mutator transposase                                      | gbpln | Arabidopsis thaliana | #                                                                                                                                  | #    | #    | #         | #     | #    | #    |
| Rsa1.0_00069.1.g3709.t1 | #                                                                                                                                                                                                | #    | #    | #         | #     | #    | #    | -                                                                   | ----  | ----                 | #                                                                                                                                  | #    | #    | #         | #     | #    | #    |
| Rsa1.0_00069.1.g3710.t1 | gb ADK13090.1] annexin 1 [Brassica napus]                                                                                                                                                        | 317  | 317  | 0         | 100.0 | 98.1 | 99.4 | annexin 1                                                           | gbpln | Brassica napus       | AT1G35720.1   Symbols: ANNAT1, OXY5, ATOXY5   annexin 1   chr1:13225304-13228939 FORWARD LENGTH=317                                | 317  | 317  | 1.00E-176 | 100.0 | 93.4 | 97.8 |
| Rsa1.0_00069.1.g3711.t1 | gb[EOA39555.1] hypothetical protein CARUB_v10008173mg [Capsella rubella]                                                                                                                         | 1037 | 1027 | 0         | 99.0  | 74.4 | 85.3 | hypothetical protein CARUB_v10008173mg                              | gbpln | Capsella rubella     | AT4G08850.1   Symbols: Leucine-rich repeat receptor-like protein kinase family protein   chr4:5636693-5640496 REVERSE LENGTH=1045  | 1037 | 1045 | 0         | 100.8 | 70.6 | 83.7 |
| Rsa1.0_00069.1.g3712.t4 | #                                                                                                                                                                                                | #    | #    | #         | #     | #    | #    | -                                                                   | ----  | ----                 | #                                                                                                                                  | #    | #    | #         | #     | #    | #    |

|                         |                                                                                                                                                                                                                                                                                                                                                                                                                                                                                                                                  |      |      |           |       |      |       |                                                         |       |                      |                                                                                                                                                                                                                                                                                                                                                |      |      |           |       |      |       |
|-------------------------|----------------------------------------------------------------------------------------------------------------------------------------------------------------------------------------------------------------------------------------------------------------------------------------------------------------------------------------------------------------------------------------------------------------------------------------------------------------------------------------------------------------------------------|------|------|-----------|-------|------|-------|---------------------------------------------------------|-------|----------------------|------------------------------------------------------------------------------------------------------------------------------------------------------------------------------------------------------------------------------------------------------------------------------------------------------------------------------------------------|------|------|-----------|-------|------|-------|
| Rsa1.0_00069.1.g3713.t1 | refNP_174807.1   calcium-dependent protein kinase 2 [Arabidopsis thaliana] gi 332278169 sp Q39016.2 CDPKB_ARA TH RecName: Full=Calcium-dependent protein kinase 11; AltName: Full=Calcium-dependent protein kinase isoform CDPK2; Short=AtCDPK2 gi 15293095 gb AAK93658.1   putative calcium-dependent protein kinase [Arabidopsis thaliana] gi 21281141 gb AAM45034.1   putative calcium-dependent protein kinase [Arabidopsis thaliana] gi 332193701 gb AEE31822.1   calcium-dependent protein kinase 2 [Arabidopsis thaliana] | 497  | 495  | 0         | 99.6  | 97.4 | 98.2  | calcium-dependent protein kinase 2                      | gbpln | Arabidopsis thaliana | AT1G35670.1   Symbols: ATCDPK2, CPK11, ATPCK11, CDPK2   calcium-dependent protein kinase 2   chr1:13205456-13208058 FORWARD LENGTH=495                                                                                                                                                                                                         | 497  | 495  | 0         | 99.6  | 97.4 | 98.2  |
| Rsa1.0_00069.1.g3714.t1 | gb EOA40451.1   hypothetical protein CARUB_v10009176mg [Capsella rubella]                                                                                                                                                                                                                                                                                                                                                                                                                                                        | 468  | 438  | 0         | 93.6  | 78.6 | 84.6  | hypothetical protein CARUB_v10009176mg                  | gbpln | Capsella rubella     | AT1G35620.1   Symbols: ATPDIL5-2, ATPD18, PD18, PDIL5-2   PDI-like 5-2   chr1:13156504-13158280 FORWARD LENGTH=440                                                                                                                                                                                                                             | 468  | 440  | 0         | 94.0  | 78.0 | 84.0  |
| Rsa1.0_00070.1.g3715.t1 | #                                                                                                                                                                                                                                                                                                                                                                                                                                                                                                                                | #    | #    | #         | #     | #    | #     | -                                                       | ----  | ----                 | AT4G24590.1   Symbols:   unknown protein; BEST Arabidopsis thaliana protein match is: unknown protein (TAIR:AT5G49710.3); Has 105 Blast hits to 105 proteins in 26 species: Archae - 0; Bacteria - 0; Metazoa - 8; Fungi - 3; Plants - 85; Viruses - 0; Other Eukaryotes - 9 (source: NCBI BLink).   chr4:12696651-12698036 FORWARD LENGTH=241 | 71   | 241  | 2.00E-11  | 339.4 | 47.9 | 52.1  |
| Rsa1.0_00070.1.g3716.t1 | gb EOA15984.1   hypothetical protein CARUB_v10004098mg [Capsella rubella]                                                                                                                                                                                                                                                                                                                                                                                                                                                        | 897  | 907  | 0         | 101.1 | 77.5 | 83.5  | hypothetical protein CARUB_v10004098mg                  | gbpln | Capsella rubella     | AT4G24580.1   Symbols: REN1   Rho GTPase activation protein (RhoGAP) with PH domain   chr4:12687879-12694248 REVERSE LENGTH=933                                                                                                                                                                                                                | 897  | 933  | 0         | 104.0 | 79.3 | 86.1  |
| Rsa1.0_00070.1.g3717.t1 | #                                                                                                                                                                                                                                                                                                                                                                                                                                                                                                                                | #    | #    | #         | #     | #    | #     | -                                                       | ----  | ----                 | #                                                                                                                                                                                                                                                                                                                                              | #    | #    | #         | #     | #    |       |
| Rsa1.0_00070.1.g3718.t1 | ref XP_002867659.1   ubiquitin-specific protease 16 [Arabidopsis lyrata subsp. lyrata] gi 297313495 gb EFH43918.1   ubiquitin-specific protease 16 [Arabidopsis lyrata subsp. lyrata]                                                                                                                                                                                                                                                                                                                                            | 1009 | 1007 | 0         | 99.8  | 77.6 | 85.7  | ubiquitin-specific protease 16                          | gbpln | Arabidopsis lyrata   | AT4G24560.1   Symbols: UBP16   ubiquitin-specific protease 16   chr4:12679493-12684528 REVERSE LENGTH=1008                                                                                                                                                                                                                                     | 1009 | 1008 | 0         | 99.9  | 78.0 | 85.5  |
| Rsa1.0_00070.1.g3719.t1 | gb AFM77897.1   MADS-box protein AGL24 [Brassica napus]                                                                                                                                                                                                                                                                                                                                                                                                                                                                          | 233  | 221  | 1.00E-119 | 94.8  | 91.4 | 94.0  | MADS-box protein AGL24                                  | gbpln | Brassica napus       | AT4G24540.1   Symbols: AGL24   AGAMOUS-like 24   chr4:12671160-12673645 REVERSE LENGTH=220                                                                                                                                                                                                                                                     | 233  | 220  | 1.00E-102 | 94.4  | 80.3 | 88.0  |
| Rsa1.0_00070.1.g3720.t1 | #                                                                                                                                                                                                                                                                                                                                                                                                                                                                                                                                | #    | #    | #         | #     | #    | #     | -                                                       | ----  | ----                 | #                                                                                                                                                                                                                                                                                                                                              | #    | #    | #         | #     | #    |       |
| Rsa1.0_00070.1.g3721.t1 | gb EOA23805.1   hypothetical protein CARUB_v10017019mg [Capsella rubella]                                                                                                                                                                                                                                                                                                                                                                                                                                                        | 160  | 520  | 5.00E-13  | 325.0 | 25.6 | 29.4  | hypothetical protein CARUB_v10017019mg                  | gbpln | Capsella rubella     | AT4G24530.1   Symbols:   O-fucosyltransferase family protein   chr4:12667424-12669713 REVERSE LENGTH=519                                                                                                                                                                                                                                       | 160  | 519  | 2.00E-14  | 324.4 | 21.3 | 21.3  |
| Rsa1.0_00070.1.g3722.t1 | ref XP_002867662.1   hypothetical protein ARALYDRAFT_492391 [Arabidopsis lyrata subsp. lyrata] gi 297313498 gb EFH43921.1   hypothetical protein ARALYDRAFT_492391 [Arabidopsis lyrata subsp. lyrata]                                                                                                                                                                                                                                                                                                                            | 695  | 692  | 0         | 99.6  | 91.2 | 94.8  | hypothetical protein ARALYDRAFT_492391                  | gbpln | Arabidopsis lyrata   | AT4G24520.1   Symbols: ATR1, AR1   P450 reductase 1   chr4:12663065-12667066 REVERSE LENGTH=692                                                                                                                                                                                                                                                | 695  | 692  | 0         | 99.6  | 89.8 | 94.2  |
| Rsa1.0_00070.1.g3723.t1 | #                                                                                                                                                                                                                                                                                                                                                                                                                                                                                                                                | #    | #    | #         | #     | #    | #     | -                                                       | ----  | ----                 | #                                                                                                                                                                                                                                                                                                                                              | #    | #    | #         | #     | #    |       |
| Rsa1.0_00070.1.g3724.t6 | gb EOA37111.1   hypothetical protein CARUB_v10010324mg [Capsella rubella] gi 482572925 gb EOA37112.1   hypothetical protein CARUB_v10010324mg [Capsella rubella]                                                                                                                                                                                                                                                                                                                                                                 | 211  | 203  | 4.00E-75  | 96.2  | 69.7 | 77.3  | hypothetical protein CARUB_v10010324mg                  | gbpln | Capsella rubella     | AT1G07700.1   Symbols:   Thioredoxin superfamily protein   chr1:2380214-2381127 FORWARD LENGTH=204                                                                                                                                                                                                                                             | 211  | 204  | 3.00E-73  | 96.7  | 65.4 | 73.9  |
| Rsa1.0_00070.1.g3725.t1 | gb EOA17945.1   hypothetical protein CARUB_v10006335mg [Capsella rubella]                                                                                                                                                                                                                                                                                                                                                                                                                                                        | 131  | 312  | 1.00E-53  | 238.2 | 76.3 | 85.5  | hypothetical protein CARUB_v10006335mg                  | gbpln | Capsella rubella     | AT4G24470.2   Symbols: ZIM, GATA25   GATA-type zinc finger protein with TIFY domain   chr4:12645785-12647734 FORWARD LENGTH=309                                                                                                                                                                                                                | 131  | 309  | 2.00E-55  | 235.9 | 76.3 | 86.3  |
| Rsa1.0_00070.1.g3726.t2 | ref XP_002869716.1   zinc-finger protein expressed in inflorescence meristem [Arabidopsis lyrata subsp. lyrata] gi 297315552 gb EFH45975.1   zinc-finger protein expressed in inflorescence meristem [Arabidopsis lyrata subsp. lyrata]                                                                                                                                                                                                                                                                                          | 183  | 311  | 5.00E-54  | 169.9 | 67.2 | 72.1  | zinc-finger protein expressed in inflorescence meristem | gbpln | Arabidopsis lyrata   | AT4G24470.2   Symbols: ZIM, GATA25   GATA-type zinc finger protein with TIFY domain   chr4:12645785-12647734 FORWARD LENGTH=309                                                                                                                                                                                                                | 183  | 309  | 9.00E-54  | 168.9 | 67.2 | 72.1  |
| Rsa1.0_00070.1.g3727.t1 | gb EOA17710.1   hypothetical protein CARUB_v10006082mg [Capsella rubella]                                                                                                                                                                                                                                                                                                                                                                                                                                                        | 106  | 106  | 6.00E-55  | 100.0 | 98.1 | 100.0 | hypothetical protein CARUB_v10006082mg                  | gbpln | Capsella rubella     | AT4G24440.2   Symbols:   transcription initiation factor IIA gamma chain / TFIIA-gamma (TFIIA-S)   chr4:12633460-12634553 FORWARD LENGTH=106                                                                                                                                                                                                   | 106  | 106  | 3.00E-57  | 100.0 | 97.2 | 100.0 |
| Rsa1.0_00070.1.g3728.t1 | gb EOA29907.1   hypothetical protein CARUB_v10013001mg [Capsella rubella]                                                                                                                                                                                                                                                                                                                                                                                                                                                        | 1093 | 803  | 3.00E-75  | 73.5  | 18.4 | 23.6  | hypothetical protein CARUB_v10013001mg                  | gbpln | Capsella rubella     | AT3G02930.2   Symbols:   Plant protein of unknown function (DUF827)   chr3:655158-658319 FORWARD LENGTH=804                                                                                                                                                                                                                                    | 1093 | 804  | 1.00E-70  | 73.6  | 17.6 | 22.6  |

|                         |                                                                                                                                                                                                                                                                                                                                                                                                                                                                                                                                                                                                                                                                                                                                                                                                                                                                                                                                                                                                                                      |     |      |           |       |      |      |                                        |       |                      |                                                                                                                             |     |      |           |       |      |      |
|-------------------------|--------------------------------------------------------------------------------------------------------------------------------------------------------------------------------------------------------------------------------------------------------------------------------------------------------------------------------------------------------------------------------------------------------------------------------------------------------------------------------------------------------------------------------------------------------------------------------------------------------------------------------------------------------------------------------------------------------------------------------------------------------------------------------------------------------------------------------------------------------------------------------------------------------------------------------------------------------------------------------------------------------------------------------------|-----|------|-----------|-------|------|------|----------------------------------------|-------|----------------------|-----------------------------------------------------------------------------------------------------------------------------|-----|------|-----------|-------|------|------|
| Rsa1.0_00070.1.g3729.t3 | ref NP_194164.1  uncharacterized protein [Arabidopsis thaliana]   gi 5051775 emb CAB45068.1  putative protein [Arabidopsis thaliana]   gi 7269283 emb CAB79343.1  putative protein [Arabidopsis thaliana]   gi 58652054 gb AAW80852.1  At4g24330 [Arabidopsis thaliana]   gi 332659490 gb AEE84890.1  uncharacterized protein AT4G24330 [Arabidopsis thaliana]                                                                                                                                                                                                                                                                                                                                                                                                                                                                                                                                                                                                                                                                       | 477 | 478  | 0         | 100.2 | 81.1 | 87.4 | uncharacterized protein                | gbpln | Arabidopsis thaliana | AT4G24330.1   Symbols:   Protein of unknown function (DUF1682)   chr4:12603848-12606229 REVERSE LENGTH=478                  | 477 | 478  | 0         | 100.2 | 81.1 | 87.4 |
| Rsa1.0_00070.1.g3730.t1 | ref XP_002869727.1  cphsc70-1 [Arabidopsis lyrata subsp. lyrata]   gi 297315563 gb EFH45986.1  cphsc70-1 [Arabidopsis lyrata subsp. lyrata]                                                                                                                                                                                                                                                                                                                                                                                                                                                                                                                                                                                                                                                                                                                                                                                                                                                                                          | 713 | 718  | 0         | 100.7 | 93.8 | 96.4 | cphsc70-1                              | gbpln | Arabidopsis lyrata   | AT4G24280.1   Symbols: cpHsc70-1   chloroplast heat shock protein 70-1   chr4:12590094-12593437 FORWARD LENGTH=718          | 713 | 718  | 0         | 100.7 | 88.9 | 91.4 |
| Rsa1.0_00070.1.g3731.t1 | gb EOA15374.1  hypothetical protein CARUB_v10006044mg [Capsella rubella]                                                                                                                                                                                                                                                                                                                                                                                                                                                                                                                                                                                                                                                                                                                                                                                                                                                                                                                                                             | 125 | 121  | 1.00E-27  | 96.8  | 65.6 | 75.2 | hypothetical protein CARUB_v10006044mg | gbpln | Capsella rubella     | AT4G24275.1   Symbols:   Identified as a screen for stress-responsive genes.   chr4:12588579-12588959 FORWARD LENGTH=126    | 125 | 126  | 1.00E-26  | 100.8 | 71.2 | 80.8 |
| Rsa1.0_00070.1.g3732.t1 | gb EOA15955.1  hypothetical protein CARUB_v10004057mg [Capsella rubella]                                                                                                                                                                                                                                                                                                                                                                                                                                                                                                                                                                                                                                                                                                                                                                                                                                                                                                                                                             | 843 | 1002 | 0         | 118.9 | 64.1 | 70.9 | hypothetical protein CARUB_v10004057mg | gbpln | Capsella rubella     | AT4G24200.1   Symbols:   Transcription elongation factor (TFIS) family protein   chr4:12556927-12559929 REVERSE LENGTH=1000 | 843 | 1000 | 0         | 118.6 | 63.9 | 70.6 |
| Rsa1.0_00070.1.g3733.t1 | # # # # # # # #                                                                                                                                                                                                                                                                                                                                                                                                                                                                                                                                                                                                                                                                                                                                                                                                                                                                                                                                                                                                                      |     |      |           |       |      |      | -                                      | ----  | ----                 | # # # # # # #                                                                                                               |     |      |           |       |      |      |
| Rsa1.0_00070.1.g3734.t1 | ref NP_194157.1  endoglucanase 21 [Arabidopsis thaliana]   gi 75266338 sp Q9STW8.1 GUN21 ARAT H RecName: Full=Endoglucanase 21; AltName: Full=Endo-1,4-beta glucanase 21   gi 5051768 emb CAB45061.1  endo-1,4-beta-glucanase like protein [Arabidopsis thaliana]   gi 7269276 emb CAB79336.1  endo-1,4-beta-glucanase like protein [Arabidopsis thaliana]   gi 332659479 gb AEE84879.1  endoglucanase 21 [Arabidopsis thaliana]                                                                                                                                                                                                                                                                                                                                                                                                                                                                                                                                                                                                     | 643 | 620  | 0         | 96.4  | 73.7 | 82.7 | endoglucanase 21                       | gbpln | Arabidopsis thaliana | AT4G24260.1   Symbols: ATGH9A3, KOR3, GH9A3   glycosyl hydrolase 9A3   chr4:12577871-12580133 REVERSE LENGTH=620            | 643 | 620  | 0         | 96.4  | 73.7 | 82.7 |
| Rsa1.0_00070.1.g3735.t1 | ref XP_002867673.1  hypothetical protein ARALYDRAFT_914165 [Arabidopsis lyrata subsp. lyrata]   gi 297313509 gb EFH43932.1  hypothetical protein ARALYDRAFT_914165 [Arabidopsis lyrata subsp. lyrata]                                                                                                                                                                                                                                                                                                                                                                                                                                                                                                                                                                                                                                                                                                                                                                                                                                | 449 | 482  | 0         | 107.3 | 87.1 | 92.0 | hypothetical protein ARALYDRAFT_914165 | gbpln | Arabidopsis lyrata   | AT4G24250.1   Symbols: MLO13, ATMLO13   Seven transmembrane MLO family protein   chr4:12575008-12577517 REVERSE LENGTH=478  | 449 | 478  | 0         | 106.5 | 86.2 | 91.8 |
| Rsa1.0_00070.1.g3736.t1 | gb ACQ76809.1  WRKY transcription factor 7 [Brassica napus]                                                                                                                                                                                                                                                                                                                                                                                                                                                                                                                                                                                                                                                                                                                                                                                                                                                                                                                                                                          | 352 | 348  | 1.00E-170 | 98.9  | 90.1 | 92.6 | WRKY transcription factor 7            | gbpln | Brassica napus       | AT4G24240.1   Symbols: WRKY7, ATWRKY7   WRKY DNA-binding protein 7   chr4:12571930-12573446 FORWARD LENGTH=353              | 352 | 353  | 1.00E-139 | 100.3 | 76.4 | 83.5 |
| Rsa1.0_00070.1.g3737.t1 | ref NP_194154.1  acyl-CoA-binding domain 3 [Arabidopsis thaliana]   gi 145333919 ref NP_001078439.1  acyl-CoA-binding domain 3 [Arabidopsis thaliana]   gi 145333930 ref NP_001078440.1  acyl-CoA-binding domain 3 [Arabidopsis thaliana]   gi 145333941 ref NP_001078441.1  acyl-CoA-binding domain 3 [Arabidopsis thaliana]   gi 75207746 sp Q9STX1.1 ACBP3 ARAT H RecName: Full=Acyl-CoA-binding domain-containing protein 3; Short=Acyl-CoA binding protein 3; Flags: Precursor   gi 5051765 emb CAB45058.1  putative protein [Arabidopsis thaliana]   gi 7269273 emb CAB79333.1  putative protein [Arabidopsis thaliana]   gi 110742400 dbj BAE99122.1  hypothetical protein [Arabidopsis thaliana]   gi 332659471 gb AEE84871.1  acyl-CoA-binding domain 3 [Arabidopsis thaliana]   gi 332659472 gb AEE84872.1  acyl-CoA-binding domain 3 [Arabidopsis thaliana]   gi 332659473 gb AEE84873.1  acyl-CoA-binding domain 3 [Arabidopsis thaliana]   gi 332659474 gb AEE84874.1  acyl-CoA-binding domain 3 [Arabidopsis thaliana] | 368 | 362  | 2.00E-88  | 98.4  | 61.4 | 72.0 | acyl-CoA-binding domain 3              | gbpln | Arabidopsis thaliana | AT4G24230.5   Symbols: ACBP3   acyl-CoA-binding domain 3   chr4:12567240-12568754 REVERSE LENGTH=362                        | 368 | 362  | 5.00E-91  | 98.4  | 61.4 | 72.0 |

|                         |                                                                                                                                                                                                           |      |      |           |       |      |      |                                           |       |                      |                                                                                                                                               |      |      |           |       |      |      |  |
|-------------------------|-----------------------------------------------------------------------------------------------------------------------------------------------------------------------------------------------------------|------|------|-----------|-------|------|------|-------------------------------------------|-------|----------------------|-----------------------------------------------------------------------------------------------------------------------------------------------|------|------|-----------|-------|------|------|--|
| Rsa1.0_00070.1.g3738.t1 | gb AFD96485.1  putative enone 5-beta-reductase [Brassica oleracea var. gemmifera]                                                                                                                         | 380  | 382  | 0         | 100.5 | 91.1 | 96.6 | putative enone 5-beta-reductase           | gbpln | Brassica oleracea    | AT4G24220.1   Symbols: VEP1, AWI31   NAD(P)-binding Rossmann-fold superfamily protein   chr4:12565219-12566474 FORWARD LENGTH=388             | 380  | 388  | 1.00E-178 | 102.1 | 78.7 | 90.3 |  |
| Rsa1.0_00070.1.g3739.t1 | gb AAD09508.1  ATFP4, partial [Arabidopsis thaliana]                                                                                                                                                      | 159  | 179  | 6.00E-33  | 112.6 | 65.4 | 72.3 | ATFP4, partial                            | gbpln | Arabidopsis thaliana | AT3G07600.1   Symbols:   Heavy metal transport/detoxification superfamily protein   chr3:2424300-2424954 REVERSE LENGTH=157                   | 159  | 157  | 4.00E-35  | 98.7  | 65.4 | 72.3 |  |
| Rsa1.0_00070.1.g3740.t2 | ref XP_002891519.1  hypothetical protein ARALYDRAFT_337099 [Arabidopsis lyrata subsp. lyrata] gi 297337361 gb EFH67778.1  hypothetical protein ARALYDRAFT_337099 [Arabidopsis lyrata subsp. lyrata]       | 643  | 1163 | 4.00E-40  | 180.9 | 23.5 | 36.5 | hypothetical protein ARALYDRAFT_337099    | gbpln | Arabidopsis lyrata   | AT1G67370.1   Symbols: ASY1, ATASY1   DNA-binding HORMA family protein   chr1:25239347-25243713 REVERSE LENGTH=596                            | 643  | 596  | 4.00E-33  | 92.7  | 12.8 | 14.5 |  |
| Rsa1.0_00070.1.g3741.t1 | ref XP_002862875.1  hypothetical protein ARALYDRAFT_920182 [Arabidopsis lyrata subsp. lyrata] gi 297308637 gb EFH39134.1  hypothetical protein ARALYDRAFT_920182 [Arabidopsis lyrata subsp. lyrata]       | 310  | 315  | 3.00E-31  | 101.6 | 32.3 | 46.5 | hypothetical protein ARALYDRAFT_920182    | gbpln | Arabidopsis lyrata   | AT1G02770.1   Symbols:   Protein of unknown function (DUF626)   chr1:605071-606624 REVERSE LENGTH=316                                         | 310  | 316  | 7.00E-34  | 101.9 | 31.9 | 49.4 |  |
| Rsa1.0_00070.1.g3742.t1 | ref XP_002867675.1  hypothetical protein ARALYDRAFT_329238 [Arabidopsis lyrata subsp. lyrata] gi 297313511 gb EFH43934.1  hypothetical protein ARALYDRAFT_329238 [Arabidopsis lyrata subsp. lyrata]       | 121  | 157  | 3.00E-40  | 129.8 | 68.6 | 81.8 | hypothetical protein ARALYDRAFT_329238    | gbpln | Arabidopsis lyrata   | AT4G24204.3   Symbols:   RING/U-box superfamily protein   chr4:12562069-12562815 REVERSE LENGTH=178                                           | 121  | 178  | 1.00E-42  | 147.1 | 70.2 | 81.0 |  |
| Rsa1.0_00070.1.g3743.t1 | ref XP_002867676.1  hypothetical protein ARALYDRAFT_492440 [Arabidopsis lyrata subsp. lyrata] gi 297313512 gb EFH43935.1  hypothetical protein ARALYDRAFT_492440 [Arabidopsis lyrata subsp. lyrata]       | 986  | 1002 | 0         | 101.6 | 79.5 | 87.3 | hypothetical protein ARALYDRAFT_492440    | gbpln | Arabidopsis lyrata   | AT4G24200.1   Symbols:   Transcription elongation factor (TFIIS) family protein   chr4:12556927-12559929 REVERSE LENGTH=1000                  | 986  | 1000 | 0         | 101.4 | 77.9 | 86.0 |  |
| Rsa1.0_00070.1.g3744.t1 | ref XP_002867677.1  hypothetical protein ARALYDRAFT_492441 [Arabidopsis lyrata subsp. lyrata] gi 297313513 gb EFH43936.1  hypothetical protein ARALYDRAFT_492441 [Arabidopsis lyrata subsp. lyrata]       | 804  | 823  | 0         | 102.4 | 93.5 | 96.5 | hypothetical protein ARALYDRAFT_492441    | gbpln | Arabidopsis lyrata   | AT4G24190.1   Symbols: SHD, HSP90.7, Athsp90.7, Athsp90-7   Chaperone protein htpG family protein   chr4:12551902-12555851 REVERSE LENGTH=823 | 804  | 823  | 0         | 102.4 | 92.2 | 95.9 |  |
| Rsa1.0_00070.1.g3745.t1 | emb CAB45053.1  thaumatin-like protein [Arabidopsis thaliana] gi 7269268 emb CAB79328.1  thaumatin-like protein [Arabidopsis thaliana]                                                                    | 256  | 255  | 1.00E-130 | 99.6  | 89.1 | 94.1 | thaumatin-like protein                    | gbpln | Arabidopsis thaliana | AT4G24180.1   Symbols: TLP1, ATTLP1   THAUMATIN-LIKE PROTEIN 1   chr4:12550356-12551221 REVERSE LENGTH=260                                    | 256  | 260  | 1.00E-131 | 101.6 | 89.1 | 94.1 |  |
| Rsa1.0_00070.1.g3746.t1 | ref XP_002869734.1  hydrolase, alpha/beta fold family protein [Arabidopsis lyrata subsp. lyrata] gi 297315570 gb EFH45993.1  hydrolase, alpha/beta fold family protein [Arabidopsis lyrata subsp. lyrata] | 407  | 417  | 0         | 102.5 | 88.2 | 94.1 | hydrolase, alpha/beta fold family protein | gbpln | Arabidopsis lyrata   | AT4G24160.1   Symbols:   alpha/beta-Hydrolases superfamily protein   chr4:12539871-12542210 FORWARD LENGTH=418                                | 407  | 418  | 0         | 102.7 | 88.7 | 94.1 |  |
| Rsa1.0_00070.1.g3747.t1 | ref XP_002869735.1  hypothetical protein ARALYDRAFT_354358 [Arabidopsis lyrata subsp. lyrata] gi 297315571 gb EFH45994.1  hypothetical protein ARALYDRAFT_354358 [Arabidopsis lyrata subsp. lyrata]       | 435  | 431  | 1.00E-139 | 99.1  | 68.0 | 76.3 | hypothetical protein ARALYDRAFT_354358    | gbpln | Arabidopsis lyrata   | AT4G24150.1   Symbols: AtGRF8, GRF8   growth-regulating factor 8   chr4:12535972-12539387 FORWARD LENGTH=493                                  | 435  | 493  | 1.00E-134 | 113.3 | 62.8 | 71.5 |  |
| Rsa1.0_00070.1.g3748.t1 | gb EOA16234.1  hypothetical protein CARUB_v10004382mg [Capsella rubella]                                                                                                                                  | 591  | 622  | 0         | 105.2 | 74.6 | 82.7 | hypothetical protein CARUB_v10004382mg    | gbpln | Capsella rubella     | AT4G24260.1   Symbols: ATGH9A3, KOR3, GH9A3   glycosyl hydrolase 9A3   chr4:12577871-12580133 REVERSE LENGTH=620                              | 591  | 620  | 0         | 104.9 | 75.0 | 83.9 |  |
| Rsa1.0_00070.1.g3749.t1 | # # # # # # # # # # # # # # # # # # # # # #                                                                                                                                                               |      |      |           |       |      |      |                                           |       |                      |                                                                                                                                               |      |      |           |       |      |      |  |
| Rsa1.0_00070.1.g3750.t1 | gb EOA17566.1  hypothetical protein CARUB_v10005927mg [Capsella rubella]                                                                                                                                  | 157  | 157  | 7.00E-73  | 100.0 | 83.4 | 91.7 | hypothetical protein CARUB_v10005927mg    | gbpln | Capsella rubella     | AT4G24130.1   Symbols:   Protein of unknown function, DJF538   chr4:12527861-12528423 FORWARD LENGTH=157                                      | 157  | 157  | 1.00E-74  | 100.0 | 83.4 | 91.7 |  |
| Rsa1.0_00070.1.g3751.t1 | gb EOA16163.1  hypothetical protein CARUB_v10004301mg [Capsella rubella]                                                                                                                                  | 403  | 672  | 0         | 166.7 | 91.6 | 96.8 | hypothetical protein CARUB_v10004301mg    | gbpln | Capsella rubella     | AT4G24120.1   Symbols: YSL1, ATYSL1   YELLOW STRIPE like 1   chr4:12524581-12527023 FORWARD LENGTH=673                                        | 403  | 673  | 0         | 167.0 | 90.6 | 96.0 |  |
| Rsa1.0_00071.1.g3752.t1 | gb EOA14930.1  hypothetical protein CARUB_v10028273mg [Capsella rubella]                                                                                                                                  | 1265 | 1269 | 0         | 100.3 | 92.0 | 95.6 | hypothetical protein CARUB_v10028273mg    | gbpln | Capsella rubella     | AT5G64270.1   Symbols:   splicing factor, putative   chr5:25706909-25710718 FORWARD LENGTH=1269                                               | 1265 | 1269 | 0         | 100.3 | 90.8 | 94.9 |  |

|                         |                                                                                                                                                                                                                                                                                                                                                                                                                                                                                                                                                                                                                                                                                              |      |      |           |       |      |      |                                                                 |       |                      |                                                                                                                                               |      |     |           |       |      |      |
|-------------------------|----------------------------------------------------------------------------------------------------------------------------------------------------------------------------------------------------------------------------------------------------------------------------------------------------------------------------------------------------------------------------------------------------------------------------------------------------------------------------------------------------------------------------------------------------------------------------------------------------------------------------------------------------------------------------------------------|------|------|-----------|-------|------|------|-----------------------------------------------------------------|-------|----------------------|-----------------------------------------------------------------------------------------------------------------------------------------------|------|-----|-----------|-------|------|------|
| Rsa1.0_00071.1.g3753.t1 | ref[NP_201234.1] dicarboxylate transport 2.1 [Arabidopsis thaliana] gi 75171656 sp Q9FMF7.1 DIT21_ARATH RecName: Full=Dicarboxylate transporter 2.1, chloroplastic; AltName: Full=AtpDCT1; AltName: Full=Glutamate/malate translocator; Flags: Precursor gi 9759405 dbj BAB09860.1  2-oxoglutarate/malate translocator [Arabidopsis thaliana] gi 15810581 gb AAL07178.1  putative 2-oxoglutarate/malate translocator protein [Arabidopsis thaliana] gi 23397031 gb AAN31801.1  putative 2-oxoglutarate/malate translocator [Arabidopsis thaliana] gi 53850569 gb AAU95461.1  At5g64290 [Arabidopsis thaliana] gi 332010483 gb AED97866.1  dicarboxylate transport 2.1 [Arabidopsis thaliana] | 560  | 563  | 0         | 100.5 | 93.4 | 96.4 | dicarboxylate transport 2.1                                     | gbpln | Arabidopsis thaliana | AT5G64290.1   Symbols: DCT, DIT2.1   dicarboxylate transport 2.1   chr5:25714495-25716642 REVERSE LENGTH=563                                  | 560  | 563 | 0         | 100.5 | 93.4 | 96.4 |
| Rsa1.0_00071.1.g3754.t1 | gb EOA12507.1  hypothetical protein CARUB_v10026209mg [Capsella rubella]                                                                                                                                                                                                                                                                                                                                                                                                                                                                                                                                                                                                                     | 520  | 534  | 0         | 102.7 | 86.5 | 90.2 | hypothetical protein CARUB_v10026209mg                          | gbpln | Capsella rubella     | AT5G64300.1   Symbols: ATGCH, GCH, TRIBA1, RFD1   GTP cyclohydrolase II   chr5:25718459-25720790 FORWARD LENGTH=543                           | 520  | 543 | 0         | 104.4 | 86.0 | 90.4 |
| Rsa1.0_00071.1.g3755.t4 | dbj BAB09864.1  non-phototropic hypocotyl 3 [Arabidopsis thaliana]                                                                                                                                                                                                                                                                                                                                                                                                                                                                                                                                                                                                                           | 1146 | 745  | 0         | 65.0  | 54.5 | 56.7 | non-phototropic hypocotyl 3                                     | gbpln | Arabidopsis thaliana | AT5G64330.1   Symbols: NPH3, RPT3, JK218   Phototropic-responsive NPH3 family protein   chr5:25727568-25730225 FORWARD LENGTH=746             | 1146 | 746 | 0         | 65.1  | 54.5 | 56.6 |
| Rsa1.0_00071.1.g3756.t1 | ref XP_002269289.1  PREDICTED: uncharacterized protein C6C3.02c [Vitis vinifera] gi 296088792 emb CBI38242.3  unnamed protein product [Vitis vinifera]                                                                                                                                                                                                                                                                                                                                                                                                                                                                                                                                       | 162  | 145  | 5.00E-38  | 89.5  | 59.9 | 69.8 | PREDICTED: uncharacterized protein C6C3.02c                     | gbpln | Vitis vinifera       | AT5G09570.1   Symbols:   Cox19-like CHCH family protein   chr5:2970733-2971970 FORWARD LENGTH=139                                             | 162  | 139 | 3.00E-40  | 85.8  | 52.5 | 63.0 |
| Rsa1.0_00071.1.g3757.t1 | gb EOA13529.1  hypothetical protein CARUB_v10026593mg [Capsella rubella] gi 482549336 gb EOA13530.1  hypothetical protein CARUB_v10026593mg [Capsella rubella]                                                                                                                                                                                                                                                                                                                                                                                                                                                                                                                               | 360  | 379  | 1.00E-157 | 105.3 | 76.7 | 83.6 | hypothetical protein CARUB_v10026593mg                          | gbpln | Capsella rubella     | AT5G64520.1   Symbols: XRCC2, ATXRCC2   homolog of X-ray repair cross complementing 2 (XRCC2)   chr5:25788069-25790204 FORWARD LENGTH=372     | 360  | 372 | 1.00E-152 | 103.3 | 76.7 | 84.7 |
| Rsa1.0_00071.1.g3758.t1 | ref XP_002864908.1  ANAC104/XND1 [Arabidopsis lyrata subsp. lyrata] gi 297310743 gb EFH41167.1  ANAC104/XND1 [Arabidopsis lyrata subsp. lyrata]                                                                                                                                                                                                                                                                                                                                                                                                                                                                                                                                              | 188  | 188  | 1.00E-89  | 100.0 | 92.6 | 96.8 | ANAC104/XND1                                                    | gbpln | Arabidopsis lyrata   | AT5G64530.1   Symbols: ANAC104, XND1   xylem NAC domain 1   chr5:25795360-25796699 FORWARD LENGTH=187                                         | 188  | 187 | 7.00E-91  | 99.5  | 89.4 | 94.1 |
| Rsa1.0_00071.1.g3759.t1 | ref XP_002866619.1  hypothetical protein ARALYDRAFT_358659 [Arabidopsis lyrata subsp. lyrata] gi 297312454 gb EFH42878.1  hypothetical protein ARALYDRAFT_358659 [Arabidopsis lyrata subsp. lyrata]                                                                                                                                                                                                                                                                                                                                                                                                                                                                                          | 513  | 1082 | 0         | 210.9 | 86.4 | 90.3 | hypothetical protein ARALYDRAFT_358659                          | gbpln | Arabidopsis lyrata   | AT5G64550.1   Symbols:   Ioricin-related   chr5:25801794-25803698 REVERSE LENGTH=634                                                          | 513  | 634 | 0         | 123.6 | 86.0 | 89.7 |
| Rsa1.0_00071.1.g3760.t1 | gb AAD12028.1  putative non-LTR retroelement reverse transcriptase [Arabidopsis thaliana]                                                                                                                                                                                                                                                                                                                                                                                                                                                                                                                                                                                                    | 331  | 1447 | 5.00E-37  | 437.2 | 30.5 | 50.5 | putative non-LTR retroelement reverse transcriptase             | gbpln | Arabidopsis thaliana | AT5G18880.1   Symbols:   RNA-directed DNA polymerase (reverse transcriptase)-related family protein   chr5:6300535-6301422 REVERSE LENGTH=295 | 331  | 295 | 1.00E-32  | 89.1  | 26.9 | 45.0 |
| Rsa1.0_00071.1.g3761.t1 | gb EOA12936.1  hypothetical protein CARUB_v10025915mg [Capsella rubella]                                                                                                                                                                                                                                                                                                                                                                                                                                                                                                                                                                                                                     | 778  | 784  | 0         | 100.8 | 89.2 | 94.0 | hypothetical protein CARUB_v10025915mg                          | gbpln | Capsella rubella     | AT5G64570.1   Symbols: XYL4, ATBXL4   beta-D-xylosidase 4   chr5:25810227-25811309 REVERSE LENGTH=784                                         | 778  | 784 | 0         | 100.8 | 87.4 | 93.2 |
| Rsa1.0_00071.1.g3762.t1 | ref XP_002864909.1  hypothetical protein ARALYDRAFT_496672 [Arabidopsis lyrata subsp. lyrata] gi 297310744 gb EFH41168.1  hypothetical protein ARALYDRAFT_496672 [Arabidopsis lyrata subsp. lyrata]                                                                                                                                                                                                                                                                                                                                                                                                                                                                                          | 639  | 521  | 0         | 81.5  | 66.7 | 70.6 | hypothetical protein ARALYDRAFT_496672                          | gbpln | Arabidopsis lyrata   | AT5G64600.1   Symbols:   O-fucosyltransferase family protein   chr5:25825178-25827931 FORWARD LENGTH=522                                      | 639  | 522 | 0         | 81.7  | 66.0 | 69.8 |
| Rsa1.0_00071.1.g3763.t1 | gb EOA13365.1  hypothetical protein CARUB_v10026402mg [Capsella rubella]                                                                                                                                                                                                                                                                                                                                                                                                                                                                                                                                                                                                                     | 438  | 445  | 0         | 101.6 | 92.7 | 95.4 | hypothetical protein CARUB_v10026402mg                          | gbpln | Capsella rubella     | AT5G64610.1   Symbols: HAM1   histone acetyltransferase of the MYST family 1   chr5:25828333-25830503 REVERSE LENGTH=445                      | 438  | 445 | 0         | 101.6 | 92.2 | 94.5 |
| Rsa1.0_00071.1.g3764.t2 | gb AAC28221.1  similar to reverse transcriptases (PFam: rvt.hmm, score: 60.13) [Arabidopsis thaliana]                                                                                                                                                                                                                                                                                                                                                                                                                                                                                                                                                                                        | 728  | 1164 | 1.00E-110 | 159.9 | 26.6 | 40.5 | similar to reverse transcriptases (PFam: rvt.hmm, score: 60.13) | gbpln | Arabidopsis thaliana | AT5G64620.1   Symbols: C/VIF2, ATC/VIF2   cell wall / vacuolar inhibitor of fructosidase 2   chr5:25831875-25832417 FORWARD LENGTH=180        | 728  | 180 | 7.00E-61  | 24.7  | 15.9 | 17.2 |
| Rsa1.0_00071.1.g3765.t1 | ref XP_002864912.1  pectinesterase family protein [Arabidopsis lyrata subsp. lyrata] gi 297310747 gb EFH41171.1  pectinesterase family protein [Arabidopsis lyrata subsp. lyrata]                                                                                                                                                                                                                                                                                                                                                                                                                                                                                                            | 570  | 602  | 0         | 105.6 | 85.3 | 91.6 | pectinesterase family protein                                   | gbpln | Arabidopsis lyrata   | AT5G64640.1   Symbols:   Plant invertase/pectin methyltransferase inhibitor superfamily   chr5:25836820-25839053 FORWARD LENGTH=602           | 570  | 602 | 0         | 105.6 | 84.2 | 91.1 |

|                         |                                                                                                                                                                                                                                                                                                                                                                                                                                                                                                                                                                                                                                                                                                                                                                                                                                                                                                                                                                         |      |      |           |       |      |      |                                                     |       |                      |                                                                                                                                                                                                                                                                                                                                                                                                                                                           |      |      |           |       |      |      |
|-------------------------|-------------------------------------------------------------------------------------------------------------------------------------------------------------------------------------------------------------------------------------------------------------------------------------------------------------------------------------------------------------------------------------------------------------------------------------------------------------------------------------------------------------------------------------------------------------------------------------------------------------------------------------------------------------------------------------------------------------------------------------------------------------------------------------------------------------------------------------------------------------------------------------------------------------------------------------------------------------------------|------|------|-----------|-------|------|------|-----------------------------------------------------|-------|----------------------|-----------------------------------------------------------------------------------------------------------------------------------------------------------------------------------------------------------------------------------------------------------------------------------------------------------------------------------------------------------------------------------------------------------------------------------------------------------|------|------|-----------|-------|------|------|
| Rsa1.0_00071.1.g3766.t1 | gb EOA21717.1  hypothetical protein CARUB_v10002154mg [Capsella rubella]                                                                                                                                                                                                                                                                                                                                                                                                                                                                                                                                                                                                                                                                                                                                                                                                                                                                                                | 161  | 160  | 9.00E-81  | 99.4  | 91.3 | 93.8 | hypothetical protein CARUB_v10002154mg              | gbpln | Capsella rubella     | AT5G64650.1   Symbols:   Ribosomal protein L17 family protein   chr5:25839542-25840775 REVERSE LENGTH=160                                                                                                                                                                                                                                                                                                                                                 | 161  | 160  | 7.00E-82  | 99.4  | 90.1 | 93.2 |
| Rsa1.0_00071.1.g3767.t1 | ref XP_002866628.1  ribosomal protein L15 family protein [Arabidopsis lyrata subsp. lyrata]<br>gi 297312483 gb EFH42887.1  ribosomal protein L15 family protein [Arabidopsis lyrata subsp. lyrata]<br>ref NP_201273.1  uncharacterized protein [Arabidopsis thaliana]<br>gi 30698059 ref NP_851270.1  uncharacterized protein [Arabidopsis thaliana]<br>gi 10178071 dbj BAB11435.1  unnamed protein product [Arabidopsis thaliana]<br>gi 26452974 dbj BAC43563.1  unknown protein [Arabidopsis thaliana]<br>gi 28973531 gb AA064090.1  unknown protein [Arabidopsis thaliana]<br>gi 332010553 gb AED97936.1  uncharacterized protein AT5G64680 [Arabidopsis thaliana]<br>gi 332010554 gb AED97937.1  uncharacterized protein AT5G64680 [Arabidopsis thaliana]<br>ref XP_002866629.1  hypothetical protein ARALYDRAFT_332687 [Arabidopsis lyrata subsp. lyrata]<br>gi 297312464 gb EFH42888.1  hypothetical protein ARALYDRAFT_332687 [Arabidopsis lyrata subsp. lyrata] | 286  | 281  | 1.00E-145 | 98.3  | 91.3 | 93.7 | ribosomal protein L15 family protein                | gbpln | Arabidopsis lyrata   | AT5G64670.1   Symbols:   Ribosomal protein L18e/L15 superfamily protein   chr5:25852535-25853880 REVERSE LENGTH=281                                                                                                                                                                                                                                                                                                                                       | 286  | 281  | 2.33E-156 | 98.3  | 90.6 | 93.4 |
| Rsa1.0_00071.1.g3768.t1 | gi 28973531 gb AA064090.1  unknown protein [Arabidopsis thaliana]<br>gi 332010553 gb AED97936.1  uncharacterized protein AT5G64680 [Arabidopsis thaliana]<br>gi 332010554 gb AED97937.1  uncharacterized protein AT5G64680 [Arabidopsis thaliana]<br>ref XP_002866629.1  hypothetical protein ARALYDRAFT_332687 [Arabidopsis lyrata subsp. lyrata]<br>gi 297312464 gb EFH42888.1  hypothetical protein ARALYDRAFT_332687 [Arabidopsis lyrata subsp. lyrata]                                                                                                                                                                                                                                                                                                                                                                                                                                                                                                             | 145  | 203  | 1.00E-21  | 140.0 | 49.0 | 62.1 | uncharacterized protein                             | gbpln | Arabidopsis thaliana | AT5G64680.2   Symbols:   unknown protein; FUNCTIONS IN: molecular_function unknown; INVOLVED IN: biological_process unknown; LOCATED IN: nucleolus; EXPRESSED IN: 23 plant structures; EXPRESSED DURING: 13 growth stages; Has 1807 Blast hits to 1807 proteins in 277 species: Archae - 0; Bacteria - 0; Metazoa - 736; Fungi - 347; Plants - 385; Viruses - 0; Other Eukaryotes - 339 (source: NCBI BLINK).   chr5:25854433-25855331 FORWARD LENGTH=203 | 145  | 203  | 3.00E-24  | 140.0 | 49.0 | 62.1 |
| Rsa1.0_00071.1.g3769.t1 | ref XP_002866629.1  hypothetical protein ARALYDRAFT_332687 [Arabidopsis lyrata subsp. lyrata]<br>gi 297312464 gb EFH42888.1  hypothetical protein ARALYDRAFT_332687 [Arabidopsis lyrata subsp. lyrata]                                                                                                                                                                                                                                                                                                                                                                                                                                                                                                                                                                                                                                                                                                                                                                  | 109  | 95   | 8.00E-33  | 87.2  | 72.5 | 79.8 | hypothetical protein ARALYDRAFT_332687              | gbpln | Arabidopsis lyrata   | AT5G09830.1   Symbols:   BoA-like family protein   chr5:3057816-3058769 REVERSE LENGTH=93                                                                                                                                                                                                                                                                                                                                                                 | 109  | 93   | 3.00E-32  | 85.3  | 64.2 | 72.5 |
| Rsa1.0_00071.1.g3770.t1 | gb EOA12539.1  hypothetical protein CARUB_v10026529mg [Capsella rubella]<br>ref NP_201275.1  nodulin MtN21 /EamA-like transporter family protein [Arabidopsis thaliana]<br>gi 75170420 sp Q9FGG3.1 WTR45_ARAT H RecName: Full=WAT1-related protein At5g64700  gi 10177201 dbj BAB10303.1  nodulin-like protein [Arabidopsis thaliana]<br>gi 332010557 gb AED97940.1  nodulin MtN21 /EamA-like transporter family protein [Arabidopsis thaliana]                                                                                                                                                                                                                                                                                                                                                                                                                                                                                                                         | 399  | 400  | 6.00E-94  | 100.3 | 63.9 | 76.2 | hypothetical protein CARUB_v10026529mg              | gbpln | Capsella rubella     | AT5G64690.1   Symbols:   neurofilament triplet H protein-related   chr5:25862969-25864521 FORWARD LENGTH=344                                                                                                                                                                                                                                                                                                                                              | 399  | 344  | 3.00E-75  | 86.2  | 53.1 | 66.7 |
| Rsa1.0_00071.1.g3771.t1 | gi 75170420 sp Q9FGG3.1 WTR45_ARAT H RecName: Full=WAT1-related protein At5g64700  gi 10177201 dbj BAB10303.1  nodulin-like protein [Arabidopsis thaliana]<br>gi 332010557 gb AED97940.1  nodulin MtN21 /EamA-like transporter family protein [Arabidopsis thaliana]                                                                                                                                                                                                                                                                                                                                                                                                                                                                                                                                                                                                                                                                                                    | 354  | 359  | 1.00E-163 | 101.4 | 87.9 | 92.4 | nodulin MtN21 /EamA-like transporter family protein | gbpln | Arabidopsis thaliana | AT5G64700.1   Symbols:   nodulin MtN21 /EamA-like transporter family protein   chr5:25865190-25866845 REVERSE LENGTH=359                                                                                                                                                                                                                                                                                                                                  | 354  | 359  | 1.00E-166 | 101.4 | 87.9 | 92.4 |
| Rsa1.0_00071.1.g3772.t1 | gb EOA14833.1  hypothetical protein CARUB_v10028143mg [Capsella rubella]                                                                                                                                                                                                                                                                                                                                                                                                                                                                                                                                                                                                                                                                                                                                                                                                                                                                                                | 157  | 158  | 2.00E-64  | 100.6 | 75.2 | 86.0 | hypothetical protein CARUB_v10028143mg              | gbpln | Capsella rubella     | AT5G64720.1   Symbols:   Protein of unknown function (DUF1278)   chr5:25872346-25872813 REVERSE LENGTH=155                                                                                                                                                                                                                                                                                                                                                | 157  | 155  | 3.00E-66  | 98.7  | 73.9 | 85.4 |
| Rsa1.0_00071.1.g3773.t1 | #                                                                                                                                                                                                                                                                                                                                                                                                                                                                                                                                                                                                                                                                                                                                                                                                                                                                                                                                                                       | #    | #    | #         | #     | #    | -    | ----                                                | ----  | #                    | #                                                                                                                                                                                                                                                                                                                                                                                                                                                         | #    | #    | #         | #     | #    |      |
| Rsa1.0_00071.1.g3774.t1 | gb AAG50806.1 AC079281_8 unknown protein [Arabidopsis thaliana]                                                                                                                                                                                                                                                                                                                                                                                                                                                                                                                                                                                                                                                                                                                                                                                                                                                                                                         | 1770 | 1213 | 0         | 68.5  | 37.9 | 48.1 | unknown protein                                     | gbpln | Arabidopsis thaliana | AT1G60720.1   Symbols:   RNA-directed DNA polymerase (reverse transcriptase)-related family protein   chr1:22357072-22357941 FORWARD LENGTH=289                                                                                                                                                                                                                                                                                                           | 1770 | 289  | 2.00E-79  | 16.3  | 8.0  | 10.5 |
| Rsa1.0_00071.1.g3775.t2 | gb ACS68196.1  cellulose synthase 6.1 catalytic subunit [Brassica napus]                                                                                                                                                                                                                                                                                                                                                                                                                                                                                                                                                                                                                                                                                                                                                                                                                                                                                                | 1082 | 1084 | 0         | 100.2 | 99.1 | 99.4 | cellulose synthase 6.1 catalytic subunit            | gbpln | Brassica napus       | AT5G64740.1   Symbols:   CESA6, IXR2, E112, PRC1   cellulose synthase 6   chr5:25881555-25886333 FORWARD LENGTH=1084                                                                                                                                                                                                                                                                                                                                      | 1082 | 1084 | 0         | 100.2 | 95.7 | 98.0 |
| Rsa1.0_00071.1.g3776.t1 | gb AF157747.1  ethylene-responsive transcription factor ABR1 [Brassica juncea]                                                                                                                                                                                                                                                                                                                                                                                                                                                                                                                                                                                                                                                                                                                                                                                                                                                                                          | 318  | 381  | 1.00E-106 | 119.8 | 70.4 | 77.7 | ethylene-responsive transcription factor ABR1       | gbpln | Brassica juncea      | AT5G64750.1   Symbols:   ABR1   Integrase-type DNA-binding superfamily protein   chr5:25891679-25893656 FORWARD LENGTH=391                                                                                                                                                                                                                                                                                                                                | 318  | 391  | 1.00E-104 | 123.0 | 78.6 | 83.0 |
| Rsa1.0_00071.1.g3777.t3 | dbj BAF00918.1  putative reverse transcriptase [Arabidopsis thaliana]<br>ref XP_002864811.1  hypothetical protein ARALYDRAFT_358470 [Arabidopsis lyrata subsp. lyrata]<br>gi 297310646 gb EFH41070.1  hypothetical protein ARALYDRAFT_358470 [Arabidopsis lyrata subsp. lyrata]<br>ref XP_002864921.1  glycosyl hydrolase family 17 protein [Arabidopsis lyrata subsp. lyrata]                                                                                                                                                                                                                                                                                                                                                                                                                                                                                                                                                                                          | 1164 | 910  | 0         | 78.2  | 28.0 | 37.5 | putative reverse transcriptase                      | gbpln | Arabidopsis thaliana | AT1G43760.1   Symbols:   DNase I-like superfamily protein   chr1:16528880-16531065 REVERSE LENGTH=626                                                                                                                                                                                                                                                                                                                                                     | 1164 | 626  | 2.00E-68  | 53.8  | 10.7 | 15.6 |
| Rsa1.0_00071.1.g3778.t1 | ref XP_002864811.1  hypothetical protein ARALYDRAFT_358470 [Arabidopsis lyrata subsp. lyrata]<br>gi 297310646 gb EFH41070.1  hypothetical protein ARALYDRAFT_358470 [Arabidopsis lyrata subsp. lyrata]<br>ref XP_002864921.1  glycosyl hydrolase family 17 protein [Arabidopsis lyrata subsp. lyrata]                                                                                                                                                                                                                                                                                                                                                                                                                                                                                                                                                                                                                                                                   | 348  | 556  | 2.00E-78  | 159.8 | 47.7 | 56.9 | hypothetical protein ARALYDRAFT_358470              | gbpln | Arabidopsis lyrata   | AT5G62660.1   Symbols:   F-box and associated interaction domains-containing protein   chr5:25156326-25157465 REVERSE LENGTH=379                                                                                                                                                                                                                                                                                                                          | 348  | 379  | 9.00E-74  | 108.9 | 45.7 | 54.6 |
| Rsa1.0_00071.1.g3779.t1 | ref XP_002864921.1  glycosyl hydrolase family 17 protein [Arabidopsis lyrata subsp. lyrata]<br>gi 297310756 gb EFH41180.1  glycosyl hydrolase family 17 protein [Arabidopsis lyrata subsp. lyrata]                                                                                                                                                                                                                                                                                                                                                                                                                                                                                                                                                                                                                                                                                                                                                                      | 485  | 485  | 0         | 100.0 | 87.0 | 92.0 | glycosyl hydrolase family 17 protein                | gbpln | Arabidopsis lyrata   | AT5G64790.1   Symbols:   O-Glycosyl hydrolases family 17 protein   chr5:25902713-25904559 FORWARD LENGTH=485                                                                                                                                                                                                                                                                                                                                              | 485  | 485  | 0         | 100.0 | 85.8 | 92.4 |

|                         |                                                                                                                                                                                                                                                                                                                                                                                                                                                                                                                                                                                                                                                              |     |     |           |       |      |      |                                              |       |                      |                                                                                                                                                                                                                                                                                                                                                                                                                                                                                                                                                                                                                                           |     |     |           |       |      |      |
|-------------------------|--------------------------------------------------------------------------------------------------------------------------------------------------------------------------------------------------------------------------------------------------------------------------------------------------------------------------------------------------------------------------------------------------------------------------------------------------------------------------------------------------------------------------------------------------------------------------------------------------------------------------------------------------------------|-----|-----|-----------|-------|------|------|----------------------------------------------|-------|----------------------|-------------------------------------------------------------------------------------------------------------------------------------------------------------------------------------------------------------------------------------------------------------------------------------------------------------------------------------------------------------------------------------------------------------------------------------------------------------------------------------------------------------------------------------------------------------------------------------------------------------------------------------------|-----|-----|-----------|-------|------|------|
| Rsa1.0_00071.1.g3780.t1 | ref[XP_002864923.1] WRKY DNA-binding protein 51 [Arabidopsis lyrata subsp. lyrata] gi 297310758 gb EFH41182.1  WRKY DNA-binding protein 51 [Arabidopsis lyrata subsp. lyrata]<br>ref[NP_568996.1] Ras-related small GTP-binding family protein [Arabidopsis thaliana] gi 29839609 sp Q9C5J9.1 Y5483_ARATH RecName: Full=Uncharacterized GTP-binding protein At5g64813                                                                                                                                                                                                                                                                                        | 166 | 194 | 2.00E-68  | 116.9 | 81.3 | 84.9 | WRKY DNA-binding protein 51                  | gbpln | Arabidopsis lyrata   | AT5G64810.1   Symbols: WRKY51, ATWRKY51   WRKY DNA-binding protein 51   chr5:25908415-25909687 FORWARD LENGTH=194                                                                                                                                                                                                                                                                                                                                                                                                                                                                                                                         | 166 | 194 | 8.00E-70  | 116.9 | 79.5 | 84.9 |
| Rsa1.0_00071.1.g3781.t1 | gi 13430582 gb AAK25913.1 AF360203.1 unknown protein [Arabidopsis thaliana] gi 14532852 gb AAK64108.1  unknown protein [Arabidopsis thaliana] gi 332010571 gb AED97954.1  Ras-related small GTP-binding family protein [Arabidopsis thaliana]                                                                                                                                                                                                                                                                                                                                                                                                                | 323 | 342 | 1.00E-165 | 105.9 | 92.9 | 96.3 | Ras-related small GTP-binding family protein | gbpln | Arabidopsis thaliana | AT5G64813.1   Symbols: LIP1   Ras-related small GTP-binding family protein   chr5:25910836-25912625 FORWARD LENGTH=342                                                                                                                                                                                                                                                                                                                                                                                                                                                                                                                    | 323 | 342 | 1.00E-168 | 105.9 | 92.9 | 96.3 |
| Rsa1.0_00071.1.g3782.t1 | #                                                                                                                                                                                                                                                                                                                                                                                                                                                                                                                                                                                                                                                            | #   | #   | #         | #     | #    | #    | -                                            | ----  | ----                 | #                                                                                                                                                                                                                                                                                                                                                                                                                                                                                                                                                                                                                                         | #   | #   | #         | #     | #    | #    |
| Rsa1.0_00071.1.g3783.t1 | ref[XP_002864926.1] hypothetical protein ARALYDRAFT_496705 [Arabidopsis lyrata subsp. lyrata] gi 297310761 gb EFH41185.1  hypothetical protein ARALYDRAFT_496705 [Arabidopsis lyrata subsp. lyrata]                                                                                                                                                                                                                                                                                                                                                                                                                                                          | 141 | 114 | 3.00E-40  | 80.9  | 63.1 | 65.2 | hypothetical protein ARALYDRAFT_496705       | gbpln | Arabidopsis lyrata   | AT5G64850.1   Symbols:   FUNCTIONS IN: molecular function unknown; INVOLVED IN: biological process unknown; LOCATED IN: plasma membrane; EXPRESSED IN: 22 plant structures; EXPRESSED DURING: 13 growth stages; CONTAINS InterPro DOMAIN/s: RPM1-interacting protein 4, defence response (InterPro:IPR008700); BEST Arabidopsis thaliana protein match is: unknown protein (TAIR:AT5G09960.1); Has 30201 Blast hits to 17322 proteins in 780 species: Archaee - 12; Bacteria - 1396; Metazoa - 17338; Fungi - 3422; Plants - 5037; Viruses - 0; Other Eukaryotes - 2996 (source: NCBI BLINK).   chr5:25921585-25923038 FORWARD LENGTH=114 | 141 | 114 | 1.00E-41  | 80.9  | 61.7 | 65.2 |
| Rsa1.0_00071.1.g3784.t3 | ref[NP_201291.1] 4-alpha-glucanotransferase-like protein [Arabidopsis thaliana] gi 75180614 sp Q9LV91.1 DPE1_ARATH RecName: Full=4-alpha-glucanotransferase DPE1, chloroplastic/amyloplastic; AltName: Full=Amylomaltase; AltName: Full=Disproportionating enzyme; Short=D-enzyme; AltName: Full=Protein DISPROPORTIONATING ENZYME 1; Flags: Precursor gi 8843750 dbj BAA97298.1  4-alpha-glucanotransferase [Arabidopsis thaliana] gi 14335104 gb AAK59831.1  AT5g64860/MXK3.9 [Arabidopsis thaliana] gi 19548067 gb AAL87397.1  AT5g64860/MXK3.9 [Arabidopsis thaliana] gi 332010579 gb AED97962.1  4-alpha-glucanotransferase DPE1 [Arabidopsis thaliana] | 579 | 576 | 0         | 99.5  | 85.3 | 89.8 | 4-alpha-glucanotransferase-like protein      | gbpln | Arabidopsis thaliana | AT5G64860.1   Symbols: DPE1   disproportionating enzyme   chr5:25925373-25928788 REVERSE LENGTH=576                                                                                                                                                                                                                                                                                                                                                                                                                                                                                                                                       | 579 | 576 | 0         | 99.5  | 85.3 | 89.8 |
| Rsa1.0_00071.1.g3785.t1 | gb EOA14807.1  hypothetical protein CARUB_v10028114mg [Capsella rubella]                                                                                                                                                                                                                                                                                                                                                                                                                                                                                                                                                                                     | 297 | 335 | 1.00E-102 | 112.8 | 73.4 | 80.5 | hypothetical protein CARUB_v10028114mg       | gbpln | Capsella rubella     | AT5G64920.1   Symbols: CIP8   COP1-interacting protein 8   chr5:25944338-25945342 REVERSE LENGTH=334                                                                                                                                                                                                                                                                                                                                                                                                                                                                                                                                      | 297 | 334 | 2.00E-98  | 112.5 | 76.4 | 82.2 |
| Rsa1.0_00071.1.g3786.t1 | gb EOA13275.1  hypothetical protein CARUB_v10026304mg [Capsella rubella]                                                                                                                                                                                                                                                                                                                                                                                                                                                                                                                                                                                     | 483 | 486 | 0         | 100.6 | 88.0 | 94.0 | hypothetical protein CARUB_v10026304mg       | gbpln | Capsella rubella     | AT5G65380.1   Symbols:   MATE efflux family protein   chr5:26123241-26126352 REVERSE LENGTH=486                                                                                                                                                                                                                                                                                                                                                                                                                                                                                                                                           | 483 | 486 | 0         | 100.6 | 87.2 | 93.0 |
| Rsa1.0_00071.1.g3787.t1 | #                                                                                                                                                                                                                                                                                                                                                                                                                                                                                                                                                                                                                                                            | #   | #   | #         | #     | #    | #    | -                                            | ----  | ----                 | #                                                                                                                                                                                                                                                                                                                                                                                                                                                                                                                                                                                                                                         | #   | #   | #         | #     | #    | #    |
| Rsa1.0_00071.1.g3788.t1 | ref[XP_002866670.1] predicted protein [Arabidopsis lyrata subsp. lyrata] gi 297312505 gb EFH42929.1  predicted protein [Arabidopsis lyrata subsp. lyrata]                                                                                                                                                                                                                                                                                                                                                                                                                                                                                                    | 288 | 305 | 1.00E-137 | 105.9 | 84.7 | 90.3 | predicted protein                            | gbpln | Arabidopsis lyrata   | AT5G65420.1   Symbols: CYCD4;1   CYCLIN D4;1   chr5:26141592-26143750 REVERSE LENGTH=308                                                                                                                                                                                                                                                                                                                                                                                                                                                                                                                                                  | 288 | 308 | 1.00E-134 | 106.9 | 84.4 | 88.9 |
| Rsa1.0_00071.1.g3789.t1 | gb EOA13890.1  hypothetical protein CARUB_v10026999mg [Capsella rubella]                                                                                                                                                                                                                                                                                                                                                                                                                                                                                                                                                                                     | 248 | 248 | 1.00E-136 | 100.0 | 94.4 | 98.0 | hypothetical protein CARUB_v10026999mg       | gbpln | Capsella rubella     | AT5G65430.1   Symbols: GRF8, 14-3-3KAPPA, GF14 KAPPA   general regulatory factor 8   chr5:26148546-26150255 REVERSE LENGTH=248                                                                                                                                                                                                                                                                                                                                                                                                                                                                                                            | 248 | 248 | 1.00E-138 | 100.0 | 94.4 | 98.0 |



|                         |                                                                                                                                                                                                                                                                                                                                                                                                                        |     |     |           |       |      |      |                                                       |       |                      |                                                                                                                                                                                                                                                                                                                                                                                                                                                                                                                                             |     |     |           |       |      |      |
|-------------------------|------------------------------------------------------------------------------------------------------------------------------------------------------------------------------------------------------------------------------------------------------------------------------------------------------------------------------------------------------------------------------------------------------------------------|-----|-----|-----------|-------|------|------|-------------------------------------------------------|-------|----------------------|---------------------------------------------------------------------------------------------------------------------------------------------------------------------------------------------------------------------------------------------------------------------------------------------------------------------------------------------------------------------------------------------------------------------------------------------------------------------------------------------------------------------------------------------|-----|-----|-----------|-------|------|------|
| Rsa1.0_00071.1.g3790.t1 | gb[EOA12401.1] hypothetical protein CARUB_v10027313mg [Capsella rubella]                                                                                                                                                                                                                                                                                                                                               | 165 | 149 | 1.00E-30  | 90.3  | 53.3 | 60.0 | hypothetical protein CARUB_v10027313mg                | gbpln | Capsella rubella     | AT5G65480.1   Symbols:   unknown protein; FUNCTIONS IN: molecular_function unknown; INVOLVED IN: biological_process unknown; LOCATED IN: chloroplast; EXPRESSED IN: 24 plant structures; EXPRESSED DURING: 15 growth stages; BEST Arabidopsis thaliana protein match is: unknown protein (TAIR:AT4G38060.2); Has 1807 Blast hits to 1807 proteins in 277 species: Archae - 0; Bacteria - 0; Metazoa - 736; Fungi - 347; Plants - 385; Viruses - 0; Other Eukaryotes - 339 (source: NCBI BLINK).   chr5:26176827-26177434 FORWARD LENGTH=153 | 165 | 153 | 2.00E-31  | 92.7  | 49.1 | 53.3 |
| Rsa1.0_00071.1.g3791.t1 | gb[EOA12374.1] hypothetical protein CARUB_v10025893mg, partial [Capsella rubella]                                                                                                                                                                                                                                                                                                                                      | 788 | 825 | 0         | 104.7 | 84.0 | 91.9 | hypothetical protein CARUB_v10025893mg, partial       | gbpln | Capsella rubella     | AT5G65500.1   Symbols:   U-box domain-containing protein kinase family protein   chr5:26181093-26183997 REVERSE LENGTH=791                                                                                                                                                                                                                                                                                                                                                                                                                  | 788 | 791 | 0         | 100.4 | 81.6 | 90.1 |
| Rsa1.0_00071.1.g3792.t1 | ref[NP_201355.1] tetratricopeptide repeat domain-containing protein [Arabidopsis thaliana]   gi 8978280 dbj BAA98171.1  unnamed protein product [Arabidopsis thaliana]   gi 26453066 dbj BAC43609.1  unknown protein [Arabidopsis thaliana]   gi 28973455 gb AO64052.1  unknown protein [Arabidopsis thaliana]   gi 332010683 gb AED98066.1  tetratricopeptide repeat domain-containing protein [Arabidopsis thaliana] | 181 | 206 | 9.00E-94  | 113.8 | 93.4 | 97.8 | tetratricopeptide repeat domain-containing protein    | gbpln | Arabidopsis thaliana | AT5G65520.1   Symbols:   Tetratricopeptide repeat (TPR)-like superfamily protein   chr5:26189876-26190496 REVERSE LENGTH=206                                                                                                                                                                                                                                                                                                                                                                                                                | 181 | 206 | 4.00E-96  | 113.8 | 93.4 | 97.8 |
| Rsa1.0_00071.1.g3793.t1 | dbj BAJ34054.1  unnamed protein product [Thellungiella halophila]                                                                                                                                                                                                                                                                                                                                                      | 153 | 650 | 1.00E-16  | 424.8 | 35.3 | 39.2 | unnamed protein product                               | ----  | ----                 | AT5G02500.1   Symbols: HSC70-1, HSP70-1, AT-HSC70-1, HSC70   heat shock cognate protein 70-1   chr5:554055-556334 REVERSE LENGTH=651                                                                                                                                                                                                                                                                                                                                                                                                        | 153 | 651 | 2.00E-18  | 425.5 | 33.3 | 37.3 |
| Rsa1.0_00071.1.g3794.t2 | ref[NP_201353.4] U-box domain-containing protein kinase family protein [Arabidopsis thaliana]   gi 332010681 gb AED98064.1  U-box domain-containing protein kinase family protein [Arabidopsis thaliana]                                                                                                                                                                                                               | 180 | 791 | 1.00E-12  | 439.4 | 20.0 | 23.3 | U-box domain-containing protein kinase family protein | gbpln | Arabidopsis thaliana | AT5G65500.1   Symbols:   U-box domain-containing protein kinase family protein   chr5:26181093-26183997 REVERSE LENGTH=791                                                                                                                                                                                                                                                                                                                                                                                                                  | 180 | 791 | 4.00E-15  | 439.4 | 20.0 | 23.3 |
| Rsa1.0_00071.1.g3795.t1 | #                                                                                                                                                                                                                                                                                                                                                                                                                      | #   | #   | #         | #     | #    | #    | -                                                     | ----  | ----                 | #                                                                                                                                                                                                                                                                                                                                                                                                                                                                                                                                           | #   | #   | #         | #     | #    |      |
| Rsa1.0_00071.1.g3796.t1 | #                                                                                                                                                                                                                                                                                                                                                                                                                      | #   | #   | #         | #     | #    | #    | -                                                     | ----  | ----                 | #                                                                                                                                                                                                                                                                                                                                                                                                                                                                                                                                           | #   | #   | #         | #     | #    |      |
| Rsa1.0_00071.1.g3797.t1 | ref[XP_002864981.1] hypothetical protein ARALYDRAFT_496816 [Arabidopsis lyrata subsp. lyrata]   gi 297310816 gb EFH41240.1  hypothetical protein ARALYDRAFT_496816 [Arabidopsis lyrata subsp. lyrata]                                                                                                                                                                                                                  | 361 | 374 | 1.00E-169 | 103.6 | 86.4 | 89.2 | hypothetical protein ARALYDRAFT_496816                | gbpln | Arabidopsis lyrata   | AT5G65790.1   Symbols: ATMYB68, MYB68   myb domain protein 68   chr5:26323035-26324385 FORWARD LENGTH=374                                                                                                                                                                                                                                                                                                                                                                                                                                   | 361 | 374 | 1.00E-164 | 103.6 | 85.9 | 88.4 |
| Rsa1.0_00071.1.g3798.t1 | ref[XP_002866689.1] hypothetical protein ARALYDRAFT_332796 [Arabidopsis lyrata subsp. lyrata]   gi 297312524 gb EFH42948.1  hypothetical protein ARALYDRAFT_332796 [Arabidopsis lyrata subsp. lyrata]                                                                                                                                                                                                                  | 470 | 470 | 0         | 100.0 | 96.2 | 98.3 | hypothetical protein ARALYDRAFT_332796                | gbpln | Arabidopsis lyrata   | AT5G65800.1   Symbols: ACS5, CIN5, ETO2, ATACS5   ACC synthase 5   chr5:26331096-26332698 REVERSE LENGTH=470                                                                                                                                                                                                                                                                                                                                                                                                                                | 470 | 470 | 0         | 100.0 | 96.2 | 98.7 |
| Rsa1.0_00071.1.g3799.t1 | gb[AAM65141.1] unknown [Arabidopsis thaliana]                                                                                                                                                                                                                                                                                                                                                                          | 261 | 258 | 1.00E-135 | 98.9  | 88.5 | 96.2 | unknown                                               | gbpln | Arabidopsis thaliana | AT5G65810.1   Symbols:   unknown protein; BEST Arabidopsis thaliana protein match is: unknown protein (TAIR:AT3G49720.2); Has 30201 Blast hits to 17322 proteins in 780 species: Archae - 12; Bacteria - 1396; Metazoa - 17338; Fungi - 3422; Plants - 5037; Viruses - 0; Other Eukaryotes - 2996 (source: NCBI BLINK).   chr5:26337833-26339144 REVERSE LENGTH=258                                                                                                                                                                         | 261 | 258 | 1.00E-137 | 98.9  | 88.1 | 95.8 |
| Rsa1.0_00071.1.g3800.t1 | gb[EOA24531.1] hypothetical protein CARUB_v10017786mg [Capsella rubella]                                                                                                                                                                                                                                                                                                                                               | 281 | 282 | 1.00E-107 | 100.4 | 73.3 | 81.1 | hypothetical protein CARUB_v10017786mg                | gbpln | Capsella rubella     | AT5G65830.1   Symbols: ATRLP57, RLP57   receptor like protein 57   chr5:26342396-26343235 REVERSE LENGTH=279                                                                                                                                                                                                                                                                                                                                                                                                                                | 281 | 279 | 1.00E-106 | 99.3  | 75.1 | 84.3 |
| Rsa1.0_00071.1.g3801.t1 | ref[XP_002866692.1] hypothetical protein ARALYDRAFT_496819 [Arabidopsis lyrata subsp. lyrata]   gi 297312527 gb EFH42951.1  hypothetical protein ARALYDRAFT_496819 [Arabidopsis lyrata subsp. lyrata]                                                                                                                                                                                                                  | 267 | 265 | 1.00E-115 | 99.3  | 77.2 | 85.0 | hypothetical protein ARALYDRAFT_496819                | gbpln | Arabidopsis lyrata   | AT5G65840.1   Symbols:   Thioredoxin superfamily protein   chr5:26344097-26346057 REVERSE LENGTH=275                                                                                                                                                                                                                                                                                                                                                                                                                                        | 267 | 275 | 1.00E-114 | 103.0 | 76.4 | 84.3 |

|                         |                                                                                                                                                                                                                                                                                                                                                                                     |     |     |           |       |      |      |                                        |       |                      |                                                                                                                                                                                                                                                                                                                                                                                                                                                                                                                         |     |     |           |       |      |      |
|-------------------------|-------------------------------------------------------------------------------------------------------------------------------------------------------------------------------------------------------------------------------------------------------------------------------------------------------------------------------------------------------------------------------------|-----|-----|-----------|-------|------|------|----------------------------------------|-------|----------------------|-------------------------------------------------------------------------------------------------------------------------------------------------------------------------------------------------------------------------------------------------------------------------------------------------------------------------------------------------------------------------------------------------------------------------------------------------------------------------------------------------------------------------|-----|-----|-----------|-------|------|------|
| Rsa1.0_00071.1.g3802.t1 | ref NP_201393.1  U-box domain-containing protein 31 [Arabidopsis thaliana]<br>gi 75170648 sp Q9FHN9.1 PUB31_ARAT<br>H RecName: Full=U-box domain-containing protein 31; AltName: Full=Plant U-box protein 31<br>gi 9759576 dbj BAB11139.1  unnamed protein product. [Arabidopsis thaliana]<br>gi 332010740 gb AED98123.1  U-box domain-containing protein 31 [Arabidopsis thaliana] | 442 | 444 | 0         | 100.5 | 84.2 | 90.0 | U-box domain-containing protein 31     | gbpln | Arabidopsis thaliana | AT5G65920.1   Symbols:   ARM repeat superfamily protein   chr5:26364323-26365657 REVERSE LENGTH=444                                                                                                                                                                                                                                                                                                                                                                                                                     | 442 | 444 | 0         | 100.5 | 84.2 | 90.0 |
| Rsa1.0_00071.1.g3803.t1 | ref NP_201563.1  uncharacterized protein [Arabidopsis thaliana]<br>gi 9757983 dbj BAB08470.1  unnamed protein product. [Arabidopsis thaliana]<br>gi 32815941 gb AAP88355.1  At5g67620 [Arabidopsis thaliana]<br>gi 110736456 dbj BAF00196.1  hypothetical protein [Arabidopsis thaliana]<br>gi 332010985 gb AED98368.1  uncharacterized protein AT5G67620 [Arabidopsis thaliana]    | 177 | 182 | 3.00E-73  | 102.8 | 83.6 | 90.4 | uncharacterized protein                | gbpln | Arabidopsis thaliana | AT5G67620.1   Symbols:   unknown protein; FUNCTIONS IN: molecular.function unknown; INVOLVED IN: N-terminal protein myristoylation; LOCATED IN: microtubule; BEST Arabidopsis thaliana protein match is: unknown protein (TAIR:AT5G62900.1); Has 1807 Blast hits to 1807 proteins in 277 species: Archae - 0; Bacteria - 0; Metazoa - 736; Fungi - 347; Plants - 385; Viruses - 0; Other Eukaryotes - 339 (source: NCBI BLink).   chr5:26964891-26965720 REVERSE LENGTH=182                                             | 177 | 182 | 1.00E-75  | 102.8 | 83.6 | 90.4 |
| Rsa1.0_00071.1.g3804.t1 | ref XP_002866696.1  hypothetical protein ARALYDRAFT_358798 [Arabidopsis lyrata subsp. lyrata]<br>gi 297312531 gb EFH42955.1  hypothetical protein ARALYDRAFT_358798 [Arabidopsis lyrata subsp. lyrata]                                                                                                                                                                              | 156 | 154 | 2.00E-75  | 98.7  | 91.0 | 94.2 | hypothetical protein ARALYDRAFT_358798 | gbpln | Arabidopsis lyrata   | AT5G67590.1   Symbols: FRO1   NADH-ubiquinone oxidoreductase-related   chr5:26958073-26959356 FORWARD LENGTH=154                                                                                                                                                                                                                                                                                                                                                                                                        | 156 | 154 | 2.00E-75  | 98.7  | 88.5 | 92.3 |
| Rsa1.0_00071.1.g3805.t1 | gb EOA13780.1  hypothetical protein CARUB_v10026874mg [Capsella rubella]                                                                                                                                                                                                                                                                                                            | 115 | 299 | 1.00E-30  | 260.0 | 70.4 | 75.7 | hypothetical protein CARUB_v10026874mg | gbpln | Capsella rubella     | AT5G67580.2   Symbols: TRB2, ATTRB2, TBP3, ATTPB3   Homeodomain-like/winged-helix DNA-binding family protein   chr5:26955843-26957073 REVERSE LENGTH=299                                                                                                                                                                                                                                                                                                                                                                | 115 | 299 | 4.00E-27  | 260.0 | 65.2 | 70.4 |
| Rsa1.0_00071.1.g3806.t1 | ref NP_201556.2  uncharacterized protein [Arabidopsis thaliana]<br>gi 91807108 gb ABE68281.1  unknown [Arabidopsis thaliana]<br>gi 332010976 gb AED98359.1  uncharacterized protein AT5G67550 [Arabidopsis thaliana]                                                                                                                                                                | 509 | 509 | 0         | 100.0 | 81.9 | 89.8 | uncharacterized protein                | gbpln | Arabidopsis thaliana | AT5G67550.1   Symbols:   unknown protein; FUNCTIONS IN: molecular.function unknown; INVOLVED IN: biological.process unknown; LOCATED IN: endomembrane system; EXPRESSED IN: flower; EXPRESSED DURING: 4 anthesis; BEST Arabidopsis thaliana protein match is: unknown protein (TAIR:AT1G71110.1); Has 161 Blast hits to 154 proteins in 16 species: Archae - 0; Bacteria - 0; Metazoa - 0; Fungi - 0; Plants - 161; Viruses - 0; Other Eukaryotes - 0 (source: NCBI BLink).   chr5:26946908-26949112 REVERSE LENGTH=509 | 509 | 509 | 0         | 100.0 | 81.9 | 89.8 |
| Rsa1.0_00071.1.g3807.t1 | ref XP_002863741.1  hypothetical protein ARALYDRAFT_917455 [Arabidopsis lyrata subsp. lyrata]<br>gi 297309576 gb EFH40000.1  hypothetical protein ARALYDRAFT_917455 [Arabidopsis lyrata subsp. lyrata]                                                                                                                                                                              | 136 | 390 | 7.00E-27  | 286.8 | 44.9 | 61.8 | hypothetical protein ARALYDRAFT_917455 | gbpln | Arabidopsis lyrata   | AT5G18880.1   Symbols:   RNA-directed DNA polymerase (reverse transcriptase)-related family protein   chr5:6300535-6301422 REVERSE LENGTH=295                                                                                                                                                                                                                                                                                                                                                                           | 136 | 295 | 6.00E-12  | 216.9 | 32.4 | 50.7 |
| Rsa1.0_00071.1.g3808.t1 | gb AAW22622.1  porin-like protein [Brassica napus]                                                                                                                                                                                                                                                                                                                                  | 276 | 276 | 1.00E-152 | 100.0 | 97.5 | 98.9 | porin-like protein                     | gbpln | Brassica napus       | AT5G67500.1   Symbols: VDAC2, ATVDAC2   voltage dependent anion channel 2   chr5:26935223-26937123 FORWARD LENGTH=276                                                                                                                                                                                                                                                                                                                                                                                                   | 276 | 276 | 1.00E-144 | 100.0 | 89.9 | 95.7 |
| Rsa1.0_00071.1.g3809.t1 | gb AAB53260.1  zinc-finger protein-1 [Brassica rapa subsp. oleifera]                                                                                                                                                                                                                                                                                                                | 236 | 235 | 5.00E-86  | 99.6  | 79.2 | 84.3 | zinc-finger protein-1                  | gbpln | Brassica rapa        | AT5G67450.1   Symbols: AZF1, ZF1   zinc-finger protein 1   chr5:26919142-26919879 REVERSE LENGTH=245                                                                                                                                                                                                                                                                                                                                                                                                                    | 236 | 245 | 1.00E-82  | 103.8 | 76.3 | 79.7 |

|                         |                                                                                                                                                                                                                                                                                                                                                                                                                                                                                                                                                                                                                                                                                                                                                                                                                                                                                                                    |     |      |           |       |      |      |                                                                                                                                                     |       |                                                                                                         |                                                                                                                                                                                                                                                                                                                                                                                                                                                                                                                                       |     |          |           |       |      |      |
|-------------------------|--------------------------------------------------------------------------------------------------------------------------------------------------------------------------------------------------------------------------------------------------------------------------------------------------------------------------------------------------------------------------------------------------------------------------------------------------------------------------------------------------------------------------------------------------------------------------------------------------------------------------------------------------------------------------------------------------------------------------------------------------------------------------------------------------------------------------------------------------------------------------------------------------------------------|-----|------|-----------|-------|------|------|-----------------------------------------------------------------------------------------------------------------------------------------------------|-------|---------------------------------------------------------------------------------------------------------|---------------------------------------------------------------------------------------------------------------------------------------------------------------------------------------------------------------------------------------------------------------------------------------------------------------------------------------------------------------------------------------------------------------------------------------------------------------------------------------------------------------------------------------|-----|----------|-----------|-------|------|------|
| Rsa1.0_00072.1.g3810.t1 | ref NP_564548.1  uncharacterized protein [Arabidopsis thaliana] gi 5430751 gb AAD43151.1 AC007504.6 Unknown protein [Arabidopsis thaliana] gi 13926179 gb AAK49571.1 AF370563.1 Unknown protein [Arabidopsis thaliana] gi 17381289 gb AL36062.1 At g49500/F13F21.6 [Arabidopsis thaliana] gi 20453373 gb AAM19925.1 At g49500/F13F21.6 [Arabidopsis thaliana] gi 20466376 gb AAM20505.1  unknown protein [Arabidopsis thaliana] gi 21592836 gb AAM64786.1  unknown [Arabidopsis thaliana] gi 22136326 gb AAM91241.1  unknown protein [Arabidopsis thaliana] gi 25083427 gb AAN72075.1  expressed protein [Arabidopsis thaliana] gi 332194315 gb AEE32436.1  uncharacterized protein AT1G49500 [Arabidopsis thaliana] ref XP_002893547.1  peptidase C1A papain family protein [Arabidopsis lyrata subsp. lyrata] gi 297339389 gb EFH69806.1  peptidase C1A papain family protein [Arabidopsis lyrata subsp. lyrata] | 63  | 63   | 2.00E-21  | 100.0 | 79.4 | 93.7 | uncharacterized protein                                                                                                                             | gbpln | Arabidopsis thaliana                                                                                    | AT1G49500.1   Symbols:   unknown protein; FUNCTIONS IN: molecular,function unknown; INVOLVED IN: biological,process unknown; LOCATED IN: endomembrane system; EXPRESSED IN: 19 plant structures; EXPRESSED DURING: 10 growth stages; BEST Arabidopsis thaliana protein match is: unknown protein (TAIR:AT3G19030.1). Has 24 Blast hits to 24 proteins in 2 species: Archae - 0; Bacteria - 0; Metazoa - 0; Fungi - 0; Plants - 24; Viruses - 0; Other Eukaryotes - 0 (source: NCBI BLINK).   chr1:18321988-18322179 REVERSE LENGTH=63 | 63  | 63       | 4.00E-24  | 100.0 | 79.4 | 93.7 |
| Rsa1.0_00072.1.g3811.t1 | ref XP_002893547.1  peptidase C1A papain family protein [Arabidopsis lyrata subsp. lyrata] gi 297339389 gb EFH69806.1  peptidase C1A papain family protein [Arabidopsis lyrata subsp. lyrata]                                                                                                                                                                                                                                                                                                                                                                                                                                                                                                                                                                                                                                                                                                                      | 106 | 345  | 1.00E-39  | 325.5 | 70.8 | 81.1 | peptidase C1A papain family protein                                                                                                                 | gbpln | Arabidopsis lyrata                                                                                      | AT1G29080.1   Symbols:   Papain family cysteine protease   chr1:10157494-10158674 REVERSE LENGTH=346                                                                                                                                                                                                                                                                                                                                                                                                                                  | 106 | 346      | 1.00E-40  | 326.4 | 67.9 | 80.2 |
| Rsa1.0_00072.1.g3812.t1 | #                                                                                                                                                                                                                                                                                                                                                                                                                                                                                                                                                                                                                                                                                                                                                                                                                                                                                                                  | #   | #    | #         | #     | #    | -    | ----                                                                                                                                                | ----  | #                                                                                                       | #                                                                                                                                                                                                                                                                                                                                                                                                                                                                                                                                     | #   | #        | #         | #     | #    |      |
| Rsa1.0_00072.1.g3813.t1 | #                                                                                                                                                                                                                                                                                                                                                                                                                                                                                                                                                                                                                                                                                                                                                                                                                                                                                                                  | #   | #    | #         | #     | #    | -    | ----                                                                                                                                                | ----  | #                                                                                                       | #                                                                                                                                                                                                                                                                                                                                                                                                                                                                                                                                     | #   | #        | #         | #     | #    |      |
| Rsa1.0_00072.1.g3814.t1 | #                                                                                                                                                                                                                                                                                                                                                                                                                                                                                                                                                                                                                                                                                                                                                                                                                                                                                                                  | #   | #    | #         | #     | #    | -    | ----                                                                                                                                                | ----  | #                                                                                                       | #                                                                                                                                                                                                                                                                                                                                                                                                                                                                                                                                     | #   | #        | #         | #     | #    |      |
| Rsa1.0_00072.1.g3815.t1 | #                                                                                                                                                                                                                                                                                                                                                                                                                                                                                                                                                                                                                                                                                                                                                                                                                                                                                                                  | #   | #    | #         | #     | #    | -    | ----                                                                                                                                                | ----  | AT5G08380.1   Symbols: AtAGAL1, AGAL1   alpha-galactosidase 1   chr5:2694851-2697616 REVERSE LENGTH=410 | 40                                                                                                                                                                                                                                                                                                                                                                                                                                                                                                                                    | 410 | 1.00E-12 | 1025.0    | 75.0  | 82.5 |      |
| Rsa1.0_00072.1.g3816.t1 | #                                                                                                                                                                                                                                                                                                                                                                                                                                                                                                                                                                                                                                                                                                                                                                                                                                                                                                                  | #   | #    | #         | #     | #    | -    | ----                                                                                                                                                | ----  | #                                                                                                       | #                                                                                                                                                                                                                                                                                                                                                                                                                                                                                                                                     | #   | #        | #         | #     | #    |      |
| Rsa1.0_00072.1.g3817.t1 | gb EOA32197.1  hypothetical protein CARUB_v10015453mg [Capsella rubella]                                                                                                                                                                                                                                                                                                                                                                                                                                                                                                                                                                                                                                                                                                                                                                                                                                           | 208 | 552  | 1.00E-24  | 265.4 | 25.0 | 39.9 | hypothetical protein CARUB_v10015453mg                                                                                                              | gbpln | Capsella rubella                                                                                        | AT1G52950.1   Symbols:   Nucleic acid-binding, OB-fold-like protein   chr1:19725483-19728007 FORWARD LENGTH=566                                                                                                                                                                                                                                                                                                                                                                                                                       | 208 | 566      | 5.00E-18  | 272.1 | 22.1 | 34.6 |
| Rsa1.0_00072.1.g3818.t1 | pir S65812 RNA-directed DNA polymerase (EC 2.7.7.49) (clone DW15) - Arabidopsis thaliana retrotransposon Ta11-1 gi 976278 gb AAA75254.1  reverse transcriptase [Arabidopsis thaliana]                                                                                                                                                                                                                                                                                                                                                                                                                                                                                                                                                                                                                                                                                                                              | 409 | 1333 | 2.00E-77  | 325.9 | 42.1 | 58.4 | RNA-directed DNA polymerase (EC 2.7.7.49) (clone DW15) - Arabidopsis thaliana retrotransposon Ta11-1 gi 976278 gb AAA75254.1  reverse transcriptase | gbpln | Arabidopsis thaliana                                                                                    | AT1G43760.1   Symbols:   DNase I-like superfamily protein   chr1:16528880-16531065 REVERSE LENGTH=626                                                                                                                                                                                                                                                                                                                                                                                                                                 | 409 | 626      | 2.00E-19  | 153.1 | 19.6 | 32.0 |
| Rsa1.0_00072.1.g3819.t1 | ref XP_002893547.1  peptidase C1A papain family protein [Arabidopsis lyrata subsp. lyrata] gi 297339389 gb EFH69806.1  peptidase C1A papain family protein [Arabidopsis lyrata subsp. lyrata]                                                                                                                                                                                                                                                                                                                                                                                                                                                                                                                                                                                                                                                                                                                      | 300 | 345  | 1.00E-107 | 115.0 | 63.0 | 78.0 | peptidase C1A papain family protein                                                                                                                 | gbpln | Arabidopsis lyrata                                                                                      | AT1G29080.1   Symbols:   Papain family cysteine protease   chr1:10157494-10158674 REVERSE LENGTH=346                                                                                                                                                                                                                                                                                                                                                                                                                                  | 300 | 346      | 1.00E-108 | 115.3 | 62.7 | 78.7 |
| Rsa1.0_00072.1.g3820.t1 | gb AAZ41812.1  O1P13-2 [Brassica rapa subsp. pekinensis]                                                                                                                                                                                                                                                                                                                                                                                                                                                                                                                                                                                                                                                                                                                                                                                                                                                           | 340 | 558  | 1.00E-75  | 164.1 | 48.2 | 63.5 | O1P13-2                                                                                                                                             | gbpln | Brassica rapa                                                                                           | #                                                                                                                                                                                                                                                                                                                                                                                                                                                                                                                                     | #   | #        | #         | #     | #    |      |
| Rsa1.0_00072.1.g3821.t1 | gb AAG10812.1 AC018460.6 Putative retroelement polyprotein [Arabidopsis thaliana]                                                                                                                                                                                                                                                                                                                                                                                                                                                                                                                                                                                                                                                                                                                                                                                                                                  | 664 | 1404 | 0         | 211.4 | 64.5 | 77.0 | Putative retroelement polyprotein                                                                                                                   | gbpln | Arabidopsis thaliana                                                                                    | AT4G23160.1   Symbols: CRK8   cysteine-rich RLK (RECEPTOR-like protein kinase) 8   chr4:12129485-12134086 FORWARD LENGTH=1262                                                                                                                                                                                                                                                                                                                                                                                                         | 664 | 1262     | 2.00E-94  | 190.1 | 29.1 | 40.1 |
| Rsa1.0_00072.1.g3822.t1 | ref XP_002894196.1  nucleotide binding protein [Arabidopsis lyrata subsp. lyrata] gi 297340038 gb EFH70455.1  nucleotide binding protein [Arabidopsis lyrata subsp. lyrata]                                                                                                                                                                                                                                                                                                                                                                                                                                                                                                                                                                                                                                                                                                                                        | 838 | 839  | 0         | 100.1 | 88.8 | 93.6 | nucleotide binding protein                                                                                                                          | gbpln | Arabidopsis lyrata                                                                                      | AT1G49540.2   Symbols: ELP2, AtELP2   elongator protein 2   chr1:18333767-18337382 REVERSE LENGTH=840                                                                                                                                                                                                                                                                                                                                                                                                                                 | 838 | 840      | 0         | 100.2 | 87.8 | 92.6 |
| Rsa1.0_00072.1.g3823.t1 | #                                                                                                                                                                                                                                                                                                                                                                                                                                                                                                                                                                                                                                                                                                                                                                                                                                                                                                                  | #   | #    | #         | #     | #    | -    | ----                                                                                                                                                | ----  | #                                                                                                       | #                                                                                                                                                                                                                                                                                                                                                                                                                                                                                                                                     | #   | #        | #         | #     | #    |      |
| Rsa1.0_00072.1.g3824.t1 | ref XP_002891521.1  predicted protein [Arabidopsis lyrata subsp. lyrata] gi 297337363 gb EFH67780.1  predicted protein [Arabidopsis lyrata subsp. lyrata]                                                                                                                                                                                                                                                                                                                                                                                                                                                                                                                                                                                                                                                                                                                                                          | 628 | 350  | 1.00E-176 | 55.7  | 48.9 | 51.9 | predicted protein                                                                                                                                   | gbpln | Arabidopsis lyrata                                                                                      | AT1G49570.1   Symbols:   Peroxidase superfamily protein 2   chr1:18347077-18348712 FORWARD LENGTH=350                                                                                                                                                                                                                                                                                                                                                                                                                                 | 628 | 350      | 1.00E-178 | 55.7  | 48.9 | 51.8 |

|                         |                                                                                                                                                                                                                                                                                                                                                                                                                                                                                                                                                                                          |      |      |           |       |      |      |                                                       |       |                      |                                                                                                                                                                                                                                                                                                                                                                                                                                                              |      |      |           |       |      |      |
|-------------------------|------------------------------------------------------------------------------------------------------------------------------------------------------------------------------------------------------------------------------------------------------------------------------------------------------------------------------------------------------------------------------------------------------------------------------------------------------------------------------------------------------------------------------------------------------------------------------------------|------|------|-----------|-------|------|------|-------------------------------------------------------|-------|----------------------|--------------------------------------------------------------------------------------------------------------------------------------------------------------------------------------------------------------------------------------------------------------------------------------------------------------------------------------------------------------------------------------------------------------------------------------------------------------|------|------|-----------|-------|------|------|
| Rsa1.0_00072.1.g3825.t1 | ref[NP_175381.1] putative calcium-dependent protein kinase [Arabidopsis thaliana]<br>gi 75334455 sp Q9FX86.1 CAMK8_ARAT<br>H RecName: Full=CDPK-related kinase 8; Short=AtCRK8; AltName: Full=Calcium/calmodulin-dependent protein kinase CRK8<br>gi 10120419 gb AA13044.1 AC011807.3 Putative CDPK-related protein kinase [Arabidopsis thaliana]<br>gi 37202008 gb AAQ89619.1  At1g49580 [Arabidopsis thaliana]<br>gi 110738705 dbj BAF01277.1  putative CDPK-related protein kinase [Arabidopsis thaliana]<br>gi 332194323 gb AEE32444.1  CDPK-related kinase 8 [Arabidopsis thaliana] | 594  | 606  | 0         | 102.0 | 89.9 | 93.8 | putative calcium-dependent protein kinase             | gbpln | Arabidopsis thaliana | AT1G49580.1   Symbols:   Calcium-dependent protein kinase (CDPK) family protein   chr1:18351611-18354384 FORWARD LENGTH=606                                                                                                                                                                                                                                                                                                                                  | 594  | 606  | 0         | 102.0 | 89.9 | 93.8 |
| Rsa1.0_00072.1.g3826.t1 | dbj BAB09912.1  MADS-box protein-like [Arabidopsis thaliana]                                                                                                                                                                                                                                                                                                                                                                                                                                                                                                                             | 347  | 368  | 6.00E-47  | 106.1 | 32.0 | 43.5 | MADS-box protein-like                                 | gbpln | Arabidopsis thaliana | AT5G49420.1   Symbols:   MADS-box transcription factor family protein   chr5:20035166-20036170 REVERSE LENGTH=334                                                                                                                                                                                                                                                                                                                                            | 347  | 334  | 2.00E-49  | 96.3  | 32.0 | 43.5 |
| Rsa1.0_00072.1.g3827.t1 | gb AAG50652.1 AC073433.4 transposase, putative [Arabidopsis thaliana]                                                                                                                                                                                                                                                                                                                                                                                                                                                                                                                    | 81   | 659  | 2.00E-23  | 813.6 | 66.7 | 82.7 | transposase, putative                                 | gbpln | Arabidopsis thaliana | #                                                                                                                                                                                                                                                                                                                                                                                                                                                            | #    | #    | #         | #     | #    |      |
| Rsa1.0_00072.1.g3828.t1 | #                                                                                                                                                                                                                                                                                                                                                                                                                                                                                                                                                                                        | #    | #    | #         | #     | #    | -    |                                                       | ----  | ----                 | #                                                                                                                                                                                                                                                                                                                                                                                                                                                            | #    | #    | #         | #     | #    |      |
| Rsa1.0_00072.1.g3829.t1 | gb ABD65636.1  hypothetical protein 23.t00055 [Brassica oleracea]                                                                                                                                                                                                                                                                                                                                                                                                                                                                                                                        | 215  | 414  | 1.00E-17  | 192.6 | 20.9 | 23.7 | hypothetical protein 23.t00055                        | gbpln | Brassica oleracea    | #                                                                                                                                                                                                                                                                                                                                                                                                                                                            | #    | #    | #         | #     | #    |      |
| Rsa1.0_00072.1.g3830.t1 | gb EOA14700.1  hypothetical protein CARUB_v10027975mg [Capsella rubella]                                                                                                                                                                                                                                                                                                                                                                                                                                                                                                                 | 396  | 766  | 1.00E-124 | 193.4 | 59.8 | 75.5 | hypothetical protein CARUB_v10027975mg                | gbpln | Capsella rubella     | AT1G19260.1   Symbols:   TTF-type zinc finger protein with HAT dimerisation domain   chr1:6657260-6659569 REVERSE LENGTH=769                                                                                                                                                                                                                                                                                                                                 | 396  | 769  | 1.00E-126 | 194.2 | 60.6 | 75.0 |
| Rsa1.0_00072.1.g3831.t1 | ref[XP_002894219.1] hypothetical protein ARALYDRAFT.474111 [Arabidopsis lyrata subsp. lyrata]<br>gi 297340061 gb EFH70478.1  hypothetical protein ARALYDRAFT.474111 [Arabidopsis lyrata subsp. lyrata]                                                                                                                                                                                                                                                                                                                                                                                   | 112  | 102  | 4.00E-32  | 91.1  | 67.0 | 76.8 | hypothetical protein ARALYDRAFT.474111                | gbpln | Arabidopsis lyrata   | AT1G49800.1   Symbols:   unknown protein; FUNCTIONS IN: molecular_function unknown; INVOLVED IN: biological_process unknown; LOCATED IN: endomembrane system; EXPRESSED IN: sepal, male gametophyte, stamen; EXPRESSED DURING: 4 anthesis; Has 12 Blast hits to 12 proteins in 5 species: Archae - 0; Bacteria - 0; Metazoa - 0; Fungi - 0; Plants - 12; Viruses - 0; Other Eukaryotes - 0 (source: NCBI BLINK).   chr1:18438550-18438876 REVERSE LENGTH=108 | 112  | 108  | 2.00E-29  | 96.4  | 65.2 | 80.4 |
| Rsa1.0_00072.1.g3832.t1 | gb AAP53216.2  retrotransposon protein, putative, Ty1-copia subclass [Oryza sativa Japonica Group]                                                                                                                                                                                                                                                                                                                                                                                                                                                                                       | 440  | 1262 | 1.00E-64  | 286.8 | 35.0 | 43.6 | retrotransposon protein, putative, Ty1-copia subclass | gbpln | Oryza sativa         | AT4G23160.1   Symbols: CRK8   cysteine-rich RLK (RECEPTOR-like protein kinase) 8   chr4:12129485-12134086 FORWARD LENGTH=1262                                                                                                                                                                                                                                                                                                                                | 440  | 1262 | 2.00E-23  | 286.8 | 16.4 | 24.3 |
| Rsa1.0_00072.1.g3833.t1 | emb CAB39638.1  RNA-directed DNA polymerase-like protein [Arabidopsis thaliana] gi 7267666 emb CAB78094.1  RNA-directed DNA polymerase-like protein [Arabidopsis thaliana]                                                                                                                                                                                                                                                                                                                                                                                                               | 1667 | 1274 | 0         | 76.4  | 29.8 | 41.6 | RNA-directed DNA polymerase-like protein              | gbpln | Arabidopsis thaliana | AT4G29090.1   Symbols:   Ribonuclease H-like superfamily protein   chr4:14333528-14335255 FORWARD LENGTH=575                                                                                                                                                                                                                                                                                                                                                 | 1667 | 575  | 1.00E-48  | 34.5  | 6.5  | 10.4 |
| Rsa1.0_00072.1.g3834.t1 | ref[XP_002894216.1] U-box domain-containing protein [Arabidopsis lyrata subsp. lyrata]<br>gi 297340058 gb EFH70475.1  U-box domain-containing protein [Arabidopsis lyrata subsp. lyrata]                                                                                                                                                                                                                                                                                                                                                                                                 | 424  | 421  | 0         | 99.3  | 88.9 | 95.0 | U-box domain-containing protein                       | gbpln | Arabidopsis lyrata   | AT1G49780.1   Symbols: PUB26   plant U-box 26   chr1:18429024-18430289 REVERSE LENGTH=421                                                                                                                                                                                                                                                                                                                                                                    | 424  | 421  | 0         | 99.3  | 87.7 | 94.6 |
| Rsa1.0_00072.1.g3835.t1 | gb AAG51754.1 AC068667.33 reverse transcriptase, putative; 100033-105622 [Arabidopsis thaliana]                                                                                                                                                                                                                                                                                                                                                                                                                                                                                          | 318  | 1557 | 2.00E-15  | 489.6 | 17.6 | 30.5 | reverse transcriptase, putative; 100033-105622        | gbpln | Arabidopsis thaliana | #                                                                                                                                                                                                                                                                                                                                                                                                                                                            | #    | #    | #         | #     | #    |      |
| Rsa1.0_00072.1.g3836.t1 | ref[NP_178819.1] Zinc knuckle (CCHC-type) family protein [Arabidopsis thaliana] gi 3327395 gb AAC26677.1  putative Ta11-like non-LTR retroelement protein [Arabidopsis thaliana] gi 330251037 gb AEC06131.1  Zinc knuckle (CCHC-type) family protein [Arabidopsis thaliana]                                                                                                                                                                                                                                                                                                              | 338  | 530  | 4.00E-42  | 156.8 | 23.4 | 30.5 | Zinc knuckle (CCHC-type) family protein               | gbpln | Arabidopsis thaliana | AT2G07760.1   Symbols:   Zinc knuckle (CCHC-type) family protein   chr2:3584420-3586278 REVERSE LENGTH=530                                                                                                                                                                                                                                                                                                                                                   | 338  | 530  | 1.00E-44  | 156.8 | 23.4 | 30.5 |
| Rsa1.0_00072.1.g3837.t1 | ref[NP_188563.1] leucine-rich repeat-containing protein [Arabidopsis thaliana] gi 1194454 dbj BAB02456.1  unnamed protein product [Arabidopsis thaliana] gi 332642702 gb AEE76223.1  leucine-rich repeat-containing protein [Arabidopsis thaliana]                                                                                                                                                                                                                                                                                                                                       | 489  | 493  | 1.00E-165 | 100.8 | 68.7 | 77.1 | leucine-rich repeat-containing protein                | gbpln | Arabidopsis thaliana | AT3G19320.1   Symbols:   Leucine-rich repeat (LRR) family protein   chr3:6696395-6698073 REVERSE LENGTH=493                                                                                                                                                                                                                                                                                                                                                  | 489  | 493  | 1.00E-168 | 100.8 | 68.7 | 77.1 |

|                         |                                                                                                                                                                                                                                                                                                                                                                                                                                                                                                                                                                                                                                                       |      |      |           |       |      |      |                                                               |       |                      |                                                                                                                                                      |      |      |           |       |      |      |
|-------------------------|-------------------------------------------------------------------------------------------------------------------------------------------------------------------------------------------------------------------------------------------------------------------------------------------------------------------------------------------------------------------------------------------------------------------------------------------------------------------------------------------------------------------------------------------------------------------------------------------------------------------------------------------------------|------|------|-----------|-------|------|------|---------------------------------------------------------------|-------|----------------------|------------------------------------------------------------------------------------------------------------------------------------------------------|------|------|-----------|-------|------|------|
| Rsa1.0_00073.1.g3838.t1 | gb AAC35532.1  contains similarity to proteases [Arabidopsis thaliana]                                                                                                                                                                                                                                                                                                                                                                                                                                                                                                                                                                                | 1351 | 1392 | 0         | 103.0 | 55.5 | 70.0 | contains similarity to proteases                              | gbpln | Arabidopsis thaliana | AT4G23160.1   Symbols: CRK8   cysteine-rich RLK (RECEPTOR-like protein kinase) 8   chr4:12129485-12134086 FORWARD LENGTH=1262                        | 1351 | 1262 | 1.00E-112 | 93.4  | 13.8 | 22.3 |
| Rsa1.0_00073.1.g3839.t1 | ref NP_001190617.1  K-box region and MADS-box transcription factor family protein [Arabidopsis thaliana]<br>gi 332010614 gb AED97997.1  K-box region and MADS-box transcription factor family protein [Arabidopsis thaliana]                                                                                                                                                                                                                                                                                                                                                                                                                          | 67   | 232  | 7.00E-22  | 346.3 | 74.6 | 89.6 | K-box region and MADS-box transcription factor family protein | gbpln | Arabidopsis thaliana | AT5G65070.3   Symbols: MAF4   K-box region and MADS-box transcription factor family protein   chr5:25992310-25995930 FORWARD LENGTH=232              | 67   | 232  | 1.00E-24  | 346.3 | 74.6 | 89.6 |
| Rsa1.0_00073.1.g3840.t1 | gb EOA35746.1  hypothetical protein CARUB_v10020979mg [Capsella rubella]                                                                                                                                                                                                                                                                                                                                                                                                                                                                                                                                                                              | 173  | 197  | 1.00E-30  | 113.9 | 48.0 | 59.5 | hypothetical protein CARUB_v10020979mg                        | gbpln | Capsella rubella     | AT5G65070.1   Symbols: MAF4, FCL4, AGL69   K-box region and MADS-box transcription factor family protein   chr5:25992310-25995930 FORWARD LENGTH=200 | 173  | 200  | 4.00E-32  | 115.6 | 48.6 | 58.4 |
| Rsa1.0_00073.1.g3841.t1 | #                                                                                                                                                                                                                                                                                                                                                                                                                                                                                                                                                                                                                                                     | #    | #    | #         | #     | #    | #    | -                                                             | ----  | ----                 | #                                                                                                                                                    | #    | #    | #         | #     | #    | #    |
| Rsa1.0_00073.1.g3842.15 | gb EOA12728.1  hypothetical protein CARUB_v10028173mg [Capsella rubella]                                                                                                                                                                                                                                                                                                                                                                                                                                                                                                                                                                              | 211  | 197  | 5.00E-72  | 93.4  | 69.2 | 80.1 | hypothetical protein CARUB_v10028173mg                        | gbpln | Capsella rubella     | AT5G65070.1   Symbols: MAF4, FCL4, AGL69   K-box region and MADS-box transcription factor family protein   chr5:25992310-25995930 FORWARD LENGTH=200 | 211  | 200  | 2.00E-73  | 94.8  | 68.2 | 79.1 |
| Rsa1.0_00073.1.g3843.12 | ref XP_002864939.1  hypothetical protein ARALYDRAFT_332725 [Arabidopsis lyrata subsp. lyrata]<br>gi 297310774 gb EFH41198.1  hypothetical protein ARALYDRAFT_332725 [Arabidopsis lyrata subsp. lyrata]                                                                                                                                                                                                                                                                                                                                                                                                                                                | 554  | 527  | 0         | 95.1  | 80.3 | 85.0 | hypothetical protein ARALYDRAFT_332725                        | gbpln | Arabidopsis lyrata   | AT5G65090.1   Symbols: MRH3, BST1, DER4   DNAse I-like superfamily protein   chr5:26004282-26006656 FORWARD LENGTH=529                               | 554  | 529  | 0         | 95.5  | 79.2 | 84.1 |
| Rsa1.0_00073.1.g3844.t1 | ref XP_002864941.1  hypothetical protein ARALYDRAFT_919839 [Arabidopsis lyrata subsp. lyrata]<br>gi 297310776 gb EFH41200.1  hypothetical protein ARALYDRAFT_919839 [Arabidopsis lyrata subsp. lyrata]                                                                                                                                                                                                                                                                                                                                                                                                                                                | 272  | 286  | 5.00E-98  | 105.1 | 69.1 | 80.5 | hypothetical protein ARALYDRAFT_919839                        | gbpln | Arabidopsis lyrata   | AT5G65130.1   Symbols:   Integrase-type DNA-binding superfamily protein   chr5:26017403-26018236 FORWARD LENGTH=277                                  | 272  | 277  | 6.00E-98  | 101.8 | 71.3 | 80.9 |
| Rsa1.0_00073.1.g3845.t1 | gb EOA13558.1  hypothetical protein CARUB_v10026620mg [Capsella rubella]                                                                                                                                                                                                                                                                                                                                                                                                                                                                                                                                                                              | 375  | 369  | 0         | 98.4  | 84.5 | 90.4 | hypothetical protein CARUB_v10026620mg                        | gbpln | Capsella rubella     | AT5G65140.1   Symbols: TPPJ   Haloacid dehalogenase-like hydrolase (HAD) superfamily protein   chr5:26019878-26022077 REVERSE LENGTH=370             | 375  | 370  | 0         | 98.7  | 85.3 | 90.1 |
| Rsa1.0_00073.1.g3846.t1 | #                                                                                                                                                                                                                                                                                                                                                                                                                                                                                                                                                                                                                                                     | #    | #    | #         | #     | #    | #    | -                                                             | ----  | ----                 | #                                                                                                                                                    | #    | #    | #         | #     | #    | #    |
| Rsa1.0_00073.1.g3847.t1 | gb EOA14828.1  hypothetical protein CARUB_v10028138mg [Capsella rubella]                                                                                                                                                                                                                                                                                                                                                                                                                                                                                                                                                                              | 174  | 175  | 1.00E-80  | 100.6 | 79.9 | 85.6 | hypothetical protein CARUB_v10028138mg                        | gbpln | Capsella rubella     | AT5G65158.1   Symbols:   Lipase/lipoxygenase, PLAT/LH2 family protein   chr5:26030390-26030704 FORWARD LENGTH=104                                    | 174  | 104  | 3.00E-56  | 59.8  | 56.9 | 58.6 |
| Rsa1.0_00073.1.g3848.t1 | ref NP_680465.2  succinate dehydrogenase [ubiquinone] iron-sulfur subunit 3 [Arabidopsis thaliana]<br>gi 75262571 sp Q9FJP9.1 DHSB3_ARAT H RecName: Full=Succinate dehydrogenase [ubiquinone] iron-sulfur subunit 3, mitochondrial; AltName: Full=Iron-sulfur subunit of complex II; Short=Is; Flags: Precursor<br>gi 10178178 dbj BAB11652.1  succinate dehydrogenase iron-sulfur protein-like [Arabidopsis thaliana]<br>gi 12049602 emb CAC19857.1  mitochondrial succinate dehydrogenase iron-sulphur subunit [Arabidopsis thaliana] gi 332010628 gb AED98011.1  succinate dehydrogenase [ubiquinone] iron-sulfur subunit 3 [Arabidopsis thaliana] | 306  | 309  | 1.00E-163 | 101.0 | 89.5 | 93.8 | succinate dehydrogenase                                       | gbpln | Arabidopsis thaliana | AT5G65165.1   Symbols: SDH2-3   succinate dehydrogenase 2-3   chr5:26034515-26035922 REVERSE LENGTH=309                                              | 306  | 309  | 1.00E-165 | 101.0 | 89.5 | 93.8 |
| Rsa1.0_00073.1.g3849.t1 | ref NP_201321.1  VQ motif-containing protein [Arabidopsis thaliana]<br>gi 10178179 dbj BAB11653.1  unnamed protein product [Arabidopsis thaliana]<br>gi 44917435 gb AAS49042.1  At5g65170 [Arabidopsis thaliana]<br>gi 46931270 gb AAT06439.1  At5g65170 [Arabidopsis thaliana]<br>gi 332010630 gb AED98013.1  VQ motif-containing protein [Arabidopsis thaliana]                                                                                                                                                                                                                                                                                     | 335  | 362  | 1.00E-105 | 108.1 | 70.4 | 78.5 | VQ motif-containing protein                                   | gbpln | Arabidopsis thaliana | AT5G65170.1   Symbols:   VQ motif-containing protein   chr5:26041218-26042306 FORWARD LENGTH=362                                                     | 335  | 362  | 1.00E-107 | 108.1 | 70.4 | 78.5 |

|                         |                                                                                                                                                                                                                                                                                                                                                            |     |     |           |       |      |      |                                                          |       |                      |                                                                                                                                                                                                                                                                                                                                                                                                                                                                        |     |     |           |       |      |      |
|-------------------------|------------------------------------------------------------------------------------------------------------------------------------------------------------------------------------------------------------------------------------------------------------------------------------------------------------------------------------------------------------|-----|-----|-----------|-------|------|------|----------------------------------------------------------|-------|----------------------|------------------------------------------------------------------------------------------------------------------------------------------------------------------------------------------------------------------------------------------------------------------------------------------------------------------------------------------------------------------------------------------------------------------------------------------------------------------------|-----|-----|-----------|-------|------|------|
| Rsa1.0_00073.1.g3850.t1 | refXP_002866656.1  armadillo/beta-catenin repeat family protein [Arabidopsis lyrata subsp. lyrata] gi 297312491 gb EFH42915.1  armadillo/beta-catenin repeat family protein [Arabidopsis lyrata subsp. lyrata]                                                                                                                                             | 544 | 547 | 0         | 100.6 | 83.3 | 89.7 | armadillo/beta-catenin repeat family protein             | gbpln | Arabidopsis lyrata   | AT5G65200.1   Symbols: PUB38, ATPUB38   plant U-box 38   chr5:26048173-26049843 REVERSE LENGTH=556                                                                                                                                                                                                                                                                                                                                                                     | 544 | 556 | 0         | 102.2 | 83.5 | 90.8 |
| Rsa1.0_00073.1.g3851.t1 | refXP_002866657.1  short-chain dehydrogenase/reductase family protein [Arabidopsis lyrata subsp. lyrata] gi 297312492 gb EFH42916.1  short-chain dehydrogenase/reductase family protein [Arabidopsis lyrata subsp. lyrata]                                                                                                                                 | 285 | 285 | 1.00E-145 | 100.0 | 87.4 | 92.6 | short-chain dehydrogenase/reductase family protein       | gbpln | Arabidopsis lyrata   | AT5G65205.1   Symbols:   NAD(P)-binding Rossmann-fold superfamily protein   chr5:26050926-26052017 REVERSE LENGTH=285                                                                                                                                                                                                                                                                                                                                                  | 285 | 285 | 1.00E-144 | 100.0 | 85.6 | 91.6 |
| Rsa1.0_00073.1.g3852.t1 | refNP_680466.1  uncharacterized protein [Arabidopsis thaliana] gi 19347918 gb AAL85980.1  unknown protein [Arabidopsis thaliana] gi 21689793 gb AAM67540.1  unknown protein [Arabidopsis thaliana] gi 26453218 dbj BAC43683.1  unknown protein [Arabidopsis thaliana] gi 332010635 gb AED98018.1  uncharacterized protein AT5G65207 [Arabidopsis thaliana] | 72  | 73  | 3.00E-21  | 101.4 | 72.2 | 84.7 | uncharacterized protein                                  | gbpln | Arabidopsis thaliana | AT5G65207.1   Symbols:   unknown protein; BEST Arabidopsis thaliana protein match is: unknown protein (TAIR:AT5G10040.1); Has 30201 Blast hits to 17322 proteins in 780 species: Archae - 12; Bacteria - 1396; Metazoa - 17338; Fungi - 3422; Plants - 5037; Viruses - 0; Other Eukaryotes - 2996 (source: NCBI BLINK).   chr5:26052364-26052585 REVERSE LENGTH=73                                                                                                     | 72  | 73  | 4.00E-24  | 101.4 | 72.2 | 84.7 |
| Rsa1.0_00073.1.g3853.t1 | #                                                                                                                                                                                                                                                                                                                                                          | #   | #   | #         | #     | #    | #    | -                                                        | ---   | ---                  | #                                                                                                                                                                                                                                                                                                                                                                                                                                                                      | #   | #   | #         | #     | #    |      |
| Rsa1.0_00073.1.g3854.t1 | gb ACU32463.1  TGA2 protein [Brassica rapa subsp. pekinensis]                                                                                                                                                                                                                                                                                              | 370 | 367 | 0         | 99.2  | 89.7 | 93.8 | TGA2 protein                                             | gbpln | Brassica rapa        | AT5G65210.5   Symbols: TGA1   bZIP transcription factor family protein   chr5:26058031-26060749 FORWARD LENGTH=368                                                                                                                                                                                                                                                                                                                                                     | 370 | 368 | 0         | 99.5  | 87.6 | 94.3 |
| Rsa1.0_00073.1.g3855.t1 | refXP_004288191.1  PREDICTED: 50S ribosomal protein L29, chloroplastic-like [Fragaria vesca subsp. vesca]                                                                                                                                                                                                                                                  | 94  | 174 | 2.00E-16  | 185.1 | 45.7 | 59.6 | PREDICTED: 50S ribosomal protein L29, chloroplastic-like | gbpln | Fragaria vesca       | AT5G65220.1   Symbols:   Ribosomal L29 family protein   chr5:26061301-26062506 FORWARD LENGTH=173                                                                                                                                                                                                                                                                                                                                                                      | 94  | 173 | 2.00E-18  | 184.0 | 47.9 | 57.4 |
| Rsa1.0_00073.1.g3856.t1 | refXP_002866660.1  hypothetical protein ARALYDRAFT_496756 [Arabidopsis lyrata subsp. lyrata] gi 297312495 gb EFH42919.1  hypothetical protein ARALYDRAFT_496756 [Arabidopsis lyrata subsp. lyrata]                                                                                                                                                         | 279 | 299 | 1.00E-108 | 107.2 | 77.4 | 84.6 | hypothetical protein ARALYDRAFT_496756                   | gbpln | Arabidopsis lyrata   | AT5G65250.1   Symbols:   unknown protein; FUNCTIONS IN: molecular_function unknown; INVOLVED IN: biological_process unknown; LOCATED IN: chloroplast; EXPRESSED IN: 22 plant structures; EXPRESSED DURING: 13 growth stages; Has 30201 Blast hits to 17322 proteins in 780 species: Archae - 12; Bacteria - 1396; Metazoa - 17338; Fungi - 3422; Plants - 5037; Viruses - 0; Other Eukaryotes - 2996 (source: NCBI BLINK).   chr5:26078699-26080051 REVERSE LENGTH=300 | 279 | 300 | 1.00E-110 | 107.5 | 77.1 | 85.3 |
| Rsa1.0_00073.1.g3857.t1 | gb EOA12395.1  hypothetical protein CARUB_v10027046mg, partial [Capsella rubella]                                                                                                                                                                                                                                                                          | 211 | 233 | 1.00E-105 | 110.4 | 89.6 | 93.4 | hypothetical protein CARUB_v10027046mg, partial          | gbpln | Capsella rubella     | AT5G65260.1   Symbols:   RNA-binding (RRM/RBD/RNP motifs) family protein   chr5:26080501-26082984 REVERSE LENGTH=220                                                                                                                                                                                                                                                                                                                                                   | 211 | 220 | 1.00E-105 | 104.3 | 91.5 | 96.2 |
| Rsa1.0_00073.1.g3858.t1 | refXP_002864951.1  LMBR1 integral membrane family protein [Arabidopsis lyrata subsp. lyrata] gi 297310786 gb EFH41210.1  LMBR1 integral membrane family protein [Arabidopsis lyrata subsp. lyrata]                                                                                                                                                         | 733 | 733 | 0         | 100.0 | 91.8 | 95.8 | LMBR1 integral membrane family protein                   | gbpln | Arabidopsis lyrata   | AT5G65290.1   Symbols:   LMBR1-like membrane protein   chr5:26089814-26094337 FORWARD LENGTH=733                                                                                                                                                                                                                                                                                                                                                                       | 733 | 733 | 0         | 100.0 | 91.8 | 95.5 |
| Rsa1.0_00073.1.g3859.t1 | refXP_002866663.1  hypothetical protein ARALYDRAFT_496763 [Arabidopsis lyrata subsp. lyrata] gi 297312498 gb EFH42922.1  hypothetical protein ARALYDRAFT_496763 [Arabidopsis lyrata subsp. lyrata]                                                                                                                                                         | 149 | 150 | 4.00E-37  | 100.7 | 65.1 | 76.5 | hypothetical protein ARALYDRAFT_496763                   | gbpln | Arabidopsis lyrata   | AT5G65300.1   Symbols:   unknown protein; Has 30201 Blast hits to 17322 proteins in 780 species: Archae - 12; Bacteria - 1396; Metazoa - 17338; Fungi - 3422; Plants - 5037; Viruses - 0; Other Eukaryotes - 2996 (source: NCBI BLINK).   chr5:26095266-26095718 REVERSE LENGTH=150                                                                                                                                                                                    | 149 | 150 | 9.00E-30  | 100.7 | 61.7 | 73.8 |
| Rsa1.0_00073.1.g3860.t1 | gb EOA13730.1  hypothetical protein CARUB_v10026808mg [Capsella rubella]                                                                                                                                                                                                                                                                                   | 312 | 315 | 1.00E-133 | 101.0 | 83.3 | 88.5 | hypothetical protein CARUB_v10026808mg                   | gbpln | Capsella rubella     | AT5G65310.1   Symbols: ATHB5, ATHB-5, HB5   homeobox protein 5   chr5:26102457-26104217 REVERSE LENGTH=312                                                                                                                                                                                                                                                                                                                                                             | 312 | 312 | 1.00E-135 | 100.0 | 82.7 | 89.4 |
| Rsa1.0_00073.1.g3861.t1 | gb EOA14656.1  hypothetical protein CARUB_v10027920mg [Capsella rubella]                                                                                                                                                                                                                                                                                   | 257 | 293 | 3.00E-86  | 114.0 | 68.9 | 82.1 | hypothetical protein CARUB_v10027920mg                   | gbpln | Capsella rubella     | AT5G65320.1   Symbols:   basic helix-loop-helix (bHLH) DNA-binding superfamily protein   chr5:26107368-26108640 REVERSE LENGTH=296                                                                                                                                                                                                                                                                                                                                     | 257 | 296 | 1.00E-82  | 115.2 | 69.3 | 80.9 |
| Rsa1.0_00073.1.g3862.t1 | refNP_201336.1  protein agamous-like 78 [Arabidopsis thaliana] gi 9759613 dbj BAB11555.1  unnamed protein product [Arabidopsis thaliana] gi 32402412 gb AAN52788.1  MADS-box protein AGL78 [Arabidopsis thaliana] gi 332010657 gb AED98040.1  protein agamous-like 78 [Arabidopsis thaliana]                                                               | 339 | 341 | 1.00E-71  | 100.6 | 50.7 | 63.4 | protein agamous-like 78                                  | gbpln | Arabidopsis thaliana | AT5G65330.1   Symbols: AGL78   AGAMOUS-like 78   chr5:26110326-26111351 FORWARD LENGTH=341                                                                                                                                                                                                                                                                                                                                                                             | 339 | 341 | 3.00E-74  | 100.6 | 50.7 | 63.4 |
| Rsa1.0_00073.1.g3863.t1 | gb AAD32950.1  putative non-LTR retroelement reverse transcriptase [Arabidopsis thaliana]                                                                                                                                                                                                                                                                  | 258 | 773 | 3.00E-26  | 299.6 | 29.1 | 43.8 | putative non-LTR retroelement reverse transcriptase      | gbpln | Arabidopsis thaliana | AT4G2090.1   Symbols:   Ribonuclease H-like superfamily protein   chr4:14333528-14335255 FORWARD LENGTH=575                                                                                                                                                                                                                                                                                                                                                            | 258 | 575 | 2.00E-15  | 222.9 | 29.8 | 45.7 |

|                         |                                                                                                                                                                                                                                                                                                                                                                                                                                                                                                                                                               |     |      |           |       |       |       |                                                     |             |                      |                                                                                                                                                                                                                                                                                                                                                                                                                                                                                                   |     |     |           |       |       |       |
|-------------------------|---------------------------------------------------------------------------------------------------------------------------------------------------------------------------------------------------------------------------------------------------------------------------------------------------------------------------------------------------------------------------------------------------------------------------------------------------------------------------------------------------------------------------------------------------------------|-----|------|-----------|-------|-------|-------|-----------------------------------------------------|-------------|----------------------|---------------------------------------------------------------------------------------------------------------------------------------------------------------------------------------------------------------------------------------------------------------------------------------------------------------------------------------------------------------------------------------------------------------------------------------------------------------------------------------------------|-----|-----|-----------|-------|-------|-------|
| Rsa1.0_00073.1.g3864.t1 | refNP_201337.1  uncharacterized protein [Arabidopsis thaliana]<br>gi 9759614 dbj BAB11556.1  unnamed protein product [Arabidopsis thaliana]<br>gi 34146816 gb AA062416.1  At5g65340 [Arabidopsis thaliana]<br>gi 51969418 dbj BAD43401.1  putative protein [Arabidopsis thaliana]<br>gi 332010658 gb AED98041.1  uncharacterized protein AT5G65340 [Arabidopsis thaliana]                                                                                                                                                                                     | 251 | 253  | 1.00E-118 | 100.8 | 86.1  | 94.0  | uncharacterized protein                             | gbpln       | Arabidopsis thaliana | AT5G65340.1   Symbols:   Protein of unknown function, DUF617   chr5:26113684-26114445 REVERSE LENGTH=253                                                                                                                                                                                                                                                                                                                                                                                          | 251 | 253 | 1.00E-121 | 100.8 | 86.1  | 94.0  |
| Rsa1.0_00073.1.g3865.t1 | tpg[DAA55311.1] TPA: histone H3.2 [Zea mays]                                                                                                                                                                                                                                                                                                                                                                                                                                                                                                                  | 136 | 245  | 1.00E-72  | 180.1 | 100.0 | 100.0 | TPA: histone H3.2                                   | gbenv/gbpln | Zea mays             | AT5G65360.1   Symbols:   Histone superfamily protein   chr5:26120099-26120509 REVERSE LENGTH=136                                                                                                                                                                                                                                                                                                                                                                                                  | 136 | 136 | 5.00E-74  | 100.0 | 100.0 | 100.0 |
| Rsa1.0_00073.1.g3866.t1 | refXP_002864953.1  hypothetical protein ARALYDRAFT_358736 [Arabidopsis lyrata subsp. lyrata]<br>gi 297310788 gb EFH41212.1  hypothetical protein ARALYDRAFT_358736 [Arabidopsis lyrata subsp. lyrata]                                                                                                                                                                                                                                                                                                                                                         | 293 | 295  | 1.00E-122 | 100.7 | 73.0  | 84.0  | hypothetical protein ARALYDRAFT_358736              | gbpln       | Arabidopsis lyrata   | AT5G65370.1   Symbols:   ENTH/ANTH/VHS superfamily protein   chr5:26121708-26122749 FORWARD LENGTH=295                                                                                                                                                                                                                                                                                                                                                                                            | 293 | 295 | 1.00E-118 | 100.7 | 70.6  | 80.9  |
| Rsa1.0_00073.1.g3867.t1 | gb[EOA13275.1] hypothetical protein CARUB_v10026304mg [Capsella rubella]                                                                                                                                                                                                                                                                                                                                                                                                                                                                                      | 301 | 486  | 1.00E-139 | 161.5 | 84.1  | 92.0  | hypothetical protein CARUB_v10026304mg              | gbpln       | Capsella rubella     | AT5G65380.1   Symbols:   MATE efflux family protein   chr5:26123241-26126352 REVERSE LENGTH=486                                                                                                                                                                                                                                                                                                                                                                                                   | 301 | 486 | 1.00E-141 | 161.5 | 84.1  | 92.0  |
| Rsa1.0_00073.1.g3868.t1 | # # # # # # # # - ----                                                                                                                                                                                                                                                                                                                                                                                                                                                                                                                                        |     |      |           |       |       |       |                                                     |             |                      | # # # # # # # #                                                                                                                                                                                                                                                                                                                                                                                                                                                                                   |     |     |           |       |       |       |
| Rsa1.0_00073.1.g3869.t1 | gb[EOA13872.1] hypothetical protein CARUB_v10026973mg [Capsella rubella]                                                                                                                                                                                                                                                                                                                                                                                                                                                                                      | 258 | 261  | 1.00E-110 | 101.2 | 77.9  | 86.4  | hypothetical protein CARUB_v10026973mg              | gbpln       | Capsella rubella     | AT5G65400.1   Symbols:   alpha/beta-Hydrolases superfamily protein   chr5:26131448-26133062 FORWARD LENGTH=252                                                                                                                                                                                                                                                                                                                                                                                    | 258 | 252 | 1.00E-106 | 97.7  | 77.5  | 86.4  |
| Rsa1.0_00073.1.g3870.t1 | dbj BAJ34581.1  unnamed protein product [Theilungiella halophila]                                                                                                                                                                                                                                                                                                                                                                                                                                                                                             | 262 | 286  | 3.00E-98  | 109.2 | 82.4  | 88.2  | unnamed protein product                             | ----        | ----                 | AT5G65410.1   Symbols:   ATHB25, ZFHD2, HB25, ZHD1   homeobox protein 25   chr5:26136179-26137018 FORWARD LENGTH=279                                                                                                                                                                                                                                                                                                                                                                              | 262 | 279 | 8.00E-92  | 106.5 | 77.5  | 83.2  |
| Rsa1.0_00073.1.g3871.t3 | gb AAD22286.1  putative non-LTR retroelement reverse transcriptase [Arabidopsis thaliana]                                                                                                                                                                                                                                                                                                                                                                                                                                                                     | 356 | 1311 | 1.00E-28  | 368.3 | 33.7  | 43.3  | putative non-LTR retroelement reverse transcriptase | gbpln       | Arabidopsis thaliana | AT1G10000.1   Symbols:   Ribonuclease H-like superfamily protein   chr1:3263877-3264788 REVERSE LENGTH=303                                                                                                                                                                                                                                                                                                                                                                                        | 356 | 303 | 5.00E-26  | 85.1  | 21.1  | 34.3  |
| Rsa1.0_00073.1.g3872.t1 | refXP_002864958.1  hypothetical protein ARALYDRAFT_496780 [Arabidopsis lyrata subsp. lyrata]<br>gi 297310793 gb EFH41217.1  hypothetical protein ARALYDRAFT_496780 [Arabidopsis lyrata subsp. lyrata]                                                                                                                                                                                                                                                                                                                                                         | 506 | 504  | 0         | 99.6  | 91.5  | 94.9  | hypothetical protein ARALYDRAFT_496780              | gbpln       | Arabidopsis lyrata   | AT5G65470.1   Symbols:   O-fucosyltransferase family protein   chr5:26172432-26174904 FORWARD LENGTH=504                                                                                                                                                                                                                                                                                                                                                                                          | 506 | 504 | 0         | 99.6  | 90.7  | 94.9  |
| Rsa1.0_00073.1.g3873.t1 | gb AAL87313.1  unknown protein [Arabidopsis thaliana]                                                                                                                                                                                                                                                                                                                                                                                                                                                                                                         | 89  | 645  | 9.00E-24  | 724.7 | 60.7  | 64.0  | unknown protein                                     | gbpln       | Arabidopsis thaliana | AT5G65490.1   Symbols:   FUNCTIONS IN: molecular function unknown; INVOLVED IN: biological process unknown; LOCATED IN: chloroplast; EXPRESSED IN: 22 plant structures; EXPRESSED DURING: 13 growth stages; CONTAINS InterPro DOMAIN/s: SGT1 (InterPro:IPR010770); Has 1807 Blast hits to 1807 proteins in 277 species: Archae - 0; Bacteria - 0; Metazoa - 736; Fungi - 347; Plants - 385; Viruses - 0; Other Eukaryotes - 339 (source: NCBI BLINK).   chr5:26178003-26180309 REVERSE LENGTH=643 | 89  | 643 | 1.00E-26  | 722.5 | 60.7  | 64.0  |
| Rsa1.0_00073.1.g3874.t1 | gb[EOA30867.1] hypothetical protein CARUB_v10014010mg [Capsella rubella]                                                                                                                                                                                                                                                                                                                                                                                                                                                                                      | 403 | 366  | 1.00E-148 | 90.8  | 65.0  | 73.9  | hypothetical protein CARUB_v10014010mg              | gbpln       | Capsella rubella     | AT3G57640.1   Symbols:   Protein kinase superfamily protein   chr3:21344921-21345991 REVERSE LENGTH=356                                                                                                                                                                                                                                                                                                                                                                                           | 403 | 356 | 3.00E-86  | 88.3  | 45.9  | 57.6  |
| Rsa1.0_00073.1.g3875.t1 | refNP_201356.2  protein kinase family protein [Arabidopsis thaliana]<br>gi 332010684 gb AED98067.1  protein kinase family protein [Arabidopsis thaliana]                                                                                                                                                                                                                                                                                                                                                                                                      | 470 | 456  | 0         | 97.0  | 84.9  | 90.6  | protein kinase family protein                       | gbpln       | Arabidopsis thaliana | AT5G65530.1   Symbols:   Protein kinase superfamily protein   chr5:26190844-26192826 REVERSE LENGTH=456                                                                                                                                                                                                                                                                                                                                                                                           | 470 | 456 | 0         | 97.0  | 84.9  | 90.6  |
| Rsa1.0_00073.1.g3876.t1 | refNP_201362.1  Dof zinc finger protein DOF5.7 [Arabidopsis thaliana]<br>gi 55583993 sp Q9L5L6.1  DOF5.7 ARAT H RecName: Full=Dof zinc finger protein DOF5.7; Short=AtDOF5.7<br>gi 8978287 dbj BAA98178.1  DOF zinc finger protein-like [Arabidopsis thaliana]<br>gi 50198797 gb AAT70432.1  At5g65590 [Arabidopsis thaliana]<br>gi 52421291 gb AAU45215.1  At4g35930 [Arabidopsis thaliana]<br>gi 225879166 dbj BAH30653.1  hypothetical protein [Arabidopsis thaliana]<br>gi 332010691 gb AED98074.1  Dof zinc finger protein DOF5.7 [Arabidopsis thaliana] | 288 | 316  | 1.00E-119 | 109.7 | 80.6  | 87.2  | Dof zinc finger protein DOF5.7                      | gbpln       | Arabidopsis thaliana | AT5G65590.1   Symbols:   Dof-type zinc finger DNA-binding family protein   chr5:26212084-26213034 REVERSE LENGTH=316                                                                                                                                                                                                                                                                                                                                                                              | 288 | 316 | 1.00E-122 | 109.7 | 80.6  | 87.2  |

|                         |                                                                                                                                                                                                                                                                                                                                                                                                                              |      |      |           |       |      |      |                                                     |       |                      |                                                                                                                                               |      |      |           |       |      |      |
|-------------------------|------------------------------------------------------------------------------------------------------------------------------------------------------------------------------------------------------------------------------------------------------------------------------------------------------------------------------------------------------------------------------------------------------------------------------|------|------|-----------|-------|------|------|-----------------------------------------------------|-------|----------------------|-----------------------------------------------------------------------------------------------------------------------------------------------|------|------|-----------|-------|------|------|
| Rsa1.0_00073.1.g3877.t1 | #                                                                                                                                                                                                                                                                                                                                                                                                                            | #    | #    | #         | #     | #    | #    | #                                                   | -     | ----                 | ----                                                                                                                                          | #    | #    | #         | #     | #    | #    |
| Rsa1.0_00074.1.g3878.t1 | dbj BAB11288.1  unnamed protein product [Arabidopsis thaliana]                                                                                                                                                                                                                                                                                                                                                               | 955  | 978  | 0         | 102.4 | 66.0 | 76.3 | unnamed protein product                             | gbpln | Arabidopsis thaliana | AT1G66880.1   Symbols:   Protein kinase superfamily protein   chr1:24946928-24955438 FORWARD LENGTH=1296                                      | 955  | 1296 | 0         | 135.7 | 53.5 | 67.1 |
| Rsa1.0_00074.1.g3879.t1 | gb AAC26241.1  F9D12.15 gene product [Arabidopsis thaliana]                                                                                                                                                                                                                                                                                                                                                                  | 789  | 850  | 1.00E-111 | 107.7 | 34.5 | 49.3 | F9D12.15 gene product                               | gbpln | Arabidopsis thaliana | #                                                                                                                                             | #    | #    | #         | #     | #    |      |
| Rsa1.0_00074.1.g3880.t1 | #                                                                                                                                                                                                                                                                                                                                                                                                                            | #    | #    | #         | #     | #    | #    | -                                                   | ----  | ----                 | #                                                                                                                                             | #    | #    | #         | #     | #    |      |
| Rsa1.0_00074.1.g3881.t1 | ref XP_002870862.1  hypothetical protein ARALYDRAFT_494160 [Arabidopsis lyrata subsp. lyrata] gi 297316698 gb EFH47121.1  hypothetical protein ARALYDRAFT_494160 [Arabidopsis lyrata subsp. lyrata] ref NP_198631.2  plastid movement impaired 15 protein [Arabidopsis thaliana]                                                                                                                                             | 427  | 436  | 0         | 102.1 | 90.4 | 96.5 | hypothetical protein ARALYDRAFT_494160              | gbpln | Arabidopsis lyrata   | AT5G38200.1   Symbols:   Class I glutamine amidotransferase-like superfamily protein   chr5:15256383-15258474 FORWARD LENGTH=436              | 427  | 436  | 0         | 102.1 | 89.9 | 96.3 |
| Rsa1.0_00074.1.g3882.t1 | gi 334302885 sp Q9FF41.3 PMI15.ARAT H RecName: Full=Protein PLASTID MOVEMENT IMPAIRED 15 gi 332006890 gb AED94273.1  plastid movement impaired 15 protein [Arabidopsis thaliana]                                                                                                                                                                                                                                             | 573  | 579  | 1.00E-157 | 101.0 | 60.9 | 75.9 | plastid movement impaired 15 protein                | gbpln | Arabidopsis thaliana | AT5G38150.1   Symbols: PMI15   Plant protein of unknown function (DUF827)   chr5:15223116-15224950 REVERSE LENGTH=579                         | 573  | 579  | 1.00E-160 | 101.0 | 60.9 | 75.9 |
| Rsa1.0_00074.1.g3883.t1 | gb AAC33226.1  putative non-LTR retroelement reverse transcriptase [Arabidopsis thaliana]                                                                                                                                                                                                                                                                                                                                    | 1225 | 1529 | 0         | 124.8 | 34.6 | 46.7 | putative non-LTR retroelement reverse transcriptase | gbpln | Arabidopsis thaliana | AT3G24255.1   Symbols:   RNA-directed DNA polymerase (reverse transcriptase)-related family protein   chr3:8789471-8793208 FORWARD LENGTH=746 | 1225 | 746  | 1.00E-86  | 60.9  | 13.8 | 19.0 |
| Rsa1.0_00074.1.g3884.t1 | ref NP_198630.2  nuclear transcription factor Y subunit C-10 [Arabidopsis thaliana] gi 75221594 sp Q58CM8.1 NFYCA ARAT H RecName: Full=Nuclear transcription factor Y subunit C-10; Short=AtNF-YC-10 gi 61656131 gb AAX49368.1  At5g38140 [Arabidopsis thaliana] gi 107738227 gb ABF83665.1  At5g38140 [Arabidopsis thaliana] gi 332006889 gb AED94272.1  nuclear transcription factor Y subunit C-10 [Arabidopsis thaliana] | 218  | 195  | 3.00E-56  | 89.4  | 54.1 | 64.7 | nuclear transcription factor Y subunit C-10         | gbpln | Arabidopsis thaliana | AT5G38140.1   Symbols: NF-YC12   nuclear factor Y, subunit C12   chr5:15220377-15222025 REVERSE LENGTH=195                                    | 218  | 195  | 9.00E-59  | 89.4  | 54.1 | 64.7 |
| Rsa1.0_00074.1.g3885.t1 | #                                                                                                                                                                                                                                                                                                                                                                                                                            | #    | #    | #         | #     | #    | #    | -                                                   | ----  | ----                 | #                                                                                                                                             | #    | #    | #         | #     | #    |      |
| Rsa1.0_00074.1.g3886.t1 | dbj BAA85462.1  transposon-like ORF [Brassica rapa]                                                                                                                                                                                                                                                                                                                                                                          | 436  | 703  | 8.00E-70  | 161.2 | 30.7 | 36.0 | transposon-like ORF                                 | gbpln | Brassica rapa        | #                                                                                                                                             | #    | #    | #         | #     | #    |      |
| Rsa1.0_00074.1.g3887.t1 | gb EOA26039.1  hypothetical protein CARUB_v10019447mg [Capsella rubella]                                                                                                                                                                                                                                                                                                                                                     | 437  | 442  | 0         | 101.1 | 74.8 | 84.4 | hypothetical protein CARUB_v10019447mg              | gbpln | Capsella rubella     | AT5G38130.1   Symbols:   HXXXD-type acyl-transferase family protein   chr5:15217956-15219344 REVERSE LENGTH=462                               | 437  | 462  | 0         | 105.7 | 74.1 | 85.1 |
| Rsa1.0_00074.1.g3888.t1 | #                                                                                                                                                                                                                                                                                                                                                                                                                            | #    | #    | #         | #     | #    | #    | -                                                   | ----  | ----                 | #                                                                                                                                             | #    | #    | #         | #     | #    |      |
| Rsa1.0_00074.1.g3889.t1 | gb ABV21212.1  Ty1_Copia-element protein [Arabidopsis thaliana]                                                                                                                                                                                                                                                                                                                                                              | 473  | 438  | 1.00E-85  | 92.6  | 35.7 | 53.1 | Ty1_Copia-element protein                           | gbpln | Arabidopsis thaliana | AT3G24255.1   Symbols:   RNA-directed DNA polymerase (reverse transcriptase)-related family protein   chr3:8789471-8793208 FORWARD LENGTH=746 | 473  | 746  | 1.00E-55  | 157.7 | 28.1 | 42.9 |
| Rsa1.0_00074.1.g3890.t1 | #                                                                                                                                                                                                                                                                                                                                                                                                                            | #    | #    | #         | #     | #    | #    | -                                                   | ----  | ----                 | #                                                                                                                                             | #    | #    | #         | #     | #    |      |
| Rsa1.0_00074.1.g3891.t1 | dbj BAB02625.1  unnamed protein product [Arabidopsis thaliana]                                                                                                                                                                                                                                                                                                                                                               | 395  | 420  | 2.00E-85  | 106.3 | 47.8 | 61.8 | unnamed protein product                             | gbpln | Arabidopsis thaliana | AT3G28223.1   Symbols:   F-box family protein   chr3:10527669-10528921 REVERSE LENGTH=391                                                     | 395  | 391  | 2.00E-76  | 99.0  | 42.0 | 58.2 |
| Rsa1.0_00074.1.g3892.t1 | dbj BAC41800.2  putative disease resistance protein [Arabidopsis thaliana]                                                                                                                                                                                                                                                                                                                                                   | 435  | 977  | 9.00E-91  | 224.6 | 46.9 | 62.8 | putative disease resistance protein                 | gbpln | Arabidopsis thaliana | AT5G40910.1   Symbols:   Disease resistance protein (TIR-NBS-LRR class) family   chr5:16395507-16399129 FORWARD LENGTH=1104                   | 435  | 1104 | 2.00E-93  | 253.8 | 46.9 | 62.8 |
| Rsa1.0_00074.1.g3893.t1 | ref XP_002868590.1  predicted protein [Arabidopsis lyrata subsp. lyrata] gi 297314426 gb EFH44849.1  predicted protein [Arabidopsis lyrata subsp. lyrata]                                                                                                                                                                                                                                                                    | 786  | 624  | 0         | 79.4  | 57.8 | 66.4 | predicted protein                                   | gbpln | Arabidopsis lyrata   | AT5G41550.1   Symbols:   Disease resistance protein (TIR-NBS-LRR class) family   chr5:16617232-16620785 REVERSE LENGTH=1085                   | 786  | 1085 | 0         | 138.0 | 56.0 | 64.5 |
| Rsa1.0_00074.1.g3894.t1 | ref XP_002870580.1  hypothetical protein ARALYDRAFT_915957 [Arabidopsis lyrata subsp. lyrata] gi 297316416 gb EFH46839.1  hypothetical protein ARALYDRAFT_915957 [Arabidopsis lyrata subsp. lyrata]                                                                                                                                                                                                                          | 329  | 286  | 4.00E-71  | 86.9  | 40.4 | 50.2 | hypothetical protein ARALYDRAFT_915957              | gbpln | Arabidopsis lyrata   | AT5G37890.1   Symbols:   Protein with RING/U-box and TRAF-like domains   chr5:15090512-15091822 REVERSE LENGTH=286                            | 329  | 286  | 9.00E-70  | 86.9  | 38.6 | 49.2 |
| Rsa1.0_00074.1.g3895.t1 | gb AAC95173.1  putative retroelement pol polyprotein [Arabidopsis thaliana]                                                                                                                                                                                                                                                                                                                                                  | 1231 | 1200 | 0         | 97.5  | 47.8 | 59.1 | putative retroelement pol polyprotein               | gbpln | Arabidopsis thaliana | AT4G23160.1   Symbols: CRK8   cysteine-rich RLK (RECEPTOR-like protein kinase) 8   chr4:12129485-12134086 FORWARD LENGTH=1262                 | 1231 | 1262 | 9.00E-44  | 102.5 | 7.2  | 11.5 |



|                         |                                                                                                                                                                                                                                                                                                                                                                      |     |     |           |       |      |      |                                                                                                                                                                         |       |                         |                                                                                                                                                                                                                                                                                                                                                     |     |     |           |       |      |      |
|-------------------------|----------------------------------------------------------------------------------------------------------------------------------------------------------------------------------------------------------------------------------------------------------------------------------------------------------------------------------------------------------------------|-----|-----|-----------|-------|------|------|-------------------------------------------------------------------------------------------------------------------------------------------------------------------------|-------|-------------------------|-----------------------------------------------------------------------------------------------------------------------------------------------------------------------------------------------------------------------------------------------------------------------------------------------------------------------------------------------------|-----|-----|-----------|-------|------|------|
| Rsa1.0_00074.1.g3896.t1 | sp O65780.1 GALE1_CYATE RecName: Full=UDP-glucose 4-epimerase GEPI42; AltName: Full=Galactowaldenase; AltName: Full=UDP-galactose 4-epimerase [3021355]emb CAA06338.1 UDP-galactose 4-epimerase [Cyamopsis tetragonoloba]                                                                                                                                            | 73  | 354 | 2.00E-21  | 484.9 | 64.4 | 69.9 | RecName: Full=UDP-glucose 4-epimerase GEPI42; AltName: Full=Galactowaldenase; AltName: Full=UDP-galactose 4-epimerase [3021355]emb CAA06338.1 UDP-galactose 4-epimerase | gbpln | Cyamopsis tetragonoloba | AT1G12780.1   Symbols: UGE1, ATUGE1   UDP-D-glucose/UDP-D-galactose 4-epimerase 1   chr1:4356124-4358120 REVERSE LENGTH=351                                                                                                                                                                                                                         | 73  | 351 | 6.00E-23  | 480.8 | 63.0 | 68.5 |
| Rsa1.0_00074.1.g3897.t1 | ref XP_002870573.1  hypothetical protein ARALYDRAFT_355742 [Arabidopsis lyrata subsp. lyrata] gi 297316409 gb EFH46832.1  hypothetical protein ARALYDRAFT_355742 [Arabidopsis lyrata subsp. lyrata]                                                                                                                                                                  | 242 | 267 | 2.00E-91  | 110.3 | 78.9 | 86.8 | hypothetical protein ARALYDRAFT_355742                                                                                                                                  | gbpln | Arabidopsis lyrata      | AT5G37860.1   Symbols:   Heavy metal transport/detoxification superfamily protein   chr5:15069578-15070555 REVERSE LENGTH=262                                                                                                                                                                                                                       | 242 | 262 | 1.00E-93  | 108.3 | 78.1 | 86.4 |
| Rsa1.0_00074.1.g3898.t1 | gb ABE73472.1  putative pyridoxal kinase splice variant 1 [Brassica napus]                                                                                                                                                                                                                                                                                           | 331 | 334 | 1.00E-171 | 100.9 | 91.2 | 92.7 | putative pyridoxal kinase splice variant 1                                                                                                                              | gbpln | Brassica napus          | AT5G37850.2   Symbols: SOS4   pfkB-like carbohydrate kinase family protein   chr5:15065621-15068783 FORWARD LENGTH=309                                                                                                                                                                                                                              | 331 | 309 | 1.00E-168 | 93.4  | 88.5 | 91.8 |
| Rsa1.0_00074.1.g3899.t2 | dbj BAB10363.1  unnamed protein product [Arabidopsis thaliana]                                                                                                                                                                                                                                                                                                       | 213 | 219 | 1.00E-65  | 102.8 | 64.8 | 72.3 | unnamed protein product                                                                                                                                                 | gbpln | Arabidopsis thaliana    | AT5G37840.1   Symbols:   BEST Arabidopsis thaliana protein match is: plastid movement impaired 2 (TAIR:AT1G66480.1); Has 1807 Blast hits to 1807 proteins in 277 species: Archae - 0; Bacteria - 0; Metazoa - 736; Fungi - 347; Plants - 385; Viruses - 0; Other Eukaryotes - 339 (source: NCBI BLINK).   chr5:15062192-15063327 REVERSE LENGTH=214 | 213 | 214 | 4.00E-68  | 100.5 | 64.8 | 71.8 |
| Rsa1.0_00075.1.g3900.t1 | dbj BAB59032.1  cytokinin synthase [Arabidopsis thaliana]                                                                                                                                                                                                                                                                                                            | 334 | 330 | 1.00E-172 | 98.8  | 87.7 | 94.9 | cytokinin synthase                                                                                                                                                      | gbpln | Arabidopsis thaliana    | AT5G19040.1   Symbols: ATIPT5, IPT5   isopentenyltransferase 5   chr5:6362389-6363381 REVERSE LENGTH=330                                                                                                                                                                                                                                            | 334 | 330 | 1.00E-174 | 98.8  | 87.4 | 94.9 |
| Rsa1.0_00075.1.g3901.t1 | ref XP_002880309.1  hypothetical protein ARALYDRAFT_483931 [Arabidopsis lyrata subsp. lyrata] gi 297326146 gb EFH56568.1  hypothetical protein ARALYDRAFT_483931 [Arabidopsis lyrata subsp. lyrata]                                                                                                                                                                  | 74  | 492 | 4.00E-14  | 664.9 | 50.0 | 51.4 | hypothetical protein ARALYDRAFT_483931                                                                                                                                  | gbpln | Arabidopsis lyrata      | AT2G47510.2   Symbols: FUM1   fumarase 1   chr2:19498614-19502020 FORWARD LENGTH=492                                                                                                                                                                                                                                                                | 74  | 492 | 7.00E-17  | 664.9 | 50.0 | 51.4 |
| Rsa1.0_00075.1.g3902.t1 | ref NP_187269.1  ribosomal protein L34e-like protein [Arabidopsis thaliana] gi 862922 gb AAF3031.1 AC018907_11 unknown protein [Arabidopsis thaliana] gi 62867643 gb AAY17425.1  At3g06180 [Arabidopsis thaliana] gi 90962960 gb ABE02404.1  At3g06180 [Arabidopsis thaliana] gi 332640836 gb AEE74357.1  ribosomal protein L34e-like protein [Arabidopsis thaliana] | 221 | 241 | 1.00E-58  | 109.0 | 68.3 | 74.7 | ribosomal protein L34e-like protein                                                                                                                                     | gbpln | Arabidopsis thaliana    | AT3G06180.1   Symbols:   Ribosomal protein L34e superfamily protein   chr3:1871705-1873554 FORWARD LENGTH=241                                                                                                                                                                                                                                       | 221 | 241 | 3.00E-61  | 109.0 | 68.3 | 74.7 |
| Rsa1.0_00075.1.g3903.t1 | ref NP_197403.2  mitochondrial editing factor 18 [Arabidopsis thaliana] gi 223635651 sp POC8Q8.1 PP394_ARATH RecName: Full=Penatricopeptide repeat-containing protein At5g19020. mitochondrial; Flags: Precursor gi 332005257 gb AED92640.1  mitochondrial editing factor 18 [Arabidopsis thaliana]                                                                  | 696 | 685 | 0         | 98.4  | 82.8 | 90.7 | mitochondrial editing factor 18                                                                                                                                         | gbpln | Arabidopsis thaliana    | AT5G19020.1   Symbols: MEF18   mitochondrial editing factor 18   chr5:6352771-6354828 REVERSE LENGTH=685                                                                                                                                                                                                                                            | 696 | 685 | 0         | 98.4  | 82.8 | 90.7 |
| Rsa1.0_00075.1.g3904.t1 | ref NP_197402.1  mitogen-activated protein kinase 16 [Arabidopsis thaliana] gi 14152844 sp Q8W4J2.2 MPK16_ARATH RecName: Full=Mitogen-activated protein kinase 16; Short=AtMPK16; Short=MAP kinase 16 gi 332005256 gb AED92639.1  mitogen-activated protein kinase 16 [Arabidopsis thaliana]                                                                         | 600 | 567 | 0         | 94.5  | 88.5 | 90.0 | mitogen-activated protein kinase 16                                                                                                                                     | gbpln | Arabidopsis thaliana    | AT5G19010.1   Symbols: MPK16   mitogen-activated protein kinase 16   chr5:6345096-6347676 REVERSE LENGTH=567                                                                                                                                                                                                                                        | 600 | 567 | 0         | 94.5  | 88.5 | 90.0 |

|                         |                                                                                                                                                                                                                                                                                                                                                                                                                                                                                                   |      |     |           |       |      |      |                                            |       |                      |                                                                                                                                                                                                                                                                                                                                                                                                                                                                  |      |     |           |       |      |      |
|-------------------------|---------------------------------------------------------------------------------------------------------------------------------------------------------------------------------------------------------------------------------------------------------------------------------------------------------------------------------------------------------------------------------------------------------------------------------------------------------------------------------------------------|------|-----|-----------|-------|------|------|--------------------------------------------|-------|----------------------|------------------------------------------------------------------------------------------------------------------------------------------------------------------------------------------------------------------------------------------------------------------------------------------------------------------------------------------------------------------------------------------------------------------------------------------------------------------|------|-----|-----------|-------|------|------|
| Rsa1.0_00075.1.g3905.t1 | refNP_197401.2  BTB-POZ and math domain-containing protein [Arabidopsis thaliana]<br>gi 75301130 sp Q8L765.1 BPM1_ARATH<br>RecName: Full=BTB/POZ and MATH domain-containing protein 1; AltName: Full=Protein BTB-POZ AND MATH DOMAIN 1; Short=AtBPM1<br>gi 22531225 gb AAM97116.1  putative protein [Arabidopsis thaliana]<br>gi 27311975 gb AAO00953.1  putative protein [Arabidopsis thaliana]<br>gi 332005254 gb AED92637.1  BTB-POZ and math domain-containing protein [Arabidopsis thaliana] | 425  | 407 | 0         | 95.8  | 76.0 | 81.6 | BTB-POZ and math domain-containing protein | gbpln | Arabidopsis thaliana | AT5G19000.1   Symbols: ATBPM1, BPM1   BTB-POZ and MATH domain 1   chr5:63424563-6344641 FORWARD LENGTH=407                                                                                                                                                                                                                                                                                                                                                       | 425  | 407 | 0         | 95.8  | 76.0 | 81.6 |
| Rsa1.0_00075.1.g3906.t1 | #                                                                                                                                                                                                                                                                                                                                                                                                                                                                                                 | #    | #   | #         | #     | #    | #    | -                                          | ----  | ----                 | #                                                                                                                                                                                                                                                                                                                                                                                                                                                                | #    | #   | #         | #     | #    |      |
| Rsa1.0_00075.1.g3907.t1 | gb EOA19340.1  hypothetical protein CARUB_v10000220mg [Capsella rubella]                                                                                                                                                                                                                                                                                                                                                                                                                          | 834  | 835 | 0         | 100.1 | 88.0 | 93.2 | hypothetical protein CARUB_v10000220mg     | gbpln | Capsella rubella     | AT5G18980.1   Symbols:   ARM repeat superfamily protein   chr5:6334944-6337943 REVERSE LENGTH=835                                                                                                                                                                                                                                                                                                                                                                | 834  | 835 | 0         | 100.1 | 87.5 | 92.9 |
| Rsa1.0_00075.1.g3908.t1 | gb EOA21686.1  hypothetical protein CARUB_v10002111mg [Capsella rubella]                                                                                                                                                                                                                                                                                                                                                                                                                          | 170  | 170 | 9.00E-86  | 100.0 | 92.9 | 95.9 | hypothetical protein CARUB_v10002111mg     | gbpln | Capsella rubella     | AT5G18970.1   Symbols:   AWPm-19-like family protein   chr5:6333714-6334539 REVERSE LENGTH=171                                                                                                                                                                                                                                                                                                                                                                   | 170  | 171 | 6.00E-86  | 100.6 | 91.8 | 95.3 |
| Rsa1.0_00075.1.g3909.t1 | gb EOA22563.1  hypothetical protein CARUB_v10003224mg [Capsella rubella]                                                                                                                                                                                                                                                                                                                                                                                                                          | 507  | 486 | 0         | 95.9  | 70.4 | 81.7 | hypothetical protein CARUB_v10003224mg     | gbpln | Capsella rubella     | AT5G18950.1   Symbols:   Tetratricopeptide repeat (TPR)-like superfamily protein   chr5:6328519-6329970 REVERSE LENGTH=483                                                                                                                                                                                                                                                                                                                                       | 507  | 483 | 0         | 95.3  | 68.4 | 80.1 |
| Rsa1.0_00075.1.g3910.t3 | #                                                                                                                                                                                                                                                                                                                                                                                                                                                                                                 | #    | #   | #         | #     | #    | #    | -                                          | ----  | ----                 | #                                                                                                                                                                                                                                                                                                                                                                                                                                                                | #    | #   | #         | #     | #    |      |
| Rsa1.0_00075.1.g3911.t1 | #                                                                                                                                                                                                                                                                                                                                                                                                                                                                                                 | #    | #   | #         | #     | #    | #    | -                                          | ----  | ----                 | #                                                                                                                                                                                                                                                                                                                                                                                                                                                                | #    | #   | #         | #     | #    |      |
| Rsa1.0_00075.1.g3912.t1 | gb EOA22928.1  hypothetical protein CARUB_v10003664mg [Capsella rubella]                                                                                                                                                                                                                                                                                                                                                                                                                          | 350  | 347 | 1.00E-170 | 99.1  | 86.0 | 93.1 | hypothetical protein CARUB_v10003664mg     | gbpln | Capsella rubella     | AT5G18930.1   Symbols: BUD2, SAMDC4   Adenosylmethionine decarboxylase family protein   chr5:6312172-6313215 REVERSE LENGTH=347                                                                                                                                                                                                                                                                                                                                  | 350  | 347 | 1.00E-173 | 99.1  | 86.0 | 91.4 |
| Rsa1.0_00075.1.g3913.t1 | gb EOA19930.1  hypothetical protein CARUB_v10000179mg [Capsella rubella]                                                                                                                                                                                                                                                                                                                                                                                                                          | 1011 | 893 | 0         | 88.3  | 73.8 | 79.5 | hypothetical protein CARUB_v10000179mg     | gbpln | Capsella rubella     | AT5G18860.1   Symbols:   inosine-uridine preferring nucleoside hydrolase family protein   chr5:6291023-6295581 FORWARD LENGTH=890                                                                                                                                                                                                                                                                                                                                | 1011 | 890 | 0         | 88.0  | 72.9 | 78.5 |
| Rsa1.0_00075.1.g3914.t1 | gb EOA22613.1  hypothetical protein CARUB_v10003281mg [Capsella rubella]                                                                                                                                                                                                                                                                                                                                                                                                                          | 62   | 96  | 2.00E-17  | 154.8 | 67.7 | 75.8 | hypothetical protein CARUB_v10003281mg     | gbpln | Capsella rubella     | AT5G18850.1   Symbols:   unknown protein; FUNCTIONS IN: molecular_function unknown; INVOLVED IN: biological_process unknown; LOCATED IN: endomembrane system; EXPRESSED IN: 23 plant structures; EXPRESSED DURING: 13 growth stages; Has 1807 Blast hits to 1807 proteins in 277 species: Archae - 0; Bacteria - 0; Metazoa - 736; Fungi - 347; Plants - 385; Viruses - 0; Other Eukaryotes - 339 (source: NCBI BLINK).   chr5:6286896-6287272 FORWARD LENGTH=99 | 62   | 99  | 1.00E-18  | 159.7 | 69.4 | 74.2 |
| Rsa1.0_00075.1.g3915.t1 | refNP_568367.1  sugar transporter ERD6-like 16 [Arabidopsis thaliana]<br>gi 118572295 sp Q8LB19.2 EDL16_ARATH<br>H RecName: Full=Sugar transporter ERD6-like 16<br>gi 17381265 gb AAL36051.1  AT5g18840/F17K4.90 [Arabidopsis thaliana]<br>gi 23309019 gb AAN18269.1  At5g18840/F17K4.90 [Arabidopsis thaliana]<br>gi 332005237 gb AED92620.1  sugar transporter ERD6-like 16 [Arabidopsis thaliana]                                                                                              | 488  | 482 | 0         | 98.8  | 88.7 | 92.0 | sugar transporter ERD6-like 16             | gbpln | Arabidopsis thaliana | AT5G18840.1   Symbols:   Major facilitator superfamily protein   chr5:6282954-6286399 FORWARD LENGTH=482                                                                                                                                                                                                                                                                                                                                                         | 488  | 482 | 0         | 98.8  | 88.7 | 92.0 |
| Rsa1.0_00075.1.g3916.t1 | dbj BAJ34638.1  unnamed protein product [Thellungiella halophila]                                                                                                                                                                                                                                                                                                                                                                                                                                 | 784  | 803 | 0         | 102.4 | 87.0 | 93.0 | unnamed protein product                    | ----  | ----                 | AT5G18830.1   Symbols: SPL7, ATSPL7   squamosa promoter binding protein-like 7   chr5:6276116-6280227 FORWARD LENGTH=801                                                                                                                                                                                                                                                                                                                                         | 784  | 801 | 0         | 102.2 | 83.9 | 90.4 |
| Rsa1.0_00075.1.g3917.t1 | #                                                                                                                                                                                                                                                                                                                                                                                                                                                                                                 | #    | #   | #         | #     | #    | #    | -                                          | ----  | ----                 | AT5G16620.1   Symbols: PDE120, TIC40, ATTIC40   hydroxyproline-rich glycoprotein family protein   chr5:5450808-5454256 FORWARD LENGTH=447                                                                                                                                                                                                                                                                                                                        | 53   | 447 | 2.00E-12  | 843.4 | 64.2 | 69.8 |

|                         |                                                                                                                                                                                                                                                                                                                                                                                                                                                                                                                                                                                                                                                                                                                                                                                                                                                                                                                                                                                                                                                                                                                                               |      |     |           |       |      |       |                                                      |       |                    |                                                                                                                                                                                                                                                                                                                                                                                                                                                                              |      |     |           |       |      |       |  |  |
|-------------------------|-----------------------------------------------------------------------------------------------------------------------------------------------------------------------------------------------------------------------------------------------------------------------------------------------------------------------------------------------------------------------------------------------------------------------------------------------------------------------------------------------------------------------------------------------------------------------------------------------------------------------------------------------------------------------------------------------------------------------------------------------------------------------------------------------------------------------------------------------------------------------------------------------------------------------------------------------------------------------------------------------------------------------------------------------------------------------------------------------------------------------------------------------|------|-----|-----------|-------|------|-------|------------------------------------------------------|-------|--------------------|------------------------------------------------------------------------------------------------------------------------------------------------------------------------------------------------------------------------------------------------------------------------------------------------------------------------------------------------------------------------------------------------------------------------------------------------------------------------------|------|-----|-----------|-------|------|-------|--|--|
|                         | ret[NP_197381.1] NADH dehydrogenase (ubiquinone) 1 alpha subcomplex 8 [Arabidopsis thaliana]<br>gi 30687007 ref NP_850849.1  NADH dehydrogenase (ubiquinone) 1 alpha subcomplex 8 [Arabidopsis thaliana]<br>gi 297807915 ref XP_002871841.1  NADH-ubiquinone oxidoreductase 19 kDa subunit family protein [Arabidopsis lyrata subsp. lyrata]<br>gi 75156052 sp Q8LGE7.1 NDA8B_ARAT H RecName: Full=NADH dehydrogenase [ubiquinone] 1 alpha subcomplex subunit 8-B<br>gi 21536569 gb AAM60901.1  NADH:ubiquinone oxidoreductase-like protein [Arabidopsis thaliana]<br>gi 28466879 gb AAO44048.1  At5g18800 [Arabidopsis thaliana]<br>gi 110735767 dbj BAE99861.1  NADH:ubiquinone oxidoreductase like protein [Arabidopsis thaliana]<br>gi 297317678 gb EFH48100.1  NADH-ubiquinone oxidoreductase 19 kDa subunit family protein [Arabidopsis lyrata subsp. lyrata]<br>gi 332005230 gb AED92613.1  NADH dehydrogenase (ubiquinone) 1 alpha subcomplex 8 [Arabidopsis thaliana]<br>gi 332005231 gb AED92614.1  NADH dehydrogenase (ubiquinone) 1 alpha subcomplex 8 [Arabidopsis thaliana]<br>gi 482557653 gb EOA21845.1  hypothetical protein |      |     |           |       |      |       |                                                      |       |                    |                                                                                                                                                                                                                                                                                                                                                                                                                                                                              |      |     |           |       |      |       |  |  |
| Rsa1.0_00075.1.g3918.t1 | gb EAOA32347.1  hypothetical protein CARUB_v10015614mg [Capsella rubella]                                                                                                                                                                                                                                                                                                                                                                                                                                                                                                                                                                                                                                                                                                                                                                                                                                                                                                                                                                                                                                                                     | 106  | 106 | 6.00E-56  | 100.0 | 99.1 | 100.0 | NADH dehydrogenase (ubiquinone) 1 alpha subcomplex 8 | gbpln | Arabidopsis lyrata | AT5G18800.2   Symbols:   Cox19-like CHCH family protein   chr5:6267304-6268393 FORWARD LENGTH=106                                                                                                                                                                                                                                                                                                                                                                            | 106  | 106 | 1.00E-58  | 100.0 | 99.1 | 100.0 |  |  |
| Rsa1.0_00075.1.g3919.t1 | gb EOA19923.1  hypothetical protein CARUB_v10000173mg [Capsella rubella]                                                                                                                                                                                                                                                                                                                                                                                                                                                                                                                                                                                                                                                                                                                                                                                                                                                                                                                                                                                                                                                                      | 119  | 97  | 3.00E-26  | 81.5  | 48.7 | 51.3  | hypothetical protein CARUB_v10015614mg               | gbpln | Capsella rubella   | AT5G18790.1   Symbols:   Ribosomal protein L33 family protein   chr5:6266324-6266500 REVERSE LENGTH=58<br>AT5G18750.1   Symbols:   DNAJ heat shock N-terminal domain-containing protein   chr5:6255177-6257831 FORWARD LENGTH=884                                                                                                                                                                                                                                            | 119  | 58  | 4.00E-28  | 48.7  | 47.9 | 48.7  |  |  |
| Rsa1.0_00075.1.g3920.t1 | gb EOA20118.1  hypothetical protein CARUB_v10000401mg [Capsella rubella]                                                                                                                                                                                                                                                                                                                                                                                                                                                                                                                                                                                                                                                                                                                                                                                                                                                                                                                                                                                                                                                                      | 858  | 903 | 0         | 105.2 | 66.4 | 77.9  | hypothetical protein CARUB_v10000173mg               | gbpln | Capsella rubella   | AT5G18730.1   Symbols:   CONTAINS InterPro DOMAIN/s: Molecular chaperone, heat shock protein, Hsp40, DnaJ (InterPro:IPR015609); BEST Arabidopsis thaliana protein match is: Domain of unknown function (DUF3444) (TAIR:AT5G18740.1); Has 30201 Blast hits to 17322 proteins in 780 species: Archae - 12; Bacteria - 1396; Metazoa - 17338; Fungi - 3422; Plants - 5037; Viruses - 0; Other Eukaryotes - 2996 (source: NCBI BLINK).   chr5:6247611-6249197 FORWARD LENGTH=528 | 858  | 884 | 0         | 103.0 | 66.0 | 78.4  |  |  |
| Rsa1.0_00075.1.g3921.t1 | gb EOA20118.1  hypothetical protein CARUB_v10000401mg [Capsella rubella]                                                                                                                                                                                                                                                                                                                                                                                                                                                                                                                                                                                                                                                                                                                                                                                                                                                                                                                                                                                                                                                                      | 560  | 666 | 0         | 118.9 | 61.6 | 72.7  | hypothetical protein CARUB_v10000401mg               | gbpln | Capsella rubella   | AT5G18730.1   Symbols:   CONTAINS InterPro DOMAIN/s: Molecular chaperone, heat shock protein, Hsp40, DnaJ (InterPro:IPR015609); BEST Arabidopsis thaliana protein match is: Domain of unknown function (DUF3444) (TAIR:AT5G18740.1); Has 30201 Blast hits to 17322 proteins in 780 species: Archae - 12; Bacteria - 1396; Metazoa - 17338; Fungi - 3422; Plants - 5037; Viruses - 0; Other Eukaryotes - 2996 (source: NCBI BLINK).   chr5:6247611-6249197 FORWARD LENGTH=528 | 560  | 528 | 0         | 94.3  | 62.1 | 72.0  |  |  |
| Rsa1.0_00075.1.g3922.t1 | gb EOA20118.1  hypothetical protein CARUB_v10000401mg [Capsella rubella]                                                                                                                                                                                                                                                                                                                                                                                                                                                                                                                                                                                                                                                                                                                                                                                                                                                                                                                                                                                                                                                                      | 1010 | 666 | 1.00E-179 | 65.9  | 31.2 | 37.4  | hypothetical protein CARUB_v10000401mg               | gbpln | Capsella rubella   | AT5G18730.1   Symbols:   CONTAINS InterPro DOMAIN/s: Molecular chaperone, heat shock protein, Hsp40, DnaJ (InterPro:IPR015609); BEST Arabidopsis thaliana protein match is: Domain of unknown function (DUF3444) (TAIR:AT5G18740.1); Has 30201 Blast hits to 17322 proteins in 780 species: Archae - 12; Bacteria - 1396; Metazoa - 17338; Fungi - 3422; Plants - 5037; Viruses - 0; Other Eukaryotes - 2996 (source: NCBI BLINK).   chr5:6247611-6249197 FORWARD LENGTH=528 | 1010 | 528 | 1.00E-173 | 52.3  | 30.7 | 36.0  |  |  |
| Rsa1.0_00075.1.g3923.t1 | gb EOA22541.1  hypothetical protein CARUB_v10003196mg [Capsella rubella]                                                                                                                                                                                                                                                                                                                                                                                                                                                                                                                                                                                                                                                                                                                                                                                                                                                                                                                                                                                                                                                                      | 532  | 554 | 0         | 104.1 | 67.3 | 78.2  | hypothetical protein CARUB_v10003196mg               | gbpln | Capsella rubella   | AT5G18730.1   Symbols:   CONTAINS InterPro DOMAIN/s: Molecular chaperone, heat shock protein, Hsp40, DnaJ (InterPro:IPR015609); BEST Arabidopsis thaliana protein match is: Domain of unknown function (DUF3444) (TAIR:AT5G18740.1); Has 30201 Blast hits to 17322 proteins in 780 species: Archae - 12; Bacteria - 1396; Metazoa - 17338; Fungi - 3422; Plants - 5037; Viruses - 0; Other Eukaryotes - 2996 (source: NCBI BLINK).   chr5:6247611-6249197 FORWARD LENGTH=528 | 532  | 528 | 1.00E-176 | 99.2  | 58.8 | 70.7  |  |  |

|                         |                                                                                                                                                                                                                                                                                                                                                                                                                                                                                                                                  |      |      |           |       |      |      |                                                                 |       |                      |                                                                                                                                                                                                                                                                                                                                                                                                                                                                              |      |      |           |       |      |      |
|-------------------------|----------------------------------------------------------------------------------------------------------------------------------------------------------------------------------------------------------------------------------------------------------------------------------------------------------------------------------------------------------------------------------------------------------------------------------------------------------------------------------------------------------------------------------|------|------|-----------|-------|------|------|-----------------------------------------------------------------|-------|----------------------|------------------------------------------------------------------------------------------------------------------------------------------------------------------------------------------------------------------------------------------------------------------------------------------------------------------------------------------------------------------------------------------------------------------------------------------------------------------------------|------|------|-----------|-------|------|------|
| Rsa1.0_00075.1.g3924.t1 | refXP_002871829.1  hypothetical protein ARALYDRAFT_488759 [Arabidopsis lyrata subsp. lyrata] gi 297317666 gb EFH48088.1  hypothetical protein ARALYDRAFT_488759 [Arabidopsis lyrata subsp. lyrata]                                                                                                                                                                                                                                                                                                                               | 587  | 566  | 0         | 96.4  | 65.1 | 74.1 | hypothetical protein ARALYDRAFT_488759                          | gbpln | Arabidopsis lyrata   | AT5G18730.1   Symbols:   CONTAINS InterPro DOMAIN/s: Molecular chaperone, heat shock protein, Hsp40, DnaJ (InterPro:IPR015609); BEST Arabidopsis thaliana protein match is: Domain of unknown function (DUF3444) (TAIR:AT5G18740.1); Has 30201 Blast hits to 17322 proteins in 780 species: Archae - 12; Bacteria - 1396; Metazoa - 17338; Fungi - 3422; Plants - 5037; Viruses - 0; Other Eukaryotes - 2996 (source: NCBI ELink).   chr5:6247611-6249197 FORWARD LENGTH=528 | 587  | 528  | 1.00E-122 | 89.9  | 41.4 | 55.5 |
| Rsa1.0_00075.1.g3925.t1 | refXP_002873912.1  EMB3013 [Arabidopsis lyrata subsp. lyrata] gi 297319749 gb EFH50171.1  EMB3013 [Arabidopsis lyrata subsp. lyrata]                                                                                                                                                                                                                                                                                                                                                                                             | 1362 | 1366 | 0         | 100.3 | 91.6 | 95.8 | EMB3013                                                         | gbpln | Arabidopsis lyrata   | AT5G18700.1   Symbols: RUK, EMB3013   Protein kinase family protein with ARM repeat domain   chr5:6235387-6240733 REVERSE LENGTH=1366                                                                                                                                                                                                                                                                                                                                        | 1362 | 1366 | 0         | 100.3 | 90.3 | 95.0 |
| Rsa1.0_00075.1.g3926.t1 | gb EOA19299.1  hypothetical protein CARUB_v10002269mg [Capsella rubella]                                                                                                                                                                                                                                                                                                                                                                                                                                                         | 133  | 122  | 2.00E-21  | 91.7  | 63.9 | 70.7 | hypothetical protein CARUB_v10002269mg                          | gbpln | Capsella rubella     | #                                                                                                                                                                                                                                                                                                                                                                                                                                                                            | #    | #    | #         | #     | #    |      |
| Rsa1.0_00075.1.g3927.t1 | ref NP_197369.2  Tubby-like F-box protein 11 [Arabidopsis thaliana] gi 75223283 sp O6NPQ1.1 TLP11_ARAT H RecName: Full=Tubby-like F-box protein 11; Short=ATLP11 gi 38564318 gb AAR23738.1  At5g18680 [Arabidopsis thaliana] gi 58652098 gb AAW80874.1  At5g18680 [Arabidopsis thaliana] gi 22589892.1 db BAH30591.1  hypothetical protein [Arabidopsis thaliana] gi 332005215 gb AED92598.1  Tubby-like F-box protein 11 [Arabidopsis thaliana]                                                                                 | 393  | 389  | 0         | 99.0  | 87.5 | 92.1 | Tubby-like F-box protein 11                                     | gbpln | Arabidopsis thaliana | AT5G18680.1   Symbols: AtTLP11, TLP11   tubby like protein 11   chr5:6228358-6230426 REVERSE LENGTH=389                                                                                                                                                                                                                                                                                                                                                                      | 393  | 389  | 0         | 99.0  | 87.5 | 92.1 |
| Rsa1.0_00075.1.g3928.t1 | ref NP_197368.1  inactive beta-amylase 9 [Arabidopsis thaliana] gi 75331155 sp Q8VYW2.1 BAM9_ARAT H RecName: Full=Inactive beta-amylase 9; AltName: Full=1,4-alpha-D-glucan maltohydrolase; AltName: Full=Inactive beta-amylase 3 gi 17978933 gb AAL47434.1  AT5g18670/T1A4_50 [Arabidopsis thaliana] gi 21592648 gb AAM64597.1  beta-amylase-like protein [Arabidopsis thaliana] gi 22655358 gb AAM98271.1  At5g18670/T1A4_50 [Arabidopsis thaliana] gi 332005214 gb AED92597.1  inactive beta-amylase 9 [Arabidopsis thaliana] | 536  | 536  | 0         | 100.0 | 85.4 | 90.3 | inactive beta-amylase 9                                         | gbpln | Arabidopsis thaliana | AT5G18670.1   Symbols: BMY3, BAM9   beta-amylase 3   chr5:6226138-6227999 FORWARD LENGTH=536                                                                                                                                                                                                                                                                                                                                                                                 | 536  | 536  | 0         | 100.0 | 85.4 | 90.3 |
| Rsa1.0_00075.1.g3929.t5 | #                                                                                                                                                                                                                                                                                                                                                                                                                                                                                                                                | #    | #    | #         | #     | #    | -    | ----                                                            | ----  | #                    | #                                                                                                                                                                                                                                                                                                                                                                                                                                                                            | #    | #    | #         | #     |      |      |
| Rsa1.0_00075.1.g3930.t1 | refXP_002873908.1  pale-green and chlorophyll B reduced 2 [Arabidopsis lyrata subsp. lyrata] gi 297319745 gb EFH50167.1  pale-green and chlorophyll B reduced 2 [Arabidopsis lyrata subsp. lyrata]                                                                                                                                                                                                                                                                                                                               | 419  | 417  | 0         | 99.5  | 83.5 | 90.2 | pale-green and chlorophyll B reduced 2                          | gbpln | Arabidopsis lyrata   | AT5G18660.1   Symbols: PCB2   NAD(P)-binding Rossmann-fold superfamily protein   chr5:6220872-6222125 REVERSE LENGTH=417                                                                                                                                                                                                                                                                                                                                                     | 419  | 417  | 0         | 99.5  | 82.6 | 90.2 |
| Rsa1.0_00075.1.g3931.t2 | refXP_002871827.1  zinc finger family protein [Arabidopsis lyrata subsp. lyrata] gi 297317664 gb EFH48086.1  zinc finger family protein [Arabidopsis lyrata subsp. lyrata]                                                                                                                                                                                                                                                                                                                                                       | 258  | 267  | 1.00E-137 | 103.5 | 91.1 | 96.1 | zinc finger family protein                                      | gbpln | Arabidopsis lyrata   | AT5G18650.1   Symbols:   CHY-type/CTOCHY-type/RING-type Zinc finger protein   chr5:6218260-6220374 FORWARD LENGTH=267                                                                                                                                                                                                                                                                                                                                                        | 258  | 267  | 1.00E-138 | 103.5 | 90.3 | 95.0 |
| Rsa1.0_00076.1.g3932.t1 | refXP_002880944.1  hypothetical protein ARALYDRAFT_481690 [Arabidopsis lyrata subsp. lyrata] gi 297326783 gb EFH57203.1  hypothetical protein ARALYDRAFT_481690 [Arabidopsis lyrata subsp. lyrata]                                                                                                                                                                                                                                                                                                                               | 284  | 276  | 1.00E-110 | 97.2  | 78.9 | 84.2 | hypothetical protein ARALYDRAFT_481690                          | gbpln | Arabidopsis lyrata   | AT2G28200.1   Symbols:   C2H2-type zinc finger family protein   chr2:12024321-12025181 FORWARD LENGTH=286                                                                                                                                                                                                                                                                                                                                                                    | 284  | 286  | 1.00E-111 | 100.7 | 79.2 | 85.2 |
| Rsa1.0_00076.1.g3933.t1 | #                                                                                                                                                                                                                                                                                                                                                                                                                                                                                                                                | #    | #    | #         | #     | #    | -    | ----                                                            | ----  | #                    | #                                                                                                                                                                                                                                                                                                                                                                                                                                                                            | #    | #    | #         | #     |      |      |
| Rsa1.0_00076.1.g3934.t1 | gb AAC28221.1  similar to reverse transcriptases (PFam: rvt.hmm, score: 60.13) [Arabidopsis thaliana]                                                                                                                                                                                                                                                                                                                                                                                                                            | 703  | 1164 | 0         | 165.6 | 56.9 | 71.0 | similar to reverse transcriptases (PFam: rvt.hmm, score: 60.13) | gbpln | Arabidopsis thaliana | AT3G24255.1   Symbols:   RNA-directed DNA polymerase (reverse transcriptase)-related family protein   chr3:8789471-8793208 FORWARD LENGTH=746                                                                                                                                                                                                                                                                                                                                | 703  | 746  | 1.00E-63  | 106.1 | 19.3 | 27.3 |
| Rsa1.0_00076.1.g3935.t1 | gb EOA27882.1  hypothetical protein CARUB_v10024052mg [Capsella rubella]                                                                                                                                                                                                                                                                                                                                                                                                                                                         | 213  | 213  | 1.00E-115 | 100.0 | 95.3 | 98.6 | hypothetical protein CARUB_v10024052mg                          | gbpln | Capsella rubella     | AT2G28305.1   Symbols: LOG1, ATLOG1   Putative lysine decarboxylase family protein   chr2:12081186-12084307 FORWARD LENGTH=213                                                                                                                                                                                                                                                                                                                                               | 213  | 213  | 1.00E-116 | 100.0 | 94.4 | 98.1 |

|                         |                                                                                                                                                                                                                                                                                                                                                                         |     |     |           |       |      |      |                                                   |       |                      |                                                                                                                                                                                                                                                             |     |     |           |       |      |      |
|-------------------------|-------------------------------------------------------------------------------------------------------------------------------------------------------------------------------------------------------------------------------------------------------------------------------------------------------------------------------------------------------------------------|-----|-----|-----------|-------|------|------|---------------------------------------------------|-------|----------------------|-------------------------------------------------------------------------------------------------------------------------------------------------------------------------------------------------------------------------------------------------------------|-----|-----|-----------|-------|------|------|
| Rsa1.0_00076.1.g3936.t3 | refXP_002880936.1   hypothetical protein ARALYDRAFT_481676 [Arabidopsis lyrata subsp. lyrata] gi 297326775 gb EFH57195.1   hypothetical protein ARALYDRAFT_481676 [Arabidopsis lyrata subsp. lyrata]                                                                                                                                                                    | 379 | 381 | 0         | 100.5 | 91.0 | 92.1 | hypothetical protein ARALYDRAFT_481676            | gbpln | Arabidopsis lyrata   | AT2G28310.3   Symbols:   Protein of unknown function (DUF077)   chr2:12085773-12087888 FORWARD LENGTH=374                                                                                                                                                   | 379 | 374 | 0         | 98.7  | 90.2 | 92.3 |
| Rsa1.0_00076.1.g3937.t1 | refXP_002880935.1   hypothetical protein ARALYDRAFT_320561 [Arabidopsis lyrata subsp. lyrata] gi 297326774 gb EFH57194.1   hypothetical protein ARALYDRAFT_320561 [Arabidopsis lyrata subsp. lyrata]                                                                                                                                                                    | 341 | 342 | 0         | 100.3 | 96.8 | 98.2 | hypothetical protein ARALYDRAFT_320561            | gbpln | Arabidopsis lyrata   | AT2G28315.1   Symbols:   Nucleotide/sugar transporter family protein   chr2:12088896-12090570 FORWARD LENGTH=342                                                                                                                                            | 341 | 342 | 0         | 100.3 | 96.5 | 98.2 |
| Rsa1.0_00076.1.g3938.t1 | refXP_002880933.1   hypothetical protein ARALYDRAFT_901675 [Arabidopsis lyrata subsp. lyrata] gi 297326772 gb EFH57192.1   hypothetical protein ARALYDRAFT_901675 [Arabidopsis lyrata subsp. lyrata]                                                                                                                                                                    | 290 | 320 | 1.00E-77  | 110.3 | 57.9 | 72.1 | hypothetical protein ARALYDRAFT_901675            | gbpln | Arabidopsis lyrata   | AT1G08010.2   Symbols: GATA11   GATA transcription factor 11   chr1:2486202-2487402 REVERSE LENGTH=303                                                                                                                                                      | 290 | 303 | 5.00E-71  | 104.5 | 53.8 | 67.2 |
| Rsa1.0_00076.1.g3939.t2 | refNP_180403.4   SIT4 phosphatase-associated-like protein [Arabidopsis thaliana] gi 330253018 gb AEC08112.1   SIT4 phosphatase-associated-like protein [Arabidopsis thaliana] refNP_565671.1   uncharacterized protein [Arabidopsis thaliana] gi 75206504 sp Q9SKN3.1 CSPL6_ARAT H RecName: Full=CASP-like protein At2g28370                                            | 798 | 788 | 0         | 98.7  | 82.2 | 88.0 | SIT4 phosphatase-associated-like protein          | gbpln | Arabidopsis thaliana | AT2G28360.1   Symbols:   SIT4 phosphatase-associated family protein   chr2:12124604-12129879 REVERSE LENGTH=788                                                                                                                                             | 798 | 788 | 0         | 98.7  | 82.2 | 88.0 |
| Rsa1.0_00076.1.g3940.t1 | gi 14030701 gb AAK53025.1 AF375441_1 At2g28370/T1B3.11 [Arabidopsis thaliana] gi 4432940 gb AAD20689.1   expressed protein [Arabidopsis thaliana] gi 21553379 gb AAM62472.1   unknown [Arabidopsis thaliana] gi 23506069 gb AAN28894.1   At2g28370/T1B3.11 [Arabidopsis thaliana] gi 330253019 gb AEC08113.1   uncharacterized protein AT2G28370 [Arabidopsis thaliana] | 185 | 179 | 2.00E-82  | 96.8  | 89.7 | 93.5 | uncharacterized protein                           | gbpln | Arabidopsis thaliana | AT2G28370.1   Symbols:   Uncharacterised protein family (UPF0497)   chr2:12132092-12133447 FORWARD LENGTH=179                                                                                                                                               | 185 | 179 | 6.00E-85  | 96.8  | 89.7 | 93.5 |
| Rsa1.0_00076.1.g3941.t1 | gb EOA27124.1   hypothetical protein CARUB_v10023224mg [Capsella rubella]                                                                                                                                                                                                                                                                                               | 436 | 443 | 0         | 101.6 | 78.7 | 85.1 | hypothetical protein CARUB_v10023224mg            | gbpln | Capsella rubella     | AT2G28380.1   Symbols: DRB2   dsRNA-binding protein 2   chr2:12134098-12135915 REVERSE LENGTH=434                                                                                                                                                           | 436 | 434 | 1.00E-180 | 99.5  | 78.2 | 84.9 |
| Rsa1.0_00076.1.g3942.t1 | #                                                                                                                                                                                                                                                                                                                                                                       | #   | #   | #         | #     | #    | #    | -                                                 | ----  | ----                 | #                                                                                                                                                                                                                                                           | #   | #   | #         | #     | #    | #    |
| Rsa1.0_00076.1.g3943.t1 | refXP_002879098.1   hypothetical protein ARALYDRAFT_481665 [Arabidopsis lyrata subsp. lyrata] gi 297324937 gb EFH55357.1   hypothetical protein ARALYDRAFT_481665 [Arabidopsis lyrata subsp. lyrata]                                                                                                                                                                    | 162 | 164 | 4.00E-59  | 101.2 | 78.4 | 87.0 | hypothetical protein ARALYDRAFT_481665            | gbpln | Arabidopsis lyrata   | AT2G28400.1   Symbols:   Protein of unknown function, DUF584   chr2:12148513-12149001 REVERSE LENGTH=162                                                                                                                                                    | 162 | 162 | 2.00E-59  | 100.0 | 77.8 | 86.4 |
| Rsa1.0_00076.1.g3944.t1 | #                                                                                                                                                                                                                                                                                                                                                                       | #   | #   | #         | #     | #    | #    | -                                                 | ----  | ----                 | #                                                                                                                                                                                                                                                           | #   | #   | #         | #     | #    | #    |
| Rsa1.0_00076.1.g3945.t1 | gb EOA28155.1   hypothetical protein CARUB_v10024345mg [Capsella rubella]                                                                                                                                                                                                                                                                                               | 116 | 118 | 2.00E-44  | 101.7 | 77.6 | 83.6 | hypothetical protein CARUB_v10024345mg            | gbpln | Capsella rubella     | AT2G28410.1   Symbols:   unknown protein; Has 18 Blast hits to 18 proteins in 5 species: Archae - 0; Bacteria - 0; Metazoa - 0; Fungi - 0; Plants - 18; Viruses - 0; Other Eukaryotes - 0 (source: NCBI BLink).   chr2:12156202-12156549 FORWARD LENGTH=115 | 116 | 115 | 6.00E-43  | 99.1  | 70.7 | 81.0 |
| Rsa1.0_00076.1.g3946.t2 | #                                                                                                                                                                                                                                                                                                                                                                       | #   | #   | #         | #     | #    | #    | -                                                 | ----  | ----                 | #                                                                                                                                                                                                                                                           | #   | #   | #         | #     | #    | #    |
| Rsa1.0_00076.1.g3947.t1 | refNP_180411.1   proline-rich protein [Arabidopsis thaliana] gi 4432833 gb AAD20682.1   En/Spm-like transposon protein [Arabidopsis thaliana] gi 6763350 gb AA78699.1   proline-rich family protein [Arabidopsis thaliana] gi 330253029 gb AEC08123.1   proline-rich protein [Arabidopsis thaliana]                                                                     | 168 | 268 | 3.00E-23  | 159.5 | 53.6 | 61.3 | proline-rich protein                              | gbpln | Arabidopsis thaliana | AT2G28440.1   Symbols:   proline-rich family protein   chr2:12161226-12162032 FORWARD LENGTH=268                                                                                                                                                            | 168 | 268 | 1.00E-25  | 159.5 | 53.6 | 61.3 |
| Rsa1.0_00076.1.g3948.t1 | gb AAC98462.1   putative chloroplast nucleoid DNA binding protein [Arabidopsis thaliana] gi 20197956 gb AAM15330.1   putative chloroplast nucleoid DNA binding protein [Arabidopsis thaliana]                                                                                                                                                                           | 429 | 389 | 1.00E-138 | 90.7  | 58.7 | 70.6 | putative chloroplast nucleoid DNA binding protein | gbpln | Arabidopsis thaliana | AT2G28040.1   Symbols:   Eukaryotic aspartyl protease family protein   chr2:11936203-11937390 REVERSE LENGTH=395                                                                                                                                            | 429 | 395 | 1.00E-141 | 92.1  | 58.7 | 70.6 |
| Rsa1.0_00076.1.g3949.t1 | #                                                                                                                                                                                                                                                                                                                                                                       | #   | #   | #         | #     | #    | #    | -                                                 | ----  | ----                 | #                                                                                                                                                                                                                                                           | #   | #   | #         | #     | #    | #    |
| Rsa1.0_00076.1.g3950.t1 | #                                                                                                                                                                                                                                                                                                                                                                       | #   | #   | #         | #     | #    | #    | -                                                 | ----  | ----                 | #                                                                                                                                                                                                                                                           | #   | #   | #         | #     | #    | #    |

|                          |                                                                                                                                                                                                                                                                                                                                    |      |     |           |       |      |      |                                        |       |                      |                                                                                                                                                |      |      |           |       |      |      |
|--------------------------|------------------------------------------------------------------------------------------------------------------------------------------------------------------------------------------------------------------------------------------------------------------------------------------------------------------------------------|------|-----|-----------|-------|------|------|----------------------------------------|-------|----------------------|------------------------------------------------------------------------------------------------------------------------------------------------|------|------|-----------|-------|------|------|
| Rsa1.0_00076.1.g3951.t1  | refNP_180417.2  LOB domain-containing protein 11 [Arabidopsis thaliana]<br>gi 334302828 sp Q9SK08.2 LBD11_ARAT H RecName: Full=LOB domain-containing protein 11; AltName: Full=ASYMMETRIC LEAVES 2-like protein 7; Short=AS2-like protein 7<br>gi 330253037 gb AEC08131.1  LOB domain-containing protein 11 [Arabidopsis thaliana] | 236  | 232 | 1.00E-101 | 98.3  | 89.8 | 93.2 | LOB domain-containing protein 11       | gbpln | Arabidopsis thaliana | AT2G28500.1   Symbols: LBD11   LOB domain-containing protein 11   chr2:12186603-12188110 REVERSE LENGTH=232                                    | 236  | 232  | 1.00E-103 | 98.3  | 89.8 | 93.2 |
| Rsa1.0_00076.1.g3952.t3  | #                                                                                                                                                                                                                                                                                                                                  | #    | #   | #         | #     | #    | -    | ----                                   | ----  | ----                 | #                                                                                                                                              | #    | #    | #         | #     | #    |      |
| Rsa1.0_00077.1.g3953.t1  | refXP_002894568.1  transferase family protein [Arabidopsis lyrata subsp. lyrata]<br>gi 297340410 gb EFH70827.1  transferase family protein [Arabidopsis lyrata subsp. lyrata]                                                                                                                                                      | 180  | 433 | 5.00E-48  | 240.6 | 61.1 | 67.8 | transferase family protein             | gbpln | Arabidopsis lyrata   | AT5G48930.1   Symbols: HCT   hydroxycinnamoyl-CoA shikimate/quininate hydroxycinnamoyl transferase   chr5:19836654-19838092 REVERSE LENGTH=433 | 180  | 433  | 3.00E-49  | 240.6 | 58.3 | 65.6 |
| Rsa1.0_00077.1.g3954.t1  | refXP_002870182.1  hypothetical protein ARALYDRAFT_915160 [Arabidopsis lyrata subsp. lyrata]<br>gi 297316018 gb EFH44644.1.1  hypothetical protein ARALYDRAFT_915160 [Arabidopsis lyrata subsp. lyrata]                                                                                                                            | 652  | 676 | 0         | 103.7 | 80.7 | 86.7 | hypothetical protein ARALYDRAFT_915160 | gbpln | Arabidopsis lyrata   | AT4G16110.1   Symbols: ARR2, RR2   response regulator 2   chr4:9112979-9115785 FORWARD LENGTH=664                                              | 652  | 664  | 0         | 101.8 | 77.8 | 84.0 |
| Rsa1.0_00077.1.g3955.t1  | refXP_002868161.1  ATSEB1 [Arabidopsis lyrata subsp. lyrata]<br>gi 297313997 gb EFH44420.1  ATSEB1 [Arabidopsis lyrata subsp. lyrata]                                                                                                                                                                                              | 660  | 658 | 0         | 99.7  | 83.6 | 89.4 | ATSEB1                                 | gbpln | Arabidopsis lyrata   | AT4G16120.1   Symbols: ATSEB1, COBL7, SEB1   COBRA-like protein-7 precursor   chr4:9116591-9119138 REVERSE LENGTH=661                          | 660  | 661  | 0         | 100.2 | 84.5 | 91.8 |
| Rsa1.0_00077.1.g3956.t13 | refXP_002870181.1  hypothetical protein ARALYDRAFT_355153 [Arabidopsis lyrata subsp. lyrata]<br>gi 297316017 gb EFH44644.1  hypothetical protein ARALYDRAFT_355153 [Arabidopsis lyrata subsp. lyrata]                                                                                                                              | 1027 | 989 | 0         | 96.3  | 90.2 | 93.6 | hypothetical protein ARALYDRAFT_355153 | gbpln | Arabidopsis lyrata   | AT4G16130.1   Symbols: ARA1, ISA1, ATISA1   arabinose kinase   chr4:9120875-9127656 FORWARD LENGTH=1039                                        | 1027 | 1039 | 0         | 101.2 | 90.4 | 93.4 |
| Rsa1.0_00077.1.g3957.t1  | gb EOA17545.1  hypothetical protein CARUB_v10005904mg [Capsella rubella]                                                                                                                                                                                                                                                           | 177  | 166 | 3.00E-20  | 93.8  | 33.9 | 36.7 | hypothetical protein CARUB_v10005904mg | gbpln | Capsella rubella     | #                                                                                                                                              | #    | #    | #         | #     | #    |      |
| Rsa1.0_00077.1.g3958.t1  | #                                                                                                                                                                                                                                                                                                                                  | #    | #   | #         | #     | #    | -    | ----                                   | ----  | ----                 | #                                                                                                                                              | #    | #    | #         | #     | #    |      |
| Rsa1.0_00077.1.g3959.t1  | gb EOA17527.1  hypothetical protein CARUB_v10005860mg [Capsella rubella]                                                                                                                                                                                                                                                           | 184  | 178 | 4.00E-57  | 96.7  | 72.8 | 84.2 | hypothetical protein CARUB_v10005860mg | gbpln | Capsella rubella     | AT4G16141.1   Symbols:   GATA type zinc finger transcription factor family protein   chr4:9131872-9132893 REVERSE LENGTH=197                   | 184  | 197  | 2.00E-58  | 107.1 | 75.5 | 84.8 |
| Rsa1.0_00077.1.g3960.t1  | gb EOA18223.1  hypothetical protein CARUB_v10006712mg [Capsella rubella]                                                                                                                                                                                                                                                           | 528  | 533 | 0         | 100.9 | 92.8 | 95.5 | hypothetical protein CARUB_v10006712mg | gbpln | Capsella rubella     | AT4G16143.2   Symbols: IMPA-2   importin alpha isoform 2   chr4:9134450-9137134 REVERSE LENGTH=535                                             | 528  | 535  | 0         | 101.3 | 92.6 | 95.8 |
| Rsa1.0_00077.1.g3961.t1  | gb AAV85709.1  At4g16144 [Arabidopsis thaliana]                                                                                                                                                                                                                                                                                    | 530  | 507 | 0         | 95.7  | 87.0 | 90.8 | At4g16144                              | gbpln | Arabidopsis thaliana | AT4G16144.1   Symbols: AMSH3   associated molecule with the SH3 domain of STAM 3   chr4:9138053-9141422 REVERSE LENGTH=507                     | 530  | 507  | 0         | 95.7  | 87.0 | 90.6 |
| Rsa1.0_00077.1.g3962.t1  | gb EOA17716.1  hypothetical protein CARUB_v10006097mg [Capsella rubella]                                                                                                                                                                                                                                                           | 117  | 103 | 2.00E-27  | 88.0  | 59.0 | 65.8 | hypothetical protein CARUB_v10006097mg | gbpln | Capsella rubella     | AT4G16146.1   Symbols:   cAMP-regulated phosphoprotein 19-related protein   chr4:9142663-9144356 REVERSE LENGTH=102                            | 117  | 102  | 9.00E-29  | 87.2  | 55.6 | 63.2 |
| Rsa1.0_00077.1.g3963.t2  | refXP_002867797.1  hypothetical protein ARALYDRAFT_329412 [Arabidopsis lyrata subsp. lyrata]<br>gi 297313633 gb EFH44056.1  hypothetical protein ARALYDRAFT_329412 [Arabidopsis lyrata subsp. lyrata]                                                                                                                              | 718  | 732 | 0         | 101.9 | 87.5 | 93.9 | hypothetical protein ARALYDRAFT_329412 | gbpln | Arabidopsis lyrata   | AT4G04910.1   Symbols: NSF   AAA-type ATPase family protein   chr4:2489696-2495666 REVERSE LENGTH=742                                          | 718  | 742  | 0         | 103.3 | 75.6 | 85.8 |
| Rsa1.0_00077.1.g3964.t1  | gb EOA16331.1  hypothetical protein CARUB_v10004481mg [Capsella rubella]                                                                                                                                                                                                                                                           | 563  | 564 | 0         | 100.2 | 94.0 | 96.6 | hypothetical protein CARUB_v10004481mg | gbpln | Capsella rubella     | AT4G16155.1   Symbols:   dihydrolipoyl dehydrogenases   chr4:9153570-9157322 REVERSE LENGTH=630                                                | 563  | 630  | 0         | 111.9 | 94.8 | 96.4 |
| Rsa1.0_00077.1.g3965.t3  | gb EOA15607.1  hypothetical protein CARUB_v10005679mg [Capsella rubella]<br>gi 482551415 gb EOA15608.1  hypothetical protein CARUB_v10005679mg [Capsella rubella]                                                                                                                                                                  | 229  | 224 | 1.00E-80  | 97.8  | 75.1 | 81.7 | hypothetical protein CARUB_v10005679mg | gbpln | Capsella rubella     | AT3G17100.2   Symbols:   sequence-specific DNA binding transcription factors   chr3:5831552-5832244 FORWARD LENGTH=230                         | 229  | 230  | 6.00E-58  | 100.4 | 62.0 | 74.7 |

|                         |                                                                                                                                                                                                                                                                                                                                                                                                                                                                                                                                                                                                                             |      |      |           |       |      |      |                                        |       |                    |                                                                                                                                                                                                                                                                                                                                                                                                                                                        |      |      |           |       |      |      |
|-------------------------|-----------------------------------------------------------------------------------------------------------------------------------------------------------------------------------------------------------------------------------------------------------------------------------------------------------------------------------------------------------------------------------------------------------------------------------------------------------------------------------------------------------------------------------------------------------------------------------------------------------------------------|------|------|-----------|-------|------|------|----------------------------------------|-------|--------------------|--------------------------------------------------------------------------------------------------------------------------------------------------------------------------------------------------------------------------------------------------------------------------------------------------------------------------------------------------------------------------------------------------------------------------------------------------------|------|------|-----------|-------|------|------|
| Rsa1.0_00077.1.g3966.t1 | ref[XP_002868153.1] predicted protein [Arabidopsis lyrata subsp. lyrata] gi 297313989 gb EFH44412.1  predicted protein [Arabidopsis lyrata subsp. lyrata]                                                                                                                                                                                                                                                                                                                                                                                                                                                                   | 820  | 822  | 0         | 100.2 | 93.5 | 96.6 | predicted protein                      | gbpln | Arabidopsis lyrata | AT4G16180.2   Symbols:   unknown protein; FUNCTIONS IN: molecular_function unknown; INVOLVED IN: biological_process unknown; LOCATED IN: plasma membrane; BEST Arabidopsis thaliana protein match is: unknown protein (TAIR:AT3G28720.1); Has 5 Blast hits to 5 proteins in 3 species: Archae - 0; Bacteria - 0; Metazoa - 0; Fungi - 0; Plants - 4; Viruses - 0; Other Eukaryotes - 1 (source: NCBI BLink).   chr4:9165365-9170323 REVERSE LENGTH=820 | 820  | 820  | 0         | 100.0 | 91.2 | 94.3 |
| Rsa1.0_00077.1.g3967.t1 | gb EOA16872.1  hypothetical protein CARUB_v10005098mg [Capsella rubella]                                                                                                                                                                                                                                                                                                                                                                                                                                                                                                                                                    | 368  | 365  | 0         | 99.2  | 86.1 | 91.0 | hypothetical protein CARUB_v10005098mg | gbpln | Capsella rubella   | AT4G16190.1   Symbols:   Papain family cysteine protease   chr4:9171512-9172877 FORWARD LENGTH=373                                                                                                                                                                                                                                                                                                                                                     | 368  | 373  | 0         | 101.4 | 86.7 | 91.6 |
| Rsa1.0_00077.1.g3968.t1 | # # # # # # # #                                                                                                                                                                                                                                                                                                                                                                                                                                                                                                                                                                                                             | #    | #    | #         | #     | #    | -    | ----                                   | ----  | ----               | #                                                                                                                                                                                                                                                                                                                                                                                                                                                      | #    | #    | #         | #     | #    |      |
| Rsa1.0_00077.1.g3969.t1 | gb EOA17085.1  hypothetical protein CARUB_v10005333mg [Capsella rubella]                                                                                                                                                                                                                                                                                                                                                                                                                                                                                                                                                    | 307  | 305  | 1.00E-147 | 99.3  | 83.7 | 89.3 | hypothetical protein CARUB_v10005333mg | gbpln | Capsella rubella   | AT3G17000.1   Symbols: UBC32   ubiquitin-conjugating enzyme 32   chr3:5797296-5799467 FORWARD LENGTH=309                                                                                                                                                                                                                                                                                                                                               | 307  | 309  | 1.00E-119 | 100.7 | 70.0 | 81.4 |
| Rsa1.0_00077.1.g3970.t1 | ref[NP_567490.1] RNA polymerases M/15 Kd subunit [Arabidopsis thaliana] gi 297800522 ref[XP_002868145.1] hypothetical protein ARALYDRAFT_493259 [Arabidopsis lyrata subsp. lyrata] gi 21537166 gb AAM61507.1  RNA Polymerase II subunit 14.5 kD, putative [Arabidopsis thaliana] gi 11405070 gb ABI49500.1  At4g16265 [Arabidopsis thaliana] gi 297313981 gb EFH44404.1  hypothetical protein ARALYDRAFT_493259 [Arabidopsis lyrata subsp. lyrata] gi 332658323 gb AEE83723.1  RNA polymerases M/15 Kd subunit [Arabidopsis thaliana] gi 482553494 gb EOA17687.1  hypothetical protein CARUB_v10006057mg [Capsella rubella] | 114  | 114  | 1.00E-61  | 100.0 | 99.1 | 99.1 | RNA polymerases M/15 Kd subunit        | gbpln | Arabidopsis lyrata | AT4G16265.1   Symbols: NRPB9B, NRPD9B, NRP9B   RNA polymerases M/15 Kd subunit   chr4:9202529-9203975 REVERSE LENGTH=114                                                                                                                                                                                                                                                                                                                               | 114  | 114  | 2.00E-64  | 100.0 | 99.1 | 99.1 |
| Rsa1.0_00077.1.g3971.t1 | ref[XP_002870166.1] peroxidase 40 [Arabidopsis lyrata subsp. lyrata] gi 297316002 gb EFH46425.1  peroxidase 40 [Arabidopsis lyrata subsp. lyrata]                                                                                                                                                                                                                                                                                                                                                                                                                                                                           | 359  | 362  | 1.00E-179 | 100.8 | 87.2 | 90.5 | peroxidase 40                          | gbpln | Arabidopsis lyrata | AT4G16270.1   Symbols:   Peroxidase superfamily protein   chr4:9205038-9206483 FORWARD LENGTH=362                                                                                                                                                                                                                                                                                                                                                      | 359  | 362  | 1.00E-173 | 100.8 | 82.7 | 86.4 |
| Rsa1.0_00077.1.g3972.t1 | gb AAL61622.1 AF414188.1 FCA gamma [Brassica napus]                                                                                                                                                                                                                                                                                                                                                                                                                                                                                                                                                                         | 572  | 715  | 0         | 125.0 | 89.0 | 92.1 | FCA gamma                              | gbpln | Brassica napus     | AT4G16280.4   Symbols:   RNA binding:abscisic acid binding   chr4:9207164-9214187 REVERSE LENGTH=672                                                                                                                                                                                                                                                                                                                                                   | 572  | 672  | 0         | 117.5 | 76.7 | 81.6 |
| Rsa1.0_00077.1.g3973.t1 | emb CAB41488.2  putative FCA orthologue [Brassica napus]                                                                                                                                                                                                                                                                                                                                                                                                                                                                                                                                                                    | 266  | 384  | 3.00E-47  | 144.4 | 39.5 | 42.1 | putative FCA orthologue                | gbpln | Brassica napus     | AT4G16280.2   Symbols: FCA   RNA binding:abscisic acid binding   chr4:9207164-9214412 REVERSE LENGTH=747                                                                                                                                                                                                                                                                                                                                               | 266  | 747  | 3.00E-26  | 280.8 | 28.9 | 33.8 |
| Rsa1.0_00077.1.g3974.t1 | ref[XP_002883592.1] hypothetical protein ARALYDRAFT_342698 [Arabidopsis lyrata subsp. lyrata] gi 297329432 gb EFH59851.1  hypothetical protein ARALYDRAFT_342698 [Arabidopsis lyrata subsp. lyrata]                                                                                                                                                                                                                                                                                                                                                                                                                         | 288  | 369  | 2.00E-85  | 128.1 | 61.1 | 75.3 | hypothetical protein ARALYDRAFT_342698 | gbpln | Arabidopsis lyrata | AT3G19470.2   Symbols:   F-box and associated interaction domains-containing protein   chr3:6749766-6750914 FORWARD LENGTH=382                                                                                                                                                                                                                                                                                                                         | 288  | 382  | 1.00E-78  | 132.6 | 59.4 | 72.2 |
| Rsa1.0_00077.1.g3975.t1 | ref[XP_002868142.1] hypothetical protein ARALYDRAFT_355126 [Arabidopsis lyrata subsp. lyrata] gi 297313978 gb EFH44401.1  hypothetical protein ARALYDRAFT_355126 [Arabidopsis lyrata subsp. lyrata]                                                                                                                                                                                                                                                                                                                                                                                                                         | 342  | 338  | 1.00E-168 | 98.8  | 83.9 | 91.5 | hypothetical protein ARALYDRAFT_355126 | gbpln | Arabidopsis lyrata | AT4G16330.2   Symbols:   2-oxoglutarate (2OG) and Fe(II)-dependent oxygenase superfamily protein   chr4:9226298-9227914 REVERSE LENGTH=364                                                                                                                                                                                                                                                                                                             | 342  | 364  | 1.00E-156 | 106.4 | 76.9 | 82.7 |
| Rsa1.0_00077.1.g3976.t2 | ref[XP_002868141.1] hypothetical protein ARALYDRAFT_493252 [Arabidopsis lyrata subsp. lyrata] gi 297313977 gb EFH44400.1  hypothetical protein ARALYDRAFT_493252 [Arabidopsis lyrata subsp. lyrata]                                                                                                                                                                                                                                                                                                                                                                                                                         | 1826 | 1830 | 0         | 100.2 | 96.4 | 98.0 | hypothetical protein ARALYDRAFT_493252 | gbpln | Arabidopsis lyrata | AT4G16340.1   Symbols: SPK1   guanyl-nucleotide exchange factors:GTPase binding:GTP binding   chr4:9228773-9241060 REVERSE LENGTH=1830                                                                                                                                                                                                                                                                                                                 | 1826 | 1830 | 0         | 100.2 | 95.8 | 97.8 |
| Rsa1.0_00077.1.g3977.t2 | ref[XP_002868140.1] hypothetical protein ARALYDRAFT_493251 [Arabidopsis lyrata subsp. lyrata] gi 297313976 gb EFH44399.1  hypothetical protein ARALYDRAFT_493251 [Arabidopsis lyrata subsp. lyrata]                                                                                                                                                                                                                                                                                                                                                                                                                         | 263  | 226  | 1.00E-90  | 85.9  | 61.6 | 69.2 | hypothetical protein ARALYDRAFT_493251 | gbpln | Arabidopsis lyrata | AT4G16350.1   Symbols: CBL6, SCABP2   calcineurin B-like protein 6   chr4:9242505-9243669 REVERSE LENGTH=226                                                                                                                                                                                                                                                                                                                                           | 263  | 226  | 9.00E-92  | 85.9  | 60.5 | 68.1 |

|                         |                                                                                                                                                                                                                                                                                                                                                                                                                                                                                                                                                                                                                                                                                                                                                                                                                                                                                                    |     |     |          |       |      |      |                                               |       |                      |                                                                                                                                                                                                                                                                                                                                                                  |     |     |          |       |      |      |
|-------------------------|----------------------------------------------------------------------------------------------------------------------------------------------------------------------------------------------------------------------------------------------------------------------------------------------------------------------------------------------------------------------------------------------------------------------------------------------------------------------------------------------------------------------------------------------------------------------------------------------------------------------------------------------------------------------------------------------------------------------------------------------------------------------------------------------------------------------------------------------------------------------------------------------------|-----|-----|----------|-------|------|------|-----------------------------------------------|-------|----------------------|------------------------------------------------------------------------------------------------------------------------------------------------------------------------------------------------------------------------------------------------------------------------------------------------------------------------------------------------------------------|-----|-----|----------|-------|------|------|
| Rsa1.0_00077.1.g3978.t1 | ref[NP_974559.5] metal ion binding protein [Arabidopsis thaliana] gi 332658339 gb AE83739.1  metal ion binding protein [Arabidopsis thaliana]                                                                                                                                                                                                                                                                                                                                                                                                                                                                                                                                                                                                                                                                                                                                                      | 271 | 254 | 3.00E-67 | 93.7  | 71.6 | 75.6 | metal ion binding protein                     | gbpln | Arabidopsis thaliana | AT4G16380.1   Symbols:   Heavy metal transport/detoxification superfamily protein   chr4:9254638-9255955 FORWARD LENGTH=254                                                                                                                                                                                                                                      | 271 | 254 | 8.00E-70 | 93.7  | 71.6 | 75.6 |
| Rsa1.0_00077.1.g3979.t1 | emb[CAC01940.1] 67kD chloroplastic RNA-binding protein, P67.1 [Raphanus sativus]                                                                                                                                                                                                                                                                                                                                                                                                                                                                                                                                                                                                                                                                                                                                                                                                                   | 701 | 700 | 0        | 99.9  | 98.4 | 99.1 | 67kD chloroplastic RNA-binding protein, P67.1 | gbpln | Raphanus sativus     | AT4G16390.1   Symbols: SVR7   pentatricopeptide (PPR) repeat-containing protein   chr4:9257985-9260093 FORWARD LENGTH=702                                                                                                                                                                                                                                        | 701 | 702 | 0        | 100.1 | 86.7 | 92.7 |
| Rsa1.0_00077.1.g3980.t1 | emb[CAB10417.1] hypothetical protein [Arabidopsis thaliana] gi 7268389 emb CAB78682.1  hypothetical protein [Arabidopsis thaliana]                                                                                                                                                                                                                                                                                                                                                                                                                                                                                                                                                                                                                                                                                                                                                                 | 96  | 209 | 6.00E-18 | 217.7 | 52.1 | 66.7 | hypothetical protein                          | gbpln | Arabidopsis thaliana | AT4G16400.1   Symbols:   unknown protein; BEST Arabidopsis thaliana protein match is: unknown protein (TAIR:AT3G13175.1); Has 30201 Blast hits to 17322 proteins in 780 species: Archae - 12; Bacteria - 1396; Metazoa - 17338; Fungi - 3422; Plants - 5037; Viruses - 0; Other Eukaryotes - 2996 (source: NCBI BLINK)   chr4:9260564-9262102 FORWARD LENGTH=218 | 96  | 218 | 1.00E-20 | 227.1 | 52.1 | 66.7 |
| Rsa1.0_00077.1.g3981.t1 | ref[XP_002870160.1] hypothetical protein ARALYDRAFT_329873 [Arabidopsis lyrata subsp. lyrata] gi 297315996 gb EFH46419.1  hypothetical protein ARALYDRAFT_329873 [Arabidopsis lyrata subsp. lyrata]                                                                                                                                                                                                                                                                                                                                                                                                                                                                                                                                                                                                                                                                                                | 88  | 192 | 2.00E-39 | 218.2 | 85.2 | 98.9 | hypothetical protein ARALYDRAFT_329873        | gbpln | Arabidopsis lyrata   | AT4G16400.1   Symbols:   unknown protein; BEST Arabidopsis thaliana protein match is: unknown protein (TAIR:AT3G13175.1); Has 30201 Blast hits to 17322 proteins in 780 species: Archae - 12; Bacteria - 1396; Metazoa - 17338; Fungi - 3422; Plants - 5037; Viruses - 0; Other Eukaryotes - 2996 (source: NCBI BLINK)   chr4:9260564-9262102 FORWARD LENGTH=218 | 88  | 218 | 3.00E-41 | 247.7 | 83.0 | 96.6 |
| Rsa1.0_00077.1.g3982.t1 | ref[NP_193376.1] transcription factor bHLH3 [Arabidopsis thaliana] gi 75318117 sp Q23487.1 BH003_ARATH RecName: Full=Transcription factor bHLH3; AltName: Full=Basic helix-loop-helix protein 3; Short=AtbHLH3; Short=bHLH 3; AltName: Full=Transcription factor EN 34; AltName: Full=bHLH transcription factor bHLH003 gi 16226919 gb AAL16298.1 AF428368.1 AT4g16430/dl4240w [Arabidopsis thaliana] gi 18026954 gb AAL55710.1 AF251688.1 putative transcription factor bHLH3 [Arabidopsis thaliana] gi 2244999 emb CAB10419.1  transcription factor like protein [Arabidopsis thaliana] gi 7268393 emb CAB78685.1  transcription factor like protein [Arabidopsis thaliana] gi 16323045 gb AAL15257.1  AT4g16430/dl4240w [Arabidopsis thaliana] gi 25141207 gb AANT3298.1  AT4g16430/dl4240w [Arabidopsis thaliana] gi 33265834 gb AEE83747.1  transcription factor bHLH3 [Arabidopsis thaliana] | 465 | 467 | 0        | 100.4 | 86.0 | 91.2 | transcription factor bHLH3                    | gbpln | Arabidopsis thaliana | AT4G16430.1   Symbols:   basic helix-loop-helix (bHLH) DNA-binding superfamily protein   chr4:9267599-9269002 FORWARD LENGTH=467                                                                                                                                                                                                                                 | 465 | 467 | 0        | 100.4 | 86.0 | 91.2 |
| Rsa1.0_00077.1.g3983.t1 | ref[XP_002868134.1] predicted protein [Arabidopsis lyrata subsp. lyrata] gi 297313970 gb EFH44393.1  predicted protein [Arabidopsis lyrata subsp. lyrata]                                                                                                                                                                                                                                                                                                                                                                                                                                                                                                                                                                                                                                                                                                                                          | 468 | 474 | 0        | 101.3 | 88.9 | 96.2 | predicted protein                             | gbpln | Arabidopsis lyrata   | AT4G16440.1   Symbols:   ferredoxin hydrogenases   chr4:9269263-9271510 REVERSE LENGTH=474                                                                                                                                                                                                                                                                       | 468 | 474 | 0        | 101.3 | 89.1 | 96.2 |
| Rsa1.0_00077.1.g3984.t1 | ref[XP_002868133.1] integral membrane family protein [Arabidopsis lyrata subsp. lyrata] gi 341958538 sp D7M9V1.1 CSPL7_ARA LL RecName: Full=CASP-like protein ARALYDRAFT_915107 gi 297313969 gb EFH44392.1  integral membrane family protein [Arabidopsis lyrata subsp. lyrata]                                                                                                                                                                                                                                                                                                                                                                                                                                                                                                                                                                                                                    | 206 | 182 | 5.00E-72 | 88.3  | 63.1 | 76.7 | integral membrane family protein              | gbpln | Arabidopsis lyrata   | AT4G16442.1   Symbols:   Uncharacterised protein family (UPF0497)   chr4:9272042-9272970 REVERSE LENGTH=182                                                                                                                                                                                                                                                      | 206 | 182 | 5.00E-74 | 88.3  | 62.6 | 76.2 |



|                         |                                                                                                                                                                                                                                                                                                                                                                                                                                                                                                                                                                                                                                                                                                           |     |      |           |       |      |      |                                        |       |                      |                                                                                                                                                                                                                                                                                                                                                                                                                                                                                                                                                                    |     |      |           |       |      |      |
|-------------------------|-----------------------------------------------------------------------------------------------------------------------------------------------------------------------------------------------------------------------------------------------------------------------------------------------------------------------------------------------------------------------------------------------------------------------------------------------------------------------------------------------------------------------------------------------------------------------------------------------------------------------------------------------------------------------------------------------------------|-----|------|-----------|-------|------|------|----------------------------------------|-------|----------------------|--------------------------------------------------------------------------------------------------------------------------------------------------------------------------------------------------------------------------------------------------------------------------------------------------------------------------------------------------------------------------------------------------------------------------------------------------------------------------------------------------------------------------------------------------------------------|-----|------|-----------|-------|------|------|
| Rsa1.0_00077.1.g3985.t1 | refXP_002867712.1  hypothetical protein ARALYDRAFT_492539 [Arabidopsis lyrata subsp. lyrata] gi 297313548 gb EFH43971.1  hypothetical protein ARALYDRAFT_492539 [Arabidopsis lyrata subsp. lyrata]                                                                                                                                                                                                                                                                                                                                                                                                                                                                                                        | 365 | 1003 | 1.00E-126 | 274.8 | 63.8 | 75.1 | hypothetical protein ARALYDRAFT_492539 | gbpln | Arabidopsis lyrata   | AT4G23370.1   Symbols:   unknown protein; FUNCTIONS IN: molecular_function unknown; INVOLVED IN: biological_process unknown; LOCATED IN: endomembrane system; CONTAINS InterPro DOMAIN/s: Protein of unknown function DUF239, plant (InterPro:IPR004314); BEST Arabidopsis thaliana protein match is: unknown protein (TAIRAT4G23360.1); Has 2365 Blast hits to 710 proteins in 27 species: Archae - 0; Bacteria - 35; Metazoa - 0; Fungi - 30; Plants - 2300; Viruses - 0; Other Eukaryotes - 0 (source: NCBI BLINK)   chr4:12206362-12213435 REVERSE LENGTH=1038 | 365 | 1038 | 1.00E-120 | 284.4 | 58.6 | 74.5 |
| Rsa1.0_00078.1.g3986.t1 | gb AAM63759.1  unknown [Arabidopsis thaliana]                                                                                                                                                                                                                                                                                                                                                                                                                                                                                                                                                                                                                                                             | 187 | 187  | 2.00E-83  | 100.0 | 84.0 | 90.4 | unknown                                | gbpln | Arabidopsis thaliana | AT3G02910.1   Symbols:   AIG2-like (avirulence induced gene) family protein   chr3:649986-650549 FORWARD LENGTH=187                                                                                                                                                                                                                                                                                                                                                                                                                                                | 187 | 187  | 3.00E-85  | 100.0 | 83.4 | 89.3 |
| Rsa1.0_00078.1.g3987.t1 | refNP_186943.1  uncharacterized protein [Arabidopsis thaliana] gi 75186537 sp Q9M8T5.1 Y3293_ARAT H RecName: Full=WEB family protein At3g02930, chloroplastic; Flags: Precursor gi 6728968 gb AAF26966.1 AC018363_11 unknown protein [Arabidopsis thaliana] gi 332640360 gb AEE73881.1  uncharacterized protein AT3G02930 [Arabidopsis thaliana]                                                                                                                                                                                                                                                                                                                                                          | 740 | 806  | 0         | 108.9 | 70.0 | 84.1 | uncharacterized protein                | gbpln | Arabidopsis thaliana | AT3G02930.1   Symbols:   Plant protein of unknown function (DUF827)   chr3:655306-658319 FORWARD LENGTH=806                                                                                                                                                                                                                                                                                                                                                                                                                                                        | 740 | 806  | 0         | 108.9 | 70.0 | 84.1 |
| Rsa1.0_00078.1.g3988.t1 | refXP_002882262.1  MYB107 [Arabidopsis lyrata subsp. lyrata] gi 297328102 gb EFH58521.1  MYB107 [Arabidopsis lyrata subsp. lyrata]                                                                                                                                                                                                                                                                                                                                                                                                                                                                                                                                                                        | 312 | 322  | 1.00E-142 | 103.2 | 87.2 | 94.2 | MYB107                                 | gbpln | Arabidopsis lyrata   | AT3G02940.1   Symbols: MYB107, AtMYB107   myb domain protein 107   chr3:662141-663830 FORWARD LENGTH=321                                                                                                                                                                                                                                                                                                                                                                                                                                                           | 312 | 321  | 1.00E-142 | 102.9 | 86.2 | 92.9 |
| Rsa1.0_00078.1.g3989.t5 | refNP_566189.1  Tho complex subunit 7/Mft1p [Arabidopsis thaliana] gi 6728966 gb AAF26964.1 AC018363_9 unknown protein [Arabidopsis thaliana] gi 15983444 gb AAL11590.1 AF424596_1 AT3g02950/F13E7_10 [Arabidopsis thaliana] gi 48310661 gb AAT41862.1  At3g02950 [Arabidopsis thaliana] gi 332640363 gb AEE73884.1  Tho complex subunit 7/Mft1p [Arabidopsis thaliana]                                                                                                                                                                                                                                                                                                                                   | 236 | 236  | 1.00E-109 | 100.0 | 88.1 | 94.5 | Tho complex subunit 7/Mft1p            | gbpln | Arabidopsis thaliana | AT3G02950.1   Symbols: THO7, AtTHO7   Tho complex subunit 7/Mft1p   chr3:665631-666439 REVERSE LENGTH=236                                                                                                                                                                                                                                                                                                                                                                                                                                                          | 236 | 236  | 1.00E-111 | 100.0 | 88.1 | 94.5 |
| Rsa1.0_00078.1.g3990.t2 | refNP_186947.1  protein exordium like 6 [Arabidopsis thaliana] gi 6728964 gb AAF26962.1 AC018363_7 ph6-1-like protein [Arabidopsis thaliana] gi 332640365 gb AEE73886.1  protein exordium like 6 [Arabidopsis thaliana]                                                                                                                                                                                                                                                                                                                                                                                                                                                                                   | 603 | 332  | 1.00E-144 | 55.1  | 42.0 | 45.6 | protein exordium like 6                | gbpln | Arabidopsis thaliana | AT3G02970.1   Symbols: EXL6   EXORDIUM like 6   chr3:669217-670495 REVERSE LENGTH=332                                                                                                                                                                                                                                                                                                                                                                                                                                                                              | 603 | 332  | 2.33E-156 | 55.1  | 42.0 | 45.6 |
| Rsa1.0_00078.1.g3991.t1 | gb EOA30505.1  hypothetical protein CARUB_v10013628mg [Capsella rubella]                                                                                                                                                                                                                                                                                                                                                                                                                                                                                                                                                                                                                                  | 462 | 468  | 0         | 101.3 | 80.3 | 86.8 | hypothetical protein CARUB_v10013628mg | gbpln | Capsella rubella     | AT3G02990.1   Symbols: ATHSFA1E, HSF1A1   heat shock transcription factor A1E   chr3:673614-675988 FORWARD LENGTH=468                                                                                                                                                                                                                                                                                                                                                                                                                                              | 462 | 468  | 0         | 101.3 | 81.4 | 88.3 |
| Rsa1.0_00078.1.g3992.t1 | refNP_186924.1  putative protein phosphatase 2C 33 [Arabidopsis thaliana] gi 79295498 refNP_001030624.1  putative protein phosphatase 2C 33 [Arabidopsis thaliana] gi 75186497 sp Q9M8R7.1 P2C33_ARAT H RecName: Full=Probable protein phosphatase 2C 33; Short=AtPP2C33; AltName: Full=AtPPC6.1 gi 6728987 gb AAF26985.1 AC018363_30 putative protein phosphatase-2C (PP2C) [Arabidopsis thaliana] gi 58652052 gb AAW80851.1  At3g02750 [Arabidopsis thaliana] gi 115311509 gb AB1893935.1  At3g02750 [Arabidopsis thaliana] gi 332640333 gb AEE73854.1  putative protein phosphatase 2C 33 [Arabidopsis thaliana] gi 332640334 gb AEE73855.1  putative protein phosphatase 2C 33 [Arabidopsis thaliana] | 193 | 492  | 5.00E-40  | 254.9 | 54.4 | 58.0 | putative protein phosphatase 2C 33     | gbpln | Arabidopsis thaliana | AT3G02750.2   Symbols:   Protein phosphatase 2C family protein   chr3:593601-595457 REVERSE LENGTH=492                                                                                                                                                                                                                                                                                                                                                                                                                                                             | 193 | 492  | 2.00E-42  | 254.9 | 54.4 | 58.0 |

|                         |                                                                                                                                                                                                                                                                                                                                                                                                                                                                                                                                                                                                                                                                                                                                                 |     |     |           |       |      |      |                                                                                                             |       |                      |                                                                                                                              |     |     |           |       |      |      |
|-------------------------|-------------------------------------------------------------------------------------------------------------------------------------------------------------------------------------------------------------------------------------------------------------------------------------------------------------------------------------------------------------------------------------------------------------------------------------------------------------------------------------------------------------------------------------------------------------------------------------------------------------------------------------------------------------------------------------------------------------------------------------------------|-----|-----|-----------|-------|------|------|-------------------------------------------------------------------------------------------------------------|-------|----------------------|------------------------------------------------------------------------------------------------------------------------------|-----|-----|-----------|-------|------|------|
| Rsa1.0_00078.1.g3993.t1 | ref NP_186923.1  aspartyl protease-like protein [Arabidopsis thaliana] gi 6728988 gb AAF26986.1 ACO18363_31 putative aspartyl protease [Arabidopsis thaliana] gi 21593593 gb AAM65560.1  putative aspartyl protease [Arabidopsis thaliana] gi 332640332 gb AEE73853.1  aspartyl protease-like protein [Arabidopsis thaliana]                                                                                                                                                                                                                                                                                                                                                                                                                    | 490 | 488 | 0         | 99.6  | 83.9 | 90.6 | aspartyl protease-like protein                                                                              | gbpln | Arabidopsis thaliana | AT3G02740.1   Symbols:   Eukaryotic aspartyl protease family protein   chr3:590561-593089 FORWARD LENGTH=488                 | 490 | 488 | 0         | 99.6  | 83.9 | 90.6 |
| Rsa1.0_00078.1.g3994.t1 | ref XP_002884335.1  thioredoxin F-type 1 [Arabidopsis lyrata subsp. lyrata] gi 297330175 gb EFH60594.1  thioredoxin F-type 1 [Arabidopsis lyrata subsp. lyrata]                                                                                                                                                                                                                                                                                                                                                                                                                                                                                                                                                                                 | 182 | 178 | 4.00E-82  | 97.8  | 84.1 | 87.9 | thioredoxin F-type 1                                                                                        | gbpln | Arabidopsis lyrata   | AT3G02730.1   Symbols: TRXF1, ATF1   thioredoxin F-type 1   chr3:588570-589591 REVERSE LENGTH=178                            | 182 | 178 | 4.00E-83  | 97.8  | 82.4 | 87.9 |
| Rsa1.0_00078.1.g3995.t2 | gb EOA14628.1  hypothetical protein CARUB_v10027900mg [Capsella rubella]                                                                                                                                                                                                                                                                                                                                                                                                                                                                                                                                                                                                                                                                        | 524 | 550 | 0         | 105.0 | 64.3 | 76.0 | hypothetical protein CARUB_v10027900mg                                                                      | gbpln | Capsella rubella     | AT5G54050.1   Symbols:   Cysteine/Histidine-rich C1 domain family protein   chr5:21933663-21935970 REVERSE LENGTH=580        | 524 | 580 | 0         | 110.7 | 66.2 | 80.0 |
| Rsa1.0_00078.1.g3996.t1 | ref XP_002882249.1  hypothetical protein ARALYDRAFT_896249 [Arabidopsis lyrata subsp. lyrata] gi 297328089 gb EFH58508.1  hypothetical protein ARALYDRAFT_896249 [Arabidopsis lyrata subsp. lyrata]                                                                                                                                                                                                                                                                                                                                                                                                                                                                                                                                             | 388 | 388 | 0         | 100.0 | 92.0 | 95.4 | hypothetical protein ARALYDRAFT_896249                                                                      | gbpln | Arabidopsis lyrata   | AT3G02720.1   Symbols:   Class I glutamine amidotransferase-like superfamily protein   chr3:586336-588088 FORWARD LENGTH=388 | 388 | 388 | 0         | 100.0 | 91.0 | 94.8 |
| Rsa1.0_00078.1.g3997.t1 | ref NP_566174.1  14-3-3-like protein GF14 nu [Arabidopsis thaliana] gi 3023217 sp Q96300.1 14337_ARATH RecName: Full=14-3-3-like protein GF14 nu; AltName: Full=General regulatory factor 7 gi 5802792 gb AAD51782.1 AF145299.1 14-3-3 protein GF14 nu [Arabidopsis thaliana] gi 1531631 gb AAB49335.1  GF14 nu [Arabidopsis thaliana] gi 6957715 gb AAF32459.1  putative 14-3-3 protein [Arabidopsis thaliana] gi 17529080 gb AAL38750.1  putative 14-3-3 protein GF14nu (grf7) [Arabidopsis thaliana] gi 20465433 gb AAM20176.1  putative 14-3-3 protein [Arabidopsis thaliana] gi 21593311 gb AAM65260.1  14-3-3 protein GF14nu (grf7) [Arabidopsis thaliana] gi 332640301 gb AEE73822.1  14-3-3-like protein GF14 nu [Arabidopsis thaliana] | 261 | 265 | 1.00E-141 | 101.5 | 95.0 | 98.1 | 14-3-3-like protein GF14 nu                                                                                 | gbpln | Arabidopsis thaliana | AT3G02520.1   Symbols: GRF7, GF14 NU   general regulatory factor 7   chr3:526800-527915 REVERSE LENGTH=265                   | 261 | 265 | 1.00E-144 | 101.5 | 95.0 | 98.1 |
| Rsa1.0_00078.1.g3998.t1 | ref XP_002884325.1  hypothetical protein ARALYDRAFT_477487 [Arabidopsis lyrata subsp. lyrata] gi 297330165 gb EFH60584.1  hypothetical protein ARALYDRAFT_477487 [Arabidopsis lyrata subsp. lyrata]                                                                                                                                                                                                                                                                                                                                                                                                                                                                                                                                             | 535 | 535 | 0         | 100.0 | 98.7 | 99.8 | hypothetical protein ARALYDRAFT_477487                                                                      | gbpln | Arabidopsis lyrata   | AT3G02530.1   Symbols:   TCP-1/cpn60 chaperonin family protein   chr3:528806-532457 REVERSE LENGTH=535                       | 535 | 535 | 0         | 100.0 | 98.1 | 99.6 |
| Rsa1.0_00078.1.g3999.t1 | sp Q9XH45.1 RS7_BRAOL RecName: Full=40S ribosomal protein S7 gi 5532505 gb AAD44761.1 AF144752.1 40S ribosomal protein S7 homolog [Brassica oleracea]                                                                                                                                                                                                                                                                                                                                                                                                                                                                                                                                                                                           | 202 | 191 | 1.00E-100 | 94.6  | 87.6 | 91.6 | RecName: Full=40S ribosomal protein S7 gi 5532505 gb AAD44761.1 AF144752.1 40S ribosomal protein S7 homolog | gbpln | Brassica oleracea    | AT3G02560.2   Symbols:   Ribosomal protein S7e family protein   chr3:542341-543168 FORWARD LENGTH=191                        | 202 | 191 | 1.00E-100 | 94.6  | 85.1 | 91.1 |
| Rsa1.0_00078.1.g4000.t2 | ref NP_186906.1  mannose-6-phosphate isomerase [Arabidopsis thaliana] gi 75336067 sp Q9M864.1 MPI1_ARATH RecName: Full=Mannose-6-phosphate isomerase 1; AltName: Full=Phosphohexomutase 1; AltName: Full=Phosphomannose isomerase 1; Short=PMI1; AltName: Full=Protein MATERNAL EFFECT EMBRYO ARREST 31 gi 6957720 gb AAF32464.1  putative mannose-6-phosphate isomerase [Arabidopsis thaliana] gi 17979416 gb AAL49850.1  putative mannose-6-phosphate isomerase [Arabidopsis thaliana] gi 20465985 gb AAM20214.1  putative mannose-6-phosphate isomerase [Arabidopsis thaliana] gi 332640310 gb AEE73831.1  mannose-6-phosphate isomerase [Arabidopsis thaliana]                                                                              | 427 | 432 | 0         | 101.2 | 92.0 | 95.6 | mannose-6-phosphate isomerase                                                                               | gbpln | Arabidopsis thaliana | AT3G02570.1   Symbols: MEE31, PMI1   Mannose-6-phosphate isomerase, type 1   chr3:543463-545478 REVERSE LENGTH=432           | 427 | 432 | 0         | 101.2 | 92.0 | 95.6 |

|                         |                                                                                                                                                                                                                                                                                                                                                                                                                                                                                                                                                                                                                                                                                              |      |      |           |       |      |      |                                                     |       |                      |                                                                                                                                           |      |      |           |       |      |      |
|-------------------------|----------------------------------------------------------------------------------------------------------------------------------------------------------------------------------------------------------------------------------------------------------------------------------------------------------------------------------------------------------------------------------------------------------------------------------------------------------------------------------------------------------------------------------------------------------------------------------------------------------------------------------------------------------------------------------------------|------|------|-----------|-------|------|------|-----------------------------------------------------|-------|----------------------|-------------------------------------------------------------------------------------------------------------------------------------------|------|------|-----------|-------|------|------|
| Rsa1.0_00078.1.g4001.t1 | refNP_186907.1 delta(7)-sterol-C5(6)-desaturase 1 [Arabidopsis thaliana] gi 33301592 sp G39208.2 SC5D1_ARAT H RecName: Full=Delta(7)-sterol-C5(6)-desaturase 1; AltName: Full=Delta(7)-sterol-C5-desaturase 1; AltName: Full=Delta-7-C-5 sterol desaturase 1; AltName: Full=Protein DWARF 7; AltName: Full=Protein STEROL 1 gi 4234768 gb AAD12944.1 sterol-C5-desaturase [Arabidopsis thaliana] gi 6957721 gb AAF32465.1 sterol-C5-desaturase [Arabidopsis thaliana] gi 51971639 dbj BAD44484.1 sterol-C5-desaturase [Arabidopsis thaliana] gi 105829795 gb ABF74704.1 At3g02580 [Arabidopsis thaliana] gi 33264031 gb AEE73832.1 delta(7)-sterol-C5(6)-desaturase 1 [Arabidopsis thaliana] | 276  | 281  | 1.00E-144 | 101.8 | 89.1 | 94.2 | delta(7)-sterol-C5(6)-desaturase 1                  | gbpln | Arabidopsis thaliana | AT3G02580.1   Symbols: STE1, DWF7, BUL1   sterol 1   chr3:547048-548615 FORWARD LENGTH=281                                                | 276  | 281  | 1.00E-147 | 101.8 | 89.1 | 94.2 |
| Rsa1.0_00078.1.g4002.t4 | gb EOA30892.1 hypothetical protein CARUB_v10014038mg [Capsella rubella]                                                                                                                                                                                                                                                                                                                                                                                                                                                                                                                                                                                                                      | 374  | 360  | 0         | 96.3  | 84.0 | 86.6 | hypothetical protein CARUB_v10014038mg              | gbpln | Capsella rubella     | AT3G02600.1   Symbols: LPP3, ATLPP3   lipid phosphate phosphatase 3   chr3:551534-554411 FORWARD LENGTH=364                               | 374  | 364  | 0         | 97.3  | 82.4 | 86.1 |
| Rsa1.0_00078.1.g4003.t1 | refNP_186910.2 acyl-[acyl-carrier-protein] desaturase [Arabidopsis thaliana] gi 332640318 gb AEE73839.1 acyl-[acyl-carrier-protein] desaturase [Arabidopsis thaliana]                                                                                                                                                                                                                                                                                                                                                                                                                                                                                                                        | 409  | 413  | 0         | 101.0 | 90.0 | 92.9 | acyl-                                               | gbpln | Arabidopsis thaliana | AT3G02610.1   Symbols:   Plant stearyl-acyl-carrier-protein desaturase family protein   chr3:555665-557458 FORWARD LENGTH=413             | 409  | 413  | 0         | 101.0 | 90.0 | 92.9 |
| Rsa1.0_00078.1.g4004.t1 | gb AAM65632.1 PhD-finger protein, putative [Arabidopsis thaliana]                                                                                                                                                                                                                                                                                                                                                                                                                                                                                                                                                                                                                            | 684  | 429  | 1.00E-104 | 62.7  | 34.4 | 42.8 | PhD-finger protein, putative                        | gbpln | Arabidopsis thaliana | AT1G14770.2   Symbols:   RING/FYVE/PHD zinc finger superfamily protein   chr1:5086867-5088437 REVERSE LENGTH=429                          | 684  | 429  | 1.00E-106 | 62.7  | 34.4 | 42.8 |
| Rsa1.0_00078.1.g4005.t1 | gb ADG57793.1 S-adenosyl-L-methionine decarboxylase 3-2 [Brassica napus]                                                                                                                                                                                                                                                                                                                                                                                                                                                                                                                                                                                                                     | 364  | 368  | 0         | 101.1 | 96.2 | 98.6 | S-adenosyl-L-methionine decarboxylase 3-2           | gbpln | Brassica napus       | AT3G02470.4   Symbols:   S-adenosylmethionine decarboxylase   chr3:510223-511323 FORWARD LENGTH=366                                       | 364  | 366  | 0         | 100.5 | 93.4 | 97.5 |
| Rsa1.0_00078.1.g4006.t2 | gb EOA30699.1 hypothetical protein CARUB_v10013836mg [Capsella rubella]                                                                                                                                                                                                                                                                                                                                                                                                                                                                                                                                                                                                                      | 387  | 409  | 0         | 105.7 | 86.8 | 92.8 | hypothetical protein CARUB_v10013836mg              | gbpln | Capsella rubella     | AT3G02410.1   Symbols: ICME-LIKE2   alpha/beta-Hydrolases superfamily protein   chr3:492118-494877 REVERSE LENGTH=422                     | 387  | 422  | 0         | 109.0 | 85.8 | 92.0 |
| Rsa1.0_00078.1.g4007.t1 | gb EOA30433.1 hypothetical protein CARUB_v10013557mg [Capsella rubella]                                                                                                                                                                                                                                                                                                                                                                                                                                                                                                                                                                                                                      | 488  | 486  | 0         | 99.6  | 96.3 | 98.4 | hypothetical protein CARUB_v10013557mg              | gbpln | Capsella rubella     | AT3G02360.1   Symbols:   6-phosphogluconate dehydrogenase family protein   chr3:482498-483958 FORWARD LENGTH=486                          | 488  | 486  | 0         | 99.6  | 95.7 | 98.4 |
| Rsa1.0_00078.1.g4008.t2 | #                                                                                                                                                                                                                                                                                                                                                                                                                                                                                                                                                                                                                                                                                            | #    | #    | #         | #     | #    | #    | -                                                   | ----  | ----                 | #                                                                                                                                         | #    | #    | #         | #     | #    | #    |
| Rsa1.0_00078.1.g4009.t1 | refXP_002884314.1 SEPALATA2 [Arabidopsis lyrata subsp. lyrata] gi 297330154 gb EFH60573.1 SEPALATA2 [Arabidopsis lyrata subsp. lyrata]                                                                                                                                                                                                                                                                                                                                                                                                                                                                                                                                                       | 294  | 250  | 1.00E-120 | 85.0  | 76.2 | 79.6 | SEPALATA2                                           | gbpln | Arabidopsis lyrata   | AT3G02310.1   Symbols: SEP2, AGL4   K-box region and MADS-box transcription factor family protein   chr3:464554-466687 REVERSE LENGTH=250 | 294  | 250  | 1.00E-122 | 85.0  | 75.9 | 79.6 |
| Rsa1.0_00078.1.g4010.t1 | refXP_002882220.1 regulator of chromosome condensation family protein [Arabidopsis lyrata subsp. lyrata] gi 297328060 gb EFH58479.1 regulator of chromosome condensation family protein [Arabidopsis lyrata subsp. lyrata]                                                                                                                                                                                                                                                                                                                                                                                                                                                                   | 472  | 471  | 0         | 99.8  | 96.4 | 97.5 | regulator of chromosome condensation family protein | gbpln | Arabidopsis lyrata   | AT3G02300.1   Symbols:   Regulator of chromosome condensation (RCC1) family protein   chr3:461551-463929 FORWARD LENGTH=471               | 472  | 471  | 0         | 99.8  | 94.5 | 96.2 |
| Rsa1.0_00078.1.g4011.t1 | emb CAB86926.1 putative protein [Arabidopsis thaliana]                                                                                                                                                                                                                                                                                                                                                                                                                                                                                                                                                                                                                                       | 431  | 977  | 5.00E-93  | 226.7 | 48.7 | 65.9 | putative protein                                    | gbpln | Arabidopsis thaliana | AT3G58980.1   Symbols:   F-box family protein   chr3:2179445-21797006 REVERSE LENGTH=594                                                  | 431  | 594  | 3.00E-95  | 137.8 | 48.7 | 65.9 |
| Rsa1.0_00078.1.g4012.t2 | gb EOA31362.1 hypothetical protein CARUB_v10014539mg [Capsella rubella]                                                                                                                                                                                                                                                                                                                                                                                                                                                                                                                                                                                                                      | 221  | 231  | 1.00E-92  | 104.5 | 86.0 | 92.3 | hypothetical protein CARUB_v10014539mg              | gbpln | Capsella rubella     | AT3G02290.1   Symbols:   RING/U-box superfamily protein   chr3:459385-460688 FORWARD LENGTH=231                                           | 221  | 231  | 1.00E-94  | 104.5 | 86.9 | 92.3 |
| Rsa1.0_00078.1.g4013.t1 | refXP_002884312.1 predicted protein [Arabidopsis lyrata subsp. lyrata] gi 297330152 gb EFH60571.1 predicted protein [Arabidopsis lyrata subsp. lyrata]                                                                                                                                                                                                                                                                                                                                                                                                                                                                                                                                       | 5062 | 5090 | 0         | 100.6 | 91.2 | 95.5 | predicted protein                                   | gbpln | Arabidopsis lyrata   | AT3G02260.1   Symbols: BIG, DOC1, TIR3, UMB1, ASA1, LPR1, CRM1   auxin transport protein (BIG)   chr3:431152-448489 REVERSE LENGTH=5098   | 5062 | 5098 | 0         | 100.7 | 91.0 | 95.3 |
| Rsa1.0_00078.1.g4014.t2 | refXP_002884311.1 hypothetical protein ARALYDRAFT_896190 [Arabidopsis lyrata subsp. lyrata] gi 297330151 gb EFH60570.1 hypothetical protein ARALYDRAFT_896190 [Arabidopsis lyrata subsp. lyrata]                                                                                                                                                                                                                                                                                                                                                                                                                                                                                             | 469  | 513  | 0         | 109.4 | 82.9 | 88.1 | hypothetical protein ARALYDRAFT_896190              | gbpln | Arabidopsis lyrata   | AT3G02250.1   Symbols:   O-fucosyltransferase family protein   chr3:424185-426376 REVERSE LENGTH=512                                      | 469  | 512  | 0         | 109.2 | 82.5 | 87.4 |

|                         |                                                                                                                                                                                                                                                                                                                                                                                                                                                                                                                                                                                                                                                                                                                                                                                                                                       |     |     |           |       |      |      |                                                 |       |                      |                                                                                                                                                                                                                                                                                                                                                     |     |     |           |       |      |      |
|-------------------------|---------------------------------------------------------------------------------------------------------------------------------------------------------------------------------------------------------------------------------------------------------------------------------------------------------------------------------------------------------------------------------------------------------------------------------------------------------------------------------------------------------------------------------------------------------------------------------------------------------------------------------------------------------------------------------------------------------------------------------------------------------------------------------------------------------------------------------------|-----|-----|-----------|-------|------|------|-------------------------------------------------|-------|----------------------|-----------------------------------------------------------------------------------------------------------------------------------------------------------------------------------------------------------------------------------------------------------------------------------------------------------------------------------------------------|-----|-----|-----------|-------|------|------|
| Rsa1.0_00078.1.g4015.t1 | ref[XP_002882216.1] predicted protein [Arabidopsis lyrata subsp. lyrata] gi 297328056 gb EFH58475.1  predicted protein [Arabidopsis lyrata subsp. lyrata]                                                                                                                                                                                                                                                                                                                                                                                                                                                                                                                                                                                                                                                                             | 104 | 106 | 1.00E-16  | 101.9 | 51.0 | 57.7 | predicted protein                               | gbpln | Arabidopsis lyrata   | #                                                                                                                                                                                                                                                                                                                                                   | #   | #   | #         | #     | #    | #    |
| Rsa1.0_00078.1.g4016.t1 | ref[NP_186872.1] reversibly glycosylated polypeptide 1 [Arabidopsis thaliana] gi 297828664 ref[XP_002882214.1] hypothetical protein ARALYDRAFT_477458 [Arabidopsis lyrata subsp. lyrata] gi 75207399 sp Q9SRT9.1 RGP1_ARATH RecName: Full=UDP-arabinopyranose mutase 1; AltName: Full=Reversibly glycosylated polypeptide 1; Short=AtRGP1; AltName: Full=UDP-L-arabinose mutase 1 gi 6041795 gb AAF02115.1 AC009755.8 reversibly glycosylated polypeptide-1 [Arabidopsis thaliana] gi 27311607 gb AAO00769.1  reversibly glycosylated polypeptide-1 [Arabidopsis thaliana] gi 31711848 gb AAP68280.1  At3g02230 [Arabidopsis thaliana] gi 297328054 gb EFH58473.1  hypothetical protein ARALYDRAFT_477458 [Arabidopsis lyrata subsp. lyrata] gi 332640260 gb AEE73781.1  reversibly glycosylated polypeptide 1 [Arabidopsis thaliana] | 357 | 357 | 0         | 100.0 | 97.5 | 99.2 | reversibly glycosylated polypeptide 1           | gbpln | Arabidopsis lyrata   | AT3G02230.1   Symbols: RGP1, ATRGP1   reversibly glycosylated polypeptide 1   chr3:415463-417304 FORWARD LENGTH=357                                                                                                                                                                                                                                 | 357 | 357 | 0         | 100.0 | 97.5 | 99.2 |
| Rsa1.0_00078.1.g4017.t1 | ref[XP_002884309.1] hypothetical protein ARALYDRAFT_477457 [Arabidopsis lyrata subsp. lyrata] gi 297330149 gb EFH60568.1  hypothetical protein ARALYDRAFT_477457 [Arabidopsis lyrata subsp. lyrata]                                                                                                                                                                                                                                                                                                                                                                                                                                                                                                                                                                                                                                   | 227 | 227 | 1.00E-103 | 100.0 | 82.8 | 86.3 | hypothetical protein ARALYDRAFT_477457          | gbpln | Arabidopsis lyrata   | AT3G02220.1   Symbols:   unknown protein; CONTAINS InterPro DOMAIN/s: Protein of unknown function DUF2039 (InterPro:IPR019351). Has 215 Blast hits to 215 proteins in 94 species: Archae - 2; Bacteria - 2; Metazoa - 125; Fungi - 4; Plants - 38; Viruses - 0; Other Eukaryotes - 44 (source: NCBI BLINK).   chr3:412210-413536 REVERSE LENGTH=227 | 227 | 227 | 1.00E-102 | 100.0 | 81.9 | 87.2 |
| Rsa1.0_00078.1.g4018.t1 | ref[XP_002884308.1] phytochelatin synthetase family protein [Arabidopsis lyrata subsp. lyrata] gi 297330148 gb EFH60567.1  phytochelatin synthetase family protein [Arabidopsis lyrata subsp. lyrata] gb AAF02117.1 AC009755.10 unknown protein [Arabidopsis thaliana] gi 6513915 gb AAF14819.1 AC011664.1 unknown protein [Arabidopsis thaliana]                                                                                                                                                                                                                                                                                                                                                                                                                                                                                     | 475 | 451 | 0         | 94.9  | 87.4 | 90.9 | phytochelatin synthetase family protein         | gbpln | Arabidopsis lyrata   | AT3G02210.1   Symbols: COBL1   COBRA-like protein 1 precursor   chr3:409352-411478 REVERSE LENGTH=452                                                                                                                                                                                                                                               | 475 | 452 | 0         | 95.2  | 86.9 | 90.5 |
| Rsa1.0_00078.1.g4019.t1 | gb AAF02117.1 AC009755.10 unknown protein [Arabidopsis thaliana] gi 6513915 gb AAF14819.1 AC011664.1 unknown protein [Arabidopsis thaliana]                                                                                                                                                                                                                                                                                                                                                                                                                                                                                                                                                                                                                                                                                           | 397 | 400 | 0         | 100.8 | 87.2 | 95.2 | unknown protein                                 | gbpln | Arabidopsis thaliana | AT3G02200.2   Symbols:   Proteasome component (PCI) domain protein   chr3:406692-408919 FORWARD LENGTH=417                                                                                                                                                                                                                                          | 397 | 417 | 0         | 105.0 | 84.6 | 93.5 |
| Rsa1.0_00078.1.g4020.t1 | gb EOA31810.1  hypothetical protein CARUB_v10015033mg, partial [Capsella rubella]                                                                                                                                                                                                                                                                                                                                                                                                                                                                                                                                                                                                                                                                                                                                                     | 51  | 74  | 4.00E-19  | 145.1 | 92.2 | 96.1 | hypothetical protein CARUB_v10015033mg, partial | gbpln | Capsella rubella     | AT3G02190.1   Symbols:   Ribosomal protein L39 family protein   chr3:406005-406342 REVERSE LENGTH=51                                                                                                                                                                                                                                                | 51  | 51  | 1.00E-21  | 100.0 | 94.1 | 96.1 |
| Rsa1.0_00078.1.g4021.t1 | #                                                                                                                                                                                                                                                                                                                                                                                                                                                                                                                                                                                                                                                                                                                                                                                                                                     | #   | #   | #         | #     | #    | -    | -                                               | ----  | ----                 | #                                                                                                                                                                                                                                                                                                                                                   | #   | #   | #         | #     | #    |      |
| Rsa1.0_00079.1.g4022.t1 | gb AAM65279.1  unknown [Arabidopsis thaliana]                                                                                                                                                                                                                                                                                                                                                                                                                                                                                                                                                                                                                                                                                                                                                                                         | 192 | 185 | 1.00E-61  | 96.4  | 78.6 | 84.4 | unknown                                         | gbpln | Arabidopsis thaliana | AT1G67740.1   Symbols: PSBY, YCF32   photosystem II BY   chr1:25394429-25394998 REVERSE LENGTH=189                                                                                                                                                                                                                                                  | 192 | 189 | 2.00E-62  | 98.4  | 77.1 | 82.3 |
| Rsa1.0_00079.1.g4023.t1 | gb AFQ32095.1  3-ketoacyl-CoA reductase 1 [Eutrema halophilum]                                                                                                                                                                                                                                                                                                                                                                                                                                                                                                                                                                                                                                                                                                                                                                        | 319 | 318 | 1.00E-169 | 99.7  | 88.4 | 94.7 | 3-ketoacyl-CoA reductase 1                      | gbpln | Eutrema halophilum   | AT1G67730.1   Symbols: YBR159, KCR1, ATKCR1   beta-ketoacyl reductase 1   chr1:25391676-25393365 FORWARD LENGTH=318                                                                                                                                                                                                                                 | 319 | 318 | 1.00E-166 | 99.7  | 86.2 | 92.8 |
| Rsa1.0_00079.1.g4024.t1 | #                                                                                                                                                                                                                                                                                                                                                                                                                                                                                                                                                                                                                                                                                                                                                                                                                                     | #   | #   | #         | #     | #    | -    | -                                               | ----  | ----                 | #                                                                                                                                                                                                                                                                                                                                                   | #   | #   | #         | #     | #    |      |
| Rsa1.0_00079.1.g4025.t1 | gb EOA33252.1  hypothetical protein CARUB_v10021974mg [Capsella rubella]                                                                                                                                                                                                                                                                                                                                                                                                                                                                                                                                                                                                                                                                                                                                                              | 932 | 929 | 0         | 99.7  | 89.6 | 94.7 | hypothetical protein CARUB_v10021974mg          | gbpln | Capsella rubella     | AT1G67720.1   Symbols:   Leucine-rich repeat protein kinase family protein   chr1:25386494-25390856 FORWARD LENGTH=929                                                                                                                                                                                                                              | 932 | 929 | 0         | 99.7  | 89.9 | 95.1 |
| Rsa1.0_00079.1.g4026.t1 | gb EOA39791.1  hypothetical protein CARUB_v10008446mg [Capsella rubella]                                                                                                                                                                                                                                                                                                                                                                                                                                                                                                                                                                                                                                                                                                                                                              | 708 | 718 | 0         | 101.4 | 91.7 | 95.3 | hypothetical protein CARUB_v10008446mg          | gbpln | Capsella rubella     | AT5G42270.1   Symbols: VARI, FTSH5   FtsH extracellular protease family   chr5:16902659-16905102 FORWARD LENGTH=704                                                                                                                                                                                                                                 | 708 | 704 | 0         | 99.4  | 88.4 | 93.5 |
| Rsa1.0_00079.1.g4027.t1 | ref[XP_002891605.1] hypothetical protein ARALYDRAFT_892050 [Arabidopsis lyrata subsp. lyrata] gi 297337447 gb EFH67864.1  hypothetical protein ARALYDRAFT_892050 [Arabidopsis lyrata subsp. lyrata]                                                                                                                                                                                                                                                                                                                                                                                                                                                                                                                                                                                                                                   | 481 | 507 | 0         | 105.4 | 80.2 | 87.9 | hypothetical protein ARALYDRAFT_892050          | gbpln | Arabidopsis lyrata   | AT1G50990.1   Symbols:   Protein kinase protein with tetratricopeptide repeat domain   chr1:18902930-18905204 FORWARD LENGTH=507                                                                                                                                                                                                                    | 481 | 507 | 0         | 105.4 | 79.2 | 87.7 |

|                         |                                                                                                                                                                                                                                                                                                                                                                                                                               |     |      |          |       |      |      |                                                                    |       |                      |                                                                                                                                         |     |      |          |       |      |      |
|-------------------------|-------------------------------------------------------------------------------------------------------------------------------------------------------------------------------------------------------------------------------------------------------------------------------------------------------------------------------------------------------------------------------------------------------------------------------|-----|------|----------|-------|------|------|--------------------------------------------------------------------|-------|----------------------|-----------------------------------------------------------------------------------------------------------------------------------------|-----|------|----------|-------|------|------|
| Rsa1.0_00079.1.g4028.t1 | ref[XP_002888617.1] hypothetical protein ARALYDRAFT_894522 [Arabidopsis lyrata subsp. lyrata] gi 297334458 gb EFH64876.1  hypothetical protein ARALYDRAFT_894522 [Arabidopsis lyrata subsp. lyrata]                                                                                                                                                                                                                           | 521 | 529  | 0        | 101.5 | 81.8 | 87.1 | hypothetical protein ARALYDRAFT_894522                             | gbpln | Arabidopsis lyrata   | AT1G67710.1   Symbols: ARR11   response regulator 11   chr1:25376994-25378905 REVERSE LENGTH=521                                        | 521 | 521  | 0        | 100.0 | 80.0 | 85.6 |
| Rsa1.0_00079.1.g4029.t1 | gb EOA33518.1  hypothetical protein CARUB_v10019853mg [Capsella rubella]                                                                                                                                                                                                                                                                                                                                                      | 701 | 759  | 0        | 108.3 | 88.6 | 93.4 | hypothetical protein CARUB_v10019853mg                             | gbpln | Capsella rubella     | AT1G67690.1   Symbols:   Zinc-like metalloproteases family protein   chr1:25369086-25373730 FORWARD LENGTH=710                          | 701 | 710  | 0        | 101.3 | 87.4 | 93.3 |
| Rsa1.0_00079.1.g4030.t1 | ref[NP_195616.2] Kinesin motor family protein [Arabidopsis thaliana] gi 16902294 dbj BAB71852.1  kinesin-related protein [Arabidopsis thaliana] gi 23297817 gb AAN13032.1  putative kinesin protein [Arabidopsis thaliana] gi 332661612 gb AEE87012.1  Kinesin motor family protein [Arabidopsis thaliana]                                                                                                                    | 239 | 1055 | 3.00E-32 | 441.4 | 27.6 | 29.7 | Kinesin motor family protein                                       | gbpln | Arabidopsis thaliana | AT4G39050.1   Symbols:   Kinesin motor family protein   chr4:18193462-18200148 FORWARD LENGTH=1055                                      | 239 | 1055 | 1.00E-34 | 441.4 | 27.6 | 29.7 |
| Rsa1.0_00079.1.g4031.t1 | ref[NP_188326.1] AP2/B3 domain-containing protein [Arabidopsis thaliana] gi 75274019 sp Q9LSP6.1 Y3701_ARATH RecName: Full=B3 domain-containing protein At3g17010 gi 7670025 dbj BAA94979.1  unnamed protein product [Arabidopsis thaliana] gi 22589865 dbj BAH30456.1  hypothetical protein [Arabidopsis thaliana] gi 33264237 gb AEE75894.1  AP2/B3 domain-containing protein [Arabidopsis thaliana]                        | 249 | 302  | 1.00E-19 | 121.3 | 18.9 | 23.3 | AP2/B3 domain-containing protein                                   | gbpln | Arabidopsis thaliana | AT3G17010.1   Symbols:   AP2/B3-like transcriptional factor family protein   chr3:5800460-5802303 FORWARD LENGTH=302                    | 249 | 302  | 3.00E-22 | 121.3 | 18.9 | 23.3 |
| Rsa1.0_00079.1.g4032.t1 | ref[NP_176936.1] signal recognition particle subunit SRP72 [Arabidopsis thaliana] gi 11072013 gb AAG28892.1 AC008113.8 F12A21.17 [Arabidopsis thaliana] gi 28392947 gb AAO41909.1  unknown protein [Arabidopsis thaliana] gi 28827690 gb AAO50689.1  unknown protein [Arabidopsis thaliana] gi 332196560 gb AEE34681.1  signal recognition particle subunit SRP72 [Arabidopsis thaliana]                                      | 660 | 664  | 0        | 100.6 | 82.6 | 88.3 | signal recognition particle subunit SRP72                          | gbpln | Arabidopsis thaliana | AT1G67680.1   Symbols:   SRP72 RNA-binding domain   chr1:25365962-25368464 REVERSE LENGTH=664                                           | 660 | 664  | 0        | 100.6 | 82.6 | 88.3 |
| Rsa1.0_00079.1.g4033.t1 | dbj BAJ34583.1  unnamed protein product [Thellungiella halophila]                                                                                                                                                                                                                                                                                                                                                             | 321 | 352  | 3.00E-96 | 109.7 | 60.4 | 67.0 | unnamed protein product                                            | ----  | ----                 | AT1G67660.3   Symbols:   Restriction endonuclease, type II-like superfamily protein   chr1:25364065-25365069 FORWARD LENGTH=334         | 321 | 334  | 5.00E-90 | 104.0 | 55.8 | 64.8 |
| Rsa1.0_00079.1.g4034.t2 | ref[XP_002874699.1] hypothetical protein ARALYDRAFT_352228 [Arabidopsis lyrata subsp. lyrata] gi 297320536 gb EFH50958.1  hypothetical protein ARALYDRAFT_352228 [Arabidopsis lyrata subsp. lyrata]                                                                                                                                                                                                                           | 170 | 304  | 2.00E-25 | 178.8 | 46.5 | 62.4 | hypothetical protein ARALYDRAFT_352228                             | gbpln | Arabidopsis lyrata   | AT4G11580.1   Symbols:   RNI-like superfamily protein   chr4:7006648-7007738 REVERSE LENGTH=333                                         | 170 | 333  | 5.00E-22 | 195.9 | 30.6 | 41.2 |
| Rsa1.0_00079.1.g4035.t1 | ref[XP_002887133.1] hypothetical protein ARALYDRAFT_894509 [Arabidopsis lyrata subsp. lyrata] gi 297332974 gb EFH63392.1  hypothetical protein ARALYDRAFT_894509 [Arabidopsis lyrata subsp. lyrata]                                                                                                                                                                                                                           | 292 | 248  | 4.00E-63 | 84.9  | 44.5 | 56.2 | hypothetical protein ARALYDRAFT_894509                             | gbpln | Arabidopsis lyrata   | AT1G67623.1   Symbols:   F-box family protein   chr1:25342111-25343243 FORWARD LENGTH=296                                               | 292 | 296  | 3.00E-59 | 101.4 | 43.5 | 57.9 |
| Rsa1.0_00079.1.g4036.t1 | gb EOA35764.1  hypothetical protein CARUB_v10020997mg [Capsella rubella]                                                                                                                                                                                                                                                                                                                                                      | 190 | 188  | 4.00E-58 | 98.9  | 62.1 | 71.6 | hypothetical protein CARUB_v10020997mg                             | gbpln | Capsella rubella     | AT1G67620.1   Symbols:   Lojap-related protein   chr1:25340585-25341770 FORWARD LENGTH=184                                              | 190 | 184  | 3.00E-56 | 96.8  | 59.5 | 68.4 |
| Rsa1.0_00079.1.g4037.t1 | ref[NP_176927.1] Acid phosphatase/vanadium-dependent haloperoxidase-related protein [Arabidopsis thaliana] gi 11072018 gb AAG28897.1 AC008113.13 F12A21.27 [Arabidopsis thaliana] gi 21555489 gb AAM63870.1  unknown [Arabidopsis thaliana] gi 89274151 gb ABD65596.1  At1g67600 [Arabidopsis thaliana] gi 332196549 gb AEE34670.1  Acid phosphatase/vanadium-dependent haloperoxidase-related protein [Arabidopsis thaliana] | 177 | 163  | 3.00E-78 | 92.1  | 81.4 | 88.1 | Acid phosphatase/vanadium-dependent haloperoxidase-related protein | gbpln | Arabidopsis thaliana | AT1G67600.1   Symbols:   Acid phosphatase/vanadium-dependent haloperoxidase-related protein   chr1:25336701-25337455 REVERSE LENGTH=163 | 177 | 163  | 1.00E-80 | 92.1  | 81.4 | 88.1 |

|                          |                                                                                                                                                                                                                          |      |      |           |       |      |      |                                               |       |                      |                                                                                                                                                                                                                                                                                                                                                                                                                                                                                                                                                                                                                   |      |      |           |       |      |      |
|--------------------------|--------------------------------------------------------------------------------------------------------------------------------------------------------------------------------------------------------------------------|------|------|-----------|-------|------|------|-----------------------------------------------|-------|----------------------|-------------------------------------------------------------------------------------------------------------------------------------------------------------------------------------------------------------------------------------------------------------------------------------------------------------------------------------------------------------------------------------------------------------------------------------------------------------------------------------------------------------------------------------------------------------------------------------------------------------------|------|------|-----------|-------|------|------|
| Rsa1.0_00079.1.g4038.t3  | gb AAM60869.1  unknown [Arabidopsis thaliana]                                                                                                                                                                            | 344  | 347  | 1.00E-141 | 100.9 | 81.4 | 86.9 | unknown                                       | gbpln | Arabidopsis thaliana | AT1G67590.1   Symbols:   Remorin family protein   chr1:25333137-25334472 REVERSE LENGTH=347                                                                                                                                                                                                                                                                                                                                                                                                                                                                                                                       | 344  | 347  | 1.00E-143 | 100.9 | 81.7 | 87.2 |
| Rsa1.0_00079.1.g4039.t2  | ref XP_002888609.1  kinase family protein [Arabidopsis lyrata subsp. lyrata]   gi 297334450 gb EFH64868.1  kinase family protein [Arabidopsis lyrata subsp. lyrata]                                                      | 818  | 756  | 0         | 92.4  | 77.0 | 81.7 | kinase family protein                         | gbpln | Arabidopsis lyrata   | AT1G67590.2   Symbols:   Protein kinase superfamily protein   chr1:25327727-25330965 REVERSE LENGTH=752                                                                                                                                                                                                                                                                                                                                                                                                                                                                                                           | 818  | 752  | 0         | 91.9  | 76.0 | 80.6 |
| Rsa1.0_00079.1.g4040.t2  | ref NP_564899.1  uncharacterized protein [Arabidopsis thaliana]   gi 332196544 gb AEE34665.1  uncharacterized protein AT1G67570 [Arabidopsis thaliana]                                                                   | 455  | 456  | 0         | 100.2 | 84.8 | 88.6 | uncharacterized protein                       | gbpln | Arabidopsis thaliana | AT1G67570.1   Symbols:   Protein of unknown function (DUF537)   chr1:25325318-25326938 FORWARD LENGTH=456                                                                                                                                                                                                                                                                                                                                                                                                                                                                                                         | 455  | 456  | 0         | 100.2 | 84.8 | 88.6 |
| Rsa1.0_00079.1.g4041.t1  | gb EOA34286.1  hypothetical protein CARUB_v10021801mg [Capsella rubella]                                                                                                                                                 | 254  | 255  | 3.00E-73  | 100.4 | 60.2 | 70.9 | hypothetical protein CARUB_v10021801mg        | gbpln | Capsella rubella     | AT1G67540.2   Symbols:   unknown protein; FUNCTIONS IN: molecular_function unknown; INVOLVED IN: biological_process unknown; LOCATED IN: cellular_component unknown; EXPRESSED IN: petal, leaf whorl, male gametophyte, flower, pollen tube; EXPRESSED DURING: L mature pollen stage, M germinated pollen stage, 4 anthesis, petal differentiation and expansion stage; Has 30201 Blast hits to 17322 proteins in 780 species: Archae - 12; Bacteria - 1396; Metazoa - 17338; Fungi - 3422; Plants - 5037; Viruses - 0; Other Eukaryotes - 2996 (source: NCBI BLINK),   chr1:25311496-25312351 REVERSE LENGTH=255 | 254  | 255  | 5.00E-73  | 100.4 | 59.8 | 70.9 |
| Rsa1.0_00079.1.g4042.t1  | gb EOA22397.1  hypothetical protein CARUB_v10003032mg [Capsella rubella]                                                                                                                                                 | 504  | 595  | 1.00E-167 | 118.1 | 61.3 | 72.6 | hypothetical protein CARUB_v10003032mg        | gbpln | Capsella rubella     | AT5G01480.1   Symbols:   Cysteine/Histidine-rich C1 domain family protein   chr5:192990-194231 FORWARD LENGTH=413                                                                                                                                                                                                                                                                                                                                                                                                                                                                                                 | 504  | 413  | 1.00E-115 | 81.9  | 43.7 | 50.8 |
| Rsa1.0_00079.1.g4043.t1  | ref NP_176683.1  WD40 domain-containing protein [Arabidopsis thaliana]   gi 53628631 gb AAU94425.1  At1g65030 [Arabidopsis thaliana]   gi 332196196 gb AEE34317.1  WD40 domain-containing protein [Arabidopsis thaliana] | 344  | 345  | 0         | 100.3 | 90.4 | 95.9 | WD40 domain-containing protein                | gbpln | Arabidopsis thaliana | AT1G65030.1   Symbols:   Transducin/WD40 repeat-like superfamily protein   chr1:24156798-24158511 FORWARD LENGTH=345                                                                                                                                                                                                                                                                                                                                                                                                                                                                                              | 344  | 345  | 0         | 100.3 | 90.4 | 95.9 |
| Rsa1.0_00079.1.g4044.t1  | gb AAF06043.1 AC009360.8 EST   gi T44882 comes from this gene, partial [Arabidopsis thaliana]                                                                                                                            | 107  | 135  | 3.00E-44  | 126.2 | 86.9 | 90.7 | EST   gi T44882 comes from this gene, partial | gbpln | Arabidopsis thaliana | AT1G65032.1   Symbols:   unknown protein; FUNCTIONS IN: molecular_function unknown; INVOLVED IN: biological_process unknown; LOCATED IN: cellular_component unknown; Has 30201 Blast hits to 17322 proteins in 780 species: Archae - 12; Bacteria - 1396; Metazoa - 17338; Fungi - 3422; Plants - 5037; Viruses - 0; Other Eukaryotes - 2996 (source: NCBI BLINK),   chr1:24158895-24159170 REVERSE LENGTH=91                                                                                                                                                                                                     | 107  | 91   | 2.00E-46  | 85.0  | 81.3 | 84.1 |
| Rsa1.0_00079.1.g4045.t1  | gb EOA28341.1  hypothetical protein CARUB_v10024542mg [Capsella rubella]                                                                                                                                                 | 267  | 247  | 2.00E-70  | 92.5  | 52.8 | 68.5 | hypothetical protein CARUB_v10024542mg        | gbpln | Capsella rubella     | AT2G42730.1   Symbols:   F-box family protein   chr2:17787454-17791218 REVERSE LENGTH=737                                                                                                                                                                                                                                                                                                                                                                                                                                                                                                                         | 267  | 737  | 4.00E-71  | 276.0 | 55.8 | 68.9 |
| Rsa1.0_00079.1.g4046.t1  | ref XP_002888603.1  predicted protein [Arabidopsis lyrata subsp. lyrata]   gi 297334444 gb EFH64862.1  predicted protein [Arabidopsis lyrata subsp. lyrata]                                                              | 713  | 718  | 0         | 100.7 | 88.8 | 93.3 | predicted protein                             | gbpln | Arabidopsis lyrata   | AT1G67510.1   Symbols:   Leucine-rich repeat protein kinase family protein   chr1:25297477-25300184 REVERSE LENGTH=719                                                                                                                                                                                                                                                                                                                                                                                                                                                                                            | 713  | 719  | 0         | 100.8 | 86.1 | 92.6 |
| Rsa1.0_00079.1.g4047.t1  | gb EOA22975.1  hypothetical protein CARUB_v10003716mg [Capsella rubella]                                                                                                                                                 | 284  | 281  | 1.00E-37  | 98.9  | 38.0 | 51.8 | hypothetical protein CARUB_v10003716mg        | gbpln | Capsella rubella     | AT5G27070.1   Symbols:   AGL53   AGAMOUS-like 53   chr5:9527741-9528604 FORWARD LENGTH=287                                                                                                                                                                                                                                                                                                                                                                                                                                                                                                                        | 284  | 287  | 2.00E-34  | 101.1 | 42.6 | 54.9 |
| Rsa1.0_00079.1.g4048.t1  | ref NP_181801.1  F-box protein [Arabidopsis thaliana]   gi 4512680 gb AAD21734.1  hypothetical protein [Arabidopsis thaliana]   gi 330255067 gb AEC10161.1  F-box protein [Arabidopsis thaliana]                         | 260  | 737  | 2.00E-69  | 283.5 | 59.6 | 70.0 | F-box protein                                 | gbpln | Arabidopsis thaliana | AT2G42730.1   Symbols:   F-box family protein   chr2:17787454-17791218 REVERSE LENGTH=737                                                                                                                                                                                                                                                                                                                                                                                                                                                                                                                         | 260  | 737  | 5.00E-72  | 283.5 | 59.6 | 70.0 |
| Rsa1.0_00079.1.g4049.t19 | ref NP_001185336.1  HEAT repeat-containing protein [Arabidopsis thaliana]   gi 332196480 gb AEE34601.1  HEAT repeat-containing protein [Arabidopsis thaliana]                                                            | 2376 | 2223 | 0         | 93.6  | 77.9 | 82.3 | HEAT repeat-containing protein                | gbpln | Arabidopsis thaliana | AT1G67140.3   Symbols:   SWEETIE   HEAT repeat-containing protein   chr1:25101016-25117372 REVERSE LENGTH=2223                                                                                                                                                                                                                                                                                                                                                                                                                                                                                                    | 2376 | 2223 | 0         | 93.6  | 77.9 | 82.3 |

|                         |                                                                                                                                                                                                                                                                                                                                                                                                           |      |      |           |       |      |      |                                         |       |                      |                                                                                                                                                                                                                                                                                                                                                                |      |      |           |       |      |      |
|-------------------------|-----------------------------------------------------------------------------------------------------------------------------------------------------------------------------------------------------------------------------------------------------------------------------------------------------------------------------------------------------------------------------------------------------------|------|------|-----------|-------|------|------|-----------------------------------------|-------|----------------------|----------------------------------------------------------------------------------------------------------------------------------------------------------------------------------------------------------------------------------------------------------------------------------------------------------------------------------------------------------------|------|------|-----------|-------|------|------|
| Rsa1.0_00079.1.g4050.t1 | ref[XP_002887107.1] hypothetical protein ARALYDRAFT_475814 [Arabidopsis lyrata subsp. lyrata] gi 297332948 gb EFH63366.1  hypothetical protein ARALYDRAFT_475814 [Arabidopsis lyrata subsp. lyrata]                                                                                                                                                                                                       | 328  | 364  | 1.00E-134 | 111.0 | 76.2 | 85.1 | hypothetical protein ARALYDRAFT_475814  | gbpln | Arabidopsis lyrata   | AT1G67170.1   Symbols:   unknown protein; BEST Arabidopsis thaliana protein match is: unknown protein (TAIR:AT3G14750.1). Has 5478 Blast hits to 4354 proteins in 533 species: Archae - 87; Bacteria - 653; Metazoa - 2554; Fungi - 380; Plants - 418; Viruses - 16; Other Eukaryotes - 1370 (source: NCBI BLINK).   chr1:25127727-25129145 FORWARD LENGTH=359 | 328  | 359  | 1.00E-132 | 109.5 | 74.1 | 83.2 |
| Rsa1.0_00079.1.g4051.t1 | gb EOA35210.1  hypothetical protein CARUB_v10020360mg [Capsella rubella]                                                                                                                                                                                                                                                                                                                                  | 419  | 419  | 0         | 100.0 | 93.6 | 97.1 | hypothetical protein CARUB_v10020360mg  | gbpln | Capsella rubella     | AT1G67190.2   Symbols:   F-box/RNI-like superfamily protein   chr1:25133054-25134313 FORWARD LENGTH=419                                                                                                                                                                                                                                                        | 419  | 419  | 0         | 100.0 | 92.8 | 96.9 |
| Rsa1.0_00079.1.g4052.t1 | # # # # # # # #                                                                                                                                                                                                                                                                                                                                                                                           |      |      |           |       |      |      | -                                       | ----  | ----                 | # # # # # # #                                                                                                                                                                                                                                                                                                                                                  |      |      |           |       |      |      |
| Rsa1.0_00079.1.g4053.t1 | ref[NP_176892.1] protein little nuclei1 [Arabidopsis thaliana] gi 332196494 gb AE34615.1  protein little nuclei1 [Arabidopsis thaliana]                                                                                                                                                                                                                                                                   | 1094 | 1132 | 0         | 103.5 | 80.3 | 89.9 | protein little nuclei1                  | gbpln | Arabidopsis thaliana | AT1G67230.1   Symbols: LINC1   little nuclei1   chr1:25151561-25156032 REVERSE LENGTH=1132                                                                                                                                                                                                                                                                     | 1094 | 1132 | 0         | 103.5 | 80.3 | 89.9 |
| Rsa1.0_00079.1.g4054.t1 | emb CAN64046.1  hypothetical protein VITISV_040537 [Vitis vinifera]                                                                                                                                                                                                                                                                                                                                       | 428  | 1259 | 1.00E-74  | 294.2 | 31.8 | 39.5 | hypothetical protein VITISV_040537      | gbpln | Vitis vinifera       | #                                                                                                                                                                                                                                                                                                                                                              | #    | #    | #         | #     | #    | #    |
| Rsa1.0_00079.1.g4055.t1 | gb AAG00256.1 AC002130_21 F1N21.7 [Arabidopsis thaliana]                                                                                                                                                                                                                                                                                                                                                  | 141  | 303  | 1.00E-69  | 214.9 | 87.9 | 95.0 | F1N21.7                                 | gbpln | Arabidopsis thaliana | AT1G67250.1   Symbols:   Proteasome maturation factor UMP1   chr1:25163808-25164967 REVERSE LENGTH=141                                                                                                                                                                                                                                                         | 141  | 141  | 4.00E-71  | 100.0 | 88.7 | 95.0 |
| Rsa1.0_00079.1.g4056.t1 | ref[NP_174229.2] uncharacterized protein [Arabidopsis thaliana] gi 332192954 gb AE31075.1  uncharacterized protein AT1G29350 [Arabidopsis thaliana]                                                                                                                                                                                                                                                       | 869  | 831  | 0         | 95.6  | 74.9 | 81.6 | uncharacterized protein                 | gbpln | Arabidopsis thaliana | AT1G29350.1   Symbols:   Kinase-related protein of unknown function (DUF1296)   chr1:10268761-10273613 REVERSE LENGTH=831                                                                                                                                                                                                                                      | 869  | 831  | 0         | 95.6  | 74.9 | 81.6 |
| Rsa1.0_00079.1.g4057.t1 | ref[XP_002881592.1] hypothetical protein ARALYDRAFT_903069 [Arabidopsis lyrata subsp. lyrata] gi 297327431 gb EFH57851.1  hypothetical protein ARALYDRAFT_903069 [Arabidopsis lyrata subsp. lyrata]                                                                                                                                                                                                       | 376  | 411  | 4.00E-88  | 109.3 | 53.2 | 69.7 | hypothetical protein ARALYDRAFT_903069  | gbpln | Arabidopsis lyrata   | AT2G38590.1   Symbols:   F-box and associated interaction domains-containing protein   chr2:16142897-16144171 FORWARD LENGTH=424                                                                                                                                                                                                                               | 376  | 424  | 1.00E-89  | 112.8 | 54.0 | 69.7 |
| Rsa1.0_00079.1.g4058.t1 | emb CB130817.3  unnamed protein product [Vitis vinifera]                                                                                                                                                                                                                                                                                                                                                  | 375  | 195  | 1.00E-34  | 52.0  | 23.7 | 29.1 | unnamed protein product                 | gbpln | Vitis vinifera       | AT2G30933.1   Symbols:   Carbohydrate-binding X8 domain superfamily protein   chr2:13164179-13166517 REVERSE LENGTH=227                                                                                                                                                                                                                                        | 375  | 227  | 2.00E-30  | 60.5  | 15.5 | 18.7 |
| Rsa1.0_00079.1.g4059.t1 | ref[NP_564327.1] cold regulated 314 thylakoid membrane 2 [Arabidopsis thaliana] gi 426019472 sp F411G5.1 CRIM2_ARAT_H RecName: Full=Cold-regulated 413 inner membrane protein 2, chloroplastic; Short=AtCOR413-TM2; AltName: Full=Cold-regulated 413 thylakoid membrane 2; Short=AtCOR413-TM2; Flags: Precursor gi 332192959 gb AE31080.1  cold regulated 314 thylakoid membrane 2 [Arabidopsis thaliana] | 223  | 226  | 1.00E-97  | 101.3 | 81.2 | 89.7 | cold regulated 314 thylakoid membrane 2 | gbpln | Arabidopsis thaliana | AT1G29390.1   Symbols: COR314-TM2, COR413IM2   cold regulated 314 thylakoid membrane 2   chr1:10286409-10287878 REVERSE LENGTH=226                                                                                                                                                                                                                             | 223  | 226  | 1.00E-100 | 101.3 | 81.2 | 89.7 |
| Rsa1.0_00079.1.g4060.t1 | gb EOA39685.1  hypothetical protein CARUB_v10008326mg [Capsella rubella]                                                                                                                                                                                                                                                                                                                                  | 805  | 798  | 0         | 99.1  | 83.2 | 89.4 | hypothetical protein CARUB_v10008326mg  | gbpln | Capsella rubella     | AT1G29400.2   Symbols: AML5, ML5   MEI2-like protein 5   chr1:10290393-10293696 REVERSE LENGTH=800                                                                                                                                                                                                                                                             | 805  | 800  | 0         | 99.4  | 83.4 | 89.1 |
| Rsa1.0_00079.1.g4061.t1 | # # # # # # # #                                                                                                                                                                                                                                                                                                                                                                                           |      |      |           |       |      |      | -                                       | ----  | ----                 | # # # # # # #                                                                                                                                                                                                                                                                                                                                                  |      |      |           |       |      |      |
| Rsa1.0_00079.1.g4062.t1 | gb ABV89665.1  auxin-responsive protein [Brassica rapa]                                                                                                                                                                                                                                                                                                                                                   | 137  | 139  | 1.00E-56  | 101.5 | 82.5 | 90.5 | auxin-responsive protein                | gbpln | Brassica rapa        | AT1G29500.1   Symbols:   SAUR-like auxin-responsive protein family   chr1:10321290-10321697 FORWARD LENGTH=135                                                                                                                                                                                                                                                 | 137  | 135  | 9.00E-56  | 98.5  | 77.4 | 83.9 |
| Rsa1.0_00079.1.g4063.t1 | gb AAM64520.1  auxin-induced protein, putative [Arabidopsis thaliana]                                                                                                                                                                                                                                                                                                                                     | 142  | 141  | 1.00E-57  | 99.3  | 83.8 | 90.1 | auxin-induced protein, putative         | gbpln | Arabidopsis thaliana | AT1G29450.1   Symbols:   SAUR-like auxin-responsive protein family   chr1:10305981-10306406 REVERSE LENGTH=141                                                                                                                                                                                                                                                 | 142  | 141  | 3.00E-59  | 99.3  | 83.1 | 89.4 |
| Rsa1.0_00079.1.g4064.t1 | # # # # # # # #                                                                                                                                                                                                                                                                                                                                                                                           |      |      |           |       |      |      | -                                       | ----  | ----                 | # # # # # # #                                                                                                                                                                                                                                                                                                                                                  |      |      |           |       |      |      |
| Rsa1.0_00079.1.g4065.t1 | # # # # # # # #                                                                                                                                                                                                                                                                                                                                                                                           |      |      |           |       |      |      | -                                       | ----  | ----                 | # # # # # # #                                                                                                                                                                                                                                                                                                                                                  |      |      |           |       |      |      |
| Rsa1.0_00079.1.g4066.t1 | emb CAA48292.1  bgp1 [Brassica rapa] gi 448272 prf 1916399A Bgp1 gene                                                                                                                                                                                                                                                                                                                                     | 57   | 119  | 9.00E-12  | 208.8 | 73.7 | 77.2 | bgp1                                    | gbpln | Brassica rapa        | AT1G24520.1   Symbols: BCP1   homolog of Brassica campestris pollen protein 1   chr1:8688699-8689058 FORWARD LENGTH=119                                                                                                                                                                                                                                        | 57   | 119  | 7.00E-14  | 208.8 | 73.7 | 77.2 |
| Rsa1.0_00079.1.g4067.t1 | ref[XP_002893444.1] transducin family protein [Arabidopsis lyrata subsp. lyrata] gi 297339286 gb EFH69703.1  transducin family protein [Arabidopsis lyrata subsp. lyrata]                                                                                                                                                                                                                                 | 536  | 418  | 0         | 78.0  | 67.4 | 70.7 | transducin family protein               | gbpln | Arabidopsis lyrata   | AT1G24530.1   Symbols:   Transducin/WD40 repeat-like superfamily protein   chr1:8693287-8694543 FORWARD LENGTH=418                                                                                                                                                                                                                                             | 536  | 418  | 0         | 78.0  | 66.8 | 70.3 |

|                          |                                                                                                                                                                                                       |      |      |           |       |      |      |                                                 |       |                      |                                                                                                                                     |      |      |           |       |      |      |
|--------------------------|-------------------------------------------------------------------------------------------------------------------------------------------------------------------------------------------------------|------|------|-----------|-------|------|------|-------------------------------------------------|-------|----------------------|-------------------------------------------------------------------------------------------------------------------------------------|------|------|-----------|-------|------|------|
| Rsa1.0_00079.1.g4068.t12 | emb[CAB39638.1] RNA-directed DNA polymerase-like protein [Arabidopsis thaliana] gi 7267666 emb[CAB78094.1] RNA-directed DNA polymerase-like protein [Arabidopsis thaliana]                            | 2006 | 1274 | 0         | 63.5  | 17.1 | 23.8 | RNA-directed DNA polymerase-like protein        | gbpln | Arabidopsis thaliana | AT4G29090.1   Symbols:   Ribonuclease H-like superfamily protein   chr4:14333528-14335255 FORWARD LENGTH=575                        | 2006 | 575  | 7.00E-52  | 28.7  | 6.1  | 10.2 |
| Rsa1.0_00079.1.g4069.t1  | ref XP_002893443.1  CYP86C1 [Arabidopsis lyrata subsp. lyrata] gi 297339285 gb EFH69702.1  CYP86C1 [Arabidopsis lyrata subsp. lyrata]                                                                 | 517  | 522  | 0         | 101.0 | 83.0 | 91.1 | CYP86C1                                         | gbpln | Arabidopsis lyrata   | AT1G24540.1   Symbols: CYP86C1   cytochrome P450, family 86, subfamily C, polypeptide 1   chr1:8699751-8701319 FORWARD LENGTH=522   | 517  | 522  | 0         | 101.0 | 82.0 | 90.3 |
| Rsa1.0_00079.1.g4070.t1  | ref XP_002890706.1  hypothetical protein ARALYDRAFT_890218 [Arabidopsis lyrata subsp. lyrata] gi 297336546 gb EFH69655.1  hypothetical protein ARALYDRAFT_890218 [Arabidopsis lyrata subsp. lyrata]   | 393  | 421  | 1.00E-173 | 107.1 | 77.6 | 85.2 | hypothetical protein ARALYDRAFT_890218          | gbpln | Arabidopsis lyrata   | AT1G67800.4   Symbols:   Copine (Calcium-dependent phospholipid-binding protein) family   chr1:25421029-25423237 REVERSE LENGTH=433 | 393  | 433  | 1.00E-166 | 110.2 | 72.5 | 81.7 |
| Rsa1.0_00079.1.g4071.t1  | gb AAC23765.1  Mutator-like transposase [Arabidopsis thaliana] ref XP_002882271.1  hypothetical protein ARALYDRAFT_896293 [Arabidopsis lyrata subsp. lyrata]                                          | 481  | 784  | 2.00E-23  | 163.0 | 11.4 | 15.8 | Mutator-like transposase                        | gbpln | Arabidopsis thaliana | #                                                                                                                                   | #    | #    | #         | #     | #    | #    |
| Rsa1.0_00079.1.g4072.t1  | gi 297328111 gb EFH58530.1  hypothetical protein ARALYDRAFT_896293 [Arabidopsis lyrata subsp. lyrata]                                                                                                 | 207  | 164  | 4.00E-16  | 79.2  | 21.7 | 28.5 | hypothetical protein ARALYDRAFT_896293          | gbpln | Arabidopsis lyrata   | #                                                                                                                                   | #    | #    | #         | #     | #    | #    |
| Rsa1.0_00079.1.g4073.t1  | gb AAG50806.1  AC079281.8 unknown protein [Arabidopsis thaliana]                                                                                                                                      | 1716 | 1213 | 0         | 70.7  | 40.0 | 51.6 | unknown protein                                 | gbpln | Arabidopsis thaliana | AT1G43760.1   Symbols:   DNase I-like superfamily protein   chr1:16528880-16531065 REVERSE LENGTH=626                               | 1716 | 626  | 2.00E-74  | 36.5  | 8.9  | 14.8 |
| Rsa1.0_00079.1.g4074.t2  | gb EOA39560.1  hypothetical protein CARUB_v10008178mg [Capsella rubella]                                                                                                                              | 956  | 1022 | 0         | 106.9 | 77.2 | 85.7 | hypothetical protein CARUB_v10008178mg          | gbpln | Capsella rubella     | AT1G29720.1   Symbols:   Leucine-rich repeat transmembrane protein kinase   chr1:10393894-10399771 REVERSE LENGTH=1019              | 956  | 1019 | 0         | 106.6 | 73.0 | 82.1 |
| Rsa1.0_00079.1.g4075.t1  | ref XP_002863747.1  predicted protein [Arabidopsis lyrata subsp. lyrata] gi 297309582 gb EFH40006.1  predicted protein [Arabidopsis lyrata subsp. lyrata]                                             | 965  | 989  | 0         | 102.5 | 58.8 | 73.2 | predicted protein                               | gbpln | Arabidopsis lyrata   | AT5G46470.1   Symbols: RPS6   disease resistance protein (TIR-NBS-LRR class) family   chr5:18842701-18846809 FORWARD LENGTH=1127    | 965  | 1127 | 0         | 116.8 | 56.1 | 63.6 |
| Rsa1.0_00079.1.g4076.t3  | ref XP_002893580.1  hypothetical protein ARALYDRAFT_473178 [Arabidopsis lyrata subsp. lyrata] gi 297339422 gb EFH69839.1  hypothetical protein ARALYDRAFT_473178 [Arabidopsis lyrata subsp. lyrata]   | 1017 | 1023 | 0         | 100.6 | 78.5 | 87.9 | hypothetical protein ARALYDRAFT_473178          | gbpln | Arabidopsis lyrata   | AT1G29750.2   Symbols: RKF1   receptor-like kinase in flowers 1   chr1:10414071-10420469 REVERSE LENGTH=1021                        | 1017 | 1021 | 0         | 100.4 | 78.3 | 87.7 |
| Rsa1.0_00080.1.g4077.t1  | ref XP_002882754.1  hypothetical protein ARALYDRAFT_897397 [Arabidopsis lyrata subsp. lyrata] gi 297328594 gb EFH59013.1  hypothetical protein ARALYDRAFT_897397 [Arabidopsis lyrata subsp. lyrata]   | 433  | 432  | 0         | 99.8  | 87.8 | 94.0 | hypothetical protein ARALYDRAFT_897397          | gbpln | Arabidopsis lyrata   | AT3G11900.1   Symbols: ANT1   aromatic and neutral transporter 1   chr3:3758523-3760103 FORWARD LENGTH=432                          | 433  | 432  | 0         | 99.8  | 88.0 | 94.5 |
| Rsa1.0_00080.1.g4078.t1  | #                                                                                                                                                                                                     | #    | #    | #         | #     | #    | -    | ----                                            | ----  | ----                 | #                                                                                                                                   | #    | #    | #         | #     | #    | #    |
| Rsa1.0_00080.1.g4079.t6  | ref XP_002884872.1  hypothetical protein ARALYDRAFT_317971 [Arabidopsis lyrata subsp. lyrata] gi 297330712 gb EFH61131.1  hypothetical protein ARALYDRAFT_317971 [Arabidopsis lyrata subsp. lyrata]   | 1175 | 1115 | 0         | 94.9  | 84.6 | 88.9 | hypothetical protein ARALYDRAFT_317971          | gbpln | Arabidopsis lyrata   | AT3G11910.1   Symbols: UBP13   ubiquitin-specific protease 13   chr3:3761758-3770290 REVERSE LENGTH=1115                            | 1175 | 1115 | 0         | 94.9  | 84.0 | 88.6 |
| Rsa1.0_00080.1.g4080.t1  | ref XP_002882756.1  universal stress protein family protein [Arabidopsis lyrata subsp. lyrata] gi 297328596 gb EFH59015.1  universal stress protein family protein [Arabidopsis lyrata subsp. lyrata] | 200  | 200  | 3.00E-93  | 100.0 | 82.5 | 89.0 | universal stress protein family protein         | gbpln | Arabidopsis lyrata   | AT3G11930.2   Symbols:   Adenine nucleotide alpha hydrolases-like superfamily protein   chr3:3776371-3777393 FORWARD LENGTH=200     | 200  | 200  | 2.00E-94  | 100.0 | 82.5 | 90.5 |
| Rsa1.0_00080.1.g4081.t1  | gb EOA27796.1  hypothetical protein CARUB_v10023948mg, partial [Capsella rubella]                                                                                                                     | 207  | 241  | 1.00E-114 | 116.4 | 96.6 | 98.6 | hypothetical protein CARUB_v10023948mg, partial | gbpln | Capsella rubella     | AT2G37270.2   Symbols: ATRPS5B, RPS5B   ribosomal protein 5B   chr2:15647883-15649042 REVERSE LENGTH=207                            | 207  | 207  | 1.00E-116 | 100.0 | 95.7 | 98.6 |
| Rsa1.0_00080.1.g4082.t2  | ref XP_002884874.1  prenyltransferase [Arabidopsis lyrata subsp. lyrata] gi 297330714 gb EFH61133.1  prenyltransferase [Arabidopsis lyrata subsp. lyrata]                                             | 326  | 385  | 1.00E-176 | 118.1 | 92.9 | 95.7 | prenyltransferase                               | gbpln | Arabidopsis lyrata   | AT3G11945.1   Symbols: PDS2, ATHST, HST   homogentisate prenyltransferase   chr3:3780041-3782880 REVERSE LENGTH=386                 | 326  | 386  | 1.00E-175 | 118.4 | 92.9 | 95.1 |
| Rsa1.0_00080.1.g4083.t1  | ref XP_002882731.1  glycerol-3-phosphate acyltransferase 5 [Arabidopsis lyrata subsp. lyrata] gi 297328571 gb EFH58990.1  glycerol-3-phosphate acyltransferase 5 [Arabidopsis lyrata subsp. lyrata]   | 113  | 502  | 8.00E-39  | 444.2 | 72.6 | 81.4 | glycerol-3-phosphate acyltransferase 5          | gbpln | Arabidopsis lyrata   | AT3G11430.1   Symbols: ATPGAT5, GPAT5   glycerol-3-phosphate acyltransferase 5   chr3:3595911-3597678 FORWARD LENGTH=502            | 113  | 502  | 6.00E-40  | 444.2 | 70.8 | 80.5 |



|                         |                                                                                                                                                                                                                                                                                                                                                                                                                                                                                                                                                                                                                          |      |      |           |       |      |      |                                                       |       |                      |                                                                                                                                                                                                                                                                                                                                                                                                                                                                                   |      |      |           |       |      |      |
|-------------------------|--------------------------------------------------------------------------------------------------------------------------------------------------------------------------------------------------------------------------------------------------------------------------------------------------------------------------------------------------------------------------------------------------------------------------------------------------------------------------------------------------------------------------------------------------------------------------------------------------------------------------|------|------|-----------|-------|------|------|-------------------------------------------------------|-------|----------------------|-----------------------------------------------------------------------------------------------------------------------------------------------------------------------------------------------------------------------------------------------------------------------------------------------------------------------------------------------------------------------------------------------------------------------------------------------------------------------------------|------|------|-----------|-------|------|------|
| Rsa1.0_00080.1.g4084.t3 | gb AAB87099.1  putative retroelement pol polyprotein [Arabidopsis thaliana]                                                                                                                                                                                                                                                                                                                                                                                                                                                                                                                                              | 1498 | 1496 | 0         | 99.9  | 58.9 | 71.4 | putative retroelement pol polyprotein                 | gbpln | Arabidopsis thaliana | AT4G23160.1   Symbols: CRK8   cysteine-rich RLK (RECEPTOR-like protein kinase) 8   chr4:12129485-12134086 FORWARD LENGTH=1262                                                                                                                                                                                                                                                                                                                                                     | 1498 | 1262 | 1.00E-140 | 84.2  | 16.0 | 22.2 |
| Rsa1.0_00080.1.g4085.t2 | ref NP_187803.4  RNA binding protein [Arabidopsis thaliana]<br>gi 332641610 gb AE75131.1  RNA binding protein [Arabidopsis thaliana]                                                                                                                                                                                                                                                                                                                                                                                                                                                                                     | 1929 | 1896 | 0         | 98.3  | 84.2 | 90.6 | RNA binding protein                                   | gbpln | Arabidopsis thaliana | AT3G11964.1   Symbols:   RNA binding;RNA binding   chr3:3793957-3806626 REVERSE LENGTH=1896                                                                                                                                                                                                                                                                                                                                                                                       | 1929 | 1896 | 0         | 98.3  | 84.2 | 90.6 |
| Rsa1.0_00080.1.g4086.t1 | gb EOA31497.1  hypothetical protein CARUB_v10014683mg [Capsella rubella]                                                                                                                                                                                                                                                                                                                                                                                                                                                                                                                                                 | 274  | 198  | 2.00E-53  | 72.3  | 43.1 | 43.4 | hypothetical protein CARUB_v10014683mg                | gbpln | Capsella rubella     | AT1G55310.3   Symbols: SR33, SCL33, At-SCL33   SC35-like splicing factor 33   chr1:20630676-20632695 FORWARD LENGTH=300                                                                                                                                                                                                                                                                                                                                                           | 274  | 300  | 1.00E-41  | 109.5 | 33.6 | 39.1 |
| Rsa1.0_00080.1.g4087.t1 | ref XP_002882759.1  hypothetical protein ARALYDRAFT_478549 [Arabidopsis lyrata subsp. lyrata]<br>gi 297328599 gb EFH59018.1  hypothetical protein ARALYDRAFT_478549 [Arabidopsis lyrata subsp. lyrata]                                                                                                                                                                                                                                                                                                                                                                                                                   | 616  | 616  | 0         | 100.0 | 90.3 | 95.3 | hypothetical protein ARALYDRAFT_478549                | gbpln | Arabidopsis lyrata   | AT3G11980.1   Symbols: MS2, FAR2   Jojoba acyl CoA reductase-related male sterility protein   chr3:3814484-3816927 FORWARD LENGTH=616                                                                                                                                                                                                                                                                                                                                             | 616  | 616  | 0         | 100.0 | 89.4 | 94.8 |
| Rsa1.0_00080.1.g4088.t1 | ref NP_564494.1  protein downregulated in DIF1 18 [Arabidopsis thaliana]<br>gi 7767668 gb AAF69165.1 AC007915_17 F27F5.27 [Arabidopsis thaliana]<br>gi 332193971 gb AEE32092.1  protein downregulated in DIF1 18 [Arabidopsis thaliana]                                                                                                                                                                                                                                                                                                                                                                                  | 169  | 172  | 2.00E-48  | 101.8 | 53.8 | 74.6 | protein downregulated in DIF1 18                      | gbpln | Arabidopsis thaliana | AT1G45190.1   Symbols: DD18   downregulated in DIF1 18   chr1:17104406-17104924 FORWARD LENGTH=172                                                                                                                                                                                                                                                                                                                                                                                | 169  | 172  | 7.00E-51  | 101.8 | 53.8 | 74.6 |
| Rsa1.0_00080.1.g4089.t1 | gb EOA33095.1  hypothetical protein CARUB_v10016433mg [Capsella rubella]                                                                                                                                                                                                                                                                                                                                                                                                                                                                                                                                                 | 128  | 685  | 2.00E-32  | 535.2 | 56.3 | 60.2 | hypothetical protein CARUB_v10016433mg                | gbpln | Capsella rubella     | AT3G12010.1   Symbols:   FUNCTIONS IN: molecular_function unknown; INVOLVED IN: biological_process unknown; EXPRESSED IN: sperm cell, cultured cell; CONTAINS InterPro DOMAIN/s: Colon cancer-associated Mic1-like (InterPro:IPR009755); Has 30201 Blast hits to 17322 proteins in 780 species: Archaea - 12; Bacteria - 1396; Metazoa - 17338; Fungi - 3422; Plants - 5037; Viruses - 0; Other Eukaryotes - 2996 (source: NCBI BLINK).   chr3:3821337-3825537 FORWARD LENGTH=682 | 128  | 682  | 5.00E-35  | 532.8 | 55.5 | 60.2 |
| Rsa1.0_00080.1.g4090.t2 | gb AAF18538.1 AC006551_24 Very similar to retrotransposon reverse transcriptase [Arabidopsis thaliana]                                                                                                                                                                                                                                                                                                                                                                                                                                                                                                                   | 708  | 1231 | 0         | 173.9 | 47.3 | 64.5 | Very similar to retrotransposon reverse transcriptase | gbpln | Arabidopsis thaliana | AT4G29090.1   Symbols:   Ribonuclease H-like superfamily protein   chr4:14333528-14335255 FORWARD LENGTH=575                                                                                                                                                                                                                                                                                                                                                                      | 708  | 575  | 1.00E-100 | 81.2  | 28.4 | 44.5 |
| Rsa1.0_00080.1.g4091.t1 | ref NP_187809.3  kinesin motor protein-like protein [Arabidopsis thaliana]<br>gi 332641616 gb AEE75137.1  kinesin motor protein-like protein [Arabidopsis thaliana]                                                                                                                                                                                                                                                                                                                                                                                                                                                      | 955  | 965  | 0         | 101.0 | 88.6 | 93.2 | kinesin motor protein-like protein                    | gbpln | Arabidopsis thaliana | AT3G12020.1   Symbols:   P-loop containing nucleoside triphosphate hydrolases superfamily protein   chr3:3827016-3834146 FORWARD LENGTH=965                                                                                                                                                                                                                                                                                                                                       | 955  | 965  | 0         | 101.0 | 88.6 | 93.2 |
| Rsa1.0_00080.1.g4092.t1 | ref NP_187811.1  DNA-3-methyladenine glycosylase [Arabidopsis thaliana]<br>gi 2833373 sp Q39147.1 3MG_ARATH RecName: Full=DNA-3-methyladenine glycosylase; AltName: Full=3-methyladenine DNA glycosidase<br>gi 12322001 gb AAG51039.1 AC069473_1 DNA-3-methyladenine glycosylase (MAG); 45351-46783 [Arabidopsis thaliana]<br>gi 429157 emb CAA53763.1  3-methyladenine glycosylase [Arabidopsis thaliana]<br>gi 10998145 dbj BAB03116.1  DNA-3-methyladenine glycosylase (3-methyladenine DNA glycosidase) [Arabidopsis thaliana]<br>gi 332641619 gb AEE75140.1  DNA-3-methyladenine glycosylase [Arabidopsis thaliana] | 253  | 254  | 1.00E-123 | 100.4 | 85.8 | 91.7 | DNA-3-methyladenine glycosylase                       | gbpln | Arabidopsis thaliana | AT3G12040.1   Symbols:   DNA-3-methyladenine glycosylase (MAG)   chr3:3835349-3836781 REVERSE LENGTH=254                                                                                                                                                                                                                                                                                                                                                                          | 253  | 254  | 1.00E-126 | 100.4 | 85.8 | 91.7 |
| Rsa1.0_00080.1.g4093.t2 | gb EOA30887.1  hypothetical protein CARUB_v10014031mg [Capsella rubella]                                                                                                                                                                                                                                                                                                                                                                                                                                                                                                                                                 | 427  | 362  | 1.00E-154 | 84.8  | 65.1 | 69.3 | hypothetical protein CARUB_v10014031mg                | gbpln | Capsella rubella     | AT3G12050.1   Symbols:   Aha1 domain-containing protein   chr3:3839289-3841303 FORWARD LENGTH=360                                                                                                                                                                                                                                                                                                                                                                                 | 427  | 360  | 1.00E-153 | 84.3  | 65.1 | 69.8 |
| Rsa1.0_00080.1.g4094.t1 | ref XP_002882764.1  predicted protein [Arabidopsis lyrata subsp. lyrata]<br>gi 297328604 gb EFH59023.1  predicted protein [Arabidopsis lyrata subsp. lyrata]                                                                                                                                                                                                                                                                                                                                                                                                                                                             | 537  | 559  | 0         | 104.1 | 78.4 | 87.3 | predicted protein                                     | gbpln | Arabidopsis lyrata   | AT3G12060.1   Symbols: TBL1   Plant protein of unknown function (DUF828)   chr3:3843142-3845150 FORWARD LENGTH=556                                                                                                                                                                                                                                                                                                                                                                | 537  | 556  | 0         | 103.5 | 76.9 | 86.0 |
| Rsa1.0_00080.1.g4095.t1 | gb EOA30058.1  hypothetical protein CARUB_v10013165mg [Capsella rubella]                                                                                                                                                                                                                                                                                                                                                                                                                                                                                                                                                 | 657  | 655  | 0         | 99.7  | 87.1 | 91.9 | hypothetical protein CARUB_v10013165mg                | gbpln | Capsella rubella     | AT3G12080.1   Symbols: emb2738   GTP-binding family protein   chr3:3847851-3851980 FORWARD LENGTH=663                                                                                                                                                                                                                                                                                                                                                                             | 657  | 663  | 0         | 100.9 | 88.0 | 92.5 |

|                         |                                                                                                                                                                                                                                                                                                                                                                                                                                                                                                                                                                                                                               |      |      |           |       |      |      |                                        |       |                      |                                                                                                                                                                                                                                                                                                                                             |      |      |           |       |      |      |
|-------------------------|-------------------------------------------------------------------------------------------------------------------------------------------------------------------------------------------------------------------------------------------------------------------------------------------------------------------------------------------------------------------------------------------------------------------------------------------------------------------------------------------------------------------------------------------------------------------------------------------------------------------------------|------|------|-----------|-------|------|------|----------------------------------------|-------|----------------------|---------------------------------------------------------------------------------------------------------------------------------------------------------------------------------------------------------------------------------------------------------------------------------------------------------------------------------------------|------|------|-----------|-------|------|------|
| Rsa1.0_00080.1.g4096.t1 | refXP_002884881.1  hypothetical protein ARALYDRAFT_478564 [Arabidopsis lyrata subsp. lyrata] gi 297330721 gb EFH61140.1                                                                                                                                                                                                                                                                                                                                                                                                                                                                                                       | 282  | 282  | 1.00E-143 | 100.0 | 95.7 | 97.9 | hypothetical protein ARALYDRAFT_478564 | gbpln | Arabidopsis lyrata   | AT3G12090.1   Symbols: TET6   tetraspanin6   chr3:3852326-3853714 REVERSE LENGTH=282                                                                                                                                                                                                                                                        | 282  | 282  | 1.00E-145 | 100.0 | 94.7 | 97.9 |
| Rsa1.0_00080.1.g4097.t2 | hypothetical protein ARALYDRAFT_478564 [Arabidopsis lyrata subsp. lyrata]<br>dbj BAJ34578.1  unnamed protein product [Theilungiella halophila]                                                                                                                                                                                                                                                                                                                                                                                                                                                                                | 605  | 393  | 0         | 65.0  | 59.0 | 61.3 | unnamed protein product                | ----  | ----                 | AT3G12100.1   Symbols:   Cation efflux family protein   chr3:3854741-3857270 REVERSE LENGTH=393                                                                                                                                                                                                                                             | 605  | 393  | 0         | 65.0  | 58.5 | 60.5 |
| Rsa1.0_00080.1.g4098.t1 | ref NP_187818.1  actin-11 [Arabidopsis thaliana]<br>gi 1703129 sp P53496.1 ACT11_ARATH RecName: Full=Actin-11<br>gi 12322007 gb AAG51045.1 AC069473.7 actin 11 (ACT11); 24016-22523 [Arabidopsis thaliana]<br>gi 1002533 gb AAB39404.1  actin-11 [Arabidopsis thaliana]<br>gi 9294108 db BAB01959.1  actin 11 [Arabidopsis thaliana]<br>gi 21593328 gb AAM65277.1  actin 11 (ACT11) [Arabidopsis thaliana]<br>gi 26451746 db BAC42968.1  unknown protein [Arabidopsis thaliana]<br>gi 28973377 gb AAO64013.1  putative actin 11 (ACT11) [Arabidopsis thaliana]<br>gi 332641630 gb AEE75151.1  actin-11 [Arabidopsis thaliana] | 186  | 377  | 1.00E-103 | 202.7 | 97.3 | 99.5 | actin-11                               | gbpln | Arabidopsis thaliana | AT3G12110.1   Symbols: ACT11   actin-11   chr3:3858116-3859609 FORWARD LENGTH=377                                                                                                                                                                                                                                                           | 186  | 377  | 1.00E-105 | 202.7 | 97.3 | 99.5 |
| Rsa1.0_00080.1.g4099.t1 | gb AFC41106.1  FAD2-1 [Brassica oleracea]                                                                                                                                                                                                                                                                                                                                                                                                                                                                                                                                                                                     | 384  | 384  | 0         | 100.0 | 97.1 | 98.7 | FAD2-1                                 | gbpln | Brassica oleracea    | AT3G12120.2   Symbols: FAD2   fatty acid desaturase 2   chr3:3860592-3861743 REVERSE LENGTH=383                                                                                                                                                                                                                                             | 384  | 383  | 0         | 99.7  | 90.9 | 94.8 |
| Rsa1.0_00080.1.g4100.t1 | refXP_002884884.1  KH domain-containing protein [Arabidopsis lyrata subsp. lyrata]<br>gi 297330724 gb EFH61143.1  KH domain-containing protein [Arabidopsis lyrata subsp. lyrata]                                                                                                                                                                                                                                                                                                                                                                                                                                             | 245  | 245  | 1.00E-114 | 100.0 | 90.2 | 94.3 | KH domain-containing protein           | gbpln | Arabidopsis lyrata   | AT3G12130.1   Symbols:   KH domain-containing protein / zinc finger (CCH type) family protein   chr3:3864486-3866406 REVERSE LENGTH=248                                                                                                                                                                                                     | 245  | 248  | 1.00E-110 | 101.2 | 86.9 | 93.5 |
| Rsa1.0_00080.1.g4101.t1 | refXP_002889521.1  kinase family protein [Arabidopsis lyrata subsp. lyrata]<br>gi 297335369 gb EFH65780.1  kinase family protein [Arabidopsis lyrata subsp. lyrata]                                                                                                                                                                                                                                                                                                                                                                                                                                                           | 183  | 1043 | 1.00E-10  | 569.9 | 20.2 | 24.0 | kinase family protein                  | gbpln | Arabidopsis lyrata   | AT1G04700.1   Symbols:   PB1 domain-containing protein tyrosine kinase   chr1:1316919-1320653 FORWARD LENGTH=1042                                                                                                                                                                                                                           | 183  | 1042 | 2.00E-12  | 569.4 | 18.6 | 23.0 |
| Rsa1.0_00080.1.g4102.t1 | refXP_002871631.1  hypothetical protein ARALYDRAFT_488325 [Arabidopsis lyrata subsp. lyrata]<br>gi 297317468 gb EFH47890.1  hypothetical protein ARALYDRAFT_488325 [Arabidopsis lyrata subsp. lyrata]                                                                                                                                                                                                                                                                                                                                                                                                                         | 384  | 384  | 0         | 100.0 | 91.7 | 96.6 | hypothetical protein ARALYDRAFT_488325 | gbpln | Arabidopsis lyrata   | AT5G14780.1   Symbols: FDH   formate dehydrogenase   chr5:4777043-4779190 FORWARD LENGTH=384                                                                                                                                                                                                                                                | 384  | 384  | 0         | 100.0 | 89.6 | 95.6 |
| Rsa1.0_00080.1.g4103.t1 | refXP_002884885.1  hypothetical protein ARALYDRAFT_341336 [Arabidopsis lyrata subsp. lyrata]<br>gi 297330725 gb EFH61144.1  hypothetical protein ARALYDRAFT_341336 [Arabidopsis lyrata subsp. lyrata]                                                                                                                                                                                                                                                                                                                                                                                                                         | 476  | 431  | 1.00E-101 | 90.5  | 47.1 | 63.2 | hypothetical protein ARALYDRAFT_341336 | gbpln | Arabidopsis lyrata   | AT1G50920.1   Symbols:   Nucleolar GTP-binding protein   chr1:1887055-18872570 FORWARD LENGTH=671                                                                                                                                                                                                                                           | 476  | 671  | 1.00E-74  | 141.0 | 40.1 | 57.8 |
| Rsa1.0_00080.1.g4104.t4 | refXP_002884889.1  leucine-rich repeat protein FLR1 [Arabidopsis lyrata subsp. lyrata]<br>gi 297330729 gb EFH61148.1  leucine-rich repeat protein FLR1 [Arabidopsis lyrata subsp. lyrata]                                                                                                                                                                                                                                                                                                                                                                                                                                     | 484  | 325  | 1.00E-109 | 67.1  | 41.1 | 48.6 | leucine-rich repeat protein FLR1       | gbpln | Arabidopsis lyrata   | AT3G12145.1   Symbols: FLR1, FLOR1   Leucine-rich repeat (LRR) family protein   chr3:3874764-3876075 REVERSE LENGTH=325                                                                                                                                                                                                                     | 484  | 325  | 1.00E-111 | 67.1  | 41.3 | 48.1 |
| Rsa1.0_00081.1.g4105.t2 | refXP_002875887.1  predicted protein [Arabidopsis lyrata subsp. lyrata]<br>gi 297321725 gb EFH52146.1  predicted protein [Arabidopsis lyrata subsp. lyrata]                                                                                                                                                                                                                                                                                                                                                                                                                                                                   | 367  | 315  | 1.00E-130 | 85.8  | 62.9 | 73.6 | predicted protein                      | gbpln | Arabidopsis lyrata   | AT3G48210.1   Symbols:   CONTAINS InterPro DOMAIN/s: Kinetochore-Ndc80 complex; subunit Spc25 (InterPro:IPR013255). Has 194 Blast hits to 194 proteins in 72 species: Archae - 0; Bacteria - 4; Metazoa - 72; Fungi - 39; Plants - 62; Viruses - 0; Other Eukaryotes - 17 (source: NCBI BLINK).   chr3:17849435-17851396 FORWARD LENGTH=315 | 367  | 315  | 1.00E-131 | 85.8  | 62.9 | 72.2 |
| Rsa1.0_00081.1.g4106.t1 | refXP_002875882.1  hypothetical protein ARALYDRAFT_323420 [Arabidopsis lyrata subsp. lyrata]<br>gi 297321720 gb EFH52141.1  hypothetical protein ARALYDRAFT_323420 [Arabidopsis lyrata subsp. lyrata]                                                                                                                                                                                                                                                                                                                                                                                                                         | 3068 | 3832 | 0         | 124.9 | 84.0 | 89.0 | hypothetical protein ARALYDRAFT_323420 | gbpln | Arabidopsis lyrata   | AT3G48190.1   Symbols: ATM, ATATM   ataxia-telangiectasia mutated   chr3:17797628-17828361 FORWARD LENGTH=3845                                                                                                                                                                                                                              | 3068 | 3845 | 0         | 125.3 | 83.7 | 88.9 |
| Rsa1.0_00081.1.g4107.t5 | #                                                                                                                                                                                                                                                                                                                                                                                                                                                                                                                                                                                                                             | #    | #    | #         | #     | #    | -    | ----                                   | ----  | #                    | #                                                                                                                                                                                                                                                                                                                                           | #    | #    | #         | #     | #    |      |

|                         |                                                                                                                                                                                                                                                                                                                                                                      |     |     |           |       |      |      |                                                      |       |                      |                                                                                                                                                                                                                                                                                                                                           |     |     |           |       |      |      |
|-------------------------|----------------------------------------------------------------------------------------------------------------------------------------------------------------------------------------------------------------------------------------------------------------------------------------------------------------------------------------------------------------------|-----|-----|-----------|-------|------|------|------------------------------------------------------|-------|----------------------|-------------------------------------------------------------------------------------------------------------------------------------------------------------------------------------------------------------------------------------------------------------------------------------------------------------------------------------------|-----|-----|-----------|-------|------|------|
| Rsa1.0_00081.1.g4108.t5 | ref XP_002889872.1  At1g11500 [Arabidopsis lyrata subsp. lyrata] g 297335714 g EFH66131.1  At1g11500 [Arabidopsis lyrata subsp. lyrata]                                                                                                                                                                                                                              | 250 | 184 | 7.00E-56  | 73.6  | 44.8 | 50.0 | At1g11500                                            | gbpln | Arabidopsis lyrata   | AT1G11500.1   Symbols:   Protein of unknown function (DUF1218)   chr1:3870833-3871570 FORWARD LENGTH=184                                                                                                                                                                                                                                  | 250 | 184 | 8.00E-57  | 73.6  | 46.8 | 51.2 |
| Rsa1.0_00081.1.g4109.t1 | # # # # # # # # - ----                                                                                                                                                                                                                                                                                                                                               |     |     |           |       |      |      |                                                      |       |                      | # # # # # # # #                                                                                                                                                                                                                                                                                                                           |     |     |           |       |      |      |
| Rsa1.0_00081.1.g4110.t1 | ref XP_002889873.1  C-terminal cysteine residue is changed to A serine 1 [Arabidopsis lyrata subsp. lyrata] g 297335715 g EFH66132.1  C-terminal cysteine residue is changed to A serine 1 [Arabidopsis lyrata subsp. lyrata]                                                                                                                                        | 126 | 118 | 5.00E-53  | 93.7  | 79.4 | 88.9 | C-terminal cysteine residue is changed to A serine 1 | gbpln | Arabidopsis lyrata   | AT1G11530.1   Symbols: ATCXXS1, CXXS1   C-terminal cysteine residue is changed to a serine 1   chr1:3874518-3875311 FORWARD LENGTH=118                                                                                                                                                                                                    | 126 | 118 | 4.00E-55  | 93.7  | 78.6 | 87.3 |
| Rsa1.0_00081.1.g4111.t1 | gb AAF16642.1 AC011661_20 T23J18.21 [Arabidopsis thaliana]                                                                                                                                                                                                                                                                                                           | 175 | 304 | 3.00E-43  | 173.7 | 46.9 | 49.7 | T23J18.21                                            | gbpln | Arabidopsis thaliana | AT1G11545.1   Symbols: XTH8   xyloglucan endotransglucosylase/hydrolase 8   chr1:3878689-3880286 REVERSE LENGTH=305                                                                                                                                                                                                                       | 175 | 305 | 1.00E-45  | 174.3 | 46.9 | 49.7 |
| Rsa1.0_00081.1.g4112.t1 | # # # # # # # # - ----                                                                                                                                                                                                                                                                                                                                               |     |     |           |       |      |      |                                                      |       |                      | # # # # # # # #                                                                                                                                                                                                                                                                                                                           |     |     |           |       |      |      |
| Rsa1.0_00081.1.g4113.t1 | ref XP_002889875.1  hypothetical protein ARALYDRAFT_888463 [Arabidopsis lyrata subsp. lyrata] g 297335717 g EFH66134.1  hypothetical protein ARALYDRAFT_888463 [Arabidopsis lyrata subsp. lyrata]                                                                                                                                                                    | 89  | 89  | 7.00E-38  | 100.0 | 88.8 | 93.3 | hypothetical protein ARALYDRAFT_888463               | gbpln | Arabidopsis lyrata   | AT1G11572.1   Symbols:   Plant thionin family protein   chr1:3884455-3884724 FORWARD LENGTH=89                                                                                                                                                                                                                                            | 89  | 89  | 5.00E-38  | 100.0 | 83.1 | 91.0 |
| Rsa1.0_00081.1.g4114.t2 | # # # # # # # # - ----                                                                                                                                                                                                                                                                                                                                               |     |     |           |       |      |      |                                                      |       |                      | # # # # # # # #                                                                                                                                                                                                                                                                                                                           |     |     |           |       |      |      |
| Rsa1.0_00081.1.g4115.t1 | ref XP_002889876.1  At1g11580/T23J18_33 [Arabidopsis lyrata subsp. lyrata] g 297335718 g EFH66135.1  At1g11580/T23J18_33 [Arabidopsis lyrata subsp. lyrata]                                                                                                                                                                                                          | 554 | 556 | 0         | 100.4 | 87.0 | 94.0 | At1g11580/T23J18_33                                  | gbpln | Arabidopsis lyrata   | AT1G11580.1   Symbols: ATPMEPCRA, PMEPCRA   methyltransferase PCR A   chr1:3888730-3890649 FORWARD LENGTH=557                                                                                                                                                                                                                             | 554 | 557 | 0         | 100.5 | 87.0 | 93.7 |
| Rsa1.0_00081.1.g4116.t1 | gb ABJ98060.1  glucose 6-Pi/Pi transporter [Eutrema halophilum]                                                                                                                                                                                                                                                                                                      | 442 | 388 | 0         | 87.8  | 79.4 | 82.4 | glucose 6-Pi/Pi transporter                          | gbpln | Eutrema halophilum   | AT1G61800.1   Symbols: GPT2, ATGPT2   glucose-6-phosphate/phosphate translocator 2   chr1:22824527-22826459 FORWARD LENGTH=388                                                                                                                                                                                                            | 442 | 388 | 1.00E-175 | 87.8  | 69.5 | 76.7 |
| Rsa1.0_00081.1.g4117.t1 | ref XP_002889880.1  CYP77B1 [Arabidopsis lyrata subsp. lyrata] g 297335722 g EFH66139.1  CYP77B1 [Arabidopsis lyrata subsp. lyrata]                                                                                                                                                                                                                                  | 476 | 510 | 0         | 107.1 | 88.2 | 92.6 | CYP77B1                                              | gbpln | Arabidopsis lyrata   | AT1G11600.1   Symbols: CYP77B1   cytochrome P450, family 77, subfamily B, polypeptide 1   chr1:3902090-3903622 FORWARD LENGTH=510                                                                                                                                                                                                         | 476 | 510 | 0         | 107.1 | 88.0 | 92.4 |
| Rsa1.0_00081.1.g4118.t4 | gb EOA40397.1  hypothetical protein CARUB_v10009124mg, partial [Capsella rubella]                                                                                                                                                                                                                                                                                    | 495 | 448 | 1.00E-121 | 90.5  | 42.8 | 44.8 | hypothetical protein CARUB_v10009124mg, partial      | gbpln | Capsella rubella     | AT1G11650.1   Symbols: ATRBP45B, RBP45B   RNA-binding (RRM/RBD/RNP motifs) family protein   chr1:3914895-3917301 FORWARD LENGTH=306                                                                                                                                                                                                       | 495 | 306 | 1.00E-113 | 61.8  | 41.2 | 43.4 |
| Rsa1.0_00081.1.g4119.t1 | ref XP_002889884.1  hypothetical protein ARALYDRAFT_471303 [Arabidopsis lyrata subsp. lyrata] g 297335726 g EFH66143.1  hypothetical protein ARALYDRAFT_471303 [Arabidopsis lyrata subsp. lyrata]                                                                                                                                                                    | 115 | 113 | 2.00E-41  | 98.3  | 76.5 | 82.6 | hypothetical protein ARALYDRAFT_471303               | gbpln | Arabidopsis lyrata   | AT1G11655.1   Symbols:   unknown protein; BEST Arabidopsis thaliana protein match is: unknown protein (TAIR:AT4G21902.1); Has 22 Blast hits to 22 proteins in 6 species: Archae - 0; Bacteria - 0; Metazoa - 0; Fungi - 0; Plants - 22; Viruses - 0; Other Eukaryotes - 0 (source: NCBI BLink).   chr1:3919338-3919679 FORWARD LENGTH=113 | 115 | 113 | 2.00E-43  | 98.3  | 73.9 | 82.6 |
| Rsa1.0_00081.1.g4120.t1 | ref XP_002893783.1  predicted protein [Arabidopsis lyrata subsp. lyrata] g 297339625 g EFH70042.1  predicted protein [Arabidopsis lyrata subsp. lyrata]                                                                                                                                                                                                              | 223 | 276 | 5.00E-13  | 123.8 | 28.3 | 42.2 | predicted protein                                    | gbpln | Arabidopsis lyrata   | AT5G03495.1   Symbols:   RNA-binding (RRM/RBD/RNP motifs) family protein   chr5:873804-875025 REVERSE LENGTH=226                                                                                                                                                                                                                          | 223 | 226 | 1.00E-12  | 101.3 | 30.0 | 41.7 |
| Rsa1.0_00081.1.g4121.t1 | ref NP_001184966.1  ATP-dependent Clp protease proteolytic subunit 6 [Arabidopsis thaliana] g 332190658 g AE28779.1  ATP-dependent Clp protease proteolytic subunit 6 [Arabidopsis thaliana]                                                                                                                                                                         | 193 | 289 | 5.00E-43  | 149.7 | 47.2 | 48.2 | ATP-dependent Clp protease proteolytic subunit 6     | gbpln | Arabidopsis thaliana | AT1G11750.2   Symbols: CLPP6   CLP protease proteolytic subunit 6   chr1:3967609-3969535 FORWARD LENGTH=289                                                                                                                                                                                                                               | 193 | 289 | 2.00E-45  | 149.7 | 47.2 | 48.2 |
| Rsa1.0_00081.1.g4122.t1 | ref NP_849642.1  self-incompatibility protein S1 family [Arabidopsis thaliana] g 4835779 g AAD30245.1 AC007296_6 F25C20.8 [Arabidopsis thaliana] g 26452159 dbj BAC43168.1  unknown protein [Arabidopsis thaliana] g 28416883 g AAO42972.1  At1g11763 [Arabidopsis thaliana] g 332190661 g AEE28782.1  self-incompatibility protein S1 family [Arabidopsis thaliana] | 124 | 137 | 2.00E-32  | 110.5 | 56.5 | 74.2 | self-incompatibility protein S1 family               | gbpln | Arabidopsis thaliana | AT1G11765.1   Symbols:   Plant self-incompatibility protein S1 family   chr1:3973908-3974321 FORWARD LENGTH=137                                                                                                                                                                                                                           | 124 | 137 | 3.00E-35  | 110.5 | 56.5 | 74.2 |
| Rsa1.0_00081.1.g4123.t1 | gb EOA37855.1  hypothetical protein CARUB_v10011450mg [Capsella rubella]                                                                                                                                                                                                                                                                                             | 126 | 137 | 7.00E-31  | 108.7 | 54.0 | 66.7 | hypothetical protein CARUB_v10011450mg               | gbpln | Capsella rubella     | AT1G11765.1   Symbols:   Plant self-incompatibility protein S1 family   chr1:3973908-3974321 FORWARD LENGTH=137                                                                                                                                                                                                                           | 126 | 137 | 3.00E-33  | 108.7 | 50.0 | 70.6 |

|                         |                                                                                                                                                                                                                                                                                                                                                                                                                                                                                                                               |     |     |           |       |      |      |                                                     |       |                      |                                                                                                                        |     |     |           |       |      |      |
|-------------------------|-------------------------------------------------------------------------------------------------------------------------------------------------------------------------------------------------------------------------------------------------------------------------------------------------------------------------------------------------------------------------------------------------------------------------------------------------------------------------------------------------------------------------------|-----|-----|-----------|-------|------|------|-----------------------------------------------------|-------|----------------------|------------------------------------------------------------------------------------------------------------------------|-----|-----|-----------|-------|------|------|
| Rsa1.0_00081.1.g4124.t1 | gb ABD65170.1  hypothetical protein 40.t00057 [Brassica oleracea]                                                                                                                                                                                                                                                                                                                                                                                                                                                             | 466 | 255 | 5.00E-96  | 54.7  | 38.0 | 43.8 | hypothetical protein 40.t00057                      | gbpln | Brassica oleracea    | AT3G47680.1   Symbols:   DNA binding   chr3:17577483-17578391 REVERSE LENGTH=302                                       | 466 | 302 | 1.00E-40  | 64.8  | 20.4 | 28.3 |
| Rsa1.0_00081.1.g4125.t1 | ref XP_002898995.1  hypothetical protein ARALYDRAFT_471318 [Arabidopsis lyrata subsp. lyrata] gi 297338577 gb EFH66154.1  hypothetical protein ARALYDRAFT_471318 [Arabidopsis lyrata subsp. lyrata]                                                                                                                                                                                                                                                                                                                           | 538 | 536 | 0         | 99.6  | 79.9 | 87.9 | hypothetical protein ARALYDRAFT_471318              | gbpln | Arabidopsis lyrata   | AT1G11770.1   Symbols:   FAD-binding Berberine family protein   chr1:3975679-3977289 FORWARD LENGTH=536                | 538 | 536 | 0         | 99.6  | 80.5 | 90.1 |
| Rsa1.0_00081.1.g4126.t1 | ref XP_002892656.1  oxidoreductase [Arabidopsis lyrata subsp. lyrata] gi 297338498 gb EFH68915.1  oxidoreductase [Arabidopsis lyrata subsp. lyrata]                                                                                                                                                                                                                                                                                                                                                                           | 647 | 345 | 1.00E-179 | 53.3  | 47.1 | 49.8 | oxidoreductase                                      | gbpln | Arabidopsis lyrata   | AT1G11780.1   Symbols:   oxidoreductase, 2OG-Fe(II) oxygenase family protein   chr1:3977614-3979177 REVERSE LENGTH=345 | 647 | 345 | 1.00E-180 | 53.3  | 46.8 | 49.5 |
| Rsa1.0_00081.1.g4127.t1 | ref NP_563894.2  endonuclease/exonuclease/phosphatase e-like protein [Arabidopsis thaliana] gi 4835775 gb AAD30241.1 AC007296.2 EST gb F14156 comes from this gene [Arabidopsis thaliana] gi 2213581 gb AAM91094.1  At1g1800/F25C20.3 [Arabidopsis thaliana] gi 23308397 gb AAN18168.1  At1g1800/F25C20.3 [Arabidopsis thaliana] gi 332190667 gb AEE28788.1  endonuclease/exonuclease/phosphatase e-like protein [Arabidopsis thaliana]                                                                                       | 442 | 441 | 0         | 99.8  | 78.7 | 85.3 | endonuclease/exonuclease/phosphatase e-like protein | gbpln | Arabidopsis thaliana | AT1G11800.1   Symbols:   endonuclease/exonuclease/phosphatase family protein   chr1:3985520-3987263 REVERSE LENGTH=441 | 442 | 441 | 0         | 99.8  | 78.7 | 85.3 |
| Rsa1.0_00081.1.g4128.t1 | ref NP_001184967.1  O-Glycosyl hydrolases family 17 protein [Arabidopsis thaliana] gi 357529541 sp O65399.3 E131_ARATH RecName: Full=Glucan endo-1,3-beta-glucosidase 1; AltName: Full=(1-3)-beta-glucan endohydrolase 1; Short=(1-3)-beta-glucanase 1; AltName: Full=Beta-1,3-endoglucanase 1; Short=Beta-1,3-glucanase 1; Flags: Precursor gi 332190670 gb AEE28791.1  O-Glycosyl hydrolases family 17 protein [Arabidopsis thaliana]                                                                                       | 525 | 511 | 0         | 97.3  | 75.6 | 81.7 | O-Glycosyl hydrolases family 17 protein             | gbpln | Arabidopsis thaliana | AT1G11820.2   Symbols:   O-Glycosyl hydrolases family 17 protein   chr1:3991144-3993327 REVERSE LENGTH=511             | 525 | 511 | 0         | 97.3  | 75.6 | 81.7 |
| Rsa1.0_00081.1.g4129.t1 | #                                                                                                                                                                                                                                                                                                                                                                                                                                                                                                                             | #   | #   | #         | #     | #    | #    | -                                                   | ----  | ----                 | #                                                                                                                      | #   | #   | #         | #     | #    | #    |
| Rsa1.0_00081.1.g4130.t1 | gb EOA37702.1  hypothetical protein CARUB_v10012421mg [Capsella rubella]                                                                                                                                                                                                                                                                                                                                                                                                                                                      | 816 | 515 | 0         | 63.1  | 56.7 | 59.3 | hypothetical protein CARUB_v10012421mg              | gbpln | Capsella rubella     | AT1G11870.2   Symbols:   ATSRs, SRS   Seryl-tRNA synthetase   chr1:4003895-4006556 FORWARD LENGTH=514                  | 816 | 514 | 0         | 63.0  | 57.1 | 59.8 |
| Rsa1.0_00081.1.g4131.t2 | ref XP_002892659.1  hypothetical protein ARALYDRAFT_471336 [Arabidopsis lyrata subsp. lyrata] gi 297338501 gb EFH68918.1  hypothetical protein ARALYDRAFT_471336 [Arabidopsis lyrata subsp. lyrata]                                                                                                                                                                                                                                                                                                                           | 513 | 494 | 0         | 96.3  | 78.6 | 86.2 | hypothetical protein ARALYDRAFT_471336              | gbpln | Arabidopsis lyrata   | AT1G11880.1   Symbols:   transferases, transferring hexosyl groups   chr1:4007909-4010327 REVERSE LENGTH=489           | 513 | 489 | 0         | 95.3  | 78.0 | 85.2 |
| Rsa1.0_00081.1.g4132.t1 | ref NP_172653.1  vesicle transport protein SEC22 [Arabidopsis thaliana] gi 27805717 sp Q94AU2.1 SEC22_ARATH RecName: Full=25.3 kDa vesicle transport protein; Short=ATSEC22 gi 15027877 gb AAK76469.1  putative vesicle transport protein [Arabidopsis thaliana] gi 19310827 gb AAL85144.1  putative vesicle transport protein [Arabidopsis thaliana] gi 21555190 gb AAM63800.1  putative vesicle transport protein [Arabidopsis thaliana] gi 332190688 gb AEE28809.1  vesicle transport protein SEC22 [Arabidopsis thaliana] | 218 | 218 | 1.00E-124 | 100.0 | 98.2 | 99.1 | vesicle transport protein SEC22                     | gbpln | Arabidopsis thaliana | AT1G11890.1   Symbols:   SEC22, ATSEC22   Synaptobrevin family protein   chr1:4011509-4012835 FORWARD LENGTH=218       | 218 | 218 | 1.00E-126 | 100.0 | 98.2 | 99.1 |
| Rsa1.0_00081.1.g4133.t1 | ref NP_849648.4  B-cell receptor-associated protein 31-like protein [Arabidopsis thaliana] gi 22655198 gb AAM98189.1  unknown protein [Arabidopsis thaliana] gi 332190690 gb AEE28811.1  B-cell receptor-associated protein 31-like protein [Arabidopsis thaliana]                                                                                                                                                                                                                                                            | 245 | 221 | 2.00E-91  | 90.2  | 73.5 | 83.3 | B-cell receptor-associated protein 31-like protein  | gbpln | Arabidopsis thaliana | AT1G11905.1   Symbols:   B-cell receptor-associated protein 31-like   chr1:4014958-4016222 FORWARD LENGTH=221          | 245 | 221 | 6.00E-94  | 90.2  | 73.5 | 83.3 |
| Rsa1.0_00081.1.g4134.t1 | gb AAC32240.1  unknown protein [Arabidopsis thaliana]                                                                                                                                                                                                                                                                                                                                                                                                                                                                         | 310 | 346 | 1.00E-101 | 111.6 | 69.0 | 81.0 | unknown protein                                     | gbpln | Arabidopsis thaliana | AT2G32560.1   Symbols:   F-box family protein   chr2:13824820-13826761 FORWARD LENGTH=371                              | 310 | 371 | 1.00E-95  | 119.7 | 61.3 | 68.1 |
| Rsa1.0_00081.1.g4135.t2 | gb AAB03108.1  aspartic protease [Brassica napus]                                                                                                                                                                                                                                                                                                                                                                                                                                                                             | 414 | 506 | 0         | 122.2 | 98.8 | 99.3 | aspartic protease                                   | gbpln | Brassica napus       | AT1G11910.1   Symbols:   APA1, ATAPA1   aspartic proteinase A1   chr1:4017119-4019874 REVERSE LENGTH=506               | 414 | 506 | 0         | 122.2 | 95.4 | 97.8 |

|                         |                                                                                                                                                                                                                                                                                                                                                                                            |     |     |           |       |      |      |                                         |       |                      |                                                                                                                                               |     |     |           |       |      |      |
|-------------------------|--------------------------------------------------------------------------------------------------------------------------------------------------------------------------------------------------------------------------------------------------------------------------------------------------------------------------------------------------------------------------------------------|-----|-----|-----------|-------|------|------|-----------------------------------------|-------|----------------------|-----------------------------------------------------------------------------------------------------------------------------------------------|-----|-----|-----------|-------|------|------|
| Rsa1.0_00082.1.g4136.t2 | refNP_196627.1  calmodulin-binding protein-like protein [Arabidopsis thaliana] gi 10129644 emb CAC08240.1  vacuolar calcium binding protein-like [Arabidopsis thaliana] gi 53828561 gb AAU94390.1  At5g10660 [Arabidopsis thaliana] gi 55733763 gb AAV59278.1  At5g10660 [Arabidopsis thaliana] gi 332004195 gb AED91578.1  calmodulin-binding protein-like protein [Arabidopsis thaliana] | 452 | 407 | 5.00E-97  | 90.0  | 56.4 | 63.5 | calmodulin-binding protein-like protein | gbpln | Arabidopsis thaliana | AT5G10660.1   Symbols:   calmodulin-binding protein-related   chr5:3370553-3371776 FORWARD LENGTH=407                                         | 452 | 407 | 1.00E-99  | 90.0  | 56.4 | 63.5 |
| Rsa1.0_00082.1.g4137.t1 | #                                                                                                                                                                                                                                                                                                                                                                                          | #   | #   | #         | #     | #    | #    | -                                       | ----  | ----                 | #                                                                                                                                             | #   | #   | #         | #     | #    |      |
| Rsa1.0_00082.1.g4138.t1 | refXP_002871436.1  hypothetical protein ARALYDRAFT_909030 [Arabidopsis lyrata subsp. lyrata] gi 297317273 gb EFH47695.1  hypothetical protein ARALYDRAFT_909030 [Arabidopsis lyrata subsp. lyrata]                                                                                                                                                                                         | 911 | 923 | 0         | 101.3 | 86.2 | 92.4 | hypothetical protein ARALYDRAFT_909030  | gbpln | Arabidopsis lyrata   | AT5G10720.1   Symbols: AHK5, CKI2, HK5   histidine kinase 5   chr5:3386835-3390541 FORWARD LENGTH=922                                         | 911 | 922 | 0         | 101.2 | 86.1 | 91.9 |
| Rsa1.0_00082.1.g4139.t1 | refXP_002873472.1  catalytic/coenzyme binding protein [Arabidopsis lyrata subsp. lyrata] gi 297319309 gb EFH49731.1  catalytic/coenzyme binding protein [Arabidopsis lyrata subsp. lyrata]                                                                                                                                                                                                 | 287 | 287 | 2.33E-156 | 100.0 | 94.1 | 96.5 | catalytic/coenzyme binding protein      | gbpln | Arabidopsis lyrata   | AT5G10730.1   Symbols:   NAD(P)-binding Rossmann-fold superfamily protein   chr5:3390822-3392947 REVERSE LENGTH=287                           | 287 | 287 | 1.00E-144 | 100.0 | 93.4 | 96.9 |
| Rsa1.0_00082.1.g4140.t1 | gb EOA25676.1  hypothetical protein CARUB_v10019028mg [Capsella rubella]                                                                                                                                                                                                                                                                                                                   | 484 | 476 | 0         | 98.3  | 74.2 | 85.3 | hypothetical protein CARUB_v10019028mg  | gbpln | Capsella rubella     | AT3G28600.1   Symbols:   P-loop containing nucleoside triphosphate hydrolases superfamily protein   chr3:10722437-10723870 FORWARD LENGTH=477 | 484 | 477 | 0         | 98.6  | 73.8 | 83.5 |
| Rsa1.0_00082.1.g4141.t1 | refXP_002873473.1  hypothetical protein ARALYDRAFT_487908 [Arabidopsis lyrata subsp. lyrata] gi 297319310 gb EFH49732.1  hypothetical protein ARALYDRAFT_487908 [Arabidopsis lyrata subsp. lyrata]                                                                                                                                                                                         | 344 | 373 | 1.00E-164 | 108.4 | 87.5 | 93.6 | hypothetical protein ARALYDRAFT_487908  | gbpln | Arabidopsis lyrata   | AT5G10740.1   Symbols:   Protein phosphatase 2C family protein   chr5:3393797-3395848 REVERSE LENGTH=354                                      | 344 | 354 | 1.00E-163 | 102.9 | 82.6 | 88.4 |
| Rsa1.0_00082.1.g4142.t6 | refXP_002873476.1  hypothetical protein ARALYDRAFT_325615 [Arabidopsis lyrata subsp. lyrata] gi 297319313 gb EFH49735.1  hypothetical protein ARALYDRAFT_325615 [Arabidopsis lyrata subsp. lyrata]                                                                                                                                                                                         | 980 | 475 | 0         | 48.5  | 40.6 | 44.0 | hypothetical protein ARALYDRAFT_325615  | gbpln | Arabidopsis lyrata   | AT5G10770.1   Symbols:   Eukaryotic aspartyl protease family protein   chr5:3403331-3405331 REVERSE LENGTH=474                                | 980 | 474 | 0         | 48.4  | 39.4 | 42.2 |
| Rsa1.0_00082.1.g4143.t8 | refXP_002871441.1  ubiquitin-specific protease 22 [Arabidopsis lyrata subsp. lyrata] gi 297317278 gb EFH47700.1  ubiquitin-specific protease 22 [Arabidopsis lyrata subsp. lyrata]                                                                                                                                                                                                         | 565 | 557 | 0         | 98.6  | 83.7 | 88.1 | ubiquitin-specific protease 22          | gbpln | Arabidopsis lyrata   | AT5G10790.1   Symbols: UBP22   ubiquitin-specific protease 22   chr5:3410638-3412559 FORWARD LENGTH=557                                       | 565 | 557 | 0         | 98.6  | 83.0 | 87.6 |
| Rsa1.0_00082.1.g4144.t1 | refNP_196643.1  major facilitator protein [Arabidopsis thaliana] gi 75173996 sp Q9LEV7.1 FBT6_ARATH RecName: Full=Probable folate-biotin transporter 6 gi 8979716 emb CAB96837.1  putative protein [Arabidopsis thaliana] gi 332004217 gb AED91600.1  probable folate-biotin transporter 6 [Arabidopsis thaliana]                                                                          | 573 | 503 | 0         | 87.8  | 72.3 | 77.1 | major facilitator protein               | gbpln | Arabidopsis thaliana | AT5G10820.1   Symbols:   Major facilitator superfamily protein   chr5:3420876-3423166 REVERSE LENGTH=503                                      | 573 | 503 | 0         | 87.8  | 72.3 | 77.1 |
| Rsa1.0_00082.1.g4145.t1 | refXP_002871442.1  hypothetical protein ARALYDRAFT_487916 [Arabidopsis lyrata subsp. lyrata] gi 297317279 gb EFH47701.1  hypothetical protein ARALYDRAFT_487916 [Arabidopsis lyrata subsp. lyrata]                                                                                                                                                                                         | 261 | 261 | 1.00E-137 | 100.0 | 87.7 | 95.8 | hypothetical protein ARALYDRAFT_487916  | gbpln | Arabidopsis lyrata   | AT5G10830.1   Symbols:   S-adenosyl-L-methionine-dependent methyltransferases superfamily protein   chr5:3423731-3424649 FORWARD LENGTH=261   | 261 | 261 | 1.00E-138 | 100.0 | 87.0 | 95.4 |
| Rsa1.0_00082.1.g4146.t1 | refXP_002873480.1  hypothetical protein ARALYDRAFT_909044 [Arabidopsis lyrata subsp. lyrata] gi 297319317 gb EFH49739.1  hypothetical protein ARALYDRAFT_909044 [Arabidopsis lyrata subsp. lyrata]                                                                                                                                                                                         | 634 | 648 | 0         | 102.2 | 94.6 | 96.1 | hypothetical protein ARALYDRAFT_909044  | gbpln | Arabidopsis lyrata   | AT5G10840.1   Symbols:   Endomembrane protein 70 protein family   chr5:3424910-3427797 REVERSE LENGTH=648                                     | 634 | 648 | 0         | 102.2 | 95.1 | 96.7 |
| Rsa1.0_00082.1.g4147.t1 | #                                                                                                                                                                                                                                                                                                                                                                                          | #   | #   | #         | #     | #    | #    | -                                       | ----  | ----                 | #                                                                                                                                             | #   | #   | #         | #     | #    |      |

|                         |                                                                                                                                                                                                                                                                                                                                                          |     |      |           |        |       |       |                                                              |             |                      |                                                                                                                                                                                                                                                                        |     |      |           |        |       |       |
|-------------------------|----------------------------------------------------------------------------------------------------------------------------------------------------------------------------------------------------------------------------------------------------------------------------------------------------------------------------------------------------------|-----|------|-----------|--------|-------|-------|--------------------------------------------------------------|-------------|----------------------|------------------------------------------------------------------------------------------------------------------------------------------------------------------------------------------------------------------------------------------------------------------------|-----|------|-----------|--------|-------|-------|
| Rsa1.0_00082.1.g4148.t1 | refNP_181089.1  late embryogenesis abundant hydroxyproline-rich glycoprotein [Arabidopsis thaliana] gi 3608142 gb AAC36175.1  similar to harpin-induced protein hin1 from tobacco [Arabidopsis thaliana] gi 330254016 gb AEC09110.1  late embryogenesis abundant hydroxyproline-rich glycoprotein [Arabidopsis thaliana]                                 | 206 | 238  | 4.00E-52  | 115.5  | 48.5  | 66.5  | late embryogenesis abundant hydroxyproline-rich glycoprotein | gbpln       | Arabidopsis thaliana | AT2G35460.1   Symbols:   Late embryogenesis abundant (LEA) hydroxyproline-rich glycoprotein family   chr2:14905788-14906504 FORWARD LENGTH=238                                                                                                                         | 206 | 238  | 1.00E-54  | 115.5  | 48.5  | 66.5  |
| Rsa1.0_00082.1.g4149.t1 | refXP_002873481.1  CBS domain-containing protein [Arabidopsis lyrata subsp. lyrata] gi 297319318 gb EFH49740.1  CBS domain-containing protein [Arabidopsis lyrata subsp. lyrata]                                                                                                                                                                         | 206 | 206  | 1.00E-108 | 100.0  | 92.2  | 95.6  | CBS domain-containing protein                                | gbpln       | Arabidopsis lyrata   | AT5G10860.1   Symbols:   Cystathionine beta-synthase (CBS) family protein   chr5:3429173-3430142 REVERSE LENGTH=206                                                                                                                                                    | 206 | 206  | 1.00E-110 | 100.0  | 91.7  | 95.6  |
| Rsa1.0_00082.1.g4150.t1 | refXP_002873482.1  predicted protein [Arabidopsis lyrata subsp. lyrata] gi 297319319 gb EFH49741.1  predicted protein [Arabidopsis lyrata subsp. lyrata]                                                                                                                                                                                                 | 259 | 265  | 1.00E-123 | 102.3  | 85.3  | 91.5  | predicted protein                                            | gbpln       | Arabidopsis lyrata   | AT5G10870.1   Symbols:   ATCM2, CM2   chorismate mutase 2   chr5:3430691-3432272 REVERSE LENGTH=265                                                                                                                                                                    | 259 | 265  | 1.00E-122 | 102.3  | 86.1  | 90.7  |
| Rsa1.0_00082.1.g4151.t1 | refXP_002873483.1  predicted protein [Arabidopsis lyrata subsp. lyrata] gi 297319320 gb EFH49742.1  predicted protein [Arabidopsis lyrata subsp. lyrata]                                                                                                                                                                                                 | 450 | 303  | 4.00E-96  | 67.3   | 46.4  | 55.8  | predicted protein                                            | gbpln       | Arabidopsis lyrata   | AT5G10890.1   Symbols:   myosin heavy chain-related   chr5:3434030-3435067 REVERSE LENGTH=295                                                                                                                                                                          | 450 | 295  | 1.00E-94  | 65.6   | 44.9  | 54.2  |
| Rsa1.0_00082.1.g4152.t1 | gb EOA20114.1  hypothetical protein CARUB_v10000393mg, partial [Capsella rubella]                                                                                                                                                                                                                                                                        | 635 | 670  | 0         | 105.5  | 83.9  | 91.3  | hypothetical protein CARUB_v10000393mg, partial              | gbpln       | Capsella rubella     | AT5G10900.1   Symbols:   Calcineurin-like metallo-phosphoesterase superfamily protein   chr5:3436413-3439221 REVERSE LENGTH=600                                                                                                                                        | 635 | 600  | 0         | 94.5   | 79.5  | 86.6  |
| Rsa1.0_00082.1.g4153.t1 | gb EOA20415.1  hypothetical protein CARUB_v10000724mg [Capsella rubella]                                                                                                                                                                                                                                                                                 | 203 | 518  | 1.00E-79  | 255.2  | 75.4  | 77.8  | hypothetical protein CARUB_v10000724mg                       | gbpln       | Capsella rubella     | AT5G10920.1   Symbols:   L-Asparatase-like family protein   chr5:3441805-3443892 FORWARD LENGTH=517                                                                                                                                                                    | 203 | 517  | 7.00E-82  | 254.7  | 75.4  | 78.3  |
| Rsa1.0_00082.1.g4154.t1 | gb AFW86017.1  histone H3 [Zea mays]                                                                                                                                                                                                                                                                                                                     | 136 | 227  | 1.00E-72  | 166.9  | 100.0 | 100.0 | histone H3                                                   | gbenv/gbpln | Zea mays             | AT4G40030.2   Symbols:   Histone superfamily protein   chr4:18555840-18556827 REVERSE LENGTH=164                                                                                                                                                                       | 136 | 164  | 9.00E-75  | 120.6  | 100.0 | 100.0 |
| Rsa1.0_00082.1.g4155.t1 | refNP_196660.1  SAUR-like auxin-responsive protein [Arabidopsis thaliana] gi 8979733 emb CAB96854.1  putative protein [Arabidopsis thaliana] gi 88900398 gb ABD5751.1  At5g10990 [Arabidopsis thaliana] gi 332004235 gb AED91618.1  SAUR-like auxin-responsive protein [Arabidopsis thaliana]                                                            | 147 | 148  | 9.00E-63  | 100.7  | 81.0  | 91.2  | SAUR-like auxin-responsive protein                           | gbpln       | Arabidopsis thaliana | AT5G10990.1   Symbols:   SAUR-like auxin-responsive protein family   chr5:3476884-3477330 FORWARD LENGTH=148                                                                                                                                                           | 147 | 148  | 3.00E-65  | 100.7  | 81.0  | 91.2  |
| Rsa1.0_00082.1.g4156.t1 | gb EOA21927.1  hypothetical protein CARUB_v10002414mg [Capsella rubella]                                                                                                                                                                                                                                                                                 | 355 | 390  | 1.00E-134 | 109.9  | 77.7  | 87.0  | hypothetical protein CARUB_v10002414mg                       | gbpln       | Capsella rubella     | AT5G11000.1   Symbols:   Plant protein of unknown function (DUF868)   chr5:3479166-3480335 REVERSE LENGTH=389                                                                                                                                                          | 355 | 389  | 1.00E-134 | 109.6  | 78.9  | 87.3  |
| Rsa1.0_00082.1.g4157.t1 | gb EOA19826.1  hypothetical protein CARUB_v10000071mg [Capsella rubella]                                                                                                                                                                                                                                                                                 | 103 | 1186 | 1.00E-11  | 1151.5 | 53.4  | 56.3  | hypothetical protein CARUB_v10000071mg                       | gbpln       | Capsella rubella     | AT5G11040.1   Symbols:   TRS120, AtTRS120   TRS120   chr5:3495332-3500610 FORWARD LENGTH=1186                                                                                                                                                                          | 103 | 1186 | 2.00E-14  | 1151.5 | 53.4  | 56.3  |
| Rsa1.0_00082.1.g4158.t1 | gb EOA20808.1  hypothetical protein CARUB_v10001144mg [Capsella rubella]                                                                                                                                                                                                                                                                                 | 515 | 391  | 0         | 75.9   | 67.8  | 70.7  | hypothetical protein CARUB_v10001144mg                       | gbpln       | Capsella rubella     | AT5G11060.1   Symbols:   KNAT4   KNOTTED1-like homeobox gene 4   chr5:3510408-3512967 FORWARD LENGTH=393                                                                                                                                                               | 515 | 393  | 0         | 76.3   | 67.6  | 70.1  |
| Rsa1.0_00082.1.g4159.t1 | refNP_196668.1  uncharacterized protein [Arabidopsis thaliana] gi 9795159 emb CAC03455.1  putative protein [Arabidopsis thaliana] gi 21593765 gb AAM65732.1  unknown [Arabidopsis thaliana] gi 110740693 db BAE98448.1  hypothetical protein [Arabidopsis thaliana] gi 332004248 gb AED91631.1  uncharacterized protein AT5G11070 [Arabidopsis thaliana] | 121 | 152  | 3.00E-53  | 125.6  | 84.3  | 92.6  | uncharacterized protein                                      | gbpln       | Arabidopsis thaliana | AT5G11070.1   Symbols:   unknown protein; Has 1807 Blast hits to 1807 proteins in 277 species: Archae - 0; Bacteria - 0; Metazoa - 736; Fungi - 347; Plants - 385; Viruses - 0; Other Eukaryotes - 339 (source: NCBI BLINK).   chr5:3516440-3516898 REVERSE LENGTH=152 | 121 | 152  | 5.00E-56  | 125.6  | 84.3  | 92.6  |
| Rsa1.0_00082.1.g4160.t1 | #                                                                                                                                                                                                                                                                                                                                                        | #   | #    | #         | #      | #     | -     | ----                                                         | ----        | #                    | #                                                                                                                                                                                                                                                                      | #   | #    | #         | #      | #     |       |
| Rsa1.0_00082.1.g4161.t1 | #                                                                                                                                                                                                                                                                                                                                                        | #   | #    | #         | #      | #     | -     | ----                                                         | ----        | #                    | #                                                                                                                                                                                                                                                                      | #   | #    | #         | #      | #     |       |
| Rsa1.0_00082.1.g4162.t1 | refXP_002871454.1  hypothetical protein ARALYDRAFT_487941 [Arabidopsis lyrata subsp. lyrata] gi 297317291 gb EFH47713.1  hypothetical protein ARALYDRAFT_487941 [Arabidopsis lyrata subsp. lyrata]                                                                                                                                                       | 216 | 223  | 2.00E-72  | 103.2  | 73.6  | 81.9  | hypothetical protein ARALYDRAFT_487941                       | gbpln       | Arabidopsis lyrata   | AT5G11090.1   Symbols:   serine-rich protein-related   chr5:3524796-3525449 FORWARD LENGTH=217                                                                                                                                                                         | 216 | 217  | 6.00E-74  | 100.5  | 74.5  | 82.4  |

|                         |                                                                                                                                                                                                                                                                                                                                                                                                                                                                                                                                                                                                                                                                                |     |     |           |       |      |      |                                                                                                    |       |                      |                                                                                                                                                                             |     |     |           |       |      |      |
|-------------------------|--------------------------------------------------------------------------------------------------------------------------------------------------------------------------------------------------------------------------------------------------------------------------------------------------------------------------------------------------------------------------------------------------------------------------------------------------------------------------------------------------------------------------------------------------------------------------------------------------------------------------------------------------------------------------------|-----|-----|-----------|-------|------|------|----------------------------------------------------------------------------------------------------|-------|----------------------|-----------------------------------------------------------------------------------------------------------------------------------------------------------------------------|-----|-----|-----------|-------|------|------|
| Rsa1.0_00082.1.g4163.t4 | ref[XP_002871455.1] plant synaptotagmin [Arabidopsis lyrata subsp. lyrata] gi 297317292 gb EFH47714.1  plant synaptotagmin [Arabidopsis lyrata subsp. lyrata]                                                                                                                                                                                                                                                                                                                                                                                                                                                                                                                  | 555 | 569 | 0         | 102.5 | 92.3 | 96.9 | plant synaptotagmin                                                                                | gbpln | Arabidopsis lyrata   | AT5G11100.1   Symbols: SYTD, ATSYTD, NTMC2TYPE2.2, NTMC2T2.2, SYT4   Calcium-dependent lipid-binding (CaLB domain) family protein   chr5:3532402-3535221 FORWARD LENGTH=569 | 555 | 569 | 0         | 102.5 | 91.5 | 96.6 |
| Rsa1.0_00082.1.g4164.t1 | ref[NP_196674.2] putative glycosyltransferase [Arabidopsis thaliana] gi 292630779 sp Q9LFP3.2 GLYT4_ARA TH RecName: Full=Probable glycosyltransferase At5g11130 gi 332004254 gb AED91637.1  putative glycosyltransferase [Arabidopsis thaliana]                                                                                                                                                                                                                                                                                                                                                                                                                                | 605 | 480 | 0         | 79.3  | 58.2 | 63.8 | putative glycosyltransferase                                                                       | gbpln | Arabidopsis thaliana | AT5G11130.1   Symbols:   Exostosin family protein   chr5:3542320-3544724 FORWARD LENGTH=480                                                                                 | 605 | 480 | 0         | 79.3  | 58.2 | 63.8 |
| Rsa1.0_00082.1.g4165.t1 | ref[NP_196677.1] adenine phosphoribosyltransferase 5 [Arabidopsis thaliana] gi 297807153 ref[XP_002871460.1] hypothetical protein ARALYDRAFT_487948 [Arabidopsis lyrata subsp. lyrata] gi 8953378 emb CAB96651.1  adenine phosphoribosyltransferase-like protein [Arabidopsis thaliana] gi 28393271 gb AAO42064.1  putative adenine phosphoribosyltransferase [Arabidopsis thaliana] gi 28827532 gb AAO50610.1  putative adenine phosphoribosyltransferase [Arabidopsis thaliana] gi 297317297 gb EFH47719.1  hypothetical protein ARALYDRAFT_487948 [Arabidopsis lyrata subsp. lyrata] gi 332004257 gb AED91640.1  adenine phosphoribosyltransferase 5 [Arabidopsis thaliana] | 191 | 191 | 1.00E-101 | 100.0 | 96.3 | 98.4 | adenine phosphoribosyltransferase 5                                                                | gbpln | Arabidopsis lyrata   | AT5G11160.1   Symbols: APT5   adenine phosphoribosyltransferase 5   chr5:3550774-3551986 FORWARD LENGTH=191                                                                 | 191 | 191 | 1.00E-104 | 100.0 | 96.3 | 98.4 |
| Rsa1.0_00082.1.g4166.t1 | ref[NP_850807.2] DEAD-box ATP-dependent RNA helicase 56 [Arabidopsis thaliana] gi 332004258 gb AED91641.1  DEAD-box ATP-dependent RNA helicase 56 [Arabidopsis thaliana]                                                                                                                                                                                                                                                                                                                                                                                                                                                                                                       | 344 | 344 | 0         | 100.0 | 96.5 | 98.3 | DEAD-box ATP-dependent RNA helicase 56                                                             | gbpln | Arabidopsis thaliana | AT5G11170.2   Symbols:   DEAD/DEAH box RNA helicase family protein   chr5:3554272-3556646 FORWARD LENGTH=344                                                                | 344 | 344 | 0         | 100.0 | 96.5 | 98.3 |
| Rsa1.0_00082.1.g4167.t1 | emb CAB96655.1  DEAD BOX RNA helicase RH15 [Arabidopsis thaliana]                                                                                                                                                                                                                                                                                                                                                                                                                                                                                                                                                                                                              | 467 | 427 | 0         | 91.4  | 87.4 | 88.7 | DEAD BOX RNA helicase RH15                                                                         | gbpln | Arabidopsis thaliana | AT5G11170.1   Symbols:   DEAD/DEAH box RNA helicase family protein   chr5:3553334-3556646 FORWARD LENGTH=427                                                                | 467 | 427 | 0         | 91.4  | 86.9 | 88.2 |
| Rsa1.0_00082.1.g4168.t1 | sp Q9LFN5.2 GLR25_ARATH RecName: Full=Glutamate receptor 2.5; AltName: Full=Ligand-gated ion channel 2.5; Flags: Precursor                                                                                                                                                                                                                                                                                                                                                                                                                                                                                                                                                     | 859 | 918 | 0         | 106.9 | 79.9 | 88.9 | RecName: Full=Glutamate receptor 2.5; AltName: Full=Ligand-gated ion channel 2.5; Flags: Precursor | ----- | -----                | AT5G11210.1   Symbols: ATGLR2.5, GLR2.5   glutamate receptor 2.5   chr5:3571214-3574537 REVERSE LENGTH=829                                                                  | 859 | 829 | 0         | 96.5  | 73.8 | 82.7 |
| Rsa1.0_00082.1.g4169.t1 | gb EOA21704.1  hypothetical protein CARUB_v10002138mg [Capsella rubella]                                                                                                                                                                                                                                                                                                                                                                                                                                                                                                                                                                                                       | 164 | 164 | 2.00E-86  | 100.0 | 93.9 | 96.3 | hypothetical protein CARUB_v10002138mg                                                             | gbpln | Capsella rubella     | AT5G11340.1   Symbols:   Acyl-CoA N-acyltransferases (NAT) superfamily protein   chr5:3619226-3621068 FORWARD LENGTH=164                                                    | 164 | 164 | 3.00E-86  | 100.0 | 90.9 | 95.1 |
| Rsa1.0_00082.1.g4170.t1 | gb EOA20066.1  hypothetical protein CARUB_v10000340mg [Capsella rubella]                                                                                                                                                                                                                                                                                                                                                                                                                                                                                                                                                                                                       | 188 | 695 | 5.00E-18  | 369.7 | 32.4 | 37.8 | hypothetical protein CARUB_v10000340mg                                                             | gbpln | Capsella rubella     | AT5G11390.1   Symbols: WIT1   WPP domain-interacting protein 1   chr5:3633971-3636418 FORWARD LENGTH=703                                                                    | 188 | 703 | 5.00E-19  | 373.9 | 30.9 | 37.2 |
| Rsa1.0_00082.1.g4171.t1 | ref[XP_002873510.1] kinase family protein [Arabidopsis lyrata subsp. lyrata] gi 297319347 gb EFH49769.1  kinase family protein [Arabidopsis lyrata subsp. lyrata]                                                                                                                                                                                                                                                                                                                                                                                                                                                                                                              | 320 | 334 | 1.00E-75  | 104.4 | 52.8 | 67.8 | kinase family protein                                                                              | gbpln | Arabidopsis lyrata   | AT5G11410.1   Symbols:   Protein kinase superfamily protein   chr5:3638431-3639883 REVERSE LENGTH=336                                                                       | 320 | 336 | 4.00E-78  | 105.0 | 52.8 | 65.6 |
| Rsa1.0_00082.1.g4172.t1 | ref[XP_002871473.1] hypothetical protein ARALYDRAFT_487977 [Arabidopsis lyrata subsp. lyrata] gi 297317310 gb EFH47732.1  hypothetical protein ARALYDRAFT_487977 [Arabidopsis lyrata subsp. lyrata]                                                                                                                                                                                                                                                                                                                                                                                                                                                                            | 366 | 366 | 0         | 100.0 | 93.4 | 98.6 | hypothetical protein ARALYDRAFT_487977                                                             | gbpln | Arabidopsis lyrata   | AT5G11420.1   Symbols:   Protein of unknown function, DUF642   chr5:3644655-3646991 FORWARD LENGTH=366                                                                      | 366 | 366 | 0         | 100.0 | 92.9 | 98.4 |

|                         |                                                                                                                                                                                                                                                                                                                                                                                                                                                      |     |      |           |       |      |      |                                                     |       |                      |                                                                                                                                                                                                                                                                                                                                                                            |     |     |          |       |      |      |
|-------------------------|------------------------------------------------------------------------------------------------------------------------------------------------------------------------------------------------------------------------------------------------------------------------------------------------------------------------------------------------------------------------------------------------------------------------------------------------------|-----|------|-----------|-------|------|------|-----------------------------------------------------|-------|----------------------|----------------------------------------------------------------------------------------------------------------------------------------------------------------------------------------------------------------------------------------------------------------------------------------------------------------------------------------------------------------------------|-----|-----|----------|-------|------|------|
| Rsa1.0_00082.1.g4173.t1 | refNP_196705.1  CTC-interacting domain 5 [Arabidopsis thaliana] gi 7573401 emb CAB87704.1  putative protein [Arabidopsis thaliana] gi 52354449 gb AAU44545.1  hypothetical protein AT5G11440 [Arabidopsis thaliana] gi 55740661 gb AAV63923.1  hypothetical protein At5g11440 [Arabidopsis thaliana] gi 332004297 gb AED91680.1  CTC-interacting domain 5 [Arabidopsis thaliana]                                                                     | 161 | 155  | 2.00E-55  | 96.3  | 75.2 | 81.4 | CTC-interacting domain 5                            | gbpln | Arabidopsis thaliana | AT5G11440.1   Symbols: CID5, IPD1   CTC-interacting domain 5   chr5:3653060-3653607 REVERSE LENGTH=155                                                                                                                                                                                                                                                                     | 161 | 155 | 6.00E-58 | 96.3  | 75.2 | 81.4 |
| Rsa1.0_00082.1.g4174.t1 | gb ABX10747.1  unknown [Brassica juncea]                                                                                                                                                                                                                                                                                                                                                                                                             | 78  | 215  | 8.00E-23  | 275.6 | 69.2 | 70.5 | unknown                                             | gbpln | Brassica juncea      | AT5G11500.2   Symbols:   unknown protein; FUNCTIONS IN: molecular_function unknown; INVOLVED IN: biological_process unknown; LOCATED IN: cellular_component unknown; EXPRESSED IN: 24 plant structures; EXPRESSED DURING: 15 growth stages; CONTAINS InterPro DOMAIN/s: Protein of unknown function DUF814 (InterPro:IPR008532),   chr5:3676747-3678946 FORWARD LENGTH=214 | 78  | 214 | 3.00E-25 | 274.4 | 69.2 | 69.2 |
| Rsa1.0_00082.1.g4175.t2 | dbj BAJ33906.1  unnamed protein product [Thellungiella halophila]                                                                                                                                                                                                                                                                                                                                                                                    | 243 | 453  | 3.00E-64  | 186.4 | 55.1 | 61.3 | unnamed protein product                             | ----  | ----                 | AT5G11520.1   Symbols: ASP3, YLS4   aspartate aminotransferase 3   chr5:3685257-3687721 REVERSE LENGTH=449                                                                                                                                                                                                                                                                 | 243 | 449 | 2.00E-64 | 184.8 | 53.5 | 60.9 |
| Rsa1.0_00083.1.g4176.t1 | emb CAB39638.1  RNA-directed DNA polymerase-like protein [Arabidopsis thaliana] gi 267666 emb CAB78094.1  RNA-directed DNA polymerase-like protein [Arabidopsis thaliana]                                                                                                                                                                                                                                                                            | 883 | 1274 | 0         | 144.3 | 45.9 | 61.8 | RNA-directed DNA polymerase-like protein            | gbpln | Arabidopsis thaliana | AT1G43760.1   Symbols:   DNase I-like superfamily protein   chr1:16528880-16531065 REVERSE LENGTH=626                                                                                                                                                                                                                                                                      | 883 | 626 | 5.00E-36 | 70.9  | 12.6 | 20.8 |
| Rsa1.0_00083.1.g4177.t1 | gb EOA19987.1  hypothetical protein CARUB_v10000251mg [Capsella rubella]                                                                                                                                                                                                                                                                                                                                                                             | 807 | 806  | 0         | 99.9  | 87.4 | 92.8 | hypothetical protein CARUB_v10000251mg              | gbpln | Capsella rubella     | AT5G13690.1   Symbols: CYL1, NAGLU   alpha-N-acetylglucosaminidase family / NAGLU family   chr5:4415808-4420159 FORWARD LENGTH=806                                                                                                                                                                                                                                         | 807 | 806 | 0        | 99.9  | 86.5 | 91.4 |
| Rsa1.0_00083.1.g4178.t1 | refNP_196871.1  nodulin MtN21 /EamA-like transporter family protein [Arabidopsis thaliana] gi 75171811 sp Q9FNA5.1 WTR39_ARAT H RecName: Full=WAT1-related protein At5g13670 gi 9758033 dbj BAB08694.1  unnamed protein product [Arabidopsis thaliana] gi 21536666 gb AAM60998.1  nodulin-like protein [Arabidopsis thaliana] gi 332004543 gb AED91926.1  nodulin MtN21 /EamA-like transporter family protein [Arabidopsis thaliana]                 | 379 | 377  | 1.00E-180 | 99.5  | 81.5 | 89.2 | nodulin MtN21 /EamA-like transporter family protein | gbpln | Arabidopsis thaliana | AT5G13670.1   Symbols:   nodulin MtN21 /EamA-like transporter family protein   chr5:4407205-4408955 REVERSE LENGTH=377                                                                                                                                                                                                                                                     | 379 | 377 | 0        | 99.5  | 81.5 | 89.2 |
| Rsa1.0_00083.1.g4179.t1 | refXP_002871578.1  elongation factor family protein [Arabidopsis lyrata subsp. lyrata] gi 297317415 gb EFH47837.1  elongation factor family protein [Arabidopsis lyrata subsp. lyrata]                                                                                                                                                                                                                                                               | 695 | 675  | 0         | 97.1  | 91.8 | 93.8 | elongation factor family protein                    | gbpln | Arabidopsis lyrata   | AT5G13650.1   Symbols:   elongation factor family protein   chr5:4397821-4402364 FORWARD LENGTH=675                                                                                                                                                                                                                                                                        | 695 | 675 | 0        | 97.1  | 91.7 | 93.7 |
| Rsa1.0_00083.1.g4180.t1 | refNP_196868.1  phospholipid:diacylglycerol acyltransferase 1 [Arabidopsis thaliana] gi 75171814 sp Q9FNA9.1 PDAT1_ARAT H RecName: Full=Phospholipid:diacylglycerol acyltransferase 1; Short=ATPDAT gi 9758029 dbj BAB08690.1  unnamed protein product [Arabidopsis thaliana] gi 15450695 gb AAK96619.1  AT5g13640 /MSH12_10 [Arabidopsis thaliana] gi 332004538 gb AED91921.1  phospholipid:diacylglycerol acyltransferase 1 [Arabidopsis thaliana] | 665 | 671  | 0         | 100.9 | 91.9 | 95.5 | phospholipid:diacylglycerol acyltransferase 1       | gbpln | Arabidopsis thaliana | AT5G13640.1   Symbols: ATPDAT, PDAT, PDAT1   phospholipid:diacylglycerol acyltransferase   chr5:4393529-4397213 FORWARD LENGTH=671                                                                                                                                                                                                                                         | 665 | 671 | 0        | 100.9 | 91.9 | 95.5 |
| Rsa1.0_00083.1.g4181.t1 | gb EOA22855.1  hypothetical protein CARUB_v10003585mg [Capsella rubella]                                                                                                                                                                                                                                                                                                                                                                             | 285 | 318  | 2.00E-74  | 111.6 | 53.7 | 66.3 | hypothetical protein CARUB_v10003585mg              | gbpln | Capsella rubella     | AT5G13620.1   Symbols:   unknown protein; BEST Arabidopsis thaliana protein match is: unknown protein (TAIR:AT1G49290.1); Has 1807 Blast hits to 1807 proteins in 277 species: Archae - 0; Bacteria - 0; Metazoa - 736; Fungi - 347; Plants - 385; Viruses - 0; Other Eukaryotes - 339 (source: NCBI BLINK).   chr5:4385385-4386373 REVERSE LENGTH=301                     | 285 | 301 | 1.00E-74 | 105.6 | 53.7 | 68.4 |



|                         |                                                                                                                                                                                                                                                                                                                                                                                                                                                                                               |     |      |           |       |      |      |                                                 |       |                      |                                                                                                                                                                                                                                                                                                                                                                   |     |     |           |       |      |      |
|-------------------------|-----------------------------------------------------------------------------------------------------------------------------------------------------------------------------------------------------------------------------------------------------------------------------------------------------------------------------------------------------------------------------------------------------------------------------------------------------------------------------------------------|-----|------|-----------|-------|------|------|-------------------------------------------------|-------|----------------------|-------------------------------------------------------------------------------------------------------------------------------------------------------------------------------------------------------------------------------------------------------------------------------------------------------------------------------------------------------------------|-----|-----|-----------|-------|------|------|
| Rsa1.0_00083.1.g4182.t1 | gb EOA22855.1  hypothetical protein CARUB_v10003585mg [Capsella rubella]                                                                                                                                                                                                                                                                                                                                                                                                                      | 296 | 318  | 2.00E-83  | 107.4 | 58.8 | 71.6 | hypothetical protein CARUB_v10003585mg          | gbpln | Capsella rubella     | AT5G13620.1   Symbols:   unknown protein; BEST Arabidopsis thaliana protein match is: unknown protein (TAIR:AT1G49290.1). Has 1807 Blast hits to 1807 proteins in 277 species: Archae - 0; Bacteria - 0; Metazoa - 736; Fungi - 347; Plants - 385; Viruses - 0; Other Eukaryotes - 339 (source: NCBI BLink).   chr5:4385385-4386373 REVERSE LENGTH=301            | 296 | 301 | 4.00E-81  | 101.7 | 58.1 | 70.6 |
| Rsa1.0_00083.1.g4183.t3 | ref XP_002871575.1  phototropic-responsive NPH3 family protein [Arabidopsis lyrata subsp. lyrata] gi 297317412 gb EFH47834.1  phototropic-responsive NPH3 family protein [Arabidopsis lyrata subsp. lyrata]                                                                                                                                                                                                                                                                                   | 407 | 591  | 1.00E-101 | 145.2 | 45.0 | 48.6 | phototropic-responsive NPH3 family protein      | gbpln | Arabidopsis lyrata   | AT5G13600.1   Symbols:   Phototropic-responsive NPH3 family protein   chr5:4380432-4382497 FORWARD LENGTH=591                                                                                                                                                                                                                                                     | 407 | 591 | 1.00E-103 | 145.2 | 44.7 | 48.6 |
| Rsa1.0_00083.1.g4184.t1 | ref NP_196824.1  GEM-like protein 5 [Arabidopsis thaliana] gi 75181135 sp Q9LYV6.1 GEM5_ARAT H RecName: Full=GEM-like protein 5 gi 7529275 emb CAB86627.1  ABA-responsive protein-like [Arabidopsis thaliana] gi 38454154 gb AAR20771.1  At5g13200 [Arabidopsis thaliana] gi 46402484 gb AAS92344.1  At5g13200 [Arabidopsis thaliana] gi 110738428 dbj BAF01140.1  ABA-responsive protein - like [Arabidopsis thaliana] gi 332004480 gb AED91863.1  GEM-like protein 5 [Arabidopsis thaliana] | 279 | 272  | 1.00E-135 | 97.5  | 84.6 | 90.3 | GEM-like protein 5                              | gbpln | Arabidopsis thaliana | AT5G13200.1   Symbols:   GRAM domain family protein   chr5:4207081-4208079 FORWARD LENGTH=272                                                                                                                                                                                                                                                                     | 279 | 272 | 1.00E-137 | 97.5  | 84.6 | 90.3 |
| Rsa1.0_00083.1.g4185.t1 | ref NP_568286.1  uncharacterized protein [Arabidopsis thaliana] gi 14334510 gb AAK59452.1  unknown protein [Arabidopsis thaliana] gi 17104547 gb AAL34162.1  unknown protein [Arabidopsis thaliana] gi 21593874 gb AAM65841.1  unknown [Arabidopsis thaliana] gi 332004479 gb AED91862.1  uncharacterized protein AT5G13190 [Arabidopsis thaliana]                                                                                                                                            | 168 | 134  | 1.00E-70  | 79.8  | 76.8 | 77.4 | uncharacterized protein                         | gbpln | Arabidopsis thaliana | AT5G13190.1   Symbols:   CONTAINS InterPro DOMAIN/s: LPS-induced tumor necrosis factor alpha factor (InterPro:IPR006629). Has 30201 Blast hits to 17322 proteins in 780 species: Archae - 12; Bacteria - 1396; Metazoa - 17338; Fungi - 3422; Plants - 5037; Viruses - 0; Other Eukaryotes - 2996 (source: NCBI BLink).   chr5:4204987-4206205 REVERSE LENGTH=134 | 168 | 134 | 6.00E-73  | 79.8  | 76.8 | 77.4 |
| Rsa1.0_00083.1.g4186.t1 | gb AFI56995.1  NAC5 [Brassica napus]                                                                                                                                                                                                                                                                                                                                                                                                                                                          | 248 | 249  | 1.00E-120 | 100.4 | 91.1 | 95.6 | NAC5                                            | gbpln | Brassica napus       | AT5G13180.1   Symbols:   ANAC083, VNI2, NAC083   NAC domain containing protein 83   chr5:4196643-4197577 FORWARD LENGTH=252                                                                                                                                                                                                                                       | 248 | 252 | 1.00E-113 | 101.6 | 87.1 | 94.0 |
| Rsa1.0_00083.1.g4187.t3 | #                                                                                                                                                                                                                                                                                                                                                                                                                                                                                             | #   | #    | #         | #     | #    | #    | -                                               | ----  | ----                 | #                                                                                                                                                                                                                                                                                                                                                                 | #   | #   | #         | #     | #    |      |
| Rsa1.0_00083.1.g4188.t1 | gb ABK28247.1  unknown [Arabidopsis thaliana]                                                                                                                                                                                                                                                                                                                                                                                                                                                 | 550 | 372  | 8.00E-70  | 67.6  | 25.5 | 35.5 | unknown                                         | gbpln | Arabidopsis thaliana | AT5G36228.1   Symbols:   nucleic acid bindingzinc ion binding   chr5:14271691-14272776 FORWARD LENGTH=361                                                                                                                                                                                                                                                         | 550 | 361 | 1.00E-23  | 65.6  | 11.3 | 19.3 |
| Rsa1.0_00083.1.g4189.t1 | ref XP_002873602.1  nodulin MtN3 family protein [Arabidopsis lyrata subsp. lyrata] gi 297319439 gb EFH49861.1  nodulin MtN3 family protein [Arabidopsis lyrata subsp. lyrata]                                                                                                                                                                                                                                                                                                                 | 307 | 295  | 1.00E-133 | 96.1  | 78.8 | 87.0 | nodulin MtN3 family protein                     | gbpln | Arabidopsis lyrata   | AT5G13170.1   Symbols:   SAG29, SWEET15, AtSWEET15   senescence-associated gene 29   chr5:4181331-4183171 REVERSE LENGTH=292                                                                                                                                                                                                                                      | 307 | 292 | 1.00E-131 | 95.1  | 77.5 | 84.0 |
| Rsa1.0_00083.1.g4190.t1 | gb EOA20310.1  hypothetical protein CARUB_v10000618mg, partial [Capsella rubella]                                                                                                                                                                                                                                                                                                                                                                                                             | 447 | 554  | 0         | 123.9 | 95.3 | 97.3 | hypothetical protein CARUB_v10000618mg, partial | gbpln | Capsella rubella     | AT5G13160.1   Symbols:   PBS1   Protein kinase superfamily protein   chr5:4176854-4179682 FORWARD LENGTH=456                                                                                                                                                                                                                                                      | 447 | 456 | 0         | 102.0 | 94.4 | 97.5 |
| Rsa1.0_00083.1.g4191.t2 | dbj BAB10837.1  retroelement pol polyprotein-like [Arabidopsis thaliana]                                                                                                                                                                                                                                                                                                                                                                                                                      | 205 | 1462 | 8.00E-61  | 713.2 | 54.1 | 66.3 | retroelement pol polyprotein-like               | gbpln | Arabidopsis thaliana | #                                                                                                                                                                                                                                                                                                                                                                 | #   | #   | #         | #     | #    |      |
| Rsa1.0_00083.1.g4192.t1 | ref XP_002873600.1  hypothetical protein ARALYDRAFT_488130 [Arabidopsis lyrata subsp. lyrata] gi 297319437 gb EFH49859.1  hypothetical protein ARALYDRAFT_488130 [Arabidopsis lyrata subsp. lyrata]                                                                                                                                                                                                                                                                                           | 270 | 267  | 1.00E-106 | 98.9  | 77.8 | 82.6 | hypothetical protein ARALYDRAFT_488130          | gbpln | Arabidopsis lyrata   | AT5G13140.1   Symbols:   Pollen Ole e 1 allergen and extensin family protein   chr5:4170688-4171744 REVERSE LENGTH=267                                                                                                                                                                                                                                            | 270 | 267 | 1.00E-104 | 98.9  | 77.4 | 83.7 |
| Rsa1.0_00083.1.g4193.t1 | ref XP_002871545.1  hypothetical protein ARALYDRAFT_488123 [Arabidopsis lyrata subsp. lyrata] gi 297317382 gb EFH47804.1  hypothetical protein ARALYDRAFT_488123 [Arabidopsis lyrata subsp. lyrata]                                                                                                                                                                                                                                                                                           | 671 | 183  | 2.00E-97  | 27.3  | 25.0 | 25.3 | hypothetical protein ARALYDRAFT_488123          | gbpln | Arabidopsis lyrata   | AT5G13070.1   Symbols:   MSF1-like family protein   chr5:4148216-4149062 FORWARD LENGTH=183                                                                                                                                                                                                                                                                       | 671 | 183 | 3.00E-99  | 27.3  | 24.7 | 25.2 |
| Rsa1.0_00083.1.g4194.t1 | gb EOA16200.1  hypothetical protein CARUB_v10004340mg [Capsella rubella]                                                                                                                                                                                                                                                                                                                                                                                                                      | 646 | 644  | 0         | 99.7  | 79.9 | 88.9 | hypothetical protein CARUB_v10004340mg          | gbpln | Capsella rubella     | AT4G13460.2   Symbols:   SDG22, SUVH9, SET22   SU(VAR)3-9 homolog 9   chr4:7824653-7826605 REVERSE LENGTH=650                                                                                                                                                                                                                                                     | 646 | 650 | 0         | 100.6 | 75.9 | 85.8 |

|                         |                                                                                                                                                                                                                                                                                                                                                                                                                                                                                                                                                                                                                                      |      |      |           |       |      |      |                                        |       |                      |                                                                                                                                                                                                                                                                                                                                                                                                                                                                                                                                         |      |      |           |       |      |      |
|-------------------------|--------------------------------------------------------------------------------------------------------------------------------------------------------------------------------------------------------------------------------------------------------------------------------------------------------------------------------------------------------------------------------------------------------------------------------------------------------------------------------------------------------------------------------------------------------------------------------------------------------------------------------------|------|------|-----------|-------|------|------|----------------------------------------|-------|----------------------|-----------------------------------------------------------------------------------------------------------------------------------------------------------------------------------------------------------------------------------------------------------------------------------------------------------------------------------------------------------------------------------------------------------------------------------------------------------------------------------------------------------------------------------------|------|------|-----------|-------|------|------|
| Rsa1.0_00083.1.g4195.t1 | emb CAB88266.1  putative protein [Arabidopsis thaliana]                                                                                                                                                                                                                                                                                                                                                                                                                                                                                                                                                                              | 409  | 414  | 0         | 101.2 | 85.6 | 92.4 | putative protein                       | gbpln | Arabidopsis thaliana | AT5G13020.1   Symbols: Emsy N Terminus (ENT)/ plant Tudor-like domains-containing protein   chr5:4129691-4132089 REVERSE LENGTH=397                                                                                                                                                                                                                                                                                                                                                                                                     | 409  | 397  | 0         | 97.1  | 82.6 | 89.0 |
| Rsa1.0_00083.1.g4196.t1 | dbj BAJ33947.1  unnamed protein product [Theellungiella halophila]                                                                                                                                                                                                                                                                                                                                                                                                                                                                                                                                                                   | 1230 | 1255 | 0         | 102.0 | 91.7 | 96.2 | unnamed protein product                | ----  | ----                 | AT5G13010.1   Symbols: EMB3011   RNA helicase family protein   chr5:4122747-4128660 FORWARD LENGTH=1255                                                                                                                                                                                                                                                                                                                                                                                                                                 | 1230 | 1255 | 0         | 102.0 | 89.1 | 94.6 |
| Rsa1.0_00083.1.g4197.t3 | ref NP_196804.6  callose synthase [Arabidopsis thaliana] gi 357529555 sp Q9LXT9.3 CAL53_ARA TH RecName: Full=Callose synthase 3; AltName: Full=1,3-beta-glucan synthase; AltName: Full=Protein GLUCAN SYNTHASE-LIKE 12 gi 332004456 gb AED91839.1  callose synthase [Arabidopsis thaliana]                                                                                                                                                                                                                                                                                                                                           | 2009 | 1955 | 0         | 97.3  | 93.2 | 95.4 | callose synthase                       | gbpln | Arabidopsis thaliana | AT5G13000.1   Symbols: ATGSL12, gsl12   glucan synthase-like 12   chr5:4110445-4121202 REVERSE LENGTH=1955                                                                                                                                                                                                                                                                                                                                                                                                                              | 2009 | 1955 | 0         | 97.3  | 93.2 | 95.4 |
| Rsa1.0_00083.1.g4198.t1 | #                                                                                                                                                                                                                                                                                                                                                                                                                                                                                                                                                                                                                                    | #    | #    | #         | #     | #    | #    | -                                      | ----  | ----                 | #                                                                                                                                                                                                                                                                                                                                                                                                                                                                                                                                       | #    | #    | #         | #     | #    |      |
| Rsa1.0_00083.1.g4199.t1 | ref XP_002873592.1  hypothetical protein ARALYDRAFT_488115 [Arabidopsis lyrata subsp. lyrata] gi 297319429 gb EFH49851.1  hypothetical protein ARALYDRAFT_488115 [Arabidopsis lyrata subsp. lyrata]                                                                                                                                                                                                                                                                                                                                                                                                                                  | 85   | 80   | 2.00E-14  | 94.1  | 54.1 | 63.5 | hypothetical protein ARALYDRAFT_488115 | gbpln | Arabidopsis lyrata   | AT5G12990.1   Symbols: CLE40   CLAVATA3/ESR-RELATED 40   chr5:4109234-4109768 REVERSE LENGTH=80                                                                                                                                                                                                                                                                                                                                                                                                                                         | 85   | 80   | 1.00E-11  | 94.1  | 49.4 | 58.8 |
| Rsa1.0_00083.1.g4200.t1 | gb EOA19944.1  hypothetical protein CARUB_v10000198mg [Capsella rubella]                                                                                                                                                                                                                                                                                                                                                                                                                                                                                                                                                             | 903  | 863  | 0         | 95.6  | 82.3 | 87.7 | hypothetical protein CARUB_v10000198mg | gbpln | Capsella rubella     | AT5G12950.1   Symbols: Putative glycosyl hydrolase of unknown function (DUF1680)   chr5:4093117-4096806 FORWARD LENGTH=861                                                                                                                                                                                                                                                                                                                                                                                                              | 903  | 861  | 0         | 95.3  | 81.5 | 86.7 |
| Rsa1.0_00083.1.g4201.t1 | gb EOA22730.1  hypothetical protein CARUB_v10003437mg [Capsella rubella]                                                                                                                                                                                                                                                                                                                                                                                                                                                                                                                                                             | 372  | 373  | 1.00E-165 | 100.3 | 75.3 | 84.4 | hypothetical protein CARUB_v10003437mg | gbpln | Capsella rubella     | AT5G12940.1   Symbols: Leucine-rich repeat (LRR) family protein   chr5:4087782-4088897 FORWARD LENGTH=371                                                                                                                                                                                                                                                                                                                                                                                                                               | 372  | 371  | 1.00E-165 | 99.7  | 75.0 | 85.8 |
| Rsa1.0_00083.1.g4202.t1 | #                                                                                                                                                                                                                                                                                                                                                                                                                                                                                                                                                                                                                                    | #    | #    | #         | #     | #    | #    | -                                      | ----  | ----                 | #                                                                                                                                                                                                                                                                                                                                                                                                                                                                                                                                       | #    | #    | #         | #     | #    |      |
| Rsa1.0_00083.1.g4203.t1 | ref XP_002873588.1  hypothetical protein ARALYDRAFT_909241 [Arabidopsis lyrata subsp. lyrata] gi 297319425 gb EFH49847.1  hypothetical protein ARALYDRAFT_909241 [Arabidopsis lyrata subsp. lyrata]                                                                                                                                                                                                                                                                                                                                                                                                                                  | 458  | 442  | 1.00E-167 | 96.5  | 73.6 | 81.0 | hypothetical protein ARALYDRAFT_909241 | gbpln | Arabidopsis lyrata   | AT5G12930.1   Symbols: unknown protein; Has 1807 Blast hits to 1807 proteins in 277 species: Archae - 0; Bacteria - 0; Metazoa - 736; Fungi - 347; Plants - 385; Viruses - 0; Other Eukaryotes - 339 (source: NCBI BLink).   chr5:4083155-4085222 REVERSE LENGTH=439                                                                                                                                                                                                                                                                    | 458  | 439  | 1.00E-168 | 95.9  | 72.3 | 79.9 |
| Rsa1.0_00083.1.g4204.t1 | ref XP_002873586.1  hypothetical protein ARALYDRAFT_488108 [Arabidopsis lyrata subsp. lyrata] gi 297319423 gb EFH49845.1  hypothetical protein ARALYDRAFT_488108 [Arabidopsis lyrata subsp. lyrata]                                                                                                                                                                                                                                                                                                                                                                                                                                  | 494  | 559  | 0         | 113.2 | 79.8 | 84.8 | hypothetical protein ARALYDRAFT_488108 | gbpln | Arabidopsis lyrata   | AT5G12900.1   Symbols: unknown protein; FUNCTIONS IN: molecular function unknown; INVOLVED IN: biological process unknown; LOCATED IN: chloroplast; EXPRESSED IN: 21 plant structures; EXPRESSED DURING: 13 growth stages; BEST Arabidopsis thaliana protein match is: unknown protein (TAIR:AT1G12330.1); Has 1807 Blast hits to 1807 proteins in 277 species: Archae - 0; Bacteria - 0; Metazoa - 736; Fungi - 347; Plants - 385; Viruses - 0; Other Eukaryotes - 339 (source: NCBI BLink).   chr5:4072151-4074445 REVERSE LENGTH=562 | 494  | 562  | 0         | 113.8 | 78.9 | 84.8 |
| Rsa1.0_00083.1.g4205.t1 | #                                                                                                                                                                                                                                                                                                                                                                                                                                                                                                                                                                                                                                    | #    | #    | #         | #     | #    | #    | -                                      | ----  | ----                 | #                                                                                                                                                                                                                                                                                                                                                                                                                                                                                                                                       | #    | #    | #         | #     | #    |      |
| Rsa1.0_00083.1.g4206.t1 | #                                                                                                                                                                                                                                                                                                                                                                                                                                                                                                                                                                                                                                    | #    | #    | #         | #     | #    | #    | -                                      | ----  | ----                 | #                                                                                                                                                                                                                                                                                                                                                                                                                                                                                                                                       | #    | #    | #         | #     | #    |      |
| Rsa1.0_00083.1.g4207.t1 | ref NP_196791.1  transcription factor MYB46 [Arabidopsis thaliana] gi 75335627 sp Q9LXV2.1 MYB46_ARATH RecName: Full=Transcription factor MYB46; AltName: Full=Myb-related protein 46; Short=AtMYB46 gi 7630043 emb CAB88251.1  putative transcription factor (MYB46) [Arabidopsis thaliana] gi 23306410 gb AAN17432.1  putative transcription factor (MYB46) [Arabidopsis thaliana] gi 27311887 gb AAO00909.1  putative transcription factor (MYB46) [Arabidopsis thaliana] gi 41619388 gb AAS10091.1  MYB transcription factor [Arabidopsis thaliana] gi 33200444 gb AED91824.1  transcription factor MYB46 [Arabidopsis thaliana] | 279  | 280  | 1.00E-122 | 100.4 | 83.2 | 90.7 | transcription factor MYB46             | gbpln | Arabidopsis thaliana | AT5G12870.1   Symbols: ATMYB46, MYB46   myb domain protein 46   chr5:4062939-4064939 REVERSE LENGTH=280                                                                                                                                                                                                                                                                                                                                                                                                                                 | 279  | 280  | 1.00E-125 | 100.4 | 83.2 | 90.7 |
| Rsa1.0_00083.1.g4208.t1 | dbj BAJ33608.1  unnamed protein product [Theellungiella halophila]                                                                                                                                                                                                                                                                                                                                                                                                                                                                                                                                                                   | 680  | 707  | 0         | 104.0 | 86.9 | 91.5 | unnamed protein product                | ----  | ----                 | AT5G12850.1   Symbols: CCCH-type zinc finger protein with ARM repeat domain   chr5:4057068-4059188 FORWARD LENGTH=706                                                                                                                                                                                                                                                                                                                                                                                                                   | 680  | 706  | 0         | 103.8 | 84.4 | 89.0 |

|                         |                                                                                                                                                                                                                                                 |      |      |          |       |      |      |                                                      |       |                      |                                                                                                                                                                                                                                                                                                                                                      |      |      |          |       |      |      |
|-------------------------|-------------------------------------------------------------------------------------------------------------------------------------------------------------------------------------------------------------------------------------------------|------|------|----------|-------|------|------|------------------------------------------------------|-------|----------------------|------------------------------------------------------------------------------------------------------------------------------------------------------------------------------------------------------------------------------------------------------------------------------------------------------------------------------------------------------|------|------|----------|-------|------|------|
| Rsa1.0_00083.1.g4209.t1 | gb[EOA21339.1] hypothetical protein CARUB_v10001701mg [Capsella rubella]                                                                                                                                                                        | 430  | 272  | 3.00E-99 | 63.3  | 48.6 | 50.2 | hypothetical protein CARUB_v10001701mg               | gbpln | Capsella rubella     | AT5G12840.3   Symbols: HAP2A, ATHAP2A, NF-YA1   nuclear factor Y, subunit A1   chr5:4051147-4052961 REVERSE LENGTH=272                                                                                                                                                                                                                               | 430  | 272  | 1.00E-98 | 63.3  | 48.1 | 50.2 |
| Rsa1.0_00083.1.g4210.t1 | ref[XP_002873570.1] hypothetical protein ARALYDRAFT.488089 [Arabidopsis lyrata subsp. lyrata] gi 297319407 gb EFH49829.1  hypothetical protein ARALYDRAFT.488089 [Arabidopsis lyrata subsp. lyrata]                                             | 535  | 480  | 0        | 89.7  | 70.5 | 78.7 | hypothetical protein ARALYDRAFT.488089               | gbpln | Arabidopsis lyrata   | AT5G12420.1   Symbols:   O-acyltransferase (WSD1-like) family protein   chr5:4024568-4028715 REVERSE LENGTH=480                                                                                                                                                                                                                                      | 535  | 480  | 0        | 89.7  | 70.1 | 78.3 |
| Rsa1.0_00083.1.g4211.t1 | ref[XP_002873570.1] hypothetical protein ARALYDRAFT.488089 [Arabidopsis lyrata subsp. lyrata] gi 297319407 gb EFH49829.1  hypothetical protein ARALYDRAFT.488089 [Arabidopsis lyrata subsp. lyrata]                                             | 456  | 480  | 0        | 105.3 | 71.5 | 81.1 | hypothetical protein ARALYDRAFT.488089               | gbpln | Arabidopsis lyrata   | AT5G12420.1   Symbols:   O-acyltransferase (WSD1-like) family protein   chr5:4024568-4028715 REVERSE LENGTH=480                                                                                                                                                                                                                                      | 456  | 480  | 0        | 105.3 | 71.7 | 81.4 |
| Rsa1.0_00083.1.g4212.t1 | ref[NP_568273.2] PHD-finger and DNA binding domain-containing protein [Arabidopsis thaliana] gi 332004422 gb AED91805.1  PHD-finger and DNA binding domain-containing protein [Arabidopsis thaliana]                                            | 1539 | 1602 | 0        | 104.1 | 74.6 | 84.7 | PHD-finger and DNA binding domain-containing protein | gbpln | Arabidopsis thaliana | AT5G12400.1   Symbols:   DNA binding; zinc ion binding; DNA binding   chr5:4013813-4021018 FORWARD LENGTH=1602                                                                                                                                                                                                                                       | 1539 | 1602 | 0        | 104.1 | 74.6 | 84.7 |
| Rsa1.0_00083.1.g4213.t1 | #                                                                                                                                                                                                                                               | #    | #    | #        | #     | #    | #    | -                                                    | ----  | ----                 | #                                                                                                                                                                                                                                                                                                                                                    | #    | #    | #        | #     | #    |      |
| Rsa1.0_00083.1.g4214.t1 | ref[XP_002873568.1] binding protein [Arabidopsis lyrata subsp. lyrata] gi 297319405 gb EFH49827.1  binding protein [Arabidopsis lyrata subsp. lyrata]                                                                                           | 171  | 167  | 2.00E-73 | 97.7  | 81.3 | 87.1 | binding protein                                      | gbpln | Arabidopsis lyrata   | AT5G12390.1   Symbols: FIS1B   Tetratricopeptide repeat (TPR)-like superfamily protein   chr5:4010948-4011950 REVERSE LENGTH=167                                                                                                                                                                                                                     | 171  | 167  | 2.00E-75 | 97.7  | 81.9 | 87.1 |
| Rsa1.0_00083.1.g4215.t1 | ref[XP_002871523.1] ran GTPase binding protein [Arabidopsis lyrata subsp. lyrata] gi 297317360 gb EFH47782.1  ran GTPase binding protein [Arabidopsis lyrata subsp. lyrata]                                                                     | 1073 | 1075 | 0        | 100.2 | 94.3 | 97.5 | ran GTPase binding protein                           | gbpln | Arabidopsis lyrata   | AT5G12350.1   Symbols:   Regulator of chromosome condensation (RCC1) family with FYVE zinc finger domain   chr5:3995789-4000545 FORWARD LENGTH=1075                                                                                                                                                                                                  | 1073 | 1075 | 0        | 100.2 | 94.1 | 97.2 |
| Rsa1.0_00084.1.g4216.t1 | gb[AAC28197.1] contains similarity to reverse transcriptases [Arabidopsis thaliana] gi 7267156 emb CAB77868.1  putative reverse transcriptase [Arabidopsis thaliana]                                                                            | 409  | 1077 | 1.00E-64 | 263.3 | 29.6 | 37.2 | contains similarity to reverse transcriptases        | gbpln | Arabidopsis thaliana | ATMG00310.1   Symbols: ORF154   RNA-directed DNA polymerase (reverse transcriptase)-related family protein   chrM:90883-91347 REVERSE LENGTH=154                                                                                                                                                                                                     | 409  | 154  | 2.00E-18 | 37.7  | 11.5 | 15.6 |
| Rsa1.0_00084.1.g4217.t1 | ref[XP_002885986.1] predicted protein [Arabidopsis lyrata subsp. lyrata] gi 297331826 gb EFH62245.1  predicted protein [Arabidopsis lyrata subsp. lyrata]                                                                                       | 583  | 740  | 0        | 126.9 | 64.0 | 67.8 | predicted protein                                    | gbpln | Arabidopsis lyrata   | AT2G15880.1   Symbols:   Leucine-rich repeat (LRR) family protein   chr2:6918039-6920319 REVERSE LENGTH=727                                                                                                                                                                                                                                          | 583  | 727  | 0        | 124.7 | 66.7 | 70.7 |
| Rsa1.0_00084.1.g4218.t1 | gb[AAD17398.1] putative non-LTR retroelement reverse transcriptase [Arabidopsis thaliana]                                                                                                                                                       | 339  | 1225 | 3.00E-22 | 361.4 | 17.4 | 26.5 | putative non-LTR retroelement reverse transcriptase  | gbpln | Arabidopsis thaliana | AT2G22440.1   Symbols:   BEST Arabidopsis thaliana protein match is: Ribonuclease H-like superfamily protein (TAIR:AT4G29090.1); Has 208 Blast hits to 191 proteins in 10 species: Archae - 0; Bacteria - 0; Metazoa - 0; Fungi - 0; Plants - 208; Viruses - 0; Other Eukaryotes - 0 (source: NCBI BLINK).   chr2:9528910-9529917 FORWARD LENGTH=256 | 339  | 256  | 4.00E-21 | 75.5  | 19.8 | 29.5 |
| Rsa1.0_00084.1.g4219.t4 | gb[EOA29790.1] hypothetical protein CARUB_v10012885mg [Capsella rubella]                                                                                                                                                                        | 1027 | 1012 | 0        | 98.5  | 81.0 | 88.9 | hypothetical protein CARUB_v10012885mg               | gbpln | Capsella rubella     | AT2G15900.1   Symbols:   Phox-associated domain; Phox-like; Sorting nexin, C-terminal   chr2:6927390-6932535 FORWARD LENGTH=994                                                                                                                                                                                                                      | 1027 | 994  | 0        | 96.8  | 79.3 | 86.4 |
| Rsa1.0_00084.1.g4220.t1 | gb[EOA32338.1] hypothetical protein CARUB_v10015605mg, partial [Capsella rubella]                                                                                                                                                               | 146  | 247  | 2.00E-17 | 169.2 | 40.4 | 47.3 | hypothetical protein CARUB_v10015605mg, partial      | gbpln | Capsella rubella     | AT2G15910.1   Symbols:   CSL zinc finger domain-containing protein   chr2:6932917-6935333 REVERSE LENGTH=367                                                                                                                                                                                                                                         | 146  | 367  | 7.00E-18 | 251.4 | 38.4 | 47.9 |
| Rsa1.0_00084.1.g4221.t1 | ref[NP_179191.1] CSL zinc finger domain-containing protein [Arabidopsis thaliana] gi 5306242 gb AAD41975.1  unknown protein [Arabidopsis thaliana] gi 330251353 gb AEC06447.1  CSL zinc finger domain-containing protein [Arabidopsis thaliana] | 81   | 367  | 2.00E-38 | 453.1 | 92.6 | 93.8 | CSL zinc finger domain-containing protein            | gbpln | Arabidopsis thaliana | AT2G15910.1   Symbols:   CSL zinc finger domain-containing protein   chr2:6932917-6935333 REVERSE LENGTH=367                                                                                                                                                                                                                                         | 81   | 367  | 3.00E-41 | 453.1 | 92.6 | 93.8 |
| Rsa1.0_00084.1.g4222.t1 | gb[ABD65615.1] hypothetical protein 23.t00033 [Brassica oleracea]                                                                                                                                                                               | 194  | 326  | 6.00E-27 | 168.0 | 34.0 | 56.2 | hypothetical protein 23.t00033                       | gbpln | Brassica oleracea    | #                                                                                                                                                                                                                                                                                                                                                    | #    | #    | #        | #     | #    |      |
| Rsa1.0_00084.1.g4223.t1 | gb[ABD65624.1] hypothetical protein 23.t00036 [Brassica oleracea]                                                                                                                                                                               | 912  | 842  | 1.00E-58 | 92.3  | 17.2 | 24.2 | hypothetical protein 23.t00036                       | gbpln | Brassica oleracea    | AT2G07240.1   Symbols:   cysteine-type peptidases; cysteine-type peptidases   chr2:3007102-3011701 REVERSE LENGTH=874                                                                                                                                                                                                                                | 912  | 874  | 3.00E-26 | 95.8  | 8.9  | 14.7 |

|                         |                                                                                                                                                                                                                                                                                                                                                                                                                                                                                                                                                                                                                                                                                                                |      |      |           |       |      |      |                                                         |       |                      |                                                                                                                                                                            |      |      |           |       |      |      |
|-------------------------|----------------------------------------------------------------------------------------------------------------------------------------------------------------------------------------------------------------------------------------------------------------------------------------------------------------------------------------------------------------------------------------------------------------------------------------------------------------------------------------------------------------------------------------------------------------------------------------------------------------------------------------------------------------------------------------------------------------|------|------|-----------|-------|------|------|---------------------------------------------------------|-------|----------------------|----------------------------------------------------------------------------------------------------------------------------------------------------------------------------|------|------|-----------|-------|------|------|
| Rsa1.0_00084.1.g4224.t1 | ref[XP_002883931.1] hypothetical protein ARALYDRAFT_899833 [Arabidopsis lyrata subsp. lyrata] gi 297329771 gb EFH61090.1                                                                                                                                                                                                                                                                                                                                                                                                                                                                                                                                                                                       | 3634 | 3792 | 0         | 104.3 | 80.5 | 87.6 | hypothetical protein ARALYDRAFT_899833                  | gbpln | Arabidopsis lyrata   | AT1G50030.2   Symbols: TOR   target of rapamycin   chr:1:18522626-18539619 REVERSE LENGTH=2454                                                                             | 3634 | 2454 | 8.00E-64  | 67.5  | 5.1  | 8.0  |
| Rsa1.0_00084.1.g4225.t1 | ref[XP_002877500.1] predicted protein [Arabidopsis lyrata subsp. lyrata] gi 297323338 gb EFH53759.1  predicted protein [Arabidopsis lyrata subsp. lyrata]                                                                                                                                                                                                                                                                                                                                                                                                                                                                                                                                                      | 181  | 136  | 9.00E-21  | 75.1  | 30.9 | 39.2 | predicted protein                                       | gbpln | Arabidopsis lyrata   | AT4G04650.1   Symbols:   RNA-directed DNA polymerase (reverse transcriptase)-related family protein   chr:4:2353989-2355213 REVERSE LENGTH=332                             | 181  | 332  | 4.00E-12  | 183.4 | 21.0 | 32.0 |
| Rsa1.0_00084.1.g4226.t2 | gb EOA12473.1  hypothetical protein CARUB_v10025904mg [Capsella rubella]                                                                                                                                                                                                                                                                                                                                                                                                                                                                                                                                                                                                                                       | 116  | 800  | 7.00E-23  | 689.7 | 48.3 | 58.6 | hypothetical protein CARUB_v10025904mg                  | gbpln | Capsella rubella     | #                                                                                                                                                                          | #    | #    | #         | #     | #    | #    |
| Rsa1.0_00084.1.g4227.t1 | emb CAN65769.1  hypothetical protein VITISV_002387 [Vitis vinifera]                                                                                                                                                                                                                                                                                                                                                                                                                                                                                                                                                                                                                                            | 964  | 806  | 6.00E-70  | 83.6  | 21.2 | 31.2 | hypothetical protein VITISV_002387                      | gbpln | Vitis vinifera       | AT5G18880.1   Symbols:   RNA-directed DNA polymerase (reverse transcriptase)-related family protein   chr:5:6300535-6301422 REVERSE LENGTH=295                             | 964  | 295  | 2.00E-47  | 30.6  | 10.0 | 15.0 |
| Rsa1.0_00084.1.g4228.t1 | dbj BAJ34053.1  unnamed protein product [Thellungiella halophila]                                                                                                                                                                                                                                                                                                                                                                                                                                                                                                                                                                                                                                              | 198  | 197  | 5.00E-97  | 99.5  | 88.4 | 95.5 | unnamed protein product                                 | ----  | ----                 | AT2G15970.1   Symbols: COR413-PM1, WCOR413, WCOR413-LIKE, ATCOR413-PM1, FL3-5A3, ATCYP19   cold regulated 413 plasma membrane 1   chr:2:6950163-6951012 FORWARD LENGTH=197 | 198  | 197  | 7.00E-83  | 99.5  | 78.8 | 87.4 |
| Rsa1.0_00084.1.g4229.t1 | ref NP_179197.1  pentatricopeptide repeat-containing protein [Arabidopsis thaliana] gi 75267579 sp Q9XIM8.1 PP155_ARATH RecName: Full=Pentatricopeptide repeat-containing protein At2g15980 gi 5306237 gb AAD41970.1  hypothetical protein [Arabidopsis thaliana] gi 330251359 gb AEC06453.1  pentatricopeptide repeat-containing protein [Arabidopsis thaliana]                                                                                                                                                                                                                                                                                                                                               | 486  | 498  | 0         | 102.5 | 78.4 | 88.3 | pentatricopeptide repeat-containing protein             | gbpln | Arabidopsis thaliana | AT2G15980.1   Symbols:   Tetratricopeptide repeat (TPR)-like superfamily protein   chr:2:6951349-6952845 REVERSE LENGTH=498                                                | 486  | 498  | 0         | 102.5 | 78.4 | 88.3 |
| Rsa1.0_00084.1.g4230.t1 | dbj BAB09379.1  non-LTR retroelement reverse transcriptase-like protein [Arabidopsis thaliana]                                                                                                                                                                                                                                                                                                                                                                                                                                                                                                                                                                                                                 | 1199 | 1223 | 0         | 102.0 | 51.9 | 68.7 | non-LTR retroelement reverse transcriptase-like protein | gbpln | Arabidopsis thaliana | AT3G24255.1   Symbols:   RNA-directed DNA polymerase (reverse transcriptase)-related family protein   chr:3:8789471-8793208 FORWARD LENGTH=746                             | 1199 | 746  | 1.00E-101 | 62.2  | 15.6 | 20.6 |
| Rsa1.0_00084.1.g4231.t1 | ref NP_179203.2  Cysteine/Histidine-rich C1 domain family protein [Arabidopsis thaliana] gi 330251368 gb AEC06462.1  Cysteine/Histidine-rich C1 domain family protein [Arabidopsis thaliana]                                                                                                                                                                                                                                                                                                                                                                                                                                                                                                                   | 242  | 243  | 1.00E-128 | 100.4 | 90.9 | 95.9 | Cysteine/Histidine-rich C1 domain family protein        | gbpln | Arabidopsis thaliana | AT2G16050.1   Symbols:   Cysteine/Histidine-rich C1 domain family protein   chr:2:6980450-6981939 FORWARD LENGTH=243                                                       | 242  | 243  | 1.00E-130 | 100.4 | 90.9 | 95.9 |
| Rsa1.0_00084.1.g4232.t1 | #                                                                                                                                                                                                                                                                                                                                                                                                                                                                                                                                                                                                                                                                                                              | #    | #    | #         | #     | #    | -    | ----                                                    | ----  | ----                 | #                                                                                                                                                                          | #    | #    | #         | #     | #    | #    |
| Rsa1.0_00084.1.g4233.t1 | ref[XP_002875620.1] predicted protein [Arabidopsis lyrata subsp. lyrata] gi 297321458 gb EFH51879.1  predicted protein [Arabidopsis lyrata subsp. lyrata]                                                                                                                                                                                                                                                                                                                                                                                                                                                                                                                                                      | 173  | 78   | 5.00E-21  | 45.1  | 27.7 | 30.6 | predicted protein                                       | gbpln | Arabidopsis lyrata   | #                                                                                                                                                                          | #    | #    | #         | #     | #    | #    |
| Rsa1.0_00084.1.g4234.t2 | gb AAP37043.1  nonsymbiotic hemoglobin [Raphanus sativus]                                                                                                                                                                                                                                                                                                                                                                                                                                                                                                                                                                                                                                                      | 417  | 160  | 7.00E-76  | 38.4  | 34.1 | 34.3 | nonsymbiotic hemoglobin                                 | gbpln | Raphanus sativus     | AT2G16060.1   Symbols: GLB1, AHB1, ARATH GLB1, NSHB1, ATGLB1, HB1   hemoglobin 1   chr:2:6982782-6983522 REVERSE LENGTH=160                                                | 417  | 160  | 2.00E-74  | 38.4  | 32.1 | 33.3 |
| Rsa1.0_00084.1.g4235.t1 | ref NP_028242.1  plastid division2 protein [Arabidopsis thaliana] gi 75215718 sp Q9XII.1 PDV2_ARATH RecName: Full=Plastid division protein PDV2; AltName: Full=Protein PLASTID DIVISION2 gi 4678204 gb AAD26950.1  expressed protein [Arabidopsis thaliana] gi 19423944 gb AAL87305.1  unknown protein [Arabidopsis thaliana] gi 21281205 gb AAM45024.1  unknown protein [Arabidopsis thaliana] gi 21618067 gb AAM67117.1  unknown [Arabidopsis thaliana] gi 117413982 dbj BAF36495.1  plastid division protein PDV2 [Arabidopsis thaliana] gi 117413986 dbj BAF36497.1  plastid division protein PDV2 [Arabidopsis thaliana] gi 330251371 gb AEC06465.1  plastid division protein PDV2 [Arabidopsis thaliana] | 287  | 307  | 1.00E-120 | 107.0 | 81.2 | 88.9 | plastid division2 protein                               | gbpln | Arabidopsis thaliana | AT2G16070.2   Symbols: PDV2   plastid division2   chr:2:6984072-6985356 REVERSE LENGTH=307                                                                                 | 287  | 307  | 1.00E-122 | 107.0 | 81.2 | 88.9 |

|                         |                                                                                                                                                                                                                                                                                                                                                                                                                                                                                                                                                                                                                |      |     |           |       |      |      |                                                         |       |                      |                                                                                                                                                                                                                                                                                                                                                                                                                                                                                                                                                                                     |      |     |           |       |      |      |
|-------------------------|----------------------------------------------------------------------------------------------------------------------------------------------------------------------------------------------------------------------------------------------------------------------------------------------------------------------------------------------------------------------------------------------------------------------------------------------------------------------------------------------------------------------------------------------------------------------------------------------------------------|------|-----|-----------|-------|------|------|---------------------------------------------------------|-------|----------------------|-------------------------------------------------------------------------------------------------------------------------------------------------------------------------------------------------------------------------------------------------------------------------------------------------------------------------------------------------------------------------------------------------------------------------------------------------------------------------------------------------------------------------------------------------------------------------------------|------|-----|-----------|-------|------|------|
| Rsa1.0_00084.1.g4236.t1 | ref XP_002886198.1  hypothetical protein ARALYDRAFT_480784 [Arabidopsis lyrata subsp. lyrata] gi 297332038 gb EFH62457.1  hypothetical protein ARALYDRAFT_480784 [Arabidopsis lyrata subsp. lyrata]                                                                                                                                                                                                                                                                                                                                                                                                            | 559  | 598 | 0         | 107.0 | 84.6 | 91.6 | hypothetical protein ARALYDRAFT_480784                  | gbpln | Arabidopsis lyrata   | AT2G16090.1   Symbols: ARI2, ATARI2   RING/U-box superfamily protein   chr2:6987367-6989822 REVERSE LENGTH=593                                                                                                                                                                                                                                                                                                                                                                                                                                                                      | 559  | 593 | 0         | 106.1 | 81.9 | 89.4 |
| Rsa1.0_00085.1.g4237.t1 | ref NP_172022.1  zinc transporter 5 [Arabidopsis thaliana] gi 37090146 sp O23039.1 ZIP5_ARATH RecName: Full=Zinc transporter 5; AltName: Full=ZRT/IRT-like protein 5; Flags: Precursor gi 17385784 gb AAL38432.1 AF369909.1 putative metal transporter ZIP5 [Arabidopsis thaliana] gi 2388566 gb AAB71447.1  Similar to Arabidopsis Fe(II) transport protein (gb U27590) [Arabidopsis thaliana] gi 48596981 gb AAT46031.1  At1g05300 [Arabidopsis thaliana] gi 51971447 dbj BAD44388.1  putative zinc transporter [Arabidopsis thaliana] gi 332189709 gb AEE27820.1  zinc transporter 5 [Arabidopsis thaliana] | 363  | 360 | 1.00E-171 | 99.2  | 88.2 | 92.6 | zinc transporter 5                                      | gbpln | Arabidopsis thaliana | AT1G05300.1   Symbols: ZIP5   zinc transporter 5 precursor   chr1:1545258-1547709 REVERSE LENGTH=360                                                                                                                                                                                                                                                                                                                                                                                                                                                                                | 363  | 360 | 1.00E-174 | 99.2  | 88.2 | 92.6 |
| Rsa1.0_00085.1.g4238.t1 | #                                                                                                                                                                                                                                                                                                                                                                                                                                                                                                                                                                                                              | #    | #   | #         | #     | #    | #    | -                                                       | ----  | ----                 | #                                                                                                                                                                                                                                                                                                                                                                                                                                                                                                                                                                                   | #    | #   | #         | #     | #    |      |
| Rsa1.0_00085.1.g4239.t1 | dbj BAA09643.1  CTP:phosphocholine cytidyltransferase [Brassica napus]                                                                                                                                                                                                                                                                                                                                                                                                                                                                                                                                         | 80   | 324 | 2.00E-20  | 405.0 | 71.3 | 83.8 | CTP:phosphocholine cytidyltransferase                   | gbpln | Brassica napus       | AT2G32260.1   Symbols: ATCCT1, CCT1   phosphorylcholine cytidyltransferase   chr2:13697645-13700241 FORWARD LENGTH=332                                                                                                                                                                                                                                                                                                                                                                                                                                                              | 80   | 332 | 8.00E-20  | 415.0 | 56.3 | 71.3 |
| Rsa1.0_00085.1.g4240.t1 | gb EOA37878.1  hypothetical protein CARUB_v10011474mg [Capsella rubella]                                                                                                                                                                                                                                                                                                                                                                                                                                                                                                                                       | 1017 | 864 | 0         | 85.0  | 52.4 | 64.1 | hypothetical protein CARUB_v10011474mg                  | gbpln | Capsella rubella     | AT1G05320.3   Symbols:   FUNCTIONS IN: molecular_function unknown; INVOLVED IN: biological_process unknown; LOCATED IN: cellular_component unknown; EXPRESSED IN: fruit, egg cell; CONTAINS InterPro DOMAIN/s: Prefoldin (InterPro:IPR009053); BEST Arabidopsis thaliana protein match is: unknown protein (TAIR:AT2G32240.1); Has 267444 Blast hits to 119656 proteins in 3886 species: Archae - 3699; Bacteria - 62432; Metazoa - 106542; Fungi - 19875; Plants - 13918; Viruses - 1288; Other Eukaryotes - 59690 (source: NCBI BLINK).   chr1:1554856-1557658 FORWARD LENGTH=790 | 1017 | 790 | 0         | 77.7  | 49.7 | 61.3 |
| Rsa1.0_00085.1.g4241.t1 | gb EOA28176.1  hypothetical protein CARUB_v10024366mg [Capsella rubella]                                                                                                                                                                                                                                                                                                                                                                                                                                                                                                                                       | 73   | 109 | 2.00E-19  | 149.3 | 72.6 | 80.8 | hypothetical protein CARUB_v10024366mg                  | gbpln | Capsella rubella     | AT2G32210.1   Symbols:   unknown protein; BEST Arabidopsis thaliana protein match is: unknown protein (TAIR:AT2G32190.1); Has 214 Blast hits to 214 proteins in 21 species: Archae - 0; Bacteria - 0; Metazoa - 1; Fungi - 10; Plants - 203; Viruses - 0; Other Eukaryotes - 0 (source: NCBI BLINK).   chr2:13678077-13678554 FORWARD LENGTH=71                                                                                                                                                                                                                                     | 73   | 71  | 8.00E-21  | 97.3  | 68.5 | 76.7 |
| Rsa1.0_00085.1.g4242.t1 | ref NP_172027.2  ubiquitin-like modifier-activating enzyme 5 [Arabidopsis thaliana] gi 290463407 sp O23034.2 UBA5_ARATH RecName: Full=Ubiquitin-like modifier-activating enzyme 5; Short=Ubiquitin-activating enzyme 5 gi 332189707 gb AEE27828.1  ubiquitin-like modifier-activating enzyme 5 [Arabidopsis thaliana]                                                                                                                                                                                                                                                                                          | 429  | 431 | 0         | 100.5 | 93.7 | 96.0 | ubiquitin-like modifier-activating enzyme 5             | gbpln | Arabidopsis thaliana | AT1G05350.1   Symbols:   NAD(P)-binding Rossmann-fold superfamily protein   chr1:1560891-1564005 REVERSE LENGTH=431                                                                                                                                                                                                                                                                                                                                                                                                                                                                 | 429  | 431 | 0         | 100.5 | 93.7 | 96.0 |
| Rsa1.0_00085.1.g4243.t1 | ref NP_172029.2  Sec.4-like phosphatidylinositol transfer family protein [Arabidopsis thaliana] gi 332189709 gb AEE27830.1  Sec.4-like phosphatidylinositol transfer family protein [Arabidopsis thaliana]                                                                                                                                                                                                                                                                                                                                                                                                     | 419  | 417 | 0         | 99.5  | 93.3 | 96.2 | Sec.4-like phosphatidylinositol transfer family protein | gbpln | Arabidopsis thaliana | AT1G05370.1   Symbols:   Sec14p-like phosphatidylinositol transfer family protein   chr1:1569418-1572280 REVERSE LENGTH=417                                                                                                                                                                                                                                                                                                                                                                                                                                                         | 419  | 417 | 0         | 99.5  | 93.3 | 96.2 |
| Rsa1.0_00085.1.g4244.t1 | #                                                                                                                                                                                                                                                                                                                                                                                                                                                                                                                                                                                                              | #    | #   | #         | #     | #    | #    | -                                                       | ----  | ----                 | #                                                                                                                                                                                                                                                                                                                                                                                                                                                                                                                                                                                   | #    | #   | #         | #     | #    |      |

|                         |                                                                                                                                                                                                                                                                                                                                                                                                                                                                                                                                                                                                                                                                                                                                                                                                                                                                                                                                                                                  |      |      |           |       |      |      |                                                                        |       |                      |                                                                                                                                                                                                                                                           |      |      |           |       |      |      |
|-------------------------|----------------------------------------------------------------------------------------------------------------------------------------------------------------------------------------------------------------------------------------------------------------------------------------------------------------------------------------------------------------------------------------------------------------------------------------------------------------------------------------------------------------------------------------------------------------------------------------------------------------------------------------------------------------------------------------------------------------------------------------------------------------------------------------------------------------------------------------------------------------------------------------------------------------------------------------------------------------------------------|------|------|-----------|-------|------|------|------------------------------------------------------------------------|-------|----------------------|-----------------------------------------------------------------------------------------------------------------------------------------------------------------------------------------------------------------------------------------------------------|------|------|-----------|-------|------|------|
| Rsa1.0_00085.1.g4245.t1 | ref[NP_563736.3] Acyl-CoA N-acyltransferase with RING/FYVE/PHD-type zinc finger protein [Arabidopsis thaliana]<br>gi 186478156 ref[NP_001117233.1] Acyl-CoA N-acyltransferase with RING/FYVE/PHD-type zinc finger protein [Arabidopsis thaliana]<br>gi 8778713 gb AAF79721.1 AC005106.2 T25N20.3 [Arabidopsis thaliana]<br>gi 332189710 gb AEE27831.1  Acyl-CoA N-acyltransferase with RING/FYVE/PHD-type zinc finger protein [Arabidopsis thaliana]<br>gi 332189711 gb AEE27832.1  Acyl-CoA N-acyltransferase with RING/FYVE/PHD-type zinc finger protein [Arabidopsis thaliana]<br>ref[NP_563737.1] LOW PSII accumulation 19 protein [Arabidopsis thaliana]<br>gi 8778732 gb AAF79740.1 AC005106.21 T25N20.4 [Arabidopsis thaliana]<br>gi 13677959 gb AAK44057.1 AF370242.1 unknown protein [Arabidopsis thaliana]<br>gi 23296864 gb JAN13149.1  unknown protein [Arabidopsis thaliana]<br>gi 332189712 gb AEE27833.1  LOW PSII accumulation 19 protein [Arabidopsis thaliana] | 1098 | 1138 | 0         | 103.6 | 71.4 | 81.0 | Acyl-CoA N-acyltransferase with RING/FYVE/PHD-type zinc finger protein | gbpln | Arabidopsis thaliana | AT1G05380.2   Symbols:   Acyl-CoA N-acyltransferase with RING/FYVE/PHD-type zinc finger protein   chr1:1577231-1582190 FORWARD LENGTH=1138                                                                                                                | 1098 | 1138 | 0         | 103.6 | 71.4 | 81.0 |
| Rsa1.0_00085.1.g4246.t1 | ref[XP_002892288.1] hypothetical protein ARALYDRAFT_887726 [Arabidopsis lyrata subsp. lyrata]<br>gi 297338130 gb EFH68547.1  hypothetical protein ARALYDRAFT_887726 [Arabidopsis lyrata subsp. lyrata]                                                                                                                                                                                                                                                                                                                                                                                                                                                                                                                                                                                                                                                                                                                                                                           | 195  | 199  | 1.00E-80  | 102.1 | 79.5 | 87.7 | LOW PSII accumulation 19 protein                                       | gbpln | Arabidopsis thaliana | AT1G05385.1   Symbols: LPA19, Psb27-H1   photosystem II 11 kDa protein-related   chr1:1582747-1583648 REVERSE LENGTH=199                                                                                                                                  | 195  | 199  | 3.00E-83  | 102.1 | 79.5 | 87.7 |
| Rsa1.0_00085.1.g4247.t1 | ref[XP_002892288.1] hypothetical protein ARALYDRAFT_887726 [Arabidopsis lyrata subsp. lyrata]<br>gi 297338130 gb EFH68547.1  hypothetical protein ARALYDRAFT_887726 [Arabidopsis lyrata subsp. lyrata]                                                                                                                                                                                                                                                                                                                                                                                                                                                                                                                                                                                                                                                                                                                                                                           | 234  | 230  | 4.00E-71  | 98.3  | 69.7 | 79.5 | hypothetical protein ARALYDRAFT_887726                                 | gbpln | Arabidopsis lyrata   | AT1G05420.1   Symbols: ATOFP12, OFP12   ovate family protein 12   chr1:1590073-1590753 FORWARD LENGTH=226                                                                                                                                                 | 234  | 226  | 9.00E-72  | 96.6  | 69.7 | 78.2 |
| Rsa1.0_00085.1.g4248.t1 | gb EOA40311.1  hypothetical protein CARUB_v10009042mg [Capsella rubella]                                                                                                                                                                                                                                                                                                                                                                                                                                                                                                                                                                                                                                                                                                                                                                                                                                                                                                         | 478  | 470  | 0         | 98.3  | 76.4 | 84.9 | hypothetical protein CARUB_v10009042mg                                 | gbpln | Capsella rubella     | AT1G05410.1   Symbols:   Protein of unknown function (DUF1423)   chr1:1585504-1587268 REVERSE LENGTH=471                                                                                                                                                  | 478  | 471  | 0         | 98.5  | 76.6 | 85.4 |
| Rsa1.0_00085.1.g4249.t1 | ref[XP_002892289.1] hypothetical protein ARALYDRAFT_470544 [Arabidopsis lyrata subsp. lyrata]<br>gi 297338131 gb EFH68548.1  hypothetical protein ARALYDRAFT_470544 [Arabidopsis lyrata subsp. lyrata]                                                                                                                                                                                                                                                                                                                                                                                                                                                                                                                                                                                                                                                                                                                                                                           | 259  | 269  | 1.00E-90  | 103.9 | 68.7 | 79.2 | hypothetical protein ARALYDRAFT_470544                                 | gbpln | Arabidopsis lyrata   | AT1G05430.1   Symbols:   unknown protein; Has 31 Blast hits to 31 proteins in 9 species: Archae - 0; Bacteria - 0; Metazoa - 0; Fungi - 0; Plants - 31; Viruses - 0; Other Eukaryotes - 0 (source: NCBI BLink).   chr1:1594227-1595731 REVERSE LENGTH=269 | 259  | 269  | 1.00E-91  | 103.9 | 68.0 | 79.2 |
| Rsa1.0_00085.1.g4250.t1 | gb AAF79737.1 AC005106.18 T25N20.9 [Arabidopsis thaliana]                                                                                                                                                                                                                                                                                                                                                                                                                                                                                                                                                                                                                                                                                                                                                                                                                                                                                                                        | 371  | 393  | 1.00E-129 | 105.9 | 67.1 | 75.5 | T25N20.9                                                               | gbpln | Arabidopsis thaliana | AT1G05440.1   Symbols:   C-8 sterol isomerases   chr1:1596374-1597843 REVERSE LENGTH=384                                                                                                                                                                  | 371  | 384  | 1.00E-132 | 103.5 | 67.1 | 75.5 |
| Rsa1.0_00085.1.g4251.t1 | ref[XP_002867509.1] hypothetical protein ARALYDRAFT_913808 [Arabidopsis lyrata subsp. lyrata]<br>gi 297313345 gb EFH43768.1  hypothetical protein ARALYDRAFT_913808 [Arabidopsis lyrata subsp. lyrata]                                                                                                                                                                                                                                                                                                                                                                                                                                                                                                                                                                                                                                                                                                                                                                           | 269  | 312  | 2.00E-33  | 116.0 | 33.8 | 43.5 | hypothetical protein ARALYDRAFT_913808                                 | gbpln | Arabidopsis lyrata   | AT3G49610.1   Symbols:   Domain of unknown function (DUF313)   chr3:18390413-18391417 REVERSE LENGTH=334                                                                                                                                                  | 269  | 334  | 1.00E-34  | 124.2 | 27.1 | 34.2 |
| Rsa1.0_00085.1.g4252.t1 | gb ABK28778.1  unknown [Arabidopsis thaliana]                                                                                                                                                                                                                                                                                                                                                                                                                                                                                                                                                                                                                                                                                                                                                                                                                                                                                                                                    | 201  | 206  | 1.00E-60  | 102.5 | 70.1 | 80.6 | unknown                                                                | gbpln | Arabidopsis thaliana | AT1G05450.2   Symbols:   Bifunctional inhibitor/lipid-transfer protein/seed storage 2S albumin superfamily protein   chr1:1600004-1601086 FORWARD LENGTH=205                                                                                              | 201  | 205  | 5.00E-63  | 102.0 | 70.1 | 80.6 |
| Rsa1.0_00085.1.g4253.t1 | gb AAK40099.1 AF339908.1 RNA helicase SDE3 [Arabidopsis thaliana]                                                                                                                                                                                                                                                                                                                                                                                                                                                                                                                                                                                                                                                                                                                                                                                                                                                                                                                | 1054 | 1002 | 0         | 95.1  | 79.7 | 84.9 | RNA helicase SDE3                                                      | gbpln | Arabidopsis thaliana | AT1G05460.1   Symbols: SDE3   P-loop containing nucleoside triphosphate hydrolases superfamily protein   chr1:1601357-1604658 REVERSE LENGTH=1002                                                                                                         | 1054 | 1002 | 0         | 95.1  | 79.6 | 84.7 |
| Rsa1.0_00085.1.g4254.t1 | ref[NP_172038.4] Type I inositol-1,4,5-trisphosphate 5-phosphatase CVP2 [Arabidopsis thaliana]<br>gi 259016256 sp Q9LR47.2 IP5P3_ARAT H RecName: Full=Type I inositol 1,4,5-trisphosphate 5-phosphatase CVP2; AltName: Full=Protein COTYLEDON VASCULAR PATTERN 2<br>gi 332189723 gb AEE27844.1  Type I inositol-1,4,5-trisphosphate 5-phosphatase CVP2 [Arabidopsis thaliana]                                                                                                                                                                                                                                                                                                                                                                                                                                                                                                                                                                                                    | 617  | 617  | 0         | 100.0 | 95.1 | 97.4 | Type I inositol-1,4,5-trisphosphate 5-phosphatase CVP2                 | gbpln | Arabidopsis thaliana | AT1G05470.1   Symbols: CVP2   DNAse I-like superfamily protein   chr1:1608558-1611291 REVERSE LENGTH=617                                                                                                                                                  | 617  | 617  | 0         | 100.0 | 95.1 | 97.4 |

|                         |                                                                                                                                                                                                                                                                                                                                                                                                                                                                                                                                                                                                                                                                                                                                                                                                                                                                                                                                                                                                      |      |      |           |       |      |      |                                                           |       |                      |                                                                                                                                                                             |      |      |           |       |      |      |
|-------------------------|------------------------------------------------------------------------------------------------------------------------------------------------------------------------------------------------------------------------------------------------------------------------------------------------------------------------------------------------------------------------------------------------------------------------------------------------------------------------------------------------------------------------------------------------------------------------------------------------------------------------------------------------------------------------------------------------------------------------------------------------------------------------------------------------------------------------------------------------------------------------------------------------------------------------------------------------------------------------------------------------------|------|------|-----------|-------|------|------|-----------------------------------------------------------|-------|----------------------|-----------------------------------------------------------------------------------------------------------------------------------------------------------------------------|------|------|-----------|-------|------|------|
| Rsa1.0_00085.1.g4255.t1 | refXP_002892292.1   hypothetical protein ARALYDRAFT_470549 [Arabidopsis lyrata subsp. lyrata] gi 297338134 gb EFH68551.1   hypothetical protein ARALYDRAFT_470549 [Arabidopsis lyrata subsp. lyrata]                                                                                                                                                                                                                                                                                                                                                                                                                                                                                                                                                                                                                                                                                                                                                                                                 | 1691 | 1406 | 0         | 83.1  | 45.5 | 51.0 | hypothetical protein ARALYDRAFT_470549                    | gbpln | Arabidopsis lyrata   | AT1G05490.1   Symbols: chr31   chromatin remodeling 31   chr1:1618795-1623195 REVERSE LENGTH=1410                                                                           | 1691 | 1410 | 0         | 83.4  | 45.4 | 51.2 |
| Rsa1.0_00085.1.g4256.t3 | refNP_172041.2   calcium-dependent lipid-binding domain-containing protein [Arabidopsis thaliana] gi 75301121 sp Q8L706.1 SYT5_ARATH RecName: Full=Synaptotagmin-5; AltName: Full=NTMC2T2.1; AltName: Full=Synaptotagmin E gi 22655178 gb AAM98179.1  Ca2+-dependent lipid-binding protein, putative [Arabidopsis thaliana] gi 31711980 gb AAP68346.1  At1g05500 [Arabidopsis thaliana] gi 110737090 dbj BAF00497.1  putative Ca2+-dependent lipid-binding protein [Arabidopsis thaliana] gi 332189725 gb AEE27846.1  synaptotagmin-5 [Arabidopsis thaliana] refNP_172042.1   uncharacterized protein [Arabidopsis thaliana] gi 8778719 gb AAF79727.1 AC005106.8 T25N20.16 [Arabidopsis thaliana] gi 17979351 gb AAL49901.1  unknown protein [Arabidopsis thaliana] gi 20466017 gb AAM20230.1  unknown protein [Arabidopsis thaliana] gi 110741000 dbj BAE95594.1   hypothetical protein [Arabidopsis thaliana] gi 332189726 gb AEE27847.1  uncharacterized protein AT1G05510 [Arabidopsis thaliana] | 594  | 560  | 0         | 94.3  | 87.7 | 91.4 | calcium-dependent lipid-binding domain-containing protein | gbpln | Arabidopsis thaliana | AT1G05500.1   Symbols: SYTE, ATSYTE, NTMC2TYPE2.1, NTMC2T2.1, SYT5   Calcium-dependent lipid-binding (CaLB domain) family protein   chr1:1625098-1628940 FORWARD LENGTH=560 | 594  | 560  | 0         | 94.3  | 87.7 | 91.4 |
| Rsa1.0_00085.1.g4257.t1 | refNP_172045.1   uncharacterized protein [Arabidopsis thaliana] gi 8778720 gb AAF79728.1 AC005106.9 T25N20.19 [Arabidopsis thaliana] gi 332189729 gb AEE27850.1  uncharacterized protein AT1G05540 [Arabidopsis thaliana] refNP_001184912.1   uncharacterized protein [Arabidopsis thaliana] gi 332189732 gb AEE27853.1  uncharacterized protein AT1G05550 [Arabidopsis thaliana]                                                                                                                                                                                                                                                                                                                                                                                                                                                                                                                                                                                                                    | 241  | 241  | 1.00E-134 | 100.0 | 92.9 | 98.3 | uncharacterized protein                                   | gbpln | Arabidopsis thaliana | AT1G05510.1   Symbols:   Protein of unknown function (DUF1264)   chr1:1629527-1630690 FORWARD LENGTH=241                                                                    | 241  | 241  | 1.00E-137 | 100.0 | 92.9 | 98.3 |
| Rsa1.0_00085.1.g4258.t1 | refNP_001184912.1   uncharacterized protein [Arabidopsis thaliana] gi 332189732 gb AEE27853.1  uncharacterized protein AT1G05550 [Arabidopsis thaliana]                                                                                                                                                                                                                                                                                                                                                                                                                                                                                                                                                                                                                                                                                                                                                                                                                                              | 366  | 367  | 1.00E-154 | 100.3 | 72.4 | 85.0 | uncharacterized protein                                   | gbpln | Arabidopsis thaliana | AT1G05540.1   Symbols:   Protein of unknown function (DUF295)   chr1:1639348-1640707 FORWARD LENGTH=367                                                                     | 366  | 367  | 1.00E-157 | 100.3 | 72.4 | 85.0 |
| Rsa1.0_00085.1.g4259.t2 | refNP_001184912.1   uncharacterized protein [Arabidopsis thaliana] gi 332189732 gb AEE27853.1  uncharacterized protein AT1G05550 [Arabidopsis thaliana]                                                                                                                                                                                                                                                                                                                                                                                                                                                                                                                                                                                                                                                                                                                                                                                                                                              | 443  | 385  | 1.00E-117 | 86.9  | 48.5 | 57.6 | uncharacterized protein                                   | gbpln | Arabidopsis thaliana | AT1G05550.3   Symbols:   Protein of unknown function (DUF295)   chr1:1641229-1643748 REVERSE LENGTH=385                                                                     | 443  | 385  | 1.00E-120 | 86.9  | 48.5 | 57.6 |
| Rsa1.0_00085.1.g4260.t1 | #                                                                                                                                                                                                                                                                                                                                                                                                                                                                                                                                                                                                                                                                                                                                                                                                                                                                                                                                                                                                    | #    | #    | #         | #     | #    | #    | -                                                         | ----  | ----                 | #                                                                                                                                                                           | #    | #    | #         | #     | #    |      |
| Rsa1.0_00085.1.g4261.t1 | #                                                                                                                                                                                                                                                                                                                                                                                                                                                                                                                                                                                                                                                                                                                                                                                                                                                                                                                                                                                                    | #    | #    | #         | #     | #    | #    | -                                                         | ----  | ----                 | #                                                                                                                                                                           | #    | #    | #         | #     | #    |      |
| Rsa1.0_00085.1.g4262.t6 | refNP_001184912.1   uncharacterized protein [Arabidopsis thaliana] gi 332189732 gb AEE27853.1  uncharacterized protein AT1G05550 [Arabidopsis thaliana]                                                                                                                                                                                                                                                                                                                                                                                                                                                                                                                                                                                                                                                                                                                                                                                                                                              | 368  | 385  | 1.00E-139 | 104.6 | 65.2 | 75.8 | uncharacterized protein                                   | gbpln | Arabidopsis thaliana | AT1G05550.3   Symbols:   Protein of unknown function (DUF295)   chr1:1641229-1643748 REVERSE LENGTH=385                                                                     | 368  | 385  | 1.00E-142 | 104.6 | 65.2 | 75.8 |
| Rsa1.0_00085.1.g4263.t1 | dbj BAJ33712.1  unnamed protein product [Thellungiella halophila]                                                                                                                                                                                                                                                                                                                                                                                                                                                                                                                                                                                                                                                                                                                                                                                                                                                                                                                                    | 457  | 456  | 0         | 99.8  | 84.2 | 89.7 | unnamed protein product                                   | ----  | ----                 | AT1G05560.1   Symbols: UGT1, UGT75B1   UDP-glucosyltransferase 75B1   chr1:1645674-1647083 REVERSE LENGTH=469                                                               | 457  | 469  | 0         | 102.6 | 80.3 | 88.8 |
| Rsa1.0_00085.1.g4264.t1 | gb AAF79731.1 AC005106.12 T25N20.20 [Arabidopsis thaliana]                                                                                                                                                                                                                                                                                                                                                                                                                                                                                                                                                                                                                                                                                                                                                                                                                                                                                                                                           | 127  | 493  | 4.00E-23  | 388.2 | 46.5 | 52.8 | T25N20.20                                                 | gbpln | Arabidopsis thaliana | AT1G05550.3   Symbols:   Protein of unknown function (DUF295)   chr1:1641229-1643748 REVERSE LENGTH=385                                                                     | 127  | 385  | 1.00E-25  | 303.1 | 44.9 | 51.2 |
| Rsa1.0_00085.1.g4265.t1 | dbj BAJ33712.1  unnamed protein product [Thellungiella halophila]                                                                                                                                                                                                                                                                                                                                                                                                                                                                                                                                                                                                                                                                                                                                                                                                                                                                                                                                    | 427  | 456  | 0         | 106.8 | 82.7 | 87.4 | unnamed protein product                                   | ----  | ----                 | AT1G05560.1   Symbols: UGT1, UGT75B1   UDP-glucosyltransferase 75B1   chr1:1645674-1647083 REVERSE LENGTH=469                                                               | 427  | 469  | 0         | 109.8 | 79.9 | 87.4 |
| Rsa1.0_00085.1.g4266.t1 | gb AAK37413.1 AF237733.1 callose synthase 1 catalytic subunit [Arabidopsis thaliana]                                                                                                                                                                                                                                                                                                                                                                                                                                                                                                                                                                                                                                                                                                                                                                                                                                                                                                                 | 1939 | 1950 | 0         | 100.6 | 94.2 | 97.1 | callose synthase 1 catalytic subunit                      | gbpln | Arabidopsis thaliana | AT1G05570.1   Symbols: CALS1, GSL06, ATGSL6, ATGSL06, GSL6   callose synthase 1   chr1:1647880-1658677 REVERSE LENGTH=1950                                                  | 1939 | 1950 | 0         | 100.6 | 94.5 | 97.2 |
| Rsa1.0_00086.1.g4267.t2 | refXP_002886385.1   hypothetical protein ARALYDRAFT_893060 [Arabidopsis lyrata subsp. lyrata] gi 297332226 gb EFH62644.1   hypothetical protein ARALYDRAFT_893060 [Arabidopsis lyrata subsp. lyrata]                                                                                                                                                                                                                                                                                                                                                                                                                                                                                                                                                                                                                                                                                                                                                                                                 | 199  | 294  | 8.00E-81  | 147.7 | 76.9 | 82.9 | hypothetical protein ARALYDRAFT_893060                    | gbpln | Arabidopsis lyrata   | AT1G63780.1   Symbols: IMP4   Ribosomal RNA processing Brix domain protein   chr1:23665045-23667243 REVERSE LENGTH=294                                                      | 199  | 294  | 8.00E-80  | 147.7 | 71.9 | 77.9 |

|                         |                                                                                                                                                                                                                                                                                                                                                                                                                                                 |     |      |           |        |      |      |                                                             |       |                        |                                                                                                                                                                                                                                                                                                                                              |     |      |           |        |      |      |
|-------------------------|-------------------------------------------------------------------------------------------------------------------------------------------------------------------------------------------------------------------------------------------------------------------------------------------------------------------------------------------------------------------------------------------------------------------------------------------------|-----|------|-----------|--------|------|------|-------------------------------------------------------------|-------|------------------------|----------------------------------------------------------------------------------------------------------------------------------------------------------------------------------------------------------------------------------------------------------------------------------------------------------------------------------------------|-----|------|-----------|--------|------|------|
| Rsa1.0_00086.1.g4268.t1 | refXP_002886402.1   hypothetical protein ARALYDRAFT_475012 [Arabidopsis lyrata subsp. lyrata] gi297332243 gb EFH62661.1   hypothetical protein ARALYDRAFT_475012 [Arabidopsis lyrata subsp. lyrata]                                                                                                                                                                                                                                             | 156 | 154  | 2.00E-64  | 98.7   | 80.1 | 88.5 | hypothetical protein ARALYDRAFT_475012                      | gbpln | Arabidopsis lyrata     | AT1G63310.1   Symbols:   unknown protein; BEST Arabidopsis thaliana protein match is: unknown protein (TAIR:AT2G20362.1). Has 78 Blast hits to 77 proteins in 11 species: Archae - 0; Bacteria - 0; Metazoa - 0; Fungi - 0; Plants - 78; Viruses - 0; Other Eukaryotes - 0 (source: NCBI BLink).   chr1:23486580-23487044 REVERSE LENGTH=154 | 156 | 154  | 1.00E-66  | 98.7   | 79.5 | 88.5 |
| Rsa1.0_00086.1.g4269.t1 | gb ABA18088.1  ABC transporter family protein [Olimarabidopsis pumila]                                                                                                                                                                                                                                                                                                                                                                          | 211 | 231  | 1.00E-114 | 109.5  | 95.3 | 99.5 | ABC transporter family protein                              | gbpln | Olimarabidopsis pumila | AT1G63270.1   Symbols: ATNAP10, NAP10   non-intrinsic ABC protein 10   chr1:23469664-23470353 REVERSE LENGTH=229                                                                                                                                                                                                                             | 211 | 229  | 1.00E-116 | 108.5  | 94.3 | 99.5 |
| Rsa1.0_00086.1.g4270.t1 | refNP_176514.1   putative DEAD-box ATP-dependent RNA helicase 48 [Arabidopsis thaliana] gi75333533 sp Q9C8S9.1 RH48_ARATH RecName: Full=Probable DEAD-box ATP-dependent RNA helicase 48 gi12324351 gb AA652143.1 AC022355_4 putative RNA helicase: 42376-45543 [Arabidopsis thaliana] gi332195955 gb AEE34076.1   putative DEAD-box ATP-dependent RNA helicase 48 [Arabidopsis thaliana]                                                        | 786 | 798  | 0         | 101.5  | 86.3 | 91.2 | putative DEAD-box ATP-dependent RNA helicase 48             | gbpln | Arabidopsis thaliana   | AT1G63250.1   Symbols:   DEA(D/H)-box RNA helicase family protein   chr1:23463284-23466451 REVERSE LENGTH=798                                                                                                                                                                                                                                | 786 | 798  | 0         | 101.5  | 86.3 | 91.2 |
| Rsa1.0_00086.1.g4271.t1 | refXP_002886433.1   phloem protein 2-A11 [Arabidopsis lyrata subsp. lyrata] gi297332274 gb EFH62692.1   phloem protein 2-A11 [Arabidopsis lyrata subsp. lyrata]                                                                                                                                                                                                                                                                                 | 144 | 287  | 4.00E-66  | 199.3  | 79.9 | 89.6 | phloem protein 2-A11                                        | gbpln | Arabidopsis lyrata     | AT1G12710.1   Symbols: AtPP2-A12, PP2-A12   phloem protein 2-A12   chr1:4326980-4328324 REVERSE LENGTH=291                                                                                                                                                                                                                                   | 144 | 291  | 1.00E-64  | 202.1  | 75.7 | 87.5 |
| Rsa1.0_00086.1.g4272.t1 | refNP_176493.1   membrane bound O-acyl transferase domain-containing protein [Arabidopsis thaliana] gi12323260 gb AAG51612.1 AC010795_16 unknown protein: 29405-27288 [Arabidopsis thaliana] gi18175648 gb AAL59903.1   unknown protein [Arabidopsis thaliana] gi21689737 gb AAM67512.1   unknown protein [Arabidopsis thaliana] gi332195924 gb AEE34045.1   membrane bound O-acyl transferase domain-containing protein [Arabidopsis thaliana] | 466 | 465  | 0         | 99.8   | 92.1 | 96.6 | membrane bound O-acyl transferase domain-containing protein | gbpln | Arabidopsis thaliana   | AT1G63050.1   Symbols:   MBOAT (membrane bound O-acyl transferase) family protein   chr1:23376061-23378178 REVERSE LENGTH=465                                                                                                                                                                                                                | 466 | 465  | 0         | 99.8   | 92.1 | 96.6 |
| Rsa1.0_00086.1.g4273.t1 | #                                                                                                                                                                                                                                                                                                                                                                                                                                               | #   | #    | #         | #      | #    | #    | -                                                           | ----  | ----                   | #                                                                                                                                                                                                                                                                                                                                            | #   | #    | #         | #      | #    |      |
| Rsa1.0_00086.1.g4274.t1 | gb EOA34651.1  hypothetical protein CARUB_v10022214mg [Capsella rubella]                                                                                                                                                                                                                                                                                                                                                                        | 245 | 257  | 3.00E-74  | 104.9  | 73.5 | 82.0 | hypothetical protein CARUB_v10022214mg                      | gbpln | Capsella rubella       | AT1G12630.1   Symbols:   Integrase-type DNA-binding superfamily protein   chr1:4298897-4299475 FORWARD LENGTH=192                                                                                                                                                                                                                            | 245 | 192  | 2.00E-43  | 78.4   | 46.5 | 51.8 |
| Rsa1.0_00086.1.g4275.t1 | #                                                                                                                                                                                                                                                                                                                                                                                                                                               | #   | #    | #         | #      | #    | #    | -                                                           | ----  | ----                   | #                                                                                                                                                                                                                                                                                                                                            | #   | #    | #         | #      | #    |      |
| Rsa1.0_00086.1.g4276.t1 | refXP_002883360.1   time for coffee [Arabidopsis lyrata subsp. lyrata] gi297329200 gb EFH59619.1   time for coffee [Arabidopsis lyrata subsp. lyrata]                                                                                                                                                                                                                                                                                           | 131 | 1550 | 3.00E-46  | 1183.2 | 83.2 | 89.3 | time for coffee                                             | gbpln | Arabidopsis lyrata     | AT3G22380.2   Symbols: TIC   time for coffee   chr3:7913181-7918967 FORWARD LENGTH=1555                                                                                                                                                                                                                                                      | 131 | 1555 | 6.00E-45  | 1187.0 | 81.7 | 87.0 |
| Rsa1.0_00086.1.g4277.t1 | gb EOA34129.1  hypothetical protein CARUB_v10021630mg [Capsella rubella]                                                                                                                                                                                                                                                                                                                                                                        | 696 | 699  | 0         | 100.4  | 93.1 | 96.8 | hypothetical protein CARUB_v10021630mg                      | gbpln | Capsella rubella       | AT1G63010.4   Symbols:   Major Facilitator Superfamily with SPX (SYG1/Pho81/XPR1) domain-containing protein   chr1:23347972-23351026 REVERSE LENGTH=699                                                                                                                                                                                      | 696 | 699  | 0         | 100.4  | 92.8 | 96.4 |
| Rsa1.0_00086.1.g4278.t1 | refXP_002887985.1   hypothetical protein ARALYDRAFT_893174 [Arabidopsis lyrata subsp. lyrata] gi297333826 gb EFH64244.1   hypothetical protein ARALYDRAFT_893174 [Arabidopsis lyrata subsp. lyrata]                                                                                                                                                                                                                                             | 297 | 300  | 1.00E-166 | 101.0  | 95.3 | 98.7 | hypothetical protein ARALYDRAFT_893174                      | gbpln | Arabidopsis lyrata     | AT1G63000.1   Symbols: NRS/ER_UER1   nucleotide-rhamnose synthase/epimerase-reductase   chr1:233742510-23343859 FORWARD LENGTH=301                                                                                                                                                                                                           | 297 | 301  | 1.00E-167 | 101.3  | 94.6 | 98.7 |
| Rsa1.0_00086.1.g4279.t1 | gb EOA35527.1  hypothetical protein CARUB_v10020735mg [Capsella rubella]                                                                                                                                                                                                                                                                                                                                                                        | 290 | 292  | 1.00E-154 | 100.7  | 92.8 | 94.1 | hypothetical protein CARUB_v10020735mg                      | gbpln | Capsella rubella       | AT1G62990.1   Symbols: KNAT7, IXR11   KNOTTED-like homeobox of Arabidopsis thaliana 7   chr1:23337468-23340348 FORWARD LENGTH=291                                                                                                                                                                                                            | 290 | 291  | 1.00E-155 | 100.3  | 92.1 | 94.1 |
| Rsa1.0_00086.1.g4280.t1 | #                                                                                                                                                                                                                                                                                                                                                                                                                                               | #   | #    | #         | #      | #    | #    | -                                                           | ----  | ----                   | #                                                                                                                                                                                                                                                                                                                                            | #   | #    | #         | #      | #    |      |
| Rsa1.0_00086.1.g4281.t1 | #                                                                                                                                                                                                                                                                                                                                                                                                                                               | #   | #    | #         | #      | #    | #    | -                                                           | ----  | ----                   | #                                                                                                                                                                                                                                                                                                                                            | #   | #    | #         | #      | #    |      |
| Rsa1.0_00086.1.g4282.t1 | refXP_002887990.1   hypothetical protein ARALYDRAFT_475057 [Arabidopsis lyrata subsp. lyrata] gi297333831 gb EFH64249.1   hypothetical protein ARALYDRAFT_475057 [Arabidopsis lyrata subsp. lyrata]                                                                                                                                                                                                                                             | 804 | 772  | 0         | 96.0   | 61.6 | 68.5 | hypothetical protein ARALYDRAFT_475057                      | gbpln | Arabidopsis lyrata     | AT1G62970.1   Symbols:   Chaperone DnaJ-domain superfamily protein   chr1:23323358-23325751 FORWARD LENGTH=797                                                                                                                                                                                                                               | 804 | 797  | 0         | 99.1   | 62.2 | 70.1 |



|                         |                                                                                                                                                                                                                                                                                                                                                                                                                                                                                                                                                                                                                                                                                                                                         |     |     |          |        |      |      |                                                              |       |                      |                                                                                                                                                                                                                                                                                                                                                                                  |     |     |          |        |      |      |
|-------------------------|-----------------------------------------------------------------------------------------------------------------------------------------------------------------------------------------------------------------------------------------------------------------------------------------------------------------------------------------------------------------------------------------------------------------------------------------------------------------------------------------------------------------------------------------------------------------------------------------------------------------------------------------------------------------------------------------------------------------------------------------|-----|-----|----------|--------|------|------|--------------------------------------------------------------|-------|----------------------|----------------------------------------------------------------------------------------------------------------------------------------------------------------------------------------------------------------------------------------------------------------------------------------------------------------------------------------------------------------------------------|-----|-----|----------|--------|------|------|
| Rsa1.0_00086.1.g4283.t1 | ref NP_564804.1  putative aminotransferase ACS10 [Arabidopsis thaliana] gi 50400664 sp Q9LQ10.1 1A110_ARATH RecName: Full=Probable aminotransferase ACS10 gi 8493584 gb AAF75807.1 AC011000_10 Strong similarity to ACS5 from Lupinus albus gb AF119414, and contains an Aminotransferase-classI domain PF 00155 [Arabidopsis thaliana] gi 13194768 gb AAK15546.1 AF348575.1 aminotransferase [Arabidopsis thaliana] gi 15451222 gb AAK96882.1  Strong similarity to ACS5 from Lupinus albus gb AF119414, and contains an Aminotransferase-classI domain PF 00155 [Arabidopsis thaliana] gi 31711978 gb AAP68345.1  At1g62960 [Arabidopsis thaliana] gi 332195906 gb AEE34027.1  putative aminotransferase ACS10 [Arabidopsis thaliana] | 551 | 557 | 0        | 101.1  | 83.8 | 91.3 | putative aminotransferase ACS10                              | gbpln | Arabidopsis thaliana | AT1G62960.1   Symbols: ACS10   ACC synthase 10   chr1:23318271-23320229 REVERSE LENGTH=557                                                                                                                                                                                                                                                                                       | 551 | 557 | 0        | 101.1  | 83.8 | 91.3 |
| Rsa1.0_00086.1.g4284.t1 | ref XP_002887991.1  hypothetical protein ARALYDRAFT.475059 [Arabidopsis lyrata subsp. lyrata] gi 297333832 gb EFH64250.1  hypothetical protein ARALYDRAFT.475059 [Arabidopsis lyrata subsp. lyrata]                                                                                                                                                                                                                                                                                                                                                                                                                                                                                                                                     | 74  | 888 | 1.00E-21 | 1200.0 | 68.9 | 79.7 | hypothetical protein ARALYDRAFT.475059                       | gbpln | Arabidopsis lyrata   | AT1G62950.1   Symbols:   leucine-rich repeat transmembrane protein kinase family protein   chr1:23315294-23318061 FORWARD LENGTH=890                                                                                                                                                                                                                                             | 74  | 890 | 6.00E-24 | 1202.7 | 66.2 | 79.7 |
| Rsa1.0_00086.1.g4285.t1 | gb ABE65414.1  hypothetical protein At1g62935 [Arabidopsis thaliana]                                                                                                                                                                                                                                                                                                                                                                                                                                                                                                                                                                                                                                                                    | 164 | 178 | 2.00E-43 | 108.5  | 65.2 | 73.8 | hypothetical protein At1g62935                               | gbpln | Arabidopsis thaliana | AT1G62935.1   Symbols:   unknown protein; FUNCTIONS IN: molecular function unknown; INVOLVED IN: biological process unknown; LOCATED IN: endomembrane system; Has 45 Blast hits to 45 proteins in 13 species: Archae - 0; Bacteria - 2; Metazoa - 6; Fungi - 0; Plants - 8; Viruses - 0; Other Eukaryotes - 29 (source: NCBI BLINK).   chr1:23308880-23309410 REVERSE LENGTH=176 | 164 | 176 | 7.00E-46 | 107.3  | 65.2 | 73.8 |
| Rsa1.0_00086.1.g4286.t1 | ref XP_002888002.1  cornichon family protein [Arabidopsis lyrata subsp. lyrata] gi 297333843 gb EFH64261.1  cornichon family protein [Arabidopsis lyrata subsp. lyrata]                                                                                                                                                                                                                                                                                                                                                                                                                                                                                                                                                                 | 137 | 137 | 2.00E-64 | 100.0  | 90.5 | 94.9 | cornichon family protein                                     | gbpln | Arabidopsis lyrata   | AT1G12390.1   Symbols:   Cornichon family protein   chr1:4220347-4221481 FORWARD LENGTH=137                                                                                                                                                                                                                                                                                      | 137 | 137 | 6.00E-64 | 100.0  | 83.2 | 92.0 |
| Rsa1.0_00086.1.g4287.t1 | gb EOA28932.1  hypothetical protein CARUB_v10025180mg [Capsella rubella]                                                                                                                                                                                                                                                                                                                                                                                                                                                                                                                                                                                                                                                                | 216 | 244 | 3.00E-76 | 113.0  | 63.0 | 78.2 | hypothetical protein CARUB_v10025180mg                       | gbpln | Capsella rubella     | AT1G08090.1   Symbols: ATACA7, ACA7   alpha carbonic anhydrase 7   chr1:2517022-2518546 REVERSE LENGTH=275                                                                                                                                                                                                                                                                       | 216 | 275 | 2.00E-75 | 127.3  | 68.1 | 82.9 |
| Rsa1.0_00086.1.g4288.t1 | ref NP_190240.1  mitochondrial import inner membrane translocase subunit Tim9 [Arabidopsis thaliana] gi 12643936 sp O9XG9.2 TIM9_ARATH RecName: Full=Mitochondrial import inner membrane translocase subunit TIM9; AltName: Full=Protein EMBRYO DEFECTIVE 2474 gi 6523059 emb CAB62326.1  small zinc finger-like protein TIM9 [Arabidopsis thaliana] gi 15028235 gb AAK76614.1  putative small zinc finger protein TIM9 [Arabidopsis thaliana] gi 19310825 gb AAL85143.1  putative small zinc finger protein TIM9 [Arabidopsis thaliana] gi 332644651 gb AEE78172.1  mitochondrial import inner membrane translocase subunit Tim9 [Arabidopsis thaliana]                                                                                | 93  | 93  | 5.00E-43 | 100.0  | 91.4 | 94.6 | mitochondrial import inner membrane translocase subunit Tim9 | gbpln | Arabidopsis thaliana | AT3G46560.1   Symbols: TIM9_emb2474   Tim10/DDP family zinc finger protein   chr3:17138632-17139301 FORWARD LENGTH=93                                                                                                                                                                                                                                                            | 93  | 93  | 9.00E-46 | 100.0  | 91.4 | 94.6 |
| Rsa1.0_00086.1.g4289.t1 | pir E84492  probable retroelement pol polyprotein [imported] - Arabidopsis thaliana                                                                                                                                                                                                                                                                                                                                                                                                                                                                                                                                                                                                                                                     | 267 | 531 | 1.00E-48 | 198.9  | 40.4 | 53.6 | probable retroelement pol polyprotein                        | ----  | ----                 | #                                                                                                                                                                                                                                                                                                                                                                                | #   | #   | #        | #      | #    | #    |
| Rsa1.0_00086.1.g4290.t1 | gb EOA33664.1  hypothetical protein CARUB_v10019841mg [Capsella rubella]                                                                                                                                                                                                                                                                                                                                                                                                                                                                                                                                                                                                                                                                | 758 | 772 | 0        | 101.8  | 84.0 | 90.5 | hypothetical protein CARUB_v10019841mg                       | gbpln | Capsella rubella     | AT1G62870.1   Symbols:   unknown protein; BEST Arabidopsis thaliana protein match is: unknown protein (TAIR:AT1G12380.1); Has 351 Blast hits to 343 proteins in 42 species: Archae - 2; Bacteria - 0; Metazoa - 27; Fungi - 5; Plants - 299; Viruses - 0; Other Eukaryotes - 18 (source: NCBI BLINK).   chr1:23284220-23286508 REVERSE LENGTH=762                                | 758 | 762 | 0        | 100.5  | 83.1 | 90.1 |

|                         |                                                                                                                                                                                                                                                                                                                     |     |      |           |       |      |      |                                                                           |       |                      |                                                                                                                                          |     |     |           |       |      |      |
|-------------------------|---------------------------------------------------------------------------------------------------------------------------------------------------------------------------------------------------------------------------------------------------------------------------------------------------------------------|-----|------|-----------|-------|------|------|---------------------------------------------------------------------------|-------|----------------------|------------------------------------------------------------------------------------------------------------------------------------------|-----|-----|-----------|-------|------|------|
| Rsa1.0_00086.1.g4291.t1 | gb EOA35655.1  hypothetical protein CARUB_v10020879mg [Capsella rubella]                                                                                                                                                                                                                                            | 254 | 236  | 1.00E-111 | 92.9  | 79.9 | 85.4 | hypothetical protein CARUB_v10020879mg                                    | gbpln | Capsella rubella     | AT1G62850.3   Symbols:   Class I peptide chain release factor   chr1:23272608-23274211 REVERSE LENGTH=236                                | 254 | 236 | 1.00E-113 | 92.9  | 80.3 | 85.4 |
| Rsa1.0_00086.1.g4292.t1 | ref XP_002886450.1  amine oxidase family protein [Arabidopsis lyrata subsp. lyrata] gi 297332291 gb EFH62709.1  amine oxidase family protein [Arabidopsis lyrata subsp. lyrata]                                                                                                                                     | 704 | 840  | 0         | 119.3 | 83.1 | 88.6 | amine oxidase family protein                                              | gbpln | Arabidopsis lyrata   | AT1G62830.1   Symbols: LDL1, SWP1, ATSWP1, ATLSL1, LSD1   LSD1-like 1   chr1:23264638-23267172 REVERSE LENGTH=844                        | 704 | 844 | 0         | 119.9 | 82.7 | 88.1 |
| Rsa1.0_00086.1.g4293.t1 | ref XP_002886453.1  hypothetical protein ARALYDRAFT_475071 [Arabidopsis lyrata subsp. lyrata] gi 297332294 gb EFH62712.1  hypothetical protein ARALYDRAFT_475071 [Arabidopsis lyrata subsp. lyrata]                                                                                                                 | 405 | 405  | 0         | 100.0 | 83.7 | 93.6 | hypothetical protein ARALYDRAFT_475071                                    | gbpln | Arabidopsis lyrata   | AT1G62800.2   Symbols: ASP4   aspartate aminotransferase 4   chr1:23253934-23257416 REVERSE LENGTH=405                                   | 405 | 405 | 0         | 100.0 | 82.5 | 93.8 |
| Rsa1.0_00086.1.g4294.t1 | #                                                                                                                                                                                                                                                                                                                   | #   | #    | #         | #     | #    | #    | -                                                                         | ----  | ----                 | #                                                                                                                                        | #   | #   | #         | #     | #    |      |
| Rsa1.0_00086.1.g4295.t1 | ref NP_176463.2  plant invertase/pectin methylesterase inhibitor domain-containing protein [Arabidopsis thaliana] gi 6630459 gb AAF19547.1 AC007190.15 F23N19.12 [Arabidopsis thaliana] gi 332195880 gb AE34001.1  plant invertase/pectin methylesterase inhibitor domain-containing protein [Arabidopsis thaliana] | 204 | 312  | 2.00E-74  | 152.9 | 67.6 | 74.5 | plant invertase/pectin methylesterase inhibitor domain-containing protein | gbpln | Arabidopsis thaliana | AT1G62760.1   Symbols:   Plant invertase/pectin methylesterase inhibitor superfamily protein   chr1:23237574-23238512 REVERSE LENGTH=312 | 204 | 312 | 5.00E-77  | 152.9 | 67.6 | 74.5 |
| Rsa1.0_00086.1.g4296.t2 | #                                                                                                                                                                                                                                                                                                                   | #   | #    | #         | #     | #    | #    | -                                                                         | ----  | ----                 | #                                                                                                                                        | #   | #   | #         | #     | #    |      |
| Rsa1.0_00087.1.g4297.t1 | ref XP_002882423.1  hypothetical protein ARALYDRAFT_477844 [Arabidopsis lyrata subsp. lyrata] gi 297328263 gb EFH58682.1  hypothetical protein ARALYDRAFT_477844 [Arabidopsis lyrata subsp. lyrata]                                                                                                                 | 411 | 428  | 1.00E-162 | 104.1 | 81.5 | 89.5 | hypothetical protein ARALYDRAFT_477844                                    | gbpln | Arabidopsis lyrata   | AT3G05545.1   Symbols:   RING/U-box superfamily protein   chr3:1609436-1612133 FORWARD LENGTH=425                                        | 411 | 425 | 1.00E-162 | 103.4 | 81.5 | 88.8 |
| Rsa1.0_00087.1.g4298.t1 | ref XP_002886149.1  ATPAP11/PAP11 [Arabidopsis lyrata subsp. lyrata] gi 297331989 gb EFH62408.1  ATPAP11/PAP11 [Arabidopsis lyrata subsp. lyrata]                                                                                                                                                                   | 133 | 461  | 2.00E-59  | 346.6 | 80.5 | 91.7 | ATPAP11/PAP11                                                             | gbpln | Arabidopsis lyrata   | AT1G52940.1   Symbols: PAP5, ATPAP5   purple acid phosphatase 5   chr1:19716402-19723716 FORWARD LENGTH=396                              | 133 | 396 | 5.00E-60  | 297.7 | 78.9 | 91.0 |
| Rsa1.0_00087.1.g4299.t1 | dbj BAB21595.1  Tat binding protein like protein [Brassica rapa]                                                                                                                                                                                                                                                    | 403 | 424  | 0         | 105.2 | 99.0 | 99.5 | Tat binding protein like protein                                          | gbpln | Brassica rapa        | AT3G05530.1   Symbols: RPT5A, ATS6A.2   regulatory particle triple-A ATPase 5A   chr3:1603540-1605993 FORWARD LENGTH=424                 | 403 | 424 | 0         | 105.2 | 98.8 | 99.3 |
| Rsa1.0_00087.1.g4300.t2 | #                                                                                                                                                                                                                                                                                                                   | #   | #    | #         | #     | #    | #    | -                                                                         | ----  | ----                 | #                                                                                                                                        | #   | #   | #         | #     | #    |      |
| Rsa1.0_00087.1.g4301.t1 | ref XP_002882419.1  rubber elongation factor family protein [Arabidopsis lyrata subsp. lyrata] gi 297328259 gb EFH58678.1  rubber elongation factor family protein [Arabidopsis lyrata subsp. lyrata]                                                                                                               | 245 | 246  | 1.00E-121 | 100.4 | 91.4 | 97.6 | rubber elongation factor family protein                                   | gbpln | Arabidopsis lyrata   | AT3G05500.1   Symbols:   Rubber elongation factor protein (REF)   chr3:1593540-1594802 FORWARD LENGTH=246                                | 245 | 246 | 1.00E-123 | 100.4 | 91.0 | 97.6 |
| Rsa1.0_00087.1.g4302.t1 | ref XP_002882418.1  hypothetical protein ARALYDRAFT_477838 [Arabidopsis lyrata subsp. lyrata] gi 297328258 gb EFH58677.1  hypothetical protein ARALYDRAFT_477838 [Arabidopsis lyrata subsp. lyrata]                                                                                                                 | 119 | 118  | 4.00E-45  | 99.2  | 88.2 | 93.3 | hypothetical protein ARALYDRAFT_477838                                    | gbpln | Arabidopsis lyrata   | AT3G05490.1   Symbols: RALFL22   ralfl-like 22   chr3:1591381-1591740 FORWARD LENGTH=119                                                 | 119 | 119 | 2.00E-46  | 100.0 | 85.7 | 91.6 |
| Rsa1.0_00087.1.g4303.t1 | ref XP_002882417.1  cell cycle checkpoint control protein family [Arabidopsis lyrata subsp. lyrata] gi 297328257 gb EFH58676.1  cell cycle checkpoint control protein family [Arabidopsis lyrata subsp. lyrata]                                                                                                     | 439 | 438  | 0         | 99.8  | 86.3 | 92.5 | cell cycle checkpoint control protein family                              | gbpln | Arabidopsis lyrata   | AT3G05480.1   Symbols: ATRAD9, RAD9   cell cycle checkpoint control protein family   chr3:1585383-1588238 FORWARD LENGTH=439             | 439 | 439 | 0         | 100.0 | 87.0 | 92.3 |
| Rsa1.0_00087.1.g4304.t1 | ref XP_002884514.1  hypothetical protein ARALYDRAFT_317406 [Arabidopsis lyrata subsp. lyrata] gi 297330354 gb EFH60773.1  hypothetical protein ARALYDRAFT_317406 [Arabidopsis lyrata subsp. lyrata]                                                                                                                 | 840 | 896  | 0         | 106.7 | 86.7 | 90.8 | hypothetical protein ARALYDRAFT_317406                                    | gbpln | Arabidopsis lyrata   | AT3G05470.1   Symbols:   Actin-binding FH2 (formin homology 2) family protein   chr3:1579667-1582547 REVERSE LENGTH=884                  | 840 | 884 | 0         | 105.2 | 85.0 | 89.5 |
| Rsa1.0_00087.1.g4305.t1 | gb AAG51783.1 AC079679.3 reverse transcriptase, putative; 16838-20266 [Arabidopsis thaliana]                                                                                                                                                                                                                        | 417 | 1142 | 5.00E-94  | 273.9 | 47.2 | 63.1 | reverse transcriptase, putative; 16838-20266                              | gbpln | Arabidopsis thaliana | AT4G2090.1   Symbols:   Ribonuclease H-like superfamily protein   chr4:14333528-14335255 FORWARD LENGTH=575                              | 417 | 575 | 2.00E-52  | 137.9 | 34.1 | 55.9 |

|                         |                                                                                                                                                                                                                                                                                                                                                                                                                                                                                          |     |     |           |       |      |      |                                        |       |                      |                                                                                                                                                                                                                                                                                                                                                                                                                                                                                                                                                                                                                                                                                            |     |     |           |        |      |      |
|-------------------------|------------------------------------------------------------------------------------------------------------------------------------------------------------------------------------------------------------------------------------------------------------------------------------------------------------------------------------------------------------------------------------------------------------------------------------------------------------------------------------------|-----|-----|-----------|-------|------|------|----------------------------------------|-------|----------------------|--------------------------------------------------------------------------------------------------------------------------------------------------------------------------------------------------------------------------------------------------------------------------------------------------------------------------------------------------------------------------------------------------------------------------------------------------------------------------------------------------------------------------------------------------------------------------------------------------------------------------------------------------------------------------------------------|-----|-----|-----------|--------|------|------|
| Rsa1.0_00087.1.g4306.t1 | ref[XP_002884511.1] predicted protein [Arabidopsis lyrata subsp. lyrata] gi 297330351 gb EFH60770.1  predicted protein [Arabidopsis lyrata subsp. lyrata]                                                                                                                                                                                                                                                                                                                                | 222 | 473 | 6.00E-62  | 213.1 | 57.2 | 71.6 | predicted protein                      | gbpln | Arabidopsis lyrata   | AT3G05450.1   Symbols:   CONTAINS InterPro DOMAIN/s: Cystatin-related, plant (InterPro:IPR006525); BEST Arabidopsis thaliana protein match is: Cystatin/monellin superfamily protein (TAIR:AT3G05685.1); Has 2098 Blast hits to 1525 proteins in 202 species: Archae - 2; Bacteria - 561; Metazoa - 485; Fungi - 302; Plants - 191; Viruses - 20; Other Eukaryotes - 537 (source: NCBI BLink).   chr3:1573909-1576418 REVERSE LENGTH=440                                                                                                                                                                                                                                                   | 222 | 440 | 9.00E-45  | 198.2  | 50.9 | 63.5 |
| Rsa1.0_00087.1.g4307.t1 | #                                                                                                                                                                                                                                                                                                                                                                                                                                                                                        | #   | #   | #         | #     | #    | #    | -                                      | ----  | ----                 | AT1G45130.1   Symbols: BGAL5   beta-galactosidase 5   chr1:17065447-17069110 FORWARD LENGTH=732                                                                                                                                                                                                                                                                                                                                                                                                                                                                                                                                                                                            | 60  | 732 | 5.00E-12  | 1220.0 | 50.0 | 51.7 |
| Rsa1.0_00087.1.g4308.t1 | ref[XP_002884511.1] predicted protein [Arabidopsis lyrata subsp. lyrata] gi 297330351 gb EFH60770.1  predicted protein [Arabidopsis lyrata subsp. lyrata]                                                                                                                                                                                                                                                                                                                                | 231 | 473 | 7.00E-64  | 204.8 | 59.3 | 71.4 | predicted protein                      | gbpln | Arabidopsis lyrata   | AT3G05450.1   Symbols:   CONTAINS InterPro DOMAIN/s: Cystatin-related, plant (InterPro:IPR006525); BEST Arabidopsis thaliana protein match is: Cystatin/monellin superfamily protein (TAIR:AT3G05685.1); Has 2098 Blast hits to 1525 proteins in 202 species: Archae - 2; Bacteria - 561; Metazoa - 485; Fungi - 302; Plants - 191; Viruses - 20; Other Eukaryotes - 537 (source: NCBI BLink).   chr3:1573909-1576418 REVERSE LENGTH=440                                                                                                                                                                                                                                                   | 231 | 440 | 1.00E-46  | 190.5  | 51.1 | 62.8 |
| Rsa1.0_00087.1.g4309.t1 | ref[XP_002884570.1] hypothetical protein ARALYDRAFT_340813 [Arabidopsis lyrata subsp. lyrata] gi 297330410 gb EFH60829.1  hypothetical protein ARALYDRAFT_340813 [Arabidopsis lyrata subsp. lyrata]                                                                                                                                                                                                                                                                                      | 263 | 265 | 2.00E-19  | 100.8 | 28.9 | 47.1 | hypothetical protein ARALYDRAFT_340813 | gbpln | Arabidopsis lyrata   | AT1G03720.1   Symbols:   Cysteine proteinases superfamily protein   chr1:924996-926373 REVERSE LENGTH=274                                                                                                                                                                                                                                                                                                                                                                                                                                                                                                                                                                                  | 263 | 274 | 3.00E-18  | 104.2  | 23.6 | 37.6 |
| Rsa1.0_00087.1.g4310.t4 | ref[NP_187193.3] acyl-CoA binding protein 4 [Arabidopsis thaliana] gi 75264903 sp Q9MA55.1 ACBP4_ARAT H RecName: Full=Acyl-CoA-binding domain-containing protein 4; Short=Acyl-CoA binding protein 4 gi 7596769 gb AAF64540.1  unknown protein [Arabidopsis thaliana] gi 30102696 gb AAP21266.1  At3g05420 [Arabidopsis thaliana] gi 110736070 dbj BAF00008.1  hypothetical protein [Arabidopsis thaliana] gi 332640716 gb AEE74237.1  acyl-CoA binding protein 4 [Arabidopsis thaliana] | 760 | 668 | 0         | 87.9  | 79.3 | 82.2 | acyl-CoA binding protein 4             | gbpln | Arabidopsis thaliana | AT3G05420.1   Symbols: ACBP4   acyl-CoA binding protein 4   chr3:1561880-1567047 FORWARD LENGTH=668                                                                                                                                                                                                                                                                                                                                                                                                                                                                                                                                                                                        | 760 | 668 | 0         | 87.9   | 79.3 | 82.2 |
| Rsa1.0_00087.1.g4311.t1 | gb EOA31164.1  hypothetical protein CARUB_v10014330mg [Capsella rubella]                                                                                                                                                                                                                                                                                                                                                                                                                 | 270 | 283 | 1.00E-125 | 104.8 | 85.9 | 92.2 | hypothetical protein CARUB_v10014330mg | gbpln | Capsella rubella     | AT3G05410.2   Symbols:   Photosystem II reaction center PsbP family protein   chr3:1554783-1561456 FORWARD LENGTH=280                                                                                                                                                                                                                                                                                                                                                                                                                                                                                                                                                                      | 270 | 280 | 1.00E-127 | 103.7  | 85.2 | 89.6 |
| Rsa1.0_00087.1.g4312.t1 | ref[NP_187191.2] sugar transporter ERD6-like 12 [Arabidopsis thaliana] gi 75331208 sp Q8VZT3.1 EDL12_ARAT H RecName: Full=Sugar transporter ERD6-like 12; AltName: Full=Sugar transporter-like protein 5 gi 17380764 gb AAL36212.1  putative sugar transporter protein [Arabidopsis thaliana] gi 20259597 gb AAM14155.1  putative sugar transporter [Arabidopsis thaliana] gi 332640712 gb AEE74233.1  sugar transporter ERD6-like 12 [Arabidopsis thaliana]                             | 462 | 462 | 0         | 100.0 | 84.4 | 91.8 | sugar transporter ERD6-like 12         | gbpln | Arabidopsis thaliana | AT3G05400.1   Symbols:   Major facilitator superfamily protein   chr3:1549702-1553942 FORWARD LENGTH=462                                                                                                                                                                                                                                                                                                                                                                                                                                                                                                                                                                                   | 462 | 462 | 0         | 100.0  | 84.4 | 91.8 |
| Rsa1.0_00087.1.g4313.t1 | gb EOA32093.1  hypothetical protein CARUB_v10015342mg [Capsella rubella]                                                                                                                                                                                                                                                                                                                                                                                                                 | 465 | 463 | 0         | 99.6  | 91.6 | 96.3 | hypothetical protein CARUB_v10015342mg | gbpln | Capsella rubella     | AT3G05390.1   Symbols:   FUNCTIONS IN: molecular_function unknown; INVOLVED IN: biological_process unknown; LOCATED IN: mitochondrion; EXPRESSED IN: 15 plant structures; EXPRESSED DURING: 7 growth stages; CONTAINS InterPro DOMAIN/s: Protein of unknown function DUF248, methyltransferase putative (InterPro:IPR004159); BEST Arabidopsis thaliana protein match is: S-adenosyl-L-methionine-dependent methyltransferases superfamily protein (TAIR:AT4G01240.1); Has 507 Blast hits to 498 proteins in 33 species: Archae - 4; Bacteria - 8; Metazoa - 0; Fungi - 0; Plants - 493; Viruses - 0; Other Eukaryotes - 2 (source: NCBI BLink).   chr3:1546585-1547976 REVERSE LENGTH=463 | 465 | 463 | 0         | 99.6   | 90.8 | 95.7 |

|                         |                                                                                                                                                                                                                                                                                                                                                                                                                                                                  |      |      |           |       |      |      |                                         |       |                      |                                                                                                                            |      |      |           |       |      |      |
|-------------------------|------------------------------------------------------------------------------------------------------------------------------------------------------------------------------------------------------------------------------------------------------------------------------------------------------------------------------------------------------------------------------------------------------------------------------------------------------------------|------|------|-----------|-------|------|------|-----------------------------------------|-------|----------------------|----------------------------------------------------------------------------------------------------------------------------|------|------|-----------|-------|------|------|
| Rsa1.0_00087.1.g4314.t3 | refNP_001030643.1   protein ALWAYS EARLY 2 [Arabidopsis thaliana] gi 334185096 refNP_001189812.1   protein ALWAYS EARLY 2 [Arabidopsis thaliana] gi 334185098 refNP_001189813.1   protein ALWAYS EARLY 2 [Arabidopsis thaliana] gi 332640707 gb AEE74228.1   protein ALWAYS EARLY 2 [Arabidopsis thaliana] gi 332640709 gb AEE74230.1   protein ALWAYS EARLY 2 [Arabidopsis thaliana] gi 332640710 gb AEE74231.1   protein ALWAYS EARLY 2 [Arabidopsis thaliana] | 1058 | 1052 | 0         | 99.4  | 77.5 | 84.7 | protein ALWAYS EARLY 2                  | gbpln | Arabidopsis thaliana | AT3G05380.4   Symbols: ALY2   DIRP .Myb-like DNA-binding domain   chr3:1540562-1546139 FORWARD LENGTH=1052                 | 1058 | 1052 | 0         | 99.4  | 77.5 | 84.7 |
| Rsa1.0_00087.1.g4315.t1 | refNP_187186.5   metalloproteinase M24-like protein [Arabidopsis thaliana] gi 19310478 gb AAL84973.1   AT3g05350/T12H1_32 [Arabidopsis thaliana] gi 24111421 gb AAN46861.1   At3g05350/T12H1_32 [Arabidopsis thaliana] gi 332640703 gb AEE74224.1   metalloproteinase M24-like protein [Arabidopsis thaliana]                                                                                                                                                    | 722  | 710  | 0         | 98.3  | 88.5 | 92.1 | metalloproteinase M24-like protein      | gbpln | Arabidopsis thaliana | AT3G05350.1   Symbols:   Metalloproteinase M24 family protein   chr3:1527103-1533843 REVERSE LENGTH=710                    | 722  | 710  | 0         | 98.3  | 88.5 | 92.1 |
| Rsa1.0_00087.1.g4316.t1 | gb EOA32090.1   hypothetical protein CARUB_v10015337mg [Capsella rubella]                                                                                                                                                                                                                                                                                                                                                                                        | 648  | 661  | 0         | 102.0 | 78.9 | 88.9 | hypothetical protein CARUB_v10015337mg  | gbpln | Capsella rubella     | AT3G05340.1   Symbols:   Tetratricopeptide repeat (TPR)-like superfamily protein   chr3:1524071-1526047 REVERSE LENGTH=658 | 648  | 658  | 0         | 101.5 | 78.5 | 88.6 |
| Rsa1.0_00087.1.g4317.t1 | gb EOA30452.1   hypothetical protein CARUB_v10013577mg [Capsella rubella]                                                                                                                                                                                                                                                                                                                                                                                        | 458  | 482  | 0         | 105.2 | 82.5 | 89.3 | hypothetical protein CARUB_v10013577mg  | gbpln | Capsella rubella     | AT3G05330.1   Symbols: ATN, ATTAN   cyclin family   chr3:1519162-1521159 REVERSE LENGTH=444                                | 458  | 444  | 0         | 96.9  | 76.0 | 82.8 |
| Rsa1.0_00087.1.g4318.t1 | refXP_002884502.1   hypothetical protein ARALYDRAFT_477821 [Arabidopsis lyrata subsp. lyrata] gi 297330342 gb EFH60761.1   hypothetical protein ARALYDRAFT_477821 [Arabidopsis lyrata subsp. lyrata]                                                                                                                                                                                                                                                             | 209  | 212  | 6.00E-98  | 101.4 | 81.3 | 91.4 | hypothetical protein ARALYDRAFT_477821  | gbpln | Arabidopsis lyrata   | AT3G05327.1   Symbols:   Cyclin family protein   chr3:1517581-1518399 REVERSE LENGTH=212                                   | 209  | 212  | 1.00E-100 | 101.4 | 82.3 | 90.9 |
| Rsa1.0_00087.1.g4319.t1 | refNP_187183.3   O-fucosyltransferase family protein [Arabidopsis thaliana] gi 6729042 gb AAF27038.1   AC009177_28 unknown protein [Arabidopsis thaliana] gi 332640698 gb AEE74219.1   O-fucosyltransferase family protein [Arabidopsis thaliana]                                                                                                                                                                                                                | 419  | 445  | 0         | 106.2 | 89.5 | 94.3 | O-fucosyltransferase family protein     | gbpln | Arabidopsis thaliana | AT3G05320.1   Symbols:   O-fucosyltransferase family protein   chr3:1513558-1514895 REVERSE LENGTH=445                     | 419  | 445  | 0         | 106.2 | 89.5 | 94.3 |
| Rsa1.0_00087.1.g4320.t1 | gb EOA30122.1   hypothetical protein CARUB_v10013232mg [Capsella rubella]                                                                                                                                                                                                                                                                                                                                                                                        | 651  | 621  | 0         | 95.4  | 77.3 | 85.1 | hypothetical protein CARUB_v10013232mg  | gbpln | Capsella rubella     | AT3G05270.2   Symbols:   Plant protein of unknown function (DUF869)   chr3:1500803-1502926 REVERSE LENGTH=615              | 651  | 615  | 0         | 94.5  | 76.8 | 84.5 |
| Rsa1.0_00087.1.g4321.t1 | gb EOA31145.1   hypothetical protein CARUB_v10014308mg [Capsella rubella]                                                                                                                                                                                                                                                                                                                                                                                        | 289  | 289  | 1.00E-153 | 100.0 | 90.7 | 94.5 | hypothetical protein CARUB_v10014308mg  | gbpln | Capsella rubella     | AT3G05260.1   Symbols:   NAD(P)-binding Rossmann-fold superfamily protein   chr3:1497665-1498919 REVERSE LENGTH=289        | 289  | 289  | 1.00E-153 | 100.0 | 89.3 | 94.1 |
| Rsa1.0_00087.1.g4322.t1 | refNP_187176.2   RING/U-box domain-containing protein [Arabidopsis thaliana] gi 2645061.1 dbj BAC42417.1   unknown protein [Arabidopsis thaliana] gi 31711722 gb AAP68217.1   At3g05250 [Arabidopsis thaliana] gi 70905075 gb AAZ14063.1   At3g05250 [Arabidopsis thaliana] gi 332640690 gb AEE74211.1   RING/U-box domain-containing protein [Arabidopsis thaliana]                                                                                             | 270  | 278  | 1.00E-113 | 103.0 | 75.6 | 84.8 | RING/U-box domain-containing protein    | gbpln | Arabidopsis thaliana | AT3G05250.1   Symbols:   RING/U-box superfamily protein   chr3:1495635-1497387 FORWARD LENGTH=278                          | 270  | 278  | 1.00E-116 | 103.0 | 75.6 | 84.8 |
| Rsa1.0_00087.1.g4323.t1 | refNP_187175.2   mitochondrial editing factor 19 [Arabidopsis thaliana] gi 218546759 sp Q9MA95.2 PP214_ARA TH RecName: Full=Putative pentatricopeptide repeat-containing protein At3g05240 gi 332640689 gb AEE74210.1   mitochondrial editing factor 19 [Arabidopsis thaliana]                                                                                                                                                                                   | 564  | 565  | 0         | 100.2 | 80.5 | 90.4 | mitochondrial editing factor 19         | gbpln | Arabidopsis thaliana | AT3G05240.1   Symbols: MEF19   mitochondrial editing factor 19   chr3:1493684-1495381 REVERSE LENGTH=565                   | 564  | 565  | 0         | 100.2 | 80.5 | 90.4 |
| Rsa1.0_00087.1.g4324.t1 | refXP_002882405.1   signal peptidase subunit family protein [Arabidopsis lyrata subsp. lyrata] gi 297328245 gb EFH58664.1   signal peptidase subunit family protein [Arabidopsis lyrata subsp. lyrata]                                                                                                                                                                                                                                                           | 783  | 167  | 3.00E-91  | 21.3  | 20.1 | 20.6 | signal peptidase subunit family protein | gbpln | Arabidopsis lyrata   | AT3G05230.1   Symbols:   Signal peptidase subunit   chr3:1492304-1493452 FORWARD LENGTH=167                                | 783  | 167  | 5.00E-93  | 21.3  | 19.8 | 20.6 |

|                         |                                                                                                                                                                                                                                                                                                                                                                                                                                                                                                                                                                                                                                                                                                                                                                                                                                  |      |      |           |       |      |      |                                          |       |                      |                                                                                                                                                                                                                                                                                                                                                                                     |      |     |           |       |      |      |
|-------------------------|----------------------------------------------------------------------------------------------------------------------------------------------------------------------------------------------------------------------------------------------------------------------------------------------------------------------------------------------------------------------------------------------------------------------------------------------------------------------------------------------------------------------------------------------------------------------------------------------------------------------------------------------------------------------------------------------------------------------------------------------------------------------------------------------------------------------------------|------|------|-----------|-------|------|------|------------------------------------------|-------|----------------------|-------------------------------------------------------------------------------------------------------------------------------------------------------------------------------------------------------------------------------------------------------------------------------------------------------------------------------------------------------------------------------------|------|-----|-----------|-------|------|------|
| Rsa1.0_00087.1.g4325.t1 | emb[CAB39638.1] RNA-directed DNA polymerase-like protein [Arabidopsis thaliana] gi 7267666 emb[CAB78094.1] RNA-directed DNA polymerase-like protein [Arabidopsis thaliana]<br>ref NP_187172.1  DNA excision repair protein ERCC-1 [Arabidopsis thaliana] gi 55976606 sp Q9MA98.1 ERCC1_ARAT H RecName: Full=DNA excision repair protein ERCC-1; Short=AtERCC1; Short=AtRAD10; AltName: Full=Ultraviolet hypersensitive 7 gi 6729031 gb AAF27027.1 AC009177.17 putative nucleotide repair protein [Arabidopsis thaliana]                                                                                                                                                                                                                                                                                                          | 1822 | 1274 | 0         | 69.9  | 33.0 | 45.1 | RNA-directed DNA polymerase-like protein | gbpln | Arabidopsis thaliana | AT4G29090.1   Symbols:   Ribonuclease H-like superfamily protein   chr4:14333528-14335255 FORWARD LENGTH=575                                                                                                                                                                                                                                                                        | 1822 | 575 | 9.00E-69  | 31.6  | 9.8  | 15.0 |
| Rsa1.0_00087.1.g4326.t1 | gi 9800490 gb AAF99316.1 AF276082.1 ERCC1 [Arabidopsis thaliana] gi 15215614 gb AAK91352.1 AT3g05210.T12H1.18 [Arabidopsis thaliana] gi 21435979 gb AAM51569.1 AT3g05210.T12H1.18 [Arabidopsis thaliana] gi 21618171 gb AAM67221.1 putative nucleotide repair protein [Arabidopsis thaliana] gi 332640684 gb AEE74205.1 DNA excision repair protein ERCC-1 [Arabidopsis thaliana] ref XP_002884492.1  kinase family protein [Arabidopsis lyrata subsp. lyrata] gi 297330332 gb EFH60751.1 kinase family protein [Arabidopsis lyrata subsp. lyrata]                                                                                                                                                                                                                                                                               | 408  | 410  | 0         | 100.5 | 87.0 | 91.9 | DNA excision repair protein ERCC-1       | gbpln | Arabidopsis thaliana | AT3G05210.1   Symbols: ERCC1, UVR7   nucleotide repair protein, putative   chr3:1479591-1481823 FORWARD LENGTH=410                                                                                                                                                                                                                                                                  | 408  | 410 | 0         | 100.5 | 87.0 | 91.9 |
| Rsa1.0_00087.1.g4327.t1 | ref NP_187164.1  uncharacterized protein [Arabidopsis thaliana] gi 6729023 gb AAF27019.1 AC009177.9 hypothetical protein [Arabidopsis thaliana] gi 332640668 gb AEE74189.1  uncharacterized protein AT3G05130 [Arabidopsis thaliana]                                                                                                                                                                                                                                                                                                                                                                                                                                                                                                                                                                                             | 501  | 469  | 0         | 93.6  | 80.4 | 85.0 | kinase family protein                    | gbpln | Arabidopsis lyrata   | AT3G05140.1   Symbols: RBK2   ROP binding protein kinases 2   chr3:1435817-1437800 REVERSE LENGTH=460                                                                                                                                                                                                                                                                               | 501  | 460 | 0         | 91.8  | 77.8 | 83.0 |
| Rsa1.0_00087.1.g4328.t1 | ref NP_187163.1  putative gibberellin receptor GID1L1 [Arabidopsis thaliana] gi 75336145 sp Q9MAA7.1 GID1A_ARAT H RecName: Full=Gibberellin receptor GID1A; AltName: Full=AtCXE10; AltName: Full=Carboxylesterase 10; AltName: Full=GID1-like protein 1; AltName: Full=Protein GA INSENSITIVE DWARF 1A; Short=AtGID1A gi 6729022 gb AAF27018.1 AC009177.8 unknown protein [Arabidopsis thaliana] gi 22530934 gb AAM96971.1  unknown protein [Arabidopsis thaliana] gi 27311999 gb AAO09965.1  unknown protein [Arabidopsis thaliana] gi 332640667 gb AEE74188.1  putative gibberellin receptor GID1L1 [Arabidopsis thaliana] ref XP_002884491.1  hypothetical protein ARALYDRAFT_340677 [Arabidopsis lyrata subsp. lyrata] gi 297330331 gb EFH60750.1  hypothetical protein ARALYDRAFT_340677 [Arabidopsis lyrata subsp. lyrata] | 580  | 634  | 1.00E-167 | 109.3 | 64.0 | 79.5 | uncharacterized protein                  | gbpln | Arabidopsis thaliana | AT3G05130.1   Symbols:   BEST Arabidopsis thaliana protein match is: Prefoldin chaperone subunit family protein (TAIR:AT5G27330.1); Has 171032 Blast hits to 82560 proteins in 3364 species: Archae - 2835; Bacteria - 33550; Metazoa - 71995; Fungi - 13365; Plants - 959; Viruses - 592; Other Eukaryotes - 39097 (source: NCBI BLink).   chr3:1433475-1435379 REVERSE LENGTH=634 | 580  | 634 | 1.00E-170 | 109.3 | 64.0 | 79.5 |
| Rsa1.0_00087.1.g4329.t1 | ref NP_187163.1  putative gibberellin receptor GID1L1 [Arabidopsis thaliana] gi 75336145 sp Q9MAA7.1 GID1A_ARAT H RecName: Full=Gibberellin receptor GID1A; AltName: Full=AtCXE10; AltName: Full=Carboxylesterase 10; AltName: Full=GID1-like protein 1; AltName: Full=Protein GA INSENSITIVE DWARF 1A; Short=AtGID1A gi 6729022 gb AAF27018.1 AC009177.8 unknown protein [Arabidopsis thaliana] gi 22530934 gb AAM96971.1  unknown protein [Arabidopsis thaliana] gi 27311999 gb AAO09965.1  unknown protein [Arabidopsis thaliana] gi 332640667 gb AEE74188.1  putative gibberellin receptor GID1L1 [Arabidopsis thaliana] ref XP_002884491.1  hypothetical protein ARALYDRAFT_340677 [Arabidopsis lyrata subsp. lyrata] gi 297330331 gb EFH60750.1  hypothetical protein ARALYDRAFT_340677 [Arabidopsis lyrata subsp. lyrata] | 353  | 345  | 1.00E-176 | 97.7  | 85.3 | 92.4 | putative gibberellin receptor GID1L1     | gbpln | Arabidopsis thaliana | AT3G05120.1   Symbols: ATGID1A, GID1A   alpha/beta-Hydrolases superfamily protein   chr3:1430682-1432287 FORWARD LENGTH=345                                                                                                                                                                                                                                                         | 353  | 345 | 1.00E-178 | 97.7  | 85.3 | 92.4 |
| Rsa1.0_00087.1.g4330.t1 | ref NP_187163.1  putative gibberellin receptor GID1L1 [Arabidopsis thaliana] gi 75336145 sp Q9MAA7.1 GID1A_ARAT H RecName: Full=Gibberellin receptor GID1A; AltName: Full=AtCXE10; AltName: Full=Carboxylesterase 10; AltName: Full=GID1-like protein 1; AltName: Full=Protein GA INSENSITIVE DWARF 1A; Short=AtGID1A gi 6729022 gb AAF27018.1 AC009177.8 unknown protein [Arabidopsis thaliana] gi 22530934 gb AAM96971.1  unknown protein [Arabidopsis thaliana] gi 27311999 gb AAO09965.1  unknown protein [Arabidopsis thaliana] gi 332640667 gb AEE74188.1  putative gibberellin receptor GID1L1 [Arabidopsis thaliana] ref XP_002884491.1  hypothetical protein ARALYDRAFT_340677 [Arabidopsis lyrata subsp. lyrata] gi 297330331 gb EFH60750.1  hypothetical protein ARALYDRAFT_340677 [Arabidopsis lyrata subsp. lyrata] | 545  | 633  | 1.00E-105 | 116.1 | 46.4 | 65.1 | hypothetical protein ARALYDRAFT_340677   | gbpln | Arabidopsis lyrata   | AT3G04960.3   Symbols:   Domain of unknown function (DUF3444)   chr3:1373819-1375769 FORWARD LENGTH=605                                                                                                                                                                                                                                                                             | 545  | 605 | 5.00E-91  | 111.0 | 41.7 | 60.9 |
| Rsa1.0_00087.1.g4331.t1 | gb EOA29113.1  hypothetical protein CARUB_v10025380mg [Capsella rubella]                                                                                                                                                                                                                                                                                                                                                                                                                                                                                                                                                                                                                                                                                                                                                         | 174  | 821  | 1.00E-11  | 471.8 | 17.8 | 20.1 | hypothetical protein CARUB_v10025380mg   | gbpln | Capsella rubella     | AT2G39360.1   Symbols:   Protein kinase superfamily protein   chr2:16437592-16440039 REVERSE LENGTH=815                                                                                                                                                                                                                                                                             | 174  | 815 | 2.00E-13  | 468.4 | 18.4 | 20.7 |
| Rsa1.0_00087.1.g4332.t2 | gb EOA23889.1  hypothetical protein CARUB_v10017105mg [Capsella rubella]                                                                                                                                                                                                                                                                                                                                                                                                                                                                                                                                                                                                                                                                                                                                                         | 523  | 488  | 0         | 93.3  | 84.1 | 88.3 | hypothetical protein CARUB_v10017105mg   | gbpln | Capsella rubella     | AT3G42950.1   Symbols:   Pectin lyase-like superfamily protein   chr3:15015383-15017800 FORWARD LENGTH=484                                                                                                                                                                                                                                                                          | 523  | 484 | 0         | 92.5  | 81.8 | 87.8 |
| Rsa1.0_00087.1.g4333.t1 | ref NP_179553.1  F-box protein [Arabidopsis thaliana] gi 75216815 sp Q9ZUN0.1 FB113_ARAT H RecName: Full=Putative F-box protein At2g19630 gi 4191792 gb AAD10161.1  hypothetical protein [Arabidopsis thaliana] gi 330251810 gb AEC06904.1  F-box protein [Arabidopsis thaliana]                                                                                                                                                                                                                                                                                                                                                                                                                                                                                                                                                 | 292  | 297  | 2.00E-42  | 101.7 | 40.8 | 57.2 | F-box protein                            | gbpln | Arabidopsis thaliana | AT2G19630.1   Symbols:   F-box and associated interaction domains-containing protein   chr2:8490217-8491110 REVERSE LENGTH=297                                                                                                                                                                                                                                                      | 292  | 297 | 4.00E-45  | 101.7 | 40.8 | 57.2 |

|                         |                                                                                                                                                                                                                                                                                                                                                                                                                          |      |      |           |       |      |      |                                                                                                                                                                               |       |                      |                                                                                                                                                                                                                                                                                                                                                        |      |      |           |       |      |      |
|-------------------------|--------------------------------------------------------------------------------------------------------------------------------------------------------------------------------------------------------------------------------------------------------------------------------------------------------------------------------------------------------------------------------------------------------------------------|------|------|-----------|-------|------|------|-------------------------------------------------------------------------------------------------------------------------------------------------------------------------------|-------|----------------------|--------------------------------------------------------------------------------------------------------------------------------------------------------------------------------------------------------------------------------------------------------------------------------------------------------------------------------------------------------|------|------|-----------|-------|------|------|
| Rsa1.0_00087.1.g4334.t1 | gb ACY38730.1  salt-induced WD protein 1 [Brassica napus]                                                                                                                                                                                                                                                                                                                                                                | 757  | 754  | 0         | 99.6  | 90.2 | 95.2 | salt-induced WD protein 1                                                                                                                                                     | gbpln | Brassica napus       | AT3G05090.2   Symbols: LRS1   Transducin/WD40 repeat-like superfamily protein   chr3:1418573-1422723 REVERSE LENGTH=753                                                                                                                                                                                                                                | 757  | 753  | 0         | 99.5  | 90.0 | 94.5 |
| Rsa1.0_00087.1.g4335.t1 | ref XP_002882392.1  hypothetical protein ARALYDRAFT_477790 [Arabidopsis lyrata subsp. lyrata] gi 297328232 gb EFH58651.1  hypothetical protein ARALYDRAFT_477790 [Arabidopsis lyrata subsp. lyrata]                                                                                                                                                                                                                      | 148  | 144  | 9.00E-63  | 97.3  | 85.1 | 90.5 | hypothetical protein ARALYDRAFT_477790                                                                                                                                        | gbpln | Arabidopsis lyrata   | AT3G05070.1   Symbols:   CONTAINS InterPro DOMAIN/s: mRNA splicing factor, Cwf18 [InterPro:IPR013169]; Has 292 Blast hits to 292 proteins in 153 species: Archae - 0; Bacteria - 0; Metazoa - 118; Fungi - 83; Plants - 38; Viruses - 11; Other Eukaryotes - 42 (source: NCBI BLink).   chr3:1416480-1417533 FORWARD LENGTH=144                        | 148  | 144  | 2.00E-64  | 97.3  | 83.8 | 91.2 |
| Rsa1.0_00087.1.g4336.t1 | ref NP_187156.1  protein kinase domain-containing protein [Arabidopsis thaliana] gi 6729015 gb AAF2701.1.1 AC009177.1 putative cyclin-dependent protein kinase [Arabidopsis thaliana] gi 14532508 gb AAK63982.1  AT3g05050/T12H1.1 [Arabidopsis thaliana] gi 23506083 gb AAN2890.1  At3g05050/T12H1.1 [Arabidopsis thaliana] gi 332640659 gb AEE74180.1  protein kinase domain-containing protein [Arabidopsis thaliana] | 587  | 593  | 0         | 101.0 | 81.4 | 89.9 | protein kinase domain-containing protein                                                                                                                                      | gbpln | Arabidopsis thaliana | AT3G05050.1   Symbols:   Protein kinase superfamily protein   chr3:1408789-1411194 REVERSE LENGTH=593                                                                                                                                                                                                                                                  | 587  | 593  | 0         | 101.0 | 81.4 | 89.9 |
| Rsa1.0_00087.1.g4337.t1 | ref XP_002884488.1  hypothetical protein ARALYDRAFT_477786 [Arabidopsis lyrata subsp. lyrata] gi 297330328 gb EFH60747.1  hypothetical protein ARALYDRAFT_477786 [Arabidopsis lyrata subsp. lyrata]                                                                                                                                                                                                                      | 1185 | 1202 | 0         | 101.4 | 81.9 | 88.5 | hypothetical protein ARALYDRAFT_477786                                                                                                                                        | gbpln | Arabidopsis lyrata   | AT3G05040.1   Symbols: HST, HST1   ARM repeat superfamily protein   chr3:1401479-1408095 REVERSE LENGTH=1202                                                                                                                                                                                                                                           | 1185 | 1202 | 0         | 101.4 | 81.3 | 88.4 |
| Rsa1.0_00087.1.g4338.t1 | gb ABD85028.1  hypothetical protein 26.t00082 [Brassica oleracea]                                                                                                                                                                                                                                                                                                                                                        | 341  | 220  | 6.00E-81  | 64.5  | 44.0 | 53.4 | hypothetical protein 26.t00082                                                                                                                                                | gbpln | Brassica oleracea    | AT1G14800.1   Symbols:   Nucleic acid-binding, OB-fold-like protein   chr1:5099572-5102558 FORWARD LENGTH=384                                                                                                                                                                                                                                          | 341  | 384  | 8.00E-52  | 112.6 | 30.8 | 45.5 |
| Rsa1.0_00087.1.g4339.t1 | ref XP_002884487.1  hypothetical protein ARALYDRAFT_477785 [Arabidopsis lyrata subsp. lyrata] gi 297330327 gb EFH60746.1  hypothetical protein ARALYDRAFT_477785 [Arabidopsis lyrata subsp. lyrata]                                                                                                                                                                                                                      | 552  | 543  | 0         | 98.4  | 92.6 | 95.7 | hypothetical protein ARALYDRAFT_477785                                                                                                                                        | gbpln | Arabidopsis lyrata   | AT3G05030.1   Symbols: NHX2, ATNHX2   sodium hydrogen exchanger 2   chr3:1393456-1396784 REVERSE LENGTH=546                                                                                                                                                                                                                                            | 552  | 546  | 0         | 98.9  | 91.8 | 95.8 |
| Rsa1.0_00087.1.g4340.t1 | ref XP_002864564.1  predicted protein [Arabidopsis lyrata subsp. lyrata] gi 297310399 gb EFH40823.1  predicted protein [Arabidopsis lyrata subsp. lyrata]                                                                                                                                                                                                                                                                | 381  | 447  | 1.00E-108 | 117.3 | 64.0 | 76.4 | predicted protein                                                                                                                                                             | gbpln | Arabidopsis lyrata   | AT5G58340.2   Symbols:   myb-like HTH transcriptional regulator family protein   chr5:23582607-23584245 FORWARD LENGTH=448                                                                                                                                                                                                                             | 381  | 448  | 1.00E-110 | 117.6 | 64.8 | 77.2 |
| Rsa1.0_00087.1.g4341.t1 | sp P10352.2 ACP1.BRANA RecName: Full=Acyl carrier protein, chloroplastic; AltName: Full=ACP05; Short=ACP; AltName: Full=Clone 29C08; Flags: Precursor gi 295796 emb CAA34247.1  acyl carrier protein [Brassica napus]                                                                                                                                                                                                    | 131  | 134  | 5.00E-55  | 102.3 | 89.3 | 93.1 | RecName: Full=Acyl carrier protein, chloroplastic; AltName: Full=ACP05; Short=ACP; AltName: Full=Clone 29C08; Flags: Precursor gi 295796 emb CAA34247.1  acyl carrier protein | gbpln | Brassica napus       | AT3G05020.1   Symbols: ACP1, ACP   acyl carrier protein 1   chr3:1391863-1392878 REVERSE LENGTH=137                                                                                                                                                                                                                                                    | 131  | 137  | 2.00E-48  | 104.6 | 80.2 | 89.3 |
| Rsa1.0_00087.1.g4342.t2 | ref XP_002884485.1  hypothetical protein ARALYDRAFT_340666 [Arabidopsis lyrata subsp. lyrata] gi 297330325 gb EFH60744.1  hypothetical protein ARALYDRAFT_340666 [Arabidopsis lyrata subsp. lyrata]                                                                                                                                                                                                                      | 790  | 810  | 0         | 102.5 | 86.5 | 92.4 | hypothetical protein ARALYDRAFT_340666                                                                                                                                        | gbpln | Arabidopsis lyrata   | AT4G08630.1   Symbols:   unknown protein; BEST Arabidopsis thaliana protein match is: unknown protein (TAIR:AT3G48860.2); Has 1487 Blast hits to 747 proteins in 184 species: Archae - 0; Bacteria - 56; Metazoa - 305; Fungi - 197; Plants - 180; Viruses - 3; Other Eukaryotes - 746 (source: NCBI BLink).   chr4:5506998-5511959 REVERSE LENGTH=845 | 790  | 845  | 0         | 107.0 | 82.9 | 89.9 |
| Rsa1.0_00087.1.g4343.t1 | ref NP_187151.1  Transport protein particle (TRAPP) component [Arabidopsis thaliana] gi 12322850 gb AAG51412.1 AC009465.12 unknown protein; 16248-17501 [Arabidopsis thaliana] gi 27754554 gb AAO22724.1  unknown protein [Arabidopsis thaliana] gi 28394073 gb AAO42444.1  unknown protein [Arabidopsis thaliana] gi 332640653 gb AEE74174.1  Transport protein particle (TRAPP) component [Arabidopsis thaliana]       | 240  | 173  | 1.00E-92  | 72.1  | 67.9 | 68.3 | Transport protein particle (TRAPP) component                                                                                                                                  | gbpln | Arabidopsis thaliana | AT3G05000.1   Symbols:   Transport protein particle (TRAPP) component   chr3:1387444-1388697 REVERSE LENGTH=173                                                                                                                                                                                                                                        | 240  | 173  | 4.00E-95  | 72.1  | 67.9 | 68.3 |

|                         |                                                                                                                                                                                                                                                                                                                                                                |      |      |           |       |      |      |                                                      |       |                      |                                                                                                                                                                                                                                                                                                                                                          |      |      |           |       |      |      |
|-------------------------|----------------------------------------------------------------------------------------------------------------------------------------------------------------------------------------------------------------------------------------------------------------------------------------------------------------------------------------------------------------|------|------|-----------|-------|------|------|------------------------------------------------------|-------|----------------------|----------------------------------------------------------------------------------------------------------------------------------------------------------------------------------------------------------------------------------------------------------------------------------------------------------------------------------------------------------|------|------|-----------|-------|------|------|
| Rsa1.0_00087.1.g4344.t2 | refXP_002862604.1   hypothetical protein ARALYDRAFT_920493 [Arabidopsis lyrata subsp. lyrata] gi 297308231 gb EFH38862.1   hypothetical protein ARALYDRAFT_920493 [Arabidopsis lyrata subsp. lyrata]                                                                                                                                                           | 739  | 1235 | 4.00E-94  | 167.1 | 33.6 | 43.4 | hypothetical protein ARALYDRAFT_920493               | gbpln | Arabidopsis lyrata   | AT3G04990.1   Symbols:   BEST Arabidopsis thaliana protein match is: Frigida-like protein (TAIR:AT5G27220.1); Has 30900 Blast hits to 17560 proteins in 1427 species: Archae - 757; Bacteria - 4112; Metazoa - 14311; Fungi - 2221; Plants - 1348; Viruses - 71; Other Eukaryotes - 8080 (source: NCBI BLink).   chr3:1383996-1384679 REVERSE LENGTH=227 | 739  | 227  | 1.00E-31  | 30.7  | 12.0 | 14.6 |
| Rsa1.0_00087.1.g4345.t1 | refXP_002862604.1   hypothetical protein ARALYDRAFT_920493 [Arabidopsis lyrata subsp. lyrata] gi 297308231 gb EFH38862.1   hypothetical protein ARALYDRAFT_920493 [Arabidopsis lyrata subsp. lyrata]                                                                                                                                                           | 631  | 1235 | 1.00E-104 | 195.7 | 39.8 | 51.2 | hypothetical protein ARALYDRAFT_920493               | gbpln | Arabidopsis lyrata   | AT5G27220.1   Symbols:   Frigida-like protein   chr5:9578757-9582752 FORWARD LENGTH=1181                                                                                                                                                                                                                                                                 | 631  | 1181 | 3.00E-29  | 187.2 | 14.6 | 22.7 |
| Rsa1.0_00087.1.g4346.t1 | ref NP_187149.1  DNAJ heat shock N-terminal domain-containing protein [Arabidopsis thaliana] gi 12322856 gb AAG51418.1 AC009465.18 hypothetical protein, contains DnaJ motif; prokaryotic heat shock protein motif; 22764-26261 [Arabidopsis thaliana] gi 332640650 gb AEE74171.1  DNAJ heat shock N-terminal domain-containing protein [Arabidopsis thaliana] | 1092 | 1165 | 0         | 106.7 | 62.9 | 74.8 | DNAJ heat shock N-terminal domain-containing protein | gbpln | Arabidopsis thaliana | AT3G04980.1   Symbols:   DNAJ heat shock N-terminal domain-containing protein   chr3:1378684-1382181 REVERSE LENGTH=1165                                                                                                                                                                                                                                 | 1092 | 1165 | 0         | 106.7 | 62.9 | 74.8 |
| Rsa1.0_00087.1.g4347.t1 | refXP_002882388.1   zinc finger family protein [Arabidopsis lyrata subsp. lyrata] gi 297328228 gb EFH58647.1   zinc finger family protein [Arabidopsis lyrata subsp. lyrata]                                                                                                                                                                                   | 371  | 398  | 1.00E-170 | 107.3 | 80.6 | 86.5 | zinc finger family protein                           | gbpln | Arabidopsis lyrata   | AT3G04970.1   Symbols:   DHHC-type zinc finger family protein   chr3:1376240-1378339 FORWARD LENGTH=397                                                                                                                                                                                                                                                  | 371  | 397  | 1.00E-170 | 107.0 | 79.5 | 86.3 |
| Rsa1.0_00087.1.g4348.t1 | refXP_002882387.1   hypothetical protein ARALYDRAFT_477773 [Arabidopsis lyrata subsp. lyrata] gi 297328227 gb EFH58646.1   hypothetical protein ARALYDRAFT_477773 [Arabidopsis lyrata subsp. lyrata]                                                                                                                                                           | 564  | 609  | 1.00E-112 | 108.0 | 45.6 | 63.3 | hypothetical protein ARALYDRAFT_477773               | gbpln | Arabidopsis lyrata   | AT3G04960.4   Symbols:   Domain of unknown function (DUF3444)   chr3:1373819-1375769 FORWARD LENGTH=553                                                                                                                                                                                                                                                  | 564  | 553  | 1.00E-110 | 98.0  | 43.8 | 58.3 |
| Rsa1.0_00087.1.g4349.t1 | refXP_002882387.1   hypothetical protein ARALYDRAFT_477773 [Arabidopsis lyrata subsp. lyrata] gi 297328227 gb EFH58646.1   hypothetical protein ARALYDRAFT_477773 [Arabidopsis lyrata subsp. lyrata]                                                                                                                                                           | 847  | 609  | 1.00E-102 | 71.9  | 24.7 | 34.7 | hypothetical protein ARALYDRAFT_477773               | gbpln | Arabidopsis lyrata   | AT3G04960.3   Symbols:   Domain of unknown function (DUF3444)   chr3:1373819-1375769 FORWARD LENGTH=605                                                                                                                                                                                                                                                  | 847  | 605  | 1.00E-104 | 71.4  | 28.8 | 42.3 |
| Rsa1.0_00087.1.g4350.t1 | gb AAG03119.1 AC004133_13 F5A9.24 [Arabidopsis thaliana]                                                                                                                                                                                                                                                                                                       | 828  | 1254 | 0         | 151.4 | 49.0 | 65.3 | F5A9.24                                              | gbpln | Arabidopsis thaliana | ATMG00310.1   Symbols:   ORF154   RNA-directed DNA polymerase (reverse transcriptase)-related family protein   chrM:90883-91347 REVERSE LENGTH=154                                                                                                                                                                                                       | 828  | 154  | 9.00E-44  | 18.6  | 9.4  | 13.4 |
| Rsa1.0_00087.1.g4351.t1 | refXP_002882385.1   hypothetical protein ARALYDRAFT_896550 [Arabidopsis lyrata subsp. lyrata] gi 297328225 gb EFH58644.1   hypothetical protein ARALYDRAFT_896550 [Arabidopsis lyrata subsp. lyrata]                                                                                                                                                           | 331  | 324  | 1.00E-142 | 97.9  | 80.1 | 88.5 | hypothetical protein ARALYDRAFT_896550               | gbpln | Arabidopsis lyrata   | AT3G04940.1   Symbols:   ATCYSD1, CYSD1   cysteine synthase D1   chr3:1365681-1367508 FORWARD LENGTH=324                                                                                                                                                                                                                                                 | 331  | 324  | 1.00E-144 | 97.9  | 79.2 | 88.5 |
| Rsa1.0_00087.1.g4352.t1 | gb AAG51407.1 AC009465.7 putative cysteine synthase; 39489-37437 [Arabidopsis thaliana]                                                                                                                                                                                                                                                                        | 321  | 399  | 1.00E-145 | 124.3 | 82.6 | 92.2 | putative cysteine synthase; 39489-37437              | gbpln | Arabidopsis thaliana | AT3G04940.1   Symbols:   ATCYSD1, CYSD1   cysteine synthase D1   chr3:1365681-1367508 FORWARD LENGTH=324                                                                                                                                                                                                                                                 | 321  | 324  | 2.33E-156 | 100.9 | 82.6 | 92.2 |
| Rsa1.0_00087.1.g4353.t1 | gb EOA30558.1  hypothetical protein CARUB_v10013683mg [Capsella rubella]                                                                                                                                                                                                                                                                                       | 436  | 453  | 1.00E-160 | 103.9 | 78.7 | 85.8 | hypothetical protein CARUB_v10013683mg               | gbpln | Capsella rubella     | AT3G04930.1   Symbols:   DNA-binding storekeeper protein-related transcriptional regulator   chr3:1363029-1364399 FORWARD LENGTH=456                                                                                                                                                                                                                     | 436  | 456  | 1.00E-154 | 104.6 | 78.0 | 84.6 |
| Rsa1.0_00087.1.g4354.t1 | refXP_002882383.1   40S ribosomal protein S24 [Arabidopsis lyrata subsp. lyrata] gi 297328223 gb EFH58642.1   40S ribosomal protein S24 [Arabidopsis lyrata subsp. lyrata]                                                                                                                                                                                     | 133  | 133  | 4.00E-68  | 100.0 | 98.5 | 98.5 | 40S ribosomal protein S24                            | gbpln | Arabidopsis lyrata   | AT5G28060.1   Symbols:   Ribosomal protein S24e family protein   chr5:10069791-10070792 REVERSE LENGTH=133                                                                                                                                                                                                                                               | 133  | 133  | 3.00E-68  | 100.0 | 94.7 | 96.2 |

|                         |                                                                                                                                                                                                                                                                                                                                                                                                                                                                                                                                                                                                                                                                                     |     |     |           |       |      |      |                                                                                                                                            |       |                      |                                                                                                                        |     |     |           |       |      |      |
|-------------------------|-------------------------------------------------------------------------------------------------------------------------------------------------------------------------------------------------------------------------------------------------------------------------------------------------------------------------------------------------------------------------------------------------------------------------------------------------------------------------------------------------------------------------------------------------------------------------------------------------------------------------------------------------------------------------------------|-----|-----|-----------|-------|------|------|--------------------------------------------------------------------------------------------------------------------------------------------|-------|----------------------|------------------------------------------------------------------------------------------------------------------------|-----|-----|-----------|-------|------|------|
| Rsa1.0_00087.1.g4355.t1 | ref NP_187142.1  serine/threonine-protein kinase WNK1 [Arabidopsis thaliana]<br>gi 75262294 sp Q9CAV6.1 WNK1_ARAT H RecName: Full=Serine/threonine-protein kinase WNK1; Short=AtWNK1; AltName: Full=Protein kinase with no lysine 1<br>gi 12322854 gb AAG51416.1 AC009465.16 putative mitogen activated protein kinase kinase: 49861-46888 [Arabidopsis thaliana]<br>gi 20302596 dbj BAB91125.1  Ser/Thr kinase [Arabidopsis thaliana]<br>gi 332640634 gb AEE74155.1  serine/threonine-protein kinase WNK1 [Arabidopsis thaliana]                                                                                                                                                   | 686 | 700 | 0         | 102.0 | 87.3 | 91.4 | serine/threonine-protein kinase WNK1                                                                                                       | gbpln | Arabidopsis thaliana | AT3G04910.1   Symbols: WNK1, ZIK4, ATWNK1   with no lysine (K) kinase 1   chr3:1355084-1358057 FORWARD LENGTH=700      | 686 | 700 | 0         | 102.0 | 87.3 | 91.4 |
| Rsa1.0_00087.1.g4356.t1 | gb EOA31421.1  hypothetical protein CARUB_v10014601mg [Capsella rubella]                                                                                                                                                                                                                                                                                                                                                                                                                                                                                                                                                                                                            | 263 | 217 | 7.00E-86  | 82.5  | 61.6 | 68.8 | hypothetical protein CARUB_v10014601mg                                                                                                     | gbpln | Capsella rubella     | AT3G04890.1   Symbols:   Uncharacterized conserved protein (DUF2358)   chr3:1347708-1349066 FORWARD LENGTH=216         | 263 | 216 | 5.00E-85  | 82.1  | 58.9 | 66.2 |
| Rsa1.0_00087.1.g4357.t1 | ref NP_566241.1  DNA-damage-repair/tolerance protein DRT102 [Arabidopsis thaliana]<br>gi 148872800 sp Q05212.2 DR102_ARAT H RecName: Full=DNA-damage-repair/tolerance protein DRT102<br>gi 15529165 gb AAK97677.1  AT3g04880/T9J14.17 [Arabidopsis thaliana]<br>gi 23505883 gb AAN28801.1  At3g04880/T9J14.17 [Arabidopsis thaliana]<br>gi 332640629 gb AEE74150.1  DNA-damage-repair/tolerance protein DRT102 [Arabidopsis thaliana]                                                                                                                                                                                                                                               | 284 | 310 | 1.00E-135 | 109.2 | 88.7 | 92.3 | DNA-damage-repair/tolerance protein DRT102                                                                                                 | gbpln | Arabidopsis thaliana | AT3G04880.1   Symbols: DRT102   DNA-damage-repair/tolerance protein (DRT102)   chr3:1346431-1347363 REVERSE LENGTH=310 | 284 | 310 | 1.00E-138 | 109.2 | 88.7 | 92.3 |
| Rsa1.0_00087.1.g4358.t1 | gb ACM68701.1  zeta-carotene desaturase [Brassica rapa subsp. pekinensis]                                                                                                                                                                                                                                                                                                                                                                                                                                                                                                                                                                                                           | 584 | 561 | 0         | 96.1  | 93.8 | 94.3 | zeta-carotene desaturase                                                                                                                   | gbpln | Brassica rapa        | AT3G04870.2   Symbols: ZDS, PDE181, SPC1   zeta-carotene desaturase   chr3:1342842-1346189 FORWARD LENGTH=558          | 584 | 558 | 0         | 95.5  | 90.4 | 92.8 |
| Rsa1.0_00087.1.g4359.t1 | ref XP_002884475.1  hypothetical protein ARALYDRAFT_477757 [Arabidopsis lyrata subsp. lyrata]<br>gi 297330315 gb EFH60734.1  hypothetical protein ARALYDRAFT_477757 [Arabidopsis lyrata subsp. lyrata]                                                                                                                                                                                                                                                                                                                                                                                                                                                                              | 291 | 289 | 1.00E-130 | 99.3  | 81.4 | 91.4 | hypothetical protein ARALYDRAFT_477757                                                                                                     | gbpln | Arabidopsis lyrata   | AT3G04860.1   Symbols:   Plant protein of unknown function (DUF868)   chr3:1339349-1340218 REVERSE LENGTH=289          | 291 | 289 | 1.00E-132 | 99.3  | 82.1 | 90.7 |
| Rsa1.0_00087.1.g4360.t1 | sp P49396.2 RS3A_BRARA RecName: Full=40S ribosomal protein S3a; AltName: Full=S phase-specific protein B1S289<br>gi 387909 gb AA33013.1  S-phase-specific protein [Brassica rapa]<br>gi 397401 emb CAA81030.1  unnamed protein product [Brassica rapa]                                                                                                                                                                                                                                                                                                                                                                                                                              | 262 | 262 | 1.00E-138 | 100.0 | 97.3 | 98.5 | RecName: Full=40S ribosomal protein S3a; AltName: Full=S phase-specific protein B1S289<br>gi 387909 gb AA33013.1  S-phase-specific protein | gbpln | Brassica rapa        | AT4G34670.1   Symbols:   Ribosomal protein S3Ae   chr4:16548724-16550222 FORWARD LENGTH=262                            | 262 | 262 | 1.00E-139 | 100.0 | 93.1 | 96.2 |
| Rsa1.0_00087.1.g4361.t1 | gb EOA31103.1  hypothetical protein CARUB_v10014256mg [Capsella rubella]                                                                                                                                                                                                                                                                                                                                                                                                                                                                                                                                                                                                            | 303 | 304 | 1.00E-166 | 100.3 | 93.7 | 98.0 | hypothetical protein CARUB_v10014256mg                                                                                                     | gbpln | Capsella rubella     | AT3G04830.1   Symbols:   Protein prenyltransferase superfamily protein   chr3:1326289-1329132 FORWARD LENGTH=303       | 303 | 303 | 1.00E-166 | 100.0 | 92.4 | 97.7 |
| Rsa1.0_00087.1.g4362.t1 | ref NP_187132.1  serine/threonine-protein kinase Nek2 [Arabidopsis thaliana]<br>gi 79607883 ref NP_974221.2  serine/threonine-protein kinase Nek2 [Arabidopsis thaliana]<br>gi 75333670 sp Q9CAU7.1 NEK2_ARATH RecName: Full=Serine/threonine-protein kinase Nek2; AltName: Full=NimA-related protein kinase 2; Short=ANek2<br>gi 12322861 gb AAG51423.1 AC009465.23 putative kinase: 86849-83844 [Arabidopsis thaliana]<br>gi 24030188 gb AAN41275.1  putative kinase [Arabidopsis thaliana]<br>gi 332640617 gb AEE74138.1  serine/threonine-protein kinase Nek2 [Arabidopsis thaliana]<br>gi 332640618 gb AEE74139.1  serine/threonine-protein kinase Nek2 [Arabidopsis thaliana] | 537 | 606 | 0         | 112.8 | 87.0 | 91.2 | serine/threonine-protein kinase Nek2                                                                                                       | gbpln | Arabidopsis thaliana | AT3G04810.2   Symbols: ATNEK2, NEK2   NIMA-related kinase 2   chr3:1318096-1321101 FORWARD LENGTH=606                  | 537 | 606 | 0         | 112.8 | 87.0 | 91.2 |
| Rsa1.0_00087.1.g4363.t1 | #                                                                                                                                                                                                                                                                                                                                                                                                                                                                                                                                                                                                                                                                                   | #   | #   | #         | #     | #    | #    | -                                                                                                                                          | ----  | ----                 | #                                                                                                                      | #   | #   | #         | #     | #    |      |



|                         |                                                                                                                                                                                                                 |      |      |           |       |      |      |                                              |       |                      |                                                                                                                                                                                                                                                                                                                                                                                                                            |      |      |           |       |      |      |
|-------------------------|-----------------------------------------------------------------------------------------------------------------------------------------------------------------------------------------------------------------|------|------|-----------|-------|------|------|----------------------------------------------|-------|----------------------|----------------------------------------------------------------------------------------------------------------------------------------------------------------------------------------------------------------------------------------------------------------------------------------------------------------------------------------------------------------------------------------------------------------------------|------|------|-----------|-------|------|------|
| Rsa1.0_00087.1.g4364.t1 | dbj BAJ33930.1  unnamed protein product [Thelungiella halophila]                                                                                                                                                | 275  | 278  | 1.00E-139 | 101.1 | 92.7 | 96.0 | unnamed protein product                      | ----  | ----                 | AT3G04790.1   Symbols:   Ribose 5-phosphate isomerase, type A protein   chr3:1313365-1314195 FORWARD LENGTH=276                                                                                                                                                                                                                                                                                                            | 275  | 276  | 1.00E-140 | 100.4 | 91.3 | 95.3 |
| Rsa1.0_00087.1.g4365.t1 | gb EOA31567.1  hypothetical protein CARUB_v10014759mg [Capsella rubella]                                                                                                                                        | 176  | 176  | 2.00E-96  | 100.0 | 97.2 | 98.9 | hypothetical protein CARUB_v10014759mg       | gbpln | Capsella rubella     | AT3G04780.1   Symbols:   Protein of unknown function (DUF1000)   chr3:1311447-1313013 REVERSE LENGTH=176                                                                                                                                                                                                                                                                                                                   | 176  | 176  | 4.00E-98  | 100.0 | 96.6 | 98.3 |
| Rsa1.0_00087.1.g4366.t1 | ref XP_002893313.1  hypothetical protein ARALYDRAFT_472658 [Arabidopsis lyrata subsp. lyrata]   gi 2973309155 gb EFH69572.1  hypothetical protein ARALYDRAFT_472658 [Arabidopsis lyrata subsp. lyrata]          | 321  | 378  | 6.00E-91  | 117.8 | 59.5 | 73.8 | hypothetical protein ARALYDRAFT_472658       | gbpln | Arabidopsis lyrata   | AT1G23950.3   Symbols:   Protein of unknown function (DUF826)   chr1:8469712-8471353 REVERSE LENGTH=368                                                                                                                                                                                                                                                                                                                    | 321  | 368  | 1.00E-89  | 114.6 | 56.4 | 71.3 |
| Rsa1.0_00087.1.g4367.t1 | ref XP_002884468.1  pentatricopeptide repeat-containing protein [Arabidopsis lyrata subsp. lyrata]   gi 297330308 gb EFH60727.1  pentatricopeptide repeat-containing protein [Arabidopsis lyrata subsp. lyrata] | 589  | 598  | 0         | 101.5 | 89.6 | 95.9 | pentatricopeptide repeat-containing protein  | gbpln | Arabidopsis lyrata   | AT3G04760.1   Symbols:   Pentatricopeptide repeat (PPR-like) superfamily protein   chr3:1303884-1305692 REVERSE LENGTH=602                                                                                                                                                                                                                                                                                                 | 589  | 602  | 0         | 102.2 | 87.4 | 94.4 |
| Rsa1.0_00087.1.g4368.t1 | gb EOA32570.1  hypothetical protein CARUB_v10015860mg [Capsella rubella]                                                                                                                                        | 660  | 651  | 0         | 98.6  | 80.5 | 86.7 | hypothetical protein CARUB_v10015860mg       | gbpln | Capsella rubella     | AT3G04750.1   Symbols:   Tetratricopeptide repeat (TPR)-like superfamily protein   chr3:1301391-1303376 REVERSE LENGTH=661                                                                                                                                                                                                                                                                                                 | 660  | 661  | 0         | 100.2 | 79.1 | 85.0 |
| Rsa1.0_00087.1.g4369.t1 | ref XP_002882372.1  hypothetical protein ARALYDRAFT_477743 [Arabidopsis lyrata subsp. lyrata]   gi 297328212 gb EFH58631.1  hypothetical protein ARALYDRAFT_477743 [Arabidopsis lyrata subsp. lyrata]           | 1666 | 1702 | 0         | 102.2 | 89.7 | 93.8 | hypothetical protein ARALYDRAFT_477743       | gbpln | Arabidopsis lyrata   | AT3G04740.1   Symbols: SWP, MED14, ATMED14   RNA polymerase II transcription mediators   chr3:1294037-1300555 FORWARD LENGTH=1703                                                                                                                                                                                                                                                                                          | 1666 | 1703 | 0         | 102.2 | 89.7 | 93.8 |
| Rsa1.0_00087.1.g4370.t1 | #                                                                                                                                                                                                               | #    | #    | #         | #     | #    | #    | -                                            | ----  | ----                 | #                                                                                                                                                                                                                                                                                                                                                                                                                          | #    | #    | #         | #     | #    | #    |
| Rsa1.0_00087.1.g4371.t1 | ref XP_002874695.1  predicted protein [Arabidopsis lyrata subsp. lyrata]   gi 297320532 gb EFH50954.1  predicted protein [Arabidopsis lyrata subsp. lyrata]                                                     | 83   | 84   | 2.00E-11  | 101.2 | 49.4 | 55.4 | predicted protein                            | gbpln | Arabidopsis lyrata   | AT4G11510.1   Symbols: RALFL28   ralf-like 28   chr4:6984051-6984308 REVERSE LENGTH=85                                                                                                                                                                                                                                                                                                                                     | 83   | 85   | 3.00E-12  | 102.4 | 51.8 | 59.0 |
| Rsa1.0_00087.1.g4372.t1 | #                                                                                                                                                                                                               | #    | #    | #         | #     | #    | #    | -                                            | ----  | ----                 | #                                                                                                                                                                                                                                                                                                                                                                                                                          | #    | #    | #         | #     | #    | #    |
| Rsa1.0_00087.1.g4373.t1 | gb ABV89663.1  indoleacetic acid-induced protein 16 [Brassica rapa]                                                                                                                                             | 236  | 231  | 1.00E-122 | 97.9  | 91.9 | 94.5 | indoleacetic acid-induced protein 16         | gbpln | Brassica rapa        | AT3G04730.1   Symbols: IAA16   indoleacetic acid-induced protein 16   chr3:1288993-1290415 REVERSE LENGTH=236                                                                                                                                                                                                                                                                                                              | 236  | 236  | 1.00E-119 | 100.0 | 92.4 | 95.3 |
| Rsa1.0_00087.1.g4374.t1 | #                                                                                                                                                                                                               | #    | #    | #         | #     | #    | #    | -                                            | ----  | ----                 | #                                                                                                                                                                                                                                                                                                                                                                                                                          | #    | #    | #         | #     | #    | #    |
| Rsa1.0_00087.1.g4375.t1 | ref XP_002882370.1  hypothetical protein ARALYDRAFT_477736 [Arabidopsis lyrata subsp. lyrata]   gi 297328210 gb EFH58629.1  hypothetical protein ARALYDRAFT_477736 [Arabidopsis lyrata subsp. lyrata]           | 146  | 191  | 2.00E-56  | 130.8 | 87.0 | 93.2 | hypothetical protein ARALYDRAFT_477736       | gbpln | Arabidopsis lyrata   | AT3G04700.1   Symbols:   Protein of unknown function (DUF1685)   chr3:1276949-1277607 FORWARD LENGTH=191                                                                                                                                                                                                                                                                                                                   | 146  | 191  | 2.00E-58  | 130.8 | 85.6 | 92.5 |
| Rsa1.0_00087.1.g4376.t1 | dbj BAJ34400.1  unnamed protein product [Thelungiella halophila]                                                                                                                                                | 317  | 330  | 1.00E-149 | 104.1 | 87.4 | 91.2 | unnamed protein product                      | ----  | ----                 | AT3G04670.1   Symbols: WRKY39, ATWRKY39   WRKY DNA-binding protein 39   chr3:1266530-1267691 REVERSE LENGTH=330                                                                                                                                                                                                                                                                                                            | 317  | 330  | 1.00E-145 | 104.1 | 85.2 | 89.3 |
| Rsa1.0_00087.1.g4377.t1 | #                                                                                                                                                                                                               | #    | #    | #         | #     | #    | #    | -                                            | ----  | ----                 | #                                                                                                                                                                                                                                                                                                                                                                                                                          | #    | #    | #         | #     | #    | #    |
| Rsa1.0_00087.1.g4378.t1 | dbj BAH19881.1  AT3G04630 [Arabidopsis thaliana]                                                                                                                                                                | 278  | 286  | 1.00E-107 | 102.9 | 79.9 | 87.4 | AT3G04630                                    | gbpln | Arabidopsis thaliana | AT3G04630.3   Symbols: WDL1   WVD2-like 1   chr3:1259231-1260652 FORWARD LENGTH=286                                                                                                                                                                                                                                                                                                                                        | 278  | 286  | 1.00E-109 | 102.9 | 80.2 | 87.8 |
| Rsa1.0_00087.1.g4379.t1 | gb AAG51783.1 AC079679_3 reverse transcriptase, putative; 16838-20266 [Arabidopsis thaliana]                                                                                                                    | 693  | 1142 | 0         | 164.8 | 51.9 | 65.8 | reverse transcriptase, putative; 16838-20266 | gbpln | Arabidopsis thaliana | AT4G29090.1   Symbols:   Ribonuclease H-like superfamily protein   chr4:14333528-14335255 FORWARD LENGTH=575                                                                                                                                                                                                                                                                                                               | 693  | 575  | 4.00E-77  | 83.0  | 25.4 | 38.4 |
| Rsa1.0_00087.1.g4380.t2 | emb CAA22150.1  hypothetical protein [Arabidopsis thaliana]   gi 7269091 emb CAB79200.1  hypothetical protein [Arabidopsis thaliana]                                                                            | 108  | 457  | 5.00E-13  | 423.1 | 33.3 | 38.0 | hypothetical protein                         | gbpln | Arabidopsis thaliana | #                                                                                                                                                                                                                                                                                                                                                                                                                          | #    | #    | #         | #     | #    | #    |
| Rsa1.0_00087.1.g4381.t1 | ref XP_002884451.1  hypothetical protein ARALYDRAFT_896493 [Arabidopsis lyrata subsp. lyrata]   gi 297330291 gb EFH60710.1  hypothetical protein ARALYDRAFT_896493 [Arabidopsis lyrata subsp. lyrata]           | 413  | 415  | 0         | 100.5 | 87.4 | 92.5 | hypothetical protein ARALYDRAFT_896493       | gbpln | Arabidopsis lyrata   | AT3G04560.1   Symbols:   unknown protein; FUNCTIONS IN: molecular_function unknown; INVOLVED IN: biological_process unknown; EXPRESSED IN: 22 plant structures; EXPRESSED DURING: 16 growth stages; Has 227 Blast hits to 225 proteins in 83 species: Archae - 0; Bacteria - 17; Metazoa - 98; Fungi - 29; Plants - 51; Viruses - 1; Other Eukaryotes - 31 (source: NCBI BLink).   chr3:1227506-1229338 REVERSE LENGTH=417 | 413  | 417  | 0         | 101.0 | 87.7 | 92.7 |

|                         |                                                                                                                                                                                                                                                                                                                                                                                                                                                                                                                                                                                  |      |      |           |       |      |      |                                                              |       |                      |                                                                                                                                                       |      |      |           |       |      |      |
|-------------------------|----------------------------------------------------------------------------------------------------------------------------------------------------------------------------------------------------------------------------------------------------------------------------------------------------------------------------------------------------------------------------------------------------------------------------------------------------------------------------------------------------------------------------------------------------------------------------------|------|------|-----------|-------|------|------|--------------------------------------------------------------|-------|----------------------|-------------------------------------------------------------------------------------------------------------------------------------------------------|------|------|-----------|-------|------|------|
| Rsa1.0_00087.1.g4382.t1 | gb EOA31191.1  hypothetical protein CARUB_v10014357mg [Capsella rubella]                                                                                                                                                                                                                                                                                                                                                                                                                                                                                                         | 313  | 278  | 1.00E-132 | 88.8  | 73.8 | 79.9 | hypothetical protein CARUB_v10014357mg                       | gbpln | Capsella rubella     | AT3G04530.1   Symbols: PPK2, PEPCK2, ATPCK2   phosphoenolpyruvate carboxylase kinase 2   chr3:1221546-1222456 FORWARD LENGTH=278                      | 313  | 278  | 1.00E-133 | 88.8  | 73.2 | 79.9 |
| Rsa1.0_00087.1.g4383.t1 | ref NP_566228.1  threonine aldolase 2 [Arabidopsis thaliana]<br>gi 11762214 gb AAG40385.1 AF325033.1 AT3g04520 [Arabidopsis thaliana]<br>gi 20268680 gb AAM14044.1  putative L-allo-threonine aldolase [Arabidopsis thaliana] gi 21553589 gb AAM62682.1  L-allo-threonine aldolase, putative [Arabidopsis thaliana]<br>gi 21689845 gb AAM67566.1  putative L-allo-threonine aldolase [Arabidopsis thaliana] gi 51968832 dbj BAD43108.1  L-allo-threonine aldolase like protein [Arabidopsis thaliana]<br>gi 332640570 gb AEE74091.1  threonine aldolase 2 [Arabidopsis thaliana] | 391  | 355  | 0         | 90.8  | 83.6 | 88.0 | threonine aldolase 2                                         | gbpln | Arabidopsis thaliana | AT3G04520.1   Symbols: THA2   threonine aldolase 2   chr3:1217397-1219571 REVERSE LENGTH=355                                                          | 391  | 355  | 0         | 90.8  | 83.6 | 88.0 |
| Rsa1.0_00087.1.g4384.t1 | gb EOA31480.1  hypothetical protein CARUB_v10014673mg [Capsella rubella]                                                                                                                                                                                                                                                                                                                                                                                                                                                                                                         | 191  | 200  | 6.00E-77  | 104.7 | 87.4 | 90.6 | hypothetical protein CARUB_v10014673mg                       | gbpln | Capsella rubella     | AT3G04510.1   Symbols: LSH2   Protein of unknown function (DUF640)   chr3:1215812-1216417 REVERSE LENGTH=201                                          | 191  | 201  | 2.00E-75  | 105.2 | 87.4 | 89.5 |
| Rsa1.0_00087.1.g4385.t1 | ref XP_002882350.1  transcription factor [Arabidopsis lyrata subsp. lyrata]<br>gi 297328190 gb EFH58609.1  transcription factor [Arabidopsis lyrata subsp. lyrata]                                                                                                                                                                                                                                                                                                                                                                                                               | 412  | 440  | 2.33E-156 | 106.8 | 73.3 | 81.1 | transcription factor                                         | gbpln | Arabidopsis lyrata   | AT3G04450.1   Symbols:   Homeodomain-like superfamily protein   chr3:1184302-1186264 FORWARD LENGTH=442                                               | 412  | 442  | 1.00E-147 | 107.3 | 73.8 | 81.6 |
| Rsa1.0_00087.1.g4386.t1 | ref NP_187088.2  histone-lysine N-methyltransferase SUVR4 [Arabidopsis thaliana]<br>gi 94730582 sp Q8W595.2 SUVR4_ARAT H RecName: Full=Histone-lysine N-methyltransferase SUVR4; AltName: Full=Protein SET DOMAIN GROUP 31; AltName: Full=Suppressor of variegation 3-9-related protein 4; Short=Su(var)3-9-related protein 4<br>gi 332640552 gb AEE74073.1  histone-lysine N-methyltransferase SUVR4 [Arabidopsis thaliana]                                                                                                                                                     | 949  | 492  | 0         | 51.8  | 38.9 | 44.2 | histone-lysine N-methyltransferase SUVR4                     | gbpln | Arabidopsis thaliana | AT3G04380.1   Symbols: SUVR4, SDG31   SET-domain containing protein lysine methyltransferase family protein   chr3:1161602-1164539 FORWARD LENGTH=492 | 949  | 492  | 0         | 51.8  | 38.9 | 44.2 |
| Rsa1.0_00087.1.g4387.t1 | gb EOA35181.1  hypothetical protein CARUB_v10020326mg [Capsella rubella]                                                                                                                                                                                                                                                                                                                                                                                                                                                                                                         | 399  | 430  | 1.00E-155 | 107.8 | 72.7 | 84.5 | hypothetical protein CARUB_v10020326mg                       | gbpln | Capsella rubella     | AT1G77840.1   Symbols:   Translation initiation factor IF2/IF5   chr1:29269087-29270400 FORWARD LENGTH=437                                            | 399  | 437  | 1.00E-154 | 109.5 | 72.4 | 83.7 |
| Rsa1.0_00087.1.g4388.t1 | ref NP_566225.4  Calcium-dependent lipid-binding (CaLB domain) family protein [Arabidopsis thaliana]<br>gi 332640549 gb AEE74070.1  Calcium-dependent lipid-binding (CaLB domain) family protein [Arabidopsis thaliana]<br>ref NP_974091.1  Ubiquitin carboxyl-terminal hydrolase-related protein [Arabidopsis thaliana]<br>gi 332196212 gb AEE34333.1  Ubiquitin carboxyl-terminal hydrolase-related protein [Arabidopsis thaliana]                                                                                                                                             | 361  | 391  | 1.00E-139 | 108.3 | 88.9 | 93.1 | Calcium-dependent lipid-binding (CaLB domain) family protein | gbpln | Arabidopsis thaliana | AT3G04360.1   Symbols:   Calcium-dependent lipid-binding (CaLB domain) family protein   chr3:1157025-1158200 REVERSE LENGTH=391                       | 361  | 391  | 1.00E-142 | 108.3 | 88.9 | 93.1 |
| Rsa1.0_00087.1.g4389.t1 | ref NP_974091.1  Ubiquitin carboxyl-terminal hydrolase-related protein [Arabidopsis thaliana]<br>gi 332196212 gb AEE34333.1  Ubiquitin carboxyl-terminal hydrolase-related protein [Arabidopsis thaliana]                                                                                                                                                                                                                                                                                                                                                                        | 1106 | 1147 | 0         | 103.7 | 61.4 | 76.0 | Ubiquitin carboxyl-terminal hydrolase-related protein        | gbpln | Arabidopsis thaliana | AT1G65120.2   Symbols:   Ubiquitin carboxyl-terminal hydrolase-related protein   chr1:24191457-24195907 REVERSE LENGTH=1147                           | 1106 | 1147 | 0         | 103.7 | 61.4 | 76.0 |
| Rsa1.0_00087.1.g4390.t1 | ref NP_974091.1  Ubiquitin carboxyl-terminal hydrolase-related protein [Arabidopsis thaliana]<br>gi 332196212 gb AEE34333.1  Ubiquitin carboxyl-terminal hydrolase-related protein [Arabidopsis thaliana]                                                                                                                                                                                                                                                                                                                                                                        | 1121 | 1147 | 0         | 102.3 | 60.2 | 74.8 | Ubiquitin carboxyl-terminal hydrolase-related protein        | gbpln | Arabidopsis thaliana | AT1G65120.2   Symbols:   Ubiquitin carboxyl-terminal hydrolase-related protein   chr1:24191457-24195907 REVERSE LENGTH=1147                           | 1121 | 1147 | 0         | 102.3 | 60.2 | 74.8 |
| Rsa1.0_00087.1.g4391.t6 | gb EOA33079.1  hypothetical protein CARUB_v10016416mg [Capsella rubella]                                                                                                                                                                                                                                                                                                                                                                                                                                                                                                         | 1259 | 1317 | 0         | 104.6 | 84.6 | 91.3 | hypothetical protein CARUB_v10016416mg                       | gbpln | Capsella rubella     | AT3G04340.1   Symbols: emb2458   FtsH extracellular protease family   chr3:1146943-1153341 REVERSE LENGTH=1320                                        | 1259 | 1320 | 0         | 104.8 | 85.1 | 91.1 |
| Rsa1.0_00087.1.g4392.t1 | ref NP_187080.1  cupin domain-containing protein [Arabidopsis thaliana]<br>gi 6721156 gb AAF26784.1 ACO16829_8 hypothetical protein [Arabidopsis thaliana]<br>gi 37202048 gb AAQ89639.1  At3g04300 [Arabidopsis thaliana]<br>gi 51968382 dbj BAD42883.1  unknown protein [Arabidopsis thaliana]<br>gi 332640543 gb AEE74064.1  cupin domain-containing protein [Arabidopsis thaliana]                                                                                                                                                                                            | 95   | 96   | 1.00E-43  | 101.1 | 91.6 | 97.9 | cupin domain-containing protein                              | gbpln | Arabidopsis thaliana | AT3G04300.1   Symbols:   RmlC-like cupins superfamily protein   chr3:1140318-1140723 FORWARD LENGTH=96                                                | 95   | 96   | 2.00E-46  | 101.1 | 91.6 | 97.9 |

|                         |                                                                                                                                                                                                                                                                                                                                                                                                                                                                                                                                         |      |      |          |       |      |      |                                              |       |                      |                                                                                                                                                                                                                                                                                                                                             |      |      |          |       |      |      |
|-------------------------|-----------------------------------------------------------------------------------------------------------------------------------------------------------------------------------------------------------------------------------------------------------------------------------------------------------------------------------------------------------------------------------------------------------------------------------------------------------------------------------------------------------------------------------------|------|------|----------|-------|------|------|----------------------------------------------|-------|----------------------|---------------------------------------------------------------------------------------------------------------------------------------------------------------------------------------------------------------------------------------------------------------------------------------------------------------------------------------------|------|------|----------|-------|------|------|
| Rsa1.0_00087.1.g4393.t1 | refXP_002884438.1   Li-tolerant lipase 1 [Arabidopsis lyrata subsp. lyrata]   g1297330278 gb EFH60697.1   Li-tolerant lipase 1 [Arabidopsis lyrata subsp. lyrata]                                                                                                                                                                                                                                                                                                                                                                       | 366  | 366  | 0        | 100.0 | 95.9 | 98.1 | Li-tolerant lipase 1                         | gbpln | Arabidopsis lyrata   | AT3G04290.1   Symbols: ATLL1, LTL1   Li-tolerant lipase 1   chr3:1133620-1136223 REVERSE LENGTH=366                                                                                                                                                                                                                                         | 366  | 366  | 0        | 100.0 | 95.1 | 97.5 |
| Rsa1.0_00087.1.g4394.t1 | gb AAC62225.1   response regulator protein [Brassica napus]                                                                                                                                                                                                                                                                                                                                                                                                                                                                             | 136  | 136  | 4.00E-67 | 100.0 | 94.9 | 96.3 | response regulator protein                   | gbpln | Brassica napus       | AT3G04280.3   Symbols: ARR22, RR22   response regulator 22   chr3:1130138-1130689 REVERSE LENGTH=142                                                                                                                                                                                                                                        | 136  | 142  | 2.00E-57 | 104.4 | 81.6 | 87.5 |
| Rsa1.0_00087.1.g4395.t1 | gb EOA32751.1   hypothetical protein CARUB_v10016056mg [Capsella rubella]                                                                                                                                                                                                                                                                                                                                                                                                                                                               | 124  | 130  | 1.00E-21 | 104.8 | 42.7 | 58.9 | hypothetical protein CARUB_v10016056mg       | gbpln | Capsella rubella     | AT3G04280.3   Symbols: ARR22, RR22   response regulator 22   chr3:1130138-1130689 REVERSE LENGTH=142                                                                                                                                                                                                                                        | 124  | 142  | 3.00E-19 | 114.5 | 48.4 | 59.7 |
| Rsa1.0_00087.1.g4396.t1 | gb EOA17608.1   hypothetical protein CARUB_v10005968mg [Capsella rubella]   g1482557559 gb EOA21751.1   hypothetical protein CARUB_v10002207mg [Capsella rubella]                                                                                                                                                                                                                                                                                                                                                                       | 146  | 146  | 2.00E-74 | 100.0 | 93.2 | 95.9 | hypothetical protein CARUB_v10005968mg       | gbpln | Capsella rubella     | AT5G18380.1   Symbols:   Ribosomal protein S5 domain 2-like superfamily protein   chr5:6090253-6090693 REVERSE LENGTH=146                                                                                                                                                                                                                   | 146  | 146  | 2.00E-76 | 100.0 | 92.5 | 95.9 |
| Rsa1.0_00087.1.g4397.t1 | # # # # # # # # -                                                                                                                                                                                                                                                                                                                                                                                                                                                                                                                       |      |      |          |       |      |      |                                              | ----  | ----                 | #                                                                                                                                                                                                                                                                                                                                           | #    | #    | #        | #     | #    | #    |
| Rsa1.0_00087.1.g4398.t1 | refXP_002863119.1   predicted protein [Arabidopsis lyrata subsp. lyrata]   g1297308943 gb EFH39378.1   predicted protein [Arabidopsis lyrata subsp. lyrata]                                                                                                                                                                                                                                                                                                                                                                             | 1197 | 1121 | 0        | 93.7  | 45.5 | 61.2 | predicted protein                            | gbpln | Arabidopsis lyrata   | AT2G14080.1   Symbols:   Disease resistance protein (TIR-NBS-LRR class) family   chr2:5925225-5929600 FORWARD LENGTH=1215                                                                                                                                                                                                                   | 1197 | 1215 | 0        | 101.5 | 45.2 | 60.9 |
| Rsa1.0_00087.1.g4399.t1 | refXP_002863119.1   predicted protein [Arabidopsis lyrata subsp. lyrata]   g1297308943 gb EFH39378.1   predicted protein [Arabidopsis lyrata subsp. lyrata]                                                                                                                                                                                                                                                                                                                                                                             | 1173 | 1121 | 0        | 95.6  | 45.7 | 61.1 | predicted protein                            | gbpln | Arabidopsis lyrata   | AT2G14080.1   Symbols:   Disease resistance protein (TIR-NBS-LRR class) family   chr2:5925225-5929600 FORWARD LENGTH=1215                                                                                                                                                                                                                   | 1173 | 1215 | 0        | 103.6 | 44.8 | 60.9 |
| Rsa1.0_00087.1.g4400.t1 | refXP_002884430.1   hypothetical protein ARALYDRAFT_477678 [Arabidopsis lyrata subsp. lyrata]   g1297330270 gb EFH60689.1   hypothetical protein ARALYDRAFT_477678 [Arabidopsis lyrata subsp. lyrata]                                                                                                                                                                                                                                                                                                                                   | 193  | 704  | 2.00E-48 | 364.8 | 58.5 | 65.3 | hypothetical protein ARALYDRAFT_477678       | gbpln | Arabidopsis lyrata   | AT3G04160.1   Symbols:   unknown protein; Has 1711 Blast hits to 1353 proteins in 195 species: Archae - 0; Bacteria - 64; Metazoa - 693; Fungi - 201; Plants - 207; Viruses - 0; Other Eukaryotes - 546 (source: NCBI BLink).   chr3:1091647-1094296 REVERSE LENGTH=712                                                                     | 193  | 712  | 4.00E-50 | 368.9 | 57.0 | 63.7 |
| Rsa1.0_00087.1.g4401.t1 | ref NP_179024.1   TIR-NBS-LRR class disease resistance protein [Arabidopsis thaliana]   g1330251184 gb AEC06278.1   TIR-NBS-LRR class disease resistance protein [Arabidopsis thaliana]                                                                                                                                                                                                                                                                                                                                                 | 1153 | 1215 | 0        | 105.4 | 45.4 | 61.2 | TIR-NBS-LRR class disease resistance protein | gbpln | Arabidopsis thaliana | AT2G14080.1   Symbols:   Disease resistance protein (TIR-NBS-LRR class) family   chr2:5925225-5929600 FORWARD LENGTH=1215                                                                                                                                                                                                                   | 1153 | 1215 | 0        | 105.4 | 45.4 | 61.2 |
| Rsa1.0_00087.1.g4402.t1 | gb EOA29984.1   hypothetical protein CARUB_v10013089mg [Capsella rubella]                                                                                                                                                                                                                                                                                                                                                                                                                                                               | 119  | 703  | 5.00E-42 | 590.8 | 71.4 | 79.0 | hypothetical protein CARUB_v10013089mg       | gbpln | Capsella rubella     | AT3G04160.2   Symbols:   unknown protein; FUNCTIONS IN: molecular_function unknown; INVOLVED IN: biological_process unknown; EXPRESSED IN: 7 plant structures: EXPRESSED DURING: F mature embryo stage, petal differentiation and expansion stage, E expanded cotyledon stage, D bilateral stage.   chr3:1091647-1094296 REVERSE LENGTH=714 | 119  | 714  | 3.00E-40 | 600.0 | 68.1 | 70.6 |
| Rsa1.0_00087.1.g4403.t1 | ref NP_187064.1   ankyrin repeat-containing protein [Arabidopsis thaliana]   g16721171 gb AAF26799.1 AC016829_23 unknown protein [Arabidopsis thaliana]   g117065146 gb AAL32727.1   Unknown protein [Arabidopsis thaliana]   g120259844 gb AAM13269.1   unknown protein [Arabidopsis thaliana]   g1332640521 gb AEE74042.1   ankyrin repeat-containing protein [Arabidopsis thaliana]                                                                                                                                                  | 640  | 656  | 0        | 102.5 | 82.3 | 88.4 | ankyrin repeat-containing protein            | gbpln | Arabidopsis thaliana | AT3G04140.1   Symbols:   Ankyrin repeat family protein   chr3:1087063-1089106 FORWARD LENGTH=656                                                                                                                                                                                                                                            | 640  | 656  | 0        | 102.5 | 82.3 | 88.4 |
| Rsa1.0_00087.1.g4404.t1 | ref NP_566222.1   pentatricopeptide repeat-containing protein [Arabidopsis thaliana]   g179312733 ref NP_001030630.1   pentatricopeptide repeat-containing protein [Arabidopsis thaliana]   g1218546763 sp Q9M8W9.2 PP211_ARA TH RecName: Full=Pentatricopeptide repeat-containing protein At3g04130, mitochondrial; Flags: Precursor   g1332640519 gb AEE74040.1   pentatricopeptide repeat-containing protein [Arabidopsis thaliana]   g1332640520 gb AEE74041.1   pentatricopeptide repeat-containing protein [Arabidopsis thaliana] | 508  | 508  | 0        | 100.0 | 82.9 | 90.6 | pentatricopeptide repeat-containing protein  | gbpln | Arabidopsis thaliana | AT3G04130.2   Symbols:   Tetratricopeptide repeat (TPR)-like superfamily protein   chr3:1084136-1085662 FORWARD LENGTH=508                                                                                                                                                                                                                  | 508  | 508  | 0        | 100.0 | 82.9 | 90.6 |
| Rsa1.0_00087.1.g4405.t1 | dbj BAJ33926.1   unnamed protein product [Thellungiella halophila]                                                                                                                                                                                                                                                                                                                                                                                                                                                                      | 356  | 338  | 0        | 94.9  | 92.7 | 93.8 | unnamed protein product                      | ----  | ----                 | AT3G04120.1   Symbols: GAPC, GAPC-1, GAPC1   glyceraldehyde-3-phosphate dehydrogenase C subunit 1   chr3:1081077-1083131 FORWARD LENGTH=338                                                                                                                                                                                                 | 356  | 338  | 0        | 94.9  | 91.6 | 93.5 |

|                         |                                                                                                                                                                                                                                                                                                                                                                                                                                                                                                                      |     |     |           |       |      |      |                                        |       |                      |                                                                                                                                                                                                                                                                                                                                                                   |     |     |           |       |      |      |
|-------------------------|----------------------------------------------------------------------------------------------------------------------------------------------------------------------------------------------------------------------------------------------------------------------------------------------------------------------------------------------------------------------------------------------------------------------------------------------------------------------------------------------------------------------|-----|-----|-----------|-------|------|------|----------------------------------------|-------|----------------------|-------------------------------------------------------------------------------------------------------------------------------------------------------------------------------------------------------------------------------------------------------------------------------------------------------------------------------------------------------------------|-----|-----|-----------|-------|------|------|
| Rsa1.0_00087.1.g4406.t1 | refXP_002882329.1   MADS-box family protein [Arabidopsis lyrata subsp. lyrata] gi 297329169 gb EFH58588.1   MADS-box family protein [Arabidopsis lyrata subsp. lyrata]                                                                                                                                                                                                                                                                                                                                               | 171 | 205 | 4.00E-42  | 119.9 | 51.5 | 69.6 | MADS-box family protein                | gbpln | Arabidopsis lyrata   | AT3G04100.1   Symbols: AGL57   AGAMOUS-like 57   chr3:1075299-1075922 FORWARD LENGTH=207                                                                                                                                                                                                                                                                          | 171 | 207 | 1.00E-43  | 121.1 | 51.5 | 67.8 |
| Rsa1.0_00087.1.g4407.t1 | refXP_002884428.1   SIP1.1 [Arabidopsis lyrata subsp. lyrata] gi 297330268 gb EFH60687.1   SIP1.1 [Arabidopsis lyrata subsp. lyrata]                                                                                                                                                                                                                                                                                                                                                                                 | 239 | 240 | 1.00E-113 | 100.4 | 90.8 | 94.1 | SIP1_1                                 | gbpln | Arabidopsis lyrata   | AT3G04090.1   Symbols: SIP1.1, SIP1A   small and basic intrinsic protein 1A   chr3:1072340-1074031 REVERSE LENGTH=240                                                                                                                                                                                                                                             | 239 | 240 | 1.00E-106 | 100.4 | 84.1 | 88.3 |
| Rsa1.0_00087.1.g4408.t1 | gb EOA30494.1   hypothetical protein CARUB_v10013618mg [Capsella rubella]                                                                                                                                                                                                                                                                                                                                                                                                                                            | 428 | 471 | 0         | 110.0 | 90.4 | 94.9 | hypothetical protein CARUB_v10013618mg | gbpln | Capsella rubella     | AT3G04080.1   Symbols: ATAPY1, APY1   apyrase 1   chr3:1068068-1070917 REVERSE LENGTH=471                                                                                                                                                                                                                                                                         | 428 | 471 | 0         | 110.0 | 90.7 | 95.3 |
| Rsa1.0_00087.1.g4409.t1 | refNP_568371.1   uncharacterized protein [Arabidopsis thaliana] gi 91806882 gb ABE66168.1   hypothetical protein At5g19270 [Arabidopsis thaliana] gi 332005295 gb AED92678.1   uncharacterized protein AT5G19270 [Arabidopsis thaliana]                                                                                                                                                                                                                                                                              | 175 | 365 | 4.00E-27  | 208.6 | 36.6 | 49.7 | uncharacterized protein                | gbpln | Arabidopsis thaliana | AT5G19270.1   Symbols:   unknown protein; BEST Arabidopsis thaliana protein match is: unknown protein (TAIR:AT4G03566.1); Has 30201 Blast hits to 17322 proteins in 780 species: Archae - 12; Bacteria - 1396; Metazoa - 17338; Fungi - 3422; Plants - 5037; Viruses - 0; Other Eukaryotes - 2996 (source: NCBI BLINK).   chr5:6485617-6487009 REVERSE LENGTH=365 | 175 | 365 | 2.00E-29  | 208.6 | 36.6 | 49.7 |
| Rsa1.0_00087.1.g4410.t1 | refNP_187057.2   NAC domain containing protein 47 [Arabidopsis thaliana] gi 29029082 gb AAO64920.1   At3g04070 [Arabidopsis thaliana] gi 110743057 dbj BAE99421.1   NAM-like protein [Arabidopsis thaliana] gi 332640512 gb AEE74033.1   NAC domain containing protein 47 [Arabidopsis thaliana]                                                                                                                                                                                                                     | 357 | 359 | 1.00E-164 | 100.6 | 80.7 | 87.1 | NAC domain containing protein 47       | gbpln | Arabidopsis thaliana | AT3G04070.1   Symbols: anac047, NAC047   NAC domain containing protein 47   chr3:1061573-1062976 REVERSE LENGTH=359                                                                                                                                                                                                                                               | 357 | 359 | 1.00E-167 | 100.6 | 80.7 | 87.1 |
| Rsa1.0_00087.1.g4411.t1 | refNP_187056.1   NAC domain containing protein 46 [Arabidopsis thaliana] gi 6223650 gb AAF05864.1   AC011698_15 NAM-like protein (no apical meristem) [Arabidopsis thaliana] gi 13605595 gb AAK32791.1   AAF361623.1 AT3g04060/T11118.17 [Arabidopsis thaliana] gi 19548079 gb AAL87404.1   AT3g04060/T11118.17 [Arabidopsis thaliana] gi 21537076 gb AAM61417.1   NAM-like protein (no apical meristem) [Arabidopsis thaliana] gi 332640511 gb AEE74032.1   NAC domain containing protein 46 [Arabidopsis thaliana] | 326 | 338 | 1.00E-147 | 103.7 | 78.8 | 86.8 | NAC domain containing protein 46       | gbpln | Arabidopsis thaliana | AT3G04060.1   Symbols: anac046, NAC046   NAC domain containing protein 46   chr3:1053625-1054952 REVERSE LENGTH=338                                                                                                                                                                                                                                               | 326 | 338 | 1.00E-150 | 103.7 | 78.8 | 86.8 |
| Rsa1.0_00087.1.g4412.t2 | #                                                                                                                                                                                                                                                                                                                                                                                                                                                                                                                    | #   | #   | #         | #     | #    | #    | -                                      | ----  | ----                 | #                                                                                                                                                                                                                                                                                                                                                                 | #   | #   | #         | #     | #    | #    |
| Rsa1.0_00087.1.g4413.t1 | refNP_187038.2   uncharacterized protein [Arabidopsis thaliana] gi 27754515 gb AAO22705.1   unknown protein [Arabidopsis thaliana] gi 28393971 gb AAO42393.1   unknown protein [Arabidopsis thaliana] gi 332640486 gb AEE74007.1   uncharacterized protein AT3G03880 [Arabidopsis thaliana]                                                                                                                                                                                                                          | 192 | 193 | 2.00E-73  | 100.5 | 76.0 | 85.9 | uncharacterized protein                | gbpln | Arabidopsis thaliana | AT3G03880.1   Symbols:   Protein of unknown function (DUF1639)   chr3:998123-999029 FORWARD LENGTH=193                                                                                                                                                                                                                                                            | 192 | 193 | 7.00E-76  | 100.5 | 76.0 | 85.9 |
| Rsa1.0_00087.1.g4414.t1 | gb EOA31260.1   hypothetical protein CARUB_v10014432mg [Capsella rubella]                                                                                                                                                                                                                                                                                                                                                                                                                                            | 256 | 260 | 3.00E-86  | 101.6 | 70.3 | 78.9 | hypothetical protein CARUB_v10014432mg | gbpln | Capsella rubella     | AT3G03870.2   Symbols:   unknown protein; BEST Arabidopsis thaliana protein match is: unknown protein (TAIR:AT5G18130.1). Has 47 Blast hits to 47 proteins in 13 species: Archae - 0; Bacteria - 0; Metazoa - 2; Fungi - 0; Plants - 45; Viruses - 0; Other Eukaryotes - 0 (source: NCBI BLINK).   chr3:995520-997180 FORWARD LENGTH=266                          | 256 | 266 | 3.00E-88  | 103.9 | 73.8 | 80.9 |
| Rsa1.0_00087.1.g4415.t1 | refNP_566214.1   protein alfin-like 5 [Arabidopsis thaliana] gi 75163676 sp Q93YX4.1   APRL5_ARAT H RecName: Full=5'-adenylylsulfate reductase-like 5; AltName: Full=Adenosine 5'-phosphosulfate reductase-like 5; Short=APR-like 5; Short=AtAPRL5; Flags: Precursor gi 16604553 gb AAL24078.1   unknown protein [Arabidopsis thaliana] gi 20259149 gb AAM14290.1   unknown protein [Arabidopsis thaliana] gi 332640483 gb AEE74004.1   protein alfin-like 5 [Arabidopsis thaliana]                                  | 310 | 300 | 1.00E-133 | 96.8  | 79.4 | 87.1 | protein alfin-like 5                   | gbpln | Arabidopsis thaliana | AT3G03860.1   Symbols: ATAPRL5, APRL5   APR-like 5   chr3:992465-994315 FORWARD LENGTH=300                                                                                                                                                                                                                                                                        | 310 | 300 | 1.00E-136 | 96.8  | 79.4 | 87.1 |
| Rsa1.0_00087.1.g4416.t1 | #                                                                                                                                                                                                                                                                                                                                                                                                                                                                                                                    | #   | #   | #         | #     | #    | #    | -                                      | ----  | ----                 | #                                                                                                                                                                                                                                                                                                                                                                 | #   | #   | #         | #     | #    | #    |

|                         |                                                                                                                                                                                                                                                                                                                                                                                        |      |      |           |       |      |      |                                        |             |                      |                                                                                                                                                                                                                                                                                                                                                                                                                                                                                                      |      |      |           |       |      |      |
|-------------------------|----------------------------------------------------------------------------------------------------------------------------------------------------------------------------------------------------------------------------------------------------------------------------------------------------------------------------------------------------------------------------------------|------|------|-----------|-------|------|------|----------------------------------------|-------------|----------------------|------------------------------------------------------------------------------------------------------------------------------------------------------------------------------------------------------------------------------------------------------------------------------------------------------------------------------------------------------------------------------------------------------------------------------------------------------------------------------------------------------|------|------|-----------|-------|------|------|
| Rsa1.0_00087.1.g4417.t2 | ref NP_187030.1  syntxin 1B/2/3 [Arabidopsis thaliana] gi 28380139 sp Q9SRV7.1 SY131.ARAT H RecName: Full=Putative syntxin-131; Short=AtSYP131 gi 6006872 gb AAAF00648.1 AC009540.25 s=syntxin-like protein [Arabidopsis thaliana] gi 332640474 gb AEE73995.1  putative syntxin-131 [Arabidopsis thaliana]                                                                             | 278  | 306  | 1.00E-138 | 110.1 | 93.9 | 97.1 | syntxin 1B/2/3                         | gbpln       | Arabidopsis thaliana | AT3G03800.1   Symbols: SYP131, ATSYP131   syntxin of plants 131   chr3:969314-971460 FORWARD LENGTH=306                                                                                                                                                                                                                                                                                                                                                                                              | 278  | 306  | 1.00E-140 | 110.1 | 93.9 | 97.1 |
| Rsa1.0_00087.1.g4418.t2 | gb EOA29778.1  hypothetical protein CARUB_v10012869mg [Capsella rubella]                                                                                                                                                                                                                                                                                                               | 1083 | 1084 | 0         | 100.1 | 84.7 | 90.8 | hypothetical protein CARUB_v10012869mg | gbpln       | Capsella rubella     | AT3G03790.2   Symbols:   ankyrin repeat family protein / regulator of chromosome condensation (RCC1) family protein   chr3:963195-967857 FORWARD LENGTH=1081                                                                                                                                                                                                                                                                                                                                         | 1083 | 1081 | 0         | 99.8  | 84.8 | 90.5 |
| Rsa1.0_00087.1.g4419.t1 | dbj BAJ33898.1  unnamed protein product [Thellungiella halophila]                                                                                                                                                                                                                                                                                                                      | 710  | 765  | 0         | 107.7 | 95.5 | 97.5 | unnamed protein product                | ----        | ----                 | AT3G03780.3   Symbols: ATMS2, MS2   methionine synthase 2   chr3:957602-960740 FORWARD LENGTH=765                                                                                                                                                                                                                                                                                                                                                                                                    | 710  | 765  | 0         | 107.7 | 94.2 | 96.6 |
| Rsa1.0_00088.1.g4420.t1 | #                                                                                                                                                                                                                                                                                                                                                                                      | #    | #    | #         | #     | #    | -    | ----                                   | ----        | ----                 | #                                                                                                                                                                                                                                                                                                                                                                                                                                                                                                    | #    | #    | #         | #     | #    |      |
| Rsa1.0_00088.1.g4421.t1 | ref NP_196927.4  uncharacterized protein [Arabidopsis thaliana] gi 332004620 gb AED92003.1  uncharacterized protein AT5G14230 [Arabidopsis thaliana]                                                                                                                                                                                                                                   | 779  | 751  | 0         | 96.4  | 83.6 | 89.7 | uncharacterized protein                | gbpln       | Arabidopsis thaliana | AT5G14230.1   Symbols:   CONTAINS InterPro DOMAIN/s: Ankyrin repeat-containing domain (InterPro:IPRO20683), Ankyrin repeat (InterPro:IPRO02110); BEST Arabidopsis thaliana protein match is: XB3 ortholog 2 in Arabidopsis thaliana (TAIR:AT5G57740.1); Has 66374 Blast hits to 25358 proteins in 1201 species: Archae - 121; Bacteria - 8133; Metazoa - 29530; Fungi - 5985; Plants - 3349; Viruses - 785; Other Eukaryotes - 18571 (source: NCBI BLink).   chr5:4591883-4595775 FORWARD LENGTH=751 | 779  | 751  | 0         | 96.4  | 83.6 | 89.7 |
| Rsa1.0_00088.1.g4422.t1 | ref XP_002873657.1  hypothetical protein ARALYDRAFT_488258 [Arabidopsis lyrata subsp. lyrata] gi 297319494 gb EFH449916.1  hypothetical protein ARALYDRAFT_488258 [Arabidopsis lyrata subsp. lyrata] ref XP_002871610.1  SET domain-containing protein [Arabidopsis lyrata subsp. lyrata] gi 297317447 gb EFH47869.1  SET domain-containing protein [Arabidopsis lyrata subsp. lyrata] | 256  | 256  | 1.00E-126 | 100.0 | 91.8 | 95.7 | hypothetical protein ARALYDRAFT_488258 | gbpln       | Arabidopsis lyrata   | AT5G14240.1   Symbols:   Thioredoxin superfamily protein   chr5:4596223-4597568 REVERSE LENGTH=256                                                                                                                                                                                                                                                                                                                                                                                                   | 256  | 256  | 1.00E-128 | 100.0 | 91.0 | 94.9 |
| Rsa1.0_00088.1.g4423.t1 | ref NP_001147134.1  transcription regulator [Zea mays] gi 195607552 gb ACG25606.1  transcription regulator [Zea mays]                                                                                                                                                                                                                                                                  | 256  | 255  | 1.00E-129 | 99.6  | 94.9 | 98.0 | transcription regulator                | gbenv/gbpln | Zea mays             | AT5G14260.2   Symbols:   Rubisco methyltransferase family protein   chr5:4601139-4603973 FORWARD LENGTH=514                                                                                                                                                                                                                                                                                                                                                                                          | 256  | 572  | 1.00E-128 | 223.4 | 85.5 | 91.0 |
| Rsa1.0_00088.1.g4424.t1 | gb EOA20643.1  hypothetical protein CARUB_v10000956mg [Capsella rubella]                                                                                                                                                                                                                                                                                                               | 444  | 446  | 0         | 100.5 | 88.1 | 91.4 | hypothetical protein CARUB_v10000956mg | gbpln       | Capsella rubella     | AT5G14280.1   Symbols:   DNA-binding storekeeper protein-related   chr5:4609123-4611444 FORWARD LENGTH=572                                                                                                                                                                                                                                                                                                                                                                                           | 444  | 446  | 0         | 100.5 | 87.2 | 91.2 |
| Rsa1.0_00088.1.g4425.t1 | gb EOA21688.1  hypothetical protein CARUB_v10002113mg [Capsella rubella]                                                                                                                                                                                                                                                                                                               | 132  | 169  | 6.00E-69  | 128.0 | 97.7 | 98.5 | hypothetical protein CARUB_v10002113mg | gbpln       | Capsella rubella     | AT5G14310.1   Symbols: AtCXE16, CXE16   carboxyesterase 16   chr5:4615592-4617422 FORWARD LENGTH=446                                                                                                                                                                                                                                                                                                                                                                                                 | 132  | 169  | 3.00E-71  | 128.0 | 97.0 | 98.5 |
| Rsa1.0_00088.1.g4426.t1 | ref NP_196937.1  uncharacterized protein [Arabidopsis thaliana] gi 7573458 emb CAB87772.1  putative protein [Arabidopsis thaliana] gi 332004635 gb AED92018.1  uncharacterized protein AT5G14330 [Arabidopsis thaliana]                                                                                                                                                                | 74   | 128  | 4.00E-16  | 173.0 | 70.3 | 81.1 | uncharacterized protein                | gbpln       | Arabidopsis thaliana | AT5G14320.1   Symbols:   Ribosomal protein S13/S18 family   chr5:4617839-4618772 REVERSE LENGTH=169                                                                                                                                                                                                                                                                                                                                                                                                  | 74   | 128  | 7.00E-19  | 173.0 | 70.3 | 81.1 |
| Rsa1.0_00088.1.g4427.t1 | ref NP_196938.1  myb domain protein 40 [Arabidopsis thaliana] gi 7573459 emb CAB87773.1  MYB40-putative transcription factor [Arabidopsis thaliana] gi 41619392 gb AAS10092.1  MYB transcription factor [Arabidopsis thaliana] gi 332004636 gb AED92019.1  myb domain protein 40 [Arabidopsis thaliana]                                                                                | 267  | 263  | 1.00E-111 | 98.5  | 78.7 | 84.3 | myb domain protein 40                  | gbpln       | Arabidopsis thaliana | AT5G14330.1   Symbols:   unknown protein; Has 8 Blast hits to 8 proteins in 2 species: Archae - 0; Bacteria - 0; Metazoa - 0; Fungi - 0; Plants - 8; Viruses - 0; Other Eukaryotes - 0 (source: NCBI BLink).   chr5:4619947-4620551 REVERSE LENGTH=128                                                                                                                                                                                                                                               | 267  | 263  | 1.00E-114 | 98.5  | 78.7 | 84.3 |
| Rsa1.0_00088.1.g4428.t1 | ref NP_001078582.1  early nodulin-like protein 21 [Arabidopsis thaliana] gi 332004637 gb AED92020.1  early nodulin-like protein 21 [Arabidopsis thaliana]                                                                                                                                                                                                                              | 145  | 145  | 4.00E-60  | 100.0 | 75.9 | 84.1 | early nodulin-like protein 21          | gbpln       | Arabidopsis thaliana | AT5G14340.1   Symbols: AtMYB40, MYB40   myb domain protein 40   chr5:4623367-4624779 FORWARD LENGTH=263                                                                                                                                                                                                                                                                                                                                                                                              | 145  | 145  | 1.00E-62  | 100.0 | 75.9 | 84.1 |
| Rsa1.0_00088.1.g4429.t1 | ref NP_001078582.1  early nodulin-like protein 21 [Arabidopsis thaliana] gi 332004637 gb AED92020.1  early nodulin-like protein 21 [Arabidopsis thaliana]                                                                                                                                                                                                                              | 145  | 145  | 4.00E-60  | 100.0 | 75.9 | 84.1 | early nodulin-like protein 21          | gbpln       | Arabidopsis thaliana | AT5G14345.1   Symbols: ENODL21, AENODL21   early nodulin-like protein 21   chr5:4626175-4626722 REVERSE LENGTH=145                                                                                                                                                                                                                                                                                                                                                                                   | 145  | 145  | 1.00E-62  | 100.0 | 75.9 | 84.1 |
| Rsa1.0_00088.1.g4430.t1 | #                                                                                                                                                                                                                                                                                                                                                                                      | #    | #    | #         | #     | #    | -    | ----                                   | ----        | ----                 | #                                                                                                                                                                                                                                                                                                                                                                                                                                                                                                    | #    | #    | #         | #     | #    |      |
| Rsa1.0_00088.1.g4431.t1 | #                                                                                                                                                                                                                                                                                                                                                                                      | #    | #    | #         | #     | #    | -    | ----                                   | ----        | ----                 | #                                                                                                                                                                                                                                                                                                                                                                                                                                                                                                    | #    | #    | #         | #     | #    |      |

|                         |                                                                                                                                                                                                                                                                                                                                                                         |     |     |           |       |      |      |                                            |       |                      |                                                                                                                                                                                                                                                           |     |     |           |       |      |      |
|-------------------------|-------------------------------------------------------------------------------------------------------------------------------------------------------------------------------------------------------------------------------------------------------------------------------------------------------------------------------------------------------------------------|-----|-----|-----------|-------|------|------|--------------------------------------------|-------|----------------------|-----------------------------------------------------------------------------------------------------------------------------------------------------------------------------------------------------------------------------------------------------------|-----|-----|-----------|-------|------|------|
| Rsa1.0_00088.1.g4432.t1 | ref NP_568300.1  CCT motif family protein [Arabidopsis thaliana] gi 15292917 gb AAK92829.1  unknown protein [Arabidopsis thaliana] gi 20259039 gb AAM14235.1  unknown protein [Arabidopsis thaliana] gi 332004640 gb AED92023.1  CCT motif family protein [Arabidopsis thaliana]                                                                                        | 554 | 339 | 1.00E-116 | 61.2  | 45.8 | 50.7 | CCT motif family protein                   | gbpln | Arabidopsis thaliana | AT5G14370.1   Symbols:   CCT motif family protein   chr5:4632147-4633651 REVERSE LENGTH=339                                                                                                                                                               | 554 | 339 | 1.00E-118 | 61.2  | 45.8 | 50.7 |
| Rsa1.0_00088.1.g4433.t1 | emb CAB42531.1  AGP6 protein [Arabidopsis thaliana]                                                                                                                                                                                                                                                                                                                     | 153 | 150 | 3.00E-37  | 98.0  | 71.2 | 79.1 | AGP6 protein                               | gbpln | Arabidopsis thaliana | AT5G14380.1   Symbols: AGP6   arabinogalactan protein 6   chr5:4636088-4636540 REVERSE LENGTH=150                                                                                                                                                         | 153 | 150 | 1.00E-39  | 98.0  | 70.6 | 78.4 |
| Rsa1.0_00088.1.g4434.t1 | ref NP_196943.1  alpha/beta-hydrolasefamily protein [Arabidopsis thaliana] gi 7573464 emb CAB87778.1  putative protein [Arabidopsis thaliana] gi 17529314 gb AAL38884.1  unknown protein [Arabidopsis thaliana] gi 21436177 gb AAM51376.1  unknown protein [Arabidopsis thaliana] gi 332004642 gb AED92025.1  alpha/beta-hydrolasefamily protein [Arabidopsis thaliana] | 373 | 369 | 0         | 98.9  | 91.2 | 95.4 | alpha/beta-hydrolasefamily protein         | gbpln | Arabidopsis thaliana | AT5G14390.1   Symbols:   alpha/beta-Hydrolases superfamily protein   chr5:4637551-4639575 REVERSE LENGTH=369                                                                                                                                              | 373 | 369 | 0         | 98.9  | 91.2 | 95.4 |
| Rsa1.0_00088.1.g4435.t2 | ref XP_002871617.1  predicted protein [Arabidopsis lyrata subsp. lyrata] gi 297317454 gb EFH47876.1  predicted protein [Arabidopsis lyrata subsp. lyrata]                                                                                                                                                                                                               | 529 | 381 | 0         | 72.0  | 64.1 | 68.8 | predicted protein                          | gbpln | Arabidopsis lyrata   | AT5G14400.1   Symbols: CYP724A1   cytochrome P450, family 724, subfamily A, polypeptide 1   chr5:4644128-4646382 FORWARD LENGTH=367                                                                                                                       | 529 | 367 | 0         | 69.4  | 61.2 | 65.4 |
| Rsa1.0_00088.1.g4436.t1 | gb EOA19501.1  hypothetical protein CARUB_v10002248mg [Capsella rubella]                                                                                                                                                                                                                                                                                                | 134 | 132 | 2.00E-45  | 98.5  | 79.9 | 90.3 | hypothetical protein CARUB_v10002248mg     | gbpln | Capsella rubella     | AT5G14410.1   Symbols:   unknown protein; Has 23 Blast hits to 23 proteins in 9 species: Archae - 0; Bacteria - 0; Metazoa - 0; Fungi - 0; Plants - 23; Viruses - 0; Other Eukaryotes - 0 (source: NCBI BLINK).   chr5:4646897-4647398 REVERSE LENGTH=133 | 134 | 133 | 3.00E-47  | 99.3  | 79.9 | 88.8 |
| Rsa1.0_00088.1.g4437.t1 | gb EOA20582.1  hypothetical protein CARUB_v10000894mg [Capsella rubella]                                                                                                                                                                                                                                                                                                | 465 | 466 | 0         | 100.2 | 87.7 | 92.9 | hypothetical protein CARUB_v10000894mg     | gbpln | Capsella rubella     | AT5G14420.2   Symbols: RGLG2   RING domain ligase2   chr5:4648355-4650563 REVERSE LENGTH=468                                                                                                                                                              | 465 | 468 | 0         | 100.6 | 86.9 | 91.6 |
| Rsa1.0_00088.1.g4438.t1 | ref XP_002871620.1  GDSL-motif lipase/hydrolase family protein [Arabidopsis lyrata subsp. lyrata] gi 297317457 gb EFH47879.1  GDSL-motif lipase/hydrolase family protein [Arabidopsis lyrata subsp. lyrata]                                                                                                                                                             | 391 | 386 | 0         | 98.7  | 91.6 | 94.6 | GDSL-motif lipase/hydrolase family protein | gbpln | Arabidopsis lyrata   | AT5G14450.1   Symbols:   GDSL-like Lipase/Acylhydrolase superfamily protein   chr5:4658488-4660034 FORWARD LENGTH=389                                                                                                                                     | 391 | 389 | 0         | 99.5  | 91.3 | 94.4 |
| Rsa1.0_00088.1.g4439.t1 | gb EOA22627.1  hypothetical protein CARUB_v10003297mg [Capsella rubella]                                                                                                                                                                                                                                                                                                | 521 | 538 | 0         | 103.3 | 83.7 | 89.3 | hypothetical protein CARUB_v10003297mg     | gbpln | Capsella rubella     | AT5G14460.1   Symbols:   Pseudouridine synthase family protein   chr5:4660239-4662543 REVERSE LENGTH=540                                                                                                                                                  | 521 | 540 | 0         | 103.6 | 82.7 | 88.1 |
| Rsa1.0_00088.1.g4440.t1 | ref XP_002873669.1  hypothetical protein ARALYDRAFT_325917 [Arabidopsis lyrata subsp. lyrata] gi 297319506 gb EFH49928.1  hypothetical protein ARALYDRAFT_325917 [Arabidopsis lyrata subsp. lyrata]                                                                                                                                                                     | 367 | 366 | 0         | 99.7  | 93.2 | 97.0 | hypothetical protein ARALYDRAFT_325917     | gbpln | Arabidopsis lyrata   | AT5G14470.1   Symbols:   GHMP kinase family protein   chr5:4663029-4664657 REVERSE LENGTH=366                                                                                                                                                             | 367 | 366 | 0         | 99.7  | 90.7 | 95.9 |
| Rsa1.0_00088.1.g4441.t1 | gb EOA20817.1  hypothetical protein CARUB_v10001154mg [Capsella rubella]                                                                                                                                                                                                                                                                                                | 389 | 387 | 0         | 99.5  | 86.4 | 93.6 | hypothetical protein CARUB_v10001154mg     | gbpln | Capsella rubella     | AT5G14480.1   Symbols:   beta-1,4-N-acetylglucosaminyltransferase family protein   chr5:4667984-4669693 FORWARD LENGTH=387                                                                                                                                | 389 | 387 | 0         | 99.5  | 85.3 | 92.3 |
| Rsa1.0_00088.1.g4442.t3 | # # # # # # # # - ----                                                                                                                                                                                                                                                                                                                                                  |     |     |           |       |      |      |                                            |       |                      | # # # # # # #                                                                                                                                                                                                                                             |     |     |           |       |      |      |
| Rsa1.0_00088.1.g4443.t5 | ref XP_002873676.1  hypothetical protein ARALYDRAFT_909422 [Arabidopsis lyrata subsp. lyrata] gi 297319513 gb EFH49935.1  hypothetical protein ARALYDRAFT_909422 [Arabidopsis lyrata subsp. lyrata]                                                                                                                                                                     | 372 | 369 | 0         | 99.2  | 87.6 | 93.5 | hypothetical protein ARALYDRAFT_909422     | gbpln | Arabidopsis lyrata   | AT5G14550.1   Symbols:   Core-2/1-branching beta-1,6-N-acetylglucosaminyltransferase family protein   chr5:4691321-4693732 REVERSE LENGTH=377                                                                                                             | 372 | 377 | 0         | 101.3 | 86.0 | 93.3 |
| Rsa1.0_00088.1.g4444.t2 | ref XP_002873678.1  hypothetical protein ARALYDRAFT_488299 [Arabidopsis lyrata subsp. lyrata] gi 297319515 gb EFH49937.1  hypothetical protein ARALYDRAFT_488299 [Arabidopsis lyrata subsp. lyrata]                                                                                                                                                                     | 947 | 992 | 0         | 104.8 | 85.7 | 92.5 | hypothetical protein ARALYDRAFT_488299     | gbpln | Arabidopsis lyrata   | AT5G14580.1   Symbols:   polyribonucleotide nucleotidyltransferase, putative   chr5:4697612-4703013 REVERSE LENGTH=991                                                                                                                                    | 947 | 991 | 0         | 104.6 | 83.3 | 91.2 |

|                         |                                                                                                                                                                                                                                                                                                                                                                                                                         |     |      |           |       |      |      |                                        |       |                      |                                                                                                                                                                                                                                                                                                                                                                                                                                  |     |     |           |       |      |      |
|-------------------------|-------------------------------------------------------------------------------------------------------------------------------------------------------------------------------------------------------------------------------------------------------------------------------------------------------------------------------------------------------------------------------------------------------------------------|-----|------|-----------|-------|------|------|----------------------------------------|-------|----------------------|----------------------------------------------------------------------------------------------------------------------------------------------------------------------------------------------------------------------------------------------------------------------------------------------------------------------------------------------------------------------------------------------------------------------------------|-----|-----|-----------|-------|------|------|
| Rsa1.0_00088.1.g4445.t1 | refNP_568302.1  tRNA (adenine-N1-)-methyltransferase [Arabidopsis thaliana] gi 28393527 gb AAO42184.1  unknown protein [Arabidopsis thaliana] gi 28827644 gb AA050666.1  unknown protein [Arabidopsis thaliana] gi 332004669 gb AED92052.1  tRNA (adenine-N1-)-methyltransferase-like protein [Arabidopsis thaliana]                                                                                                    | 322 | 318  | 1.00E-166 | 98.8  | 88.8 | 94.7 | tRNA (adenine-N1-)-methyltransferase   | gbpln | Arabidopsis thaliana | AT5G14600.1   Symbols:   S-adenosyl-L-methionine-dependent methyltransferases superfamily protein   chr5:4707518-4709022 FORWARD LENGTH=318                                                                                                                                                                                                                                                                                      | 322 | 318 | 1.00E-169 | 98.8  | 88.8 | 94.7 |
| Rsa1.0_00088.1.g4446.t1 | refXP_002873681.1  hypothetical protein ARALYDRAFT_488304 [Arabidopsis lyrata subsp. lyrata] gi 297319518 gb EFH49940.1  hypothetical protein ARALYDRAFT_488304 [Arabidopsis lyrata subsp. lyrata]                                                                                                                                                                                                                      | 605 | 629  | 0         | 104.0 | 73.4 | 84.6 | hypothetical protein ARALYDRAFT_488304 | gbpln | Arabidopsis lyrata   | AT5G14620.1   Symbols: DRM2, DMT7   domains rearranged methyltransferase 2   chr5:4715429-4718578 REVERSE LENGTH=626                                                                                                                                                                                                                                                                                                             | 605 | 626 | 0         | 103.5 | 71.9 | 83.0 |
| Rsa1.0_00088.1.g4447.t1 | refNP_196969.1  polygalacturonase [Arabidopsis thaliana] gi 7573314 emb CAB87632.1  polygalacturonase-like protein [Arabidopsis thaliana] gi 332004675 gb AED92058.1  pectin lyase-like superfamily protein [Arabidopsis thaliana]                                                                                                                                                                                      | 439 | 435  | 0         | 99.1  | 87.5 | 92.5 | polygalacturonase                      | gbpln | Arabidopsis thaliana | AT5G14650.1   Symbols:   Pectin lyase-like superfamily protein   chr5:4724509-4726328 FORWARD LENGTH=435                                                                                                                                                                                                                                                                                                                         | 439 | 435 | 0         | 99.1  | 87.5 | 92.5 |
| Rsa1.0_00088.1.g4448.t1 | refXP_002873683.1  predicted protein [Arabidopsis lyrata subsp. lyrata] gi 297319520 gb EFH49942.1  predicted protein [Arabidopsis lyrata subsp. lyrata]                                                                                                                                                                                                                                                                | 299 | 273  | 1.00E-127 | 91.3  | 75.6 | 79.3 | predicted protein                      | gbpln | Arabidopsis lyrata   | AT5G14660.2   Symbols: PDF1B, DEF2, ATDEF2   peptide deformylase 1B   chr5:4727129-4728671 REVERSE LENGTH=273                                                                                                                                                                                                                                                                                                                    | 299 | 273 | 1.00E-130 | 91.3  | 75.3 | 79.6 |
| Rsa1.0_00088.1.g4449.t1 | emb CB139638.3  unnamed protein product [Vitis vinifera]                                                                                                                                                                                                                                                                                                                                                                | 191 | 591  | 1.00E-100 | 309.4 | 94.2 | 94.8 | unnamed protein product                | gbpln | Vitis vinifera       | AT5G14670.1   Symbols: ATARFA1B, ARFA1B   ADP-ribosylation factor A1B   chr5:4729319-4730495 FORWARD LENGTH=188                                                                                                                                                                                                                                                                                                                  | 191 | 188 | 1.00E-101 | 98.4  | 93.7 | 93.7 |
| Rsa1.0_00088.1.g4450.t1 | gb EOA21670.1  hypothetical protein CARUB_v10002093mg [Capsella rubella]                                                                                                                                                                                                                                                                                                                                                | 394 | 175  | 3.00E-59  | 44.4  | 27.7 | 28.9 | hypothetical protein CARUB_v10002093mg | gbpln | Capsella rubella     | AT5G14680.1   Symbols:   Adenine nucleotide alpha hydrolases-like superfamily protein   chr5:4731620-4733025 REVERSE LENGTH=175                                                                                                                                                                                                                                                                                                  | 394 | 175 | 2.00E-61  | 44.4  | 27.4 | 28.7 |
| Rsa1.0_00088.1.g4451.t1 | gb ACP30591.1  disease resistance protein [Brassica rapa subsp. pekinensis]                                                                                                                                                                                                                                                                                                                                             | 443 | 1555 | 4.00E-77  | 351.0 | 34.5 | 44.5 | disease resistance protein             | gbpln | Brassica rapa        | AT4G29090.1   Symbols:   Ribonuclease H-like superfamily protein   chr4:14333528-14335255 FORWARD LENGTH=575                                                                                                                                                                                                                                                                                                                     | 443 | 575 | 7.00E-44  | 129.8 | 26.0 | 38.6 |
| Rsa1.0_00088.1.g4452.t1 | refXP_002873686.1  hypothetical protein ARALYDRAFT_488312 [Arabidopsis lyrata subsp. lyrata] gi 297319523 gb EFH49945.1  hypothetical protein ARALYDRAFT_488312 [Arabidopsis lyrata subsp. lyrata]                                                                                                                                                                                                                      | 370 | 368  | 0         | 99.5  | 90.0 | 96.2 | hypothetical protein ARALYDRAFT_488312 | gbpln | Arabidopsis lyrata   | AT5G14700.1   Symbols:   NAD(P)-binding Rossmann-fold superfamily protein   chr5:4740502-4743327 REVERSE LENGTH=368                                                                                                                                                                                                                                                                                                              | 370 | 368 | 0         | 99.5  | 89.5 | 94.6 |
| Rsa1.0_00088.1.g4453.t1 | gb AAL38867.1  putative protein kinase [Arabidopsis thaliana]                                                                                                                                                                                                                                                                                                                                                           | 711 | 674  | 0         | 94.8  | 81.6 | 85.8 | putative protein kinase                | gbpln | Arabidopsis thaliana | AT5G14720.1   Symbols:   Protein kinase superfamily protein   chr5:4748212-4752642 REVERSE LENGTH=674                                                                                                                                                                                                                                                                                                                            | 711 | 674 | 0         | 94.8  | 81.6 | 85.8 |
| Rsa1.0_00088.1.g4454.t1 | refNP_196977.1  uncharacterized protein [Arabidopsis thaliana] gi 9755741 emb CAC01872.1  putative protein [Arabidopsis thaliana] gi 38454160 gb AAR20774.1  At5g14730 [Arabidopsis thaliana] gi 45592916 gb AAS68112.1  At5g14730 [Arabidopsis thaliana] gi 110737749 dbj BAF00813.1  hypothetical protein [Arabidopsis thaliana] gi 332004684 gb AED92067.1  uncharacterized protein AT5G14730 [Arabidopsis thaliana] | 262 | 246  | 2.00E-61  | 93.9  | 56.5 | 68.3 | uncharacterized protein                | gbpln | Arabidopsis thaliana | AT5G14730.1   Symbols:   unknown protein; CONTAINS InterPro DOMAIN/s: Protein of unknown function DUF1645 (InterPro:IPR012442), BEST Arabidopsis thaliana protein match is: unknown protein (TAIR:AT3G01513.1); Has 85 Blast hits to 83 proteins in 14 species: Archae - 0; Bacteria - 9; Metazoa - 0; Fungi - 0; Plants - 76; Viruses - 0; Other Eukaryotes - 0 (source: NCBI BLINK).   chr5:4756282-4757022 FORWARD LENGTH=246 | 262 | 246 | 5.00E-64  | 93.9  | 56.5 | 68.3 |
| Rsa1.0_00089.1.g4455.t1 | gb EOA35144.1  hypothetical protein CARUB_v10020279mg [Capsella rubella]                                                                                                                                                                                                                                                                                                                                                | 227 | 454  | 5.00E-82  | 200.0 | 67.0 | 72.2 | hypothetical protein CARUB_v10020279mg | gbpln | Capsella rubella     | AT1G67320.2   Symbols:   DNA primase, large subunit family   chr1:25205520-25208966 REVERSE LENGTH=454                                                                                                                                                                                                                                                                                                                           | 227 | 454 | 3.00E-84  | 200.0 | 66.5 | 72.2 |
| Rsa1.0_00089.1.g4456.t1 | gb AAF99785.1 AC012463.2 T2E6.4 [Arabidopsis thaliana]                                                                                                                                                                                                                                                                                                                                                                  | 480 | 740  | 1.00E-166 | 154.2 | 59.8 | 74.0 | T2E6.4                                 | gbpln | Arabidopsis thaliana | AT3G24255.1   Symbols:   RNA-directed DNA polymerase (reverse transcriptase)-related family protein   chr3:8789471-8793208 FORWARD LENGTH=746                                                                                                                                                                                                                                                                                    | 480 | 746 | 1.00E-83  | 155.4 | 33.5 | 42.3 |
| Rsa1.0_00089.1.g4457.t1 | gb EOA35144.1  hypothetical protein CARUB_v10020279mg [Capsella rubella]                                                                                                                                                                                                                                                                                                                                                | 82  | 454  | 5.00E-22  | 553.7 | 68.3 | 73.2 | hypothetical protein CARUB_v10020279mg | gbpln | Capsella rubella     | AT1G67320.1   Symbols:   DNA primase, large subunit family   chr1:25205520-25208966 REVERSE LENGTH=449                                                                                                                                                                                                                                                                                                                           | 82  | 449 | 5.00E-24  | 547.6 | 67.1 | 72.0 |
| Rsa1.0_00089.1.g4458.t2 | gb EOA35534.1  hypothetical protein CARUB_v10020741mg [Capsella rubella]                                                                                                                                                                                                                                                                                                                                                | 306 | 288  | 1.00E-133 | 94.1  | 82.7 | 87.3 | hypothetical protein CARUB_v10020741mg | gbpln | Capsella rubella     | AT1G67325.2   Symbols:   Ran BP2/NZF zinc finger-like superfamily protein   chr1:2520825-25212412 REVERSE LENGTH=288                                                                                                                                                                                                                                                                                                             | 306 | 288 | 1.00E-135 | 94.1  | 83.0 | 86.9 |

|                         |                                                                                                                                                                                                                                                                                                                                                                                                                                                                                                                                                                                                                                                                                                                                                                                                                                                               |      |      |           |       |      |      |                                         |       |                      |                                                                                                                                  |      |     |           |       |      |      |
|-------------------------|---------------------------------------------------------------------------------------------------------------------------------------------------------------------------------------------------------------------------------------------------------------------------------------------------------------------------------------------------------------------------------------------------------------------------------------------------------------------------------------------------------------------------------------------------------------------------------------------------------------------------------------------------------------------------------------------------------------------------------------------------------------------------------------------------------------------------------------------------------------|------|------|-----------|-------|------|------|-----------------------------------------|-------|----------------------|----------------------------------------------------------------------------------------------------------------------------------|------|-----|-----------|-------|------|------|
| Rsa1.0_00089.1.g4459.t1 | refXP_002887113.1  hypothetical protein ARALYDRAFT_475830 [Arabidopsis lyrata subsp. lyrata] gi 297332954 gb EFH63372.1                                                                                                                                                                                                                                                                                                                                                                                                                                                                                                                                                                                                                                                                                                                                       | 291  | 291  | 1.00E-149 | 100.0 | 85.6 | 91.1 | hypothetical protein ARALYDRAFT_475830  | gbpln | Arabidopsis lyrata   | AT1G67330.1   Symbols:   Protein of unknown function (DUF579)   chr1:25214118-25214993 FORWARD LENGTH=291                        | 291  | 291 | 1.00E-148 | 100.0 | 83.5 | 90.4 |
| Rsa1.0_00089.1.g4460.t1 | gb AAF97969.1 AC000103_19 F21J9.30 [Arabidopsis thaliana]                                                                                                                                                                                                                                                                                                                                                                                                                                                                                                                                                                                                                                                                                                                                                                                                     | 1785 | 1270 | 0         | 71.1  | 35.5 | 48.1 | F21J9.30                                | gbpln | Arabidopsis thaliana | AT4G29090.1   Symbols:   Ribonuclease H-like superfamily protein   chr4:14333528-14335255 FORWARD LENGTH=575                     | 1785 | 575 | 3.00E-95  | 32.2  | 10.8 | 16.9 |
| Rsa1.0_00089.1.g4461.t1 | # # # # # # # # # #                                                                                                                                                                                                                                                                                                                                                                                                                                                                                                                                                                                                                                                                                                                                                                                                                                           | #    | #    | #         | #     | #    | #    | -                                       | ----  | ----                 | #                                                                                                                                | #    | #   | #         | #     | #    | #    |
| Rsa1.0_00089.1.g4462.t1 | refXP_002887115.1  zinc finger family protein [Arabidopsis lyrata subsp. lyrata] gi 297332956 gb EFH63374.1  zinc finger family protein [Arabidopsis lyrata subsp. lyrata]                                                                                                                                                                                                                                                                                                                                                                                                                                                                                                                                                                                                                                                                                    | 352  | 375  | 1.00E-164 | 106.5 | 84.9 | 89.5 | zinc finger family protein              | gbpln | Arabidopsis lyrata   | AT1G67340.1   Symbols:   HCP-like superfamily protein with MYND-type zinc finger   chr1:25230323-25231622 FORWARD LENGTH=379     | 352  | 379 | 1.00E-162 | 107.7 | 83.0 | 88.1 |
| Rsa1.0_00089.1.g4463.t1 | refXP_002888592.1  rubber elongation factor family protein [Arabidopsis lyrata subsp. lyrata] gi 297334433 gb EFH64851.1  rubber elongation factor family protein [Arabidopsis lyrata subsp. lyrata]                                                                                                                                                                                                                                                                                                                                                                                                                                                                                                                                                                                                                                                          | 100  | 246  | 2.00E-15  | 246.0 | 50.0 | 59.0 | rubber elongation factor family protein | gbpln | Arabidopsis lyrata   | AT1G67360.1   Symbols:   Rubber elongation factor protein (REF)   chr1:25237072-25237913 REVERSE LENGTH=240                      | 100  | 240 | 6.00E-18  | 240.0 | 49.0 | 58.0 |
| Rsa1.0_00089.1.g4464.t1 | gb EOA22363.1  hypothetical protein CARUB_v10002992mg [Capsella rubella]                                                                                                                                                                                                                                                                                                                                                                                                                                                                                                                                                                                                                                                                                                                                                                                      | 282  | 401  | 3.00E-14  | 142.2 | 21.6 | 34.4 | hypothetical protein CARUB_v10002992mg  | gbpln | Capsella rubella     | AT1G31000.1   Symbols:   F-box and associated interaction domains-containing protein   chr1:11053377-11054561 REVERSE LENGTH=363 | 282  | 363 | 8.00E-17  | 128.7 | 35.5 | 55.0 |
| Rsa1.0_00089.1.g4465.t1 | # # # # # # # # # #                                                                                                                                                                                                                                                                                                                                                                                                                                                                                                                                                                                                                                                                                                                                                                                                                                           | #    | #    | #         | #     | #    | #    | -                                       | ----  | ----                 | #                                                                                                                                | #    | #   | #         | #     | #    | #    |
| Rsa1.0_00089.1.g4466.t1 | db BAJ34244.1  unnamed protein product [Theellungiella halophila]                                                                                                                                                                                                                                                                                                                                                                                                                                                                                                                                                                                                                                                                                                                                                                                             | 232  | 234  | 5.00E-99  | 100.9 | 78.4 | 85.8 | unnamed protein product                 | ----  | ----                 | AT1G67360.1   Symbols:   Rubber elongation factor protein (REF)   chr1:25237072-25237913 REVERSE LENGTH=240                      | 232  | 240 | 3.00E-98  | 103.4 | 76.3 | 86.6 |
| Rsa1.0_00089.1.g4467.t2 | ref NP_176908.2  exostosin-like protein [Arabidopsis thaliana] gi 115311405 gb ABI93883.1  At1g67410 [Arabidopsis thaliana] gi 332196520 gb AEE34641.1  exostosin-like protein [Arabidopsis thaliana]                                                                                                                                                                                                                                                                                                                                                                                                                                                                                                                                                                                                                                                         | 426  | 430  | 0         | 100.9 | 83.3 | 91.5 | exostosin-like protein                  | gbpln | Arabidopsis thaliana | AT1G67410.1   Symbols:   Exostosin family protein   chr1:25251606-25253568 REVERSE LENGTH=430                                    | 426  | 430 | 0         | 100.9 | 83.3 | 91.5 |
| Rsa1.0_00089.1.g4468.t1 | refXP_002887120.1  peptidase [Arabidopsis lyrata subsp. lyrata] gi 297332961 gb EFH63379.1  peptidase [Arabidopsis lyrata subsp. lyrata]                                                                                                                                                                                                                                                                                                                                                                                                                                                                                                                                                                                                                                                                                                                      | 873  | 873  | 0         | 100.0 | 84.4 | 91.6 | peptidase                               | gbpln | Arabidopsis lyrata   | AT1G67420.2   Symbols:   Zn-dependent exopeptidases superfamily protein   chr1:25255264-25260358 FORWARD LENGTH=922              | 873  | 922 | 0         | 105.6 | 83.6 | 90.7 |
| Rsa1.0_00089.1.g4469.t1 | ref NP_176910.1  60S ribosomal protein L17-2 [Arabidopsis thaliana] gi 297838479 ref XP_002887121.1  60S ribosomal protein L17 [Arabidopsis lyrata subsp. lyrata] gi 27735241 sp P51413.2 RL172_ARATH RecName: Full=60S ribosomal protein L17-2 gi 3176668 gb AAC18792.1  Similar to ribosomal protein L17 gi X62724 from Hordeum vulgare. ESTs gb Z34728. gb F19974. gb T75677 and gb Z33937 come from this gene [Arabidopsis thaliana] gi 14596149 gb AAK68802.1  ribosomal protein L17-like protein [Arabidopsis thaliana] gi 20148391 gb AAM10086.1  unknown protein [Arabidopsis thaliana] gi 110736681 db BAF00304.1  ribosomal protein L17-like protein [Arabidopsis thaliana] gi 297332962 gb EFH63380.1  60S ribosomal protein L17 [Arabidopsis lyrata subsp. lyrata] gi 332196523 gb AEE34644.1  60S ribosomal protein L17-2 [Arabidopsis thaliana] | 175  | 175  | 7.00E-98  | 100.0 | 98.3 | 99.4 | 60S ribosomal protein L17-2             | gbpln | Arabidopsis lyrata   | AT1G67430.1   Symbols:   Ribosomal protein L22a/L17e family protein   chr1:25262209-25263627 FORWARD LENGTH=175                  | 175  | 175 | 1.00E-100 | 100.0 | 98.3 | 99.4 |
| Rsa1.0_00089.1.g4470.t1 | refXP_002883830.1  hypothetical protein ARALYDRAFT_480339 [Arabidopsis lyrata subsp. lyrata] gi 297329670 gb EFH60089.1  hypothetical protein ARALYDRAFT_480339 [Arabidopsis lyrata subsp. lyrata]                                                                                                                                                                                                                                                                                                                                                                                                                                                                                                                                                                                                                                                            | 76   | 73   | 1.00E-22  | 96.1  | 76.3 | 82.9 | hypothetical protein ARALYDRAFT_480339  | gbpln | Arabidopsis lyrata   | AT2G14247.1   Symbols:   Expressed protein   chr2:6034472-6034708 FORWARD LENGTH=78                                              | 76   | 78  | 8.00E-20  | 102.6 | 69.7 | 81.6 |
| Rsa1.0_00089.1.g4471.t1 | gb EOA14519.1  hypothetical protein CARUB_v10027748mg [Capsella rubella]                                                                                                                                                                                                                                                                                                                                                                                                                                                                                                                                                                                                                                                                                                                                                                                      | 354  | 368  | 4.00E-65  | 104.0 | 44.9 | 59.6 | hypothetical protein CARUB_v10027748mg  | gbpln | Capsella rubella     | AT4G38940.1   Symbols:   Galactose oxidase/kelch repeat superfamily protein   chr4:18152848-18153960 FORWARD LENGTH=370          | 354  | 370 | 3.00E-66  | 104.5 | 46.6 | 60.7 |



|                          |                                                                                                                                                                                                                                                                                                                                                                                          |      |      |           |       |      |      |                                           |       |                      |                                                                                                                                                                                                                                                                                                                                                                                                                                                                       |      |      |           |       |      |      |  |
|--------------------------|------------------------------------------------------------------------------------------------------------------------------------------------------------------------------------------------------------------------------------------------------------------------------------------------------------------------------------------------------------------------------------------|------|------|-----------|-------|------|------|-------------------------------------------|-------|----------------------|-----------------------------------------------------------------------------------------------------------------------------------------------------------------------------------------------------------------------------------------------------------------------------------------------------------------------------------------------------------------------------------------------------------------------------------------------------------------------|------|------|-----------|-------|------|------|--|
| Rsa1.0_00089.1.g4472.t1  | gb[EOA14519.1] hypothetical protein CARUB_v10027748mg [Capsella rubella]                                                                                                                                                                                                                                                                                                                 | 291  | 368  | 2.00E-62  | 126.5 | 48.5 | 63.2 | hypothetical protein CARUB_v10027748mg    | gbpln | Capsella rubella     | AT4G38940.1   Symbols:   Galactose oxidase/kelch repeat superfamily protein   chr4:18152848-18153960 FORWARD LENGTH=370                                                                                                                                                                                                                                                                                                                                               | 291  | 370  | 1.00E-54  | 127.1 | 47.1 | 61.9 |  |
| Rsa1.0_00089.1.g4473.t1  | ref[XP_002886270.1] hypothetical protein ARALYDRAFT_900378 [Arabidopsis lyrata subsp. lyrata] gi 297332110 gb EFH62529.1] hypothetical protein ARALYDRAFT_900378 [Arabidopsis lyrata subsp. lyrata]                                                                                                                                                                                      | 229  | 346  | 5.00E-20  | 151.1 | 22.3 | 27.1 | hypothetical protein ARALYDRAFT_900378    | gbpln | Arabidopsis lyrata   | AT4G38940.1   Symbols:   Galactose oxidase/kelch repeat superfamily protein   chr4:18152848-18153960 FORWARD LENGTH=370                                                                                                                                                                                                                                                                                                                                               | 229  | 370  | 8.00E-18  | 161.6 | 24.9 | 33.6 |  |
| Rsa1.0_00089.1.g4474.t25 | gb[EOA22909.1] hypothetical protein CARUB_v10003642mg [Capsella rubella]                                                                                                                                                                                                                                                                                                                 | 480  | 282  | 2.00E-29  | 58.8  | 21.3 | 27.5 | hypothetical protein CARUB_v10003642mg    | gbpln | Capsella rubella     | AT5G27070.1   Symbols: AGL53   AGAMOUS-like 53   chr5:9527741-9528604 FORWARD LENGTH=287                                                                                                                                                                                                                                                                                                                                                                              | 480  | 287  | 3.00E-27  | 59.8  | 20.8 | 27.3 |  |
| Rsa1.0_00089.1.g4475.t1  | ref[NP_176917.2] DNA polymerase zeta subunit [Arabidopsis thaliana] gi 34330129 dbj BAC82450.1] catalytic subunit of polymerase zeta [Arabidopsis thaliana] gi 332196534 gb AEE34655.1] DNA polymerase zeta subunit [Arabidopsis thaliana]                                                                                                                                               | 1864 | 1890 | 0         | 101.4 | 85.2 | 91.3 | DNA polymerase zeta subunit               | gbpln | Arabidopsis thaliana | AT1G67500.1   Symbols: ATREV3, REV3   recovery protein 3   chr1:25287707-25296714 REVERSE LENGTH=1890                                                                                                                                                                                                                                                                                                                                                                 | 1864 | 1890 | 0         | 101.4 | 85.2 | 91.3 |  |
| Rsa1.0_00089.1.g4476.t1  | gb[EOA22909.1] hypothetical protein CARUB_v10003642mg [Capsella rubella]                                                                                                                                                                                                                                                                                                                 | 287  | 282  | 2.00E-44  | 98.3  | 43.9 | 57.8 | hypothetical protein CARUB_v10003642mg    | gbpln | Capsella rubella     | AT5G27070.1   Symbols: AGL53   AGAMOUS-like 53   chr5:9527741-9528604 FORWARD LENGTH=287                                                                                                                                                                                                                                                                                                                                                                              | 287  | 287  | 8.00E-40  | 100.0 | 43.9 | 59.2 |  |
| Rsa1.0_00089.1.g4477.t1  | ref[XP_002886270.1] hypothetical protein ARALYDRAFT_900378 [Arabidopsis lyrata subsp. lyrata] gi 297332110 gb EFH62529.1] hypothetical protein ARALYDRAFT_900378 [Arabidopsis lyrata subsp. lyrata]                                                                                                                                                                                      | 231  | 346  | 2.00E-19  | 149.8 | 22.5 | 26.4 | hypothetical protein ARALYDRAFT_900378    | gbpln | Arabidopsis lyrata   | AT4G38940.1   Symbols:   Galactose oxidase/kelch repeat superfamily protein   chr4:18152848-18153960 FORWARD LENGTH=370                                                                                                                                                                                                                                                                                                                                               | 231  | 370  | 1.00E-19  | 160.2 | 25.5 | 34.2 |  |
| Rsa1.0_00089.1.g4478.t1  | ref[XP_002886268.1] hypothetical protein ARALYDRAFT_900376 [Arabidopsis lyrata subsp. lyrata] gi 297332108 gb EFH62527.1] hypothetical protein ARALYDRAFT_900376 [Arabidopsis lyrata subsp. lyrata]                                                                                                                                                                                      | 350  | 346  | 2.00E-74  | 98.9  | 46.9 | 60.6 | hypothetical protein ARALYDRAFT_900376    | gbpln | Arabidopsis lyrata   | AT4G38940.1   Symbols:   Galactose oxidase/kelch repeat superfamily protein   chr4:18152848-18153960 FORWARD LENGTH=370                                                                                                                                                                                                                                                                                                                                               | 350  | 370  | 1.00E-70  | 105.7 | 46.0 | 62.9 |  |
| Rsa1.0_00089.1.g4479.t1  | ref[XP_002886735.1] hypothetical protein ARALYDRAFT_315436 [Arabidopsis lyrata subsp. lyrata] gi 297332576 gb EFH62994.1] hypothetical protein ARALYDRAFT_315436 [Arabidopsis lyrata subsp. lyrata]                                                                                                                                                                                      | 595  | 649  | 0         | 109.1 | 76.1 | 82.0 | hypothetical protein ARALYDRAFT_315436    | gbpln | Arabidopsis lyrata   | AT1G57820.1   Symbols: VIM1, ORTH2   Zinc finger (C3HC4-type RING finger) family protein   chr1:21414342-21417902 REVERSE LENGTH=645                                                                                                                                                                                                                                                                                                                                  | 595  | 645  | 0         | 108.4 | 72.6 | 79.3 |  |
| Rsa1.0_00089.1.g4480.t1  | # # # # # # # # # # # # # # # #                                                                                                                                                                                                                                                                                                                                                          |      |      |           |       |      |      |                                           |       |                      |                                                                                                                                                                                                                                                                                                                                                                                                                                                                       |      |      |           |       |      |      |  |
| Rsa1.0_00089.1.g4481.t1  | ref[XP_002887130.1] lipoxygenase family protein [Arabidopsis lyrata subsp. lyrata] gi 297332971 gb EFH63389.1] lipoxygenase family protein [Arabidopsis lyrata subsp. lyrata]                                                                                                                                                                                                            | 918  | 917  | 0         | 99.9  | 87.7 | 93.4 | lipoxygenase family protein               | gbpln | Arabidopsis lyrata   | AT1G67560.1   Symbols: LOX6   PLAT/LH2 domain-containing lipoxygenase family protein   chr1:25319926-25324117 FORWARD LENGTH=917                                                                                                                                                                                                                                                                                                                                      | 918  | 917  | 0         | 99.9  | 86.8 | 92.7 |  |
| Rsa1.0_00089.1.g4482.t1  | ref[NP_564899.1] uncharacterized protein [Arabidopsis thaliana] gi 332196544 gb AEE34665.1] uncharacterized protein AT1G67570 [Arabidopsis thaliana]                                                                                                                                                                                                                                     | 460  | 456  | 0         | 99.1  | 80.9 | 87.2 | uncharacterized protein                   | gbpln | Arabidopsis thaliana | AT1G67570.1   Symbols:   Protein of unknown function (DUF3537)   chr1:25325318-25326938 FORWARD LENGTH=456                                                                                                                                                                                                                                                                                                                                                            | 460  | 456  | 0         | 99.1  | 80.9 | 87.2 |  |
| Rsa1.0_00089.1.g4483.t2  | ref[NP_176936.1] signal recognition particle subunit SRP72 [Arabidopsis thaliana] gi 11072013 gb AAG28892.1 AC008113.8 F12A21.17 [Arabidopsis thaliana] gi 28392947 gb AAO41909.1] unknown protein [Arabidopsis thaliana] gi 28827690 gb AAO50689.1] unknown protein [Arabidopsis thaliana] gi 332196560 gb AEE34681.1] signal recognition particle subunit SRP72 [Arabidopsis thaliana] | 654  | 664  | 0         | 101.5 | 80.9 | 87.6 | signal recognition particle subunit SRP72 | gbpln | Arabidopsis thaliana | AT1G67680.1   Symbols:   SRP72 RNA-binding domain   chr1:25365962-25368464 REVERSE LENGTH=664                                                                                                                                                                                                                                                                                                                                                                         | 654  | 664  | 0         | 101.5 | 80.9 | 87.6 |  |
| Rsa1.0_00089.1.g4484.t21 | ref[NP_850972.1] uncharacterized protein [Arabidopsis thaliana] gi 15215606 gb AAK91348.1] At1g67700/F12A21_30 [Arabidopsis thaliana] gi 21435965 gb AAM51570.1] At1g67700/F12A21_30 [Arabidopsis thaliana] gi 332196562 gb AEE34683.1] uncharacterized protein AT1G67700 [Arabidopsis thaliana]                                                                                         | 263  | 230  | 1.00E-111 | 87.5  | 77.2 | 79.5 | uncharacterized protein                   | gbpln | Arabidopsis thaliana | AT1G67700.1   Symbols:   unknown protein; FUNCTIONS IN: molecular function unknown; INVOLVED IN: biological process unknown; LOCATED IN: chloroplast, chloroplast envelope; EXPRESSED IN: 22 plant structures; EXPRESSED DURING: 13 growth stages; Has 49 Blast hits to 49 proteins in 20 species: Archae - 0; Bacteria - 0; Metazoa - 0; Fungi - 0; Plants - 44; Viruses - 0; Other Eukaryotes - 5 (source: NCBI BLINK).   chr1:25374295-25375716 FORWARD LENGTH=230 | 263  | 230  | 1.00E-114 | 87.5  | 77.2 | 79.5 |  |

|                         |                                                                                                                                                                                                                                                                                                                                                                                                                                                                                                                                                                                                                                                                                                                                                                                                                                                                                                                                                                                                                                                |     |     |          |       |      |       |                                        |       |                      |                                                                                                                                                                                                                                                             |     |     |          |       |      |       |
|-------------------------|------------------------------------------------------------------------------------------------------------------------------------------------------------------------------------------------------------------------------------------------------------------------------------------------------------------------------------------------------------------------------------------------------------------------------------------------------------------------------------------------------------------------------------------------------------------------------------------------------------------------------------------------------------------------------------------------------------------------------------------------------------------------------------------------------------------------------------------------------------------------------------------------------------------------------------------------------------------------------------------------------------------------------------------------|-----|-----|----------|-------|------|-------|----------------------------------------|-------|----------------------|-------------------------------------------------------------------------------------------------------------------------------------------------------------------------------------------------------------------------------------------------------------|-----|-----|----------|-------|------|-------|
| Rsa1.0_00089.1.g4485.t1 | gb EOA35026.1  hypothetical protein CARUB_v10020133mg [Capsella rubella]                                                                                                                                                                                                                                                                                                                                                                                                                                                                                                                                                                                                                                                                                                                                                                                                                                                                                                                                                                       | 512 | 528 | 0        | 103.1 | 82.8 | 89.1  | hypothetical protein CARUB_v10020133mg | gbpln | Capsella rubella     | AT1G67710.1   Symbols: ARR11   response regulator 11   chr1:25376994-25378905 REVERSE LENGTH=521                                                                                                                                                            | 512 | 521 | 0        | 101.8 | 82.4 | 88.5  |
| Rsa1.0_00089.1.g4486.t1 | ref XP_002888618.1  hypothetical protein ARALYDRAFT_475878 [Arabidopsis lyrata subsp. lyrata] gi 297332983 gb EFH64877.1  hypothetical protein ARALYDRAFT_475878 [Arabidopsis lyrata subsp. lyrata]                                                                                                                                                                                                                                                                                                                                                                                                                                                                                                                                                                                                                                                                                                                                                                                                                                            | 146 | 185 | 3.00E-37 | 126.7 | 71.9 | 79.5  | hypothetical protein ARALYDRAFT_475878 | gbpln | Arabidopsis lyrata   | AT1G67740.1   Symbols: PSBY, YCF32   photosystem II BY   chr1:25394429-25394998 REVERSE LENGTH=189                                                                                                                                                          | 146 | 189 | 3.00E-37 | 129.5 | 69.2 | 75.3  |
| Rsa1.0_00089.1.g4488.t1 | ref XP_002887142.1  predicted protein [Arabidopsis lyrata subsp. lyrata] gi 297332983 gb EFH63401.1  predicted protein [Arabidopsis lyrata subsp. lyrata]                                                                                                                                                                                                                                                                                                                                                                                                                                                                                                                                                                                                                                                                                                                                                                                                                                                                                      | 562 | 542 | 0        | 96.4  | 76.3 | 82.0  | predicted protein                      | gbpln | Arabidopsis lyrata   | AT3G26100.2   Symbols:   Regulator of chromosome condensation (RCC1) family protein   chr3:9538063-9540149 FORWARD LENGTH=532                                                                                                                               | 562 | 532 | 0        | 94.7  | 60.1 | 69.8  |
| Rsa1.0_00089.1.g4488.t1 | ref XP_002887143.1  pectate lyase family protein [Arabidopsis lyrata subsp. lyrata] gi 297332984 gb EFH63402.1  pectate lyase family protein [Arabidopsis lyrata subsp. lyrata]                                                                                                                                                                                                                                                                                                                                                                                                                                                                                                                                                                                                                                                                                                                                                                                                                                                                | 407 | 408 | 0        | 100.2 | 92.6 | 95.3  | pectate lyase family protein           | gbpln | Arabidopsis lyrata   | AT1G67750.1   Symbols:   Pectate lyase family protein   chr1:25401660-25403165 FORWARD LENGTH=408                                                                                                                                                           | 407 | 408 | 0        | 100.2 | 92.6 | 95.1  |
| Rsa1.0_00089.1.g4489.t1 | ref XP_002886268.1  hypothetical protein ARALYDRAFT_900376 [Arabidopsis lyrata subsp. lyrata] gi 297332108 gb EFH62527.1  hypothetical protein ARALYDRAFT_900376 [Arabidopsis lyrata subsp. lyrata]                                                                                                                                                                                                                                                                                                                                                                                                                                                                                                                                                                                                                                                                                                                                                                                                                                            | 347 | 346 | 1.00E-63 | 99.7  | 45.8 | 62.0  | hypothetical protein ARALYDRAFT_900376 | gbpln | Arabidopsis lyrata   | AT4G38940.1   Symbols:   Galactose oxidase/kelch repeat superfamily protein   chr4:18152848-18153960 FORWARD LENGTH=370                                                                                                                                     | 347 | 370 | 1.00E-62 | 106.6 | 46.4 | 59.4  |
| Rsa1.0_00089.1.g4490.t1 | ref NP_198119.1  histone H2A 7 [Arabidopsis thaliana] gi 75306451 sp Q94F49.1 H2A5_ARATH RecName: Full=Probable histone H2A.5; AltName: Full=HTA7 gi 14326516 gb AAK60303.1 AF385711.1 AT5g27670/F15A18_130 [Arabidopsis thaliana] gi 18700220 gb AAL77720.1  AT5g27670/F15A18_130 [Arabidopsis thaliana] gi 332006330 gb AED93713.1  histone H2A 7 [Arabidopsis thaliana]                                                                                                                                                                                                                                                                                                                                                                                                                                                                                                                                                                                                                                                                     | 89  | 150 | 1.00E-25 | 168.5 | 67.4 | 76.4  | histone H2A 7                          | gbpln | Arabidopsis thaliana | AT5G27670.1   Symbols: HTA7   histone H2A 7   chr5:9792807-9793365 REVERSE LENGTH=150                                                                                                                                                                       | 89  | 150 | 2.00E-28 | 168.5 | 67.4 | 76.4  |
| Rsa1.0_00089.1.g4491.t1 | #                                                                                                                                                                                                                                                                                                                                                                                                                                                                                                                                                                                                                                                                                                                                                                                                                                                                                                                                                                                                                                              | #   | #   | #        | #     | #    | #     | -                                      | ----  | ----                 | #                                                                                                                                                                                                                                                           | #   | #   | #        | #     | #    | #     |
| Rsa1.0_00089.1.g4492.t1 | #                                                                                                                                                                                                                                                                                                                                                                                                                                                                                                                                                                                                                                                                                                                                                                                                                                                                                                                                                                                                                                              | #   | #   | #        | #     | #    | #     | -                                      | ----  | ----                 | #                                                                                                                                                                                                                                                           | #   | #   | #        | #     | #    | #     |
| Rsa1.0_00089.1.g4493.t1 | ref XP_002886268.1  hypothetical protein ARALYDRAFT_900376 [Arabidopsis lyrata subsp. lyrata] gi 297332108 gb EFH62527.1  hypothetical protein ARALYDRAFT_900376 [Arabidopsis lyrata subsp. lyrata] ref NP_683481.1  uncharacterized protein [Arabidopsis thaliana] gi 297841483 ref XP_002888623.1  hypothetical protein ARALYDRAFT_475883 [Arabidopsis lyrata subsp. lyrata] gi 17528968 gb AAL38694.1  unknown protein [Arabidopsis thaliana] gi 20465479 gb AAM20199.1  unknown protein [Arabidopsis thaliana] gi 21618233 gb AAM67283.1  unknown [Arabidopsis thaliana] gi 26450708 dbj BAC42463.1  unknown protein [Arabidopsis thaliana] gi 297334464 gb EFH64882.1  hypothetical protein ARALYDRAFT_475883 [Arabidopsis lyrata subsp. lyrata] gi 332196574 gb AEE34695.1  uncharacterized protein AT1G67785 [Arabidopsis thaliana] ref XP_002887371.1  hypothetical protein ARALYDRAFT_476270 [Arabidopsis lyrata subsp. lyrata] gi 297333212 gb EFH63630.1  hypothetical protein ARALYDRAFT_476270 [Arabidopsis lyrata subsp. lyrata] | 359 | 346 | 3.00E-71 | 96.4  | 46.5 | 61.6  | hypothetical protein ARALYDRAFT_900376 | gbpln | Arabidopsis lyrata   | AT4G38940.1   Symbols:   Galactose oxidase/kelch repeat superfamily protein   chr4:18152848-18153960 FORWARD LENGTH=370                                                                                                                                     | 359 | 370 | 3.00E-70 | 103.1 | 46.2 | 61.8  |
| Rsa1.0_00089.1.g4494.t1 | ref NP_683481.1  uncharacterized protein [Arabidopsis thaliana] gi 297841483 ref XP_002888623.1  hypothetical protein ARALYDRAFT_475883 [Arabidopsis lyrata subsp. lyrata] gi 17528968 gb AAL38694.1  unknown protein [Arabidopsis thaliana] gi 20465479 gb AAM20199.1  unknown protein [Arabidopsis thaliana] gi 21618233 gb AAM67283.1  unknown [Arabidopsis thaliana] gi 26450708 dbj BAC42463.1  unknown protein [Arabidopsis thaliana] gi 297334464 gb EFH64882.1  hypothetical protein ARALYDRAFT_475883 [Arabidopsis lyrata subsp. lyrata] gi 332196574 gb AEE34695.1  uncharacterized protein AT1G67785 [Arabidopsis thaliana] ref XP_002887371.1  hypothetical protein ARALYDRAFT_476270 [Arabidopsis lyrata subsp. lyrata] gi 297333212 gb EFH63630.1  hypothetical protein ARALYDRAFT_476270 [Arabidopsis lyrata subsp. lyrata]                                                                                                                                                                                                     | 63  | 63  | 3.00E-27 | 100.0 | 96.8 | 100.0 | uncharacterized protein                | gbpln | Arabidopsis lyrata   | AT1G67785.1   Symbols:   unknown protein; Has 30 Blast hits to 30 proteins in 12 species: Archae - 0; Bacteria - 0; Metazoa - 0; Fungi - 0; Plants - 30; Viruses - 0; Other Eukaryotes - 0 (source: NCBI BLINK).   chr1:25416100-25416984 REVERSE LENGTH=63 | 63  | 63  | 4.00E-30 | 100.0 | 96.8 | 100.0 |
| Rsa1.0_00089.1.g4495.t1 | ref XP_002887371.1  hypothetical protein ARALYDRAFT_476270 [Arabidopsis lyrata subsp. lyrata] gi 297333212 gb EFH63630.1  hypothetical protein ARALYDRAFT_476270 [Arabidopsis lyrata subsp. lyrata]                                                                                                                                                                                                                                                                                                                                                                                                                                                                                                                                                                                                                                                                                                                                                                                                                                            | 705 | 768 | 0        | 108.9 | 66.7 | 76.0  | hypothetical protein ARALYDRAFT_476270 | gbpln | Arabidopsis lyrata   | AT1G71390.1   Symbols: AtRLP11, RLP11   receptor like protein 11   chr1:26906453-26908807 FORWARD LENGTH=784                                                                                                                                                | 705 | 784 | 0        | 111.2 | 65.1 | 74.8  |

|                         |                                                                                                                                                                                                                                                                                                                                                                                                                                                                                                                                                                                                                                 |     |     |           |       |      |      |                                                 |       |                      |                                                                                                                                                                                                                                                                                                                                                          |     |     |           |       |      |      |
|-------------------------|---------------------------------------------------------------------------------------------------------------------------------------------------------------------------------------------------------------------------------------------------------------------------------------------------------------------------------------------------------------------------------------------------------------------------------------------------------------------------------------------------------------------------------------------------------------------------------------------------------------------------------|-----|-----|-----------|-------|------|------|-------------------------------------------------|-------|----------------------|----------------------------------------------------------------------------------------------------------------------------------------------------------------------------------------------------------------------------------------------------------------------------------------------------------------------------------------------------------|-----|-----|-----------|-------|------|------|
| Rsa1.0_00089.1.g4496.t1 | refNP_177295.1   receptor like protein 11 [Arabidopsis thaliana]<br>gi 12323717 gb AAG51813.1 AC016163_2 putative disease resistance protein; 69620-67266 [Arabidopsis thaliana]<br>gi 332197075 gb AEE35196.1   receptor like protein 11 [Arabidopsis thaliana]                                                                                                                                                                                                                                                                                                                                                                | 741 | 784 | 0         | 105.8 | 67.3 | 77.3 | receptor like protein 11                        | gbpln | Arabidopsis thaliana | AT1G71390.1   Symbols: AtRLP11, RLP11   receptor like protein 11   chr1:26906453-26908807 FORWARD LENGTH=784                                                                                                                                                                                                                                             | 741 | 784 | 0         | 105.8 | 67.3 | 77.3 |
| Rsa1.0_00089.1.g4497.t1 | refNP_564908.1   chloroplast sensor kinase [Arabidopsis thaliana]<br>gi 332196584 gb AEE34705.1   chloroplast sensor kinase [Arabidopsis thaliana]                                                                                                                                                                                                                                                                                                                                                                                                                                                                              | 609 | 611 | 0         | 100.3 | 88.8 | 92.3 | chloroplast sensor kinase                       | gbpln | Arabidopsis thaliana | AT1G67840.1   Symbols: CSK   chloroplast sensor kinase   chr1:25434156-25436839 FORWARD LENGTH=611                                                                                                                                                                                                                                                       | 609 | 611 | 0         | 100.3 | 88.8 | 92.3 |
| Rsa1.0_00089.1.g4498.t2 | refNP_564909.1   uncharacterized protein [Arabidopsis thaliana]<br>gi 42572023 refNP_974102.1   uncharacterized protein [Arabidopsis thaliana]<br>gi 14326582 gb AAK60335.1 AF385745_1 At1g67850/F12A21_2 [Arabidopsis thaliana]<br>gi 25090152 gb AAN72241.1   At1g67850/F12A21_2 [Arabidopsis thaliana]<br>gi 222423797 dbj BAH19864.1   AT1G67850 [Arabidopsis thaliana]<br>gi 222424761 dbj BAH20333.1   AT1G67850 [Arabidopsis thaliana]<br>gi 332196585 gb AEE34706.1   uncharacterized protein AT1G67850 [Arabidopsis thaliana]<br>gi 332196586 gb AEE34707.1   uncharacterized protein AT1G67850 [Arabidopsis thaliana] | 362 | 404 | 0         | 111.6 | 92.3 | 96.7 | uncharacterized protein                         | gbpln | Arabidopsis thaliana | AT1G67850.2   Symbols:   Protein of unknown function (DUF070)   chr1:25439204-25441904 FORWARD LENGTH=404                                                                                                                                                                                                                                                | 362 | 404 | 0         | 111.6 | 92.3 | 96.7 |
| Rsa1.0_00089.1.g4499.t1 | gb EOA35521.1   hypothetical protein CARUB_v10020730mg [Capsella rubella]                                                                                                                                                                                                                                                                                                                                                                                                                                                                                                                                                       | 264 | 295 | 3.00E-62  | 111.7 | 61.4 | 70.5 | hypothetical protein CARUB_v10020730mg          | gbpln | Capsella rubella     | AT1G67870.1   Symbols:   glycine-rich protein   chr1:25449593-25450943 REVERSE LENGTH=279                                                                                                                                                                                                                                                                | 264 | 279 | 4.00E-18  | 105.7 | 26.5 | 31.8 |
| Rsa1.0_00089.1.g4500.t1 | ref XP_002888633.1   glycosyl transferase family 17 protein [Arabidopsis lyrata subsp. lyrata]<br>gi 297334474 gb EFH64892.1   glycosyl transferase family 17 protein [Arabidopsis lyrata subsp. lyrata]                                                                                                                                                                                                                                                                                                                                                                                                                        | 392 | 390 | 0         | 99.5  | 91.6 | 96.9 | glycosyl transferase family 17 protein          | gbpln | Arabidopsis lyrata   | AT1G67880.1   Symbols:   beta-1,4-N-acetylglucosaminyltransferase family protein   chr1:25454081-25455453 REVERSE LENGTH=390                                                                                                                                                                                                                             | 392 | 390 | 0         | 99.5  | 91.6 | 96.7 |
| Rsa1.0_00089.1.g4501.t1 | gb EOA33765.1   hypothetical protein CARUB_v10019960mg [Capsella rubella]                                                                                                                                                                                                                                                                                                                                                                                                                                                                                                                                                       | 583 | 630 | 0         | 108.1 | 93.0 | 96.7 | hypothetical protein CARUB_v10019960mg          | gbpln | Capsella rubella     | AT1G67900.3   Symbols:   Phototropic-responsive NPH3 family protein   chr1:25467737-25469888 FORWARD LENGTH=631                                                                                                                                                                                                                                          | 583 | 631 | 0         | 108.2 | 92.8 | 96.6 |
| Rsa1.0_00089.1.g4502.t1 | ref XP_002888634.1   hypothetical protein ARALYDRAFT_894552 [Arabidopsis lyrata subsp. lyrata]<br>gi 297334475 gb EFH64893.1   hypothetical protein ARALYDRAFT_894552 [Arabidopsis lyrata subsp. lyrata]                                                                                                                                                                                                                                                                                                                                                                                                                        | 91  | 102 | 7.00E-31  | 112.1 | 73.6 | 83.5 | hypothetical protein ARALYDRAFT_894552          | gbpln | Arabidopsis lyrata   | AT1G67910.2   Symbols:   unknown protein; FUNCTIONS IN: molecular_function unknown; INVOLVED IN: biological_process unknown; LOCATED IN: chloroplast; EXPRESSED IN: 21 plant structures; EXPRESSED DURING: 12 growth stages; BEST Arabidopsis thaliana protein match is: unknown protein (TAIR:AT1G24577.t1).   chr1:25471534-25471809 REVERSE LENGTH=91 | 91  | 91  | 1.00E-30  | 100.0 | 69.2 | 80.2 |
| Rsa1.0_00089.1.g4503.t1 | dbj BAJ34019.1   unnamed protein product [Theillungiella halophila]                                                                                                                                                                                                                                                                                                                                                                                                                                                                                                                                                             | 67  | 66  | 4.00E-24  | 98.5  | 88.1 | 94.0 | unnamed protein product                         | ----  | ----                 | AT1G67920.1   Symbols:   unknown protein; BEST Arabidopsis thaliana protein match is: unknown protein (TAIR:AT1G24600.1); Has 22 Blast hits to 22 proteins in 5 species: Archaea - 0; Bacteria - 0; Metazoa - 0; Fungi - 0; Plants - 22; Viruses - 0; Other Eukaryotes - 0 (source: NCBI BLINK).   chr1:25473731-25473934 FORWARD LENGTH=67              | 67  | 67  | 3.00E-24  | 100.0 | 86.6 | 92.5 |
| Rsa1.0_00089.1.g4504.t1 | gb AAO03559.1   lipoxygenase 2 [Brassica napus]                                                                                                                                                                                                                                                                                                                                                                                                                                                                                                                                                                                 | 889 | 892 | 0         | 100.3 | 87.6 | 93.1 | lipoxygenase 2                                  | gbpln | Brassica napus       | AT3G45140.1   Symbols: LOX2, ATLOX2   lipoxygenase 2   chr3:16525437-16529233 FORWARD LENGTH=896                                                                                                                                                                                                                                                         | 889 | 896 | 0         | 100.8 | 74.2 | 85.7 |
| Rsa1.0_00089.1.g4505.t1 | #                                                                                                                                                                                                                                                                                                                                                                                                                                                                                                                                                                                                                               | #   | #   | #         | #     | #    | -    | ----                                            | ----  | #                    | #                                                                                                                                                                                                                                                                                                                                                        | #   | #   | #         | #     | #    |      |
| Rsa1.0_00089.1.g4506.t1 | gb AAO03559.1   lipoxygenase 2 [Brassica napus]                                                                                                                                                                                                                                                                                                                                                                                                                                                                                                                                                                                 | 889 | 892 | 0         | 100.3 | 90.6 | 94.3 | lipoxygenase 2                                  | gbpln | Brassica napus       | AT3G45140.1   Symbols: LOX2, ATLOX2   lipoxygenase 2   chr3:16525437-16529233 FORWARD LENGTH=896                                                                                                                                                                                                                                                         | 889 | 896 | 0         | 100.8 | 75.7 | 86.5 |
| Rsa1.0_00089.1.g4507.t1 | gb AAO03559.1   lipoxygenase 2 [Brassica napus]                                                                                                                                                                                                                                                                                                                                                                                                                                                                                                                                                                                 | 892 | 892 | 0         | 100.0 | 89.1 | 93.6 | lipoxygenase 2                                  | gbpln | Brassica napus       | AT3G45140.1   Symbols: LOX2, ATLOX2   lipoxygenase 2   chr3:16525437-16529233 FORWARD LENGTH=896                                                                                                                                                                                                                                                         | 892 | 896 | 0         | 100.4 | 76.3 | 87.3 |
| Rsa1.0_00089.1.g4508.t3 | gb AAM77369.1   AF521301_1 phosphatidylinositol synthase [Brassica napus]                                                                                                                                                                                                                                                                                                                                                                                                                                                                                                                                                       | 245 | 227 | 1.00E-123 | 92.7  | 88.6 | 90.2 | phosphatidylinositol synthase                   | gbpln | Brassica napus       | AT1G68000.1   Symbols: ATPIS1, ATPIS, PIS1   phosphatidylinositol synthase 1   chr1:25491346-25492930 FORWARD LENGTH=227                                                                                                                                                                                                                                 | 245 | 227 | 1.00E-124 | 92.7  | 86.5 | 89.8 |
| Rsa1.0_00089.1.g4509.t1 | gb EOA34815.1   hypothetical protein CARUB_v10022393mg, partial [Capsella rubella]                                                                                                                                                                                                                                                                                                                                                                                                                                                                                                                                              | 386 | 379 | 0         | 98.2  | 96.4 | 97.4 | hypothetical protein CARUB_v10022393mg, partial | gbpln | Capsella rubella     | AT1G68010.1   Symbols: HPR, ATHPR1   hydroxypyruvate reductase   chr1:25493418-25495720 FORWARD LENGTH=386                                                                                                                                                                                                                                               | 386 | 386 | 0         | 100.0 | 97.4 | 98.4 |

|                         |                                                                                                                                                                                                                                                                                                                                                                                                                                                                                                                                                                                                                                                                  |      |      |           |       |      |      |                                                                               |       |                      |                                                                                                                                                  |      |     |           |       |      |      |
|-------------------------|------------------------------------------------------------------------------------------------------------------------------------------------------------------------------------------------------------------------------------------------------------------------------------------------------------------------------------------------------------------------------------------------------------------------------------------------------------------------------------------------------------------------------------------------------------------------------------------------------------------------------------------------------------------|------|------|-----------|-------|------|------|-------------------------------------------------------------------------------|-------|----------------------|--------------------------------------------------------------------------------------------------------------------------------------------------|------|-----|-----------|-------|------|------|
| Rsa1.0_00089.1.g4510.t1 | ref[XP_002888643.1] predicted protein [Arabidopsis lyrata subsp. lyrata] gi 297334444 gb EFH64902.1  predicted protein [Arabidopsis lyrata subsp. lyrata]                                                                                                                                                                                                                                                                                                                                                                                                                                                                                                        | 860  | 857  | 0         | 99.7  | 93.8 | 96.7 | predicted protein                                                             | gbpln | Arabidopsis lyrata   | AT1G68020.2   Symbols: ATTPS6, TPS6   UDP-Glycosyltransferase / trehalose-phosphatase family protein   chr1:25497493-25500241 FORWARD LENGTH=860 | 860  | 860 | 0         | 100.0 | 92.9 | 96.2 |
| Rsa1.0_00089.1.g4511.t1 | ref[NP_176973.1] microtubule-associated proteins 70-1 [Arabidopsis thaliana] gi 75169797 sp Q9C9X0.1 MP701_ARAT H RecName: Full=Microtubule-associated protein 70-1; Short=AtMAP70-1; AltName: Full=70 kDa microtubule-associated protein 1 gi 12324091 gb AAG52019.1 AC012563.29 unknown protein; 30164-32998 [Arabidopsis thaliana] gi 18377700 gb AL67000.1  unknown protein [Arabidopsis thaliana] gi 20465647 gb AAM20292.1  unknown protein [Arabidopsis thaliana] gi 76058012 emb CAJ31078.1  70 kDa microtubule associated protein Type 1 [Arabidopsis thaliana] gi 332196621 gb AEE34742.1  microtubule-associated proteins 70-1 [Arabidopsis thaliana] | 614  | 622  | 0         | 101.3 | 91.4 | 95.3 | microtubule-associated proteins 70-1                                          | gbpln | Arabidopsis thaliana | AT1G68060.1   Symbols: ATMAP70-1, MAP70-1   microtubule-associated proteins 70-1   chr1:25511392-25514226 REVERSE LENGTH=622                     | 614  | 622 | 0         | 101.3 | 91.4 | 95.3 |
| Rsa1.0_00089.1.g4512.t1 | ref[NP_176975.2] 2-oxoglutarate (2OG) and Fe(II)-dependent oxygenase domain-containing protein [Arabidopsis thaliana] gi 56236062 gb AAV84487.1  At1g68080 [Arabidopsis thaliana] gi 58531340 gb AAW78592.1  At1g68080 [Arabidopsis thaliana] gi 60547659 gb AAX23793.1  hypothetical protein At1g68080 [Arabidopsis thaliana] gi 71905461 gb AAZ52708.1  expressed protein [Arabidopsis thaliana] gi 332196623 gb AEE34744.1  2-oxoglutarate (2OG) and Fe(II)-dependent oxygenase domain-containing protein [Arabidopsis thaliana]                                                                                                                              | 392  | 389  | 1.00E-173 | 99.2  | 77.3 | 88.5 | 2-oxoglutarate (2OG) and Fe(II)-dependent oxygenase domain-containing protein | gbpln | Arabidopsis thaliana | AT1G68080.1   Symbols:   2-oxoglutarate (2OG) and Fe(II)-dependent oxygenase superfamily protein   chr1:25517530-25519240 FORWARD LENGTH=389     | 392  | 389 | 1.00E-175 | 99.2  | 77.3 | 88.5 |
| Rsa1.0_00089.1.g4513.t1 | gb EOA35125.1  hypothetical protein CARUB_v10020247mg [Capsella rubella]                                                                                                                                                                                                                                                                                                                                                                                                                                                                                                                                                                                         | 466  | 466  | 0         | 100.0 | 81.8 | 88.8 | hypothetical protein CARUB_v10020247mg                                        | gbpln | Capsella rubella     | AT1G68100.1   Symbols: IAR1   ZIP metal ion transporter family   chr1:25521325-25524032 FORWARD LENGTH=469                                       | 466  | 469 | 0         | 100.6 | 82.2 | 88.0 |
| Rsa1.0_00089.1.g4514.t1 | ref[XP_002898637.1] atidd14-domain 14 [Arabidopsis lyrata subsp. lyrata] gi 297334478 gb EFH64896.1  atidd14-domain 14 [Arabidopsis lyrata subsp. lyrata]                                                                                                                                                                                                                                                                                                                                                                                                                                                                                                        | 413  | 423  | 0         | 102.4 | 85.5 | 90.6 | atidd14-domain 14                                                             | gbpln | Arabidopsis lyrata   | AT1G68130.1   Symbols: AtIDD14, IDD14   indeterminate(ID)-domain 14   chr1:25532484-25534317 FORWARD LENGTH=419                                  | 413  | 419 | 0         | 101.5 | 83.5 | 88.1 |
| Rsa1.0_00089.1.g4515.t1 | #                                                                                                                                                                                                                                                                                                                                                                                                                                                                                                                                                                                                                                                                | #    | #    | #         | #     | #    | #    | -                                                                             | ----  | ----                 | #                                                                                                                                                | #    | #   | #         | #     | #    |      |
| Rsa1.0_00089.1.g4516.t1 | gb EOA35581.1  hypothetical protein CARUB_v10020790mg [Capsella rubella]                                                                                                                                                                                                                                                                                                                                                                                                                                                                                                                                                                                         | 258  | 270  | 2.00E-76  | 104.7 | 67.8 | 77.5 | hypothetical protein CARUB_v10020790mg                                        | gbpln | Capsella rubella     | AT1G68160.1   Symbols:   Protein of unknown function (DUF3755)   chr1:25546168-25548625 REVERSE LENGTH=273                                       | 258  | 273 | 3.00E-60  | 105.8 | 58.9 | 70.2 |
| Rsa1.0_00089.1.g4517.t1 | ref[XP_002891889.1] hypothetical protein ARALYDRAFT_474711 [Arabidopsis lyrata subsp. lyrata] gi 297337731 gb EFH68148.1  hypothetical protein ARALYDRAFT_474711 [Arabidopsis lyrata subsp. lyrata]                                                                                                                                                                                                                                                                                                                                                                                                                                                              | 102  | 551  | 6.00E-30  | 540.2 | 67.6 | 73.5 | hypothetical protein ARALYDRAFT_474711                                        | gbpln | Arabidopsis lyrata   | AT1G54380.1   Symbols:   spliceosome protein-related   chr1:20298287-20300899 REVERSE LENGTH=515                                                 | 102  | 515 | 2.00E-32  | 504.9 | 66.7 | 73.5 |
| Rsa1.0_00089.1.g4518.t1 | gb EOA36691.1  hypothetical protein CARUB_v10012096mg [Capsella rubella]                                                                                                                                                                                                                                                                                                                                                                                                                                                                                                                                                                                         | 293  | 327  | 1.00E-104 | 111.6 | 62.5 | 75.8 | hypothetical protein CARUB_v10012096mg                                        | gbpln | Capsella rubella     | AT5G43690.1   Symbols:   P-loop containing nucleoside triphosphate hydrolases superfamily protein   chr5:17546273-17547268 FORWARD LENGTH=331    | 293  | 331 | 1.00E-106 | 113.0 | 62.5 | 75.8 |
| Rsa1.0_00090.1.g4519.t1 | ref[XP_002866178.1] hypothetical protein ARALYDRAFT_918860 [Arabidopsis lyrata subsp. lyrata] gi 297312013 gb EFH42437.1  hypothetical protein ARALYDRAFT_918860 [Arabidopsis lyrata subsp. lyrata]                                                                                                                                                                                                                                                                                                                                                                                                                                                              | 231  | 232  | 9.00E-81  | 100.4 | 63.2 | 76.2 | hypothetical protein ARALYDRAFT_918860                                        | gbpln | Arabidopsis lyrata   | AT5G56920.1   Symbols:   Cystatin/monellin superfamily protein   chr5:23025000-23025765 FORWARD LENGTH=227                                       | 231  | 227 | 5.00E-43  | 98.3  | 39.8 | 58.4 |
| Rsa1.0_00090.1.g4520.t1 | emb CAB39638.1  RNA-directed DNA polymerase-like protein [Arabidopsis thaliana] gi 7267666 emb CAB78094.1  RNA-directed DNA polymerase-like protein [Arabidopsis thaliana]                                                                                                                                                                                                                                                                                                                                                                                                                                                                                       | 1472 | 1274 | 0         | 86.5  | 38.2 | 52.7 | RNA-directed DNA polymerase-like protein                                      | gbpln | Arabidopsis thaliana | AT4G29090.1   Symbols:   Ribonuclease H-like superfamily protein   chr4:14333528-14335255 FORWARD LENGTH=575                                     | 1472 | 575 | 2.00E-65  | 39.1  | 10.4 | 15.6 |
| Rsa1.0_00090.1.g4521.t1 | #                                                                                                                                                                                                                                                                                                                                                                                                                                                                                                                                                                                                                                                                | #    | #    | #         | #     | #    | #    | -                                                                             | ----  | ----                 | #                                                                                                                                                | #    | #   | #         | #     | #    |      |

|                          |                                                                                                                                                                                                                                                                                                                                                                                                                                                                                                                               |      |      |           |       |      |      |                                                                         |       |                      |                                                                                                                                                                                                                                                                                                                                                           |      |      |           |       |      |      |
|--------------------------|-------------------------------------------------------------------------------------------------------------------------------------------------------------------------------------------------------------------------------------------------------------------------------------------------------------------------------------------------------------------------------------------------------------------------------------------------------------------------------------------------------------------------------|------|------|-----------|-------|------|------|-------------------------------------------------------------------------|-------|----------------------|-----------------------------------------------------------------------------------------------------------------------------------------------------------------------------------------------------------------------------------------------------------------------------------------------------------------------------------------------------------|------|------|-----------|-------|------|------|
| Rsa1.0_00090.1.g4522.t1  | gb AAG50806.1 AC079281.8 unknown protein [Arabidopsis thaliana]                                                                                                                                                                                                                                                                                                                                                                                                                                                               | 1797 | 1213 | 0         | 67.5  | 24.9 | 37.7 | unknown protein                                                         | gbpln | Arabidopsis thaliana | AT1G43760.1   Symbols:   DNase I-like superfamily protein   chr1:16528880-16531065 REVERSE LENGTH=626                                                                                                                                                                                                                                                     | 1797 | 626  | 2.00E-71  | 34.8  | 8.1  | 14.3 |
| Rsa1.0_00090.1.g4523.t1  | ref XP_002887971.1  hypothetical protein ARALYDRAFT_893147 [Arabidopsis lyrata subsp. lyrata]   gi 29733381.2 gb EFH64230.1  hypothetical protein ARALYDRAFT_893147 [Arabidopsis lyrata subsp. lyrata]                                                                                                                                                                                                                                                                                                                        | 310  | 296  | 8.00E-35  | 95.5  | 32.9 | 46.1 | hypothetical protein ARALYDRAFT_893147                                  | gbpln | Arabidopsis lyrata   | AT5G05050.1   Symbols:   Cysteine proteinases superfamily protein   chr5:1491639-1493457 FORWARD LENGTH=299                                                                                                                                                                                                                                               | 310  | 299  | 5.00E-22  | 96.5  | 22.6 | 34.8 |
| Rsa1.0_00090.1.g4524.t2  | ref XP_002863021.1  hypothetical protein ARALYDRAFT_359201 [Arabidopsis lyrata subsp. lyrata]   gi 297793205 ref XP_002864487.1  predicted protein [Arabidopsis lyrata subsp. lyrata]   gi 297308821 gb EFH39280.1  hypothetical protein ARALYDRAFT_359201 [Arabidopsis lyrata subsp. lyrata]   gi 297310322 gb EFH40746.1  predicted protein [Arabidopsis lyrata subsp. lyrata]                                                                                                                                              | 488  | 166  | 4.00E-28  | 34.0  | 15.4 | 18.6 | hypothetical protein ARALYDRAFT_359201                                  | gbpln | Arabidopsis lyrata   | AT1G63200.1   Symbols:   Cystatin/monellin superfamily protein   chr1:23433630-23434600 REVERSE LENGTH=216                                                                                                                                                                                                                                                | 488  | 216  | 5.00E-23  | 44.3  | 12.5 | 19.5 |
| Rsa1.0_00090.1.g4525.t1  | #                                                                                                                                                                                                                                                                                                                                                                                                                                                                                                                             | #    | #    | #         | #     | #    | #    | -                                                                       | ----  | ----                 | #                                                                                                                                                                                                                                                                                                                                                         | #    | #    | #         | #     | #    |      |
| Rsa1.0_00090.1.g4526.t15 | ref NP_200501.1  proteinase inhibitor I25, cystatin, conserved region-containing protein [Arabidopsis thaliana]   gi 8777431 dbj BAA97021.1  unnamed protein product [Arabidopsis thaliana]   gi 21595644 gb AAM66120.1  unknown [Arabidopsis thaliana]   gi 26452958 dbj BA043555.1  unknown protein [Arabidopsis thaliana]   gi 28973159 gb AA063904.1  unknown protein [Arabidopsis thaliana]   gi 332009439 gb AED96822.1  proteinase inhibitor I25, cystatin, conserved region-containing protein [Arabidopsis thaliana] | 461  | 224  | 7.00E-63  | 48.6  | 26.7 | 34.7 | proteinase inhibitor I25, cystatin, conserved region-containing protein | gbpln | Arabidopsis thaliana | AT5G56910.1   Symbols:   Proteinase inhibitor I25, cystatin, conserved region   chr5:23022996-23024008 FORWARD LENGTH=224                                                                                                                                                                                                                                 | 461  | 224  | 2.00E-65  | 48.6  | 26.7 | 34.7 |
| Rsa1.0_00090.1.g4527.t1  | gb EOA12814.1  hypothetical protein CARUB_v10025774mg [Capsella rubella]                                                                                                                                                                                                                                                                                                                                                                                                                                                      | 116  | 1110 | 2.00E-19  | 956.9 | 45.7 | 51.7 | hypothetical protein CARUB_v10025774mg                                  | gbpln | Capsella rubella     | AT5G56880.1   Symbols:   Protein kinase superfamily protein   chr5:23010801-23015559 REVERSE LENGTH=1113                                                                                                                                                                                                                                                  | 116  | 1113 | 1.00E-20  | 959.5 | 42.2 | 50.0 |
| Rsa1.0_00090.1.g4528.t1  | ref NP_200499.1  uncharacterized protein [Arabidopsis thaliana]   gi 8809656 dbj BAA97207.1  unnamed protein product [Arabidopsis thaliana]   gi 208879512 gb AC131301.1  AT5g56880 [Arabidopsis thaliana]   gi 332009435 gb AED96818.1  uncharacterized protein AT5G56880 [Arabidopsis thaliana]                                                                                                                                                                                                                             | 162  | 159  | 9.00E-54  | 98.1  | 68.5 | 78.4 | uncharacterized protein                                                 | gbpln | Arabidopsis thaliana | AT5G56880.1   Symbols:   unknown protein; Has 9 Blast hits to 9 proteins in 5 species: Archae - 0; Bacteria - 0; Metazoa - 0; Fungi - 0; Plants - 9; Viruses - 0; Other Eukaryotes - 0 (source: NCBI BLINK).   chr5:23009140-23009619 REVERSE LENGTH=159                                                                                                  | 162  | 159  | 3.00E-56  | 98.1  | 68.5 | 78.4 |
| Rsa1.0_00090.1.g4529.t1  | ref XP_002864484.1  predicted protein [Arabidopsis lyrata subsp. lyrata]   gi 297310319 gb EFH40743.1  predicted protein [Arabidopsis lyrata subsp. lyrata]                                                                                                                                                                                                                                                                                                                                                                   | 722  | 726  | 0         | 100.6 | 92.9 | 96.1 | predicted protein                                                       | gbpln | Arabidopsis lyrata   | AT5G56870.1   Symbols:   BGAL4   beta-galactosidase 4   chr5:23004284-23008410 FORWARD LENGTH=724                                                                                                                                                                                                                                                         | 722  | 724  | 0         | 100.3 | 92.0 | 95.3 |
| Rsa1.0_00090.1.g4530.t1  | gb EOA13498.1  hypothetical protein CARUB_v10026556mg [Capsella rubella]                                                                                                                                                                                                                                                                                                                                                                                                                                                      | 387  | 395  | 1.00E-139 | 102.1 | 82.2 | 88.6 | hypothetical protein CARUB_v10026556mg                                  | gbpln | Capsella rubella     | AT5G56860.1   Symbols:   GNC, GATA21   GATA type zinc finger transcription factor family protein   chr5:22989630-22991351 REVERSE LENGTH=398                                                                                                                                                                                                              | 387  | 398  | 1.00E-137 | 102.8 | 80.1 | 86.8 |
| Rsa1.0_00090.1.g4531.t1  | gb EOA13221.1  hypothetical protein CARUB_v10026246mg [Capsella rubella]                                                                                                                                                                                                                                                                                                                                                                                                                                                      | 469  | 511  | 1.00E-177 | 109.0 | 74.2 | 83.8 | hypothetical protein CARUB_v10026246mg                                  | gbpln | Capsella rubella     | AT5G56850.1   Symbols:   unknown protein; EXPRESSED IN: 21 plant structures; EXPRESSED DURING: 13 growth stages; Has 35333 Blast hits to 34131 proteins in 2444 species: Archae - 798; Bacteria - 22429; Metazoa - 974; Fungi - 991; Plants - 531; Viruses - 0; Other Eukaryotes - 9610 (source: NCBI BLINK).   chr5:22985432-22987977 REVERSE LENGTH=551 | 469  | 551  | 1.00E-172 | 117.5 | 74.4 | 84.6 |
| Rsa1.0_00090.1.g4532.t1  | gb EOA13846.1  hypothetical protein CARUB_v10026949mg [Capsella rubella]                                                                                                                                                                                                                                                                                                                                                                                                                                                      | 233  | 272  | 5.00E-89  | 116.7 | 74.7 | 85.4 | hypothetical protein CARUB_v10026949mg                                  | gbpln | Capsella rubella     | AT5G56840.1   Symbols:   myb-like transcription factor family protein   chr5:22980789-22982152 FORWARD LENGTH=233                                                                                                                                                                                                                                         | 233  | 233  | 3.00E-86  | 100.0 | 76.4 | 86.7 |
| Rsa1.0_00090.1.g4533.t1  | dbj BAB09901.1  unnamed protein product [Arabidopsis thaliana]                                                                                                                                                                                                                                                                                                                                                                                                                                                                | 275  | 242  | 3.00E-46  | 88.0  | 36.4 | 45.8 | unnamed protein product                                                 | gbpln | Arabidopsis thaliana | AT3G21000.1   Symbols:   Gag-Pol-related retrotransposon family protein   chr3:7363921-7365138 FORWARD LENGTH=405                                                                                                                                                                                                                                         | 275  | 405  | 1.00E-10  | 147.3 | 20.7 | 37.8 |
| Rsa1.0_00090.1.g4534.t1  | gb EOA13381.1  hypothetical protein CARUB_v10026420mg [Capsella rubella]                                                                                                                                                                                                                                                                                                                                                                                                                                                      | 111  | 438  | 2.00E-18  | 394.6 | 52.3 | 68.5 | hypothetical protein CARUB_v10026420mg                                  | gbpln | Capsella rubella     | AT5G56810.1   Symbols:   F-box/RNI-like/FBD-like domains-containing protein   chr5:22974520-22975992 FORWARD LENGTH=435                                                                                                                                                                                                                                   | 111  | 435  | 3.00E-20  | 391.9 | 48.6 | 61.3 |

| Rsa1.0_00090.1.g4535.t1  | #                                                                                                                                                                                                                                                                                                                                                                                                                                                                                     | #    | #    | #         | #     | #    | #    | -                                      | ---   | ----                 | #                                                                                                                                                                                                                                                              | #    | #   | #         | #     | #    |      |
|--------------------------|---------------------------------------------------------------------------------------------------------------------------------------------------------------------------------------------------------------------------------------------------------------------------------------------------------------------------------------------------------------------------------------------------------------------------------------------------------------------------------------|------|------|-----------|-------|------|------|----------------------------------------|-------|----------------------|----------------------------------------------------------------------------------------------------------------------------------------------------------------------------------------------------------------------------------------------------------------|------|-----|-----------|-------|------|------|
| Rsa1.0_00090.1.g4535.t1  | refNP_200492.1  putative F-box/FBD/LRR-repeat protein [Arabidopsis thaliana] gi 75262578 sp Q9FJT2.1 FDL40_ARAT H RecName: Full=Putative F-box/FBD/LRR-repeat protein At5g56810 gi 10176785 dbj BAB09899.1  unnamed protein product [Arabidopsis thaliana] gi 332009427 gb AED96810.1  putative F-box/FBD/LRR-repeat protein [Arabidopsis thaliana]                                                                                                                                   | 347  | 435  | 1.00E-103 | 125.4 | 60.8 | 72.0 | putative F-box/FBD/LRR-repeat protein  | gbpln | Arabidopsis thaliana | AT5G56810.1   Symbols:   F-box/RNI-like/FBD-like domains-containing protein   chr5:22974520-22975992 FORWARD LENGTH=435                                                                                                                                        | 347  | 435 | 1.00E-106 | 125.4 | 60.8 | 72.0 |
| Rsa1.0_00090.1.g4537.t1  | refXP_002864481.1  F-box family protein [Arabidopsis lyrata subsp. lyrata] gi 297310316 gb EFH40740.1  F-box family protein [Arabidopsis lyrata subsp. lyrata]                                                                                                                                                                                                                                                                                                                        | 432  | 428  | 1.00E-117 | 99.1  | 56.5 | 70.1 | F-box family protein                   | gbpln | Arabidopsis lyrata   | AT5G56810.1   Symbols:   F-box/RNI-like/FBD-like domains-containing protein   chr5:22974520-22975992 FORWARD LENGTH=435                                                                                                                                        | 432  | 435 | 1.00E-117 | 100.7 | 56.0 | 70.6 |
| Rsa1.0_00090.1.g4538.t1  | gb AFK13856.1  Ty3/gypsy retrotransposon protein [Beta vulgaris subsp. vulgaris]                                                                                                                                                                                                                                                                                                                                                                                                      | 1644 | 1631 | 0         | 99.2  | 46.6 | 60.6 | Ty3/gypsy retrotransposon protein      | gbpln | Beta vulgaris        | ATMG00860.1   Symbols: ORF158   DNA/RNA polymerases superfamily protein   chrM:235916-236392 FORWARD LENGTH=158                                                                                                                                                | 1644 | 158 | 1.00E-38  | 9.6   | 4.6  | 5.8  |
| Rsa1.0_00090.1.g4539.t1  | refXP_002864437.1  hypothetical protein ARALYDRAFT_495701 [Arabidopsis lyrata subsp. lyrata] gi 297310272 gb EFH40696.1  hypothetical protein ARALYDRAFT_495701 [Arabidopsis lyrata subsp. lyrata]                                                                                                                                                                                                                                                                                    | 149  | 148  | 1.00E-78  | 99.3  | 93.3 | 97.3 | hypothetical protein ARALYDRAFT_495701 | gbpln | Arabidopsis lyrata   | AT5G56150.2   Symbols: UBC30   ubiquitin-conjugating enzyme 30   chr5:22729756-22730964 FORWARD LENGTH=148                                                                                                                                                     | 149  | 148 | 3.00E-80  | 99.3  | 91.9 | 96.0 |
| Rsa1.0_00090.1.g4540.t10 | gb EOA14478.1  hypothetical protein CARUB_v10027692mg [Capsella rubella]                                                                                                                                                                                                                                                                                                                                                                                                              | 402  | 580  | 1.00E-164 | 144.3 | 78.9 | 87.1 | hypothetical protein CARUB_v10027692mg | gbpln | Capsella rubella     | AT5G56160.1   Symbols:   Sec14p-like phosphatidylinositol transfer family protein   chr5:22732444-22735380 FORWARD LENGTH=577                                                                                                                                  | 402  | 577 | 1.00E-160 | 143.5 | 75.1 | 84.1 |
| Rsa1.0_00090.1.g4541.t1  | refNP_200428.1  LORELEI-LIKE-GPI-ANCHORED PROTEIN 1 [Arabidopsis thaliana] gi 9758637 dbj BAB09299.1  unnamed protein product [Arabidopsis thaliana] gi 23306374 gb AAN17414.1  putative protein [Arabidopsis thaliana] gi 24899659 gb AAN65044.1  putative protein [Arabidopsis thaliana] gi 332009346 gb AED96729.1  LORELEI-LIKE-GPI-ANCHORED PROTEIN 1 [Arabidopsis thaliana]                                                                                                     | 148  | 168  | 9.00E-50  | 113.5 | 66.2 | 72.3 | LORELEI-LIKE-GPI-ANCHORED PROTEIN 1    | gbpln | Arabidopsis thaliana | AT5G56170.1   Symbols: LLG1   LORELEI-LIKE-GPI-ANCHORED PROTEIN 1   chr5:22736072-22737108 FORWARD LENGTH=168                                                                                                                                                  | 148  | 168 | 3.00E-52  | 113.5 | 66.2 | 72.3 |
| Rsa1.0_00090.1.g4542.t1  | gb EOA13271.1  hypothetical protein CARUB_v10026299mg [Capsella rubella]                                                                                                                                                                                                                                                                                                                                                                                                              | 382  | 489  | 1.00E-110 | 128.0 | 63.6 | 72.8 | hypothetical protein CARUB_v10026299mg | gbpln | Capsella rubella     | AT5G56200.1   Symbols:   C2H2 type zinc finger transcription factor family   chr5:22747768-22749249 FORWARD LENGTH=493                                                                                                                                         | 382  | 493 | 1.00E-102 | 129.1 | 63.1 | 71.2 |
| Rsa1.0_00090.1.g4543.t1  | refNP_001190554.1  uncharacterized protein [Arabidopsis thaliana] gi 332009356 gb AED96739.1  uncharacterized protein AT5G56240 [Arabidopsis thaliana]                                                                                                                                                                                                                                                                                                                                | 995  | 987  | 0         | 99.2  | 61.6 | 70.6 | uncharacterized protein                | gbpln | Arabidopsis thaliana | AT5G56240.2   Symbols:   INVOLVED IN: biological_process unknown; EXPRESSED IN: 22 plant structures; EXPRESSED DURING: 13 growth stages; BEST Arabidopsis thaliana protein match is: hapless 8 (TAIR:AT5G56250.1).   chr5:22760088-22763539 REVERSE LENGTH=987 | 995  | 987 | 0         | 99.2  | 61.6 | 70.6 |
| Rsa1.0_00090.1.g4544.t1  | refNP_200436.1  protein hapless 8 [Arabidopsis thaliana] gi 42573690 refNP_974941.1  protein hapless 8 [Arabidopsis thaliana] gi 9758752 dbj BAB09116.1  unnamed protein product [Arabidopsis thaliana] gi 18389250 gb AAL67068.1  unknown protein [Arabidopsis thaliana] gi 20465799 gb AAM20388.1  unknown protein [Arabidopsis thaliana] gi 332009357 gb AED96740.1  protein hapless 8 [Arabidopsis thaliana] gi 332009358 gb AED96741.1  protein hapless 8 [Arabidopsis thaliana] | 760  | 811  | 0         | 106.7 | 69.6 | 76.8 | protein hapless 8                      | gbpln | Arabidopsis thaliana | AT5G56250.1   Symbols: HAP8   hapless 8   chr5:22768918-22771869 REVERSE LENGTH=811                                                                                                                                                                            | 760  | 811 | 0         | 106.7 | 69.6 | 76.8 |

|                         |                                                                                                                                                                                                                                                                                                                                                                                                                                                                                                                                                                                                                                                                                                                                                                                                                                                                                                                                                                                                                                                                                                                                                                                             |      |     |           |       |      |      |                                                 |       |                      |                                                                                                                                        |      |     |           |       |      |      |
|-------------------------|---------------------------------------------------------------------------------------------------------------------------------------------------------------------------------------------------------------------------------------------------------------------------------------------------------------------------------------------------------------------------------------------------------------------------------------------------------------------------------------------------------------------------------------------------------------------------------------------------------------------------------------------------------------------------------------------------------------------------------------------------------------------------------------------------------------------------------------------------------------------------------------------------------------------------------------------------------------------------------------------------------------------------------------------------------------------------------------------------------------------------------------------------------------------------------------------|------|-----|-----------|-------|------|------|-------------------------------------------------|-------|----------------------|----------------------------------------------------------------------------------------------------------------------------------------|------|-----|-----------|-------|------|------|
| Rsa1.0_00090.1.g4545.t1 | refNP_200437.1  Regulator of ribonuclease-like protein 3 [Arabidopsis thaliana]<br>gi 17368897 sp Q9FH13.1 RRAA3_ARAT H RecName: Full=Regulator of ribonuclease-like protein 3<br>gi 9758753 dbj BAB09117.1  S-demethylmenaquinone methyltransferase-like [Arabidopsis thaliana] gi 38603850 gb AAR24670.1  AT5g56260 [Arabidopsis thaliana] gi 38603934 gb AAR24712.1  AT5g56260 [Arabidopsis thaliana] gi 332009359 gb AED96742.1  Regulator of ribonuclease-like protein 3 [Arabidopsis thaliana]<br>refNP_200438.1  putative WRKY transcription factor 2 [Arabidopsis thaliana]<br>gi 29839620 sp Q9FG77.1 WRKY2_ARAT H RecName: Full=Probable WRKY transcription factor 2; AltName: Full=WRKY DNA-binding protein 2<br>gi 15991724 gb AAL13039.1 AF418308.1 WRKY transcription factor 2 [Arabidopsis thaliana]<br>gi 9758400 dbj BAB08871.1  transcription factor NtWRKY4-like [Arabidopsis thaliana]<br>gi 20465416 gb AAM20132.1  putative transcription factor NtWRKY4 [Arabidopsis thaliana]<br>gi 21689791 gb AAM67539.1  putative transcription factor NtWRKY4 [Arabidopsis thaliana]<br>gi 332009360 gb AED96743.1  putative WRKY transcription factor 2 [Arabidopsis thaliana] | 166  | 166 | 2.00E-86  | 100.0 | 95.2 | 97.0 | Regulator of ribonuclease-like protein 3        | gbpln | Arabidopsis thaliana | AT5G56260.1   Symbols: Ribonuclease E inhibitor RraA/Dimethylmenaquinone methyltransferase   chr5:22775549-22776049 REVERSE LENGTH=166 | 166  | 166 | 9.00E-89  | 100.0 | 95.2 | 97.0 |
| Rsa1.0_00090.1.g4546.t1 | gi 9758400 dbj BAB08871.1  transcription factor NtWRKY4-like [Arabidopsis thaliana]<br>gi 20465416 gb AAM20132.1  putative transcription factor NtWRKY4 [Arabidopsis thaliana]<br>gi 21689791 gb AAM67539.1  putative transcription factor NtWRKY4 [Arabidopsis thaliana]<br>gi 332009360 gb AED96743.1  putative WRKY transcription factor 2 [Arabidopsis thaliana]                                                                                                                                                                                                                                                                                                                                                                                                                                                                                                                                                                                                                                                                                                                                                                                                                        | 1016 | 687 | 0         | 67.6  | 49.6 | 53.4 | putative WRKY transcription factor 2            | gbpln | Arabidopsis thaliana | AT5G56270.1   Symbols: WRKY2, ATWRKY2   WRKY DNA-binding protein 2   chr5:22780816-22783137 FORWARD LENGTH=687                         | 1016 | 687 | 0         | 67.6  | 49.6 | 53.4 |
| Rsa1.0_00090.1.g4547.t2 | gb ABB92565.1  peroxisomal import receptor PTS1 [Brassica napus]                                                                                                                                                                                                                                                                                                                                                                                                                                                                                                                                                                                                                                                                                                                                                                                                                                                                                                                                                                                                                                                                                                                            | 724  | 731 | 0         | 101.0 | 95.2 | 97.0 | peroxisomal import receptor PTS1                | gbpln | Brassica napus       | AT5G56290.1   Symbols: PEX5, ATPEX5   peroxin 5   chr5:22786655-22791972 FORWARD LENGTH=728                                            | 724  | 728 | 0         | 100.6 | 89.9 | 94.1 |
| Rsa1.0_00090.1.g4548.t1 | gb EOA27690.1  hypothetical protein CARUB_v10023843mg, partial [Capsella rubella]                                                                                                                                                                                                                                                                                                                                                                                                                                                                                                                                                                                                                                                                                                                                                                                                                                                                                                                                                                                                                                                                                                           | 275  | 271 | 2.00E-28  | 98.5  | 30.5 | 48.4 | hypothetical protein CARUB_v10023843mg, partial | gbpln | Capsella rubella     | AT1G10000.1   Symbols: Ribonuclease H-like superfamily protein   chr1:3263877-3264788 REVERSE LENGTH=303                               | 275  | 303 | 3.00E-30  | 110.2 | 31.3 | 48.7 |
| Rsa1.0_00090.1.g4549.t1 | ref XP_002864445.1  hypothetical protein ARALYDRAFT_918774 [Arabidopsis lyrata subsp. lyrata]<br>gi 297310280 gb EFH40704.1  hypothetical protein ARALYDRAFT_918774 [Arabidopsis lyrata subsp. lyrata]                                                                                                                                                                                                                                                                                                                                                                                                                                                                                                                                                                                                                                                                                                                                                                                                                                                                                                                                                                                      | 384  | 388 | 0         | 101.0 | 88.0 | 93.8 | hypothetical protein ARALYDRAFT_918774          | gbpln | Arabidopsis lyrata   | AT5G56300.1   Symbols: GAMT2   gibberellic acid methyltransferase 2   chr5:22799571-22801484 FORWARD LENGTH=387                        | 384  | 387 | 0         | 100.8 | 86.5 | 92.4 |
| Rsa1.0_00090.1.g4550.t1 | ref XP_002864446.1  pentatricopeptide repeat-containing protein [Arabidopsis lyrata subsp. lyrata]<br>gi 297310281 gb EFH40705.1  pentatricopeptide repeat-containing protein [Arabidopsis lyrata subsp. lyrata]                                                                                                                                                                                                                                                                                                                                                                                                                                                                                                                                                                                                                                                                                                                                                                                                                                                                                                                                                                            | 541  | 531 | 0         | 98.2  | 79.5 | 88.2 | pentatricopeptide repeat-containing protein     | gbpln | Arabidopsis lyrata   | AT5G56310.1   Symbols: Pentatricopeptide repeat (PPR) superfamily protein   chr5:22802322-22803914 FORWARD LENGTH=530                  | 541  | 530 | 0         | 98.0  | 78.7 | 88.0 |
| Rsa1.0_00090.1.g4551.t3 | refNP_564398.1  putative FBD-associated F-box protein [Arabidopsis thaliana]<br>gi 302425238 sp Q9LQM1.2 FBD39_ARAT H RecName: Full=Probable FBD-associated F-box protein At1g32375<br>gi 332193353 gb AEE31474.1  putative FBD-associated F-box protein [Arabidopsis thaliana]                                                                                                                                                                                                                                                                                                                                                                                                                                                                                                                                                                                                                                                                                                                                                                                                                                                                                                             | 428  | 422 | 1.00E-128 | 98.6  | 57.7 | 72.4 | putative FBD-associated F-box protein           | gbpln | Arabidopsis thaliana | AT1G32375.1   Symbols: F-box/RNI-like/FBD-like domains-containing protein   chr1:11679230-11680679 FORWARD LENGTH=422                  | 428  | 422 | 1.00E-131 | 98.6  | 57.7 | 72.4 |
| Rsa1.0_00090.1.g4552.t1 | refNP_564398.1  putative FBD-associated F-box protein [Arabidopsis thaliana]<br>gi 302425238 sp Q9LQM1.2 FBD39_ARAT H RecName: Full=Probable FBD-associated F-box protein At1g32375<br>gi 332193353 gb AEE31474.1  putative FBD-associated F-box protein [Arabidopsis thaliana]                                                                                                                                                                                                                                                                                                                                                                                                                                                                                                                                                                                                                                                                                                                                                                                                                                                                                                             | 429  | 422 | 1.00E-128 | 98.4  | 58.3 | 73.9 | putative FBD-associated F-box protein           | gbpln | Arabidopsis thaliana | AT1G32375.1   Symbols: F-box/RNI-like/FBD-like domains-containing protein   chr1:11679230-11680679 FORWARD LENGTH=422                  | 429  | 422 | 1.00E-131 | 98.4  | 58.3 | 73.9 |
| Rsa1.0_00090.1.g4553.t1 | refXP_002864451.1  zinc finger family protein [Arabidopsis lyrata subsp. lyrata]<br>gi 297310286 gb EFH40710.1  zinc finger family protein [Arabidopsis lyrata subsp. lyrata]                                                                                                                                                                                                                                                                                                                                                                                                                                                                                                                                                                                                                                                                                                                                                                                                                                                                                                                                                                                                               | 374  | 395 | 1.00E-141 | 105.6 | 80.5 | 88.8 | zinc finger family protein                      | gbpln | Arabidopsis lyrata   | AT5G56340.1   Symbols: ATCORT1   RING/U-box superfamily protein   chr5:22818254-22819444 FORWARD LENGTH=396                            | 374  | 396 | 1.00E-137 | 105.9 | 74.3 | 80.5 |

|                         |                                                                                                                                                                                                                                                                                                                                                                                                                                                                                                                                                                                                                                                                                                                                                                                                  |     |      |           |       |      |      |                                          |       |                      |                                                                                                                         |     |     |           |       |      |      |
|-------------------------|--------------------------------------------------------------------------------------------------------------------------------------------------------------------------------------------------------------------------------------------------------------------------------------------------------------------------------------------------------------------------------------------------------------------------------------------------------------------------------------------------------------------------------------------------------------------------------------------------------------------------------------------------------------------------------------------------------------------------------------------------------------------------------------------------|-----|------|-----------|-------|------|------|------------------------------------------|-------|----------------------|-------------------------------------------------------------------------------------------------------------------------|-----|-----|-----------|-------|------|------|
| Rsa1.0_00090.1.g4554.t1 | ref[NP_200446.1] pyruvate kinase [Arabidopsis thaliana] gi 297796505 ref XP_002866137.1  hypothetical protein ARALYDRAFT_495726 [Arabidopsis lyrata subsp. lyrata] gi 10177833 dbj BAB11262.1  pyruvate kinase [Arabidopsis thaliana] gi 15450942 gb AAK96742.1  pyruvate kinase [Arabidopsis thaliana] gi 17978781 gb AAL47384.1  pyruvate kinase [Arabidopsis thaliana] gi 21592702 gb AAM64651.1  pyruvate kinase [Arabidopsis thaliana] gi 297311972 gb EFH42396.1  hypothetical protein ARALYDRAFT_495726 [Arabidopsis lyrata subsp. lyrata] gi 332009369 gb AED96752.1  pyruvate kinase [Arabidopsis thaliana] ref XP_002866138.1  calmodulin-binding protein [Arabidopsis lyrata subsp. lyrata] gi 297311973 gb EFH42397.1  calmodulin-binding protein [Arabidopsis lyrata subsp. lyrata] | 498 | 498  | 0         | 100.0 | 96.6 | 98.4 | pyruvate kinase                          | gbpln | Arabidopsis lyrata   | AT5G56350.1   Symbols:   Pyruvate kinase family protein   chr5:22820254-22822529 REVERSE LENGTH=498                     | 498 | 498 | 0         | 100.0 | 96.6 | 98.4 |
| Rsa1.0_00090.1.g4555.t5 | ref XP_002866138.1  calmodulin-binding protein [Arabidopsis lyrata subsp. lyrata] gi 297311973 gb EFH42397.1  calmodulin-binding protein [Arabidopsis lyrata subsp. lyrata]                                                                                                                                                                                                                                                                                                                                                                                                                                                                                                                                                                                                                      | 846 | 653  | 0         | 77.2  | 63.7 | 69.0 | calmodulin-binding protein               | gbpln | Arabidopsis lyrata   | AT5G56360.1   Symbols: PSL4   calmodulin-binding protein   chr5:22823586-22827950 REVERSE LENGTH=647                    | 846 | 647 | 0         | 76.5  | 61.2 | 66.7 |
| Rsa1.0_00090.1.g4556.t1 | gb ABM55734.1  nitrilase 2 [Brassica rapa]                                                                                                                                                                                                                                                                                                                                                                                                                                                                                                                                                                                                                                                                                                                                                       | 331 | 350  | 1.00E-130 | 105.7 | 73.7 | 81.6 | nitrilase 2                              | gbpln | Brassica rapa        | AT3G44300.1   Symbols: NIT2, AtNIT2   nitrilase 2   chr3:15983351-15985172 FORWARD LENGTH=339                           | 331 | 339 | 1.00E-131 | 102.4 | 72.5 | 81.0 |
| Rsa1.0_00090.1.g4557.t1 | ref XP_002866141.1  F-box family protein [Arabidopsis lyrata subsp. lyrata] gi 297311976 gb EFH42400.1  F-box family protein [Arabidopsis lyrata subsp. lyrata]                                                                                                                                                                                                                                                                                                                                                                                                                                                                                                                                                                                                                                  | 414 | 424  | 1.00E-160 | 102.4 | 70.5 | 83.1 | F-box family protein                     | gbpln | Arabidopsis lyrata   | AT5G56370.2   Symbols:   F-box/RNI-like/FBD-like domains-containing protein   chr5:22836200-22837619 REVERSE LENGTH=421 | 414 | 421 | 1.00E-153 | 101.7 | 69.1 | 80.2 |
| Rsa1.0_00090.1.g4558.t2 | gb EOA14711.1  hypothetical protein CARUB_v10027989mg [Capsella rubella]                                                                                                                                                                                                                                                                                                                                                                                                                                                                                                                                                                                                                                                                                                                         | 424 | 420  | 1.00E-150 | 99.1  | 67.5 | 77.4 | hypothetical protein CARUB_v10027989mg   | gbpln | Capsella rubella     | AT5G56380.1   Symbols:   F-box/RNI-like/FBD-like domains-containing protein   chr5:22838836-22840353 REVERSE LENGTH=439 | 424 | 439 | 1.00E-132 | 103.5 | 60.8 | 74.3 |
| Rsa1.0_00090.1.g4559.t1 | ref NP_564398.1  putative FBD-associated F-box protein [Arabidopsis thaliana] gi 302425238 sp Q9LQM1.2 FBD39_ARA_TH RecName: Full=Probable FBD-associated F-box protein At1g32375 gi 332193353 gb AEE31474.1  putative FBD-associated F-box protein [Arabidopsis thaliana] ref NP_564398.1  putative FBD-associated F-box protein [Arabidopsis thaliana]                                                                                                                                                                                                                                                                                                                                                                                                                                         | 422 | 422  | 1.00E-128 | 100.0 | 60.4 | 73.9 | putative FBD-associated F-box protein    | gbpln | Arabidopsis thaliana | AT1G32375.1   Symbols:   F-box/RNI-like/FBD-like domains-containing protein   chr1:11679230-11680679 FORWARD LENGTH=422 | 422 | 422 | 1.00E-130 | 100.0 | 60.4 | 73.9 |
| Rsa1.0_00090.1.g4560.t1 | gi 302425238 sp Q9LQM1.2 FBD39_ARA_TH RecName: Full=Probable FBD-associated F-box protein At1g32375 gi 332193353 gb AEE31474.1  putative FBD-associated F-box protein [Arabidopsis thaliana] ref NP_564398.1  putative FBD-associated F-box protein [Arabidopsis thaliana]                                                                                                                                                                                                                                                                                                                                                                                                                                                                                                                       | 419 | 422  | 1.00E-125 | 100.7 | 61.1 | 73.7 | putative FBD-associated F-box protein    | gbpln | Arabidopsis thaliana | AT1G32375.1   Symbols:   F-box/RNI-like/FBD-like domains-containing protein   chr1:11679230-11680679 FORWARD LENGTH=422 | 419 | 422 | 1.00E-127 | 100.7 | 61.1 | 73.7 |
| Rsa1.0_00090.1.g4561.t1 | ref NP_564398.1  putative FBD-associated F-box protein [Arabidopsis thaliana] gi 302425238 sp Q9LQM1.2 FBD39_ARA_TH RecName: Full=Probable FBD-associated F-box protein At1g32375 gi 332193353 gb AEE31474.1  putative FBD-associated F-box protein [Arabidopsis thaliana]                                                                                                                                                                                                                                                                                                                                                                                                                                                                                                                       | 915 | 422  | 1.00E-120 | 46.1  | 27.2 | 33.7 | putative FBD-associated F-box protein    | gbpln | Arabidopsis thaliana | AT1G32375.1   Symbols:   F-box/RNI-like/FBD-like domains-containing protein   chr1:11679230-11680679 FORWARD LENGTH=422 | 915 | 422 | 1.00E-122 | 46.1  | 27.2 | 33.7 |
| Rsa1.0_00090.1.g4562.t1 | emb CAB39638.1  RNA-directed DNA polymerase-like protein [Arabidopsis thaliana] gi 7267666 emb CAB78094.1  RNA-directed DNA polymerase-like protein [Arabidopsis thaliana]                                                                                                                                                                                                                                                                                                                                                                                                                                                                                                                                                                                                                       | 698 | 1274 | 0         | 182.5 | 52.6 | 69.2 | RNA-directed DNA polymerase-like protein | gbpln | Arabidopsis thaliana | AT4G29090.1   Symbols:   Ribonuclease H-like superfamily protein   chr4:14333528-14335255 FORWARD LENGTH=575            | 698 | 575 | 9.00E-38  | 82.4  | 11.6 | 19.3 |
| Rsa1.0_00091.1.g4563.t1 | emb CCD74546.1  F-box family protein [Arabidopsis halleri subsp. halleri]                                                                                                                                                                                                                                                                                                                                                                                                                                                                                                                                                                                                                                                                                                                        | 463 | 530  | 8.00E-95  | 114.5 | 49.7 | 63.7 | F-box family protein                     | gbpln | Arabidopsis halleri  | AT2G26030.3   Symbols:   F-box/RNI-like/FBD-like domains-containing protein   chr2:11091505-11093000 REVERSE LENGTH=442 | 463 | 442 | 3.00E-95  | 95.5  | 49.2 | 62.6 |



|                         |                                                                                                                                                                                                                                                                                                                                                                                                                                                                                                                                                 |      |      |           |       |      |      |                                               |       |                      |                                                                                                                                               |      |      |           |       |      |      |
|-------------------------|-------------------------------------------------------------------------------------------------------------------------------------------------------------------------------------------------------------------------------------------------------------------------------------------------------------------------------------------------------------------------------------------------------------------------------------------------------------------------------------------------------------------------------------------------|------|------|-----------|-------|------|------|-----------------------------------------------|-------|----------------------|-----------------------------------------------------------------------------------------------------------------------------------------------|------|------|-----------|-------|------|------|
| Rsa1.0_00091.1.g4564.t1 | refNP_567204.3   cysteine-rich receptor-like protein kinase 41 [Arabidopsis thaliana]   gi 152013451 sp O23081.2 CRK41_ARAT H RecName: Full=Cysteine-rich receptor-like protein kinase 41; Short=Cysteine-rich RLK41; Flags: Precursor gi 332656562 gb AEE81962.1  cysteine-rich receptor-like protein kinase 41 [Arabidopsis thaliana]   ref XP_002879092.1  hypothetical protein ARALYDRAFT_481654 [Arabidopsis lyrata subsp. lyrata]   gi 297324931 gb EFH55351.1  hypothetical protein ARALYDRAFT_481654 [Arabidopsis lyrata subsp. lyrata] | 611  | 665  | 0         | 108.8 | 72.8 | 84.5 | cysteine-rich receptor-like protein kinase 41 | gbpln | Arabidopsis thaliana | AT4G00970.1   Symbols: CRK41   cysteine-rich RLK (RECEPTOR-like protein kinase) 41   chr4:418437-421694 FORWARD LENGTH=665                    | 611  | 665  | 0         | 108.8 | 72.8 | 84.5 |
| Rsa1.0_00091.1.g4565.t1 | hypothetical protein ARALYDRAFT_481654 [Arabidopsis lyrata subsp. lyrata]                                                                                                                                                                                                                                                                                                                                                                                                                                                                       | 297  | 330  | 2.00E-52  | 111.1 | 52.9 | 63.3 | hypothetical protein ARALYDRAFT_481654        | gbpln | Arabidopsis lyrata   | AT2G27505.1   Symbols:   FBD-like domain family protein   chr2:11756746-11757829 FORWARD LENGTH=298                                           | 297  | 298  | 1.00E-54  | 100.3 | 50.2 | 61.6 |
| Rsa1.0_00091.1.g4566.t1 | gb EOA23440.1  hypothetical protein CARUB_v10016624mg [Capsella rubella]                                                                                                                                                                                                                                                                                                                                                                                                                                                                        | 1014 | 1017 | 0         | 100.3 | 96.0 | 98.2 | hypothetical protein CARUB_v10016624mg        | gbpln | Capsella rubella     | AT3G55410.1   Symbols:   2-oxoglutarate dehydrogenase, E1 component   chr3:20541897-20545728 FORWARD LENGTH=1017                              | 1014 | 1017 | 0         | 100.3 | 95.7 | 98.1 |
| Rsa1.0_00091.1.g4567.t1 | dbj BAD95408.1  hypothetical protein [Arabidopsis thaliana]                                                                                                                                                                                                                                                                                                                                                                                                                                                                                     | 189  | 478  | 6.00E-45  | 252.9 | 50.3 | 63.5 | hypothetical protein                          | gbpln | Arabidopsis thaliana | AT3G24255.1   Symbols:   RNA-directed DNA polymerase (reverse transcriptase)-related family protein   chr3:8789471-8793208 FORWARD LENGTH=746 | 189  | 746  | 3.00E-38  | 394.7 | 38.1 | 49.7 |
| Rsa1.0_00091.1.g4568.t1 | #                                                                                                                                                                                                                                                                                                                                                                                                                                                                                                                                               | #    | #    | #         | #     | #    | #    | -                                             | ----  | ----                 | #                                                                                                                                             | #    | #    | #         | #     | #    |      |
| Rsa1.0_00091.1.g4569.t1 | refNP_199308.1   putative F-box/FBD/LRR-repeat protein [Arabidopsis thaliana]   gi 75262649 sp Q9FLA2.1 FDL34_ARAT H RecName: Full=Putative F-box/FBD/LRR-repeat protein At5g44950   gi 10177487 dbj BAB10878.1  unnamed protein product [Arabidopsis thaliana]   gi 332007796 gb AED95179.1  putative F-box/FBD/LRR-repeat protein [Arabidopsis thaliana]                                                                                                                                                                                      | 446  | 438  | 1.00E-107 | 98.2  | 52.9 | 65.7 | putative F-box/FBD/LRR-repeat protein         | gbpln | Arabidopsis thaliana | AT5G44950.1   Symbols:   F-box/RNI-like/FBD-like domains-containing protein   chr5:18151665-18153164 FORWARD LENGTH=438                       | 446  | 438  | 1.00E-109 | 98.2  | 52.9 | 65.7 |
| Rsa1.0_00091.1.g4570.t1 | refNP_199313.3   TIR-NBS-LRR class disease resistance protein [Arabidopsis thaliana]   gi 62320509 dbj BAD95061.1  putative protein [Arabidopsis thaliana]   gi 332007804 gb AED95187.1  TIR-NBS-LRR class disease resistance protein [Arabidopsis thaliana]                                                                                                                                                                                                                                                                                    | 445  | 419  | 1.00E-164 | 94.2  | 64.9 | 74.4 | TIR-NBS-LRR class disease resistance protein  | gbpln | Arabidopsis thaliana | AT5G45000.1   Symbols:   Disease resistance protein (TIR-NBS-LRR class) family   chr5:18165427-18167005 FORWARD LENGTH=419                    | 445  | 419  | 1.00E-166 | 94.2  | 64.9 | 74.4 |
| Rsa1.0_00091.1.g4571.t1 | #                                                                                                                                                                                                                                                                                                                                                                                                                                                                                                                                               | #    | #    | #         | #     | #    | #    | -                                             | ----  | ----                 | #                                                                                                                                             | #    | #    | #         | #     | #    |      |
| Rsa1.0_00091.1.g4572.t1 | refNP_851134.1   S-ribonuclease binding protein [Arabidopsis thaliana]   gi 9758985 dbj BAB09495.1  unnamed protein product [Arabidopsis thaliana]   gi 16604442 gb AAL24227.1  AT5g45100/K17O22_9 [Arabidopsis thaliana]   gi 23505847 gb AAN28783.1  AT5g45100/K17O22_9 [Arabidopsis thaliana]   gi 332007818 gb AED95201.1  S-ribonuclease binding protein [Arabidopsis thaliana]                                                                                                                                                            | 280  | 294  | 2.00E-94  | 105.0 | 70.4 | 78.9 | S-ribonuclease binding protein                | gbpln | Arabidopsis thaliana | AT5G45100.1   Symbols:   SBP (S-ribonuclease binding protein) family protein   chr5:18218769-18219741 FORWARD LENGTH=294                      | 280  | 294  | 6.00E-97  | 105.0 | 70.4 | 78.9 |
| Rsa1.0_00091.1.g4573.t1 | gb EOA14460.1  hypothetical protein CARUB_v10027669mg [Capsella rubella]                                                                                                                                                                                                                                                                                                                                                                                                                                                                        | 257  | 299  | 6.00E-96  | 116.3 | 70.8 | 80.9 | hypothetical protein CARUB_v10027669mg        | gbpln | Capsella rubella     | AT5G45105.2   Symbols: ZIP8   zinc transporter 8 precursor   chr5:18223453-18224946 REVERSE LENGTH=299                                        | 257  | 299  | 1.00E-96  | 116.3 | 70.4 | 80.2 |
| Rsa1.0_00091.1.g4574.t1 | gb EOA14334.1  hypothetical protein CARUB_v10027512mg [Capsella rubella]                                                                                                                                                                                                                                                                                                                                                                                                                                                                        | 495  | 488  | 0         | 98.6  | 84.4 | 91.5 | hypothetical protein CARUB_v10027512mg        | gbpln | Capsella rubella     | AT5G45120.1   Symbols:   Eukaryotic aspartyl protease family protein   chr5:18241003-18242478 FORWARD LENGTH=491                              | 495  | 491  | 0         | 99.2  | 83.6 | 89.9 |
| Rsa1.0_00091.1.g4575.t1 | gb AAK43485.1 AC084807_10 polyprotein, putative [Arabidopsis thaliana]   gi 225898008 dbj BAH30336.1  hypothetical protein [Arabidopsis thaliana]                                                                                                                                                                                                                                                                                                                                                                                               | 1380 | 1459 | 0         | 105.7 | 53.2 | 71.2 | polyprotein, putative                         | gbpln | Arabidopsis thaliana | AT4G23160.1   Symbols: CRK8   cysteine-rich RLK (RECEPTOR-like protein kinase) 8   chr4:12129485-12134086 FORWARD LENGTH=1262                 | 1380 | 1262 | 1.00E-112 | 91.4  | 14.2 | 20.9 |
| Rsa1.0_00091.1.g4576.t1 | gb EOA14027.1  hypothetical protein CARUB_v10027159mg [Capsella rubella]                                                                                                                                                                                                                                                                                                                                                                                                                                                                        | 200  | 200  | 1.00E-110 | 100.0 | 97.5 | 98.0 | hypothetical protein CARUB_v10027159mg        | gbpln | Capsella rubella     | AT5G45130.1   Symbols: ATRAB5A, ATRABF2A, RABF2A, RAB5A, RHA1, ATRAB-F2A, RAB-F2A   RAB homolog 1   chr5:18244495-18246060 FORWARD LENGTH=200 | 200  | 200  | 1.00E-112 | 100.0 | 97.0 | 98.0 |
| Rsa1.0_00091.1.g4577.t1 | gb EOA14759.1  hypothetical protein CARUB_v10028056mg [Capsella rubella]                                                                                                                                                                                                                                                                                                                                                                                                                                                                        | 296  | 270  | 3.00E-68  | 91.2  | 51.4 | 62.5 | hypothetical protein CARUB_v10028056mg        | gbpln | Capsella rubella     | AT5G45220.1   Symbols:   Disease resistance protein (TIR-NBS-LRR class) family   chr5:18298926-18301069 REVERSE LENGTH=546                    | 296  | 546  | 5.00E-46  | 184.5 | 34.1 | 44.9 |

|                         |                                                                                                                                                                                                                                                                                                                                                                                                                                               |      |      |           |       |      |      |                                                                                                      |       |                      |                                                                                                                                                                                                                                                                                                                                                                                                                           |      |      |           |       |      |      |
|-------------------------|-----------------------------------------------------------------------------------------------------------------------------------------------------------------------------------------------------------------------------------------------------------------------------------------------------------------------------------------------------------------------------------------------------------------------------------------------|------|------|-----------|-------|------|------|------------------------------------------------------------------------------------------------------|-------|----------------------|---------------------------------------------------------------------------------------------------------------------------------------------------------------------------------------------------------------------------------------------------------------------------------------------------------------------------------------------------------------------------------------------------------------------------|------|------|-----------|-------|------|------|
| Rsa1.0_00091.1.g4578.t1 | ref[XP_002862525.1] predicted protein [Arabidopsis lyrata subsp. lyrata] gi 297308098 gb EFH38783.1  predicted protein [Arabidopsis lyrata subsp. lyrata]                                                                                                                                                                                                                                                                                     | 180  | 497  | 9.00E-63  | 276.1 | 72.8 | 83.9 | predicted protein                                                                                    | gbpln | Arabidopsis lyrata   | AT5G45210.1   Symbols:   Disease resistance protein (TIR-NBS-LRR class) family   chr5:18295521-18298434 FORWARD LENGTH=697                                                                                                                                                                                                                                                                                                | 180  | 697  | 2.00E-58  | 387.2 | 62.8 | 73.3 |
| Rsa1.0_00091.1.g4579.t1 | ref[XP_002863534.1] predicted protein [Arabidopsis lyrata subsp. lyrata] gi 297309369 gb EFH39793.1  predicted protein [Arabidopsis lyrata subsp. lyrata]                                                                                                                                                                                                                                                                                     | 2279 | 1360 | 0         | 59.7  | 35.1 | 40.3 | predicted protein                                                                                    | gbpln | Arabidopsis lyrata   | AT5G45050.1   Symbols: TTR1, ATWRKY16, WRKY16   Disease resistance protein (TIR-NBS-LRR class)   chr5:18177016-18181805 REVERSE LENGTH=1372                                                                                                                                                                                                                                                                               | 2279 | 1372 | 0         | 60.2  | 34.3 | 39.5 |
| Rsa1.0_00091.1.g4580.t1 | dbj BAH59426.1  putative disease resistance protein [Arabidopsis thaliana]                                                                                                                                                                                                                                                                                                                                                                    | 1207 | 1217 | 0         | 100.8 | 76.1 | 84.0 | putative disease resistance protein                                                                  | gbpln | Arabidopsis thaliana | AT5G45250.1   Symbols: RPS4   Disease resistance protein (TIR-NBS-LRR class) family   chr5:18321914-18326022 REVERSE LENGTH=1217                                                                                                                                                                                                                                                                                          | 1207 | 1217 | 0         | 100.8 | 75.9 | 83.9 |
| Rsa1.0_00091.1.g4581.t1 | gb AAD21699.1  Contains reverse transcriptase domain (rvt) PF100078 [Arabidopsis thaliana]                                                                                                                                                                                                                                                                                                                                                    | 1002 | 1253 | 1.00E-165 | 125.0 | 34.6 | 53.3 | Contains reverse transcriptase domain (rvt) PF100078                                                 | gbpln | Arabidopsis thaliana | AT1G43760.1   Symbols:   DNase I-like superfamily protein   chr1:16528880-16531065 REVERSE LENGTH=626                                                                                                                                                                                                                                                                                                                     | 1002 | 626  | 9.00E-57  | 62.5  | 13.1 | 21.2 |
| Rsa1.0_00091.1.g4582.t1 | gb EOA13616.1  hypothetical protein CARUB_v10026683mg [Capsella rubella]                                                                                                                                                                                                                                                                                                                                                                      | 354  | 354  | 1.00E-165 | 100.0 | 80.5 | 90.4 | hypothetical protein CARUB_v10026683mg                                                               | gbpln | Capsella rubella     | AT5G45310.1   Symbols:   unknown protein; LOCATED IN: endomembrane system; EXPRESSED IN: stem, inflorescence meristem, root, leaf; EXPRESSED DURING: LP.04 four leaves visible; Has 30201 Blast hits to 17322 proteins in 780 species: Archae - 12; Bacteria - 1396; Metazoa - 17338; Fungi - 3422; Plants - 5037; Viruses - 0; Other Eukaryotes - 2996 (source: NCBI BLINK).   chr5:18359373-18360796 REVERSE LENGTH=352 | 354  | 352  | 1.00E-166 | 99.4  | 80.8 | 90.1 |
| Rsa1.0_00091.1.g4583.t1 | ref[XP_002868101.1] hypothetical protein ARALYDRAFT_915040 [Arabidopsis lyrata subsp. lyrata] gi 297313937 gb EFH44360.1  hypothetical protein ARALYDRAFT_915040 [Arabidopsis lyrata subsp. lyrata]                                                                                                                                                                                                                                           | 322  | 495  | 1.00E-107 | 153.7 | 63.7 | 80.7 | hypothetical protein ARALYDRAFT_915040                                                               | gbpln | Arabidopsis lyrata   | AT1G28020.1   Symbols:   Tetratricopeptide repeat (TPR)-like superfamily protein   chr1:9768395-9771157 REVERSE LENGTH=612                                                                                                                                                                                                                                                                                                | 322  | 612  | 4.00E-42  | 190.1 | 33.5 | 50.0 |
| Rsa1.0_00091.1.g4584.t1 | ref[XP_002865271.1] hypothetical protein ARALYDRAFT_917000 [Arabidopsis lyrata subsp. lyrata] gi 297311106 gb EFH41530.1  hypothetical protein ARALYDRAFT_917000 [Arabidopsis lyrata subsp. lyrata]                                                                                                                                                                                                                                           | 731  | 712  | 0         | 97.4  | 64.0 | 76.6 | hypothetical protein ARALYDRAFT_917000                                                               | gbpln | Arabidopsis lyrata   | AT4G36140.1   Symbols:   disease resistance protein (TIR-NBS-LRR class), putative   chr4:17098956-17104479 REVERSE LENGTH=1607                                                                                                                                                                                                                                                                                            | 731  | 1607 | 1.00E-157 | 219.8 | 43.8 | 59.0 |
| Rsa1.0_00091.1.g4585.t1 | ref[XP_002863518.1] predicted protein [Arabidopsis lyrata subsp. lyrata] gi 297309353 gb EFH39777.1  predicted protein [Arabidopsis lyrata subsp. lyrata]                                                                                                                                                                                                                                                                                     | 1135 | 1150 | 0         | 101.3 | 70.8 | 82.6 | predicted protein                                                                                    | gbpln | Arabidopsis lyrata   | AT4G36150.1   Symbols:   Disease resistance protein (TIR-NBS-LRR class) family   chr4:17104776-17108711 FORWARD LENGTH=1179                                                                                                                                                                                                                                                                                               | 1135 | 1179 | 0         | 103.9 | 49.3 | 65.5 |
| Rsa1.0_00091.1.g4586.t1 | ref[XP_002863489.1] hypothetical protein ARALYDRAFT_916947 [Arabidopsis lyrata subsp. lyrata] gi 297309324 gb EFH39748.1  hypothetical protein ARALYDRAFT_916947 [Arabidopsis lyrata subsp. lyrata]                                                                                                                                                                                                                                           | 552  | 570  | 0         | 103.3 | 71.2 | 79.9 | hypothetical protein ARALYDRAFT_916947                                                               | gbpln | Arabidopsis lyrata   | AT5G45330.1   Symbols: DCP5-L   decapping 5-like   chr5:18363701-18366544 REVERSE LENGTH=571                                                                                                                                                                                                                                                                                                                              | 552  | 571  | 0         | 103.4 | 65.9 | 73.0 |
| Rsa1.0_00091.1.g4587.t1 | gb EOA13319.1  hypothetical protein CARUB_v10026354mg [Capsella rubella]                                                                                                                                                                                                                                                                                                                                                                      | 467  | 466  | 0         | 99.8  | 92.7 | 97.0 | hypothetical protein CARUB_v10026354mg                                                               | gbpln | Capsella rubella     | AT5G45340.1   Symbols: CYP707A3   cytochrome P450, family 707, subfamily A, polypeptide 3   chr5:18368977-18370909 REVERSE LENGTH=463                                                                                                                                                                                                                                                                                     | 467  | 463  | 0         | 99.1  | 92.5 | 96.6 |
| Rsa1.0_00092.1.g4588.t1 | dbj BAA97290.1  non-LTR retroelement reverse transcriptase-like [Arabidopsis thaliana]                                                                                                                                                                                                                                                                                                                                                        | 804  | 1072 | 1.00E-179 | 133.3 | 40.4 | 58.1 | non-LTR retroelement reverse transcriptase-like                                                      | gbpln | Arabidopsis thaliana | AT5G18880.1   Symbols:   RNA-directed DNA polymerase (reverse transcriptase)-related family protein   chr5:6300535-6301422 REVERSE LENGTH=295                                                                                                                                                                                                                                                                             | 804  | 295  | 2.00E-74  | 36.7  | 17.8 | 24.0 |
| Rsa1.0_00092.1.g4589.t2 | gb AAB96826.1  lysine-ketoglutarate reductase/saccharopine dehydrogenase bifunctional enzyme [Arabidopsis thaliana]                                                                                                                                                                                                                                                                                                                           | 591  | 1064 | 0         | 180.0 | 83.4 | 88.8 | lysine-ketoglutarate reductase/saccharopine dehydrogenase bifunctional enzyme                        | gbpln | Arabidopsis thaliana | AT4G33150.2   Symbols:   lysine-ketoglutarate reductase/saccharopine dehydrogenase bifunctional enzyme   chr4:15985479-15991069 REVERSE LENGTH=1064                                                                                                                                                                                                                                                                       | 591  | 1064 | 0         | 180.0 | 83.4 | 88.8 |
| Rsa1.0_00092.1.g4590.t2 | ref[NP_567913.1] 5' nucleotidase, deoxy (Pyrimidine), cytosolic type C protein domain containing protein-like protein [Arabidopsis thaliana] gi 15982925 gb AAL09809.1  AT4G33140/F4110.70 [Arabidopsis thaliana] gi 22137262 gb AAM91476.1  AT4G33140/F4110.70 [Arabidopsis thaliana] gi 33266078 gb AEE86180.1  5' nucleotidase, deoxy (Pyrimidine), cytosolic type C protein domain containing protein-like protein [Arabidopsis thaliana] | 166  | 353  | 2.00E-77  | 212.7 | 79.5 | 86.1 | 5' nucleotidase, deoxy (Pyrimidine), cytosolic type C protein domain containing protein-like protein | gbpln | Arabidopsis thaliana | AT4G33140.1   Symbols:   Haloacid dehalogenase-like hydrolase (HAD) superfamily protein   chr4:15981648-15984135 FORWARD LENGTH=353                                                                                                                                                                                                                                                                                       | 166  | 353  | 9.00E-80  | 212.7 | 79.5 | 86.1 |

|                         |                                                                                                                                                                                                                                                                                                                                                                                                                     |      |      |           |       |      |      |                                                 |       |                      |                                                                                                                                                                                                                                                                                                                                                                                                                                                                                                                                                            |      |      |           |       |      |      |
|-------------------------|---------------------------------------------------------------------------------------------------------------------------------------------------------------------------------------------------------------------------------------------------------------------------------------------------------------------------------------------------------------------------------------------------------------------|------|------|-----------|-------|------|------|-------------------------------------------------|-------|----------------------|------------------------------------------------------------------------------------------------------------------------------------------------------------------------------------------------------------------------------------------------------------------------------------------------------------------------------------------------------------------------------------------------------------------------------------------------------------------------------------------------------------------------------------------------------------|------|------|-----------|-------|------|------|
| Rsa1.0_00092.1.g4591.t1 | refXP_002867201.1  coclaurine N-methyltransferase [Arabidopsis lyrata subsp. lyrata]<br>gi 297313037 gb EFH43460.1  coclaurine N-methyltransferase [Arabidopsis lyrata subsp. lyrata]                                                                                                                                                                                                                               | 355  | 355  | 0         | 100.0 | 90.7 | 98.0 | coclaurine N-methyltransferase                  | gbpln | Arabidopsis lyrata   | AT4G33110.2   Symbols:   S-adenosyl-L-methionine-dependent methyltransferases superfamily protein   chr4:15972497-15974531 REVERSE LENGTH=355                                                                                                                                                                                                                                                                                                                                                                                                              | 355  | 355  | 0         | 100.0 | 87.6 | 96.9 |
| Rsa1.0_00092.1.g4592.t1 | refXP_002867210.1  hypothetical protein ARALYDRAFT_491387 [Arabidopsis lyrata subsp. lyrata]<br>gi 297313046 gb EFH43469.1  hypothetical protein ARALYDRAFT_491387 [Arabidopsis lyrata subsp. lyrata]                                                                                                                                                                                                               | 143  | 142  | 1.00E-62  | 99.3  | 86.7 | 89.5 | hypothetical protein ARALYDRAFT_491387          | gbpln | Arabidopsis lyrata   | AT4G33040.1   Symbols:   Thioredoxin superfamily protein   chr4:15940779-15941213 REVERSE LENGTH=144                                                                                                                                                                                                                                                                                                                                                                                                                                                       | 143  | 144  | 9.00E-65  | 100.7 | 87.4 | 90.9 |
| Rsa1.0_00092.1.g4593.t1 | refXP_002869229.1  hypothetical protein ARALYDRAFT_491388 [Arabidopsis lyrata subsp. lyrata]<br>gi 297315065 gb EFH45488.1  hypothetical protein ARALYDRAFT_491388 [Arabidopsis lyrata subsp. lyrata]                                                                                                                                                                                                               | 479  | 475  | 0         | 99.2  | 94.2 | 96.7 | hypothetical protein ARALYDRAFT_491388          | gbpln | Arabidopsis lyrata   | AT4G33030.1   Symbols: SQD1   sulfoquinovosyldiacylglycerol 1   chr4:15936051-15937566 FORWARD LENGTH=477                                                                                                                                                                                                                                                                                                                                                                                                                                                  | 479  | 477  | 0         | 99.6  | 94.2 | 97.1 |
| Rsa1.0_00092.1.g4594.t1 | gb EOA17824.1  hypothetical protein CARUB_v10006225mg, partial [Capsella rubella]                                                                                                                                                                                                                                                                                                                                   | 250  | 241  | 1.00E-119 | 96.4  | 85.6 | 90.0 | hypothetical protein CARUB_v10006225mg, partial | gbpln | Capsella rubella     | AT4G33000.2   Symbols: CBL10, SCABP8, ATCBL10   calineurin B-like protein 10   chr4:15924821-15926398 FORWARD LENGTH=246                                                                                                                                                                                                                                                                                                                                                                                                                                   | 250  | 246  | 1.00E-121 | 98.4  | 85.2 | 90.0 |
| Rsa1.0_00092.1.g4595.t1 | refXP_002867215.1  hypothetical protein ARALYDRAFT_491396 [Arabidopsis lyrata subsp. lyrata]<br>gi 297313051 gb EFH43474.1  hypothetical protein ARALYDRAFT_491396 [Arabidopsis lyrata subsp. lyrata]                                                                                                                                                                                                               | 451  | 472  | 0         | 104.7 | 78.7 | 84.3 | hypothetical protein ARALYDRAFT_491396          | gbpln | Arabidopsis lyrata   | AT4G32980.1   Symbols: ATH1   homeobox gene 1   chr4:15914865-15916873 REVERSE LENGTH=473                                                                                                                                                                                                                                                                                                                                                                                                                                                                  | 451  | 473  | 0         | 104.9 | 76.7 | 83.4 |
| Rsa1.0_00092.1.g4596.t1 | refXP_002867217.1  hypothetical protein ARALYDRAFT_491398 [Arabidopsis lyrata subsp. lyrata]<br>gi 297313053 gb EFH43476.1  hypothetical protein ARALYDRAFT_491398 [Arabidopsis lyrata subsp. lyrata]                                                                                                                                                                                                               | 262  | 264  | 1.00E-129 | 100.8 | 84.0 | 89.3 | hypothetical protein ARALYDRAFT_491398          | gbpln | Arabidopsis lyrata   | AT4G32960.1   Symbols:   unknown protein; BEST Arabidopsis thaliana protein match is: unknown protein (TAIR:AT4G32970.1); Has 106 Blast hits to 106 proteins in 39 species: Archae - 0; Bacteria - 0; Metazoa - 62; Fungi - 0; Plants - 37; Viruses - 0; Other Eukaryotes - 7 (source: NCBI BLINK).   chr4:15908785-15910141 REVERSE LENGTH=264                                                                                                                                                                                                            | 262  | 264  | 1.00E-131 | 100.8 | 83.6 | 88.5 |
| Rsa1.0_00092.1.g4597.t1 | refNP_195021.1  putative protein phosphatase 2C 61 [Arabidopsis thaliana]<br>gi 75100739 sp Q82637.1 P2C61_ARATH RecName: Full=Probable protein phosphatase 2C 61; Short=AtP2C61<br>gi 3688176 emb CAA21204.1  putative protein [Arabidopsis thaliana]<br>gi 7270242 emb CAB80012.1  putative protein [Arabidopsis thaliana]<br>gi 33266075 gb AEE8615.1  putative protein phosphatase 2C 61 [Arabidopsis thaliana] | 326  | 326  | 1.00E-164 | 100.0 | 84.4 | 91.1 | putative protein phosphatase 2C 61              | gbpln | Arabidopsis thaliana | AT4G32950.1   Symbols:   Protein phosphatase 2C family protein   chr4:15904444-15906010 REVERSE LENGTH=326                                                                                                                                                                                                                                                                                                                                                                                                                                                 | 326  | 326  | 1.00E-166 | 100.0 | 84.4 | 91.1 |
| Rsa1.0_00092.1.g4598.t1 | emb CAA21202.1  putative protein [Arabidopsis thaliana]<br>gi 7270240 emb CAB80010.1  putative protein [Arabidopsis thaliana]                                                                                                                                                                                                                                                                                       | 211  | 181  | 3.00E-86  | 85.8  | 76.3 | 78.2 | putative protein                                | gbpln | Arabidopsis thaliana | AT4G32930.1   Symbols:   unknown protein; CONTAINS InterPro DOMAIN/s: Protein of unknown function DUF866, eukaryotic (InterPro:IPR008584); Has 30201 Blast hits to 17322 proteins in 780 species: Archae - 12; Bacteria - 1396; Metazoa - 17338; Fungi - 3422; Plants - 5037; Viruses - 0; Other Eukaryotes - 2996 (source: NCBI BLINK).   chr4:15898878-15900185 FORWARD LENGTH=167                                                                                                                                                                       | 211  | 167  | 4.00E-87  | 79.1  | 75.4 | 76.8 |
| Rsa1.0_00092.1.g4599.t1 | refXP_002867220.1  glycine-rich protein [Arabidopsis lyrata subsp. lyrata]<br>gi 297313056 gb EFH43479.1  glycine-rich protein [Arabidopsis lyrata subsp. lyrata]                                                                                                                                                                                                                                                   | 1405 | 1424 | 0         | 101.4 | 88.3 | 93.7 | glycine-rich protein                            | gbpln | Arabidopsis lyrata   | AT4G32920.3   Symbols:   glycine-rich protein   chr4:15888153-15896006 REVERSE LENGTH=1432                                                                                                                                                                                                                                                                                                                                                                                                                                                                 | 1405 | 1432 | 0         | 101.9 | 88.5 | 94.0 |
| Rsa1.0_00092.1.g4600.t1 | gb EOA17574.1  hypothetical protein CARUB_v10005935mg [Capsella rubella]                                                                                                                                                                                                                                                                                                                                            | 121  | 154  | 4.00E-33  | 127.3 | 61.2 | 66.9 | hypothetical protein CARUB_v10005935mg          | gbpln | Capsella rubella     | AT4G32915.1   Symbols:   FUNCTIONS IN: molecular function unknown; INVOLVED IN: regulation of translational fidelity; LOCATED IN: chloroplast; EXPRESSED IN: 22 plant structures; EXPRESSED DURING: 13 growth stages; CONTAINS InterPro DOMAIN/s: Glu-tRNA-Gln amidotransferase, C subunit (InterPro:IPR003837); Has 30201 Blast hits to 17322 proteins in 780 species: Archae - 12; Bacteria - 1396; Metazoa - 17338; Fungi - 3422; Plants - 5037; Viruses - 0; Other Eukaryotes - 2996 (source: NCBI BLINK).   chr4:15885549-15886628 FORWARD LENGTH=155 | 121  | 155  | 1.00E-34  | 128.1 | 57.0 | 62.0 |

|                         |                                                                                                                                                                                                                                                                                                                                                                                                                                                                                                                                                                                        |      |      |           |       |      |      |                                          |       |                      |                                                                                                                                                                                                                                                                                                                                               |      |      |           |       |      |      |
|-------------------------|----------------------------------------------------------------------------------------------------------------------------------------------------------------------------------------------------------------------------------------------------------------------------------------------------------------------------------------------------------------------------------------------------------------------------------------------------------------------------------------------------------------------------------------------------------------------------------------|------|------|-----------|-------|------|------|------------------------------------------|-------|----------------------|-----------------------------------------------------------------------------------------------------------------------------------------------------------------------------------------------------------------------------------------------------------------------------------------------------------------------------------------------|------|------|-----------|-------|------|------|
| Rsa1.0_00092.1.g4601.t1 | refXP_002869237.1   zinc finger family protein [Arabidopsis lyrata subsp. lyrata] gi 297315073 gb EFH45496.1   zinc finger family protein [Arabidopsis lyrata subsp. lyrata]                                                                                                                                                                                                                                                                                                                                                                                                           | 314  | 309  | 1.00E-126 | 98.4  | 75.5 | 82.2 | zinc finger family protein               | gbpln | Arabidopsis lyrata   | AT4G32890.1   Symbols: GATA9   GATA transcription factor 9   chr4:15875598-15876615 FORWARD LENGTH=308                                                                                                                                                                                                                                        | 314  | 308  | 1.00E-128 | 98.1  | 75.5 | 81.8 |
| Rsa1.0_00092.1.g4602.t1 | gb ACS8190.1   cellulose synthase 1.2 catalytic subunit [Brassica napus]                                                                                                                                                                                                                                                                                                                                                                                                                                                                                                               | 1165 | 1083 | 0         | 93.0  | 91.9 | 92.2 | cellulose synthase 1.2 catalytic subunit | gbpln | Brassica napus       | AT4G32410.1   Symbols: CESA1, RSW1, ALCESA1   cellulose synthase 1   chr4:15641009-15646388 REVERSE LENGTH=1081                                                                                                                                                                                                                               | 1165 | 1081 | 0         | 92.8  | 87.7 | 90.0 |
| Rsa1.0_00092.1.g4603.t2 | gb ACP30555.1   disease resistance protein [Brassica rapa subsp. pekinensis]                                                                                                                                                                                                                                                                                                                                                                                                                                                                                                           | 1110 | 1074 | 0         | 96.8  | 77.5 | 85.0 | disease resistance protein               | gbpln | Brassica rapa        | AT5G48770.1   Symbols:   Disease resistance protein (TIR-NBS-LRR class) family   chr5:19773277-19777242 REVERSE LENGTH=1190                                                                                                                                                                                                                   | 1110 | 1190 | 0         | 107.2 | 44.0 | 57.4 |
| Rsa1.0_00092.1.g4604.t1 | gb ACP30556.1   disease resistance protein [Brassica rapa subsp. pekinensis]                                                                                                                                                                                                                                                                                                                                                                                                                                                                                                           | 506  | 522  | 1.00E-171 | 103.2 | 65.8 | 75.3 | disease resistance protein               | gbpln | Brassica rapa        | AT1G72870.1   Symbols:   Disease resistance protein (TIR-NBS class)   chr1:27421086-27422999 FORWARD LENGTH=512                                                                                                                                                                                                                               | 506  | 512  | 3.00E-61  | 101.2 | 37.0 | 52.2 |
| Rsa1.0_00092.1.g4605.t1 | refXP_002869282.1   hypothetical protein ARALYDRAFT_491495 [Arabidopsis lyrata subsp. lyrata] gi 297315118 gb EFH45541.1   hypothetical protein ARALYDRAFT_491495 [Arabidopsis lyrata subsp. lyrata]                                                                                                                                                                                                                                                                                                                                                                                   | 424  | 437  | 1.00E-168 | 103.1 | 79.2 | 86.3 | hypothetical protein ARALYDRAFT_491495   | gbpln | Arabidopsis lyrata   | AT4G32330.2   Symbols:   TPX2 (targeting protein for Xlp2) protein family   chr4:15609801-15611867 FORWARD LENGTH=436                                                                                                                                                                                                                         | 424  | 436  | 1.00E-169 | 102.8 | 77.4 | 84.9 |
| Rsa1.0_00092.1.g4606.t1 | refXP_002869283.1   hypothetical protein ARALYDRAFT_913218 [Arabidopsis lyrata subsp. lyrata] gi 297315119 gb EFH45542.1   hypothetical protein ARALYDRAFT_913218 [Arabidopsis lyrata subsp. lyrata]                                                                                                                                                                                                                                                                                                                                                                                   | 303  | 329  | 1.00E-142 | 108.6 | 84.2 | 90.4 | hypothetical protein ARALYDRAFT_913218   | gbpln | Arabidopsis lyrata   | AT4G32320.1   Symbols: APX6   ascorbate peroxidase 6   chr4:15602777-15605234 FORWARD LENGTH=329                                                                                                                                                                                                                                              | 303  | 329  | 1.00E-144 | 108.6 | 83.5 | 90.4 |
| Rsa1.0_00092.1.g4607.t1 | refXP_002869284.1   lectin protein kinase family protein [Arabidopsis lyrata subsp. lyrata] gi 297315120 gb EFH45543.1   lectin protein kinase family protein [Arabidopsis lyrata subsp. lyrata]                                                                                                                                                                                                                                                                                                                                                                                       | 820  | 825  | 0         | 100.6 | 84.6 | 91.2 | lectin protein kinase family protein     | gbpln | Arabidopsis lyrata   | AT4G32300.1   Symbols: SD2-5   S-domain-2 5   chr4:15599970-15602435 FORWARD LENGTH=821                                                                                                                                                                                                                                                       | 820  | 821  | 0         | 100.1 | 83.3 | 90.2 |
| Rsa1.0_00092.1.g4608.t1 | ref NP_680756.1   uncharacterized protein [Arabidopsis thaliana] gi 28392894 gb AAO41883.1   unknown protein [Arabidopsis thaliana] gi 28827750 gb AAO50719.1   unknown protein [Arabidopsis thaliana] gi 332660636 gb AEE86036.1   uncharacterized protein AT4G32295 [Arabidopsis thaliana]                                                                                                                                                                                                                                                                                           | 259  | 238  | 1.00E-108 | 91.9  | 78.8 | 83.4 | uncharacterized protein                  | gbpln | Arabidopsis thaliana | AT4G32295.1   Symbols:   unknown protein; BEST Arabidopsis thaliana protein match is: unknown protein (TAIR:AT3G24150.1); Has 39 Blast hits to 39 proteins in 10 species: Archaee - 0; Bacteria - 0; Metazoa - 0; Fungi - 0; Plants - 39; Viruses - 0; Other Eukaryotes - 0 (source: NCBI BLink).   chr4:15592960-15594080 FORWARD LENGTH=238 | 259  | 238  | 1.00E-110 | 91.9  | 78.8 | 83.4 |
| Rsa1.0_00092.1.g4609.t1 | refXP_002867248.1   hypothetical protein ARALYDRAFT_491501 [Arabidopsis lyrata subsp. lyrata] gi 297313084 gb EFH43507.1   hypothetical protein ARALYDRAFT_491501 [Arabidopsis lyrata subsp. lyrata]                                                                                                                                                                                                                                                                                                                                                                                   | 380  | 385  | 1.00E-176 | 101.3 | 81.3 | 89.5 | hypothetical protein ARALYDRAFT_491501   | gbpln | Arabidopsis lyrata   | AT4G32290.1   Symbols:   Core-2/I-branching beta-1,6-N-acetylglucosaminyltransferase family protein   chr4:15589839-15590993 REVERSE LENGTH=384                                                                                                                                                                                               | 380  | 384  | 1.00E-172 | 101.1 | 80.3 | 89.7 |
| Rsa1.0_00092.1.g4610.t2 | ref NP_567891.1   auxin-responsive protein IAA29 [Arabidopsis thaliana] gi 46395937 sp Q93WC4.2 IAA29_ARAT H RecName: Full=Auxin-responsive protein IAA29; AltName: Full=Indoleacetic acid-induced protein 29 gi 49616375 gb AA767084.1  IAA29 [Arabidopsis thaliana] gi 110739230 dbj BAF01529.1   hypothetical protein [Arabidopsis thaliana] gi 225898645 dtj BAH30553.1   hypothetical protein [Arabidopsis thaliana] gi 225898847 dtj BAH30554.1   hypothetical protein [Arabidopsis thaliana] gi 332660632 gb AEE86032.1   auxin-responsive protein IAA29 [Arabidopsis thaliana] | 283  | 251  | 7.00E-89  | 88.7  | 63.6 | 71.4 | auxin-responsive protein IAA29           | gbpln | Arabidopsis thaliana | AT4G32280.1   Symbols: IAA29   indole-3-acetic acid inducible 29   chr4:15583479-15584628 FORWARD LENGTH=251                                                                                                                                                                                                                                  | 283  | 251  | 2.00E-91  | 88.7  | 63.6 | 71.4 |
| Rsa1.0_00092.1.g4611.t1 | refXP_002867249.1   hypothetical protein ARALYDRAFT_491505 [Arabidopsis lyrata subsp. lyrata] gi 297313085 gb EFH43508.1   hypothetical protein ARALYDRAFT_491505 [Arabidopsis lyrata subsp. lyrata]                                                                                                                                                                                                                                                                                                                                                                                   | 337  | 342  | 1.00E-177 | 101.5 | 89.9 | 95.5 | hypothetical protein ARALYDRAFT_491505   | gbpln | Arabidopsis lyrata   | AT4G32272.1   Symbols:   Nucleotide/sugar transporter family protein   chr4:15577195-15579689 REVERSE LENGTH=344                                                                                                                                                                                                                              | 337  | 344  | 1.00E-176 | 102.1 | 89.0 | 95.8 |

|                         |                                                                                                                                                                                                                                                                                                                                                                                                                                                                                                                                                                                                                                                                                                                                                         |     |     |           |       |      |      |                                        |       |                      |                                                                                                                                                                                                                                                                                                                                                                                                                                                                                                                                 |     |     |           |       |      |      |
|-------------------------|---------------------------------------------------------------------------------------------------------------------------------------------------------------------------------------------------------------------------------------------------------------------------------------------------------------------------------------------------------------------------------------------------------------------------------------------------------------------------------------------------------------------------------------------------------------------------------------------------------------------------------------------------------------------------------------------------------------------------------------------------------|-----|-----|-----------|-------|------|------|----------------------------------------|-------|----------------------|---------------------------------------------------------------------------------------------------------------------------------------------------------------------------------------------------------------------------------------------------------------------------------------------------------------------------------------------------------------------------------------------------------------------------------------------------------------------------------------------------------------------------------|-----|-----|-----------|-------|------|------|
| Rsa1.0_00092.1.g4612.t1 | ref[NP_567888.2] Phox (PX) domain-containing protein [Arabidopsis thaliana] gi 332660612 gb AE86012.1  Phox (PX) domain-containing protein [Arabidopsis thaliana]                                                                                                                                                                                                                                                                                                                                                                                                                                                                                                                                                                                       | 715 | 723 | 0         | 101.1 | 84.8 | 90.8 | Phox (PX) domain-containing protein    | gbpln | Arabidopsis thaliana | AT4G32160.1   Symbols:   Phox (PX) domain-containing protein   chr4:15529056-15532892 FORWARD LENGTH=723                                                                                                                                                                                                                                                                                                                                                                                                                        | 715 | 723 | 0         | 101.1 | 84.8 | 90.8 |
| Rsa1.0_00092.1.g4613.t1 | # # # # # # # # - ----                                                                                                                                                                                                                                                                                                                                                                                                                                                                                                                                                                                                                                                                                                                                  |     |     |           |       |      |      |                                        |       |                      | # # # # # # # #                                                                                                                                                                                                                                                                                                                                                                                                                                                                                                                 |     |     |           |       |      |      |
| Rsa1.0_00092.1.g4614.t1 | ref[XP_002867264.1] hypothetical protein ARALYDRAFT_353622 [Arabidopsis lyrata subsp. lyrata] gi 297313100 gb EFH43523.1  hypothetical protein ARALYDRAFT_353622 [Arabidopsis lyrata subsp. lyrata]                                                                                                                                                                                                                                                                                                                                                                                                                                                                                                                                                     | 120 | 127 | 6.00E-37  | 105.8 | 62.5 | 75.0 | hypothetical protein ARALYDRAFT_353622 | gbpln | Arabidopsis lyrata   | AT4G32090.1   Symbols:   Beta-1,3-N-Acetylglucosaminyltransferase family protein   chr4:15509990-15510820 REVERSE LENGTH=124                                                                                                                                                                                                                                                                                                                                                                                                    | 120 | 124 | 2.00E-38  | 103.3 | 62.5 | 74.2 |
| Rsa1.0_00092.1.g4615.t1 | gb[EOA16049.1] hypothetical protein CARUB_v10004180mg [Capsella rubella]                                                                                                                                                                                                                                                                                                                                                                                                                                                                                                                                                                                                                                                                                | 711 | 784 | 0         | 110.3 | 83.8 | 91.6 | hypothetical protein CARUB_v10004180mg | gbpln | Capsella rubella     | AT4G32070.1   Symbols: Phox4   Octicosapeptide/Phox/Bem1p (PB1) domain-containing protein / tetratricopeptide repeat (TPR)-containing protein   chr4:15504662-15507097 REVERSE LENGTH=811                                                                                                                                                                                                                                                                                                                                       | 711 | 811 | 0         | 114.1 | 84.5 | 92.3 |
| Rsa1.0_00092.1.g4616.t1 | ref[NP_194932.1] homeobox protein knotted-1-like 5 [Arabidopsis thaliana] gi 12644283 sp P48002.2 KNAT5_ARATH RecName: Full=Homeobox protein knotted-1-like 5; AltName: Full=Homeodomain-containing protein 1; AltName: Full=Protein KNAT5 gi 17224610 gb AAL37042.1 AF306661_1 homeodomain transcription factor KNAT5 [Arabidopsis thaliana] gi 2506031 dbj BAA22602.1  homeodomain containing protein 1 [Arabidopsis thaliana] gi 3858938 emb CAA16585.1  homeodomain containing protein 1 [Arabidopsis thaliana] gi 7270108 emb CAB79922.1  homeodomain containing protein 1 [Arabidopsis thaliana] gi 10994642 gb ABG48389.1  At4g32040 [Arabidopsis thaliana] gi 332660597 gb AEE85997.1  homeobox protein knotted-1-like 5 [Arabidopsis thaliana] | 371 | 383 | 1.00E-171 | 103.2 | 85.7 | 91.4 | homeobox protein knotted-1-like 5      | gbpln | Arabidopsis thaliana | AT4G32040.1   Symbols: KNAT5   KNOTTED1-like homeobox gene 5   chr4:15494127-15496009 FORWARD LENGTH=383                                                                                                                                                                                                                                                                                                                                                                                                                        | 371 | 383 | 1.00E-174 | 103.2 | 85.7 | 91.4 |
| Rsa1.0_00092.1.g4617.t1 | ref[XP_002869297.1] hypothetical protein ARALYDRAFT_913253 [Arabidopsis lyrata subsp. lyrata] gi 297315133 gb EFH45556.1  hypothetical protein ARALYDRAFT_913253 [Arabidopsis lyrata subsp. lyrata]                                                                                                                                                                                                                                                                                                                                                                                                                                                                                                                                                     | 124 | 256 | 2.00E-41  | 206.5 | 73.4 | 82.3 | hypothetical protein ARALYDRAFT_913253 | gbpln | Arabidopsis lyrata   | AT4G32030.1   Symbols:   unknown protein; BEST Arabidopsis thaliana protein match is: unknown protein (TAIR:AT1G0610.1); Has 63 Blast hits to 59 proteins in 12 species: Archae - 0; Bacteria - 0; Metazoa - 6; Fungi - 0; Plants - 53; Viruses - 0; Other Eukaryotes - 4 (source: NCBI BLink).   chr4:15490903-15493007 FORWARD LENGTH=253                                                                                                                                                                                     | 124 | 253 | 3.00E-43  | 204.0 | 75.0 | 83.9 |
| Rsa1.0_00092.1.g4618.t1 | gb[EOA15616.1] hypothetical protein CARUB_v10005750mg [Capsella rubella]                                                                                                                                                                                                                                                                                                                                                                                                                                                                                                                                                                                                                                                                                | 180 | 205 | 4.00E-61  | 113.9 | 76.7 | 82.8 | hypothetical protein CARUB_v10005750mg | gbpln | Capsella rubella     | AT4G32020.1   Symbols:   unknown protein; FUNCTIONS IN: molecular function unknown; INVOLVED IN: biological process unknown; LOCATED IN: chloroplast; EXPRESSED IN: 24 plant structures; EXPRESSED DURING: 15 growth stages; BEST Arabidopsis thaliana protein match is: unknown protein (TAIR:AT2G25250.1); Has 65 Blast hits to 65 proteins in 19 species: Archae - 0; Bacteria - 0; Metazoa - 3; Fungi - 8; Plants - 54; Viruses - 0; Other Eukaryotes - 0 (source: NCBI BLink).   chr4:15488076-15488621 FORWARD LENGTH=181 | 180 | 181 | 1.00E-52  | 100.6 | 70.6 | 75.0 |
| Rsa1.0_00092.1.g4619.t1 | gb[EOA16061.1] hypothetical protein CARUB_v10004194mg [Capsella rubella]                                                                                                                                                                                                                                                                                                                                                                                                                                                                                                                                                                                                                                                                                | 797 | 775 | 0         | 97.2  | 81.9 | 88.6 | hypothetical protein CARUB_v10004194mg | gbpln | Capsella rubella     | AT4G32010.1   Symbols: HSL1, HSI2-L1, VAL2   HSI2-like 1   chr4:15481231-15484097 FORWARD LENGTH=780                                                                                                                                                                                                                                                                                                                                                                                                                            | 797 | 780 | 0         | 97.9  | 81.9 | 88.1 |
| Rsa1.0_00092.1.g4620.t1 | ref[XP_002867266.1] hypothetical protein ARALYDRAFT_491537 [Arabidopsis lyrata subsp. lyrata] gi 297313102 gb EFH43525.1  hypothetical protein ARALYDRAFT_491537 [Arabidopsis lyrata subsp. lyrata]                                                                                                                                                                                                                                                                                                                                                                                                                                                                                                                                                     | 453 | 453 | 0         | 100.0 | 94.9 | 98.0 | hypothetical protein ARALYDRAFT_491537 | gbpln | Arabidopsis lyrata   | AT4G31990.2   Symbols: ASP5, AAT3, ATAAT1   aspartate aminotransferase 5   chr4:15471074-15473521 REVERSE LENGTH=453                                                                                                                                                                                                                                                                                                                                                                                                            | 453 | 453 | 0         | 100.0 | 94.3 | 97.6 |
| Rsa1.0_00092.1.g4621.t1 | emb[CB121094.3] unnamed protein product [Vitis vinifera]                                                                                                                                                                                                                                                                                                                                                                                                                                                                                                                                                                                                                                                                                                | 44  | 112 | 5.00E-16  | 254.5 | 93.2 | 97.7 | unnamed protein product                | gbpln | Vitis vinifera       | AT4G31985.1   Symbols:   Ribosomal protein L39 family protein   chr4:15469931-15470366 FORWARD LENGTH=51                                                                                                                                                                                                                                                                                                                                                                                                                        | 44  | 51  | 4.00E-18  | 115.9 | 95.5 | 95.5 |

|                         |                                                                                                                                                                                                                                                                                                                                                                                                                                                                                                      |      |      |           |       |      |      |                                           |       |                      |                                                                                                                                                                                                                                                                     |      |      |           |       |      |      |
|-------------------------|------------------------------------------------------------------------------------------------------------------------------------------------------------------------------------------------------------------------------------------------------------------------------------------------------------------------------------------------------------------------------------------------------------------------------------------------------------------------------------------------------|------|------|-----------|-------|------|------|-------------------------------------------|-------|----------------------|---------------------------------------------------------------------------------------------------------------------------------------------------------------------------------------------------------------------------------------------------------------------|------|------|-----------|-------|------|------|
| Rsa1.0_00092.1.g4622.t1 | ref[XP_002867268.1] mitochondrial glycoprotein family protein [Arabidopsis lyrata subsp. lyrata]<br>gi 297313104 gb EFH43527.1  mitochondrial glycoprotein family protein [Arabidopsis lyrata subsp. lyrata]                                                                                                                                                                                                                                                                                         | 245  | 234  | 1.00E-107 | 95.5  | 77.6 | 85.3 | mitochondrial glycoprotein family protein | gbpln | Arabidopsis lyrata   | AT4G31930.1   Symbols:   Mitochondrial glycoprotein family protein   chr4:15449710-15450804 REVERSE LENGTH=234                                                                                                                                                      | 245  | 234  | 1.00E-107 | 95.5  | 75.9 | 83.7 |
| Rsa1.0_00092.1.g4623.t1 | dbj BAJ34619.1  unnamed protein product [Theilungiella halophila]                                                                                                                                                                                                                                                                                                                                                                                                                                    | 516  | 539  | 0         | 104.5 | 81.2 | 87.2 | unnamed protein product                   | ----  | ----                 | AT4G31920.1   Symbols: ARR10, RR10   response regulator 10   chr4:15444290-15446766 REVERSE LENGTH=552                                                                                                                                                              | 516  | 552  | 0         | 107.0 | 75.6 | 83.5 |
| Rsa1.0_00092.1.g4624.t1 | ref[XP_002869305.1] transferase family protein [Arabidopsis lyrata subsp. lyrata]<br>gi 297315141 gb EFH45564.1  transferase family protein [Arabidopsis lyrata subsp. lyrata]                                                                                                                                                                                                                                                                                                                       | 460  | 461  | 0         | 100.2 | 86.7 | 92.0 | transferase family protein                | gbpln | Arabidopsis lyrata   | AT4G31910.1   Symbols:   HXXXD-type acyl-transferase family protein   chr4:15441125-15443696 FORWARD LENGTH=458                                                                                                                                                     | 460  | 458  | 0         | 99.6  | 84.3 | 90.2 |
| Rsa1.0_00092.1.g4625.t1 | ref[XP_002878829.1] PKL/SSL2 [Arabidopsis lyrata subsp. lyrata]<br>gi 297324688 gb EFH55088.1  PKL/SSL2 [Arabidopsis lyrata subsp. lyrata]                                                                                                                                                                                                                                                                                                                                                           | 666  | 1399 | 1.00E-132 | 210.1 | 34.8 | 41.3 | PKL/SSL2                                  | gbpln | Arabidopsis lyrata   | AT2G25170.1   Symbols: PKL, GYM, CHD3, CHR6, SSL2   chromatin remodeling factor CHD3 (PICKLE)   chr2:10714411-10723763 FORWARD LENGTH=1384                                                                                                                          | 666  | 1384 | 1.00E-135 | 207.8 | 34.7 | 41.4 |
| Rsa1.0_00092.1.g4626.t1 | ref[XP_002867272.1] hypothetical protein ARALYDRAFT_491547 [Arabidopsis lyrata subsp. lyrata]<br>gi 297313108 gb EFH43531.1  hypothetical protein ARALYDRAFT_491547 [Arabidopsis lyrata subsp. lyrata]                                                                                                                                                                                                                                                                                               | 1040 | 864  | 0         | 83.1  | 33.0 | 37.4 | hypothetical protein ARALYDRAFT_491547    | gbpln | Arabidopsis lyrata   | AT4G31880.2   Symbols:   LOCATED IN: cytosol; EXPRESSED IN: 24 plant structures; EXPRESSED DURING: 14 growth stages; BEST Arabidopsis thaliana protein match is: Tudor/PWPW/MBT superfamily protein (TAIR:AT1G15940.1).   chr4:15419435-15423939 REVERSE LENGTH=872 | 1040 | 872  | 0         | 83.8  | 32.6 | 37.0 |
| Rsa1.0_00092.1.g4627.t1 | gb EOA36857.1  hypothetical protein CARUB_v10008803mg [Capsella rubella]                                                                                                                                                                                                                                                                                                                                                                                                                             | 678  | 536  | 2.00E-91  | 79.1  | 33.2 | 46.0 | hypothetical protein CARUB_v10008803mg    | gbpln | Capsella rubella     | AT2G07760.1   Symbols:   Zinc knuckle (CCHC-type) family protein   chr2:3584420-3586278 REVERSE LENGTH=530                                                                                                                                                          | 678  | 530  | 1.00E-47  | 78.2  | 12.4 | 15.3 |
| Rsa1.0_00092.1.g4628.t1 | # # # # # # # #                                                                                                                                                                                                                                                                                                                                                                                                                                                                                      | #    | #    | #         | #     | #    | #    | -                                         | ----  | ----                 | # # # # # # # #                                                                                                                                                                                                                                                     | #    | #    | #         | #     | #    | #    |
| Rsa1.0_00092.1.g4629.t1 | gb AAM12502.1 AF411209_1 glutathione peroxidase [Brassica napus]                                                                                                                                                                                                                                                                                                                                                                                                                                     | 223  | 232  | 1.00E-120 | 104.0 | 97.3 | 97.3 | glutathione peroxidase                    | gbpln | Brassica napus       | AT4G31870.1   Symbols: ATGPX7, GPX7   glutathione peroxidase 7   chr4:15410205-15411617 FORWARD LENGTH=233                                                                                                                                                          | 223  | 233  | 5.00E-91  | 104.5 | 76.2 | 83.0 |
| Rsa1.0_00092.1.g4630.t1 | gb EOA16897.1  hypothetical protein CARUB_v10005121mg [Capsella rubella]                                                                                                                                                                                                                                                                                                                                                                                                                             | 351  | 359  | 0         | 102.3 | 93.4 | 98.0 | hypothetical protein CARUB_v10005121mg    | gbpln | Capsella rubella     | AT4G31860.1   Symbols:   Protein phosphatase 2C family protein   chr4:15406685-15406589 REVERSE LENGTH=357                                                                                                                                                          | 351  | 357  | 0         | 101.7 | 91.7 | 96.3 |
| Rsa1.0_00092.1.g4631.t1 | ref NP_194913.1  proton gradient regulation 3 [Arabidopsis thaliana]<br>gi 75213543 sp Q9S252.1 PP344_ARAT H RecName: Full=Pentatricopeptide repeat-containing protein At4g31850, chloroplastic; AltName: Full=Protein PROTON GRADIENT REGULATION 3; Flags: Precursor<br>gi 4584524 emb CAB40755.1  putative protein [Arabidopsis thaliana]<br>gi 7270088 emb CAB79903.1  putative protein [Arabidopsis thaliana]<br>gi 332660567 gb AEE85967.1  proton gradient regulation 3 [Arabidopsis thaliana] | 1107 | 1112 | 0         | 100.5 | 86.8 | 93.6 | proton gradient regulation 3              | gbpln | Arabidopsis thaliana | AT4G31850.1   Symbols: PGR3   proton gradient regulation 3   chr4:15403020-15406358 FORWARD LENGTH=1112                                                                                                                                                             | 1107 | 1112 | 0         | 100.5 | 86.8 | 93.6 |
| Rsa1.0_00092.1.g4632.t1 | ref[XP_002869310.1] hypothetical protein ARALYDRAFT_491553 [Arabidopsis lyrata subsp. lyrata]<br>gi 297315146 gb EFH45569.1  hypothetical protein ARALYDRAFT_491553 [Arabidopsis lyrata subsp. lyrata]                                                                                                                                                                                                                                                                                               | 170  | 177  | 7.00E-69  | 104.1 | 82.9 | 87.1 | hypothetical protein ARALYDRAFT_491553    | gbpln | Arabidopsis lyrata   | AT4G31840.1   Symbols: ENODL15, AtENODL15   early nodulin-like protein 15   chr4:15401798-15402426 FORWARD LENGTH=177                                                                                                                                               | 170  | 177  | 2.00E-70  | 104.1 | 81.8 | 86.5 |
| Rsa1.0_00092.1.g4633.t1 | ref[XP_002867277.1] hypothetical protein ARALYDRAFT_913282 [Arabidopsis lyrata subsp. lyrata]<br>gi 297313113 gb EFH43536.1  hypothetical protein ARALYDRAFT_913282 [Arabidopsis lyrata subsp. lyrata]                                                                                                                                                                                                                                                                                               | 85   | 100  | 2.00E-33  | 117.6 | 87.1 | 92.9 | hypothetical protein ARALYDRAFT_913282    | gbpln | Arabidopsis lyrata   | AT4G31830.1   Symbols:   unknown protein; Has 42 Blast hits to 42 proteins in 10 species: Archae - 0; Bacteria - 0; Metazoa - 0; Fungi - 0; Plants - 42; Viruses - 0; Other Eukaryotes - 0 (source: NCBI BLINK).   chr4:15400803-15401105 REVERSE LENGTH=100        | 85   | 100  | 5.00E-36  | 117.6 | 87.1 | 91.8 |
| Rsa1.0_00092.1.g4634.t1 | ref[XP_002867283.1] hypothetical protein ARALYDRAFT_913296 [Arabidopsis lyrata subsp. lyrata]<br>gi 297313119 gb EFH43542.1  hypothetical protein ARALYDRAFT_913296 [Arabidopsis lyrata subsp. lyrata]                                                                                                                                                                                                                                                                                               | 263  | 394  | 6.00E-55  | 149.8 | 43.3 | 52.9 | hypothetical protein ARALYDRAFT_913296    | gbpln | Arabidopsis lyrata   | AT2G24645.1   Symbols:   Transcriptional factor B3 family protein   chr2:10480728-10482650 REVERSE LENGTH=490                                                                                                                                                       | 263  | 490  | 7.00E-31  | 186.3 | 37.6 | 55.1 |

|                          |                                                                                                                                                                                                                                                                                                                                                                                                                                                                                                                                                                                                                                                                                                                                                                                                        |      |      |           |       |      |      |                                           |       |                      |                                                                                                                                                                                                                                                                                                                                                                                                                           |      |      |           |       |      |      |
|--------------------------|--------------------------------------------------------------------------------------------------------------------------------------------------------------------------------------------------------------------------------------------------------------------------------------------------------------------------------------------------------------------------------------------------------------------------------------------------------------------------------------------------------------------------------------------------------------------------------------------------------------------------------------------------------------------------------------------------------------------------------------------------------------------------------------------------------|------|------|-----------|-------|------|------|-------------------------------------------|-------|----------------------|---------------------------------------------------------------------------------------------------------------------------------------------------------------------------------------------------------------------------------------------------------------------------------------------------------------------------------------------------------------------------------------------------------------------------|------|------|-----------|-------|------|------|
| Rsa1.0_00092.1.g4635.t13 | ref NP_198062.2  glutamate receptor 2.1 [Arabidopsis thaliana]<br>gi 41017064 sp O04660.2 GLR21_ARATH<br>RecName: Full=Glutamate receptor 2.1;<br>AltName: Full=Ligand-gated ion channel 2.1; Short=AtGLR3; Flags: Precursor<br>gi 10735996 dbj BAE99973.1  ion channel - like protein [Arabidopsis thaliana] gi 332006267 gb AE83650.1  glutamate receptor 2.1 [Arabidopsis thaliana]                                                                                                                                                                                                                                                                                                                                                                                                                 | 851  | 901  | 0         | 105.9 | 79.3 | 88.1 | glutamate receptor 2.1                    | gbpln | Arabidopsis thaliana | AT5G27100.1   Symbols: ATGLR2.1, GLR2.1   glutamate receptor 2.1   chr5:9535160-9538311 REVERSE LENGTH=901                                                                                                                                                                                                                                                                                                                | 851  | 901  | 0         | 105.9 | 79.3 | 88.1 |
| Rsa1.0_00092.1.g4636.t1  | gb EOA16495.1  hypothetical protein CARUB_v10004653mg [Capsella rubella]                                                                                                                                                                                                                                                                                                                                                                                                                                                                                                                                                                                                                                                                                                                               | 499  | 496  | 1.00E-156 | 99.4  | 60.9 | 69.7 | hypothetical protein CARUB_v10004653mg    | gbpln | Capsella rubella     | AT4G31630.1   Symbols:   Transcriptional factor B3 family protein   chr4:15325343-15327220 REVERSE LENGTH=512                                                                                                                                                                                                                                                                                                             | 499  | 512  | 1.00E-154 | 102.6 | 59.9 | 72.9 |
| Rsa1.0_00092.1.g4637.t1  | ref NP_194887.1  putative xyloglucan glycosyltransferase 5 [Arabidopsis thaliana]<br>gi 75201904 sp Q9SB75.1 CSLC5_ARATH<br>RecName: Full=Probable xyloglucan glycosyltransferase 5; AltName: Full=Cellulose synthase-like protein C5; Short=AtCslC5<br>gi 3281868 emb CAA19764.1  putative protein [Arabidopsis thaliana]<br>gi 7270062 emb CAB79877.1  putative protein [Arabidopsis thaliana]<br>gi 28058784 gb AAO29953.1  putative protein [Arabidopsis thaliana]<br>gi 30725520 gb AAP37782.1  At4g31590 [Arabidopsis thaliana]<br>gi 332660533 gb AEE85933.1  putative xyloglucan glycosyltransferase 5 [Arabidopsis thaliana]                                                                                                                                                                  | 688  | 692  | 0         | 100.6 | 94.8 | 97.5 | putative xyloglucan glycosyltransferase 5 | gbpln | Arabidopsis thaliana | AT4G31590.1   Symbols: ATCSLC05, CSLC05, ATCSLC5, CSLC5   Cellulose-synthase-like C5   chr4:15309889-15312336 REVERSE LENGTH=692                                                                                                                                                                                                                                                                                          | 688  | 692  | 0         | 100.6 | 94.8 | 97.5 |
| Rsa1.0_00092.1.g4638.t23 | ref NP_194885.2  uncharacterized protein [Arabidopsis thaliana]<br>gi 332660530 gb AEE85930.1  uncharacterized protein AT4G31570 [Arabidopsis thaliana]                                                                                                                                                                                                                                                                                                                                                                                                                                                                                                                                                                                                                                                | 2870 | 2730 | 0         | 95.1  | 72.3 | 79.3 | uncharacterized protein                   | gbpln | Arabidopsis thaliana | AT4G31570.1   Symbols:   CONTAINS InterPro DOMAIN/s: Prefoldin (InterPro:IPR009053); BEST Arabidopsis thaliana protein match is: unknown protein (TAIR:AT1G24460.1); Has 194354 Blast hits to 68897 proteins in 3244 species: Archae - 3686; Bacteria - 38556; Metazoa - 84828; Fungi - 17265; Plants - 10589; Viruses - 805; Other Eukaryotes - 38623 (source: NCBI BLINK).   chr4:15297061-15306036 FORWARD LENGTH=2730 | 2870 | 2730 | 0         | 95.1  | 72.3 | 79.3 |
| Rsa1.0_00092.1.g4639.t1  | ref NP_194884.1  high chlorophyll fluorescence 153 protein [Arabidopsis thaliana]<br>gi 11692862 gb AAG40034.1 AF324683.1<br>AT4g31560 [Arabidopsis thaliana]<br>gi 11908100 gb AAG41479.1 AF326897.1<br>unknown protein [Arabidopsis thaliana]<br>gi 12642912 gb AAK03398.1 AF339716.1<br>unknown protein [Arabidopsis thaliana]<br>gi 13928337 gb AAK49632.1 AF372916.1<br>AT4g31560/F3L17.130 [Arabidopsis thaliana] gi 5262767 emb CAB45915.1  putative protein [Arabidopsis thaliana]<br>gi 7270059 emb CAB79874.1  putative protein [Arabidopsis thaliana]<br>gi 21592375 gb AAM64326.1  unknown [Arabidopsis thaliana]<br>gi 27363346 gb AAO11592.1 <br>At4g31560/F3L17.130 [Arabidopsis thaliana] gi 332660529 gb AEE85929.1  high chlorophyll fluorescence 153 protein [Arabidopsis thaliana] | 140  | 137  | 1.00E-50  | 97.9  | 75.7 | 81.4 | high chlorophyll fluorescence 153 protein | gbpln | Arabidopsis thaliana | AT4G31560.1   Symbols: HCF153   high chlorophyll fluorescence 153   chr4:15295219-15296028 FORWARD LENGTH=137                                                                                                                                                                                                                                                                                                             | 140  | 137  | 3.00E-53  | 97.9  | 75.7 | 81.4 |
| Rsa1.0_00092.1.g4640.t1  | emb CAB43904.1  putative protein [Arabidopsis thaliana]<br>gi 7269745 emb CAB81478.1  putative protein [Arabidopsis thaliana]                                                                                                                                                                                                                                                                                                                                                                                                                                                                                                                                                                                                                                                                          | 1132 | 1415 | 0         | 125.0 | 55.9 | 71.5 | putative protein                          | gbpln | Arabidopsis thaliana | AT4G23160.1   Symbols: CRK8   cysteine-rich RLK (RECEPTOR-like protein kinase) 8   chr4:12129485-12134086 FORWARD LENGTH=1262                                                                                                                                                                                                                                                                                             | 1132 | 1262 | 4.00E-35  | 111.5 | 6.3  | 9.0  |
| Rsa1.0_00092.1.g4641.t1  | gb ACQ76798.1  WRKY transcription factor 11 [Brassica napus]                                                                                                                                                                                                                                                                                                                                                                                                                                                                                                                                                                                                                                                                                                                                           | 462  | 327  | 2.33E-156 | 70.8  | 56.7 | 62.1 | WRKY transcription factor 11              | gbpln | Brassica napus       | AT4G31550.2   Symbols: WRKY11, ATWRKY11   WRKY DNA-binding protein 11   chr4:15290065-15291458 REVERSE LENGTH=324                                                                                                                                                                                                                                                                                                         | 462  | 324  | 1.00E-142 | 70.1  | 55.0 | 61.5 |
| Rsa1.0_00092.1.g4642.t1  | ref XP_002869322.1  catalytic/coenzyme binding protein [Arabidopsis lyrata subsp. lyrata]<br>gi 297315158 gb EFH45581.1  catalytic/coenzyme binding protein [Arabidopsis lyrata subsp. lyrata]                                                                                                                                                                                                                                                                                                                                                                                                                                                                                                                                                                                                         | 327  | 324  | 1.00E-142 | 99.1  | 84.4 | 89.9 | catalytic/coenzyme binding protein        | gbpln | Arabidopsis lyrata   | AT4G31530.1   Symbols:   NAD(P)-binding Rossmann-fold superfamily protein   chr4:15282281-15284064 FORWARD LENGTH=324                                                                                                                                                                                                                                                                                                     | 327  | 324  | 1.00E-144 | 99.1  | 85.0 | 89.9 |

|                         |                                                                                                                                                                                                                                                                                                                                                                                                                                                                                                                                                                     |     |     |           |       |      |      |                                             |       |                      |                                                                                                                                                                                                                                                                                                                                                  |     |     |           |       |      |      |
|-------------------------|---------------------------------------------------------------------------------------------------------------------------------------------------------------------------------------------------------------------------------------------------------------------------------------------------------------------------------------------------------------------------------------------------------------------------------------------------------------------------------------------------------------------------------------------------------------------|-----|-----|-----------|-------|------|------|---------------------------------------------|-------|----------------------|--------------------------------------------------------------------------------------------------------------------------------------------------------------------------------------------------------------------------------------------------------------------------------------------------------------------------------------------------|-----|-----|-----------|-------|------|------|
| Rsa1.0_00092.1.g4643.t1 | ref NP_172767.1  cytochrome P450 71B2 [Arabidopsis thaliana] gi 38503391 sp O65788.2 C71B2_ARATH RecName: Full=Cytochrome P450 71B2 gi 4850391 gb AAAD31061.1 AC007357.10 identical to gb D78605 cytochrome P450 monooxygenase from Arabidopsis thaliana and is a member of the PF 00067 Cytochrome P450 family. ESTs gb Z18072.gb Z35218 and gb T43466 come from this gene [Arabidopsis thaliana] gi 28392854 gb AAO41864.1  putative cytochrome P450 monooxygenase [Arabidopsis thaliana] gi 332190846 gb AEE28967.1  cytochrome P450 71B2 [Arabidopsis thaliana] | 512 | 502 | 0         | 98.0  | 72.9 | 83.0 | cytochrome P450 71B2                        | gbpln | Arabidopsis thaliana | AT1G13080.1   Symbols: CYP71B2   cytochrome P450, family 71, subfamily B, polypeptide 2   chr1:4459212-4460807 FORWARD LENGTH=502                                                                                                                                                                                                                | 512 | 502 | 0         | 98.0  | 72.9 | 83.0 |
| Rsa1.0_00092.1.g4644.t1 | ref XP_002867298.1  hypothetical protein ARALYDRAFT_491586 [Arabidopsis lyrata subsp. lyrata] gi 297313134 gb EFH43557.1  hypothetical protein ARALYDRAFT_491586 [Arabidopsis lyrata subsp. lyrata]                                                                                                                                                                                                                                                                                                                                                                 | 222 | 202 | 3.00E-52  | 91.0  | 64.4 | 71.6 | hypothetical protein ARALYDRAFT_491586      | gbpln | Arabidopsis lyrata   | AT4G31510.1   Symbols:   unknown protein; BEST Arabidopsis thaliana protein match is: unknown protein (TAIR:AT2G24550.1); Has 205 Blast hits to 205 proteins in 31 species: Archae - 0; Bacteria - 0; Metazoa - 5; Fungi - 3; Plants - 187; Viruses - 0; Other Eukaryotes - 10 (source: NCBI BLink).   chr4:15278328-15277219 REVERSE LENGTH=214 | 222 | 214 | 8.00E-53  | 96.4  | 64.4 | 73.9 |
| Rsa1.0_00092.1.g4645.t1 | gb EOA15441.1  hypothetical protein CARUB_v10004083mg [Capsella rubella]                                                                                                                                                                                                                                                                                                                                                                                                                                                                                            | 948 | 948 | 0         | 100.0 | 96.8 | 98.5 | hypothetical protein CARUB_v10004083mg      | gbpln | Capsella rubella     | AT4G31480.2   Symbols:   Coatomer, beta subunit   chr4:15264145-15267384 FORWARD LENGTH=948                                                                                                                                                                                                                                                      | 948 | 948 | 0         | 100.0 | 96.6 | 98.2 |
| Rsa1.0_00092.1.g4646.t1 | gb EOA17929.1  hypothetical protein CARUB_v10006338mg [Capsella rubella]                                                                                                                                                                                                                                                                                                                                                                                                                                                                                            | 183 | 186 | 7.00E-85  | 101.6 | 84.2 | 90.7 | hypothetical protein CARUB_v10006338mg      | gbpln | Capsella rubella     | AT4G31470.1   Symbols:   CAP (Cysteine-rich secretory proteins, Antigen 5, and Pathogenesis-related 1 protein) superfamily protein   chr4:15261746-15262303 REVERSE LENGTH=185                                                                                                                                                                   | 183 | 185 | 1.00E-82  | 101.1 | 82.5 | 88.5 |
| Rsa1.0_00092.1.g4647.t1 | ref XP_002867302.1  zinc finger family protein [Arabidopsis lyrata subsp. lyrata] gi 297313138 gb EFH43561.1  zinc finger family protein [Arabidopsis lyrata subsp. lyrata]                                                                                                                                                                                                                                                                                                                                                                                         | 448 | 499 | 1.00E-174 | 111.4 | 81.0 | 86.6 | zinc finger family protein                  | gbpln | Arabidopsis lyrata   | AT4G31450.1   Symbols:   RING/U-box superfamily protein   chr4:15255955-15257977 REVERSE LENGTH=497                                                                                                                                                                                                                                              | 448 | 497 | 1.00E-169 | 110.9 | 79.2 | 85.0 |
| Rsa1.0_00092.1.g4648.t1 | gb EOA18912.1  hypothetical protein CARUB_v10007542mg [Capsella rubella]                                                                                                                                                                                                                                                                                                                                                                                                                                                                                            | 351 | 404 | 1.00E-126 | 115.1 | 72.9 | 82.6 | hypothetical protein CARUB_v10007542mg      | gbpln | Capsella rubella     | AT4G31440.1   Symbols:   unknown protein; BEST Arabidopsis thaliana protein match is: unknown protein (TAIR:AT2G24530.1); Has 210 Blast hits to 209 proteins in 55 species: Archae - 0; Bacteria - 72; Metazoa - 2; Fungi - 6; Plants - 128; Viruses - 0; Other Eukaryotes - 2 (source: NCBI BLink).   chr4:15253731-15254870 FORWARD LENGTH=379 | 351 | 379 | 1.00E-115 | 108.0 | 68.4 | 76.4 |
| Rsa1.0_00092.1.g4649.t1 | #                                                                                                                                                                                                                                                                                                                                                                                                                                                                                                                                                                   | #   | #   | #         | #     | #    | #    | -                                           | ----  | ----                 | #                                                                                                                                                                                                                                                                                                                                                | #   | #   | #         | #     | #    |      |
| Rsa1.0_00092.1.g4650.t1 | gb EOA16535.1  hypothetical protein CARUB_v10004695mg [Capsella rubella]                                                                                                                                                                                                                                                                                                                                                                                                                                                                                            | 488 | 484 | 0         | 99.2  | 84.4 | 92.0 | hypothetical protein CARUB_v10004695mg      | gbpln | Capsella rubella     | AT4G31140.1   Symbols:   O-Glycosyl hydrolases family 17 protein   chr4:15141581-15143188 FORWARD LENGTH=484                                                                                                                                                                                                                                     | 488 | 484 | 0         | 99.2  | 83.2 | 92.0 |
| Rsa1.0_00092.1.g4651.t1 | gb EOA18616.1  hypothetical protein CARUB_v10007189mg [Capsella rubella]                                                                                                                                                                                                                                                                                                                                                                                                                                                                                            | 638 | 642 | 0         | 100.6 | 93.3 | 96.4 | hypothetical protein CARUB_v10007189mg      | gbpln | Capsella rubella     | AT4G31120.1   Symbols: SKB1, ATRPMT5   SHK1 binding protein 1   chr4:15132185-15136568 REVERSE LENGTH=642                                                                                                                                                                                                                                        | 638 | 642 | 0         | 100.6 | 91.7 | 95.9 |
| Rsa1.0_00092.1.g4652.t4 | ref NP_849478.1  uncharacterized protein [Arabidopsis thaliana] gi 19310420 gb AAL84947.1  AT4g31110/F6E21_30 [Arabidopsis thaliana] gi 21436035 gb AAM51595.1  AT4g31110/F6E21_30 [Arabidopsis thaliana] gi 332660458 gb AEE85658.1  uncharacterized protein AT4G31115 [Arabidopsis thaliana]                                                                                                                                                                                                                                                                      | 275 | 250 | 4.00E-99  | 90.9  | 73.5 | 78.5 | uncharacterized protein                     | gbpln | Arabidopsis thaliana | AT4G31115.1   Symbols:   Protein of unknown function (DUF1997)   chr4:15130243-15131847 FORWARD LENGTH=250                                                                                                                                                                                                                                       | 275 | 250 | 1.00E-101 | 90.9  | 73.5 | 78.5 |
| Rsa1.0_00092.1.g4653.t1 | gb EOA15750.1  hypothetical protein CARUB_v10006795mg [Capsella rubella]                                                                                                                                                                                                                                                                                                                                                                                                                                                                                            | 764 | 806 | 0         | 105.5 | 69.5 | 78.8 | hypothetical protein CARUB_v10006795mg      | gbpln | Capsella rubella     | AT4G31100.1   Symbols:   wall-associated kinase, putative   chr4:15123862-15126426 FORWARD LENGTH=786                                                                                                                                                                                                                                            | 764 | 786 | 0         | 102.9 | 66.9 | 77.7 |
| Rsa1.0_00092.1.g4654.t1 | ref XP_002867315.1  pentatricopeptide repeat-containing protein [Arabidopsis lyrata subsp. lyrata] gi 297313151 gb EFH43574.1  pentatricopeptide repeat-containing protein [Arabidopsis lyrata subsp. lyrata]                                                                                                                                                                                                                                                                                                                                                       | 600 | 598 | 0         | 99.7  | 79.3 | 87.2 | pentatricopeptide repeat-containing protein | gbpln | Arabidopsis lyrata   | AT4G31070.1   Symbols:   Tetratricopeptide repeat (TPR)-like superfamily protein   chr4:15118696-15120537 REVERSE LENGTH=613                                                                                                                                                                                                                     | 600 | 613 | 0         | 102.2 | 76.5 | 85.3 |



|                         |                                                                                                                                                                                                                                                                                                                                                                                                                                                                                                                                                                                                                                                                                                                                                                                                                                                                                                                                                                                                                                                                                                                                                                                                                                   |      |      |           |       |      |      |                                                   |       |                      |                                                                                                                                                                                                                                                                                                                                                                           |      |      |           |       |      |      |
|-------------------------|-----------------------------------------------------------------------------------------------------------------------------------------------------------------------------------------------------------------------------------------------------------------------------------------------------------------------------------------------------------------------------------------------------------------------------------------------------------------------------------------------------------------------------------------------------------------------------------------------------------------------------------------------------------------------------------------------------------------------------------------------------------------------------------------------------------------------------------------------------------------------------------------------------------------------------------------------------------------------------------------------------------------------------------------------------------------------------------------------------------------------------------------------------------------------------------------------------------------------------------|------|------|-----------|-------|------|------|---------------------------------------------------|-------|----------------------|---------------------------------------------------------------------------------------------------------------------------------------------------------------------------------------------------------------------------------------------------------------------------------------------------------------------------------------------------------------------------|------|------|-----------|-------|------|------|
| Rsa1.0_00092.1.g4655.t1 | <p>refXP_002867317.1   hypothetical protein ARALYDRAFT_328615 [Arabidopsis lyrata subsp. lyrata] gi 297313153 gb EFH43576.1   hypothetical protein ARALYDRAFT_328615 [Arabidopsis lyrata subsp. lyrata]</p>                                                                                                                                                                                                                                                                                                                                                                                                                                                                                                                                                                                                                                                                                                                                                                                                                                                                                                                                                                                                                       | 294  | 294  | 1.00E-163 | 100.0 | 92.9 | 96.9 | hypothetical protein ARALYDRAFT_328615            | gbpln | Arabidopsis lyrata   | AT4G31020.1   Symbols:   alpha/beta-Hydrolases superfamily protein   chr4:15108832-15110079 REVERSE LENGTH=294                                                                                                                                                                                                                                                            | 294  | 294  | 1.00E-165 | 100.0 | 92.5 | 96.9 |
| Rsa1.0_00092.1.g4656.t1 | <p>refXP_002869353.1   hypothetical protein ARALYDRAFT_353720 [Arabidopsis lyrata subsp. lyrata] gi 297315189 gb EFH45612.1   hypothetical protein ARALYDRAFT_353720 [Arabidopsis lyrata subsp. lyrata]</p> <p>refNP_194825.1   CBL-interacting serine/threonine-protein kinase 6 [Arabidopsis thaliana] gi 75318580 sp O65554.1 CIPK6_ARATH RecName: Full=CBL-interacting serine/threonine-protein kinase 6; AltName: Full=SNF1-related kinase 3.14; AltName: Full=SOS2-like protein kinase PKS4; AltName: Full=SOS3-interacting protein 3 gi 9280634 gb AAF86505.1 AF285106.1 CBL-interacting protein kinase 6 [Arabidopsis thaliana] gi 13448033 gb AAK26843.1 AF339145.1 SOS2-like protein kinase PKS4 [Arabidopsis thaliana] gi 16930695 gb AAL32013.1 AF436831.1 AT4g30960/F6118_130 [Arabidopsis thaliana] gi 2980770 emb CAA18197.1  putative protein kinase [Arabidopsis thaliana] gi 7269998 emb CAB79814.1  putative protein kinase [Arabidopsis thaliana] gi 14334746 gb AAK59551.1  putative protein kinase [Arabidopsis thaliana] gi 15293235 gb AAK93728.1  putative protein kinase [Arabidopsis thaliana] gi 33266043 gb AEE85835.1  CBL-interacting serine/threonine-protein kinase 6 [Arabidopsis thaliana]</p> | 2637 | 2855 | 0         | 108.3 | 72.8 | 83.5 | hypothetical protein ARALYDRAFT_353720            | gbpln | Arabidopsis lyrata   | AT4G30990.1   Symbols:   ARM repeat superfamily protein   chr4:15084456-15097860 FORWARD LENGTH=2599                                                                                                                                                                                                                                                                      | 2637 | 2599 | 0         | 98.6  | 72.4 | 83.2 |
| Rsa1.0_00092.1.g4657.t1 | <p>refNP_001184904.1   uncharacterized protein [Arabidopsis thaliana] gi 332189512 gb AEE27633.1   uncharacterized protein AT1G03910 [Arabidopsis thaliana]</p>                                                                                                                                                                                                                                                                                                                                                                                                                                                                                                                                                                                                                                                                                                                                                                                                                                                                                                                                                                                                                                                                   | 432  | 441  | 0         | 102.1 | 90.0 | 96.1 | CBL-interacting serine/threonine-protein kinase 6 | gbpln | Arabidopsis thaliana | AT4G30960.1   Symbols: CIPK6, SIP3, SNRK3.14, ATCIPK6   SOS3-interacting protein 3   chr4:15067400-15068725 FORWARD LENGTH=441                                                                                                                                                                                                                                            | 432  | 441  | 0         | 102.1 | 90.0 | 96.1 |
| Rsa1.0_00092.1.g4658.t1 | <p>refXP_002867320.1   hypothetical protein ARALYDRAFT_328625 [Arabidopsis lyrata subsp. lyrata] gi 297313156 gb EFH43579.1   hypothetical protein ARALYDRAFT_328625 [Arabidopsis lyrata subsp. lyrata]</p> <p>refNP_567861.1   50S ribosomal protein L21 [Arabidopsis thaliana] gi 29839556 sp Q8L9A0.1 RM21_ARATH RecName: Full=50S ribosomal protein L21, mitochondrial; Flags: Precursor gi 12641613 emb CAC27453.1  putative ribosomal protein L21 [Arabidopsis thaliana] gi 21595368 gb AAM66095.1   unknown [Arabidopsis thaliana] gi 29028852 gb AA064805.1   At4g30930 [Arabidopsis thaliana] gi 110736393 dbj BAF00165.1   hypothetical protein [Arabidopsis thaliana] gi 225898835 dbj BAH30548.1   hypothetical protein [Arabidopsis thaliana] gi 332660431 gb AEE85831.1   50S ribosomal protein L21 [Arabidopsis thaliana]</p>                                                                                                                                                                                                                                                                                                                                                                                      | 454  | 716  | 1.00E-111 | 157.7 | 50.7 | 54.2 | uncharacterized protein                           | gbpln | Arabidopsis thaliana | AT1G03910.2   Symbols:   EXPRESSED IN: 24 plant structures; EXPRESSED DURING: 13 growth stages; CONTAINS InterPro DOMAIN/s: Cactin protein, cactus-binding domain, C-terminal (InterPro:IPR019134), Cactin, central region (InterPro:IPR018816); BEST Arabidopsis thaliana protein match is: unknown protein (TAIR:AT2G36815.2).   chr1:996432-1000231 FORWARD LENGTH=716 | 454  | 716  | 1.00E-114 | 157.7 | 50.7 | 54.2 |
| Rsa1.0_00092.1.g4659.t1 | <p>refXP_002867320.1   hypothetical protein ARALYDRAFT_328625 [Arabidopsis lyrata subsp. lyrata] gi 297313156 gb EFH43579.1   hypothetical protein ARALYDRAFT_328625 [Arabidopsis lyrata subsp. lyrata]</p> <p>refNP_567861.1   50S ribosomal protein L21 [Arabidopsis thaliana] gi 29839556 sp Q8L9A0.1 RM21_ARATH RecName: Full=50S ribosomal protein L21, mitochondrial; Flags: Precursor gi 12641613 emb CAC27453.1  putative ribosomal protein L21 [Arabidopsis thaliana] gi 21595368 gb AAM66095.1   unknown [Arabidopsis thaliana] gi 29028852 gb AA064805.1   At4g30930 [Arabidopsis thaliana] gi 110736393 dbj BAF00165.1   hypothetical protein [Arabidopsis thaliana] gi 225898835 dbj BAH30548.1   hypothetical protein [Arabidopsis thaliana] gi 332660431 gb AEE85831.1   50S ribosomal protein L21 [Arabidopsis thaliana]</p>                                                                                                                                                                                                                                                                                                                                                                                      | 559  | 770  | 1.00E-138 | 137.7 | 47.8 | 52.4 | hypothetical protein ARALYDRAFT_328625            | gbpln | Arabidopsis lyrata   | AT4G30935.1   Symbols: WRKY32, ATWRKY32   WRKY DNA-binding protein 32   chr4:15051916-15053908 REVERSE LENGTH=466                                                                                                                                                                                                                                                         | 559  | 466  | 1.00E-140 | 83.4  | 47.4 | 51.9 |
| Rsa1.0_00092.1.g4660.t2 | <p>refXP_002867320.1   hypothetical protein ARALYDRAFT_328625 [Arabidopsis lyrata subsp. lyrata] gi 297313156 gb EFH43579.1   hypothetical protein ARALYDRAFT_328625 [Arabidopsis lyrata subsp. lyrata]</p> <p>refNP_567861.1   50S ribosomal protein L21 [Arabidopsis thaliana] gi 29839556 sp Q8L9A0.1 RM21_ARATH RecName: Full=50S ribosomal protein L21, mitochondrial; Flags: Precursor gi 12641613 emb CAC27453.1  putative ribosomal protein L21 [Arabidopsis thaliana] gi 21595368 gb AAM66095.1   unknown [Arabidopsis thaliana] gi 29028852 gb AA064805.1   At4g30930 [Arabidopsis thaliana] gi 110736393 dbj BAF00165.1   hypothetical protein [Arabidopsis thaliana] gi 225898835 dbj BAH30548.1   hypothetical protein [Arabidopsis thaliana] gi 332660431 gb AEE85831.1   50S ribosomal protein L21 [Arabidopsis thaliana]</p>                                                                                                                                                                                                                                                                                                                                                                                      | 263  | 270  | 1.00E-103 | 102.7 | 82.9 | 86.7 | 50S ribosomal protein L21                         | gbpln | Arabidopsis thaliana | AT4G30930.1   Symbols: NFD1   Ribosomal protein L21   chr4:15050170-15051630 REVERSE LENGTH=270                                                                                                                                                                                                                                                                           | 263  | 270  | 1.00E-105 | 102.7 | 82.9 | 86.7 |

|                         |                                                                                                                                                                                                                                                                                                                                                                                                                              |      |      |           |       |      |      |                                        |       |                      |                                                                                                                                                                                                                                                                                                                                                                                                                                                                                                  |      |      |           |       |      |      |
|-------------------------|------------------------------------------------------------------------------------------------------------------------------------------------------------------------------------------------------------------------------------------------------------------------------------------------------------------------------------------------------------------------------------------------------------------------------|------|------|-----------|-------|------|------|----------------------------------------|-------|----------------------|--------------------------------------------------------------------------------------------------------------------------------------------------------------------------------------------------------------------------------------------------------------------------------------------------------------------------------------------------------------------------------------------------------------------------------------------------------------------------------------------------|------|------|-----------|-------|------|------|
| Rsa1.0_00092.1.g4661.t1 | ref XP_002867326.1  hypothetical protein ARALYDRAFT_491666 [Arabidopsis lyrata subsp. lyrata] gi 297313162 gb EFH43585.1  hypothetical protein ARALYDRAFT_491666 [Arabidopsis lyrata subsp. lyrata]                                                                                                                                                                                                                          | 362  | 360  | 1.00E-180 | 99.4  | 84.0 | 91.4 | hypothetical protein ARALYDRAFT_491666 | gbpln | Arabidopsis lyrata   | AT4G30850.2   Symbols: HHP2   heptahelical transmembrane protein2   chr4:15020540-15022278 REVERSE LENGTH=358                                                                                                                                                                                                                                                                                                                                                                                    | 362  | 358  | 1.00E-180 | 98.9  | 83.1 | 91.4 |
| Rsa1.0_00092.1.g4662.t1 | dbj BAJ33617.1  unnamed protein product [Thellungiella halophila]                                                                                                                                                                                                                                                                                                                                                            | 123  | 121  | 2.00E-47  | 98.4  | 79.7 | 87.8 | unnamed protein product                | ----  | ----                 | AT4G30845.1   Symbols:   unknown protein; FUNCTIONS IN: molecular_function unknown; INVOLVED IN: biological_process unknown; LOCATED IN: chloroplast; Has 16 Blast hits to 16 proteins in 8 species: Archae - 0; Bacteria - 0; Metazoa - 0; Fungi - 0; Plants - 16; Viruses - 0; Other Eukaryotes - 0 (source: NCBI BLLink).   chr4:15019895-15020319 FORWARD LENGTH=114                                                                                                                         | 123  | 114  | 3.00E-42  | 92.7  | 74.0 | 83.7 |
| Rsa1.0_00092.1.g4663.t6 | gb EOA15356.1  hypothetical protein CARUB_v10005095mg [Capsella rubella]                                                                                                                                                                                                                                                                                                                                                     | 412  | 366  | 1.00E-142 | 88.8  | 66.0 | 76.2 | hypothetical protein CARUB_v10005095mg | gbpln | Capsella rubella     | AT4G30830.1   Symbols:   Protein of unknown function, DUF593   chr4:15015506-15016683 REVERSE LENGTH=363                                                                                                                                                                                                                                                                                                                                                                                         | 412  | 363  | 1.00E-143 | 88.1  | 64.8 | 76.2 |
| Rsa1.0_00092.1.g4664.t1 | ref NP_567854.1  carboxypeptidase D [Arabidopsis thaliana] gi 7532010 sp Q949Q7.1 SCP29_ARAT H RecName: Full=Serine carboxypeptidase-like 29; Flags: Precursor gi 15293049 gb AAK93635.1  putative serine carboxypeptidase II [Arabidopsis thaliana] gi 22136958 gb AAM91708.1  putative serine carboxypeptidase II [Arabidopsis thaliana] gi 33266041 gb AEE85811.1  serine carboxypeptidase-like 29 [Arabidopsis thaliana] | 479  | 479  | 0         | 100.0 | 80.8 | 88.1 | carboxypeptidase D                     | gbpln | Arabidopsis thaliana | AT4G30810.1   Symbols: scpl29   serine carboxypeptidase-like 29   chr4:15003474-15006017 FORWARD LENGTH=479                                                                                                                                                                                                                                                                                                                                                                                      | 479  | 479  | 0         | 100.0 | 80.8 | 88.1 |
| Rsa1.0_00092.1.g4665.t1 | gb EOA29140.1  hypothetical protein CARUB_v10025409mg [Capsella rubella]                                                                                                                                                                                                                                                                                                                                                     | 272  | 549  | 1.00E-17  | 201.8 | 22.4 | 41.2 | hypothetical protein CARUB_v10025409mg | gbpln | Capsella rubella     | AT3G11870.1   Symbols:   Endoribonuclease/protein kinase IRE1-like   chr3:3746998-3749093 REVERSE LENGTH=554                                                                                                                                                                                                                                                                                                                                                                                     | 272  | 554  | 1.00E-15  | 203.7 | 21.3 | 42.6 |
| Rsa1.0_00092.1.g4666.t1 | ref NP_194808.1  uncharacterized protein [Arabidopsis thaliana] gi 5725443 emb CAB52452.1  putative protein [Arabidopsis thaliana] gi 7269980 emb CAB79797.1  putative protein [Arabidopsis thaliana] gi 332660409 gb AEE85809.1  uncharacterized protein AT4G30790 [Arabidopsis thaliana]                                                                                                                                   | 1129 | 1148 | 0         | 101.7 | 85.1 | 91.5 | uncharacterized protein                | gbpln | Arabidopsis thaliana | AT4G30790.1   Symbols:   INVOLVED IN: autophagy; EXPRESSED IN: 24 plant structures; EXPRESSED DURING: 15 growth stages; CONTAINS InterPro DOMAIN/s: Autophagy-related protein 17 (InterPro:IPR007240), Autophagy-related protein 11 (InterPro:IPR019460); Has 8793 Blast hits to 6268 proteins in 570 species: Archae - 89; Bacteria - 657; Metazoa - 4844; Fungi - 808; Plants - 441; Viruses - 15; Other Eukaryotes - 1939 (source: NCBI BLLink).   chr4:14993383-14997785 REVERSE LENGTH=1148 | 1129 | 1148 | 0         | 101.7 | 85.1 | 91.5 |
| Rsa1.0_00092.1.g4667.t1 | ref XP_002869363.1  hypothetical protein ARALYDRAFT_491676 [Arabidopsis lyrata subsp. lyrata] gi 297315199 gb EFH45622.1  hypothetical protein ARALYDRAFT_491676 [Arabidopsis lyrata subsp. lyrata]                                                                                                                                                                                                                          | 562  | 587  | 0         | 104.4 | 83.8 | 89.9 | hypothetical protein ARALYDRAFT_491676 | gbpln | Arabidopsis lyrata   | AT4G30780.1   Symbols:   unknown protein; BEST Arabidopsis thaliana protein match is: unknown protein (TAIR:AT2G24100.1); Has 109 Blast hits to 109 proteins in 18 species: Archae - 0; Bacteria - 0; Metazoa - 1; Fungi - 0; Plants - 95; Viruses - 0; Other Eukaryotes - 13 (source: NCBI BLLink).   chr4:14990523-14992855 FORWARD LENGTH=589                                                                                                                                                 | 562  | 589  | 0         | 104.8 | 83.3 | 89.7 |
| Rsa1.0_00092.1.g4668.t1 | ref XP_002867329.1  hypothetical protein ARALYDRAFT_913400 [Arabidopsis lyrata subsp. lyrata] gi 297313165 gb EFH43588.1  hypothetical protein ARALYDRAFT_913400 [Arabidopsis lyrata subsp. lyrata]                                                                                                                                                                                                                          | 154  | 157  | 5.00E-72  | 101.9 | 86.4 | 94.2 | hypothetical protein ARALYDRAFT_913400 | gbpln | Arabidopsis lyrata   | AT4G30770.1   Symbols:   Putative membrane lipoprotein   chr4:14986140-14986613 REVERSE LENGTH=157                                                                                                                                                                                                                                                                                                                                                                                               | 154  | 157  | 5.00E-68  | 101.9 | 85.7 | 93.5 |

|                         |                                                                                                                                                                                                                                                                                                                                                                                                                                                                                                                                                                                                                                          |     |     |           |       |      |      |                                                             |       |                      |                                                                                                                                           |     |     |           |       |      |      |
|-------------------------|------------------------------------------------------------------------------------------------------------------------------------------------------------------------------------------------------------------------------------------------------------------------------------------------------------------------------------------------------------------------------------------------------------------------------------------------------------------------------------------------------------------------------------------------------------------------------------------------------------------------------------------|-----|-----|-----------|-------|------|------|-------------------------------------------------------------|-------|----------------------|-------------------------------------------------------------------------------------------------------------------------------------------|-----|-----|-----------|-------|------|------|
| Rsa1.0_00092.1.g4669.t1 | ref[NP_194781.2] leucine-rich repeat protein kinase-like protein [Arabidopsis thaliana]<br>gi 75331150 sp Q8VYT3.1 Y4052_ARATH RecName: Full=Probable LRR receptor-like serine/threonine-protein kinase At4g30520; Flags: Precursor<br>gi 17979065 gb AAL49800.1  putative receptor kinase homolog [Arabidopsis thaliana] gi 20465457 gb AAM20188.1  putative receptor kinase-like protein [Arabidopsis thaliana]<br>gi 22458964 gb ACN59353.1  leucine-rich repeat receptor-like protein kinase [Arabidopsis thaliana]<br>gi 332660376 gb AEE85776.1  probable LRR receptor-like serine/threonine-protein kinase [Arabidopsis thaliana] | 653 | 648 | 0         | 99.2  | 90.5 | 94.3 | leucine-rich repeat protein kinase-like protein             | gbpln | Arabidopsis thaliana | AT4G30520.1   Symbols:   Leucine-rich repeat protein kinase family protein   chr4:14908193-14911040 REVERSE LENGTH=648                    | 653 | 648 | 0         | 99.2  | 90.5 | 94.3 |
| Rsa1.0_00092.1.g4670.t1 | sp Q8H1Q8.2 AT18B_ARATH RecName: Full=Autophagy-related protein 18b; Short=AtATG18b                                                                                                                                                                                                                                                                                                                                                                                                                                                                                                                                                      | 361 | 366 | 0         | 101.4 | 91.7 | 95.8 | RecName: Full=Autophagy-related protein 18b; Short=AtATG18b | ----  | ----                 | AT4G30510.1   Symbols: ATATG18B, ATG18B, G18B   homolog of yeast autophagy 18 (ATG18) B   chr4:14905299-14906915 REVERSE LENGTH=312       | 361 | 312 | 1.00E-169 | 86.4  | 79.8 | 83.4 |
| Rsa1.0_00092.1.g4671.t1 | gb AAM61727.1  unknown [Arabidopsis thaliana]                                                                                                                                                                                                                                                                                                                                                                                                                                                                                                                                                                                            | 187 | 173 | 4.00E-80  | 92.5  | 78.6 | 85.0 | unknown                                                     | gbpln | Arabidopsis thaliana | AT2G23940.1   Symbols:   Protein of unknown function (DUF788)   chr2:10184199-10185097 FORWARD LENGTH=173                                 | 187 | 173 | 3.00E-82  | 92.5  | 78.1 | 85.0 |
| Rsa1.0_00092.1.g4672.t1 | ref XP_002867344.1  hypothetical protein ARALYDRAFT_491701 [Arabidopsis lyrata subsp. lyrata]<br>gi 297313180 gb EFH43603.1  hypothetical protein ARALYDRAFT_491701 [Arabidopsis lyrata subsp. lyrata]                                                                                                                                                                                                                                                                                                                                                                                                                                   | 500 | 497 | 0         | 99.4  | 89.2 | 95.6 | hypothetical protein ARALYDRAFT_491701                      | gbpln | Arabidopsis lyrata   | AT4G30490.1   Symbols:   AFG1-like ATPase family protein   chr4:14899226-14901883 REVERSE LENGTH=497                                      | 500 | 497 | 0         | 99.4  | 88.0 | 94.6 |
| Rsa1.0_00092.1.g4673.t1 | ref NP_194777.3  tetratricopeptide repeat domain-containing protein [Arabidopsis thaliana]<br>gi 7269949 emb CAB79766.1  putative protein [Arabidopsis thaliana]<br>gi 222422923 dbj BAH19448.1  AT4G30480 [Arabidopsis thaliana]<br>gi 332660370 gb AEE85770.1  tetratricopeptide repeat domain-containing protein [Arabidopsis thaliana]                                                                                                                                                                                                                                                                                               | 282 | 277 | 1.00E-109 | 98.2  | 77.3 | 83.3 | tetratricopeptide repeat domain-containing protein          | gbpln | Arabidopsis thaliana | AT4G30480.2   Symbols: TPR1, AtTPR1   Tetratricopeptide repeat (TPR)-like superfamily protein   chr4:14897500-14898937 FORWARD LENGTH=277 | 282 | 277 | 1.00E-111 | 98.2  | 77.3 | 83.3 |
| Rsa1.0_00092.1.g4674.t1 | dbj BAJ34378.1  unnamed protein product [Theellungiella halophila]                                                                                                                                                                                                                                                                                                                                                                                                                                                                                                                                                                       | 303 | 303 | 1.00E-169 | 100.0 | 95.7 | 97.0 | unnamed protein product                                     | ----  | ----                 | AT4G30470.1   Symbols:   NAD(P)-binding Rossmann-fold superfamily protein   chr4:14894263-14896506 FORWARD LENGTH=303                     | 303 | 303 | 1.00E-167 | 100.0 | 96.0 | 97.4 |
| Rsa1.0_00092.1.g4675.t1 | #                                                                                                                                                                                                                                                                                                                                                                                                                                                                                                                                                                                                                                        | #   | #   | #         | #     | #    | #    | -                                                           | ----  | ----                 | #                                                                                                                                         | #   | #   | #         | #     | #    | #    |
| Rsa1.0_00092.1.g4676.t1 | ref XP_002881484.1  RNA polymerase sigma-70 factor [Arabidopsis lyrata subsp. lyrata]<br>gi 297327323 gb EFH57743.1  RNA polymerase sigma-70 factor [Arabidopsis lyrata subsp. lyrata]                                                                                                                                                                                                                                                                                                                                                                                                                                                   | 145 | 546 | 9.00E-33  | 376.6 | 48.3 | 51.7 | RNA polymerase sigma-70 factor                              | gbpln | Arabidopsis lyrata   | AT2G36990.1   Symbols: SIGF, SIG6, ATSIG6, SOLDAT8   RNAPolymerase sigma-subunit F   chr2:15537502-15540016 REVERSE LENGTH=547            | 145 | 547 | 8.00E-35  | 377.2 | 47.6 | 51.7 |
| Rsa1.0_00092.1.g4677.t1 | #                                                                                                                                                                                                                                                                                                                                                                                                                                                                                                                                                                                                                                        | #   | #   | #         | #     | #    | #    | -                                                           | ----  | ----                 | #                                                                                                                                         | #   | #   | #         | #     | #    | #    |

|                         |                                                                                                                                                                                                                                                                                                                                                                                                                                                                                                                                                                                                                                                                                                                                                                                                                                                                                                                                                                                                                                                                                                                                                                                                                                                                                 |     |     |           |       |      |      |                                               |       |                      |                                                                                                                                |     |     |           |       |      |      |
|-------------------------|---------------------------------------------------------------------------------------------------------------------------------------------------------------------------------------------------------------------------------------------------------------------------------------------------------------------------------------------------------------------------------------------------------------------------------------------------------------------------------------------------------------------------------------------------------------------------------------------------------------------------------------------------------------------------------------------------------------------------------------------------------------------------------------------------------------------------------------------------------------------------------------------------------------------------------------------------------------------------------------------------------------------------------------------------------------------------------------------------------------------------------------------------------------------------------------------------------------------------------------------------------------------------------|-----|-----|-----------|-------|------|------|-----------------------------------------------|-------|----------------------|--------------------------------------------------------------------------------------------------------------------------------|-----|-----|-----------|-------|------|------|
| Rsa1.0_00092.1.g4678.t1 | ref NP_194733.1  UDP-D-glucuronate 4-epimerase 1 [Arabidopsis thaliana] gi 297798928 ref XP_002867348.1  UDP-D-glucuronate 4-epimerase 1 [Arabidopsis lyrata subsp. lyrata] gi 75311748 sp Q9M0B6.1 GAE1_ARATH RecName: Full=UDP-glucuronate 4-epimerase 1; AltName: Full=UDP-glucuronic acid epimerase 1; Short=AtUGlcAE3 gi 7269945 emb CAB79762.1  nucleotide sugar epimerase-like protein [Arabidopsis thaliana] gi 15810529 gb AAL07152.1  putative nucleotide sugar epimerase [Arabidopsis thaliana] gi 20466778 gb AAM20706.1  nucleotide sugar epimerase-like protein [Arabidopsis thaliana] gi 21553636 gb AAM62729.1  nucleotide sugar epimerase-like protein [Arabidopsis thaliana] gi 23198200 gb AAN15627.1  nucleotide sugar epimerase-like protein [Arabidopsis thaliana] gi 50429331 gb AAT7233.1  UDP-D-glucuronate 4-epimerase [Arabidopsis thaliana] gi 297313184 gb EFH43607.1  UDP-D-glucuronate 4-epimerase 1 [Arabidopsis lyrata subsp. lyrata] gi 332660365 gb AEE85765.1  UDP-D-glucuronate 4-epimerase 1 [Arabidopsis thaliana] gi 385137886 gb AFI41204.1  UDP-D-glucuronate 4-epimerase 1 ref XP_002869378.1  predicted protein [Arabidopsis lyrata subsp. lyrata] gi 297315214 gb EFH45637.1  predicted protein [Arabidopsis lyrata subsp. lyrata] | 429 | 429 | 0         | 100.0 | 97.9 | 98.6 | UDP-D-glucuronate 4-epimerase 1               | gbpln | Arabidopsis lyrata   | AT4G30440.1   Symbols: GAE1   UDP-D-glucuronate 4-epimerase 1   chr4:14881976-14883265 REVERSE LENGTH=429                      | 429 | 429 | 0         | 100.0 | 97.9 | 98.6 |
| Rsa1.0_00092.1.g4679.t1 | ref NP_002869378.1  predicted protein [Arabidopsis lyrata subsp. lyrata] gi 297315214 gb EFH45637.1  predicted protein [Arabidopsis lyrata subsp. lyrata]                                                                                                                                                                                                                                                                                                                                                                                                                                                                                                                                                                                                                                                                                                                                                                                                                                                                                                                                                                                                                                                                                                                       | 353 | 371 | 1.00E-163 | 105.1 | 78.5 | 89.5 | predicted protein                             | gbpln | Arabidopsis lyrata   | AT4G30420.1   Symbols: nodulin MtN21 /EamA-like transporter family protein   chr4:14877069-14878914 FORWARD LENGTH=373         | 353 | 373 | 1.00E-163 | 105.7 | 77.3 | 88.1 |
| Rsa1.0_00093.1.g4680.t1 | # # # # # # # # # #                                                                                                                                                                                                                                                                                                                                                                                                                                                                                                                                                                                                                                                                                                                                                                                                                                                                                                                                                                                                                                                                                                                                                                                                                                                             |     |     |           |       |      |      |                                               |       |                      |                                                                                                                                |     |     |           |       |      |      |
| Rsa1.0_00093.1.g4681.t1 | gb EOA38661.1  hypothetical protein CARUB_v10010598mg [Capsella rubella]                                                                                                                                                                                                                                                                                                                                                                                                                                                                                                                                                                                                                                                                                                                                                                                                                                                                                                                                                                                                                                                                                                                                                                                                        | 141 | 140 | 4.00E-68  | 99.3  | 92.2 | 93.6 | hypothetical protein CARUB_v10010598mg        | gbpln | Capsella rubella     | AT1G10590.3   Symbols: Nucleic acid-binding, OB-fold-like protein   chr1:3502324-3503033 REVERSE LENGTH=153                    | 141 | 153 | 4.00E-69  | 108.5 | 90.8 | 95.0 |
| Rsa1.0_00093.1.g4682.t1 | ref NP_172531.2  transcription factor bHLH90 [Arabidopsis thaliana] gi 122229969 sp Q0WNR2.1 BH090_ATH RecName: Full=Transcription factor bHLH90; AltName: Full=Basic helix-loop-helix protein 90; Short=AtbHLH90; Short=bHLH90; AltName: Full=Transcription factor EN 50; AltName: Full=bHLH transcription factor bHLH090 gi 110738624 dbj BAF01237.1  putative bHLH transcription factor bHLH090 [Arabidopsis thaliana] gi 332190488 gb AEE28609.1  transcription factor bHLH90 [Arabidopsis thaliana]                                                                                                                                                                                                                                                                                                                                                                                                                                                                                                                                                                                                                                                                                                                                                                        | 386 | 441 | 1.00E-153 | 114.2 | 74.9 | 84.2 | transcription factor bHLH90                   | gbpln | Arabidopsis thaliana | AT1G10610.1   Symbols: basic helix-loop-helix (bHLH) DNA-binding superfamily protein   chr1:3506463-3508752 FORWARD LENGTH=441 | 386 | 441 | 1.00E-156 | 114.2 | 74.9 | 84.2 |
| Rsa1.0_00093.1.g4683.t1 | ref NP_172532.1  protein kinase-like protein [Arabidopsis thaliana] gi 310947344 sp Q9SGY7.2 PEK11_ATH RecName: Full=Putative proline-rich receptor-like protein kinase PERK11; AltName: Full=Proline-rich extensin-like receptor kinase 11; Short=AtPERK11 gi 332190489 gb AEE28610.1  putative proline-rich receptor-like protein kinase PERK11 [Arabidopsis thaliana]                                                                                                                                                                                                                                                                                                                                                                                                                                                                                                                                                                                                                                                                                                                                                                                                                                                                                                        | 627 | 718 | 0         | 114.5 | 75.9 | 82.6 | protein kinase-like protein                   | gbpln | Arabidopsis thaliana | AT1G10620.1   Symbols: Protein kinase superfamily protein   chr1:3509001-3511975 REVERSE LENGTH=718                            | 627 | 718 | 0         | 114.5 | 75.9 | 82.6 |
| Rsa1.0_00093.1.g4684.t1 | gb EOA40072.1  hypothetical protein CARUB_v10008765mg [Capsella rubella]                                                                                                                                                                                                                                                                                                                                                                                                                                                                                                                                                                                                                                                                                                                                                                                                                                                                                                                                                                                                                                                                                                                                                                                                        | 533 | 549 | 0         | 103.0 | 87.4 | 94.0 | hypothetical protein CARUB_v10008765mg        | gbpln | Capsella rubella     | AT1G10640.1   Symbols: Pectin lyase-like superfamily protein   chr1:3515478-3517807 REVERSE LENGTH=532                         | 533 | 532 | 0         | 99.8  | 86.7 | 94.2 |
| Rsa1.0_00093.1.g4685.t1 | gb AAC69114.1  putative gag-protease polyprotein [Arabidopsis thaliana]                                                                                                                                                                                                                                                                                                                                                                                                                                                                                                                                                                                                                                                                                                                                                                                                                                                                                                                                                                                                                                                                                                                                                                                                         | 628 | 627 | 3.00E-65  | 99.8  | 23.7 | 34.7 | putative gag-protease polyprotein             | gbpln | Arabidopsis thaliana | #                                                                                                                              | #   | #   | #         | #     | #    |      |
| Rsa1.0_00093.1.g4686.t1 | gb AAM61038.1  S-ribonuclease binding protein SBP1, putative [Arabidopsis thaliana]                                                                                                                                                                                                                                                                                                                                                                                                                                                                                                                                                                                                                                                                                                                                                                                                                                                                                                                                                                                                                                                                                                                                                                                             | 348 | 337 | 1.00E-155 | 96.8  | 79.9 | 85.9 | S-ribonuclease binding protein SBP1, putative | gbpln | Arabidopsis thaliana | AT1G10650.1   Symbols: SBP (S-ribonuclease binding protein) family protein   chr1:3524122-3525318 REVERSE LENGTH=339           | 348 | 339 | 1.00E-155 | 97.4  | 80.5 | 86.5 |

|                         |                                                                                                                                                                                                                                                                                                                                                                                                                                                                                                    |      |      |           |       |      |      |                                        |       |                      |                                                                                                                                                                                                                                                                                                                                                                                                                                                        |      |      |           |       |      |      |
|-------------------------|----------------------------------------------------------------------------------------------------------------------------------------------------------------------------------------------------------------------------------------------------------------------------------------------------------------------------------------------------------------------------------------------------------------------------------------------------------------------------------------------------|------|------|-----------|-------|------|------|----------------------------------------|-------|----------------------|--------------------------------------------------------------------------------------------------------------------------------------------------------------------------------------------------------------------------------------------------------------------------------------------------------------------------------------------------------------------------------------------------------------------------------------------------------|------|------|-----------|-------|------|------|
| Rsa1.0_00093.1.g4687.t1 | refXP_002889822.1   hypothetical protein ARALYDRAFT_471189 [Arabidopsis lyrata subsp. lyrata] gi 297335664 gb EFH66081.1   hypothetical protein ARALYDRAFT_471189 [Arabidopsis lyrata subsp. lyrata]                                                                                                                                                                                                                                                                                               | 102  | 101  | 8.00E-47  | 99.0  | 86.3 | 93.1 | hypothetical protein ARALYDRAFT_471189 | gbpln | Arabidopsis lyrata   | AT1G10657.2   Symbols:   Plant protein 1589 of unknown function   chr1:3530652-3531522 FORWARD LENGTH=101                                                                                                                                                                                                                                                                                                                                              | 102  | 101  | 1.00E-48  | 99.0  | 85.3 | 91.2 |
| Rsa1.0_00093.1.g4688.t1 | refXP_002889823.1   hypothetical protein ARALYDRAFT_888344 [Arabidopsis lyrata subsp. lyrata] gi 297335665 gb EFH66082.1   hypothetical protein ARALYDRAFT_888344 [Arabidopsis lyrata subsp. lyrata]                                                                                                                                                                                                                                                                                               | 268  | 319  | 1.00E-112 | 119.0 | 75.4 | 79.1 | hypothetical protein ARALYDRAFT_888344 | gbpln | Arabidopsis lyrata   | AT1G10660.1   Symbols:   unknown protein; LOCATED IN: endomembrane system; EXPRESSED IN: 24 plant structures; EXPRESSED DURING: 15 growth stages; BEST Arabidopsis thaliana protein match is: unknown protein (TAIR:AT5G62960.1); Has 155 Blast hits to 154 proteins in 22 species: Archae - 0; Bacteria - 0; Metazoa - 10; Fungi - 4; Plants - 139; Viruses - 0; Other Eukaryotes - 2 (source: NCBI BLink).   chr1:3533009-3534781 FORWARD LENGTH=320 | 268  | 320  | 1.00E-108 | 119.4 | 74.6 | 79.5 |
| Rsa1.0_00093.1.g4689.t1 | refNP_172538.1   ABC transporter B family member 10 [Arabidopsis thaliana] gi 229470217 sp Q9SGY1.2 AB10B_ARA TH RecName: Full=ABC transporter B family member 10; Short=ABC transporter ABCB10; AltName: Full=Multidrug resistance protein 10; AltName: Full=P-glycoprotein 10 gi 332190507 gb AEE28628.1   ABC transporter B family member 10 [Arabidopsis thaliana]                                                                                                                             | 497  | 1227 | 0         | 246.9 | 90.7 | 96.0 | ABC transporter B family member 10     | gbpln | Arabidopsis thaliana | AT1G10680.1   Symbols: PGP10   P-glycoprotein 10   chr1:3538470-3543782 REVERSE LENGTH=1227                                                                                                                                                                                                                                                                                                                                                            | 497  | 1227 | 0         | 246.9 | 90.7 | 96.0 |
| Rsa1.0_00093.1.g4690.t1 | gb AAD32898.1   putative retroelement pol polyprotein [Arabidopsis thaliana]                                                                                                                                                                                                                                                                                                                                                                                                                       | 1366 | 1307 | 0         | 95.7  | 58.4 | 73.9 | putative retroelement pol polyprotein  | gbpln | Arabidopsis thaliana | AT4G23160.1   Symbols: CRK8   cysteine-rich RLK (RECEPTOR-like protein kinase) 8   chr4:12129485-12134086 FORWARD LENGTH=1262                                                                                                                                                                                                                                                                                                                          | 1366 | 1262 | 1.00E-104 | 92.4  | 14.5 | 22.2 |
| Rsa1.0_00093.1.g4691.t1 | refXP_002892589.1   P-glycoprotein 10 [Arabidopsis lyrata subsp. lyrata] gi 297338431 gb EFH68848.1   P-glycoprotein 10 [Arabidopsis lyrata subsp. lyrata]                                                                                                                                                                                                                                                                                                                                         | 718  | 1229 | 0         | 171.2 | 86.9 | 91.6 | P-glycoprotein 10                      | gbpln | Arabidopsis lyrata   | AT1G10680.1   Symbols: PGP10   P-glycoprotein 10   chr1:3538470-3543782 REVERSE LENGTH=1227                                                                                                                                                                                                                                                                                                                                                            | 718  | 1227 | 0         | 170.9 | 86.6 | 91.8 |
| Rsa1.0_00093.1.g4692.t1 | refNP_172539.1   uncharacterized protein [Arabidopsis thaliana] gi 4874279 gb AAD31344.1 AC007354.17 ESTs gb T75618 and gb AA404816 come from this gene [Arabidopsis thaliana] gi 45825137 gb AAS77476.1   At1g10690 [Arabidopsis thaliana] gi 46359777 gb AAS89752.1   At1g10690 [Arabidopsis thaliana] gi 332190508 gb AEE28629.1   uncharacterized protein AT1G10690 [Arabidopsis thaliana]                                                                                                     | 110  | 110  | 1.00E-40  | 100.0 | 79.1 | 86.4 | uncharacterized protein                | gbpln | Arabidopsis thaliana | AT1G10690.1   Symbols:   unknown protein; BEST Arabidopsis thaliana protein match is: unknown protein (TAIR:AT1G06783.1); Has 59 Blast hits to 59 proteins in 9 species: Archae - 0; Bacteria - 0; Metazoa - 0; Fungi - 0; Plants - 59; Viruses - 0; Other Eukaryotes - 0 (source: NCBI BLink).   chr1:3550236-3550568 REVERSE LENGTH=110                                                                                                              | 110  | 110  | 2.00E-43  | 100.0 | 79.1 | 86.4 |
| Rsa1.0_00093.1.g4693.t1 | refNP_172540.1   ribose-phosphate pyrophosphokinase 3 [Arabidopsis thaliana] gi 62286943 sp Q93Z66.1 KPRS3_ARAT H RecName: Full=Ribose-phosphate pyrophosphokinase 3, chloroplastic; AltName: Full=Phosphoribosyl pyrophosphate synthase 3; Flags: Precursor gi 16604386 gb AL24199.1   At1g10700/F20B24.13 [Arabidopsis thaliana] gi 19699210 gb AAL90971.1   At1g10700/F20B24.13 [Arabidopsis thaliana] gi 332190509 gb AEE28630.1   ribose-phosphate pyrophosphokinase 3 [Arabidopsis thaliana] | 409  | 411  | 0         | 100.5 | 94.4 | 97.6 | ribose-phosphate pyrophosphokinase 3   | gbpln | Arabidopsis thaliana | AT1G10700.1   Symbols: PRS3   phosphoribosyl pyrophosphate (PRPP) synthase 3   chr1:3554157-3556274 FORWARD LENGTH=411                                                                                                                                                                                                                                                                                                                                 | 409  | 411  | 0         | 100.5 | 94.4 | 97.6 |
| Rsa1.0_00093.1.g4694.t1 | gb AAF17660.1 AC009398.9 F20B24.15 [Arabidopsis thaliana]                                                                                                                                                                                                                                                                                                                                                                                                                                          | 412  | 452  | 2.33E-156 | 109.7 | 77.2 | 83.7 | F20B24.15                              | gbpln | Arabidopsis thaliana | AT1G10720.1   Symbols:   BSD domain-containing protein   chr1:3562964-3564446 FORWARD LENGTH=429                                                                                                                                                                                                                                                                                                                                                       | 412  | 429  | 1.00E-145 | 104.1 | 77.2 | 83.7 |
| Rsa1.0_00093.1.g4695.t1 | gb EOA40487.1   hypothetical protein CARUB.v10009212mg [Capsella rubella] gi 482576301 gb EOA40488.1   hypothetical protein CARUB.v10009212mg [Capsella rubella]                                                                                                                                                                                                                                                                                                                                   | 428  | 428  | 0         | 100.0 | 97.9 | 99.3 | hypothetical protein CARUB.v10009212mg | gbpln | Capsella rubella     | AT1G60780.1   Symbols: HAP13   Clathrin adaptor complexes medium subunit family protein   chr1:22369289-22371885 REVERSE LENGTH=428                                                                                                                                                                                                                                                                                                                    | 428  | 428  | 0         | 100.0 | 96.3 | 99.3 |
| Rsa1.0_00093.1.g4696.t1 | #                                                                                                                                                                                                                                                                                                                                                                                                                                                                                                  | #    | #    | #         | #     | #    | #    | -                                      | ----  | ----                 | #                                                                                                                                                                                                                                                                                                                                                                                                                                                      | #    | #    | #         | #     | #    | #    |
| Rsa1.0_00093.1.g4697.t1 | gb AAZ20131.1   pectin methyltransferase inhibitor [Brassica oleracea var. botrytis]                                                                                                                                                                                                                                                                                                                                                                                                               | 168  | 168  | 7.00E-74  | 100.0 | 82.7 | 88.7 | pectin methyltransferase inhibitor     | gbpln | Brassica oleracea    | AT1G10770.1   Symbols:   Plant invertase/pectin methyltransferase inhibitor superfamily protein   chr1:3591859-3592362 REVERSE LENGTH=167                                                                                                                                                                                                                                                                                                              | 168  | 167  | 5.00E-69  | 99.4  | 77.4 | 88.1 |

|                          |                                                                                                                                                                                                                                                                                                                                                                                                                                                                                                                                                                                                                                                                                                                                                                                                                                                                                                                                                                                                     |     |     |           |       |      |      |                                               |       |                      |                                                                                                                                                                                                                                                                                                                                                                                                                                                                                                           |     |     |           |       |      |      |
|--------------------------|-----------------------------------------------------------------------------------------------------------------------------------------------------------------------------------------------------------------------------------------------------------------------------------------------------------------------------------------------------------------------------------------------------------------------------------------------------------------------------------------------------------------------------------------------------------------------------------------------------------------------------------------------------------------------------------------------------------------------------------------------------------------------------------------------------------------------------------------------------------------------------------------------------------------------------------------------------------------------------------------------------|-----|-----|-----------|-------|------|------|-----------------------------------------------|-------|----------------------|-----------------------------------------------------------------------------------------------------------------------------------------------------------------------------------------------------------------------------------------------------------------------------------------------------------------------------------------------------------------------------------------------------------------------------------------------------------------------------------------------------------|-----|-----|-----------|-------|------|------|
| Rsa1.0_00093.1.g4698.t1  | refNP_172548.2   F-box/RNI-like protein [Arabidopsis thaliana]   gi 75265517 sp Q9SAC4.1 FB2_ARATH RecName: Full=F-box protein At1g10780   gi 4874270 gb AAD31335.1 AC007354.8 T16B5.8 [Arabidopsis thaliana]   gi 50253496 gb AAT71950.1   At1g10780 [Arabidopsis thaliana]   gi 53850513 gb AAU95433.1   At1g10780 [Arabidopsis thaliana]   gi 332190524 gb AEE28645.1   F-box/RNI-like protein [Arabidopsis thaliana]                                                                                                                                                                                                                                                                                                                                                                                                                                                                                                                                                                            | 144 | 418 | 2.00E-49  | 290.3 | 69.4 | 75.0 | F-box/RNI-like protein                        | gbpln | Arabidopsis thaliana | AT1G10780.1   Symbols:   F-box/RNI-like superfamily protein   chr1:3592875-3594310 REVERSE LENGTH=418                                                                                                                                                                                                                                                                                                                                                                                                     | 144 | 418 | 5.00E-52  | 290.3 | 69.4 | 75.0 |
| Rsa1.0_00093.1.g4699.t1  | refXP_002889837.1   hypothetical protein ARALYDRAFT_312123 [Arabidopsis lyrata subsp. lyrata]   gi 297335679 gb EFH66096.1   hypothetical protein ARALYDRAFT_312123 [Arabidopsis lyrata subsp. lyrata]                                                                                                                                                                                                                                                                                                                                                                                                                                                                                                                                                                                                                                                                                                                                                                                              | 335 | 330 | 2.00E-92  | 98.5  | 58.5 | 69.3 | hypothetical protein ARALYDRAFT_312123        | gbpln | Arabidopsis lyrata   | AT1G10790.1   Symbols:   BEST Arabidopsis thaliana protein match is: hydroxyproline-rich glycoprotein family protein (TAIR:AT3G56590.2); Has 78 Blast hits to 78 proteins in 11 species: Archae - 0; Bacteria - 0; Metazoa - 0; Fungi - 0; Plants - 78; Viruses - 0; Other Eukaryotes - 0 (source: NCBI BLINK).   chr1:3596360-3597847 FORWARD LENGTH=336                                                                                                                                                 | 335 | 336 | 1.00E-90  | 100.3 | 55.5 | 66.6 |
| Rsa1.0_00093.1.g4700.t1  | gb AAF17663.1 AC009398.12 F20B24.22 [Arabidopsis thaliana]                                                                                                                                                                                                                                                                                                                                                                                                                                                                                                                                                                                                                                                                                                                                                                                                                                                                                                                                          | 233 | 236 | 4.00E-96  | 101.3 | 80.7 | 89.3 | F20B24.22                                     | gbpln | Arabidopsis thaliana | AT1G10800.1   Symbols:   unknown protein; FUNCTIONS IN: molecular_function unknown; INVOLVED IN: biological_process unknown; LOCATED IN: endomembrane system; EXPRESSED IN: inflorescence meristem, hypocotyl, root, flower; EXPRESSED DURING: petal differentiation and expansion stage; Has 23 Blast hits to 23 proteins in 9 species: Archae - 0; Bacteria - 0; Metazoa - 0; Fungi - 0; Plants - 22; Viruses - 0; Other Eukaryotes - 1 (source: NCBI BLINK).   chr1:3598158-3598514 REVERSE LENGTH=118 | 233 | 118 | 1.00E-49  | 50.6  | 40.3 | 44.2 |
| Rsa1.0_00093.1.g4701.t17 | refXP_002892601.1   predicted protein [Arabidopsis lyrata subsp. lyrata]   gi 297338443 gb EFH68860.1   predicted protein [Arabidopsis lyrata subsp. lyrata]                                                                                                                                                                                                                                                                                                                                                                                                                                                                                                                                                                                                                                                                                                                                                                                                                                        | 335 | 263 | 2.00E-96  | 78.5  | 54.3 | 60.3 | predicted protein                             | gbpln | Arabidopsis lyrata   | AT1G10820.2   Symbols:   Protein of unknown function (DUF3755)   chr1:3601437-3604650 REVERSE LENGTH=258                                                                                                                                                                                                                                                                                                                                                                                                  | 335 | 258 | 1.00E-91  | 77.0  | 52.8 | 58.2 |
| Rsa1.0_00093.1.g4702.t1  | gb EOA38040.1  hypothetical protein CARUB_v10009509mg [Capsella rubella]                                                                                                                                                                                                                                                                                                                                                                                                                                                                                                                                                                                                                                                                                                                                                                                                                                                                                                                            | 364 | 366 | 1.00E-179 | 100.5 | 89.6 | 94.5 | hypothetical protein CARUB_v10009509mg        | gbpln | Capsella rubella     | AT1G10830.1   Symbols: Z-ISO, Z-ISO1.1   15-cis-zeta-carotene isomerase   chr1:3605736-3607449 REVERSE LENGTH=367                                                                                                                                                                                                                                                                                                                                                                                         | 364 | 367 | 1.00E-177 | 100.8 | 89.3 | 94.8 |
| Rsa1.0_00093.1.g4703.t1  | refNP_563880.1   translation initiation factor eIF-3 subunit 3 [Arabidopsis thaliana]   gi 23396619 sp O9C5Z2.2 EIF3H_ARATH RecName: Full=Eukaryotic translation initiation factor 3 subunit H; Short=eIF3h; AltName: Full=Eukaryotic translation initiation factor 3 subunit 3; AltName: Full=eIF-3-gamma; AltName: Full=eIF3 p38 subunit   gi 4874264 gb AAD31329.1 AC007354.2 Similar to gb U54559   eIF3-p40 subunit from Homo sapiens and is a member of the PF 01398 Mov34 family, ESTs gb N96623 and gb N07519 come from this gene [Arabidopsis thaliana]   gi 15451122 gb AAK96832.1   Unknown protein [Arabidopsis thaliana]   gi 20148435 gb AAM10108.1   unknown protein [Arabidopsis thaliana]   gi 21592938 gb AAM64888.1   putative translation initiation factor [Arabidopsis thaliana]   gi 23397245 gb AAN31904.1   putative translation initiation factor [Arabidopsis thaliana]   gi 332190533 gb AEE28654.1   translation initiation factor 3 subunit H1 [Arabidopsis thaliana] | 337 | 337 | 0         | 100.0 | 97.6 | 98.2 | translation initiation factor eIF-3 subunit 3 | gbpln | Arabidopsis thaliana | AT1G10840.1   Symbols: TIF3H1   translation initiation factor 3 subunit H1   chr1:3607885-3610299 REVERSE LENGTH=337                                                                                                                                                                                                                                                                                                                                                                                      | 337 | 337 | 0         | 100.0 | 97.6 | 98.2 |
| Rsa1.0_00093.1.g4704.t1  | gb EOA38849.1  hypothetical protein CARUB_v10011198mg [Capsella rubella]                                                                                                                                                                                                                                                                                                                                                                                                                                                                                                                                                                                                                                                                                                                                                                                                                                                                                                                            | 666 | 662 | 0         | 99.4  | 86.6 | 91.3 | hypothetical protein CARUB_v10011198mg        | gbpln | Capsella rubella     | AT1G10850.1   Symbols:   Leucine-rich repeat protein kinase family protein   chr1:3612228-3614343 FORWARD LENGTH=663                                                                                                                                                                                                                                                                                                                                                                                      | 666 | 663 | 0         | 99.5  | 85.6 | 90.5 |
| Rsa1.0_00093.1.g4705.t1  | refXP_002892606.1   ARF-GAP domain 4 [Arabidopsis lyrata subsp. lyrata]   gi 297338448 gb EFH68865.1   ARF-GAP domain 4 [Arabidopsis lyrata subsp. lyrata]                                                                                                                                                                                                                                                                                                                                                                                                                                                                                                                                                                                                                                                                                                                                                                                                                                          | 769 | 773 | 0         | 100.5 | 91.4 | 94.7 | ARF-GAP domain 4                              | gbpln | Arabidopsis lyrata   | AT1G10870.1   Symbols: AGD4   ARF-GAP domain 4   chr1:3616905-3623612 REVERSE LENGTH=775                                                                                                                                                                                                                                                                                                                                                                                                                  | 769 | 775 | 0         | 100.8 | 91.0 | 94.4 |

|                         |                                                                                                                                                                                                                                                                                                                                                                                                                                    |     |     |          |       |      |      |                                                               |       |                      |                                                                                                                                                                                                                                                                                                                                                                                                                                                                                                                                                                                                                    |     |     |           |       |      |      |
|-------------------------|------------------------------------------------------------------------------------------------------------------------------------------------------------------------------------------------------------------------------------------------------------------------------------------------------------------------------------------------------------------------------------------------------------------------------------|-----|-----|----------|-------|------|------|---------------------------------------------------------------|-------|----------------------|--------------------------------------------------------------------------------------------------------------------------------------------------------------------------------------------------------------------------------------------------------------------------------------------------------------------------------------------------------------------------------------------------------------------------------------------------------------------------------------------------------------------------------------------------------------------------------------------------------------------|-----|-----|-----------|-------|------|------|
| Rsa1.0_00093.1.g4706.t1 | dbj BAF00442.1  hypothetical protein [Arabidopsis thaliana]                                                                                                                                                                                                                                                                                                                                                                        | 379 | 386 | 0        | 101.8 | 85.0 | 91.0 | hypothetical protein                                          | gbpln | Arabidopsis thaliana | AT1G10880.1   Symbols:   Core-2/1-branching beta-1,6-N-acetylglucosaminyltransferase family protein   chr1:3624035-3627021 REVERSE LENGTH=651                                                                                                                                                                                                                                                                                                                                                                                                                                                                      | 379 | 651 | 1.00E-173 | 171.8 | 78.9 | 84.4 |
| Rsa1.0_00093.1.g4707.t1 | ref NP_172558.4  arginine and glutamate-rich protein 1 [Arabidopsis thaliana] gi 332190539 gb AEE28660.1  uncharacterized protein AT1G10890 [Arabidopsis thaliana]                                                                                                                                                                                                                                                                 | 288 | 288 | 2.00E-81 | 100.0 | 89.9 | 94.1 | arginine and glutamate-rich protein 1                         | gbpln | Arabidopsis thaliana | AT1G10890.1   Symbols:   unknown protein; FUNCTIONS IN: molecular_function unknown; INVOLVED IN: biological_process unknown; LOCATED IN: chloroplast; EXPRESSED IN: petal, flower, leaf; EXPRESSED DURING: LP.04 four leaves visible, 4 anthesis, petal differentiation and expansion stage; BEST Arabidopsis thaliana protein match is: unknown protein (TAIR:AT5G13340.1); Has 11769 Blast hits to 8435 proteins in 698 species: Archaea - 22; Bacteria - 971; Metazoa - 5937; Fungi - 1065; Plants - 592; Viruses - 101; Other Eukaryotes - 3081 (source: NCBI BLINK)   chr1:3628081-3630545 FORWARD LENGTH=288 | 288 | 288 | 4.00E-84  | 100.0 | 89.9 | 94.1 |
| Rsa1.0_00093.1.g4708.t1 | gb AAB65487.1  phosphatidylinositol-4-phosphate 5-kinase isolog; 89655-95590 [Arabidopsis thaliana]                                                                                                                                                                                                                                                                                                                                | 758 | 859 | 0        | 113.3 | 86.3 | 92.5 | phosphatidylinositol-4-phosphate 5-kinase isolog; 89655-95590 | gbpln | Arabidopsis thaliana | AT1G10900.1   Symbols:   Phosphatidylinositol-4-phosphate 5-kinase family protein   chr1:3632396-3636416 REVERSE LENGTH=754                                                                                                                                                                                                                                                                                                                                                                                                                                                                                        | 758 | 754 | 0         | 99.5  | 86.3 | 92.5 |
| Rsa1.0_00093.1.g4709.t1 | ref NP_172560.2  pentatricopeptide repeat-containing protein [Arabidopsis thaliana] gi 122242678 sp Q0WV0.1 PPR31_ARA TH RecName: Full=Pentatricopeptide repeat-containing protein At1g10910, chloroplastic; Flags: Precursor gi 110741600 dbj BAE98748.1  membrane-associated salt-inducible protein isolog [Arabidopsis thaliana] gi 332190541 gb AEE28662.1  pentatricopeptide repeat-containing protein [Arabidopsis thaliana] | 671 | 664 | 0        | 99.0  | 84.6 | 90.8 | pentatricopeptide repeat-containing protein                   | gbpln | Arabidopsis thaliana | AT1G10910.1   Symbols:   Pentatricopeptide repeat (PPR) superfamily protein   chr1:3639908-3643974 FORWARD LENGTH=664                                                                                                                                                                                                                                                                                                                                                                                                                                                                                              | 671 | 664 | 0         | 99.0  | 84.6 | 90.8 |
| Rsa1.0_00093.1.g4710.t1 | gb AAA33003.1  serine/threonine protein kinase [Brassica napus] gi 1097353 prf 2113401A protein kinase                                                                                                                                                                                                                                                                                                                             | 357 | 359 | 0        | 100.6 | 95.5 | 97.2 | serine/threonine protein kinase                               | gbpln | Brassica napus       | AT1G10940.1   Symbols: ASK1, SNRK2-4, SNRK2.4, SRK2A   Protein kinase superfamily protein   chr1:3656050-3658170 REVERSE LENGTH=363                                                                                                                                                                                                                                                                                                                                                                                                                                                                                | 357 | 363 | 0         | 101.7 | 94.1 | 96.9 |
| Rsa1.0_00093.1.g4711.t1 | gb EOA37821.1  hypothetical protein CARUB_v10011995mg [Capsella rubella]                                                                                                                                                                                                                                                                                                                                                           | 583 | 589 | 0        | 101.0 | 95.0 | 97.1 | hypothetical protein CARUB_v10011995mg                        | gbpln | Capsella rubella     | AT1G10950.1   Symbols: TMN1, AtTMN1   transmembrane nine 1   chr1:3659322-3663622 FORWARD LENGTH=589                                                                                                                                                                                                                                                                                                                                                                                                                                                                                                               | 583 | 589 | 0         | 101.0 | 93.7 | 96.4 |
| Rsa1.0_00093.1.g4712.t1 | dbj BAJ33728.1  unnamed protein product [Thellungiella halophila]                                                                                                                                                                                                                                                                                                                                                                  | 147 | 148 | 1.00E-60 | 100.7 | 78.2 | 87.8 | unnamed protein product                                       | ----  | ----                 | AT1G60950.1   Symbols: FED A, ATFD2   2Fe-2S ferredoxin-like superfamily protein   chr1:22444565-22445011 FORWARD LENGTH=148                                                                                                                                                                                                                                                                                                                                                                                                                                                                                       | 147 | 148 | 5.00E-61  | 100.7 | 76.9 | 85.7 |
| Rsa1.0_00093.1.g4713.t1 | gb AAB65494.1  hypothetical protein; 51018-49636 [Arabidopsis thaliana]                                                                                                                                                                                                                                                                                                                                                            | 149 | 281 | 3.00E-27 | 188.6 | 48.3 | 66.4 | hypothetical protein; 51018-49636                             | gbpln | Arabidopsis thaliana | AT1G11020.1   Symbols:   RING/FYVE/PHD zinc finger superfamily protein   chr1:3676968-3678350 FORWARD LENGTH=321                                                                                                                                                                                                                                                                                                                                                                                                                                                                                                   | 149 | 321 | 2.00E-29  | 215.4 | 49.7 | 67.1 |
| Rsa1.0_00093.1.g4714.t1 | ref XP_002888117.1  fed A [Arabidopsis lyrata subsp. lyrata] gi 297333958 gb EFH64376.1  fed A [Arabidopsis lyrata subsp. lyrata]                                                                                                                                                                                                                                                                                                  | 153 | 148 | 9.00E-58 | 96.7  | 73.2 | 81.7 | fed A                                                         | gbpln | Arabidopsis lyrata   | AT1G60950.1   Symbols: FED A, ATFD2   2Fe-2S ferredoxin-like superfamily protein   chr1:22444565-22445011 FORWARD LENGTH=148                                                                                                                                                                                                                                                                                                                                                                                                                                                                                       | 153 | 148 | 1.00E-59  | 96.7  | 73.2 | 81.0 |
| Rsa1.0_00093.1.g4715.t1 | #                                                                                                                                                                                                                                                                                                                                                                                                                                  | #   | #   | #        | #     | #    | -    | ----                                                          | ----  | ----                 | #                                                                                                                                                                                                                                                                                                                                                                                                                                                                                                                                                                                                                  | #   | #   | #         | #     | #    |      |
| Rsa1.0_00093.1.g4716.t1 | gb EOA16130.1  hypothetical protein CARUB_v10004265mg [Capsella rubella]                                                                                                                                                                                                                                                                                                                                                           | 720 | 701 | 0        | 97.4  | 52.6 | 67.6 | hypothetical protein CARUB_v10004265mg                        | gbpln | Capsella rubella     | AT3G42170.1   Symbols:   BED zinc finger :hAT family dimerisation domain   chr3:14321838-14323928 FORWARD LENGTH=696                                                                                                                                                                                                                                                                                                                                                                                                                                                                                               | 720 | 696 | 5.00E-63  | 96.7  | 25.0 | 44.3 |
| Rsa1.0_00093.1.g4717.t1 | #                                                                                                                                                                                                                                                                                                                                                                                                                                  | #   | #   | #        | #     | #    | -    | ----                                                          | ----  | ----                 | #                                                                                                                                                                                                                                                                                                                                                                                                                                                                                                                                                                                                                  | #   | #   | #         | #     | #    |      |
| Rsa1.0_00093.1.g4718.t1 | ref XP_002889844.1  zinc finger family protein [Arabidopsis lyrata subsp. lyrata] gi 297335686 gb EFH66103.1  zinc finger family protein [Arabidopsis lyrata subsp. lyrata]                                                                                                                                                                                                                                                        | 350 | 323 | 2.00E-38 | 92.3  | 26.3 | 34.0 | zinc finger family protein                                    | gbpln | Arabidopsis lyrata   | AT1G11020.1   Symbols:   RING/FYVE/PHD zinc finger superfamily protein   chr1:3676968-3678350 FORWARD LENGTH=321                                                                                                                                                                                                                                                                                                                                                                                                                                                                                                   | 350 | 321 | 4.00E-40  | 91.7  | 25.4 | 33.1 |
| Rsa1.0_00093.1.g4719.t1 | ref XP_002892615.1  predicted protein [Arabidopsis lyrata subsp. lyrata] gi 297338457 gb EFH68874.1  predicted protein [Arabidopsis lyrata subsp. lyrata]                                                                                                                                                                                                                                                                          | 424 | 438 | 0        | 103.3 | 85.4 | 92.7 | predicted protein                                             | gbpln | Arabidopsis lyrata   | AT1G11040.1   Symbols:   HSP40/DnaJ peptide-binding protein   chr1:3679225-3680924 REVERSE LENGTH=438                                                                                                                                                                                                                                                                                                                                                                                                                                                                                                              | 424 | 438 | 0         | 103.3 | 84.7 | 92.5 |
| Rsa1.0_00093.1.g4720.t2 | ref XP_002889846.1  predicted protein [Arabidopsis lyrata subsp. lyrata] gi 297335688 gb EFH66105.1  predicted protein [Arabidopsis lyrata subsp. lyrata]                                                                                                                                                                                                                                                                          | 868 | 873 | 0        | 100.6 | 84.9 | 90.3 | predicted protein                                             | gbpln | Arabidopsis lyrata   | AT1G11060.1   Symbols:   WAPL (Wings apart-like protein regulation of heterochromatin) protein   chr1:3684568-3689537 FORWARD LENGTH=930                                                                                                                                                                                                                                                                                                                                                                                                                                                                           | 868 | 930 | 0         | 107.1 | 83.9 | 88.9 |

|                         |                                                                                                                                                                                                                                                                                                     |     |      |           |       |      |      |                                              |       |                      |                                                                                                                                                                                                                                                                                                                                                                                                             |     |     |           |       |      |      |
|-------------------------|-----------------------------------------------------------------------------------------------------------------------------------------------------------------------------------------------------------------------------------------------------------------------------------------------------|-----|------|-----------|-------|------|------|----------------------------------------------|-------|----------------------|-------------------------------------------------------------------------------------------------------------------------------------------------------------------------------------------------------------------------------------------------------------------------------------------------------------------------------------------------------------------------------------------------------------|-----|-----|-----------|-------|------|------|
| Rsa1.0_00093.1.g4721.t1 | ref[NP_172574.5] uncharacterized protein [Arabidopsis thaliana] gi 332190558 gb AE28679.1  uncharacterized protein AT1G11070 [Arabidopsis thaliana]                                                                                                                                                 | 855 | 763  | 0         | 89.2  | 56.7 | 64.7 | uncharacterized protein                      | gbpln | Arabidopsis thaliana | AT1G11070.1   Symbols:   BEST Arabidopsis thaliana protein match is: Hydroxyproline-rich glycoprotein family protein (TAIR:AT1G080.1); Has 579 Blast hits to 567 proteins in 152 species: Archae - 0; Bacteria - 68; Metazoa - 159; Fungi - 113; Plants - 172; Viruses - 0; Other Eukaryotes - 67 (source: NCBI BLink).   chr1:3690406-3693648 REVERSE LENGTH=763                                           | 855 | 763 | 0         | 89.2  | 56.7 | 64.7 |
| Rsa1.0_00093.1.g4722.t1 | #                                                                                                                                                                                                                                                                                                   | #   | #    | #         | #     | #    | #    | -                                            | ----  | ----                 | #                                                                                                                                                                                                                                                                                                                                                                                                           | #   | #   | #         | #     | #    |      |
| Rsa1.0_00093.1.g4723.t1 | ref[NP_172575.2] carboxypeptidase C [Arabidopsis thaliana] gi 334302853 sp O04084.2 SCP31_ARAT H RecName: Full=Serine carboxypeptidase-like 31; Flags: Precursor gi 133778908 gb ABO38794.1  At1g11080 [Arabidopsis thaliana] gi 332190559 gb AEE28680.1  carboxypeptidase C [Arabidopsis thaliana] | 491 | 492  | 0         | 100.2 | 89.4 | 92.9 | carboxypeptidase C                           | gbpln | Arabidopsis thaliana | AT1G11080.1   Symbols: scpl31   serine carboxypeptidase-like 31   chr1:3694917-3697759 REVERSE LENGTH=492                                                                                                                                                                                                                                                                                                   | 491 | 492 | 0         | 100.2 | 89.4 | 92.9 |
| Rsa1.0_00093.1.g4724.t1 | gb AAG51783.1 AC079679.3 reverse transcriptase, putative; 16838-20266 [Arabidopsis thaliana]                                                                                                                                                                                                        | 469 | 1142 | 1.00E-127 | 243.5 | 51.8 | 66.1 | reverse transcriptase, putative; 16838-20266 | gbpln | Arabidopsis thaliana | AT4G29090.1   Symbols:   Ribonuclease H-like superfamily protein   chr4:14333528-14335255 FORWARD LENGTH=575                                                                                                                                                                                                                                                                                                | 469 | 575 | 6.00E-56  | 122.6 | 33.3 | 52.0 |
| Rsa1.0_00093.1.g4725.t1 | #                                                                                                                                                                                                                                                                                                   | #   | #    | #         | #     | #    | #    | -                                            | ----  | ----                 | #                                                                                                                                                                                                                                                                                                                                                                                                           | #   | #   | #         | #     | #    |      |
| Rsa1.0_00093.1.g4726.t1 | gb EOA36604.1  hypothetical protein CARUB_v10011807mg [Capsella rubella]                                                                                                                                                                                                                            | 46  | 322  | 5.00E-16  | 700.0 | 84.8 | 93.5 | hypothetical protein CARUB_v10011807mg       | gbpln | Capsella rubella     | AT1G11090.1   Symbols:   alpha/beta-Hydrolases superfamily protein   chr1:3702655-3703629 FORWARD LENGTH=324                                                                                                                                                                                                                                                                                                | 46  | 324 | 4.00E-17  | 704.3 | 82.6 | 91.3 |
| Rsa1.0_00093.1.g4727.t1 | ref[NP_001117267.1] uncharacterized protein [Arabidopsis thaliana] gi 98961969 gb ABF59314.1  unknown protein [Arabidopsis thaliana] gi 332190565 gb AEE28686.1  uncharacterized protein AT1G11112 [Arabidopsis thaliana]                                                                           | 77  | 78   | 2.00E-18  | 101.3 | 76.6 | 83.1 | uncharacterized protein                      | gbpln | Arabidopsis thaliana | AT1G11112.1   Symbols:   unknown protein; FUNCTIONS IN: molecular function unknown; INVOLVED IN: biological process unknown; LOCATED IN: cellular component unknown; Has 30201 Blast hits to 17322 proteins in 780 species: Archae - 12; Bacteria - 1396; Metazoa - 17338; Fungi - 3422; Plants - 5037; Viruses - 0; Other Eukaryotes - 2996 (source: NCBI BLink).   chr1:3713220-3713456 REVERSE LENGTH=78 | 77  | 78  | 4.00E-21  | 101.3 | 76.6 | 83.1 |
| Rsa1.0_00093.1.g4728.t1 | ref[NP_172579.2] uncharacterized protein [Arabidopsis thaliana] gi 332190566 gb AEE28687.1  uncharacterized protein AT1G11120 [Arabidopsis thaliana]                                                                                                                                                | 183 | 187  | 3.00E-64  | 102.2 | 79.2 | 85.8 | uncharacterized protein                      | gbpln | Arabidopsis thaliana | AT1G11120.1   Symbols:   unknown protein; BEST Arabidopsis thaliana protein match is: unknown protein (TAIR:AT1G09812.1); Has 270 Blast hits to 255 proteins in 62 species: Archae - 0; Bacteria - 2; Metazoa - 93; Fungi - 14; Plants - 126; Viruses - 0; Other Eukaryotes - 35 (source: NCBI BLink).   chr1:3715229-3717320 FORWARD LENGTH=187                                                            | 183 | 187 | 1.00E-66  | 102.2 | 79.2 | 85.8 |
| Rsa1.0_00093.1.g4729.t1 | ref[NP_001184959.1] uncharacterized protein [Arabidopsis thaliana] gi 332190568 gb AEE28689.1  uncharacterized protein AT1G11125 [Arabidopsis thaliana]                                                                                                                                             | 273 | 265  | 7.00E-80  | 97.1  | 65.6 | 75.5 | uncharacterized protein                      | gbpln | Arabidopsis thaliana | AT1G11125.1   Symbols:   unknown protein; BEST Arabidopsis thaliana protein match is: unknown protein (TAIR:AT1G61170.1).   chr1:3718846-3719643 FORWARD LENGTH=265                                                                                                                                                                                                                                         | 273 | 265 | 2.00E-82  | 97.1  | 65.6 | 75.5 |
| Rsa1.0_00094.1.g4730.t1 | #                                                                                                                                                                                                                                                                                                   | #   | #    | #         | #     | #    | #    | -                                            | ----  | ----                 | #                                                                                                                                                                                                                                                                                                                                                                                                           | #   | #   | #         | #     | #    |      |
| Rsa1.0_00094.1.g4731.t1 | #                                                                                                                                                                                                                                                                                                   | #   | #    | #         | #     | #    | #    | -                                            | ----  | ----                 | #                                                                                                                                                                                                                                                                                                                                                                                                           | #   | #   | #         | #     | #    |      |
| Rsa1.0_00094.1.g4732.t1 | gb AAG30607.1 AF314656.1 aquaporin [Brassica oleracea]                                                                                                                                                                                                                                              | 282 | 281  | 1.00E-156 | 99.6  | 97.2 | 98.2 | aquaporin                                    | gbpln | Brassica oleracea    | AT4G35100.2   Symbols: PJP3   plasma membrane intrinsic protein 3   chr4:16708672-16709958 FORWARD LENGTH=280                                                                                                                                                                                                                                                                                               | 282 | 280 | 1.00E-155 | 99.3  | 95.0 | 97.5 |
| Rsa1.0_00094.1.g4733.t1 | ref[XP_002867091.1] hypothetical protein ARALYDRAFT_353319 [Arabidopsis lyrata subsp. lyrata] gi 297312927 gb EFH43350.1  hypothetical protein ARALYDRAFT_353319 [Arabidopsis lyrata subsp. lyrata]                                                                                                 | 373 | 386  | 1.00E-154 | 103.5 | 77.5 | 87.9 | hypothetical protein ARALYDRAFT_353319       | gbpln | Arabidopsis lyrata   | AT4G35110.2   Symbols:   Arabidopsis phospholipase-like protein (PEARL1 4) family   chr4:16712660-16713987 REVERSE LENGTH=386                                                                                                                                                                                                                                                                               | 373 | 386 | 1.00E-149 | 103.5 | 74.8 | 85.3 |
| Rsa1.0_00094.1.g4734.t1 | ref[XP_002869106.1] kelch repeat-containing F-box family protein [Arabidopsis lyrata subsp. lyrata] gi 297314942 gb EFH45365.1  kelch repeat-containing F-box family protein [Arabidopsis lyrata subsp. lyrata]                                                                                     | 353 | 399  | 3.00E-93  | 113.0 | 56.9 | 71.1 | kelch repeat-containing F-box family protein | gbpln | Arabidopsis lyrata   | AT4G35120.1   Symbols:   Galactose oxidase/kelch repeat superfamily protein   chr4:16716806-16718017 FORWARD LENGTH=389                                                                                                                                                                                                                                                                                     | 353 | 389 | 1.00E-84  | 110.2 | 53.5 | 65.7 |
| Rsa1.0_00094.1.g4735.t1 | ref[XP_002869107.1] kelch repeat-containing F-box family protein [Arabidopsis lyrata subsp. lyrata] gi 297314943 gb EFH45366.1  kelch repeat-containing F-box family protein [Arabidopsis lyrata subsp. lyrata]                                                                                     | 381 | 413  | 1.00E-103 | 108.4 | 58.3 | 70.9 | kelch repeat-containing F-box family protein | gbpln | Arabidopsis lyrata   | AT4G35120.1   Symbols:   Galactose oxidase/kelch repeat superfamily protein   chr4:16716806-16718017 FORWARD LENGTH=389                                                                                                                                                                                                                                                                                     | 381 | 389 | 3.00E-92  | 102.1 | 54.3 | 66.9 |



| Rsa1.0_00094.1.g4736.t2 | #                                                                                                                                                                                                                                                                                                                                                                                                                                                               | #   | #   | #         | #     | #    | #    | -                                                    | ----  | ----                 | #                                                                                                                          | #   | #   | #         | #     | #    |      |
|-------------------------|-----------------------------------------------------------------------------------------------------------------------------------------------------------------------------------------------------------------------------------------------------------------------------------------------------------------------------------------------------------------------------------------------------------------------------------------------------------------|-----|-----|-----------|-------|------|------|------------------------------------------------------|-------|----------------------|----------------------------------------------------------------------------------------------------------------------------|-----|-----|-----------|-------|------|------|
| Rsa1.0_00094.1.g4736.t1 | ref XP_002869106.1  kelch repeat-containing F-box family protein [Arabidopsis lyrata subsp. lyrata] gi 297314942 gb EFH45365.1  kelch repeat-containing F-box family protein [Arabidopsis lyrata subsp. lyrata]                                                                                                                                                                                                                                                 | 380 | 399 | 1.00E-92  | 105.0 | 53.7 | 68.4 | kelch repeat-containing F-box family gbpln protein   |       | Arabidopsis lyrata   | AT4G35120.1   Symbols: Galactose oxidase/kelch repeat superfamily protein   chr4:16716806-16718017 FORWARD LENGTH=389      | 380 | 389 | 1.00E-80  | 102.4 | 49.5 | 64.5 |
| Rsa1.0_00094.1.g4738.t1 | ref XP_002869106.1  kelch repeat-containing F-box family protein [Arabidopsis lyrata subsp. lyrata] gi 297314942 gb EFH45365.1  kelch repeat-containing F-box family protein [Arabidopsis lyrata subsp. lyrata]                                                                                                                                                                                                                                                 | 385 | 399 | 9.00E-87  | 103.6 | 51.7 | 64.9 | kelch repeat-containing F-box family gbpln protein   |       | Arabidopsis lyrata   | AT4G35120.1   Symbols: Galactose oxidase/kelch repeat superfamily protein   chr4:16716806-16718017 FORWARD LENGTH=389      | 385 | 389 | 4.00E-81  | 101.0 | 50.6 | 64.9 |
| Rsa1.0_00094.1.g4739.t1 | ref NP_195239.1  pentatricopeptide repeat-containing protein [Arabidopsis thaliana] gi 75098809 sp O49619.1 PP350_ARATH RecName: Full=Pentatricopeptide repeat-containing protein At4g35130. chloroplast; Flags: Precursor gi 2924523 emb CAA17777.1  putative protein [Arabidopsis thaliana] gi 7270464 emb CAB80230.1  putative protein [Arabidopsis thaliana] gi 332661071 gb AEE86471.1  pentatricopeptide repeat-containing protein [Arabidopsis thaliana] | 802 | 804 | 0         | 100.2 | 77.2 | 87.5 | pentatricopeptide repeat-containing protein          | gbpln | Arabidopsis thaliana | AT4G35130.1   Symbols: Tetratricopeptide repeat (TPR)-like superfamily protein   chr4:16721084-16723498 REVERSE LENGTH=804 | 802 | 804 | 0         | 100.2 | 77.2 | 87.5 |
| Rsa1.0_00094.1.g4740.t1 | ref XP_002867089.1  transducin family protein [Arabidopsis lyrata subsp. lyrata] gi 297312925 gb EFH43348.1  transducin family protein [Arabidopsis lyrata subsp. lyrata]                                                                                                                                                                                                                                                                                       | 482 | 494 | 0         | 102.5 | 78.2 | 86.9 | transducin family protein                            | gbpln | Arabidopsis lyrata   | AT4G35140.1   Symbols: Transducin/WD40 repeat-like superfamily protein   chr4:16723873-16726477 REVERSE LENGTH=496         | 482 | 496 | 0         | 102.9 | 78.2 | 87.1 |
| Rsa1.0_00094.1.g4741.t1 | ref XP_002867086.1  hypothetical protein ARALYDRAFT_491132 [Arabidopsis lyrata subsp. lyrata] gi 297312922 gb EFH43345.1  hypothetical protein ARALYDRAFT_491132 [Arabidopsis lyrata subsp. lyrata]                                                                                                                                                                                                                                                             | 479 | 478 | 0         | 99.8  | 76.0 | 85.2 | hypothetical protein ARALYDRAFT_491132               | gbpln | Arabidopsis lyrata   | AT4G35180.1   Symbols: LHT7   LYS/HIS transporter 7   chr4:16738517-16740385 REVERSE LENGTH=478                            | 479 | 478 | 0         | 99.8  | 76.0 | 85.4 |
| Rsa1.0_00094.1.g4742.t1 | ref XP_002869102.1  hypothetical protein ARALYDRAFT_912862 [Arabidopsis lyrata subsp. lyrata] gi 297314938 gb EFH45361.1  hypothetical protein ARALYDRAFT_912862 [Arabidopsis lyrata subsp. lyrata]                                                                                                                                                                                                                                                             | 235 | 225 | 1.00E-117 | 95.7  | 87.2 | 91.1 | hypothetical protein ARALYDRAFT_912862               | gbpln | Arabidopsis lyrata   | AT4G35190.1   Symbols: Putative lysine decarboxylase family protein   chr4:16746724-16748090 FORWARD LENGTH=228            | 235 | 228 | 1.00E-113 | 97.0  | 86.0 | 90.2 |
| Rsa1.0_00094.1.g4743.t1 | gb EOA17153.1  hypothetical protein CARUB_v10005421mg [Capsella rubella]                                                                                                                                                                                                                                                                                                                                                                                        | 273 | 286 | 1.00E-135 | 104.8 | 87.5 | 93.4 | hypothetical protein CARUB_v10005421mg               | gbpln | Capsella rubella     | AT4G35220.1   Symbols: Cyclase family protein   chr4:16752636-16753966 FORWARD LENGTH=272                                  | 273 | 272 | 1.00E-133 | 99.6  | 82.8 | 87.5 |
| Rsa1.0_00094.1.g4744.t1 | ref NP_567980.1  BR-signaling kinase 1 [Arabidopsis thaliana] gi 75331881 sp O9444.1 Y4523_ARATH RecName: Full=Probable serine/threonine-protein kinase At4g35230                                                                                                                                                                                                                                                                                               | 518 | 512 | 0         | 98.8  | 92.7 | 94.6 | BR-signaling kinase 1                                | gbpln | Arabidopsis thaliana | AT4G35230.1   Symbols: BSK1   BR-signaling kinase 1   chr4:16755325-16758041 REVERSE LENGTH=512                            | 518 | 512 | 0         | 98.8  | 92.7 | 94.6 |
| Rsa1.0_00094.1.g4745.t1 | gi 16612249 gb AAL27496.1 AF439824.1 AT4g35230/F23E12.210 [Arabidopsis thaliana] gi 22655470 gb AAM98327.1  At4g35230/F23E12.210 [Arabidopsis thaliana] gi 332661082 gb AEE86482.1  BR-signaling kinase 1 [Arabidopsis thaliana]                                                                                                                                                                                                                                | 518 | 512 | 0         | 98.8  | 92.7 | 94.6 | BR-signaling kinase 1                                | gbpln | Arabidopsis thaliana | AT4G35230.1   Symbols: BSK1   BR-signaling kinase 1   chr4:16755325-16758041 REVERSE LENGTH=512                            | 518 | 512 | 0         | 98.8  | 92.7 | 94.6 |
| Rsa1.0_00094.1.g4746.t1 | ref NP_195250.2  uncharacterized protein [Arabidopsis thaliana] gi 334187179 ref NP_001190921.1  uncharacterized protein [Arabidopsis thaliana] gi 332661083 gb AEE86483.1  uncharacterized protein AT4G35240 [Arabidopsis thaliana] gi 332661084 gb AEE86484.1  uncharacterized protein AT4G35240 [Arabidopsis thaliana]                                                                                                                                       | 869 | 865 | 0         | 99.5  | 81.8 | 87.1 | uncharacterized protein                              | gbpln | Arabidopsis thaliana | AT4G35240.2   Symbols: Protein of unknown function (DUF630 and DUF632)   chr4:16761334-16764324 REVERSE LENGTH=865         | 869 | 865 | 0         | 99.5  | 81.8 | 87.1 |
| Rsa1.0_00094.1.g4747.t1 | ref XP_002864695.1  phospholipid/glycerol acyltransferase family protein [Arabidopsis lyrata subsp. lyrata] gi 297310530 gb EFH40954.1  phospholipid/glycerol acyltransferase family protein [Arabidopsis lyrata subsp. lyrata]                                                                                                                                                                                                                                 | 376 | 376 | 0         | 100.0 | 94.7 | 97.3 | phospholipid/glycerol acyltransferase family protein | gbpln | Arabidopsis lyrata   | AT5G0620.1   Symbols: GPAT9   glycerol-3-phosphate acyltransferase 9   chr5:24367266-24369647 FORWARD LENGTH=376           | 376 | 376 | 0         | 100.0 | 93.6 | 97.3 |

|                         |                                                                                                                                                                                                                                                                                                                                                                                         |      |      |           |       |      |      |                                                     |       |                      |                                                                                                                                                                                                                                                                                                                                                                     |      |      |           |       |      |      |
|-------------------------|-----------------------------------------------------------------------------------------------------------------------------------------------------------------------------------------------------------------------------------------------------------------------------------------------------------------------------------------------------------------------------------------|------|------|-----------|-------|------|------|-----------------------------------------------------|-------|----------------------|---------------------------------------------------------------------------------------------------------------------------------------------------------------------------------------------------------------------------------------------------------------------------------------------------------------------------------------------------------------------|------|------|-----------|-------|------|------|
| Rsa1.0_00094.1.g4748.t1 | gb AAO61647.1  NAD-dependent isocitrate dehydrogenase beta subunit [Brassica napus]                                                                                                                                                                                                                                                                                                     | 401  | 367  | 0         | 91.5  | 89.5 | 90.5 | NAD-dependent isocitrate dehydrogenase beta subunit | gbpln | Brassica napus       | AT4G35260.1   Symbols: IDH1, IDH-1   isocitrate dehydrogenase 1   chr4:16774494-16776233 REVERSE LENGTH=367                                                                                                                                                                                                                                                         | 401  | 367  | 0         | 91.5  | 87.5 | 89.8 |
| Rsa1.0_00094.1.g4749.t1 | gb EOA15973.1  hypothetical protein CARUB_v10004068mg [Capsella rubella] gi 482551781 gb EOA15974.1  hypothetical protein CARUB_v10004068mg [Capsella rubella] gi 482551782 gb EOA15975.1  hypothetical protein CARUB_v10004068mg [Capsella rubella]                                                                                                                                    | 965  | 972  | 0         | 100.7 | 84.6 | 89.6 | hypothetical protein CARUB_v10004068mg              | gbpln | Capsella rubella     | AT4G35270.1   Symbols:   Plant regulator RWP-RK family protein   chr4:1677657-16780824 REVERSE LENGTH=963                                                                                                                                                                                                                                                           | 965  | 963  | 0         | 99.8  | 83.7 | 89.3 |
| Rsa1.0_00094.1.g4750.t1 | ref XP_002867079.1  zinc finger family protein [Arabidopsis lyrata subsp. lyrata] gi 297312915 gb EFH43338.1  zinc finger family protein [Arabidopsis lyrata subsp. lyrata]                                                                                                                                                                                                             | 269  | 283  | 4.00E-92  | 105.2 | 71.0 | 77.0 | zinc finger family protein                          | gbpln | Arabidopsis lyrata   | AT4G35280.1   Symbols:   C2H2-like zinc finger protein   chr4:16787429-16788283 REVERSE LENGTH=284                                                                                                                                                                                                                                                                  | 269  | 284  | 1.00E-94  | 105.6 | 70.6 | 76.2 |
| Rsa1.0_00094.1.g4751.t1 | gb EOA30237.1  hypothetical protein CARUB_v10013359mg [Capsella rubella]                                                                                                                                                                                                                                                                                                                | 548  | 563  | 1.00E-145 | 102.7 | 62.0 | 72.1 | hypothetical protein CARUB_v10013359mg              | gbpln | Capsella rubella     | AT2G17200.1   Symbols: DSK2   ubiquitin family protein   chr2:7482133-7485090 REVERSE LENGTH=551                                                                                                                                                                                                                                                                    | 548  | 551  | 2.33E-156 | 100.5 | 62.4 | 72.6 |
| Rsa1.0_00094.1.g4752.t1 | gb AAQ02674.1  glutamate receptor [Raphanus sativus var. sativus]                                                                                                                                                                                                                                                                                                                       | 913  | 915  | 0         | 100.2 | 98.2 | 98.8 | glutamate receptor                                  | gbpln | Raphanus sativus     | AT4G35290.1   Symbols: GLUR2, GLR3.2, ATGLR3.2, ATGLUR2   glutamate receptor 2   chr4:16790290-16793461 FORWARD LENGTH=912                                                                                                                                                                                                                                          | 913  | 912  | 0         | 99.9  | 85.1 | 92.8 |
| Rsa1.0_00094.1.g4753.t1 | gb EOA16091.1  hypothetical protein CARUB_v10004225mg [Capsella rubella] gi 482551899 gb EOA16092.1  hypothetical protein CARUB_v10004225mg [Capsella rubella]                                                                                                                                                                                                                          | 741  | 740  | 0         | 99.9  | 93.8 | 97.6 | hypothetical protein CARUB_v10004225mg              | gbpln | Capsella rubella     | AT4G35300.4   Symbols: TMT2   tonoplast monosaccharide transporter2   chr4:16796432-16799071 REVERSE LENGTH=739                                                                                                                                                                                                                                                     | 741  | 739  | 0         | 99.7  | 93.7 | 97.7 |
| Rsa1.0_00094.1.g4754.t1 | gb EOA16342.1  hypothetical protein CARUB_v10004491mg [Capsella rubella]                                                                                                                                                                                                                                                                                                                | 557  | 560  | 0         | 100.5 | 91.9 | 95.0 | hypothetical protein CARUB_v10004491mg              | gbpln | Capsella rubella     | AT4G35310.1   Symbols: CPK5, ATCPK5   calmodulin-domain protein kinase 5   chr4:16802436-16804628 FORWARD LENGTH=556                                                                                                                                                                                                                                                | 557  | 556  | 0         | 99.8  | 90.7 | 95.0 |
| Rsa1.0_00094.1.g4755.t1 | ref NP_567982.1  uncharacterized protein [Arabidopsis thaliana] gi 13605511 gb AAK32749.1 AF361581.1 AT4g35320/F23E12_120 [Arabidopsis thaliana] gi 16323284 gb AAL15397.1  AT4g35320/F23E12_120 [Arabidopsis thaliana] gi 332661099 gb AEE86499.1  uncharacterized protein AT4G35320 [Arabidopsis thaliana]                                                                            | 146  | 147  | 4.00E-55  | 100.7 | 81.5 | 91.1 | uncharacterized protein                             | gbpln | Arabidopsis thaliana | AT4G35320.1   Symbols:   unknown protein; BEST Arabidopsis thaliana protein match is: unknown protein (TAIR:AT2G17300.1); Has 30201 Blast hits to 17322 proteins in 780 species: Archae - 12; Bacteria - 1396; Metazoa - 17338; Fungi - 3422; Plants - 5037; Viruses - 0; Other Eukaryotes - 2996 (source: NCBI BLINK).   chr4:16806139-16806582 REVERSE LENGTH=147 | 146  | 147  | 1.00E-57  | 100.7 | 81.5 | 91.1 |
| Rsa1.0_00094.1.g4756.t1 | gb EOA16913.1  hypothetical protein CARUB_v10005136mg [Capsella rubella]                                                                                                                                                                                                                                                                                                                | 357  | 354  | 0         | 99.2  | 92.2 | 96.9 | hypothetical protein CARUB_v10005136mg              | gbpln | Capsella rubella     | AT4G35350.1   Symbols: XCP1   xylem cysteine peptidase 1   chr4:16810529-16811875 FORWARD LENGTH=355                                                                                                                                                                                                                                                                | 357  | 355  | 0         | 99.4  | 91.6 | 96.1 |
| Rsa1.0_00094.1.g4757.t1 | ref XP_002867075.1  hypothetical protein ARALYDRAFT_491111 [Arabidopsis lyrata subsp. lyrata] gi 297312911 gb EFH43334.1  hypothetical protein ARALYDRAFT_491111 [Arabidopsis lyrata subsp. lyrata]                                                                                                                                                                                     | 367  | 367  | 0         | 100.0 | 96.2 | 98.1 | hypothetical protein ARALYDRAFT_491111              | gbpln | Arabidopsis lyrata   | AT4G35360.1   Symbols:   Uncharacterised conserved protein (UCP030210)   chr4:16812303-16814656 REVERSE LENGTH=367                                                                                                                                                                                                                                                  | 367  | 367  | 0         | 100.0 | 95.6 | 97.0 |
| Rsa1.0_00094.1.g4758.t1 | ref XP_002870014.1  transducin family protein [Arabidopsis lyrata subsp. lyrata] gi 297315850 gb EFH46273.1  transducin family protein [Arabidopsis lyrata subsp. lyrata]                                                                                                                                                                                                               | 476  | 493  | 1.00E-160 | 103.6 | 64.7 | 77.7 | transducin family protein                           | gbpln | Arabidopsis lyrata   | AT4G18905.1   Symbols:   Transducin/WD40 repeat-like superfamily protein   chr4:10360234-10362991 FORWARD LENGTH=494                                                                                                                                                                                                                                                | 476  | 494  | 1.00E-161 | 103.8 | 64.1 | 77.5 |
| Rsa1.0_00094.1.g4759.t2 | ref XP_002869091.1  hypothetical protein ARALYDRAFT_491109 [Arabidopsis lyrata subsp. lyrata] gi 297314927 gb EFH43350.1  hypothetical protein ARALYDRAFT_491109 [Arabidopsis lyrata subsp. lyrata]                                                                                                                                                                                     | 1706 | 1704 | 0         | 99.9  | 90.5 | 95.1 | hypothetical protein ARALYDRAFT_491109              | gbpln | Arabidopsis lyrata   | AT4G35380.1   Symbols:   SEC7-like guanine nucleotide exchange family protein   chr4:16819883-16825960 FORWARD LENGTH=1706                                                                                                                                                                                                                                          | 1706 | 1706 | 0         | 100.0 | 90.0 | 95.1 |
| Rsa1.0_00094.1.g4760.t1 | ref NP_195265.2  AT-hook protein of GA feedback 1 [Arabidopsis thaliana] gi 50198777 gb AAT70422.1  At4g35390 [Arabidopsis thaliana] gi 53828597 gb AAU94408.1  At4g35390 [Arabidopsis thaliana] gi 19657394 tpd FAA00296.1  TPA: AT-hook motif nuclear localized protein 25 [Arabidopsis thaliana] gi 332661106 gb AEE86506.1  AT-hook protein of GA feedback 1 [Arabidopsis thaliana] | 284  | 299  | 1.00E-100 | 105.3 | 88.4 | 91.5 | AT-hook protein of GA feedback 1                    | gbpln | Arabidopsis thaliana | AT4G35390.1   Symbols: AGF1   AT-hook protein of GA feedback 1   chr4:16829603-16830502 FORWARD LENGTH=299                                                                                                                                                                                                                                                          | 284  | 299  | 1.00E-103 | 105.3 | 88.4 | 91.5 |

|                          |                                                                                                                                                                                                                                                                                                                                                                                                                                                                                                                                                                     |      |      |           |       |      |      |                                                   |       |                      |                                                                                                                                            |      |      |           |       |      |      |
|--------------------------|---------------------------------------------------------------------------------------------------------------------------------------------------------------------------------------------------------------------------------------------------------------------------------------------------------------------------------------------------------------------------------------------------------------------------------------------------------------------------------------------------------------------------------------------------------------------|------|------|-----------|-------|------|------|---------------------------------------------------|-------|----------------------|--------------------------------------------------------------------------------------------------------------------------------------------|------|------|-----------|-------|------|------|
| Rsa1.0_00094.1.g4761.t1  | ref[XP_002884054.1] hypothetical protein ARALYDRAFT_480622 [Arabidopsis lyrata subsp. lyrata] gi 297329894 gb EFH60313.1  hypothetical protein ARALYDRAFT_480622 [Arabidopsis lyrata subsp. lyrata] gi 482567420 gb EOA31609.1  hypothetical protein CARUB_v10014806mg [Capsella rubella]                                                                                                                                                                                                                                                                           | 161  | 161  | 1.00E-86  | 100.0 | 96.9 | 98.1 | hypothetical protein ARALYDRAFT_480622            | gbpln | Arabidopsis lyrata   | AT2G17380.1   Symbols: AP19   associated protein 19   chr2:7553122-7554887 FORWARD LENGTH=161                                              | 161  | 161  | 1.00E-88  | 100.0 | 96.3 | 97.5 |
| Rsa1.0_00094.1.g4762.t1  | ref[XP_002880609.1] hypothetical protein ARALYDRAFT_901029 [Arabidopsis lyrata subsp. lyrata] gi 297326448 gb EFH56868.1  hypothetical protein ARALYDRAFT_901029 [Arabidopsis lyrata subsp. lyrata]                                                                                                                                                                                                                                                                                                                                                                 | 445  | 464  | 1.00E-110 | 104.3 | 53.3 | 68.3 | hypothetical protein ARALYDRAFT_901029            | gbpln | Arabidopsis lyrata   | AT3G18150.1   Symbols:   RNI-like superfamily protein   chr3:6217929-6219500 FORWARD LENGTH=456                                            | 445  | 456  | 1.00E-111 | 102.5 | 51.9 | 67.0 |
| Rsa1.0_00094.1.g4763.t1  | ref[NP_567985.1] chloride channel protein CLC-e [Arabidopsis thaliana] gi 41688502 sp Q8GX93.2 CLCE_ARATH RecName: Full=Chloride channel protein CLC-e; Short=AtCLC-e; AltName: Full=CBS domain-containing protein CBSCLC3 gi 332661110 gb AEE86510.1  chloride channel protein CLC-e [Arabidopsis thaliana]                                                                                                                                                                                                                                                        | 700  | 710  | 0         | 101.4 | 85.3 | 92.7 | chloride channel protein CLC-e                    | gbpln | Arabidopsis thaliana | AT4G35440.1   Symbols: CLC-E, ATCLC-E, CLCE   chloride channel E   chr4:16836384-16839345 REVERSE LENGTH=710                               | 700  | 710  | 0         | 101.4 | 85.3 | 92.7 |
| Rsa1.0_00094.1.g4764.t1  | dbj BAJ33771.1  unnamed protein product [Thellungiella halophila]                                                                                                                                                                                                                                                                                                                                                                                                                                                                                                   | 353  | 342  | 1.00E-166 | 96.9  | 87.3 | 90.9 | unnamed protein product                           | ----  | ----                 | AT4G35450.1   Symbols: AKR2, AFT, AKR2A   ankyrin repeat-containing protein 2   chr4:16839862-16841759 FORWARD LENGTH=342                  | 353  | 342  | 1.00E-164 | 96.9  | 86.4 | 91.5 |
| Rsa1.0_00095.1.g4765.t1  | gb EOA28951.1  hypothetical protein CARUB_v10025202mg, partial [Capsella rubella]                                                                                                                                                                                                                                                                                                                                                                                                                                                                                   | 350  | 409  | 8.00E-61  | 116.9 | 42.6 | 53.1 | hypothetical protein CARUB_v10025202mg, partial   | gbpln | Capsella rubella     | AT4G05360.1   Symbols:   Zinc knuckle (CCHC-type) family protein   chr4:2728204-2732337 FORWARD LENGTH=735                                 | 350  | 735  | 8.00E-61  | 210.0 | 44.9 | 58.0 |
| Rsa1.0_00095.1.g4766.t21 | ref[NP_567423.1] phragmoplast-associated kinesin-related protein 1 [Arabidopsis thaliana] gi 75173840 sp Q9LDN0.1 KN12A_ARATH RecName: Full=Kinesin-like protein KIN12A; AltName: Full=Phragmoplast-associated kinesin-related protein 1; Short=AtPAKRP1 gi 8745333 gb AAF78893.1  phragmoplast-associated kinesin-related protein 1 [Arabidopsis thaliana] gi 8745335 gb AAF78894.1  phragmoplast-associated kinesin-related protein 1 [Arabidopsis thaliana] gi 332657984 gb AEE83384.1  phragmoplast-associated kinesin-related protein 1 [Arabidopsis thaliana] | 1309 | 1292 | 0         | 98.7  | 80.4 | 87.2 | phragmoplast-associated kinesin-related protein 1 | gbpln | Arabidopsis thaliana | AT4G14150.1   Symbols: PAKRP1, KINESIN-12A   phragmoplast-associated kinesin-related protein 1   chr4:8158645-8165008 REVERSE LENGTH=1292  | 1309 | 1292 | 0         | 98.7  | 80.4 | 87.2 |
| Rsa1.0_00095.1.g4767.t1  | ref[XP_002870333.1] hypothetical protein ARALYDRAFT_493493 [Arabidopsis lyrata subsp. lyrata] gi 297316169 gb EFH46592.1  hypothetical protein ARALYDRAFT_493493 [Arabidopsis lyrata subsp. lyrata]                                                                                                                                                                                                                                                                                                                                                                 | 775  | 763  | 0         | 98.5  | 91.5 | 95.5 | hypothetical protein ARALYDRAFT_493493            | gbpln | Arabidopsis lyrata   | AT4G14160.2   Symbols:   Sec23/Sec24 protein transport family protein   chr4:8167574-8173026 FORWARD LENGTH=772                            | 775  | 772  | 0         | 99.6  | 87.6 | 92.4 |
| Rsa1.0_00095.1.g4768.t1  | # # # # # # # # -                                                                                                                                                                                                                                                                                                                                                                                                                                                                                                                                                   |      |      |           |       |      |      |                                                   | ----  | ----                 | #                                                                                                                                          | #    | #    | #         | #     | #    | #    |
| Rsa1.0_00095.1.g4769.t1  | ref[XP_003596591.1] Histone H3 [Medicago truncatula] gi 355485639 gb AES66842.1  Histone H3 [Medicago truncatula]                                                                                                                                                                                                                                                                                                                                                                                                                                                   | 142  | 146  | 2.00E-45  | 102.8 | 67.6 | 70.4 | Histone H3                                        | gbpln | Medicago truncatula  | AT5G65360.1   Symbols:   Histone superfamily protein   chr5:26120099-26120509 REVERSE LENGTH=136                                           | 142  | 136  | 5.00E-47  | 95.8  | 64.8 | 66.2 |
| Rsa1.0_00095.1.g4770.t1  | gb EOA14799.1  hypothetical protein CARUB_v10028105mg [Capsella rubella]                                                                                                                                                                                                                                                                                                                                                                                                                                                                                            | 316  | 329  | 2.00E-48  | 104.1 | 41.5 | 57.3 | hypothetical protein CARUB_v10028105mg            | gbpln | Capsella rubella     | AT5G38620.1   Symbols:   MADS-box transcription factor family protein   chr5:15463858-15464907 REVERSE LENGTH=349                          | 316  | 349  | 3.00E-50  | 110.4 | 42.4 | 57.6 |
| Rsa1.0_00095.1.g4771.t1  | gb AFK65668.1  chloroplast phytoene desaturase [Brassica rapa subsp. oleifera]                                                                                                                                                                                                                                                                                                                                                                                                                                                                                      | 555  | 563  | 0         | 101.4 | 98.7 | 99.8 | chloroplast phytoene desaturase                   | gbpln | Brassica rapa        | AT4G14210.1   Symbols: PDS3, PDS, PDE226   phytoene desaturase 3   chr4:8190426-8194769 REVERSE LENGTH=566                                 | 555  | 566  | 0         | 102.0 | 94.8 | 98.6 |
| Rsa1.0_00095.1.g4772.t1  | gb EOA16503.1  hypothetical protein CARUB_v10004662mg [Capsella rubella]                                                                                                                                                                                                                                                                                                                                                                                                                                                                                            | 533  | 493  | 0         | 92.5  | 83.7 | 87.2 | hypothetical protein CARUB_v10004662mg            | gbpln | Capsella rubella     | AT4G14240.1   Symbols:   CBS domain-containing protein with a domain of unknown function (DUF21)   chr4:8204712-8207273 REVERSE LENGTH=494 | 533  | 494  | 0         | 92.7  | 83.7 | 86.9 |
| Rsa1.0_00095.1.g4773.t1  | # # # # # # # # -                                                                                                                                                                                                                                                                                                                                                                                                                                                                                                                                                   |      |      |           |       |      |      |                                                   | ----  | ----                 | #                                                                                                                                          | #    | #    | #         | #     | #    | #    |
| Rsa1.0_00095.1.g4774.t1  | gb EOA18833.1  hypothetical protein CARUB_v10007447mg, partial [Capsella rubella]                                                                                                                                                                                                                                                                                                                                                                                                                                                                                   | 490  | 436  | 1.00E-101 | 89.0  | 45.7 | 61.6 | hypothetical protein CARUB_v10007447mg, partial   | gbpln | Capsella rubella     | AT4G14250.2   Symbols:   structural constituent of ribosome   chr4:8208985-8213237 REVERSE LENGTH=815                                      | 490  | 815  | 1.00E-103 | 166.3 | 42.4 | 55.3 |

|                         |                                                                                                                                                                                                                                                                                                                                                                   |      |      |           |       |      |      |                                                          |       |                      |                                                                                                                                                                                                                                                                                                                                          |      |      |           |       |      |      |
|-------------------------|-------------------------------------------------------------------------------------------------------------------------------------------------------------------------------------------------------------------------------------------------------------------------------------------------------------------------------------------------------------------|------|------|-----------|-------|------|------|----------------------------------------------------------|-------|----------------------|------------------------------------------------------------------------------------------------------------------------------------------------------------------------------------------------------------------------------------------------------------------------------------------------------------------------------------------|------|------|-----------|-------|------|------|
| Rsa1.0_00095.1.g4775.t1 | gb AGH62811.1  UBX1 [Brassica napus]                                                                                                                                                                                                                                                                                                                              | 388  | 386  | 1.00E-159 | 99.5  | 74.5 | 82.5 | UBX1                                                     | gbpln | Brassica napus       | AT4G14250.1   Symbols:   structural constituent of ribosome   chr4:8208985-8213237 REVERSE LENGTH=821                                                                                                                                                                                                                                    | 388  | 821  | 2.00E-92  | 211.6 | 47.9 | 59.8 |
| Rsa1.0_00095.1.g4776.t1 | emb CAB10204.1  hypothetical protein [Arabidopsis thaliana]<br>gi 2973130 emb CAB78467.1  hypothetical protein [Arabidopsis thaliana]                                                                                                                                                                                                                             | 424  | 724  | 1.00E-113 | 170.8 | 53.8 | 65.3 | hypothetical protein                                     | gbpln | Arabidopsis thaliana | AT4G14250.1   Symbols:   structural constituent of ribosome   chr4:8208985-8213237 REVERSE LENGTH=821                                                                                                                                                                                                                                    | 424  | 821  | 1.00E-115 | 193.6 | 53.5 | 64.9 |
| Rsa1.0_00095.1.g4777.t1 | gb AGH62811.1  UBX1 [Brassica napus]                                                                                                                                                                                                                                                                                                                              | 295  | 386  | 6.00E-61  | 130.8 | 40.3 | 51.5 | UBX1                                                     | gbpln | Brassica napus       | AT4G14250.1   Symbols:   structural constituent of ribosome   chr4:8208985-8213237 REVERSE LENGTH=821                                                                                                                                                                                                                                    | 295  | 821  | 8.00E-58  | 278.3 | 50.8 | 62.0 |
| Rsa1.0_00095.1.g4778.t1 | #                                                                                                                                                                                                                                                                                                                                                                 | #    | #    | #         | #     | #    | #    | -                                                        | ----  | ----                 | #                                                                                                                                                                                                                                                                                                                                        | #    | #    | #         | #     | #    | #    |
| Rsa1.0_00095.1.g4779.t1 | #                                                                                                                                                                                                                                                                                                                                                                 | #    | #    | #         | #     | #    | #    | -                                                        | ----  | ----                 | #                                                                                                                                                                                                                                                                                                                                        | #    | #    | #         | #     | #    | #    |
| Rsa1.0_00095.1.g4780.t1 | ref XP_002868166.1  hypothetical protein ARALYDRAFT_915171 [Arabidopsis lyrata subsp. lyrata]<br>gi 297314002 gb EFH44425.1  hypothetical protein ARALYDRAFT_915171 [Arabidopsis lyrata subsp. lyrata]                                                                                                                                                            | 135  | 135  | 3.00E-52  | 100.0 | 74.1 | 83.0 | hypothetical protein ARALYDRAFT_915171                   | gbpln | Arabidopsis lyrata   | AT4G15990.1   Symbols:   unknown protein; BEST Arabidopsis thaliana protein match is: unknown protein (TAIR:ATG16024.1); Has 14 Blast hits to 14 proteins in 2 species: Archae - 0; Bacteria - 0; Metazoa - 0; Fungi - 0; Plants - 14; Viruses - 0; Other Eukaryotes - 0 (source: NCBI BLINK).   chr4:9061269-9061676 REVERSE LENGTH=135 | 135  | 135  | 2.00E-53  | 100.0 | 71.9 | 83.0 |
| Rsa1.0_00095.1.g4781.t1 | ref XP_002870327.1  hypothetical protein ARALYDRAFT_493483 [Arabidopsis lyrata subsp. lyrata]<br>gi 297316183 gb EFH46586.1  hypothetical protein ARALYDRAFT_493483 [Arabidopsis lyrata subsp. lyrata]                                                                                                                                                            | 154  | 144  | 1.00E-44  | 93.5  | 61.0 | 72.7 | hypothetical protein ARALYDRAFT_493483                   | gbpln | Arabidopsis lyrata   | AT4G14270.1   Symbols:   Protein containing PAM2 motif which mediates interaction with the PABC domain of polyadenyl binding proteins.   chr4:8218517-8219037 FORWARD LENGTH=143                                                                                                                                                         | 154  | 143  | 4.00E-45  | 92.9  | 60.4 | 69.5 |
| Rsa1.0_00095.1.g4782.t1 | ref NP_189482.1  F-box domain-containing protein [Arabidopsis thaliana]<br>gi 334302799 sp Q9LSJ3.2 FBL48_ARAT H RecName: Full=Putative F-box/LRR-repeat protein At3g28410<br>gi 332643920 gb AEE77441.1  F-box domain-containing protein [Arabidopsis thaliana]                                                                                                  | 290  | 465  | 1.00E-59  | 160.3 | 52.4 | 66.9 | F-box domain-containing protein                          | gbpln | Arabidopsis thaliana | AT3G28410.1   Symbols:   F-box/RNI-like superfamily protein   chr3:10640152-10642071 REVERSE LENGTH=465                                                                                                                                                                                                                                  | 290  | 465  | 3.00E-62  | 160.3 | 52.4 | 66.9 |
| Rsa1.0_00095.1.g4783.t1 | gb EOA16349.1  hypothetical protein CARUB_v10004497mg [Capsella rubella]                                                                                                                                                                                                                                                                                          | 536  | 556  | 0         | 103.7 | 89.6 | 93.8 | hypothetical protein CARUB_v10004497mg                   | gbpln | Capsella rubella     | AT4G14290.1   Symbols:   alpha/beta-Hydrolases superfamily protein   chr4:8225547-8230057 REVERSE LENGTH=558                                                                                                                                                                                                                             | 536  | 558  | 0         | 104.1 | 89.4 | 93.8 |
| Rsa1.0_00095.1.g4784.t1 | gb AAZ67609.1  80A08_24 [Brassica rapa subsp. pekinensis]                                                                                                                                                                                                                                                                                                         | 377  | 475  | 8.00E-18  | 126.0 | 17.2 | 20.4 | 80A08_24                                                 | gbpln | Brassica rapa        | #                                                                                                                                                                                                                                                                                                                                        | #    | #    | #         | #     | #    |      |
| Rsa1.0_00095.1.g4785.t1 | ref NP_001031637.1  Peroxisomal membrane 22 kDa (Mpv17/PMP22) family protein [Arabidopsis thaliana]<br>gi 62321523 dbj BAD95003.1  hypothetical protein [Arabidopsis thaliana]<br>gi 9896183 gb ABF59245.1  unknown protein [Arabidopsis thaliana]<br>gi 332658013 gb AEE83413.1  Peroxisomal membrane 22 kDa (Mpv17/PMP22) family protein [Arabidopsis thaliana] | 185  | 185  | 1.00E-94  | 100.0 | 89.7 | 94.6 | Peroxisomal membrane 22 kDa (Mpv17/PMP22) family protein | gbpln | Arabidopsis thaliana | AT4G14305.1   Symbols:   Peroxisomal membrane 22 kDa (Mpv17/PMP22) family protein   chr4:8235335-8236605 REVERSE LENGTH=185                                                                                                                                                                                                              | 185  | 185  | 4.00E-97  | 100.0 | 89.7 | 94.6 |
| Rsa1.0_00095.1.g4786.t1 | ref NP_198678.1  MADS-box protein AGL73 [Arabidopsis thaliana]<br>gi 10176830 dbj BAB10152.1  MADS-box protein-like [Arabidopsis thaliana]<br>gi 32402438 gb AAN52801.1  MADS-box protein AGL73 [Arabidopsis thaliana]<br>gi 332006959 gb AED94342.1  MADS-box protein AGL73 [Arabidopsis thaliana]                                                               | 311  | 349  | 2.00E-48  | 112.2 | 43.4 | 59.8 | MADS-box protein AGL73                                   | gbpln | Arabidopsis thaliana | AT5G38620.1   Symbols:   MADS-box transcription factor family protein   chr5:15463858-15464907 REVERSE LENGTH=349                                                                                                                                                                                                                        | 311  | 349  | 4.00E-51  | 112.2 | 43.4 | 59.8 |
| Rsa1.0_00095.1.g4787.t1 | gb AAD19784.1  putative retroelement pol polyprotein [Arabidopsis thaliana]                                                                                                                                                                                                                                                                                       | 1581 | 1501 | 0         | 94.9  | 51.1 | 64.8 | putative retroelement pol polyprotein                    | gbpln | Arabidopsis thaliana | AT4G23160.1   Symbols: CRK8   cysteine-rich RLK (RECEPTOR-like protein kinase) 8   chr4:12129485-12134086 FORWARD LENGTH=1262                                                                                                                                                                                                            | 1581 | 1262 | 1.00E-130 | 79.8  | 13.9 | 19.9 |
| Rsa1.0_00095.1.g4788.t1 | emb CAD22562.1  reverse transcriptase [Brassica rapa subsp. oleifera]                                                                                                                                                                                                                                                                                             | 241  | 137  | 7.00E-57  | 56.8  | 42.3 | 51.0 | reverse transcriptase                                    | gbpln | Brassica rapa        | #                                                                                                                                                                                                                                                                                                                                        | #    | #    | #         | #     | #    |      |
| Rsa1.0_00095.1.g4789.t1 | gb AAM82603.1 AF525305.1 putative DNA/RNA binding protein [Brassica napus]                                                                                                                                                                                                                                                                                        | 129  | 306  | 8.00E-14  | 237.2 | 34.1 | 46.5 | putative DNA/RNA binding protein                         | gbpln | Brassica napus       | AT2G07760.1   Symbols:   Zinc knuckle (CCHC-type) family protein   chr2:3584420-3586278 REVERSE LENGTH=530                                                                                                                                                                                                                               | 129  | 530  | 1.00E-10  | 410.9 | 27.1 | 45.0 |
| Rsa1.0_00095.1.g4790.t2 | #                                                                                                                                                                                                                                                                                                                                                                 | #    | #    | #         | #     | #    | #    | -                                                        | ----  | ----                 | #                                                                                                                                                                                                                                                                                                                                        | #    | #    | #         | #     | #    |      |
| Rsa1.0_00096.1.g4791.t1 | gb EOA33755.1  hypothetical protein CARUB_v10019950mg [Capsella rubella]                                                                                                                                                                                                                                                                                          | 326  | 635  | 7.00E-58  | 194.8 | 38.7 | 47.5 | hypothetical protein CARUB_v10019950mg                   | gbpln | Capsella rubella     | AT1G80790.1   Symbols:   XH/XS domain-containing protein   chr1:30360280-30362856 FORWARD LENGTH=634                                                                                                                                                                                                                                     | 326  | 634  | 3.00E-54  | 194.5 | 32.8 | 42.6 |

|                         |                                                                                                                                                                                                                                                                                                                                                                                                                                                                                                                                                                                                                                                                                                                              |     |      |           |       |      |      |                                                 |       |                      |                                                                                                                                                                                                                                                                                                                                              |     |      |           |       |      |      |
|-------------------------|------------------------------------------------------------------------------------------------------------------------------------------------------------------------------------------------------------------------------------------------------------------------------------------------------------------------------------------------------------------------------------------------------------------------------------------------------------------------------------------------------------------------------------------------------------------------------------------------------------------------------------------------------------------------------------------------------------------------------|-----|------|-----------|-------|------|------|-------------------------------------------------|-------|----------------------|----------------------------------------------------------------------------------------------------------------------------------------------------------------------------------------------------------------------------------------------------------------------------------------------------------------------------------------------|-----|------|-----------|-------|------|------|
| Rsa1.0_00096.1.g4792.t1 | gb EOA33755.1  hypothetical protein CARUB_v10019950mg [Capsella rubella]                                                                                                                                                                                                                                                                                                                                                                                                                                                                                                                                                                                                                                                     | 295 | 635  | 5.00E-59  | 215.3 | 49.2 | 66.1 | hypothetical protein CARUB_v10019950mg          | gbpln | Capsella rubella     | AT4G00380.1   Symbols:   XH/XS domain-containing protein   chr4:167959-170448 FORWARD LENGTH=635                                                                                                                                                                                                                                             | 295 | 635  | 1.00E-57  | 215.3 | 42.0 | 61.0 |
| Rsa1.0_00096.1.g4793.t1 | # # # # # # # #                                                                                                                                                                                                                                                                                                                                                                                                                                                                                                                                                                                                                                                                                                              |     |      |           |       |      |      |                                                 |       |                      |                                                                                                                                                                                                                                                                                                                                              |     |      |           |       |      |      |
| Rsa1.0_00096.1.g4794.t1 | gb EOA33982.1  hypothetical protein CARUB_v10021476mg [Capsella rubella]                                                                                                                                                                                                                                                                                                                                                                                                                                                                                                                                                                                                                                                     | 259 | 306  | 1.00E-133 | 118.1 | 92.3 | 95.8 | hypothetical protein CARUB_v10021476mg          | gbpln | Capsella rubella     | AT1G80760.1   Symbols: NIP6.1, NIP6, NLM7   NOD26-like intrinsic protein 6.1   chr1:30350640-30352015 REVERSE LENGTH=305                                                                                                                                                                                                                     | 259 | 305  | 1.00E-133 | 117.8 | 91.1 | 93.8 |
| Rsa1.0_00096.1.g4795.t1 | gb EOA35639.1  hypothetical protein CARUB_v10020853mg [Capsella rubella]                                                                                                                                                                                                                                                                                                                                                                                                                                                                                                                                                                                                                                                     | 265 | 249  | 1.00E-124 | 94.0  | 83.0 | 89.8 | hypothetical protein CARUB_v10020853mg          | gbpln | Capsella rubella     | AT1G80750.1   Symbols:   Ribosomal protein L30/L7 family protein   chr1:30349052-30350434 FORWARD LENGTH=247                                                                                                                                                                                                                                 | 265 | 247  | 1.00E-119 | 93.2  | 81.1 | 87.5 |
| Rsa1.0_00096.1.g4796.t1 | ref XP_002887812.1  zinc-finger protein 1 [Arabidopsis lyrata subsp. lyrata]   g 297333653 gb EFH64071.1  zinc-finger protein 1 [Arabidopsis lyrata subsp. lyrata]                                                                                                                                                                                                                                                                                                                                                                                                                                                                                                                                                           | 207 | 220  | 9.00E-82  | 106.3 | 83.1 | 89.4 | zinc-finger protein 1                           | gbpln | Arabidopsis lyrata   | AT1G80730.1   Symbols: ZFP1, ATZFP1   zinc-finger protein 1   chr1:30339493-30340179 REVERSE LENGTH=228                                                                                                                                                                                                                                      | 207 | 228  | 3.00E-81  | 110.1 | 81.2 | 88.4 |
| Rsa1.0_00096.1.g4797.t3 | gb EOA35616.1  hypothetical protein CARUB_v10020831mg, partial [Capsella rubella]                                                                                                                                                                                                                                                                                                                                                                                                                                                                                                                                                                                                                                            | 240 | 255  | 1.00E-88  | 106.3 | 66.7 | 75.0 | hypothetical protein CARUB_v10020831mg, partial | gbpln | Capsella rubella     | AT1G15860.2   Symbols:   Domain of unknown function (DUF298)   chr1:5455055-5456741 FORWARD LENGTH=227                                                                                                                                                                                                                                       | 240 | 227  | 8.00E-90  | 94.6  | 66.7 | 75.8 |
| Rsa1.0_00096.1.g4798.t2 | dbj BAJ34529.1  unnamed protein product [Theilungiella halophila]                                                                                                                                                                                                                                                                                                                                                                                                                                                                                                                                                                                                                                                            | 192 | 1042 | 4.00E-72  | 542.7 | 72.4 | 75.0 | unnamed protein product                         | ----- | -----                | AT1G80680.1   Symbols: SAR3, MOS3, PRE, NUP96   SUPPRESSOR OF AUXIN RESISTANCE 3   chr1:30324219-30328489 FORWARD LENGTH=1046                                                                                                                                                                                                                | 192 | 1046 | 1.00E-70  | 544.8 | 68.2 | 73.4 |
| Rsa1.0_00096.1.g4799.t1 | ref NP_178182.1  Rae1-like protein [Arabidopsis thaliana]   g 83305440 sp Q38942.2 RAE1L_ARATH RecName: Full=Rae1-like protein At1g80670   g 6503279 gb AAF14655.1 AC011713_3 F23A5.2(form2) [Arabidopsis thaliana]   g 21593271 gb AAM65220.1  mRNA export protein, putative [Arabidopsis thaliana]   g 94442413 gb ABF18994.1  At1g80670 [Arabidopsis thaliana]   g 332198314 gb AEE36435.1  Rae1-like protein [Arabidopsis thaliana]   ref NP_178180.1  RNase THREE-like protein 1 [Arabidopsis thaliana]   g 75264856 sp Q9M8N2.1 RTL1_ARATH RecName: Full=Ribonuclease 3-like protein 1; AltName: Full=Ribonuclease III-like protein 1; Short=RNase III-like protein 1; AltName: Full=Ribonuclease three-like protein 1 | 346 | 349  | 0         | 100.9 | 92.2 | 96.2 | Rae1-like protein                               | gbpln | Arabidopsis thaliana | AT1G80670.1   Symbols:   Transducin/WD40 repeat-like superfamily protein   chr1:30320809-30323543 REVERSE LENGTH=349                                                                                                                                                                                                                         | 346 | 349  | 0         | 100.9 | 92.2 | 96.2 |
| Rsa1.0_00096.1.g4800.t1 | g 6730736 gb AAF27126.1 AC018849_14 hypothetical protein; 4021-3030 [Arabidopsis thaliana]   g 26449780 dbj BAC42013.1  unknown protein [Arabidopsis thaliana]   g 28950719 gb AAO63283.1  At1g80650 [Arabidopsis thaliana]   g 332198311 gb AEE36432.1  RNase THREE-like protein 1 [Arabidopsis thaliana]                                                                                                                                                                                                                                                                                                                                                                                                                   | 208 | 198  | 6.00E-51  | 95.2  | 62.5 | 71.2 | RNase THREE-like protein 1                      | gbpln | Arabidopsis thaliana | AT1G80650.1   Symbols: RTL1   RNase THREE-like protein 1   chr1:30314609-30315600 FORWARD LENGTH=198                                                                                                                                                                                                                                         | 208 | 198  | 2.00E-53  | 95.2  | 62.5 | 71.2 |
| Rsa1.0_00096.1.g4801.t1 | gb EOA35187.1  hypothetical protein CARUB_v10020332mg [Capsella rubella]                                                                                                                                                                                                                                                                                                                                                                                                                                                                                                                                                                                                                                                     | 420 | 428  | 0         | 101.9 | 87.1 | 91.7 | hypothetical protein CARUB_v10020332mg          | gbpln | Capsella rubella     | AT1G80640.1   Symbols:   Protein kinase superfamily protein   chr1:30311979-30314238 FORWARD LENGTH=427                                                                                                                                                                                                                                      | 420 | 427  | 0         | 101.7 | 87.9 | 92.6 |
| Rsa1.0_00096.1.g4802.t1 | gb EOA35169.1  hypothetical protein CARUB_v10020315mg [Capsella rubella]                                                                                                                                                                                                                                                                                                                                                                                                                                                                                                                                                                                                                                                     | 392 | 435  | 1.00E-133 | 111.0 | 72.4 | 80.6 | hypothetical protein CARUB_v10020315mg          | gbpln | Capsella rubella     | AT1G80620.1   Symbols:   S15/NS1, RNA-binding protein   chr1:30305404-30307182 FORWARD LENGTH=414                                                                                                                                                                                                                                            | 392 | 414  | 1.00E-134 | 105.6 | 69.9 | 79.6 |
| Rsa1.0_00096.1.g4803.t1 | ref XP_002892884.1  hypothetical protein ARALYDRAFT_312568 [Arabidopsis lyrata subsp. lyrata]   g 297338726 gb EFH69143.1  hypothetical protein ARALYDRAFT_312568 [Arabidopsis lyrata subsp. lyrata]                                                                                                                                                                                                                                                                                                                                                                                                                                                                                                                         | 316 | 308  | 4.00E-36  | 97.5  | 42.7 | 55.7 | hypothetical protein ARALYDRAFT_312568          | gbpln | Arabidopsis lyrata   | AT1G80610.1   Symbols:   unknown protein; BEST Arabidopsis thaliana protein match is: unknown protein (TAIR:AT1G5800.1); Has 73 Blast hits to 69 proteins in 15 species: Archae - 0; Bacteria - 0; Metazoa - 2; Fungi - 2; Plants - 55; Viruses - 0; Other Eukaryotes - 14 (source: NCBI BLINK).   chr1:30301204-30303960 REVERSE LENGTH=211 | 316 | 211  | 4.00E-32  | 66.8  | 25.3 | 27.5 |

|                         |                                                                                                                                                                                                                                                                                                                                                                                                                                                                                                                                                                                                                                                                                                                                                                                                                                                                                                                                                                                                                                                                                                                                                                                                                                                                                                                                                                                                                                                                                                                                                                                                                                                                                                                                                                                                                                                                                                                                                                      |      |      |           |       |      |      |                                                     |       |                      |                                                                                                                                               |      |     |           |       |      |      |
|-------------------------|----------------------------------------------------------------------------------------------------------------------------------------------------------------------------------------------------------------------------------------------------------------------------------------------------------------------------------------------------------------------------------------------------------------------------------------------------------------------------------------------------------------------------------------------------------------------------------------------------------------------------------------------------------------------------------------------------------------------------------------------------------------------------------------------------------------------------------------------------------------------------------------------------------------------------------------------------------------------------------------------------------------------------------------------------------------------------------------------------------------------------------------------------------------------------------------------------------------------------------------------------------------------------------------------------------------------------------------------------------------------------------------------------------------------------------------------------------------------------------------------------------------------------------------------------------------------------------------------------------------------------------------------------------------------------------------------------------------------------------------------------------------------------------------------------------------------------------------------------------------------------------------------------------------------------------------------------------------------|------|------|-----------|-------|------|------|-----------------------------------------------------|-------|----------------------|-----------------------------------------------------------------------------------------------------------------------------------------------|------|-----|-----------|-------|------|------|
| Rsa1.0_00096.1.g4804.t1 | ref[NP_178175.1] acetylornithine aminotransferase [Arabidopsis thaliana] gi 75312291 sp G9M8M7.1 ARGD_ARAT H RecName: Full=Acetylornithine aminotransferase, chloroplastic/mitochondrial; Short=ACOAT; AltName: Full=Acetylornithine transaminase; Short=AOTA; AltName: Full=Protein HOPW1-1-INTERACTING 1; Flags: Precursor gi 6730727 gb AAF27117.1 AC018849.5 putative acetylornithine transaminase; 18117-19955 [Arabidopsis thaliana] gi 15451028 gb AAK96785.1  putative acetylornithine transaminase [Arabidopsis thaliana] gi 27311957 gb AAO00944.1  putative acetylornithine transaminase [Arabidopsis thaliana] gi 158939876 gb ABW84224.1  putative mitochondrial acetylornithine transaminase [Arabidopsis thaliana] gi 332198305 gb AEE36426.1  acetylornithine aminotransferase [Arabidopsis thaliana] ref[NP_176829.1] putative WRKY transcription factor 64 [Arabidopsis thaliana] gi 29839608 sp G9C557.1 WRK64_ARAT H RecName: Full=Probable WRKY transcription factor 64; AltName: Full=WRKY DNA-binding protein 64 gi 12322262 gb AAG51157.1 AC074025.7 hypothetical protein [Arabidopsis thaliana] gi 12322288 gb AAG51170.1 AC079285.3 hypothetical protein [Arabidopsis thaliana] gi 18252119 gb AAL61860.1  WRKY transcription factor 64 [Arabidopsis thaliana] gi 332196406 gb AEE34527.1  putative WRKY transcription factor 64 [Arabidopsis thaliana] ref[NP_001117559.1] putative WRKY transcription factor 67 [Arabidopsis thaliana] gi 12322264 gb AAG51159.1 AC074025.9 wrky-type DNA binding protein, putative [Arabidopsis thaliana] gi 225898054 dbj BAH30359.1  hypothetical protein [Arabidopsis thaliana] gi 332196404 gb AEE34525.1  putative WRKY transcription factor 67 [Arabidopsis thaliana] ref[XP_002887821.1] ethylene-responsive element-binding family protein [Arabidopsis lyrata subsp. lyrata] gi 297333662 gb EFH64080.1  ethylene-responsive element-binding family protein [Arabidopsis lyrata subsp. lyrata] | 451  | 457  | 0         | 101.3 | 91.8 | 95.6 | acetylornithine aminotransferase                    | gbpln | Arabidopsis thaliana | AT1G80600.1   Symbols: WIN1   HOPW1-1-interacting 1   chr1:30298675-30300513 REVERSE LENGTH=457                                               | 451  | 457 | 0         | 101.3 | 91.8 | 95.6 |
| Rsa1.0_00096.1.g4805.t1 | gi 12322262 gb AAG51157.1 AC074025.7 hypothetical protein [Arabidopsis thaliana] gi 12322288 gb AAG51170.1 AC079285.3 hypothetical protein [Arabidopsis thaliana] gi 18252119 gb AAL61860.1  WRKY transcription factor 64 [Arabidopsis thaliana] gi 332196406 gb AEE34527.1  putative WRKY transcription factor 64 [Arabidopsis thaliana] ref[NP_001117559.1] putative WRKY transcription factor 67 [Arabidopsis thaliana] gi 12322264 gb AAG51159.1 AC074025.9 wrky-type DNA binding protein, putative [Arabidopsis thaliana] gi 225898054 dbj BAH30359.1  hypothetical protein [Arabidopsis thaliana] gi 332196404 gb AEE34525.1  putative WRKY transcription factor 67 [Arabidopsis thaliana]                                                                                                                                                                                                                                                                                                                                                                                                                                                                                                                                                                                                                                                                                                                                                                                                                                                                                                                                                                                                                                                                                                                                                                                                                                                                     | 262  | 249  | 1.00E-64  | 95.0  | 52.7 | 65.6 | putative WRKY transcription factor 64               | gbpln | Arabidopsis thaliana | AT1G66560.1   Symbols: WRKY64, ATWRKY64   WRKY DNA-binding protein 64   chr1:24833579-24834631 FORWARD LENGTH=249                             | 262  | 249 | 3.00E-67  | 95.0  | 52.7 | 65.6 |
| Rsa1.0_00096.1.g4806.t1 | gi 12322264 gb AAG51159.1 AC074025.9 wrky-type DNA binding protein, putative [Arabidopsis thaliana] gi 225898054 dbj BAH30359.1  hypothetical protein [Arabidopsis thaliana] gi 332196404 gb AEE34525.1  putative WRKY transcription factor 67 [Arabidopsis thaliana] ref[XP_002887821.1] ethylene-responsive element-binding family protein [Arabidopsis lyrata subsp. lyrata] gi 297333662 gb EFH64080.1  ethylene-responsive element-binding family protein [Arabidopsis lyrata subsp. lyrata]                                                                                                                                                                                                                                                                                                                                                                                                                                                                                                                                                                                                                                                                                                                                                                                                                                                                                                                                                                                                                                                                                                                                                                                                                                                                                                                                                                                                                                                                    | 258  | 249  | 2.00E-60  | 96.5  | 48.8 | 64.0 | putative WRKY transcription factor 67               | gbpln | Arabidopsis thaliana | AT1G66550.2   Symbols: WRKY67, ATWRKY67   WRKY DNA-binding protein 67   chr1:24828537-24829589 FORWARD LENGTH=249                             | 258  | 249 | 5.00E-63  | 96.5  | 48.8 | 64.0 |
| Rsa1.0_00096.1.g4807.t1 | ref[XP_002887821.1] ethylene-responsive element-binding family protein [Arabidopsis lyrata subsp. lyrata] gi 297333662 gb EFH64080.1  ethylene-responsive element-binding family protein [Arabidopsis lyrata subsp. lyrata]                                                                                                                                                                                                                                                                                                                                                                                                                                                                                                                                                                                                                                                                                                                                                                                                                                                                                                                                                                                                                                                                                                                                                                                                                                                                                                                                                                                                                                                                                                                                                                                                                                                                                                                                          | 260  | 258  | 2.00E-72  | 99.2  | 67.3 | 71.2 | ethylene-responsive element-binding family protein  | gbpln | Arabidopsis lyrata   | AT1G80580.1   Symbols:   Integrase-type DNA-binding superfamily protein   chr1:30293558-30294328 FORWARD LENGTH=256                           | 260  | 256 | 8.00E-64  | 98.5  | 65.0 | 72.3 |
| Rsa1.0_00096.1.g4808.t1 | gb AAC33226.1  putative non-LTR retroelement reverse transcriptase [Arabidopsis thaliana]                                                                                                                                                                                                                                                                                                                                                                                                                                                                                                                                                                                                                                                                                                                                                                                                                                                                                                                                                                                                                                                                                                                                                                                                                                                                                                                                                                                                                                                                                                                                                                                                                                                                                                                                                                                                                                                                            | 1435 | 1529 | 0         | 106.6 | 40.8 | 58.0 | putative non-LTR retroelement reverse transcriptase | gbpln | Arabidopsis thaliana | AT3G24255.1   Symbols:   RNA-directed DNA polymerase (reverse transcriptase)-related family protein   chr3:8789471-8793208 FORWARD LENGTH=746 | 1435 | 746 | 5.00E-93  | 52.0  | 12.8 | 17.4 |
| Rsa1.0_00096.1.g4809.t1 | ref[NP_001077854.1] nucleotide-diphospho-sugar transferase [Arabidopsis thaliana] gi 332198263 gb AEE36384.1  nucleotide-diphospho-sugar transferase [Arabidopsis thaliana] ref[XP_002889297.1] predicted protein [Arabidopsis lyrata subsp. lyrata] gi 297335138 gb EFH65556.1  predicted protein [Arabidopsis lyrata subsp. lyrata]                                                                                                                                                                                                                                                                                                                                                                                                                                                                                                                                                                                                                                                                                                                                                                                                                                                                                                                                                                                                                                                                                                                                                                                                                                                                                                                                                                                                                                                                                                                                                                                                                                | 344  | 337  | 1.00E-149 | 98.0  | 82.3 | 88.4 | nucleotide-diphospho-sugar transferase              | gbpln | Arabidopsis thaliana | AT1G80290.2   Symbols:   Nucleotide-diphospho-sugar transferases superfamily protein   chr1:30188420-30189574 FORWARD LENGTH=337              | 344  | 337 | 1.00E-152 | 98.0  | 82.3 | 88.4 |
| Rsa1.0_00096.1.g4810.t1 | ref[XP_002889297.1] predicted protein [Arabidopsis lyrata subsp. lyrata] gi 297335138 gb EFH65556.1  predicted protein [Arabidopsis lyrata subsp. lyrata]                                                                                                                                                                                                                                                                                                                                                                                                                                                                                                                                                                                                                                                                                                                                                                                                                                                                                                                                                                                                                                                                                                                                                                                                                                                                                                                                                                                                                                                                                                                                                                                                                                                                                                                                                                                                            | 320  | 320  | 1.00E-171 | 100.0 | 87.8 | 93.8 | predicted protein                                   | gbpln | Arabidopsis lyrata   | AT1G80320.1   Symbols:   2-oxoglutarate (2OG) and Fe(II)-dependent oxygenase superfamily protein   chr1:30196782-30197896 FORWARD LENGTH=320  | 320  | 320 | 1.00E-170 | 100.0 | 86.6 | 92.5 |
| Rsa1.0_00096.1.g4811.t1 | ref[XP_002887836.1] gibberellin 3-oxidase 4 [Arabidopsis lyrata subsp. lyrata] gi 297333677 gb EFH64095.1  gibberellin 3-oxidase 4 [Arabidopsis lyrata subsp. lyrata]                                                                                                                                                                                                                                                                                                                                                                                                                                                                                                                                                                                                                                                                                                                                                                                                                                                                                                                                                                                                                                                                                                                                                                                                                                                                                                                                                                                                                                                                                                                                                                                                                                                                                                                                                                                                | 348  | 355  | 1.00E-170 | 102.0 | 81.9 | 91.4 | gibberellin 3-oxidase 4                             | gbpln | Arabidopsis lyrata   | AT1G80330.1   Symbols: ATGA30X4, GA30X4   gibberellin 3-oxidase 4   chr1:30198061-30199537 REVERSE LENGTH=355                                 | 348  | 355 | 1.00E-170 | 102.0 | 81.9 | 89.9 |

|                         |                                                                                                                                                                                                                                                                                                                                                                                                          |     |      |           |       |      |      |                                                         |       |                      |                                                                                                                                                                                                                                                                                                                                                 |     |     |           |       |      |      |
|-------------------------|----------------------------------------------------------------------------------------------------------------------------------------------------------------------------------------------------------------------------------------------------------------------------------------------------------------------------------------------------------------------------------------------------------|-----|------|-----------|-------|------|------|---------------------------------------------------------|-------|----------------------|-------------------------------------------------------------------------------------------------------------------------------------------------------------------------------------------------------------------------------------------------------------------------------------------------------------------------------------------------|-----|-----|-----------|-------|------|------|
| Rsa1.0_00096.1.g4812.t1 | ref[XP_002887835.1] predicted protein [Arabidopsis lyrata subsp. lyrata] gi 297333676 gb EFH64094.1  predicted protein [Arabidopsis lyrata subsp. lyrata]                                                                                                                                                                                                                                                | 359 | 355  | 0         | 98.9  | 86.4 | 92.2 | predicted protein                                       | gbpln | Arabidopsis lyrata   | AT1G80340.1   Symbols: GA4H, ATGA3OX2, GA3OX2   gibberellin 3-oxidase 2   chr1:30200695-30202163 REVERSE LENGTH=347                                                                                                                                                                                                                             | 359 | 347 | 1.00E-175 | 96.7  | 85.2 | 90.0 |
| Rsa1.0_00096.1.g4813.t1 | ref[XP_002887834.1] katanin [Arabidopsis lyrata subsp. lyrata] gi 297333675 gb EFH64093.1  katanin [Arabidopsis lyrata subsp. lyrata]                                                                                                                                                                                                                                                                    | 529 | 522  | 0         | 98.7  | 91.5 | 95.3 | katanin                                                 | gbpln | Arabidopsis lyrata   | AT1G80350.1   Symbols: ERH3, AAA1, FRA2, LUE1, ATKTN1, KTN1, FRC2, BOT1, FTR   P-loop containing nucleoside triphosphate hydrolases superfamily protein   chr1:30205499-30208050 REVERSE LENGTH=523                                                                                                                                             | 529 | 523 | 0         | 98.9  | 90.9 | 94.7 |
| Rsa1.0_00096.1.g4814.t1 | gb EOA33402.1  hypothetical protein CARUB_v10020424mg [Capsella rubella]                                                                                                                                                                                                                                                                                                                                 | 383 | 394  | 0         | 102.9 | 88.8 | 94.3 | hypothetical protein CARUB_v10020424mg                  | gbpln | Capsella rubella     | AT1G80360.1   Symbols:   Pyridoxal phosphate (PLP)-dependent transferases superfamily protein   chr1:30208736-30210643 REVERSE LENGTH=394                                                                                                                                                                                                       | 383 | 394 | 0         | 102.9 | 86.4 | 93.0 |
| Rsa1.0_00096.1.g4815.t1 | gb EOA35146.1  hypothetical protein CARUB_v10020281mg [Capsella rubella]                                                                                                                                                                                                                                                                                                                                 | 443 | 454  | 0         | 102.5 | 78.1 | 86.2 | hypothetical protein CARUB_v10020281mg                  | gbpln | Capsella rubella     | AT1G80380.2   Symbols:   P-loop containing nucleoside triphosphate hydrolases superfamily protein   chr1:30217332-30219784 FORWARD LENGTH=456                                                                                                                                                                                                   | 443 | 456 | 0         | 102.9 | 78.1 | 86.0 |
| Rsa1.0_00096.1.g4816.t1 | ref[XP_002889294.1] zinc finger family protein [Arabidopsis lyrata subsp. lyrata] gi 297335135 gb EFH65553.1  zinc finger family protein [Arabidopsis lyrata subsp. lyrata]                                                                                                                                                                                                                              | 398 | 401  | 1.00E-172 | 100.8 | 79.1 | 85.7 | zinc finger family protein                              | gbpln | Arabidopsis lyrata   | AT1G80400.1   Symbols:   RING/U-box superfamily protein   chr1:30225864-30227360 FORWARD LENGTH=407                                                                                                                                                                                                                                             | 398 | 407 | 1.00E-174 | 102.3 | 78.9 | 83.9 |
| Rsa1.0_00096.1.g4817.t5 | gb AAM08130.1 AF324348.1 putative DNA repair protein XRCC1 [Arabidopsis thaliana] gi 1181954 emb CAC16136.1  putative DNA repair protein XRCC1 [Arabidopsis thaliana]                                                                                                                                                                                                                                    | 355 | 353  | 1.00E-141 | 99.4  | 75.8 | 82.3 | putative DNA repair protein XRCC1                       | gbpln | Arabidopsis thaliana | AT1G80420.3   Symbols: ATXRCC1   BRCT domain-containing DNA repair protein   chr1:30235444-30237163 REVERSE LENGTH=353                                                                                                                                                                                                                          | 355 | 353 | 1.00E-143 | 99.4  | 75.5 | 82.0 |
| Rsa1.0_00096.1.g4818.t1 | ref[XP_002887829.1] VQ motif-containing protein [Arabidopsis lyrata subsp. lyrata] gi 297333670 gb EFH64088.1  VQ motif-containing protein [Arabidopsis lyrata subsp. lyrata]                                                                                                                                                                                                                            | 170 | 180  | 1.00E-61  | 105.9 | 77.6 | 85.3 | VQ motif-containing protein                             | gbpln | Arabidopsis lyrata   | AT1G80450.1   Symbols:   VQ motif-containing protein   chr1:30244155-30244688 REVERSE LENGTH=177                                                                                                                                                                                                                                                | 170 | 177 | 3.00E-63  | 104.1 | 74.7 | 81.2 |
| Rsa1.0_00096.1.g4819.t2 | gb ABK32113.1  At1g80460 [Arabidopsis thaliana]                                                                                                                                                                                                                                                                                                                                                          | 163 | 522  | 3.00E-29  | 320.2 | 37.4 | 40.5 | At1g80460                                               | gbpln | Arabidopsis thaliana | AT1G80460.1   Symbols: NHO1, GLI1   Actin-like ATPase superfamily protein   chr1:30246960-30249055 REVERSE LENGTH=522                                                                                                                                                                                                                           | 163 | 522 | 6.00E-26  | 320.2 | 38.0 | 41.1 |
| Rsa1.0_00096.1.g4820.t1 | ref[NP_178163.1] plastid transcriptionally active 17 protein [Arabidopsis thaliana] gi 6730739 gb AAF27129.1 AC018849_17 hypothetical protein; 58060-60358 [Arabidopsis thaliana] gi 48958493 gb AAT47799.1  At1g80480 [Arabidopsis thaliana] gi 51536562 gb AAU05519.1  At1g80480 [Arabidopsis thaliana] gi 332198289 gb AEE36410.1  plastid transcriptionally active 17 protein [Arabidopsis thaliana] | 812 | 444  | 0         | 54.7  | 46.4 | 49.1 | plastid transcriptionally active 17 protein             | gbpln | Arabidopsis thaliana | AT1G80480.1   Symbols: PTAC17   plastid transcriptionally active 17 protein   chr1:30258272-30260570 REVERSE LENGTH=444                                                                                                                                                                                                                         | 812 | 444 | 0         | 54.7  | 46.4 | 49.1 |
| Rsa1.0_00096.1.g4821.t1 | ref[NP_178169.4] uncharacterized protein [Arabidopsis thaliana] gi 332198296 gb AEE36417.1  uncharacterized protein AT1G80540 [Arabidopsis thaliana]                                                                                                                                                                                                                                                     | 536 | 538  | 0         | 100.4 | 89.6 | 94.0 | uncharacterized protein                                 | gbpln | Arabidopsis thaliana | AT1G80540.1   Symbols:   unknown protein; BEST Arabidopsis thaliana protein match is: unknown protein (TAIR:AT2G12400.1); Has 175 Blast hits to 171 proteins in 20 species: Archae - 0; Bacteria - 0; Metazoa - 2; Fungi - 0; Plants - 171; Viruses - 0; Other Eukaryotes - 2 (source: NCBI BLINK).   chr1:30281638-30284258 REVERSE LENGTH=538 | 536 | 538 | 0         | 100.4 | 89.6 | 94.0 |
| Rsa1.0_00096.1.g4822.t1 | ref[XP_002889287.1] hypothetical protein ARALYDRAFT_895936 [Arabidopsis lyrata subsp. lyrata] gi 297335128 gb EFH65546.1  hypothetical protein ARALYDRAFT_895936 [Arabidopsis lyrata subsp. lyrata]                                                                                                                                                                                                      | 409 | 404  | 0         | 98.8  | 85.1 | 89.2 | hypothetical protein ARALYDRAFT_895936                  | gbpln | Arabidopsis lyrata   | AT1G80560.1   Symbols: ATIMD2, IMD2   isopropylmalate dehydrogenase 2   chr1:30287833-30290126 FORWARD LENGTH=405                                                                                                                                                                                                                               | 409 | 405 | 1.00E-148 | 99.0  | 61.9 | 77.5 |
| Rsa1.0_00096.1.g4823.t1 | ref[XP_002889287.1] hypothetical protein ARALYDRAFT_895936 [Arabidopsis lyrata subsp. lyrata] gi 297335128 gb EFH65546.1  hypothetical protein ARALYDRAFT_895936 [Arabidopsis lyrata subsp. lyrata]                                                                                                                                                                                                      | 415 | 404  | 1.00E-137 | 97.3  | 57.3 | 73.0 | hypothetical protein ARALYDRAFT_895936                  | gbpln | Arabidopsis lyrata   | AT1G80560.1   Symbols: ATIMD2, IMD2   isopropylmalate dehydrogenase 2   chr1:30287833-30290126 FORWARD LENGTH=405                                                                                                                                                                                                                               | 415 | 405 | 1.00E-138 | 97.6  | 56.9 | 74.0 |
| Rsa1.0_00096.1.g4824.t1 | dbj BAB09379.1  non-LTR retroelement reverse transcriptase-like protein [Arabidopsis thaliana]                                                                                                                                                                                                                                                                                                           | 411 | 1223 | 7.00E-11  | 297.6 | 9.2  | 13.1 | non-LTR retroelement reverse transcriptase-like protein | gbpln | Arabidopsis thaliana | AT3G24255.1   Symbols:   RNA-directed DNA polymerase (reverse transcriptase)-related family protein   chr3:8789471-8793208 FORWARD LENGTH=746                                                                                                                                                                                                   | 411 | 746 | 1.00E-11  | 181.5 | 10.2 | 14.1 |

|                         |                                                                                                                                                                                                                                                                                                                                                                                                                                                                                                                                                                                                                                                                                                                                                                |     |      |           |       |       |       |                                                                                                                                                                                                          |       |                      |                                                                                                                                                                                                                                                                                                                                                                                                                                                                       |     |     |           |       |       |       |
|-------------------------|----------------------------------------------------------------------------------------------------------------------------------------------------------------------------------------------------------------------------------------------------------------------------------------------------------------------------------------------------------------------------------------------------------------------------------------------------------------------------------------------------------------------------------------------------------------------------------------------------------------------------------------------------------------------------------------------------------------------------------------------------------------|-----|------|-----------|-------|-------|-------|----------------------------------------------------------------------------------------------------------------------------------------------------------------------------------------------------------|-------|----------------------|-----------------------------------------------------------------------------------------------------------------------------------------------------------------------------------------------------------------------------------------------------------------------------------------------------------------------------------------------------------------------------------------------------------------------------------------------------------------------|-----|-----|-----------|-------|-------|-------|
| Rsa1.0_00096.1.g4825.t1 | sp P29102.1 LEU3_BRANA RecName: Full=3-isopropylmalate dehydrogenase, chloroplatic; Short=3-IPM-DH; Short=IMDH; AltName: Full=beta-IPM dehydrogenase; Flags: Precursor gi 17827 emb CAA42596.1  3-isopropylmalate dehydrogenase [Brassica napus]                                                                                                                                                                                                                                                                                                                                                                                                                                                                                                               | 402 | 406  | 0         | 101.0 | 98.3  | 99.3  | RecName: Full=3-isopropylmalate dehydrogenase, chloroplatic; Short=3-IPM-DH; Short=IMDH; AltName: Full=beta-IPM dehydrogenase; Flags: Precursor gi 17827 emb CAA42596.1  3-isopropylmalate dehydrogenase | gbpln | Brassica napus       | AT1G80560.1   Symbols: ATIMD2, IMD2   isopropylmalate dehydrogenase 2   chr1:30287833-30290126 FORWARD LENGTH=405                                                                                                                                                                                                                                                                                                                                                     | 402 | 405 | 0         | 100.7 | 92.8  | 96.3  |
| Rsa1.0_00096.1.g4826.t2 | gb AAG51783.1 AC079679_3 reverse transcriptase, putative; 16838-20266 [Arabidopsis thaliana]                                                                                                                                                                                                                                                                                                                                                                                                                                                                                                                                                                                                                                                                   | 370 | 1142 | 5.00E-26  | 308.6 | 19.5  | 24.3  | reverse transcriptase, putative; 16838-20266                                                                                                                                                             | gbpln | Arabidopsis thaliana | AT2G22440.1   Symbols:   BEST Arabidopsis thaliana protein match is: Ribonuclease H-like superfamily protein (TAIR:AT4G29090.1); Has 208 Blast hits to 191 proteins in 10 species: Archae - 0; Bacteria - 0; Metazoa - 0; Fungi - 0; Plants - 208; Viruses - 0; Other Eukaryotes - 0 (source: NCBI BLink).   chr2:9528910-9529917 FORWARD LENGTH=256                                                                                                                  | 370 | 256 | 1.00E-18  | 69.2  | 17.8  | 28.6  |
| Rsa1.0_00097.1.g4827.t1 | gb EOA37184.1  hypothetical protein CARUB_v10010566mg [Capsella rubella]                                                                                                                                                                                                                                                                                                                                                                                                                                                                                                                                                                                                                                                                                       | 172 | 148  | 2.00E-51  | 86.0  | 66.3  | 72.7  | hypothetical protein CARUB_v10010566mg                                                                                                                                                                   | gbpln | Capsella rubella     | AT1G04555.1   Symbols:   unknown protein; FUNCTIONS IN: molecular_function unknown; INVOLVED IN: biological_process unknown; LOCATED IN: cellular_component unknown; BEST Arabidopsis thaliana protein match is: unknown protein (TAIR:AT4G33380.1); Has 84 Blast hits to 83 proteins in 15 species: Archae - 0; Bacteria - 0; Metazoa - 9; Fungi - 0; Plants - 75; Viruses - 0; Other Eukaryotes - 0 (source: NCBI BLink).   chr1:1242743-1243949 FORWARD LENGTH=152 | 172 | 152 | 2.00E-53  | 88.4  | 65.1  | 72.1  |
| Rsa1.0_00097.1.g4828.t9 | gb EOA40141.1  hypothetical protein CARUB_v10008852mg [Capsella rubella]                                                                                                                                                                                                                                                                                                                                                                                                                                                                                                                                                                                                                                                                                       | 828 | 522  | 1.00E-123 | 63.0  | 25.4  | 26.6  | hypothetical protein CARUB_v10008852mg                                                                                                                                                                   | gbpln | Capsella rubella     | AT1G04510.1   Symbols: MAC3A   MOS4-associated complex 3A   chr1:1226749-1230592 FORWARD LENGTH=523                                                                                                                                                                                                                                                                                                                                                                   | 828 | 523 | 1.00E-120 | 63.2  | 25.0  | 26.0  |
| Rsa1.0_00097.1.g4829.t1 | ref NP_171944.2  CCT motif-containing protein [Arabidopsis thaliana] gi 91805737 gb ABE65597.1  zinc finger CONSTANS-like protein [Arabidopsis thaliana] gi 225897874 dbj BAH30269.1  hypothetical protein [Arabidopsis thaliana] gi 332189584 gb AEE27705.1  CCT motif-containing protein [Arabidopsis thaliana]                                                                                                                                                                                                                                                                                                                                                                                                                                              | 360 | 386  | 1.00E-158 | 107.2 | 82.5  | 87.8  | CCT motif-containing protein                                                                                                                                                                             | gbpln | Arabidopsis thaliana | AT1G04500.1   Symbols:   CCT motif family protein   chr1:1221757-1224235 REVERSE LENGTH=386                                                                                                                                                                                                                                                                                                                                                                           | 360 | 386 | 1.00E-161 | 107.2 | 82.5  | 87.8  |
| Rsa1.0_00097.1.g4830.t1 | gb EOA31608.1  hypothetical protein CARUB_v10014805mg, partial [Capsella rubella]                                                                                                                                                                                                                                                                                                                                                                                                                                                                                                                                                                                                                                                                              | 140 | 161  | 8.00E-75  | 115.0 | 100.0 | 100.0 | hypothetical protein CARUB_v10014805mg, partial                                                                                                                                                          | gbpln | Capsella rubella     | AT3G04400.1   Symbols: emb2171   Ribosomal protein L14p/L23e family protein   chr3:1167339-1168308 FORWARD LENGTH=140                                                                                                                                                                                                                                                                                                                                                 | 140 | 140 | 8.00E-77  | 100.0 | 100.0 | 100.0 |
| Rsa1.0_00097.1.g4831.t1 | ref XP_002889506.1  hypothetical protein ARALYDRAFT_470423 [Arabidopsis lyrata subsp. lyrata] gi 297335348 gb EFH65765.1  hypothetical protein ARALYDRAFT_470423 [Arabidopsis lyrata subsp. lyrata] ref NP_563706.1  putative methyltransferase PMT8 [Arabidopsis thaliana] gi 186478123 ref NP_001117225.1  putative methyltransferase PMT8 [Arabidopsis thaliana] gi 75249499 sp Q940J9.1 PMT8_ARATH RecName: Full=Probable methyltransferase PMT8 gi 15450900 gb AAK96721.1  Unknown protein [Arabidopsis thaliana] gi 17978687 gb AAL47337.1  unknown protein [Arabidopsis thaliana] gi 332189575 gb AEE27696.1  putative methyltransferase PMT8 [Arabidopsis thaliana] gi 332189576 gb AEE27697.1  putative methyltransferase PMT8 [Arabidopsis thaliana] | 168 | 154  | 3.00E-28  | 91.7  | 47.6  | 57.7  | hypothetical protein ARALYDRAFT_470423                                                                                                                                                                   | gbpln | Arabidopsis lyrata   | AT1G04445.1   Symbols:   C2H2-like zinc finger protein   chr1:1207344-1207862 FORWARD LENGTH=172                                                                                                                                                                                                                                                                                                                                                                      | 168 | 172 | 5.00E-25  | 102.4 | 47.0  | 60.1  |
| Rsa1.0_00097.1.g4832.t1 | ref XP_002889506.1  hypothetical protein ARALYDRAFT_470423 [Arabidopsis lyrata subsp. lyrata] ref NP_563706.1  putative methyltransferase PMT8 [Arabidopsis thaliana] gi 186478123 ref NP_001117225.1  putative methyltransferase PMT8 [Arabidopsis thaliana] gi 75249499 sp Q940J9.1 PMT8_ARATH RecName: Full=Probable methyltransferase PMT8 gi 15450900 gb AAK96721.1  Unknown protein [Arabidopsis thaliana] gi 17978687 gb AAL47337.1  unknown protein [Arabidopsis thaliana] gi 332189575 gb AEE27696.1  putative methyltransferase PMT8 [Arabidopsis thaliana] gi 332189576 gb AEE27697.1  putative methyltransferase PMT8 [Arabidopsis thaliana]                                                                                                       | 621 | 623  | 0         | 100.3 | 91.8  | 96.9  | putative methyltransferase PMT8                                                                                                                                                                          | gbpln | Arabidopsis thaliana | AT1G04430.2   Symbols:   S-adenosyl-L-methionine-dependent methyltransferases superfamily protein   chr1:1198860-1201301 FORWARD LENGTH=623                                                                                                                                                                                                                                                                                                                           | 621 | 623 | 0         | 100.3 | 91.8  | 96.9  |
| Rsa1.0_00097.1.g4833.t1 | dbj BAJ34213.1  unnamed protein product [Theilungella halophila]                                                                                                                                                                                                                                                                                                                                                                                                                                                                                                                                                                                                                                                                                               | 332 | 332  | 0         | 100.0 | 98.2  | 99.7  | unnamed protein product                                                                                                                                                                                  | ----  | ----                 | AT1G04410.1   Symbols:   Lactate/malate dehydrogenase family protein   chr1:1189418-1191267 REVERSE LENGTH=332                                                                                                                                                                                                                                                                                                                                                        | 332 | 332 | 0         | 100.0 | 97.6  | 99.7  |



|                         |                                                                                                                                                                                                                                                                                                                                                                                                                                                                                                                       |      |      |           |       |      |       |                                                 |       |                      |                                                                                                                                             |      |      |           |       |      |      |
|-------------------------|-----------------------------------------------------------------------------------------------------------------------------------------------------------------------------------------------------------------------------------------------------------------------------------------------------------------------------------------------------------------------------------------------------------------------------------------------------------------------------------------------------------------------|------|------|-----------|-------|------|-------|-------------------------------------------------|-------|----------------------|---------------------------------------------------------------------------------------------------------------------------------------------|------|------|-----------|-------|------|------|
| Rsa1.0_00097.1.g4834.t7 | refXP_002892212.1   hypothetical protein ARALYDRAFT_470414 [Arabidopsis lyrata subsp. lyrata] gi 297338054 gb EFH68471.1                                                                                                                                                                                                                                                                                                                                                                                              | 194  | 346  | 2.00E-76  | 178.4 | 74.2 | 83.5  | hypothetical protein ARALYDRAFT_470414          | gbpln | Arabidopsis lyrata   | AT1G04380.1   Symbols:   2-oxoglutarate (2OG) and Fe(II)-dependent oxygenase superfamily protein   chr1:1177142-1178384 REVERSE LENGTH=345  | 194  | 345  | 2.00E-76  | 177.8 | 72.7 | 82.5 |
| Rsa1.0_00097.1.g4835.t1 | hypothetical protein ARALYDRAFT_470414 [Arabidopsis lyrata subsp. lyrata] refXP_00289500.1   hypothetical protein ARALYDRAFT_470412 [Arabidopsis lyrata subsp. lyrata] gi 297335342 gb EFH65759.1                                                                                                                                                                                                                                                                                                                     | 350  | 361  | 1.00E-166 | 103.1 | 82.6 | 89.1  | hypothetical protein ARALYDRAFT_470412          | gbpln | Arabidopsis lyrata   | AT1G04350.1   Symbols:   2-oxoglutarate (2OG) and Fe(II)-dependent oxygenase superfamily protein   chr1:1165296-1166538 FORWARD LENGTH=360  | 350  | 360  | 1.00E-164 | 102.9 | 80.0 | 87.7 |
| Rsa1.0_00097.1.g4836.t1 | hypothetical protein ARALYDRAFT_470412 [Arabidopsis lyrata subsp. lyrata] gb AAO11668.1   hypothetical protein [Arabidopsis thaliana]                                                                                                                                                                                                                                                                                                                                                                                 | 95   | 221  | 6.00E-13  | 232.6 | 37.9 | 58.9  | hypothetical protein                            | gbpln | Arabidopsis thaliana | AT2G04420.1   Symbols:   Polynucleotidyl transferase, ribonuclease H-like superfamily protein   chr2:1535561-1536226 FORWARD LENGTH=221     | 95   | 221  | 2.00E-15  | 232.6 | 37.9 | 58.9 |
| Rsa1.0_00097.1.g4837.t1 | ref NP_171929.1   HR-like lesion-inducing protein-like protein [Arabidopsis thaliana] gi 2341039 gb AAB70443.1   Similar to Nicotiana lesion-inducing ORF (gb U66269) [Arabidopsis thaliana] gi 17979509 gb AAL50090.1   At1g04340/F19P19_23 [Arabidopsis thaliana] gi 20147297 gb AAM10362.1   At1g04340/F19P19_23 [Arabidopsis thaliana] gi 332189565 gb AEE27686.1   HR-like lesion-inducing protein-like protein [Arabidopsis thaliana]                                                                           | 168  | 159  | 8.00E-61  | 94.6  | 70.8 | 81.0  | HR-like lesion-inducing protein-like protein    | gbpln | Arabidopsis thaliana | AT1G04340.1   Symbols:   HR-like lesion-inducing protein-related   chr1:1163345-1164737 REVERSE LENGTH=159                                  | 168  | 159  | 3.00E-63  | 94.6  | 70.8 | 81.0 |
| Rsa1.0_00097.1.g4838.t1 | ref NP_171927.1   ethylene response sensor 2 [Arabidopsis thaliana] gi 75101250 sp P93825.2 ERS2_ARATH RecName: Full=Ethylene response sensor 2; Short=AtERS2; AltName: Full=Protein ERS2 gi 2341041 gb AAB70445.1   Arabidopsis thaliana putative ethylene receptor (ERS2) gene (gb AF047976). EST gb W43451 comes from this gene [Arabidopsis thaliana] gi 3687656 gb AAC62209.1   putative ethylene receptor [Arabidopsis thaliana] gi 332189563 gb AEE27684.1   ethylene response sensor 2 [Arabidopsis thaliana] | 626  | 645  | 0         | 103.0 | 79.2 | 86.3  | ethylene response sensor 2                      | gbpln | Arabidopsis thaliana | AT1G04310.1   Symbols: ERS2   ethylene response sensor 2   chr1:1155116-1157125 REVERSE LENGTH=645                                          | 626  | 645  | 0         | 103.0 | 79.2 | 86.3 |
| Rsa1.0_00097.1.g4839.t1 | refXP_002892207.1   hypothetical protein ARALYDRAFT_470409 [Arabidopsis lyrata subsp. lyrata] gi 297338049 gb EFH68466.1                                                                                                                                                                                                                                                                                                                                                                                              | 1056 | 1071 | 0         | 101.4 | 79.7 | 86.6  | hypothetical protein ARALYDRAFT_470409          | gbpln | Arabidopsis lyrata   | AT1G04300.1   Symbols:   TRAF-like superfamily protein   chr1:1148818-1153895 REVERSE LENGTH=1074                                           | 1056 | 1074 | 0         | 101.7 | 79.0 | 86.6 |
| Rsa1.0_00097.1.g4840.t1 | hypothetical protein ARALYDRAFT_470409 [Arabidopsis lyrata subsp. lyrata] refXP_002892206.1   thioesterase family protein [Arabidopsis lyrata subsp. lyrata] gi 297338048 gb EFH68465.1   thioesterase family protein [Arabidopsis lyrata subsp. lyrata]                                                                                                                                                                                                                                                              | 160  | 155  | 2.00E-59  | 96.9  | 73.8 | 81.9  | thioesterase family protein                     | gbpln | Arabidopsis lyrata   | AT1G04290.1   Symbols:   Thioesterase superfamily protein   chr1:1147721-1148352 REVERSE LENGTH=155                                         | 160  | 155  | 2.00E-61  | 96.9  | 73.1 | 81.3 |
| Rsa1.0_00097.1.g4841.t1 | gb EOA39428.1   hypothetical protein CARUB_v10012550mg [Capsella rubella]                                                                                                                                                                                                                                                                                                                                                                                                                                             | 286  | 538  | 1.00E-111 | 188.1 | 69.9 | 76.6  | hypothetical protein CARUB_v10012550mg          | gbpln | Capsella rubella     | AT1G04280.1   Symbols:   P-loop containing nucleoside triphosphate hydrolases superfamily protein   chr1:1143643-1146541 REVERSE LENGTH=534 | 286  | 534  | 1.00E-112 | 186.7 | 68.9 | 76.9 |
| Rsa1.0_00097.1.g4842.t1 | gb EOA36082.1   hypothetical protein CARUB_v10010394mg, partial [Capsella rubella]                                                                                                                                                                                                                                                                                                                                                                                                                                    | 152  | 186  | 1.00E-81  | 122.4 | 98.7 | 100.0 | hypothetical protein CARUB_v10010394mg, partial | gbpln | Capsella rubella     | AT1G04270.1   Symbols: RPS15   cytosolic ribosomal protein S15   chr1:1141852-1142960 REVERSE LENGTH=152                                    | 152  | 152  | 8.00E-84  | 100.0 | 99.3 | 99.3 |
| Rsa1.0_00097.1.g4843.t1 | gb EOA36534.1   hypothetical protein CARUB_v10011583mg [Capsella rubella]                                                                                                                                                                                                                                                                                                                                                                                                                                             | 176  | 182  | 1.00E-80  | 103.4 | 86.9 | 93.8  | hypothetical protein CARUB_v10011583mg          | gbpln | Capsella rubella     | AT1G04260.1   Symbols: MPI7, MPIP7, PRA1.D   CAMV movement protein interacting protein 7   chr1:1140749-1141297 REVERSE LENGTH=182          | 176  | 182  | 1.00E-82  | 103.4 | 85.2 | 94.3 |

|                         |                                                                                                                                                                                                                                                                                                                                                                                                                                                                                                                                                                                                                                                                                                                                                                                                                                                                                                          |     |      |           |       |      |      |                                                  |       |                      |                                                                                                                                        |     |     |           |       |      |      |
|-------------------------|----------------------------------------------------------------------------------------------------------------------------------------------------------------------------------------------------------------------------------------------------------------------------------------------------------------------------------------------------------------------------------------------------------------------------------------------------------------------------------------------------------------------------------------------------------------------------------------------------------------------------------------------------------------------------------------------------------------------------------------------------------------------------------------------------------------------------------------------------------------------------------------------------------|-----|------|-----------|-------|------|------|--------------------------------------------------|-------|----------------------|----------------------------------------------------------------------------------------------------------------------------------------|-----|-----|-----------|-------|------|------|
| Rsa1.0_00097.1.g4844.t1 | ref NP_171921.1  auxin-responsive protein IAA17 [Arabidopsis thaliana] gi 11131276 sp P93830.2 IAA17_ARATH RecName: Full=Auxin-responsive protein IAA17; AltName: Full=Auxin response 3; AltName: Full=Indoleacetic acid-induced protein 17 gi 12484197 gb AAG53997.1 AF336916.1 auxin-induced protein, IAA17/AXR3-1 [Arabidopsis thaliana] gi 2618723 gb AAB84354.1  IAA17 [Arabidopsis thaliana] gi 2921756 gb AAC39439.1  IAA17/AXR3 protein [Arabidopsis thaliana] gi 4389514 gb AAB70451.2  Identical to Arabidopsis gb AF040632 and gb U49073 IAA17/AXR3 gene. ESTs gb H36782 and gb F14074 come from this gene [Arabidopsis thaliana] gi 17979185 gb AAL49831.1  auxin-induced protein IAA17/AXR3-1 [Arabidopsis thaliana] gi 21436239 gb AAM51258.1  auxin-induced protein IAA17/AXR3-1 [Arabidopsis thaliana] gi 332189553 gb AEE27674.1  auxin-responsive protein IAA17 [Arabidopsis thaliana] | 229 | 229  | 1.00E-118 | 100.0 | 90.0 | 93.4 | auxin-responsive protein IAA17                   | gbpln | Arabidopsis thaliana | AT1G04250.1   Symbols: AXR3, IAA17   AUX/IAA transcriptional regulator family protein   chr1:1136382-1138340 FORWARD LENGTH=229        | 229 | 229 | 1.00E-120 | 100.0 | 90.0 | 93.4 |
| Rsa1.0_00097.1.g4845.t1 | ref NP_171918.1  3-ketoacyl-CoA synthase 17 [Arabidopsis thaliana] gi 114149942 sp Q5XEP9.2 KCS17_ARATH RecName: Full=3-ketoacyl-CoA synthase 17; Short=KCS-17; AltName: Full=Very long-chain fatty acid condensing enzyme 17; Short=VLCFA condensing enzyme 17 gi 3142289 gb AAC16740.1  Strong similarity to beta-keto-Coa synthase gb U37088 from Simmondsia chinensis [Arabidopsis thaliana] gi 332189550 gb AEE27671.1  3-ketoacyl-CoA synthase 17 [Arabidopsis thaliana]                                                                                                                                                                                                                                                                                                                                                                                                                           | 499 | 528  | 0         | 105.8 | 85.6 | 90.8 | 3-ketoacyl-CoA synthase 17                       | gbpln | Arabidopsis thaliana | AT1G04220.1   Symbols: KCS2   3-ketoacyl-CoA synthase 2   chr1:1119853-1122483 REVERSE LENGTH=528                                      | 499 | 528 | 0         | 105.8 | 85.6 | 90.8 |
| Rsa1.0_00097.1.g4846.t1 | ref NP_171915.1  tetratricopeptide repeat-containing protein [Arabidopsis thaliana] gi 19423984 gb AAL87273.1  unknown protein [Arabidopsis thaliana] gi 21281239 gb AAM45091.1  unknown protein [Arabidopsis thaliana] gi 332189547 gb AEE27668.1  tetratricopeptide repeat-containing protein [Arabidopsis thaliana]                                                                                                                                                                                                                                                                                                                                                                                                                                                                                                                                                                                   | 325 | 328  | 1.00E-168 | 100.9 | 90.2 | 93.8 | tetratricopeptide repeat-containing protein      | gbpln | Arabidopsis thaliana | AT1G04190.1   Symbols: TPR3   Tetratricopeptide repeat (TPR)-like superfamily protein   chr1:1106617-1108557 REVERSE LENGTH=328        | 325 | 328 | 1.00E-171 | 100.9 | 90.2 | 93.8 |
| Rsa1.0_00097.1.g4847.t1 | gb EOA40138.1  hypothetical protein CARUB_v10008849mg, partial [Capsella rubella]                                                                                                                                                                                                                                                                                                                                                                                                                                                                                                                                                                                                                                                                                                                                                                                                                        | 465 | 523  | 0         | 112.5 | 95.9 | 98.3 | hypothetical protein CARUB_v10008849mg, partial  | gbpln | Capsella rubella     | AT1G04170.1   Symbols: EIF2 GAMMA   eukaryotic translation initiation factor 2 gamma subunit   chr1:1097423-1099702 FORWARD LENGTH=465 | 465 | 465 | 0         | 100.0 | 95.9 | 98.1 |
| Rsa1.0_00097.1.g4848.t1 | gb EOA37524.1  hypothetical protein CARUB_v10011722mg [Capsella rubella]                                                                                                                                                                                                                                                                                                                                                                                                                                                                                                                                                                                                                                                                                                                                                                                                                                 | 826 | 790  | 0         | 95.6  | 82.3 | 96.9 | hypothetical protein CARUB_v10011722mg           | gbpln | Capsella rubella     | AT1G04140.2   Symbols:   Transducin family protein / WD-40 repeat family protein   chr1:1075992-1080321 REVERSE LENGTH=793             | 826 | 793 | 0         | 96.0  | 79.9 | 85.6 |
| Rsa1.0_00097.1.g4849.t1 | ref XP_002889490.1  hypothetical protein ARALYDRAFT_333729 [Arabidopsis lyrata subsp. lyrata] gi 297335332 gb EFH65749.1  hypothetical protein ARALYDRAFT_333729 [Arabidopsis lyrata subsp. lyrata]                                                                                                                                                                                                                                                                                                                                                                                                                                                                                                                                                                                                                                                                                                      | 753 | 1328 | 0         | 176.4 | 79.8 | 86.6 | hypothetical protein ARALYDRAFT_333729           | gbpln | Arabidopsis lyrata   | AT1G04060.1   Symbols: PRP39   Tetratricopeptide repeat (TPR)-like superfamily protein   chr1:1051803-1056550 FORWARD LENGTH=768       | 753 | 768 | 0         | 102.0 | 82.5 | 89.4 |
| Rsa1.0_00097.1.g4850.t1 | ref NP_563698.1  HAD superfamily, subfamily IIIB acid phosphatase [Arabidopsis thaliana] gi 13926198 gb AAK49578.1 AF370572.1 Similar to acid phosphatase [Arabidopsis thaliana] gi 16226693 gb AAL16234.1 AF428465.1 At1g04040/F21M11.2 [Arabidopsis thaliana] gi 4204285 gb AAD10666.1 Similar to acid phosphatase [Arabidopsis thaliana] gi 332189528 gb AEE27649.1  HAD superfamily, subfamily IIIB acid phosphatase [Arabidopsis thaliana]                                                                                                                                                                                                                                                                                                                                                                                                                                                          | 271 | 271  | 1.00E-138 | 100.0 | 84.1 | 93.4 | HAD superfamily, subfamily IIIB acid phosphatase | gbpln | Arabidopsis thaliana | AT1G04040.1   Symbols:   HAD superfamily, subfamily IIIB acid phosphatase   chr1:1042564-1043819 REVERSE LENGTH=271                    | 271 | 271 | 1.00E-140 | 100.0 | 84.1 | 93.4 |

|                         |                                                                                                                                                                                                                                                                                                                                                                                                                                                                                                                                                     |     |      |           |       |      |      |                                        |       |                      |                                                                                                                                           |     |      |           |       |      |      |
|-------------------------|-----------------------------------------------------------------------------------------------------------------------------------------------------------------------------------------------------------------------------------------------------------------------------------------------------------------------------------------------------------------------------------------------------------------------------------------------------------------------------------------------------------------------------------------------------|-----|------|-----------|-------|------|------|----------------------------------------|-------|----------------------|-------------------------------------------------------------------------------------------------------------------------------------------|-----|------|-----------|-------|------|------|
| Rsa1.0_00097.1.g4851.t1 | refXP_002899488.1  ATBARD1/BARD1 [Arabidopsis lyrata subsp. lyrata] gi 297335330 gb EFH65747.1  ATBARD1/BARD1 [Arabidopsis lyrata subsp. lyrata]                                                                                                                                                                                                                                                                                                                                                                                                    | 698 | 708  | 0         | 101.4 | 76.2 | 83.5 | ATBARD1/BARD1                          | gbpln | Arabidopsis lyrata   | AT1G04020.2   Symbols: ATBARD1, BARD1   breast cancer associated RING 1   chr1:1036610-1040045 FORWARD LENGTH=713                         | 698 | 713  | 0         | 102.1 | 75.1 | 83.8 |
| Rsa1.0_00097.1.g4852.t1 | refXP_002899485.1  calcium-binding EF hand family protein [Arabidopsis lyrata subsp. lyrata] gi 297335327 gb EFH65744.1  calcium-binding EF hand family protein [Arabidopsis lyrata subsp. lyrata]                                                                                                                                                                                                                                                                                                                                                  | 534 | 539  | 0         | 100.9 | 85.0 | 91.2 | calcium-binding EF hand family protein | gbpln | Arabidopsis lyrata   | AT1G03960.1   Symbols:   Calcium-binding EF hand family protein   chr1:1014085-1017472 FORWARD LENGTH=529                                 | 534 | 529  | 0         | 99.1  | 83.3 | 89.5 |
| Rsa1.0_00097.1.g4853.t1 | refXP_002892189.1  SNF7 family protein [Arabidopsis lyrata subsp. lyrata] gi 297338031 gb EFH68448.1  SNF7 family protein [Arabidopsis lyrata subsp. lyrata]                                                                                                                                                                                                                                                                                                                                                                                        | 211 | 210  | 1.00E-108 | 99.5  | 93.4 | 97.2 | SNF7 family protein                    | gbpln | Arabidopsis lyrata   | AT1G03950.1   Symbols: VPS2.3   vacuolar protein sorting-associated protein 2.3   chr1:1011388-1013212 REVERSE LENGTH=210                 | 211 | 210  | 1.00E-110 | 99.5  | 93.4 | 96.2 |
| Rsa1.0_00097.1.g4854.t1 | refXP_002892187.1  transferase [Arabidopsis lyrata subsp. lyrata] gi 297338029 gb EFH68446.1  transferase [Arabidopsis lyrata subsp. lyrata]                                                                                                                                                                                                                                                                                                                                                                                                        | 477 | 464  | 0         | 97.3  | 79.7 | 87.8 | transferase                            | gbpln | Arabidopsis lyrata   | AT1G03940.1   Symbols:   HXXXD-type acyl-transferase family protein   chr1:1009542-1010951 REVERSE LENGTH=469                             | 477 | 469  | 0         | 98.3  | 79.0 | 87.6 |
| Rsa1.0_00097.1.g4855.t1 | #                                                                                                                                                                                                                                                                                                                                                                                                                                                                                                                                                   | #   | #    | #         | #     | #    | -    | ----                                   | ----  | #                    | #                                                                                                                                         | #   | #    | #         | #     | #    |      |
| Rsa1.0_00097.1.g4856.t1 | #                                                                                                                                                                                                                                                                                                                                                                                                                                                                                                                                                   | #   | #    | #         | #     | #    | -    | ----                                   | ----  | #                    | #                                                                                                                                         | #   | #    | #         | #     | #    |      |
| Rsa1.0_00097.1.g4857.t1 | gb EOA38377.1  hypothetical protein CARUB_v10009912mg [Capsella rubella]                                                                                                                                                                                                                                                                                                                                                                                                                                                                            | 292 | 290  | 1.00E-150 | 99.3  | 90.4 | 94.2 | hypothetical protein CARUB_v10009912mg | gbpln | Capsella rubella     | AT1G03905.1   Symbols:   P-loop containing nucleoside triphosphate hydrolases superfamily protein   chr1:993478-995594 FORWARD LENGTH=290 | 292 | 290  | 1.00E-150 | 99.3  | 91.1 | 94.2 |
| Rsa1.0_00097.1.g4858.t1 | refNP_563693.1  non-intrinsic ABC protein 4 [Arabidopsis thaliana] gi 75116803 sp O681Q7.1 Y1390_ARATH RecName: Full=Uncharacterized protein At1g03900 gi 51968466 dbj BAD42925.1  unknown protein [Arabidopsis thaliana] gi 51969262 dbj BAD43323.1  unknown protein [Arabidopsis thaliana] gi 51970966 dbj BAD44175.1  unknown protein [Arabidopsis thaliana] gi 332189509 gb AEE27630.1  non-intrinsic ABC protein 4 [Arabidopsis thaliana]                                                                                                      | 261 | 272  | 3.00E-38  | 104.2 | 46.4 | 47.5 | non-intrinsic ABC protein 4            | gbpln | Arabidopsis thaliana | AT1G03900.1   Symbols: ATNAP4, NAP4   non-intrinsic ABC protein 4   chr1:991252-992852 FORWARD LENGTH=272                                 | 261 | 272  | 8.00E-41  | 104.2 | 46.4 | 47.5 |
| Rsa1.0_00097.1.g4859.t2 | gb EOA35015.1  hypothetical protein CARUB_v10020118mg [Capsella rubella]                                                                                                                                                                                                                                                                                                                                                                                                                                                                            | 563 | 535  | 0         | 95.0  | 87.0 | 92.0 | hypothetical protein CARUB_v10020118mg | gbpln | Capsella rubella     | AT1G65660.1   Symbols: SMP1   Pre-mRNA splicing Prp18-interacting factor   chr1:24418295-24421231 REVERSE LENGTH=535                      | 563 | 535  | 0         | 95.0  | 86.7 | 91.7 |
| Rsa1.0_00097.1.g4860.t2 | gb EOA38381.1  hypothetical protein CARUB_v10009925mg [Capsella rubella]                                                                                                                                                                                                                                                                                                                                                                                                                                                                            | 515 | 286  | 1.00E-160 | 55.5  | 54.2 | 55.0 | hypothetical protein CARUB_v10009925mg | gbpln | Capsella rubella     | AT1G03860.3   Symbols: ATPHB2, PHB2   prohibitin 2   chr1:979611-981157 REVERSE LENGTH=286                                                | 515 | 286  | 1.00E-155 | 55.5  | 53.6 | 55.0 |
| Rsa1.0_00097.1.g4861.t1 | refNP_563691.1  monothiol glutaredoxin-S13 [Arabidopsis thaliana] gi 119370631 sp Q84TF4.2 GRS13_ARATH RecName: Full=Monothiol glutaredoxin-S13; Short=AtGrxS13; AltName: Full=Protein ROXY 18 gi 14334678 gb AAK59517.1  unknown protein [Arabidopsis thaliana] gi 17104675 gb AAL34226.1  unknown protein [Arabidopsis thaliana] gi 21555130 gb AAM63783.1  unknown [Arabidopsis thaliana] gi 110736837 dbj BAF00376.1  hypothetical protein [Arabidopsis thaliana] gi 332189502 gb AEE27623.1  monothiol glutaredoxin-S13 [Arabidopsis thaliana] | 153 | 150  | 1.00E-50  | 98.0  | 69.9 | 81.0 | monothiol glutaredoxin-S13             | gbpln | Arabidopsis thaliana | AT1G03850.2   Symbols:   Glutaredoxin family protein   chr1:977233-977685 REVERSE LENGTH=150                                              | 153 | 150  | 4.00E-53  | 98.0  | 69.9 | 81.0 |
| Rsa1.0_00097.1.g4862.t4 | refNP_001184903.1  guanylate-binding protein [Arabidopsis thaliana] gi 332189498 gb AEE27619.1  guanylate-binding protein [Arabidopsis thaliana]                                                                                                                                                                                                                                                                                                                                                                                                    | 647 | 1013 | 1.00E-142 | 156.6 | 40.3 | 44.5 | guanylate-binding protein              | gbpln | Arabidopsis thaliana | AT1G03830.2   Symbols:   guanylate-binding family protein   chr1:962128-966622 REVERSE LENGTH=1013                                        | 647 | 1013 | 1.00E-145 | 156.6 | 40.3 | 44.5 |
| Rsa1.0_00097.1.g4863.t1 | #                                                                                                                                                                                                                                                                                                                                                                                                                                                                                                                                                   | #   | #    | #         | #     | #    | -    | ----                                   | ----  | #                    | #                                                                                                                                         | #   | #    | #         | #     | #    |      |

|                         |                                                                                                                                                                                                                                                                                                                                                                                                                                                                                                                                                                            |     |     |           |       |      |      |                                         |       |                      |                                                                                                                                                                                                                                                                                                                                                                                                                                                                 |     |     |           |       |      |      |
|-------------------------|----------------------------------------------------------------------------------------------------------------------------------------------------------------------------------------------------------------------------------------------------------------------------------------------------------------------------------------------------------------------------------------------------------------------------------------------------------------------------------------------------------------------------------------------------------------------------|-----|-----|-----------|-------|------|------|-----------------------------------------|-------|----------------------|-----------------------------------------------------------------------------------------------------------------------------------------------------------------------------------------------------------------------------------------------------------------------------------------------------------------------------------------------------------------------------------------------------------------------------------------------------------------|-----|-----|-----------|-------|------|------|
| Rsa1.0_00097.1.g4864.t1 | ref XP_002879939.1  predicted protein [Arabidopsis lyrata subsp. lyrata] gi 297325778 gb EFH56198.1  predicted protein [Arabidopsis lyrata subsp. lyrata]                                                                                                                                                                                                                                                                                                                                                                                                                  | 197 | 236 | 5.00E-26  | 119.8 | 49.2 | 66.5 | predicted protein                       | gbpln | Arabidopsis lyrata   | AT2G41470.1   Symbols:   unknown protein; FUNCTIONS IN: molecular_function unknown; INVOLVED IN: biological_process unknown; LOCATED IN: vacuole; BEST Arabidopsis thaliana protein match is: unknown protein (TAIR:AT2G41440.1); Has 1066 Blast hits to 825 proteins in 144 species: Archae - 7; Bacteria - 46; Metazoa - 465; Fungi - 36; Plants - 67; Viruses - 4; Other Eukaryotes - 441 (sources: NCBI BLINK).   chr2:17289952-17293749 REVERSE LENGTH=414 | 197 | 414 | 4.00E-27  | 210.2 | 44.7 | 56.3 |
| Rsa1.0_00097.1.g4865.t1 | dbj BAJ33922.1  unnamed protein product [Thellungiella halophila]                                                                                                                                                                                                                                                                                                                                                                                                                                                                                                          | 49  | 226 | 1.00E-12  | 461.2 | 81.6 | 85.7 | unnamed protein product                 | ----  | ----                 | AT1G04250.1   Symbols: AXR3, IAA17   AUX/IAA transcriptional regulator family protein   chr1:1136382-1138340 FORWARD LENGTH=229                                                                                                                                                                                                                                                                                                                                 | 49  | 229 | 3.00E-15  | 467.3 | 81.6 | 83.7 |
| Rsa1.0_00098.1.g4866.t2 | ref XP_002864957.1  hypothetical protein ARALYDRAFT_332761 [Arabidopsis lyrata subsp. lyrata] gi 297310792 gb EFH41216.1  hypothetical protein ARALYDRAFT_332761 [Arabidopsis lyrata subsp. lyrata]                                                                                                                                                                                                                                                                                                                                                                        | 666 | 731 | 0         | 109.8 | 56.5 | 64.1 | hypothetical protein ARALYDRAFT_332761  | gbpln | Arabidopsis lyrata   | AT5G65450.1   Symbols: UBP17   ubiquitin-specific protease 17   chr5:26157863-26161096 FORWARD LENGTH=731                                                                                                                                                                                                                                                                                                                                                       | 666 | 731 | 0         | 109.8 | 56.6 | 63.2 |
| Rsa1.0_00098.1.g4867.t1 | ref NP_201321.1  VQ motif-containing protein [Arabidopsis thaliana] gi 10178179 dbj BAB11653.1  unnamed protein product [Arabidopsis thaliana] gi 44917435 gb AAS49042.1  At5g65170 [Arabidopsis thaliana] gi 48931270 gb AAT06439.1  At5g65170 [Arabidopsis thaliana] gi 332010630 gb AED98013.1  VQ motif-containing protein [Arabidopsis thaliana]                                                                                                                                                                                                                      | 357 | 362 | 1.00E-110 | 101.4 | 70.0 | 76.8 | VQ motif-containing protein             | gbpln | Arabidopsis thaliana | AT5G65170.1   Symbols:   VQ motif-containing protein   chr5:26041218-26042306 FORWARD LENGTH=362                                                                                                                                                                                                                                                                                                                                                                | 357 | 362 | 1.00E-113 | 101.4 | 70.0 | 76.8 |
| Rsa1.0_00098.1.g4868.t1 | #                                                                                                                                                                                                                                                                                                                                                                                                                                                                                                                                                                          | #   | #   | #         | #     | #    | #    | -                                       | ----  | ----                 | #                                                                                                                                                                                                                                                                                                                                                                                                                                                               | #   | #   | #         | #     | #    |      |
| Rsa1.0_00098.1.g4869.t1 | gb EOA12626.1  hypothetical protein CARUB_v10027509mg [Capsella rubella]                                                                                                                                                                                                                                                                                                                                                                                                                                                                                                   | 590 | 591 | 0         | 100.2 | 88.6 | 93.2 | hypothetical protein CARUB_v10027509mg  | gbpln | Capsella rubella     | AT5G65160.1   Symbols: TPR14   tetratricopeptide repeat (TPR)-containing protein   chr5:26031457-26033668 REVERSE LENGTH=593                                                                                                                                                                                                                                                                                                                                    | 590 | 593 | 0         | 100.5 | 87.1 | 91.2 |
| Rsa1.0_00098.1.g4870.t1 | #                                                                                                                                                                                                                                                                                                                                                                                                                                                                                                                                                                          | #   | #   | #         | #     | #    | #    | -                                       | ----  | ----                 | #                                                                                                                                                                                                                                                                                                                                                                                                                                                               | #   | #   | #         | #     | #    |      |
| Rsa1.0_00098.1.g4871.t1 | gb EOA13558.1  hypothetical protein CARUB_v10026620mg [Capsella rubella]                                                                                                                                                                                                                                                                                                                                                                                                                                                                                                   | 377 | 369 | 0         | 97.9  | 82.8 | 89.1 | hypothetical protein CARUB_v10026620mg  | gbpln | Capsella rubella     | AT5G65140.1   Symbols: TPPJ   Haloacid dehalogenase-like hydrolase (HAD) superfamily protein   chr5:26019878-26022077 REVERSE LENGTH=370                                                                                                                                                                                                                                                                                                                        | 377 | 370 | 1.00E-179 | 98.1  | 83.3 | 89.4 |
| Rsa1.0_00098.1.g4872.t1 | #                                                                                                                                                                                                                                                                                                                                                                                                                                                                                                                                                                          | #   | #   | #         | #     | #    | #    | -                                       | ----  | ----                 | #                                                                                                                                                                                                                                                                                                                                                                                                                                                               | #   | #   | #         | #     | #    |      |
| Rsa1.0_00098.1.g4873.t1 | ref NP_181032.1  embryo sac development arrest 3 protein [Arabidopsis thaliana] gi 145330358 ref NP_001078004.1  embryo sac development arrest 3 protein [Arabidopsis thaliana] gi 3033382 gb AAC12826.1  unknown protein [Arabidopsis thaliana] gi 20466396 gb AAM20515.1  unknown protein [Arabidopsis thaliana] gi 22136346 gb AAM91251.1  unknown protein [Arabidopsis thaliana] gi 330253937 gb AEC09031.1  embryo sac development arrest 3 protein [Arabidopsis thaliana] gi 330253938 gb AEC09032.1  embryo sac development arrest 3 protein [Arabidopsis thaliana] | 340 | 186 | 6.00E-33  | 54.7  | 22.4 | 25.6 | embryo sac development arrest 3 protein | gbpln | Arabidopsis thaliana | AT2G34860.2   Symbols: EDA3   DnaJ/Hsp40 cysteine-rich domain superfamily protein   chr2:14708380-14709804 FORWARD LENGTH=186                                                                                                                                                                                                                                                                                                                                   | 340 | 186 | 1.00E-35  | 54.7  | 22.4 | 25.6 |
| Rsa1.0_00098.1.g4874.t1 | ref XP_002866642.1  hypothetical protein ARALYDRAFT_496712 [Arabidopsis lyrata subsp. lyrata] gi 297312477 gb EFH42901.1  hypothetical protein ARALYDRAFT_496712 [Arabidopsis lyrata subsp. lyrata]                                                                                                                                                                                                                                                                                                                                                                        | 560 | 559 | 0         | 99.8  | 65.5 | 78.6 | hypothetical protein ARALYDRAFT_496712  | gbpln | Arabidopsis lyrata   | AT5G64930.1   Symbols: CPR5, HYS1   CPR5 protein, putative   chr5:25945885-25948321 REVERSE LENGTH=564                                                                                                                                                                                                                                                                                                                                                          | 560 | 564 | 0         | 100.7 | 62.1 | 77.0 |
| Rsa1.0_00098.1.g4875.t1 | #                                                                                                                                                                                                                                                                                                                                                                                                                                                                                                                                                                          | #   | #   | #         | #     | #    | #    | -                                       | ----  | ----                 | #                                                                                                                                                                                                                                                                                                                                                                                                                                                               | #   | #   | #         | #     | #    |      |
| Rsa1.0_00098.1.g4876.t1 | gb EOA14237.1  hypothetical protein CARUB_v10027392mg [Capsella rubella]                                                                                                                                                                                                                                                                                                                                                                                                                                                                                                   | 108 | 116 | 7.00E-21  | 107.4 | 51.9 | 68.5 | hypothetical protein CARUB_v10027392mg  | gbpln | Capsella rubella     | AT5G64900.1   Symbols: PROPEP1, ATPEP1, PEP1   precursor of peptide 1   chr5:25937253-25937939 FORWARD LENGTH=92                                                                                                                                                                                                                                                                                                                                                | 108 | 92  | 3.00E-21  | 85.2  | 47.2 | 63.0 |

|                         |                                                                                                                                                                                                                                                                                                                                                                                                                                   |     |     |           |       |      |      |                                                 |       |                      |                                                                                                                                                                                                                                                                                                                                                                                                                                                                                                                                                                                                                                          |     |     |           |       |      |      |
|-------------------------|-----------------------------------------------------------------------------------------------------------------------------------------------------------------------------------------------------------------------------------------------------------------------------------------------------------------------------------------------------------------------------------------------------------------------------------|-----|-----|-----------|-------|------|------|-------------------------------------------------|-------|----------------------|------------------------------------------------------------------------------------------------------------------------------------------------------------------------------------------------------------------------------------------------------------------------------------------------------------------------------------------------------------------------------------------------------------------------------------------------------------------------------------------------------------------------------------------------------------------------------------------------------------------------------------------|-----|-----|-----------|-------|------|------|
| Rsa1.0_00098.1.g4877.t1 | refNP_568999.1  uncharacterized protein [Arabidopsis thaliana] gi 8843752 dbj BAA97300.1  unnamed protein product [Arabidopsis thaliana] gi 110738041 dbj BAF00955.1  hypothetical protein [Arabidopsis thaliana] gi 332010581 gb AED97964.1  uncharacterized protein AT5G64880 [Arabidopsis thaliana]                                                                                                                            | 156 | 171 | 1.00E-38  | 109.6 | 66.7 | 80.1 | uncharacterized protein                         | gbpln | Arabidopsis thaliana | AT5G64880.1   Symbols:   unknown protein; Has 30201 Blast hits to 17322 proteins in 780 species: Archae - 12; Bacteria - 1396; Metazoa - 17338; Fungi - 3422; Plants - 5037; Viruses - 0; Other Eukaryotes - 2996 (source: NCBI BLINK).   chr5:25932353-25933874 FORWARD LENGTH=171                                                                                                                                                                                                                                                                                                                                                      | 156 | 171 | 4.00E-41  | 109.6 | 66.7 | 80.1 |
| Rsa1.0_00098.1.g4878.t1 | refXP_002866640.1  hypothetical protein ARALYDRAFT_496707 [Arabidopsis lyrata subsp. lyrata] gi 297312475 gb EFH42899.1  hypothetical protein ARALYDRAFT_496707 [Arabidopsis lyrata subsp. lyrata]                                                                                                                                                                                                                                | 472 | 479 | 0         | 101.5 | 91.3 | 96.2 | hypothetical protein ARALYDRAFT_496707          | gbpln | Arabidopsis lyrata   | AT5G64870.1   Symbols:   SPFH/Band 7/PHB domain-containing membrane-associated protein family   chr5:25929776-25931308 REVERSE LENGTH=479                                                                                                                                                                                                                                                                                                                                                                                                                                                                                                | 472 | 479 | 0         | 101.5 | 92.8 | 97.0 |
| Rsa1.0_00098.1.g4879.t1 | refXP_002864926.1  hypothetical protein ARALYDRAFT_496705 [Arabidopsis lyrata subsp. lyrata] gi 297310761 gb EFH41185.1  hypothetical protein ARALYDRAFT_496705 [Arabidopsis lyrata subsp. lyrata]                                                                                                                                                                                                                                | 114 | 114 | 2.00E-38  | 100.0 | 76.3 | 80.7 | hypothetical protein ARALYDRAFT_496705          | gbpln | Arabidopsis lyrata   | AT5G64850.1   Symbols:   FUNCTIONS IN: molecular function unknown; INVOLVED IN: biological_process unknown; LOCATED IN: plasma membrane; EXPRESSED IN: 22 plant structures; EXPRESSED DURING: 13 growth stages; CONTAINS InterPro DOMAIN/s: RPM1-interacting protein 4, defence response (InterPro:IPRO08700); BEST Arabidopsis thaliana protein match is: unknown protein (TAIR:AT5G09960.1); Has 30201 Blast hits to 17322 proteins in 780 species: Archae - 12; Bacteria - 1396; Metazoa - 17338; Fungi - 3422; Plants - 5037; Viruses - 0; Other Eukaryotes - 2996 (source: NCBI BLINK).   chr5:25921585-25923038 FORWARD LENGTH=114 | 114 | 114 | 2.00E-40  | 100.0 | 74.6 | 79.8 |
| Rsa1.0_00098.1.g4880.t1 | gb EOA13510.1  hypothetical protein CARUB_v10026577mg, partial [Capsella rubella]                                                                                                                                                                                                                                                                                                                                                 | 523 | 386 | 1.00E-157 | 73.8  | 55.1 | 60.6 | hypothetical protein CARUB_v10026577mg, partial | gbpln | Capsella rubella     | AT5G64830.1   Symbols:   programmed cell death 2 C-terminal domain-containing protein   chr5:25914911-25916512 REVERSE LENGTH=380                                                                                                                                                                                                                                                                                                                                                                                                                                                                                                        | 523 | 380 | 1.00E-150 | 72.7  | 55.1 | 61.2 |
| Rsa1.0_00098.1.g4881.t1 | dbj BAA97293.1  unnamed protein product [Arabidopsis thaliana]                                                                                                                                                                                                                                                                                                                                                                    | 129 | 651 | 1.00E-61  | 504.7 | 87.6 | 89.1 | unnamed protein product                         | gbpln | Arabidopsis thaliana | AT5G64816.2   Symbols:   unknown protein; Has 35333 Blast hits to 34131 proteins in 2444 species: Archae - 798; Bacteria - 22429; Metazoa - 974; Fungi - 991; Plants - 531; Viruses - 0; Other Eukaryotes - 9610 (source: NCBI BLINK).   chr5:25913487-25913879 FORWARD LENGTH=130                                                                                                                                                                                                                                                                                                                                                       | 129 | 130 | 5.00E-62  | 100.8 | 87.6 | 89.1 |
| Rsa1.0_00098.1.g4882.t1 | refNP_568996.1  Ras-related small GTP-binding family protein [Arabidopsis thaliana] gi 29839609 sp Q9C5J9.1 Y5483_ARATH RecName: Full=Uncharacterized GTP-binding protein At5g64813 gi 13430582 gb AAK25913.1 AF362023.1 unknown protein [Arabidopsis thaliana] gi 14532852 gb AAK64108.1  unknown protein [Arabidopsis thaliana] gi 332010571 gb AED97954.1  Ras-related small GTP-binding family protein [Arabidopsis thaliana] | 346 | 342 | 0         | 98.8  | 93.4 | 95.4 | Ras-related small GTP-binding family protein    | gbpln | Arabidopsis thaliana | AT5G64813.1   Symbols: LIP1   Ras-related small GTP-binding family protein   chr5:25910836-25912625 FORWARD LENGTH=342                                                                                                                                                                                                                                                                                                                                                                                                                                                                                                                   | 346 | 342 | 0         | 98.8  | 93.4 | 95.4 |
| Rsa1.0_00098.1.g4883.t1 | refXP_002864923.1  WRKY DNA-binding protein 51 [Arabidopsis lyrata subsp. lyrata] gi 297310758 gb EFH41182.1  WRKY DNA-binding protein 51 [Arabidopsis lyrata subsp. lyrata]                                                                                                                                                                                                                                                      | 206 | 194 | 2.00E-85  | 94.2  | 79.1 | 87.4 | WRKY DNA-binding protein 51                     | gbpln | Arabidopsis lyrata   | AT5G64810.1   Symbols: WRKY51, ATWRKY51   WRKY DNA-binding protein 51   chr5:25908415-25909687 FORWARD LENGTH=194                                                                                                                                                                                                                                                                                                                                                                                                                                                                                                                        | 206 | 194 | 2.00E-87  | 94.2  | 78.6 | 87.9 |
| Rsa1.0_00098.1.g4884.t1 | #                                                                                                                                                                                                                                                                                                                                                                                                                                 | #   | #   | #         | #     | #    | #    | -                                               | ----  | ----                 | #                                                                                                                                                                                                                                                                                                                                                                                                                                                                                                                                                                                                                                        | #   | #   | #         | #     | #    |      |
| Rsa1.0_00098.1.g4885.t1 | refXP_002891409.1  hypothetical protein ARALYDRAFT_336931 [Arabidopsis lyrata subsp. lyrata] gi 297337251 gb EFH67668.1  hypothetical protein ARALYDRAFT_336931 [Arabidopsis lyrata subsp. lyrata]                                                                                                                                                                                                                                | 279 | 379 | 4.00E-25  | 135.8 | 39.4 | 55.9 | hypothetical protein ARALYDRAFT_336931          | gbpln | Arabidopsis lyrata   | AT4G21240.1   Symbols:   F-box and associated interaction domains-containing protein   chr4:11322411-11323664 FORWARD LENGTH=417                                                                                                                                                                                                                                                                                                                                                                                                                                                                                                         | 279 | 417 | 3.00E-24  | 149.5 | 41.6 | 57.7 |
| Rsa1.0_00098.1.g4886.t1 | gb EOA13972.1  hypothetical protein CARUB_v10027097mg, partial [Capsella rubella]                                                                                                                                                                                                                                                                                                                                                 | 171 | 219 | 3.00E-66  | 128.1 | 74.9 | 86.5 | hypothetical protein CARUB_v10027097mg, partial | gbpln | Capsella rubella     | AT5G64780.1   Symbols:   Uncharacterised conserved protein UCP009193   chr5:25900700-25901955 REVERSE LENGTH=175                                                                                                                                                                                                                                                                                                                                                                                                                                                                                                                         | 171 | 175 | 1.00E-66  | 102.3 | 75.4 | 85.4 |

|                         |                                                                                                                                                                                                                                                                                                                                                                                                                                                                                                                                                               |      |      |           |        |      |      |                                                       |       |                      |                                                                                                                                                                                                                                                                                                                                                                                                                                                                                                                                                                                                                                            |                 |                 |                 |                 |                 |      |
|-------------------------|---------------------------------------------------------------------------------------------------------------------------------------------------------------------------------------------------------------------------------------------------------------------------------------------------------------------------------------------------------------------------------------------------------------------------------------------------------------------------------------------------------------------------------------------------------------|------|------|-----------|--------|------|------|-------------------------------------------------------|-------|----------------------|--------------------------------------------------------------------------------------------------------------------------------------------------------------------------------------------------------------------------------------------------------------------------------------------------------------------------------------------------------------------------------------------------------------------------------------------------------------------------------------------------------------------------------------------------------------------------------------------------------------------------------------------|-----------------|-----------------|-----------------|-----------------|-----------------|------|
| Rsa1.0_00098.1.g4887.t1 | ref NP_201282.1  uncharacterized protein [Arabidopsis thaliana] gi 75170417 sp Q9FGF6.1 RGF9_ARATH RecName: Full=Root meristem growth factor 9; Short=AtRGF9; Flags: Precursor gi 10177208 dbj BAB10310.1  unnamed protein product [Arabidopsis thaliana] gi 27311821 gb AAO00876.1  unknown protein [Arabidopsis thaliana] gi 30102780 gb AAP21308.1  At5g64770 [Arabidopsis thaliana] gi 332010566 gb AED97949.1  uncharacterized protein AT5G64770 [Arabidopsis thaliana]                                                                                  | 79   | 79   | 5.00E-24  | 100.0  | 72.2 | 78.5 | uncharacterized protein                               | gbpln | Arabidopsis thaliana | AT5G64770.1   Symbols: RGF9   Encodes a root meristem growth factor (RGF). Belongs to a family of functionally redundant homologous peptides that are secreted, tyrosine-sulfated, and expressed mainly in the stem cell area and the innermost layer of central columella cells. RGFs are required for maintenance of the root stem cell niche and transit amplifying cell proliferation. Members of this family include: At5g60810 (RGF1), At1g13620 (RGF2), At2g04025 (RGF3), At3g30350 (RGF4), At5g51451 (RGF5), At4g16515 (RGF6), At3g02240 (RGF7), At2g03830 (RGF8) and At5g64770 (RGF9).   chr5:25897681-25898085 REVERSE LENGTH=79 | 79              | 79              | 8.00E-27        | 100.0           | 72.2            | 78.5 |
| Rsa1.0_00098.1.g4888.t1 | ref XP_002864920.1  hypothetical protein ARALYDRAFT_496690 [Arabidopsis lyrata subsp. lyrata] gi 297310755 gb EFH41179.1  hypothetical protein ARALYDRAFT_496690 [Arabidopsis lyrata subsp. lyrata] ref NP_201279.1  cellulose synthase A catalytic subunit 6 [UDP-forming] [Arabidopsis thaliana] gi 73917714 sp Q94JQ6.2 CESA6_ARATH RecName: Full=Cellulose synthase A catalytic subunit 6 [UDP-forming]; Short=AtCesA6; AltName: Full=AraxCelA; AltName: Full=Isoxaben-resistant protein 2; AltName: Full=Protein PROCUSTE 1; AltName: Full=Protein QUILL | 390  | 392  | 1.00E-129 | 100.5  | 75.9 | 81.8 | hypothetical protein ARALYDRAFT_496690                | gbpln | Arabidopsis lyrata   | AT5G64750.1   Symbols: ABR1   Integrase-type DNA-binding superfamily protein   chr5:25891679-25893656 FORWARD LENGTH=391                                                                                                                                                                                                                                                                                                                                                                                                                                                                                                                   | 390             | 391             | 1.00E-130       | 100.3           | 76.4            | 81.8 |
| Rsa1.0_00098.1.g4889.t1 | gi 10177205 dbj BAB10307.1  cellulose synthase catalytic subunit [Arabidopsis thaliana] gi 332010562 gb AED97945.1  cellulose synthase A catalytic subunit 6 [UDP-forming] [Arabidopsis thaliana] ref XP_002864918.1  transducin family protein [Arabidopsis lyrata subsp. lyrata] gi 297310753 gb EFH41177.1  transducin family protein [Arabidopsis lyrata subsp. lyrata]                                                                                                                                                                                   | 1079 | 1084 | 0         | 100.5  | 95.6 | 97.9 | cellulose synthase A catalytic subunit 6              | gbpln | Arabidopsis thaliana | AT5G64740.1   Symbols: CESA6, IXR2, E112, PRC1   cellulose synthase 6   chr5:25881555-25886333 FORWARD LENGTH=1084                                                                                                                                                                                                                                                                                                                                                                                                                                                                                                                         | 1079            | 1084            | 0               | 100.5           | 95.6            | 97.9 |
| Rsa1.0_00098.1.g4890.t1 | ref XP_002866632.1  hypothetical protein ARALYDRAFT_919796 [Arabidopsis lyrata subsp. lyrata] gi 297312467 gb EFH42891.1  hypothetical protein ARALYDRAFT_919796 [Arabidopsis lyrata subsp. lyrata]                                                                                                                                                                                                                                                                                                                                                           | 301  | 300  | 1.00E-168 | 99.7   | 96.3 | 99.0 | transducin family protein                             | gbpln | Arabidopsis lyrata   | AT5G64730.1   Symbols:   Transducin/WD40 repeat-like superfamily protein   chr5:25873146-25875021 FORWARD LENGTH=299                                                                                                                                                                                                                                                                                                                                                                                                                                                                                                                       | 301             | 299             | 1.00E-170       | 99.3            | 94.7            | 98.3 |
| Rsa1.0_00098.1.g4891.t1 | gb EOA12540.1  hypothetical protein CARUB_v10026557mg, partial [Capsella rubella]                                                                                                                                                                                                                                                                                                                                                                                                                                                                             | 147  | 154  | 1.00E-54  | 104.8  | 72.1 | 81.0 | hypothetical protein ARALYDRAFT_919796                | gbpln | Arabidopsis lyrata   | AT5G64720.1   Symbols:   Protein of unknown function (DUF1278)   chr5:25872346-25872813 REVERSE LENGTH=155                                                                                                                                                                                                                                                                                                                                                                                                                                                                                                                                 | 147             | 155             | 5.00E-56        | 105.4           | 71.4            | 80.3 |
| Rsa1.0_00098.1.g4892.t1 | gb EOA12539.1  hypothetical protein CARUB_v10026529mg [Capsella rubella]                                                                                                                                                                                                                                                                                                                                                                                                                                                                                      | 354  | 395  | 1.00E-165 | 111.6  | 86.7 | 91.2 | hypothetical protein CARUB_v10026557mg, partial       | gbpln | Capsella rubella     | AT5G64700.1   Symbols:   nodulin MtN21 /EamA-like transporter family protein   chr5:25865190-25866845 REVERSE LENGTH=359                                                                                                                                                                                                                                                                                                                                                                                                                                                                                                                   | 354             | 359             | 1.00E-165       | 101.4           | 87.0            | 91.8 |
| Rsa1.0_00098.1.g4893.t1 | ref XP_002866628.1  ribosomal protein L15 family protein [Arabidopsis lyrata subsp. lyrata] gi 297312463 gb EFH42887.1  ribosomal protein L15 family protein [Arabidopsis lyrata subsp. lyrata]                                                                                                                                                                                                                                                                                                                                                               | 312  | 400  | 9.00E-70  | 128.2  | 66.0 | 75.6 | hypothetical protein CARUB_v10026529mg                | gbpln | Capsella rubella     | AT5G64690.1   Symbols:   neurofilament triplet H protein-related   chr5:25862969-25864521 FORWARD LENGTH=344                                                                                                                                                                                                                                                                                                                                                                                                                                                                                                                               | 312             | 344             | 5.00E-70        | 110.3           | 60.6            | 72.1 |
| Rsa1.0_00098.1.g4894.t1 | # # # # # # # # -                                                                                                                                                                                                                                                                                                                                                                                                                                                                                                                                             | 283  | 281  | 1.00E-147 | 99.3   | 92.6 | 96.5 | ribosomal protein L15 family protein                  | gbpln | Arabidopsis lyrata   | AT5G64670.1   Symbols:   Ribosomal protein L18e/L15 superfamily protein   chr5:25852535-25853880 REVERSE LENGTH=281                                                                                                                                                                                                                                                                                                                                                                                                                                                                                                                        | 283             | 281             | 1.00E-147       | 99.3            | 90.8            | 95.4 |
| Rsa1.0_00098.1.g4895.t1 | # # # # # # # #                                                                                                                                                                                                                                                                                                                                                                                                                                                                                                                                               | 419  | 419  | 0         | 100.0  | 89.7 | 95.7 | hypothetical protein CARUB_v10027914mg                | gbpln | Capsella rubella     | AT5G64660.1   Symbols: ATCMPG2, CMPG2   CYS, MET, PRO, and GLY protein 2   chr5:25842119-25843381 REVERSE LENGTH=420                                                                                                                                                                                                                                                                                                                                                                                                                                                                                                                       | 419             | 420             | 0               | 100.2           | 87.6            | 94.0 |
| Rsa1.0_00098.1.g4897.t1 | gb AAF18538.1 AC006551.24 Very similar to retrotransposon reverse transcriptase [Arabidopsis thaliana] ref XP_002864912.1  pectinesterase family protein [Arabidopsis lyrata subsp. lyrata] gi 297310747 gb EFH41171.1  pectinesterase family protein [Arabidopsis lyrata subsp. lyrata]                                                                                                                                                                                                                                                                      | 102  | 1231 | 1.00E-21  | 1206.9 | 55.9 | 73.5 | Very similar to retrotransposon reverse transcriptase | gbpln | Arabidopsis thaliana | # # # # # # # #                                                                                                                                                                                                                                                                                                                                                                                                                                                                                                                                                                                                                            | # # # # # # # # | # # # # # # # # | # # # # # # # # | # # # # # # # # | # # # # # # # # |      |
| Rsa1.0_00098.1.g4898.t1 | ref XP_002864912.1  pectinesterase family protein [Arabidopsis lyrata subsp. lyrata] gi 297310747 gb EFH41171.1  pectinesterase family protein [Arabidopsis lyrata subsp. lyrata]                                                                                                                                                                                                                                                                                                                                                                             | 595  | 602  | 0         | 101.2  | 84.0 | 88.9 | pectinesterase family protein                         | gbpln | Arabidopsis lyrata   | AT5G64640.1   Symbols:   Plant invertase/pectin methyltransferase inhibitor superfamily   chr5:25836820-25839053 FORWARD LENGTH=602                                                                                                                                                                                                                                                                                                                                                                                                                                                                                                        | 595             | 602             | 0               | 101.2           | 83.4            | 89.1 |

|                         |                                                                                                                                                                                                                                                                                                                                                                                                                                                                                                                                                                                                                                               |     |     |           |       |      |      |                                                   |       |                      |                                                                                                                                                 |     |     |           |       |      |      |
|-------------------------|-----------------------------------------------------------------------------------------------------------------------------------------------------------------------------------------------------------------------------------------------------------------------------------------------------------------------------------------------------------------------------------------------------------------------------------------------------------------------------------------------------------------------------------------------------------------------------------------------------------------------------------------------|-----|-----|-----------|-------|------|------|---------------------------------------------------|-------|----------------------|-------------------------------------------------------------------------------------------------------------------------------------------------|-----|-----|-----------|-------|------|------|
| Rsa1.0_00098.1.g4899.t1 | ref[NP_974991.1] transducin/WD40 domain-containing protein [Arabidopsis thaliana]<br>gi[75337830]sp[Q9SXY1.1]FAS2_ARATH<br>RecName: Full=Chromatin assembly factor 1 subunit FAS2; Short=CAF-1 subunit FAS2; AltName: Full=CAF-1 p60 homolog; AltName: Full=Protein FASCIATA 2<br>gi[4884488]dbj[BAA77766.1] FAS2 [Arabidopsis thaliana]<br>gi[101780666]dbj[BAB11430.1] FAS2 [Arabidopsis thaliana]<br>gi[332010547]gb[AE97930.1] transducin/WD40 domain-containing protein [Arabidopsis thaliana]<br>ref[XP_002864910.1] C/VIF2 [Arabidopsis lyrata subsp. lyrata]<br>gi[297310745]gb[EFH41169.1] C/VIF2 [Arabidopsis lyrata subsp. lyrata] | 479 | 487 | 0         | 101.7 | 88.5 | 93.3 | transducin/WD40 domain-containing protein         | gbpln | Arabidopsis thaliana | AT5G64630.2   Symbols: FAS2, NFB01, NFB1, MUB3.9   Transducin/WD40 repeat-like superfamily protein   chr5:25833298-25836158 FORWARD LENGTH=487  | 479 | 487 | 0         | 101.7 | 88.5 | 93.3 |
| Rsa1.0_00098.1.g4900.t1 | ref[XP_002863741.1] hypothetical protein ARALYDRAFT_917455 [Arabidopsis lyrata subsp. lyrata]<br>gi[297309576]gb[EFH40000.1] hypothetical protein ARALYDRAFT_917455 [Arabidopsis lyrata subsp. lyrata]<br>ref[XP_002888154.1] hypothetical protein ARALYDRAFT_893536 [Arabidopsis lyrata subsp. lyrata]<br>gi[297333995]gb[EFH64413.1] hypothetical protein ARALYDRAFT_893536 [Arabidopsis lyrata subsp. lyrata]<br>ref[NP_201263.2] AAA-type ATPase family protein [Arabidopsis thaliana]<br>gi[332010540]gb[AE97923.1] AAA-type ATPase family protein [Arabidopsis thaliana]                                                                | 179 | 179 | 5.00E-77  | 100.0 | 78.8 | 86.6 | C/VIF2                                            | gbpln | Arabidopsis lyrata   | AT5G64620.1   Symbols: C/VIF2, ATC/VIF2   cell wall / vacuolar inhibitor of fructosidase 2   chr5:25831875-25832417 FORWARD LENGTH=180          | 179 | 180 | 7.00E-78  | 100.6 | 78.8 | 85.5 |
| Rsa1.0_00098.1.g4901.t1 | ref[XP_002888154.1] hypothetical protein ARALYDRAFT_893536 [Arabidopsis lyrata subsp. lyrata]<br>ref[XP_002863741.1] hypothetical protein ARALYDRAFT_917455 [Arabidopsis lyrata subsp. lyrata]<br>ref[XP_002864910.1] C/VIF2 [Arabidopsis lyrata subsp. lyrata]<br>ref[XP_002888154.1] hypothetical protein ARALYDRAFT_893536 [Arabidopsis lyrata subsp. lyrata]                                                                                                                                                                                                                                                                              | 182 | 390 | 3.00E-32  | 214.3 | 40.1 | 55.5 | hypothetical protein ARALYDRAFT_917455            | gbpln | Arabidopsis lyrata   | AT1G43730.1   Symbols:   RNA-directed DNA polymerase (reverse transcriptase)-related family protein   chr1:16508723-16509784 REVERSE LENGTH=320 | 182 | 320 | 3.00E-22  | 175.8 | 32.4 | 50.5 |
| Rsa1.0_00098.1.g4902.t1 | ref[XP_002888154.1] hypothetical protein ARALYDRAFT_893536 [Arabidopsis lyrata subsp. lyrata]<br>ref[NP_201263.2] AAA-type ATPase family protein [Arabidopsis thaliana]<br>gi[332010540]gb[AE97923.1] AAA-type ATPase family protein [Arabidopsis thaliana]                                                                                                                                                                                                                                                                                                                                                                                   | 367 | 404 | 2.00E-44  | 110.1 | 39.2 | 55.6 | hypothetical protein ARALYDRAFT_893536            | gbpln | Arabidopsis lyrata   | AT4G21240.1   Symbols:   F-box and associated interaction domains-containing protein   chr4:11322411-11323664 FORWARD LENGTH=417                | 367 | 417 | 4.00E-41  | 113.6 | 37.6 | 53.4 |
| Rsa1.0_00098.1.g4903.t9 | ref[XP_002888154.1] hypothetical protein ARALYDRAFT_893536 [Arabidopsis lyrata subsp. lyrata]<br>ref[NP_201263.2] AAA-type ATPase family protein [Arabidopsis thaliana]<br>gi[332010540]gb[AE97923.1] AAA-type ATPase family protein [Arabidopsis thaliana]                                                                                                                                                                                                                                                                                                                                                                                   | 709 | 855 | 6.00E-65  | 120.6 | 18.1 | 18.8 | AAA-type ATPase family protein                    | gbpln | Arabidopsis thaliana | AT5G64580.1   Symbols:   AAA-type ATPase family protein   chr5:25817391-25821465 REVERSE LENGTH=855                                             | 709 | 855 | 1.00E-67  | 120.6 | 18.1 | 18.8 |
| Rsa1.0_00098.1.g4904.t1 | #                                                                                                                                                                                                                                                                                                                                                                                                                                                                                                                                                                                                                                             | #   | #   | #         | #     | #    | #    | -                                                 | ----  | ----                 | #                                                                                                                                               | #   | #   | #         | #     | #    |      |
| Rsa1.0_00098.1.g4905.t1 | ref[XP_002864667.1] APUM18 [Arabidopsis lyrata subsp. lyrata]<br>gi[297310502]gb[EFH40926.1] APUM18 [Arabidopsis lyrata subsp. lyrata]<br>ref[XP_002862436.1] predicted protein [Arabidopsis lyrata subsp. lyrata]<br>gi[297307949]gb[EFH38694.1] predicted protein [Arabidopsis lyrata subsp. lyrata]                                                                                                                                                                                                                                                                                                                                        | 247 | 404 | 3.00E-37  | 163.6 | 45.3 | 61.5 | hypothetical protein ARALYDRAFT_893536            | gbpln | Arabidopsis lyrata   | AT4G21240.1   Symbols:   F-box and associated interaction domains-containing protein   chr4:11322411-11323664 FORWARD LENGTH=417                | 247 | 417 | 2.00E-38  | 168.8 | 45.7 | 61.5 |
| Rsa1.0_00099.1.g4906.t1 | gb[EOA13133.1] hypothetical protein CARUB_v10026150mg [Capsella rubella]                                                                                                                                                                                                                                                                                                                                                                                                                                                                                                                                                                      | 570 | 577 | 0         | 101.2 | 93.9 | 95.8 | hypothetical protein CARUB_v10026150mg            | gbpln | Capsella rubella     | AT5G60020.1   Symbols: LAC17, ATLAC17   lacase 17   chr5:24168072-24170223 FORWARD LENGTH=577                                                   | 570 | 577 | 0         | 101.2 | 93.2 | 96.0 |
| Rsa1.0_00099.1.g4907.t7 | gb[ADA58340.1] pseudo-response regulator 3 [Brassica rapa]                                                                                                                                                                                                                                                                                                                                                                                                                                                                                                                                                                                    | 469 | 492 | 0         | 104.9 | 85.7 | 90.0 | pseudo-response regulator 3                       | gbpln | Brassica rapa        | AT5G60100.3   Symbols: PRR3   pseudo-response regulator 3   chr5:24198215-24200502 REVERSE LENGTH=495                                           | 469 | 495 | 0         | 105.5 | 79.3 | 85.5 |
| Rsa1.0_00099.1.g4908.t1 | ref[XP_002864667.1] APUM18 [Arabidopsis lyrata subsp. lyrata]<br>gi[297310502]gb[EFH40926.1] APUM18 [Arabidopsis lyrata subsp. lyrata]<br>ref[XP_002862436.1] predicted protein [Arabidopsis lyrata subsp. lyrata]<br>gi[297307949]gb[EFH38694.1] predicted protein [Arabidopsis lyrata subsp. lyrata]                                                                                                                                                                                                                                                                                                                                        | 332 | 328 | 1.00E-134 | 98.8  | 72.9 | 83.1 | APUM18                                            | gbpln | Arabidopsis lyrata   | AT5G60110.1   Symbols: APUM18, PUM18   pumilio 18   chr5:24201954-24202937 FORWARD LENGTH=327                                                   | 332 | 327 | 1.00E-124 | 98.5  | 71.7 | 81.6 |
| Rsa1.0_00099.1.g4909.t1 | ref[XP_002864667.1] APUM18 [Arabidopsis lyrata subsp. lyrata]<br>gi[297310502]gb[EFH40926.1] APUM18 [Arabidopsis lyrata subsp. lyrata]<br>ref[XP_002862436.1] predicted protein [Arabidopsis lyrata subsp. lyrata]<br>gi[297307949]gb[EFH38694.1] predicted protein [Arabidopsis lyrata subsp. lyrata]                                                                                                                                                                                                                                                                                                                                        | 326 | 530 | 2.00E-27  | 162.6 | 22.1 | 30.4 | predicted protein                                 | gbpln | Arabidopsis lyrata   | #                                                                                                                                               | #   | #   | #         | #     | #    |      |
| Rsa1.0_00099.1.g4910.t2 | dbj[BAJ34032.1] unnamed protein product [Thellungiella halophila]                                                                                                                                                                                                                                                                                                                                                                                                                                                                                                                                                                             | 459 | 492 | 0         | 107.2 | 83.2 | 87.6 | unnamed protein product                           | ----  | ----                 | AT5G60120.1   Symbols: TOE2   target of early activation tagged (EAT) 2   chr5:24208153-24211067 FORWARD LENGTH=485                             | 459 | 485 | 0         | 105.7 | 78.4 | 84.3 |
| Rsa1.0_00099.1.g4911.t1 | gb[EOA14648.1] hypothetical protein CARUB_v10027909mg [Capsella rubella]                                                                                                                                                                                                                                                                                                                                                                                                                                                                                                                                                                      | 291 | 320 | 6.00E-79  | 110.0 | 55.7 | 72.5 | hypothetical protein CARUB_v10027909mg            | gbpln | Capsella rubella     | AT5G60130.2   Symbols:   AP2/B3-like transcriptional factor family protein   chr5:24211871-24213112 REVERSE LENGTH=300                          | 291 | 300 | 6.00E-79  | 103.1 | 56.0 | 75.3 |
| Rsa1.0_00099.1.g4912.t1 | ref[NP_001119463.2] AP2/B3-like transcriptional factor family protein [Arabidopsis thaliana]<br>gi[357529134]sp[Q9LST3.3]Y5142.ARATH<br>H RecName: Full=B3 domain-containing protein At5g60142<br>gi[332009902]gb[AE97285.1] AP2/B3-like transcriptional factor family protein [Arabidopsis thaliana]                                                                                                                                                                                                                                                                                                                                         | 212 | 346 | 2.00E-49  | 163.2 | 42.9 | 49.1 | AP2/B3-like transcriptional factor family protein | gbpln | Arabidopsis thaliana | AT5G60142.1   Symbols:   AP2/B3-like transcriptional factor family protein   chr5:24216180-24217591 REVERSE LENGTH=346                          | 212 | 346 | 5.00E-52  | 163.2 | 42.9 | 49.1 |

|                         |                                                                                                                                                                                                                                                                                                                                                                                                                                                                                                                                                   |      |      |           |       |      |      |                                           |       |                      |                                                                                                                                                                                                                                                                           |      |      |           |       |      |      |
|-------------------------|---------------------------------------------------------------------------------------------------------------------------------------------------------------------------------------------------------------------------------------------------------------------------------------------------------------------------------------------------------------------------------------------------------------------------------------------------------------------------------------------------------------------------------------------------|------|------|-----------|-------|------|------|-------------------------------------------|-------|----------------------|---------------------------------------------------------------------------------------------------------------------------------------------------------------------------------------------------------------------------------------------------------------------------|------|------|-----------|-------|------|------|
| Rsa1.0_00099.1.g4913.t1 | ref NP_200823.1  uncharacterized protein [Arabidopsis thaliana]   g 332009903 gb AED97286.1  uncharacterized protein AT5G60150 [Arabidopsis thaliana]                                                                                                                                                                                                                                                                                                                                                                                             | 1200 | 1195 | 0         | 99.6  | 51.1 | 60.6 | uncharacterized protein                   | gbpln | Arabidopsis thaliana | AT5G60150.1   Symbols:   unknown protein; Has 1807 Blast hits to 1807 proteins in 277 species: Archae - 0; Bacteria - 0; Metazoa - 736; Fungi - 347; Plants - 385; Viruses - 0; Other Eukaryotes - 339 (source: NCBI BLink).   chr5:24218211-24223245 FORWARD LENGTH=1195 | 1200 | 1195 | 0         | 99.6  | 51.1 | 60.6 |
| Rsa1.0_00099.1.g4914.t2 | ref XP_002864671.1  hypothetical protein ARALYDRAFT_358235 [Arabidopsis lyrata subsp. lyrata]   g 297310506 gb EFH40930.1  hypothetical protein ARALYDRAFT_358235 [Arabidopsis lyrata subsp. lyrata]                                                                                                                                                                                                                                                                                                                                              | 1027 | 1001 | 0         | 97.5  | 76.0 | 83.5 | hypothetical protein ARALYDRAFT_358235    | gbpln | Arabidopsis lyrata   | AT5G60170.2   Symbols:   RNA binding (RRM/RBD/RNP motifs) family protein   chr5:24228178-24232394 FORWARD LENGTH=987                                                                                                                                                      | 1027 | 987  | 0         | 96.1  | 74.7 | 81.9 |
| Rsa1.0_00099.1.g4915.t1 | ref XP_002864667.1  APUM18 [Arabidopsis lyrata subsp. lyrata]   g 297310502 gb EFH40926.1  APUM18 [Arabidopsis lyrata subsp. lyrata]                                                                                                                                                                                                                                                                                                                                                                                                              | 323  | 328  | 1.00E-104 | 101.5 | 62.8 | 73.7 | APUM18                                    | gbpln | Arabidopsis lyrata   | AT5G60110.1   Symbols: APUM18, PUM18   pumilio 18   chr5:24201954-24202937 FORWARD LENGTH=327                                                                                                                                                                             | 323  | 327  | 3.00E-95  | 101.2 | 61.0 | 72.8 |
| Rsa1.0_00099.1.g4916.t1 | ref XP_002864666.1  hypothetical protein ARALYDRAFT_358227 [Arabidopsis lyrata subsp. lyrata]   g 297310501 gb EFH40925.1  hypothetical protein ARALYDRAFT_358227 [Arabidopsis lyrata subsp. lyrata]                                                                                                                                                                                                                                                                                                                                              | 370  | 530  | 1.00E-65  | 143.2 | 42.7 | 53.0 | hypothetical protein ARALYDRAFT_358227    | gbpln | Arabidopsis lyrata   | AT5G60250.1   Symbols:   zinc finger (C3HC4-type RING finger) family protein   chr5:24252226-24254710 FORWARD LENGTH=655                                                                                                                                                  | 370  | 655  | 1.00E-56  | 177.0 | 37.3 | 51.9 |
| Rsa1.0_00099.1.g4917.t1 | ref XP_002864672.1  Ulp1 protease family protein [Arabidopsis lyrata subsp. lyrata]   g 297310507 gb EFH40931.1  Ulp1 protease family protein [Arabidopsis lyrata subsp. lyrata]                                                                                                                                                                                                                                                                                                                                                                  | 228  | 226  | 1.00E-103 | 99.1  | 77.6 | 89.5 | Ulp1 protease family protein              | gbpln | Arabidopsis lyrata   | AT5G60190.1   Symbols:   Cysteine proteinases superfamily protein   chr5:24235319-24235999 FORWARD LENGTH=226                                                                                                                                                             | 228  | 226  | 1.00E-106 | 99.1  | 79.4 | 90.4 |
| Rsa1.0_00099.1.g4918.t1 | #                                                                                                                                                                                                                                                                                                                                                                                                                                                                                                                                                 | #    | #    | #         | #     | #    | -    | -                                         | ----  | ----                 | #                                                                                                                                                                                                                                                                         | #    | #    | #         | #     | #    |      |
| Rsa1.0_00099.1.g4919.t1 | gb EOA13642.1  hypothetical protein CARUB_v10026713mg [Capsella rubella]                                                                                                                                                                                                                                                                                                                                                                                                                                                                          | 259  | 344  | 1.00E-117 | 132.8 | 83.4 | 90.3 | hypothetical protein CARUB_v10026713mg    | gbpln | Capsella rubella     | AT5G60200.1   Symbols: TMO6   TARGET OF MONOPTEROS 6   chr5:24241078-24241951 FORWARD LENGTH=257                                                                                                                                                                          | 259  | 257  | 1.00E-115 | 99.2  | 81.1 | 87.3 |
| Rsa1.0_00099.1.g4920.t1 | ref NP_200829.5  interactor of constitutive active ROPs 3 [Arabidopsis thaliana]   g 334188518 ref NP_001190579.1  interactor of constitutive active ROPs 3 [Arabidopsis thaliana]   g 75180396 sp Q9LS55.1 ICR3 ARATH RecName: Full=Interactor of constitutive active ROPs 3   g 8885572 db BAA97502.1  myosin heavy chain-like [Arabidopsis thaliana]   g 332009910 gb AED97293.1  interactor of constitutive active ROPs 3 [Arabidopsis thaliana]   g 332009911 gb AED97294.1  interactor of constitutive active ROPs 3 [Arabidopsis thaliana] | 515  | 564  | 0         | 109.5 | 74.8 | 83.1 | interactor of constitutive active ROPs 3  | gbpln | Arabidopsis thaliana | AT5G60210.2   Symbols: RIP5   ROP interactive partner 5   chr5:24243529-24245889 REVERSE LENGTH=564                                                                                                                                                                       | 515  | 564  | 0         | 109.5 | 74.8 | 83.1 |
| Rsa1.0_00099.1.g4921.t1 | ref NP_974966.1  tRNA-splicing endonuclease subunit Sen2-2 [Arabidopsis thaliana]   g 332009914 gb AED97297.1  tRNA-splicing endonuclease subunit Sen2-2 [Arabidopsis thaliana]                                                                                                                                                                                                                                                                                                                                                                   | 417  | 255  | 1.00E-103 | 61.2  | 42.0 | 46.5 | tRNA-splicing endonuclease subunit Sen2-2 | gbpln | Arabidopsis thaliana | AT5G60230.2   Symbols: SEN2, ATSEN2   splicing endonuclease 2   chr5:24250185-24250952 REVERSE LENGTH=255                                                                                                                                                                 | 417  | 255  | 1.00E-105 | 61.2  | 42.0 | 46.5 |
| Rsa1.0_00099.1.g4922.t1 | ref NP_200833.1  C3H4 type zinc finger protein [Arabidopsis thaliana]   g 8885575 db BAA97505.1  unnamed protein product [Arabidopsis thaliana]   g 332009916 gb AED97299.1  C3H4 type zinc finger protein [Arabidopsis thaliana]                                                                                                                                                                                                                                                                                                                 | 794  | 655  | 0         | 82.5  | 53.4 | 60.7 | C3H4 type zinc finger protein             | gbpln | Arabidopsis thaliana | AT5G60250.1   Symbols:   zinc finger (C3HC4-type RING finger) family protein   chr5:24252226-24254710 FORWARD LENGTH=655                                                                                                                                                  | 794  | 655  | 0         | 82.5  | 53.4 | 60.7 |
| Rsa1.0_00099.1.g4923.t1 | ref NP_001118679.1  uncharacterized protein [Arabidopsis thaliana]   g 11994728 db BAB03044.1  unnamed protein product [Arabidopsis thaliana]   g 332643177 gb AEE76698.1  uncharacterized protein AT3G22961 [Arabidopsis thaliana]                                                                                                                                                                                                                                                                                                               | 278  | 223  | 7.00E-26  | 80.2  | 30.9 | 42.1 | uncharacterized protein                   | gbpln | Arabidopsis thaliana | AT3G22961.1   Symbols:   Paired amphipathic helix (PAH2) superfamily protein   chr3:8142138-8142809 FORWARD LENGTH=223                                                                                                                                                    | 278  | 223  | 2.00E-28  | 80.2  | 30.9 | 42.1 |
| Rsa1.0_00099.1.g4924.t1 | #                                                                                                                                                                                                                                                                                                                                                                                                                                                                                                                                                 | #    | #    | #         | #     | #    | -    | -                                         | ----  | ----                 | #                                                                                                                                                                                                                                                                         | #    | #    | #         | #     | #    |      |
| Rsa1.0_00099.1.g4925.t1 | ref XP_002864676.1  lectin protein kinase family protein [Arabidopsis lyrata subsp. lyrata]   g 297310511 gb EFH40935.1  lectin protein kinase family protein [Arabidopsis lyrata subsp. lyrata]                                                                                                                                                                                                                                                                                                                                                  | 670  | 668  | 0         | 99.7  | 77.6 | 86.4 | lectin protein kinase family protein      | gbpln | Arabidopsis lyrata   | AT5G60270.1   Symbols:   Concanavalin A-like lectin protein kinase family protein   chr5:24257761-24259767 FORWARD LENGTH=668                                                                                                                                             | 670  | 668  | 0         | 99.7  | 76.9 | 86.3 |



|                         |                                                                                                                                                                                                                                                                                                                                                                                                                                                                                                                                                                                                                                                                                                                                                                                                                                                                |     |      |           |       |      |      |                                                       |       |                      |                                                                                                                                                                                                                                                                                                                                                      |     |      |           |       |      |      |
|-------------------------|----------------------------------------------------------------------------------------------------------------------------------------------------------------------------------------------------------------------------------------------------------------------------------------------------------------------------------------------------------------------------------------------------------------------------------------------------------------------------------------------------------------------------------------------------------------------------------------------------------------------------------------------------------------------------------------------------------------------------------------------------------------------------------------------------------------------------------------------------------------|-----|------|-----------|-------|------|------|-------------------------------------------------------|-------|----------------------|------------------------------------------------------------------------------------------------------------------------------------------------------------------------------------------------------------------------------------------------------------------------------------------------------------------------------------------------------|-----|------|-----------|-------|------|------|
| Rsa1.0_00099.1.g4926.t1 | ref XP_002864676.1  lectin protein kinase family protein [Arabidopsis lyrata subsp. lyrata]<br>gi 297310511 gb EFH40935.1  lectin protein kinase family protein [Arabidopsis lyrata subsp. lyrata]                                                                                                                                                                                                                                                                                                                                                                                                                                                                                                                                                                                                                                                             | 665 | 668  | 0         | 100.5 | 77.6 | 87.4 | lectin protein kinase family protein                  | gbpln | Arabidopsis lyrata   | AT5G60270.1   Symbols:   Concanavalin A-like lectin protein kinase family protein   chr5:24257761-24259767 FORWARD LENGTH=668                                                                                                                                                                                                                        | 665 | 668  | 0         | 100.5 | 77.3 | 87.2 |
| Rsa1.0_00099.1.g4927.t1 | gb EOA36785.1  hypothetical protein CARUB_v10008113mg [Capsella rubella]                                                                                                                                                                                                                                                                                                                                                                                                                                                                                                                                                                                                                                                                                                                                                                                       | 166 | 1222 | 6.00E-16  | 736.1 | 25.3 | 27.7 | hypothetical protein CARUB_v10008113mg                | gbpln | Capsella rubella     | AT1G17500.1   Symbols:   ATPase E1-E2 type family protein / haloacid dehalogenase-like hydrolase family protein   chr1:6018757-6023201 FORWARD LENGTH=1216                                                                                                                                                                                           | 166 | 1216 | 7.00E-18  | 732.5 | 24.7 | 27.1 |
| Rsa1.0_00099.1.g4928.t1 | gb AAF18538.1 AC006551_24 Very similar to retrotransposon reverse transcriptase [Arabidopsis thaliana]                                                                                                                                                                                                                                                                                                                                                                                                                                                                                                                                                                                                                                                                                                                                                         | 231 | 1231 | 1.00E-53  | 532.9 | 48.1 | 63.2 | Very similar to retrotransposon reverse transcriptase | gbpln | Arabidopsis thaliana | AT4G29090.1   Symbols:   Ribonuclease H-like superfamily protein   chr4:14333528-14335255 FORWARD LENGTH=575                                                                                                                                                                                                                                         | 231 | 575  | 4.00E-31  | 248.9 | 30.7 | 50.6 |
| Rsa1.0_00099.1.g4929.t1 | gb AAG51783.1 AC079679_3 reverse transcriptase, putative; 16838-20266 [Arabidopsis thaliana]                                                                                                                                                                                                                                                                                                                                                                                                                                                                                                                                                                                                                                                                                                                                                                   | 283 | 1142 | 8.00E-53  | 403.5 | 38.9 | 50.2 | reverse transcriptase, putative; 16838-20266          | gbpln | Arabidopsis thaliana | AT2G22440.1   Symbols:   BEST Arabidopsis thaliana protein match is: Ribonuclease H-like superfamily protein (TAIR:AT4G29090.1); Has 208 Blast hits to 191 proteins in 10 species: Archae - 0; Bacteria - 0; Metazoa - 0; Fungi - 0; Plants - 208; Viruses - 0; Other Eukaryotes - 0 (source: NCBI BLINK).   chr2:9528910-9529917 FORWARD LENGTH=256 | 283 | 256  | 6.00E-22  | 90.5  | 19.8 | 25.8 |
| Rsa1.0_00099.1.g4930.t1 | ref XP_002864676.1  lectin protein kinase family protein [Arabidopsis lyrata subsp. lyrata]<br>gi 297310511 gb EFH40935.1  lectin protein kinase family protein [Arabidopsis lyrata subsp. lyrata]<br>ref NP_200836.1  concanavalin A-like lectin kinase-like protein [Arabidopsis thaliana]                                                                                                                                                                                                                                                                                                                                                                                                                                                                                                                                                                   | 672 | 668  | 0         | 99.4  | 81.0 | 89.0 | lectin protein kinase family protein                  | gbpln | Arabidopsis lyrata   | AT5G60270.1   Symbols:   Concanavalin A-like lectin protein kinase family protein   chr5:24257761-24259767 FORWARD LENGTH=668                                                                                                                                                                                                                        | 672 | 668  | 0         | 99.4  | 80.7 | 89.0 |
| Rsa1.0_00099.1.g4931.t1 | gi 75335417 sp O9LSR9.1 LRK18_ARAT H ResName: FullL-type lectin-domain containing receptor kinase L8; Short=LectRK-1.8; Flags: Precursor<br>gi 8885578 dbj BAA97508.1  receptor-like protein kinase [Arabidopsis thaliana]<br>gi 34365777 gb AAQ65200.1  At5g60280 [Arabidopsis thaliana]<br>gi 62320942 dbj BAD93956.1  receptor like protein kinase [Arabidopsis thaliana]<br>gi 332009919 gb AED97302.1  concanavalin A-like lectin kinase-like protein [Arabidopsis thaliana]<br>ref NP_200838.1  concanavalin A-like lectin kinase-like protein [Arabidopsis thaliana]<br>gi 30697356 ref NP_851230.1  concanavalin A-like lectin kinase-like protein [Arabidopsis thaliana]<br>gi 8885579 dbj BAA97509.1  receptor-like protein kinase [Arabidopsis thaliana]<br>gi 21539487 gb AAM53296.1  tRNA intron endonuclease-like protein [Arabidopsis thaliana] | 672 | 657  | 0         | 97.8  | 78.3 | 87.9 | concanavalin A-like lectin kinase-like protein        | gbpln | Arabidopsis thaliana | AT5G60280.1   Symbols:   Concanavalin A-like lectin protein kinase family protein   chr5:24260563-24262536 FORWARD LENGTH=657                                                                                                                                                                                                                        | 672 | 657  | 0         | 97.8  | 78.3 | 87.9 |
| Rsa1.0_00099.1.g4932.t1 | gi 22655060 gb AAM98121.1  unknown protein [Arabidopsis thaliana]<br>gi 23198282 gb AAN15668.1  tRNA intron endonuclease-like protein [Arabidopsis thaliana]<br>gi 332009921 gb AED97304.1  concanavalin A-like lectin kinase-like protein [Arabidopsis thaliana]<br>gi 332009922 gb AED97305.1  concanavalin A-like lectin kinase-like protein [Arabidopsis thaliana]                                                                                                                                                                                                                                                                                                                                                                                                                                                                                         | 691 | 718  | 0         | 103.9 | 82.1 | 91.2 | concanavalin A-like lectin kinase-like protein        | gbpln | Arabidopsis thaliana | AT5G60300.2   Symbols:   Concanavalin A-like lectin protein kinase family protein   chr5:24264862-24267018 FORWARD LENGTH=718                                                                                                                                                                                                                        | 691 | 718  | 0         | 103.9 | 82.1 | 91.2 |
| Rsa1.0_00099.1.g4933.t7 | gb EOA14027.1  hypothetical protein CARUB_v10027159mg [Capsella rubella]                                                                                                                                                                                                                                                                                                                                                                                                                                                                                                                                                                                                                                                                                                                                                                                       | 187 | 200  | 2.00E-33  | 107.0 | 46.0 | 53.5 | hypothetical protein CARUB_v10027159mg                | gbpln | Capsella rubella     | AT5G45130.1   Symbols:   ATRAB5A, ATRABF2A, RABF2A, RAB5A, RHA1, ATRAB-F2A, RAB-F2A   RAB homolog 1   chr5:18244495-18246060 FORWARD LENGTH=200                                                                                                                                                                                                      | 187 | 200  | 2.00E-35  | 107.0 | 45.5 | 53.5 |
| Rsa1.0_00099.1.g4934.t1 | gb EOA34414.1  hypothetical protein CARUB_v10021942mg, partial [Capsella rubella]                                                                                                                                                                                                                                                                                                                                                                                                                                                                                                                                                                                                                                                                                                                                                                              | 328 | 361  | 1.00E-158 | 110.1 | 83.5 | 90.2 | hypothetical protein CARUB_v10021942mg, partial       | gbpln | Capsella rubella     | AT1G74020.1   Symbols:   SS2   strictosidine synthase 2   chr1:27835289-27837277 REVERSE LENGTH=335                                                                                                                                                                                                                                                  | 328 | 335  | 1.00E-100 | 102.1 | 54.9 | 68.9 |

|                         |                                                                                                                                                                                                                                                                                                                                           |     |      |           |       |      |      |                                                      |       |                      |                                                                                                                                                                                                                                                                                                                                                                                                                                                                                       |     |     |           |       |      |      |
|-------------------------|-------------------------------------------------------------------------------------------------------------------------------------------------------------------------------------------------------------------------------------------------------------------------------------------------------------------------------------------|-----|------|-----------|-------|------|------|------------------------------------------------------|-------|----------------------|---------------------------------------------------------------------------------------------------------------------------------------------------------------------------------------------------------------------------------------------------------------------------------------------------------------------------------------------------------------------------------------------------------------------------------------------------------------------------------------|-----|-----|-----------|-------|------|------|
| Rsa1.0_00099.1.g4935.t1 | gb EOA15422.1  hypothetical protein CARUB_v10007751mg [Capsella rubella]                                                                                                                                                                                                                                                                  | 227 | 108  | 4.00E-29  | 47.6  | 29.5 | 35.2 | hypothetical protein CARUB_v10007751mg               | gbpln | Capsella rubella     | AT4G02655.1   Symbols:   unknown protein; FUNCTIONS IN: molecular_function unknown; INVOLVED IN: biological_process unknown; LOCATED IN: endomembrane system; BEST Arabidopsis thaliana protein match is: unknown protein (TAIR:AT1G18486.1); Has 30201 Blast hits to 17322 proteins in 780 species: Archae - 12; Bacteria - 1396; Metazoa - 17338; Fungi - 3422; Plants - 5037; Viruses - 0; Other Eukaryotes - 2996 (source: NCBI BLINK).   chr4:1158876-1159241 FORWARD LENGTH=121 | 227 | 121 | 8.00E-26  | 53.3  | 27.3 | 34.4 |
| Rsa1.0_00099.1.g4936.t1 | dbj BAJ34485.1  unnamed protein product [Theillungiella halophila]                                                                                                                                                                                                                                                                        | 706 | 682  | 0         | 96.6  | 89.4 | 92.9 | unnamed protein product                              | ----  | ----                 | AT1G73990.1   Symbols: SPPA, SPPA1   signal peptide peptidase   chr1:27824465-27828807 FORWARD LENGTH=677                                                                                                                                                                                                                                                                                                                                                                             | 706 | 677 | 0         | 95.9  | 85.8 | 90.8 |
| Rsa1.0_00099.1.g4937.t1 | ref XP_002888955.1  phosphoribulokinase/uridine kinase [Arabidopsis lyrata subsp. lyrata] gi 297334786 gb EFH65214.1  phosphoribulokinase/uridine kinase [Arabidopsis lyrata subsp. lyrata]                                                                                                                                               | 581 | 643  | 0         | 110.7 | 70.7 | 82.3 | phosphoribulokinase/uridine kinase                   | gbpln | Arabidopsis lyrata   | AT1G73980.1   Symbols:   Phosphoribulokinase / Uridine kinase family   chr1:27820292-27823527 REVERSE LENGTH=643                                                                                                                                                                                                                                                                                                                                                                      | 581 | 643 | 0         | 110.7 | 70.7 | 82.1 |
| Rsa1.0_00099.1.g4938.t1 | #                                                                                                                                                                                                                                                                                                                                         | #   | #    | #         | #     | #    | #    | -                                                    | ----  | ----                 | #                                                                                                                                                                                                                                                                                                                                                                                                                                                                                     | #   | #   | #         | #     | #    |      |
| Rsa1.0_00099.1.g4939.t1 | dbj BAA97099.1  retroelement pol polyprotein-like [Arabidopsis thaliana]                                                                                                                                                                                                                                                                  | 271 | 1098 | 6.00E-37  | 405.2 | 35.8 | 45.8 | retroelement pol polyprotein-like                    | gbpln | Arabidopsis thaliana | AT1G73980.1   Symbols:   Phosphoribulokinase / Uridine kinase family   chr1:27820292-27823527 REVERSE LENGTH=643                                                                                                                                                                                                                                                                                                                                                                      | 271 | 643 | 1.00E-13  | 237.3 | 15.1 | 18.8 |
| Rsa1.0_00099.1.g4940.t1 | ref XP_002887517.1  hypothetical protein ARALYDRAFT_476537 [Arabidopsis lyrata subsp. lyrata] gi 297333358 gb EFH63776.1  hypothetical protein ARALYDRAFT_476537 [Arabidopsis lyrata subsp. lyrata]                                                                                                                                       | 802 | 803  | 0         | 100.1 | 83.7 | 89.9 | hypothetical protein ARALYDRAFT_476537               | gbpln | Arabidopsis lyrata   | AT1G73970.1   Symbols:   unknown protein; Has 34 Blast hits to 33 proteins in 15 species: Archae - 0; Bacteria - 0; Metazoa - 0; Fungi - 0; Plants - 32; Viruses - 0; Other Eukaryotes - 2 (source: NCBI BLINK).   chr1:27817140-27819963 FORWARD LENGTH=803                                                                                                                                                                                                                          | 802 | 803 | 0         | 100.1 | 83.8 | 90.0 |
| Rsa1.0_00100.1.g4941.t1 | gb EOA24820.1  hypothetical protein CARUB_v10018107mg [Capsella rubella]                                                                                                                                                                                                                                                                  | 174 | 176  | 2.00E-82  | 101.1 | 84.5 | 92.0 | hypothetical protein CARUB_v10018107mg               | gbpln | Capsella rubella     | AT3G56290.1   Symbols:   unknown protein; Has 39 Blast hits to 39 proteins in 15 species: Archae - 0; Bacteria - 0; Metazoa - 0; Fungi - 0; Plants - 39; Viruses - 0; Other Eukaryotes - 0 (source: NCBI BLINK).   chr3:20878743-20879541 REVERSE LENGTH=173                                                                                                                                                                                                                          | 174 | 173 | 2.00E-79  | 99.4  | 86.8 | 92.5 |
| Rsa1.0_00100.1.g4942.t1 | gb AAG51783.1 AC079679.3 reverse transcriptase, putative: 16838-20266 [Arabidopsis thaliana]                                                                                                                                                                                                                                              | 210 | 1142 | 4.00E-47  | 543.8 | 46.7 | 62.4 | reverse transcriptase, putative: 16838-20266         | gbpln | Arabidopsis thaliana | AT4G29090.1   Symbols:   Ribonuclease H-like superfamily protein   chr4:14333528-14335255 FORWARD LENGTH=575                                                                                                                                                                                                                                                                                                                                                                          | 210 | 575 | 6.00E-22  | 273.8 | 30.5 | 48.1 |
| Rsa1.0_00100.1.g4943.t1 | ref XP_002876361.1  hypothetical protein ARALYDRAFT_486071 [Arabidopsis lyrata subsp. lyrata] gi 297322199 gb EFH52620.1  hypothetical protein ARALYDRAFT_486071 [Arabidopsis lyrata subsp. lyrata]                                                                                                                                       | 432 | 430  | 0         | 99.5  | 91.9 | 96.1 | hypothetical protein ARALYDRAFT_486071               | gbpln | Arabidopsis lyrata   | AT3G56310.1   Symbols:   Melibiase family protein   chr3:20882886-20885745 FORWARD LENGTH=437                                                                                                                                                                                                                                                                                                                                                                                         | 432 | 437 | 0         | 101.2 | 91.9 | 95.8 |
| Rsa1.0_00100.1.g4944.t1 | ref NP_191191.2  PAP/OAS1 substrate-binding domain-containing protein [Arabidopsis thaliana] gi 30725328 gb AAP37686.1  At3g56320 [Arabidopsis thaliana] gi 110736147 dbj BAF00045.1  hypothetical protein [Arabidopsis thaliana] gi 332645988 gb AEE79509.1  PAP/OAS1 substrate-binding domain-containing protein [Arabidopsis thaliana] | 567 | 603  | 0         | 106.3 | 81.5 | 90.5 | PAP/OAS1 substrate-binding domain-containing protein | gbpln | Arabidopsis thaliana | AT3G56320.1   Symbols:   PAP/OAS1 substrate-binding domain superfamily   chr3:20886193-20888624 REVERSE LENGTH=603                                                                                                                                                                                                                                                                                                                                                                    | 567 | 603 | 0         | 106.3 | 81.5 | 90.5 |
| Rsa1.0_00100.1.g4945.t1 | ref XP_002876362.1  predicted protein [Arabidopsis lyrata subsp. lyrata] gi 297322200 gb EFH52621.1  predicted protein [Arabidopsis lyrata subsp. lyrata]                                                                                                                                                                                 | 434 | 431  | 0         | 99.3  | 84.8 | 90.3 | predicted protein                                    | gbpln | Arabidopsis lyrata   | AT3G56330.1   Symbols:   N2.N2-dimethylguanosine tRNA methyltransferase   chr3:20890250-20891933 FORWARD LENGTH=433                                                                                                                                                                                                                                                                                                                                                                   | 434 | 433 | 0         | 99.8  | 84.8 | 91.5 |
| Rsa1.0_00100.1.g4946.t1 | ref XP_002878080.1  hypothetical protein ARALYDRAFT_324152 [Arabidopsis lyrata subsp. lyrata] gi 297323918 gb EFH54339.1  hypothetical protein ARALYDRAFT_324152 [Arabidopsis lyrata subsp. lyrata]                                                                                                                                       | 355 | 241  | 1.00E-116 | 67.9  | 56.6 | 58.9 | hypothetical protein ARALYDRAFT_324152               | gbpln | Arabidopsis lyrata   | AT3G56350.1   Symbols:   Iron/manganese superoxide dismutase family protein   chr3:20894155-20895625 REVERSE LENGTH=241                                                                                                                                                                                                                                                                                                                                                               | 355 | 241 | 1.00E-118 | 67.9  | 56.1 | 59.2 |

|                         |                                                                                                                                                                                                                                                                                                                                                                                                                                                                                                                                                                               |     |      |           |       |      |      |                                                 |       |                      |                                                                                                                                                                                                                                                                                                                                                                                                                                                                                                                                 |     |      |           |       |      |      |
|-------------------------|-------------------------------------------------------------------------------------------------------------------------------------------------------------------------------------------------------------------------------------------------------------------------------------------------------------------------------------------------------------------------------------------------------------------------------------------------------------------------------------------------------------------------------------------------------------------------------|-----|------|-----------|-------|------|------|-------------------------------------------------|-------|----------------------|---------------------------------------------------------------------------------------------------------------------------------------------------------------------------------------------------------------------------------------------------------------------------------------------------------------------------------------------------------------------------------------------------------------------------------------------------------------------------------------------------------------------------------|-----|------|-----------|-------|------|------|
| Rsa1.0_00100.1.g4947.t1 | ref[XP_002876363.1] hypothetical protein ARALYDRAFT_907078 [Arabidopsis lyrata subsp. lyrata] gi 297322201 gb EFH52622.1  hypothetical protein ARALYDRAFT_907078 [Arabidopsis lyrata subsp. lyrata]                                                                                                                                                                                                                                                                                                                                                                           | 228 | 233  | 2.00E-82  | 102.2 | 76.8 | 82.9 | hypothetical protein ARALYDRAFT_907078          | gbpln | Arabidopsis lyrata   | AT3G56360.1   Symbols:   unknown protein; FUNCTIONS IN: molecular_function unknown; INVOLVED IN: biological_process unknown; LOCATED IN: chloroplast; EXPRESSED IN: 24 plant structures; EXPRESSED DURING: 15 growth stages; BEST Arabidopsis thaliana protein match is: unknown protein (TAIR:AT5G05250.1); Has 45 Blast hits to 45 proteins in 13 species: Archaea - 0; Bacteria - 0; Metazoa - 0; Fungi - 0; Plants - 45; Viruses - 0; Other Eukaryotes - 0 (source: NCBI BLINK)   chr3:20896641-20897342 FORWARD LENGTH=233 | 228 | 233  | 7.00E-81  | 102.2 | 75.0 | 80.7 |
| Rsa1.0_00100.1.g4948.t1 | ref[NP_191196.1] leucine-rich repeat protein kinase-like protein [Arabidopsis thaliana] gi 7594515 emb CAB88040.1  putative protein [Arabidopsis thaliana] gi 19032341 dbj BAB85646.1  inflorescence and root apices receptor-like kinase [Arabidopsis thaliana] gi 19032343 dbj BAB85647.1  inflorescence and root apices receptor-like kinase [Arabidopsis thaliana] gi 224589604 gb ACN59335.1  leucine-rich repeat receptor-like protein kinase [Arabidopsis thaliana] gi 332645993 gb AEE79514.1  leucine-rich repeat protein kinase-like protein [Arabidopsis thaliana] | 959 | 964  | 0         | 100.5 | 89.2 | 94.8 | leucine-rich repeat protein kinase-like protein | gbpln | Arabidopsis thaliana | AT3G56370.1   Symbols:   Leucine-rich repeat protein kinase family protein   chr3:20909403-20902390 REVERSE LENGTH=964                                                                                                                                                                                                                                                                                                                                                                                                          | 959 | 964  | 0         | 100.5 | 89.2 | 94.8 |
| Rsa1.0_00100.1.g4949.t1 | gb EOA25718.1  hypothetical protein CARUB_v10019069mg, partial [Capsella rubella]                                                                                                                                                                                                                                                                                                                                                                                                                                                                                             | 125 | 148  | 4.00E-55  | 118.4 | 89.6 | 94.4 | hypothetical protein CARUB_v10019069mg, partial | gbpln | Capsella rubella     | AT3G56380.1   Symbols: ARR17, RR17   response regulator 17   chr3:20905480-20906368 FORWARD LENGTH=153                                                                                                                                                                                                                                                                                                                                                                                                                          | 125 | 153  | 8.00E-58  | 122.4 | 92.0 | 94.4 |
| Rsa1.0_00100.1.g4950.t1 | gb ACQ76810.1  WRKY transcription factor 70 [Brassica napus]                                                                                                                                                                                                                                                                                                                                                                                                                                                                                                                  | 278 | 276  | 1.00E-134 | 99.3  | 89.2 | 93.2 | WRKY transcription factor 70                    | gbpln | Brassica napus       | AT3G56400.1   Symbols: WRKY70, ATWRKY70   WRKY DNA-binding protein 70   chr3:20909082-20910409 REVERSE LENGTH=294                                                                                                                                                                                                                                                                                                                                                                                                               | 278 | 294  | 1.00E-101 | 105.8 | 66.2 | 76.6 |
| Rsa1.0_00100.1.g4951.t1 | ref[XP_002878083.1] hypothetical protein ARALYDRAFT_486082 [Arabidopsis lyrata subsp. lyrata] gi 297323921 gb EFH54342.1  hypothetical protein ARALYDRAFT_486082 [Arabidopsis lyrata subsp. lyrata]                                                                                                                                                                                                                                                                                                                                                                           | 645 | 1485 | 6.00E-44  | 230.2 | 20.2 | 23.4 | hypothetical protein ARALYDRAFT_486082          | gbpln | Arabidopsis lyrata   | AT3G56410.2   Symbols:   Protein of unknown function (DUF3133)   chr3:20916320-20921134 REVERSE LENGTH=1535                                                                                                                                                                                                                                                                                                                                                                                                                     | 645 | 1535 | 3.00E-44  | 238.0 | 18.6 | 21.4 |
| Rsa1.0_00100.1.g4952.t1 | # # # # # # # # - ---- # # # # # # #                                                                                                                                                                                                                                                                                                                                                                                                                                                                                                                                          |     |      |           |       |      |      |                                                 |       |                      |                                                                                                                                                                                                                                                                                                                                                                                                                                                                                                                                 |     |      |           |       |      |      |
| Rsa1.0_00100.1.g4953.t1 | gb EOA24904.1  hypothetical protein CARUB_v10018194mg [Capsella rubella]                                                                                                                                                                                                                                                                                                                                                                                                                                                                                                      | 129 | 147  | 7.00E-68  | 114.0 | 96.9 | 99.2 | hypothetical protein CARUB_v10018194mg          | gbpln | Capsella rubella     | AT3G56490.1   Symbols: HIT3, HINT1   HIS triad family protein 3   chr3:20941532-20943129 FORWARD LENGTH=147                                                                                                                                                                                                                                                                                                                                                                                                                     | 129 | 147  | 8.00E-70  | 114.0 | 96.1 | 98.4 |
| Rsa1.0_00100.1.g4954.t1 | ref[XP_002878090.1] hypothetical protein ARALYDRAFT_486092 [Arabidopsis lyrata subsp. lyrata] gi 297323928 gb EFH54349.1  hypothetical protein ARALYDRAFT_486092 [Arabidopsis lyrata subsp. lyrata]                                                                                                                                                                                                                                                                                                                                                                           | 259 | 256  | 1.00E-122 | 98.8  | 87.3 | 94.2 | hypothetical protein ARALYDRAFT_486092          | gbpln | Arabidopsis lyrata   | AT3G56510.2   Symbols:   RNA-binding (RRM/RBD/RNP motifs) family protein   chr3:20944348-20946235 REVERSE LENGTH=257                                                                                                                                                                                                                                                                                                                                                                                                            | 259 | 257  | 1.00E-122 | 99.2  | 86.1 | 94.2 |
| Rsa1.0_00100.1.g4955.t1 | ref[XP_002878093.1] hypothetical protein ARALYDRAFT_486095 [Arabidopsis lyrata subsp. lyrata] gi 297323931 gb EFH54352.1  hypothetical protein ARALYDRAFT_486095 [Arabidopsis lyrata subsp. lyrata]                                                                                                                                                                                                                                                                                                                                                                           | 282 | 301  | 5.00E-51  | 106.7 | 47.5 | 63.5 | hypothetical protein ARALYDRAFT_486095          | gbpln | Arabidopsis lyrata   | AT3G56530.1   Symbols: anac064, NAC064   NAC domain containing protein 64   chr3:20948911-20950045 REVERSE LENGTH=319                                                                                                                                                                                                                                                                                                                                                                                                           | 282 | 319  | 2.00E-47  | 113.1 | 44.3 | 58.9 |
| Rsa1.0_00100.1.g4956.t1 | ref[NP_191214.1] pentatricopeptide repeat-containing protein [Arabidopsis thaliana] gi 75180975 sp O9LXY5.1 PP284, ARAT H RecName: Full=Pentatricopeptide repeat-containing protein At3g56550 gi 7594533 emb CAB88058.1  putative protein [Arabidopsis thaliana] gi 91806586 gb ABE6020.1  pentatricopeptide repeat-containing protein [Arabidopsis thaliana] gi 332646013 gb AEE79534.1  pentatricopeptide repeat-containing protein [Arabidopsis thaliana]                                                                                                                  | 578 | 581  | 0         | 100.5 | 82.9 | 91.0 | pentatricopeptide repeat-containing protein     | gbpln | Arabidopsis thaliana | AT3G56550.1   Symbols:   Pentatricopeptide repeat (PPR) superfamily protein   chr3:20952896-20954641 REVERSE LENGTH=581                                                                                                                                                                                                                                                                                                                                                                                                         | 578 | 581  | 0         | 100.5 | 82.9 | 91.0 |

|                         |                                                                                                                                                                                                                                                                                                                                                                                                                                                                                                                                                                                                                                                                                                                                                         |      |      |           |       |      |      |                                                                                                                                             |       |                      |                                                                                                                                                    |      |      |           |       |      |      |
|-------------------------|---------------------------------------------------------------------------------------------------------------------------------------------------------------------------------------------------------------------------------------------------------------------------------------------------------------------------------------------------------------------------------------------------------------------------------------------------------------------------------------------------------------------------------------------------------------------------------------------------------------------------------------------------------------------------------------------------------------------------------------------------------|------|------|-----------|-------|------|------|---------------------------------------------------------------------------------------------------------------------------------------------|-------|----------------------|----------------------------------------------------------------------------------------------------------------------------------------------------|------|------|-----------|-------|------|------|
| Rsa1.0_00100.1.g4957.t1 | refXP_002886390.1  hypothetical protein ARALYDRAFT_893070 [Arabidopsis lyrata subsp. lyrata] gi 29732221 gb EFH62649.1                                                                                                                                                                                                                                                                                                                                                                                                                                                                                                                                                                                                                                  | 192  | 298  | 2.00E-42  | 155.2 | 49.5 | 65.6 | hypothetical protein ARALYDRAFT_893070                                                                                                      | gbpln | Arabidopsis lyrata   | AT2G42470.1   Symbols:   TRAF-like family protein   chr2:17679887-17685187 REVERSE LENGTH=898                                                      | 192  | 898  | 7.00E-34  | 467.7 | 46.9 | 64.6 |
| Rsa1.0_00100.1.g4958.t1 | hypothetical protein ARALYDRAFT_893070 [Arabidopsis lyrata subsp. lyrata] refXP_002876372.1  SET domain-containing protein [Arabidopsis lyrata subsp. lyrata] gi 29732221 gb EFH52631.1  SET domain-containing protein [Arabidopsis lyrata subsp. lyrata]                                                                                                                                                                                                                                                                                                                                                                                                                                                                                               | 484  | 518  | 0         | 107.0 | 77.5 | 87.8 | SET domain-containing protein                                                                                                               | gbpln | Arabidopsis lyrata   | AT3G56570.1   Symbols:   SET domain-containing protein   chr3:20958660-20961137 FORWARD LENGTH=531                                                 | 484  | 531  | 0         | 109.7 | 77.7 | 88.0 |
| Rsa1.0_00100.1.g4959.t1 | refNP_567039.1  RING/U-box domain-containing protein [Arabidopsis thaliana] gi 42572705 refNP_974448.1  RING/U-box domain-containing protein [Arabidopsis thaliana] gi 79315364 refNP_001030874.1  RING/U-box domain-containing protein [Arabidopsis thaliana] gi 15028361 gb AAK76657.1  unknown protein [Arabidopsis thaliana] gi 20465561 gb AAM20263.1  unknown protein [Arabidopsis thaliana] gi 66865932 gb AAY57600.1  RING finger family protein [Arabidopsis thaliana] gi 332646016 gb AEE79537.1  RING/U-box domain-containing protein [Arabidopsis thaliana] gi 332646017 gb AEE79538.1  RING/U-box domain-containing protein [Arabidopsis thaliana] gi 332646018 gb AEE79539.1  RING/U-box domain-containing protein [Arabidopsis thaliana] | 323  | 320  | 1.00E-116 | 99.1  | 73.7 | 82.7 | RING/U-box domain-containing protein                                                                                                        | gbpln | Arabidopsis thaliana | AT3G56580.3   Symbols:   RING/U-box superfamily protein   chr3:20962563-20963525 FORWARD LENGTH=320                                                | 323  | 320  | 1.00E-119 | 99.1  | 73.7 | 82.7 |
| Rsa1.0_00100.1.g4960.t1 | refXP_002878091.1  hypothetical protein ARALYDRAFT_324164 [Arabidopsis lyrata subsp. lyrata] gi 297323939 gb EFH54350.1  hypothetical protein ARALYDRAFT_324164 [Arabidopsis lyrata subsp. lyrata]                                                                                                                                                                                                                                                                                                                                                                                                                                                                                                                                                      | 398  | 167  | 3.00E-38  | 42.0  | 22.6 | 26.9 | hypothetical protein ARALYDRAFT_324164                                                                                                      | gbpln | Arabidopsis lyrata   | AT3G56520.1   Symbols:   NAC (No Apical Meristem) domain transcriptional regulator superfamily protein   chr3:20947107-20947731 REVERSE LENGTH=175 | 398  | 175  | 2.00E-40  | 44.0  | 21.9 | 26.4 |
| Rsa1.0_00100.1.g4961.t1 | refNP_191218.2  hydroxyproline-rich glycoprotein family protein [Arabidopsis thaliana] gi 110741964 dbj BAE98922.1  hypothetical protein [Arabidopsis thaliana] gi 332646019 gb AEE79540.1  hydroxyproline-rich glycoprotein family protein [Arabidopsis thaliana]                                                                                                                                                                                                                                                                                                                                                                                                                                                                                      | 507  | 477  | 1.00E-175 | 94.1  | 72.8 | 79.1 | hydroxyproline-rich glycoprotein family protein                                                                                             | gbpln | Arabidopsis thaliana | AT3G56590.1   Symbols:   hydroxyproline-rich glycoprotein family protein   chr3:20965105-20967675 FORWARD LENGTH=477                               | 507  | 477  | 1.00E-178 | 94.1  | 72.8 | 79.1 |
| Rsa1.0_00100.1.g4962.t1 | refXP_002876374.1  inositol or phosphatidylinositol kinase [Arabidopsis lyrata subsp. lyrata] gi 297322212 gb EFH52633.1  inositol or phosphatidylinositol kinase [Arabidopsis lyrata subsp. lyrata]                                                                                                                                                                                                                                                                                                                                                                                                                                                                                                                                                    | 534  | 535  | 0         | 100.2 | 81.1 | 87.5 | inositol or phosphatidylinositol kinase                                                                                                     | gbpln | Arabidopsis lyrata   | AT3G56600.2   Symbols:   Protein kinase superfamily protein   chr3:20969087-20970697 FORWARD LENGTH=536                                            | 534  | 536  | 0         | 100.4 | 81.3 | 87.8 |
| Rsa1.0_00100.1.g4963.t1 | refNP_191221.1  nodulin MtN21 /EamA-like transporter protein [Arabidopsis thaliana] gi 75180969 sp Q9LXX8.1 WTR27_ARAT H RecName: Full=WAT1-related protein At3g56620 gi 7594540 emb CAB88065.1  nodulin-like protein [Arabidopsis thaliana] gi 332646024 gb AEE79545.1  WAT1-related protein [Arabidopsis thaliana]                                                                                                                                                                                                                                                                                                                                                                                                                                    | 383  | 377  | 1.00E-176 | 98.4  | 83.3 | 87.7 | nodulin MtN21 /EamA-like transporter protein                                                                                                | gbpln | Arabidopsis thaliana | AT3G56620.1   Symbols:   nodulin MtN21 /EamA-like transporter family protein   chr3:20972696-20974495 REVERSE LENGTH=377                           | 383  | 377  | 1.00E-179 | 98.4  | 83.3 | 87.7 |
| Rsa1.0_00100.1.g4964.t1 | gb EOA25848.1  hypothetical protein CARUB_v10019225mg [Capsella rubella]                                                                                                                                                                                                                                                                                                                                                                                                                                                                                                                                                                                                                                                                                | 789  | 790  | 0         | 100.1 | 94.6 | 97.6 | hypothetical protein CARUB_v10019225mg                                                                                                      | gbpln | Capsella rubella     | AT3G56640.1   Symbols: SEC15A   exocyst complex component sec15A   chr3:20981964-20984336 FORWARD LENGTH=790                                       | 789  | 790  | 0         | 100.1 | 93.8 | 97.5 |
| Rsa1.0_00100.1.g4965.t1 | refXP_002878101.1  CIP111 [Arabidopsis lyrata subsp. lyrata] gi 297323939 gb EFH54360.1  CIP111 [Arabidopsis lyrata subsp. lyrata]                                                                                                                                                                                                                                                                                                                                                                                                                                                                                                                                                                                                                      | 1022 | 1025 | 0         | 100.3 | 84.4 | 89.5 | CIP111                                                                                                                                      | gbpln | Arabidopsis lyrata   | AT3G56690.1   Symbols: CIP111   Cam interacting protein 111   chr3:20993869-20998531 REVERSE LENGTH=1022                                           | 1022 | 1022 | 0         | 100.0 | 83.0 | 88.8 |
| Rsa1.0_00100.1.g4966.t1 | sp B9TSP7.1 FACR6 ARATH RecName: Full=Fatty acyl-CoA reductase 6, chloroplastic; Flags: Precursor gi 167077488 gb ABZ10953.1  fatty acyl CoA reductase long isoform [Arabidopsis thaliana]                                                                                                                                                                                                                                                                                                                                                                                                                                                                                                                                                              | 463  | 548  | 0         | 118.4 | 73.4 | 83.2 | RecName: Full=Fatty acyl-CoA reductase 6, chloroplastic; Flags: Precursor gi 167077488 gb ABZ10953.1  fatty acyl CoA reductase long isoform | gbpln | Arabidopsis thaliana | AT3G56700.1   Symbols: FAR6   fatty acid reductase 6   chr3:20999731-21002058 REVERSE LENGTH=527                                                   | 463  | 527  | 1.00E-169 | 113.8 | 69.5 | 78.8 |



|                         |                                                                                                                                                                                                                                                                                                                                                                                                                                                                                                                                                                                                                                                                                                                                                                                                                                                                                                         |     |      |           |        |      |      |                                                   |       |                         |                                                                                                                                                                                                                                                                                                                                                                                                      |     |     |           |       |      |      |
|-------------------------|---------------------------------------------------------------------------------------------------------------------------------------------------------------------------------------------------------------------------------------------------------------------------------------------------------------------------------------------------------------------------------------------------------------------------------------------------------------------------------------------------------------------------------------------------------------------------------------------------------------------------------------------------------------------------------------------------------------------------------------------------------------------------------------------------------------------------------------------------------------------------------------------------------|-----|------|-----------|--------|------|------|---------------------------------------------------|-------|-------------------------|------------------------------------------------------------------------------------------------------------------------------------------------------------------------------------------------------------------------------------------------------------------------------------------------------------------------------------------------------------------------------------------------------|-----|-----|-----------|-------|------|------|
| Rsa1.0.00100.1.g4975.t1 | ref NP_191244.1  abscisic acid-insensitive 5-like protein 2 [Arabidopsis thaliana]<br>gi 75334900 sp Q9LES3.1 A15L2_ARATH<br>RecName: Full=ABSCISIC ACID-<br>INSENSITIVE 5-like protein 2; AltName:<br>Full=ABA-responsive element-binding<br>protein 3; AltName: Full=Dc3 promoter-<br>binding factor 3; Short=AtDPBF3;<br>AltName: Full=bZIP transcription factor<br>66; Short=AtbZIP66<br>gi 9663004 emb CAC00748.1  promoter-<br>binding factor-like protein [Arabidopsis<br>thaliana] gi 9967421 dbj BAB12406.1 <br>ABA-responsive element binding<br>protein 3 (AREB3) [Arabidopsis<br>thaliana] gi 17064744 gb AAL32526.1 <br>promoter-binding factor-like protein<br>[Arabidopsis thaliana]<br>gi 20148683 gb AM10232.1  promoter-<br>binding factor-like protein [Arabidopsis<br>thaliana] gi 332646053 gb AEE79574.1 <br>abscisic acid-insensitive 5-like protein<br>2 [Arabidopsis thaliana] | 287 | 297  | 1.00E-137 | 103.5  | 87.8 | 92.7 | abscisic acid-<br>insensitive 5-like<br>protein 2 | gbpln | Arabidopsis<br>thaliana | AT3G56850.1   Symbols: AREB3, DPBF3  <br>ABA-responsive element binding protein 3  <br>chr3:21046554-21047894 REVERSE<br>LENGTH=297                                                                                                                                                                                                                                                                  | 287 | 297 | 1.00E-140 | 103.5 | 87.8 | 92.7 |
| Rsa1.0.00100.1.g4976.t1 | dbj BAJ33737.1  unnamed protein<br>product [Thellungiella halophila]                                                                                                                                                                                                                                                                                                                                                                                                                                                                                                                                                                                                                                                                                                                                                                                                                                    | 464 | 479  | 0         | 103.2  | 73.7 | 78.2 | unnamed protein<br>product                        | ----  | ----                    | AT3G56860.5   Symbols: UBA2A   UBP1-<br>associated protein 2A   chr3:21050708-<br>21052144 REVERSE LENGTH=478<br>AT3G56870.1   Symbols:   unknown protein;<br>Has 204 Blast hits to 201 proteins in 58<br>species: Archae - 0; Bacteria - 10; Metazoa<br>- 72; Fungi - 8; Plants - 41; Viruses - 0;<br>Other Eukaryotes - 73 (source: NCBI BLINK).<br>  chr3:21053077-21055518 FORWARD<br>LENGTH=700 | 464 | 478 | 0         | 103.0 | 73.5 | 78.2 |
| Rsa1.0.00100.1.g4977.t1 | gb EOA23551.1  hypothetical protein<br>CARUB_v10016745mg [Capsella rubella]                                                                                                                                                                                                                                                                                                                                                                                                                                                                                                                                                                                                                                                                                                                                                                                                                             | 811 | 722  | 0         | 89.0   | 47.8 | 56.6 | hypothetical protein<br>CARUB_v10016745mg         | gbpln | Capsella<br>rubella     | AT3G62850.1   Symbols:   zinc finger<br>protein-related   chr3:23237487-23239155<br>REVERSE LENGTH=472                                                                                                                                                                                                                                                                                               | 811 | 700 | 1.00E-180 | 86.3  | 46.5 | 54.7 |
| Rsa1.0.00100.1.g4978.t1 | ref XP_002883443.1  hypothetical<br>protein ARALYDRAFT_342502<br>[Arabidopsis lyrata subsp. lyrata]<br>gi 297329283 gb EFH59702.1 <br>hypothetical protein<br>ARALYDRAFT_342502 [Arabidopsis<br>lyrata subsp. lyrata]                                                                                                                                                                                                                                                                                                                                                                                                                                                                                                                                                                                                                                                                                   | 281 | 454  | 1.00E-19  | 161.6  | 23.1 | 35.9 | hypothetical protein<br>ARALYDRAFT_342502         | gbpln | Arabidopsis<br>lyrata   | AT3G62850.1   Symbols:   zinc finger<br>protein-related   chr3:23237487-23239155<br>REVERSE LENGTH=472                                                                                                                                                                                                                                                                                               | 281 | 472 | 6.00E-17  | 168.0 | 22.1 | 35.2 |
| Rsa1.0.00100.1.g4979.t1 | emb CAB39638.1  RNA-directed DNA<br>polymerase-like protein [Arabidopsis<br>thaliana] gi 7267666 emb CAB78094.1 <br>RNA-directed DNA polymerase-like<br>protein [Arabidopsis thaliana]                                                                                                                                                                                                                                                                                                                                                                                                                                                                                                                                                                                                                                                                                                                  | 120 | 1274 | 3.00E-17  | 1061.7 | 43.3 | 58.3 | RNA-directed DNA<br>polymerase-like<br>protein    | gbpln | Arabidopsis<br>thaliana | AT4G09490.1   Symbols:   Polynucleotidyl<br>transferase, ribonuclease H-like superfamily<br>protein   chr4:6015583-6016575 REVERSE<br>LENGTH=170                                                                                                                                                                                                                                                     | 120 | 170 | 2.00E-11  | 141.7 | 35.8 | 52.5 |
| Rsa1.0.00100.1.g4980.t1 | ref XP_002876384.1  VQ motif-<br>containing protein [Arabidopsis lyrata<br>subsp. lyrata]<br>gi 297322222 gb EFH52643.1  VQ motif-<br>containing protein [Arabidopsis lyrata<br>subsp. lyrata]                                                                                                                                                                                                                                                                                                                                                                                                                                                                                                                                                                                                                                                                                                          | 231 | 242  | 1.00E-90  | 104.8  | 80.1 | 88.3 | VQ motif-containing<br>protein                    | gbpln | Arabidopsis<br>lyrata   | AT3G56880.1   Symbols:   VQ motif-<br>containing protein   chr3:21060044-21060781<br>FORWARD LENGTH=245                                                                                                                                                                                                                                                                                              | 231 | 245 | 3.00E-92  | 106.1 | 77.9 | 85.7 |
| Rsa1.0.00100.1.g4981.t1 | ref XP_002878117.1  hypothetical<br>protein ARALYDRAFT_324196<br>[Arabidopsis lyrata subsp. lyrata]<br>gi 297323955 gb EFH54376.1 <br>hypothetical protein<br>ARALYDRAFT_324196 [Arabidopsis<br>lyrata subsp. lyrata]                                                                                                                                                                                                                                                                                                                                                                                                                                                                                                                                                                                                                                                                                   | 158 | 170  | 5.00E-68  | 107.6  | 81.0 | 90.5 | hypothetical protein<br>ARALYDRAFT_324196         | gbpln | Arabidopsis<br>lyrata   | AT3G56891.1   Symbols:   Heavy metal<br>transport/detoxification superfamily protein  <br>chr3:21064199-21064922 REVERSE<br>LENGTH=166                                                                                                                                                                                                                                                               | 158 | 166 | 9.00E-67  | 105.1 | 79.1 | 88.6 |
| Rsa1.0.00100.1.g4982.t1 | ref NP_191249.2  aladin-related /<br>adracalin-related protein [Arabidopsis<br>thaliana] gi 26452390 dbj BAC43280.1 <br>unknown protein [Arabidopsis thaliana]<br>gi 28951013 gb AA063430.1  At3g56900<br>[Arabidopsis thaliana]<br>gi 332646063 gb AEE79584.1  aladin-<br>related / adracalin-related protein<br>[Arabidopsis thaliana]                                                                                                                                                                                                                                                                                                                                                                                                                                                                                                                                                                | 444 | 447  | 0         | 100.7  | 87.4 | 93.2 | aladin-related /<br>adracalin-related<br>protein  | gbpln | Arabidopsis<br>thaliana | AT3G56900.1   Symbols:   Transducin/WD40<br>repeat-like superfamily protein  <br>chr3:2106330-21069343 FORWARD<br>LENGTH=447                                                                                                                                                                                                                                                                         | 444 | 447 | 0         | 100.7 | 87.4 | 93.2 |
| Rsa1.0.00100.1.g4983.t1 | gb EOA24894.1  hypothetical protein<br>CARUB_v10018185mg [Capsella rubella]                                                                                                                                                                                                                                                                                                                                                                                                                                                                                                                                                                                                                                                                                                                                                                                                                             | 144 | 151  | 2.00E-32  | 104.9  | 84.0 | 90.3 | hypothetical protein<br>CARUB_v10018185mg         | gbpln | Capsella<br>rubella     | AT3G56910.1   Symbols: PSRP5   plastid-<br>specific 50S ribosomal protein 5  <br>chr3:21069558-21070257 REVERSE<br>LENGTH=148                                                                                                                                                                                                                                                                        | 144 | 148 | 5.00E-34  | 102.8 | 84.0 | 88.2 |
| Rsa1.0.00100.1.g4984.t6 | emb CAC00755.1  putative protein<br>[Arabidopsis thaliana]                                                                                                                                                                                                                                                                                                                                                                                                                                                                                                                                                                                                                                                                                                                                                                                                                                              | 259 | 319  | 1.00E-113 | 123.2  | 76.1 | 86.5 | putative protein                                  | gbpln | Arabidopsis<br>thaliana | AT3G56920.1   Symbols:   DHHC-type zinc<br>finger family protein   chr3:21070834-<br>21072441 FORWARD LENGTH=338                                                                                                                                                                                                                                                                                     | 259 | 338 | 1.00E-112 | 130.5 | 76.1 | 86.5 |
| Rsa1.0.00100.1.g4985.t1 | gb EOA23934.1  hypothetical protein<br>CARUB_v10017149mg [Capsella rubella]<br>gi 482559744 gb EOA23935.1 <br>hypothetical protein<br>CARUB_v10017149mg [Capsella rubella]                                                                                                                                                                                                                                                                                                                                                                                                                                                                                                                                                                                                                                                                                                                              | 468 | 474  | 0         | 101.3  | 85.3 | 91.7 | hypothetical protein<br>CARUB_v10017149mg         | gbpln | Capsella<br>rubella     | AT3G56930.1   Symbols:   DHHC-type zinc<br>finger family protein   chr3:21073805-<br>21075873 FORWARD LENGTH=477                                                                                                                                                                                                                                                                                     | 468 | 477 | 0         | 101.9 | 83.8 | 90.0 |

|                         |                                                                                                                                                                                                                                                                                                                                                                                                                                                                                                                                                                                                                                                                                                                                                                                                                                                                                                                                                                                              |     |     |           |       |      |      |                                                 |       |                      |                                                                                                                                             |     |     |           |       |      |      |
|-------------------------|----------------------------------------------------------------------------------------------------------------------------------------------------------------------------------------------------------------------------------------------------------------------------------------------------------------------------------------------------------------------------------------------------------------------------------------------------------------------------------------------------------------------------------------------------------------------------------------------------------------------------------------------------------------------------------------------------------------------------------------------------------------------------------------------------------------------------------------------------------------------------------------------------------------------------------------------------------------------------------------------|-----|-----|-----------|-------|------|------|-------------------------------------------------|-------|----------------------|---------------------------------------------------------------------------------------------------------------------------------------------|-----|-----|-----------|-------|------|------|
| Rsa1.0_00100.1.g4986.t1 | gb EOA24121.1  hypothetical protein CARUB_v10017355mg [Capsella rubella]                                                                                                                                                                                                                                                                                                                                                                                                                                                                                                                                                                                                                                                                                                                                                                                                                                                                                                                     | 409 | 409 | 0         | 100.0 | 94.4 | 96.3 | hypothetical protein CARUB_v10017355mg          | gbpln | Capsella rubella     | AT3G56940.1   Symbols: CRD1, CHL27, ACSF1 dicarboxylate diiron protein, putative (Ord1)   chr3:21076594-21078269 FORWARD LENGTH=409         | 409 | 409 | 0         | 100.0 | 92.7 | 95.8 |
| Rsa1.0_00100.1.g4987.t1 | ref NP_001190113.1  putative aquaporin SIP2-1 [Arabidopsis thaliana] gi 332646071 gb AEE79592.1  putative aquaporin SIP2-1 [Arabidopsis thaliana]                                                                                                                                                                                                                                                                                                                                                                                                                                                                                                                                                                                                                                                                                                                                                                                                                                            | 237 | 260 | 1.00E-110 | 109.7 | 81.9 | 92.0 | putative aquaporin SIP2-1                       | gbpln | Arabidopsis thaliana | AT3G56950.2   Symbols: SIP2;1   small and basic intrinsic protein 2;1   chr3:21078411-21079644 REVERSE LENGTH=260                           | 237 | 260 | 1.00E-113 | 109.7 | 81.9 | 92.0 |
| Rsa1.0_00100.1.g4988.t1 | ref XP_002882328.1  hypothetical protein ARALYDRAFT_340564 [Arabidopsis lyrata subsp. lyrata] gi 297328188 gb EFH58587.1  hypothetical protein ARALYDRAFT_340564 [Arabidopsis lyrata subsp. lyrata]                                                                                                                                                                                                                                                                                                                                                                                                                                                                                                                                                                                                                                                                                                                                                                                          | 489 | 510 | 0         | 104.3 | 80.8 | 88.3 | hypothetical protein ARALYDRAFT_340564          | gbpln | Arabidopsis lyrata   | AT3G04050.1   Symbols:   Pyruvate kinase family protein   chr3:1049795-1051522 FORWARD LENGTH=510                                           | 489 | 510 | 0         | 104.3 | 80.4 | 88.3 |
| Rsa1.0_00100.1.g4989.t1 | ref NP_191255.1  phosphatidylinositol-4-phosphate 5-kinase 4 [Arabidopsis thaliana] gi 75181907 sp O9M1K2.1 PI5K4_ARATH RecName: Full=Phosphatidylinositol 4-phosphate 5-kinase 4; Short=AtPIP5K4; AltName: Full=1-phosphatidylinositol 4-phosphate kinase 4; AltName: Full=Diphosphoinositide kinase 4; AltName: Full=PtdIns(4)P-5-kinase 4 gi 6911866 emb CAB72166.1  phosphatidylinositol-4-phosphate 5-kinase-like protein [Arabidopsis thaliana] gi 332646072 gb AEE79593.1  phosphatidylinositol-4-phosphate 5-kinase 4 [Arabidopsis thaliana] ref NP_201050.2  uncharacterized protein [Arabidopsis thaliana] gi 20385491 gb AAM21312.1 AF371327.1 EMB514 [Arabidopsis thaliana] gi 21593438 gb AAM65405.1  unknown [Arabidopsis thaliana] gi 30793885 gb AAP40395.1  unknown protein [Arabidopsis thaliana] gi 30794104 gb AAP40494.1  unknown protein [Arabidopsis thaliana] gi 51968752 dbj BAD43068.1  unnamed protein product [Arabidopsis thaliana] gi 110739286 dbj BAF01556.1 | 781 | 779 | 0         | 99.7  | 93.3 | 96.9 | phosphatidylinositol-4-phosphate 5-kinase 4     | gbpln | Arabidopsis thaliana | AT3G56960.1   Symbols: PIP5K4   phosphatidylinositol monophosphate 5 kinase 4   chr3:21080957-21083885 FORWARD LENGTH=779                   | 781 | 779 | 0         | 99.7  | 93.3 | 96.9 |
| Rsa1.0_00101.1.g4990.t1 | hypothetical protein [Arabidopsis thaliana] gi 332010225 gb AED97608.1  uncharacterized protein AT5G62440 [Arabidopsis thaliana]                                                                                                                                                                                                                                                                                                                                                                                                                                                                                                                                                                                                                                                                                                                                                                                                                                                             | 164 | 202 | 1.00E-59  | 123.2 | 67.1 | 70.1 | uncharacterized protein                         | gbpln | Arabidopsis thaliana | AT5G62440.1   Symbols:   Protein of unknown function (DUF3223)   chr5:25072620-25073917 REVERSE LENGTH=202                                  | 164 | 202 | 4.00E-62  | 123.2 | 67.1 | 70.1 |
| Rsa1.0_00101.1.g4991.t1 | gb EOA14154.1  hypothetical protein CARUB_v10027301mg, partial [Capsella rubella] ref NP_201044.1  NAC-domain protein 101 [Arabidopsis thaliana] gi 8809651 dbj BAA97202.1  NAM (no apical meristem)-like protein [Arabidopsis thaliana] gi 67633908 gb AA78878.1  no apical meristem family protein [Arabidopsis thaliana] gi 111074488 gb ABH04617.1  At5g62380 [Arabidopsis thaliana] gi 332010219 gb AED97602.1  NAC-domain protein 101 [Arabidopsis thaliana]                                                                                                                                                                                                                                                                                                                                                                                                                                                                                                                           | 122 | 152 | 4.00E-62  | 124.6 | 96.7 | 96.7 | hypothetical protein CARUB_v10027301mg, partial | gbpln | Capsella rubella     | AT3G47370.3   Symbols:   Ribosomal protein S10p/S20e family protein   chr3:17453671-17454437 REVERSE LENGTH=122                             | 122 | 122 | 7.00E-64  | 100.0 | 95.9 | 95.9 |
| Rsa1.0_00101.1.g4992.t1 | ref NP_201044.1  NAC-domain protein 101 [Arabidopsis thaliana] gi 8809651 dbj BAA97202.1  NAM (no apical meristem)-like protein [Arabidopsis thaliana] gi 67633908 gb AA78878.1  no apical meristem family protein [Arabidopsis thaliana] gi 111074488 gb ABH04617.1  At5g62380 [Arabidopsis thaliana] gi 332010219 gb AED97602.1  NAC-domain protein 101 [Arabidopsis thaliana]                                                                                                                                                                                                                                                                                                                                                                                                                                                                                                                                                                                                             | 317 | 348 | 1.00E-153 | 109.8 | 83.9 | 90.5 | NAC-domain protein 101                          | gbpln | Arabidopsis thaliana | AT5G62380.1   Symbols: VND6, ANAC101, NAC101   NAC-domain protein 101   chr5:25050684-25051858 FORWARD LENGTH=348                           | 317 | 348 | 1.00E-155 | 109.8 | 83.9 | 90.5 |
| Rsa1.0_00101.1.g4993.t1 | #                                                                                                                                                                                                                                                                                                                                                                                                                                                                                                                                                                                                                                                                                                                                                                                                                                                                                                                                                                                            | #   | #   | #         | #     | #    | #    | -                                               | ----  | ----                 | #                                                                                                                                           | #   | #   | #         | #     | #    |      |
| Rsa1.0_00101.1.g4994.t1 | gb EOA13946.1  hypothetical protein CARUB_v10027064mg [Capsella rubella] ref XP_002864781.1  hypothetical protein ARALYDRAFT_332462 [Arabidopsis lyrata subsp. lyrata] gi 297310616 gb EFH41040.1                                                                                                                                                                                                                                                                                                                                                                                                                                                                                                                                                                                                                                                                                                                                                                                            | 202 | 228 | 3.00E-89  | 112.9 | 83.2 | 87.6 | hypothetical protein CARUB_v10027064mg          | gbpln | Capsella rubella     | AT5G62360.1   Symbols:   Plant invertase/pectin methyltransferase inhibitor superfamily protein   chr5:25040699-25041310 FORWARD LENGTH=203 | 202 | 203 | 4.00E-86  | 100.5 | 82.2 | 88.1 |
| Rsa1.0_00101.1.g4995.t1 | hypothetical protein ARALYDRAFT_332462 [Arabidopsis lyrata subsp. lyrata]                                                                                                                                                                                                                                                                                                                                                                                                                                                                                                                                                                                                                                                                                                                                                                                                                                                                                                                    | 244 | 235 | 1.00E-111 | 96.3  | 85.7 | 90.6 | hypothetical protein ARALYDRAFT_332462          | gbpln | Arabidopsis lyrata   | AT5G62280.1   Symbols:   Protein of unknown function (DUF1442)   chr5:25017165-25017985 FORWARD LENGTH=236                                  | 244 | 236 | 1.00E-108 | 96.7  | 87.7 | 91.8 |
| Rsa1.0_00101.1.g4996.t1 | gb ABD65101.1  hypothetical protein 31.t00082 [Brassica oleracea]                                                                                                                                                                                                                                                                                                                                                                                                                                                                                                                                                                                                                                                                                                                                                                                                                                                                                                                            | 249 | 226 | 2.00E-46  | 90.8  | 41.0 | 59.0 | hypothetical protein 31.t00082                  | gbpln | Brassica oleracea    | AT1G52950.1   Symbols:   Nucleic acid-binding, OB-fold-like protein   chr1:19725483-19728007 FORWARD LENGTH=566                             | 249 | 566 | 4.00E-11  | 227.3 | 22.1 | 47.4 |

|                         |                                                                                                                                                                                                                                                                                                                                                                                                                              |      |      |           |       |      |      |                                                                                    |       |                      |                                                                                                                                                                                                                                                                                                                                                                              |      |      |           |       |      |      |
|-------------------------|------------------------------------------------------------------------------------------------------------------------------------------------------------------------------------------------------------------------------------------------------------------------------------------------------------------------------------------------------------------------------------------------------------------------------|------|------|-----------|-------|------|------|------------------------------------------------------------------------------------|-------|----------------------|------------------------------------------------------------------------------------------------------------------------------------------------------------------------------------------------------------------------------------------------------------------------------------------------------------------------------------------------------------------------------|------|------|-----------|-------|------|------|
| Rsa1.0_00101.1.g4997.t1 | gb ABD65118.1  hypothetical protein 31.t00031 [Brassica oleracea]                                                                                                                                                                                                                                                                                                                                                            | 525  | 467  | 1.00E-144 | 89.0  | 49.0 | 60.0 | hypothetical protein 31.t00031                                                     | gbpln | Brassica oleracea    | AT1G52950.1   Symbols:   Nucleic acid-binding, OB-fold-like protein   chr1:19725483-19728007 FORWARD LENGTH=566                                                                                                                                                                                                                                                              | 525  | 566  | 6.00E-80  | 107.8 | 33.3 | 54.3 |
| Rsa1.0_00101.1.g4998.t1 | gb ABD65118.1  hypothetical protein 31.t00031 [Brassica oleracea]                                                                                                                                                                                                                                                                                                                                                            | 522  | 467  | 1.00E-141 | 89.5  | 47.9 | 60.7 | hypothetical protein 31.t00031                                                     | gbpln | Brassica oleracea    | AT1G52950.1   Symbols:   Nucleic acid-binding, OB-fold-like protein   chr1:19725483-19728007 FORWARD LENGTH=566                                                                                                                                                                                                                                                              | 522  | 566  | 2.00E-82  | 108.4 | 33.9 | 54.6 |
| Rsa1.0_00101.1.g4999.t1 | gb EOA15396.1  hypothetical protein CARUB.v10006640mg [Capsella rubella]                                                                                                                                                                                                                                                                                                                                                     | 170  | 171  | 6.00E-73  | 100.6 | 78.2 | 90.6 | hypothetical protein CARUB.v10006640mg                                             | gbpln | Capsella rubella     | AT4G25040.1   Symbols:   Uncharacterised protein family (UPF0497)   chr4:12868320-12869319 FORWARD LENGTH=170                                                                                                                                                                                                                                                                | 170  | 170  | 8.00E-75  | 100.0 | 82.4 | 91.2 |
| Rsa1.0_00101.1.g5000.t1 | gb EOA17627.1  hypothetical protein CARUB.v10005992mg [Capsella rubella]                                                                                                                                                                                                                                                                                                                                                     | 135  | 136  | 7.00E-58  | 100.7 | 88.9 | 93.3 | hypothetical protein CARUB.v10005992mg                                             | gbpln | Capsella rubella     | AT4G25050.1   Symbols: ACP4   acyl carrier protein 4   chr4:12870178-12871024 FORWARD LENGTH=137                                                                                                                                                                                                                                                                             | 135  | 137  | 2.00E-56  | 101.5 | 85.9 | 91.1 |
| Rsa1.0_00101.1.g5001.t1 | gb EOA17991.1  hypothetical protein CARUB.v10006425mg [Capsella rubella]                                                                                                                                                                                                                                                                                                                                                     | 835  | 864  | 0         | 103.5 | 76.9 | 87.3 | hypothetical protein CARUB.v10006425mg                                             | gbpln | Capsella rubella     | AT4G25090.1   Symbols:   Riboflavin synthase-like superfamily protein   chr4:12878930-12883599 REVERSE LENGTH=849                                                                                                                                                                                                                                                            | 835  | 849  | 0         | 101.7 | 74.9 | 85.0 |
| Rsa1.0_00101.1.g5002.t1 | gb ABO76902.1  high-affinity K+ transporter HAK5 [Eutrema halophilum]                                                                                                                                                                                                                                                                                                                                                        | 780  | 790  | 0         | 101.3 | 89.1 | 93.6 | high-affinity K+ transporter HAK5                                                  | gbpln | Eutrema halophilum   | AT4G13420.1   Symbols: HAK5, ATHAK5   high affinity K+ transporter 5   chr4:7797038-7802174 REVERSE LENGTH=785                                                                                                                                                                                                                                                               | 780  | 785  | 0         | 100.6 | 86.5 | 92.2 |
| Rsa1.0_00101.1.g5003.t1 | gb ACY64665.1  SRS2 [Arabidopsis thaliana]                                                                                                                                                                                                                                                                                                                                                                                   | 1140 | 1147 | 0         | 100.6 | 82.9 | 88.8 | SRS2                                                                               | gbpln | Arabidopsis thaliana | AT4G25120.1   Symbols: SRS2, ATSR2   P-loop containing nucleoside triphosphate hydrolases superfamily protein   chr4:12890694-12898309 FORWARD LENGTH=1149                                                                                                                                                                                                                   | 1140 | 1149 | 0         | 100.8 | 82.9 | 88.8 |
| Rsa1.0_00101.1.g5004.t1 | ref XP_002867624.1  protein-methionine-S-oxide reductase [Arabidopsis lyrata subsp. lyrata]   gi 297313460 gb EFH43883.1  protein-methionine-S-oxide reductase [Arabidopsis lyrata subsp. lyrata]   sp P29110.1 OLEO3_BRANA RecName: Full=Oleosin Bn-III; Short=BnIII   gi 17639 emb CAA4394.1  oleosin Bn-III [Brassica napus]   gi 196122089 gb ACG69519.1  oleosin S3-7 [Brassica napus]   gi 742387 prf 2009397A oleosin | 253  | 257  | 1.00E-125 | 101.6 | 83.0 | 91.3 | protein-methionine-S-oxide reductase                                               | gbpln | Arabidopsis lyrata   | AT4G25130.1   Symbols: PMSR4   peptide met sulfoxide reductase 4   chr4:12898802-12899998 REVERSE LENGTH=258                                                                                                                                                                                                                                                                 | 253  | 258  | 1.00E-125 | 102.0 | 83.0 | 90.9 |
| Rsa1.0_00101.1.g5005.t1 | Ref P29110.1 OLEO3_BRANA RecName: Full=Oleosin Bn-III; Short=BnIII   gi 17639 emb CAA4394.1  oleosin Bn-III [Brassica napus]   gi 196122089 gb ACG69519.1  oleosin S3-7 [Brassica napus]   gi 742387 prf 2009397A oleosin                                                                                                                                                                                                    | 196  | 195  | 3.00E-82  | 99.5  | 87.2 | 90.8 | RecName: Full=Oleosin Bn-III; Short=BnIII   gi 17639 emb CAA4394.1  oleosin Bn-III | gbpln | Brassica napus       | AT4G25140.1   Symbols: OLEO1, OLE1   oleosin 1   chr4:12900498-12901259 FORWARD LENGTH=173                                                                                                                                                                                                                                                                                   | 196  | 173  | 1.00E-73  | 88.3  | 81.6 | 83.2 |
| Rsa1.0_00101.1.g5006.t1 | gb EOA16012.1  hypothetical protein CARUB.v10004133mg [Capsella rubella]                                                                                                                                                                                                                                                                                                                                                     | 819  | 830  | 0         | 101.3 | 80.2 | 88.0 | hypothetical protein CARUB.v10004133mg                                             | gbpln | Capsella rubella     | AT4G25160.1   Symbols:   U-box domain-containing protein kinase family protein   chr4:12903360-12906669 REVERSE LENGTH=835                                                                                                                                                                                                                                                   | 819  | 835  | 0         | 102.0 | 79.7 | 87.8 |
| Rsa1.0_00101.1.g5007.t1 | ref XP_002867620.1  hypothetical protein ARALYDRAFT_492315 [Arabidopsis lyrata subsp. lyrata]   gi 297313456 gb EFH43879.1  hypothetical protein ARALYDRAFT_492315 [Arabidopsis lyrata subsp. lyrata]                                                                                                                                                                                                                        | 513  | 412  | 1.00E-154 | 80.3  | 60.0 | 67.6 | hypothetical protein ARALYDRAFT_492315                                             | gbpln | Arabidopsis lyrata   | AT4G25190.1   Symbols: QWRF7   Family of unknown function (DUF566)   chr4:12914400-12916001 REVERSE LENGTH=394                                                                                                                                                                                                                                                               | 513  | 394  | 1.00E-155 | 76.8  | 58.9 | 67.3 |
| Rsa1.0_00101.1.g5008.t1 | ref XP_002869685.1  hypothetical protein ARALYDRAFT_914061 [Arabidopsis lyrata subsp. lyrata]   gi 297315521 gb EFH45944.1  hypothetical protein ARALYDRAFT_914061 [Arabidopsis lyrata subsp. lyrata]                                                                                                                                                                                                                        | 382  | 363  | 3.00E-80  | 95.0  | 56.8 | 68.8 | hypothetical protein ARALYDRAFT_914061                                             | gbpln | Arabidopsis lyrata   | AT4G25210.1   Symbols:   DNA-binding storekeeper protein-related transcriptional regulator   chr4:12918446-12919552 FORWARD LENGTH=368                                                                                                                                                                                                                                       | 382  | 368  | 6.00E-81  | 96.3  | 48.7 | 57.3 |
| Rsa1.0_00101.1.g5009.t1 | gb EOA17732.1  hypothetical protein CARUB.v10006114mg [Capsella rubella]                                                                                                                                                                                                                                                                                                                                                     | 56   | 98   | 1.00E-20  | 175.0 | 80.4 | 89.3 | hypothetical protein CARUB.v10006114mg                                             | gbpln | Capsella rubella     | AT4G25225.1   Symbols:   unknown protein; LOCATED IN: endomembrane system; BEST Arabidopsis thaliana protein match is: unknown protein (TAIR:AT2G35736.2); Has 78 Blast hits to 78 proteins in 13 species: Archae - 0; Bacteria - 0; Metazoa - 0; Fungi - 0; Plants - 78; Viruses - 0; Other Eukaryotes - 0 (source: NCBI BLINK).   chr4:12923086-12923256 REVERSE LENGTH=56 | 56   | 56   | 1.00E-21  | 100.0 | 78.6 | 85.7 |



|                         |                                                                                                                                                                                                                                                                                                                                                                                                                                                                                                                                                                                                                                                                                                                                                                                                                                                                                                                                                                                                                                                                                                                  |     |     |           |       |      |      |                                                                           |       |                      |                                                                                                                                                                                                                                                               |     |     |           |       |      |      |
|-------------------------|------------------------------------------------------------------------------------------------------------------------------------------------------------------------------------------------------------------------------------------------------------------------------------------------------------------------------------------------------------------------------------------------------------------------------------------------------------------------------------------------------------------------------------------------------------------------------------------------------------------------------------------------------------------------------------------------------------------------------------------------------------------------------------------------------------------------------------------------------------------------------------------------------------------------------------------------------------------------------------------------------------------------------------------------------------------------------------------------------------------|-----|-----|-----------|-------|------|------|---------------------------------------------------------------------------|-------|----------------------|---------------------------------------------------------------------------------------------------------------------------------------------------------------------------------------------------------------------------------------------------------------|-----|-----|-----------|-------|------|------|
| Rsa1.0_00101.1.g5010.t1 | refNP_194253.2   E3 ubiquitin protein ligase RIN2 [Arabidopsis thaliana] gi 30686808 refNP_849552.1   E3 ubiquitin protein ligase RIN2 [Arabidopsis thaliana] gi 75304438 sp Q8VYC8.1 RIN2_ARATH RecName: Full=E3 ubiquitin protein ligase RIN2; AltName: Full=AMF receptor-like protein 1A; AltName: Full=RPM1-interacting protein 2 gi 18176187 gb AAL60000.1   unknown protein [Arabidopsis thaliana] gi 332659628 gb AEE85028.1   E3 ubiquitin protein ligase RIN2 [Arabidopsis thaliana] gi 332659629 gb AEE85029.1   E3 ubiquitin protein ligase RIN2 [Arabidopsis thaliana] refNP_194255.1   plant invertase/pectin methylesterase inhibitor domain-containing protein [Arabidopsis thaliana] gi 4454013 emb CAA23066.1   putative protein [Arabidopsis thaliana] gi 7269376 emb CAB81336.1   putative protein [Arabidopsis thaliana] gi 28418607 gb AAO42834.1   At4g25250 [Arabidopsis thaliana] gi 110743315 db BAE99546.1   hypothetical protein [Arabidopsis thaliana] gi 332659631 gb AEE85031.1   plant invertase/pectin methylesterase inhibitor domain-containing protein [Arabidopsis thaliana] | 544 | 578 | 0         | 106.3 | 90.1 | 94.7 | E3 ubiquitin protein ligase RIN2                                          | gbpln | Arabidopsis thaliana | AT4G25230.2   Symbols: RIN2   RPM1 interacting protein 2   chr4:12924446-12928671 FORWARD LENGTH=578                                                                                                                                                          | 544 | 578 | 0         | 106.3 | 90.1 | 94.7 |
| Rsa1.0_00101.1.g5011.t1 | refNP_194255.1   plant invertase/pectin methylesterase inhibitor domain-containing protein [Arabidopsis thaliana] gi 4454013 emb CAA23066.1   putative protein [Arabidopsis thaliana] gi 7269376 emb CAB81336.1   putative protein [Arabidopsis thaliana] gi 28418607 gb AAO42834.1   At4g25250 [Arabidopsis thaliana] gi 110743315 db BAE99546.1   hypothetical protein [Arabidopsis thaliana] gi 332659631 gb AEE85031.1   plant invertase/pectin methylesterase inhibitor domain-containing protein [Arabidopsis thaliana]                                                                                                                                                                                                                                                                                                                                                                                                                                                                                                                                                                                    | 261 | 199 | 2.00E-81  | 76.2  | 57.9 | 67.0 | plant invertase/pectin methylesterase inhibitor domain-containing protein | gbpln | Arabidopsis thaliana | AT4G25250.1   Symbols:   Plant invertase/pectin methylesterase inhibitor superfamily protein   chr4:12934632-12935231 FORWARD LENGTH=199                                                                                                                      | 261 | 199 | 4.00E-84  | 76.2  | 57.9 | 67.0 |
| Rsa1.0_00101.1.g5012.t1 | gb EOA30196.1   hypothetical protein CARUB_v10013313mg [Capsella rubella]                                                                                                                                                                                                                                                                                                                                                                                                                                                                                                                                                                                                                                                                                                                                                                                                                                                                                                                                                                                                                                        | 577 | 582 | 0         | 100.9 | 75.0 | 84.6 | hypothetical protein CARUB_v10013313mg                                    | gbpln | Capsella rubella     | AT4G03460.1   Symbols:   Ankyrin repeat family protein   chr4:1536404-1540111 REVERSE LENGTH=677                                                                                                                                                              | 577 | 677 | 7.00E-50  | 117.3 | 28.1 | 42.5 |
| Rsa1.0_00101.1.g5013.t1 | gb EOA17445.1   hypothetical protein CARUB_v10005764mg [Capsella rubella]                                                                                                                                                                                                                                                                                                                                                                                                                                                                                                                                                                                                                                                                                                                                                                                                                                                                                                                                                                                                                                        | 201 | 202 | 8.00E-91  | 100.5 | 82.1 | 90.0 | hypothetical protein CARUB_v10005764mg                                    | gbpln | Capsella rubella     | AT4G25280.1   Symbols:   Plant invertase/pectin methylesterase inhibitor superfamily protein   chr4:12936005-12936610 REVERSE LENGTH=201                                                                                                                      | 201 | 201 | 4.00E-92  | 100.0 | 80.1 | 89.1 |
| Rsa1.0_00101.1.g5014.t1 | refNP_194259.4   DNA photolyase [Arabidopsis thaliana] gi 332659635 gb AEE85035.1   DNA photolyase [Arabidopsis thaliana] refXP_002869680.1   oxidoreductase [Arabidopsis lyrata subsp. lyrata] gi 297315516 gb EFH45939.1   oxidoreductase [Arabidopsis lyrata subsp. lyrata]                                                                                                                                                                                                                                                                                                                                                                                                                                                                                                                                                                                                                                                                                                                                                                                                                                   | 688 | 692 | 0         | 100.6 | 83.1 | 89.8 | DNA photolyase                                                            | gbpln | Arabidopsis thaliana | AT4G25290.1   Symbols:   DNA photolyases; DNA photolyases   chr4:12941486-12944994 REVERSE LENGTH=692                                                                                                                                                         | 688 | 692 | 0         | 100.6 | 83.1 | 89.8 |
| Rsa1.0_00101.1.g5015.t1 | refXP_002869680.1   oxidoreductase [Arabidopsis lyrata subsp. lyrata] gi 297315516 gb EFH45939.1   oxidoreductase [Arabidopsis lyrata subsp. lyrata]                                                                                                                                                                                                                                                                                                                                                                                                                                                                                                                                                                                                                                                                                                                                                                                                                                                                                                                                                             | 346 | 356 | 1.00E-152 | 102.9 | 76.0 | 86.1 | oxidoreductase                                                            | gbpln | Arabidopsis lyrata   | AT4G25300.1   Symbols:   2-oxoglutarate (2OG) and Fe(II)-dependent oxygenase superfamily protein   chr4:12945263-12946642 FORWARD LENGTH=356                                                                                                                  | 346 | 356 | 1.00E-154 | 102.9 | 75.4 | 86.7 |
| Rsa1.0_00101.1.g5016.t2 | refNP_001190835.1   uncharacterized protein [Arabidopsis thaliana] gi 332659640 gb AEE85040.1   uncharacterized protein AT4G25315 [Arabidopsis thaliana]                                                                                                                                                                                                                                                                                                                                                                                                                                                                                                                                                                                                                                                                                                                                                                                                                                                                                                                                                         | 108 | 108 | 5.00E-50  | 100.0 | 83.3 | 93.5 | uncharacterized protein                                                   | gbpln | Arabidopsis thaliana | AT4G25315.2   Symbols:   Expressed protein   chr4:12951659-12952834 REVERSE LENGTH=108                                                                                                                                                                        | 108 | 108 | 8.00E-53  | 100.0 | 83.3 | 93.5 |
| Rsa1.0_00101.1.g5017.t3 | gb EOA16732.1   hypothetical protein CARUB_v10004935mg [Capsella rubella]                                                                                                                                                                                                                                                                                                                                                                                                                                                                                                                                                                                                                                                                                                                                                                                                                                                                                                                                                                                                                                        | 367 | 411 | 1.00E-126 | 112.0 | 78.2 | 85.3 | hypothetical protein CARUB_v10004935mg                                    | gbpln | Capsella rubella     | AT4G25320.1   Symbols:   AT hook motif DNA-binding family protein   chr4:12954488-12956342 FORWARD LENGTH=404                                                                                                                                                 | 367 | 404 | 1.00E-127 | 110.1 | 78.5 | 83.9 |
| Rsa1.0_00101.1.g5018.t1 | gb EOA19111.1   hypothetical protein CARUB_v10007779mg [Capsella rubella]                                                                                                                                                                                                                                                                                                                                                                                                                                                                                                                                                                                                                                                                                                                                                                                                                                                                                                                                                                                                                                        | 222 | 224 | 5.00E-80  | 100.9 | 66.2 | 82.4 | hypothetical protein CARUB_v10007779mg                                    | gbpln | Capsella rubella     | AT4G25330.1   Symbols:   unknown protein; Has 21 Blast hits to 21 proteins in 10 species: Archaea - 0; Bacteria - 0; Metazoa - 0; Fungi - 0; Plants - 21; Viruses - 0; Other Eukaryotes - 0 (source: NCBI BLINK).   chr4:12957834-12958683 FORWARD LENGTH=229 | 222 | 229 | 6.00E-76  | 103.2 | 59.9 | 77.5 |
| Rsa1.0_00101.1.g5019.t2 | refNP_567717.1   peptidylprolyl isomerase [Arabidopsis thaliana] gi 75163771 sp Q93ZG9.1 FKB53_ARATH RecName: Full=Peptidyl-prolyl cis-trans isomerase FKBP53; Short=PPlase FKBP53; AltName: Full=FK506-binding protein 53; Short=AtFKBP53; AltName: Full=Immunophilin FKBP53; AltName: Full=Rotamase gi 15982872 gb AAL09783.1   AT4g25340/T30C3.20 [Arabidopsis thaliana] gi 23506115 gb AAN28917.1   At4g25340/T30C3.20 [Arabidopsis thaliana] gi 332659643 gb AEE85043.1   peptidylprolyl isomerase [Arabidopsis thaliana]                                                                                                                                                                                                                                                                                                                                                                                                                                                                                                                                                                                   | 455 | 477 | 1.00E-137 | 104.8 | 67.9 | 80.4 | peptidylprolyl isomerase                                                  | gbpln | Arabidopsis thaliana | AT4G25340.1   Symbols: FKBP53, ATFKBP53   FK506 BINDING PROTEIN 53   chr4:12959657-12962632 REVERSE LENGTH=477                                                                                                                                                | 455 | 477 | 1.00E-139 | 104.8 | 67.9 | 80.4 |
| Rsa1.0_00101.1.g5020.t2 | #                                                                                                                                                                                                                                                                                                                                                                                                                                                                                                                                                                                                                                                                                                                                                                                                                                                                                                                                                                                                                                                                                                                | #   | #   | #         | #     | #    | -    | ----                                                                      | ----  | #                    | #                                                                                                                                                                                                                                                             | #   | #   | #         | #     | #    |      |

|                         |                                                                                                                                                                                                                                                                                                                                                                                                                                                                                                                                                                                                                                                                                                                                                                                                                                                                                                                                                                                                                                                                                                                                                                                                                                       |     |     |           |       |      |      |                                                                        |       |                      |                                                                                                                                                                              |     |     |           |       |      |      |
|-------------------------|---------------------------------------------------------------------------------------------------------------------------------------------------------------------------------------------------------------------------------------------------------------------------------------------------------------------------------------------------------------------------------------------------------------------------------------------------------------------------------------------------------------------------------------------------------------------------------------------------------------------------------------------------------------------------------------------------------------------------------------------------------------------------------------------------------------------------------------------------------------------------------------------------------------------------------------------------------------------------------------------------------------------------------------------------------------------------------------------------------------------------------------------------------------------------------------------------------------------------------------|-----|-----|-----------|-------|------|------|------------------------------------------------------------------------|-------|----------------------|------------------------------------------------------------------------------------------------------------------------------------------------------------------------------|-----|-----|-----------|-------|------|------|
| Rsa1.0_00101.1.g5021.t1 | refNP_567718.1  Double Clip-N motif protein [Arabidopsis thaliana]<br>gi 14334924 gb AAK59640.1  unknown protein [Arabidopsis thaliana]<br>gi 16323364 gb AAL15176.1  unknown protein [Arabidopsis thaliana]<br>gi 21555497 gb AAM63872.1  unknown [Arabidopsis thaliana]<br>gi 195604812 gb ACG24236.1  ATP-dependent Clip protease ATP-binding subunit clipA [Zea mays]<br>gi 332659648 gb AEE85048.1  Double Clip-N motif protein [Arabidopsis thaliana]<br>refNP_194268.1  zinc finger A20 and AN1 domain-containing stress-associated protein 10 [Arabidopsis thaliana]<br>gi 75266322 sp Q9STJ9.1 SAP10 ARAT H RecName: Full=Zinc finger A20 and AN1 domain-containing stress-associated protein 10; Short=AtSAP10<br>gi 5123927 emb CAB45515.1  putative protein [Arabidopsis thaliana]<br>gi 7269399 emb CAB81349.1  putative protein [Arabidopsis thaliana]<br>gi 117168073 gb ABK32119.1  At4g25380 [Arabidopsis thaliana]<br>gi 332659649 gb AEE85049.1  zinc finger A20 and AN1 domain-containing stress-associated protein 10 [Arabidopsis thaliana]<br>refXP_002869674.1  kinase family protein [Arabidopsis lyrata subsp. lyrata] gi 297315510 gb EFH45933.1  kinase family protein [Arabidopsis lyrata subsp. lyrata] | 235 | 238 | 1.00E-100 | 101.3 | 80.4 | 86.4 | Double Clip-N motif protein                                            | gbpln | Arabidopsis thaliana | AT4G25370.1   Symbols: Double Clip-N motif protein   chr4:12972747-12974580 FORWARD LENGTH=238                                                                               | 235 | 238 | 1.00E-103 | 101.3 | 80.4 | 86.4 |
| Rsa1.0_00101.1.g5022.t1 | gi 5123927 emb CAB45515.1  putative protein [Arabidopsis thaliana]<br>gi 7269399 emb CAB81349.1  putative protein [Arabidopsis thaliana]<br>gi 117168073 gb ABK32119.1  At4g25380 [Arabidopsis thaliana]<br>gi 332659649 gb AEE85049.1  zinc finger A20 and AN1 domain-containing stress-associated protein 10 [Arabidopsis thaliana]<br>refXP_002869674.1  kinase family protein [Arabidopsis lyrata subsp. lyrata] gi 297315510 gb EFH45933.1  kinase family protein [Arabidopsis lyrata subsp. lyrata]                                                                                                                                                                                                                                                                                                                                                                                                                                                                                                                                                                                                                                                                                                                             | 136 | 130 | 6.00E-45  | 95.6  | 66.2 | 73.5 | zinc finger A20 and AN1 domain-containing stress-associated protein 10 | gbpln | Arabidopsis thaliana | AT4G25380.1   Symbols: SAP10   stress-associated protein 10   chr4:12975936-12976328 REVERSE LENGTH=130                                                                      | 136 | 130 | 1.00E-47  | 95.6  | 66.2 | 73.5 |
| Rsa1.0_00101.1.g5023.t1 | refXP_002869674.1  kinase family protein [Arabidopsis lyrata subsp. lyrata] gi 297315510 gb EFH45933.1  kinase family protein [Arabidopsis lyrata subsp. lyrata]                                                                                                                                                                                                                                                                                                                                                                                                                                                                                                                                                                                                                                                                                                                                                                                                                                                                                                                                                                                                                                                                      | 612 | 649 | 0         | 106.0 | 80.9 | 85.8 | kinase family protein                                                  | gbpln | Arabidopsis lyrata   | AT4G25390.1   Symbols: Protein kinase superfamily protein   chr4:12977491-12979446 FORWARD LENGTH=651                                                                        | 612 | 651 | 0         | 106.4 | 80.6 | 86.3 |
| Rsa1.0_00101.1.g5024.t1 | gb EOA17859.1  hypothetical protein CARUB_v10006264mg [Capsella rubella]                                                                                                                                                                                                                                                                                                                                                                                                                                                                                                                                                                                                                                                                                                                                                                                                                                                                                                                                                                                                                                                                                                                                                              | 185 | 197 | 2.00E-65  | 106.5 | 68.1 | 75.1 | hypothetical protein CARUB_v10006264mg                                 | gbpln | Capsella rubella     | AT4G25400.1   Symbols: basic helix-loop-helix (bHLH) DNA-binding superfamily protein   chr4:12981295-12982335 FORWARD LENGTH=163                                             | 185 | 163 | 4.00E-66  | 88.1  | 64.9 | 75.7 |
| Rsa1.0_00101.1.g5025.t1 | refXP_002869672.1  basix helix-loop-helix family protein [Arabidopsis lyrata subsp. lyrata] gi 297315508 gb EFH45931.1  basix helix-loop-helix family protein [Arabidopsis lyrata subsp. lyrata]                                                                                                                                                                                                                                                                                                                                                                                                                                                                                                                                                                                                                                                                                                                                                                                                                                                                                                                                                                                                                                      | 188 | 222 | 2.00E-67  | 118.1 | 73.9 | 81.9 | basix helix-loop-helix family protein                                  | gbpln | Arabidopsis lyrata   | AT4G25410.1   Symbols: basic helix-loop-helix (bHLH) DNA-binding superfamily protein   chr4:12985772-12987149 FORWARD LENGTH=230                                             | 188 | 230 | 1.00E-68  | 122.3 | 70.7 | 79.8 |
| Rsa1.0_00101.1.g5026.t1 | dbj BAM73279.1  gibberellin 20 oxidase 1 [Raphanus sativus]                                                                                                                                                                                                                                                                                                                                                                                                                                                                                                                                                                                                                                                                                                                                                                                                                                                                                                                                                                                                                                                                                                                                                                           | 381 | 381 | 0         | 100.0 | 99.0 | 99.5 | gibberellin 20 oxidase 1                                               | gbpln | Raphanus sativus     | AT4G25420.1   Symbols: GA5, GA20OX1, AT2301, ATGA20OX1   2-oxoglutarate (2OG) and Fe(II)-dependent oxygenase superfamily protein   chr4:12990982-12992409 REVERSE LENGTH=377 | 381 | 377 | 0         | 99.0  | 85.8 | 89.5 |
| Rsa1.0_00101.1.g5027.t1 | gb EOA14349.1  hypothetical protein CARUB_v10027529mg [Capsella rubella]                                                                                                                                                                                                                                                                                                                                                                                                                                                                                                                                                                                                                                                                                                                                                                                                                                                                                                                                                                                                                                                                                                                                                              | 165 | 222 | 3.00E-47  | 134.5 | 66.7 | 80.6 | hypothetical protein CARUB_v10027529mg                                 | gbpln | Capsella rubella     | AT5G51870.1   Symbols: AGL71   AGAMOUS-like 71   chr5:21085635-21087923 REVERSE LENGTH=207                                                                                   | 165 | 207 | 2.00E-24  | 125.5 | 43.0 | 62.4 |
| Rsa1.0_00101.1.g5028.t1 | gb AAD45623.1 AF084185_1 dehydration responsive element binding protein [Brassica napus]                                                                                                                                                                                                                                                                                                                                                                                                                                                                                                                                                                                                                                                                                                                                                                                                                                                                                                                                                                                                                                                                                                                                              | 214 | 214 | 1.00E-107 | 100.0 | 92.1 | 95.8 | dehydration responsive element binding protein                         | gbpln | Brassica napus       | AT4G25470.1   Symbols: CBF2, DREB1C, FTQ4, ATCBF2   C-repeat/DRE binding factor 2   chr4:13015436-13016086 REVERSE LENGTH=216                                                | 214 | 216 | 9.00E-97  | 100.9 | 79.0 | 87.9 |
| Rsa1.0_00101.1.g5029.t1 | # # # # # # # #                                                                                                                                                                                                                                                                                                                                                                                                                                                                                                                                                                                                                                                                                                                                                                                                                                                                                                                                                                                                                                                                                                                                                                                                                       | #   | #   | #         | #     | #    | #    | -                                                                      | ----  | ----                 | # # # # # # #                                                                                                                                                                | #   | #   | #         | #     | #    | #    |
| Rsa1.0_00101.1.g5030.t1 | gb EOA15349.1  hypothetical protein CARUB_v10004256mg [Capsella rubella]                                                                                                                                                                                                                                                                                                                                                                                                                                                                                                                                                                                                                                                                                                                                                                                                                                                                                                                                                                                                                                                                                                                                                              | 340 | 708 | 1.00E-61  | 208.2 | 48.2 | 56.8 | hypothetical protein CARUB_v10004256mg                                 | gbpln | Capsella rubella     | AT4G25520.1   Symbols: SLK1   SEUSS-like 1   chr4:13032450-13035803 REVERSE LENGTH=748                                                                                       | 340 | 748 | 5.00E-61  | 220.0 | 50.0 | 57.9 |
| Rsa1.0_00101.1.g5031.t1 | gb EOA15349.1  hypothetical protein CARUB_v10004256mg [Capsella rubella]                                                                                                                                                                                                                                                                                                                                                                                                                                                                                                                                                                                                                                                                                                                                                                                                                                                                                                                                                                                                                                                                                                                                                              | 559 | 708 | 1.00E-173 | 126.7 | 65.1 | 76.7 | hypothetical protein CARUB_v10004256mg                                 | gbpln | Capsella rubella     | AT4G25515.1   Symbols: SLK3   SEUSS-like 3   chr4:13028219-13031463 FORWARD LENGTH=685                                                                                       | 559 | 685 | 1.00E-175 | 122.5 | 65.8 | 77.3 |
| Rsa1.0_00101.1.g5032.t1 | refXP_002869669.1  hypothetical protein ARALYDRAFT_354233 [Arabidopsis lyrata subsp. lyrata] gi 297315505 gb EFH45928.1  hypothetical protein ARALYDRAFT_354233 [Arabidopsis lyrata subsp. lyrata]                                                                                                                                                                                                                                                                                                                                                                                                                                                                                                                                                                                                                                                                                                                                                                                                                                                                                                                                                                                                                                    | 655 | 663 | 1.00E-141 | 101.2 | 42.3 | 48.9 | hypothetical protein ARALYDRAFT_354233                                 | gbpln | Arabidopsis lyrata   | AT4G25515.1   Symbols: SLK3   SEUSS-like 3   chr4:13028219-13031463 FORWARD LENGTH=685                                                                                       | 655 | 685 | 1.00E-137 | 104.6 | 41.5 | 48.9 |
| Rsa1.0_00101.1.g5033.t4 | gb EOA17496.1  hypothetical protein CARUB_v10005830mg [Capsella rubella]                                                                                                                                                                                                                                                                                                                                                                                                                                                                                                                                                                                                                                                                                                                                                                                                                                                                                                                                                                                                                                                                                                                                                              | 219 | 184 | 2.00E-56  | 84.0  | 57.5 | 62.1 | hypothetical protein CARUB_v10005830mg                                 | gbpln | Capsella rubella     | AT5G52200.1   Symbols: phosphoprotein phosphatase inhibitors   chr5:21202818-21204719 REVERSE LENGTH=191                                                                     | 219 | 191 | 8.00E-45  | 87.2  | 50.2 | 58.0 |

|                         |                                                                                                                                                                                                                                                                                                                                                                                                                                                                                                                                                                                                                                                                                                                                                                                                                                                                         |      |      |           |       |      |      |                                                           |       |                      |                                                                                                                                           |      |      |           |       |      |      |
|-------------------------|-------------------------------------------------------------------------------------------------------------------------------------------------------------------------------------------------------------------------------------------------------------------------------------------------------------------------------------------------------------------------------------------------------------------------------------------------------------------------------------------------------------------------------------------------------------------------------------------------------------------------------------------------------------------------------------------------------------------------------------------------------------------------------------------------------------------------------------------------------------------------|------|------|-----------|-------|------|------|-----------------------------------------------------------|-------|----------------------|-------------------------------------------------------------------------------------------------------------------------------------------|------|------|-----------|-------|------|------|
| Rsa1.0_00101.1.g5034.t1 | refNP_194284.2  DNA mismatch repair protein Msh3 [Arabidopsis thaliana]<br>gi 12644077 sp O65607.2 MSH3_ARATH<br>RecName: Full=DNA mismatch repair protein MSH3; Short=AtMSH3; AltName: Full=MutS protein homolog 3<br>gi 3319876 emb CAA07684.1  Msh3 protein [Arabidopsis thaliana]<br>gi 332659675 gb AEE85075.1  DNA mismatch repair protein Msh3 [Arabidopsis thaliana]                                                                                                                                                                                                                                                                                                                                                                                                                                                                                            | 1038 | 1081 | 0         | 104.1 | 85.2 | 90.2 | DNA mismatch repair protein Msh3                          | gbpln | Arabidopsis thaliana | AT4G25540.1   Symbols: MSH3, ATMSH3   homolog of DNA mismatch repair protein MSH3   chr4:13042700-13048115 REVERSE LENGTH=1081            | 1038 | 1081 | 0         | 104.1 | 85.2 | 90.2 |
| Rsa1.0_00101.1.g5035.t1 | refNP_173360.1  TTF-type zinc finger protein with HAT dimerization domain [Arabidopsis thaliana]<br>gi 332191703 gb AEE29824.1  TTF-type zinc finger protein with HAT dimerization domain [Arabidopsis thaliana]                                                                                                                                                                                                                                                                                                                                                                                                                                                                                                                                                                                                                                                        | 574  | 769  | 4.00E-97  | 134.0 | 29.3 | 37.5 | TTF-type zinc finger protein with HAT dimerization domain | gbpln | Arabidopsis thaliana | AT1G19260.1   Symbols:   TTF-type zinc finger protein with HAT dimerisation domain   chr1:6657260-6659569 REVERSE LENGTH=769              | 574  | 769  | 1.00E-100 | 134.0 | 29.3 | 37.5 |
| Rsa1.0_00101.1.g5036.t1 | refXP_002869667.1  AtMYB18 [Arabidopsis lyrata subsp. lyrata]<br>gi 297315503 gb EFH45926.1  AtMYB18 [Arabidopsis lyrata subsp. lyrata]                                                                                                                                                                                                                                                                                                                                                                                                                                                                                                                                                                                                                                                                                                                                 | 264  | 262  | 1.00E-101 | 99.2  | 73.9 | 79.9 | AtMYB18                                                   | gbpln | Arabidopsis lyrata   | AT4G25560.1   Symbols: AtMYB18, MYB18   myb domain protein 18   chr4:13052555-13053573 FORWARD LENGTH=283                                 | 264  | 283  | 1.00E-102 | 107.2 | 73.1 | 80.7 |
| Rsa1.0_00101.1.g5037.t1 | gb AAM62824.1  cytochrome b561 [Arabidopsis thaliana]                                                                                                                                                                                                                                                                                                                                                                                                                                                                                                                                                                                                                                                                                                                                                                                                                   | 235  | 237  | 1.00E-110 | 100.9 | 88.9 | 94.0 | cytochrome b561                                           | gbpln | Arabidopsis thaliana | AT4G25570.1   Symbols: ACYB-2   Cytochrome b561/ferric reductase transmembrane protein family   chr4:13053887-13055518 REVERSE LENGTH=239 | 235  | 239  | 1.00E-110 | 101.7 | 88.5 | 93.6 |
| Rsa1.0_00101.1.g5038.t1 | gb EOA18495.1  hypothetical protein CARUB_v10007046mg [Capsella rubella]                                                                                                                                                                                                                                                                                                                                                                                                                                                                                                                                                                                                                                                                                                                                                                                                | 543  | 573  | 1.00E-153 | 105.5 | 69.8 | 78.5 | hypothetical protein CARUB_v10007046mg                    | gbpln | Capsella rubella     | AT4G25580.1   Symbols:   CAP160 protein   chr4:13056320-13058657 FORWARD LENGTH=626                                                       | 543  | 626  | 1.00E-150 | 115.3 | 70.3 | 81.4 |
| Rsa1.0_00101.1.g5039.t1 | gb EOA18372.1  hypothetical protein CARUB_v10006893mg [Capsella rubella]                                                                                                                                                                                                                                                                                                                                                                                                                                                                                                                                                                                                                                                                                                                                                                                                | 129  | 137  | 1.00E-63  | 106.2 | 92.2 | 95.3 | hypothetical protein CARUB_v10006893mg                    | gbpln | Capsella rubella     | AT4G25590.1   Symbols: ADF7   actin depolymerizing factor 7   chr4:13059137-13060050 REVERSE LENGTH=137                                   | 129  | 137  | 3.00E-65  | 106.2 | 91.5 | 94.6 |
| Rsa1.0_00101.1.g5040.t1 | refXP_002894416.1  hypothetical protein ARALYDRAFT_892322 [Arabidopsis lyrata subsp. lyrata]<br>gi 297340258 gb EFH70675.1  hypothetical protein ARALYDRAFT_892322 [Arabidopsis lyrata subsp. lyrata]                                                                                                                                                                                                                                                                                                                                                                                                                                                                                                                                                                                                                                                                   | 155  | 137  | 2.00E-23  | 88.4  | 37.4 | 52.3 | hypothetical protein ARALYDRAFT_892322                    | gbpln | Arabidopsis lyrata   | AT3G15360.1   Symbols: ATHM4, TRX-M4, ATM4   thioredoxin M-type 4   chr3:5188448-5189457 FORWARD LENGTH=193                               | 155  | 193  | 1.00E-23  | 124.5 | 30.3 | 45.8 |
| Rsa1.0_00101.1.g5041.t1 | refNP_194291.2  C2H2-like zinc finger protein [Arabidopsis thaliana]<br>gi 19698895 gb AAL91183.1  unknown protein [Arabidopsis thaliana]<br>gi 23198356 gb AAN15705.1  unknown protein [Arabidopsis thaliana]<br>gi 332659682 gb AEE85082.1  C2H2-like zinc finger protein [Arabidopsis thaliana]                                                                                                                                                                                                                                                                                                                                                                                                                                                                                                                                                                      | 938  | 586  | 0         | 62.5  | 49.4 | 54.3 | C2H2-like zinc finger protein                             | gbpln | Arabidopsis thaliana | AT4G25610.1   Symbols:   C2H2-like zinc finger protein   chr4:13063801-13066860 FORWARD LENGTH=586                                        | 938  | 586  | 0         | 62.5  | 49.4 | 54.3 |
| Rsa1.0_00101.1.g5042.t1 | gb EOA16635.1  hypothetical protein CARUB_v10004810mg [Capsella rubella]                                                                                                                                                                                                                                                                                                                                                                                                                                                                                                                                                                                                                                                                                                                                                                                                | 446  | 444  | 1.00E-148 | 99.6  | 71.3 | 80.0 | hypothetical protein CARUB_v10004810mg                    | gbpln | Capsella rubella     | AT4G25620.1   Symbols:   hydroxyproline-rich glycoprotein family protein   chr4:13067447-13069296 REVERSE LENGTH=449                      | 446  | 449  | 1.00E-149 | 100.7 | 72.6 | 80.3 |
| Rsa1.0_00101.1.g5043.t1 | refNP_567724.1  rRNA 2'-O-methyltransferase fibrillarin 2 [Arabidopsis thaliana]<br>gi 67461067 sp Q94AH9.2 MD36A_ARATH<br>H RecName: Full=Mediator of RNA polymerase II transcription subunit 36a; AltName: Full=Fibrillarin-like protein 2; AltName: Full=rRNA 2'-O-methyltransferase fibrillarin 2<br>gi 9965955 gb AAG10104.1 AF233444.1 fibrillarin 2 [Arabidopsis thaliana]<br>gi 4914455 emb CAB43694.1  fibrillarin-like protein [Arabidopsis thaliana]<br>gi 7269413 emb CAB81373.1  fibrillarin-like protein [Arabidopsis thaliana]<br>gi 9965796 gb AAG10153.1  fibrillarin 2 [Arabidopsis thaliana]<br>gi 21536840 gb AAM61172.1  fibrillarin 2 (AtFib2) [Arabidopsis thaliana]<br>gi 23297150 gb AAN13105.1  fibrillarin 2 (AtFib2) [Arabidopsis thaliana]<br>gi 332659685 gb AEE85085.1  rRNA 2'-O-methyltransferase fibrillarin 2 [Arabidopsis thaliana] | 305  | 320  | 1.00E-134 | 104.9 | 76.1 | 79.3 | rRNA 2'-O-methyltransferase fibrillarin 2                 | gbpln | Arabidopsis thaliana | AT4G25630.1   Symbols: FIB2, ATFIB2   fibrillarin 2   chr4:13074239-13076205 FORWARD LENGTH=320                                           | 305  | 320  | 1.00E-137 | 104.9 | 76.1 | 79.3 |
| Rsa1.0_00101.1.g5044.t1 | dbj BAJ33972.1  unnamed protein product [Thellungiella halophila]                                                                                                                                                                                                                                                                                                                                                                                                                                                                                                                                                                                                                                                                                                                                                                                                       | 490  | 488  | 0         | 99.6  | 89.2 | 94.5 | unnamed protein product                                   | ----  | ----                 | AT4G25640.1   Symbols: ATDTX35, FFT, DTX35   detoxifying efflux carrier 35   chr4:13076953-13078965 REVERSE LENGTH=488                    | 490  | 488  | 0         | 99.6  | 89.6 | 95.5 |

|                         |                                                                                                                                                                                                                                                                                                                                       |      |      |           |       |      |      |                                                 |       |                      |                                                                                                                                                                                                                                                                                                         |      |      |           |       |      |      |
|-------------------------|---------------------------------------------------------------------------------------------------------------------------------------------------------------------------------------------------------------------------------------------------------------------------------------------------------------------------------------|------|------|-----------|-------|------|------|-------------------------------------------------|-------|----------------------|---------------------------------------------------------------------------------------------------------------------------------------------------------------------------------------------------------------------------------------------------------------------------------------------------------|------|------|-----------|-------|------|------|
| Rsa1.0_00101.1.g5045.t1 | emb[CAB43698.1] hypothetical protein [Arabidopsis thaliana] gi 7269417 emb[CAB81377.1] hypothetical protein [Arabidopsis thaliana]                                                                                                                                                                                                    | 219  | 247  | 4.00E-85  | 112.8 | 78.1 | 84.0 | hypothetical protein                            | gbpln | Arabidopsis thaliana | AT4G25670.2   Symbols:   unknown protein; LOCATED IN: cellular_component unknown; EXPRESSED IN: male gametophyte, pollen tube; EXPRESSED DURING: M germinated pollen stage; BEST Arabidopsis thaliana protein match is: unknown protein (TAIR:AT4G25690.2).   chr4:13085431-13085997 REVERSE LENGTH=188 | 219  | 188  | 4.00E-69  | 85.8  | 61.6 | 66.2 |
| Rsa1.0_00101.1.g5046.t1 | gb AAS5552.1  putative beta-carotene hydroxylase [Brassica rapa] gi 73697713 gb AA281472.1  beta-carotene hydroxylase [Brassica rapa]                                                                                                                                                                                                 | 307  | 300  | 1.00E-161 | 97.7  | 93.2 | 94.8 | putative beta-carotene hydroxylase              | gbpln | Brassica rapa        | AT4G25700.1   Symbols: BETA-OHASE 1, B1, chv1, BCH1   beta-hydroxylase 1   chr4:13094142-13095866 REVERSE LENGTH=310                                                                                                                                                                                    | 307  | 310  | 1.00E-152 | 101.0 | 86.3 | 90.9 |
| Rsa1.0_00101.1.g5047.t1 | gb EOA15458.1  hypothetical protein CARUB_v10004151mg [Capsella rubella]                                                                                                                                                                                                                                                              | 820  | 814  | 0         | 99.3  | 81.5 | 89.8 | hypothetical protein CARUB_v10004151mg          | gbpln | Capsella rubella     | AT4G25730.1   Symbols:   FtsJ-like methyltransferase family protein   chr4:13102906-13106718 REVERSE LENGTH=821                                                                                                                                                                                         | 820  | 821  | 0         | 100.1 | 79.8 | 88.8 |
| Rsa1.0_00101.1.g5048.t1 | gb EOA13969.1  hypothetical protein CARUB_v10027094mg, partial [Capsella rubella]                                                                                                                                                                                                                                                     | 181  | 220  | 4.00E-76  | 121.5 | 86.7 | 89.0 | hypothetical protein CARUB_v10027094mg, partial | gbpln | Capsella rubella     | AT4G25740.1   Symbols:   RNA binding Plectin/S10 domain-containing protein   chr4:13107488-13108751 REVERSE LENGTH=177                                                                                                                                                                                  | 181  | 177  | 2.00E-73  | 97.8  | 90.6 | 92.8 |
| Rsa1.0_00102.1.g5049.t2 | ref XP_002518263.1  cation-transporting atpase plant, putative [Ricinus communis] gi 223542610 gb EEF44149.1  cation-transporting atpase plant, putative [Ricinus communis]                                                                                                                                                           | 1067 | 1075 | 0         | 100.7 | 51.4 | 66.5 | cation-transporting atpase plant, putative      | gbpln | Ricinus communis     | AT5G57110.2   Symbols: ACA8, AT-ACA8   autoinhibited Ca2+ -ATPase, isoform 8   chr5:23109729-23116857 REVERSE LENGTH=1074                                                                                                                                                                               | 1067 | 1074 | 0         | 100.7 | 50.3 | 65.9 |
| Rsa1.0_00102.1.g5050.t1 | gb EOA15699.1  hypothetical protein CARUB_v10006454mg [Capsella rubella]                                                                                                                                                                                                                                                              | 580  | 312  | 1.00E-137 | 53.8  | 42.1 | 44.1 | hypothetical protein CARUB_v10006454mg          | gbpln | Capsella rubella     | AT4G26010.1   Symbols:   Peroxidase superfamily protein   chr4:13200653-13201688 FORWARD LENGTH=310                                                                                                                                                                                                     | 580  | 310  | 1.00E-128 | 53.4  | 39.0 | 41.9 |
| Rsa1.0_00102.1.g5051.t2 | ref NP_194335.2  plant intracellular ras group-related LRR 8 [Arabidopsis thaliana] gi 20260486 gb AAM13141.1  putative leucine-rich-repeat protein [Arabidopsis thaliana] gi 30725612 gb AAP37828.1  At4g26050 [Arabidopsis thaliana] gi 332659749 gb AEE85149.1  plant intracellular ras group-related LRR 8 [Arabidopsis thaliana] | 399  | 383  | 1.00E-175 | 96.0  | 84.0 | 88.0 | plant intracellular ras group-related LRR 8     | gbpln | Arabidopsis thaliana | AT4G26050.1   Symbols: PIRL8   plant intracellular ras group-related LRR 8   chr4:13210522-13213149 FORWARD LENGTH=383                                                                                                                                                                                  | 399  | 383  | 1.00E-177 | 96.0  | 84.0 | 88.0 |
| Rsa1.0_00102.1.g5052.t1 | dbj BAJ34574.1  unnamed protein product [Thellungiella halophila]                                                                                                                                                                                                                                                                     | 415  | 439  | 0         | 105.8 | 93.5 | 97.3 | unnamed protein product                         | ----- | -----                | AT4G26080.1   Symbols: ABI1, AtABI1   Protein phosphatase 2C family protein   chr4:13220231-13221828 REVERSE LENGTH=434                                                                                                                                                                                 | 415  | 434  | 0         | 104.6 | 89.4 | 93.5 |
| Rsa1.0_00102.1.g5053.t1 | ref XP_002868748.1  DSBA oxidoreductase family protein [Arabidopsis lyrata subsp. lyrata] gi 297314584 gb EFH45007.1  DSBA oxidoreductase family protein [Arabidopsis lyrata subsp. lyrata]                                                                                                                                           | 170  | 217  | 3.00E-13  | 127.6 | 26.5 | 31.8 | DSBA oxidoreductase family protein              | gbpln | Arabidopsis lyrata   | AT5G38900.1   Symbols:   Thioredoxin superfamily protein   chr5:15573745-15574945 REVERSE LENGTH=217                                                                                                                                                                                                    | 170  | 217  | 2.00E-15  | 127.6 | 26.5 | 31.2 |
| Rsa1.0_00102.1.g5054.t1 | ref NP_199541.1  putative F-box protein [Arabidopsis thaliana] gi 75264281 sp Q9LVS9.1 FB340_ARAT H RecName: Full=Probable F-box protein At5g47300 gi 8809613 dbj BAA97164.1  unnamed protein product [Arabidopsis thaliana] gi 332008112 gb AED95495.1  putative F-box protein [Arabidopsis thaliana]                                | 380  | 416  | 4.00E-72  | 109.5 | 46.3 | 61.8 | putative F-box protein                          | gbpln | Arabidopsis thaliana | AT5G47300.1   Symbols:   F-box and associated interaction domains-containing protein   chr5:19198125-19199375 FORWARD LENGTH=416                                                                                                                                                                        | 380  | 416  | 9.00E-75  | 109.5 | 46.3 | 61.8 |
| Rsa1.0_00102.1.g5055.t1 | gb AAF19803.1  RPS2 protein [Brassica oleracea]                                                                                                                                                                                                                                                                                       | 906  | 907  | 0         | 100.1 | 90.5 | 95.5 | RPS2 protein                                    | gbpln | Brassica oleracea    | AT4G26090.1   Symbols: RPS2   NB-ARC domain-containing disease resistance protein   chr4:13224596-13227325 FORWARD LENGTH=909                                                                                                                                                                           | 906  | 909  | 0         | 100.3 | 84.8 | 91.3 |
| Rsa1.0_00102.1.g5056.t1 | gb EOA13389.1  hypothetical protein CARUB_v10026431mg [Capsella rubella]                                                                                                                                                                                                                                                              | 434  | 434  | 0         | 100.0 | 91.9 | 94.9 | hypothetical protein CARUB_v10026431mg          | gbpln | Capsella rubella     | AT5G57020.1   Symbols: NMT1, ATNMT1   myristoyl-CoA:protein N-myristoyltransferase   chr5:23075451-23076755 FORWARD LENGTH=434                                                                                                                                                                          | 434  | 434  | 0         | 100.0 | 91.2 | 95.2 |
| Rsa1.0_00102.1.g5057.t1 | ref XP_002867580.1  hypothetical protein ARALYDRAFT_492204 [Arabidopsis lyrata subsp. lyrata] gi 297313416 gb EFH43839.1  hypothetical protein ARALYDRAFT_492204 [Arabidopsis lyrata subsp. lyrata]                                                                                                                                   | 462  | 454  | 0         | 98.3  | 90.3 | 92.9 | hypothetical protein ARALYDRAFT_492204          | gbpln | Arabidopsis lyrata   | AT4G26100.1   Symbols: CK1, CKL1   casein kinase 1   chr4:13227885-13230508 REVERSE LENGTH=450                                                                                                                                                                                                          | 462  | 450  | 0         | 97.4  | 88.7 | 92.0 |
| Rsa1.0_00102.1.g5058.t1 | gb AAM88865.2 AF527176.1 putative NPR1 [Brassica napus]                                                                                                                                                                                                                                                                               | 581  | 579  | 0         | 99.7  | 91.2 | 95.0 | putative NPR1                                   | gbpln | Brassica napus       | AT1G64280.1   Symbols: NPR1, SAI1, NIM1, ATNPR1   regulatory protein (NPR1)   chr1:23853329-23855407 REVERSE LENGTH=593                                                                                                                                                                                 | 581  | 593  | 0         | 102.1 | 69.7 | 82.8 |

|                          |                                                                                                                                                                                                                                                                                                                                                                                                                                                                                                                                     |     |      |           |        |      |      |                                                                                                          |       |                      |                                                                                                                                                                                                                                                                                                                                                                                                                                                                                                         |     |     |           |       |      |      |
|--------------------------|-------------------------------------------------------------------------------------------------------------------------------------------------------------------------------------------------------------------------------------------------------------------------------------------------------------------------------------------------------------------------------------------------------------------------------------------------------------------------------------------------------------------------------------|-----|------|-----------|--------|------|------|----------------------------------------------------------------------------------------------------------|-------|----------------------|---------------------------------------------------------------------------------------------------------------------------------------------------------------------------------------------------------------------------------------------------------------------------------------------------------------------------------------------------------------------------------------------------------------------------------------------------------------------------------------------------------|-----|-----|-----------|-------|------|------|
| Rsa1.0_00102.1.g5059.t1  | gb AAA50234.1  nucleosome assembly protein 1-like protein; similar to mouse nap 1, PIR Accession Number JS0707, partial [Arabidopsis thaliana]                                                                                                                                                                                                                                                                                                                                                                                      | 371 | 382  | 1.00E-145 | 103.0  | 77.9 | 90.6 | nucleosome assembly protein 1-like protein; similar to mouse nap 1, PIR Accession Number JS0707, partial | gbpln | Arabidopsis thaliana | AT4G26110.1   Symbols: NAP1;1, ATNAP1;1   nucleosome assembly protein1;1   chr4:13232712-13235502 FORWARD LENGTH=372                                                                                                                                                                                                                                                                                                                                                                                    | 371 | 372 | 1.00E-148 | 100.3 | 77.9 | 90.6 |
| Rsa1.0_00102.1.g5060.t1  | gb EOA16271.1  hypothetical protein CARUB_v10004416mg [Capsella rubella]                                                                                                                                                                                                                                                                                                                                                                                                                                                            | 605 | 599  | 0         | 99.0   | 72.7 | 84.6 | hypothetical protein CARUB_v10004416mg                                                                   | gbpln | Capsella rubella     | AT4G26120.1   Symbols:   Ankyrin repeat family protein / BTB/POZ domain-containing protein   chr4:13236448-13238487 FORWARD LENGTH=600                                                                                                                                                                                                                                                                                                                                                                  | 605 | 600 | 0         | 99.2  | 70.9 | 80.5 |
| Rsa1.0_00102.1.g5061.t1  | gb AAG52829.1 AC024261_16 unknown protein; 27363-23366 [Arabidopsis thaliana]                                                                                                                                                                                                                                                                                                                                                                                                                                                       | 72  | 1036 | 1.00E-11  | 1438.9 | 56.9 | 65.3 | unknown protein; 27363-23366                                                                             | gbpln | Arabidopsis thaliana | AT1G51540.1   Symbols:   Galactose oxidase/kelch repeat superfamily protein   chr1:19115702-19117381 FORWARD LENGTH=415                                                                                                                                                                                                                                                                                                                                                                                 | 72  | 415 | 3.00E-14  | 576.4 | 56.9 | 65.3 |
| Rsa1.0_00102.1.g5062.t1  | ref XP_002867579.1  hypothetical protein ARALYDRAFT_492200 [Arabidopsis lyrata subsp. lyrata] gi 297313415 gb EFH43838.1  hypothetical protein ARALYDRAFT_492200 [Arabidopsis lyrata subsp. lyrata]                                                                                                                                                                                                                                                                                                                                 | 290 | 284  | 1.00E-106 | 97.9   | 76.9 | 83.4 | hypothetical protein ARALYDRAFT_492200                                                                   | gbpln | Arabidopsis lyrata   | AT4G26130.1   Symbols:   unknown protein; FUNCTIONS IN: molecular_function unknown; INVOLVED IN: biological_process unknown; LOCATED IN: endomembrane system; EXPRESSED DURING: 13 growth stages; BEST Arabidopsis thaliana protein match is: unknown protein (TAIR:AT5G56980.1); Has 121 Blast hits to 116 proteins in 19 species: Archae - 0; Bacteria - 0; Metazoa - 4; Fungi - 0; Plants - 113; Viruses - 0; Other Eukaryotes - 4 (source: NCBI BLINK).   chr4:13240403-13241263 REVERSE LENGTH=286 | 290 | 286 | 2.00E-96  | 98.6  | 76.2 | 83.1 |
| Rsa1.0_00102.1.g5063.t2  | ref NP_849553.1  beta-galactosidase 12 [Arabidopsis thaliana] gi 75265630 sp Q9SCV0.1 BGL12_ARAT H RecName: Full=Beta-galactosidase 12; Short=Lactase 12; Flags: Precursor gi 6686896 emb CAB64748.1  putative beta-galactosidase [Arabidopsis thaliana] gi 332659762 gb AEE85162.1  beta-galactosidase 12 [Arabidopsis thaliana]                                                                                                                                                                                                   | 733 | 728  | 0         | 99.3   | 89.6 | 93.6 | beta-galactosidase 12                                                                                    | gbpln | Arabidopsis thaliana | AT4G26140.1   Symbols: BGAL12   beta-galactosidase 12   chr4:13243219-13247823 REVERSE LENGTH=728                                                                                                                                                                                                                                                                                                                                                                                                       | 733 | 728 | 0         | 99.3  | 89.6 | 93.6 |
| Rsa1.0_00102.1.g5064.t1  | gb AAC95212.1  Mutator-like transposase [Arabidopsis thaliana]                                                                                                                                                                                                                                                                                                                                                                                                                                                                      | 906 | 915  | 1.00E-160 | 101.0  | 30.9 | 42.5 | Mutator-like transposase                                                                                 | gbpln | Arabidopsis thaliana | AT1G64260.1   Symbols:   MuDR family transposase   chr1:2384756-23849915 FORWARD LENGTH=719                                                                                                                                                                                                                                                                                                                                                                                                             | 906 | 719 | 3.00E-36  | 79.4  | 14.6 | 27.0 |
| Rsa1.0_00102.1.g5065.t1  | gb ABD64941.1  Ulp1 protease family protein [Brassica oleracea]                                                                                                                                                                                                                                                                                                                                                                                                                                                                     | 930 | 871  | 1.00E-101 | 93.7   | 31.7 | 48.7 | Ulp1 protease family protein                                                                             | gbpln | Brassica oleracea    | AT1G31150.1   Symbols:   Domain of unknown function (DUF985)   chr1:11120097-11122412 FORWARD LENGTH=673                                                                                                                                                                                                                                                                                                                                                                                                | 930 | 673 | 5.00E-32  | 72.4  | 11.6 | 18.2 |
| Rsa1.0_00102.1.g5066.t1  | gb EOA16889.1  hypothetical protein CARUB_v10005113mg [Capsella rubella]                                                                                                                                                                                                                                                                                                                                                                                                                                                            | 330 | 361  | 1.00E-89  | 109.4  | 65.8 | 75.2 | hypothetical protein CARUB_v10005113mg                                                                   | gbpln | Capsella rubella     | AT4G26150.1   Symbols: CGA1, GATA22, GNL   cytokinin-responsive gata factor 1   chr4:13253210-13254659 FORWARD LENGTH=352                                                                                                                                                                                                                                                                                                                                                                               | 330 | 352 | 1.00E-79  | 106.7 | 65.2 | 73.9 |
| Rsa1.0_00102.1.g5067.t1  | ref NP_194346.1  thioredoxin-like 2-1 [Arabidopsis thaliana] gi 51702019 sp g8LEK4.2 TRL21_ARAT H RecName: Full=Thioredoxin-like 2-1, chloroplastic; AltName: Full=Atypical cysteine/histidine-rich thioredoxin 1; Short=AAcHT1; Flags: Precursor gi 4538945 emb CAB39681.1  putative thioredoxin [Arabidopsis thaliana] gi 7269467 emb CAB79471.1  putative thioredoxin [Arabidopsis thaliana] gi 88196727 gb ABD43006.1  At4g26160 [Arabidopsis thaliana] gi 332659765 gb AEE85165.1  thioredoxin-like 2-1 [Arabidopsis thaliana] | 215 | 221  | 3.00E-84  | 102.8  | 80.0 | 86.5 | thioredoxin-like 2-1                                                                                     | gbpln | Arabidopsis thaliana | AT4G26160.1   Symbols: ACHT1   atypical CYS HIS rich thioredoxin 1   chr4:13255296-13256632 FORWARD LENGTH=221                                                                                                                                                                                                                                                                                                                                                                                          | 215 | 221 | 9.00E-87  | 102.8 | 80.0 | 86.5 |
| Rsa1.0_00102.1.g5068.t10 | gb EOA26149.1  hypothetical protein CARUB_v10019585mg [Capsella rubella]                                                                                                                                                                                                                                                                                                                                                                                                                                                            | 577 | 423  | 1.00E-29  | 73.3   | 19.4 | 26.2 | hypothetical protein CARUB_v10019585mg                                                                   | gbpln | Capsella rubella     | AT4G26340.1   Symbols:   F-box/RNI-like/FBD-like domains-containing protein   chr4:13324130-13325559 FORWARD LENGTH=419                                                                                                                                                                                                                                                                                                                                                                                 | 577 | 419 | 5.00E-28  | 72.6  | 19.1 | 28.2 |
| Rsa1.0_00102.1.g5069.t1  | gb EOA25784.1  hypothetical protein CARUB_v10019151mg, partial [Capsella rubella]                                                                                                                                                                                                                                                                                                                                                                                                                                                   | 439 | 460  | 5.00E-79  | 104.8  | 44.2 | 57.9 | hypothetical protein CARUB_v10019151mg, partial                                                          | gbpln | Capsella rubella     | AT3G52680.2   Symbols:   F-box/RNI-like/FBD-like domains-containing protein   chr3:19527075-19528838 FORWARD LENGTH=456                                                                                                                                                                                                                                                                                                                                                                                 | 439 | 456 | 4.00E-80  | 103.9 | 43.5 | 59.0 |

|                         |                                                                                                                                                                                                                                                                                                                             |      |      |           |       |      |      |                                                         |       |                      |                                                                                                                                                                                                                                                                                                                                                                                                                                                                                                                                                                                                                         |      |      |           |       |      |      |
|-------------------------|-----------------------------------------------------------------------------------------------------------------------------------------------------------------------------------------------------------------------------------------------------------------------------------------------------------------------------|------|------|-----------|-------|------|------|---------------------------------------------------------|-------|----------------------|-------------------------------------------------------------------------------------------------------------------------------------------------------------------------------------------------------------------------------------------------------------------------------------------------------------------------------------------------------------------------------------------------------------------------------------------------------------------------------------------------------------------------------------------------------------------------------------------------------------------------|------|------|-----------|-------|------|------|
| Rsa1.0_00102.1.g5070.t1 | gb AAT00536.1  effector of transcription [Brassica napus]                                                                                                                                                                                                                                                                   | 390  | 440  | 1.00E-165 | 112.8 | 81.0 | 86.9 | effector of transcription                               | gbpln | Brassica napus       | AT4G26170.1   Symbols:   FUNCTIONS IN: molecular function unknown; INVOLVED IN: biological process unknown; LOCATED IN: chloroplast; EXPRESSED IN: 7 plant structures; EXPRESSED DURING: F mature embryo stage, petal differentiation and expansion stage, E expanded cotyledon stage, D bilateral stage; BEST Arabidopsis thaliana protein match is: effector of transcription2 (TAIR:AT5G56780.1); Has 75 Blast hits to 42 proteins in 17 species: Archae - 0; Bacteria - 2; Metazoa - 2; Fungi - 0; Plants - 70; Viruses - 0; Other Eukaryotes - 1 (source: NCBI BLink).   chr4:13256930-13259382 FORWARD LENGTH=506 | 390  | 506  | 3.00E-95  | 129.7 | 55.1 | 63.8 |
| Rsa1.0_00102.1.g5071.t1 | gb EOA16979.1  hypothetical protein CARUB_v10005210mg [Capsella rubella]                                                                                                                                                                                                                                                    | 357  | 333  | 1.00E-173 | 93.3  | 86.0 | 88.8 | hypothetical protein CARUB_v10005210mg                  | gbpln | Capsella rubella     | AT4G26180.1   Symbols:   Mitochondrial substrate carrier family protein   chr4:13260263-13261887 REVERSE LENGTH=325                                                                                                                                                                                                                                                                                                                                                                                                                                                                                                     | 357  | 325  | 1.00E-169 | 91.0  | 83.5 | 86.8 |
| Rsa1.0_00102.1.g5072.t1 | gb EOA17906.1  hypothetical protein CARUB_v10006315mg [Capsella rubella]                                                                                                                                                                                                                                                    | 447  | 450  | 0         | 100.7 | 94.9 | 97.8 | hypothetical protein CARUB_v10006315mg                  | gbpln | Capsella rubella     | AT4G26200.1   Symbols: ACS7, ATACS7   1-amino-cyclopropane-1-carboxylate synthase 7   chr4:13275307-13276946 FORWARD LENGTH=447                                                                                                                                                                                                                                                                                                                                                                                                                                                                                         | 447  | 447  | 0         | 100.0 | 95.5 | 98.0 |
| Rsa1.0_00102.1.g5073.t1 | #                                                                                                                                                                                                                                                                                                                           | #    | #    | #         | #     | #    | #    | -                                                       | ----  | ----                 | AT3G55430.1   Symbols:   O-Glycosyl hydrolases family 17 protein   chr3:20549806-20552004 REVERSE LENGTH=449                                                                                                                                                                                                                                                                                                                                                                                                                                                                                                            | 139  | 449  | 6.00E-12  | 323.0 | 23.7 | 36.0 |
| Rsa1.0_00102.1.g5074.t1 | ref NP_567741.2  galactinol synthase 6 [Arabidopsis thaliana]<br>gi 75151964 sp Q8H1S1.1 GOLS6_ARAT H RecName: Full=Galactinol synthase 6; Short=AtGols6; Short=GoIS-6<br>gi 23296356 gb AANI3051.1  galactinol synthase [Arabidopsis thaliana]<br>gi 332659775 gb AEE85175.1  galactinol synthase 6 [Arabidopsis thaliana] | 338  | 336  | 1.00E-166 | 99.4  | 82.2 | 91.1 | galactinol synthase 6                                   | gbpln | Arabidopsis thaliana | AT4G26250.1   Symbols: AtGoIS6, GoIS6   galactinol synthase 6   chr4:13289641-13291053 FORWARD LENGTH=336                                                                                                                                                                                                                                                                                                                                                                                                                                                                                                               | 338  | 336  | 1.00E-169 | 99.4  | 82.2 | 91.1 |
| Rsa1.0_00102.1.g5075.t1 | #                                                                                                                                                                                                                                                                                                                           | #    | #    | #         | #     | #    | #    | -                                                       | ----  | ----                 | #                                                                                                                                                                                                                                                                                                                                                                                                                                                                                                                                                                                                                       | #    | #    | #         | #     | #    |      |
| Rsa1.0_00102.1.g5076.t1 | #                                                                                                                                                                                                                                                                                                                           | #    | #    | #         | #     | #    | #    | -                                                       | ----  | ----                 | #                                                                                                                                                                                                                                                                                                                                                                                                                                                                                                                                                                                                                       | #    | #    | #         | #     | #    |      |
| Rsa1.0_00102.1.g5077.t2 | gb EOA30274.1  hypothetical protein CARUB_v10013395mg [Capsella rubella]                                                                                                                                                                                                                                                    | 617  | 546  | 8.00E-80  | 88.5  | 26.9 | 29.3 | hypothetical protein CARUB_v10013395mg                  | gbpln | Capsella rubella     | AT2G17700.1   Symbols:   ACT-like protein tyrosine kinase family protein   chr2:7685778-7689278 REVERSE LENGTH=546                                                                                                                                                                                                                                                                                                                                                                                                                                                                                                      | 617  | 546  | 3.00E-80  | 88.5  | 26.6 | 28.7 |
| Rsa1.0_00103.1.g5078.t1 | #                                                                                                                                                                                                                                                                                                                           | #    | #    | #         | #     | #    | #    | -                                                       | ----  | ----                 | #                                                                                                                                                                                                                                                                                                                                                                                                                                                                                                                                                                                                                       | #    | #    | #         | #     | #    |      |
| Rsa1.0_00103.1.g5079.t1 | gb AAG50806.1 AC079281.8 unknown protein [Arabidopsis thaliana]                                                                                                                                                                                                                                                             | 1794 | 1213 | 0         | 67.6  | 34.2 | 44.0 | unknown protein                                         | gbpln | Arabidopsis thaliana | AT1G60720.1   Symbols:   RNA-directed DNA polymerase (reverse transcriptase)-related family protein   chr1:22357072-22357941 FORWARD LENGTH=289                                                                                                                                                                                                                                                                                                                                                                                                                                                                         | 1794 | 289  | 3.00E-71  | 16.1  | 7.2  | 10.0 |
| Rsa1.0_00103.1.g5080.t2 | ref NP_192969.4  cytochrome P450, family 706, subfamily A, polypeptide 6 [Arabidopsis thaliana]<br>gi 51536592 gb AAU05534.1  At4g12320 [Arabidopsis thaliana]<br>gi 332657714 gb AEE83114.1  cytochrome P450, family 706, subfamily A, polypeptide 6 [Arabidopsis thaliana]                                                | 516  | 518  | 0         | 100.4 | 82.2 | 91.3 | cytochrome P450, family 706, subfamily A, polypeptide 6 | gbpln | Arabidopsis thaliana | AT4G12320.1   Symbols: CYP706A6   cytochrome P450, family 706, subfamily A, polypeptide 6   chr4:7314939-7316647 REVERSE LENGTH=518                                                                                                                                                                                                                                                                                                                                                                                                                                                                                     | 516  | 518  | 0         | 100.4 | 82.2 | 91.3 |
| Rsa1.0_00103.1.g5081.t1 | gb EOA22327.1  hypothetical protein CARUB_v10002934mg [Capsella rubella]                                                                                                                                                                                                                                                    | 165  | 163  | 2.00E-71  | 98.8  | 82.4 | 90.3 | hypothetical protein CARUB_v10002934mg                  | gbpln | Capsella rubella     | AT4G12410.1   Symbols:   SAUR-like auxin-responsive protein family   chr4:7342956-7343429 REVERSE LENGTH=157                                                                                                                                                                                                                                                                                                                                                                                                                                                                                                            | 165  | 157  | 2.00E-71  | 95.2  | 80.6 | 88.5 |
| Rsa1.0_00103.1.g5082.t1 | #                                                                                                                                                                                                                                                                                                                           | #    | #    | #         | #     | #    | #    | -                                                       | ----  | ----                 | #                                                                                                                                                                                                                                                                                                                                                                                                                                                                                                                                                                                                                       | #    | #    | #         | #     | #    |      |
| Rsa1.0_00103.1.g5083.t1 | #                                                                                                                                                                                                                                                                                                                           | #    | #    | #         | #     | #    | #    | -                                                       | ----  | ----                 | #                                                                                                                                                                                                                                                                                                                                                                                                                                                                                                                                                                                                                       | #    | #    | #         | #     | #    |      |
| Rsa1.0_00103.1.g5084.t1 | #                                                                                                                                                                                                                                                                                                                           | #    | #    | #         | #     | #    | #    | -                                                       | ----  | ----                 | #                                                                                                                                                                                                                                                                                                                                                                                                                                                                                                                                                                                                                       | #    | #    | #         | #     | #    |      |
| Rsa1.0_00103.1.g5085.t1 | ref XP_002874771.1  hypothetical protein ARALYDRAFT_911635 [Arabidopsis lyrata subsp. lyrata]<br>gi 297320608 gb EFH51030.1  hypothetical protein ARALYDRAFT_911635 [Arabidopsis lyrata subsp. lyrata]                                                                                                                      | 574  | 587  | 0         | 102.3 | 91.6 | 94.9 | hypothetical protein ARALYDRAFT_911635                  | gbpln | Arabidopsis lyrata   | AT4G12420.2   Symbols: SKU5   Cupredoxin superfamily protein   chr4:7349941-7352868 REVERSE LENGTH=587                                                                                                                                                                                                                                                                                                                                                                                                                                                                                                                  | 574  | 587  | 0         | 102.3 | 90.8 | 94.4 |
| Rsa1.0_00103.1.g5086.t2 | gb AAM82604.1 AF525305.2 putative AP endonuclease/reverse transcriptase [Brassica napus]                                                                                                                                                                                                                                    | 1609 | 1214 | 0         | 75.5  | 26.7 | 40.3 | putative AP endonuclease/reverse transcriptase          | gbpln | Brassica napus       | AT5G18880.1   Symbols:   RNA-directed DNA polymerase (reverse transcriptase)-related family protein   chr5:6300535-6301422 REVERSE LENGTH=295                                                                                                                                                                                                                                                                                                                                                                                                                                                                           | 1609 | 295  | 1.00E-74  | 18.3  | 9.0  | 11.9 |
| Rsa1.0_00103.1.g5087.t1 | gb AAC35532.1  contains similarity to proteases [Arabidopsis thaliana]                                                                                                                                                                                                                                                      | 549  | 1392 | 1.00E-112 | 253.6 | 46.3 | 61.2 | contains similarity to proteases                        | gbpln | Arabidopsis thaliana | AT4G23160.1   Symbols: CRK8   cysteine-rich RLK (RECEPTOR-like protein kinase) 8   chr4:12129485-12134086 FORWARD LENGTH=1262                                                                                                                                                                                                                                                                                                                                                                                                                                                                                           | 549  | 1262 | 2.00E-34  | 229.9 | 19.3 | 30.4 |

|                         |                                                                                                                                                                                                                                                                                                                                                                                                                                                                                                                                                                                               |     |      |          |       |      |      |                                                                                    |       |                      |                                                                                                                                                                                                                                                                                                                            |     |      |          |       |      |      |
|-------------------------|-----------------------------------------------------------------------------------------------------------------------------------------------------------------------------------------------------------------------------------------------------------------------------------------------------------------------------------------------------------------------------------------------------------------------------------------------------------------------------------------------------------------------------------------------------------------------------------------------|-----|------|----------|-------|------|------|------------------------------------------------------------------------------------|-------|----------------------|----------------------------------------------------------------------------------------------------------------------------------------------------------------------------------------------------------------------------------------------------------------------------------------------------------------------------|-----|------|----------|-------|------|------|
| Rsa1.0_00103.1.g5088.t1 | gb ABA93904.1  transposon protein, putative, Mariner sub-class [Oryza sativa Japonica Group] gi 222616021 gb EEE52153.1  hypothetical protein OsJ_33993 [Oryza sativa Japonica Group]                                                                                                                                                                                                                                                                                                                                                                                                         | 273 | 452  | 7.00E-57 | 165.6 | 42.9 | 66.7 | transposon protein, putative, Mariner sub-class                                    | gbpln | Oryza sativa         | #                                                                                                                                                                                                                                                                                                                          | #   | #    | #        | #     | #    |      |
| Rsa1.0_00103.1.g5089.t1 | #                                                                                                                                                                                                                                                                                                                                                                                                                                                                                                                                                                                             | #   | #    | #        | #     | #    | -    | ----                                                                               | ----  | #                    | #                                                                                                                                                                                                                                                                                                                          | #   | #    | #        | #     | #    |      |
| Rsa1.0_00103.1.g5090.t1 | ref NP_192983.2  OSBP(oxysterol binding protein)-related protein 2B [Arabidopsis thaliana] gi 313471379 sp Q9SU36.2 ORP2B_ARA TH RecName: Full=Oxysterol-binding protein-related protein 2B; AltName: Full=OSBP-related protein 2B gi 332657735 gb AEE83135.1  OSBP(oxysterol binding protein)-related protein 2B [Arabidopsis thaliana]                                                                                                                                                                                                                                                      | 730 | 693  | 0        | 94.9  | 82.9 | 87.5 | OSBP(oxysterol binding protein)-related protein 2B                                 | gbpln | Arabidopsis thaliana | AT4G12460.1   Symbols: ORP2B   OSBP(oxysterol binding protein)-related protein 2B   chr4:7391400-7396056 FORWARD LENGTH=693                                                                                                                                                                                                | 730 | 693  | 0        | 94.9  | 82.9 | 87.5 |
| Rsa1.0_00103.1.g5091.t1 | ref NP_192986.1  bifunctional inhibitor/lipid-transfer protein/seed storage 2S albumin-like protein [Arabidopsis thaliana] gi 4725948 emb CAB41719.1  pEARLI 1-like protein [Arabidopsis thaliana] gi 7267951 emb CAB78292.1  pEARLI 1-like protein [Arabidopsis thaliana] gi 15450471 gb AAK96529.1  AT4g12490/T1P17.80 [Arabidopsis thaliana] gi 16974459 gb AAL31233.1  AT4g12490/T1P17.80 [Arabidopsis thaliana] gi 332657739 gb AEE83139.1  bifunctional inhibitor/lipid-transfer protein/seed storage 2S albumin-like protein [Arabidopsis thaliana]                                    | 166 | 182  | 4.00E-56 | 109.6 | 75.9 | 88.0 | bifunctional inhibitor/lipid-transfer protein/seed storage 2S albumin-like protein | gbpln | Arabidopsis thaliana | AT4G12490.1   Symbols:   Bifunctional inhibitor/lipid-transfer protein/seed storage 2S albumin superfamily protein   chr4:7409830-7410378 REVERSE LENGTH=182                                                                                                                                                               | 166 | 182  | 2.00E-58 | 109.6 | 75.9 | 88.0 |
| Rsa1.0_00103.1.g5092.t1 | #                                                                                                                                                                                                                                                                                                                                                                                                                                                                                                                                                                                             | #   | #    | #        | #     | #    | -    | ----                                                                               | ----  | #                    | #                                                                                                                                                                                                                                                                                                                          | #   | #    | #        | #     | #    |      |
| Rsa1.0_00103.1.g5093.t1 | gb EOA22039.1  hypothetical protein CARUB_v10002564mg [Capsella rubella]                                                                                                                                                                                                                                                                                                                                                                                                                                                                                                                      | 133 | 135  | 9.00E-50 | 101.5 | 86.5 | 92.5 | hypothetical protein CARUB_v10002564mg                                             | gbpln | Capsella rubella     | AT4G12510.1   Symbols:   Bifunctional inhibitor/lipid-transfer protein/seed storage 2S albumin superfamily protein   chr4:7417414-7417803 REVERSE LENGTH=129                                                                                                                                                               | 133 | 129  | 5.00E-52 | 97.0  | 83.5 | 88.0 |
| Rsa1.0_00103.1.g5094.t1 | ref NP_192990.1  bifunctional inhibitor/lipid-transfer protein/seed storage 2S albumin-like protein [Arabidopsis thaliana] gi 4725952 emb CAB41723.1  AIR1A-like protein [Arabidopsis thaliana] gi 7267955 emb CAB78296.1  AIR1A-like protein [Arabidopsis thaliana] gi 89001069 gb ABD59124.1  At4g12530 [Arabidopsis thaliana] gi 91806666 gb ABE6060.1  protease inhibitor/seed storage/lipid transfer protein family protein [Arabidopsis thaliana] gi 332657743 gb AEE83143.1  bifunctional inhibitor/lipid-transfer protein/seed storage 2S albumin-like protein [Arabidopsis thaliana] | 117 | 117  | 2.00E-43 | 100.0 | 81.2 | 87.2 | bifunctional inhibitor/lipid-transfer protein/seed storage 2S albumin-like protein | gbpln | Arabidopsis thaliana | AT4G12530.1   Symbols:   Bifunctional inhibitor/lipid-transfer protein/seed storage 2S albumin superfamily protein   chr4:7428141-7428494 REVERSE LENGTH=117                                                                                                                                                               | 117 | 117  | 4.00E-46 | 100.0 | 81.2 | 87.2 |
| Rsa1.0_00103.1.g5095.t1 | ref XP_002863072.1  kelch repeat-containing F-box family protein [Arabidopsis lyrata subsp. lyrata] gi 297308883 gb EFH39331.1  kelch repeat-containing F-box family protein [Arabidopsis lyrata subsp. lyrata]                                                                                                                                                                                                                                                                                                                                                                               | 171 | 387  | 9.00E-14 | 226.3 | 24.0 | 31.0 | kelch repeat-containing F-box family protein                                       | gbpln | Arabidopsis lyrata   | AT5G48990.1   Symbols:   Galactose oxidase/kelch repeat superfamily protein   chr5:19862340-19863458 FORWARD LENGTH=372                                                                                                                                                                                                    | 171 | 372  | 5.00E-16 | 217.5 | 24.0 | 32.7 |
| Rsa1.0_00103.1.g5096.t1 | gb EOA22039.1  hypothetical protein CARUB_v10002564mg [Capsella rubella]                                                                                                                                                                                                                                                                                                                                                                                                                                                                                                                      | 133 | 135  | 5.00E-49 | 101.5 | 85.0 | 91.7 | hypothetical protein CARUB_v10002564mg                                             | gbpln | Capsella rubella     | AT4G12510.1   Symbols:   Bifunctional inhibitor/lipid-transfer protein/seed storage 2S albumin superfamily protein   chr4:7417414-7417803 REVERSE LENGTH=129                                                                                                                                                               | 133 | 129  | 3.00E-51 | 97.0  | 82.0 | 87.2 |
| Rsa1.0_00103.1.g5097.t2 | gb AGC65584.1  GFP-CESA3ixr1-2 [Binary plant gene expression vector pKM24-MD1]                                                                                                                                                                                                                                                                                                                                                                                                                                                                                                                | 402 | 1344 | 0        | 334.3 | 85.3 | 88.3 | GFP-CESA3ixr1-2                                                                    | ----  | ----                 | AT5G05170.1   Symbols: CESA3, IXR1, ATCESA3, ATH-B, CEV1   Cellulose synthase family protein   chr5:1530401-1535090 REVERSE LENGTH=1065                                                                                                                                                                                    | 402 | 1065 | 0        | 264.9 | 85.3 | 88.3 |
| Rsa1.0_00104.1.g5098.t1 | emb CAB10225.1  retrovirus-related like polyprotein [Arabidopsis thaliana] gi 7268152 emb CAB78488.1  retrovirus-related like polyprotein [Arabidopsis thaliana]                                                                                                                                                                                                                                                                                                                                                                                                                              | 327 | 1489 | 4.00E-66 | 455.4 | 39.4 | 54.7 | retrovirus-related like polyprotein                                                | gbpln | Arabidopsis thaliana | AT1G21280.1   Symbols:   CONTAINS InterPro DOMAIN's: Retrotransposon gag protein (InterPro:IPR005162); Has 707 Blast hits to 705 proteins in 25 species: Archae - 0; Bacteria - 0; Metazoa - 4; Fungi - 0; Plants - 703; Viruses - 0; Other Eukaryotes - 0 (source: NCBI BLINK).   chr1:7447690-7448403 REVERSE LENGTH=237 | 327 | 237  | 4.00E-25 | 72.5  | 19.9 | 32.7 |

|                         |                                                                                                                                                                                                                                                                                                                                                                                                                                                                                                                                                                     |     |     |           |       |      |      |                                                      |       |                      |                                                                                                                                                                                                                                                                                                                                                                                                                                                                               |     |     |           |       |      |      |
|-------------------------|---------------------------------------------------------------------------------------------------------------------------------------------------------------------------------------------------------------------------------------------------------------------------------------------------------------------------------------------------------------------------------------------------------------------------------------------------------------------------------------------------------------------------------------------------------------------|-----|-----|-----------|-------|------|------|------------------------------------------------------|-------|----------------------|-------------------------------------------------------------------------------------------------------------------------------------------------------------------------------------------------------------------------------------------------------------------------------------------------------------------------------------------------------------------------------------------------------------------------------------------------------------------------------|-----|-----|-----------|-------|------|------|
| Rsa1.0_00104.1.g5099.t1 | gb[EOA13781.1] hypothetical protein CARUB_v10026881mg, partial [Capsella rubella]                                                                                                                                                                                                                                                                                                                                                                                                                                                                                   | 291 | 297 | 1.00E-152 | 102.1 | 92.8 | 95.5 | hypothetical protein CARUB_v10026881mg, partial      | gbpln | Capsella rubella     | AT5G60660.1   Symbols: PIP2F, PIP2.4   plasma membrane intrinsic protein 2.4   chr5:24375673-24376939 REVERSE LENGTH=291                                                                                                                                                                                                                                                                                                                                                      | 291 | 291 | 1.00E-148 | 100.0 | 89.0 | 91.8 |
| Rsa1.0_00104.1.g5100.t1 | #                                                                                                                                                                                                                                                                                                                                                                                                                                                                                                                                                                   | #   | #   | #         | #     | #    | #    | -                                                    | ----  | ----                 | #                                                                                                                                                                                                                                                                                                                                                                                                                                                                             | #   | #   | #         | #     | #    | #    |
| Rsa1.0_00104.1.g5101.t1 | #                                                                                                                                                                                                                                                                                                                                                                                                                                                                                                                                                                   | #   | #   | #         | #     | #    | #    | -                                                    | ----  | ----                 | #                                                                                                                                                                                                                                                                                                                                                                                                                                                                             | #   | #   | #         | #     | #    | #    |
| Rsa1.0_00104.1.g5102.t1 | ref[NP_200873.1] uncharacterized protein [Arabidopsis thaliana] gi 9759329 dbj BAB09838.1  unnamed protein product [Arabidopsis thaliana] gi 55978853 gb AAV68888.1  hypothetical protein AT5G60650 [Arabidopsis thaliana] gi 332009980 gb AED97363.1  uncharacterized protein AT5G60650 [Arabidopsis thaliana]                                                                                                                                                                                                                                                     | 74  | 147 | 1.00E-21  | 198.6 | 68.9 | 71.6 | uncharacterized protein                              | gbpln | Arabidopsis thaliana | AT5G60650.1   Symbols:   unknown protein; FUNCTIONS IN: molecular, function unknown; INVOLVED IN: biological process unknown; LOCATED IN: endomembrane system; BEST Arabidopsis thaliana protein match is: unknown protein (TAIR:AT2G28410.1). Has 1807 Blast hits to 1807 proteins in 277 species: Archae - 0; Bacteria - 0; Metazoa - 736; Fungi - 347; Plants - 385; Viruses - 0; Other Eukaryotes - 339 (source: NCBI BLink).   chr5:24374305-24374748 REVERSE LENGTH=147 | 74  | 147 | 2.00E-24  | 198.6 | 68.9 | 71.6 |
| Rsa1.0_00104.1.g5103.t1 | ref[XP_002866387.1] hypothetical protein ARALYDRAFT_496212 [Arabidopsis lyrata subsp. lyrata] gi 297312222 gb EFH42646.1  hypothetical protein ARALYDRAFT_496212 [Arabidopsis lyrata subsp. lyrata]                                                                                                                                                                                                                                                                                                                                                                 | 600 | 597 | 0         | 99.5  | 85.8 | 90.7 | hypothetical protein ARALYDRAFT_496212               | gbpln | Arabidopsis lyrata   | AT5G60640.1   Symbols: ATPDIL1-4, PDI2, ATPD2, PDIL1-4   PDI-like 1-4   chr5:24371141-24373993 REVERSE LENGTH=597                                                                                                                                                                                                                                                                                                                                                             | 600 | 597 | 0         | 99.5  | 85.0 | 90.3 |
| Rsa1.0_00104.1.g5104.t1 | ref[NP_174811.1] protein pumilio 9 [Arabidopsis thaliana] gi 122244101 sp Q1PFN9.1 PUM9_ARAT H RecName: Full=Pumilio homolog 9; Short=APUM-9; Short=AtPUM9 gi 91805917 gb ABE65687.1  pumilio/Puf RNA-binding domain-containing protein [Arabidopsis thaliana] gi 332193705 gb AEE31826.1  protein pumilio 9 [Arabidopsis thaliana] ref[XP_002864695.1] phospholipid/glycerol acyltransferase family protein [Arabidopsis lyrata subsp. lyrata] gi 297310530 gb EFH40954.1  phospholipid/glycerol acyltransferase family protein [Arabidopsis lyrata subsp. lyrata] | 139 | 564 | 2.00E-16  | 405.8 | 28.1 | 35.3 | protein pumilio 9                                    | gbpln | Arabidopsis thaliana | AT1G35730.1   Symbols: APUM9, PUM9   pumilio 9   chr1:13227324-13229796 REVERSE LENGTH=564                                                                                                                                                                                                                                                                                                                                                                                    | 139 | 564 | 5.00E-19  | 405.8 | 28.1 | 35.3 |
| Rsa1.0_00104.1.g5105.t2 | ref[XP_002864695.1] phospholipid/glycerol acyltransferase family protein [Arabidopsis lyrata subsp. lyrata] gi 297310530 gb EFH40954.1  phospholipid/glycerol acyltransferase family protein [Arabidopsis lyrata subsp. lyrata]                                                                                                                                                                                                                                                                                                                                     | 356 | 376 | 0         | 105.6 | 95.8 | 97.5 | phospholipid/glycerol acyltransferase family protein | gbpln | Arabidopsis lyrata   | AT5G60620.1   Symbols: GPAT9   glycerol-3-phosphate acyltransferase 9   chr5:24367266-24369647 FORWARD LENGTH=376                                                                                                                                                                                                                                                                                                                                                             | 356 | 376 | 0         | 105.6 | 94.7 | 97.5 |
| Rsa1.0_00104.1.g5106.t1 | ref[NP_192624.2] pumilio 11 [Arabidopsis thaliana] gi 313471422 sp Q9LDW3.2 PUM11_ARA TH RecName: Full=Pumilio homolog 11; Short=APUM-11; Short=AtPUM11 gi 332657281 gb AEE82681.1  pumilio 11 [Arabidopsis thaliana]                                                                                                                                                                                                                                                                                                                                               | 524 | 556 | 1.00E-140 | 106.1 | 56.7 | 71.0 | pumilio 11                                           | gbpln | Arabidopsis thaliana | AT4G08840.1   Symbols: APUM11, PUM11   pumilio 11   chr4:5631298-5633779 FORWARD LENGTH=556                                                                                                                                                                                                                                                                                                                                                                                   | 524 | 556 | 1.00E-143 | 106.1 | 56.7 | 71.0 |
| Rsa1.0_00104.1.g5107.t1 | #                                                                                                                                                                                                                                                                                                                                                                                                                                                                                                                                                                   | #   | #   | #         | #     | #    | #    | -                                                    | ----  | ----                 | #                                                                                                                                                                                                                                                                                                                                                                                                                                                                             | #   | #   | #         | #     | #    | #    |
| Rsa1.0_00104.1.g5108.t4 | #                                                                                                                                                                                                                                                                                                                                                                                                                                                                                                                                                                   | #   | #   | #         | #     | #    | #    | -                                                    | ----  | ----                 | #                                                                                                                                                                                                                                                                                                                                                                                                                                                                             | #   | #   | #         | #     | #    | #    |
| Rsa1.0_00104.1.g5109.t1 | ref[XP_002864693.1] hypothetical protein ARALYDRAFT_358267 [Arabidopsis lyrata subsp. lyrata] gi 297310528 gb EFH40952.1  hypothetical protein ARALYDRAFT_358267 [Arabidopsis lyrata subsp. lyrata]                                                                                                                                                                                                                                                                                                                                                                 | 282 | 284 | 1.00E-138 | 100.7 | 87.6 | 90.4 | hypothetical protein ARALYDRAFT_358267               | gbpln | Arabidopsis lyrata   | AT5G60590.2   Symbols:   DHBP synthase RibB-like alpha/beta domain   chr5:24357066-24358443 FORWARD LENGTH=288                                                                                                                                                                                                                                                                                                                                                                | 282 | 288 | 1.00E-136 | 102.1 | 85.1 | 88.3 |
| Rsa1.0_00104.1.g5110.t1 | ref[XP_002864692.1] zinc finger family protein [Arabidopsis lyrata subsp. lyrata] gi 297310527 gb EFH40951.1  zinc finger family protein [Arabidopsis lyrata subsp. lyrata]                                                                                                                                                                                                                                                                                                                                                                                         | 493 | 491 | 0         | 99.6  | 84.8 | 88.8 | zinc finger family protein                           | gbpln | Arabidopsis lyrata   | AT5G60580.3   Symbols:   RING/U-box superfamily protein   chr5:24354298-24356706 FORWARD LENGTH=487                                                                                                                                                                                                                                                                                                                                                                           | 493 | 487 | 0         | 98.8  | 83.8 | 88.2 |
| Rsa1.0_00104.1.g5111.t1 | #                                                                                                                                                                                                                                                                                                                                                                                                                                                                                                                                                                   | #   | #   | #         | #     | #    | #    | -                                                    | ----  | ----                 | #                                                                                                                                                                                                                                                                                                                                                                                                                                                                             | #   | #   | #         | #     | #    | #    |
| Rsa1.0_00104.1.g5112.t1 | ref[XP_002864691.1] kelch repeat-containing F-box family protein [Arabidopsis lyrata subsp. lyrata] gi 297310526 gb EFH40950.1  kelch repeat-containing F-box family protein [Arabidopsis lyrata subsp. lyrata] ref[XP_002864689.1] hypothetical protein ARALYDRAFT_919290 [Arabidopsis lyrata subsp. lyrata] gi 297310524 gb EFH40948.1  hypothetical protein ARALYDRAFT_919290 [Arabidopsis lyrata subsp. lyrata]                                                                                                                                                 | 385 | 386 | 0         | 100.3 | 85.2 | 91.7 | kelch repeat-containing F-box family protein         | gbpln | Arabidopsis lyrata   | AT5G60570.1   Symbols:   Galactose oxidase/kelch repeat superfamily protein   chr5:24348713-24349894 FORWARD LENGTH=393                                                                                                                                                                                                                                                                                                                                                       | 385 | 393 | 0         | 102.1 | 85.7 | 93.0 |
| Rsa1.0_00104.1.g5113.t1 | ref[XP_002864689.1] hypothetical protein ARALYDRAFT_919290 [Arabidopsis lyrata subsp. lyrata] gi 297310524 gb EFH40948.1  hypothetical protein ARALYDRAFT_919290 [Arabidopsis lyrata subsp. lyrata]                                                                                                                                                                                                                                                                                                                                                                 | 401 | 407 | 0         | 101.5 | 87.5 | 93.5 | hypothetical protein ARALYDRAFT_919290               | gbpln | Arabidopsis lyrata   | AT5G60550.1   Symbols: GRIK2, AT5NAK1   geminivirus rep interacting kinase 2   chr5:24340135-24342356 FORWARD LENGTH=407                                                                                                                                                                                                                                                                                                                                                      | 401 | 407 | 0         | 101.5 | 86.3 | 93.3 |



|                         |                                                                                                                                                                                                                                                                                                                                                                                                                                                                                                                                                                                                                                                                                                                                                                                                                                                                                                                                                                                                       |     |     |           |       |      |      |                                                         |       |                      |                                                                                                                                        |     |     |           |       |      |      |
|-------------------------|-------------------------------------------------------------------------------------------------------------------------------------------------------------------------------------------------------------------------------------------------------------------------------------------------------------------------------------------------------------------------------------------------------------------------------------------------------------------------------------------------------------------------------------------------------------------------------------------------------------------------------------------------------------------------------------------------------------------------------------------------------------------------------------------------------------------------------------------------------------------------------------------------------------------------------------------------------------------------------------------------------|-----|-----|-----------|-------|------|------|---------------------------------------------------------|-------|----------------------|----------------------------------------------------------------------------------------------------------------------------------------|-----|-----|-----------|-------|------|------|
| Rsa1.0_00104.1.g5114.t1 | refNP_568922.1  Pyridoxal biosynthesis protein PDX2 [Arabidopsis thaliana] gi 75154761 sp Q8LAD0.1 PDX2 ARATH RecName: Full=Pyridoxal biosynthesis protein PDX2; AltName: Full=Probable glutamine amidotransferase; Short=AtPDX2; AltName: Full=Protein EMBRYO DEFECTIVE 2407 gi 21593486 gb AA063330.1  At5g60540 imidazoleglycerol-phosphate synthase subunit H-like [Arabidopsis thaliana] gi 26449721 dbj BAC41984.1  putative imidazoleglycerol-phosphate synthase subunit H [Arabidopsis thaliana] gi 28950813 gb AA063330.1  At5g60540 [Arabidopsis thaliana] gi 332009958 gb AED97341.1  Pyridoxal biosynthesis protein PDX2 [Arabidopsis thaliana] refNP_200861.1  late embryogenesis abundant protein-like protein [Arabidopsis thaliana] gi 9757755 dbj BAB08238.1  unnamed protein product [Arabidopsis thaliana] gi 23308395 gb AN18167.1  At5g60530/muf9_190 [Arabidopsis thaliana] gi 332009957 gb AED97340.1  late embryogenesis abundant protein-like protein [Arabidopsis thaliana] | 255 | 255 | 1.00E-131 | 100.0 | 91.8 | 95.7 | Pyridoxal biosynthesis protein PDX2                     | gbpln | Arabidopsis thaliana | AT5G60540.1   Symbols: EMB2407, ATPDX2, PDX2   pyridoxine biosynthesis 2   chr5:24336874-24338647 REVERSE LENGTH=255                   | 255 | 255 | 1.00E-133 | 100.0 | 91.8 | 95.7 |
| Rsa1.0_00104.1.g5115.t1 | At5g60530/muf9_190 [Arabidopsis thaliana] gi 332009957 gb AED97340.1  late embryogenesis abundant protein-like protein [Arabidopsis thaliana]                                                                                                                                                                                                                                                                                                                                                                                                                                                                                                                                                                                                                                                                                                                                                                                                                                                         | 420 | 439 | 1.00E-169 | 104.5 | 66.0 | 70.0 | late embryogenesis abundant protein-like protein        | gbpln | Arabidopsis thaliana | AT5G60530.1   Symbols:   late embryogenesis abundant protein-related / LEA protein-related   chr5:24334197-24335685 REVERSE LENGTH=439 | 420 | 439 | 1.00E-171 | 104.5 | 66.0 | 70.0 |
| Rsa1.0_00104.1.g5116.t1 | gb EOA14608.1  hypothetical protein CARUB_v10027860mg [Capsella rubella]                                                                                                                                                                                                                                                                                                                                                                                                                                                                                                                                                                                                                                                                                                                                                                                                                                                                                                                              | 332 | 335 | 0         | 100.9 | 94.3 | 96.7 | hypothetical protein CARUB_v10027860mg                  | gbpln | Capsella rubella     | AT5G60520.1   Symbols:   Late embryogenesis abundant (LEA) protein-related   chr5:24331787-24332947 REVERSE LENGTH=338                 | 332 | 338 | 1.00E-172 | 101.8 | 91.9 | 95.8 |
| Rsa1.0_00104.1.g5117.t1 | gb EOA12731.1  hypothetical protein CARUB_v10028181mg [Capsella rubella]                                                                                                                                                                                                                                                                                                                                                                                                                                                                                                                                                                                                                                                                                                                                                                                                                                                                                                                              | 271 | 271 | 1.00E-130 | 100.0 | 79.3 | 90.4 | hypothetical protein CARUB_v10028181mg                  | gbpln | Capsella rubella     | AT5G60510.1   Symbols:   Undecaprenyl pyrophosphate synthetase family protein   chr5:24330721-24331539 FORWARD LENGTH=272              | 271 | 272 | 1.00E-127 | 100.4 | 75.3 | 88.9 |
| Rsa1.0_00104.1.g5118.t1 | gb EOA12731.1  hypothetical protein CARUB_v10028181mg [Capsella rubella]                                                                                                                                                                                                                                                                                                                                                                                                                                                                                                                                                                                                                                                                                                                                                                                                                                                                                                                              | 271 | 271 | 1.00E-130 | 100.0 | 79.0 | 90.4 | hypothetical protein CARUB_v10028181mg                  | gbpln | Capsella rubella     | AT5G60510.1   Symbols:   Undecaprenyl pyrophosphate synthetase family protein   chr5:24330721-24331539 FORWARD LENGTH=272              | 271 | 272 | 1.00E-128 | 100.4 | 76.8 | 88.6 |
| Rsa1.0_00104.1.g5119.t1 | refNP_200854.1  protein transport protein SEC61 subunit beta [Arabidopsis thaliana] gi 9757748 dbj BAB08229.1  unnamed protein product [Arabidopsis thaliana] gi 26451290 dbj BAC42746.1  protein transport protein subunit - like [Arabidopsis thaliana] gi 28973101 gb AA063875.1  putative protein transport protein subunit [Arabidopsis thaliana] gi 332009950 gb AED97333.1  protein transport protein SEC61 subunit beta [Arabidopsis thaliana]                                                                                                                                                                                                                                                                                                                                                                                                                                                                                                                                                | 109 | 109 | 8.00E-32  | 100.0 | 88.1 | 93.6 | protein transport protein SEC61 subunit beta            | gbpln | Arabidopsis thaliana | AT5G60460.1   Symbols:   Preprotein translocase Sec, Sec61-beta subunit protein   chr5:24317590-24317919 REVERSE LENGTH=109            | 109 | 109 | 1.00E-34  | 100.0 | 88.1 | 93.6 |
| Rsa1.0_00104.1.g5120.t1 | gb ACR10266.1  sulfotransferase 5b [Brassica rapa subsp. pekinensis]                                                                                                                                                                                                                                                                                                                                                                                                                                                                                                                                                                                                                                                                                                                                                                                                                                                                                                                                  | 344 | 344 | 0         | 100.0 | 95.3 | 97.7 | sulfotransferase 5b                                     | gbpln | Brassica rapa        | AT1G74090.1   Symbols: SOT18, ATSOT18, ATST5B   desulfo-glucosinolate sulfotransferase 18   chr1:27863003-27864055 FORWARD LENGTH=350  | 344 | 350 | 1.00E-167 | 101.7 | 83.1 | 89.8 |
| Rsa1.0_00104.1.g5121.t1 | gb ACR10265.1  sulfotransferase 5a [Brassica rapa subsp. pekinensis]                                                                                                                                                                                                                                                                                                                                                                                                                                                                                                                                                                                                                                                                                                                                                                                                                                                                                                                                  | 337 | 338 | 0         | 100.3 | 95.8 | 97.3 | sulfotransferase 5a                                     | gbpln | Brassica rapa        | AT1G74100.1   Symbols: SOT16, ATSOT16, COR1-7, ATST5A   sulfotransferase 16   chr1:27864489-27865505 REVERSE LENGTH=338                | 337 | 338 | 0         | 100.3 | 91.4 | 95.8 |
| Rsa1.0_00104.1.g5122.t1 | refNP_177551.1  cytochrome P450, family 78, subfamily A, polypeptide 10 [Arabidopsis thaliana] gi 12325138 gb AA052514.1 AC016662_8 putative cytochrome P-450; 4810-6511 [Arabidopsis thaliana] gi 91806081 gb ABE65769.1  cytochrome P450 family protein [Arabidopsis thaliana] gi 332197430 gb AEE35551.1  cytochrome P450, family 78, subfamily A, polypeptide 10 [Arabidopsis thaliana]                                                                                                                                                                                                                                                                                                                                                                                                                                                                                                                                                                                                           | 534 | 537 | 0         | 100.6 | 89.3 | 94.0 | cytochrome P450, family 78, subfamily A, polypeptide 10 | gbpln | Arabidopsis thaliana | AT1G74110.1   Symbols: CYP78A10   cytochrome P450, family 78, subfamily A, polypeptide 10   chr1:27866667-27868368 REVERSE LENGTH=537  | 534 | 537 | 0         | 100.6 | 89.3 | 94.0 |

|                         |                                                                                                                                                                                                                                                                                                                                                                                                                                                                                                                                   |      |      |           |       |      |      |                                                               |       |                      |                                                                                                                                                                                                                                                                                                                                                                                                                                                                                                                                                                                                      |      |     |           |       |      |      |
|-------------------------|-----------------------------------------------------------------------------------------------------------------------------------------------------------------------------------------------------------------------------------------------------------------------------------------------------------------------------------------------------------------------------------------------------------------------------------------------------------------------------------------------------------------------------------|------|------|-----------|-------|------|------|---------------------------------------------------------------|-------|----------------------|------------------------------------------------------------------------------------------------------------------------------------------------------------------------------------------------------------------------------------------------------------------------------------------------------------------------------------------------------------------------------------------------------------------------------------------------------------------------------------------------------------------------------------------------------------------------------------------------------|------|-----|-----------|-------|------|------|
| Rsa1.0_00104.1.g5123.t1 | refNP_565080.1  Mitochondrial transcription termination factor family protein [Arabidopsis thaliana] gi 12323819 gb AAG51878.1 AC079678_8 unknown protein; 33994-35331 [Arabidopsis thaliana] gi 332197431 gb AEE35552.1  Mitochondrial transcription termination factor family protein [Arabidopsis thaliana]                                                                                                                                                                                                                    | 445  | 445  | 0         | 100.0 | 75.1 | 87.2 | Mitochondrial transcription termination factor family protein | gbpln | Arabidopsis thaliana | AT1G74120.1   Symbols:   Mitochondrial transcription termination factor family protein   chr1:27871923-27873260 REVERSE LENGTH=445                                                                                                                                                                                                                                                                                                                                                                                                                                                                   | 445  | 445 | 0         | 100.0 | 75.1 | 87.2 |
| Rsa1.0_00104.1.g5124.t1 | refXP_002887527.1  hypothetical protein ARALYDRAFT_316359 [Arabidopsis lyrata subsp. lyrata] gi 297333368 gb EFH63786.1  hypothetical protein ARALYDRAFT_316359 [Arabidopsis lyrata subsp. lyrata]                                                                                                                                                                                                                                                                                                                                | 313  | 323  | 1.00E-89  | 103.2 | 59.7 | 75.4 | hypothetical protein ARALYDRAFT_316359                        | gbpln | Arabidopsis lyrata   | AT1G74130.1   Symbols:   Rhomboid-related intramembrane serine protease family protein   chr1:27873687-27875897 FORWARD LENGTH=322                                                                                                                                                                                                                                                                                                                                                                                                                                                                   | 313  | 322 | 1.00E-87  | 102.9 | 57.2 | 70.0 |
| Rsa1.0_00104.1.g5125.t1 | refXP_002887528.1  hypothetical protein ARALYDRAFT_316360 [Arabidopsis lyrata subsp. lyrata] gi 297333369 gb EFH63787.1  hypothetical protein ARALYDRAFT_316360 [Arabidopsis lyrata subsp. lyrata]                                                                                                                                                                                                                                                                                                                                | 591  | 567  | 0         | 95.9  | 73.8 | 81.0 | hypothetical protein ARALYDRAFT_316360                        | gbpln | Arabidopsis lyrata   | AT1G74150.1   Symbols:   Galactose oxidase/kelch repeat superfamily protein   chr1:27880528-27883626 FORWARD LENGTH=569                                                                                                                                                                                                                                                                                                                                                                                                                                                                              | 591  | 569 | 0         | 96.3  | 72.3 | 80.2 |
| Rsa1.0_00104.1.g5126.t1 | gb EOA29006.1  hypothetical protein CARUB_v10025259mg [Capsella rubella]                                                                                                                                                                                                                                                                                                                                                                                                                                                          | 1985 | 1761 | 0         | 88.7  | 40.5 | 53.9 | hypothetical protein CARUB_v10025259mg                        | gbpln | Capsella rubella     | AT1G74190.1   Symbols:   AtRLP15, RLP15   receptor like protein 15   chr1:27902590-27906158 REVERSE LENGTH=965                                                                                                                                                                                                                                                                                                                                                                                                                                                                                       | 1985 | 965 | 0         | 48.6  | 31.6 | 37.0 |
| Rsa1.0_00104.1.g5127.t2 | refXP_002889897.1  leucine-rich repeat family protein [Arabidopsis lyrata subsp. lyrata] gi 297334808 gb EFH65226.1  leucine-rich repeat family protein [Arabidopsis lyrata subsp. lyrata]                                                                                                                                                                                                                                                                                                                                        | 946  | 966  | 0         | 102.1 | 65.9 | 79.6 | leucine-rich repeat family protein                            | gbpln | Arabidopsis lyrata   | AT1G74190.1   Symbols:   AtRLP15, RLP15   receptor like protein 15   chr1:27902590-27906158 REVERSE LENGTH=965                                                                                                                                                                                                                                                                                                                                                                                                                                                                                       | 946  | 965 | 0         | 102.0 | 64.8 | 78.3 |
| Rsa1.0_00104.1.g5128.t4 | refNP_177558.4  receptor like protein 14 [Arabidopsis thaliana] gi 332197442 gb AEE35563.1  receptor like protein 14 [Arabidopsis thaliana] refNP_177561.1  glycerophosphoryl diester phosphodiesterase [Arabidopsis thaliana]                                                                                                                                                                                                                                                                                                    | 1120 | 976  | 0         | 87.1  | 52.1 | 60.0 | receptor like protein 14                                      | gbpln | Arabidopsis thaliana | AT1G74180.1   Symbols:   AtRLP14, RLP14   receptor like protein 14   chr1:27897197-27900908 REVERSE LENGTH=976                                                                                                                                                                                                                                                                                                                                                                                                                                                                                       | 1120 | 976 | 0         | 87.1  | 52.1 | 60.0 |
| Rsa1.0_00104.1.g5129.t1 | gi 12324904 gb AAG52406.1 AC020579_8 putative glycerophosphodiester phosphodiesterase; 42559-40170 [Arabidopsis thaliana] gi 17381162 gb AAL36393.1  putative glycerophosphodiester phosphodiesterase [Arabidopsis thaliana] gi 21592460 gb AAM64411.1  putative glycerophosphodiester phosphodiesterase [Arabidopsis thaliana] gi 23296874 gb AAN13192.1  putative glycerophosphodiester phosphodiesterase [Arabidopsis thaliana] gi 332197445 gb AEE35566.1  glycerophosphoryl diester phosphodiesterase [Arabidopsis thaliana] | 425  | 392  | 0         | 92.2  | 78.4 | 84.0 | glycerophosphoryl diester phosphodiesterase                   | gbpln | Arabidopsis thaliana | AT1G74210.1   Symbols:   PLC-like phosphodiesterases superfamily protein   chr1:27910396-27912785 FORWARD LENGTH=392                                                                                                                                                                                                                                                                                                                                                                                                                                                                                 | 425  | 392 | 0         | 92.2  | 78.4 | 84.0 |
| Rsa1.0_00104.1.g5130.t1 | refNP_177562.1  uncharacterized protein [Arabidopsis thaliana] gi 12324902 gb AAG52404.1 AC020579_6 hypothetical protein; 38821-39856 [Arabidopsis thaliana] gi 332197446 gb AEE35567.1  uncharacterized protein AT1G74220 [Arabidopsis thaliana]                                                                                                                                                                                                                                                                                 | 305  | 316  | 3.00E-85  | 103.6 | 70.5 | 80.7 | uncharacterized protein                                       | gbpln | Arabidopsis thaliana | AT1G74220.1   Symbols:   unknown protein; FUNCTIONS IN: molecular_function unknown; INVOLVED IN: biological_process unknown; LOCATED IN: chloroplast; EXPRESSED IN: male gametophyte, flower, pollen tube; EXPRESSED DURING: L mature pollen stage, M germinated pollen stage, 4 anthesis; BEST Arabidopsis thaliana protein match is: unknown protein (TAIR:AT2G03630.1); Has 383 Blast hits to 347 proteins in 86 species: Archae - 0; Bacteria - 17; Metazoa - 87; Fungi - 65; Plants - 76; Viruses - 2; Other Eukaryotes - 136 (source: NCBI BLINK).   chr1:27913099-27914134 REVERSE LENGTH=316 | 305  | 316 | 7.00E-88  | 103.6 | 70.5 | 80.7 |
| Rsa1.0_00104.1.g5131.t1 | gb ABB97027.1  unknown [Brassica rapa]                                                                                                                                                                                                                                                                                                                                                                                                                                                                                            | 285  | 208  | 1.00E-59  | 73.0  | 38.2 | 38.2 | unknown                                                       | gbpln | Brassica rapa        | AT1G74230.1   Symbols:   GR-RBP5   glycine-rich RNA-binding protein 5   chr1:27915346-27916857 FORWARD LENGTH=289                                                                                                                                                                                                                                                                                                                                                                                                                                                                                    | 285  | 289 | 3.00E-58  | 101.4 | 36.8 | 38.2 |
| Rsa1.0_00104.1.g5132.t1 | refXP_002887533.1  hypothetical protein ARALYDRAFT_339621 [Arabidopsis lyrata subsp. lyrata] gi 297333374 gb EFH63792.1  hypothetical protein ARALYDRAFT_339621 [Arabidopsis lyrata subsp. lyrata]                                                                                                                                                                                                                                                                                                                                | 366  | 364  | 1.00E-175 | 99.5  | 88.8 | 94.0 | hypothetical protein ARALYDRAFT_339621                        | gbpln | Arabidopsis lyrata   | AT1G74240.1   Symbols:   Mitochondrial substrate carrier family protein   chr1:27917437-27919987 FORWARD LENGTH=364                                                                                                                                                                                                                                                                                                                                                                                                                                                                                  | 366  | 364 | 1.00E-172 | 99.5  | 87.7 | 93.7 |

|                         |                                                                                                                                                                                                                                                                                                                                                                                                                                                                                                                                                                                                                                                                                                                                                                                                                                                                       |      |      |           |       |      |      |                                                            |       |                      |                                                                                                                         |      |      |           |       |      |      |
|-------------------------|-----------------------------------------------------------------------------------------------------------------------------------------------------------------------------------------------------------------------------------------------------------------------------------------------------------------------------------------------------------------------------------------------------------------------------------------------------------------------------------------------------------------------------------------------------------------------------------------------------------------------------------------------------------------------------------------------------------------------------------------------------------------------------------------------------------------------------------------------------------------------|------|------|-----------|-------|------|------|------------------------------------------------------------|-------|----------------------|-------------------------------------------------------------------------------------------------------------------------|------|------|-----------|-------|------|------|
| Rsa1.0_00104.1.g5133.t1 | ref NP_172188.1  60S ribosomal protein L35a-1 [Arabidopsis thaliana]<br>gi 297843500 ref XP_002889631.1  60S ribosomal protein L35a [Arabidopsis lyrata subsp. lyrata]<br>gi 175174783 sp Q9LMLK0.1 R35A1_ARAT H RecName: Full=60S ribosomal protein L35a-1<br>gi 8954039 gb AAF82213.1 AC067971.21 Strong similarity to a ribosomal protein from Arabidopsis thaliana gb AL161667. It contains a ribosomal protein L35Ae domain PF01247 [Arabidopsis thaliana]<br>gi 21555376 gb AAM63844.1  ribosomal protein, putative [Arabidopsis thaliana]<br>gi 26453120 dbj BAC43636.1  unknown protein [Arabidopsis thaliana]<br>gi 28416859 gb AAO42960.1  At1g07070 [Arabidopsis thaliana]<br>gi 297335473 gb EFH65890.1  60S ribosomal protein L35a [Arabidopsis lyrata subsp. lyrata]<br>gi 332189953 gb AEE28074.1  60S ribosomal protein L35a-1 [Arabidopsis thaliana] | 112  | 112  | 4.00E-57  | 100.0 | 96.4 | 99.1 | 60S ribosomal protein L35a-1                               | gbpln | Arabidopsis lyrata   | AT1G07070.1   Symbols:   Ribosomal protein L35Ae family protein   chr1:2168652-2169703 FORWARD LENGTH=112               | 112  | 112  | 6.00E-60  | 100.0 | 96.4 | 99.1 |
| Rsa1.0_00104.1.g5134.t1 | gb EOA35326.1  hypothetical protein CARUB_v10020509mg [Capsella rubella]                                                                                                                                                                                                                                                                                                                                                                                                                                                                                                                                                                                                                                                                                                                                                                                              | 363  | 367  | 1.00E-165 | 101.1 | 75.5 | 85.7 | hypothetical protein CARUB_v10020509mg                     | gbpln | Capsella rubella     | AT1G74300.1   Symbols:   alpha/beta-Hydrolases superfamily protein   chr1:27935368-27936474 FORWARD LENGTH=346          | 363  | 346  | 1.00E-160 | 95.3  | 71.9 | 81.8 |
| Rsa1.0_00104.1.g5135.t1 | ref XP_002888971.1  ATHSP101 [Arabidopsis lyrata subsp. lyrata]<br>gi 297334812 gb EFH65230.1  ATHSP101 [Arabidopsis lyrata subsp. lyrata]                                                                                                                                                                                                                                                                                                                                                                                                                                                                                                                                                                                                                                                                                                                            | 913  | 911  | 0         | 99.8  | 95.5 | 98.7 | ATHSP101                                                   | gbpln | Arabidopsis lyrata   | AT1G74310.1   Symbols: ATHSP101, HSP101, HOT1   heat shock protein 101   chr1:27936715-27939862 REVERSE LENGTH=911      | 913  | 911  | 0         | 99.8  | 93.6 | 97.0 |
| Rsa1.0_00104.1.g5136.t1 | ref NP_177572.2  protein kinase domain-containing protein [Arabidopsis thaliana]<br>gi 20453122 gb AAM19803.1  At1g74320/FIQ17.1 [Arabidopsis thaliana]<br>gi 22655289 gb AAM98234.1  putative choline kinase [Arabidopsis thaliana]<br>gi 30984574 gb AAP42750.1  At1g74320 [Arabidopsis thaliana]<br>gi 332197456 gb AEE35577.1  protein kinase domain-containing protein [Arabidopsis thaliana]                                                                                                                                                                                                                                                                                                                                                                                                                                                                    | 345  | 350  | 0         | 101.4 | 89.6 | 93.6 | protein kinase domain-containing protein                   | gbpln | Arabidopsis thaliana | AT1G74320.1   Symbols:   Protein kinase superfamily protein   chr1:27941192-27942903 FORWARD LENGTH=350                 | 345  | 350  | 0         | 101.4 | 89.6 | 93.6 |
| Rsa1.0_00104.1.g5137.t2 | ref NP_001154470.1  protein kinase domain-containing protein [Arabidopsis thaliana]<br>gi 332197458 gb AEE35579.1  protein kinase domain-containing protein [Arabidopsis thaliana]                                                                                                                                                                                                                                                                                                                                                                                                                                                                                                                                                                                                                                                                                    | 663  | 690  | 0         | 104.1 | 86.4 | 92.3 | protein kinase domain-containing protein                   | gbpln | Arabidopsis thaliana | AT1G74330.2   Symbols:   Protein kinase superfamily protein   chr1:27943535-27947109 REVERSE LENGTH=690                 | 663  | 690  | 0         | 104.1 | 86.4 | 92.3 |
| Rsa1.0_00104.1.g5138.t1 | ref NP_177575.1  intron maturase, type II-like protein [Arabidopsis thaliana]<br>gi 12324793 gb AAG52355.1 AC011765.7 putative type II intron maturase; 7603-5342 [Arabidopsis thaliana]<br>gi 332197460 gb AEE35581.1  intron maturase, type II-like protein [Arabidopsis thaliana]                                                                                                                                                                                                                                                                                                                                                                                                                                                                                                                                                                                  | 879  | 753  | 0         | 85.7  | 70.5 | 76.1 | intron maturase, type II-like protein                      | gbpln | Arabidopsis thaliana | AT1G74350.1   Symbols:   Intron maturase, type II family protein   chr1:27949022-27951283 REVERSE LENGTH=753            | 879  | 753  | 0         | 85.7  | 70.5 | 76.1 |
| Rsa1.0_00104.1.g5139.t1 | ref NP_565084.1  putative LRR receptor-like serine/threonine-protein kinase [Arabidopsis thaliana]<br>gi 264664459 sp COLGJ.1 Y1743_ARAT H RecName: Full=Probable LRR receptor-like serine/threonine-protein kinase At1g74360; Flags: Precursor<br>gi 224589485 gb ACN59276.1  leucine-rich repeat receptor-like protein kinase [Arabidopsis thaliana]<br>gi 332197461 gb AEE35582.1  putative LRR receptor-like serine/threonine-protein kinase [Arabidopsis thaliana]                                                                                                                                                                                                                                                                                                                                                                                               | 1124 | 1106 | 0         | 98.4  | 84.2 | 91.0 | putative LRR receptor-like serine/threonine-protein kinase | gbpln | Arabidopsis thaliana | AT1G74360.1   Symbols:   Leucine-rich repeat protein kinase family protein   chr1:27954299-27957911 FORWARD LENGTH=1106 | 1124 | 1106 | 0         | 98.4  | 84.2 | 91.0 |
| Rsa1.0_00104.1.g5140.t1 | ref XP_002888973.1  zinc finger family protein [Arabidopsis lyrata subsp. lyrata]<br>gi 297334814 gb EFH65232.1  zinc finger family protein [Arabidopsis lyrata subsp. lyrata]                                                                                                                                                                                                                                                                                                                                                                                                                                                                                                                                                                                                                                                                                        | 244  | 259  | 1.00E-114 | 106.1 | 83.6 | 91.8 | zinc finger family protein                                 | gbpln | Arabidopsis lyrata   | AT1G74370.1   Symbols:   RING/U-box superfamily protein   chr1:27958200-27958985 REVERSE LENGTH=261                     | 244  | 261  | 1.00E-113 | 107.0 | 82.4 | 89.3 |

|                         |                                                                                                                                                                                                                                                                                                                                                                                                                                                                                                                                                                                |     |      |           |       |      |       |                                                   |       |                      |                                                                                                                                                                                                                                                                                          |     |     |           |       |      |      |
|-------------------------|--------------------------------------------------------------------------------------------------------------------------------------------------------------------------------------------------------------------------------------------------------------------------------------------------------------------------------------------------------------------------------------------------------------------------------------------------------------------------------------------------------------------------------------------------------------------------------|-----|------|-----------|-------|------|-------|---------------------------------------------------|-------|----------------------|------------------------------------------------------------------------------------------------------------------------------------------------------------------------------------------------------------------------------------------------------------------------------------------|-----|-----|-----------|-------|------|------|
| Rsa1.0_00104.1.g5141.t1 | ref[XP_002887538.1] galactosyl transferase GMA12/MNN10 family protein [Arabidopsis lyrata subsp. lyrata] gi 29733379 gb EFH63797.1  galactosyl transferase GMA12/MNN10 family protein [Arabidopsis lyrata subsp. lyrata]                                                                                                                                                                                                                                                                                                                                                       | 346 | 457  | 0         | 132.1 | 95.4 | 97.7  | galactosyl transferase GMA12/MNN10 family protein | gbpln | Arabidopsis lyrata   | AT1G74380.1   Symbols: XXT5   xyloglucan xylosyltransferase 5   chr1:27959848-27961221 FORWARD LENGTH=457                                                                                                                                                                                | 346 | 457 | 0         | 132.1 | 94.8 | 97.4 |
| Rsa1.0_00104.1.g5142.t1 | ref[XP_002888974.1] exonuclease family protein [Arabidopsis lyrata subsp. lyrata] gi 29733481 gb EFH65233.1  exonuclease family protein [Arabidopsis lyrata subsp. lyrata]                                                                                                                                                                                                                                                                                                                                                                                                     | 496 | 506  | 0         | 102.0 | 81.0 | 89.3  | exonuclease family protein                        | gbpln | Arabidopsis lyrata   | AT1G74390.1   Symbols:   Polynucleotidyl transferase, ribonuclease H-like superfamily protein   chr1:27961760-27963826 REVERSE LENGTH=506                                                                                                                                                | 496 | 506 | 0         | 102.0 | 77.2 | 86.3 |
| Rsa1.0_00104.1.g5143.t1 | gb[EOA35690.1] hypothetical protein CARUB_v10020916mg [Capsella rubella]                                                                                                                                                                                                                                                                                                                                                                                                                                                                                                       | 223 | 223  | 1.00E-114 | 100.0 | 89.2 | 93.3  | hypothetical protein CARUB_v10020916mg            | gbpln | Capsella rubella     | AT1G74410.1   Symbols:   RING/U-box superfamily protein   chr1:27965723-27967681 FORWARD LENGTH=223                                                                                                                                                                                      | 223 | 223 | 1.00E-112 | 100.0 | 90.1 | 93.3 |
| Rsa1.0_00104.1.g5144.t2 | # # # # # # # # # #                                                                                                                                                                                                                                                                                                                                                                                                                                                                                                                                                            | #   | #    | #         | #     | #    | #     | -                                                 | ----  | ----                 | #                                                                                                                                                                                                                                                                                        | #   | #   | #         | #     | #    | #    |
| Rsa1.0_00104.1.g5145.t1 | ref[NP_177583.1] myb domain protein 95 [Arabidopsis thaliana] gi 6715434 gb AAF26414.1 AF217205.1 putative transcription factor [Arabidopsis thaliana] gi 12324794 gb AAG52356.1 AC011765.8 putative MYB family transcription factor; 31729-33438 [Arabidopsis thaliana] gi 26451798 db BAC42993.1  putative transcription factor MYB95 [Arabidopsis thaliana] gi 28950825 gb AAO63336.1  At1g74430 [Arabidopsis thaliana] gi 41619172 gb AAS10040.1  MYB transcription factor [Arabidopsis thaliana] gi 332197470 gb AEE35591.1  myb domain protein 95 [Arabidopsis thaliana] | 279 | 271  | 5.00E-95  | 97.1  | 71.3 | 83.2  | myb domain protein 95                             | gbpln | Arabidopsis thaliana | AT1G74430.1   Symbols: MYB95, ATMYB95, ATMYP66   myb domain protein 95   chr1:27975409-27977118 FORWARD LENGTH=271                                                                                                                                                                       | 279 | 271 | 1.00E-97  | 97.1  | 71.3 | 83.2 |
| Rsa1.0_00104.1.g5146.t1 | ref[NP_177584.1] uncharacterized protein [Arabidopsis thaliana] gi 12324798 gb AAG52360.1 AC011765.12 hypothetical protein; 36691-35528 [Arabidopsis thaliana] gi 332197471 gb AEE35592.1  uncharacterized protein AT1G74440 [Arabidopsis thaliana]                                                                                                                                                                                                                                                                                                                            | 206 | 208  | 2.00E-97  | 101.0 | 85.0 | 89.3  | uncharacterized protein                           | gbpln | Arabidopsis thaliana | AT1G74440.1   Symbols:   Protein of unknown function (DUF962)   chr1:27979208-27980371 REVERSE LENGTH=208                                                                                                                                                                                | 206 | 208 | 1.00E-100 | 101.0 | 85.0 | 89.3 |
| Rsa1.0_00104.1.g5147.t1 | ref[XP_002887541.1] hypothetical protein ARALYDRAFT.476579 [Arabidopsis lyrata subsp. lyrata] gi 297333382 gb EFH63800.1  hypothetical protein ARALYDRAFT.476579 [Arabidopsis lyrata subsp. lyrata]                                                                                                                                                                                                                                                                                                                                                                            | 390 | 398  | 1.00E-175 | 102.1 | 81.5 | 92.3  | hypothetical protein ARALYDRAFT.476579            | gbpln | Arabidopsis lyrata   | AT1G74450.1   Symbols:   Protein of unknown function (DUF793)   chr1:27982737-27983930 FORWARD LENGTH=397                                                                                                                                                                                | 390 | 397 | 1.00E-176 | 101.8 | 81.3 | 91.8 |
| Rsa1.0_00104.1.g5148.t1 | gb[EOA34248.1] hypothetical protein CARUB_v10021759mg [Capsella rubella]                                                                                                                                                                                                                                                                                                                                                                                                                                                                                                       | 94  | 95   | 1.00E-24  | 101.1 | 60.6 | 79.8  | hypothetical protein CARUB_v10021759mg            | gbpln | Capsella rubella     | AT1G74458.1   Symbols:   unknown protein; LOCATED IN: endomembrane system; Has 9 Blast hits to 9 proteins in 4 species: Archae - 0; Bacteria - 0; Metazoa - 0; Fungi - 0; Plants - 9; Viruses - 0; Other Eukaryotes - 0 (source: NCBI BLINK).   chr1:27987071-27987551 FORWARD LENGTH=94 | 94  | 94  | 3.00E-26  | 100.0 | 60.6 | 77.7 |
| Rsa1.0_00104.1.g5149.t1 | gb[ABI63587.1] geranylgeranyl reductase [Brassica rapa subsp. pekinensis]                                                                                                                                                                                                                                                                                                                                                                                                                                                                                                      | 380 | 466  | 0         | 122.6 | 99.7 | 100.0 | geranylgeranyl reductase                          | gbpln | Brassica rapa        | AT1G74470.1   Symbols:   Pyridine nucleotide-disulphide oxidoreductase family protein   chr1:27991248-27992845 FORWARD LENGTH=467                                                                                                                                                        | 380 | 467 | 0         | 122.9 | 96.3 | 97.6 |
| Rsa1.0_00104.1.g5150.t1 | gb[EOA34041.1] hypothetical protein CARUB_v10021541mg [Capsella rubella]                                                                                                                                                                                                                                                                                                                                                                                                                                                                                                       | 283 | 298  | 3.00E-87  | 105.3 | 65.4 | 77.4  | hypothetical protein CARUB_v10021541mg            | gbpln | Capsella rubella     | AT1G74480.1   Symbols:   RWP-RK domain-containing protein   chr1:27993032-27994178 REVERSE LENGTH=298                                                                                                                                                                                    | 283 | 298 | 2.00E-87  | 105.3 | 64.3 | 76.3 |
| Rsa1.0_00104.1.g5151.t1 | # # # # # # # # # #                                                                                                                                                                                                                                                                                                                                                                                                                                                                                                                                                            | #   | #    | #         | #     | #    | #     | -                                                 | ----  | ----                 | #                                                                                                                                                                                                                                                                                        | #   | #   | #         | #     | #    | #    |
| Rsa1.0_00104.1.g5152.t1 | # # # # # # # # # #                                                                                                                                                                                                                                                                                                                                                                                                                                                                                                                                                            | #   | #    | #         | #     | #    | #     | -                                                 | ----  | ----                 | #                                                                                                                                                                                                                                                                                        | #   | #   | #         | #     | #    | #    |
| Rsa1.0_00104.1.g5153.t1 | emb[CAB39638.1] RNA-directed DNA polymerase-like protein [Arabidopsis thaliana] gi 7267666 emb[CAB78094.1] RNA-directed DNA polymerase-like protein [Arabidopsis thaliana]                                                                                                                                                                                                                                                                                                                                                                                                     | 226 | 1274 | 7.00E-35  | 563.7 | 39.8 | 52.2  | RNA-directed DNA polymerase-like protein          | gbpln | Arabidopsis thaliana | AT2G06845.1   Symbols:   Beta-galactosidase related protein   chr2:2754666-2756008 FORWARD LENGTH=315                                                                                                                                                                                    | 226 | 315 | 4.00E-32  | 139.4 | 35.8 | 47.8 |
| Rsa1.0_00104.1.g5154.t2 | # # # # # # # # # #                                                                                                                                                                                                                                                                                                                                                                                                                                                                                                                                                            | #   | #    | #         | #     | #    | #     | -                                                 | ----  | ----                 | #                                                                                                                                                                                                                                                                                        | #   | #   | #         | #     | #    | #    |
| Rsa1.0_00104.1.g5155.t1 | gb[EOA35161.1] hypothetical protein CARUB_v10020300mg [Capsella rubella] gi 48257097 gb EOA35163.1  hypothetical protein CARUB_v10020300mg [Capsella rubella]                                                                                                                                                                                                                                                                                                                                                                                                                  | 458 | 444  | 0         | 96.9  | 77.1 | 82.8  | hypothetical protein CARUB_v10020300mg            | gbpln | Capsella rubella     | AT1G74510.1   Symbols:   Galactose oxidase/kelch repeat superfamily protein   chr1:28006065-28007420 FORWARD LENGTH=451                                                                                                                                                                  | 458 | 451 | 0         | 98.5  | 79.3 | 84.1 |

|                         |                                                                                                                                                                                                                                                                                                                                                                                                                                                                                                                                                                                                                                                                                                                                                                                                                                                                                                                                                                                                                                                                                                                                                                                                                                                                                                                                                                 |     |     |           |       |      |      |                                             |       |                      |                                                                                                                                                                                                                                                                                    |     |     |           |       |      |      |
|-------------------------|-----------------------------------------------------------------------------------------------------------------------------------------------------------------------------------------------------------------------------------------------------------------------------------------------------------------------------------------------------------------------------------------------------------------------------------------------------------------------------------------------------------------------------------------------------------------------------------------------------------------------------------------------------------------------------------------------------------------------------------------------------------------------------------------------------------------------------------------------------------------------------------------------------------------------------------------------------------------------------------------------------------------------------------------------------------------------------------------------------------------------------------------------------------------------------------------------------------------------------------------------------------------------------------------------------------------------------------------------------------------|-----|-----|-----------|-------|------|------|---------------------------------------------|-------|----------------------|------------------------------------------------------------------------------------------------------------------------------------------------------------------------------------------------------------------------------------------------------------------------------------|-----|-----|-----------|-------|------|------|
| Rsa1.0_00104.1.g5156.t1 | ref[XP_002888983.1] hypothetical protein ARALYDRAFT_476589 [Arabidopsis lyrata subsp. lyrata] gi 297334824 gb EFH65242.1                                                                                                                                                                                                                                                                                                                                                                                                                                                                                                                                                                                                                                                                                                                                                                                                                                                                                                                                                                                                                                                                                                                                                                                                                                        | 488 | 308 | 1.00E-124 | 63.1  | 49.6 | 53.9 | hypothetical protein ARALYDRAFT_476589      | gbpln | Arabidopsis lyrata   | AT1G74530.3   Symbols:   unknown protein; Has 35333 Blast hits to 34131 proteins in 2444 species: Archae - 798; Bacteria - 22429; Metazoa - 974; Fungi - 991; Plants - 531; Viruses - 0; Other Eukaryotes - 9610 (source: NCBI BLINK).   chr1:28009723-28012044 REVERSE LENGTH=314 | 488 | 314 | 1.00E-120 | 64.3  | 48.8 | 53.1 |
| Rsa1.0_00104.1.g5157.t1 | hypothetical protein ARALYDRAFT_476589 [Arabidopsis lyrata subsp. lyrata] ref[NP_177597.1] pentatricopeptide repeat-containing protein [Arabidopsis thaliana] gi 75169839 sp Q9CA58.1 PP120_ARAT H RecName: Full=Putative pentatricopeptide repeat-containing protein At1g74580 gi 12324819 gb AAG52381.1 AC011765_33 hypothetical protein; 77097-79388 [Arabidopsis thaliana] gi 332197491 gb AEE35612.1  pentatricopeptide repeat-containing protein [Arabidopsis thaliana]                                                                                                                                                                                                                                                                                                                                                                                                                                                                                                                                                                                                                                                                                                                                                                                                                                                                                   | 764 | 763 | 0         | 99.9  | 86.5 | 95.0 | pentatricopeptide repeat-containing protein | gbpln | Arabidopsis thaliana | AT1G74580.1   Symbols:   Pentatricopeptide repeat (PPR) superfamily protein   chr1:28020777-28023068 FORWARD LENGTH=763                                                                                                                                                            | 764 | 763 | 0         | 99.9  | 86.5 | 95.0 |
| Rsa1.0_00104.1.g5158.t1 | gb EOA34238.1  hypothetical protein CARUB_v10021750mg [Capsella rubella]                                                                                                                                                                                                                                                                                                                                                                                                                                                                                                                                                                                                                                                                                                                                                                                                                                                                                                                                                                                                                                                                                                                                                                                                                                                                                        | 120 | 232 | 6.00E-44  | 193.3 | 72.5 | 85.8 | hypothetical protein CARUB_v10021750mg      | gbpln | Capsella rubella     | AT1G74590.1   Symbols: ATGSTU10, GSTU10   glutathione S-transferase TAU 10   chr1:28023887-28024666 REVERSE LENGTH=232                                                                                                                                                             | 120 | 232 | 6.00E-45  | 193.3 | 70.8 | 84.2 |
| Rsa1.0_00104.1.g5159.t1 | # # # # # # # # - - - - # # # # # # #                                                                                                                                                                                                                                                                                                                                                                                                                                                                                                                                                                                                                                                                                                                                                                                                                                                                                                                                                                                                                                                                                                                                                                                                                                                                                                                           |     |     |           |       |      |      |                                             |       |                      |                                                                                                                                                                                                                                                                                    |     |     |           |       |      |      |
| Rsa1.0_00104.1.g5160.t1 | ref[NP_177598.1] glutathione S-transferase TAU 10 [Arabidopsis thaliana] gi 75169838 sp Q9CA57.1 GSTUA_ARAT H RecName: Full=Glutathione S-transferase U10; Short=AtGSTU10; AltName: Full=GST class-tau member 10 gi 12324822 gb AAG52384.1 AC011765_36 putative glutathione S-transferase; 80986-80207 [Arabidopsis thaliana] gi 21593631 gb AAM65598.1  putative glutathione S-transferase [Arabidopsis thaliana] gi 26450308 dbj BAC42270.1  putative glutathione S-transferase [Arabidopsis thaliana] gi 28973029 gb AAO63839.1  putative glutathione transferase [Arabidopsis thaliana] gi 332197492 gb AEE35613.1  glutathione S-transferase TAU 10 [Arabidopsis thaliana] ref[NP_177598.1] glutathione S-transferase TAU 10 [Arabidopsis thaliana] gi 75169838 sp Q9CA57.1 GSTUA_ARAT H RecName: Full=Glutathione S-transferase U10; Short=AtGSTU10; AltName: Full=GST class-tau member 10 gi 12324822 gb AAG52384.1 AC011765_36 putative glutathione S-transferase; 80986-80207 [Arabidopsis thaliana] gi 21593631 gb AAM65598.1  putative glutathione S-transferase [Arabidopsis thaliana] gi 26450308 dbj BAC42270.1  putative glutathione S-transferase [Arabidopsis thaliana] gi 28973029 gb AAO63839.1  putative glutathione transferase [Arabidopsis thaliana] gi 332197492 gb AEE35613.1  glutathione S-transferase TAU 10 [Arabidopsis thaliana] | 89  | 232 | 2.00E-32  | 260.7 | 78.7 | 88.8 | glutathione S-transferase TAU 10            | gbpln | Arabidopsis thaliana | AT1G74590.1   Symbols: ATGSTU10, GSTU10   glutathione S-transferase TAU 10   chr1:28023887-28024666 REVERSE LENGTH=232                                                                                                                                                             | 89  | 232 | 3.00E-35  | 260.7 | 78.7 | 88.8 |
| Rsa1.0_00104.1.g5161.t1 | ref[NP_177599.1] pentatricopeptide repeat-containing protein [Arabidopsis thaliana] gi 75169837 sp Q9CA56.1 PP121_ARAT H RecName: Full=Pentatricopeptide repeat-containing protein At1g74600, chloroplastic; Flags: Precursor gi 12324789 gb AAG52351.1 AC011765_33 hypothetical protein; 84160-81473 [Arabidopsis thaliana] gi 332197493 gb AEE35614.1  pentatricopeptide repeat-containing protein [Arabidopsis thaliana]                                                                                                                                                                                                                                                                                                                                                                                                                                                                                                                                                                                                                                                                                                                                                                                                                                                                                                                                     | 796 | 895 | 0         | 112.4 | 83.7 | 91.2 | pentatricopeptide repeat-containing protein | gbpln | Arabidopsis thaliana | AT1G74600.1   Symbols:   pentatricopeptide (PPR) repeat-containing protein   chr1:28025153-28027840 REVERSE LENGTH=895                                                                                                                                                             | 796 | 895 | 0         | 112.4 | 83.7 | 91.2 |
| Rsa1.0_00104.1.g5163.t1 | gb ABD64930.1  hypothetical protein 24.t00076 [Brassica oleracea]                                                                                                                                                                                                                                                                                                                                                                                                                                                                                                                                                                                                                                                                                                                                                                                                                                                                                                                                                                                                                                                                                                                                                                                                                                                                                               | 472 | 407 | 1.00E-10  | 86.2  | 19.5 | 28.6 | hypothetical protein 24.t00076              | gbpln | Brassica oleracea    | # # # # # # #                                                                                                                                                                                                                                                                      | #   | #   | #         | #     | #    | #    |

|                         |                                                                                                                                                                                                                                                                                                                          |      |      |           |       |      |       |                                                                          |       |                      |                                                                                                                                                                                                                                                                                                                                                                                                                                                                                                                                                      |      |      |           |       |      |      |
|-------------------------|--------------------------------------------------------------------------------------------------------------------------------------------------------------------------------------------------------------------------------------------------------------------------------------------------------------------------|------|------|-----------|-------|------|-------|--------------------------------------------------------------------------|-------|----------------------|------------------------------------------------------------------------------------------------------------------------------------------------------------------------------------------------------------------------------------------------------------------------------------------------------------------------------------------------------------------------------------------------------------------------------------------------------------------------------------------------------------------------------------------------------|------|------|-----------|-------|------|------|
| Rsa1.0_00104.1.g5164.t3 | gb AAD2557.1 AC005850.14<br>Hypothetical protein [Arabidopsis thaliana]                                                                                                                                                                                                                                                  | 293  | 404  | 1.00E-116 | 137.9 | 67.6 | 77.5  | Hypothetical protein                                                     | gbpln | Arabidopsis thaliana | AT1G43722.1   Symbols:   unknown protein; BEST Arabidopsis thaliana protein match is: unknown protein (TAIR:AT5G28730.1); Has 924 Blast hits to 912 proteins in 109 species: Archae - 0; Bacteria - 0; Metazoa - 222; Fungi - 31; Plants - 661; Viruses - 0; Other Eukaryotes - 10 (source: NCBI BLINK).   chr1:16496403-16497377 FORWARD LENGTH=324                                                                                                                                                                                                 | 293  | 324  | 1.00E-39  | 110.6 | 29.0 | 37.5 |
| Rsa1.0_00105.1.g5165.t1 | gb EOA31254.1  hypothetical protein CARUB_v10014434mg [Capsella rubella]                                                                                                                                                                                                                                                 | 263  | 259  | 1.00E-122 | 98.5  | 83.7 | 90.5  | hypothetical protein CARUB_v10014434mg                                   | gbpln | Capsella rubella     | AT3G07565.1   Symbols:   Protein of unknown function (DUF3755)   chr3:2413823-2415872 FORWARD LENGTH=258                                                                                                                                                                                                                                                                                                                                                                                                                                             | 263  | 258  | 1.00E-118 | 98.1  | 82.5 | 89.7 |
| Rsa1.0_00105.1.g5166.t1 | ref NP_566313.2  Cytochrome b561/ferric reductase transmembrane with DOMON related domain [Arabidopsis thaliana]<br>gi 110736322 dbj BAF00131.1  hypothetical protein [Arabidopsis thaliana] gi 332641046 gb AEE74567.1  Cytochrome b561/ferric reductase transmembrane with DOMON related domain [Arabidopsis thaliana] | 370  | 369  | 1.00E-176 | 99.7  | 79.5 | 91.4  | Cytochrome b561/ferric reductase transmembrane with DOMON related domain | gbpln | Arabidopsis thaliana | AT3G07570.1   Symbols:   Cytochrome b561/ferric reductase transmembrane with DOMON related domain   chr3:2418205-2420206 REVERSE LENGTH=369                                                                                                                                                                                                                                                                                                                                                                                                          | 370  | 369  | 1.00E-179 | 99.7  | 79.5 | 91.4 |
| Rsa1.0_00105.1.g5167.t1 | #                                                                                                                                                                                                                                                                                                                        | #    | #    | #         | #     | #    | #     | -                                                                        | ---   | ---                  | #                                                                                                                                                                                                                                                                                                                                                                                                                                                                                                                                                    | #    | #    | #         | #     | #    |      |
| Rsa1.0_00105.1.g5168.t1 | gb EOA36857.1  hypothetical protein CARUB_v10008803mg [Capsella rubella]                                                                                                                                                                                                                                                 | 592  | 536  | 2.00E-89  | 90.5  | 30.2 | 40.0  | hypothetical protein CARUB_v10008803mg                                   | gbpln | Capsella rubella     | AT2G07760.1   Symbols:   Zinc knuckle (OCHC-type) family protein   chr2:3584420-3586278 REVERSE LENGTH=530                                                                                                                                                                                                                                                                                                                                                                                                                                           | 592  | 530  | 1.00E-51  | 89.5  | 15.4 | 19.1 |
| Rsa1.0_00105.1.g5169.t1 | ref XP_002884659.1  At3g07580 [Arabidopsis lyrata subsp. lyrata] gi 297330499 gb EFH60918.1  At3g07580 [Arabidopsis lyrata subsp. lyrata]                                                                                                                                                                                | 145  | 145  | 8.00E-54  | 100.0 | 73.1 | 80.7  | At3g07580                                                                | gbpln | Arabidopsis lyrata   | AT3G07580.1   Symbols:   unknown protein; FUNCTIONS IN: molecular_function unknown; INVOLVED IN: biological_process unknown; LOCATED IN: chloroplast; EXPRESSED IN: 18 plant structures; EXPRESSED DURING: 12 growth stages; BEST Arabidopsis thaliana protein match is: unknown protein (TAIR:AT5G48335.1); Has 30201 Blast hits to 17322 proteins in 780 species: Archae - 12; Bacteria - 1396; Metazoa - 17338; Fungi - 3422; Plants - 5037; Viruses - 0; Other Eukaryotes - 2996 (source: NCBI BLINK).   chr3:2421177-2422661 REVERSE LENGTH=143 | 145  | 143  | 5.00E-54  | 98.6  | 70.3 | 78.6 |
| Rsa1.0_00105.1.g5170.t1 | gb ABC00745.1  putative small nuclear ribonucleoprotein D1 [Brassica napus]                                                                                                                                                                                                                                              | 118  | 118  | 1.00E-58  | 100.0 | 99.2 | 100.0 | putative small nuclear ribonucleoprotein D1                              | gbpln | Brassica napus       | AT3G07590.2   Symbols:   Small nuclear ribonucleoprotein family protein   chr3:2423146-2423958 FORWARD LENGTH=114                                                                                                                                                                                                                                                                                                                                                                                                                                    | 118  | 114  | 2.00E-49  | 96.6  | 80.5 | 82.2 |
| Rsa1.0_00105.1.g5171.t1 | dbj BAB11200.1  copia-type polyprotein [Arabidopsis thaliana] gi 13872710 emb CAC37622.1  polyprotein [Arabidopsis thaliana]                                                                                                                                                                                             | 1415 | 1334 | 0         | 94.3  | 42.0 | 51.7  | copia-type polyprotein                                                   | gbpln | Arabidopsis thaliana | AT4G23160.1   Symbols: CRK8   cysteine-rich RLK (RECEPTOR-like protein kinase) 8   chr4:12129485-12134086 FORWARD LENGTH=1262                                                                                                                                                                                                                                                                                                                                                                                                                        | 1415 | 1262 | 2.00E-79  | 89.2  | 11.7 | 18.6 |
| Rsa1.0_00105.1.g5172.t6 | ref XP_002888593.1  meiotic asynaptic mutant 1 [Arabidopsis lyrata subsp. lyrata] gi 297334434 gb EFH64852.1  meiotic asynaptic mutant 1 [Arabidopsis lyrata subsp. lyrata]                                                                                                                                              | 879  | 596  | 1.00E-32  | 67.8  | 12.7 | 15.5  | meiotic asynaptic mutant 1                                               | gbpln | Arabidopsis lyrata   | AT1G67370.1   Symbols: ASY1, ATASY1   DNA-binding HORMA family protein   chr1:25238347-25243713 REVERSE LENGTH=596                                                                                                                                                                                                                                                                                                                                                                                                                                   | 879  | 596  | 1.00E-34  | 67.8  | 12.7 | 15.5 |
| Rsa1.0_00105.1.g5173.t1 | ref XP_002882534.1  hypothetical protein ARALYDRAFT_896920 [Arabidopsis lyrata subsp. lyrata] gi 297328374 gb EFH53793.1  hypothetical protein ARALYDRAFT_896920 [Arabidopsis lyrata subsp. lyrata]                                                                                                                      | 571  | 699  | 1.00E-113 | 122.4 | 39.8 | 45.0  | hypothetical protein ARALYDRAFT_896920                                   | gbpln | Arabidopsis lyrata   | AT3G07530.1   Symbols:   CONTAINS InterPro DOMAIN/s: Beta-Casp domain (InterPro:IPR022712); BEST Arabidopsis thaliana protein match is: cleavage and polyadenylation specificity factor 73 kDa subunit-II (TAIR:AT2G01730.1); Has 624 Blast hits to 615 proteins in 160 species: Archae - 54; Bacteria - 6; Metazoa - 333; Fungi - 44; Plants - 93; Viruses - 0; Other Eukaryotes - 94 (source: NCBI BLINK).   chr3:2400793-2404280 FORWARD LENGTH=699                                                                                               | 571  | 699  | 1.00E-108 | 122.4 | 37.5 | 42.6 |
| Rsa1.0_00105.1.g5174.t1 | ref XP_002862875.1  hypothetical protein ARALYDRAFT_920182 [Arabidopsis lyrata subsp. lyrata] gi 2973006637 gb EFH39134.1  hypothetical protein ARALYDRAFT_920182 [Arabidopsis lyrata subsp. lyrata]                                                                                                                     | 325  | 315  | 2.00E-27  | 96.9  | 29.5 | 40.3  | hypothetical protein ARALYDRAFT_920182                                   | gbpln | Arabidopsis lyrata   | AT1G02770.1   Symbols:   Protein of unknown function (DUF826)   chr1:605071-606624 REVERSE LENGTH=316                                                                                                                                                                                                                                                                                                                                                                                                                                                | 325  | 316  | 5.00E-29  | 97.2  | 25.2 | 39.7 |
| Rsa1.0_00105.1.g5175.t1 | gb AAF67380.1  Hypothetical protein T15F17.1 [Arabidopsis thaliana]                                                                                                                                                                                                                                                      | 146  | 1141 | 3.00E-40  | 781.5 | 52.7 | 61.6  | Hypothetical protein T15F17.1                                            | gbpln | Arabidopsis thaliana | #                                                                                                                                                                                                                                                                                                                                                                                                                                                                                                                                                    | #    | #    | #         | #     | #    |      |
| Rsa1.0_00105.1.g5176.t1 | emb CAN81763.1  hypothetical protein VITISV_026693 [Vitis vinifera]                                                                                                                                                                                                                                                      | 164  | 179  | 1.00E-18  | 109.1 | 32.9 | 50.0  | hypothetical protein VITISV_026693                                       | gbpln | Vitis vinifera       | #                                                                                                                                                                                                                                                                                                                                                                                                                                                                                                                                                    | #    | #    | #         | #     | #    |      |

|                         |                                                                                                                                                                                                                                                                                                                                                                                                                                                                                                                                                                                                                                                                                                                                                                                                                                                                                                                                                                                                                                                                                                                           |      |      |           |       |      |      |                                                               |       |                      |                                                                                                                                                                                                                                                                                                                                                                                                                                                               |      |      |           |       |      |      |
|-------------------------|---------------------------------------------------------------------------------------------------------------------------------------------------------------------------------------------------------------------------------------------------------------------------------------------------------------------------------------------------------------------------------------------------------------------------------------------------------------------------------------------------------------------------------------------------------------------------------------------------------------------------------------------------------------------------------------------------------------------------------------------------------------------------------------------------------------------------------------------------------------------------------------------------------------------------------------------------------------------------------------------------------------------------------------------------------------------------------------------------------------------------|------|------|-----------|-------|------|------|---------------------------------------------------------------|-------|----------------------|---------------------------------------------------------------------------------------------------------------------------------------------------------------------------------------------------------------------------------------------------------------------------------------------------------------------------------------------------------------------------------------------------------------------------------------------------------------|------|------|-----------|-------|------|------|
| Rsa1.0_00105.1.g5177.t1 | gb EOA29803.1  hypothetical protein CARUB_v10012897mg [Capsella rubella]                                                                                                                                                                                                                                                                                                                                                                                                                                                                                                                                                                                                                                                                                                                                                                                                                                                                                                                                                                                                                                                  | 814  | 983  | 0         | 120.8 | 57.2 | 67.0 | hypothetical protein CARUB_v10012897mg                        | gbpln | Capsella rubella     | AT3G07610.1   Symbols: IBM1   Transcription factor jumonji (jmiC) domain-containing protein   chr3:2426148-2432876 FORWARD LENGTH=1027                                                                                                                                                                                                                                                                                                                        | 814  | 1027 | 0         | 126.2 | 56.8 | 66.8 |
| Rsa1.0_00105.1.g5178.t2 | gb AAD09508.1  ATRF4, partial [Arabidopsis thaliana]                                                                                                                                                                                                                                                                                                                                                                                                                                                                                                                                                                                                                                                                                                                                                                                                                                                                                                                                                                                                                                                                      | 177  | 179  | 1.00E-44  | 101.1 | 58.2 | 67.8 | ATRF4, partial                                                | gbpln | Arabidopsis thaliana | AT3G07600.1   Symbols:   Heavy metal transport/detoxification superfamily protein   chr3:2424300-2424954 REVERSE LENGTH=157                                                                                                                                                                                                                                                                                                                                   | 177  | 157  | 1.00E-46  | 88.7  | 58.2 | 67.8 |
| Rsa1.0_00105.1.g5179.t1 | gb EOA29803.1  hypothetical protein CARUB_v10012897mg [Capsella rubella]                                                                                                                                                                                                                                                                                                                                                                                                                                                                                                                                                                                                                                                                                                                                                                                                                                                                                                                                                                                                                                                  | 1011 | 983  | 0         | 97.2  | 49.3 | 58.3 | hypothetical protein CARUB_v10012897mg                        | gbpln | Capsella rubella     | AT3G07610.1   Symbols: IBM1   Transcription factor jumonji (jmiC) domain-containing protein   chr3:2426148-2432876 FORWARD LENGTH=1027                                                                                                                                                                                                                                                                                                                        | 1011 | 1027 | 0         | 101.6 | 36.1 | 40.9 |
| Rsa1.0_00105.1.g5180.t1 | gb AAM61395.1  putative P-protein: chorismate mutase, prephenate dehydratase [Arabidopsis thaliana]<br>ref NP_187422.1  zinc finger protein CONSTANS-LIKE 9 [Arabidopsis thaliana] gi 42572309 ref NP_974250.1  zinc finger protein CONSTANS-LIKE 9 [Arabidopsis thaliana] gi 79313159 ref NP_001030659.1  zinc finger protein CONSTANS-LIKE 9 [Arabidopsis thaliana] gi 186509893 ref NP_001118599.1  zinc finger protein CONSTANS-LIKE 9 [Arabidopsis thaliana] gi 17433084 sp Q9SSE5.1 COL9_ARATH RecName: Full=Zinc finger protein CONSTANS-LIKE 9 gi 6466948 gb AAF13083.1 AC009176.10 unknown protein [Arabidopsis thaliana] gi 119360037 gb ABL66747.1  AT3G07650 [Arabidopsis thaliana] gi 222423327 dbj BAH19639.1  AT3G07650 [Arabidopsis thaliana] gi 332641059 gb AEE74580.1  zinc finger protein CONSTANS-LIKE 9 [Arabidopsis thaliana] gi 332641060 gb AEE74581.1  zinc finger protein CONSTANS-LIKE 9 [Arabidopsis thaliana] gi 332641061 gb AEE74582.1  zinc finger protein CONSTANS-LIKE 9 [Arabidopsis thaliana] gi 332641062 gb AEE74583.1  zinc finger protein CONSTANS-LIKE 9 [Arabidopsis thaliana] | 382  | 381  | 0         | 99.7  | 89.0 | 95.0 | putative P-protein: chorismate mutase, prephenate dehydratase | gbpln | Arabidopsis thaliana | AT3G07630.2   Symbols: ADT2   arogenate dehydratase 2   chr3:2435457-2437530 FORWARD LENGTH=381                                                                                                                                                                                                                                                                                                                                                               | 382  | 381  | 0         | 99.7  | 88.7 | 94.8 |
| Rsa1.0_00105.1.g5181.t1 | gi 6466948 gb AAF13083.1 AC009176.10 unknown protein [Arabidopsis thaliana] gi 119360037 gb ABL66747.1  AT3G07650 [Arabidopsis thaliana] gi 222423327 dbj BAH19639.1  AT3G07650 [Arabidopsis thaliana] gi 332641059 gb AEE74580.1  zinc finger protein CONSTANS-LIKE 9 [Arabidopsis thaliana] gi 332641060 gb AEE74581.1  zinc finger protein CONSTANS-LIKE 9 [Arabidopsis thaliana] gi 332641061 gb AEE74582.1  zinc finger protein CONSTANS-LIKE 9 [Arabidopsis thaliana] gi 332641062 gb AEE74583.1  zinc finger protein CONSTANS-LIKE 9 [Arabidopsis thaliana]                                                                                                                                                                                                                                                                                                                                                                                                                                                                                                                                                        | 377  | 372  | 1.00E-175 | 98.7  | 84.6 | 88.9 | zinc finger protein CONSTANS-LIKE 9                           | gbpln | Arabidopsis thaliana | AT3G07650.4   Symbols: COL9   CONSTANS-like 9   chr3:2442494-2443901 FORWARD LENGTH=372                                                                                                                                                                                                                                                                                                                                                                       | 377  | 372  | 1.00E-178 | 98.7  | 84.6 | 88.9 |
| Rsa1.0_00105.1.g5182.t1 | ref XP_002884662.1  hypothetical protein ARALYDRAFT_896937 [Arabidopsis lyrata subsp. lyrata] gi 297330502 gb EFH60921.1  hypothetical protein ARALYDRAFT_896937 [Arabidopsis lyrata subsp. lyrata]                                                                                                                                                                                                                                                                                                                                                                                                                                                                                                                                                                                                                                                                                                                                                                                                                                                                                                                       | 809  | 840  | 0         | 103.8 | 82.8 | 88.3 | hypothetical protein ARALYDRAFT_896937                        | gbpln | Arabidopsis lyrata   | AT3G07660.1   Symbols:   Kinase-related protein of unknown function (DUF1296)   chr3:2445275-2450372 REVERSE LENGTH=841                                                                                                                                                                                                                                                                                                                                       | 809  | 841  | 0         | 104.0 | 81.1 | 87.0 |
| Rsa1.0_00105.1.g5183.t1 | ref XP_002882544.1  predicted protein [Arabidopsis lyrata subsp. lyrata] gi 297328384 gb EFH58803.1  predicted protein [Arabidopsis lyrata subsp. lyrata]                                                                                                                                                                                                                                                                                                                                                                                                                                                                                                                                                                                                                                                                                                                                                                                                                                                                                                                                                                 | 445  | 459  | 0         | 103.1 | 93.5 | 97.1 | predicted protein                                             | gbpln | Arabidopsis lyrata   | AT3G07690.1   Symbols:   6-phosphogluconate dehydrogenase family protein   chr3:2457232-2459378 FORWARD LENGTH=466                                                                                                                                                                                                                                                                                                                                            | 445  | 466  | 0         | 104.7 | 93.7 | 96.9 |
| Rsa1.0_00105.1.g5184.t1 | gb EOA29886.1  hypothetical protein CARUB_v10013091mg [Capsella rubella]                                                                                                                                                                                                                                                                                                                                                                                                                                                                                                                                                                                                                                                                                                                                                                                                                                                                                                                                                                                                                                                  | 678  | 701  | 0         | 103.4 | 92.9 | 96.8 | hypothetical protein CARUB_v10013091mg                        | gbpln | Capsella rubella     | AT3G07700.2   Symbols:   Protein kinase superfamily protein   chr3:2459696-2463241 REVERSE LENGTH=695<br>AT2G22440.1   Symbols:   BEST Arabidopsis thaliana protein match is: Ribonuclease H-like superfamily protein (TAIR:AT4G29090.1); Has 208 Blast hits to 191 proteins in 10 species: Archae - 0; Bacteria - 0; Metazoa - 0; Fungi - 0; Plants - 208; Viruses - 0; Other Eukaryotes - 0 (source: NCBI BLINK).   chr2:9528910-9529917 FORWARD LENGTH=256 | 678  | 695  | 0         | 102.5 | 92.0 | 95.9 |
| Rsa1.0_00105.1.g5185.t1 | dbj BAA97156.1  unnamed protein product [Arabidopsis thaliana]                                                                                                                                                                                                                                                                                                                                                                                                                                                                                                                                                                                                                                                                                                                                                                                                                                                                                                                                                                                                                                                            | 177  | 329  | 1.00E-22  | 185.9 | 37.9 | 50.8 | unnamed protein product                                       | gbpln | Arabidopsis thaliana | AT4G29090.1   Symbols:   Ribonuclease H-like superfamily protein   chr4:14333528-14335255 FORWARD LENGTH=575                                                                                                                                                                                                                                                                                                                                                  | 177  | 256  | 1.00E-14  | 144.6 | 23.7 | 31.6 |
| Rsa1.0_00105.1.g5186.t1 | gb AAD17398.1  putative non-LTR retroelement reverse transcriptase [Arabidopsis thaliana]                                                                                                                                                                                                                                                                                                                                                                                                                                                                                                                                                                                                                                                                                                                                                                                                                                                                                                                                                                                                                                 | 343  | 1225 | 2.00E-68  | 357.1 | 40.2 | 53.4 | putative non-LTR retroelement reverse transcriptase           | gbpln | Arabidopsis thaliana | AT4G29090.1   Symbols:   Ribonuclease H-like superfamily protein   chr4:14333528-14335255 FORWARD LENGTH=575                                                                                                                                                                                                                                                                                                                                                  | 343  | 575  | 1.00E-42  | 167.6 | 28.0 | 47.8 |

|                         |                                                                                                                                                                                                                                                                                                                                                                                                                                                                                                                                                                                                                                                                                                                  |     |     |           |       |      |      |                                                   |       |                      |                                                                                                                                                                                                                                                                                                                                                          |     |     |           |       |      |      |
|-------------------------|------------------------------------------------------------------------------------------------------------------------------------------------------------------------------------------------------------------------------------------------------------------------------------------------------------------------------------------------------------------------------------------------------------------------------------------------------------------------------------------------------------------------------------------------------------------------------------------------------------------------------------------------------------------------------------------------------------------|-----|-----|-----------|-------|------|------|---------------------------------------------------|-------|----------------------|----------------------------------------------------------------------------------------------------------------------------------------------------------------------------------------------------------------------------------------------------------------------------------------------------------------------------------------------------------|-----|-----|-----------|-------|------|------|
| Rsa1.0_00105.1.g5187.t1 | ref NP_566316.1  galactose oxidase/kelch repeat-containing protein [Arabidopsis thaliana] gi 6466955 gb AAF13090.1 AC009176.17 unknown protein [Arabidopsis thaliana] gi 6648184 gb AAF21182.1 AC013483.6 unknown protein [Arabidopsis thaliana] gi 11692832 gb AAG40019.1 AF324668.1 MLP3.17 [Arabidopsis thaliana] gi 11993873 gb AAG42920.1 AF329503.1 unknown protein [Arabidopsis thaliana] gi 14517448 gb AAK62614.1 AT3g07720/F17A17.6 [Arabidopsis thaliana] gi 21280883 gb AAM44920.1  unknown protein [Arabidopsis thaliana] gi 23507767 gb AAN38887.1  At3g07720/F17A17.6 [Arabidopsis thaliana] gi 332641071 gb AEE74592.1  galactose oxidase/kelch repeat-containing protein [Arabidopsis thaliana] | 329 | 329 | 1.00E-170 | 100.0 | 86.9 | 93.3 | galactose oxidase/kelch repeat-containing protein | gbpln | Arabidopsis thaliana | AT3G07720.1   Symbols:   Galactose oxidase/kelch repeat superfamily protein   chr3:2465439-2467033 FORWARD LENGTH=329                                                                                                                                                                                                                                    | 329 | 329 | 1.00E-172 | 100.0 | 86.9 | 93.3 |
| Rsa1.0_00105.1.g5188.t1 | gb EOA30367.1  hypothetical protein CARUB_v10013490mg [Capsella rubella]                                                                                                                                                                                                                                                                                                                                                                                                                                                                                                                                                                                                                                         | 488 | 507 | 1.00E-77  | 103.9 | 45.3 | 57.8 | hypothetical protein CARUB_v10013490mg            | gbpln | Capsella rubella     | AT3G07730.1   Symbols:   unknown protein; BEST Arabidopsis thaliana protein match is: unknown protein (TAIR:AT4G01170.1); Has 1299 Blast hits to 1149 proteins in 206 species: Archae - 3; Bacteria - 100; Metazoa - 453; Fungi - 114; Plants - 108; Viruses - 2; Other Eukaryotes - 519 (source: NCBI BLINK).   chr3:2468185-2469606 FORWARD LENGTH=473 | 488 | 473 | 2.00E-73  | 96.9  | 44.7 | 58.0 |
| Rsa1.0_00105.1.g5189.t2 | gb EOA30289.1  hypothetical protein CARUB_v10013390mg [Capsella rubella]                                                                                                                                                                                                                                                                                                                                                                                                                                                                                                                                                                                                                                         | 550 | 548 | 0         | 99.6  | 82.5 | 89.6 | hypothetical protein CARUB_v10013390mg            | gbpln | Capsella rubella     | AT3G07740.1   Symbols:   ADA2A, ATADA2A, HAC10, HXA02, HXA2   homolog of yeast ADA2 2A   chr3:2470014-2473062 REVERSE LENGTH=548                                                                                                                                                                                                                         | 550 | 548 | 0         | 99.6  | 82.0 | 88.4 |
| Rsa1.0_00105.1.g5190.t1 | gb EOA31153.1  hypothetical protein CARUB_v10014316mg [Capsella rubella]                                                                                                                                                                                                                                                                                                                                                                                                                                                                                                                                                                                                                                         | 285 | 287 | 1.00E-147 | 100.7 | 90.5 | 95.1 | hypothetical protein CARUB_v10014316mg            | gbpln | Capsella rubella     | AT3G07750.2   Symbols:   3'-5'-exoribonuclease family protein   chr3:2473486-2475218 FORWARD LENGTH=286                                                                                                                                                                                                                                                  | 285 | 286 | 1.00E-149 | 100.4 | 90.2 | 94.7 |
| Rsa1.0_00105.1.g5191.t1 | ref XP_002882548.1  hypothetical protein ARALYDRAFT_896947 [Arabidopsis lyrata subsp. lyrata] gi 297328388 gb EFH58807.1  hypothetical protein ARALYDRAFT_896947 [Arabidopsis lyrata subsp. lyrata]                                                                                                                                                                                                                                                                                                                                                                                                                                                                                                              | 142 | 140 | 1.00E-70  | 98.6  | 93.0 | 94.4 | hypothetical protein ARALYDRAFT_896947            | gbpln | Arabidopsis lyrata   | AT3G07760.2   Symbols:   Sterile alpha motif (SAM) domain-containing protein   chr3:2476723-2477947 FORWARD LENGTH=125                                                                                                                                                                                                                                   | 142 | 125 | 2.00E-68  | 88.0  | 85.2 | 86.6 |
| Rsa1.0_00105.1.g5192.t1 | ref XP_002882549.1  hypothetical protein ARALYDRAFT_896948 [Arabidopsis lyrata subsp. lyrata] gi 297328389 gb EFH58808.1  hypothetical protein ARALYDRAFT_896948 [Arabidopsis lyrata subsp. lyrata]                                                                                                                                                                                                                                                                                                                                                                                                                                                                                                              | 804 | 799 | 0         | 99.4  | 88.7 | 94.0 | hypothetical protein ARALYDRAFT_896948            | gbpln | Arabidopsis lyrata   | AT3G07770.1   Symbols:   Hsp89.1, AtHsp90.6, AtHsp90-6   HEAT SHOCK PROTEIN 89.1   chr3:2479611-2483970 FORWARD LENGTH=799                                                                                                                                                                                                                               | 804 | 799 | 0         | 99.4  | 87.8 | 93.9 |
| Rsa1.0_00105.1.g5193.t1 | ref NP_187436.1  protein DGCR14 [Arabidopsis thaliana] gi 6466961 gb AAF13096.1 AC009176.23 hypothetical protein [Arabidopsis thaliana] gi 6648191 gb AAF21189.1 AC013483.13 hypothetical protein [Arabidopsis thaliana] gi 332641083 gb AEE74604.1  protein DGCR14-like protein [Arabidopsis thaliana]                                                                                                                                                                                                                                                                                                                                                                                                          | 488 | 508 | 0         | 104.1 | 84.2 | 89.5 | protein DGCR14                                    | gbpln | Arabidopsis thaliana | AT3G07790.1   Symbols:   DGCR14-related   chr3:2487491-2489017 FORWARD LENGTH=508                                                                                                                                                                                                                                                                        | 488 | 508 | 0         | 104.1 | 84.2 | 89.5 |
| Rsa1.0_00105.1.g5194.t1 | gb EOA31343.1  hypothetical protein CARUB_v10014517mg [Capsella rubella]                                                                                                                                                                                                                                                                                                                                                                                                                                                                                                                                                                                                                                         | 227 | 238 | 1.00E-108 | 104.8 | 86.3 | 91.2 | hypothetical protein CARUB_v10014517mg            | gbpln | Capsella rubella     | AT3G07800.1   Symbols:   Thymidine kinase   chr3:2489944-2490935 REVERSE LENGTH=238                                                                                                                                                                                                                                                                      | 227 | 238 | 1.00E-107 | 104.8 | 85.5 | 89.0 |
| Rsa1.0_00105.1.g5195.t2 | ref XP_002882552.1  hypothetical protein ARALYDRAFT_478119 [Arabidopsis lyrata subsp. lyrata] gi 297328392 gb EFH58811.1  hypothetical protein ARALYDRAFT_478119 [Arabidopsis lyrata subsp. lyrata]                                                                                                                                                                                                                                                                                                                                                                                                                                                                                                              | 512 | 495 | 0         | 96.7  | 88.1 | 90.2 | hypothetical protein ARALYDRAFT_478119            | gbpln | Arabidopsis lyrata   | AT3G07810.2   Symbols:   RNA-binding (RRM/RBD/RNP motifs) family protein   chr3:2482875-2495102 FORWARD LENGTH=495                                                                                                                                                                                                                                       | 512 | 495 | 0         | 96.7  | 87.7 | 90.2 |
| Rsa1.0_00105.1.g5196.t1 | gb ADJ68232.1  exo-polygalacturonase [Brassica rapa subsp. oleifera]                                                                                                                                                                                                                                                                                                                                                                                                                                                                                                                                                                                                                                             | 426 | 476 | 0         | 111.7 | 92.5 | 95.1 | exo-polygalacturonase                             | gbpln | Brassica rapa        | AT3G14040.1   Symbols:   Pectin lyase-like superfamily protein   chr3:4648607-4650226 REVERSE LENGTH=445                                                                                                                                                                                                                                                 | 426 | 445 | 0         | 104.5 | 79.1 | 87.1 |



|                         |                                                                                                                                                                                                                                                                                                                                                                                       |      |      |           |       |      |      |                                                                                |       |                      |                                                                                                                                                                                                                                                                                                                                                                                                                                                                                                                                                                                                  |      |      |           |       |      |      |
|-------------------------|---------------------------------------------------------------------------------------------------------------------------------------------------------------------------------------------------------------------------------------------------------------------------------------------------------------------------------------------------------------------------------------|------|------|-----------|-------|------|------|--------------------------------------------------------------------------------|-------|----------------------|--------------------------------------------------------------------------------------------------------------------------------------------------------------------------------------------------------------------------------------------------------------------------------------------------------------------------------------------------------------------------------------------------------------------------------------------------------------------------------------------------------------------------------------------------------------------------------------------------|------|------|-----------|-------|------|------|
| Rsa1.0_00105.1.g5197.t1 | ref[XP_002884670.1]<br>exopolygalacturonase [Arabidopsis lyrata subsp. lyrata]<br>gi 297330510 gb EFH60929.1 <br>exopolygalacturonase [Arabidopsis lyrata subsp. lyrata]                                                                                                                                                                                                              | 543  | 449  | 1.00E-164 | 82.7  | 51.7 | 62.6 | exopolygalacturonase                                                           | gbpln | Arabidopsis lyrata   | AT3G14040.1   Symbols:   Pectin lyase-like superfamily protein   chr3:4648607-4650226 REVERSE LENGTH=445                                                                                                                                                                                                                                                                                                                                                                                                                                                                                         | 543  | 445  | 1.00E-158 | 82.0  | 51.4 | 62.6 |
| Rsa1.0_00105.1.g5198.t1 | gb EOA31341.1  hypothetical protein CARUB_v10014515mg [Capsella rubella]                                                                                                                                                                                                                                                                                                              | 237  | 238  | 1.00E-117 | 100.4 | 89.5 | 92.0 | hypothetical protein CARUB_v10014515mg                                         | gbpln | Capsella rubella     | AT3G07880.1   Symbols: SCN1   Immunoglobulin E-set superfamily protein   chr3:2514175-2515544 FORWARD LENGTH=240                                                                                                                                                                                                                                                                                                                                                                                                                                                                                 | 237  | 240  | 1.00E-114 | 101.3 | 85.7 | 89.9 |
| Rsa1.0_00106.1.g5199.t1 | #                                                                                                                                                                                                                                                                                                                                                                                     | #    | #    | #         | #     | #    | #    | -                                                                              | ----  | ----                 | #                                                                                                                                                                                                                                                                                                                                                                                                                                                                                                                                                                                                | #    | #    | #         | #     | #    | #    |
| Rsa1.0_00106.1.g5200.t1 | gb AAM60857.1  dihydroipoamide S-acetyltransferase, putative [Arabidopsis thaliana]                                                                                                                                                                                                                                                                                                   | 457  | 464  | 0         | 101.5 | 85.3 | 90.2 | dihydroipoamide S-acetyltransferase, putative                                  | gbpln | Arabidopsis thaliana | AT1G34430.1   Symbols: EMB3003   2-oxoacid dehydrogenases acyltransferase family protein   chr1:12588027-12590084 REVERSE LENGTH=465                                                                                                                                                                                                                                                                                                                                                                                                                                                             | 457  | 465  | 0         | 101.8 | 86.0 | 90.6 |
| Rsa1.0_00106.1.g5201.t1 | pir  T00833 RNA-directed DNA polymerase homolog T13L16.7 - Arabidopsis thaliana (fragment)                                                                                                                                                                                                                                                                                            | 1410 | 1365 | 0         | 96.8  | 36.9 | 51.6 | RNA-directed DNA polymerase homolog T13L16.7 - Arabidopsis thaliana (fragment) | ----  | ----                 | AT4G29090.1   Symbols:   Ribonuclease H-like superfamily protein   chr4:14333528-14335255 FORWARD LENGTH=575                                                                                                                                                                                                                                                                                                                                                                                                                                                                                     | 1410 | 575  | 5.00E-65  | 40.8  | 11.3 | 18.2 |
| Rsa1.0_00106.1.g5202.t3 | ref[XP_002893821.1] At1g34380 [Arabidopsis lyrata subsp. lyrata]<br>gi 297339663 gb EFH70080.1  At1g34380 [Arabidopsis lyrata subsp. lyrata]                                                                                                                                                                                                                                          | 743  | 335  | 1.00E-162 | 45.1  | 38.6 | 41.6 | At1g34380                                                                      | gbpln | Arabidopsis lyrata   | AT1G34380.2   Symbols:   5'-3' exonuclease family protein   chr1:12552839-12554299 REVERSE LENGTH=347                                                                                                                                                                                                                                                                                                                                                                                                                                                                                            | 743  | 347  | 1.00E-163 | 46.7  | 39.0 | 42.4 |
| Rsa1.0_00106.1.g5203.t1 | ref[XP_002891100.1] zinc finger family protein [Arabidopsis lyrata subsp. lyrata]<br>gi 297336942 gb EFH67359.1  zinc finger family protein [Arabidopsis lyrata subsp. lyrata]                                                                                                                                                                                                        | 457  | 505  | 0         | 110.5 | 78.1 | 86.7 | zinc finger family protein                                                     | gbpln | Arabidopsis lyrata   | AT1G34370.1   Symbols: STOP1   C2H2 and C2HC zinc fingers superfamily protein   chr1:12551002-12552501 FORWARD LENGTH=499                                                                                                                                                                                                                                                                                                                                                                                                                                                                        | 457  | 499  | 0         | 109.2 | 75.5 | 84.7 |
| Rsa1.0_00106.1.g5204.t7 | gb EOA39503.1  hypothetical protein CARUB_v10008117mg [Capsella rubella]                                                                                                                                                                                                                                                                                                              | 1134 | 1204 | 0         | 106.2 | 50.3 | 62.3 | hypothetical protein CARUB_v10008117mg                                         | gbpln | Capsella rubella     | AT1G34355.1   Symbols: ATPS1, PS1   forkhead-associated (FHA) domain-containing protein   chr1:12536497-12541730 FORWARD LENGTH=1477                                                                                                                                                                                                                                                                                                                                                                                                                                                             | 1134 | 1477 | 0         | 130.2 | 47.3 | 58.5 |
| Rsa1.0_00106.1.g5205.t1 | #                                                                                                                                                                                                                                                                                                                                                                                     | #    | #    | #         | #     | #    | #    | -                                                                              | ----  | ----                 | #                                                                                                                                                                                                                                                                                                                                                                                                                                                                                                                                                                                                | #    | #    | #         | #     | #    | #    |
| Rsa1.0_00106.1.g5206.t1 | #                                                                                                                                                                                                                                                                                                                                                                                     | #    | #    | #         | #     | #    | #    | -                                                                              | ----  | ----                 | #                                                                                                                                                                                                                                                                                                                                                                                                                                                                                                                                                                                                | #    | #    | #         | #     | #    | #    |
| Rsa1.0_00106.1.g5207.t1 | #                                                                                                                                                                                                                                                                                                                                                                                     | #    | #    | #         | #     | #    | #    | -                                                                              | ----  | ----                 | #                                                                                                                                                                                                                                                                                                                                                                                                                                                                                                                                                                                                | #    | #    | #         | #     | #    | #    |
| Rsa1.0_00106.1.g5208.t1 | gb ABW81060.1  GagPol3 [Arabidopsis lyrata subsp. lyrata]                                                                                                                                                                                                                                                                                                                             | 684  | 1103 | 1.00E-162 | 161.3 | 46.1 | 59.2 | GagPol3                                                                        | gbpln | Arabidopsis lyrata   | #                                                                                                                                                                                                                                                                                                                                                                                                                                                                                                                                                                                                | #    | #    | #         | #     | #    | #    |
| Rsa1.0_00106.1.g5209.t1 | gb ABD65035.1  hypothetical protein 26.100052 [Brassica oleracea]                                                                                                                                                                                                                                                                                                                     | 751  | 695  | 0         | 92.5  | 59.9 | 72.2 | hypothetical protein 26.100052                                                 | gbpln | Brassica oleracea    | AT1G51172.1   Symbols:   unknown protein; FUNCTIONS IN: molecular function unknown; INVOLVED IN: biological process unknown; LOCATED IN: cellular component unknown; CONTAINS InterPro DOMAIN/s: Protein of unknown function DUF601 (InterPro:IPR006736); BEST Arabidopsis thaliana protein match is: Protein of unknown function, DUF601 (TAIR-AT1G46696.1); Has 1849 Blast hits to 1554 proteins in 272 species: Archae - 15; Bacteria - 116; Metazoa - 677; Fungi - 267; Plants - 154; Viruses - 11; Other Eukaryotes - 609 (source: NCBI BLINK).   chr1:18963205-18965571 FORWARD LENGTH=681 | 751  | 681  | 1.00E-21  | 90.7  | 5.9  | 9.9  |
| Rsa1.0_00106.1.g5210.t1 | gb AAF79483.1 AC022492_27 F1L3.20 [Arabidopsis thaliana]                                                                                                                                                                                                                                                                                                                              | 835  | 1188 | 0         | 142.3 | 45.4 | 56.2 | F1L3.20                                                                        | gbpln | Arabidopsis thaliana | AT4G23160.1   Symbols: CRK8   cysteine-rich RLK (RECEPTOR-like protein kinase) 8   chr4:12129485-12134086 FORWARD LENGTH=1262                                                                                                                                                                                                                                                                                                                                                                                                                                                                    | 835  | 1262 | 1.00E-20  | 151.1 | 5.6  | 9.3  |
| Rsa1.0_00106.1.g5211.t1 | ref[XP_002891097.1]<br>esterase/lipase/thioesterase family protein [Arabidopsis lyrata subsp. lyrata]<br>gi 297336939 gb EFH67356.1 <br>esterase/lipase/thioesterase family protein [Arabidopsis lyrata subsp. lyrata]                                                                                                                                                                | 544  | 529  | 0         | 97.2  | 80.0 | 87.1 | esterase/lipase/thioesterase family protein                                    | gbpln | Arabidopsis lyrata   | AT1G34340.1   Symbols:   alpha/beta-Hydrolases superfamily protein   chr1:12530936-12534031 FORWARD LENGTH=530                                                                                                                                                                                                                                                                                                                                                                                                                                                                                   | 544  | 530  | 0         | 97.4  | 79.8 | 87.1 |
| Rsa1.0_00106.1.g5212.t1 | ref[NP_174692.1] uncharacterized protein [Arabidopsis thaliana]<br>gi 37202044 gb AAQ89637.1  At1g34320 [Arabidopsis thaliana]<br>gi 51970944 dbj BAD44164.1 <br>hypothetical protein [Arabidopsis thaliana]<br>gi 51971088 dbj BAD44236.1 <br>hypothetical protein [Arabidopsis thaliana]<br>gi 332193576 gb AEE31697.1 <br>uncharacterized protein AT1G34320 [Arabidopsis thaliana] | 654  | 657  | 0         | 100.5 | 90.8 | 93.7 | uncharacterized protein                                                        | gbpln | Arabidopsis thaliana | AT1G34320.1   Symbols:   Protein of unknown function (DUF668)   chr1:12520713-12524046 FORWARD LENGTH=657                                                                                                                                                                                                                                                                                                                                                                                                                                                                                        | 654  | 657  | 0         | 100.5 | 90.8 | 93.7 |
| Rsa1.0_00106.1.g5213.t1 | #                                                                                                                                                                                                                                                                                                                                                                                     | #    | #    | #         | #     | #    | #    | -                                                                              | ----  | ----                 | #                                                                                                                                                                                                                                                                                                                                                                                                                                                                                                                                                                                                | #    | #    | #         | #     | #    | #    |

|                         |                                                                                                                                                                                                                                                                                                                                                                                                                                                                                                                                                                                                                                                                                                                              |      |      |          |       |      |      |                                                          |       |                      |                                                                                                                                                 |      |      |          |       |      |      |
|-------------------------|------------------------------------------------------------------------------------------------------------------------------------------------------------------------------------------------------------------------------------------------------------------------------------------------------------------------------------------------------------------------------------------------------------------------------------------------------------------------------------------------------------------------------------------------------------------------------------------------------------------------------------------------------------------------------------------------------------------------------|------|------|----------|-------|------|------|----------------------------------------------------------|-------|----------------------|-------------------------------------------------------------------------------------------------------------------------------------------------|------|------|----------|-------|------|------|
| Rsa1.0_00106.1.g5214.t1 | refNP_174690.1   lectin protein kinase-like protein [Arabidopsis thaliana] gi 7538636 sp Q9XID3.1 Y1343_ARATH RecName: Full=G-type lectin S-receptor-like serine/threonine-protein kinase At1g34300; Flags: Precursor gi 5091617 gb AAD39605.1 AC007454.4 Contains similarity to gi 479356 protein kinase PK1 from Zea mays, is a member of the PF 00954 S-locus glycoprotein family and contains a PF 00069 Eukaryotic protein kinase domain [Arabidopsis thaliana] gi 19699084 gb AAL80909.1 At1g34300/F23M19.5 [Arabidopsis thaliana] gi 24111429 gb AAN46865.1 At1g34300/F23M19.5 [Arabidopsis thaliana] gi 332193573 gb AEE31694.1 G-type lectin S-receptor-like serine/threonine-protein kinase [Arabidopsis thaliana] | 533  | 829  | 0        | 155.5 | 64.2 | 69.2 | lectin protein kinase-like protein                       | gbpln | Arabidopsis thaliana | AT1G34300.1   Symbols:   lectin protein kinase family protein   chr1:12503450-12505939 FORWARD LENGTH=829                                       | 533  | 829  | 0        | 155.5 | 64.2 | 69.2 |
| Rsa1.0_00106.1.g5215.t1 | #                                                                                                                                                                                                                                                                                                                                                                                                                                                                                                                                                                                                                                                                                                                            | #    | #    | #        | #     | #    | -    | ----                                                     | ----  | #                    | #                                                                                                                                               | #    | #    | #        | #     | #    |      |
| Rsa1.0_00106.1.g5216.t1 | gb AAD21699.1  Contains reverse transcriptase domain (rvt) PF 00078 [Arabidopsis thaliana]                                                                                                                                                                                                                                                                                                                                                                                                                                                                                                                                                                                                                                   | 448  | 1253 | 1.00E-57 | 279.7 | 33.7 | 50.9 | Contains reverse transcriptase domain (rvt) PF 00078     | gbpln | Arabidopsis thaliana | AT1G60720.1   Symbols:   RNA-directed DNA polymerase (reverse transcriptase)-related family protein   chr1:22357072-22357941 FORWARD LENGTH=289 | 448  | 289  | 1.00E-29 | 64.5  | 17.4 | 29.0 |
| Rsa1.0_00106.1.g5217.t1 | refNP_564443.1   exostosin-like protein [Arabidopsis thaliana] gi 5091619 gb AAD39607.1 AC007454.6 F23M19.7 [Arabidopsis thaliana] gi 15450928 gb AAK96735.1  Unknown protein [Arabidopsis thaliana] gi 20148711 gb AAM10246.1  unknown protein [Arabidopsis thaliana] gi 332193570 gb AEE31691.1  exostosin-like protein [Arabidopsis thaliana]                                                                                                                                                                                                                                                                                                                                                                             | 486  | 477  | 0        | 98.1  | 85.0 | 90.7 | exostosin-like protein                                   | gbpln | Arabidopsis thaliana | AT1G34270.1   Symbols:   Exostosin family protein   chr1:12492571-12494514 REVERSE LENGTH=477                                                   | 486  | 477  | 0        | 98.1  | 85.0 | 90.7 |
| Rsa1.0_00106.1.g5218.t1 | refXP_002891093.1   phosphatidylinositol-4-phosphate 5-kinase family protein [Arabidopsis lyrata subsp. lyrata] gi 297336935 gb EFH67352.1   phosphatidylinositol-4-phosphate 5-kinase family protein [Arabidopsis lyrata subsp. lyrata]                                                                                                                                                                                                                                                                                                                                                                                                                                                                                     | 1428 | 1450 | 0        | 101.5 | 78.3 | 85.4 | phosphatidylinositol-4-phosphate 5-kinase family protein | gbpln | Arabidopsis lyrata   | AT1G34260.1   Symbols: FAB1D   FORMS APOID AND BINUCLEATE CELLS 1A   chr1:12485967-12491799 FORWARD LENGTH=1456                                 | 1428 | 1456 | 0        | 102.0 | 77.0 | 84.5 |
| Rsa1.0_00106.1.g5219.t1 | gb ACBS9223.1  glutathione S-transferase [Brassica oleracea]                                                                                                                                                                                                                                                                                                                                                                                                                                                                                                                                                                                                                                                                 | 155  | 523  | 1.00E-24 | 337.4 | 34.2 | 44.5 | glutathione S-transferase                                | gbpln | Brassica oleracea    | #                                                                                                                                               | #    | #    | #        | #     | #    |      |
| Rsa1.0_00107.1.g5220.t2 | refNP_200453.1   F-box/FBD/LRR-repeat protein [Arabidopsis thaliana] gi 42573694 refNP_974943.1   F-box/FBD/LRR-repeat protein [Arabidopsis thaliana] gi 75262699 sp Q9FM89.1 FDL38_ARATH RecName: Full=F-box/FBD/LRR-repeat protein At5g56420 gi 10177841 dbj BAB11270.1   unnamed protein product [Arabidopsis thaliana] gi 332009379 gb AED96762.1   F-box/FBD/LRR-repeat protein [Arabidopsis thaliana] gi 332009380 gb AED96763.1   F-box/FBD/LRR-repeat protein [Arabidopsis thaliana]                                                                                                                                                                                                                                 | 350  | 422  | 3.00E-38 | 120.6 | 35.4 | 56.0 | F-box/FBD/LRR-repeat protein                             | gbpln | Arabidopsis thaliana | AT5G56420.2   Symbols:   F-box/RNI-like/FBD-like domains-containing protein   chr5:22850863-22852334 REVERSE LENGTH=422                         | 350  | 422  | 8.00E-41 | 120.6 | 35.4 | 56.0 |
| Rsa1.0_00107.1.g5221.t2 | refXP_002870044.1   hypothetical protein ARALYDRAFT_493014 [Arabidopsis lyrata subsp. lyrata] gi 297315880 gb EFH46303.1   hypothetical protein ARALYDRAFT_493014 [Arabidopsis lyrata subsp. lyrata]                                                                                                                                                                                                                                                                                                                                                                                                                                                                                                                         | 432  | 431  | 0        | 99.8  | 81.9 | 90.3 | hypothetical protein ARALYDRAFT_493014                   | gbpln | Arabidopsis lyrata   | AT4G18470.1   Symbols: SNI1   negative regulator of systemic acquired resistance (SNI1)   chr4:10192984-10195511 FORWARD LENGTH=432             | 432  | 432  | 0        | 100.0 | 80.8 | 90.3 |
| Rsa1.0_00107.1.g5222.t1 | gb EOA15623.1  hypothetical protein CARUB_v10005759mg [Capsella rubella]                                                                                                                                                                                                                                                                                                                                                                                                                                                                                                                                                                                                                                                     | 208  | 203  | 2.00E-96 | 97.6  | 87.0 | 90.4 | hypothetical protein CARUB_v10005759mg                   | gbpln | Capsella rubella     | AT4G18460.1   Symbols:   D-Tyr-tRNA(Tyr) deacylase family protein   chr4:10195763-10196679 REVERSE LENGTH=153                                   | 208  | 153  | 8.00E-81 | 73.6  | 68.8 | 73.1 |
| Rsa1.0_00107.1.g5223.t1 | gb EOA17808.1  hypothetical protein CARUB_v10006206mg [Capsella rubella]                                                                                                                                                                                                                                                                                                                                                                                                                                                                                                                                                                                                                                                     | 667  | 695  | 0        | 104.2 | 95.5 | 97.9 | hypothetical protein CARUB_v10006206mg                   | gbpln | Capsella rubella     | AT4G18465.1   Symbols:   RNA helicase family protein   chr4:10197056-10201611 FORWARD LENGTH=695                                                | 667  | 695  | 0        | 104.2 | 94.5 | 97.3 |

|                         |                                                                                                                                                                                                                                                                                                                                                                                                                                                                                                                                                                                                                                                                                                                                                                                                                                                                                                                                                                                                                                                                                                    |      |      |          |       |      |      |                                                                                |       |                      |                                                                                                                                                                                                                                                                                                                                                                                                                                                                                                                                                                |      |      |          |       |      |      |
|-------------------------|----------------------------------------------------------------------------------------------------------------------------------------------------------------------------------------------------------------------------------------------------------------------------------------------------------------------------------------------------------------------------------------------------------------------------------------------------------------------------------------------------------------------------------------------------------------------------------------------------------------------------------------------------------------------------------------------------------------------------------------------------------------------------------------------------------------------------------------------------------------------------------------------------------------------------------------------------------------------------------------------------------------------------------------------------------------------------------------------------|------|------|----------|-------|------|------|--------------------------------------------------------------------------------|-------|----------------------|----------------------------------------------------------------------------------------------------------------------------------------------------------------------------------------------------------------------------------------------------------------------------------------------------------------------------------------------------------------------------------------------------------------------------------------------------------------------------------------------------------------------------------------------------------------|------|------|----------|-------|------|------|
| Rsa1.0_00107.1.g5224.t1 | ref NP_193583.1  magnesium-chelatase subunit chlI [Arabidopsis thaliana] gi 117238 sp P16127.1 CHLI1_ARATH RecName: Full=Magnesium-chelatase subunit ChlI-1, chloroplastic; Short=Mg-chelatase subunit I-1; AltName: Full=Mg-protoporphyrin IX chelatase subunit ChlI-1; AltName: Full=Protein CHLORINA 42; Flags: Precursor gi 1020100 emb CAA62754.1  protoporphyrin-IX Mg-chelatase [Arabidopsis thaliana] gi 2832653 emb CAA16728.1  protein ch-42 precursor, chloroplast [Arabidopsis thaliana] gi 4490290 emb CAB38561.1  unnamed protein product [Arabidopsis thaliana] gi 7268641 emb CAB78850.1  protein ch-42 precursor, chloroplast [Arabidopsis thaliana] gi 20260586 gb AAM13191.1  protein ch-42 precursor, chloroplast [Arabidopsis thaliana] gi 33589664 gb AAQ22598.1  At4g18480 [Arabidopsis thaliana] gi 110742552 dbj BAE99191.1  protein ch-42 precursor [Arabidopsis thaliana] gi 195604748 gb ACG24204.1  magnesium-chelatase subunit chlI [Zea mays] gi 332658651 gb AEE84051.1  magnesium-chelatase subunit chlI [Arabidopsis thaliana] pi 228771 nrfl 1811226A ccsA gene | 423  | 424  | 0        | 100.2 | 93.4 | 96.5 | magnesium-chelatase subunit chlI                                               | gbpln | Arabidopsis thaliana | AT4G18480.1   Symbols: CHLI1, CH42, CH-42, CHL11, CHLI-1   P-loop containing nucleoside triphosphate hydrolases superfamily protein   chr4:10201897-10203361 REVERSE LENGTH=424                                                                                                                                                                                                                                                                                                                                                                                | 423  | 424  | 0        | 100.2 | 93.4 | 96.5 |
| Rsa1.0_00107.1.g5225.t2 | gb EOA15459.1  hypothetical protein CARUB_v10004153mg [Capsella rubella] gi 482551267 gb EOA15460.1  hypothetical protein CARUB_v10004153mg [Capsella rubella]                                                                                                                                                                                                                                                                                                                                                                                                                                                                                                                                                                                                                                                                                                                                                                                                                                                                                                                                     | 809  | 814  | 0        | 100.6 | 63.7 | 73.8 | hypothetical protein CARUB_v10004153mg                                         | gbpln | Capsella rubella     | AT4G18490.2   Symbols:   unknown protein; FUNCTIONS IN: molecular_function unknown; INVOLVED IN: biological_process unknown; LOCATED IN: cellular_component unknown; EXPRESSED IN: shoot, shoot apex, embryo, flower, seed; EXPRESSED DURING: petal differentiation and expansion stage. E expanded cotyledon stage; Has 30201 Blast hits to 17322 proteins in 780 species: Archae - 12; Bacteria - 1396; Metazoa - 17338; Fungi - 3422; Plants - 5037; Viruses - 0; Other Eukaryotes - 2996 (source: NCBI BLINK).   chr4:10204388-10208197 FORWARD LENGTH=755 | 809  | 755  | 0        | 93.3  | 62.4 | 70.8 |
| Rsa1.0_00107.1.g5226.t4 | ref NP_197443.3  regulator of chromosome condensation-like protein with FYVE zinc finger domain [Arabidopsis thaliana] gi 332005320 gb AED92703.1  regulator of chromosome condensation-like protein with FYVE zinc finger domain [Arabidopsis thaliana]                                                                                                                                                                                                                                                                                                                                                                                                                                                                                                                                                                                                                                                                                                                                                                                                                                           | 487  | 1105 | 3.00E-86 | 226.9 | 40.2 | 43.7 | regulator of chromosome condensation-like protein with FYVE zinc finger domain | gbpln | Arabidopsis thaliana | AT5G19420.1   Symbols:   Regulator of chromosome condensation (RCC1) family with FYVE zinc finger domain   chr5:6547945-6552866 REVERSE LENGTH=1105                                                                                                                                                                                                                                                                                                                                                                                                            | 487  | 1105 | 8.00E-89 | 226.9 | 40.2 | 43.7 |
| Rsa1.0_00107.1.g5227.t2 | gb EOA15459.1  hypothetical protein CARUB_v10004153mg [Capsella rubella] gi 482551267 gb EOA15460.1  hypothetical protein CARUB_v10004153mg [Capsella rubella]                                                                                                                                                                                                                                                                                                                                                                                                                                                                                                                                                                                                                                                                                                                                                                                                                                                                                                                                     | 344  | 814  | 2.00E-56 | 236.6 | 36.6 | 41.3 | hypothetical protein CARUB_v10004153mg                                         | gbpln | Capsella rubella     | AT4G18490.1   Symbols:   unknown protein; Has 30201 Blast hits to 17322 proteins in 780 species: Archae - 12; Bacteria - 1396; Metazoa - 17338; Fungi - 3422; Plants - 5037; Viruses - 0; Other Eukaryotes - 2996 (source: NCBI BLINK).   chr4:10204388-10208197 FORWARD LENGTH=756                                                                                                                                                                                                                                                                            | 344  | 756  | 2.00E-56 | 219.8 | 35.5 | 40.1 |
| Rsa1.0_00107.1.g5228.t1 | #                                                                                                                                                                                                                                                                                                                                                                                                                                                                                                                                                                                                                                                                                                                                                                                                                                                                                                                                                                                                                                                                                                  | #    | #    | #        | #     | #    | #    | -                                                                              | ----  | ----                 | #                                                                                                                                                                                                                                                                                                                                                                                                                                                                                                                                                              | #    | #    | #        | #     | #    |      |
| Rsa1.0_00107.1.g5229.t1 | gb EOA18754.1  hypothetical protein CARUB_v10007338mg [Capsella rubella]                                                                                                                                                                                                                                                                                                                                                                                                                                                                                                                                                                                                                                                                                                                                                                                                                                                                                                                                                                                                                           | 108  | 112  | 7.00E-27 | 103.7 | 78.7 | 88.0 | hypothetical protein CARUB_v10007338mg                                         | gbpln | Capsella rubella     | AT4G18501.1   Symbols:   unknown protein; Has 35333 Blast hits to 34131 proteins in 2444 species: Archae - 798; Bacteria - 22429; Metazoa - 974; Fungi - 991; Plants - 531; Viruses - 0; Other Eukaryotes - 9610 (source: NCBI BLINK).   chr4:10209311-10209640 FORWARD LENGTH=109                                                                                                                                                                                                                                                                             | 108  | 109  | 4.00E-25 | 100.9 | 70.4 | 82.4 |
| Rsa1.0_00107.1.g5230.t1 | ref XP_002870040.1  hypothetical protein ARALYDRAFT_493008 [Arabidopsis lyrata subsp. lyrata] gi 297315876 gb EFH46299.1  hypothetical protein ARALYDRAFT_493008 [Arabidopsis lyrata subsp. lyrata]                                                                                                                                                                                                                                                                                                                                                                                                                                                                                                                                                                                                                                                                                                                                                                                                                                                                                                | 78   | 78   | 1.00E-16 | 100.0 | 71.8 | 83.3 | hypothetical protein ARALYDRAFT_493008                                         | gbpln | Arabidopsis lyrata   | AT4G18510.1   Symbols: CLE2   CLAVATA3/ESR-related 2   chr4:10212092-10212319 FORWARD LENGTH=75                                                                                                                                                                                                                                                                                                                                                                                                                                                                | 78   | 75   | 4.00E-16 | 96.2  | 70.5 | 78.2 |
| Rsa1.0_00107.1.g5231.t3 | gb AAG50806.1 AC079291.8 unknown protein [Arabidopsis thaliana]                                                                                                                                                                                                                                                                                                                                                                                                                                                                                                                                                                                                                                                                                                                                                                                                                                                                                                                                                                                                                                    | 1730 | 1213 | 0        | 70.1  | 24.4 | 37.2 | unknown protein                                                                | gbpln | Arabidopsis thaliana | AT1G43760.1   Symbols:   DNase I-like superfamily protein   chr1:16528880-16531065 REVERSE LENGTH=626                                                                                                                                                                                                                                                                                                                                                                                                                                                          | 1730 | 626  | 2.00E-61 | 36.2  | 7.2  | 12.3 |
| Rsa1.0_00107.1.g5232.t1 | #                                                                                                                                                                                                                                                                                                                                                                                                                                                                                                                                                                                                                                                                                                                                                                                                                                                                                                                                                                                                                                                                                                  | #    | #    | #        | #     | #    | #    | -                                                                              | ----  | ----                 | #                                                                                                                                                                                                                                                                                                                                                                                                                                                                                                                                                              | #    | #    | #        | #     | #    |      |

|                         |                                                                                                                                                                                                                                                                                                                                                                                                      |      |      |           |       |      |      |                                                     |       |                      |                                                                                                                                                                                                                                                                                                                                                 |      |      |          |       |      |      |
|-------------------------|------------------------------------------------------------------------------------------------------------------------------------------------------------------------------------------------------------------------------------------------------------------------------------------------------------------------------------------------------------------------------------------------------|------|------|-----------|-------|------|------|-----------------------------------------------------|-------|----------------------|-------------------------------------------------------------------------------------------------------------------------------------------------------------------------------------------------------------------------------------------------------------------------------------------------------------------------------------------------|------|------|----------|-------|------|------|
| Rsa1.0_00107.1.g5233.t1 | refNP_193588.5  uncharacterized protein [Arabidopsis thaliana]   gi 332658658 gb AEE84058.1  uncharacterized protein AT4G18530 [Arabidopsis thaliana]                                                                                                                                                                                                                                                | 399  | 389  | 0         | 97.5  | 82.0 | 88.0 | uncharacterized protein                             | gbpln | Arabidopsis thaliana | AT4G18530.1   Symbols:   Protein of unknown function (DUF707)   chr4:10217749-10220285 FORWARD LENGTH=389                                                                                                                                                                                                                                       | 399  | 389  | 0        | 97.5  | 82.0 | 88.0 |
| Rsa1.0_00107.1.g5234.t1 | gb EOA16325.1  hypothetical protein CARUB_v10004475mg [Capsella rubella]                                                                                                                                                                                                                                                                                                                             | 542  | 569  | 0         | 105.0 | 82.8 | 90.0 | hypothetical protein CARUB_v10004475mg              | gbpln | Capsella rubella     | AT4G18540.1   Symbols:   unknown protein; Has 209 Blast hits to 205 proteins in 54 species: Archae - 0; Bacteria - 17; Metazoa - 2; Fungi - 150; Plants - 40; Viruses - 0; Other Eukaryotes - 0 (source: NCBI BLINK).   chr4:10221203-10223028 REVERSE LENGTH=520                                                                               | 542  | 520  | 0        | 95.9  | 75.3 | 81.4 |
| Rsa1.0_00107.1.g5235.t1 | refXP_002967985.1  lipase class 3 family protein [Arabidopsis lyrata subsp. lyrata]   gi 297313821 gb EFH44244.1  lipase class 3 family protein [Arabidopsis lyrata subsp. lyrata]                                                                                                                                                                                                                   | 434  | 418  | 0         | 96.3  | 83.6 | 89.6 | lipase class 3 family protein                       | gbpln | Arabidopsis lyrata   | AT4G18550.1   Symbols:   alpha/beta-Hydrolases superfamily protein   chr4:10225006-10226862 REVERSE LENGTH=419                                                                                                                                                                                                                                  | 434  | 419  | 0        | 96.5  | 81.3 | 88.5 |
| Rsa1.0_00107.1.g5236.t1 | gb EOA17812.1  hypothetical protein CARUB_v10006210mg [Capsella rubella]                                                                                                                                                                                                                                                                                                                             | 601  | 647  | 0         | 107.7 | 85.7 | 90.3 | hypothetical protein CARUB_v10006210mg              | gbpln | Capsella rubella     | AT4G18570.1   Symbols:   Tetratricopeptide repeat (TPR)-like superfamily protein   chr4:10231439-10234534 FORWARD LENGTH=642                                                                                                                                                                                                                    | 601  | 642  | 0        | 106.8 | 83.0 | 89.9 |
| Rsa1.0_00107.1.g5237.t1 | gb EOA18306.1  hypothetical protein CARUB_v10006819mg [Capsella rubella]                                                                                                                                                                                                                                                                                                                             | 144  | 130  | 3.00E-15  | 90.3  | 43.8 | 57.6 | hypothetical protein CARUB_v10006819mg              | gbpln | Capsella rubella     | AT4G18580.2   Symbols:   unknown protein; Has 35333 Blast hits to 34131 proteins in 2444 species: Archae - 798; Bacteria - 22429; Metazoa - 974; Fungi - 991; Plants - 531; Viruses - 0; Other Eukaryotes - 9610 (source: NCBI BLINK).   chr4:10234853-10235524 REVERSE LENGTH=115                                                              | 144  | 115  | 1.00E-16 | 79.9  | 44.4 | 52.1 |
| Rsa1.0_00107.1.g5238.t1 | refNP_567560.2  Nucleic acid-binding, OB-fold-like protein [Arabidopsis thaliana]   gi 45773776 gb AAS76692.1  At4g18590 [Arabidopsis thaliana]   gi 46359785 gb AAS89756.1  At4g18590 [Arabidopsis thaliana]   gi 332658664 gb AEE84064.1  Nucleic acid-binding, OB-fold-like protein [Arabidopsis thaliana]                                                                                        | 106  | 106  | 7.00E-50  | 100.0 | 88.7 | 95.3 | Nucleic acid-binding, OB-fold-like protein          | gbpln | Arabidopsis thaliana | AT4G18590.1   Symbols:   Nucleic acid-binding, OB-fold-like protein   chr4:10236524-10236940 FORWARD LENGTH=106                                                                                                                                                                                                                                 | 106  | 106  | 1.00E-52 | 100.0 | 88.7 | 95.3 |
| Rsa1.0_00107.1.g5239.t1 | refXP_002870034.1  pollen ole e 1 allergen and extensin family protein [Arabidopsis lyrata subsp. lyrata]   gi 297315870 gb EFH46293.1  pollen ole e 1 allergen and extensin family protein [Arabidopsis lyrata subsp. lyrata]                                                                                                                                                                       | 173  | 173  | 1.00E-87  | 100.0 | 90.8 | 95.4 | pollen ole e 1 allergen and extensin family protein | gbpln | Arabidopsis lyrata   | AT4G18596.1   Symbols:   Pollen Ole e 1 allergen and extensin family protein   chr4:10239114-10239728 FORWARD LENGTH=172                                                                                                                                                                                                                        | 173  | 172  | 1.00E-89 | 99.4  | 91.3 | 96.0 |
| Rsa1.0_00107.1.g5240.t1 | gb EOA15429.1  hypothetical protein CARUB_v10003966mg [Capsella rubella]                                                                                                                                                                                                                                                                                                                             | 2174 | 2074 | 0         | 95.4  | 43.4 | 52.3 | hypothetical protein CARUB_v10003966mg              | gbpln | Capsella rubella     | AT4G18600.1   Symbols: WAVES, ATSCAR-LIKE, SCARL   SCAR family protein   chr4:10239947-10247372 REVERSE LENGTH=2028                                                                                                                                                                                                                             | 2174 | 2028 | 0        | 93.3  | 42.2 | 50.1 |
| Rsa1.0_00107.1.g5241.t1 | refXP_002870033.1  hypothetical protein ARALYDRAFT_914818 [Arabidopsis lyrata subsp. lyrata]   gi 297315869 gb EFH46292.1  hypothetical protein ARALYDRAFT_914818 [Arabidopsis lyrata subsp. lyrata]                                                                                                                                                                                                 | 194  | 191  | 5.00E-88  | 98.5  | 91.2 | 91.8 | hypothetical protein ARALYDRAFT_914818              | gbpln | Arabidopsis lyrata   | AT4G18610.1   Symbols: LSH9   Protein of unknown function (DUF640)   chr4:10250794-10251369 FORWARD LENGTH=191                                                                                                                                                                                                                                  | 194  | 191  | 9.00E-90 | 98.5  | 90.7 | 91.8 |
| Rsa1.0_00107.1.g5242.t1 | gb ABK28243.1  unknown [Arabidopsis thaliana]                                                                                                                                                                                                                                                                                                                                                        | 315  | 297  | 5.00E-59  | 94.3  | 36.8 | 55.6 | unknown                                             | gbpln | Arabidopsis thaliana | AT4G04650.1   Symbols:   RNA-directed DNA polymerase (reverse transcriptase)-related family protein   chr4:2353989-2355213 REVERSE LENGTH=332                                                                                                                                                                                                   | 315  | 332  | 5.00E-59 | 105.4 | 35.9 | 54.3 |
| Rsa1.0_00107.1.g5243.t1 | #                                                                                                                                                                                                                                                                                                                                                                                                    | #    | #    | #         | #     | #    | #    | -                                                   | ----  | ----                 | #                                                                                                                                                                                                                                                                                                                                               | #    | #    | #        | #     | #    |      |
| Rsa1.0_00107.1.g5244.t1 | gb EOA15586.1  hypothetical protein CARUB_v10005444mg [Capsella rubella]                                                                                                                                                                                                                                                                                                                             | 279  | 280  | 1.00E-121 | 100.4 | 76.3 | 85.3 | hypothetical protein CARUB_v10005444mg              | gbpln | Capsella rubella     | AT4G18690.1   Symbols:   unknown protein; BEST Arabidopsis thaliana protein match is: unknown protein (TAIR:AT4G18680.1); Has 522 Blast hits to 522 proteins in 39 species: Archae - 0; Bacteria - 0; Metazoa - 9; Fungi - 0; Plants - 513; Viruses - 0; Other Eukaryotes - 0 (source: NCBI BLINK).   chr4:10282788-10283636 FORWARD LENGTH=282 | 279  | 282  | 4.00E-80 | 101.1 | 52.7 | 70.6 |
| Rsa1.0_00107.1.g5245.t1 | refNP_193602.4  leucine-rich repeat extensin-like protein 5 [Arabidopsis thaliana]   gi 300681244 sp Q9SN46.2 LRX5, ARAT H RecName: Full=Leucine-rich repeat extensin-like protein 5; Short=AtLRX5; Short=LRR/EXTENSIN5; AltName: Full=Cell wall hydroxyproline-rich glycoprotein; Flags: Precursor   gi 332658674 gb AEE84074.1  leucine-rich repeat extensin-like protein 5 [Arabidopsis thaliana] | 797  | 857  | 0         | 107.5 | 44.7 | 46.5 | leucine-rich repeat extensin-like protein 5         | gbpln | Arabidopsis thaliana | AT4G18670.1   Symbols:   Leucine-rich repeat (LRR) family protein   chr4:10275918-10278491 REVERSE LENGTH=857                                                                                                                                                                                                                                   | 797  | 857  | 0        | 107.5 | 44.7 | 46.5 |

| Rsa1.0_00107.1.g5246.t1 | #                                                                                                                                                                                                                                                                                                                                                                                                                                                                                                                                                                                                                                                                                                                                                                                                                                                                                                                                                                                                                                                                                                                                                                                                                                                                                                         | #   | #   | #         | #     | #    | #     | -                                               | ---   | ---                  | #                                                                                                                                       | #   | #   | #         | #     | #    |       |
|-------------------------|-----------------------------------------------------------------------------------------------------------------------------------------------------------------------------------------------------------------------------------------------------------------------------------------------------------------------------------------------------------------------------------------------------------------------------------------------------------------------------------------------------------------------------------------------------------------------------------------------------------------------------------------------------------------------------------------------------------------------------------------------------------------------------------------------------------------------------------------------------------------------------------------------------------------------------------------------------------------------------------------------------------------------------------------------------------------------------------------------------------------------------------------------------------------------------------------------------------------------------------------------------------------------------------------------------------|-----|-----|-----------|-------|------|-------|-------------------------------------------------|-------|----------------------|-----------------------------------------------------------------------------------------------------------------------------------------|-----|-----|-----------|-------|------|-------|
| Rsa1.0_00107.1.g5247.t1 | gb[EOA18865.1] hypothetical protein CARUB_v10007488mg, partial [Capsella rubella]                                                                                                                                                                                                                                                                                                                                                                                                                                                                                                                                                                                                                                                                                                                                                                                                                                                                                                                                                                                                                                                                                                                                                                                                                         | 496 | 509 | 0         | 102.6 | 91.1 | 94.6  | hypothetical protein CARUB_v10007488mg, partial | gbpln | Capsella rubella     | AT4G18700.1   Symbols: CIPK12, SnRK3.9, ATWL4, WL4   GBL-interacting protein kinase 12   chr4:10289110-10290579 REVERSE LENGTH=489      | 496 | 489 | 0         | 98.6  | 90.9 | 94.4  |
| Rsa1.0_00107.1.g5248.t1 | ref[XP_002870026.1] hypothetical protein ARALYDRAFT_914806 [Arabidopsis lyrata subsp. lyrata] gi 297315862 gb EFH46285.1                                                                                                                                                                                                                                                                                                                                                                                                                                                                                                                                                                                                                                                                                                                                                                                                                                                                                                                                                                                                                                                                                                                                                                                  | 375 | 380 | 0         | 101.3 | 98.9 | 99.7  | hypothetical protein ARALYDRAFT_914806          | gbpln | Arabidopsis lyrata   | AT4G18710.1   Symbols: BIN2, DWF12, UCU1, ATSK21, SK21   Protein kinase superfamily protein   chr4:10296474-10298913 FORWARD LENGTH=380 | 375 | 380 | 0         | 101.3 | 98.7 | 99.7  |
| Rsa1.0_00107.1.g5249.t1 | ref[NP_191423.1] 60S ribosomal protein L11-2 [Arabidopsis thaliana] gi 18415161 ref NP_567563.1  60S ribosomal protein L11-2 [Arabidopsis thaliana] gi 30694822 ref NP_568649.2  60S ribosomal protein L11-2 [Arabidopsis thaliana] gi 27735235 sp P42794.2 RL112, ARATH RecName: Full=60S ribosomal protein L11-2; AltName: Full=L16 gi 11908058 gb AAG41458.1 AF326876.1 putative ribosomal protein L11 [Arabidopsis thaliana] gi 12642874 gb AAK00379.1 AF339697.1 putative ribosomal protein L11 [Arabidopsis thaliana] gi 14326537 gb AAK60313.1 AF385722.1 AT4g18730/F28A21_140 [Arabidopsis thaliana] gi 7630065 emb CAB88287.1  ribosomal protein L11-like [Arabidopsis thaliana] gi 9758681 dbj BAB09220.1  ribosomal protein L11-like [Arabidopsis thaliana] gi 14517470 gb AAK62625.1  AT4g18730/F28A21_140 [Arabidopsis thaliana] gi 18700224 gb AAL7722.1  AT4g18730/F28A21_140 [Arabidopsis thaliana] gi 21553372 gb AAM62465.1  ribosomal protein L11, cytosolic [Arabidopsis thaliana] gi 21592421 gb AAM64372.1  ribosomal protein L11, cytosolic [Arabidopsis thaliana] gi 22136574 gb AAM91073.1  AT4g18730/F28A21_140 [Arabidopsis thaliana] ref NP_193609.2  Rho termination factor [Arabidopsis thaliana] gi 332658683 gb AEE84083.1  Rho termination factor [Arabidopsis thaliana] | 182 | 182 | 1.00E-102 | 100.0 | 99.5 | 100.0 | 60S ribosomal protein L11-2                     | gbpln | Arabidopsis thaliana | AT5G45775.2   Symbols:   Ribosomal L5P family protein   chr5:18565281-18566496 REVERSE LENGTH=182                                       | 182 | 182 | 1.00E-104 | 100.0 | 99.5 | 100.0 |
| Rsa1.0_00107.1.g5250.t1 | ref NP_193609.2  Rho termination factor [Arabidopsis thaliana] gi 332658683 gb AEE84083.1  Rho termination factor [Arabidopsis thaliana]                                                                                                                                                                                                                                                                                                                                                                                                                                                                                                                                                                                                                                                                                                                                                                                                                                                                                                                                                                                                                                                                                                                                                                  | 230 | 245 | 4.00E-65  | 106.5 | 66.1 | 77.4  | Rho termination factor                          | gbpln | Arabidopsis thaliana | AT4G18740.1   Symbols:   Rho termination factor   chr4:10303543-10304479 REVERSE LENGTH=245                                             | 230 | 245 | 1.00E-67  | 106.5 | 66.1 | 77.4  |
| Rsa1.0_00107.1.g5251.t1 | gb[EOA15340.1] hypothetical protein CARUB_v10004110mg [Capsella rubella]                                                                                                                                                                                                                                                                                                                                                                                                                                                                                                                                                                                                                                                                                                                                                                                                                                                                                                                                                                                                                                                                                                                                                                                                                                  | 869 | 872 | 0         | 100.3 | 86.7 | 92.6  | hypothetical protein CARUB_v10004110mg          | gbpln | Capsella rubella     | AT4G18750.1   Symbols: DOT4   Pentatricopeptide repeat (PPR) superfamily protein   chr4:10304850-10307465 FORWARD LENGTH=871            | 869 | 871 | 0         | 100.2 | 85.7 | 91.4  |
| Rsa1.0_00107.1.g5252.t1 | gb[EOA16660.1] hypothetical protein CARUB_v10004846mg [Capsella rubella]                                                                                                                                                                                                                                                                                                                                                                                                                                                                                                                                                                                                                                                                                                                                                                                                                                                                                                                                                                                                                                                                                                                                                                                                                                  | 456 | 434 | 1.00E-169 | 95.2  | 76.3 | 93.8  | hypothetical protein CARUB_v10004846mg          | gbpln | Capsella rubella     | AT4G18760.1   Symbols: AtRLP51, RLP51   receptor like protein 51   chr4:10308163-10309458 REVERSE LENGTH=431                            | 456 | 431 | 1.00E-167 | 94.5  | 71.7 | 78.7  |
| Rsa1.0_00107.1.g5253.t1 | gb[EOA18242.1] hypothetical protein CARUB_v10006734mg [Capsella rubella]                                                                                                                                                                                                                                                                                                                                                                                                                                                                                                                                                                                                                                                                                                                                                                                                                                                                                                                                                                                                                                                                                                                                                                                                                                  | 421 | 432 | 0         | 102.6 | 87.6 | 94.3  | hypothetical protein CARUB_v10006734mg          | gbpln | Capsella rubella     | AT4G18770.1   Symbols: MYB98, AtMYB98   myb domain protein 98   chr4:10311068-10312557 FORWARD LENGTH=427                               | 421 | 427 | 0         | 101.4 | 86.9 | 93.1  |
| Rsa1.0_00107.1.g5254.t1 | ref XP_002878577.1  protein binding protein [Arabidopsis lyrata subsp. lyrata] gi 297324416 gb EFH54836.1                                                                                                                                                                                                                                                                                                                                                                                                                                                                                                                                                                                                                                                                                                                                                                                                                                                                                                                                                                                                                                                                                                                                                                                                 | 639 | 796 | 1.00E-137 | 124.6 | 46.5 | 60.4  | protein binding protein                         | gbpln | Arabidopsis lyrata   | AT2G21850.1   Symbols:   Cysteine/Histidine-rich C1 domain family protein   chr2:9315268-9317908 FORWARD LENGTH=787                     | 639 | 787 | 1.00E-139 | 123.2 | 46.5 | 59.5  |
| Rsa1.0_00107.1.g5255.t3 | ref XP_002867975.1  hypothetical protein ARALYDRAFT_492979 [Arabidopsis lyrata subsp. lyrata] gi 297313811 gb EFH44234.1                                                                                                                                                                                                                                                                                                                                                                                                                                                                                                                                                                                                                                                                                                                                                                                                                                                                                                                                                                                                                                                                                                                                                                                  | 97  | 214 | 1.00E-40  | 220.6 | 86.6 | 92.8  | hypothetical protein ARALYDRAFT_492979          | gbpln | Arabidopsis lyrata   | AT4G18900.1   Symbols: ATHSGBP, ATRAB11B, ATRABA1D, RABA1d   RAB GTPase homolog A1D   chr4:10320156-10321339 REVERSE LENGTH=214         | 97  | 214 | 2.00E-43  | 220.6 | 86.6 | 92.8  |
| Rsa1.0_00107.1.g5256.t1 | gb[EOA17416.1] hypothetical protein CARUB_v10005719mg [Capsella rubella]                                                                                                                                                                                                                                                                                                                                                                                                                                                                                                                                                                                                                                                                                                                                                                                                                                                                                                                                                                                                                                                                                                                                                                                                                                  | 115 | 214 | 3.00E-59  | 186.1 | 96.5 | 98.3  | hypothetical protein CARUB_v10005719mg          | gbpln | Capsella rubella     | AT4G18800.1   Symbols: ATHSGBP, ATRAB11B, ATRABA1D, RABA1d   RAB GTPase homolog A1D   chr4:10320156-10321339 REVERSE LENGTH=214         | 115 | 214 | 6.00E-62  | 186.1 | 96.5 | 98.3  |

|                         |                                                                                                                                                                                                                                                                                                                                                                                                                                                                                         |      |      |           |       |      |      |                                              |       |                      |                                                                                                                                               |      |      |           |       |      |      |
|-------------------------|-----------------------------------------------------------------------------------------------------------------------------------------------------------------------------------------------------------------------------------------------------------------------------------------------------------------------------------------------------------------------------------------------------------------------------------------------------------------------------------------|------|------|-----------|-------|------|------|----------------------------------------------|-------|----------------------|-----------------------------------------------------------------------------------------------------------------------------------------------|------|------|-----------|-------|------|------|
| Rsa1.0_00107.1.g5257.t1 | ref NP_188381.1  putative F-box/kelch-repeat protein [Arabidopsis thaliana]   gi 75274267 sp Q9LUP4.1 FBK60_ARAT H RecName: Full=Putative F-box/kelch-repeat protein At3g17540   gi 9294141 db BAB02043.1  unnamed protein product [Arabidopsis thaliana]   gi 332642445 gb AEE75966.1  putative F-box/kelch-repeat protein [Arabidopsis thaliana]                                                                                                                                      | 384  | 396  | 2.00E-82  | 103.1 | 49.0 | 65.1 | putative F-box/kelch-repeat protein          | gbpln | Arabidopsis thaliana | AT3G17540.1   Symbols:   F-box and associated interaction domains-containing protein   chr3:6002783-6003973 FORWARD LENGTH=396                | 384  | 396  | 4.00E-85  | 103.1 | 49.0 | 65.1 |
| Rsa1.0_00107.1.g5258.t1 | gb ABV89650.1  transcriptional repressor [Brassica rapa]                                                                                                                                                                                                                                                                                                                                                                                                                                | 598  | 600  | 0         | 100.3 | 92.6 | 95.5 | transcriptional repressor                    | gbpln | Brassica rapa        | AT4G18810.1   Symbols:   NAD(P)-binding Rossmann-fold superfamily protein   chr4:10322622-10325735 REVERSE LENGTH=596                         | 598  | 596  | 0         | 99.7  | 88.8 | 93.5 |
| Rsa1.0_00107.1.g5259.t1 | emb CAB39638.1  RNA-directed DNA polymerase-like protein [Arabidopsis thaliana]   gi 7267666 emb CAB78094.1  RNA-directed DNA polymerase-like protein [Arabidopsis thaliana]                                                                                                                                                                                                                                                                                                            | 372  | 1274 | 4.00E-57  | 342.5 | 37.9 | 54.0 | RNA-directed DNA polymerase-like protein     | gbpln | Arabidopsis thaliana | AT2G06845.1   Symbols:   Beta-galactosidase related protein   chr2:2754666-2756008 FORWARD LENGTH=315                                         | 372  | 315  | 2.00E-41  | 84.7  | 26.1 | 37.4 |
| Rsa1.0_00107.1.g5260.t1 | gb EOA15933.1  hypothetical protein CARUB_v10004027mg [Capsella rubella]                                                                                                                                                                                                                                                                                                                                                                                                                | 1093 | 1115 | 0         | 102.0 | 85.5 | 90.6 | hypothetical protein CARUB_v10004027mg       | gbpln | Capsella rubella     | AT4G18920.1   Symbols:   AAA-type ATPase family protein   chr4:10330371-10334090 FORWARD LENGTH=1097                                          | 1093 | 1097 | 0         | 100.4 | 84.7 | 89.5 |
| Rsa1.0_00107.1.g5261.t1 | ref XP_002870022.1  ATOFP5/OPF5 [Arabidopsis lyrata subsp. lyrata]   gi 297315858 gb EFH46281.1  ATOFP5/OPF5 [Arabidopsis lyrata subsp. lyrata]                                                                                                                                                                                                                                                                                                                                         | 332  | 351  | 1.00E-155 | 105.7 | 83.1 | 92.5 | ATOFP5/OPF5                                  | gbpln | Arabidopsis lyrata   | AT4G18830.1   Symbols: ATOFP5, OPF5   ovate family protein 5   chr4:10337449-10338498 FORWARD LENGTH=349                                      | 332  | 349  | 1.00E-156 | 105.1 | 82.5 | 91.9 |
| Rsa1.0_00107.1.g5262.t1 | gb EOA16398.1  hypothetical protein CARUB_v10004552mg [Capsella rubella]                                                                                                                                                                                                                                                                                                                                                                                                                | 538  | 537  | 0         | 99.8  | 81.4 | 90.7 | hypothetical protein CARUB_v10004552mg       | gbpln | Capsella rubella     | AT4G18840.1   Symbols:   Pentatricopeptide repeat (PPR-like) superfamily protein   chr4:10338719-10340356 REVERSE LENGTH=545                  | 538  | 545  | 0         | 101.3 | 76.2 | 84.8 |
| Rsa1.0_00107.1.g5263.t1 | ref XP_002870008.1  hypothetical protein ARALYDRAFT_492961 [Arabidopsis lyrata subsp. lyrata]   gi 297315844 gb EFH46267.1  hypothetical protein ARALYDRAFT_492961 [Arabidopsis lyrata subsp. lyrata]                                                                                                                                                                                                                                                                                   | 111  | 107  | 9.00E-35  | 96.4  | 71.2 | 77.5 | hypothetical protein ARALYDRAFT_492961       | gbpln | Arabidopsis lyrata   | AT4G18980.1   Symbols: AtS40-3   AtS40-3   chr4:10398973-10399293 FORWARD LENGTH=106                                                          | 111  | 106  | 4.00E-34  | 95.5  | 70.3 | 75.7 |
| Rsa1.0_00107.1.g5264.t1 | gb EOA17974.1  hypothetical protein CARUB_v10006389mg [Capsella rubella]                                                                                                                                                                                                                                                                                                                                                                                                                | 352  | 361  | 1.00E-172 | 102.6 | 87.5 | 93.5 | hypothetical protein CARUB_v10006389mg       | gbpln | Capsella rubella     | AT4G18990.1   Symbols: XTH29   xyloglucan endotransglucosylase/hydrolase 29   chr4:10401941-10404248 REVERSE LENGTH=357                       | 352  | 357  | 1.00E-171 | 101.4 | 88.6 | 93.8 |
| Rsa1.0_00107.1.g5265.t1 | gb EOA16327.1  hypothetical protein CARUB_v10004477mg [Capsella rubella]                                                                                                                                                                                                                                                                                                                                                                                                                | 782  | 566  | 0         | 72.4  | 59.7 | 66.0 | hypothetical protein CARUB_v10004477mg       | gbpln | Capsella rubella     | AT4G19010.1   Symbols:   AMP-dependent synthetase and ligase family protein   chr4:10411715-10414221 REVERSE LENGTH=566                       | 782  | 566  | 0         | 72.4  | 59.8 | 66.0 |
| Rsa1.0_00107.1.g5266.t1 | ref NP_193637.2  chromomethylase 2 [Arabidopsis thaliana]   gi 322510132 sp Q94F87.3 CMT2_ARAT H RecName: Full=DNA (cytosine-5)-methyltransferase CMT2; AltName: Full=Chromomethylase 2; AltName: Full=Protein CHROMOMETHYLASE 2   gi 332658726 gb AEE84126.1  chromomethylase 2 [Arabidopsis thaliana]                                                                                                                                                                                 | 1104 | 1295 | 0         | 117.3 | 72.4 | 81.5 | chromomethylase 2                            | gbpln | Arabidopsis thaliana | AT4G19020.1   Symbols: CMT2   chromomethylase 2   chr4:10414526-10420936 FORWARD LENGTH=1295                                                  | 1104 | 1295 | 0         | 117.3 | 72.4 | 81.5 |
| Rsa1.0_00107.1.g5267.t1 | ref XP_002867959.1  hypothetical protein ARALYDRAFT_492951 [Arabidopsis lyrata subsp. lyrata]   gi 297313795 gb EFH44218.1  hypothetical protein ARALYDRAFT_492951 [Arabidopsis lyrata subsp. lyrata]                                                                                                                                                                                                                                                                                   | 728  | 718  | 0         | 98.6  | 93.7 | 96.0 | hypothetical protein ARALYDRAFT_492951       | gbpln | Arabidopsis lyrata   | AT4G19040.1   Symbols: EDR2   ENHANCED DISEASE RESISTANCE 2   chr4:10431799-10437171 REVERSE LENGTH=718                                       | 728  | 718  | 0         | 98.6  | 93.4 | 95.7 |
| Rsa1.0_00107.1.g5268.t1 | gb AAG51783.1 AC079679.3 reverse transcriptase, putative; 16838-20266 [Arabidopsis thaliana]                                                                                                                                                                                                                                                                                                                                                                                            | 535  | 1142 | 1.00E-115 | 213.5 | 42.4 | 54.2 | reverse transcriptase, putative; 16838-20266 | gbpln | Arabidopsis thaliana | AT4G20900.1   Symbols:   Ribonuclease H-like superfamily protein   chr4:14333528-14335255 FORWARD LENGTH=575                                  | 535  | 575  | 2.00E-46  | 107.5 | 26.5 | 44.1 |
| Rsa1.0_00107.1.g5269.t1 | ref NP_193641.1  putative disease resistance protein [Arabidopsis thaliana]   gi 46395783 sp Q84WD3.2 DRL26_ARAT H RecName: Full=Probable disease resistance protein At4g19060   gi 2832635 emb CAA16764.1  hypothetical protein [Arabidopsis thaliana]   gi 7268701 emb CAB78908.1  hypothetical protein [Arabidopsis thaliana]   gi 63003754 gb AAV25406.1  At4g19060 [Arabidopsis thaliana]   gi 332658735 gb AEE84135.1  putative disease resistance protein [Arabidopsis thaliana] | 350  | 383  | 1.00E-109 | 109.4 | 61.1 | 72.3 | putative disease resistance protein          | gbpln | Arabidopsis thaliana | AT4G19060.1   Symbols:   P-loop containing nucleoside triphosphate hydrolases superfamily protein   chr4:10445082-10446233 REVERSE LENGTH=383 | 350  | 383  | 1.00E-112 | 109.4 | 61.1 | 72.3 |

|                         |                                                                                                                                                                                                     |      |      |           |       |      |      |                                           |       |                      |                                                                                                                                                                                                                                                                                     |      |      |           |       |      |      |
|-------------------------|-----------------------------------------------------------------------------------------------------------------------------------------------------------------------------------------------------|------|------|-----------|-------|------|------|-------------------------------------------|-------|----------------------|-------------------------------------------------------------------------------------------------------------------------------------------------------------------------------------------------------------------------------------------------------------------------------------|------|------|-----------|-------|------|------|
| Rsa1.0_00107.1.g5270.t1 | emb[CAA16762.1] putative protein [Arabidopsis thaliana]<br>gi 7268700 emb CAB78907.1  putative protein [Arabidopsis thaliana]                                                                       | 1153 | 1405 | 0         | 121.9 | 67.7 | 81.0 | putative protein                          | gbpln | Arabidopsis thaliana | AT4G19050.1   Symbols:   NB-ARC domain-containing disease resistance protein   chr4:10440102-10443786 REVERSE LENGTH=1201                                                                                                                                                           | 1153 | 1201 | 0         | 104.2 | 54.1 | 63.0 |
| Rsa1.0_00107.1.g5271.t1 | ref XP_002867953.1  early-responsive to dehydration 3 [Arabidopsis lyrata subsp. lyrata] gi 297313789 gb EFH44212.1  early-responsive to dehydration 3 [Arabidopsis lyrata subsp. lyrata]           | 600  | 600  | 0         | 100.0 | 94.7 | 98.5 | early-responsive to dehydration 3         | gbpln | Arabidopsis lyrata   | AT4G19120.2   Symbols: ERD3   S-adenosyl-L-methionine-dependent methyltransferases superfamily protein   chr4:10460665-10463034 REVERSE LENGTH=600                                                                                                                                  | 600  | 600  | 0         | 100.0 | 93.7 | 98.3 |
| Rsa1.0_00107.1.g5272.t1 | gb EOA17088.1  hypothetical protein CARUB_v10005338mg [Capsella rubella]                                                                                                                            | 287  | 304  | 1.00E-127 | 105.9 | 81.5 | 91.6 | hypothetical protein CARUB_v10005338mg    | gbpln | Capsella rubella     | AT4G19140.1   Symbols:   unknown protein; Has 30201 Blast hits to 17322 proteins in 780 species: Archae - 12; Bacteria - 1396; Metazoa - 17338; Fungi - 3422; Plants - 5037; Viruses - 0; Other Eukaryotes - 2996 (source: NCBI BLINK).   chr4:10469830-10471275 FORWARD LENGTH=303 | 287  | 303  | 1.00E-128 | 105.6 | 80.5 | 89.2 |
| Rsa1.0_00107.1.g5273.t1 | gb EOA17266.1  hypothetical protein CARUB_v10005540mg [Capsella rubella]                                                                                                                            | 254  | 258  | 6.00E-99  | 101.6 | 76.0 | 81.5 | hypothetical protein CARUB_v10005540mg    | gbpln | Capsella rubella     | AT4G19150.1   Symbols:   Ankyrin repeat family protein   chr4:10471578-10472677 REVERSE LENGTH=243                                                                                                                                                                                  | 254  | 243  | 2.00E-96  | 95.7  | 75.2 | 79.9 |
| Rsa1.0_00107.1.g5274.t1 | dbj BAA97287.1  retroelement pol polyprotein-like [Arabidopsis thaliana]                                                                                                                            | 1474 | 1491 | 0         | 101.2 | 61.3 | 75.3 | retroelement pol polyprotein-like         | gbpln | Arabidopsis thaliana | AT4G23160.1   Symbols: CRK8   cysteine-rich RLK (RECEPTOR-like protein kinase) 8   chr4:12129485-12134086 FORWARD LENGTH=1262                                                                                                                                                       | 1474 | 1262 | 2.33E-156 | 85.6  | 17.2 | 24.1 |
| Rsa1.0_00107.1.g5275.t1 | ref NP_974572.1  uncharacterized protein [Arabidopsis thaliana] gi 332658751 gb AEE84151.1  uncharacterized protein AT4G19160 [Arabidopsis thaliana]                                                | 467  | 453  | 1.00E-178 | 97.0  | 73.4 | 81.4 | uncharacterized protein                   | gbpln | Arabidopsis thaliana | AT4G19160.2   Symbols:   unknown protein; Has 35333 Blast hits to 34131 proteins in 2444 species: Archae - 798; Bacteria - 22429; Metazoa - 974; Fungi - 991; Plants - 531; Viruses - 0; Other Eukaryotes - 9610 (source: NCBI BLINK).   chr4:10477772-10479947 FORWARD LENGTH=453  | 467  | 453  | 1.00E-180 | 97.0  | 73.4 | 81.4 |
| Rsa1.0_00107.1.g5276.t1 | dbj BAJ34120.1  unnamed protein product [Thellungiella halophila]                                                                                                                                   | 596  | 602  | 0         | 101.0 | 87.6 | 94.1 | unnamed protein product                   | ----  | ----                 | AT4G19170.1   Symbols: NCED4, CCD4   nine-cis-epoxycarotenoid dioxygenase 4   chr4:10481835-10483622 FORWARD LENGTH=595                                                                                                                                                             | 596  | 595  | 0         | 99.8  | 84.1 | 90.6 |
| Rsa1.0_00107.1.g5277.t1 | ref XP_002867950.1  nucleoside phosphatase family protein [Arabidopsis lyrata subsp. lyrata] gi 297313786 gb EFH44209.1  nucleoside phosphatase family protein [Arabidopsis lyrata subsp. lyrata]   | 740  | 741  | 0         | 100.1 | 87.7 | 92.7 | nucleoside phosphatase family protein     | gbpln | Arabidopsis lyrata   | AT4G19180.1   Symbols:   GDA1/CD39 nucleoside phosphatase family protein   chr4:10485518-10487868 REVERSE LENGTH=740                                                                                                                                                                | 740  | 740  | 0         | 100.0 | 86.9 | 92.4 |
| Rsa1.0_00107.1.g5278.t1 | gb EOA16763.1  hypothetical protein CARUB_v10004980mg [Capsella rubella]                                                                                                                            | 399  | 397  | 0         | 99.5  | 87.7 | 93.7 | hypothetical protein CARUB_v10004980mg    | gbpln | Capsella rubella     | AT4G19185.1   Symbols:   nodulin MtN21 /EamA-like transporter family protein   chr4:10489201-10491488 REVERSE LENGTH=398                                                                                                                                                            | 399  | 398  | 0         | 99.7  | 88.7 | 93.7 |
| Rsa1.0_00107.1.g5279.t1 | ref XP_002869996.1  putative protein [Arabidopsis lyrata subsp. lyrata] gi 297315832 gb EFH46255.1  putative protein [Arabidopsis lyrata subsp. lyrata]                                             | 574  | 1251 | 0         | 217.9 | 80.8 | 88.5 | putative protein                          | gbpln | Arabidopsis lyrata   | AT4G19190.1   Symbols:   zinc knuckle (OHC-type) family protein   chr4:10493323-10495969 FORWARD LENGTH=595                                                                                                                                                                         | 574  | 595  | 0         | 103.7 | 81.0 | 88.9 |
| Rsa1.0_00107.1.g5280.t1 | ref XP_002869995.1  expressed protein [Arabidopsis lyrata subsp. lyrata] gi 297315831 gb EFH46254.1  expressed protein [Arabidopsis lyrata subsp. lyrata]                                           | 171  | 171  | 4.00E-19  | 100.0 | 59.6 | 60.8 | expressed protein                         | gbpln | Arabidopsis lyrata   | #                                                                                                                                                                                                                                                                                   | #    | #    | #         | #     | #    | #    |
| Rsa1.0_00107.1.g5281.t1 | ref XP_002869937.1  transcription initiation factor [Arabidopsis lyrata subsp. lyrata] gi 297315773 gb EFH46196.1  transcription initiation factor [Arabidopsis lyrata subsp. lyrata]               | 431  | 483  | 1.00E-136 | 112.1 | 60.8 | 73.5 | transcription initiation factor           | gbpln | Arabidopsis lyrata   | AT4G20340.1   Symbols:   Transcription factor TFIIE, alpha subunit   chr4:10985011-10987748 FORWARD LENGTH=475                                                                                                                                                                      | 431  | 475  | 1.00E-133 | 110.2 | 62.9 | 76.1 |
| Rsa1.0_00107.1.g5282.t1 | ref XP_002867886.1  hypothetical protein ARALYDRAFT_492835 [Arabidopsis lyrata subsp. lyrata] gi 297313722 gb EFH44145.1  hypothetical protein ARALYDRAFT_492835 [Arabidopsis lyrata subsp. lyrata] | 290  | 286  | 1.00E-114 | 98.6  | 74.1 | 85.9 | hypothetical protein ARALYDRAFT_492835    | gbpln | Arabidopsis lyrata   | AT4G20330.1   Symbols:   Transcription initiation factor TFIIE, beta subunit   chr4:10982683-10984039 REVERSE LENGTH=286                                                                                                                                                            | 290  | 286  | 1.00E-111 | 98.6  | 73.1 | 84.5 |
| Rsa1.0_00107.1.g5283.t1 | gb AGC70150.1  ABC transporter E family member 2 protein [Cardamine hirsuta]                                                                                                                        | 605  | 605  | 0         | 100.0 | 97.0 | 99.0 | ABC transporter E family member 2 protein | gbpln | Cardamine hirsuta    | AT4G19210.1   Symbols: ATRLI2, RL12   RNAse I inhibitor protein 2   chr4:10501906-10504776 FORWARD LENGTH=605                                                                                                                                                                       | 605  | 605  | 0         | 100.0 | 96.2 | 98.5 |
| Rsa1.0_00107.1.g5284.t1 | ref XP_002863741.1  hypothetical protein ARALYDRAFT_917455 [Arabidopsis lyrata subsp. lyrata] gi 297309576 gb EFH40000.1  hypothetical protein ARALYDRAFT_917455 [Arabidopsis lyrata subsp. lyrata] | 284  | 390  | 2.00E-38  | 137.3 | 29.6 | 43.0 | hypothetical protein ARALYDRAFT_917455    | gbpln | Arabidopsis lyrata   | AT1G60720.1   Symbols:   RNA-directed DNA polymerase (reverse transcriptase)-related family protein   chr1:22357072-22357941 FORWARD LENGTH=289                                                                                                                                     | 284  | 289  | 4.00E-35  | 101.8 | 32.4 | 48.9 |

|                         |                                                                                                                                                                                                                                                                                                                                                                                                                                                                                                                                                                                                                                                                                  |      |      |           |       |      |      |                                                |       |                      |                                                                                                                                                                                                                                                                                                                                                                                                                                                                        |      |     |           |       |      |      |
|-------------------------|----------------------------------------------------------------------------------------------------------------------------------------------------------------------------------------------------------------------------------------------------------------------------------------------------------------------------------------------------------------------------------------------------------------------------------------------------------------------------------------------------------------------------------------------------------------------------------------------------------------------------------------------------------------------------------|------|------|-----------|-------|------|------|------------------------------------------------|-------|----------------------|------------------------------------------------------------------------------------------------------------------------------------------------------------------------------------------------------------------------------------------------------------------------------------------------------------------------------------------------------------------------------------------------------------------------------------------------------------------------|------|-----|-----------|-------|------|------|
| Rsa1.0_00107.1.g5285.t2 | gb AAM82604.1 AF525305.2 putative AP endonuclease/reverse transcriptase [Brassica napus]<br>ref NP_567581.1  abscisic acid 8'-hydroxylase 1 [Arabidopsis thaliana]<br>gi 75306306 sp Q949P1.1 ABAH1_ARAT<br>H RecName: Full=Abscisic acid 8'-hydroxylase 1; Short=ABA 8'-hydroxylase 1; AltName: Full=Cytochrome P450 707A1<br>gi 15293093 gb AAK93657.1  putative cytochrome P450 protein [Arabidopsis thaliana]<br>gi 20259299 gb AAM14385.1  putative cytochrome P450 protein [Arabidopsis thaliana]<br>gi 46401564 dbj BAD16629.1  cytochrome P450 monooxygenase [Arabidopsis thaliana]<br>gi 332658762 gb AEE84162.1  abscisic acid 8'-hydroxylase 1 [Arabidopsis thaliana] | 1120 | 1214 | 0         | 108.4 | 48.3 | 64.1 | putative AP endonuclease/reverse transcriptase | gbpln | Brassica napus       | AT1G43760.1   Symbols:   DNase I-like superfamily protein   chr1:16528880-16531065 REVERSE LENGTH=626                                                                                                                                                                                                                                                                                                                                                                  | 1120 | 626 | 6.00E-74  | 55.9  | 13.1 | 20.0 |
| Rsa1.0_00107.1.g5286.t1 | gi 15293093 gb AAK93657.1  putative cytochrome P450 protein [Arabidopsis thaliana]<br>gi 20259299 gb AAM14385.1  putative cytochrome P450 protein [Arabidopsis thaliana]<br>gi 46401564 dbj BAD16629.1  cytochrome P450 monooxygenase [Arabidopsis thaliana]<br>gi 332658762 gb AEE84162.1  abscisic acid 8'-hydroxylase 1 [Arabidopsis thaliana]                                                                                                                                                                                                                                                                                                                                | 467  | 467  | 0         | 100.0 | 92.7 | 96.1 | abscisic acid 8'-hydroxylase 1                 | gbpln | Arabidopsis thaliana | AT4G19230.1   Symbols: CYP707A1   cytochrome P450, family 707, subfamily A, polypeptide 1   chr4:10521524-10523517 FORWARD LENGTH=467                                                                                                                                                                                                                                                                                                                                  | 467  | 467 | 0         | 100.0 | 92.7 | 96.1 |
| Rsa1.0_00107.1.g5287.t1 | gb EOA17520.1  hypothetical protein CARUB_v10005853mg [Capsella rubella]                                                                                                                                                                                                                                                                                                                                                                                                                                                                                                                                                                                                         | 180  | 180  | 3.00E-71  | 100.0 | 72.2 | 83.9 | hypothetical protein CARUB_v10005853mg         | gbpln | Capsella rubella     | AT4G19350.1   Symbols: EMB3006   embryo defective 3006   chr4:10562214-10563676 REVERSE LENGTH=180                                                                                                                                                                                                                                                                                                                                                                     | 180  | 180 | 1.00E-67  | 100.0 | 66.1 | 81.7 |
| Rsa1.0_00107.1.g5288.t1 | #                                                                                                                                                                                                                                                                                                                                                                                                                                                                                                                                                                                                                                                                                | #    | #    | #         | #     | #    | #    | -                                              | ----  | ----                 | #                                                                                                                                                                                                                                                                                                                                                                                                                                                                      | #    | #   | #         | #     | #    | #    |
| Rsa1.0_00107.1.g5289.t1 | gb AAM62450.1  unknown [Arabidopsis thaliana]                                                                                                                                                                                                                                                                                                                                                                                                                                                                                                                                                                                                                                    | 167  | 160  | 3.00E-53  | 95.8  | 61.7 | 74.9 | unknown                                        | gbpln | Arabidopsis thaliana | AT4G19430.1   Symbols:   unknown protein; FUNCTIONS IN: molecular_function unknown; INVOLVED IN: biological_process unknown; LOCATED IN: chloroplast; EXPRESSED IN: 17 plant structures; EXPRESSED DURING: 13 growth stages; Has 30201 Blast hits to 17322 proteins in 780 species; Archae - 12; Bacteria - 1396; Metazoa - 17338; Fungi - 3422; Plants - 5037; Viruses - 0; Other Eukaryotes - 2996 (source: NCBI BLINK).   chr4:10598606-10599088 REVERSE LENGTH=160 | 167  | 160 | 2.00E-54  | 95.8  | 60.5 | 73.7 |
| Rsa1.0_00107.1.g5290.t1 | #                                                                                                                                                                                                                                                                                                                                                                                                                                                                                                                                                                                                                                                                                | #    | #    | #         | #     | #    | #    | -                                              | ----  | ----                 | #                                                                                                                                                                                                                                                                                                                                                                                                                                                                      | #    | #   | #         | #     | #    | #    |
| Rsa1.0_00108.1.g5291.t1 | gb EOA15965.1  hypothetical protein CARUB_v10004060mg [Capsella rubella]                                                                                                                                                                                                                                                                                                                                                                                                                                                                                                                                                                                                         | 968  | 996  | 0         | 102.9 | 86.3 | 92.4 | hypothetical protein CARUB_v10004060mg         | gbpln | Capsella rubella     | AT4G20270.1   Symbols: BAM3   Leucine-rich receptor-like protein kinase family protein   chr4:10949822-10952924 FORWARD LENGTH=992                                                                                                                                                                                                                                                                                                                                     | 968  | 992 | 0         | 102.5 | 85.0 | 91.4 |
| Rsa1.0_00108.1.g5292.t1 | ref XP_002869942.1  predicted protein [Arabidopsis lyrata subsp. lyrata]<br>gi 297315778 gb EFH46201.1  predicted protein [Arabidopsis lyrata subsp. lyrata]                                                                                                                                                                                                                                                                                                                                                                                                                                                                                                                     | 212  | 211  | 2.00E-68  | 99.5  | 77.8 | 83.0 | predicted protein                              | gbpln | Arabidopsis lyrata   | AT4G20280.1   Symbols: TAF11   TBP-associated factor 11   chr4:10953792-10954664 FORWARD LENGTH=210                                                                                                                                                                                                                                                                                                                                                                    | 212  | 210 | 1.00E-67  | 99.1  | 76.4 | 83.5 |
| Rsa1.0_00108.1.g5293.t1 | gb EOA16922.1  hypothetical protein CARUB_v10005146mg [Capsella rubella]                                                                                                                                                                                                                                                                                                                                                                                                                                                                                                                                                                                                         | 160  | 352  | 9.00E-31  | 220.0 | 60.6 | 66.3 | hypothetical protein CARUB_v10005146mg         | gbpln | Capsella rubella     | AT4G20300.2   Symbols:   Protein of unknown function (DUF1639)   chr4:10955813-10958865 FORWARD LENGTH=352                                                                                                                                                                                                                                                                                                                                                             | 160  | 352 | 8.00E-33  | 220.0 | 61.9 | 68.1 |
| Rsa1.0_00108.1.g5294.t1 | gb AAM63055.1  unknown [Arabidopsis thaliana]                                                                                                                                                                                                                                                                                                                                                                                                                                                                                                                                                                                                                                    | 187  | 174  | 1.00E-74  | 93.0  | 79.7 | 85.0 | unknown                                        | gbpln | Arabidopsis thaliana | AT4G20300.2   Symbols:   Protein of unknown function (DUF1639)   chr4:10955813-10958865 FORWARD LENGTH=352                                                                                                                                                                                                                                                                                                                                                             | 187  | 352 | 7.00E-77  | 188.2 | 79.7 | 84.5 |
| Rsa1.0_00108.1.g5295.t1 | ref NP_001154255.1  Peptidase M50 family protein [Arabidopsis thaliana]<br>gi 332658903 gb AEE84303.1  Peptidase M50 family protein [Arabidopsis thaliana]                                                                                                                                                                                                                                                                                                                                                                                                                                                                                                                       | 513  | 488  | 0         | 95.1  | 76.8 | 83.0 | Peptidase M50 family protein                   | gbpln | Arabidopsis thaliana | AT4G20310.2   Symbols:   Peptidase M50 family protein   chr4:10961639-10963690 FORWARD LENGTH=488                                                                                                                                                                                                                                                                                                                                                                      | 513  | 488 | 0         | 95.1  | 76.8 | 83.0 |
| Rsa1.0_00108.1.g5296.t1 | #                                                                                                                                                                                                                                                                                                                                                                                                                                                                                                                                                                                                                                                                                | #    | #    | #         | #     | #    | #    | -                                              | ----  | ----                 | #                                                                                                                                                                                                                                                                                                                                                                                                                                                                      | #    | #   | #         | #     | #    | #    |
| Rsa1.0_00108.1.g5297.t1 | #                                                                                                                                                                                                                                                                                                                                                                                                                                                                                                                                                                                                                                                                                | #    | #    | #         | #     | #    | #    | -                                              | ----  | ----                 | #                                                                                                                                                                                                                                                                                                                                                                                                                                                                      | #    | #   | #         | #     | #    | #    |
| Rsa1.0_00108.1.g5298.t1 | ref NP_001078412.2  ribonuclease H2 subunit B [Arabidopsis thaliana]<br>gi 332658907 gb AEE84307.1  ribonuclease H2 subunit B domain-containing protein [Arabidopsis thaliana]                                                                                                                                                                                                                                                                                                                                                                                                                                                                                                   | 498  | 277  | 1.00E-125 | 55.6  | 44.6 | 47.0 | ribonuclease H2 subunit B                      | gbpln | Arabidopsis thaliana | AT4G20325.1   Symbols:   FUNCTIONS IN: molecular_function unknown; INVOLVED IN: biological_process unknown; LOCATED IN: nucleus; CONTAINS InterPro DOMAIN/s: Ribonuclease H2, subunit B (InterPro:IPR019024); Has 30201 Blast hits to 17322 proteins in 780 species; Archae - 12; Bacteria - 1396; Metazoa - 17338; Fungi - 3422; Plants - 5037; Viruses - 0; Other Eukaryotes - 2996 (source: NCBI BLINK).   chr4:10980124-10982426 FORWARD LENGTH=277                | 498  | 277 | 1.00E-127 | 55.6  | 44.6 | 47.0 |
| Rsa1.0_00108.1.g5299.t1 | gb EOA18080.1  hypothetical protein CARUB_v10006542mg [Capsella rubella]                                                                                                                                                                                                                                                                                                                                                                                                                                                                                                                                                                                                         | 472  | 480  | 0         | 101.7 | 94.1 | 95.3 | hypothetical protein CARUB_v10006542mg         | gbpln | Capsella rubella     | AT4G20360.1   Symbols: ATRAB8D, ATRABE1B, RABE1b   RAB GTPase homolog E1B   chr4:10990036-10991466 FORWARD LENGTH=476                                                                                                                                                                                                                                                                                                                                                  | 472  | 476 | 0         | 100.8 | 92.4 | 94.7 |



|                         |                                                                                                                                                                                                                                                                                                                                                                                                                                                                                                                                                                                                |     |     |           |       |      |      |                                                  |       |                      |                                                                                                                             |     |     |           |       |      |      |
|-------------------------|------------------------------------------------------------------------------------------------------------------------------------------------------------------------------------------------------------------------------------------------------------------------------------------------------------------------------------------------------------------------------------------------------------------------------------------------------------------------------------------------------------------------------------------------------------------------------------------------|-----|-----|-----------|-------|------|------|--------------------------------------------------|-------|----------------------|-----------------------------------------------------------------------------------------------------------------------------|-----|-----|-----------|-------|------|------|
| Rsa1.0_00108.1.g5300.t7 | gb ADK63407.1  zinc finger protein [Brassica rapa]                                                                                                                                                                                                                                                                                                                                                                                                                                                                                                                                             | 307 | 191 | 2.00E-94  | 62.2  | 58.6 | 59.3 | zinc finger protein                              | gbpln | Brassica rapa        | AT4G20380.7   Symbols: LSD1   LSD1 zinc finger family protein   chr4:11005012-11006438 FORWARD LENGTH=189                   | 307 | 189 | 7.00E-71  | 61.6  | 49.2 | 53.7 |
| Rsa1.0_00108.1.g5301.t1 | sp Q56XW8.2 FBL30_ARATH RecName: Full=F-box/LRR-repeat protein At1g48400                                                                                                                                                                                                                                                                                                                                                                                                                                                                                                                       | 439 | 487 | 1.00E-106 | 110.9 | 51.7 | 66.5 | RecName: Full=F-box/LRR-repeat protein At1g48400 | ----  | ----                 | AT1G48390.1   Symbols:   RNI-like superfamily protein   chr1:17879448-17880903 REVERSE LENGTH=413                           | 439 | 413 | 2.00E-86  | 94.1  | 49.7 | 60.4 |
| Rsa1.0_00108.1.g5302.t1 | #                                                                                                                                                                                                                                                                                                                                                                                                                                                                                                                                                                                              | #   | #   | #         | #     | #    | #    | -                                                | ----  | ----                 | #                                                                                                                           | #   | #   | #         | #     | #    | #    |
| Rsa1.0_00108.1.g5303.t1 | sp Q56XW8.2 FBL30_ARATH RecName: Full=F-box/LRR-repeat protein At1g48400                                                                                                                                                                                                                                                                                                                                                                                                                                                                                                                       | 491 | 487 | 1.00E-145 | 99.2  | 62.5 | 73.7 | RecName: Full=F-box/LRR-repeat protein At1g48400 | ----  | ----                 | AT1G48400.1   Symbols:   F-box/RNI-like/FBD-like domains-containing protein   chr1:17882136-17883855 REVERSE LENGTH=513     | 491 | 513 | 1.00E-147 | 104.5 | 62.1 | 73.3 |
| Rsa1.0_00108.1.g5304.t1 | #                                                                                                                                                                                                                                                                                                                                                                                                                                                                                                                                                                                              | #   | #   | #         | #     | #    | #    | -                                                | ----  | ----                 | #                                                                                                                           | #   | #   | #         | #     | #    | #    |
| Rsa1.0_00108.1.g5305.t1 | ref XP_002869932.1  transcription factor jumonji family protein [Arabidopsis lyrata subsp. lyrata]                                                                                                                                                                                                                                                                                                                                                                                                                                                                                             | 980 | 948 | 0         | 96.7  | 76.1 | 83.5 | transcription factor jumonji family protein      | gbpln | Arabidopsis lyrata   | AT4G20400.1   Symbols: JMJ14, PKDM7B   JUMONJI 14   chr4:11009004-11013588 FORWARD LENGTH=954                               | 980 | 954 | 0         | 97.3  | 75.8 | 82.7 |
| Rsa1.0_00108.1.g5306.t1 | gb EOA17129.1  hypothetical protein CARUB_v10005391mg [Capsella rubella]                                                                                                                                                                                                                                                                                                                                                                                                                                                                                                                       | 291 | 291 | 1.00E-160 | 100.0 | 94.2 | 98.3 | hypothetical protein CARUB_v10005391mg           | gbpln | Capsella rubella     | AT4G20410.1   Symbols: GSNAP, GAMMA-SNAP   gamma-soluble NSF attachment protein   chr4:11014099-11016454 REVERSE LENGTH=291 | 291 | 291 | 1.00E-162 | 100.0 | 93.8 | 97.9 |
| Rsa1.0_00108.1.g5307.t1 | gb ABA00707.1  putative tapetum-specific A3 [Brassica napus]                                                                                                                                                                                                                                                                                                                                                                                                                                                                                                                                   | 140 | 139 | 1.00E-48  | 99.3  | 72.9 | 81.4 | putative tapetum-specific A3                     | gbpln | Brassica napus       | AT4G20420.1   Symbols:   Tapetum specific protein TAP35/TAP44   chr4:11017041-11017469 FORWARD LENGTH=142                   | 140 | 142 | 4.00E-35  | 101.4 | 62.1 | 74.3 |
| Rsa1.0_00108.1.g5308.t1 | ref XP_002867881.1  subtilase family protein [Arabidopsis lyrata subsp. lyrata] gi 297315768 gb EFH46191.1  transcription factor jumonji family protein [Arabidopsis lyrata subsp. lyrata]                                                                                                                                                                                                                                                                                                                                                                                                     | 850 | 857 | 0         | 100.8 | 89.8 | 94.6 | subtilase family protein                         | gbpln | Arabidopsis lyrata   | AT4G20430.1   Symbols:   Subtilase family protein   chr4:11017656-11021105 REVERSE LENGTH=856                               | 850 | 856 | 0         | 100.7 | 89.1 | 93.5 |
| Rsa1.0_00108.1.g5309.t1 | dbj BAD43836.1  unknown protein [Arabidopsis thaliana]                                                                                                                                                                                                                                                                                                                                                                                                                                                                                                                                         | 215 | 254 | 6.00E-70  | 118.1 | 74.0 | 76.7 | unknown protein                                  | gbpln | Arabidopsis thaliana | AT5G44500.2   Symbols:   Small nuclear ribonucleoprotein family protein   chr5:17927505-17928269 FORWARD LENGTH=254         | 215 | 254 | 4.00E-69  | 118.1 | 72.1 | 74.9 |
| Rsa1.0_00108.1.g5310.t1 | ref NP_193779.2  putative UDP-arabinose 4-epimerase 3 [Arabidopsis thaliana] gi 332278213 sp Q9SUN3.3 ARAE3 ARATH RecName: Full=Probable UDP-arabinose 4-epimerase 3; AltName: Full=UDP-D-xylose 4-epimerase 3 gi 332658935 gb AEE84335.1  putative UDP-arabinose 4-epimerase 3 [Arabidopsis thaliana]                                                                                                                                                                                                                                                                                         | 607 | 411 | 0         | 67.7  | 62.9 | 64.3 | putative UDP-arabinose 4-epimerase 3             | gbpln | Arabidopsis thaliana | AT4G20460.1   Symbols:   NAD(P)-binding Rossmann-fold superfamily protein   chr4:11029762-11031765 REVERSE LENGTH=411       | 607 | 411 | 0         | 67.7  | 62.9 | 64.3 |
| Rsa1.0_00108.1.g5311.t1 | ref NP_193806.1  pentatricopeptide repeat-containing protein [Arabidopsis thaliana] gi 75211707 sp Q9SVH3.1 PP328_ARATH RecName: Full=Pentatricopeptide repeat-containing protein At4g20740 gi 5262214 emb CAB45840.1  putative protein [Arabidopsis thaliana] gi 7268870 emb CAB79074.1  putative protein [Arabidopsis thaliana] gi 332658957 gb AEE84357.1  pentatricopeptide repeat-containing protein [Arabidopsis thaliana]                                                                                                                                                               | 975 | 727 | 0         | 74.6  | 59.6 | 64.7 | pentatricopeptide repeat-containing protein      | gbpln | Arabidopsis thaliana | AT4G20740.1   Symbols:   Pentatricopeptide repeat (PPR-like) superfamily protein   chr4:1126151-1128334 FORWARD LENGTH=727  | 975 | 727 | 0         | 74.6  | 59.6 | 64.7 |
| Rsa1.0_00108.1.g5312.t1 | gb EOA18794.1  hypothetical protein CARUB_v10007408mg [Capsella rubella]                                                                                                                                                                                                                                                                                                                                                                                                                                                                                                                       | 770 | 770 | 0         | 100.0 | 79.5 | 87.0 | hypothetical protein CARUB_v10007408mg           | gbpln | Capsella rubella     | AT4G20770.1   Symbols:   Pentatricopeptide repeat (PPR) superfamily protein   chr4:1130762-1133086 REVERSE LENGTH=774       | 770 | 774 | 0         | 100.5 | 80.1 | 87.7 |
| Rsa1.0_00108.1.g5313.t1 | ref NP_193810.1  calcium-binding protein CML42 [Arabidopsis thaliana] gi 75337714 sp Q9SVG9.1 CML42_ARATH RecName: Full=Calcium-binding protein CML42; AltName: Full=Calmodulin-like protein 42 gi 5262218 emb CAB45844.1  calcium-binding protein-like [Arabidopsis thaliana] gi 7268874 emb CAB79078.1  calcium-binding protein-like [Arabidopsis thaliana] gi 26450755 dbj BAC42486.1  putative calcium-binding protein [Arabidopsis thaliana] gi 28372940 gb AAO39952.1  At4g20780 [Arabidopsis thaliana] gi 332658960 gb AEE84360.1  calcium-binding protein CML42 [Arabidopsis thaliana] | 191 | 191 | 8.00E-81  | 100.0 | 82.7 | 89.5 | calcium-binding protein CML42                    | gbpln | Arabidopsis thaliana | AT4G20780.1   Symbols: CML42   calmodulin like 42   chr4:11133309-11133884 REVERSE LENGTH=191                               | 191 | 191 | 3.00E-83  | 100.0 | 82.7 | 89.5 |

|                          |                                                                                                                                                                                                                                                                                                                                                                                                                                                                                   |      |      |           |       |      |      |                                               |       |                      |                                                                                                                                                      |      |      |           |       |      |      |
|--------------------------|-----------------------------------------------------------------------------------------------------------------------------------------------------------------------------------------------------------------------------------------------------------------------------------------------------------------------------------------------------------------------------------------------------------------------------------------------------------------------------------|------|------|-----------|-------|------|------|-----------------------------------------------|-------|----------------------|------------------------------------------------------------------------------------------------------------------------------------------------------|------|------|-----------|-------|------|------|
| Rsa1.0_00108.1.g5314.t1  | gb EOA18285.1  hypothetical protein CARUB_v10006784mg [Capsella rubella]                                                                                                                                                                                                                                                                                                                                                                                                          | 523  | 519  | 0         | 99.2  | 77.2 | 86.4 | hypothetical protein CARUB_v10006784mg        | gbpln | Capsella rubella     | AT4G20790.1   Symbols:   Leucine-rich repeat protein kinase family protein   chr4:11134775-11136423 REVERSE LENGTH=518                               | 523  | 518  | 0         | 99.0  | 79.7 | 88.3 |
| Rsa1.0_00108.1.g5315.t1  | ref XP_002869926.1  FAD-binding domain-containing protein [Arabidopsis lyrata subsp. lyrata]   gi 297315762 gb EFH46185.1  FAD-binding domain-containing protein [Arabidopsis lyrata subsp. lyrata]   ref XP_002869926.1  FAD-binding domain-containing protein [Arabidopsis lyrata subsp. lyrata]                                                                                                                                                                                | 527  | 529  | 0         | 100.4 | 76.1 | 87.1 | FAD-binding domain-containing protein         | gbpln | Arabidopsis lyrata   | AT4G20800.1   Symbols:   FAD-binding Berberine family protein   chr4:11139656-11141242 FORWARD LENGTH=528                                            | 527  | 528  | 0         | 100.2 | 75.5 | 85.6 |
| Rsa1.0_00108.1.g5316.t1  | ref XP_002869926.1  FAD-binding domain-containing protein [Arabidopsis lyrata subsp. lyrata]   gi 297315762 gb EFH46185.1  FAD-binding domain-containing protein [Arabidopsis lyrata subsp. lyrata]                                                                                                                                                                                                                                                                               | 527  | 529  | 0         | 100.4 | 78.0 | 86.0 | FAD-binding domain-containing protein         | gbpln | Arabidopsis lyrata   | AT4G20800.1   Symbols:   FAD-binding Berberine family protein   chr4:11139656-11141242 FORWARD LENGTH=528                                            | 527  | 528  | 0         | 100.2 | 77.2 | 85.6 |
| Rsa1.0_00108.1.g5317.t1  | ref NP_193814.1  FAD-binding and BBE domain-containing protein [Arabidopsis thaliana]   gi 5262222 emb CAB45848.1  reticuline oxidase-like protein [Arabidopsis thaliana]   gi 7268878 emb CAB79082.1  reticuline oxidase-like protein [Arabidopsis thaliana]   gi 332658964 gb AEE84364.1  FAD-binding and BBE domain-containing protein [Arabidopsis thaliana]                                                                                                                  | 534  | 532  | 0         | 99.6  | 85.8 | 93.8 | FAD-binding and BBE domain-containing protein | gbpln | Arabidopsis thaliana | AT4G20820.1   Symbols:   FAD-binding Berberine family protein   chr4:11150160-11151758 FORWARD LENGTH=532                                            | 534  | 532  | 0         | 99.6  | 85.8 | 93.8 |
| Rsa1.0_00108.1.g5318.t1  | gb EOA18748.1  hypothetical protein CARUB_v10007331mg [Capsella rubella]                                                                                                                                                                                                                                                                                                                                                                                                          | 511  | 555  | 0         | 108.6 | 81.2 | 91.0 | hypothetical protein CARUB_v10007331mg        | gbpln | Capsella rubella     | AT4G20840.1   Symbols:   FAD-binding Berberine family protein   chr4:11157916-11159535 FORWARD LENGTH=539                                            | 511  | 539  | 0         | 105.5 | 80.0 | 90.2 |
| Rsa1.0_00108.1.g5319.t1  | gb EOA18748.1  hypothetical protein CARUB_v10007331mg [Capsella rubella]                                                                                                                                                                                                                                                                                                                                                                                                          | 577  | 555  | 0         | 96.2  | 72.1 | 82.8 | hypothetical protein CARUB_v10007331mg        | gbpln | Capsella rubella     | AT4G20840.1   Symbols:   FAD-binding Berberine family protein   chr4:11157916-11159535 FORWARD LENGTH=539                                            | 577  | 539  | 0         | 93.4  | 68.3 | 78.0 |
| Rsa1.0_00108.1.g5320.t25 | gb EOA15904.1  hypothetical protein CARUB_v10003995mg [Capsella rubella]                                                                                                                                                                                                                                                                                                                                                                                                          | 1292 | 1384 | 0         | 107.1 | 89.2 | 94.5 | hypothetical protein CARUB_v10003995mg        | gbpln | Capsella rubella     | AT4G20850.1   Symbols:   TPP2   tripeptidyl peptidase ii   chr4:11160935-11169889 REVERSE LENGTH=1380                                                | 1292 | 1380 | 0         | 106.8 | 87.3 | 92.5 |
| Rsa1.0_00108.1.g5321.t1  | gb EOA18805.1  hypothetical protein CARUB_v10007418mg [Capsella rubella]                                                                                                                                                                                                                                                                                                                                                                                                          | 522  | 523  | 0         | 100.2 | 85.4 | 92.5 | hypothetical protein CARUB_v10007418mg        | gbpln | Capsella rubella     | AT4G20860.1   Symbols:   FAD-binding Berberine family protein   chr4:11172726-11174318 FORWARD LENGTH=530                                            | 522  | 530  | 0         | 101.5 | 83.3 | 90.8 |
| Rsa1.0_00108.1.g5322.t2  | gb EOA17348.1  hypothetical protein CARUB_v10005630mg [Capsella rubella]                                                                                                                                                                                                                                                                                                                                                                                                          | 239  | 237  | 1.00E-127 | 99.2  | 92.9 | 97.1 | hypothetical protein CARUB_v10005630mg        | gbpln | Capsella rubella     | AT4G20870.1   Symbols:   FAH2, ATFAH2   fatty acid hydroxylase 2   chr4:11174620-11175878 REVERSE LENGTH=237                                         | 239  | 237  | 1.00E-130 | 99.2  | 92.5 | 97.1 |
| Rsa1.0_00108.1.g5323.t1  | ref NP_193820.1  ethylene-responsive/regulated nuclear protein [Arabidopsis thaliana]   gi 5262778 emb CAB45883.1  ethylene-regulated transcript 2 (ERT2) [Arabidopsis thaliana]   gi 7268884 emb CAB79088.1  ethylene-regulated transcript 2 (ERT2) [Arabidopsis thaliana]   gi 26452095 dbj BAC43137.1  putative ethylene-regulated transcript 2 ERT2 [Arabidopsis thaliana]   gi 332658971 gb AEE84371.1  ethylene-responsive/regulated nuclear protein [Arabidopsis thaliana] | 419  | 405  | 7.00E-73  | 96.7  | 59.4 | 67.3 | ethylene-responsive/regulated nuclear protein | gbpln | Arabidopsis thaliana | AT4G20880.1   Symbols:   ethylene-responsive nuclear protein / ethylene-regulated nuclear protein (ERT2)   chr4:11179389-11180606 REVERSE LENGTH=405 | 419  | 405  | 2.00E-75  | 96.7  | 59.4 | 67.3 |
| Rsa1.0_00108.1.g5324.t1  | gb EOA16631.1  hypothetical protein CARUB_v10004805mg [Capsella rubella]                                                                                                                                                                                                                                                                                                                                                                                                          | 447  | 445  | 0         | 99.6  | 94.9 | 95.7 | hypothetical protein CARUB_v10004805mg        | gbpln | Capsella rubella     | AT4G20890.1   Symbols:   TUB9   tubulin beta-9 chain   chr4:11182218-11183840 FORWARD LENGTH=444                                                     | 447  | 444  | 0         | 99.3  | 94.6 | 95.5 |
| Rsa1.0_00108.1.g5325.t1  | gb AAL05056.1 AF411383.1 HEN1 [Arabidopsis thaliana]                                                                                                                                                                                                                                                                                                                                                                                                                              | 935  | 942  | 0         | 100.7 | 78.9 | 87.8 | HEN1                                          | gbpln | Arabidopsis thaliana | AT4G20910.2   Symbols:   HEN1   double-stranded RNA binding protein-related / DsRBD protein-related   chr4:11186264-11190575 REVERSE LENGTH=942      | 935  | 942  | 0         | 100.7 | 78.8 | 87.7 |
| Rsa1.0_00108.1.g5326.t2  | ref XP_002867868.1  predicted protein [Arabidopsis lyrata subsp. lyrata]   gi 297313704 gb EFH44127.1  predicted protein [Arabidopsis lyrata subsp. lyrata]                                                                                                                                                                                                                                                                                                                       | 674  | 854  | 0         | 126.7 | 63.6 | 73.6 | predicted protein                             | gbpln | Arabidopsis lyrata   | AT4G20920.1   Symbols:   double-stranded RNA-binding domain (DsRBD)-containing protein   chr4:11194177-11197577 REVERSE LENGTH=743                   | 674  | 743  | 0         | 110.2 | 63.4 | 73.0 |
| Rsa1.0_00108.1.g5327.t1  | ref XP_002867868.1  predicted protein [Arabidopsis lyrata subsp. lyrata]   gi 297313704 gb EFH44127.1  predicted protein [Arabidopsis lyrata subsp. lyrata]                                                                                                                                                                                                                                                                                                                       | 927  | 854  | 0         | 92.1  | 64.6 | 74.2 | predicted protein                             | gbpln | Arabidopsis lyrata   | AT4G20910.2   Symbols:   HEN1   double-stranded RNA binding protein-related / DsRBD protein-related   chr4:11186264-11190575 REVERSE LENGTH=942      | 927  | 942  | 0         | 101.6 | 63.9 | 75.1 |

|                         |                                                                                                                                                                                                                                                                                                                                                                                                                                                                                 |      |      |           |       |      |      |                                                                                                                                                                 |       |                      |                                                                                                                                               |      |     |           |        |      |      |
|-------------------------|---------------------------------------------------------------------------------------------------------------------------------------------------------------------------------------------------------------------------------------------------------------------------------------------------------------------------------------------------------------------------------------------------------------------------------------------------------------------------------|------|------|-----------|-------|------|------|-----------------------------------------------------------------------------------------------------------------------------------------------------------------|-------|----------------------|-----------------------------------------------------------------------------------------------------------------------------------------------|------|-----|-----------|--------|------|------|
| Rsa1.0_00108.1.g5328.t1 | sp COLGG9.1 Y4294_ARATH RecName: Full=Probable LRR receptor-like serine/threonine-protein kinase At4g20940 gi 224589622 gb ACNS9344.1  leucine-rich repeat receptor-like protein kinase [Arabidopsis thaliana]                                                                                                                                                                                                                                                                  | 1051 | 1037 | 0         | 98.7  | 90.4 | 94.8 | RecName: Full=Probable LRR receptor-like serine/threonine-protein kinase At4g20940 gi 224589622 gb ACNS9344.1  leucine-rich repeat receptor-like protein kinase | gbpln | Arabidopsis thaliana | AT4G20940.1   Symbols:   Leucine-rich repeat receptor-like protein kinase family protein   chr4:11202728-11206038 FORWARD LENGTH=977          | 1051 | 977 | 0         | 93.0   | 69.7 | 73.8 |
| Rsa1.0_00108.1.g5329.t1 | gb EOA17462.1  hypothetical protein CARUB_v10005784mg, partial [Capsella rubella]                                                                                                                                                                                                                                                                                                                                                                                               | 189  | 196  | 2.00E-74  | 103.7 | 77.8 | 87.8 | hypothetical protein CARUB_v10005784mg, partial                                                                                                                 | gbpln | Capsella rubella     | AT4G20970.1   Symbols:   basic helix-loop-helix (bHLH) DNA-binding superfamily protein   chr4:11215259-11216212 FORWARD LENGTH=190            | 189  | 190 | 8.00E-72  | 100.5  | 77.2 | 86.8 |
| Rsa1.0_00108.1.g5330.t1 | ref XP_002869915.1  carbonic anhydrase family protein [Arabidopsis lyrata subsp. lyrata] gi 297315751 gb EFH46174.1  carbonic anhydrase family protein [Arabidopsis lyrata subsp. lyrata]                                                                                                                                                                                                                                                                                       | 261  | 267  | 1.00E-106 | 102.3 | 69.0 | 80.8 | carbonic anhydrase family protein                                                                                                                               | gbpln | Arabidopsis lyrata   | AT4G20990.1   Symbols: ATACA4, ACA4   alpha carbonic anhydrase 4   chr4:11219772-11221126 FORWARD LENGTH=267                                  | 261  | 267 | 1.00E-107 | 102.3  | 69.0 | 79.3 |
| Rsa1.0_00108.1.g5331.t1 | ref NP_189230.1  F-box protein [Arabidopsis thaliana] gi 75274193 sp Q9LU90.1 FB188_ARATH RecName: Full=F-box protein At3g26010 gi 9279606 dbj BAB01064.1  unnamed protein product [Arabidopsis thaliana] gi 91806483 gb ABE65969.1  F-box family protein [Arabidopsis thaliana] gi 332643580 gb AEE77101.1  F-box protein [Arabidopsis thaliana]                                                                                                                               | 419  | 414  | 1.00E-109 | 98.8  | 53.2 | 66.6 | F-box protein                                                                                                                                                   | gbpln | Arabidopsis thaliana | AT3G26010.1   Symbols:   Galactose oxidase/kelch repeat superfamily protein   chr3:9511901-9513145 FORWARD LENGTH=414                         | 419  | 414 | 1.00E-111 | 98.8   | 53.2 | 66.6 |
| Rsa1.0_00108.1.g5332.t1 | ref NP_193834.1  late embryogenesis abundant domain-containing protein [Arabidopsis thaliana] gi 5262792 emb CAB45897.1  putative protein [Arabidopsis thaliana] gi 7268899 emb CAB78102.1  putative protein [Arabidopsis thaliana] gi 18176126 gb AAL5988.1  unknown protein [Arabidopsis thaliana] gi 21436217 gb AAM51396.1  unknown protein [Arabidopsis thaliana] gi 332658988 gb AEE84388.1  late embryogenesis abundant domain-containing protein [Arabidopsis thaliana] | 242  | 266  | 1.00E-102 | 109.9 | 83.5 | 91.7 | late embryogenesis abundant domain-containing protein                                                                                                           | gbpln | Arabidopsis thaliana | AT4G21020.1   Symbols:   Late embryogenesis abundant protein (LEA) family protein   chr4:11228263-11229392 FORWARD LENGTH=266                 | 242  | 266 | 1.00E-105 | 109.9  | 83.5 | 91.7 |
| Rsa1.0_00108.1.g5333.t1 | #                                                                                                                                                                                                                                                                                                                                                                                                                                                                               | #    | #    | #         | #     | #    | #    | -                                                                                                                                                               | ----  | ----                 | AT5G15450.1   Symbols: APG6, CLPB3, CLPB-P   casein lytic proteinase B3   chr5:5014389-5018255 REVERSE LENGTH=968                             | 75   | 968 | 9.00E-13  | 1290.7 | 44.0 | 53.3 |
| Rsa1.0_00108.1.g5334.t1 | ref XP_002869911.1  Dof-type zinc finger domain-containing protein [Arabidopsis lyrata subsp. lyrata] gi 297315747 gb EFH46170.1  Dof-type zinc finger domain-containing protein [Arabidopsis lyrata subsp. lyrata]                                                                                                                                                                                                                                                             | 250  | 223  | 1.00E-61  | 89.2  | 53.2 | 64.0 | Dof-type zinc finger domain-containing protein                                                                                                                  | gbpln | Arabidopsis lyrata   | AT4G21050.1   Symbols:   Dof-type zinc finger domain-containing protein   chr4:11238441-11239073 FORWARD LENGTH=210                           | 250  | 210 | 5.00E-58  | 84.0   | 46.4 | 55.6 |
| Rsa1.0_00108.1.g5335.t1 | ref XP_002869911.1  Dof-type zinc finger domain-containing protein [Arabidopsis lyrata subsp. lyrata] gi 297315747 gb EFH46170.1  Dof-type zinc finger domain-containing protein [Arabidopsis lyrata subsp. lyrata]                                                                                                                                                                                                                                                             | 244  | 223  | 6.00E-56  | 91.4  | 50.4 | 62.7 | Dof-type zinc finger domain-containing protein                                                                                                                  | gbpln | Arabidopsis lyrata   | AT4G21050.1   Symbols:   Dof-type zinc finger domain-containing protein   chr4:11238441-11239073 FORWARD LENGTH=210                           | 244  | 210 | 2.00E-52  | 86.1   | 43.9 | 54.9 |
| Rsa1.0_00108.1.g5336.t1 | dbj BAD95408.1  hypothetical protein [Arabidopsis thaliana]                                                                                                                                                                                                                                                                                                                                                                                                                     | 250  | 478  | 1.00E-71  | 191.2 | 50.0 | 68.8 | hypothetical protein                                                                                                                                            | gbpln | Arabidopsis thaliana | AT3G24255.1   Symbols:   RNA-directed DNA polymerase (reverse transcriptase)-related family protein   chr3:8789471-8793208 FORWARD LENGTH=746 | 250  | 746 | 3.00E-64  | 298.4  | 42.4 | 59.6 |
| Rsa1.0_00108.1.g5337.t1 | ref XP_002869911.1  Dof-type zinc finger domain-containing protein [Arabidopsis lyrata subsp. lyrata] gi 297315747 gb EFH46170.1  Dof-type zinc finger domain-containing protein [Arabidopsis lyrata subsp. lyrata]                                                                                                                                                                                                                                                             | 250  | 223  | 9.00E-64  | 89.2  | 54.0 | 64.8 | Dof-type zinc finger domain-containing protein                                                                                                                  | gbpln | Arabidopsis lyrata   | AT4G21050.1   Symbols:   Dof-type zinc finger domain-containing protein   chr4:11238441-11239073 FORWARD LENGTH=210                           | 250  | 210 | 4.00E-59  | 84.0   | 46.4 | 56.0 |
| Rsa1.0_00108.1.g5338.t1 | ref XP_002869911.1  Dof-type zinc finger domain-containing protein [Arabidopsis lyrata subsp. lyrata] gi 297315747 gb EFH46170.1  Dof-type zinc finger domain-containing protein [Arabidopsis lyrata subsp. lyrata]                                                                                                                                                                                                                                                             | 221  | 223  | 2.00E-58  | 100.9 | 59.7 | 70.1 | Dof-type zinc finger domain-containing protein                                                                                                                  | gbpln | Arabidopsis lyrata   | AT4G21050.1   Symbols:   Dof-type zinc finger domain-containing protein   chr4:11238441-11239073 FORWARD LENGTH=210                           | 221  | 210 | 5.00E-54  | 95.0   | 50.7 | 58.4 |

|                         |                                                                                                                                                                                                                                                                                                                                                                                                                                                                                                                                                                                                                                                                                                                                                     |      |      |          |       |      |      |                                        |       |                      |                                                                                                                                                                                                                                                                                                                               |      |     |          |       |      |      |
|-------------------------|-----------------------------------------------------------------------------------------------------------------------------------------------------------------------------------------------------------------------------------------------------------------------------------------------------------------------------------------------------------------------------------------------------------------------------------------------------------------------------------------------------------------------------------------------------------------------------------------------------------------------------------------------------------------------------------------------------------------------------------------------------|------|------|----------|-------|------|------|----------------------------------------|-------|----------------------|-------------------------------------------------------------------------------------------------------------------------------------------------------------------------------------------------------------------------------------------------------------------------------------------------------------------------------|------|-----|----------|-------|------|------|
| Rsa1.0_00108.1.g5339.t1 | ref[XP_002869910.1] predicted protein [Arabidopsis lyrata subsp. lyrata] gi 297315746 gb EFH46169.1  predicted protein [Arabidopsis lyrata subsp. lyrata]                                                                                                                                                                                                                                                                                                                                                                                                                                                                                                                                                                                           | 126  | 741  | 5.00E-20 | 588.1 | 40.5 | 42.1 | predicted protein                      | gbpln | Arabidopsis lyrata   | AT4G21060.1   Symbols:   Galactosyltransferase family protein   chr4:11240730-11244860 FORWARD LENGTH=741                                                                                                                                                                                                                     | 126  | 741 | 3.00E-21 | 588.1 | 40.5 | 42.1 |
| Rsa1.0_00108.1.g5340.t1 | # # # # # # # # - ----                                                                                                                                                                                                                                                                                                                                                                                                                                                                                                                                                                                                                                                                                                                              |      |      |          |       |      |      |                                        |       |                      | # # # # # # #                                                                                                                                                                                                                                                                                                                 |      |     |          |       |      |      |
| Rsa1.0_00108.1.g5341.t1 | ref[NP_001154260.1] Galactosyltransferase family protein [Arabidopsis thaliana] gi 221271910 sp A7XDQ9.1 B3GTK_ARA_TH RecName: Full=Probable beta-1,3-galactosyltransferase 20 gi 150026533 gb ABR58857.1  putative galactosyltransferase [Arabidopsis thaliana] gi 332658993 gb AEE84393.1  Galactosyltransferase family protein [Arabidopsis thaliana]                                                                                                                                                                                                                                                                                                                                                                                            | 682  | 684  | 0        | 100.3 | 89.7 | 95.3 | Galactosyltransferase family protein   | gbpln | Arabidopsis thaliana | AT4G21060.2   Symbols:   Galactosyltransferase family protein   chr4:11242003-11244860 FORWARD LENGTH=684                                                                                                                                                                                                                     | 682  | 684 | 0        | 100.3 | 89.7 | 95.3 |
| Rsa1.0_00108.1.g5342.t1 | emb[CAB45902.1] putative protein (fragment) [Arabidopsis thaliana] gi 7268904 emb CAB79107.1  putative protein (fragment) [Arabidopsis thaliana]                                                                                                                                                                                                                                                                                                                                                                                                                                                                                                                                                                                                    | 1525 | 1495 | 0        | 98.0  | 74.5 | 82.7 | putative protein (fragment)            | gbpln | Arabidopsis thaliana | AT4G21070.1   Symbols: ATBRCA1, BRCA1   breast cancer susceptibility1   chr4:11248174-11252633 FORWARD LENGTH=941                                                                                                                                                                                                             | 1525 | 941 | 0        | 61.7  | 44.7 | 50.9 |
| Rsa1.0_00108.1.g5343.t1 | ref[NP_193841.2] ferredoxin 2 [Arabidopsis thaliana] gi 30685306 ref NP_849415.1  ferredoxin 2 [Arabidopsis thaliana] gi 79325201 ref NP_001031685.1  ferredoxin 2 [Arabidopsis thaliana] gi 19698259 dbj BAB86773.1  MFDX2 precursor [Arabidopsis thaliana] gi 28192429 gb AAL82812.1  adrenodoxin-like ferredoxin 1 [Arabidopsis thaliana] gi 28466923 gb AAO44070.1  At4g21090 [Arabidopsis thaliana] gi 110743957 dbj BAE99811.1  mitochondrial ferredoxin [Arabidopsis thaliana] gi 222424373 dbj BAH20142.1  AT4G21090 [Arabidopsis thaliana] gi 332658998 gb AEE84398.1  ferredoxin 2 [Arabidopsis thaliana] gi 332658999 gb AEE84399.1  ferredoxin 2 [Arabidopsis thaliana] gi 332659000 gb AEE84400.1  ferredoxin 2 [Arabidopsis thaliana] | 208  | 197  | 1.00E-87 | 94.7  | 81.3 | 85.6 | ferredoxin 2                           | gbpln | Arabidopsis thaliana | AT4G21090.3   Symbols: ATMFDX2, MFDX2   MITOCHONDRIAL FERREDOXIN 2   chr4:11256663-11258269 REVERSE LENGTH=197                                                                                                                                                                                                                | 208  | 197 | 5.00E-90 | 94.7  | 81.3 | 85.6 |
| Rsa1.0_00108.1.g5344.t1 | gb EOA18805.1  hypothetical protein CARUB_v10007418mg [Capsella rubella]                                                                                                                                                                                                                                                                                                                                                                                                                                                                                                                                                                                                                                                                            | 520  | 523  | 0        | 100.6 | 83.3 | 91.5 | hypothetical protein CARUB_v10007418mg | gbpln | Capsella rubella     | AT4G20860.1   Symbols:   FAD-binding Berberine family protein   chr4:11172726-11174318 FORWARD LENGTH=530                                                                                                                                                                                                                     | 520  | 530 | 0        | 101.9 | 82.1 | 90.8 |
| Rsa1.0_00108.1.g5345.t1 | gb EOA17579.1  hypothetical protein CARUB_v10005939mg [Capsella rubella]                                                                                                                                                                                                                                                                                                                                                                                                                                                                                                                                                                                                                                                                            | 145  | 145  | 9.00E-78 | 100.0 | 95.9 | 98.6 | hypothetical protein CARUB_v10005939mg | gbpln | Capsella rubella     | AT4G21110.1   Symbols:   G10 family protein   chr4:11267673-11268774 FORWARD LENGTH=145                                                                                                                                                                                                                                       | 145  | 145 | 2.00E-79 | 100.0 | 94.5 | 97.9 |
| Rsa1.0_00108.1.g5346.t1 | ref[XP_002867862.1] hypothetical protein ARALYDRAFT_492773 [Arabidopsis lyrata subsp. lyrata] gi 297313698 gb EFH44121.1  hypothetical protein ARALYDRAFT_492773 [Arabidopsis lyrata subsp. lyrata]                                                                                                                                                                                                                                                                                                                                                                                                                                                                                                                                                 | 241  | 246  | 4.00E-85 | 102.1 | 73.0 | 81.7 | hypothetical protein ARALYDRAFT_492773 | gbpln | Arabidopsis lyrata   | AT4G21140.1   Symbols:   BEST Arabidopsis thaliana protein match is: copper ion binding (TAIRAT4G05400.2); Has 41 Blast hits to 41 proteins in 16 species: Archae - 0; Bacteria - 0; Metazoa - 0; Fungi - 0; Plants - 40; Viruses - 0; Other Eukaryotes - 1 (source: NCBI BLINK).   chr4:11277491-11278222 REVERSE LENGTH=243 | 241  | 243 | 3.00E-86 | 100.8 | 73.4 | 83.4 |
| Rsa1.0_00108.1.g5347.t1 | ref[NP_193847.2] ribophorin II (RPN2) family protein [Arabidopsis thaliana] gi 334186764 ref NP_001190785.1  ribophorin II (RPN2) family protein [Arabidopsis thaliana] gi 75163691 sp Q93Z16.1 RPN2_ARATH RecName: Full=Dolichyl-diphosphooligosaccharide--protein glycosyltransferase subunit 2; AltName: Full=Protein HAPLESS 6; AltName: Full=Ribophorin II; Short=RPN-II; AltName: Full=Ribophorin-2; Flags: Precursor gi 16604454 gb AAL24233.1  AT4g21150/F7J7_90 [Arabidopsis thaliana] gi 18958022 gb AAL79584.1  AT4g21150/F7J7_90 [Arabidopsis thaliana] gi 332659008 gb AEE84408.1  ribophorin II (RPN2) family protein [Arabidopsis thaliana] gi 332659010 gb AEE84410.1  ribophorin II (RPN2) family protein [Arabidopsis thaliana]   | 684  | 691  | 0        | 101.0 | 89.8 | 94.9 | ribophorin II (RPN2) family protein    | gbpln | Arabidopsis thaliana | AT4G21150.3   Symbols: HAP6   ribophorin II (RPN2) family protein   chr4:11278646-11283599 FORWARD LENGTH=691                                                                                                                                                                                                                 | 684  | 691 | 0        | 101.0 | 89.8 | 94.9 |

|                         |                                                                                                                                                                                                                                                                                                                                                                                                                                                                  |     |      |           |       |      |      |                                                                     |       |                      |                                                                                                                                                                                                                                                                                    |     |     |           |       |      |      |
|-------------------------|------------------------------------------------------------------------------------------------------------------------------------------------------------------------------------------------------------------------------------------------------------------------------------------------------------------------------------------------------------------------------------------------------------------------------------------------------------------|-----|------|-----------|-------|------|------|---------------------------------------------------------------------|-------|----------------------|------------------------------------------------------------------------------------------------------------------------------------------------------------------------------------------------------------------------------------------------------------------------------------|-----|-----|-----------|-------|------|------|
| Rsa1.0_00108.1.g5348.t1 | ref[XP_002869903.1] zac [Arabidopsis lyrata subsp. lyrata] gi 297315739 gb EFH46162.1  zac [Arabidopsis lyrata subsp. lyrata]                                                                                                                                                                                                                                                                                                                                    | 312 | 332  | 1.00E-159 | 106.4 | 88.8 | 94.2 | zac                                                                 | gbpln | Arabidopsis lyrata   | AT4G21160.4   Symbols: ZAC   Calcium-dependent ARF-type GTPase activating protein family   chr4:11284694-11286532 FORWARD LENGTH=337                                                                                                                                               | 312 | 337 | 1.00E-160 | 108.0 | 87.8 | 94.2 |
| Rsa1.0_00108.1.g5349.t1 | sp O49558.2 PP331_ARATH RecName: Full=Pentatricopeptide repeat-containing protein At4g21170                                                                                                                                                                                                                                                                                                                                                                      | 580 | 585  | 0         | 100.9 | 76.9 | 84.3 | RecName: Full=Pentatricopeptide repeat-containing protein At4g21170 | ----  | ----                 | AT4G21170.1   Symbols:   Tetratricopeptide repeat (TPR)-like superfamily protein   chr4:11288756-11288513 REVERSE LENGTH=551                                                                                                                                                       | 580 | 551 | 0         | 95.0  | 69.7 | 77.2 |
| Rsa1.0_00108.1.g5350.t1 | ref[XP_002869902.1] DNAJ heat shock N-terminal domain-containing protein [Arabidopsis lyrata subsp. lyrata] gi 297315738 gb EFH46161.1  DNAJ heat shock N-terminal domain-containing protein [Arabidopsis lyrata subsp. lyrata]                                                                                                                                                                                                                                  | 665 | 662  | 0         | 99.5  | 83.3 | 91.3 | DNAJ heat shock N-terminal domain-containing protein                | gbpln | Arabidopsis lyrata   | AT4G21180.1   Symbols: ATERDJ2B   DnaJ / Sec63 Brl domains-containing protein   chr4:11289337-11292179 FORWARD LENGTH=661                                                                                                                                                          | 665 | 661 | 0         | 99.4  | 82.7 | 90.1 |
| Rsa1.0_00108.1.g5351.t1 | ref[XP_002867860.1] EMB1417 [Arabidopsis lyrata subsp. lyrata] gi 297313696 gb EFH44119.1  EMB1417 [Arabidopsis lyrata subsp. lyrata]                                                                                                                                                                                                                                                                                                                            | 310 | 317  | 1.00E-150 | 102.3 | 91.6 | 94.8 | EMB1417                                                             | gbpln | Arabidopsis lyrata   | AT4G21190.1   Symbols: emb1417   Pentatricopeptide repeat (PPR) superfamily protein   chr4:11292493-11293763 REVERSE LENGTH=307                                                                                                                                                    | 310 | 307 | 2.33E-156 | 99.0  | 87.1 | 90.6 |
| Rsa1.0_00108.1.g5352.t1 | #                                                                                                                                                                                                                                                                                                                                                                                                                                                                | #   | #    | #         | #     | #    | -    | ----                                                                | ----  | ----                 | #                                                                                                                                                                                                                                                                                  | #   | #   | #         | #     | #    | #    |
| Rsa1.0_00108.1.g5353.t1 | #                                                                                                                                                                                                                                                                                                                                                                                                                                                                | #   | #    | #         | #     | #    | -    | ----                                                                | ----  | ----                 | #                                                                                                                                                                                                                                                                                  | #   | #   | #         | #     | #    | #    |
| Rsa1.0_00108.1.g5354.t2 | ref[XP_002869899.1] phosphoprotein phosphatase/ protein kinase [Arabidopsis lyrata subsp. lyrata] gi 297315735 gb EFH46158.1  phosphoprotein phosphatase/ protein kinase [Arabidopsis lyrata subsp. lyrata]                                                                                                                                                                                                                                                      | 571 | 403  | 0         | 70.6  | 58.8 | 62.0 | phosphoprotein phosphatase/ protein kinase                          | gbpln | Arabidopsis lyrata   | AT4G21210.1   Symbols: ATRP1, RP1   PPK regulatory protein   chr4:11307002-11308587 FORWARD LENGTH=403                                                                                                                                                                             | 571 | 403 | 0         | 70.6  | 58.3 | 62.2 |
| Rsa1.0_00108.1.g5355.t2 | ref[NP_974583.1] uncharacterized protein [Arabidopsis thaliana] gi 222423130 db BAH19544.1  AT4G21215 [Arabidopsis thaliana] gi 332659027 gb AE84427.1  uncharacterized protein AT4G21215 [Arabidopsis thaliana]                                                                                                                                                                                                                                                 | 200 | 199  | 4.00E-82  | 99.5  | 82.0 | 90.5 | uncharacterized protein                                             | gbpln | Arabidopsis thaliana | AT4G21215.2   Symbols:   unknown protein; Has 35333 Blast hits to 34131 proteins in 2444 species; Archae - 798; Bacteria - 22429; Metazoa - 974; Fungi - 991; Plants - 531; Viruses - 0; Other Eukaryotes - 9610 (source: NCBI BLINK).   chr4:11310890-11313421 REVERSE LENGTH=199 | 200 | 199 | 1.00E-84  | 99.5  | 82.0 | 90.5 |
| Rsa1.0_00108.1.g5356.t1 | gb ACP30591.1  disease resistance protein [Brassica rapa subsp. pekinensis]                                                                                                                                                                                                                                                                                                                                                                                      | 343 | 1555 | 1.00E-31  | 453.4 | 28.9 | 44.9 | disease resistance protein                                          | gbpln | Brassica rapa        | AT1G10000.1   Symbols:   Ribonuclease H-like superfamily protein   chr1:3263877-3264788 REVERSE LENGTH=303                                                                                                                                                                         | 343 | 303 | 2.00E-29  | 88.3  | 25.7 | 39.1 |
| Rsa1.0_00108.1.g5357.t1 | ref[XP_002867857.1] kinase family protein [Arabidopsis lyrata subsp. lyrata] gi 297313693 gb EFH44116.1  kinase family protein [Arabidopsis lyrata subsp. lyrata]                                                                                                                                                                                                                                                                                                | 640 | 642  | 0         | 100.3 | 82.8 | 90.2 | kinase family protein                                               | gbpln | Arabidopsis lyrata   | AT4G21230.1   Symbols: CRK27   cysteine-rich RLK (RECEPTOR-like protein kinase) 27   chr4:11319244-11321679 REVERSE LENGTH=642                                                                                                                                                     | 640 | 642 | 0         | 100.3 | 82.0 | 88.9 |
| Rsa1.0_00108.1.g5358.t1 | ref[NP_566724.1] putative E3 ubiquitin-protein ligase XBAT35 [Arabidopsis thaliana] gi 122233562 sp Q4FE47.1 XB35_ARATH RecName: Full=Putative E3 ubiquitin-protein ligase XBAT35; AltName: Full=Ankyrin repeat domain and RING finger-containing protein XBAT35; AltName: Full=Protein XB3 homolog 5 gi 70905085 gb AAZ14068.1  At3g23280 [Arabidopsis thaliana] gi 332643225 gb AEE78746.1  putative E3 ubiquitin-protein ligase XBAT35 [Arabidopsis thaliana] | 435 | 462  | 1.00E-151 | 106.2 | 66.7 | 79.1 | putative E3 ubiquitin-protein ligase XBAT35                         | gbpln | Arabidopsis thaliana | AT3G23280.1   Symbols: XBAT35   XB3 ortholog 5 in Arabidopsis thaliana   chr3:8321588-8324109 FORWARD LENGTH=462                                                                                                                                                                   | 435 | 462 | 1.00E-153 | 106.2 | 66.7 | 79.1 |
| Rsa1.0_00108.1.g5359.t1 | gb EOA20168.1  hypothetical protein CARUB_v10000461mg [Capsella rubella]                                                                                                                                                                                                                                                                                                                                                                                         | 623 | 626  | 0         | 100.5 | 86.4 | 91.2 | hypothetical protein CARUB_v10000461mg                              | gbpln | Capsella rubella     | AT5G16590.1   Symbols: LRR1   Leucine-rich repeat protein kinase family protein   chr5:5431862-5433921 FORWARD LENGTH=625                                                                                                                                                          | 623 | 625 | 0         | 100.3 | 86.5 | 91.3 |
| Rsa1.0_00108.1.g5360.t1 | ref[XP_002871726.1] hypothetical protein ARALYDRAFT_909643 [Arabidopsis lyrata subsp. lyrata] gi 297317563 gb EFH47985.1  hypothetical protein ARALYDRAFT_909643 [Arabidopsis lyrata subsp. lyrata]                                                                                                                                                                                                                                                              | 313 | 320  | 1.00E-122 | 102.2 | 78.0 | 86.9 | hypothetical protein ARALYDRAFT_909643                              | gbpln | Arabidopsis lyrata   | AT5G16600.1   Symbols: MYB43, ATMYP43   myb domain protein 43   chr5:5438291-5440214 FORWARD LENGTH=327                                                                                                                                                                            | 313 | 327 | 1.00E-125 | 104.5 | 79.6 | 88.5 |
| Rsa1.0_00108.1.g5361.t1 | gb AAD15377.1  putative non-LTR retroelement reverse transcriptase [Arabidopsis thaliana]                                                                                                                                                                                                                                                                                                                                                                        | 660 | 1044 | 0         | 158.2 | 49.2 | 61.7 | putative non-LTR retroelement reverse transcriptase                 | gbpln | Arabidopsis thaliana | AT1G43760.1   Symbols:   DNase I-like superfamily protein   chr1:16528880-16531065 REVERSE LENGTH=626                                                                                                                                                                              | 660 | 626 | 8.00E-28  | 94.8  | 11.1 | 17.9 |
| Rsa1.0_00108.1.g5362.t1 | gb AAM64908.1  myb-related protein M4 [Arabidopsis thaliana]                                                                                                                                                                                                                                                                                                                                                                                                     | 352 | 350  | 1.00E-153 | 99.4  | 81.5 | 87.5 | myb-related protein M4                                              | gbpln | Arabidopsis thaliana | AT4G21440.1   Symbols: ATMYP102, ATM4, MYB102   MYB-like 102   chr4:11418425-11419652 REVERSE LENGTH=350                                                                                                                                                                           | 352 | 350 | 1.00E-155 | 99.4  | 81.3 | 87.5 |
| Rsa1.0_00108.1.g5363.t1 | gb EOA16902.1  hypothetical protein CARUB_v10005126mg, partial [Capsella rubella]                                                                                                                                                                                                                                                                                                                                                                                | 293 | 357  | 1.00E-143 | 121.8 | 90.8 | 94.2 | hypothetical protein CARUB_v10005126mg, partial                     | gbpln | Capsella rubella     | AT4G21450.1   Symbols:   PapD-like superfamily protein   chr4:11426136-11428125 FORWARD LENGTH=295                                                                                                                                                                                 | 293 | 295 | 1.00E-144 | 100.7 | 91.5 | 94.5 |

|                         |                                                                                                                                                                                                                                            |     |     |           |       |      |      |                                                                                             |       |                         |                                                                                                                                                                                                                                                                                                                                                                                                                                                                                                  |     |     |           |       |      |      |
|-------------------------|--------------------------------------------------------------------------------------------------------------------------------------------------------------------------------------------------------------------------------------------|-----|-----|-----------|-------|------|------|---------------------------------------------------------------------------------------------|-------|-------------------------|--------------------------------------------------------------------------------------------------------------------------------------------------------------------------------------------------------------------------------------------------------------------------------------------------------------------------------------------------------------------------------------------------------------------------------------------------------------------------------------------------|-----|-----|-----------|-------|------|------|
| Rsa1.0_00108.1.g5364.t1 | ref[XP_002869885.1] ATFMN<br>[Arabidopsis lyrata subsp. lyrata]<br>gi 297315721 gb EFH46144.1  ATFMN<br>[Arabidopsis lyrata subsp. lyrata]                                                                                                 | 381 | 380 | 0         | 99.7  | 92.9 | 96.6 | ATFMN                                                                                       | gbpln | Arabidopsis<br>lyrata   | AT4G21470.1   Symbols: ATFMN/FHY,<br>FMN/FHY   riboflavin kinase/FMN hydrolase<br>  chr4:11431284-11433197 FORWARD<br>LENGTH=379                                                                                                                                                                                                                                                                                                                                                                 | 381 | 379 | 0         | 99.5  | 92.1 | 95.8 |
| Rsa1.0_00108.1.g5365.t1 | ref[XP_002867843.1] hypothetical<br>protein ARALYDRAFT_914525<br>[Arabidopsis lyrata subsp. lyrata]<br>gi 297313679 gb EFH44102.1 <br>hypothetical protein<br>ARALYDRAFT_914525 [Arabidopsis<br>lyrata subsp. lyrata]                      | 234 | 222 | 3.00E-39  | 94.9  | 56.0 | 66.7 | hypothetical protein<br>ARALYDRAFT_914525                                                   | gbpln | Arabidopsis<br>lyrata   | AT4G21500.1   Symbols:   unknown protein;<br>FUNCTIONS IN: molecular.function unknown;<br>INVOLVED IN: biological.process unknown;<br>LOCATED IN: endomembrane system; BEST<br>Arabidopsis thaliana protein match is:<br>unknown protein (TAIR:AT4G05018.1); Has<br>20 Blast hits to 20 proteins in 8 species:<br>Archae - 0; Bacteria - 0; Metazoa - 0; Fungi<br>- 0; Plants - 17; Viruses - 0; Other<br>Eukaryotes - 3 (source: NCBI BLink).  <br>chr4:11441065-11441712 REVERSE<br>LENGTH=215 | 234 | 215 | 1.00E-41  | 91.9  | 55.1 | 63.7 |
| Rsa1.0_00108.1.g5366.t1 | emb[CAA18501.1] Calcium-dependent<br>serine/threonine protein kinase<br>[Arabidopsis thaliana]<br>gi 7270559 emb CAB81516.1  Calcium-<br>dependent serine/threonine protein<br>kinase [Arabidopsis thaliana]                               | 180 | 536 | 1.00E-26  | 297.8 | 37.2 | 45.6 | Calcium-dependent<br>serine/threonine<br>protein kinase                                     | gbpln | Arabidopsis<br>thaliana | AT4G36070.1   Symbols: CPK18   calcium-<br>dependent protein kinase 18  <br>chr4:17056907-17059595 REVERSE<br>LENGTH=534                                                                                                                                                                                                                                                                                                                                                                         | 180 | 534 | 5.00E-28  | 296.7 | 36.1 | 43.3 |
| Rsa1.0_00108.1.g5367.t1 | gb[EOA16671.1] hypothetical protein<br>CARUB_v10004860mg [Capsella rubella]                                                                                                                                                                | 648 | 429 | 0         | 66.2  | 59.6 | 62.0 | hypothetical protein<br>CARUB_v10004860mg                                                   | gbpln | Capsella<br>rubella     | AT4G21520.1   Symbols:   Transducin/WD40<br>repeat-like superfamily protein  <br>chr4:11447514-11450377 REVERSE<br>LENGTH=425                                                                                                                                                                                                                                                                                                                                                                    | 648 | 425 | 0         | 65.6  | 59.3 | 62.5 |
| Rsa1.0_00108.1.g5368.t1 | gb[EOA18651.1] hypothetical protein<br>CARUB_v10007227mg [Capsella rubella]                                                                                                                                                                | 821 | 777 | 0         | 94.6  | 81.2 | 86.4 | hypothetical protein<br>CARUB_v10007227mg                                                   | gbpln | Capsella<br>rubella     | AT4G21530.1   Symbols:   Transducin/WD40<br>repeat-like superfamily protein  <br>chr4:11450743-11455862 FORWARD<br>LENGTH=777                                                                                                                                                                                                                                                                                                                                                                    | 821 | 777 | 0         | 94.6  | 81.6 | 87.2 |
| Rsa1.0_00108.1.g5369.t1 | gb[EOA16060.1] hypothetical protein<br>CARUB_v10004192mg, partial [Capsella<br>rubella]                                                                                                                                                    | 765 | 776 | 0         | 101.4 | 59.5 | 69.0 | hypothetical protein<br>CARUB_v10004192mg,<br>partial                                       | gbpln | Capsella<br>rubella     | AT4G21550.1   Symbols: VAL3   VP1/ABI3-<br>like 3   chr4:11463104-11468486 FORWARD<br>LENGTH=713                                                                                                                                                                                                                                                                                                                                                                                                 | 765 | 713 | 0         | 93.2  | 58.0 | 67.1 |
| Rsa1.0_00108.1.g5370.t1 | dbj[BAJ33668.1] unnamed protein<br>product [Thellungiella halophila]                                                                                                                                                                       | 185 | 209 | 4.00E-95  | 113.0 | 95.1 | 97.3 | unnamed protein<br>product                                                                  | ----  | ----                    | AT4G21560.3   Symbols: VPS28-1   vacuolar<br>protein sorting-associated protein 28<br>homolog 1   chr4:11469037-11469666<br>REVERSE LENGTH=209                                                                                                                                                                                                                                                                                                                                                   | 185 | 209 | 1.00E-96  | 113.0 | 94.1 | 97.3 |
| Rsa1.0_00108.1.g5371.t1 | dbj[BAJ34582.1] unnamed protein<br>product [Thellungiella halophila]                                                                                                                                                                       | 294 | 294 | 1.00E-162 | 100.0 | 96.3 | 97.6 | unnamed protein<br>product                                                                  | ----  | ----                    | AT4G21570.1   Symbols:   Protein of<br>unknown function (DUF300)  <br>chr4:11471126-11472269 REVERSE<br>LENGTH=294                                                                                                                                                                                                                                                                                                                                                                               | 294 | 294 | 1.00E-159 | 100.0 | 91.5 | 95.6 |
| Rsa1.0_00108.1.g5372.t1 | sp Q9SVX4.1 FB205_ARATH RecName:<br>Full=F-box protein At3g57590<br>gi 4678288 emb CAB41196.1  putative<br>protein [Arabidopsis thaliana]                                                                                                  | 439 | 404 | 9.00E-78  | 92.0  | 42.1 | 54.0 | RecName: Full=F-box<br>protein At3g57590<br>gi 4678288 emb CAB41<br>196.1  putative protein | gbpln | Arabidopsis<br>thaliana | AT3G57590.1   Symbols:   F-box and<br>associated interaction domains-containing<br>protein   chr3:21330182-21331396 REVERSE<br>LENGTH=404                                                                                                                                                                                                                                                                                                                                                        | 439 | 404 | 4.00E-80  | 92.0  | 41.9 | 54.0 |
| Rsa1.0_00108.1.g5373.t1 | gb[EOA32879.1] hypothetical protein<br>CARUB_v10016194mg [Capsella rubella]                                                                                                                                                                | 388 | 431 | 4.00E-66  | 111.1 | 45.4 | 58.8 | hypothetical protein<br>CARUB_v10016194mg                                                   | gbpln | Capsella<br>rubella     | AT5G42430.1   Symbols:   F-box and<br>associated interaction domains-containing<br>protein   chr5:16971312-16972499 REVERSE<br>LENGTH=395                                                                                                                                                                                                                                                                                                                                                        | 388 | 395 | 2.00E-71  | 101.8 | 45.6 | 58.0 |
| Rsa1.0_00108.1.g5374.t1 | ref[XP_002866486.1] BCL-2-associated<br>athanogene 7 [Arabidopsis lyrata subsp.<br>lyrata] gi 297312321 gb EFH42745.1 <br>BCL-2-associated athenogene 7<br>[Arabidopsis lyrata subsp. lyrata]                                              | 444 | 447 | 1.00E-158 | 100.7 | 73.9 | 94.2 | BCL-2-associated<br>athanogene 7                                                            | gbpln | Arabidopsis<br>lyrata   | AT5G62390.1   Symbols: ATBAG7, BAG7  <br>BCL-2-associated athenogene 7  <br>chr5:25052377-25054170 REVERSE<br>LENGTH=446                                                                                                                                                                                                                                                                                                                                                                         | 444 | 446 | 1.00E-158 | 100.5 | 72.5 | 84.0 |
| Rsa1.0_00108.1.g5375.t1 | gb[EOA16997.1] hypothetical protein<br>CARUB_v10005235mg [Capsella rubella]                                                                                                                                                                | 326 | 325 | 1.00E-169 | 99.7  | 91.7 | 94.8 | hypothetical protein<br>CARUB_v10005235mg                                                   | gbpln | Capsella<br>rubella     | AT4G21580.1   Symbols:   oxidoreductase,<br>zinc-binding dehydrogenase family protein  <br>chr4:11475822-11477514 FORWARD<br>LENGTH=325                                                                                                                                                                                                                                                                                                                                                          | 326 | 325 | 1.00E-170 | 99.7  | 90.8 | 94.5 |
| Rsa1.0_00108.1.g5376.t1 | ref[XP_002869881.1] hypothetical<br>protein ARALYDRAFT_492719<br>[Arabidopsis lyrata subsp. lyrata]<br>gi 297315717 gb EFH46140.1 <br>hypothetical protein<br>ARALYDRAFT_492719 [Arabidopsis<br>lyrata subsp. lyrata]                      | 307 | 299 | 1.00E-164 | 97.4  | 90.6 | 93.2 | hypothetical protein<br>ARALYDRAFT_492719                                                   | gbpln | Arabidopsis<br>lyrata   | AT4G21585.1   Symbols: ENDO4  <br>endonuclease 4   chr4:11477988-11479953<br>FORWARD LENGTH=299                                                                                                                                                                                                                                                                                                                                                                                                  | 307 | 299 | 1.00E-164 | 97.4  | 89.3 | 93.2 |
| Rsa1.0_00108.1.g5377.t1 | gb[EOA37991.1] hypothetical protein<br>CARUB_v10009460mg [Capsella rubella]                                                                                                                                                                | 374 | 377 | 1.00E-116 | 100.8 | 59.1 | 72.5 | hypothetical protein<br>CARUB_v10009460mg                                                   | gbpln | Capsella<br>rubella     | AT1G11270.2   Symbols:   F-box and<br>associated interaction domains-containing<br>protein   chr1:3785715-3786653 REVERSE<br>LENGTH=312                                                                                                                                                                                                                                                                                                                                                          | 374 | 312 | 1.00E-89  | 83.4  | 46.0 | 54.5 |
| Rsa1.0_00108.1.g5378.t1 | ref[NP_567633.2] Subtilase family<br>protein [Arabidopsis thaliana]<br>gi 27311663 gb AA000797.1  subtilisin<br>proteinase - like [Arabidopsis thaliana]<br>gi 332659085 gb AEE84485.1  Subtilase<br>family protein [Arabidopsis thaliana] | 271 | 766 | 1.00E-120 | 282.7 | 80.8 | 87.8 | Subtilase family protein                                                                    | gbpln | Arabidopsis<br>thaliana | AT4G21650.1   Symbols:   Subtilase family<br>protein   chr4:11501314-11504656 REVERSE<br>LENGTH=766                                                                                                                                                                                                                                                                                                                                                                                              | 271 | 766 | 1.00E-122 | 282.7 | 80.8 | 87.8 |
| Rsa1.0_00109.1.g5379.t3 | #                                                                                                                                                                                                                                          | #   | #   | #         | #     | #    | #    | -                                                                                           | ----  | ----                    | #                                                                                                                                                                                                                                                                                                                                                                                                                                                                                                | #   | #   | #         | #     | #    | #    |

|                         |                                                                                                                                                                                                                                                                                                                                                                                                                                                                                                                                                                                                                                                                                                                                                                                                                |      |     |           |       |      |      |                                                                                                                                                                                                                                                                     |       |                      |                                                                                                                                                                                                                                                                                                                                                                                                                                                                                                                                                                                                 |     |     |           |       |      |      |
|-------------------------|----------------------------------------------------------------------------------------------------------------------------------------------------------------------------------------------------------------------------------------------------------------------------------------------------------------------------------------------------------------------------------------------------------------------------------------------------------------------------------------------------------------------------------------------------------------------------------------------------------------------------------------------------------------------------------------------------------------------------------------------------------------------------------------------------------------|------|-----|-----------|-------|------|------|---------------------------------------------------------------------------------------------------------------------------------------------------------------------------------------------------------------------------------------------------------------------|-------|----------------------|-------------------------------------------------------------------------------------------------------------------------------------------------------------------------------------------------------------------------------------------------------------------------------------------------------------------------------------------------------------------------------------------------------------------------------------------------------------------------------------------------------------------------------------------------------------------------------------------------|-----|-----|-----------|-------|------|------|
| Rsa1.0_00109.1.g5380.t1 | gb AAC28189.1  contains similarity to Arabidopsis thaliana retrotransposon Athila (GB:X81801) [Arabidopsis thaliana]                                                                                                                                                                                                                                                                                                                                                                                                                                                                                                                                                                                                                                                                                           | 368  | 940 | 5.00E-51  | 255.4 | 27.4 | 35.3 | contains similarity to Arabidopsis thaliana retrotransposon Athila (GB:X81801)                                                                                                                                                                                      | gbpln | Arabidopsis thaliana | #                                                                                                                                                                                                                                                                                                                                                                                                                                                                                                                                                                                               | #   | #   | #         | #     | #    | #    |
| Rsa1.0_00109.1.g5381.t5 | gb AAC28189.1  contains similarity to Arabidopsis thaliana retrotransposon Athila (GB:X81801) [Arabidopsis thaliana]                                                                                                                                                                                                                                                                                                                                                                                                                                                                                                                                                                                                                                                                                           | 1399 | 940 | 6.00E-55  | 67.2  | 7.0  | 9.6  | contains similarity to Arabidopsis thaliana retrotransposon Athila (GB:X81801)                                                                                                                                                                                      | gbpln | Arabidopsis thaliana | #                                                                                                                                                                                                                                                                                                                                                                                                                                                                                                                                                                                               | #   | #   | #         | #     | #    | #    |
| Rsa1.0_00109.1.g5382.t1 | ref NP_179121.1  CCHC-type zinc knuckle protein [Arabidopsis thaliana]<br>gi 4585917 gb AAD25578.1  hypothetical protein [Arabidopsis thaliana]<br>gi 330251290 gb AEC06374.1  CCHC-type zinc knuckle protein [Arabidopsis thaliana]                                                                                                                                                                                                                                                                                                                                                                                                                                                                                                                                                                           | 459  | 474 | 2.00E-14  | 103.3 | 21.8 | 33.3 | CCHC-type zinc knuckle protein                                                                                                                                                                                                                                      | gbpln | Arabidopsis thaliana | AT2G15180.1   Symbols:   Zinc knuckle (CCHC-type) family protein   chr2:6588743-6590167 REVERSE LENGTH=474                                                                                                                                                                                                                                                                                                                                                                                                                                                                                      | 459 | 474 | 4.00E-17  | 103.3 | 21.8 | 33.3 |
| Rsa1.0_00109.1.g5383.t3 | gb ABD65084.1  hypothetical protein 27.t00096 [Brassica oleracea]                                                                                                                                                                                                                                                                                                                                                                                                                                                                                                                                                                                                                                                                                                                                              | 338  | 645 | 2.00E-38  | 190.8 | 37.6 | 51.5 | hypothetical protein 27.t00096                                                                                                                                                                                                                                      | gbpln | Brassica oleracea    | #                                                                                                                                                                                                                                                                                                                                                                                                                                                                                                                                                                                               | #   | #   | #         | #     | #    | #    |
| Rsa1.0_00109.1.g5384.t1 | #                                                                                                                                                                                                                                                                                                                                                                                                                                                                                                                                                                                                                                                                                                                                                                                                              | #    | #   | #         | #     | #    | #    | -                                                                                                                                                                                                                                                                   | ----  | ----                 | #                                                                                                                                                                                                                                                                                                                                                                                                                                                                                                                                                                                               | #   | #   | #         | #     | #    | #    |
| Rsa1.0_00109.1.g5385.t3 | ref NP_850114.1  FER-LIKE IRON DEFICIENCY-INDUCED transcription factor [Arabidopsis thaliana]<br>gi 12242304 sp QOV7X4.1 FIT_ARATH<br>RecName: Full=Transcription factor FER-LIKE IRON DEFICIENCY-INDUCED TRANSCRIPTION FACTOR;<br>AltName: Full=Basic helix-loop-helix protein 29; Short=AtbHLH29; Short=bHLH 29; AltName: Full=FER-LIKE REGULATOR OF IRON UPTAKE;<br>AltName: Full=Transcription factor EN 43; AltName: Full=Transcription factor Fe-DEFICIENCY INDUCED TRANSCRIPTION FACTOR 1; AltName: Full=bHLH transcription factor bHLH029<br>gi 11074390 gb ABH04553.1 <br>At2g28160 [Arabidopsis thaliana]<br>gi 225898152 dbj BAH30406.1 <br>hypothetical protein [Arabidopsis thaliana] gi 330252992 gb AEC08086.1 <br>FER-LIKE IRON DEFICIENCY-INDUCED transcription factor [Arabidopsis thaliana] | 387  | 318 | 1.00E-145 | 82.2  | 67.4 | 73.9 | FER-LIKE IRON DEFICIENCY-INDUCED transcription factor                                                                                                                                                                                                               | gbpln | Arabidopsis thaliana | AT2G28160.1   Symbols: FIT1, ATBHLH029, FRU, BHLH029, ATBHLH29, ATFIT1   FER-like regulator of iron uptake   chr2:12004713-12005908 FORWARD LENGTH=318                                                                                                                                                                                                                                                                                                                                                                                                                                          | 387 | 318 | 1.00E-147 | 82.2  | 67.4 | 73.9 |
| Rsa1.0_00109.1.g5386.t2 | gb ABW81058.1  atlantys transposase [Arabidopsis lyrata subsp. lyrata]                                                                                                                                                                                                                                                                                                                                                                                                                                                                                                                                                                                                                                                                                                                                         | 535  | 777 | 3.00E-18  | 145.2 | 9.2  | 14.6 | atlantys transposase                                                                                                                                                                                                                                                | gbpln | Arabidopsis lyrata   | AT1G51172.1   Symbols:   unknown protein; FUNCTIONS IN: molecular_function unknown; INVOLVED IN: biological_process unknown; LOCATED IN: cellular_component unknown; CONTAINS InterPro DOMAIN/s: Protein of unknown function DUF601 (InterPro:IPR006736); BEST Arabidopsis thaliana protein match is: Protein of unknown function, DUF601 (TAIR:AT1G46696.1); Has 1849 Blast hits to 1554 proteins in 272 species: Archae - 15; Bacteria - 116; Metazoa - 677; Fungi - 267; Plants - 154; Viruses - 11; Other Eukaryotes - 609 (source: NCBI BLINK)   chr1:18963205-18965571 FORWARD LENGTH=681 | 535 | 681 | 1.00E-18  | 127.3 | 7.5  | 13.1 |
| Rsa1.0_00109.1.g5387.t1 | sp P21239.2 RUB1_BRANA RecName: Full=RubisCO large subunit-binding protein subunit alpha, chloroplastic; AltName: Full=60 kDa chaperonin subunit alpha; AltName: Full=CPN-60 alpha; Flags: Precursor<br>gi 289365 gb AAA32979.1  60-kDa chaperonin-60 alpha polypeptide precursor, partial [Brassica napus]                                                                                                                                                                                                                                                                                                                                                                                                                                                                                                    | 616  | 546 | 0         | 88.6  | 85.6 | 86.4 | RecName: Full=RubisCO large subunit-binding protein subunit alpha, chloroplastic; AltName: Full=60 kDa chaperonin subunit alpha; AltName: Full=CPN-60 alpha; Flags: Precursor<br>gi 289365 gb AAA32979.1  60-kDa chaperonin-60 alpha polypeptide precursor, partial | gbpln | Brassica napus       | AT2G28000.1   Symbols: CPN60A, CH-CPN60A, SLP   chaperonin-60alpha   chr2:11926603-11929184 FORWARD LENGTH=586                                                                                                                                                                                                                                                                                                                                                                                                                                                                                  | 616 | 586 | 0         | 95.1  | 81.3 | 84.1 |

|                         |                                                                                                                                                                                                                                                                                                                                                                                                                                                                                                                                                                                                                                                                                         |      |      |           |       |      |      |                                                                                |       |                      |                                                                                                                                                                                                                                                                                                                                                                                                                                           |      |      |           |       |      |      |
|-------------------------|-----------------------------------------------------------------------------------------------------------------------------------------------------------------------------------------------------------------------------------------------------------------------------------------------------------------------------------------------------------------------------------------------------------------------------------------------------------------------------------------------------------------------------------------------------------------------------------------------------------------------------------------------------------------------------------------|------|------|-----------|-------|------|------|--------------------------------------------------------------------------------|-------|----------------------|-------------------------------------------------------------------------------------------------------------------------------------------------------------------------------------------------------------------------------------------------------------------------------------------------------------------------------------------------------------------------------------------------------------------------------------------|------|------|-----------|-------|------|------|
| Rsa1.0_00109.1.g5388.t1 | gb[EOA28660.1] hypothetical protein CARUB_v10024882mg [Capsella rubella]                                                                                                                                                                                                                                                                                                                                                                                                                                                                                                                                                                                                                | 1142 | 1133 | 0         | 99.2  | 86.7 | 91.7 | hypothetical protein CARUB_v10024882mg                                         | gbpln | Capsella rubella     | AT2G27900.2   Symbols:   CONTAINS InterPro DOMAIN/s: Protein of unknown function DUF2451, C-terminal (InterPro:IPR019514), Vacuolar protein sorting-associated protein 54 (InterPro:IPR019515); Has 35333 Blast hits to 34131 proteins in 2444 species: Archae - 798; Bacteria - 22429; Metazoa - 974; Fungi - 991; Plants - 531; Viruses - 0; Other Eukaryotes - 9610 (source: NCBI ELink).   chr2:11877654-11885238 FORWARD LENGTH=1124 | 1142 | 1124 | 0         | 98.4  | 86.7 | 91.3 |
| Rsa1.0_00109.1.g5389.t1 | #                                                                                                                                                                                                                                                                                                                                                                                                                                                                                                                                                                                                                                                                                       | #    | #    | #         | #     | #    | -    | ----                                                                           | ----  | #                    | #                                                                                                                                                                                                                                                                                                                                                                                                                                         | #    | #    | #         | #     |      |      |
| Rsa1.0_00109.1.g5390.t1 | #                                                                                                                                                                                                                                                                                                                                                                                                                                                                                                                                                                                                                                                                                       | #    | #    | #         | #     | #    | -    | ----                                                                           | ----  | #                    | #                                                                                                                                                                                                                                                                                                                                                                                                                                         | #    | #    | #         | #     |      |      |
| Rsa1.0_00109.1.g5391.t1 | ref[XP_002887565.1] hypothetical protein ARALYDRAFT_895360 [Arabidopsis lyrata subsp. lyrata] gi 297333406 gb EFH63824.1  hypothetical protein ARALYDRAFT_895360 [Arabidopsis lyrata subsp. lyrata] ref[NP_180328.1] vacuolar protein-sorting-associated protein 4 [Arabidopsis thaliana] gi 13605797 gb AAK32884.1 AF367297.1 F10A12.27/F10A12.27 [Arabidopsis thaliana] gi 3860272 gb AAC73040.1  putative ATPase [Arabidopsis thaliana] gi 20147133 gb AAM10283.1  F10A12.27/F10A12.27 [Arabidopsis thaliana] gi 20197659 gb AAM15184.1  putative ATPase [Arabidopsis thaliana] gi 330252925 gb AEC08019.1  suppressor of K+ transport growth defect1 protein [Arabidopsis thaliana] | 275  | 254  | 3.00E-92  | 92.4  | 68.0 | 76.4 | hypothetical protein ARALYDRAFT_895360                                         | gbpln | Arabidopsis lyrata   | AT1G45063.2   Symbols:   copper ion binding;electron carriers   chr1:17034068-17034886 REVERSE LENGTH=272                                                                                                                                                                                                                                                                                                                                 | 275  | 272  | 2.00E-87  | 98.9  | 61.5 | 73.8 |
| Rsa1.0_00109.1.g5392.t2 | putative ATPase [Arabidopsis thaliana] gi 20147133 gb AAM10283.1  F10A12.27/F10A12.27 [Arabidopsis thaliana] gi 20197659 gb AAM15184.1  putative ATPase [Arabidopsis thaliana] gi 330252925 gb AEC08019.1  suppressor of K+ transport growth defect1 protein [Arabidopsis thaliana]                                                                                                                                                                                                                                                                                                                                                                                                     | 437  | 435  | 0         | 99.5  | 94.3 | 95.9 | vacuolar protein-sorting-associated protein 4                                  | gbpln | Arabidopsis thaliana | AT2G27600.1   Symbols: SKD1, VPS4, ATSKD1   AAA-type ATPase family protein   chr2:11781226-11783730 FORWARD LENGTH=435                                                                                                                                                                                                                                                                                                                    | 437  | 435  | 0         | 99.5  | 94.3 | 95.9 |
| Rsa1.0_00109.1.g5393.t1 | pir [T00833 RNA-directed DNA polymerase homolog T13L16.7 - Arabidopsis thaliana (fragment)]                                                                                                                                                                                                                                                                                                                                                                                                                                                                                                                                                                                             | 300  | 1365 | 8.00E-49  | 455.0 | 35.7 | 49.7 | RNA-directed DNA polymerase homolog T13L16.7 - Arabidopsis thaliana (fragment) | ----  | ----                 | ATMG01250.1   Symbols: ORF102   RNA-directed DNA polymerase (reverse transcriptase)   chrM:310514-310882 FORWARD LENGTH=122                                                                                                                                                                                                                                                                                                               | 300  | 122  | 4.00E-11  | 40.7  | 9.7  | 13.7 |
| Rsa1.0_00109.1.g5394.t1 | gb AAG51783.1 AC079679.3 reverse transcriptase, putative: 16838-20266 [Arabidopsis thaliana] ref[XP_002878119.1] hypothetical protein ARALYDRAFT_907145 [Arabidopsis lyrata subsp. lyrata] gi 297822539 ref[XP_002879152.1] hypothetical protein ARALYDRAFT_901778 [Arabidopsis lyrata subsp. lyrata] gi 297323957 gb EFH54378.1  hypothetical protein ARALYDRAFT_907145 [Arabidopsis lyrata subsp. lyrata] gi 297324991 gb EFH55411.1  hypothetical protein ARALYDRAFT_901778 [Arabidopsis lyrata subsp. lyrata]                                                                                                                                                                       | 479  | 1142 | 3.00E-73  | 238.4 | 39.7 | 57.8 | reverse transcriptase, putative: 16838-20266                                   | gbpln | Arabidopsis thaliana | AT4G29090.1   Symbols:   Ribonuclease H-like superfamily protein   chr4:14333528-14335255 FORWARD LENGTH=575                                                                                                                                                                                                                                                                                                                              | 479  | 575  | 1.00E-28  | 120.0 | 27.3 | 45.7 |
| Rsa1.0_00109.1.g5395.t1 | hypothetical protein ARALYDRAFT_901778 [Arabidopsis lyrata subsp. lyrata] gi 297323957 gb EFH54378.1  hypothetical protein ARALYDRAFT_907145 [Arabidopsis lyrata subsp. lyrata] gi 297324991 gb EFH55411.1  hypothetical protein ARALYDRAFT_901778 [Arabidopsis lyrata subsp. lyrata]                                                                                                                                                                                                                                                                                                                                                                                                   | 164  | 163  | 3.00E-60  | 99.4  | 73.2 | 85.4 | hypothetical protein ARALYDRAFT_907145                                         | gbpln | Arabidopsis lyrata   | AT2G27580.2   Symbols:   A20/AN1-like zinc finger family protein   chr2:11776640-11777131 REVERSE LENGTH=163                                                                                                                                                                                                                                                                                                                              | 164  | 163  | 2.00E-59  | 99.4  | 73.8 | 85.4 |
| Rsa1.0_00109.1.g5396.t9 | emb CAN66330.1  hypothetical protein VITISV_000598 [Vitis vinifera]                                                                                                                                                                                                                                                                                                                                                                                                                                                                                                                                                                                                                     | 459  | 2691 | 8.00E-45  | 586.3 | 25.7 | 32.7 | hypothetical protein VITISV_000598                                             | gbpln | Vitis vinifera       | #                                                                                                                                                                                                                                                                                                                                                                                                                                         | #    | #    | #         | #     | #    |      |
| Rsa1.0_00109.1.g5397.t1 | #                                                                                                                                                                                                                                                                                                                                                                                                                                                                                                                                                                                                                                                                                       | #    | #    | #         | #     | #    | -    | ----                                                                           | ----  | #                    | #                                                                                                                                                                                                                                                                                                                                                                                                                                         | #    | #    | #         | #     |      |      |
| Rsa1.0_00109.1.g5398.t1 | gb AAF18641.1 AC006228.12 F5J5.16 [Arabidopsis thaliana]                                                                                                                                                                                                                                                                                                                                                                                                                                                                                                                                                                                                                                | 657  | 1024 | 2.00E-61  | 155.9 | 24.4 | 36.4 | F5J5.16                                                                        | gbpln | Arabidopsis thaliana | #                                                                                                                                                                                                                                                                                                                                                                                                                                         | #    | #    | #         | #     | #    |      |
| Rsa1.0_00109.1.g5399.t1 | #                                                                                                                                                                                                                                                                                                                                                                                                                                                                                                                                                                                                                                                                                       | #    | #    | #         | #     | #    | -    | ----                                                                           | ----  | #                    | #                                                                                                                                                                                                                                                                                                                                                                                                                                         | #    | #    | #         | #     |      |      |
| Rsa1.0_00109.1.g5400.t1 | #                                                                                                                                                                                                                                                                                                                                                                                                                                                                                                                                                                                                                                                                                       | #    | #    | #         | #     | #    | -    | ----                                                                           | ----  | #                    | #                                                                                                                                                                                                                                                                                                                                                                                                                                         | #    | #    | #         | #     |      |      |
| Rsa1.0_00109.1.g5401.t1 | dbj BAB11196.1  mutator-like transposase [Arabidopsis thaliana]                                                                                                                                                                                                                                                                                                                                                                                                                                                                                                                                                                                                                         | 685  | 797  | 1.00E-107 | 116.4 | 38.8 | 57.4 | mutator-like transposase                                                       | gbpln | Arabidopsis thaliana | #                                                                                                                                                                                                                                                                                                                                                                                                                                         | #    | #    | #         | #     | #    |      |
| Rsa1.0_00109.1.g5402.t6 | gb ABD65085.1  Ulp1 protease family protein [Brassica oleracea]                                                                                                                                                                                                                                                                                                                                                                                                                                                                                                                                                                                                                         | 675  | 640  | 6.00E-42  | 94.8  | 21.5 | 30.2 | Ulp1 protease family protein                                                   | gbpln | Brassica oleracea    | AT5G45570.1   Symbols:   Ulp1 protease family protein   chr5:18472301-18475574 FORWARD LENGTH=921                                                                                                                                                                                                                                                                                                                                         | 675  | 921  | 5.00E-11  | 136.4 | 9.9  | 15.7 |
| Rsa1.0_00110.1.g5403.t1 | #                                                                                                                                                                                                                                                                                                                                                                                                                                                                                                                                                                                                                                                                                       | #    | #    | #         | #     | #    | -    | ----                                                                           | ----  | #                    | #                                                                                                                                                                                                                                                                                                                                                                                                                                         | #    | #    | #         | #     |      |      |
| Rsa1.0_00110.1.g5404.t1 | ref[XP_002884836.1] CPRD49 [Arabidopsis lyrata subsp. lyrata] gi 297330676 gb EFH61095.1  CPRD49 [Arabidopsis lyrata subsp. lyrata]                                                                                                                                                                                                                                                                                                                                                                                                                                                                                                                                                     | 256  | 256  | 1.00E-140 | 100.0 | 92.6 | 96.9 | CPRD49                                                                         | gbpln | Arabidopsis lyrata   | AT3G11210.1   Symbols:   SGNH hydrolase-type esterase superfamily protein   chr3:3511101-3512899 REVERSE LENGTH=256                                                                                                                                                                                                                                                                                                                       | 256  | 256  | 1.00E-137 | 100.0 | 89.1 | 95.3 |
| Rsa1.0_00110.1.g5405.t1 | gb EOA31316.1  hypothetical protein CARUB_v10014489mg [Capsella rubella]                                                                                                                                                                                                                                                                                                                                                                                                                                                                                                                                                                                                                | 248  | 246  | 1.00E-116 | 99.2  | 92.7 | 94.8 | hypothetical protein CARUB_v10014489mg                                         | gbpln | Capsella rubella     | AT3G11200.1   Symbols: AL2   alfin-like 2   chr3:3508387-3510418 REVERSE LENGTH=246                                                                                                                                                                                                                                                                                                                                                       | 248  | 246  | 1.00E-111 | 99.2  | 91.5 | 95.2 |



|                         |                                                                                                                                                                                                                                                                                                                                                           |      |      |           |       |      |      |                                                 |       |                      |                                                                                                                                                                                                                                                                                                                                               |      |      |           |       |      |      |
|-------------------------|-----------------------------------------------------------------------------------------------------------------------------------------------------------------------------------------------------------------------------------------------------------------------------------------------------------------------------------------------------------|------|------|-----------|-------|------|------|-------------------------------------------------|-------|----------------------|-----------------------------------------------------------------------------------------------------------------------------------------------------------------------------------------------------------------------------------------------------------------------------------------------------------------------------------------------|------|------|-----------|-------|------|------|
| Rsa1.0_00110.1.g5406.t1 | ref[XP_002882718.1] oxidoreductase [Arabidopsis lyrata subsp. lyrata] gi 297328558 gb EFH58977.1  oxidoreductase [Arabidopsis lyrata subsp. lyrata]                                                                                                                                                                                                       | 390  | 372  | 0         | 95.4  | 77.9 | 86.4 | oxidoreductase                                  | gbpln | Arabidopsis lyrata   | AT3G11180.1   Symbols:   2-oxoglutarate (2OG) and Fe(II)-dependent oxygenase superfamily protein   chr3:3504249-3506688 FORWARD LENGTH=400                                                                                                                                                                                                    | 390  | 400  | 0         | 102.6 | 80.0 | 90.3 |
| Rsa1.0_00110.1.g5407.t1 | # # # # # # # # - ----                                                                                                                                                                                                                                                                                                                                    |      |      |           |       |      |      |                                                 |       |                      | # # # # # # #                                                                                                                                                                                                                                                                                                                                 |      |      |           |       |      |      |
| Rsa1.0_00110.1.g5408.t1 | ref[XP_002884832.1] hypothetical protein ARALYDRAFT_478455 [Arabidopsis lyrata subsp. lyrata] gi 297330672 gb EFH61091.1  hypothetical protein ARALYDRAFT_478455 [Arabidopsis lyrata subsp. lyrata]                                                                                                                                                       | 345  | 375  | 1.00E-131 | 108.7 | 73.6 | 84.1 | hypothetical protein ARALYDRAFT_478455          | gbpln | Arabidopsis lyrata   | AT3G11150.1   Symbols:   2-oxoglutarate (2OG) and Fe(II)-dependent oxygenase superfamily protein   chr3:3492986-3494599 REVERSE LENGTH=371                                                                                                                                                                                                    | 345  | 371  | 1.00E-127 | 107.5 | 71.6 | 81.2 |
| Rsa1.0_00110.1.g5409.t1 | ref[XP_002884831.1] hypothetical protein ARALYDRAFT_478454 [Arabidopsis lyrata subsp. lyrata] gi 297330671 gb EFH61090.1  hypothetical protein ARALYDRAFT_478454 [Arabidopsis lyrata subsp. lyrata]                                                                                                                                                       | 1687 | 1702 | 0         | 100.9 | 95.3 | 96.4 | hypothetical protein ARALYDRAFT_478454          | gbpln | Arabidopsis lyrata   | AT3G11130.1   Symbols:   Clathrin, heavy chain   chr3:3482575-3491667 REVERSE LENGTH=1705                                                                                                                                                                                                                                                     | 1687 | 1705 | 0         | 101.1 | 95.3 | 96.2 |
| Rsa1.0_00110.1.g5410.t1 | dbj BAJ34637.1  unnamed protein product [Thellungiella halophila]                                                                                                                                                                                                                                                                                         | 258  | 250  | 2.00E-96  | 96.9  | 79.5 | 88.4 | unnamed protein product                         | ----  | ----                 | AT3G11100.1   Symbols:   sequence-specific DNA binding transcription factors   chr3:3476490-3477320 REVERSE LENGTH=249                                                                                                                                                                                                                        | 258  | 249  | 2.00E-93  | 96.5  | 76.0 | 85.3 |
| Rsa1.0_00110.1.g5411.t1 | dbj BAE98403.1  putative non-LTR reverse transcriptase [Arabidopsis thaliana]                                                                                                                                                                                                                                                                             | 160  | 278  | 1.00E-34  | 173.8 | 43.8 | 63.1 | putative non-LTR reverse transcriptase          | gbpln | Arabidopsis thaliana | AT4G04650.1   Symbols:   RNA-directed DNA polymerase (reverse transcriptase)-related family protein   chr4:2353989-2355213 REVERSE LENGTH=332                                                                                                                                                                                                 | 160  | 332  | 1.00E-17  | 207.5 | 30.6 | 44.4 |
| Rsa1.0_00110.1.g5412.t1 | ref[NP_187719.1] receptor like protein 35 [Arabidopsis thaliana] gi 6016687 gb AAF01514.1 AC009991_10 putative disease resistance protein [Arabidopsis thaliana] gi 12321885 gb AA50981.1 AC073395_23 disease resistance protein, putative; 7647-10478 [Arabidopsis thaliana] gi 332641479 gb AEE75000.1  receptor like protein 35 [Arabidopsis thaliana] | 523  | 943  | 1.00E-161 | 180.3 | 63.7 | 72.8 | receptor like protein 35                        | gbpln | Arabidopsis thaliana | AT3G11080.1   Symbols:   AtRLP35, RLP35   receptor like protein 35   chr3:3470481-3473312 FORWARD LENGTH=943                                                                                                                                                                                                                                  | 523  | 943  | 1.00E-164 | 180.3 | 63.7 | 72.8 |
| Rsa1.0_00110.1.g5413.t1 | gb EOA29966.1  hypothetical protein CARUB_v10013078mg [Capsella rubella]                                                                                                                                                                                                                                                                                  | 680  | 710  | 0         | 104.4 | 82.4 | 89.7 | hypothetical protein CARUB_v10013078mg          | gbpln | Capsella rubella     | AT3G11040.1   Symbols:   Glycosyl hydrolase family 85   chr3:3460143-3463312 FORWARD LENGTH=701                                                                                                                                                                                                                                               | 680  | 701  | 0         | 103.1 | 83.2 | 89.9 |
| Rsa1.0_00110.1.g5414.t1 | gb ABV08790.1  DREB2B [Eutrema halophilum]                                                                                                                                                                                                                                                                                                                | 288  | 316  | 8.00E-86  | 109.7 | 68.4 | 80.6 | DREB2B                                          | gbpln | Eutrema halophilum   | AT3G11020.1   Symbols:   DREB2B, DREB2   DRE/CRT-binding protein 2B   chr3:3456009-3457001 FORWARD LENGTH=330                                                                                                                                                                                                                                 | 288  | 330  | 7.00E-78  | 114.6 | 62.8 | 77.8 |
| Rsa1.0_00110.1.g5415.t1 | gb EOA29651.1  hypothetical protein CARUB_v10015153mg [Capsella rubella]                                                                                                                                                                                                                                                                                  | 467  | 478  | 1.00E-167 | 102.4 | 67.5 | 76.4 | hypothetical protein CARUB_v10015153mg          | gbpln | Capsella rubella     | AT3G11000.1   Symbols:   DCD (Development and Cell Death) domain protein   chr3:3448442-3450283 FORWARD LENGTH=488                                                                                                                                                                                                                            | 467  | 488  | 1.00E-158 | 104.5 | 64.2 | 74.5 |
| Rsa1.0_00110.1.g5416.t1 | gb EOA32919.1  hypothetical protein CARUB_v10016246mg, partial [Capsella rubella]                                                                                                                                                                                                                                                                         | 104  | 161  | 1.00E-42  | 154.8 | 89.4 | 93.3 | hypothetical protein CARUB_v10016246mg, partial | gbpln | Capsella rubella     | AT3G10985.1   Symbols:   SAG20, WI12, ATW-12   senescence associated gene 20   chr3:3442776-3443108 FORWARD LENGTH=110                                                                                                                                                                                                                        | 104  | 110  | 1.00E-41  | 105.8 | 86.5 | 91.3 |
| Rsa1.0_00110.1.g5417.t1 | # # # # # # # # - ----                                                                                                                                                                                                                                                                                                                                    |      |      |           |       |      |      |                                                 |       |                      | # # # # # # #                                                                                                                                                                                                                                                                                                                                 |      |      |           |       |      |      |
| Rsa1.0_00110.1.g5418.t1 | emb CAB10225.1  retrovirus-related like polyprotein [Arabidopsis thaliana] gi 7268152 emb CAB78488.1  retrovirus-related like polyprotein [Arabidopsis thaliana]                                                                                                                                                                                          | 1527 | 1489 | 0         | 97.5  | 56.6 | 70.5 | retrovirus-related like polyprotein             | gbpln | Arabidopsis thaliana | AT4G23160.1   Symbols:   CRK8   cysteine-rich RLK (RECEPTOR-like protein kinase) 8   chr4:12129485-12134086 FORWARD LENGTH=1262                                                                                                                                                                                                               | 1527 | 1262 | 1.00E-165 | 82.6  | 18.5 | 24.4 |
| Rsa1.0_00110.1.g5419.t1 | ref[XP_002884824.1] xanthine/uracil permease family protein [Arabidopsis lyrata subsp. lyrata] gi 297330664 gb EFH61083.1  xanthine/uracil permease family protein [Arabidopsis lyrata subsp. lyrata]                                                                                                                                                     | 564  | 580  | 0         | 102.8 | 88.3 | 91.7 | xanthine/uracil permease family protein         | gbpln | Arabidopsis lyrata   | AT3G10960.1   Symbols:   ATAZG1, AZG1   AZA-guanine resistant1   chr3:3424986-3426725 REVERSE LENGTH=579                                                                                                                                                                                                                                      | 564  | 579  | 0         | 102.7 | 88.1 | 91.1 |
| Rsa1.0_00110.1.g5420.t1 | emb CAB39637.1  putative protein [Arabidopsis thaliana] gi 7267665 emb CAB78093.1  putative protein [Arabidopsis thaliana] gi 91805577 gb ABE65517.1  hypothetical protein At4g09700 [Arabidopsis thaliana]                                                                                                                                               | 404  | 371  | 6.00E-77  | 91.8  | 33.4 | 46.5 | putative protein                                | gbpln | Arabidopsis thaliana | AT2G13450.1   Symbols:   unknown protein; BEST Arabidopsis thaliana protein match is: unknown protein (TAIR:AT4G02000.1); Has 247 Blast hits to 243 proteins in 13 species: Archae - 0; Bacteria - 2; Metazoa - 0; Fungi - 2; Plants - 243; Viruses - 0; Other Eukaryotes - 0 (source: NCBI BLink).   chr2:5598739-5599923 REVERSE LENGTH=394 | 404  | 394  | 2.00E-25  | 97.5  | 16.8 | 24.8 |

|                         |                                                                                                                                                                                                                                                                                                                                                                                                                                                                                                                                                                                                                                                                                                                                                                                                                                                                                                                                                                                                                                                                                                                                                          |     |     |           |       |      |       |                                        |       |                      |                                                                                                                                                                                                                                                                                                                                                                                                                                                                  |     |     |           |       |      |       |
|-------------------------|----------------------------------------------------------------------------------------------------------------------------------------------------------------------------------------------------------------------------------------------------------------------------------------------------------------------------------------------------------------------------------------------------------------------------------------------------------------------------------------------------------------------------------------------------------------------------------------------------------------------------------------------------------------------------------------------------------------------------------------------------------------------------------------------------------------------------------------------------------------------------------------------------------------------------------------------------------------------------------------------------------------------------------------------------------------------------------------------------------------------------------------------------------|-----|-----|-----------|-------|------|-------|----------------------------------------|-------|----------------------|------------------------------------------------------------------------------------------------------------------------------------------------------------------------------------------------------------------------------------------------------------------------------------------------------------------------------------------------------------------------------------------------------------------------------------------------------------------|-----|-----|-----------|-------|------|-------|
| Rsa1.0_00110.1.g5421.t1 | gb AAF01528.1 AC009991_24<br>hypothetical protein [Arabidopsis thaliana] gi 21618249 gb AAM67299.1 <br>unknown [Arabidopsis thaliana]                                                                                                                                                                                                                                                                                                                                                                                                                                                                                                                                                                                                                                                                                                                                                                                                                                                                                                                                                                                                                    | 97  | 97  | 9.00E-29  | 100.0 | 76.3 | 86.6  | hypothetical protein                   | gbpln | Arabidopsis thaliana | AT5G05300.1   Symbols:   unknown protein; FUNCTIONS IN: molecular_function unknown; INVOLVED IN: biological_process unknown; LOCATED IN: endomembrane system; EXPRESSED IN: 10 plant structures; EXPRESSED DURING: 8 growth stages; Has 1807 Blast hits to 1807 proteins in 277 species: Archae - 0; Bacteria - 0; Metazoa - 736; Fungi - 347; Plants - 385; Viruses - 0; Other Eukaryotes - 339 (source: NCBI BLink).   chr5:1570102-1570410 REVERSE LENGTH=102 | 97  | 102 | 2.00E-17  | 105.2 | 58.8 | 70.1  |
| Rsa1.0_00110.1.g5422.t1 | gb AAL07333.1  superoxide dismutase [Raphanus sativus]                                                                                                                                                                                                                                                                                                                                                                                                                                                                                                                                                                                                                                                                                                                                                                                                                                                                                                                                                                                                                                                                                                   | 370 | 231 | 1.00E-133 | 62.4  | 61.9 | 61.9  | superoxide dismutase                   | gbpln | Raphanus sativus     | AT3G10920.1   Symbols: MSD1, MEE33, ATMSD1   manganese superoxide dismutase 1   chr3:3418015-3419581 FORWARD LENGTH=231                                                                                                                                                                                                                                                                                                                                          | 370 | 231 | 1.00E-130 | 62.4  | 59.7 | 60.0  |
| Rsa1.0_00110.1.g5423.t1 | gb EOA31384.1  hypothetical protein CARUB_v10014560mg [Capsella rubella]                                                                                                                                                                                                                                                                                                                                                                                                                                                                                                                                                                                                                                                                                                                                                                                                                                                                                                                                                                                                                                                                                 | 227 | 226 | 1.00E-110 | 99.6  | 87.7 | 93.0  | hypothetical protein CARUB_v10014560mg | gbpln | Capsella rubella     | AT3G10915.2   Symbols:   Reticulon family protein   chr3:3416101-3417497 REVERSE LENGTH=226                                                                                                                                                                                                                                                                                                                                                                      | 227 | 226 | 1.00E-112 | 99.6  | 86.8 | 93.8  |
| Rsa1.0_00110.1.g5424.t1 | ref NP_187702.1  RING-H2 finger protein ATL72 [Arabidopsis thaliana] gi 68565331 sp Q9SG96.1 ATL72_ARATH RecName: Full=RING-H2 finger protein ATL72 gi 6630539 gb AAF19558.1 AC011708.1 putative RING zinc finger protein [Arabidopsis thaliana] gi 28466857 gb AAO44037.1  At3g10910 [Arabidopsis thaliana] gi 110735947 dbj BAE99948.1  putative RING zinc finger protein [Arabidopsis thaliana] gi 332641448 gb AEE74969.1  RING-H2 finger protein ATL72 [Arabidopsis thaliana] ref NP_187700.1  mannan endo-1,4-beta-mannosidase 3 [Arabidopsis thaliana] gi 75265804 sp Q9SG94.1 MAN3_ARATH RecName: Full=Mannan endo-1,4-beta-mannosidase 3; AltName: Full=Beta-mannanase 3; AltName: Full=Endo-beta-1,4-mannanase 3; Short=AtMAN3; Flags: Precursor gi 6630541 gb AAF19560.1 AC011708.3 putative (1-4)-beta-mannan endohydrolase [Arabidopsis thaliana] gi 332641446 gb AEE74967.1  mannan endo-1,4-beta-mannosidase 3 [Arabidopsis thaliana] ref XP_002884817.1  hypothetical protein ARALYDRAFT_478421 [Arabidopsis lyrata subsp. lyrata] gi 297330657 gb EFH61076.1  hypothetical protein ARALYDRAFT_478421 [Arabidopsis lyrata subsp. lyrata] | 185 | 181 | 4.00E-81  | 97.8  | 80.5 | 88.1  | RING-H2 finger protein ATL72           | gbpln | Arabidopsis thaliana | AT3G10910.1   Symbols:   RING/U-box superfamily protein   chr3:3403068-3413613 REVERSE LENGTH=181                                                                                                                                                                                                                                                                                                                                                                | 185 | 181 | 1.00E-83  | 97.8  | 80.5 | 88.1  |
| Rsa1.0_00110.1.g5425.t1 | ref XP_002884817.1  hypothetical protein ARALYDRAFT_478421 [Arabidopsis lyrata subsp. lyrata] gi 297330657 gb EFH61076.1  hypothetical protein ARALYDRAFT_478421 [Arabidopsis lyrata subsp. lyrata]                                                                                                                                                                                                                                                                                                                                                                                                                                                                                                                                                                                                                                                                                                                                                                                                                                                                                                                                                      | 415 | 414 | 0         | 99.8  | 80.2 | 88.2  | mannan endo-1,4-beta-mannosidase 3     | gbpln | Arabidopsis thaliana | AT3G10890.1   Symbols:   Glycosyl hydrolase superfamily protein   chr3:3407455-3409000 REVERSE LENGTH=414                                                                                                                                                                                                                                                                                                                                                        | 415 | 414 | 0         | 99.8  | 80.2 | 88.2  |
| Rsa1.0_00110.1.g5426.t1 | gb EOA31718.1  hypothetical protein CARUB_v10014926mg [Capsella rubella]                                                                                                                                                                                                                                                                                                                                                                                                                                                                                                                                                                                                                                                                                                                                                                                                                                                                                                                                                                                                                                                                                 | 272 | 275 | 1.00E-139 | 101.1 | 86.4 | 96.3  | hypothetical protein ARALYDRAFT_478421 | gbpln | Arabidopsis lyrata   | AT3G10870.1   Symbols: MES17, ATMES17   methyl esterase 17   chr3:3401228-3402612 REVERSE LENGTH=276                                                                                                                                                                                                                                                                                                                                                             | 272 | 276 | 1.00E-138 | 101.5 | 87.1 | 96.0  |
| Rsa1.0_00110.1.g5427.t1 | gb EOA30394.1  hypothetical protein CARUB_v10013515mg [Capsella rubella]                                                                                                                                                                                                                                                                                                                                                                                                                                                                                                                                                                                                                                                                                                                                                                                                                                                                                                                                                                                                                                                                                 | 72  | 125 | 1.00E-33  | 173.6 | 94.4 | 100.0 | hypothetical protein CARUB_v10014926mg | gbpln | Capsella rubella     | AT3G10860.1   Symbols:   Cytochrome b-c1 complex, subunit 8 protein   chr3:3399815-3400514 FORWARD LENGTH=72                                                                                                                                                                                                                                                                                                                                                     | 72  | 72  | 1.00E-35  | 100.0 | 94.4 | 100.0 |
| Rsa1.0_00110.1.g5428.t1 | gb EOA30394.1  hypothetical protein CARUB_v10013515mg [Capsella rubella]                                                                                                                                                                                                                                                                                                                                                                                                                                                                                                                                                                                                                                                                                                                                                                                                                                                                                                                                                                                                                                                                                 | 555 | 498 | 1.00E-171 | 89.7  | 70.3 | 76.6  | hypothetical protein CARUB_v10013515mg | gbpln | Capsella rubella     | AT3G10810.1   Symbols:   zinc finger (C3HC4-type RING finger) family protein   chr3:3381848-3384227 REVERSE LENGTH=496                                                                                                                                                                                                                                                                                                                                           | 555 | 496 | 1.00E-173 | 89.4  | 71.2 | 77.5  |
| Rsa1.0_00110.1.g5429.t1 | dbj BAJ34203.1  unnamed protein product [Thellungiella halophila]                                                                                                                                                                                                                                                                                                                                                                                                                                                                                                                                                                                                                                                                                                                                                                                                                                                                                                                                                                                                                                                                                        | 630 | 677 | 0         | 107.5 | 76.3 | 83.2  | unnamed protein product                | ----  | ----                 | AT3G10800.1   Symbols: BZIP28   Basic-leucine zipper (bZIP) transcription factor family protein   chr3:3379326-3381430 FORWARD LENGTH=675                                                                                                                                                                                                                                                                                                                        | 630 | 675 | 0         | 107.1 | 72.5 | 81.3  |
| Rsa1.0_00110.1.g5430.t1 | ref XP_002882696.1  predicted protein [Arabidopsis lyrata subsp. lyrata] gi 297328536 gb EFH58955.1  predicted protein [Arabidopsis lyrata subsp. lyrata]                                                                                                                                                                                                                                                                                                                                                                                                                                                                                                                                                                                                                                                                                                                                                                                                                                                                                                                                                                                                | 211 | 227 | 7.00E-80  | 107.6 | 69.7 | 84.8  | predicted protein                      | gbpln | Arabidopsis lyrata   | AT3G10780.1   Symbols:   emp24/gp25L/p24 family/GOLD family protein   chr3:3375161-3376334 FORWARD LENGTH=217                                                                                                                                                                                                                                                                                                                                                    | 211 | 217 | 2.00E-78  | 102.8 | 66.8 | 82.9  |
| Rsa1.0_00110.1.g5431.t1 | gb EOA31000.1  hypothetical protein CARUB_v10014143mg [Capsella rubella]                                                                                                                                                                                                                                                                                                                                                                                                                                                                                                                                                                                                                                                                                                                                                                                                                                                                                                                                                                                                                                                                                 | 276 | 334 | 7.00E-84  | 121.0 | 67.0 | 74.6  | hypothetical protein CARUB_v10014143mg | gbpln | Capsella rubella     | AT3G10770.2   Symbols:   Single-stranded nucleic acid binding R3H protein   chr3:3372461-3374026 REVERSE LENGTH=325                                                                                                                                                                                                                                                                                                                                              | 276 | 325 | 4.00E-85  | 117.8 | 65.9 | 74.6  |
| Rsa1.0_00110.1.g5432.t1 | dbj BAJ34024.1  unnamed protein product [Thellungiella halophila]                                                                                                                                                                                                                                                                                                                                                                                                                                                                                                                                                                                                                                                                                                                                                                                                                                                                                                                                                                                                                                                                                        | 277 | 325 | 1.00E-105 | 117.3 | 83.8 | 85.9  | unnamed protein product                | ----  | ----                 | AT3G10760.1   Symbols:   Homeodomain-like superfamily protein   chr3:3369814-3370821 FORWARD LENGTH=335                                                                                                                                                                                                                                                                                                                                                          | 277 | 335 | 1.00E-106 | 120.9 | 81.6 | 83.0  |

|                         |                                                                                                                                                                                                                                                                                                                                                                                                                                                                                                                                          |     |     |           |       |      |      |                                                 |       |                      |                                                                                                                                     |     |     |           |       |      |      |
|-------------------------|------------------------------------------------------------------------------------------------------------------------------------------------------------------------------------------------------------------------------------------------------------------------------------------------------------------------------------------------------------------------------------------------------------------------------------------------------------------------------------------------------------------------------------------|-----|-----|-----------|-------|------|------|-------------------------------------------------|-------|----------------------|-------------------------------------------------------------------------------------------------------------------------------------|-----|-----|-----------|-------|------|------|
| Rsa1.0_00110.1.g5433.t1 | gb EOA39317.1  hypothetical protein CARUB_v10012356mg, partial [Capsella rubella]                                                                                                                                                                                                                                                                                                                                                                                                                                                        | 345 | 507 | 2.00E-46  | 147.0 | 45.8 | 62.6 | hypothetical protein CARUB_v10012356mg, partial | gbpln | Capsella rubella     | AT1G22000.1   Symbols:   FBD, F-box and Leucine Rich Repeat domains containing protein   chr1:7744189-7747123 FORWARD LENGTH=717    | 345 | 717 | 3.00E-40  | 207.8 | 42.9 | 58.6 |
| Rsa1.0_00110.1.g5434.t1 | # # # # # # # # # #                                                                                                                                                                                                                                                                                                                                                                                                                                                                                                                      |     |     |           |       |      |      |                                                 |       |                      |                                                                                                                                     |     |     |           |       |      |      |
| Rsa1.0_00111.1.g5435.t1 | ref NP_850203.1  chaperonin CPN60-like 1 [Arabidopsis thaliana] gi 75301136 sp q8L7B5.1 CH60B_ARAT H RecName: Full=Chaperonin CPN60-like 1, mitochondrial; AltName: Full=HSP60-like 1; Flags: Precursor gi 22531044 gb AAM97026.1  mitochondrial chaperonin HSP60 [Arabidopsis thaliana] gi 23197790 gb AAN15422.1  mitochondrial chaperonin HSP60 [Arabidopsis thaliana] gi 51968972 dbj BAD43178.1  mitochondrial chaperonin (HSP60) [Arabidopsis thaliana] gi 330253705 gb AEC08799.1  chaperonin CPN60-like 1 [Arabidopsis thaliana] | 436 | 585 | 1.00E-101 | 134.2 | 52.3 | 60.6 | chaperonin CPN60-like 1                         | gbpln | Arabidopsis thaliana | AT2G33210.1   Symbols: HSP60-2   heat shock protein 60-2   chr2:14075093-14078568 REVERSE LENGTH=585                                | 436 | 585 | 1.00E-103 | 134.2 | 52.3 | 60.6 |
| Rsa1.0_00111.1.g5436.t1 | gb EOA28559.1  hypothetical protein CARUB_v10024776mg [Capsella rubella]                                                                                                                                                                                                                                                                                                                                                                                                                                                                 | 524 | 245 | 1.00E-125 | 46.8  | 42.2 | 43.5 | hypothetical protein CARUB_v10024776mg          | gbpln | Capsella rubella     | AT2G33255.1   Symbols:   Haloacid dehalogenase-like hydrolase (HAD) superfamily protein   chr2:14098795-14100358 FORWARD LENGTH=245 | 524 | 245 | 1.00E-128 | 46.8  | 42.0 | 43.5 |
| Rsa1.0_00111.1.g5437.t1 | ref NP_180861.1  receptor like protein 24 [Arabidopsis thaliana] gi 2924789 gb AAC04918.1  putative leucine-rich repeat disease resistance protein [Arabidopsis thaliana] gi 20196994 gb AAM14862.1  putative leucine-rich repeat disease resistance protein [Arabidopsis thaliana] gi 330253681 gb AEC08775.1  receptor like protein 24 [Arabidopsis thaliana]                                                                                                                                                                          | 887 | 864 | 0         | 97.4  | 63.4 | 75.4 | receptor like protein 24                        | gbpln | Arabidopsis thaliana | AT2G33020.1   Symbols: AtRLP24, RLP24   receptor like protein 24   chr2:14013874-14016516 REVERSE LENGTH=864                        | 887 | 864 | 0         | 97.4  | 63.4 | 75.4 |
| Rsa1.0_00111.1.g5438.t1 | gb ACT33452.1  SU(VAR)3-9-like protein 2 [Brassica rapa subsp. pekinensis]                                                                                                                                                                                                                                                                                                                                                                                                                                                               | 642 | 635 | 0         | 98.9  | 83.5 | 88.0 | SU(VAR)3-9-like protein 2                       | gbpln | Brassica rapa        | AT2G33290.1   Symbols: SUVH2, SDG3, ATSUVH2   SU(VAR)3-9 homolog 2   chr2:14110078-14112033 FORWARD LENGTH=651                      | 642 | 651 | 0         | 101.4 | 61.2 | 76.9 |
| Rsa1.0_00111.1.g5439.t1 | ref XP_002890380.1  hypothetical protein ARALYDRAFT_481010 [Arabidopsis lyrata subsp. lyrata] gi 297326219 gb EFH56639.1  hypothetical protein ARALYDRAFT_481010 [Arabidopsis lyrata subsp. lyrata]                                                                                                                                                                                                                                                                                                                                      | 811 | 800 | 0         | 98.6  | 74.6 | 83.5 | hypothetical protein ARALYDRAFT_481010          | gbpln | Arabidopsis lyrata   | AT2G21450.1   Symbols: CHR34   chromatin remodeling 34   chr2:9179622-9182356 REVERSE LENGTH=816                                    | 811 | 816 | 0         | 100.6 | 74.1 | 84.0 |
| Rsa1.0_00111.1.g5440.t1 | ref XP_002890380.1  hypothetical protein ARALYDRAFT_481010 [Arabidopsis lyrata subsp. lyrata] gi 297326219 gb EFH56639.1  hypothetical protein ARALYDRAFT_481010 [Arabidopsis lyrata subsp. lyrata]                                                                                                                                                                                                                                                                                                                                      | 165 | 800 | 2.00E-25  | 484.8 | 39.4 | 51.5 | hypothetical protein ARALYDRAFT_481010          | gbpln | Arabidopsis lyrata   | AT2G21450.1   Symbols: CHR34   chromatin remodeling 34   chr2:9179622-9182356 REVERSE LENGTH=816                                    | 165 | 816 | 1.00E-24  | 494.5 | 44.8 | 58.2 |
| Rsa1.0_00111.1.g5441.t1 | gb EOA29418.1  hypothetical protein CARUB_v10025709mg, partial [Capsella rubella]                                                                                                                                                                                                                                                                                                                                                                                                                                                        | 366 | 281 | 5.00E-56  | 76.8  | 30.1 | 34.2 | hypothetical protein CARUB_v10025709mg, partial | gbpln | Capsella rubella     | AT2G33030.1   Symbols: AtRLP25, RLP25   receptor like protein 25   chr2:14017684-14018340 REVERSE LENGTH=218                        | 366 | 218 | 6.00E-57  | 59.6  | 28.4 | 33.9 |
| Rsa1.0_00111.1.g5442.t1 | ref XP_002881275.1  C2 domain-containing protein [Arabidopsis lyrata subsp. lyrata] gi 297327114 gb EFH57534.1  C2 domain-containing protein [Arabidopsis lyrata subsp. lyrata]                                                                                                                                                                                                                                                                                                                                                          | 613 | 595 | 0         | 97.1  | 82.4 | 88.1 | C2 domain-containing protein                    | gbpln | Arabidopsis lyrata   | AT2G33320.1   Symbols:   Calcium-dependent lipid-binding (CaLB domain) family protein   chr2:14119526-14121334 REVERSE LENGTH=602   | 613 | 602 | 0         | 98.2  | 80.3 | 86.9 |

|                          |                                                                                                                                                                                                                                                                                                                                                                                                                                                                                                                                                                                                                                                                                                                                                                                                                                                                                                                                                |      |      |           |       |      |      |                                        |       |                      |                                                                                                                                                                                                                                                                                                                                                              |      |      |           |       |      |      |
|--------------------------|------------------------------------------------------------------------------------------------------------------------------------------------------------------------------------------------------------------------------------------------------------------------------------------------------------------------------------------------------------------------------------------------------------------------------------------------------------------------------------------------------------------------------------------------------------------------------------------------------------------------------------------------------------------------------------------------------------------------------------------------------------------------------------------------------------------------------------------------------------------------------------------------------------------------------------------------|------|------|-----------|-------|------|------|----------------------------------------|-------|----------------------|--------------------------------------------------------------------------------------------------------------------------------------------------------------------------------------------------------------------------------------------------------------------------------------------------------------------------------------------------------------|------|------|-----------|-------|------|------|
| Rsa1.0_001111.1.g5443.t1 | ref NP_850206.4  Pre-mRNA-processing factor 19-2 [Arabidopsis thaliana]  gi 240254574 ref NP_850207.4  Pre-mRNA-processing factor 19-2 [Arabidopsis thaliana]  gi 288558844 sp O22785.3 PR19B_ARATH RecName: Full=Pre-mRNA-processing factor 19 homolog 2; AltName: Full=MOS4-associated complex protein 3B; Short=MAC protein 3B; AltName: Full=Plant U-box protein 60; AltName: Full=U-box domain-containing protein 60  gi 226222620 gb ACO38702.1  truncated MOS4-associated complex protein 3B [Arabidopsis thaliana]  gi 330253723 gb AEC08817.1  Pre-mRNA-processing factor 19-2 [Arabidopsis thaliana]  gi 330253724 gb AEC08818.1  Pre-mRNA-processing factor 19-2 [Arabidopsis thaliana]  ref NP_001077999.1  CCT motif-containing protein [Arabidopsis thaliana]  gi 60547735 gb AAX23831.1  hypothetical protein At2g33350 [Arabidopsis thaliana]  gi 330253727 gb AEC08821.1  CCT motif-containing protein [Arabidopsis thaliana] | 525  | 525  | 0         | 100.0 | 93.5 | 97.1 | Pre-mRNA-processing factor 19-2        | gbpln | Arabidopsis thaliana | AT2G33340.2   Symbols: MAC3B   MOS4-associated complex 3B   chr2:14126584-14131000 REVERSE LENGTH=525                                                                                                                                                                                                                                                        | 525  | 525  | 0         | 100.0 | 93.5 | 97.1 |
| Rsa1.0_001111.1.g5444.t1 | ref NP_001077999.1  CCT motif-containing protein [Arabidopsis thaliana]  gi 60547735 gb AAX23831.1  hypothetical protein At2g33350 [Arabidopsis thaliana]  gi 330253727 gb AEC08821.1  CCT motif-containing protein [Arabidopsis thaliana]                                                                                                                                                                                                                                                                                                                                                                                                                                                                                                                                                                                                                                                                                                     | 380  | 409  | 1.00E-131 | 107.6 | 73.7 | 81.3 | CCT motif-containing protein           | gbpln | Arabidopsis thaliana | AT2G33350.2   Symbols:   CCT motif family protein   chr2:14134116-14136836 FORWARD LENGTH=409                                                                                                                                                                                                                                                                | 380  | 409  | 1.00E-134 | 107.6 | 73.7 | 81.3 |
| Rsa1.0_001111.1.g5445.t1 | gb ACG69528.1  caleosin CLO3-2 [Brassica napus]                                                                                                                                                                                                                                                                                                                                                                                                                                                                                                                                                                                                                                                                                                                                                                                                                                                                                                | 239  | 239  | 1.00E-134 | 100.0 | 96.7 | 97.9 | caleosin CLO3-2                        | gbpln | Brassica napus       | AT2G33380.1   Symbols: RD20, CLO-3   Caleosin-related family protein   chr2:14144984-14146374 REVERSE LENGTH=236                                                                                                                                                                                                                                             | 239  | 236  | 1.00E-120 | 98.7  | 82.8 | 92.1 |
| Rsa1.0_001111.1.g5446.t4 | gb EOA27327.1  hypothetical protein CARUB_v10023443mg [Capsella rubella]                                                                                                                                                                                                                                                                                                                                                                                                                                                                                                                                                                                                                                                                                                                                                                                                                                                                       | 381  | 377  | 0         | 99.0  | 86.1 | 92.9 | hypothetical protein CARUB_v10023443mg | gbpln | Capsella rubella     | AT2G33385.2   Symbols: arpc2b   actin-related protein C2B   chr2:14147604-14149769 REVERSE LENGTH=374                                                                                                                                                                                                                                                        | 381  | 374  | 0         | 98.2  | 83.7 | 91.9 |
| Rsa1.0_001111.1.g5447.t1 | ref NP_180897.1  uncharacterized protein [Arabidopsis thaliana]  gi 2459422 gb AAB80657.1  unknown protein [Arabidopsis thaliana]  gi 19310603 gb AAL85032.1  unknown protein [Arabidopsis thaliana]  gi 24030291 gb AAN41317.1  unknown protein [Arabidopsis thaliana]  gi 330253735 gb AEC08829.1  uncharacterized protein AT2G33390 [Arabidopsis thaliana]                                                                                                                                                                                                                                                                                                                                                                                                                                                                                                                                                                                  | 98   | 98   | 8.00E-27  | 100.0 | 84.7 | 88.8 | uncharacterized protein                | gbpln | Arabidopsis thaliana | AT2G33390.1   Symbols:   unknown protein; Has 34 Blast hits to 34 proteins in 10 species: Archae - 0; Bacteria - 0; Metazoa - 0; Fungi - 0; Plants - 34; Viruses - 0; Other Eukaryotes - 0 (source: NCBI BLink).   chr2:14151714-14152698 FORWARD LENGTH=98                                                                                                  | 98   | 98   | 1.00E-29  | 100.0 | 84.7 | 88.8 |
| Rsa1.0_001111.1.g5448.t1 | ref XP_002881282.1  hypothetical protein ARALYDRAFT_482283 [Arabidopsis lyrata subsp. lyrata]  gi 297327121 gb EFH57541.1  hypothetical protein ARALYDRAFT_482283 [Arabidopsis lyrata subsp. lyrata]                                                                                                                                                                                                                                                                                                                                                                                                                                                                                                                                                                                                                                                                                                                                           | 289  | 270  | 5.00E-85  | 93.4  | 64.0 | 75.1 | hypothetical protein ARALYDRAFT_482283 | gbpln | Arabidopsis lyrata   | AT2G33400.1   Symbols:   unknown protein; BEST Arabidopsis thaliana protein match is: unknown protein (TAIR:AT1G04030.1); Has 3875 Blast hits to 2949 proteins in 323 species: Archae - 6; Bacteria - 281; Metazoa - 960; Fungi - 593; Plants - 281; Viruses - 98; Other Eukaryotes - 1656 (source: NCBI BLink).   chr2:14153331-14154401 REVERSE LENGTH=272 | 289  | 272  | 2.00E-80  | 94.1  | 67.5 | 75.8 |
| Rsa1.0_001111.1.g5449.t1 | gb EOA27238.1  hypothetical protein CARUB_v10023347mg [Capsella rubella]                                                                                                                                                                                                                                                                                                                                                                                                                                                                                                                                                                                                                                                                                                                                                                                                                                                                       | 395  | 403  | 1.00E-154 | 102.0 | 82.5 | 85.1 | hypothetical protein CARUB_v10023347mg | gbpln | Capsella rubella     | AT2G33410.1   Symbols:   RNA-binding (RRM/RBD/RNP motifs) family protein   chr2:14156085-14157435 FORWARD LENGTH=404                                                                                                                                                                                                                                         | 395  | 404  | 1.00E-136 | 102.3 | 81.0 | 84.1 |
| Rsa1.0_001111.1.g5450.t1 | gb EOA29220.1  hypothetical protein CARUB_v10025494mg [Capsella rubella]                                                                                                                                                                                                                                                                                                                                                                                                                                                                                                                                                                                                                                                                                                                                                                                                                                                                       | 1035 | 1044 | 0         | 100.9 | 91.4 | 95.0 | hypothetical protein CARUB_v10025494mg | gbpln | Capsella rubella     | AT2G33420.1   Symbols:   Protein of unknown function (DUF10)   chr2:14158782-14162304 FORWARD LENGTH=1039                                                                                                                                                                                                                                                    | 1035 | 1039 | 0         | 100.4 | 90.0 | 94.4 |
| Rsa1.0_001111.1.g5451.t1 | ref XP_002879451.1  hypothetical protein ARALYDRAFT_482286 [Arabidopsis lyrata subsp. lyrata]  gi 297325290 gb EFH55710.1  hypothetical protein ARALYDRAFT_482286 [Arabidopsis lyrata subsp. lyrata]                                                                                                                                                                                                                                                                                                                                                                                                                                                                                                                                                                                                                                                                                                                                           | 356  | 219  | 1.00E-112 | 61.5  | 56.7 | 58.7 | hypothetical protein ARALYDRAFT_482286 | gbpln | Arabidopsis lyrata   | AT2G33430.1   Symbols: DAL1, DAL   differentiation and greening-like 1   chr2:14162732-14164729 FORWARD LENGTH=219                                                                                                                                                                                                                                           | 356  | 219  | 1.00E-112 | 61.5  | 56.2 | 57.9 |
| Rsa1.0_001111.1.g5452.t1 | gb EOA28019.1  hypothetical protein CARUB_v10024195mg [Capsella rubella]                                                                                                                                                                                                                                                                                                                                                                                                                                                                                                                                                                                                                                                                                                                                                                                                                                                                       | 143  | 166  | 7.00E-64  | 116.1 | 89.5 | 95.8 | hypothetical protein CARUB_v10024195mg | gbpln | Capsella rubella     | AT2G33450.1   Symbols:   Ribosomal L28 family   chr2:14173620-14174380 FORWARD LENGTH=143                                                                                                                                                                                                                                                                    | 143  | 143  | 8.00E-66  | 100.0 | 89.5 | 95.1 |
| Rsa1.0_001111.1.g5453.t1 | gb EOA29289.1  hypothetical protein CARUB_v10025564mg [Capsella rubella]                                                                                                                                                                                                                                                                                                                                                                                                                                                                                                                                                                                                                                                                                                                                                                                                                                                                       | 199  | 220  | 1.00E-74  | 110.6 | 78.4 | 85.4 | hypothetical protein CARUB_v10025564mg | gbpln | Capsella rubella     | AT2G33460.1   Symbols: RIC1   ROP-interactive CRIB motif-containing protein 1   chr2:14174590-14175561 REVERSE LENGTH=224                                                                                                                                                                                                                                    | 199  | 224  | 8.00E-75  | 112.6 | 78.9 | 84.9 |

|                          |                                                                                                                                                                                                                                                                                                                                                                                                                                                                                                                                                                                                                                                                                                                                                        |     |     |           |       |      |      |                                        |       |                      |                                                                                                                                                                                                                                                              |     |     |           |       |      |      |
|--------------------------|--------------------------------------------------------------------------------------------------------------------------------------------------------------------------------------------------------------------------------------------------------------------------------------------------------------------------------------------------------------------------------------------------------------------------------------------------------------------------------------------------------------------------------------------------------------------------------------------------------------------------------------------------------------------------------------------------------------------------------------------------------|-----|-----|-----------|-------|------|------|----------------------------------------|-------|----------------------|--------------------------------------------------------------------------------------------------------------------------------------------------------------------------------------------------------------------------------------------------------------|-----|-----|-----------|-------|------|------|
| Rsa1.0_00111.1.g5454.t1  | ref[XP_002881284.1] hypothetical protein ARALYDRAFT_482291 [Arabidopsis lyrata subsp. lyrata] gi 297327123 gb EFH57543.1                                                                                                                                                                                                                                                                                                                                                                                                                                                                                                                                                                                                                               | 202 | 202 | 1.00E-109 | 100.0 | 93.6 | 97.5 | hypothetical protein ARALYDRAFT_482291 | gbpln | Arabidopsis lyrata   | AT2G33470.2   Symbols: GLTP1   glycolipid transfer protein 1   chr2:14176599-14177950 REVERSE LENGTH=202                                                                                                                                                     | 202 | 202 | 1.00E-108 | 100.0 | 90.6 | 96.0 |
| Rsa1.0_00111.1.g5455.t16 | gb EOA27680.1  hypothetical protein CARUB_v10023833mg [Capsella rubella]                                                                                                                                                                                                                                                                                                                                                                                                                                                                                                                                                                                                                                                                               | 256 | 273 | 1.00E-90  | 106.6 | 76.6 | 87.1 | hypothetical protein CARUB_v10023833mg | gbpln | Capsella rubella     | AT2G33480.1   Symbols: ANAC041   NAC domain containing protein 41   chr2:14181275-14182247 FORWARD LENGTH=268                                                                                                                                                | 256 | 268 | 2.00E-90  | 104.7 | 77.0 | 89.5 |
| Rsa1.0_00111.1.g5456.t2  | gb EOA26568.1  hypothetical protein CARUB_v10022626mg [Capsella rubella]                                                                                                                                                                                                                                                                                                                                                                                                                                                                                                                                                                                                                                                                               | 276 | 853 | 5.00E-33  | 309.1 | 35.5 | 37.7 | hypothetical protein CARUB_v10022626mg | gbpln | Capsella rubella     | AT2G31260.1   Symbols: APG9, ATPG9   autophagy 9 (APG9)   chr2:13322291-13326293 REVERSE LENGTH=866                                                                                                                                                          | 276 | 866 | 2.00E-34  | 313.8 | 35.1 | 37.0 |
| Rsa1.0_00111.1.g5457.t1  | ref[XP_002881291.1] hypothetical protein ARALYDRAFT_321088 [Arabidopsis lyrata subsp. lyrata] gi 297327130 gb EFH57550.1  hypothetical protein ARALYDRAFT_321088 [Arabidopsis lyrata subsp. lyrata] ref[NP_180917.1] Rossmann-fold NAD(P)-binding domain-containing protein [Arabidopsis thaliana] gi 2459446 gb AAB0681.1  putative cinnamoyl-CoA reductase [Arabidopsis thaliana] gi 21536817 gb AAM61149.1  putative cinnamoyl-CoA reductase [Arabidopsis thaliana] gi 21539438 gb AAM53272.1  putative cinnamoyl-CoA reductase [Arabidopsis thaliana] gi 23197694 gb AAN15374.1  putative cinnamoyl-CoA reductase [Arabidopsis thaliana] gi 330253763 gb AEC08857.1  Rossmann-fold NAD(P)-binding domain-containing protein [Arabidopsis thaliana] | 90  | 139 | 3.00E-33  | 154.4 | 78.9 | 90.0 | hypothetical protein ARALYDRAFT_321088 | gbpln | Arabidopsis lyrata   | AT2G33585.1   Symbols:   unknown protein; Has 31 Blast hits to 31 proteins in 12 species: Archae - 0; Bacteria - 0; Metazoa - 0; Fungi - 0; Plants - 31; Viruses - 0; Other Eukaryotes - 0 (source: NCBI BLink).   chr2:14223403-14224167 REVERSE LENGTH=193 | 90  | 193 | 8.00E-36  | 214.4 | 75.6 | 85.6 |
| Rsa1.0_00111.1.g5458.t1  | ref[XP_002873095.1] predicted protein [Arabidopsis lyrata subsp. lyrata] gi 297318932 gb EFH49354.1  predicted protein [Arabidopsis lyrata subsp. lyrata]                                                                                                                                                                                                                                                                                                                                                                                                                                                                                                                                                                                              | 258 | 227 | 2.00E-27  | 88.0  | 34.5 | 45.7 | predicted protein                      | gbpln | Arabidopsis lyrata   | AT5G03480.1   Symbols:   RNA-binding (RRM/RBD/RNP motifs) family protein   chr5:869208-870855 REVERSE LENGTH=321                                                                                                                                             | 258 | 321 | 9.00E-26  | 124.4 | 27.9 | 40.7 |
| Rsa1.0_00111.1.g5460.t1  | gb EOA27050.1  hypothetical protein CARUB_v10023146mg [Capsella rubella]                                                                                                                                                                                                                                                                                                                                                                                                                                                                                                                                                                                                                                                                               | 458 | 467 | 0         | 102.0 | 78.8 | 88.0 | hypothetical protein CARUB_v10023146mg | gbpln | Capsella rubella     | AT2G33610.1   Symbols: ATSWI3B, CHB2, SWI3B   switch subunit 3   chr2:14229023-14231149 FORWARD LENGTH=469                                                                                                                                                   | 458 | 469 | 0         | 102.4 | 77.5 | 86.5 |
| Rsa1.0_00111.1.g5461.t5  | gb EOA27415.1  hypothetical protein CARUB_v10023550mg [Capsella rubella]                                                                                                                                                                                                                                                                                                                                                                                                                                                                                                                                                                                                                                                                               | 354 | 346 | 2.00E-98  | 97.7  | 63.3 | 69.2 | hypothetical protein CARUB_v10023550mg | gbpln | Capsella rubella     | AT2G33620.4   Symbols:   AT hook motif DNA-binding family protein   chr2:14234749-14236563 FORWARD LENGTH=351                                                                                                                                                | 354 | 351 | 1.00E-96  | 99.2  | 66.1 | 72.0 |
| Rsa1.0_00111.1.g5462.t1  | gb EOA29301.1  hypothetical protein CARUB_v10025579mg [Capsella rubella]                                                                                                                                                                                                                                                                                                                                                                                                                                                                                                                                                                                                                                                                               | 501 | 501 | 0         | 100.0 | 87.4 | 91.2 | hypothetical protein CARUB_v10025579mg | gbpln | Capsella rubella     | AT2G33670.1   Symbols: MLO5, ATML05   Seven transmembrane MLO family protein   chr2:14245138-14247879 FORWARD LENGTH=501                                                                                                                                     | 501 | 501 | 0         | 100.0 | 86.4 | 91.0 |
| Rsa1.0_00111.1.g5463.t1  | ref[NP_180861.1] receptor like protein 24 [Arabidopsis thaliana] gi 2924789 gb AAC04918.1  putative leucine-rich repeat disease resistance protein [Arabidopsis thaliana] gi 20196994 gb AAM14862.1  putative leucine-rich repeat disease resistance protein [Arabidopsis thaliana] gi 330253681 gb AEC08775.1  receptor like protein 24 [Arabidopsis thaliana]                                                                                                                                                                                                                                                                                                                                                                                        | 881 | 864 | 0         | 98.1  | 64.9 | 75.5 | receptor like protein 24               | gbpln | Arabidopsis thaliana | AT2G33020.1   Symbols: AtRLP24, RLP24   receptor like protein 24   chr2:14013874-14016516 REVERSE LENGTH=864                                                                                                                                                 | 881 | 864 | 0         | 98.1  | 64.9 | 75.5 |
| Rsa1.0_00111.1.g5464.t1  | gb EOA28253.1  hypothetical protein CARUB_v10024446mg [Capsella rubella]                                                                                                                                                                                                                                                                                                                                                                                                                                                                                                                                                                                                                                                                               | 72  | 77  | 4.00E-27  | 106.9 | 88.9 | 91.7 | hypothetical protein CARUB_v10024446mg | gbpln | Capsella rubella     | AT2G33690.1   Symbols:   Late embryogenesis abundant protein, group 6   chr2:14252199-14252414 FORWARD LENGTH=71                                                                                                                                             | 72  | 71  | 3.00E-28  | 98.6  | 86.1 | 90.3 |

|                         |                                                                                                                                                                                                                                                                                                                                                                                                                                                                                                                                                                                                                               |      |      |          |       |      |      |                                             |       |                      |                                                                                                                                                                                                                                                                                       |      |      |           |       |      |      |
|-------------------------|-------------------------------------------------------------------------------------------------------------------------------------------------------------------------------------------------------------------------------------------------------------------------------------------------------------------------------------------------------------------------------------------------------------------------------------------------------------------------------------------------------------------------------------------------------------------------------------------------------------------------------|------|------|----------|-------|------|------|---------------------------------------------|-------|----------------------|---------------------------------------------------------------------------------------------------------------------------------------------------------------------------------------------------------------------------------------------------------------------------------------|------|------|-----------|-------|------|------|
| Rsa1.0_00111.1.g5465.t1 | ref NP_180926.1  putative protein phosphatase 2C 27 [Arabidopsis thaliana]<br>gi 75220399 sp P93006.1 P2C27_ARATH<br>RecName: Full=Probable protein phosphatase 2C 27; Short=AtPP2C27<br>gi 1707015 gb AAC69126.1  putative protein phosphatase 2C [Arabidopsis thaliana] gi 17979442 gb AAL49863.1  putative protein phosphatase 2C [Arabidopsis thaliana]<br>gi 20259093 gb AAM14262.1  putative protein phosphatase 2C [Arabidopsis thaliana] gi 33025377 gb AEC08870.1  putative protein phosphatase 2C 27 [Arabidopsis thaliana]                                                                                         | 395  | 380  | 0        | 96.2  | 84.8 | 90.4 | putative protein phosphatase 2C 27          | gbpln | Arabidopsis thaliana | AT2G33700.1   Symbols:   Protein phosphatase 2C family protein   chr2:14254200-14255784 FORWARD<br>LENGTH=380                                                                                                                                                                         | 395  | 380  | 0         | 96.2  | 84.8 | 90.4 |
| Rsa1.0_00111.1.g5466.t1 | gb EOA29237.1  hypothetical protein CARUB_v10025511mg [Capsella rubella]                                                                                                                                                                                                                                                                                                                                                                                                                                                                                                                                                      | 198  | 214  | 1.00E-70 | 108.1 | 69.7 | 75.3 | hypothetical protein CARUB_v10025511mg      | gbpln | Capsella rubella     | AT2G33710.1   Symbols:   Integrase-type DNA-binding superfamily protein   chr2:14259271-14260652 REVERSE<br>LENGTH=218                                                                                                                                                                | 198  | 218  | 5.00E-64  | 110.1 | 70.2 | 77.8 |
| Rsa1.0_00111.1.g5467.t1 | dbj BAA97287.1  retroelement pol polyprotein-like [Arabidopsis thaliana]                                                                                                                                                                                                                                                                                                                                                                                                                                                                                                                                                      | 1476 | 1491 | 0        | 101.0 | 57.2 | 72.6 | retroelement pol polyprotein-like           | gbpln | Arabidopsis thaliana | AT4G23160.1   Symbols: CRK8   cysteine-rich RLK (RECEPTOR-like protein kinase) 8   chr4:12129485-12134086 FORWARD<br>LENGTH=1262                                                                                                                                                      | 1476 | 1262 | 1.00E-137 | 85.5  | 15.5 | 22.3 |
| Rsa1.0_00111.1.g5468.t1 | ref NP_180929.1  DEAD-box ATP-dependent RNA helicase 21 [Arabidopsis thaliana]<br>gi 75319077 sp P93008.1 RH21_ARATH<br>RecName: Full=DEAD-box ATP-dependent RNA helicase 21<br>gi 1707017 gb AAC69128.1  putative U5 small nuclear ribonucleoprotein, an RNA helicase [Arabidopsis thaliana]<br>gi 17473908 gb AAL38370.1  putative U5 small nuclear ribonucleoprotein, an RNA helicase [Arabidopsis thaliana]<br>gi 20259792 gb AAM13243.1  putative U5 small nuclear ribonucleoprotein, an RNA helicase [Arabidopsis thaliana]<br>gi 33025378 gb AEC08875.1  DEAD-box ATP-dependent RNA helicase 21 [Arabidopsis thaliana] | 706  | 733  | 0        | 103.8 | 81.7 | 83.3 | DEAD-box ATP-dependent RNA helicase 21      | gbpln | Arabidopsis thaliana | AT2G33730.1   Symbols:   P-loop containing nucleoside triphosphate hydrolases superfamily protein   chr2:14265679-14267880 REVERSE<br>LENGTH=733                                                                                                                                      | 706  | 733  | 0         | 103.8 | 81.7 | 83.3 |
| Rsa1.0_00111.1.g5469.t1 | gb EOA28781.1  hypothetical protein CARUB_v10025013mg [Capsella rubella]                                                                                                                                                                                                                                                                                                                                                                                                                                                                                                                                                      | 285  | 349  | 8.00E-76 | 122.5 | 58.9 | 75.1 | hypothetical protein CARUB_v10025013mg      | gbpln | Capsella rubella     | AT2G33750.2   Symbols: ATPUP2, PUP2   purine permease 2   chr2:14271794-14273265 REVERSE<br>LENGTH=347                                                                                                                                                                                | 285  | 347  | 4.00E-68  | 121.8 | 57.5 | 72.6 |
| Rsa1.0_00111.1.g5470.t1 | ref NP_180932.1  pentatricopeptide repeat-containing protein [Arabidopsis thaliana]<br>gi 75101013 sp P93011.1 PP182_ARATH<br>RecName: Full=Pentatricopeptide repeat-containing protein At2g33760<br>gi 1707020 gb AAC69141.1  hypothetical protein [Arabidopsis thaliana]<br>gi 33025378 gb AEC08881.1  pentatricopeptide repeat-containing protein [Arabidopsis thaliana]                                                                                                                                                                                                                                                   | 584  | 583  | 0        | 99.8  | 84.9 | 93.5 | pentatricopeptide repeat-containing protein | gbpln | Arabidopsis thaliana | AT2G33760.1   Symbols:   Pentatricopeptide repeat (PPR) superfamily protein   chr2:14275800-14277551 FORWARD<br>LENGTH=583                                                                                                                                                            | 584  | 583  | 0         | 99.8  | 84.9 | 93.5 |
| Rsa1.0_00111.1.g5471.t1 | dbj BAJ34336.1  unnamed protein product [Thellungiella halophila]                                                                                                                                                                                                                                                                                                                                                                                                                                                                                                                                                             | 1004 | 896  | 0        | 89.2  | 73.7 | 78.2 | unnamed protein product                     | ----  | ----                 | AT2G33770.1   Symbols: UBC24, ATUBC24, PHO2   phosphate 2   chr2:14277785-14281482 REVERSE<br>LENGTH=907                                                                                                                                                                              | 1004 | 907  | 0         | 90.3  | 72.0 | 77.6 |
| Rsa1.0_00111.1.g5472.t1 | ref XP_002893514.1  hypothetical protein ARALYDRAFT_473032 [Arabidopsis lyrata subsp. lyrata]<br>gi 297339356 gb EFH69773.1  hypothetical protein ARALYDRAFT_473032 [Arabidopsis lyrata subsp. lyrata]                                                                                                                                                                                                                                                                                                                                                                                                                        | 562  | 578  | 0        | 102.8 | 64.6 | 75.3 | hypothetical protein ARALYDRAFT_473032      | gbpln | Arabidopsis lyrata   | AT1G28240.1   Symbols:   Protein of unknown function (DUF616)   chr1:9868521-9871798 REVERSE<br>LENGTH=581                                                                                                                                                                            | 562  | 581  | 0         | 103.4 | 62.8 | 72.4 |
| Rsa1.0_00111.1.g5473.t1 | gb EOA29043.1  hypothetical protein CARUB_v10025298mg [Capsella rubella]                                                                                                                                                                                                                                                                                                                                                                                                                                                                                                                                                      | 219  | 256  | 7.00E-72 | 116.9 | 69.4 | 81.7 | hypothetical protein CARUB_v10025298mg      | gbpln | Capsella rubella     | AT2G33790.1   Symbols: ATAGP30, AGP30   arabinogalactan protein 30   chr2:14293862-14295237 REVERSE<br>LENGTH=239                                                                                                                                                                     | 219  | 239  | 5.00E-74  | 109.1 | 70.8 | 81.3 |
| Rsa1.0_00111.1.g5474.t1 | ref XP_002881312.1  hypothetical protein ARALYDRAFT_902475 [Arabidopsis lyrata subsp. lyrata]<br>gi 29732715 gb EFH57571.1  hypothetical protein ARALYDRAFT_902475 [Arabidopsis lyrata subsp. lyrata]                                                                                                                                                                                                                                                                                                                                                                                                                         | 147  | 144  | 2.00E-60 | 98.0  | 83.7 | 89.8 | hypothetical protein ARALYDRAFT_902475      | gbpln | Arabidopsis lyrata   | AT2G33855.1   Symbols:   unknown protein; Has 3533 Blast hits to 34131 proteins in 2444 species: Archaea - 798; Bacteria - 22429; Metazoa - 974; Fungi - 991; Plants - 531; Viruses - 0; Other Eukaryotes - 9610 (source: NCBI BLINK).   chr2:14324717-14325151 REVERSE<br>LENGTH=144 | 147  | 144  | 7.00E-55  | 98.0  | 79.6 | 89.1 |
| Rsa1.0_00111.1.g5475.t1 | gb AAB62404.1  auxin response transcription factor 3 [Arabidopsis thaliana]                                                                                                                                                                                                                                                                                                                                                                                                                                                                                                                                                   | 614  | 608  | 0        | 99.0  | 82.2 | 87.3 | auxin response transcription factor 3       | gbpln | Arabidopsis thaliana | AT2G33860.1   Symbols: ETT, ARF3   Transcription factor B3 family protein / auxin-responsive factor AUX/IAA-related   chr2:14325444-14328613 REVERSE<br>LENGTH=608                                                                                                                    | 614  | 608  | 0         | 99.0  | 81.3 | 86.3 |

|                         |                                                                                                                                                                                                                                                                                                                                                                                                                                                                                                                              |     |      |           |       |      |      |                                                 |       |                      |                                                                                                                                      |     |     |           |       |      |      |
|-------------------------|------------------------------------------------------------------------------------------------------------------------------------------------------------------------------------------------------------------------------------------------------------------------------------------------------------------------------------------------------------------------------------------------------------------------------------------------------------------------------------------------------------------------------|-----|------|-----------|-------|------|------|-------------------------------------------------|-------|----------------------|--------------------------------------------------------------------------------------------------------------------------------------|-----|-----|-----------|-------|------|------|
| Rsa1.0_00111.1.g5476.t1 | refNP_195969.1  UDP-glycosyltransferase-like protein [Arabidopsis thaliana] gi 75264464 sp Q9LZD8.1 U89A2_ARAT H RecName: Full=UDP-glycosyltransferase 89A2 gi 7378633 emb CAB83309.1  UDPG glucosyltransferase-like protein [Arabidopsis thaliana] gi 111074184 gb ABH04465.1  At5g03490 [Arabidopsis thaliana] gi 332003228 gb AED90611.1  UDP-glycosyltransferase 89A2 [Arabidopsis thaliana]                                                                                                                             | 459 | 465  | 0         | 101.3 | 73.6 | 85.0 | UDP-glycosyltransferase-like protein            | gbpln | Arabidopsis thaliana | AT5G03490.1   Symbols:   UDP-Glycosyltransferase superfamily protein   chr5:871550-872947 FORWARD LENGTH=465                         | 459 | 465 | 0         | 101.3 | 73.6 | 85.0 |
| Rsa1.0_00111.1.g5477.t1 | gb AAB67617.1  putative SF16 protein [Helianthus annuus] [Arabidopsis thaliana]                                                                                                                                                                                                                                                                                                                                                                                                                                              | 115 | 249  | 4.00E-40  | 216.5 | 73.0 | 82.6 | putative SF16 protein [Helianthus annuus]       | gbpln | Arabidopsis thaliana | AT2G33990.1   Symbols:   iqd9   IQ-domain 9   chr2:14360502-14361630 REVERSE LENGTH=263                                              | 115 | 263 | 7.00E-43  | 228.7 | 73.0 | 82.6 |
| Rsa1.0_00111.1.g5478.t1 | gb ACP30591.1  disease resistance protein [Brassica rapa subsp. pekinensis]                                                                                                                                                                                                                                                                                                                                                                                                                                                  | 616 | 1555 | 1.00E-109 | 252.4 | 31.5 | 40.6 | disease resistance protein                      | gbpln | Brassica rapa        | AT2G34000.1   Symbols:   RING/U-box superfamily protein   chr2:14365177-14365632 FORWARD LENGTH=151                                  | 616 | 151 | 2.00E-57  | 24.5  | 17.5 | 19.2 |
| Rsa1.0_00111.1.g5479.t1 | refNP_180950.2  calcium-binding EF-hand-containing protein [Arabidopsis thaliana] gi 330253814 gb AEC08908.1  calcium-binding EF-hand-containing protein [Arabidopsis thaliana]                                                                                                                                                                                                                                                                                                                                              | 568 | 566  | 0         | 99.6  | 72.0 | 85.2 | calcium-binding EF-hand-containing protein      | gbpln | Arabidopsis thaliana | AT2G34030.1   Symbols:   Calcium-binding EF-hand family protein   chr2:14375086-14377364 REVERSE LENGTH=566                          | 568 | 566 | 0         | 99.6  | 72.0 | 85.2 |
| Rsa1.0_00111.1.g5480.t3 | gb EOA26361.1  hypothetical protein CARUB_v10022882mg, partial [Capsella rubella]                                                                                                                                                                                                                                                                                                                                                                                                                                            | 190 | 586  | 3.00E-33  | 308.4 | 43.2 | 45.3 | hypothetical protein CARUB_v10022882mg, partial | gbpln | Capsella rubella     | AT2G34040.2   Symbols:   Apoptosis inhibitory protein 5 (API5)   chr2:14378571-14382246 REVERSE LENGTH=442                           | 190 | 442 | 1.00E-35  | 232.6 | 42.6 | 44.7 |
| Rsa1.0_00111.1.g5481.t1 | gb EOA27690.1  hypothetical protein CARUB_v10023843mg, partial [Capsella rubella]                                                                                                                                                                                                                                                                                                                                                                                                                                            | 252 | 271  | 8.00E-25  | 107.5 | 27.0 | 42.1 | hypothetical protein CARUB_v10023843mg, partial | gbpln | Capsella rubella     | AT1G10000.1   Symbols:   Ribonuclease H-like superfamily protein   chr1:3263877-3264788 REVERSE LENGTH=303                           | 252 | 303 | 6.00E-21  | 120.2 | 23.0 | 40.5 |
| Rsa1.0_00111.1.g5482.t1 | refNP_565779.1  trichome birefringence-like 37 protein [Arabidopsis thaliana] gi 20196907 gb AAB67625.2  expressed protein [Arabidopsis thaliana] gi 21554400 gb AAM63505.1  unknown [Arabidopsis thaliana] gi 330253819 gb AEC08913.1  trichome birefringence-like 37 protein [Arabidopsis thaliana]                                                                                                                                                                                                                        | 383 | 385  | 0         | 100.5 | 84.3 | 90.9 | trichome birefringence-like 37 protein          | gbpln | Arabidopsis thaliana | AT2G34070.1   Symbols:   TBL37   TRICHOME BIREFRINGENCE-LIKE 37   chr2:14387631-14390160 REVERSE LENGTH=385                          | 383 | 385 | 0         | 100.5 | 84.3 | 90.9 |
| Rsa1.0_00111.1.g5483.t1 | refNP_565780.1  cysteine proteinase-like protein [Arabidopsis thaliana] gi 2342728 gb AAB67626.1  cysteine proteinase [Arabidopsis thaliana] gi 330253821 gb AEC08915.1  cysteine proteinase-like protein [Arabidopsis thaliana]                                                                                                                                                                                                                                                                                             | 345 | 345  | 1.00E-177 | 100.0 | 85.5 | 91.3 | cysteine proteinase-like protein                | gbpln | Arabidopsis thaliana | AT2G34080.1   Symbols:   Cysteine proteinases superfamily protein   chr2:14393431-14394777 REVERSE LENGTH=345                        | 345 | 345 | 1.00E-180 | 100.0 | 85.5 | 91.3 |
| Rsa1.0_00111.1.g5484.t1 | # # # # # # # -                                                                                                                                                                                                                                                                                                                                                                                                                                                                                                              |     |      |           |       |      |      |                                                 | ----  | ----                 | #                                                                                                                                    |     |     |           |       |      |      |
| Rsa1.0_00111.1.g5485.t1 | gb EOA12750.1  hypothetical protein CARUB_v10028431mg [Capsella rubella]                                                                                                                                                                                                                                                                                                                                                                                                                                                     | 469 | 423  | 1.00E-116 | 90.2  | 48.4 | 61.2 | hypothetical protein CARUB_v10028431mg          | gbpln | Capsella rubella     | AT5G56430.1   Symbols:   F-box/FBD-like domains containing protein   chr5:22853323-22854575 REVERSE LENGTH=360                       | 469 | 360 | 1.00E-88  | 76.8  | 34.5 | 43.7 |
| Rsa1.0_00111.1.g5486.t1 | refNP_180961.1  Dof zinc finger protein DOF2.3 [Arabidopsis thaliana] gi 55583789 sp Q22967.1 CDF4_ARATH RecName: Full=Cyclic dof factor 4; AltName: Full=Dof zinc finger protein DOF2.3; Short=ATDOF2.3 gi 2342734 gb AAB67632.1  putative DOF zinc finger protein [Arabidopsis thaliana] gi 34365615 gb AAQ65119.1  At2g34140 [Arabidopsis thaliana] gi 62319965 dbj BAD94068.1  putative DOF zinc finger protein [Arabidopsis thaliana] gi 330253829 gb AEC08923.1  Dof zinc finger protein DOF2.3 [Arabidopsis thaliana] | 167 | 170  | 1.00E-68  | 101.8 | 79.0 | 85.0 | Dof zinc finger protein DOF2.3                  | gbpln | Arabidopsis thaliana | AT2G34140.1   Symbols:   Dof-type zinc finger DNA-binding family protein   chr2:14414188-14414700 REVERSE LENGTH=170                 | 167 | 170 | 4.00E-71  | 101.8 | 79.0 | 85.0 |
| Rsa1.0_00111.1.g5487.t1 | # # # # # # # -                                                                                                                                                                                                                                                                                                                                                                                                                                                                                                              |     |      |           |       |      |      |                                                 | ----  | ----                 | #                                                                                                                                    |     |     |           |       |      |      |
| Rsa1.0_00111.1.g5488.t1 | refXP_002883131.1  calcium-binding EF hand family protein [Arabidopsis lyrata subsp. lyrata] gi 297328971 gb EFH59390.1  calcium-binding EF hand family protein [Arabidopsis lyrata subsp. lyrata]                                                                                                                                                                                                                                                                                                                           | 175 | 175  | 5.00E-91  | 100.0 | 93.7 | 98.3 | calcium-binding EF hand family protein          | gbpln | Arabidopsis lyrata   | AT3G18430.2   Symbols:   Calcium-binding EF-hand family protein   chr3:6326180-6327476 FORWARD LENGTH=175                            | 175 | 175 | 4.00E-93  | 100.0 | 93.1 | 98.3 |
| Rsa1.0_00111.1.g5489.t1 | refXP_002881326.1  CIPK13 [Arabidopsis lyrata subsp. lyrata] gi 297327165 gb EFH57585.1  CIPK13 [Arabidopsis lyrata subsp. lyrata]                                                                                                                                                                                                                                                                                                                                                                                           | 498 | 505  | 0         | 101.4 | 87.1 | 93.6 | CIPK13                                          | gbpln | Arabidopsis lyrata   | AT2G34180.1   Symbols:   CIPK13, SnRK3.7, WL2, ATWL2   CBL-interacting protein kinase 13   chr2:14430761-14432269 REVERSE LENGTH=502 | 498 | 502 | 0         | 100.8 | 85.7 | 92.2 |
| Rsa1.0_00111.1.g5490.t3 | # # # # # # # -                                                                                                                                                                                                                                                                                                                                                                                                                                                                                                              |     |      |           |       |      |      |                                                 | ----  | ----                 | #                                                                                                                                    |     |     |           |       |      |      |

|                          |                                                                                                                                                                                                                                                                                                                                                                                                                                                                                                                                                                                                                                                                                 |     |      |           |       |      |      |                                             |       |                      |                                                                                                                                                                                                                                                                                                                                                                                                                                                                                                                                                                                                                                                                                     |     |     |           |       |      |      |
|--------------------------|---------------------------------------------------------------------------------------------------------------------------------------------------------------------------------------------------------------------------------------------------------------------------------------------------------------------------------------------------------------------------------------------------------------------------------------------------------------------------------------------------------------------------------------------------------------------------------------------------------------------------------------------------------------------------------|-----|------|-----------|-------|------|------|---------------------------------------------|-------|----------------------|-------------------------------------------------------------------------------------------------------------------------------------------------------------------------------------------------------------------------------------------------------------------------------------------------------------------------------------------------------------------------------------------------------------------------------------------------------------------------------------------------------------------------------------------------------------------------------------------------------------------------------------------------------------------------------------|-----|-----|-----------|-------|------|------|
| Rsa1.0_001111.1.g5491.t1 | gb ABY58019.1  arm repeat containing protein 1 [Brassica oleracea var. viridis]                                                                                                                                                                                                                                                                                                                                                                                                                                                                                                                                                                                                 | 660 | 663  | 0         | 100.5 | 87.7 | 93.3 | arm repeat containing protein 1             | gbpln | Brassica oleracea    | AT1G29340.1   Symbols: PUB17, ATPUB17   plant U-box 17   chr1:10264412-10266601 FORWARD LENGTH=729                                                                                                                                                                                                                                                                                                                                                                                                                                                                                                                                                                                  | 660 | 729 | 0         | 110.5 | 59.2 | 75.9 |
| Rsa1.0_001111.1.g5492.t1 | ref XP_002881327.1  hypothetical protein ARALYDRAFT_321144 [Arabidopsis lyrata subsp. lyrata] gi 297327166 gb EFH57586.1  hypothetical protein ARALYDRAFT_321144 [Arabidopsis lyrata subsp. lyrata]                                                                                                                                                                                                                                                                                                                                                                                                                                                                             | 829 | 865  | 0         | 104.3 | 71.5 | 90.6 | hypothetical protein ARALYDRAFT_321144      | gbpln | Arabidopsis lyrata   | AT1G29350.1   Symbols:   Kinase-related protein of unknown function (DUF1296)   chr1:10268761-10273613 REVERSE LENGTH=831                                                                                                                                                                                                                                                                                                                                                                                                                                                                                                                                                           | 829 | 831 | 0         | 100.2 | 65.3 | 76.7 |
| Rsa1.0_001111.1.g5493.t1 | gb EOA27389.1  hypothetical protein CARUB_v10023519mg [Capsella rubella]                                                                                                                                                                                                                                                                                                                                                                                                                                                                                                                                                                                                        | 347 | 353  | 1.00E-180 | 101.7 | 88.5 | 94.8 | hypothetical protein CARUB_v10023519mg      | gbpln | Capsella rubella     | AT2G34260.1   Symbols:   transducin family protein / WD-40 repeat family protein   chr2:14465899-14468416 FORWARD LENGTH=353<br>AT2G34310.3   Symbols:   unknown protein; FUNCTIONS IN: molecular_function unknown; INVOLVED IN: biological_process unknown; LOCATED IN: cellular_component unknown; EXPRESSED IN: 24 plant structures; EXPRESSED DURING: 13 growth stages; BEST Arabidopsis thaliana protein match is: unknown protein (TAIRAT1G29530.1); Has 236 Blast hits to 216 proteins in 70 species: Archae - 0; Bacteria - 10; Metazoa - 74; Fungi - 47; Plants - 60; Viruses - 0; Other Eukaryotes - 45 (source: NCBI BLINK).   chr2:14478564-14479812 REVERSE LENGTH=242 | 347 | 353 | 1.00E-174 | 101.7 | 87.9 | 94.2 |
| Rsa1.0_001111.1.g5494.t1 | gb EOA27733.1  hypothetical protein CARUB_v10023887mg [Capsella rubella]                                                                                                                                                                                                                                                                                                                                                                                                                                                                                                                                                                                                        | 224 | 258  | 4.00E-54  | 115.2 | 67.0 | 78.6 | hypothetical protein CARUB_v10023887mg      | gbpln | Capsella rubella     | AT2G34340.1   Symbols:   Protein of unknown function, DUF584   chr2:14489032-14489442 REVERSE LENGTH=136                                                                                                                                                                                                                                                                                                                                                                                                                                                                                                                                                                            | 224 | 242 | 2.00E-54  | 108.0 | 57.6 | 70.1 |
| Rsa1.0_001111.1.g5495.t1 | ref XP_002881332.1  hypothetical protein ARALYDRAFT_482377 [Arabidopsis lyrata subsp. lyrata] gi 297327171 gb EFH57591.1  hypothetical protein ARALYDRAFT_482377 [Arabidopsis lyrata subsp. lyrata]                                                                                                                                                                                                                                                                                                                                                                                                                                                                             | 139 | 134  | 2.00E-39  | 96.4  | 62.6 | 74.8 | hypothetical protein ARALYDRAFT_482377      | gbpln | Arabidopsis lyrata   | AT2G34350.1   Symbols:   Nodulin-like / Major Facilitator Superfamily protein   chr2:14493624-14495644 FORWARD LENGTH=525                                                                                                                                                                                                                                                                                                                                                                                                                                                                                                                                                           | 139 | 136 | 4.00E-38  | 97.8  | 66.2 | 80.6 |
| Rsa1.0_001111.1.g5496.t1 | ref XP_002879492.1  hypothetical protein ARALYDRAFT_321151 [Arabidopsis lyrata subsp. lyrata] gi 297325331 gb EFH57551.1  hypothetical protein ARALYDRAFT_321151 [Arabidopsis lyrata subsp. lyrata]                                                                                                                                                                                                                                                                                                                                                                                                                                                                             | 525 | 2264 | 0         | 431.2 | 88.4 | 93.9 | hypothetical protein ARALYDRAFT_321151      | gbpln | Arabidopsis lyrata   | AT2G34355.1   Symbols:   Major facilitator superfamily protein   chr2:14496376-14498311 FORWARD LENGTH=523                                                                                                                                                                                                                                                                                                                                                                                                                                                                                                                                                                          | 525 | 525 | 0         | 100.0 | 88.8 | 93.7 |
| Rsa1.0_001111.1.g5497.t1 | ref XP_002879492.1  hypothetical protein ARALYDRAFT_321151 [Arabidopsis lyrata subsp. lyrata] gi 297325331 gb EFH57551.1  hypothetical protein ARALYDRAFT_321151 [Arabidopsis lyrata subsp. lyrata]                                                                                                                                                                                                                                                                                                                                                                                                                                                                             | 524 | 2264 | 0         | 432.1 | 87.2 | 93.3 | hypothetical protein ARALYDRAFT_321151      | gbpln | Arabidopsis lyrata   | AT2G34380.1   Symbols:   Putative adipose-regulatory protein (Seipin)   chr2:14512777-14514306 FORWARD LENGTH=509                                                                                                                                                                                                                                                                                                                                                                                                                                                                                                                                                                   | 524 | 523 | 0         | 99.8  | 87.6 | 94.3 |
| Rsa1.0_001111.1.g5498.t1 | gb AAC26703.1  unknown protein [Arabidopsis thaliana] gi 20197167 gb AAM14953.1  unknown protein [Arabidopsis thaliana]                                                                                                                                                                                                                                                                                                                                                                                                                                                                                                                                                         | 384 | 459  | 1.00E-139 | 119.5 | 67.2 | 80.2 | unknown protein                             | gbpln | Arabidopsis thaliana | AT2G34400.1   Symbols:   Pentatricopeptide repeat (PPR-like) superfamily protein   chr2:14518226-14518186 FORWARD LENGTH=621                                                                                                                                                                                                                                                                                                                                                                                                                                                                                                                                                        | 384 | 509 | 1.00E-141 | 132.6 | 67.2 | 80.2 |
| Rsa1.0_001111.1.g5499.t1 | ref XP_002879496.1  pentatricopeptide repeat-containing protein [Arabidopsis lyrata subsp. lyrata] gi 297325335 gb EFH57555.1  pentatricopeptide repeat-containing protein [Arabidopsis lyrata subsp. lyrata]                                                                                                                                                                                                                                                                                                                                                                                                                                                                   | 499 | 617  | 0         | 123.6 | 67.7 | 75.4 | pentatricopeptide repeat-containing protein | gbpln | Arabidopsis lyrata   | AT2G34410.2   Symbols:   O-acetyltransferase-like protein [Arabidopsis thaliana] gi 110737554 dbj BAF00719.1  hypothetical protein [Arabidopsis thaliana] gi 222423437 dbj BAH19689.1  AT2G34410 [Arabidopsis thaliana] gi 330253875 gb AEC08969.1  O-acetyltransferase-like protein [Arabidopsis thaliana] gi 330253876 gb AEC08970.1  O-acetyltransferase-like protein [Arabidopsis thaliana]                                                                                                                                                                                                                                                                                     | 499 | 621 | 0         | 124.4 | 66.3 | 74.5 |
| Rsa1.0_001111.1.g5500.t1 | ref NP_180988.3  O-acetyltransferase-like protein [Arabidopsis thaliana] gi 79324285 ref NP_001031478.1  O-acetyltransferase-like protein [Arabidopsis thaliana] gi 51536464 gb AAU05470.1  At2g34410 [Arabidopsis thaliana] gi 55733775 gb AAV59284.1  At2g34410 [Arabidopsis thaliana] gi 62320442 dbj BAD94920.1  hypothetical protein [Arabidopsis thaliana] gi 110737554 dbj BAF00719.1  hypothetical protein [Arabidopsis thaliana] gi 222423437 dbj BAH19689.1  AT2G34410 [Arabidopsis thaliana] gi 330253875 gb AEC08969.1  O-acetyltransferase-like protein [Arabidopsis thaliana] gi 330253876 gb AEC08970.1  O-acetyltransferase-like protein [Arabidopsis thaliana] | 541 | 540  | 0         | 99.8  | 95.4 | 98.2 | O-acetyltransferase-like protein            | gbpln | Arabidopsis thaliana | AT2G34410.2   Symbols:   O-acetyltransferase family protein   chr2:14518719-14522053 FORWARD LENGTH=540                                                                                                                                                                                                                                                                                                                                                                                                                                                                                                                                                                             | 541 | 540 | 0         | 99.8  | 95.4 | 98.2 |



|                         |                                                                                                                                                                                                                                                                                                                                                                                                                                                                                                                                                                                                                                                                                                                                                                                                                                                                               |     |     |           |       |       |       |                                                                                                                            |       |                      |                                                                                                                                                 |     |     |           |       |      |       |
|-------------------------|-------------------------------------------------------------------------------------------------------------------------------------------------------------------------------------------------------------------------------------------------------------------------------------------------------------------------------------------------------------------------------------------------------------------------------------------------------------------------------------------------------------------------------------------------------------------------------------------------------------------------------------------------------------------------------------------------------------------------------------------------------------------------------------------------------------------------------------------------------------------------------|-----|-----|-----------|-------|-------|-------|----------------------------------------------------------------------------------------------------------------------------|-------|----------------------|-------------------------------------------------------------------------------------------------------------------------------------------------|-----|-----|-----------|-------|------|-------|
| Rsa1.0_00111.1.g5501.t1 | sp P13851.1 CB21_SINAL RecName: Full=Chlorophyll a-b binding protein 1, chloroplastic; AltName: Full=LHCII type I CAB-1; Short=LHCP; Flags: Precursor<br>gi 21138 emb CAA34459.1  unnamed protein product [Sinapis alba]<br>gi 21140 emb CAA33903.1  chlorophyll a/b-binding polypeptide [Sinapis alba]                                                                                                                                                                                                                                                                                                                                                                                                                                                                                                                                                                       | 266 | 266 | 1.00E-151 | 100.0 | 100.0 | 100.0 | RecName: Full=Chlorophyll a-b binding protein 1, chloroplastic; AltName: Full=LHCII type I CAB-1; Short=LHCP; Flags: gbpln | gbpln | Sinapis alba         | AT2G34430.1   Symbols: LHB1B1, LHCB1.4   light-harvesting chlorophyll-protein complex II subunit B1   chr2:14524818-14525618 FORWARD LENGTH=266 | 266 | 266 | 1.00E-149 | 100.0 | 96.2 | 97.7  |
| Rsa1.0_00111.1.g5502.t1 | ref XP_002879499.1  MADS-box family protein [Arabidopsis lyrata subsp. lyrata] gi 297325338 gb EFH55758.1  MADS-box family protein [Arabidopsis lyrata subsp. lyrata]                                                                                                                                                                                                                                                                                                                                                                                                                                                                                                                                                                                                                                                                                                         | 191 | 172 | 3.00E-69  | 90.1  | 70.7  | 77.5  | MADS-box family protein                                                                                                    | gbpln | Arabidopsis lyrata   | AT2G34440.1   Symbols: AGL29   AGAMOUS-like 29   chr2:14526950-14527468 FORWARD LENGTH=172                                                      | 191 | 172 | 2.00E-70  | 90.1  | 69.1 | 78.5  |
| Rsa1.0_00111.1.g5503.t1 | ref XP_002881335.1  high mobility group family protein [Arabidopsis lyrata subsp. lyrata] gi 297327174 gb EFH57594.1  high mobility group family protein [Arabidopsis lyrata subsp. lyrata]                                                                                                                                                                                                                                                                                                                                                                                                                                                                                                                                                                                                                                                                                   | 156 | 152 | 1.00E-57  | 97.4  | 78.8  | 83.3  | high mobility group family protein                                                                                         | gbpln | Arabidopsis lyrata   | AT2G34450.1   Symbols:   HMG-box (high mobility group) DNA-binding family protein   chr2:14527918-14529448 REVERSE LENGTH=151                   | 156 | 151 | 2.00E-59  | 96.8  | 76.9 | 83.3  |
| Rsa1.0_00111.1.g5504.t1 | ref NP_565789.2  NAD(P)-binding Rossmann-fold-containing protein [Arabidopsis thaliana] gi 75151867 sp O8H124.1 Y2446_ARATH RecName: Full=Uncharacterized protein At2g34460, chloroplastic; Flags: Precursor gi 24030209 gb AAN41284.1  unknown protein [Arabidopsis thaliana] gi 330253883 gb AEC08977.1  NAD(P)-binding Rossmann-fold-containing protein [Arabidopsis thaliana]                                                                                                                                                                                                                                                                                                                                                                                                                                                                                             | 288 | 280 | 1.00E-129 | 97.2  | 82.6  | 88.9  | NAD(P)-binding Rossmann-fold-containing protein                                                                            | gbpln | Arabidopsis thaliana | AT2G34460.1   Symbols:   NAD(P)-binding Rossmann-fold superfamily protein   chr2:14529635-14530732 FORWARD LENGTH=280                           | 288 | 280 | 1.00E-131 | 97.2  | 82.6 | 88.9  |
| Rsa1.0_00111.1.g5505.t1 | ref XP_002881336.1  predicted protein [Arabidopsis lyrata subsp. lyrata] gi 297327175 gb EFH57595.1  predicted protein [Arabidopsis lyrata subsp. lyrata]                                                                                                                                                                                                                                                                                                                                                                                                                                                                                                                                                                                                                                                                                                                     | 275 | 278 | 1.00E-138 | 101.1 | 88.0  | 89.5  | predicted protein                                                                                                          | gbpln | Arabidopsis lyrata   | AT2G34470.1   Symbols: UREG, PSKF109   urease accessory protein G   chr2:14530900-14532411 REVERSE LENGTH=275                                   | 275 | 275 | 1.00E-139 | 100.0 | 87.3 | 89.1  |
| Rsa1.0_00111.1.g5506.t1 | ref NP_180995.1  60S ribosomal protein L18a-2 [Arabidopsis thaliana] gi 297826909 ref XP_002881337.1  60S ribosomal protein L18A [Arabidopsis lyrata subsp. lyrata] gi 21431842 sp P51418.2 R18A2_ARATH RecName: Full=60S ribosomal protein L18a-2 gi 3128228 gb AAC26708.1  60S ribosomal protein L18A [Arabidopsis thaliana] gi 14596031 gb AAK68743.1  Unknown protein [Arabidopsis thaliana] gi 20197170 gb AAM14956.1  60S ribosomal protein L18A [Arabidopsis thaliana] gi 21539567 gb AAM53336.1  60S ribosomal protein L18A [Arabidopsis thaliana] gi 23197736 gb AAN15395.1  60S ribosomal protein L18A [Arabidopsis thaliana] gi 30102898 gb AAP21367.1  At2g34480 [Arabidopsis thaliana] gi 297327176 gb EFH57596.1  60S ribosomal protein L18A [Arabidopsis lyrata subsp. lyrata] gi 330253886 gb AEC08990.1  60S ribosomal protein L18a-2 [Arabidopsis thaliana] | 178 | 178 | 1.00E-100 | 100.0 | 98.3  | 100.0 | 60S ribosomal protein L18a-2                                                                                               | gbpln | Arabidopsis lyrata   | AT2G34480.1   Symbols:   Ribosomal protein L18ae/LX family protein   chr2:14532916-14534161 REVERSE LENGTH=178                                  | 178 | 178 | 1.00E-102 | 100.0 | 98.3 | 100.0 |
| Rsa1.0_00111.1.g5507.t1 | ref NP_180997.1  cytochrome P450, family 710, subfamily A [Arabidopsis thaliana] gi 75278303 sp O64697.1 C7101_ARATH RecName: Full=Cytochrome P450 710A1; AltName: Full=C-22 sterol desaturase gi 3128210 gb AAC26690.1  putative cytochrome P450 [Arabidopsis thaliana] gi 20197156 gb AAM14944.1  putative cytochrome P450 [Arabidopsis thaliana] gi 25083451 gb AAN72080.1  putative cytochrome P450 [Arabidopsis thaliana] gi 34365731 gb AAQ65177.1  At2g34500 [Arabidopsis thaliana] gi 84468537 db BAE71351.1  CYP710 [Arabidopsis thaliana] gi 330253888 gb AEC08982.1  cytochrome P450 710A1 [Arabidopsis thaliana]                                                                                                                                                                                                                                                  | 502 | 495 | 0         | 98.6  | 82.7  | 89.4  | cytochrome P450, family 710, subfamily A                                                                                   | gbpln | Arabidopsis thaliana | AT2G34500.1   Symbols: CYP710A1   cytochrome P450, family 710, subfamily A, polypeptide 1   chr2:14539712-14541199 REVERSE LENGTH=495           | 502 | 495 | 0         | 98.6  | 82.7 | 89.4  |

|                         |                                                                                                                                                                                                                                                                                                                                                                                                                                                                                                                                                                                                                                                           |     |      |           |       |      |       |                                                                            |       |                      |                                                                                                                                                                                                                                                                                   |     |      |           |       |      |       |
|-------------------------|-----------------------------------------------------------------------------------------------------------------------------------------------------------------------------------------------------------------------------------------------------------------------------------------------------------------------------------------------------------------------------------------------------------------------------------------------------------------------------------------------------------------------------------------------------------------------------------------------------------------------------------------------------------|-----|------|-----------|-------|------|-------|----------------------------------------------------------------------------|-------|----------------------|-----------------------------------------------------------------------------------------------------------------------------------------------------------------------------------------------------------------------------------------------------------------------------------|-----|------|-----------|-------|------|-------|
| Rsa1.0_00112.1.g5508.t1 | gb EOA38233.1  hypothetical protein CARUB_v10009715mg [Capsella rubella]                                                                                                                                                                                                                                                                                                                                                                                                                                                                                                                                                                                  | 530 | 328  | 9.00E-15  | 61.9  | 10.8 | 12.5  | hypothetical protein CARUB_v10009715mg                                     | gbpln | Capsella rubella     | AT1G62740.1   Symbols: Hop2   stress-inducible protein, putative   chr1:23231026-23233380 FORWARD LENGTH=571                                                                                                                                                                      | 530 | 571  | 2.00E-16  | 107.7 | 11.1 | 17.2  |
| Rsa1.0_00112.1.g5509.t1 | dbj BAF01167.1  hypothetical protein [Arabidopsis thaliana]                                                                                                                                                                                                                                                                                                                                                                                                                                                                                                                                                                                               | 992 | 1061 | 0         | 107.0 | 87.0 | 91.7  | hypothetical protein                                                       | gbpln | Arabidopsis thaliana | AT1G06900.1   Symbols:   Insulinase (Peptidase family M16) family protein   chr1:2115155-2120635 REVERSE LENGTH=1024                                                                                                                                                              | 992 | 1024 | 0         | 103.2 | 85.5 | 89.9  |
| Rsa1.0_00112.1.g5510.t1 | ref NP_172172.2  nodulin MtN21 /EamA-like transporter protein [Arabidopsis thaliana] gi 145323764 ref NP_001077471.1  nodulin MN21 /EamA-like transporter protein [Arabidopsis thaliana] gi 75158873 sp Q8RXL8.1 Y1689_ARATH RecName: Full=Uncharacterized membrane protein At1g06890 gi 19423946 gb AAL87295.1  unknown protein [Arabidopsis thaliana] gi 21436373 gb AAM51356.1  unknown protein [Arabidopsis thaliana] gi 332189927 gb AEE28048.1  nodulin MtN21 /EamA-like transporter protein [Arabidopsis thaliana] gi 332189928 gb AEE28049.1  nodulin MtN21 /EamA-like transporter protein [Arabidopsis thaliana]                                 | 379 | 357  | 0         | 94.2  | 90.5 | 92.9  | nodulin MtN21 /EamA-like transporter protein                               | gbpln | Arabidopsis thaliana | AT1G06890.2   Symbols:   nodulin MtN21 /EamA-like transporter family protein   chr1:2111728-2114038 REVERSE LENGTH=357                                                                                                                                                            | 379 | 357  | 0         | 94.2  | 90.5 | 92.9  |
| Rsa1.0_00112.1.g5511.t1 | gb EOA38045.1  hypothetical protein CARUB_v10009515mg [Capsella rubella]                                                                                                                                                                                                                                                                                                                                                                                                                                                                                                                                                                                  | 370 | 365  | 1.00E-155 | 98.6  | 77.8 | 84.3  | hypothetical protein CARUB_v10009515mg                                     | gbpln | Capsella rubella     | AT1G06870.1   Symbols:   Peptidase S24/S26A/S26B/S26C family protein   chr1:2108832-2110642 FORWARD LENGTH=367                                                                                                                                                                    | 370 | 367  | 1.00E-155 | 99.2  | 76.8 | 83.5  |
| Rsa1.0_00112.1.g5512.t1 | ref NP_197389.1  RNA-directed DNA polymerase (reverse transcriptase)-related family protein [Arabidopsis thaliana] gi 332005241 gb AED92624.1  RNA-directed DNA polymerase (reverse transcriptase)-related family protein [Arabidopsis thaliana]                                                                                                                                                                                                                                                                                                                                                                                                          | 263 | 295  | 1.00E-67  | 112.2 | 52.9 | 70.7  | RNA-directed DNA polymerase (reverse transcriptase)-related family protein | gbpln | Arabidopsis thaliana | AT5G18880.1   Symbols:   RNA-directed DNA polymerase (reverse transcriptase)-related family protein   chr5:6300535-6301422 REVERSE LENGTH=295                                                                                                                                     | 263 | 295  | 3.00E-70  | 112.2 | 52.9 | 70.7  |
| Rsa1.0_00112.1.g5513.t1 | gb EOA39597.1  hypothetical protein CARUB_v10008222mg [Capsella rubella]                                                                                                                                                                                                                                                                                                                                                                                                                                                                                                                                                                                  | 957 | 951  | 0         | 99.4  | 84.0 | 91.1  | hypothetical protein CARUB_v10008222mg                                     | gbpln | Capsella rubella     | AT1G06840.1   Symbols:   Leucine-rich repeat protein kinase family protein   chr1:2097854-2103208 REVERSE LENGTH=953                                                                                                                                                              | 957 | 953  | 0         | 99.6  | 84.4 | 91.0  |
| Rsa1.0_00112.1.g5514.t1 | ref NP_172168.1  monothiol glutaredoxin-S11 [Arabidopsis thaliana] gi 75191726 sp Q9M9Y9.1 GRS11_ARATH RecName: Full=Monothiol glutaredoxin-S11; Short=AtGrxS11; AltName: Full=Protein ROXY 6 gi 7523711 gb AAF63150.1 ACO11001_20 Similar to glutaredoxin [Arabidopsis thaliana] gi 18252863 gb AAL62358.1  glutaredoxin, putative [Arabidopsis thaliana] gi 21387059 gb AAM47933.1  putative glutaredoxin [Arabidopsis thaliana] gi 21537263 gb AAM61604.1  glutaredoxin, putative [Arabidopsis thaliana] gi 226348190 gb ACO50411.1  glutaredoxin [Arabidopsis thaliana] gi 332189922 gb AEE28043.1  monothiol glutaredoxin-S11 [Arabidopsis thaliana] | 99  | 99   | 5.00E-49  | 100.0 | 97.0 | 100.0 | monothiol glutaredoxin-S11                                                 | gbpln | Arabidopsis thaliana | AT1G06830.1   Symbols:   Glutaredoxin family protein   chr1:2097189-2097488 FORWARD LENGTH=99                                                                                                                                                                                     | 99  | 99   | 9.00E-52  | 100.0 | 97.0 | 100.0 |
| Rsa1.0_00112.1.g5515.t1 | gb ACJ76846.1  chloroplast lipase protein [Brassica napus]                                                                                                                                                                                                                                                                                                                                                                                                                                                                                                                                                                                                | 511 | 513  | 0         | 100.4 | 94.9 | 96.5  | chloroplast lipase protein                                                 | gbpln | Brassica napus       | AT1G06800.1   Symbols: PLA-[gamma]1   alpha/beta-Hydrolases superfamily protein   chr1:2089538-2091443 REVERSE LENGTH=515                                                                                                                                                         | 511 | 515  | 0         | 100.8 | 87.1 | 92.2  |
| Rsa1.0_00112.1.g5516.t2 | dbj BAJ33712.1  unnamed protein product [Thellungiella halophila]                                                                                                                                                                                                                                                                                                                                                                                                                                                                                                                                                                                         | 293 | 456  | 7.00E-94  | 155.6 | 70.0 | 74.4  | unnamed protein product                                                    | ----  | ----                 | AT1G05560.1   Symbols: UGT1, UGT75B1   UDP-glucosyltransferase 75B1   chr1:1645674-1647083 REVERSE LENGTH=469                                                                                                                                                                     | 293 | 469  | 1.00E-86  | 160.1 | 66.2 | 73.4  |
| Rsa1.0_00112.1.g5517.t1 | ref NP_973671.1  uncharacterized protein [Arabidopsis thaliana] gi 29028790 gb AAO64774.1  At2g42395 [Arabidopsis thaliana] gi 110743081 gb BAE99433.1  hypothetical protein [Arabidopsis thaliana] gi 330255022 gb AEC10116.1  uncharacterized protein AT2G42395 [Arabidopsis thaliana]                                                                                                                                                                                                                                                                                                                                                                  | 130 | 104  | 1.00E-21  | 80.0  | 36.9 | 45.4  | uncharacterized protein                                                    | gbpln | Arabidopsis thaliana | AT2G42395.1   Symbols:   unknown protein; Has 3533 Blast hits to 34131 proteins in 2444 species: Archae - 798; Bacteria - 22429; Metazoa - 974; Fungi - 991; Plants - 531; Viruses - 0; Other Eukaryotes - 9610 (source: NCBI BLINK).   chr2:17653566-17653980 REVERSE LENGTH=104 | 130 | 104  | 3.00E-24  | 80.0  | 36.9 | 45.4  |

|                         |                                                                                                                                                                                                                                                                                                                                                                                                                                                                                                                                                        |      |      |           |       |      |      |                                                                                                                                                                                                                                                                                                                                |       |                      |                                                                                                                                                                                                                                                                                    |      |      |           |       |      |      |
|-------------------------|--------------------------------------------------------------------------------------------------------------------------------------------------------------------------------------------------------------------------------------------------------------------------------------------------------------------------------------------------------------------------------------------------------------------------------------------------------------------------------------------------------------------------------------------------------|------|------|-----------|-------|------|------|--------------------------------------------------------------------------------------------------------------------------------------------------------------------------------------------------------------------------------------------------------------------------------------------------------------------------------|-------|----------------------|------------------------------------------------------------------------------------------------------------------------------------------------------------------------------------------------------------------------------------------------------------------------------------|------|------|-----------|-------|------|------|
| Rsa1.0_00112.1.g5518.t1 | refXP_002892525.1   hypothetical protein ARALYDRAFT_888225 [Arabidopsis lyrata subsp. lyrata] gi 297338367 gb EFH68784.1                                                                                                                                                                                                                                                                                                                                                                                                                               | 233  | 166  | 3.00E-11  | 71.2  | 15.9 | 24.0 | hypothetical protein ARALYDRAFT_888225                                                                                                                                                                                                                                                                                         | gbpln | Arabidopsis lyrata   | AT2G42395.1   Symbols:   unknown protein; Has 35333 Blast hits to 34131 proteins in 2444 species: Archae - 798; Bacteria - 22429; Metazoa - 974; Fungi - 991; Plants - 531; Viruses - 0; Other Eukaryotes - 9610 (source: NCBI BLINK).   chr2:17653566-17653980 REVERSE LENGTH=104 | 233  | 104  | 3.00E-13  | 44.6  | 14.2 | 20.2 |
| Rsa1.0_00112.1.g5519.t1 | emb CAA62296.1   component of 6.1 kDa polypeptide of photosystem II reaction center [Arabidopsis thaliana]                                                                                                                                                                                                                                                                                                                                                                                                                                             | 131  | 133  | 2.00E-34  | 101.5 | 64.9 | 74.8 | component of 6.1 kDa polypeptide of photosystem II reaction center                                                                                                                                                                                                                                                             | gbpln | Arabidopsis thaliana | AT2G30570.1   Symbols: PSBW   photosystem II reaction center W   chr2:13019326-13020053 REVERSE LENGTH=133                                                                                                                                                                         | 131  | 133  | 7.00E-37  | 101.5 | 64.9 | 74.8 |
| Rsa1.0_00112.1.g5520.t1 | refXP_002899617.1   hypothetical protein ARALYDRAFT_470701 [Arabidopsis lyrata subsp. lyrata] gi 297335459 gb EFH65876.1                                                                                                                                                                                                                                                                                                                                                                                                                               | 675  | 595  | 0         | 88.1  | 68.7 | 74.4 | hypothetical protein ARALYDRAFT_470701                                                                                                                                                                                                                                                                                         | gbpln | Arabidopsis lyrata   | AT1G06780.2   Symbols: GAUT6   galacturonosyltransferase 6   chr1:2083689-2086853 FORWARD LENGTH=602                                                                                                                                                                               | 675  | 602  | 0         | 89.2  | 68.9 | 74.1 |
| Rsa1.0_00112.1.g5521.t1 | refXP_002892358.1   zinc finger family protein [Arabidopsis lyrata subsp. lyrata] gi 297338200 gb EFH68617.1                                                                                                                                                                                                                                                                                                                                                                                                                                           | 349  | 440  | 1.00E-119 | 126.1 | 71.1 | 80.5 | zinc finger family protein                                                                                                                                                                                                                                                                                                     | gbpln | Arabidopsis lyrata   | AT1G06770.1   Symbols: DRIP1   DREB2A-interacting protein 1   chr1:2079222-2081707 REVERSE LENGTH=421                                                                                                                                                                              | 349  | 421  | 1.00E-120 | 120.6 | 72.8 | 80.5 |
| Rsa1.0_00112.1.g5522.t1 | ref NP_180620.1   histone H1.2 [Arabidopsis thaliana] gi 121907 sp P28569.1   H12_ARATH RecName: Full=Histone H1.2 gi 13430598 gb AAK25921.1   AF360211.1 putative histone H1 protein [Arabidopsis thaliana] gi 16320 emb CAA44316.1   Histone H1-2 [Arabidopsis thaliana] gi 14532870 gb AAK64117.1   putative histone H1 protein [Arabidopsis thaliana] gi 20198329 gb AAM15525.1   histone H1 [Arabidopsis thaliana] gi 21553923 gb AAM63006.1   histone H1 [Arabidopsis thaliana] gi 330253325 gb AEC08419.1   histone H1.2 [Arabidopsis thaliana] | 251  | 273  | 1.00E-42  | 108.8 | 57.0 | 65.3 | histone H1.2                                                                                                                                                                                                                                                                                                                   | gbpln | Arabidopsis thaliana | AT2G30620.1   Symbols:   winged-helix DNA-binding transcription factor family protein   chr2:13045360-13046267 FORWARD LENGTH=273                                                                                                                                                  | 251  | 273  | 3.00E-45  | 108.8 | 57.0 | 65.3 |
| Rsa1.0_00112.1.g5523.t1 | refXP_002889615.1   pfkB-type carbohydrate kinase family protein [Arabidopsis lyrata subsp. lyrata] gi 297335457 gb EFH65874.1                                                                                                                                                                                                                                                                                                                                                                                                                         | 486  | 490  | 0         | 100.8 | 89.7 | 93.8 | pfkB-type carbohydrate kinase family protein                                                                                                                                                                                                                                                                                   | gbpln | Arabidopsis lyrata   | AT1G06730.1   Symbols:   pfkB-like carbohydrate kinase family protein   chr1:2067633-2070049 FORWARD LENGTH=488                                                                                                                                                                    | 486  | 488  | 0         | 100.4 | 87.7 | 92.4 |
| Rsa1.0_00112.1.g5524.t1 | refXP_002892356.1   hypothetical protein ARALYDRAFT_470695 [Arabidopsis lyrata subsp. lyrata] gi 297338198 gb EFH68615.1                                                                                                                                                                                                                                                                                                                                                                                                                               | 1170 | 1148 | 0         | 98.1  | 77.6 | 84.4 | hypothetical protein ARALYDRAFT_470695                                                                                                                                                                                                                                                                                         | gbpln | Arabidopsis lyrata   | AT1G06720.1   Symbols:   P-loop containing nucleoside triphosphate hydrolases superfamily protein   chr1:2060615-2067281 REVERSE LENGTH=1147                                                                                                                                       | 1170 | 1147 | 0         | 98.0  | 76.2 | 83.9 |
| Rsa1.0_00112.1.g5525.t1 | ref NP_172156.2   pentatricopeptide repeat-containing protein [Arabidopsis thaliana] gi 332189906 gb AEE28027.1                                                                                                                                                                                                                                                                                                                                                                                                                                        | 952  | 997  | 0         | 104.7 | 81.6 | 88.9 | pentatricopeptide repeat-containing protein                                                                                                                                                                                                                                                                                    | gbpln | Arabidopsis thaliana | AT1G06710.1   Symbols:   Tetratricopeptide repeat (TPR)-like superfamily protein   chr1:2056999-2060242 REVERSE LENGTH=997                                                                                                                                                         | 952  | 997  | 0         | 104.7 | 81.6 | 88.9 |
| Rsa1.0_00112.1.g5526.t1 | gb EOA38049.1   hypothetical protein CARUB_v10009518mg [Capsella rubella]                                                                                                                                                                                                                                                                                                                                                                                                                                                                              | 368  | 365  | 1.00E-177 | 99.2  | 86.4 | 91.3 | hypothetical protein CARUB_v10009518mg                                                                                                                                                                                                                                                                                         | gbpln | Capsella rubella     | AT1G06700.2   Symbols:   Protein kinase superfamily protein   chr1:2052750-2054552 REVERSE LENGTH=361                                                                                                                                                                              | 368  | 361  | 1.00E-174 | 98.1  | 85.3 | 90.2 |
| Rsa1.0_00112.1.g5527.t1 | sp P11594.2 PSBP_SINAL RecName: Full=Oxygen-evolving enhancer protein 2, chloroplastic; Short=OEE2; AltName: Full=23 kDa subunit of oxygen evolving system of photosystem II; AltName: Full=23 kDa thylakoid membrane protein; AltName: Full=OEC 23 kDa subunit; Flags: Precursor gi 21133 emb CAA35081.1   oxygen-evolving complex of photosystem II [Sinapis alba]                                                                                                                                                                                   | 263  | 260  | 1.00E-139 | 98.9  | 95.1 | 97.0 | RecName: Full=Oxygen-evolving enhancer protein 2, chloroplastic; Short=OEE2; AltName: Full=23 kDa subunit of oxygen evolving system of photosystem II; AltName: Full=23 kDa thylakoid membrane protein; AltName: Full=OEC 23 kDa subunit; Flags: Precursor gi 21133 emb CAA35081.1   oxygen-evolving complex of photosystem II | gbpln | Sinapis alba         | AT1G06680.1   Symbols: PSBP-1, OEE2, PSII-P, OEE23   photosystem II subunit P-1   chr1:2047940-2049186 FORWARD LENGTH=263                                                                                                                                                          | 263  | 263  | 1.00E-137 | 100.0 | 92.4 | 97.3 |

|                         |                                                                                                                                                                                                                                                                                                                                                                                                                                          |      |      |           |       |      |      |                                             |       |                      |                                                                                                                                                                                                                                                                                                                                                   |      |      |           |       |      |      |
|-------------------------|------------------------------------------------------------------------------------------------------------------------------------------------------------------------------------------------------------------------------------------------------------------------------------------------------------------------------------------------------------------------------------------------------------------------------------------|------|------|-----------|-------|------|------|---------------------------------------------|-------|----------------------|---------------------------------------------------------------------------------------------------------------------------------------------------------------------------------------------------------------------------------------------------------------------------------------------------------------------------------------------------|------|------|-----------|-------|------|------|
| Rsa1.0_00112.1.g5528.t1 | refXP_00289613.1   nuclear deih-boxhelicase [Arabidopsis lyrata subsp. lyrata] gi 297335455 gb EFH65872.1   nuclear deih-boxhelicase [Arabidopsis lyrata subsp. lyrata]                                                                                                                                                                                                                                                                  | 1369 | 1580 | 0         | 115.4 | 72.0 | 81.5 | nuclear deih-boxhelicase                    | gbpln | Arabidopsis lyrata   | AT1G06670.1   Symbols: NIH   nuclear DEIH-boxhelicase   chr1:2040567-2047333 FORWARD LENGTH=1576                                                                                                                                                                                                                                                  | 1369 | 1576 | 0         | 115.1 | 71.2 | 81.6 |
| Rsa1.0_00112.1.g5529.t1 | refXP_002892352.1   hypothetical protein ARALYDRAFT_887868 [Arabidopsis lyrata subsp. lyrata] gi 297338194 gb EFH68611.1   hypothetical protein ARALYDRAFT_887868 [Arabidopsis lyrata subsp. lyrata]                                                                                                                                                                                                                                     | 492  | 486  | 0         | 98.8  | 74.4 | 82.9 | hypothetical protein ARALYDRAFT_887868      | gbpln | Arabidopsis lyrata   | AT1G06660.1   Symbols:   unknown protein; BEST Arabidopsis thaliana protein match is: unknown protein (TAIR:AT2G30820.2). Has 166 Blast hits to 144 proteins in 35 species: Archae - 0; Bacteria - 17; Metazoa - 13; Fungi - 20; Plants - 104; Viruses - 0; Other Eukaryotes - 12 (source: NCBI BLink).   chr1:2037461-2040148 REVERSE LENGTH=481 | 492  | 481  | 0         | 97.8  | 73.0 | 81.7 |
| Rsa1.0_00112.1.g5530.t1 | refXP_00289612.1   hypothetical protein ARALYDRAFT_470684 [Arabidopsis lyrata subsp. lyrata] gi 297335454 gb EFH65871.1   hypothetical protein ARALYDRAFT_470684 [Arabidopsis lyrata subsp. lyrata]                                                                                                                                                                                                                                      | 356  | 369  | 1.00E-164 | 103.7 | 76.7 | 88.2 | hypothetical protein ARALYDRAFT_470684      | gbpln | Arabidopsis lyrata   | AT1G06650.2   Symbols:   2-oxoglutarate (2OG) and Fe(II)-dependent oxygenase superfamily protein   chr1:2035909-2037186 FORWARD LENGTH=369                                                                                                                                                                                                        | 356  | 369  | 1.00E-162 | 103.7 | 75.6 | 86.5 |
| Rsa1.0_00112.1.g5531.t1 | gb ABH07409.1   putative pol polyprotein [Brassica oleracea var. botrytis]                                                                                                                                                                                                                                                                                                                                                               | 677  | 1239 | 0         | 183.0 | 47.6 | 54.7 | putative pol polyprotein                    | gbpln | Brassica oleracea    | AT4G23160.1   Symbols: CRK8   cysteine-rich RLK (RECEPTOR-like protein kinase) 8   chr4:12129485-12134086 FORWARD LENGTH=1262                                                                                                                                                                                                                     | 677  | 1262 | 6.00E-61  | 186.4 | 18.5 | 26.7 |
| Rsa1.0_00112.1.g5532.t1 | ref NP_172147.2   1-aminocyclopropane-1-carboxylate oxidase-1 [Arabidopsis thaliana] gi 75297894 sp Q84MB3.1 ACCH1_ARAT H RecName: Full=1-aminocyclopropane-1-carboxylate oxidase homolog 1 gi 30102640 gb AAP21238.1   At1g06620 [Arabidopsis thaliana] gi 110743652 db BAE99663.1   oxidoreductase like protein [Arabidopsis thaliana] gi 332189889 gb AEE28010.1   1-aminocyclopropane-1-carboxylate oxidase-1 [Arabidopsis thaliana] | 366  | 365  | 0         | 99.7  | 86.3 | 94.3 | 1-aminocyclopropane-1-carboxylate oxidase-1 | gbpln | Arabidopsis thaliana | AT1G06620.1   Symbols:   2-oxoglutarate (2OG) and Fe(II)-dependent oxygenase superfamily protein   chr1:2025618-2027094 FORWARD LENGTH=365                                                                                                                                                                                                        | 366  | 365  | 0         | 99.7  | 86.3 | 94.3 |
| Rsa1.0_00112.1.g5533.t1 | refXP_002892351.1   binding protein [Arabidopsis lyrata subsp. lyrata] gi 297338193 gb EFH68610.1   binding protein [Arabidopsis lyrata subsp. lyrata]                                                                                                                                                                                                                                                                                   | 920  | 916  | 0         | 99.6  | 90.0 | 94.0 | binding protein                             | gbpln | Arabidopsis lyrata   | AT1G06590.1   Symbols:   unknown protein; Has 380 Blast hits to 268 proteins in 109 species: Archae - 0; Bacteria - 0; Metazoa - 245; Fungi - 73; Plants - 49; Viruses - 0; Other Eukaryotes - 13 (source: NCBI BLink).   chr1:2016504-2024505 REVERSE LENGTH=916                                                                                 | 920  | 916  | 0         | 99.6  | 89.5 | 93.3 |
| Rsa1.0_00112.1.g5534.t1 | gb AFB74208.1   4-hydroxyphenylpyruvate dioxygenase [Brassica napus]                                                                                                                                                                                                                                                                                                                                                                     | 469  | 445  | 0         | 94.9  | 84.6 | 87.6 | 4-hydroxyphenylpyruvate dioxygenase         | gbpln | Brassica napus       | AT1G06570.1   Symbols: PDS1, HPD   phytoene desaturation 1   chr1:2012015-2013543 REVERSE LENGTH=473                                                                                                                                                                                                                                              | 469  | 473  | 0         | 100.9 | 80.8 | 86.1 |
| Rsa1.0_00112.1.g5535.t2 | ref NP_172143.3   NOL1/NOP2/sun-like protein [Arabidopsis thaliana] gi 30102680 gb AAP21258.1   At1g06560 [Arabidopsis thaliana] gi 110743735 db BAE99704.1   hypothetical protein [Arabidopsis thaliana] gi 332189884 gb AEE28005.1   NOL1/NOP2/sun-like protein [Arabidopsis thaliana]                                                                                                                                                 | 558  | 599  | 0         | 107.3 | 87.5 | 93.4 | NOL1/NOP2/sun-like protein                  | gbpln | Arabidopsis thaliana | AT1G06560.1   Symbols:   NOL1/NOP2/sun family protein   chr1:2007660-2011824 FORWARD LENGTH=599                                                                                                                                                                                                                                                   | 558  | 599  | 0         | 107.3 | 87.5 | 93.4 |
| Rsa1.0_00112.1.g5536.t1 | ref NP_172141.1   uncharacterized protein [Arabidopsis thaliana] gi 6692681 gb AAF24815.1 AC007592_9 F12K11.13 [Arabidopsis thaliana] gi 20258790 gb AAM13917.1   unknown protein [Arabidopsis thaliana] gi 332189882 gb AEE28003.1   uncharacterized protein AT1G06540 [Arabidopsis thaliana]                                                                                                                                           | 116  | 125  | 3.00E-37  | 107.8 | 75.0 | 87.9 | uncharacterized protein                     | gbpln | Arabidopsis thaliana | AT1G06540.1   Symbols:   unknown protein; BEST Arabidopsis thaliana protein match is: unknown protein (TAIR:AT2G30930.1). Has 16 Blast hits to 16 proteins in 3 species: Archae - 0; Bacteria - 0; Metazoa - 0; Fungi - 0; Plants - 16; Viruses - 0; Other Eukaryotes - 0 (source: NCBI BLink).   chr1:2002908-2003393 REVERSE LENGTH=125         | 116  | 125  | 4.00E-40  | 107.8 | 75.0 | 87.9 |
| Rsa1.0_00112.1.g5537.t1 | ref NP_172140.1   tropomyosin-related protein [Arabidopsis thaliana] gi 6692690 gb AAF24824.1 AC007592_17 F12K11.14 [Arabidopsis thaliana] gi 332189881 gb AEE28002.1   tropomyosin-related protein [Arabidopsis thaliana]                                                                                                                                                                                                               | 510  | 323  | 1.00E-93  | 63.3  | 39.6 | 48.8 | tropomyosin-related protein                 | gbpln | Arabidopsis thaliana | AT1G06530.1   Symbols:   Tropomyosin-related   chr1:2001625-2002596 FORWARD LENGTH=323                                                                                                                                                                                                                                                            | 510  | 323  | 3.00E-96  | 63.3  | 39.6 | 48.8 |
| Rsa1.0_00112.1.g5538.t1 | ref XP_002892346.1   hypothetical protein ARALYDRAFT_887856 [Arabidopsis lyrata subsp. lyrata] gi 297338188 gb EFH68605.1   hypothetical protein ARALYDRAFT_887856 [Arabidopsis lyrata subsp. lyrata]                                                                                                                                                                                                                                    | 603  | 584  | 0         | 96.8  | 83.6 | 89.1 | hypothetical protein ARALYDRAFT_887856      | gbpln | Arabidopsis lyrata   | AT1G06520.1   Symbols: ATGPAT1, GPAT1   glycerol-3-phosphate acyltransferase 1   chr1:1994170-1996067 REVERSE LENGTH=585                                                                                                                                                                                                                          | 603  | 585  | 0         | 97.0  | 81.4 | 87.7 |

|                         |                                                                                                                                                                                                                                                                                                                                                                                                                                                                                                                                                                                 |      |      |           |       |      |      |                                        |       |                      |                                                                                                                                                                                                                                                                                                                                                                                                                                                                |      |      |           |       |      |      |
|-------------------------|---------------------------------------------------------------------------------------------------------------------------------------------------------------------------------------------------------------------------------------------------------------------------------------------------------------------------------------------------------------------------------------------------------------------------------------------------------------------------------------------------------------------------------------------------------------------------------|------|------|-----------|-------|------|------|----------------------------------------|-------|----------------------|----------------------------------------------------------------------------------------------------------------------------------------------------------------------------------------------------------------------------------------------------------------------------------------------------------------------------------------------------------------------------------------------------------------------------------------------------------------|------|------|-----------|-------|------|------|
| Rsa1.0_00112.1.g5539.t1 | ref NP_172138.2  uncharacterized protein [Arabidopsis thaliana] gi 27754366 gb AAO22632.1  unknown protein [Arabidopsis thaliana] gi 28393897 gb AAO42356.1  unknown protein [Arabidopsis thaliana] gi 332189879 gb AEE28000.1  uncharacterized protein AT1G06510 [Arabidopsis thaliana]                                                                                                                                                                                                                                                                                        | 247  | 277  | 1.00E-86  | 112.1 | 73.7 | 85.4 | uncharacterized protein                | gbpln | Arabidopsis thaliana | AT1G06510.1   Symbols:   unknown protein; FUNCTIONS IN: molecular_function unknown; INVOLVED IN: biological_process unknown; LOCATED IN: chloroplast; EXPRESSED IN: 21 plant structures; EXPRESSED DURING: 13 growth stages; Has 376 Blast hits to 369 proteins in 152 species: Archae - 5; Bacteria - 113; Metazoa - 105; Fungi - 46; Plants - 27; Viruses - 2; Other Eukaryotes - 78 (source: NCBI BLINK).   chr1:1992389-1993583 FORWARD LENGTH=277         | 247  | 277  | 4.00E-89  | 112.1 | 73.7 | 85.4 |
| Rsa1.0_00112.1.g5540.t1 | gb ADK87343.1  callose synthase 7 [Arabidopsis thaliana]                                                                                                                                                                                                                                                                                                                                                                                                                                                                                                                        | 1922 | 1933 | 0         | 100.6 | 89.4 | 94.6 | callose synthase 7                     | gbpln | Arabidopsis thaliana | AT1G06490.1   Symbols: ATGSL07, gsl07, atgsl7, GSL7   glucan synthase-like 7   chr1:1978762-1989295 FORWARD LENGTH=1958                                                                                                                                                                                                                                                                                                                                        | 1922 | 1958 | 0         | 101.9 | 89.4 | 94.6 |
| Rsa1.0_00113.1.g5541.t1 | gb EOA17357.1  hypothetical protein CARUB_v10005638mg [Capsella rubella]                                                                                                                                                                                                                                                                                                                                                                                                                                                                                                        | 240  | 236  | 1.00E-117 | 98.3  | 86.7 | 92.9 | hypothetical protein CARUB_v10005638mg | gbpln | Capsella rubella     | AT4G28190.1   Symbols: ULT1, ULT   Developmental regulator, ULTRAPETALA   chr4:13985753-13987050 FORWARD LENGTH=237                                                                                                                                                                                                                                                                                                                                            | 240  | 237  | 1.00E-119 | 98.8  | 87.1 | 92.9 |
| Rsa1.0_00113.1.g5542.t1 | ref XP_002869514.1  hypothetical protein ARALYDRAFT_913700 [Arabidopsis lyrata subsp. lyrata] gi 297315350 gb EFH45773.1  hypothetical protein ARALYDRAFT_913700 [Arabidopsis lyrata subsp. lyrata]                                                                                                                                                                                                                                                                                                                                                                             | 570  | 573  | 0         | 100.5 | 91.1 | 95.4 | hypothetical protein ARALYDRAFT_913700 | gbpln | Arabidopsis lyrata   | AT4G28220.1   Symbols: NDB1   NAD(P)H dehydrogenase B1   chr4:13993078-13995651 FORWARD LENGTH=571                                                                                                                                                                                                                                                                                                                                                             | 570  | 571  | 0         | 100.2 | 88.9 | 94.6 |
| Rsa1.0_00113.1.g5543.t1 | gb ABV89634.1  wound-responsive protein-related [Brassica rapa]                                                                                                                                                                                                                                                                                                                                                                                                                                                                                                                 | 87   | 89   | 5.00E-35  | 102.3 | 90.8 | 94.3 | wound-responsive protein-related       | gbpln | Brassica rapa        | AT4G28240.1   Symbols:   Wound-responsive family protein   chr4:1397979-13998239 REVERSE LENGTH=86                                                                                                                                                                                                                                                                                                                                                             | 87   | 86   | 2.00E-36  | 98.9  | 81.6 | 92.0 |
| Rsa1.0_00113.1.g5544.t1 | dbj BAJ34284.1  unnamed protein product [Theellungiella halophila]                                                                                                                                                                                                                                                                                                                                                                                                                                                                                                              | 265  | 266  | 1.00E-142 | 100.4 | 92.1 | 97.0 | unnamed protein product                | ----  | ----                 | AT4G28250.1   Symbols: ATEXPB3, EXPB3, ATHEXP BETA 1.6   expansin B3   chr4:14000446-14001945 REVERSE LENGTH=264                                                                                                                                                                                                                                                                                                                                               | 265  | 264  | 1.00E-142 | 99.6  | 90.6 | 95.1 |
| Rsa1.0_00113.1.g5545.t1 | ref NP_194555.1  uncharacterized protein [Arabidopsis thaliana] gi 145334149 ref NP_001078455.1  uncharacterized protein [Arabidopsis thaliana] gi 7269680 emb CAB79628.1  putative protein [Arabidopsis thaliana] gi 110742700 dbj BAE93261.1  hypothetical protein [Arabidopsis thaliana] gi 332660060 gb AEE85460.1  uncharacterized protein AT4G28260 [Arabidopsis thaliana] gi 332660061 gb AEE85461.1  uncharacterized protein AT4G28260 [Arabidopsis thaliana]                                                                                                           | 120  | 516  | 4.00E-43  | 430.0 | 72.5 | 75.8 | uncharacterized protein                | gbpln | Arabidopsis thaliana | AT4G28260.2   Symbols:   unknown protein; FUNCTIONS IN: molecular_function unknown; INVOLVED IN: biological_process unknown; LOCATED IN: cellular_component unknown; EXPRESSED IN: 24 plant structures; EXPRESSED DURING: 15 growth stages; Has 50 Blast hits to 42 proteins in 12 species: Archae - 0; Bacteria - 0; Metazoa - 1; Fungi - 0; Plants - 49; Viruses - 0; Other Eukaryotes - 0 (source: NCBI BLINK).   chr4:14005048-14006762 FORWARD LENGTH=516 | 120  | 516  | 7.00E-46  | 430.0 | 72.5 | 75.8 |
| Rsa1.0_00113.1.g5546.t1 | # # # # # # # # - ---- # # # # # # #                                                                                                                                                                                                                                                                                                                                                                                                                                                                                                                                            | #    | #    | #         | #     | #    | #    | -                                      | ----  | ----                 | # # # # # # #                                                                                                                                                                                                                                                                                                                                                                                                                                                  | #    | #    | #         | #     | #    | #    |
| Rsa1.0_00113.1.g5547.t1 | ref NP_194556.1  E3 ubiquitin-protein ligase RMA2 [Arabidopsis thaliana] gi 75279780 sp P93030.1 RMA2_ARATH RecName: Full=E3 ubiquitin-protein ligase RMA2; AltName: Full=Protein RING membrane-anchored 2 gi 1773040 gb AAC49830.1  RING zinc finger protein [Arabidopsis thaliana] gi 7269681 emb CAB79629.1  putative protein [Arabidopsis thaliana] gi 27764994 gb AAO23618.1  At4g28270 [Arabidopsis thaliana] gi 110742855 dbj BAE9326.1  hypothetical protein [Arabidopsis thaliana] gi 332660062 gb AEE85462.1  E3 ubiquitin-protein ligase RMA2 [Arabidopsis thaliana] | 193  | 193  | 4.00E-87  | 100.0 | 80.8 | 88.6 | E3 ubiquitin-protein ligase RMA2       | gbpln | Arabidopsis thaliana | AT4G28270.1   Symbols: ATRMA2, RMA2   RING membrane-anchored 2   chr4:14007614-14008195 REVERSE LENGTH=193                                                                                                                                                                                                                                                                                                                                                     | 193  | 193  | 1.00E-89  | 100.0 | 80.8 | 88.6 |
| Rsa1.0_00113.1.g5548.t5 | gb EOA16491.1  hypothetical protein CARUB_v10004649mg [Capsella rubella]                                                                                                                                                                                                                                                                                                                                                                                                                                                                                                        | 702  | 497  | 0         | 70.8  | 57.8 | 61.4 | hypothetical protein CARUB_v10004649mg | gbpln | Capsella rubella     | AT4G28300.1   Symbols:   Protein of unknown function (DUF1421)   chr4:14014860-14016823 FORWARD LENGTH=496                                                                                                                                                                                                                                                                                                                                                     | 702  | 496  | 0         | 70.7  | 58.1 | 62.3 |
| Rsa1.0_00113.1.g5549.t1 | ref NP_567804.1  uncharacterized protein [Arabidopsis thaliana] gi 21553910 gb AAM62993.1  unknown [Arabidopsis thaliana] gi 51972009 dbj BAD44669.1  unknown protein [Arabidopsis thaliana] gi 105829831 gb ABF74705.1  At4g28310 [Arabidopsis thaliana] gi 332660068 gb AEE85468.1  uncharacterized protein AT4G28310 [Arabidopsis thaliana]                                                                                                                                                                                                                                  | 186  | 202  | 2.00E-29  | 108.6 | 52.7 | 65.1 | uncharacterized protein                | gbpln | Arabidopsis thaliana | AT4G28310.1   Symbols:   unknown protein; BEST Arabidopsis thaliana protein match is: unknown protein (TAIR:AT1G52270.1); Has 30201 Blast hits to 17322 proteins in 780 species: Archae - 12; Bacteria - 1396; Metazoa - 17338; Fungi - 3422; Plants - 5037; Viruses - 0; Other Eukaryotes - 2996 (source: NCBI BLINK).   chr4:14017458-14018066 FORWARD LENGTH=202                                                                                            | 186  | 202  | 9.00E-32  | 108.6 | 52.7 | 65.1 |

| Rsa1.0_00113.1.g5550.t1 | #                                                                                                                                                                                                                                                                                                                                                                                                                                                                                            | #   | #   | #         | #     | #    | #    | -                                               | ---   | ---                  | #                                                                                                                                                                                                                                                                                                                                                                                                                                                                                                                  | #   | #   | #         | #     | #    |      |
|-------------------------|----------------------------------------------------------------------------------------------------------------------------------------------------------------------------------------------------------------------------------------------------------------------------------------------------------------------------------------------------------------------------------------------------------------------------------------------------------------------------------------------|-----|-----|-----------|-------|------|------|-------------------------------------------------|-------|----------------------|--------------------------------------------------------------------------------------------------------------------------------------------------------------------------------------------------------------------------------------------------------------------------------------------------------------------------------------------------------------------------------------------------------------------------------------------------------------------------------------------------------------------|-----|-----|-----------|-------|------|------|
| Rsa1.0_00113.1.g5551.t1 | ref NP_194974.1  uncharacterized protein [Arabidopsis thaliana] gi 4049350 emb CAA22575.1  putative protein [Arabidopsis thaliana] gi 7270152 emb CAB78965.1  putative protein [Arabidopsis thaliana] gi 15450373 gb AAK96480.1  AT4g32480/F8B4.180 [Arabidopsis thaliana] gi 16974485 gb AAL31246.1  AT4g32480/F8B4.180 [Arabidopsis thaliana] gi 332660667 gb AEE86067.1  uncharacterized protein AT4G32480 [Arabidopsis thaliana]                                                         | 300 | 287 | 1.00E-134 | 95.7  | 79.3 | 85.7 | uncharacterized protein                         | gbpln | Arabidopsis thaliana | AT4G32480.1   Symbols:   Protein of unknown function (DUF506)   chr4:15676488-15677776 FORWARD LENGTH=287                                                                                                                                                                                                                                                                                                                                                                                                          | 300 | 287 | 1.00E-137 | 95.7  | 79.3 | 85.7 |
| Rsa1.0_00113.1.g5552.t1 | gb EOA18034.1  hypothetical protein CARUB_v10006477mg, partial [Capsella rubella]                                                                                                                                                                                                                                                                                                                                                                                                            | 149 | 142 | 2.00E-51  | 95.3  | 71.1 | 79.9 | hypothetical protein CARUB_v10006477mg, partial | gbpln | Capsella rubella     | AT4G28395.1   Symbols: ATA7, A7   Bifunctional inhibitor/lipid-transfer protein/seed storage 2S albumin superfamily protein   chr4:14043991-14044728 FORWARD LENGTH=180                                                                                                                                                                                                                                                                                                                                            | 149 | 180 | 2.00E-53  | 120.8 | 71.8 | 78.5 |
| Rsa1.0_00113.1.g5553.t1 | ref NP_567808.1  putative protein phosphatase 2C 58 [Arabidopsis thaliana] gi 75163673 sp Q93YW5.1 P2C58_ARAT H RecName: Full=Probable protein phosphatase 2C 58; Short=AtPP2C58 gi 16604585 gb AAL24149.1  putative protein phosphatase 2C [Arabidopsis thaliana] gi 20258991 gb AAM14211.1  putative protein phosphatase 2C [Arabidopsis thaliana] gi 332660081 gb AEE85481.1  putative protein phosphatase 2C 58 [Arabidopsis thaliana]                                                   | 264 | 283 | 1.00E-135 | 107.2 | 89.0 | 95.5 | putative protein phosphatase 2C 58              | gbpln | Arabidopsis thaliana | AT4G28400.1   Symbols:   Protein phosphatase 2C family protein   chr4:14048499-14050118 FORWARD LENGTH=283                                                                                                                                                                                                                                                                                                                                                                                                         | 264 | 283 | 1.00E-138 | 107.2 | 89.0 | 95.5 |
| Rsa1.0_00113.1.g5554.t1 | gb EOA19176.1  hypothetical protein CARUB_v10007855mg [Capsella rubella]                                                                                                                                                                                                                                                                                                                                                                                                                     | 448 | 449 | 0         | 100.2 | 80.6 | 90.4 | hypothetical protein CARUB_v10007855mg          | gbpln | Capsella rubella     | AT4G28410.1   Symbols:   Tyrosine transaminase family protein   chr4:14052391-14054846 FORWARD LENGTH=447                                                                                                                                                                                                                                                                                                                                                                                                          | 448 | 447 | 0         | 99.8  | 80.4 | 89.1 |
| Rsa1.0_00113.1.g5555.t1 | gb EOA17584.1  hypothetical protein CARUB_v10005945mg [Capsella rubella]                                                                                                                                                                                                                                                                                                                                                                                                                     | 154 | 152 | 2.00E-68  | 98.7  | 85.1 | 88.3 | hypothetical protein CARUB_v10005945mg          | gbpln | Capsella rubella     | AT4G28440.1   Symbols:   Nucleic acid-binding, OB-fold-like protein   chr4:14060054-14060970 FORWARD LENGTH=153                                                                                                                                                                                                                                                                                                                                                                                                    | 154 | 153 | 6.00E-65  | 99.4  | 76.6 | 79.9 |
| Rsa1.0_00113.1.g5556.t2 | ref XP_002867449.1  AT4g28450/F20O9.130 [Arabidopsis lyrata subsp. lyrata] gi 297313285 gb EFH43708.1  AT4g28450/F20O9.130 [Arabidopsis lyrata subsp. lyrata]                                                                                                                                                                                                                                                                                                                                | 452 | 452 | 0         | 100.0 | 86.9 | 92.9 | AT4g28450/F20O9.130                             | gbpln | Arabidopsis lyrata   | AT4G28450.1   Symbols:   nucleotide binding protein binding   chr4:14061724-14064582 REVERSE LENGTH=452                                                                                                                                                                                                                                                                                                                                                                                                            | 452 | 452 | 0         | 100.0 | 85.6 | 92.0 |
| Rsa1.0_00113.1.g5557.t1 | ref NP_194575.2  uncharacterized protein [Arabidopsis thaliana] gi 91805615 gb ABE65536.1  hypothetical protein At4g28460 [Arabidopsis thaliana] gi 332660089 gb AEE85489.1  uncharacterized protein AT4G28460 [Arabidopsis thaliana]                                                                                                                                                                                                                                                        | 73  | 72  | 2.00E-24  | 98.6  | 82.2 | 87.7 | uncharacterized protein                         | gbpln | Arabidopsis thaliana | AT4G28460.1   Symbols:   unknown protein; FUNCTIONS IN: molecular function unknown; INVOLVED IN: biological process unknown; LOCATED IN: endomembrane system; EXPRESSED IN: 10 plant structures; EXPRESSED DURING: LP.04 four leaves visible, 4 anthesis, petal differentiation and expansion stage; Has 8 Blast hits to 8 proteins in 3 species: Archae - 0; Bacteria - 0; Metazoa - 0; Fungi - 0; Plants - 8; Viruses - 0; Other Eukaryotes - 0 (source: NCBI BLINK).   chr4:14066083-14066301 FORWARD LENGTH=72 | 73  | 72  | 4.00E-27  | 98.6  | 82.2 | 87.7 |
| Rsa1.0_00113.1.g5558.t1 | ref NP_194576.5  26S proteasome regulatory subunit S2 1B [Arabidopsis thaliana] gi 75130218 sp Q6XJG8.1 RPN1B_ARAT H RecName: Full=26S proteasome non-ATPase regulatory subunit 2 1B; AltName: Full=26S proteasome regulatory subunit RPN1 B; Short=AtRPN1b; AltName: Full=26S proteasome regulatory subunit S2 1B gi 32700012 gb AAP86656.1  26S proteasome subunit RPN1b [Arabidopsis thaliana] gi 332660090 gb AEE85490.1  26S proteasome regulatory subunit S2 1B [Arabidopsis thaliana] | 891 | 891 | 0         | 100.0 | 93.2 | 96.2 | 26S proteasome regulatory subunit S2 1B         | gbpln | Arabidopsis thaliana | AT4G28470.1   Symbols: RPN1B, ATRPN1B   26S proteasome regulatory subunit S2 1B   chr4:14067082-14072357 REVERSE LENGTH=891                                                                                                                                                                                                                                                                                                                                                                                        | 891 | 891 | 0         | 100.0 | 93.2 | 96.2 |
| Rsa1.0_00113.1.g5559.t1 | ref XP_002869499.1  DNAJ heat shock family protein [Arabidopsis lyrata subsp. lyrata] gi 297315335 gb EFH45758.1  DNAJ heat shock family protein [Arabidopsis lyrata subsp. lyrata]                                                                                                                                                                                                                                                                                                          | 322 | 344 | 1.00E-148 | 106.8 | 88.5 | 92.9 | DNAJ heat shock family protein                  | gbpln | Arabidopsis lyrata   | AT2G20560.1   Symbols:   DNAJ heat shock family protein   chr2:8848353-8849815 REVERSE LENGTH=337                                                                                                                                                                                                                                                                                                                                                                                                                  | 322 | 337 | 1.00E-150 | 104.7 | 83.9 | 89.1 |

|                         |                                                                                                                                                                                                                                                                                                                                                                                                 |      |      |           |       |      |      |                                        |       |                      |                                                                                                                                                                                                                                                                                                                                                                  |      |      |           |       |      |      |
|-------------------------|-------------------------------------------------------------------------------------------------------------------------------------------------------------------------------------------------------------------------------------------------------------------------------------------------------------------------------------------------------------------------------------------------|------|------|-----------|-------|------|------|----------------------------------------|-------|----------------------|------------------------------------------------------------------------------------------------------------------------------------------------------------------------------------------------------------------------------------------------------------------------------------------------------------------------------------------------------------------|------|------|-----------|-------|------|------|
| Rsa1.0_00113.1.g5560.t1 | ref[XP_002867447.1] predicted protein [Arabidopsis lyrata subsp. lyrata] gi 297313283 gb EFH43706.1  predicted protein [Arabidopsis lyrata subsp. lyrata]                                                                                                                                                                                                                                       | 200  | 200  | 4.00E-95  | 100.0 | 82.0 | 90.5 | predicted protein                      | gbpln | Arabidopsis lyrata   | AT5G46090.1   Symbols:   Protein of unknown function (DUF679)   chr5:18693485-18694129 FORWARD LENGTH=214                                                                                                                                                                                                                                                        | 200  | 214  | 5.00E-52  | 107.0 | 49.0 | 65.5 |
| Rsa1.0_00113.1.g5561.t1 | ref[NP_194579.1] NAC domain containing protein 73 [Arabidopsis thaliana] gi 2842493 emb CAA16890.1  predicted protein [Arabidopsis thaliana] gi 7269704 emb CAB79652.1  predicted protein [Arabidopsis thaliana] gi 67633762 gb AA7805.1  no apical meristem family protein [Arabidopsis thaliana] gi 332660095 gb AEE85495.1  NAC domain containing protein 73 [Arabidopsis thaliana]          | 306  | 305  | 1.00E-141 | 99.7  | 85.9 | 90.5 | NAC domain containing protein 73       | gbpln | Arabidopsis thaliana | AT4G28500.1   Symbols: ANAC073, SND2, NAC073   NAC domain containing protein 73   chr4:14083014-14084266 FORWARD LENGTH=305                                                                                                                                                                                                                                      | 306  | 305  | 1.00E-144 | 99.7  | 85.9 | 90.5 |
| Rsa1.0_00113.1.g5562.t1 | gb EOA16916.1  hypothetical protein CARUB_v10005139mg [Capsella rubella]                                                                                                                                                                                                                                                                                                                        | 349  | 353  | 1.00E-166 | 101.1 | 84.8 | 89.4 | hypothetical protein CARUB_v10005139mg | gbpln | Capsella rubella     | AT4G28530.1   Symbols: anac074, NAC074   NAC domain containing protein 74   chr4:14090725-14094603 REVERSE LENGTH=352                                                                                                                                                                                                                                            | 349  | 352  | 1.00E-154 | 100.9 | 85.1 | 89.4 |
| Rsa1.0_00113.1.g5563.t1 | # # # # # # # # - ----                                                                                                                                                                                                                                                                                                                                                                          |      |      |           |       |      |      |                                        |       |                      | # # # # # # #                                                                                                                                                                                                                                                                                                                                                    |      |      |           |       |      |      |
| Rsa1.0_00113.1.g5564.t1 | ref[XP_002886265.1] predicted protein [Arabidopsis lyrata subsp. lyrata] gi 297332105 gb EFH62524.1  predicted protein [Arabidopsis lyrata subsp. lyrata]                                                                                                                                                                                                                                       | 1183 | 1181 | 0         | 99.8  | 83.1 | 90.1 | predicted protein                      | gbpln | Arabidopsis lyrata   | AT2G18760.1   Symbols: CHR8   chromatin remodeling 8   chr2:8129154-8133502 FORWARD LENGTH=1187                                                                                                                                                                                                                                                                  | 1183 | 1187 | 0         | 100.3 | 83.9 | 90.5 |
| Rsa1.0_00113.1.g5565.t1 | ref[NP_567812.1] casein kinase I-like 6 [Arabidopsis thaliana] gi 20466498 gb AAM20566.1  protein kinase ADK1-like protein [Arabidopsis thaliana] gi 23198156 gb AAN15605.1  protein kinase ADK1-like protein [Arabidopsis thaliana] gi 62996982 gb AA724535.1  casein kinase 1-like protein 6 [Arabidopsis thaliana] gi 332660103 gb AEE85903.1  casein kinase I-like 6 [Arabidopsis thaliana] | 481  | 479  | 0         | 99.6  | 91.7 | 95.4 | casein kinase I-like 6                 | gbpln | Arabidopsis thaliana | AT4G28540.1   Symbols: CKL6, PPK1   casein kinase I-like 6   chr4:14107284-14110511 FORWARD LENGTH=479                                                                                                                                                                                                                                                           | 481  | 479  | 0         | 99.6  | 91.7 | 95.4 |
| Rsa1.0_00114.1.g5566.t1 | ref[XP_002863741.1] hypothetical protein ARALYDRAFT_917455 [Arabidopsis lyrata subsp. lyrata] gi 297309576 gb EFH40000.1  hypothetical protein ARALYDRAFT_917455 [Arabidopsis lyrata subsp. lyrata]                                                                                                                                                                                             | 346  | 390  | 4.00E-50  | 112.7 | 35.3 | 47.4 | hypothetical protein ARALYDRAFT_917455 | gbpln | Arabidopsis lyrata   | AT5G18880.1   Symbols:   RNA-directed DNA polymerase (reverse transcriptase)-related family protein   chr5:6300535-6301422 REVERSE LENGTH=295                                                                                                                                                                                                                    | 346  | 295  | 4.00E-39  | 85.3  | 27.2 | 43.6 |
| Rsa1.0_00114.1.g5567.t1 | gb EOA38158.1  hypothetical protein CARUB_v10009634mg [Capsella rubella]                                                                                                                                                                                                                                                                                                                        | 347  | 343  | 1.00E-139 | 98.8  | 77.8 | 86.5 | hypothetical protein CARUB_v10009634mg | gbpln | Capsella rubella     | AT1G24267.1   Symbols:   Protein of unknown function (DUF1654)   chr1:8604451-8607241 REVERSE LENGTH=343                                                                                                                                                                                                                                                         | 347  | 343  | 1.00E-137 | 98.8  | 76.1 | 85.0 |
| Rsa1.0_00114.1.g5568.t1 | ref[XP_002514883.1] conserved hypothetical protein [Ricinus communis] gi 223545934 gb EEF47437.1  conserved hypothetical protein [Ricinus communis]                                                                                                                                                                                                                                             | 222  | 269  | 7.00E-47  | 121.2 | 59.0 | 70.3 | conserved hypothetical protein         | gbpln | Ricinus communis     | AT5G13090.1   Symbols:   unknown protein; BEST Arabidopsis thaliana protein match is: unknown protein (TAIR:AT1G24270.1); Has 30201 Blast hits to 17322 proteins in 780 species: Archae - 12; Bacteria - 1396; Metazoa - 17338; Fungi - 3422; Plants - 5037; Viruses - 0; Other Eukaryotes - 2996 (source: NCBI BLINK)   chr5:4153758-4154567 REVERSE LENGTH=269 | 222  | 269  | 4.00E-42  | 121.2 | 54.5 | 67.1 |
| Rsa1.0_00114.1.g5569.t1 | ref[XP_002893458.1] glucose-6-phosphate dehydrogenase 3 [Arabidopsis lyrata subsp. lyrata] gi 297339300 gb EFH69717.1  glucose-6-phosphate dehydrogenase 3 [Arabidopsis lyrata subsp. lyrata]                                                                                                                                                                                                   | 591  | 601  | 0         | 101.7 | 87.6 | 92.9 | glucose-6-phosphate dehydrogenase 3    | gbpln | Arabidopsis lyrata   | AT1G24280.1   Symbols: G6PD3   glucose-6-phosphate dehydrogenase 3   chr1:8609495-8612383 FORWARD LENGTH=599                                                                                                                                                                                                                                                     | 591  | 599  | 0         | 101.4 | 85.6 | 90.7 |
| Rsa1.0_00114.1.g5570.t1 | ref[NP_174062.1] kelch repeat-containing F-box protein [Arabidopsis thaliana] gi 374095396 sp Q9FZJ3.2 FBK16_ARAT H RecName: Full=Putative F-box/kelch-repeat protein At1g27420 gi 332192706 gb AEE30827.1  putative F-box/kelch-repeat protein [Arabidopsis thaliana]                                                                                                                          | 356  | 346  | 1.00E-119 | 97.2  | 64.0 | 73.9 | kelch repeat-containing F-box protein  | gbpln | Arabidopsis thaliana | AT1G27420.1   Symbols:   Galactose oxidase/kelch repeat superfamily protein   chr1:9519108-9520520 FORWARD LENGTH=346                                                                                                                                                                                                                                            | 356  | 346  | 1.00E-122 | 97.2  | 64.0 | 73.9 |

|                         |                                                                                                                                                                                                                                                                                                                                                                                                                                                                                                                         |      |      |           |        |      |      |                                             |       |                      |                                                                                                                                                                                                                                                                                                                                                                                                                                                                                                                                                                                |      |      |           |        |      |      |
|-------------------------|-------------------------------------------------------------------------------------------------------------------------------------------------------------------------------------------------------------------------------------------------------------------------------------------------------------------------------------------------------------------------------------------------------------------------------------------------------------------------------------------------------------------------|------|------|-----------|--------|------|------|---------------------------------------------|-------|----------------------|--------------------------------------------------------------------------------------------------------------------------------------------------------------------------------------------------------------------------------------------------------------------------------------------------------------------------------------------------------------------------------------------------------------------------------------------------------------------------------------------------------------------------------------------------------------------------------|------|------|-----------|--------|------|------|
| Rsa1.0_00114.1.g5571.t1 | gb EOA37642.1  hypothetical protein CARUB_v10012120mg [Capsella rubella]                                                                                                                                                                                                                                                                                                                                                                                                                                                | 384  | 605  | 1.00E-176 | 157.6  | 86.2 | 91.9 | hypothetical protein CARUB_v10012120mg      | gbpln | Capsella rubella     | AT1G24310.1   Symbols:   unknown protein; FUNCTIONS IN: molecular_function unknown; INVOLVED IN: biological_process unknown; LOCATED IN: nucleolus; EXPRESSED IN: 20 plant structures; EXPRESSED DURING: 13 growth stages; Has 2922 Blast hits to 2454 proteins in 263 species: Archae = 0; Bacteria = 57; Metazoa = 1043; Fungi = 654; Plants = 388; Viruses = 11; Other Eukaryotes = 769 (source: NCBI BLINK).   chr1:8624192-8626179 FORWARD LENGTH=377                                                                                                                     | 384  | 377  | 1.00E-164 | 98.2   | 82.6 | 87.0 |
| Rsa1.0_00114.1.g5572.t1 | ref NP_201043.1  pentatricopeptide repeat-containing protein [Arabidopsis thaliana]<br>gi 75180621 sp Q9LVA2.1 PP443_ARATH RecName: Full=Pentatricopeptide repeat-containing protein At5g62370 gi 8809650 dbj BAA97201.1  unnamed protein product [Arabidopsis thaliana] gi 332010218 gb AED97601.1  pentatricopeptide repeat-containing protein [Arabidopsis thaliana]                                                                                                                                                 | 83   | 982  | 2.00E-18  | 1183.1 | 51.8 | 56.6 | pentatricopeptide repeat-containing protein | gbpln | Arabidopsis thaliana | AT5G62370.1   Symbols:   Tetratricopeptide repeat (TPR)-like superfamily protein   chr5:25041901-25044849 REVERSE LENGTH=982                                                                                                                                                                                                                                                                                                                                                                                                                                                   | 83   | 982  | 3.00E-21  | 1183.1 | 51.8 | 56.6 |
| Rsa1.0_00114.1.g5573.t1 | gb EOA39714.1  hypothetical protein CARUB_v10008359mg [Capsella rubella]                                                                                                                                                                                                                                                                                                                                                                                                                                                | 773  | 776  | 0         | 100.4  | 84.2 | 90.4 | hypothetical protein CARUB_v10008359mg      | gbpln | Capsella rubella     | AT1G24330.1   Symbols:   ARM repeat superfamily protein   chr1:8631779-8634835 FORWARD LENGTH=771                                                                                                                                                                                                                                                                                                                                                                                                                                                                              | 773  | 771  | 0         | 99.7   | 85.1 | 91.2 |
| Rsa1.0_00114.1.g5574.t1 | gb EOA37163.1  hypothetical protein CARUB_v10010495mg [Capsella rubella]                                                                                                                                                                                                                                                                                                                                                                                                                                                | 164  | 166  | 8.00E-81  | 101.2  | 89.6 | 92.7 | hypothetical protein CARUB_v10010495mg      | gbpln | Capsella rubella     | AT1G24350.1   Symbols:   Acid phosphatase/vanadium-dependent haloperoxidase-related protein   chr1:8639098-8640313 REVERSE LENGTH=168                                                                                                                                                                                                                                                                                                                                                                                                                                          | 164  | 168  | 3.00E-83  | 102.4  | 89.6 | 92.7 |
| Rsa1.0_00114.1.g5575.t1 | ref NP_564218.1  RING/U-box domain-containing protein [Arabidopsis thaliana] gi 9743332 gb AAF97956.1 AC000103.6 F21J9.10 [Arabidopsis thaliana] gi 21553664 gb AM62757.1  unknown [Arabidopsis thaliana] gi 24030317 gb AAN41327.1  unknown protein [Arabidopsis thaliana] gi 332192409 gb AEE30530.1  RING/U-box domain-containing protein [Arabidopsis thaliana]                                                                                                                                                     | 254  | 251  | 1.00E-134 | 98.8   | 92.1 | 96.1 | RING/U-box domain-containing protein        | gbpln | Arabidopsis thaliana | AT1G24440.1   Symbols:   RING/U-box superfamily protein   chr1:8662340-8663777 FORWARD LENGTH=251                                                                                                                                                                                                                                                                                                                                                                                                                                                                              | 254  | 251  | 1.00E-137 | 98.8   | 92.1 | 96.1 |
| Rsa1.0_00114.1.g5576.t1 | gb EOA37586.1  hypothetical protein CARUB_v10011938mg [Capsella rubella]                                                                                                                                                                                                                                                                                                                                                                                                                                                | 1750 | 1772 | 0         | 101.3  | 75.0 | 85.6 | hypothetical protein CARUB_v10011938mg      | gbpln | Capsella rubella     | AT1G24460.1   Symbols:   unknown protein; FUNCTIONS IN: molecular_function unknown; INVOLVED IN: biological_process unknown; LOCATED IN: cellular_component unknown; EXPRESSED IN: 23 plant structures; EXPRESSED DURING: 14 growth stages; BEST Arabidopsis thaliana protein match is: unknown protein (TAIR:AT4G31570.1); Has 181008 Blast hits to 85359 proteins in 3551 species: Archae = 3290; Bacteria = 48304; Metazoa = 70793; Fungi = 13943; Plants = 10118; Viruses = 785; Other Eukaryotes = 33775 (source: NCBI BLINK).   chr1:8666072-8672338 FORWARD LENGTH=1807 | 1750 | 1807 | 0         | 103.3  | 75.3 | 85.0 |
| Rsa1.0_00114.1.g5577.t1 | ref NP_173859.1  T-complex protein 1 subunit epsilon [Arabidopsis thaliana] gi 3024697 sp Q04450.1 TCPE_ARATH RecName: Full=T-complex protein 1 subunit epsilon; Short=TCP-1-epsilon; AltName: Full=CCT-epsilon gi 9743353 gb AAF97977.1 AC000103.27 F21J9.17 [Arabidopsis thaliana] gi 19715605 gb AAL91625.1  At1g24510/F21J9.150 [Arabidopsis thaliana] gi 23463047 gb AAN33193.1  At1g24510/F21J9.150 [Arabidopsis thaliana] gi 332192420 gb AEE30541.1  T-complex protein 1 subunit epsilon [Arabidopsis thaliana] | 535  | 535  | 0         | 100.0  | 98.7 | 99.4 | T-complex protein 1 subunit epsilon         | gbpln | Arabidopsis thaliana | AT1G24510.1   Symbols:   TCP-1/cpn60 chaperonin family protein   chr1:8685504-8688101 REVERSE LENGTH=535                                                                                                                                                                                                                                                                                                                                                                                                                                                                       | 535  | 535  | 0         | 100.0  | 98.7 | 99.4 |
| Rsa1.0_00114.1.g5578.t1 | #                                                                                                                                                                                                                                                                                                                                                                                                                                                                                                                       | #    | #    | #         | #      | #    | #    | -                                           | ----  | ----                 | #                                                                                                                                                                                                                                                                                                                                                                                                                                                                                                                                                                              | #    | #    | #         | #      | #    |      |
| Rsa1.0_00114.1.g5579.t1 | emb CAA48292.1  bgp1 [Brassica rapa] gi 448272 prf I1916399A Bgp1 gene                                                                                                                                                                                                                                                                                                                                                                                                                                                  | 117  | 119  | 5.00E-29  | 101.7  | 86.3 | 89.7 | bgp1                                        | gbpln | Brassica rapa        | AT1G24520.1   Symbols: BCP1   homolog of Brassica campestris pollen protein 1   chr1:8688699-8689058 FORWARD LENGTH=119                                                                                                                                                                                                                                                                                                                                                                                                                                                        | 117  | 119  | 3.00E-30  | 101.7  | 78.6 | 88.0 |



|                         |                                                                                                                                                                                                                                                                                                                                                                                                                                              |     |     |           |       |      |      |                                        |       |                      |                                                                                                                                                                                                                                                                                                                                              |     |     |           |       |      |      |
|-------------------------|----------------------------------------------------------------------------------------------------------------------------------------------------------------------------------------------------------------------------------------------------------------------------------------------------------------------------------------------------------------------------------------------------------------------------------------------|-----|-----|-----------|-------|------|------|----------------------------------------|-------|----------------------|----------------------------------------------------------------------------------------------------------------------------------------------------------------------------------------------------------------------------------------------------------------------------------------------------------------------------------------------|-----|-----|-----------|-------|------|------|
| Rsa1.0_00114.1.g5580.t8 | ref[XP_002893444.1] transducin family protein [Arabidopsis lyrata subsp. lyrata] gi 297339286 gb EFH69703.1  transducin family protein [Arabidopsis lyrata subsp. lyrata]                                                                                                                                                                                                                                                                    | 887 | 418 | 1.00E-170 | 47.1  | 35.7 | 38.0 | transducin family protein              | gbpln | Arabidopsis lyrata   | AT1G24530.1   Symbols:   Transducin/WD40 repeat-like superfamily protein   chr1:8693287-8694543 FORWARD LENGTH=418                                                                                                                                                                                                                           | 887 | 418 | 1.00E-168 | 47.1  | 35.6 | 37.8 |
| Rsa1.0_00114.1.g5581.t1 | ref[XP_002893439.1] F21J9.24 [Arabidopsis lyrata subsp. lyrata] gi 297339281 gb EFH69698.1  F21J9.24 [Arabidopsis lyrata subsp. lyrata]                                                                                                                                                                                                                                                                                                      | 139 | 136 | 3.00E-47  | 97.8  | 85.6 | 88.5 | F21J9.24                               | gbpln | Arabidopsis lyrata   | AT1G67856.1   Symbols:   RING/U-box superfamily protein   chr1:25442486-25442887 FORWARD LENGTH=133                                                                                                                                                                                                                                          | 139 | 133 | 6.00E-43  | 95.7  | 66.9 | 79.9 |
| Rsa1.0_00114.1.g5582.t1 | gb EOA36370.1  hypothetical protein CARUB_v10010770mg [Capsella rubella]                                                                                                                                                                                                                                                                                                                                                                     | 80  | 87  | 5.00E-13  | 108.8 | 67.5 | 72.5 | hypothetical protein CARUB_v10010770mg | gbpln | Capsella rubella     | AT1G24575.1   Symbols:   unknown protein; Has 7 Blast hits to 7 proteins in 2 species: Archae - 0; Bacteria - 0; Metazoa - 0; Fungi - 0; Plants - 7; Viruses - 0; Other Eukaryotes - 0 (source: NCBI BLINK).   chr1:87111211-8711477 REVERSE LENGTH=88                                                                                       | 80  | 88  | 1.00E-15  | 110.0 | 65.0 | 73.8 |
| Rsa1.0_00114.1.g5583.t1 | gb EMJ13006.1  hypothetical protein PRUPE_ppa009890mg [Prunus persica] gi 462409693 gb EMJ15027.1  hypothetical protein PRUPE_ppa009892mg [Prunus persica]                                                                                                                                                                                                                                                                                   | 63  | 273 | 3.00E-14  | 433.3 | 69.8 | 76.2 | hypothetical protein PRUPE_ppa009890mg | gbpln | Prunus persica       | AT1G58684.1   Symbols:   Ribosomal protein S5 family protein   chr1:21770021-21771217 REVERSE LENGTH=284                                                                                                                                                                                                                                     | 63  | 284 | 3.00E-16  | 450.8 | 61.9 | 65.1 |
| Rsa1.0_00114.1.g5584.t1 | gb EOA36376.1  hypothetical protein CARUB_v10010782mg [Capsella rubella]                                                                                                                                                                                                                                                                                                                                                                     | 84  | 82  | 1.00E-24  | 97.6  | 72.6 | 81.0 | hypothetical protein CARUB_v10010782mg | gbpln | Capsella rubella     | AT1G24577.1   Symbols:   unknown protein; BEST Arabidopsis thaliana protein match is: unknown protein (TAIR:AT1G67910.2); Has 115 Blast hits to 115 proteins in 17 species: Archae - 0; Bacteria - 0; Metazoa - 0; Fungi - 0; Plants - 115; Viruses - 0; Other Eukaryotes - 0 (source: NCBI BLINK).   chr1:8712758-8712985 REVERSE LENGTH=75 | 84  | 75  | 3.00E-23  | 89.3  | 64.3 | 70.2 |
| Rsa1.0_00114.1.g5585.t1 | ref[XP_002890702.1] hypothetical protein ARALYDRAFT_890210 [Arabidopsis lyrata subsp. lyrata] gi 297336544 gb EFH66961.1  hypothetical protein ARALYDRAFT_890210 [Arabidopsis lyrata subsp. lyrata]                                                                                                                                                                                                                                          | 296 | 305 | 1.00E-132 | 103.0 | 82.8 | 89.2 | hypothetical protein ARALYDRAFT_890210 | gbpln | Arabidopsis lyrata   | AT1G24590.1   Symbols:   DRNL, DRN-LIKE, SOB2, ESR2   DORNROSCHEN-like   chr1:8714389-8715309 REVERSE LENGTH=306                                                                                                                                                                                                                             | 296 | 306 | 1.00E-135 | 103.4 | 82.1 | 89.5 |
| Rsa1.0_00114.1.g5586.t1 | ref[XP_002893438.1] hypothetical protein ARALYDRAFT_890209 [Arabidopsis lyrata subsp. lyrata] gi 297339290 gb EFH69697.1  hypothetical protein ARALYDRAFT_890209 [Arabidopsis lyrata subsp. lyrata]                                                                                                                                                                                                                                          | 75  | 72  | 3.00E-24  | 96.0  | 78.7 | 85.3 | hypothetical protein ARALYDRAFT_890209 | gbpln | Arabidopsis lyrata   | AT1G24600.1   Symbols:   unknown protein; BEST Arabidopsis thaliana protein match is: unknown protein (TAIR:AT1G67920.1); Has 18 Blast hits to 18 proteins in 5 species: Archae - 0; Bacteria - 0; Metazoa - 0; Fungi - 0; Plants - 18; Viruses - 0; Other Eukaryotes - 0 (source: NCBI BLINK).   chr1:8720375-8720593 FORWARD LENGTH=72     | 75  | 72  | 5.00E-24  | 96.0  | 73.3 | 80.0 |
| Rsa1.0_00114.1.g5587.t3 | ref[XP_002888898.1] hypothetical protein ARALYDRAFT_476423 [Arabidopsis lyrata subsp. lyrata] gi 297334739 gb EFH65157.1  hypothetical protein ARALYDRAFT_476423 [Arabidopsis lyrata subsp. lyrata]                                                                                                                                                                                                                                          | 139 | 381 | 9.00E-34  | 274.1 | 53.2 | 58.3 | hypothetical protein ARALYDRAFT_476423 | gbpln | Arabidopsis lyrata   | AT1G72880.1   Symbols:   Survival protein SurE-like phosphatase/nucleotidase   chr1:27423678-27425928 REVERSE LENGTH=385                                                                                                                                                                                                                     | 139 | 385 | 6.00E-36  | 277.0 | 52.5 | 56.1 |
| Rsa1.0_00114.1.g5588.t1 | ref[NP_173866.1] putative calcium-binding protein CML25 [Arabidopsis thaliana] gi 75334522 sp O9FYK2.1 CML25_ARATH RecName: Full=Probable calcium-binding protein CML25; AltName: Full=Calmodulin-like protein 25 gi 9743349 gb AAF97973.1 AC000103.23 F21J9.28 [Arabidopsis thaliana] gi 91805849 gb ABE65653.1  polcalcin [Arabidopsis thaliana] gi 332192433 gb AEE30554.1  putative calcium-binding protein CML25 [Arabidopsis thaliana] | 185 | 186 | 1.00E-89  | 100.5 | 90.3 | 94.1 | putative calcium-binding protein CML25 | gbpln | Arabidopsis thaliana | AT1G24620.1   Symbols:   EF hand calcium-binding protein family   chr1:8723893-8724453 REVERSE LENGTH=186                                                                                                                                                                                                                                    | 185 | 186 | 5.00E-92  | 100.5 | 90.3 | 94.1 |
| Rsa1.0_00114.1.g5589.t1 | ref[XP_002893435.1] leucine-rich repeat family protein [Arabidopsis lyrata subsp. lyrata] gi 297339277 gb EFH69694.1  leucine-rich repeat family protein [Arabidopsis lyrata subsp. lyrata]                                                                                                                                                                                                                                                  | 298 | 894 | 4.00E-74  | 300.0 | 54.0 | 65.1 | leucine-rich repeat family protein     | gbpln | Arabidopsis lyrata   | AT1G24650.1   Symbols:   Leucine-rich repeat protein kinase family protein   chr1:8734570-8737315 FORWARD LENGTH=886                                                                                                                                                                                                                         | 298 | 886 | 1.00E-69  | 297.3 | 50.7 | 62.4 |
| Rsa1.0_00114.1.g5590.t1 | gb EOA20525.1  hypothetical protein CARUB_v10000839mg [Capsella rubella]                                                                                                                                                                                                                                                                                                                                                                     | 205 | 484 | 6.00E-18  | 236.1 | 33.2 | 46.8 | hypothetical protein CARUB_v10000839mg | gbpln | Capsella rubella     | AT1G52030.1   Symbols:   MBP2, MBP1.2, F-ATMBP   myosinase-binding protein 2   chr1:19346090-19348282 REVERSE LENGTH=642                                                                                                                                                                                                                     | 205 | 642 | 3.00E-19  | 313.2 | 31.7 | 47.8 |
| Rsa1.0_00114.1.g5591.t1 | dbj BAJ33823.1  unnamed protein product [Thellungiella halophila]                                                                                                                                                                                                                                                                                                                                                                            | 212 | 209 | 1.00E-103 | 98.6  | 86.3 | 92.0 | unnamed protein product                | ----  | ----                 | AT1G24625.1   Symbols:   ZFP7   zinc finger protein 7   chr1:8726009-8726638 REVERSE LENGTH=209                                                                                                                                                                                                                                              | 212 | 209 | 3.00E-94  | 98.6  | 83.0 | 89.2 |

|                         |                                                                                                                                                                                                                                                                                                                                                                                                                                                        |      |      |           |       |      |      |                                                 |       |                      |                                                                                                                                                                                                                                                                                                                                                                                                                                                                                                 |      |      |           |       |      |      |
|-------------------------|--------------------------------------------------------------------------------------------------------------------------------------------------------------------------------------------------------------------------------------------------------------------------------------------------------------------------------------------------------------------------------------------------------------------------------------------------------|------|------|-----------|-------|------|------|-------------------------------------------------|-------|----------------------|-------------------------------------------------------------------------------------------------------------------------------------------------------------------------------------------------------------------------------------------------------------------------------------------------------------------------------------------------------------------------------------------------------------------------------------------------------------------------------------------------|------|------|-----------|-------|------|------|
| Rsa1.0_00114.1.g5592.t1 | gb EOA36780.1  hypothetical protein CARUB_v10008078mg [Capsella rubella]                                                                                                                                                                                                                                                                                                                                                                               | 1802 | 1806 | 0         | 100.2 | 86.9 | 91.7 | hypothetical protein CARUB_v10008078mg          | gbpln | Capsella rubella     | AT1G24706.1   Symbols: THO2, AtTHO2   THO2   chr1:8742210-8755243 FORWARD LENGTH=1804                                                                                                                                                                                                                                                                                                                                                                                                           | 1802 | 1804 | 0         | 100.1 | 86.8 | 91.5 |
| Rsa1.0_00114.1.g5593.t1 | # # # # # # # #                                                                                                                                                                                                                                                                                                                                                                                                                                        | #    | #    | #         | #     | #    | #    | -                                               | ----  | ----                 | # # # # # # #                                                                                                                                                                                                                                                                                                                                                                                                                                                                                   | #    | #    | #         | #     | #    | #    |
| Rsa1.0_00114.1.g5594.t1 | gb EOA36221.1  hypothetical protein CARUB_v10010170mg [Capsella rubella]                                                                                                                                                                                                                                                                                                                                                                               | 238  | 236  | 1.00E-112 | 99.2  | 83.2 | 91.2 | hypothetical protein CARUB_v10010170mg          | gbpln | Capsella rubella     | AT1G24735.1   Symbols:   S-adenosyl-L-methionine-dependent methyltransferases superfamily protein   chr1:8757977-8759448 FORWARD LENGTH=240                                                                                                                                                                                                                                                                                                                                                     | 238  | 240  | 1.00E-113 | 100.8 | 80.7 | 87.8 |
| Rsa1.0_00114.1.g5595.t3 | ref XP_002890697.1  At1g68060/T23K23_9 [Arabidopsis lyrata subsp. lyrata] gi 297336539 gb EFH66956.1  At1g68060/T23K23_9 [Arabidopsis lyrata subsp. lyrata]                                                                                                                                                                                                                                                                                            | 552  | 634  | 0         | 114.9 | 89.5 | 93.7 | At1g68060/T23K23_9                              | gbpln | Arabidopsis lyrata   | AT1G24764.1   Symbols: ATMAP70-2, MAP70-2   microtubule-associated proteins 70-2   chr1:8760001-8763256 REVERSE LENGTH=634                                                                                                                                                                                                                                                                                                                                                                      | 552  | 634  | 0         | 114.9 | 88.9 | 93.7 |
| Rsa1.0_00114.1.g5596.t3 | ref NP_173884.5  UDP-3-O-[3-hydroxymyristoyl] N-acetylglucosamine deacetylase [Arabidopsis thaliana] gi 334182837 ref NP_173878.6  UDP-3-O-[3-hydroxymyristoyl] N-acetylglucosamine deacetylase [Arabidopsis thaliana] gi 332192446 gb AEE30567.1  UDP-3-O-[3-hydroxymyristoyl] N-acetylglucosamine deacetylase [Arabidopsis thaliana] gi 332192452 gb AEE30573.1  UDP-3-O-[3-hydroxymyristoyl] N-acetylglucosamine deacetylase [Arabidopsis thaliana] | 350  | 369  | 2.33E-156 | 105.4 | 72.9 | 80.6 | UDP-3-O-                                        | gbpln | Arabidopsis thaliana | AT1G24880.1   Symbols:   UDP-3-O-acyl N-acetylglucosamine deacetylase family protein   chr1:8776028-8783586 FORWARD LENGTH=369                                                                                                                                                                                                                                                                                                                                                                  | 350  | 369  | 1.00E-149 | 105.4 | 72.9 | 80.6 |
| Rsa1.0_00114.1.g5597.t1 | ref XP_002890696.1  hypothetical protein ARALYDRAFT_472860 [Arabidopsis lyrata subsp. lyrata] gi 297336538 gb EFH66955.1  hypothetical protein ARALYDRAFT_472860 [Arabidopsis lyrata subsp. lyrata]                                                                                                                                                                                                                                                    | 278  | 277  | 1.00E-137 | 99.6  | 88.5 | 92.1 | hypothetical protein ARALYDRAFT_472860          | gbpln | Arabidopsis lyrata   | AT1G25220.1   Symbols: ASB1, TRP4, WE17   anthranilate synthase beta subunit 1   chr1:8837430-8839478 REVERSE LENGTH=276                                                                                                                                                                                                                                                                                                                                                                        | 278  | 276  | 1.00E-140 | 99.3  | 88.5 | 91.7 |
| Rsa1.0_00114.1.g5598.t1 | # # # # # # # #                                                                                                                                                                                                                                                                                                                                                                                                                                        | #    | #    | #         | #     | #    | #    | -                                               | ----  | ----                 | # # # # # # #                                                                                                                                                                                                                                                                                                                                                                                                                                                                                   | #    | #    | #         | #     | #    | #    |
| Rsa1.0_00115.1.g5599.t1 | dbj BAJ34508.1  unnamed protein product [Theilungiella halophila]                                                                                                                                                                                                                                                                                                                                                                                      | 497  | 502  | 0         | 101.0 | 88.7 | 94.2 | unnamed protein product                         | ----  | ----                 | AT4G21910.3   Symbols:   MATE efflux family protein   chr4:11625821-11630964 REVERSE LENGTH=507                                                                                                                                                                                                                                                                                                                                                                                                 | 497  | 507  | 0         | 102.0 | 84.9 | 91.5 |
| Rsa1.0_00115.1.g5600.t1 | gb EOA18828.1  hypothetical protein CARUB_v10007442mg [Capsella rubella]                                                                                                                                                                                                                                                                                                                                                                               | 117  | 119  | 4.00E-44  | 101.7 | 76.1 | 88.9 | hypothetical protein CARUB_v10007442mg          | gbpln | Capsella rubella     | AT4G21902.1   Symbols:   unknown protein; FUNCTIONS IN: molecular_function unknown; INVOLVED IN: biological_process unknown; LOCATED IN: cellular_component unknown; BEST Arabidopsis thaliana protein match is: unknown protein (TAIR:AT4G04745.1); Has 30201 Blast hits to 17322 proteins in 780 species: Archaea - 12; Bacteria - 1396; Metazoa - 17338; Fungi - 3422; Plants - 5037; Viruses - 0; Other Eukaryotes - 2996 (source: NCBI BLINK).   chr4:11619786-11620139 FORWARD LENGTH=117 | 117  | 117  | 6.00E-45  | 100.0 | 71.8 | 84.6 |
| Rsa1.0_00115.1.g5601.t1 | # # # # # # # #                                                                                                                                                                                                                                                                                                                                                                                                                                        | #    | #    | #         | #     | #    | #    | -                                               | ----  | ----                 | # # # # # # #                                                                                                                                                                                                                                                                                                                                                                                                                                                                                   | #    | #    | #         | #     | #    | #    |
| Rsa1.0_00115.1.g5602.t1 | gb EOA16303.1  hypothetical protein CARUB_v10004453mg [Capsella rubella]                                                                                                                                                                                                                                                                                                                                                                               | 583  | 578  | 0         | 99.1  | 80.8 | 87.3 | hypothetical protein CARUB_v10004453mg          | gbpln | Capsella rubella     | AT4G21900.1   Symbols: PRORP3   proteinaceous RNase P 3   chr4:11616567-11619349 REVERSE LENGTH=576                                                                                                                                                                                                                                                                                                                                                                                             | 583  | 576  | 0         | 98.8  | 80.3 | 86.4 |
| Rsa1.0_00115.1.g5603.t1 | ref XP_002867816.1  hypothetical protein ARALYDRAFT_354584 [Arabidopsis lyrata subsp. lyrata] gi 297313652 gb EFH44075.1  hypothetical protein ARALYDRAFT_354584 [Arabidopsis lyrata subsp. lyrata]                                                                                                                                                                                                                                                    | 272  | 388  | 8.00E-63  | 142.6 | 57.7 | 70.6 | hypothetical protein ARALYDRAFT_354584          | gbpln | Arabidopsis lyrata   | AT4G21895.1   Symbols:   DNA binding   chr4:11613523-11614242 REVERSE LENGTH=239                                                                                                                                                                                                                                                                                                                                                                                                                | 272  | 239  | 1.00E-49  | 87.9  | 41.9 | 54.0 |
| Rsa1.0_00115.1.g5604.t1 | ref XP_002266891.1  PREDICTED: uncharacterized protein LOC100252085 [Vitis vinifera]                                                                                                                                                                                                                                                                                                                                                                   | 635  | 633  | 0         | 99.7  | 63.5 | 77.6 | PREDICTED: uncharacterized protein LOC100252085 | gbpln | Vitis vinifera       | AT4G21890.1   Symbols:   unknown protein; FUNCTIONS IN: molecular_function unknown; INVOLVED IN: biological_process unknown; LOCATED IN: nucleus; EXPRESSED IN: 13 plant structures; EXPRESSED DURING: 7 growth stages; Has 14 Blast hits to 14 proteins in 5 species: Archaea - 0; Bacteria - 0; Metazoa - 0; Fungi - 0; Plants - 14; Viruses - 0; Other Eukaryotes - 0 (source: NCBI BLINK).   chr4:11611874-11612674 REVERSE LENGTH=266                                                      | 635  | 266  | 1.00E-132 | 41.9  | 37.8 | 39.8 |

|                           |                                                                                                                                                                                                                                                                                                                                                                                                                                                                                                                                                                                                                                                                                                                                                                                                                                                                                                                                                                                                                                                        |      |      |           |       |      |      |                                             |       |                      |                                                                                                                                                                                                                                                                                      |      |      |           |       |      |      |
|---------------------------|--------------------------------------------------------------------------------------------------------------------------------------------------------------------------------------------------------------------------------------------------------------------------------------------------------------------------------------------------------------------------------------------------------------------------------------------------------------------------------------------------------------------------------------------------------------------------------------------------------------------------------------------------------------------------------------------------------------------------------------------------------------------------------------------------------------------------------------------------------------------------------------------------------------------------------------------------------------------------------------------------------------------------------------------------------|------|------|-----------|-------|------|------|---------------------------------------------|-------|----------------------|--------------------------------------------------------------------------------------------------------------------------------------------------------------------------------------------------------------------------------------------------------------------------------------|------|------|-----------|-------|------|------|
| Rsa1.0_001115.1.g5605.t2  | ref NP_193919.6  pentatricopeptide repeat-containing protein [Arabidopsis thaliana]<br>gi 223635628 sp O49711.2 PP335_ARATH RecName: Full=Pentatricopeptide repeat-containing protein At4g21880, mitochondrial; Flags: Precursor gi 332659118 gb AEE84518.1  pentatricopeptide repeat-containing protein [Arabidopsis thaliana]                                                                                                                                                                                                                                                                                                                                                                                                                                                                                                                                                                                                                                                                                                                        | 818  | 843  | 0         | 103.1 | 70.0 | 79.3 | pentatricopeptide repeat-containing protein | gbpln | Arabidopsis thaliana | AT4G21880.1   Symbols:   Pentatricopeptide repeat (PPR) superfamily protein   chr4:11605156-11610651 FORWARD LENGTH=843                                                                                                                                                              | 818  | 843  | 0         | 103.1 | 70.0 | 79.3 |
| Rsa1.0_001115.1.g5606.t1  | gb EOA17633.1  hypothetical protein CARUB_v10005998mg [Capsella rubella]                                                                                                                                                                                                                                                                                                                                                                                                                                                                                                                                                                                                                                                                                                                                                                                                                                                                                                                                                                               | 138  | 134  | 6.00E-54  | 97.1  | 75.4 | 86.2 | hypothetical protein CARUB_v10005998mg      | gbpln | Capsella rubella     | AT4G21870.1   Symbols:   HSP20-like chaperones superfamily protein   chr4:11603756-11604285 REVERSE LENGTH=134                                                                                                                                                                       | 138  | 134  | 5.00E-55  | 97.1  | 76.1 | 87.0 |
| Rsa1.0_001115.1.g5607.t1  | gb EOA17443.1  hypothetical protein CARUB_v10005762mg [Capsella rubella]                                                                                                                                                                                                                                                                                                                                                                                                                                                                                                                                                                                                                                                                                                                                                                                                                                                                                                                                                                               | 254  | 202  | 6.00E-78  | 79.5  | 64.2 | 67.7 | hypothetical protein CARUB_v10005762mg      | gbpln | Capsella rubella     | AT4G21860.3   Symbols: MSRB2   methionine sulfoxide reductase B 2   chr4:11600238-11601507 REVERSE LENGTH=202                                                                                                                                                                        | 254  | 202  | 3.00E-76  | 79.5  | 61.4 | 65.7 |
| Rsa1.0_001115.1.g5608.t1  | gb EOA15912.1  hypothetical protein CARUB_v10004007mg [Capsella rubella]                                                                                                                                                                                                                                                                                                                                                                                                                                                                                                                                                                                                                                                                                                                                                                                                                                                                                                                                                                               | 1354 | 1233 | 0         | 91.1  | 73.9 | 81.0 | hypothetical protein CARUB_v10004007mg      | gbpln | Capsella rubella     | AT4G21820.1   Symbols:   binding;calmodulin binding   chr4:11577558-11583871 FORWARD LENGTH=1255                                                                                                                                                                                     | 1354 | 1255 | 0         | 92.7  | 56.4 | 62.7 |
| Rsa1.0_001115.1.g5609.t1  | ref NP_193912.3  derlin-2.1 [Arabidopsis thaliana]<br>gi 297799884 ref XP_002867826.1  hypothetical protein ARALYDRAFT_492693 [Arabidopsis lyrata subsp. lyrata]<br>gi 332278209 sp Q8VZ96.3 DER21_ARATH RecName: Full=Derlin-2.1; AltName: Full=AtDerlin2-1<br>gi 17473759 gb AAL38318.1  putative protein [Arabidopsis thaliana]<br>gi 24899743 gb AAN65086.1  putative protein [Arabidopsis thaliana]<br>gi 297313662 gb EFH44085.1  hypothetical protein ARALYDRAFT_492693 [Arabidopsis lyrata subsp. lyrata]<br>gi 332659106 gb AEE84506.1  derlin-2.1 [Arabidopsis thaliana]<br>ref NP_193911.1  XPA-binding protein 1 [Arabidopsis thaliana]<br>gi 42572979 ref NP_974586.1  XPA-binding protein 1 [Arabidopsis thaliana]<br>gi 16930419 gb AAL31895.1 AF419563.1 AT4g21800/F17L22_260 [Arabidopsis thaliana]<br>gi 23505917 gb AAN28818.1  AT4g21800/F17L22_260 [Arabidopsis thaliana]<br>gi 332659104 gb AEE84504.1  XPA-binding protein 1 [Arabidopsis thaliana]<br>gi 332659105 gb AEE84505.1  XPA-binding protein 1 [Arabidopsis thaliana] | 244  | 244  | 1.00E-137 | 100.0 | 97.1 | 98.4 | derlin-2.1                                  | gbpln | Arabidopsis lyrata   | AT4G21810.1   Symbols: DER2.1   DERLIN-2.1   chr4:11575345-11577003 REVERSE LENGTH=244                                                                                                                                                                                               | 244  | 244  | 1.00E-140 | 100.0 | 97.1 | 98.4 |
| Rsa1.0_001115.1.g5610.t2  | ref NP_193911.1  XPA-binding protein 1 [Arabidopsis thaliana]<br>gi 42572979 ref NP_974586.1  XPA-binding protein 1 [Arabidopsis thaliana]<br>gi 16930419 gb AAL31895.1 AF419563.1 AT4g21800/F17L22_260 [Arabidopsis thaliana]<br>gi 23505917 gb AAN28818.1  AT4g21800/F17L22_260 [Arabidopsis thaliana]<br>gi 332659104 gb AEE84504.1  XPA-binding protein 1 [Arabidopsis thaliana]<br>gi 332659105 gb AEE84505.1  XPA-binding protein 1 [Arabidopsis thaliana]                                                                                                                                                                                                                                                                                                                                                                                                                                                                                                                                                                                       | 375  | 379  | 0         | 101.1 | 85.9 | 91.2 | XPA-binding protein 1                       | gbpln | Arabidopsis thaliana | AT4G21800.2   Symbols: QQT2   P-loop containing nucleoside triphosphate hydrolases superfamily protein   chr4:11573289-11574976 FORWARD LENGTH=379                                                                                                                                   | 375  | 379  | 0         | 101.1 | 85.9 | 91.2 |
| Rsa1.0_001115.1.g5611.t2  | ref XP_002869863.1  hypothetical protein ARALYDRAFT_492696 [Arabidopsis lyrata subsp. lyrata]<br>gi 297315699 gb EFH46122.1  hypothetical protein ARALYDRAFT_492696 [Arabidopsis lyrata subsp. lyrata]                                                                                                                                                                                                                                                                                                                                                                                                                                                                                                                                                                                                                                                                                                                                                                                                                                                 | 268  | 291  | 1.00E-127 | 108.6 | 86.6 | 91.4 | hypothetical protein ARALYDRAFT_492696      | gbpln | Arabidopsis lyrata   | AT4G21790.1   Symbols: TOM1, ATTOM1   tobamovirus multiplication 1   chr4:11569924-11572163 FORWARD LENGTH=291                                                                                                                                                                       | 268  | 291  | 1.00E-129 | 108.6 | 86.6 | 92.2 |
| Rsa1.0_001115.1.g5612.t24 | ref NP_567635.1  uncharacterized protein [Arabidopsis thaliana]<br>gi 4455286 emb CAB36822.1  hypothetical protein [Arabidopsis thaliana]<br>gi 7268979 emb CAB81285.1  hypothetical protein [Arabidopsis thaliana]<br>gi 21553952 gb AAM63033.1  unknown [Arabidopsis thaliana]<br>gi 26450234 dbj BAC42234.1  unknown protein [Arabidopsis thaliana]<br>gi 28827718 gb AAO50703.1  unknown protein [Arabidopsis thaliana]<br>gi 332659102 gb AEE84502.1  uncharacterized protein AT4G21780 [Arabidopsis thaliana]                                                                                                                                                                                                                                                                                                                                                                                                                                                                                                                                    | 112  | 115  | 1.00E-37  | 102.7 | 75.0 | 83.9 | uncharacterized protein                     | gbpln | Arabidopsis thaliana | AT4G21780.1   Symbols:   unknown protein; Has 30201 Blast hits to 17322 proteins in 780 species: Archae - 12; Bacteria - 1396; Metazoa - 17338; Fungi - 3422; Plants - 5037; Viruses - 0; Other: Eukaryotes - 2996 (source: NCBI BLINK).   chr4:11567213-11567560 FORWARD LENGTH=115 | 112  | 115  | 2.00E-40  | 102.7 | 75.0 | 83.9 |

|                         |                                                                                                                                                                                                                                                                                                                                                                                                                                                                                                                                                                                                                                                                                                                                                                                                            |      |      |           |       |      |      |                                                   |       |                      |                                                                                                                                                                                                                                                                                                                                             |      |      |           |       |      |      |
|-------------------------|------------------------------------------------------------------------------------------------------------------------------------------------------------------------------------------------------------------------------------------------------------------------------------------------------------------------------------------------------------------------------------------------------------------------------------------------------------------------------------------------------------------------------------------------------------------------------------------------------------------------------------------------------------------------------------------------------------------------------------------------------------------------------------------------------------|------|------|-----------|-------|------|------|---------------------------------------------------|-------|----------------------|---------------------------------------------------------------------------------------------------------------------------------------------------------------------------------------------------------------------------------------------------------------------------------------------------------------------------------------------|------|------|-----------|-------|------|------|
| Rsa1.0_00115.1.g5613.t1 | refNP_193908.1  RNA pseudourine synthase 6 [Arabidopsis thaliana] gi 75212600 sp Q9SVS0.1 PUS6 ARATH RecName: Full=RNA pseudourine synthase 6, chloroplastic; AltName: Full=RNA pseudouridylylate synthase 6; AltName: Full=RNA-uridine isomerase 6; Flags: Precursor gi 4455285 emb CAB36821.1  hypothetical protein [Arabidopsis thaliana] gi 7268974 emb CAB81284.1  hypothetical protein [Arabidopsis thaliana] gi 23296381 gb AANI3057.1  unknown protein [Arabidopsis thaliana] gi 110741616 dbj BAE98756.1  hypothetical protein [Arabidopsis thaliana] gi 332659101 gb AEE84501.1  RNA pseudourine synthase 6 [Arabidopsis thaliana] refXP_002869865.1  beta-glucosidase 47 [Arabidopsis lyrata subsp. lyrata] gi 2973157101 gb EFH46124.1  beta-glucosidase 47 [Arabidopsis lyrata subsp. lyrata] | 474  | 472  | 0         | 99.6  | 85.0 | 91.8 | RNA pseudourine synthase 6                        | gbpln | Arabidopsis thaliana | AT4G21770.1   Symbols:   Pseudouridine synthase family protein   chr4:11564028-11566345 REVERSE LENGTH=472                                                                                                                                                                                                                                  | 474  | 472  | 0         | 99.6  | 85.0 | 91.8 |
| Rsa1.0_00115.1.g5614.t1 | gb EOA18374.1  hypothetical protein CARUB_v10006895mg [Capsella rubella]                                                                                                                                                                                                                                                                                                                                                                                                                                                                                                                                                                                                                                                                                                                                   | 739  | 762  | 0         | 103.1 | 87.4 | 92.0 | hypothetical protein CARUB_v10006895mg            | gbpln | Capsella rubella     | AT4G21750.2   Symbols: ATML1   Homeobox-leucine zipper family protein / lipid-binding START domain-containing protein   chr4:11556965-11560243 FORWARD LENGTH=762                                                                                                                                                                           | 739  | 762  | 0         | 103.1 | 87.6 | 91.9 |
| Rsa1.0_00115.1.g5615.t1 | gb EOA17556.1  hypothetical protein CARUB_v10005915mg [Capsella rubella]                                                                                                                                                                                                                                                                                                                                                                                                                                                                                                                                                                                                                                                                                                                                   | 169  | 162  | 1.00E-45  | 95.9  | 60.9 | 72.8 | hypothetical protein CARUB_v10005915mg            | gbpln | Capsella rubella     | AT4G21745.1   Symbols:   PAK-box/P21-Rho-binding family protein   chr4:11549340-11550415 FORWARD LENGTH=156                                                                                                                                                                                                                                 | 169  | 156  | 4.00E-42  | 92.3  | 60.4 | 69.8 |
| Rsa1.0_00115.1.g5616.t1 | #                                                                                                                                                                                                                                                                                                                                                                                                                                                                                                                                                                                                                                                                                                                                                                                                          | #    | #    | #         | #     | #    | #    | -                                                 | ----  | ----                 | #                                                                                                                                                                                                                                                                                                                                           | #    | #    | #         | #     | #    |      |
| Rsa1.0_00115.1.g5617.t1 | refXP_002869843.1  hypothetical protein ARALYDRAFT_354556 [Arabidopsis lyrata subsp. lyrata] gi 297315679 gb EFH46102.1  hypothetical protein ARALYDRAFT_354556 [Arabidopsis lyrata subsp. lyrata]                                                                                                                                                                                                                                                                                                                                                                                                                                                                                                                                                                                                         | 140  | 504  | 1.00E-51  | 360.0 | 75.7 | 80.0 | hypothetical protein ARALYDRAFT_354556            | gbpln | Arabidopsis lyrata   | AT4G21740.1   Symbols:   unknown protein; BEST Arabidopsis thaliana protein match is: unknown protein (TAIR:AT1G30515.1). Has 20 Blast hits to 20 proteins in 4 species: Archae - 0; Bacteria - 0; Metazoa - 0; Fungi - 0; Plants - 20; Viruses - 0; Other Eukaryotes - 0 (source: NCBI BLink).   chr4:11545926-11546396 FORWARD LENGTH=156 | 140  | 156  | 5.00E-49  | 111.4 | 74.3 | 80.0 |
| Rsa1.0_00115.1.g5618.t1 | refXP_002519046.1  conserved hypothetical protein [Ricinus communis] gi 223541709 gb EEF43257.1  conserved hypothetical protein [Ricinus communis]                                                                                                                                                                                                                                                                                                                                                                                                                                                                                                                                                                                                                                                         | 166  | 138  | 2.00E-45  | 83.1  | 59.0 | 69.9 | conserved hypothetical protein                    | gbpln | Ricinus communis     | AT4G21720.1   Symbols:   unknown protein; Has 2692 Blast hits to 975 proteins in 186 species: Archae - 4; Bacteria - 460; Metazoa - 658; Fungi - 93; Plants - 1089; Viruses - 100; Other Eukaryotes - 288 (source: NCBI BLink).   chr4:11542561-11544274 FORWARD LENGTH=139                                                                 | 166  | 139  | 2.00E-45  | 83.7  | 65.1 | 72.9 |
| Rsa1.0_00115.1.g5619.t1 | refXP_002867829.1  hypothetical protein ARALYDRAFT_492703 [Arabidopsis lyrata subsp. lyrata] gi 297313665 gb EFH44088.1  hypothetical protein ARALYDRAFT_492703 [Arabidopsis lyrata subsp. lyrata]                                                                                                                                                                                                                                                                                                                                                                                                                                                                                                                                                                                                         | 1189 | 1188 | 0         | 99.9  | 98.0 | 99.3 | hypothetical protein ARALYDRAFT_492703            | gbpln | Arabidopsis lyrata   | AT4G21710.1   Symbols: NRPB2, EMB1989, RPB2   DNA-directed RNA polymerase family protein   chr4:11535684-11542200 REVERSE LENGTH=1188                                                                                                                                                                                                       | 1189 | 1188 | 0         | 99.9  | 97.8 | 99.2 |
| Rsa1.0_00115.1.g5620.t1 | sp Q56XW8.2 FBL30_ARATH RecName: Full=F-box/LRR-repeat protein At1g48400                                                                                                                                                                                                                                                                                                                                                                                                                                                                                                                                                                                                                                                                                                                                   | 493  | 487  | 1.00E-148 | 98.8  | 62.3 | 73.8 | RecName: Full=F-box/LRR-repeat protein At1g48400  | ----  | ----                 | AT1G48400.1   Symbols:   F-box/RNI-like/FBD-like domains-containing protein   chr1:17882136-17883855 REVERSE LENGTH=513                                                                                                                                                                                                                     | 493  | 513  | 1.00E-150 | 104.1 | 61.9 | 73.4 |
| Rsa1.0_00115.1.g5621.t1 | refNP_175273.1  F-box/RNI-like/FBD-like domain-containing protein [Arabidopsis thaliana] gi 5733869 gb AAD49757.1 AC007932.5 Contains F-box domain PF 00646 [Arabidopsis thaliana] gi 332194164 gb AEE32285.1  F-box/LRR-repeat protein [Arabidopsis thaliana]                                                                                                                                                                                                                                                                                                                                                                                                                                                                                                                                             | 490  | 513  | 1.00E-154 | 104.7 | 63.3 | 74.3 | F-box/RNI-like/FBD-like domain-containing protein | gbpln | Arabidopsis thaliana | AT1G48400.1   Symbols:   F-box/RNI-like/FBD-like domains-containing protein   chr1:17882136-17883855 REVERSE LENGTH=513                                                                                                                                                                                                                     | 490  | 513  | 1.00E-157 | 104.7 | 63.3 | 74.3 |
| Rsa1.0_00115.1.g5622.t1 | refNP_193901.1  uncharacterized protein [Arabidopsis thaliana] gi 4455278 emb CAB36814.1  hypothetical protein [Arabidopsis thaliana] gi 7268967 emb CAB81277.1  hypothetical protein [Arabidopsis thaliana] gi 332659091 gb AEE84491.1  uncharacterized protein AT4G21700 [Arabidopsis thaliana]                                                                                                                                                                                                                                                                                                                                                                                                                                                                                                          | 923  | 962  | 0         | 104.2 | 78.3 | 86.8 | uncharacterized protein                           | gbpln | Arabidopsis thaliana | AT4G21700.1   Symbols:   Protein of unknown function (DUF2921)   chr4:11529956-11532844 FORWARD LENGTH=962                                                                                                                                                                                                                                  | 923  | 962  | 0         | 104.2 | 78.3 | 86.8 |
| Rsa1.0_00115.1.g5623.t1 | #                                                                                                                                                                                                                                                                                                                                                                                                                                                                                                                                                                                                                                                                                                                                                                                                          | #    | #    | #         | #     | #    | #    | -                                                 | ----  | ----                 | #                                                                                                                                                                                                                                                                                                                                           | #    | #    | #         | #     | #    |      |

|                         |                                                                                                                                                                                                                                                                                                                                                                                                                                                                                                                                                                                                                                                                                                                                                                                                                                                                                                                                                                                                                                                                                                                                                                                                                                                                                                                                                                                                                                                                                                                                                                  |      |     |           |       |      |      |                                                        |       |                      |                                                                                                                                              |      |     |           |       |      |      |
|-------------------------|------------------------------------------------------------------------------------------------------------------------------------------------------------------------------------------------------------------------------------------------------------------------------------------------------------------------------------------------------------------------------------------------------------------------------------------------------------------------------------------------------------------------------------------------------------------------------------------------------------------------------------------------------------------------------------------------------------------------------------------------------------------------------------------------------------------------------------------------------------------------------------------------------------------------------------------------------------------------------------------------------------------------------------------------------------------------------------------------------------------------------------------------------------------------------------------------------------------------------------------------------------------------------------------------------------------------------------------------------------------------------------------------------------------------------------------------------------------------------------------------------------------------------------------------------------------|------|-----|-----------|-------|------|------|--------------------------------------------------------|-------|----------------------|----------------------------------------------------------------------------------------------------------------------------------------------|------|-----|-----------|-------|------|------|
| Rsa1.0_00115.1.g5625.t1 | refXP_002867832.1   proton-dependent oligopeptide transport family protein [Arabidopsis lyrata subsp. lyrata] gi 297313688 gb EFH44091.1   proton-dependent oligopeptide transport family protein [Arabidopsis lyrata subsp. lyrata]                                                                                                                                                                                                                                                                                                                                                                                                                                                                                                                                                                                                                                                                                                                                                                                                                                                                                                                                                                                                                                                                                                                                                                                                                                                                                                                             | 583  | 589 | 0         | 101.0 | 92.6 | 95.9 | proton-dependent oligopeptide transport family protein | gbpln | Arabidopsis lyrata   | AT4G21680.1   Symbols: NRT1.8   NITRATE TRANSPORTER 1.8   chr4:11517540-11519576 REVERSE LENGTH=589                                          | 583  | 589 | 0         | 101.0 | 90.6 | 94.5 |
| Rsa1.0_00115.1.g5626.t1 | refXP_002869873.1   hypothetical protein ARALYDRAFT_492708 [Arabidopsis lyrata subsp. lyrata] gi 297315709 gb EFH46132.1   hypothetical protein ARALYDRAFT_492708 [Arabidopsis lyrata subsp. lyrata]                                                                                                                                                                                                                                                                                                                                                                                                                                                                                                                                                                                                                                                                                                                                                                                                                                                                                                                                                                                                                                                                                                                                                                                                                                                                                                                                                             | 827  | 965 | 0         | 116.7 | 57.9 | 64.6 | hypothetical protein ARALYDRAFT_492708                 | gbpln | Arabidopsis lyrata   | AT4G21670.1   Symbols: CPL1, FRY2, ATCPL1   C-terminal domain phosphatase-like 1   chr4:11511511-11516922 FORWARD LENGTH=967                 | 827  | 967 | 0         | 116.9 | 61.5 | 72.4 |
| Rsa1.0_00116.1.g5627.t1 | gb EOA18823.1   hypothetical protein CARUB_v10007437mg [Capsella rubella]                                                                                                                                                                                                                                                                                                                                                                                                                                                                                                                                                                                                                                                                                                                                                                                                                                                                                                                                                                                                                                                                                                                                                                                                                                                                                                                                                                                                                                                                                        | 110  | 110 | 1.00E-38  | 100.0 | 84.5 | 90.9 | hypothetical protein CARUB_v10007437mg                 | gbpln | Capsella rubella     | #                                                                                                                                            | #    | #   | #         | #     | #    | #    |
| Rsa1.0_00116.1.g5628.t1 | refXP_002868886.1   kinase family protein [Arabidopsis lyrata subsp. lyrata] gi 297314722 gb EFH45145.1   kinase family protein [Arabidopsis lyrata subsp. lyrata]                                                                                                                                                                                                                                                                                                                                                                                                                                                                                                                                                                                                                                                                                                                                                                                                                                                                                                                                                                                                                                                                                                                                                                                                                                                                                                                                                                                               | 855  | 882 | 0         | 103.2 | 91.3 | 94.0 | kinase family protein                                  | gbpln | Arabidopsis lyrata   | AT4G39110.1   Symbols:   Malectin/receptor-like protein kinase family protein   chr4:18222483-18225119 REVERSE LENGTH=878                    | 855  | 878 | 0         | 102.7 | 90.8 | 93.6 |
| Rsa1.0_00116.1.g5629.t1 | refXP_002868887.1   inositol monophosphatase family protein [Arabidopsis lyrata subsp. lyrata] gi 297314723 gb EFH45146.1   inositol monophosphatase family protein [Arabidopsis lyrata subsp. lyrata] ref NP_198925.1   RING/U-box domain-containing protein [Arabidopsis thaliana] gi 30692196 ref NP_849522.1   RING/U-box domain-containing protein [Arabidopsis thaliana] gi 42573229 ref NP_974711.1   RING/U-box domain-containing protein [Arabidopsis thaliana] gi 42573231 ref NP_974712.1   RING/U-box domain-containing protein [Arabidopsis thaliana] gi 145334267 ref NP_001078514.1   RING/U-box domain-containing protein [Arabidopsis thaliana] gi 4914426 emb CAB43629.1   putative protein [Arabidopsis thaliana] gi 7270897 emb CAB80577.1   putative protein [Arabidopsis thaliana] gi 17065052 gb AL32680.1   putative protein [Arabidopsis thaliana] gi 22136224 gb AAM91190.1   putative protein [Arabidopsis thaliana] gi 66865958 gb AA57613.1   RING finger family protein [Arabidopsis thaliana] gi 332661622 gb AEE87022.1   RING/U-box domain-containing protein [Arabidopsis thaliana] gi 332661623 gb AEE87023.1   RING/U-box domain-containing protein [Arabidopsis thaliana] gi 332661624 gb AEE87024.1   RING/U-box domain-containing protein [Arabidopsis thaliana] gi 332661625 gb AEE87025.1   RING/U-box domain-containing protein [Arabidopsis thaliana] ref XP_002868831.1   DNA binding protein [Arabidopsis lyrata subsp. lyrata] gi 297312667 gb EFH43090.1   DNA binding protein [Arabidopsis lyrata subsp. lyrata] | 347  | 346 | 1.00E-164 | 99.7  | 83.0 | 89.0 | inositol monophosphatase family protein                | gbpln | Arabidopsis lyrata   | AT4G39120.1   Symbols: IMPL2, HISN7   myo-inositol monophosphatase like 2   chr4:18225578-18227988 REVERSE LENGTH=375                        | 347  | 375 | 1.00E-166 | 108.1 | 84.4 | 89.0 |
| Rsa1.0_00116.1.g5630.t1 | refXP_002868887.1   inositol monophosphatase family protein [Arabidopsis lyrata subsp. lyrata] gi 297314723 gb EFH45146.1   inositol monophosphatase family protein [Arabidopsis lyrata subsp. lyrata] ref NP_198925.1   RING/U-box domain-containing protein [Arabidopsis thaliana] gi 30692196 ref NP_849522.1   RING/U-box domain-containing protein [Arabidopsis thaliana] gi 42573229 ref NP_974711.1   RING/U-box domain-containing protein [Arabidopsis thaliana] gi 42573231 ref NP_974712.1   RING/U-box domain-containing protein [Arabidopsis thaliana] gi 145334267 ref NP_001078514.1   RING/U-box domain-containing protein [Arabidopsis thaliana] gi 4914426 emb CAB43629.1   putative protein [Arabidopsis thaliana] gi 7270897 emb CAB80577.1   putative protein [Arabidopsis thaliana] gi 17065052 gb AL32680.1   putative protein [Arabidopsis thaliana] gi 22136224 gb AAM91190.1   putative protein [Arabidopsis thaliana] gi 66865958 gb AA57613.1   RING finger family protein [Arabidopsis thaliana] gi 332661622 gb AEE87022.1   RING/U-box domain-containing protein [Arabidopsis thaliana] gi 332661623 gb AEE87023.1   RING/U-box domain-containing protein [Arabidopsis thaliana] gi 332661624 gb AEE87024.1   RING/U-box domain-containing protein [Arabidopsis thaliana] gi 332661625 gb AEE87025.1   RING/U-box domain-containing protein [Arabidopsis thaliana] ref XP_002868831.1   DNA binding protein [Arabidopsis lyrata subsp. lyrata] gi 297312667 gb EFH43090.1   DNA binding protein [Arabidopsis lyrata subsp. lyrata] | 426  | 429 | 0         | 100.7 | 83.8 | 87.8 | RING/U-box domain-containing protein                   | gbpln | Arabidopsis thaliana | AT4G39140.5   Symbols:   RING/U-box superfamily protein   chr4:18229637-18231282 REVERSE LENGTH=429                                          | 426  | 429 | 0         | 100.7 | 83.8 | 87.8 |
| Rsa1.0_00116.1.g5631.t1 | refXP_002868831.1   DNA binding protein [Arabidopsis lyrata subsp. lyrata] gi 297312667 gb EFH43090.1   DNA binding protein [Arabidopsis lyrata subsp. lyrata]                                                                                                                                                                                                                                                                                                                                                                                                                                                                                                                                                                                                                                                                                                                                                                                                                                                                                                                                                                                                                                                                                                                                                                                                                                                                                                                                                                                                   | 601  | 600 | 1.00E-149 | 99.8  | 61.2 | 72.4 | DNA binding protein                                    | gbpln | Arabidopsis lyrata   | AT4G39160.1   Symbols:   Homeodomain-like superfamily protein   chr4:18236828-18239744 FORWARD LENGTH=601                                    | 601  | 601 | 1.00E-149 | 100.0 | 60.4 | 70.7 |
| Rsa1.0_00116.1.g5632.t1 | gb EOA16166.1   hypothetical protein CARUB_v10004299mg [Capsella rubella]                                                                                                                                                                                                                                                                                                                                                                                                                                                                                                                                                                                                                                                                                                                                                                                                                                                                                                                                                                                                                                                                                                                                                                                                                                                                                                                                                                                                                                                                                        | 613  | 672 | 0         | 109.6 | 88.1 | 93.3 | hypothetical protein CARUB_v10004299mg                 | gbpln | Capsella rubella     | AT4G39170.1   Symbols:   Sec14p-like phosphatidylinositol transfer family protein   chr4:18243621 FORWARD LENGTH=614                         | 613  | 614 | 0         | 100.2 | 87.9 | 93.3 |
| Rsa1.0_00116.1.g5633.t1 | refXP_002868891.1   hypothetical protein ARALYDRAFT_912375 [Arabidopsis lyrata subsp. lyrata] gi 297314727 gb EFH45150.1   hypothetical protein ARALYDRAFT_912375 [Arabidopsis lyrata subsp. lyrata]                                                                                                                                                                                                                                                                                                                                                                                                                                                                                                                                                                                                                                                                                                                                                                                                                                                                                                                                                                                                                                                                                                                                                                                                                                                                                                                                                             | 1060 | 551 | 0         | 52.0  | 42.8 | 46.1 | hypothetical protein ARALYDRAFT_912375                 | gbpln | Arabidopsis lyrata   | AT4G39180.1   Symbols: SEC14, ATSEC14   Sec14p-like phosphatidylinositol transfer family protein   chr4:18244006-18246673 REVERSE LENGTH=554 | 1060 | 554 | 0         | 52.3  | 43.0 | 45.9 |

|                         |                                                                                                                                                                                                                                                                                                                                                                                                                                                                                                                                                                                                                                                                                                                                                                                                                                                                                                                                                                                                                                                                                                                                                                                  |      |     |           |       |       |       |                                                             |       |                      |                                                                                                                                           |      |     |           |       |       |       |
|-------------------------|----------------------------------------------------------------------------------------------------------------------------------------------------------------------------------------------------------------------------------------------------------------------------------------------------------------------------------------------------------------------------------------------------------------------------------------------------------------------------------------------------------------------------------------------------------------------------------------------------------------------------------------------------------------------------------------------------------------------------------------------------------------------------------------------------------------------------------------------------------------------------------------------------------------------------------------------------------------------------------------------------------------------------------------------------------------------------------------------------------------------------------------------------------------------------------|------|-----|-----------|-------|-------|-------|-------------------------------------------------------------|-------|----------------------|-------------------------------------------------------------------------------------------------------------------------------------------|------|-----|-----------|-------|-------|-------|
| Rsa1.0_00116.1.g5634.t1 | ref NP_195631.1  40S ribosomal protein S25-4 [Arabidopsis thaliana]<br>gi 30580493 sp Q9T029.1 RS254_ARATH<br>RecName: Full=40S ribosomal protein S25-4 gi 4914432 emb CAB43635.1<br>ribosomal protein S25 [Arabidopsis thaliana] gi 7270903 emb CAB80583.1<br>ribosomal protein S25 [Arabidopsis thaliana] gi 14335026 gb AAK59777.1<br>AT4g39200.T22F8.100 [Arabidopsis thaliana] gi 16323232 gb AAL15350.1<br>AT4g39200.T22F8.100 [Arabidopsis thaliana] gi 21553704 gb AAM62797.1<br>ribosomal protein S25 [Arabidopsis thaliana] gi 332661636 gb AEE87036.1<br>40S ribosomal protein S25-4 [Arabidopsis thaliana]<br>gi 482553510 gb EOA17703.1<br>hypothetical protein<br>CARUB.v10006075mg [Capsella rubella]                                                                                                                                                                                                                                                                                                                                                                                                                                                             | 108  | 108 | 1.00E-55  | 100.0 | 100.0 | 100.0 | 40S ribosomal protein S25-4                                 | gbpln | Arabidopsis thaliana | AT4G39200.1   Symbols:   Ribosomal protein S25 family protein   chr4:18257464-18258464 FORWARD LENGTH=108                                 | 108  | 108 | 2.00E-58  | 100.0 | 100.0 | 100.0 |
| Rsa1.0_00116.1.g5635.t1 | ref NP_195633.1  protein RER1A [Arabidopsis thaliana]<br>gi 8225938 sp O48670.1 RER1A_ARATH<br>RecName: Full=Protein RER1A;<br>Short=AtRER1A<br>gi 2865175 db BAA24803.1  AtRer1A [Arabidopsis thaliana]<br>gi 4914434 emb CAB43637.1  AtRer1A [Arabidopsis thaliana]<br>gi 7270905 emb CAB80585.1  AtRer1A [Arabidopsis thaliana]<br>gi 14994255 gb AAK73262.1  AtRer1A [Arabidopsis thaliana]<br>gi 21554242 gb AAM63317.1  AtRer1A [Arabidopsis thaliana]<br>gi 24030322 gb AAN41329.1  putative AtRer1A protein [Arabidopsis thaliana]<br>gi 332661639 gb AEE87039.1  protein RER1A [Arabidopsis thaliana]<br>ref NP_195634.1  NmrA-like negative transcriptional regulator family protein [Arabidopsis thaliana]<br>gi 4914435 emb CAB43638.1  NAD(P)H oxidoreductase, isoflavone reductase-like protein [Arabidopsis thaliana]<br>gi 7270906 emb CAB80586.1  NAD(P)H oxidoreductase, isoflavone reductase-like protein [Arabidopsis thaliana]<br>gi 23297378 gb AAN12954.1  putative NAD(P)H oxidoreductase, isoflavone reductase [Arabidopsis thaliana]<br>gi 332661640 gb AEE87040.1  NmrA-like negative transcriptional regulator family protein [Arabidopsis thaliana] | 194  | 191 | 2.00E-98  | 98.5  | 91.2  | 93.3  | protein RER1A                                               | gbpln | Arabidopsis thaliana | AT4G39220.1   Symbols: ATRER1A   Rer1 family protein   chr4:18264280-18265531 FORWARD LENGTH=191                                          | 194  | 191 | 1.00E-101 | 98.5  | 91.2  | 93.3  |
| Rsa1.0_00116.1.g5636.t1 | ref NP_195634.1  NmrA-like negative transcriptional regulator family protein [Arabidopsis thaliana]<br>gi 4914435 emb CAB43638.1  NAD(P)H oxidoreductase, isoflavone reductase-like protein [Arabidopsis thaliana]<br>gi 7270906 emb CAB80586.1  NAD(P)H oxidoreductase, isoflavone reductase-like protein [Arabidopsis thaliana]<br>gi 23297378 gb AAN12954.1  putative NAD(P)H oxidoreductase, isoflavone reductase [Arabidopsis thaliana]<br>gi 332661640 gb AEE87040.1  NmrA-like negative transcriptional regulator family protein [Arabidopsis thaliana]                                                                                                                                                                                                                                                                                                                                                                                                                                                                                                                                                                                                                   | 308  | 308 | 1.00E-157 | 100.0 | 87.3  | 92.9  | NmrA-like negative transcriptional regulator family protein | gbpln | Arabidopsis thaliana | AT4G39230.1   Symbols:   NmrA-like negative transcriptional regulator family protein   chr4:18266024-18267604 REVERSE LENGTH=308          | 308  | 308 | 1.00E-160 | 100.0 | 87.3  | 92.9  |
| Rsa1.0_00116.1.g5637.t3 | gb ABD64941.1  Ulp1 protease family protein [Brassica oleracea]                                                                                                                                                                                                                                                                                                                                                                                                                                                                                                                                                                                                                                                                                                                                                                                                                                                                                                                                                                                                                                                                                                                  | 622  | 871 | 6.00E-70  | 140.0 | 32.0  | 49.8  | Ulp1 protease family protein                                | gbpln | Brassica oleracea    | AT2G07240.1   Symbols:   cysteine-type peptidases:cysteine-type peptidases   chr2:3007102-3011701 REVERSE LENGTH=874                      | 622  | 874 | 1.00E-42  | 140.5 | 15.6  | 23.5  |
| Rsa1.0_00116.1.g5638.t1 | ref XP_002863918.1  hypothetical protein ARALYDRAFT_357086 [Arabidopsis lyrata subsp. lyrata]<br>gi 297309753 gb EFH40177.1  hypothetical protein ARALYDRAFT_357086 [Arabidopsis lyrata subsp. lyrata]                                                                                                                                                                                                                                                                                                                                                                                                                                                                                                                                                                                                                                                                                                                                                                                                                                                                                                                                                                           | 147  | 123 | 5.00E-17  | 83.7  | 28.6  | 37.4  | hypothetical protein ARALYDRAFT_357086                      | gbpln | Arabidopsis lyrata   | #                                                                                                                                         | #    | #   | #         | #     | #     |       |
| Rsa1.0_00116.1.g5639.t1 | gb AAC95212.1  Mutator-like transposase [Arabidopsis thaliana]                                                                                                                                                                                                                                                                                                                                                                                                                                                                                                                                                                                                                                                                                                                                                                                                                                                                                                                                                                                                                                                                                                                   | 1039 | 915 | 1.00E-174 | 88.1  | 26.9  | 38.7  | Mutator-like transposase                                    | gbpln | Arabidopsis thaliana | AT1G64260.1   Symbols:   MuDR family transposase   chr1:23847756-23849915 FORWARD LENGTH=719                                              | 1039 | 719 | 4.00E-36  | 69.2  | 11.8  | 21.7  |
| Rsa1.0_00116.1.g5640.t1 | db BAJ34207.1  unnamed protein product [Thellungiella halophila]                                                                                                                                                                                                                                                                                                                                                                                                                                                                                                                                                                                                                                                                                                                                                                                                                                                                                                                                                                                                                                                                                                                 | 171  | 166 | 1.00E-41  | 97.1  | 47.4  | 48.5  | unnamed protein product                                     | ----  | ----                 | AT4G39260.3   Symbols: CCR1, ATGRP8, GR-RBP8, GRP8   cold, circadian rhythm, and RNA binding 1   chr4:18274166-18274958 REVERSE LENGTH=92 | 171  | 92  | 1.00E-43  | 53.8  | 48.0  | 50.9  |

|                         |                                                                                                                                                                                                                                                                                                                                                                                                                                                                                                                                                                                                                                                                                                                                  |      |      |           |       |      |      |                                              |       |                      |                                                                                                                                                                                                                                                                                                                                                             |      |     |           |       |      |      |
|-------------------------|----------------------------------------------------------------------------------------------------------------------------------------------------------------------------------------------------------------------------------------------------------------------------------------------------------------------------------------------------------------------------------------------------------------------------------------------------------------------------------------------------------------------------------------------------------------------------------------------------------------------------------------------------------------------------------------------------------------------------------|------|------|-----------|-------|------|------|----------------------------------------------|-------|----------------------|-------------------------------------------------------------------------------------------------------------------------------------------------------------------------------------------------------------------------------------------------------------------------------------------------------------------------------------------------------------|------|-----|-----------|-------|------|------|
| Rsa1.0_00116.1.g5641.t1 | ref[NP_195541.2] uncharacterized protein [Arabidopsis thaliana] gi 22655230 gb AAM98205.1  putative protein [Arabidopsis thaliana] gi 30102890 gb AAP21363.1  At4g38290 [Arabidopsis thaliana] gi 51969484 dbj BAD43434.1  putative protein [Arabidopsis thaliana] gi 51969630 dbj BAD43507.1  putative protein [Arabidopsis thaliana] gi 51970242 dbj BAD43813.1  putative protein [Arabidopsis thaliana] gi 332661509 gb AEE86909.1  uncharacterized protein AT4G38280 [Arabidopsis thaliana]                                                                                                                                                                                                                                  | 153  | 170  | 6.00E-39  | 111.1 | 60.8 | 69.9 | uncharacterized protein                      | gbpln | Arabidopsis thaliana | AT4G38280.1   Symbols:   BEST Arabidopsis thaliana protein match is: Integral membrane protein hemolysin-III homolog (TAIR:AT2G45250.1); Has 65 Blast hits to 65 proteins in 13 species: Archae - 0; Bacteria - 0; Metazoa - 0; Fungi - 2; Plants - 63; Viruses - 0; Other Eukaryotes - 0 (source: NCBI BLINK).   chr4:17942034-17942864 FORWARD LENGTH=170 | 153  | 170 | 2.00E-41  | 111.1 | 60.8 | 69.9 |
| Rsa1.0_00116.1.g5642.t1 | gb AAG51783.1 AC079679.3 reverse transcriptase, putative; 16838-20266 [Arabidopsis thaliana]                                                                                                                                                                                                                                                                                                                                                                                                                                                                                                                                                                                                                                     | 1529 | 1142 | 0         | 74.7  | 42.2 | 53.9 | reverse transcriptase, putative; 16838-20266 | gbpln | Arabidopsis thaliana | AT4G29090.1   Symbols:   Ribonuclease H-like superfamily protein   chr4:14333528-14335255 FORWARD LENGTH=575                                                                                                                                                                                                                                                | 1529 | 575 | 5.00E-68  | 37.6  | 9.9  | 15.1 |
| Rsa1.0_00116.1.g5643.t1 | gb EOA16024.1  hypothetical protein CARUB_v10004149mg [Capsella rubella]                                                                                                                                                                                                                                                                                                                                                                                                                                                                                                                                                                                                                                                         | 815  | 815  | 0         | 100.0 | 92.8 | 97.1 | hypothetical protein CARUB_v10004149mg       | gbpln | Capsella rubella     | AT2G21790.1   Symbols: R1, RNR1, CLS8, ATRNR1   ribonucleotide reductase 1   chr2:9293529-9297580 FORWARD LENGTH=816                                                                                                                                                                                                                                        | 815  | 816 | 0         | 100.1 | 91.0 | 96.2 |
| Rsa1.0_00116.1.g5644.t1 | ref[NP_568058.1] ubiquitin carboxyl-terminal hydrolase 27 [Arabidopsis thaliana] gi 75262796 sp Q9FSP0.1 UBP27_ARAT H RecName: Full=Ubiquitin carboxyl-terminal hydrolase 27; AltName: Full=Deubiquitinating enzyme 27; Short=AtUBP27; AltName: Full=Ubiquitin thioesterase 27; AltName: Full=Ubiquitin-specific-processing protease 27 gi 11993494 gb AAG42765.1 AF302675.1 ubiquitin-specific protease 27 [Arabidopsis thaliana] gi 13877891 gb AAK44023.1 AF370208.1 putative ubiquitin-specific protease UB27 [Arabidopsis thaliana] gi 22136950 gb AAM91704.1  putative ubiquitin-specific protease UB27 [Arabidopsis thaliana] gi 332661662 gb AEE87062.1  ubiquitin carboxyl-terminal hydrolase 27 [Arabidopsis thaliana] | 494  | 494  | 0         | 100.0 | 75.7 | 86.2 | ubiquitin carboxyl-terminal hydrolase 27     | gbpln | Arabidopsis thaliana | AT4G39370.1   Symbols: UB27   ubiquitin-specific protease 27   chr4:18306392-18308625 FORWARD LENGTH=494                                                                                                                                                                                                                                                    | 494  | 494 | 0         | 100.0 | 75.7 | 86.2 |
| Rsa1.0_00116.1.g5645.t1 | ref[NP_195648.1] uncharacterized protein [Arabidopsis thaliana] gi 5042154 emb CAB44673.1  hypothetical protein [Arabidopsis thaliana] gi 7270922 emb CAB80601.1  hypothetical protein [Arabidopsis thaliana] gi 332661664 gb AEE87064.1  uncharacterized protein AT4G39380 [Arabidopsis thaliana]                                                                                                                                                                                                                                                                                                                                                                                                                               | 508  | 518  | 1.00E-177 | 102.0 | 69.9 | 77.4 | uncharacterized protein                      | gbpln | Arabidopsis thaliana | AT4G39380.1   Symbols:   BEST Arabidopsis thaliana protein match is: TSL-kinase interacting protein 1 (TAIR:AT2G36960.3); Has 80 Blast hits to 74 proteins in 15 species: Archae - 0; Bacteria - 0; Metazoa - 0; Fungi - 0; Plants - 78; Viruses - 0; Other Eukaryotes - 2 (source: NCBI BLINK).   chr4:18309628-18311874 REVERSE LENGTH=518                | 508  | 518 | 1.00E-179 | 102.0 | 69.9 | 77.4 |
| Rsa1.0_00116.1.g5646.t1 | ref[NP_568059.1] nucleotide sugar transporter-KT 1 [Arabidopsis thaliana] gi 30692341 ref NP_849527.1  nucleotide sugar transporter-KT 1 [Arabidopsis thaliana] gi 20259516 gb AAM13878.1  unknown protein [Arabidopsis thaliana] gi 23296523 gb AANI13117.1  unknown protein [Arabidopsis thaliana] gi 332661666 gb AEE87066.1  nucleotide sugar transporter-KT 1 [Arabidopsis thaliana] gi 332661667 gb AEE87067.1  nucleotide sugar transporter-KT 1 [Arabidopsis thaliana]                                                                                                                                                                                                                                                   | 336  | 337  | 1.00E-177 | 100.3 | 96.4 | 98.2 | nucleotide sugar transporter-KT 1            | gbpln | Arabidopsis thaliana | AT4G39390.2   Symbols: ATNST-KT1, NST-K1   nucleotide sugar transporter-KT 1   chr4:18316278-18317854 FORWARD LENGTH=337                                                                                                                                                                                                                                    | 336  | 337 | 1.00E-179 | 100.3 | 96.4 | 98.2 |
| Rsa1.0_00116.1.g5647.t2 | gb EOA16559.1  hypothetical protein CARUB_v10004718mg [Capsella rubella]                                                                                                                                                                                                                                                                                                                                                                                                                                                                                                                                                                                                                                                         | 604  | 478  | 0         | 79.1  | 71.2 | 74.0 | hypothetical protein CARUB_v10004718mg       | gbpln | Capsella rubella     | AT4G39660.1   Symbols: AGT2   alanine:glyoxylate aminotransferase 2   chr4:18406797-18409262 FORWARD LENGTH=476                                                                                                                                                                                                                                             | 604  | 476 | 0         | 78.8  | 69.9 | 73.2 |
| Rsa1.0_00116.1.g5648.t1 | # # # # # # # # # #                                                                                                                                                                                                                                                                                                                                                                                                                                                                                                                                                                                                                                                                                                              |      |      |           |       |      |      | -                                            | ----  | ----                 | # # # # # # # #                                                                                                                                                                                                                                                                                                                                             |      |     |           |       |      |      |
| Rsa1.0_00116.1.g5649.t1 | gb EOA15353.1  hypothetical protein CARUB_v10004348mg [Capsella rubella]                                                                                                                                                                                                                                                                                                                                                                                                                                                                                                                                                                                                                                                         | 603  | 640  | 0         | 106.1 | 72.1 | 79.9 | hypothetical protein CARUB_v10004348mg       | gbpln | Capsella rubella     | AT4G39680.2   Symbols:   SAP domain-containing protein   chr4:18414604-18416938 REVERSE LENGTH=633                                                                                                                                                                                                                                                          | 603  | 633 | 0         | 105.0 | 70.3 | 78.8 |

|                          |                                                                                                                                                                                                                                                                                                                                                                                                                                                                                                 |      |      |           |       |      |      |                                                 |       |                      |                                                                                                                                                                                                                                                                                                                                                                                                                                                                                                                                                          |      |      |           |       |      |      |
|--------------------------|-------------------------------------------------------------------------------------------------------------------------------------------------------------------------------------------------------------------------------------------------------------------------------------------------------------------------------------------------------------------------------------------------------------------------------------------------------------------------------------------------|------|------|-----------|-------|------|------|-------------------------------------------------|-------|----------------------|----------------------------------------------------------------------------------------------------------------------------------------------------------------------------------------------------------------------------------------------------------------------------------------------------------------------------------------------------------------------------------------------------------------------------------------------------------------------------------------------------------------------------------------------------------|------|------|-----------|-------|------|------|
| Rsa1.0_001116.1.g5650.t1 | ref NP_568066.1  uncharacterized protein [Arabidopsis thaliana] gi 13605659 gb AAK32823.1 AF361810.1 AT4g39690.T19P19.80 [Arabidopsis thaliana] gi 2170889 gb AAM70568.1 AT4g39690.T19P19.80 [Arabidopsis thaliana] gi 2339714 gb AAN31857.1  unknown protein [Arabidopsis thaliana] gi 332661705 gb AEE87105.1  uncharacterized protein AT4G39690 [Arabidopsis thaliana]                                                                                                                       | 633  | 650  | 0         | 102.7 | 76.8 | 86.4 | uncharacterized protein                         | gbpln | Arabidopsis thaliana | AT4G39690.1   Symbols:   FUNCTIONS IN: molecular function unknown; INVOLVED IN: biological process unknown; LOCATED IN: mitochondrion; EXPRESSED IN: 26 plant structures; EXPRESSED DURING: 14 growth stages; CONTAINS InterPro DOMAIN/s: Mitochondrial inner membrane protein Mitofilin (InterPro:IPR019133); Has 30201 Blast hits to 17322 proteins in 780 species: Archae - 12; Bacteria - 1396; Metazoa - 17338; Fungi - 3422; Plants - 5037; Viruses - 0; Other Eukaryotes - 2996 (source: NCBI BLINK).   chr4:18417755-18421633 FORWARD LENGTH=650 | 633  | 650  | 0         | 102.7 | 76.8 | 86.4 |
| Rsa1.0_001116.1.g5651.t1 | ref XP_002868925.1  hypothetical protein ARALYDRAFT_490754 [Arabidopsis lyrata subsp. lyrata] gi 297314761 gb EFH45184.1  hypothetical protein ARALYDRAFT_490754 [Arabidopsis lyrata subsp. lyrata]                                                                                                                                                                                                                                                                                             | 294  | 287  | 1.00E-111 | 97.6  | 75.5 | 82.0 | hypothetical protein ARALYDRAFT_490754          | gbpln | Arabidopsis lyrata   | AT4G39720.1   Symbols:   VQ motif-containing protein   chr4:18429992-18430864 REVERSE LENGTH=290                                                                                                                                                                                                                                                                                                                                                                                                                                                         | 294  | 290  | 1.00E-112 | 98.6  | 73.8 | 81.3 |
| Rsa1.0_001116.1.g5652.t1 | gb AAK01359.1 AF314810.1 dehydration stress-induced protein [Brassica napus]                                                                                                                                                                                                                                                                                                                                                                                                                    | 178  | 178  | 1.00E-100 | 100.0 | 98.9 | 98.9 | dehydration stress-induced protein              | gbpln | Brassica napus       | AT4G39730.1   Symbols:   Lipase/lipoxygenase, PLAT/LH2 family protein   chr4:18432950-18433581 FORWARD LENGTH=181                                                                                                                                                                                                                                                                                                                                                                                                                                        | 178  | 181  | 1.00E-90  | 101.7 | 86.0 | 91.0 |
| Rsa1.0_001116.1.g5653.t1 | ref XP_002863119.1  predicted protein [Arabidopsis lyrata subsp. lyrata] gi 297308943 gb EFH39378.1  predicted protein [Arabidopsis lyrata subsp. lyrata]                                                                                                                                                                                                                                                                                                                                       | 1157 | 1121 | 0         | 96.9  | 48.2 | 60.7 | predicted protein                               | gbpln | Arabidopsis lyrata   | AT5G11250.1   Symbols:   Disease resistance protein (TIR-NBS-LRR class)   chr5:3587978-3591960 REVERSE LENGTH=1189                                                                                                                                                                                                                                                                                                                                                                                                                                       | 1157 | 1189 | 0         | 102.8 | 46.9 | 59.9 |
| Rsa1.0_001116.1.g5654.t1 | ref XP_002868926.1  electron transport SCO1/SenC family protein [Arabidopsis lyrata subsp. lyrata] gi 297314762 gb EFH45185.1  electron transport SCO1/SenC family protein [Arabidopsis lyrata subsp. lyrata]                                                                                                                                                                                                                                                                                   | 280  | 276  | 1.00E-123 | 98.6  | 77.5 | 86.8 | electron transport SCO1/SenC family protein     | gbpln | Arabidopsis lyrata   | AT4G39740.1   Symbols:   Thioredoxin superfamily protein   chr4:18435586-18437095 REVERSE LENGTH=276                                                                                                                                                                                                                                                                                                                                                                                                                                                     | 280  | 276  | 1.00E-124 | 98.6  | 76.8 | 86.1 |
| Rsa1.0_001116.1.g5655.t1 | gb AAM62525.1  unknown [Arabidopsis thaliana]                                                                                                                                                                                                                                                                                                                                                                                                                                                   | 383  | 390  | 1.00E-124 | 101.8 | 61.4 | 73.6 | unknown                                         | gbpln | Arabidopsis thaliana | AT4G39753.1   Symbols:   Galactose oxidase/kelch repeat superfamily protein   chr4:18440125-18441297 FORWARD LENGTH=390                                                                                                                                                                                                                                                                                                                                                                                                                                  | 383  | 390  | 1.00E-120 | 101.8 | 59.8 | 72.1 |
| Rsa1.0_001116.1.g5656.t1 | gb EOA29201.1  hypothetical protein CARUB_v10025475mg [Capsella rubella]                                                                                                                                                                                                                                                                                                                                                                                                                        | 346  | 420  | 1.00E-102 | 121.4 | 59.2 | 71.7 | hypothetical protein CARUB_v10025475mg          | gbpln | Capsella rubella     | AT4G39753.1   Symbols:   Galactose oxidase/kelch repeat superfamily protein   chr4:18440125-18441297 FORWARD LENGTH=390                                                                                                                                                                                                                                                                                                                                                                                                                                  | 346  | 390  | 4.00E-99  | 112.7 | 55.5 | 65.6 |
| Rsa1.0_001116.1.g5657.t1 | gb AAM62525.1  unknown [Arabidopsis thaliana]                                                                                                                                                                                                                                                                                                                                                                                                                                                   | 375  | 390  | 1.00E-130 | 104.0 | 64.3 | 75.5 | unknown                                         | gbpln | Arabidopsis thaliana | AT4G39753.1   Symbols:   Galactose oxidase/kelch repeat superfamily protein   chr4:18440125-18441297 FORWARD LENGTH=390                                                                                                                                                                                                                                                                                                                                                                                                                                  | 375  | 390  | 1.00E-125 | 104.0 | 62.9 | 74.1 |
| Rsa1.0_001116.1.g5658.t1 | ref NP_568071.1  putative F-box/kelch-repeat protein [Arabidopsis thaliana] gi 125991857 sp POC2F9.1 FK105_ARATH RecName: Full=Putative F-box/kelch-repeat protein At4g39756 gi 332661715 gb AEE87115.1  putative F-box/kelch-repeat protein [Arabidopsis thaliana]                                                                                                                                                                                                                             | 376  | 374  | 1.00E-147 | 99.5  | 71.0 | 80.3 | putative F-box/kelch-repeat protein             | gbpln | Arabidopsis thaliana | AT4G39756.1   Symbols:   Galactose oxidase/kelch repeat superfamily protein   chr4:18441756-18442880 FORWARD LENGTH=374                                                                                                                                                                                                                                                                                                                                                                                                                                  | 376  | 374  | 1.00E-149 | 99.5  | 71.0 | 80.3 |
| Rsa1.0_001116.1.g5659.t1 | ref XP_002868927.1  predicted protein [Arabidopsis lyrata subsp. lyrata] gi 297314763 gb EFH45186.1  predicted protein [Arabidopsis lyrata subsp. lyrata]                                                                                                                                                                                                                                                                                                                                       | 342  | 349  | 1.00E-179 | 102.0 | 88.6 | 94.7 | predicted protein                               | gbpln | Arabidopsis lyrata   | AT4G39770.1   Symbols:   TPPH   Haloacid dehalogenase-like hydrolase (HAD) superfamily protein   chr4:18449138-18451218 REVERSE LENGTH=349                                                                                                                                                                                                                                                                                                                                                                                                               | 342  | 349  | 1.00E-180 | 102.0 | 88.6 | 94.2 |
| Rsa1.0_001116.1.g5660.t1 | ref NP_195688.1  ethylene-responsive transcription factor ERF060 [Arabidopsis thaliana] gi 75219968 sp O65665.1 ERF60_ARATH RecName: Full=Ethylene-responsive transcription factor ERF060 gi 3080447 emb CAA18764.1  putative protein [Arabidopsis thaliana] gi 7270902 emb CAB80641.1  putative protein [Arabidopsis thaliana] gi 106879185 gb ABF82622.1  At4g39780 [Arabidopsis thaliana] gi 332661718 gb AEE87118.1  ethylene-responsive transcription factor ERF060 [Arabidopsis thaliana] | 275  | 272  | 1.00E-117 | 98.9  | 77.5 | 84.4 | ethylene-responsive transcription factor ERF060 | gbpln | Arabidopsis thaliana | AT4G39780.1   Symbols:   Integrase-type DNA-binding superfamily protein   chr4:18458216-18459034 REVERSE LENGTH=272                                                                                                                                                                                                                                                                                                                                                                                                                                      | 275  | 272  | 1.00E-120 | 98.9  | 77.5 | 84.4 |
| Rsa1.0_001116.1.g5661.t1 | gb EOA17274.1  hypothetical protein CARUB_v10005547mg [Capsella rubella]                                                                                                                                                                                                                                                                                                                                                                                                                        | 447  | 256  | 1.00E-114 | 57.3  | 47.0 | 49.2 | hypothetical protein CARUB_v10005547mg          | gbpln | Capsella rubella     | AT4G39810.1   Symbols:   Polynucleotidyl transferase, ribonuclease H-like superfamily protein   chr4:18474608-18475735 REVERSE LENGTH=255                                                                                                                                                                                                                                                                                                                                                                                                                | 447  | 255  | 1.00E-112 | 57.0  | 44.7 | 47.2 |



|                          |                                                                                                                                                                                                                                                                                                                                                                                                                                                                                                                                                                                                                                                                                                                                                                                                                                                                                                                                                                                                                                         |     |     |           |        |      |      |                                         |       |                      |                                                                                                                                                                                                                                                                                                                                                                                                                                      |     |     |           |       |      |      |
|--------------------------|-----------------------------------------------------------------------------------------------------------------------------------------------------------------------------------------------------------------------------------------------------------------------------------------------------------------------------------------------------------------------------------------------------------------------------------------------------------------------------------------------------------------------------------------------------------------------------------------------------------------------------------------------------------------------------------------------------------------------------------------------------------------------------------------------------------------------------------------------------------------------------------------------------------------------------------------------------------------------------------------------------------------------------------------|-----|-----|-----------|--------|------|------|-----------------------------------------|-------|----------------------|--------------------------------------------------------------------------------------------------------------------------------------------------------------------------------------------------------------------------------------------------------------------------------------------------------------------------------------------------------------------------------------------------------------------------------------|-----|-----|-----------|-------|------|------|
| Rsa1.0_00116.1.g5662.t1  | ref[XP_002868932.1] binding protein [Arabidopsis lyrata subsp. lyrata] gi 297314768 gb EFH45191.1  binding protein [Arabidopsis lyrata subsp. lyrata]                                                                                                                                                                                                                                                                                                                                                                                                                                                                                                                                                                                                                                                                                                                                                                                                                                                                                   | 387 | 412 | 1.00E-175 | 106.5  | 79.8 | 88.9 | binding protein                         | gbpln | Arabidopsis lyrata   | AT4G39820.1   Symbols:   Tetratricopeptide repeat (TPR)-like superfamily protein   chr4:18476698-18477924 REVERSE LENGTH=408                                                                                                                                                                                                                                                                                                         | 387 | 408 | 1.00E-177 | 105.4 | 79.6 | 88.1 |
| Rsa1.0_00116.1.g5663.t1  | gb EOA14703.1  hypothetical protein CARUB_v10027980mg [Capsella rubella]                                                                                                                                                                                                                                                                                                                                                                                                                                                                                                                                                                                                                                                                                                                                                                                                                                                                                                                                                                | 72  | 842 | 5.00E-12  | 1169.4 | 51.4 | 69.4 | hypothetical protein CARUB_v10027980mg  | gbpln | Capsella rubella     | #                                                                                                                                                                                                                                                                                                                                                                                                                                    | #   | #   | #         | #     | #    | #    |
| Rsa1.0_00116.1.g5664.t1  | ref[XP_002866887.1] hypothetical protein ARALYDRAFT_490769 [Arabidopsis lyrata subsp. lyrata] gi 297312723 gb EFH43146.1  hypothetical protein ARALYDRAFT_490769 [Arabidopsis lyrata subsp. lyrata]                                                                                                                                                                                                                                                                                                                                                                                                                                                                                                                                                                                                                                                                                                                                                                                                                                     | 445 | 449 | 1.00E-159 | 100.9  | 78.2 | 86.3 | hypothetical protein ARALYDRAFT_490769  | gbpln | Arabidopsis lyrata   | AT4G39840.1   Symbols:   unknown protein; FUNCTIONS IN: molecular_function unknown; LOCATED IN: endomembrane system; EXPRESSED IN: 23 plant structures; EXPRESSED DURING: 13 growth stages; Has 20719 Blast hits to 6096 proteins in 607 species: Archae - 22; Bacteria - 3243; Metazoa - 4364; Fungi - 2270; Plants - 237; Viruses - 128; Other Eukaryotes - 10455 (source: NCBI BLINK)   chr4:18485268-18486623 FORWARD LENGTH=451 | 445 | 451 | 1.00E-154 | 101.3 | 80.2 | 88.8 |
| Rsa1.0_00116.1.g5665.t26 | gb EOA24245.1  hypothetical protein CARUB_v10017480mg [Capsella rubella]                                                                                                                                                                                                                                                                                                                                                                                                                                                                                                                                                                                                                                                                                                                                                                                                                                                                                                                                                                | 412 | 366 | 2.00E-82  | 88.8   | 41.5 | 54.1 | hypothetical protein CARUB_v10017480mg  | gbpln | Capsella rubella     | AT5G54330.1   Symbols:   Protein of unknown function (DUF295)   chr5:22064993-22066063 FORWARD LENGTH=356                                                                                                                                                                                                                                                                                                                            | 412 | 356 | 1.00E-78  | 86.4  | 40.0 | 53.2 |
| Rsa1.0_00116.1.g5666.t1  | gb EOA24245.1  hypothetical protein CARUB_v10017480mg [Capsella rubella]                                                                                                                                                                                                                                                                                                                                                                                                                                                                                                                                                                                                                                                                                                                                                                                                                                                                                                                                                                | 416 | 366 | 2.00E-82  | 88.0   | 38.2 | 48.8 | hypothetical protein CARUB_v10017480mg  | gbpln | Capsella rubella     | AT5G52930.1   Symbols:   Protein of unknown function (DUF295)   chr5:21470370-21471449 FORWARD LENGTH=359                                                                                                                                                                                                                                                                                                                            | 416 | 359 | 5.00E-82  | 86.3  | 36.5 | 46.2 |
| Rsa1.0_00116.1.g5667.t1  | #                                                                                                                                                                                                                                                                                                                                                                                                                                                                                                                                                                                                                                                                                                                                                                                                                                                                                                                                                                                                                                       | #   | #   | #         | #      | #    | #    | -                                       | ----  | ----                 | #                                                                                                                                                                                                                                                                                                                                                                                                                                    | #   | #   | #         | #     | #    | #    |
| Rsa1.0_00116.1.g5668.t1  | gb EOA17796.1  hypothetical protein CARUB_v10006190mg [Capsella rubella]                                                                                                                                                                                                                                                                                                                                                                                                                                                                                                                                                                                                                                                                                                                                                                                                                                                                                                                                                                | 365 | 364 | 2.00E-99  | 99.7   | 54.8 | 67.9 | hypothetical protein CARUB_v10006190mg  | gbpln | Capsella rubella     | AT2G21950.1   Symbols: SKIP6   SKP1 interacting partner 6   chr2:9353526-9354644 REVERSE LENGTH=372                                                                                                                                                                                                                                                                                                                                  | 365 | 372 | 1.00E-48  | 101.9 | 36.4 | 50.7 |
| Rsa1.0_00116.1.g5669.t2  | ref[XP_002868935.1] hypothetical protein ARALYDRAFT_912479 [Arabidopsis lyrata subsp. lyrata] gi 297314771 gb EFH45194.1  hypothetical protein ARALYDRAFT_912479 [Arabidopsis lyrata subsp. lyrata] ref[NP_568074.1] ubiquitin carboxyl-terminal hydrolase 3 [Arabidopsis thaliana] gi 62901126 sp O24454.1 UBP3_ARATH RecName: Full=Ubiquitin carboxyl-terminal hydrolase 3; AltName: Full=Deubiquitinating enzyme 3; Short=AtUBP3; AltName: Full=Ubiquitin thioesterase 3; AltName: Full=Ubiquitin-specific-processing protease 3 gi 2347098 gb AAB67966.1  ubiquitin-specific protease [Arabidopsis thaliana] gi 4490742 emb CAB38904.1  ubiquitin-specific protease (AtUBP3) [Arabidopsis thaliana] gi 7271046 emb CAB80654.1  ubiquitin-specific protease (AtUBP3) [Arabidopsis thaliana] gi 16004539 gb AAL24275.1  AT4g39910.1/T5J17.80 [Arabidopsis thaliana] gi 18958042 gb AAL79594.1  AT4g39910.1/T5J17.80 [Arabidopsis thaliana] gi 332661736 gb AEE87136.1  ubiquitin carboxyl-terminal hydrolase 3 [Arabidopsis thaliana] | 235 | 244 | 2.00E-92  | 103.8  | 79.1 | 84.3 | hypothetical protein ARALYDRAFT_912479  | gbpln | Arabidopsis lyrata   | AT4G39900.1   Symbols:   unknown protein; Has 30201 Blast hits to 17322 proteins in 780 species: Archae - 12; Bacteria - 1396; Metazoa - 17338; Fungi - 3422; Plants - 2996; Viruses - 0; Other Eukaryotes - 2996 (source: NCBI BLINK)   chr4:18508569-18510289 REVERSE LENGTH=245                                                                                                                                                   | 235 | 245 | 5.00E-93  | 104.3 | 75.3 | 80.9 |
| Rsa1.0_00116.1.g5670.t1  | gi 4490742 emb CAB38904.1  ubiquitin-specific protease (AtUBP3) [Arabidopsis thaliana] gi 7271046 emb CAB80654.1  ubiquitin-specific protease (AtUBP3) [Arabidopsis thaliana] gi 16004539 gb AAL24275.1  AT4g39910.1/T5J17.80 [Arabidopsis thaliana] gi 18958042 gb AAL79594.1  AT4g39910.1/T5J17.80 [Arabidopsis thaliana] gi 332661736 gb AEE87136.1  ubiquitin carboxyl-terminal hydrolase 3 [Arabidopsis thaliana]                                                                                                                                                                                                                                                                                                                                                                                                                                                                                                                                                                                                                  | 373 | 371 | 0         | 99.5   | 96.8 | 97.3 | ubiquitin carboxyl-terminal hydrolase 3 | gbpln | Arabidopsis thaliana | AT4G39910.1   Symbols: ATUBP3, UBP3   ubiquitin-specific protease 3   chr4:18511858-18514139 REVERSE LENGTH=371                                                                                                                                                                                                                                                                                                                      | 373 | 371 | 0         | 99.5  | 96.8 | 97.3 |

|                         |                                                                                                                                                                                                                                                                                                                                                                                                                                                                                                                                                                                                                                                                                                                                                                                                                   |      |      |          |       |      |      |                                                 |       |                      |                                                                                                                                                                                                                                                                                                                                                                                                                                                                                        |      |      |          |       |      |      |
|-------------------------|-------------------------------------------------------------------------------------------------------------------------------------------------------------------------------------------------------------------------------------------------------------------------------------------------------------------------------------------------------------------------------------------------------------------------------------------------------------------------------------------------------------------------------------------------------------------------------------------------------------------------------------------------------------------------------------------------------------------------------------------------------------------------------------------------------------------|------|------|----------|-------|------|------|-------------------------------------------------|-------|----------------------|----------------------------------------------------------------------------------------------------------------------------------------------------------------------------------------------------------------------------------------------------------------------------------------------------------------------------------------------------------------------------------------------------------------------------------------------------------------------------------------|------|------|----------|-------|------|------|
| Rsa1.0_00116.1.g5671.t1 | ref NP_195704.1  Adenylyl-sulfate kinase 2 [Arabidopsis thaliana] gi 7387808 sp O49196.1 KAP2_ARATH RecName: Full=Adenylyl-sulfate kinase 2, chloroplastic; AltName: Full=ATP adenosine-5'-phosphosulfate 3'-phosphotransferase; AltName: Full=Adenosine-5'-phosphosulfate kinase; Short=APS kinase; Flags: Precursor gi 18087563 gb AAL58913.1 AF462823.1 AT4g39940/T5J17.110 [Arabidopsis thaliana] gi 2829133 gb AAC39520.1 adenosine-5'-phosphosulfate-kinase [Arabidopsis thaliana] gi 4490745 emb CAB38907.1 adenosine-5'-phosphosulfate-kinase [Arabidopsis thaliana] gi 7271049 emb CAB80657.1 adenosine-5'-phosphosulfate-kinase [Arabidopsis thaliana] gi 20453397 gb AAM19937.1 AT4g39940/T5J17.110 [Arabidopsis thaliana] gi 332661742 gb AEE87142.1 Adenylyl-sulfate kinase 2 [Arabidopsis thaliana] | 222  | 293  | 2.00E-91 | 132.0 | 79.3 | 85.6 | Adenylyl-sulfate kinase 2                       | gbpln | Arabidopsis thaliana | AT4G39940.1   Symbols: AKN2, APK2   APS-kinase 2   chr4:18519787-18521276 FORWARD LENGTH=293                                                                                                                                                                                                                                                                                                                                                                                           | 222  | 293  | 7.00E-94 | 132.0 | 79.3 | 85.6 |
| Rsa1.0_00116.1.g5672.t1 | ref NP_850025.1  6-phosphofructokinase 5 [Arabidopsis thaliana] gi 75161510 sp G8VYN6.1 K6PF5_ARATH RecName: Full=6-phosphofructokinase 5, chloroplastic; Short=Phosphofructokinase 5; AltName: Full=Phosphohexokinase 5; Flags: Precursor gi 17979345 gb AAL49898.1 putative pyrophosphate-fructose-6-phosphate 1-phosphotransferase [Arabidopsis thaliana] gi 20466013 gb AAM20228.1 putative pyrophosphate-fructose-6-phosphate 1-phosphotransferase [Arabidopsis thaliana] gi 330252218 gb AEC07312.1 6-phosphofructokinase 5 [Arabidopsis thaliana]                                                                                                                                                                                                                                                          | 511  | 537  | 0        | 105.1 | 84.1 | 90.2 | 6-phosphofructokinase 5                         | gbpln | Arabidopsis thaliana | AT2G22480.1   Symbols: PFK5   phosphofructokinase 5   chr2:9545670-9548414 FORWARD LENGTH=537                                                                                                                                                                                                                                                                                                                                                                                          | 511  | 537  | 0        | 105.1 | 84.1 | 90.2 |
| Rsa1.0_00116.1.g5673.t1 | ref NP_568035.1  uncharacterized protein [Arabidopsis thaliana] gi 21554196 gb AAM63277.1  unknown [Arabidopsis thaliana] gi 107739205 gb ABF83661.1 At4g38100 [Arabidopsis thaliana] gi 332661479 gb AEE86878.1  uncharacterized protein AT4G38100 [Arabidopsis thaliana]                                                                                                                                                                                                                                                                                                                                                                                                                                                                                                                                        | 204  | 193  | 5.00E-67 | 94.6  | 68.6 | 78.9 | uncharacterized protein                         | gbpln | Arabidopsis thaliana | AT4G38100.1   Symbols:   unknown protein; LOCATED IN: chloroplast thylakoid membrane; EXPRESSED IN: 23 plant structures; EXPRESSED DURING: 13 growth stages; BEST Arabidopsis thaliana protein match is: unknown protein (TAIR:AT4G01150.1); Has 30201 Blast hits to 17322 proteins in 780 species: Archae - 12; Bacteria - 1396; Metazoa - 17338; Fungi - 3422; Plants - 5037; Viruses - 0; Other Eukaryotes - 2996 (source: NCBI BLINK).   chr4:17887033-17888177 REVERSE LENGTH=193 | 204  | 193  | 1.00E-69 | 94.6  | 68.6 | 78.9 |
| Rsa1.0_00116.1.g5674.t1 | ref XP_002868948.1  predicted protein [Arabidopsis lyrata subsp. lyrata] gi 297314784 gb EFH45207.1  predicted protein [Arabidopsis lyrata subsp. lyrata]                                                                                                                                                                                                                                                                                                                                                                                                                                                                                                                                                                                                                                                         | 225  | 225  | 2.00E-88 | 100.0 | 76.9 | 84.0 | predicted protein                               | gbpln | Arabidopsis lyrata   | AT4G38070.1   Symbols:   basic helix-loop-helix (bHLH) DNA-binding superfamily protein   chr4:17876535-17882569 FORWARD LENGTH=1513                                                                                                                                                                                                                                                                                                                                                    | 225  | 1513 | 3.00E-85 | 672.4 | 76.9 | 84.0 |
| Rsa1.0_00116.1.g5675.t1 | sp POCB23.1 Y4862_ARATH RecName: Full=Uncharacterized protein At4g38062                                                                                                                                                                                                                                                                                                                                                                                                                                                                                                                                                                                                                                                                                                                                           | 1018 | 1050 | 0        | 103.1 | 75.2 | 86.1 | RecName: Full=Uncharacterized protein At4g38062 | ----  | ----                 | AT4G38070.1   Symbols:   basic helix-loop-helix (bHLH) DNA-binding superfamily protein   chr4:17876535-17882569 FORWARD LENGTH=1513                                                                                                                                                                                                                                                                                                                                                    | 1018 | 1513 | 0        | 148.6 | 74.6 | 85.5 |
| Rsa1.0_00116.1.g5676.t1 | ref NP_195519.3  uncharacterized protein [Arabidopsis thaliana] gi 4467112 emb CAB37546.1  putative protei [Arabidopsis thaliana] gi 7270789 emb CAB80471.1  putative protein [Arabidopsis thaliana] gi 332661470 gb AEE86870.1  uncharacterized protein AT4G38060 [Arabidopsis thaliana]                                                                                                                                                                                                                                                                                                                                                                                                                                                                                                                         | 142  | 125  | 3.00E-42 | 88.0  | 70.4 | 77.5 | uncharacterized protein                         | gbpln | Arabidopsis thaliana | AT4G38060.1   Symbols:   unknown protein; BEST Arabidopsis thaliana protein match is: unknown protein (TAIR:AT5G65480.1); Has 63 Blast hits to 63 proteins in 13 species: Archae - 0; Bacteria - 0; Metazoa - 0; Fungi - 0; Plants - 63; Viruses - 0; Other Eukaryotes - 0 (source: NCBI BLINK).   chr4:17874002-17874379 REVERSE LENGTH=125                                                                                                                                           | 142  | 125  | 8.00E-45 | 88.0  | 70.4 | 77.5 |
| Rsa1.0_00116.1.g5677.t1 | gb EOA16680.1  hypothetical protein CARUB_v10004872mg [Capsella rubella]                                                                                                                                                                                                                                                                                                                                                                                                                                                                                                                                                                                                                                                                                                                                          | 407  | 426  | 0        | 104.7 | 87.5 | 92.6 | hypothetical protein CARUB_v10004872mg          | gbpln | Capsella rubella     | AT4G38040.1   Symbols:   Exostosin family protein   chr4:17867501-17869131 FORWARD LENGTH=425                                                                                                                                                                                                                                                                                                                                                                                          | 407  | 426  | 0        | 104.4 | 85.7 | 91.6 |
| Rsa1.0_00116.1.g5678.t1 | gb EOA16170.1  hypothetical protein CARUB_v10004306mg [Capsella rubella]                                                                                                                                                                                                                                                                                                                                                                                                                                                                                                                                                                                                                                                                                                                                          | 665  | 668  | 0        | 100.5 | 82.3 | 90.2 | hypothetical protein CARUB_v10004306mg          | gbpln | Capsella rubella     | AT4G38030.1   Symbols:   Rhamnogalacturonate lyase family protein   chr4:17863206-17866730 REVERSE LENGTH=667                                                                                                                                                                                                                                                                                                                                                                          | 665  | 667  | 0        | 100.3 | 81.8 | 89.2 |

|                         |                                                                                                                                                                                                                                                                                                                                                                                                                                                                                                                                                                                                                                                                                                                                                                                         |      |      |           |       |      |      |                                             |       |                      |                                                                                                                               |      |     |           |       |      |      |
|-------------------------|-----------------------------------------------------------------------------------------------------------------------------------------------------------------------------------------------------------------------------------------------------------------------------------------------------------------------------------------------------------------------------------------------------------------------------------------------------------------------------------------------------------------------------------------------------------------------------------------------------------------------------------------------------------------------------------------------------------------------------------------------------------------------------------------|------|------|-----------|-------|------|------|---------------------------------------------|-------|----------------------|-------------------------------------------------------------------------------------------------------------------------------|------|-----|-----------|-------|------|------|
| Rsa1.0_00116.1.g5679.t1 | ref[XP_002868953.1] elicitor-activated gene 3 [Arabidopsis lyrata subsp. lyrata] gi 297314789 gb EFH45212.1  elicitor-activated gene 3 [Arabidopsis lyrata subsp. lyrata]                                                                                                                                                                                                                                                                                                                                                                                                                                                                                                                                                                                                               | 353  | 359  | 1.00E-178 | 101.7 | 91.8 | 97.2 | elicitor-activated gene 3                   | gbpln | Arabidopsis lyrata   | AT4G37990.1   Symbols: ELI3-2, ELI3, ATCAD8, CAD-B2   elicitor-activated gene 3-2   chr4:17855964-17857388 FORWARD LENGTH=359 | 353  | 359 | 1.00E-178 | 101.7 | 90.4 | 96.6 |
| Rsa1.0_00116.1.g5680.t1 | dbj BAJ33843.1  unnamed protein product [Thellungiella halophila]                                                                                                                                                                                                                                                                                                                                                                                                                                                                                                                                                                                                                                                                                                                       | 357  | 358  | 1.00E-179 | 100.3 | 90.5 | 95.5 | unnamed protein product                     | ----  | ----                 | AT4G37980.1   Symbols: ELI3-1, ELI3, ATCAD7, CAD7   elicitor-activated gene 3-1   chr4:17852870-17854302 FORWARD LENGTH=357   | 357  | 357 | 1.00E-174 | 100.0 | 85.7 | 92.4 |
| Rsa1.0_00116.1.g5681.t1 | ref[XP_002868957.1] hypothetical protein ARALYDRAFT_912531 [Arabidopsis lyrata subsp. lyrata] gi 297314793 gb EFH45216.1  hypothetical protein ARALYDRAFT_912531 [Arabidopsis lyrata subsp. lyrata]                                                                                                                                                                                                                                                                                                                                                                                                                                                                                                                                                                                     | 1330 | 665  | 0         | 50.0  | 33.3 | 37.7 | hypothetical protein ARALYDRAFT_912531      | gbpln | Arabidopsis lyrata   | AT4G37950.1   Symbols:   Rhamnogalacturonate lyase family protein   chr4:17844792-17849156 FORWARD LENGTH=678                 | 1330 | 678 | 0         | 51.0  | 31.4 | 38.1 |
| Rsa1.0_00117.1.g5682.t1 | ref[NP_178819.1] Zinc knuckle (CCHC-type) family protein [Arabidopsis thaliana] gi 3327395 gb AC26677.1  putative Ta11-like non-LTR retroelement protein [Arabidopsis thaliana] gi 330251037 gb AE06131.1  Zinc knuckle (CCHC-type) family protein [Arabidopsis thaliana]                                                                                                                                                                                                                                                                                                                                                                                                                                                                                                               | 142  | 530  | 3.00E-11  | 373.2 | 23.2 | 27.5 | Zinc knuckle (CCHC-type) family protein     | gbpln | Arabidopsis thaliana | AT2G07760.1   Symbols:   Zinc knuckle (CCHC-type) family protein   chr2:3584420-3586278 REVERSE LENGTH=530                    | 142  | 530 | 9.00E-14  | 373.2 | 23.2 | 27.5 |
| Rsa1.0_00117.1.g5683.t1 | #                                                                                                                                                                                                                                                                                                                                                                                                                                                                                                                                                                                                                                                                                                                                                                                       | #    | #    | #         | #     | #    | -    | ----                                        | ----  | #                    | #                                                                                                                             | #    | #   | #         | #     | #    |      |
| Rsa1.0_00117.1.g5684.t1 | #                                                                                                                                                                                                                                                                                                                                                                                                                                                                                                                                                                                                                                                                                                                                                                                       | #    | #    | #         | #     | #    | -    | ----                                        | ----  | #                    | #                                                                                                                             | #    | #   | #         | #     | #    |      |
| Rsa1.0_00117.1.g5685.t1 | ref[NP_188965.1] ethylene-responsive transcription factor 1B [Arabidopsis thaliana] gi 57012702 sp Q8LDC8.2 ERF92_ARAT H RecName: Full=Ethylene-responsive transcription factor 1B; Short=AtERF1B; AltName: Full=Ethylene-responsive element-binding factor 1B; Short=EREBP-1B gi 16226399 gb AAL16158.1 AF428390.1 AT3g23240/K14B15_13 [Arabidopsis thaliana] gi 4128208 gb AAD03544.1  ethylene response factor 1 [Arabidopsis thaliana] gi 4128210 gb AAD03545.1  ethylene response factor 1 [Arabidopsis thaliana] gi 7939534 dbj BAA95737.1  ethylene response DNA binding protein-like [Arabidopsis thaliana] gi 22137229 gb AAM91459.1  AT3g23240/K14B15_13 [Arabidopsis thaliana] gi 33264321 gb AEE76738.1  ethylene-responsive transcription factor 1B [Arabidopsis thaliana] | 210  | 218  | 1.00E-92  | 103.8 | 87.1 | 92.9 | ethylene-responsive transcription factor 1B | gbpln | Arabidopsis thaliana | AT3G23240.1   Symbols: ERF1, ATERF1   ethylene response factor 1   chr3:8295705-8296361 FORWARD LENGTH=218                    | 210  | 218 | 4.00E-95  | 103.8 | 87.1 | 92.9 |
| Rsa1.0_00117.1.g5686.t1 | #                                                                                                                                                                                                                                                                                                                                                                                                                                                                                                                                                                                                                                                                                                                                                                                       | #    | #    | #         | #     | #    | -    | ----                                        | ----  | #                    | #                                                                                                                             | #    | #   | #         | #     | #    |      |
| Rsa1.0_00117.1.g5687.t1 | gb EOA32154.1  hypothetical protein CARUB_v10015406mg [Capsella rubella]                                                                                                                                                                                                                                                                                                                                                                                                                                                                                                                                                                                                                                                                                                                | 136  | 143  | 4.00E-57  | 105.1 | 89.0 | 97.1 | hypothetical protein CARUB_v10015406mg      | gbpln | Capsella rubella     | AT3G23230.1   Symbols:   Integrase-type DNA-binding superfamily protein   chr3:8289647-8290066 REVERSE LENGTH=139             | 136  | 139 | 2.00E-56  | 102.2 | 90.4 | 94.9 |
| Rsa1.0_00117.1.g5688.t1 | emb CAB39638.1  RNA-directed DNA polymerase-like protein [Arabidopsis thaliana] gi 7267666 emb CAB78094.1  RNA-directed DNA polymerase-like protein [Arabidopsis thaliana]                                                                                                                                                                                                                                                                                                                                                                                                                                                                                                                                                                                                              | 1815 | 1274 | 0         | 70.2  | 31.7 | 41.2 | RNA-directed DNA polymerase-like protein    | gbpln | Arabidopsis thaliana | AT4G29090.1   Symbols:   Ribonuclease H-like superfamily protein   chr4:14333528-14335255 FORWARD LENGTH=575                  | 1815 | 575 | 3.00E-52  | 31.7  | 6.4  | 10.2 |
| Rsa1.0_00117.1.g5689.t1 | gb EOA31669.1  hypothetical protein CARUB_v10014873mg [Capsella rubella]                                                                                                                                                                                                                                                                                                                                                                                                                                                                                                                                                                                                                                                                                                                | 137  | 141  | 6.00E-44  | 102.9 | 75.9 | 85.4 | hypothetical protein CARUB_v10014873mg      | gbpln | Capsella rubella     | AT3G23220.1   Symbols:   Integrase-type DNA-binding superfamily protein   chr3:8287969-8288388 FORWARD LENGTH=139             | 137  | 139 | 5.00E-38  | 101.5 | 76.6 | 81.8 |

|                         |                                                                                                                                                                                                                                                                                                                                                                                                                                                                                                                                                                                                                                                                                                                                                     |      |      |          |       |      |      |                                              |       |                      |                                                                                                                                            |      |      |           |       |      |      |
|-------------------------|-----------------------------------------------------------------------------------------------------------------------------------------------------------------------------------------------------------------------------------------------------------------------------------------------------------------------------------------------------------------------------------------------------------------------------------------------------------------------------------------------------------------------------------------------------------------------------------------------------------------------------------------------------------------------------------------------------------------------------------------------------|------|------|----------|-------|------|------|----------------------------------------------|-------|----------------------|--------------------------------------------------------------------------------------------------------------------------------------------|------|------|-----------|-------|------|------|
| Rsa1.0_00117.1.g5690.t1 | ref NP_188962.2  transcription factor bHLH34 [Arabidopsis thaliana] gi 75311556 sp g9LTC7.1 BH034_ARAT H RecName: Full=Transcription factor bHLH34; AltName: Full=Basic helix-loop-helix protein 34; Short=AtbHLH34; Short=bHLH 34; AltName: Full=Transcription factor EN 135; AltName: Full=bHLH transcription factor bHLH034 gi 793953 dbj BA95734.1  unnamed protein product [Arabidopsis thaliana] gi 20466416 gb AAM20525.1  unknown protein [Arabidopsis thaliana] gi 22136350 gb AAM91253.1  unknown protein [Arabidopsis thaliana] gi 332643214 gb AEE76735.1  transcription factor bHLH34 [Arabidopsis thaliana]                                                                                                                           | 314  | 320  | 3.00E-98 | 101.9 | 69.7 | 79.0 | transcription factor bHLH34                  | gbpln | Arabidopsis thaliana | AT3G23210.1   Symbols: bHLH34   basic helix-loop-helix (bHLH) DNA-binding superfamily protein   chr3:8283255-8284915 REVERSE LENGTH=320    | 314  | 320  | 1.00E-101 | 101.9 | 69.7 | 79.0 |
| Rsa1.0_00117.1.g5691.t1 | ref XP_002883411.1  hypothetical protein ARALYDRAFT_898831 [Arabidopsis lyrata subsp. lyrata] gi 297329251 gb EFH59670.1  hypothetical protein ARALYDRAFT_898831 [Arabidopsis lyrata subsp. lyrata]                                                                                                                                                                                                                                                                                                                                                                                                                                                                                                                                                 | 152  | 152  | 1.00E-71 | 100.0 | 92.1 | 96.1 | hypothetical protein ARALYDRAFT_898831       | gbpln | Arabidopsis lyrata   | AT3G23200.1   Symbols:   Uncharacterised protein family (UPF0497)   chr3:8281659-8282603 FORWARD LENGTH=152                                | 152  | 152  | 5.00E-74  | 100.0 | 91.4 | 96.1 |
| Rsa1.0_00117.1.g5692.t1 | ref XP_002883410.1  hypothetical protein ARALYDRAFT_479832 [Arabidopsis lyrata subsp. lyrata] gi 297329250 gb EFH59669.1  hypothetical protein ARALYDRAFT_479832 [Arabidopsis lyrata subsp. lyrata]                                                                                                                                                                                                                                                                                                                                                                                                                                                                                                                                                 | 174  | 215  | 1.00E-29 | 123.6 | 54.0 | 67.2 | hypothetical protein ARALYDRAFT_479832       | gbpln | Arabidopsis lyrata   | AT3G23190.1   Symbols:   HR-like lesion-inducing protein-related   chr3:8279445-8280963 FORWARD LENGTH=216                                 | 174  | 216  | 2.00E-29  | 124.1 | 51.1 | 63.8 |
| Rsa1.0_00117.1.g5693.t1 | ref NP_188959.3  HR-like lesion-inducing protein-like protein [Arabidopsis thaliana] gi 7939528 dbj BAA95731.1  HR-like lesion-inducing protein [Arabidopsis thaliana] gi 332643211 gb AEE76732.1  HR-like lesion-inducing protein-like protein [Arabidopsis thaliana] ref NP_683584.2  HR-like lesion-inducing protein-like protein [Arabidopsis thaliana] gi 26450286 dbj BAC42259.1  unknown protein [Arabidopsis thaliana] gi 28972991 gb AA063820.1  unknown protein [Arabidopsis thaliana] gi 29367154 gb AA072720.1  unknown protein [Arabidopsis thaliana] gi 61742709 gb AAX55175.1  hypothetical protein At3g23175 [Arabidopsis thaliana] gi 332643210 gb AEE76731.1  HR-like lesion-inducing protein-like protein [Arabidopsis thaliana] | 217  | 217  | 8.00E-97 | 100.0 | 76.5 | 87.6 | HR-like lesion-inducing protein-like protein | gbpln | Arabidopsis thaliana | AT3G23180.1   Symbols:   HR-like lesion-inducing protein-related   chr3:8277131-8278396 FORWARD LENGTH=217                                 | 217  | 217  | 2.00E-99  | 100.0 | 76.5 | 87.6 |
| Rsa1.0_00117.1.g5694.t1 | ref NP_683584.2  HR-like lesion-inducing protein-like protein [Arabidopsis thaliana] gi 26450286 dbj BAC42259.1  unknown protein [Arabidopsis thaliana] gi 28972991 gb AA063820.1  unknown protein [Arabidopsis thaliana] gi 29367154 gb AA072720.1  unknown protein [Arabidopsis thaliana] gi 61742709 gb AAX55175.1  hypothetical protein At3g23175 [Arabidopsis thaliana] gi 332643210 gb AEE76731.1  HR-like lesion-inducing protein-like protein [Arabidopsis thaliana]                                                                                                                                                                                                                                                                        | 170  | 169  | 2.00E-19 | 99.4  | 27.6 | 32.4 | HR-like lesion-inducing protein-like protein | gbpln | Arabidopsis thaliana | AT3G23175.1   Symbols:   HR-like lesion-inducing protein-related   chr3:8274202-8274973 REVERSE LENGTH=169                                 | 170  | 169  | 7.00E-22  | 99.4  | 27.6 | 32.4 |
| Rsa1.0_00117.1.g5695.t1 | dbj BAF00897.1  thylene receptor like protein [Arabidopsis thaliana]                                                                                                                                                                                                                                                                                                                                                                                                                                                                                                                                                                                                                                                                                | 127  | 773  | 1.00E-49 | 608.7 | 76.4 | 81.1 | thylene receptor like protein                | gbpln | Arabidopsis thaliana | AT3G23150.1   Symbols: ETR2   Signal transduction histidine kinase, hybrid-type, ethylene sensor   chr3:8255156-8257560 FORWARD LENGTH=773 | 127  | 773  | 3.00E-52  | 608.7 | 76.4 | 81.1 |
| Rsa1.0_00117.1.g5696.t1 | emb CAB40035.1  retrotransposon like protein [Arabidopsis thaliana] gi 7267767 emb CAB81170.1  retrotransposon like protein [Arabidopsis thaliana]                                                                                                                                                                                                                                                                                                                                                                                                                                                                                                                                                                                                  | 1373 | 1515 | 0        | 110.3 | 60.2 | 75.5 | retrotransposon like protein                 | gbpln | Arabidopsis thaliana | AT4G23160.1   Symbols: CRK8   cysteine-rich RLK (RECEPTOR-like protein kinase) 8   chr4:12129485-12134086 FORWARD LENGTH=1262              | 1373 | 1262 | 1.00E-112 | 91.9  | 14.6 | 21.8 |
| Rsa1.0_00117.1.g5697.t1 | dbj BAB84007.2  ethylene receptor [Brassica oleracea]                                                                                                                                                                                                                                                                                                                                                                                                                                                                                                                                                                                                                                                                                               | 624  | 776  | 0        | 124.4 | 97.0 | 98.2 | ethylene receptor                            | gbpln | Brassica oleracea    | AT3G23150.1   Symbols: ETR2   Signal transduction histidine kinase, hybrid-type, ethylene sensor   chr3:8255156-8257560 FORWARD LENGTH=773 | 624  | 773  | 0         | 123.9 | 85.9 | 91.8 |
| Rsa1.0_00117.1.g5698.t1 | #                                                                                                                                                                                                                                                                                                                                                                                                                                                                                                                                                                                                                                                                                                                                                   | #    | #    | #        | #     | #    | -    | ----                                         | ----  | #                    | #                                                                                                                                          | #    | #    | #         | #     | #    |      |
| Rsa1.0_00117.1.g5699.t1 | ref XP_002870534.1  hypothetical protein ARALYDRAFT_493723 [Arabidopsis lyrata subsp. lyrata] gi 297316370 gb EFH46793.1  hypothetical protein ARALYDRAFT_493723 [Arabidopsis lyrata subsp. lyrata]                                                                                                                                                                                                                                                                                                                                                                                                                                                                                                                                                 | 253  | 225  | 2.00E-24 | 88.9  | 27.7 | 32.0 | hypothetical protein ARALYDRAFT_493723       | gbpln | Arabidopsis lyrata   | AT5G37475.1   Symbols:   Translation initiation factor eIF3 subunit   chr5:14868328-14867749 REVERSE LENGTH=225                            | 253  | 225  | 3.00E-26  | 88.9  | 26.5 | 32.0 |
| Rsa1.0_00117.1.g5700.t1 | #                                                                                                                                                                                                                                                                                                                                                                                                                                                                                                                                                                                                                                                                                                                                                   | #    | #    | #        | #     | #    | -    | ----                                         | ----  | #                    | #                                                                                                                                          | #    | #    | #         | #     | #    |      |

|                         |                                                                                                                                                                                                                                                                                                                                                                                         |      |      |           |       |      |      |                                          |       |                      |                                                                                                                                               |      |     |           |       |      |      |
|-------------------------|-----------------------------------------------------------------------------------------------------------------------------------------------------------------------------------------------------------------------------------------------------------------------------------------------------------------------------------------------------------------------------------------|------|------|-----------|-------|------|------|------------------------------------------|-------|----------------------|-----------------------------------------------------------------------------------------------------------------------------------------------|------|-----|-----------|-------|------|------|
| Rsa1.0_00117.1.g5701.t1 | gb EOA32767.1  hypothetical protein CARUB_v10016073mg [Capsella rubella]                                                                                                                                                                                                                                                                                                                | 203  | 205  | 5.00E-77  | 101.0 | 81.8 | 86.7 | hypothetical protein CARUB_v10016073mg   | gbpln | Capsella rubella     | AT3G23130.1   Symbols: SUP, FON1, FLO10   C2H2 and C2HC zinc fingers superfamily protein   chr3:8242504-8243118 FORWARD LENGTH=204            | 203  | 204 | 4.00E-77  | 100.5 | 78.8 | 85.2 |
| Rsa1.0_00117.1.g5702.t1 | #<br>ref NP_188951.2  DNA repair protein XRCC4 [Arabidopsis thaliana]<br>gi 238479872 ref NP_001154639.1  DNA repair protein XRCC4 [Arabidopsis thaliana]<br>gi 85701292 sp O682V0.2 XRCC4_ARAT H RecName: Full=DNA repair protein XRCC4                                                                                                                                                | #    | #    | #         | #     | #    | #    | -                                        | ----  | ----                 | #                                                                                                                                             | #    | #   | #         | #     | #    | #    |
| Rsa1.0_00117.1.g5703.t1 | gi 9800643 gb AAF91285.2 AF233528.1 putative double strand break repair protein [Arabidopsis thaliana]<br>gi 9294200 dbj BAB02102.1  unnamed protein product [Arabidopsis thaliana]<br>gi 332643196 gb AEE76717.1  DNA repair protein XRCC4 [Arabidopsis thaliana]<br>gi 332643197 gb AEE76718.1  DNA repair protein XRCC4 [Arabidopsis thaliana]                                       | 317  | 264  | 1.00E-109 | 83.3  | 65.9 | 72.2 | DNA repair protein XRCC4                 | gbpln | Arabidopsis thaliana | AT3G23100.2   Symbols: XRCC4   homolog of human DNA ligase iv-binding protein XRCC4   chr3:8220721-8221991 FORWARD LENGTH=264                 | 317  | 264 | 1.00E-112 | 83.3  | 65.9 | 72.2 |
| Rsa1.0_00117.1.g5704.t1 | dbj BAB02101.1  unnamed protein product [Arabidopsis thaliana]                                                                                                                                                                                                                                                                                                                          | 163  | 374  | 8.00E-21  | 229.4 | 31.9 | 36.8 | unnamed protein product                  | gbpln | Arabidopsis thaliana | AT3G23090.2   Symbols:   TPX2 (targeting protein for Xklp2) protein family   chr3:8214533-8216137 REVERSE LENGTH=338                          | 163  | 338 | 3.00E-23  | 207.4 | 31.9 | 36.8 |
| Rsa1.0_00117.1.g5705.t1 | #<br>ref XP_002885543.1  hypothetical protein ARALYDRAFT_319027 [Arabidopsis lyrata subsp. lyrata]<br>gi 297331383 gb EFH61802.1  hypothetical protein ARALYDRAFT_319027 [Arabidopsis lyrata subsp. lyrata]                                                                                                                                                                             | #    | #    | #         | #     | #    | #    | -                                        | ----  | ----                 | #                                                                                                                                             | #    | #   | #         | #     | #    | #    |
| Rsa1.0_00117.1.g5706.t1 | gi 297331383 gb EFH61802.1  hypothetical protein ARALYDRAFT_319027 [Arabidopsis lyrata subsp. lyrata]                                                                                                                                                                                                                                                                                   | 454  | 427  | 0         | 94.1  | 79.1 | 85.2 | hypothetical protein ARALYDRAFT_319027   | gbpln | Arabidopsis lyrata   | AT4G14500.1   Symbols:   Polyketide cyclase/dehydrase and lipid transport superfamily protein   chr4:8334391-8337022 FORWARD LENGTH=433       | 454  | 433 | 0         | 95.4  | 74.0 | 81.1 |
| Rsa1.0_00117.1.g5707.t1 | #                                                                                                                                                                                                                                                                                                                                                                                       | #    | #    | #         | #     | #    | #    | -                                        | ----  | ----                 | #                                                                                                                                             | #    | #   | #         | #     | #    | #    |
| Rsa1.0_00117.1.g5708.t1 | ref XP_002883396.1  hypothetical protein ARALYDRAFT_479814 [Arabidopsis lyrata subsp. lyrata]<br>gi 297329236 gb EFH59655.1  hypothetical protein ARALYDRAFT_479814 [Arabidopsis lyrata subsp. lyrata]                                                                                                                                                                                  | 334  | 482  | 3.00E-30  | 144.3 | 31.7 | 41.9 | hypothetical protein ARALYDRAFT_479814   | gbpln | Arabidopsis lyrata   | AT3G23060.1   Symbols:   RING/U-box superfamily protein   chr3:8200868-8203116 FORWARD LENGTH=480                                             | 334  | 480 | 7.00E-32  | 143.7 | 29.9 | 37.7 |
| Rsa1.0_00117.1.g5709.t1 | dbj BAJ33997.1  unnamed protein product [Thellungiella halophila]                                                                                                                                                                                                                                                                                                                       | 241  | 239  | 1.00E-113 | 99.2  | 85.5 | 92.9 | unnamed protein product                  | ----  | ----                 | AT3G23050.1   Symbols: IAA7, AXR2   indole-3-acetic acid 7   chr3:8194768-8196716 FORWARD LENGTH=243                                          | 241  | 243 | 1.00E-114 | 100.8 | 85.9 | 93.8 |
| Rsa1.0_00118.1.g5710.t2 | gb EOA39639.1  hypothetical protein CARUB_v10008273mg [Capsella rubella]                                                                                                                                                                                                                                                                                                                | 567  | 879  | 1.00E-170 | 155.0 | 55.2 | 70.4 | hypothetical protein CARUB_v10008273mg   | gbpln | Capsella rubella     | AT1G51820.1   Symbols:   Leucine-rich repeat protein kinase family protein   chr1:19237407-19241883 REVERSE LENGTH=885                        | 567  | 885 | 1.00E-166 | 156.1 | 54.1 | 69.1 |
| Rsa1.0_00118.1.g5711.t2 | emb CAB39638.1  RNA-directed DNA polymerase-like protein [Arabidopsis thaliana]<br>gi 7267666 emb CAB78094.1  RNA-directed DNA polymerase-like protein [Arabidopsis thaliana]<br>ref XP_002886329.1  hypothetical protein ARALYDRAFT_892929 [Arabidopsis lyrata subsp. lyrata]<br>gi 297332170 gb EFH62588.1  hypothetical protein ARALYDRAFT_892929 [Arabidopsis lyrata subsp. lyrata] | 2035 | 1274 | 0         | 62.6  | 29.3 | 40.5 | RNA-directed DNA polymerase-like protein | gbpln | Arabidopsis thaliana | AT2G01740.1   Symbols:   Tetratricopeptide repeat (TPR)-like superfamily protein   chr2:326136-327815 REVERSE LENGTH=559                      | 2035 | 559 | 0         | 27.5  | 20.3 | 23.3 |
| Rsa1.0_00118.1.g5712.t1 | ref NP_565275.1  uncharacterized protein [Arabidopsis thaliana]<br>gi 75268025 sp Q9ZU97.2 VAC14_ARAT H RecName: Full=Protein VAC14 homolog<br>gi 20197546 gb AAD12702.2  expressed protein [Arabidopsis thaliana]<br>gi 33025039 gb AEC05485.1  uncharacterized protein AT2G01690 [Arabidopsis thaliana]                                                                               | 379  | 383  | 1.00E-178 | 101.1 | 82.6 | 88.4 | hypothetical protein ARALYDRAFT_892929   | gbpln | Arabidopsis lyrata   | AT1G64720.1   Symbols: CP5   Polyketide cyclase/dehydrase and lipid transport superfamily protein   chr1:24046887-24048537 REVERSE LENGTH=385 | 379  | 385 | 1.00E-180 | 101.6 | 82.8 | 89.4 |
| Rsa1.0_00118.1.g5713.t1 | ref NP_565275.1  uncharacterized protein [Arabidopsis thaliana]<br>gi 75268025 sp Q9ZU97.2 VAC14_ARAT H RecName: Full=Protein VAC14 homolog<br>gi 20197546 gb AAD12702.2  expressed protein [Arabidopsis thaliana]<br>gi 33025039 gb AEC05485.1  uncharacterized protein AT2G01690 [Arabidopsis thaliana]                                                                               | 736  | 743  | 0         | 101.0 | 92.1 | 96.6 | uncharacterized protein                  | gbpln | Arabidopsis thaliana | AT2G01690.1   Symbols:   ARM repeat superfamily protein   chr2:309144-313499 REVERSE LENGTH=743                                               | 736  | 743 | 0         | 101.0 | 92.1 | 96.6 |
| Rsa1.0_00118.1.g5714.t1 | gb EOA25668.1  hypothetical protein CARUB_v10019019mg [Capsella rubella]                                                                                                                                                                                                                                                                                                                | 208  | 227  | 2.00E-69  | 109.1 | 70.2 | 80.3 | hypothetical protein CARUB_v10019019mg   | gbpln | Capsella rubella     | AT2G01610.1   Symbols:   Plant invertase/pectin methyltransferase inhibitor superfamily protein   chr2:274124-274792 REVERSE LENGTH=222       | 208  | 222 | 4.00E-65  | 106.7 | 68.8 | 78.8 |

|                         |                                                                                                                                                                                                      |     |     |           |       |      |      |                                                                                                                                    |       |                      |                                                                                                                                                                                                                                                                                                                                                                                                                                                                                                                                                                                           |     |     |          |       |      |      |
|-------------------------|------------------------------------------------------------------------------------------------------------------------------------------------------------------------------------------------------|-----|-----|-----------|-------|------|------|------------------------------------------------------------------------------------------------------------------------------------|-------|----------------------|-------------------------------------------------------------------------------------------------------------------------------------------------------------------------------------------------------------------------------------------------------------------------------------------------------------------------------------------------------------------------------------------------------------------------------------------------------------------------------------------------------------------------------------------------------------------------------------------|-----|-----|----------|-------|------|------|
| Rsa1.0_00118.1.g5715.t1 | refXP_002875082.1   hypothetical protein ARALYDRAFT_904366 [Arabidopsis lyrata subsp. lyrata] gi 297320920 gb EFH51341.1   hypothetical protein ARALYDRAFT_904366 [Arabidopsis lyrata subsp. lyrata] | 577 | 562 | 0         | 97.4  | 84.7 | 89.1 | hypothetical protein ARALYDRAFT_904366                                                                                             | gbpln | Arabidopsis lyrata   | AT2G01600.1   Symbols:   ENTH/ANTH/VHS superfamily protein   chr2:268975-272356 FORWARD LENGTH=571                                                                                                                                                                                                                                                                                                                                                                                                                                                                                        | 577 | 571 | 0        | 99.0  | 83.2 | 88.6 |
| Rsa1.0_00118.1.g5716.t1 | refXP_002876764.1   hypothetical protein ARALYDRAFT_484074 [Arabidopsis lyrata subsp. lyrata] gi 297322602 gb EFH53023.1   hypothetical protein ARALYDRAFT_484074 [Arabidopsis lyrata subsp. lyrata] | 193 | 191 | 3.00E-76  | 99.0  | 82.9 | 94.3 | hypothetical protein ARALYDRAFT_484074                                                                                             | gbpln | Arabidopsis lyrata   | AT2G01580.1   Symbols:   unknown protein; BEST Arabidopsis thaliana protein match is: unknown protein (TAIR:AT3G07510.2); Has 129 Blast hits to 129 proteins in 12 species: Archae - 0; Bacteria - 0; Metazoa - 0; Fungi - 0; Plants - 129; Viruses - 0; Other Eukaryotes - 0 (source: NCBI BLink).   chr2:265181-265756 REVERSE LENGTH=191                                                                                                                                                                                                                                               | 193 | 191 | 9.00E-69 | 99.0  | 82.9 | 92.7 |
| Rsa1.0_00118.1.g5717.t6 | gb ABD64940.1   hypothetical protein 24.t00018 [Brassica oleracea]                                                                                                                                   | 549 | 380 | 3.00E-56  | 69.2  | 24.6 | 34.6 | hypothetical protein 24.t00018                                                                                                     | gbpln | Brassica oleracea    | AT3G47680.1   Symbols:   DNA binding   chr3:17577483-17578391 REVERSE LENGTH=302                                                                                                                                                                                                                                                                                                                                                                                                                                                                                                          | 549 | 302 | 4.00E-42 | 55.0  | 22.4 | 29.9 |
| Rsa1.0_00118.1.g5718.t1 | gb ABD64939.1   hypothetical protein 24.t00017 [Brassica oleracea]                                                                                                                                   | 395 | 442 | 1.00E-157 | 111.9 | 68.4 | 77.2 | hypothetical protein 24.t00017                                                                                                     | gbpln | Brassica oleracea    | AT2G13770.1   Symbols:   CONTAINS InterPro DOMAIN/s: Putative harbinger transposase-derived nuclease (InterPro:IPR006912); Has 451 Blast hits to 352 proteins in 33 species: Archae - 0; Bacteria - 0; Metazoa - 28; Fungi - 8; Plants - 388; Viruses - 0; Other Eukaryotes - 27 (source: NCBI BLink).   chr2:5736603-5737847 FORWARD LENGTH=343                                                                                                                                                                                                                                          | 395 | 343 | 5.00E-32 | 86.8  | 14.9 | 20.0 |
| Rsa1.0_00118.1.g5719.t1 | dbj BAA97156.1   unnamed protein product [Arabidopsis thaliana]                                                                                                                                      | 275 | 329 | 5.00E-40  | 119.6 | 37.1 | 50.5 | unnamed protein product                                                                                                            | gbpln | Arabidopsis thaliana | AT4G29090.1   Symbols:   Ribonuclease H-like superfamily protein   chr4:1433528-14335255 FORWARD LENGTH=575                                                                                                                                                                                                                                                                                                                                                                                                                                                                               | 275 | 575 | 4.00E-20 | 209.1 | 28.0 | 47.6 |
| Rsa1.0_00118.1.g5720.t1 | #                                                                                                                                                                                                    | #   | #   | #         | #     | #    | #    | -                                                                                                                                  | ----  | ----                 | #                                                                                                                                                                                                                                                                                                                                                                                                                                                                                                                                                                                         | #   | #   | #        | #     | #    |      |
| Rsa1.0_00118.1.g5721.t1 | sp Q5BN22.1 RGA2_BRACM RecName: Full=DELLA protein RGA2; AltName: Full=BrRGA2; AltName: Full=RGA-like protein 2 gi 60656561 gb AAX33298.1   DELLA protein [Brassica rapa]                            | 585 | 579 | 0         | 99.0  | 91.1 | 93.7 | RecName: Full=DELLA protein RGA2; AltName: Full=BrRGA2; AltName: Full=RGA-like protein 2 gi 60656561 gb AAX33298.1   DELLA protein | gbpln | Brassica rapa        | AT2G01570.1   Symbols: RGA1, RGA   GRAS family transcription factor family protein   chr2:255581-257344 REVERSE LENGTH=587                                                                                                                                                                                                                                                                                                                                                                                                                                                                | 585 | 587 | 0        | 100.3 | 82.6 | 88.4 |
| Rsa1.0_00118.1.g5722.t1 | refXP_002875078.1   hypothetical protein ARALYDRAFT_322499 [Arabidopsis lyrata subsp. lyrata] gi 297320916 gb EFH51337.1   hypothetical protein ARALYDRAFT_322499 [Arabidopsis lyrata subsp. lyrata] | 135 | 137 | 4.00E-57  | 101.5 | 82.2 | 89.6 | hypothetical protein ARALYDRAFT_322499                                                                                             | gbpln | Arabidopsis lyrata   | AT1G0780.1   Symbols:   unknown protein; FUNCTIONS IN: molecular_function unknown; INVOLVED IN: biological_process unknown; LOCATED IN: mitochondrion; EXPRESSED IN: sperm cell, male gametophyte, pollen tube; EXPRESSED DURING: L mature pollen stage, M germinated pollen stage; BEST Arabidopsis thaliana protein match is: unknown protein (TAIR:AT1G23150.1); Has 143 Blast hits to 143 proteins in 17 species: Archae - 0; Bacteria - 0; Metazoa - 0; Fungi - 0; Plants - 143; Viruses - 0; Other Eukaryotes - 0 (source: NCBI BLink).   chr1:26695462-26695975 REVERSE LENGTH=140 | 135 | 140 | 6.00E-35 | 103.7 | 53.3 | 68.9 |
| Rsa1.0_00118.1.g5723.t1 | gb ADK63403.1   C2 domain-containing protein [Brassica rapa]                                                                                                                                         | 180 | 180 | 3.00E-96  | 100.0 | 93.3 | 97.2 | C2 domain-containing protein                                                                                                       | gbpln | Brassica rapa        | AT2G01540.1   Symbols:   Calcium-dependent lipid-binding (CaLB domain) family protein   chr2:242297-243233 REVERSE LENGTH=180                                                                                                                                                                                                                                                                                                                                                                                                                                                             | 180 | 180 | 9.00E-94 | 100.0 | 87.8 | 92.2 |
| Rsa1.0_00118.1.g5724.t1 | refXP_002870338.1   hypothetical protein ARALYDRAFT_493506 [Arabidopsis lyrata subsp. lyrata] gi 297316174 gb EFH46597.1   hypothetical protein ARALYDRAFT_493506 [Arabidopsis lyrata subsp. lyrata] | 151 | 151 | 2.00E-75  | 100.0 | 88.1 | 92.7 | hypothetical protein ARALYDRAFT_493506                                                                                             | gbpln | Arabidopsis lyrata   | AT2G01520.1   Symbols: MLP328   MLP-like protein 328   chr2:235992-236881 FORWARD LENGTH=151                                                                                                                                                                                                                                                                                                                                                                                                                                                                                              | 151 | 151 | 2.00E-77 | 100.0 | 86.8 | 93.4 |
| Rsa1.0_00118.1.g5725.t1 | #                                                                                                                                                                                                    | #   | #   | #         | #     | #    | #    | -                                                                                                                                  | ----  | ----                 | AT2G01510.1   Symbols:   Tetratricopeptide repeat (TPR)-like superfamily protein   chr2:230752-232506 REVERSE LENGTH=584                                                                                                                                                                                                                                                                                                                                                                                                                                                                  | 134 | 584 | 1.00E-12 | 435.8 | 23.1 | 26.1 |

|                         |                                                                                                                                                                                                                                                                                                                                                                                                                                                                                                                                                                                                                                                                                                                                                                                                                                                                                                                                                                                                                                                                                                                                               |     |     |           |       |      |      |                                           |       |                         |                                                                                                                                    |     |     |           |       |      |      |
|-------------------------|-----------------------------------------------------------------------------------------------------------------------------------------------------------------------------------------------------------------------------------------------------------------------------------------------------------------------------------------------------------------------------------------------------------------------------------------------------------------------------------------------------------------------------------------------------------------------------------------------------------------------------------------------------------------------------------------------------------------------------------------------------------------------------------------------------------------------------------------------------------------------------------------------------------------------------------------------------------------------------------------------------------------------------------------------------------------------------------------------------------------------------------------------|-----|-----|-----------|-------|------|------|-------------------------------------------|-------|-------------------------|------------------------------------------------------------------------------------------------------------------------------------|-----|-----|-----------|-------|------|------|
| Rsa1.0_00118.1.g5726.t1 | refNP_671764.1  protein<br>CLAVATA3/ESR-related 16<br>[Arabidopsis thaliana]<br>gi 75160477 sp Q8S8M2.1 CLE16_ARAT<br>H RecName: Full=CLAVATA3/ESR<br>(CLE)-related protein 16; Contains:<br>RecName: Full=CLE16p; Flags:<br>Precursor<br>gi 20197403 gb AAM15061.1 AC005560.<br>22 CLE16, putative [Arabidopsis<br>thaliana] gi 44917487 gb AAS49068.1 <br>At2g01505 [Arabidopsis thaliana]<br>gi 330250368 gb AEC05462.1  protein<br>CLAVATA3/ESR-related 16<br>[Arabidopsis thaliana]<br>ref XP_002876753.1  HOS9/PFS2<br>[Arabidopsis lyrata subsp. lyrata]<br>gi 29732259.1 gb EFH53012.1 <br>HOS9/PFS2 [Arabidopsis lyrata subsp.<br>lyrata]<br>ref XP_002875075.1  hypothetical<br>protein ARALYDRAFT_484067<br>[Arabidopsis lyrata subsp. lyrata]<br>gi 29732091.3 gb EFH51334.1 <br>hypothetical protein<br>ARALYDRAFT_484067 [Arabidopsis<br>lyrata subsp. lyrata]                                                                                                                                                                                                                                                                  | 104 | 103 | 6.00E-25  | 99.0  | 56.7 | 66.3 | protein<br>CLAVATA3/ESR-<br>related 16    | gbpln | Arabidopsis<br>thaliana | AT2G01505.1   Symbols: CLE16  <br>CLAVATA3/ESR-RELATED 16  <br>chr2:228926-229237 REVERSE<br>LENGTH=103                            | 104 | 103 | 1.00E-27  | 99.0  | 56.7 | 66.3 |
| Rsa1.0_00118.1.g5727.t2 | ref XP_002876753.1  HOS9/PFS2<br>[Arabidopsis lyrata subsp. lyrata]<br>gi 29732259.1 gb EFH53012.1 <br>HOS9/PFS2 [Arabidopsis lyrata subsp.<br>lyrata]<br>ref XP_002875075.1  hypothetical<br>protein ARALYDRAFT_484067<br>[Arabidopsis lyrata subsp. lyrata]<br>gi 29732091.3 gb EFH51334.1 <br>hypothetical protein<br>ARALYDRAFT_484067 [Arabidopsis<br>lyrata subsp. lyrata]                                                                                                                                                                                                                                                                                                                                                                                                                                                                                                                                                                                                                                                                                                                                                              | 250 | 275 | 7.00E-70  | 110.0 | 63.2 | 72.8 | HOS9/PFS2                                 | gbpln | Arabidopsis<br>lyrata   | AT2G01500.1   Symbols: PFS2, WOX6, HOS9<br>  Homeodomain-like superfamily protein  <br>chr2:224470-225997 REVERSE<br>LENGTH=271    | 250 | 271 | 5.00E-61  | 108.4 | 61.2 | 69.2 |
| Rsa1.0_00118.1.g5728.t1 | ref XP_002875075.1  hypothetical<br>protein ARALYDRAFT_484067<br>[Arabidopsis lyrata subsp. lyrata]<br>gi 29732091.3 gb EFH51334.1 <br>hypothetical protein<br>ARALYDRAFT_484067 [Arabidopsis<br>lyrata subsp. lyrata]                                                                                                                                                                                                                                                                                                                                                                                                                                                                                                                                                                                                                                                                                                                                                                                                                                                                                                                        | 284 | 284 | 1.00E-140 | 100.0 | 85.6 | 93.3 | hypothetical protein<br>ARALYDRAFT_484067 | gbpln | Arabidopsis<br>lyrata   | AT2G01490.1   Symbols:   phytanoyl-CoA<br>dioxygenase (PhyH) family protein  <br>chr2:221316-223187 FORWARD<br>LENGTH=283          | 284 | 283 | 1.00E-140 | 99.6  | 84.2 | 91.9 |
| Rsa1.0_00118.1.g5729.t1 | #                                                                                                                                                                                                                                                                                                                                                                                                                                                                                                                                                                                                                                                                                                                                                                                                                                                                                                                                                                                                                                                                                                                                             | #   | #   | #         | #     | #    | #    | -                                         | ----  | ----                    | #                                                                                                                                  | #   | #   | #         | #     | #    |      |
| Rsa1.0_00118.1.g5730.t1 | refNP_178254.2  mitogen-activated<br>protein kinase 17 [Arabidopsis thaliana]<br>gi 79316341 refNP_001030939.1 <br>mitogen-activated protein kinase 17<br>[Arabidopsis thaliana]<br>gi 79316349 refNP_001030940.1 <br>mitogen-activated protein kinase 17<br>[Arabidopsis thaliana]<br>gi 79316359 refNP_001030941.1 <br>mitogen-activated protein kinase 17<br>[Arabidopsis thaliana]<br>gi 75327927 sp Q84M93.1 MPK17_ARAT<br>H RecName: Full=Mitogen-activated<br>protein kinase 17; Short=AtMPK17;<br>Short=MAP kinase 17<br>gi 30102718 gb AAP21277.1  At2g01450<br>[Arabidopsis thaliana]<br>gi 110736492 dbj BAF00214.1  putative<br>MAP kinase [Arabidopsis thaliana]<br>gi 222423803 dbj BAH19967.1 <br>AT2G01450 [Arabidopsis thaliana]<br>gi 330250358 gb AEC05452.1  mitogen-<br>activated protein kinase 17 [Arabidopsis<br>thaliana] gi 330250359 gb AEC05453.1 <br>mitogen-activated protein kinase 17<br>[Arabidopsis thaliana]<br>gi 330250360 gb AEC05454.1  mitogen-<br>activated protein kinase 17 [Arabidopsis<br>thaliana] gi 330250361 gb AEC05455.1 <br>mitogen-activated protein kinase 17<br>[Arabidopsis thaliana] | 489 | 486 | 0         | 99.4  | 94.9 | 97.3 | mitogen-activated<br>protein kinase 17    | gbpln | Arabidopsis<br>thaliana | AT2G01450.4   Symbols: ATMPK17, MPK17  <br>MAP kinase 17   chr2:199722-202010<br>REVERSE LENGTH=486                                | 489 | 486 | 0         | 99.4  | 94.9 | 97.3 |
| Rsa1.0_00118.1.g5731.t1 | dbj BAJ34534.1  unnamed protein<br>product [Theilungiella halophila]                                                                                                                                                                                                                                                                                                                                                                                                                                                                                                                                                                                                                                                                                                                                                                                                                                                                                                                                                                                                                                                                          | 122 | 201 | 4.00E-52  | 164.8 | 85.2 | 89.3 | unnamed protein<br>product                | ----  | ----                    | AT2G01430.1   Symbols: ATHB17, ATHB-17,<br>HB17   homeobox-leucine zipper protein 17  <br>chr2:187798-190369 REVERSE<br>LENGTH=275 | 122 | 275 | 2.00E-52  | 225.4 | 83.6 | 89.3 |
| Rsa1.0_00119.1.g5732.t1 | #                                                                                                                                                                                                                                                                                                                                                                                                                                                                                                                                                                                                                                                                                                                                                                                                                                                                                                                                                                                                                                                                                                                                             | #   | #   | #         | #     | #    | #    | -                                         | ----  | ----                    | #                                                                                                                                  | #   | #   | #         | #     | #    |      |
| Rsa1.0_00119.1.g5733.t1 | #                                                                                                                                                                                                                                                                                                                                                                                                                                                                                                                                                                                                                                                                                                                                                                                                                                                                                                                                                                                                                                                                                                                                             | #   | #   | #         | #     | #    | #    | -                                         | ----  | ----                    | #                                                                                                                                  | #   | #   | #         | #     | #    |      |

|                         |                                                                                                                                                                                                                                                                                                                                                                                                                                                                                                                                                                                                                                |     |     |           |       |      |      |                                             |       |                      |                                                                                                                                                                                                                                                                                     |     |     |           |       |      |      |
|-------------------------|--------------------------------------------------------------------------------------------------------------------------------------------------------------------------------------------------------------------------------------------------------------------------------------------------------------------------------------------------------------------------------------------------------------------------------------------------------------------------------------------------------------------------------------------------------------------------------------------------------------------------------|-----|-----|-----------|-------|------|------|---------------------------------------------|-------|----------------------|-------------------------------------------------------------------------------------------------------------------------------------------------------------------------------------------------------------------------------------------------------------------------------------|-----|-----|-----------|-------|------|------|
| Rsa1.0_00119.1.g5734.t1 | refNP_567581.1  abscisic acid 8'-hydroxylase 1 [Arabidopsis thaliana] gi 75306306 sp Q949P1.1 ABAH1_ARAT H RecName: Full=Abscisic acid 8'-hydroxylase 1; Short=ABA 8'-hydroxylase 1; AltName: Full=Cytochrome P450 707A1 gi 15293093 gb AAK93657.1  putative cytochrome P450 protein [Arabidopsis thaliana] gi 20259299 gb AAAM14385.1  putative cytochrome P450 protein [Arabidopsis thaliana] gi 46401564 dbj BAD16629.1  cytochrome P450 monooxygenase [Arabidopsis thaliana] gi 332658762 gb AEE84162.1  abscisic acid 8'-hydroxylase 1 [Arabidopsis thaliana]                                                             | 467 | 467 | 0         | 100.0 | 92.9 | 96.1 | abscisic acid 8'-hydroxylase 1              | gbpln | Arabidopsis thaliana | AT4G19230.1   Symbols: CYP707A1   cytochrome P450, family 707, subfamily A, polypeptide 1   chr4:10521524-10523517 FORWARD LENGTH=467                                                                                                                                               | 467 | 467 | 0         | 100.0 | 92.9 | 96.1 |
| Rsa1.0_00119.1.g5735.t1 | refXP_002867948.1  pentatricopeptide repeat-containing protein [Arabidopsis lyrata subsp. lyrata] gi 297313784 gb EFH44207.1  pentatricopeptide repeat-containing protein [Arabidopsis lyrata subsp. lyrata]                                                                                                                                                                                                                                                                                                                                                                                                                   | 873 | 919 | 0         | 105.3 | 80.3 | 88.2 | pentatricopeptide repeat-containing protein | gbpln | Arabidopsis lyrata   | AT4G19220.1   Symbols:   Tetratricopeptide repeat (TPR)-like superfamily protein   chr4:10505266-10508121 REVERSE LENGTH=932                                                                                                                                                        | 873 | 932 | 0         | 106.8 | 77.8 | 86.8 |
| Rsa1.0_00119.1.g5736.t1 | refNP_193656.2  ABC transporter E family member 2 [Arabidopsis thaliana] gi 75330288 sp Q8LPJ4.1 AB2E_ARATH RecName: Full=ABC transporter E family member 2; Short=ABC transporter ABCE2; Short=AtABCE2; AltName: Full=RNase L inhibitor-like protein 2; Short=ATRLI2; Short=AthRLI2 gi 20466462 gb AAM20548.1  RNase L inhibitor-like protein [Arabidopsis thaliana] gi 23198180 gb AAN15617.1  RNase L inhibitor-like protein [Arabidopsis thaliana] gi 110742163 dbj BAE99009.1  RNase L inhibitor-like protein [Arabidopsis thaliana] gi 332658760 gb AEE84160.1  ABC transporter E family member 2 [Arabidopsis thaliana] | 578 | 605 | 0         | 104.7 | 97.4 | 98.8 | ABC transporter E family member 2           | gbpln | Arabidopsis thaliana | AT4G19210.1   Symbols: ATRLI2, RL12   RNase L inhibitor protein 2   chr4:10501906-10504776 FORWARD LENGTH=605                                                                                                                                                                       | 578 | 605 | 0         | 104.7 | 97.4 | 98.8 |
| Rsa1.0_00119.1.g5737.t1 | refXP_002890942.1  hypothetical protein ARALYDRAFT_313748 [Arabidopsis lyrata subsp. lyrata] gi 297336784 gb EFH67201.1  hypothetical protein ARALYDRAFT_313748 [Arabidopsis lyrata subsp. lyrata]                                                                                                                                                                                                                                                                                                                                                                                                                             | 352 | 822 | 5.00E-28  | 233.5 | 16.2 | 17.3 | hypothetical protein ARALYDRAFT_313748      | gbpln | Arabidopsis lyrata   | AT5G45400.1   Symbols: RPA70C, ATRPA70C   Replication factor-A protein 1-related   chr3:18398990-18401644 FORWARD LENGTH=853                                                                                                                                                        | 352 | 853 | 1.00E-30  | 242.3 | 16.2 | 17.3 |
| Rsa1.0_00119.1.g5738.t1 | gb EOA30324.1  hypothetical protein CARUB_v10013451mg [Capsella rubella]                                                                                                                                                                                                                                                                                                                                                                                                                                                                                                                                                       | 431 | 445 | 1.00E-109 | 103.2 | 51.0 | 61.3 | hypothetical protein CARUB_v10013451mg      | gbpln | Capsella rubella     | AT3G62850.1   Symbols:   zinc finger protein-related   chr3:23237487-23239155 REVERSE LENGTH=472                                                                                                                                                                                    | 431 | 472 | 1.00E-110 | 109.5 | 50.6 | 63.8 |
| Rsa1.0_00119.1.g5739.t1 | gb EOA17088.1  hypothetical protein CARUB_v10005338mg [Capsella rubella]                                                                                                                                                                                                                                                                                                                                                                                                                                                                                                                                                       | 169 | 304 | 2.00E-69  | 179.9 | 80.5 | 88.8 | hypothetical protein CARUB_v10005338mg      | gbpln | Capsella rubella     | AT4G19140.1   Symbols:   unknown protein; Has 30201 Blast hits to 17322 proteins in 780 species: Archae - 12; Bacteria - 1396; Metazoa - 17338; Fungi - 3422; Plants - 5037; Viruses - 0; Other Eukaryotes - 2996 (source: NCBI BLINK).   chr4:10469830-10471275 FORWARD LENGTH=303 | 169 | 303 | 7.00E-70  | 179.3 | 77.5 | 82.8 |
| Rsa1.0_00119.1.g5740.t1 | gb EOA15986.1  hypothetical protein CARUB_v10004104mg [Capsella rubella]                                                                                                                                                                                                                                                                                                                                                                                                                                                                                                                                                       | 760 | 879 | 0         | 115.7 | 69.9 | 81.6 | hypothetical protein CARUB_v10004104mg      | gbpln | Capsella rubella     | AT4G19130.1   Symbols:   Replication factor-A protein 1-related   chr4:10466619-10469092 REVERSE LENGTH=784                                                                                                                                                                         | 760 | 784 | 0         | 103.2 | 67.2 | 77.6 |
| Rsa1.0_00119.1.g5741.t1 | gb EOA15853.1  hypothetical protein CARUB_v10007621mg [Capsella rubella]                                                                                                                                                                                                                                                                                                                                                                                                                                                                                                                                                       | 600 | 600 | 0         | 100.0 | 91.2 | 96.3 | hypothetical protein CARUB_v10007621mg      | gbpln | Capsella rubella     | AT4G19120.2   Symbols: ERD3   S-adenosyl-L-methionine-dependent methyltransferases superfamily protein   chr4:10460665-10463034 REVERSE LENGTH=600                                                                                                                                  | 600 | 600 | 0         | 100.0 | 90.8 | 96.2 |
| Rsa1.0_00119.1.g5742.t1 | refNP_849407.1  putative serine/threonine protein kinase [Arabidopsis thaliana] gi 332658742 gb AEE84142.1  putative serine/threonine protein kinase [Arabidopsis thaliana]                                                                                                                                                                                                                                                                                                                                                                                                                                                    | 461 | 464 | 0         | 100.7 | 89.4 | 94.8 | putative serine/threonine protein kinase    | gbpln | Arabidopsis thaliana | AT4G19110.2   Symbols:   Protein kinase superfamily protein   chr4:10454770-10457468 REVERSE LENGTH=464                                                                                                                                                                             | 461 | 464 | 0         | 100.7 | 89.4 | 94.8 |



|                         |                                                                                                                                                                                                                                                                                                                                                                                                                                                                                                                                                                                                         |     |     |           |       |      |      |                                        |       |                      |                                                                                                                                       |     |     |           |       |      |      |
|-------------------------|---------------------------------------------------------------------------------------------------------------------------------------------------------------------------------------------------------------------------------------------------------------------------------------------------------------------------------------------------------------------------------------------------------------------------------------------------------------------------------------------------------------------------------------------------------------------------------------------------------|-----|-----|-----------|-------|------|------|----------------------------------------|-------|----------------------|---------------------------------------------------------------------------------------------------------------------------------------|-----|-----|-----------|-------|------|------|
| Rsa1.0_00119.1.g5743.t1 | ref NP_193642.1  cadmium-induced protein AS8 [Arabidopsis thaliana] gi 1168863 sp F42735.1 CD18_ARATH RecName: Full=Cadmium-induced protein AS8 gi 534902 emb CAA85363.1  cadmium induced protein [Arabidopsis thaliana] gi 2832634 emb CAA16763.1  cadmium-induced protein [Arabidopsis thaliana] gi 7268702 emb CAB78909.1  cadmium-induced protein [Arabidopsis thaliana] gi 18176472 gb AAL60050.1  AT4g19070/F13C5.230 [Arabidopsis thaliana] gi 22655438 gb AAM98311.1  AT4g19070/F13C5.230 [Arabidopsis thaliana] gi 332658736 gb AEE84136.1  cadmium-induced protein AS8 [Arabidopsis thaliana] | 174 | 171 | 4.00E-71  | 98.3  | 82.2 | 98.5 | cadmium-induced protein AS8            | gbpln | Arabidopsis thaliana | AT4G19070.1   Symbols:   Putative membrane lipoprotein   chr4:10446770-10448079 REVERSE LENGTH=171                                    | 174 | 171 | 2.00E-73  | 98.3  | 82.2 | 88.5 |
| Rsa1.0_00119.1.g5744.t2 | ref XP_002867959.1  hypothetical protein ARALYDRAFT_492951 [Arabidopsis lyrata subsp. lyrata] gi 297313795 gb EFH44218.1  hypothetical protein ARALYDRAFT_492951 [Arabidopsis lyrata subsp. lyrata]                                                                                                                                                                                                                                                                                                                                                                                                     | 725 | 718 | 0         | 99.0  | 92.7 | 96.0 | hypothetical protein ARALYDRAFT_492951 | gbpln | Arabidopsis lyrata   | AT4G19040.1   Symbols: EDR2   ENHANCED DISEASE RESISTANCE 2   chr4:10431799-104317171 REVERSE LENGTH=718                              | 725 | 718 | 0         | 99.0  | 92.4 | 95.7 |
| Rsa1.0_00119.1.g5745.t1 | gb EOA17974.1  hypothetical protein CARUB.v10006389mg [Capsella rubella]                                                                                                                                                                                                                                                                                                                                                                                                                                                                                                                                | 353 | 361 | 1.00E-169 | 102.3 | 84.7 | 90.9 | hypothetical protein CARUB.v10006389mg | gbpln | Capsella rubella     | AT4G18990.1   Symbols: XTH29   xyloglucan endotransglucosylase/hydrolase 29   chr4:10401941-10404248 REVERSE LENGTH=357               | 353 | 357 | 1.00E-169 | 101.1 | 86.4 | 92.9 |
| Rsa1.0_00119.1.g5746.t1 | ref XP_002870008.1  hypothetical protein ARALYDRAFT_492961 [Arabidopsis lyrata subsp. lyrata] gi 297315844 gb EFH46267.1  hypothetical protein ARALYDRAFT_492961 [Arabidopsis lyrata subsp. lyrata]                                                                                                                                                                                                                                                                                                                                                                                                     | 109 | 107 | 5.00E-36  | 98.2  | 71.6 | 81.7 | hypothetical protein ARALYDRAFT_492961 | gbpln | Arabidopsis lyrata   | AT4G18980.1   Symbols: AtS40-3   AtS40-3   chr4:1038973-10399293 FORWARD LENGTH=106                                                   | 109 | 106 | 2.00E-36  | 97.2  | 70.6 | 78.9 |
| Rsa1.0_00119.1.g5747.t1 | emb CAA16754.1  putative protein [Arabidopsis thaliana] gi 7268691 emb CAB78899.1  putative protein [Arabidopsis thaliana]                                                                                                                                                                                                                                                                                                                                                                                                                                                                              | 360 | 626 | 0         | 173.9 | 90.8 | 95.8 | putative protein                       | gbpln | Arabidopsis thaliana | AT4G18970.1   Symbols:   GDSL-like Lipase/Acylhydrolase superfamily protein   chr4:10389308-10390808 REVERSE LENGTH=361               | 360 | 361 | 0         | 100.3 | 90.8 | 95.8 |
| Rsa1.0_00119.1.g5748.t1 | ref XP_002870009.1  hypothetical protein ARALYDRAFT_914774 [Arabidopsis lyrata subsp. lyrata] gi 297315845 gb EFH46268.1  hypothetical protein ARALYDRAFT_914774 [Arabidopsis lyrata subsp. lyrata]                                                                                                                                                                                                                                                                                                                                                                                                     | 193 | 302 | 2.00E-85  | 156.5 | 89.6 | 92.7 | hypothetical protein ARALYDRAFT_914774 | gbpln | Arabidopsis lyrata   | AT4G18960.1   Symbols: AG   K-box region and MADS-box transcription factor family protein   chr4:10383917-10388272 FORWARD LENGTH=252 | 193 | 252 | 1.00E-87  | 130.6 | 88.6 | 92.7 |
| Rsa1.0_00119.1.g5749.t1 | gb ABK28640.1  unknown [Arabidopsis thaliana]                                                                                                                                                                                                                                                                                                                                                                                                                                                                                                                                                           | 268 | 248 | 4.00E-83  | 92.5  | 64.6 | 70.9 | unknown                                | gbpln | Arabidopsis thaliana | AT4G18920.1   Symbols:   Protein of unknown function (DUF1264)   chr4:10368784-10370086 FORWARD LENGTH=247                            | 268 | 247 | 1.00E-85  | 92.2  | 64.6 | 70.9 |
| Rsa1.0_00119.1.g5750.t1 | ref XP_002870013.1  hypothetical protein ARALYDRAFT_492969 [Arabidopsis lyrata subsp. lyrata] gi 297315849 gb EFH46272.1  hypothetical protein ARALYDRAFT_492969 [Arabidopsis lyrata subsp. lyrata]                                                                                                                                                                                                                                                                                                                                                                                                     | 289 | 298 | 1.00E-151 | 103.1 | 91.7 | 96.9 | hypothetical protein ARALYDRAFT_492969 | gbpln | Arabidopsis lyrata   | AT4G18910.1   Symbols: NIP1.2, NLM2, ATNLM2   NOD26-like intrinsic protein 1.2   chr4:10366211-10368179 FORWARD LENGTH=294            | 289 | 294 | 1.00E-151 | 101.7 | 90.3 | 96.2 |
| Rsa1.0_00119.1.g5751.t1 | ref NP_193624.1  BES1/BZR1 homolog 3 [Arabidopsis thaliana] gi 61211367 sp O49404.1 BEH3_ARATH RecName: Full=BES1/BZR1 homolog protein 3 gi 2832617 emb CAA16746.1  putative protein [Arabidopsis thaliana] gi 7268683 emb CAB78891.1  putative protein [Arabidopsis thaliana] gi 21594000 gb AAM65918.1  unknown [Arabidopsis thaliana] gi 26452712 dbj BAC43438.1  unknown protein [Arabidopsis thaliana] gi 87116658 gb ABD19693.1  At4g18890 [Arabidopsis thaliana] gi 332658702 gb AEE84102.1  BES1/BZR1 homolog 3 [Arabidopsis thaliana]                                                          | 276 | 284 | 1.00E-130 | 102.9 | 95.7 | 97.5 | BES1/BZR1 homolog 3                    | gbpln | Arabidopsis thaliana | AT4G18890.1   Symbols: BEH3   BES1/BZR1 homolog 3   chr4:10352774-10355259 FORWARD LENGTH=284                                         | 276 | 284 | 1.00E-132 | 102.9 | 95.7 | 97.5 |
| Rsa1.0_00119.1.g5752.t1 | #                                                                                                                                                                                                                                                                                                                                                                                                                                                                                                                                                                                                       | #   | #   | #         | #     | #    | -    | ----                                   | ----  | ----                 | #                                                                                                                                     | #   | #   | #         | #     | #    |      |
| Rsa1.0_00119.1.g5753.t1 | gb ADX69244.1  heat shock transcription factor A4a [Brassica napus]                                                                                                                                                                                                                                                                                                                                                                                                                                                                                                                                     | 386 | 389 | 0         | 100.8 | 92.7 | 95.6 | heat shock transcription factor A4a    | gbpln | Brassica napus       | AT4G18880.1   Symbols: AT-HSFA4A, HSF A4A   heat shock transcription factor A4A   chr4:10347769-10349051 REVERSE LENGTH=401           | 386 | 401 | 1.00E-172 | 103.9 | 84.5 | 90.4 |
| Rsa1.0_00119.1.g5754.t1 | #                                                                                                                                                                                                                                                                                                                                                                                                                                                                                                                                                                                                       | #   | #   | #         | #     | #    | -    | ----                                   | ----  | ----                 | #                                                                                                                                     | #   | #   | #         | #     | #    |      |

|                         |                                                                                                                                                                                                                                                                                                                                                             |      |      |           |       |      |      |                                        |       |                      |                                                                                                                                                                                                                                                                                                                                                 |      |      |           |       |      |      |
|-------------------------|-------------------------------------------------------------------------------------------------------------------------------------------------------------------------------------------------------------------------------------------------------------------------------------------------------------------------------------------------------------|------|------|-----------|-------|------|------|----------------------------------------|-------|----------------------|-------------------------------------------------------------------------------------------------------------------------------------------------------------------------------------------------------------------------------------------------------------------------------------------------------------------------------------------------|------|------|-----------|-------|------|------|
| Rsa1.0_00119.1.g5756.t1 | ref[XP_002870027.1] hypothetical protein ARALYDRAFT_492990 [Arabidopsis lyrata subsp. lyrata] gi 297315863 gb EFH46286.1] hypothetical protein ARALYDRAFT_492990 [Arabidopsis lyrata subsp. lyrata]                                                                                                                                                         | 285  | 281  | 1.00E-113 | 98.6  | 72.6 | 82.5 | hypothetical protein ARALYDRAFT_492990 | gbpln | Arabidopsis lyrata   | AT4G18690.1   Symbols:   unknown protein; BEST Arabidopsis thaliana protein match is: unknown protein (TAIR:AT4G18680.1). Has 522 Blast hits to 522 proteins in 39 species: Archae - 0; Bacteria - 0; Metazoa - 9; Fungi - 0; Plants - 513; Viruses - 0; Other Eukaryotes - 0 (source: NCBI BLink).   chr4:10282788-10283636 FORWARD LENGTH=282 | 285  | 282  | 1.00E-111 | 98.9  | 70.9 | 82.1 |
| Rsa1.0_00119.1.g5756.t1 | emb[CAB37448.1] putative protein [Arabidopsis thaliana] gi 7268657 emb[CAB78865.1] putative protein [Arabidopsis thaliana]                                                                                                                                                                                                                                  | 418  | 472  | 1.00E-161 | 112.9 | 74.4 | 84.2 | putative protein                       | gbpln | Arabidopsis thaliana | AT4G18630.1   Symbols:   Protein of unknown function (DUF688)   chr4:10257178-10258734 FORWARD LENGTH=479                                                                                                                                                                                                                                       | 418  | 479  | 1.00E-163 | 114.6 | 73.9 | 83.5 |
| Rsa1.0_00119.1.g5757.t1 | emb[CAB10225.1] retrovirus-related like polyprotein [Arabidopsis thaliana] gi 7268152 emb[CAB78488.1] retrovirus-related like polyprotein [Arabidopsis thaliana]                                                                                                                                                                                            | 1382 | 1489 | 0         | 107.7 | 46.7 | 64.5 | retrovirus-related like polyprotein    | gbpln | Arabidopsis thaliana | AT4G23160.1   Symbols: CRK8   cysteine-rich RLK (RECEPTOR-like protein kinase) 8   chr4:12129485-12134086 FORWARD LENGTH=1262                                                                                                                                                                                                                   | 1382 | 1262 | 3.00E-71  | 91.3  | 9.6  | 12.8 |
| Rsa1.0_00119.1.g5758.t1 | gb[EOA19044.1] hypothetical protein CARUB_v10007704mg [Capsella rubella]                                                                                                                                                                                                                                                                                    | 189  | 191  | 2.00E-80  | 101.1 | 85.7 | 88.4 | hypothetical protein CARUB_v10007704mg | gbpln | Capsella rubella     | AT4G18610.1   Symbols: LSH9   Protein of unknown function (DUF640)   chr4:10250794-10251369 FORWARD LENGTH=191                                                                                                                                                                                                                                  | 189  | 191  | 5.00E-82  | 101.1 | 85.2 | 88.4 |
| Rsa1.0_00119.1.g5759.t1 | ref[XP_002870037.1] hypothetical protein ARALYDRAFT_493003 [Arabidopsis lyrata subsp. lyrata] gi 297315873 gb EFH46296.1] hypothetical protein ARALYDRAFT_493003 [Arabidopsis lyrata subsp. lyrata]                                                                                                                                                         | 606  | 636  | 0         | 105.0 | 80.4 | 85.8 | hypothetical protein ARALYDRAFT_493003 | gbpln | Arabidopsis lyrata   | AT4G18570.1   Symbols:   Tetratricopeptide repeat (TPR)-like superfamily protein   chr4:10231439-10234534 FORWARD LENGTH=642                                                                                                                                                                                                                    | 606  | 642  | 0         | 105.9 | 79.2 | 87.0 |
| Rsa1.0_00119.1.g5760.t1 | gb[EOA15507.1] hypothetical protein CARUB_v10004827mg [Capsella rubella]                                                                                                                                                                                                                                                                                    | 391  | 440  | 0         | 112.5 | 84.4 | 92.3 | hypothetical protein CARUB_v10004827mg | gbpln | Capsella rubella     | AT4G18550.1   Symbols:   alpha/beta-Hydrolases superfamily protein   chr4:10225006-10226862 REVERSE LENGTH=419                                                                                                                                                                                                                                  | 391  | 419  | 1.00E-179 | 107.2 | 78.5 | 84.9 |
| Rsa1.0_00119.1.g5761.t1 | gb[EOA16325.1] hypothetical protein CARUB_v10004475mg [Capsella rubella]                                                                                                                                                                                                                                                                                    | 570  | 569  | 0         | 99.8  | 87.0 | 93.2 | hypothetical protein CARUB_v10004475mg | gbpln | Capsella rubella     | AT4G18540.1   Symbols:   unknown protein; Has 209 Blast hits to 205 proteins in 54 species: Archae - 0; Bacteria - 17; Metazoa - 2; Fungi - 150; Plants - 40; Viruses - 0; Other Eukaryotes - 0 (source: NCBI BLink).   chr4:10221203-10223028 REVERSE LENGTH=520                                                                               | 570  | 520  | 0         | 91.2  | 77.7 | 84.0 |
| Rsa1.0_00119.1.g5762.t1 | ref[NP_567176.2] XH/XS domain-containing protein [Arabidopsis thaliana] gi 332656471 gb AEE81871.1] XH/XS domain-containing protein [Arabidopsis thaliana]                                                                                                                                                                                                  | 174  | 635  | 1.00E-29  | 364.9 | 47.1 | 64.4 | XH/XS domain-containing protein        | gbpln | Arabidopsis thaliana | AT4G00380.1   Symbols:   XH/XS domain-containing protein   chr4:167959-170448 FORWARD LENGTH=635                                                                                                                                                                                                                                                | 174  | 635  | 4.00E-32  | 364.9 | 47.1 | 64.4 |
| Rsa1.0_00119.1.g5763.t1 | ref[NP_173043.1] XH/XS domain-containing protein [Arabidopsis thaliana] gi 6587797 gb AAF18488.1 AC010924.1 Contains similarity to gb AF136530 transcriptional regulator from Zea mays. ESTs gb F14071. gb Z26823. gb A198935 come from this gene [Arabidopsis thaliana] gi 332191261 gb AEE29382.1] XH/XS domain-containing protein [Arabidopsis thaliana] | 239  | 634  | 2.00E-56  | 265.3 | 47.7 | 63.2 | XH/XS domain-containing protein        | gbpln | Arabidopsis thaliana | AT1G15910.1   Symbols:   XH/XS domain-containing protein   chr1:5465951-5468723 FORWARD LENGTH=634                                                                                                                                                                                                                                              | 239  | 634  | 5.00E-59  | 265.3 | 47.7 | 63.2 |
| Rsa1.0_00119.1.g5764.t1 | ref[NP_193588.5] uncharacterized protein [Arabidopsis thaliana] gi 332658658 gb AEE84058.1] uncharacterized protein AT4G18530 [Arabidopsis thaliana]                                                                                                                                                                                                        | 403  | 389  | 0         | 96.5  | 78.7 | 84.9 | uncharacterized protein                | gbpln | Arabidopsis thaliana | AT4G18530.1   Symbols:   Protein of unknown function (DUF707)   chr4:10217749-10220285 FORWARD LENGTH=389                                                                                                                                                                                                                                       | 403  | 389  | 0         | 96.5  | 78.7 | 84.9 |
| Rsa1.0_00119.1.g5765.t1 | gb[EOA16240.1] hypothetical protein CARUB_v10004383mg [Capsella rubella]                                                                                                                                                                                                                                                                                    | 615  | 621  | 0         | 101.0 | 91.2 | 95.3 | hypothetical protein CARUB_v10004383mg | gbpln | Capsella rubella     | AT4G18520.1   Symbols:   Pentatricopeptide repeat (PPR) superfamily protein   chr4:10215250-10217103 REVERSE LENGTH=617                                                                                                                                                                                                                         | 615  | 617  | 0         | 100.3 | 90.4 | 94.5 |
| Rsa1.0_00119.1.g5766.t1 | ref[XP_002870040.1] hypothetical protein ARALYDRAFT_493008 [Arabidopsis lyrata subsp. lyrata] gi 297315876 gb EFH46299.1] hypothetical protein ARALYDRAFT_493008 [Arabidopsis lyrata subsp. lyrata]                                                                                                                                                         | 78   | 78   | 1.00E-14  | 100.0 | 65.4 | 74.4 | hypothetical protein ARALYDRAFT_493008 | gbpln | Arabidopsis lyrata   | AT4G18510.1   Symbols: CLE2   CLAVATA3/ESR-related 2   chr4:10212092-10212319 FORWARD LENGTH=75                                                                                                                                                                                                                                                 | 78   | 75   | 3.00E-14  | 96.2  | 70.5 | 75.6 |

|                          |                                                                                                                                                                                                                                                                                                                                                                                                                                                                                                                                                                                                                                                                                                                                                                                 |      |      |           |       |      |      |                                          |       |                      |                                                                                                                                                                                                                                                                                                                                                                                                                                                                                                                                                                |      |      |           |       |      |      |
|--------------------------|---------------------------------------------------------------------------------------------------------------------------------------------------------------------------------------------------------------------------------------------------------------------------------------------------------------------------------------------------------------------------------------------------------------------------------------------------------------------------------------------------------------------------------------------------------------------------------------------------------------------------------------------------------------------------------------------------------------------------------------------------------------------------------|------|------|-----------|-------|------|------|------------------------------------------|-------|----------------------|----------------------------------------------------------------------------------------------------------------------------------------------------------------------------------------------------------------------------------------------------------------------------------------------------------------------------------------------------------------------------------------------------------------------------------------------------------------------------------------------------------------------------------------------------------------|------|------|-----------|-------|------|------|
| Rsa1.0_001119.1.g5767.t2 | gb AAB61114.1  EST gb ATTS0887 comes from this gene [Arabidopsis thaliana]                                                                                                                                                                                                                                                                                                                                                                                                                                                                                                                                                                                                                                                                                                      | 233  | 358  | 3.00E-38  | 153.6 | 41.2 | 45.1 | EST gb ATTS0887 comes from this gene     | gbpln | Arabidopsis thaliana | AT1G69980.1   Symbols:   unknown protein; LOCATED IN: endomembrane system; EXPRESSED IN: 24 plant structures; EXPRESSED DURING: 15 growth stages; Has 30 Blast hits to 30 proteins in 12 species: Archae - 0; Bacteria - 0; Metazoa - 0; Fungi - 0; Plants - 30; Viruses - 0; Other Eukaryotes - 0 (source: NCBI BLink).   chr1:26356559-26357647 REVERSE LENGTH=205                                                                                                                                                                                           | 233  | 205  | 1.00E-40  | 88.0  | 41.2 | 45.1 |
| Rsa1.0_001119.1.g5768.t1 | ref XP_002870040.1  hypothetical protein ARALYDRAFT_493008 [Arabidopsis lyrata subsp. lyrata] gi 297315876 gb EFH46299.1  hypothetical protein ARALYDRAFT_493008 [Arabidopsis lyrata subsp. lyrata]                                                                                                                                                                                                                                                                                                                                                                                                                                                                                                                                                                             | 78   | 78   | 3.00E-14  | 100.0 | 70.5 | 78.2 | hypothetical protein ARALYDRAFT_493008   | gbpln | Arabidopsis lyrata   | AT4G18510.1   Symbols: CLE2   CLAVATA3/ESR-related 2   chr4:10212092-10212319 FORWARD LENGTH=75                                                                                                                                                                                                                                                                                                                                                                                                                                                                | 78   | 75   | 4.00E-15  | 96.2  | 70.5 | 78.2 |
| Rsa1.0_001119.1.g5769.t1 | ref NP_001031665.1  uncharacterized protein [Arabidopsis thaliana] gi 98962121 gb ABF59390.1  unknown protein [Arabidopsis thaliana] gi 332658655 gb AEE84055.1  uncharacterized protein AT4G18501 [Arabidopsis thaliana]                                                                                                                                                                                                                                                                                                                                                                                                                                                                                                                                                       | 113  | 109  | 6.00E-27  | 96.5  | 73.5 | 81.4 | uncharacterized protein                  | gbpln | Arabidopsis thaliana | AT4G18501.1   Symbols:   unknown protein; Has 3533 Blast hits to 34131 proteins in 2444 species: Archae - 798; Bacteria - 22429; Metazoa - 974; Fungi - 991; Plants - 531; Viruses - 0; Other Eukaryotes - 9610 (source: NCBI BLink).   chr4:10209311-10209640 FORWARD LENGTH=109                                                                                                                                                                                                                                                                              | 113  | 109  | 1.00E-29  | 96.5  | 73.5 | 81.4 |
| Rsa1.0_001119.1.g5770.t1 | ref NP_001119007.2  uncharacterized protein [Arabidopsis thaliana] gi 332658653 gb AEB84053.1  uncharacterized protein AT4G18490 [Arabidopsis thaliana]                                                                                                                                                                                                                                                                                                                                                                                                                                                                                                                                                                                                                         | 773  | 755  | 0         | 97.7  | 69.2 | 79.4 | uncharacterized protein                  | gbpln | Arabidopsis thaliana | AT4G18490.2   Symbols:   unknown protein; FUNCTIONS IN: molecular function unknown; INVOLVED IN: biological process unknown; LOCATED IN: cellular component unknown; EXPRESSED IN: shoot, shoot apex, embryo, flower, seed; EXPRESSED DURING: petal differentiation and expansion stage, E expanded cotyledon stage; Has 30201 Blast hits to 17322 proteins in 780 species: Archae - 12; Bacteria - 1396; Metazoa - 17338; Fungi - 3422; Plants - 5037; Viruses - 0; Other Eukaryotes - 2996 (source: NCBI BLink).   chr4:10204388-10208197 FORWARD LENGTH=755 | 773  | 755  | 0         | 97.7  | 69.2 | 79.4 |
| Rsa1.0_001119.1.g5771.t1 | ref XP_002316838.1  predicted protein [Populus trichocarpa] gi 222859903 gb EE97450.1  predicted protein [Populus trichocarpa]                                                                                                                                                                                                                                                                                                                                                                                                                                                                                                                                                                                                                                                  | 93   | 420  | 3.00E-27  | 451.6 | 63.4 | 71.0 | predicted protein                        | gbpln | Populus trichocarpa  | AT4G18480.1   Symbols: CHL11, CH42, CH-42, CHL1, CHL1-1   P-loop containing nucleoside triphosphate hydrolases superfamily protein   chr4:10201897-10203361 REVERSE LENGTH=424                                                                                                                                                                                                                                                                                                                                                                                 | 93   | 424  | 2.00E-27  | 455.9 | 69.9 | 72.0 |
| Rsa1.0_001119.1.g5772.t1 | emb CAB39638.1  RNA-directed DNA polymerase-like protein [Arabidopsis thaliana] gi 7267666 emb CAB78094.1  RNA-directed DNA polymerase-like protein [Arabidopsis thaliana]                                                                                                                                                                                                                                                                                                                                                                                                                                                                                                                                                                                                      | 1356 | 1274 | 0         | 94.0  | 41.7 | 56.9 | RNA-directed DNA polymerase-like protein | gbpln | Arabidopsis thaliana | AT4G29090.1   Symbols:   Ribonuclease H-like superfamily protein   chr4:14333528-14335255 FORWARD LENGTH=575                                                                                                                                                                                                                                                                                                                                                                                                                                                   | 1356 | 575  | 1.00E-63  | 42.4  | 12.6 | 20.1 |
| Rsa1.0_001119.1.g5773.t1 | gb EOA16437.1  hypothetical protein CARUB_v10004589mg [Capsella rubella]                                                                                                                                                                                                                                                                                                                                                                                                                                                                                                                                                                                                                                                                                                        | 60   | 523  | 1.00E-20  | 871.7 | 80.0 | 86.7 | hypothetical protein CARUB_v10004589mg   | gbpln | Capsella rubella     | AT1G36280.2   Symbols:   L-Aspartase-like family protein   chr1:13640600-13642908 FORWARD LENGTH=519                                                                                                                                                                                                                                                                                                                                                                                                                                                           | 60   | 519  | 4.00E-23  | 865.0 | 80.0 | 85.0 |
| Rsa1.0_001119.1.g5774.t1 | ref NP_193578.1  RAB GTPase homolog A1E [Arabidopsis thaliana] gi 297800216 ref XP_002867992.1  hypothetical protein ARALYDRAFT_493018 [Arabidopsis lyrata subsp. lyrata] gi 75098755 sp O49513.1 RAA1E_ARAT H RecName: Full=Ras-related protein RABA1e; Short=AtRABA1e gi 2832648 emb CAA16723.1  membrane-bound small GTP-binding-like protein [Arabidopsis thaliana] gi 7268636 emb CAB78845.1  membrane-bound small GTP-binding-like protein [Arabidopsis thaliana] gi 38603932 gb AAR24711.1  At4g18430 [Arabidopsis thaliana] gi 44681422 gb AAS47651.1  At4g18430 [Arabidopsis thaliana] gi 297313828 gb EFH44251.1  hypothetical protein ARALYDRAFT_493018 [Arabidopsis lyrata subsp. lyrata] gi 332658645 gb AEE84045.1  RAB GTPase homolog A1E [Arabidopsis thaliana] | 217  | 217  | 1.00E-122 | 100.0 | 97.7 | 99.1 | RAB GTPase homolog A1E                   | gbpln | Arabidopsis lyrata   | AT4G18430.1   Symbols: AtRABA1e, RABA1e   RAB GTPase homolog A1E   chr4:10183903-10185223 REVERSE LENGTH=217                                                                                                                                                                                                                                                                                                                                                                                                                                                   | 217  | 217  | 1.00E-125 | 100.0 | 97.7 | 99.1 |
| Rsa1.0_001119.1.g5775.t1 | emb CAN73272.1  hypothetical protein VITISV_013115 [Vitis vinifera]                                                                                                                                                                                                                                                                                                                                                                                                                                                                                                                                                                                                                                                                                                             | 1021 | 1178 | 0         | 115.4 | 43.6 | 55.6 | hypothetical protein VITISV_013115       | gbpln | Vitis vinifera       | AT4G23160.1   Symbols: CRK8   cysteine-rich RLK (RECEPTOR-like protein kinase) 8   chr4:12129485-12134086 FORWARD LENGTH=1262                                                                                                                                                                                                                                                                                                                                                                                                                                  | 1021 | 1262 | 1.00E-123 | 123.6 | 21.3 | 30.4 |

|                         |                                                                                                                                                                                                                                                                                                                                                                                                                                                                                                                                                                                                                                                                                                                                                                              |     |      |           |       |      |      |                                         |       |                      |                                                                                                                                                                                                                                                                                                                                                                                                                                                                        |     |     |           |       |      |      |
|-------------------------|------------------------------------------------------------------------------------------------------------------------------------------------------------------------------------------------------------------------------------------------------------------------------------------------------------------------------------------------------------------------------------------------------------------------------------------------------------------------------------------------------------------------------------------------------------------------------------------------------------------------------------------------------------------------------------------------------------------------------------------------------------------------------|-----|------|-----------|-------|------|------|-----------------------------------------|-------|----------------------|------------------------------------------------------------------------------------------------------------------------------------------------------------------------------------------------------------------------------------------------------------------------------------------------------------------------------------------------------------------------------------------------------------------------------------------------------------------------|-----|-----|-----------|-------|------|------|
| Rsa1.0_00119.1.g5776.t1 | gb[EOA17708.1] hypothetical protein CARUB_v10006080mg [Capsella rubella]                                                                                                                                                                                                                                                                                                                                                                                                                                                                                                                                                                                                                                                                                                     | 99  | 107  | 6.00E-31  | 108.1 | 69.7 | 73.7 | hypothetical protein CARUB_v10006080mg  | gbpln | Capsella rubella     | AT4G18400.1   Symbols:   unknown protein; FUNCTIONS IN: molecular_function unknown; INVOLVED IN: biological_process unknown; LOCATED IN: chloroplast; EXPRESSED IN: 22 plant structures; EXPRESSED DURING: 13 growth stages; Has 30201 Blast hits to 17322 proteins in 780 species: Archae - 12; Bacteria - 1396; Metazoa - 17338; Fungi - 3422; Plants - 5037; Viruses - 0; Other Eukaryotes - 2996 (source: NCBI BLINK).   chr4:10170024-10171221 REVERSE LENGTH=107 | 99  | 107 | 1.00E-33  | 108.1 | 69.7 | 73.7 |
| Rsa1.0_00119.1.g5777.t1 | dbj[BAJ33883.1] unnamed protein product [Thellungiella halophila]                                                                                                                                                                                                                                                                                                                                                                                                                                                                                                                                                                                                                                                                                                            | 253 | 379  | 3.00E-91  | 149.8 | 81.8 | 86.6 | unnamed protein product                 | ----  | ----                 | AT4G18390.2   Symbols: TCP2   TEOSINTE BRANCHED 1, cycloidea and PCF transcription factor 2   chr4:10163212-10164309 REVERSE LENGTH=365                                                                                                                                                                                                                                                                                                                                | 253 | 365 | 4.00E-87  | 144.3 | 77.5 | 81.8 |
| Rsa1.0_00119.1.g5778.t1 | ref[XP_002868000.1] hypothetical protein ARALYDRAFT_914851 [Arabidopsis lyrata subsp. lyrata] gi 297313836 gb EFH44259.1] hypothetical protein ARALYDRAFT_914851 [Arabidopsis lyrata subsp. lyrata]                                                                                                                                                                                                                                                                                                                                                                                                                                                                                                                                                                          | 115 | 112  | 5.00E-48  | 97.4  | 84.3 | 93.9 | hypothetical protein ARALYDRAFT_914851  | gbpln | Arabidopsis lyrata   | AT4G18372.1   Symbols:   Small nuclear ribonucleoprotein family protein   chr4:10151349-10151687 REVERSE LENGTH=112                                                                                                                                                                                                                                                                                                                                                    | 115 | 112 | 3.00E-50  | 97.4  | 83.5 | 93.0 |
| Rsa1.0_00119.1.g5779.t1 | gb[EOA16863.1] hypothetical protein CARUB_v10005088mg [Capsella rubella]                                                                                                                                                                                                                                                                                                                                                                                                                                                                                                                                                                                                                                                                                                     | 368 | 368  | 0         | 100.0 | 98.4 | 99.5 | hypothetical protein CARUB_v10005088mg  | gbpln | Capsella rubella     | AT4G18360.1   Symbols:   Aldolase-type TIM barrel family protein   chr4:10146141-10148386 REVERSE LENGTH=368                                                                                                                                                                                                                                                                                                                                                           | 368 | 368 | 0         | 100.0 | 97.3 | 98.6 |
| Rsa1.0_00119.1.g5780.t1 | ref[XP_002862798.1] hypothetical protein ARALYDRAFT_497292 [Arabidopsis lyrata subsp. lyrata] gi 297308526 gb EFH39056.1] hypothetical protein ARALYDRAFT_497292 [Arabidopsis lyrata subsp. lyrata] ref[NP_193569.1] 9-cis-epoxycarotenoid dioxygenase NCED2 [Arabidopsis thaliana] gi 75098750 sp O49505.1 NCED2_ARAT H RecName: Full=9-cis-epoxycarotenoid dioxygenase NCED2, chloroplastic; Short=ATNCED2; Flags: Precursor gi 2832640 emb CAA16715.1] neoxanthin cleavage enzyme - like protein [Arabidopsis thaliana] gi 7268628 emb CAB78837.1] neoxanthin cleavage enzyme-like protein [Arabidopsis thaliana] gi 133778876 gb ABO38778.1] At4g18350 [Arabidopsis thaliana] gi 332658630 gb AEE84030.1] 9-cis-epoxycarotenoid dioxygenase NCED2 [Arabidopsis thaliana] | 787 | 842  | 0         | 107.0 | 57.8 | 69.8 | hypothetical protein ARALYDRAFT_497292  | gbpln | Arabidopsis lyrata   | AT1G71400.1   Symbols: AtRLP12, RLP12   receptor like protein 12   chr1:26909905-26912448 FORWARD LENGTH=847                                                                                                                                                                                                                                                                                                                                                           | 787 | 847 | 0         | 107.6 | 56.7 | 70.5 |
| Rsa1.0_00119.1.g5781.t1 | gi 75098750 sp O49505.1 NCED2_ARAT H RecName: Full=9-cis-epoxycarotenoid dioxygenase NCED2, chloroplastic; Short=ATNCED2; Flags: Precursor gi 2832640 emb CAA16715.1] neoxanthin cleavage enzyme - like protein [Arabidopsis thaliana] gi 7268628 emb CAB78837.1] neoxanthin cleavage enzyme-like protein [Arabidopsis thaliana] gi 133778876 gb ABO38778.1] At4g18350 [Arabidopsis thaliana] gi 332658630 gb AEE84030.1] 9-cis-epoxycarotenoid dioxygenase NCED2 [Arabidopsis thaliana]                                                                                                                                                                                                                                                                                     | 583 | 583  | 0         | 100.0 | 90.1 | 95.2 | 9-cis-epoxycarotenoid dioxygenase NCED2 | gbpln | Arabidopsis thaliana | AT4G18350.1   Symbols: NCED2, ATNCED2   nine-cis-epoxycarotenoid dioxygenase 2   chr4:10142672-10144423 FORWARD LENGTH=583                                                                                                                                                                                                                                                                                                                                             | 583 | 583 | 0         | 100.0 | 90.1 | 95.2 |
| Rsa1.0_00119.1.g5782.t1 | gb[AAD32866.1]AC005489.4 F14N23.4 [Arabidopsis thaliana]                                                                                                                                                                                                                                                                                                                                                                                                                                                                                                                                                                                                                                                                                                                     | 234 | 1161 | 2.00E-53  | 496.2 | 42.3 | 56.4 | F14N23.4                                | gbpln | Arabidopsis thaliana | AT5G16486.1   Symbols:   RNA-directed DNA polymerase (reverse transcriptase)-related family protein   chr5:5383597-5384226 REVERSE LENGTH=209                                                                                                                                                                                                                                                                                                                          | 234 | 209 | 3.00E-50  | 89.3  | 41.5 | 57.3 |
| Rsa1.0_00119.1.g5783.t1 | ref[NP_193568.2] glycosyl hydrolase family 17 protein [Arabidopsis thaliana] gi 21539539 gb AAM53322.1] beta-1,3-glucanase-like protein [Arabidopsis thaliana] gi 24899809 gb AAN65119.1] beta-1,3-glucanase-like protein [Arabidopsis thaliana] gi 332658629 gb AEE84029.1] glycosyl hydrolase family 17 protein [Arabidopsis thaliana]                                                                                                                                                                                                                                                                                                                                                                                                                                     | 956 | 397  | 0         | 41.5  | 37.1 | 39.4 | glycosyl hydrolase family 17 protein    | gbpln | Arabidopsis thaliana | AT4G18340.1   Symbols:   Glycosyl hydrolase superfamily protein   chr4:10130245-10132019 REVERSE LENGTH=397                                                                                                                                                                                                                                                                                                                                                            | 956 | 397 | 0         | 41.5  | 37.1 | 39.4 |
| Rsa1.0_00119.1.g5784.t1 | gb[EOA15399.1] hypothetical protein CARUB_v10006826mg [Capsella rubella]                                                                                                                                                                                                                                                                                                                                                                                                                                                                                                                                                                                                                                                                                                     | 282 | 537  | 1.00E-131 | 190.4 | 80.9 | 89.0 | hypothetical protein CARUB_v10006826mg  | gbpln | Capsella rubella     | AT4G18260.1   Symbols:   Cytochrome b561/ferric reductase transmembrane protein family   chr4:10093524-10097337 REVERSE LENGTH=545                                                                                                                                                                                                                                                                                                                                     | 282 | 545 | 1.00E-130 | 193.3 | 79.1 | 88.7 |
| Rsa1.0_00119.1.g5785.t2 | gb[EOA16230.1] hypothetical protein CARUB_v10004372mg [Capsella rubella]                                                                                                                                                                                                                                                                                                                                                                                                                                                                                                                                                                                                                                                                                                     | 642 | 626  | 0         | 97.5  | 72.6 | 82.9 | hypothetical protein CARUB_v10004372mg  | gbpln | Capsella rubella     | AT4G18250.1   Symbols:   receptor serine/threonine kinase, putative   chr4:10087343-10091963 REVERSE LENGTH=853                                                                                                                                                                                                                                                                                                                                                        | 642 | 853 | 0         | 132.9 | 68.4 | 80.5 |

|                          |                                                                                                                                                                                                                                                       |      |      |           |       |      |      |                                           |       |                      |                                                                                                                                                                                                                                                                                                                                                                                                                                                                                                                                                    |      |      |           |       |      |      |
|--------------------------|-------------------------------------------------------------------------------------------------------------------------------------------------------------------------------------------------------------------------------------------------------|------|------|-----------|-------|------|------|-------------------------------------------|-------|----------------------|----------------------------------------------------------------------------------------------------------------------------------------------------------------------------------------------------------------------------------------------------------------------------------------------------------------------------------------------------------------------------------------------------------------------------------------------------------------------------------------------------------------------------------------------------|------|------|-----------|-------|------|------|
| Rsa1.0_001119.1.g5786.t1 | ref[XP_002868006.1] hypothetical protein ARALYDRAFT_493043 [Arabidopsis lyrata subsp. lyrata] gi 297313842 gb EFH44265.1] hypothetical protein ARALYDRAFT_493043 [Arabidopsis lyrata subsp. lyrata]                                                   | 222  | 233  | 8.00E-99  | 105.0 | 79.3 | 83.8 | hypothetical protein ARALYDRAFT_493043    | gbpln | Arabidopsis lyrata   | AT4G18230.1   Symbols:   FUNCTIONS IN: molecular function unknown; INVOLVED IN: biological process unknown; LOCATED IN: endomembrane system; EXPRESSED IN: 23 plant structures; EXPRESSED DURING: 13 growth stages; CONTAINS InterPro DOMAIN/s: Oligosaccharide biosynthesis protein Alg14 like (InterPro:IPRO13969); Has 640 Blast hits to 640 proteins in 277 species: Archaea - 4; Bacteria - 281; Metazoa - 94; Fungi - 127; Plants - 57; Viruses - 0; Other Eukaryotes - 77 (source: NCBI BLINK).   chr4:10080521-10081710 REVERSE LENGTH=233 | 222  | 233  | 9.00E-94  | 105.0 | 80.6 | 83.8 |
| Rsa1.0_001119.1.g5787.t1 | ref[XP_002870065.1] glycoside hydrolase family 28 protein [Arabidopsis lyrata subsp. lyrata] gi 297315901 gb EFH46324.1] glycoside hydrolase family 28 protein [Arabidopsis lyrata subsp. lyrata]                                                     | 840  | 414  | 0         | 49.3  | 41.0 | 43.8 | glycoside hydrolase family 28 protein     | gbpln | Arabidopsis lyrata   | AT4G18180.1   Symbols:   Pectin lyase-like superfamily protein   chr4:10065626-10067317 FORWARD LENGTH=414                                                                                                                                                                                                                                                                                                                                                                                                                                         | 840  | 414  | 0         | 49.3  | 40.0 | 42.5 |
| Rsa1.0_001119.1.g5788.t1 | gb AC114393.1] WRKY28-1 transcription factor [Brassica napus]                                                                                                                                                                                         | 313  | 312  | 1.00E-169 | 99.7  | 93.3 | 96.8 | WRKY28-1 transcription factor             | gbpln | Brassica napus       | AT4G18170.1   Symbols: WRKY28, ATWRKY28   WRKY DNA-binding protein 28   chr4:10061508-10062691 FORWARD LENGTH=318                                                                                                                                                                                                                                                                                                                                                                                                                                  | 313  | 318  | 1.00E-141 | 101.6 | 83.4 | 89.8 |
| Rsa1.0_001119.1.g5789.t1 | ref[XP_002870067.1] hypothetical protein ARALYDRAFT_914875 [Arabidopsis lyrata subsp. lyrata] gi 297315903 gb EFH46326.1] hypothetical protein ARALYDRAFT_914875 [Arabidopsis lyrata subsp. lyrata]                                                   | 447  | 438  | 0         | 98.0  | 82.6 | 87.7 | hypothetical protein ARALYDRAFT_914875    | gbpln | Arabidopsis lyrata   | AT4G18160.1   Symbols: KCO6, ATTPK3, ATKCO6, TPK3   Ca2+ activated outward rectifying K+ channel 6   chr4:10055696-10057546 FORWARD LENGTH=436                                                                                                                                                                                                                                                                                                                                                                                                     | 447  | 436  | 0         | 97.5  | 79.6 | 84.1 |
| Rsa1.0_001119.1.g5790.t1 | gb EOA17641.1] hypothetical protein CARUB_v10006007mg [Capsella rubella]                                                                                                                                                                              | 150  | 133  | 1.00E-68  | 88.7  | 88.0 | 88.7 | hypothetical protein CARUB_v10006007mg    | gbpln | Capsella rubella     | AT4G18100.1   Symbols:   Ribosomal protein L32e   chr4:10035715-10036475 REVERSE LENGTH=133                                                                                                                                                                                                                                                                                                                                                                                                                                                        | 150  | 133  | 6.00E-71  | 88.7  | 87.3 | 88.7 |
| Rsa1.0_001119.1.g5791.t2 | gb EOA12313.1] hypothetical protein CARUB_v10007956mg [Capsella rubella]                                                                                                                                                                              | 1403 | 1409 | 0         | 100.4 | 84.5 | 91.0 | hypothetical protein CARUB_v10007956mg    | gbpln | Capsella rubella     | AT2G07690.1   Symbols: ATMRP11, MRP11, ABCC13   multidrug resistance-associated protein 11   chr2:3514774-3522491 FORWARD LENGTH=1404                                                                                                                                                                                                                                                                                                                                                                                                              | 1403 | 1404 | 0         | 100.1 | 84.3 | 90.3 |
| Rsa1.0_001119.1.g5792.t2 | ref[NP_850027.2] FAD-dependent oxidoreductase-like protein [Arabidopsis thaliana] gi 55740569 gb AAV63877.1] hypothetical protein [Arabidopsis thaliana] gi 330252239 gb AEC07333.1] FAD-dependent oxidoreductase-like protein [Arabidopsis thaliana] | 683  | 420  | 0         | 61.5  | 50.7 | 54.6 | FAD-dependent oxidoreductase-like protein | gbpln | Arabidopsis thaliana | AT2G22650.1   Symbols:   FAD-dependent oxidoreductase family protein   chr2:9624703-9626931 REVERSE LENGTH=420                                                                                                                                                                                                                                                                                                                                                                                                                                     | 683  | 420  | 0         | 61.5  | 50.7 | 54.6 |
| Rsa1.0_001119.1.g5793.t1 | gb EOA16930.1] hypothetical protein CARUB_v10005154mg [Capsella rubella]                                                                                                                                                                              | 351  | 351  | 0         | 100.0 | 94.9 | 98.0 | hypothetical protein CARUB_v10005154mg    | gbpln | Capsella rubella     | AT4G18060.1   Symbols:   SH3 domain-containing protein   chr4:10027668-10029662 REVERSE LENGTH=351                                                                                                                                                                                                                                                                                                                                                                                                                                                 | 351  | 351  | 0         | 100.0 | 94.0 | 98.0 |
| Rsa1.0_001119.1.g5794.t1 | ref[XP_002870073.1] P-glycoprotein 9 [Arabidopsis lyrata subsp. lyrata] gi 297315909 gb EFH46332.1] P-glycoprotein 9 [Arabidopsis lyrata subsp. lyrata]                                                                                               | 1186 | 1239 | 0         | 104.5 | 79.9 | 84.7 | P-glycoprotein 9                          | gbpln | Arabidopsis lyrata   | AT4G18050.1   Symbols: PGP9   P-glycoprotein 9   chr4:10022205-10027280 FORWARD LENGTH=1236                                                                                                                                                                                                                                                                                                                                                                                                                                                        | 1186 | 1236 | 0         | 104.2 | 80.2 | 84.1 |
| Rsa1.0_001119.1.g5795.t1 | ref[XP_002868014.1] hypothetical protein ARALYDRAFT_493066 [Arabidopsis lyrata subsp. lyrata] gi 297313850 gb EFH44273.1] hypothetical protein ARALYDRAFT_493066 [Arabidopsis lyrata subsp. lyrata]                                                   | 206  | 235  | 2.00E-98  | 114.1 | 84.0 | 89.8 | hypothetical protein ARALYDRAFT_493066    | gbpln | Arabidopsis lyrata   | AT4G18040.1   Symbols: EIF4E, CUM1, AT.EIF4E1, eIF4E1   eukaryotic translation initiation factor 4E   chr4:10016724-10018151 REVERSE LENGTH=235                                                                                                                                                                                                                                                                                                                                                                                                    | 206  | 235  | 9.00E-99  | 114.1 | 82.5 | 88.3 |

|                         |                                                                                                                                                                                                                                                                                                                                                                                                                                                                                                                                                                                                                                                                                                                                                                                                                                                                                                                                                                                                                                                                                                     |     |     |           |       |      |      |                                                   |                      |                                                                                                                                        |                                                                                                                                                                                                                                                                                                                                                 |     |     |           |       |      |      |
|-------------------------|-----------------------------------------------------------------------------------------------------------------------------------------------------------------------------------------------------------------------------------------------------------------------------------------------------------------------------------------------------------------------------------------------------------------------------------------------------------------------------------------------------------------------------------------------------------------------------------------------------------------------------------------------------------------------------------------------------------------------------------------------------------------------------------------------------------------------------------------------------------------------------------------------------------------------------------------------------------------------------------------------------------------------------------------------------------------------------------------------------|-----|-----|-----------|-------|------|------|---------------------------------------------------|----------------------|----------------------------------------------------------------------------------------------------------------------------------------|-------------------------------------------------------------------------------------------------------------------------------------------------------------------------------------------------------------------------------------------------------------------------------------------------------------------------------------------------|-----|-----|-----------|-------|------|------|
| Rsa1.0_00119.1.g5796.t1 | refNP_567548.1 two-component response regulator-like APRR2 [Arabidopsis thaliana] gi 30684266 refNP_849403.1 two-component response regulator-like APRR2 [Arabidopsis thaliana] gi 145361326 refNP_849404.2 two-component response regulator-like APRR2 [Arabidopsis thaliana] gi 334186660 refNP_001190759.1 two-component response regulator-like APRR2 [Arabidopsis thaliana] gi 52783226 sp Q6LA43.2 APRR2_ARAT H RecName: Full=Two-component response regulator-like APRR2; AltName: Full=Pseudo-response regulator 2; AltName: Full=TOC2 protein gi 14326543 gb AAK60316.1 AF385725.1 AT4g18020/T6K21_200 [Arabidopsis thaliana] gi 23506085 gb AAN28902.1 At4g18020/T6K21_200 [Arabidopsis thaliana] gi 332658580 gb AEE83980.1 two-component response regulator-like APRR2 [Arabidopsis thaliana] gi 332658581 gb AEE83981.1 two-component response regulator-like APRR2 [Arabidopsis thaliana] gi 332658582 gb AEE83982.1 two-component response regulator-like APRR2 [Arabidopsis thaliana] gi 332658585 gb AEE83985.1 two-component response regulator-like APRR2 [Arabidopsis thaliana] | 546 | 535 | 0         | 98.0  | 72.7 | 81.5 | two-component response regulator-like gbpln APRR2 | Arabidopsis thaliana | AT4G18020.6   Symbols: APRR2   CheY-like two-component responsive regulator family protein   chr4:10003738-10006682 REVERSE LENGTH=535 | 546                                                                                                                                                                                                                                                                                                                                             | 535 | 0   | 98.0      | 72.7  | 81.5 |      |
| Rsa1.0_00119.1.g5797.t1 | #                                                                                                                                                                                                                                                                                                                                                                                                                                                                                                                                                                                                                                                                                                                                                                                                                                                                                                                                                                                                                                                                                                   | #   | #   | #         | #     | #    | -    | ----                                              | ----                 | #                                                                                                                                      | #                                                                                                                                                                                                                                                                                                                                               | #   | #   | #         | #     |      |      |
| Rsa1.0_00120.1.g5798.t1 | #                                                                                                                                                                                                                                                                                                                                                                                                                                                                                                                                                                                                                                                                                                                                                                                                                                                                                                                                                                                                                                                                                                   | #   | #   | #         | #     | #    | -    | ----                                              | ----                 | #                                                                                                                                      | #                                                                                                                                                                                                                                                                                                                                               | #   | #   | #         | #     |      |      |
| Rsa1.0_00120.1.g5799.t1 | #                                                                                                                                                                                                                                                                                                                                                                                                                                                                                                                                                                                                                                                                                                                                                                                                                                                                                                                                                                                                                                                                                                   | #   | #   | #         | #     | #    | -    | ----                                              | ----                 | #                                                                                                                                      | #                                                                                                                                                                                                                                                                                                                                               | #   | #   | #         | #     |      |      |
| Rsa1.0_00120.1.g5800.t1 | refNP_193987.1 uncharacterized protein [Arabidopsis thaliana] gi 3892711 emb CAA22161.1  putative protein [Arabidopsis thaliana] gi 7289102 emb CAE79211.1  putative protein [Arabidopsis thaliana] gi 332659224 gb AEE84624.1 uncharacterized protein AT4G22560 [Arabidopsis thaliana]                                                                                                                                                                                                                                                                                                                                                                                                                                                                                                                                                                                                                                                                                                                                                                                                             | 257 | 264 | 1.00E-110 | 102.7 | 82.1 | 89.1 | uncharacterized protein                           | gbpln                | Arabidopsis thaliana                                                                                                                   | AT4G22560.1   Symbols:   unknown protein; BEST Arabidopsis thaliana protein match is: unknown protein (TAIR:AT4G12450.1); Has 380 Blast hits to 380 proteins in 21 species: Archae - 0; Bacteria - 0; Metazoa - 0; Fungi - 6; Plants - 374; Viruses - 0; Other Eukaryotes - 0 (source: NCBI BLINK).   chr4:11880178-11880972 FORWARD LENGTH=264 | 257 | 264 | 1.00E-113 | 102.7 | 82.1 | 89.1 |
| Rsa1.0_00120.1.g5801.t1 | #                                                                                                                                                                                                                                                                                                                                                                                                                                                                                                                                                                                                                                                                                                                                                                                                                                                                                                                                                                                                                                                                                                   | #   | #   | #         | #     | #    | -    | ----                                              | ----                 | #                                                                                                                                      | #                                                                                                                                                                                                                                                                                                                                               | #   | #   | #         | #     |      |      |
| Rsa1.0_00120.1.g5802.t1 | #                                                                                                                                                                                                                                                                                                                                                                                                                                                                                                                                                                                                                                                                                                                                                                                                                                                                                                                                                                                                                                                                                                   | #   | #   | #         | #     | #    | -    | ----                                              | ----                 | #                                                                                                                                      | #                                                                                                                                                                                                                                                                                                                                               | #   | #   | #         | #     |      |      |
| Rsa1.0_00120.1.g5803.t2 | refNP_196896.1 endonuclease VIII-like 3 [Arabidopsis thaliana] gi 10177658 dbj BAB11120.1  unnamed protein product [Arabidopsis thaliana] gi 332004577 gb AED91960.1  GRF zinc finger / zinc knuckle protein [Arabidopsis thaliana]                                                                                                                                                                                                                                                                                                                                                                                                                                                                                                                                                                                                                                                                                                                                                                                                                                                                 | 169 | 415 | 5.00E-23  | 245.6 | 32.5 | 35.5 | endonuclease VIII-like 3                          | gbpln                | Arabidopsis thaliana                                                                                                                   | AT5G13920.1   Symbols:   GRF zinc finger / Zinc knuckle protein   chr5:4485931-4487433 REVERSE LENGTH=415                                                                                                                                                                                                                                       | 169 | 415 | 2.00E-25  | 245.6 | 32.5 | 35.5 |
| Rsa1.0_00120.1.g5804.t1 | refNP_567662.1 OSBP(oysterol binding protein)-related protein 2A [Arabidopsis thaliana] gi 75163969 sp Q940Y1.1 ORP2A_ARAT H RecName: Full=Oxysterol-binding protein-related protein 2A; AltName: Full=OSBP-related protein 2A gi 15450519 gb AAK96552.1  AT4g22540/F7K2_120 [Arabidopsis thaliana] gi 24111447 gb AAN46892.1  AT4g22540/F7K2_120 [Arabidopsis thaliana] gi 332659220 gb AEE84620.1  OSBP(oysterol binding protein)-related protein 2A [Arabidopsis thaliana]                                                                                                                                                                                                                                                                                                                                                                                                                                                                                                                                                                                                                       | 731 | 721 | 0         | 98.6  | 89.7 | 94.5 | OSBP(oysterol binding protein)-related protein 2A | gbpln                | Arabidopsis thaliana                                                                                                                   | AT4G22540.1   Symbols: ORP2A   OSBP(oysterol binding protein)-related protein 2A   chr4:11860969-11866108 REVERSE LENGTH=721                                                                                                                                                                                                                    | 731 | 721 | 0         | 98.6  | 89.7 | 94.5 |
| Rsa1.0_00120.1.g5805.t1 | #                                                                                                                                                                                                                                                                                                                                                                                                                                                                                                                                                                                                                                                                                                                                                                                                                                                                                                                                                                                                                                                                                                   | #   | #   | #         | #     | #    | -    | ----                                              | ----                 | #                                                                                                                                      | #                                                                                                                                                                                                                                                                                                                                               | #   | #   | #         | #     |      |      |
| Rsa1.0_00120.1.g5806.t1 | #                                                                                                                                                                                                                                                                                                                                                                                                                                                                                                                                                                                                                                                                                                                                                                                                                                                                                                                                                                                                                                                                                                   | #   | #   | #         | #     | #    | -    | ----                                              | ----                 | #                                                                                                                                      | #                                                                                                                                                                                                                                                                                                                                               | #   | #   | #         | #     |      |      |
| Rsa1.0_00120.1.g5807.t1 | #                                                                                                                                                                                                                                                                                                                                                                                                                                                                                                                                                                                                                                                                                                                                                                                                                                                                                                                                                                                                                                                                                                   | #   | #   | #         | #     | #    | -    | ----                                              | ----                 | #                                                                                                                                      | #                                                                                                                                                                                                                                                                                                                                               | #   | #   | #         | #     |      |      |
| Rsa1.0_00120.1.g5808.t1 | refXP_002867770.1 hypothetical protein ARALYDRAFT_329378 [Arabidopsis lyrata subsp. lyrata] gi 297313606 gb EFH44029.1  hypothetical protein ARALYDRAFT_329378 [Arabidopsis lyrata subsp. lyrata]                                                                                                                                                                                                                                                                                                                                                                                                                                                                                                                                                                                                                                                                                                                                                                                                                                                                                                   | 433 | 406 | 0         | 93.8  | 80.8 | 88.2 | hypothetical protein ARALYDRAFT_329378            | gbpln                | Arabidopsis lyrata                                                                                                                     | AT4G12560.2   Symbols: CPR30   F-box and associated interaction domains-containing protein   chr4:7441815-7443157 FORWARD LENGTH=413                                                                                                                                                                                                            | 433 | 413 | 1.00E-172 | 95.4  | 68.6 | 80.4 |

|                         |                                                                                                                                                                                                                                                                                                                              |      |      |           |       |      |      |                                                |       |                      |                                                                                                                                                                                                                                                                                                                            |      |      |           |      |      |      |
|-------------------------|------------------------------------------------------------------------------------------------------------------------------------------------------------------------------------------------------------------------------------------------------------------------------------------------------------------------------|------|------|-----------|-------|------|------|------------------------------------------------|-------|----------------------|----------------------------------------------------------------------------------------------------------------------------------------------------------------------------------------------------------------------------------------------------------------------------------------------------------------------------|------|------|-----------|------|------|------|
| Rsa1.0_00120.1.g5809.t1 | ref[XP_002891749.1] hypothetical protein ARALYDRAFT_337498 [Arabidopsis lyrata subsp. lyrata] gi 297337591 gb EFH68008.1                                                                                                                                                                                                     | 386  | 495  | 3.00E-76  | 128.2 | 46.6 | 60.6 | hypothetical protein ARALYDRAFT_337498         | gbpln | Arabidopsis lyrata   | AT1G53360.1   Symbols:   F-box associated ubiquitination effector family protein   chr1:19907517-19908548 FORWARD LENGTH=343                                                                                                                                                                                               | 386  | 343  | 6.00E-76  | 88.9 | 45.9 | 55.4 |
| Rsa1.0_00120.1.g5810.t1 | sp Q3ECR3.3 FB305_ARATH RecName: Full=Putative F-box protein At1g53360                                                                                                                                                                                                                                                       | 399  | 384  | 8.00E-76  | 96.2  | 46.1 | 56.9 | RecName: Full=Putative F-box protein At1g53360 | ----  | ----                 | AT1G53360.1   Symbols:   F-box associated ubiquitination effector family protein   chr1:19907517-19908548 FORWARD LENGTH=343                                                                                                                                                                                               | 399  | 343  | 3.00E-76  | 86.0 | 44.6 | 54.6 |
| Rsa1.0_00120.1.g5811.t1 | ref[XP_002869826.1] hypothetical protein ARALYDRAFT_914375 [Arabidopsis lyrata subsp. lyrata] gi 297315682 gb EFH46085.1                                                                                                                                                                                                     | 247  | 246  | 1.00E-135 | 99.6  | 96.4 | 98.4 | hypothetical protein ARALYDRAFT_914375         | gbpln | Arabidopsis lyrata   | AT4G12590.1   Symbols:   Protein of unknown function DUF106, transmembrane   chr4:7451291-7452976 REVERSE LENGTH=246                                                                                                                                                                                                       | 247  | 246  | 1.00E-136 | 99.6 | 95.1 | 97.6 |
| Rsa1.0_00120.1.g5812.t1 | gb EOA16792.1  hypothetical protein CARUB_v10005012mg [Capsella rubella]                                                                                                                                                                                                                                                     | 636  | 388  | 1.00E-136 | 61.0  | 43.4 | 46.9 | hypothetical protein CARUB_v10005012mg         | gbpln | Capsella rubella     | AT4G22360.1   Symbols:   SWB complex BAF90b domain-containing protein   chr4:11807811-11809660 FORWARD LENGTH=385                                                                                                                                                                                                          | 636  | 385  | 1.00E-137 | 60.5 | 44.0 | 47.6 |
| Rsa1.0_00120.1.g5813.t1 | sp Q3ECR3.3 FB305_ARATH RecName: Full=Putative F-box protein At1g53360                                                                                                                                                                                                                                                       | 411  | 384  | 4.00E-88  | 93.4  | 47.2 | 59.9 | RecName: Full=Putative F-box protein At1g53360 | ----  | ----                 | AT1G53360.1   Symbols:   F-box associated ubiquitination effector family protein   chr1:19907517-19908548 FORWARD LENGTH=343                                                                                                                                                                                               | 411  | 343  | 7.00E-89  | 83.5 | 46.5 | 58.9 |
| Rsa1.0_00120.1.g5814.t1 | #                                                                                                                                                                                                                                                                                                                            | #    | #    | #         | #     | #    | #    | -                                              | ----  | ----                 | #                                                                                                                                                                                                                                                                                                                          | #    | #    | #         | #    | #    | #    |
| Rsa1.0_00120.1.g5815.t1 | gb EOA26092.1  hypothetical protein CARUB_v10019514mg [Capsella rubella]                                                                                                                                                                                                                                                     | 412  | 421  | 1.00E-136 | 102.2 | 61.7 | 72.3 | hypothetical protein CARUB_v10019514mg         | gbpln | Capsella rubella     | AT5G35600.1   Symbols: HDA7   histone deacetylase7   chr5:13770121-13771712 REVERSE LENGTH=409                                                                                                                                                                                                                             | 412  | 409  | 1.00E-137 | 99.3 | 61.2 | 72.1 |
| Rsa1.0_00120.1.g5816.t1 | gb AAG51247.1 AC055769.6 copia-type polyprotein, putative; 28768-32772 [Arabidopsis thaliana]                                                                                                                                                                                                                                | 1356 | 1334 | 0         | 98.4  | 68.7 | 81.6 | copia-type polyprotein, putative; 28768-32772  | gbpln | Arabidopsis thaliana | AT4G23160.1   Symbols: CRK8   cysteine-rich RLK (RECEPTOR-like protein kinase) 8   chr4:12129485-12134086 FORWARD LENGTH=1262                                                                                                                                                                                              | 1356 | 1262 | 3.00E-97  | 93.1 | 13.1 | 21.4 |
| Rsa1.0_00120.1.g5817.t2 | ref[XP_002891749.1] hypothetical protein ARALYDRAFT_337498 [Arabidopsis lyrata subsp. lyrata] gi 297337591 gb EFH68008.1                                                                                                                                                                                                     | 789  | 495  | 9.00E-77  | 62.7  | 23.3 | 31.1 | hypothetical protein ARALYDRAFT_337498         | gbpln | Arabidopsis lyrata   | AT1G53360.1   Symbols:   F-box associated ubiquitination effector family protein   chr1:19907517-19908548 FORWARD LENGTH=343                                                                                                                                                                                               | 789  | 343  | 1.00E-76  | 43.5 | 22.6 | 29.3 |
| Rsa1.0_00120.1.g5818.t1 | gb EOA21412.1  hypothetical protein CARUB_v10001785mg [Capsella rubella]                                                                                                                                                                                                                                                     | 255  | 254  | 1.00E-122 | 99.6  | 85.5 | 91.8 | hypothetical protein CARUB_v10001785mg         | gbpln | Capsella rubella     | AT4G05530.1   Symbols: IBR1, SDRA   indole-3-butyrlic acid response 1   chr4:2816462-2818074 FORWARD LENGTH=254                                                                                                                                                                                                            | 255  | 254  | 1.00E-124 | 99.6 | 85.1 | 91.0 |
| Rsa1.0_00120.1.g5819.t1 | ref NP_193953.1  SufE/NifU family protein [Arabidopsis thaliana] gi 75098819 sp O49627.1 ISU1_ARATH RecName: Full=Iron-sulfur cluster assembly protein 1; Short=AtISU1; Short=Protein ISQU-LIKE 1; AltName: Full=NifU-like N-terminal domain-containing protein ISU1; AltName: Full=NifU-like protein ISU1; Flags: Precursor | 170  | 167  | 1.00E-88  | 98.2  | 93.5 | 96.5 | SufE/NifU family protein                       | gbpln | Arabidopsis thaliana | AT4G22220.1   Symbols: ISU1, ATISU1   SufE/NifU family protein   chr4:11759444-11760881 REVERSE LENGTH=167                                                                                                                                                                                                                 | 170  | 167  | 5.00E-91  | 98.2 | 93.5 | 96.5 |
| Rsa1.0_00120.1.g5820.t1 | gi 13605507 gb AAK32747.1 AF361579.1 AT4g22220/T10114.50 [Arabidopsis thaliana] gi 2832672 emb CAA16772.1  nifU-like protein [Arabidopsis thaliana] gi 7269067 emb CAB79177.1  nifU-like protein [Arabidopsis thaliana] gi 19548021 gb AAL87374.1                                                                            | 170  | 167  | 1.00E-88  | 98.2  | 93.5 | 96.5 | SufE/NifU family protein                       | gbpln | Arabidopsis thaliana | AT4G22220.1   Symbols: ISU1, ATISU1   SufE/NifU family protein   chr4:11759444-11760881 REVERSE LENGTH=167                                                                                                                                                                                                                 | 170  | 167  | 5.00E-91  | 98.2 | 93.5 | 96.5 |
| Rsa1.0_00120.1.g5821.t1 | gi 82937831 emb CAI29442.1  Fe-S scaffold protein 1 [Arabidopsis thaliana] gi 332659176 gb AEE84576.1  SufE/NifU family protein [Arabidopsis thaliana]                                                                                                                                                                       | 170  | 167  | 1.00E-88  | 98.2  | 93.5 | 96.5 | SufE/NifU family protein                       | gbpln | Arabidopsis thaliana | AT4G22220.1   Symbols: ISU1, ATISU1   SufE/NifU family protein   chr4:11759444-11760881 REVERSE LENGTH=167                                                                                                                                                                                                                 | 170  | 167  | 5.00E-91  | 98.2 | 93.5 | 96.5 |
| Rsa1.0_00120.1.g5822.t1 | emb CAB10225.1  retrovirus-related like polyprotein [Arabidopsis thaliana] gi 7268152 emb CAB78488.1  retrovirus-related like polyprotein [Arabidopsis thaliana]                                                                                                                                                             | 389  | 1489 | 1.00E-138 | 382.8 | 62.2 | 74.0 | retrovirus-related like polyprotein            | gbpln | Arabidopsis thaliana | AT1G21280.1   Symbols:   CONTAINS InterPro DOMAIN/s: Retrotransposon gag protein (InterPro:IPR005162); Has 707 Blast hits to 705 proteins in 25 species: Archae - 0; Bacteria - 0; Metazoa - 4; Fungi - 0; Plants - 703; Viruses - 0; Other Eukaryotes - 0 (source: NCBI BLink).   chr1:7447690-7448403 REVERSE LENGTH=237 | 389  | 237  | 3.00E-34  | 60.9 | 18.3 | 30.3 |
| Rsa1.0_00120.1.g5821.t1 | gb ACG60672.1  unknown protein [Brassica oleracea var. aboglabra]                                                                                                                                                                                                                                                            | 98   | 288  | 3.00E-12  | 293.9 | 38.8 | 64.3 | unknown protein                                | gbpln | Brassica oleracea    | #                                                                                                                                                                                                                                                                                                                          | #    | #    | #         | #    | #    | #    |

|                         |                                                                                                                                                                                                                                                                                                                                                                                                                                                                                                                                                                                                                                                                                                                                                                                                                                                                                                                                                                               |     |      |          |       |      |      |                                           |       |                      |                                                                                                                                         |     |     |          |       |      |      |
|-------------------------|-------------------------------------------------------------------------------------------------------------------------------------------------------------------------------------------------------------------------------------------------------------------------------------------------------------------------------------------------------------------------------------------------------------------------------------------------------------------------------------------------------------------------------------------------------------------------------------------------------------------------------------------------------------------------------------------------------------------------------------------------------------------------------------------------------------------------------------------------------------------------------------------------------------------------------------------------------------------------------|-----|------|----------|-------|------|------|-------------------------------------------|-------|----------------------|-----------------------------------------------------------------------------------------------------------------------------------------|-----|-----|----------|-------|------|------|
| Rsa1.0_00120.1.g5823.t1 | dbj BAJ34508.1  unnamed protein product [Thellungiella halophila]                                                                                                                                                                                                                                                                                                                                                                                                                                                                                                                                                                                                                                                                                                                                                                                                                                                                                                             | 502 | 502  | 0        | 100.0 | 92.6 | 97.2 | unnamed protein product                   | ----  | ----                 | AT4G21910.3   Symbols:   MATE efflux family protein   chr4:11625821-11630964 REVERSE LENGTH=507                                         | 502 | 507 | 0        | 101.0 | 87.8 | 94.0 |
| Rsa1.0_00120.1.g5824.t1 | ref XP_002867816.1  hypothetical protein ARALYDRAFT_354584 [Arabidopsis lyrata subsp. lyrata] gi 297313652 gb EFH44078.1  hypothetical protein ARALYDRAFT_354584 [Arabidopsis lyrata subsp. lyrata] ref XP_002867819.1  hypothetical protein ARALYDRAFT_492684 [Arabidopsis lyrata subsp. lyrata] gi 297313655 gb EFH44078.1  hypothetical protein ARALYDRAFT_492684 [Arabidopsis lyrata subsp. lyrata]                                                                                                                                                                                                                                                                                                                                                                                                                                                                                                                                                                       | 272 | 388  | 3.00E-60 | 142.6 | 53.7 | 66.2 | hypothetical protein ARALYDRAFT_354584    | gbpln | Arabidopsis lyrata   | AT4G21895.1   Symbols:   DNA binding   chr4:11613523-11614242 REVERSE LENGTH=239                                                        | 272 | 239 | 3.00E-52 | 87.9  | 46.0 | 58.8 |
| Rsa1.0_00120.1.g5825.t1 | ref NP_189011.2  transcription factor bHLH77 [Arabidopsis thaliana] gi 75311240 sp Q9LK48.1 BH077_ARAT H RecName: Full=Transcription factor bHLH77; AltName: Full=Basic helix-loop-helix protein 77; Short=AtbHLH77; Short=bHLH 77; AltName: Full=Transcription factor EN 87; AltName: Full=bHLH transcription factor bHLH077 gi 9293943 dbj BAB01846.1  unnamed protein product [Arabidopsis thaliana] gi 17529310 gb AAL38882.1  putative DNA-binding protein [Arabidopsis thaliana] gi 20465453 gb AAM20186.1  putative DNA-binding protein [Arabidopsis thaliana] gi 332643281 gb AEE76802.1  transcription factor bHLH77 [Arabidopsis thaliana]                                                                                                                                                                                                                                                                                                                          | 136 | 131  | 9.00E-49 | 96.3  | 74.3 | 82.4 | hypothetical protein ARALYDRAFT_492684    | gbpln | Arabidopsis lyrata   | AT4G21870.1   Symbols:   HSP20-like chaperones superfamily protein   chr4:11603756-11604285 REVERSE LENGTH=134                          | 136 | 134 | 1.00E-49 | 98.5  | 72.8 | 83.1 |
| Rsa1.0_00120.1.g5826.t1 | #                                                                                                                                                                                                                                                                                                                                                                                                                                                                                                                                                                                                                                                                                                                                                                                                                                                                                                                                                                             | #   | #    | #        | #     | #    | #    | -                                         | ----  | ----                 | #                                                                                                                                       | #   | #   | #        | #     | #    |      |
| Rsa1.0_00120.1.g5827.t1 | ref NP_189011.2  transcription factor bHLH77 [Arabidopsis thaliana] gi 75311240 sp Q9LK48.1 BH077_ARAT H RecName: Full=Transcription factor bHLH77; AltName: Full=Basic helix-loop-helix protein 77; Short=AtbHLH77; Short=bHLH 77; AltName: Full=Transcription factor EN 87; AltName: Full=bHLH transcription factor bHLH077 gi 9293943 dbj BAB01846.1  unnamed protein product [Arabidopsis thaliana] gi 17529310 gb AAL38882.1  putative DNA-binding protein [Arabidopsis thaliana] gi 20465453 gb AAM20186.1  putative DNA-binding protein [Arabidopsis thaliana] gi 332643281 gb AEE76802.1  transcription factor bHLH77 [Arabidopsis thaliana]                                                                                                                                                                                                                                                                                                                          | 82  | 371  | 1.00E-12 | 452.4 | 52.4 | 58.5 | transcription factor bHLH77               | gbpln | Arabidopsis thaliana | AT3G23690.1   Symbols:   basic helix-loop-helix (bHLH) DNA-binding superfamily protein   chr3:8528933-8530655 REVERSE LENGTH=371        | 82  | 371 | 2.00E-15 | 452.4 | 52.4 | 58.5 |
| Rsa1.0_00120.1.g5828.t1 | gb ACP30591.1  disease resistance protein [Brassica rapa subsp. pekinensis]                                                                                                                                                                                                                                                                                                                                                                                                                                                                                                                                                                                                                                                                                                                                                                                                                                                                                                   | 158 | 1555 | 2.00E-19 | 984.2 | 31.6 | 49.4 | disease resistance protein                | gbpln | Brassica rapa        | AT4G09490.1   Symbols:   Polynucleotidyl transferase, ribonuclease H-like superfamily protein   chr4:6015583-6016575 REVERSE LENGTH=170 | 158 | 170 | 5.00E-19 | 107.6 | 30.4 | 46.8 |
| Rsa1.0_00120.1.g5829.t1 | #                                                                                                                                                                                                                                                                                                                                                                                                                                                                                                                                                                                                                                                                                                                                                                                                                                                                                                                                                                             | #   | #    | #        | #     | #    | #    | -                                         | ----  | ----                 | #                                                                                                                                       | #   | #   | #        | #     | #    |      |
| Rsa1.0_00120.1.g5830.t1 | #                                                                                                                                                                                                                                                                                                                                                                                                                                                                                                                                                                                                                                                                                                                                                                                                                                                                                                                                                                             | #   | #    | #        | #     | #    | #    | -                                         | ----  | ----                 | #                                                                                                                                       | #   | #   | #        | #     | #    |      |
| Rsa1.0_00120.1.g5831.t1 | #                                                                                                                                                                                                                                                                                                                                                                                                                                                                                                                                                                                                                                                                                                                                                                                                                                                                                                                                                                             | #   | #    | #        | #     | #    | #    | -                                         | ----  | ----                 | #                                                                                                                                       | #   | #   | #        | #     | #    |      |
| Rsa1.0_00120.1.g5832.t1 | ref NP_567638.1  peptide methionine sulfoxide reductase B9 [Arabidopsis thaliana] gi 75146721 sp Q84JT6.1 MSRB9_ARAT H RecName: Full=Peptide methionine sulfoxide reductase B9; Short=AtMSRB9; AltName: Full=Peptide-methionine (R)-S-oxide reductase gi 28393654 gb AAO42245.1  unknown protein [Arabidopsis thaliana] gi 28973573 gb AAO64111.1  unknown protein [Arabidopsis thaliana] gi 332659112 gb AEE84512.1  peptide methionine sulfoxide reductase B9 [Arabidopsis thaliana] ref NP_567638.1  peptide methionine sulfoxide reductase B9 [Arabidopsis thaliana] gi 75146721 sp Q84JT6.1 MSRB9_ARAT H RecName: Full=Peptide methionine sulfoxide reductase B9; Short=AtMSRB9; AltName: Full=Peptide-methionine (R)-S-oxide reductase gi 28393654 gb AAO42245.1  unknown protein [Arabidopsis thaliana] gi 28973573 gb AAO64111.1  unknown protein [Arabidopsis thaliana] gi 332659112 gb AEE84512.1  peptide methionine sulfoxide reductase B9 [Arabidopsis thaliana] | 144 | 143  | 1.00E-61 | 99.3  | 80.6 | 86.1 | peptide methionine sulfoxide reductase B9 | gbpln | Arabidopsis thaliana | AT4G21850.1   Symbols:   ATMSRB9, MSRB9   methionine sulfoxide reductase B9   chr4:11591378-11592138 REVERSE LENGTH=143                 | 144 | 143 | 3.00E-64 | 99.3  | 80.6 | 86.1 |
| Rsa1.0_00120.1.g5833.t1 | ref NP_567638.1  peptide methionine sulfoxide reductase B9 [Arabidopsis thaliana] gi 75146721 sp Q84JT6.1 MSRB9_ARAT H RecName: Full=Peptide methionine sulfoxide reductase B9; Short=AtMSRB9; AltName: Full=Peptide-methionine (R)-S-oxide reductase gi 28393654 gb AAO42245.1  unknown protein [Arabidopsis thaliana] gi 28973573 gb AAO64111.1  unknown protein [Arabidopsis thaliana] gi 332659112 gb AEE84512.1  peptide methionine sulfoxide reductase B9 [Arabidopsis thaliana]                                                                                                                                                                                                                                                                                                                                                                                                                                                                                        | 144 | 143  | 6.00E-62 | 99.3  | 81.3 | 86.1 | peptide methionine sulfoxide reductase B9 | gbpln | Arabidopsis thaliana | AT4G21850.1   Symbols:   ATMSRB9, MSRB9   methionine sulfoxide reductase B9   chr4:11591378-11592138 REVERSE LENGTH=143                 | 144 | 143 | 2.00E-64 | 99.3  | 81.3 | 86.1 |



|                          | sp P10978.1 POLX_TOBAC                                                                                                                                                                                                                                                                                                                                                                                                                                                                                                                                                                                                                                           | RecName: Full=Retrovirus-related Pol polyprotein from transposon TNT 1-94; Includes: RecName: Full=Protease; Includes: RecName: Full=Reverse transcriptase; Includes: RecName: Full=Endonuclease gi 20045 emb CAA32025.1  unnamed protein product [Nicotiana tabacum] | 467 | 1328 | 8.00E-33 | 284.4 | 20.1 | 29.1 | RecName: Full=Retrovirus-related Pol polyprotein from transposon TNT 1-94; Includes: RecName: Full=Protease; Includes: RecName: Full=Reverse transcriptase; Includes: RecName: Full=Endonuclease gi 20045 emb CAA32025.1  unnamed protein product | gbpln | Nicotiana tabacum    | #                                                                                                                                                                                                                                                                                | #   | #   | #        | #     | #    |      |
|--------------------------|------------------------------------------------------------------------------------------------------------------------------------------------------------------------------------------------------------------------------------------------------------------------------------------------------------------------------------------------------------------------------------------------------------------------------------------------------------------------------------------------------------------------------------------------------------------------------------------------------------------------------------------------------------------|-----------------------------------------------------------------------------------------------------------------------------------------------------------------------------------------------------------------------------------------------------------------------|-----|------|----------|-------|------|------|---------------------------------------------------------------------------------------------------------------------------------------------------------------------------------------------------------------------------------------------------|-------|----------------------|----------------------------------------------------------------------------------------------------------------------------------------------------------------------------------------------------------------------------------------------------------------------------------|-----|-----|----------|-------|------|------|
| Rsa1.0_00120.1.g5834.t17 |                                                                                                                                                                                                                                                                                                                                                                                                                                                                                                                                                                                                                                                                  |                                                                                                                                                                                                                                                                       |     |      |          |       |      |      |                                                                                                                                                                                                                                                   |       |                      |                                                                                                                                                                                                                                                                                  |     |     |          |       |      |      |
| Rsa1.0_00120.1.g5835.t1  | gb AAG51783.1 AC079679.3 reverse transcriptase, putative; 16838-20266 [Arabidopsis thaliana]                                                                                                                                                                                                                                                                                                                                                                                                                                                                                                                                                                     |                                                                                                                                                                                                                                                                       | 189 | 1142 | 3.00E-22 | 604.2 | 34.4 | 54.0 | reverse transcriptase, putative; 16838-20266                                                                                                                                                                                                      | gbpln | Arabidopsis thaliana | AT2G34320.1   Symbols:   Polynucleotidyl transferase, ribonuclease H-like superfamily protein   chr2:14484959-14485837 FORWARD LENGTH=292                                                                                                                                        | 189 | 292 | 2.00E-15 | 154.5 | 21.2 | 36.0 |
| Rsa1.0_00121.1.g5836.t1  | ref NP_001031725.1  RNA recognition motif-containing protein [Arabidopsis thaliana] gi 332659833 gb AEE85233.1  RNA recognition motif-containing protein [Arabidopsis thaliana]                                                                                                                                                                                                                                                                                                                                                                                                                                                                                  |                                                                                                                                                                                                                                                                       | 430 | 452  | 0        | 105.1 | 87.0 | 92.3 | RNA recognition motif-containing protein                                                                                                                                                                                                          | gbpln | Arabidopsis thaliana | AT4G26650.2   Symbols:   RNA-binding (RRM/RBD/RNP motifs) family protein   chr4:13445265-13447592 FORWARD LENGTH=452                                                                                                                                                             | 430 | 452 | 0        | 105.1 | 87.0 | 92.3 |
| Rsa1.0_00121.1.g5837.t1  | ref NP_567754.1  Tim17/Tim22/Tim23 pre-protein translocase of the mitochondrial outer membrane domain-containing protein [Arabidopsis thaliana] gi 75165412 sp Q94EH2.1 T1222_ARATH RecName: Full=Mitochondrial import inner membrane translocase subunit TIM22-2 gi 15294264 gb AAK95309.1 AF410323.1 AT4g26670/F10M23.10 [Arabidopsis thaliana] gi 20857097 gb AAM26699.1  AT4g26670/F10M23.10 [Arabidopsis thaliana] gi 21593873 gb AAM65840.1  unknown [Arabidopsis thaliana] gi 89213239 gb ABD64059.1  At4g26670 [Arabidopsis thaliana] gi 332659835 gb AEE85235.1  mitochondrial import inner membrane translocase subunit TIM22-2 [Arabidopsis thaliana] |                                                                                                                                                                                                                                                                       | 188 | 210  | 3.00E-82 | 111.7 | 82.4 | 86.7 | Tim17/Tim22/Tim23 pre-protein translocase of the mitochondrial outer membrane domain-containing protein                                                                                                                                           | gbpln | Arabidopsis thaliana | AT4G26670.1   Symbols:   Mitochondrial import inner membrane translocase subunit Tim17/Tim22/Tim23 family protein   chr4:13452257-13453579 FORWARD LENGTH=210                                                                                                                    | 188 | 210 | 1.00E-84 | 111.7 | 82.4 | 86.7 |
| Rsa1.0_00121.1.g5838.t1  | ref XP_002867547.1  hypothetical protein ARALYDRAFT_913883 [Arabidopsis lyrata subsp. lyrata] gi 297313383 gb EFH43806.1  hypothetical protein ARALYDRAFT_913883 [Arabidopsis lyrata subsp. lyrata] ref XP_002869597.1  pentatricopeptide repeat-containing protein [Arabidopsis lyrata subsp. lyrata] gi 297315433 gb EFH45856.1  pentatricopeptide repeat-containing protein [Arabidopsis lyrata subsp. lyrata]                                                                                                                                                                                                                                                |                                                                                                                                                                                                                                                                       | 61  | 61   | 1.00E-26 | 100.0 | 95.1 | 98.4 | hypothetical protein ARALYDRAFT_913883                                                                                                                                                                                                            | gbpln | Arabidopsis lyrata   | AT3G11591.1   Symbols:   unknown protein; Has 30201 Blast hits to 17322 proteins in 780 species: Archae - 12; Bacteria - 1396; Metazoa - 17338; Fungi - 3422; Plants - 5037; Viruses - 0; Other Eukaryotes - 2996 (source: NCBI BLINK).   chr3:3663780-3663971 REVERSE LENGTH=63 | 61  | 63  | 1.00E-13 | 103.3 | 50.8 | 68.9 |
| Rsa1.0_00121.1.g5839.t1  | ref XP_002867546.1  MRH5/SHV3 [Arabidopsis lyrata subsp. lyrata] gi 297313382 gb EFH43805.1  MRH5/SHV3 [Arabidopsis lyrata subsp. lyrata] ref XP_002869596.1  hypothetical protein ARALYDRAFT_913880 [Arabidopsis lyrata subsp. lyrata] gi 297315432 gb EFH45855.1  hypothetical protein ARALYDRAFT_913880 [Arabidopsis lyrata subsp. lyrata]                                                                                                                                                                                                                                                                                                                    |                                                                                                                                                                                                                                                                       | 527 | 538  | 0        | 102.1 | 80.6 | 88.4 | pentatricopeptide repeat-containing protein                                                                                                                                                                                                       | gbpln | Arabidopsis lyrata   | AT4G26680.2   Symbols:   Tetratricopeptide repeat (TPR)-like superfamily protein   chr4:13454853-13456418 FORWARD LENGTH=521                                                                                                                                                     | 527 | 521 | 0        | 98.9  | 79.5 | 88.6 |
| Rsa1.0_00121.1.g5840.t1  | ref XP_002867546.1  MRH5/SHV3 [Arabidopsis lyrata subsp. lyrata] gi 297313382 gb EFH43805.1  MRH5/SHV3 [Arabidopsis lyrata subsp. lyrata] ref XP_002869596.1  hypothetical protein ARALYDRAFT_913880 [Arabidopsis lyrata subsp. lyrata] gi 297315432 gb EFH45855.1  hypothetical protein ARALYDRAFT_913880 [Arabidopsis lyrata subsp. lyrata]                                                                                                                                                                                                                                                                                                                    |                                                                                                                                                                                                                                                                       | 757 | 756  | 0        | 99.9  | 81.2 | 90.1 | MRH5/SHV3                                                                                                                                                                                                                                         | gbpln | Arabidopsis lyrata   | AT4G26690.1   Symbols: SHV3, MRH5, GPDL2   PLC-like phosphodiesterase family protein   chr4:13456793-13459890 REVERSE LENGTH=759                                                                                                                                                 | 757 | 759 | 0        | 100.3 | 80.2 | 90.0 |
| Rsa1.0_00121.1.g5841.t1  | ref XP_002869596.1  hypothetical protein ARALYDRAFT_913880 [Arabidopsis lyrata subsp. lyrata] gi 297315432 gb EFH45855.1  hypothetical protein ARALYDRAFT_913880 [Arabidopsis lyrata subsp. lyrata] ref XP_002869595.1  hypothetical protein ARALYDRAFT_329014 [Arabidopsis lyrata subsp. lyrata] gi 297315431 gb EFH45854.1  hypothetical protein ARALYDRAFT_329014 [Arabidopsis lyrata subsp. lyrata]                                                                                                                                                                                                                                                          |                                                                                                                                                                                                                                                                       | 685 | 690  | 0        | 100.7 | 90.1 | 94.2 | hypothetical protein ARALYDRAFT_913880                                                                                                                                                                                                            | gbpln | Arabidopsis lyrata   | AT4G26700.2   Symbols: ATFIM1, FIM1   fibrin   chr4:13463760-13467426 FORWARD LENGTH=887                                                                                                                                                                                         | 685 | 687 | 0        | 100.3 | 88.9 | 93.6 |
| Rsa1.0_00121.1.g5842.t1  | ref XP_002869595.1  hypothetical protein ARALYDRAFT_329014 [Arabidopsis lyrata subsp. lyrata] gi 297315431 gb EFH45854.1  hypothetical protein ARALYDRAFT_329014 [Arabidopsis lyrata subsp. lyrata]                                                                                                                                                                                                                                                                                                                                                                                                                                                              |                                                                                                                                                                                                                                                                       | 748 | 785  | 0        | 104.9 | 74.3 | 83.0 | hypothetical protein ARALYDRAFT_329014                                                                                                                                                                                                            | gbpln | Arabidopsis lyrata   | AT5G55300.1   Symbols: MGO1, TOP1ALPHA, TOP1   DNA topoisomerase I alpha   chr5:22424837-22429045 REVERSE LENGTH=916                                                                                                                                                             | 748 | 916 | 0        | 122.5 | 68.3 | 78.7 |

|                         |                                                                                                                                                                                                                                                                                                                                                                                                                                                                                                                                                                                                                                                                                                                                                                                                                                                                                                                                                                                                                                                  |     |     |           |       |      |      |                                                                     |       |                      |                                                                                                                                   |     |     |           |       |      |      |
|-------------------------|--------------------------------------------------------------------------------------------------------------------------------------------------------------------------------------------------------------------------------------------------------------------------------------------------------------------------------------------------------------------------------------------------------------------------------------------------------------------------------------------------------------------------------------------------------------------------------------------------------------------------------------------------------------------------------------------------------------------------------------------------------------------------------------------------------------------------------------------------------------------------------------------------------------------------------------------------------------------------------------------------------------------------------------------------|-----|-----|-----------|-------|------|------|---------------------------------------------------------------------|-------|----------------------|-----------------------------------------------------------------------------------------------------------------------------------|-----|-----|-----------|-------|------|------|
| Rsa1.0_00121.1.g5843.t1 | ref[XP_002867545.1] protein phosphatase x-1 [Arabidopsis lyrata subsp. lyrata] gi 297313381 gb EFH43804.1  protein phosphatase x-1 [Arabidopsis lyrata subsp. lyrata]                                                                                                                                                                                                                                                                                                                                                                                                                                                                                                                                                                                                                                                                                                                                                                                                                                                                            | 303 | 305 | 1.00E-159 | 100.7 | 89.8 | 93.1 | protein phosphatase x-1                                             | gbpln | Arabidopsis lyrata   | AT4G26720.1   Symbols: PPX1, PPX-1   protein phosphatase X 1   chr4:13470397-13472154 REVERSE LENGTH=305                          | 303 | 305 | 1.00E-161 | 100.7 | 89.4 | 92.7 |
| Rsa1.0_00121.1.g5844.t1 | gb ACG69537.1  caleosin CLO1-5 [Brassica napus]                                                                                                                                                                                                                                                                                                                                                                                                                                                                                                                                                                                                                                                                                                                                                                                                                                                                                                                                                                                                  | 245 | 245 | 1.00E-138 | 100.0 | 96.7 | 97.1 | caleosin CLO1-5                                                     | gbpln | Brassica napus       | AT4G26740.1   Symbols: ATS1, CLO1, ATPXG1   seed gene 1   chr4:13473791-13475278 REVERSE LENGTH=245                               | 245 | 245 | 1.00E-136 | 100.0 | 92.7 | 96.3 |
| Rsa1.0_00121.1.g5845.t1 | ref[XP_002867543.1] hydroxyproline-rich glycoprotein family protein [Arabidopsis lyrata subsp. lyrata] gi 297313379 gb EFH43802.1  hydroxyproline-rich glycoprotein family protein [Arabidopsis lyrata subsp. lyrata]                                                                                                                                                                                                                                                                                                                                                                                                                                                                                                                                                                                                                                                                                                                                                                                                                            | 419 | 421 | 0         | 100.5 | 87.4 | 91.6 | hydroxyproline-rich glycoprotein family protein                     | gbpln | Arabidopsis lyrata   | AT4G26750.1   Symbols:   hydroxyproline-rich glycoprotein family protein   chr4:13475848-13478382 REVERSE LENGTH=421              | 419 | 421 | 0         | 100.5 | 86.4 | 90.7 |
| Rsa1.0_00121.1.g5846.t1 | gb EOA16304.1  hypothetical protein CARUB_v10004454mg [Capsella rubella]                                                                                                                                                                                                                                                                                                                                                                                                                                                                                                                                                                                                                                                                                                                                                                                                                                                                                                                                                                         | 580 | 578 | 0         | 99.7  | 88.1 | 93.1 | hypothetical protein CARUB_v10004454mg                              | gbpln | Capsella rubella     | AT4G26760.1   Symbols: MAP65-2   microtubule-associated protein 65-2   chr4:13478834-13481300 REVERSE LENGTH=578                  | 580 | 578 | 0         | 99.7  | 86.9 | 92.4 |
| Rsa1.0_00121.1.g5847.t1 | ref[XP_002869592.1] phosphatidate cytidyltransferase/GDP-diglyceride synthetase [Arabidopsis lyrata subsp. lyrata] gi 297315428 gb EFH45851.1  phosphatidate cytidyltransferase/GDP-diglyceride synthetase [Arabidopsis lyrata subsp. lyrata]                                                                                                                                                                                                                                                                                                                                                                                                                                                                                                                                                                                                                                                                                                                                                                                                    | 536 | 471 | 0         | 87.9  | 79.7 | 82.3 | phosphatidate cytidyltransferase/C DP-diglyceride synthetase        | gbpln | Arabidopsis lyrata   | AT4G26770.1   Symbols:   Phosphatidate cytidyltransferase family protein   chr4:13482580-13484697 FORWARD LENGTH=471              | 536 | 471 | 0         | 87.9  | 79.3 | 81.7 |
| Rsa1.0_00121.1.g5848.t1 | ref[NP_567757.1] molecular chaperone GrpE [Arabidopsis thaliana] gi 21593024 gb AAM64973.1  grpE like protein [Arabidopsis thaliana] gi 26451456 dbj BAC42827.1  putative grpE protein [Arabidopsis thaliana] gi 29824143 gb AAP04032.1  putative grpE protein [Arabidopsis thaliana] gi 33265985 gb AEE65251.1  molecular chaperone GrpE [Arabidopsis thaliana]                                                                                                                                                                                                                                                                                                                                                                                                                                                                                                                                                                                                                                                                                 | 324 | 327 | 1.00E-130 | 100.9 | 79.3 | 88.0 | molecular chaperone GrpE                                            | gbpln | Arabidopsis thaliana | AT4G26780.1   Symbols: AR192   Co-chaperone GrpE family protein   chr4:13485066-13486560 REVERSE LENGTH=327                       | 324 | 327 | 1.00E-133 | 100.9 | 79.3 | 88.0 |
| Rsa1.0_00121.1.g5849.t1 | gb EOA16926.1  hypothetical protein CARUB_v10005151mg [Capsella rubella] gi 482552734 gb EOA16927.1  hypothetical protein CARUB_v10005151mg [Capsella rubella]                                                                                                                                                                                                                                                                                                                                                                                                                                                                                                                                                                                                                                                                                                                                                                                                                                                                                   | 352 | 351 | 0         | 99.7  | 88.6 | 93.2 | hypothetical protein CARUB_v10005151mg                              | gbpln | Capsella rubella     | AT4G26790.2   Symbols:   GDSL-like Lipase/Acylhydrolase superfamily protein   chr4:13487859-13489149 FORWARD LENGTH=351           | 352 | 351 | 1.00E-180 | 99.7  | 84.4 | 90.3 |
| Rsa1.0_00121.1.g5850.t1 | sp Q9S220.2 PP339_ARATH RecName: Full=Pentatricopeptide repeat-containing protein At4g26800                                                                                                                                                                                                                                                                                                                                                                                                                                                                                                                                                                                                                                                                                                                                                                                                                                                                                                                                                      | 500 | 514 | 1.00E-161 | 102.8 | 59.2 | 73.0 | RecName: Full=Pentatricopeptide repeat-containing protein At4g26800 | ----- | -----                | AT1G62680.1   Symbols:   Pentatricopeptide repeat (PPR) superfamily protein   chr1:23208247-23209893 REVERSE LENGTH=548           | 500 | 548 | 1.00E-129 | 109.6 | 46.4 | 67.6 |
| Rsa1.0_00121.1.g5851.t1 | gb EOA15377.1  hypothetical protein CARUB_v10006096mg, partial [Capsella rubella] ref[NP_001045207.1] Os01g0918300 [Oryza sativa Japonica Group] gi 2501449 sp P55857.1 SUMO1_ORYSJ RecName: Full=Small ubiquitin-related modifier 1; Short=OsSUMO1; AltName: Full=Ubiquitin-like protein SMT3 gi 1668773 emb CAA67922.1  ubiquitin-like protein [Oryza sativa] gi 18146762 dbj BAB82439.1  ubiquitin-related protein [Oryza sativa Japonica Group] gi 19386713 dbj BAB86095.1  putative SUMO protein [Oryza sativa Japonica Group] gi 57900450 dbj BAD87743.1  putative SUMO protein [Oryza sativa Japonica Group] gi 113534738 dbj BAF07121.1  Os01g0918300 [Oryza sativa Japonica Group] gi 125528873 gb EAY76987.1  hypothetical protein Os_04943 [Oryza sativa Indica Group] gi 125573116 gb EAZ14631.1  hypothetical protein Os_04555 [Oryza sativa Japonica Group] gi 149390685 gb ABR25360.1  ubiquitin-like protein smt3 [Oryza sativa Indica Group] gi 215765122 dbj BAG86819.1  unnamed protein product [Oryza sativa Japonica Group] | 103 | 103 | 4.00E-45  | 100.0 | 90.3 | 91.3 | hypothetical protein CARUB_v10006096mg, partial                     | gbpln | Capsella rubella     | AT4G26810.2   Symbols:   SWIB/MDM2 domain superfamily protein   chr4:13492247-13492649 REVERSE LENGTH=106                         | 103 | 106 | 3.00E-46  | 102.9 | 88.3 | 92.2 |
| Rsa1.0_00121.1.g5852.t1 | gi 113534738 dbj BAF07121.1  Os01g0918300 [Oryza sativa Japonica Group] gi 125528873 gb EAY76987.1  hypothetical protein Os_04943 [Oryza sativa Indica Group] gi 125573116 gb EAZ14631.1  hypothetical protein Os_04555 [Oryza sativa Japonica Group] gi 149390685 gb ABR25360.1  ubiquitin-like protein smt3 [Oryza sativa Indica Group] gi 215765122 dbj BAG86819.1  unnamed protein product [Oryza sativa Japonica Group]                                                                                                                                                                                                                                                                                                                                                                                                                                                                                                                                                                                                                     | 107 | 100 | 7.00E-45  | 93.5  | 85.0 | 86.0 | Os01g0918300                                                        | gbpln | Oryza sativa         | AT4G26840.1   Symbols: SUM1, SUMO 1, SUMO1, ATSUMO1   small ubiquitin-like modifier 1   chr4:13497466-13498458 FORWARD LENGTH=100 | 107 | 100 | 2.00E-46  | 93.5  | 82.2 | 84.1 |

|                         |                                                                                                                                                                                                                    |      |      |           |       |      |      |                                               |       |                      |                                                                                                                                                                                                                                                                                                                                                                                                                                          |      |      |           |       |      |      |
|-------------------------|--------------------------------------------------------------------------------------------------------------------------------------------------------------------------------------------------------------------|------|------|-----------|-------|------|------|-----------------------------------------------|-------|----------------------|------------------------------------------------------------------------------------------------------------------------------------------------------------------------------------------------------------------------------------------------------------------------------------------------------------------------------------------------------------------------------------------------------------------------------------------|------|------|-----------|-------|------|------|
| Rsa1.0_00121.1.g5853.t1 | gb AET14214.1  GDP-L-galactose phosphorylase [Brassica rapa subsp. chinensis]                                                                                                                                      | 435  | 434  | 0         | 99.8  | 97.5 | 99.1 | GDP-L-galactose phosphorylase                 | gbpln | Brassica rapa        | AT4G26850.1   Symbols: VTC2   mannose-1-phosphate guanylyltransferase (GDP)s;GDP-galactose:mannose-1-phosphate guanylyltransferases;GDP-galactose:glucose-1-phosphate guanylyltransferases;GDP-galactose:myoinositol-1-phosphate guanylyltransferases   chr4:13499262-13501145 REVERSE LENGTH=442                                                                                                                                        | 435  | 442  | 0         | 101.6 | 90.8 | 95.4 |
| Rsa1.0_00121.1.g5854.t1 | ref XP_002867537.1  AT4g26860/F10M23_200 [Arabidopsis lyrata subsp. lyrata]   g 297313373 gb EFH43796.1  AT4g26860/F10M23_200 [Arabidopsis lyrata subsp. lyrata]                                                   | 244  | 244  | 1.00E-131 | 100.0 | 91.4 | 96.3 | AT4g26860/F10M23_200                          | gbpln | Arabidopsis lyrata   | AT4G26860.1   Symbols:   Predicted pyridoxal phosphate-dependent enzyme, YBL036C type   chr4:13503291-13504693 REVERSE LENGTH=244                                                                                                                                                                                                                                                                                                        | 244  | 244  | 1.00E-132 | 100.0 | 91.0 | 95.9 |
| Rsa1.0_00121.1.g5855.t1 | ref NP_194419.2  mitogen-activated protein kinase kinase kinase 16 [Arabidopsis thaliana]   g 332659865 gb AEE85265.1  mitogen-activated protein kinase kinase kinase 16 [Arabidopsis thaliana]                    | 439  | 444  | 1.00E-175 | 101.1 | 73.1 | 83.8 | mitogen-activated protein kinase kinase 16    | gbpln | Arabidopsis thaliana | AT4G26890.1   Symbols: MAPKKK16   mitogen-activated protein kinase kinase 16   chr4:13512072-13513406 FORWARD LENGTH=444                                                                                                                                                                                                                                                                                                                 | 439  | 444  | 1.00E-178 | 101.1 | 73.1 | 83.8 |
| Rsa1.0_00121.1.g5856.t1 | gb EOA15723.1  hypothetical protein CARUB_v10006625mg [Capsella rubella]                                                                                                                                           | 587  | 586  | 0         | 99.8  | 91.7 | 94.2 | hypothetical protein CARUB_v10006625mg        | gbpln | Capsella rubella     | AT4G26900.1   Symbols: AT-HF, HISN4   HIS HF   chr4:13515514-13519608 FORWARD LENGTH=592                                                                                                                                                                                                                                                                                                                                                 | 587  | 592  | 0         | 100.9 | 92.0 | 95.1 |
| Rsa1.0_00121.1.g5857.t1 | ref XP_002866485.1  pentatricopeptide repeat-containing protein [Arabidopsis lyrata subsp. lyrata]   g 297312320 gb EFH42744.1  pentatricopeptide repeat-containing protein [Arabidopsis lyrata subsp. lyrata]     | 934  | 983  | 0         | 105.2 | 83.5 | 91.5 | pentatricopeptide repeat-containing protein   | gbpln | Arabidopsis lyrata   | AT5G62370.1   Symbols:   Tetratricopeptide repeat (TPR)-like superfamily protein   chr5:25041901-25044849 REVERSE LENGTH=982                                                                                                                                                                                                                                                                                                             | 934  | 982  | 0         | 105.1 | 82.5 | 90.7 |
| Rsa1.0_00121.1.g5858.t1 | ref XP_002869585.1  NADH:ubiquinone oxidoreductase family protein [Arabidopsis lyrata subsp. lyrata]   g 297315421 gb EFH45844.1  NADH:ubiquinone oxidoreductase family protein [Arabidopsis lyrata subsp. lyrata] | 196  | 184  | 2.00E-75  | 93.9  | 80.1 | 85.7 | NADH:ubiquinone oxidoreductase family protein | gbpln | Arabidopsis lyrata   | AT4G26965.1   Symbols:   NADH:ubiquinone oxidoreductase, 17.2kDa subunit   chr4:13539717-13542041 FORWARD LENGTH=184                                                                                                                                                                                                                                                                                                                     | 196  | 184  | 2.00E-75  | 93.9  | 78.6 | 84.2 |
| Rsa1.0_00121.1.g5859.t1 | gb EOA18648.1  hypothetical protein CARUB_v10007224mg [Capsella rubella]                                                                                                                                           | 467  | 468  | 1.00E-175 | 100.2 | 71.3 | 79.0 | hypothetical protein CARUB_v10007224mg        | gbpln | Capsella rubella     | AT4G26990.1   Symbols:   unknown protein; BEST Arabidopsis thaliana protein match is: unknown protein (TAIR:AT5G54920.1); Has 30201 Blast hits to 17322 proteins in 780 species: Archae - 12; Bacteria - 1396; Metazoa - 17338; Fungi - 3422; Plants - 5037; Viruses - 0; Other Eukaryotes - 2996 (source: NCBI BLink).   chr4:13551150-13554253 REVERSE LENGTH=474                                                                      | 467  | 474  | 1.00E-178 | 101.5 | 72.2 | 82.0 |
| Rsa1.0_00121.1.g5860.t1 | ref XP_002869583.1  hypothetical protein ARALYDRAFT_354097 [Arabidopsis lyrata subsp. lyrata]   g 297315419 gb EFH45842.1  hypothetical protein ARALYDRAFT_354097 [Arabidopsis lyrata subsp. lyrata]               | 2537 | 2550 | 0         | 100.5 | 72.8 | 81.6 | hypothetical protein ARALYDRAFT_354097        | gbpln | Arabidopsis lyrata   | AT4G27010.1   Symbols:   CONTAINS InterPro DOMAIN/s: Ribosome 60S biogenesis N-terminal (InterPro:IPRO21714); BEST Arabidopsis thaliana protein match is: unknown protein (TAIR:AT1G72270.1); Has 30201 Blast hits to 17322 proteins in 780 species: Archae - 12; Bacteria - 1396; Metazoa - 17338; Fungi - 3422; Plants - 5037; Viruses - 0; Other Eukaryotes - 2996 (source: NCBI BLink).   chr4:13558943-13568296 FORWARD LENGTH=2374 | 2537 | 2374 | 0         | 93.6  | 67.1 | 75.9 |
| Rsa1.0_00121.1.g5861.t1 | ref XP_002867528.1  hypothetical protein ARALYDRAFT_913846 [Arabidopsis lyrata subsp. lyrata]   g 297313364 gb EFH43787.1  hypothetical protein ARALYDRAFT_913846 [Arabidopsis lyrata subsp. lyrata]               | 525  | 522  | 0         | 99.4  | 93.0 | 97.9 | hypothetical protein ARALYDRAFT_913846        | gbpln | Arabidopsis lyrata   | AT4G27020.1   Symbols:   unknown protein; FUNCTIONS IN: molecular function unknown; LOCATED IN: vacuole; BEST Arabidopsis thaliana protein match is: unknown protein (TAIR:AT5G54870.1); Has 1807 Blast hits to 1807 proteins in 277 species: Archae - 0; Bacteria - 0; Metazoa - 736; Fungi - 347; Plants - 385; Viruses - 0; Other Eukaryotes - 339 (source: NCBI BLink).   chr4:13568604-13571381 REVERSE LENGTH=523                  | 525  | 523  | 0         | 99.6  | 91.8 | 96.6 |
| Rsa1.0_00121.1.g5862.t1 | ref XP_002869582.1  hypothetical protein ARALYDRAFT_492093 [Arabidopsis lyrata subsp. lyrata]   g 297315418 gb EFH45841.1  hypothetical protein ARALYDRAFT_492093 [Arabidopsis lyrata subsp. lyrata]               | 295  | 323  | 1.00E-143 | 109.5 | 84.4 | 91.9 | hypothetical protein ARALYDRAFT_492093        | gbpln | Arabidopsis lyrata   | AT4G27030.1   Symbols: FAD4, FADA   fatty acid desaturase A   chr4:13571951-13572922 FORWARD LENGTH=323                                                                                                                                                                                                                                                                                                                                  | 295  | 323  | 1.00E-144 | 109.5 | 83.7 | 91.5 |
| Rsa1.0_00121.1.g5863.t1 | gb EOA17310.1  hypothetical protein CARUB_v10005583mg [Capsella rubella]                                                                                                                                           | 250  | 250  | 1.00E-138 | 100.0 | 95.2 | 97.6 | hypothetical protein CARUB_v10005583mg        | gbpln | Capsella rubella     | AT4G27040.4   Symbols: VPS22   EAP30/Vps36 family protein   chr4:13573061-13574576 REVERSE LENGTH=250                                                                                                                                                                                                                                                                                                                                    | 250  | 250  | 1.00E-140 | 100.0 | 94.8 | 97.6 |

|                         |                                                                                                                                                                                                                                                                                                                                                                                                                                                                                                                                                            |      |      |           |       |      |       |                                            |       |                      |                                                                                                                                                                                                                                                                                                                                  |      |      |           |       |      |      |
|-------------------------|------------------------------------------------------------------------------------------------------------------------------------------------------------------------------------------------------------------------------------------------------------------------------------------------------------------------------------------------------------------------------------------------------------------------------------------------------------------------------------------------------------------------------------------------------------|------|------|-----------|-------|------|-------|--------------------------------------------|-------|----------------------|----------------------------------------------------------------------------------------------------------------------------------------------------------------------------------------------------------------------------------------------------------------------------------------------------------------------------------|------|------|-----------|-------|------|------|
| Rsa1.0_00121.1.g5864.t1 | refNP_194436.2  Microtubule-associated protein TORTIFOLIA1 [Arabidopsis thaliana] gi 83288274 sp Q9T041.2 MAPT_ARATH RecName: Full=Microtubule-associated protein TORTIFOLIA1; AltName: Full=Microtubule-associated protein SPIRAL2; AltName: Full=Protein CONVOLUTA gi 51870567 emb CAC80696.2  TORTIFOLIA1 microtubule-associated protein [Arabidopsis thaliana] gi 53791209 dbj BAD54701.1  microtubule associated protein SPIRAL2 [Arabidopsis thaliana] gi 332659895 gb AEE85295.1  Microtubule-associated protein TORTIFOLIA1 [Arabidopsis thaliana] | 869  | 864  | 0         | 99.4  | 88.4 | 93.0  | Microtubule-associated protein TORTIFOLIA1 | gbpln | Arabidopsis thaliana | AT4G27060.1   Symbols: TOR1, SPR2, CN   ARM repeat superfamily protein   chr4:13581581-13585070 REVERSE LENGTH=864                                                                                                                                                                                                               | 869  | 864  | 0         | 99.4  | 88.4 | 93.0 |
| Rsa1.0_00121.1.g5865.t1 | gb EOA17638.1  hypothetical protein CARUB_v10006004mg [Capsella rubella]                                                                                                                                                                                                                                                                                                                                                                                                                                                                                   | 134  | 134  | 1.00E-67  | 100.0 | 97.8 | 100.0 | hypothetical protein CARUB_v10006004mg     | gbpln | Capsella rubella     | AT4G27090.1   Symbols:   Ribosomal protein L14   chr4:13594104-13595187 REVERSE LENGTH=134                                                                                                                                                                                                                                       | 134  | 134  | 2.00E-69  | 100.0 | 97.0 | 99.3 |
| Rsa1.0_00121.1.g5866.t1 | ref NP_001031730.1  RabGAP/TBC domain-containing protein [Arabidopsis thaliana] gi 33265990 gb AEE85301.1  RabGAP/TBC domain-containing protein [Arabidopsis thaliana] emb CAB38841.1  putative protein [Arabidopsis thaliana]                                                                                                                                                                                                                                                                                                                             | 433  | 433  | 0         | 100.0 | 90.8 | 95.2  | RabGAP/TBC domain-containing protein       | gbpln | Arabidopsis thaliana | AT4G27100.2   Symbols:   Yot/Rab-GAP domain of gyp1p superfamily protein   chr4:13595845-13598620 FORWARD LENGTH=433                                                                                                                                                                                                             | 433  | 433  | 0         | 100.0 | 90.8 | 95.2 |
| Rsa1.0_00121.1.g5867.t1 | emb CAB38841.1  putative protein [Arabidopsis thaliana] gi 7269564 emb CAB79566.1  putative protein [Arabidopsis thaliana]                                                                                                                                                                                                                                                                                                                                                                                                                                 | 685  | 717  | 0         | 104.7 | 83.6 | 90.9  | putative protein                           | gbpln | Arabidopsis thaliana | AT4G27110.1   Symbols: COB11   COBRA-like protein 11 precursor   chr4:13599236-13601521 REVERSE LENGTH=668                                                                                                                                                                                                                       | 685  | 668  | 0         | 97.5  | 80.7 | 87.7 |
| Rsa1.0_00121.1.g5868.t1 | gb EOA17860.1  hypothetical protein CARUB_v10006265mg [Capsella rubella]                                                                                                                                                                                                                                                                                                                                                                                                                                                                                   | 447  | 298  | 1.00E-129 | 66.7  | 61.1 | 63.3  | hypothetical protein CARUB_v10006265mg     | gbpln | Capsella rubella     | AT4G27120.2   Symbols:   CONTAINS InterPro DOMAIN/s: DDRGK domain (InterPro:IPR019153); Has 14775 Blast hits to 8764 proteins in 778 species: Archae - 29; Bacteria - 1878; Metazoa - 5164; Fungi - 1447; Plants - 582; Viruses - 164; Other Eukaryotes - 5511 (source: NCBI BLINK).   chr4:13602210-13604227 REVERSE LENGTH=298 | 447  | 298  | 1.00E-120 | 66.7  | 60.0 | 61.1 |
| Rsa1.0_00121.1.g5869.t1 | gb AAA63470.1  storage protein, partial [Raphanus sativus]                                                                                                                                                                                                                                                                                                                                                                                                                                                                                                 | 176  | 155  | 1.00E-84  | 88.1  | 86.4 | 86.4  | storage protein, partial                   | gbpln | Raphanus sativus     | AT4G27170.1   Symbols: SESA4, AT2S4   seed storage albumin 4   chr4:13613637-13614137 FORWARD LENGTH=166                                                                                                                                                                                                                         | 176  | 166  | 1.00E-53  | 94.3  | 61.9 | 73.3 |
| Rsa1.0_00121.1.g5870.t1 | #                                                                                                                                                                                                                                                                                                                                                                                                                                                                                                                                                          | #    | #    | #         | #     | #    | -     | ----                                       | ----  | ----                 | #                                                                                                                                                                                                                                                                                                                                | #    | #    | #         | #     | #    |      |
| Rsa1.0_00121.1.g5871.t1 | gb ABD65056.1  hypothetical protein 27.t00122 [Brassica oleracea]                                                                                                                                                                                                                                                                                                                                                                                                                                                                                          | 237  | 239  | 9.00E-26  | 100.8 | 27.0 | 33.8  | hypothetical protein 27.t00122             | gbpln | Brassica oleracea    | AT4G29090.1   Symbols:   Ribonuclease H-like superfamily protein   chr4:14333528-14335255 FORWARD LENGTH=575                                                                                                                                                                                                                     | 237  | 575  | 5.00E-15  | 242.6 | 20.7 | 32.5 |
| Rsa1.0_00121.1.g5872.t1 | gb ABC87311.1  sporocytelless [Brassica juncea]                                                                                                                                                                                                                                                                                                                                                                                                                                                                                                            | 325  | 313  | 1.00E-154 | 96.3  | 88.9 | 91.4  | sporocytelless                             | gbpln | Brassica juncea      | AT4G27330.1   Symbols: SPL, NZZ   sporocytelless (SPL)   chr4:13682327-13683459 REVERSE LENGTH=314                                                                                                                                                                                                                               | 325  | 314  | 3.00E-98  | 96.6  | 68.3 | 74.2 |
| Rsa1.0_00121.1.g5873.t1 | ref XP_002867510.1  hypothetical protein ARALYDRAFT_492065 [Arabidopsis lyrata subsp. lyrata] gi 297313346 gb EFH43769.1  hypothetical protein ARALYDRAFT_492065 [Arabidopsis lyrata subsp. lyrata]                                                                                                                                                                                                                                                                                                                                                        | 682  | 617  | 0         | 90.5  | 78.9 | 84.3  | hypothetical protein ARALYDRAFT_492065     | gbpln | Arabidopsis lyrata   | AT4G27340.1   Symbols:   Met-10+ like family protein   chr4:13687366-13690370 REVERSE LENGTH=619                                                                                                                                                                                                                                 | 682  | 619  | 0         | 90.8  | 78.9 | 84.9 |
| Rsa1.0_00121.1.g5874.t1 | #                                                                                                                                                                                                                                                                                                                                                                                                                                                                                                                                                          | #    | #    | #         | #     | #    | -     | ----                                       | ----  | ----                 | AT5G45275.1   Symbols:   Major facilitator superfamily protein   chr5:18334476-18337240 REVERSE LENGTH=570                                                                                                                                                                                                                       | 139  | 570  | 5.00E-11  | 410.1 | 20.9 | 23.0 |
| Rsa1.0_00121.1.g5875.t1 | ref XP_002867508.1  hypothetical protein ARALYDRAFT_492064 [Arabidopsis lyrata subsp. lyrata] gi 297313344 gb EFH43767.1  hypothetical protein ARALYDRAFT_492064 [Arabidopsis lyrata subsp. lyrata]                                                                                                                                                                                                                                                                                                                                                        | 282  | 278  | 2.33E-156 | 98.6  | 90.8 | 94.0  | hypothetical protein ARALYDRAFT_492064     | gbpln | Arabidopsis lyrata   | AT4G27350.1   Symbols:   Protein of unknown function (DUF1223)   chr4:13690979-13692621 REVERSE LENGTH=278                                                                                                                                                                                                                       | 282  | 278  | 1.00E-147 | 98.6  | 89.4 | 93.3 |
| Rsa1.0_00121.1.g5876.t1 | gb EOA18630.1  hypothetical protein CARUB_v10007205mg [Capsella rubella]                                                                                                                                                                                                                                                                                                                                                                                                                                                                                   | 101  | 111  | 8.00E-45  | 109.9 | 86.1 | 90.1  | hypothetical protein CARUB_v10007205mg     | gbpln | Capsella rubella     | AT4G27360.1   Symbols:   Dynein light chain type 1 family protein   chr4:13694032-13694517 FORWARD LENGTH=103                                                                                                                                                                                                                    | 101  | 103  | 3.00E-47  | 102.0 | 85.1 | 89.1 |
| Rsa1.0_00121.1.g5877.t2 | gb EOA15928.1  hypothetical protein CARUB_v10004022mg [Capsella rubella]                                                                                                                                                                                                                                                                                                                                                                                                                                                                                   | 1066 | 1140 | 0         | 106.9 | 77.5 | 85.6  | hypothetical protein CARUB_v10004022mg     | gbpln | Capsella rubella     | AT4G27370.1   Symbols: VIIIIB, ATVIIIIB   P-loop containing nucleoside triphosphate hydrolases superfamily protein   chr4:13694881-13700780 REVERSE LENGTH=1134                                                                                                                                                                  | 1066 | 1134 | 0         | 106.4 | 77.0 | 84.7 |

|                         |                                                                                                                                                                                                                                                                                                                                                                                                                                                                                                                                                                                                          |     |     |           |       |      |      |                                                                           |       |                      |                                                                                                                                                                                                                                                                                     |     |     |           |       |      |      |
|-------------------------|----------------------------------------------------------------------------------------------------------------------------------------------------------------------------------------------------------------------------------------------------------------------------------------------------------------------------------------------------------------------------------------------------------------------------------------------------------------------------------------------------------------------------------------------------------------------------------------------------------|-----|-----|-----------|-------|------|------|---------------------------------------------------------------------------|-------|----------------------|-------------------------------------------------------------------------------------------------------------------------------------------------------------------------------------------------------------------------------------------------------------------------------------|-----|-----|-----------|-------|------|------|
| Rsa1.0_00121.1.g5878.t1 | gb[EOA15638.1] hypothetical protein CARUB_v10005882mg, partial [Capsella rubella]                                                                                                                                                                                                                                                                                                                                                                                                                                                                                                                        | 103 | 173 | 8.00E-26  | 168.0 | 73.8 | 83.5 | hypothetical protein CARUB_v10005882mg, partial                           | gbpln | Capsella rubella     | AT4G27380.1   Symbols:   unknown protein; Has 30201 Blast hits to 17322 proteins in 780 species: Archae - 12; Bacteria - 1396; Metazoa - 17338; Fungi - 3422; Plants - 5037; Viruses - 0; Other Eukaryotes - 2996 (source: NCBI BLINK).   chr4:13701340-13702953 FORWARD LENGTH=156 | 103 | 156 | 2.00E-21  | 151.5 | 66.0 | 79.6 |
| Rsa1.0_00121.1.g5879.t1 | gb[AAP35056.1] NAC-domain protein 485 [Brassica napus]                                                                                                                                                                                                                                                                                                                                                                                                                                                                                                                                                   | 271 | 300 | 1.00E-137 | 110.7 | 90.8 | 93.7 | NAC-domain protein 485                                                    | gbpln | Brassica napus       | AT4G27410.2   Symbols: RD26, ANAC072   NAC (No Apical Meristem) domain transcriptional regulator superfamily protein   chr4:13707928-13709013 REVERSE LENGTH=297                                                                                                                    | 271 | 297 | 1.00E-134 | 109.6 | 87.5 | 91.1 |
| Rsa1.0_00121.1.g5880.t1 | ref[XP_002867504.1] abc transporter family protein [Arabidopsis lyrata subsp. lyrata] gi 297313404 gb EFH43763.1  abc transporter family protein [Arabidopsis lyrata subsp. lyrata]                                                                                                                                                                                                                                                                                                                                                                                                                      | 641 | 639 | 0         | 99.7  | 82.4 | 90.0 | abc transporter family protein                                            | gbpln | Arabidopsis lyrata   | AT4G27420.1   Symbols:   ABC-2 type transporter family protein   chr4:13712434-13714797 REVERSE LENGTH=638                                                                                                                                                                          | 641 | 638 | 0         | 99.5  | 81.3 | 89.2 |
| Rsa1.0_00122.1.g5881.t1 | ref[XP_002867617.1] hypothetical protein ARALYDRAFT_354257 [Arabidopsis lyrata subsp. lyrata] gi 297313453 gb EFH43876.1  hypothetical protein ARALYDRAFT_354257 [Arabidopsis lyrata subsp. lyrata]                                                                                                                                                                                                                                                                                                                                                                                                      | 739 | 758 | 0         | 102.6 | 85.1 | 92.8 | hypothetical protein ARALYDRAFT_354257                                    | gbpln | Arabidopsis lyrata   | AT4G25270.1   Symbols:   Tetratricopeptide repeat (TPR)-like superfamily protein   chr4:12937253-12938836 REVERSE LENGTH=527                                                                                                                                                        | 739 | 527 | 0         | 71.3  | 56.8 | 61.8 |
| Rsa1.0_00122.1.g5882.t1 | ref[XP_002867618.1] invertase/pectin methylesterase inhibitor family protein [Arabidopsis lyrata subsp. lyrata] gi 297313454 gb EFH43877.1  invertase/pectin methylesterase inhibitor family protein [Arabidopsis lyrata subsp. lyrata]                                                                                                                                                                                                                                                                                                                                                                  | 201 | 201 | 6.00E-94  | 100.0 | 83.1 | 92.5 | invertase/pectin methylesterase inhibitor family protein                  | gbpln | Arabidopsis lyrata   | AT4G25260.1   Symbols:   Plant invertase/pectin methylesterase inhibitor superfamily protein   chr4:12936005-12936610 REVERSE LENGTH=201                                                                                                                                            | 201 | 201 | 2.00E-96  | 100.0 | 82.6 | 92.0 |
| Rsa1.0_00122.1.g5883.t1 | gb[EOA17786.1] hypothetical protein CARUB_v10006179mg [Capsella rubella]                                                                                                                                                                                                                                                                                                                                                                                                                                                                                                                                 | 138 | 68  | 3.00E-15  | 49.3  | 30.4 | 31.2 | hypothetical protein CARUB_v10006179mg                                    | gbpln | Capsella rubella     | AT4G21105.1   Symbols:   cytochrome-c oxidases;electron carriers   chr4:11266273-11266724 FORWARD LENGTH=68                                                                                                                                                                         | 138 | 68  | 1.00E-17  | 49.3  | 29.7 | 31.2 |
| Rsa1.0_00122.1.g5884.t1 | ref[NP_194255.1] plant invertase/pectin methylesterase inhibitor domain-containing protein [Arabidopsis thaliana] gi 4454013 emb CAA23066.1  putative protein [Arabidopsis thaliana] gi 7269376 emb CAB81336.1  putative protein [Arabidopsis thaliana] gi 28416607 gb AAO42834.1  At4g25250 [Arabidopsis thaliana] gi 110743315 dbj BAE99546.1  hypothetical protein [Arabidopsis thaliana] gi 332659631 gb AEE85031.1  plant invertase/pectin methylesterase inhibitor domain-containing protein [Arabidopsis thaliana]                                                                                | 197 | 199 | 2.00E-54  | 101.0 | 59.4 | 75.6 | plant invertase/pectin methylesterase inhibitor domain-containing protein | gbpln | Arabidopsis thaliana | AT4G25250.1   Symbols:   Plant invertase/pectin methylesterase inhibitor superfamily protein   chr4:12934632-12935231 FORWARD LENGTH=199                                                                                                                                            | 197 | 199 | 6.00E-57  | 101.0 | 59.4 | 75.6 |
| Rsa1.0_00122.1.g5885.t1 | gb AAM62643.1  ripening-related protein-like [Arabidopsis thaliana]                                                                                                                                                                                                                                                                                                                                                                                                                                                                                                                                      | 150 | 199 | 1.00E-58  | 132.7 | 76.7 | 87.3 | ripening-related protein-like                                             | gbpln | Arabidopsis thaliana | AT4G25250.1   Symbols:   Plant invertase/pectin methylesterase inhibitor superfamily protein   chr4:12934632-12935231 FORWARD LENGTH=199                                                                                                                                            | 150 | 199 | 6.00E-61  | 132.7 | 76.0 | 86.7 |
| Rsa1.0_00122.1.g5886.t1 | gb[EOA16286.1] hypothetical protein CARUB_v10004433mg [Capsella rubella]                                                                                                                                                                                                                                                                                                                                                                                                                                                                                                                                 | 617 | 590 | 0         | 95.6  | 84.8 | 89.1 | hypothetical protein CARUB_v10004433mg                                    | gbpln | Capsella rubella     | AT4G25240.1   Symbols: SKS1   SKU5 similar 1   chr4:12930539-12933563 FORWARD LENGTH=589                                                                                                                                                                                            | 617 | 589 | 0         | 95.5  | 84.1 | 88.7 |
| Rsa1.0_00122.1.g5887.t1 | gb[EOA15790.1] hypothetical protein CARUB_v10007136mg [Capsella rubella]                                                                                                                                                                                                                                                                                                                                                                                                                                                                                                                                 | 505 | 503 | 0         | 99.6  | 91.9 | 96.8 | hypothetical protein CARUB_v10007136mg                                    | gbpln | Capsella rubella     | AT4G25220.1   Symbols: RHS15   root hair specific 15   chr4:12921161-12922762 FORWARD LENGTH=504                                                                                                                                                                                    | 505 | 504 | 0         | 99.8  | 87.7 | 92.7 |
| Rsa1.0_00122.1.g5888.t1 | ref[NP_194251.1] DNA-binding storekeeper protein-related transcriptional regulator [Arabidopsis thaliana] gi 75201680 sp Q9SB42.1 MDA1_ARATH RecName: Full=Mediator-associated protein 1 gi 13272449 gb AAK17163.1 AF325095.1 putative protein [Arabidopsis thaliana] gi 4454009 emb CAA23062.1  putative protein [Arabidopsis thaliana] gi 7269371 emb CAB79430.1  putative protein [Arabidopsis thaliana] gi 22589881 dbj BAH30536.1  hypothetical protein [Arabidopsis thaliana] gi 332659625 gb AEE85025.1  DNA-binding storekeeper protein-related transcriptional regulator [Arabidopsis thaliana] | 377 | 368 | 8.00E-84  | 97.6  | 47.7 | 58.9 | DNA-binding storekeeper protein-related transcriptional regulator         | gbpln | Arabidopsis thaliana | AT4G25210.1   Symbols:   DNA-binding storekeeper protein-related transcriptional regulator   chr4:12918446-12919552 FORWARD LENGTH=368                                                                                                                                              | 377 | 368 | 2.00E-86  | 97.6  | 47.7 | 58.9 |

|                         |                                                                                                                                                                                                                                                                                                                                                                                                                                                                                                                                                                                                                                                                |     |     |           |       |      |      |                                        |       |                      |                                                                                                                                                                                                                                                                                                                                                    |     |     |           |       |      |      |
|-------------------------|----------------------------------------------------------------------------------------------------------------------------------------------------------------------------------------------------------------------------------------------------------------------------------------------------------------------------------------------------------------------------------------------------------------------------------------------------------------------------------------------------------------------------------------------------------------------------------------------------------------------------------------------------------------|-----|-----|-----------|-------|------|------|----------------------------------------|-------|----------------------|----------------------------------------------------------------------------------------------------------------------------------------------------------------------------------------------------------------------------------------------------------------------------------------------------------------------------------------------------|-----|-----|-----------|-------|------|------|
| Rsa1.0_00122.1.g5889.t1 | emb CAA67022.1  LMW heat shock protein [Arabidopsis thaliana]                                                                                                                                                                                                                                                                                                                                                                                                                                                                                                                                                                                                  | 214 | 210 | 3.00E-91  | 98.1  | 80.4 | 90.2 | LMW heat shock protein                 | gbpln | Arabidopsis thaliana | AT4G25200.1   Symbols: ATHSP23.6-MITO, HSP23.6-MITO   mitochondrion-localized small heat shock protein 23.6   chr4:12917089-12917858 FORWARD LENGTH=210                                                                                                                                                                                            | 214 | 210 | 3.00E-85  | 98.1  | 76.6 | 85.5 |
| Rsa1.0_00122.1.g5890.t1 | #                                                                                                                                                                                                                                                                                                                                                                                                                                                                                                                                                                                                                                                              | #   | #   | #         | #     | #    | #    | -                                      | ----  | ----                 | #                                                                                                                                                                                                                                                                                                                                                  | #   | #   | #         | #     | #    |      |
| Rsa1.0_00122.1.g5891.t1 | ref XP_002867620.1  hypothetical protein ARALYDRAFT_492315 [Arabidopsis lyrata subsp. lyrata] gi 297313456 gb EFH43879.1  hypothetical protein ARALYDRAFT_492315 [Arabidopsis lyrata subsp. lyrata]                                                                                                                                                                                                                                                                                                                                                                                                                                                            | 387 | 412 | 2.33E-156 | 106.5 | 77.3 | 88.1 | hypothetical protein ARALYDRAFT_492315 | gbpln | Arabidopsis lyrata   | AT4G25190.1   Symbols: QWR7   Family of unknown function (DUF566)   chr4:12914400-12916001 REVERSE LENGTH=394                                                                                                                                                                                                                                      | 387 | 394 | 1.00E-147 | 101.8 | 75.2 | 86.0 |
| Rsa1.0_00122.1.g5892.t1 | ref XP_002867621.1  DNA-directed RNA polymerase [Arabidopsis lyrata subsp. lyrata] gi 297313457 gb EFH43880.1  DNA-directed RNA polymerase [Arabidopsis lyrata subsp. lyrata]                                                                                                                                                                                                                                                                                                                                                                                                                                                                                  | 316 | 315 | 1.00E-127 | 99.7  | 75.9 | 82.0 | DNA-directed RNA polymerase            | gbpln | Arabidopsis lyrata   | AT4G25180.1   Symbols:   RNA polymerase III RPC4   chr4:12911746-12913907 REVERSE LENGTH=311                                                                                                                                                                                                                                                       | 316 | 311 | 1.00E-113 | 98.4  | 70.9 | 76.9 |
| Rsa1.0_00122.1.g5893.t1 | ref NP_201433.1  GATA transcription factor 5 [Arabidopsis thaliana] gi 42573812 ref NP_975002.1  GATA transcription factor 5 [Arabidopsis thaliana] gi 71660777 sp Q9FH57.1 GATA5.ARAT H RecName: Full=GATA transcription factor 5 gi 10177426 gb BAB10711.1  GATA-binding transcription factor-like protein [Arabidopsis thaliana] gi 22531223 gb AAM97115.1  GATA-binding transcription factor-like protein [Arabidopsis thaliana] gi 34098855 gb AAQ56810.1  At5g66320 [Arabidopsis thaliana] gi 332010815 gb AED98198.1  GATA transcription factor 5 [Arabidopsis thaliana] gi 332010816 gb AED98199.1  GATA transcription factor 5 [Arabidopsis thaliana] | 339 | 339 | 1.00E-127 | 100.0 | 76.7 | 85.5 | GATA transcription factor 5            | gbpln | Arabidopsis thaliana | AT5G66320.2   Symbols: GATA5   GATA transcription factor 5   chr5:26496208-26497309 REVERSE LENGTH=339                                                                                                                                                                                                                                             | 339 | 339 | 1.00E-130 | 100.0 | 76.7 | 85.5 |
| Rsa1.0_00122.1.g5894.t1 | emb CAA23058.1  putative protein [Arabidopsis thaliana] gi 7269367 emb CAB79426.1  putative protein [Arabidopsis thaliana]                                                                                                                                                                                                                                                                                                                                                                                                                                                                                                                                     | 344 | 336 | 1.00E-155 | 97.7  | 80.2 | 87.8 | putative protein                       | gbpln | Arabidopsis thaliana | AT4G25170.1   Symbols:   Uncharacterised conserved protein (UCP012943)   chr4:12909740-12911389 FORWARD LENGTH=344                                                                                                                                                                                                                                 | 344 | 344 | 1.00E-150 | 100.0 | 76.7 | 84.3 |
| Rsa1.0_00122.1.g5895.t1 | #                                                                                                                                                                                                                                                                                                                                                                                                                                                                                                                                                                                                                                                              | #   | #   | #         | #     | #    | #    | -                                      | ----  | ----                 | #                                                                                                                                                                                                                                                                                                                                                  | #   | #   | #         | #     | #    |      |
| Rsa1.0_00122.1.g5896.t1 | ref NP_565573.4  uncharacterized protein [Arabidopsis thaliana] gi 15724184 gb AAL06484.1 AF411794.1 At2g24550/F25P17.15 [Arabidopsis thaliana] gi 20466816 gb AAM20725.1  unknown protein [Arabidopsis thaliana] gi 23198218 gb AAN15636.1  unknown protein [Arabidopsis thaliana] gi 330252497 gb AECO7591.1  uncharacterized protein AT2G24550 [Arabidopsis thaliana]                                                                                                                                                                                                                                                                                       | 255 | 245 | 1.00E-63  | 96.1  | 69.0 | 73.7 | uncharacterized protein                | gbpln | Arabidopsis thaliana | AT2G24550.1   Symbols:   unknown protein; BEST Arabidopsis thaliana protein match is: unknown protein (TAIR:AT4G31510.1); Has 219 Blast hits to 219 proteins in 33 species: Archaea = 0; Bacteria = 0; Metazoa = 16; Fungi = 2; Plants = 184; Viruses = 0; Other Eukaryotes = 17 (source: NCBI BLINK).   chr2:10428060-10429051 REVERSE LENGTH=245 | 255 | 245 | 3.00E-66  | 96.1  | 69.0 | 73.7 |
| Rsa1.0_00122.1.g5897.t1 | gb ACQ76799.1  WRKY transcription factor 17 [Brassica napus]                                                                                                                                                                                                                                                                                                                                                                                                                                                                                                                                                                                                   | 321 | 325 | 1.00E-144 | 101.2 | 91.9 | 94.7 | WRKY transcription factor 17           | gbpln | Brassica napus       | AT2G24570.1   Symbols: WRKY17, ATWRKY17   WRKY DNA-binding protein 17   chr2:10437676-10439222 REVERSE LENGTH=321                                                                                                                                                                                                                                  | 321 | 321 | 1.00E-139 | 100.0 | 82.9 | 89.1 |
| Rsa1.0_00122.1.g5898.t1 | gb EOA27191.1  hypothetical protein CARUB_v10023301mg [Capsella rubella]                                                                                                                                                                                                                                                                                                                                                                                                                                                                                                                                                                                       | 413 | 416 | 0         | 100.7 | 88.6 | 94.4 | hypothetical protein CARUB_v10023301mg | gbpln | Capsella rubella     | AT2G24580.1   Symbols:   FAD-dependent oxidoreductase family protein   chr2:10444928-10446178 REVERSE LENGTH=416                                                                                                                                                                                                                                   | 413 | 416 | 0         | 100.7 | 87.7 | 93.9 |

|                         |                                                                                                                                                                                                                                                                                                                                                                                                                                                                                                                                                                                                                                                                                                                                                  |      |     |           |       |      |      |                                                                           |       |                      |                                                                                                                                                                   |      |     |           |       |      |      |
|-------------------------|--------------------------------------------------------------------------------------------------------------------------------------------------------------------------------------------------------------------------------------------------------------------------------------------------------------------------------------------------------------------------------------------------------------------------------------------------------------------------------------------------------------------------------------------------------------------------------------------------------------------------------------------------------------------------------------------------------------------------------------------------|------|-----|-----------|-------|------|------|---------------------------------------------------------------------------|-------|----------------------|-------------------------------------------------------------------------------------------------------------------------------------------------------------------|------|-----|-----------|-------|------|------|
| Rsa1.0_00122.1.g5899.t3 | ref NP_180035.1  RNA recognition motif and CCHC-type zinc finger domain-containing protein [Arabidopsis thaliana] gi 75337303 sp Q9SJA6.1 RZ22A_ARAT H RecName: Full=Serine/arginine-rich splicing factor RSZ22A. AltName: Full=RS-containing zinc finger protein 22A; Short=At-RSZ22a; Short=At-RSZ22a gi 4572679 gb AAD23894.1  putative RSZ22 splicing factor [Arabidopsis thaliana] gi 26450830 dbj BAC42523.1  putative RSZ22 splicing factor [Arabidopsis thaliana] gi 28950713 gb AAO63280.1  At2g24590 [Arabidopsis thaliana] gi 330252501 gb AEC07595.1  serine/arginine-rich splicing factor RSZ22A [Arabidopsis thaliana]                                                                                                             | 245  | 196 | 3.00E-45  | 80.0  | 64.9 | 67.3 | RNA recognition motif and CCHC-type zinc finger domain-containing protein | gbpln | Arabidopsis thaliana | AT2G24590.1   Symbols: RSZ22a, At-RSZ22a   RNA recognition motif and CCHC-type zinc finger domains containing protein   chr2:10449837-10450860 FORWARD LENGTH=196 | 245  | 196 | 9.00E-48  | 80.0  | 64.9 | 67.3 |
| Rsa1.0_00122.1.g5900.t1 | ref NP_850056.1  cyclic nucleotide gated channel [Arabidopsis thaliana] gi 38503238 sp Q9SJA4.2 CNG14_ARAT H RecName: Full=Probable cyclic nucleotide-gated ion channel 14; AltName: Full=Cyclic nucleotide- and calmodulin-regulated ion channel 14 gi 110736217 dbj BAF00079.1  putative cyclic nucleotide-regulated ion channel protein [Arabidopsis thaliana] gi 330252507 gb AEC07601.1  cyclic nucleotide-gated channel 14 [Arabidopsis thaliana]                                                                                                                                                                                                                                                                                          | 758  | 726 | 0         | 95.8  | 87.5 | 91.4 | cyclic nucleotide gated channel                                           | gbpln | Arabidopsis thaliana | AT2G24610.1   Symbols: ATCNGC14, CNGC14   cyclic nucleotide-gated channel 14   chr2:10457105-10460351 FORWARD LENGTH=726                                          | 758  | 726 | 0         | 95.8  | 87.5 | 91.4 |
| Rsa1.0_00122.1.g5901.t1 | ref NP_565576.1  ubiquitin carboxyl-terminal hydrolase 19 [Arabidopsis thaliana] gi 75265927 sp Q9SJA1.2 UBP19_ARAT H RecName: Full=Ubiquitin carboxyl-terminal hydrolase 19; AltName: Full=Deubiquitinating enzyme 19; Short=AtUBP19; AltName: Full=Ubiquitin thioesterase 19; AltName: Full=Ubiquitin-specific-processing protease 19 gi 13430806 gb AAK26025.1 AF360315.1 putative ubiquitin carboxyl terminal hydrolase [Arabidopsis thaliana] gi 15810655 gb AAL07252.1  putative ubiquitin carboxyl terminal hydrolase [Arabidopsis thaliana] gi 20197976 gb AAD23896.2  putative ubiquitin carboxyl terminal hydrolase [Arabidopsis thaliana] gi 330252513 gb AEC07607.1  ubiquitin carboxyl-terminal hydrolase 19 [Arabidopsis thaliana] | 617  | 672 | 0         | 108.9 | 83.0 | 88.5 | ubiquitin carboxyl-terminal hydrolase 19                                  | gbpln | Arabidopsis thaliana | AT2G24640.1   Symbols: UBP19   ubiquitin-specific protease 19   chr2:10475613-10479341 REVERSE LENGTH=672                                                         | 617  | 672 | 0         | 108.9 | 83.0 | 88.5 |
| Rsa1.0_00122.1.g5902.t2 | gb EOA27328.1  hypothetical protein CARUB_v10023444mg, partial [Capsella rubella]                                                                                                                                                                                                                                                                                                                                                                                                                                                                                                                                                                                                                                                                | 577  | 378 | 1.00E-123 | 65.5  | 40.0 | 48.5 | hypothetical protein CARUB_v10023444mg, partial                           | gbpln | Capsella rubella     | AT4G00260.1   Symbols: MEE45   Transcriptional factor B3 family protein   chr4:114971-117051 FORWARD LENGTH=528                                                   | 577  | 528 | 3.00E-93  | 91.5  | 32.2 | 41.1 |
| Rsa1.0_00122.1.g5903.t2 | ref XP_002878782.1  hypothetical protein ARALYDRAFT_901047 [Arabidopsis lyrata subsp. lyrata] gi 297324621 gb EFH55041.1  hypothetical protein ARALYDRAFT_901047 [Arabidopsis lyrata subsp. lyrata]                                                                                                                                                                                                                                                                                                                                                                                                                                                                                                                                              | 510  | 595 | 1.00E-169 | 116.7 | 64.5 | 78.4 | hypothetical protein ARALYDRAFT_901047                                    | gbpln | Arabidopsis lyrata   | AT4G00260.1   Symbols: MEE45   Transcriptional factor B3 family protein   chr4:114971-117051 FORWARD LENGTH=528                                                   | 510  | 528 | 1.00E-171 | 103.5 | 63.7 | 75.5 |
| Rsa1.0_00122.1.g5904.t1 | ref XP_002880626.1  hypothetical protein ARALYDRAFT_901062 [Arabidopsis lyrata subsp. lyrata] gi 297326465 gb EFH56885.1  hypothetical protein ARALYDRAFT_901062 [Arabidopsis lyrata subsp. lyrata]                                                                                                                                                                                                                                                                                                                                                                                                                                                                                                                                              | 485  | 631 | 1.00E-170 | 130.1 | 65.8 | 80.2 | hypothetical protein ARALYDRAFT_901062                                    | gbpln | Arabidopsis lyrata   | AT4G00260.1   Symbols: MEE45   Transcriptional factor B3 family protein   chr4:114971-117051 FORWARD LENGTH=528                                                   | 485  | 528 | 1.00E-154 | 108.9 | 62.5 | 75.1 |
| Rsa1.0_00122.1.g5905.t1 | ref NP_180117.4  receptor like protein 21 [Arabidopsis thaliana] gi 330252611 gb AEC07705.1  receptor like protein 21 [Arabidopsis thaliana]                                                                                                                                                                                                                                                                                                                                                                                                                                                                                                                                                                                                     | 1023 | 935 | 0         | 91.4  | 63.4 | 72.5 | receptor like protein 21                                                  | gbpln | Arabidopsis thaliana | AT2G25470.1   Symbols: AtRLP21, RLP21   receptor like protein 21   chr2:10838420-10841881 FORWARD LENGTH=935                                                      | 1023 | 935 | 0         | 91.4  | 63.4 | 72.5 |
| Rsa1.0_00122.1.g5906.t1 | gb EOA28688.1  hypothetical protein CARUB_v10024914mg [Capsella rubella]                                                                                                                                                                                                                                                                                                                                                                                                                                                                                                                                                                                                                                                                         | 171  | 215 | 3.00E-67  | 125.7 | 72.5 | 85.4 | hypothetical protein CARUB_v10024914mg                                    | gbpln | Capsella rubella     | AT2G24840.1   Symbols: AGL61, DIA   AGAMOUS-like 61   chr2:10581082-10581876 FORWARD LENGTH=264                                                                   | 171  | 264 | 3.00E-69  | 154.4 | 73.7 | 84.2 |

|                         |                                                                                                                                                                                                                                                                                                                                                                                                                                                                                                                                                                                |     |     |           |       |      |      |                                                               |       |                      |                                                                                                                                                                                                                                                                                                                                                                                                                                                                                                                                                                       |     |     |           |       |      |      |
|-------------------------|--------------------------------------------------------------------------------------------------------------------------------------------------------------------------------------------------------------------------------------------------------------------------------------------------------------------------------------------------------------------------------------------------------------------------------------------------------------------------------------------------------------------------------------------------------------------------------|-----|-----|-----------|-------|------|------|---------------------------------------------------------------|-------|----------------------|-----------------------------------------------------------------------------------------------------------------------------------------------------------------------------------------------------------------------------------------------------------------------------------------------------------------------------------------------------------------------------------------------------------------------------------------------------------------------------------------------------------------------------------------------------------------------|-----|-----|-----------|-------|------|------|
| Rsa1.0_00122.1.g5907.t1 | ref NP_565578.1  DnaJ/Hsp40 cysteine-rich domain-containing protein [Arabidopsis thaliana] gi 15294199 gb AAK95276.1 AF410290.1 At2g24860/F27C12.22 [Arabidopsis thaliana] gi 20197874 gb AAD23026.2  expressed protein [Arabidopsis thaliana] gi 20453299 gb AAM19888.1  At2g24860/F27C12.22 [Arabidopsis thaliana] gi 21618127 gb AAM67177.1  Tsi1-interacting protein TSIP1 [Arabidopsis thaliana] gi 51970710 dbj BAD44047.1  unknown protein [Arabidopsis thaliana] gi 330252543 gb AEC07637.1  DnaJ/Hsp40 cysteine-rich domain-containing protein [Arabidopsis thaliana] | 148 | 144 | 1.00E-63  | 97.3  | 82.4 | 89.2 | DnaJ/Hsp40 cysteine-rich domain-containing protein            | gbpln | Arabidopsis thaliana | AT2G24860.1   Symbols:   DnaJ/Hsp40 cysteine-rich domain superfamily protein   chr2:10587118-10588240 REVERSE LENGTH=144                                                                                                                                                                                                                                                                                                                                                                                                                                              | 148 | 144 | 3.00E-66  | 97.3  | 82.4 | 89.2 |
| Rsa1.0_00122.1.g5908.t1 | ref XP_002878810.1  membrane-associated progesterone binding protein 2 [Arabidopsis lyrata subsp. lyrata] gi 297324649 gb EFH55069.1  membrane-associated progesterone binding protein 2 [Arabidopsis lyrata subsp. lyrata]                                                                                                                                                                                                                                                                                                                                                    | 100 | 100 | 9.00E-49  | 100.0 | 95.0 | 98.0 | membrane-associated progesterone binding protein 2            | gbpln | Arabidopsis lyrata   | AT2G24940.1   Symbols: AtMAPR2, MAPR2   membrane-associated progesterone binding protein 2   chr2:10609447-10609749 FORWARD LENGTH=100                                                                                                                                                                                                                                                                                                                                                                                                                                | 100 | 100 | 4.00E-51  | 100.0 | 94.0 | 98.0 |
| Rsa1.0_00122.1.g5909.t1 | ref NP_001118381.1  uncharacterized protein [Arabidopsis thaliana] gi 330252550 gb AEC07644.1  uncharacterized protein AT2G24960 [Arabidopsis thaliana]                                                                                                                                                                                                                                                                                                                                                                                                                        | 744 | 774 | 0         | 104.0 | 75.5 | 84.0 | uncharacterized protein                                       | gbpln | Arabidopsis thaliana | AT2G24960.2   Symbols:   unknown protein; FUNCTIONS IN: molecular function unknown; INVOLVED IN: biological process unknown; LOCATED IN: cellular component unknown; EXPRESSED IN: 21 plant structures; EXPRESSED DURING: 12 growth stages; BEST Arabidopsis thaliana protein match is: unknown protein (TAIR:AT4G02210.2). Has 30201 Blast hits to 17322 proteins in 780 species: Archae - 12; Bacteria - 1396; Metazoa - 17338; Fungi - 3422; Plants - 5037; Viruses - 0; Other Eukaryotes - 2996 (source: NCBI BLINK).   chr2:10617263-10620034 FORWARD LENGTH=774 | 744 | 774 | 0         | 104.0 | 75.5 | 84.0 |
| Rsa1.0_00122.1.g5910.t1 | ref NP_851100.1  Serine/threonine-protein kinase Rio1 [Arabidopsis thaliana] gi 9758721 dbj BAB09107.1  SUDD-like protein [Arabidopsis thaliana] gi 51971891 dbj BAD44610.1  unknown protein [Arabidopsis thaliana] gi 51972017 dbj BAD44673.1  unknown protein [Arabidopsis thaliana] gi 332006786 gb AED94169.1  Serine/threonine-protein kinase Rio1 [Arabidopsis thaliana]                                                                                                                                                                                                 | 540 | 531 | 0         | 98.3  | 88.7 | 92.8 | Serine/threonine-protein kinase Rio1                          | gbpln | Arabidopsis thaliana | AT5G37350.1   Symbols:   Serine/threonine-protein kinase Rio1   chr5:14793037-14795828 FORWARD LENGTH=531                                                                                                                                                                                                                                                                                                                                                                                                                                                             | 540 | 531 | 0         | 98.3  | 88.7 | 92.8 |
| Rsa1.0_00122.1.g5911.t1 | ref XP_002886580.1  predicted protein [Arabidopsis lyrata subsp. lyrata] gi 297332421 gb EFH62839.1  predicted protein [Arabidopsis lyrata subsp. lyrata]                                                                                                                                                                                                                                                                                                                                                                                                                      | 179 | 275 | 5.00E-43  | 153.6 | 54.2 | 67.6 | predicted protein                                             | gbpln | Arabidopsis lyrata   | #                                                                                                                                                                                                                                                                                                                                                                                                                                                                                                                                                                     | #   | #   | #         | #     | #    | #    |
| Rsa1.0_00122.1.g5912.t1 | gb EOA35514.1  hypothetical protein CARUB_v10020721mg [Capsella rubella]                                                                                                                                                                                                                                                                                                                                                                                                                                                                                                       | 267 | 298 | 1.00E-38  | 111.6 | 37.8 | 55.4 | hypothetical protein CARUB_v10020721mg                        | gbpln | Capsella rubella     | AT1G66620.1   Symbols:   Protein with RING/U-box and TRAF-like domains   chr1:24852806-24854044 REVERSE LENGTH=313                                                                                                                                                                                                                                                                                                                                                                                                                                                    | 267 | 313 | 2.00E-37  | 117.2 | 35.2 | 51.7 |
| Rsa1.0_00122.1.g5913.t1 | ref NP_565582.1  aminotransferase-like, plant mobile domain-containing protein [Arabidopsis thaliana] gi 4559351 gb AAD23012.1  expressed protein [Arabidopsis thaliana] gi 95147312 gb ABF57291.1  At2g25010 [Arabidopsis thaliana] gi 330252555 gb AEC07649.1  aminotransferase-like, plant mobile domain-containing protein [Arabidopsis thaliana]                                                                                                                                                                                                                          | 512 | 509 | 0         | 99.4  | 91.0 | 95.5 | aminotransferase-like, plant mobile domain-containing protein | gbpln | Arabidopsis thaliana | AT2G25010.1   Symbols:   Aminotransferase-like, plant mobile domain family protein   chr2:10631691-10633547 FORWARD LENGTH=509                                                                                                                                                                                                                                                                                                                                                                                                                                        | 512 | 509 | 0         | 99.4  | 91.0 | 95.5 |
| Rsa1.0_00122.1.g5914.t1 | gb EOA29374.1  hypothetical protein CARUB_v10025661mg [Capsella rubella]                                                                                                                                                                                                                                                                                                                                                                                                                                                                                                       | 815 | 809 | 0         | 99.3  | 77.9 | 88.0 | hypothetical protein CARUB_v10025661mg                        | gbpln | Capsella rubella     | AT2G25140.1   Symbols: HSP98.7, CLPB-M, CLPB4   casein lytic proteinase B4   chr2:10697877-10701998 REVERSE LENGTH=964                                                                                                                                                                                                                                                                                                                                                                                                                                                | 815 | 964 | 0         | 118.3 | 69.2 | 78.7 |
| Rsa1.0_00122.1.g5915.t1 | dbj BAJ34450.1  unnamed protein product [Thellungiella halophila]                                                                                                                                                                                                                                                                                                                                                                                                                                                                                                              | 317 | 356 | 1.00E-154 | 112.3 | 89.0 | 93.4 | unnamed protein product                                       | ----  | ----                 | AT2G25070.1   Symbols:   Protein phosphatase 2C family protein   chr2:10663517-10665366 REVERSE LENGTH=355                                                                                                                                                                                                                                                                                                                                                                                                                                                            | 317 | 355 | 1.00E-156 | 112.0 | 84.9 | 89.9 |



|                         |                                                                                                                                                                                                                                                                                                                                                                                                                                                                                                                                                                                                                                                                                                                                                                                                                                                                                                                                                                                          |      |      |           |       |      |      |                                                    |       |                      |                                                                                                                                                                                                                                                                                                                                                        |      |     |           |       |      |      |
|-------------------------|------------------------------------------------------------------------------------------------------------------------------------------------------------------------------------------------------------------------------------------------------------------------------------------------------------------------------------------------------------------------------------------------------------------------------------------------------------------------------------------------------------------------------------------------------------------------------------------------------------------------------------------------------------------------------------------------------------------------------------------------------------------------------------------------------------------------------------------------------------------------------------------------------------------------------------------------------------------------------------------|------|------|-----------|-------|------|------|----------------------------------------------------|-------|----------------------|--------------------------------------------------------------------------------------------------------------------------------------------------------------------------------------------------------------------------------------------------------------------------------------------------------------------------------------------------------|------|-----|-----------|-------|------|------|
| Rsa1.0_00122.1.g5916.t1 | refNP_180081.1  CBL-interacting serine/threonine-protein kinase 16 [Arabidopsis thaliana]<br>gi 75337155 sp Q9SEZ7.1 CIPKG_ARAT<br>H RecName: Full=CBL-interacting serine/threonine-protein kinase 16; AltName: Full=SNF1-related kinase 3.18; AltName: Full=SOS2-like protein kinase PKS15<br>gi 14009298 gb AAK50348.1  CBL-interacting protein kinase 16 [Arabidopsis thaliana]<br>gi 116325944 gb ABJ98573.1  At2g25090 [Arabidopsis thaliana]<br>gi 330252562 gb AEC07656.1  CBL-interacting serine/threonine-protein kinase 16 [Arabidopsis thaliana]                                                                                                                                                                                                                                                                                                                                                                                                                              | 461  | 469  | 0         | 101.7 | 85.7 | 92.2 | CBL-interacting serine/threonine-protein kinase 16 | gbpln | Arabidopsis thaliana | AT2G25090.1   Symbols: CIPK16, SnRK3.18   CBL-interacting protein kinase 16   chr2:10670542-10672610 REVERSE LENGTH=469                                                                                                                                                                                                                                | 461  | 469 | 0         | 101.7 | 85.7 | 92.2 |
| Rsa1.0_00123.1.g5917.t1 | gb EOA19387.1  hypothetical protein CARUB_v10000661mg [Capsella rubella]                                                                                                                                                                                                                                                                                                                                                                                                                                                                                                                                                                                                                                                                                                                                                                                                                                                                                                                 | 500  | 539  | 1.00E-178 | 107.8 | 72.8 | 84.0 | hypothetical protein CARUB_v10000661mg             | gbpln | Capsella rubella     | AT5G05240.1   Symbols:   Uncharacterised conserved protein (UCP030365)   chr5:1554023-1556230 REVERSE LENGTH=530                                                                                                                                                                                                                                       | 500  | 530 | 1.00E-174 | 106.0 | 70.2 | 80.2 |
| Rsa1.0_00123.1.g5918.t1 | refXP_002871146.1  hypothetical protein ARALYDRAFT_487314 [Arabidopsis lyrata subsp. lyrata]<br>gi 297316983 gb EFH47405.1  hypothetical protein ARALYDRAFT_487314 [Arabidopsis lyrata subsp. lyrata]                                                                                                                                                                                                                                                                                                                                                                                                                                                                                                                                                                                                                                                                                                                                                                                    | 371  | 365  | 1.00E-149 | 98.4  | 82.2 | 88.7 | hypothetical protein ARALYDRAFT_487314             | gbpln | Arabidopsis lyrata   | AT5G05230.1   Symbols:   RING/U-box superfamily protein   chr5:1551593-1553543 FORWARD LENGTH=363                                                                                                                                                                                                                                                      | 371  | 363 | 1.00E-150 | 97.8  | 82.7 | 88.7 |
| Rsa1.0_00123.1.g5919.t1 | refXP_002871145.1  hypothetical protein ARALYDRAFT_908428 [Arabidopsis lyrata subsp. lyrata]<br>gi 297316982 gb EFH47404.1  hypothetical protein ARALYDRAFT_908428 [Arabidopsis lyrata subsp. lyrata]<br>ref NP_568150.1  aarF domain-containing protein kinase [Arabidopsis thaliana]<br>gi 75261770 sp Q9ASX5.1 Y5520_ARAT<br>H RecName: Full=Uncharacterized aarF domain-containing protein kinase At5g05200, chloroplastic; Flags: Precursor<br>gi 13605575 gb AAK32781.1 AF361613.1 At5g05200/K2A11.7 [Arabidopsis thaliana]<br>gi 14334952 gb AAK59653.1  unknown protein [Arabidopsis thaliana]<br>gi 16648993 gb AAL24348.1  Unknown protein [Arabidopsis thaliana]<br>gi 17104611 gb AAL34194.1  unknown protein [Arabidopsis thaliana]<br>gi 20259938 gb AAM13316.1  unknown protein [Arabidopsis thaliana]<br>gi 22137078 gb AAM91384.1  At5g05200/K2A11.7 [Arabidopsis thaliana]<br>gi 332003457 gb AED90840.1  aarF domain-containing protein kinase [Arabidopsis thaliana] | 138  | 183  | 5.00E-50  | 132.6 | 78.3 | 84.1 | hypothetical protein ARALYDRAFT_908428             | gbpln | Arabidopsis lyrata   | AT5G05220.1   Symbols:   unknown protein; Has 30201 Blast hits to 17322 proteins in 780 species: Archae - 12; Bacteria - 1396; Metazoa - 17338; Fungi - 3422; Plants - 5037; Viruses - 0; Other Eukaryotes - 2996 (source: NCBI BLINK).   chr5:1550273-1550821 FORWARD LENGTH=182                                                                      | 138  | 182 | 4.00E-50  | 131.9 | 73.2 | 81.9 |
| Rsa1.0_00123.1.g5920.t1 | refXP_002871143.1  hypothetical protein ARALYDRAFT_908425 [Arabidopsis lyrata subsp. lyrata]<br>gi 297316980 gb EFH47402.1  hypothetical protein ARALYDRAFT_908425 [Arabidopsis lyrata subsp. lyrata]                                                                                                                                                                                                                                                                                                                                                                                                                                                                                                                                                                                                                                                                                                                                                                                    | 565  | 540  | 0         | 95.6  | 85.8 | 90.3 | aarF domain-containing protein kinase              | gbpln | Arabidopsis thaliana | AT5G05200.1   Symbols:   Protein kinase superfamily protein   chr5:1544206-1547082 REVERSE LENGTH=540                                                                                                                                                                                                                                                  | 565  | 540 | 0         | 95.6  | 85.8 | 90.3 |
| Rsa1.0_00123.1.g5921.t1 | refXP_002871143.1  hypothetical protein ARALYDRAFT_908425 [Arabidopsis lyrata subsp. lyrata]<br>gi 297316980 gb EFH47402.1  hypothetical protein ARALYDRAFT_908425 [Arabidopsis lyrata subsp. lyrata]                                                                                                                                                                                                                                                                                                                                                                                                                                                                                                                                                                                                                                                                                                                                                                                    | 630  | 591  | 0         | 93.8  | 63.2 | 71.6 | hypothetical protein ARALYDRAFT_908425             | gbpln | Arabidopsis lyrata   | AT5G05190.1   Symbols:   Protein of unknown function (DUF133)   chr5:1541853-1543875 FORWARD LENGTH=615                                                                                                                                                                                                                                                | 630  | 615 | 0         | 97.6  | 65.2 | 73.8 |
| Rsa1.0_00123.1.g5922.t1 | gb EOA20598.1  hypothetical protein CARUB_v10000908mg [Capsella rubella]                                                                                                                                                                                                                                                                                                                                                                                                                                                                                                                                                                                                                                                                                                                                                                                                                                                                                                                 | 404  | 462  | 1.00E-128 | 114.4 | 65.8 | 78.7 | hypothetical protein CARUB_v10000908mg             | gbpln | Capsella rubella     | AT5G05180.1   Symbols:   unknown protein; BEST Arabidopsis thaliana protein match is: unknown protein (TAIR:AT3G10880.1); Has 1807 Blast hits to 1807 proteins in 277 species: Archae - 0; Bacteria - 0; Metazoa - 736; Fungi - 347; Plants - 385; Viruses - 0; Other Eukaryotes - 339 (source: NCBI BLINK).   chr5:1536924-1538318 FORWARD LENGTH=432 | 404  | 432 | 1.00E-121 | 106.9 | 63.6 | 77.7 |
| Rsa1.0_00123.1.g5923.t1 | gb AFJ66186.1  hypothetical protein 11M19.5 [Arabidopsis halleri]                                                                                                                                                                                                                                                                                                                                                                                                                                                                                                                                                                                                                                                                                                                                                                                                                                                                                                                        | 1416 | 1557 | 0         | 110.0 | 56.1 | 65.9 | hypothetical protein 11M19.5                       | gbpln | Arabidopsis halleri  | ATMG00860.1   Symbols: ORF158   DNA/RNA polymerases superfamily protein   chrM:235916-236392 FORWARD LENGTH=158                                                                                                                                                                                                                                        | 1416 | 158 | 2.00E-31  | 11.2  | 4.9  | 6.1  |

|                         |                                                                                                                                                                                                                                                                                                                                                                                                                                                                                                                                                                                                                                                                                                                                                                                                                                                                                                                                                  |     |     |           |       |      |      |                                                           |       |                      |                                                                                                                                                         |     |     |           |       |      |      |
|-------------------------|--------------------------------------------------------------------------------------------------------------------------------------------------------------------------------------------------------------------------------------------------------------------------------------------------------------------------------------------------------------------------------------------------------------------------------------------------------------------------------------------------------------------------------------------------------------------------------------------------------------------------------------------------------------------------------------------------------------------------------------------------------------------------------------------------------------------------------------------------------------------------------------------------------------------------------------------------|-----|-----|-----------|-------|------|------|-----------------------------------------------------------|-------|----------------------|---------------------------------------------------------------------------------------------------------------------------------------------------------|-----|-----|-----------|-------|------|------|
| Rsa1.0_00123.1.g5924.t1 | ref NP_196135.1  putative leucine-rich repeat receptor-like protein kinase [Arabidopsis thaliana] gi 75338868 sp Q9FHK7.1 Y5516_ARATH RecName: Full=Probable leucine-rich repeat receptor-like protein kinase At5g05160; Flags: Precursor gi 9759257 dbj BAB09692.1  receptor-like protein kinase [Arabidopsis thaliana] gi 224589658 gb ACN59361.1  leucine-rich repeat receptor-like protein kinase [Arabidopsis thaliana] gi 332003452 gb AED90835.1  putative leucine-rich repeat receptor-like protein kinase [Arabidopsis thaliana] ref NP_196133.3  Transcription elongation factor (TFIIS) family protein [Arabidopsis thaliana] gi 75170631 sp Q9FHK9.1 MD26B_ARAT H RecName: Full=Probable mediator of RNA polymerase II transcription subunit 26b gi 9759255 dbj BAB09690.1  unnamed protein product [Arabidopsis thaliana] gi 332003450 gb AED90833.1  Transcription elongation factor (TFIIS) family protein [Arabidopsis thaliana] | 633 | 640 | 0         | 101.1 | 90.7 | 95.1 | putative leucine-rich repeat receptor-like protein kinase | gbpln | Arabidopsis thaliana | AT5G05160.1   Symbols:   Leucine-rich repeat protein kinase family protein   chr5:1528000-1530017 FORWARD LENGTH=640                                    | 633 | 640 | 0         | 101.1 | 90.7 | 95.1 |
| Rsa1.0_00123.1.g5925.t2 | ref XP_002871138.1  zinc finger family protein [Arabidopsis lyrata subsp. lyrata] gi 297316975 gb EFH47397.1  zinc finger family protein [Arabidopsis lyrata subsp. lyrata]                                                                                                                                                                                                                                                                                                                                                                                                                                                                                                                                                                                                                                                                                                                                                                      | 445 | 436 | 0         | 98.0  | 78.4 | 84.9 | Transcription elongation factor (TFIIS) family protein    | gbpln | Arabidopsis thaliana | AT5G05140.1   Symbols:   Transcription elongation factor (TFIIS) family protein   chr5:1520355-1522297 FORWARD LENGTH=436                               | 445 | 436 | 0         | 98.0  | 78.4 | 84.9 |
| Rsa1.0_00123.1.g5926.t1 | gb EOA19963.1  hypothetical protein CARUB_v10000214mg [Capsella rubella]                                                                                                                                                                                                                                                                                                                                                                                                                                                                                                                                                                                                                                                                                                                                                                                                                                                                         | 849 | 846 | 0         | 99.6  | 85.3 | 91.6 | hypothetical protein CARUB_v10000214mg                    | gbpln | Capsella rubella     | AT5G05130.1   Symbols:   DNA/RNA helicase protein   chr5:1512173-1514918 FORWARD LENGTH=862                                                             | 849 | 862 | 0         | 101.5 | 85.2 | 91.5 |
| Rsa1.0_00123.1.g5927.t1 | ref XP_002871138.1  zinc finger family protein [Arabidopsis lyrata subsp. lyrata] gi 297316975 gb EFH47397.1  zinc finger family protein [Arabidopsis lyrata subsp. lyrata]                                                                                                                                                                                                                                                                                                                                                                                                                                                                                                                                                                                                                                                                                                                                                                      | 172 | 204 | 4.00E-23  | 118.6 | 48.3 | 57.0 | zinc finger family protein                                | gbpln | Arabidopsis lyrata   | AT5G05120.1   Symbols:   C2H2 and C2HC zinc fingers superfamily protein   chr5:1511232-1511837 FORWARD LENGTH=201                                       | 172 | 201 | 3.00E-23  | 116.9 | 44.2 | 55.8 |
| Rsa1.0_00123.1.g5928.t1 | dbj BAJ34510.1  unnamed protein product [Thellungiella halophila]                                                                                                                                                                                                                                                                                                                                                                                                                                                                                                                                                                                                                                                                                                                                                                                                                                                                                | 271 | 270 | 1.00E-102 | 99.6  | 81.2 | 85.2 | unnamed protein product                                   | ----  | ----                 | AT5G05090.1   Symbols:   Homeodomain-like superfamily protein   chr5:1503393-1504193 FORWARD LENGTH=266                                                 | 271 | 266 | 5.00E-93  | 98.2  | 77.1 | 81.5 |
| Rsa1.0_00123.1.g5929.t2 | ref XP_002873191.1  ubiquitin-conjugating enzyme 18 [Arabidopsis lyrata subsp. lyrata] gi 297319028 gb EFH49450.1  ubiquitin-conjugating enzyme 18 [Arabidopsis lyrata subsp. lyrata]                                                                                                                                                                                                                                                                                                                                                                                                                                                                                                                                                                                                                                                                                                                                                            | 263 | 254 | 1.00E-126 | 96.6  | 87.5 | 90.5 | ubiquitin-conjugating enzyme 18                           | gbpln | Arabidopsis lyrata   | AT5G05080.2   Symbols:   UBC22, ATUBC22   ubiquitin-conjugating enzyme 22   chr5:1498727-1499972 REVERSE LENGTH=251                                     | 263 | 251 | 1.00E-124 | 95.4  | 85.2 | 88.6 |
| Rsa1.0_00123.1.g5930.t2 | ref NP_196126.2  putative S-acyltransferase [Arabidopsis thaliana] gi 75251250 sp Q5PNZ1.1 ZDH21_ARAT H RecName: Full=Probable S-acyltransferase At5g05070; AltName: Full=Probable palmitoyltransferase At5g05070; AltName: Full=Zinc finger DHHC domain-containing protein At5g05070 gi 56381885 gb AAV85661.1  At5g05070 [Arabidopsis thaliana] gi 332003441 gb AED90824.1  putative S-acyltransferase [Arabidopsis thaliana]                                                                                                                                                                                                                                                                                                                                                                                                                                                                                                                  | 375 | 413 | 1.00E-176 | 110.1 | 83.2 | 90.9 | putative S-acyltransferase                                | gbpln | Arabidopsis thaliana | AT5G05070.1   Symbols:   DHHC-type zinc finger family protein   chr5:1496896-1498441 FORWARD LENGTH=413                                                 | 375 | 413 | 1.00E-179 | 110.1 | 83.2 | 90.9 |
| Rsa1.0_00123.1.g5931.t2 | ref NP_197984.2  alpha-L-arabinofuranosidase 2 [Arabidopsis thaliana] gi 75248533 sp Q8VZR2.1 ASD2_ARATH RecName: Full=Alpha-L-arabinofuranosidase 2; Short=AtASD2; AltName: Full=Beta-D-xylosidase; Flags: Precursor gi 17380938 gb AAL36281.1  putative arabinosidase [Arabidopsis thaliana] gi 29824173 gb AAP04047.1  unknown protein [Arabidopsis thaliana] gi 29825625 gb AAO92262.1  alpha-L-arabinofuranosidase [Arabidopsis thaliana] gi 332006144 gb AED93527.1  alpha-L-arabinofuranosidase 2 [Arabidopsis thaliana]                                                                                                                                                                                                                                                                                                                                                                                                                  | 678 | 674 | 0         | 99.4  | 80.7 | 87.5 | alpha-L-arabinofuranosidase 2                             | gbpln | Arabidopsis thaliana | AT5G26120.1   Symbols:   ATASD2, ASD2   alpha-L-arabinofuranosidase 2   chr5:9121835-9125399 REVERSE LENGTH=674                                         | 678 | 674 | 0         | 99.4  | 80.7 | 87.5 |
| Rsa1.0_00123.1.g5932.t1 | gb EOA22393.1  hypothetical protein CARUB_v10003029mg [Capsella rubella]                                                                                                                                                                                                                                                                                                                                                                                                                                                                                                                                                                                                                                                                                                                                                                                                                                                                         | 529 | 526 | 0         | 99.4  | 88.8 | 93.2 | hypothetical protein CARUB_v10003029mg                    | gbpln | Capsella rubella     | AT5G05010.2   Symbols:   clathrin adaptor complexes medium subunit family protein   chr5:1477137-1479872 FORWARD LENGTH=527                             | 529 | 527 | 0         | 99.6  | 88.3 | 94.0 |
| Rsa1.0_00123.1.g5933.t1 | gb EOA21162.1  hypothetical protein CARUB_v10001510mg [Capsella rubella]                                                                                                                                                                                                                                                                                                                                                                                                                                                                                                                                                                                                                                                                                                                                                                                                                                                                         | 314 | 313 | 1.00E-163 | 99.7  | 89.8 | 95.2 | hypothetical protein CARUB_v10001510mg                    | gbpln | Capsella rubella     | AT5G05000.1   Symbols:   TOC34, ATTOC34, OEP34   translocan at the outer envelope membrane of chloroplasts 34   chr5:1474262-1475772 REVERSE LENGTH=313 | 314 | 313 | 1.00E-160 | 99.7  | 87.3 | 93.9 |

|                         |                                                                                                                                                                                                                                                                                                                                                                                                                                                                                                                                                                                  |      |      |           |       |      |      |                                                |       |                      |                                                                                                                                                                                                                                                              |      |      |           |       |      |      |
|-------------------------|----------------------------------------------------------------------------------------------------------------------------------------------------------------------------------------------------------------------------------------------------------------------------------------------------------------------------------------------------------------------------------------------------------------------------------------------------------------------------------------------------------------------------------------------------------------------------------|------|------|-----------|-------|------|------|------------------------------------------------|-------|----------------------|--------------------------------------------------------------------------------------------------------------------------------------------------------------------------------------------------------------------------------------------------------------|------|------|-----------|-------|------|------|
| Rsa1.0_00123.1.g5934.t1 | gb EOA20566.1  hypothetical protein CARUB_v10000878mg [Capsella rubella]                                                                                                                                                                                                                                                                                                                                                                                                                                                                                                         | 615  | 472  | 0         | 76.7  | 59.0 | 66.7 | hypothetical protein CARUB_v10000878mg         | gbpln | Capsella rubella     | AT5G04990.1   Symbols: SUN1, ATSUN1   SAD1/JNC-84 domain protein 1   chr5:1471698-1473770 REVERSE LENGTH=471                                                                                                                                                 | 615  | 471  | 0         | 76.6  | 57.6 | 66.2 |
| Rsa1.0_00123.1.g5935.t1 | ref XP_002873178.1  hypothetical protein ARALYDRAFT_487284 [Arabidopsis lyrata subsp. lyrata]   gi 297319015 gb EFH449437.1  hypothetical protein ARALYDRAFT_487284 [Arabidopsis lyrata subsp. lyrata]                                                                                                                                                                                                                                                                                                                                                                           | 599  | 616  | 0         | 102.8 | 81.3 | 85.1 | hypothetical protein ARALYDRAFT_487284         | gbpln | Arabidopsis lyrata   | AT5G04970.1   Symbols:   Plant invertase/pectin methyltransferase inhibitor superfamily   chr5:1464262-1467001 REVERSE LENGTH=624                                                                                                                            | 599  | 624  | 0         | 104.2 | 81.3 | 84.8 |
| Rsa1.0_00123.1.g5936.t1 | gb EOA22839.1  hypothetical protein CARUB_v10003563mg [Capsella rubella]                                                                                                                                                                                                                                                                                                                                                                                                                                                                                                         | 360  | 321  | 1.00E-163 | 89.2  | 78.1 | 82.2 | hypothetical protein CARUB_v10003563mg         | gbpln | Capsella rubella     | AT5G04950.1   Symbols: NAS1, ATNAS1   nicotianamine synthase 1   chr5:1457876-1458838 REVERSE LENGTH=320                                                                                                                                                     | 360  | 320  | 1.00E-165 | 88.9  | 77.8 | 82.2 |
| Rsa1.0_00123.1.g5937.t1 | ref XP_002872136.1  integral membrane transporter family protein [Arabidopsis lyrata subsp. lyrata]   gi 297317973 gb EFH48395.1  integral membrane transporter family protein [Arabidopsis lyrata subsp. lyrata]                                                                                                                                                                                                                                                                                                                                                                | 113  | 498  | 2.00E-41  | 440.7 | 75.2 | 80.5 | integral membrane transporter family protein   | gbpln | Arabidopsis lyrata   | AT5G25050.1   Symbols:   Major facilitator superfamily protein   chr5:8632022-8633828 FORWARD LENGTH=499                                                                                                                                                     | 113  | 499  | 1.00E-43  | 441.6 | 74.3 | 79.6 |
| Rsa1.0_00123.1.g5938.t1 | #                                                                                                                                                                                                                                                                                                                                                                                                                                                                                                                                                                                | #    | #    | #         | #     | #    | #    | -                                              | ----  | ----                 | #                                                                                                                                                                                                                                                            | #    | #    | #         | #     | #    |      |
| Rsa1.0_00123.1.g5939.t1 | gb EOA22636.1  hypothetical protein CARUB_v10003306mg [Capsella rubella]                                                                                                                                                                                                                                                                                                                                                                                                                                                                                                         | 662  | 664  | 0         | 100.3 | 81.3 | 90.0 | hypothetical protein CARUB_v10003306mg         | gbpln | Capsella rubella     | AT5G04940.2   Symbols: SUVH1   SU(VAR)3-9 homolog 1   chr5:1454616-1456628 REVERSE LENGTH=670                                                                                                                                                                | 662  | 670  | 0         | 101.2 | 81.3 | 89.6 |
| Rsa1.0_00123.1.g5940.t1 | gb EOA22636.1  hypothetical protein CARUB_v10003306mg [Capsella rubella]                                                                                                                                                                                                                                                                                                                                                                                                                                                                                                         | 665  | 664  | 0         | 99.8  | 81.7 | 89.0 | hypothetical protein CARUB_v10003306mg         | gbpln | Capsella rubella     | AT5G04940.2   Symbols: SUVH1   SU(VAR)3-9 homolog 1   chr5:1454616-1456628 REVERSE LENGTH=670                                                                                                                                                                | 665  | 670  | 0         | 100.8 | 81.5 | 87.8 |
| Rsa1.0_00123.1.g5941.t1 | ref XP_002871124.1  hypothetical protein ARALYDRAFT_908384 [Arabidopsis lyrata subsp. lyrata]   gi 297316961 gb EFH47383.1  hypothetical protein ARALYDRAFT_908384 [Arabidopsis lyrata subsp. lyrata]                                                                                                                                                                                                                                                                                                                                                                            | 1154 | 1161 | 0         | 100.6 | 92.5 | 95.7 | hypothetical protein ARALYDRAFT_908384         | gbpln | Arabidopsis lyrata   | AT5G04930.1   Symbols: ALA1   aminophospholipid ATPase 1   chr5:1445509-1449568 FORWARD LENGTH=1158                                                                                                                                                          | 1154 | 1158 | 0         | 100.3 | 92.1 | 95.1 |
| Rsa1.0_00123.1.g5942.t2 | ref NP_196112.1  vacuolar protein sorting-associated protein 36 [Arabidopsis thaliana]   gi 75170174 sp Q9FF81.1 VPS36 ARAT H RecName: Full=Vacuolar protein sorting-associated protein 36; Short=AtVPS36; AltName: Full=ESCRT-II complex subunit VPS36   gi 10178031 dbj BAB11514.1  unnamed protein product [Arabidopsis thaliana]   gi 18175694 gb AAL59912.1  unknown protein [Arabidopsis thaliana]   gi 20465997 gb AAM20220.1  unknown protein [Arabidopsis thaliana]   gi 332003421 gb AED90804.1  vacuolar protein sorting-associated protein 36 [Arabidopsis thaliana] | 444  | 440  | 0         | 99.1  | 89.4 | 93.5 | vacuolar protein sorting-associated protein 36 | gbpln | Arabidopsis thaliana | AT5G04920.1   Symbols:   EAP30/Vps36 family protein   chr5:1439172-1441545 REVERSE LENGTH=440                                                                                                                                                                | 444  | 440  | 0         | 99.1  | 89.4 | 93.5 |
| Rsa1.0_00123.1.g5943.t1 | gb EOA21537.1  hypothetical protein CARUB_v10001943mg [Capsella rubella]                                                                                                                                                                                                                                                                                                                                                                                                                                                                                                         | 213  | 215  | 5.00E-92  | 100.9 | 87.8 | 92.0 | hypothetical protein CARUB_v10001943mg         | gbpln | Capsella rubella     | AT5G04910.1   Symbols:   unknown protein; Has 71 Blast hits to 71 proteins in 36 species: Archae - 0; Bacteria - 0; Metazoa - 17; Fungi - 0; Plants - 40; Viruses - 0; Other Eukaryotes - 14 (source: NCBI BLink).   chr5:1437695-1438770 FORWARD LENGTH=222 | 213  | 222  | 4.00E-90  | 104.2 | 86.4 | 92.5 |
| Rsa1.0_00123.1.g5944.t1 | gb EOA26425.1  hypothetical protein CARUB_v10024547mg [Capsella rubella]                                                                                                                                                                                                                                                                                                                                                                                                                                                                                                         | 517  | 509  | 0         | 98.5  | 91.7 | 95.0 | hypothetical protein CARUB_v10024547mg         | gbpln | Capsella rubella     | AT2G26640.1   Symbols: KCS11   3-ketoacyl-CoA synthase 11   chr2:11330094-11331623 FORWARD LENGTH=509                                                                                                                                                        | 517  | 509  | 0         | 98.5  | 90.9 | 95.4 |
| Rsa1.0_00123.1.g5945.t1 | ref NP_680142.2  DEA(D/H)-box RNA helicase family protein [Arabidopsis thaliana]   gi 10178028 dbj BAB11511.1  ATP-dependent RNA helicase A-like protein [Arabidopsis thaliana]   gi 332003418 gb AED90801.1  DEA(D/H)-box RNA helicase family protein [Arabidopsis thaliana]                                                                                                                                                                                                                                                                                                    | 1165 | 1161 | 0         | 99.7  | 94.2 | 96.8 | DEA(D/H)-box RNA helicase family protein       | gbpln | Arabidopsis thaliana | AT5G04895.1   Symbols:   DEA(D/H)-box RNA helicase family protein   chr5:1428796-1434516 FORWARD LENGTH=1161                                                                                                                                                 | 1165 | 1161 | 0         | 99.7  | 94.2 | 96.8 |
| Rsa1.0_00123.1.g5946.t1 | ref XP_002871120.1  hypothetical protein ARALYDRAFT_487275 [Arabidopsis lyrata subsp. lyrata]   gi 297316957 gb EFH47379.1  hypothetical protein ARALYDRAFT_487275 [Arabidopsis lyrata subsp. lyrata]                                                                                                                                                                                                                                                                                                                                                                            | 384  | 366  | 2.00E-96  | 95.3  | 54.4 | 67.4 | hypothetical protein ARALYDRAFT_487275         | gbpln | Arabidopsis lyrata   | AT5G04890.1   Symbols: RTM2   HSP20-like chaperones superfamily protein   chr5:1427217-1428390 FORWARD LENGTH=366                                                                                                                                            | 384  | 366  | 1.00E-79  | 95.3  | 53.4 | 64.3 |

|                         |                                                                                                                                                                                                                                                                                                                                                                                                                    |     |     |           |       |      |      |                                             |       |                      |                                                                                                                                                                                                                                                                                                                                                        |     |     |           |       |      |      |
|-------------------------|--------------------------------------------------------------------------------------------------------------------------------------------------------------------------------------------------------------------------------------------------------------------------------------------------------------------------------------------------------------------------------------------------------------------|-----|-----|-----------|-------|------|------|---------------------------------------------|-------|----------------------|--------------------------------------------------------------------------------------------------------------------------------------------------------------------------------------------------------------------------------------------------------------------------------------------------------------------------------------------------------|-----|-----|-----------|-------|------|------|
| Rsa1.0_00123.1.g5947.t4 | ref[XP_002871119.1] glycosyl hydrolase family 3 protein [Arabidopsis lyrata subsp. lyrata] gi 297316956 gb EFH47378.1  glycosyl hydrolase family 3 protein [Arabidopsis lyrata subsp. lyrata]                                                                                                                                                                                                                      | 674 | 668 | 0         | 99.1  | 88.3 | 92.6 | glycosyl hydrolase family 3 protein         | gbpln | Arabidopsis lyrata   | AT5G04885.1   Symbols:   Glycosyl hydrolase family protein   chr5:1423369-1426628 FORWARD LENGTH=665                                                                                                                                                                                                                                                   | 674 | 665 | 0         | 98.7  | 86.5 | 92.4 |
| Rsa1.0_00123.1.g5948.t1 | gb AAx22255.1  At1g23470 [Arabidopsis thaliana]                                                                                                                                                                                                                                                                                                                                                                    | 160 | 169 | 5.00E-66  | 105.6 | 78.1 | 90.0 | At1g23470                                   | gbpln | Arabidopsis thaliana | AT1G29960.1   Symbols:   Peptidase S24/S26A/S26B/S26C family protein   chr1:10494813-10495851 FORWARD LENGTH=169                                                                                                                                                                                                                                       | 160 | 169 | 1.00E-67  | 105.6 | 76.9 | 89.4 |
| Rsa1.0_00123.1.g5949.t1 | gb ABE73345.1  putative calcium-dependent protein kinase 2 [Isatis tinctoria] gi 92110524 gb ABE73346.1  putative calcium-dependent protein kinase 2 [Isatis tinctoria]                                                                                                                                                                                                                                            | 609 | 625 | 0         | 102.6 | 93.6 | 95.2 | putative calcium-dependent protein kinase 2 | gbpln | Isatis tinctoria     | AT5G04870.1   Symbols: CPK1, ATPCK1   calcium dependent protein kinase 1   chr5:1417015-1419877 REVERSE LENGTH=610                                                                                                                                                                                                                                     | 609 | 610 | 0         | 100.2 | 91.3 | 93.8 |
| Rsa1.0_00123.1.g5950.t1 | #                                                                                                                                                                                                                                                                                                                                                                                                                  | #   | #   | #         | #     | #    | #    | -                                           | ----  | ----                 | #                                                                                                                                                                                                                                                                                                                                                      | #   | #   | #         | #     | #    |      |
| Rsa1.0_00123.1.g5951.t1 | ref[XP_002873172.1] hypothetical protein ARALYDRAFT_487270 [Arabidopsis lyrata subsp. lyrata] gi 297319009 gb EFH49431.1  hypothetical protein ARALYDRAFT_487270 [Arabidopsis lyrata subsp. lyrata]                                                                                                                                                                                                                | 758 | 770 | 0         | 101.6 | 79.9 | 86.3 | hypothetical protein ARALYDRAFT_487270      | gbpln | Arabidopsis lyrata   | AT5G04860.1   Symbols:   unknown protein; BEST Arabidopsis thaliana protein match is: unknown protein (TAIR:AT3G11760.1); Has 1807 Blast hits to 1807 proteins in 277 species: Archae - 0; Bacteria - 0; Metazoa - 736; Fungi - 347; Plants - 385; Viruses - 0; Other Eukaryotes - 339 (source: NCBI BLink).   chr5:1411760-1414459 REVERSE LENGTH=782 | 758 | 782 | 0         | 103.2 | 80.7 | 88.3 |
| Rsa1.0_00123.1.g5952.t1 | gb EOA21471.1  hypothetical protein CARUB_v10001863mg [Capsella rubella]                                                                                                                                                                                                                                                                                                                                           | 238 | 235 | 1.00E-120 | 98.7  | 92.4 | 95.8 | hypothetical protein CARUB_v10001863mg      | gbpln | Capsella rubella     | AT5G04850.1   Symbols: VPS60.2   SNF7 family protein   chr5:1408246-1409806 REVERSE LENGTH=235                                                                                                                                                                                                                                                         | 238 | 235 | 1.00E-120 | 98.7  | 90.8 | 95.4 |
| Rsa1.0_00123.1.g5953.t3 | dbj BAB08988.1  unnamed protein product [Arabidopsis thaliana]                                                                                                                                                                                                                                                                                                                                                     | 354 | 342 | 1.00E-134 | 96.6  | 75.1 | 82.8 | unnamed protein product                     | gbpln | Arabidopsis thaliana | AT5G04840.1   Symbols:   bZIP protein   chr5:1406005-1407648 FORWARD LENGTH=307                                                                                                                                                                                                                                                                        | 354 | 307 | 1.00E-129 | 86.7  | 72.9 | 78.5 |
| Rsa1.0_00123.1.g5954.t1 | gb EOA21611.1  hypothetical protein CARUB_v10002023mg [Capsella rubella]                                                                                                                                                                                                                                                                                                                                           | 193 | 194 | 1.00E-93  | 100.5 | 86.5 | 91.7 | hypothetical protein CARUB_v10002023mg      | gbpln | Capsella rubella     | AT5G04830.2   Symbols:   Nuclear transport factor 2 (NTF2) family protein   chr5:1402294-1403671 REVERSE LENGTH=178                                                                                                                                                                                                                                    | 193 | 178 | 3.00E-89  | 92.2  | 79.3 | 83.9 |
| Rsa1.0_00123.1.g5955.t1 | ref[NP_196102.1] ovate family protein 13 [Arabidopsis thaliana] gi 9758457 dbj BAB08986.1  unnamed protein product [Arabidopsis thaliana] gi 17529322 gb AAL38888.1  unknown protein [Arabidopsis thaliana] gi 21436368 gb AAM51354.1  unknown protein [Arabidopsis thaliana] gi 21536974 gb AAM61315.1  unknown [Arabidopsis thaliana] gi 332003407 gb AED90790.1  ovate family protein 13 [Arabidopsis thaliana] | 264 | 260 | 1.00E-107 | 98.5  | 81.4 | 87.1 | ovate family protein 13                     | gbpln | Arabidopsis thaliana | AT5G04820.1   Symbols: ATOFP13, OFP13   ovate family protein 13   chr5:1399685-1400467 FORWARD LENGTH=260                                                                                                                                                                                                                                              | 264 | 260 | 1.00E-109 | 98.5  | 81.4 | 87.1 |
| Rsa1.0_00123.1.g5956.t1 | ref[XP_002892396.1] hypothetical protein ARALYDRAFT_470757 [Arabidopsis lyrata subsp. lyrata] gi 297338238 gb EFH68655.1  hypothetical protein ARALYDRAFT_470757 [Arabidopsis lyrata subsp. lyrata]                                                                                                                                                                                                                | 170 | 481 | 1.00E-63  | 282.9 | 72.4 | 82.4 | hypothetical protein ARALYDRAFT_470757      | gbpln | Arabidopsis lyrata   | AT1G07360.1   Symbols:   CCH-type zinc fingerfamily protein with RNA-binding domain   chr1:2260562-2262795 REVERSE LENGTH=481                                                                                                                                                                                                                          | 170 | 481 | 5.00E-66  | 282.9 | 72.4 | 82.4 |
| Rsa1.0_00123.1.g5957.t1 | ref[XP_002871115.1] pentatricopeptide repeat-containing protein [Arabidopsis lyrata subsp. lyrata] gi 297316952 gb EFH47374.1  pentatricopeptide repeat-containing protein [Arabidopsis lyrata subsp. lyrata]                                                                                                                                                                                                      | 947 | 942 | 0         | 99.5  | 88.4 | 91.4 | pentatricopeptide repeat-containing protein | gbpln | Arabidopsis lyrata   | AT5G04810.1   Symbols:   pentatricopeptide (PPR) repeat-containing protein   chr5:1390049-1393760 FORWARD LENGTH=952                                                                                                                                                                                                                                   | 947 | 952 | 0         | 100.5 | 87.8 | 91.6 |
| Rsa1.0_00123.1.g5958.t1 | ref[XP_002871114.1] 40S ribosomal protein S17 [Arabidopsis lyrata subsp. lyrata] gi 297316951 gb EFH47373.1  40S ribosomal protein S17 [Arabidopsis lyrata subsp. lyrata]                                                                                                                                                                                                                                          | 136 | 138 | 7.00E-65  | 101.5 | 92.6 | 94.1 | 40S ribosomal protein S17                   | gbpln | Arabidopsis lyrata   | AT5G04800.4   Symbols:   Ribosomal S17 family protein   chr5:1389217-1389642 FORWARD LENGTH=141                                                                                                                                                                                                                                                        | 136 | 141 | 8.00E-65  | 103.7 | 91.2 | 93.4 |
| Rsa1.0_00123.1.g5959.t1 | gb EOA21222.1  hypothetical protein CARUB_v10001570mg [Capsella rubella]                                                                                                                                                                                                                                                                                                                                           | 501 | 300 | 1.00E-134 | 59.9  | 48.1 | 50.9 | hypothetical protein CARUB_v10001570mg      | gbpln | Capsella rubella     | AT5G04740.1   Symbols:   ACT domain-containing protein   chr5:1368713-1371391 REVERSE LENGTH=301                                                                                                                                                                                                                                                       | 501 | 301 | 1.00E-136 | 60.1  | 48.3 | 51.1 |
| Rsa1.0_00123.1.g5960.t1 | gb EOA19982.1  hypothetical protein CARUB_v10000246mg [Capsella rubella]                                                                                                                                                                                                                                                                                                                                           | 804 | 812 | 0         | 101.0 | 80.6 | 89.9 | hypothetical protein CARUB_v10000246mg      | gbpln | Capsella rubella     | AT5G04720.1   Symbols: ADR1-L2   ADR1-like 2   chr5:1360748-1363665 FORWARD LENGTH=811                                                                                                                                                                                                                                                                 | 804 | 811 | 0         | 100.9 | 77.1 | 88.8 |
| Rsa1.0_00123.1.g5961.t1 | gb EOA20384.1  hypothetical protein CARUB_v10000697mg [Capsella rubella]                                                                                                                                                                                                                                                                                                                                           | 525 | 529 | 0         | 100.8 | 91.0 | 94.9 | hypothetical protein CARUB_v10000697mg      | gbpln | Capsella rubella     | AT5G04710.1   Symbols:   Zn-dependent exopeptidases superfamily protein   chr5:1357273-1360128 REVERSE LENGTH=526                                                                                                                                                                                                                                      | 525 | 526 | 0         | 100.2 | 91.6 | 95.0 |

|                          |                                                                                                                                                                                                                                                                                                                                                                                                                                                                                                                                                                                                                                                                                                     |     |     |           |       |      |      |                                                                                                                          |                      |                                                                                                                                                                                                                                                                                                                                                                                                                                                                                                                                                                |     |     |           |       |      |      |
|--------------------------|-----------------------------------------------------------------------------------------------------------------------------------------------------------------------------------------------------------------------------------------------------------------------------------------------------------------------------------------------------------------------------------------------------------------------------------------------------------------------------------------------------------------------------------------------------------------------------------------------------------------------------------------------------------------------------------------------------|-----|-----|-----------|-------|------|------|--------------------------------------------------------------------------------------------------------------------------|----------------------|----------------------------------------------------------------------------------------------------------------------------------------------------------------------------------------------------------------------------------------------------------------------------------------------------------------------------------------------------------------------------------------------------------------------------------------------------------------------------------------------------------------------------------------------------------------|-----|-----|-----------|-------|------|------|
| Rsa1.0_00123.1.g5962.t1  | gb EOA24093.1  hypothetical protein CARUB_v10017323mg, partial [Capsella rubella]                                                                                                                                                                                                                                                                                                                                                                                                                                                                                                                                                                                                                   | 384 | 423 | 7.00E-91  | 110.2 | 51.6 | 68.0 | hypothetical protein CARUB_v10017323mg, gbpIn partial                                                                    | Capsella rubella     | AT3G26010.1   Symbols:   Galactose oxidase/kelch repeat superfamily protein   chr3:9511901-9513145 FORWARD LENGTH=414                                                                                                                                                                                                                                                                                                                                                                                                                                          | 384 | 414 | 5.00E-93  | 107.8 | 51.6 | 68.5 |
| Rsa1.0_00123.1.g5963.t1  | ref NP_189230.1  F-box protein [Arabidopsis thaliana] gi 75274193 sp Q9LU90.1 FB188_ARATH RecName: Full=F-box protein At3g26010 gi 9279606 dbj BAB01064.1  unnamed protein product [Arabidopsis thaliana] gi 91806483 gb ABE65969.1  F-box family protein [Arabidopsis thaliana] gi 332643580 gb AEE77101.1  F-box protein [Arabidopsis thaliana] ref NP_189230.1  F-box protein [Arabidopsis thaliana] gi 75274193 sp Q9LU90.1 FB188_ARATH RecName: Full=F-box protein At3g26010 gi 9279606 dbj BAB01064.1  unnamed protein product [Arabidopsis thaliana] gi 91806483 gb ABE65969.1  F-box family protein [Arabidopsis thaliana] gi 332643580 gb AEE77101.1  F-box protein [Arabidopsis thaliana] | 423 | 414 | 1.00E-112 | 97.9  | 52.0 | 68.1 | F-box protein gbpIn                                                                                                      | Arabidopsis thaliana | AT3G26010.1   Symbols:   Galactose oxidase/kelch repeat superfamily protein   chr3:9511901-9513145 FORWARD LENGTH=414                                                                                                                                                                                                                                                                                                                                                                                                                                          | 423 | 414 | 1.00E-115 | 97.9  | 52.0 | 68.1 |
| Rsa1.0_00123.1.g5964.t1  | At3g26010 gi 9279606 dbj BAB01064.1  unnamed protein product [Arabidopsis thaliana] gi 91806483 gb ABE65969.1  F-box family protein [Arabidopsis thaliana] gi 332643580 gb AEE77101.1  F-box protein [Arabidopsis thaliana] ref NP_187447.1  O-fucosyltransferase-like protein [Arabidopsis thaliana] gi 6648202 gb AAF21200.1 AC013483.24 putative auxin-independent growth promoter [Arabidopsis thaliana] gi 332641096 gb AEE74617.1  O-fucosyltransferase-like protein [Arabidopsis thaliana]                                                                                                                                                                                                   | 381 | 414 | 4.00E-93  | 108.7 | 53.3 | 68.5 | F-box protein gbpIn                                                                                                      | Arabidopsis thaliana | AT3G26010.1   Symbols:   Galactose oxidase/kelch repeat superfamily protein   chr3:9511901-9513145 FORWARD LENGTH=414                                                                                                                                                                                                                                                                                                                                                                                                                                          | 381 | 414 | 9.00E-96  | 108.7 | 53.3 | 68.5 |
| Rsa1.0_00123.1.g5965.t2  | ref NP_568384.1  uncharacterized protein [Arabidopsis thaliana] gi 21593922 gb AAM65887.1  unknown [Arabidopsis thaliana] gi 26453290 dbj BAC43718.1  unknown protein [Arabidopsis thaliana] gi 28416873 gb AAO42967.1  At5g19875 [Arabidopsis thaliana] gi 332005377 gb AED92760.1  uncharacterized protein AT5G19875 [Arabidopsis thaliana]                                                                                                                                                                                                                                                                                                                                                       | 170 | 579 | 1.00E-22  | 340.6 | 31.2 | 34.7 | O-fucosyltransferase-like protein gbpIn                                                                                  | Arabidopsis thaliana | AT3G07900.1   Symbols:   O-fucosyltransferase family protein   chr3:2520826-2523008 FORWARD LENGTH=579                                                                                                                                                                                                                                                                                                                                                                                                                                                         | 170 | 579 | 4.00E-25  | 340.6 | 31.2 | 34.7 |
| Rsa1.0_00123.1.g5966.t1  | ref NP_568384.1  uncharacterized protein [Arabidopsis thaliana] gi 21593922 gb AAM65887.1  unknown [Arabidopsis thaliana] gi 26453290 dbj BAC43718.1  unknown protein [Arabidopsis thaliana] gi 28416873 gb AAO42967.1  At5g19875 [Arabidopsis thaliana] gi 332005377 gb AED92760.1  uncharacterized protein AT5G19875 [Arabidopsis thaliana]                                                                                                                                                                                                                                                                                                                                                       | 123 | 123 | 6.00E-48  | 100.0 | 80.5 | 91.9 | uncharacterized protein gbpIn                                                                                            | Arabidopsis thaliana | AT5G19875.1   Symbols:   unknown protein; FUNCTIONS IN: molecular function unknown; INVOLVED IN: response to oxidative stress; LOCATED IN: endomembrane system; EXPRESSED IN: 21 plant structures; EXPRESSED DURING: 13 growth stages; BEST Arabidopsis thaliana protein match is: unknown protein (TAIR:AT2G31940.1); Has 30201 Blast hits to 17322 proteins in 780 species: Archae - 12; Bacteria - 1396; Metazoa - 17338; Fungi - 3422; Plants - 5037; Viruses - 0; Other Eukaryotes - 2996 (source: NCBI BLINK).   chr5:6718412-6718783 FORWARD LENGTH=123 | 123 | 123 | 1.00E-50  | 100.0 | 80.5 | 91.9 |
| Rsa1.0_00123.1.g5967.t1  | gb AAM60837.1  peroxidase [Arabidopsis thaliana]                                                                                                                                                                                                                                                                                                                                                                                                                                                                                                                                                                                                                                                    | 344 | 329 | 1.00E-166 | 95.6  | 84.9 | 90.1 | peroxidase gbpIn                                                                                                         | Arabidopsis thaliana | AT5G19880.1   Symbols:   Peroxidase superfamily protein   chr5:6720578-6722411 REVERSE LENGTH=329                                                                                                                                                                                                                                                                                                                                                                                                                                                              | 344 | 329 | 1.00E-167 | 95.6  | 84.6 | 89.8 |
| Rsa1.0_00123.1.g5968.t1  | sp Q42517.1 PERN_ARMRU RecName: Full=Peroxidase N; AltName: Full=Neutral peroxidase; Flags: Precursor gi 16096 emb CAA40796.1  peroxidase [Armoracia rusticana]                                                                                                                                                                                                                                                                                                                                                                                                                                                                                                                                     | 324 | 327 | 1.00E-163 | 100.9 | 86.4 | 92.3 | RecName: Full=Peroxidase N; AltName: Full=Neutral peroxidase; Flags: Precursor gi 16096 emb CAA40796.1  peroxidase gbpIn | Armoracia rusticana  | AT5G19890.1   Symbols:   Peroxidase superfamily protein   chr5:6724372-6725877 REVERSE LENGTH=328                                                                                                                                                                                                                                                                                                                                                                                                                                                              | 324 | 328 | 1.00E-163 | 101.2 | 85.2 | 92.6 |
| Rsa1.0_00123.1.g5969.t1  | ref NP_197490.1  putative PRLI-interacting factor [Arabidopsis thaliana] gi 222422845 dbj BAH19409.1  AT5G19900 [Arabidopsis thaliana] gi 332005380 gb AED92763.1  putative PRLI-interacting factor [Arabidopsis thaliana]                                                                                                                                                                                                                                                                                                                                                                                                                                                                          | 466 | 494 | 1.00E-175 | 106.0 | 76.8 | 84.3 | putative PRLI-interacting factor gbpIn                                                                                   | Arabidopsis thaliana | AT5G19900.1   Symbols:   PRLI-interacting factor, putative   chr5:6728561-6730045 REVERSE LENGTH=494                                                                                                                                                                                                                                                                                                                                                                                                                                                           | 466 | 494 | 1.00E-178 | 106.0 | 76.8 | 84.3 |
| Rsa1.0_00123.1.g5970.t2  | gb EOA20119.1  hypothetical protein CARUB_v10000397mg [Capsella rubella]                                                                                                                                                                                                                                                                                                                                                                                                                                                                                                                                                                                                                            | 828 | 668 | 0         | 80.7  | 53.9 | 59.8 | hypothetical protein CARUB_v10000397mg gbpIn                                                                             | Capsella rubella     | AT5G19920.1   Symbols:   Transducin/WD40 repeat-like superfamily protein   chr5:6733622-6737266 REVERSE LENGTH=656                                                                                                                                                                                                                                                                                                                                                                                                                                             | 828 | 656 | 0         | 79.2  | 42.6 | 46.3 |
| Rsa1.0_00123.1.g5971.t18 | ref NP_568386.1  uncharacterized protein [Arabidopsis thaliana] gi 33418778 ref NP_001190343.1  uncharacterized protein [Arabidopsis thaliana] gi 110738248 dbj BAF01053.1  hypothetical protein [Arabidopsis thaliana] gi 332005384 gb AED92767.1  uncharacterized protein AT5G19930 [Arabidopsis thaliana] gi 332005385 gb AED92768.1  uncharacterized protein AT5G19930 [Arabidopsis thaliana]                                                                                                                                                                                                                                                                                                   | 667 | 288 | 1.00E-133 | 43.2  | 37.5 | 40.3 | uncharacterized protein gbpIn                                                                                            | Arabidopsis thaliana | AT5G19930.2   Symbols:   Protein of unknown function DUF92, transmembrane   chr5:6737872-6739283 REVERSE LENGTH=288                                                                                                                                                                                                                                                                                                                                                                                                                                            | 667 | 288 | 1.00E-136 | 43.2  | 37.5 | 40.3 |

|                          |                                                                                                                                                                                                                                                                                                                                                                                                                                                                                                                                                                                                                                                                                                                                                                                                                                                                                                                                                         |     |     |           |       |      |      |                                                                     |       |                      |                                                                                                                                                                                                                                                                                                                                                                                                                                                                                           |     |     |           |       |      |      |
|--------------------------|---------------------------------------------------------------------------------------------------------------------------------------------------------------------------------------------------------------------------------------------------------------------------------------------------------------------------------------------------------------------------------------------------------------------------------------------------------------------------------------------------------------------------------------------------------------------------------------------------------------------------------------------------------------------------------------------------------------------------------------------------------------------------------------------------------------------------------------------------------------------------------------------------------------------------------------------------------|-----|-----|-----------|-------|------|------|---------------------------------------------------------------------|-------|----------------------|-------------------------------------------------------------------------------------------------------------------------------------------------------------------------------------------------------------------------------------------------------------------------------------------------------------------------------------------------------------------------------------------------------------------------------------------------------------------------------------------|-----|-----|-----------|-------|------|------|
| Rsa1.0_00123.1.g5972.t1  | gb EOA21452.1  hypothetical protein CARUB_v10001836mg [Capsella rubella]                                                                                                                                                                                                                                                                                                                                                                                                                                                                                                                                                                                                                                                                                                                                                                                                                                                                                | 228 | 241 | 1.00E-108 | 105.7 | 86.8 | 92.5 | hypothetical protein CARUB_v10001836mg                              | gbpln | Capsella rubella     | AT5G19940.1   Symbols:   Plastid-lipid associated protein PAP / fibrillin family protein   chr5:6739693-6740661 FORWARD LENGTH=239                                                                                                                                                                                                                                                                                                                                                        | 228 | 239 | 1.00E-107 | 104.8 | 84.6 | 90.4 |
| Rsa1.0_00123.1.g5973.t1  | ref XP_002873975.1  hypothetical protein ARALYDRAFT_488891 [Arabidopsis lyrata subsp. lyrata] gi 297319812 gb EFH50234.1  hypothetical protein ARALYDRAFT_488891 [Arabidopsis lyrata subsp. lyrata]                                                                                                                                                                                                                                                                                                                                                                                                                                                                                                                                                                                                                                                                                                                                                     | 448 | 445 | 0         | 99.3  | 74.1 | 81.5 | hypothetical protein ARALYDRAFT_488891                              | gbpln | Arabidopsis lyrata   | AT5G19950.2   Symbols:   Domain of unknown function (DUF1767)   chr5:6741163-6743702 REVERSE LENGTH=443                                                                                                                                                                                                                                                                                                                                                                                   | 448 | 443 | 0         | 98.9  | 73.4 | 81.3 |
| Rsa1.0_00123.1.g5974.t1  | gb EOA21005.1  hypothetical protein CARUB_v10001340mg [Capsella rubella]                                                                                                                                                                                                                                                                                                                                                                                                                                                                                                                                                                                                                                                                                                                                                                                                                                                                                | 341 | 344 | 1.00E-155 | 100.9 | 83.6 | 88.6 | hypothetical protein CARUB_v10001340mg                              | gbpln | Capsella rubella     | AT5G19980.1   Symbols: GONST4   golgi nucleotide sugar transporter 4   chr5:6749907-6750932 REVERSE LENGTH=341                                                                                                                                                                                                                                                                                                                                                                            | 341 | 341 | 1.00E-153 | 100.0 | 79.5 | 86.8 |
| Rsa1.0_00123.1.g5975.t1  | ref NP_568389.1  regulatory particle triple-A ATPase 6A [Arabidopsis thaliana] gi 75168996 sp Q9C5U3.1 PR58A_ARAT H RecName: Full=26S protease regulatory subunit 8 homolog A; AltName: Full=26S proteasome AAA-ATPase subunit RPT6a; AltName: Full=26S proteasome subunit 8 homolog A; AltName: Full=Regulatory particle triple-A ATPase subunit 6a gi 13537115 dbj BAB40755.1  AtSUG1 [Arabidopsis thaliana] gi 17473854 gb AAL38350.1  unknown protein [Arabidopsis thaliana] gi 32306505 gb AAP78936.1  At5g19990 [Arabidopsis thaliana] gi 332005394 gb AED92777.1  regulatory particle triple-A ATPase 6A [Arabidopsis thaliana]                                                                                                                                                                                                                                                                                                                  | 420 | 419 | 0         | 99.8  | 98.6 | 99.3 | regulatory particle triple-A ATPase 6A                              | gbpln | Arabidopsis thaliana | AT5G19990.1   Symbols: RPT6A, ATSUG1   regulatory particle triple-A ATPase 6A   chr5:6752144-6754918 FORWARD LENGTH=419                                                                                                                                                                                                                                                                                                                                                                   | 420 | 419 | 0         | 99.8  | 98.6 | 99.3 |
| Rsa1.0_00123.1.g5976.t1  | gb ABD17866.1  etiolation seedling like-RAN2 small Ras GTP-binding nuclear protein [Brassica napus]                                                                                                                                                                                                                                                                                                                                                                                                                                                                                                                                                                                                                                                                                                                                                                                                                                                     | 221 | 221 | 1.00E-127 | 100.0 | 98.6 | 99.5 | etiolation seedling like-RAN2 small Ras GTP-binding nuclear protein | gbpln | Brassica napus       | AT5G20010.1   Symbols: RAN-1, RAN1, ATRAN1   RAS-related nuclear protein-1   chr5:6760364-6761747 FORWARD LENGTH=221                                                                                                                                                                                                                                                                                                                                                                      | 221 | 221 | 1.00E-126 | 100.0 | 95.0 | 98.2 |
| Rsa1.0_00123.1.g5977.t1  | ref XP_002871925.1  SPX domain-containing protein [Arabidopsis lyrata subsp. lyrata] gi 297317762 gb EFH48184.1  SPX domain-containing protein [Arabidopsis lyrata subsp. lyrata] ref NP_680174.2  uncharacterized protein [Arabidopsis thaliana] gi 297812203 ref XP_002873985.1  hypothetical protein ARALYDRAFT_488920 [Arabidopsis lyrata subsp. lyrata] gi 48310058 gb AAT41745.1  At5g20165 [Arabidopsis thaliana] gi 50198835 gb AAT70449.1  At5g20165 [Arabidopsis thaliana] gi 62318608 dbj BAD95036.1  putative protein [Arabidopsis thaliana] gi 297319822 gb EFH50244.1  hypothetical protein ARALYDRAFT_488920 [Arabidopsis lyrata subsp. lyrata] gi 332005422 gb AED92805.1  uncharacterized protein AT5G20165 [Arabidopsis thaliana] ref XP_002871927.1  hypothetical protein ARALYDRAFT_488924 [Arabidopsis lyrata subsp. lyrata] gi 297317764 gb EFH48186.1  hypothetical protein ARALYDRAFT_488924 [Arabidopsis lyrata subsp. lyrata] | 255 | 257 | 1.00E-114 | 100.8 | 81.6 | 89.0 | SPX domain-containing protein                                       | gbpln | Arabidopsis lyrata   | AT5G20150.1   Symbols: ATPSPX1, SPX1   SPX domain gene 1   chr5:6802429-6803367 FORWARD LENGTH=256                                                                                                                                                                                                                                                                                                                                                                                        | 255 | 256 | 1.00E-116 | 100.4 | 81.6 | 89.8 |
| Rsa1.0_00123.1.g5978.t1  | ref NP_680174.2  uncharacterized protein [Arabidopsis thaliana] gi 297812203 ref XP_002873985.1  hypothetical protein ARALYDRAFT_488920 [Arabidopsis lyrata subsp. lyrata] gi 48310058 gb AAT41745.1  At5g20165 [Arabidopsis thaliana] gi 50198835 gb AAT70449.1  At5g20165 [Arabidopsis thaliana] gi 62318608 dbj BAD95036.1  putative protein [Arabidopsis thaliana] gi 297319822 gb EFH50244.1  hypothetical protein ARALYDRAFT_488920 [Arabidopsis lyrata subsp. lyrata] gi 332005422 gb AED92805.1  uncharacterized protein AT5G20165 [Arabidopsis thaliana] ref XP_002871927.1  hypothetical protein ARALYDRAFT_488924 [Arabidopsis lyrata subsp. lyrata] gi 297317764 gb EFH48186.1  hypothetical protein ARALYDRAFT_488924 [Arabidopsis lyrata subsp. lyrata]                                                                                                                                                                                   | 158 | 70  | 2.00E-32  | 44.3  | 42.4 | 43.0 | uncharacterized protein                                             | gbpln | Arabidopsis lyrata   | AT5G20165.1   Symbols:   unknown protein; FUNCTIONS IN: molecular_function unknown; INVOLVED IN: biological_process unknown; LOCATED IN: endomembrane system; CONTAINS InterPro DOMAIN/s: Protein of unknown function DUF1242 (InterPro:IPR009653); Has 35333 Blast hits to 34131 proteins in 2444 species: Archae - 798; Bacteria - 22429; Metazoa - 974; Fungi - 991; Plants - 531; Viruses - 0; Other Eukaryotes - 9610 (source: NCBI BLINK).   chr5:6805803-6806730 REVERSE LENGTH=70 | 158 | 70  | 6.00E-35  | 44.3  | 42.4 | 43.0 |
| Rsa1.0_00123.1.g5979.t1  | ref XP_002871927.1  hypothetical protein ARALYDRAFT_488924 [Arabidopsis lyrata subsp. lyrata] gi 297317764 gb EFH48186.1  hypothetical protein ARALYDRAFT_488924 [Arabidopsis lyrata subsp. lyrata]                                                                                                                                                                                                                                                                                                                                                                                                                                                                                                                                                                                                                                                                                                                                                     | 286 | 287 | 1.00E-104 | 100.3 | 81.8 | 87.8 | hypothetical protein ARALYDRAFT_488924                              | gbpln | Arabidopsis lyrata   | AT5G20190.1   Symbols:   Tetratricopeptide repeat (TPR)-like superfamily protein   chr5:6814093-6815171 FORWARD LENGTH=290                                                                                                                                                                                                                                                                                                                                                                | 286 | 290 | 1.00E-106 | 101.4 | 81.8 | 88.8 |
| Rsa1.0_00123.1.g5980.t1  | emb CAN61043.1  hypothetical protein VITISV_037528 [Vitis vinifera]                                                                                                                                                                                                                                                                                                                                                                                                                                                                                                                                                                                                                                                                                                                                                                                                                                                                                     | 83  | 183 | 1.00E-12  | 220.5 | 42.2 | 47.0 | hypothetical protein VITISV_037528                                  | gbpln | Vitis vinifera       | AT4G26370.2   Symbols:   antitermination NusB domain-containing protein   chr4:13334766-13336153 REVERSE LENGTH=248                                                                                                                                                                                                                                                                                                                                                                       | 83  | 248 | 4.00E-14  | 298.8 | 50.6 | 51.8 |
| Rsa1.0_00123.1.g5981.t16 | ref XP_002871928.1  hypothetical protein ARALYDRAFT_488925 [Arabidopsis lyrata subsp. lyrata] gi 297317765 gb EFH48187.1  hypothetical protein ARALYDRAFT_488925 [Arabidopsis lyrata subsp. lyrata]                                                                                                                                                                                                                                                                                                                                                                                                                                                                                                                                                                                                                                                                                                                                                     | 745 | 762 | 0         | 102.3 | 70.5 | 80.7 | hypothetical protein ARALYDRAFT_488925                              | gbpln | Arabidopsis lyrata   | AT5G20200.1   Symbols:   nucleoporin-related   chr5:6816776-6821620 FORWARD LENGTH=762                                                                                                                                                                                                                                                                                                                                                                                                    | 745 | 762 | 0         | 102.3 | 69.3 | 79.7 |

|                          |                                                                                                                                                                                                                                                                                                                                                                                                                                                                                                                                                                                                                                                                                                                                                                          |      |      |           |       |      |      |                                                      |             |                      |                                                                                                                                     |      |      |           |       |      |      |
|--------------------------|--------------------------------------------------------------------------------------------------------------------------------------------------------------------------------------------------------------------------------------------------------------------------------------------------------------------------------------------------------------------------------------------------------------------------------------------------------------------------------------------------------------------------------------------------------------------------------------------------------------------------------------------------------------------------------------------------------------------------------------------------------------------------|------|------|-----------|-------|------|------|------------------------------------------------------|-------------|----------------------|-------------------------------------------------------------------------------------------------------------------------------------|------|------|-----------|-------|------|------|
| Rsa1.0_00123.1.g5982.t1  | dbj BAJ34551.1  unnamed protein product [Thellungiella halophila]                                                                                                                                                                                                                                                                                                                                                                                                                                                                                                                                                                                                                                                                                                        | 177  | 194  | 3.00E-61  | 109.6 | 76.3 | 83.6 | unnamed protein product                              | ----        | ----                 | AT5G20230.1   Symbols: ATBCB, BCB, SAG14   blue-copper-binding protein   chr5:6826626-6827408 FORWARD LENGTH=196                    | 177  | 196  | 1.00E-62  | 110.7 | 76.3 | 84.7 |
| Rsa1.0_00123.1.g5983.t1  | gb AAy63867.1  PISTILLATA [Brassica juncea]                                                                                                                                                                                                                                                                                                                                                                                                                                                                                                                                                                                                                                                                                                                              | 203  | 208  | 1.00E-107 | 102.5 | 94.1 | 97.0 | PISTILLATA                                           | gbpln       | Brassica juncea      | AT5G20240.1   Symbols: PI   K-box region and MADS-box transcription factor family protein   chr5:6829203-6831208 FORWARD LENGTH=208 | 203  | 208  | 1.00E-108 | 102.5 | 92.6 | 96.1 |
| Rsa1.0_00123.1.g5984.t1  | ref NP_001190347.1  putative galactinol--sucrose galactosyltransferase 6 [Arabidopsis thaliana]<br>gi 19699067 gb AAL30901.1  AT5g20250/F5O24.140 [Arabidopsis thaliana]<br>gi 23308457 gb AAN18198.1  At5g20250/F5O24.140 [Arabidopsis thaliana]<br>gi 110742681 dbj BAE99252.1  seed imbibition protein-like [Arabidopsis thaliana]<br>gi 332005438 gb AED92821.1  putative galactinol--sucrose galactosyltransferase 6 [Arabidopsis thaliana]                                                                                                                                                                                                                                                                                                                         | 870  | 844  | 0         | 97.0  | 81.3 | 86.9 | putative galactinol--sucrose galactosyltransferase 6 | gbpln       | Arabidopsis thaliana | AT5G20250.4   Symbols: DIN10   Raffinose synthase family protein   chr5:6833730-6836635 FORWARD LENGTH=844                          | 870  | 844  | 0         | 97.0  | 81.3 | 86.9 |
| Rsa1.0_00123.1.g5985.t1  | sp Q3E9A4.3 GLYT5_ARATH RecName: Full=Probable glycosyltransferase At5g20260                                                                                                                                                                                                                                                                                                                                                                                                                                                                                                                                                                                                                                                                                             | 1069 | 466  | 0         | 43.6  | 27.4 | 30.2 | RecName: Full=Probable glycosyltransferase At5g20260 | ----        | ----                 | AT5G20260.1   Symbols:   Exostosin family protein   chr5:6836806-6839532 REVERSE LENGTH=458                                         | 1069 | 458  | 0         | 42.8  | 27.4 | 30.2 |
| Rsa1.0_00123.1.g5986.t1  | sp Q3E9A4.3 GLYT5_ARATH RecName: Full=Probable glycosyltransferase At5g20260                                                                                                                                                                                                                                                                                                                                                                                                                                                                                                                                                                                                                                                                                             | 118  | 466  | 3.00E-33  | 394.9 | 64.4 | 70.3 | RecName: Full=Probable glycosyltransferase At5g20260 | ----        | ----                 | AT5G20260.1   Symbols:   Exostosin family protein   chr5:6836806-6839532 REVERSE LENGTH=458                                         | 118  | 458  | 6.00E-36  | 388.1 | 64.4 | 70.3 |
| Rsa1.0_00123.1.g5987.t1  | dbj BAJ33817.1  unnamed protein product [Thellungiella halophila]                                                                                                                                                                                                                                                                                                                                                                                                                                                                                                                                                                                                                                                                                                        | 334  | 331  | 1.00E-173 | 99.1  | 91.0 | 94.6 | unnamed protein product                              | ----        | ----                 | AT5G20270.1   Symbols: HHP1   heptahelical transmembrane protein   chr5:6841025-6842656 REVERSE LENGTH=332                          | 334  | 332  | 1.00E-174 | 99.4  | 87.1 | 91.6 |
| Rsa1.0_00123.1.g5988.t1  | ref XP_002873988.1  ATSPS1F [Arabidopsis lyrata subsp. lyrata]<br>gi 297319825 gb EFH50247.1  ATSPS1F [Arabidopsis lyrata subsp. lyrata]                                                                                                                                                                                                                                                                                                                                                                                                                                                                                                                                                                                                                                 | 1045 | 1045 | 0         | 100.0 | 94.4 | 97.5 | ATSPS1F                                              | gbpln       | Arabidopsis lyrata   | AT5G20280.1   Symbols: ATSPS1F, SPS1F   sucrose phosphate synthase 1F   chr5:6844994-6849997 REVERSE LENGTH=1043                    | 1045 | 1043 | 0         | 99.8  | 94.4 | 97.3 |
| Rsa1.0_00123.1.g5989.t1  | #                                                                                                                                                                                                                                                                                                                                                                                                                                                                                                                                                                                                                                                                                                                                                                        | #    | #    | #         | #     | #    | #    | -                                                    | ----        | ----                 | #                                                                                                                                   | #    | #    | #         | #     | #    | #    |
| Rsa1.0_00123.1.g5990.t1  | gb EOA13427.1  hypothetical protein CARUB_v10026466mg [Capsella rubella]                                                                                                                                                                                                                                                                                                                                                                                                                                                                                                                                                                                                                                                                                                 | 144  | 423  | 5.00E-15  | 293.8 | 36.1 | 44.4 | hypothetical protein CARUB_v10026466mg               | gbpln       | Capsella rubella     | AT5G62510.1   Symbols:   F-box family protein   chr5:25095373-25096635 REVERSE LENGTH=420                                           | 144  | 420  | 4.00E-15  | 291.7 | 33.3 | 45.8 |
| Rsa1.0_00123.1.g5991.t1  | ref NP_001105391.1  40S ribosomal protein S8 [Zea mays]<br>gi 6226702 sp Q08069.2 RS8_MAIZE RecName: Full=40S ribosomal protein S8 gi 1498053 gb AAB06330.1  ribosomal protein S8 [Zea mays]<br>gi 194692698 gb ACF80433.1  unknown [Zea mays]<br>gi 195605614 gb AG24637.1  40S ribosomal protein S8 [Zea mays]<br>gi 413926193 gb AFW66125.1  putative ribosomal protein S8e family protein [Zea mays]<br>gi 413926197 gb AFW66129.1  putative ribosomal protein S8e family protein [Zea mays]<br>gi 413926198 gb AFW66130.1  putative ribosomal protein S8e family protein [Zea mays]<br>gi 413926206 gb AFW66138.1  putative ribosomal protein S8e family protein [Zea mays]<br>gi 413926210 gb AFW66142.1  putative ribosomal protein S8e family protein [Zea mays] | 226  | 221  | 1.00E-104 | 97.8  | 82.3 | 90.3 | 40S ribosomal protein S8                             | gbenv/gbpln | Zea mays             | AT5G59240.1   Symbols:   Ribosomal protein S8e family protein   chr5:23902626-23903670 REVERSE LENGTH=210                           | 226  | 210  | 2.00E-98  | 92.9  | 77.4 | 82.7 |
| Rsa1.0_00123.1.g5992.t1  | ref XP_002873990.1  hypothetical protein ARALYDRAFT_910069 [Arabidopsis lyrata subsp. lyrata]<br>gi 297319827 gb EFH50249.1  hypothetical protein ARALYDRAFT_910069 [Arabidopsis lyrata subsp. lyrata]                                                                                                                                                                                                                                                                                                                                                                                                                                                                                                                                                                   | 793  | 786  | 0         | 99.1  | 84.4 | 90.8 | hypothetical protein ARALYDRAFT_910069               | gbpln       | Arabidopsis lyrata   | AT5G20300.2   Symbols:   Avirulence induced gene (AIG1) family protein   chr5:6853544-6856332 REVERSE LENGTH=793                    | 793  | 793  | 0         | 100.0 | 83.6 | 89.0 |
| Rsa1.0_00123.1.g5993.t1  | gb EOA22284.1  hypothetical protein CARUB_v10002882mg [Capsella rubella]                                                                                                                                                                                                                                                                                                                                                                                                                                                                                                                                                                                                                                                                                                 | 376  | 413  | 1.00E-153 | 109.8 | 75.5 | 84.0 | hypothetical protein CARUB_v10002882mg               | gbpln       | Capsella rubella     | AT5G20310.1   Symbols:   Adenine nucleotide alpha hydrolases-like superfamily protein   chr5:6857553-6859001 FORWARD LENGTH=394     | 376  | 394  | 1.00E-138 | 104.8 | 70.5 | 80.1 |
| Rsa1.0_00123.1.g5994.t23 | ref XP_002873991.1  predicted protein [Arabidopsis lyrata subsp. lyrata]<br>gi 297319828 gb EFH50250.1  predicted protein [Arabidopsis lyrata subsp. lyrata]                                                                                                                                                                                                                                                                                                                                                                                                                                                                                                                                                                                                             | 1689 | 1693 | 0         | 100.2 | 76.8 | 84.3 | predicted protein                                    | gbpln       | Arabidopsis lyrata   | AT5G20320.1   Symbols: DCL4, ATDCL4   dicer-like 4   chr5:6859571-6869068 REVERSE LENGTH=1702                                       | 1689 | 1702 | 0         | 100.8 | 76.9 | 84.7 |

|                         |                                                                                                                                                                                                                                                                                                                                                                                                                          |     |     |           |       |      |       |                                                     |       |                      |                                                                                                                                             |     |     |           |       |      |      |
|-------------------------|--------------------------------------------------------------------------------------------------------------------------------------------------------------------------------------------------------------------------------------------------------------------------------------------------------------------------------------------------------------------------------------------------------------------------|-----|-----|-----------|-------|------|-------|-----------------------------------------------------|-------|----------------------|---------------------------------------------------------------------------------------------------------------------------------------------|-----|-----|-----------|-------|------|------|
| Rsa1.0_00124.1.g5995.t1 | gb ABW17183.1  profilin [Raphanus sativus] gi 158122106 gb ABW17189.1  profilin [Brassica juncea var. multiceps] ref XP_002869435.1  kelch repeat-containing F-box family protein [Arabidopsis lyrata subsp. lyrata]                                                                                                                                                                                                     | 134 | 134 | 5.00E-73  | 100.0 | 99.3 | 100.0 | profilin                                            | gbpln | Brassica juncea      | AT4G29340.1   Symbols: PRF4   profilin 4   chr4:14447718-14448467 FORWARD LENGTH=134                                                        | 134 | 134 | 3.00E-73  | 100.0 | 96.3 | 97.8 |
| Rsa1.0_00124.1.g5996.t1 | gi 297315271 gb EFH45694.1  kelch repeat-containing F-box family protein [Arabidopsis lyrata subsp. lyrata] ref XP_002867410.1  60S ribosomal protein L28 [Arabidopsis lyrata subsp. lyrata]                                                                                                                                                                                                                             | 407 | 387 | 1.00E-120 | 95.1  | 58.7 | 71.7  | kelch repeat-containing F-box family protein        | gbpln | Arabidopsis lyrata   | AT4G29370.1   Symbols: Galactose oxidase/kelch repeat superfamily protein   chr4:14455602-14456738 FORWARD LENGTH=378                       | 407 | 378 | 1.00E-104 | 92.9  | 53.1 | 67.3 |
| Rsa1.0_00124.1.g5997.t1 | gi 297313240 gb EFH43669.1  60S ribosomal protein L28 [Arabidopsis lyrata subsp. lyrata] ref XP_002867404.1  mitochondrial ATP synthase g subunit family protein [Arabidopsis lyrata subsp. lyrata]                                                                                                                                                                                                                      | 143 | 143 | 2.00E-72  | 100.0 | 93.7 | 96.5  | 60S ribosomal protein L28                           | gbpln | Arabidopsis lyrata   | AT4G29410.2   Symbols: Ribosomal L28e protein family   chr4:14468439-14469964 REVERSE LENGTH=143                                            | 143 | 143 | 2.00E-72  | 100.0 | 90.2 | 95.1 |
| Rsa1.0_00124.1.g5998.t1 | gi 297313240 gb EFH43663.1  mitochondrial ATP synthase g subunit family protein [Arabidopsis lyrata subsp. lyrata]                                                                                                                                                                                                                                                                                                       | 122 | 122 | 3.00E-60  | 100.0 | 92.6 | 95.9  | mitochondrial ATP synthase g subunit family protein | gbpln | Arabidopsis lyrata   | AT4G29480.1   Symbols: Mitochondrial ATP synthase subunit G protein   chr4:14486265-14487257 REVERSE LENGTH=122                             | 122 | 122 | 6.00E-63  | 100.0 | 92.6 | 95.9 |
| Rsa1.0_00124.1.g5999.t1 | gb EOA18714.1  hypothetical protein CARUB_v10007292mg [Capsella rubella]                                                                                                                                                                                                                                                                                                                                                 | 375 | 386 | 0         | 102.9 | 92.5 | 95.7  | hypothetical protein CARUB_v10007292mg              | gbpln | Capsella rubella     | AT4G29510.1   Symbols: ATPRTM11, PRMT11, ATPRTM1B, PRMT1B   arginine methyltransferase 11   chr4:14491739-14493752 FORWARD LENGTH=390       | 375 | 390 | 0         | 104.0 | 91.7 | 95.2 |
| Rsa1.0_00124.1.g6000.t1 | gb EOA17036.1  hypothetical protein CARUB_v10005279mg [Capsella rubella]                                                                                                                                                                                                                                                                                                                                                 | 311 | 317 | 1.00E-153 | 101.9 | 87.8 | 92.3  | hypothetical protein CARUB_v10005279mg              | gbpln | Capsella rubella     | AT4G29590.1   Symbols: S-adenosyl-L-methionine-dependent methyltransferases superfamily protein   chr4:14512736-14514404 REVERSE LENGTH=317 | 311 | 317 | 1.00E-154 | 101.9 | 87.8 | 92.3 |
| Rsa1.0_00124.1.g6001.t1 | #                                                                                                                                                                                                                                                                                                                                                                                                                        | #   | #   | #         | #     | #    | #     | -                                                   | ----  | ----                 | #                                                                                                                                           | #   | #   | #         | #     | #    |      |
| Rsa1.0_00124.1.g6002.t1 | gb EOA31108.1  hypothetical protein CARUB_v10014260mg [Capsella rubella]                                                                                                                                                                                                                                                                                                                                                 | 318 | 303 | 1.00E-118 | 95.3  | 70.4 | 79.9  | hypothetical protein CARUB_v10014260mg              | gbpln | Capsella rubella     | AT2G19570.1   Symbols: CDA1, AT-CDA1, DESZ   cytidine deaminase 1   chr2:8470598-8471503 REVERSE LENGTH=301                                 | 318 | 301 | 1.00E-121 | 94.7  | 69.8 | 79.6 |
| Rsa1.0_00124.1.g6003.t1 | gb EOA17360.1  hypothetical protein CARUB_v10005641mg [Capsella rubella]                                                                                                                                                                                                                                                                                                                                                 | 244 | 235 | 1.00E-97  | 96.3  | 81.1 | 86.1  | hypothetical protein CARUB_v10005641mg              | gbpln | Capsella rubella     | AT4G29670.1   Symbols: ACHT2   atypical CYS HIS rich thioredoxin 2   chr4:14535772-14537108 REVERSE LENGTH=235                              | 244 | 235 | 7.00E-96  | 96.3  | 78.3 | 85.2 |
| Rsa1.0_00124.1.g6004.t1 | ref NP_194697.1  alkaline-phosphatase-like protein [Arabidopsis thaliana] gi 5123562 emb CAB45328.1  nucleotide pyrophosphatase-like protein [Arabidopsis thaliana] gi 269867 emb CAB79726.1  nucleotide pyrophosphatase-like protein [Arabidopsis thaliana] gi 22589829 db BAH30545.1  hypothetical protein [Arabidopsis thaliana] gi 332660261 gb AEE85661.1  alkaline-phosphatase-like protein [Arabidopsis thaliana] | 467 | 496 | 0         | 106.2 | 85.0 | 92.5  | alkaline-phosphatase-like protein                   | gbpln | Arabidopsis thaliana | AT4G29680.1   Symbols: Alkaline-phosphatase-like family protein   chr4:14538067-14539557 REVERSE LENGTH=496                                 | 467 | 496 | 0         | 106.2 | 85.0 | 92.5 |
| Rsa1.0_00124.1.g6005.t1 | ref XP_002867392.1  ATPAO5 [Arabidopsis lyrata subsp. lyrata] gi 297313228 gb EFH43651.1  ATPAO5 [Arabidopsis lyrata subsp. lyrata]                                                                                                                                                                                                                                                                                      | 521 | 536 | 0         | 102.9 | 83.9 | 91.7  | ATPAO5                                              | gbpln | Arabidopsis lyrata   | AT4G29720.1   Symbols: ATPAO5, PAO5   polyamine oxidase 5   chr4:14553456-14555057 REVERSE LENGTH=533                                       | 521 | 533 | 0         | 102.3 | 83.9 | 91.2 |
| Rsa1.0_00124.1.g6006.t2 | #                                                                                                                                                                                                                                                                                                                                                                                                                        | #   | #   | #         | #     | #    | #     | -                                                   | ----  | ----                 | #                                                                                                                                           | #   | #   | #         | #     | #    |      |
| Rsa1.0_00124.1.g6007.t1 | ref NP_849470.1  cytokinin dehydrogenase 4 [Arabidopsis thaliana] gi 332660270 gb AEE85670.1  cytokinin dehydrogenase 4 [Arabidopsis thaliana] ref XP_002890655.1  transferase family protein [Arabidopsis lyrata subsp. lyrata] gi 297326494 gb EFH56914.1  transferase family protein [Arabidopsis lyrata subsp. lyrata]                                                                                               | 412 | 428 | 0         | 103.9 | 87.6 | 92.5  | cytokinin dehydrogenase 4                           | gbpln | Arabidopsis thaliana | AT4G29740.1   Symbols: CKX4, ATCKX4   cytokinin oxidase 4   chr4:14566351-14568754 FORWARD LENGTH=428                                       | 412 | 428 | 0         | 103.9 | 87.6 | 92.5 |
| Rsa1.0_00124.1.g6008.t1 | ref XP_002890655.1  transferase family protein [Arabidopsis lyrata subsp. lyrata] gi 297326494 gb EFH56914.1  transferase family protein [Arabidopsis lyrata subsp. lyrata]                                                                                                                                                                                                                                              | 412 | 462 | 0         | 112.1 | 83.5 | 92.7  | transferase family protein                          | gbpln | Arabidopsis lyrata   | AT2G25150.1   Symbols: HXXXD-type acyl-transferase family protein   chr2:10702582-10704266 REVERSE LENGTH=461                               | 412 | 461 | 0         | 111.9 | 82.0 | 91.7 |
| Rsa1.0_00124.1.g6009.t1 | #                                                                                                                                                                                                                                                                                                                                                                                                                        | #   | #   | #         | #     | #    | #     | -                                                   | ----  | ----                 | #                                                                                                                                           | #   | #   | #         | #     | #    |      |



|                         |                                                                                                                                                                                                                                                                                                                                                        |      |      |           |       |      |      |                                          |       |                      |                                                                                                                                                                                                                                                                                                                                                         |      |      |           |       |      |      |
|-------------------------|--------------------------------------------------------------------------------------------------------------------------------------------------------------------------------------------------------------------------------------------------------------------------------------------------------------------------------------------------------|------|------|-----------|-------|------|------|------------------------------------------|-------|----------------------|---------------------------------------------------------------------------------------------------------------------------------------------------------------------------------------------------------------------------------------------------------------------------------------------------------------------------------------------------------|------|------|-----------|-------|------|------|
| Rsa1.0_00124.1.g6010.t1 | gb EOA28459.1  hypothetical protein CARUB_v10024668mg [Capsella rubella]                                                                                                                                                                                                                                                                               | 780  | 840  | 0         | 107.7 | 79.6 | 87.7 | hypothetical protein CARUB_v10024668mg   | gbpln | Capsella rubella     | AT4G29750.1   Symbols:   CRS1 / YhbY (CRM) domain-containing protein   chr4:14569728-14572962 FORWARD LENGTH=841                                                                                                                                                                                                                                        | 780  | 841  | 0         | 107.8 | 79.5 | 86.7 |
| Rsa1.0_00124.1.g6011.t2 | ref XP_002880655.1  transferase family protein [Arabidopsis lyrata subsp. lyrata] gi 297326494 gb EFH56914.1  transferase family protein [Arabidopsis lyrata subsp. lyrata]                                                                                                                                                                            | 455  | 462  | 0         | 101.5 | 79.6 | 89.0 | transferase family protein               | gbpln | Arabidopsis lyrata   | AT2G25150.1   Symbols:   HXXXD-type acyl-transferase family protein   chr2:10702582-10704266 REVERSE LENGTH=461                                                                                                                                                                                                                                         | 455  | 461  | 0         | 101.3 | 78.5 | 87.9 |
| Rsa1.0_00124.1.g6012.t1 | ref XP_002869413.1  hypothetical protein ARALYDRAFT_913517 [Arabidopsis lyrata subsp. lyrata] gi 297315249 gb EFH45672.1  hypothetical protein ARALYDRAFT_913517 [Arabidopsis lyrata subsp. lyrata]                                                                                                                                                    | 462  | 461  | 0         | 99.8  | 78.1 | 85.7 | hypothetical protein ARALYDRAFT_913517   | gbpln | Arabidopsis lyrata   | AT2G25150.1   Symbols:   HXXXD-type acyl-transferase family protein   chr2:10702582-10704266 REVERSE LENGTH=461                                                                                                                                                                                                                                         | 462  | 461  | 1.00E-158 | 99.8  | 61.0 | 75.5 |
| Rsa1.0_00124.1.g6013.t1 | ref NP_567834.2  uncharacterized protein [Arabidopsis thaliana] gi 27754582 gb AAO22738.1  unknown protein [Arabidopsis thaliana] gi 28973634 gb AAO4139.1  unknown protein [Arabidopsis thaliana] gi 332660275 gb AEE85675.1  uncharacterized protein AT4G29780 [Arabidopsis thaliana]                                                                | 496  | 540  | 0         | 108.9 | 82.3 | 89.7 | uncharacterized protein                  | gbpln | Arabidopsis thaliana | AT4G29780.1   Symbols:   unknown protein; BEST Arabidopsis thaliana protein match is: unknown protein (TAIR:AT5G12010.1); Has 945 Blast hits to 944 proteins in 87 species: Archae - 0; Bacteria - 0; Metazoa - 519; Fungi - 43; Plants - 365; Viruses - 0; Other Eukaryotes - 18 (source: NCBI BLINK).   chr4:14579859-14581481 FORWARD LENGTH=540     | 496  | 540  | 0         | 108.9 | 82.3 | 89.7 |
| Rsa1.0_00124.1.g6014.t1 | ref XP_002869409.1  hypothetical protein ARALYDRAFT_491781 [Arabidopsis lyrata subsp. lyrata] gi 297315245 gb EFH45668.1  hypothetical protein ARALYDRAFT_491781 [Arabidopsis lyrata subsp. lyrata]                                                                                                                                                    | 1234 | 1210 | 0         | 98.1  | 83.5 | 89.1 | hypothetical protein ARALYDRAFT_491781   | gbpln | Arabidopsis lyrata   | AT4G29790.1   Symbols:   unknown protein; BEST Arabidopsis thaliana protein match is: unknown protein (TAIR:AT2G19390.1); Has 538 Blast hits to 357 proteins in 124 species: Archae - 0; Bacteria - 74; Metazoa - 109; Fungi - 58; Plants - 105; Viruses - 2; Other Eukaryotes - 190 (source: NCBI BLINK).   chr4:14584228-14590123 FORWARD LENGTH=1211 | 1234 | 1211 | 0         | 98.1  | 83.1 | 88.7 |
| Rsa1.0_00124.1.g6015.t1 | ref XP_002869436.1  hypothetical protein ARALYDRAFT_913570 [Arabidopsis lyrata subsp. lyrata] gi 297315272 gb EFH45695.1  hypothetical protein ARALYDRAFT_913570 [Arabidopsis lyrata subsp. lyrata]                                                                                                                                                    | 399  | 386  | 5.00E-91  | 96.7  | 50.9 | 65.2 | hypothetical protein ARALYDRAFT_913570   | gbpln | Arabidopsis lyrata   | AT5G39560.1   Symbols:   Galactose oxidase/kelch repeat superfamily protein   chr5:15841885-15843096 REVERSE LENGTH=403                                                                                                                                                                                                                                 | 399  | 403  | 3.00E-68  | 101.0 | 45.1 | 64.7 |
| Rsa1.0_00124.1.g6016.t1 | ref NP_194714.1  uncharacterized protein [Arabidopsis thaliana] gi 4914409 emb CAB43660.1  putative protein [Arabidopsis thaliana] gi 7289884 emb CAB79743.1  putative protein [Arabidopsis thaliana] gi 88900368 gb ABD57496.1  At4g29850 [Arabidopsis thaliana] gi 332660285 gb AEE85685.1  uncharacterized protein AT4G29850 [Arabidopsis thaliana] | 64   | 103  | 3.00E-27  | 160.9 | 93.8 | 96.9 | uncharacterized protein                  | gbpln | Arabidopsis thaliana | AT4G29850.1   Symbols:   Eukaryotic protein of unknown function (DUF872)   chr4:14601818-14602874 REVERSE LENGTH=103                                                                                                                                                                                                                                    | 64   | 103  | 5.00E-30  | 160.9 | 93.8 | 96.9 |
| Rsa1.0_00124.1.g6017.t1 | ref XP_002869407.1  hypothetical protein ARALYDRAFT_491771 [Arabidopsis lyrata subsp. lyrata] gi 297315243 gb EFH45666.1  hypothetical protein ARALYDRAFT_491771 [Arabidopsis lyrata subsp. lyrata]                                                                                                                                                    | 161  | 173  | 3.00E-78  | 107.5 | 88.8 | 96.9 | hypothetical protein ARALYDRAFT_491771   | gbpln | Arabidopsis lyrata   | AT4G29870.1   Symbols:   Oligosaccharyltransferase complex/magnesium transporter family protein   chr4:14606012-14606530 FORWARD LENGTH=172                                                                                                                                                                                                             | 161  | 172  | 8.00E-79  | 106.8 | 87.0 | 94.4 |
| Rsa1.0_00124.1.g6018.t1 | ref XP_002867383.1  protein binding protein [Arabidopsis lyrata subsp. lyrata] gi 297313219 gb EFH43642.1  protein binding protein [Arabidopsis lyrata subsp. lyrata]                                                                                                                                                                                  | 368  | 369  | 1.00E-168 | 100.3 | 86.4 | 92.1 | protein binding protein                  | gbpln | Arabidopsis lyrata   | AT4G29880.1   Symbols:   PIRL7   plant intracellular ras group-related LRR 7   chr4:14607078-14608379 REVERSE LENGTH=373                                                                                                                                                                                                                                | 368  | 373  | 1.00E-167 | 101.4 | 85.6 | 92.1 |
| Rsa1.0_00124.1.g6019.t1 | ref XP_002869406.1  predicted protein [Arabidopsis lyrata subsp. lyrata] gi 297315242 gb EFH45665.1  predicted protein [Arabidopsis lyrata subsp. lyrata]                                                                                                                                                                                              | 453  | 422  | 0         | 93.2  | 75.5 | 83.4 | predicted protein                        | gbpln | Arabidopsis lyrata   | AT4G29890.1   Symbols:   choline monooxygenase, putative (CMO-like)   chr4:14608868-14610905 FORWARD LENGTH=422                                                                                                                                                                                                                                         | 453  | 422  | 0         | 93.2  | 74.2 | 82.6 |
| Rsa1.0_00124.1.g6020.t1 | gb EOA18057.1  hypothetical protein CARUB_v10006503mg [Capsella rubella]                                                                                                                                                                                                                                                                               | 1062 | 1070 | 0         | 100.8 | 93.6 | 96.6 | hypothetical protein CARUB_v10006503mg   | gbpln | Capsella rubella     | AT4G29900.1   Symbols:   ACA10, CIF1, ATACA10   subinhibited Ca(2+)-ATPase 10   chr4:14611225-14618775 REVERSE LENGTH=1069                                                                                                                                                                                                                              | 1062 | 1069 | 0         | 100.7 | 93.6 | 96.5 |
| Rsa1.0_00124.1.g6021.t1 | emb CAN77253.1  hypothetical protein VITISV_020397 [Vitis vinifera]                                                                                                                                                                                                                                                                                    | 112  | 215  | 1.00E-44  | 192.0 | 74.1 | 86.6 | hypothetical protein VITISV_020397       | gbpln | Vitis vinifera       | # # # # # #                                                                                                                                                                                                                                                                                                                                             | #    | #    | #         | #     | #    | #    |
| Rsa1.0_00124.1.g6022.t1 | emb CAB39638.1  RNA-directed DNA polymerase-like protein [Arabidopsis thaliana] gi 7267666 emb CAB78094.1  RNA-directed DNA polymerase-like protein [Arabidopsis thaliana]                                                                                                                                                                             | 744  | 1274 | 0         | 171.2 | 46.9 | 63.8 | RNA-directed DNA polymerase-like protein | gbpln | Arabidopsis thaliana | AT4G29090.1   Symbols:   Ribonuclease H-like superfamily protein   chr4:14333528-14335255 FORWARD LENGTH=575                                                                                                                                                                                                                                            | 744  | 575  | 2.00E-68  | 77.3  | 23.0 | 36.0 |

|                         |                                                                                                                                                                                                                                                                                                                                                                                                                                                                                                                                                                                                                                                                                                                                                                                                                                                                                                                                      |     |     |           |       |      |      |                                                                            |       |                      |                                                                                                                                                                                                                                                                                                                                                                                                                                                                                                                                                                                                                                               |     |     |           |       |      |      |
|-------------------------|--------------------------------------------------------------------------------------------------------------------------------------------------------------------------------------------------------------------------------------------------------------------------------------------------------------------------------------------------------------------------------------------------------------------------------------------------------------------------------------------------------------------------------------------------------------------------------------------------------------------------------------------------------------------------------------------------------------------------------------------------------------------------------------------------------------------------------------------------------------------------------------------------------------------------------------|-----|-----|-----------|-------|------|------|----------------------------------------------------------------------------|-------|----------------------|-----------------------------------------------------------------------------------------------------------------------------------------------------------------------------------------------------------------------------------------------------------------------------------------------------------------------------------------------------------------------------------------------------------------------------------------------------------------------------------------------------------------------------------------------------------------------------------------------------------------------------------------------|-----|-----|-----------|-------|------|------|
| Rsa1.0_00124.1.g6023.t1 | gb EOA17787.1  hypothetical protein CARUB_v10006180mg [Capsella rubella]                                                                                                                                                                                                                                                                                                                                                                                                                                                                                                                                                                                                                                                                                                                                                                                                                                                             | 67  | 67  | 8.00E-30  | 100.0 | 94.0 | 97.0 | hypothetical protein CARUB_v10006180mg                                     | gbpln | Capsella rubella     | AT4G29905.1   Symbols:   unknown protein; BEST Arabidopsis thaliana protein match is: unknown protein (TAIR:AT5G57123.1); Has 73 Blast hits to 73 proteins in 13 species: Archae - 0; Bacteria - 0; Metazoa - 0; Fungi - 0; Plants - 73; Viruses - 0; Other Eukaryotes - 0 (source: NCBI BLink).   chr4:14627227-14627430 REVERSE LENGTH=67                                                                                                                                                                                                                                                                                                   | 67  | 67  | 2.00E-31  | 100.0 | 91.0 | 95.5 |
| Rsa1.0_00124.1.g6024.t1 | ref NP_194722.2  transcription factor bHLH27 [Arabidopsis thaliana] gi 26450533 dbj BAC42379.1  putative bHLH transcription factor bHLH027 [Arabidopsis thaliana] gi 29028850 gb AAO64804.1  At4g29930 [Arabidopsis thaliana] gi 51970544 dbj BAD43964.1  bHLH transcription factor (bHLH027) - like protein [Arabidopsis thaliana] gi 51970694 dbj BAD44039.1  bHLH transcription factor (bHLH027) - like protein [Arabidopsis thaliana] gi 110736372 dbj BAF00155.1  bHLH transcription factor (bHLH027) - like protein [Arabidopsis thaliana] gi 332660294 gb AEE85694.1  transcription factor bHLH27 [Arabidopsis thaliana]                                                                                                                                                                                                                                                                                                      | 325 | 254 | 1.00E-104 | 78.2  | 58.8 | 64.6 | transcription factor bHLH27                                                | gbpln | Arabidopsis thaliana | AT4G29930.1   Symbols:   basic helix-loop-helix (bHLH) DNA-binding superfamily protein   chr4:14644108-14647449 FORWARD LENGTH=254                                                                                                                                                                                                                                                                                                                                                                                                                                                                                                            | 325 | 254 | 1.00E-107 | 78.2  | 58.8 | 64.6 |
| Rsa1.0_00124.1.g6025.t1 | ref XP_002867376.1  hypothetical protein ARALYDRAFT_491757 [Arabidopsis lyrata subsp. lyrata] gi 297313212 gb EFH43635.1  hypothetical protein ARALYDRAFT_491757 [Arabidopsis lyrata subsp. lyrata]                                                                                                                                                                                                                                                                                                                                                                                                                                                                                                                                                                                                                                                                                                                                  | 164 | 170 | 2.00E-60  | 103.7 | 79.3 | 87.2 | hypothetical protein ARALYDRAFT_491757                                     | gbpln | Arabidopsis lyrata   | AT4G29980.1   Symbols:   FUNCTIONS IN: molecular_function unknown; INVOLVED IN: biological_process unknown; LOCATED IN: endomembrane system; EXPRESSED IN: leaf whorl, sepal, flower, seed; EXPRESSED DURING: petal differentiation and expansion stage. E expanded cotyledon stage; BEST Arabidopsis thaliana protein match is: Fascioline-like arabinogalactan family protein (TAIR:AT1G30800.1); Has 30201 Blast hits to 17322 proteins in 780 species: Archae - 12; Bacteria - 1396; Metazoa - 17338; Fungi - 3422; Plants - 5037; Viruses - 0; Other Eukaryotes - 2996 (source: NCBI BLink).   chr4:14665037-14665546 REVERSE LENGTH=169 | 164 | 169 | 2.00E-60  | 103.0 | 68.3 | 76.2 |
| Rsa1.0_00124.1.g6026.t1 | gb EOA15663.1  hypothetical protein CARUB_v10006130mg [Capsella rubella]                                                                                                                                                                                                                                                                                                                                                                                                                                                                                                                                                                                                                                                                                                                                                                                                                                                             | 90  | 90  | 2.00E-41  | 100.0 | 87.8 | 95.6 | hypothetical protein CARUB_v10006130mg                                     | gbpln | Capsella rubella     | AT4G30010.1   Symbols:   unknown protein; FUNCTIONS IN: molecular_function unknown; INVOLVED IN: biological_process unknown; LOCATED IN: mitochondrion, plastid; EXPRESSED IN: 26 plant structures; EXPRESSED DURING: 15 growth stages; Has 39 Blast hits to 39 proteins in 18 species: Archae - 0; Bacteria - 0; Metazoa - 0; Fungi - 0; Plants - 39; Viruses - 0; Other Eukaryotes - 0 (source: NCBI BLink).   chr4:14672947-14673219 FORWARD LENGTH=90                                                                                                                                                                                     | 90  | 90  | 6.00E-42  | 100.0 | 84.4 | 93.3 |
| Rsa1.0_00124.1.g6027.t3 | ref NP_567839.1  PA-domain containing subtilase family protein [Arabidopsis thaliana] gi 4938478 emb CAB43837.1  proteinase-like protein [Arabidopsis thaliana] gi 7269902 emb CAB80995.1  AT4g30020 [Arabidopsis thaliana] gi 22655014 gb AAM98098.1  AT4g30020/F6G3_50 [Arabidopsis thaliana] gi 29028756 gb AAO64757.1  AT4g30020/F6G3_50 [Arabidopsis thaliana] gi 110740572 dbj BAE98391.1  hypothetical protein [Arabidopsis thaliana] gi 332660309 gb AEE85709.1  PA-domain containing subtilase family protein [Arabidopsis thaliana] ref NP_194735.2  Core-2/I-branching beta-1,6-N-acetylglucosaminyltransferase family protein [Arabidopsis thaliana] gi 17065050 gb AAL32679.1  putative protein [Arabidopsis thaliana] gi 21387127 gb AAM47967.1  putative protein [Arabidopsis thaliana] gi 332660313 gb AEE85713.1  Core-2/I-branching beta-1,6-N-acetylglucosaminyltransferase family protein [Arabidopsis thaliana] | 781 | 816 | 0         | 104.5 | 91.4 | 96.7 | PA-domain containing subtilase family protein                              | gbpln | Arabidopsis thaliana | AT4G30020.1   Symbols:   PA-domain containing subtilase family protein   chr4:14678251-14681762 FORWARD LENGTH=816                                                                                                                                                                                                                                                                                                                                                                                                                                                                                                                            | 781 | 816 | 0         | 104.5 | 91.4 | 96.7 |
| Rsa1.0_00124.1.g6028.t1 | ref NP_194735.2  Core-2/I-branching beta-1,6-N-acetylglucosaminyltransferase family protein [Arabidopsis thaliana] gi 17065050 gb AAL32679.1  putative protein [Arabidopsis thaliana] gi 21387127 gb AAM47967.1  putative protein [Arabidopsis thaliana] gi 332660313 gb AEE85713.1  Core-2/I-branching beta-1,6-N-acetylglucosaminyltransferase family protein [Arabidopsis thaliana]                                                                                                                                                                                                                                                                                                                                                                                                                                                                                                                                               | 402 | 401 | 0         | 99.8  | 88.3 | 95.0 | Core-2/I-branching beta-1,6-N-acetylglucosaminyltransferase family protein | gbpln | Arabidopsis thaliana | AT4G30060.1   Symbols:   Core-2/I-branching beta-1,6-N-acetylglucosaminyltransferase family protein   chr4:14689420-14691519 REVERSE LENGTH=401                                                                                                                                                                                                                                                                                                                                                                                                                                                                                               | 402 | 401 | 0         | 99.8  | 88.3 | 95.0 |

|                         |                                                                                                                                                                                                                                                                                                                                                          |      |      |           |       |      |      |                                                                                                   |       |                      |                                                                                                                                                |      |      |           |       |      |      |
|-------------------------|----------------------------------------------------------------------------------------------------------------------------------------------------------------------------------------------------------------------------------------------------------------------------------------------------------------------------------------------------------|------|------|-----------|-------|------|------|---------------------------------------------------------------------------------------------------|-------|----------------------|------------------------------------------------------------------------------------------------------------------------------------------------|------|------|-----------|-------|------|------|
| Rsa1.0_00124.1.g6029.t1 | refXP_002869396.1  hypothetical protein ARALYDRAFT_491747 [Arabidopsis lyrata subsp. lyrata] gi 297315232 gb EFH45655.1  hypothetical protein ARALYDRAFT_491747 [Arabidopsis lyrata subsp. lyrata]                                                                                                                                                       | 189  | 127  | 1.00E-29  | 67.2  | 36.0 | 42.9 | hypothetical protein ARALYDRAFT_491747                                                            | gbpln | Arabidopsis lyrata   | AT4G30070.1   Symbols: LCR59   low-molecular-weight cysteine-rich 59   chr4:14697549-14698315 FORWARD LENGTH=129                               | 189  | 129  | 4.00E-28  | 68.3  | 34.9 | 42.3 |
| Rsa1.0_00124.1.g6030.t1 | refXP_002867369.1  hypothetical protein ARALYDRAFT_913475 [Arabidopsis lyrata subsp. lyrata] gi 297313205 gb EFH43628.1  hypothetical protein ARALYDRAFT_913475 [Arabidopsis lyrata subsp. lyrata]                                                                                                                                                       | 658  | 670  | 0         | 101.8 | 92.4 | 96.0 | hypothetical protein ARALYDRAFT_913475                                                            | gbpln | Arabidopsis lyrata   | AT4G30080.1   Symbols: ARF16   auxin response factor 16   chr4:14703369-14705564 REVERSE LENGTH=670                                            | 658  | 670  | 0         | 101.8 | 92.4 | 95.9 |
| Rsa1.0_00124.1.g6031.t1 | refNP_194739.1  tRNA-splicing endonuclease positive effector-related protein [Arabidopsis thaliana] gi 4938486 emb CAB43845.1  putative protein [Arabidopsis thaliana] gi 7269910 emb CAB81003.1  putative protein [Arabidopsis thaliana] gi 33266032 gb AEE85721.1  tRNA-splicing endonuclease positive effector-related protein [Arabidopsis thaliana] | 1273 | 1311 | 0         | 103.0 | 87.5 | 92.3 | tRNA-splicing endonuclease positive effector-related protein                                      | gbpln | Arabidopsis thaliana | AT4G30100.1   Symbols:   P-loop containing nucleoside triphosphate hydrolases superfamily protein   chr4:14714191-14719335 FORWARD LENGTH=1311 | 1273 | 1311 | 0         | 103.0 | 87.5 | 92.3 |
| Rsa1.0_00124.1.g6032.t1 | refXP_002867367.1  predicted protein [Arabidopsis lyrata subsp. lyrata] gi 297313203 gb EFH43626.1  predicted protein [Arabidopsis lyrata subsp. lyrata]                                                                                                                                                                                                 | 917  | 944  | 0         | 102.9 | 82.4 | 88.8 | predicted protein                                                                                 | gbpln | Arabidopsis lyrata   | AT4G30110.1   Symbols: HMA2, ATHMA2   heavy metal atpase 2   chr4:14720253-14724577 REVERSE LENGTH=951                                         | 917  | 951  | 0         | 103.7 | 80.6 | 87.7 |
| Rsa1.0_00124.1.g6033.t1 | gb AFS33099.1  heavy metal ATPase transporter 3 [Camelina sativa]                                                                                                                                                                                                                                                                                        | 160  | 761  | 8.00E-33  | 475.6 | 62.5 | 70.6 | heavy metal ATPase transporter 3                                                                  | gbpln | Camelina sativa      | AT4G30110.1   Symbols: HMA2, ATHMA2   heavy metal atpase 2   chr4:14720253-14724577 REVERSE LENGTH=951                                         | 160  | 951  | 1.00E-22  | 594.4 | 46.9 | 60.6 |
| Rsa1.0_00124.1.g6034.t1 | gb EOA39894.1  hypothetical protein CARUB_v10008573mg [Capsella rubella]                                                                                                                                                                                                                                                                                 | 1148 | 630  | 4.00E-99  | 54.9  | 17.6 | 25.4 | hypothetical protein CARUB_v10008573mg                                                            | gbpln | Capsella rubella     | AT1G31150.1   Symbols:   Domain of unknown function (DUF1985)   chr1:1120097-1122412 FORWARD LENGTH=673                                        | 1148 | 673  | 3.00E-63  | 58.6  | 11.8 | 17.3 |
| Rsa1.0_00124.1.g6035.t1 | gb ABD64950.1  GRF zinc finger containing protein [Brassica oleracea]                                                                                                                                                                                                                                                                                    | 99   | 180  | 1.00E-10  | 181.8 | 37.4 | 52.5 | GRF zinc finger containing protein                                                                | gbpln | Brassica oleracea    | AT5G15690.1   Symbols:   zinc ion binding   chr5:5113823-5114402 REVERSE LENGTH=169                                                            | 99   | 169  | 3.00E-12  | 170.7 | 34.3 | 49.5 |
| Rsa1.0_00124.1.g6036.t1 | gb AAF78267.1 AC020576.11 Contains weak similarity to 25.7 kDa protein from Cicer arietinum gb AJ276422 and contains a transposase mutator PF 00872 domain. ESTs gb T13756, gb AA712647, gb AA585980 come from this gene [Arabidopsis thaliana]                                                                                                          | 932  | 1206 | 0         | 129.4 | 44.8 | 63.7 | transposase mutator PF 00872 domain. ESTs gb T13756, gb AA712647, gb AA585980 come from this gene | gbpln | Arabidopsis thaliana | AT1G64260.1   Symbols:   MuDR family transposase   chr1:23847756-23849915 FORWARD LENGTH=719                                                   | 932  | 719  | 2.00E-41  | 77.1  | 15.7 | 25.8 |
| Rsa1.0_00124.1.g6037.t1 | gb EOA18568.1  hypothetical protein CARUB_v10007127mg [Capsella rubella]                                                                                                                                                                                                                                                                                 | 982  | 969  | 0         | 98.7  | 92.4 | 95.3 | hypothetical protein CARUB_v10007127mg                                                            | gbpln | Capsella rubella     | AT4G30160.1   Symbols: VLN4, ATVLN4   villin 4   chr4:14754528-14759511 FORWARD LENGTH=974                                                     | 982  | 974  | 0         | 99.2  | 92.0 | 95.0 |
| Rsa1.0_00124.1.g6038.t1 | refXP_002867366.1  predicted protein [Arabidopsis lyrata subsp. lyrata] gi 297313202 gb EFH43625.1  predicted protein [Arabidopsis lyrata subsp. lyrata]                                                                                                                                                                                                 | 762  | 757  | 0         | 99.3  | 87.8 | 92.1 | predicted protein                                                                                 | gbpln | Arabidopsis lyrata   | AT4G30110.1   Symbols: HMA2, ATHMA2   heavy metal atpase 2   chr4:14720253-14724577 REVERSE LENGTH=951                                         | 762  | 951  | 0         | 124.8 | 67.7 | 80.2 |
| Rsa1.0_00124.1.g6039.t1 | gb EOA17003.1  hypothetical protein CARUB_v10005239mg [Capsella rubella]                                                                                                                                                                                                                                                                                 | 325  | 325  | 1.00E-170 | 100.0 | 91.1 | 95.1 | hypothetical protein CARUB_v10005239mg                                                            | gbpln | Capsella rubella     | AT4G30170.1   Symbols:   Peroxidase family protein   chr4:14762922-14764482 FORWARD LENGTH=325                                                 | 325  | 325  | 1.00E-168 | 100.0 | 89.5 | 94.2 |

|                         |                                                                                                                                                                                                                                                                                                                                                                                                                                                                                                                                                                                                                                                                                                                                                           |      |      |           |       |      |      |                                        |       |                      |                                                                                                                                                                                                                                                                                                                                                 |      |      |           |       |      |      |
|-------------------------|-----------------------------------------------------------------------------------------------------------------------------------------------------------------------------------------------------------------------------------------------------------------------------------------------------------------------------------------------------------------------------------------------------------------------------------------------------------------------------------------------------------------------------------------------------------------------------------------------------------------------------------------------------------------------------------------------------------------------------------------------------------|------|------|-----------|-------|------|------|----------------------------------------|-------|----------------------|-------------------------------------------------------------------------------------------------------------------------------------------------------------------------------------------------------------------------------------------------------------------------------------------------------------------------------------------------|------|------|-----------|-------|------|------|
| Rsa1.0_00125.1.g6040.t1 | ref NP_194748.1  H(+)-ATPase 2 [Arabidopsis thaliana] gi 114335 sp P19456.2 PMA2_ARATH RecName: Full=ATPase 2, plasma membrane-type; AltName: Full=Proton pump 2 gi 166629 gb AAA32751.1  H+-ATPase [Arabidopsis thaliana] gi 5730129 emb CAB52463.1  H+-transporting ATPase type 2, plasma membrane [Arabidopsis thaliana] gi 7269919 emb CAB81012.1  H+-transporting ATPase type 2, plasma membrane [Arabidopsis thaliana] gi 14334804 gb AAK59580.1  putative H+-transporting ATPase [Arabidopsis thaliana] gi 23397277 gb AAN31920.1  putative H+-transporting ATPase type 2 [Arabidopsis thaliana] gi 25055009 gb AAN71968.1  putative H+-transporting ATPase [Arabidopsis thaliana] gi 33266033 gb AEE85731.1  H(+)-ATPase 2 [Arabidopsis thaliana] | 924  | 948  | 0         | 102.6 | 91.3 | 95.6 | H(+)-ATPase 2                          | gbpln | Arabidopsis thaliana | AT4G30190.1   Symbols: AHA2, PMA2, HA2   H(+)-ATPase 2   chr4:14770820-14775920 REVERSE LENGTH=948                                                                                                                                                                                                                                              | 924  | 948  | 0         | 102.6 | 91.3 | 95.6 |
| Rsa1.0_00125.1.g6041.t1 | dbj BAA22099.1  unnamed protein product [Arabidopsis thaliana]                                                                                                                                                                                                                                                                                                                                                                                                                                                                                                                                                                                                                                                                                            | 637  | 642  | 0         | 100.8 | 57.5 | 71.7 | unnamed protein product                | gbpln | Arabidopsis thaliana | AT1G52030.1   Symbols: MBP2, MBP1.2, F-ATMBP   myrosinase-binding protein 2   chr1:19346090-19348282 REVERSE LENGTH=642                                                                                                                                                                                                                         | 637  | 642  | 0         | 100.8 | 57.5 | 71.7 |
| Rsa1.0_00125.1.g6042.t1 | #                                                                                                                                                                                                                                                                                                                                                                                                                                                                                                                                                                                                                                                                                                                                                         | #    | #    | #         | #     | #    | #    | -                                      | ----  | ----                 | #                                                                                                                                                                                                                                                                                                                                               | #    | #    | #         | #     | #    |      |
| Rsa1.0_00125.1.g6043.t1 | #                                                                                                                                                                                                                                                                                                                                                                                                                                                                                                                                                                                                                                                                                                                                                         | #    | #    | #         | #     | #    | #    | -                                      | ----  | ----                 | #                                                                                                                                                                                                                                                                                                                                               | #    | #    | #         | #     | #    |      |
| Rsa1.0_00125.1.g6044.t1 | gb AAG50652.1 AC073433.4 transposase, putative [Arabidopsis thaliana]                                                                                                                                                                                                                                                                                                                                                                                                                                                                                                                                                                                                                                                                                     | 90   | 659  | 5.00E-21  | 732.2 | 55.6 | 71.1 | transposase, putative                  | gbpln | Arabidopsis thaliana | #                                                                                                                                                                                                                                                                                                                                               | #    | #    | #         | #     | #    |      |
| Rsa1.0_00125.1.g6045.t1 | ref XP_002871180.1  ATHMOV34 [Arabidopsis lyrata subsp. lyrata] gi 297317017 gb EFH47439.1  ATHMOV34 [Arabidopsis lyrata subsp. lyrata]                                                                                                                                                                                                                                                                                                                                                                                                                                                                                                                                                                                                                   | 75   | 308  | 2.00E-14  | 410.7 | 60.0 | 65.3 | ATHMOV34                               | gbpln | Arabidopsis lyrata   | AT5G05780.1   Symbols: RPN8A, AE3, ATHMOV34   RP non-ATPase subunit 8A   chr5:1735862-1738176 FORWARD LENGTH=308                                                                                                                                                                                                                                | 75   | 308  | 3.00E-16  | 410.7 | 57.3 | 64.0 |
| Rsa1.0_00125.1.g6046.t1 | dbj BAB10503.1  retroelement pol polyprotein-like [Arabidopsis thaliana]                                                                                                                                                                                                                                                                                                                                                                                                                                                                                                                                                                                                                                                                                  | 1338 | 1475 | 0         | 110.2 | 62.3 | 77.7 | retroelement pol polyprotein-like      | gbpln | Arabidopsis thaliana | AT4G23160.1   Symbols: CRK8   cysteine-rich RLK (RECEPTOR-like protein kinase) 8   chr4:12129485-12134086 FORWARD LENGTH=1262                                                                                                                                                                                                                   | 1338 | 1262 | 0         | 94.3  | 23.7 | 30.6 |
| Rsa1.0_00125.1.g6047.t1 | ref NP_001189859.1  26S proteasome regulatory subunit N8 [Arabidopsis thaliana] gi 332641502 gb AEE75023.1  probable 26S proteasome non-ATPase regulatory subunit 8 [Arabidopsis thaliana]                                                                                                                                                                                                                                                                                                                                                                                                                                                                                                                                                                | 261  | 307  | 4.00E-18  | 117.6 | 21.1 | 24.9 | 26S proteasome regulatory subunit N8   | gbpln | Arabidopsis thaliana | AT3G11270.2   Symbols: MEE34   Mov34/MPN/PAD-1 family protein   chr3:3528989-3531317 FORWARD LENGTH=307                                                                                                                                                                                                                                         | 261  | 307  | 1.00E-20  | 117.6 | 21.1 | 24.9 |
| Rsa1.0_00125.1.g6048.t1 | gb AAM63626.1  unknown [Arabidopsis thaliana]                                                                                                                                                                                                                                                                                                                                                                                                                                                                                                                                                                                                                                                                                                             | 205  | 208  | 1.00E-102 | 101.5 | 89.3 | 94.6 | unknown                                | gbpln | Arabidopsis thaliana | AT1G52140.1   Symbols:   unknown protein; BEST Arabidopsis thaliana protein match is: unknown protein (TAIR:AT3G16330.1); Has 114 Blast hits to 114 proteins in 15 species: Archae - 0; Bacteria - 0; Metazoa - 0; Fungi - 0; Plants - 114; Viruses - 0; Other Eukaryotes - 0 (source: NCBI BLINK).   chr1:19407559-19408185 REVERSE LENGTH=208 | 205  | 208  | 1.00E-104 | 101.5 | 88.8 | 94.6 |
| Rsa1.0_00125.1.g6049.t1 | ref XP_002863741.1  hypothetical protein ARALYDRAFT_917455 [Arabidopsis lyrata subsp. lyrata] gi 297309576 gb EFH40000.1  hypothetical protein ARALYDRAFT_917455 [Arabidopsis lyrata subsp. lyrata]                                                                                                                                                                                                                                                                                                                                                                                                                                                                                                                                                       | 144  | 390  | 2.00E-31  | 270.8 | 46.5 | 66.0 | hypothetical protein ARALYDRAFT_917455 | gbpln | Arabidopsis lyrata   | AT5G18880.1   Symbols:   RNA-directed DNA polymerase (reverse transcriptase)-related family protein   chr5:6300535-6301422 REVERSE LENGTH=295                                                                                                                                                                                                   | 144  | 295  | 4.00E-18  | 204.9 | 31.3 | 49.3 |

|                         |                                                                                                                                                                                                                                                                                                                                                                                                                                                                                                                                                                                                                                                                                                                                                                                                                                                                                                                                                                                                                                                                                                                                                                                                                                                                                                                                                                                                                                                                                                                                                                                                                                                                                                                                                                                                     |      |      |          |       |      |      |                                          |       |                      |                                                                                                                                                                                        |      |      |          |       |      |      |
|-------------------------|-----------------------------------------------------------------------------------------------------------------------------------------------------------------------------------------------------------------------------------------------------------------------------------------------------------------------------------------------------------------------------------------------------------------------------------------------------------------------------------------------------------------------------------------------------------------------------------------------------------------------------------------------------------------------------------------------------------------------------------------------------------------------------------------------------------------------------------------------------------------------------------------------------------------------------------------------------------------------------------------------------------------------------------------------------------------------------------------------------------------------------------------------------------------------------------------------------------------------------------------------------------------------------------------------------------------------------------------------------------------------------------------------------------------------------------------------------------------------------------------------------------------------------------------------------------------------------------------------------------------------------------------------------------------------------------------------------------------------------------------------------------------------------------------------------|------|------|----------|-------|------|------|------------------------------------------|-------|----------------------|----------------------------------------------------------------------------------------------------------------------------------------------------------------------------------------|------|------|----------|-------|------|------|
| Rsa1.0_00125.1.g6050.t3 | ref[NP_175627.1] homeobox-leucine zipper protein ATHB-15 [Arabidopsis thaliana]<br>gi 75216693 sp Q9ZU1.1. ATB15_ARAT H RecName: Full=Homeobox-leucine zipper protein ATHB-15; AltName: Full=HD-ZIP protein ATHB-15; AltName: Full=Homeodomain transcription factor ATHB-15; AltName: Full=Protein CORONA; AltName: Full=Protein INCURVATA 4<br>gi 4220462 gb AAD12689.1  Strong similarity to gb Z50851 HD-zip (athb-8) gene from Arabidopsis thaliana containing Homeobox PF00046 and bZIP PF00170 domains [Arabidopsis thaliana] gi 16974581 gb AAL31186.1  At1g52150/F5F19.21 [Arabidopsis thaliana] gi 19578319 emb CAD28400.1  homeodomain-leucine zipper protein [Arabidopsis thaliana]<br>gi 332194639 gb AEE32760.1  homeobox-leucine zipper protein ATHB-15 [Arabidopsis thaliana]<br>ref XP_002880903.1  hypothetical protein ARALYDRAFT_901626 [Arabidopsis lyrata subsp. lyrata] gi 297326742 gb EFH57162.1  hypothetical protein ARALYDRAFT_901626 [Arabidopsis lyrata subsp. lyrata]<br>ref[NP_175627.1] homeobox-leucine zipper protein ATHB-15 [Arabidopsis thaliana]<br>gi 75216693 sp Q9ZU1.1. ATB15_ARAT H RecName: Full=Homeobox-leucine zipper protein ATHB-15; AltName: Full=HD-ZIP protein ATHB-15; AltName: Full=Homeodomain transcription factor ATHB-15; AltName: Full=Protein CORONA; AltName: Full=Protein INCURVATA 4<br>gi 4220462 gb AAD12689.1  Strong similarity to gb Z50851 HD-zip (athb-8) gene from Arabidopsis thaliana containing Homeobox PF00046 and bZIP PF00170 domains [Arabidopsis thaliana] gi 16974581 gb AAL31186.1  At1g52150/F5F19.21 [Arabidopsis thaliana] gi 19578319 emb CAD28400.1  homeodomain-leucine zipper protein [Arabidopsis thaliana]<br>gi 332194639 gb AEE32760.1  homeobox-leucine zipper protein ATHB-15 [Arabidopsis thaliana] | 628  | 836  | 0        | 133.1 | 67.0 | 70.7 | homeobox-leucine zipper protein ATHB-15  | gbpln | Arabidopsis thaliana | AT1G52150.1   Symbols: ATHB-15, ATHB15, CNA, ICU4   Homeobox-leucine zipper family protein / lipid-binding START domain-containing protein   chr1:19409913-19413961 REVERSE LENGTH=836 | 628  | 836  | 0        | 133.1 | 67.0 | 70.7 |
| Rsa1.0_00125.1.g6051.t1 | gi 297326742 gb EFH57162.1  hypothetical protein ARALYDRAFT_901626 [Arabidopsis lyrata subsp. lyrata]<br>ref[NP_175627.1] homeobox-leucine zipper protein ATHB-15 [Arabidopsis thaliana]<br>gi 75216693 sp Q9ZU1.1. ATB15_ARAT H RecName: Full=Homeobox-leucine zipper protein ATHB-15; AltName: Full=HD-ZIP protein ATHB-15; AltName: Full=Homeodomain transcription factor ATHB-15; AltName: Full=Protein CORONA; AltName: Full=Protein INCURVATA 4<br>gi 4220462 gb AAD12689.1  Strong similarity to gb Z50851 HD-zip (athb-8) gene from Arabidopsis thaliana containing Homeobox PF00046 and bZIP PF00170 domains [Arabidopsis thaliana] gi 16974581 gb AAL31186.1  At1g52150/F5F19.21 [Arabidopsis thaliana] gi 19578319 emb CAD28400.1  homeodomain-leucine zipper protein [Arabidopsis thaliana]<br>gi 332194639 gb AEE32760.1  homeobox-leucine zipper protein ATHB-15 [Arabidopsis thaliana]                                                                                                                                                                                                                                                                                                                                                                                                                                                                                                                                                                                                                                                                                                                                                                                                                                                                                               | 1007 | 1014 | 0        | 100.7 | 69.4 | 79.9 | hypothetical protein ARALYDRAFT_901626   | gbpln | Arabidopsis lyrata   | AT3G47580.1   Symbols:   Leucine-rich repeat protein kinase family protein   chr3:17532687-17535810 FORWARD LENGTH=1011                                                                | 1007 | 1011 | 0        | 100.4 | 68.1 | 79.7 |
| Rsa1.0_00125.1.g6052.t1 | ref[NP_175627.1] homeobox-leucine zipper protein ATHB-15 [Arabidopsis thaliana]<br>gi 75216693 sp Q9ZU1.1. ATB15_ARAT H RecName: Full=Homeobox-leucine zipper protein ATHB-15; AltName: Full=HD-ZIP protein ATHB-15; AltName: Full=Homeodomain transcription factor ATHB-15; AltName: Full=Protein CORONA; AltName: Full=Protein INCURVATA 4<br>gi 4220462 gb AAD12689.1  Strong similarity to gb Z50851 HD-zip (athb-8) gene from Arabidopsis thaliana containing Homeobox PF00046 and bZIP PF00170 domains [Arabidopsis thaliana] gi 16974581 gb AAL31186.1  At1g52150/F5F19.21 [Arabidopsis thaliana] gi 19578319 emb CAD28400.1  homeodomain-leucine zipper protein [Arabidopsis thaliana]<br>gi 332194639 gb AEE32760.1  homeobox-leucine zipper protein ATHB-15 [Arabidopsis thaliana]                                                                                                                                                                                                                                                                                                                                                                                                                                                                                                                                                                                                                                                                                                                                                                                                                                                                                                                                                                                                        | 845  | 836  | 0        | 98.9  | 95.3 | 96.9 | homeobox-leucine zipper protein ATHB-15  | gbpln | Arabidopsis thaliana | AT1G52150.1   Symbols: ATHB-15, ATHB15, CNA, ICU4   Homeobox-leucine zipper family protein / lipid-binding START domain-containing protein   chr1:19409913-19413961 REVERSE LENGTH=836 | 845  | 836  | 0        | 98.9  | 95.3 | 96.9 |
| Rsa1.0_00125.1.g6053.t1 | #                                                                                                                                                                                                                                                                                                                                                                                                                                                                                                                                                                                                                                                                                                                                                                                                                                                                                                                                                                                                                                                                                                                                                                                                                                                                                                                                                                                                                                                                                                                                                                                                                                                                                                                                                                                                   | #    | #    | #        | #     | #    | #    | -                                        | ----  | ----                 | #                                                                                                                                                                                      | #    | #    | #        | #     | #    |      |
| Rsa1.0_00125.1.g6054.t1 | gb AAN62481.1  phosphatidylinositol 3-kinase [Brassica napus]                                                                                                                                                                                                                                                                                                                                                                                                                                                                                                                                                                                                                                                                                                                                                                                                                                                                                                                                                                                                                                                                                                                                                                                                                                                                                                                                                                                                                                                                                                                                                                                                                                                                                                                                       | 109  | 813  | 1.00E-35 | 745.9 | 62.4 | 65.1 | phosphatidylinositol 3-kinase            | gbpln | Brassica napus       | AT1G60490.1   Symbols: ATVPS34, VPS34, PI3K   vacuolar protein sorting 34   chr1:22285792-22290190 REVERSE LENGTH=814                                                                  | 109  | 814  | 2.00E-35 | 746.8 | 56.9 | 63.3 |
| Rsa1.0_00125.1.g6055.t1 | gb EOA36300.1  hypothetical protein CARUB_v10010579mg [Capsella rubella]                                                                                                                                                                                                                                                                                                                                                                                                                                                                                                                                                                                                                                                                                                                                                                                                                                                                                                                                                                                                                                                                                                                                                                                                                                                                                                                                                                                                                                                                                                                                                                                                                                                                                                                            | 145  | 145  | 3.00E-73 | 100.0 | 95.2 | 99.3 | hypothetical protein CARUB_v10010579mg   | gbpln | Capsella rubella     | AT1G52230.1   Symbols: PSAH2, PSAH-2, PSI-H   photosystem I subunit H2   chr1:19454902-19455508 FORWARD LENGTH=145                                                                     | 145  | 145  | 6.00E-74 | 100.0 | 93.8 | 97.2 |
| Rsa1.0_00125.1.g6056.t1 | ref XP_002894369.1  dynein light chain type 1 family protein [Arabidopsis lyrata subsp. lyrata] gi 29734021 gb EFH70628.1  dynein light chain type 1 family protein [Arabidopsis lyrata subsp. lyrata]<br>ref[NP_175636.2] protein PDI-like 1-5 [Arabidopsis thaliana]<br>gi 310947294 sp A3KPF5.1 PDI15_ARAT H RecName: Full=Protein disulfide isomerase-like 1-5; Short=AtPDI1-5; AltName: Full=Protein disulfide isomerase 3; Short=AtPDI3; AltName: Full=Protein disulfide isomerase-like 3-1; Short=AtPDI3-1; Flags: Precursor<br>gi 126352280 gb ABO09885.1  At1g52260 [Arabidopsis thaliana] gi 332194654 gb AEE32775.1  protein PDI-like 1-5 [Arabidopsis thaliana]                                                                                                                                                                                                                                                                                                                                                                                                                                                                                                                                                                                                                                                                                                                                                                                                                                                                                                                                                                                                                                                                                                                         | 94   | 94   | 1.00E-46 | 100.0 | 96.8 | 97.9 | dynein light chain type 1 family protein | gbpln | Arabidopsis lyrata   | AT1G52240.2   Symbols: ATROPGEF11, ROPGEF11, PIRF1   RHO guanyl-nucleotide exchange factor 11   chr1:19458844-19459235 REVERSE LENGTH=94                                               | 94   | 94   | 4.00E-49 | 100.0 | 95.7 | 97.9 |
| Rsa1.0_00125.1.g6057.t1 | ref[NP_175636.2] protein PDI-like 1-5 [Arabidopsis thaliana]<br>gi 310947294 sp A3KPF5.1 PDI15_ARAT H RecName: Full=Protein disulfide isomerase-like 1-5; Short=AtPDI1-5; AltName: Full=Protein disulfide isomerase 3; Short=AtPDI3; AltName: Full=Protein disulfide isomerase-like 3-1; Short=AtPDI3-1; Flags: Precursor<br>gi 126352280 gb ABO09885.1  At1g52260 [Arabidopsis thaliana] gi 332194654 gb AEE32775.1  protein PDI-like 1-5 [Arabidopsis thaliana]                                                                                                                                                                                                                                                                                                                                                                                                                                                                                                                                                                                                                                                                                                                                                                                                                                                                                                                                                                                                                                                                                                                                                                                                                                                                                                                                   | 249  | 537  | 1.00E-33 | 215.7 | 41.4 | 51.4 | protein PDI-like 1-5                     | gbpln | Arabidopsis thaliana | AT1G52260.1   Symbols: ATPDIL1-5, ATPDIL3, PDI3, PDI1-5   PDI-like 1-5   chr1:19460694-19463346 FORWARD LENGTH=537                                                                     | 249  | 537  | 4.00E-36 | 215.7 | 41.4 | 51.4 |

|                         |                                                                                                                                                                                                                                                                                                                                                                                                                                                                                                                                                                                                                                                                                                                                                                                                                                                                                                                                                                                                                                                                                                                                                                                                                                                                                                                                                                                                                                                                                                                                                                                                                                                                                                                                                                                                                                                                                                                                                                                                                                                       |      |      |           |       |      |      |                                        |       |                      |                                                                                                                                              |      |      |           |       |      |      |
|-------------------------|-------------------------------------------------------------------------------------------------------------------------------------------------------------------------------------------------------------------------------------------------------------------------------------------------------------------------------------------------------------------------------------------------------------------------------------------------------------------------------------------------------------------------------------------------------------------------------------------------------------------------------------------------------------------------------------------------------------------------------------------------------------------------------------------------------------------------------------------------------------------------------------------------------------------------------------------------------------------------------------------------------------------------------------------------------------------------------------------------------------------------------------------------------------------------------------------------------------------------------------------------------------------------------------------------------------------------------------------------------------------------------------------------------------------------------------------------------------------------------------------------------------------------------------------------------------------------------------------------------------------------------------------------------------------------------------------------------------------------------------------------------------------------------------------------------------------------------------------------------------------------------------------------------------------------------------------------------------------------------------------------------------------------------------------------------|------|------|-----------|-------|------|------|----------------------------------------|-------|----------------------|----------------------------------------------------------------------------------------------------------------------------------------------|------|------|-----------|-------|------|------|
| Rsa1.0_00125.1.g6058.t1 | emb[CAB75932.1] putative protein [Arabidopsis thaliana]                                                                                                                                                                                                                                                                                                                                                                                                                                                                                                                                                                                                                                                                                                                                                                                                                                                                                                                                                                                                                                                                                                                                                                                                                                                                                                                                                                                                                                                                                                                                                                                                                                                                                                                                                                                                                                                                                                                                                                                               | 1333 | 1339 | 0         | 100.5 | 54.5 | 71.2 | putative protein                       | gbpln | Arabidopsis thaliana | AT4G23160.1   Symbols: CRK8   cysteine-rich RLK (RECEPTOR-like protein kinase) 8   chr4:12129485-12134086 FORWARD LENGTH=1262                | 1333 | 1262 | 1.00E-107 | 94.7  | 15.1 | 23.6 |
| Rsa1.0_00125.1.g6059.t1 | gb[EOA36855.1] hypothetical protein CARUB_v10008802mg [Capsella rubella]                                                                                                                                                                                                                                                                                                                                                                                                                                                                                                                                                                                                                                                                                                                                                                                                                                                                                                                                                                                                                                                                                                                                                                                                                                                                                                                                                                                                                                                                                                                                                                                                                                                                                                                                                                                                                                                                                                                                                                              | 98   | 536  | 3.00E-41  | 546.9 | 83.7 | 89.8 | hypothetical protein CARUB_v10008802mg | gbpln | Capsella rubella     | AT1G52260.1   Symbols: ATPDIL1-5, ATPD13, PDI3, PDIL1-5   PDI-like 1-5   chr1:19460694-19463346 FORWARD LENGTH=537                           | 98   | 537  | 2.00E-41  | 548.0 | 80.6 | 89.8 |
| Rsa1.0_00125.1.g6060.t1 | ref[NP_175638.1] RAB GTPase homolog G3D [Arabidopsis thaliana] gi 297852978 ref[XP_002894370.1] hypothetical protein ARALYDRAFT.474344 [Arabidopsis lyrata subsp. lyrata] gi 75169431 sp Q9C820.1 RAG3D_ARAT H RecName: Full=Ras-related protein RABG3d; Short=AtRABG3d; AltName: Full=Ras-related protein Rab72; Short=AtRab72 gi 12323132 gb AAG51552.1 AC037424.17 GTP-binding protein RAB7D. putative; 63624-64923 [Arabidopsis thaliana] gi 15718410 dbj BAB68372.1 AtRab72 [Arabidopsis thaliana] gi 18389228 gb AAL67057.1 putative GTP-binding protein RAB7D [Arabidopsis thaliana] gi 20465885 gb AAM20047.1 putative GTP-binding protein RAB7D [Arabidopsis thaliana] gi 297340212 gb EFH70629.1 hypothetical protein ARALYDRAFT.474344 [Arabidopsis lyrata subsp. lyrata] gi 332194656 gb AEE32777.1  RAB GTPase homolog G3D [Arabidopsis thaliana] ref[NP_175639.1] protein kinase-like protein [Arabidopsis thaliana] gi 75333493 sp Q9C821.1 PEK15_ARAT H RecName: Full=Proline-rich receptor-like protein kinase PERK15; AltName: Full=Proline-rich extensin-like receptor kinase 15; Short=AtPERK15 gi 12323130 gb AAG51550.1 AC037424.15 protein kinase, putative; 60711-62822 [Arabidopsis thaliana] gi 44917591 gb AAS49120.1 At1g52290 [Arabidopsis thaliana] gi 62320604 dbj BAD95250.1  protein kinase [Arabidopsis thaliana] gi 332194657 gb AEE32778.1  proline-rich receptor-like protein kinase PERK15 [Arabidopsis thaliana] ref[NP_175640.1] 60S ribosomal protein L37-2 [Arabidopsis thaliana] gi 20143906 sp Q43292.2 RL372_ARATH RecName: Full=60S ribosomal protein L37-2 gi 12323122 gb AAG51542.1 AC037424.7 60S ribosomal protein L37, putative; 56921-57860 [Arabidopsis thaliana] gi 13877907 gb AAK44031.1 AF370216.1 putative 60S ribosomal protein L37 [Arabidopsis thaliana] gi 21280805 gb AAM44969.1 putative 60S ribosomal protein L37 [Arabidopsis thaliana] gi 222423584 tbl BAH19761.1 AT1G52300 [Arabidopsis thaliana] gi 332194658 gb AEE32779.1  60S ribosomal protein L37-2 [Arabidopsis thaliana] | 206  | 206  | 1.00E-115 | 100.0 | 97.6 | 99.0 | RAB GTPase homolog G3D                 | gbpln | Arabidopsis lyrata   | AT1G52280.1   Symbols: AtRABG3d, RABG3d   RAB GTPase homolog G3D   chr1:19468150-19469449 REVERSE LENGTH=206                                 | 206  | 206  | 1.00E-117 | 100.0 | 97.6 | 99.0 |
| Rsa1.0_00125.1.g6061.t1 | ref[NP_175640.1] 60S ribosomal protein L37-2 [Arabidopsis thaliana] gi 20143906 sp Q43292.2 RL372_ARATH RecName: Full=60S ribosomal protein L37-2 gi 12323122 gb AAG51542.1 AC037424.7 60S ribosomal protein L37, putative; 56921-57860 [Arabidopsis thaliana] gi 13877907 gb AAK44031.1 AF370216.1 putative 60S ribosomal protein L37 [Arabidopsis thaliana] gi 21280805 gb AAM44969.1 putative 60S ribosomal protein L37 [Arabidopsis thaliana] gi 222423584 tbl BAH19761.1 AT1G52300 [Arabidopsis thaliana] gi 332194658 gb AEE32779.1  60S ribosomal protein L37-2 [Arabidopsis thaliana]                                                                                                                                                                                                                                                                                                                                                                                                                                                                                                                                                                                                                                                                                                                                                                                                                                                                                                                                                                                                                                                                                                                                                                                                                                                                                                                                                                                                                                                         | 509  | 509  | 0         | 100.0 | 80.2 | 86.8 | protein kinase-like protein            | gbpln | Arabidopsis thaliana | AT1G52290.1   Symbols:   Protein kinase superfamily protein   chr1:19470251-19472362 REVERSE LENGTH=509                                      | 509  | 509  | 0         | 100.0 | 80.2 | 86.8 |
| Rsa1.0_00125.1.g6062.t1 | gb[EOA40057.1] hypothetical protein CARUB_v10008750mg [Capsella rubella] gi 482575871 gb EOA40058.1 hypothetical protein CARUB_v10008750mg [Capsella rubella]                                                                                                                                                                                                                                                                                                                                                                                                                                                                                                                                                                                                                                                                                                                                                                                                                                                                                                                                                                                                                                                                                                                                                                                                                                                                                                                                                                                                                                                                                                                                                                                                                                                                                                                                                                                                                                                                                         | 602  | 554  | 0         | 92.0  | 77.7 | 83.4 | hypothetical protein CARUB_v10008750mg | gbpln | Capsella rubella     | AT1G52310.1   Symbols:   protein kinase family protein / C-type lectin domain-containing protein   chr1:19478401-19480462 FORWARD LENGTH=552 | 602  | 552  | 0         | 91.7  | 77.7 | 82.7 |
| Rsa1.0_00125.1.g6063.t1 | gb[EOA40057.1] hypothetical protein CARUB_v10008750mg [Capsella rubella] gi 482575871 gb EOA40058.1 hypothetical protein CARUB_v10008750mg [Capsella rubella]                                                                                                                                                                                                                                                                                                                                                                                                                                                                                                                                                                                                                                                                                                                                                                                                                                                                                                                                                                                                                                                                                                                                                                                                                                                                                                                                                                                                                                                                                                                                                                                                                                                                                                                                                                                                                                                                                         | 602  | 554  | 0         | 92.0  | 77.7 | 83.4 | hypothetical protein CARUB_v10008750mg | gbpln | Capsella rubella     | AT1G52310.1   Symbols:   protein kinase family protein / C-type lectin domain-containing protein   chr1:19478401-19480462 FORWARD LENGTH=552 | 602  | 552  | 0         | 91.7  | 77.7 | 82.7 |

|                         |                                                                                                                                                                                                                                                                                                                                                                                                                                                                                                                                                                                                                                                                                                                                                                                                                                                                      |     |      |          |       |      |      |                                                                                     |       |                      |                                                                                                                                                                                                                                                                                                                                                                                                                                                                                                                                                                                                                           |     |     |          |       |      |      |
|-------------------------|----------------------------------------------------------------------------------------------------------------------------------------------------------------------------------------------------------------------------------------------------------------------------------------------------------------------------------------------------------------------------------------------------------------------------------------------------------------------------------------------------------------------------------------------------------------------------------------------------------------------------------------------------------------------------------------------------------------------------------------------------------------------------------------------------------------------------------------------------------------------|-----|------|----------|-------|------|------|-------------------------------------------------------------------------------------|-------|----------------------|---------------------------------------------------------------------------------------------------------------------------------------------------------------------------------------------------------------------------------------------------------------------------------------------------------------------------------------------------------------------------------------------------------------------------------------------------------------------------------------------------------------------------------------------------------------------------------------------------------------------------|-----|-----|----------|-------|------|------|
| Rsa1.0_00125.1.g6064.t1 | refNP_175645.1  coatomer subunit beta--2 [Arabidopsis thaliana] gi 75169434 sp Q9C827.1 COB22_ARAT H RecName: Full=Coatomer subunit beta--2; AltName: Full=Beta--coat protein 2; Short=Beta--COP 2 gi 12323125 gb AAG51545.1 AC037424_10 coatomer complex subunit, putative: 33791-27676 [Arabidopsis thaliana] gi 332194671 gb AEE32792.1  coatomer subunit beta--2 [Arabidopsis thaliana]                                                                                                                                                                                                                                                                                                                                                                                                                                                                          | 938 | 926  | 0        | 98.7  | 92.3 | 96.2 | coatomer subunit beta--2                                                            | gbpln | Arabidopsis thaliana | AT1G52360.1   Symbols:   Coatomer, beta' subunit   chr1:19499282-19505397 FORWARD LENGTH=926                                                                                                                                                                                                                                                                                                                                                                                                                                                                                                                              | 938 | 926 | 0        | 98.7  | 92.3 | 96.2 |
| Rsa1.0_00125.1.g6065.t1 | #                                                                                                                                                                                                                                                                                                                                                                                                                                                                                                                                                                                                                                                                                                                                                                                                                                                                    | #   | #    | #        | #     | #    | #    | -                                                                                   | ----  | ----                 | AT1G52380.1   Symbols:   NUP50 (Nucleoporin 50 kDa) protein   chr1:19509979-19511301 FORWARD LENGTH=440                                                                                                                                                                                                                                                                                                                                                                                                                                                                                                                   | 113 | 440 | 2.00E-11 | 389.4 | 34.5 | 40.7 |
| Rsa1.0_00125.1.g6066.t1 | refXP_002894381.1  hypothetical protein ARALYDRAFT_892257 [Arabidopsis lyrata subsp. lyrata] gi 297340223 gb EFH70640.1  hypothetical protein ARALYDRAFT_892257 [Arabidopsis lyrata subsp. lyrata]                                                                                                                                                                                                                                                                                                                                                                                                                                                                                                                                                                                                                                                                   | 391 | 721  | 3.00E-98 | 184.4 | 51.4 | 65.7 | hypothetical protein ARALYDRAFT_892257                                              | gbpln | Arabidopsis lyrata   | AT1G52490.1   Symbols:   CONTAINS InterPro DOMAIN/s: F-box domain, cyclin--like (InterPro:IPR001810), F-box domain, Skp2-like (InterPro:IPR022364), F-box associated domain, type 3 (InterPro:IPR013187), F-box associated interaction domain (InterPro:IPR017451); BEST Arabidopsis thaliana protein match is: F-box and associated interaction domains--containing protein (TAIR:AT1G32420.1); Has 1577 Blast hits to 1056 proteins in 31 species: Archae - 0; Bacteria - 0; Metazoa - 0; Fungi - 0; Plants - 1577; Viruses - 0; Other Eukaryotes - 0 (source: NCBI BLink).   chr1:19556218-19559011 REVERSE LENGTH=513 | 391 | 513 | 1.00E-66 | 131.2 | 37.1 | 47.1 |
| Rsa1.0_00125.1.g6067.t1 | sp Q9SSQ2.1 FB55_ARATH RecName: Full=F-box protein At1g52490 gi 5903056 gb AAD5561.5.1 AC008016_25 F6D8.29 [Arabidopsis thaliana]                                                                                                                                                                                                                                                                                                                                                                                                                                                                                                                                                                                                                                                                                                                                    | 391 | 423  | 1.00E-96 | 108.2 | 50.9 | 62.9 | RecName: Full=F-box protein At1g52490 gi 5903056 gb AAD5561.5.1 AC008016_25 F6D8.29 | gbpln | Arabidopsis thaliana | AT1G52490.1   Symbols:   CONTAINS InterPro DOMAIN/s: F-box domain, cyclin--like (InterPro:IPR001810), F-box domain, Skp2-like (InterPro:IPR022364), F-box associated domain, type 3 (InterPro:IPR013187), F-box associated interaction domain (InterPro:IPR017451); BEST Arabidopsis thaliana protein match is: F-box and associated interaction domains--containing protein (TAIR:AT1G32420.1); Has 1577 Blast hits to 1056 proteins in 31 species: Archae - 0; Bacteria - 0; Metazoa - 0; Fungi - 0; Plants - 1577; Viruses - 0; Other Eukaryotes - 0 (source: NCBI BLink).   chr1:19556218-19559011 REVERSE LENGTH=513 | 391 | 513 | 2.00E-66 | 131.2 | 37.3 | 45.8 |
| Rsa1.0_00125.1.g6068.t1 | refXP_002894388.1  predicted protein [Arabidopsis lyrata subsp. lyrata] gi 297340230 gb EFH70647.1  predicted protein [Arabidopsis lyrata subsp. lyrata]                                                                                                                                                                                                                                                                                                                                                                                                                                                                                                                                                                                                                                                                                                             | 814 | 810  | 0        | 99.5  | 93.2 | 95.7 | predicted protein                                                                   | gbpln | Arabidopsis lyrata   | AT1G52570.1   Symbols:   PLDALPHA2   phospholipase D alpha 2   chr1:19583940-19586551 REVERSE LENGTH=810                                                                                                                                                                                                                                                                                                                                                                                                                                                                                                                  | 814 | 810 | 0        | 99.5  | 93.0 | 95.7 |
| Rsa1.0_00125.1.g6069.t1 | gb AAG50751.1 AC079733_19 polyprotein, putative [Arabidopsis thaliana]                                                                                                                                                                                                                                                                                                                                                                                                                                                                                                                                                                                                                                                                                                                                                                                               | 268 | 1468 | 2.00E-31 | 547.8 | 23.5 | 28.7 | polyprotein, putative                                                               | gbpln | Arabidopsis thaliana | AT1G52580.1   Symbols:   ATRBL5, RBL5   RHOMBROID-like protein 5   chr1:19587637-19588958 FORWARD LENGTH=309                                                                                                                                                                                                                                                                                                                                                                                                                                                                                                              | 268 | 309 | 4.00E-26 | 115.3 | 26.9 | 32.5 |
| Rsa1.0_00125.1.g6070.t1 | refNP_175669.1  signal peptidase, endoplasmic reticulum--type [Arabidopsis thaliana] gi 297847646 ref XP_002891704.1  hypothetical protein ARALYDRAFT_474386 [Arabidopsis lyrata subsp. lyrata] gi 5903045 gb AAD55604.1 AC008016_14 Similar to gb AF108945  signal peptidase 18 kDa subunit from Homo sapiens. ESTs gb H76629, gb H76949 and gb H76216 come from this gene [Arabidopsis thaliana] gi 17381152 gb AAL36388.1  putative signal peptidase subunit [Arabidopsis thaliana] gi 20465737 gb AAM20337.1  putative signal peptidase subunit [Arabidopsis thaliana] gi 21536563 gb AAM60895.1  signal peptidase subunit, putative [Arabidopsis thaliana] gi 297337546 gb EFH67963.1  hypothetical protein ARALYDRAFT_474386 [Arabidopsis lyrata subsp. lyrata] gi 332194707 gb AEE32828.1  Peptidase S24/S26A/S26B/S26C family protein [Arabidopsis thaliana] | 153 | 180  | 8.00E-77 | 117.6 | 94.1 | 96.1 | signal peptidase, endoplasmic reticulum--type                                       | gbpln | Arabidopsis lyrata   | AT1G52600.1   Symbols:   Peptidase S24/S26A/S26B/S26C family protein   chr1:19590612-19592466 FORWARD LENGTH=180                                                                                                                                                                                                                                                                                                                                                                                                                                                                                                          | 153 | 180 | 2.00E-79 | 117.6 | 94.1 | 96.1 |
| Rsa1.0_00125.1.g6071.t1 | #                                                                                                                                                                                                                                                                                                                                                                                                                                                                                                                                                                                                                                                                                                                                                                                                                                                                    | #   | #    | #        | #     | #    | #    | -                                                                                   | ----  | ----                 | #                                                                                                                                                                                                                                                                                                                                                                                                                                                                                                                                                                                                                         | #   | #   | #        | #     | #    |      |

|                         |                                                                                                                                                                                                                                                                                                                                                                                                                                                                                                                                                                               |     |      |           |       |      |      |                                                         |       |                      |                                                                                                                                                                                                                                                                                                                                                                                 |     |     |           |       |      |      |
|-------------------------|-------------------------------------------------------------------------------------------------------------------------------------------------------------------------------------------------------------------------------------------------------------------------------------------------------------------------------------------------------------------------------------------------------------------------------------------------------------------------------------------------------------------------------------------------------------------------------|-----|------|-----------|-------|------|------|---------------------------------------------------------|-------|----------------------|---------------------------------------------------------------------------------------------------------------------------------------------------------------------------------------------------------------------------------------------------------------------------------------------------------------------------------------------------------------------------------|-----|-----|-----------|-------|------|------|
| Rsa1.0_00126.1.g6072.t1 | gb AAC62132.1  copia-like retroelement pol polyprotein [Arabidopsis thaliana]                                                                                                                                                                                                                                                                                                                                                                                                                                                                                                 | 241 | 1137 | 5.00E-76  | 471.8 | 61.0 | 76.3 | copia-like retroelement pol polyprotein                 | gbpln | Arabidopsis thaliana | ATMG00810.1   Symbols: ORF240B   DNA/RNA polymerases superfamily protein   chrM:227709-228431 REVERSE LENGTH=240                                                                                                                                                                                                                                                                | 241 | 240 | 9.00E-12  | 99.6  | 20.3 | 34.4 |
| Rsa1.0_00126.1.g6073.t1 | ref XP_002890460.1  homeobox-leucine zipper protein 9 [Arabidopsis lyrata subsp. lyrata] gi 297326299 gb EFH56719.1  homeobox-leucine zipper protein 9 [Arabidopsis lyrata subsp. lyrata]                                                                                                                                                                                                                                                                                                                                                                                     | 278 | 273  | 1.00E-121 | 98.2  | 83.8 | 89.9 | homeobox-leucine zipper protein 9                       | gbpln | Arabidopsis lyrata   | AT2G22800.1   Symbols: HAT9   Homeobox-leucine zipper protein family   chr2:9704949-9706048 REVERSE LENGTH=274                                                                                                                                                                                                                                                                  | 278 | 274 | 1.00E-112 | 98.6  | 82.4 | 88.8 |
| Rsa1.0_00126.1.g6074.t1 | gb EOA28316.1  hypothetical protein CARUB_v10024517mg [Capsella rubella]                                                                                                                                                                                                                                                                                                                                                                                                                                                                                                      | 232 | 740  | 6.00E-17  | 319.0 | 34.9 | 46.6 | hypothetical protein CARUB_v10024517mg                  | gbpln | Capsella rubella     | AT4G37820.1   Symbols:   unknown protein; BEST Arabidopsis thaliana protein match is: unknown protein (TAIR:AT2G22795.1); Has 43572 Blast hits to 177005 proteins in 4263 species: Archae - 2016; Bacteria - 67591; Metazoa - 157995; Fungi - 49745; Plants - 22011; Viruses - 2192; Other Eukaryotes - 132022 (source: NCBI BLINK)   chr4:17785692-17787290 FORWARD LENGTH=532 | 232 | 532 | 4.00E-17  | 229.3 | 34.1 | 45.7 |
| Rsa1.0_00126.1.g6075.t1 | ref XP_002878634.1  hypothetical protein ARALYDRAFT_900728 [Arabidopsis lyrata subsp. lyrata] gi 297324473 gb EFH54893.1  hypothetical protein ARALYDRAFT_900728 [Arabidopsis lyrata subsp. lyrata]                                                                                                                                                                                                                                                                                                                                                                           | 322 | 321  | 1.00E-104 | 99.7  | 67.4 | 78.6 | hypothetical protein ARALYDRAFT_900728                  | gbpln | Arabidopsis lyrata   | AT2G22790.1   Symbols:   unknown protein; BEST Arabidopsis thaliana protein match is: unknown protein (TAIR:AT5G67020.1); Has 111 Blast hits to 111 proteins in 33 species: Archae - 0; Bacteria - 44; Metazoa - 0; Fungi - 0; Plants - 67; Viruses - 0; Other Eukaryotes - 0 (source: NCBI BLINK)   chr2:9695932-9696909 FORWARD LENGTH=325                                    | 322 | 325 | 6.00E-92  | 100.9 | 65.2 | 73.9 |
| Rsa1.0_00126.1.g6076.t1 | ref XP_002880457.1  peroxisomal NAD-malate dehydrogenase 1 [Arabidopsis lyrata subsp. lyrata] gi 297326296 gb EFH56716.1  peroxisomal NAD-malate dehydrogenase 1 [Arabidopsis lyrata subsp. lyrata]                                                                                                                                                                                                                                                                                                                                                                           | 353 | 354  | 0         | 100.3 | 95.2 | 96.9 | peroxisomal NAD-malate dehydrogenase 1                  | gbpln | Arabidopsis lyrata   | AT2G22780.1   Symbols: PMDH1   peroxisomal NAD-malate dehydrogenase 1   chr2:9689995-9691923 REVERSE LENGTH=354                                                                                                                                                                                                                                                                 | 353 | 354 | 0         | 100.3 | 94.6 | 96.9 |
| Rsa1.0_00126.1.g6077.t1 | ref XP_002878633.1  hypothetical protein ARALYDRAFT_481138 [Arabidopsis lyrata subsp. lyrata] gi 297324472 gb EFH54892.1  hypothetical protein ARALYDRAFT_481138 [Arabidopsis lyrata subsp. lyrata]                                                                                                                                                                                                                                                                                                                                                                           | 323 | 321  | 1.00E-119 | 99.4  | 77.4 | 85.8 | hypothetical protein ARALYDRAFT_481138                  | gbpln | Arabidopsis lyrata   | AT2G22770.1   Symbols: NAI1   basic helix-loop-helix (bHLH) DNA-binding superfamily protein   chr2:9684858-9686321 FORWARD LENGTH=320                                                                                                                                                                                                                                           | 323 | 320 | 1.00E-120 | 99.1  | 77.4 | 86.1 |
| Rsa1.0_00126.1.g6078.t1 | dbj BAB09379.1  non-LTR retroelement reverse transcriptase-like protein [Arabidopsis thaliana]                                                                                                                                                                                                                                                                                                                                                                                                                                                                                | 714 | 1223 | 0         | 171.3 | 47.6 | 65.1 | non-LTR retroelement reverse transcriptase-like protein | gbpln | Arabidopsis thaliana | AT3G24255.1   Symbols:   RNA-directed DNA polymerase (reverse transcriptase)-related family protein   chr3:8789471-8793208 FORWARD LENGTH=746                                                                                                                                                                                                                                   | 714 | 746 | 3.00E-84  | 104.5 | 24.1 | 32.6 |
| Rsa1.0_00126.1.g6079.t1 | gb AAC67331.1  putative non-LTR retroelement reverse transcriptase [Arabidopsis thaliana]                                                                                                                                                                                                                                                                                                                                                                                                                                                                                     | 944 | 1449 | 1.00E-134 | 153.5 | 33.1 | 48.5 | putative non-LTR retroelement reverse transcriptase     | gbpln | Arabidopsis thaliana | AT3G24255.1   Symbols:   RNA-directed DNA polymerase (reverse transcriptase)-related family protein   chr3:8789471-8793208 FORWARD LENGTH=746                                                                                                                                                                                                                                   | 944 | 746 | 2.00E-59  | 79.0  | 15.3 | 22.2 |
| Rsa1.0_00126.1.g6080.t1 | ref XP_002862436.1  predicted protein [Arabidopsis lyrata subsp. lyrata] gi 297307949 gb EFH38694.1  predicted protein [Arabidopsis lyrata subsp. lyrata]                                                                                                                                                                                                                                                                                                                                                                                                                     | 581 | 530  | 9.00E-39  | 91.2  | 14.5 | 19.1 | predicted protein                                       | gbpln | Arabidopsis lyrata   | #                                                                                                                                                                                                                                                                                                                                                                               | #   | #   | #         | #     | #    | #    |
| Rsa1.0_00126.1.g6081.t1 | emb CAB39942.1  putative protein [Arabidopsis thaliana] gi 7267871 emb CAB78214.1  putative protein [Arabidopsis thaliana]                                                                                                                                                                                                                                                                                                                                                                                                                                                    | 175 | 473  | 3.00E-32  | 270.3 | 40.6 | 61.7 | putative protein                                        | gbpln | Arabidopsis thaliana | AT5G18880.1   Symbols:   RNA-directed DNA polymerase (reverse transcriptase)-related family protein   chr5:6300535-6301422 REVERSE LENGTH=295                                                                                                                                                                                                                                   | 175 | 295 | 3.00E-32  | 168.6 | 38.3 | 57.1 |
| Rsa1.0_00126.1.g6082.t1 | #                                                                                                                                                                                                                                                                                                                                                                                                                                                                                                                                                                             | #   | #    | #         | #     | #    | #    | -                                                       | ----  | ----                 | #                                                                                                                                                                                                                                                                                                                                                                               | #   | #   | #         | #     | #    | #    |
| Rsa1.0_00126.1.g6083.t1 | ref NP_179861.2  transcription factor bHLH19 [Arabidopsis thaliana] gi 22231648 sp Q1PFF6.1 BH019_ARAT H ResName: Full=Transcription factor bHLH19; AltName: Full=Basic helix-loop-helix protein 19; Short=AtbHLH19; Short=bHLH 19; AltName: Full=Transcription factor EN 26; AltName: Full=bHLH transcription factor bHLH019 gi 91806242 gb ABE65849.1  basic helix-loop-helix family protein [Arabidopsis thaliana] gi 225898130 dbj BAH30397.1  hypothetical protein [Arabidopsis thaliana] gi 330252257 gb AEC07351.1  transcription factor bHLH19 [Arabidopsis thaliana] | 296 | 295  | 1.00E-118 | 99.7  | 74.0 | 83.8 | transcription factor bHLH19                             | gbpln | Arabidopsis thaliana | AT2G22760.1   Symbols:   basic helix-loop-helix (bHLH) DNA-binding superfamily protein   chr2:9678012-9679165 FORWARD LENGTH=295                                                                                                                                                                                                                                                | 296 | 295 | 1.00E-121 | 99.7  | 74.0 | 83.8 |



|                         |                                                                                                                                                                                                                                                                                                                                                                                                                                                                                                                                                                                                                                                                                                                                                                                                                                                                                                                                         |     |      |           |        |      |      |                                        |       |                      |                                                                                                                                                                                                                                                                                                                                                                                                                                                                                                         |     |      |           |       |      |      |
|-------------------------|-----------------------------------------------------------------------------------------------------------------------------------------------------------------------------------------------------------------------------------------------------------------------------------------------------------------------------------------------------------------------------------------------------------------------------------------------------------------------------------------------------------------------------------------------------------------------------------------------------------------------------------------------------------------------------------------------------------------------------------------------------------------------------------------------------------------------------------------------------------------------------------------------------------------------------------------|-----|------|-----------|--------|------|------|----------------------------------------|-------|----------------------|---------------------------------------------------------------------------------------------------------------------------------------------------------------------------------------------------------------------------------------------------------------------------------------------------------------------------------------------------------------------------------------------------------------------------------------------------------------------------------------------------------|-----|------|-----------|-------|------|------|
| Rsa1.0_00126.1.g6084.t1 | gb AAD32898.1  putative retroelement pol polyprotein [Arabidopsis thaliana]                                                                                                                                                                                                                                                                                                                                                                                                                                                                                                                                                                                                                                                                                                                                                                                                                                                             | 128 | 1307 | 1.00E-35  | 1021.1 | 55.5 | 75.8 | putative retroelement pol polyprotein  | gbpln | Arabidopsis thaliana | AT4G23160.1   Symbols: CRK8   cysteine-rich RLK (RECEPTOR-like protein kinase) 8   chr4:12129485-12134086 FORWARD LENGTH=1262                                                                                                                                                                                                                                                                                                                                                                           | 128 | 1262 | 1.00E-21  | 985.9 | 36.7 | 54.7 |
| Rsa1.0_00126.1.g6085.t1 | gb EOA28808.1  hypothetical protein CARUB_v10025041mg [Capsella rubella]                                                                                                                                                                                                                                                                                                                                                                                                                                                                                                                                                                                                                                                                                                                                                                                                                                                                | 322 | 305  | 1.00E-128 | 94.7   | 73.0 | 82.3 | hypothetical protein CARUB_v10025041mg | gbpln | Capsella rubella     | AT2G22750.2   Symbols:   basic helix-loop-helix (bHLH) DNA-binding superfamily protein   chr2:9672145-9673624 FORWARD LENGTH=305                                                                                                                                                                                                                                                                                                                                                                        | 322 | 305  | 1.00E-114 | 94.7  | 75.2 | 82.0 |
| Rsa1.0_00126.1.g6086.t1 | ref XP_002880456.1  predicted protein [Arabidopsis lyrata subsp. lyrata] gi 297326295 gb EFH56715.1  predicted protein [Arabidopsis lyrata subsp. lyrata]                                                                                                                                                                                                                                                                                                                                                                                                                                                                                                                                                                                                                                                                                                                                                                               | 780 | 808  | 0         | 103.6  | 61.0 | 72.3 | predicted protein                      | gbpln | Arabidopsis lyrata   | AT2G22740.1   Symbols: SUVH6, SDG23   SU(VAR)3-9 homolog 6   chr2:9664256-9666628 REVERSE LENGTH=790                                                                                                                                                                                                                                                                                                                                                                                                    | 780 | 790  | 0         | 101.3 | 60.1 | 71.7 |
| Rsa1.0_00126.1.g6087.t1 | ref XP_002878630.1  hypothetical protein ARALYDRAFT_320107 [Arabidopsis lyrata subsp. lyrata] gi 297324469 gb EFH54889.1  hypothetical protein ARALYDRAFT_320107 [Arabidopsis lyrata subsp. lyrata]                                                                                                                                                                                                                                                                                                                                                                                                                                                                                                                                                                                                                                                                                                                                     | 527 | 506  | 0         | 96.0   | 84.3 | 89.0 | hypothetical protein ARALYDRAFT_320107 | gbpln | Arabidopsis lyrata   | AT2G22730.1   Symbols:   Major facilitator superfamily protein   chr2:9660964-9663972 FORWARD LENGTH=510                                                                                                                                                                                                                                                                                                                                                                                                | 527 | 510  | 0         | 96.8  | 82.5 | 87.3 |
| Rsa1.0_00126.1.g6088.t1 | ref NP_973513.1  SPT2 chromatin protein [Arabidopsis thaliana] gi 110741100 dbj BAE98844.1  hypothetical protein [Arabidopsis thaliana] gi 330252251 gb AEC07345.1  SPT2 chromatin protein [Arabidopsis thaliana]                                                                                                                                                                                                                                                                                                                                                                                                                                                                                                                                                                                                                                                                                                                       | 517 | 569  | 1.00E-164 | 110.1  | 72.5 | 82.2 | SPT2 chromatin protein                 | gbpln | Arabidopsis thaliana | AT2G22720.3   Symbols:   SPT2 chromatin protein   chr2:9658182-9660532 FORWARD LENGTH=569                                                                                                                                                                                                                                                                                                                                                                                                               | 517 | 569  | 1.00E-167 | 110.1 | 72.5 | 82.2 |
| Rsa1.0_00126.1.g6089.t1 | sp Q9SAE1.2 C71BR ARATH RecName: Full=Cytochrome P450 71B27                                                                                                                                                                                                                                                                                                                                                                                                                                                                                                                                                                                                                                                                                                                                                                                                                                                                             | 103 | 503  | 9.00E-38  | 488.3  | 73.8 | 84.5 | RecName: Full=Cytochrome P450 71B27    | ----  | ----                 | AT1G13080.1   Symbols: CYP71B2   cytochrome P450, family 71, subfamily B, polypeptide 2   chr1:4459212-4460807 FORWARD LENGTH=502                                                                                                                                                                                                                                                                                                                                                                       | 103 | 502  | 2.00E-37  | 487.4 | 78.6 | 89.3 |
| Rsa1.0_00126.1.g6090.t1 | gb ABD65065.1  hypothetical protein 27.t00043 [Brassica oleracea]                                                                                                                                                                                                                                                                                                                                                                                                                                                                                                                                                                                                                                                                                                                                                                                                                                                                       | 117 | 117  | 4.00E-30  | 100.0  | 60.7 | 77.8 | hypothetical protein 27.t00043         | gbpln | Brassica oleracea    | # # # # # #                                                                                                                                                                                                                                                                                                                                                                                                                                                                                             | #   | #    | #         | #     | #    | #    |
| Rsa1.0_00127.1.g6091.t1 | gb EOA16586.1  hypothetical protein CARUB_v10004752mg [Capsella rubella] gi 482552394 gb EOA16587.1  hypothetical protein CARUB_v10004752mg [Capsella rubella] gi 482552395 gb EOA16588.1  hypothetical protein CARUB_v10004752mg [Capsella rubella] gi 482552396 gb EOA16589.1  hypothetical protein CARUB_v10004752mg [Capsella rubella]                                                                                                                                                                                                                                                                                                                                                                                                                                                                                                                                                                                              | 432 | 464  | 1.00E-123 | 107.4  | 66.4 | 77.3 | hypothetical protein CARUB_v10004752mg | gbpln | Capsella rubella     | AT4G33740.3   Symbols:   unknown protein; FUNCTIONS IN: molecular function unknown; INVOLVED IN: biological process unknown; LOCATED IN: cellular component unknown; BEST Arabidopsis thaliana protein match is: unknown protein (TAIR:AT4G37820.1); Has 138092 Blast hits to 73110 proteins in 2951 species: Archae - 732; Bacteria - 17903; Metazoa - 48520; Fungi - 16808; Plants - 7078; Viruses - 1044; Other Eukaryotes - 46007 (source: NOBI BLink).   chr4:16187384-16188802 FORWARD LENGTH=472 | 432 | 472  | 1.00E-109 | 109.3 | 62.7 | 76.6 |
| Rsa1.0_00127.1.g6092.t1 | gb EOA18047.1  hypothetical protein CARUB_v10006493mg [Capsella rubella]                                                                                                                                                                                                                                                                                                                                                                                                                                                                                                                                                                                                                                                                                                                                                                                                                                                                | 172 | 173  | 1.00E-80  | 100.6  | 82.6 | 89.5 | hypothetical protein CARUB_v10006493mg | gbpln | Capsella rubella     | AT4G33730.1   Symbols:   CAP (Cysteine-rich secretory proteins, Antigen 5, and Pathogenesis-related 1 protein) superfamily protein   chr4:16185098-16185616 FORWARD LENGTH=172                                                                                                                                                                                                                                                                                                                          | 172 | 172  | 3.00E-79  | 100.0 | 82.6 | 88.4 |
| Rsa1.0_00127.1.g6093.t1 | ref NP_195098.1  putative pathogenesis-related protein [Arabidopsis thaliana] gi 11692906 gb AAG40056.1 AF324705.1 AT4g33720 [Arabidopsis thaliana] gi 11935187 gb AAG42009.1 AF327419.1 putative pathogenesis-related protein 1 precursor, 19.3K [Arabidopsis thaliana] gi 12642876 gb AAK00381.1 AF339699.1 putative pathogenesis-related protein 1 precursor, 19.3K [Arabidopsis thaliana] gi 3549674 emb CAZ0565.1  pathogenesis-related protein 1 precursor, 19.3K [Arabidopsis thaliana] gi 7270321 emb CAB80089.1  pathogenesis-related protein 1 precursor, 19.3K [Arabidopsis thaliana] gi 14517484 gb AAK62632.1  AT4g33720/T16L1.210 [Arabidopsis thaliana] gi 21593911 gb AAM65876.1  pathogenesis-related protein 1 precursor, 19.3K [Arabidopsis thaliana] gi 22136566 gb AAM91069.1  AT4g33720/T16L1.210 [Arabidopsis thaliana] gi 332660869 gb AEE86269.1  putative pathogenesis-related protein [Arabidopsis thaliana] | 165 | 163  | 1.00E-68  | 98.8   | 77.0 | 85.5 | putative pathogenesis-related protein  | gbpln | Arabidopsis thaliana | AT4G33720.1   Symbols:   CAP (Cysteine-rich secretory proteins, Antigen 5, and Pathogenesis-related 1 protein) superfamily protein   chr4:16182813-16183304 FORWARD LENGTH=163                                                                                                                                                                                                                                                                                                                          | 165 | 163  | 5.00E-71  | 98.8  | 77.0 | 85.5 |

|                         |                                                                                                                                                                                                                                                                                                                                                                                                                                                                                                                                                                                                                                                                                                                        |     |     |           |       |      |      |                                        |       |                      |                                                                                                                                                                                                                                                                                                                                                                                                                                                                       |     |     |           |       |      |      |
|-------------------------|------------------------------------------------------------------------------------------------------------------------------------------------------------------------------------------------------------------------------------------------------------------------------------------------------------------------------------------------------------------------------------------------------------------------------------------------------------------------------------------------------------------------------------------------------------------------------------------------------------------------------------------------------------------------------------------------------------------------|-----|-----|-----------|-------|------|------|----------------------------------------|-------|----------------------|-----------------------------------------------------------------------------------------------------------------------------------------------------------------------------------------------------------------------------------------------------------------------------------------------------------------------------------------------------------------------------------------------------------------------------------------------------------------------|-----|-----|-----------|-------|------|------|
| Rsa1.0_00127.1.g6094.t1 | ref NP_195096.2  CBS domain-containing protein [Arabidopsis thaliana] gi 75248526 sp Q8VZ12.1 Y4370_ARATH RecName: Full=DUF21 domain-containing protein At4g33700; AltName: Full=CBS domain-containing protein CBSDUF6 gi 17381276 gb AAL36056.1  AT4g33700/T16L1_190 [Arabidopsis thaliana] gi 20856058 gb AAM26645.1  AT4g33700/T16L1_190 [Arabidopsis thaliana] gi 332660867 gb AEE86267.1  DUF21 domain-containing protein [Arabidopsis thaliana]                                                                                                                                                                                                                                                                  | 419 | 424 | 0         | 101.2 | 93.1 | 95.2 | CBS domain-containing protein          | gbpln | Arabidopsis thaliana | AT4G33700.1   Symbols:   CBS domain-containing protein with a domain of unknown function (DUF21)   chr4:16176547-16179188 REVERSE LENGTH=424                                                                                                                                                                                                                                                                                                                          | 419 | 424 | 0         | 101.2 | 93.1 | 95.2 |
| Rsa1.0_00127.1.g6095.t1 | ref XP_002869199.1  AT4g33690/T16L1_180 [Arabidopsis lyrata subsp. lyrata] gi 297315035 gb EFH45458.1  AT4g33690/T16L1_180 [Arabidopsis lyrata subsp. lyrata]                                                                                                                                                                                                                                                                                                                                                                                                                                                                                                                                                          | 267 | 245 | 8.00E-82  | 91.8  | 62.5 | 67.8 | AT4g33690/T16L1_180                    | gbpln | Arabidopsis lyrata   | AT4G33690.1   Symbols:   unknown protein; FUNCTIONS IN: molecular_function unknown; INVOLVED IN: biological_process unknown; LOCATED IN: chloroplast; EXPRESSED IN: pollen tube; Has 543 Blast hits to 512 proteins in 106 species: Archae - 0; Bacteria - 0; Metazoa - 281; Fungi - 54; Plants - 72; Viruses - 0; Other Eukaryotes - 136 (source: NCBI BLINK).   chr4:16175198-16176137 FORWARD LENGTH=246                                                           | 267 | 246 | 3.00E-77  | 92.1  | 60.3 | 65.2 |
| Rsa1.0_00127.1.g6096.t1 | ref NP_567934.1  LL-diaminopimelate aminotransferase [Arabidopsis thaliana] gi 75163801 sp Q93ZN9.1 DAPAT_ARATH RecName: Full=LL-diaminopimelate aminotransferase, chloroplastic; Short=ADAP-AT; Short=DAP-AT; Short=DAP-aminotransferase; Short=LL-DAP-aminotransferase; AltName: Full=Protein ABERRANT GROWTH AND DEATH 2; Flags: Precursor gi 15912291 gb AAL08279.1  AT4g33680/T16L1_170 [Arabidopsis thaliana] gi 17529044 gb AAL38732.1  unknown protein [Arabidopsis thaliana] gi 21436149 gb AAM51321.1  unknown protein [Arabidopsis thaliana] gi 41323503 gb AAR99909.1  aminotransferase AGD2 [Arabidopsis thaliana] gi 332660865 gb AEE86265.1  LL-diaminopimelate aminotransferase [Arabidopsis thaliana] | 462 | 461 | 0         | 99.8  | 95.0 | 98.3 | LL-diaminopimelate aminotransferase    | gbpln | Arabidopsis thaliana | AT4G33680.1   Symbols: AGD2   Pyridoxal phosphate (PLP)-dependent transferases superfamily protein   chr4:16171847-16174630 REVERSE LENGTH=461                                                                                                                                                                                                                                                                                                                        | 462 | 461 | 0         | 99.8  | 95.0 | 98.3 |
| Rsa1.0_00127.1.g6097.t1 | ref NP_195093.1  D-threo-aldose 1-dehydrogenase [Arabidopsis thaliana] gi 75220139 sp O81884.1 GALDH_ARATH RecName: Full=L-galactose dehydrogenase; Short=At-GalDH; Short=L-GalDH gi 3549669 emb CAA20580.1  putative protein [Arabidopsis thaliana] gi 7270315 emb CAB80084.1  putative protein [Arabidopsis thaliana] gi 15215698 gb AAK91395.1  AT4g33670/T16L1_160 [Arabidopsis thaliana] gi 16555790 emb CAD10386.1  L-galactose dehydrogenase [Arabidopsis thaliana] gi 19699264 gb AAL90998.1  AT4g33670/T16L1_160 [Arabidopsis thaliana] gi 332660864 gb AEE86264.1  L-galactose dehydrogenase [Arabidopsis thaliana]                                                                                          | 318 | 319 | 1.00E-161 | 100.3 | 88.1 | 93.7 | D-threo-aldose 1-dehydrogenase         | gbpln | Arabidopsis thaliana | AT4G33670.1   Symbols:   NAD(P)-linked oxidoreductase superfamily protein   chr4:16169670-16171446 REVERSE LENGTH=319                                                                                                                                                                                                                                                                                                                                                 | 318 | 319 | 1.00E-163 | 100.3 | 88.1 | 93.7 |
| Rsa1.0_00127.1.g6098.t1 | ref XP_002869200.1  hypothetical protein ARALYDRAFT_913046 [Arabidopsis lyrata subsp. lyrata] gi 297315036 gb EFH45459.1  hypothetical protein ARALYDRAFT_913046 [Arabidopsis lyrata subsp. lyrata]                                                                                                                                                                                                                                                                                                                                                                                                                                                                                                                    | 83  | 78  | 4.00E-22  | 94.0  | 72.3 | 80.7 | hypothetical protein ARALYDRAFT_913046 | gbpln | Arabidopsis lyrata   | AT4G33666.1   Symbols:   unknown protein; FUNCTIONS IN: molecular_function unknown; INVOLVED IN: biological_process unknown; LOCATED IN: chloroplast; EXPRESSED IN: 19 plant structures; EXPRESSED DURING: 11 growth stages; Has 30201 Blast hits to 17322 proteins in 780 species: Archae - 12; Bacteria - 1396; Metazoa - 17338; Fungi - 3422; Plants - 5037; Viruses - 0; Other Eukaryotes - 2996 (source: NCBI BLINK).   chr4:16169167-16169406 FORWARD LENGTH=79 | 83  | 79  | 2.00E-19  | 95.2  | 62.7 | 72.3 |
| Rsa1.0_00127.1.g6099.t1 | #                                                                                                                                                                                                                                                                                                                                                                                                                                                                                                                                                                                                                                                                                                                      | #   | #   | #         | #     | #    | #    | -                                      | ----  | ----                 | #                                                                                                                                                                                                                                                                                                                                                                                                                                                                     | #   | #   | #         | #     | #    |      |

|                         |                                                                                                                                                                                                                                                                                                                                                                                                                                                                                                                                                                        |     |     |           |       |      |      |                                                 |       |                      |                                                                                                                                                                                                                                                                                                                                                                                                                                                                                                                                                                                                                                                                                                                                                                                                |     |     |           |       |      |      |
|-------------------------|------------------------------------------------------------------------------------------------------------------------------------------------------------------------------------------------------------------------------------------------------------------------------------------------------------------------------------------------------------------------------------------------------------------------------------------------------------------------------------------------------------------------------------------------------------------------|-----|-----|-----------|-------|------|------|-------------------------------------------------|-------|----------------------|------------------------------------------------------------------------------------------------------------------------------------------------------------------------------------------------------------------------------------------------------------------------------------------------------------------------------------------------------------------------------------------------------------------------------------------------------------------------------------------------------------------------------------------------------------------------------------------------------------------------------------------------------------------------------------------------------------------------------------------------------------------------------------------------|-----|-----|-----------|-------|------|------|
| Rsa1.0_00127.1.g6100.t1 | ref[XP_002865966.1] hypothetical protein ARALYDRAFT_357572 [Arabidopsis lyrata subsp. lyrata] gi 297311801 gb EFH44225.1  hypothetical protein ARALYDRAFT_357572 [Arabidopsis lyrata subsp. lyrata]                                                                                                                                                                                                                                                                                                                                                                    | 427 | 455 | 2.00E-96  | 106.6 | 48.7 | 59.7 | hypothetical protein ARALYDRAFT_357572          | gbpln | Arabidopsis lyrata   | AT1G32660.1   Symbols: F-box and associated interaction domains-containing protein   chr1:11811040-11812380 FORWARD LENGTH=446                                                                                                                                                                                                                                                                                                                                                                                                                                                                                                                                                                                                                                                                 | 427 | 446 | 5.00E-77  | 104.4 | 43.8 | 56.7 |
| Rsa1.0_00127.1.g6101.t3 | ref[NP_567931.1] dynamin-related protein 3A [Arabidopsis thaliana] gi 60392233 sp Q8S944.2 DRP3A ARAT H RecName: Full=Dynamin-related protein 3A; AltName: Full=Dynamin-like protein 2; AltName: Full=Dynamin-like protein 2a gi 3549667 emb CAA20578.1  Arabidopsis dynamin-like protein ADL2 [Arabidopsis thaliana] gi 7270313 emb CAB80082.1  Arabidopsis dynamin-like protein ADL2 [Arabidopsis thaliana] gi 19032335 dbj BAB85643.1  dynamin like protein 2a [Arabidopsis thaliana] gi 332660860 gb AAE86260.1  dynamin-related protein 3A [Arabidopsis thaliana] | 803 | 808 | 0         | 100.6 | 85.9 | 90.8 | dynamin-related protein 3A                      | gbpln | Arabidopsis thaliana | AT4G33650.1   Symbols: ADL2, DRP3A   dynamin-related protein 3A   chr4:16161073-16166587 FORWARD LENGTH=808                                                                                                                                                                                                                                                                                                                                                                                                                                                                                                                                                                                                                                                                                    | 803 | 808 | 0         | 100.6 | 85.9 | 90.8 |
| Rsa1.0_00127.1.g6102.t1 | emb CAA20577.1  putative protein [Arabidopsis thaliana] gi 7270312 emb CAB80081.1  putative protein [Arabidopsis thaliana]                                                                                                                                                                                                                                                                                                                                                                                                                                             | 96  | 161 | 8.00E-37  | 167.7 | 78.1 | 79.2 | putative protein                                | gbpln | Arabidopsis thaliana | AT4G33640.1   Symbols:   unknown protein; Has 30201 Blast hits to 17322 proteins in 780 species: Archae - 12; Bacteria - 1396; Metazoa - 17338; Fungi - 3422; Plants - 5037; Viruses - 0; Other Eukaryotes - 2996 (source: NCBI BLINK).   chr4:16159727-16160211 REVERSE LENGTH=95<br>AT4G33625.2   Symbols:   FUNCTIONS IN: molecular_function unknown; INVOLVED IN: biological_process unknown; LOCATED IN: plasma membrane; EXPRESSED IN: cultured cell; CONTAINS InterPro DOMAIN/s: Golgi apparatus membrane protein TVP15 (InterPro:IPR013714); Has 30201 Blast hits to 17322 proteins in 780 species: Archae - 12; Bacteria - 1396; Metazoa - 17338; Fungi - 3422; Plants - 5037; Viruses - 0; Other Eukaryotes - 2996 (source: NCBI BLINK).   chr4:16153114-16154543 REVERSE LENGTH=199 | 96  | 95  | 2.00E-39  | 99.0  | 78.1 | 79.2 |
| Rsa1.0_00127.1.g6103.t1 | ref[NP_001119110.1] uncharacterized protein [Arabidopsis thaliana] gi 332660856 gb AAE86256.1  uncharacterized protein AT4G33625 [Arabidopsis thaliana]                                                                                                                                                                                                                                                                                                                                                                                                                | 193 | 199 | 2.00E-82  | 103.1 | 77.2 | 82.4 | uncharacterized protein                         | gbpln | Arabidopsis thaliana | AT4G33620.1   Symbols:   Cysteine proteinases superfamily protein   chr4:16147692-16152853 FORWARD LENGTH=783                                                                                                                                                                                                                                                                                                                                                                                                                                                                                                                                                                                                                                                                                  | 193 | 199 | 8.00E-85  | 103.1 | 77.2 | 82.4 |
| Rsa1.0_00127.1.g6104.t1 | ref[XP_002869203.1] Ulp1 protease family protein [Arabidopsis lyrata subsp. lyrata] gi 297315039 gb EFH45462.1  Ulp1 protease family protein [Arabidopsis lyrata subsp. lyrata]                                                                                                                                                                                                                                                                                                                                                                                        | 807 | 777 | 0         | 96.3  | 74.2 | 82.0 | Ulp1 protease family protein                    | gbpln | Arabidopsis lyrata   | AT4G33585.1   Symbols:   unknown protein; LOCATED IN: endomembrane system; Has 3456 Blast hits to 2147 proteins in 337 species: Archae - 4; Bacteria - 491; Metazoa - 997; Fungi - 201; Plants - 1105; Viruses - 207; Other Eukaryotes - 451 (source: NCBI BLINK).   chr4:16141778-16142257 REVERSE LENGTH=159                                                                                                                                                                                                                                                                                                                                                                                                                                                                                 | 807 | 783 | 0         | 97.0  | 74.0 | 80.8 |
| Rsa1.0_00127.1.g6105.t1 | gb EOA18539.1  hypothetical protein CARUB_v10007093mg, partial [Capsella rubella]                                                                                                                                                                                                                                                                                                                                                                                                                                                                                      | 147 | 160 | 6.00E-37  | 108.8 | 69.4 | 73.5 | hypothetical protein CARUB_v10007093mg, partial | gbpln | Capsella rubella     | AT4G33540.1   Symbols:   metallo-beta-lactamase family protein   chr4:16130882-16133678 FORWARD LENGTH=355                                                                                                                                                                                                                                                                                                                                                                                                                                                                                                                                                                                                                                                                                     | 147 | 159 | 6.00E-28  | 108.2 | 56.5 | 62.6 |
| Rsa1.0_00127.1.g6106.t2 | ref[NP_195080.2] metallo-beta-lactamase family protein [Arabidopsis thaliana] gi 20260498 gb AAM13147.1  putative protein [Arabidopsis thaliana] gi 28059392 gb AAC030054.1  putative protein [Arabidopsis thaliana] gi 110740679 dbj BAE98442.1  hypothetical protein [Arabidopsis thaliana] gi 332660843 gb AAE86243.1  metallo-beta-lactamase family protein [Arabidopsis thaliana]                                                                                                                                                                                 | 658 | 355 | 1.00E-148 | 54.0  | 37.4 | 41.3 | metallo-beta-lactamase family protein           | gbpln | Arabidopsis thaliana | AT4G33500.1   Symbols: KUP5   K+ uptake permease 5   chr4:16126503-16130353 REVERSE LENGTH=855                                                                                                                                                                                                                                                                                                                                                                                                                                                                                                                                                                                                                                                                                                 | 658 | 355 | 1.00E-151 | 54.0  | 37.4 | 41.3 |
| Rsa1.0_00127.1.g6107.t1 | gb EOA16000.1  hypothetical protein CARUB_v10004118mg [Capsella rubella]                                                                                                                                                                                                                                                                                                                                                                                                                                                                                               | 861 | 855 | 0         | 99.3  | 90.0 | 94.4 | hypothetical protein CARUB_v10004118mg          | gbpln | Capsella rubella     | AT4G33520.2   Symbols: PAA1, HMA6   P-type ATP-ase 1   chr4:16118993-16125849 FORWARD LENGTH=949                                                                                                                                                                                                                                                                                                                                                                                                                                                                                                                                                                                                                                                                                               | 861 | 855 | 0         | 99.3  | 90.0 | 94.7 |
| Rsa1.0_00127.1.g6108.t1 | ref[XP_002869211.1] predicted protein [Arabidopsis lyrata subsp. lyrata] gi 297315047 gb EFH45470.1  predicted protein [Arabidopsis lyrata subsp. lyrata]                                                                                                                                                                                                                                                                                                                                                                                                              | 951 | 949 | 0         | 99.8  | 90.2 | 94.3 | predicted protein                               | gbpln | Arabidopsis lyrata   |                                                                                                                                                                                                                                                                                                                                                                                                                                                                                                                                                                                                                                                                                                                                                                                                | 951 | 949 | 0         | 99.8  | 89.8 | 94.3 |

|                         |                                                                                                                                                                                                                                                                                                                                                                                                                                                                                                                                                                                                                                                                                                                                                                                                                                      |     |     |           |       |      |      |                                               |       |                      |                                                                                                                                                                                                                                                                                                                                                                                                                                                                                                                                              |     |     |           |       |      |      |
|-------------------------|--------------------------------------------------------------------------------------------------------------------------------------------------------------------------------------------------------------------------------------------------------------------------------------------------------------------------------------------------------------------------------------------------------------------------------------------------------------------------------------------------------------------------------------------------------------------------------------------------------------------------------------------------------------------------------------------------------------------------------------------------------------------------------------------------------------------------------------|-----|-----|-----------|-------|------|------|-----------------------------------------------|-------|----------------------|----------------------------------------------------------------------------------------------------------------------------------------------------------------------------------------------------------------------------------------------------------------------------------------------------------------------------------------------------------------------------------------------------------------------------------------------------------------------------------------------------------------------------------------------|-----|-----|-----------|-------|------|------|
| Rsa1.0_00127.1.g6109.t1 | ref NP_195077.1  phospho-2-dehydro-3-deoxyheptonate aldolase 2 [Arabidopsis thaliana] gi 21264400 sp Q00218.2 AROG_ARATH RecName: Full=Phospho-2-dehydro-3-deoxyheptonate aldolase 2, chloroplastic; AltName: Full=3-deoxy-D-arabino-heptulosonate 7-phosphate synthase 2; AltName: Full=DAHP synthase 2; AltName: Full=Phospho-2-keto-3-deoxyheptonate aldolase 2; Flags: Precursor gi 13605635 gb AAK32811.1 AF361798.1 AT4g33510/F17M5.270 [Arabidopsis thaliana] gi 4490318 emb CAB38809.1  2-dehydro-3-deoxyphosphoheptonate aldolase [Arabidopsis thaliana] gi 7270299 emb CAB80068.1  2-dehydro-3-deoxyphosphoheptonate aldolase [Arabidopsis thaliana] gi 21700887 gb AAM70567.1  AT4g33510/F17M5.270 [Arabidopsis thaliana] gi 33266087 gb AEE86237.1  phospho-2-dehydro-3-deoxyheptonate aldolase 2 [Arabidopsis thaliana] | 509 | 507 | 0         | 99.6  | 93.5 | 96.9 | phospho-2-dehydro-3-deoxyheptonate aldolase 2 | gbpln | Arabidopsis thaliana | AT4G33510.1   Symbols: DHS2   3-deoxy-d-arabino-heptulosonate 7-phosphate synthase   chr4:16116496-16118549 FORWARD LENGTH=507                                                                                                                                                                                                                                                                                                                                                                                                               | 509 | 507 | 0         | 99.6  | 93.5 | 96.9 |
| Rsa1.0_00127.1.g6110.t2 | gb EOA16026.1  hypothetical protein CARUB_v10004154mg [Capsella rubella]                                                                                                                                                                                                                                                                                                                                                                                                                                                                                                                                                                                                                                                                                                                                                             | 581 | 813 | 7.00E-85  | 139.9 | 48.4 | 61.3 | hypothetical protein CARUB_v10004154mg        | gbpln | Capsella rubella     | AT4G33500.1   Symbols:   Protein phosphatase 2C family protein   chr4:16112835-16116243 REVERSE LENGTH=724                                                                                                                                                                                                                                                                                                                                                                                                                                   | 581 | 724 | 2.00E-73  | 124.6 | 41.0 | 49.2 |
| Rsa1.0_00127.1.g6111.t1 | gb EOA17969.1  hypothetical protein CARUB_v10006384mg [Capsella rubella]                                                                                                                                                                                                                                                                                                                                                                                                                                                                                                                                                                                                                                                                                                                                                             | 414 | 409 | 0         | 98.8  | 88.4 | 93.7 | hypothetical protein CARUB_v10006384mg        | gbpln | Capsella rubella     | AT4G33495.1   Symbols: RPD1   Ubiquitin carboxyl-terminal hydrolase family protein   chr4:16111349-16112578 REVERSE LENGTH=409                                                                                                                                                                                                                                                                                                                                                                                                               | 414 | 409 | 0         | 98.8  | 88.6 | 93.5 |
| Rsa1.0_00127.1.g6112.t1 | ref XP_002867175.1  hypothetical protein ARALYDRAFT_328390 [Arabidopsis lyrata subsp. lyrata] gi 297313011 gb EFH43434.1  hypothetical protein ARALYDRAFT_328390 [Arabidopsis lyrata subsp. lyrata]                                                                                                                                                                                                                                                                                                                                                                                                                                                                                                                                                                                                                                  | 428 | 425 | 0         | 99.3  | 93.7 | 96.3 | hypothetical protein ARALYDRAFT_328390        | gbpln | Arabidopsis lyrata   | AT4G33490.2   Symbols:   Eukaryotic aspartyl protease family protein   chr4:16108781-16110679 REVERSE LENGTH=425                                                                                                                                                                                                                                                                                                                                                                                                                             | 428 | 425 | 0         | 99.3  | 93.5 | 96.0 |
| Rsa1.0_00127.1.g6113.t4 | ref XP_002867176.1  hypothetical protein ARALYDRAFT_491340 [Arabidopsis lyrata subsp. lyrata] gi 297313012 gb EFH43435.1  hypothetical protein ARALYDRAFT_491340 [Arabidopsis lyrata subsp. lyrata]                                                                                                                                                                                                                                                                                                                                                                                                                                                                                                                                                                                                                                  | 346 | 336 | 1.00E-138 | 97.1  | 83.5 | 87.0 | hypothetical protein ARALYDRAFT_491340        | gbpln | Arabidopsis lyrata   | AT4G33480.1   Symbols:   unknown protein; FUNCTIONS IN: molecular_function unknown; INVOLVED IN: biological_process unknown; LOCATED IN: chloroplast; EXPRESSED IN: 22 plant structures; EXPRESSED DURING: 13 growth stages; CONTAINS InterPro DOMAIN/s: Protein of unknown function DUF3727 (InterPro:IPRO22203); Has 348 Blast hits to 348 proteins in 78 species: Archaea - 0; Bacteria - 101; Metazoa - 0; Fungi - 0; Plants - 183; Viruses - 0; Other Eukaryotes - 64 (source: NCBI BLINK).   chr4:16105804-16108497 REVERSE LENGTH=336 | 346 | 336 | 1.00E-139 | 97.1  | 82.1 | 86.7 |
| Rsa1.0_00127.1.g6114.t1 | gb EOA18366.1  hypothetical protein CARUB_v10006887mg [Capsella rubella]                                                                                                                                                                                                                                                                                                                                                                                                                                                                                                                                                                                                                                                                                                                                                             | 426 | 437 | 0         | 102.6 | 89.0 | 93.9 | hypothetical protein CARUB_v10006887mg        | gbpln | Capsella rubella     | AT4G33470.1   Symbols: hda14, ATHDA14   histone deacetylase 14   chr4:16102774-16105439 REVERSE LENGTH=423                                                                                                                                                                                                                                                                                                                                                                                                                                   | 426 | 423 | 0         | 99.3  | 86.9 | 91.5 |
| Rsa1.0_00127.1.g6115.t1 | ref NP_195072.2  ABC transporter I family member 10 [Arabidopsis thaliana] gi 75329129 sp Q8H1R4.1 AB10I_ARATH RecName: Full=ABC transporter I family member 10, chloroplastic; Short=ABC transporter ABCI10; Short=AtABC10; AltName: Full=Non-intrinsic ABC protein 13; AltName: Full=Protein EMBRYO DEFECTIVE 2751; Flags: Precursor gi 23296450 gb AAN13061.1  unknown protein [Arabidopsis thaliana] gi 37202112 gb AAQ89671.1  At4g33460 [Arabidopsis thaliana] gi 62318881 db EAD3954.1  hypothetical protein [Arabidopsis thaliana] gi 332660827 gb AEE86227.1  ABC transporter I family member 10 [Arabidopsis thaliana]                                                                                                                                                                                                     | 359 | 271 | 1.00E-126 | 75.5  | 63.2 | 66.9 | ABC transporter I family member 10            | gbpln | Arabidopsis thaliana | AT4G33460.1   Symbols: ATNAP13, EMB2751   ABC transporter family protein   chr4:16098325-16100113 REVERSE LENGTH=271                                                                                                                                                                                                                                                                                                                                                                                                                         | 359 | 271 | 1.00E-129 | 75.5  | 63.2 | 66.9 |
| Rsa1.0_00127.1.g6116.t1 | ref XP_002867181.1  AtMYB69 [Arabidopsis lyrata subsp. lyrata] gi 297313017 gb EFH43440.1  AtMYB69 [Arabidopsis lyrata subsp. lyrata]                                                                                                                                                                                                                                                                                                                                                                                                                                                                                                                                                                                                                                                                                                | 250 | 250 | 1.00E-121 | 100.0 | 83.6 | 89.6 | AtMYB69                                       | gbpln | Arabidopsis lyrata   | AT4G33450.1   Symbols: ATMYP69, MYB69   myb domain protein 69   chr4:16095746-16096603 REVERSE LENGTH=250                                                                                                                                                                                                                                                                                                                                                                                                                                    | 250 | 250 | 1.00E-120 | 100.0 | 82.0 | 87.6 |

|                         |                                                                                                                                                                                                                                                                                                                                                                                                                                                                                      |      |      |           |       |      |      |                                                                                      |       |                      |                                                                                                                                              |      |      |           |       |      |      |
|-------------------------|--------------------------------------------------------------------------------------------------------------------------------------------------------------------------------------------------------------------------------------------------------------------------------------------------------------------------------------------------------------------------------------------------------------------------------------------------------------------------------------|------|------|-----------|-------|------|------|--------------------------------------------------------------------------------------|-------|----------------------|----------------------------------------------------------------------------------------------------------------------------------------------|------|------|-----------|-------|------|------|
| Rsa1.0_00127.1.g6117.t1 | refNP_195070.2  glycoside hydrolase family 28 protein / polygalacturonase (pectinase) family protein [Arabidopsis thaliana] gi 27754320 gb AAO22613.1  putative polygalacturonase [Arabidopsis thaliana] gi 28393881 gb AAO42348.1  putative polygalacturonase [Arabidopsis thaliana] gi 332660825 gb AEE86225.1  glycoside hydrolase family 28 protein / polygalacturonase (pectinase) family protein [Arabidopsis thaliana]                                                        | 475  | 475  | 0         | 100.0 | 88.8 | 94.7 | glycoside hydrolase family 28 protein / polygalacturonase (pectinase) family protein | gbpln | Arabidopsis thaliana | AT4G33440.1   Symbols:   Pectin lyase-like superfamily protein   chr4:16092020-16094732 FORWARD LENGTH=475                                   | 475  | 475  | 0         | 100.0 | 88.8 | 94.7 |
| Rsa1.0_00127.1.g6118.t1 | gb AF067895.1  leucine-rich repeat receptor-like kinase (mitochondrion) [Brassica rapa subsp. oleifera]                                                                                                                                                                                                                                                                                                                                                                              | 611  | 632  | 0         | 103.4 | 98.0 | 98.5 | leucine-rich repeat receptor-like kinase (mitochondrion)                             | gbpln | Brassica rapa        | AT4G33430.1   Symbols: BAK1, RKS10, SERK3, ELG, ATSERK3, ATBAK1   BR1-associated receptor kinase   chr4:16086654-16090288 REVERSE LENGTH=615 | 611  | 615  | 0         | 100.7 | 94.3 | 96.2 |
| Rsa1.0_00127.1.g6119.t1 | emb CCJ34835.1  horseradish peroxidase isoenzyme HRP_6351 [Armoracia rusticana]                                                                                                                                                                                                                                                                                                                                                                                                      | 316  | 314  | 1.00E-156 | 99.4  | 84.5 | 91.1 | horseradish peroxidase isoenzyme HRP_6351                                            | gbpln | Armoracia rusticana  | AT4G33420.1   Symbols:   Peroxidase superfamily protein   chr4:16084856-16086105 FORWARD LENGTH=325                                          | 316  | 325  | 1.00E-158 | 102.8 | 84.5 | 90.8 |
| Rsa1.0_00127.1.g6120.t1 | ref XP_002869215.1  signal peptide peptidase family protein [Arabidopsis lyrata subsp. lyrata] gi 297315051 gb EFH45474.1  signal peptide peptidase family protein [Arabidopsis lyrata subsp. lyrata]                                                                                                                                                                                                                                                                                | 372  | 372  | 0         | 100.0 | 94.1 | 98.4 | signal peptide peptidase family protein                                              | gbpln | Arabidopsis lyrata   | AT4G33410.1   Symbols: ATSPPL1, SPPL1   SIGNAL PEPTIDE PEPTIDASE-LIKE 1   chr4:16081640-16083119 FORWARD LENGTH=372                          | 372  | 372  | 0         | 100.0 | 94.1 | 98.4 |
| Rsa1.0_00127.1.g6121.t1 | ref NP_195066.1  Vacuolar import/degradation, Vid27-related protein [Arabidopsis thaliana] gi 4490307 emb CAB38798.1  Dem-like protein [Arabidopsis thaliana] gi 7270288 emb CAB80057.1  Dem-like protein [Arabidopsis thaliana] gi 20465423 gb AAM20135.1  putative Dem protein [Arabidopsis thaliana] gi 28394003 gb AAO42409.1  putative Dem protein [Arabidopsis thaliana] gi 332660820 gb AEE86220.1  Vacuolar import/degradation, Vid27-related protein [Arabidopsis thaliana] | 651  | 645  | 0         | 99.1  | 87.9 | 92.6 | Vacuolar import/degradation, Vid27-related protein                                   | gbpln | Arabidopsis thaliana | AT4G33400.1   Symbols:   Vacuolar import/degradation, Vid27-related protein   chr4:16078189-16080410 REVERSE LENGTH=645                      | 651  | 645  | 0         | 99.1  | 87.9 | 92.6 |
| Rsa1.0_00127.1.g6122.t1 | ref XP_002869216.1  hypothetical protein ARALYDRAFT_491351 [Arabidopsis lyrata subsp. lyrata] gi 297315052 gb EFH45475.1  hypothetical protein ARALYDRAFT_491351 [Arabidopsis lyrata subsp. lyrata]                                                                                                                                                                                                                                                                                  | 1116 | 777  | 0         | 69.6  | 51.6 | 57.6 | hypothetical protein ARALYDRAFT_491351                                               | gbpln | Arabidopsis lyrata   | AT4G33390.1   Symbols:   Plant protein of unknown function (DUF827)   chr4:16075282-16077706 FORWARD LENGTH=779                              | 1116 | 779  | 0         | 69.8  | 50.6 | 57.1 |
| Rsa1.0_00127.1.g6123.t1 | gb EOA17218.1  hypothetical protein CARUB_v10005493mg [Capsella rubella]                                                                                                                                                                                                                                                                                                                                                                                                             | 279  | 269  | 1.00E-132 | 96.4  | 84.9 | 88.9 | hypothetical protein CARUB_v10005493mg                                               | gbpln | Capsella rubella     | AT4G33350.1   Symbols:   Tic22-like family protein   chr4:16064638-16066715 REVERSE LENGTH=268                                               | 279  | 268  | 1.00E-130 | 96.1  | 82.4 | 88.5 |
| Rsa1.0_00127.1.g6124.t1 | gb EOA16266.1  hypothetical protein CARUB_v10004410mg [Capsella rubella]                                                                                                                                                                                                                                                                                                                                                                                                             | 593  | 604  | 0         | 101.9 | 89.5 | 94.6 | hypothetical protein CARUB_v10004410mg                                               | gbpln | Capsella rubella     | AT4G33330.1   Symbols: PGSIP3, GUX2   plant glycogenin-like starch initiation protein 3   chr4:16060142-16063061 REVERSE LENGTH=596          | 593  | 596  | 0         | 100.5 | 87.5 | 93.4 |
| Rsa1.0_00127.1.g6125.t1 | gb ACP30606.1  disease resistance protein [Brassica rapa subsp. pekinensis]                                                                                                                                                                                                                                                                                                                                                                                                          | 943  | 836  | 0         | 88.7  | 46.8 | 48.3 | disease resistance protein                                                           | gbpln | Brassica rapa        | AT4G33300.2   Symbols: ADR1-L1   ADR1-like 1   chr4:16051162-16054005 REVERSE LENGTH=816                                                     | 943  | 816  | 0         | 86.5  | 37.4 | 43.5 |
| Rsa1.0_00128.1.g6126.t1 | ref XP_002890867.1  hypothetical protein ARALYDRAFT_473263 [Arabidopsis lyrata subsp. lyrata] gi 297336709 gb EFH67126.1  hypothetical protein ARALYDRAFT_473263 [Arabidopsis lyrata subsp. lyrata]                                                                                                                                                                                                                                                                                  | 1627 | 1622 | 0         | 99.7  | 93.7 | 96.8 | hypothetical protein ARALYDRAFT_473263                                               | gbpln | Arabidopsis lyrata   | AT1G30400.2   Symbols: ATMTRP1, EST1, ABCC1   multidrug resistance-associated protein 1   chr1:10728139-10737697 FORWARD LENGTH=1622         | 1627 | 1622 | 0         | 99.7  | 93.6 | 96.9 |
| Rsa1.0_00128.1.g6127.t1 | gb ABU90830.1  pollen-expressed protein MF10 [Brassica rapa subsp. oleifera]                                                                                                                                                                                                                                                                                                                                                                                                         | 481  | 434  | 1.00E-174 | 90.2  | 76.3 | 80.0 | pollen-expressed protein MF10                                                        | gbpln | Brassica rapa        | AT3G28980.1   Symbols:   Protein of unknown function (DUF1216)   chr3:10993403-10994925 REVERSE LENGTH=445                                   | 481  | 445  | 1.00E-129 | 92.5  | 55.5 | 70.5 |
| Rsa1.0_00128.1.g6128.t1 | ref NP_174332.1  Phototropic-responsive NPH3-like protein [Arabidopsis thaliana] gi 166228367 sp Q9S9Q9.2 Y1044_ARAT H RecName: Full=BTB/POZ domain-containing protein At1g30440 gi 332193095 gb AEE31216.1  Phototropic-responsive NPH3-like protein [Arabidopsis thaliana]                                                                                                                                                                                                         | 676  | 665  | 0         | 98.4  | 87.4 | 91.7 | Phototropic-responsive NPH3-like protein                                             | gbpln | Arabidopsis thaliana | AT1G30440.1   Symbols:   Phototropic-responsive NPH3 family protein   chr1:10759475-10762199 FORWARD LENGTH=665                              | 676  | 665  | 0         | 98.4  | 87.4 | 91.7 |

|                         |                                                                                                                                                                                                                                                                                                                                                                                                                                                                                                                                                                                                                                                                                                                                                                                                                     |     |     |           |       |      |      |                                                                                 |       |                      |                                                                                                                                                                                                                                                                                                                                       |     |     |           |       |      |      |
|-------------------------|---------------------------------------------------------------------------------------------------------------------------------------------------------------------------------------------------------------------------------------------------------------------------------------------------------------------------------------------------------------------------------------------------------------------------------------------------------------------------------------------------------------------------------------------------------------------------------------------------------------------------------------------------------------------------------------------------------------------------------------------------------------------------------------------------------------------|-----|-----|-----------|-------|------|------|---------------------------------------------------------------------------------|-------|----------------------|---------------------------------------------------------------------------------------------------------------------------------------------------------------------------------------------------------------------------------------------------------------------------------------------------------------------------------------|-----|-----|-----------|-------|------|------|
| Rsa1.0_00128.1.g6129.t1 | gb[EOA30041.1] hypothetical protein CARUB_v10013147mg [Capsella rubella] gi482565853 gb EOA30042.1  hypothetical protein CARUB_v10013147mg [Capsella rubella] gi482565854 gb EOA30043.1  hypothetical protein CARUB_v10013147mg [Capsella rubella]                                                                                                                                                                                                                                                                                                                                                                                                                                                                                                                                                                  | 260 | 667 | 2.00E-57  | 256.5 | 41.5 | 50.4 | hypothetical protein CARUB_v10013147mg                                          | gbpln | Capsella rubella     | AT3G06340.3   Symbols:   DNAJ heat shock N-terminal domain-containing protein   chr3:1920607-1922628 REVERSE LENGTH=673                                                                                                                                                                                                               | 260 | 673 | 2.00E-58  | 258.8 | 41.2 | 50.8 |
| Rsa1.0_00128.1.g6130.t2 | gb[EOA27117.1] hypothetical protein CARUB_v10023215mg [Capsella rubella]                                                                                                                                                                                                                                                                                                                                                                                                                                                                                                                                                                                                                                                                                                                                            | 186 | 446 | 4.00E-54  | 239.8 | 58.1 | 61.8 | hypothetical protein CARUB_v10023215mg                                          | gbpln | Capsella rubella     | AT2G45730.1   Symbols:   eukaryotic initiation factor 3 gamma subunit family protein   chr2:18836519-18839123 REVERSE LENGTH=446                                                                                                                                                                                                      | 186 | 446 | 3.00E-53  | 239.8 | 51.1 | 54.8 |
| Rsa1.0_00128.1.g6131.t1 | gb[EOA26321.1] hypothetical protein CARUB_v10025291mg [Capsella rubella]                                                                                                                                                                                                                                                                                                                                                                                                                                                                                                                                                                                                                                                                                                                                            | 134 | 553 | 1.00E-61  | 412.7 | 87.3 | 95.5 | hypothetical protein CARUB_v10025291mg                                          | gbpln | Capsella rubella     | AT2G45720.2   Symbols:   ARM repeat superfamily protein   chr2:18834468-18836129 FORWARD LENGTH=553                                                                                                                                                                                                                                   | 134 | 553 | 4.00E-64  | 412.7 | 88.1 | 94.0 |
| Rsa1.0_00128.1.g6132.t1 | ref NP_174333.2  cation-chloride co-transporter 1 [Arabidopsis thaliana] gi30691718 ref NP_849731.1  cation-chloride co-transporter 1 [Arabidopsis thaliana] gi30691724 ref NP_849732.1  cation-chloride co-transporter 1 [Arabidopsis thaliana] gi12220911 slp Q2UVJ5.1 CC1 ARAT H RecName: Full=Cation-chloride cotransporter 1; Short=AtCC1; AltName: Full=Protein HAPLESS 5 gi83523648 emb CAJ34849.1  cation chloride cotransporter [Arabidopsis thaliana] gi110741532 dbj BAE98715.1  putative cation-chloride co-transporter [Arabidopsis thaliana] gi332193096 gb AEE31217.1  cation-chloride co-transporter 1 [Arabidopsis thaliana] gi332193097 gb AEE31218.1  cation-chloride co-transporter 1 [Arabidopsis thaliana] gi332193098 gb AEE31219.1  cation-chloride co-transporter 1 [Arabidopsis thaliana] | 973 | 975 | 0         | 100.2 | 93.1 | 95.1 | cation-chloride co-transporter 1                                                | gbpln | Arabidopsis thaliana | AT1G30450.2   Symbols: CCC1, ATCCC1, HAPS   cation-chloride co-transporter 1   chr1:10762905-10769061 FORWARD LENGTH=975                                                                                                                                                                                                              | 973 | 975 | 0         | 100.2 | 93.1 | 95.1 |
| Rsa1.0_00128.1.g6133.t1 | ref XP_002893618.1  hypothetical protein ARALYDRAFT_890588 [Arabidopsis lyrata subsp. lyrata] gi297339460 gb EFH69877.1  hypothetical protein ARALYDRAFT_890588 [Arabidopsis lyrata subsp. lyrata]                                                                                                                                                                                                                                                                                                                                                                                                                                                                                                                                                                                                                  | 713 | 631 | 0         | 88.5  | 78.5 | 81.6 | hypothetical protein ARALYDRAFT_890588                                          | gbpln | Arabidopsis lyrata   | AT1G30460.1   Symbols: CPSF30, ATCP30   cleavage and polyadenylation specificity factor 30   chr1:10771469-10775323 REVERSE LENGTH=631                                                                                                                                                                                                | 713 | 631 | 0         | 88.5  | 77.8 | 81.3 |
| Rsa1.0_00128.1.g6134.t4 | ref NP_174335.4  SIT4 phosphatase-associated-like protein [Arabidopsis thaliana] gi332193102 gb AEE31223.1  SIT4 phosphatase-associated-like protein [Arabidopsis thaliana]                                                                                                                                                                                                                                                                                                                                                                                                                                                                                                                                                                                                                                         | 798 | 811 | 0         | 101.6 | 86.3 | 91.6 | SIT4 phosphatase-associated-like protein                                        | gbpln | Arabidopsis thaliana | AT1G30470.1   Symbols:   SIT4 phosphatase-associated family protein   chr1:10779423-10786415 FORWARD LENGTH=811                                                                                                                                                                                                                       | 798 | 811 | 0         | 101.6 | 86.3 | 91.6 |
| Rsa1.0_00128.1.g6135.t1 | ref XP_002893626.1  hypothetical protein ARALYDRAFT_473274 [Arabidopsis lyrata subsp. lyrata] gi297339468 gb EFH69885.1  hypothetical protein ARALYDRAFT_473274 [Arabidopsis lyrata subsp. lyrata]                                                                                                                                                                                                                                                                                                                                                                                                                                                                                                                                                                                                                  | 179 | 192 | 2.00E-22  | 107.3 | 51.4 | 62.6 | hypothetical protein ARALYDRAFT_473274                                          | gbpln | Arabidopsis lyrata   | AT1G30475.1   Symbols:   BEST Arabidopsis thaliana protein match is: embryo defective 1303 (TAIR:AT1G56200.1); Has 148 Blast hits to 148 proteins in 34 species: Archae - 0; Bacteria - 14; Metazoa - 63; Fungi - 0; Plants - 62; Viruses - 0; Other Eukaryotes - 9 (source: NCBI BLINK).   chr1:10788501-10789943 REVERSE LENGTH=191 | 179 | 191 | 2.00E-20  | 106.7 | 48.6 | 59.2 |
| Rsa1.0_00128.1.g6136.t1 | gb[EOA37969.1] hypothetical protein CARUB_v10009438mg [Capsella rubella]                                                                                                                                                                                                                                                                                                                                                                                                                                                                                                                                                                                                                                                                                                                                            | 424 | 382 | 1.00E-141 | 90.1  | 72.6 | 78.5 | hypothetical protein CARUB_v10009438mg                                          | gbpln | Capsella rubella     | AT1G30480.1   Symbols: DRT111   D111/G-patch domain-containing protein   chr1:10790315-10792423 FORWARD LENGTH=387                                                                                                                                                                                                                    | 424 | 387 | 1.00E-143 | 91.3  | 72.2 | 79.0 |
| Rsa1.0_00128.1.g6137.t2 | ref NP_001078388.1  AGC (cAMP-dependent, cGMP-dependent and protein kinase C) kinase family protein [Arabidopsis thaliana] gi332658025 gb AEE83425.1  AGC (cAMP-dependent, cGMP-dependent and protein kinase C) kinase family protein [Arabidopsis thaliana]                                                                                                                                                                                                                                                                                                                                                                                                                                                                                                                                                        | 184 | 548 | 1.00E-14  | 297.8 | 22.8 | 25.0 | AGC (cAMP-dependent, cGMP-dependent and protein kinase C) kinase family protein | gbpln | Arabidopsis thaliana | AT4G14350.3   Symbols:   AGC (cAMP-dependent, cGMP-dependent and protein kinase C) kinase family protein   chr4:8256353-8259934 REVERSE LENGTH=548                                                                                                                                                                                    | 184 | 548 | 4.00E-17  | 297.8 | 22.8 | 25.0 |
| Rsa1.0_00128.1.g6138.t1 | ref XP_002868291.1  hypothetical protein ARALYDRAFT_915444 [Arabidopsis lyrata subsp. lyrata] gi297314127 gb EFH44550.1  hypothetical protein ARALYDRAFT_915444 [Arabidopsis lyrata subsp. lyrata]                                                                                                                                                                                                                                                                                                                                                                                                                                                                                                                                                                                                                  | 451 | 456 | 0         | 101.1 | 88.2 | 90.7 | hypothetical protein ARALYDRAFT_915444                                          | gbpln | Arabidopsis lyrata   | AT4G14340.1   Symbols: CKI1, OKL11   casein kinase I   chr4:8248532-8251668 REVERSE LENGTH=457                                                                                                                                                                                                                                        | 451 | 457 | 0         | 101.3 | 88.5 | 90.9 |

|                         |                                                                                                                                                                                                                                                                                                                                                                                                                                                                                |     |     |           |       |       |       |                                                        |       |                      |                                                                                                                                                                                                                                                                                                                                                                                                     |     |     |           |       |      |      |
|-------------------------|--------------------------------------------------------------------------------------------------------------------------------------------------------------------------------------------------------------------------------------------------------------------------------------------------------------------------------------------------------------------------------------------------------------------------------------------------------------------------------|-----|-----|-----------|-------|-------|-------|--------------------------------------------------------|-------|----------------------|-----------------------------------------------------------------------------------------------------------------------------------------------------------------------------------------------------------------------------------------------------------------------------------------------------------------------------------------------------------------------------------------------------|-----|-----|-----------|-------|------|------|
| Rsa1.0_00128.1.g6139.t1 | emb[CAB10212.1] kinesin like protein [Arabidopsis thaliana] gi 7268138 emb[CAB78475.1] kinesin like protein [Arabidopsis thaliana]                                                                                                                                                                                                                                                                                                                                             | 516 | 959 | 0         | 185.9 | 77.9  | 84.5  | kinesin like protein                                   | gbpln | Arabidopsis thaliana | AT4G14330.1   Symbols:   P-loop containing nucleoside triphosphate hydrolases superfamily protein   chr4:8244228-8247286 FORWARD LENGTH=869                                                                                                                                                                                                                                                         | 516 | 869 | 0         | 168.4 | 77.9 | 84.5 |
| Rsa1.0_00128.1.g6140.t1 | gb[EOA15341.1] hypothetical protein CARUB_v10004114mg [Capsella rubella]                                                                                                                                                                                                                                                                                                                                                                                                       | 200 | 864 | 7.00E-85  | 432.0 | 82.0  | 90.5  | hypothetical protein CARUB_v10004114mg                 | gbpln | Capsella rubella     | AT4G14330.1   Symbols:   P-loop containing nucleoside triphosphate hydrolases superfamily protein   chr4:8244228-8247286 FORWARD LENGTH=869                                                                                                                                                                                                                                                         | 200 | 869 | 5.00E-87  | 434.5 | 82.0 | 89.5 |
| Rsa1.0_00128.1.g6141.t1 | gb[AAK94425.1]AF398144.1 60S ribosomal protein L144 [Brassica rapa subsp. pekinensis]                                                                                                                                                                                                                                                                                                                                                                                          | 105 | 119 | 2.00E-52  | 113.3 | 100.0 | 100.0 | 60S ribosomal protein L144                             | gbpln | Brassica rapa        | AT4G14320.1   Symbols:   Zinc-binding ribosomal protein family protein   chr4:8242684-8243805 REVERSE LENGTH=105                                                                                                                                                                                                                                                                                    | 105 | 105 | 4.00E-53  | 100.0 | 96.2 | 97.1 |
| Rsa1.0_00128.1.g6142.t1 | ref[NP_001031638.1] uncharacterized protein [Arabidopsis thaliana] gi 33265801.7 gb AEE83417.1  uncharacterized protein AT4G14315 [Arabidopsis thaliana]                                                                                                                                                                                                                                                                                                                       | 61  | 59  | 2.00E-15  | 96.7  | 73.8  | 83.6  | uncharacterized protein                                | gbpln | Arabidopsis thaliana | AT4G14315.1   Symbols:   unknown protein; FUNCTIONS IN: molecular function unknown; INVOLVED IN: biological process unknown; LOCATED IN: endomembrane system; Has 35333 Blast hits to 34131 proteins in 2444 species: Archae - 798; Bacteria - 22429; Metazoa - 974; Fungi - 991; Plants - 531; Viruses - 0; Other Eukaryotes - 9610 (source: NCBI BLINK).   chr4:8240994-8241173 FORWARD LENGTH=59 | 61  | 59  | 3.00E-18  | 96.7  | 73.8 | 83.6 |
| Rsa1.0_00128.1.g6143.t1 | ref[NP_193167.3] transducin/WD40 domain-containing protein-like protein [Arabidopsis thaliana] gi 33265801.6 gb AEE83416.1  transducin/WD40 domain-containing protein-like protein [Arabidopsis thaliana]                                                                                                                                                                                                                                                                      | 845 | 893 | 0         | 105.7 | 80.4  | 87.1  | transducin/WD40 domain-containing protein-like protein | gbpln | Arabidopsis thaliana | AT4G14310.1   Symbols:   Transducin/WD40 repeat-like superfamily protein   chr4:8237137-8240324 REVERSE LENGTH=893                                                                                                                                                                                                                                                                                  | 845 | 893 | 0         | 105.7 | 80.4 | 87.1 |
| Rsa1.0_00128.1.g6144.t1 | #                                                                                                                                                                                                                                                                                                                                                                                                                                                                              | #   | #   | #         | #     | #     | #     | -                                                      | ----  | ----                 | #                                                                                                                                                                                                                                                                                                                                                                                                   | #   | #   | #         | #     | #    |      |
| Rsa1.0_00128.1.g6145.t1 | gb[EOA16593.1] hypothetical protein CARUB_v10004759mg, partial [Capsella rubella] gi 482552401 gb EOA16594.1  hypothetical protein CARUB_v10004759mg, partial [Capsella rubella]                                                                                                                                                                                                                                                                                               | 384 | 463 | 1.00E-122 | 120.6 | 72.1  | 76.8  | hypothetical protein CARUB_v10004759mg, partial        | gbpln | Capsella rubella     | AT4G14300.1   Symbols:   RNA-binding (RRM/RBP/RNP motifs) family protein   chr4:8231179-8232785 FORWARD LENGTH=411                                                                                                                                                                                                                                                                                  | 384 | 411 | 1.00E-117 | 107.0 | 69.8 | 74.5 |
| Rsa1.0_00128.1.g6146.t2 | ref[XP_002868296.1] predicted protein [Arabidopsis lyrata subsp. lyrata] gi 297314132 gb EFH44555.1  predicted protein [Arabidopsis lyrata subsp. lyrata]                                                                                                                                                                                                                                                                                                                      | 523 | 557 | 0         | 106.5 | 87.0  | 90.4  | predicted protein                                      | gbpln | Arabidopsis lyrata   | AT4G14290.1   Symbols:   alpha/beta-Hydrolases superfamily protein   chr4:8225547-8230057 REVERSE LENGTH=558                                                                                                                                                                                                                                                                                        | 523 | 558 | 0         | 106.7 | 85.9 | 90.8 |
| Rsa1.0_00128.1.g6147.t1 | gb[EOA16558.1] hypothetical protein CARUB_v10004717mg [Capsella rubella]                                                                                                                                                                                                                                                                                                                                                                                                       | 472 | 478 | 0         | 101.3 | 85.0  | 90.7  | hypothetical protein CARUB_v10004717mg                 | gbpln | Capsella rubella     | AT4G14230.1   Symbols:   CBS domain-containing protein with a domain of unknown function (DUF21)   chr4:8200850-8203130 REVERSE LENGTH=495                                                                                                                                                                                                                                                          | 472 | 495 | 0         | 104.9 | 84.5 | 91.3 |
| Rsa1.0_00128.1.g6148.t1 | gb[EOA15685.1] hypothetical protein CARUB_v10006394mg [Capsella rubella]                                                                                                                                                                                                                                                                                                                                                                                                       | 141 | 134 | 2.00E-41  | 95.0  | 62.4  | 75.2  | hypothetical protein CARUB_v10006394mg                 | gbpln | Capsella rubella     | AT4G14225.1   Symbols:   A20/AN1-like zinc finger family protein   chr4:8198777-8199202 FORWARD LENGTH=125                                                                                                                                                                                                                                                                                          | 141 | 125 | 2.00E-40  | 88.7  | 57.4 | 66.0 |
| Rsa1.0_00128.1.g6149.t1 | ref[NP_193158.2] E3 ubiquitin-protein ligase RHF1A [Arabidopsis thaliana] gi 75339838 sp Q4TU14.1 RHFI1_ARAT H RecName: Full=E3 ubiquitin-protein ligase RHF1A; AltName: Full=RING-H2 zinc finger protein RHF1a gi 66885948 gb AA57608.1  RING finger family protein [Arabidopsis thaliana] gi 332657995 gb AEE83395.1  E3 ubiquitin-protein ligase RHF1A [Arabidopsis thaliana]                                                                                               | 316 | 371 | 1.00E-103 | 117.4 | 73.4  | 80.7  | E3 ubiquitin-protein ligase RHF1A                      | gbpln | Arabidopsis thaliana | AT4G14220.1   Symbols: RHF1A   RING-H2 group F1A   chr4:8196012-8198240 FORWARD LENGTH=371                                                                                                                                                                                                                                                                                                          | 316 | 371 | 1.00E-106 | 117.4 | 73.4 | 80.7 |
| Rsa1.0_00128.1.g6150.t1 | gb ADT89708.1  chloroplast phytoene desaturase [Brassica napus] gi 315185067 gb ADT89709.1  chloroplast phytoene desaturase [Brassica napus]                                                                                                                                                                                                                                                                                                                                   | 536 | 565 | 0         | 105.4 | 96.3  | 98.1  | chloroplast phytoene desaturase                        | gbpln | Brassica napus       | AT4G14210.1   Symbols: PDS3, PDS, PDE226   phytoene desaturase 3   chr4:8190426-8194769 REVERSE LENGTH=566                                                                                                                                                                                                                                                                                          | 536 | 566 | 0         | 105.6 | 91.6 | 97.0 |
| Rsa1.0_00128.1.g6151.t1 | ref[NP_190196.1] Histidyl-tRNA synthetase 1 [Arabidopsis thaliana] gi 3659909 gb AAC61600.1  histidyl-tRNA synthetase [Arabidopsis thaliana] gi 7798998 emb[CAB90937.1] histidyl-tRNA synthetase [Arabidopsis thaliana] gi 15810389 gb AAL07082.1  putative histidyl-tRNA synthetase [Arabidopsis thaliana] gi 21436315 gb AAM51327.1  putative histidyl-tRNA synthetase [Arabidopsis thaliana] gi 3326444592 gb AEE78113.1  Histidyl-tRNA synthetase 1 [Arabidopsis thaliana] | 490 | 486 | 0         | 99.2  | 90.4  | 93.9  | Histidyl-tRNA synthetase 1                             | gbpln | Arabidopsis thaliana | AT3G46100.1   Symbols: ATHRS1, HRS1   Histidyl-tRNA synthetase 1   chr3:16928444-16930984 REVERSE LENGTH=486                                                                                                                                                                                                                                                                                        | 490 | 486 | 0         | 99.2  | 90.4 | 93.9 |

|                         |                                                                                                                                                                                                                                                                                                                                                                                                                                                                                                                                                                              |      |      |          |       |      |      |                                                         |       |                      |                                                                                                                                                                                                                                                                                                                                                                                               |      |      |          |       |      |      |
|-------------------------|------------------------------------------------------------------------------------------------------------------------------------------------------------------------------------------------------------------------------------------------------------------------------------------------------------------------------------------------------------------------------------------------------------------------------------------------------------------------------------------------------------------------------------------------------------------------------|------|------|----------|-------|------|------|---------------------------------------------------------|-------|----------------------|-----------------------------------------------------------------------------------------------------------------------------------------------------------------------------------------------------------------------------------------------------------------------------------------------------------------------------------------------------------------------------------------------|------|------|----------|-------|------|------|
| Rsa1.0_00128.1.g6152.t1 | refXP_002870333.1  hypothetical protein ARALYDRAFT_493493 [Arabidopsis lyrata subsp. lyrata] gi 297316169 gb EFH46592.1  hypothetical protein ARALYDRAFT_493493 [Arabidopsis lyrata subsp. lyrata]                                                                                                                                                                                                                                                                                                                                                                           | 781  | 763  | 0        | 97.7  | 90.5 | 94.6 | hypothetical protein ARALYDRAFT_493493                  | gbpln | Arabidopsis lyrata   | AT4G14160.2   Symbols:   Sec23/Sec24 protein transport family protein   chr4:8167574-8173026 FORWARD LENGTH=772                                                                                                                                                                                                                                                                               | 781  | 772  | 0        | 98.8  | 87.2 | 91.8 |
| Rsa1.0_00128.1.g6153.t1 | ref NP_680684.1  uncharacterized protein [Arabidopsis thaliana] gi 117168131 gb ABK32148.1  At4g14145 [Arabidopsis thaliana] gi 332657981 gb AEE8338.1  uncharacterized protein AT4G14145 [Arabidopsis thaliana]                                                                                                                                                                                                                                                                                                                                                             | 120  | 134  | 4.00E-52 | 111.7 | 86.7 | 90.8 | uncharacterized protein                                 | gbpln | Arabidopsis thaliana | AT4G14145.1   Symbols:   unknown protein; FUNCTIONS IN: molecular_function unknown; INVOLVED IN: biological_process unknown; LOCATED IN: chloroplast; Has 30201 Blast hits to 17322 proteins in 780 species: Archae - 12; Bacteria - 1396; Metazoa - 17338; Fungi - 3422; Plants - 5037; Viruses - 0; Other Eukaryotes - 2996 (source: NCBI BLink).   chr4:8152499-8153091 REVERSE LENGTH=134 | 120  | 134  | 7.00E-55 | 111.7 | 86.7 | 90.8 |
| Rsa1.0_00128.1.g6154.t1 | ref NP_195548.6  Patched family protein [Arabidopsis thaliana] gi 332661516 gb AEE86916.1  Patched family protein [Arabidopsis thaliana]                                                                                                                                                                                                                                                                                                                                                                                                                                     | 1306 | 1273 | 0        | 97.5  | 86.4 | 92.2 | Patched family protein                                  | gbpln | Arabidopsis thaliana | AT4G38350.1   Symbols:   Patched family protein   chr4:17958324-17966846 REVERSE LENGTH=1273                                                                                                                                                                                                                                                                                                  | 1306 | 1273 | 0        | 97.5  | 86.4 | 92.2 |
| Rsa1.0_00128.1.g6155.t1 | ref NP_195551.5  mate efflux domain-containing protein [Arabidopsis thaliana] gi 325530113 sp Q9SVE7.2 MATE3_ARA TH RecName: Full=MATE efflux family protein 3, chloroplastic; AltName: Full=Protein DTX45; Flags: Precursor gi 332661521 gb AEE86921.1  MATE efflux family protein 3 [Arabidopsis thaliana]                                                                                                                                                                                                                                                                 | 753  | 560  | 0        | 74.4  | 63.5 | 66.9 | mate efflux domain-containing protein                   | gbpln | Arabidopsis thaliana | AT4G38380.1   Symbols:   MATE efflux family protein   chr4:17971855-17974787 REVERSE LENGTH=560                                                                                                                                                                                                                                                                                               | 753  | 560  | 0        | 74.4  | 63.5 | 66.9 |
| Rsa1.0_00128.1.g6156.t1 | ref NP_198882.1  ATP synthase mitochondrial F1 complex assembly factor 2 [Arabidopsis thaliana] gi 14517426 gb AAK62603.1  AT5g40660/MNF13_180 [Arabidopsis thaliana] gi 22655442 gb AAM98313.1  AT5g40660/MNF13_180 [Arabidopsis thaliana] gi 332007196 gb AED94579.1  ATP12 protein-related [Arabidopsis thaliana]                                                                                                                                                                                                                                                         | 68   | 325  | 9.00E-30 | 477.9 | 92.6 | 94.1 | ATP synthase mitochondrial F1 complex assembly factor 2 | gbpln | Arabidopsis thaliana | AT5G40660.1   Symbols:   ATP12 protein-related   chr5:16283650-16285161 REVERSE LENGTH=325                                                                                                                                                                                                                                                                                                    | 68   | 325  | 1.00E-32 | 477.9 | 92.6 | 94.1 |
| Rsa1.0_00128.1.g6157.t2 | ref NP_568041.1  ACT-like protein tyrosine kinase family protein [Arabidopsis thaliana] gi 332661531 gb AEE86931.1  ACT-like protein tyrosine kinase family protein [Arabidopsis thaliana]                                                                                                                                                                                                                                                                                                                                                                                   | 571  | 575  | 0        | 100.7 | 85.8 | 90.0 | ACT-like protein tyrosine kinase family protein         | gbpln | Arabidopsis thaliana | AT4G38470.1   Symbols:   ACT-like protein tyrosine kinase family protein   chr4:17999432-18003551 FORWARD LENGTH=575                                                                                                                                                                                                                                                                          | 571  | 575  | 0        | 100.7 | 85.8 | 90.0 |
| Rsa1.0_00128.1.g6158.t1 | ref NP_568042.1  transducin/WD40 domain-containing protein [Arabidopsis thaliana] gi 332661532 gb AEE86932.1  transducin/WD40 domain-containing protein [Arabidopsis thaliana]                                                                                                                                                                                                                                                                                                                                                                                               | 496  | 471  | 0        | 95.0  | 68.5 | 74.2 | transducin/WD40 domain-containing protein               | gbpln | Arabidopsis thaliana | AT4G38480.1   Symbols:   Transducin/WD40 repeat-like superfamily protein   chr4:18003957-18006002 FORWARD LENGTH=471                                                                                                                                                                                                                                                                          | 496  | 471  | 0        | 95.0  | 68.5 | 74.2 |
| Rsa1.0_00128.1.g6159.t1 | ref NP_568043.1  uncharacterized protein [Arabidopsis thaliana] gi 15451094 gb AAK96818.1  Unknown protein [Arabidopsis thaliana] gi 18377452 gb AAL66892.1  unknown protein [Arabidopsis thaliana] gi 332661533 gb AEE86933.1  uncharacterized protein AT4G38490 [Arabidopsis thaliana]                                                                                                                                                                                                                                                                                     | 153  | 153  | 6.00E-39 | 100.0 | 63.4 | 74.5 | uncharacterized protein                                 | gbpln | Arabidopsis thaliana | AT4G38490.1   Symbols:   unknown protein; Has 30201 Blast hits to 17322 proteins in 780 species: Archae - 12; Bacteria - 1396; Metazoa - 17338; Fungi - 3422; Plants - 5037; Viruses - 0; Other Eukaryotes - 2996 (source: NCBI BLink).   chr4:18006385-18007203 FORWARD LENGTH=153                                                                                                           | 153  | 153  | 2.00E-41 | 100.0 | 63.4 | 74.5 |
| Rsa1.0_00128.1.g6160.t1 | ref NP_195564.2  putative protein phosphatase 2C 64 [Arabidopsis thaliana] gi 42573223 ref NP_974708.1  putative protein phosphatase 2C 64 [Arabidopsis thaliana] gi 75251246 sp Q5PNS9.1 P2C64_ARAT H RecName: Full=Probable protein phosphatase 2C 64; Short=AtPP2C64 gi 156382008 gb AAV85723.1  At4g38520 [Arabidopsis thaliana] gi 59958308 gb AAX12864.1  At4g38520 [Arabidopsis thaliana] gi 332661541 gb AEE86941.1  putative protein phosphatase 2C 64 [Arabidopsis thaliana] gi 332661542 gb AEE86942.1  putative protein phosphatase 2C 64 [Arabidopsis thaliana] | 378  | 400  | 0        | 105.8 | 88.1 | 93.1 | putative protein phosphatase 2C 64                      | gbpln | Arabidopsis thaliana | AT4G38520.2   Symbols:   Protein phosphatase 2C family protein   chr4:18015999-18017514 REVERSE LENGTH=400                                                                                                                                                                                                                                                                                    | 378  | 400  | 0        | 105.8 | 88.1 | 93.1 |
| Rsa1.0_00128.1.g6161.t1 | #                                                                                                                                                                                                                                                                                                                                                                                                                                                                                                                                                                            | #    | #    | #        | #     | #    | #    | -                                                       | ----  | ----                 | #                                                                                                                                                                                                                                                                                                                                                                                             | #    | #    | #        | #     | #    |      |



|                         |                                                                                                                                                                                                                                                                                                                                                                                                                                                                                                                                                                                                                                                                                                                                                                                                                                                                           |      |      |           |       |      |       |                                        |       |                      |                                                                                                                                             |      |      |           |       |      |      |
|-------------------------|---------------------------------------------------------------------------------------------------------------------------------------------------------------------------------------------------------------------------------------------------------------------------------------------------------------------------------------------------------------------------------------------------------------------------------------------------------------------------------------------------------------------------------------------------------------------------------------------------------------------------------------------------------------------------------------------------------------------------------------------------------------------------------------------------------------------------------------------------------------------------|------|------|-----------|-------|------|-------|----------------------------------------|-------|----------------------|---------------------------------------------------------------------------------------------------------------------------------------------|------|------|-----------|-------|------|------|
| Rsa1.0_00128.1.g6162.t2 | ref[NP_195567.2] phospholipase like protein (PEARLI 4) [Arabidopsis thaliana]<br>gi 13430740 gb AAK25992.1 AF360282.1 putative Phospholipase [Arabidopsis thaliana] gi 23397110 gb AAN31839.1 putative phospholipase [Arabidopsis thaliana] gi 25054999 gb AAN71965.1 putative phospholipase [Arabidopsis thaliana] gi 332661545 gb AEE86945.1 phospholipase like protein (PEARLI 4) [Arabidopsis thaliana]                                                                                                                                                                                                                                                                                                                                                                                                                                                               | 601  | 612  | 0         | 101.8 | 76.2 | 84.7  | phospholipase like protein (PEARLI 4)  | gbpln | Arabidopsis thaliana | AT4G38550.1   Symbols: Arabidopsis phospholipase-like protein (PEARLI 4) family   chr4:18025886-18028546 FORWARD LENGTH=612                 | 601  | 612  | 0         | 101.8 | 76.2 | 84.7 |
| Rsa1.0_00128.1.g6163.t1 | ref[XP_002866808.1] hypothetical protein ARALYDRAFT_327813 [Arabidopsis lyrata subsp. lyrata] gi 297312644 gb EFH43067.1 hypothetical protein ARALYDRAFT_327813 [Arabidopsis lyrata subsp. lyrata]                                                                                                                                                                                                                                                                                                                                                                                                                                                                                                                                                                                                                                                                        | 522  | 520  | 1.00E-134 | 99.6  | 58.8 | 70.1  | hypothetical protein ARALYDRAFT_327813 | gbpln | Arabidopsis lyrata   | AT4G38560.2   Symbols: Arabidopsis phospholipase-like protein (PEARLI 4) family   chr4:18029275-18031191 FORWARD LENGTH=523                 | 522  | 523  | 1.00E-132 | 100.2 | 56.9 | 69.7 |
| Rsa1.0_00128.1.g6164.t1 | gb AAM77369.1 AF521301.1 phosphatidylinositol synthase [Brassica napus]                                                                                                                                                                                                                                                                                                                                                                                                                                                                                                                                                                                                                                                                                                                                                                                                   | 226  | 227  | 1.00E-114 | 100.4 | 88.1 | 95.1  | phosphatidylinositol synthase          | gbpln | Brassica napus       | AT4G38570.1   Symbols: PIS2   probable CDP-diacylglycerol--inositol 3-phosphatidyltransferase 2   chr4:18031420-18033091 REVERSE LENGTH=225 | 226  | 225  | 1.00E-116 | 99.6  | 92.9 | 94.2 |
| Rsa1.0_00128.1.g6165.t1 | gb EOA15649.1  hypothetical protein CARUB_v1000594img [Capsella rubella]                                                                                                                                                                                                                                                                                                                                                                                                                                                                                                                                                                                                                                                                                                                                                                                                  | 153  | 153  | 5.00E-82  | 100.0 | 96.1 | 100.0 | hypothetical protein CARUB_v1000594img | gbpln | Capsella rubella     | AT4G38580.1   Symbols: ATFP6, HIPP26, FP6   farnesylated protein 6   chr4:18034596-18035693 FORWARD LENGTH=153                              | 153  | 153  | 2.00E-84  | 100.0 | 96.1 | 99.3 |
| Rsa1.0_00128.1.g6166.t1 | ref[XP_002868849.1] hypothetical protein ARALYDRAFT_912310 [Arabidopsis lyrata subsp. lyrata] gi 297314685 gb EFH45108.1  hypothetical protein ARALYDRAFT_912310 [Arabidopsis lyrata subsp. lyrata]                                                                                                                                                                                                                                                                                                                                                                                                                                                                                                                                                                                                                                                                       | 1890 | 1884 | 0         | 99.7  | 88.1 | 92.8  | hypothetical protein ARALYDRAFT_912310 | gbpln | Arabidopsis lyrata   | AT4G38600.1   Symbols: KAK, UPL3   HEAT repeat :HECT-domain (ubiquitin-transferase)   chr4:18041503-18049292 REVERSE LENGTH=1888            | 1890 | 1888 | 0         | 99.9  | 88.3 | 93.4 |
| Rsa1.0_00128.1.g6167.t3 | # # # # # # # - ---- # # # # # #                                                                                                                                                                                                                                                                                                                                                                                                                                                                                                                                                                                                                                                                                                                                                                                                                                          |      |      |           |       |      |       |                                        |       |                      |                                                                                                                                             |      |      |           |       |      |      |
| Rsa1.0_00128.1.g6168.t1 | ref[NP_195574.1] transcription repressor MYB4 [Arabidopsis thaliana] gi 56749359 sp Q9SZP1.1 MYB4_ARATH RecName: Full=Transcription repressor MYB4; AltName: Full=Myb-related protein 4; Short=AtMYB4 gi 4467149 emb CAB37518.1  putative transcription factor (MYB4) [Arabidopsis thaliana] gi 7270845 emb CAB80526.1  putative transcription factor (MYB4) [Arabidopsis thaliana] gi 17979197 gb AAL49837.1  putative transcription factor MYB4 [Arabidopsis thaliana] gi 21689787 gb AAM67537.1  putative transcription factor MYB4 [Arabidopsis thaliana] gi 22655176 gb AAM98178.1  putative transcription factor MYB4 [Arabidopsis thaliana] gi 30023754 gb AAP13410.1  At4g38620 [Arabidopsis thaliana] gi 41619362 gb AAS10085.1  MYB transcription factor [Arabidopsis thaliana] gi 332661555 gb AEE86955.1  transcription repressor MYB4 [Arabidopsis thaliana] | 288  | 282  | 1.00E-135 | 97.9  | 85.4 | 89.6  | transcription repressor MYB4           | gbpln | Arabidopsis thaliana | AT4G38620.1   Symbols: ATMYB4, MYB4   myb domain protein 4   chr4:18053866-18054876 FORWARD LENGTH=282                                      | 288  | 282  | 1.00E-138 | 97.9  | 85.4 | 89.6 |

|                         |                                                                                                                                                                                                                                                                                                                                                                                                                                                                                                                                                                                                                                                                                                                                                                                                                                                                                                                                                                                                                                                                                                                                                                                                                                                                                                                                                                                                                                                                                                                                                                                                                                                                                                                                                                                                                                                                                                                                                                                                                                                                                                                                                                                                                                                                                                                                                                                                                                                                                                                                                                                                      |                         |     |     |           |       |      |      |                                                          |       |                      |                                                                                                                                  |     |     |           |       |      |      |
|-------------------------|------------------------------------------------------------------------------------------------------------------------------------------------------------------------------------------------------------------------------------------------------------------------------------------------------------------------------------------------------------------------------------------------------------------------------------------------------------------------------------------------------------------------------------------------------------------------------------------------------------------------------------------------------------------------------------------------------------------------------------------------------------------------------------------------------------------------------------------------------------------------------------------------------------------------------------------------------------------------------------------------------------------------------------------------------------------------------------------------------------------------------------------------------------------------------------------------------------------------------------------------------------------------------------------------------------------------------------------------------------------------------------------------------------------------------------------------------------------------------------------------------------------------------------------------------------------------------------------------------------------------------------------------------------------------------------------------------------------------------------------------------------------------------------------------------------------------------------------------------------------------------------------------------------------------------------------------------------------------------------------------------------------------------------------------------------------------------------------------------------------------------------------------------------------------------------------------------------------------------------------------------------------------------------------------------------------------------------------------------------------------------------------------------------------------------------------------------------------------------------------------------------------------------------------------------------------------------------------------------|-------------------------|-----|-----|-----------|-------|------|------|----------------------------------------------------------|-------|----------------------|----------------------------------------------------------------------------------------------------------------------------------|-----|-----|-----------|-------|------|------|
|                         | ref NP_195575.1  26S proteasome non-ATPase regulatory subunit 4 [Arabidopsis thaliana] gi 1709794 sp P55034.1 PSMD4_ARATH RecName: Full=26S proteasome non-ATPase regulatory subunit 4; AltName: Full=26S proteasome regulatory subunit RPN10; AltName: Full=26S proteasome regulatory subunit S5A; AltName: Full=Multiubiquitin chain-binding protein 1; Short=AtMCB1; AltName: Full=Protein REGULATORY PARTICLE NON-ATPASE 10 gi 13430814 gb AAK26029.1 AF360319.1 putative multiubiquitin chain binding protein MBP1 [Arabidopsis thaliana] gi 1165206 gb AAA85583.1  MBP1 [Arabidopsis thaliana] gi 4467150 emb CAB37519.1  multiubiquitin chain binding protein (MBP1) [Arabidopsis thaliana] gi 7270846 emb CAB80527.1  multiubiquitin chain binding protein (MBP1) [Arabidopsis thaliana] gi 21281020 gb AAM44937.1  putative multiubiquitin chain binding protein MBP1 [Arabidopsis thaliana] gi 110735112 gb ABG89126.1  RPN10 [synthetic construct] gi 332661556 gb AEE86956.1  26S proteasome non-ATPase regulatory subunit 4 [Arabidopsis thaliana] ref NP_568045.1  Plasma-membrane choline transporter family protein [Arabidopsis thaliana] gi 16649077 gb AAL24390.1  putative protein [Arabidopsis thaliana] gi 21387167 gb AAM47987.1  putative protein [Arabidopsis thaliana] gi 332661557 gb AEE86957.1  Plasma-membrane choline transporter family protein [Arabidopsis thaliana] ref XP_002866813.1  glycosyl hydrolase family 10 protein [Arabidopsis lyrata subsp. lyrata] gi 297312649 gb EFH43072.1  glycosyl hydrolase family 10 protein [Arabidopsis lyrata subsp. lyrata] ref XP_002868852.1  hypothetical protein ARALYDRAFT_912315 [Arabidopsis lyrata subsp. lyrata] gi 297314688 gb EFH45111.1  hypothetical protein ARALYDRAFT_912315 [Arabidopsis lyrata subsp. lyrata] ref NP_195581.1  1-phosphatidylinositol phosphodiesterase-related protein [Arabidopsis thaliana] gi 4467156 emb CAB37525.1  putative protein [Arabidopsis thaliana] gi 7270852 emb CAB80533.1  putative protein [Arabidopsis thaliana] gi 17979229 gb AAL49931.1  AT4g38690/F20M13.250 [Arabidopsis thaliana] gi 2014710 gb AAM10267.1  AT4g38690/F20M13.250 [Arabidopsis thaliana] gi 332661565 gb AEE86965.1  1-phosphatidylinositol phosphodiesterase-related protein [Arabidopsis thaliana] ref NP_001190956.1  glycine-rich protein [Arabidopsis thaliana] gi 332661568 gb AEE86968.1  glycine-rich protein [Arabidopsis thaliana] gb EOA16996.1  hypothetical protein CARUB_v10005234mg [Capsella rubella] gb EOA15636.1  hypothetical protein CARUB_v10005879mg [Capsella rubella] | Rsa1.0_00128.1.g6169.t1 | 381 | 386 | 0         | 101.3 | 96.9 | 98.7 | 26S proteasome non-ATPase regulatory subunit 4           | gbpln | Arabidopsis thaliana | AT4G38630.1   Symbols: RPN10, MCB1, ATMCB1, MBP1   regulatory particle non-ATPase 10   chr4:18057357-18059459 REVERSE LENGTH=386 | 381 | 386 | 0         | 101.3 | 96.9 | 98.7 |
|                         | gi 16649077 gb AAL24390.1  putative protein [Arabidopsis thaliana] gi 21387167 gb AAM47987.1  putative protein [Arabidopsis thaliana] gi 332661557 gb AEE86957.1  Plasma-membrane choline transporter family protein [Arabidopsis thaliana] ref XP_002866813.1  glycosyl hydrolase family 10 protein [Arabidopsis lyrata subsp. lyrata] gi 297312649 gb EFH43072.1  glycosyl hydrolase family 10 protein [Arabidopsis lyrata subsp. lyrata] ref XP_002868852.1  hypothetical protein ARALYDRAFT_912315 [Arabidopsis lyrata subsp. lyrata] gi 297314688 gb EFH45111.1  hypothetical protein ARALYDRAFT_912315 [Arabidopsis lyrata subsp. lyrata] ref NP_195581.1  1-phosphatidylinositol phosphodiesterase-related protein [Arabidopsis thaliana] gi 4467156 emb CAB37525.1  putative protein [Arabidopsis thaliana] gi 7270852 emb CAB80533.1  putative protein [Arabidopsis thaliana] gi 17979229 gb AAL49931.1  AT4g38690/F20M13.250 [Arabidopsis thaliana] gi 2014710 gb AAM10267.1  AT4g38690/F20M13.250 [Arabidopsis thaliana] gi 332661565 gb AEE86965.1  1-phosphatidylinositol phosphodiesterase-related protein [Arabidopsis thaliana] ref NP_001190956.1  glycine-rich protein [Arabidopsis thaliana] gi 332661568 gb AEE86968.1  glycine-rich protein [Arabidopsis thaliana]                                                                                                                                                                                                                                                                                                                                                                                                                                                                                                                                                                                                                                                                                                                                                                                                                                                                                                                                                                                                                                                                                                                                                                                                                                                                                                              | Rsa1.0_00128.1.g6170.t1 | 544 | 556 | 0         | 102.2 | 87.9 | 94.5 | Plasma-membrane choline transporter family protein       | gbpln | Arabidopsis thaliana | AT4G38640.1   Symbols:   Plasma-membrane choline transporter family protein   chr4:18059884-18062091 REVERSE LENGTH=556          | 544 | 556 | 0         | 102.2 | 87.9 | 94.5 |
|                         | ref XP_002866813.1  glycosyl hydrolase family 10 protein [Arabidopsis lyrata subsp. lyrata] gi 297312649 gb EFH43072.1  glycosyl hydrolase family 10 protein [Arabidopsis lyrata subsp. lyrata] ref XP_002868852.1  hypothetical protein ARALYDRAFT_912315 [Arabidopsis lyrata subsp. lyrata] gi 297314688 gb EFH45111.1  hypothetical protein ARALYDRAFT_912315 [Arabidopsis lyrata subsp. lyrata] ref NP_195581.1  1-phosphatidylinositol phosphodiesterase-related protein [Arabidopsis thaliana] gi 4467156 emb CAB37525.1  putative protein [Arabidopsis thaliana] gi 7270852 emb CAB80533.1  putative protein [Arabidopsis thaliana] gi 17979229 gb AAL49931.1  AT4g38690/F20M13.250 [Arabidopsis thaliana] gi 2014710 gb AAM10267.1  AT4g38690/F20M13.250 [Arabidopsis thaliana] gi 332661565 gb AEE86965.1  1-phosphatidylinositol phosphodiesterase-related protein [Arabidopsis thaliana] ref NP_001190956.1  glycine-rich protein [Arabidopsis thaliana] gi 332661568 gb AEE86968.1  glycine-rich protein [Arabidopsis thaliana]                                                                                                                                                                                                                                                                                                                                                                                                                                                                                                                                                                                                                                                                                                                                                                                                                                                                                                                                                                                                                                                                                                                                                                                                                                                                                                                                                                                                                                                                                                                                                          | Rsa1.0_00128.1.g6171.t1 | 565 | 562 | 0         | 99.5  | 85.1 | 91.9 | glycosyl hydrolase family 10 protein                     | gbpln | Arabidopsis lyrata   | AT4G38650.1   Symbols:   Glycosyl hydrolase family 10 protein   chr4:18063377-18065769 FORWARD LENGTH=562                        | 565 | 562 | 0         | 99.5  | 83.5 | 89.7 |
|                         | ref NP_195581.1  1-phosphatidylinositol phosphodiesterase-related protein [Arabidopsis thaliana] gi 4467156 emb CAB37525.1  putative protein [Arabidopsis thaliana] gi 7270852 emb CAB80533.1  putative protein [Arabidopsis thaliana] gi 17979229 gb AAL49931.1  AT4g38690/F20M13.250 [Arabidopsis thaliana] gi 2014710 gb AAM10267.1  AT4g38690/F20M13.250 [Arabidopsis thaliana] gi 332661565 gb AEE86965.1  1-phosphatidylinositol phosphodiesterase-related protein [Arabidopsis thaliana] ref NP_001190956.1  glycine-rich protein [Arabidopsis thaliana] gi 332661568 gb AEE86968.1  glycine-rich protein [Arabidopsis thaliana]                                                                                                                                                                                                                                                                                                                                                                                                                                                                                                                                                                                                                                                                                                                                                                                                                                                                                                                                                                                                                                                                                                                                                                                                                                                                                                                                                                                                                                                                                                                                                                                                                                                                                                                                                                                                                                                                                                                                                              | Rsa1.0_00128.1.g6172.t1 | 354 | 345 | 1.00E-168 | 97.5  | 88.1 | 90.4 | hypothetical protein ARALYDRAFT_912315                   | gbpln | Arabidopsis lyrata   | AT4G38660.1   Symbols:   Pathogenesis-related thaumatin superfamily protein   chr4:18066448-18067984 REVERSE LENGTH=345          | 354 | 345 | 1.00E-165 | 97.5  | 85.3 | 89.8 |
|                         | ref NP_195581.1  1-phosphatidylinositol phosphodiesterase-related protein [Arabidopsis thaliana] gi 4467156 emb CAB37525.1  putative protein [Arabidopsis thaliana] gi 7270852 emb CAB80533.1  putative protein [Arabidopsis thaliana] gi 17979229 gb AAL49931.1  AT4g38690/F20M13.250 [Arabidopsis thaliana] gi 2014710 gb AAM10267.1  AT4g38690/F20M13.250 [Arabidopsis thaliana] gi 332661565 gb AEE86965.1  1-phosphatidylinositol phosphodiesterase-related protein [Arabidopsis thaliana] ref NP_001190956.1  glycine-rich protein [Arabidopsis thaliana] gi 332661568 gb AEE86968.1  glycine-rich protein [Arabidopsis thaliana]                                                                                                                                                                                                                                                                                                                                                                                                                                                                                                                                                                                                                                                                                                                                                                                                                                                                                                                                                                                                                                                                                                                                                                                                                                                                                                                                                                                                                                                                                                                                                                                                                                                                                                                                                                                                                                                                                                                                                              | Rsa1.0_00128.1.g6173.t1 | 318 | 318 | 1.00E-176 | 100.0 | 93.3 | 95.9 | 1-phosphatidylinositol phosphodiesterase-related protein | gbpln | Arabidopsis thaliana | AT4G38690.1   Symbols:   PLC-like phosphodiesterases superfamily protein   chr4:18074743-18075699 REVERSE LENGTH=318             | 318 | 318 | 1.00E-179 | 100.0 | 93.4 | 95.9 |
|                         | ref NP_001190956.1  glycine-rich protein [Arabidopsis thaliana] gi 332661568 gb AEE86968.1  glycine-rich protein [Arabidopsis thaliana]                                                                                                                                                                                                                                                                                                                                                                                                                                                                                                                                                                                                                                                                                                                                                                                                                                                                                                                                                                                                                                                                                                                                                                                                                                                                                                                                                                                                                                                                                                                                                                                                                                                                                                                                                                                                                                                                                                                                                                                                                                                                                                                                                                                                                                                                                                                                                                                                                                                              | Rsa1.0_00128.1.g6174.t1 | 449 | 465 | 1.00E-123 | 103.6 | 71.7 | 78.2 | glycine-rich protein                                     | gbpln | Arabidopsis thaliana | AT4G38710.2   Symbols:   glycine-rich protein   chr4:18078141-18080002 REVERSE LENGTH=465                                        | 449 | 465 | 1.00E-126 | 103.6 | 71.7 | 78.2 |
|                         | gb EOA16996.1  hypothetical protein CARUB_v10005234mg [Capsella rubella]                                                                                                                                                                                                                                                                                                                                                                                                                                                                                                                                                                                                                                                                                                                                                                                                                                                                                                                                                                                                                                                                                                                                                                                                                                                                                                                                                                                                                                                                                                                                                                                                                                                                                                                                                                                                                                                                                                                                                                                                                                                                                                                                                                                                                                                                                                                                                                                                                                                                                                                             | Rsa1.0_00128.1.g6175.t1 | 341 | 326 | 1.00E-176 | 95.6  | 88.6 | 92.4 | hypothetical protein CARUB_v10005234mg                   | gbpln | Capsella rubella     | AT4G38730.1   Symbols:   Protein of unknown function (DUF803)   chr4:18080484-18082305 REVERSE LENGTH=326                        | 341 | 326 | 1.00E-176 | 95.6  | 87.1 | 90.9 |
|                         | gb EOA15636.1  hypothetical protein CARUB_v10005879mg [Capsella rubella]                                                                                                                                                                                                                                                                                                                                                                                                                                                                                                                                                                                                                                                                                                                                                                                                                                                                                                                                                                                                                                                                                                                                                                                                                                                                                                                                                                                                                                                                                                                                                                                                                                                                                                                                                                                                                                                                                                                                                                                                                                                                                                                                                                                                                                                                                                                                                                                                                                                                                                                             | Rsa1.0_00128.1.g6176.t1 | 172 | 173 | 5.00E-90  | 100.6 | 93.6 | 95.9 | hypothetical protein CARUB_v10005879mg                   | gbpln | Capsella rubella     | AT4G38740.1   Symbols: ROC1   rotamase CYP 1   chr4:18083620-18084138 REVERSE LENGTH=172                                         | 172 | 172 | 3.00E-91  | 100.0 | 92.4 | 95.3 |
| Rsa1.0_00128.1.g6177.t1 | #                                                                                                                                                                                                                                                                                                                                                                                                                                                                                                                                                                                                                                                                                                                                                                                                                                                                                                                                                                                                                                                                                                                                                                                                                                                                                                                                                                                                                                                                                                                                                                                                                                                                                                                                                                                                                                                                                                                                                                                                                                                                                                                                                                                                                                                                                                                                                                                                                                                                                                                                                                                                    | #                       | #   | #   | #         | #     | #    | -    | ----                                                     | ----  | #                    | #                                                                                                                                | #   | #   | #         | #     | #    |      |

|                         |                                                                                                                                                                                                                                                                                                                                                               |     |     |           |        |      |      |                                             |       |                      |                                                                                                                                         |     |     |           |        |      |      |
|-------------------------|---------------------------------------------------------------------------------------------------------------------------------------------------------------------------------------------------------------------------------------------------------------------------------------------------------------------------------------------------------------|-----|-----|-----------|--------|------|------|---------------------------------------------|-------|----------------------|-----------------------------------------------------------------------------------------------------------------------------------------|-----|-----|-----------|--------|------|------|
| Rsa1.0_00128.1.g6178.t1 | ref[XP_002868862.1] hypothetical protein ARALYDRAFT_490641 [Arabidopsis lyrata subsp. lyrata] gi 297314698 gb EFH45121.1                                                                                                                                                                                                                                      | 463 | 458 | 1.00E-81  | 98.9   | 31.1 | 33.7 | hypothetical protein ARALYDRAFT_490641      | gbpln | Arabidopsis lyrata   | AT4G38770.1   Symbols: PRP4, ATPRP4   proline-rich protein 4   chr4:18097009-18098448 REVERSE LENGTH=448                                | 463 | 448 | 5.00E-78  | 96.8   | 31.1 | 33.7 |
| Rsa1.0_00128.1.g6179.t1 | hypothetical protein ARALYDRAFT_490641 [Arabidopsis lyrata subsp. lyrata] ref[NP_178437.1] pentatricopeptide repeat-containing protein [Arabidopsis thaliana] gi 75216181 sp Q9ZQ74.1 PP146 ARAT H RecName: Full=Trihelix transcription factor GT-3a; AltName: Full=Trihelix DNA-binding protein GT-3a                                                        | 67  | 689 | 2.00E-22  | 1028.4 | 73.1 | 83.6 | pentatricopeptide repeat-containing protein | gbpln | Arabidopsis thaliana | AT2G03380.1   Symbols:   Pentatricopeptide repeat (PPR) superfamily protein   chr2:1028292-1030361 FORWARD LENGTH=689                   | 67  | 689 | 3.00E-25  | 1028.4 | 73.1 | 83.6 |
| Rsa1.0_00128.1.g6180.t1 | #                                                                                                                                                                                                                                                                                                                                                             | #   | #   | #         | #      | #    | #    | -                                           | ----  | ----                 | #                                                                                                                                       | #   | #   | #         | #      | #    | #    |
| Rsa1.0_00128.1.g6181.t1 | gb EOA17208.1  hypothetical protein CARUB_v10005480mg [Capsella rubella]                                                                                                                                                                                                                                                                                      | 272 | 273 | 1.00E-152 | 100.4  | 97.4 | 99.3 | hypothetical protein CARUB_v10005480mg      | gbpln | Capsella rubella     | AT4G38790.1   Symbols:   ER lumen protein retaining receptor family protein   chr4:18111426-18112977 FORWARD LENGTH=273                 | 272 | 273 | 1.00E-152 | 100.4  | 96.0 | 97.4 |
| Rsa1.0_00128.1.g6182.t1 | ref[XP_002868864.1] ATMTN1 [Arabidopsis lyrata subsp. lyrata] gi 297314700 gb EFH45123.1  ATMTN1 [Arabidopsis lyrata subsp. lyrata]                                                                                                                                                                                                                           | 259 | 266 | 1.00E-127 | 102.7  | 89.6 | 95.4 | ATMTN1                                      | gbpln | Arabidopsis lyrata   | AT4G38800.1   Symbols: ATMTN1, ATMTAN1, MTN1, MTAN1   methylthioadenosine nucleosidase 1   chr4:18113355-18114996 REVERSE LENGTH=267    | 259 | 267 | 1.00E-128 | 103.1  | 88.0 | 95.4 |
| Rsa1.0_00128.1.g6183.t1 | #                                                                                                                                                                                                                                                                                                                                                             | #   | #   | #         | #      | #    | #    | -                                           | ----  | ----                 | #                                                                                                                                       | #   | #   | #         | #      | #    | #    |
| Rsa1.0_00128.1.g6184.t1 | #                                                                                                                                                                                                                                                                                                                                                             | #   | #   | #         | #      | #    | #    | -                                           | ----  | ----                 | #                                                                                                                                       | #   | #   | #         | #      | #    | #    |
| Rsa1.0_00129.1.g6185.t1 | #                                                                                                                                                                                                                                                                                                                                                             | #   | #   | #         | #      | #    | #    | -                                           | ----  | ----                 | #                                                                                                                                       | #   | #   | #         | #      | #    | #    |
| Rsa1.0_00129.1.g6186.t1 | ref[XP_002873009.1] hypothetical protein ARALYDRAFT_486927 [Arabidopsis lyrata subsp. lyrata] gi 297318846 gb EFH49268.1                                                                                                                                                                                                                                      | 184 | 454 | 2.00E-43  | 246.7  | 50.5 | 59.2 | hypothetical protein ARALYDRAFT_486927      | gbpln | Arabidopsis lyrata   | AT5G01490.1   Symbols: CAX4, ATCAX4   cation exchanger 4   chr5:195589-198465 FORWARD LENGTH=454                                        | 184 | 454 | 3.00E-44  | 246.7  | 49.5 | 55.4 |
| Rsa1.0_00129.1.g6187.t1 | hypothetical protein ARALYDRAFT_486927 [Arabidopsis lyrata subsp. lyrata]                                                                                                                                                                                                                                                                                     | #   | #   | #         | #      | #    | #    | -                                           | ----  | ----                 | #                                                                                                                                       | #   | #   | #         | #      | #    | #    |
| Rsa1.0_00129.1.g6188.t1 | gb ABD65170.1  hypothetical protein 40.100057 [Brassica oleracea]                                                                                                                                                                                                                                                                                             | 376 | 255 | 2.00E-59  | 67.8   | 33.5 | 43.6 | hypothetical protein 40.100057              | gbpln | Brassica oleracea    | AT3G47680.1   Symbols:   DNA binding   chr3:17577483-17578391 REVERSE LENGTH=302                                                        | 376 | 302 | 7.00E-37  | 80.3   | 24.7 | 35.1 |
| Rsa1.0_00129.1.g6189.t1 | ref[NP_195758.1] transcription factor [Arabidopsis thaliana] gi 75337089 sp Q9SDW0.1 TGT3A ARAT H RecName: Full=Trihelix transcription factor GT-3a; AltName: Full=Trihelix DNA-binding protein GT-3a                                                                                                                                                         | 311 | 323 | 1.00E-105 | 103.9  | 77.8 | 87.1 | transcription factor                        | gbpln | Arabidopsis thaliana | AT5G01380.1   Symbols:   Homeodomain-like superfamily protein   chr5:155784-157451 REVERSE LENGTH=323                                   | 311 | 323 | 1.00E-108 | 103.9  | 77.8 | 87.1 |
| Rsa1.0_00129.1.g6190.t1 | transcription factor GT-3a [Arabidopsis thaliana] gi 7320716 emb CAB81921.1  transcription factor GT-3a [Arabidopsis thaliana] gi 30060335 gb AAP13347.1  transcription factor GT-3a [Arabidopsis thaliana] gi 14050647 gb ABI49473.1  At5g01380 [Arabidopsis thaliana] gi 33200295 gb AED90334.1  trihelix transcription factor GT-3a [Arabidopsis thaliana] | 364 | 134 | 1.00E-14  | 36.8   | 14.6 | 21.7 | hypothetical protein CARUB_v10003236mg      | gbpln | Capsella rubella     | AT1G10000.1   Symbols:   Ribonuclease H-like superfamily protein   chr1:3263877-3264788 REVERSE LENGTH=303                              | 364 | 303 | 5.00E-15  | 83.2   | 14.6 | 21.7 |
| Rsa1.0_00129.1.g6191.t1 | ref[XP_002870931.1] hypothetical protein ARALYDRAFT_486945 [Arabidopsis lyrata subsp. lyrata] gi 297316768 gb EFH47190.1                                                                                                                                                                                                                                      | 601 | 603 | 0         | 100.3  | 91.7 | 95.3 | hypothetical protein ARALYDRAFT_486945      | gbpln | Arabidopsis lyrata   | AT5G01320.1   Symbols:   Thiamine pyrophosphate dependent pyruvate decarboxylase family protein   chr5:129484-131625 REVERSE LENGTH=603 | 601 | 603 | 0         | 100.3  | 89.4 | 94.3 |
| Rsa1.0_00129.1.g6192.t1 | hypothetical protein ARALYDRAFT_486945 [Arabidopsis lyrata subsp. lyrata] ref[XP_002873016.1] basic helix-loop-helix family protein [Arabidopsis lyrata subsp. lyrata] gi 297318853 gb EFH49275.1  basic helix-loop-helix family protein [Arabidopsis lyrata subsp. lyrata]                                                                                   | 687 | 898 | 0         | 130.7  | 81.5 | 90.4 | basic helix-loop-helix family protein       | gbpln | Arabidopsis lyrata   | AT5G01310.1   Symbols: APTX   APRATAXIN-like   chr5:125304-128960 FORWARD LENGTH=912                                                    | 687 | 912 | 0         | 132.8  | 81.1 | 90.0 |

|                         |                                                                                                                                                                                                                                                                                                                                                                                                  |      |      |           |       |      |      |                                              |       |                      |                                                                                                                                                                                                                                                                                                                                                                  |      |      |           |       |      |      |  |
|-------------------------|--------------------------------------------------------------------------------------------------------------------------------------------------------------------------------------------------------------------------------------------------------------------------------------------------------------------------------------------------------------------------------------------------|------|------|-----------|-------|------|------|----------------------------------------------|-------|----------------------|------------------------------------------------------------------------------------------------------------------------------------------------------------------------------------------------------------------------------------------------------------------------------------------------------------------------------------------------------------------|------|------|-----------|-------|------|------|--|
| Rsa1.0_00129.1.g6193.t1 | refNP_195745.1   alpha 1,4-glycosyltransferase family protein [Arabidopsis thaliana] gi 6759448 emb CAB69853.1   putative protein [Arabidopsis thaliana] gi 51315396 gb AA799803.1   At5g01250 [Arabidopsis thaliana] gi 110738709 dbj BAF01279.1   hypothetical protein [Arabidopsis thaliana] gi 332002934 gb AED90317.1   alpha 1,4-glycosyltransferase family protein [Arabidopsis thaliana] | 532  | 407  | 1.00E-176 | 76.5  | 58.3 | 65.0 | alpha 1,4-glycosyltransferase family protein | gbpln | Arabidopsis thaliana | AT5G01250.1   Symbols:   alpha 1,4-glycosyltransferase family protein   chr5:102370-103593 REVERSE LENGTH=407                                                                                                                                                                                                                                                    | 532  | 407  | 1.00E-179 | 76.5  | 58.3 | 65.0 |  |
| Rsa1.0_00129.1.g6194.t1 | gb EOA20516.1   hypothetical protein CARUB_v10000830mg [Capsella rubella]                                                                                                                                                                                                                                                                                                                        | 496  | 488  | 0         | 98.4  | 93.8 | 95.4 | hypothetical protein CARUB_v10000830mg       | gbpln | Capsella rubella     | AT5G01240.1   Symbols: LAX1   like AUXIN RESISTANT 1   chr5:98228-101493 FORWARD LENGTH=488                                                                                                                                                                                                                                                                      | 496  | 488  | 0         | 98.4  | 91.9 | 94.6 |  |
| Rsa1.0_00129.1.g6195.t1 | gb EOA21184.1   hypothetical protein CARUB_v10001529mg [Capsella rubella]                                                                                                                                                                                                                                                                                                                        | 315  | 309  | 1.00E-173 | 98.1  | 93.3 | 96.5 | hypothetical protein CARUB_v10001529mg       | gbpln | Capsella rubella     | AT5G01230.1   Symbols:   S-adenosyl-L-methionine-dependent methyltransferases superfamily protein   chr5:92789-95380 REVERSE LENGTH=309                                                                                                                                                                                                                          | 315  | 309  | 1.00E-176 | 98.1  | 93.7 | 96.5 |  |
| Rsa1.0_00129.1.g6196.t1 | gb EOA19296.1   hypothetical protein CARUB_v10002205mg [Capsella rubella]                                                                                                                                                                                                                                                                                                                        | 155  | 148  | 5.00E-33  | 95.5  | 58.7 | 73.5 | hypothetical protein CARUB_v10002205mg       | gbpln | Capsella rubella     | AT3G09032.1   Symbols:   unknown protein; BEST Arabidopsis thaliana protein match is: unknown protein (TAIR:AT5G01225.1). Has 35333 Blast hits to 34131 proteins in 2444 species: Archae - 798; Bacteria - 22429; Metazoa - 974; Fungi - 991; Plants - 531; Viruses - 0; Other Eukaryotes - 9610 (source: NCBI BLINK).   chr3:2757605-2758045 REVERSE LENGTH=146 | 155  | 146  | 5.00E-33  | 94.2  | 52.3 | 67.1 |  |
| Rsa1.0_00129.1.g6197.t1 | emb CAB10225.1   retrovirus-related like polyprotein [Arabidopsis thaliana] gi 7268152 emb CAB78488.1   retrovirus-related like polyprotein [Arabidopsis thaliana]                                                                                                                                                                                                                               | 1446 | 1489 | 0         | 103.0 | 54.6 | 69.3 | retrovirus-related like polyprotein          | gbpln | Arabidopsis thaliana | AT4G23160.1   Symbols: CRK8   cysteine-rich RLK (RECEPTOR-like protein kinase) 8   chr4:12129485-12134086 FORWARD LENGTH=1262                                                                                                                                                                                                                                    | 1446 | 1262 | 1.00E-150 | 87.3  | 18.4 | 24.1 |  |
| Rsa1.0_00129.1.g6198.t1 | gb EOA20265.1   hypothetical protein CARUB_v10000567mg [Capsella rubella]                                                                                                                                                                                                                                                                                                                        | 566  | 577  | 0         | 101.9 | 86.2 | 92.2 | hypothetical protein CARUB_v10000567mg       | gbpln | Capsella rubella     | AT5G01180.1   Symbols: PTR5, ATPTR5   peptide transporter 5   chr5:61257-63240 REVERSE LENGTH=570                                                                                                                                                                                                                                                                | 566  | 570  | 0         | 100.7 | 85.5 | 91.7 |  |
| Rsa1.0_00129.1.g6199.t1 | ref XP_002873024.1   glycine-rich protein [Arabidopsis lyrata subsp. lyrata] gi 297318861 gb EFH49283.1   glycine-rich protein [Arabidopsis lyrata subsp. lyrata]                                                                                                                                                                                                                                | 517  | 575  | 1.00E-157 | 111.2 | 68.9 | 78.7 | glycine-rich protein                         | gbpln | Arabidopsis lyrata   | AT5G01170.1   Symbols:   Protein of unknown function (DUF740)   chr5:58315-60021 FORWARD LENGTH=568                                                                                                                                                                                                                                                              | 517  | 568  | 1.00E-152 | 109.9 | 71.0 | 79.7 |  |
| Rsa1.0_00129.1.g6200.t1 | gb EOA20910.1   hypothetical protein CARUB_v10001245mg [Capsella rubella]                                                                                                                                                                                                                                                                                                                        | 360  | 361  | 1.00E-162 | 100.3 | 81.9 | 87.2 | hypothetical protein CARUB_v10001245mg       | gbpln | Capsella rubella     | AT5G01160.1   Symbols:   RING/U-box superfamily protein   chr5:54280-55727 FORWARD LENGTH=360                                                                                                                                                                                                                                                                    | 360  | 360  | 1.00E-159 | 100.0 | 80.0 | 86.1 |  |
| Rsa1.0_00129.1.g6201.t1 | gb EOA20523.1   hypothetical protein CARUB_v10000837mg [Capsella rubella]                                                                                                                                                                                                                                                                                                                        | 436  | 485  | 1.00E-143 | 111.2 | 65.8 | 79.4 | hypothetical protein CARUB_v10000837mg       | gbpln | Capsella rubella     | AT5G01150.1   Symbols:   Protein of unknown function (DUF674)   chr5:51988-53649 FORWARD LENGTH=501                                                                                                                                                                                                                                                              | 436  | 501  | 1.00E-110 | 114.9 | 55.0 | 70.9 |  |
| Rsa1.0_00129.1.g6202.t1 | gb EOA22313.1   hypothetical protein CARUB_v10002914mg [Capsella rubella]                                                                                                                                                                                                                                                                                                                        | 500  | 513  | 0         | 102.6 | 74.2 | 86.2 | hypothetical protein CARUB_v10002914mg       | gbpln | Capsella rubella     | AT5G01120.1   Symbols:   Protein of unknown function (DUF674)   chr5:45281-46986 FORWARD LENGTH=510                                                                                                                                                                                                                                                              | 500  | 510  | 0         | 102.0 | 71.8 | 83.0 |  |
| Rsa1.0_00129.1.g6203.t1 | gb EMS60894.1   Polyubiquitin [Triticum urartu]                                                                                                                                                                                                                                                                                                                                                  | 130  | 458  | 4.00E-50  | 352.3 | 78.5 | 81.5 | Polyubiquitin                                | gbpln | Triticum urartu      | AT1G65350.1   Symbols: UBO13   ubiquitin 13   chr1:24272518-24277275 REVERSE LENGTH=319                                                                                                                                                                                                                                                                          | 130  | 319  | 3.00E-52  | 245.4 | 78.5 | 81.5 |  |
| Rsa1.0_00129.1.g6204.t1 | gb EOA35496.1   hypothetical protein CARUB_v10020702mg [Capsella rubella]                                                                                                                                                                                                                                                                                                                        | 171  | 307  | 1.00E-27  | 179.5 | 33.9 | 40.9 | hypothetical protein CARUB_v10020702mg       | gbpln | Capsella rubella     | AT1G70440.1   Symbols: SRO3   similar to RCD one 3   chr1:26549354-26550520 REVERSE LENGTH=305                                                                                                                                                                                                                                                                   | 171  | 305  | 1.00E-28  | 178.4 | 32.2 | 40.9 |  |
| Rsa1.0_00129.1.g6205.t1 | # # # # # # # # # - ---- # # # # # # #                                                                                                                                                                                                                                                                                                                                                           |      |      |           |       |      |      |                                              |       |                      |                                                                                                                                                                                                                                                                                                                                                                  |      |      |           |       |      |      |  |
| Rsa1.0_00129.1.g6206.t1 | ref XP_002870942.1   hypothetical protein ARALYDRAFT_486969 [Arabidopsis lyrata subsp. lyrata] gi 297316779 gb EFH47201.1   hypothetical protein ARALYDRAFT_486969 [Arabidopsis lyrata subsp. lyrata]                                                                                                                                                                                            | 632  | 630  | 0         | 99.7  | 84.3 | 90.0 | hypothetical protein ARALYDRAFT_486969       | gbpln | Arabidopsis lyrata   | AT5G01100.1   Symbols:   O-fucosyltransferase family protein   chr5:34872-37756 REVERSE LENGTH=631                                                                                                                                                                                                                                                               | 632  | 631  | 0         | 99.8  | 84.3 | 91.0 |  |
| Rsa1.0_00129.1.g6207.t1 | ref XP_002870943.1   hypothetical protein ARALYDRAFT_324871 [Arabidopsis lyrata subsp. lyrata] gi 297316780 gb EFH47202.1   hypothetical protein ARALYDRAFT_324871 [Arabidopsis lyrata subsp. lyrata]                                                                                                                                                                                            | 76   | 79   | 1.00E-16  | 103.9 | 57.9 | 67.1 | hypothetical protein ARALYDRAFT_324871       | gbpln | Arabidopsis lyrata   | AT5G01075.1   Symbols:   Glycosyl hydrolase family 35 protein   chr5:27095-27423 REVERSE LENGTH=81                                                                                                                                                                                                                                                               | 76   | 81   | 1.00E-15  | 106.6 | 57.9 | 69.7 |  |
| Rsa1.0_00129.1.g6208.t1 | gb EOA21547.1   hypothetical protein CARUB_v10001956mg [Capsella rubella]                                                                                                                                                                                                                                                                                                                        | 207  | 211  | 4.00E-87  | 101.9 | 82.1 | 87.4 | hypothetical protein CARUB_v10001956mg       | gbpln | Capsella rubella     | AT5G01070.2   Symbols:   RING/FYVE/PHD zinc finger superfamily protein   chr5:25094-25799 REVERSE LENGTH=206                                                                                                                                                                                                                                                     | 207  | 206  | 1.00E-82  | 99.5  | 79.2 | 85.0 |  |

|                         |                                                                                                                                                                                                                                                                                                                                                                                |     |     |           |       |      |      |                                                                                                            |       |                      |                                                                                                                                                                                                                                                                                                                                                                                                                                                                                       |     |     |           |       |      |      |
|-------------------------|--------------------------------------------------------------------------------------------------------------------------------------------------------------------------------------------------------------------------------------------------------------------------------------------------------------------------------------------------------------------------------|-----|-----|-----------|-------|------|------|------------------------------------------------------------------------------------------------------------|-------|----------------------|---------------------------------------------------------------------------------------------------------------------------------------------------------------------------------------------------------------------------------------------------------------------------------------------------------------------------------------------------------------------------------------------------------------------------------------------------------------------------------------|-----|-----|-----------|-------|------|------|
| Rsa1.0_00129.1.g6209.t1 | refNP_195726.1  Protein kinase protein with tetratricopeptide repeat domain [Arabidopsis thaliana]<br>gi 6759429 emb CAB69834.1  putative protein-kinase [Arabidopsis thaliana]<br>gi 332002910 gb AED90293.1  Protein kinase protein with tetratricopeptide repeat domain [Arabidopsis thaliana]                                                                              | 850 | 499 | 1.00E-148 | 58.7  | 30.0 | 33.9 | Protein kinase protein with tetratricopeptide repeat domain                                                | gbpln | Arabidopsis thaliana | AT5G01060.1   Symbols:   Protein kinase protein with tetratricopeptide repeat domain   chr5:22740-24847 FORWARD LENGTH=499                                                                                                                                                                                                                                                                                                                                                            | 850 | 499 | 1.00E-150 | 58.7  | 30.0 | 33.9 |
| Rsa1.0_00129.1.g6210.t1 | gb EOA19354.1  hypothetical protein CARUB_v10000287mg [Capsella rubella]<br>gi 482556163 gb EOA19355.1  hypothetical protein CARUB_v10000287mg [Capsella rubella]                                                                                                                                                                                                              | 686 | 760 | 1.00E-167 | 110.8 | 57.7 | 68.4 | hypothetical protein CARUB_v10000287mg                                                                     | gbpln | Capsella rubella     | AT5G01030.2   Symbols:   Protein of unknown function (DUF3527)   chr5:10638-13003 FORWARD LENGTH=744                                                                                                                                                                                                                                                                                                                                                                                  | 686 | 744 | 1.00E-166 | 108.5 | 58.0 | 69.2 |
| Rsa1.0_00129.1.g6211.t1 | gb EOA20315.1  hypothetical protein CARUB_v10000622mg [Capsella rubella]                                                                                                                                                                                                                                                                                                       | 541 | 553 | 0         | 102.2 | 89.5 | 93.5 | hypothetical protein CARUB_v10000622mg                                                                     | gbpln | Capsella rubella     | AT5G02010.1   Symbols: ATROPGEF7, ROPGEF7   RHO guanyl-nucleotide exchange factor 7   chr5:383493-385698 FORWARD LENGTH=546                                                                                                                                                                                                                                                                                                                                                           | 541 | 546 | 0         | 100.9 | 88.2 | 93.2 |
| Rsa1.0_00129.1.g6212.t1 | ref NP_195822.1  uncharacterized protein [Arabidopsis thaliana]<br>gi 7340676 emb CAB82975.1  putative protein [Arabidopsis thaliana]<br>gi 16648748 gb AAL25566.1  AT5g02020/T7H20.70 [Arabidopsis thaliana]<br>gi 203334906 gb AAM16209.1  AT5g02020/T7H20.70 [Arabidopsis thaliana]<br>gi 332003037 gb AED90420.1  uncharacterized protein AT5G02020 [Arabidopsis thaliana] | 150 | 149 | 3.00E-46  | 99.3  | 76.7 | 84.7 | uncharacterized protein                                                                                    | gbpln | Arabidopsis thaliana | AT5G02020.1   Symbols: SIS   Encodes a protein involved in salt tolerance, names SIS (Salt Induced Serine rich).   chr5:386557-387921 REVERSE LENGTH=149                                                                                                                                                                                                                                                                                                                              | 150 | 149 | 9.00E-49  | 99.3  | 76.7 | 84.7 |
| Rsa1.0_00129.1.g6213.t1 | gb EOA20156.1  hypothetical protein CARUB_v10000448mg [Capsella rubella]                                                                                                                                                                                                                                                                                                       | 579 | 637 | 0         | 110.0 | 84.6 | 90.2 | hypothetical protein CARUB_v10000448mg                                                                     | gbpln | Capsella rubella     | AT5G02030.1   Symbols: LSN, PNY, HB-6, BLR, RPL, BLH9, VAN   POX (plant homeobox) family protein   chr5:395754-398872 FORWARD LENGTH=575                                                                                                                                                                                                                                                                                                                                              | 579 | 575 | 0         | 99.3  | 83.8 | 87.6 |
| Rsa1.0_00130.1.g6214.t1 | #                                                                                                                                                                                                                                                                                                                                                                              | #   | #   | #         | #     | #    | #    | -                                                                                                          | ----  | ----                 | AT1G54410.1   Symbols:   dehydrin family protein   chr1:20310305-20310601 REVERSE LENGTH=98                                                                                                                                                                                                                                                                                                                                                                                           | 95  | 98  | 4.00E-11  | 103.2 | 54.7 | 56.8 |
| Rsa1.0_00130.1.g6215.t1 | gb AAA92823.1  cyclin dependent protein kinase homolog; similar to moth bean p34cdc2 protein, PIR Accession Number JQ2243 [Brassica napus]                                                                                                                                                                                                                                     | 303 | 294 | 1.00E-166 | 97.0  | 95.0 | 95.7 | cyclin dependent protein kinase homolog; similar to moth bean p34cdc2 protein, PIR Accession Number JQ2243 | gbpln | Brassica napus       | AT3G48750.1   Symbols: CDKA1, CDC2AAT, CDK2, CDC2, CDG2A, CDKA1   cell division control 2   chr3:18072238-18074296 FORWARD LENGTH=294                                                                                                                                                                                                                                                                                                                                                 | 303 | 294 | 1.00E-164 | 97.0  | 92.1 | 95.0 |
| Rsa1.0_00130.1.g6216.t1 | gb ADK63397.1  DHHC type zinc finger protein [Brassica rapa]                                                                                                                                                                                                                                                                                                                   | 450 | 441 | 0         | 98.0  | 90.9 | 92.4 | DHHC type zinc finger protein                                                                              | gbpln | Brassica rapa        | AT3G48760.1   Symbols:   DHHC-type zinc finger family protein   chr3:18075902-18078084 FORWARD LENGTH=476                                                                                                                                                                                                                                                                                                                                                                             | 450 | 476 | 0         | 105.8 | 84.4 | 88.9 |
| Rsa1.0_00130.1.g6217.t1 | gb EOA15422.1  hypothetical protein CARUB_v10007751mg [Capsella rubella]                                                                                                                                                                                                                                                                                                       | 217 | 108 | 6.00E-26  | 49.8  | 29.0 | 36.9 | hypothetical protein CARUB_v10007751mg                                                                     | gbpln | Capsella rubella     | AT4G02655.1   Symbols:   unknown protein; FUNCTIONS IN: molecular.function unknown; INVOLVED IN: biological.process unknown; LOCATED IN: endomembrane system; BEST Arabidopsis thaliana protein match is: unknown protein (TAIR:AT1G18486.1); Has 30201 Blast hits to 17322 proteins in 780 species: Archae - 12; Bacteria - 1396; Metazoa - 17338; Fungi - 3422; Plants - 5037; Viruses - 0; Other Eukaryotes - 2996 (source: NCBI BLINK).   chr4:1158876-1159241 FORWARD LENGTH=121 | 217 | 121 | 5.00E-24  | 55.8  | 27.6 | 38.7 |
| Rsa1.0_00130.1.g6218.t1 | gb ABW97708.1  serine palmitoyltransferase long chain base subunit [Brassica rapa subsp. chinensis]                                                                                                                                                                                                                                                                            | 489 | 489 | 0         | 100.0 | 98.4 | 99.0 | serine palmitoyltransferase long chain base subunit                                                        | gbpln | Brassica rapa        | AT3G48780.1   Symbols: ATSP1, SPT1   serine palmitoyltransferase 1   chr3:18089346-18092276 FORWARD LENGTH=489                                                                                                                                                                                                                                                                                                                                                                        | 489 | 489 | 0         | 100.0 | 92.4 | 96.9 |
| Rsa1.0_00130.1.g6219.t1 | gb EOA23885.1  hypothetical protein CARUB_v10017101mg [Capsella rubella]                                                                                                                                                                                                                                                                                                       | 484 | 489 | 0         | 101.0 | 81.8 | 90.7 | hypothetical protein CARUB_v10017101mg                                                                     | gbpln | Capsella rubella     | AT3G48780.1   Symbols: ATSP1, SPT1   serine palmitoyltransferase 1   chr3:18089346-18092276 FORWARD LENGTH=489                                                                                                                                                                                                                                                                                                                                                                        | 484 | 489 | 0         | 101.0 | 81.0 | 90.1 |
| Rsa1.0_00130.1.g6220.t1 | ref XP_002877632.1  hypothetical protein ARALYDRAFT_485234 [Arabidopsis lyrata subsp. lyrata]<br>gi 297323470 gb EFH53891.1  hypothetical protein ARALYDRAFT_485234 [Arabidopsis lyrata subsp. lyrata]                                                                                                                                                                         | 236 | 280 | 5.00E-83  | 118.6 | 78.4 | 86.4 | hypothetical protein ARALYDRAFT_485234                                                                     | gbpln | Arabidopsis lyrata   | AT3G48800.1   Symbols:   Sterile alpha motif (SAM) domain-containing protein   chr3:18095825-18096661 REVERSE LENGTH=278                                                                                                                                                                                                                                                                                                                                                              | 236 | 278 | 2.00E-80  | 117.8 | 78.4 | 86.0 |

|                         |                                                                                                                                                                                                                                                                                                                                                                                                                                                                                                                                                                                                |     |     |           |       |      |      |                                                           |       |                      |                                                                                                                                                     |     |     |           |       |      |      |
|-------------------------|------------------------------------------------------------------------------------------------------------------------------------------------------------------------------------------------------------------------------------------------------------------------------------------------------------------------------------------------------------------------------------------------------------------------------------------------------------------------------------------------------------------------------------------------------------------------------------------------|-----|-----|-----------|-------|------|------|-----------------------------------------------------------|-------|----------------------|-----------------------------------------------------------------------------------------------------------------------------------------------------|-----|-----|-----------|-------|------|------|
| Rsa1.0_00130.1.g6221.t1 | refNP_190451.2  glycosyltransferase family 29 (sialyltransferase) protein [Arabidopsis thaliana]<br>gi 19347711 gb AAL85966.1  unknown protein [Arabidopsis thaliana]<br>gi 22136812 gb AAM91750.1  unknown protein [Arabidopsis thaliana]<br>gi 332644938 gb AEE78459.1  glycosyltransferase family 29 (sialyltransferase) protein [Arabidopsis thaliana]                                                                                                                                                                                                                                     | 811 | 440 | 0         | 54.3  | 41.2 | 44.0 | glycosyltransferase family 29 (sialyltransferase) protein | gbpln | Arabidopsis thaliana | AT3G48820.1   Symbols:   Glycosyltransferase family 29 (sialyltransferase) family protein   chr3:18100106-18102852 REVERSE LENGTH=440               | 811 | 440 | 0         | 54.3  | 41.2 | 44.0 |
| Rsa1.0_00130.1.g6222.t1 | refXP_002875931.1  membrane-associated progesterone binding protein 3 [Arabidopsis lyrata subsp. lyrata]<br>gi 297321769 gb EFH52190.1  membrane-associated progesterone binding protein 3 [Arabidopsis lyrata subsp. lyrata]                                                                                                                                                                                                                                                                                                                                                                  | 191 | 232 | 4.00E-72  | 121.5 | 80.6 | 88.0 | membrane-associated progesterone binding protein 3        | gbpln | Arabidopsis lyrata   | AT3G48890.1   Symbols: ATP2, ATMAPR3, MSBP2, MAPR3   membrane-associated progesterone binding protein 3   chr3:18129669-18131353 FORWARD LENGTH=233 | 191 | 233 | 4.00E-71  | 122.0 | 77.0 | 82.2 |
| Rsa1.0_00130.1.g6223.t3 | refXP_002863317.1  hypothetical protein ARALYDRAFT_497154 [Arabidopsis lyrata subsp. lyrata]<br>gi 297309151 gb EFH39576.1  hypothetical protein ARALYDRAFT_497154 [Arabidopsis lyrata subsp. lyrata]                                                                                                                                                                                                                                                                                                                                                                                          | 397 | 403 | 0         | 101.5 | 86.9 | 91.7 | hypothetical protein ARALYDRAFT_497154                    | gbpln | Arabidopsis lyrata   | AT4G12730.1   Symbols: FLA2   FASCICLIN-like arabinogalactan 2   chr4:7491598-7492809 REVERSE LENGTH=403                                            | 397 | 403 | 0         | 101.5 | 86.6 | 91.7 |
| Rsa1.0_00130.1.g6224.t1 | refXP_002872419.1  RNA polymerase III subunit RPC82 family protein [Arabidopsis lyrata subsp. lyrata]<br>gi 297318256 gb EFH48678.1  RNA polymerase III subunit RPC82 family protein [Arabidopsis lyrata subsp. lyrata]                                                                                                                                                                                                                                                                                                                                                                        | 526 | 521 | 0         | 99.0  | 78.3 | 88.2 | RNA polymerase III subunit RPC82 family protein           | gbpln | Arabidopsis lyrata   | AT3G49000.1   Symbols:   RNA polymerase III subunit RPC82 family protein   chr3:18162903-18165846 FORWARD LENGTH=523                                | 526 | 523 | 0         | 99.4  | 77.8 | 88.2 |
| Rsa1.0_00130.1.g6225.t1 | gb ABL97945.1  cold induced protein [Brassica rapa]                                                                                                                                                                                                                                                                                                                                                                                                                                                                                                                                            | 229 | 206 | 1.00E-113 | 90.0  | 88.2 | 88.6 | cold induced protein                                      | gbpln | Brassica rapa        | AT3G49010.3   Symbols: ATBBC1, BBC1, RSU2   breast basic conserved 1   chr3:18166971-18168047 REVERSE LENGTH=206                                    | 229 | 206 | 1.00E-103 | 90.0  | 77.7 | 80.3 |
| Rsa1.0_00130.1.g6226.t1 | refNP_190471.1  FBD-associated F-box protein [Arabidopsis thaliana]<br>gi 75337428 sp Q9SMT9.1 FBD9_ARATH RecName: Full=FBD-associated F-box protein At3g49020<br>gi 6522564 emb CAB62008.1  putative protein [Arabidopsis thaliana]<br>gi 67633680 gb AA78764.1  F-box family protein [Arabidopsis thaliana]<br>gi 111074508 gb ABH04627.1  At3g49020 [Arabidopsis thaliana]<br>gi 332644966 gb AEE78487.1  FBD-associated F-box protein [Arabidopsis thaliana]                                                                                                                               | 387 | 447 | 1.00E-129 | 115.5 | 63.0 | 76.0 | FBD-associated F-box protein                              | gbpln | Arabidopsis thaliana | AT3G49020.1   Symbols:   FBD, F-box and Leucine Rich Repeat domains containing protein   chr3:18169079-18170660 FORWARD LENGTH=447                  | 387 | 447 | 1.00E-131 | 115.5 | 63.0 | 76.0 |
| Rsa1.0_00130.1.g6227.t1 | refNP_566915.1  U-box domain-containing protein 32 [Arabidopsis thaliana]<br>gi 75332032 sp Q94A51.1 PUB32_ARATH RecName: Full=U-box domain-containing protein 32; AltName: Full=Plant U-box protein 32<br>gi 15215682 gb AAK91387.1  AT3g49060/T2J13.100 [Arabidopsis thaliana]<br>gi 28416483 gb AAO42772.1  AT3g49060/T2J13.100 [Arabidopsis thaliana]<br>gi 51970634 dbj BAD44009.1  unknown protein [Arabidopsis thaliana]<br>gi 51970796 dbj BAO44090.1  unknown protein [Arabidopsis thaliana]<br>gi 332644973 gb AEE78494.1  U-box domain-containing protein 32 [Arabidopsis thaliana] | 821 | 805 | 0         | 98.1  | 85.9 | 91.7 | U-box domain-containing protein 32                        | gbpln | Arabidopsis thaliana | AT3G49060.1   Symbols:   U-box domain-containing protein kinase family protein   chr3:18187396-18191878 REVERSE LENGTH=805                          | 821 | 805 | 0         | 98.1  | 85.9 | 91.7 |
| Rsa1.0_00130.1.g6228.t1 | gb EOA24998.1  hypothetical protein CARUB_v10018295mg [Capsella rubella]                                                                                                                                                                                                                                                                                                                                                                                                                                                                                                                       | 119 | 103 | 3.00E-49  | 86.6  | 83.2 | 84.9 | hypothetical protein CARUB_v10018295mg                    | gbpln | Capsella rubella     | AT3G49100.1   Symbols:   Signal recognition particle, SRP9/SRP14 subunit   chr3:18196944-18198298 FORWARD LENGTH=103                                | 119 | 103 | 1.00E-51  | 86.6  | 82.4 | 84.0 |
| Rsa1.0_00130.1.g6229.t1 | refXP_002872085.1  transferase family protein [Arabidopsis lyrata subsp. lyrata]<br>gi 297317922 gb EFH48344.1  transferase family protein [Arabidopsis lyrata subsp. lyrata]                                                                                                                                                                                                                                                                                                                                                                                                                  | 424 | 430 | 1.00E-133 | 101.4 | 58.5 | 72.9 | transferase family protein                                | gbpln | Arabidopsis lyrata   | AT5G23970.1   Symbols:   HXXXD-type acyl-transferase family protein   chr5:8096326-8097612 FORWARD LENGTH=428                                       | 424 | 428 | 1.00E-132 | 100.9 | 58.0 | 72.2 |

|                         |                                                                                                                                                                                                                                                                                                                                                                                                                                                                                                                                                                                                      |     |     |           |       |      |      |                                        |       |                      |                                                                                                                                  |     |     |           |       |      |      |
|-------------------------|------------------------------------------------------------------------------------------------------------------------------------------------------------------------------------------------------------------------------------------------------------------------------------------------------------------------------------------------------------------------------------------------------------------------------------------------------------------------------------------------------------------------------------------------------------------------------------------------------|-----|-----|-----------|-------|------|------|----------------------------------------|-------|----------------------|----------------------------------------------------------------------------------------------------------------------------------|-----|-----|-----------|-------|------|------|
| Rsa1.0_00130.1.g6230.t1 | refXP_002877656.1   hypothetical protein ARALYDRAFT_906195 [Arabidopsis lyrata subsp. lyrata] gi 297323494 gb EFH53915.1   hypothetical protein ARALYDRAFT_906195 [Arabidopsis lyrata subsp. lyrata]                                                                                                                                                                                                                                                                                                                                                                                                 | 488 | 503 | 0         | 103.1 | 71.5 | 84.0 | hypothetical protein ARALYDRAFT_906195 | gbpln | Arabidopsis lyrata   | AT3G49200.1   Symbols:   O-acyltransferase (WSD1-like) family protein   chr3:18235445-18237646 REVERSE LENGTH=507                | 488 | 507 | 0         | 103.9 | 70.5 | 83.6 |
| Rsa1.0_00130.1.g6231.t1 | gb EOA26120.1   hypothetical protein CARUB_v10019546mg [Capsella rubella]                                                                                                                                                                                                                                                                                                                                                                                                                                                                                                                            | 440 | 522 | 0         | 118.6 | 76.6 | 86.4 | hypothetical protein CARUB_v10019546mg | gbpln | Capsella rubella     | AT3G49190.1   Symbols:   O-acyltransferase (WSD1-like) family protein   chr3:18231988-18234376 REVERSE LENGTH=522                | 440 | 522 | 0         | 118.6 | 78.0 | 88.0 |
| Rsa1.0_00130.1.g6232.t1 | refXP_002875955.1   pectinesterase family protein [Arabidopsis lyrata subsp. lyrata] gi 297321793 gb EFH52214.1   pectinesterase family protein [Arabidopsis lyrata subsp. lyrata]                                                                                                                                                                                                                                                                                                                                                                                                                   | 568 | 598 | 0         | 105.3 | 82.9 | 90.0 | pectinesterase family protein          | gbpln | Arabidopsis lyrata   | AT3G49220.1   Symbols:   Plant invertase/pectin methylesterase inhibitor superfamily   chr3:18249840-18253647 FORWARD LENGTH=598 | 568 | 598 | 0         | 105.3 | 82.9 | 90.1 |
| Rsa1.0_00130.1.g6233.t2 | #                                                                                                                                                                                                                                                                                                                                                                                                                                                                                                                                                                                                    | #   | #   | #         | #     | #    | #    | -                                      | ----  | ----                 | #                                                                                                                                | #   | #   | #         | #     | #    |      |
| Rsa1.0_00130.1.g6234.t1 | refXP_002877660.1   hypothetical protein ARALYDRAFT_485283 [Arabidopsis lyrata subsp. lyrata] gi 297323498 gb EFH53919.1   hypothetical protein ARALYDRAFT_485283 [Arabidopsis lyrata subsp. lyrata]                                                                                                                                                                                                                                                                                                                                                                                                 | 398 | 423 | 1.00E-172 | 106.3 | 76.6 | 88.2 | hypothetical protein ARALYDRAFT_485283 | gbpln | Arabidopsis lyrata   | AT3G49250.1   Symbols: DMS3, IDN1   defective in meristem silencing 3   chr3:18258613-18260803 REVERSE LENGTH=420                | 398 | 420 | 1.00E-164 | 105.5 | 73.9 | 85.7 |
| Rsa1.0_00130.1.g6235.t1 | #                                                                                                                                                                                                                                                                                                                                                                                                                                                                                                                                                                                                    | #   | #   | #         | #     | #    | #    | -                                      | ----  | ----                 | #                                                                                                                                | #   | #   | #         | #     | #    |      |
| Rsa1.0_00130.1.g6236.t1 | refNP_566917.1   protein IQ-domain 21 [Arabidopsis thaliana] gi 42572619 refNP_974405.1   protein IQ-domain 21 [Arabidopsis thaliana] gi 13605619 gb AAK32803.1 AF361635.1 AT3g49260/F2K15.120 [Arabidopsis thaliana] gi 21593446 gb AAM65413.1   SF16-like protein [Arabidopsis thaliana] gi 23308403 gb AAN18171.1   At3g49260/F2K15.120 [Arabidopsis thaliana] gi 39980284 gb AAR32943.1   guard cell associated protein [Arabidopsis thaliana] gi 332644995 gb AEE78516.1   protein IQ-domain 21 [Arabidopsis thaliana] gi 332644996 gb AEE78517.1   protein IQ-domain 21 [Arabidopsis thaliana] | 475 | 471 | 0         | 99.2  | 82.9 | 87.8 | protein IQ-domain 21                   | gbpln | Arabidopsis thaliana | AT3G49260.2   Symbols: iqd21   IQ-domain 21   chr3:18262755-18265859 FORWARD LENGTH=471                                          | 475 | 471 | 0         | 99.2  | 82.9 | 87.8 |
| Rsa1.0_00130.1.g6237.t7 | refXP_002877664.1   hypothetical protein ARALYDRAFT_906210 [Arabidopsis lyrata subsp. lyrata] gi 297323502 gb EFH53923.1   hypothetical protein ARALYDRAFT_906210 [Arabidopsis lyrata subsp. lyrata]                                                                                                                                                                                                                                                                                                                                                                                                 | 908 | 460 | 0         | 50.7  | 44.8 | 46.5 | hypothetical protein ARALYDRAFT_906210 | gbpln | Arabidopsis lyrata   | AT3G49310.1   Symbols:   Major facilitator superfamily protein   chr3:18285084-18287991 REVERSE LENGTH=460                       | 908 | 460 | 0         | 50.7  | 41.7 | 42.7 |
| Rsa1.0_00130.1.g6238.t1 | refXP_002877667.1   hypothetical protein ARALYDRAFT_348033 [Arabidopsis lyrata subsp. lyrata] gi 297323505 gb EFH53926.1   hypothetical protein ARALYDRAFT_348033 [Arabidopsis lyrata subsp. lyrata]                                                                                                                                                                                                                                                                                                                                                                                                 | 341 | 341 | 1.00E-158 | 100.0 | 79.8 | 89.4 | hypothetical protein ARALYDRAFT_348033 | gbpln | Arabidopsis lyrata   | AT3G49340.1   Symbols:   Cysteine proteinases superfamily protein   chr3:18293347-18294577 REVERSE LENGTH=341                    | 341 | 341 | 1.00E-157 | 100.0 | 78.0 | 88.3 |
| Rsa1.0_00130.1.g6239.t1 | refXP_002877670.1   hypothetical protein ARALYDRAFT_485296 [Arabidopsis lyrata subsp. lyrata] gi 297323508 gb EFH53929.1   hypothetical protein ARALYDRAFT_485296 [Arabidopsis lyrata subsp. lyrata]                                                                                                                                                                                                                                                                                                                                                                                                 | 597 | 592 | 0         | 99.2  | 89.6 | 94.6 | hypothetical protein ARALYDRAFT_485296 | gbpln | Arabidopsis lyrata   | AT5G24430.1   Symbols:   Calcium-dependent protein kinase (CDPK) family protein   chr5:8339390-8342913 REVERSE LENGTH=594        | 597 | 594 | 0         | 99.5  | 85.9 | 92.0 |
| Rsa1.0_00130.1.g6240.t1 | #                                                                                                                                                                                                                                                                                                                                                                                                                                                                                                                                                                                                    | #   | #   | #         | #     | #    | #    | -                                      | ----  | ----                 | AT3G49390.2   Symbols: CID10   CTC-interacting domain 10   chr3:18314901-18317658 REVERSE LENGTH=353                             | 39  | 353 | 2.00E-11  | 905.1 | 76.9 | 84.6 |

|                         |                                                                                                                                                                                                                                                                                                                                                                                                                                                                                                                                                                                             |      |      |           |       |      |      |                                                          |       |                      |                                                                                                                                |      |     |           |       |      |      |
|-------------------------|---------------------------------------------------------------------------------------------------------------------------------------------------------------------------------------------------------------------------------------------------------------------------------------------------------------------------------------------------------------------------------------------------------------------------------------------------------------------------------------------------------------------------------------------------------------------------------------------|------|------|-----------|-------|------|------|----------------------------------------------------------|-------|----------------------|--------------------------------------------------------------------------------------------------------------------------------|------|-----|-----------|-------|------|------|
| Rsa1.0_00130.1.g6241.t1 | ref NP_190508.1  CTC-interacting domain 10 protein [Arabidopsis thaliana] gi 79314662 ref NP_001030833.1  CTC-interacting domain 10 protein [Arabidopsis thaliana] gi 12324442 gb AA521182.1 AC012329_9 putative RNA-binding protein; 38450-35693 [Arabidopsis thaliana] gi 6723409 emb CAB66418.1  RNA-binding-like protein [Arabidopsis thaliana] gi 222424104 dbj BAH20012.1  AT3G49390 [Arabidopsis thaliana] gi 332645014 gb AEE78535.1  CTC-interacting domain 10 protein [Arabidopsis thaliana] gi 332645015 gb AEE78536.1  CTC-interacting domain 10 protein [Arabidopsis thaliana] | 302  | 353  | 1.00E-126 | 116.9 | 77.2 | 85.1 | CTC-interacting domain 10 protein                        | gbpln | Arabidopsis thaliana | AT3G49390.2   Symbols: CID10   CTC-interacting domain 10   chr3:18314901-18317658 REVERSE LENGTH=353                           | 302  | 353 | 1.00E-128 | 116.9 | 77.2 | 85.1 |
| Rsa1.0_00130.1.g6242.t1 | gb AAG52185.1 AC012329_12 putative splicing factor; 53460-55514 [Arabidopsis thaliana]                                                                                                                                                                                                                                                                                                                                                                                                                                                                                                      | 289  | 295  | 1.00E-106 | 102.1 | 84.1 | 87.2 | putative splicing factor; 53460-55514                    | gbpln | Arabidopsis thaliana | AT3G49430.3   Symbols: SRp34a, SR34a, At-SR34a   SER/ARG-rich protein 34A   chr3:18332668-18334829 FORWARD LENGTH=300          | 289  | 300 | 1.00E-108 | 103.8 | 84.1 | 87.2 |
| Rsa1.0_00130.1.g6243.t1 | ref NP_192444.1  RING/U-box domain-containing protein [Arabidopsis thaliana] gi 7267295 emb CAB81077.1  putative protein [Arabidopsis thaliana] gi 332657108 gb AEE82508.1  RING/U-box domain-containing protein [Arabidopsis thaliana]                                                                                                                                                                                                                                                                                                                                                     | 223  | 206  | 2.00E-30  | 92.4  | 43.0 | 54.3 | RING/U-box domain-containing protein                     | gbpln | Arabidopsis thaliana | AT4G05350.1   Symbols:   RING/U-box superfamily protein   chr4:2726910-2727530 REVERSE LENGTH=206                              | 223  | 206 | 5.00E-33  | 92.4  | 43.0 | 54.3 |
| Rsa1.0_00131.1.g6244.t1 | #                                                                                                                                                                                                                                                                                                                                                                                                                                                                                                                                                                                           | #    | #    | #         | #     | #    | #    | -                                                        | ----  | ----                 | #                                                                                                                              | #    | #   | #         | #     | #    | #    |
| Rsa1.0_00131.1.g6245.t1 | #                                                                                                                                                                                                                                                                                                                                                                                                                                                                                                                                                                                           | #    | #    | #         | #     | #    | #    | -                                                        | ----  | ----                 | #                                                                                                                              | #    | #   | #         | #     | #    | #    |
| Rsa1.0_00131.1.g6246.t1 | ref XP_002882559.1  hypothetical protein ARALYDRAFT_478135 [Arabidopsis lyrata subsp. lyrata] gi 297328399 gb EFH58818.1  hypothetical protein ARALYDRAFT_478135 [Arabidopsis lyrata subsp. lyrata]                                                                                                                                                                                                                                                                                                                                                                                         | 383  | 383  | 0         | 100.0 | 89.8 | 93.5 | hypothetical protein ARALYDRAFT_478135                   | gbpln | Arabidopsis lyrata   | AT3G07940.1   Symbols:   Calcium-dependent ARF-type GTPase activating protein family   chr3:2529542-2531368 FORWARD LENGTH=385 | 383  | 385 | 0         | 100.5 | 88.8 | 93.2 |
| Rsa1.0_00131.1.g6247.t1 | ref XP_002882562.1  hypothetical protein ARALYDRAFT_896969 [Arabidopsis lyrata subsp. lyrata] gi 297328402 gb EFH58821.1  hypothetical protein ARALYDRAFT_896969 [Arabidopsis lyrata subsp. lyrata]                                                                                                                                                                                                                                                                                                                                                                                         | 305  | 304  | 1.00E-156 | 99.7  | 93.4 | 96.1 | hypothetical protein ARALYDRAFT_896969                   | gbpln | Arabidopsis lyrata   | AT3G07950.1   Symbols:   rhomboid protein-related   chr3:2531982-2534277 FORWARD LENGTH=304                                    | 305  | 304 | 1.00E-157 | 99.7  | 92.1 | 95.7 |
| Rsa1.0_00131.1.g6248.t1 | ref XP_002882563.1  phosphatidylinositol-4-phosphate 5-kinase family protein [Arabidopsis lyrata subsp. lyrata] gi 297328403 gb EFH58822.1  phosphatidylinositol-4-phosphate 5-kinase family protein [Arabidopsis lyrata subsp. lyrata]                                                                                                                                                                                                                                                                                                                                                     | 714  | 715  | 0         | 100.1 | 95.4 | 97.8 | phosphatidylinositol-4-phosphate 5-kinase family protein | gbpln | Arabidopsis lyrata   | AT3G07960.1   Symbols:   Phosphatidylinositol-4-phosphate 5-kinase family protein   chr3:2535274-2538090 FORWARD LENGTH=715    | 714  | 715 | 0         | 100.1 | 94.8 | 97.6 |
| Rsa1.0_00131.1.g6249.t6 | gb AFJ66186.1  hypothetical protein 11M19.5 [Arabidopsis halleri]                                                                                                                                                                                                                                                                                                                                                                                                                                                                                                                           | 2683 | 1557 | 0         | 58.0  | 36.7 | 44.5 | hypothetical protein 11M19.5                             | gbpln | Arabidopsis halleri  | AT3G25270.1   Symbols:   Ribonuclease H-like superfamily protein   chr3:9203934-9204965 REVERSE LENGTH=343                     | 2683 | 343 | 4.00E-59  | 12.8  | 4.1  | 6.2  |
| Rsa1.0_00131.1.g6250.t1 | gb EOA21051.1  hypothetical protein CARUB_v10001392mg [Capsella rubella]                                                                                                                                                                                                                                                                                                                                                                                                                                                                                                                    | 310  | 334  | 5.00E-65  | 107.7 | 50.6 | 61.0 | hypothetical protein CARUB_v10001392mg                   | gbpln | Capsella rubella     | AT3G25080.1   Symbols:   Protein of unknown function (DUF626)   chr3:9137105-9137892 FORWARD LENGTH=171                        | 310  | 171 | 8.00E-40  | 55.2  | 30.0 | 36.5 |
| Rsa1.0_00131.1.g6251.t1 | ref XP_002884676.1  protein binding protein [Arabidopsis lyrata subsp. lyrata] gi 297330516 gb EFH60935.1  protein binding protein [Arabidopsis lyrata subsp. lyrata]                                                                                                                                                                                                                                                                                                                                                                                                                       | 748  | 778  | 0         | 104.0 | 86.2 | 91.4 | protein binding protein                                  | gbpln | Arabidopsis lyrata   | AT3G08020.1   Symbols:   PHD finger family protein   chr3:2557753-2561534 REVERSE LENGTH=779                                   | 748  | 779 | 0         | 104.1 | 85.7 | 91.2 |
| Rsa1.0_00131.1.g6252.t1 | gb EOA30873.1  hypothetical protein CARUB_v10014019mg [Capsella rubella]                                                                                                                                                                                                                                                                                                                                                                                                                                                                                                                    | 365  | 365  | 0         | 100.0 | 93.2 | 98.1 | hypothetical protein CARUB_v10014019mg                   | gbpln | Capsella rubella     | AT3G08030.1   Symbols:   Protein of unknown function, DUF642   chr3:2564191-2565819 FORWARD LENGTH=365                         | 365  | 365 | 0         | 100.0 | 91.8 | 97.3 |
| Rsa1.0_00131.1.g6253.t1 | ref XP_002884678.1  hypothetical protein ARALYDRAFT_478146 [Arabidopsis lyrata subsp. lyrata] gi 297330518 gb EFH60937.1  hypothetical protein ARALYDRAFT_478146 [Arabidopsis lyrata subsp. lyrata]                                                                                                                                                                                                                                                                                                                                                                                         | 529  | 530  | 0         | 100.2 | 82.4 | 92.2 | hypothetical protein ARALYDRAFT_478146                   | gbpln | Arabidopsis lyrata   | AT3G08040.2   Symbols: FRD3, MAN1, ATFRD3   MATE efflux family protein   chr3:2566593-2569397 REVERSE LENGTH=526               | 529  | 526 | 0         | 99.4  | 81.5 | 91.1 |



|                         |                                                                                                                                                                                                                                                                                                                                                                                                                                                                                                                                                                                                                                                                                                                                                                                                                      |     |     |           |       |      |      |                                           |       |                      |                                                                                                                                                                                                                                                           |     |     |           |       |      |      |
|-------------------------|----------------------------------------------------------------------------------------------------------------------------------------------------------------------------------------------------------------------------------------------------------------------------------------------------------------------------------------------------------------------------------------------------------------------------------------------------------------------------------------------------------------------------------------------------------------------------------------------------------------------------------------------------------------------------------------------------------------------------------------------------------------------------------------------------------------------|-----|-----|-----------|-------|------|------|-------------------------------------------|-------|----------------------|-----------------------------------------------------------------------------------------------------------------------------------------------------------------------------------------------------------------------------------------------------------|-----|-----|-----------|-------|------|------|
| Rsa1.0_00131.1.g6254.t1 | refXP_002884680.1  hypothetical protein ARALYDRAFT_478147 [Arabidopsis lyrata subsp. lyrata] gi 297330520 gb EFH60939.1                                                                                                                                                                                                                                                                                                                                                                                                                                                                                                                                                                                                                                                                                              | 314 | 342 | 1.00E-116 | 108.9 | 75.2 | 83.4 | hypothetical protein ARALYDRAFT_478147    | gbpln | Arabidopsis lyrata   | AT3G08500.1   Symbols: MYB83, AtMYB83   myb domain protein 83   chr3:2576958-2578072 REVERSE LENGTH=343                                                                                                                                                   | 314 | 343 | 1.00E-111 | 109.2 | 72.3 | 81.8 |
| Rsa1.0_00131.1.g6255.t1 | hypothetical protein ARALYDRAFT_478147 [Arabidopsis lyrata subsp. lyrata] ref NP_850540.1  E3 ubiquitin-protein ligase makorin [Arabidopsis thaliana] gi 42572319 ref NP_974255.1  E3 ubiquitin-protein ligase makorin [Arabidopsis thaliana] gi 75323660 sp Q6IDS6.1 C3H35_ARATH RecName: Full=E3 ubiquitin-protein ligase makorin; AltName: Full=Zinc finger CCH domain-containing protein 35; Short=AtC3H35 gi 17979277 gb AAL49864.1  unknown protein [Arabidopsis thaliana] gi 24030475 gb AAN41388.1  unknown protein [Arabidopsis thaliana] gi 332641117 gb AEE74638.1  E3 ubiquitin-protein ligase makorin [Arabidopsis thaliana] gi 332641118 gb AEE74639.1  E3 ubiquitin-protein ligase makorin [Arabidopsis thaliana] gb AAD26119.1 AF108123.1 phosphoinositide-specific phospholipase C [Brassica napus] | 364 | 323 | 1.00E-142 | 88.7  | 69.8 | 75.3 | E3 ubiquitin-protein ligase makorin       | gbpln | Arabidopsis thaliana | AT3G08505.1   Symbols:   zinc finger (CCH-type/C3HC4-type RING finger) family protein   chr3:2580603-2582043 REVERSE LENGTH=323                                                                                                                           | 364 | 323 | 1.00E-145 | 88.7  | 69.8 | 75.3 |
| Rsa1.0_00131.1.g6256.t1 | gb AAD26119.1 AF108123.1 phosphoinositide-specific phospholipase C [Brassica napus]                                                                                                                                                                                                                                                                                                                                                                                                                                                                                                                                                                                                                                                                                                                                  | 582 | 581 | 0         | 99.8  | 94.3 | 97.1 | phosphoinositide-specific phospholipase C | gbpln | Brassica napus       | AT3G08510.2   Symbols: ATPLC2, PLC2   phospholipase C 2   chr3:2582626-2585556 REVERSE LENGTH=581                                                                                                                                                         | 582 | 581 | 0         | 99.8  | 91.1 | 95.4 |
| Rsa1.0_00131.1.g6257.t1 | dbj BAJ33646.1  unnamed protein product [Thellungiella halophila]                                                                                                                                                                                                                                                                                                                                                                                                                                                                                                                                                                                                                                                                                                                                                    | 527 | 533 | 0         | 101.1 | 94.7 | 98.3 | unnamed protein product                   | ----  | ----                 | AT3G08550.1   Symbols: ELD1, ABI8, KOB1   elongation defective 1 protein / ELD1 protein   chr3:2596513-2599515 FORWARD LENGTH=533                                                                                                                         | 527 | 533 | 0         | 101.1 | 92.4 | 97.0 |
| Rsa1.0_00131.1.g6258.t1 | gb EOA36510.1  hypothetical protein CARUB_v10011291mg [Capsella rubella]                                                                                                                                                                                                                                                                                                                                                                                                                                                                                                                                                                                                                                                                                                                                             | 176 | 353 | 7.00E-31  | 200.6 | 46.0 | 64.8 | hypothetical protein CARUB_v10011291mg    | gbpln | Capsella rubella     | AT1G47790.1   Symbols:   F-box and associated interaction domains-containing protein   chr1:17600004-17601173 REVERSE LENGTH=389                                                                                                                          | 176 | 389 | 8.00E-32  | 221.0 | 46.6 | 63.1 |
| Rsa1.0_00131.1.g6259.t1 | gb AAP21180.1  At3g08610 [Arabidopsis thaliana]                                                                                                                                                                                                                                                                                                                                                                                                                                                                                                                                                                                                                                                                                                                                                                      | 65  | 73  | 2.00E-29  | 112.3 | 95.4 | 96.9 | At3g08610                                 | gbpln | Arabidopsis thaliana | AT3G08610.1   Symbols:   unknown protein; Has 40 Blast hits to 40 proteins in 15 species: Archae - 0; Bacteria - 0; Metazoa - 0; Fungi - 0; Plants - 40; Viruses - 0; Other Eukaryotes - 0 (source: NCBI BLink).   chr3:2616435-2616768 REVERSE LENGTH=65 | 65  | 65  | 6.00E-32  | 100.0 | 95.4 | 96.9 |
| Rsa1.0_00131.1.g6260.t1 | ref NP_187476.1  uncharacterized protein [Arabidopsis thaliana] gi 12322723 gb AAG51347.1 AC012562_8 unknown protein; 33915-34928 [Arabidopsis thaliana] gi 19698961 gb AAL91216.1  unknown protein [Arabidopsis thaliana] gi 22136296 gb AAM91226.1  unknown protein [Arabidopsis thaliana] gi 332641136 gb AEE74657.1  uncharacterized protein AT3G08640 [Arabidopsis thaliana] ref NP_974256.1  ZIP metal ion transporter-like protein [Arabidopsis thaliana] gi 310947322 sp Q9C9Z1.2 ZTP50_ARATH RecName: Full=Putative zinc transporter At3g08650 gi 332641138 gb AEE74659.1  ZIP metal ion transporter-like protein [Arabidopsis thaliana]                                                                                                                                                                    | 351 | 337 | 1.00E-138 | 96.0  | 74.4 | 81.5 | uncharacterized protein                   | gbpln | Arabidopsis thaliana | AT3G08640.1   Symbols:   Protein of unknown function (DUF3411)   chr3:2622992-2624005 FORWARD LENGTH=337                                                                                                                                                  | 351 | 337 | 1.00E-140 | 96.0  | 74.4 | 81.5 |
| Rsa1.0_00131.1.g6261.t1 | gi 310947322 sp Q9C9Z1.2 ZTP50_ARATH RecName: Full=Putative zinc transporter At3g08650 gi 332641138 gb AEE74659.1  ZIP metal ion transporter-like protein [Arabidopsis thaliana]                                                                                                                                                                                                                                                                                                                                                                                                                                                                                                                                                                                                                                     | 81  | 619 | 9.00E-20  | 764.2 | 60.5 | 69.1 | ZIP metal ion transporter-like protein    | gbpln | Arabidopsis thaliana | AT3G08650.2   Symbols:   ZIP metal ion transporter family   chr3:2624694-2627308 REVERSE LENGTH=619                                                                                                                                                       | 81  | 619 | 2.00E-22  | 764.2 | 60.5 | 69.1 |
| Rsa1.0_00131.1.g6262.t1 | # # # # # # # # -                                                                                                                                                                                                                                                                                                                                                                                                                                                                                                                                                                                                                                                                                                                                                                                                    | #   | #   | #         | #     | #    | #    | -                                         | ----  | ----                 | #                                                                                                                                                                                                                                                         | #   | #   | #         | #     | #    | #    |
| Rsa1.0_00131.1.g6263.t1 | emb CAA18485.1  putative protein [Arabidopsis thaliana] gi 3805857 emb CA21477.1  putative protein [Arabidopsis thaliana] gi 7270543 emb CAB81500.1  putative protein [Arabidopsis thaliana]                                                                                                                                                                                                                                                                                                                                                                                                                                                                                                                                                                                                                         | 222 | 527 | 2.00E-30  | 237.4 | 29.7 | 31.1 | putative protein                          | gbpln | Arabidopsis thaliana | AT4G35910.1   Symbols:   Adenine nucleotide alpha hydrolases-like superfamily protein   chr4:17008817-17011014 REVERSE LENGTH=458                                                                                                                         | 222 | 458 | 9.00E-33  | 206.3 | 29.7 | 31.1 |
| Rsa1.0_00131.1.g6264.t1 | gb EOA30171.1  hypothetical protein CARUB_v10013288mg [Capsella rubella]                                                                                                                                                                                                                                                                                                                                                                                                                                                                                                                                                                                                                                                                                                                                             | 587 | 595 | 0         | 101.4 | 91.1 | 95.7 | hypothetical protein CARUB_v10013288mg    | gbpln | Capsella rubella     | AT3G08650.2   Symbols:   ZIP metal ion transporter family   chr3:2624694-2627308 REVERSE LENGTH=619                                                                                                                                                       | 587 | 619 | 0         | 105.5 | 91.7 | 95.2 |

|                         |                                                                                                                                                                                                                                                                                                                                                                                                                                                                                                                                                                                                                                                                                                                                                                                                                                                                                                                                                                                                                                                                                                                                                                                                                                                                                                                                                                                                                                                                                                                                                                                                                                                                                                                                                                                                                                                                                                                                                                                                                                                                                                                                                                                                                                                                                                                                                                                                                                                                                                                                                                                                                                                                                                                                                                                                                                                                    |     |     |          |       |      |       |                                    |       |                      |                                                                                                                       |     |     |          |       |      |       |
|-------------------------|--------------------------------------------------------------------------------------------------------------------------------------------------------------------------------------------------------------------------------------------------------------------------------------------------------------------------------------------------------------------------------------------------------------------------------------------------------------------------------------------------------------------------------------------------------------------------------------------------------------------------------------------------------------------------------------------------------------------------------------------------------------------------------------------------------------------------------------------------------------------------------------------------------------------------------------------------------------------------------------------------------------------------------------------------------------------------------------------------------------------------------------------------------------------------------------------------------------------------------------------------------------------------------------------------------------------------------------------------------------------------------------------------------------------------------------------------------------------------------------------------------------------------------------------------------------------------------------------------------------------------------------------------------------------------------------------------------------------------------------------------------------------------------------------------------------------------------------------------------------------------------------------------------------------------------------------------------------------------------------------------------------------------------------------------------------------------------------------------------------------------------------------------------------------------------------------------------------------------------------------------------------------------------------------------------------------------------------------------------------------------------------------------------------------------------------------------------------------------------------------------------------------------------------------------------------------------------------------------------------------------------------------------------------------------------------------------------------------------------------------------------------------------------------------------------------------------------------------------------------------|-----|-----|----------|-------|------|-------|------------------------------------|-------|----------------------|-----------------------------------------------------------------------------------------------------------------------|-----|-----|----------|-------|------|-------|
| Rsa1.0_00131.1.g6265.t1 | <p>ref NP_187480.1  putative inactive receptor kinase [Arabidopsis thaliana]<br/> gi 42572323 ref NP_974257.1  putative inactive receptor kinase [Arabidopsis thaliana]<br/> gi 75333601 sp Q9C9Y8.1 Y3868_ARATH<br/> RecName: Full=Probable inactive receptor kinase At3g08680; Flags: Precursor<br/> gi 12322735 gb AAG51359.1 AC012562.20 putative protein kinase; 49514-51513 [Arabidopsis thaliana]<br/> gi 224589559 gb ACN59313.1  leucine-rich repeat receptor-like protein kinase [Arabidopsis thaliana]<br/> gi 332641141 gb AEE74662.1  putative inactive receptor kinase [Arabidopsis thaliana]<br/> gi 332641142 gb AEE74663.1  putative inactive receptor kinase [Arabidopsis thaliana]<br/> ref NP_398331.1  ubiquitin-conjugating enzyme E2 11 [Arabidopsis thaliana]<br/> gi 334185174 ref NP_001189841.1  ubiquitin-conjugating enzyme E2 11 [Arabidopsis thaliana]<br/> gi 297829396 ref XP_002882580.1  ubiquitin-conjugating enzyme 11 [Arabidopsis lyrata subsp. lyrata]<br/> gi 12643427 sp P35134.2 UBC11_ARATH<br/> RecName: Full=Ubiquitin-conjugating enzyme E2 11; AltName: Full=Ubiquitin carrier protein 11; AltName: Full=Ubiquitin-conjugating enzyme E2-17 kDa 11; AltName: Full=Ubiquitin-protein ligase 11<br/> gi 12322738 gb AAG51362.1 AC012562.23 putative ubiquitin conjugating enzyme; 52410-53412 [Arabidopsis thaliana]<br/> gi 17380790 gb AAL36225.1  putative E2, ubiquitin-conjugating enzyme UBC11 [Arabidopsis thaliana]<br/> gi 20259611 gb AAM14162.1  putative ubiquitin conjugating enzyme 11 (UBC11) [Arabidopsis thaliana]<br/> gi 21554241 gb AAM63316.1  E2, ubiquitin-conjugating enzyme UBC11 [Arabidopsis thaliana]<br/> gi 66354432 gb AAY44851.1  ubiquitinating enzyme [Arabidopsis thaliana]<br/> gi 110736468 dbj BAF00202.1  putative ubiquitin conjugating enzyme [Arabidopsis thaliana]<br/> gi 297328420 gb EFH58839.1  ubiquitin-conjugating enzyme 11 [Arabidopsis thaliana]<br/> ref NP_187484.1  serine/threonine protein kinase 2 [Arabidopsis thaliana]<br/> gi 30680612 ref NP_850543.1  serine/threonine protein kinase 2 [Arabidopsis thaliana]<br/> gi 21431798 sp Q39030.2 KPK2_ARATH<br/> RecName: Full=Serine/threonine-protein kinase AtPK2/ATPK19; AltName: Full=Ribosomal-protein S6 kinase homolog 2<br/> gi 12322721 gb AAG51345.1 AC012562.6 putative ribosomal-protein S6 kinase (ATPK19); 61330-59548 [Arabidopsis thaliana]<br/> gi 13272447 gb AAK17162.1 AF325094.1 putative ribosomal-protein S6 kinase (ATPK19) [Arabidopsis thaliana]<br/> gi 111074206 gb ABH04476.1  At3g08720 [Arabidopsis thaliana]<br/> gi 222422905 dbj BAH19439.1  AT3G08720 [Arabidopsis thaliana]<br/> gi 332641148 gb AEE74669.1  serine/threonine protein kinase 2 [Arabidopsis thaliana]<br/> gi 332641149 gb AEE74670.1  serine/threonine protein kinase 2 [Arabidopsis thaliana]</p> | 621 | 640 | 0        | 103.1 | 85.7 | 91.3  | putative inactive receptor kinase  | gbpln | Arabidopsis thaliana | AT3G08680.2   Symbols:   Leucine-rich repeat protein kinase family protein   chr:3:2638591-2640590 FORWARD LENGTH=640 | 621 | 640 | 0        | 103.1 | 85.7 | 91.3  |
| Rsa1.0_00131.1.g6266.t1 | <p>gi 12322738 gb AAG51362.1 AC012562.23 putative ubiquitin conjugating enzyme; 52410-53412 [Arabidopsis thaliana]<br/> gi 17380790 gb AAL36225.1  putative E2, ubiquitin-conjugating enzyme UBC11 [Arabidopsis thaliana]<br/> gi 20259611 gb AAM14162.1  putative ubiquitin conjugating enzyme 11 (UBC11) [Arabidopsis thaliana]<br/> gi 21554241 gb AAM63316.1  E2, ubiquitin-conjugating enzyme UBC11 [Arabidopsis thaliana]<br/> gi 66354432 gb AAY44851.1  ubiquitinating enzyme [Arabidopsis thaliana]<br/> gi 110736468 dbj BAF00202.1  putative ubiquitin conjugating enzyme [Arabidopsis thaliana]<br/> gi 297328420 gb EFH58839.1  ubiquitin-conjugating enzyme 11 [Arabidopsis thaliana]<br/> ref NP_187484.1  serine/threonine protein kinase 2 [Arabidopsis thaliana]<br/> gi 30680612 ref NP_850543.1  serine/threonine protein kinase 2 [Arabidopsis thaliana]<br/> gi 21431798 sp Q39030.2 KPK2_ARATH<br/> RecName: Full=Serine/threonine-protein kinase AtPK2/ATPK19; AltName: Full=Ribosomal-protein S6 kinase homolog 2<br/> gi 12322721 gb AAG51345.1 AC012562.6 putative ribosomal-protein S6 kinase (ATPK19); 61330-59548 [Arabidopsis thaliana]<br/> gi 13272447 gb AAK17162.1 AF325094.1 putative ribosomal-protein S6 kinase (ATPK19) [Arabidopsis thaliana]<br/> gi 111074206 gb ABH04476.1  At3g08720 [Arabidopsis thaliana]<br/> gi 222422905 dbj BAH19439.1  AT3G08720 [Arabidopsis thaliana]<br/> gi 332641148 gb AEE74669.1  serine/threonine protein kinase 2 [Arabidopsis thaliana]<br/> gi 332641149 gb AEE74670.1  serine/threonine protein kinase 2 [Arabidopsis thaliana]</p>                                                                                                                                                                                                                                                                                                                                                                                                                                                                                                                                                                                                                                                                                                                                                                                                                                                                                                                                                                                                                                                                                                                                                                                                                                                 | 148 | 148 | 2.00E-80 | 100.0 | 96.6 | 100.0 | ubiquitin-conjugating enzyme E2 11 | gbpln | Arabidopsis lyrata   | AT3G08690.2   Symbols: UBC11   ubiquitin-conjugating enzyme 11   chr:3:2641487-2642489 FORWARD LENGTH=148             | 148 | 148 | 5.00E-83 | 100.0 | 96.6 | 100.0 |
| Rsa1.0_00131.1.g6267.t1 | <p>gi 12322721 gb AAG51345.1 AC012562.6 putative ribosomal-protein S6 kinase (ATPK19); 61330-59548 [Arabidopsis thaliana]<br/> gi 13272447 gb AAK17162.1 AF325094.1 putative ribosomal-protein S6 kinase (ATPK19) [Arabidopsis thaliana]<br/> gi 111074206 gb ABH04476.1  At3g08720 [Arabidopsis thaliana]<br/> gi 222422905 dbj BAH19439.1  AT3G08720 [Arabidopsis thaliana]<br/> gi 332641148 gb AEE74669.1  serine/threonine protein kinase 2 [Arabidopsis thaliana]<br/> gi 332641149 gb AEE74670.1  serine/threonine protein kinase 2 [Arabidopsis thaliana]</p>                                                                                                                                                                                                                                                                                                                                                                                                                                                                                                                                                                                                                                                                                                                                                                                                                                                                                                                                                                                                                                                                                                                                                                                                                                                                                                                                                                                                                                                                                                                                                                                                                                                                                                                                                                                                                                                                                                                                                                                                                                                                                                                                                                                                                                                                                              | 437 | 471 | 0        | 107.8 | 82.8 | 88.8  | serine/threonine protein kinase 2  | gbpln | Arabidopsis thaliana | AT3G08720.2   Symbols: ATPK19, ATPK2   serine/threonine protein kinase 2   chr:3:2648625-2650407 REVERSE LENGTH=471   | 437 | 471 | 0        | 107.8 | 82.8 | 88.8  |

|                         |                                                                                                                                                                                                                                                                                                                                                                                                                                                                                                                                                                  |     |      |           |       |      |      |                                                               |       |                         |                                                                                                                                                                                                                                                                                                                                                                                           |     |      |           |       |      |      |
|-------------------------|------------------------------------------------------------------------------------------------------------------------------------------------------------------------------------------------------------------------------------------------------------------------------------------------------------------------------------------------------------------------------------------------------------------------------------------------------------------------------------------------------------------------------------------------------------------|-----|------|-----------|-------|------|------|---------------------------------------------------------------|-------|-------------------------|-------------------------------------------------------------------------------------------------------------------------------------------------------------------------------------------------------------------------------------------------------------------------------------------------------------------------------------------------------------------------------------------|-----|------|-----------|-------|------|------|
| Rsa1.0_00131.1.g6268.t1 | gb ACD79975.1  serine/threonine-<br>protein kinase ATPK19/ATPK2<br>[Brassica rapa]                                                                                                                                                                                                                                                                                                                                                                                                                                                                               | 461 | 458  | 0         | 99.3  | 94.1 | 96.3 | serine/threonine-<br>protein kinase<br>ATPK19/ATPK2           | gbpln | Brassica<br>rapa        | AT3G08730.1   Symbols: ATPK1, ATPK6,<br>ATS6K1, PK6, PK1, S6K1   protein-serine<br>kinase   chr3:2651581-2653363 REVERSE<br>LENGTH=465                                                                                                                                                                                                                                                    | 461 | 465  | 0         | 100.9 | 86.3 | 93.9 |
| Rsa1.0_00131.1.g6269.t7 | #                                                                                                                                                                                                                                                                                                                                                                                                                                                                                                                                                                | #   | #    | #         | #     | #    | -    | -                                                             | ----  | ----                    | #                                                                                                                                                                                                                                                                                                                                                                                         | #   | #    | #         | #     | #    | #    |
| Rsa1.0_00131.1.g6270.t1 | #                                                                                                                                                                                                                                                                                                                                                                                                                                                                                                                                                                | #   | #    | #         | #     | #    | -    | -                                                             | ----  | ----                    | #                                                                                                                                                                                                                                                                                                                                                                                         | #   | #    | #         | #     | #    | #    |
| Rsa1.0_00131.1.g6271.t1 | #                                                                                                                                                                                                                                                                                                                                                                                                                                                                                                                                                                | #   | #    | #         | #     | #    | -    | -                                                             | ----  | ----                    | #                                                                                                                                                                                                                                                                                                                                                                                         | #   | #    | #         | #     | #    | #    |
| Rsa1.0_00131.1.g6272.t1 | gb EOA32525.1  hypothetical protein<br>CARUB_v10015806mg [Capsella rubella]                                                                                                                                                                                                                                                                                                                                                                                                                                                                                      | 622 | 613  | 0         | 98.6  | 81.4 | 96.5 | hypothetical protein<br>CARUB_v10015806mg                     | gbpln | Capsella<br>rubella     | AT3G08790.1   Symbols:   ENTH/VHS/GAT<br>family protein   chr3:2667881-2671001<br>FORWARD LENGTH=607                                                                                                                                                                                                                                                                                      | 622 | 607  | 0         | 97.6  | 81.8 | 86.2 |
| Rsa1.0_00131.1.g6273.t1 | ref XP_002884700.1  RAPTOR1B<br>[Arabidopsis lyrata subsp. lyrata]<br>gi 297330540 gb EFH60959.1 <br>RAPTOR1B [Arabidopsis lyrata subsp.<br>lyrata]                                                                                                                                                                                                                                                                                                                                                                                                              | 179 | 1344 | 6.00E-13  | 750.8 | 22.3 | 24.6 | RAPTOR1B                                                      | gbpln | Arabidopsis<br>lyrata   | AT3G08850.1   Symbols: RAPTOR1B,<br>ATRATOR1B, RAPTOR1   HEAT repeat<br>.WD domain, G-beta repeat protein protein  <br>chr3:2686978-2694911 REVERSE<br>LENGTH=1344                                                                                                                                                                                                                        | 179 | 1344 | 2.00E-15  | 750.8 | 22.3 | 24.6 |
| Rsa1.0_00131.1.g6274.t1 | ref NP_187499.1  concanavalin A-like<br>lectin protein kinase-like protein<br>[Arabidopsis thaliana]<br>gi 7537552 sp Q9SR87.1 LRK61_ARAT<br>H RecName: Full=Probable L-type<br>lectin-domain containing receptor<br>kinase VL1; Short=LeCRK-VL1; Flags:<br>Precursor                                                                                                                                                                                                                                                                                            | 685 | 693  | 0         | 101.2 | 75.2 | 86.1 | concanavalin A-like<br>lectin protein kinase-<br>like protein | gbpln | Arabidopsis<br>thaliana | AT3G08870.1   Symbols:   Concanavalin A-<br>like lectin protein kinase family protein  <br>chr3:2700500-2702581 REVERSE<br>LENGTH=693                                                                                                                                                                                                                                                     | 685 | 693  | 0         | 101.2 | 75.2 | 86.1 |
| Rsa1.0_00131.1.g6275.t3 | gi 6403505 gb AAF07845.1 ACO10871_21<br>putative serine/threonine protein kinase<br>[Arabidopsis thaliana]<br>gi 332641169 gb AEE74689.1 <br>concanavalin A-like lectin protein<br>kinase-like protein [Arabidopsis<br>thaliana]<br>ref NP_187500.2  uncharacterized<br>protein [Arabidopsis thaliana]<br>gi 51969186 dbj BAD43285.1 <br>hypothetical protein [Arabidopsis<br>thaliana] gi 51971667 dbj BAD44498.1 <br>hypothetical protein [Arabidopsis<br>thaliana] gi 332641169 gb AEE74690.1 <br>uncharacterized protein AT3G08880<br>[Arabidopsis thaliana] | 171 | 201  | 3.00E-70  | 117.5 | 80.1 | 90.1 | uncharacterized<br>protein                                    | gbpln | Arabidopsis<br>thaliana | AT3G08880.1   Symbols:   unknown protein;<br>BEST Arabidopsis thaliana protein match is:<br>unknown protein (TAIR:AT5G01570.1). Has<br>177 Blast hits to 175 proteins in 60 species:<br>Archae - 4; Bacteria - 33; Metazoa - 18;<br>Fungi - 11; Plants - 59; Viruses - 0; Other<br>Eukaryotes - 52 (source: NCBI BLINK).  <br>chr3:2703169-2704165 FORWARD<br>LENGTH=201                  | 171 | 201  | 1.00E-72  | 117.5 | 80.1 | 90.1 |
| Rsa1.0_00131.1.g6276.t1 | gb EOA31033.1  hypothetical protein<br>CARUB_v10014182mg [Capsella rubella]                                                                                                                                                                                                                                                                                                                                                                                                                                                                                      | 320 | 324  | 1.00E-158 | 101.3 | 88.8 | 92.8 | hypothetical protein<br>CARUB_v10014182mg                     | gbpln | Capsella<br>rubella     | AT3G08910.1   Symbols:   DNAJ heat shock<br>family protein   chr3:2710402-2711811<br>REVERSE LENGTH=323                                                                                                                                                                                                                                                                                   | 320 | 323  | 1.00E-159 | 100.9 | 88.4 | 93.1 |
| Rsa1.0_00131.1.g6277.t1 | ref XP_002871919.1 <br>phospholipase/carboxylesterase family<br>protein [Arabidopsis lyrata subsp.<br>lyrata] gi 297317756 gb EFH48178.1 <br>phospholipase/carboxylesterase family<br>protein [Arabidopsis lyrata subsp.<br>lyrata]                                                                                                                                                                                                                                                                                                                              | 210 | 252  | 7.00E-85  | 120.0 | 75.7 | 84.8 | phospholipase/carboxyl<br>esterase family protein             | gbpln | Arabidopsis<br>lyrata   | AT5G20060.3   Symbols:   alpha/beta-<br>Hydrolases superfamily protein  <br>chr5:6776800-6779447 FORWARD<br>LENGTH=252                                                                                                                                                                                                                                                                    | 210 | 252  | 1.00E-86  | 120.0 | 75.7 | 84.8 |
| Rsa1.0_00131.1.g6278.t1 | gb EOA31912.1  hypothetical protein<br>CARUB_v10015141mg [Capsella rubella]                                                                                                                                                                                                                                                                                                                                                                                                                                                                                      | 716 | 523  | 0         | 73.0  | 57.4 | 62.2 | hypothetical protein<br>CARUB_v10015141mg                     | gbpln | Capsella<br>rubella     | AT3G09000.1   Symbols:   proline-rich<br>family protein   chr3:2746014-2748326 FORWARD<br>LENGTH=541                                                                                                                                                                                                                                                                                      | 716 | 541  | 0         | 75.6  | 58.4 | 63.5 |
| Rsa1.0_00131.1.g6279.t1 | ref NP_566341.1  protein kinase domain-<br>containing protein [Arabidopsis thaliana]<br>gi 21537226 gb AAM61567.1  putative<br>receptor ser thr protein kinase<br>[Arabidopsis thaliana]<br>gi 332641187 gb AEE74708.1  protein<br>kinase domain-containing protein<br>[Arabidopsis thaliana]                                                                                                                                                                                                                                                                    | 390 | 393  | 0         | 100.8 | 87.2 | 93.1 | protein kinase domain-<br>containing protein                  | gbpln | Arabidopsis<br>thaliana | AT3G09010.1   Symbols:   Protein kinase<br>superfamily protein   chr3:2750285-2752086<br>FORWARD LENGTH=393                                                                                                                                                                                                                                                                               | 390 | 393  | 0         | 100.8 | 87.2 | 93.1 |
| Rsa1.0_00131.1.g6280.t1 | gb EOA30698.1  hypothetical protein<br>CARUB_v10013835mg [Capsella rubella]                                                                                                                                                                                                                                                                                                                                                                                                                                                                                      | 396 | 409  | 0         | 103.3 | 83.3 | 92.2 | hypothetical protein<br>CARUB_v10013835mg                     | gbpln | Capsella<br>rubella     | AT3G09020.1   Symbols:   alpha 1,4-<br>glycosyltransferase family protein  <br>chr3:2753307-2754542 FORWARD<br>LENGTH=411                                                                                                                                                                                                                                                                 | 396 | 411  | 0         | 103.8 | 84.3 | 92.2 |
| Rsa1.0_00131.1.g6281.t1 | ref NP_974262.1  uncharacterized<br>protein [Arabidopsis thaliana]<br>gi 48310269 gb AAT41787.1  At3g09032<br>[Arabidopsis thaliana]<br>gi 52627121 gb AAU84687.1  At3g09032<br>[Arabidopsis thaliana]<br>gi 332641190 gb AEE74711.1 <br>uncharacterized protein AT3G09032<br>[Arabidopsis thaliana]                                                                                                                                                                                                                                                             | 136 | 146  | 2.00E-39  | 107.4 | 72.8 | 82.4 | uncharacterized<br>protein                                    | gbpln | Arabidopsis<br>thaliana | AT3G09032.1   Symbols:   unknown protein;<br>BEST Arabidopsis thaliana protein match is:<br>unknown protein (TAIR:AT5G01225.1). Has<br>35333 Blast hits to 34131 proteins in 2444<br>species: Archae - 798; Bacteria - 22429;<br>Metazoa - 974; Fungi - 991; Plants - 531;<br>Viruses - 0; Other Eukaryotes - 9610<br>(source: NCBI BLINK).   chr3:2757605-<br>2758045 REVERSE LENGTH=146 | 136 | 146  | 6.00E-42  | 107.4 | 72.8 | 82.4 |

|                         |                                                                                                                                                                                                                                                                                                                                                                                                                                                                    |      |      |           |       |      |      |                                                |       |                      |                                                                                                                                                                                                                                                                                                                                                                                                                                                                                    |      |      |           |       |      |      |
|-------------------------|--------------------------------------------------------------------------------------------------------------------------------------------------------------------------------------------------------------------------------------------------------------------------------------------------------------------------------------------------------------------------------------------------------------------------------------------------------------------|------|------|-----------|-------|------|------|------------------------------------------------|-------|----------------------|------------------------------------------------------------------------------------------------------------------------------------------------------------------------------------------------------------------------------------------------------------------------------------------------------------------------------------------------------------------------------------------------------------------------------------------------------------------------------------|------|------|-----------|-------|------|------|
| Rsa1.0_00131.1.g6282.t1 | ref NP_187517.1  uncharacterized protein [Arabidopsis thaliana] gi 5923670 gb AAD56321.1 AC009326.8 unknown protein [Arabidopsis thaliana] gi 44681474 gb AAS47677.1  At3g09050 [Arabidopsis thaliana] gi 62320254 dbj BAD94528.1  hypothetical protein [Arabidopsis thaliana] gi 332641193 gb AEE74714.1  uncharacterized protein AT3G09050 [Arabidopsis thaliana]                                                                                                | 263  | 258  | 1.00E-107 | 98.1  | 80.2 | 87.8 | uncharacterized protein                        | gbpln | Arabidopsis thaliana | AT3G09050.1   Symbols:   unknown protein; FUNCTIONS IN: molecular_function unknown; INVOLVED IN: biological_process unknown; LOCATED IN: chloroplast thylakoid membrane, chloroplast; EXPRESSED IN: 21 plant structures; EXPRESSED DURING: 13 growth stages; Has 120 Blast hits to 120 proteins in 47 species: Archae - 4; Bacteria - 10; Metazoa - 33; Fungi - 2; Plants - 44; Viruses - 0; Other Eukaryotes - 27 (source: NCBI BLINK).   chr3:2764860-2765907 FORWARD LENGTH=258 | 263  | 258  | 1.00E-109 | 98.1  | 80.2 | 87.8 |
| Rsa1.0_00131.1.g6283.t1 | ref XP_002884711.1  transducin family protein [Arabidopsis lyrata subsp. lyrata] gi 297330551 gb EFH60970.1  transducin family protein [Arabidopsis lyrata subsp. lyrata]                                                                                                                                                                                                                                                                                          | 1090 | 1010 | 0         | 92.7  | 67.3 | 73.5 | transducin family protein                      | gbpln | Arabidopsis lyrata   | AT3G09080.1   Symbols:   Transducin/WD40 repeat-like superfamily protein   chr3:2776259-2781785 REVERSE LENGTH=1026                                                                                                                                                                                                                                                                                                                                                                | 1090 | 1026 | 0         | 94.1  | 66.8 | 74.0 |
| Rsa1.0_00131.1.g6284.t1 | gb EOA32721.1  hypothetical protein CARUB_v10016025mg [Capsella rubella]                                                                                                                                                                                                                                                                                                                                                                                           | 112  | 112  | 3.00E-54  | 100.0 | 92.9 | 96.4 | hypothetical protein CARUB_v10016025mg         | gbpln | Capsella rubella     | AT3G09085.1   Symbols:   Protein of unknown function (DUF962)   chr3:2782238-2782576 FORWARD LENGTH=112                                                                                                                                                                                                                                                                                                                                                                            | 112  | 112  | 8.00E-55  | 100.0 | 89.3 | 94.6 |
| Rsa1.0_00131.1.g6285.t1 | gb EOA29845.1  hypothetical protein CARUB_v10012938mg [Capsella rubella]                                                                                                                                                                                                                                                                                                                                                                                           | 884  | 896  | 0         | 101.4 | 88.9 | 93.4 | hypothetical protein CARUB_v10012938mg         | gbpln | Capsella rubella     | AT3G09090.1   Symbols:   DEX1   defective in exine formation protein (DEX1)   chr3:2782912-2787552 REVERSE LENGTH=896                                                                                                                                                                                                                                                                                                                                                              | 884  | 896  | 0         | 101.4 | 88.0 | 92.9 |
| Rsa1.0_00131.1.g6286.t1 | ref XP_002884720.1  60S acidic ribosomal protein P0 [Arabidopsis lyrata subsp. lyrata] gi 297330550 gb EFH60979.1  60S acidic ribosomal protein P0 [Arabidopsis lyrata subsp. lyrata]                                                                                                                                                                                                                                                                              | 323  | 322  | 1.00E-152 | 99.7  | 82.4 | 84.5 | 60S acidic ribosomal protein P0                | gbpln | Arabidopsis lyrata   | AT3G09200.1   Symbols:   Ribosomal protein L10 family protein   chr3:2823364-2825020 REVERSE LENGTH=320                                                                                                                                                                                                                                                                                                                                                                            | 323  | 320  | 1.00E-154 | 99.1  | 81.7 | 84.5 |
| Rsa1.0_00131.1.g6287.t1 | gb EOA32588.1  hypothetical protein CARUB_v10015881mg [Capsella rubella]                                                                                                                                                                                                                                                                                                                                                                                           | 332  | 329  | 1.00E-158 | 99.1  | 86.1 | 93.4 | hypothetical protein CARUB_v10015881mg         | gbpln | Capsella rubella     | AT3G09210.1   Symbols:   PTAC13   plastid transcriptionally active 13   chr3:2825422-2826850 REVERSE LENGTH=333                                                                                                                                                                                                                                                                                                                                                                    | 332  | 333  | 1.00E-155 | 100.3 | 88.0 | 94.0 |
| Rsa1.0_00131.1.g6288.t1 | gb AEI89705.1  transcription factor MYB1 protein [Brassica rapa subsp. chinensis]                                                                                                                                                                                                                                                                                                                                                                                  | 399  | 387  | 0         | 97.0  | 88.2 | 89.5 | transcription factor MYB1 protein              | gbpln | Brassica rapa        | AT3G09230.1   Symbols:   AMYB1, MYB1   myb domain protein 1   chr3:2833460-2835134 FORWARD LENGTH=393                                                                                                                                                                                                                                                                                                                                                                              | 399  | 393  | 1.00E-144 | 98.5  | 68.7 | 76.9 |
| Rsa1.0_00131.1.g6289.t1 | ref XP_002884723.1  hypothetical protein ARALYDRAFT_317726 [Arabidopsis lyrata subsp. lyrata] gi 297330563 gb EFH60982.1  hypothetical protein ARALYDRAFT_317726 [Arabidopsis lyrata subsp. lyrata]                                                                                                                                                                                                                                                                | 488  | 506  | 0         | 103.7 | 89.1 | 93.4 | hypothetical protein ARALYDRAFT_317726         | gbpln | Arabidopsis lyrata   | AT3G09240.1   Symbols:   Protein kinase protein with tetratricopeptide repeat domain   chr3:2835668-2837956 REVERSE LENGTH=477                                                                                                                                                                                                                                                                                                                                                     | 488  | 477  | 0         | 97.7  | 85.7 | 89.5 |
| Rsa1.0_00131.1.g6290.t1 | ref NP_566347.1  nuclear transport factor 2 (NTF2)-like protein [Arabidopsis thaliana] gi 6478918 gb AAF14023.1 AC011436.7 unknown protein [Arabidopsis thaliana] gi 17380786 gb AAL36223.1  unknown protein [Arabidopsis thaliana] gi 20259607 gb AAM14160.1  unknown protein [Arabidopsis thaliana] gi 2159281.1 gb AAM64760.1  unknown [Arabidopsis thaliana] gi 332641221 gb AEE74742.1  nuclear transport factor 2 (NTF2)-like protein [Arabidopsis thaliana] | 243  | 244  | 1.00E-118 | 100.4 | 84.4 | 91.8 | nuclear transport factor 2 (NTF2)-like protein | gbpln | Arabidopsis thaliana | AT3G09250.1   Symbols:   Nuclear transport factor 2 (NTF2) family protein   chr3:2839080-2840294 FORWARD LENGTH=244                                                                                                                                                                                                                                                                                                                                                                | 243  | 244  | 1.00E-120 | 100.4 | 84.4 | 91.8 |
| Rsa1.0_00131.1.g6291.t1 | # # # # # # # # - ---- ---- # # # # # # #                                                                                                                                                                                                                                                                                                                                                                                                                          |      |      |           |       |      |      |                                                |       |                      |                                                                                                                                                                                                                                                                                                                                                                                                                                                                                    |      |      |           |       |      |      |
| Rsa1.0_00131.1.g6292.t1 | ref XP_002884741.1  lipin family protein [Arabidopsis lyrata subsp. lyrata] gi 297330581 gb EFH61000.1  lipin family protein [Arabidopsis lyrata subsp. lyrata]                                                                                                                                                                                                                                                                                                    | 834  | 875  | 0         | 104.9 | 85.0 | 90.6 | lipin family protein                           | gbpln | Arabidopsis lyrata   | AT3G09560.3   Symbols:   Lipin family protein   chr3:2934953-2938673 REVERSE LENGTH=904                                                                                                                                                                                                                                                                                                                                                                                            | 834  | 904  | 0         | 108.4 | 83.9 | 89.6 |
| Rsa1.0_00131.1.g6293.t2 | ref XP_002882629.1  myb family transcription factor [Arabidopsis lyrata subsp. lyrata] gi 297328469 gb EFH58888.1  myb family transcription factor [Arabidopsis lyrata subsp. lyrata]                                                                                                                                                                                                                                                                              | 288  | 297  | 1.00E-113 | 103.1 | 79.2 | 84.7 | myb family transcription factor                | gbpln | Arabidopsis lyrata   | AT3G09600.1   Symbols:   Homeodomain-like superfamily protein   chr3:2946459-2948270 FORWARD LENGTH=298                                                                                                                                                                                                                                                                                                                                                                            | 288  | 298  | 1.00E-115 | 103.5 | 79.2 | 84.7 |
| Rsa1.0_00131.1.g6294.t1 | ref XP_002882630.1  60S ribosomal protein L4/L1 [Arabidopsis lyrata subsp. lyrata] gi 297328470 gb EFH58889.1  60S ribosomal protein L4/L1 [Arabidopsis lyrata subsp. lyrata]                                                                                                                                                                                                                                                                                      | 406  | 406  | 0         | 100.0 | 94.8 | 97.5 | 60S ribosomal protein L4/L1                    | gbpln | Arabidopsis lyrata   | AT3G09630.1   Symbols:   Ribosomal protein L4/L1 family   chr3:2953813-2955444 FORWARD LENGTH=406                                                                                                                                                                                                                                                                                                                                                                                  | 406  | 406  | 0         | 100.0 | 94.6 | 97.0 |
| Rsa1.0_00131.1.g6295.t1 | gb EOA31293.1  hypothetical protein CARUB_v10014466mg [Capsella rubella]                                                                                                                                                                                                                                                                                                                                                                                           | 271  | 251  | 1.00E-129 | 92.6  | 83.8 | 87.8 | hypothetical protein CARUB_v10014466mg         | gbpln | Capsella rubella     | AT3G09640.2   Symbols:   APX2, APX1B   ascorbate peroxidase 2   chr3:2956301-2958163 FORWARD LENGTH=251                                                                                                                                                                                                                                                                                                                                                                            | 271  | 251  | 1.00E-131 | 92.6  | 83.0 | 87.8 |

|                         |                                                                                                                                                                                                                                                                                                                                                                                                                                                                                                                                                                                                                                     |     |     |           |       |       |       |                                                 |       |                      |                                                                                                                                                                                                                                                                           |     |     |           |       |      |      |
|-------------------------|-------------------------------------------------------------------------------------------------------------------------------------------------------------------------------------------------------------------------------------------------------------------------------------------------------------------------------------------------------------------------------------------------------------------------------------------------------------------------------------------------------------------------------------------------------------------------------------------------------------------------------------|-----|-----|-----------|-------|-------|-------|-------------------------------------------------|-------|----------------------|---------------------------------------------------------------------------------------------------------------------------------------------------------------------------------------------------------------------------------------------------------------------------|-----|-----|-----------|-------|------|------|
| Rsa1.0_00131.1.g6296.t1 | gb EOA21773.1  hypothetical protein CARUB_v10002234mg [Capsella rubella]                                                                                                                                                                                                                                                                                                                                                                                                                                                                                                                                                            | 136 | 136 | 7.00E-72  | 100.0 | 100.0 | 100.0 | hypothetical protein CARUB_v10002234mg          | gbpln | Capsella rubella     | AT5G02960.1   Symbols:   Ribosomal protein S12/S23 family protein   chr5:693280-694396 REVERSE LENGTH=142                                                                                                                                                                 | 136 | 142 | 7.00E-74  | 104.4 | 99.3 | 99.3 |
| Rsa1.0_00131.1.g6297.t1 | ref NP_187580.1  alpha/beta-hydrolase domain-containing protein [Arabidopsis thaliana]<br>gi 79313171 ref NP_001030665.1  alpha/beta-hydrolase domain-containing protein [Arabidopsis thaliana]<br>gi 6682247 gb AAF23299.1 AC016661_24 unknown protein [Arabidopsis thaliana]<br>gi 45237181 gb AAS55571.1  At3g09690 [Arabidopsis thaliana]<br>gi 110740722 dbj BAE98461.1  hypothetical protein [Arabidopsis thaliana]<br>gi 332641277 gb AEE74798.1  alpha/beta-hydrolase domain-containing protein [Arabidopsis thaliana]<br>gi 332641278 gb AEE74799.1  alpha/beta-hydrolase domain-containing protein [Arabidopsis thaliana] | 518 | 527 | 0         | 101.7 | 79.2  | 88.4  | alpha/beta-hydrolase domain-containing protein  | gbpln | Arabidopsis thaliana | AT3G09690.2   Symbols:   alpha/beta-Hydrolases superfamily protein   chr3:2972356-2974592 FORWARD LENGTH=527                                                                                                                                                              | 518 | 527 | 0         | 101.7 | 79.2 | 88.4 |
| Rsa1.0_00131.1.g6298.t1 | dbj BAJ34352.1  unnamed protein product [Thellungiella halophila]<br>ref NP_187583.2  DEAD-box ATP-dependent RNA helicase 57 [Arabidopsis thaliana]<br>gi 75328099 sp Q84TG1.1 RH57_ARATH RecName: Full=DEAD-box ATP-dependent RNA helicase 57<br>gi 29028778 gb AAO64768.1  At3g09720 [Arabidopsis thaliana]<br>gi 110742885 dbj BAE99340.1  RNA helicase like protein [Arabidopsis thaliana]<br>gi 332641282 gb AEE74803.1  DEAD-box ATP-dependent RNA helicase 57 [Arabidopsis thaliana]                                                                                                                                         | 555 | 449 | 1.00E-176 | 80.9  | 62.7  | 67.6  | unnamed protein product                         | ----  | ----                 | AT3G09710.1   Symbols: IQD1   IQ-domain 1   chr3:2976834-2978900 REVERSE LENGTH=454                                                                                                                                                                                       | 555 | 454 | 1.00E-166 | 81.8  | 58.7 | 65.2 |
| Rsa1.0_00131.1.g6299.t1 | gi 29028778 gb AAO64768.1  At3g09720 [Arabidopsis thaliana]<br>gi 110742885 dbj BAE99340.1  RNA helicase like protein [Arabidopsis thaliana]<br>gi 332641282 gb AEE74803.1  DEAD-box ATP-dependent RNA helicase 57 [Arabidopsis thaliana]                                                                                                                                                                                                                                                                                                                                                                                           | 542 | 541 | 0         | 99.8  | 87.3  | 93.5  | DEAD-box ATP-dependent RNA helicase 57          | gbpln | Arabidopsis thaliana | AT3G09720.1   Symbols:   P-loop containing nucleoside triphosphate hydrolases superfamily protein   chr3:2980483-2983268 REVERSE LENGTH=541                                                                                                                               | 542 | 541 | 0         | 99.8  | 87.3 | 93.5 |
| Rsa1.0_00131.1.g6300.t2 | gb AAF23302.1 AC016661_27 hypothetical protein [Arabidopsis thaliana]                                                                                                                                                                                                                                                                                                                                                                                                                                                                                                                                                               | 412 | 405 | 1.00E-137 | 98.3  | 73.3  | 80.8  | hypothetical protein                            | gbpln | Arabidopsis thaliana | AT3G09730.1   Symbols:   unknown protein; Has 1171 Blast hits to 1097 proteins in 212 species: Archae - 14; Bacteria - 83; Metazoa - 583; Fungi - 105; Plants - 149; Viruses - 14; Other Eukaryotes - 223 (source: NCBI BLINK).   chr3:2984018-2986260 FORWARD LENGTH=397 | 412 | 397 | 1.00E-137 | 96.4  | 71.8 | 79.4 |
| Rsa1.0_00131.1.g6301.t1 | gb EOA31812.1  hypothetical protein CARUB_v10015035mg [Capsella rubella]                                                                                                                                                                                                                                                                                                                                                                                                                                                                                                                                                            | 70  | 73  | 3.00E-15  | 104.3 | 90.0  | 95.7  | hypothetical protein CARUB_v10015035mg          | gbpln | Capsella rubella     | AT2G37120.1   Symbols:   S1FA-like DNA-binding protein   chr2:15594250-15594815 REVERSE LENGTH=76                                                                                                                                                                         | 70  | 76  | 8.00E-14  | 108.6 | 75.7 | 88.6 |
| Rsa1.0_00131.1.g6302.t2 | gb EOA29627.1  hypothetical protein CARUB_v10014405mg [Capsella rubella]                                                                                                                                                                                                                                                                                                                                                                                                                                                                                                                                                            | 340 | 265 | 2.33E-156 | 77.9  | 75.0  | 77.1  | hypothetical protein CARUB_v10014405mg          | gbpln | Capsella rubella     | AT3G09740.1   Symbols: SYP71, ATSYP71   syntaxin of plants 71   chr3:2989615-2991354 FORWARD LENGTH=266                                                                                                                                                                   | 340 | 266 | 2.33E-156 | 78.2  | 74.7 | 77.1 |
| Rsa1.0_00131.1.g6303.t1 | gb EOA30784.1  hypothetical protein CARUB_v10013928mg [Capsella rubella]                                                                                                                                                                                                                                                                                                                                                                                                                                                                                                                                                            | 379 | 384 | 1.00E-139 | 101.3 | 68.3  | 73.4  | hypothetical protein CARUB_v10013928mg          | gbpln | Capsella rubella     | AT3G09770.1   Symbols:   RING/U-box superfamily protein   chr3:2996402-2997835 REVERSE LENGTH=388                                                                                                                                                                         | 379 | 388 | 1.00E-120 | 102.4 | 64.4 | 68.6 |
| Rsa1.0_00131.1.g6304.t1 | ref XP_002884782.1  hypothetical protein ARALYDRAFT_317819 [Arabidopsis lyrata subsp. lyrata]<br>gi 297330622 gb EFH6104.1  hypothetical protein ARALYDRAFT_317819 [Arabidopsis lyrata subsp. lyrata]                                                                                                                                                                                                                                                                                                                                                                                                                               | 79  | 79  | 1.00E-14  | 100.0 | 55.7  | 69.6  | hypothetical protein ARALYDRAFT_317819          | gbpln | Arabidopsis lyrata   | AT3G10195.1   Symbols:   Putative membrane lipoprotein   chr3:3156630-3156976 REVERSE LENGTH=81                                                                                                                                                                           | 79  | 81  | 2.00E-14  | 102.5 | 51.9 | 62.0 |
| Rsa1.0_00131.1.g6305.t1 | gb EOA31328.1  hypothetical protein CARUB_v10014499mg [Capsella rubella]                                                                                                                                                                                                                                                                                                                                                                                                                                                                                                                                                            | 143 | 243 | 1.00E-16  | 169.9 | 29.4  | 35.0  | hypothetical protein CARUB_v10014499mg          | gbpln | Capsella rubella     | AT3G10220.1   Symbols:   tubulin folding cofactor B   chr3:3161977-3164037 FORWARD LENGTH=243                                                                                                                                                                             | 143 | 243 | 1.00E-18  | 169.9 | 28.7 | 34.3 |
| Rsa1.0_00131.1.g6306.t1 | ref NP_194099.1  SRPBCC ligand-binding domain-containing protein [Arabidopsis thaliana]<br>gi 13605714 gb AAK32850.1 AF361838_1 AT4g23680/F9D16_150 [Arabidopsis thaliana]<br>gi 4454037 emb CAA23034.1  putative major latex protein [Arabidopsis thaliana]<br>gi 7269216 emb CAB79323.1  putative major latex protein [Arabidopsis thaliana]<br>gi 22655454 gb AAM98319.1  AT4g23680/F9D16_150 [Arabidopsis thaliana]<br>gi 332659394 gb AEE84794.1  SRPBCC ligand-binding domain-containing protein [Arabidopsis thaliana]                                                                                                       | 151 | 151 | 4.00E-68  | 100.0 | 80.1  | 90.1  | SRPBCC ligand-binding domain-containing protein | gbpln | Arabidopsis thaliana | AT4G23680.1   Symbols:   Polyketide cyclase/dehydrase and lipid transport superfamily protein   chr4:12336416-12337417 REVERSE LENGTH=151                                                                                                                                 | 151 | 151 | 1.00E-70  | 100.0 | 80.1 | 90.1 |

|                          |                                                                                                                                                                                                                                                                                                                                                                                                                                                                                                                                                                                         |      |      |           |       |      |      |                                                                     |       |                      |                                                                                                                                                 |      |      |           |       |      |      |
|--------------------------|-----------------------------------------------------------------------------------------------------------------------------------------------------------------------------------------------------------------------------------------------------------------------------------------------------------------------------------------------------------------------------------------------------------------------------------------------------------------------------------------------------------------------------------------------------------------------------------------|------|------|-----------|-------|------|------|---------------------------------------------------------------------|-------|----------------------|-------------------------------------------------------------------------------------------------------------------------------------------------|------|------|-----------|-------|------|------|
| Rsa1.0_00131.1.g6307.t1  | refXP_002875076.1  hypothetical protein ARALYDRAFT_904347 [Arabidopsis lyrata subsp. lyrata] gi 297320914 gb EFH51335.1  hypothetical protein ARALYDRAFT_904347 [Arabidopsis lyrata subsp. lyrata]                                                                                                                                                                                                                                                                                                                                                                                      | 151  | 151  | 7.00E-66  | 100.0 | 78.1 | 86.1 | hypothetical protein ARALYDRAFT_904347                              | gbpln | Arabidopsis lyrata   | AT2G01520.1   Symbols: MLP328   MLP-like protein 328   chr2:235992-236881 FORWARD LENGTH=151                                                    | 151  | 151  | 3.00E-68  | 100.0 | 78.1 | 85.4 |
| Rsa1.0_00131.1.g6308.t2  | refNP_176271.1  RNA-directed DNA polymerase (reverse transcriptase)-related protein [Arabidopsis thaliana] gi 332195602 gb AE33723.1  RNA-directed DNA polymerase (reverse transcriptase)-related protein [Arabidopsis thaliana]                                                                                                                                                                                                                                                                                                                                                        | 237  | 289  | 2.00E-44  | 121.9 | 38.4 | 55.3 | RNA-directed DNA polymerase (reverse transcriptase)-related protein | gbpln | Arabidopsis thaliana | AT1G60720.1   Symbols:   RNA-directed DNA polymerase (reverse transcriptase)-related family protein   chr1:22357072-22357941 FORWARD LENGTH=289 | 237  | 289  | 7.00E-47  | 121.9 | 38.4 | 55.3 |
| Rsa1.0_00131.1.g6309.t1  | refNP_566370.1  uncharacterized protein [Arabidopsis thaliana] gi 42572351 refNP_974271.1  uncharacterized protein [Arabidopsis thaliana] gi 15809982 gb AAL06918.1  AT3g10250/F14P13.15 [Arabidopsis thaliana] gi 18958054 gb AAL79600.1  AT3g10250/F14P13.15 [Arabidopsis thaliana] gi 21536630 gb AAM60962.1  unknown [Arabidopsis thaliana] gi 222423631 dbj BAH19784.1  AT3G10250 [Arabidopsis thaliana] gi 332641356 gb AEE74877.1  uncharacterized protein AT3G10250 [Arabidopsis thaliana] gi 332641357 gb AEE74878.1  uncharacterized protein AT3G10250 [Arabidopsis thaliana] | 338  | 324  | 1.00E-148 | 95.9  | 83.7 | 88.5 | uncharacterized protein                                             | gbpln | Arabidopsis thaliana | AT3G10250.2   Symbols:   Plant protein 1589 of unknown function   chr3:3168371-3170418 REVERSE LENGTH=324                                       | 338  | 324  | 1.00E-151 | 95.9  | 83.7 | 88.5 |
| Rsa1.0_00131.1.g6310.t1  | gb EOA30978.1  hypothetical protein CARUB_v10014124mg, partial [Capsella rubella]                                                                                                                                                                                                                                                                                                                                                                                                                                                                                                       | 574  | 337  | 1.00E-170 | 58.7  | 53.3 | 54.9 | hypothetical protein CARUB_v10014124mg, partial                     | gbpln | Capsella rubella     | AT3G10290.1   Symbols:   Nucleotide-sugar transporter family protein   chr3:3183511-3185324 REVERSE LENGTH=355                                  | 574  | 355  | 1.00E-172 | 61.8  | 53.1 | 55.1 |
| Rsa1.0_00131.1.g6311.t17 | refNP_187641.2  putative calcium-binding protein CML49 [Arabidopsis thaliana] gi 75331395 sp Q8W4L0.1 CML49_ARAT H RecName: Full=Probable calcium-binding protein CML49; AltName: Full=Calmodulin-like protein 49 gi 17064844 gb AAL32576.1  Unknown protein [Arabidopsis thaliana] gi 50897258 gb AAT85768.1  At3g10300 [Arabidopsis thaliana] gi 332641365 gb AEE74886.1  putative calcium-binding protein CML49 [Arabidopsis thaliana]                                                                                                                                               | 424  | 335  | 1.00E-106 | 79.0  | 46.5 | 48.6 | putative calcium-binding protein CML49                              | gbpln | Arabidopsis thaliana | AT3G10300.3   Symbols:   Calcium-binding EF-hand family protein   chr3:3186436-3188071 FORWARD LENGTH=335                                       | 424  | 335  | 1.00E-108 | 79.0  | 46.5 | 48.6 |
| Rsa1.0_00131.1.g6312.t1  | refXP_002882663.1  anion-transporting ATPase family protein [Arabidopsis lyrata subsp. lyrata] gi 297328503 gb EFH58922.1  anion-transporting ATPase family protein [Arabidopsis lyrata subsp. lyrata]                                                                                                                                                                                                                                                                                                                                                                                  | 406  | 410  | 0         | 101.0 | 93.1 | 95.1 | anion-transporting ATPase family protein                            | gbpln | Arabidopsis lyrata   | AT3G10350.1   Symbols:   P-loop containing nucleoside triphosphate hydrolases superfamily protein   chr3:3208310-3210678 FORWARD LENGTH=411     | 406  | 411  | 0         | 101.2 | 93.1 | 95.1 |
| Rsa1.0_00131.1.g6313.t3  | refXP_002884791.1  hypothetical protein ARALYDRAFT_897214 [Arabidopsis lyrata subsp. lyrata] gi 297330631 gb EFH61050.1  hypothetical protein ARALYDRAFT_897214 [Arabidopsis lyrata subsp. lyrata]                                                                                                                                                                                                                                                                                                                                                                                      | 1076 | 1053 | 0         | 97.9  | 89.4 | 93.3 | hypothetical protein ARALYDRAFT_897214                              | gbpln | Arabidopsis lyrata   | AT3G10380.1   Symbols: SEC8, ATSEC8   subunit of exocyst complex 8   chr3:3219922-3228356 REVERSE LENGTH=1053                                   | 1076 | 1053 | 0         | 97.9  | 89.4 | 93.5 |
| Rsa1.0_00131.1.g6314.t1  | refNP_187652.1  carboxypeptidase [Arabidopsis thaliana] gi 20455475 sp P32826.2 SCP49_ARATH RecName: Full=Serine carboxypeptidase-like 49; Flags: Precursor gi 12322792 gb AAG51389.1 AC011560.21 putative serine carboxypeptidase precursor: 109294-111839 [Arabidopsis thaliana] gi 20147199 gb AAM10315.1  AT3g10410/F13M14.32 [Arabidopsis thaliana] gi 23506193 gb AAN31108.1  AT3g10410/F13M14.32 [Arabidopsis thaliana] gi 332641381 gb AEE74902.1  serine carboxypeptidase-like 49 [Arabidopsis thaliana]                                                                       | 521  | 516  | 0         | 99.0  | 81.8 | 87.3 | carboxypeptidase                                                    | gbpln | Arabidopsis thaliana | AT3G10410.1   Symbols: SCPL49, CPY   SERINE CARBOXYPEPTIDASE-LIKE 49   chr3:3235518-3238063 REVERSE LENGTH=516                                  | 521  | 516  | 0         | 99.0  | 81.8 | 87.3 |

|                         |                                                                                                                                                                                                                                                                                                                                                                                                                                                                                                                                                                                                                                                                      |     |      |           |       |      |      |                                                     |       |                      |                                                                                                                                                                                                                                                                                                                                                                   |     |     |           |       |      |      |
|-------------------------|----------------------------------------------------------------------------------------------------------------------------------------------------------------------------------------------------------------------------------------------------------------------------------------------------------------------------------------------------------------------------------------------------------------------------------------------------------------------------------------------------------------------------------------------------------------------------------------------------------------------------------------------------------------------|-----|------|-----------|-------|------|------|-----------------------------------------------------|-------|----------------------|-------------------------------------------------------------------------------------------------------------------------------------------------------------------------------------------------------------------------------------------------------------------------------------------------------------------------------------------------------------------|-----|-----|-----------|-------|------|------|
| Rsa1.0_00131.1.g6315.t1 | gb[EOA32369.1] hypothetical protein CARUB_v10015636mg [Capsella rubella]                                                                                                                                                                                                                                                                                                                                                                                                                                                                                                                                                                                             | 639 | 688  | 0         | 107.7 | 90.6 | 94.4 | hypothetical protein CARUB_v10015636mg              | gbpln | Capsella rubella     | AT3G10420.2   Symbols: SPD1   P-loop containing nucleoside triphosphate hydrolases superfamily protein   chr3:3239307-3242274 FORWARD LENGTH=684                                                                                                                                                                                                                  | 639 | 684 | 0         | 107.0 | 91.1 | 94.2 |
| Rsa1.0_00131.1.g6316.t1 | ref[NP_187487.1] F-box protein [Arabidopsis thaliana]<br>gi 75333597 sp Q9C9Y4.1 FB136_ARATH RecName: Full=F-box protein At3g08750<br>gi 12322733 gb AAG51357.1 AC012562_18 hypothetical protein; 68748-67639 [Arabidopsis thaliana]<br>gi 67633624 gb AA78736.1  F-box family protein [Arabidopsis thaliana]<br>gi 332641152 gb AEE74673.1  F-box protein [Arabidopsis thaliana]                                                                                                                                                                                                                                                                                    | 379 | 369  | 3.00E-95  | 97.4  | 53.0 | 66.2 | F-box protein                                       | gbpln | Arabidopsis thaliana | AT3G08750.1   Symbols:   F-box and associated interaction domains-containing protein   chr3:2656716-2657825 REVERSE LENGTH=369                                                                                                                                                                                                                                    | 379 | 369 | 8.00E-98  | 97.4  | 53.0 | 66.2 |
| Rsa1.0_00132.1.g6317.t1 | gb AAC32226.1  putative non-LTR retroelement reverse transcriptase [Arabidopsis thaliana]                                                                                                                                                                                                                                                                                                                                                                                                                                                                                                                                                                            | 699 | 1529 | 1.00E-149 | 218.7 | 40.9 | 59.7 | putative non-LTR retroelement reverse transcriptase | gbpln | Arabidopsis thaliana | AT3G24255.1   Symbols:   RNA-directed DNA polymerase (reverse transcriptase)-related family protein   chr3:8789471-8793208 FORWARD LENGTH=746                                                                                                                                                                                                                     | 699 | 746 | 1.00E-46  | 106.7 | 18.2 | 28.3 |
| Rsa1.0_00132.1.g6318.t1 | ref[NP_192187.1] Ent-copalyl diphosphate synthase [Arabidopsis thaliana]<br>gi 62900384 sp Q38802.1 KSA_ARATH RecName: Full=Ent-copalyl diphosphate synthase, chloroplastic; Short=AtCPS; Short=Ent-CDP synthase; AltName: Full=Ent-kaurene synthase A; Short=KSA; AltName: Full=Protein GA REQUIRING 1; Flags: Precursor<br>gi 5711330 gb AA53632.1  ent-kaurene synthetase A [Arabidopsis thaliana]<br>gi 4263508 gb AAD15334.1  ent-kaurene synthetase A [Arabidopsis thaliana]<br>gi 7269763 emb CAB77763.1  ent-kaurene synthetase A-like protein [Arabidopsis thaliana]<br>gi 332656829 gb AEE82229.1  Ent-copalyl diphosphate synthase [Arabidopsis thaliana] | 816 | 802  | 0         | 98.3  | 81.5 | 86.4 | Ent-copalyl diphosphate synthase                    | gbpln | Arabidopsis thaliana | AT4G02780.1   Symbols: GA1, ABC33, ATCPS1, CPS, CPS1   Terpenoid cyclases/Protein prenyltransferases superfamily protein   chr4:1237881-1244766 REVERSE LENGTH=802                                                                                                                                                                                                | 816 | 802 | 0         | 98.3  | 81.5 | 86.4 |
| Rsa1.0_00132.1.g6319.t1 | gb[EOA21585.1] hypothetical protein CARUB_v10001997mg [Capsella rubella]                                                                                                                                                                                                                                                                                                                                                                                                                                                                                                                                                                                             | 207 | 202  | 1.00E-108 | 97.6  | 93.7 | 95.7 | hypothetical protein CARUB_v10001997mg              | gbpln | Capsella rubella     | AT4G02770.1   Symbols: PSAD-1   photosystem I subunit D-1   chr4:1229247-1229873 REVERSE LENGTH=208                                                                                                                                                                                                                                                               | 207 | 208 | 1.00E-109 | 100.5 | 93.7 | 96.6 |
| Rsa1.0_00132.1.g6320.t1 | ref[NP_001190662.1] F-box protein [Arabidopsis thaliana]<br>gi 332656827 gb AEE82227.1  F-box protein [Arabidopsis thaliana]                                                                                                                                                                                                                                                                                                                                                                                                                                                                                                                                         | 459 | 551  | 1.00E-157 | 120.0 | 66.2 | 78.4 | F-box protein                                       | gbpln | Arabidopsis thaliana | AT4G02760.3   Symbols:   RNI-like superfamily protein   chr4:1224336-1227857 REVERSE LENGTH=551                                                                                                                                                                                                                                                                   | 459 | 551 | 1.00E-160 | 120.0 | 66.2 | 78.4 |
| Rsa1.0_00132.1.g6321.t1 | gb AAC67331.1  putative non-LTR retroelement reverse transcriptase [Arabidopsis thaliana]                                                                                                                                                                                                                                                                                                                                                                                                                                                                                                                                                                            | 670 | 1449 | 5.00E-45  | 216.3 | 14.8 | 21.5 | putative non-LTR retroelement reverse transcriptase | gbpln | Arabidopsis thaliana | AT5G19270.1   Symbols:   unknown protein; BEST Arabidopsis thaliana protein match is: unknown protein (TAIR:AT4G03566.1); Has 30201 Blast hits to 17322 proteins in 780 species: Archae - 12; Bacteria - 1396; Metazoa - 17338; Fungi - 3422; Plants - 5037; Viruses - 0; Other Eukaryotes - 2996 (source: NCBI BLINK).   chr5:6485617-6487009 REVERSE LENGTH=365 | 670 | 365 | 3.00E-28  | 54.5  | 8.5  | 12.1 |
| Rsa1.0_00132.1.g6322.t1 | ref[NP_192183.2] F-box protein SKIP17 [Arabidopsis thaliana]<br>gi 122223794 sp Q0WR09.1 SKI17_ARATH RecName: Full=F-box protein SKIP17; AltName: Full=SKP1-interacting partner 17<br>gi 110736714 dbj BAF00320.1  hypothetical protein [Arabidopsis thaliana]<br>gi 332656823 gb AEE82223.1  F-box protein SKIP17 [Arabidopsis thaliana]                                                                                                                                                                                                                                                                                                                            | 509 | 479  | 1.00E-163 | 94.1  | 62.5 | 69.7 | F-box protein SKIP17                                | gbpln | Arabidopsis thaliana | AT4G02740.1   Symbols:   F-box/RNI-like superfamily protein   chr4:1217756-1220834 REVERSE LENGTH=479                                                                                                                                                                                                                                                             | 509 | 479 | 1.00E-166 | 94.1  | 62.5 | 69.7 |
| Rsa1.0_00132.1.g6323.t1 | ref[XP_002888603.1] predicted protein [Arabidopsis lyrata subsp. lyrata]<br>gi 297334444 gb EFH64862.1  predicted protein [Arabidopsis lyrata subsp. lyrata]                                                                                                                                                                                                                                                                                                                                                                                                                                                                                                         | 126 | 718  | 1.00E-24  | 569.8 | 55.6 | 58.7 | predicted protein                                   | gbpln | Arabidopsis lyrata   | AT1G67510.1   Symbols:   Leucine-rich repeat protein kinase family protein   chr1:25297477-25300184 REVERSE LENGTH=719                                                                                                                                                                                                                                            | 126 | 719 | 6.00E-27  | 570.6 | 54.8 | 58.7 |
| Rsa1.0_00132.1.g6324.t1 | ref[NP_849820.1] dormancy/auxin associated protein [Arabidopsis thaliana]<br>gi 12321756 gb AAG50916.1 AC069159_17 unknown protein [Arabidopsis thaliana]<br>gi 332195242 gb AEE33363.1  dormancy/auxin associated protein [Arabidopsis thaliana]                                                                                                                                                                                                                                                                                                                                                                                                                    | 132 | 140  | 3.00E-54  | 106.1 | 88.6 | 94.7 | dormancy/auxin associated protein                   | gbpln | Arabidopsis thaliana | AT1G56220.3   Symbols:   Dormancy/auxin associated family protein   chr1:21043414-21044469 FORWARD LENGTH=140                                                                                                                                                                                                                                                     | 132 | 140 | 6.00E-57  | 106.1 | 88.6 | 94.7 |

|                         |                                                                                                                                                                                                     |      |      |           |       |      |      |                                           |       |                      |                                                                                                                                                                                                                                                                                                                                                                                                                                                                                                                                  |      |      |           |       |      |      |
|-------------------------|-----------------------------------------------------------------------------------------------------------------------------------------------------------------------------------------------------|------|------|-----------|-------|------|------|-------------------------------------------|-------|----------------------|----------------------------------------------------------------------------------------------------------------------------------------------------------------------------------------------------------------------------------------------------------------------------------------------------------------------------------------------------------------------------------------------------------------------------------------------------------------------------------------------------------------------------------|------|------|-----------|-------|------|------|
| Rsa1.0_00132.1.g6325.t1 | gb EOA20700.1  hypothetical protein CARUB_v10001014mg [Capsella rubella]                                                                                                                            | 376  | 429  | 3.00E-86  | 114.1 | 42.6 | 44.4 | hypothetical protein CARUB_v10001014mg    | gbpln | Capsella rubella     | AT4G02720.1   Symbols:   unknown protein; FUNCTIONS IN: molecular_function unknown; INVOLVED IN: biological_process unknown; EXPRESSED IN: 25 plant structures; EXPRESSED DURING: 14 growth stages; CONTAINS InterPro DOMAIN/s: Protein of unknown function DUF926 (InterPro:IPR009269); Has 30201 Blast hits to 17322 proteins in 780 species: Archae - 12; Bacteria - 1396; Metazoa - 17338; Fungi - 3422; Plants - 5037; Viruses - 0; Other Eukaryotes - 2996 (source: NCBI BLink).   chr4:1204545-1205813 REVERSE LENGTH=422 | 376  | 422  | 1.00E-79  | 112.2 | 40.4 | 43.6 |
| Rsa1.0_00132.1.g6326.t1 | ref XP_002872822.1  hypothetical protein ARALYDRAFT_911940 [Arabidopsis lyrata subsp. lyrata] gi 297318659 gb EFH49081.1  hypothetical protein ARALYDRAFT_911940 [Arabidopsis lyrata subsp. lyrata] | 227  | 205  | 2.00E-72  | 90.3  | 67.0 | 70.5 | hypothetical protein ARALYDRAFT_911940    | gbpln | Arabidopsis lyrata   | AT4G02715.1   Symbols:   unknown protein; Has 30201 Blast hits to 17322 proteins in 780 species: Archae - 12; Bacteria - 1396; Metazoa - 17338; Fungi - 3422; Plants - 5037; Viruses - 0; Other Eukaryotes - 2996 (source: NCBI BLink).   chr4:1202170-1202787 REVERSE LENGTH=205                                                                                                                                                                                                                                                | 227  | 205  | 1.00E-71  | 90.3  | 66.1 | 70.5 |
| Rsa1.0_00132.1.g6327.t1 | gb EOA19816.1  hypothetical protein CARUB_v10000062mg [Capsella rubella]                                                                                                                            | 1147 | 1214 | 0         | 105.8 | 75.3 | 87.1 | hypothetical protein CARUB_v10000062mg    | gbpln | Capsella rubella     | AT4G02710.1   Symbols:   Kinase interacting (KIP1-like) family protein   chr4:1193516-1197061 REVERSE LENGTH=1111                                                                                                                                                                                                                                                                                                                                                                                                                | 1147 | 1111 | 0         | 96.9  | 69.0 | 78.7 |
| Rsa1.0_00132.1.g6328.t1 | gb ABA01552.1  sulfate transporter [Raphanus sativus] gi 83026562 gb ABB96299.1  sulfate transporter RSultr3.2A [Raphanus sativus]                                                                  | 629  | 651  | 0         | 103.5 | 98.6 | 98.9 | sulfate transporter                       | gbpln | Raphanus sativus     | AT4G02700.1   Symbols: SULTR3.2   sulfate transporter 3;2   chr4:1189062-1193325 FORWARD LENGTH=646                                                                                                                                                                                                                                                                                                                                                                                                                              | 629  | 646  | 0         | 102.7 | 87.3 | 94.0 |
| Rsa1.0_00132.1.g6329.t1 | gb EOA21179.1  hypothetical protein CARUB_v10001524mg [Capsella rubella]                                                                                                                            | 177  | 309  | 5.00E-17  | 174.6 | 25.4 | 29.4 | hypothetical protein CARUB_v10001524mg    | gbpln | Capsella rubella     | AT4G02690.1   Symbols:   Bax inhibitor-1 family protein   chr4:1186023-1187534 FORWARD LENGTH=248                                                                                                                                                                                                                                                                                                                                                                                                                                | 177  | 248  | 3.00E-19  | 140.1 | 26.6 | 28.8 |
| Rsa1.0_00132.1.g6330.t1 | gb AAD32898.1  putative retroelement pol polyprotein [Arabidopsis thaliana]                                                                                                                         | 1378 | 1307 | 0         | 94.8  | 59.1 | 73.9 | putative retroelement pol polyprotein     | gbpln | Arabidopsis thaliana | AT4G23160.1   Symbols: CRK8   cysteine-rich RLK (RECEPTOR-like protein kinase) 8   chr4:12129485-12134086 FORWARD LENGTH=1262                                                                                                                                                                                                                                                                                                                                                                                                    | 1378 | 1262 | 1.00E-103 | 91.6  | 14.2 | 21.9 |
| Rsa1.0_00132.1.g6331.t1 | gb EOA21988.1  hypothetical protein CARUB_v10002509mg [Capsella rubella]                                                                                                                            | 253  | 650  | 2.00E-58  | 256.9 | 47.0 | 60.1 | hypothetical protein CARUB_v10002509mg    | gbpln | Capsella rubella     | AT4G01740.1   Symbols:   Cysteine/Histidine-rich C1 domain family protein   chr4:753422-755456 FORWARD LENGTH=652                                                                                                                                                                                                                                                                                                                                                                                                                | 253  | 652  | 3.00E-59  | 257.7 | 46.6 | 58.1 |
| Rsa1.0_00132.1.g6332.t1 | gb AAG51228.1 AC035249_3 Tam3-like transposon protein; 93317-95488 [Arabidopsis thaliana] gi 12323055 gb AAG51515.1 AC068324_3 hAT-element transposase, putative [Arabidopsis thaliana]             | 662  | 723  | 0         | 109.2 | 56.3 | 72.7 | Tam3-like transposon protein; 93317-95488 | gbpln | Arabidopsis thaliana | AT3G42170.1   Symbols:   BED zinc finger hAT family dimerisation domain   chr3:14321838-14323928 FORWARD LENGTH=696                                                                                                                                                                                                                                                                                                                                                                                                              | 662  | 696  | 5.00E-44  | 105.1 | 20.7 | 38.5 |
| Rsa1.0_00132.1.g6333.t1 | gb EOA19666.1  hypothetical protein CARUB_v10003318mg [Capsella rubella]                                                                                                                            | 595  | 608  | 0         | 102.2 | 80.5 | 88.4 | hypothetical protein CARUB_v10003318mg    | gbpln | Capsella rubella     | AT4G02650.1   Symbols:   ENTH/ANTH/VHS superfamily protein   chr4:1156539-1158543 FORWARD LENGTH=611                                                                                                                                                                                                                                                                                                                                                                                                                             | 595  | 611  | 0         | 102.7 | 80.3 | 89.6 |
| Rsa1.0_00132.1.g6334.t1 | dbj BAJ34632.1  unnamed protein product [Thellungiella halophila]                                                                                                                                   | 385  | 419  | 1.00E-160 | 108.8 | 86.8 | 92.2 | unnamed protein product                   | ----  | ----                 | AT4G02640.2   Symbols: BZO2H1   bZIP transcription factor family protein   chr4:1154031-1156085 FORWARD LENGTH=417                                                                                                                                                                                                                                                                                                                                                                                                               | 385  | 417  | 1.00E-160 | 108.3 | 83.4 | 90.6 |
| Rsa1.0_00132.1.g6335.t1 | ref XP_002874905.1  kinase family protein [Arabidopsis lyrata subsp. lyrata] gi 297320742 gb EFH51164.1  kinase family protein [Arabidopsis lyrata subsp. lyrata]                                   | 492  | 492  | 0         | 100.0 | 87.4 | 92.9 | kinase family protein                     | gbpln | Arabidopsis lyrata   | AT4G02630.1   Symbols:   Protein kinase superfamily protein   chr4:1151683-1153161 FORWARD LENGTH=492                                                                                                                                                                                                                                                                                                                                                                                                                            | 492  | 492  | 0         | 100.0 | 86.0 | 92.1 |



|                         |                                                                                                                                                                                                                                                                                                                                                                                                                                                                                                                                                                                                                                                                                                                                                                                                                                                                                                                                                                                                                                                                                                                                                                                                                                                                                                                                                                                                                                                                                                                                                   |     |     |           |       |      |       |                                                 |       |                      |                                                                                                                                        |     |     |           |       |      |       |
|-------------------------|---------------------------------------------------------------------------------------------------------------------------------------------------------------------------------------------------------------------------------------------------------------------------------------------------------------------------------------------------------------------------------------------------------------------------------------------------------------------------------------------------------------------------------------------------------------------------------------------------------------------------------------------------------------------------------------------------------------------------------------------------------------------------------------------------------------------------------------------------------------------------------------------------------------------------------------------------------------------------------------------------------------------------------------------------------------------------------------------------------------------------------------------------------------------------------------------------------------------------------------------------------------------------------------------------------------------------------------------------------------------------------------------------------------------------------------------------------------------------------------------------------------------------------------------------|-----|-----|-----------|-------|------|-------|-------------------------------------------------|-------|----------------------|----------------------------------------------------------------------------------------------------------------------------------------|-----|-----|-----------|-------|------|-------|
| Rsa1.0_00132.1.g6336.t1 | ref NP_192171.1  V-type proton ATPase subunit F [Arabidopsis thaliana]<br>gi 12585530 sp Q92QX4.1 VATF_ARATH<br>RecName: Full=V-type proton ATPase subunit F; Short=V-ATPase subunit F; AltName: Full=V-ATPase 14 kDa subunit; AltName: Full=Vacuolar H(+)-ATPase subunit F; AltName: Full=Vacuolar proton pump subunit F<br>gi 3892056 gb AAC78269.1  putative vacuolar ATPase [Arabidopsis thaliana]<br>gi 7269022 emb CAB80755.1  putative vacuolar ATPase [Arabidopsis thaliana]<br>gi 17529086 gb AAL38753.1  putative vacuolar ATPase [Arabidopsis thaliana]<br>gi 21436129 gb AAM5131.1  putative vacuolar ATPase [Arabidopsis thaliana]<br>gi 21536536 gb AAM60868.1  putative vacuolar ATPase [Arabidopsis thaliana]<br>gi 332656805 gb AEE82205.1  V-type proton ATPase subunit F [Arabidopsis thaliana]                                                                                                                                                                                                                                                                                                                                                                                                                                                                                                                                                                                                                                                                                                                                | 128 | 128 | 3.00E-66  | 100.0 | 96.9 | 100.0 | V-type proton ATPase subunit F                  | gbpln | Arabidopsis thaliana | AT4G02620.1   Symbols: vacuolar ATPase subunit F family protein   chr4:1149419-1151132 REVERSE LENGTH=128                              | 128 | 128 | 6.00E-69  | 100.0 | 96.9 | 100.0 |
| Rsa1.0_00132.1.g6337.t1 | ref NP_192170.1  tryptophan synthase alpha chain [Arabidopsis thaliana]<br>gi 75097570 sp O22765.2 TRPA1_ARATH<br>RecName: Full=Tryptophan synthase alpha chain; AltName: Full=Indole synthase; AltName: Full=Indole-3-glycerol-phosphate lyase<br>gi 3892048 gb AAC78257.1  putative tryptophan synthase alpha 1-like protein [Arabidopsis thaliana]<br>gi 7269021 emb CAB80754.1  tryptophan synthase alpha 1-like protein [Arabidopsis thaliana]<br>gi 26450413 dbj BAC42321.1  putative tryptophan synthase alpha 1 [Arabidopsis thaliana]<br>gi 29824243 gb AAP04082.1  putative tryptophan synthase alpha 1 chain [Arabidopsis thaliana]<br>gi 332656804 gb AEE82204.1  tryptophan synthase alpha chain [Arabidopsis thaliana]<br>ref NP_192169.1  MLO-like protein 1 [Arabidopsis thaliana]<br>gi 79324987 ref NP_001031578.1  MLO-like protein 1 [Arabidopsis thaliana]<br>gi 6166555 sp O49621.1 MLO1_ARATH<br>RecName: Full=MLO-like protein 1; Short=AtMlo1; AltName: Full=MLO protein homolog 1; Short=AtMlo-H1<br>gi 2765817 emb CAB08605.1  AtMlo-h1 [Arabidopsis thaliana]<br>gi 3892049 gb AAC78258.1  AtMlo-h1 [Arabidopsis thaliana]<br>gi 7269020 emb CAB80753.1  AtMlo-h1-like protein [Arabidopsis thaliana]<br>gi 18175953 gb AAL59957.1  putative AtMlo-h1 protein [Arabidopsis thaliana]<br>gi 21280825 gb AAM45040.1  putative AtMlo-h1 protein [Arabidopsis thaliana]<br>gi 332656802 gb AEE82202.1  MLO-like protein 1 [Arabidopsis thaliana]<br>gi 332656803 gb AEE82203.1  MLO-like protein 1 [Arabidopsis thaliana] | 276 | 275 | 2.33E-156 | 99.6  | 93.8 | 96.7  | tryptophan synthase alpha chain                 | gbpln | Arabidopsis thaliana | AT4G02610.1   Symbols: Aldolase-type TIM barrel family protein   chr4:1147662-1149217 FORWARD LENGTH=275                               | 276 | 275 | 1.00E-148 | 99.6  | 93.8 | 96.7  |
| Rsa1.0_00132.1.g6338.t1 | ref NP_192169.1  MLO-like protein 1 [Arabidopsis thaliana]<br>gi 79324987 ref NP_001031578.1  MLO-like protein 1 [Arabidopsis thaliana]<br>gi 6166555 sp O49621.1 MLO1_ARATH<br>RecName: Full=MLO-like protein 1; Short=AtMlo1; AltName: Full=MLO protein homolog 1; Short=AtMlo-H1<br>gi 2765817 emb CAB08605.1  AtMlo-h1 [Arabidopsis thaliana]<br>gi 3892049 gb AAC78258.1  AtMlo-h1 [Arabidopsis thaliana]<br>gi 7269020 emb CAB80753.1  AtMlo-h1-like protein [Arabidopsis thaliana]<br>gi 18175953 gb AAL59957.1  putative AtMlo-h1 protein [Arabidopsis thaliana]<br>gi 21280825 gb AAM45040.1  putative AtMlo-h1 protein [Arabidopsis thaliana]<br>gi 332656802 gb AEE82202.1  MLO-like protein 1 [Arabidopsis thaliana]<br>gi 332656803 gb AEE82203.1  MLO-like protein 1 [Arabidopsis thaliana]                                                                                                                                                                                                                                                                                                                                                                                                                                                                                                                                                                                                                                                                                                                                         | 538 | 526 | 0         | 97.8  | 85.9 | 90.5  | MLO-like protein 1                              | gbpln | Arabidopsis thaliana | AT4G02600.2   Symbols: MLO1, ATMLO1   Seven transmembrane MLO family protein   chr4:1144141-1147156 FORWARD LENGTH=526                 | 538 | 526 | 0         | 97.8  | 85.9 | 90.5  |
| Rsa1.0_00132.1.g6339.t1 | dbj BAJ33851.1  unnamed protein product [Thellungiella halophila]                                                                                                                                                                                                                                                                                                                                                                                                                                                                                                                                                                                                                                                                                                                                                                                                                                                                                                                                                                                                                                                                                                                                                                                                                                                                                                                                                                                                                                                                                 | 303 | 310 | 1.00E-144 | 102.3 | 92.1 | 94.1  | unnamed protein product                         | ----  | ----                 | AT4G02590.2   Symbols: UNE12   basic helix-loop-helix (bHLH) DNA-binding superfamily protein   chr4:1137968-1140306 REVERSE LENGTH=310 | 303 | 310 | 1.00E-140 | 102.3 | 91.4 | 93.1  |
| Rsa1.0_00132.1.g6340.t1 | gb EOA22672.1  hypothetical protein CARUB_v10003375mg [Capsella rubella]                                                                                                                                                                                                                                                                                                                                                                                                                                                                                                                                                                                                                                                                                                                                                                                                                                                                                                                                                                                                                                                                                                                                                                                                                                                                                                                                                                                                                                                                          | 986 | 738 | 0         | 74.8  | 71.8 | 73.5  | hypothetical protein CARUB_v10003375mg          | gbpln | Capsella rubella     | AT4G02570.4   Symbols: CUL1   cullin 1   chr4:1129315-1133435 FORWARD LENGTH=738                                                       | 986 | 738 | 0         | 74.8  | 71.2 | 73.1  |
| Rsa1.0_00132.1.g6341.t1 | # # # # # # # # -                                                                                                                                                                                                                                                                                                                                                                                                                                                                                                                                                                                                                                                                                                                                                                                                                                                                                                                                                                                                                                                                                                                                                                                                                                                                                                                                                                                                                                                                                                                                 |     |     |           |       |      |       |                                                 | ----  | ----                 | AT2G21590.2   Symbols: APL4   Glucose-1-phosphate adenylyltransferase family protein   chr2:9239362-9242150 FORWARD LENGTH=523         | 203 | 523 | 3.00E-12  | 257.6 | 16.3 | 17.7  |
| Rsa1.0_00133.1.g6342.t4 | gb EOA15720.1  hypothetical protein CARUB_v10006622mg, partial [Capsella rubella]                                                                                                                                                                                                                                                                                                                                                                                                                                                                                                                                                                                                                                                                                                                                                                                                                                                                                                                                                                                                                                                                                                                                                                                                                                                                                                                                                                                                                                                                 | 873 | 545 | 1.00E-129 | 62.4  | 28.9 | 39.5  | hypothetical protein CARUB_v10006622mg, partial | gbpln | Capsella rubella     | AT1G24650.1   Symbols: Leucine-rich repeat protein kinase family protein   chr1:8734570-8737315 FORWARD LENGTH=886                     | 873 | 886 | 1.00E-112 | 101.5 | 27.8 | 36.9  |

|                         |                                                                                                                                                                                                                                                                                                                                                                                                                                                                                                                                                                                                                                                                                                                                                          |     |     |           |       |      |      |                                        |       |                      |                                                                                                                                  |     |     |           |       |      |      |
|-------------------------|----------------------------------------------------------------------------------------------------------------------------------------------------------------------------------------------------------------------------------------------------------------------------------------------------------------------------------------------------------------------------------------------------------------------------------------------------------------------------------------------------------------------------------------------------------------------------------------------------------------------------------------------------------------------------------------------------------------------------------------------------------|-----|-----|-----------|-------|------|------|----------------------------------------|-------|----------------------|----------------------------------------------------------------------------------------------------------------------------------|-----|-----|-----------|-------|------|------|
| Rsa1.0_00133.1.g6343.t1 | gb EOA36981.1  hypothetical protein CARUB_v10009953mg [Capsella rubella] gi 482572795 gb EOA36982.1  hypothetical protein CARUB_v10009953mg [Capsella rubella] gi 482572796 gb EOA36983.1  hypothetical protein CARUB_v10009953mg [Capsella rubella]                                                                                                                                                                                                                                                                                                                                                                                                                                                                                                     | 281 | 281 | 1.00E-150 | 100.0 | 95.0 | 97.5 | hypothetical protein CARUB_v10009953mg | gbpln | Capsella rubella     | AT1G22280.1   Symbols: PAPP2C   phytochrome-associated protein phosphatase type 2C   chr1:7874236-7875496 FORWARD LENGTH=281     | 281 | 281 | 1.00E-151 | 100.0 | 93.2 | 97.2 |
| Rsa1.0_00133.1.g6344.t1 | gb ADO95305.1  14-3-3-like protein GF14 Epsilon [Eutrema salsugineum]                                                                                                                                                                                                                                                                                                                                                                                                                                                                                                                                                                                                                                                                                    | 230 | 253 | 1.00E-116 | 110.0 | 93.9 | 96.5 | 14-3-3-like protein GF14 Epsilon       | gbpln | Eutrema salsugineum  | AT1G22300.2   Symbols: GRF10, GF14 EPSILON   general regulatory factor 10   chr1:7879244-7881103 REVERSE LENGTH=254              | 230 | 254 | 1.00E-117 | 110.4 | 93.9 | 96.1 |
| Rsa1.0_00133.1.g6345.t1 | ref NP_173653.1  UDP-glucosyl transferase 85A2 [Arabidopsis thaliana] gi 75315975 sp Q9ZWJ3.1 U85A2_ARAT H RecName: Full=UDP-glycosyltransferase 85A2 gi 9392679 gb AAF87256.1 AC068562.3 Identical to UDP-glucose glucosyltransferase from Arabidopsis thaliana gb AB016819 and contains a UDP-glucosyl transferase PF 00201 domain. ESTs gb T46254, gb R83990, gb H37246, gb W43072, gb R90721, gb R90712, gb AA712612, gb AA404770 come from this gene [Arabidopsis thaliana] gi 12083244 gb AAG48781.1 AF332418.1 putative UDP-glucose glucosyltransferase [Arabidopsis thaliana] gi 3928543 dbj BAA34687.1  UDP-glucose glucosyltransferase [Arabidopsis thaliana] gi 332192111 gb AEE30232.1  UDP-glucosyl transferase 85A2 [Arabidopsis thaliana] | 480 | 481 | 0         | 100.2 | 78.3 | 88.5 | UDP-glucosyl transferase 85A2          | gbpln | Arabidopsis thaliana | AT1G22360.1   Symbols: AtUGT85A2, UGT85A2   UDP-glucosyl transferase 85A2   chr1:7895068-7897527 REVERSE LENGTH=481              | 480 | 481 | 0         | 100.2 | 78.3 | 88.5 |
| Rsa1.0_00133.1.g6346.t1 | #                                                                                                                                                                                                                                                                                                                                                                                                                                                                                                                                                                                                                                                                                                                                                        | #   | #   | #         | #     | #    | -    | ----                                   | ----  | #                    | #                                                                                                                                | #   | #   | #         | #     | #    |      |
| Rsa1.0_00133.1.g6347.t1 | ref XP_002890510.1  hypothetical protein ARALYDRAFT_472481 [Arabidopsis lyrata subsp. lyrata] gi 297336352 gb EFH66769.1  hypothetical protein ARALYDRAFT_472481 [Arabidopsis lyrata subsp. lyrata]                                                                                                                                                                                                                                                                                                                                                                                                                                                                                                                                                      | 521 | 527 | 0         | 101.2 | 92.9 | 97.1 | hypothetical protein ARALYDRAFT_472481 | gbpln | Arabidopsis lyrata   | AT1G22410.1   Symbols:   Class-II DAHP synthetase family protein   chr1:7912120-7914742 FORWARD LENGTH=527                       | 521 | 527 | 0         | 101.2 | 92.1 | 96.7 |
| Rsa1.0_00133.1.g6348.t1 | ref XP_002887733.1  GF14 omega [Arabidopsis lyrata subsp. lyrata] gi 297333574 gb EFH63992.1  GF14 omega [Arabidopsis lyrata subsp. lyrata]                                                                                                                                                                                                                                                                                                                                                                                                                                                                                                                                                                                                              | 384 | 260 | 2.00E-90  | 67.7  | 43.5 | 46.9 | GF14 omega                             | gbpln | Arabidopsis lyrata   | AT1G78300.1   Symbols: GRF2, 14-3-3 OMEGA, GF14 OMEGA   general regulatory factor 2   chr1:29461883-29463052 FORWARD LENGTH=259  | 384 | 259 | 5.00E-92  | 67.4  | 43.0 | 46.9 |
| Rsa1.0_00133.1.g6349.t1 | #                                                                                                                                                                                                                                                                                                                                                                                                                                                                                                                                                                                                                                                                                                                                                        | #   | #   | #         | #     | #    | -    | ----                                   | ----  | #                    | #                                                                                                                                | #   | #   | #         | #     | #    |      |
| Rsa1.0_00133.1.g6350.t1 | ref NP_567645.1  alcohol dehydrogenase-like 5 [Arabidopsis thaliana] gi 42572985 ref NP_974589.1  alcohol dehydrogenase-like 5 [Arabidopsis thaliana] gi 12223583 sp QOV7W6.1 ADHL5_ARA TH RecName: Full=Alcohol dehydrogenase-like 5 gi 111074376 gb ABH04561.1  At4g22110 [Arabidopsis thaliana] gi 332659151 gb AEE84551.1  alcohol dehydrogenase-like 5 [Arabidopsis thaliana] gi 332659152 gb AEE84552.1  alcohol dehydrogenase-like 5 [Arabidopsis thaliana]                                                                                                                                                                                                                                                                                       | 549 | 389 | 0         | 70.9  | 58.8 | 65.0 | alcohol dehydrogenase-like 5           | gbpln | Arabidopsis thaliana | AT4G22110.2   Symbols:   GroES-like zinc-binding dehydrogenase family protein   chr4:11711422-11713946 REVERSE LENGTH=389        | 549 | 389 | 0         | 70.9  | 58.8 | 65.0 |
| Rsa1.0_00133.1.g6351.t1 | ref XP_002893233.1  hypothetical protein ARALYDRAFT_335492 [Arabidopsis lyrata subsp. lyrata] gi 297339075 gb EFH69492.1  hypothetical protein ARALYDRAFT_335492 [Arabidopsis lyrata subsp. lyrata]                                                                                                                                                                                                                                                                                                                                                                                                                                                                                                                                                      | 301 | 312 | 1.00E-125 | 103.7 | 83.4 | 90.4 | hypothetical protein ARALYDRAFT_335492 | gbpln | Arabidopsis lyrata   | AT1G22490.1   Symbols:   basic helix-loop-helix (bHLH) DNA-binding superfamily protein   chr1:7938448-7940489 REVERSE LENGTH=304 | 301 | 304 | 1.00E-126 | 101.0 | 82.1 | 87.4 |
| Rsa1.0_00133.1.g6352.t1 | ref NP_001154357.1  uncharacterized protein [Arabidopsis thaliana] gi 332192131 gb AEE30252.1  uncharacterized protein AT1G22520 [Arabidopsis thaliana]                                                                                                                                                                                                                                                                                                                                                                                                                                                                                                                                                                                                  | 97  | 179 | 3.00E-33  | 184.5 | 78.4 | 85.6 | uncharacterized protein                | gbpln | Arabidopsis thaliana | AT1G22520.2   Symbols:   Domain of unknown function (DUF543)   chr1:7952996-7954304 REVERSE LENGTH=179                           | 97  | 179 | 5.00E-36  | 184.5 | 78.4 | 85.6 |
| Rsa1.0_00133.1.g6353.t1 | gb EOA37552.1  hypothetical protein CARUB_v10011811mg [Capsella rubella]                                                                                                                                                                                                                                                                                                                                                                                                                                                                                                                                                                                                                                                                                 | 565 | 564 | 0         | 99.8  | 86.9 | 92.0 | hypothetical protein CARUB_v10011811mg | gbpln | Capsella rubella     | AT1G22570.1   Symbols:   Major facilitator superfamily protein   chr1:7976620-7978573 REVERSE LENGTH=565                         | 565 | 565 | 0         | 100.0 | 85.7 | 91.5 |



|                         |                                                                                                                                                                                                                                                                                                                                                                                                                                                                                                                                                                                                                                                                                                                                                                                                                                                                                          |      |      |           |       |      |      |                                                                                                 |       |                         |                                                                                                                                                                                                                                                                                                                                                                           |      |      |           |       |      |      |
|-------------------------|------------------------------------------------------------------------------------------------------------------------------------------------------------------------------------------------------------------------------------------------------------------------------------------------------------------------------------------------------------------------------------------------------------------------------------------------------------------------------------------------------------------------------------------------------------------------------------------------------------------------------------------------------------------------------------------------------------------------------------------------------------------------------------------------------------------------------------------------------------------------------------------|------|------|-----------|-------|------|------|-------------------------------------------------------------------------------------------------|-------|-------------------------|---------------------------------------------------------------------------------------------------------------------------------------------------------------------------------------------------------------------------------------------------------------------------------------------------------------------------------------------------------------------------|------|------|-----------|-------|------|------|
| Rsa1.0_00133.1.g6367.t1 | gb ABD32665.1  Terpenoid<br>cyclases/protein prenyltransferase<br>alpha-alpha toroid; Bacterial adhesion<br>[Medicago truncatula]                                                                                                                                                                                                                                                                                                                                                                                                                                                                                                                                                                                                                                                                                                                                                        | 330  | 426  | 1.00E-131 | 129.1 | 74.8 | 84.5 | Terpenoid<br>cyclases/protein<br>prenyltransferase<br>alpha-alpha toroid;<br>Bacterial adhesion | gbpln | Medicago<br>truncatula  | AT2G13770.1   Symbols:   CONTAINS<br>InterPro DOMAIN/s: Putative harbinger<br>transposase-derived nuclease<br>(InterPro:IPR006912); Has 451 Blast hits to<br>352 proteins in 33 species: Archae - 0;<br>Bacteria - 0; Metazoa - 28; Fungi - 8; Plants<br>- 388; Viruses - 0; Other Eukaryotes - 27<br>(source: NCBI BLINK).   chr2:5736603-<br>5737847 FORWARD LENGTH=343 | 330  | 343  | 3.00E-37  | 103.9 | 33.3 | 43.0 |
| Rsa1.0_00134.1.g6368.t1 | ref NP_175386.2  presequence protease<br>2 [Arabidopsis thaliana]<br>gi 30694606 ref NP_850961.1 <br>presequence protease 2 [Arabidopsis<br>thaliana] gi 30694608 ref NP_850962.1 <br>presequence protease 2 [Arabidopsis<br>thaliana]<br>gi 75161392 sp Q8VY06.1 PREP2_ARAT<br>H RecName: Full=Presequence protease<br>2, chloroplastic/mitochondrial;<br>Short=AtPreP2; Short=PreP 2;<br>AltName: Full=Zinc metalloprotease 2;<br>Short=AtZnMP2; Flags: Precursor<br>gi 18377704 gb AAL67002.1  putative<br>hydrogenase protein [Arabidopsis<br>thaliana] gi 28393925 gb AAO42370.1 <br>putative hydrogenase [Arabidopsis<br>thaliana] gi 332194330 gb AEE32451.1 <br>presequence protease 2 [Arabidopsis<br>thaliana] gi 332194331 gb AEE32452.1 <br>presequence protease 2 [Arabidopsis<br>thaliana] gi 332194332 gb AEE32453.1 <br>presequence protease 2 [Arabidopsis<br>thaliana] | 1088 | 1080 | 0         | 99.3  | 87.7 | 92.7 | presequence protease<br>2                                                                       | gbpln | Arabidopsis<br>thaliana | AT1G49630.2   Symbols: ATPREP2, PREP2  <br>presequence protease 2   chr1:18368405-<br>18375336 REVERSE LENGTH=1080                                                                                                                                                                                                                                                        | 1088 | 1080 | 0         | 99.3  | 87.7 | 92.7 |
| Rsa1.0_00134.1.g6369.t1 | gb EOA38477.1  hypothetical protein<br>CARUB_v10010232mg, partial [Capsella<br>rubella]                                                                                                                                                                                                                                                                                                                                                                                                                                                                                                                                                                                                                                                                                                                                                                                                  | 172  | 225  | 3.00E-45  | 130.8 | 72.1 | 82.6 | hypothetical protein<br>CARUB_v10010232mg,<br>partial                                           | gbpln | Capsella<br>rubella     | AT1G49620.1   Symbols: KRP7, ION6, ICK5  <br>Cyclin-dependent kinase inhibitor family<br>protein   chr1:18365692-18366559 REVERSE<br>LENGTH=195                                                                                                                                                                                                                           | 172  | 195  | 2.00E-39  | 113.4 | 68.6 | 79.1 |
| Rsa1.0_00134.1.g6370.t1 | #                                                                                                                                                                                                                                                                                                                                                                                                                                                                                                                                                                                                                                                                                                                                                                                                                                                                                        | #    | #    | #         | #     | #    | -    | -                                                                                               | ----  | ----                    | #                                                                                                                                                                                                                                                                                                                                                                         | #    | #    | #         | #     | #    |      |
| Rsa1.0_00134.1.g6371.t1 | ref XP_002862436.1  predicted protein<br>[Arabidopsis lyrata subsp. lyrata]<br>gi 297307949 gb EFH38694.1  predicted<br>protein [Arabidopsis lyrata subsp.<br>lyrata]                                                                                                                                                                                                                                                                                                                                                                                                                                                                                                                                                                                                                                                                                                                    | 355  | 530  | 2.00E-16  | 149.3 | 15.2 | 23.7 | predicted protein                                                                               | gbpln | Arabidopsis<br>lyrata   | #                                                                                                                                                                                                                                                                                                                                                                         | #    | #    | #         | #     | #    |      |
| Rsa1.0_00134.1.g6372.t1 | #                                                                                                                                                                                                                                                                                                                                                                                                                                                                                                                                                                                                                                                                                                                                                                                                                                                                                        | #    | #    | #         | #     | #    | -    | -                                                                                               | ----  | ----                    | #                                                                                                                                                                                                                                                                                                                                                                         | #    | #    | #         | #     | #    |      |
| Rsa1.0_00134.1.g6373.t2 | gb AAC13599.1  similar to reverse<br>transcriptase (Pfam:<br>transcript_fact.hmm, score: 72.31)<br>[Arabidopsis thaliana]                                                                                                                                                                                                                                                                                                                                                                                                                                                                                                                                                                                                                                                                                                                                                                | 725  | 928  | 1.00E-126 | 128.0 | 35.3 | 48.8 | similar to reverse<br>transcriptase (Pfam:<br>transcript_fact.hmm,<br>score: 72.31)             | gbpln | Arabidopsis<br>thaliana | AT1G43760.1   Symbols:   DNase I-like<br>superfamily protein   chr1:16528880-<br>16531065 REVERSE LENGTH=626                                                                                                                                                                                                                                                              | 725  | 626  | 6.00E-37  | 86.3  | 16.0 | 25.5 |
| Rsa1.0_00134.1.g6374.t1 | #                                                                                                                                                                                                                                                                                                                                                                                                                                                                                                                                                                                                                                                                                                                                                                                                                                                                                        | #    | #    | #         | #     | #    | -    | -                                                                                               | ----  | ----                    | #                                                                                                                                                                                                                                                                                                                                                                         | #    | #    | #         | #     | #    |      |
| Rsa1.0_00134.1.g6375.t2 | gb EOA40417.1  hypothetical protein<br>CARUB_v10009142mg [Capsella rubella]                                                                                                                                                                                                                                                                                                                                                                                                                                                                                                                                                                                                                                                                                                                                                                                                              | 1064 | 443  | 0         | 41.6  | 36.7 | 37.8 | hypothetical protein<br>CARUB_v10009142mg                                                       | gbpln | Capsella<br>rubella     | AT1G49600.1   Symbols: ATRBP47A,<br>RBP47A   RNA-binding protein 47A  <br>chr1:18357236-18360150 REVERSE<br>LENGTH=445                                                                                                                                                                                                                                                    | 1064 | 445  | 0         | 41.8  | 34.4 | 35.0 |
| Rsa1.0_00134.1.g6376.t1 | ref XP_002891523.1  hypothetical<br>protein ARALYDRAFT_474094<br>[Arabidopsis lyrata subsp. lyrata]<br>gi 297337365 gb EFH67782.1 <br>hypothetical protein<br>ARALYDRAFT_474094 [Arabidopsis<br>lyrata subsp. lyrata]                                                                                                                                                                                                                                                                                                                                                                                                                                                                                                                                                                                                                                                                    | 213  | 242  | 1.00E-95  | 113.6 | 86.4 | 91.5 | hypothetical protein<br>ARALYDRAFT_474094                                                       | gbpln | Arabidopsis<br>lyrata   | AT1G49590.1   Symbols:   C2H2 and C2HC<br>zinc fingers superfamily protein  <br>chr1:18354997-18356409 FORWARD<br>LENGTH=242                                                                                                                                                                                                                                              | 213  | 242  | 5.00E-98  | 113.6 | 85.9 | 91.5 |
| Rsa1.0_00134.1.g6377.t1 | dbj BAB09912.1  MADS-box protein-like<br>[Arabidopsis thaliana]                                                                                                                                                                                                                                                                                                                                                                                                                                                                                                                                                                                                                                                                                                                                                                                                                          | 267  | 368  | 2.00E-25  | 137.8 | 24.7 | 33.3 | MADS-box protein-like                                                                           | gbpln | Arabidopsis<br>thaliana | AT5G49420.1   Symbols:   MADS-box<br>transcription factor family protein  <br>chr5:20035166-20036170 REVERSE<br>LENGTH=334                                                                                                                                                                                                                                                | 267  | 334  | 6.00E-28  | 125.1 | 24.7 | 33.3 |
| Rsa1.0_00134.1.g6378.t1 | ref XP_002870580.1  hypothetical<br>protein ARALYDRAFT_915957<br>[Arabidopsis lyrata subsp. lyrata]<br>gi 297316416 gb EFH46839.1 <br>hypothetical protein<br>ARALYDRAFT_915957 [Arabidopsis<br>lyrata subsp. lyrata]                                                                                                                                                                                                                                                                                                                                                                                                                                                                                                                                                                                                                                                                    | 291  | 286  | 1.00E-103 | 98.3  | 62.5 | 75.9 | hypothetical protein<br>ARALYDRAFT_915957                                                       | gbpln | Arabidopsis<br>lyrata   | AT5G37890.1   Symbols:   Protein with<br>RING/U-box and TRAF-like domains  <br>chr5:15090512-15091822 REVERSE<br>LENGTH=286                                                                                                                                                                                                                                               | 291  | 286  | 1.00E-101 | 98.3  | 58.1 | 73.5 |

|                         |                                                                                                                                                                                                                                                                                                                                                                           |      |     |           |       |      |      |                                                 |       |                      |                                                                                                                                                                                                                                                                                                                                                                                                                                                                                                                                                                                                                                                                                                |      |     |           |       |      |      |
|-------------------------|---------------------------------------------------------------------------------------------------------------------------------------------------------------------------------------------------------------------------------------------------------------------------------------------------------------------------------------------------------------------------|------|-----|-----------|-------|------|------|-------------------------------------------------|-------|----------------------|------------------------------------------------------------------------------------------------------------------------------------------------------------------------------------------------------------------------------------------------------------------------------------------------------------------------------------------------------------------------------------------------------------------------------------------------------------------------------------------------------------------------------------------------------------------------------------------------------------------------------------------------------------------------------------------------|------|-----|-----------|-------|------|------|
| Rsa1.0_00134.1.g6379.t1 | ref[NP_564480.1] uncharacterized protein [Arabidopsis thaliana] gi 13605690 gb AAK32835.1 AF361826.1 At1g42440/F7F22.7 [Arabidopsis thaliana] gi 22137072 gb AAAM91381.1  At1g42440/F7F22.7 [Arabidopsis thaliana] gi 23397226 gb AAN31895.1  unknown protein [Arabidopsis thaliana] gi 332193797 gb AEE31918.1  uncharacterized protein AT1G42440 [Arabidopsis thaliana] | 235  | 793 | 6.00E-82  | 337.4 | 71.9 | 79.1 | uncharacterized protein                         | gbpln | Arabidopsis thaliana | AT1G42440.1   Symbols:   FUNCTIONS IN: molecular function unknown; INVOLVED IN: ribosome biogenesis; LOCATED IN: nucleus; EXPRESSED IN: 22 plant structures; EXPRESSED DURING: 13 growth stages; CONTAINS InterPro DOMAIN/s: AARP2CN (InterPro:IPR012948), Protein of unknown function DUF663 (InterPro:IPR007034); BEST Arabidopsis thaliana protein match is: P-loop containing nucleoside triphosphate hydrolases superfamily protein (TAIR:AT1G06720.1); Has 2741 Blast hits to 2088 proteins in 291 species: Archae - 2; Bacteria - 131; Metazoa - 833; Fungi - 650; Plants - 171; Viruses - 49; Other Eukaryotes - 905 (source: NCBI BLINK).   chr1:15895528-15899939 REVERSE LENGTH=793 | 235  | 793 | 2.00E-84  | 337.4 | 71.9 | 79.1 |
| Rsa1.0_00134.1.g6380.t1 | gb EOA37196.1  hypothetical protein CARUB_v10010637mg [Capsella rubella]                                                                                                                                                                                                                                                                                                  | 130  | 129 | 2.00E-55  | 99.2  | 83.8 | 92.3 | hypothetical protein CARUB_v10010637mg          | gbpln | Capsella rubella     | AT1G49975.1   Symbols:   INVOLVED IN: photosynthesis; LOCATED IN: photosystem I, chloroplast, thylakoid membrane; EXPRESSED IN: 20 plant structures; EXPRESSED DURING: 13 growth stages; CONTAINS InterPro DOMAIN/s: Photosystem I reaction centre subunit N (InterPro:IPR008796); Has 34 Blast hits to 34 proteins in 14 species: Archae - 0; Bacteria - 0; Metazoa - 0; Fungi - 0; Plants - 34; Viruses - 0; Other Eukaryotes - 0 (source: NCBI BLINK).   chr1:18504845-18505431 FORWARD LENGTH=129                                                                                                                                                                                          | 130  | 129 | 9.00E-58  | 99.2  | 84.6 | 89.2 |
| Rsa1.0_00134.1.g6381.t1 | ref[XP_002891550.1] hypothetical protein ARALYDRAFT_474131 [Arabidopsis lyrata subsp. lyrata] gi 297337392 gb EFH67809.1  hypothetical protein ARALYDRAFT_474131 [Arabidopsis lyrata subsp. lyrata]                                                                                                                                                                       | 405  | 422 | 1.00E-112 | 104.2 | 57.3 | 70.1 | hypothetical protein ARALYDRAFT_474131          | gbpln | Arabidopsis lyrata   | AT1G49990.1   Symbols:   F-box family protein   chr1:18513696-18514988 FORWARD LENGTH=430                                                                                                                                                                                                                                                                                                                                                                                                                                                                                                                                                                                                      | 405  | 430 | 1.00E-111 | 106.2 | 57.3 | 69.6 |
| Rsa1.0_00134.1.g6382.t1 | ref[XP_002891550.1] hypothetical protein ARALYDRAFT_474131 [Arabidopsis lyrata subsp. lyrata] gi 297337392 gb EFH67809.1  hypothetical protein ARALYDRAFT_474131 [Arabidopsis lyrata subsp. lyrata]                                                                                                                                                                       | 434  | 422 | 1.00E-109 | 97.2  | 53.5 | 66.8 | hypothetical protein ARALYDRAFT_474131          | gbpln | Arabidopsis lyrata   | AT1G49990.1   Symbols:   F-box family protein   chr1:18513696-18514988 FORWARD LENGTH=430                                                                                                                                                                                                                                                                                                                                                                                                                                                                                                                                                                                                      | 434  | 430 | 1.00E-108 | 99.1  | 52.8 | 67.3 |
| Rsa1.0_00134.1.g6383.t1 | ref[XP_002891550.1] hypothetical protein ARALYDRAFT_474131 [Arabidopsis lyrata subsp. lyrata] gi 297337392 gb EFH67809.1  hypothetical protein ARALYDRAFT_474131 [Arabidopsis lyrata subsp. lyrata]                                                                                                                                                                       | 416  | 422 | 1.00E-113 | 101.4 | 57.9 | 70.9 | hypothetical protein ARALYDRAFT_474131          | gbpln | Arabidopsis lyrata   | AT1G49990.1   Symbols:   F-box family protein   chr1:18513696-18514988 FORWARD LENGTH=430                                                                                                                                                                                                                                                                                                                                                                                                                                                                                                                                                                                                      | 416  | 430 | 1.00E-112 | 103.4 | 57.9 | 70.9 |
| Rsa1.0_00134.1.g6384.t1 | ref[NP_175420.3] DNA polymerase kappa subunit [Arabidopsis thaliana] gi 46394839 gb AAS91582.1  DNA-directed polymerase kappa [Arabidopsis thaliana] gi 332194382 gb AEE32503.1  DNA polymerase kappa subunit [Arabidopsis thaliana]                                                                                                                                      | 1235 | 671 | 0         | 54.3  | 42.3 | 45.3 | DNA polymerase kappa subunit                    | gbpln | Arabidopsis thaliana | AT1G49980.1   Symbols:   DNA/RNA polymerases superfamily protein   chr1:18508026-18512111 FORWARD LENGTH=671                                                                                                                                                                                                                                                                                                                                                                                                                                                                                                                                                                                   | 1235 | 671 | 0         | 54.3  | 42.3 | 45.3 |
| Rsa1.0_00134.1.g6385.t1 | ref[NP_175422.2] ribosomal RNA small subunit methyltransferase E [Arabidopsis thaliana] gi 49660069 gb AAT68325.1  hypothetical protein At1g50000 [Arabidopsis thaliana] gi 55740521 gb AAV63853.1  hypothetical protein At1g50000 [Arabidopsis thaliana] gi 332194384 gb AEE32505.1  ribosomal RNA small subunit methyltransferase E [Arabidopsis thaliana]              | 308  | 296 | 1.00E-145 | 96.1  | 86.0 | 90.9 | ribosomal RNA small subunit methyltransferase E | gbpln | Arabidopsis thaliana | AT1G50000.1   Symbols:   methyltransferases   chr1:18515183-18517244 REVERSE LENGTH=296                                                                                                                                                                                                                                                                                                                                                                                                                                                                                                                                                                                                        | 308  | 296 | 1.00E-148 | 96.1  | 86.0 | 90.9 |

|                          |                                                                                                                                                                                                                                                                                                                                                                                                                                                                                                                                                                                                                                                                                                                                                                                                                                      |      |      |           |       |       |       |                                                 |             |                      |                                                                                                                                                                                                                                                                                                                                                                                                                                                 |      |      |           |       |       |       |
|--------------------------|--------------------------------------------------------------------------------------------------------------------------------------------------------------------------------------------------------------------------------------------------------------------------------------------------------------------------------------------------------------------------------------------------------------------------------------------------------------------------------------------------------------------------------------------------------------------------------------------------------------------------------------------------------------------------------------------------------------------------------------------------------------------------------------------------------------------------------------|------|------|-----------|-------|-------|-------|-------------------------------------------------|-------------|----------------------|-------------------------------------------------------------------------------------------------------------------------------------------------------------------------------------------------------------------------------------------------------------------------------------------------------------------------------------------------------------------------------------------------------------------------------------------------|------|------|-----------|-------|-------|-------|
| Rsa1.0_00134.1.g6386.t1  | refNP_193232.1  tubulin alpha-6 chain [Arabidopsis thaliana] gi 267070 sp P2951.1.1 TBA6_ARATH RecName: Full=Tubulin alpha-6 chain gi 166920 gb AAA32892.1  TUA6 [Arabidopsis thaliana] gi 2244853 emb CAB10275.1  tubulin alpha-6 chain (TUA6) [Arabidopsis thaliana] gi 7268242 emb CAB78538.1  tubulin alpha-6 chain (TUA6) [Arabidopsis thaliana] gi 16604480 gb AAL24246.1  AT4g14960/di3520c [Arabidopsis thaliana] gi 17529124 gb AAL38788.1  putative tubulin alpha-6 chain TUA6 [Arabidopsis thaliana] gi 18958026 gb AAL79586.1  AT4g14960/di3520c [Arabidopsis thaliana] gi 21436097 gb AAM51249.1  putative tubulin alpha-6 chain TUA6 [Arabidopsis thaliana] gi 189514805 gb ABD75335.1  tubulin alpha-1 chain [Brassica rapa subsp. oleifera] gi 332658130 gb AEE83530.1  tubulin alpha-6 chain [Arabidopsis thaliana] | 450  | 450  | 0         | 100.0 | 100.0 | 100.0 | tubulin alpha-6 chain                           | gbpln       | Arabidopsis thaliana | AT4G14960.2   Symbols: TUA6   Tubulin/FtsZ family protein   chr4:8548769-8550319 REVERSE LENGTH=450                                                                                                                                                                                                                                                                                                                                             | 450  | 450  | 0         | 100.0 | 100.0 | 100.0 |
| Rsa1.0_00134.1.g6387.t1  | db BAJ34041.1  unnamed protein product [Theilungella halophila]                                                                                                                                                                                                                                                                                                                                                                                                                                                                                                                                                                                                                                                                                                                                                                      | 212  | 212  | 5.00E-95  | 100.0 | 88.2  | 91.5  | unnamed protein product                         | ----        | ----                 | AT1G50020.1   Symbols:   unknown protein; FUNCTIONS IN: molecular_function unknown; INVOLVED IN: biological_process unknown; LOCATED IN: chloroplast thylakoid membrane, chloroplast; EXPRESSED DURING: 15 plant structures; Has 72 Blast hits to 72 proteins in 27 species: Archae - 0; Bacteria - 0; Metazoa - 0; Fungi - 0; Plants - 72; Viruses - 0; Other Eukaryotes - 0 (source: NCBI BLINK).   chr1:18520144-18521600 REVERSE LENGTH=209 | 212  | 209  | 1.00E-91  | 98.6  | 83.5  | 88.7  |
| Rsa1.0_00134.1.g6388.t1  | #                                                                                                                                                                                                                                                                                                                                                                                                                                                                                                                                                                                                                                                                                                                                                                                                                                    | #    | #    | #         | #     | #     | #     | -                                               | ----        | ----                 | #                                                                                                                                                                                                                                                                                                                                                                                                                                               | #    | #    | #         | #     | #     |       |
| Rsa1.0_00134.1.g6389.t1  | db BAB02259.1  retroelement pol polyprotein-like [Arabidopsis thaliana]                                                                                                                                                                                                                                                                                                                                                                                                                                                                                                                                                                                                                                                                                                                                                              | 729  | 777  | 5.00E-27  | 106.6 | 15.2  | 25.1  | retroelement pol polyprotein-like               | gbpln       | Arabidopsis thaliana | #                                                                                                                                                                                                                                                                                                                                                                                                                                               | #    | #    | #         | #     | #     |       |
| Rsa1.0_00134.1.g6390.t1  | #                                                                                                                                                                                                                                                                                                                                                                                                                                                                                                                                                                                                                                                                                                                                                                                                                                    | #    | #    | #         | #     | #     | #     | -                                               | ----        | ----                 | #                                                                                                                                                                                                                                                                                                                                                                                                                                               | #    | #    | #         | #     | #     |       |
| Rsa1.0_00134.1.g6391.t1  | #                                                                                                                                                                                                                                                                                                                                                                                                                                                                                                                                                                                                                                                                                                                                                                                                                                    | #    | #    | #         | #     | #     | #     | -                                               | ----        | ----                 | #                                                                                                                                                                                                                                                                                                                                                                                                                                               | #    | #    | #         | #     | #     |       |
| Rsa1.0_00134.1.g6392.t1  | #                                                                                                                                                                                                                                                                                                                                                                                                                                                                                                                                                                                                                                                                                                                                                                                                                                    | #    | #    | #         | #     | #     | #     | -                                               | ----        | ----                 | #                                                                                                                                                                                                                                                                                                                                                                                                                                               | #    | #    | #         | #     | #     |       |
| Rsa1.0_00134.1.g6393.t26 | gb AEH16576.1  target of rapamycin [Eutrema halophilum] gi 334855093 gb AEH16577.1  target of rapamycin [Eutrema halophilum]                                                                                                                                                                                                                                                                                                                                                                                                                                                                                                                                                                                                                                                                                                         | 2482 | 2479 | 0         | 99.9  | 93.6  | 96.0  | target of rapamycin                             | gbpln       | Eutrema halophilum   | AT1G50030.1   Symbols: TOR   target of rapamycin   chr1:18522826-18539619 REVERSE LENGTH=2481                                                                                                                                                                                                                                                                                                                                                   | 2482 | 2481 | 0         | 100.0 | 92.5  | 95.3  |
| Rsa1.0_00134.1.g6394.t1  | gb AFW66445.1  ubiquitin2 [Zea mays]                                                                                                                                                                                                                                                                                                                                                                                                                                                                                                                                                                                                                                                                                                                                                                                                 | 384  | 535  | 1.00E-115 | 139.3 | 63.3  | 75.3  | ubiquitin2                                      | gbenv/gbpln | Zea mays             | AT5G20620.1   Symbols: UBQ4   ubiquitin 4   chr5:6973315-6974463 REVERSE LENGTH=382                                                                                                                                                                                                                                                                                                                                                             | 384  | 382  | 1.00E-117 | 99.5  | 63.0  | 75.0  |
| Rsa1.0_00134.1.g6395.t1  | gb EOA23612.1  hypothetical protein CARUB_v10016812mg [Capsella rubella]                                                                                                                                                                                                                                                                                                                                                                                                                                                                                                                                                                                                                                                                                                                                                             | 475  | 651  | 1.00E-154 | 137.1 | 59.2  | 75.4  | hypothetical protein CARUB_v10016812mg          | gbpln       | Capsella rubella     | AT3G58930.1   Symbols:   F-box/RNI-like superfamily protein   chr3:21778381-21780014 REVERSE LENGTH=482                                                                                                                                                                                                                                                                                                                                         | 475  | 482  | 1.00E-154 | 101.5 | 58.3  | 72.0  |
| Rsa1.0_00134.1.g6396.t1  | emb CAN81876.1  hypothetical protein VITISV_034528 [Vitis vinifera]                                                                                                                                                                                                                                                                                                                                                                                                                                                                                                                                                                                                                                                                                                                                                                  | 559  | 1241 | 5.00E-42  | 222.0 | 24.7  | 36.5  | hypothetical protein VITISV_034528              | gbpln       | Vitis vinifera       | AT3G19680.1   Symbols:   Protein of unknown function (DUF1005)   chr3:6840448-6842107 FORWARD LENGTH=491                                                                                                                                                                                                                                                                                                                                        | 559  | 491  | 2.00E-30  | 87.8  | 15.9  | 18.8  |
| Rsa1.0_00134.1.g6397.t1  | gb EOA39631.1  hypothetical protein CARUB_v10008262mg, partial [Capsella rubella]                                                                                                                                                                                                                                                                                                                                                                                                                                                                                                                                                                                                                                                                                                                                                    | 291  | 895  | 1.00E-92  | 307.6 | 59.8  | 68.7  | hypothetical protein CARUB_v10008262mg, partial | gbpln       | Capsella rubella     | AT1G51890.1   Symbols:   Leucine-rich repeat protein kinase family protein   chr1:19274802-19278528 REVERSE LENGTH=876                                                                                                                                                                                                                                                                                                                          | 291  | 876  | 1.00E-94  | 301.0 | 58.8  | 69.8  |
| Rsa1.0_00134.1.g6398.t1  | gb AAD32898.1  putative retroelement pol polyprotein [Arabidopsis thaliana]                                                                                                                                                                                                                                                                                                                                                                                                                                                                                                                                                                                                                                                                                                                                                          | 1342 | 1307 | 0         | 97.4  | 60.7  | 74.4  | putative retroelement pol polyprotein           | gbpln       | Arabidopsis thaliana | AT4G23160.1   Symbols: CRK8   cysteine-rich RLK (RECEPTOR-like protein kinase) 8   chr4:12129485-12134086 FORWARD LENGTH=1262                                                                                                                                                                                                                                                                                                                   | 1342 | 1262 | 3.00E-98  | 94.0  | 13.9  | 21.8  |
| Rsa1.0_00134.1.g6399.t1  | #                                                                                                                                                                                                                                                                                                                                                                                                                                                                                                                                                                                                                                                                                                                                                                                                                                    | #    | #    | #         | #     | #     | #     | -                                               | ----        | ----                 | #                                                                                                                                                                                                                                                                                                                                                                                                                                               | #    | #    | #         | #     | #     |       |
| Rsa1.0_00134.1.g6400.t1  | ref XP_002891554.1  hypothetical protein ARALYDRAFT_474142 [Arabidopsis lyrata subsp. lyrata] gi 297337396 gb EFH67813.1  hypothetical protein ARALYDRAFT_474142 [Arabidopsis lyrata subsp. lyrata]                                                                                                                                                                                                                                                                                                                                                                                                                                                                                                                                                                                                                                  | 162  | 161  | 5.00E-68  | 99.4  | 74.1  | 88.9  | hypothetical protein ARALYDRAFT_474142          | gbpln       | Arabidopsis lyrata   | AT1G50060.1   Symbols:   CAP (Cysteine-rich secretory proteins, Antigen 5, and Pathogenesis-related 1 protein) superfamily protein   chr1:18551186-18552446 FORWARD LENGTH=161                                                                                                                                                                                                                                                                  | 162  | 161  | 1.00E-63  | 99.4  | 72.2  | 88.3  |

|                         |                                                                                                                                                                                                                                                                                                                                                                                                                                                                                                                                                                                                                                                                                                                                               |      |      |           |       |      |      |                                                       |       |                         |                                                                                                                                                              |      |      |           |       |      |      |
|-------------------------|-----------------------------------------------------------------------------------------------------------------------------------------------------------------------------------------------------------------------------------------------------------------------------------------------------------------------------------------------------------------------------------------------------------------------------------------------------------------------------------------------------------------------------------------------------------------------------------------------------------------------------------------------------------------------------------------------------------------------------------------------|------|------|-----------|-------|------|------|-------------------------------------------------------|-------|-------------------------|--------------------------------------------------------------------------------------------------------------------------------------------------------------|------|------|-----------|-------|------|------|
|                         | ref NP_175431.1  branched-chain-<br>amino-acid aminotransferase 6<br>[Arabidopsis thaliana]<br>gi 26391671 sp Q9LPM9.1 BCAT6_ARAT<br>H RecName: Full=Branched-chain-<br>amino-acid aminotransferase 6;<br>Short=Atbcat-6<br>gi 8569092 gb AAF76437.1 AC015445.4<br>Strong similarity to branched-chain<br>amino acid aminotransferase (BCAT2)<br>from Solanum tuberosum gb AF193846<br>and contains an Aminotransferase class<br>IV domain PF01063. ESTs gb Z26805.<br>gb Z30511 come from this gene<br>[Arabidopsis thaliana]<br>gi 13810195 emb CAC37393.1 <br>branched-chain amino acid<br>transaminase 6 [Arabidopsis thaliana]<br>gi 332194395 gb AEE32516.1  branched-<br>chain-amino-acid aminotransferase 6<br>[Arabidopsis thaliana] | 417  | 356  | 0         | 85.4  | 75.8 | 79.9 | branched-chain-<br>amino-acid<br>aminotransferase 6   | gbpln | Arabidopsis<br>thaliana | AT1G50110.1   Symbols:   D-aminoacid<br>aminotransferase-like PLP-dependent<br>enzymes superfamily protein  <br>chr1:18558203-18560219 REVERSE<br>LENGTH=356 | 417  | 356  | 0         | 85.4  | 75.8 | 79.9 |
| Rsa1.0_00134.1.g6401.t1 |                                                                                                                                                                                                                                                                                                                                                                                                                                                                                                                                                                                                                                                                                                                                               |      |      |           |       |      |      |                                                       |       |                         |                                                                                                                                                              |      |      |           |       |      |      |
| Rsa1.0_00134.1.g6402.t1 | #                                                                                                                                                                                                                                                                                                                                                                                                                                                                                                                                                                                                                                                                                                                                             | #    | #    | #         | #     | #    | #    | -                                                     | ----  | ----                    | #                                                                                                                                                            | #    | #    | #         | #     | #    | #    |
| Rsa1.0_00134.1.g6403.t1 | #                                                                                                                                                                                                                                                                                                                                                                                                                                                                                                                                                                                                                                                                                                                                             | #    | #    | #         | #     | #    | #    | -                                                     | ----  | ----                    | #                                                                                                                                                            | #    | #    | #         | #     | #    | #    |
| Rsa1.0_00134.1.g6404.t1 | gb AAG10817.1 AC011808.5 Putative<br>retroelement polyprotein [Arabidopsis<br>thaliana]                                                                                                                                                                                                                                                                                                                                                                                                                                                                                                                                                                                                                                                       | 1261 | 1413 | 0         | 112.1 | 53.4 | 68.7 | Putative retroelement<br>polyprotein                  | gbpln | Arabidopsis<br>thaliana | AT4G23160.1   Symbols: CRK8   cysteine-<br>rich RLK (RECEPTOR-like protein kinase) 8  <br>chr4:12129485-12134086 FORWARD<br>LENGTH=1262                      | 1261 | 1262 | 0         | 100.1 | 24.6 | 32.4 |
| Rsa1.0_00134.1.g6405.t6 | gb EOA37992.1  hypothetical protein<br>CARUB_v10009461mg [Capsella rubella]                                                                                                                                                                                                                                                                                                                                                                                                                                                                                                                                                                                                                                                                   | 544  | 377  | 1.00E-127 | 69.3  | 50.7 | 53.3 | hypothetical protein<br>CARUB_v10009461mg             | gbpln | Capsella<br>rubella     | AT1G50300.1   Symbols: TAF15   TBP-<br>associated factor 15   chr1:18628818-<br>18631682 REVERSE LENGTH=372                                                  | 544  | 372  | 1.00E-122 | 68.4  | 49.8 | 52.9 |
| Rsa1.0_00134.1.g6406.t1 | ref NP_175085.1  porphobilinogen<br>synthase [Arabidopsis thaliana]<br>gi 13876503 gb AAK43479.1 AC084807.4<br>delta-aminolevulinic acid dehydratase<br>(Ald), putative [Arabidopsis thaliana]<br>gi 332193910 gb AEE32031.1 <br>porphobilinogen synthase [Arabidopsis<br>thaliana]                                                                                                                                                                                                                                                                                                                                                                                                                                                           | 389  | 406  | 0         | 104.4 | 84.1 | 91.0 | porphobilinogen<br>synthase                           | gbpln | Arabidopsis<br>thaliana | AT1G44318.1   Symbols: hemb2   Aldolase<br>superfamily protein   chr1:16831016-<br>16833916 FORWARD LENGTH=406                                               | 389  | 406  | 0         | 104.4 | 84.1 | 91.0 |
| Rsa1.0_00134.1.g6407.t1 | gb AAF97281.1 AC010164.3<br>Hypothetical protein [Arabidopsis<br>thaliana]<br>gi 12324507 gb AAG52212.1 AC022288_<br>11 putative gag-pol polyprotein; 76173-<br>77576 [Arabidopsis thaliana]                                                                                                                                                                                                                                                                                                                                                                                                                                                                                                                                                  | 384  | 467  | 1.00E-106 | 121.6 | 57.0 | 74.0 | Hypothetical protein                                  | gbpln | Arabidopsis<br>thaliana | #                                                                                                                                                            | #    | #    | #         | #     | #    | #    |
| Rsa1.0_00134.1.g6408.t1 | #                                                                                                                                                                                                                                                                                                                                                                                                                                                                                                                                                                                                                                                                                                                                             | #    | #    | #         | #     | #    | #    | -                                                     | ----  | ----                    | #                                                                                                                                                            | #    | #    | #         | #     | #    | #    |
| Rsa1.0_00134.1.g6409.t1 | #                                                                                                                                                                                                                                                                                                                                                                                                                                                                                                                                                                                                                                                                                                                                             | #    | #    | #         | #     | #    | #    | -                                                     | ----  | ----                    | #                                                                                                                                                            | #    | #    | #         | #     | #    | #    |
| Rsa1.0_00135.1.g6410.t1 | gb AAM62981.1  unknown [Arabidopsis<br>thaliana]                                                                                                                                                                                                                                                                                                                                                                                                                                                                                                                                                                                                                                                                                              | 110  | 114  | 7.00E-44  | 103.6 | 83.6 | 94.5 | unknown                                               | gbpln | Arabidopsis<br>thaliana | AT1G52680.1   Symbols:   late<br>embryogenesis abundant protein-related /<br>LEA protein-related   chr1:19618419-<br>19618961 REVERSE LENGTH=114             | 110  | 114  | 9.00E-46  | 103.6 | 82.7 | 92.7 |
| Rsa1.0_00135.1.g6411.t1 | gb EOA37169.1  hypothetical protein<br>CARUB_v10010503mg, partial [Capsella<br>rubella]                                                                                                                                                                                                                                                                                                                                                                                                                                                                                                                                                                                                                                                       | 135  | 163  | 1.00E-62  | 120.7 | 96.3 | 98.5 | hypothetical protein<br>CARUB_v10010503mg,<br>partial | gbpln | Capsella<br>rubella     | AT1G52740.1   Symbols: HTA9   histone H2A<br>protein 9   chr1:19645409-19646221<br>FORWARD LENGTH=134                                                        | 135  | 134  | 9.00E-65  | 99.3  | 96.3 | 98.5 |
| Rsa1.0_00135.1.g6412.t1 | ref NP_175684.3  alpha/beta-hydrolase<br>domain-containing protein [Arabidopsis<br>thaliana] gi 332194727 gb AEE32848.1 <br>alpha/beta-hydrolase domain-<br>containing protein [Arabidopsis thaliana]                                                                                                                                                                                                                                                                                                                                                                                                                                                                                                                                         | 617  | 633  | 0         | 102.6 | 85.3 | 91.4 | alpha/beta-hydrolase<br>domain-containing<br>protein  | gbpln | Arabidopsis<br>thaliana | AT1G52750.1   Symbols:   alpha/beta-<br>Hydrolases superfamily protein  <br>chr1:19646785-19649208 REVERSE<br>LENGTH=633                                     | 617  | 633  | 0         | 102.6 | 85.3 | 91.4 |
| Rsa1.0_00135.1.g6413.t1 | gb EOA39092.1  hypothetical protein<br>CARUB_v10011835mg [Capsella rubella]                                                                                                                                                                                                                                                                                                                                                                                                                                                                                                                                                                                                                                                                   | 329  | 322  | 1.00E-172 | 97.9  | 87.8 | 92.1 | hypothetical protein<br>CARUB_v10011835mg             | gbpln | Capsella<br>rubella     | AT1G52760.1   Symbols: LysoPL2  <br>lysophospholipase 2   chr1:19651378-<br>19652576 FORWARD LENGTH=332                                                      | 329  | 332  | 1.00E-173 | 100.9 | 89.1 | 93.9 |
| Rsa1.0_00135.1.g6414.t1 | #                                                                                                                                                                                                                                                                                                                                                                                                                                                                                                                                                                                                                                                                                                                                             | #    | #    | #         | #     | #    | #    | -                                                     | ----  | ----                    | #                                                                                                                                                            | #    | #    | #         | #     | #    | #    |
| Rsa1.0_00135.1.g6415.t1 | ref NP_175686.1  phototropic-<br>responsive NPH3-like protein<br>[Arabidopsis thaliana]<br>gi 12324646 gb AAG52282.1 AC019018_<br>19 putative non-phototropic hypocotyl;<br>25081-26618 [Arabidopsis thaliana]<br>gi 27311773 gb AA000852.1  putative<br>non-phototropic hypocotyl [Arabidopsis<br>thaliana] gi 31376385 gb AAP49519.1 <br>At1g52770 [Arabidopsis thaliana]<br>gi 332194729 gb AEE32850.1 <br>phototropic-responsive NPH3-like<br>protein [Arabidopsis thaliana]                                                                                                                                                                                                                                                              | 449  | 454  | 0         | 101.1 | 81.3 | 88.4 | phototropic-responsive<br>NPH3-like protein           | gbpln | Arabidopsis<br>thaliana | AT1G52770.1   Symbols:   Phototropic-<br>responsive NPH3 family protein  <br>chr1:19659009-19657546 FORWARD<br>LENGTH=454                                    | 449  | 454  | 0         | 101.1 | 81.3 | 88.4 |
| Rsa1.0_00135.1.g6416.t1 | gb AAG51783.1 AC079679.3 reverse<br>transcriptase, putative; 16838-20266<br>[Arabidopsis thaliana]                                                                                                                                                                                                                                                                                                                                                                                                                                                                                                                                                                                                                                            | 432  | 1142 | 1.00E-111 | 264.4 | 47.2 | 62.5 | reverse transcriptase,<br>putative; 16838-20266       | gbpln | Arabidopsis<br>thaliana | AT4G2090.1   Symbols:   Ribonuclease H-<br>like superfamily protein   chr4:14333528-<br>14335255 FORWARD LENGTH=575                                          | 432  | 575  | 4.00E-44  | 133.1 | 28.9 | 46.3 |

|                         |                                                                                                                                                                                                                                                                                                                                                                      |      |      |           |       |      |      |                                                      |       |                      |                                                                                                                                                                                                                                                                                                                                                                   |      |      |           |       |      |      |
|-------------------------|----------------------------------------------------------------------------------------------------------------------------------------------------------------------------------------------------------------------------------------------------------------------------------------------------------------------------------------------------------------------|------|------|-----------|-------|------|------|------------------------------------------------------|-------|----------------------|-------------------------------------------------------------------------------------------------------------------------------------------------------------------------------------------------------------------------------------------------------------------------------------------------------------------------------------------------------------------|------|------|-----------|-------|------|------|
| Rsa1.0_00135.1.g6417.t1 | emb[CAB39638.1] RNA-directed DNA polymerase-like protein [Arabidopsis thaliana] gi 7267666 emb[CAB78094.1] RNA-directed DNA polymerase-like protein [Arabidopsis thaliana]                                                                                                                                                                                           | 1774 | 1274 | 0         | 71.8  | 32.0 | 42.1 | RNA-directed DNA polymerase-like protein             | gbpln | Arabidopsis thaliana | AT4G29090.1   Symbols:   Ribonuclease H-like superfamily protein   chr4:14333528-14335255 FORWARD LENGTH=575                                                                                                                                                                                                                                                      | 1774 | 575  | 7.00E-63  | 32.4  | 9.3  | 14.3 |
| Rsa1.0_00135.1.g6418.t1 | gb EOA39112.1  hypothetical protein CARUB_v10011888mg [Capsella rubella]                                                                                                                                                                                                                                                                                             | 1059 | 1061 | 0         | 100.2 | 78.8 | 87.6 | hypothetical protein CARUB_v10011888mg               | gbpln | Capsella rubella     | AT1G52780.1   Symbols:   Protein of unknown function (DUF2921)   chr1:19658846-19662025 FORWARD LENGTH=1059                                                                                                                                                                                                                                                       | 1059 | 1059 | 0         | 100.0 | 76.3 | 84.7 |
| Rsa1.0_00135.1.g6419.t1 | ref NP_175688.1  oxidoreductase, 2OG-Fe(II) oxygenase family protein [Arabidopsis thaliana] gi 12324652 gb AAG52288.1 AC019018.25 putative oxidoreductase: 32373-31266 [Arabidopsis thaliana] gi 332194731 gb AEE32852.1  oxidoreductase, 2OG-Fe(II) oxygenase family protein [Arabidopsis thaliana]                                                                 | 310  | 310  | 1.00E-171 | 100.0 | 91.6 | 96.5 | oxidoreductase, 2OG-Fe(II) oxygenase family protein  | gbpln | Arabidopsis thaliana | AT1G52790.1   Symbols:   2-oxoglutarate (2OG) and Fe(II)-dependent oxygenase superfamily protein   chr1:19662194-19663301 REVERSE LENGTH=310                                                                                                                                                                                                                      | 310  | 310  | 1.00E-174 | 100.0 | 91.6 | 96.5 |
| Rsa1.0_00135.1.g6420.t1 | ref NP_175689.1  oxidoreductase, 2OG-Fe(II) oxygenase family protein [Arabidopsis thaliana] gi 12324655 gb AAG52291.1 AC019018.28 putative oxidoreductase: 33116-34434 [Arabidopsis thaliana] gi 67633452 gb AY78650.1  oxidoreductase [Arabidopsis thaliana] gi 332194732 gb AEE32853.1  oxidoreductase, 2OG-Fe(II) oxygenase family protein [Arabidopsis thaliana] | 324  | 314  | 1.00E-170 | 96.9  | 86.4 | 92.0 | oxidoreductase, 2OG-Fe(II) oxygenase family protein  | gbpln | Arabidopsis thaliana | AT1G52800.1   Symbols:   2-oxoglutarate (2OG) and Fe(II)-dependent oxygenase superfamily protein   chr1:19664044-19665362 FORWARD LENGTH=314                                                                                                                                                                                                                      | 324  | 314  | 1.00E-173 | 96.9  | 86.4 | 92.0 |
| Rsa1.0_00135.1.g6421.t1 | ref NP_175690.1  2-oxoglutarate-dependent dioxygenase-related protein [Arabidopsis thaliana] gi 12324657 gb AAG52293.1 AC019018.30 putative oxidoreductase: 36199-37309 [Arabidopsis thaliana] gi 332194733 gb AEE32854.1  2-oxoglutarate-dependent dioxygenase-related protein [Arabidopsis thaliana]                                                               | 321  | 289  | 1.00E-139 | 90.0  | 75.7 | 82.9 | 2-oxoglutarate-dependent dioxygenase-related protein | gbpln | Arabidopsis thaliana | AT1G52810.1   Symbols:   2-oxoglutarate (2OG) and Fe(II)-dependent oxygenase superfamily protein   chr1:19667127-19668237 FORWARD LENGTH=289                                                                                                                                                                                                                      | 321  | 289  | 1.00E-142 | 90.0  | 75.7 | 82.9 |
| Rsa1.0_00135.1.g6422.t1 | #                                                                                                                                                                                                                                                                                                                                                                    | #    | #    | #         | #     | #    | -    | ----                                                 | ----  | #                    | #                                                                                                                                                                                                                                                                                                                                                                 | #    | #    | #         | #     | #    |      |
| Rsa1.0_00135.1.g6423.t1 | #                                                                                                                                                                                                                                                                                                                                                                    | #    | #    | #         | #     | #    | -    | ----                                                 | ----  | #                    | #                                                                                                                                                                                                                                                                                                                                                                 | #    | #    | #         | #     | #    |      |
| Rsa1.0_00135.1.g6424.t1 | ref NP_175691.1  putative 2-oxoglutarate-dependent dioxygenase [Arabidopsis thaliana] gi 12324633 gb AAG52269.1 AC019018.6 putative oxidoreductase: 38288-39393 [Arabidopsis thaliana] gi 332194734 gb AEE32855.1  putative 2-oxoglutarate-dependent dioxygenase [Arabidopsis thaliana]                                                                              | 314  | 317  | 1.00E-168 | 101.0 | 90.8 | 96.2 | putative 2-oxoglutarate-dependent dioxygenase        | gbpln | Arabidopsis thaliana | AT1G52820.1   Symbols:   2-oxoglutarate (2OG) and Fe(II)-dependent oxygenase superfamily protein   chr1:19669216-19670321 FORWARD LENGTH=317                                                                                                                                                                                                                      | 314  | 317  | 1.00E-170 | 101.0 | 90.8 | 96.2 |
| Rsa1.0_00135.1.g6425.t1 | #                                                                                                                                                                                                                                                                                                                                                                    | #    | #    | #         | #     | #    | -    | ----                                                 | ----  | #                    | #                                                                                                                                                                                                                                                                                                                                                                 | #    | #    | #         | #     | #    |      |
| Rsa1.0_00135.1.g6426.t1 | ref XP_002894404.1  hypothetical protein ARALYDRAFT.474409 [Arabidopsis lyrata subsp. lyrata] gi 297340246 gb EFH70663.1  hypothetical protein ARALYDRAFT.474409 [Arabidopsis lyrata subsp. lyrata]                                                                                                                                                                  | 201  | 188  | 2.00E-75  | 93.5  | 73.1 | 81.1 | hypothetical protein ARALYDRAFT.474409               | gbpln | Arabidopsis lyrata   | AT1G52830.1   Symbols:   IAA6, SHY1   indole-3-acetic acid 6   chr1:19672670-19673559 REVERSE LENGTH=189                                                                                                                                                                                                                                                          | 201  | 189  | 1.00E-76  | 94.0  | 72.1 | 81.1 |
| Rsa1.0_00135.1.g6427.t1 | #                                                                                                                                                                                                                                                                                                                                                                    | #    | #    | #         | #     | #    | -    | ----                                                 | ----  | #                    | #                                                                                                                                                                                                                                                                                                                                                                 | #    | #    | #         | #     | #    |      |
| Rsa1.0_00135.1.g6428.t1 | dbj BAB02160.1  unnamed protein product [Arabidopsis thaliana] gi 15292885 gb AAK92813.1  unknown protein [Arabidopsis thaliana] gi 21280913 gb AAM45005.1  unknown protein [Arabidopsis thaliana]                                                                                                                                                                   | 296  | 415  | 1.00E-53  | 140.2 | 43.2 | 56.8 | unnamed protein product                              | gbpln | Arabidopsis thaliana | AT2G13770.1   Symbols:   CONTAINS InterPro DOMAIN/s: Putative harbinger transposase-derived nuclease (InterPro:IPR006912); Has 451 Blast hits to 352 proteins in 33 species: Archae - 0; Bacteria - 0; Metazoa - 28; Fungi - 8; Plants - 388; Viruses - 0; Other Eukaryotes - 27 (source: NCBI BLINK).   chr2:5736603-5737847 FORWARD LENGTH=343                  | 296  | 343  | 1.00E-27  | 115.9 | 31.8 | 41.9 |
| Rsa1.0_00135.1.g6429.t1 | gb EOA37260.1  hypothetical protein CARUB_v10010820mg [Capsella rubella]                                                                                                                                                                                                                                                                                             | 68   | 68   | 9.00E-30  | 100.0 | 95.6 | 98.5 | hypothetical protein CARUB_v10010820mg               | gbpln | Capsella rubella     | AT1G52855.1   Symbols:   unknown protein; BEST Arabidopsis thaliana protein match is: unknown protein (TAIR:AT3G15534.1); Has 35333 Blast hits to 34131 proteins in 2444 species: Archae - 798; Bacteria - 22429; Metazoa - 974; Fungi - 991; Plants - 531; Viruses - 0; Other Eukaryotes - 9610 (source: NCBI BLINK).   chr1:19683137-19683343 REVERSE LENGTH=68 | 68   | 68   | 5.00E-32  | 100.0 | 94.1 | 97.1 |
| Rsa1.0_00135.1.g6430.t1 | #                                                                                                                                                                                                                                                                                                                                                                    | #    | #    | #         | #     | #    | -    | ----                                                 | ----  | #                    | #                                                                                                                                                                                                                                                                                                                                                                 | #    | #    | #         | #     | #    |      |



|                         |                                                                                                                                                                                                                                                                                                                                                                                                                                                          |      |      |           |       |      |      |                                                          |       |                      |                                                                                                                                                                                                                                                                                                                                                                                                              |      |      |           |       |      |      |
|-------------------------|----------------------------------------------------------------------------------------------------------------------------------------------------------------------------------------------------------------------------------------------------------------------------------------------------------------------------------------------------------------------------------------------------------------------------------------------------------|------|------|-----------|-------|------|------|----------------------------------------------------------|-------|----------------------|--------------------------------------------------------------------------------------------------------------------------------------------------------------------------------------------------------------------------------------------------------------------------------------------------------------------------------------------------------------------------------------------------------------|------|------|-----------|-------|------|------|
| Rsa1.0_00135.1.g6431.t1 | refNP_564615.3  Peroxisomal membrane 22 kDa (Mpv17/PMP22) family protein [Arabidopsis thaliana] gi 12324641 gb AAG52277.1 AC019018.14 unknown protein; 54928-56750 [Arabidopsis thaliana] gi 14326545 gb AAK60317.1 AF385726.1 At1g52870/F14G24.14 [Arabidopsis thaliana] gi 25090145 gb AAN72239.1 At1g52870/F14G24.14 [Arabidopsis thaliana] gi 33219474 gb AEE32862.1 Peroxisomal membrane 22 kDa (Mpv17/PMP22) family protein [Arabidopsis thaliana] | 362  | 366  | 0         | 101.1 | 89.0 | 94.8 | Peroxisomal membrane 22 kDa (Mpv17/PMP22) family protein | gbpln | Arabidopsis thaliana | AT1G52870.2   Symbols:   Peroxisomal membrane 22 kDa (Mpv17/PMP22) family protein   chr1:19685856-19687678 FORWARD LENGTH=366                                                                                                                                                                                                                                                                                | 362  | 366  | 0         | 101.1 | 89.0 | 94.8 |
| Rsa1.0_00135.1.g6432.t1 | gb EOA33105.1  hypothetical protein CARUB_v10016443mg [Capsella rubella]                                                                                                                                                                                                                                                                                                                                                                                 | 107  | 107  | 4.00E-28  | 100.0 | 60.7 | 77.6 | hypothetical protein CARUB_v10016443mg                   | gbpln | Capsella rubella     | AT3G15518.1   Symbols:   unknown protein; FUNCTIONS IN: molecular.function unknown; INVOLVED IN: biological.process unknown; LOCATED IN: cellular.component unknown; Has 30201 Blast hits to 17322 proteins in 780 species: Archae - 12; Bacteria - 1396; Metazoa - 17338; Fungi - 3422; Plants - 5037; Viruses - 0; Other Eukaryotes - 2996 (source: NCBI BLink).   chr3:5249221-5249541 FORWARD LENGTH=106 | 107  | 106  | 9.00E-31  | 99.1  | 62.6 | 77.6 |
| Rsa1.0_00135.1.g6433.t1 | gb AAD32898.1  putative retroelement pol polyprotein [Arabidopsis thaliana]                                                                                                                                                                                                                                                                                                                                                                              | 1358 | 1307 | 0         | 96.2  | 60.6 | 75.7 | putative retroelement pol polyprotein                    | gbpln | Arabidopsis thaliana | AT4G23160.1   Symbols: CRK8   cysteine-rich RLK (RECEPTOR-like protein kinase) 8   chr4:12129485-12134086 FORWARD LENGTH=1262                                                                                                                                                                                                                                                                                | 1358 | 1262 | 1.00E-101 | 92.9  | 14.7 | 21.8 |
| Rsa1.0_00135.1.g6434.t1 | gb EOA38054.1  hypothetical protein CARUB_v10009524mg, partial [Capsella rubella]                                                                                                                                                                                                                                                                                                                                                                        | 321  | 363  | 1.00E-104 | 113.1 | 73.5 | 79.8 | hypothetical protein CARUB_v10009524mg, partial          | gbpln | Capsella rubella     | AT1G52880.1   Symbols: NAM, ANAC018, ATNAM, NARS2   NAC (No Apical Meristem) domain transcriptional regulator superfamily protein   chr1:19689285-19690430 REVERSE LENGTH=320                                                                                                                                                                                                                                | 321  | 320  | 1.00E-100 | 99.7  | 72.9 | 77.9 |
| Rsa1.0_00135.1.g6435.t1 | #                                                                                                                                                                                                                                                                                                                                                                                                                                                        | #    | #    | #         | #     | #    | #    | -                                                        | ----  | ----                 | #                                                                                                                                                                                                                                                                                                                                                                                                            | #    | #    | #         | #     | #    | #    |
| Rsa1.0_00135.1.g6436.t1 | gb AAG00256.1 AC002130_21 F1N21.7 [Arabidopsis thaliana]                                                                                                                                                                                                                                                                                                                                                                                                 | 132  | 303  | 4.00E-17  | 229.5 | 29.5 | 36.4 | F1N21.7                                                  | gbpln | Arabidopsis thaliana | AT5G33393.1   Symbols:   unknown protein; LOCATED IN: chloroplast; Has 30201 Blast hits to 17322 proteins in 780 species: Archae - 12; Bacteria - 1396; Metazoa - 17338; Fungi - 3422; Plants - 5037; Viruses - 0; Other Eukaryotes - 2996 (source: NCBI BLink).   chr5:12656430-12658588 REVERSE LENGTH=435                                                                                                 | 132  | 435  | 1.00E-15  | 329.5 | 24.2 | 37.1 |
| Rsa1.0_00135.1.g6437.t1 | ref XP_002894409.1  ANAC019 [Arabidopsis lyrata subsp. lyrata] gi 297340251 gb EFH70668.1  ANAC019 [Arabidopsis lyrata subsp. lyrata]                                                                                                                                                                                                                                                                                                                    | 314  | 320  | 1.00E-154 | 101.9 | 88.2 | 93.3 | ANAC019                                                  | gbpln | Arabidopsis lyrata   | AT1G52890.1   Symbols: ANAC019, NAC019   NAC domain containing protein 19   chr1:19697292-19698444 REVERSE LENGTH=317                                                                                                                                                                                                                                                                                        | 314  | 317  | 1.00E-149 | 101.0 | 84.4 | 90.8 |
| Rsa1.0_00135.1.g6438.t1 | #                                                                                                                                                                                                                                                                                                                                                                                                                                                        | #    | #    | #         | #     | #    | #    | -                                                        | ----  | ----                 | #                                                                                                                                                                                                                                                                                                                                                                                                            | #    | #    | #         | #     | #    | #    |
| Rsa1.0_00135.1.g6439.t1 | gb EOA39327.1  hypothetical protein CARUB_v10012368mg [Capsella rubella]                                                                                                                                                                                                                                                                                                                                                                                 | 196  | 203  | 3.00E-90  | 103.6 | 83.2 | 90.8 | hypothetical protein CARUB_v10012368mg                   | gbpln | Capsella rubella     | AT1G52900.1   Symbols:   Toll-Interleukin-Resistance (TIR) domain family protein   chr1:19702211-19702916 REVERSE LENGTH=199                                                                                                                                                                                                                                                                                 | 196  | 199  | 1.00E-89  | 101.5 | 83.7 | 89.8 |
| Rsa1.0_00135.1.g6440.t1 | gb EOA38605.1  hypothetical protein CARUB_v10010446mg [Capsella rubella]                                                                                                                                                                                                                                                                                                                                                                                 | 175  | 175  | 4.00E-90  | 100.0 | 92.0 | 96.6 | hypothetical protein CARUB_v10010446mg                   | gbpln | Capsella rubella     | AT1G52910.1   Symbols:   Protein of unknown function (DUF1218)   chr1:19708114-19709128 FORWARD LENGTH=175                                                                                                                                                                                                                                                                                                   | 175  | 175  | 4.00E-87  | 100.0 | 87.4 | 92.0 |
| Rsa1.0_00135.1.g6441.t1 | ref XP_002894411.1  predicted protein [Arabidopsis lyrata subsp. lyrata] gi 297340253 gb EFH70670.1  predicted protein [Arabidopsis lyrata subsp. lyrata]                                                                                                                                                                                                                                                                                                | 657  | 410  | 0         | 62.4  | 54.5 | 58.3 | predicted protein                                        | gbpln | Arabidopsis lyrata   | AT1G52920.1   Symbols: GCR2, GPCR   G protein coupled receptor   chr1:19709360-19711048 REVERSE LENGTH=410                                                                                                                                                                                                                                                                                                   | 657  | 410  | 0         | 62.4  | 52.7 | 57.5 |
| Rsa1.0_00135.1.g6442.t1 | dbj BAJ33634.1  unnamed protein product [Theleungiella halophila]                                                                                                                                                                                                                                                                                                                                                                                        | 248  | 512  | 1.00E-122 | 206.5 | 83.1 | 91.1 | unnamed protein product                                  | ----  | ----                 | AT3G14680.1   Symbols: CYP72A14   cytochrome P450, family 72, subfamily A, polypeptide 14   chr3:4934478-4936462 FORWARD LENGTH=512                                                                                                                                                                                                                                                                          | 248  | 512  | 1.00E-123 | 206.5 | 81.0 | 91.1 |
| Rsa1.0_00136.1.g6443.t1 | gb EOA36640.1  hypothetical protein CARUB_v10011892mg [Capsella rubella]                                                                                                                                                                                                                                                                                                                                                                                 | 719  | 1530 | 0         | 212.8 | 94.6 | 97.2 | hypothetical protein CARUB_v10011892mg                   | gbpln | Capsella rubella     | AT1G08730.1   Symbols: XIC, ATXIC   Myosin family protein with Dil domain   chr1:2779963-2788325 FORWARD LENGTH=1538                                                                                                                                                                                                                                                                                         | 719  | 1538 | 0         | 213.9 | 94.4 | 96.2 |
| Rsa1.0_00136.1.g6444.t2 | ref NP_172347.2  F-box protein SKIP24 [Arabidopsis thaliana] gi 17529082 gb AAL38751.1  unknown protein [Arabidopsis thaliana] gi 22136746 gb AAM91692.1  unknown protein [Arabidopsis thaliana] gi 332190216 gb AEE28337.1  F-box protein SKIP24 [Arabidopsis thaliana]                                                                                                                                                                                 | 260  | 274  | 1.00E-109 | 105.4 | 79.2 | 88.5 | F-box protein SKIP24                                     | gbpln | Arabidopsis thaliana | AT1G08710.1   Symbols:   F-box family protein   chr1:2771720-2773250 FORWARD LENGTH=274                                                                                                                                                                                                                                                                                                                      | 260  | 274  | 1.00E-112 | 105.4 | 79.2 | 88.5 |
| Rsa1.0_00136.1.g6445.t1 | gb EOA40330.1  hypothetical protein CARUB_v10009057mg [Capsella rubella]                                                                                                                                                                                                                                                                                                                                                                                 | 442  | 467  | 0         | 105.7 | 88.7 | 93.9 | hypothetical protein CARUB_v10009057mg                   | gbpln | Capsella rubella     | AT1G08700.1   Symbols: PS1   Presenilin-1   chr1:2769865-2771349 REVERSE LENGTH=453                                                                                                                                                                                                                                                                                                                          | 442  | 453  | 0         | 102.5 | 84.8 | 91.4 |

|                          |                                                                                                                                                                                                                                                                                                                                                                                                                                                                                                                                                                                                                       |      |      |           |       |      |      |                                                                                   |       |                      |                                                                                                                                                                                                                                                                                                                                                                                                                                                           |      |      |           |       |      |      |
|--------------------------|-----------------------------------------------------------------------------------------------------------------------------------------------------------------------------------------------------------------------------------------------------------------------------------------------------------------------------------------------------------------------------------------------------------------------------------------------------------------------------------------------------------------------------------------------------------------------------------------------------------------------|------|------|-----------|-------|------|------|-----------------------------------------------------------------------------------|-------|----------------------|-----------------------------------------------------------------------------------------------------------------------------------------------------------------------------------------------------------------------------------------------------------------------------------------------------------------------------------------------------------------------------------------------------------------------------------------------------------|------|------|-----------|-------|------|------|
| Rsa1.0_00136.1.g6446.t1  | ref XP_002889709.1  hypothetical protein ARALYDRAFT_470937 [Arabidopsis lyrata subsp. lyrata] gi 297335551 gb EFH65968.1  hypothetical protein ARALYDRAFT_470937 [Arabidopsis lyrata subsp. lyrata]                                                                                                                                                                                                                                                                                                                                                                                                                   | 996  | 668  | 0         | 67.1  | 51.1 | 54.8 | hypothetical protein ARALYDRAFT_470937                                            | gbpln | Arabidopsis lyrata   | AT1G08680.2   Symbols: ZIGA4   ARF GAP-like zinc finger-containing protein ZIGA4   chr1:2762820-2768387 FORWARD LENGTH=648                                                                                                                                                                                                                                                                                                                                | 996  | 648  | 0         | 65.1  | 49.8 | 53.7 |
| Rsa1.0_00136.1.g6447.t1  | gb AAF86559.1 AC069252.18 F2E2.15 [Arabidopsis thaliana]                                                                                                                                                                                                                                                                                                                                                                                                                                                                                                                                                              | 169  | 487  | 7.00E-18  | 288.2 | 35.5 | 56.2 | F2E2.15                                                                           | gbpln | Arabidopsis thaliana | AT1G22080.2   Symbols:   Cysteine proteinases superfamily protein   chr1:7792404-7794089 REVERSE LENGTH=332                                                                                                                                                                                                                                                                                                                                               | 169  | 332  | 5.00E-20  | 196.4 | 34.3 | 52.7 |
| Rsa1.0_00136.1.g6448.t1  | gb EOA39383.1  hypothetical protein CARUB_v10009932mg [Capsella rubella]                                                                                                                                                                                                                                                                                                                                                                                                                                                                                                                                              | 288  | 285  | 1.00E-155 | 99.0  | 91.0 | 96.2 | hypothetical protein CARUB_v10009932mg                                            | gbpln | Capsella rubella     | AT1G08650.1   Symbols: PPK1, ATPCK1   phosphoenolpyruvate carboxylase kinase 1   chr1:2752206-2753232 FORWARD LENGTH=284                                                                                                                                                                                                                                                                                                                                  | 288  | 284  | 1.00E-156 | 98.6  | 89.6 | 95.1 |
| Rsa1.0_00136.1.g6449.t1  | gb EOA36952.1  hypothetical protein CARUB_v10009875mg [Capsella rubella]                                                                                                                                                                                                                                                                                                                                                                                                                                                                                                                                              | 287  | 299  | 1.00E-136 | 104.2 | 84.0 | 90.9 | hypothetical protein CARUB_v10009875mg                                            | gbpln | Capsella rubella     | AT1G08640.1   Symbols: CJD1   Chloroplast J-like domain 1   chr1:2748714-2751209 REVERSE LENGTH=294                                                                                                                                                                                                                                                                                                                                                       | 287  | 294  | 1.00E-137 | 102.4 | 84.3 | 90.6 |
| Rsa1.0_00136.1.g6450.t1  | gb EOA38078.1  hypothetical protein CARUB_v10009546mg [Capsella rubella]                                                                                                                                                                                                                                                                                                                                                                                                                                                                                                                                              | 358  | 358  | 0         | 100.0 | 90.5 | 94.7 | hypothetical protein CARUB_v10009546mg                                            | gbpln | Capsella rubella     | AT1G08630.4   Symbols: THA1   threonine aldolase 1   chr1:2743948-2745685 REVERSE LENGTH=358                                                                                                                                                                                                                                                                                                                                                              | 358  | 358  | 0         | 100.0 | 89.1 | 94.7 |
| Rsa1.0_00136.1.g6451.t1  | ref NP_172338.4  transcription factor jumonji and C5HC2 type zinc finger domain-containing protein [Arabidopsis thaliana] gi 334182398 ref NP_001184940.1  transcription factor jumonji and C5HC2 type zinc finger domain-containing protein [Arabidopsis thaliana] gi 225897896 db BAH30280.1  hypothetical protein [Arabidopsis thaliana] gi 332190197 gb AEE28318.1  transcription factor jumonji and C5HC2 type zinc finger domain-containing protein [Arabidopsis thaliana] gi 332190198 gb AEE28319.1  transcription factor jumonji and C5HC2 type zinc finger domain-containing protein [Arabidopsis thaliana] | 1194 | 1209 | 0         | 101.3 | 80.5 | 88.4 | transcription factor jumonji and C5HC2 type zinc finger domain-containing protein | gbpln | Arabidopsis thaliana | AT1G08620.2   Symbols: PKDM7D   Transcription factor jumonji (jmj) family protein / zinc finger (C5HC2 type) family protein   chr1:2737554-2743370 FORWARD LENGTH=1209                                                                                                                                                                                                                                                                                    | 1194 | 1209 | 0         | 101.3 | 80.5 | 88.4 |
| Rsa1.0_00136.1.g6452.t19 | ref XP_002889705.1  ATRX/CHR20 [Arabidopsis lyrata subsp. lyrata] gi 297335547 gb EFH65964.1  ATRX/CHR20 [Arabidopsis lyrata subsp. lyrata]                                                                                                                                                                                                                                                                                                                                                                                                                                                                           | 1510 | 1483 | 0         | 98.2  | 83.7 | 89.1 | ATRX/CHR20                                                                        | gbpln | Arabidopsis lyrata   | AT1G08600.2   Symbols: ATRX   P-loop containing nucleoside triphosphate hydrolases superfamily protein   chr1:2724562-2733431 FORWARD LENGTH=1479                                                                                                                                                                                                                                                                                                         | 1510 | 1479 | 0         | 97.9  | 82.8 | 87.7 |
| Rsa1.0_00136.1.g6453.t1  | ref NP_172334.1  uncharacterized protein [Arabidopsis thaliana] gi 9802580 gb AAF9782.1 AC003981.32 F22O13.6 [Arabidopsis thaliana] gi 38454044 gb AAR20716.1  At1g08580 [Arabidopsis thaliana] gi 41349904 gb AAS00337.1  At1g08580 [Arabidopsis thaliana] gi 332190190 gb AEE28311.1  uncharacterized protein AT1G08580 [Arabidopsis thaliana]                                                                                                                                                                                                                                                                      | 168  | 123  | 1.00E-40  | 73.2  | 50.0 | 52.4 | uncharacterized protein                                                           | gbpln | Arabidopsis thaliana | AT1G08590.1   Symbols:   unknown protein; Has 39 Blast hits to 39 proteins in 15 species: Archaea - 0; Bacteria - 0; Metazoa - 0; Fungi - 0; Plants - 35; Viruses - 0; Other Eukaryotes - 4 (source: NCBI BLINK).   chr1:2715296-2716351 REVERSE LENGTH=123                                                                                                                                                                                               | 168  | 123  | 4.00E-43  | 73.2  | 50.0 | 52.4 |
| Rsa1.0_00136.1.g6454.t1  | db BAJ34000.1  unnamed protein product [Thellungiella halophila]                                                                                                                                                                                                                                                                                                                                                                                                                                                                                                                                                      | 250  | 274  | 1.00E-106 | 109.6 | 84.0 | 90.4 | unnamed protein product                                                           | ----  | ----                 | AT1G08570.1   Symbols: ACHT4   atypical CYS HIS rich thioredoxin 4   chr1:2713059-2714312 FORWARD LENGTH=275                                                                                                                                                                                                                                                                                                                                              | 250  | 275  | 1.00E-106 | 110.0 | 81.6 | 88.4 |
| Rsa1.0_00136.1.g6455.t1  | ref XP_002892462.1  SYP111 [Arabidopsis lyrata subsp. lyrata] gi 297338304 gb EFH68721.1  SYP111 [Arabidopsis lyrata subsp. lyrata]                                                                                                                                                                                                                                                                                                                                                                                                                                                                                   | 306  | 310  | 1.00E-135 | 101.3 | 84.6 | 92.8 | SYP111                                                                            | gbpln | Arabidopsis lyrata   | AT1G08560.1   Symbols: SYP111, KN, ATSPY111   syntaxin of plants 111   chr1:2709778-2710710 REVERSE LENGTH=310                                                                                                                                                                                                                                                                                                                                            | 306  | 310  | 1.00E-135 | 101.3 | 84.0 | 92.5 |
| Rsa1.0_00136.1.g6456.t1  | gb EOA40354.1  hypothetical protein CARUB_v10009082mg [Capsella rubella]                                                                                                                                                                                                                                                                                                                                                                                                                                                                                                                                              | 459  | 461  | 0         | 100.4 | 86.9 | 93.2 | hypothetical protein CARUB_v10009082mg                                            | gbpln | Capsella rubella     | AT1G08550.2   Symbols: NPQ1, AVDE1   non-photochemical quenching 1   chr1:2707462-2709387 FORWARD LENGTH=462                                                                                                                                                                                                                                                                                                                                              | 459  | 462  | 0         | 100.7 | 86.5 | 93.0 |
| Rsa1.0_00136.1.g6457.t2  | ref NP_172329.2  uncharacterized protein [Arabidopsis thaliana] gi 110738913 db BAF01378.1  hypothetical protein [Arabidopsis thaliana] gi 332190181 gb AEE28302.1  uncharacterized protein AT1G08530 [Arabidopsis thaliana]                                                                                                                                                                                                                                                                                                                                                                                          | 261  | 257  | 5.00E-79  | 98.5  | 67.8 | 78.2 | uncharacterized protein                                                           | gbpln | Arabidopsis thaliana | AT1G08530.1   Symbols:   unknown protein; FUNCTIONS IN: molecular.function unknown; INVOLVED IN: biological_process unknown; LOCATED IN: chloroplast; BEST Arabidopsis thaliana protein match is: unknown protein (TAIRAT5G09995.2); Has 140 Blast hits to 140 proteins in 53 species: Archaea - 0; Bacteria - 63; Metazoa - 0; Fungi - 0; Plants - 76; Viruses - 0; Other Eukaryotes - 1 (source: NCBI BLINK).   chr1:2701252-2702952 FORWARD LENGTH=257 | 261  | 257  | 1.00E-81  | 98.5  | 67.8 | 78.2 |

|                         |                                                                                                                                                                                                                                                                                                           |     |     |           |       |      |      |                                        |       |                      |                                                                                                                                                                                                                                                                                                                                                                                                                                                                                    |     |      |           |       |      |      |
|-------------------------|-----------------------------------------------------------------------------------------------------------------------------------------------------------------------------------------------------------------------------------------------------------------------------------------------------------|-----|-----|-----------|-------|------|------|----------------------------------------|-------|----------------------|------------------------------------------------------------------------------------------------------------------------------------------------------------------------------------------------------------------------------------------------------------------------------------------------------------------------------------------------------------------------------------------------------------------------------------------------------------------------------------|-----|------|-----------|-------|------|------|
| Rsa1.0_00136.1.g6458.t1 | gb[EOA39742.1] hypothetical protein CARUB_v10008387mg [Capsella rubella]                                                                                                                                                                                                                                  | 755 | 758 | 0         | 100.4 | 89.8 | 94.2 | hypothetical protein CARUB_v10008387mg | gbpln | Capsella rubella     | AT1G08520.1   Symbols: ALB1, ALB-1V, V157, PDE166, CHLD   ALBINA   chr1:2696538-2700819 FORWARD LENGTH=760                                                                                                                                                                                                                                                                                                                                                                         | 755 | 760  | 0         | 100.7 | 90.2 | 94.6 |
| Rsa1.0_00136.1.g6459.t1 | gb[ABI18986.1] palmitoyl-ACP thioesterase [Brassica juncea]                                                                                                                                                                                                                                               | 411 | 411 | 0         | 100.0 | 92.2 | 95.4 | palmitoyl-ACP thioesterase             | gbpln | Brassica juncea      | AT1G08510.1   Symbols: FATB   fatty acyl-ACP thioesterases B   chr1:2691546-2693409 REVERSE LENGTH=412                                                                                                                                                                                                                                                                                                                                                                             | 411 | 412  | 0         | 100.2 | 88.3 | 93.2 |
| Rsa1.0_00136.1.g6460.t1 | ref[XP_002892460.1] hypothetical protein ARALYDRAFT_470910 [Arabidopsis lyrata subsp. lyrata] gi 297338302 gb EFH68719.1   hypothetical protein ARALYDRAFT_470910 [Arabidopsis lyrata subsp. lyrata]                                                                                                      | 464 | 466 | 0         | 100.4 | 90.7 | 93.5 | hypothetical protein ARALYDRAFT_470910 | gbpln | Arabidopsis lyrata   | AT1G08490.1   Symbols: ATSUF5, SUFS, ATCPNIF5, ATNFS2, CPNIF5   chloroplastic NIFS-like cysteine desulfurase   chr1:2685980-2688547 REVERSE LENGTH=463                                                                                                                                                                                                                                                                                                                             | 464 | 463  | 0         | 99.8  | 90.3 | 93.5 |
| Rsa1.0_00136.1.g6461.t1 | ref[NP_563819.1] uncharacterized protein [Arabidopsis thaliana] gi 15450427 gb AAK96507.1   At1g08480.1   T27G7.10 [Arabidopsis thaliana] gi 16974435 gb AAL31221.1   At1g08480.1   T27G7.10 [Arabidopsis thaliana] gi 332190176 gb AEE28297.1   uncharacterized protein AT1G08480 [Arabidopsis thaliana] | 138 | 142 | 2.00E-65  | 102.9 | 90.6 | 92.8 | uncharacterized protein                | gbpln | Arabidopsis thaliana | AT1G08480.1   Symbols:   unknown protein; FUNCTIONS IN: molecular function unknown; INVOLVED IN: biological process unknown; LOCATED IN: mitochondrion, plasma membrane, plastid, vacuole; EXPRESSED IN: 27 plant structures; EXPRESSED DURING: 15 growth stages; Has 39 Blast hits to 39 proteins in 13 species: Archae - 0; Bacteria - 0; Metazoa - 0; Fungi - 0; Plants - 39; Viruses - 0; Other Eukaryotes - 0 (source: NCBI BLINK).   chr1:2684340-2685395 FORWARD LENGTH=142 | 138 | 142  | 5.00E-68  | 102.9 | 90.6 | 92.8 |
| Rsa1.0_00136.1.g6462.t1 | gb[EOA37930.1] hypothetical protein CARUB_v10009397mg [Capsella rubella]                                                                                                                                                                                                                                  | 393 | 390 | 0         | 99.2  | 88.0 | 93.4 | hypothetical protein CARUB_v10009397mg | gbpln | Capsella rubella     | AT1G08470.1   Symbols: SSL3   strictosidine synthase-like 3   chr1:2682262-2683977 REVERSE LENGTH=390                                                                                                                                                                                                                                                                                                                                                                              | 393 | 390  | 0         | 99.2  | 87.5 | 93.1 |
| Rsa1.0_00136.1.g6463.t1 | gb[EOA36256.1] hypothetical protein CARUB_v10010384mg [Capsella rubella]                                                                                                                                                                                                                                  | 168 | 188 | 2.00E-82  | 111.9 | 87.5 | 94.0 | hypothetical protein CARUB_v10010384mg | gbpln | Capsella rubella     | AT1G08465.1   Symbols: YAB2   Plant-specific transcription factor YABBY family protein   chr1:2676033-2679382 FORWARD LENGTH=184                                                                                                                                                                                                                                                                                                                                                   | 168 | 184  | 3.00E-78  | 109.5 | 82.7 | 89.9 |
| Rsa1.0_00136.1.g6464.t1 | ref[XP_002889694.1] hypothetical protein ARALYDRAFT_334132 [Arabidopsis lyrata subsp. lyrata] gi 297335536 gb EFH65953.1   hypothetical protein ARALYDRAFT_334132 [Arabidopsis lyrata subsp. lyrata]                                                                                                      | 508 | 501 | 0         | 98.6  | 86.2 | 90.9 | hypothetical protein ARALYDRAFT_334132 | gbpln | Arabidopsis lyrata   | AT1G08440.1   Symbols:   Aluminium activated malate transporter family protein   chr1:2663027-2665343 FORWARD LENGTH=501                                                                                                                                                                                                                                                                                                                                                           | 508 | 501  | 0         | 98.6  | 85.0 | 90.6 |
| Rsa1.0_00136.1.g6465.t1 | ref[XP_003605992.1] Serine/threonine protein phosphatase [Medicago truncatula] gi 355507047 gb AES8189.1   Serine/threonine protein phosphatase [Medicago truncatula]                                                                                                                                     | 120 | 875 | 1.00E-36  | 729.2 | 63.3 | 66.7 | Serine/threonine protein phosphatase   | gbpln | Medicago truncatula  | AT2G27210.2   Symbols: BSL3   BRI1 suppressor 1 (BSU1)-like 3   chr2:11630188-11636182 FORWARD LENGTH=1001                                                                                                                                                                                                                                                                                                                                                                         | 120 | 1001 | 4.00E-38  | 834.2 | 62.5 | 66.7 |
| Rsa1.0_00136.1.g6466.t1 | ref[NP_172316.2] RINT-1 / TIP-1 family protein [Arabidopsis thaliana] gi 26451304 dbj BAC42753.1   unknown protein [Arabidopsis thaliana] gi 29824357 gb AAP04139.1   unknown protein [Arabidopsis thaliana] gi 332190164 gb AEE28285.1   RINT-1 / TIP-1 family protein [Arabidopsis thaliana]            | 800 | 804 | 0         | 100.5 | 79.0 | 86.5 | RINT-1 / TIP-1 family protein          | gbpln | Arabidopsis thaliana | AT1G08400.1   Symbols:   RINT-1 / TIP-1 family   chr1:2643348-2646005 REVERSE LENGTH=804                                                                                                                                                                                                                                                                                                                                                                                           | 800 | 804  | 0         | 100.5 | 79.0 | 86.5 |
| Rsa1.0_00136.1.g6467.t1 | gb[EOA37194.1] hypothetical protein CARUB_v10010612mg [Capsella rubella]                                                                                                                                                                                                                                  | 123 | 136 | 3.00E-43  | 110.6 | 74.8 | 78.0 | hypothetical protein CARUB_v10010612mg | gbpln | Capsella rubella     | AT1G08390.1   Symbols:   unknown protein; Has 62 Blast hits to 62 proteins in 27 species: Archae - 0; Bacteria - 0; Metazoa - 34; Fungi - 0; Plants - 28; Viruses - 0; Other Eukaryotes - 0 (source: NCBI BLINK).   chr1:2642220-2643103 FORWARD LENGTH=137                                                                                                                                                                                                                        | 123 | 137  | 3.00E-41  | 111.4 | 69.1 | 78.0 |
| Rsa1.0_00136.1.g6468.t1 | gb[EOA38046.1] hypothetical protein CARUB_v10009516mg [Capsella rubella]                                                                                                                                                                                                                                  | 368 | 365 | 1.00E-160 | 99.2  | 84.8 | 90.8 | hypothetical protein CARUB_v10009516mg | gbpln | Capsella rubella     | AT1G08370.1   Symbols: DCP1, ATDCP1   decapping 1   chr1:2638355-2640367 FORWARD LENGTH=367                                                                                                                                                                                                                                                                                                                                                                                        | 368 | 367  | 1.00E-153 | 99.7  | 83.7 | 91.0 |
| Rsa1.0_00136.1.g6469.t1 | gb[EOA39504.1] hypothetical protein CARUB_v10010278mg [Capsella rubella]                                                                                                                                                                                                                                  | 216 | 216 | 1.00E-107 | 100.0 | 95.8 | 99.1 | hypothetical protein CARUB_v10010278mg | gbpln | Capsella rubella     | AT1G08360.1   Symbols:   Ribosomal protein L1p/L10e family   chr1:2636231-2637694 FORWARD LENGTH=216                                                                                                                                                                                                                                                                                                                                                                               | 216 | 216  | 1.00E-108 | 100.0 | 95.8 | 97.7 |
| Rsa1.0_00136.1.g6470.t1 | ref[NP_001077489.1] endomembrane protein 70-like protein [Arabidopsis thaliana] gi 332190159 gb AEE28280.1   endomembrane protein 70-like protein [Arabidopsis thaliana]                                                                                                                                  | 610 | 589 | 0         | 96.6  | 82.5 | 88.4 | endomembrane protein 70-like protein   | gbpln | Arabidopsis thaliana | AT1G08350.2   Symbols:   Endomembrane protein 70 protein family   chr1:2632970-2635605 REVERSE LENGTH=589                                                                                                                                                                                                                                                                                                                                                                          | 610 | 589  | 0         | 96.6  | 82.5 | 88.4 |

|                         |                                                                                                                                                                                                                                                                                                                                                                                                                            |      |      |           |        |      |      |                                                                   |       |                      |                                                                                                                                      |      |      |           |       |      |      |
|-------------------------|----------------------------------------------------------------------------------------------------------------------------------------------------------------------------------------------------------------------------------------------------------------------------------------------------------------------------------------------------------------------------------------------------------------------------|------|------|-----------|--------|------|------|-------------------------------------------------------------------|-------|----------------------|--------------------------------------------------------------------------------------------------------------------------------------|------|------|-----------|-------|------|------|
| Rsa1.0_00136.1.g6471.t1 | refNP_172310.1  Rho GTPase activating protein with PAK-box/P21-Rho-binding domain [Arabidopsis thaliana] gi46931246 gb AAT06427.1  At1g08340 [Arabidopsis thaliana] gi48958519 gb AAT47812.1  At1g08340 [Arabidopsis thaliana] gi110736318 dbj BAF00129.1  hypothetical protein [Arabidopsis thaliana] gi332190157 gb AEE28278.1  Rho GTPase activating protein with PAK-box/P21-Rho-binding domain [Arabidopsis thaliana] | 321  | 331  | 1.00E-144 | 103.1  | 83.2 | 91.6 | Rho GTPase activating protein with PAK-box/P21-Rho-binding domain | gbpln | Arabidopsis thaliana | AT1G08340.1   Symbols:   Rho GTPase activating protein with PAK-box/P21-Rho-binding domain   chr1:2631308-2632669 FORWARD LENGTH=331 | 321  | 331  | 2.33E-156 | 103.1 | 83.2 | 91.6 |
| Rsa1.0_00137.1.g6472.t1 | refXP_002518059.1  arp2/3 complex 20 kD subunit, putative [Ricinus communis] gi223542655 gb EEF44192.1  arp2/3 complex 20 kD subunit, putative [Ricinus communis]                                                                                                                                                                                                                                                          | 139  | 169  | 8.00E-66  | 121.6  | 95.0 | 99.3 | arp2/3 complex 20 kD subunit, putative                            | gbpln | Ricinus communis     | AT4G14147.1   Symbols: ARPC4   protein binding   chr4:8154079-8156246 REVERSE LENGTH=169                                             | 139  | 169  | 6.00E-68  | 121.6 | 97.1 | 97.8 |
| Rsa1.0_00137.1.g6473.t1 | refXP_002880292.1  ribonuclease P [Arabidopsis lyrata subsp. lyrata] gi297326131 gb EFH56551.1  ribonuclease P [Arabidopsis lyrata subsp. lyrata]                                                                                                                                                                                                                                                                          | 820  | 825  | 0         | 100.6  | 78.0 | 86.8 | ribonuclease P                                                    | gbpln | Arabidopsis lyrata   | AT2G47300.2   Symbols:   ribonuclease Ps   chr2:19418733-19422076 FORWARD LENGTH=826                                                 | 820  | 826  | 0         | 100.7 | 78.8 | 86.6 |
| Rsa1.0_00137.1.g6474.t1 | refNP_182265.1  histidine kinase CKI1 [Arabidopsis thaliana] gi75097398 sp Q22267.1 CKI1_ARATH RecName: Full=Histidine kinase CKI1; AltName: Full=Protein CYTOKININ-INDEPENDENT 1 gi1679803 dbj BAA13416.1  histidine kinase homolog [Arabidopsis thaliana] gi2529684 gb AAC62867.1  putative histidine kinase [Arabidopsis thaliana] gi330255746 gb AEC10840.1  histidine kinase CKI1 [Arabidopsis thaliana]              | 1078 | 1122 | 0         | 104.1  | 66.5 | 76.3 | histidine kinase CKI1                                             | gbpln | Arabidopsis thaliana | AT2G47430.1   Symbols: CKI1   Signal transduction histidine kinase   chr2:19459167-19463122 REVERSE LENGTH=1122                      | 1078 | 1122 | 0         | 104.1 | 66.5 | 76.3 |
| Rsa1.0_00137.1.g6475.t1 | refXP_002864881.1  hypothetical protein ARALYDRAFT_496593 [Arabidopsis lyrata subsp. lyrata] gi297310716 gb EFH41140.1  hypothetical protein ARALYDRAFT_496593 [Arabidopsis lyrata subsp. lyrata]                                                                                                                                                                                                                          | 130  | 357  | 1.00E-25  | 274.6  | 48.5 | 55.4 | hypothetical protein ARALYDRAFT_496593                            | gbpln | Arabidopsis lyrata   | AT5G63990.1   Symbols:   Inositol monophosphatase family protein   chr5:25613387-25615736 FORWARD LENGTH=357                         | 130  | 357  | 4.00E-28  | 274.6 | 47.7 | 53.1 |
| Rsa1.0_00137.1.g6476.t1 | emb CAA49513.1  beta-1,3-glucanase homologue [Brassica napus]                                                                                                                                                                                                                                                                                                                                                              | 473  | 474  | 0         | 100.2  | 82.5 | 88.8 | beta-1,3-glucanase homologue                                      | gbpln | Brassica napus       | AT4G14080.1   Symbols: MEE48   O-Glycosyl hydrolases family 17 protein   chr4:8118697-8120292 REVERSE LENGTH=478                     | 473  | 478  | 0         | 101.1 | 81.2 | 90.3 |
| Rsa1.0_00137.1.g6477.t2 | emb CAA96521.1  AMP-binding protein [Brassica napus]                                                                                                                                                                                                                                                                                                                                                                       | 750  | 701  | 0         | 93.5   | 89.5 | 91.3 | AMP-binding protein                                               | gbpln | Brassica napus       | AT4G14070.1   Symbols: AAE15   acyl-activating enzyme 15   chr4:8112122-8118039 REVERSE LENGTH=727                                   | 750  | 727  | 0         | 96.9  | 82.9 | 90.0 |
| Rsa1.0_00137.1.g6478.t1 | #                                                                                                                                                                                                                                                                                                                                                                                                                          | #    | #    | #         | #      | #    | #    | -                                                                 | ----  | ----                 | #                                                                                                                                    | #    | #    | #         | #     | #    | #    |
| Rsa1.0_00137.1.g6479.t1 | refXP_002868318.1  hypothetical protein ARALYDRAFT_330113 [Arabidopsis lyrata subsp. lyrata] gi297314154 gb EFH44577.1  hypothetical protein ARALYDRAFT_330113 [Arabidopsis lyrata subsp. lyrata]                                                                                                                                                                                                                          | 167  | 1057 | 3.00E-92  | 632.9  | 96.4 | 98.2 | hypothetical protein ARALYDRAFT_330113                            | gbpln | Arabidopsis lyrata   | AT4G14040.1   Symbols: EDA38, SBP2   selenium-binding protein 2   chr4:8100691-8102828 REVERSE LENGTH=487                            | 167  | 487  | 5.00E-92  | 291.6 | 94.6 | 98.2 |
| Rsa1.0_00137.1.g6480.t1 | gb AAG51046.1 AC069473.8 gypsy/Ty-3 retroelement polyprotein; 69905-74404 [Arabidopsis thaliana] gi10998138 dbj BAB03109.1  retroelement pol polyprotein [Arabidopsis thaliana]                                                                                                                                                                                                                                            | 134  | 1499 | 7.00E-34  | 1118.7 | 53.7 | 67.9 | gypsy/Ty-3 retroelement polyprotein; 69905-74404                  | gbpln | Arabidopsis thaliana | #                                                                                                                                    | #    | #    | #         | #     | #    | #    |
| Rsa1.0_00137.1.g6481.t1 | #                                                                                                                                                                                                                                                                                                                                                                                                                          | #    | #    | #         | #      | #    | #    | -                                                                 | ----  | ----                 | #                                                                                                                                    | #    | #    | #         | #     | #    | #    |
| Rsa1.0_00137.1.g6482.t1 | gb EOA17616.1  hypothetical protein CARUB_v10005981mg, partial [Capsella rubella]                                                                                                                                                                                                                                                                                                                                          | 117  | 139  | 2.00E-42  | 118.8  | 74.4 | 82.9 | hypothetical protein CARUB_v10005981mg, partial                   | gbpln | Capsella rubella     | AT4G14010.1   Symbols: RALFL32   ralf-like 32   chr4:8093010-8093363 REVERSE LENGTH=117                                              | 117  | 117  | 1.00E-44  | 100.0 | 75.2 | 82.1 |
| Rsa1.0_00137.1.g6483.t1 | gb AAG51783.1 AC079679.3 reverse transcriptase, putative; 16838-20266 [Arabidopsis thaliana]                                                                                                                                                                                                                                                                                                                               | 260  | 1142 | 1.00E-12  | 439.2  | 13.5 | 20.0 | reverse transcriptase, putative; 16838-20266                      | gbpln | Arabidopsis thaliana | #                                                                                                                                    | #    | #    | #         | #     | #    | #    |
| Rsa1.0_00137.1.g6484.t1 | gb AAG51783.1 AC079679.3 reverse transcriptase, putative; 16838-20266 [Arabidopsis thaliana]                                                                                                                                                                                                                                                                                                                               | 807  | 1142 | 1.00E-172 | 141.5  | 40.1 | 51.7 | reverse transcriptase, putative; 16838-20266                      | gbpln | Arabidopsis thaliana | AT1G43760.1   Symbols:   DNase I-like superfamily protein   chr1:16528800-16531065 REVERSE LENGTH=626                                | 807  | 626  | 5.00E-31  | 77.6  | 12.6 | 21.6 |
| Rsa1.0_00137.1.g6485.t2 | gb EOA17132.1  hypothetical protein CARUB_v10005396mg [Capsella rubella]                                                                                                                                                                                                                                                                                                                                                   | 953  | 290  | 1.00E-127 | 30.4   | 25.5 | 26.8 | hypothetical protein CARUB_v10005396mg                            | gbpln | Capsella rubella     | AT4G14000.1   Symbols:   Putative methyltransferase family protein   chr4:8090851-8092347 FORWARD LENGTH=290                         | 953  | 290  | 1.00E-129 | 30.4  | 25.7 | 26.8 |

|                         |                                                                                                                                                                                                                                                                                                                                                                                                                                                                                                                                                                     |     |      |           |       |      |      |                                                |       |                      |                                                                                                                                                                                                                                                                                                                                                                                                                                                                                                                                                                             |     |     |           |       |      |      |
|-------------------------|---------------------------------------------------------------------------------------------------------------------------------------------------------------------------------------------------------------------------------------------------------------------------------------------------------------------------------------------------------------------------------------------------------------------------------------------------------------------------------------------------------------------------------------------------------------------|-----|------|-----------|-------|------|------|------------------------------------------------|-------|----------------------|-----------------------------------------------------------------------------------------------------------------------------------------------------------------------------------------------------------------------------------------------------------------------------------------------------------------------------------------------------------------------------------------------------------------------------------------------------------------------------------------------------------------------------------------------------------------------------|-----|-----|-----------|-------|------|------|
| Rsa1.0_00137.1.g6486.t1 | gb AAG52094.1 AC012680.5 putative Mutator-like transposase; 12516-14947 [Arabidopsis thaliana]                                                                                                                                                                                                                                                                                                                                                                                                                                                                      | 382 | 761  | 1.00E-118 | 199.2 | 57.9 | 72.3 | putative Mutator-like transposase; 12516-14947 | gbpln | Arabidopsis thaliana | #                                                                                                                                                                                                                                                                                                                                                                                                                                                                                                                                                                           | #   | #   | #         | #     | #    | #    |
| Rsa1.0_00137.1.g6487.t1 | #                                                                                                                                                                                                                                                                                                                                                                                                                                                                                                                                                                   | #   | #    | #         | #     | #    | #    | -                                              | ----  | ----                 | #                                                                                                                                                                                                                                                                                                                                                                                                                                                                                                                                                                           | #   | #   | #         | #     | #    | #    |
| Rsa1.0_00137.1.g6488.t1 | gb EOA16570.1  hypothetical protein CARUB_v10004729mg [Capsella rubella]                                                                                                                                                                                                                                                                                                                                                                                                                                                                                            | 473 | 473  | 0         | 100.0 | 84.8 | 90.9 | hypothetical protein CARUB_v10004729mg         | gbpln | Capsella rubella     | AT4G13980.1   Symbols: AT-HSFA5, HSFA5   winged-helix DNA-binding transcription factor family protein   chr4:8077519-8079247 REVERSE LENGTH=466                                                                                                                                                                                                                                                                                                                                                                                                                             | 473 | 466 | 0         | 98.5  | 84.4 | 89.4 |
| Rsa1.0_00137.1.g6489.t2 | ref XP_002868324.1  zinc ion binding protein [Arabidopsis lyrata subsp. lyrata] gi 297314160 gb EFH44583.1  zinc ion binding protein [Arabidopsis lyrata subsp. lyrata]                                                                                                                                                                                                                                                                                                                                                                                             | 795 | 776  | 0         | 97.6  | 83.0 | 88.7 | zinc ion binding protein                       | gbpln | Arabidopsis lyrata   | AT4G13970.1   Symbols:   zinc ion binding   chr4:8070696-8074134 REVERSE LENGTH=778                                                                                                                                                                                                                                                                                                                                                                                                                                                                                         | 795 | 778 | 0         | 97.9  | 82.9 | 87.4 |
| Rsa1.0_00137.1.g6490.t1 | gb AAD25646.1  putative retroelement pol polyprotein [Arabidopsis thaliana]                                                                                                                                                                                                                                                                                                                                                                                                                                                                                         | 731 | 1461 | 1.00E-144 | 199.9 | 43.8 | 59.6 | putative retroelement pol polyprotein          | gbpln | Arabidopsis thaliana | #                                                                                                                                                                                                                                                                                                                                                                                                                                                                                                                                                                           | #   | #   | #         | #     | #    |      |
| Rsa1.0_00137.1.g6491.t1 | gb ABD65088.1  hypothetical protein 27.t00109 [Brassica oleracea]                                                                                                                                                                                                                                                                                                                                                                                                                                                                                                   | 668 | 1176 | 9.00E-88  | 176.0 | 27.1 | 38.8 | hypothetical protein 27.t00109                 | gbpln | Brassica oleracea    | AT2G07190.1   Symbols:   Domain of unknown function (DUF1985)   chr2:2987367-2988945 FORWARD LENGTH=452                                                                                                                                                                                                                                                                                                                                                                                                                                                                     | 668 | 452 | 1.00E-29  | 67.7  | 18.4 | 29.2 |
| Rsa1.0_00138.1.g6492.t1 | ref XP_002867739.1  hypothetical protein ARALYDRAFT_492568 [Arabidopsis lyrata subsp. lyrata] gi 297313575 gb EFH43998.1  hypothetical protein ARALYDRAFT_492568 [Arabidopsis lyrata subsp. lyrata]                                                                                                                                                                                                                                                                                                                                                                 | 566 | 557  | 0         | 98.4  | 78.3 | 85.5 | hypothetical protein ARALYDRAFT_492568         | gbpln | Arabidopsis lyrata   | AT4G22980.1   Symbols:   FUNCTIONS IN: molecular_function unknown; INVOLVED IN: biological_process unknown; LOCATED IN: chloroplast; EXPRESSED IN: 13 plant structures; EXPRESSED DURING: 9 growth stages; BEST Arabidopsis thaliana protein match is: Pyridoxal phosphate (PLP)-dependent transferases superfamily protein (TAIR:AT5G51920.1); Has 520 Blast hits to 468 proteins in 130 species: Archae - 5; Bacteria - 23; Metazoa - 99; Fungi - 131; Plants - 231; Viruses - 0; Other Eukaryotes - 31 (source: NCBI BLINK).   chr4:12043974-12045653 REVERSE LENGTH=559 | 566 | 559 | 0         | 98.8  | 74.7 | 83.4 |
| Rsa1.0_00138.1.g6493.t2 | ref NP_001190805.1  SPX domain-containing membrane protein [Arabidopsis thaliana] gi 332659290 gb AEE84690.1  SPX domain-containing membrane protein [Arabidopsis thaliana] ref NP_001078433.1  UDP-galactose transporter 2 [Arabidopsis thaliana] gi 3292827 emb CAA19817.1  putative protein [Arabidopsis thaliana] gi 7269148 emb CAB79256.1  putative protein [Arabidopsis thaliana] gi 67764062 gb AAV79163.1  Golgi-localized UDP-galactose transporter [Arabidopsis thaliana] gi 332659293 gb AEE84693.1  UDP-galactose transporter 2 [Arabidopsis thaliana] | 701 | 700  | 0         | 99.9  | 90.6 | 95.1 | SPX domain-containing membrane protein         | gbpln | Arabidopsis thaliana | AT4G22990.2   Symbols:   Major Facilitator Superfamily with SPX (SYG1/Pho81/XPR1) domain-containing protein   chr4:12048240-12050984 REVERSE LENGTH=700                                                                                                                                                                                                                                                                                                                                                                                                                     | 701 | 700 | 0         | 99.9  | 90.6 | 95.1 |
| Rsa1.0_00138.1.g6494.t2 | ref NP_001078433.1  UDP-galactose transporter 2 [Arabidopsis thaliana] gi 3292827 emb CAA19817.1  putative protein [Arabidopsis thaliana] gi 7269148 emb CAB79256.1  putative protein [Arabidopsis thaliana] gi 67764062 gb AAV79163.1  Golgi-localized UDP-galactose transporter [Arabidopsis thaliana] gi 332659293 gb AEE84693.1  UDP-galactose transporter 2 [Arabidopsis thaliana]                                                                                                                                                                             | 348 | 362  | 1.00E-160 | 104.0 | 86.2 | 91.7 | UDP-galactose transporter 2                    | gbpln | Arabidopsis thaliana | AT4G23010.2   Symbols: ATUTR2, UTR2   UDP-galactose transporter 2   chr4:12060318-12062486 REVERSE LENGTH=362                                                                                                                                                                                                                                                                                                                                                                                                                                                               | 348 | 362 | 1.00E-163 | 104.0 | 86.2 | 91.7 |
| Rsa1.0_00138.1.g6495.t1 | ref NP_001190807.1  uncharacterized protein [Arabidopsis thaliana] gi 332659296 gb AEE84696.1  uncharacterized protein AT4G23020 [Arabidopsis thaliana]                                                                                                                                                                                                                                                                                                                                                                                                             | 404 | 452  | 2.00E-94  | 111.9 | 57.7 | 66.8 | uncharacterized protein                        | gbpln | Arabidopsis thaliana | AT4G23020.2   Symbols:   unknown protein; FUNCTIONS IN: molecular_function unknown; INVOLVED IN: biological_process unknown; LOCATED IN: cellular_component unknown; BEST Arabidopsis thaliana protein match is: unknown protein (TAIR:AT4G11780.1).   chr4:12066331-12068442 REVERSE LENGTH=452                                                                                                                                                                                                                                                                            | 404 | 452 | 5.00E-97  | 111.9 | 57.7 | 66.8 |
| Rsa1.0_00138.1.g6496.t1 | gb EOA17838.1  hypothetical protein CARUB_v10006239mg [Capsella rubella]                                                                                                                                                                                                                                                                                                                                                                                                                                                                                            | 507 | 509  | 0         | 100.4 | 90.1 | 94.5 | hypothetical protein CARUB_v10006239mg         | gbpln | Capsella rubella     | AT4G23030.1   Symbols:   MATE efflux family protein   chr4:12072857-12074365 FORWARD LENGTH=502                                                                                                                                                                                                                                                                                                                                                                                                                                                                             | 507 | 502 | 0         | 99.0  | 89.7 | 94.1 |
| Rsa1.0_00138.1.g6497.t1 | ref NP_194037.2  protein IQ-domain 22 [Arabidopsis thaliana] gi 56693675 gb AAW22634.1  calmodulin binding protein IQD22 [Arabidopsis thaliana] gi 332659301 gb AEE84701.1  protein IQ-domain 22 [Arabidopsis thaliana]                                                                                                                                                                                                                                                                                                                                             | 503 | 484  | 0         | 96.2  | 79.3 | 84.9 | protein IQ-domain 22                           | gbpln | Arabidopsis thaliana | AT4G23060.1   Symbols: IQD22   IQ-domain 22   chr4:12087283-12090408 FORWARD LENGTH=484                                                                                                                                                                                                                                                                                                                                                                                                                                                                                     | 503 | 484 | 0         | 96.2  | 79.3 | 84.9 |
| Rsa1.0_00138.1.g6498.t1 | ref XP_002867733.1  rhomboid family protein [Arabidopsis lyrata subsp. lyrata] gi 297313569 gb EFH43992.1  rhomboid family protein [Arabidopsis lyrata subsp. lyrata]                                                                                                                                                                                                                                                                                                                                                                                               | 302 | 318  | 1.00E-125 | 105.3 | 83.4 | 85.8 | rhomboid family protein                        | gbpln | Arabidopsis lyrata   | AT4G23070.1   Symbols: ATRBL7, RBL7   RHOMBOID-like protein 7   chr4:12090690-12092077 REVERSE LENGTH=313                                                                                                                                                                                                                                                                                                                                                                                                                                                                   | 302 | 313 | 1.00E-120 | 103.6 | 81.1 | 85.8 |
| Rsa1.0_00138.1.g6499.t1 | dbj BAE98403.1  putative non-LTR reverse transcriptase [Arabidopsis thaliana]                                                                                                                                                                                                                                                                                                                                                                                                                                                                                       | 143 | 278  | 7.00E-27  | 194.4 | 39.2 | 58.0 | putative non-LTR reverse transcriptase         | gbpln | Arabidopsis thaliana | AT1G43730.1   Symbols:   RNA-directed DNA polymerase (reverse transcriptase)-related family protein   chr1:16508723-16509784 REVERSE LENGTH=320                                                                                                                                                                                                                                                                                                                                                                                                                             | 143 | 320 | 2.00E-14  | 223.8 | 30.8 | 49.0 |

|                         |                                                                                                                                                                                                                                                                                                                                                                                                                                                                                                                                              |      |      |           |       |      |      |                                                                                                          |       |                      |                                                                                                                                                 |      |     |           |       |      |      |
|-------------------------|----------------------------------------------------------------------------------------------------------------------------------------------------------------------------------------------------------------------------------------------------------------------------------------------------------------------------------------------------------------------------------------------------------------------------------------------------------------------------------------------------------------------------------------------|------|------|-----------|-------|------|------|----------------------------------------------------------------------------------------------------------|-------|----------------------|-------------------------------------------------------------------------------------------------------------------------------------------------|------|-----|-----------|-------|------|------|
| Rsa1.0_00138.1.g6500.t1 | gb AAG50806.1 AC079281.8 unknown protein [Arabidopsis thaliana]                                                                                                                                                                                                                                                                                                                                                                                                                                                                              | 1835 | 1213 | 0         | 66.1  | 35.1 | 46.2 | unknown protein                                                                                          | gbpln | Arabidopsis thaliana | AT1G60720.1   Symbols:   RNA-directed DNA polymerase (reverse transcriptase)-related family protein   chr1:22357072-22357941 FORWARD LENGTH=289 | 1835 | 289 | 1.00E-72  | 15.7  | 7.4  | 10.1 |
| Rsa1.0_00138.1.g6501.t1 | gb EOA27833.1  hypothetical protein CARUB_v10023990mg [Capsella rubella]                                                                                                                                                                                                                                                                                                                                                                                                                                                                     | 231  | 231  | 1.00E-118 | 100.0 | 87.9 | 92.6 | hypothetical protein CARUB_v10023990mg                                                                   | gbpln | Capsella rubella     | AT4G11650.1   Symbols: ATOSM34, OSM34   osmotin 34   chr4:7025127-7026113 REVERSE LENGTH=244                                                    | 231  | 244 | 2.00E-70  | 105.6 | 57.1 | 68.0 |
| Rsa1.0_00138.1.g6502.t1 | emb CAK24967.1  gamma-glutamylcysteine synthetase [Brassica napus]                                                                                                                                                                                                                                                                                                                                                                                                                                                                           | 518  | 514  | 0         | 99.2  | 95.2 | 96.7 | gamma-glutamylcysteine synthetase                                                                        | gbpln | Brassica napus       | AT4G23100.3   Symbols: GSH1   glutamate-cysteine ligase   chr4:12103458-12106751 REVERSE LENGTH=522                                             | 518  | 522 | 0         | 100.8 | 91.7 | 95.0 |
| Rsa1.0_00138.1.g6503.t2 | ref XP_004166549.1  PREDICTED: cysteine-rich receptor-like protein kinase 29-like [Cucumis sativus]                                                                                                                                                                                                                                                                                                                                                                                                                                          | 1296 | 1251 | 0         | 96.5  | 43.6 | 61.4 | PREDICTED: cysteine-rich receptor-like protein kinase 29-like                                            | gbpln | Cucumis sativus      | AT4G23180.1   Symbols: CRK10, RLK4   cysteine-rich RLK (RECEPTOR-like protein kinase) 10   chr4:12138171-12140780 FORWARD LENGTH=669            | 1296 | 669 | 0         | 51.6  | 34.3 | 40.3 |
| Rsa1.0_00138.1.g6504.t1 | ref XP_002869784.1  hypothetical protein ARALYDRAFT_492546 [Arabidopsis lyrata subsp. lyrata] gi 297315620 gb EFH46043.1  hypothetical protein ARALYDRAFT_492546 [Arabidopsis lyrata subsp. lyrata]                                                                                                                                                                                                                                                                                                                                          | 665  | 662  | 0         | 99.5  | 81.5 | 88.0 | hypothetical protein ARALYDRAFT_492546                                                                   | gbpln | Arabidopsis lyrata   | AT4G23180.1   Symbols: CRK10, RLK4   cysteine-rich RLK (RECEPTOR-like protein kinase) 10   chr4:12138171-12140780 FORWARD LENGTH=669            | 665  | 669 | 0         | 100.6 | 78.6 | 86.2 |
| Rsa1.0_00138.1.g6505.t1 | ref XP_002867727.1  predicted protein [Arabidopsis lyrata subsp. lyrata] gi 297313563 gb EFH43986.1  predicted protein [Arabidopsis lyrata subsp. lyrata]                                                                                                                                                                                                                                                                                                                                                                                    | 652  | 674  | 0         | 103.4 | 61.8 | 73.5 | predicted protein                                                                                        | gbpln | Arabidopsis lyrata   | AT4G23190.1   Symbols: CRK11, AT-RLK3   cysteine-rich RLK (RECEPTOR-like protein kinase) 11   chr4:12141197-12143710 REVERSE LENGTH=667         | 652  | 667 | 0         | 102.3 | 60.1 | 71.8 |
| Rsa1.0_00138.1.g6506.t1 | ref XP_002877439.1  hypothetical protein ARALYDRAFT_484965 [Arabidopsis lyrata subsp. lyrata] gi 297323277 gb EFH53698.1  hypothetical protein ARALYDRAFT_484965 [Arabidopsis lyrata subsp. lyrata]                                                                                                                                                                                                                                                                                                                                          | 861  | 678  | 0         | 78.7  | 49.2 | 55.6 | hypothetical protein ARALYDRAFT_484965                                                                   | gbpln | Arabidopsis lyrata   | AT4G23130.2   Symbols: CRK5, RLK6   cysteine-rich RLK (RECEPTOR-like protein kinase) 5   chr4:12117688-12120134 REVERSE LENGTH=663              | 861  | 663 | 0         | 77.0  | 48.2 | 56.4 |
| Rsa1.0_00138.1.g6507.t1 | ref NP_849425.1  cysteine-rich receptor-like protein kinase 5 [Arabidopsis thaliana] gi 23296342 gb AAN13047.1  putative protein kinase [Arabidopsis thaliana] gi 332659313 gb AEE84713.1  cysteine-rich receptor-like protein kinase 5 [Arabidopsis thaliana]                                                                                                                                                                                                                                                                               | 666  | 663  | 0         | 99.5  | 67.6 | 78.7 | cysteine-rich receptor-like protein kinase 5                                                             | gbpln | Arabidopsis thaliana | AT4G23130.2   Symbols: CRK5, RLK6   cysteine-rich RLK (RECEPTOR-like protein kinase) 5   chr4:12117688-12120134 REVERSE LENGTH=663              | 666  | 663 | 0         | 99.5  | 67.6 | 78.7 |
| Rsa1.0_00138.1.g6508.t1 | sp O65483.2 CRK24_ARATH RecName: Full=Cysteine-rich receptor-like protein kinase 24; Short=Cysteine-rich RLK24; Flags: Precursor                                                                                                                                                                                                                                                                                                                                                                                                             | 1285 | 636  | 0         | 49.5  | 35.0 | 40.5 | RecName: Full=Cysteine-rich receptor-like protein kinase 24; Short=Cysteine-rich RLK24; Flags: Precursor | ----  | ----                 | AT4G23290.2   Symbols: CRK21   cysteine-rich RLK (RECEPTOR-like protein kinase) 21   chr4:12177910-12180610 REVERSE LENGTH=690                  | 1285 | 690 | 0         | 53.7  | 33.3 | 38.8 |
| Rsa1.0_00138.1.g6509.t1 | gb EOA16043.1  hypothetical protein CARUB_v10004176mg [Capsella rubella]                                                                                                                                                                                                                                                                                                                                                                                                                                                                     | 772  | 787  | 0         | 101.9 | 70.9 | 80.8 | hypothetical protein CARUB_v10004176mg                                                                   | gbpln | Capsella rubella     | AT4G23310.1   Symbols: CRK23   cysteine-rich RLK (RECEPTOR-like protein kinase) 23   chr4:12185737-12188763 FORWARD LENGTH=830                  | 772  | 830 | 0         | 107.5 | 73.3 | 83.9 |
| Rsa1.0_00138.1.g6510.t7 | ref NP_194062.1  putative cysteine-rich receptor-like protein kinase 23 [Arabidopsis thaliana] gi 75318568 sp O65482.1 CRK23_ARATH RecName: Full=Putative cysteine-rich receptor-like protein kinase 23; Short=Cysteine-rich RLK23; Flags: Precursor gi 3021283 emb CAA18478.1  serine/threonine kinase-like protein [Arabidopsis thaliana] gi 7269179 emb CAB79286.1  serine/threonine kinase-like protein [Arabidopsis thaliana] gi 332659337 gb AEE84737.1  putative cysteine-rich receptor-like protein kinase 23 [Arabidopsis thaliana] | 1095 | 830  | 0         | 75.8  | 51.0 | 58.1 | putative cysteine-rich receptor-like protein kinase 23                                                   | gbpln | Arabidopsis thaliana | AT4G23310.1   Symbols: CRK23   cysteine-rich RLK (RECEPTOR-like protein kinase) 23   chr4:12185737-12188763 FORWARD LENGTH=830                  | 1095 | 830 | 0         | 75.8  | 51.0 | 58.1 |
| Rsa1.0_00138.1.g6511.t1 | sp O65483.2 CRK24_ARATH RecName: Full=Cysteine-rich receptor-like protein kinase 24; Short=Cysteine-rich RLK24; Flags: Precursor                                                                                                                                                                                                                                                                                                                                                                                                             | 1226 | 636  | 0         | 51.9  | 39.6 | 44.2 | RecName: Full=Cysteine-rich receptor-like protein kinase 24; Short=Cysteine-rich RLK24; Flags: Precursor | ----  | ----                 | AT4G23290.2   Symbols: CRK21   cysteine-rich RLK (RECEPTOR-like protein kinase) 21   chr4:12177910-12180610 REVERSE LENGTH=690                  | 1226 | 690 | 0         | 56.3  | 33.0 | 39.2 |
| Rsa1.0_00138.1.g6512.t1 | #                                                                                                                                                                                                                                                                                                                                                                                                                                                                                                                                            | #    | #    | #         | #     | #    | #    | -                                                                                                        | ----  | ----                 | #                                                                                                                                               | #    | #   | #         | #     | #    | #    |
| Rsa1.0_00138.1.g6513.t1 | gb EOA17073.1  hypothetical protein CARUB_v10005322mg [Capsella rubella]                                                                                                                                                                                                                                                                                                                                                                                                                                                                     | 304  | 306  | 1.00E-163 | 100.7 | 92.8 | 96.1 | hypothetical protein CARUB_v10005322mg                                                                   | gbpln | Capsella rubella     | AT4G23730.1   Symbols:   Galactose mutarotase-like superfamily protein   chr4:12362955-12364792 FORWARD LENGTH=306                              | 304  | 306 | 1.00E-163 | 100.7 | 90.1 | 95.4 |

|                         |                                                                                                                                                                                                                                     |     |     |           |       |      |      |                                                        |       |                     |                                                                                                                                                                                                                                                             |     |     |           |       |      |      |
|-------------------------|-------------------------------------------------------------------------------------------------------------------------------------------------------------------------------------------------------------------------------------|-----|-----|-----------|-------|------|------|--------------------------------------------------------|-------|---------------------|-------------------------------------------------------------------------------------------------------------------------------------------------------------------------------------------------------------------------------------------------------------|-----|-----|-----------|-------|------|------|
| Rsa1.0_00138.1.g6514.t1 | gb ACC91242.1  leucine-rich repeat transmembrane protein kinase [Arabidopsis halleri]                                                                                                                                               | 631 | 636 | 0         | 100.8 | 84.9 | 92.1 | leucine-rich repeat transmembrane protein kinase       | gbpln | Arabidopsis halleri | AT4G23740.1   Symbols:   Leucine-rich repeat protein kinase family protein   chr4:12367063-12369159 FORWARD LENGTH=638                                                                                                                                      | 631 | 638 | 0         | 101.1 | 83.2 | 89.5 |
| Rsa1.0_00138.1.g6515.t1 | ref XP_002869765.1  hypothetical protein ARALYDRAFT_492491 [Arabidopsis lyrata subsp. lyrata] gi 297315601 gb EFH46024.1  hypothetical protein ARALYDRAFT_492491 [Arabidopsis lyrata subsp. lyrata]                                 | 312 | 340 | 1.00E-105 | 109.0 | 72.1 | 82.7 | hypothetical protein ARALYDRAFT_492491                 | gbpln | Arabidopsis lyrata  | AT4G23750.2   Symbols: CRF2, TMO3   cytokinin response factor 2   chr4:12376751-12377782 FORWARD LENGTH=343                                                                                                                                                 | 312 | 343 | 1.00E-107 | 109.9 | 70.8 | 80.1 |
| Rsa1.0_00139.1.g6516.t1 | gb EOA35159.1  hypothetical protein CARUB_v10020298mg [Capsella rubella]                                                                                                                                                            | 449 | 446 | 0         | 99.3  | 85.3 | 90.9 | hypothetical protein CARUB_v10020298mg                 | gbpln | Capsella rubella    | AT1G71980.1   Symbols:   Protease-associated (PA) RING/U-box zinc finger family protein   chr1:27088250-27099881 FORWARD LENGTH=448                                                                                                                         | 449 | 448 | 0         | 99.8  | 83.7 | 90.2 |
| Rsa1.0_00139.1.g6517.t2 | ref XP_002318388.1  predicted protein [Populus trichocarpa] gi 222859061 gb EEE96608.1  predicted protein [Populus trichocarpa]                                                                                                     | 137 | 529 | 3.00E-23  | 386.1 | 43.8 | 51.8 | predicted protein                                      | gbpln | Populus trichocarpa | AT5G64960.1   Symbols: CDKC2, CDKC2   cyclin dependent kinase group C2   chr5:25955497-25958427 FORWARD LENGTH=513                                                                                                                                          | 137 | 513 | 1.00E-22  | 374.5 | 39.4 | 52.6 |
| Rsa1.0_00139.1.g6518.t1 | gb EOA35238.1  hypothetical protein CARUB_v10020397mg [Capsella rubella]                                                                                                                                                            | 409 | 405 | 0         | 99.0  | 86.6 | 91.2 | hypothetical protein CARUB_v10020397mg                 | gbpln | Capsella rubella    | AT1G71990.1   Symbols: FUT13, ATFUT13, FUCTC, FT4-M, ATFT4   fucosyltransferase 13   chr1:27100345-27102097 FORWARD LENGTH=401                                                                                                                              | 409 | 401 | 0         | 98.0  | 85.8 | 91.2 |
| Rsa1.0_00139.1.g6519.t1 | gb EOA34198.1  hypothetical protein CARUB_v10021707mg [Capsella rubella]                                                                                                                                                            | 570 | 535 | 0         | 93.9  | 84.2 | 89.1 | hypothetical protein CARUB_v10021707mg                 | gbpln | Capsella rubella    | AT1G22650.1   Symbols:   Plant neutral invertase family protein   chr1:8013529-8015647 REVERSE LENGTH=534                                                                                                                                                   | 570 | 534 | 0         | 93.7  | 79.5 | 88.2 |
| Rsa1.0_00139.1.g6520.t1 | gb EOA34875.1  hypothetical protein CARUB_v10022457mg [Capsella rubella]                                                                                                                                                            | 307 | 384 | 4.00E-86  | 125.1 | 73.0 | 77.9 | hypothetical protein CARUB_v10022457mg                 | gbpln | Capsella rubella    | AT1G72010.1   Symbols:   TCP family transcription factor   chr1:27107844-27108971 FORWARD LENGTH=375                                                                                                                                                        | 307 | 375 | 4.00E-82  | 122.1 | 68.4 | 73.9 |
| Rsa1.0_00139.1.g6521.t1 | gb EOA34662.1  hypothetical protein CARUB_v10022225mg [Capsella rubella]                                                                                                                                                            | 96  | 96  | 1.00E-40  | 100.0 | 94.8 | 97.9 | hypothetical protein CARUB_v10022225mg                 | gbpln | Capsella rubella    | AT1G72020.1   Symbols:   unknown protein; Has 52 Blast hits to 52 proteins in 18 species: Archae - 0; Bacteria - 0; Metazoa - 0; Fungi - 0; Plants - 52; Viruses - 0; Other Eukaryotes - 0 (source: NCBI BLINK).   chr1:27109521-27110327 REVERSE LENGTH=97 | 96  | 97  | 5.00E-42  | 101.0 | 87.5 | 92.7 |
| Rsa1.0_00139.1.g6522.t1 | #                                                                                                                                                                                                                                   | #   | #   | #         | #     | #    | #    | -                                                      | ----  | ----                | #                                                                                                                                                                                                                                                           | #   | #   | #         | #     | #    | #    |
| Rsa1.0_00139.1.g6523.t1 | #                                                                                                                                                                                                                                   | #   | #   | #         | #     | #    | #    | -                                                      | ----  | ----                | #                                                                                                                                                                                                                                                           | #   | #   | #         | #     | #    | #    |
| Rsa1.0_00139.1.g6524.t1 | ref XP_002888857.1  deoxynucleoside kinase family [Arabidopsis lyrata subsp. lyrata] gi 297334698 gb EFH65116.1  deoxynucleoside kinase family [Arabidopsis lyrata subsp. lyrata]                                                   | 567 | 586 | 0         | 103.4 | 81.0 | 86.9 | deoxynucleoside kinase family                          | gbpln | Arabidopsis lyrata  | AT1G72040.1   Symbols:   P-loop containing nucleoside triphosphate hydrolases superfamily protein   chr1:27112159-27114248 REVERSE LENGTH=580                                                                                                               | 567 | 580 | 0         | 102.3 | 80.6 | 86.9 |
| Rsa1.0_00139.1.g6525.t1 | gb EOA35884.1  hypothetical protein CARUB_v10021139mg [Capsella rubella]                                                                                                                                                            | 183 | 131 | 3.00E-43  | 71.6  | 51.9 | 57.4 | hypothetical protein CARUB_v10021139mg                 | gbpln | Capsella rubella    | AT1G72070.1   Symbols:   Chaperone DnaJ-domain superfamily protein   chr1:27118851-27119608 REVERSE LENGTH=126                                                                                                                                              | 183 | 126 | 6.00E-41  | 68.9  | 51.9 | 56.8 |
| Rsa1.0_00139.1.g6526.t1 | #                                                                                                                                                                                                                                   | #   | #   | #         | #     | #    | #    | -                                                      | ----  | ----                | #                                                                                                                                                                                                                                                           | #   | #   | #         | #     | #    | #    |
| Rsa1.0_00139.1.g6527.t1 | ref XP_002887411.1  radical SAM domain-containing protein [Arabidopsis lyrata subsp. lyrata] gi 297333252 gb EFH63670.1  radical SAM domain-containing protein [Arabidopsis lyrata subsp. lyrata]                                   | 619 | 602 | 0         | 97.3  | 86.3 | 91.6 | radical SAM domain-containing protein                  | gbpln | Arabidopsis lyrata  | AT1G72090.1   Symbols:   Methylthioesterase   chr1:27123617-27126767 FORWARD LENGTH=601                                                                                                                                                                     | 619 | 601 | 0         | 97.1  | 84.5 | 89.8 |
| Rsa1.0_00139.1.g6528.t1 | dbj BAJ33896.1  unnamed protein product [Thellungiella halophila]                                                                                                                                                                   | 285 | 467 | 1.00E-134 | 163.9 | 79.6 | 84.9 | unnamed protein product                                | ----  | ----                | AT1G72110.1   Symbols:   O-acyltransferase (WSD1-like) family protein   chr1:27129253-27131354 REVERSE LENGTH=479                                                                                                                                           | 285 | 479 | 1.00E-135 | 168.1 | 77.9 | 87.0 |
| Rsa1.0_00139.1.g6529.t1 | ref XP_002887414.1  hypothetical protein ARALYDRAFT_316182 [Arabidopsis lyrata subsp. lyrata] gi 297333255 gb EFH63673.1  hypothetical protein ARALYDRAFT_316182 [Arabidopsis lyrata subsp. lyrata]                                 | 466 | 535 | 1.00E-169 | 114.8 | 71.0 | 79.0 | hypothetical protein ARALYDRAFT_316182                 | gbpln | Arabidopsis lyrata  | AT1G72130.1   Symbols:   Major facilitator superfamily protein   chr1:27137201-27139223 FORWARD LENGTH=538                                                                                                                                                  | 466 | 538 | 1.00E-167 | 115.5 | 68.7 | 77.5 |
| Rsa1.0_00139.1.g6530.t1 | ref XP_002887416.1  proton-dependent oligopeptide transport family protein [Arabidopsis lyrata subsp. lyrata] gi 297333257 gb EFH63675.1  proton-dependent oligopeptide transport family protein [Arabidopsis lyrata subsp. lyrata] | 732 | 534 | 0         | 73.0  | 56.4 | 61.6 | proton-dependent oligopeptide transport family protein | gbpln | Arabidopsis lyrata  | AT1G72130.1   Symbols:   Major facilitator superfamily protein   chr1:27137201-27139223 FORWARD LENGTH=538                                                                                                                                                  | 732 | 538 | 0         | 73.5  | 52.9 | 61.3 |
| Rsa1.0_00139.1.g6531.t2 | gb EOA34977.1  hypothetical protein CARUB_v10020065mg [Capsella rubella]                                                                                                                                                            | 567 | 567 | 0         | 100.0 | 79.4 | 84.7 | hypothetical protein CARUB_v10020065mg                 | gbpln | Capsella rubella    | AT1G72150.1   Symbols: PATL1   PATELLIN 1   chr1:27148558-27150652 FORWARD LENGTH=573                                                                                                                                                                       | 567 | 573 | 0         | 101.1 | 79.7 | 84.7 |

|                         |                                                                                                                                                                                                                                                                                                                                                                                                                                                                                                                                                                                                                                                                                                                                                                                                                                                                                                                                                                                                                                                                                                                                                                                                                                                                                                                                                                                                                                                             |      |      |           |       |       |       |                                         |       |                      |                                                                                                                                                                                                                                                                                                                                              |      |      |           |       |      |      |
|-------------------------|-------------------------------------------------------------------------------------------------------------------------------------------------------------------------------------------------------------------------------------------------------------------------------------------------------------------------------------------------------------------------------------------------------------------------------------------------------------------------------------------------------------------------------------------------------------------------------------------------------------------------------------------------------------------------------------------------------------------------------------------------------------------------------------------------------------------------------------------------------------------------------------------------------------------------------------------------------------------------------------------------------------------------------------------------------------------------------------------------------------------------------------------------------------------------------------------------------------------------------------------------------------------------------------------------------------------------------------------------------------------------------------------------------------------------------------------------------------|------|------|-----------|-------|-------|-------|-----------------------------------------|-------|----------------------|----------------------------------------------------------------------------------------------------------------------------------------------------------------------------------------------------------------------------------------------------------------------------------------------------------------------------------------------|------|------|-----------|-------|------|------|
| Rsa1.0_00139.1.g6532.t1 | ref[NP_177366.1] transcription factor bHLH96 [Arabidopsis thaliana] gi 75308860 sp Q9C7T4.1 BH096_ARAT H RecName: Full=Transcription factor bHLH96; AltName: Full=Basic helix-loop-helix protein 96; Short=AtbHLH96; Short=bHLH 96; AltName: Full=Transcription factor EN 15; AltName: Full=bHLH transcription factor bHLH096<br>gi 12323671 gb AAG51804.1 AC067754_20 unknown protein; 44011-46213 [Arabidopsis thaliana] gi 20520637 emb CAD30833.1 basic-helix-loop-helix transcription factor [Arabidopsis thaliana] gi 28392970 gb AAO41920.1 putative bHLH protein [Arabidopsis thaliana] gi 29824221 gb AAP0407.1.1 putative bHLH protein [Arabidopsis thaliana] gi 332197168 gb AEE35289.1 transcription factor bHLH96 [Arabidopsis thaliana] ref[NP_177367.1] RING-H2 finger protein ATL54 [Arabidopsis thaliana] gi 68565207 sp Q8LFY8.2 ATL54_ARAT H RecName: Full=RING-H2 finger protein ATL54<br>gi 12323653 gb AAG51786.1 AC067754_2 RING-H2 zinc finger protein ATL3. putative; 49574-48333 [Arabidopsis thaliana] gi 15529216 gb AAK97702.1 At1G72220/T9N14.22 [Arabidopsis thaliana] gi 25141211 gb AAN73300.1 At1G72220/T9N14.22 [Arabidopsis thaliana] gi 332197169 gb AEE35290.1 RING-H2 finger protein ATL54 [Arabidopsis thaliana] ref[XP_002887423.1] hypothetical protein ARALYDRAFT.476354 [Arabidopsis lyrata subsp. lyrata] gi 297333264 gb EFH63682.1 hypothetical protein ARALYDRAFT.476354 [Arabidopsis lyrata subsp. lyrata] | 324  | 320  | 1.00E-139 | 98.8  | 81.2  | 88.0  | transcription factor bHLH96             | gbpln | Arabidopsis thaliana | AT1G72210.1   Symbols:   basic helix-loop-helix (bHLH) DNA-binding superfamily protein   chr1:27180066-27182268 FORWARD LENGTH=320                                                                                                                                                                                                           | 324  | 320  | 1.00E-142 | 98.8  | 81.2 | 88.0 |
| Rsa1.0_00139.1.g6533.t1 | ref[XP_002887423.1] hypothetical protein ARALYDRAFT.476354 [Arabidopsis lyrata subsp. lyrata] gi 297333264 gb EFH63682.1 hypothetical protein ARALYDRAFT.476354 [Arabidopsis lyrata subsp. lyrata]                                                                                                                                                                                                                                                                                                                                                                                                                                                                                                                                                                                                                                                                                                                                                                                                                                                                                                                                                                                                                                                                                                                                                                                                                                                          | 319  | 413  | 1.00E-102 | 129.5 | 70.5  | 80.6  | RING-H2 finger protein ATL54            | gbpln | Arabidopsis thaliana | AT1G72220.1   Symbols:   RING/U-box superfamily protein   chr1:27184388-27185629 REVERSE LENGTH=413                                                                                                                                                                                                                                          | 319  | 413  | 1.00E-105 | 129.5 | 70.5 | 80.6 |
| Rsa1.0_00139.1.g6534.t1 | ref[XP_002887423.1] hypothetical protein ARALYDRAFT.476354 [Arabidopsis lyrata subsp. lyrata] gi 297333264 gb EFH63682.1 hypothetical protein ARALYDRAFT.476354 [Arabidopsis lyrata subsp. lyrata]                                                                                                                                                                                                                                                                                                                                                                                                                                                                                                                                                                                                                                                                                                                                                                                                                                                                                                                                                                                                                                                                                                                                                                                                                                                          | 176  | 181  | 1.00E-66  | 102.8 | 77.3  | 83.5  | hypothetical protein ARALYDRAFT.476354  | gbpln | Arabidopsis lyrata   | AT1G72230.1   Symbols:   Cupredoxin superfamily protein   chr1:27188287-27189093 FORWARD LENGTH=181                                                                                                                                                                                                                                          | 176  | 181  | 6.00E-68  | 102.8 | 75.6 | 82.4 |
| Rsa1.0_00139.1.g6535.t1 | gb AAG51792.1 AC067754.8 hypothetical protein; 54117-54518 [Arabidopsis thaliana]                                                                                                                                                                                                                                                                                                                                                                                                                                                                                                                                                                                                                                                                                                                                                                                                                                                                                                                                                                                                                                                                                                                                                                                                                                                                                                                                                                           | 136  | 133  | 3.00E-27  | 97.8  | 72.1  | 79.4  | hypothetical protein; 54117-54518       | gbpln | Arabidopsis thaliana | AT1G72240.1   Symbols:   unknown protein; BEST Arabidopsis thaliana protein match is: unknown protein (TAIR:AT1G22470.1); Has 65 Blast hits to 63 proteins in 13 species: Archae - 0; Bacteria - 0; Metazoa - 1; Fungi - 0; Plants - 64; Viruses - 0; Other Eukaryotes - 0 (source: NCBI BLink).   chr1:27190211-27190573 FORWARD LENGTH=120 | 136  | 120  | 2.00E-27  | 88.2  | 65.4 | 72.8 |
| Rsa1.0_00139.1.g6536.t1 | gb EOA35119.1  hypothetical protein CARUB_v10020240mg [Capsella rubella]                                                                                                                                                                                                                                                                                                                                                                                                                                                                                                                                                                                                                                                                                                                                                                                                                                                                                                                                                                                                                                                                                                                                                                                                                                                                                                                                                                                    | 760  | 467  | 0         | 61.4  | 55.3  | 57.0  | hypothetical protein CARUB_v10020240mg  | gbpln | Capsella rubella     | AT1G72280.1   Symbols: AERO1, ERO1   endoplasmic reticulum oxidoreductins 1   chr1:27212039-27214506 REVERSE LENGTH=469                                                                                                                                                                                                                      | 760  | 469  | 0         | 61.7  | 55.7 | 57.9 |
| Rsa1.0_00139.1.g6537.t1 | gb AAQ54577.1  drought-induced protein [Raphanus sativus]                                                                                                                                                                                                                                                                                                                                                                                                                                                                                                                                                                                                                                                                                                                                                                                                                                                                                                                                                                                                                                                                                                                                                                                                                                                                                                                                                                                                   | 220  | 202  | 1.00E-112 | 91.8  | 90.5  | 90.9  | drought-induced protein                 | gbpln | Raphanus sativus     | AT1G72290.1   Symbols:   Kunitz family trypsin and protease inhibitor protein   chr1:27215852-27216499 FORWARD LENGTH=215                                                                                                                                                                                                                    | 220  | 215  | 2.00E-68  | 97.7  | 60.9 | 70.0 |
| Rsa1.0_00139.1.g6538.t1 | gb AAK43485.1 AC084807.10 polyprotein, putative [Arabidopsis thaliana] gi 225898008 dbj BAH30336.1 hypothetical protein [Arabidopsis thaliana]                                                                                                                                                                                                                                                                                                                                                                                                                                                                                                                                                                                                                                                                                                                                                                                                                                                                                                                                                                                                                                                                                                                                                                                                                                                                                                              | 1371 | 1459 | 0         | 106.4 | 54.7  | 70.7  | polyprotein, putative                   | gbpln | Arabidopsis thaliana | AT4G23160.1   Symbols: CRK8   cysteine-rich RLK (RECEPTOR-like protein kinase) 8   chr4:12129485-12134086 FORWARD LENGTH=1262                                                                                                                                                                                                                | 1371 | 1262 | 1.00E-109 | 92.0  | 14.4 | 20.4 |
| Rsa1.0_00139.1.g6539.t1 | dbj BAB72020.1  water-soluble chlorophyll protein [Raphanus sativus var. niger] gi 404312339 dbj BAM42883.1  water soluble chlorophyll-binding protein [Raphanus sativus var. raphanistroides]                                                                                                                                                                                                                                                                                                                                                                                                                                                                                                                                                                                                                                                                                                                                                                                                                                                                                                                                                                                                                                                                                                                                                                                                                                                              | 222  | 222  | 1.00E-125 | 100.0 | 100.0 | 100.0 | water-soluble chlorophyll protein       | gbpln | Raphanus sativus     | AT1G72290.1   Symbols:   Kunitz family trypsin and protease inhibitor protein   chr1:27215852-27216499 FORWARD LENGTH=215                                                                                                                                                                                                                    | 222  | 215  | 7.00E-68  | 96.8  | 61.3 | 71.2 |
| Rsa1.0_00139.1.g6540.t1 | # # # # # # # # # #                                                                                                                                                                                                                                                                                                                                                                                                                                                                                                                                                                                                                                                                                                                                                                                                                                                                                                                                                                                                                                                                                                                                                                                                                                                                                                                                                                                                                                         | #    | #    | #         | #     | #     | -     | ----                                    | ----  | ----                 | # # # # # #                                                                                                                                                                                                                                                                                                                                  | #    | #    | #         | #     | #    | #    |
| Rsa1.0_00139.1.g6541.t1 | gb ABA39633.1  Kunitz-type cysteine protease inhibitor [Brassica oleracea var. botrytis]                                                                                                                                                                                                                                                                                                                                                                                                                                                                                                                                                                                                                                                                                                                                                                                                                                                                                                                                                                                                                                                                                                                                                                                                                                                                                                                                                                    | 225  | 226  | 5.00E-67  | 100.4 | 62.7  | 73.3  | Kunitz-type cysteine protease inhibitor | gbpln | Brassica oleracea    | AT1G72290.1   Symbols:   Kunitz family trypsin and protease inhibitor protein   chr1:27215852-27216499 FORWARD LENGTH=215                                                                                                                                                                                                                    | 225  | 215  | 6.00E-56  | 95.6  | 50.7 | 62.2 |



|                         |                                                                                                                                                                                                                                                                                                                  |      |      |           |       |      |      |                                                                                                                                                                |       |                      |                                                                                                                                                                                                                                                                                                                                                                                                                                                                                     |      |      |           |       |      |      |
|-------------------------|------------------------------------------------------------------------------------------------------------------------------------------------------------------------------------------------------------------------------------------------------------------------------------------------------------------|------|------|-----------|-------|------|------|----------------------------------------------------------------------------------------------------------------------------------------------------------------|-------|----------------------|-------------------------------------------------------------------------------------------------------------------------------------------------------------------------------------------------------------------------------------------------------------------------------------------------------------------------------------------------------------------------------------------------------------------------------------------------------------------------------------|------|------|-----------|-------|------|------|
| Rsa1.0_00139.1.g6542.t1 | ref XP_002887429.1  predicted protein [Arabidopsis lyrata subsp. lyrata] gi 297333270 gb EFH63688.1  predicted protein [Arabidopsis lyrata subsp. lyrata]                                                                                                                                                        | 101  | 101  | 3.00E-28  | 100.0 | 74.3 | 82.2 | predicted protein                                                                                                                                              | gbpln | Arabidopsis lyrata   | AT1G17285.1   Symbols:   unknown protein; FUNCTIONS IN: molecular_function unknown; INVOLVED IN: biological_process unknown; LOCATED IN: endomembrane system; BEST Arabidopsis thaliana protein match is: unknown protein (TAIR:AT1G17300.1); Has 35333 Blast hits to 34131 proteins in 2444 species: Archaea - 798; Bacteria - 22429; Metazoa - 974; Fungi - 991; Plants - 531; Viruses - 0; Other Eukaryotes - 9610 (source: NCBI BLINK)   chr1:5920895-5921287 FORWARD LENGTH=95 | 101  | 95   | 3.00E-18  | 94.1  | 46.5 | 62.4 |
| Rsa1.0_00139.1.g6543.t1 | gb EOA33684.1  hypothetical protein CARUB_v10019867mg [Capsella rubella] gi 492569497 gb EOA33685.1  hypothetical protein CARUB_v10019867mg [Capsella rubella]                                                                                                                                                   | 729  | 729  | 0         | 100.0 | 82.9 | 90.1 | hypothetical protein CARUB_v10019867mg                                                                                                                         | gbpln | Capsella rubella     | AT1G72320.1   Symbols: APUM23, PUM23   pumilio 23   chr1:27228984-27232580 REVERSE LENGTH=753                                                                                                                                                                                                                                                                                                                                                                                       | 729  | 753  | 0         | 103.3 | 81.9 | 90.1 |
| Rsa1.0_00139.1.g6544.t1 | ref XP_002881012.1  predicted protein [Arabidopsis lyrata subsp. lyrata] gi 297326851 gb EFH57271.1  predicted protein [Arabidopsis lyrata subsp. lyrata]                                                                                                                                                        | 280  | 290  | 2.00E-63  | 103.6 | 52.5 | 63.2 | predicted protein                                                                                                                                              | gbpln | Arabidopsis lyrata   | ATCG00790.1   Symbols: RPL16   ribosomal protein L16   chrC:81189-82652 REVERSE LENGTH=135                                                                                                                                                                                                                                                                                                                                                                                          | 280  | 135  | 5.00E-55  | 48.2  | 35.0 | 40.4 |
| Rsa1.0_00139.1.g6545.t1 | gb AAD25622.1 AC005287.24 Hypothetical protein [Arabidopsis thaliana]                                                                                                                                                                                                                                            | 487  | 224  | 9.00E-73  | 46.0  | 29.0 | 35.1 | Hypothetical protein                                                                                                                                           | gbpln | Arabidopsis thaliana | AT1G14800.1   Symbols:   Nucleic acid-binding, OB-fold-like protein   chr1:5099572-5102558 FORWARD LENGTH=384                                                                                                                                                                                                                                                                                                                                                                       | 487  | 384  | 2.00E-64  | 78.9  | 25.9 | 31.0 |
| Rsa1.0_00139.1.g6546.t1 | gb AAF79224.1 AC006917.9 F10B6.21 [Arabidopsis thaliana]                                                                                                                                                                                                                                                         | 211  | 383  | 1.00E-26  | 181.5 | 28.0 | 45.5 | F10B6.21                                                                                                                                                       | gbpln | Arabidopsis thaliana | AT2G35280.1   Symbols:   F-box family protein   chr2:14859709-14860200 REVERSE LENGTH=163                                                                                                                                                                                                                                                                                                                                                                                           | 211  | 163  | 1.00E-24  | 77.3  | 25.6 | 40.3 |
| Rsa1.0_00139.1.g6547.t1 | ref XP_003606913.1  ATP-dependent DNA helicase PIF1 [Medicago truncatula] gi 355507968 gb AES89110.1  ATP-dependent DNA helicase PIF1 [Medicago truncatula]                                                                                                                                                      | 1928 | 1558 | 0         | 80.8  | 35.5 | 49.2 | ATP-dependent DNA helicase PIF1                                                                                                                                | gbpln | Medicago truncatula  | AT5G28780.1   Symbols:   PIF1 helicase   chr5:10812907-10814173 REVERSE LENGTH=337                                                                                                                                                                                                                                                                                                                                                                                                  | 1928 | 337  | 4.00E-66  | 17.5  | 7.0  | 9.6  |
| Rsa1.0_00139.1.g6548.t1 | gb EOA35257.1  hypothetical protein CARUB_v10020426mg, partial [Capsella rubella]                                                                                                                                                                                                                                | 390  | 392  | 0         | 100.5 | 92.1 | 95.1 | hypothetical protein CARUB_v10020426mg, partial                                                                                                                | gbpln | Capsella rubella     | AT1G72340.1   Symbols:   NagB/RpiA/CoA transferase-like superfamily protein   chr1:27236898-27238482 FORWARD LENGTH=382                                                                                                                                                                                                                                                                                                                                                             | 390  | 382  | 0         | 97.9  | 92.3 | 94.4 |
| Rsa1.0_00139.1.g6549.t1 | gb EOA34308.1  hypothetical protein CARUB_v10021825mg [Capsella rubella]                                                                                                                                                                                                                                         | 254  | 222  | 6.00E-62  | 87.4  | 52.4 | 60.6 | hypothetical protein CARUB_v10021825mg                                                                                                                         | gbpln | Capsella rubella     | AT1G72350.1   Symbols:   MADS-box transcription factor family protein   chr1:27239273-27239947 REVERSE LENGTH=224                                                                                                                                                                                                                                                                                                                                                                   | 254  | 224  | 5.00E-61  | 88.2  | 52.8 | 60.2 |
| Rsa1.0_00139.1.g6550.t1 | ref NP_001077812.1  ethylene-responsive transcription factor ERF073 [Arabidopsis thaliana] gi 12325282 gb AAG52589.1 AC016529.20 putative AP2 domain transcription factor: 71325-70452 [Arabidopsis thaliana] gi 332197190 gb AEE35311.1  ethylene-responsive transcription factor ERF073 [Arabidopsis thaliana] | 246  | 262  | 1.00E-68  | 106.5 | 61.4 | 71.5 | ethylene-responsive transcription factor ERF073                                                                                                                | gbpln | Arabidopsis thaliana | AT1G72360.2   Symbols: HRE1   Integrase-type DNA-binding superfamily protein   chr1:27241904-27242777 FORWARD LENGTH=262                                                                                                                                                                                                                                                                                                                                                            | 246  | 262  | 4.00E-71  | 106.5 | 61.4 | 71.5 |
| Rsa1.0_00139.1.g6551.t1 | sp Q9ZSR8.1 RSSA_BRANA RecName: Full=40S ribosomal protein SA; AltName: Full=Laminin receptor-like protein; AltName: Full=p40 gi 3769681 gb AAC97937.1  laminin receptor-like protein [Brassica napus]                                                                                                           | 294  | 292  | 1.00E-165 | 99.3  | 96.6 | 97.6 | RecName: Full=40S ribosomal protein SA; AltName: Full=Laminin receptor-like protein; AltName: Full=p40 gi 3769681 gb AAC97937.1  laminin receptor-like protein | gbpln | Brassica napus       | AT1G72370.1   Symbols: P40, AP40, RP40, RPSAA   40s ribosomal protein SA   chr1:27243148-27244842 REVERSE LENGTH=298                                                                                                                                                                                                                                                                                                                                                                | 294  | 298  | 1.00E-143 | 101.4 | 88.4 | 90.8 |
| Rsa1.0_00139.1.g6552.t1 | gb EOA33489.1  hypothetical protein CARUB_v10019669mg [Capsella rubella]                                                                                                                                                                                                                                         | 1312 | 1325 | 0         | 101.0 | 79.1 | 85.3 | hypothetical protein CARUB_v10019669mg                                                                                                                         | gbpln | Capsella rubella     | AT1G72390.1   Symbols:   CONTAINS InterPro DOMAIN/s: Spt20 family (InterPro:IPRO21950); Has 8778 Blast hits to 7244 proteins in 477 species: Archaea - 6; Bacteria - 326; Metazoa - 4198; Fungi - 1506; Plants - 923; Viruses - 22; Other Eukaryotes - 1797 (source: NCBI BLINK)   chr1:27245455-27251218 FORWARD LENGTH=1325                                                                                                                                                       | 1312 | 1325 | 0         | 101.0 | 78.6 | 85.4 |
| Rsa1.0_00139.1.g6553.t1 | ref NP_001117589.1  chaperone DnaJ-domain containing protein [Arabidopsis thaliana] gi 332197199 gb AEE35320.1  chaperone DnaJ-domain containing protein [Arabidopsis thaliana]                                                                                                                                  | 204  | 201  | 2.00E-56  | 98.5  | 64.7 | 72.1 | chaperone DnaJ-domain containing protein                                                                                                                       | gbpln | Arabidopsis thaliana | AT1G72416.3   Symbols:   Chaperone DnaJ-domain superfamily protein   chr1:27259125-27260109 REVERSE LENGTH=201                                                                                                                                                                                                                                                                                                                                                                      | 204  | 201  | 7.00E-59  | 98.5  | 64.7 | 72.1 |
| Rsa1.0_00139.1.g6554.t1 | emb CAA07494.1  heat stress-induced protein [Brassica oleracea var. capitata] gi 3551243 db BAA32820.1  Water-Soluble Chlorophyll Protein [Brassica oleracea var. botrytis]                                                                                                                                      | 231  | 218  | 7.00E-72  | 94.4  | 61.0 | 69.3 | heat stress-induced protein                                                                                                                                    | gbpln | Brassica oleracea    | AT1G72290.1   Symbols:   Kunitz family trypsin and protease inhibitor protein   chr1:27215852-27216499 FORWARD LENGTH=215                                                                                                                                                                                                                                                                                                                                                           | 231  | 215  | 2.00E-54  | 93.1  | 48.1 | 61.0 |

|                          |                                                                                                                                                                                                                                                                                                                                                                                                                                                                                                                                                                                                                                                                                                                                                                                                                                                                                                                                                                   |      |      |           |       |      |      |                                        |             |                         |                                                                                                                                                                                                                                                                                                                                                                                                                                                                                                                                                                |      |      |           |       |      |      |
|--------------------------|-------------------------------------------------------------------------------------------------------------------------------------------------------------------------------------------------------------------------------------------------------------------------------------------------------------------------------------------------------------------------------------------------------------------------------------------------------------------------------------------------------------------------------------------------------------------------------------------------------------------------------------------------------------------------------------------------------------------------------------------------------------------------------------------------------------------------------------------------------------------------------------------------------------------------------------------------------------------|------|------|-----------|-------|------|------|----------------------------------------|-------------|-------------------------|----------------------------------------------------------------------------------------------------------------------------------------------------------------------------------------------------------------------------------------------------------------------------------------------------------------------------------------------------------------------------------------------------------------------------------------------------------------------------------------------------------------------------------------------------------------|------|------|-----------|-------|------|------|
| Rsa1.0_00139.1.g6555.t1  | gb EOA35672.1  hypothetical protein CARUB_v10020896mg [Capsella rubella]                                                                                                                                                                                                                                                                                                                                                                                                                                                                                                                                                                                                                                                                                                                                                                                                                                                                                          | 207  | 228  | 1.00E-98  | 110.1 | 88.9 | 92.8 | hypothetical protein CARUB_v10020896mg | gbpln       | Capsella rubella        | AT1G72420.1   Symbols:   NADH:ubiquinone oxidoreductase intermediate-associated protein 30   chr1:27261367-27263186 REVERSE LENGTH=228                                                                                                                                                                                                                                                                                                                                                                                                                         | 207  | 228  | 2.00E-96  | 110.1 | 85.0 | 90.8 |
| Rsa1.0_00139.1.g6556.t1  | #                                                                                                                                                                                                                                                                                                                                                                                                                                                                                                                                                                                                                                                                                                                                                                                                                                                                                                                                                                 | #    | #    | #         | #     | #    | -    | ----                                   | ----        | #                       | #                                                                                                                                                                                                                                                                                                                                                                                                                                                                                                                                                              | #    | #    | #         | #     | #    |      |
| Rsa1.0_00139.1.g6557.t1  | db BAF63144.1  kinetochore protein [Crucihimalaya wallichii]                                                                                                                                                                                                                                                                                                                                                                                                                                                                                                                                                                                                                                                                                                                                                                                                                                                                                                      | 269  | 241  | 5.00E-62  | 89.6  | 51.3 | 62.8 | kinetochore protein                    | gbpln       | Crucihimalaya wallichii | AT5G35520.1   Symbols: MIS12, ATMIS12   minichromosome instability 12 (mis12)-like   chr5:13701396-13702925 FORWARD LENGTH=238                                                                                                                                                                                                                                                                                                                                                                                                                                 | 269  | 238  | 3.00E-58  | 88.5  | 48.7 | 61.3 |
| Rsa1.0_00139.1.g6558.t1  | gb EOA34209.1  hypothetical protein CARUB_v10021718mg [Capsella rubella]                                                                                                                                                                                                                                                                                                                                                                                                                                                                                                                                                                                                                                                                                                                                                                                                                                                                                          | 118  | 118  | 1.00E-60  | 100.0 | 94.9 | 99.2 | hypothetical protein CARUB_v10021718mg | gbpln       | Capsella rubella        | AT1G72430.1   Symbols:   SAUR-like auxin-responsive protein family   chr1:27265150-27265509 REVERSE LENGTH=119                                                                                                                                                                                                                                                                                                                                                                                                                                                 | 118  | 119  | 4.00E-62  | 100.8 | 94.9 | 99.2 |
| Rsa1.0_00139.1.g6559.t1  | ref XP_002888875.1  hypothetical protein ARALYDRAFT_316209 [Arabidopsis lyrata subsp. lyrata] gi 297334716 gb EFH65134.1  hypothetical protein ARALYDRAFT_316209 [Arabidopsis lyrata subsp. lyrata] ref NP_565043.1  protein TIFY 11B [Arabidopsis thaliana] gi 75169694 sp Q9C9E3.1 T111B_ARATH RecName: Full=Protein TIFY 11B; AltName: Full=Jasmonate ZIM domain-containing protein 6 gi 12325268 gb AAG52575.1 AC016529.6 unknown protein; 37093-38893 [Arabidopsis thaliana] gi 13877769 gb AAK43962.1 AF370147.1 unknown protein [Arabidopsis thaliana] gi 16323402 gb AAL15195.1  unknown protein [Arabidopsis thaliana] gi 21593614 gb AAM65581.1  unknown [Arabidopsis thaliana] gi 332197205 gb AEE35326.1  protein TIFY 11B [Arabidopsis thaliana] ref XP_002888879.1  hypothetical protein ARALYDRAFT_895100 [Arabidopsis lyrata subsp. lyrata] gi 297334720 gb EFH65138.1  hypothetical protein ARALYDRAFT_895100 [Arabidopsis lyrata subsp. lyrata] | 1008 | 1029 | 0         | 102.1 | 81.9 | 87.7 | hypothetical protein ARALYDRAFT_316209 | gbpln       | Arabidopsis lyrata      | AT1G72440.1   Symbols:   EDA25, SWA2   CCAAT-binding factor   chr1:27268325-27273596 REVERSE LENGTH=1043                                                                                                                                                                                                                                                                                                                                                                                                                                                       | 1008 | 1043 | 0         | 103.5 | 74.2 | 80.6 |
| Rsa1.0_00139.1.g6560.t1  | ref NP_565043.1  protein TIFY 11B [Arabidopsis thaliana] gi 75169694 sp Q9C9E3.1 T111B_ARATH RecName: Full=Protein TIFY 11B; AltName: Full=Jasmonate ZIM domain-containing protein 6 gi 12325268 gb AAG52575.1 AC016529.6 unknown protein; 37093-38893 [Arabidopsis thaliana] gi 13877769 gb AAK43962.1 AF370147.1 unknown protein [Arabidopsis thaliana] gi 16323402 gb AAL15195.1  unknown protein [Arabidopsis thaliana] gi 21593614 gb AAM65581.1  unknown [Arabidopsis thaliana] gi 332197205 gb AEE35326.1  protein TIFY 11B [Arabidopsis thaliana] ref XP_002888879.1  hypothetical protein ARALYDRAFT_895100 [Arabidopsis lyrata subsp. lyrata] gi 297334720 gb EFH65138.1  hypothetical protein ARALYDRAFT_895100 [Arabidopsis lyrata subsp. lyrata]                                                                                                                                                                                                     | 275  | 269  | 1.00E-108 | 97.8  | 73.1 | 84.0 | protein TIFY 11B                       | gbpln       | Arabidopsis thaliana    | AT1G72450.1   Symbols:   JAZ6, TIFY11B   jasmonate-zim-domain protein 6   chr1:27274336-27276136 REVERSE LENGTH=269                                                                                                                                                                                                                                                                                                                                                                                                                                            | 275  | 269  | 1.00E-111 | 97.8  | 73.1 | 84.0 |
| Rsa1.0_00139.1.g6561.t1  | ref XP_002888879.1  hypothetical protein ARALYDRAFT_895100 [Arabidopsis lyrata subsp. lyrata] gi 297334720 gb EFH65138.1  hypothetical protein ARALYDRAFT_895100 [Arabidopsis lyrata subsp. lyrata]                                                                                                                                                                                                                                                                                                                                                                                                                                                                                                                                                                                                                                                                                                                                                               | 491  | 509  | 0         | 103.7 | 80.9 | 85.5 | hypothetical protein ARALYDRAFT_895100 | gbpln       | Arabidopsis lyrata      | AT1G72480.1   Symbols:   Lung seven transmembrane receptor family protein   chr1:27286304-27288339 REVERSE LENGTH=509                                                                                                                                                                                                                                                                                                                                                                                                                                          | 491  | 509  | 0         | 103.7 | 80.4 | 85.1 |
| Rsa1.0_00139.1.g6562.t1  | gb EOA35532.1  hypothetical protein CARUB_v10020740mg [Capsella rubella]                                                                                                                                                                                                                                                                                                                                                                                                                                                                                                                                                                                                                                                                                                                                                                                                                                                                                          | 287  | 288  | 1.00E-127 | 100.3 | 84.0 | 88.9 | hypothetical protein CARUB_v10020740mg | gbpln       | Capsella rubella        | AT1G72490.1   Symbols:   unknown protein; BEST Arabidopsis thaliana protein match is: unknown protein (TAIR:AT1G7400.1); Has 75 Blast hits to 75 proteins in 21 species: Archae - 0; Bacteria - 0; Metazoa - 3; Fungi - 4; Plants - 58; Viruses - 0; Other Eukaryotes - 10 (source: NCBI BLINK).   chr1:27289435-27290732 REVERSE LENGTH=287                                                                                                                                                                                                                   | 287  | 287  | 1.00E-127 | 100.0 | 81.9 | 89.5 |
| Rsa1.0_00139.1.g6563.t1  | ref XP_002888881.1  hypothetical protein ARALYDRAFT_476383 [Arabidopsis lyrata subsp. lyrata] gi 297334722 gb EFH65140.1  hypothetical protein ARALYDRAFT_476383 [Arabidopsis lyrata subsp. lyrata]                                                                                                                                                                                                                                                                                                                                                                                                                                                                                                                                                                                                                                                                                                                                                               | 756  | 757  | 0         | 100.1 | 88.6 | 93.9 | hypothetical protein ARALYDRAFT_476383 | gbpln       | Arabidopsis lyrata      | AT1G72500.1   Symbols:   LOCATED IN: plasma membrane; EXPRESSED IN: 23 plant structures; EXPRESSED DURING: 13 growth stages; CONTAINS InterPro DOMAIN/s: von Willebrand factor, type A (InterPro:IPR002035); BEST Arabidopsis thaliana protein match is: inter-alpha-trypsin inhibitor heavy chain-related (TAIR:AT1G19110.1); Has 1407 Blast hits to 1406 proteins in 307 species: Archae - 6; Bacteria - 522; Metazoa - 484; Fungi - 59; Plants - 110; Viruses - 0; Other Eukaryotes - 226 (source: NCBI BLINK).   chr1:27295336-27298556 REVERSE LENGTH=756 | 756  | 756  | 0         | 100.0 | 86.5 | 93.3 |
| Rsa1.0_00139.1.g6564.t10 | gb AAO73529.1  gag-pol polyprotein [Glycine max]                                                                                                                                                                                                                                                                                                                                                                                                                                                                                                                                                                                                                                                                                                                                                                                                                                                                                                                  | 1467 | 1577 | 0         | 107.5 | 43.4 | 60.1 | gag-pol polyprotein                    | gbenv/gbpln | Glycine max             | AT4G23160.1   Symbols:   CRK8   cysteine-rich RLK (RECEPTOR-like protein kinase) 8   chr4:12129485-12134086 FORWARD LENGTH=1262                                                                                                                                                                                                                                                                                                                                                                                                                                | 1467 | 1262 | 1.00E-61  | 86.0  | 9.5  | 14.6 |
| Rsa1.0_00139.1.g6565.t1  | gb AAF18631.1 AC006228.2 F5J5.2 [Arabidopsis thaliana]                                                                                                                                                                                                                                                                                                                                                                                                                                                                                                                                                                                                                                                                                                                                                                                                                                                                                                            | 425  | 463  | 7.00E-39  | 108.9 | 24.5 | 40.9 | F5J5.2                                 | gbpln       | Arabidopsis thaliana    | #                                                                                                                                                                                                                                                                                                                                                                                                                                                                                                                                                              | #    | #    | #         | #     | #    |      |
| Rsa1.0_00140.1.g6566.t1  | gb EOA28259.1  hypothetical protein CARUB_v10024453mg [Capsella rubella]                                                                                                                                                                                                                                                                                                                                                                                                                                                                                                                                                                                                                                                                                                                                                                                                                                                                                          | 75   | 75   | 2.00E-31  | 100.0 | 93.3 | 97.3 | hypothetical protein CARUB_v10024453mg | gbpln       | Capsella rubella        | AT2G24040.1   Symbols:   Low temperature and salt responsive protein family   chr2:10224028-10224531 FORWARD LENGTH=75                                                                                                                                                                                                                                                                                                                                                                                                                                         | 75   | 75   | 9.00E-33  | 100.0 | 89.3 | 94.7 |
| Rsa1.0_00140.1.g6567.t1  | gb EOA18398.1  hypothetical protein CARUB_v10006936mg [Capsella rubella]                                                                                                                                                                                                                                                                                                                                                                                                                                                                                                                                                                                                                                                                                                                                                                                                                                                                                          | 599  | 614  | 0         | 102.5 | 74.0 | 82.1 | hypothetical protein CARUB_v10006936mg | gbpln       | Capsella rubella        | AT4G33430.1   Symbols:   BAK1, RKS10, SERK3, ELG, ATSERK3, ATBAK1   BRI1-associated receptor kinase   chr4:16086654-16090288 REVERSE LENGTH=615                                                                                                                                                                                                                                                                                                                                                                                                                | 599  | 615  | 0         | 102.7 | 73.5 | 81.8 |

|                         |                                                                                                                                                                                                      |     |      |           |       |      |      |                                          |       |                      |                                                                                                                                                                                                                                                                                                                                                                                         |     |     |           |       |      |      |
|-------------------------|------------------------------------------------------------------------------------------------------------------------------------------------------------------------------------------------------|-----|------|-----------|-------|------|------|------------------------------------------|-------|----------------------|-----------------------------------------------------------------------------------------------------------------------------------------------------------------------------------------------------------------------------------------------------------------------------------------------------------------------------------------------------------------------------------------|-----|-----|-----------|-------|------|------|
| Rsa1.0_00140.1.g6568.t1 | ref[XP_002878716.1] hypothetical protein ARALYDRAFT_481264 [Arabidopsis lyrata subsp. lyrata] gi 297324555 gb EFH54975.1                                                                             | 316 | 292  | 1.00E-119 | 92.4  | 77.8 | 83.2 | hypothetical protein ARALYDRAFT_481264   | gbpln | Arabidopsis lyrata   | AT2G24060.1   Symbols:   Translation initiation factor 3 protein   chr2:10229453-10231390 FORWARD LENGTH=312                                                                                                                                                                                                                                                                            | 316 | 312 | 1.00E-117 | 98.7  | 73.1 | 78.8 |
| Rsa1.0_00140.1.g6569.t2 | gb[EOA29260.1] hypothetical protein CARUB_v10025534mg [Capsella rubella]                                                                                                                             | 590 | 614  | 0         | 104.1 | 77.1 | 83.2 | hypothetical protein CARUB_v10025534mg   | gbpln | Capsella rubella     | AT2G24070.2   Symbols: QWRF4   Family of unknown function (DUF566)   chr2:10231822-10233986 REVERSE LENGTH=609                                                                                                                                                                                                                                                                          | 590 | 609 | 0         | 103.2 | 73.9 | 80.7 |
| Rsa1.0_00140.1.g6570.t1 | ref[XP_002878721.1] ribosomal protein L35 [Arabidopsis lyrata subsp. lyrata] gi 297324560 gb EFH54980.1   ribosomal protein L35 [Arabidopsis lyrata subsp. lyrata]                                   | 148 | 140  | 7.00E-54  | 94.6  | 79.1 | 83.8 | ribosomal protein L35                    | gbpln | Arabidopsis lyrata   | AT2G24090.1   Symbols:   Ribosomal protein L35   chr2:10242038-10243416 FORWARD LENGTH=145                                                                                                                                                                                                                                                                                              | 148 | 145 | 1.00E-52  | 98.0  | 81.1 | 86.5 |
| Rsa1.0_00140.1.g6571.t1 | ref[NP_001118363.1] uncharacterized protein [Arabidopsis thaliana] gi 330252224 gb AEC07318.1   uncharacterized protein AT2G22520 [Arabidopsis thaliana]                                             | 159 | 151  | 1.00E-27  | 95.0  | 49.7 | 64.2 | uncharacterized protein                  | gbpln | Arabidopsis thaliana | AT2G22520.2   Symbols:   unknown protein; FUNCTIONS IN: molecular_function unknown; LOCATED IN: cellular_component unknown; EXPRESSED IN: stem; Has 30201 Blast hits to 17322 proteins in 780 species: Archaea - 12; Bacteria - 1396; Metazoa - 1738; Fungi - 3422; Plants - 5037; Viruses - 0; Other Eukaryotes - 2996 (source: NCBI BLINK).   chr2:9572066-9572623 FORWARD LENGTH=151 | 159 | 151 | 5.00E-30  | 95.0  | 49.7 | 64.2 |
| Rsa1.0_00140.1.g6572.t1 | gb[EOA29019.1] hypothetical protein CARUB_v10025273mg [Capsella rubella]                                                                                                                             | 996 | 991  | 0         | 99.5  | 88.6 | 93.1 | hypothetical protein CARUB_v10025273mg   | gbpln | Capsella rubella     | AT2G24120.1   Symbols: PDE319, SCA3   DNA/RNA polymerases superfamily protein   chr2:10248358-10254530 REVERSE LENGTH=993                                                                                                                                                                                                                                                               | 996 | 993 | 0         | 99.7  | 88.1 | 92.0 |
| Rsa1.0_00140.1.g6573.t1 | #                                                                                                                                                                                                    | #   | #    | #         | #     | #    | -    | ----                                     | ----  | #                    | #                                                                                                                                                                                                                                                                                                                                                                                       | #   | #   | #         | #     | #    | #    |
| Rsa1.0_00140.1.g6574.t1 | #                                                                                                                                                                                                    | #   | #    | #         | #     | #    | -    | ----                                     | ----  | #                    | #                                                                                                                                                                                                                                                                                                                                                                                       | #   | #   | #         | #     | #    | #    |
| Rsa1.0_00140.1.g6575.t1 | emb[CAB39638.1] RNA-directed DNA polymerase-like protein [Arabidopsis thaliana] gi 7267666 emb[CAB78094.1] RNA-directed DNA polymerase-like protein [Arabidopsis thaliana]                           | 514 | 1274 | 4.00E-78  | 247.9 | 32.9 | 49.8 | RNA-directed DNA polymerase-like protein | gbpln | Arabidopsis thaliana | AT4G29090.1   Symbols:   Ribonuclease H-like superfamily protein   chr4:14333528-14335255 FORWARD LENGTH=575                                                                                                                                                                                                                                                                            | 514 | 575 | 3.00E-47  | 111.9 | 26.7 | 43.4 |
| Rsa1.0_00140.1.g6576.t1 | #                                                                                                                                                                                                    | #   | #    | #         | #     | #    | -    | ----                                     | ----  | #                    | #                                                                                                                                                                                                                                                                                                                                                                                       | #   | #   | #         | #     | #    | #    |
| Rsa1.0_00140.1.g6577.t2 | dbj[BAJ33647.1] unnamed protein product [Thellungiella halophila]                                                                                                                                    | 493 | 520  | 0         | 105.5 | 94.5 | 96.1 | unnamed protein product                  | ----  | ----                 | AT3G50610.1   Symbols:   unknown protein; BEST Arabidopsis thaliana protein match is: unknown protein (TAIR:AT5G66816.1); Has 125 Blast hits to 60 proteins in 16 species: Archaea - 0; Bacteria - 2; Metazoa - 10; Fungi - 4; Plants - 97; Viruses - 0; Other Eukaryotes - 12 (source: NCBI BLINK).   chr3:18779723-18780412 REVERSE LENGTH=229                                        | 493 | 520 | 7.00E-12  | 176.2 | 33.8 | 43.8 |
| Rsa1.0_00140.1.g6578.t1 | #                                                                                                                                                                                                    | #   | #    | #         | #     | #    | -    | ----                                     | ----  | #                    | #                                                                                                                                                                                                                                                                                                                                                                                       | #   | #   | #         | #     | #    | #    |
| Rsa1.0_00140.1.g6579.t1 | #                                                                                                                                                                                                    | #   | #    | #         | #     | #    | -    | ----                                     | ----  | #                    | #                                                                                                                                                                                                                                                                                                                                                                                       | #   | #   | #         | #     | #    | #    |
| Rsa1.0_00140.1.g6580.t1 | ref[XP_002874699.1] hypothetical protein ARALYDRAFT_352228 [Arabidopsis lyrata subsp. lyrata] gi 297320536 gb EFH50958.1   hypothetical protein ARALYDRAFT_352228 [Arabidopsis lyrata subsp. lyrata] | 297 | 304  | 6.00E-78  | 102.4 | 52.9 | 66.7 | hypothetical protein ARALYDRAFT_352228   | gbpln | Arabidopsis lyrata   | AT4G11580.1   Symbols:   RN1-like superfamily protein   chr4:7006648-7007738 REVERSE LENGTH=333                                                                                                                                                                                                                                                                                         | 297 | 333 | 6.00E-55  | 112.1 | 44.4 | 63.0 |
| Rsa1.0_00140.1.g6581.t1 | #                                                                                                                                                                                                    | #   | #    | #         | #     | #    | -    | ----                                     | ----  | #                    | #                                                                                                                                                                                                                                                                                                                                                                                       | #   | #   | #         | #     | #    | #    |
| Rsa1.0_00140.1.g6582.t1 | gb[EOA27318.1] hypothetical protein CARUB_v10023435mg [Capsella rubella]                                                                                                                             | 359 | 378  | 1.00E-160 | 105.3 | 89.7 | 95.3 | hypothetical protein CARUB_v10023435mg   | gbpln | Capsella rubella     | AT2G24220.2   Symbols: PUP5   purine permease 5   chr2:10300603-10301688 FORWARD LENGTH=361                                                                                                                                                                                                                                                                                             | 359 | 361 | 1.00E-159 | 100.6 | 84.1 | 89.4 |
| Rsa1.0_00140.1.g6583.t1 | gb[EOA28753.1] hypothetical protein CARUB_v10024985mg [Capsella rubella]                                                                                                                             | 851 | 852  | 0         | 100.1 | 89.1 | 94.5 | hypothetical protein CARUB_v10024985mg   | gbpln | Capsella rubella     | AT2G24230.1   Symbols:   Leucine-rich repeat protein kinase family protein   chr2:10301979-10304540 REVERSE LENGTH=853                                                                                                                                                                                                                                                                  | 851 | 853 | 0         | 100.2 | 88.2 | 94.5 |
| Rsa1.0_00140.1.g6584.t1 | ref[XP_002893531.1] CYP705A24 [Arabidopsis lyrata subsp. lyrata] gi 297339373 gb EFH69790.1   CYP705A24 [Arabidopsis lyrata subsp. lyrata]                                                           | 549 | 518  | 0         | 94.4  | 69.9 | 80.5 | CYP705A24                                | gbpln | Arabidopsis lyrata   | AT1G28430.1   Symbols: CYP705A24   cytochrome P450, family 705, subfamily A, polypeptide 24   chr1:9992986-9994642 REVERSE LENGTH=521                                                                                                                                                                                                                                                   | 549 | 521 | 0         | 94.9  | 69.6 | 80.0 |

|                         |                                                                                                                                                                                                                                                                                                                                                                             |      |     |           |       |      |      |                                        |       |                      |                                                                                                                                      |      |     |           |       |      |      |
|-------------------------|-----------------------------------------------------------------------------------------------------------------------------------------------------------------------------------------------------------------------------------------------------------------------------------------------------------------------------------------------------------------------------|------|-----|-----------|-------|------|------|----------------------------------------|-------|----------------------|--------------------------------------------------------------------------------------------------------------------------------------|------|-----|-----------|-------|------|------|
| Rsa1.0_00140.1.g6586.t1 | refNP_180705.1   F-box protein DOR [Arabidopsis thaliana]   gi 229807544 sp Q5BPS3.2 DOR_ARATH RecName: Full=F-box protein DOR; AltName: Full=Protein DROUGHT TOLERANCE REPRESSOR   gi 4589954 gb AAD26472.1  hypothetical protein [Arabidopsis thaliana]   gi 330253458 gb AEC08552.1  F-box protein DOR [Arabidopsis thaliana]                                            | 388  | 387 | 1.00E-82  | 99.7  | 45.4 | 61.1 | F-box protein DOR                      | gbpln | Arabidopsis thaliana | AT2G31470.1   Symbols: DOR   F-box and associated interaction domains-containing protein   chr2:13407492-13408655 REVERSE LENGTH=387 | 388  | 387 | 3.00E-85  | 99.7  | 45.4 | 61.1 |
| Rsa1.0_00140.1.g6586.t1 | gb EOA29274.1  hypothetical protein CARUB_v10025549mg [Capsella rubella]                                                                                                                                                                                                                                                                                                    | 360  | 362 | 1.00E-104 | 100.6 | 58.6 | 69.7 | hypothetical protein CARUB_v10025549mg | gbpln | Capsella rubella     | AT2G24250.2   Symbols:   Protein of unknown function (DUF295)   chr2:10313436-10314560 REVERSE LENGTH=374                            | 360  | 374 | 1.00E-90  | 103.9 | 56.7 | 70.0 |
| Rsa1.0_00140.1.g6587.t1 | #                                                                                                                                                                                                                                                                                                                                                                           | #    | #   | #         | #     | #    | #    | -                                      | ----  | ----                 | #                                                                                                                                    | #    | #   | #         | #     | #    | #    |
| Rsa1.0_00140.1.g6588.t1 | refXP_002880625.1   hypothetical protein ARALYDRAFT_901061 [Arabidopsis lyrata subsp. lyrata]   gi 297326464 gb EFH56884.1  hypothetical protein ARALYDRAFT_901061 [Arabidopsis lyrata subsp. lyrata]                                                                                                                                                                       | 392  | 365 | 1.00E-117 | 93.1  | 57.7 | 69.4 | hypothetical protein ARALYDRAFT_901061 | gbpln | Arabidopsis lyrata   | AT1G64840.1   Symbols:   Protein of unknown function (DUF295)   chr1:24094010-24095164 FORWARD LENGTH=384                            | 392  | 384 | 1.00E-114 | 98.0  | 55.6 | 67.9 |
| Rsa1.0_00140.1.g6589.t1 | gb EOA27399.1  hypothetical protein CARUB_v10023532mg [Capsella rubella]                                                                                                                                                                                                                                                                                                    | 157  | 351 | 3.00E-45  | 223.6 | 73.9 | 83.4 | hypothetical protein CARUB_v10023532mg | gbpln | Capsella rubella     | AT2G24260.1   Symbols: LRL1   LJRHL1-like 1   chr2:10319646-10322177 REVERSE LENGTH=350                                              | 157  | 350 | 2.00E-44  | 222.9 | 66.2 | 73.9 |
| Rsa1.0_00140.1.g6590.t1 | dbj BAJ34194.1  unnamed protein product [Thellungiella halophila]                                                                                                                                                                                                                                                                                                           | 496  | 496 | 0         | 100.0 | 99.0 | 99.8 | unnamed protein product                | ----  | ----                 | AT2G24270.3   Symbols: ALDH11A3   aldehyde dehydrogenase 11A3   chr2:10327325-10329601 REVERSE LENGTH=496                            | 496  | 496 | 0         | 100.0 | 97.4 | 99.4 |
| Rsa1.0_00141.1.g6591.t1 | refNP_177473.1   serine carboxypeptidase-like 2 [Arabidopsis thaliana]   gi 75169956 sp Q9CAU3.1 SCP2_ARATH RecName: Full=Serine carboxypeptidase-like 2; Flags: Precursor   gi 12324326 gb AAG52135.1 AC010556.17 putative serine carboxypeptidase: 5659-8034 [Arabidopsis thaliana]   gi 332197318 gb AEE35439.1  serine carboxypeptidase-like 2 [Arabidopsis thaliana]   | 337  | 441 | 1.00E-139 | 130.9 | 69.4 | 78.0 | serine carboxypeptidase-like 2         | gbpln | Arabidopsis thaliana | AT1G73300.1   Symbols: scpl2   serine carboxypeptidase-like 2   chr1:27559673-27562048 REVERSE LENGTH=441                            | 337  | 441 | 1.00E-141 | 130.9 | 69.4 | 78.0 |
| Rsa1.0_00141.1.g6592.t3 | refNP_177471.1   serine carboxypeptidase-like 3 [Arabidopsis thaliana]   gi 75169954 sp Q9CAU1.1 SCP3_ARATH RecName: Full=Serine carboxypeptidase-like 3; Flags: Precursor   gi 12324329 gb AAG52138.1 AC010556.20 putative serine carboxypeptidase: 12385-14737 [Arabidopsis thaliana]   gi 332197316 gb AEE35437.1  serine carboxypeptidase-like 3 [Arabidopsis thaliana] | 1569 | 441 | 1.00E-158 | 28.1  | 17.8 | 20.9 | serine carboxypeptidase-like 3         | gbpln | Arabidopsis thaliana | AT1G73280.1   Symbols: scpl3   serine carboxypeptidase-like 3   chr1:27552970-27555322 REVERSE LENGTH=441                            | 1569 | 441 | 1.00E-161 | 28.1  | 17.8 | 20.9 |
| Rsa1.0_00141.1.g6593.t1 | #                                                                                                                                                                                                                                                                                                                                                                           | #    | #   | #         | #     | #    | #    | -                                      | ----  | ----                 | #                                                                                                                                    | #    | #   | #         | #     | #    | #    |
| Rsa1.0_00141.1.g6594.t1 | gb EOA35721.1  hypothetical protein CARUB_v10020954mg [Capsella rubella]                                                                                                                                                                                                                                                                                                    | 279  | 208 | 4.00E-72  | 74.6  | 49.8 | 53.8 | hypothetical protein CARUB_v10020954mg | gbpln | Capsella rubella     | AT1G73260.1   Symbols: ATKTI1, KTI1   kunitz trypsin inhibitor 1   chr1:27547410-27548057 REVERSE LENGTH=215                         | 279  | 215 | 6.00E-70  | 77.1  | 46.6 | 52.0 |
| Rsa1.0_00141.1.g6595.t1 | gb EOA37168.1  hypothetical protein CARUB_v10010502mg [Capsella rubella]                                                                                                                                                                                                                                                                                                    | 164  | 163 | 3.00E-70  | 99.4  | 82.9 | 87.8 | hypothetical protein CARUB_v10010502mg | gbpln | Capsella rubella     | AT1G17880.1   Symbols: BTF3, ATBTF3   basic transcription factor 3   chr1:6152572-6153425 REVERSE LENGTH=165                         | 164  | 165 | 6.00E-72  | 100.6 | 81.7 | 85.4 |
| Rsa1.0_00141.1.g6596.t1 | refNP_188443.2   F-box domain-containing protein [Arabidopsis thaliana]   gi 257051013 sp Q9LV26.2 FBL45_ARATH RecName: Full=Putative F-box/LRR-repeat protein At3g18150   gi 332642533 gb AEE76054.1  F-box domain-containing protein [Arabidopsis thaliana]                                                                                                               | 176  | 456 | 5.00E-14  | 259.1 | 22.2 | 31.8 | F-box domain-containing protein        | gbpln | Arabidopsis thaliana | AT3G18150.1   Symbols:   RNI-like superfamily protein   chr3:6217929-6219500 FORWARD LENGTH=456                                      | 176  | 456 | 2.00E-16  | 259.1 | 22.2 | 31.8 |
| Rsa1.0_00141.1.g6597.t1 | refXP_002870999.1   F-box family protein [Arabidopsis lyrata subsp. lyrata]   gi 297316836 gb EFH47258.1  F-box family protein [Arabidopsis lyrata subsp. lyrata]                                                                                                                                                                                                           | 430  | 458 | 3.00E-77  | 106.5 | 43.0 | 58.4 | F-box family protein                   | gbpln | Arabidopsis lyrata   | AT5G02910.1   Symbols:   F-box/RNI-like superfamily protein   chr5:671720-678907 FORWARD LENGTH=458                                  | 430  | 458 | 3.00E-77  | 106.5 | 43.0 | 57.4 |
| Rsa1.0_00141.1.g6598.t1 | gb EOA34775.1  hypothetical protein CARUB_v10022350mg [Capsella rubella]                                                                                                                                                                                                                                                                                                    | 266  | 265 | 1.00E-132 | 99.6  | 95.1 | 97.0 | hypothetical protein CARUB_v10022350mg | gbpln | Capsella rubella     | AT1G73190.1   Symbols: ALPHA-TIP, TIP3;1   Aquaporin-like superfamily protein   chr1:27522155-27523171 FORWARD LENGTH=268            | 266  | 268 | 1.00E-132 | 100.8 | 92.9 | 96.2 |

|                         |                                                                                                                                                                                                                                                                                                                                                                                                                                                                                                                                                                                                                                                                       |      |      |           |       |      |      |                                                                |       |                      |                                                                                                                                    |      |      |           |       |      |      |
|-------------------------|-----------------------------------------------------------------------------------------------------------------------------------------------------------------------------------------------------------------------------------------------------------------------------------------------------------------------------------------------------------------------------------------------------------------------------------------------------------------------------------------------------------------------------------------------------------------------------------------------------------------------------------------------------------------------|------|------|-----------|-------|------|------|----------------------------------------------------------------|-------|----------------------|------------------------------------------------------------------------------------------------------------------------------------|------|------|-----------|-------|------|------|
| Rsa1.0_00141.1.g6599.t1 | dbj BAJ33996.1  unnamed protein product [Theleungiella halophila]                                                                                                                                                                                                                                                                                                                                                                                                                                                                                                                                                                                                     | 513  | 513  | 0         | 100.0 | 87.1 | 92.2 | unnamed protein product                                        | ----  | ----                 | AT1G73180.1   Symbols:   Eukaryotic translation initiation factor eIF2A family protein   chr1:27518335-27521432 FORWARD LENGTH=513 | 513  | 513  | 0         | 100.0 | 83.4 | 89.3 |
| Rsa1.0_00141.1.g6600.t1 | gb AFK38622.1  unknown [Lotus japonicus]                                                                                                                                                                                                                                                                                                                                                                                                                                                                                                                                                                                                                              | 63   | 65   | 2.00E-19  | 103.2 | 76.2 | 84.1 | unknown                                                        | gbpln | Lotus japonicus      | AT1G73177.1   Symbols: BNS   bonsai   chr1:27516721-27517352 REVERSE LENGTH=63                                                     | 63   | 63   | 5.00E-16  | 100.0 | 88.9 | 90.5 |
| Rsa1.0_00141.1.g6601.t1 | ref NP_683490.1  protein CLAVATA3/ESR-related 1 [Arabidopsis thaliana]<br>gi 122215278 sp Q3EOD6.1 CLE1_ARATH RecName: Full=CLAVATA3/ESR (CLE)-related protein 1; Contains: RecName: Full=CLE1p; Flags: Precursor gi 332197300 gb AE35421.1  protein CLAVATA3/ESR-related 1 [Arabidopsis thaliana]                                                                                                                                                                                                                                                                                                                                                                    | 122  | 74   | 8.00E-13  | 60.7  | 30.3 | 31.1 | protein CLAVATA3/ESR-related 1                                 | gbpln | Arabidopsis thaliana | AT1G73165.1   Symbols: CLE1   CLAVATA3/ESR-RELATED 1   chr1:27508725-27508949 REVERSE LENGTH=74                                    | 122  | 74   | 1.00E-15  | 60.7  | 30.3 | 31.1 |
| Rsa1.0_00141.1.g6602.t1 | ref NP_683490.1  protein CLAVATA3/ESR-related 1 [Arabidopsis thaliana]<br>gi 122215278 sp Q3EOD6.1 CLE1_ARATH RecName: Full=CLAVATA3/ESR (CLE)-related protein 1; Contains: RecName: Full=CLE1p; Flags: Precursor gi 332197300 gb AE35421.1  protein CLAVATA3/ESR-related 1 [Arabidopsis thaliana]                                                                                                                                                                                                                                                                                                                                                                    | 75   | 74   | 3.00E-14  | 98.7  | 66.7 | 76.0 | protein CLAVATA3/ESR-related 1                                 | gbpln | Arabidopsis thaliana | AT1G73165.1   Symbols: CLE1   CLAVATA3/ESR-RELATED 1   chr1:27508725-27508949 REVERSE LENGTH=74                                    | 75   | 74   | 4.00E-17  | 98.7  | 66.7 | 76.0 |
| Rsa1.0_00141.1.g6603.t1 | gb EOA34026.1  hypothetical protein CARUB_v10021524mg [Capsella rubella]                                                                                                                                                                                                                                                                                                                                                                                                                                                                                                                                                                                              | 489  | 484  | 0         | 99.0  | 83.2 | 90.4 | hypothetical protein CARUB_v10021524mg                         | gbpln | Capsella rubella     | AT1G73160.1   Symbols:   UDP-Glycosyltransferase superfamily protein   chr1:2750534-27507994 FORWARD LENGTH=486                    | 489  | 486  | 0         | 99.4  | 84.7 | 89.8 |
| Rsa1.0_00141.1.g6604.t1 | ref XP_002888909.1  hypothetical protein ARALYDRAFT_316265 [Arabidopsis lyrata subsp. lyrata]<br>gi 297334750 gb EFH65168.1  hypothetical protein ARALYDRAFT_316265 [Arabidopsis lyrata subsp. lyrata]                                                                                                                                                                                                                                                                                                                                                                                                                                                                | 417  | 449  | 1.00E-131 | 107.7 | 65.9 | 73.4 | hypothetical protein ARALYDRAFT_316265                         | gbpln | Arabidopsis lyrata   | AT1G73150.1   Symbols: GTE3   global transcription factor group E3   chr1:27504327-27505996 REVERSE LENGTH=461                     | 417  | 461  | 1.00E-133 | 110.6 | 66.7 | 74.6 |
| Rsa1.0_00141.1.g6605.t1 | #                                                                                                                                                                                                                                                                                                                                                                                                                                                                                                                                                                                                                                                                     | #    | #    | #         | #     | #    | -    | ----                                                           | ----  | ----                 | #                                                                                                                                  | #    | #    | #         | #     | #    | #    |
| Rsa1.0_00141.1.g6606.t1 | ref XP_002871006.1  kelch repeat-containing F-box family protein [Arabidopsis lyrata subsp. lyrata]<br>gi 297316843 gb EFH47265.1  kelch repeat-containing F-box family protein [Arabidopsis lyrata subsp. lyrata]<br>ref NP_565056.1  histone-lysine N-methyltransferase, H3 lysine-9 specific SUVH3 [Arabidopsis thaliana]<br>gi 30580525 sp Q9C5P4.2 SUVH3_ARATH RecName: Full=Histone-lysine N-methyltransferase, H3 lysine-9 specific SUVH3; AltName: Full=Histone H3-K9 methyltransferase 3; Short=H3-K9-HMTase 3; AltName: Full=Protein SET DOMAIN GROUP 19; AltName: Full=Suppressor of variegation 3-9 homolog protein 3; Short=Su(var)3-9 homolog protein 3 | 361  | 353  | 2.00E-66  | 97.8  | 42.4 | 59.3 | kelch repeat-containing F-box family protein                   | gbpln | Arabidopsis lyrata   | AT2G44030.1   Symbols:   Galactose oxidase/kelch repeat superfamily protein   chr2:18220086-18221228 FORWARD LENGTH=380            | 361  | 380  | 2.00E-67  | 105.3 | 47.9 | 61.8 |
| Rsa1.0_00141.1.g6607.t1 | gi 5903099 gb AAD55657.1 AC008017.30 Unknown protein [Arabidopsis thaliana]<br>gi 20466308 gb AAM20471.1  unknown protein [Arabidopsis thaliana]<br>gi 25083988 gb AAN72148.1  unknown protein [Arabidopsis thaliana]<br>gi 332197293 gb AE35414.1  histone-lysine N-methyltransferase, H3 lysine-9 specific SUVH3 [Arabidopsis thaliana]                                                                                                                                                                                                                                                                                                                             | 673  | 669  | 0         | 99.4  | 83.4 | 90.5 | histone-lysine N-methyltransferase, H3 lysine-9 specific SUVH3 | gbpln | Arabidopsis thaliana | AT1G73100.1   Symbols: SUVH3, SDG19   SU(VAR)3-9 homolog 3   chr1:27491970-27493979 FORWARD LENGTH=669                             | 673  | 669  | 0         | 99.4  | 83.4 | 90.5 |
| Rsa1.0_00141.1.g6608.t1 | ref XP_002887470.1  predicted protein [Arabidopsis lyrata subsp. lyrata]<br>gi 29733331 gb EFH63729.1  predicted protein [Arabidopsis lyrata subsp. lyrata]                                                                                                                                                                                                                                                                                                                                                                                                                                                                                                           | 1125 | 1122 | 0         | 99.7  | 79.6 | 88.8 | predicted protein                                              | gbpln | Arabidopsis lyrata   | AT1G73080.1   Symbols: PEPRI, ATPEPRI   PEP1 receptor 1   chr1:27484513-27488021 FORWARD LENGTH=1123                               | 1125 | 1123 | 0         | 99.8  | 78.0 | 87.7 |

|                         |                                                                                                                                                                                                                                                                                                                                                                                                                                                                                                                                                                                                                                                                                                                      |     |     |           |       |      |      |                                        |       |                      |                                                                                                                                                                                                                                                                                                                                                                             |     |     |           |       |      |      |
|-------------------------|----------------------------------------------------------------------------------------------------------------------------------------------------------------------------------------------------------------------------------------------------------------------------------------------------------------------------------------------------------------------------------------------------------------------------------------------------------------------------------------------------------------------------------------------------------------------------------------------------------------------------------------------------------------------------------------------------------------------|-----|-----|-----------|-------|------|------|----------------------------------------|-------|----------------------|-----------------------------------------------------------------------------------------------------------------------------------------------------------------------------------------------------------------------------------------------------------------------------------------------------------------------------------------------------------------------------|-----|-----|-----------|-------|------|------|
| Rsa1.0_00141.1.g6609.t1 | ref NP_565053.1  SNF7-like protein [Arabidopsis thaliana]<br>gi 297839171 ref XP_002887467.1  SNF7 family protein [Arabidopsis lyrata subsp. lyrata]<br>gi 5903092 gb AAD55650.1 AC008017_23 Highly similar to developmental protein DG1118 [Arabidopsis thaliana]<br>gi 16648963 gb AAL24333.1  Highly similar to developmental protein DG1118 [Arabidopsis thaliana]<br>gi 20148689 gb AAM10235.1  similar to developmental protein DG1118 [Arabidopsis thaliana]<br>gi 297333308 gb EFH63726.1  SNF7 family protein [Arabidopsis lyrata subsp. lyrata] gi 332197285 gb AEE35406.1  SNF7-like protein [Arabidopsis thaliana] gi 482571541 gb EOA35729.1  hypothetical protein CARUB_v10020963mg [Capsella rubella] | 315 | 203 | 2.00E-44  | 64.4  | 27.6 | 28.3 | SNF7-like protein                      | gbpln | Arabidopsis lyrata   | AT1G73030.1   Symbols: VPS46.2, CHMP1A   SNF7 family protein   chr1:27473938-27474848 FORWARD LENGTH=203                                                                                                                                                                                                                                                                    | 315 | 203 | 6.00E-47  | 64.4  | 27.6 | 28.3 |
| Rsa1.0_00141.1.g6610.t1 | ref NP_565053.1  SNF7-like protein [Arabidopsis thaliana]<br>gi 297839171 ref XP_002887467.1  SNF7 family protein [Arabidopsis lyrata subsp. lyrata]<br>gi 5903092 gb AAD55650.1 AC008017_23 Highly similar to developmental protein DG1118 [Arabidopsis thaliana]<br>gi 16648963 gb AAL24333.1  Highly similar to developmental protein DG1118 [Arabidopsis thaliana]<br>gi 20148689 gb AAM10235.1  similar to developmental protein DG1118 [Arabidopsis thaliana]<br>gi 297333308 gb EFH63726.1  SNF7 family protein [Arabidopsis lyrata subsp. lyrata] gi 332197285 gb AEE35406.1  SNF7-like protein [Arabidopsis thaliana] gi 482571541 gb EOA35729.1  hypothetical protein CARUB_v10020963mg [Capsella rubella] | 203 | 203 | 1.00E-113 | 100.0 | 99.0 | 99.0 | SNF7-like protein                      | gbpln | Arabidopsis lyrata   | AT1G73030.1   Symbols: VPS46.2, CHMP1A   SNF7 family protein   chr1:27473938-27474848 FORWARD LENGTH=203                                                                                                                                                                                                                                                                    | 203 | 203 | 1.00E-115 | 100.0 | 99.0 | 99.0 |
| Rsa1.0_00141.1.g6611.t1 | gb EOA33724.1  hypothetical protein CARUB_v10019915mg [Capsella rubella]                                                                                                                                                                                                                                                                                                                                                                                                                                                                                                                                                                                                                                             | 669 | 664 | 0         | 99.3  | 85.2 | 92.5 | hypothetical protein CARUB_v10019915mg | gbpln | Capsella rubella     | AT1G73020.2   Symbols:   unknown protein; FUNCTIONS IN: molecular_function unknown; INVOLVED IN: biological_process unknown; LOCATED IN: cellular_component unknown; EXPRESSED IN: 22 plant structures; EXPRESSED DURING: 13 growth stages; CONTAINS InterPro DOMAIN/s: Protein of unknown function DUF590 (InterPro:IPR007632)   chr1:27469714-27473181 REVERSE LENGTH=665 | 669 | 665 | 0         | 99.4  | 84.5 | 92.1 |
| Rsa1.0_00141.1.g6612.t1 | ref NP_181931.1  putative F-box/kelch-repeat protein [Arabidopsis thaliana]<br>gi 75099812 sp O80573.1 FBK45_ARATH RecName: Full=Putative F-box/kelch-repeat protein A12g44030<br>gi 3212860 gb AAC23411.1  hypothetical protein [Arabidopsis thaliana]<br>gi 330255269 gb AEC10363.1  putative F-box/kelch-repeat protein [Arabidopsis thaliana]                                                                                                                                                                                                                                                                                                                                                                    | 344 | 380 | 2.00E-64  | 110.5 | 50.3 | 64.2 | putative F-box/kelch-repeat protein    | gbpln | Arabidopsis thaliana | AT2G44030.1   Symbols:   Galactose oxidase/kelch repeat superfamily protein   chr2:18220086-18221228 FORWARD LENGTH=380                                                                                                                                                                                                                                                     | 344 | 380 | 5.00E-67  | 110.5 | 50.3 | 64.2 |
| Rsa1.0_00141.1.g6613.t1 | # # # # # # # # - ----                                                                                                                                                                                                                                                                                                                                                                                                                                                                                                                                                                                                                                                                                               |     |     |           |       |      |      |                                        |       |                      | AT3G46050.1   Symbols:   Galactose oxidase/kelch repeat superfamily protein   chr3:16916072-16917184 FORWARD LENGTH=370                                                                                                                                                                                                                                                     | 105 | 370 | 2.00E-12  | 352.4 | 31.4 | 39.0 |
| Rsa1.0_00141.1.g6614.t2 | ref XP_002888903.1  hypothetical protein ARALYDRAFT_476432 [Arabidopsis lyrata subsp. lyrata]<br>gi 297334744 gb EFH65162.1  hypothetical protein ARALYDRAFT_476432 [Arabidopsis lyrata subsp. lyrata]                                                                                                                                                                                                                                                                                                                                                                                                                                                                                                               | 125 | 667 | 1.00E-18  | 533.6 | 36.8 | 40.8 | hypothetical protein ARALYDRAFT_476432 | gbpln | Arabidopsis lyrata   | AT1G73020.2   Symbols:   unknown protein; FUNCTIONS IN: molecular_function unknown; INVOLVED IN: biological_process unknown; LOCATED IN: cellular_component unknown; EXPRESSED IN: 22 plant structures; EXPRESSED DURING: 13 growth stages; CONTAINS InterPro DOMAIN/s: Protein of unknown function DUF590 (InterPro:IPR007632)   chr1:27469714-27473181 REVERSE LENGTH=665 | 125 | 665 | 1.00E-20  | 532.0 | 36.0 | 40.0 |

|                         |                                                                                                                                                                                                                                                                                                                                                                  |     |     |           |       |      |      |                                                                   |       |                      |                                                                                                                                              |     |     |           |       |      |      |
|-------------------------|------------------------------------------------------------------------------------------------------------------------------------------------------------------------------------------------------------------------------------------------------------------------------------------------------------------------------------------------------------------|-----|-----|-----------|-------|------|------|-------------------------------------------------------------------|-------|----------------------|----------------------------------------------------------------------------------------------------------------------------------------------|-----|-----|-----------|-------|------|------|
| Rsa1.0_00141.1.g6615.t1 | refXP_002871006.1  kelch repeat-containing F-box family protein [Arabidopsis lyrata subsp. lyrata] gi 297316843 gb EFH47265.1  kelch repeat-containing F-box family protein [Arabidopsis lyrata subsp. lyrata]                                                                                                                                                   | 344 | 353 | 2.00E-65  | 102.6 | 45.3 | 61.6 | kelch repeat-containing F-box family protein                      | gbpln | Arabidopsis lyrata   | AT2G44030.1   Symbols: Galactose oxidase/kelch repeat superfamily protein   chr2:18220086-18221228 FORWARD LENGTH=380                        | 344 | 380 | 7.00E-68  | 110.5 | 51.2 | 64.5 |
| Rsa1.0_00141.1.g6616.t1 | gb EOA34748.1  hypothetical protein CARUB_v10022320mg [Capsella rubella]                                                                                                                                                                                                                                                                                         | 600 | 691 | 0         | 115.2 | 56.7 | 60.8 | hypothetical protein CARUB_v10022320mg                            | gbpln | Capsella rubella     | AT1G72990.1   Symbols: BGAL17   beta-galactosidase 17   chr1:27457480-27462168 REVERSE LENGTH=697                                            | 600 | 697 | 0         | 116.2 | 56.3 | 60.5 |
| Rsa1.0_00141.1.g6617.t1 | dbj BAA7842.1  ACE [Arabidopsis thaliana]                                                                                                                                                                                                                                                                                                                        | 596 | 594 | 0         | 99.7  | 93.8 | 96.3 | ACE                                                               | gbpln | Arabidopsis thaliana | AT1G72970.1   Symbols: HTH, EDA17   Glucose-methanol-choline (GMC) oxidoreductase family protein   chr1:27452872-27455706 FORWARD LENGTH=594 | 596 | 594 | 0         | 99.7  | 93.6 | 96.1 |
| Rsa1.0_00141.1.g6618.t6 | refXP_002887457.1  predicted protein [Arabidopsis lyrata subsp. lyrata] gi 297333298 gb EFH63716.1  predicted protein [Arabidopsis lyrata subsp. lyrata]                                                                                                                                                                                                         | 393 | 436 | 1.00E-137 | 110.9 | 66.7 | 79.4 | predicted protein                                                 | gbpln | Arabidopsis lyrata   | AT1G72890.1   Symbols: Disease resistance protein (TIR-NBS class)   chr1:27429947-27431717 FORWARD LENGTH=438                                | 393 | 438 | 1.00E-136 | 111.5 | 66.2 | 77.4 |
| Rsa1.0_00142.1.g6619.t1 | gb ABW81051.1  tn7 reverse transcriptase [Arabidopsis lyrata subsp. lyrata]                                                                                                                                                                                                                                                                                      | 208 | 441 | 5.00E-38  | 212.0 | 42.3 | 57.2 | tn7 reverse transcriptase                                         | gbpln | Arabidopsis lyrata   | AT3G24255.1   Symbols: RNA-directed DNA polymerase (reverse transcriptase)-related family protein   chr3:8789471-8793208 FORWARD LENGTH=746  | 208 | 746 | 3.00E-27  | 358.7 | 28.8 | 38.9 |
| Rsa1.0_00142.1.g6620.t1 | #                                                                                                                                                                                                                                                                                                                                                                | #   | #   | #         | #     | #    | #    | -                                                                 | ----  | ----                 | #                                                                                                                                            | #   | #   | #         | #     | #    | #    |
| Rsa1.0_00142.1.g6621.t1 | #                                                                                                                                                                                                                                                                                                                                                                | #   | #   | #         | #     | #    | #    | -                                                                 | ----  | ----                 | #                                                                                                                                            | #   | #   | #         | #     | #    | #    |
| Rsa1.0_00142.1.g6622.t1 | refXP_002878665.1  CYP96A1 [Arabidopsis lyrata subsp. lyrata] gi 297324504 gb EFH54924.1  CYP96A1 [Arabidopsis lyrata subsp. lyrata]                                                                                                                                                                                                                             | 213 | 514 | 1.00E-96  | 241.3 | 78.4 | 86.9 | CYP96A1                                                           | gbpln | Arabidopsis lyrata   | AT2G23180.1   Symbols: CYP96A1   cytochrome P450, family 96, subfamily A, polypeptide 1   chr2:9874953-9876503 FORWARD LENGTH=516            | 213 | 516 | 8.00E-98  | 242.3 | 77.5 | 86.4 |
| Rsa1.0_00142.1.g6623.t3 | refNP_179932.1  spermidine disinapoyl acyltransferase [Arabidopsis thaliana] gi 3242714 gb AAC23766.1  putative anthranilate N-hydroxycinnamoyl/benzoyltransferase [Arabidopsis thaliana] gi 330252366 gb AEC07460.1  spermidine disinapoyl acyltransferase [Arabidopsis thaliana]                                                                               | 448 | 451 | 0         | 100.7 | 78.1 | 86.4 | spermidine disinapoyl acyltransferase                             | gbpln | Arabidopsis thaliana | AT2G23510.1   Symbols: SDT   spermidine disinapoyl acyltransferase   chr2:10011517-10013533 REVERSE LENGTH=451                               | 448 | 451 | 0         | 100.7 | 78.1 | 86.4 |
| Rsa1.0_00142.1.g6624.t1 | gb AAF87143.1 AC002423.8 T23E23.16 [Arabidopsis thaliana]                                                                                                                                                                                                                                                                                                        | 136 | 653 | 4.00E-24  | 480.1 | 39.7 | 50.7 | T23E23.16                                                         | gbpln | Arabidopsis thaliana | AT3G24255.1   Symbols: RNA-directed DNA polymerase (reverse transcriptase)-related family protein   chr3:8789471-8793208 FORWARD LENGTH=746  | 136 | 746 | 3.00E-18  | 548.5 | 31.6 | 38.2 |
| Rsa1.0_00142.1.g6625.t1 | refNP_001154368.1  TRAM, LAG1 and CLN8 (TLC) lipid-sensing domain containing protein [Arabidopsis thaliana] gi 332192539 gb AEE30660.1  TRAM, LAG1 and CLN8 (TLC) lipid-sensing domain containing protein [Arabidopsis thaliana]                                                                                                                                 | 309 | 312 | 1.00E-135 | 101.0 | 76.7 | 86.4 | TRAM, LAG1 and CLN8 (TLC) lipid-sensing domain containing protein | gbpln | Arabidopsis thaliana | AT1G26200.1   Symbols: TRAM, LAG1 and CLN8 (TLC) lipid-sensing domain containing protein   chr1:9063471-9064914 REVERSE LENGTH=312           | 309 | 312 | 1.00E-138 | 101.0 | 76.7 | 86.4 |
| Rsa1.0_00142.1.g6626.t1 | #                                                                                                                                                                                                                                                                                                                                                                | #   | #   | #         | #     | #    | #    | -                                                                 | ----  | ----                 | #                                                                                                                                            | #   | #   | #         | #     | #    | #    |
| Rsa1.0_00142.1.g6627.t1 | gb EOA38455.1  hypothetical protein CARUB_v10010121mg [Capsella rubella]                                                                                                                                                                                                                                                                                         | 154 | 245 | 7.00E-76  | 159.1 | 92.2 | 95.5 | hypothetical protein CARUB_v10010121mg                            | gbpln | Capsella rubella     | AT1G31260.1   Symbols: ZIP10   zinc transporter 10 precursor   chr1:11175559-11177362 REVERSE LENGTH=364                                     | 154 | 364 | 6.00E-76  | 236.4 | 89.6 | 94.2 |
| Rsa1.0_00142.1.g6628.t1 | refNP_174411.2  putative zinc transporter 10 [Arabidopsis thaliana] gi 37090222 sp Q8W245.2 ZIP10_ARATH RecName: Full=Probable zinc transporter 10; AltName: Full=ZRT/IRT-like protein 10; Flags: Precursor gi 6692132 gb AAF24597.1 AC007654_13 T19E23.6 [Arabidopsis thaliana] gi 332193212 gb AEE31333.1  putative zinc transporter 10 [Arabidopsis thaliana] | 216 | 364 | 5.00E-79  | 168.5 | 67.1 | 82.4 | putative zinc transporter 10                                      | gbpln | Arabidopsis thaliana | AT1G31260.1   Symbols: ZIP10   zinc transporter 10 precursor   chr1:11175559-11177362 REVERSE LENGTH=364                                     | 216 | 364 | 2.00E-81  | 168.5 | 67.1 | 82.4 |
| Rsa1.0_00142.1.g6629.t1 | refXP_002891153.1  At1g31330/T19E23.1 [Arabidopsis lyrata subsp. lyrata] gi 297336995 gb EFH67412.1  At1g31330/T19E23.1 [Arabidopsis lyrata subsp. lyrata]                                                                                                                                                                                                       | 218 | 220 | 1.00E-113 | 100.9 | 92.2 | 97.7 | At1g31330/T19E23.1                                                | gbpln | Arabidopsis lyrata   | AT1G31330.1   Symbols: PSFAF   photosystem I subunit F   chr1:11215011-11215939 REVERSE LENGTH=221                                           | 218 | 221 | 1.00E-114 | 101.4 | 91.7 | 97.2 |
| Rsa1.0_00142.1.g6630.t1 | refXP_002307191.1  predicted protein [Populus trichocarpa] gi 118481405 gb ABK92645.1  unknown [Populus trichocarpa] gi 118486039 gb ABK94863.1  unknown [Populus trichocarpa] gi 222856640 gb EEE94187.1  predicted protein [Populus trichocarpa]                                                                                                               | 155 | 157 | 3.00E-80  | 101.3 | 96.8 | 98.7 | predicted protein                                                 | gbpln | Populus trichocarpa  | AT1G31340.1   Symbols: RUB1, NEDD8, ATRUB1   related to ubiquitin 1   chr1:11218076-11219417 REVERSE LENGTH=156                              | 155 | 156 | 3.00E-82  | 100.6 | 97.4 | 98.7 |

| Rsa1.0_00142.1.g6631.t1 | #                                                                                                                                                                                                                                                                                                                                                                                                                                                                                                                                                                                                                                                                                                                                                                                                                                                           | #   | #   | #         | #     | #    | #    | -                                                     | ----  | ----                 | #                                                                                                                            | #   | #   | #         | #     | #    |      |
|-------------------------|-------------------------------------------------------------------------------------------------------------------------------------------------------------------------------------------------------------------------------------------------------------------------------------------------------------------------------------------------------------------------------------------------------------------------------------------------------------------------------------------------------------------------------------------------------------------------------------------------------------------------------------------------------------------------------------------------------------------------------------------------------------------------------------------------------------------------------------------------------------|-----|-----|-----------|-------|------|------|-------------------------------------------------------|-------|----------------------|------------------------------------------------------------------------------------------------------------------------------|-----|-----|-----------|-------|------|------|
| Rsa1.0_00142.1.g6632.t1 | ref XP_002891150.1  F-box family protein [Arabidopsis lyrata subsp. lyrata] gi 297336992 gb EFH67409.1  F-box family protein [Arabidopsis lyrata subsp. lyrata]                                                                                                                                                                                                                                                                                                                                                                                                                                                                                                                                                                                                                                                                                             | 380 | 385 | 1.00E-169 | 101.3 | 80.0 | 88.4 | F-box family protein                                  | gbpln | Arabidopsis lyrata   | AT1G31350.1   Symbols: KUF1   KAR-UP F-box 1   chr1:11221519-11222706 REVERSE LENGTH=395                                     | 380 | 395 | 1.00E-166 | 103.9 | 80.5 | 89.2 |
| Rsa1.0_00142.1.g6633.t2 | gb AAF19546.1 AC007190.14 F23N19.13 [Arabidopsis thaliana]                                                                                                                                                                                                                                                                                                                                                                                                                                                                                                                                                                                                                                                                                                                                                                                                  | 591 | 633 | 6.00E-87  | 107.1 | 38.1 | 50.9 | F23N19.13                                             | gbpln | Arabidopsis thaliana | AT3G42170.1   Symbols:   BED zinc finger hAT family dimerisation domain   chr3:14321838-14323928 FORWARD LENGTH=696          | 591 | 696 | 2.00E-14  | 117.8 | 6.9  | 11.2 |
| Rsa1.0_00142.1.g6634.t1 | ref XP_002893846.1  RECQL2 [Arabidopsis lyrata subsp. lyrata] gi 297339688 gb EFH70105.1  RECQL2 [Arabidopsis lyrata subsp. lyrata]                                                                                                                                                                                                                                                                                                                                                                                                                                                                                                                                                                                                                                                                                                                         | 740 | 704 | 0         | 95.1  | 86.8 | 90.5 | RECQL2                                                | gbpln | Arabidopsis lyrata   | AT1G31360.1   Symbols: RECQL2, ATRECQ2, MED34   RECQ helicase L2   chr1:11232422-11237412 FORWARD LENGTH=705                 | 740 | 705 | 0         | 95.3  | 86.6 | 90.5 |
| Rsa1.0_00142.1.g6635.t1 | gb EOA37829.1  hypothetical protein CARUB_v10011411mg [Capsella rubella]                                                                                                                                                                                                                                                                                                                                                                                                                                                                                                                                                                                                                                                                                                                                                                                    | 569 | 570 | 0         | 100.2 | 81.4 | 87.7 | hypothetical protein CARUB_v10011411mg                | gbpln | Capsella rubella     | AT1G31430.1   Symbols:   Pentatricopeptide repeat (PPR-like) superfamily protein   chr1:11254025-11255737 REVERSE LENGTH=570 | 569 | 570 | 0         | 100.2 | 81.2 | 88.2 |
| Rsa1.0_00142.1.g6636.t2 | ref NP_174429.1  SH3 domain-containing protein [Arabidopsis thaliana] gi 12322535 gb AA51264.1 AC027135.5 unknown protein [Arabidopsis thaliana] gi 16974676 gb AAL32438.1 AF367773.1 SH3 domain-containing protein 1 [Arabidopsis thaliana] gi 19424043 gb AAL87310.1  unknown protein [Arabidopsis thaliana] gi 21281229 gb AAM45032.1  unknown protein [Arabidopsis thaliana] gi 332193235 gb AEE31356.1  SH3 domain-containing protein [Arabidopsis thaliana]                                                                                                                                                                                                                                                                                                                                                                                           | 439 | 439 | 0         | 100.0 | 86.6 | 91.8 | SH3 domain-containing protein                         | gbpln | Arabidopsis thaliana | AT1G31440.1   Symbols:   SH3 domain-containing protein   chr1:11256150-11258479 REVERSE LENGTH=439                           | 439 | 439 | 0         | 100.0 | 86.6 | 91.8 |
| Rsa1.0_00142.1.g6637.t2 | ref NP_174433.2  protein shoot gravitropism 2 (SGR2) [Arabidopsis thaliana] gi 16904659 dbj BAB71959.1  shoot gravitropism 2 [Arabidopsis thaliana] gi 332193239 gb AEE31360.1  protein shoot gravitropism 2 (SGR2) [Arabidopsis thaliana]                                                                                                                                                                                                                                                                                                                                                                                                                                                                                                                                                                                                                  | 894 | 933 | 0         | 104.4 | 84.5 | 89.9 | protein shoot gravitropism 2 (SGR2)                   | gbpln | Arabidopsis thaliana | AT1G31480.1   Symbols: SGR2   shoot gravitropism 2 (SGR2)   chr1:11266225-11271527 FORWARD LENGTH=933                        | 894 | 933 | 0         | 104.4 | 84.5 | 89.9 |
| Rsa1.0_00142.1.g6638.t2 | gb EOA38144.1  hypothetical protein CARUB_v10009616mg [Capsella rubella]                                                                                                                                                                                                                                                                                                                                                                                                                                                                                                                                                                                                                                                                                                                                                                                    | 359 | 346 | 1.00E-174 | 96.4  | 83.3 | 88.6 | hypothetical protein CARUB_v10009616mg                | gbpln | Capsella rubella     | AT1G31600.3   Symbols:   RNA-binding (RRM/RBD/RNP motifs) family protein   chr1:11313376-11315199 REVERSE LENGTH=431         | 359 | 431 | 1.00E-173 | 120.1 | 82.5 | 87.7 |
| Rsa1.0_00142.1.g6640.t1 | dbj BAA97086.1  unnamed protein product [Arabidopsis thaliana]                                                                                                                                                                                                                                                                                                                                                                                                                                                                                                                                                                                                                                                                                                                                                                                              | 66  | 341 | 3.00E-12  | 516.7 | 53.0 | 69.7 | unnamed protein product                               | gbpln | Arabidopsis thaliana | #                                                                                                                            | #   | #   | #         | #     | #    |      |
| Rsa1.0_00143.1.g6641.t1 | ref NP_187047.1  armadillo/beta-catenin-like repeat-containing protein [Arabidopsis thaliana] gi 42572239 ref NP_974214.1  armadillo/beta-catenin-like repeat-containing protein [Arabidopsis thaliana] gi 42572241 ref NP_974215.1  armadillo/beta-catenin-like repeat-containing protein [Arabidopsis thaliana] gi 6223642 gb AAF05856.1 AC011698.7 hypothetical protein [Arabidopsis thaliana] gi 26450645 dbj BAC42434.1  unknown protein [Arabidopsis thaliana] gi 29028942 gb AAO64850.1  At3g03970 [Arabidopsis thaliana] gi 332640498 gb AEE74019.1  armadillo/beta-catenin-like repeat-containing protein [Arabidopsis thaliana] gi 332640499 gb AEE74020.1  armadillo/beta-catenin-like repeat-containing protein [Arabidopsis thaliana] gi 332640500 gb AEE74021.1  armadillo/beta-catenin-like repeat-containing protein [Arabidopsis thaliana] | 279 | 554 | 6.00E-46  | 198.6 | 56.6 | 70.3 | armadillo/beta-catenin-like repeat-containing protein | gbpln | Arabidopsis thaliana | AT3G03970.2   Symbols:   ARM repeat superfamily protein   chr3:1028144-1029891 REVERSE LENGTH=554                            | 279 | 554 | 2.00E-48  | 198.6 | 56.6 | 70.3 |



|                         |                                                                                                                                                                                                                                                                                                              |     |     |           |       |      |      |                                        |       |                      |                                                                                                                                                                                                                                                                                                                                                                                                                                                                  |     |     |           |       |      |      |
|-------------------------|--------------------------------------------------------------------------------------------------------------------------------------------------------------------------------------------------------------------------------------------------------------------------------------------------------------|-----|-----|-----------|-------|------|------|----------------------------------------|-------|----------------------|------------------------------------------------------------------------------------------------------------------------------------------------------------------------------------------------------------------------------------------------------------------------------------------------------------------------------------------------------------------------------------------------------------------------------------------------------------------|-----|-----|-----------|-------|------|------|
| Rsa1.0_00143.1.g6642.t1 | refNP_187048.1   3-oxoacyl-[acyl-carrier protein] reductase [Arabidopsis thaliana]<br>gi 6223643 gb AAF05857.1 AC011698.8 putative short-chain type dehydrogenase/reductase [Arabidopsis thaliana] gi 332640501 gb AEE74022.1  NAD(P)-binding Rossmann-fold domain-containing protein [Arabidopsis thaliana] | 263 | 270 | 1.00E-127 | 102.7 | 86.7 | 92.0 | 3-oxoacyl-                             | gbpln | Arabidopsis thaliana | AT3G03980.1   Symbols:   NAD(P)-binding Rossmann-fold superfamily protein   chr3:1031786-1033081 FORWARD LENGTH=270                                                                                                                                                                                                                                                                                                                                              | 263 | 270 | 1.00E-129 | 102.7 | 86.7 | 92.0 |
| Rsa1.0_00143.1.g6643.t1 | gb EOA24703.1  hypothetical protein CARUB_v10017981mg [Capsella rubella]                                                                                                                                                                                                                                     | 223 | 225 | 2.00E-88  | 100.9 | 74.0 | 92.1 | hypothetical protein CARUB_v10017981mg | gbpln | Capsella rubella     | AT3G53490.1   Symbols:   unknown protein; FUNCTIONS IN: molecular function unknown; INVOLVED IN: biological process unknown; LOCATED IN: endomembrane system; BEST Arabidopsis thaliana protein match is: unknown protein (TAIR:AT5G02720.1); Has 70 Blast hits to 70 proteins in 13 species: Archae - 0; Bacteria - 0; Metazoa - 0; Fungi - 0; Plants - 70; Viruses - 0; Other Eukaryotes - 0 (source: NCBI BLink).   chr3:19832666-19834024 FORWARD LENGTH=225 | 223 | 225 | 3.00E-81  | 100.9 | 69.5 | 81.6 |
| Rsa1.0_00143.1.g6644.t1 | gb ABD65170.1  hypothetical protein 40.t00057 [Brassica oleracea]                                                                                                                                                                                                                                            | 144 | 255 | 2.00E-22  | 177.1 | 47.9 | 59.7 | hypothetical protein 40.t00057         | gbpln | Brassica oleracea    | AT3G47680.1   Symbols:   DNA binding   chr3:17577483-17578391 REVERSE LENGTH=302                                                                                                                                                                                                                                                                                                                                                                                 | 144 | 302 | 3.00E-21  | 209.7 | 36.1 | 47.9 |
| Rsa1.0_00143.1.g6645.t1 | refNP_683376.1   uncharacterized protein [Arabidopsis thaliana] gi 332193870 gb AEE31991.1  uncharacterized protein AT1G43722 [Arabidopsis thaliana]                                                                                                                                                         | 452 | 324 | 3.00E-92  | 71.7  | 35.8 | 40.5 | uncharacterized protein                | gbpln | Arabidopsis thaliana | AT1G43722.1   Symbols:   unknown protein; BEST Arabidopsis thaliana protein match is: unknown protein (TAIR:AT5G28730.1); Has 924 Blast hits to 912 proteins in 109 species: Archae - 0; Bacteria - 0; Metazoa - 22; Fungi - 31; Plants - 661; Viruses - 0; Other Eukaryotes - 10 (source: NCBI BLink).   chr1:16496403-16497377 FORWARD LENGTH=324                                                                                                              | 452 | 324 | 8.00E-95  | 71.7  | 35.8 | 40.5 |
| Rsa1.0_00143.1.g6646.t1 | refXP_002877919.1   60S ribosomal protein L12 [Arabidopsis lyrata subsp. lyrata] gi 297323757 gb EFH54178.1  60S ribosomal protein L12 [Arabidopsis lyrata subsp. lyrata]                                                                                                                                    | 166 | 166 | 1.00E-87  | 100.0 | 98.8 | 99.4 | 60S ribosomal protein L12              | gbpln | Arabidopsis lyrata   | AT3G53430.1   Symbols:   Ribosomal protein L11 family protein   chr3:19809895-19810395 REVERSE LENGTH=166                                                                                                                                                                                                                                                                                                                                                        | 166 | 166 | 5.00E-90  | 100.0 | 98.8 | 98.8 |
| Rsa1.0_00143.1.g6647.t1 | refNP_190908.1   uncharacterized protein [Arabidopsis thaliana] gi 6729491 emb CAB67647.1  putative protein [Arabidopsis thaliana] gi 332645559 gb AEE79080.1  uncharacterized protein AT3G53400 [Arabidopsis thaliana]                                                                                      | 457 | 466 | 0         | 102.0 | 80.7 | 88.0 | uncharacterized protein                | gbpln | Arabidopsis thaliana | AT3G53400.1   Symbols:   BEST Arabidopsis thaliana protein match is: conserved peptide upstream open reading frame 47 (TAIR:AT5G03190.1); Has 285 Blast hits to 285 proteins in 23 species: Archae - 0; Bacteria - 0; Metazoa - 1; Fungi - 0; Plants - 279; Viruses - 0; Other Eukaryotes - 5 (source: NCBI BLink).   chr3:19798526-19799926 FORWARD LENGTH=466                                                                                                  | 457 | 466 | 0         | 102.0 | 80.7 | 88.0 |
| Rsa1.0_00143.1.g6648.t1 | gb EOA25167.1  hypothetical protein CARUB_v10018478mg [Capsella rubella]                                                                                                                                                                                                                                     | 539 | 561 | 0         | 104.1 | 88.9 | 92.2 | hypothetical protein CARUB_v10018478mg | gbpln | Capsella rubella     | AT3G53390.1   Symbols:   Transducin/WD40 repeat-like superfamily protein   chr3:19792781-19796428 FORWARD LENGTH=558                                                                                                                                                                                                                                                                                                                                             | 539 | 558 | 0         | 103.5 | 89.1 | 92.6 |
| Rsa1.0_00143.1.g6649.t1 | gb EOA25950.1  hypothetical protein CARUB_v10019339mg [Capsella rubella]                                                                                                                                                                                                                                     | 707 | 714 | 0         | 101.0 | 88.7 | 92.5 | hypothetical protein CARUB_v10019339mg | gbpln | Capsella rubella     | AT3G53380.1   Symbols:   Concanavalin A-like lectin protein kinase family protein   chr3:19789204-19791351 REVERSE LENGTH=715                                                                                                                                                                                                                                                                                                                                    | 707 | 715 | 0         | 101.1 | 88.0 | 92.8 |
| Rsa1.0_00143.1.g6650.t1 | refXP_002877910.1   hypothetical protein ARALYDRAFT_323872 [Arabidopsis lyrata subsp. lyrata] gi 297323748 gb EFH54169.1  hypothetical protein ARALYDRAFT_323872 [Arabidopsis lyrata subsp. lyrata]                                                                                                          | 309 | 280 | 1.00E-125 | 90.6  | 71.2 | 80.9 | hypothetical protein ARALYDRAFT_323872 | gbpln | Arabidopsis lyrata   | AT3G53270.5   Symbols:   Small nuclear RNA activating complex (SNAPc), subunit SNAP43 protein   chr3:19750406-19752168 REVERSE LENGTH=280                                                                                                                                                                                                                                                                                                                        | 309 | 280 | 1.00E-124 | 90.6  | 70.2 | 78.0 |
| Rsa1.0_00143.1.g6651.t1 | gb AAX22053.1  phenylalanine ammonia-lyase [Brassica napus] gi 60499703 gb AAX22054.1  phenylalanine ammonia-lyase [Brassica napus]                                                                                                                                                                          | 724 | 724 | 0         | 100.0 | 98.2 | 99.4 | phenylalanine ammonia-lyase            | gbpln | Brassica napus       | AT3G53260.1   Symbols: PAL2, ATPAL2   phenylalanine ammonia-lyase 2   chr3:19744256-19746619 REVERSE LENGTH=717                                                                                                                                                                                                                                                                                                                                                  | 724 | 717 | 0         | 99.0  | 94.5 | 96.5 |
| Rsa1.0_00143.1.g6652.t1 | refNP_198884.1   kelch repeat-containing protein [Arabidopsis thaliana] gi 9753096 gb BAB08540.1   unnamed protein product [Arabidopsis thaliana] gi 332007199 gb AED94581.1   kelch repeat-containing protein [Arabidopsis thaliana]                                                                        | 303 | 415 | 4.00E-87  | 137.0 | 57.4 | 69.6 | kelch repeat-containing protein        | gbpln | Arabidopsis thaliana | AT5G40680.1   Symbols:   Galactose oxidase/kelch repeat superfamily protein   chr5:16288754-16290001 FORWARD LENGTH=415                                                                                                                                                                                                                                                                                                                                          | 303 | 415 | 1.00E-89  | 137.0 | 57.4 | 69.6 |

|                         |                                                                                                                                                                                                                                                                                                                                                                                                                                                                                                                                                                                                |     |     |          |       |      |      |                                                  |       |                      |                                                                                                                                                    |     |     |          |       |      |      |
|-------------------------|------------------------------------------------------------------------------------------------------------------------------------------------------------------------------------------------------------------------------------------------------------------------------------------------------------------------------------------------------------------------------------------------------------------------------------------------------------------------------------------------------------------------------------------------------------------------------------------------|-----|-----|----------|-------|------|------|--------------------------------------------------|-------|----------------------|----------------------------------------------------------------------------------------------------------------------------------------------------|-----|-----|----------|-------|------|------|
| Rsa1.0_00143.1.g6653.t1 | ref NP_566982.1  thioredoxin-like 3-3 [Arabidopsis thaliana] gi 75155215 sp Q8LCH9.1 TRL33_ARAT H RecName: Full=Thioredoxin-like 3-3 gi 21554669 gb AAM63651.1  thioredoxin-like protein [Arabidopsis thaliana] gi 114050675 gb ABI49487.1  At3g53220 [Arabidopsis thaliana] gi 332645528 gb AEE79049.1  thioredoxin-like 3-3 [Arabidopsis thaliana]                                                                                                                                                                                                                                           | 118 | 126 | 3.00E-51 | 106.8 | 81.4 | 92.4 | thioredoxin-like 3-3                             | gbpln | Arabidopsis thaliana | AT3G53220.1   Symbols:   Thioredoxin superfamily protein   chr3:19722032-19722615 FORWARD LENGTH=126                                               | 118 | 126 | 5.00E-54 | 106.8 | 81.4 | 92.4 |
| Rsa1.0_00143.1.g6654.t1 | ref XP_002877903.1  UDP-glucosyl transferase 73D1 [Arabidopsis lyrata subsp. lyrata] gi 297323741 gb EFH54162.1  UDP-glucosyl transferase 73D1 [Arabidopsis lyrata subsp. lyrata]                                                                                                                                                                                                                                                                                                                                                                                                              | 117 | 507 | 1.00E-43 | 433.3 | 79.5 | 89.7 | UDP-glucosyl transferase 73D1                    | gbpln | Arabidopsis lyrata   | AT3G53150.1   Symbols: UGT73D1   UDP-glucosyl transferase 73D1   chr3:19697736-19699259 REVERSE LENGTH=507                                         | 117 | 507 | 1.00E-45 | 433.3 | 76.1 | 89.7 |
| Rsa1.0_00143.1.g6655.t1 | ref NP_190882.1  putative O-diphenol-O-methyl transferase [Arabidopsis thaliana] gi 14194165 gb AAK56277.1 AF367289.1 AT3g53140/T4D2_70 [Arabidopsis thaliana] gi 6630734 emb CAB64217.1  caffeic acid O-methyltransferase-like protein [Arabidopsis thaliana] gi 22137206 gb AAM91448.1  AT3g53140/T4D2_70 [Arabidopsis thaliana] gi 332645520 gb AEE79041.1  putative O-diphenol-O-methyl transferase [Arabidopsis thaliana]                                                                                                                                                                 | 363 | 359 | 0        | 98.9  | 90.9 | 94.5 | putative O-diphenol-O-methyl transferase         | gbpln | Arabidopsis thaliana | AT3G53140.1   Symbols:   O-methyltransferase family protein   chr3:19695692-19697355 FORWARD LENGTH=359                                            | 363 | 359 | 0        | 98.9  | 90.9 | 94.5 |
| Rsa1.0_00143.1.g6656.t1 | ref NP_850268.2  vacuolar protein-sorting-associated protein 37-2 [Arabidopsis thaliana] gi 122215039 sp Q3EBL9.1 VP372_ARAT H RecName: Full=Vacuolar protein-sorting-associated protein 37 homolog 2; Short=AtVPS37-2; AltName: Full=ESCRT-1 complex subunit VPS37 homolog 2 gi 330254189 gb AEC09283.1  vacuolar protein-sorting-associated protein 37-2 [Arabidopsis thaliana]                                                                                                                                                                                                              | 254 | 218 | 8.00E-97 | 85.8  | 70.9 | 78.7 | vacuolar protein-sorting-associated protein 37-2 | gbpln | Arabidopsis thaliana | AT2G36680.1   Symbols:   Modifier of rudimentary (Mod(r)) protein   chr2:15368980-15370726 REVERSE LENGTH=218                                      | 254 | 218 | 2.00E-99 | 85.8  | 70.9 | 78.7 |
| Rsa1.0_00143.1.g6657.t2 | ref XP_002877902.1  hypothetical protein ARALYDRAFT_906697 [Arabidopsis lyrata subsp. lyrata] gi 297323740 gb EFH54161.1  hypothetical protein ARALYDRAFT_906697 [Arabidopsis lyrata subsp. lyrata]                                                                                                                                                                                                                                                                                                                                                                                            | 121 | 217 | 8.00E-23 | 179.3 | 53.7 | 57.9 | hypothetical protein ARALYDRAFT_906697           | gbpln | Arabidopsis lyrata   | AT3G53120.1   Symbols: VPS37-1   Modifier of rudimentary (Mod(r)) protein   chr3:19690729-19692490 REVERSE LENGTH=217                              | 121 | 217 | 1.00E-24 | 179.3 | 52.1 | 57.9 |
| Rsa1.0_00143.1.g6658.t1 | ref NP_190879.1  DEAD-box ATP-dependent RNA helicase 38 [Arabidopsis thaliana] gi 108861891 sp Q93ZG7.2 RH38_ARAT H RecName: Full=DEAD-box ATP-dependent RNA helicase 38; AltName: Full=Low expression of osmotically-responsive genes 4 protein; AltName: Full=Protein CRYOPHYTE gi 6630731 emb CAB64214.1  RNA helicase-like protein [Arabidopsis thaliana] gi 27311677 gb AAO0804.1  RNA helicase-like protein [Arabidopsis thaliana] gi 31711900 gb AAP68306.1  At3g53110 [Arabidopsis thaliana] gi 332645517 gb AEE79038.1  DEAD-box ATP-dependent RNA helicase 38 [Arabidopsis thaliana] | 497 | 496 | 0        | 99.8  | 88.1 | 93.8 | DEAD-box ATP-dependent RNA helicase 38           | gbpln | Arabidopsis thaliana | AT3G53110.1   Symbols: LOS4   P-loop containing nucleoside triphosphate hydrolases superfamily protein   chr3:19687968-19690423 FORWARD LENGTH=496 | 497 | 496 | 0        | 99.8  | 88.1 | 93.8 |
| Rsa1.0_00143.1.g6659.t1 | ref XP_002877901.1  GDSL-motif lipase/hydrolase family protein [Arabidopsis lyrata subsp. lyrata] gi 297323739 gb EFH54160.1  GDSL-motif lipase/hydrolase family protein [Arabidopsis lyrata subsp. lyrata]                                                                                                                                                                                                                                                                                                                                                                                    | 351 | 351 | 0        | 100.0 | 90.0 | 93.7 | GDSL-motif lipase/hydrolase family protein       | gbpln | Arabidopsis lyrata   | AT3G53100.1   Symbols:   GDSL-like Lipase/Acylhydrolase superfamily protein   chr3:19684989-19686542 REVERSE LENGTH=351                            | 351 | 351 | 0        | 100.0 | 88.3 | 93.2 |

|                         |                                                                                                                                                                                                                                                                                                                                                                                                                                                                                                                                 |      |      |           |       |      |       |                                                 |       |                      |                                                                                                                                                                                                                                                                |      |      |           |       |      |      |
|-------------------------|---------------------------------------------------------------------------------------------------------------------------------------------------------------------------------------------------------------------------------------------------------------------------------------------------------------------------------------------------------------------------------------------------------------------------------------------------------------------------------------------------------------------------------|------|------|-----------|-------|------|-------|-------------------------------------------------|-------|----------------------|----------------------------------------------------------------------------------------------------------------------------------------------------------------------------------------------------------------------------------------------------------------|------|------|-----------|-------|------|------|
| Rsa1.0_00143.1.g6660.t1 | ref NP_190877.1  E3 ubiquitin-protein ligase UPL7 [Arabidopsis thaliana] gi 79314848 ref NP_001030850.1  E3 ubiquitin-protein ligase UPL7 [Arabidopsis thaliana] gi 75265625 sp Q9SCQ2.1 UPL7_ARATH RecName: Full=E3 ubiquitin-protein ligase UPL7; Short=Ubiquitin-protein ligase 7 gi 6630729 emb CAB64212.1  putative protein [Arabidopsis thaliana] gi 332645514 gb AEE79035.1  E3 ubiquitin-protein ligase UPL7 [Arabidopsis thaliana] gi 332645515 gb AEE79036.1  E3 ubiquitin-protein ligase UPL7 [Arabidopsis thaliana] | 1142 | 1142 | 0         | 100.0 | 89.6 | 95.2  | E3 ubiquitin-protein ligase UPL7                | gbpln | Arabidopsis thaliana | AT3G53090.2   Symbols: UPL7   ubiquitin-protein ligase 7   chr3:19679273-19684453 FORWARD LENGTH=1142                                                                                                                                                          | 1142 | 1142 | 0         | 100.0 | 89.6 | 95.2 |
| Rsa1.0_00144.1.g6662.t1 | gb EOA23646.1  hypothetical protein CARUB_v10016844mg [Capsella rubella]                                                                                                                                                                                                                                                                                                                                                                                                                                                        | 625  | 626  | 0         | 100.2 | 93.6 | 97.1  | hypothetical protein CARUB_v10016844mg          | gbpln | Capsella rubella     | AT3G52850.1   Symbols: VSR1, BP-80, ATELP, BP80, BP80B, ATELP1, ATVSR1, GF51, VSR1.1, BP80-1.1   vacuolar sorting receptor homolog 1   chr3:19587999-19591690 FORWARD LENGTH=623                                                                               | 625  | 623  | 0         | 99.7  | 92.3 | 96.5 |
| Rsa1.0_00144.1.g6662.t1 | gb EOA25450.1  hypothetical protein CARUB_v10018788mg [Capsella rubella]                                                                                                                                                                                                                                                                                                                                                                                                                                                        | 156  | 156  | 2.00E-67  | 100.0 | 91.7 | 94.2  | hypothetical protein CARUB_v10018788mg          | gbpln | Capsella rubella     | AT3G52860.1   Symbols:   unknown protein; Has 86 Blast hits to 86 proteins in 36 species: Archae - 0; Bacteria - 2; Metazoa - 41; Fungi - 13; Plants - 26; Viruses - 0; Other Eukaryotes - 4 (source: NCBI BLINK).   chr3:19591998-19592741 REVERSE LENGTH=156 | 156  | 156  | 9.00E-67  | 100.0 | 88.5 | 92.9 |
| Rsa1.0_00144.1.g6664.t1 | gb AAK72107.1  monodehydroascorbate reductase [Brassica rapa subsp. pekinensis]                                                                                                                                                                                                                                                                                                                                                                                                                                                 | 434  | 434  | 0         | 100.0 | 98.8 | 100.0 | monodehydroascorbate reductase                  | gbpln | Brassica rapa        | AT3G52880.1   Symbols: ATMDAR1, MDAR1   monodehydroascorbate reductase 1   chr3:19601477-19604366 REVERSE LENGTH=434                                                                                                                                           | 434  | 434  | 0         | 100.0 | 95.4 | 98.2 |
| Rsa1.0_00144.1.g6664.t1 | gb EOA23462.1  hypothetical protein CARUB_v10016653mg [Capsella rubella]                                                                                                                                                                                                                                                                                                                                                                                                                                                        | 829  | 935  | 0         | 112.8 | 83.7 | 89.0  | hypothetical protein CARUB_v10016653mg          | gbpln | Capsella rubella     | AT3G52890.2   Symbols: KIPK   KCBP-interacting protein kinase   chr3:19609150-19612032 FORWARD LENGTH=934                                                                                                                                                      | 829  | 934  | 0         | 112.7 | 82.5 | 88.5 |
| Rsa1.0_00144.1.g6665.t1 | ref NP_190858.1  uncharacterized protein [Arabidopsis thaliana] gi 7529714 emb CAB86894.1  putative protein [Arabidopsis thaliana] gi 110738967 dbj BAF01404.1  hypothetical protein [Arabidopsis thaliana] gi 332645486 gb AEE79007.1  uncharacterized protein AT3G52900 [Arabidopsis thaliana]                                                                                                                                                                                                                                | 164  | 164  | 7.00E-77  | 100.0 | 90.9 | 95.1  | uncharacterized protein                         | gbpln | Arabidopsis thaliana | AT3G52900.1   Symbols:   Family of unknown function (DUF662)   chr3:19613134-19613852 FORWARD LENGTH=164                                                                                                                                                       | 164  | 164  | 2.00E-79  | 100.0 | 90.9 | 95.1 |
| Rsa1.0_00144.1.g6666.t1 | gb EOA24133.1  hypothetical protein CARUB_v10017366mg, partial [Capsella rubella]                                                                                                                                                                                                                                                                                                                                                                                                                                               | 384  | 407  | 1.00E-150 | 106.0 | 83.9 | 89.3  | hypothetical protein CARUB_v10017366mg, partial | gbpln | Capsella rubella     | AT3G52910.1   Symbols: AtGRF4, GRF4   growth-regulating factor 4   chr3:19616177-19618268 REVERSE LENGTH=380                                                                                                                                                   | 384  | 380  | 1.00E-147 | 99.0  | 84.1 | 88.0 |
| Rsa1.0_00144.1.g6667.t1 | ref NP_566974.1  uncharacterized protein [Arabidopsis thaliana] gi 21593825 gb AAM65792.1  unknown [Arabidopsis thaliana] gi 332645489 gb AEE79010.1  uncharacterized protein AT3G52920 [Arabidopsis thaliana]                                                                                                                                                                                                                                                                                                                  | 165  | 180  | 4.00E-72  | 109.1 | 84.8 | 92.1  | uncharacterized protein                         | gbpln | Arabidopsis thaliana | AT3G52920.1   Symbols:   Family of unknown function (DUF662)   chr3:19624601-19625981 FORWARD LENGTH=180                                                                                                                                                       | 165  | 180  | 2.00E-74  | 109.1 | 84.8 | 92.1 |
| Rsa1.0_00144.1.g6668.t1 | ref XP_002877893.1  hypothetical protein ARALYDRAFT_906673 [Arabidopsis lyrata subsp. lyrata] gi 297323731 gb EFH54152.1  hypothetical protein ARALYDRAFT_906673 [Arabidopsis lyrata subsp. lyrata]                                                                                                                                                                                                                                                                                                                             | 358  | 358  | 0         | 100.0 | 98.3 | 99.2  | hypothetical protein ARALYDRAFT_906673          | gbpln | Arabidopsis lyrata   | AT3G52930.1   Symbols:   Aldolase superfamily protein   chr3:19627383-19628874 REVERSE LENGTH=358                                                                                                                                                              | 358  | 358  | 0         | 100.0 | 97.8 | 98.9 |
| Rsa1.0_00144.1.g6669.t1 | gb EOA24034.1  hypothetical protein CARUB_v10017251mg [Capsella rubella]                                                                                                                                                                                                                                                                                                                                                                                                                                                        | 434  | 444  | 0         | 102.3 | 90.3 | 95.9  | hypothetical protein CARUB_v10017251mg          | gbpln | Capsella rubella     | AT2G36530.1   Symbols: LOS2, ENO2   Enolase   chr2:15321081-15323786 REVERSE LENGTH=444                                                                                                                                                                        | 434  | 444  | 0         | 102.3 | 88.7 | 95.2 |

|                         |                                                                                                                                                                                                                                                                                                                                                                                                                                                                                                                                                                                                                            |     |     |           |       |      |      |                                                            |       |                      |                                                                                                                                        |     |     |           |       |      |      |
|-------------------------|----------------------------------------------------------------------------------------------------------------------------------------------------------------------------------------------------------------------------------------------------------------------------------------------------------------------------------------------------------------------------------------------------------------------------------------------------------------------------------------------------------------------------------------------------------------------------------------------------------------------------|-----|-----|-----------|-------|------|------|------------------------------------------------------------|-------|----------------------|----------------------------------------------------------------------------------------------------------------------------------------|-----|-----|-----------|-------|------|------|
| Rsa1.0_00144.1.g6670.t1 | ref[NP_190863.3] CBS / octicosapeptide/Phox/Bemp1 domain-containing protein [Arabidopsis thaliana] gi 334185937 ref[NP_001190074.1] CBS / octicosapeptide/Phox/Bemp1 domain-containing protein [Arabidopsis thaliana] gi 75263848 sp Q9LF97.1 Y3295_ARATH RecName: Full=CBS domain-containing protein CBSOBSBP3 gi 7529719 emb CAB86899.1  putative protein [Arabidopsis thaliana] gi 332645495 gb AEE79016.1  CBS / octicosapeptide/Phox/Bemp1 domain-containing protein [Arabidopsis thaliana] gi 332645496 gb AEE79017.1  CBS / octicosapeptide/Phox/Bemp1 domain-containing protein [Arabidopsis thaliana]             | 538 | 556 | 0         | 103.3 | 77.3 | 84.8 | CBS / octicosapeptide/Phox/Bemp1 domain-containing protein | gbpln | Arabidopsis thaliana | AT3G52950.2   Symbols:   CBS / octicosapeptide/Phox/Bemp1 (PB1) domains-containing protein   chr3:19634866-19636536 FORWARD LENGTH=556 | 538 | 556 | 0         | 103.3 | 77.3 | 84.8 |
| Rsa1.0_00144.1.g6671.t1 | ref[NP_190864.1] peroxiredoxin-2E [Arabidopsis thaliana] gi 143360522 sp Q949U7.2 PRX2E_ARATH RecName: Full=Peroxiredoxin-2E, chloroplastic; AltName: Full=Peroxiredoxin IIE; AltName: Full=Thioredoxin reductase 2E; Flags: Precursor gi 7529720 emb CAB86900.1  peroxiredoxin-like protein [Arabidopsis thaliana] gi 15451116 gb AAK96829.1  peroxiredoxin-like protein [Arabidopsis thaliana] gi 18377484 gb AAL66908.1  peroxiredoxin-like protein [Arabidopsis thaliana] gi 23297326 gb AANI2942.1  putative peroxiredoxin [Arabidopsis thaliana] gi 332645497 gb AEE79018.1  peroxiredoxin-2E [Arabidopsis thaliana] | 231 | 234 | 1.00E-113 | 101.3 | 90.5 | 95.7 | peroxiredoxin-2E                                           | gbpln | Arabidopsis thaliana | AT3G52960.1   Symbols:   Thioredoxin superfamily protein   chr3:19639699-19640403 FORWARD LENGTH=234                                   | 231 | 234 | 1.00E-116 | 101.3 | 90.5 | 95.7 |
| Rsa1.0_00144.1.g6672.t1 | ref[XP_002876178.1] hypothetical protein ARALYDRAFT_906680 [Arabidopsis lyrata subsp. lyrata] gi 297322016 gb EFH52437.1  hypothetical protein ARALYDRAFT_906680 [Arabidopsis lyrata subsp. lyrata]                                                                                                                                                                                                                                                                                                                                                                                                                        | 527 | 527 | 0         | 100.0 | 97.7 | 99.1 | hypothetical protein ARALYDRAFT_906680                     | gbpln | Arabidopsis lyrata   | AT3G52990.1   Symbols:   Pyruvate kinase family protein   chr3:19649046-19652237 FORWARD LENGTH=527                                    | 527 | 527 | 0         | 100.0 | 97.5 | 99.2 |
| Rsa1.0_00144.1.g6673.t1 | dbj BAA97156.1  unnamed protein product [Arabidopsis thaliana]                                                                                                                                                                                                                                                                                                                                                                                                                                                                                                                                                             | 163 | 329 | 1.00E-12  | 201.8 | 23.3 | 33.7 | unnamed protein product                                    | gbpln | Arabidopsis thaliana | #                                                                                                                                      | #   | #   | #         | #     | #    |      |
| Rsa1.0_00144.1.g6674.t1 | gb EOA24470.1  hypothetical protein CARUB_v10017732mg [Capsella rubella]                                                                                                                                                                                                                                                                                                                                                                                                                                                                                                                                                   | 307 | 298 | 1.00E-149 | 97.1  | 83.1 | 90.9 | hypothetical protein CARUB_v10017732mg                     | gbpln | Capsella rubella     | AT3G53000.1   Symbols:   AtPP2-A15, PP2-A15   phloem protein 2-A15   chr3:19654278-19655801 FORWARD LENGTH=300                         | 307 | 300 | 1.00E-150 | 97.7  | 81.8 | 89.9 |
| Rsa1.0_00144.1.g6675.t1 | ref[NP_190869.3] uncharacterized protein [Arabidopsis thaliana] gi 110738676 dbj BAF01263.1  hypothetical protein [Arabidopsis thaliana] gi 332645504 gb AEE79025.1  uncharacterized protein AT3G53010 [Arabidopsis thaliana]                                                                                                                                                                                                                                                                                                                                                                                              | 246 | 297 | 1.00E-121 | 120.7 | 84.1 | 90.7 | uncharacterized protein                                    | gbpln | Arabidopsis thaliana | AT3G53010.1   Symbols:   Domain of unknown function (DUF303)   chr3:19656603-19657928 REVERSE LENGTH=297                               | 246 | 297 | 1.00E-123 | 120.7 | 84.1 | 90.7 |
| Rsa1.0_00144.1.g6676.t1 | ref[XP_002335364.1] predicted protein [Populus trichocarpa] gi 222833671 gb EEE72148.1  predicted protein [Populus trichocarpa]                                                                                                                                                                                                                                                                                                                                                                                                                                                                                            | 193 | 155 | 1.00E-65  | 80.3  | 65.8 | 69.9 | predicted protein                                          | gbpln | Populus trichocarpa  | AT3G53020.1   Symbols:   STV1, RPL24B, RPL24   Ribosomal protein L24e family protein   chr3:19660749-19661912 REVERSE LENGTH=163       | 193 | 163 | 3.00E-67  | 84.5  | 69.4 | 72.0 |
| Rsa1.0_00144.1.g6677.t1 | ref[XP_002876180.1] hypothetical protein ARALYDRAFT_485678 [Arabidopsis lyrata subsp. lyrata] gi 297322018 gb EFH52439.1  hypothetical protein ARALYDRAFT_485678 [Arabidopsis lyrata subsp. lyrata]                                                                                                                                                                                                                                                                                                                                                                                                                        | 732 | 533 | 0         | 72.8  | 60.2 | 62.0 | hypothetical protein ARALYDRAFT_485678                     | gbpln | Arabidopsis lyrata   | AT3G53030.1   Symbols:   SRPK4   ser/arg-rich protein kinase 4   chr3:19662412-19664362 FORWARD LENGTH=529                             | 732 | 529 | 0         | 72.3  | 59.2 | 61.2 |
| Rsa1.0_00144.1.g6678.t1 | gb EOA24269.1  hypothetical protein CARUB_v10017511mg [Capsella rubella]                                                                                                                                                                                                                                                                                                                                                                                                                                                                                                                                                   | 361 | 359 | 0         | 99.4  | 90.3 | 94.5 | hypothetical protein CARUB_v10017511mg                     | gbpln | Capsella rubella     | AT3G53140.1   Symbols:   O-methyltransferase family protein   chr3:19695692-19697355 FORWARD LENGTH=359                                | 361 | 359 | 0         | 99.4  | 90.6 | 93.9 |
| Rsa1.0_00144.1.g6679.t1 | ref[XP_002877903.1] UDP-glucosyl transferase 73D1 [Arabidopsis lyrata subsp. lyrata] gi 297323741 gb EFH54162.1  UDP-glucosyl transferase 73D1 [Arabidopsis lyrata subsp. lyrata]                                                                                                                                                                                                                                                                                                                                                                                                                                          | 504 | 507 | 0         | 100.6 | 80.8 | 90.9 | UDP-glucosyl transferase 73D1                              | gbpln | Arabidopsis lyrata   | AT3G53150.1   Symbols:   UGT73D1   UDP-glucosyl transferase 73D1   chr3:19697736-19699259 REVERSE LENGTH=507                           | 504 | 507 | 0         | 100.6 | 80.8 | 90.1 |

|                         |                                                                                                                                                                                                                                                                                                                                                                                                                                                                                                                                                                                                                                                                                                       |      |      |          |       |      |      |                                                                                    |       |                      |                                                                                                                                                              |      |      |           |       |      |      |
|-------------------------|-------------------------------------------------------------------------------------------------------------------------------------------------------------------------------------------------------------------------------------------------------------------------------------------------------------------------------------------------------------------------------------------------------------------------------------------------------------------------------------------------------------------------------------------------------------------------------------------------------------------------------------------------------------------------------------------------------|------|------|----------|-------|------|------|------------------------------------------------------------------------------------|-------|----------------------|--------------------------------------------------------------------------------------------------------------------------------------------------------------|------|------|-----------|-------|------|------|
| Rsa1.0_00144.1.g6680.t1 | gb AAD26953.1  putative non-LTR retroelement reverse transcriptase [Arabidopsis thaliana]                                                                                                                                                                                                                                                                                                                                                                                                                                                                                                                                                                                                             | 334  | 323  | 3.00E-43 | 96.7  | 31.4 | 49.4 | putative non-LTR retroelement reverse transcriptase                                | gbpln | Arabidopsis thaliana | AT5G18880.1   Symbols:   RNA-directed DNA polymerase (reverse transcriptase)-related family protein   chr5:6300535-6301422 REVERSE LENGTH=295                | 334  | 295  | 3.00E-41  | 88.3  | 31.1 | 47.0 |
| Rsa1.0_00144.1.g6681.t1 | ref XP_002877903.1  UDP-glucosyl transferase 73D1 [Arabidopsis lyrata subsp. lyrata]<br>gi 297323741 gb EFH54162.1  UDP-glucosyl transferase 73D1 [Arabidopsis lyrata subsp. lyrata]                                                                                                                                                                                                                                                                                                                                                                                                                                                                                                                  | 501  | 507  | 0        | 101.2 | 85.2 | 93.2 | UDP-glucosyl transferase 73D1                                                      | gbpln | Arabidopsis lyrata   | AT3G53150.1   Symbols: UGT73D1   UDP-glucosyl transferase 73D1   chr3:19697736-19699259 REVERSE LENGTH=507                                                   | 501  | 507  | 0         | 101.2 | 84.2 | 92.6 |
| Rsa1.0_00144.1.g6682.t1 | ref NP_190884.1  UDP-glucosyl transferase 73C7 [Arabidopsis thaliana]<br>gi 75313289 sp Q9SCP5.1 U73C7_ARATH RecName: Full=UDP-glycosyltransferase 73C7<br>gi 6630736 emb CAB64219.1  glucosyltransferase-like protein [Arabidopsis thaliana]<br>gi 50253526 gb AAT71965.1  At3g53160 [Arabidopsis thaliana]<br>gi 56381967 gb AAV85702.1  At3g53160 [Arabidopsis thaliana]<br>gi 332645522 gb AEE79043.1  UDP-glucosyl transferase 73C7 [Arabidopsis thaliana]                                                                                                                                                                                                                                       | 490  | 490  | 0        | 100.0 | 82.9 | 89.8 | UDP-glucosyl transferase 73C7                                                      | gbpln | Arabidopsis thaliana | AT3G53160.1   Symbols: UGT73C7   UDP-glucosyl transferase 73C7   chr3:19702485-19703957 REVERSE LENGTH=490                                                   | 490  | 490  | 0         | 100.0 | 82.9 | 89.8 |
| Rsa1.0_00144.1.g6683.t1 | ref NP_190885.5  tetratricopeptide repeat domain-containing protein [Arabidopsis thaliana]<br>gi 332645523 gb AEE79044.1  pentatricopeptide repeat-containing protein [Arabidopsis thaliana]                                                                                                                                                                                                                                                                                                                                                                                                                                                                                                          | 454  | 499  | 0        | 109.9 | 86.1 | 93.2 | tetratricopeptide repeat domain-containing protein                                 | gbpln | Arabidopsis thaliana | AT3G53170.1   Symbols:   Tetratricopeptide repeat (TPR)-like superfamily protein   chr3:19704600-19706417 REVERSE LENGTH=499                                 | 454  | 499  | 0         | 109.9 | 86.1 | 93.2 |
| Rsa1.0_00144.1.g6684.t1 | ref XP_002876191.1  hypothetical protein ARALYDRAFT_485693 [Arabidopsis lyrata subsp. lyrata]<br>gi 297322029 gb EFH52450.1  hypothetical protein ARALYDRAFT_485693 [Arabidopsis lyrata subsp. lyrata]                                                                                                                                                                                                                                                                                                                                                                                                                                                                                                | 174  | 853  | 9.00E-71 | 490.2 | 77.6 | 83.9 | hypothetical protein ARALYDRAFT_485693                                             | gbpln | Arabidopsis lyrata   | AT3G53180.1   Symbols:   glutamate-ammonia ligases;catalytics;glutamate-ammonia ligases   chr3:19707068-19711188 FORWARD LENGTH=852                          | 174  | 852  | 1.00E-72  | 489.7 | 76.4 | 83.3 |
| Rsa1.0_00144.1.g6685.t1 | #                                                                                                                                                                                                                                                                                                                                                                                                                                                                                                                                                                                                                                                                                                     | #    | #    | #        | #     | #    | #    | -                                                                                  | ----  | ----                 | AT4G26430.1   Symbols: CSN6B   COP9 signalosome subunit 6B   chr4:13355229-13357326 FORWARD LENGTH=317                                                       | 62   | 317  | 2.00E-12  | 511.3 | 50.0 | 51.6 |
| Rsa1.0_00144.1.g6686.t1 | emb CAB64221.1  nodulin / glutamate-ammonia ligase-like protein [Arabidopsis thaliana]                                                                                                                                                                                                                                                                                                                                                                                                                                                                                                                                                                                                                | 667  | 845  | 0        | 126.7 | 85.2 | 90.7 | nodulin / glutamate-ammonia ligase-like protein                                    | gbpln | Arabidopsis thaliana | AT3G53180.1   Symbols:   glutamate-ammonia ligases;catalytics;glutamate-ammonia ligases   chr3:19707068-19711188 FORWARD LENGTH=852                          | 667  | 852  | 0         | 127.7 | 85.2 | 90.7 |
| Rsa1.0_00145.1.g6687.t1 | emb CAB40035.1  retrotransposon like protein [Arabidopsis thaliana]<br>gi 7267767 emb CAB81170.1  retrotransposon like protein [Arabidopsis thaliana]                                                                                                                                                                                                                                                                                                                                                                                                                                                                                                                                                 | 1341 | 1515 | 0        | 113.0 | 58.3 | 74.0 | retrotransposon like protein                                                       | gbpln | Arabidopsis thaliana | AT4G23160.1   Symbols: CRK8   cysteine-rich RLK (RECEPTOR-like protein kinase) 8   chr4:12129485-12134086 FORWARD LENGTH=1262                                | 1341 | 1262 | 1.00E-118 | 94.1  | 14.8 | 21.9 |
| Rsa1.0_00145.1.g6688.t1 | ref NP_173264.1  bifunctional inhibitor/lipid-transfer protein/seed storage 2S albumin-like protein [Arabidopsis thaliana]<br>gi 6714296 gb AAF25992.1 AC013354_11 F15H18.20 [Arabidopsis thaliana]<br>gi 8671770 gb AAF78376.1 AC069551_9 T10022.25 [Arabidopsis thaliana]<br>gi 21592585 gb AAM64534.1  lipid transfer protein, putative [Arabidopsis thaliana]<br>gi 91805803 gb ABE65630.1  protease inhibitor/seed storage/lipid transfer protein family protein [Arabidopsis thaliana]<br>gi 107738083 gb ABF83631.1  At1g18280 [Arabidopsis thaliana]<br>gi 332191576 gb AEE29697.1  bifunctional inhibitor/lipid-transfer protein/seed storage 2S albumin-like protein [Arabidopsis thaliana] | 180  | 180  | 1.00E-51 | 100.0 | 66.7 | 76.1 | bifunctional inhibitor/lipid-transfer protein/seed storage 2S albumin-like protein | gbpln | Arabidopsis thaliana | AT1G18280.1   Symbols:   Bifunctional inhibitor/lipid-transfer protein/seed storage 2S albumin superfamily protein   chr1:6294403-6295207 FORWARD LENGTH=180 | 180  | 180  | 5.00E-54  | 100.0 | 66.7 | 76.1 |

|                         |                                                                                                                                                                                                                                                                                                                                                                                                                                                                                                                                                                                                                                                                               |     |     |           |       |      |      |                                                |       |                      |                                                                                                                                                                                                                                                                                                                                                                                                  |     |     |           |       |      |      |
|-------------------------|-------------------------------------------------------------------------------------------------------------------------------------------------------------------------------------------------------------------------------------------------------------------------------------------------------------------------------------------------------------------------------------------------------------------------------------------------------------------------------------------------------------------------------------------------------------------------------------------------------------------------------------------------------------------------------|-----|-----|-----------|-------|------|------|------------------------------------------------|-------|----------------------|--------------------------------------------------------------------------------------------------------------------------------------------------------------------------------------------------------------------------------------------------------------------------------------------------------------------------------------------------------------------------------------------------|-----|-----|-----------|-------|------|------|
| Rsa1.0_00145.1.g6689.t1 | refNP_173265.1  uncharacterized protein [Arabidopsis thaliana]<br>gi 6714297 gb AAF25993.1 AC013354.12 F15H18.19 [Arabidopsis thaliana]<br>gi 8671771 gb AAF78377.1 AC069551.10 T10O22.26 [Arabidopsis thaliana]<br>gi 52354129 gb AAU44385.1 <br>hypothetical protein AT1G18290 [Arabidopsis thaliana]<br>gi 55740499 gb AAV63842.1 <br>hypothetical protein At1g18290 [Arabidopsis thaliana]<br>gi 332191577 gb AEE29698.1 <br>uncharacterized protein AT1G18290 [Arabidopsis thaliana]<br>refXP_002890268.1  hypothetical protein ARALYDRAFT_312784 [Arabidopsis thaliana]<br>gi 297336110 gb EFH66527.1 <br>hypothetical protein ARALYDRAFT_312784 [Arabidopsis thaliana] | 164 | 176 | 6.00E-66  | 107.3 | 81.1 | 90.2 | uncharacterized protein                        | gbpln | Arabidopsis thaliana | AT1G18290.1   Symbols:   unknown protein; FUNCTIONS IN: molecular_function unknown; INVOLVED IN: N-terminal protein myristoylation; LOCATED IN: chloroplast; EXPRESSED IN: root; Has 94 Blast hits to 94 proteins in 12 species: Archae = 0; Bacteria = 0; Metazoa = 0; Fungi = 0; Plants = 94; Viruses = 0; Other Eukaryotes = 0 (source: NCBI BLINK)   chr1:6297436-6297966 FORWARD LENGTH=176 | 164 | 176 | 2.00E-68  | 107.3 | 81.1 | 90.2 |
| Rsa1.0_00145.1.g6690.t1 | refXP_002890268.1  hypothetical protein ARALYDRAFT_312784 [Arabidopsis thaliana]<br>gi 297336110 gb EFH66527.1 <br>hypothetical protein ARALYDRAFT_312784 [Arabidopsis thaliana]                                                                                                                                                                                                                                                                                                                                                                                                                                                                                              | 206 | 207 | 1.00E-101 | 100.5 | 85.9 | 91.3 | hypothetical protein ARALYDRAFT_312784         | gbpln | Arabidopsis lyrata   | AT1G18300.1   Symbols: atnud4, NUDT4   nudix hydrolase homolog 4   chr1:6298841-6300799 FORWARD LENGTH=207                                                                                                                                                                                                                                                                                       | 206 | 207 | 1.00E-101 | 100.5 | 84.0 | 90.8 |
| Rsa1.0_00145.1.g6691.t1 | refXP_002890269.1  At3g10110 [Arabidopsis lyrata subsp. lyrata]<br>gi 297336111 gb EFH66528.1  At3g10110 [Arabidopsis lyrata subsp. lyrata]                                                                                                                                                                                                                                                                                                                                                                                                                                                                                                                                   | 170 | 171 | 6.00E-69  | 100.6 | 82.9 | 91.8 | At3g10110                                      | gbpln | Arabidopsis lyrata   | AT3G10110.1   Symbols: MEE67   Mitochondrial import inner membrane translocase subunit Tim17/Tim22/Tim23 family protein   chr3:3116225-3117378 FORWARD LENGTH=173                                                                                                                                                                                                                                | 170 | 173 | 3.00E-71  | 101.8 | 84.1 | 92.4 |
| Rsa1.0_00145.1.g6692.t1 | refNP_683313.2  acyl-CoA N-acyltransferases-like protein [Arabidopsis thaliana]<br>gi 332191583 gb AEE29704.1  acyl-CoA N-acyltransferases-like protein [Arabidopsis thaliana]                                                                                                                                                                                                                                                                                                                                                                                                                                                                                                | 294 | 269 | 1.00E-111 | 91.5  | 68.0 | 71.8 | acyl-CoA N-acyltransferases-like protein       | gbpln | Arabidopsis thaliana | AT1G18335.1   Symbols:   Acyl-CoA N-acyltransferases (NAT) superfamily protein   chr1:6309428-6311326 REVERSE LENGTH=269                                                                                                                                                                                                                                                                         | 294 | 269 | 1.00E-114 | 91.5  | 68.0 | 71.8 |
| Rsa1.0_00145.1.g6693.t4 | gb AAW81736.1  Putative Actin-related protein 4 (ARP4) [Brassica oleracea]                                                                                                                                                                                                                                                                                                                                                                                                                                                                                                                                                                                                    | 443 | 442 | 0         | 99.8  | 95.5 | 97.1 | Putative Actin-related protein 4 (ARP4)        | gbpln | Brassica oleracea    | AT1G18450.1   Symbols: ATARP4, ARP4   actin-related protein 4   chr1:6348199-6351766 FORWARD LENGTH=441                                                                                                                                                                                                                                                                                          | 443 | 441 | 0         | 99.5  | 94.6 | 98.2 |
| Rsa1.0_00145.1.g6694.t2 | gb AAW81737.1  Putative finger family protein [Brassica oleracea]                                                                                                                                                                                                                                                                                                                                                                                                                                                                                                                                                                                                             | 434 | 467 | 0         | 107.6 | 88.7 | 93.5 | Putative finger family protein                 | gbpln | Brassica oleracea    | AT1G18470.1   Symbols:   Transmembrane Fragile-X-F-associated protein   chr1:6356407-6360057 REVERSE LENGTH=467                                                                                                                                                                                                                                                                                  | 434 | 467 | 0         | 107.6 | 88.5 | 93.5 |
| Rsa1.0_00145.1.g6695.t1 | gb AAW81738.1  Putative [Brassica oleracea]                                                                                                                                                                                                                                                                                                                                                                                                                                                                                                                                                                                                                                   | 393 | 394 | 0         | 100.3 | 83.2 | 91.9 | Putative                                       | gbpln | Brassica oleracea    | AT1G18480.1   Symbols:   Calceurin-like metallo-phosphatase superfamily protein   chr1:6361639-6362814 FORWARD LENGTH=391                                                                                                                                                                                                                                                                        | 393 | 391 | 0         | 99.5  | 81.2 | 89.1 |
| Rsa1.0_00145.1.g6696.t1 | refXP_002890283.1  hypothetical protein ARALYDRAFT_889272 [Arabidopsis thaliana]<br>gi 297336125 gb EFH66542.1 <br>hypothetical protein ARALYDRAFT_889272 [Arabidopsis thaliana]                                                                                                                                                                                                                                                                                                                                                                                                                                                                                              | 272 | 272 | 1.00E-137 | 100.0 | 86.8 | 92.6 | hypothetical protein ARALYDRAFT_889272         | gbpln | Arabidopsis lyrata   | AT1G18520.1   Symbols: TET11   tetraspanin11   chr1:6375051-6376178 FORWARD LENGTH=271                                                                                                                                                                                                                                                                                                           | 272 | 271 | 1.00E-137 | 99.6  | 86.4 | 91.9 |
| Rsa1.0_00145.1.g6697.t1 | gb EOA36227.1  hypothetical protein CARUB_v10010178mg [Capsella rubella]                                                                                                                                                                                                                                                                                                                                                                                                                                                                                                                                                                                                      | 234 | 234 | 1.00E-109 | 100.0 | 93.6 | 97.4 | hypothetical protein CARUB_v10010178mg         | gbpln | Capsella rubella     | AT1G18540.1   Symbols:   Ribosomal protein L6 family protein   chr1:6377448-6378548 REVERSE LENGTH=233                                                                                                                                                                                                                                                                                           | 234 | 233 | 1.00E-108 | 99.6  | 93.6 | 97.0 |
| Rsa1.0_00145.1.g6698.t1 | gb ACR48188.1  MYB domain protein 51-2 [Brassica rapa subsp. pekinensis]                                                                                                                                                                                                                                                                                                                                                                                                                                                                                                                                                                                                      | 328 | 333 | 1.00E-156 | 101.5 | 90.9 | 94.8 | MYB domain protein 51-2                        | gbpln | Brassica rapa        | AT1G18570.1   Symbols: MYB51, AtMYB51, BW51A, BW51B, HIG1   myb domain protein 51   chr1:6389765-6391026 FORWARD LENGTH=352                                                                                                                                                                                                                                                                      | 328 | 352 | 1.00E-125 | 107.3 | 79.0 | 86.6 |
| Rsa1.0_00145.1.g6699.t1 | refNP_564057.4  alpha-1,4-galacturonosyltransferase [Arabidopsis thaliana]<br>gi 75164846 sp Q949Q1.1 GAUTB_ARATH RecName: Full=Probable galacturonosyltransferase 11<br>gi 15293067 gb AAK93644.1  unknown protein [Arabidopsis thaliana]<br>gi 17064736 gb AAL32522.1  Unknown protein [Arabidopsis thaliana]<br>gi 332191610 gb AEE29731.1  probable galacturonosyltransferase 11 [Arabidopsis thaliana]                                                                                                                                                                                                                                                                   | 535 | 537 | 0         | 100.4 | 89.3 | 93.5 | alpha-1,4-galacturonosyltransferase            | gbpln | Arabidopsis thaliana | AT1G18580.1   Symbols: GAUT11   galacturonosyltransferase 11   chr1:6396144-6398005 FORWARD LENGTH=537                                                                                                                                                                                                                                                                                           | 535 | 537 | 0         | 100.4 | 89.3 | 93.5 |
| Rsa1.0_00145.1.g6700.t1 | refXP_002890286.1  hypothetical protein ARALYDRAFT_312807 [Arabidopsis thaliana]<br>gi 297336128 gb EFH66545.1 <br>hypothetical protein ARALYDRAFT_312807 [Arabidopsis thaliana]                                                                                                                                                                                                                                                                                                                                                                                                                                                                                              | 525 | 538 | 2.00E-99  | 102.5 | 32.2 | 34.3 | hypothetical protein ARALYDRAFT_312807         | gbpln | Arabidopsis lyrata   | AT1G18580.1   Symbols: GAUT11   galacturonosyltransferase 11   chr1:6396144-6398005 FORWARD LENGTH=537                                                                                                                                                                                                                                                                                           | 525 | 537 | 1.00E-101 | 102.3 | 31.8 | 33.9 |
| Rsa1.0_00145.1.g6701.t1 | sp P0C2G3.3 FB308_ARATH RecName: Full=Putative F-box protein At1g30925                                                                                                                                                                                                                                                                                                                                                                                                                                                                                                                                                                                                        | 393 | 523 | 7.00E-70  | 133.1 | 44.8 | 57.3 | RecName: Full=Putative F-box protein At1g30925 | ----  | ----                 | AT1G30920.1   Symbols:   F-box family protein   chr1:11004242-11005444 REVERSE LENGTH=400                                                                                                                                                                                                                                                                                                        | 393 | 400 | 8.00E-69  | 101.8 | 41.7 | 57.0 |

|                         |                                                                                                                                                                                                                                                                                                                                                                                                                                                                                                                                                                           |      |      |           |       |      |      |                                                                |       |                      |                                                                                                                                                                                                                                                                                                                                                          |      |      |           |       |      |      |
|-------------------------|---------------------------------------------------------------------------------------------------------------------------------------------------------------------------------------------------------------------------------------------------------------------------------------------------------------------------------------------------------------------------------------------------------------------------------------------------------------------------------------------------------------------------------------------------------------------------|------|------|-----------|-------|------|------|----------------------------------------------------------------|-------|----------------------|----------------------------------------------------------------------------------------------------------------------------------------------------------------------------------------------------------------------------------------------------------------------------------------------------------------------------------------------------------|------|------|-----------|-------|------|------|
| Rsa1.0_00145.1.g6702.t5 | ref[NP_173296.3] galactose oxidase/kelch repeat domain-containing protein [Arabidopsis thaliana] gi 9795595 gb AAF98413.1 AC026238.5 Hypothetical protein [Arabidopsis thaliana] gi 332191613 gb AEE29734.1  galactose oxidase/kelch repeat domain-containing protein [Arabidopsis thaliana]                                                                                                                                                                                                                                                                              | 536  | 556  | 0         | 103.7 | 79.1 | 86.9 | galactose oxidase/kelch repeat domain-containing protein       | gbpln | Arabidopsis thaliana | AT1G18610.1   Symbols:   Galactose oxidase/kelch repeat superfamily protein   chr1:6405779-6408831 FORWARD LENGTH=556                                                                                                                                                                                                                                    | 536  | 556  | 0         | 103.7 | 79.1 | 86.9 |
| Rsa1.0_00145.1.g6703.t1 | ref[NP_194349.2] haloacid dehalogenase-like hydrolase domain-containing protein [Arabidopsis thaliana] gi 332059768 gb AEE85168.1  haloacid dehalogenase-like hydrolase domain-containing protein [Arabidopsis thaliana]                                                                                                                                                                                                                                                                                                                                                  | 624  | 1057 | 1.00E-126 | 169.4 | 33.0 | 38.0 | haloacid dehalogenase-like hydrolase domain-containing protein | gbpln | Arabidopsis thaliana | AT4G26190.1   Symbols:   Haloacid dehalogenase-like hydrolase (HAD) superfamily protein   chr4:13262473-13266282 REVERSE LENGTH=1057                                                                                                                                                                                                                     | 624  | 1057 | 1.00E-128 | 169.4 | 33.0 | 38.0 |
| Rsa1.0_00145.1.g6704.t1 | gb EOA39586.1  hypothetical protein CARUB_v10008208mg [Capsella rubella]                                                                                                                                                                                                                                                                                                                                                                                                                                                                                                  | 815  | 973  | 0         | 119.4 | 67.7 | 77.7 | hypothetical protein CARUB_v10008208mg                         | gbpln | Capsella rubella     | AT1G18620.1   Symbols:   unknown protein; BEST Arabidopsis thaliana protein match is: unknown protein (TAIR:AT1G74160.1); Has 1987 Blast hits to 1263 proteins in 207 species: Archae - 0; Bacteria - 172; Metazoa - 665; Fungi - 149; Plants - 271; Viruses - 6; Other Eukaryotes - 724 (source: NCBI BLink).   chr1:6410719-6414269 FORWARD LENGTH=978 | 815  | 978  | 0         | 120.0 | 68.8 | 78.9 |
| Rsa1.0_00145.1.g6705.t2 | ref[NP_173298.1] glycine-rich RNA-binding protein 6 [Arabidopsis thaliana] gi 75334552 sp Q9FZ84.1 RBG6_ARATH RecName: Full=Glycine-rich RNA-binding protein 6, mitochondrial; Short=AtGR-RBP6; AltName: Full=AtRBG6; Flags: Precursor gi 9795594 gb AAF98412.1 AC026238.4 Similar to glycine-rich RNA-binding proteins [Arabidopsis thaliana] gi 29029110 gb AAO64934.1  At1g18630 [Arabidopsis thaliana] gi 110743184 dbj BAE99483.1  hypothetical protein [Arabidopsis thaliana] gi 332191616 gb AEE29737.1  glycine-rich RNA-binding protein 6 [Arabidopsis thaliana] | 159  | 155  | 1.00E-46  | 97.5  | 57.2 | 66.7 | glycine-rich RNA-binding protein 6                             | gbpln | Arabidopsis thaliana | AT1G18630.1   Symbols: GR-RBP6   glycine-rich RNA-binding protein 6   chr1:6415226-6416283 FORWARD LENGTH=155                                                                                                                                                                                                                                            | 159  | 155  | 5.00E-49  | 97.5  | 57.2 | 66.7 |
| Rsa1.0_00145.1.g6706.t1 | gb EOA27005.1  hypothetical protein CARUB_v10023099mg [Capsella rubella]                                                                                                                                                                                                                                                                                                                                                                                                                                                                                                  | 533  | 486  | 0         | 91.2  | 70.9 | 78.0 | hypothetical protein CARUB_v10023099mg                         | gbpln | Capsella rubella     | AT4G39280.2   Symbols:   phenylalanyl-tRNA synthetase, putative / phenylalanine-tRNA ligase, putative   chr4:18280292-18284831 REVERSE LENGTH=485                                                                                                                                                                                                        | 533  | 485  | 0         | 91.0  | 71.5 | 79.5 |
| Rsa1.0_00145.1.g6707.t1 | gb AAF97297.1 AC010164_19 Hypothetical protein [Arabidopsis thaliana]                                                                                                                                                                                                                                                                                                                                                                                                                                                                                                     | 122  | 308  | 8.00E-45  | 252.5 | 73.8 | 82.0 | Hypothetical protein                                           | gbpln | Arabidopsis thaliana | #                                                                                                                                                                                                                                                                                                                                                        | #    | #    | #         | #     | #    | #    |
| Rsa1.0_00145.1.g6708.t1 | ref[XP_002893006.1] hypothetical protein ARALYDRAFT_889285 [Arabidopsis lyrata subsp. lyrata] gi 297338848 gb EFH69265.1  hypothetical protein ARALYDRAFT_889285 [Arabidopsis lyrata subsp. lyrata]                                                                                                                                                                                                                                                                                                                                                                       | 190  | 187  | 6.00E-75  | 98.4  | 83.7 | 86.8 | hypothetical protein ARALYDRAFT_889285                         | gbpln | Arabidopsis lyrata   | AT1G18650.1   Symbols: PDCB3   plasmodesmata callose-binding protein 3   chr1:6419036-6420413 REVERSE LENGTH=184                                                                                                                                                                                                                                         | 190  | 184  | 6.00E-75  | 96.8  | 81.1 | 84.7 |
| Rsa1.0_00145.1.g6709.t1 | gb EOA39803.1  hypothetical protein CARUB_v10008466mg [Capsella rubella]                                                                                                                                                                                                                                                                                                                                                                                                                                                                                                  | 704  | 699  | 0         | 99.3  | 86.9 | 91.2 | hypothetical protein CARUB_v10008466mg                         | gbpln | Capsella rubella     | AT1G18670.1   Symbols: IBS1   Protein kinase superfamily protein   chr1:6427242-6430696 REVERSE LENGTH=709                                                                                                                                                                                                                                               | 704  | 709  | 0         | 100.7 | 87.2 | 92.2 |
| Rsa1.0_00145.1.g6710.t1 | #                                                                                                                                                                                                                                                                                                                                                                                                                                                                                                                                                                         | #    | #    | #         | #     | #    | -    | ----                                                           | ----  | ----                 | #                                                                                                                                                                                                                                                                                                                                                        | #    | #    | #         | #     | #    | #    |
| Rsa1.0_00145.1.g6711.t1 | emb CAB39638.1  RNA-directed DNA polymerase-like protein [Arabidopsis thaliana] gi 7267866 emb CAB78094.1  RNA-directed DNA polymerase-like protein [Arabidopsis thaliana]                                                                                                                                                                                                                                                                                                                                                                                                | 1525 | 1274 | 0         | 83.5  | 39.5 | 52.9 | RNA-directed DNA polymerase-like protein                       | gbpln | Arabidopsis thaliana | AT4G29090.1   Symbols:   Ribonuclease H-like superfamily protein   chr4:14333528-14335255 FORWARD LENGTH=575                                                                                                                                                                                                                                             | 1525 | 575  | 5.00E-56  | 37.7  | 10.2 | 15.7 |
| Rsa1.0_00145.1.g6712.t1 | ref[XP_002890304.1] proton-dependent oligopeptide transport family protein [Arabidopsis lyrata subsp. lyrata] gi 297336146 gb EFH66563.1  proton-dependent oligopeptide transport family protein [Arabidopsis lyrata subsp. lyrata]                                                                                                                                                                                                                                                                                                                                       | 577  | 587  | 0         | 101.7 | 90.3 | 93.6 | proton-dependent oligopeptide transport family protein         | gbpln | Arabidopsis lyrata   | AT1G18880.1   Symbols:   Major facilitator superfamily protein   chr1:6520800-6523241 FORWARD LENGTH=587                                                                                                                                                                                                                                                 | 577  | 587  | 0         | 101.7 | 89.9 | 93.2 |

|                         |                                                                                                                                                                                                                                                                                                                                                                                                                                                                                                                                                                                                                                                                                                                                                                                                                                                                                                                                                                                                                                                                                                                                                                                   |     |     |           |       |      |      |                                                     |       |                      |                                                                                                                                                                                                                                                                                                                                                   |     |     |           |       |      |      |
|-------------------------|-----------------------------------------------------------------------------------------------------------------------------------------------------------------------------------------------------------------------------------------------------------------------------------------------------------------------------------------------------------------------------------------------------------------------------------------------------------------------------------------------------------------------------------------------------------------------------------------------------------------------------------------------------------------------------------------------------------------------------------------------------------------------------------------------------------------------------------------------------------------------------------------------------------------------------------------------------------------------------------------------------------------------------------------------------------------------------------------------------------------------------------------------------------------------------------|-----|-----|-----------|-------|------|------|-----------------------------------------------------|-------|----------------------|---------------------------------------------------------------------------------------------------------------------------------------------------------------------------------------------------------------------------------------------------------------------------------------------------------------------------------------------------|-----|-----|-----------|-------|------|------|
| Rsa1.0_00145.1.g6714.t1 | refNP_173324.1   pentatricopeptide repeat-containing protein [Arabidopsis thaliana] gi 42571539 refNP_973860.1   pentatricopeptide repeat-containing protein [Arabidopsis thaliana] gi 75151479 sp Q8GYP6.1 PPR49_ARAT H RecName: Full=Pentatricopeptide repeat-containing protein At1g18900 gi 26450017 dbj BAO42129.1   unknown protein [Arabidopsis thaliana] gi 28827402 gb AAO50545.1   unknown protein [Arabidopsis thaliana] gi 332191657 gb AEE29778.1   pentatricopeptide repeat-containing protein [Arabidopsis thaliana] gi 332191658 gb AEE29779.1   pentatricopeptide repeat-containing protein [Arabidopsis thaliana] ref XP_002890307.1   aminoacyl-tRNA synthetase family [Arabidopsis lyrata subsp. lyrata] gi 8778276 gb EAF79285.1   aminoacyl-tRNA synthetase family [Arabidopsis lyrata subsp. lyrata] refNP_173330.1   myb-like HTH transcriptional regulator-like protein [Arabidopsis thaliana] gi 14778276 gb AAF79285.1   AC068602.8 F14D16.11 [Arabidopsis thaliana] gi 225897944 dbj BAH30304.1   hypothetical protein [Arabidopsis thaliana] gi 332191663 gb AEE29784.1   myb-like HTH transcriptional regulator-like protein [Arabidopsis thaliana] | 825 | 860 | 0         | 104.2 | 78.8 | 86.9 | pentatricopeptide repeat-containing protein         | gbpln | Arabidopsis thaliana | AT1G18900.2   Symbols:   Pentatricopeptide repeat (PPR) superfamily protein   chr1:6529778-6532360 FORWARD LENGTH=860                                                                                                                                                                                                                             | 825 | 860 | 0         | 104.2 | 78.8 | 86.9 |
| Rsa1.0_00145.1.g6714.t1 | refXP_002890307.1   aminoacyl-tRNA synthetase family [Arabidopsis lyrata subsp. lyrata] gi 297336149 gb EFH66566.1   aminoacyl-tRNA synthetase family [Arabidopsis lyrata subsp. lyrata] refNP_173330.1   myb-like HTH transcriptional regulator-like protein [Arabidopsis thaliana] gi 14778276 gb AAF79285.1   AC068602.8 F14D16.11 [Arabidopsis thaliana] gi 225897944 dbj BAH30304.1   hypothetical protein [Arabidopsis thaliana] gi 332191663 gb AEE29784.1   myb-like HTH transcriptional regulator-like protein [Arabidopsis thaliana]                                                                                                                                                                                                                                                                                                                                                                                                                                                                                                                                                                                                                                    | 783 | 761 | 0         | 97.2  | 79.7 | 85.1 | aminoacyl-tRNA synthetase family                    | gbpln | Arabidopsis lyrata   | AT1G18950.1   Symbols:   DDT domain superfamily   chr1:6546539-6551549 FORWARD LENGTH=750                                                                                                                                                                                                                                                         | 783 | 750 | 0         | 95.8  | 79.4 | 85.4 |
| Rsa1.0_00145.1.g6715.t1 | refNP_173330.1   myb-like HTH transcriptional regulator-like protein [Arabidopsis thaliana] gi 14778276 gb AAF79285.1   AC068602.8 F14D16.11 [Arabidopsis thaliana] gi 225897944 dbj BAH30304.1   hypothetical protein [Arabidopsis thaliana] gi 332191663 gb AEE29784.1   myb-like HTH transcriptional regulator-like protein [Arabidopsis thaliana]                                                                                                                                                                                                                                                                                                                                                                                                                                                                                                                                                                                                                                                                                                                                                                                                                             | 312 | 307 | 1.00E-131 | 98.4  | 84.9 | 91.0 | myb-like HTH transcriptional regulator-like protein | gbpln | Arabidopsis thaliana | AT1G18960.1   Symbols:   myb-like HTH transcriptional regulator family protein   chr1:6552854-6553940 FORWARD LENGTH=307                                                                                                                                                                                                                          | 312 | 307 | 1.00E-134 | 98.4  | 84.9 | 91.0 |
| Rsa1.0_00145.1.g6716.t1 | #                                                                                                                                                                                                                                                                                                                                                                                                                                                                                                                                                                                                                                                                                                                                                                                                                                                                                                                                                                                                                                                                                                                                                                                 | #   | #   | #         | #     | #    | #    | -                                                   | ----  | ----                 | #                                                                                                                                                                                                                                                                                                                                                 | #   | #   | #         | #     | #    |      |
| Rsa1.0_00145.1.g6717.t1 | dbj BAJ34162.1   unnamed protein product [Theilungiella halophila]                                                                                                                                                                                                                                                                                                                                                                                                                                                                                                                                                                                                                                                                                                                                                                                                                                                                                                                                                                                                                                                                                                                | 282 | 294 | 1.00E-109 | 104.3 | 83.0 | 86.9 | unnamed protein product                             | ----  | ----                 | AT1G19000.2   Symbols:   Homeodomain-like superfamily protein   chr1:6561335-6562684 REVERSE LENGTH=285                                                                                                                                                                                                                                           | 282 | 285 | 1.00E-101 | 101.1 | 79.8 | 84.4 |
| Rsa1.0_00145.1.g6718.t1 | refXP_002890309.1   hypothetical protein ARALYDRAFT_335156 [Arabidopsis lyrata subsp. lyrata] gi 297336151 gb EFH66568.1   hypothetical protein ARALYDRAFT_335156 [Arabidopsis lyrata subsp. lyrata]                                                                                                                                                                                                                                                                                                                                                                                                                                                                                                                                                                                                                                                                                                                                                                                                                                                                                                                                                                              | 315 | 317 | 1.00E-113 | 100.6 | 72.4 | 82.5 | hypothetical protein ARALYDRAFT_335156              | gbpln | Arabidopsis lyrata   | AT1G19010.1   Symbols:   unknown protein; BEST Arabidopsis thaliana protein match is: unknown protein (TAIR:AT1G74860.1); Has 337 Blast hits to 320 proteins in 97 species: Archae - 0; Bacteria - 14; Metazoa - 153; Fungi - 26; Plants - 76; Viruses - 0; Other Eukaryotes - 68 (source: NCBI BLINK).   chr1:6565616-6567354 FORWARD LENGTH=319 | 315 | 319 | 1.00E-109 | 101.3 | 71.4 | 81.9 |
| Rsa1.0_00145.1.g6719.t1 | gb AFK49462.1   unknown [Medicago truncatula]                                                                                                                                                                                                                                                                                                                                                                                                                                                                                                                                                                                                                                                                                                                                                                                                                                                                                                                                                                                                                                                                                                                                     | 64  | 307 | 8.00E-12  | 479.7 | 57.8 | 67.2 | unknown                                             | gbpln | Medicago truncatula  | AT5G52660.2   Symbols:   Homeodomain-like superfamily protein   chr5:21359423-21362037 REVERSE LENGTH=331                                                                                                                                                                                                                                         | 64  | 331 | 1.00E-13  | 517.2 | 53.1 | 54.7 |
| Rsa1.0_00146.1.g6720.t1 | refNP_197755.1   MTN3-like protein [Arabidopsis thaliana] gi 75100713 sp O82587.1 SWT12_ARAT H RecName: Full=Bidirectional sugar transporter SWEET12; Short=AtSWEET12; AltName: Full=MtN3-like protein gi 3747111 gb AAC64192.1   MTN3 homolog [Arabidopsis thaliana] gi 8809694 dbj BAA97235.1   MtN3-like protein [Arabidopsis thaliana] gi 15982723 gb AAL09814.1   putative MtN3 protein [Arabidopsis thaliana] gi 16323440 gb AAL15214.1   putative MtN3 protein [Arabidopsis thaliana] gi 21358848 gb AAM47150.1   putative MtN3 protein [Arabidopsis thaliana] gi 332005812 gb AED93195.1   bidirectional sugar transporter SWEET12 [Arabidopsis thaliana]                                                                                                                                                                                                                                                                                                                                                                                                                                                                                                                 | 288 | 285 | 1.00E-143 | 99.0  | 87.5 | 92.4 | MTN3-like protein                                   | gbpln | Arabidopsis thaliana | AT5G23660.1   Symbols: MTN3, SWEET12, AtSWEET12   homolog of Medicago truncatula MTN3   chr5:7971936-7973796 REVERSE LENGTH=285                                                                                                                                                                                                                   | 288 | 285 | 2.33E-156 | 99.0  | 87.5 | 92.4 |
| Rsa1.0_00146.1.g6721.t1 | refXP_002874143.1   sterile alpha motif domain-containing protein [Arabidopsis lyrata subsp. lyrata] gi 297319980 gb EFH50402.1   sterile alpha motif domain-containing protein [Arabidopsis lyrata subsp. lyrata]                                                                                                                                                                                                                                                                                                                                                                                                                                                                                                                                                                                                                                                                                                                                                                                                                                                                                                                                                                | 265 | 287 | 8.00E-83  | 108.3 | 72.8 | 80.0 | sterile alpha motif domain-containing protein       | gbpln | Arabidopsis lyrata   | AT5G23680.1   Symbols:   Sterile alpha motif (SAM) domain-containing protein   chr5:7985573-7986460 REVERSE LENGTH=295                                                                                                                                                                                                                            | 265 | 295 | 1.00E-81  | 111.3 | 71.3 | 78.9 |
| Rsa1.0_00146.1.g6722.t1 | emb CAB75484.1   putative protein [Arabidopsis thaliana]                                                                                                                                                                                                                                                                                                                                                                                                                                                                                                                                                                                                                                                                                                                                                                                                                                                                                                                                                                                                                                                                                                                          | 639 | 851 | 1.00E-110 | 133.2 | 34.9 | 47.6 | putative protein                                    | gbpln | Arabidopsis thaliana | AT4G29090.1   Symbols:   Ribonuclease H-like superfamily protein   chr4:14333528-14335255 FORWARD LENGTH=575                                                                                                                                                                                                                                      | 639 | 575 | 4.00E-69  | 90.0  | 21.9 | 33.6 |



|                         |                                                                                                                                                                                                                                                                                                                                                                               |     |     |          |       |      |       |                                                     |       |                      |                                                                                                                                                                                                                                                                                                                                                                                                                                                                                                                                                                                              |     |     |          |       |      |      |
|-------------------------|-------------------------------------------------------------------------------------------------------------------------------------------------------------------------------------------------------------------------------------------------------------------------------------------------------------------------------------------------------------------------------|-----|-----|----------|-------|------|-------|-----------------------------------------------------|-------|----------------------|----------------------------------------------------------------------------------------------------------------------------------------------------------------------------------------------------------------------------------------------------------------------------------------------------------------------------------------------------------------------------------------------------------------------------------------------------------------------------------------------------------------------------------------------------------------------------------------------|-----|-----|----------|-------|------|------|
| Rsa1.0_00146.1.g6723.t1 | refNP_197758.2  Polynucleotide adenyllyltransferase family protein [Arabidopsis thaliana] gi 332005816 gb AED93199.1  Polynucleotide adenyllyltransferase family protein [Arabidopsis thaliana] refXP_002874144.1  DNA binding protein [Arabidopsis lyrata subsp. lyrata] gi 297315198 gb EFH50403.1  DNA binding protein [Arabidopsis lyrata subsp. lyrata]                  | 532 | 527 | 0        | 99.1  | 84.2 | 91.9  | Polynucleotide adenyllyltransferase family protein  | gbpln | Arabidopsis thaliana | AT5G23690.1   Symbols:   Polynucleotide adenyllyltransferase family protein   chr5:7987864-7990466 FORWARD LENGTH=527                                                                                                                                                                                                                                                                                                                                                                                                                                                                        | 532 | 527 | 0        | 99.1  | 84.2 | 91.9 |
| Rsa1.0_00146.1.g6724.t1 | refNP_001031933.1  dual specificity protein phosphatase family protein [Arabidopsis thaliana] gi 332005821 gb AED93204.1  dual specificity protein phosphatase family protein [Arabidopsis thaliana] refXP_002869362.1  40S ribosomal protein S11 [Arabidopsis lyrata subsp. lyrata] gi 297315198 gb EFH45621.1  40S ribosomal protein S11 [Arabidopsis lyrata subsp. lyrata] | 234 | 230 | 7.00E-87 | 98.3  | 68.8 | 81.6  | DNA binding protein                                 | gbpln | Arabidopsis lyrata   | AT5G23710.1   Symbols:   DNA binding:DNA-directed RNA polymerases   chr5:7996528-7997220 REVERSE LENGTH=230                                                                                                                                                                                                                                                                                                                                                                                                                                                                                  | 234 | 230 | 1.00E-88 | 98.3  | 65.0 | 81.2 |
| Rsa1.0_00146.1.g6725.t1 | refXP_002344885.1  predicted protein [Populus trichocarpa] gi 222832333 gb EEE70810.1  predicted protein [Populus trichocarpa]                                                                                                                                                                                                                                                | 961 | 920 | 0        | 95.7  | 84.5 | 89.7  | dual specificity protein phosphatase family protein | gbpln | Arabidopsis thaliana | AT5G23720.3   Symbols: PHS1   dual specificity protein phosphatase family protein   chr5:7998506-8002594 FORWARD LENGTH=920                                                                                                                                                                                                                                                                                                                                                                                                                                                                  | 961 | 920 | 0        | 95.7  | 84.5 | 89.7 |
| Rsa1.0_00146.1.g6726.t1 | refNP_197775.3  Pectinacetyltransferase family protein [Arabidopsis thaliana] gi 10176854 dbj BAB10062.1  unnamed protein product [Arabidopsis thaliana] gi 332005846 gb AED93229.1  uncharacterized protein AT5G23890 [Arabidopsis thaliana]                                                                                                                                 | 376 | 159 | 1.00E-84 | 42.3  | 39.4 | 41.0  | 40S ribosomal protein S11                           | gbpln | Arabidopsis lyrata   | AT5G23750.2   Symbols:   Remorin family protein   chr5:8010004-8011453 REVERSE LENGTH=201                                                                                                                                                                                                                                                                                                                                                                                                                                                                                                    | 376 | 201 | 1.00E-82 | 53.5  | 48.7 | 50.5 |
| Rsa1.0_00146.1.g6727.t1 | refXP_002344885.1  predicted protein [Populus trichocarpa] gi 222832333 gb EEE70810.1  predicted protein [Populus trichocarpa]                                                                                                                                                                                                                                                | 103 | 105 | 7.00E-26 | 101.9 | 62.1 | 67.0  | predicted protein                                   | gbpln | Populus trichocarpa  | AT5G23760.1   Symbols:   Copper transport protein family   chr5:8013242-8014129 REVERSE LENGTH=103                                                                                                                                                                                                                                                                                                                                                                                                                                                                                           | 103 | 103 | 2.00E-24 | 100.0 | 70.9 | 72.8 |
| Rsa1.0_00146.1.g6728.t1 | #                                                                                                                                                                                                                                                                                                                                                                             | #   | #   | #        | #     | #    | #     | -                                                   | ----  | ----                 | #                                                                                                                                                                                                                                                                                                                                                                                                                                                                                                                                                                                            | #   | #   | #        | #     | #    |      |
| Rsa1.0_00146.1.g6729.t1 | gb EOA20340.1  hypothetical protein CARUB_v10000648mg [Capsella rubella]                                                                                                                                                                                                                                                                                                      | 535 | 544 | 0        | 101.7 | 85.6 | 92.0  | hypothetical protein CARUB_v10000648mg              | gbpln | Capsella rubella     | AT5G23850.1   Symbols:   Arabidopsis thaliana protein of unknown function (DUF821)   chr5:8038126-8040741 FORWARD LENGTH=542                                                                                                                                                                                                                                                                                                                                                                                                                                                                 | 535 | 542 | 0        | 101.3 | 85.8 | 92.0 |
| Rsa1.0_00146.1.g6730.t1 | gb EOA20636.1  hypothetical protein CARUB_v10000948mg [Capsella rubella]                                                                                                                                                                                                                                                                                                      | 449 | 449 | 0        | 100.0 | 99.3 | 100.0 | hypothetical protein CARUB_v10000948mg              | gbpln | Capsella rubella     | AT5G23860.2   Symbols: TUB8   tubulin beta 8   chr5:8042962-8044528 FORWARD LENGTH=449                                                                                                                                                                                                                                                                                                                                                                                                                                                                                                       | 449 | 449 | 0        | 100.0 | 99.3 | 99.8 |
| Rsa1.0_00146.1.g6731.t1 | refNP_197775.3  Pectinacetyltransferase family protein [Arabidopsis thaliana] gi 10176854 dbj BAB10062.1  unnamed protein product [Arabidopsis thaliana] gi 332005846 gb AED93229.1  uncharacterized protein AT5G23890 [Arabidopsis thaliana]                                                                                                                                 | 426 | 415 | 0        | 97.4  | 86.6 | 91.8  | Pectinacetyltransferase family protein              | gbpln | Arabidopsis thaliana | AT5G23870.1   Symbols:   Pectinacetyltransferase family protein   chr5:8046309-8049999 REVERSE LENGTH=415                                                                                                                                                                                                                                                                                                                                                                                                                                                                                    | 426 | 415 | 0        | 97.4  | 86.6 | 91.8 |
| Rsa1.0_00146.1.g6732.t1 | gb EOA20032.1  hypothetical protein CARUB_v10000306mg [Capsella rubella]                                                                                                                                                                                                                                                                                                      | 739 | 739 | 0        | 100.0 | 94.5 | 97.2  | hypothetical protein CARUB_v10000306mg              | gbpln | Capsella rubella     | AT5G23880.1   Symbols: EMB1265, CPSF100, ESP8, ATGSPF100   cleavage and polyadenylation specificity factor 100   chr5:8052550-8058147 FORWARD LENGTH=739                                                                                                                                                                                                                                                                                                                                                                                                                                     | 739 | 739 | 0        | 100.0 | 93.8 | 97.3 |
| Rsa1.0_00146.1.g6733.t2 | refNP_197777.1  uncharacterized protein [Arabidopsis thaliana] gi 10176856 dbj BAB10062.1  unnamed protein product [Arabidopsis thaliana] gi 332005846 gb AED93229.1  uncharacterized protein AT5G23890 [Arabidopsis thaliana]                                                                                                                                                | 938 | 946 | 0        | 100.9 | 77.4 | 85.9  | uncharacterized protein                             | gbpln | Arabidopsis thaliana | AT5G23890.1   Symbols:   LOCATED IN: mitochondrion, chloroplast thylakoid membrane, chloroplast, plastid, chloroplast envelope; EXPRESSED IN: 24 plant structures; EXPRESSED DURING: 14 growth stages; CONTAINS InterPro DOMAIN/s: S-layer homology domain (InterPro:IPR001119); BEST Arabidopsis thaliana protein match is: unknown protein (TAIR:AT5G2410.2). Has 1807 Blast hits to 1807 proteins in 277 species: Archae - 0; Bacteria - 0; Metazoa - 736; Fungi - 347; Plants - 385; Viruses - 0; Other Eukaryotes - 339 (source: NCBI BLINK).   chr5:8058789-8063005 FORWARD LENGTH=946 | 938 | 946 | 0        | 100.9 | 77.4 | 85.9 |
| Rsa1.0_00146.1.g6734.t1 | refXP_002877641.1  ATBBC1 [Arabidopsis lyrata subsp. lyrata] gi 297323479 gb EFH53900.1  ATBBC1 [Arabidopsis lyrata subsp. lyrata]                                                                                                                                                                                                                                            | 231 | 206 | 2.00E-98 | 89.2  | 74.0 | 81.0  | ATBBC1                                              | gbpln | Arabidopsis lyrata   | AT5G23900.1   Symbols:   Ribosomal protein L13e family protein   chr5:8064176-8065081 REVERSE LENGTH=206                                                                                                                                                                                                                                                                                                                                                                                                                                                                                     | 231 | 206 | 8.00E-95 | 89.2  | 71.0 | 74.0 |
| Rsa1.0_00146.1.g6735.t1 | refNP_001119268.1  uncharacterized protein [Arabidopsis thaliana] gi 332005848 gb AED93231.1  uncharacterized protein AT5G23903 [Arabidopsis thaliana]                                                                                                                                                                                                                        | 124 | 141 | 3.00E-25 | 113.7 | 56.5 | 67.7  | uncharacterized protein                             | gbpln | Arabidopsis thaliana | AT5G23903.1   Symbols:   unknown protein; FUNCTIONS IN: molecular_function unknown; INVOLVED IN: biological_process unknown; LOCATED IN: endomembrane system; BEST Arabidopsis thaliana protein match is: unknown protein (TAIR:AT1G07680.1); Has 30201 Blast hits to 17322 proteins in 780 species: Archae - 12; Bacteria - 1396; Metazoa - 17338; Fungi - 3422; Plants - 5037; Viruses - 0; Other Eukaryotes - 2996 (source: NCBI BLINK).   chr5:8066419-8067037 FORWARD LENGTH=141                                                                                                        | 124 | 141 | 5.00E-28 | 113.7 | 56.5 | 67.7 |

|                         |                                                                                                                                                                                                                                                                                                                                                                                  |     |     |           |       |      |      |                                              |       |                      |                                                                                                                                  |     |     |           |       |      |      |  |
|-------------------------|----------------------------------------------------------------------------------------------------------------------------------------------------------------------------------------------------------------------------------------------------------------------------------------------------------------------------------------------------------------------------------|-----|-----|-----------|-------|------|------|----------------------------------------------|-------|----------------------|----------------------------------------------------------------------------------------------------------------------------------|-----|-----|-----------|-------|------|------|--|
| Rsa1.0_00146.1.g6736.t2 | refNP_197779.4  ATP binding microtubule motor family protein [Arabidopsis thaliana] gi 332005850 gb AED93233.1  ATP binding microtubule motor family protein [Arabidopsis thaliana]                                                                                                                                                                                              | 642 | 701 | 0         | 109.2 | 68.2 | 78.5 | ATP binding microtubule motor family protein | gbpln | Arabidopsis thaliana | AT5G23910.1   Symbols:   ATP binding microtubule motor family protein   chr5:8068452-8072723 FORWARD LENGTH=701                  | 642 | 701 | 0         | 109.2 | 68.2 | 78.5 |  |
| Rsa1.0_00146.1.g6737.t1 | gb EOA20599.1  hypothetical protein CARUB_v10000909mg [Capsella rubella]                                                                                                                                                                                                                                                                                                         | 456 | 462 | 0         | 101.3 | 74.1 | 84.6 | hypothetical protein CARUB_v10000909mg       | gbpln | Capsella rubella     | AT5G23930.1   Symbols:   Mitochondrial transcription termination factor family protein   chr5:8074625-8075998 REVERSE LENGTH=457 | 456 | 457 | 0         | 100.2 | 73.2 | 82.7 |  |
| Rsa1.0_00146.1.g6738.t1 | refXP_002874154.1  EMB3009 [Arabidopsis lyrata subsp. lyrata] gi 297319991 gb EFH50413.1  EMB3009 [Arabidopsis lyrata subsp. lyrata]                                                                                                                                                                                                                                             | 464 | 474 | 0         | 102.2 | 84.3 | 89.9 | EMB3009                                      | gbpln | Arabidopsis lyrata   | AT5G23940.1   Symbols: EMB3009, PEL3, DCR   HXXXD-type acyl-transferase family protein   chr5:8076616-8079677 REVERSE LENGTH=484 | 464 | 484 | 0         | 104.3 | 84.1 | 89.4 |  |
| Rsa1.0_00146.1.g6739.t1 | gb ACN58564.1  (E)-beta-caryophyllene synthase [Arabidopsis lyrata subsp. petraea]                                                                                                                                                                                                                                                                                               | 430 | 545 | 1.00E-148 | 126.7 | 57.9 | 63.7 | (E)-beta-caryophyllene synthase              | gbpln | Arabidopsis lyrata   | AT5G23960.1   Symbols: ATTPS21, TPS21   terpene synthase 21   chr5:8092969-8095128 FORWARD LENGTH=547                            | 430 | 547 | 1.00E-144 | 127.2 | 55.6 | 63.3 |  |
| Rsa1.0_00146.1.g6740.t5 | refXP_002874158.1  hypothetical protein ARALYDRAFT_489258 [Arabidopsis lyrata subsp. lyrata] gi 297319995 gb EFH50417.1  hypothetical protein ARALYDRAFT_489258 [Arabidopsis lyrata subsp. lyrata]                                                                                                                                                                               | 301 | 442 | 4.00E-38  | 146.8 | 29.6 | 30.6 | hypothetical protein ARALYDRAFT_489258       | gbpln | Arabidopsis lyrata   | AT5G24000.1   Symbols:   Protein of unknown function (DUF819)   chr5:8110380-8112692 REVERSE LENGTH=443                          | 301 | 443 | 9.00E-40  | 147.2 | 29.2 | 30.2 |  |
| Rsa1.0_00146.1.g6741.t1 | gb AAB81881.1  putative MuDR-A-like transposon protein [Arabidopsis thaliana] gi 2767510 emb CAB77993.1  putative MuDR-A-like transposon protein [Arabidopsis thaliana]                                                                                                                                                                                                          | 695 | 761 | 0         | 109.5 | 54.0 | 66.9 | putative MuDR-A-like transposon protein      | gbpln | Arabidopsis thaliana | AT1G49920.1   Symbols:   MuDR family transposase   chr1:18481798-18484233 REVERSE LENGTH=785                                     | 695 | 785 | 1.00E-17  | 112.9 | 17.7 | 31.5 |  |
| Rsa1.0_00146.1.g6742.t1 | # # # # # # # # - ----                                                                                                                                                                                                                                                                                                                                                           |     |     |           |       |      |      |                                              |       |                      |                                                                                                                                  |     |     |           |       |      |      |  |
| Rsa1.0_00146.1.g6743.t1 | gb ACN58564.1  (E)-beta-caryophyllene synthase [Arabidopsis lyrata subsp. petraea]                                                                                                                                                                                                                                                                                               | 549 | 545 | 0         | 99.3  | 78.5 | 85.8 | (E)-beta-caryophyllene synthase              | gbpln | Arabidopsis lyrata   | AT5G23960.1   Symbols: ATTPS21, TPS21   terpene synthase 21   chr5:8092969-8095128 FORWARD LENGTH=547                            | 549 | 547 | 0         | 99.6  | 77.2 | 86.2 |  |
| Rsa1.0_00146.1.g6744.t2 | refXP_002874158.1  hypothetical protein ARALYDRAFT_489258 [Arabidopsis lyrata subsp. lyrata] gi 297319995 gb EFH50417.1  hypothetical protein ARALYDRAFT_489258 [Arabidopsis lyrata subsp. lyrata]                                                                                                                                                                               | 459 | 442 | 0         | 96.3  | 84.1 | 89.3 | hypothetical protein ARALYDRAFT_489258       | gbpln | Arabidopsis lyrata   | AT5G24000.1   Symbols:   Protein of unknown function (DUF819)   chr5:8110380-8112692 REVERSE LENGTH=443                          | 459 | 443 | 0         | 96.5  | 84.3 | 88.7 |  |
| Rsa1.0_00146.1.g6745.t1 | refNP_197789.1  putative receptor-like protein kinase [Arabidopsis thaliana] gi 75334039 sp Q9FLW0.1 Y5241_ARAT_H RecName: Full=Probable receptor-like protein kinase At5g24010; Flags: Precursor gi 9758225 gb BAB08724.1  receptor-protein kinase-like protein [Arabidopsis thaliana] gi 332005862 gb AED93245.1  putative receptor-like protein kinase [Arabidopsis thaliana] | 837 | 824 | 0         | 98.4  | 82.8 | 89.8 | putative receptor-like protein kinase        | gbpln | Arabidopsis thaliana | AT5G24010.1   Symbols:   Protein kinase superfamily protein   chr5:8113910-8116384 FORWARD LENGTH=824                            | 837 | 824 | 0         | 98.4  | 82.8 | 89.8 |  |
| Rsa1.0_00146.1.g6746.t1 | refXP_002872087.1  hypothetical protein ARALYDRAFT_910418 [Arabidopsis lyrata subsp. lyrata] gi 297317924 gb EFH48346.1  hypothetical protein ARALYDRAFT_910418 [Arabidopsis lyrata subsp. lyrata]                                                                                                                                                                               | 326 | 326 | 1.00E-164 | 100.0 | 95.4 | 97.2 | hypothetical protein ARALYDRAFT_910418       | gbpln | Arabidopsis lyrata   | AT5G24020.1   Symbols: MIND, ARC11, ATMIND1   septum site-determining protein (MIND)   chr5:8116731-8117711 FORWARD LENGTH=326   | 326 | 326 | 1.00E-165 | 100.0 | 94.8 | 96.9 |  |
| Rsa1.0_00146.1.g6747.t1 | gb EOA20155.1  hypothetical protein CARUB_v10000447mg [Capsella rubella]                                                                                                                                                                                                                                                                                                         | 636 | 637 | 0         | 100.2 | 83.3 | 89.6 | hypothetical protein CARUB_v10000447mg       | gbpln | Capsella rubella     | AT5G24030.1   Symbols: SLAH3   SLAC1 homologue 3   chr5:8118618-8120993 REVERSE LENGTH=635                                       | 636 | 635 | 0         | 99.8  | 82.7 | 88.8 |  |
| Rsa1.0_00147.1.g6748.t1 | gb ABD65063.1  hypothetical protein 27.t00041 [Brassica oleracea]                                                                                                                                                                                                                                                                                                                | 252 | 198 | 5.00E-32  | 78.6  | 30.2 | 38.5 | hypothetical protein 27.t00041               | gbpln | Brassica oleracea    | AT2G35280.1   Symbols:   F-box family protein   chr2:14859709-14860200 REVERSE LENGTH=163                                        | 252 | 163 | 5.00E-11  | 64.7  | 11.1 | 17.9 |  |

|                         |                                                                                                                                                                                                                                                                                                                                                                                                                                                                                                                                                                                                                                                                                                                                                |      |      |           |       |      |      |                                                                                |       |                      |                                                                                                                                                                                                                                                                                                                                                                                                                                                                                                                                                               |      |     |           |       |      |      |
|-------------------------|------------------------------------------------------------------------------------------------------------------------------------------------------------------------------------------------------------------------------------------------------------------------------------------------------------------------------------------------------------------------------------------------------------------------------------------------------------------------------------------------------------------------------------------------------------------------------------------------------------------------------------------------------------------------------------------------------------------------------------------------|------|------|-----------|-------|------|------|--------------------------------------------------------------------------------|-------|----------------------|---------------------------------------------------------------------------------------------------------------------------------------------------------------------------------------------------------------------------------------------------------------------------------------------------------------------------------------------------------------------------------------------------------------------------------------------------------------------------------------------------------------------------------------------------------------|------|-----|-----------|-------|------|------|
| Rsa1.0_00147.1.g6749.t1 | ref NP_192822.1  tetratricopeptide repeat domain-containing protein [Arabidopsis thaliana] gi 3513727 gb AAC33943.1  contains similarity to TPR domains (Pfam: TPR hm: score: 11.15) and kinesin motor domains (Pfam: kinesin2 hm: score: 17.49, 20.52 and 10.94) [Arabidopsis thaliana] gi 4539358 emb CAB40052.1  putative protein [Arabidopsis thaliana] gi 7267782 emb CAB81185.1  putative protein [Arabidopsis thaliana] gi 18176148 gb AAL59992.1  unknown protein [Arabidopsis thaliana] gi 19699309 gb AAL91265.1  AT4g10840/F25I24.50 [Arabidopsis thaliana] gi 24030472 gb AAN41387.1  unknown protein [Arabidopsis thaliana] gi 332657533 gb AEE82933.1  tetratricopeptide repeat domain-containing protein [Arabidopsis thaliana] | 601  | 609  | 0         | 101.3 | 95.7 | 97.8 | tetratricopeptide repeat domain-containing protein                             | gbpln | Arabidopsis thaliana | AT4G10840.1   Symbols:   Tetratricopeptide repeat (TPR)-like superfamily protein   chr4:6656614-6659033 FORWARD LENGTH=609                                                                                                                                                                                                                                                                                                                                                                                                                                    | 601  | 609 | 0         | 101.3 | 95.7 | 97.8 |
| Rsa1.0_00147.1.g6750.t1 | #                                                                                                                                                                                                                                                                                                                                                                                                                                                                                                                                                                                                                                                                                                                                              | #    | #    | #         | #     | #    | -    | ----                                                                           | ----  | #                    | #                                                                                                                                                                                                                                                                                                                                                                                                                                                                                                                                                             | #    | #   | #         | #     | #    |      |
| Rsa1.0_00147.1.g6751.t1 | pir T00833 RNA-directed DNA polymerase homolog T13L16.7 - Arabidopsis thaliana (fragment)                                                                                                                                                                                                                                                                                                                                                                                                                                                                                                                                                                                                                                                      | 1639 | 1365 | 0         | 83.3  | 33.7 | 47.1 | RNA-directed DNA polymerase homolog T13L16.7 - Arabidopsis thaliana (fragment) | ----  | ----                 | AT4G29090.1   Symbols:   Ribonuclease H-like superfamily protein   chr4:14333528-14335255 FORWARD LENGTH=575                                                                                                                                                                                                                                                                                                                                                                                                                                                  | 1639 | 575 | 1.00E-74  | 35.1  | 10.5 | 17.4 |
| Rsa1.0_00147.1.g6752.t1 | ref XP_002872545.1  WRKY DNA-binding protein 41 [Arabidopsis lyrata subsp. lyrata] gi 297318382 gb EFH48804.1  WRKY DNA-binding protein 41 [Arabidopsis lyrata subsp. lyrata]                                                                                                                                                                                                                                                                                                                                                                                                                                                                                                                                                                  | 316  | 313  | 1.00E-121 | 99.1  | 73.4 | 79.7 | WRKY DNA-binding protein 41                                                    | gbpln | Arabidopsis lyrata   | AT4G11070.1   Symbols: WRKY41, AtWRKY41   WRKY family transcription factor   chr4:6759303-6760763 FORWARD LENGTH=313                                                                                                                                                                                                                                                                                                                                                                                                                                          | 316  | 313 | 1.00E-122 | 99.1  | 73.1 | 83.2 |
| Rsa1.0_00147.1.g6753.t1 | ref XP_002872546.1  predicted protein [Arabidopsis lyrata subsp. lyrata] gi 297318383 gb EFH48805.1  predicted protein [Arabidopsis lyrata subsp. lyrata]                                                                                                                                                                                                                                                                                                                                                                                                                                                                                                                                                                                      | 246  | 289  | 1.00E-40  | 117.5 | 51.2 | 62.2 | predicted protein                                                              | gbpln | Arabidopsis lyrata   | AT4G11100.2   Symbols:   unknown protein; FUNCTIONS IN: molecular.function unknown; INVOLVED IN: biological.process unknown; LOCATED IN: cellular.component unknown; EXPRESSED IN: 21 plant structures; EXPRESSED DURING: 13 growth stages; BEST Arabidopsis thaliana protein match is: unknown protein (TAIR:AT5G03060.1). Has 6010 Blast hits to 4873 proteins in 584 species: Archae - 88; Bacteria - 744; Metazoa - 2092; Fungi - 437; Plants - 321; Viruses - 9; Other Eukaryotes - 2319 (source: NCBI BLINK).   chr4:6769036-6769976 FORWARD LENGTH=287 | 246  | 287 | 4.00E-35  | 116.7 | 48.4 | 61.4 |
| Rsa1.0_00147.1.g6754.t1 | ref XP_002867886.1  hypothetical protein ARALYDRAFT_492835 [Arabidopsis lyrata subsp. lyrata] gi 297313722 gb EFH44145.1  hypothetical protein ARALYDRAFT_492835 [Arabidopsis lyrata subsp. lyrata]                                                                                                                                                                                                                                                                                                                                                                                                                                                                                                                                            | 286  | 286  | 1.00E-114 | 100.0 | 75.9 | 84.6 | hypothetical protein ARALYDRAFT_492835                                         | gbpln | Arabidopsis lyrata   | AT4G20330.1   Symbols:   Transcription initiation factor FTIE, beta subunit   chr4:10982683-10984039 REVERSE LENGTH=286                                                                                                                                                                                                                                                                                                                                                                                                                                       | 286  | 286 | 1.00E-109 | 100.0 | 74.1 | 83.9 |
| Rsa1.0_00147.1.g6755.t2 | gb EOA20031.1  hypothetical protein CARUB_v10000305mg [Capsella rubella]                                                                                                                                                                                                                                                                                                                                                                                                                                                                                                                                                                                                                                                                       | 992  | 740  | 0         | 74.6  | 65.4 | 69.2 | hypothetical protein CARUB_v10000305mg                                         | gbpln | Capsella rubella     | AT4G11160.1   Symbols:   Translation initiation factor 2, small GTP-binding protein   chr4:6803846-6806726 FORWARD LENGTH=743                                                                                                                                                                                                                                                                                                                                                                                                                                 | 992  | 743 | 0         | 74.9  | 64.8 | 68.5 |
| Rsa1.0_00147.1.g6756.t1 | gb AAC25101.1  putative transposase [Arabidopsis thaliana]                                                                                                                                                                                                                                                                                                                                                                                                                                                                                                                                                                                                                                                                                     | 706  | 729  | 0         | 103.3 | 65.7 | 80.3 | putative transposase                                                           | gbpln | Arabidopsis thaliana | AT4G15020.2   Symbols:   hAT transposon superfamily   chr4:8575806-8578372 FORWARD LENGTH=768                                                                                                                                                                                                                                                                                                                                                                                                                                                                 | 706  | 768 | 2.00E-99  | 108.8 | 33.3 | 53.7 |
| Rsa1.0_00147.1.g6757.t1 | ref XP_002890328.1  hypothetical protein ARALYDRAFT_472154 [Arabidopsis lyrata subsp. lyrata] gi 297336170 gb EFH66587.1  hypothetical protein ARALYDRAFT_472154 [Arabidopsis lyrata subsp. lyrata]                                                                                                                                                                                                                                                                                                                                                                                                                                                                                                                                            | 247  | 244  | 6.00E-89  | 98.8  | 68.4 | 75.7 | hypothetical protein ARALYDRAFT_472154                                         | gbpln | Arabidopsis lyrata   | AT1G19320.1   Symbols:   Pathogenesis-related thaumatin superfamily protein   chr1:6679327-6680178 FORWARD LENGTH=247                                                                                                                                                                                                                                                                                                                                                                                                                                         | 247  | 247 | 2.00E-88  | 100.0 | 66.8 | 73.3 |
| Rsa1.0_00147.1.g6758.t1 | ref XP_002872559.1  disease resistance-responsive family protein [Arabidopsis lyrata subsp. lyrata] gi 297318396 gb EFH48818.1  disease resistance-responsive family protein [Arabidopsis lyrata subsp. lyrata]                                                                                                                                                                                                                                                                                                                                                                                                                                                                                                                                | 187  | 184  | 7.00E-70  | 98.4  | 65.2 | 79.1 | disease resistance-responsive family protein                                   | gbpln | Arabidopsis lyrata   | AT4G11210.1   Symbols:   Disease resistance-responsive (dirigent-like protein) family protein   chr4:6832691-6833245 FORWARD LENGTH=184                                                                                                                                                                                                                                                                                                                                                                                                                       | 187  | 184 | 8.00E-71  | 98.4  | 68.4 | 80.7 |

|                         |                                                                                                                                                                                                                                                                                                              |     |      |           |        |      |      |                                              |       |                      |                                                                                                                                        |     |     |           |        |      |      |
|-------------------------|--------------------------------------------------------------------------------------------------------------------------------------------------------------------------------------------------------------------------------------------------------------------------------------------------------------|-----|------|-----------|--------|------|------|----------------------------------------------|-------|----------------------|----------------------------------------------------------------------------------------------------------------------------------------|-----|-----|-----------|--------|------|------|
| Rsa1.0_00147.1.g6759.t2 | refXP_002874679.1   hypothetical protein ARALYDRAFT_489958 [Arabidopsis lyrata subsp. lyrata] gi 297320516 gb EFH50938.1   hypothetical protein ARALYDRAFT_489958 [Arabidopsis lyrata subsp. lyrata]                                                                                                         | 916 | 924  | 0         | 100.9  | 80.2 | 88.9 | hypothetical protein ARALYDRAFT_489958       | gbpln | Arabidopsis lyrata   | AT4G11230.1   Symbols:   Riboflavin synthase-like superfamily protein   chr4:6840791-6845587 REVERSE LENGTH=941                        | 916 | 941 | 0         | 102.7  | 80.7 | 88.5 |
| Rsa1.0_00147.1.g6760.t2 | #                                                                                                                                                                                                                                                                                                            | #   | #    | #         | #      | #    | #    | -                                            | ----  | ----                 | #                                                                                                                                      | #   | #   | #         | #      | #    |      |
| Rsa1.0_00147.1.g6761.t1 | emb CAF06581.1  SGT1-like protein [Brassica oleracea]                                                                                                                                                                                                                                                        | 151 | 354  | 1.00E-27  | 234.4  | 43.0 | 45.7 | SGT1-like protein                            | gbpln | Brassica oleracea    | AT4G11260.1   Symbols: ATSGT1B, ETA3, RPR1, EDM1, SGT1B   phosphatase-related   chr4:6851515-6853719 REVERSE LENGTH=358                | 151 | 358 | 3.00E-28  | 237.1  | 41.1 | 44.4 |
| Rsa1.0_00147.1.g6762.t1 | refXP_002874909.1   ATCUL1 [Arabidopsis lyrata subsp. lyrata] gi 297320746 gb EFH51168.1   ATCUL1 [Arabidopsis lyrata subsp. lyrata]                                                                                                                                                                         | 702 | 738  | 0         | 105.1  | 71.4 | 84.0 | ATCUL1                                       | gbpln | Arabidopsis lyrata   | AT4G02570.4   Symbols: CUL1   cullin 1   chr4:1129315-1133435 FORWARD LENGTH=738                                                       | 702 | 738 | 0         | 105.1  | 70.1 | 83.0 |
| Rsa1.0_00147.1.g6763.t1 | dbj BAJ33824.1  unnamed protein product [Thellungiella halophila]                                                                                                                                                                                                                                            | 359 | 358  | 0         | 99.7   | 92.5 | 96.1 | unnamed protein product                      | ----  | ----                 | AT4G11260.1   Symbols: ATSGT1B, ETA3, RPR1, EDM1, SGT1B   phosphatase-related   chr4:6851515-6853719 REVERSE LENGTH=358                | 359 | 358 | 1.00E-174 | 99.7   | 89.1 | 93.6 |
| Rsa1.0_00147.1.g6764.t1 | emb CAA57724.1  1-aminocyclopropane-1-carboxylate synthase [Brassica oleracea]                                                                                                                                                                                                                               | 488 | 491  | 0         | 100.6  | 92.2 | 96.1 | 1-aminocyclopropane-1-carboxylate synthase   | gbpln | Brassica oleracea    | AT4G11280.1   Symbols: ACS6, ATACS6   1-aminocyclopropane-1-carboxylic acid (acc) synthase 6   chr4:6864168-6865922 FORWARD LENGTH=495 | 488 | 495 | 0         | 101.4  | 91.0 | 95.5 |
| Rsa1.0_00147.1.g6765.t1 | refXP_002878134.1   hypothetical protein ARALYDRAFT_486159 [Arabidopsis lyrata subsp. lyrata] gi 297323972 gb EFH54393.1   hypothetical protein ARALYDRAFT_486159 [Arabidopsis lyrata subsp. lyrata]                                                                                                         | 549 | 561  | 0         | 102.2  | 74.7 | 79.2 | hypothetical protein ARALYDRAFT_486159       | gbpln | Arabidopsis lyrata   | AT3G57150.1   Symbols: NAP57, AtNAP57, CBF5, AtCBF5   homologue of NAP57   chr3:21154255-21155952 REVERSE LENGTH=565                   | 549 | 565 | 0         | 102.9  | 74.0 | 78.3 |
| Rsa1.0_00148.1.g6766.t1 | refXP_002892309.1   aspartyl protease family protein [Arabidopsis lyrata subsp. lyrata] gi 297338151 gb EFH68568.1   aspartyl protease family protein [Arabidopsis lyrata subsp. lyrata]                                                                                                                     | 157 | 484  | 6.00E-26  | 308.3  | 42.7 | 48.4 | aspartyl protease family protein             | gbpln | Arabidopsis lyrata   | AT1G05840.1   Symbols:   Eukaryotic aspartyl protease family protein   chr1:1762843-1766150 REVERSE LENGTH=485                         | 157 | 485 | 8.00E-28  | 308.9  | 39.5 | 44.6 |
| Rsa1.0_00148.1.g6767.t1 | refXP_002891911.1   thylakoid lumen 18.3 kDa protein [Arabidopsis lyrata subsp. lyrata] gi 297337753 gb EFH68170.1   thylakoid lumen 18.3 kDa protein [Arabidopsis lyrata subsp. lyrata]                                                                                                                     | 284 | 285  | 1.00E-135 | 100.4  | 89.4 | 95.8 | thylakoid lumen 18.3 kDa protein             | gbpln | Arabidopsis lyrata   | AT1G54780.1   Symbols: TLP18.3   thylakoid lumen 18.3 kDa protein   chr1:20439533-20440953 FORWARD LENGTH=285                          | 284 | 285 | 1.00E-137 | 100.4  | 90.5 | 94.7 |
| Rsa1.0_00148.1.g6768.t1 | gb EOA34273.1  hypothetical protein CARUB_v10021787mg [Capsella rubella]                                                                                                                                                                                                                                     | 289 | 336  | 1.00E-158 | 116.3  | 92.7 | 97.9 | hypothetical protein CARUB_v10021787mg       | gbpln | Capsella rubella     | AT1G54870.1   Symbols:   NAD(P)-binding Rossmann-fold superfamily protein   chr1:20459011-20460417 FORWARD LENGTH=335                  | 289 | 335 | 1.00E-160 | 115.9  | 92.7 | 97.2 |
| Rsa1.0_00148.1.g6769.t1 | #                                                                                                                                                                                                                                                                                                            | #   | #    | #         | #      | #    | #    | -                                            | ----  | ----                 | #                                                                                                                                      | #   | #   | #         | #      | #    |      |
| Rsa1.0_00148.1.g6770.t1 | gb AAF69169.1 AC007915.21 F27F5.21 [Arabidopsis thaliana]                                                                                                                                                                                                                                                    | 722 | 1023 | 1.00E-152 | 141.7  | 38.8 | 51.5 | F27F5.21                                     | gbpln | Arabidopsis thaliana | AT4G29090.1   Symbols:   Ribonuclease H-like superfamily protein   chr4:14333528-14335255 FORWARD LENGTH=575                           | 722 | 575 | 4.00E-32  | 79.6   | 8.7  | 13.2 |
| Rsa1.0_00148.1.g6771.t1 | gb AAG51783.1 AC079679.3 reverse transcriptase, putative: 16838-20266 [Arabidopsis thaliana]                                                                                                                                                                                                                 | 172 | 1142 | 2.00E-14  | 664.0  | 24.4 | 32.0 | reverse transcriptase, putative: 16838-20266 | gbpln | Arabidopsis thaliana | #                                                                                                                                      | #   | #   | #         | #      | #    |      |
| Rsa1.0_00148.1.g6772.t1 | refXP_002891931.1   hypothetical protein ARALYDRAFT_474773 [Arabidopsis lyrata subsp. lyrata] gi 297337773 gb EFH68190.1   hypothetical protein ARALYDRAFT_474773 [Arabidopsis lyrata subsp. lyrata]                                                                                                         | 454 | 472  | 0         | 104.0  | 81.1 | 91.0 | hypothetical protein ARALYDRAFT_474773       | gbpln | Arabidopsis lyrata   | AT1G54990.1   Symbols: AXR4, RGR, RGR1   alpha/beta-Hydrolases superfamily protein   chr1:20511565-20513489 FORWARD LENGTH=473         | 454 | 473 | 0         | 104.2  | 80.2 | 90.7 |
| Rsa1.0_00148.1.g6773.t1 | #                                                                                                                                                                                                                                                                                                            | #   | #    | #         | #      | #    | #    | -                                            | ----  | ----                 | #                                                                                                                                      | #   | #   | #         | #      | #    |      |
| Rsa1.0_00148.1.g6774.t1 | gb AAO03558.1  lipxygenase 1 [Brassica napus]                                                                                                                                                                                                                                                                | 71  | 857  | 5.00E-29  | 1207.0 | 88.7 | 88.7 | lipxygenase 1                                | gbpln | Brassica napus       | AT1G55020.1   Symbols: LOX1, ATLOX1   lipxygenase 1   chr1:20525798-20530143 FORWARD LENGTH=859                                        | 71  | 859 | 1.00E-25  | 1209.9 | 76.1 | 80.3 |
| Rsa1.0_00148.1.g6775.t2 | gb AAO03558.1  lipxygenase 1 [Brassica napus]                                                                                                                                                                                                                                                                | 797 | 857  | 0         | 107.5  | 96.7 | 97.5 | lipxygenase 1                                | gbpln | Brassica napus       | AT1G55020.1   Symbols: LOX1, ATLOX1   lipxygenase 1   chr1:20525798-20530143 FORWARD LENGTH=859                                        | 797 | 859 | 0         | 107.8  | 92.3 | 96.1 |
| Rsa1.0_00148.1.g6776.t1 | #                                                                                                                                                                                                                                                                                                            | #   | #    | #         | #      | #    | #    | -                                            | ----  | ----                 | #                                                                                                                                      | #   | #   | #         | #      | #    |      |
| Rsa1.0_00148.1.g6777.t1 | ref NP_176019.1  uncharacterized protein [Arabidopsis thaliana] gi 12321753 gb AA050913.1 AC069159.14 unknown protein [Arabidopsis thaliana] gi 110741625 dbj BAE98760.1   hypothetical protein [Arabidopsis thaliana] gi 332195244 gb AEE33365.1   uncharacterized protein AT1G56230 [Arabidopsis thaliana] | 751 | 752  | 0         | 100.1  | 85.6 | 92.1 | uncharacterized protein                      | gbpln | Arabidopsis thaliana | AT1G56230.1   Symbols:   Protein of unknown function (DUF1399)   chr1:21046111-21048959 REVERSE LENGTH=752                             | 751 | 752 | 0         | 100.1  | 85.6 | 92.1 |
| Rsa1.0_00148.1.g6778.t3 | #                                                                                                                                                                                                                                                                                                            | #   | #    | #         | #      | #    | #    | -                                            | ----  | ----                 | #                                                                                                                                      | #   | #   | #         | #      | #    |      |

|                         |                                                                                                                                                                                                                                                                                                                                                                           |      |      |           |        |      |      |                                                                |       |                      |                                                                                                                                                                                                                                                                          |      |      |           |       |      |      |
|-------------------------|---------------------------------------------------------------------------------------------------------------------------------------------------------------------------------------------------------------------------------------------------------------------------------------------------------------------------------------------------------------------------|------|------|-----------|--------|------|------|----------------------------------------------------------------|-------|----------------------|--------------------------------------------------------------------------------------------------------------------------------------------------------------------------------------------------------------------------------------------------------------------------|------|------|-----------|-------|------|------|
| Rsa1.0_00148.1.g6779.t1 | dbj BAB10503.1  retroelement pol polyprotein-like [Arabidopsis thaliana]                                                                                                                                                                                                                                                                                                  | 1361 | 1475 | 0         | 108.4  | 58.5 | 73.2 | retroelement pol polyprotein-like                              | gbpln | Arabidopsis thaliana | AT4G23160.1   Symbols: CRK8   cysteine-rich RLK (RECEPTOR-like protein kinase) 8   chr4:12129485-12134086 FORWARD LENGTH=1262                                                                                                                                            | 1361 | 1262 | 1.00E-172 | 92.7  | 20.6 | 25.8 |
| Rsa1.0_00148.1.g6780.t1 | gb EOA14487.1  hypothetical protein CARUB_v10027702mg [Capsella rubella]                                                                                                                                                                                                                                                                                                  | 190  | 187  | 3.00E-39  | 98.4   | 45.3 | 60.5 | hypothetical protein CARUB_v10027702mg                         | gbpln | Capsella rubella     | AT5G46980.1   Symbols:   Plant invertase/pectin methyltransferase inhibitor superfamily protein   chr5:19065453-19066007 REVERSE LENGTH=184                                                                                                                              | 190  | 184  | 6.00E-41  | 96.8  | 45.3 | 60.0 |
| Rsa1.0_00148.1.g6781.t1 | ref XP_002894632.1  phloem protein 2-B13 [Arabidopsis lyrata subsp. lyrata]   gi 297340474 gb EFH70891.1  phloem protein 2-B13 [Arabidopsis lyrata subsp. lyrata]                                                                                                                                                                                                         | 282  | 281  | 1.00E-133 | 99.6   | 84.0 | 89.7 | phloem protein 2-B13                                           | gbpln | Arabidopsis lyrata   | AT1G56250.1   Symbols: AtPP2-B14, PP2-B14   phloem protein 2-B14   chr1:21061746-21062844 REVERSE LENGTH=282                                                                                                                                                             | 282  | 282  | 1.00E-132 | 100.0 | 82.3 | 89.0 |
| Rsa1.0_00148.1.g6782.t1 | #                                                                                                                                                                                                                                                                                                                                                                         | #    | #    | #         | #      | #    | #    | -                                                              | ----  | ----                 | #                                                                                                                                                                                                                                                                        | #    | #    | #         | #     | #    | #    |
| Rsa1.0_00148.1.g6783.t1 | ref XP_002894633.1  hypothetical protein ARALYDRAFT.474790 [Arabidopsis lyrata subsp. lyrata]   gi 297340475 gb EFH70892.1  hypothetical protein ARALYDRAFT.474790 [Arabidopsis lyrata subsp. lyrata]                                                                                                                                                                     | 126  | 126  | 2.00E-55  | 100.0  | 84.9 | 91.3 | hypothetical protein ARALYDRAFT.474790                         | gbpln | Arabidopsis lyrata   | AT1G56260.1   Symbols:   unknown protein; Has 32 Blast hits to 32 proteins in 16 species: Archae - 0; Bacteria - 0; Metazoa - 2; Fungi - 0; Plants - 28; Viruses - 0; Other Eukaryotes - 2 (source: NCBI BLink).   chr1:21064647-21065577 REVERSE LENGTH=127             | 126  | 127  | 2.00E-56  | 100.8 | 83.3 | 90.5 |
| Rsa1.0_00149.1.g6784.t1 | ref XP_002891618.1  hypothetical protein ARALYDRAFT.474227 [Arabidopsis lyrata subsp. lyrata]   gi 297337460 gb EFH67877.1  hypothetical protein ARALYDRAFT.474227 [Arabidopsis lyrata subsp. lyrata]                                                                                                                                                                     | 81   | 353  | 8.00E-12  | 435.8  | 46.9 | 60.5 | hypothetical protein ARALYDRAFT.474227                         | gbpln | Arabidopsis lyrata   | AT1G51120.1   Symbols:   AP2/B3 transcription factor family protein   chr1:18938091-18939149 FORWARD LENGTH=352                                                                                                                                                          | 81   | 352  | 2.00E-13  | 434.6 | 44.4 | 61.7 |
| Rsa1.0_00149.1.g6785.t2 | gb EOA38742.1  hypothetical protein CARUB_v10010894mg [Capsella rubella]                                                                                                                                                                                                                                                                                                  | 405  | 423  | 0         | 104.4  | 92.3 | 96.8 | hypothetical protein CARUB_v10010894mg                         | gbpln | Capsella rubella     | AT1G50710.1   Symbols:   unknown protein; Has 109 Blast hits to 109 proteins in 44 species: Archae - 0; Bacteria - 2; Metazoa - 61; Fungi - 8; Plants - 36; Viruses - 0; Other Eukaryotes - 2 (source: NCBI BLink).   chr1:18784719-18787615 REVERSE LENGTH=423          | 405  | 423  | 0         | 104.4 | 92.6 | 96.5 |
| Rsa1.0_00149.1.g6786.t2 | gb EOA36626.1  hypothetical protein CARUB_v10011864mg [Capsella rubella]                                                                                                                                                                                                                                                                                                  | 474  | 510  | 0         | 107.6  | 86.9 | 92.4 | hypothetical protein CARUB_v10011864mg                         | gbpln | Capsella rubella     | AT1G47600.1   Symbols: BGLU34, TGG4   beta glucosidase 34   chr1:17491771-17494589 FORWARD LENGTH=511                                                                                                                                                                    | 474  | 511  | 0         | 107.8 | 81.9 | 88.0 |
| Rsa1.0_00149.1.g6787.t1 | ref XP_002891595.1  hypothetical protein ARALYDRAFT.474208 [Arabidopsis lyrata subsp. lyrata]   gi 297337437 gb EFH67854.1  hypothetical protein ARALYDRAFT.474208 [Arabidopsis lyrata subsp. lyrata]                                                                                                                                                                     | 1041 | 1047 | 0         | 100.6  | 84.8 | 91.2 | hypothetical protein ARALYDRAFT.474208                         | gbpln | Arabidopsis lyrata   | AT1G50840.1   Symbols: POLGAMMA2   polymerase gamma 2   chr1:18839277-18844313 FORWARD LENGTH=1050                                                                                                                                                                       | 1041 | 1050 | 0         | 100.9 | 83.3 | 90.9 |
| Rsa1.0_00149.1.g6788.t1 | ref NP_175204.1  putative F-box protein [Arabidopsis thaliana]   gi 75266610 sp Q9SXA0.1 FB42_ARATH RecName: Full=Putative F-box protein At1g47730   gi 5668790 gb AAD46016.1 AC007519_1 F16N3.1 [Arabidopsis thaliana]   gi 9802591 gb AAF99793.1 AC012463_10 T2E6.20 [Arabidopsis thaliana]   gi 332194084 gb AEE32205.1  putative F-box protein [Arabidopsis thaliana] | 389  | 391  | 1.00E-101 | 100.5  | 53.0 | 68.4 | putative F-box protein                                         | gbpln | Arabidopsis thaliana | AT1G47730.1   Symbols:   F-box and associated interaction domains-containing protein   chr1:17563931-17565106 REVERSE LENGTH=391                                                                                                                                         | 389  | 391  | 1.00E-104 | 100.5 | 53.0 | 68.4 |
| Rsa1.0_00149.1.g6789.t1 | gb AFK13834.1  putative PIF1 DNA helicase/replication protein A1-like protein [Beta vulgaris subsp. vulgaris]                                                                                                                                                                                                                                                             | 139  | 2037 | 2.00E-25  | 1465.5 | 41.0 | 59.7 | putative PIF1 DNA helicase/replication protein A1-like protein | gbpln | Beta vulgaris        | AT1G52950.1   Symbols:   Nucleic acid-binding, OB-fold-like protein   chr1:19725483-19728007 FORWARD LENGTH=566                                                                                                                                                          | 139  | 566  | 3.00E-18  | 407.2 | 31.7 | 51.8 |
| Rsa1.0_00149.1.g6790.t1 | ref XP_002894282.1  binding protein [Arabidopsis lyrata subsp. lyrata]   gi 297340124 gb EFH70541.1  binding protein [Arabidopsis lyrata subsp. lyrata]                                                                                                                                                                                                                   | 774  | 821  | 0         | 106.1  | 83.9 | 89.8 | binding protein                                                | gbpln | Arabidopsis lyrata   | AT1G50890.1   Symbols:   ARM repeat superfamily protein   chr1:18862295-18865752 REVERSE LENGTH=821                                                                                                                                                                      | 774  | 821  | 0         | 106.1 | 83.7 | 90.6 |
| Rsa1.0_00149.1.g6791.t1 | ref XP_002894283.1  hypothetical protein ARALYDRAFT.474212 [Arabidopsis lyrata subsp. lyrata]   gi 297340125 gb EFH70542.1  hypothetical protein ARALYDRAFT.474212 [Arabidopsis lyrata subsp. lyrata]                                                                                                                                                                     | 318  | 500  | 4.00E-91  | 157.2  | 60.7 | 66.4 | hypothetical protein ARALYDRAFT.474212                         | gbpln | Arabidopsis lyrata   | AT1G50910.1   Symbols:   unknown protein; Has 1105 Blast hits to 802 proteins in 217 species: Archae - 2; Bacteria - 177; Metazoa - 445; Fungi - 210; Plants - 58; Viruses - 6; Other Eukaryotes - 207 (source: NCBI BLink).   chr1:18867083-18869839 REVERSE LENGTH=500 | 318  | 500  | 1.00E-90  | 157.2 | 59.4 | 65.1 |

|                         |                                                                                                                                                                                                                    |     |      |           |       |      |      |                                          |       |                      |                                                                                                                                                                                                                                                                                                                                                                                                                                                         |     |     |           |       |      |      |
|-------------------------|--------------------------------------------------------------------------------------------------------------------------------------------------------------------------------------------------------------------|-----|------|-----------|-------|------|------|------------------------------------------|-------|----------------------|---------------------------------------------------------------------------------------------------------------------------------------------------------------------------------------------------------------------------------------------------------------------------------------------------------------------------------------------------------------------------------------------------------------------------------------------------------|-----|-----|-----------|-------|------|------|
| Rsa1.0_00149.1.g6792.t3 | refXP_002891601.1   hypothetical protein ARALYDRAFT_474213 [Arabidopsis lyrata subsp. lyrata] gi 297337443 gb EFH67860.1   hypothetical protein ARALYDRAFT_474213 [Arabidopsis lyrata subsp. lyrata]               | 179 | 195  | 2.00E-60  | 108.9 | 76.0 | 85.5 | hypothetical protein ARALYDRAFT_474213   | gbpln | Arabidopsis lyrata   | AT1G50930.1   Symbols:   unknown protein; BEST Arabidopsis thaliana protein match is: unknown protein (TAIR:AT3G20557.1). Has 215 Blast hits to 213 proteins in 63 species: Archae - 0; Bacteria - 2; Metazoa - 83; Fungi - 10; Plants - 45; Viruses - 5; Other Eukaryotes - 70 (source: NCBI BLINK).   chr1:18876898-18877706 FORWARD LENGTH=196                                                                                                       | 179 | 196 | 3.00E-54  | 109.5 | 74.9 | 83.8 |
| Rsa1.0_00149.1.g6793.t1 | refXP_002891603.1   predicted protein [Arabidopsis lyrata subsp. lyrata] gi 297337445 gb EFH67862.1   predicted protein [Arabidopsis lyrata subsp. lyrata]                                                         | 332 | 336  | 1.00E-159 | 101.2 | 80.7 | 89.8 | predicted protein                        | gbpln | Arabidopsis lyrata   | AT1G50960.1   Symbols: ATGA20X7, GA20X7   gibberellin 2-oxidase 7   chr1:18889549-18891719 FORWARD LENGTH=336                                                                                                                                                                                                                                                                                                                                           | 332 | 336 | 1.00E-160 | 101.2 | 80.1 | 89.5 |
| Rsa1.0_00149.1.g6794.t2 | refXP_002891604.1   hypothetical protein ARALYDRAFT_892049 [Arabidopsis lyrata subsp. lyrata] gi 297337446 gb EFH67863.1   hypothetical protein ARALYDRAFT_892049 [Arabidopsis lyrata subsp. lyrata]               | 228 | 491  | 2.00E-13  | 215.4 | 24.1 | 33.8 | hypothetical protein ARALYDRAFT_892049   | gbpln | Arabidopsis lyrata   | #                                                                                                                                                                                                                                                                                                                                                                                                                                                       | #   | #   | #         | #     | #    |      |
| Rsa1.0_00149.1.g6795.t1 | gb EOA36310.1   hypothetical protein CARUB_v10010618mg [Capsella rubella]                                                                                                                                          | 133 | 133  | 4.00E-67  | 100.0 | 96.2 | 98.5 | hypothetical protein CARUB_v10010618mg   | gbpln | Capsella rubella     | AT1G51060.1   Symbols: HTA10   histone H2A 10   chr1:18926948-18927443 FORWARD LENGTH=132                                                                                                                                                                                                                                                                                                                                                               | 133 | 132 | 8.00E-67  | 99.2  | 94.0 | 97.0 |
| Rsa1.0_00149.1.g6796.t1 | refXP_002891614.1   basic helix-loop-helix family protein [Arabidopsis lyrata subsp. lyrata] gi 297337456 gb EFH67873.1   basic helix-loop-helix family protein [Arabidopsis lyrata subsp. lyrata]                 | 228 | 226  | 1.00E-107 | 99.1  | 86.4 | 91.7 | basic helix-loop-helix family protein    | gbpln | Arabidopsis lyrata   | AT1G51070.1   Symbols: bHLH115   basic helix-loop-helix (bHLH) DNA-binding superfamily protein   chr1:18928018-18929513 FORWARD LENGTH=226                                                                                                                                                                                                                                                                                                              | 228 | 226 | 1.00E-107 | 99.1  | 85.5 | 91.2 |
| Rsa1.0_00149.1.g6797.t1 | refXP_002891618.1   hypothetical protein ARALYDRAFT_474227 [Arabidopsis lyrata subsp. lyrata] gi 297337460 gb EFH67877.1   hypothetical protein ARALYDRAFT_474227 [Arabidopsis lyrata subsp. lyrata]               | 355 | 353  | 1.00E-143 | 99.4  | 74.6 | 83.4 | hypothetical protein ARALYDRAFT_474227   | gbpln | Arabidopsis lyrata   | AT1G51120.1   Symbols:   AP2/B3 transcription factor family protein   chr1:18938091-18939149 FORWARD LENGTH=352                                                                                                                                                                                                                                                                                                                                         | 355 | 352 | 1.00E-145 | 99.2  | 73.5 | 83.9 |
| Rsa1.0_00149.1.g6798.t1 | gb EOA40599.1   hypothetical protein CARUB_v10009330mg [Capsella rubella]                                                                                                                                          | 397 | 402  | 1.00E-168 | 101.3 | 78.8 | 86.4 | hypothetical protein CARUB_v10009330mg   | gbpln | Capsella rubella     | AT1G51130.1   Symbols:   Nse4, component of Smc5/6 DNA repair complex   chr1:18939480-18941560 REVERSE LENGTH=403                                                                                                                                                                                                                                                                                                                                       | 397 | 403 | 1.00E-168 | 101.5 | 76.6 | 85.9 |
| Rsa1.0_00149.1.g6799.t1 | gb EOA39251.1   hypothetical protein CARUB_v10012248mg [Capsella rubella]                                                                                                                                          | 563 | 570  | 0         | 101.2 | 91.8 | 95.0 | hypothetical protein CARUB_v10012248mg   | gbpln | Capsella rubella     | AT1G51190.1   Symbols: PLT2   Integrase-type DNA-binding superfamily protein   chr1:18977517-18980305 FORWARD LENGTH=568                                                                                                                                                                                                                                                                                                                                | 563 | 568 | 0         | 100.9 | 90.9 | 93.8 |
| Rsa1.0_00149.1.g6800.t1 | gb EOA39443.1   hypothetical protein CARUB_v10012613mg [Capsella rubella]                                                                                                                                          | 345 | 345  | 1.00E-168 | 100.0 | 88.7 | 92.5 | hypothetical protein CARUB_v10012613mg   | gbpln | Capsella rubella     | AT1G51220.1   Symbols: WIP5   WIP domain protein 5   chr1:18989925-18992034 REVERSE LENGTH=337                                                                                                                                                                                                                                                                                                                                                          | 345 | 337 | 1.00E-159 | 97.7  | 82.9 | 87.8 |
| Rsa1.0_00149.1.g6801.t1 | #                                                                                                                                                                                                                  | #   | #    | #         | #     | #    | -    | ----                                     | ----  | #                    | #                                                                                                                                                                                                                                                                                                                                                                                                                                                       | #   | #   | #         | #     | #    |      |
| Rsa1.0_00149.1.g6802.t1 | gb EOA26685.1   hypothetical protein CARUB_v10022767mg [Capsella rubella]                                                                                                                                          | 708 | 691  | 0         | 97.6  | 76.7 | 85.5 | hypothetical protein CARUB_v10022767mg   | gbpln | Capsella rubella     | AT2G22410.1   Symbols: SLO1   SLOW GROWTH 1   chr2:9509035-9511080 FORWARD LENGTH=681                                                                                                                                                                                                                                                                                                                                                                   | 708 | 681 | 0         | 96.2  | 74.6 | 83.1 |
| Rsa1.0_00149.1.g6803.t2 | gb EOA37613.1   hypothetical protein CARUB_v10012002mg [Capsella rubella]                                                                                                                                          | 555 | 376  | 0         | 67.7  | 60.5 | 64.3 | hypothetical protein CARUB_v10012002mg   | gbpln | Capsella rubella     | AT1G51260.1   Symbols: LPAT3   lysophosphatidyl acyltransferase 3   chr1:19003460-19005512 REVERSE LENGTH=376                                                                                                                                                                                                                                                                                                                                           | 555 | 376 | 0         | 67.7  | 60.5 | 63.8 |
| Rsa1.0_00149.1.g6804.t2 | gb AFW19998.1   aluminum-activated citrate transporter [Brassica napus]                                                                                                                                            | 518 | 519  | 0         | 100.2 | 94.2 | 96.1 | aluminum-activated citrate transporter   | gbpln | Brassica napus       | AT1G51340.2   Symbols:   MATE efflux family protein   chr1:19032021-19034681 FORWARD LENGTH=515                                                                                                                                                                                                                                                                                                                                                         | 518 | 515 | 0         | 99.4  | 90.0 | 93.4 |
| Rsa1.0_00149.1.g6805.t2 | #                                                                                                                                                                                                                  | #   | #    | #         | #     | #    | -    | ----                                     | ----  | #                    | #                                                                                                                                                                                                                                                                                                                                                                                                                                                       | #   | #   | #         | #     | #    |      |
| Rsa1.0_00149.1.g6806.t1 | refNP_683417.1   uncharacterized protein [Arabidopsis thaliana] gi 89001065 gb ABD59122.1   At1g51355 [Arabidopsis thaliana] gi 332194534 gb AEE32655.1   uncharacterized protein AT1G51355 [Arabidopsis thaliana] | 116 | 116  | 7.00E-27  | 100.0 | 70.7 | 81.0 | uncharacterized protein                  | gbpln | Arabidopsis thaliana | AT1G51355.1   Symbols:   unknown protein; FUNCTIONS IN: molecular_function unknown; INVOLVED IN: biological_process unknown; LOCATED IN: chloroplast; BEST Arabidopsis thaliana protein match is: unknown protein (TAIR:AT3G20898.1); Has 52 Blast hits to 52 proteins in 9 species: Archae - 0; Bacteria - 0; Metazoa - 2; Fungi - 0; Plants - 50; Viruses - 0; Other Eukaryotes - 0 (source: NCBI BLINK).   chr1:19041475-19041825 FORWARD LENGTH=116 | 116 | 116 | 1.00E-29  | 100.0 | 70.7 | 81.0 |
| Rsa1.0_00149.1.g6807.t1 | emb CAB39638.1   RNA-directed DNA polymerase-like protein [Arabidopsis thaliana] gi 7267666 emb CAB78094.1   RNA-directed DNA polymerase-like protein [Arabidopsis thaliana]                                       | 321 | 1274 | 1.00E-43  | 396.9 | 32.7 | 48.3 | RNA-directed DNA polymerase-like protein | gbpln | Arabidopsis thaliana | AT1G10000.1   Symbols:   Ribonuclease H-like superfamily protein   chr1:3263877-3264788 REVERSE LENGTH=303                                                                                                                                                                                                                                                                                                                                              | 321 | 303 | 1.00E-43  | 94.4  | 34.0 | 46.7 |

|                         |                                                                                                                                                                                                                                                                                                                                                                       |     |     |           |       |      |      |                                                     |       |                      |                                                                                                                                                                                                                                                                                                                                                                                                            |     |     |           |       |      |      |
|-------------------------|-----------------------------------------------------------------------------------------------------------------------------------------------------------------------------------------------------------------------------------------------------------------------------------------------------------------------------------------------------------------------|-----|-----|-----------|-------|------|------|-----------------------------------------------------|-------|----------------------|------------------------------------------------------------------------------------------------------------------------------------------------------------------------------------------------------------------------------------------------------------------------------------------------------------------------------------------------------------------------------------------------------------|-----|-----|-----------|-------|------|------|
| Rsa1.0_00149.1.g6808.t1 | gb EOA28714.1  hypothetical protein CARUB_v10024942mg [Capsella rubella]                                                                                                                                                                                                                                                                                              | 206 | 270 | 4.00E-64  | 131.1 | 64.6 | 78.6 | hypothetical protein CARUB_v10024942mg              | gbpln | Capsella rubella     | AT2G31670.1   Symbols:   Stress responsive alpha-beta barrel domain protein   chr2:13472699-13473490 REVERSE LENGTH=263                                                                                                                                                                                                                                                                                    | 206 | 263 | 3.00E-64  | 127.7 | 61.7 | 77.2 |
| Rsa1.0_00149.1.g6809.t1 | gb EOA33008.1  hypothetical protein CARUB_v10016338mg [Capsella rubella]                                                                                                                                                                                                                                                                                              | 412 | 430 | 0         | 104.4 | 90.0 | 93.4 | hypothetical protein CARUB_v10016338mg              | gbpln | Capsella rubella     | AT5G01990.1   Symbols:   Auxin efflux carrier family protein   chr5:377373-379600 REVERSE LENGTH=431                                                                                                                                                                                                                                                                                                       | 412 | 431 | 0         | 104.6 | 89.1 | 93.7 |
| Rsa1.0_00149.1.g6810.t1 | ref XP_002891638.1  hypothetical protein ARALYDRAFT_314503 [Arabidopsis lyrata subsp. lyrata] gi 297337480 gb EFH67897.1                                                                                                                                                                                                                                              | 318 | 796 | 1.00E-178 | 250.3 | 94.0 | 97.5 | hypothetical protein ARALYDRAFT_314503              | gbpln | Arabidopsis lyrata   | AT1G51410.1   Symbols:   NAD(P)-binding Rossmann-fold superfamily protein   chr1:19059885-19061424 FORWARD LENGTH=325                                                                                                                                                                                                                                                                                      | 318 | 325 | 1.00E-178 | 102.2 | 95.0 | 98.7 |
| Rsa1.0_00149.1.g6811.t1 | ref XP_002894316.1  predicted protein [Arabidopsis lyrata subsp. lyrata] gi 297340158 gb EFH70575.1  predicted protein [Arabidopsis lyrata subsp. lyrata]                                                                                                                                                                                                             | 423 | 424 | 0         | 100.2 | 85.3 | 92.4 | predicted protein                                   | gbpln | Arabidopsis lyrata   | AT1G51420.1   Symbols: ATSP1, SPP1   sucrose-phosphatase 1   chr1:19064852-19066704 REVERSE LENGTH=423                                                                                                                                                                                                                                                                                                     | 423 | 423 | 0         | 100.0 | 84.6 | 92.4 |
| Rsa1.0_00149.1.g6812.t1 | gb EOA36626.1  hypothetical protein CARUB_v10011864mg [Capsella rubella]                                                                                                                                                                                                                                                                                              | 441 | 510 | 0         | 115.6 | 73.0 | 77.8 | hypothetical protein CARUB_v10011864mg              | gbpln | Capsella rubella     | AT1G47600.1   Symbols: BGLU34, TGG4   beta glucosidase 34   chr1:17491771-17494589 FORWARD LENGTH=511                                                                                                                                                                                                                                                                                                      | 441 | 511 | 0         | 115.9 | 71.4 | 76.2 |
| Rsa1.0_00149.1.g6813.t1 | gb EOA36626.1  hypothetical protein CARUB_v10011864mg [Capsella rubella]                                                                                                                                                                                                                                                                                              | 483 | 510 | 0         | 105.6 | 82.6 | 87.6 | hypothetical protein CARUB_v10011864mg              | gbpln | Capsella rubella     | AT1G47600.1   Symbols: BGLU34, TGG4   beta glucosidase 34   chr1:17491771-17494589 FORWARD LENGTH=511                                                                                                                                                                                                                                                                                                      | 483 | 511 | 0         | 105.8 | 80.5 | 85.7 |
| Rsa1.0_00149.1.g6814.t1 | dbj BAJ33599.1  unnamed protein product [Theilingella halophila]                                                                                                                                                                                                                                                                                                      | 760 | 694 | 0         | 91.3  | 81.2 | 84.7 | unnamed protein product                             | ----  | ----                 | AT1G51500.1   Symbols: CER5, D3, ABCG12, WBC12, ATWBC12   ABC-2 type transporter family protein   chr1:19097967-19100972 REVERSE LENGTH=687                                                                                                                                                                                                                                                                | 760 | 687 | 0         | 90.4  | 80.4 | 83.9 |
| Rsa1.0_00150.1.g6815.t1 | #                                                                                                                                                                                                                                                                                                                                                                     | #   | #   | #         | #     | #    | #    | -                                                   | ----  | ----                 | #                                                                                                                                                                                                                                                                                                                                                                                                          | #   | #   | #         | #     | #    |      |
| Rsa1.0_00150.1.g6816.t1 | gb AAF99736.1 AC004557_15 F17L21.21 [Arabidopsis thaliana]                                                                                                                                                                                                                                                                                                            | 181 | 360 | 1.00E-34  | 198.9 | 40.9 | 49.2 | F17L21.21                                           | gbpln | Arabidopsis thaliana | AT1G27420.1   Symbols:   Galactose oxidase/kelch repeat superfamily protein   chr1:9519108-9520520 FORWARD LENGTH=346                                                                                                                                                                                                                                                                                      | 181 | 346 | 4.00E-37  | 191.2 | 40.9 | 49.2 |
| Rsa1.0_00150.1.g6817.t1 | ref NP_564283.1  uncharacterized protein [Arabidopsis thaliana] gi 14423400 gb AAK62382.1 AF386937.1 Unknown protein [Arabidopsis thaliana] gi 24899683 gb AAN65056.1  Unknown protein [Arabidopsis thaliana] gi 26452099 dbj BAC43139.1  unknown protein [Arabidopsis thaliana] gi 332192708 gb AEE30829.1  uncharacterized protein AT1G27435 [Arabidopsis thaliana] | 61  | 81  | 7.00E-17  | 132.8 | 68.9 | 72.1 | uncharacterized protein                             | gbpln | Arabidopsis thaliana | AT1G27435.1   Symbols:   unknown protein; Has 16 Blast hits to 16 proteins in 8 species: Archae - 0; Bacteria - 0; Metazoa - 0; Fungi - 0; Plants - 16; Viruses - 0; Other Eukaryotes - 0 (source: NCBI BLINK).   chr1:9527956-9528814 REVERSE LENGTH=81                                                                                                                                                   | 61  | 81  | 1.00E-19  | 132.8 | 68.9 | 72.1 |
| Rsa1.0_00150.1.g6818.t1 | ref XP_004139852.1  PREDICTED: uncharacterized protein LOC101219957 [Cucumis sativus]                                                                                                                                                                                                                                                                                 | 854 | 766 | 0         | 89.7  | 42.2 | 57.4 | PREDICTED: uncharacterized protein LOC101219957     | gbpln | Cucumis sativus      | AT5G33406.1   Symbols:   hAT dimerisation domain-containing protein / transposase-related   chr5:12676126-12678403 REVERSE LENGTH=509                                                                                                                                                                                                                                                                      | 854 | 509 | 1.00E-123 | 59.6  | 25.5 | 30.0 |
| Rsa1.0_00150.1.g6819.t1 | gb AAC69114.1  putative gag-protease polyprotein [Arabidopsis thaliana]                                                                                                                                                                                                                                                                                               | 387 | 627 | 5.00E-57  | 162.0 | 35.4 | 52.7 | putative gag-protease polyprotein                   | gbpln | Arabidopsis thaliana | #                                                                                                                                                                                                                                                                                                                                                                                                          | #   | #   | #         | #     | #    |      |
| Rsa1.0_00150.1.g6820.t1 | #                                                                                                                                                                                                                                                                                                                                                                     | #   | #   | #         | #     | #    | #    | -                                                   | ----  | ----                 | #                                                                                                                                                                                                                                                                                                                                                                                                          | #   | #   | #         | #     | #    |      |
| Rsa1.0_00150.1.g6821.t1 | #                                                                                                                                                                                                                                                                                                                                                                     | #   | #   | #         | #     | #    | #    | -                                                   | ----  | ----                 | #                                                                                                                                                                                                                                                                                                                                                                                                          | #   | #   | #         | #     | #    |      |
| Rsa1.0_00150.1.g6822.t1 | gb EOA40460.1  hypothetical protein CARUB_v10009184mg [Capsella rubella]                                                                                                                                                                                                                                                                                              | 834 | 434 | 0         | 52.0  | 46.8 | 47.4 | hypothetical protein CARUB_v10009184mg              | gbpln | Capsella rubella     | AT1G27440.1   Symbols: GUT2, IRX10, ATGUT1   Exostosin family protein   chr1:9529265-9531213 REVERSE LENGTH=412                                                                                                                                                                                                                                                                                            | 834 | 412 | 0         | 49.4  | 46.2 | 47.2 |
| Rsa1.0_00150.1.g6823.t1 | ref XP_002890730.1  lecithin:cholesterol acyltransferase family protein [Arabidopsis lyrata subsp. lyrata] gi 297336572 gb EFH66989.1  lecithin:cholesterol acyltransferase family protein [Arabidopsis lyrata subsp. lyrata]                                                                                                                                         | 443 | 432 | 0         | 97.5  | 79.7 | 87.8 | lecithin:cholesterol acyltransferase family protein | gbpln | Arabidopsis lyrata   | AT1G27480.1   Symbols:   alpha/beta-Hydrolases superfamily protein   chr1:9544807-9546168 FORWARD LENGTH=432                                                                                                                                                                                                                                                                                               | 443 | 432 | 0         | 97.5  | 78.8 | 86.2 |
| Rsa1.0_00150.1.g6824.t1 | gb EOA37527.1  hypothetical protein CARUB_v10011729mg [Capsella rubella]                                                                                                                                                                                                                                                                                              | 174 | 174 | 1.00E-95  | 100.0 | 96.0 | 97.7 | hypothetical protein CARUB_v10011729mg              | gbpln | Capsella rubella     | AT1G27530.1   Symbols:   CONTAINS InterPro DOMAIN/s: Ubiquitin-conjugating enzyme/RWD-like (InterPro:IPR016135). Ubiquitin-fold modifier-conjugating enzyme 1 (InterPro:IPR014806); Has 269 Blast hits to 269 proteins in 110 species: Archae - 0; Bacteria - 0; Metazoa - 175; Fungi - 0; Plants - 42; Viruses - 0; Other Eukaryotes - 52 (source: NCBI BLINK).   chr1:9562761-9563887 REVERSE LENGTH=174 | 174 | 174 | 5.00E-97  | 100.0 | 94.8 | 97.1 |
| Rsa1.0_00150.1.g6825.t3 | gb EOA37898.1  hypothetical protein CARUB_v10009365mg [Capsella rubella]                                                                                                                                                                                                                                                                                              | 417 | 395 | 1.00E-177 | 94.7  | 72.2 | 81.5 | hypothetical protein CARUB_v10009365mg              | gbpln | Capsella rubella     | AT1G27600.2   Symbols: IRX9-L, 19H   Nucleotide-diphospho-sugar transferases superfamily protein   chr1:9604083-9605881 REVERSE LENGTH=394                                                                                                                                                                                                                                                                 | 417 | 394 | 1.00E-178 | 94.5  | 71.7 | 79.9 |

|                         |                                                                                                                                                                                                                                                                                                                                   |      |      |           |       |      |      |                                                 |       |                      |                                                                                                                                                                                                                                                                                                                                                                                                                                                                                                                                          |      |      |           |       |      |      |
|-------------------------|-----------------------------------------------------------------------------------------------------------------------------------------------------------------------------------------------------------------------------------------------------------------------------------------------------------------------------------|------|------|-----------|-------|------|------|-------------------------------------------------|-------|----------------------|------------------------------------------------------------------------------------------------------------------------------------------------------------------------------------------------------------------------------------------------------------------------------------------------------------------------------------------------------------------------------------------------------------------------------------------------------------------------------------------------------------------------------------------|------|------|-----------|-------|------|------|
| Rsa1.0_00150.1.g6826.t1 | dbj BAJ34257.1  unnamed protein product [Theilungiella halophila]                                                                                                                                                                                                                                                                 | 239  | 308  | 3.00E-97  | 128.9 | 91.6 | 94.1 | unnamed protein product                         | ----  | ----                 | AT1G27650.2   Symbols: ATU2AF35A   U2 snRNP auxiliary factor small subunit, putative   chr1:9615302-9616042 FORWARD LENGTH=246                                                                                                                                                                                                                                                                                                                                                                                                           | 239  | 246  | 2.00E-93  | 102.9 | 86.2 | 89.1 |
| Rsa1.0_00150.1.g6827.t4 | dbj BAAS5462.1  transposon-like ORF [Brassica rapa]                                                                                                                                                                                                                                                                               | 460  | 703  | 1.00E-101 | 152.8 | 44.1 | 50.7 | transposon-like ORF                             | gbpln | Brassica rapa        | #                                                                                                                                                                                                                                                                                                                                                                                                                                                                                                                                        | #    | #    | #         | #     | #    | #    |
| Rsa1.0_00150.1.g6828.t1 | #                                                                                                                                                                                                                                                                                                                                 | #    | #    | #         | #     | #    | #    | -                                               | ----  | ----                 | #                                                                                                                                                                                                                                                                                                                                                                                                                                                                                                                                        | #    | #    | #         | #     | #    | #    |
| Rsa1.0_00150.1.g6829.t1 | ref XP_004246844.1  PREDICTED: uncharacterized protein LOC101268024 [Solanum lycopersicum]                                                                                                                                                                                                                                        | 290  | 584  | 4.00E-37  | 201.4 | 31.0 | 43.4 | PREDICTED: uncharacterized protein LOC101268024 | gbpln | Solanum lycopersicum | #                                                                                                                                                                                                                                                                                                                                                                                                                                                                                                                                        | #    | #    | #         | #     | #    | #    |
| Rsa1.0_00150.1.g6830.t1 | #                                                                                                                                                                                                                                                                                                                                 | #    | #    | #         | #     | #    | #    | -                                               | ----  | ----                 | AT1G27710.2   Symbols:   Glycine-rich protein family   chr1:9642550-9643188 FORWARD LENGTH=206                                                                                                                                                                                                                                                                                                                                                                                                                                           | 155  | 206  | 6.00E-11  | 132.9 | 26.5 | 28.4 |
| Rsa1.0_00150.1.g6831.t4 | ref NP_174093.3  TBP-associated factor 4B [Arabidopsis thaliana]<br>gi 38490051 gb AAR21619.1  TATA-binding protein associated factor 4 [Arabidopsis thaliana]<br>gi 332192748 gb AEE30869.1  TBP-associated factor 4B [Arabidopsis thaliana]                                                                                     | 716  | 720  | 1.00E-134 | 100.6 | 37.8 | 44.8 | TBP-associated factor 4B                        | gbpln | Arabidopsis thaliana | AT1G27720.1   Symbols: TAF4, TAF4B   TBP-associated factor 4B   chr1:9643351-9647376 REVERSE LENGTH=720                                                                                                                                                                                                                                                                                                                                                                                                                                  | 716  | 720  | 1.00E-137 | 100.6 | 37.8 | 44.8 |
| Rsa1.0_00150.1.g6832.t1 | #                                                                                                                                                                                                                                                                                                                                 | #    | #    | #         | #     | #    | #    | -                                               | ----  | ----                 | #                                                                                                                                                                                                                                                                                                                                                                                                                                                                                                                                        | #    | #    | #         | #     | #    | #    |
| Rsa1.0_00150.1.g6833.t1 | ref NP_174109.2  ATP-dependent DNA helicase Q-like 5 [Arabidopsis thaliana]<br>gi 298289257 sp Q0WVW7.2 RQL5 ARAT H RecName: Full=ATP-dependent DNA helicase Q-like 5; AltName: Full=RecQ-like protein 5; Short=AtRecQ5; Short=AtRecQ15<br>gi 332192766 gb AEE30887.1  ATP-dependent DNA helicase Q-like 5 [Arabidopsis thaliana] | 904  | 911  | 0         | 100.8 | 83.0 | 88.8 | ATP-dependent DNA helicase Q-like 5             | gbpln | Arabidopsis thaliana | AT1G27880.1   Symbols:   DEAD/DEAH box RNA helicase family protein   chr1:9708940-9713901 FORWARD LENGTH=911                                                                                                                                                                                                                                                                                                                                                                                                                             | 904  | 911  | 0         | 100.8 | 83.0 | 88.8 |
| Rsa1.0_00150.1.g6834.t1 | gb AAG09097.1 AC009323.8 Putative retroelement polyprotein [Arabidopsis thaliana]                                                                                                                                                                                                                                                 | 635  | 1486 | 1.00E-158 | 234.0 | 47.4 | 58.7 | Putative retroelement polyprotein               | gbpln | Arabidopsis thaliana | AT4G23160.1   Symbols: CRK8   cysteine-rich RLK (RECEPTOR-like protein kinase) 8   chr4:12129485-12134086 FORWARD LENGTH=1262                                                                                                                                                                                                                                                                                                                                                                                                            | 635  | 1262 | 6.00E-87  | 198.7 | 28.7 | 42.0 |
| Rsa1.0_00150.1.g6835.t1 | #                                                                                                                                                                                                                                                                                                                                 | #    | #    | #         | #     | #    | #    | -                                               | ----  | ----                 | #                                                                                                                                                                                                                                                                                                                                                                                                                                                                                                                                        | #    | #    | #         | #     | #    | #    |
| Rsa1.0_00150.1.g6836.t1 | gb AAD19784.1  putative retroelement pol polyprotein [Arabidopsis thaliana]                                                                                                                                                                                                                                                       | 2135 | 1501 | 0         | 70.3  | 36.6 | 46.6 | putative retroelement pol polyprotein           | gbpln | Arabidopsis thaliana | AT4G23160.1   Symbols: CRK8   cysteine-rich RLK (RECEPTOR-like protein kinase) 8   chr4:12129485-12134086 FORWARD LENGTH=1262                                                                                                                                                                                                                                                                                                                                                                                                            | 2135 | 1262 | 1.00E-135 | 59.1  | 11.3 | 16.2 |
| Rsa1.0_00150.1.g6837.t1 | gb ABD65636.1  hypothetical protein 23.t00055 [Brassica oleracea]                                                                                                                                                                                                                                                                 | 537  | 414  | 1.00E-75  | 77.1  | 28.7 | 32.2 | hypothetical protein 23.t00055                  | gbpln | Brassica oleracea    | #                                                                                                                                                                                                                                                                                                                                                                                                                                                                                                                                        | #    | #    | #         | #     | #    | #    |
| Rsa1.0_00150.1.g6838.t1 | gb ABL97965.1  putative nuclear transport factor 2 [Brassica rapa]                                                                                                                                                                                                                                                                | 123  | 123  | 2.00E-66  | 100.0 | 99.2 | 99.2 | putative nuclear transport factor 2             | gbpln | Brassica rapa        | AT1G27970.1   Symbols: NTF2B   nuclear transport factor 2B   chr1:9746921-9747787 FORWARD LENGTH=126                                                                                                                                                                                                                                                                                                                                                                                                                                     | 123  | 126  | 6.00E-68  | 102.4 | 96.7 | 99.2 |
| Rsa1.0_00150.1.g6839.t1 | ref XP_002893503.1  zinc finger (B-box type) family protein [Arabidopsis lyrata subsp. lyrata]<br>gi 297339345 gb EFH69762.1  zinc finger (B-box type) family protein [Arabidopsis lyrata subsp. lyrata]                                                                                                                          | 364  | 428  | 1.00E-124 | 117.6 | 67.9 | 75.0 | zinc finger (B-box type) family protein         | gbpln | Arabidopsis lyrata   | AT1G28050.1   Symbols:   B-box type zinc finger protein with CCT domain   chr1:9775768-9777657 REVERSE LENGTH=433                                                                                                                                                                                                                                                                                                                                                                                                                        | 364  | 433  | 1.00E-113 | 119.0 | 66.8 | 74.5 |
| Rsa1.0_00151.1.g6840.t1 | #                                                                                                                                                                                                                                                                                                                                 | #    | #    | #         | #     | #    | #    | -                                               | ----  | ----                 | #                                                                                                                                                                                                                                                                                                                                                                                                                                                                                                                                        | #    | #    | #         | #     | #    | #    |
| Rsa1.0_00151.1.g6841.t2 | dbj BAB02733.1  transposase-like protein [Arabidopsis thaliana]                                                                                                                                                                                                                                                                   | 452  | 554  | 3.00E-84  | 122.6 | 48.0 | 61.1 | transposase-like protein                        | gbpln | Arabidopsis thaliana | AT3G42170.1   Symbols:   BED zinc finger hAT family dimerisation domain   chr3:14321838-14323928 FORWARD LENGTH=696                                                                                                                                                                                                                                                                                                                                                                                                                      | 452  | 696  | 4.00E-17  | 154.0 | 16.6 | 27.9 |
| Rsa1.0_00151.1.g6842.t3 | ref XP_002885200.1  methyltransferase family protein [Arabidopsis lyrata subsp. lyrata]<br>gi 2973328896 gb EFH61459.1  methyltransferase family protein [Arabidopsis lyrata subsp. lyrata]                                                                                                                                       | 702  | 743  | 0         | 105.8 | 77.6 | 86.2 | methyltransferase family protein                | gbpln | Arabidopsis lyrata   | AT3G17310.1   Symbols: DRM3, AtDRM3   S-adenosyl-L-methionine-dependent methyltransferases superfamily protein   chr3:5909294-5912838 REVERSE LENGTH=710                                                                                                                                                                                                                                                                                                                                                                                 | 702  | 710  | 0         | 101.1 | 77.2 | 85.6 |
| Rsa1.0_00151.1.g6843.t1 | ref XP_002883056.1  hypothetical protein ARALYDRAFT_341872 [Arabidopsis lyrata subsp. lyrata]<br>gi 297328896 gb EFH59315.1  hypothetical protein ARALYDRAFT_341872 [Arabidopsis lyrata subsp. lyrata]                                                                                                                            | 295  | 299  | 1.00E-113 | 101.4 | 66.4 | 77.6 | hypothetical protein ARALYDRAFT_341872          | gbpln | Arabidopsis lyrata   | AT3G17350.1   Symbols:   unknown protein; FUNCTIONS IN: molecular_function unknown; INVOLVED IN: biological_process unknown; LOCATED IN: endomembrane system; EXPRESSED IN: 19 plant structures; EXPRESSED DURING: 13 growth stages; BEST Arabidopsis thaliana protein match is: unknown protein (TAIR:AT5G50290.1); Has 203 Blast hits to 203 proteins in 13 species: Archae - 0; Bacteria - 0; Metazoa - 0; Fungi - 0; Plants - 203; Viruses - 0; Other Eukaryotes - 0 (source: NCBI BLINK).   chr3:5934111-5935276 FORWARD LENGTH=301 | 295  | 301  | 1.00E-113 | 102.0 | 66.8 | 76.3 |



|                         |                                                                                                                                                                                                                                                                                                                                                                                           |      |      |           |       |      |      |                                                       |       |                      |                                                                                                                                                                                                                                                                                                                                                                                                                                                                                                                                         |      |      |           |       |      |      |
|-------------------------|-------------------------------------------------------------------------------------------------------------------------------------------------------------------------------------------------------------------------------------------------------------------------------------------------------------------------------------------------------------------------------------------|------|------|-----------|-------|------|------|-------------------------------------------------------|-------|----------------------|-----------------------------------------------------------------------------------------------------------------------------------------------------------------------------------------------------------------------------------------------------------------------------------------------------------------------------------------------------------------------------------------------------------------------------------------------------------------------------------------------------------------------------------------|------|------|-----------|-------|------|------|
| Rsa1.0_00151.1.g6844.t1 | ref[XP_002883056.1] hypothetical protein ARALYDRAFT_341872 [Arabidopsis lyrata subsp. lyrata] gi 29732890 gb EFH59315.1  hypothetical protein ARALYDRAFT_341872 [Arabidopsis lyrata subsp. lyrata]                                                                                                                                                                                        | 295  | 299  | 1.00E-110 | 101.4 | 66.1 | 77.6 | hypothetical protein ARALYDRAFT_341872                | gbpln | Arabidopsis lyrata   | AT3G17350.1   Symbols:   unknown protein; FUNCTIONS IN: molecular function unknown; INVOLVED IN: biological process unknown; LOCATED IN: endomembrane system; EXPRESSED IN: 19 plant structures; EXPRESSED DURING: 13 growth stages; BEST Arabidopsis thaliana protein match is: unknown protein (TAIR:AT5G0290.1); Has 203 Blast hits to 203 proteins in 13 species: Archae - 0; Bacteria - 0; Metazoa - 0; Fungi - 0; Plants - 203; Viruses - 0; Other Eukaryotes - 0 (source: NCBI BLink).   chr3:5934111-5935276 FORWARD LENGTH=301 | 295  | 301  | 1.00E-108 | 102.0 | 65.4 | 75.6 |
| Rsa1.0_00151.1.g6845.t1 | gb[EOA29710.1] hypothetical protein CARUB_v10012795mg [Capsella rubella]                                                                                                                                                                                                                                                                                                                  | 1930 | 2139 | 0         | 110.8 | 56.1 | 62.4 | hypothetical protein CARUB_v10012795mg                | gbpln | Capsella rubella     | AT3G17360.1   Symbols: POK1   phragmoplast orienting kinesin 1   chr3:5936108-5946205 FORWARD LENGTH=2066                                                                                                                                                                                                                                                                                                                                                                                                                               | 1930 | 2066 | 0         | 107.0 | 51.2 | 56.7 |
| Rsa1.0_00151.1.g6846.t1 | ref[XP_002883060.1] hypothetical protein ARALYDRAFT_479217 [Arabidopsis lyrata subsp. lyrata] gi 29732890 gb EFH59319.1  hypothetical protein ARALYDRAFT_479217 [Arabidopsis lyrata subsp. lyrata]                                                                                                                                                                                        | 364  | 363  | 0         | 99.7  | 94.2 | 96.7 | hypothetical protein ARALYDRAFT_479217                | gbpln | Arabidopsis lyrata   | AT3G17410.1   Symbols:   Protein kinase superfamily protein   chr3:5956601-5958882 FORWARD LENGTH=364                                                                                                                                                                                                                                                                                                                                                                                                                                   | 364  | 364  | 0         | 100.0 | 91.5 | 94.8 |
| Rsa1.0_00151.1.g6847.t2 | gb[EOA30510.1] hypothetical protein CARUB_v10013633mg [Capsella rubella]                                                                                                                                                                                                                                                                                                                  | 455  | 467  | 0         | 102.6 | 85.7 | 92.3 | hypothetical protein CARUB_v10013633mg                | gbpln | Capsella rubella     | AT3G17420.1   Symbols: GPK1   glyoxysomal protein kinase 1   chr3:5959462-5961313 REVERSE LENGTH=467                                                                                                                                                                                                                                                                                                                                                                                                                                    | 455  | 467  | 0         | 102.6 | 85.9 | 91.6 |
| Rsa1.0_00151.1.g6848.t1 | gb[EOA30815.1] hypothetical protein CARUB_v10013966mg [Capsella rubella]                                                                                                                                                                                                                                                                                                                  | 316  | 375  | 7.00E-28  | 118.7 | 19.9 | 20.3 | hypothetical protein CARUB_v10013966mg                | gbpln | Capsella rubella     | AT3G17430.1   Symbols:   Nucleotide-sugar transporter family protein   chr3:5966597-5968962 FORWARD LENGTH=375                                                                                                                                                                                                                                                                                                                                                                                                                          | 316  | 375  | 4.00E-30  | 118.7 | 19.6 | 20.3 |
| Rsa1.0_00151.1.g6849.t1 | gb[EOA29624.1] hypothetical protein CARUB_v10014402mg [Capsella rubella]                                                                                                                                                                                                                                                                                                                  | 271  | 267  | 1.00E-138 | 98.5  | 91.9 | 95.6 | hypothetical protein CARUB_v10014402mg                | gbpln | Capsella rubella     | AT3G17440.1   Symbols: NPSN13, ATNPSN13   novel plant snare 13   chr3:5972909-5972290 REVERSE LENGTH=269                                                                                                                                                                                                                                                                                                                                                                                                                                | 271  | 269  | 1.00E-140 | 99.3  | 91.5 | 96.3 |
| Rsa1.0_00151.1.g6850.t1 | gb[EOA29978.1] hypothetical protein CARUB_v10013083mg [Capsella rubella]                                                                                                                                                                                                                                                                                                                  | 202  | 707  | 6.00E-12  | 350.0 | 17.8 | 20.8 | hypothetical protein CARUB_v10013083mg                | gbpln | Capsella rubella     | AT3G17450.1   Symbols:   hAT dimerisation domain-containing protein   chr3:5972793-5975684 REVERSE LENGTH=877                                                                                                                                                                                                                                                                                                                                                                                                                           | 202  | 877  | 5.00E-14  | 434.2 | 17.3 | 20.8 |
| Rsa1.0_00151.1.g6851.t1 | ref[NP_188372.1] PHD finger family protein [Arabidopsis thaliana] gi 11994684 dbj BAB02922.1  unnamed protein product [Arabidopsis thaliana] gi 332642435 gb AEE75956.1  PHD finger family protein [Arabidopsis thaliana]                                                                                                                                                                 | 199  | 198  | 1.00E-35  | 99.5  | 46.2 | 58.3 | PHD finger family protein                             | gbpln | Arabidopsis thaliana | AT3G17460.1   Symbols:   PHD finger family protein   chr3:5976949-5977545 REVERSE LENGTH=198                                                                                                                                                                                                                                                                                                                                                                                                                                            | 199  | 198  | 4.00E-38  | 99.5  | 46.2 | 58.3 |
| Rsa1.0_00151.1.g6852.t1 | gb[EOA31043.1] hypothetical protein CARUB_v10014193mg [Capsella rubella]                                                                                                                                                                                                                                                                                                                  | 324  | 323  | 1.00E-162 | 99.7  | 88.0 | 91.4 | hypothetical protein CARUB_v10014193mg                | gbpln | Capsella rubella     | AT3G17465.1   Symbols: RPL3P   ribosomal protein L3 plastid   chr3:5978059-5979572 REVERSE LENGTH=324                                                                                                                                                                                                                                                                                                                                                                                                                                   | 324  | 324  | 1.00E-159 | 100.0 | 85.8 | 89.8 |
| Rsa1.0_00151.1.g6853.t1 | ref[NP_188377.1] F-box associated protein [Arabidopsis thaliana] gi 332642440 gb AEE75961.1  F-box associated protein [Arabidopsis thaliana]                                                                                                                                                                                                                                              | 397  | 438  | 2.00E-72  | 110.3 | 45.1 | 59.7 | F-box associated protein                              | gbpln | Arabidopsis thaliana | AT3G17500.1   Symbols:   F-box family protein   chr3:5986685-5988498 FORWARD LENGTH=438                                                                                                                                                                                                                                                                                                                                                                                                                                                 | 397  | 438  | 6.00E-75  | 110.3 | 45.1 | 59.7 |
| Rsa1.0_00151.1.g6854.t1 | gb[EOA31989.1] hypothetical protein CARUB_v10015229mg, partial [Capsella rubella]                                                                                                                                                                                                                                                                                                         | 357  | 350  | 2.00E-57  | 98.0  | 42.9 | 58.3 | hypothetical protein CARUB_v10015229mg, partial       | gbpln | Capsella rubella     | AT3G17500.1   Symbols:   F-box family protein   chr3:5986685-5988498 FORWARD LENGTH=438                                                                                                                                                                                                                                                                                                                                                                                                                                                 | 357  | 438  | 1.00E-64  | 122.7 | 45.4 | 60.5 |
| Rsa1.0_00151.1.g6855.t1 | ref[XP_002883067.1] F-box family protein [Arabidopsis lyrata subsp. lyrata] gi 29732890 gb EFH59326.1  F-box family protein [Arabidopsis lyrata subsp. lyrata]                                                                                                                                                                                                                            | 392  | 385  | 5.00E-74  | 98.2  | 44.6 | 62.0 | F-box family protein                                  | gbpln | Arabidopsis lyrata   | AT3G17500.1   Symbols:   F-box family protein   chr3:5986685-5988498 FORWARD LENGTH=438                                                                                                                                                                                                                                                                                                                                                                                                                                                 | 392  | 438  | 3.00E-75  | 111.7 | 45.9 | 60.7 |
| Rsa1.0_00151.1.g6856.t2 | ref[NP_566580.1] CBL-interacting serine/threonine-protein kinase 1 [Arabidopsis thaliana] gi 56748824 sp Q8RWC9.2 CIPK1_ARAT H RefName: Full=CBL-interacting serine/threonine-protein kinase 1; AltName: Full=SNF1-related kinase 3.16; AltName: Full=SOS2-like protein kinase PKS13 gi 332642442 gb AEE75963.1  CBL-interacting serine/threonine-protein kinase 1 [Arabidopsis thaliana] | 661  | 444  | 0         | 67.2  | 61.3 | 64.6 | CBL-interacting serine/threonine-protein kinase 1     | gbpln | Arabidopsis thaliana | AT3G17510.1   Symbols: CIPK1, SnRK3.16   CBL-interacting protein kinase 1   chr3:5989309-5992627 REVERSE LENGTH=444                                                                                                                                                                                                                                                                                                                                                                                                                     | 661  | 444  | 0         | 67.2  | 61.3 | 64.6 |
| Rsa1.0_00151.1.g6857.t1 | ref[XP_002885215.1] late embryogenesis abundant domain-containing protein [Arabidopsis lyrata subsp. lyrata] gi 297331055 gb EFH61474.1  late embryogenesis abundant domain-containing protein [Arabidopsis lyrata subsp. lyrata]                                                                                                                                                         | 296  | 299  | 1.00E-102 | 101.0 | 77.7 | 91.2 | late embryogenesis abundant domain-containing protein | gbpln | Arabidopsis lyrata   | AT3G17520.1   Symbols:   Late embryogenesis abundant protein (LEA) family protein   chr3:5999462-6000358 REVERSE LENGTH=298                                                                                                                                                                                                                                                                                                                                                                                                             | 296  | 298  | 1.00E-104 | 100.7 | 78.4 | 89.9 |

|                         |                                                                                                                                                                                                                                                                                                                                                                                                                                                                                                                                                         |      |      |           |        |      |      |                                                           |       |                      |                                                                                                                                                                                                                                                                                                                                            |      |     |           |       |      |      |
|-------------------------|---------------------------------------------------------------------------------------------------------------------------------------------------------------------------------------------------------------------------------------------------------------------------------------------------------------------------------------------------------------------------------------------------------------------------------------------------------------------------------------------------------------------------------------------------------|------|------|-----------|--------|------|------|-----------------------------------------------------------|-------|----------------------|--------------------------------------------------------------------------------------------------------------------------------------------------------------------------------------------------------------------------------------------------------------------------------------------------------------------------------------------|------|-----|-----------|-------|------|------|
| Rsa1.0_00151.1.g6858.t1 | gb[EOA32842.1] hypothetical protein CARUB_v10016156mg [Capsella rubella]                                                                                                                                                                                                                                                                                                                                                                                                                                                                                | 80   | 80   | 2.00E-32  | 100.0  | 85.0 | 92.5 | hypothetical protein CARUB_v10016156mg                    | gbpln | Capsella rubella     | #                                                                                                                                                                                                                                                                                                                                          | #    | #   | #         | #     | #    | #    |
| Rsa1.0_00151.1.g6859.t1 | gb[AAD21699.1] Contains reverse transcriptase domain (rvt) PF[00078 [Arabidopsis thaliana]                                                                                                                                                                                                                                                                                                                                                                                                                                                              | 146  | 1253 | 3.00E-32  | 858.2  | 48.6 | 67.1 | Contains reverse transcriptase domain (rvt) PF[00078      | gbpln | Arabidopsis thaliana | AT4G10613.1   Symbols:   RNA-directed DNA polymerase (reverse transcriptase)-related family protein   chr4:6561039-6561479 FORWARD LENGTH=146                                                                                                                                                                                              | 146  | 146 | 2.00E-34  | 100.0 | 47.3 | 61.6 |
| Rsa1.0_00151.1.g6860.t1 | ref[XP_002883069.1] hypothetical protein ARALYDRAFT_898099 [Arabidopsis lyrata subsp. lyrata] gi[29732899]gb[EFH59328.1] hypothetical protein ARALYDRAFT_898099 [Arabidopsis lyrata subsp. lyrata]                                                                                                                                                                                                                                                                                                                                                      | 82   | 80   | 4.00E-36  | 97.6   | 90.2 | 92.7 | hypothetical protein ARALYDRAFT_898099                    | gbpln | Arabidopsis lyrata   | AT3G17580.1   Symbols:   unknown protein; BEST Arabidopsis thaliana protein match is: unknown protein (TAIR:AT1G48330.1); Has 40 Blast hits to 40 proteins in 11 species: Archae - 0; Bacteria - 0; Metazoa - 0; Fungi - 0; Plants - 40; Viruses - 0; Other Eukaryotes - 0 (source: NCBI BLink).   chr3:60115276-6015518 FORWARD LENGTH=80 | 82   | 80  | 5.00E-34  | 97.6  | 80.5 | 82.9 |
| Rsa1.0_00151.1.g6861.t1 | ref[NP_001189918.1] chromatin structure-remodeling complex protein BSH [Arabidopsis thaliana] gi[33264245]gb[AEE75972.1] chromatin structure-remodeling complex protein BSH [Arabidopsis thaliana]                                                                                                                                                                                                                                                                                                                                                      | 241  | 242  | 1.00E-124 | 100.4  | 90.0 | 95.9 | chromatin structure-remodeling complex protein BSH        | gbpln | Arabidopsis thaliana | AT3G17590.2   Symbols: BSH   transcription regulatory protein SNF5, putative (BSH)   chr3:6017313-6019591 REVERSE LENGTH=242                                                                                                                                                                                                               | 241  | 242 | 1.00E-127 | 100.4 | 90.0 | 95.9 |
| Rsa1.0_00151.1.g6862.t1 | ref[XP_002885218.1] predicted protein [Arabidopsis lyrata subsp. lyrata] gi[297331058]gb[EFH61477.1] predicted protein [Arabidopsis lyrata subsp. lyrata]                                                                                                                                                                                                                                                                                                                                                                                               | 159  | 158  | 3.00E-67  | 99.4   | 78.6 | 81.8 | predicted protein                                         | gbpln | Arabidopsis lyrata   | AT3G17600.1   Symbols: IAA31   indole-3-acetic acid inducible 31   chr3:6020281-6021040 REVERSE LENGTH=158                                                                                                                                                                                                                                 | 159  | 158 | 1.00E-69  | 99.4  | 78.6 | 81.8 |
| Rsa1.0_00151.1.g6863.t1 | gb[EMJ11389.1] hypothetical protein PRUPE_ppa017790mg [Prunus persica]                                                                                                                                                                                                                                                                                                                                                                                                                                                                                  | 1474 | 1485 | 0         | 100.7  | 44.8 | 61.2 | hypothetical protein PRUPE_ppa017790mg                    | gbpln | Prunus persica       | AT1G47350.1   Symbols:   F-box associated ubiquitination effector family protein   chr1:17358447-17360722 REVERSE LENGTH=528                                                                                                                                                                                                               | 1474 | 528 | 1.00E-25  | 35.8  | 4.3  | 5.8  |
| Rsa1.0_00152.1.g6864.t1 | gb[ACP30591.1] disease resistance protein [Brassica rapa subsp. pekinensis]                                                                                                                                                                                                                                                                                                                                                                                                                                                                             | 230  | 1555 | 1.00E-65  | 676.1  | 55.2 | 69.1 | disease resistance protein                                | gbpln | Brassica rapa        | AT2G06845.1   Symbols:   Beta-galactosidase related protein   chr2:2754666-2756008 FORWARD LENGTH=315                                                                                                                                                                                                                                      | 230  | 315 | 3.00E-24  | 137.0 | 32.6 | 42.2 |
| Rsa1.0_00152.1.g6865.t1 | #                                                                                                                                                                                                                                                                                                                                                                                                                                                                                                                                                       | #    | #    | #         | #      | #    | -    | ----                                                      | ----  | #                    | #                                                                                                                                                                                                                                                                                                                                          | #    | #   | #         | #     | #    |      |
| Rsa1.0_00152.1.g6866.t1 | #                                                                                                                                                                                                                                                                                                                                                                                                                                                                                                                                                       | #    | #    | #         | #      | #    | -    | ----                                                      | ----  | #                    | #                                                                                                                                                                                                                                                                                                                                          | #    | #   | #         | #     | #    |      |
| Rsa1.0_00152.1.g6867.t1 | ref[XP_002876738.1] 60S ribosomal protein L7 [Arabidopsis lyrata subsp. lyrata] gi[297322576]gb[EFH52997.1] 60S ribosomal protein L7 [Arabidopsis lyrata subsp. lyrata]                                                                                                                                                                                                                                                                                                                                                                                 | 242  | 242  | 1.00E-131 | 100.0  | 96.3 | 97.1 | 60S ribosomal protein L7                                  | gbpln | Arabidopsis lyrata   | AT2G01250.1   Symbols:   Ribosomal protein L30/L7 family protein   chr2:132943-134264 REVERSE LENGTH=242                                                                                                                                                                                                                                   | 242  | 242 | 1.00E-133 | 100.0 | 95.9 | 97.1 |
| Rsa1.0_00152.1.g6868.t1 | sp[Q9ZU43.2]RTNLO_ARATH RecName: Full=Reticulon-like protein B15; Short=AtRTNLB15                                                                                                                                                                                                                                                                                                                                                                                                                                                                       | 192  | 191  | 7.00E-65  | 99.5   | 70.8 | 83.3 | RecName: Full=Reticulon-like protein B15; Short=AtRTNLB15 | ----  | ----                 | AT2G01240.1   Symbols:   Reticulon family protein   chr2:128440-129256 REVERSE LENGTH=160                                                                                                                                                                                                                                                  | 192  | 160 | 3.00E-36  | 83.3  | 38.0 | 47.9 |
| Rsa1.0_00152.1.g6869.t1 | sp[Q9ZU43.2]RTNLO_ARATH RecName: Full=Reticulon-like protein B15; Short=AtRTNLB15                                                                                                                                                                                                                                                                                                                                                                                                                                                                       | 323  | 191  | 2.00E-50  | 59.1   | 35.9 | 44.6 | RecName: Full=Reticulon-like protein B15; Short=AtRTNLB15 | ----  | ----                 | AT2G01240.1   Symbols:   Reticulon family protein   chr2:128440-129256 REVERSE LENGTH=160                                                                                                                                                                                                                                                  | 323  | 160 | 2.00E-25  | 49.5  | 17.3 | 23.8 |
| Rsa1.0_00152.1.g6870.t1 | gb[EOA33848.1] hypothetical protein CARUB_v10021338mg [Capsella rubella]                                                                                                                                                                                                                                                                                                                                                                                                                                                                                | 451  | 659  | 3.00E-59  | 146.1  | 38.4 | 52.8 | hypothetical protein CARUB_v10021338mg                    | gbpln | Capsella rubella     | AT2G02030.1   Symbols:   F-box family protein   chr2:482335-483829 FORWARD LENGTH=334                                                                                                                                                                                                                                                      | 451  | 334 | 7.00E-37  | 74.1  | 22.4 | 37.7 |
| Rsa1.0_00152.1.g6871.t1 | gb[AAL86294.1] putative amino acid or GABA permease [Arabidopsis thaliana]                                                                                                                                                                                                                                                                                                                                                                                                                                                                              | 545  | 516  | 0         | 94.7   | 86.6 | 90.5 | putative amino acid or GABA permease                      | gbpln | Arabidopsis thaliana | AT2G01170.1   Symbols: BAT1   bidirectional amino acid transporter 1   chr2:102364-104462 REVERSE LENGTH=516                                                                                                                                                                                                                               | 545  | 516 | 0         | 94.7  | 86.4 | 90.5 |
| Rsa1.0_00152.1.g6872.t1 | #                                                                                                                                                                                                                                                                                                                                                                                                                                                                                                                                                       | #    | #    | #         | #      | #    | -    | ----                                                      | ----  | #                    | #                                                                                                                                                                                                                                                                                                                                          | #    | #   | #         | #     | #    |      |
| Rsa1.0_00152.1.g6873.t1 | ref[NP_565253.1] putative E3 ubiquitin-protein ligase RHA2B [Arabidopsis thaliana] gi[51316550]sp[Q9ZU51.2]RHA2B_ARATH RecName: Full=Probable E3 ubiquitin-protein ligase RHA2B; AltName: Full=RING-H2 zinc finger protein RHA2b gi[3790571]gb[AAC68672.1] RING-H2 finger protein RHA2b [Arabidopsis thaliana] gi[20197589]gb[AAD14516.2] RING-H2 finger protein RHA2b [Arabidopsis thaliana] gi[98960889]gb[ABF58928.1] At2g01150 [Arabidopsis thaliana] gi[330250313]gb[AEC05407.1] putative E3 ubiquitin-protein ligase RHA2B [Arabidopsis thaliana] | 153  | 147  | 4.00E-48  | 96.1   | 69.9 | 76.5 | putative E3 ubiquitin-protein ligase RHA2B                | gbpln | Arabidopsis thaliana | AT2G01150.1   Symbols: RHA2B   RING-H2 finger protein 2B   chr2:100703-101146 FORWARD LENGTH=147                                                                                                                                                                                                                                           | 153  | 147 | 1.00E-50  | 96.1  | 69.9 | 76.5 |
| Rsa1.0_00152.1.g6874.t1 | #                                                                                                                                                                                                                                                                                                                                                                                                                                                                                                                                                       | #    | #    | #         | #      | #    | -    | ----                                                      | ----  | #                    | #                                                                                                                                                                                                                                                                                                                                          | #    | #   | #         | #     | #    |      |
| Rsa1.0_00152.1.g6875.t1 | gb[AAF18538.1]AC006551_24 Very similar to retrotransposon reverse transcriptase [Arabidopsis thaliana]                                                                                                                                                                                                                                                                                                                                                                                                                                                  | 88   | 1231 | 1.00E-15  | 1398.9 | 50.0 | 62.5 | Very similar to retrotransposon reverse transcriptase     | gbpln | Arabidopsis thaliana | #                                                                                                                                                                                                                                                                                                                                          | #    | #   | #         | #     | #    |      |

|                         |                                                                                                                                                                                                                                                                                                                                                                                                                                                                                                                                                                                                                                                                                                                                                                                                                            |     |     |           |       |      |      |                                            |       |                      |                                                                                                                                                                                                                                                                             |     |     |           |       |      |      |
|-------------------------|----------------------------------------------------------------------------------------------------------------------------------------------------------------------------------------------------------------------------------------------------------------------------------------------------------------------------------------------------------------------------------------------------------------------------------------------------------------------------------------------------------------------------------------------------------------------------------------------------------------------------------------------------------------------------------------------------------------------------------------------------------------------------------------------------------------------------|-----|-----|-----------|-------|------|------|--------------------------------------------|-------|----------------------|-----------------------------------------------------------------------------------------------------------------------------------------------------------------------------------------------------------------------------------------------------------------------------|-----|-----|-----------|-------|------|------|
| Rsa1.0_00152.1.g6876.t1 | ref NP_178224.1  fructose-bisphosphate aldolase, class I [Arabidopsis thaliana] gi 75268018 sp Q9ZU52.1 ALFC3_ARAT H RecName: Full=Probable fructose-bisphosphate aldolase 3, chloroplastic; Flags: Precursor gi 11762176 gb AAG40366.1 AF325014.1 At2g01140 [Arabidopsis thaliana] gi 4262250 gb AAD14543.1  putative aldolase [Arabidopsis thaliana] gi 21592330 gb AAM64281.1  putative aldolase [Arabidopsis thaliana] gi 330250312 gb AEC05406.1  fructose-bisphosphate aldolase 3 [Arabidopsis thaliana]                                                                                                                                                                                                                                                                                                             | 391 | 391 | 0         | 100.0 | 94.4 | 96.7 | fructose-bisphosphate aldolase, class I    | gbpln | Arabidopsis thaliana | AT2G01140.1   Symbols:   Aldolase superfamily protein   chr2:95006-96491 REVERSE LENGTH=391                                                                                                                                                                                 | 391 | 391 | 0         | 100.0 | 94.4 | 96.7 |
| Rsa1.0_00152.1.g6877.t2 | gb EOA25931.1  hypothetical protein CARUB_v10019313mg [Capsella rubella]                                                                                                                                                                                                                                                                                                                                                                                                                                                                                                                                                                                                                                                                                                                                                   | 179 | 417 | 4.00E-46  | 233.0 | 60.3 | 66.5 | hypothetical protein CARUB_v10019313mg     | gbpln | Capsella rubella     | AT2G01120.1   Symbols: ORC4, ATORC4   origin recognition complex subunit 4   chr2:85444-88027 FORWARD LENGTH=418                                                                                                                                                            | 179 | 418 | 4.00E-45  | 233.5 | 58.1 | 64.2 |
| Rsa1.0_00152.1.g6878.t7 | gb EOA24317.1  hypothetical protein CARUB_v10017557mg [Capsella rubella]                                                                                                                                                                                                                                                                                                                                                                                                                                                                                                                                                                                                                                                                                                                                                   | 424 | 347 | 1.00E-164 | 81.8  | 71.9 | 75.7 | hypothetical protein CARUB_v10017557mg     | gbpln | Capsella rubella     | AT2G01110.1   Symbols: APG2, UNE3, PGA2, TATC   Sec-independent periplasmic protein translocase   chr2:83786-85088 REVERSE LENGTH=340                                                                                                                                       | 424 | 340 | 1.00E-159 | 80.2  | 70.8 | 74.3 |
| Rsa1.0_00152.1.g6879.t1 | gb AAM62951.1  unknown [Arabidopsis thaliana]                                                                                                                                                                                                                                                                                                                                                                                                                                                                                                                                                                                                                                                                                                                                                                              | 523 | 543 | 0         | 103.8 | 79.5 | 87.8 | unknown                                    | gbpln | Arabidopsis thaliana | AT2G13690.1   Symbols:   PRLI-interacting factor, putative   chr2:5706704-5708895 REVERSE LENGTH=544                                                                                                                                                                        | 523 | 544 | 0         | 104.0 | 79.2 | 87.2 |
| Rsa1.0_00152.1.g6880.t1 | gb EOA30667.1  hypothetical protein CARUB_v10013805mg [Capsella rubella]                                                                                                                                                                                                                                                                                                                                                                                                                                                                                                                                                                                                                                                                                                                                                   | 382 | 417 | 2.00E-93  | 109.2 | 52.4 | 67.0 | hypothetical protein CARUB_v10013805mg     | gbpln | Capsella rubella     | AT3G20620.1   Symbols:   F-box family protein-related   chr3:7198708-7199969 REVERSE LENGTH=391                                                                                                                                                                             | 382 | 391 | 2.00E-93  | 102.4 | 51.0 | 65.2 |
| Rsa1.0_00152.1.g6881.t1 | ref NP_565251.1  uncharacterized protein [Arabidopsis thaliana] gi 30677872 ref NP_84919.1  uncharacterized protein [Arabidopsis thaliana] gi 42570625 ref NP_973386.1  uncharacterized protein [Arabidopsis thaliana] gi 6598625 gb AAF18658.1  expressed protein [Arabidopsis thaliana] gi 18086561 gb AAL57705.1  At2g01100/F23H14.7 [Arabidopsis thaliana] gi 21593516 gb AAM65483.1  unknown [Arabidopsis thaliana] gi 21928015 gb AAM78036.1  At2g01100/F23H14.7 [Arabidopsis thaliana] gi 222424050 dbj BAH19986.1  AT2G01100 [Arabidopsis thaliana] gi 330250305 gb AEC05399.1  uncharacterized protein AT2G01100 [Arabidopsis thaliana] gi 330250306 gb AEC05400.1  uncharacterized protein AT2G01100 [Arabidopsis thaliana] gi 330250307 gb AEC05401.1  uncharacterized protein AT2G01100 [Arabidopsis thaliana] | 251 | 247 | 3.00E-58  | 98.4  | 64.9 | 77.3 | uncharacterized protein                    | gbpln | Arabidopsis thaliana | AT2G01100.3   Symbols:   unknown protein; Has 3533 Blast hits to 34131 proteins in 2444 species: Archae - 798; Bacteria - 22429; Metazoa - 974; Fungi - 991; Plants - 531; Viruses - 0; Other Eukaryotes - 9610 (source: NCBI BLINK).   chr2:82245-82988 FORWARD LENGTH=247 | 251 | 247 | 9.00E-61  | 98.4  | 64.9 | 77.3 |
| Rsa1.0_00152.1.g6882.t1 | gb AAM63085.1  putative ubiquinol--cytochrome-c reductase [Arabidopsis thaliana]                                                                                                                                                                                                                                                                                                                                                                                                                                                                                                                                                                                                                                                                                                                                           | 103 | 69  | 4.00E-28  | 67.0  | 59.2 | 63.1 | putative ubiquinol--cytochrome-c reductase | gbpln | Arabidopsis thaliana | AT1G15120.1   Symbols:   Ubiquinol-cytochrome C reductase hinge protein   chr1:5203091-5203897 FORWARD LENGTH=69                                                                                                                                                            | 103 | 69  | 1.00E-30  | 67.0  | 59.2 | 63.1 |
| Rsa1.0_00152.1.g6883.t1 | gb EOA36212.1  hypothetical protein CARUB_v10010136mg [Capsella rubella]                                                                                                                                                                                                                                                                                                                                                                                                                                                                                                                                                                                                                                                                                                                                                   | 249 | 243 | 4.00E-58  | 97.6  | 59.0 | 69.5 | hypothetical protein CARUB_v10010136mg     | gbpln | Capsella rubella     | AT1G15190.1   Symbols:   Fasciclin-like arabinogalactan family protein   chr1:5227275-5228021 FORWARD LENGTH=248                                                                                                                                                            | 249 | 248 | 3.00E-60  | 99.6  | 58.2 | 70.3 |
| Rsa1.0_00152.1.g6884.t1 | gb AAK55661.1 AF378858.1 At2g01080/F23H14.5 [Arabidopsis thaliana] gi 16323356 gb AAL15391.1  At2g01080/F23H14.5 [Arabidopsis thaliana]                                                                                                                                                                                                                                                                                                                                                                                                                                                                                                                                                                                                                                                                                    | 299 | 231 | 2.00E-79  | 77.3  | 67.9 | 72.6 | At2g01080/F23H14.5                         | gbpln | Arabidopsis thaliana | AT2G01080.1   Symbols:   Late embryogenesis abundant (LEA) hydroxyproline-rich glycoprotein family   chr2:78038-79176 FORWARD LENGTH=231                                                                                                                                    | 299 | 231 | 1.00E-81  | 77.3  | 67.2 | 71.9 |
| Rsa1.0_00152.1.g6885.t1 | gb AAF18655.1  unknown protein [Arabidopsis thaliana]                                                                                                                                                                                                                                                                                                                                                                                                                                                                                                                                                                                                                                                                                                                                                                      | 122 | 467 | 1.00E-25  | 382.8 | 54.9 | 63.1 | unknown protein                            | gbpln | Arabidopsis thaliana | AT2G01070.1   Symbols:   Lung seven transmembrane receptor family protein   chr2:75596-77625 FORWARD LENGTH=496                                                                                                                                                             | 122 | 496 | 1.00E-27  | 406.6 | 54.1 | 59.0 |
| Rsa1.0_00152.1.g6886.t1 | gb EOA24516.1  hypothetical protein CARUB_v10017769mg [Capsella rubella]                                                                                                                                                                                                                                                                                                                                                                                                                                                                                                                                                                                                                                                                                                                                                   | 288 | 286 | 1.00E-150 | 99.3  | 93.1 | 95.5 | hypothetical protein CARUB_v10017769mg     | gbpln | Capsella rubella     | AT2G01060.1   Symbols:   myb-like HTH transcriptional regulator family protein   chr2:73456-74902 REVERSE LENGTH=286                                                                                                                                                        | 288 | 286 | 1.00E-150 | 99.3  | 91.7 | 94.8 |

|                         |                                                                                                                                                                                                                                                                                                                                                                                                                                                                                                                                                                                                                    |      |      |           |       |      |      |                                                                            |       |                      |                                                                                                                                                                                                                                                                                             |      |     |           |       |      |      |
|-------------------------|--------------------------------------------------------------------------------------------------------------------------------------------------------------------------------------------------------------------------------------------------------------------------------------------------------------------------------------------------------------------------------------------------------------------------------------------------------------------------------------------------------------------------------------------------------------------------------------------------------------------|------|------|-----------|-------|------|------|----------------------------------------------------------------------------|-------|----------------------|---------------------------------------------------------------------------------------------------------------------------------------------------------------------------------------------------------------------------------------------------------------------------------------------|------|-----|-----------|-------|------|------|
| Rsa1.0_00152.1.g6887.t1 | ref NP_568688.1  alpha-1,4-galacturonosyltransferase [Arabidopsis thaliana]<br>gi 75163841 sp Q932X7.1 GAUT4_ARAT H RecName: Full=Probable galacturonosyltransferase 4; AltName: Full=Like glycosyl transferase 3<br>gi 15810327 gb AAL07051.1  unknown protein [Arabidopsis thaliana]<br>gi 20259235 gb AAM14333.1  unknown protein [Arabidopsis thaliana]<br>gi 332008188 gb AED95571.1  probable galacturonosyltransferase 4 [Arabidopsis thaliana]                                                                                                                                                             | 677  | 616  | 0         | 91.0  | 77.7 | 83.8 | alpha-1,4-galacturonosyltransferase                                        | gbpln | Arabidopsis thaliana | AT5G47780.1   Symbols: GAUT4   galacturonosyltransferase 4   chr5:19347991-19350517 FORWARD LENGTH=616                                                                                                                                                                                      | 677  | 616 | 0         | 91.0  | 77.7 | 83.8 |
| Rsa1.0_00152.1.g6888.t1 | gb EMJ14562.1  hypothetical protein PRUPE_ppa026835mg, partial [Prunus persica]                                                                                                                                                                                                                                                                                                                                                                                                                                                                                                                                    | 787  | 740  | 0         | 94.0  | 65.9 | 77.5 | hypothetical protein PRUPE_ppa026835mg, partial                            | gbpln | Prunus persica       | AT5G59810.1   Symbols: ATSBT5.4, SBT5.4   Subtilase family protein   chr5:24096895-24100387 REVERSE LENGTH=778                                                                                                                                                                              | 787  | 778 | 0         | 98.9  | 62.8 | 75.3 |
| Rsa1.0_00152.1.g6889.t1 | gb EOA15620.1  hypothetical protein CARUB_v10005755mg [Capsella rubella]                                                                                                                                                                                                                                                                                                                                                                                                                                                                                                                                           | 209  | 203  | 2.00E-58  | 97.1  | 59.3 | 70.8 | hypothetical protein CARUB_v10005755mg                                     | gbpln | Capsella rubella     | AT4G15950.1   Symbols: NRPD4, NRPE4, RDM2   RNA polymerase II, Rpb4, core protein   chr4:9040743-9041994 FORWARD LENGTH=205                                                                                                                                                                 | 209  | 205 | 8.00E-57  | 98.1  | 57.4 | 72.2 |
| Rsa1.0_00152.1.g6890.t1 | gb EOA14425.1  hypothetical protein CARUB_v10027627mg [Capsella rubella]                                                                                                                                                                                                                                                                                                                                                                                                                                                                                                                                           | 342  | 383  | 0         | 112.0 | 95.0 | 98.0 | hypothetical protein CARUB_v10027627mg                                     | gbpln | Capsella rubella     | AT5G47770.1   Symbols: FPS1   farnesyl diphosphate synthase 1   chr5:19345297-19347415 FORWARD LENGTH=384                                                                                                                                                                                   | 342  | 384 | 0         | 112.3 | 93.9 | 96.8 |
| Rsa1.0_00152.1.g6891.t3 | #                                                                                                                                                                                                                                                                                                                                                                                                                                                                                                                                                                                                                  | #    | #    | #         | #     | #    | #    | -                                                                          | ----  | ----                 | #                                                                                                                                                                                                                                                                                           | #    | #   | #         | #     | #    |      |
| Rsa1.0_00152.1.g6892.t1 | gb EOA13117.1  hypothetical protein CARUB_v10026139mg [Capsella rubella]                                                                                                                                                                                                                                                                                                                                                                                                                                                                                                                                           | 557  | 586  | 0         | 105.2 | 91.9 | 95.0 | hypothetical protein CARUB_v10026139mg                                     | gbpln | Capsella rubella     | AT5G47750.1   Symbols: D6PKL2, PK5   D6 protein kinase like 2   chr5:19339947-19341864 REVERSE LENGTH=586                                                                                                                                                                                   | 557  | 586 | 0         | 105.2 | 91.9 | 94.8 |
| Rsa1.0_00152.1.g6893.t1 | gb EOA15202.1  hypothetical protein CARUB_v10028591mg [Capsella rubella]                                                                                                                                                                                                                                                                                                                                                                                                                                                                                                                                           | 281  | 243  | 1.00E-105 | 86.5  | 67.3 | 74.4 | hypothetical protein CARUB_v10028591mg                                     | gbpln | Capsella rubella     | AT5G47740.1   Symbols:   Adenine nucleotide alpha hydrolases-like superfamily protein   chr5:19338688-19339683 FORWARD LENGTH=244                                                                                                                                                           | 281  | 244 | 1.00E-104 | 86.8  | 65.8 | 73.3 |
| Rsa1.0_00152.1.g6894.t1 | gb EOA13661.1  hypothetical protein CARUB_v10026730mg [Capsella rubella]                                                                                                                                                                                                                                                                                                                                                                                                                                                                                                                                           | 331  | 341  | 1.00E-174 | 103.0 | 88.2 | 93.7 | hypothetical protein CARUB_v10026730mg                                     | gbpln | Capsella rubella     | AT5G47730.1   Symbols:   Sec14p-like phosphatidylinositol transfer family protein   chr5:19334592-19336618 REVERSE LENGTH=341                                                                                                                                                               | 331  | 341 | 1.00E-172 | 103.0 | 89.4 | 94.3 |
| Rsa1.0_00152.1.g6895.t1 | #                                                                                                                                                                                                                                                                                                                                                                                                                                                                                                                                                                                                                  | #    | #    | #         | #     | #    | #    | -                                                                          | ----  | ----                 | #                                                                                                                                                                                                                                                                                           | #    | #   | #         | #     | #    |      |
| Rsa1.0_00152.1.g6896.t1 | gb ACP30609.1  disease resistance protein [Brassica rapa subsp. pekinensis]                                                                                                                                                                                                                                                                                                                                                                                                                                                                                                                                        | 1849 | 2726 | 0         | 147.4 | 50.0 | 63.5 | disease resistance protein                                                 | gbpln | Brassica rapa        | AT5G47650.1   Symbols: ATNUDT2, ATNUDX2, NUDT2   nudix hydrolase homolog 2   chr5:19310391-19312084 REVERSE LENGTH=278                                                                                                                                                                      | 1849 | 278 | 1.00E-143 | 15.0  | 13.0 | 13.8 |
| Rsa1.0_00152.1.g6897.t1 | gb ABD64993.1  transcription factor Hap3b, putative [Brassica oleracea]                                                                                                                                                                                                                                                                                                                                                                                                                                                                                                                                            | 182  | 185  | 1.00E-72  | 101.6 | 72.5 | 73.1 | transcription factor Hap3b, putative                                       | gbpln | Brassica oleracea    | AT5G47640.1   Symbols: NF-YB2   nuclear factor Y, subunit B2   chr5:19309414-19309986 FORWARD LENGTH=190                                                                                                                                                                                    | 182  | 190 | 2.00E-66  | 104.4 | 70.3 | 71.4 |
| Rsa1.0_00152.1.g6898.t1 | ref NP_199574.1  acyl carrier protein 3 [Arabidopsis thaliana]<br>gi 145334761 ref NP_001078726.1  acyl carrier protein 3 [Arabidopsis thaliana]<br>gi 75333808 sp Q9FGJ4.1 ACPM3_ARAT H RecName: Full=Acyl carrier protein 3, mitochondrial; AltName: Full=MtACP-3; Short=ACP; AltName: Full=NADH-ubiquinone oxidoreductase 9.6 kDa subunit; Flags: Precursor<br>gi 9758791 db BAB09089.1  acyl carrier protein-like [Arabidopsis thaliana]<br>gi 17380990 gb AAL36307.1  putative acyl carrier protein [Arabidopsis thaliana]<br>gi 20466033 gb AAM20351.1  putative acyl carrier protein [Arabidopsis thaliana] | 127  | 131  | 7.00E-45  | 103.1 | 72.4 | 83.5 | acyl carrier protein 3                                                     | gbpln | Arabidopsis thaliana | AT5G47630.2   Symbols: mtACP3   mitochondrial acyl carrier protein 3   chr5:19306397-19306885 FORWARD LENGTH=131                                                                                                                                                                            | 127  | 131 | 1.00E-47  | 103.1 | 72.4 | 83.5 |
| Rsa1.0_00152.1.g6899.t1 | gb ABD64996.1  RNA recognition motif. (a.k.a. RRM, RBD, or RNP domain) containing protein [Brassica oleracea]                                                                                                                                                                                                                                                                                                                                                                                                                                                                                                      | 408  | 587  | 0         | 143.9 | 86.8 | 88.7 | RNA recognition motif. (a.k.a. RRM, RBD, or RNP domain) containing protein | gbpln | Brassica oleracea    | AT5G47620.2   Symbols:   RNA-binding (RRM/RBD/RNP motifs) family protein   chr5:19302548-19304278 REVERSE LENGTH=431                                                                                                                                                                        | 408  | 431 | 1.00E-172 | 105.6 | 79.2 | 86.3 |
| Rsa1.0_00152.1.g6900.t1 | gb ABD64996.1  RNA recognition motif. (a.k.a. RRM, RBD, or RNP domain) containing protein [Brassica oleracea]                                                                                                                                                                                                                                                                                                                                                                                                                                                                                                      | 178  | 587  | 4.00E-79  | 329.8 | 79.2 | 81.5 | RNA recognition motif. (a.k.a. RRM, RBD, or RNP domain) containing protein | gbpln | Brassica oleracea    | AT5G47610.1   Symbols:   RING/U-box superfamily protein   chr5:19301399-19301899 REVERSE LENGTH=166                                                                                                                                                                                         | 178  | 166 | 4.00E-65  | 93.3  | 76.4 | 80.3 |
| Rsa1.0_00152.1.g6901.t1 | gb EOA14220.1  hypothetical protein CARUB_v10027375mg [Capsella rubella]                                                                                                                                                                                                                                                                                                                                                                                                                                                                                                                                           | 125  | 125  | 6.00E-62  | 100.0 | 93.6 | 96.0 | hypothetical protein CARUB_v10027375mg                                     | gbpln | Capsella rubella     | AT5G47570.1   Symbols:   unknown protein; Has 30201 Blast hits to 17322 proteins in 780 species: Archaebacteria - 12; Bacteria - 1396; Metazoa - 17338; Fungi - 3422; Plants - 5037; Viruses - 0; Other Eukaryotes - 2996 (source: NCBI BLINK).   chr5:19292869-19294666 REVERSE LENGTH=125 | 125  | 125 | 2.00E-57  | 100.0 | 93.6 | 95.2 |

|                         |                                                                                                                                                                                                       |     |      |           |       |      |      |                                              |       |                      |                                                                                                                                                                                                                                                                                                                                                                                                                                                                                                             |     |     |           |       |      |      |  |
|-------------------------|-------------------------------------------------------------------------------------------------------------------------------------------------------------------------------------------------------|-----|------|-----------|-------|------|------|----------------------------------------------|-------|----------------------|-------------------------------------------------------------------------------------------------------------------------------------------------------------------------------------------------------------------------------------------------------------------------------------------------------------------------------------------------------------------------------------------------------------------------------------------------------------------------------------------------------------|-----|-----|-----------|-------|------|------|--|
| Rsa1.0_00152.1.g6902.t1 | gb ABD64997.1  sodium-dicarboxylate cotransporter, putative [Brassica oleracea]                                                                                                                       | 76  | 527  | 9.00E-28  | 693.4 | 73.7 | 75.0 | sodium-dicarboxylate cotransporter, putative | gbpln | Brassica oleracea    | AT5G47560.1   Symbols: ATTD, ATSDAT, TDT   tonoplast dicarboxylate transporter   chr5:19287895-19290347 REVERSE LENGTH=540                                                                                                                                                                                                                                                                                                                                                                                  | 76  | 540 | 2.00E-25  | 710.5 | 64.5 | 69.7 |  |
| Rsa1.0_00152.1.g6903.t1 | ref XP_002863336.1  ATSDAT [Arabidopsis lyrata subsp. lyrata]   gi 297309171 gb EFH39595.1  ATSDAT [Arabidopsis lyrata subsp. lyrata]                                                                 | 461 | 540  | 0         | 117.1 | 92.2 | 97.6 | ATSDAT                                       | gbpln | Arabidopsis lyrata   | AT5G47560.1   Symbols: ATTD, ATSDAT, TDT   tonoplast dicarboxylate transporter   chr5:19287895-19290347 REVERSE LENGTH=540                                                                                                                                                                                                                                                                                                                                                                                  | 461 | 540 | 0         | 117.1 | 90.9 | 96.7 |  |
| Rsa1.0_00152.1.g6904.t1 | gb ABD64998.1  cystatin domain containing protein [Brassica oleracea]                                                                                                                                 | 108 | 148  | 2.00E-32  | 137.0 | 69.4 | 74.1 | cystatin domain containing protein           | gbpln | Brassica oleracea    | AT5G47550.1   Symbols:   Cystatin/monellin superfamily protein   chr5:19286596-19286964 REVERSE LENGTH=122                                                                                                                                                                                                                                                                                                                                                                                                  | 108 | 122 | 7.00E-26  | 113.0 | 54.6 | 61.1 |  |
| Rsa1.0_00152.1.g6905.t1 | ref XP_002863338.1  hypothetical protein ARALYDRAFT_916635 [Arabidopsis lyrata subsp. lyrata]   gi 297309173 gb EFH39597.1  hypothetical protein ARALYDRAFT_916635 [Arabidopsis lyrata subsp. lyrata] | 343 | 343  | 0         | 100.0 | 95.9 | 99.1 | hypothetical protein ARALYDRAFT_916635       | gbpln | Arabidopsis lyrata   | AT5G47540.1   Symbols:   Mo25 family protein   chr5:19283265-19285328 REVERSE LENGTH=343                                                                                                                                                                                                                                                                                                                                                                                                                    | 343 | 343 | 0         | 100.0 | 95.0 | 99.4 |  |
| Rsa1.0_00152.1.g6906.t1 | gb ABD65002.1  hypothetical protein 26.t00022 [Brassica oleracea]                                                                                                                                     | 394 | 394  | 0         | 100.0 | 91.1 | 95.4 | hypothetical protein 26.t00022               | gbpln | Brassica oleracea    | AT5G47530.1   Symbols:   Auxin-responsive family protein   chr5:19281471-19282870 FORWARD LENGTH=395                                                                                                                                                                                                                                                                                                                                                                                                        | 394 | 395 | 0         | 100.3 | 79.7 | 86.8 |  |
| Rsa1.0_00152.1.g6907.t1 | gb AAG51783.1 AC079679_3 reverse transcriptase, putative; 16838-20266 [Arabidopsis thaliana]                                                                                                          | 272 | 1142 | 4.00E-24  | 419.9 | 19.9 | 27.9 | reverse transcriptase, putative; 16838-20266 | gbpln | Arabidopsis thaliana | AT3G32050.1   Symbols:   unknown protein; BEST Arabidopsis thaliana protein match is: unknown protein (TAIR:AT3G14780.1); Has 22 Blast hits to 22 proteins in 2 species: Archae - 0; Bacteria - 0; Metazoa - 0; Fungi - 0; Plants - 22; Viruses - 0; Other Eukaryotes - 0 (source: NCBI BLink).   chr3:13067626-13068582 REVERSE LENGTH=175                                                                                                                                                                 | 272 | 175 | 6.00E-11  | 64.3  | 10.7 | 12.9 |  |
| Rsa1.0_00152.1.g6908.t1 | gb ABD65003.1  Ras-related GTP-binding protein, putative [Brassica oleracea]                                                                                                                          | 219 | 221  | 1.00E-120 | 100.9 | 97.3 | 99.1 | Ras-related GTP-binding protein, putative    | gbpln | Brassica oleracea    | AT5G47520.1   Symbols: AtRABA5a, RABA5a   RAB GTPase homolog A5A   chr5:19277596-19278366 REVERSE LENGTH=221                                                                                                                                                                                                                                                                                                                                                                                                | 219 | 221 | 1.00E-120 | 100.9 | 95.0 | 97.7 |  |
| Rsa1.0_00152.1.g6909.t2 | gb ABD64977.1  pectinesterase family protein [Brassica oleracea]                                                                                                                                      | 362 | 360  | 0         | 99.4  | 95.3 | 97.0 | pectinesterase family protein                | gbpln | Brassica oleracea    | AT5G47500.1   Symbols:   Pectin lyase-like superfamily protein   chr5:19271262-19272845 REVERSE LENGTH=362                                                                                                                                                                                                                                                                                                                                                                                                  | 362 | 362 | 0         | 100.0 | 91.2 | 94.5 |  |
| Rsa1.0_00152.1.g6910.t1 | gb ABD65007.1  integral membrane protein, putative [Brassica oleracea]                                                                                                                                | 345 | 376  | 0         | 109.0 | 93.9 | 96.8 | integral membrane protein, putative          | gbpln | Brassica oleracea    | AT5G47470.1   Symbols:   Nodulin MtN21 /EamA-like transporter family protein   chr5:19254598-19256378 FORWARD LENGTH=364                                                                                                                                                                                                                                                                                                                                                                                    | 345 | 364 | 1.00E-166 | 105.5 | 83.8 | 91.3 |  |
| Rsa1.0_00152.1.g6911.t1 | gb ABD65008.1  PPR repeat containing protein [Brassica oleracea]                                                                                                                                      | 586 | 583  | 0         | 99.5  | 89.8 | 95.1 | PPR repeat containing protein                | gbpln | Brassica oleracea    | AT5G47460.1   Symbols:   Pentatricopeptide repeat (PPR) superfamily protein   chr5:19252463-19254193 REVERSE LENGTH=376                                                                                                                                                                                                                                                                                                                                                                                     | 586 | 576 | 0         | 98.3  | 82.1 | 89.2 |  |
| Rsa1.0_00152.1.g6912.t5 | gb ABD64980.1  hypothetical protein 25.t00029 [Brassica oleracea]                                                                                                                                     | 192 | 109  | 2.00E-40  | 56.8  | 45.8 | 48.4 | hypothetical protein 25.t00029               | gbpln | Brassica oleracea    | AT4G17310.1   Symbols:   unknown protein; LOCATED IN: chloroplast; EXPRESSED IN: 9 plant structures; EXPRESSED DURING: LP_04 four leaves visible, 4 anthesis, petal differentiation and expansion stage; BEST Arabidopsis thaliana protein match is: unknown protein (TAIR:AT5G47455.7); Has 164 Blast hits to 164 proteins in 12 species: Archae - 0; Bacteria - 0; Metazoa - 0; Fungi - 0; Plants - 164; Viruses - 0; Other Eukaryotes - 0 (source: NCBI BLink).   chr4:9686466-9686848 REVERSE LENGTH=99 | 192 | 99  | 1.00E-29  | 51.6  | 35.9 | 41.1 |  |
| Rsa1.0_00152.1.g6913.t1 | gb ABD65010.1  tonoplast intrinsic protein, putative [Brassica oleracea]                                                                                                                              | 243 | 250  | 1.00E-127 | 102.9 | 97.9 | 99.2 | tonoplast intrinsic protein, putative        | gbpln | Brassica oleracea    | AT5G47450.1   Symbols: ATTIP2.3, TIP2.3, DELTA-TIP3   tonoplast intrinsic protein 2,3   chr5:19248509-19249466 REVERSE LENGTH=250                                                                                                                                                                                                                                                                                                                                                                           | 243 | 250 | 1.00E-125 | 102.9 | 93.4 | 97.5 |  |
| Rsa1.0_00153.1.g6914.t2 | dbj BAB02796.1  replication protein A1-like [Arabidopsis thaliana]                                                                                                                                    | 240 | 581  | 5.00E-59  | 242.1 | 42.9 | 62.1 | replication protein A1-like                  | gbpln | Arabidopsis thaliana | AT1G52950.1   Symbols:   Nucleic acid-binding, OB-fold-like protein   chr1:19725483-19728007 FORWARD LENGTH=566                                                                                                                                                                                                                                                                                                                                                                                             | 240 | 566 | 9.00E-61  | 235.8 | 42.9 | 69.6 |  |
| Rsa1.0_00153.1.g6915.t1 | # # # # # # # # # # # # # # # # # # # # # #                                                                                                                                                           |     |      |           |       |      |      |                                              |       |                      |                                                                                                                                                                                                                                                                                                                                                                                                                                                                                                             |     |     |           |       |      |      |  |
| Rsa1.0_00153.1.g6916.t1 | ref XP_002892967.1  hypothetical protein ARALYDRAFT_312744 [Arabidopsis lyrata subsp. lyrata]   gi 297338809 gb EFH69226.1  hypothetical protein ARALYDRAFT_312744 [Arabidopsis lyrata subsp. lyrata] | 462 | 482  | 1.00E-152 | 104.3 | 67.1 | 75.3 | hypothetical protein ARALYDRAFT_312744       | gbpln | Arabidopsis lyrata   | AT1G17790.1   Symbols:   DNA-binding bromodomain-containing protein   chr1:6125532-6127276 REVERSE LENGTH=487                                                                                                                                                                                                                                                                                                                                                                                               | 462 | 487 | 1.00E-152 | 105.4 | 66.7 | 74.7 |  |

|                         |                                                                                                                                                                                                      |     |      |           |       |      |      |                                            |       |                      |                                                                                                                                                                                                                                                                                                                                                                                                                                                                                                                                                      |     |      |           |       |      |      |
|-------------------------|------------------------------------------------------------------------------------------------------------------------------------------------------------------------------------------------------|-----|------|-----------|-------|------|------|--------------------------------------------|-------|----------------------|------------------------------------------------------------------------------------------------------------------------------------------------------------------------------------------------------------------------------------------------------------------------------------------------------------------------------------------------------------------------------------------------------------------------------------------------------------------------------------------------------------------------------------------------------|-----|------|-----------|-------|------|------|
| Rsa1.0_00153.1.g6917.t1 | gb[EOA39163.1] hypothetical protein CARUB_v10012112mg [Capsella rubella]                                                                                                                             | 236 | 273  | 3.00E-75  | 115.7 | 68.2 | 79.2 | hypothetical protein CARUB_v10012112mg     | gbpln | Capsella rubella     | AT1G17780.2   Symbols:   unknown protein; BEST Arabidopsis thaliana protein match is: unknown protein (TAIR:AT2G16575.1); Has 35333 Blast hits to 34131 proteins in 2444 species: Archae - 798; Bacteria - 22429; Metazoa - 974; Fungi - 991; Plants - 531; Viruses - 0; Other Eukaryotes - 9610 (source: NCBI BLink).   chr1:6124095-6125166 FORWARD LENGTH=263                                                                                                                                                                                     | 236 | 263  | 2.00E-69  | 111.4 | 64.0 | 73.7 |
| Rsa1.0_00153.1.g6918.t1 | ref[XP_002892966.1] cleavage stimulation factor 77 [Arabidopsis lyrata subsp. lyrata]   g[297338806]gb[EFH69225.1] cleavage stimulation factor 77 [Arabidopsis lyrata subsp. lyrata]                 | 736 | 734  | 0         | 99.7  | 90.1 | 94.2 | cleavage stimulation factor 77             | gbpln | Arabidopsis lyrata   | AT1G17760.1   Symbols: CSTF77, ATCSTF77   Tetratricopeptide repeat (TPR)-like superfamily protein   chr1:6110208-6116271 REVERSE LENGTH=734                                                                                                                                                                                                                                                                                                                                                                                                          | 736 | 734  | 0         | 99.7  | 88.7 | 93.5 |
| Rsa1.0_00153.1.g6919.t1 | gb[EOA39905.1] hypothetical protein CARUB_v10008585mg [Capsella rubella]                                                                                                                             | 580 | 625  | 0         | 107.8 | 85.3 | 91.6 | hypothetical protein CARUB_v10008585mg     | gbpln | Capsella rubella     | AT1G17745.1   Symbols: PGDH   D-3-phosphoglycerate dehydrogenase   chr1:6101157-6104979 FORWARD LENGTH=624                                                                                                                                                                                                                                                                                                                                                                                                                                           | 580 | 624  | 0         | 107.6 | 84.5 | 90.0 |
| Rsa1.0_00153.1.g6920.t1 | gb[EOA40186.1] hypothetical protein CARUB_v10008904mg [Capsella rubella]                                                                                                                             | 510 | 506  | 0         | 99.2  | 93.3 | 95.5 | hypothetical protein CARUB_v10008904mg     | gbpln | Capsella rubella     | AT1G17720.2   Symbols: ATB BETA   Protein phosphatase 2A, regulatory subunit PR55   chr1:6093949-6098065 REVERSE LENGTH=500                                                                                                                                                                                                                                                                                                                                                                                                                          | 510 | 500  | 0         | 98.0  | 92.2 | 94.5 |
| Rsa1.0_00153.1.g6921.t1 | ref[XP_002892964.1] phosphoric monoester hydrolase [Arabidopsis lyrata subsp. lyrata]   g[297338806]gb[EFH69223.1] phosphoric monoester hydrolase [Arabidopsis lyrata subsp. lyrata]                 | 280 | 284  | 1.00E-141 | 101.4 | 86.4 | 93.6 | phosphoric monoester hydrolase             | gbpln | Arabidopsis lyrata   | AT1G17710.1   Symbols:   Pyridoxal phosphate phosphatase-related protein   chr1:6090763-6091975 REVERSE LENGTH=279                                                                                                                                                                                                                                                                                                                                                                                                                                   | 280 | 279  | 1.00E-138 | 99.6  | 84.6 | 90.0 |
| Rsa1.0_00153.1.g6922.t1 | ref[XP_002892963.1] hypothetical protein ARALYDRAFT_471979 [Arabidopsis lyrata subsp. lyrata]   g[297338805]gb[EFH69222.1] hypothetical protein ARALYDRAFT_471979 [Arabidopsis lyrata subsp. lyrata] | 745 | 748  | 0         | 100.4 | 80.9 | 89.5 | hypothetical protein ARALYDRAFT_471979     | gbpln | Arabidopsis lyrata   | AT1G17690.1   Symbols: NOF1   FUNCTIONS IN: molecular_function unknown; INVOLVED IN: biological_process unknown; LOCATED IN: nucleus; EXPRESSED IN: 24 plant structures; EXPRESSED DURING: 13 growth stages; CONTAINS InterPro DOMAIN/s: Digestive organ expansion factor, predicted (InterPro:IPR010678); Has 25006 Blast hits to 13379 proteins in 904 species: Archae - 102; Bacteria - 5571; Metazoa - 7448; Fungi - 3168; Plants - 1056; Viruses - 466; Other Eukaryotes - 7195 (source: NCBI BLink).   chr1:6082878-6088157 REVERSE LENGTH=754 | 745 | 754  | 0         | 101.2 | 81.1 | 89.9 |
| Rsa1.0_00153.1.g6923.t1 | gb[EOA37010.1] hypothetical protein CARUB_v10010038mg [Capsella rubella]                                                                                                                             | 262 | 263  | 1.00E-107 | 100.4 | 84.0 | 91.6 | hypothetical protein CARUB_v10010038mg     | gbpln | Capsella rubella     | AT1G17620.1   Symbols:   Late embryogenesis abundant (LEA) hydroxyproline-rich glycoprotein family   chr1:6062313-6063107 FORWARD LENGTH=264                                                                                                                                                                                                                                                                                                                                                                                                         | 262 | 264  | 7.00E-98  | 100.8 | 79.8 | 89.7 |
| Rsa1.0_00153.1.g6924.t2 | gb[ACP30555.1] disease resistance protein [Brassica rapa subsp. pekinensis]                                                                                                                          | 546 | 1074 | 1.00E-143 | 196.7 | 52.2 | 69.2 | disease resistance protein                 | gbpln | Brassica rapa        | AT5G48770.1   Symbols:   Disease resistance protein (TIR-NBS-LRR class) family   chr5:19773277-19777242 REVERSE LENGTH=1190                                                                                                                                                                                                                                                                                                                                                                                                                          | 546 | 1190 | 2.00E-90  | 217.9 | 39.4 | 51.8 |
| Rsa1.0_00153.1.g6925.t1 | ref[NP_173184.2] nucleoside diphosphate kinase-like protein [Arabidopsis thaliana]   g[332191462]gb[AEE29583.1] nucleoside diphosphate kinase-like protein [Arabidopsis thaliana]                    | 176 | 181  | 9.00E-73  | 102.8 | 84.1 | 92.0 | nucleoside diphosphate kinase-like protein | gbpln | Arabidopsis thaliana | AT1G17410.1   Symbols:   Nucleoside diphosphate kinase family protein   chr1:5968627-5969780 REVERSE LENGTH=181                                                                                                                                                                                                                                                                                                                                                                                                                                      | 176 | 181  | 3.00E-75  | 102.8 | 84.1 | 92.0 |
| Rsa1.0_00153.1.g6926.t1 | gb[EOA38320.1] hypothetical protein CARUB_v10009828mg [Capsella rubella]                                                                                                                             | 295 | 309  | 1.00E-120 | 104.7 | 80.7 | 85.8 | hypothetical protein CARUB_v10009828mg     | gbpln | Capsella rubella     | AT1G17400.1   Symbols:   unknown protein; BEST Arabidopsis thaliana protein match is: unknown protein (TAIR:AT1G72490.1); Has 30201 Blast hits to 17322 proteins in 780 species: Archae - 12; Bacteria - 1396; Metazoa - 1738; Fungi - 3422; Plants - 5037; Viruses - 0; Other Eukaryotes - 2996 (source: NCBI BLink).   chr1:5960920-5962245 REVERSE LENGTH=295                                                                                                                                                                                     | 295 | 295  | 1.00E-117 | 100.0 | 85.8 | 90.8 |

|                         |                                                                                                                                                                                                                                                                                                                                                                                                                                                                                                                                                     |      |      |           |        |      |      |                                           |       |                      |                                                                                                                                                                                                                                                                                                                                                                |      |      |           |        |      |      |
|-------------------------|-----------------------------------------------------------------------------------------------------------------------------------------------------------------------------------------------------------------------------------------------------------------------------------------------------------------------------------------------------------------------------------------------------------------------------------------------------------------------------------------------------------------------------------------------------|------|------|-----------|--------|------|------|-------------------------------------------|-------|----------------------|----------------------------------------------------------------------------------------------------------------------------------------------------------------------------------------------------------------------------------------------------------------------------------------------------------------------------------------------------------------|------|------|-----------|--------|------|------|
| Rsa1.0_00153.1.g6927.t1 | ref[NP_564019.1] protein TIFY 11A [Arabidopsis thaliana] gi 75173855 sp Q9LDU5.1 T111A_ARATH RecName: Full=Protein TIFY 11A; AltName: Full=Jasmonate ZIM domain-containing protein 5 gi 8778483 gb AAF7949.1 AC022492_35 F1.L3.3 [Arabidopsis thaliana] gi 9665119 gb AAF97303.1 AC007843_6 Hypothetical protein [Arabidopsis thaliana] gi 23306360 gb AAN17407.1  expressed protein [Arabidopsis thaliana] gi 27311875 gb AAO00903.1  expressed protein [Arabidopsis thaliana] gi 332191460 gb AEE29581.1  protein TIFY 11A [Arabidopsis thaliana] | 260  | 274  | 1.00E-88  | 105.4  | 72.7 | 81.9 | protein TIFY 11A                          | gbpln | Arabidopsis thaliana | AT1G17380.1   Symbols: JAZ5, TIFY11A   jasmonate-zim-domain protein 5   chr1:5955654-5957070 REVERSE LENGTH=274                                                                                                                                                                                                                                                | 260  | 274  | 3.00E-91  | 105.4  | 72.7 | 81.9 |
| Rsa1.0_00153.1.g6928.t1 | #                                                                                                                                                                                                                                                                                                                                                                                                                                                                                                                                                   | #    | #    | #         | #      | #    | #    | -                                         | ----  | ----                 | #                                                                                                                                                                                                                                                                                                                                                              | #    | #    | #         | #      | #    |      |
| Rsa1.0_00153.1.g6929.t1 | gb AAK43485.1 AC084807_10 polyprotein, putative [Arabidopsis thaliana] gi 225898008 dbj BAH30336.1  hypothetical protein [Arabidopsis thaliana]                                                                                                                                                                                                                                                                                                                                                                                                     | 1386 | 1459 | 0         | 105.3  | 52.5 | 70.1 | polyprotein, putative                     | gbpln | Arabidopsis thaliana | AT4G23180.1   Symbols: CRK8   cysteine-rich RLK (RECEPTOR-like protein kinase) 8   chr4:12129485-12134086 FORWARD LENGTH=1262                                                                                                                                                                                                                                  | 1386 | 1262 | 1.00E-114 | 91.1   | 14.1 | 20.5 |
| Rsa1.0_00153.1.g6930.t1 | ref[NP_173179.4] uncharacterized protein [Arabidopsis thaliana] gi 9665120 gb AAF97304.1 AC007843_7 Hypothetical protein [Arabidopsis thaliana] gi 332191457 gb AEE29578.1  uncharacterized protein AT1G17360 [Arabidopsis thaliana]                                                                                                                                                                                                                                                                                                                | 709  | 1061 | 1.00E-116 | 149.6  | 38.2 | 44.9 | uncharacterized protein                   | gbpln | Arabidopsis thaliana | AT1G17360.1   Symbols:   BEST Arabidopsis thaliana protein match is: COP1-interacting protein-related (TAIR:AT1G72410.1); Has 9949 Blast hits to 7480 proteins in 576 species: Archae - 12; Bacteria - 1007; Metazoa - 3636; Fungi - 982; Plants - 444; Viruses - 50; Other Eukaryotes - 3818 (source: NCBI BLINK).   chr1:5947441-5951399 FORWARD LENGTH=1061 | 709  | 1061 | 1.00E-118 | 149.6  | 38.2 | 44.9 |
| Rsa1.0_00153.1.g6931.t1 | ref[NP_849679.1] SAUR-like auxin-responsive protein family [Arabidopsis thaliana] gi 9665126 gb AAF97310.1 AC007843_13 Hypothetical protein [Arabidopsis thaliana] gi 26452787 dbj BAC43474.1  unknown protein [Arabidopsis thaliana] gi 109946549 gb ABG48453.1  At1g17345 [Arabidopsis thaliana] gi 332191454 gb AEE29575.1  SAUR-like auxin-responsive protein family [Arabidopsis thaliana]                                                                                                                                                     | 133  | 131  | 4.00E-51  | 98.5   | 75.2 | 85.7 | SAUR-like auxin-responsive protein family | gbpln | Arabidopsis thaliana | AT1G17345.1   Symbols:   SAUR-like auxin-responsive protein family   chr1:5940525-5940920 FORWARD LENGTH=131                                                                                                                                                                                                                                                   | 133  | 131  | 1.00E-53  | 98.5   | 75.2 | 85.7 |
| Rsa1.0_00153.1.g6932.t1 | ref[NP_001185380.1] alanine aminotransferase 2 [Arabidopsis thaliana] gi 332191786 gb AEE35307.1  alanine aminotransferase 2 [Arabidopsis thaliana]                                                                                                                                                                                                                                                                                                                                                                                                 | 52   | 553  | 4.00E-19  | 1063.5 | 88.5 | 90.4 | alanine aminotransferase 2                | gbpln | Arabidopsis thaliana | AT1G72330.3   Symbols: ALAAT2   alanine aminotransferase 2   chr1:27233637-27236571 FORWARD LENGTH=553                                                                                                                                                                                                                                                         | 52   | 553  | 7.00E-22  | 1063.5 | 88.5 | 90.4 |
| Rsa1.0_00153.1.g6933.t1 | ref[XP_002887430.1] ALAAT2 [Arabidopsis lyrata subsp. lyrata] gi 297333271 gb EFH63689.1  ALAAT2 [Arabidopsis lyrata subsp. lyrata]                                                                                                                                                                                                                                                                                                                                                                                                                 | 546  | 535  | 0         | 98.0   | 86.1 | 92.1 | ALAAT2                                    | gbpln | Arabidopsis lyrata   | AT1G72330.1   Symbols: ALAAT2   alanine aminotransferase 2   chr1:27233637-27236571 FORWARD LENGTH=540                                                                                                                                                                                                                                                         | 546  | 540  | 0         | 98.9   | 86.3 | 92.5 |
| Rsa1.0_00153.1.g6934.t1 | ref[XP_002892943.1] hypothetical protein ARALYDRAFT_889130 [Arabidopsis lyrata subsp. lyrata] gi 297338785 gb EFH69202.1  hypothetical protein ARALYDRAFT_889130 [Arabidopsis lyrata subsp. lyrata]                                                                                                                                                                                                                                                                                                                                                 | 553  | 583  | 0         | 105.4  | 83.0 | 90.2 | hypothetical protein ARALYDRAFT_889130    | gbpln | Arabidopsis lyrata   | AT1G17270.1   Symbols:   O-fucosyltransferase family protein   chr1:5909443-5911624 REVERSE LENGTH=564                                                                                                                                                                                                                                                         | 553  | 564  | 0         | 102.0  | 80.5 | 88.1 |
| Rsa1.0_00153.1.g6935.t1 | gb EOA39598.1  hypothetical protein CARUB_v10008225mg [Capsella rubella]                                                                                                                                                                                                                                                                                                                                                                                                                                                                            | 944  | 947  | 0         | 100.3  | 90.7 | 95.9 | hypothetical protein CARUB_v10008225mg    | gbpln | Capsella rubella     | AT1G17260.1   Symbols: AHA10   autoinhibited H(+)-ATPase isoform 10   chr1:5904058-5908898 FORWARD LENGTH=947                                                                                                                                                                                                                                                  | 944  | 947  | 0         | 100.3  | 91.2 | 96.1 |
| Rsa1.0_00153.1.g6936.t1 | gb EOA37109.1  hypothetical protein CARUB_v10010315mg [Capsella rubella]                                                                                                                                                                                                                                                                                                                                                                                                                                                                            | 204  | 204  | 3.00E-97  | 100.0  | 83.8 | 93.1 | hypothetical protein CARUB_v10010315mg    | gbpln | Capsella rubella     | AT1G17200.1   Symbols:   Uncharacterised protein family (UPF0497)   chr1:5878493-5879871 FORWARD LENGTH=204                                                                                                                                                                                                                                                    | 204  | 204  | 3.00E-96  | 100.0  | 83.3 | 92.2 |
| Rsa1.0_00153.1.g6937.t1 | #                                                                                                                                                                                                                                                                                                                                                                                                                                                                                                                                                   | #    | #    | #         | #      | #    | #    | -                                         | ----  | ----                 | #                                                                                                                                                                                                                                                                                                                                                              | #    | #    | #         | #      | #    |      |
| Rsa1.0_00153.1.g6938.t1 | gb EOA38496.1  hypothetical protein CARUB_v10010264mg [Capsella rubella]                                                                                                                                                                                                                                                                                                                                                                                                                                                                            | 219  | 218  | 1.00E-108 | 99.5   | 85.4 | 90.9 | hypothetical protein CARUB_v10010264mg    | gbpln | Capsella rubella     | AT1G17190.1   Symbols: ATGSTU26, GSTU26   glutathione S-transferase tau 26   chr1:5875452-5876375 FORWARD LENGTH=220                                                                                                                                                                                                                                           | 219  | 220  | 1.00E-109 | 100.5  | 84.0 | 90.0 |
| Rsa1.0_00153.1.g6939.t1 | #                                                                                                                                                                                                                                                                                                                                                                                                                                                                                                                                                   | #    | #    | #         | #      | #    | #    | -                                         | ----  | ----                 | #                                                                                                                                                                                                                                                                                                                                                              | #    | #    | #         | #      | #    |      |
| Rsa1.0_00153.1.g6940.t1 | ref[NP_001117300.1] VQ motif-containing protein [Arabidopsis thaliana] gi 98961981 gb ABF59320.1  unknown protein [Arabidopsis thaliana] gi 332191429 gb AEE29550.1  VQ motif-containing protein [Arabidopsis thaliana]                                                                                                                                                                                                                                                                                                                             | 95   | 98   | 8.00E-38  | 103.2  | 83.2 | 89.5 | VQ motif-containing protein               | gbpln | Arabidopsis thaliana | AT1G17147.1   Symbols:   VQ motif-containing protein   chr1:5863654-5863950 REVERSE LENGTH=98                                                                                                                                                                                                                                                                  | 95   | 98   | 1.00E-40  | 103.2  | 83.2 | 89.5 |

|                         |                                                                                                                                                                                                                                                                                                                                                                                                                                                                                                                                                                                                          |     |     |           |       |      |      |                                                                                                                                                                                                            |       |                      |                                                                                                                                                                                                                                                                                                                                                                                                                                  |     |     |           |       |      |      |
|-------------------------|----------------------------------------------------------------------------------------------------------------------------------------------------------------------------------------------------------------------------------------------------------------------------------------------------------------------------------------------------------------------------------------------------------------------------------------------------------------------------------------------------------------------------------------------------------------------------------------------------------|-----|-----|-----------|-------|------|------|------------------------------------------------------------------------------------------------------------------------------------------------------------------------------------------------------------|-------|----------------------|----------------------------------------------------------------------------------------------------------------------------------------------------------------------------------------------------------------------------------------------------------------------------------------------------------------------------------------------------------------------------------------------------------------------------------|-----|-----|-----------|-------|------|------|
| Rsa1.0_00153.1.g6941.t1 | gb EOA38153.1  hypothetical protein CARUB_v10009626mg [Capsella rubella]                                                                                                                                                                                                                                                                                                                                                                                                                                                                                                                                 | 333 | 344 | 1.00E-127 | 103.3 | 79.9 | 86.5 | hypothetical protein CARUB_v10009626mg                                                                                                                                                                     | gbpln | Capsella rubella     | AT1G17140.2   Symbols: ICR1, RIP1   interactor of constitutive active rops 1   chr1:5856740-5857861 REVERSE LENGTH=344                                                                                                                                                                                                                                                                                                           | 333 | 344 | 1.00E-126 | 103.3 | 79.0 | 85.6 |
| Rsa1.0_00153.1.g6942.t1 | ref XP_002892935.1  ubiquitin-specific protease 15 [Arabidopsis lyrata subsp. lyrata] gi 297338777 gb EFH69194.1  ubiquitin-specific protease 15 [Arabidopsis lyrata subsp. lyrata]                                                                                                                                                                                                                                                                                                                                                                                                                      | 922 | 926 | 0         | 100.4 | 81.9 | 87.1 | ubiquitin-specific protease 15                                                                                                                                                                             | gbpln | Arabidopsis lyrata   | AT1G17110.1   Symbols: UBPI5   ubiquitin-specific protease 15   chr1:5845816-5849889 REVERSE LENGTH=924                                                                                                                                                                                                                                                                                                                          | 922 | 924 | 0         | 100.2 | 81.6 | 87.1 |
| Rsa1.0_00153.1.g6943.t1 | gb EOA36893.1  hypothetical protein CARUB_v10011434mg [Capsella rubella]                                                                                                                                                                                                                                                                                                                                                                                                                                                                                                                                 | 94  | 92  | 1.00E-26  | 97.9  | 68.1 | 79.8 | hypothetical protein CARUB_v10011434mg                                                                                                                                                                     | gbpln | Capsella rubella     | AT1G17090.2   Symbols:   unknown protein; INVOLVED IN: biological_process unknown; LOCATED IN: endomembrane system; EXPRESSED IN: 17 plant structures; EXPRESSED DURING: 7 growth stages; Has 5 Blast hits to 5 proteins in 2 species; Archae - 0; Bacteria - 0; Metazoa - 0; Fungi - 0; Plants - 5; Viruses - 0; Other Eukaryotes - 0 (source: NCBI BLink).   chr1:5842464-5842745 REVERSE LENGTH=93                            | 94  | 93  | 4.00E-24  | 98.9  | 66.0 | 76.6 |
| Rsa1.0_00153.1.g6944.t1 | gb EOA38632.1  hypothetical protein CARUB_v10010518mg [Capsella rubella]                                                                                                                                                                                                                                                                                                                                                                                                                                                                                                                                 | 159 | 158 | 7.00E-72  | 99.4  | 84.9 | 93.1 | hypothetical protein CARUB_v10010518mg                                                                                                                                                                     | gbpln | Capsella rubella     | AT1G17080.1   Symbols:   Ribosomal protein L18ae family   chr1:5840458-5841536 REVERSE LENGTH=154                                                                                                                                                                                                                                                                                                                                | 159 | 154 | 1.00E-71  | 96.9  | 85.5 | 91.2 |
| Rsa1.0_00153.1.g6945.t1 | sp Q9SHG5.2 C72C1_ARATH RecName: Full=Cytochrome P450 72C1; AltName: Full=Protein CHIBI 2; AltName: Full=Protein DWARFISH WITH LOW FERTILITY; AltName: Full=Protein SHRINK 1; AltName: Full=Protein SUPPRESSOR OF PHYB-4 PROTEIN 7                                                                                                                                                                                                                                                                                                                                                                       | 515 | 519 | 0         | 100.8 | 89.3 | 94.6 | RecName: Full=Cytochrome P450 72C1; AltName: Full=Protein CHIBI 2; AltName: Full=Protein DWARFISH WITH LOW FERTILITY; AltName: Full=Protein SHRINK 1; AltName: Full=Protein SUPPRESSOR OF PHYB-4 PROTEIN 7 | ----  | ----                 | AT1G17060.1   Symbols: CYP72C1, SOB7   cytochrome p450 72c1   chr1:5832282-5835255 REVERSE LENGTH=476                                                                                                                                                                                                                                                                                                                            | 515 | 476 | 0         | 92.4  | 82.1 | 86.8 |
| Rsa1.0_00153.1.g6946.t1 | gb EOA37214.1  hypothetical protein CARUB_v10010695mg [Capsella rubella]                                                                                                                                                                                                                                                                                                                                                                                                                                                                                                                                 | 114 | 114 | 6.00E-56  | 100.0 | 91.2 | 94.7 | hypothetical protein CARUB_v10010695mg                                                                                                                                                                     | gbpln | Capsella rubella     | AT1G16960.1   Symbols:   Ubiquitin domain-containing protein   chr1:5799998-5800624 FORWARD LENGTH=114                                                                                                                                                                                                                                                                                                                           | 114 | 114 | 9.00E-57  | 100.0 | 88.6 | 93.0 |
| Rsa1.0_00153.1.g6947.t1 | gb EOA39391.1  hypothetical protein CARUB_v10012478mg [Capsella rubella]                                                                                                                                                                                                                                                                                                                                                                                                                                                                                                                                 | 59  | 93  | 8.00E-15  | 157.6 | 76.3 | 86.4 | hypothetical protein CARUB_v10012478mg                                                                                                                                                                     | gbpln | Capsella rubella     | AT1G16950.1   Symbols:   unknown protein; FUNCTIONS IN: molecular_function unknown; INVOLVED IN: biological_process unknown; LOCATED IN: endomembrane system; EXPRESSED IN: stamen; EXPRESSED DURING: 4 anthesis; Has 17 Blast hits to 17 proteins in 5 species; Archae - 0; Bacteria - 0; Metazoa - 0; Fungi - 0; Plants - 17; Viruses - 0; Other Eukaryotes - 0 (source: NCBI BLink).   chr1:5796083-5796364 FORWARD LENGTH=93 | 59  | 93  | 4.00E-16  | 157.6 | 72.9 | 83.1 |
| Rsa1.0_00153.1.g6948.t1 | ref NP_173136.1  Ras-related protein RABA1b [Arabidopsis thaliana] gi 3024526 sp Q39222.1 RAA1B_ARATH RecName: Full=Ras-related protein RABA1b; Short=AtRABA1b; AltName: Full=Ras-related protein Rab11; Short=AtRab11 gi 9802771 gb AAF99840.1 AC051629.7 GTP-binding protein Rab11 [Arabidopsis thaliana] gi 451860 gb AAA32872.1  small GTP-binding protein [Arabidopsis thaliana] gi 30102592 gb AAP21214.1  At1g16920 [Arabidopsis thaliana] gi 110735723 dbj BAE99841.1  hypothetical protein [Arabidopsis thaliana] gi 332191401 gb AEE29522.1  Ras-related protein RABA1b [Arabidopsis thaliana] | 216 | 216 | 1.00E-119 | 100.0 | 96.8 | 98.1 | Ras-related protein RABA1b                                                                                                                                                                                 | gbpln | Arabidopsis thaliana | AT1G16920.1   Symbols: RAB11, ATRABA1B, RABA1b   RAB GTPase homolog A1B   chr1:5787489-5789147 REVERSE LENGTH=216                                                                                                                                                                                                                                                                                                                | 216 | 216 | 1.00E-121 | 100.0 | 96.8 | 98.1 |
| Rsa1.0_00153.1.g6949.t1 | ref XP_002892928.1  sugar binding protein [Arabidopsis lyrata subsp. lyrata] gi 297338770 gb EFH69187.1  sugar binding protein [Arabidopsis lyrata subsp. lyrata]                                                                                                                                                                                                                                                                                                                                                                                                                                        | 442 | 424 | 1.00E-159 | 95.9  | 65.6 | 71.7 | sugar binding protein                                                                                                                                                                                      | gbpln | Arabidopsis lyrata   | AT1G16905.1   Symbols:   Curculin-like (mannose-binding) lectin family protein   chr1:5782546-5783817 REVERSE LENGTH=423                                                                                                                                                                                                                                                                                                         | 442 | 423 | 1.00E-161 | 95.7  | 65.6 | 72.9 |
| Rsa1.0_00153.1.g6950.t5 | #                                                                                                                                                                                                                                                                                                                                                                                                                                                                                                                                                                                                        | #   | #   | #         | #     | #    | #    | -                                                                                                                                                                                                          | ----  | ----                 | #                                                                                                                                                                                                                                                                                                                                                                                                                                | #   | #   | #         | #     | #    |      |



|                         |                                                                                                                                                                                                                                                                                                                                                                                                                                                                                                                                                                                                                                                                                                                                          |      |     |           |       |       |       |                                                                             |       |                      |                                                                                                                                                |      |     |           |       |       |       |
|-------------------------|------------------------------------------------------------------------------------------------------------------------------------------------------------------------------------------------------------------------------------------------------------------------------------------------------------------------------------------------------------------------------------------------------------------------------------------------------------------------------------------------------------------------------------------------------------------------------------------------------------------------------------------------------------------------------------------------------------------------------------------|------|-----|-----------|-------|-------|-------|-----------------------------------------------------------------------------|-------|----------------------|------------------------------------------------------------------------------------------------------------------------------------------------|------|-----|-----------|-------|-------|-------|
| Rsa1.0_00153.1.g6951.t1 | ref[NP_173134.2] alpha-1,2-mannosyltransferase [Arabidopsis thaliana]<br>gi 75173357 sp Q9FZ49.1 ALG9_ARATH<br>RecName: Full=Dol-P-Man:Man(6)GlcNAc(2)-PP-Dol alpha-1,2-mannosyltransferase; AltName: Full=Alpha-1,2-mannosyltransferase ALG9; AltName: Full=Asparagine-linked glycosylation protein 9; AltName: Full=Dol-P-Man:Man(8)GlcNAc(2)-PP-Dol alpha-1,2-mannosyltransferase<br>gi 9802774 gb AAF99843.1 AC051629_10 Hypothetical protein [Arabidopsis thaliana] gi 22655224 gb AAM98202.1  Ser/Thr protein kinase, putative [Arabidopsis thaliana] gi 3409891 gb AAQ56838.1  At1g16900 [Arabidopsis thaliana] gi 332191397 gb AEE29518.1  Dol-P-Man:Man(6)GlcNAc(2)-PP-Dol alpha-1,2-mannosyltransferase [Arabidopsis thaliana] | 571  | 570 | 0         | 99.8  | 90.5  | 96.5  | alpha-1,2-mannosyltransferase                                               | gbpln | Arabidopsis thaliana | AT1G16900.1   Symbols:   Alg9-like mannosyltransferase family   chr1:5779262-5782303 REVERSE LENGTH=570                                        | 571  | 570 | 0         | 99.8  | 90.5  | 96.5  |
| Rsa1.0_00153.1.g6952.t1 | ref XP_003633254.1  PREDICTED: ubiquitin-conjugating enzyme E2 36 [Vitis vinifera]                                                                                                                                                                                                                                                                                                                                                                                                                                                                                                                                                                                                                                                       | 120  | 163 | 5.00E-65  | 135.8 | 100.0 | 100.0 | PREDICTED: ubiquitin-conjugating enzyme E2 36                               | gbpln | Vitis vinifera       | AT1G16890.2   Symbols: UBC36, UBC13B   uridylyltransferase-related   chr1:5776550-5778327 REVERSE LENGTH=153                                   | 120  | 153 | 1.00E-67  | 127.5 | 100.0 | 100.0 |
| Rsa1.0_00153.1.g6953.t1 | gb EOA38375.1  hypothetical protein CARUB_v10009908mg [Capsella rubella]                                                                                                                                                                                                                                                                                                                                                                                                                                                                                                                                                                                                                                                                 | 297  | 291 | 1.00E-139 | 98.0  | 86.5  | 89.9  | hypothetical protein CARUB_v10009908mg                                      | gbpln | Capsella rubella     | AT1G16880.1   Symbols:   uridylyltransferase-related   chr1:5773796-5776125 FORWARD LENGTH=290                                                 | 297  | 290 | 1.00E-140 | 97.6  | 85.9  | 89.9  |
| Rsa1.0_00153.1.g6954.t1 | gb EOA40305.1  hypothetical protein CARUB_v10009033mg [Capsella rubella]                                                                                                                                                                                                                                                                                                                                                                                                                                                                                                                                                                                                                                                                 | 476  | 474 | 0         | 99.6  | 88.9  | 93.3  | hypothetical protein CARUB_v10009033mg                                      | gbpln | Capsella rubella     | AT1G16860.1   Symbols:   Ubiquitin-specific protease family C19-related protein   chr1:5768280-5770183 FORWARD LENGTH=474                      | 476  | 474 | 0         | 99.6  | 88.4  | 92.6  |
| Rsa1.0_00153.1.g6955.t1 | gb EOA36658.1  hypothetical protein CARUB_v10011947mg [Capsella rubella]                                                                                                                                                                                                                                                                                                                                                                                                                                                                                                                                                                                                                                                                 | 150  | 144 | 1.00E-63  | 96.0  | 83.3  | 88.0  | hypothetical protein CARUB_v10011947mg                                      | gbpln | Capsella rubella     | AT1G16790.1   Symbols:   ribosomal protein-related   chr1:5744638-5745072 FORWARD LENGTH=144                                                   | 150  | 144 | 1.00E-61  | 96.0  | 82.0  | 87.3  |
| Rsa1.0_00153.1.g6956.t3 | ref NP_173120.1  Protein kinase protein with adenine nucleotide alpha hydrolases-like domain [Arabidopsis thaliana] gi 332191372 gb AEE29493.1  Protein kinase protein with adenine nucleotide alpha hydrolases-like domain [Arabidopsis thaliana]                                                                                                                                                                                                                                                                                                                                                                                                                                                                                       | 1095 | 758 | 0         | 69.2  | 60.1  | 64.0  | Protein kinase protein with adenine nucleotide alpha hydrolases-like domain | gbpln | Arabidopsis thaliana | AT1G16760.1   Symbols:   Protein kinase protein with adenine nucleotide alpha hydrolases-like domain   chr1:5734234-5737307 FORWARD LENGTH=758 | 1095 | 758 | 0         | 69.2  | 60.1  | 64.0  |
| Rsa1.0_00153.1.g6957.t1 | gb EOA36852.1  hypothetical protein CARUB_v10008799mg [Capsella rubella]                                                                                                                                                                                                                                                                                                                                                                                                                                                                                                                                                                                                                                                                 | 525  | 537 | 0         | 102.3 | 87.4  | 92.2  | hypothetical protein CARUB_v10008799mg                                      | gbpln | Capsella rubella     | AT1G16750.1   Symbols:   Protein of unknown function, DUF547   chr1:5729221-5731689 REVERSE LENGTH=529                                         | 525  | 529 | 0         | 100.8 | 85.1  | 90.5  |
| Rsa1.0_00153.1.g6958.t1 | ref NP_173118.1  Ribosomal protein L20 [Arabidopsis thaliana] gi 21554397 gb AAM63502.1  ribosomal protein L20, putative [Arabidopsis thaliana] gi 88011169 gb ABD38912.1  At1g16740 [Arabidopsis thaliana] gi 332191370 gb AEE29491.1  Ribosomal protein L20 [Arabidopsis thaliana] gi 482574488 gb EOA38675.1  hypothetical protein CARUB_v10010647mg [Capsella rubella]                                                                                                                                                                                                                                                                                                                                                               | 64   | 126 | 1.00E-28  | 196.9 | 98.4  | 98.4  | Ribosomal protein L20                                                       | gbpln | Arabidopsis thaliana | AT1G16740.1   Symbols:   Ribosomal protein L20   chr1:5727773-5728950 FORWARD LENGTH=126                                                       | 64   | 126 | 2.00E-31  | 196.9 | 98.4  | 98.4  |
| Rsa1.0_00154.1.g6959.t1 | # # # # # # # # -                                                                                                                                                                                                                                                                                                                                                                                                                                                                                                                                                                                                                                                                                                                        | #    | #   | #         | #     | #     | #     | -                                                                           | ----  | ----                 | AT5G46730.2   Symbols:   glycine-rich protein   chr5:18964030-18964902 FORWARD LENGTH=246                                                      | 114  | 246 | 1.00E-10  | 215.8 | 22.8  | 23.7  |
| Rsa1.0_00154.1.g6960.t1 | gb EOA14095.1  hypothetical protein CARUB_v10027235mg [Capsella rubella] gi 482549902 gb EOA14096.1  hypothetical protein CARUB_v10027235mg [Capsella rubella]                                                                                                                                                                                                                                                                                                                                                                                                                                                                                                                                                                           | 174  | 175 | 2.00E-74  | 100.6 | 79.9  | 87.9  | hypothetical protein CARUB_v10027235mg                                      | gbpln | Capsella rubella     | AT5G46720.1   Symbols:   AIG2-like (avirulence induced gene) family protein   chr5:18959183-18959710 FORWARD LENGTH=175                        | 174  | 175 | 5.00E-74  | 100.6 | 80.5  | 87.4  |
| Rsa1.0_00154.1.g6961.t1 | # # # # # # # # -                                                                                                                                                                                                                                                                                                                                                                                                                                                                                                                                                                                                                                                                                                                        | #    | #   | #         | #     | #     | #     | -                                                                           | ----  | ----                 | # # # # # # #                                                                                                                                  | #    | #   | #         | #     | #     | #     |
| Rsa1.0_00154.1.g6962.t1 | gb EOA17250.1  hypothetical protein CARUB_v10005524mg, partial [Capsella rubella]                                                                                                                                                                                                                                                                                                                                                                                                                                                                                                                                                                                                                                                        | 226  | 262 | 9.00E-88  | 115.9 | 71.7  | 81.4  | hypothetical protein CARUB_v10005524mg, partial                             | gbpln | Capsella rubella     | AT4G17900.1   Symbols:   PLATZ transcription factor family protein   chr4:9946046-9947697 FORWARD LENGTH=227                                   | 226  | 227 | 3.00E-90  | 100.4 | 72.6  | 81.0  |

|                         |                                                                                                                                                                                                                                                                                                                                                                                                                                                                                                                                                        |      |      |           |       |      |      |                                          |       |                      |                                                                                                                               |      |      |           |       |      |      |
|-------------------------|--------------------------------------------------------------------------------------------------------------------------------------------------------------------------------------------------------------------------------------------------------------------------------------------------------------------------------------------------------------------------------------------------------------------------------------------------------------------------------------------------------------------------------------------------------|------|------|-----------|-------|------|------|------------------------------------------|-------|----------------------|-------------------------------------------------------------------------------------------------------------------------------|------|------|-----------|-------|------|------|
| Rsa1.0_00154.1.g6963.t1 | refNP_199482.1  Tetraspanin family protein [Arabidopsis thaliana] gi 75262522 sp Q9FIQ5.1 TRN2_ARATH RecName: Full=Protein TORNADO 2; AltName: Full=Protein EKEKO; AltName: Full=TETRASPANIN-1 gi 9758506 dbj BAB08914.1 senescence-associated protein 5-like protein [Arabidopsis thaliana] gi 56381915 gb AAV85676.1  At5g46700 [Arabidopsis thaliana] gi 110740669 dbj BAE98437.1 senescence-associated protein 5-like protein [Arabidopsis thaliana] gi 332008032 gb AED95415.1  Tetraspanin family protein [Arabidopsis thaliana]                 | 269  | 269  | 1.00E-127 | 100.0 | 90.7 | 95.9 | Tetraspanin family protein               | gbpln | Arabidopsis thaliana | AT5G46700.1   Symbols: TET1, TRN2   Tetraspanin family protein   chr5:18951035-18952439 FORWARD LENGTH=269                    | 269  | 269  | 1.00E-130 | 100.0 | 90.7 | 95.9 |
| Rsa1.0_00154.1.g6964.t1 | refXP_002865171.1  zinc finger family protein [Arabidopsis lyrata subsp. lyrata] gi 297311006 gb EFH41430.1  zinc finger family protein [Arabidopsis lyrata subsp. lyrata]                                                                                                                                                                                                                                                                                                                                                                             | 334  | 290  | 1.00E-104 | 86.8  | 59.0 | 66.8 | zinc finger family protein               | gbpln | Arabidopsis lyrata   | AT5G46650.1   Symbols:   RING/U-box superfamily protein   chr5:18930443-18931312 FORWARD LENGTH=289                           | 334  | 289  | 1.00E-105 | 86.5  | 57.5 | 65.9 |
| Rsa1.0_00154.1.g6965.t2 | gb EOA13488.1  hypothetical protein CARUB_v10026550mg [Capsella rubella]                                                                                                                                                                                                                                                                                                                                                                                                                                                                               | 370  | 396  | 5.00E-97  | 107.0 | 65.9 | 75.7 | hypothetical protein CARUB_v10026550mg   | gbpln | Capsella rubella     | AT5G46640.1   Symbols:   AT hook motif DNA-binding family protein   chr5:18924670-18926292 FORWARD LENGTH=386                 | 370  | 386  | 2.00E-88  | 104.3 | 65.1 | 74.3 |
| Rsa1.0_00154.1.g6966.t1 | refNP_199475.1  AP-2 complex subunit mu-1 [Arabidopsis thaliana] gi 297794577 ref XP_002865173.1  clathrin adaptor complexes medium subunit family protein [Arabidopsis lyrata subsp. lyrata] gi 2271477 gb AAB88283.1  AP47/50p [Arabidopsis thaliana] gi 9758499 dbj BAB08907.1  AP47/50p [Arabidopsis thaliana] gi 297311008 gb EFH41432.1  clathrin adaptor complexes medium subunit family protein [Arabidopsis lyrata subsp. lyrata] gi 332008024 gb AED95407.1  clathrin adaptor complexes medium subunit family protein [Arabidopsis thaliana] | 439  | 438  | 0         | 99.8  | 99.3 | 99.8 | AP-2 complex subunit mu-1                | gbpln | Arabidopsis lyrata   | AT5G46630.1   Symbols:   Clathrin adaptor complexes medium subunit family protein   chr5:18920580-18923252 FORWARD LENGTH=438 | 439  | 438  | 0         | 99.8  | 99.3 | 99.8 |
| Rsa1.0_00154.1.g6967.t1 | refXP_002868934.1  hypothetical protein ARALYDRAFT_912478 [Arabidopsis lyrata subsp. lyrata] gi 297314770 gb EFH45193.1  hypothetical protein ARALYDRAFT_912478 [Arabidopsis lyrata subsp. lyrata]                                                                                                                                                                                                                                                                                                                                                     | 357  | 386  | 4.00E-68  | 108.1 | 47.3 | 61.1 | hypothetical protein ARALYDRAFT_912478   | gbpln | Arabidopsis lyrata   | AT4G39580.1   Symbols:   Galactose oxidase/kelch repeat superfamily protein   chr4:18385684-18386811 REVERSE LENGTH=375       | 357  | 375  | 1.00E-31  | 105.0 | 34.2 | 51.3 |
| Rsa1.0_00154.1.g6968.t1 | refNP_199466.1  ABC transporter B family member 7 [Arabidopsis thaliana] gi 75333860 sp Q9FHF1.1 AB7B_ARATH RecName: Full=ABC transporter B family member 7; Short=ABC transporter; ABOB.7; Short=AtABCB7; AltName: Full=Multidrug resistance protein 7; AltName: Full=P-glycoprotein 7 gi 10177591 dbj BAB10822.1  multidrug resistance p-glycoprotein [Arabidopsis thaliana] gi 332008013 gb AED95396.1  ABC transporter B family member 7 [Arabidopsis thaliana]                                                                                    | 864  | 1248 | 0         | 144.4 | 79.9 | 88.7 | ABC transporter B family member 7        | gbpln | Arabidopsis thaliana | AT5G46540.1   Symbols: PGP7   P-glycoprotein 7   chr5:18877192-18882347 REVERSE LENGTH=1248                                   | 864  | 1248 | 0         | 144.4 | 79.9 | 88.7 |
| Rsa1.0_00154.1.g6969.t3 | refNP_199465.4  AWP19-like protein [Arabidopsis thaliana] gi 332008012 gb AED95395.1  AWP19-like protein [Arabidopsis thaliana]                                                                                                                                                                                                                                                                                                                                                                                                                        | 286  | 157  | 3.00E-50  | 54.9  | 35.0 | 37.4 | AWP19-like protein                       | gbpln | Arabidopsis thaliana | AT5G46530.1   Symbols:   AWP19-like family protein   chr5:18875576-18876779 FORWARD LENGTH=157                                | 286  | 157  | 8.00E-53  | 54.9  | 35.0 | 37.4 |
| Rsa1.0_00154.1.g6970.t1 | gb ACP30561.1  disease resistance protein [Brassica rapa subsp. pekinensis]                                                                                                                                                                                                                                                                                                                                                                                                                                                                            | 1110 | 1005 | 0         | 90.5  | 76.8 | 79.5 | disease resistance protein               | gbpln | Brassica rapa        | AT5G46450.1   Symbols:   Disease resistance protein (TIR-NBS-LRR class) family   chr5:18835618-18839546 FORWARD LENGTH=1123   | 1110 | 1123 | 0         | 101.2 | 57.8 | 71.0 |
| Rsa1.0_00154.1.g6971.t1 | emb CAB39638.1  RNA-directed DNA polymerase-like protein [Arabidopsis thaliana] gi 7267666 emb CAB78094.1  RNA-directed DNA polymerase-like protein [Arabidopsis thaliana]                                                                                                                                                                                                                                                                                                                                                                             | 393  | 1274 | 6.00E-53  | 324.2 | 32.3 | 47.6 | RNA-directed DNA polymerase-like protein | gbpln | Arabidopsis thaliana | AT1G10000.1   Symbols:   Ribonuclease H-like superfamily protein   chr1:3263877-3264788 REVERSE LENGTH=303                    | 393  | 303  | 1.00E-47  | 77.1  | 29.3 | 40.7 |

|                         |                                                                                                                                                                                                                                                                                                                                                                                                                                                                                                                                                                                                                                                                                                                                                                                                                                                                                                                                                                                                                                                                                                                                     |      |      |           |       |      |      |                                             |       |                      |                                                                                                                                         |      |      |           |       |      |      |
|-------------------------|-------------------------------------------------------------------------------------------------------------------------------------------------------------------------------------------------------------------------------------------------------------------------------------------------------------------------------------------------------------------------------------------------------------------------------------------------------------------------------------------------------------------------------------------------------------------------------------------------------------------------------------------------------------------------------------------------------------------------------------------------------------------------------------------------------------------------------------------------------------------------------------------------------------------------------------------------------------------------------------------------------------------------------------------------------------------------------------------------------------------------------------|------|------|-----------|-------|------|------|---------------------------------------------|-------|----------------------|-----------------------------------------------------------------------------------------------------------------------------------------|------|------|-----------|-------|------|------|
| Rsa1.0_00154.1.g6972.t1 | refXP_002868793.1   hypothetical protein ARALYDRAFT_916529 [Arabidopsis lyrata subsp. lyrata] gi 297314629 gb EFH45052.1   hypothetical protein ARALYDRAFT_916529 [Arabidopsis lyrata subsp. lyrata]                                                                                                                                                                                                                                                                                                                                                                                                                                                                                                                                                                                                                                                                                                                                                                                                                                                                                                                                | 250  | 292  | 1.00E-77  | 116.8 | 60.4 | 76.0 | hypothetical protein ARALYDRAFT_916529      | gbpln | Arabidopsis lyrata   | AT5G38280.1   Symbols: PR5K   PR5-like receptor kinase   chr5:15293325-15295838 REVERSE LENGTH=665                                      | 250  | 665  | 2.00E-79  | 266.0 | 56.8 | 75.2 |
| Rsa1.0_00154.1.g6973.t1 | gb ACP30585.1   disease resistance protein [Brassica rapa subsp. pekinensis]                                                                                                                                                                                                                                                                                                                                                                                                                                                                                                                                                                                                                                                                                                                                                                                                                                                                                                                                                                                                                                                        | 803  | 1301 | 0         | 162.0 | 86.3 | 91.5 | disease resistance protein                  | gbpln | Brassica rapa        | AT5G46470.1   Symbols: RPS6   disease resistance protein (TIR-NBS-LRR class) family   chr5:18842701-18846809 FORWARD LENGTH=1127        | 803  | 1127 | 0         | 140.3 | 64.5 | 76.8 |
| Rsa1.0_00154.1.g6974.t8 | dbj BAB11094.1   carboxy-terminal proteinase D1-like protein [Arabidopsis thaliana]                                                                                                                                                                                                                                                                                                                                                                                                                                                                                                                                                                                                                                                                                                                                                                                                                                                                                                                                                                                                                                                 | 883  | 488  | 0         | 55.3  | 45.4 | 49.0 | carboxy-terminal proteinase D1-like protein | gbpln | Arabidopsis thaliana | AT5G46390.2   Symbols:   Peptidase S41 family protein   chr5:18816612-18819148 FORWARD LENGTH=489                                       | 883  | 489  | 0         | 55.4  | 45.2 | 48.7 |
| Rsa1.0_00154.1.g6975.t1 | refXP_002863403.1   hypothetical protein ARALYDRAFT_356363 [Arabidopsis lyrata subsp. lyrata] gi 297309238 gb EFH39662.1   hypothetical protein ARALYDRAFT_356363 [Arabidopsis lyrata subsp. lyrata]                                                                                                                                                                                                                                                                                                                                                                                                                                                                                                                                                                                                                                                                                                                                                                                                                                                                                                                                | 455  | 1047 | 3.00E-17  | 230.1 | 20.9 | 26.4 | hypothetical protein ARALYDRAFT_356363      | gbpln | Arabidopsis lyrata   | AT5G46380.1   Symbols:   Kinase-related protein of unknown function (DUF1296)   chr5:18813088-18815974 REVERSE LENGTH=607               | 455  | 607  | 3.00E-16  | 133.4 | 21.8 | 28.1 |
| Rsa1.0_00154.1.g6976.t1 | #                                                                                                                                                                                                                                                                                                                                                                                                                                                                                                                                                                                                                                                                                                                                                                                                                                                                                                                                                                                                                                                                                                                                   | #    | #    | #         | #     | #    | #    | -                                           | ----  | ----                 | #                                                                                                                                       | #    | #    | #         | #     | #    | #    |
| Rsa1.0_00154.1.g6977.t1 | gb EOA12518.1   hypothetical protein CARUB_v10026412mg [Capsella rubella]                                                                                                                                                                                                                                                                                                                                                                                                                                                                                                                                                                                                                                                                                                                                                                                                                                                                                                                                                                                                                                                           | 443  | 440  | 0         | 99.3  | 75.2 | 85.8 | hypothetical protein CARUB_v10026412mg      | gbpln | Capsella rubella     | AT5G46370.1   Symbols: KCO2, ATPK2, ATKCO2   Ca2+ activated outward rectifying K+ channel 2   chr5:18809623-18811720 REVERSE LENGTH=443 | 443  | 443  | 1.00E-172 | 100.0 | 70.4 | 82.2 |
| Rsa1.0_00154.1.g6978.t1 | gb AC114410.1   WRKY8-1 transcription factor [Brassica napus]                                                                                                                                                                                                                                                                                                                                                                                                                                                                                                                                                                                                                                                                                                                                                                                                                                                                                                                                                                                                                                                                       | 320  | 321  | 1.00E-165 | 100.3 | 89.4 | 94.1 | WRKY8-1 transcription factor                | gbpln | Brassica napus       | AT5G46350.1   Symbols: WRKY8, ATWRKY8   WRKY DNA-binding protein 8   chr5:18801403-18803901 REVERSE LENGTH=326                          | 320  | 326  | 1.00E-120 | 101.9 | 76.3 | 85.0 |
| Rsa1.0_00154.1.g6979.t1 | refXP_002865197.1   flagellin-sensitive 2 [Arabidopsis lyrata subsp. lyrata] gi 297311032 gb EFH41456.1   flagellin-sensitive 2 [Arabidopsis lyrata subsp. lyrata]                                                                                                                                                                                                                                                                                                                                                                                                                                                                                                                                                                                                                                                                                                                                                                                                                                                                                                                                                                  | 1171 | 1175 | 0         | 100.3 | 79.3 | 88.0 | flagellin-sensitive 2                       | gbpln | Arabidopsis lyrata   | AT5G46330.1   Symbols: FLS2   Leucine-rich receptor-like protein kinase family protein   chr5:18791802-18795407 FORWARD LENGTH=1173     | 1171 | 1173 | 0         | 100.2 | 78.1 | 87.4 |
| Rsa1.0_00154.1.g6980.t1 | #                                                                                                                                                                                                                                                                                                                                                                                                                                                                                                                                                                                                                                                                                                                                                                                                                                                                                                                                                                                                                                                                                                                                   | #    | #    | #         | #     | #    | #    | -                                           | ----  | ----                 | #                                                                                                                                       | #    | #    | #         | #     | #    | #    |
| Rsa1.0_00154.1.g6981.t1 | #                                                                                                                                                                                                                                                                                                                                                                                                                                                                                                                                                                                                                                                                                                                                                                                                                                                                                                                                                                                                                                                                                                                                   | #    | #    | #         | #     | #    | #    | -                                           | ----  | ----                 | #                                                                                                                                       | #    | #    | #         | #     | #    | #    |
| Rsa1.0_00154.1.g6982.t1 | ref NP_199441.1   3-oxoacyl-[acyl-carrier-protein] synthase I [Arabidopsis thaliana] gi 20141399 sp P52410.2 KASC1_ARAT H RecName: Full=3-oxoacyl-[acyl-carrier-protein] synthase I, chloroplastic; AltName: Full=Beta-ketoacyl-ACP synthase I; Short=KAS I; Flags: Precursor gi 10177710 dbj BAB11084.1   3-oxoacyl-[acyl-carrier-protein] synthase I precursor [Arabidopsis thaliana] gi 14335164 gb AAK59862.1   AT5g46290/MPL12.7 [Arabidopsis thaliana] gi 20334810 gb AAM16266.1   AT5g46290/MPL12.7 [Arabidopsis thaliana] gi 21593429 gb AAM65396.1   3-oxoacyl-[acyl-carrier-protein] synthase I precursor (beta-ketoacyl-ACP synthase I) (KAS I) [Arabidopsis thaliana] gi 21703101 gb AAM74493.1   AT5g46290/MPL12.7 [Arabidopsis thaliana] gi 33200798 gb AED95363.1   3-oxoacyl-[acyl-carrier-protein] synthase I [Arabidopsis thaliana] ref NP_851141.1   RNA-binding protein [Arabidopsis thaliana] gi 15215748 gb AAK91419.1   AT5g46250/MPL12.3 [Arabidopsis thaliana] gi 23308375 gb AAN18157.1   AT5g46250/MPL12.3 [Arabidopsis thaliana] gi 33200797 gb AED95357.1   RNA-binding protein [Arabidopsis thaliana] | 406  | 473  | 0         | 116.5 | 96.3 | 98.3 | 3-oxoacyl-                                  | gbpln | Arabidopsis thaliana | AT5G46290.1   Symbols: KASI, KAS1   3-ketoacyl-acyl carrier protein synthase I   chr5:18774439-18776629 REVERSE LENGTH=473              | 406  | 473  | 0         | 116.5 | 96.3 | 98.3 |
| Rsa1.0_00154.1.g6983.t1 | ref NP_851141.1   RNA-binding protein [Arabidopsis thaliana] gi 15215748 gb AAK91419.1   AT5g46250/MPL12.3 [Arabidopsis thaliana] gi 23308375 gb AAN18157.1   AT5g46250/MPL12.3 [Arabidopsis thaliana] gi 33200797 gb AED95357.1   RNA-binding protein [Arabidopsis thaliana]                                                                                                                                                                                                                                                                                                                                                                                                                                                                                                                                                                                                                                                                                                                                                                                                                                                       | 418  | 422  | 1.00E-152 | 101.0 | 72.0 | 78.9 | RNA-binding protein                         | gbpln | Arabidopsis thaliana | AT5G46250.1   Symbols:   RNA-binding protein   chr5:18755388-18758056 FORWARD LENGTH=422                                                | 418  | 422  | 1.00E-155 | 101.0 | 72.0 | 78.9 |
| Rsa1.0_00154.1.g6984.t1 | #                                                                                                                                                                                                                                                                                                                                                                                                                                                                                                                                                                                                                                                                                                                                                                                                                                                                                                                                                                                                                                                                                                                                   | #    | #    | #         | #     | #    | #    | -                                           | ----  | ----                 | #                                                                                                                                       | #    | #    | #         | #     | #    | #    |
| Rsa1.0_00154.1.g6985.t1 | refXP_002863415.1   hypothetical protein ARALYDRAFT_494350 [Arabidopsis lyrata subsp. lyrata] gi 297309250 gb EFH39674.1   hypothetical protein ARALYDRAFT_494350 [Arabidopsis lyrata subsp. lyrata]                                                                                                                                                                                                                                                                                                                                                                                                                                                                                                                                                                                                                                                                                                                                                                                                                                                                                                                                | 690  | 676  | 0         | 98.0  | 84.1 | 89.3 | hypothetical protein ARALYDRAFT_494350      | gbpln | Arabidopsis lyrata   | AT5G46240.1   Symbols: KAT1   potassium channel in Arabidopsis thaliana 1   chr5:18743652-18746561 REVERSE LENGTH=677                   | 690  | 677  | 0         | 98.1  | 82.9 | 89.3 |

|                         |                                                                                                                                                                                                                                                                                                                                                              |      |      |           |       |      |      |                                                 |       |                      |                                                                                                                                               |      |      |           |       |      |      |
|-------------------------|--------------------------------------------------------------------------------------------------------------------------------------------------------------------------------------------------------------------------------------------------------------------------------------------------------------------------------------------------------------|------|------|-----------|-------|------|------|-------------------------------------------------|-------|----------------------|-----------------------------------------------------------------------------------------------------------------------------------------------|------|------|-----------|-------|------|------|
| Rsa1.0_00154.1.g6986.t1 | gb EOA14036.1  hypothetical protein CARUB_v10027170mg [Capsella rubella]                                                                                                                                                                                                                                                                                     | 144  | 197  | 2.00E-69  | 136.8 | 86.1 | 92.4 | hypothetical protein CARUB_v10027170mg          | gbpln | Capsella rubella     | AT5G46230.1   Symbols:   Protein of unknown function, DUF538   chr5:18742593-18743024 REVERSE LENGTH=143                                      | 144  | 143  | 4.00E-68  | 99.3  | 82.6 | 90.3 |
| Rsa1.0_00154.1.g6987.t3 | gb EOA23695.1  hypothetical protein CARUB_v10016902mg [Capsella rubella]                                                                                                                                                                                                                                                                                     | 595  | 592  | 0         | 99.5  | 90.3 | 94.3 | hypothetical protein CARUB_v10016902mg          | gbpln | Capsella rubella     | AT3G54860.1   Symbols:   ATVPS33, VPS33   Sec1/munc18-like (SM) proteins superfamily   chr3:20324286-20329841 REVERSE LENGTH=592              | 595  | 592  | 0         | 99.5  | 89.4 | 93.8 |
| Rsa1.0_00154.1.g6988.t1 | gb EOA14814.1  hypothetical protein CARUB_v10028121mg [Capsella rubella]                                                                                                                                                                                                                                                                                     | 793  | 791  | 0         | 99.7  | 90.0 | 94.1 | hypothetical protein CARUB_v10028121mg          | gbpln | Capsella rubella     | AT5G46210.1   Symbols:   CUL4, ATCUL4   cullin4   chr5:18731569-18736653 REVERSE LENGTH=792                                                   | 793  | 792  | 0         | 99.9  | 89.5 | 93.4 |
| Rsa1.0_00154.1.g6989.t2 | ref NP_851140.1  large subunit ribosomal protein L14 [Arabidopsis thaliana] gi 18140860 gb AAL60452.1 AF402993.1 HUELLENLOS PARALOG [Arabidopsis thaliana] gi 16604452 gb AAL24232.1 AT5g46160/MCL19.22 [Arabidopsis thaliana] gi 332007964 gb AED95347.1  large subunit ribosomal protein L14 [Arabidopsis thaliana]                                        | 175  | 173  | 4.00E-83  | 98.9  | 92.0 | 94.3 | large subunit ribosomal protein L14             | gbpln | Arabidopsis thaliana | AT5G46160.1   Symbols:   Ribosomal protein L14p/L23e family protein   chr5:18711456-18712341 REVERSE LENGTH=173                               | 175  | 173  | 2.00E-85  | 98.9  | 92.0 | 94.3 |
| Rsa1.0_00154.1.g6990.t1 | ref XP_002863424.1  LEM3 (ligand-effect modulator 3) family protein [Arabidopsis lyrata subsp. lyrata] gi 297309259 gb EFH39683.1  LEM3 (ligand-effect modulator 3) family protein [Arabidopsis lyrata subsp. lyrata]                                                                                                                                        | 383  | 343  | 1.00E-166 | 89.6  | 80.9 | 85.1 | LEM3 (ligand-effect modulator 3) family protein | gbpln | Arabidopsis lyrata   | AT5G46150.1   Symbols:   LEM3 (ligand-effect modulator 3) family protein / CDC50 family protein   chr5:18708735-18710424 REVERSE LENGTH=343   | 383  | 343  | 1.00E-168 | 89.6  | 80.7 | 84.6 |
| Rsa1.0_00154.1.g6991.t1 | ref XP_002863425.1  expressed protein [Arabidopsis lyrata subsp. lyrata] gi 297309260 gb EFH39684.1  expressed protein [Arabidopsis lyrata subsp. lyrata]                                                                                                                                                                                                    | 79   | 79   | 4.00E-31  | 100.0 | 82.3 | 89.9 | expressed protein                               | gbpln | Arabidopsis lyrata   | #                                                                                                                                             | #    | #    | #         | #     | #    | #    |
| Rsa1.0_00154.1.g6992.t1 | #                                                                                                                                                                                                                                                                                                                                                            | #    | #    | #         | #     | #    | -    | ----                                            | ----  | #                    | #                                                                                                                                             | #    | #    | #         | #     | #    |      |
| Rsa1.0_00154.1.g6993.t1 | ref NP_199420.1  protein kinase family protein [Arabidopsis thaliana] gi 9757728 dbj BAB08253.1  serine/threonine protein kinase-like protein [Arabidopsis thaliana] gi 332007952 gb AED95335.1  protein kinase family protein [Arabidopsis thaliana]                                                                                                        | 333  | 332  | 1.00E-138 | 99.7  | 80.8 | 89.5 | protein kinase family protein                   | gbpln | Arabidopsis thaliana | AT5G46080.1   Symbols:   Protein kinase superfamily protein   chr5:18689723-18690721 REVERSE LENGTH=332                                       | 333  | 332  | 1.00E-141 | 99.7  | 80.8 | 89.5 |
| Rsa1.0_00154.1.g6994.t1 | ref NP_199419.2  Guanylate-binding protein [Arabidopsis thaliana] gi 332007951 gb AED95334.1  Guanylate-binding protein [Arabidopsis thaliana]                                                                                                                                                                                                               | 1074 | 1082 | 0         | 100.7 | 89.0 | 94.1 | Guanylate-binding protein                       | gbpln | Arabidopsis thaliana | AT5G46070.1   Symbols:   Guanylate-binding family protein   chr5:18683468-18688397 FORWARD LENGTH=1082                                        | 1074 | 1082 | 0         | 100.7 | 89.0 | 94.1 |
| Rsa1.0_00155.1.g6995.t1 | #                                                                                                                                                                                                                                                                                                                                                            | #    | #    | #         | #     | #    | -    | ----                                            | ----  | #                    | #                                                                                                                                             | #    | #    | #         | #     | #    |      |
| Rsa1.0_00155.1.g6996.t1 | gb AAF99727.1 AC004557.6 F17L21.7 [Arabidopsis thaliana]                                                                                                                                                                                                                                                                                                     | 1429 | 1534 | 0         | 107.3 | 66.6 | 78.6 | F17L21.7                                        | gbpln | Arabidopsis thaliana | AT4G23160.1   Symbols:   CRK8   cysteine-rich RLK (RECEPTOR-like protein kinase) 8   chr4:12129485-12134086 FORWARD LENGTH=1262               | 1429 | 1262 | 1.00E-104 | 88.3  | 14.1 | 20.8 |
| Rsa1.0_00155.1.g6997.t1 | ref XP_002466956.1  hypothetical protein SORBIDRAFT_01g017380 [Sorghum bicolor] gi 242039131 ref XP_002466960.1  hypothetical protein SORBIDRAFT_01g017430 [Sorghum bicolor] gi 241920810 gb EER93954.1  hypothetical protein SORBIDRAFT_01g017380 [Sorghum bicolor] gi 241920814 gb EER93958.1  hypothetical protein SORBIDRAFT_01g017430 [Sorghum bicolor] | 377  | 377  | 0         | 100.0 | 95.8 | 99.2 | hypothetical protein SORBIDRAFT_01g017380       | gbpln | Sorghum bicolor      | AT5G09810.1   Symbols:   ACT7   actin 7   chr5:3052809-3054220 FORWARD LENGTH=377                                                             | 377  | 377  | 0         | 100.0 | 94.7 | 98.4 |
| Rsa1.0_00155.1.g6998.t1 | #                                                                                                                                                                                                                                                                                                                                                            | #    | #    | #         | #     | #    | -    | ----                                            | ----  | #                    | #                                                                                                                                             | #    | #    | #         | #     | #    |      |
| Rsa1.0_00155.1.g6999.t1 | dbj BAA97287.1  retroelement pol polyprotein-like [Arabidopsis thaliana]                                                                                                                                                                                                                                                                                     | 1431 | 1491 | 0         | 104.2 | 67.2 | 80.2 | retroelement pol polyprotein-like               | gbpln | Arabidopsis thaliana | AT4G23160.1   Symbols:   CRK8   cysteine-rich RLK (RECEPTOR-like protein kinase) 8   chr4:12129485-12134086 FORWARD LENGTH=1262               | 1431 | 1262 | 1.00E-125 | 88.2  | 15.2 | 22.0 |
| Rsa1.0_00155.1.g7000.t1 | #                                                                                                                                                                                                                                                                                                                                                            | #    | #    | #         | #     | #    | -    | ----                                            | ----  | #                    | #                                                                                                                                             | #    | #    | #         | #     | #    |      |
| Rsa1.0_00155.1.g7001.t1 | ref XP_002891032.1  dehydration-responsive family protein [Arabidopsis lyrata subsp. lyrata] gi 297336874 gb EFH67291.1  dehydration-responsive family protein [Arabidopsis lyrata subsp. lyrata]                                                                                                                                                            | 643  | 639  | 0         | 99.4  | 89.0 | 93.6 | dehydration-responsive family protein           | gbpln | Arabidopsis lyrata   | AT1G33170.1   Symbols:   S-adenosyl-L-methionine-dependent methyltransferases superfamily protein   chr1:12027262-12030397 FORWARD LENGTH=639 | 643  | 639  | 0         | 99.4  | 88.3 | 93.3 |

|                         |                                                                                                                                                                                                                                                                                                                                                                                                                                                                                |     |      |           |       |      |      |                                                      |       |                      |                                                                                                                                                                                                                                                                                                                                                                                                                                                              |     |     |           |       |      |      |
|-------------------------|--------------------------------------------------------------------------------------------------------------------------------------------------------------------------------------------------------------------------------------------------------------------------------------------------------------------------------------------------------------------------------------------------------------------------------------------------------------------------------|-----|------|-----------|-------|------|------|------------------------------------------------------|-------|----------------------|--------------------------------------------------------------------------------------------------------------------------------------------------------------------------------------------------------------------------------------------------------------------------------------------------------------------------------------------------------------------------------------------------------------------------------------------------------------|-----|-----|-----------|-------|------|------|
| Rsa1.0_00155.1.g7002.t1 | emb[CAB39638.1] RNA-directed DNA polymerase-like protein [Arabidopsis thaliana] gi 7267666 emb[CAB78094.1] RNA-directed DNA polymerase-like protein [Arabidopsis thaliana]                                                                                                                                                                                                                                                                                                     | 831 | 1274 | 0         | 153.3 | 47.7 | 65.0 | RNA-directed DNA polymerase-like protein             | gbpln | Arabidopsis thaliana | AT4G29090.1   Symbols:   Ribonuclease H-like superfamily protein   chr4:14333528-14335255 FORWARD LENGTH=575                                                                                                                                                                                                                                                                                                                                                 | 831 | 575 | 2.00E-49  | 69.2  | 19.0 | 28.9 |
| Rsa1.0_00155.1.g7003.t1 | gb EOA39207.1  hypothetical protein CARUB_v10012177mg [Capsella rubella]                                                                                                                                                                                                                                                                                                                                                                                                       | 295 | 347  | 1.00E-157 | 117.6 | 91.5 | 94.2 | hypothetical protein CARUB_v10012177mg               | gbpln | Capsella rubella     | AT1G33230.1   Symbols:   TMPIT-like protein   chr1:12046844-12049794 FORWARD LENGTH=347                                                                                                                                                                                                                                                                                                                                                                      | 295 | 347 | 1.00E-158 | 117.6 | 90.2 | 93.6 |
| Rsa1.0_00155.1.g7004.t1 | ref NP_174594.1  protein GT-2-like 1 [Arabidopsis thaliana] gi 332193452 gb AEE31573.1  trihelix transcription factor GTL1 [Arabidopsis thaliana]                                                                                                                                                                                                                                                                                                                              | 649 | 669  | 0         | 103.1 | 81.0 | 87.1 | protein GT-2-like 1                                  | gbpln | Arabidopsis thaliana | AT1G33240.1   Symbols:   AT-GTL1, AT-GTL2, GTL1   GT-2-like 1   chr1:12051859-12054320 REVERSE LENGTH=669                                                                                                                                                                                                                                                                                                                                                    | 649 | 669 | 0         | 103.1 | 81.0 | 87.1 |
| Rsa1.0_00155.1.g7005.t3 | # # # # # # # - - - - - # # # # #                                                                                                                                                                                                                                                                                                                                                                                                                                              |     |      |           |       |      |      |                                                      |       |                      |                                                                                                                                                                                                                                                                                                                                                                                                                                                              |     |     |           |       |      |      |
| Rsa1.0_00155.1.g7006.t1 | ref XP_002893759.1  hypothetical protein ARALYDRAFT_890907 [Arabidopsis lyrata subsp. lyrata] gi 297339601 gb EFH70018.1  hypothetical protein ARALYDRAFT_890907 [Arabidopsis lyrata subsp. lyrata]                                                                                                                                                                                                                                                                            | 511 | 548  | 0         | 107.2 | 85.7 | 90.8 | hypothetical protein ARALYDRAFT_890907               | gbpln | Arabidopsis lyrata   | AT1G33250.1   Symbols:   Protein of unknown function (DUF604)   chr1:12057524-12059346 REVERSE LENGTH=548                                                                                                                                                                                                                                                                                                                                                    | 511 | 548 | 0         | 107.2 | 85.3 | 90.4 |
| Rsa1.0_00155.1.g7007.t3 | ref XP_002893095.1  hypothetical protein ARALYDRAFT_898144 [Arabidopsis lyrata subsp. lyrata] gi 297328935 gb EFH59354.1  hypothetical protein ARALYDRAFT_898144 [Arabidopsis lyrata subsp. lyrata]                                                                                                                                                                                                                                                                            | 354 | 837  | 1.00E-21  | 236.4 | 18.4 | 22.3 | hypothetical protein ARALYDRAFT_898144               | gbpln | Arabidopsis lyrata   | AT3G17900.1   Symbols:   unknown protein; FUNCTIONS IN: molecular function unknown; INVOLVED IN: biological_process unknown; LOCATED IN: cellular_component unknown; EXPRESSED IN: 23 plant structures; EXPRESSED DURING: 13 growth stages; Has 45 Blast hits to 44 proteins in 14 species: Archae - 0; Bacteria - 0; Metazoa - 2; Fungi - 2; Plants - 39; Viruses - 0; Other Eukaryotes - 2 (source: NCBI BLink).   chr3:6128983-6133069 FORWARD LENGTH=838 | 354 | 838 | 1.00E-23  | 236.7 | 17.8 | 21.2 |
| Rsa1.0_00155.1.g7008.t1 | ref XP_002891037.1  hypothetical protein ARALYDRAFT_313871 [Arabidopsis lyrata subsp. lyrata] gi 297336879 gb EFH67296.1  hypothetical protein ARALYDRAFT_313871 [Arabidopsis lyrata subsp. lyrata]                                                                                                                                                                                                                                                                            | 347 | 525  | 1.00E-172 | 151.3 | 85.9 | 90.2 | hypothetical protein ARALYDRAFT_313871               | gbpln | Arabidopsis lyrata   | AT1G33260.1   Symbols:   Protein kinase superfamily protein   chr1:12064796-12066114 FORWARD LENGTH=349                                                                                                                                                                                                                                                                                                                                                      | 347 | 349 | 1.00E-172 | 100.6 | 84.1 | 90.2 |
| Rsa1.0_00155.1.g7009.t1 | gb AAG51288.1 AC027035.11 protein kinase, putative [Arabidopsis thaliana]                                                                                                                                                                                                                                                                                                                                                                                                      | 177 | 528  | 1.00E-67  | 298.3 | 84.2 | 90.4 | protein kinase, putative                             | gbpln | Arabidopsis thaliana | AT1G33265.1   Symbols:   Transmembrane proteins 14C   chr1:12066662-12067820 FORWARD LENGTH=177                                                                                                                                                                                                                                                                                                                                                              | 177 | 177 | 6.00E-69  | 100.0 | 84.2 | 90.4 |
| Rsa1.0_00155.1.g7010.t1 | ref NP_174597.2  patatin-like phospholipase domain-containing protein [Arabidopsis thaliana] gi 38603808 gb AAR24649.1  At1g33270 [Arabidopsis thaliana] gi 110742517 db BAE99176.1  hypothetical protein [Arabidopsis thaliana] gi 332193457 gb AEE31578.1  patatin-like phospholipase domain-containing protein [Arabidopsis thaliana]                                                                                                                                       | 367 | 369  | 1.00E-164 | 100.5 | 79.6 | 87.2 | patatin-like phospholipase domain-containing protein | gbpln | Arabidopsis thaliana | AT1G33270.1   Symbols:   Acyl transferase/acyl hydrolase/lysophospholipase superfamily protein   chr1:12068324-12070157 REVERSE LENGTH=369                                                                                                                                                                                                                                                                                                                   | 367 | 369 | 1.00E-167 | 100.5 | 79.6 | 87.2 |
| Rsa1.0_00155.1.g7011.t1 | ref NP_174599.1  putative stage III sporulation protein AA [Arabidopsis thaliana] gi 12322578 gb AAG51292.1 AC027035.15 unknown protein [Arabidopsis thaliana] gi 48596989 gb AA146035.1  At1g33290 [Arabidopsis thaliana] gi 50198961 gb AAT70483.1  At1g33290 [Arabidopsis thaliana] gi 332193460 gb AEE31581.1  putative stage III sporulation protein AA [Arabidopsis thaliana]                                                                                            | 370 | 379  | 0         | 102.4 | 94.1 | 97.3 | putative stage III sporulation protein AA            | gbpln | Arabidopsis thaliana | AT1G33290.1   Symbols:   P-loop containing nucleoside triphosphate hydrolases superfamily protein   chr1:12074125-12075989 FORWARD LENGTH=379                                                                                                                                                                                                                                                                                                                | 370 | 379 | 0         | 102.4 | 94.1 | 97.3 |
| Rsa1.0_00155.1.g7012.t1 | ref NP_567663.1  HSP70-interacting protein 1 [Arabidopsis thaliana] gi 75331763 sp Q93YR3.1 F10AL_ARAT H RecName: Full=FAM10 family protein At4g22670 gi 16648867 gb AAL24285.1  HSP associated protein like [Arabidopsis thaliana] gi 21593067 gb AAM65016.1  HSP associated protein like [Arabidopsis thaliana] gi 28058906 gb AAO29967.1  HSP associated protein like [Arabidopsis thaliana] gi 332659238 gb AEE84638.1  HSP70-interacting protein 1 [Arabidopsis thaliana] | 364 | 441  | 2.00E-70  | 121.2 | 44.2 | 53.8 | HSP70-interacting protein 1                          | gbpln | Arabidopsis thaliana | AT4G22670.1   Symbols:   AtHip1, HIP1, TPR11   HSP70-interacting protein 1   chr4:11918236-11920671 FORWARD LENGTH=441                                                                                                                                                                                                                                                                                                                                       | 364 | 441 | 4.00E-73  | 121.2 | 44.2 | 53.8 |

|                         |                                                                                                                                                                                                                                                                                                                                                                                                                                                                                                                                                                                              |     |      |          |       |      |      |                                                     |       |                      |                                                                                                                                                                                                                                                                                                                                                                   |     |     |           |       |      |      |
|-------------------------|----------------------------------------------------------------------------------------------------------------------------------------------------------------------------------------------------------------------------------------------------------------------------------------------------------------------------------------------------------------------------------------------------------------------------------------------------------------------------------------------------------------------------------------------------------------------------------------------|-----|------|----------|-------|------|------|-----------------------------------------------------|-------|----------------------|-------------------------------------------------------------------------------------------------------------------------------------------------------------------------------------------------------------------------------------------------------------------------------------------------------------------------------------------------------------------|-----|-----|-----------|-------|------|------|
| Rsa1.0_00155.1.g7013.t1 | #                                                                                                                                                                                                                                                                                                                                                                                                                                                                                                                                                                                            | #   | #    | #        | #     | #    | #    | -                                                   | ----  | ----                 | #                                                                                                                                                                                                                                                                                                                                                                 | #   | #   | #         | #     | #    |      |
| Rsa1.0_00156.1.g7014.t1 | #                                                                                                                                                                                                                                                                                                                                                                                                                                                                                                                                                                                            | #   | #    | #        | #     | #    | #    | -                                                   | ----  | ----                 | #                                                                                                                                                                                                                                                                                                                                                                 | #   | #   | #         | #     | #    |      |
| Rsa1.0_00156.1.g7015.t1 | gb ACG60669.1  copia-type polyprotein-like protein [Brassica oleracea var. alboglabra]                                                                                                                                                                                                                                                                                                                                                                                                                                                                                                       | 182 | 196  | 2.00E-37 | 107.7 | 40.7 | 44.5 | copia-type polyprotein-like protein                 | gbpln | Brassica oleracea    | #                                                                                                                                                                                                                                                                                                                                                                 | #   | #   | #         | #     | #    |      |
| Rsa1.0_00156.1.g7016.t1 | ref NP_174257.1  uncharacterized protein [Arabidopsis thaliana] gi 12323541 gb AAG51753.1 AC068667.32 hypothetical protein; 98808-98386 [Arabidopsis thaliana] gi 28466825 gb AAO44021.1  At1g29640 [Arabidopsis thaliana] gi 110743019 dbj BAE99402.1  hypothetical protein [Arabidopsis thaliana] gi 332192993 gb AEE31114.1  uncharacterized protein AT1G29640 [Arabidopsis thaliana] ref XP_002890823.1  hypothetical protein ARALYDRAFT_473168 [Arabidopsis lyrata subsp. lyrata] gi 297336665 gb EFH67082.1  hypothetical protein ARALYDRAFT_473168 [Arabidopsis lyrata subsp. lyrata] | 136 | 140  | 2.00E-51 | 102.9 | 82.4 | 89.0 | uncharacterized protein                             | gbpln | Arabidopsis thaliana | AT1G29640.1   Symbols:   Protein of unknown function, DUF584   chr1:10355959-10356381 REVERSE LENGTH=140                                                                                                                                                                                                                                                          | 136 | 140 | 4.00E-54  | 102.9 | 82.4 | 89.0 |
| Rsa1.0_00156.1.g7017.t2 | ref XP_002894487.1  hypothetical protein ARALYDRAFT_474562 [Arabidopsis lyrata subsp. lyrata] gi 297340329 gb EFH70746.1  hypothetical protein ARALYDRAFT_474562 [Arabidopsis lyrata subsp. lyrata]                                                                                                                                                                                                                                                                                                                                                                                          | 695 | 744  | 0        | 107.1 | 85.5 | 91.5 | hypothetical protein ARALYDRAFT_473168              | gbpln | Arabidopsis lyrata   | AT1G29630.2   Symbols:   5'-3' exonuclease family protein   chr1:10349587-10353538 FORWARD LENGTH=735                                                                                                                                                                                                                                                             | 695 | 735 | 0         | 105.8 | 82.6 | 89.8 |
| Rsa1.0_00156.1.g7018.t2 | ref XP_002894487.1  hypothetical protein ARALYDRAFT_474562 [Arabidopsis lyrata subsp. lyrata] gi 297340329 gb EFH70746.1  hypothetical protein ARALYDRAFT_474562 [Arabidopsis lyrata subsp. lyrata]                                                                                                                                                                                                                                                                                                                                                                                          | 298 | 230  | 4.00E-34 | 77.2  | 23.8 | 29.5 | hypothetical protein ARALYDRAFT_474562              | gbpln | Arabidopsis lyrata   | AT1G55080.1   Symbols: MED9   MED9; BEST Arabidopsis thaliana protein match is: unknown protein (TAIR:AT1G29580.1); Has 67203 Blast hits to 25757 proteins in 1293 species: Archae - 12; Bacteria - 4374; Metazoa - 24340; Fungi - 7940; Plants - 5927; Viruses - 273; Other Eukaryotes - 24337 (source: NCBI BLINK).   chr1:20553121-20554174 REVERSE LENGTH=244 | 298 | 244 | 3.00E-34  | 81.9  | 22.5 | 28.5 |
| Rsa1.0_00156.1.g7019.t1 | gb AAC63678.1  putative non-LTR retroelement reverse transcriptase [Arabidopsis thaliana]                                                                                                                                                                                                                                                                                                                                                                                                                                                                                                    | 471 | 1216 | 5.00E-28 | 258.2 | 14.4 | 21.0 | putative non-LTR retroelement reverse transcriptase | gbpln | Arabidopsis thaliana | AT5G18880.1   Symbols:   RNA-directed DNA polymerase (reverse transcriptase)-related family protein   chr5:6300535-6301422 REVERSE LENGTH=295                                                                                                                                                                                                                     | 471 | 295 | 4.00E-21  | 62.6  | 12.5 | 19.1 |
| Rsa1.0_00156.1.g7020.t2 | ref NP_190414.1  zinc finger CCH domain-containing protein 43 [Arabidopsis thaliana] gi 62901491 sp Q9STM4.1 C3H43_ARAT H RecName: Full=Zinc finger CCH domain-containing protein 43; Short=AtC3H43; AltName: Full=Zinc finger CCH domain-containing protein ZFN-like 6 gi 4678344 emb CAB41154.1  putative protein [Arabidopsis thaliana] gi 194272236 gb ACF37203.1  At3g48440 [Arabidopsis thaliana] gi 332644896 gb AEE78417.1  zinc finger CCH domain-containing protein 43 [Arabidopsis thaliana]                                                                                      | 346 | 448  | 3.00E-18 | 129.5 | 16.8 | 21.1 | zinc finger CCH domain-containing protein 43        | gbpln | Arabidopsis thaliana | AT3G48440.1   Symbols:   Zinc finger C-x8-C-x5-C-x3-H type family protein   chr3:17941402-17943576 FORWARD LENGTH=448                                                                                                                                                                                                                                             | 346 | 448 | 8.00E-21  | 129.5 | 16.8 | 21.1 |
| Rsa1.0_00156.1.g7021.t1 | ref NP_174252.1  translation initiation factor eIF-4E [Arabidopsis thaliana] gi 12323529 gb AAG51741.1 AC068667.20 eukaryotic translation initiation factor 4E, putative; 82364-84055 [Arabidopsis thaliana] gi 332192986 gb AEE31107.1  translation initiation factor eIF-4E [Arabidopsis thaliana]                                                                                                                                                                                                                                                                                         | 496 | 285  | 1.00E-97 | 57.5  | 35.3 | 39.3 | translation initiation factor eIF-4E                | gbpln | Arabidopsis thaliana | AT1G29590.1   Symbols: eIF4E3   Eukaryotic initiation factor 4E protein   chr1:10339937-10341628 FORWARD LENGTH=285                                                                                                                                                                                                                                               | 496 | 285 | 1.00E-100 | 57.5  | 35.3 | 39.3 |
| Rsa1.0_00156.1.g7022.t1 | gb EOA37333.1  hypothetical protein CARUB_v10011041mg [Capsella rubella]                                                                                                                                                                                                                                                                                                                                                                                                                                                                                                                     | 133 | 139  | 2.00E-33 | 104.5 | 72.9 | 84.2 | hypothetical protein CARUB_v10011041mg              | gbpln | Capsella rubella     | AT1G29540.1   Symbols:   unknown protein; BEST Arabidopsis thaliana protein match is: unknown protein (TAIR:AT2G34330.1); Has 10 Blast hits to 10 proteins in 2 species: Archae - 0; Bacteria - 0; Metazoa - 0; Fungi - 0; Plants - 10; Viruses - 0; Other Eukaryotes - 0 (source: NCBI BLINK).   chr1:10327439-10327846 FORWARD LENGTH=135                       | 133 | 135 | 6.00E-31  | 101.5 | 66.9 | 78.2 |
| Rsa1.0_00156.1.g7023.t1 | gb EOA36216.1  hypothetical protein CARUB_v10010140mg [Capsella rubella]                                                                                                                                                                                                                                                                                                                                                                                                                                                                                                                     | 183 | 242  | 3.00E-22 | 132.2 | 53.6 | 63.9 | hypothetical protein CARUB_v10010140mg              | gbpln | Capsella rubella     | AT1G29530.1   Symbols:   unknown protein; BEST Arabidopsis thaliana protein match is: unknown protein (TAIR:AT2G34310.3); Has 84 Blast hits to 78 proteins in 24 species: Archae - 2; Bacteria - 4; Metazoa - 9; Fungi - 8; Plants - 55; Viruses - 0; Other Eukaryotes - 6 (source: NCBI BLINK).   chr1:10325553-10326651 REVERSE LENGTH=236                      | 183 | 236 | 2.00E-20  | 129.0 | 51.4 | 59.6 |

|                         |                                                                                                                                                                                                                                                                                                                                                                                                                                                                                                                                                                                                                                                                     |      |      |           |       |      |      |                                                                                                                                                        |       |                      |                                                                                                                                                                                                                                                                                                                                                                                                                                                                       |      |      |          |       |      |      |
|-------------------------|---------------------------------------------------------------------------------------------------------------------------------------------------------------------------------------------------------------------------------------------------------------------------------------------------------------------------------------------------------------------------------------------------------------------------------------------------------------------------------------------------------------------------------------------------------------------------------------------------------------------------------------------------------------------|------|------|-----------|-------|------|------|--------------------------------------------------------------------------------------------------------------------------------------------------------|-------|----------------------|-----------------------------------------------------------------------------------------------------------------------------------------------------------------------------------------------------------------------------------------------------------------------------------------------------------------------------------------------------------------------------------------------------------------------------------------------------------------------|------|------|----------|-------|------|------|
| Rsa1.0_00156.1.g7024.t1 | gb[EOA37440.1] hypothetical protein CARUB_v10011510mg [Capsella rubella]                                                                                                                                                                                                                                                                                                                                                                                                                                                                                                                                                                                            | 243  | 158  | 2.00E-72  | 65.0  | 60.9 | 62.1 | hypothetical protein CARUB_v10011510mg                                                                                                                 | gbpln | Capsella rubella     | AT1G29520.1   Symbols:   AWP-19-like family protein   chr1:10323735-10324525 FORWARD LENGTH=158                                                                                                                                                                                                                                                                                                                                                                       | 243  | 158  | 1.00E-73 | 65.0  | 60.1 | 61.7 |
| Rsa1.0_00156.1.g7025.t1 | gb[EOA17225.1] hypothetical protein CARUB_v10005500mg [Capsella rubella]                                                                                                                                                                                                                                                                                                                                                                                                                                                                                                                                                                                            | 247  | 267  | 5.00E-95  | 108.1 | 79.4 | 89.9 | hypothetical protein CARUB_v10005500mg                                                                                                                 | gbpln | Capsella rubella     | AT5G32440.1   Symbols:   Ubiquitin system component; Cue protein   chr5:12077014-12078396 FORWARD LENGTH=264                                                                                                                                                                                                                                                                                                                                                          | 247  | 264  | 8.00E-94 | 106.9 | 79.4 | 89.5 |
| Rsa1.0_00156.1.g7026.t1 | gb[EOA36053.1] hypothetical protein CARUB_v10008372mg [Capsella rubella] gi 482571867 gb[EOA36054.1] hypothetical protein CARUB_v10008372mg [Capsella rubella]                                                                                                                                                                                                                                                                                                                                                                                                                                                                                                      | 757  | 767  | 0         | 101.3 | 90.9 | 95.1 | hypothetical protein CARUB_v10008372mg                                                                                                                 | gbpln | Capsella rubella     | AT1G29470.2   Symbols:   S-adenosyl-L-methionine-dependent methyltransferases superfamily protein   chr1:10310424-10313369 REVERSE LENGTH=770                                                                                                                                                                                                                                                                                                                         | 757  | 770  | 0        | 101.7 | 91.3 | 95.4 |
| Rsa1.0_00156.1.g7027.t1 | sp[Q0WP85.1][PP150_ARATH RecName: Full=Pentatricopeptide repeat-containing protein At2g13420, mitochondrial; Flags: Precursor gi 110738270 dbj BAF01064.1] hypothetical protein [Arabidopsis thaliana]                                                                                                                                                                                                                                                                                                                                                                                                                                                              | 516  | 509  | 0         | 98.6  | 85.7 | 91.7 | RecName: Full=Pentatricopeptide repeat-containing protein At2g13420, mitochondrial; Flags: Precursor gi 110738270 dbj BAF01064.1] hypothetical protein | gbpln | Arabidopsis thaliana | AT1G52640.1   Symbols:   Pentatricopeptide repeat (PPR) superfamily protein   chr1:19608857-19610428 REVERSE LENGTH=523                                                                                                                                                                                                                                                                                                                                               | 516  | 523  | 9.00E-95 | 101.4 | 27.7 | 46.3 |
| Rsa1.0_00156.1.g7028.t2 | ref[NP_174756.2] uncharacterized protein [Arabidopsis thaliana] gi 332193648 gb[AEE31769.1] uncharacterized protein AT1G35220 [Arabidopsis thaliana]                                                                                                                                                                                                                                                                                                                                                                                                                                                                                                                | 1049 | 1005 | 0         | 95.8  | 87.9 | 91.0 | uncharacterized protein                                                                                                                                | gbpln | Arabidopsis thaliana | AT1G35220.1   Symbols:   unknown protein; FUNCTIONS IN: molecular_function unknown; INVOLVED IN: biological_process unknown; LOCATED IN: cellular_component unknown; EXPRESSED IN: 22 plant structures; EXPRESSED DURING: 13 growth stages; Has 319 Blast hits to 185 proteins in 75 species: Archaea - 0; Bacteria - 0; Metazoa - 200; Fungi - 0; Plants - 67; Viruses - 0; Other Eukaryotes - 46 (source: NCBI BLINK).   chr1:12909293-12913916 FORWARD LENGTH=1005 | 1049 | 1005 | 0        | 95.8  | 87.9 | 91.0 |
| Rsa1.0_00156.1.g7029.t1 | gb[AAF18538.1]AC006551_24 Very similar to retrotransposon reverse transcriptase [Arabidopsis thaliana]                                                                                                                                                                                                                                                                                                                                                                                                                                                                                                                                                              | 164  | 1231 | 7.00E-21  | 750.6 | 36.6 | 54.9 | Very similar to retrotransposon reverse transcriptase                                                                                                  | gbpln | Arabidopsis thaliana | AT2G34320.1   Symbols:   Polynucleotidyl transferase, ribonuclease H-like superfamily protein   chr2:14484959-14485837 FORWARD LENGTH=292                                                                                                                                                                                                                                                                                                                             | 164  | 292  | 3.00E-11 | 178.0 | 18.3 | 31.1 |
| Rsa1.0_00156.1.g7030.t1 | gb[EOA14807.1] hypothetical protein CARUB_v10028114mg [Capsella rubella]                                                                                                                                                                                                                                                                                                                                                                                                                                                                                                                                                                                            | 208  | 335  | 1.00E-26  | 161.1 | 28.8 | 32.7 | hypothetical protein CARUB_v10028114mg                                                                                                                 | gbpln | Capsella rubella     | AT5G64920.1   Symbols:   COP1-interacting protein 8   chr5:25944338-25945342 REVERSE LENGTH=334                                                                                                                                                                                                                                                                                                                                                                       | 208  | 334  | 5.00E-29 | 160.6 | 27.9 | 31.3 |
| Rsa1.0_00156.1.g7031.t1 | # # # # # # # # # -                                                                                                                                                                                                                                                                                                                                                                                                                                                                                                                                                                                                                                                 | #    | #    | #         | #     | #    | #    | ----                                                                                                                                                   | ----  | #                    | #                                                                                                                                                                                                                                                                                                                                                                                                                                                                     | #    | #    | #        | #     | #    | #    |
| Rsa1.0_00156.1.g7032.t1 | ref[NP_174233.2] MEI2-like protein 5 [Arabidopsis thaliana] gi 30690716 ref[NP_849727.1] MEI2-like protein 5 [Arabidopsis thaliana] gi 75331078 sp[Q8VWF5.1] AML5_ARATH RecName: Full=Protein MEI2-like 5; Short=AML5; AltName: Full=MEI2-like protein 5 gi 17065074 gb[AAL32691.1] RNA-binding protein MEI2, putative [Arabidopsis thaliana] gi 17979281 gb[AAL49866.1] putative RNA-binding protein MEI2 [Arabidopsis thaliana] gi 20259101 gb[AAM14266.1] putative RNA-binding protein MEI2 [Arabidopsis thaliana] gi 332192961 gb[AEE31082.1] MEI2-like protein 5 [Arabidopsis thaliana] gi 332192962 gb[AEE31083.1] MEI2-like protein 5 [Arabidopsis thaliana] | 707  | 800  | 0         | 113.2 | 76.8 | 84.2 | MEI2-like protein 5                                                                                                                                    | gbpln | Arabidopsis thaliana | AT1G29400.2   Symbols:   AML5, ML5   MEI2-like protein 5   chr1:10290393-10293696 REVERSE LENGTH=800                                                                                                                                                                                                                                                                                                                                                                  | 707  | 800  | 0        | 113.2 | 76.8 | 84.2 |
| Rsa1.0_00156.1.g7033.t1 | ref[XP_002893558.1] hypothetical protein ARALYDRAFT_473146 [Arabidopsis lyrata subsp. lyrata] gi 297339400 gb[EFH69817.1] hypothetical protein ARALYDRAFT_473146 [Arabidopsis lyrata subsp. lyrata]                                                                                                                                                                                                                                                                                                                                                                                                                                                                 | 164  | 841  | 1.00E-14  | 512.8 | 34.1 | 42.1 | hypothetical protein ARALYDRAFT_473146                                                                                                                 | gbpln | Arabidopsis lyrata   | AT1G29370.1   Symbols:   Kinase-related protein of unknown function (DUF1296)   chr1:10278080-10283024 REVERSE LENGTH=831                                                                                                                                                                                                                                                                                                                                             | 164  | 831  | 9.00E-16 | 506.7 | 32.9 | 40.9 |
| Rsa1.0_00156.1.g7034.t1 | ref[XP_002689553.1] hypothetical protein ARALYDRAFT_470554 [Arabidopsis lyrata subsp. lyrata] gi 297335395 gb[EFH65812.1] hypothetical protein ARALYDRAFT_470554 [Arabidopsis lyrata subsp. lyrata]                                                                                                                                                                                                                                                                                                                                                                                                                                                                 | 362  | 367  | 4.00E-89  | 101.4 | 52.8 | 65.5 | hypothetical protein ARALYDRAFT_470554                                                                                                                 | gbpln | Arabidopsis lyrata   | AT1G05540.1   Symbols:   Protein of unknown function (DUF295)   chr1:1639348-1640707 FORWARD LENGTH=367                                                                                                                                                                                                                                                                                                                                                               | 362  | 367  | 2.00E-90 | 101.4 | 51.9 | 64.9 |
| Rsa1.0_00156.1.g7035.t5 | gb[EOA33021.1] hypothetical protein CARUB_v10016352mg, partial [Capsella rubella]                                                                                                                                                                                                                                                                                                                                                                                                                                                                                                                                                                                   | 1009 | 886  | 1.00E-110 | 87.8  | 19.7 | 27.9 | hypothetical protein CARUB_v10016352mg, partial                                                                                                        | gbpln | Capsella rubella     | AT1G64260.1   Symbols:   MuDR family transposase   chr1:23847756-23849915 FORWARD LENGTH=719                                                                                                                                                                                                                                                                                                                                                                          | 1009 | 719  | 2.00E-24 | 71.3  | 8.8  | 15.1 |

|                         |                                                                                                                                                                                                                                                                                                |     |     |          |       |      |      |                                                                             |       |                      |                                                                                                                                                                                                                                                                                                                                                                                                                                                                                  |     |     |          |       |      |      |
|-------------------------|------------------------------------------------------------------------------------------------------------------------------------------------------------------------------------------------------------------------------------------------------------------------------------------------|-----|-----|----------|-------|------|------|-----------------------------------------------------------------------------|-------|----------------------|----------------------------------------------------------------------------------------------------------------------------------------------------------------------------------------------------------------------------------------------------------------------------------------------------------------------------------------------------------------------------------------------------------------------------------------------------------------------------------|-----|-----|----------|-------|------|------|
| Rsa1.0_00156.1.g7036.t1 | refXP_002883806.1  hypothetical protein ARALYDRAFT_899599 [Arabidopsis lyrata subsp. lyrata] gi 297329646 gb EFH60065.1                                                                                                                                                                        | 117 | 165 | 3.00E-16 | 141.0 | 41.0 | 57.3 | hypothetical protein ARALYDRAFT_899599                                      | gbpln | Arabidopsis lyrata   | #                                                                                                                                                                                                                                                                                                                                                                                                                                                                                | #   | #   | #        | #     | #    | #    |
| Rsa1.0_00156.1.g7037.t1 | hypothetical protein ARALYDRAFT_899599 [Arabidopsis lyrata subsp. lyrata]                                                                                                                                                                                                                      | #   | #   | #        | #     | #    | #    | -                                                                           | ----  | ----                 | #                                                                                                                                                                                                                                                                                                                                                                                                                                                                                | #   | #   | #        | #     | #    | #    |
| Rsa1.0_00156.1.g7038.t1 | refXP_002894278.1  hypothetical protein ARALYDRAFT_337235 [Arabidopsis lyrata subsp. lyrata] gi 297340120 gb EFH70537.1                                                                                                                                                                        | 160 | 800 | 2.00E-29 | 500.0 | 40.0 | 53.8 | hypothetical protein ARALYDRAFT_337235                                      | gbpln | Arabidopsis lyrata   | AT2G07200.1   Symbols:   Cysteine proteinases superfamily protein   chr2:2989205-2989878 FORWARD LENGTH=151                                                                                                                                                                                                                                                                                                                                                                      | 160 | 151 | 1.00E-15 | 94.4  | 21.3 | 34.4 |
| Rsa1.0_00156.1.g7039.t1 | hypothetical protein ARALYDRAFT_337235 [Arabidopsis lyrata subsp. lyrata]                                                                                                                                                                                                                      | #   | #   | #        | #     | #    | #    | -                                                                           | ----  | ----                 | #                                                                                                                                                                                                                                                                                                                                                                                                                                                                                | #   | #   | #        | #     | #    | #    |
| Rsa1.0_00156.1.g7039.t1 | refXP_002870431.1  hypothetical protein ARALYDRAFT_493607 [Arabidopsis lyrata subsp. lyrata] gi 297316267 gb EFH46690.1                                                                                                                                                                        | 148 | 138 | 4.00E-19 | 93.2  | 35.8 | 48.6 | hypothetical protein ARALYDRAFT_493607                                      | gbpln | Arabidopsis lyrata   | AT2G07505.1   Symbols:   zinc ion binding   chr2:3125671-3126173 FORWARD LENGTH=143                                                                                                                                                                                                                                                                                                                                                                                              | 148 | 143 | 6.00E-16 | 96.6  | 34.5 | 45.9 |
| Rsa1.0_00156.1.g7040.t1 | hypothetical protein ARALYDRAFT_493607 [Arabidopsis lyrata subsp. lyrata]                                                                                                                                                                                                                      | #   | #   | #        | #     | #    | #    | -                                                                           | ----  | ----                 | #                                                                                                                                                                                                                                                                                                                                                                                                                                                                                | #   | #   | #        | #     | #    | #    |
| Rsa1.0_00156.1.g7040.t1 | refXP_002894033.1  predicted protein [Arabidopsis lyrata subsp. lyrata] gi 297339875 gb EFH70292.1                                                                                                                                                                                             | 104 | 83  | 2.00E-11 | 79.8  | 39.4 | 51.0 | predicted protein                                                           | gbpln | Arabidopsis lyrata   | #                                                                                                                                                                                                                                                                                                                                                                                                                                                                                | #   | #   | #        | #     | #    | #    |
| Rsa1.0_00156.1.g7041.t1 | predicted protein [Arabidopsis lyrata subsp. lyrata]                                                                                                                                                                                                                                           | #   | #   | #        | #     | #    | #    | -                                                                           | ----  | ----                 | #                                                                                                                                                                                                                                                                                                                                                                                                                                                                                | #   | #   | #        | #     | #    | #    |
| Rsa1.0_00157.1.g7042.t1 | refNP_172380.2  WRC, zf-4CXXC-R1 transcription factor and jumonji domain-containing protein [Arabidopsis thaliana] gi 42571415 refNP_973798.1  WRC, zf-4CXXC-R1 transcription factor and jumonji domain-containing protein [Arabidopsis thaliana] gi 222423917 dbj BAH19922.1                  | 936 | 930 | 0        | 99.4  | 76.6 | 86.0 | WRC, zf-4CXXC-R1 transcription factor and jumonji domain-containing protein | gbpln | Arabidopsis thaliana | AT1G09060.2   Symbols:   Zinc finger, RING-type, Transcription factor jumonji/ aspartyl beta-hydroxylase   chr1:2921235-2925212 REVERSE LENGTH=930                                                                                                                                                                                                                                                                                                                               | 936 | 930 | 0        | 99.4  | 76.6 | 86.0 |
| Rsa1.0_00157.1.g7042.t1 | AT1G09060 [Arabidopsis thaliana] gi 332190267 gb AEE28388.1  WRC, zf-4CXXC-R1 transcription factor and jumonji domain-containing protein [Arabidopsis thaliana] gi 332190268 gb AEE28389.1  WRC, zf-4CXXC-R1 transcription factor and jumonji domain-containing protein [Arabidopsis thaliana] | #   | #   | #        | #     | #    | #    | -                                                                           | ----  | ----                 | #                                                                                                                                                                                                                                                                                                                                                                                                                                                                                | #   | #   | #        | #     | #    | #    |
| Rsa1.0_00157.1.g7043.t1 | refNP_172378.1  uncharacterized protein [Arabidopsis thaliana] gi 332190265 gb AEE28386.1  uncharacterized protein AT1G09040 [Arabidopsis thaliana]                                                                                                                                            | 859 | 911 | 0        | 106.1 | 67.1 | 76.3 | uncharacterized protein                                                     | gbpln | Arabidopsis thaliana | AT1G09040.1   Symbols:   unknown protein; FUNCTIONS IN: molecular_function unknown; INVOLVED IN: biological_process unknown; LOCATED IN: membrane; EXPRESSED IN: leaf; BEST Arabidopsis thaliana protein match is: unknown protein (TAIR:AT1G09050.1); Has 614 Blast hits to 567 proteins in 104 species: Archae - 2; Bacteria - 12; Metazoa - 344; Fungi - 31; Plants - 81; Viruses - 0; Other Eukaryotes - 144 (source: NCBI BLINK).   chr1:2912362-2915174 FORWARD LENGTH=911 | 859 | 911 | 0        | 106.1 | 67.1 | 76.3 |
| Rsa1.0_00157.1.g7044.t1 | uncharacterized protein [Arabidopsis thaliana]                                                                                                                                                                                                                                                 | #   | #   | #        | #     | #    | #    | -                                                                           | ----  | ----                 | #                                                                                                                                                                                                                                                                                                                                                                                                                                                                                | #   | #   | #        | #     | #    | #    |
| Rsa1.0_00157.1.g7045.t1 | gb AGA95983.1  sucrose non-fermenting 4 [Brassica rapa subsp. pekinensis]                                                                                                                                                                                                                      | 483 | 482 | 0        | 99.8  | 95.0 | 97.7 | sucrose non-fermenting 4                                                    | gbpln | Brassica rapa        | AT1G09020.1   Symbols: SNF4, ATSNF4   homolog of yeast sucrose nonfermenting 4   chr1:2900149-2904212 REVERSE LENGTH=487                                                                                                                                                                                                                                                                                                                                                         | 483 | 487 | 0        | 100.8 | 93.4 | 97.1 |
| Rsa1.0_00157.1.g7046.t1 | dbj BAE97370.1  endo-beta-mannosidase [Brassica oleracea]                                                                                                                                                                                                                                      | 932 | 946 | 0        | 101.5 | 89.3 | 94.1 | endo-beta-mannosidase                                                       | gbpln | Brassica oleracea    | AT1G09010.1   Symbols:   glycoside hydrolase family 2 protein   chr1:2895259-2899287 REVERSE LENGTH=944                                                                                                                                                                                                                                                                                                                                                                          | 932 | 944 | 0        | 101.3 | 87.3 | 93.7 |



|                         |                                                                                                                                                                                                                                                                                                                                                                                                                                                                                                                                                                                                                                                                                                                                                                                                                                                                                                                                                                                                                                                                                                                                                                                                                                                                                                                                                                                                                                                                                                                                                                                                                                                                                                                                                                                                                                                          |     |      |           |       |      |      |                                                   |       |                      |                                                                                                                                |     |      |           |       |      |      |
|-------------------------|----------------------------------------------------------------------------------------------------------------------------------------------------------------------------------------------------------------------------------------------------------------------------------------------------------------------------------------------------------------------------------------------------------------------------------------------------------------------------------------------------------------------------------------------------------------------------------------------------------------------------------------------------------------------------------------------------------------------------------------------------------------------------------------------------------------------------------------------------------------------------------------------------------------------------------------------------------------------------------------------------------------------------------------------------------------------------------------------------------------------------------------------------------------------------------------------------------------------------------------------------------------------------------------------------------------------------------------------------------------------------------------------------------------------------------------------------------------------------------------------------------------------------------------------------------------------------------------------------------------------------------------------------------------------------------------------------------------------------------------------------------------------------------------------------------------------------------------------------------|-----|------|-----------|-------|------|------|---------------------------------------------------|-------|----------------------|--------------------------------------------------------------------------------------------------------------------------------|-----|------|-----------|-------|------|------|
| Rsa1.0_00157.1.g7047.t1 | ref[NP_172373.3] plant glycogenin-like starch initiation protein 5 [Arabidopsis thaliana]<br>gi 385178635 sp F4HZC3.1 GUX5_ARAT H RecName: Full=Putative UDP-glucuronate:xylan alpha-glucuronosyltransferase 5; Short=UDP-GlcA:xylan glucuronyltransferase 5; AltName: Full=Glycogenin-like protein 5; AltName: Full=Plant glycogenin-like starch initiation protein 5; AltName: Full=Protein GLUCURONIC ACID SUBSTITUTION OF XYLAN 5; Short=AtGUX5<br>gi 332190259 gb AEE28380.1  plant glycogenin-like starch initiation protein 5 [Arabidopsis thaliana]<br>ref[NP_563830.1] sugar transporter ERD6 [Arabidopsis thaliana]<br>gi 79317421 ref[NP_001031006.1] sugar transporter ERD6 [Arabidopsis thaliana]<br>gi 117940144 sp O04036.3 ERD6_ARATH RecName: Full=Sugar transporter ERD6; AltName: Full=Early-responsive to dehydration protein 6; AltName: Full=Sugar transporter-like protein 1<br>gi 3123712 db BAA25989.1  ERD6 protein [Arabidopsis thaliana]<br>gi 6686825 emb CAB64732.1  putative sugar transporter [Arabidopsis thaliana]<br>gi 30794056 gb AAP40473.1  putative zinc finger protein ATZF1 [Arabidopsis thaliana]<br>gi 332190249 gb AEE28370.1  sugar transporter ERD6 [Arabidopsis thaliana]<br>gi 332190250 gb AEE28371.1  sugar transporter ERD6 [Arabidopsis thaliana]<br>ref[NP_563829.1] sugar transporter ERD6-like 3 [Arabidopsis thaliana]<br>gi 75323202 sp Q94KE0.1 ERDL3_ARAT H RecName: Full=Sugar transporter ERD6-like 3; AltName: Full=Sugar transporter-like protein 2<br>gi 14194109 gb AAK56249.1 AF367260.1 At1g08920/F7G19_20 [Arabidopsis thaliana]<br>gi 22137064 gb AAM91377.1  At1g08920/F7G19_20 [Arabidopsis thaliana]<br>gi 169403716 emb CAQ16329.1  hexose transporter-like protein [Arabidopsis thaliana]<br>gi 332190246 gb AEE28367.1  sugar transporter ERD6-like 3 [Arabidopsis thaliana] | 554 | 566  | 0         | 102.2 | 79.4 | 88.8 | plant glycogenin-like starch initiation protein 5 | gbpln | Arabidopsis thaliana | AT1G08990.1   Symbols: PGSIP5   plant glycogenin-like starch initiation protein 5   chr1:2888753-2890753 FORWARD LENGTH=566    | 554 | 566  | 0         | 102.2 | 79.4 | 88.8 |
| Rsa1.0_00157.1.g7048.t8 | ref[NP_563829.1] sugar transporter ERD6-like 3 [Arabidopsis thaliana]<br>gi 75323202 sp Q94KE0.1 ERDL3_ARAT H RecName: Full=Sugar transporter ERD6-like 3; AltName: Full=Sugar transporter-like protein 2<br>gi 14194109 gb AAK56249.1 AF367260.1 At1g08920/F7G19_20 [Arabidopsis thaliana]<br>gi 22137064 gb AAM91377.1  At1g08920/F7G19_20 [Arabidopsis thaliana]<br>gi 169403716 emb CAQ16329.1  hexose transporter-like protein [Arabidopsis thaliana]<br>gi 332190246 gb AEE28367.1  sugar transporter ERD6-like 3 [Arabidopsis thaliana]                                                                                                                                                                                                                                                                                                                                                                                                                                                                                                                                                                                                                                                                                                                                                                                                                                                                                                                                                                                                                                                                                                                                                                                                                                                                                                           | 786 | 496  | 0         | 63.1  | 51.5 | 55.3 | sugar transporter ERD6                            | gbpln | Arabidopsis thaliana | AT1G08930.2   Symbols: ERD6   Major facilitator superfamily protein   chr1:2873604-2876979 FORWARD LENGTH=496                  | 786 | 496  | 0         | 63.1  | 51.5 | 55.3 |
| Rsa1.0_00157.1.g7049.t1 | ref[NP_563829.1] sugar transporter ERD6-like 3 [Arabidopsis thaliana]<br>gi 75323202 sp Q94KE0.1 ERDL3_ARAT H RecName: Full=Sugar transporter ERD6-like 3; AltName: Full=Sugar transporter-like protein 2<br>gi 14194109 gb AAK56249.1 AF367260.1 At1g08920/F7G19_20 [Arabidopsis thaliana]<br>gi 22137064 gb AAM91377.1  At1g08920/F7G19_20 [Arabidopsis thaliana]<br>gi 169403716 emb CAQ16329.1  hexose transporter-like protein [Arabidopsis thaliana]<br>gi 332190246 gb AEE28367.1  sugar transporter ERD6-like 3 [Arabidopsis thaliana]                                                                                                                                                                                                                                                                                                                                                                                                                                                                                                                                                                                                                                                                                                                                                                                                                                                                                                                                                                                                                                                                                                                                                                                                                                                                                                           | 470 | 470  | 0         | 100.0 | 90.0 | 94.7 | sugar transporter ERD6-like 3                     | gbpln | Arabidopsis thaliana | AT1G08920.1   Symbols: ESL1   ERD (early response to dehydration) six-like 1   chr1:2867446-2870360 FORWARD LENGTH=470         | 470 | 470  | 0         | 100.0 | 90.0 | 94.7 |
| Rsa1.0_00157.1.g7050.t1 | #                                                                                                                                                                                                                                                                                                                                                                                                                                                                                                                                                                                                                                                                                                                                                                                                                                                                                                                                                                                                                                                                                                                                                                                                                                                                                                                                                                                                                                                                                                                                                                                                                                                                                                                                                                                                                                                        | #   | #    | #         | #     | #    | #    | -                                                 | ----  | ----                 | #                                                                                                                              | #   | #    | #         | #     | #    |      |
| Rsa1.0_00157.1.g7051.t2 | ref[XP_002889721.1] EMB3001 [Arabidopsis lyrata subsp. lyrata]<br>gi 297335563 gb EFH65980.1  EMB3001 [Arabidopsis lyrata subsp. lyrata]<br>ref[XP_002892475.1] hypothetical protein ARALYDRAFT_888122 [Arabidopsis lyrata subsp. lyrata]<br>gi 297338317 gb EFH68734.1  hypothetical protein ARALYDRAFT_888122 [Arabidopsis lyrata subsp. lyrata]<br>ref[XP_002892474.1] VAMP/synaptobrevin-associated protein 27-2 [Arabidopsis lyrata subsp. lyrata]<br>gi 297338316 gb EFH68733.1  VAMP/synaptobrevin-associated protein 27-2 [Arabidopsis lyrata subsp. lyrata]<br>ref[XP_002892472.1] hypothetical protein ARALYDRAFT_470953 [Arabidopsis lyrata subsp. lyrata]<br>gi 297338314 gb EFH68731.1  hypothetical protein ARALYDRAFT_470953 [Arabidopsis lyrata subsp. lyrata]                                                                                                                                                                                                                                                                                                                                                                                                                                                                                                                                                                                                                                                                                                                                                                                                                                                                                                                                                                                                                                                                           | 760 | 836  | 0         | 110.0 | 50.4 | 58.7 | EMB3001                                           | gbpln | Arabidopsis lyrata   | AT1G08910.1   Symbols: EMB3001   zinc ion binding/zinc ion binding   chr1:2856227-2860816 FORWARD LENGTH=829                   | 760 | 829  | 0         | 109.1 | 49.1 | 57.2 |
| Rsa1.0_00157.1.g7052.t1 | ref[XP_002892475.1] hypothetical protein ARALYDRAFT_888122 [Arabidopsis lyrata subsp. lyrata]<br>gi 297338317 gb EFH68734.1  hypothetical protein ARALYDRAFT_888122 [Arabidopsis lyrata subsp. lyrata]<br>ref[XP_002892474.1] VAMP/synaptobrevin-associated protein 27-2 [Arabidopsis lyrata subsp. lyrata]<br>gi 297338316 gb EFH68733.1  VAMP/synaptobrevin-associated protein 27-2 [Arabidopsis lyrata subsp. lyrata]<br>ref[XP_002892472.1] hypothetical protein ARALYDRAFT_470953 [Arabidopsis lyrata subsp. lyrata]<br>gi 297338314 gb EFH68731.1  hypothetical protein ARALYDRAFT_470953 [Arabidopsis lyrata subsp. lyrata]                                                                                                                                                                                                                                                                                                                                                                                                                                                                                                                                                                                                                                                                                                                                                                                                                                                                                                                                                                                                                                                                                                                                                                                                                       | 143 | 142  | 8.00E-73  | 99.3  | 97.2 | 97.9 | hypothetical protein ARALYDRAFT_888122            | gbpln | Arabidopsis lyrata   | AT1G08880.1   Symbols: HTA5, H2AXA, G-H2AX, GAMMA-H2AX   Histone superfamily protein   chr1:2847144-2847676 REVERSE LENGTH=142 | 143 | 142  | 2.00E-74  | 99.3  | 95.8 | 97.2 |
| Rsa1.0_00157.1.g7053.t2 | ref[XP_002892475.1] hypothetical protein ARALYDRAFT_888122 [Arabidopsis lyrata subsp. lyrata]<br>gi 297338317 gb EFH68734.1  hypothetical protein ARALYDRAFT_888122 [Arabidopsis lyrata subsp. lyrata]<br>ref[XP_002892474.1] VAMP/synaptobrevin-associated protein 27-2 [Arabidopsis lyrata subsp. lyrata]<br>gi 297338316 gb EFH68733.1  VAMP/synaptobrevin-associated protein 27-2 [Arabidopsis lyrata subsp. lyrata]<br>ref[XP_002892472.1] hypothetical protein ARALYDRAFT_470953 [Arabidopsis lyrata subsp. lyrata]<br>gi 297338314 gb EFH68731.1  hypothetical protein ARALYDRAFT_470953 [Arabidopsis lyrata subsp. lyrata]                                                                                                                                                                                                                                                                                                                                                                                                                                                                                                                                                                                                                                                                                                                                                                                                                                                                                                                                                                                                                                                                                                                                                                                                                       | 615 | 386  | 1.00E-141 | 62.8  | 45.0 | 48.8 | VAMP/synaptobrevin-associated protein 27-2        | gbpln | Arabidopsis lyrata   | AT1G08820.2   Symbols: VAP27-2   vamp/synaptobrevin-associated protein 27-2   chr1:2821810-2824412 REVERSE LENGTH=386          | 615 | 386  | 1.00E-141 | 62.8  | 44.4 | 48.3 |
| Rsa1.0_00157.1.g7054.t2 | ref[XP_002892475.1] hypothetical protein ARALYDRAFT_888122 [Arabidopsis lyrata subsp. lyrata]<br>gi 297338317 gb EFH68734.1  hypothetical protein ARALYDRAFT_888122 [Arabidopsis lyrata subsp. lyrata]<br>ref[XP_002892474.1] VAMP/synaptobrevin-associated protein 27-2 [Arabidopsis lyrata subsp. lyrata]<br>gi 297338316 gb EFH68733.1  VAMP/synaptobrevin-associated protein 27-2 [Arabidopsis lyrata subsp. lyrata]<br>ref[XP_002892472.1] hypothetical protein ARALYDRAFT_470953 [Arabidopsis lyrata subsp. lyrata]<br>gi 297338314 gb EFH68731.1  hypothetical protein ARALYDRAFT_470953 [Arabidopsis lyrata subsp. lyrata]                                                                                                                                                                                                                                                                                                                                                                                                                                                                                                                                                                                                                                                                                                                                                                                                                                                                                                                                                                                                                                                                                                                                                                                                                       | 941 | 1113 | 0         | 118.3 | 60.1 | 71.5 | hypothetical protein ARALYDRAFT_470953            | gbpln | Arabidopsis lyrata   | AT1G08800.2   Symbols:   Protein of unknown function, DUF593   chr1:2813578-2817078 REVERSE LENGTH=1113                        | 941 | 1113 | 0         | 118.3 | 50.9 | 61.0 |

|                         |                                                                                                                                                                                                                                                                                                                                                                                                                                                                                                                                                             |      |      |          |       |      |      |                                                |       |                      |                                                                                                                                                                                                                                                                                                                                                                                                            |      |      |          |       |      |      |
|-------------------------|-------------------------------------------------------------------------------------------------------------------------------------------------------------------------------------------------------------------------------------------------------------------------------------------------------------------------------------------------------------------------------------------------------------------------------------------------------------------------------------------------------------------------------------------------------------|------|------|----------|-------|------|------|------------------------------------------------|-------|----------------------|------------------------------------------------------------------------------------------------------------------------------------------------------------------------------------------------------------------------------------------------------------------------------------------------------------------------------------------------------------------------------------------------------------|------|------|----------|-------|------|------|
| Rsa1.0_00157.1.g7055.t1 | refNP_172356.1  uncharacterized protein [Arabidopsis thaliana] gi 9802566 gb AAF99768.1 AC003981_18 F22O13.28 [Arabidopsis thaliana] gi 55978689 gb AAV68806.1  hypothetical protein AT1G08790 [Arabidopsis thaliana] gi 60547543 gb AAx23735.1  hypothetical protein At1g08790 [Arabidopsis thaliana] gi 332190226 gb AEE28347.1  uncharacterized protein AT1G08790 [Arabidopsis thaliana]                                                                                                                                                                 | 168  | 190  | 9.00E-57 | 113.1 | 82.7 | 87.5 | uncharacterized protein                        | gbpln | Arabidopsis thaliana | AT1G08790.1   Symbols:   Protein of unknown function (DJFI1655)   chr1:2811989-2812646 FORWARD LENGTH=190                                                                                                                                                                                                                                                                                                  | 168  | 190  | 4.00E-59 | 113.1 | 82.7 | 87.5 |
| Rsa1.0_00157.1.g7056.t1 | refNP_563825.1  peptidase C13-like protein [Arabidopsis thaliana] gi 30680805 refNP_849616.1  peptidase C13-like protein [Arabidopsis thaliana] gi 42571407 refNP_973794.1  peptidase C13-like protein [Arabidopsis thaliana] gi 26450273 dbj BAC42253.1  putative GP1-anchor transamidase [Arabidopsis thaliana] gi 332190220 gb AEE28341.1  peptidase C13-like protein [Arabidopsis thaliana] gi 332190221 gb AEE28342.1  peptidase C13-like protein [Arabidopsis thaliana] gi 332190222 gb AEE28343.1  peptidase C13-like protein [Arabidopsis thaliana] | 391  | 388  | 0        | 99.2  | 88.7 | 93.9 | peptidase C13-like protein                     | gbpln | Arabidopsis thaliana | AT1G08750.3   Symbols:   Peptidase C13 family   chr1:2801283-2804392 FORWARD LENGTH=388                                                                                                                                                                                                                                                                                                                    | 391  | 388  | 0        | 99.2  | 88.7 | 93.9 |
| Rsa1.0_00157.1.g7057.t2 | gb EOA36640.1  hypothetical protein CARUB_v10011892mg [Capsella rubella]                                                                                                                                                                                                                                                                                                                                                                                                                                                                                    | 1857 | 1530 | 0        | 82.4  | 76.6 | 79.8 | hypothetical protein CARUB_v10011892mg         | gbpln | Capsella rubella     | AT1G08730.1   Symbols: XIC, ATXIC   Myosin family protein with Dil domain   chr1:2779963-2788325 FORWARD LENGTH=1538                                                                                                                                                                                                                                                                                       | 1857 | 1538 | 0        | 82.8  | 76.7 | 79.8 |
| Rsa1.0_00157.1.g7058.t1 | gb AAF86559.1 AC069252_18 F2E2.15 [Arabidopsis thaliana]                                                                                                                                                                                                                                                                                                                                                                                                                                                                                                    | 442  | 487  | 2.00E-80 | 110.2 | 41.0 | 53.6 | F2E2.15                                        | gbpln | Arabidopsis thaliana | AT3G19515.2   Symbols:   CONTAINS InterPro DOMAIN/s: Apoptosis inhibitory 5 (InterPro:IPR008383); BEST Arabidopsis thaliana protein match is: unknown protein (TAIR:AT1G23935.1); Has 546 Blast hits to 394 proteins in 84 species: Archae - 0; Bacteria - 3; Metazoa - 210; Fungi - 15; Plants - 143; Viruses - 0; Other Eukaryotes - 175 (source: NCBI BLINK).   chr3:6766872-6771078 REVERSE LENGTH=805 | 442  | 805  | 1.00E-56 | 182.1 | 29.0 | 41.0 |
| Rsa1.0_00157.1.g7059.t2 | gb EOA36256.1  hypothetical protein CARUB_v10010384mg [Capsella rubella]                                                                                                                                                                                                                                                                                                                                                                                                                                                                                    | 182  | 188  | 6.00E-61 | 103.3 | 61.5 | 66.5 | hypothetical protein CARUB_v10010384mg         | gbpln | Capsella rubella     | AT1G08465.1   Symbols: YAB2   Plant-specific transcription factor YABBY family protein   chr1:2676033-2679382 FORWARD LENGTH=184                                                                                                                                                                                                                                                                           | 182  | 184  | 6.00E-58 | 101.1 | 61.5 | 69.8 |
| Rsa1.0_00157.1.g7060.t1 | refNP_001184936.1  calreticulin-3 [Arabidopsis thaliana] gi 332190172 gb AEE28293.1  calreticulin-3 [Arabidopsis thaliana]                                                                                                                                                                                                                                                                                                                                                                                                                                  | 396  | 399  | 0        | 100.8 | 92.2 | 94.7 | calreticulin-3                                 | gbpln | Arabidopsis thaliana | AT1G08450.3   Symbols: CRT3   calreticulin 3   chr1:2668008-2671800 REVERSE LENGTH=399                                                                                                                                                                                                                                                                                                                     | 396  | 399  | 0        | 100.8 | 92.2 | 94.7 |
| Rsa1.0_00157.1.g7061.t1 | refXP_002889694.1  hypothetical protein ARALYDRAFT_334132 [Arabidopsis lyrata subsp. lyrata] gi 297335536 gb EFH65953.1  hypothetical protein ARALYDRAFT_334132 [Arabidopsis lyrata subsp. lyrata]                                                                                                                                                                                                                                                                                                                                                          | 527  | 501  | 0        | 95.1  | 77.0 | 81.8 | hypothetical protein ARALYDRAFT_334132         | gbpln | Arabidopsis lyrata   | AT1G08440.1   Symbols:   Aluminium activated malate transporter family protein   chr1:2663027-2665343 FORWARD LENGTH=501                                                                                                                                                                                                                                                                                   | 527  | 501  | 0        | 95.1  | 75.5 | 81.0 |
| Rsa1.0_00157.1.g7062.t1 | dbj BAE97280.1  putative aluminum activated malate transporter [Brassica napus]                                                                                                                                                                                                                                                                                                                                                                                                                                                                             | 496  | 498  | 0        | 100.4 | 91.7 | 95.0 | putative aluminum activated malate transporter | gbpln | Brassica napus       | AT1G08430.1   Symbols: ALMT1, ATALMT1   aluminum-activated malate transporter 1   chr1:2658800-2661029 FORWARD LENGTH=493                                                                                                                                                                                                                                                                                  | 496  | 493  | 0        | 99.4  | 74.0 | 84.3 |
| Rsa1.0_00157.1.g7063.t1 | refNP_172318.1  serine/threonine-protein phosphatase BSL2 [Arabidopsis thaliana] gi 160359046 sp Q9SJF0.2 BSL2_ARAT H RecName: Full=Serine/threonine-protein phosphatase BSL2; AltName: Full=BSU1-like protein 2 gi 332190166 gb AEE28287.1  serine/threonine-protein phosphatase BSL2 [Arabidopsis thaliana]                                                                                                                                                                                                                                               | 999  | 1018 | 0        | 101.9 | 92.4 | 95.3 | serine/threonine-protein phosphatase BSL2      | gbpln | Arabidopsis thaliana | AT1G08420.1   Symbols: BSL2   BRI1 suppressor 1 (BSU1)-like 2   chr1:2649959-2656564 FORWARD LENGTH=1018                                                                                                                                                                                                                                                                                                   | 999  | 1018 | 0        | 101.9 | 92.4 | 95.3 |
| Rsa1.0_00157.1.g7064.t1 | gb EOA36709.1  hypothetical protein CARUB_v10012258mg [Capsella rubella]                                                                                                                                                                                                                                                                                                                                                                                                                                                                                    | 577  | 589  | 0        | 102.1 | 88.7 | 92.7 | hypothetical protein CARUB_v10012258mg         | gbpln | Capsella rubella     | AT1G08410.1   Symbols:   P-loop containing nucleoside triphosphate hydrolases superfamily protein   chr1:2646307-2649106 FORWARD LENGTH=589                                                                                                                                                                                                                                                                | 577  | 589  | 0        | 102.1 | 87.9 | 92.4 |
| Rsa1.0_00157.1.g7065.t1 | dbj BAJ33638.1  unnamed protein product [Theilungiella halophila]                                                                                                                                                                                                                                                                                                                                                                                                                                                                                           | 145  | 142  | 2.00E-67 | 97.9  | 89.0 | 93.1 | unnamed protein product                        | ----  | ----                 | AT1G08380.1   Symbols: PSAO   photosystem I subunit O   chr1:2641004-2641739 REVERSE LENGTH=140                                                                                                                                                                                                                                                                                                            | 145  | 140  | 4.00E-69 | 96.6  | 89.0 | 91.0 |

|                         |                                                                                                                                                                                                                                                                                                           |     |     |           |       |      |      |                                           |       |                      |                                                                                                                                                                                                                                                                                                                                           |     |     |           |       |      |      |
|-------------------------|-----------------------------------------------------------------------------------------------------------------------------------------------------------------------------------------------------------------------------------------------------------------------------------------------------------|-----|-----|-----------|-------|------|------|-------------------------------------------|-------|----------------------|-------------------------------------------------------------------------------------------------------------------------------------------------------------------------------------------------------------------------------------------------------------------------------------------------------------------------------------------|-----|-----|-----------|-------|------|------|
| Rsa1.0_00157.1.g7066.t1 | ref[XP_002890493.1] predicted protein [Arabidopsis lyrata subsp. lyrata] gi 297336335 gb EFH6752.1  predicted protein [Arabidopsis lyrata subsp. lyrata]                                                                                                                                                  | 361 | 337 | 3.00E-66  | 93.4  | 44.0 | 56.5 | predicted protein                         | gbpln | Arabidopsis lyrata   | AT1G22090.1   Symbols: emb2204   Protein of unknown function (DUF626)   chr1:7795721-7797252 FORWARD LENGTH=329                                                                                                                                                                                                                           | 361 | 329 | 4.00E-64  | 91.1  | 41.3 | 55.4 |
| Rsa1.0_00157.1.g7067.t1 | dbj BAJ33638.1  unnamed protein product [Theellungiella halophila]                                                                                                                                                                                                                                        | 80  | 142 | 2.00E-36  | 177.5 | 92.5 | 98.8 | unnamed protein product                   | ----  | ----                 | AT1G08380.1   Symbols: PSAO   photosystem I subunit O   chr1:2641004-2641739 REVERSE LENGTH=140                                                                                                                                                                                                                                           | 80  | 140 | 7.00E-39  | 175.0 | 92.5 | 97.5 |
| Rsa1.0_00157.1.g7068.t1 | ref[XP_002889689.1] hypothetical protein ARALYDRAFT_470898 [Arabidopsis lyrata subsp. lyrata] gi 297335531 gb EFH65948.1  hypothetical protein ARALYDRAFT_470898 [Arabidopsis lyrata subsp. lyrata] ref[NP_172308.2]                                                                                      | 361 | 368 | 1.00E-128 | 101.9 | 76.2 | 85.0 | hypothetical protein ARALYDRAFT_470898    | gbpln | Arabidopsis lyrata   | AT1G08370.1   Symbols: DCP1, ATDCP1   decapping 1   chr1:2638355-2640367 FORWARD LENGTH=367                                                                                                                                                                                                                                               | 361 | 367 | 1.00E-126 | 101.7 | 74.2 | 83.7 |
| Rsa1.0_00157.1.g7069.t4 | esterase/lipase/thioesterase-like protein [Arabidopsis thaliana] gi 19321489 gb ACF16164.1  At1g08310 [Arabidopsis thaliana] gi 332190151 gb AEE28272.1  esterase/lipase/thioesterase-like protein [Arabidopsis thaliana] ref[NP_001077487.1] transmembrane amino acid transporter [Arabidopsis thaliana] | 583 | 315 | 1.00E-133 | 54.0  | 41.2 | 46.1 | esterase/lipase/thioesterase-like protein | gbpln | Arabidopsis thaliana | AT1G08310.1   Symbols:   alpha/beta-Hydrolases superfamily protein   chr1:2619134-2620338 FORWARD LENGTH=315                                                                                                                                                                                                                              | 583 | 315 | 1.00E-135 | 54.0  | 41.2 | 46.1 |
| Rsa1.0_00157.1.g7070.t1 | gi 403399391 sp F4HW02.1 GAT1_ARATH RecName: Full=GABA transporter 1; Short=ALGAT1; AltName: Full=Bidirectional amino acid transporter 1 gi 332190143 gb AEE28264.1  GABA transporter 1 [Arabidopsis thaliana]                                                                                            | 108 | 451 | 6.00E-48  | 417.6 | 86.1 | 90.7 | transmembrane amino acid transporter      | gbpln | Arabidopsis thaliana | AT1G08230.2   Symbols:   Transmembrane amino acid transporter family protein   chr1:2583715-2586700 REVERSE LENGTH=451                                                                                                                                                                                                                    | 108 | 451 | 1.00E-50  | 417.6 | 86.1 | 90.7 |
| Rsa1.0_00157.1.g7071.t1 | gb EOA40374.1  hypothetical protein CARUB_v10009101mg [Capsella rubella]                                                                                                                                                                                                                                  | 370 | 453 | 1.00E-171 | 122.4 | 81.9 | 87.6 | hypothetical protein CARUB_v10009101mg    | gbpln | Capsella rubella     | AT1G08230.2   Symbols:   Transmembrane amino acid transporter family protein   chr1:2583715-2586700 REVERSE LENGTH=451                                                                                                                                                                                                                    | 370 | 451 | 1.00E-163 | 121.9 | 80.0 | 85.4 |
| Rsa1.0_00157.1.g7072.t1 | gb EOA40235.1  hypothetical protein CARUB_v10008955mg [Capsella rubella]                                                                                                                                                                                                                                  | 887 | 493 | 0         | 55.6  | 48.7 | 50.8 | hypothetical protein CARUB_v10008955mg    | gbpln | Capsella rubella     | AT1G08210.1   Symbols:   Eukaryotic aspartyl protease family protein   chr1:2577119-2580581 REVERSE LENGTH=492                                                                                                                                                                                                                            | 887 | 492 | 0         | 55.5  | 48.0 | 50.8 |
| Rsa1.0_00157.1.g7073.t1 | ref[XP_002892445.1] hypothetical protein ARALYDRAFT_888049 [Arabidopsis lyrata subsp. lyrata] gi 297338287 gb EFH6704.1  hypothetical protein ARALYDRAFT_888049 [Arabidopsis lyrata subsp. lyrata]                                                                                                        | 110 | 111 | 2.00E-35  | 100.9 | 82.7 | 88.2 | hypothetical protein ARALYDRAFT_888049    | gbpln | Arabidopsis lyrata   | AT1G08180.1   Symbols:   unknown protein; Has 53 Blast hits to 53 proteins in 9 species: Archae - 0; Bacteria - 0; Metazoa - 1; Fungi - 0; Plants - 52; Viruses - 0; Other Eukaryotes - 0 (source: NCBI BLink).   chr1:2564741-2565076 REVERSE LENGTH=111                                                                                 | 110 | 111 | 1.00E-37  | 100.9 | 81.8 | 87.3 |
| Rsa1.0_00157.1.g7074.t1 | gb EOA37085.1  hypothetical protein CARUB_v10010243mg [Capsella rubella]                                                                                                                                                                                                                                  | 209 | 222 | 6.00E-89  | 106.2 | 87.6 | 94.3 | hypothetical protein CARUB_v10010243mg    | gbpln | Capsella rubella     | AT1G08160.1   Symbols:   Late embryogenesis abundant (LEA) hydroxyproline-rich glycoprotein family   chr1:2559672-2560337 REVERSE LENGTH=221                                                                                                                                                                                              | 209 | 221 | 9.00E-88  | 105.7 | 85.2 | 92.8 |
| Rsa1.0_00157.1.g7075.t1 | gb AEZ68614.1  high-affinity nitrate transporter [Brassica juncea]                                                                                                                                                                                                                                        | 530 | 530 | 0         | 100.0 | 97.9 | 99.4 | high-affinity nitrate transporter         | gbpln | Brassica juncea      | AT1G08090.1   Symbols: ATNRT2.1, NRT2, NRT2.1AT, ACH1, LIN1, ATNRT2.1, NRT2.1, NRT2.1   nitrate transporter 2.1   chr1:2524139-2525920 FORWARD LENGTH=530                                                                                                                                                                                 | 530 | 530 | 0         | 100.0 | 94.0 | 97.0 |
| Rsa1.0_00157.1.g7076.t1 | ref[NP_172283.1] C3HC4-type RING finger-containing protein [Arabidopsis thaliana] gi 8778841 gb AAF79840.1 AC026875_20 T6D22.13 [Arabidopsis thaliana] gi 332190114 gb AEE28235.1  C3HC4-type RING finger-containing protein [Arabidopsis thaliana]                                                       | 627 | 641 | 0         | 102.2 | 73.4 | 83.4 | C3HC4-type RING finger-containing protein | gbpln | Arabidopsis thaliana | AT1G08050.1   Symbols:   Zinc finger (C3HC4-type RING finger) family protein   chr1:2499088-2501311 REVERSE LENGTH=641                                                                                                                                                                                                                    | 627 | 641 | 0         | 102.2 | 73.4 | 83.4 |
| Rsa1.0_00157.1.g7077.t2 | gb EOA36703.1  hypothetical protein CARUB_v10012236mg [Capsella rubella]                                                                                                                                                                                                                                  | 103 | 140 | 1.00E-34  | 135.9 | 71.8 | 79.6 | hypothetical protein CARUB_v10012236mg    | gbpln | Capsella rubella     | AT1G08035.1   Symbols:   unknown protein; BEST Arabidopsis thaliana protein match is: unknown protein (TAIR:AT2G28330.1); Has 10 Blast hits to 10 proteins in 3 species: Archae - 0; Bacteria - 0; Metazoa - 0; Fungi - 0; Plants - 10; Viruses - 0; Other Eukaryotes - 0 (source: NCBI BLink).   chr1:2494772-2495149 FORWARD LENGTH=125 | 103 | 125 | 3.00E-35  | 121.4 | 73.8 | 84.5 |
| Rsa1.0_00157.1.g7078.t1 | gb EOA36903.1  hypothetical protein CARUB_v10011453mg [Capsella rubella]                                                                                                                                                                                                                                  | 501 | 499 | 0         | 99.6  | 79.8 | 87.6 | hypothetical protein CARUB_v10011453mg    | gbpln | Capsella rubella     | AT1G08030.1   Symbols: TPST   tyrosylprotein sulfotransferase   chr1:2489575-2492741 REVERSE LENGTH=500                                                                                                                                                                                                                                   | 501 | 500 | 0         | 99.8  | 80.2 | 86.8 |

|                         |                                                                                                                                                                                                                                                                                                                                                                                                                                                                               |     |     |           |       |       |       |                                                  |             |                      |                                                                                                                                                                                                                                                                                                                                          |     |     |           |       |       |       |
|-------------------------|-------------------------------------------------------------------------------------------------------------------------------------------------------------------------------------------------------------------------------------------------------------------------------------------------------------------------------------------------------------------------------------------------------------------------------------------------------------------------------|-----|-----|-----------|-------|-------|-------|--------------------------------------------------|-------------|----------------------|------------------------------------------------------------------------------------------------------------------------------------------------------------------------------------------------------------------------------------------------------------------------------------------------------------------------------------------|-----|-----|-----------|-------|-------|-------|
| Rsa1.0_00157.1.g7079.t1 | gb EOA36949.1  hypothetical protein CARUB_v10009871mg [Capsella rubella] gi 482572763 gb EOA36950.1  hypothetical protein CARUB_v10009871mg [Capsella rubella]                                                                                                                                                                                                                                                                                                                | 285 | 300 | 1.00E-91  | 105.3 | 67.0  | 75.4  | hypothetical protein CARUB_v10009871mg           | gbpln       | Capsella rubella     | AT1G08010.2   Symbols: GATA11   GATA transcription factor 11   chr1:2486202-2487402 REVERSE LENGTH=303                                                                                                                                                                                                                                   | 285 | 303 | 5.00E-90  | 106.3 | 64.6  | 76.1  |
| Rsa1.0_00157.1.g7080.t1 | ref XP_002899677.1  SIT4 phosphatase-associated family protein [Arabidopsis lyrata subsp. lyrata] gi 297335519 gb EFH65936.1  SIT4 phosphatase-associated family protein [Arabidopsis lyrata subsp. lyrata]                                                                                                                                                                                                                                                                   | 796 | 805 | 0         | 101.1 | 87.7  | 92.6  | SIT4 phosphatase-associated family protein       | gbpln       | Arabidopsis lyrata   | AT1G07990.1   Symbols:   SIT4 phosphatase-associated family protein   chr1:2477413-2482898 FORWARD LENGTH=802                                                                                                                                                                                                                            | 796 | 802 | 0         | 100.8 | 86.8  | 92.1  |
| Rsa1.0_00157.1.g7081.t1 | gb EOA38222.1  hypothetical protein CARUB_v10009702mg [Capsella rubella]                                                                                                                                                                                                                                                                                                                                                                                                      | 145 | 330 | 3.00E-40  | 227.6 | 76.6  | 96.9  | hypothetical protein CARUB_v10009702mg           | gbpln       | Capsella rubella     | AT1G07985.1   Symbols:   Expressed protein   chr1:2475508-2475942 FORWARD LENGTH=144                                                                                                                                                                                                                                                     | 145 | 144 | 7.00E-41  | 99.3  | 75.9  | 83.4  |
| Rsa1.0_00157.1.g7082.t1 | gb AAF79822.1 AC026875.2 T6D22.2 [Arabidopsis thaliana]                                                                                                                                                                                                                                                                                                                                                                                                                       | 462 | 967 | 0         | 209.3 | 97.2  | 98.3  | T6D22.2                                          | gbpln       | Arabidopsis thaliana | AT5G60390.3   Symbols:   GTP binding Elongation factor Tu family protein   chr5:24289226-24290675 FORWARD LENGTH=449                                                                                                                                                                                                                     | 462 | 449 | 0         | 97.2  | 92.2  | 93.1  |
| Rsa1.0_00157.1.g7083.t1 | ref XP_002865857.1  predicted protein [Arabidopsis lyrata subsp. lyrata] gi 297311692 gb EFH42116.1  predicted protein [Arabidopsis lyrata subsp. lyrata]                                                                                                                                                                                                                                                                                                                     | 128 | 142 | 8.00E-22  | 110.9 | 48.4  | 68.0  | predicted protein                                | gbpln       | Arabidopsis lyrata   | #                                                                                                                                                                                                                                                                                                                                        | #   | #   | #         | #     | #     | #     |
| Rsa1.0_00157.1.g7084.t1 | gb EOA38236.1  hypothetical protein CARUB_v10009719mg [Capsella rubella]                                                                                                                                                                                                                                                                                                                                                                                                      | 250 | 328 | 1.00E-129 | 131.2 | 87.6  | 94.0  | hypothetical protein CARUB_v10009719mg           | gbpln       | Capsella rubella     | AT1G07890.8   Symbols: APX1, MEE6, CS1, ATAPX1, ATAPX01   ascorbate peroxidase 1   chr1:2438005-2439435 FORWARD LENGTH=250                                                                                                                                                                                                               | 250 | 250 | 1.00E-131 | 100.0 | 88.4  | 94.0  |
| Rsa1.0_00157.1.g7085.t1 | ref NP_001184932.1  putative serine/threonine-protein kinase RLCKVII [Arabidopsis thaliana] gi 332190074 gb AEE28195.1  putative serine/threonine-protein kinase RLCKVII [Arabidopsis thaliana]                                                                                                                                                                                                                                                                               | 420 | 538 | 0         | 128.1 | 87.6  | 90.7  | putative serine/threonine-protein kinase RLCKVII | gbpln       | Arabidopsis thaliana | AT1G07870.2   Symbols:   Protein kinase superfamily protein   chr1:2428942-2431843 REVERSE LENGTH=538                                                                                                                                                                                                                                    | 420 | 538 | 0         | 128.1 | 87.6  | 90.7  |
| Rsa1.0_00157.1.g7086.t1 | ref XP_002892421.1  hypothetical protein ARALYDRAFT_470820 [Arabidopsis lyrata subsp. lyrata] gi 297338263 gb EFH68680.1  hypothetical protein ARALYDRAFT_470820 [Arabidopsis lyrata subsp. lyrata]                                                                                                                                                                                                                                                                           | 166 | 132 | 2.00E-38  | 79.5  | 50.0  | 60.8  | hypothetical protein ARALYDRAFT_470820           | gbpln       | Arabidopsis lyrata   | AT1G07860.1   Symbols:   BEST Arabidopsis thaliana protein match is: Protein kinase superfamily protein (TAIR:AT1G07870.2); Has 7 Blast hits to 7 proteins in 4 species: Archae - 0; Bacteria - 0; Metazoa - 0; Fungi - 0; Plants - 7; Viruses - 0; Other Eukaryotes - 0 (source: NCBI BLINK).   chr1:2428942-2429431 REVERSE LENGTH=135 | 166 | 135 | 3.00E-36  | 81.3  | 50.6  | 56.0  |
| Rsa1.0_00157.1.g7087.t1 | tpg DAA40122.1  TPA: histone H4.3 [Zea mays]                                                                                                                                                                                                                                                                                                                                                                                                                                  | 103 | 248 | 3.00E-52  | 240.8 | 100.0 | 100.0 | TPA: histone H4.3                                | gbenv/gbpln | Zea mays             | AT5G59970.1   Symbols:   Histone superfamily protein   chr5:24146352-24146663 REVERSE LENGTH=103                                                                                                                                                                                                                                         | 103 | 103 | 2.00E-52  | 100.0 | 100.0 | 100.0 |
| Rsa1.0_00157.1.g7088.t1 | gb EOA39923.1  hypothetical protein CARUB_v10008611mg [Capsella rubella]                                                                                                                                                                                                                                                                                                                                                                                                      | 454 | 612 | 1.00E-111 | 134.8 | 58.6  | 73.1  | hypothetical protein CARUB_v10008611mg           | gbpln       | Capsella rubella     | AT1G07705.2   Symbols:   NOT2 / NOT3 / NOT5 family   chr1:2382090-2385856 FORWARD LENGTH=614                                                                                                                                                                                                                                             | 454 | 614 | 1.00E-110 | 135.2 | 57.7  | 72.9  |
| Rsa1.0_00157.1.g7089.t1 | gb EOA25182.1  hypothetical protein CARUB_v10018494mg [Capsella rubella]                                                                                                                                                                                                                                                                                                                                                                                                      | 274 | 282 | 7.00E-39  | 102.9 | 36.5  | 50.7  | hypothetical protein CARUB_v10018494mg           | gbpln       | Capsella rubella     | AT1G10000.1   Symbols:   Ribonuclease H-like superfamily protein   chr1:3263877-3264788 REVERSE LENGTH=303                                                                                                                                                                                                                               | 274 | 303 | 2.00E-32  | 110.6 | 33.6  | 48.2  |
| Rsa1.0_00158.1.g7090.t1 | gb EOA22207.1  hypothetical protein CARUB_v10002795mg [Capsella rubella]                                                                                                                                                                                                                                                                                                                                                                                                      | 361 | 352 | 2.33E-156 | 97.5  | 77.0  | 85.6  | hypothetical protein CARUB_v10002795mg           | gbpln       | Capsella rubella     | AT5G06920.1   Symbols: FLA21   FASCICLIN-like arabinogalactan protein 21 precursor   chr5:2142858-2143919 FORWARD LENGTH=353                                                                                                                                                                                                             | 361 | 353 | 2.33E-156 | 97.8  | 75.9  | 82.8  |
| Rsa1.0_00158.1.g7091.t1 | ref NP_568727.1  cycloeucaenol cycloisomerase [Arabidopsis thaliana] gi 24211551 sp Q9M643.1 CC1_ARATH RecName: Full=Cycloeucaenol cycloisomerase; AltName: Full=Cycloeucaenol-obtusifolii isomerase; AltName: Full=Cyclopropyl sterol isomerase gi 7715089 gb AAF67863.1 AF216756.1 cyclopropyl isomerase [Arabidopsis thaliana] gi 1077384422 gb ABF83694.1 At5G0375 [Arabidopsis thaliana] gi 332008552 gb AED95935.1  cycloeucaenol cycloisomerase [Arabidopsis thaliana] | 282 | 280 | 1.00E-143 | 99.3  | 90.4  | 94.0  | cycloeucaenol cycloisomerase                     | gbpln       | Arabidopsis thaliana | AT5G50375.1   Symbols: CPI1   cyclopropyl isomerase   chr5:20511856-20513931 FORWARD LENGTH=280                                                                                                                                                                                                                                          | 282 | 280 | 1.00E-145 | 99.3  | 90.4  | 94.0  |
| Rsa1.0_00158.1.g7092.t1 | gb ACG69524.1  steroleosin SLO1-3 [Brassica napus]                                                                                                                                                                                                                                                                                                                                                                                                                            | 356 | 341 | 1.00E-180 | 95.8  | 91.0  | 93.0  | steroleosin SLO1-3                               | gbpln       | Brassica napus       | AT5G50700.1   Symbols: HSD1   hydroxysteroid dehydrogenase 1   chr5:20623259-20624995 REVERSE LENGTH=349                                                                                                                                                                                                                                 | 356 | 349 | 1.00E-163 | 98.0  | 80.9  | 87.9  |
| Rsa1.0_00158.1.g7093.t1 | #                                                                                                                                                                                                                                                                                                                                                                                                                                                                             | #   | #   | #         | #     | #     | -     | ----                                             | ----        | #                    | #                                                                                                                                                                                                                                                                                                                                        | #   | #   | #         | #     | #     |       |

|                         |                                                                                                                                                                                                                                                                                                                                                                                                                                                                                                                                                                                                                                                                                                                                                                                                                                                                                                                                                                                                                                                                                                                                  |     |      |           |       |       |       |                                                                 |       |                      |                                                                                                                                                                            |     |      |           |       |       |       |
|-------------------------|----------------------------------------------------------------------------------------------------------------------------------------------------------------------------------------------------------------------------------------------------------------------------------------------------------------------------------------------------------------------------------------------------------------------------------------------------------------------------------------------------------------------------------------------------------------------------------------------------------------------------------------------------------------------------------------------------------------------------------------------------------------------------------------------------------------------------------------------------------------------------------------------------------------------------------------------------------------------------------------------------------------------------------------------------------------------------------------------------------------------------------|-----|------|-----------|-------|-------|-------|-----------------------------------------------------------------|-------|----------------------|----------------------------------------------------------------------------------------------------------------------------------------------------------------------------|-----|------|-----------|-------|-------|-------|
| Rsa1.0_00158.1.g7094.t1 | ref XP_002865818.1  hypothetical protein ARALYDRAFT_918095 [Arabidopsis lyrata subsp. lyrata] gi 297311653 gb EFH42077.1                                                                                                                                                                                                                                                                                                                                                                                                                                                                                                                                                                                                                                                                                                                                                                                                                                                                                                                                                                                                         | 349 | 358  | 1.00E-136 | 102.6 | 79.7  | 84.5  | hypothetical protein ARALYDRAFT_918095                          | gbpln | Arabidopsis lyrata   | AT5G50570.2   Symbols: SPL13A, SPL13   Squamosa promoter-binding protein-like (SBP domain) transcription factor family protein   chr5:20582555-20583791 REVERSE LENGTH=359 | 349 | 359  | 1.00E-136 | 102.9 | 79.1  | 84.0  |
| Rsa1.0_00158.1.g7095.t3 | dbj BAB09923.1  copia-like retrotransposable element [Arabidopsis thaliana]                                                                                                                                                                                                                                                                                                                                                                                                                                                                                                                                                                                                                                                                                                                                                                                                                                                                                                                                                                                                                                                      | 949 | 1342 | 1.00E-138 | 141.4 | 30.5  | 43.1  | copia-like retrotransposable element                            | gbpln | Arabidopsis thaliana | AT5G50570.2   Symbols: SPL13A, SPL13   Squamosa promoter-binding protein-like (SBP domain) transcription factor family protein   chr5:20582555-20583791 REVERSE LENGTH=359 | 949 | 359  | 1.00E-128 | 37.8  | 27.9  | 29.9  |
| Rsa1.0_00158.1.g7096.t1 | ref NP_194222.1  protein transport protein sec61 subunit gamma-1 [Arabidopsis thaliana] gi 18423153 ref NP_568728.1  protein transport protein sec61 subunit gamma-1 [Arabidopsis thaliana] gi 297795847 ref XP_002865808.1  hypothetical protein ARALYDRAFT_495113 [Arabidopsis lyrata subsp. lyrata] gi 297799504 ref XP_002867636.1  hypothetical protein ARALYDRAFT_492346 [Arabidopsis lyrata subsp. lyrata] gi 408407792 sp PODI74.1 S61G1_ARATH RecName: Full=Protein transport protein Sec61 subunit gamma-1 [Arabidopsis thaliana] gi 408407793 sp PODI75.1 S61G2_ARATH RecName: Full=Protein transport protein Sec61 subunit gamma-2 [Arabidopsis thaliana] gi 13877813 gb AAK43984.1 AF370169.1 putative protein translocation complex Sec61 gamma chain [Arabidopsis thaliana] gi 4455235 emb CAB36734.1  PROTEIN TRANSPORT PROTEIN SEC61 GAMMA SUBUNIT-like [Arabidopsis thaliana] gi 7269342 emb CAB79401.1  PROTEIN TRANSPORT PROTEIN SEC61 GAMMA SUBUNIT-like [Arabidopsis thaliana] gi 9758755 dbj BAB09131.1  protein translocation complex Sec61 gamma chain [Arabidopsis thaliana] gi 14222466 emb A115927.1 | 69  | 69   | 1.00E-30  | 100.0 | 100.0 | 100.0 | protein transport protein sec61 subunit gamma-1                 | gbpln | Arabidopsis lyrata   | AT5G0460.1   Symbols: secE/sec61-gamma protein transport protein   chr5:20552168-20552509 REVERSE LENGTH=69                                                                | 69  | 69   | 2.00E-33  | 100.0 | 100.0 | 100.0 |
| Rsa1.0_00158.1.g7097.t1 | # # # # # # # # -                                                                                                                                                                                                                                                                                                                                                                                                                                                                                                                                                                                                                                                                                                                                                                                                                                                                                                                                                                                                                                                                                                                | #   | #    | #         | #     | #     | #     | -                                                               | ----  | ----                 | #                                                                                                                                                                          | #   | #    | #         | #     | #     | #     |
| Rsa1.0_00158.1.g7098.t1 | ref NP_199888.1  reversibly glycosylated polypeptide 4 [Arabidopsis thaliana] gi 75180555 sp Q9LUE6.1 RGP4_ARATH RecName: Full=Probable UDP-arabinopyranose mutase 4; AltName: Full=Reversibly glycosylated polypeptide 4; Short=AtRGP4; AltName: Full=UDP-L-arabinose mutase 4 gi 14326034 gb AAK60126.1 AF329280.1 reversibly glycosylated polypeptide RGP-4 [Arabidopsis thaliana] gi 8777398 dbj BAA96988.1  UDP-glucose:protein transglucosylase; reversibly glycosylated polypeptide [Arabidopsis thaliana] gi 28393265 gb AAO42061.1  putative UDP-glucose:protein transglucosylase [Arabidopsis thaliana] gi 28827766 gb AAO50727.1  putative UDP-glucose [Arabidopsis thaliana] gi 332008605 gb AED95988.1  reversibly glycosylated polypeptide 4 [Arabidopsis thaliana]                                                                                                                                                                                                                                                                                                                                                | 362 | 364  | 0         | 100.6 | 93.9  | 96.4  | reversibly glycosylated polypeptide 4                           | gbpln | Arabidopsis thaliana | AT5G50750.1   Symbols: RGP4   reversibly glycosylated polypeptide 4   chr5:20641066-20642470 FORWARD LENGTH=364                                                            | 362 | 364  | 0         | 100.6 | 93.9  | 96.4  |
| Rsa1.0_00158.1.g7099.t1 | # # # # # # # # -                                                                                                                                                                                                                                                                                                                                                                                                                                                                                                                                                                                                                                                                                                                                                                                                                                                                                                                                                                                                                                                                                                                | #   | #    | #         | #     | #     | #     | -                                                               | ----  | ----                 | #                                                                                                                                                                          | #   | #    | #         | #     | #     | #     |
| Rsa1.0_00158.1.g7100.t1 | gb AAD32898.1  putative retroelement pol polyprotein [Arabidopsis thaliana]                                                                                                                                                                                                                                                                                                                                                                                                                                                                                                                                                                                                                                                                                                                                                                                                                                                                                                                                                                                                                                                      | 527 | 1307 | 0         | 248.0 | 65.5  | 78.7  | putative retroelement pol polyprotein                           | gbpln | Arabidopsis thaliana | AT4G23160.1   Symbols: CRK8   cysteine-rich RLK (RECEPTOR-like protein kinase) 8   chr4:12129485-12134086 FORWARD LENGTH=1262                                              | 527 | 1262 | 2.00E-98  | 239.5 | 32.8  | 52.8  |
| Rsa1.0_00158.1.g7101.t1 | gb AAC95173.1  putative retroelement pol polyprotein [Arabidopsis thaliana]                                                                                                                                                                                                                                                                                                                                                                                                                                                                                                                                                                                                                                                                                                                                                                                                                                                                                                                                                                                                                                                      | 401 | 1200 | 1.00E-129 | 299.3 | 53.4  | 61.8  | putative retroelement pol polyprotein                           | gbpln | Arabidopsis thaliana | #                                                                                                                                                                          | #   | #    | #         | #     | #     | #     |
| Rsa1.0_00158.1.g7102.t1 | # # # # # # # # -                                                                                                                                                                                                                                                                                                                                                                                                                                                                                                                                                                                                                                                                                                                                                                                                                                                                                                                                                                                                                                                                                                                | #   | #    | #         | #     | #     | #     | -                                                               | ----  | ----                 | #                                                                                                                                                                          | #   | #    | #         | #     | #     | #     |
| Rsa1.0_00158.1.g7103.t1 | gb AAC28221.1  similar to reverse transcriptases (PFam: rvt.hmm, score: 60.13) [Arabidopsis thaliana]                                                                                                                                                                                                                                                                                                                                                                                                                                                                                                                                                                                                                                                                                                                                                                                                                                                                                                                                                                                                                            | 936 | 1164 | 1.00E-171 | 124.4 | 35.0  | 51.4  | similar to reverse transcriptases (PFam: rvt.hmm, score: 60.13) | gbpln | Arabidopsis thaliana | AT3G24255.1   Symbols:   RNA-directed DNA polymerase (reverse transcriptase)-related family protein   chr3:8789471-8793208 FORWARD LENGTH=746                              | 936 | 746  | 4.00E-54  | 79.7  | 14.6  | 21.9  |

| Rsa1.0_00158.1.g7104.t3 | #                                                                                                                                                                                                                                                                                                                                                                                                                                                                                       | #    | #    | #         | #     | #    | #    | -                                                          | ----  | ----                 | #                                                                                                                                                                                                                                                        | #    | #   | #         | #     | #    |      |
|-------------------------|-----------------------------------------------------------------------------------------------------------------------------------------------------------------------------------------------------------------------------------------------------------------------------------------------------------------------------------------------------------------------------------------------------------------------------------------------------------------------------------------|------|------|-----------|-------|------|------|------------------------------------------------------------|-------|----------------------|----------------------------------------------------------------------------------------------------------------------------------------------------------------------------------------------------------------------------------------------------------|------|-----|-----------|-------|------|------|
| Rsa1.0_00158.1.g7105.t2 | dbj BAB02990.1  retroelement pol polyprotein-like [Arabidopsis thaliana]                                                                                                                                                                                                                                                                                                                                                                                                                | 328  | 1250 | 1.00E-69  | 381.1 | 47.0 | 64.3 | retroelement pol polyprotein-like                          | gbpln | Arabidopsis thaliana | #                                                                                                                                                                                                                                                        | #    | #   | #         | #     | #    |      |
| Rsa1.0_00158.1.g7106.t1 | gb EOA14070.1  hypothetical protein CARUB_v10027207mg [Capsella rubella]                                                                                                                                                                                                                                                                                                                                                                                                                | 169  | 184  | 6.00E-49  | 108.9 | 69.2 | 79.3 | hypothetical protein CARUB_v10027207mg                     | gbpln | Capsella rubella     | AT5G50760.1   Symbols: SAUR-like auxin-responsive protein family   chr5:20644780-20645331 FORWARD LENGTH=183                                                                                                                                             | 169  | 183 | 3.00E-51  | 108.3 | 72.2 | 84.6 |
| Rsa1.0_00158.1.g7107.t1 | sp F4IMK4.2 MES19_ARATH RecName: Full=Putative methyltransferase 19; Short=AtMES19                                                                                                                                                                                                                                                                                                                                                                                                      | 264  | 260  | 1.00E-111 | 98.5  | 73.5 | 83.0 | RecName: Full=Putative methyltransferase 19; Short=AtMES19 | ----  | ----                 | AT2G23560.1   Symbols: ATMES7, MES7   methyl esterase 7   chr2:10029336-10030282 REVERSE LENGTH=260                                                                                                                                                      | 264  | 260 | 1.00E-111 | 98.5  | 72.7 | 82.6 |
| Rsa1.0_00158.1.g7108.t1 | gb EOA28827.1  hypothetical protein CARUB_v10025066mg [Capsella rubella]                                                                                                                                                                                                                                                                                                                                                                                                                | 173  | 200  | 5.00E-75  | 115.6 | 76.3 | 86.1 | hypothetical protein CARUB_v10025066mg                     | gbpln | Capsella rubella     | AT2G23550.1   Symbols: ATMES6, MES6, ABE1   methyl esterase 6   chr2:10027813-10028767 REVERSE LENGTH=265                                                                                                                                                | 173  | 265 | 8.00E-76  | 153.2 | 76.9 | 82.7 |
| Rsa1.0_00158.1.g7109.t1 | gb AAC95175.1  putative non-LTR retroelement reverse transcriptase [Arabidopsis thaliana]                                                                                                                                                                                                                                                                                                                                                                                               | 923  | 1352 | 1.00E-178 | 146.5 | 41.5 | 56.8 | putative non-LTR retroelement reverse transcriptase        | gbpln | Arabidopsis thaliana | AT3G24255.1   Symbols: RNA-directed DNA polymerase (reverse transcriptase)-related family protein   chr3:8789471-8793208 FORWARD LENGTH=746                                                                                                              | 923  | 746 | 1.00E-87  | 80.8  | 19.0 | 25.2 |
| Rsa1.0_00158.1.g7110.t1 | gb AAC33226.1  putative non-LTR retroelement reverse transcriptase [Arabidopsis thaliana]                                                                                                                                                                                                                                                                                                                                                                                               | 382  | 1529 | 2.00E-32  | 400.3 | 17.8 | 29.3 | putative non-LTR retroelement reverse transcriptase        | gbpln | Arabidopsis thaliana | #                                                                                                                                                                                                                                                        | #    | #   | #         | #     | #    |      |
| Rsa1.0_00158.1.g7111.t1 | ref NP_567315.1  Mannose-P-dolichol utilization defect 1 protein [Arabidopsis thaliana]<br>gi 75161427 sp Q8VY63.1 MPU12_ARATH RecName: Full=Mannose-P-dolichol utilization defect 1 protein homolog 2<br>gi 18252961 gb AAL62407.1  unknown protein [Arabidopsis thaliana]<br>gi 21389665 gb AAM48031.1  unknown protein [Arabidopsis thaliana]<br>gi 332657164 gb AEE82564.1  Mannose-P-dolichol utilization defect 1 protein [Arabidopsis thaliana]                                  | 246  | 235  | 1.00E-115 | 95.5  | 83.7 | 88.6 | Mannose-P-dolichol utilization defect 1 protein            | gbpln | Arabidopsis thaliana | AT4G07390.1   Symbols: Mannose-P-dolichol utilization defect 1 protein   chr4:4195750-4197317 FORWARD LENGTH=235                                                                                                                                         | 246  | 235 | 1.00E-118 | 95.5  | 83.7 | 88.6 |
| Rsa1.0_00158.1.g7112.t1 | dbj BAB03143.1  ankyrin-like protein [Arabidopsis thaliana]                                                                                                                                                                                                                                                                                                                                                                                                                             | 721  | 1100 | 1.00E-165 | 152.6 | 40.5 | 45.5 | ankyrin-like protein                                       | gbpln | Arabidopsis thaliana | AT3G12350.1   Symbols: F-box family protein   chr3:3931626-3933104 FORWARD LENGTH=422                                                                                                                                                                    | 721  | 422 | 1.00E-164 | 58.5  | 40.6 | 45.9 |
| Rsa1.0_00158.1.g7113.t1 | #                                                                                                                                                                                                                                                                                                                                                                                                                                                                                       | #    | #    | #         | #     | #    | #    | -                                                          | ----  | ----                 | #                                                                                                                                                                                                                                                        | #    | #   | #         | #     | #    |      |
| Rsa1.0_00159.1.g7114.t1 | ref XP_002879161.1  VHA-A1 [Arabidopsis lyrata subsp. lyrata]<br>gi 297325000 gb EFH5420.1  VHA-A1 [Arabidopsis lyrata subsp. lyrata]                                                                                                                                                                                                                                                                                                                                                   | 2782 | 822  | 0         | 29.5  | 27.4 | 28.0 | VHA-A1                                                     | gbpln | Arabidopsis lyrata   | AT2G28520.1   Symbols: VHA-A1   vacuolar proton ATPase A1   chr2:12210026-12215532 FORWARD LENGTH=817                                                                                                                                                    | 2782 | 817 | 0         | 29.4  | 26.8 | 27.5 |
| Rsa1.0_00159.1.g7115.t1 | gb EOA26342.1  hypothetical protein CARUB_v10022558mg, partial [Capsella rubella]                                                                                                                                                                                                                                                                                                                                                                                                       | 887  | 1034 | 0         | 116.6 | 71.5 | 82.4 | hypothetical protein CARUB_v10022558mg, partial            | gbpln | Capsella rubella     | AT2G28540.2   Symbols: RNA binding (RRM/RBD/RNP motifs) family protein   chr2:12218652-12223594 FORWARD LENGTH=960                                                                                                                                       | 887  | 960 | 0         | 108.2 | 69.4 | 80.0 |
| Rsa1.0_00159.1.g7116.t1 | gb EOA27271.1  hypothetical protein CARUB_v10023390mg, partial [Capsella rubella]                                                                                                                                                                                                                                                                                                                                                                                                       | 388  | 390  | 0         | 100.5 | 83.5 | 87.9 | hypothetical protein CARUB_v10023390mg, partial            | gbpln | Capsella rubella     | AT2G28560.1   Symbols: ATRAD51B, RAD51B   DNA repair (Rad51) family protein   chr2:12237052-12239086 REVERSE LENGTH=371                                                                                                                                  | 388  | 371 | 0         | 95.6  | 82.5 | 87.4 |
| Rsa1.0_00159.1.g7117.t1 | ref NP_565675.1  uncharacterized protein [Arabidopsis thaliana]<br>gi 4510404 gb AAD21491.1  expressed protein [Arabidopsis thaliana]<br>gi 19111822 gb ASD60683.1  At2g28570 [Arabidopsis thaliana]<br>gi 330253050 gb AEC08144.1  uncharacterized protein AT2G28570 [Arabidopsis thaliana]                                                                                                                                                                                            | 76   | 78   | 2.00E-12  | 102.6 | 69.7 | 81.6 | uncharacterized protein                                    | gbpln | Arabidopsis thaliana | AT2G28570.1   Symbols: unknown protein; Has 13 Blast hits to 13 proteins in 6 species: Archae - 0; Bacteria - 0; Metazoa - 0; Fungi - 0; Plants - 13; Viruses - 0; Other Eukaryotes - 0 (source: NCBI BLINK).   chr2:12242064-12242300 FORWARD LENGTH=78 | 76   | 78  | 3.00E-15  | 102.6 | 69.7 | 81.6 |
| Rsa1.0_00159.1.g7118.t1 | ref NP_850123.1  PsbP domain-containing protein 2 [Arabidopsis thaliana]<br>gi 75161418 sp Q8VY52.1 PPD2_ARATH RecName: Full=PsbP domain-containing protein 2, chloroplastic; AltName: Full=PsbP-related thylakoid luminal protein 3; Flags: Precursor<br>gi 18253015 gb AAL62434.1  unknown protein [Arabidopsis thaliana]<br>gi 22136412 gb AAM91284.1  unknown protein [Arabidopsis thaliana]<br>gi 330253054 gb AEC08148.1  PsbP domain-containing protein 2 [Arabidopsis thaliana] | 237  | 232  | 3.00E-93  | 97.9  | 76.8 | 82.7 | PsbP domain-containing protein 2                           | gbpln | Arabidopsis thaliana | AT2G28605.1   Symbols: Photosystem II reaction center PsbP family protein   chr2:12254911-12255689 FORWARD LENGTH=232                                                                                                                                    | 237  | 232 | 8.00E-96  | 97.9  | 76.8 | 82.7 |

|                         |                                                                                                                                                                                                                                                                                                                          |     |      |           |       |       |       |                                              |             |                      |                                                                                                                                                                                                                                                                                                                                                                                                                                                                                                                                                                                                                                         |     |     |           |       |       |       |
|-------------------------|--------------------------------------------------------------------------------------------------------------------------------------------------------------------------------------------------------------------------------------------------------------------------------------------------------------------------|-----|------|-----------|-------|-------|-------|----------------------------------------------|-------------|----------------------|-----------------------------------------------------------------------------------------------------------------------------------------------------------------------------------------------------------------------------------------------------------------------------------------------------------------------------------------------------------------------------------------------------------------------------------------------------------------------------------------------------------------------------------------------------------------------------------------------------------------------------------------|-----|-----|-----------|-------|-------|-------|
| Rsa1.0_00159.1.g7119.t1 | ref[XP_002879183.1] hypothetical protein ARALYDRAFT_481786 [Arabidopsis lyrata subsp. lyrata] gi 297325022 gb EFH55442.1] hypothetical protein ARALYDRAFT_481786 [Arabidopsis lyrata subsp. lyrata]                                                                                                                      | 103 | 107  | 3.00E-33  | 103.9 | 68.0  | 78.6  | hypothetical protein ARALYDRAFT_481786       | gbpln       | Arabidopsis lyrata   | AT2G28725.1   Symbols:   unknown protein; BEST Arabidopsis thaliana protein match is: unknown protein (TAIR:AT1G07795.1); Has 35 Blast hits to 35 proteins in 10 species: Archae - 0; Bacteria - 0; Metazoa - 0; Fungi - 0; Plants - 35; Viruses - 0; Other Eukaryotes - 0 (source: NCBI BLINK).   chr2:12328605-12328943 FORWARD LENGTH=112                                                                                                                                                                                                                                                                                            | 103 | 112 | 6.00E-33  | 108.7 | 65.0  | 75.7  |
| Rsa1.0_00159.1.g7120.t1 | tpg[DAA40122.1] TPA: histone H4.3 [Zea mays]                                                                                                                                                                                                                                                                             | 103 | 248  | 1.00E-51  | 240.8 | 98.1  | 100.0 | TPA: histone H4.3                            | gbenv/gbpln | Zea mays             | AT5G59970.1   Symbols:   Histone superfamily protein   chr5:24146352-24146663 REVERSE LENGTH=103                                                                                                                                                                                                                                                                                                                                                                                                                                                                                                                                        | 103 | 103 | 6.00E-52  | 100.0 | 98.1  | 100.0 |
| Rsa1.0_00159.1.g7121.t1 | #                                                                                                                                                                                                                                                                                                                        | #   | #    | #         | #     | #     | #     | -                                            | ----        | ----                 | #                                                                                                                                                                                                                                                                                                                                                                                                                                                                                                                                                                                                                                       | #   | #   | #         | #     | #     |       |
| Rsa1.0_00159.1.g7122.t1 | ref[XP_002879183.1] hypothetical protein ARALYDRAFT_481786 [Arabidopsis lyrata subsp. lyrata] gi 297325022 gb EFH55442.1] hypothetical protein ARALYDRAFT_481786 [Arabidopsis lyrata subsp. lyrata]                                                                                                                      | 170 | 107  | 2.00E-31  | 62.9  | 40.0  | 45.9  | hypothetical protein ARALYDRAFT_481786       | gbpln       | Arabidopsis lyrata   | AT2G28725.1   Symbols:   unknown protein; BEST Arabidopsis thaliana protein match is: unknown protein (TAIR:AT1G07795.1); Has 35 Blast hits to 35 proteins in 10 species: Archae - 0; Bacteria - 0; Metazoa - 0; Fungi - 0; Plants - 35; Viruses - 0; Other Eukaryotes - 0 (source: NCBI BLINK).   chr2:12328605-12328943 FORWARD LENGTH=112                                                                                                                                                                                                                                                                                            | 170 | 112 | 2.00E-32  | 65.9  | 40.0  | 45.3  |
| Rsa1.0_00159.1.g7123.t1 | tpg[DAA40122.1] TPA: histone H4.3 [Zea mays]                                                                                                                                                                                                                                                                             | 103 | 248  | 3.00E-52  | 240.8 | 100.0 | 100.0 | TPA: histone H4.3                            | gbenv/gbpln | Zea mays             | AT5G59970.1   Symbols:   Histone superfamily protein   chr5:24146352-24146663 REVERSE LENGTH=103                                                                                                                                                                                                                                                                                                                                                                                                                                                                                                                                        | 103 | 103 | 2.00E-52  | 100.0 | 100.0 | 100.0 |
| Rsa1.0_00159.1.g7124.t1 | ref[XP_002881008.1] hypothetical protein ARALYDRAFT_320665 [Arabidopsis lyrata subsp. lyrata] gi 297326847 gb EFH57267.1] hypothetical protein ARALYDRAFT_320665 [Arabidopsis lyrata subsp. lyrata]                                                                                                                      | 796 | 795  | 0         | 99.9  | 85.6  | 92.3  | hypothetical protein ARALYDRAFT_320665       | gbpln       | Arabidopsis lyrata   | AT2G28780.1   Symbols:   unknown protein; INVOLVED IN: biological_process unknown; LOCATED IN: mitochondrion; EXPRESSED IN: inflorescence meristem, root, flower; EXPRESSED DURING: petal differentiation and expansion stage; CONTAINS InterPro DOMAIN/s: Protein of unknown function DUF939, bacterial (InterPro:IPRO10343); BEST Arabidopsis thaliana protein match is: unknown protein (TAIR:AT3G09450.1); Has 671 Blast hits to 667 proteins in 305 species: Archae - 0; Bacteria - 538; Metazoa - 0; Fungi - 2; Plants - 66; Viruses - 0; Other Eukaryotes - 15 (source: NCBI BLINK).   chr2:12340099-12343281 REVERSE LENGTH=796 | 796 | 796 | 0         | 100.0 | 84.5  | 91.7  |
| Rsa1.0_00159.1.g7125.t1 | #                                                                                                                                                                                                                                                                                                                        | #   | #    | #         | #     | #     | #     | -                                            | ----        | ----                 | #                                                                                                                                                                                                                                                                                                                                                                                                                                                                                                                                                                                                                                       | #   | #   | #         | #     | #     |       |
| Rsa1.0_00159.1.g7126.t1 | #                                                                                                                                                                                                                                                                                                                        | #   | #    | #         | #     | #     | #     | -                                            | ----        | ----                 | #                                                                                                                                                                                                                                                                                                                                                                                                                                                                                                                                                                                                                                       | #   | #   | #         | #     | #     |       |
| Rsa1.0_00159.1.g7127.t1 | #                                                                                                                                                                                                                                                                                                                        | #   | #    | #         | #     | #     | #     | -                                            | ----        | ----                 | #                                                                                                                                                                                                                                                                                                                                                                                                                                                                                                                                                                                                                                       | #   | #   | #         | #     | #     |       |
| Rsa1.0_00159.1.g7129.t1 | gb[AAO12209.1] thaumatin-like cytokinin-binding protein [Brassica oleracea]                                                                                                                                                                                                                                              | 252 | 250  | 1.00E-138 | 99.2  | 96.4  | 98.0  | thaumatin-like cytokinin-binding protein     | gbpln       | Brassica oleracea    | AT2G28790.1   Symbols:   Pathogenesis-related thaumatin superfamily protein   chr2:12354664-12355413 REVERSE LENGTH=249                                                                                                                                                                                                                                                                                                                                                                                                                                                                                                                 | 252 | 249 | 1.00E-124 | 98.8  | 85.3  | 91.3  |
| Rsa1.0_00159.1.g7129.t1 | gb[EOA27075.1] hypothetical protein CARUB_v10023172mg [Capsella rubella]                                                                                                                                                                                                                                                 | 453 | 460  | 0         | 101.5 | 90.3  | 94.3  | hypothetical protein CARUB_v10023172mg       | gbpln       | Capsella rubella     | AT2G28800.1   Symbols: ALB3   63 kDa inner membrane family protein   chr2:12356669-12359158 REVERSE LENGTH=462                                                                                                                                                                                                                                                                                                                                                                                                                                                                                                                          | 453 | 462 | 0         | 102.0 | 89.6  | 93.6  |
| Rsa1.0_00159.1.g7130.t1 | gb[AAG51783.1] AC079679_3 reverse transcriptase, putative: 16838-20266 [Arabidopsis thaliana]                                                                                                                                                                                                                            | 294 | 1142 | 1.00E-58  | 388.4 | 49.0  | 67.7  | reverse transcriptase, putative: 16838-20266 | gbpln       | Arabidopsis thaliana | AT3G09510.1   Symbols:   Ribonuclease H-like superfamily protein   chr3:2921804-2923258 FORWARD LENGTH=484                                                                                                                                                                                                                                                                                                                                                                                                                                                                                                                              | 294 | 484 | 2.00E-22  | 164.6 | 22.8  | 32.3  |
| Rsa1.0_00159.1.g7131.t2 | ref[XP_002879112.1] cation/H+ exchanger [Arabidopsis lyrata subsp. lyrata] gi 297324951 gb EFH55371.1] cation/H+ exchanger [Arabidopsis lyrata subsp. lyrata]                                                                                                                                                            | 863 | 848  | 0         | 98.3  | 66.3  | 76.5  | cation/H+ exchanger                          | gbpln       | Arabidopsis lyrata   | AT2G28180.1   Symbols: ATCHX8, CHX8, CHX08   Cation/hydrogen exchanger family protein   chr2:12010994-12013832 REVERSE LENGTH=847                                                                                                                                                                                                                                                                                                                                                                                                                                                                                                       | 863 | 847 | 0         | 98.1  | 65.0  | 75.8  |
| Rsa1.0_00159.1.g7132.t1 | ref[NP_850126.1] Dof zinc finger protein DOF2.2 [Arabidopsis thaliana] gi 55584015 sp Q9ZV33.2 DOF2.2 ARAT H RecName: Full=Dof zinc finger protein DOF2.2; Short=AtDOF2.2 gi 189339294 gb ACD89067.1] At2g28810 [Arabidopsis thaliana] gi 330253082 gb AEC08176.1] Dof zinc finger protein DOF2.2 [Arabidopsis thaliana] | 338 | 340  | 1.00E-131 | 100.6 | 77.8  | 84.6  | Dof zinc finger protein DOF2.2               | gbpln       | Arabidopsis thaliana | AT2G28810.1   Symbols:   Dof-type zinc finger DNA-binding family protein   chr2:12363681-12365080 FORWARD LENGTH=340                                                                                                                                                                                                                                                                                                                                                                                                                                                                                                                    | 338 | 340 | 1.00E-133 | 100.6 | 77.8  | 84.6  |
| Rsa1.0_00159.1.g7133.t1 | gb[EOA26517.1] hypothetical protein CARUB_v10022571mg [Capsella rubella]                                                                                                                                                                                                                                                 | 653 | 982  | 0         | 150.4 | 77.9  | 85.8  | hypothetical protein CARUB_v10022571mg       | gbpln       | Capsella rubella     | AT2G28830.1   Symbols: PUB12, AtPUB12   PLANT U-BOX 12   chr2:12367001-12370608 REVERSE LENGTH=962                                                                                                                                                                                                                                                                                                                                                                                                                                                                                                                                      | 653 | 962 | 0         | 147.3 | 76.9  | 86.8  |
| Rsa1.0_00159.1.g7134.t1 | #                                                                                                                                                                                                                                                                                                                        | #   | #    | #         | #     | #     | #     | -                                            | ----        | ----                 | #                                                                                                                                                                                                                                                                                                                                                                                                                                                                                                                                                                                                                                       | #   | #   | #         | #     | #     |       |

|                         |                                                                                                                                                                                                                                                                                                                                                                                                                                                                                                                                                                                                                                        |     |     |           |       |      |      |                                        |       |                      |                                                                                                                                                                                                                                                             |     |     |           |       |      |      |
|-------------------------|----------------------------------------------------------------------------------------------------------------------------------------------------------------------------------------------------------------------------------------------------------------------------------------------------------------------------------------------------------------------------------------------------------------------------------------------------------------------------------------------------------------------------------------------------------------------------------------------------------------------------------------|-----|-----|-----------|-------|------|------|----------------------------------------|-------|----------------------|-------------------------------------------------------------------------------------------------------------------------------------------------------------------------------------------------------------------------------------------------------------|-----|-----|-----------|-------|------|------|
| Rsa1.0_00159.1.g7135.t1 | refXP_002881015.1   hypothetical protein ARALYDRAFT_481802 [Arabidopsis lyrata subsp. lyrata] gi 297326854 gb EFH57274.1   hypothetical protein ARALYDRAFT_481802 [Arabidopsis lyrata subsp. lyrata] refNP_850127.1   para-aminobenzoate synthetase [Arabidopsis thaliana] gi 20466065 gb AAM19955.1   At2g28880/F8N16.17 [Arabidopsis thaliana] gi 27363398 gb AAO11618.1   At2g28880/F8N16.17 [Arabidopsis thaliana] gi 52078130 tpg DAA01457.1   TPA_exp: plastid aminodeoxychorismate synthase/glutamine amidotransferase [Arabidopsis thaliana] gi 330253090 gb AEC08184.1   aminodeoxychorismate synthase [Arabidopsis thaliana] | 136 | 157 | 6.00E-38  | 115.4 | 70.6 | 77.9 | hypothetical protein ARALYDRAFT_481802 | gbpln | Arabidopsis lyrata   | AT2G28870.1   Symbols:   unknown protein; Has 34 Blast hits to 34 proteins in 9 species: Archae - 0; Bacteria - 0; Metazoa - 0; Fungi - 0; Plants - 34; Viruses - 0; Other Eukaryotes - 0 (source: NCBI BLINK).   chr2:12394363-12394833 REVERSE LENGTH=156 | 136 | 156 | 5.00E-39  | 114.7 | 73.5 | 80.9 |
| Rsa1.0_00159.1.g7136.t1 | refXP_002881020.1   hypothetical protein ARALYDRAFT_481806 [Arabidopsis lyrata subsp. lyrata] gi 297326859 gb EFH57279.1   hypothetical protein ARALYDRAFT_481806 [Arabidopsis lyrata subsp. lyrata] refXP_002879188.1   zinc finger family protein [Arabidopsis lyrata subsp. lyrata] gi 297325027 gb EFH55447.1   zinc finger family protein [Arabidopsis lyrata subsp. lyrata]                                                                                                                                                                                                                                                      | 941 | 919 | 0         | 97.7  | 80.3 | 86.6 | para-aminobenzoate synthetase          | gbpln | Arabidopsis thaliana | AT2G28880.1   Symbols: emb1997, ADCS   para-aminobenzoate (PABA) synthase family protein   chr2:12398937-12403108 REVERSE LENGTH=919                                                                                                                        | 941 | 919 | 0         | 97.7  | 80.3 | 86.6 |
| Rsa1.0_00159.1.g7137.t1 | refXP_002879188.1   zinc finger family protein [Arabidopsis lyrata subsp. lyrata] gi 297325027 gb EFH55447.1   zinc finger family protein [Arabidopsis lyrata subsp. lyrata]                                                                                                                                                                                                                                                                                                                                                                                                                                                           | 326 | 332 | 3.00E-76  | 101.8 | 70.2 | 78.8 | hypothetical protein ARALYDRAFT_481806 | gbpln | Arabidopsis lyrata   | AT2G28910.1   Symbols: CXIP4   CAX interacting protein 4   chr2:12415992-12416990 REVERSE LENGTH=332                                                                                                                                                        | 326 | 332 | 3.00E-65  | 101.8 | 42.9 | 48.2 |
| Rsa1.0_00159.1.g7138.t1 | gb EOA27190.1   hypothetical protein CARUB_v10023308mg [Capsella rubella]                                                                                                                                                                                                                                                                                                                                                                                                                                                                                                                                                              | 418 | 414 | 0         | 99.0  | 90.7 | 95.2 | hypothetical protein CARUB_v10023308mg | gbpln | Capsella rubella     | AT2G28930.3   Symbols: APK1B, PK1B   protein kinase 1B   chr2:12424551-12426565 FORWARD LENGTH=415                                                                                                                                                          | 418 | 415 | 0         | 99.3  | 89.0 | 93.8 |
| Rsa1.0_00159.1.g7140.t1 | emb CAA04385.1   Expansin [Brassica napus]                                                                                                                                                                                                                                                                                                                                                                                                                                                                                                                                                                                             | 260 | 260 | 1.00E-145 | 100.0 | 96.2 | 98.5 | Expansin                               | gbpln | Brassica napus       | AT2G28950.1   Symbols: ATEXPA6, ATEXP6, ATEXP ALPHA 1.8, EXPA6   expansin A6   chr2:12431840-12433482 REVERSE LENGTH=257                                                                                                                                    | 260 | 257 | 1.00E-133 | 98.8  | 91.2 | 95.8 |
| Rsa1.0_00159.1.g7141.t1 | #                                                                                                                                                                                                                                                                                                                                                                                                                                                                                                                                                                                                                                      | #   | #   | #         | #     | #    | #    | -                                      | ----  | ----                 | #                                                                                                                                                                                                                                                           | #   | #   | #         | #     | #    |      |
| Rsa1.0_00159.1.g7142.t1 | gb AAG50886.1   AC025294.24 hypothetical protein [Arabidopsis thaliana]                                                                                                                                                                                                                                                                                                                                                                                                                                                                                                                                                                | 264 | 629 | 5.00E-49  | 238.3 | 37.5 | 52.7 | hypothetical protein                   | gbpln | Arabidopsis thaliana | AT3G24255.1   Symbols:   RNA-directed DNA polymerase (reverse transcriptase)-related family protein   chr3:8789471-8793208 FORWARD LENGTH=746                                                                                                               | 264 | 746 | 8.00E-36  | 282.6 | 31.4 | 43.9 |
| Rsa1.0_00159.1.g7143.t1 | gb EOA28870.1   hypothetical protein CARUB_v10025114mg [Capsella rubella]                                                                                                                                                                                                                                                                                                                                                                                                                                                                                                                                                              | 510 | 866 | 1.00E-121 | 169.8 | 44.9 | 53.5 | hypothetical protein CARUB_v10025114mg | gbpln | Capsella rubella     | AT2G28970.1   Symbols:   Leucine-rich repeat protein kinase family protein   chr2:12443919-12448163 FORWARD LENGTH=786                                                                                                                                      | 510 | 786 | 1.00E-117 | 154.1 | 41.2 | 48.4 |
| Rsa1.0_00159.1.g7144.t1 | gb EOA29069.1   hypothetical protein CARUB_v10025325mg [Capsella rubella]                                                                                                                                                                                                                                                                                                                                                                                                                                                                                                                                                              | 887 | 882 | 0         | 99.4  | 83.4 | 90.0 | hypothetical protein CARUB_v10025325mg | gbpln | Capsella rubella     | AT2G29000.1   Symbols:   Leucine-rich repeat protein kinase family protein   chr2:12460781-12465037 FORWARD LENGTH=872                                                                                                                                      | 887 | 872 | 0         | 98.3  | 57.7 | 72.9 |
| Rsa1.0_00159.1.g7145.t1 | refXP_002862803.1   rab5-interacting family protein [Arabidopsis lyrata subsp. lyrata] gi 297822627 refXP_002879196.1   rab5-interacting family protein [Arabidopsis lyrata subsp. lyrata] gi 297308535 gb EFH39061.1   rab5-interacting family protein [Arabidopsis lyrata subsp. lyrata] gi 297325035 gb EFH55455.1   rab5-interacting family protein [Arabidopsis lyrata subsp. lyrata]                                                                                                                                                                                                                                             | 133 | 132 | 6.00E-53  | 99.2  | 88.7 | 94.0 | rab5-interacting family protein        | gbpln | Arabidopsis lyrata   | AT5G59410.1   Symbols:   Rab5-interacting family protein   chr5:23959761-23960730 REVERSE LENGTH=130                                                                                                                                                        | 133 | 130 | 8.00E-53  | 97.7  | 74.4 | 86.5 |
| Rsa1.0_00159.1.g7146.t1 | refXP_002881026.1   exostosin family protein [Arabidopsis lyrata subsp. lyrata] gi 297326865 gb EFH57285.1   exostosin family protein [Arabidopsis lyrata subsp. lyrata]                                                                                                                                                                                                                                                                                                                                                                                                                                                               | 662 | 707 | 0         | 106.8 | 82.9 | 89.7 | exostosin family protein               | gbpln | Arabidopsis lyrata   | AT2G29040.1   Symbols:   Exostosin family protein   chr2:12472425-12474962 REVERSE LENGTH=720                                                                                                                                                               | 662 | 720 | 0         | 108.8 | 81.9 | 89.3 |
| Rsa1.0_00159.1.g7147.t2 | gb EOA28676.1   hypothetical protein CARUB_v10024900mg [Capsella rubella]                                                                                                                                                                                                                                                                                                                                                                                                                                                                                                                                                              | 770 | 901 | 1.00E-169 | 117.0 | 37.5 | 49.4 | hypothetical protein CARUB_v10024900mg | gbpln | Capsella rubella     | AT2G29050.1   Symbols: ATRBL1, RBL1   RHOMBOD-like 1   chr2:12478245-12480121 FORWARD LENGTH=389                                                                                                                                                            | 770 | 389 | 5.00E-99  | 50.5  | 23.4 | 24.2 |
| Rsa1.0_00159.1.g7148.t1 | #                                                                                                                                                                                                                                                                                                                                                                                                                                                                                                                                                                                                                                      | #   | #   | #         | #     | #    | #    | -                                      | ----  | ----                 | #                                                                                                                                                                                                                                                           | #   | #   | #         | #     | #    |      |
| Rsa1.0_00159.1.g7149.t1 | gb EOA28710.1   hypothetical protein CARUB_v10024938mg [Capsella rubella]                                                                                                                                                                                                                                                                                                                                                                                                                                                                                                                                                              | 720 | 715 | 0         | 99.3  | 71.3 | 83.3 | hypothetical protein CARUB_v10024938mg | gbpln | Capsella rubella     | AT2G29060.1   Symbols:   GRAS family transcription factor   chr2:12481991-12484075 FORWARD LENGTH=694                                                                                                                                                       | 720 | 694 | 0         | 96.4  | 70.1 | 81.0 |



|                         |                                                                                                                                                                                                                                                                                                                                                                                                                                                                               |      |      |           |       |      |      |                                                |       |                      |                                                                                                                               |      |      |           |       |      |      |
|-------------------------|-------------------------------------------------------------------------------------------------------------------------------------------------------------------------------------------------------------------------------------------------------------------------------------------------------------------------------------------------------------------------------------------------------------------------------------------------------------------------------|------|------|-----------|-------|------|------|------------------------------------------------|-------|----------------------|-------------------------------------------------------------------------------------------------------------------------------|------|------|-----------|-------|------|------|
| Rsa1.0_00159.1.g7150.t1 | ref NP_973557.1  ubiquitin fusion degradation UFD1-like protein [Arabidopsis thaliana] gi 44917441 gb AAS49045.1  At2g29070 [Arabidopsis thaliana] gi 45738886 gb AAS76747.1  At2g29070 [Arabidopsis thaliana] gi 111609944 gb ABH11522.1  UFD1c [synthetic construct] gi 330253112 gb AEC08206.1  ubiquitin fusion degradation UFD1-like protein [Arabidopsis thaliana]                                                                                                      | 314  | 312  | 1.00E-151 | 99.4  | 84.7 | 90.4 | ubiquitin fusion degradation UFD1-like protein | gbpln | Arabidopsis thaliana | AT2G29070.2   Symbols: Ubiquitin fusion degradation UFD1 family protein   chr2:12487797-12489335 FORWARD LENGTH=312           | 314  | 312  | 1.00E-154 | 99.4  | 84.7 | 90.4 |
| Rsa1.0_00159.1.g7151.t1 | gb AAC33234.1  putative AAA-type ATPase [Arabidopsis thaliana]                                                                                                                                                                                                                                                                                                                                                                                                                | 795  | 807  | 0         | 101.5 | 88.6 | 93.3 | putative AAA-type ATPase                       | gbpln | Arabidopsis thaliana | AT2G29080.1   Symbols: fts3   FTSH protease 3   chr2:12489911-12492999 REVERSE LENGTH=809                                     | 795  | 809  | 0         | 101.8 | 88.6 | 93.3 |
| Rsa1.0_00159.1.g7152.t1 | gb ABW74564.1  glutamate receptor 3 [Boechera divaricarpa]                                                                                                                                                                                                                                                                                                                                                                                                                    | 921  | 954  | 0         | 103.6 | 71.4 | 81.7 | glutamate receptor 3                           | gbpln | Boechera divaricarpa | AT2G29110.1   Symbols: ATGLR2.8, GLR2.8   glutamate receptor 2.8   chr2:12506880-12510552 REVERSE LENGTH=947                  | 921  | 947  | 0         | 102.8 | 71.2 | 80.3 |
| Rsa1.0_00159.1.g7153.t1 | gb ABW74564.1  glutamate receptor 3 [Boechera divaricarpa]                                                                                                                                                                                                                                                                                                                                                                                                                    | 882  | 954  | 0         | 108.2 | 70.4 | 82.0 | glutamate receptor 3                           | gbpln | Boechera divaricarpa | AT2G29110.1   Symbols: ATGLR2.8, GLR2.8   glutamate receptor 2.8   chr2:12506880-12510552 REVERSE LENGTH=947                  | 882  | 947  | 0         | 107.4 | 70.1 | 80.6 |
| Rsa1.0_00159.1.g7154.t1 | gb ABW74563.1  glutamate receptor 2 [Boechera divaricarpa]                                                                                                                                                                                                                                                                                                                                                                                                                    | 835  | 959  | 0         | 114.9 | 76.3 | 85.6 | glutamate receptor 2                           | gbpln | Boechera divaricarpa | AT2G29120.1   Symbols: ATGLR2.7, GLR2.7   glutamate receptor 2.7   chr2:12511479-12515893 REVERSE LENGTH=952                  | 835  | 952  | 0         | 114.0 | 75.0 | 84.7 |
| Rsa1.0_00159.1.g7155.t1 | ref NP_172196.1  putative protein phosphatase 2C 2 [Arabidopsis thaliana] gi 75303253 sp Q8RX37.1 P2C02_ARAT H RecName: Full=Probable protein phosphatase 2C 2; Short=ATPP2C02; AltName: Full=Protein phosphatase AP2C2 gi 20258780 gb AAM13912.1  putative protein phosphatase 2C [Arabidopsis thaliana] gi 332189963 gb AEE28084.1  putative protein phosphatase 2C 2 [Arabidopsis thaliana] gi 333891315 gb AEG21042.1  PP2C-type phosphatase AP2C2 [Arabidopsis thaliana] | 68   | 380  | 2.00E-11  | 558.8 | 52.9 | 58.8 | putative protein phosphatase 2C 2              | gbpln | Arabidopsis thaliana | AT1G07160.1   Symbols: Protein phosphatase 2C family protein   chr1:2198155-2199678 REVERSE LENGTH=380                        | 68   | 380  | 4.00E-14  | 558.8 | 52.9 | 58.8 |
| Rsa1.0_00159.1.g7156.t2 | gb EOA18545.1  hypothetical protein CARUB_v10007102mg [Capsella rubella]                                                                                                                                                                                                                                                                                                                                                                                                      | 218  | 208  | 8.00E-30  | 95.4  | 41.7 | 52.8 | hypothetical protein CARUB_v10007102mg         | gbpln | Capsella rubella     | AT5G37200.1   Symbols: RING/U-box superfamily protein   chr5:14727832-14728485 FORWARD LENGTH=217                             | 218  | 217  | 1.00E-28  | 99.5  | 38.1 | 53.7 |
| Rsa1.0_00159.1.g7157.t1 | ref NP_194638.1  Ribonuclease H-like protein [Arabidopsis thaliana] gi 4972055 emb CAB43923.1  putative protein [Arabidopsis thaliana] gi 7269807 emb CAB79667.1  putative protein [Arabidopsis thaliana] gi 67633766 gb AA178907.1  putative reverse transcriptase/RNA-dependent DNA polymerase [Arabidopsis thaliana] gi 332660185 gb AEE85585.1  Ribonuclease H-like protein [Arabidopsis thaliana]                                                                        | 256  | 575  | 3.00E-11  | 224.6 | 16.0 | 23.4 | Ribonuclease H-like protein                    | gbpln | Arabidopsis thaliana | AT4G29090.1   Symbols: Ribonuclease H-like superfamily protein   chr4:14333528-14335255 FORWARD LENGTH=575                    | 256  | 575  | 9.00E-14  | 224.6 | 16.0 | 23.4 |
| Rsa1.0_00159.1.g7158.t1 | #                                                                                                                                                                                                                                                                                                                                                                                                                                                                             | #    | #    | #         | #     | #    | #    | -                                              | ----  | ----                 | AT2G29125.1   Symbols: RTFL2, DVL13   ROTUNDIFOLIA like 2   chr2:12523472-12523819 FORWARD LENGTH=115                         | 130  | 115  | 2.00E-11  | 88.5  | 52.3 | 58.5 |
| Rsa1.0_00159.1.g7159.t1 | gb ABW81111.1  putative pumilio Mpt5 [Boechera divaricarpa]                                                                                                                                                                                                                                                                                                                                                                                                                   | 961  | 975  | 0         | 101.5 | 83.8 | 89.0 | putative pumilio Mpt5                          | gbpln | Boechera divaricarpa | AT2G29200.1   Symbols: APUM1, PUM1   pumilio 1   chr2:12549483-12553185 REVERSE LENGTH=968                                    | 961  | 968  | 0         | 100.7 | 82.6 | 87.7 |
| Rsa1.0_00159.1.g7160.t2 | ref NP_180491.1  tropine dehydrogenase [Arabidopsis thaliana] gi 3980418 gb AAC95221.1  putative tropinone reductase [Arabidopsis thaliana] gi 18252899 gb AAL62376.1  putative tropinone reductase [Arabidopsis thaliana] gi 23197854 gb AAN15454.1  putative tropinone reductase [Arabidopsis thaliana] gi 330253136 gb AEC08230.1  tropine dehydrogenase [Arabidopsis thaliana]                                                                                            | 328  | 263  | 1.00E-104 | 80.2  | 56.4 | 61.0 | tropine dehydrogenase                          | gbpln | Arabidopsis thaliana | AT2G29300.1   Symbols: NAD(P)-binding Rossmann-fold superfamily protein   chr2:12588214-12589372 FORWARD LENGTH=263           | 328  | 263  | 1.00E-107 | 80.2  | 56.4 | 61.0 |
| Rsa1.0_00159.1.g7161.t1 | gb AAD32759.1  putative retroelement pol polyprotein [Arabidopsis thaliana]                                                                                                                                                                                                                                                                                                                                                                                                   | 1324 | 1356 | 0         | 102.4 | 73.0 | 86.0 | putative retroelement pol polyprotein          | gbpln | Arabidopsis thaliana | AT4G23160.1   Symbols: CRK8   cysteine-rich RLK (RECEPTOR-like protein kinase) 8   chr4:12129485-12134086 FORWARD LENGTH=1262 | 1324 | 1262 | 1.00E-88  | 95.3  | 13.7 | 20.6 |
| Rsa1.0_00159.1.g7162.t1 | gb ABW81050.1  tropinone-reductase-like35 [Arabidopsis lyrata subsp. lyrata]                                                                                                                                                                                                                                                                                                                                                                                                  | 262  | 262  | 1.00E-133 | 100.0 | 87.0 | 92.0 | tropinone-reductase-like35                     | gbpln | Arabidopsis lyrata   | AT2G29310.1   Symbols: NAD(P)-binding Rossmann-fold superfamily protein   chr2:12590068-12591260 FORWARD LENGTH=262           | 262  | 262  | 1.00E-133 | 100.0 | 84.4 | 90.8 |

|                         |                                                                                                                                                                                                                                                                                                                                                                                                                                                                                                                    |      |      |           |       |      |      |                                                                                                                                                                   |       |                      |                                                                                                                               |      |      |           |       |      |      |
|-------------------------|--------------------------------------------------------------------------------------------------------------------------------------------------------------------------------------------------------------------------------------------------------------------------------------------------------------------------------------------------------------------------------------------------------------------------------------------------------------------------------------------------------------------|------|------|-----------|-------|------|------|-------------------------------------------------------------------------------------------------------------------------------------------------------------------|-------|----------------------|-------------------------------------------------------------------------------------------------------------------------------|------|------|-----------|-------|------|------|
| Rsa1.0_00160.1.g7163.t1 | ref[NP_568670.1] mitochondrial carnitine/acylcarnitine carrier-like protein [Arabidopsis thaliana] gi 24211999 sp G93XM7.1 MCAT_ARAT H RecName: Full=Mitochondrial carnitine/acylcarnitine carrier-like protein; AltName: Full=Carnitine/acylcarnitine translocase-like protein; Short=CAC-like protein; AltName: Full=Protein A BOUT DE SOUFFLE                                                                                                                                                                   | 300  | 300  | 1.00E-155 | 100.0 | 91.3 | 94.7 | mitochondrial carnitine/acylcarnitine carrier-like protein                                                                                                        | gbpln | Arabidopsis thaliana | AT5G46800.1   Symbols: BOU   Mitochondrial substrate carrier family protein   chr5:18988779-18989810 REVERSE LENGTH=300       | 300  | 300  | 1.00E-158 | 100.0 | 91.3 | 94.7 |
| Rsa1.0_00160.1.g7164.t1 | gi 13992452 emb CAC38047.1  carnitine acyl carrier-like protein [Arabidopsis thaliana] gi 22531072 gb AAM97040.1  carnitine/acylcarnitine translocase-like protein [Arabidopsis thaliana] gi 23197914 gb AAAN15484.1  carnitine/acylcarnitine translocase-like protein [Arabidopsis thaliana] gi 332008045 gb AED95428.1  mitochondrial carnitine/acylcarnitine carrier-like protein [Arabidopsis thaliana] gb AAF18538.1 AC006551_24 Very similar to retrotransposon reverse transcriptase [Arabidopsis thaliana] | 565  | 1231 | 1.00E-141 | 217.9 | 47.3 | 64.4 | Very similar to retrotransposon reverse transcriptase                                                                                                             | gbpln | Arabidopsis thaliana | AT4G29090.1   Symbols:   Ribonuclease H-like superfamily protein   chr4:14333528-14335255 FORWARD LENGTH=575                  | 565  | 575  | 7.00E-78  | 101.8 | 30.8 | 45.8 |
| Rsa1.0_00160.1.g7165.t1 | gb AAD21687.1  Strong similarity to gi 3600044 T12H20.12 protease homolog from Arabidopsis thaliana BAC gb AF080119 and is a member of the reverse transcriptase family PF 00078 [Arabidopsis thaliana]                                                                                                                                                                                                                                                                                                            | 1297 | 1415 | 0         | 109.1 | 64.8 | 76.5 | Strong similarity to gi 3600044 T12H20.12 protease homolog from Arabidopsis thaliana BAC gb AF080119 and is a member of the reverse transcriptase family PF 00078 | gbpln | Arabidopsis thaliana | AT4G23160.1   Symbols: CRK8   cysteine-rich RLK (RECEPTOR-like protein kinase) 8   chr4:12129485-12134086 FORWARD LENGTH=1262 | 1297 | 1262 | 3.00E-86  | 97.3  | 12.9 | 20.0 |
| Rsa1.0_00160.1.g7166.t2 | gb EOA13941.1  hypothetical protein CARUB_v10027058mg [Capsella rubella]                                                                                                                                                                                                                                                                                                                                                                                                                                           | 351  | 229  | 6.00E-82  | 65.2  | 43.6 | 47.9 | hypothetical protein CARUB_v10027058mg                                                                                                                            | gbpln | Capsella rubella     | AT5G46790.1   Symbols: PYL1, RCAR12   PYR1-like 1   chr5:18984063-18984728 REVERSE LENGTH=221                                 | 351  | 221  | 2.00E-80  | 63.0  | 46.7 | 51.6 |
| Rsa1.0_00160.1.g7167.t1 | #                                                                                                                                                                                                                                                                                                                                                                                                                                                                                                                  | #    | #    | #         | #     | #    | #    | -                                                                                                                                                                 | ----  | ----                 | #                                                                                                                             | #    | #    | #         | #     | #    | #    |
| Rsa1.0_00160.1.g7168.t1 | ref[XP_002865162.1] hypothetical protein ARALYDRAFT_916750 [Arabidopsis lyrata subsp. lyrata] gi 297310997 gb EFH41421.1  hypothetical protein ARALYDRAFT_916750 [Arabidopsis lyrata subsp. lyrata]                                                                                                                                                                                                                                                                                                                | 229  | 233  | 3.00E-75  | 101.7 | 84.3 | 89.5 | hypothetical protein ARALYDRAFT_916750                                                                                                                            | gbpln | Arabidopsis lyrata   | AT5G46780.2   Symbols:   VQ motif-containing protein   chr5:18979236-18979949 FORWARD LENGTH=237                              | 229  | 237  | 3.00E-77  | 103.5 | 84.7 | 90.0 |
| Rsa1.0_00160.1.g7169.t1 | ref[XP_002863391.1] ARF-GAP domain 8 [Arabidopsis lyrata subsp. lyrata] gi 297309226 gb EFH39650.1  ARF-GAP domain 8 [Arabidopsis lyrata subsp. lyrata]                                                                                                                                                                                                                                                                                                                                                            | 401  | 405  | 0         | 101.0 | 85.0 | 91.5 | ARF-GAP domain 8                                                                                                                                                  | gbpln | Arabidopsis lyrata   | AT5G46750.1   Symbols: AGD9   ARF-GAP domain 9   chr5:18969950-18971817 REVERSE LENGTH=402                                    | 401  | 402  | 0         | 100.2 | 84.0 | 91.0 |
| Rsa1.0_00160.1.g7170.t1 | ref[XP_002863392.1] ubiquitin-specific protease 21 [Arabidopsis lyrata subsp. lyrata] gi 297309227 gb EFH39651.1  ubiquitin-specific protease 21 [Arabidopsis lyrata subsp. lyrata]                                                                                                                                                                                                                                                                                                                                | 680  | 724  | 0         | 106.5 | 59.9 | 72.1 | ubiquitin-specific protease 21                                                                                                                                    | gbpln | Arabidopsis lyrata   | AT5G46740.1   Symbols: UBP21   ubiquitin-specific protease 21   chr5:18965410-18968492 REVERSE LENGTH=732                     | 680  | 732  | 0         | 107.6 | 59.4 | 70.9 |
| Rsa1.0_00160.1.g7171.t1 | dbj BAA97086.1  unnamed protein product [Arabidopsis thaliana]                                                                                                                                                                                                                                                                                                                                                                                                                                                     | 183  | 341  | 2.00E-18  | 186.3 | 35.0 | 48.6 | unnamed protein product                                                                                                                                           | gbpln | Arabidopsis thaliana | #                                                                                                                             | #    | #    | #         | #     | #    | #    |
| Rsa1.0_00160.1.g7172.t1 | ref[XP_002863397.1] pentatricopeptide repeat-containing protein [Arabidopsis lyrata subsp. lyrata] gi 297309232 gb EFH39656.1  pentatricopeptide repeat-containing protein [Arabidopsis lyrata subsp. lyrata]                                                                                                                                                                                                                                                                                                      | 712  | 711  | 0         | 99.9  | 92.6 | 95.9 | pentatricopeptide repeat-containing protein                                                                                                                       | gbpln | Arabidopsis lyrata   | AT5G46580.1   Symbols:   pentatricopeptide (PPR) repeat-containing protein   chr5:18897510-18899645 REVERSE LENGTH=711        | 712  | 711  | 0         | 99.9  | 90.9 | 95.9 |
| Rsa1.0_00160.1.g7173.t1 | gb EOA13267.1  hypothetical protein CARUB_v10026296mg [Capsella rubella]                                                                                                                                                                                                                                                                                                                                                                                                                                           | 522  | 489  | 0         | 93.7  | 88.7 | 91.8 | hypothetical protein CARUB_v10026296mg                                                                                                                            | gbpln | Capsella rubella     | AT5G46570.1   Symbols: BSK2   BR-signaling kinase 2   chr5:18894667-18897198 FORWARD LENGTH=489                               | 522  | 489  | 0         | 93.7  | 88.9 | 92.0 |
| Rsa1.0_00160.1.g7174.t1 | ref[XP_002877631.1] ATP binding protein [Arabidopsis lyrata subsp. lyrata] gi 297323469 gb EFH53890.1  ATP binding protein [Arabidopsis lyrata subsp. lyrata]                                                                                                                                                                                                                                                                                                                                                      | 1707 | 1902 | 0         | 111.4 | 79.2 | 89.0 | ATP binding protein                                                                                                                                               | gbpln | Arabidopsis lyrata   | AT3G48770.1   Symbols:   DNA binding:ATP binding   chr3:18079261-18086817 REVERSE LENGTH=1899                                 | 1707 | 1899 | 0         | 111.2 | 78.0 | 87.1 |

|                         |                                                                                                                                                                                                                                                                                                                                                                                                                                                                      |      |      |           |       |      |       |                                                    |       |                      |                                                                                                                                                                                                                                                                                                                                     |      |      |           |       |      |       |
|-------------------------|----------------------------------------------------------------------------------------------------------------------------------------------------------------------------------------------------------------------------------------------------------------------------------------------------------------------------------------------------------------------------------------------------------------------------------------------------------------------|------|------|-----------|-------|------|-------|----------------------------------------------------|-------|----------------------|-------------------------------------------------------------------------------------------------------------------------------------------------------------------------------------------------------------------------------------------------------------------------------------------------------------------------------------|------|------|-----------|-------|------|-------|
| Rsa1.0_00160.1.g7175.t1 | refNP_199468.5  uncharacterized protein [Arabidopsis thaliana] gi 332008015 gb AED95398.1  uncharacterized protein AT5G46560 [Arabidopsis thaliana]                                                                                                                                                                                                                                                                                                                  | 387  | 387  | 1.00E-163 | 100.0 | 76.2 | 86.6  | uncharacterized protein                            | gbpln | Arabidopsis thaliana | AT5G46560.1   Symbols:   CONTAINS InterPro DOMAIN/s: Inner nuclear membrane protein MAN1 (InterPro:IPR018996); Has 58 Blast hits to 58 proteins in 29 species: Archae - 0; Bacteria - 4; Metazoa - 11; Fungi - 15; Plants - 20; Viruses - 0; Other Eukaryotes - 8 (source: NCBI BLINK).   chr5:18888061-18890090 FORWARD LENGTH=387 | 387  | 387  | 1.00E-166 | 100.0 | 76.2 | 86.6  |
| Rsa1.0_00160.1.g7176.t1 | refXP_002868325.1  hypothetical protein ARALYDRAFT_915512 [Arabidopsis lyrata subsp. lyrata] gi 297314161 gb EFH44584.1  hypothetical protein ARALYDRAFT_915512 [Arabidopsis lyrata subsp. lyrata]                                                                                                                                                                                                                                                                   | 323  | 366  | 4.00E-53  | 113.3 | 48.9 | 59.1  | hypothetical protein ARALYDRAFT_915512             | gbpln | Arabidopsis lyrata   | AT4G36840.1   Symbols:   Galactose oxidase/kech repeat superfamily protein   chr4:17352166-17352882 FORWARD LENGTH=238                                                                                                                                                                                                              | 323  | 238  | 9.00E-44  | 73.7  | 35.9 | 44.6  |
| Rsa1.0_00160.1.g7177.t1 | gb ACP30591.1  disease resistance protein [Brassica rapa subsp. pekinensis]                                                                                                                                                                                                                                                                                                                                                                                          | 1038 | 1555 | 0         | 149.8 | 89.3 | 93.2  | disease resistance protein                         | gbpln | Brassica rapa        | AT1G17600.1   Symbols:   Disease resistance protein (TIR-NBS-LRR class) family   chr1:6053026-6056572 REVERSE LENGTH=1049                                                                                                                                                                                                           | 1038 | 1049 | 0         | 101.1 | 83.2 | 88.4  |
| Rsa1.0_00160.1.g7178.t1 | refNP_173204.1  Disease resistance protein (TIR-NBS class) [Arabidopsis thaliana] gi 332191492 gb AEE29613.1  Disease resistance protein (TIR-NBS class) [Arabidopsis thaliana]                                                                                                                                                                                                                                                                                      | 416  | 420  | 0         | 101.0 | 78.8 | 89.9  | Disease resistance protein (TIR-NBS class)         | gbpln | Arabidopsis thaliana | AT1G17610.1   Symbols:   Disease resistance protein (TIR-NBS class)   chr1:6056895-6058157 FORWARD LENGTH=420                                                                                                                                                                                                                       | 416  | 420  | 0         | 101.0 | 78.8 | 89.9  |
| Rsa1.0_00160.1.g7179.t9 | gb EOA17641.1  hypothetical protein CARUB_v10006007mg [Capsella rubella]                                                                                                                                                                                                                                                                                                                                                                                             | 133  | 133  | 7.00E-71  | 100.0 | 97.7 | 100.0 | hypothetical protein CARUB_v10006007mg             | gbpln | Capsella rubella     | AT4G18100.1   Symbols:   Ribosomal protein L32e   chr4:10035715-10036475 REVERSE LENGTH=133                                                                                                                                                                                                                                         | 133  | 133  | 3.00E-73  | 100.0 | 97.0 | 100.0 |
| Rsa1.0_00160.1.g7180.t1 | gb EOA15162.1  hypothetical protein CARUB_v10028539mg [Capsella rubella]                                                                                                                                                                                                                                                                                                                                                                                             | 454  | 453  | 0         | 99.8  | 84.6 | 91.9  | hypothetical protein CARUB_v10028539mg             | gbpln | Capsella rubella     | AT5G46410.1   Symbols: SSP4   SCP1-like small phosphatase 4   chr5:18826007-18828156 FORWARD LENGTH=453                                                                                                                                                                                                                             | 454  | 453  | 0         | 99.8  | 84.1 | 90.7  |
| Rsa1.0_00160.1.g7181.t2 | refXP_002865195.1  binding protein [Arabidopsis lyrata subsp. lyrata] gi 297311030 gb EFH41454.1  binding protein [Arabidopsis lyrata subsp. lyrata]                                                                                                                                                                                                                                                                                                                 | 1025 | 1035 | 0         | 101.0 | 70.1 | 78.0  | binding protein                                    | gbpln | Arabidopsis lyrata   | AT5G46400.1   Symbols: AT PRP39-2, PRP39-2   Tetrapeptide repeat (TPR)-like superfamily protein   chr5:18820032-18824522 FORWARD LENGTH=1036                                                                                                                                                                                        | 1025 | 1036 | 0         | 101.1 | 70.2 | 78.1  |
| Rsa1.0_00160.1.g7182.t2 | #                                                                                                                                                                                                                                                                                                                                                                                                                                                                    | #    | #    | #         | #     | #    | #     | -                                                  | ----  | ----                 | #                                                                                                                                                                                                                                                                                                                                   | #    | #    | #         | #     | #    | #     |
| Rsa1.0_00160.1.g7183.t1 | #                                                                                                                                                                                                                                                                                                                                                                                                                                                                    | #    | #    | #         | #     | #    | #     | -                                                  | ----  | ----                 | #                                                                                                                                                                                                                                                                                                                                   | #    | #    | #         | #     | #    | #     |
| Rsa1.0_00160.1.g7184.t1 | #                                                                                                                                                                                                                                                                                                                                                                                                                                                                    | #    | #    | #         | #     | #    | #     | -                                                  | ----  | ----                 | #                                                                                                                                                                                                                                                                                                                                   | #    | #    | #         | #     | #    | #     |
| Rsa1.0_00160.1.g7185.t2 | refNP_001190533.1  F-box/RNI-like/FBD-like domains-containing protein [Arabidopsis thaliana] gi 75262547 sp Q9FJ01.1 FBD31_ARAT H RecName: Full=Putative FBD-associated F-box protein At5g53635 gi 9759202 db BAB09739.1  heat shock transcription factor HSF30-like protein [Arabidopsis thaliana] gi 332009006 gb AED96389.1  F-box/RNI-like/FBD-like domains-containing protein [Arabidopsis thaliana]                                                            | 478  | 426  | 1.00E-110 | 89.1  | 49.0 | 60.7  | F-box/RNI-like/FBD-like domains-containing protein | gbpln | Arabidopsis thaliana | AT5G53635.1   Symbols:   F-box/RNI-like/FBD-like domains-containing protein   chr5:21785999-21787444 REVERSE LENGTH=426                                                                                                                                                                                                             | 478  | 426  | 1.00E-112 | 89.1  | 49.0 | 60.7  |
| Rsa1.0_00160.1.g7186.t1 | #                                                                                                                                                                                                                                                                                                                                                                                                                                                                    | #    | #    | #         | #     | #    | #     | -                                                  | ----  | ----                 | #                                                                                                                                                                                                                                                                                                                                   | #    | #    | #         | #     | #    | #     |
| Rsa1.0_00160.1.g7187.t1 | refNP_175207.1  protein agamous-like 102 [Arabidopsis thaliana] gi 9802597 gb AAF99799.1 AC012463_16 T2E6.17 [Arabidopsis thaliana] gi 32402446 gb AAN52805.1  MADS-box protein AGL102 [Arabidopsis thaliana] gi 332194088 gb AEE32209.1  protein agamous-like 102 [Arabidopsis thaliana] emb CAB39638.1  RNA-directed DNA polymerase-like protein [Arabidopsis thaliana] gi 7267666 emb CAB78094.1  RNA-directed DNA polymerase-like protein [Arabidopsis thaliana] | 149  | 184  | 8.00E-25  | 123.5 | 43.6 | 61.1  | protein agamous-like 102                           | gbpln | Arabidopsis thaliana | AT1G47760.1   Symbols: AGL102   AGAMOUS-like 102   chr1:17572451-17573159 FORWARD LENGTH=184                                                                                                                                                                                                                                        | 149  | 184  | 2.00E-27  | 123.5 | 43.6 | 61.1  |
| Rsa1.0_00160.1.g7188.t1 | emb CAB39638.1  RNA-directed DNA polymerase-like protein [Arabidopsis thaliana] gi 7267666 emb CAB78094.1  RNA-directed DNA polymerase-like protein [Arabidopsis thaliana]                                                                                                                                                                                                                                                                                           | 1551 | 1274 | 0         | 82.1  | 34.6 | 45.0  | RNA-directed DNA polymerase-like protein           | gbpln | Arabidopsis thaliana | AT4G29090.1   Symbols:   Ribonuclease H-like superfamily protein   chr4:14333528-14335255 FORWARD LENGTH=575                                                                                                                                                                                                                        | 1551 | 575  | 1.00E-52  | 37.1  | 10.4 | 16.6  |
| Rsa1.0_00160.1.g7189.t1 | gb EOA16415.1  hypothetical protein CARUB_v10004569mg [Capsella rubella]                                                                                                                                                                                                                                                                                                                                                                                             | 530  | 530  | 0         | 100.0 | 84.9 | 93.0  | hypothetical protein CARUB_v10004569mg             | gbpln | Capsella rubella     | AT5G41480.1   Symbols: EMB9, GLA1, ATDFA, DFA   Folylpolyglutamate synthetase family protein   chr5:16595967-16598523 FORWARD LENGTH=530                                                                                                                                                                                            | 530  | 530  | 0         | 100.0 | 86.2 | 93.2  |
| Rsa1.0_00160.1.g7190.t1 | refXP_002863410.1  hypothetical protein ARALYDRAFT_494342 [Arabidopsis lyrata subsp. lyrata] gi 297309245 gb EFH39669.1  hypothetical protein ARALYDRAFT_494342 [Arabidopsis lyrata subsp. lyrata]                                                                                                                                                                                                                                                                   | 193  | 70   | 8.00E-15  | 36.3  | 21.8 | 24.9  | hypothetical protein ARALYDRAFT_494342             | gbpln | Arabidopsis lyrata   | #                                                                                                                                                                                                                                                                                                                                   | #    | #    | #         | #     | #    | #     |

|                          |                                                                                                                                                                                                                                                                                                                                                                                                                |      |      |           |       |      |      |                                                                                |       |                      |                                                                                                                                                                                                                                                                                                                                                                      |      |      |           |       |      |      |
|--------------------------|----------------------------------------------------------------------------------------------------------------------------------------------------------------------------------------------------------------------------------------------------------------------------------------------------------------------------------------------------------------------------------------------------------------|------|------|-----------|-------|------|------|--------------------------------------------------------------------------------|-------|----------------------|----------------------------------------------------------------------------------------------------------------------------------------------------------------------------------------------------------------------------------------------------------------------------------------------------------------------------------------------------------------------|------|------|-----------|-------|------|------|
| Rsa1.0_00160.1.g7191.t1  | gb EOA13309.1  hypothetical protein CARUB_v10026344mg [Capsella rubella]                                                                                                                                                                                                                                                                                                                                       | 502  | 471  | 0         | 93.8  | 89.2 | 90.8 | hypothetical protein CARUB_v10026344mg                                         | gbpln | Capsella rubella     | AT5G46290.1   Symbols: KASI, KAS1   3-ketoacyl-acyl carrier protein synthase I   chr5:18774439-18776629 REVERSE LENGTH=473                                                                                                                                                                                                                                           | 502  | 473  | 0         | 94.2  | 89.2 | 90.8 |
| Rsa1.0_00160.1.g7192.t1  | #                                                                                                                                                                                                                                                                                                                                                                                                              | #    | #    | #         | #     | #    | #    | -                                                                              | ----  | ----                 | #                                                                                                                                                                                                                                                                                                                                                                    | #    | #    | #         | #     | #    |      |
| Rsa1.0_00160.1.g7193.t1  | #                                                                                                                                                                                                                                                                                                                                                                                                              | #    | #    | #         | #     | #    | #    | -                                                                              | ----  | ----                 | AT5G49020.1   Symbols: ATPRMT4A, PRMT4A   protein arginine methyltransferase 4A   chr5:19871341-19874683 FORWARD LENGTH=528                                                                                                                                                                                                                                          | 201  | 528  | 3.00E-11  | 262.7 | 20.9 | 30.3 |
| Rsa1.0_00160.1.g7194.t1  | ref XP_002863413.1  hypothetical protein ARALYDRAFT_494345 [Arabidopsis lyrata subsp. lyrata] gi 297309248 gb EFH39672.1  hypothetical protein ARALYDRAFT_494345 [Arabidopsis lyrata subsp. lyrata]                                                                                                                                                                                                            | 771  | 776  | 0         | 100.6 | 92.9 | 97.1 | hypothetical protein ARALYDRAFT_494345                                         | gbpln | Arabidopsis lyrata   | AT5G46280.1   Symbols: MCM3   Minichromosome maintenance (MCM2/3/5) family protein   chr5:18769902-18773606 REVERSE LENGTH=776                                                                                                                                                                                                                                       | 771  | 776  | 0         | 100.6 | 91.8 | 96.2 |
| Rsa1.0_00160.1.g7195.t1  | ref NP_851141.1  RNA-binding protein [Arabidopsis thaliana] gi 15215748 gb AAK91419.1  AT5g46250/MPL12.3 [Arabidopsis thaliana] gi 23308375 gb AAN18157.1  At5g46250/MPL12.3 [Arabidopsis thaliana] gi 332007974 gb AED95357.1  RNA-binding protein [Arabidopsis thaliana]                                                                                                                                     | 408  | 422  | 1.00E-171 | 103.4 | 80.6 | 85.8 | RNA-binding protein                                                            | gbpln | Arabidopsis thaliana | AT5G46250.1   Symbols:   RNA-binding protein   chr5:18755388-18758056 FORWARD LENGTH=422                                                                                                                                                                                                                                                                             | 408  | 422  | 1.00E-174 | 103.4 | 80.6 | 85.8 |
| Rsa1.0_00160.1.g7196.t1  | pir T00833 RNA-directed DNA polymerase homolog T13L16.7 - Arabidopsis thaliana (fragment)                                                                                                                                                                                                                                                                                                                      | 1670 | 1365 | 0         | 81.7  | 31.3 | 44.0 | RNA-directed DNA polymerase homolog T13L16.7 - Arabidopsis thaliana (fragment) | ----  | ----                 | AT4G29090.1   Symbols:   Ribonuclease H-like superfamily protein   chr4:14333528-14335255 FORWARD LENGTH=575                                                                                                                                                                                                                                                         | 1670 | 575  | 2.00E-59  | 34.4  | 9.2  | 14.4 |
| Rsa1.0_00161.1.g7197.t1  | dbj BAJ33922.1  unnamed protein product [Thellungiella halophila]                                                                                                                                                                                                                                                                                                                                              | 71   | 226  | 2.00E-16  | 318.3 | 57.7 | 59.2 | unnamed protein product                                                        | ----  | ----                 | AT1G04250.1   Symbols: AXR3, IAA17   AUX/IAA transcriptional regulator family protein   chr1:1136382-1138340 FORWARD LENGTH=229                                                                                                                                                                                                                                      | 71   | 229  | 5.00E-19  | 322.5 | 57.7 | 59.2 |
| Rsa1.0_00161.1.g7198.t1  | #                                                                                                                                                                                                                                                                                                                                                                                                              | #    | #    | #         | #     | #    | #    | -                                                                              | ----  | ----                 | #                                                                                                                                                                                                                                                                                                                                                                    | #    | #    | #         | #     | #    |      |
| Rsa1.0_00161.1.g7199.t26 | ref XP_002889494.1  EIF2 gamma [Arabidopsis lyrata subsp. lyrata] gi 297335336 gb EFH65753.1  EIF2 gamma [Arabidopsis lyrata subsp. lyrata]                                                                                                                                                                                                                                                                    | 601  | 465  | 1.00E-135 | 77.4  | 44.1 | 48.1 | EIF2 gamma                                                                     | gbpln | Arabidopsis lyrata   | AT1G04170.1   Symbols: EIF2 GAMMA   eukaryotic translation initiation factor 2 gamma subunit   chr1:1097423-1099702 FORWARD LENGTH=465                                                                                                                                                                                                                               | 601  | 465  | 1.00E-137 | 77.4  | 43.9 | 48.1 |
| Rsa1.0_00161.1.g7200.t1  | ref NP_181675.2  uncharacterized protein [Arabidopsis thaliana] gi 330254884 gb AEC09978.1  uncharacterized protein AT2G41440 [Arabidopsis thaliana]                                                                                                                                                                                                                                                           | 256  | 289  | 6.00E-58  | 112.9 | 55.9 | 66.4 | uncharacterized protein                                                        | gbpln | Arabidopsis thaliana | AT2G41440.1   Symbols:   unknown protein; BEST Arabidopsis thaliana protein match is: unknown protein (TAIR:AT2G41470.1); Has 30201 Blast hits to 13222 proteins in 780 species: Archaea - 12; Bacteria - 1396; Metazoa - 17338; Fungi - 3422; Plants - 5037; Viruses - 0; Other Eukaryotes - 2996 (source: NCBI BLINK).   chr2:17271792-17274065 FORWARD LENGTH=289 | 256  | 289  | 2.00E-60  | 112.9 | 55.9 | 66.4 |
| Rsa1.0_00161.1.g7201.t1  | dbj BAJ34139.1  unnamed protein product [Thellungiella halophila]                                                                                                                                                                                                                                                                                                                                              | 70   | 158  | 2.00E-20  | 225.7 | 82.9 | 90.0 | unnamed protein product                                                        | ----  | ----                 | AT1G03850.2   Symbols:   Glutaredoxin family protein   chr1:977233-977685 REVERSE LENGTH=150                                                                                                                                                                                                                                                                         | 70   | 150  | 2.00E-21  | 214.3 | 80.0 | 88.6 |
| Rsa1.0_00161.1.g7202.t1  | ref NP_001184903.1  guanylate-binding protein [Arabidopsis thaliana] gi 332189498 gb AE27619.1  guanylate-binding protein [Arabidopsis thaliana]                                                                                                                                                                                                                                                               | 1229 | 1013 | 0         | 82.4  | 62.4 | 70.3 | guanylate-binding protein                                                      | gbpln | Arabidopsis thaliana | AT1G03830.2   Symbols:   guanylate-binding family protein   chr1:962128-966622 REVERSE LENGTH=1013                                                                                                                                                                                                                                                                   | 1229 | 1013 | 0         | 82.4  | 62.4 | 70.3 |
| Rsa1.0_00161.1.g7203.t1  | ref NP_171875.1  zinc finger CCCH domain-containing protein 2 [Arabidopsis thaliana] gi 75268098 sp Q9ZWA1.1 C3H2_ARATH RecName: Full=Zinc finger CCCH domain-containing protein 2; Short=AtC3H2; AltName: Full=Protein SOMNUS; Short=SOM gi 4204308 gb AAD10689.1  Hypothetical protein [Arabidopsis thaliana] gi 332189493 gb AE27614.1  zinc finger CCCH domain-containing protein 2 [Arabidopsis thaliana] | 394  | 393  | 1.00E-151 | 99.7  | 82.2 | 89.6 | zinc finger CCCH domain-containing protein 2                                   | gbpln | Arabidopsis thaliana | AT1G03790.1   Symbols: SOM   Zinc finger C-x8-C-x5-C-x3-H type family protein   chr1:954589-955770 FORWARD LENGTH=393                                                                                                                                                                                                                                                | 394  | 393  | 1.00E-154 | 99.7  | 82.2 | 89.6 |
| Rsa1.0_00161.1.g7204.t1  | ref XP_002889465.1  por C [Arabidopsis lyrata subsp. lyrata] gi 297335307 gb EFH65724.1  por C [Arabidopsis lyrata subsp. lyrata]                                                                                                                                                                                                                                                                              | 401  | 401  | 0         | 100.0 | 94.3 | 97.0 | por C                                                                          | gbpln | Arabidopsis lyrata   | AT1G03630.1   Symbols: POR C, PORC   protochlorophyllide oxidoreductase C   chr1:907699-909245 FORWARD LENGTH=401                                                                                                                                                                                                                                                    | 401  | 401  | 0         | 100.0 | 94.0 | 96.8 |
| Rsa1.0_00161.1.g7205.t1  | ref XP_002892171.1  predicted protein [Arabidopsis lyrata subsp. lyrata] gi 297338013 gb EFH68430.1  predicted protein [Arabidopsis lyrata subsp. lyrata]                                                                                                                                                                                                                                                      | 265  | 265  | 2.33E-156 | 100.0 | 94.0 | 96.2 | predicted protein                                                              | gbpln | Arabidopsis lyrata   | AT1G03620.1   Symbols:   ELMO/CED-12 family protein   chr1:904319-906013 REVERSE LENGTH=265                                                                                                                                                                                                                                                                          | 265  | 265  | 1.00E-149 | 100.0 | 94.0 | 96.2 |

|                         |                                                                                                                                                                                                                                                                                                     |     |     |           |       |      |      |                                             |       |                      |                                                                                                                                |     |     |           |       |      |      |
|-------------------------|-----------------------------------------------------------------------------------------------------------------------------------------------------------------------------------------------------------------------------------------------------------------------------------------------------|-----|-----|-----------|-------|------|------|---------------------------------------------|-------|----------------------|--------------------------------------------------------------------------------------------------------------------------------|-----|-----|-----------|-------|------|------|
| Rsa1.0_00161.1.g7206.t1 | ref[XP_002889464.1] hypothetical protein ARALYDRAFT_470333 [Arabidopsis lyrata subsp. lyrata] gi 297335306 gb EFH65723.1                                                                                                                                                                            | 310 | 308 | 1.00E-153 | 99.4  | 88.1 | 92.9 | hypothetical protein ARALYDRAFT_470333      | gbpln | Arabidopsis lyrata   | AT1G03610.1   Symbols:   Protein of unknown function (DUF789)   chr1:901304-902672 FORWARD LENGTH=308                          | 310 | 308 | 1.00E-155 | 99.4  | 87.4 | 92.6 |
| Rsa1.0_00161.1.g7207.t1 | ref[XP_002889463.1] photosystem II family protein [Arabidopsis lyrata subsp. lyrata] gi 297335305 gb EFH65722.1                                                                                                                                                                                     | 176 | 174 | 7.00E-72  | 98.9  | 86.4 | 92.6 | photosystem II family protein               | gbpln | Arabidopsis lyrata   | AT1G03600.1   Symbols: PSB27   photosystem II family protein   chr1:898916-899440 FORWARD LENGTH=174                           | 176 | 174 | 7.00E-72  | 98.9  | 84.1 | 90.9 |
| Rsa1.0_00161.1.g7208.t1 | ref[XP_002892170.1] predicted protein [Arabidopsis lyrata subsp. lyrata] gi 297338012 gb EFH68429.1                                                                                                                                                                                                 | 439 | 460 | 0         | 104.8 | 83.8 | 90.7 | predicted protein                           | gbpln | Arabidopsis lyrata   | AT1G03590.1   Symbols:   Protein phosphatase 2C family protein   chr1:894480-896257 REVERSE LENGTH=462                         | 439 | 462 | 0         | 105.2 | 82.5 | 90.2 |
| Rsa1.0_00161.1.g7209.t1 | gb EOA39421.1  hypothetical protein CARUB_v10012530mg [Capsella rubella]                                                                                                                                                                                                                            | 283 | 283 | 1.00E-157 | 100.0 | 93.6 | 97.2 | hypothetical protein CARUB_v10012530mg      | gbpln | Capsella rubella     | AT1G03550.1   Symbols:   Secretory carrier membrane protein (SCAMP) family protein   chr1:885851-887778 REVERSE LENGTH=283     | 283 | 283 | 1.00E-154 | 100.0 | 95.4 | 98.6 |
| Rsa1.0_00161.1.g7210.t1 | ref[XP_002889462.1] pentatricopeptide repeat-containing protein [Arabidopsis lyrata subsp. lyrata] gi 297335304 gb EFH65721.1                                                                                                                                                                       | 604 | 608 | 0         | 100.7 | 86.6 | 92.7 | pentatricopeptide repeat-containing protein | gbpln | Arabidopsis lyrata   | AT1G03540.1   Symbols:   Pentatricopeptide repeat (PPR-like) superfamily protein   chr1:883782-885611 FORWARD LENGTH=609       | 604 | 609 | 0         | 100.8 | 85.6 | 91.9 |
| Rsa1.0_00161.1.g7211.t1 | ref[XP_002892165.1] pentatricopeptide repeat-containing protein [Arabidopsis lyrata subsp. lyrata] gi 297338007 gb EFH68424.1                                                                                                                                                                       | 466 | 429 | 0         | 92.1  | 74.5 | 78.1 | pentatricopeptide repeat-containing protein | gbpln | Arabidopsis lyrata   | AT1G03510.1   Symbols:   Tetratricopeptide repeat (TPR)-like superfamily protein   chr1:876258-877547 REVERSE LENGTH=429       | 466 | 429 | 0         | 92.1  | 73.2 | 77.7 |
| Rsa1.0_00161.1.g7212.t1 | ref[XP_002889459.1] leucine-rich repeat family protein [Arabidopsis lyrata subsp. lyrata] gi 297335301 gb EFH65718.1                                                                                                                                                                                | 395 | 396 | 0         | 100.3 | 89.9 | 94.2 | leucine-rich repeat family protein          | gbpln | Arabidopsis lyrata   | AT1G03440.1   Symbols:   Leucine-rich repeat (LRR) family protein   chr1:852681-853874 FORWARD LENGTH=397                      | 395 | 397 | 0         | 100.5 | 88.6 | 93.4 |
| Rsa1.0_00161.1.g7213.t1 | #                                                                                                                                                                                                                                                                                                   | #   | #   | #         | #     | #    | #    | -                                           | ----  | ----                 | #                                                                                                                              | #   | #   | #         | #     | #    | #    |
| Rsa1.0_00161.1.g7214.t1 | #                                                                                                                                                                                                                                                                                                   | #   | #   | #         | #     | #    | #    | -                                           | ----  | ----                 | #                                                                                                                              | #   | #   | #         | #     | #    | #    |
| Rsa1.0_00161.1.g7215.t1 | ref[XP_002892158.1] hypothetical protein ARALYDRAFT_470313 [Arabidopsis lyrata subsp. lyrata] gi 297338000 gb EFH68417.1                                                                                                                                                                            | 431 | 452 | 1.00E-155 | 104.9 | 76.8 | 83.1 | hypothetical protein ARALYDRAFT_470313      | gbpln | Arabidopsis lyrata   | AT1G03350.1   Symbols:   BSD domain-containing protein   chr1:822834-824246 REVERSE LENGTH=470                                 | 431 | 470 | 1.00E-153 | 109.0 | 75.6 | 82.1 |
| Rsa1.0_00161.1.g7216.t1 | gb EOA38703.1  hypothetical protein CARUB_v10010754mg [Capsella rubella]                                                                                                                                                                                                                            | 111 | 93  | 8.00E-44  | 83.8  | 82.9 | 83.8 | hypothetical protein CARUB_v10010754mg      | gbpln | Capsella rubella     | AT1G03330.1   Symbols:   Small nuclear ribonucleoprotein family protein   chr1:818161-819297 REVERSE LENGTH=93                 | 111 | 93  | 1.00E-45  | 83.8  | 82.0 | 82.9 |
| Rsa1.0_00161.1.g7217.t1 | #                                                                                                                                                                                                                                                                                                   | #   | #   | #         | #     | #    | #    | -                                           | ----  | ----                 | #                                                                                                                              | #   | #   | #         | #     | #    | #    |
| Rsa1.0_00161.1.g7218.t1 | #                                                                                                                                                                                                                                                                                                   | #   | #   | #         | #     | #    | #    | -                                           | ----  | ----                 | #                                                                                                                              | #   | #   | #         | #     | #    | #    |
| Rsa1.0_00161.1.g7219.t2 | #                                                                                                                                                                                                                                                                                                   | #   | #   | #         | #     | #    | #    | -                                           | ----  | ----                 | #                                                                                                                              | #   | #   | #         | #     | #    | #    |
| Rsa1.0_00161.1.g7220.t1 | ref[XP_002889446.1] EDGP precursor [Arabidopsis lyrata subsp. lyrata] gi 297335288 gb EFH65705.1                                                                                                                                                                                                    | 433 | 433 | 0         | 100.0 | 85.7 | 91.9 | EDGP precursor                              | gbpln | Arabidopsis lyrata   | AT1G03220.1   Symbols:   Eukaryotic aspartyl protease family protein   chr1:787143-788444 FORWARD LENGTH=433                   | 433 | 433 | 0         | 100.0 | 83.8 | 91.2 |
| Rsa1.0_00161.1.g7221.t1 | ref[XP_002889446.1] EDGP precursor [Arabidopsis lyrata subsp. lyrata] gi 297335288 gb EFH65705.1                                                                                                                                                                                                    | 225 | 433 | 2.00E-57  | 192.4 | 55.1 | 64.9 | EDGP precursor                              | gbpln | Arabidopsis lyrata   | AT1G03220.1   Symbols:   Eukaryotic aspartyl protease family protein   chr1:787143-788444 FORWARD LENGTH=433                   | 225 | 433 | 2.00E-58  | 192.4 | 54.2 | 64.0 |
| Rsa1.0_00161.1.g7222.t1 | ref[NP_189038.1] putative F-box protein [Arabidopsis thaliana] gi 75273446 sp Q9LIR1.1 FB182_ARATH RecName: Full=Putative F-box protein At3g23960 gi 9294665 dbj BAB03014.1 unnamed protein product [Arabidopsis thaliana] gi 332643318 gb AEE76839.1 putative F-box protein [Arabidopsis thaliana] | 340 | 402 | 1.00E-60  | 118.2 | 41.5 | 60.9 | putative F-box protein                      | gbpln | Arabidopsis thaliana | AT3G23960.1   Symbols:   F-box and associated interaction domains-containing protein   chr3:8657736-8658944 FORWARD LENGTH=402 | 340 | 402 | 3.00E-63  | 118.2 | 41.5 | 60.9 |
| Rsa1.0_00161.1.g7223.t1 | #                                                                                                                                                                                                                                                                                                   | #   | #   | #         | #     | #    | #    | -                                           | ----  | ----                 | #                                                                                                                              | #   | #   | #         | #     | #    | #    |

|                         |                                                                                                                                                                                                                                                                                                                                                                                                                                                                                                                                                                                                                                                                                                                                                                                                                               |     |      |           |       |      |      |                                            |       |                      |                                                                                                                                                                                                                                                                                                                                              |     |      |           |       |      |      |
|-------------------------|-------------------------------------------------------------------------------------------------------------------------------------------------------------------------------------------------------------------------------------------------------------------------------------------------------------------------------------------------------------------------------------------------------------------------------------------------------------------------------------------------------------------------------------------------------------------------------------------------------------------------------------------------------------------------------------------------------------------------------------------------------------------------------------------------------------------------------|-----|------|-----------|-------|------|------|--------------------------------------------|-------|----------------------|----------------------------------------------------------------------------------------------------------------------------------------------------------------------------------------------------------------------------------------------------------------------------------------------------------------------------------------------|-----|------|-----------|-------|------|------|
| Rsa1.0_00161.1.g7224.t1 | refXP_002889444.1   hypothetical protein ARALYDRAFT_470299 [Arabidopsis lyrata subsp. lyrata] gi 297335286 gb EFH65703.1   hypothetical protein ARALYDRAFT_470299 [Arabidopsis lyrata subsp. lyrata]                                                                                                                                                                                                                                                                                                                                                                                                                                                                                                                                                                                                                          | 758 | 758  | 0         | 100.0 | 96.6 | 98.2 | hypothetical protein ARALYDRAFT_470299     | gbpln | Arabidopsis lyrata   | AT1G03190.2   Symbols: ATXPD, UVH6   RAD3-like DNA-binding helicase protein   chr1:775822-779863 FORWARD LENGTH=758                                                                                                                                                                                                                          | 758 | 758  | 0         | 100.0 | 96.3 | 97.9 |
| Rsa1.0_00161.1.g7225.t5 | refXP_002889442.1   hypothetical protein ARALYDRAFT_470297 [Arabidopsis lyrata subsp. lyrata] gi 297335284 gb EFH65701.1   hypothetical protein ARALYDRAFT_470297 [Arabidopsis lyrata subsp. lyrata]                                                                                                                                                                                                                                                                                                                                                                                                                                                                                                                                                                                                                          | 294 | 263  | 1.00E-123 | 89.5  | 75.9 | 82.0 | hypothetical protein ARALYDRAFT_470297     | gbpln | Arabidopsis lyrata   | AT1G03180.1   Symbols:   unknown protein; Has 36 Blast hits to 36 proteins in 15 species: Archae - 0; Bacteria - 0; Metazoa - 3; Fungi - 0; Plants - 33; Viruses - 0; Other Eukaryotes - 0 (source: NCBI BLink).   chr1:773543-775179 FORWARD LENGTH=265                                                                                     | 294 | 265  | 1.00E-124 | 90.1  | 75.2 | 81.6 |
| Rsa1.0_00161.1.g7226.t1 | gb EOA37699.1   hypothetical protein CARUB_v10012407mg [Capsella rubella]                                                                                                                                                                                                                                                                                                                                                                                                                                                                                                                                                                                                                                                                                                                                                     | 234 | 276  | 3.00E-84  | 117.9 | 76.1 | 82.9 | hypothetical protein CARUB_v10012407mg     | gbpln | Capsella rubella     | AT1G03170.1   Symbols:   Protein of unknown function (DUF3049)   chr1:769805-770527 FORWARD LENGTH=240                                                                                                                                                                                                                                       | 234 | 240  | 1.00E-81  | 102.6 | 72.2 | 79.9 |
| Rsa1.0_00161.1.g7227.t4 | gb EOA39607.1   hypothetical protein CARUB_v10008235mg [Capsella rubella]                                                                                                                                                                                                                                                                                                                                                                                                                                                                                                                                                                                                                                                                                                                                                     | 951 | 929  | 0         | 97.7  | 84.8 | 89.4 | hypothetical protein CARUB_v10008235mg     | gbpln | Capsella rubella     | AT1G03160.1   Symbols: FZL   FZO-like   chr1:761321-766053 FORWARD LENGTH=912                                                                                                                                                                                                                                                                | 951 | 912  | 0         | 95.9  | 84.5 | 89.4 |
| Rsa1.0_00161.1.g7228.t1 | gb EOA38906.1   hypothetical protein CARUB_v10011298mg [Capsella rubella]                                                                                                                                                                                                                                                                                                                                                                                                                                                                                                                                                                                                                                                                                                                                                     | 426 | 425  | 0         | 99.8  | 87.3 | 93.4 | hypothetical protein CARUB_v10011298mg     | gbpln | Capsella rubella     | AT1G03140.1   Symbols:   splicing factor Prp18 family protein   chr1:754471-756223 REVERSE LENGTH=420                                                                                                                                                                                                                                        | 426 | 420  | 0         | 98.6  | 84.5 | 91.5 |
| Rsa1.0_00161.1.g7229.t1 | ref NP_563675.1   transducin/WD-40 repeat-containing protein [Arabidopsis thaliana] gi 13877931 gb AAK44043.1 AF370228.1 unknown protein [Arabidopsis thaliana] gi 16323464 gb AL15226.1 unknown protein [Arabidopsis thaliana] gi 33218941 gb AEE27532.1   transducin/WD-40 repeat-containing protein [Arabidopsis thaliana] ref NP_171804.1   putative clathrin assembly protein [Arabidopsis thaliana] gi 46396022 sp Q9SA65.1   CAP4_ARATH RecName: Full=Putative clathrin assembly protein At1g03050 gi 4587573 gb AAD25804.1 AC006550_12 Similar to clathrin assembly protein gb AF041374 (CALM) from Rattus norvegicus [Arabidopsis thaliana] gi 91805731 gb ABE65594.1   clathrin assembly protein-like [Arabidopsis thaliana] gi 332189399 gb AEE27520.1   putative clathrin assembly protein [Arabidopsis thaliana] | 405 | 427  | 0         | 105.4 | 81.7 | 89.6 | transducin/WD-40 repeat-containing protein | gbpln | Arabidopsis thaliana | AT1G03110.1   Symbols: TRM82, AtTRM82   Transducin/WD40 repeat-like superfamily protein   chr1:749359-751796 FORWARD LENGTH=427                                                                                                                                                                                                              | 405 | 427  | 0         | 105.4 | 81.7 | 89.6 |
| Rsa1.0_00161.1.g7230.t2 | gb EOA40245.1   hypothetical protein CARUB_v10008963mg [Capsella rubella]                                                                                                                                                                                                                                                                                                                                                                                                                                                                                                                                                                                                                                                                                                                                                     | 592 | 599  | 4         | 101.2 | 87.5 | 93.1 | putative clathrin assembly protein         | gbpln | Arabidopsis thaliana | AT1G03050.1   Symbols:   ENTH/ANTH/VHS superfamily protein   chr1:707726-709860 FORWARD LENGTH=599                                                                                                                                                                                                                                           | 592 | 599  | 0         | 101.2 | 87.5 | 93.1 |
| Rsa1.0_00161.1.g7231.t1 | ref NP_849582.1   uncharacterized protein [Arabidopsis thaliana] gi 26452912 dbj BAC43534.1   unknown protein [Arabidopsis thaliana] gi 29824301 gb AAP04111.1   unknown protein [Arabidopsis thaliana] gi 332189384 gb AEE27505.1   uncharacterized protein AT1G02960 [Arabidopsis thaliana]                                                                                                                                                                                                                                                                                                                                                                                                                                                                                                                                 | 430 | 491  | 0         | 114.2 | 86.3 | 93.7 | hypothetical protein CARUB_v10008963mg     | gbpln | Capsella rubella     | AT1G02970.1   Symbols: WEE1, ATWEE1   WEE1 kinase homolog   chr1:673408-676127 FORWARD LENGTH=500                                                                                                                                                                                                                                            | 430 | 500  | 0         | 116.3 | 85.6 | 94.0 |
| Rsa1.0_00161.1.g7232.t1 | ref NP_002892135.1   hypothetical protein ARALYDRAFT_887439 [Arabidopsis lyrata subsp. lyrata] gi 297337977 gb EFH68394.1   hypothetical protein ARALYDRAFT_887439 [Arabidopsis lyrata subsp. lyrata]                                                                                                                                                                                                                                                                                                                                                                                                                                                                                                                                                                                                                         | 498 | 471  | 1.00E-163 | 94.6  | 62.0 | 72.7 | uncharacterized protein                    | gbpln | Arabidopsis thaliana | AT1G02960.2   Symbols:   unknown protein; BEST Arabidopsis thaliana protein match is: unknown protein (TAIR:AT1G02965.1); Has 100 Blast hits to 99 proteins in 48 species: Archae - 0; Bacteria - 4; Metazoa - 26; Fungi - 13; Plants - 29; Viruses - 0; Other Eukaryotes - 28 (source: NCBI BLink).   chr1:667002-669773 REVERSE LENGTH=471 | 498 | 471  | 1.00E-166 | 94.6  | 62.0 | 72.7 |
| Rsa1.0_00161.1.g7233.t1 | ref XP_002890545.1   T-complex protein 11 [Arabidopsis lyrata subsp. lyrata] gi 297336387 gb EFH68804.1   T-complex protein 11 [Arabidopsis lyrata subsp. lyrata]                                                                                                                                                                                                                                                                                                                                                                                                                                                                                                                                                                                                                                                             | 449 | 453  | 0         | 100.9 | 89.8 | 94.0 | hypothetical protein ARALYDRAFT_887439     | gbpln | Arabidopsis lyrata   | AT1G02910.1   Symbols: LPA1   tetratricopeptide repeat (TPR)-containing protein   chr1:655749-658125 REVERSE LENGTH=453                                                                                                                                                                                                                      | 449 | 453  | 0         | 100.9 | 87.8 | 93.1 |
| Rsa1.0_00162.1.g7234.t3 | ref XP_002875115.1   hypothetical protein ARALYDRAFT_484136 [Arabidopsis lyrata subsp. lyrata] gi 297320953 gb EFH51374.1   hypothetical protein ARALYDRAFT_484136 [Arabidopsis lyrata subsp. lyrata]                                                                                                                                                                                                                                                                                                                                                                                                                                                                                                                                                                                                                         | 142 | 1130 | 4.00E-22  | 795.8 | 38.7 | 44.4 | T-complex protein 11                       | gbpln | Arabidopsis lyrata   | AT1G22930.2   Symbols:   T-complex protein 11   chr1:8118049-8121854 FORWARD LENGTH=1020                                                                                                                                                                                                                                                     | 142 | 1020 | 5.00E-24  | 718.3 | 38.0 | 43.0 |
| Rsa1.0_00162.1.g7235.t1 | ref XP_002890545.1   T-complex protein 11 [Arabidopsis lyrata subsp. lyrata] gi 297336387 gb EFH68804.1   T-complex protein 11 [Arabidopsis lyrata subsp. lyrata]                                                                                                                                                                                                                                                                                                                                                                                                                                                                                                                                                                                                                                                             | 77  | 77   | 4.00E-32  | 100.0 | 84.4 | 94.8 | hypothetical protein ARALYDRAFT_484136     | gbpln | Arabidopsis lyrata   | AT2G02130.1   Symbols: PDF2.3, LCR68   low-molecular-weight cysteine-rich 68   chr2:540071-540407 FORWARD LENGTH=77                                                                                                                                                                                                                          | 77  | 77   | 7.00E-34  | 100.0 | 81.8 | 92.2 |

|                         |                                                                                                                                                                                                                                                                                                                                                                                                                                                                                                                                                                                                                                                                                                 |     |      |           |       |      |      |                                                                            |       |                      |                                                                                                                                               |     |      |           |       |      |      |
|-------------------------|-------------------------------------------------------------------------------------------------------------------------------------------------------------------------------------------------------------------------------------------------------------------------------------------------------------------------------------------------------------------------------------------------------------------------------------------------------------------------------------------------------------------------------------------------------------------------------------------------------------------------------------------------------------------------------------------------|-----|------|-----------|-------|------|------|----------------------------------------------------------------------------|-------|----------------------|-----------------------------------------------------------------------------------------------------------------------------------------------|-----|------|-----------|-------|------|------|
| Rsa1.0_00162.1.g7236.t1 | gb AAM20729.1  unknown protein [Arabidopsis thaliana]                                                                                                                                                                                                                                                                                                                                                                                                                                                                                                                                                                                                                                           | 642 | 618  | 0         | 96.3  | 67.9 | 74.0 | unknown protein                                                            | gbpln | Arabidopsis thaliana | AT2G02160.1   Symbols:   CCH-type zinc finger family protein   chr2:553407-555899 REVERSE LENGTH=669                                          | 642 | 669  | 0         | 104.2 | 67.3 | 73.2 |
| Rsa1.0_00162.1.g7237.t1 | ref XP_002876802.1  hypothetical protein ARALYDRAFT_322556 [Arabidopsis lyrata subsp. lyrata] gi 297322640 gb EFH53061.1  hypothetical protein ARALYDRAFT_322556 [Arabidopsis lyrata subsp. lyrata] ref XP_002875118.1  hypothetical protein ARALYDRAFT_484143 [Arabidopsis lyrata subsp. lyrata] gi 297320956 gb EFH51377.1  hypothetical protein ARALYDRAFT_484143 [Arabidopsis lyrata subsp. lyrata]                                                                                                                                                                                                                                                                                         | 459 | 492  | 0         | 107.2 | 84.3 | 91.1 | hypothetical protein ARALYDRAFT_322556                                     | gbpln | Arabidopsis lyrata   | AT2G02170.2   Symbols:   Remorin family protein   chr2:556595-558610 REVERSE LENGTH=486                                                       | 459 | 486  | 0         | 105.9 | 84.1 | 90.4 |
| Rsa1.0_00162.1.g7238.t1 | ref NP_178330.1  phyto-sulfonin receptor 1 [Arabidopsis thaliana] gi 29428075 sp Q9ZVR7.4 PSKR1_ARATH RecName: Full=Phyto-sulfonin receptor 1; Short=AtPSKR1; AltName: Full=Phyto-sulfonin LRR receptor kinase 1; Flags: Precursor gi 224589499 gb ACN59283.1  leucine-rich repeat receptor-like protein kinase [Arabidopsis thaliana] gi 330250464 gb AEC05558.1  phyto-sulfonin receptor 1 [Arabidopsis thaliana] ref NP_178819.1  Zinc knuckle (CCHC-type) family protein [Arabidopsis thaliana] gi 3327395 gb AAC26677.1  putative Ta11-like non-LTR retroelement protein [Arabidopsis thaliana] gi 330251037 gb AEC06131.1  Zinc knuckle (CCHC-type) family protein [Arabidopsis thaliana] | 302 | 308  | 1.00E-137 | 102.0 | 80.5 | 84.8 | hypothetical protein ARALYDRAFT_484143                                     | gbpln | Arabidopsis lyrata   | AT2G02180.1   Symbols: TOM3   tobamovirus multiplication protein 3   chr2:560976-562961 FORWARD LENGTH=303                                    | 302 | 303  | 1.00E-136 | 100.3 | 81.1 | 84.4 |
| Rsa1.0_00162.1.g7239.t1 | ref NP_178330.1  phyto-sulfonin receptor 1 [Arabidopsis thaliana] gi 29428075 sp Q9ZVR7.4 PSKR1_ARATH RecName: Full=Phyto-sulfonin receptor 1; Short=AtPSKR1; AltName: Full=Phyto-sulfonin LRR receptor kinase 1; Flags: Precursor gi 224589499 gb ACN59283.1  leucine-rich repeat receptor-like protein kinase [Arabidopsis thaliana] gi 330250464 gb AEC05558.1  phyto-sulfonin receptor 1 [Arabidopsis thaliana] ref NP_178819.1  Zinc knuckle (CCHC-type) family protein [Arabidopsis thaliana] gi 3327395 gb AAC26677.1  putative Ta11-like non-LTR retroelement protein [Arabidopsis thaliana] gi 330251037 gb AEC06131.1  Zinc knuckle (CCHC-type) family protein [Arabidopsis thaliana] | 905 | 1008 | 0         | 111.4 | 79.4 | 87.1 | phyto-sulfonin receptor 1                                                  | gbpln | Arabidopsis thaliana | AT2G02220.1   Symbols: ATPSKR1, PSKR1   phyto-sulfonin receptor 1   chr2:584098-587124 REVERSE LENGTH=1008                                    | 905 | 1008 | 0         | 111.4 | 79.4 | 87.1 |
| Rsa1.0_00162.1.g7240.t1 | ref NP_178819.1  Zinc knuckle (CCHC-type) family protein [Arabidopsis thaliana] gi 3327395 gb AAC26677.1  putative Ta11-like non-LTR retroelement protein [Arabidopsis thaliana] gi 330251037 gb AEC06131.1  Zinc knuckle (CCHC-type) family protein [Arabidopsis thaliana]                                                                                                                                                                                                                                                                                                                                                                                                                     | 190 | 530  | 1.00E-17  | 278.9 | 27.9 | 36.3 | Zinc knuckle (CCHC-type) family protein                                    | gbpln | Arabidopsis thaliana | AT2G07760.1   Symbols:   Zinc knuckle (CCHC-type) family protein   chr2:3584420-3586278 REVERSE LENGTH=530                                    | 190 | 530  | 5.00E-20  | 278.9 | 27.9 | 36.3 |
| Rsa1.0_00162.1.g7241.t1 | gb EOA24287.1  hypothetical protein CARUB_v10017527mg, partial [Capsella rubella] ref XP_002876806.1  hypothetical protein ARALYDRAFT_322561 [Arabidopsis lyrata subsp. lyrata] gi 297322644 gb EFH53065.1  hypothetical protein ARALYDRAFT_322561 [Arabidopsis lyrata subsp. lyrata] ref XP_002872697.1  predicted protein [Arabidopsis lyrata subsp. lyrata] gi 297318534 gb EFH48956.1  predicted protein [Arabidopsis lyrata subsp. lyrata]                                                                                                                                                                                                                                                 | 328 | 355  | 1.00E-113 | 108.2 | 63.7 | 75.3 | hypothetical protein CARUB_v10017527mg, partial                            | gbpln | Capsella rubella     | AT2G02230.1   Symbols: AtPP2-B1, PP2-B1   phloem protein 2-B1   chr2:590393-591595 REVERSE LENGTH=336                                         | 328 | 336  | 1.00E-112 | 102.4 | 62.8 | 72.9 |
| Rsa1.0_00162.1.g7242.t1 | ref XP_002876806.1  hypothetical protein ARALYDRAFT_322561 [Arabidopsis lyrata subsp. lyrata] gi 297322644 gb EFH53065.1  hypothetical protein ARALYDRAFT_322561 [Arabidopsis lyrata subsp. lyrata] ref XP_002872697.1  predicted protein [Arabidopsis lyrata subsp. lyrata] gi 297318534 gb EFH48956.1  predicted protein [Arabidopsis lyrata subsp. lyrata]                                                                                                                                                                                                                                                                                                                                   | 277 | 317  | 1.00E-109 | 114.4 | 70.8 | 83.8 | hypothetical protein ARALYDRAFT_322561                                     | gbpln | Arabidopsis lyrata   | AT2G02240.1   Symbols: MEE66   F-box family protein   chr2:592359-593602 REVERSE LENGTH=320                                                   | 277 | 320  | 1.00E-110 | 115.5 | 70.4 | 82.7 |
| Rsa1.0_00162.1.g7243.t5 | ref XP_002872697.1  predicted protein [Arabidopsis lyrata subsp. lyrata] gi 297318534 gb EFH48956.1  predicted protein [Arabidopsis lyrata subsp. lyrata]                                                                                                                                                                                                                                                                                                                                                                                                                                                                                                                                       | 537 | 659  | 0         | 122.7 | 73.9 | 86.4 | predicted protein                                                          | gbpln | Arabidopsis lyrata   | AT4G04540.1   Symbols: CRK39   cysteine-rich RLK (RECEPTOR-like protein kinase) 39   chr4:2259580-2262138 FORWARD LENGTH=659                  | 537 | 659  | 0         | 122.7 | 73.7 | 86.4 |
| Rsa1.0_00162.1.g7244.t6 | gb AAC13599.1  similar to reverse transcriptase (Pfam: transcript_fact.hmm, score: 72.31) [Arabidopsis thaliana] ref NP_178107.1  chromosome transmission fidelity protein 1 [Arabidopsis thaliana] gi 12324592 gb AAG52253.1 AC011717_21 putative helicase; 5525-5197 [Arabidopsis thaliana] gi 332198199 gb AEE36320.1  RAD3-like DNA-binding helicase protein [Arabidopsis thaliana]                                                                                                                                                                                                                                                                                                         | 612 | 928  | 1.00E-113 | 151.6 | 40.2 | 57.4 | similar to reverse transcriptase (Pfam: transcript_fact.hmm, score: 72.31) | gbpln | Arabidopsis thaliana | AT5G18880.1   Symbols:   RNA-directed DNA polymerase (reverse transcriptase)-related family protein   chr5:6300535-6301422 REVERSE LENGTH=295 | 612 | 295  | 4.00E-30  | 48.2  | 11.6 | 15.8 |
| Rsa1.0_00162.1.g7245.t1 | ref NP_178107.1  chromosome transmission fidelity protein 1 [Arabidopsis thaliana] gi 12324592 gb AAG52253.1 AC011717_21 putative helicase; 5525-5197 [Arabidopsis thaliana] gi 332198199 gb AEE36320.1  RAD3-like DNA-binding helicase protein [Arabidopsis thaliana]                                                                                                                                                                                                                                                                                                                                                                                                                          | 870 | 882  | 0         | 101.4 | 79.2 | 85.6 | chromosome transmission fidelity protein 1                                 | gbpln | Arabidopsis thaliana | AT1G79890.1   Symbols:   RAD3-like DNA-binding helicase protein   chr1:30048655-30052203 FORWARD LENGTH=882                                   | 870 | 882  | 0         | 101.4 | 79.2 | 85.6 |
| Rsa1.0_00162.1.g7246.t1 | ref XP_002876806.1  hypothetical protein ARALYDRAFT_322561 [Arabidopsis lyrata subsp. lyrata] gi 297322644 gb EFH53065.1  hypothetical protein ARALYDRAFT_322561 [Arabidopsis lyrata subsp. lyrata]                                                                                                                                                                                                                                                                                                                                                                                                                                                                                             | 205 | 317  | 1.00E-55  | 154.6 | 58.0 | 69.3 | hypothetical protein ARALYDRAFT_322561                                     | gbpln | Arabidopsis lyrata   | AT2G02240.1   Symbols: MEE66   F-box family protein   chr2:592359-593602 REVERSE LENGTH=320                                                   | 205 | 320  | 1.00E-56  | 156.1 | 58.0 | 67.8 |

|                         |                                                                                                                                                                                                                                                                                    |     |     |           |       |      |      |                                        |       |                      |                                                                                                                         |     |     |           |       |      |      |   |
|-------------------------|------------------------------------------------------------------------------------------------------------------------------------------------------------------------------------------------------------------------------------------------------------------------------------|-----|-----|-----------|-------|------|------|----------------------------------------|-------|----------------------|-------------------------------------------------------------------------------------------------------------------------|-----|-----|-----------|-------|------|------|---|
| Rsa1.0_00162.1.g7247.t1 | refNP_178332.2  phloem protein 2-B2 [Arabidopsis thaliana] gi 334302847 sp Q9ZVR5.2 PP2B2_ARA TH RecName: Full=Putative F-box protein PP2-B2; AltName: Full=Protein PHLOEM PROTEIN 2-LIKE B2; Short=AtPP2-B2 gi 330250467 gb AE05561.1  phloem protein 2-B2 [Arabidopsis thaliana] | 166 | 310 | 9.00E-60  | 186.7 | 68.7 | 82.5 | phloem protein 2-B2                    | gbpln | Arabidopsis thaliana | AT2G02250.1   Symbols: AtPP2-B2, PP2-B2   phloem protein 2-B2   chr2:594655-595825 REVERSE LENGTH=310                   | 166 | 310 | 3.00E-62  | 186.7 | 68.7 | 82.5 |   |
| Rsa1.0_00162.1.g7248.t1 | gb EOA26085.1  hypothetical protein CARUB_v10019504mg [Capsella rubella]                                                                                                                                                                                                           | 106 | 307 | 3.00E-36  | 289.6 | 67.0 | 82.1 | hypothetical protein CARUB_v10019504mg | gbpln | Capsella rubella     | AT2G02250.1   Symbols: AtPP2-B2, PP2-B2   phloem protein 2-B2   chr2:594655-595825 REVERSE LENGTH=310                   | 106 | 310 | 3.00E-37  | 292.5 | 71.7 | 83.0 |   |
| Rsa1.0_00162.1.g7249.t1 | gb EOA25428.1  hypothetical protein CARUB_v10019372mg [Capsella rubella]                                                                                                                                                                                                           | 264 | 300 | 7.00E-47  | 113.6 | 41.7 | 54.5 | hypothetical protein CARUB_v10019372mg | gbpln | Capsella rubella     | AT2G02240.1   Symbols: MEE66   F-box family protein   chr2:592359-593602 REVERSE LENGTH=320                             | 264 | 320 | 2.00E-44  | 121.2 | 40.5 | 56.4 |   |
| Rsa1.0_00162.1.g7250.t1 | gb EOA25428.1  hypothetical protein CARUB_v10018760mg [Capsella rubella]                                                                                                                                                                                                           | 470 | 300 | 1.00E-124 | 63.8  | 45.5 | 52.6 | hypothetical protein CARUB_v10018760mg | gbpln | Capsella rubella     | AT2G02240.1   Symbols: MEE66   F-box family protein   chr2:592359-593602 REVERSE LENGTH=320                             | 470 | 320 | 2.00E-94  | 68.1  | 35.1 | 44.5 |   |
| Rsa1.0_00162.1.g7251.t1 | gb EOA25983.1  hypothetical protein CARUB_v10019372mg [Capsella rubella]                                                                                                                                                                                                           | 703 | 282 | 5.00E-38  | 40.1  | 11.9 | 15.8 | hypothetical protein CARUB_v10019372mg | gbpln | Capsella rubella     | AT2G02240.1   Symbols: MEE66   F-box family protein   chr2:592359-593602 REVERSE LENGTH=320                             | 703 | 320 | 3.00E-39  | 45.5  | 12.8 | 15.4 |   |
| Rsa1.0_00162.1.g7252.t1 | gb ABD65034.1  Ulp1 protease family protein [Brassica oleracea]                                                                                                                                                                                                                    | 194 | 863 | 2.00E-34  | 444.8 | 40.2 | 54.6 | Ulp1 protease family protein           | gbpln | Brassica oleracea    | # # # # # # #                                                                                                           | #   | #   | #         | #     | #    | #    | # |
| Rsa1.0_00162.1.g7253.t1 | # # # # # # # #                                                                                                                                                                                                                                                                    | #   | #   | #         | #     | #    | #    | -                                      | ----  | ----                 | AT2G02370.2   Symbols:   SNARE associated Golgi protein family   chr2:621841-623084 FORWARD LENGTH=320                  | 109 | 320 | 1.00E-12  | 293.6 | 44.0 | 56.9 |   |
| Rsa1.0_00162.1.g7254.t1 | refXP_002876816.1  phloem protein 2-B10 [Arabidopsis lyrata subsp. lyrata] gi 297322654 gb EFH53075.1  phloem protein 2-B10 [Arabidopsis lyrata subsp. lyrata]                                                                                                                     | 284 | 273 | 1.00E-91  | 96.1  | 61.6 | 73.6 | phloem protein 2-B10                   | gbpln | Arabidopsis lyrata   | AT2G02360.1   Symbols: AtPP2-B10, PP2-B10   phloem protein 2-B10   chr2:619699-620736 REVERSE LENGTH=272                | 284 | 272 | 6.00E-89  | 95.8  | 58.1 | 70.1 |   |
| Rsa1.0_00162.1.g7255.t2 | refXP_002875121.1  hypothetical protein ARALYDRAFT_484153 [Arabidopsis lyrata subsp. lyrata] gi 297320959 gb EFH51380.1  hypothetical protein ARALYDRAFT_484153 [Arabidopsis lyrata subsp. lyrata]                                                                                 | 358 | 322 | 6.00E-88  | 89.9  | 53.4 | 62.0 | hypothetical protein ARALYDRAFT_484153 | gbpln | Arabidopsis lyrata   | AT2G02370.2   Symbols:   SNARE associated Golgi protein family   chr2:621841-623084 FORWARD LENGTH=320                  | 358 | 320 | 6.00E-90  | 89.4  | 53.4 | 61.7 |   |
| Rsa1.0_00162.1.g7256.t1 | refXP_002875123.1  predicted protein [Arabidopsis lyrata subsp. lyrata] gi 297320961 gb EFH51382.1  predicted protein [Arabidopsis lyrata subsp. lyrata]                                                                                                                           | 170 | 227 | 2.00E-75  | 133.5 | 78.2 | 88.2 | predicted protein                      | gbpln | Arabidopsis lyrata   | AT2G02390.1   Symbols: ATGSTZ1, GST18, GSTZ1   glutathione S-transferase zeta 1   chr2:629015-630955 FORWARD LENGTH=221 | 170 | 221 | 1.00E-77  | 130.0 | 78.8 | 88.2 |   |
| Rsa1.0_00162.1.g7257.t1 | refXP_002876817.1  cinnamoyl-CoA reductase family [Arabidopsis lyrata subsp. lyrata] gi 297322655 gb EFH53076.1  cinnamoyl-CoA reductase family [Arabidopsis lyrata subsp. lyrata]                                                                                                 | 274 | 318 | 1.00E-142 | 116.1 | 88.7 | 94.2 | cinnamoyl-CoA reductase family         | gbpln | Arabidopsis lyrata   | AT2G02400.1   Symbols:   NAD(P)-binding Rossmann-fold superfamily protein   chr2:631413-632449 REVERSE LENGTH=318       | 274 | 318 | 1.00E-143 | 116.1 | 87.2 | 93.8 |   |
| Rsa1.0_00162.1.g7258.t1 | gb EOA24407.1  hypothetical protein CARUB_v10017657mg [Capsella rubella]                                                                                                                                                                                                           | 309 | 320 | 1.00E-110 | 103.6 | 75.1 | 84.5 | hypothetical protein CARUB_v10017657mg | gbpln | Capsella rubella     | AT2G02540.1   Symbols: ATHB21, ZFHD4, HB21, ZHD3   homeobox protein 21   chr2:684302-685234 FORWARD LENGTH=310          | 309 | 310 | 1.00E-111 | 100.3 | 75.1 | 83.8 |   |
| Rsa1.0_00163.1.g7259.t4 | gb EOA38784.1  hypothetical protein CARUB_v10011034mg [Capsella rubella]                                                                                                                                                                                                           | 588 | 584 | 1.00E-173 | 99.3  | 65.5 | 75.3 | hypothetical protein CARUB_v10011034mg | gbpln | Capsella rubella     | AT1G15280.2   Symbols:   CASC3/Barentsz eIF4AIII binding   chr1:5252538-5256214 FORWARD LENGTH=585                      | 588 | 585 | 1.00E-161 | 99.5  | 64.1 | 73.3 |   |
| Rsa1.0_00163.1.g7260.t1 | gb EOA38838.1  hypothetical protein CARUB_v10011179mg [Capsella rubella]                                                                                                                                                                                                           | 694 | 905 | 0         | 130.4 | 54.5 | 65.1 | hypothetical protein CARUB_v10011179mg | gbpln | Capsella rubella     | AT3G42170.1   Symbols:   BED zinc finger hAT family dimerisation domain   chr3:14321838-14323928 FORWARD LENGTH=696     | 694 | 696 | 1.00E-120 | 100.3 | 32.3 | 47.3 |   |
| Rsa1.0_00163.1.g7261.t1 | refXP_002892861.1  hypothetical protein ARALYDRAFT_312525 [Arabidopsis lyrata subsp. lyrata] gi 297338703 gb EFH69120.1  hypothetical protein ARALYDRAFT_312525 [Arabidopsis lyrata subsp. lyrata]                                                                                 | 354 | 357 | 2.00E-83  | 100.8 | 65.8 | 72.6 | hypothetical protein ARALYDRAFT_312525 | gbpln | Arabidopsis lyrata   | AT1G15340.1   Symbols: MBD10   methyl-CPG-binding domain 10   chr1:5275895-5277474 REVERSE LENGTH=384                   | 354 | 384 | 1.00E-85  | 108.5 | 67.8 | 72.9 |   |



|                         |                                                                                                                                                                                                                                                                                                                                                                                                                                                                                                                                                                                                                                                                                                                                                                                                                                                                                                                                                                                                                                                                                                                                                                                                                                                                                                                                                                           |     |     |          |       |      |      |                                               |       |                      |                                                                                                                                                                                                                                                                                                                                                          |     |     |          |       |      |      |
|-------------------------|---------------------------------------------------------------------------------------------------------------------------------------------------------------------------------------------------------------------------------------------------------------------------------------------------------------------------------------------------------------------------------------------------------------------------------------------------------------------------------------------------------------------------------------------------------------------------------------------------------------------------------------------------------------------------------------------------------------------------------------------------------------------------------------------------------------------------------------------------------------------------------------------------------------------------------------------------------------------------------------------------------------------------------------------------------------------------------------------------------------------------------------------------------------------------------------------------------------------------------------------------------------------------------------------------------------------------------------------------------------------------|-----|-----|----------|-------|------|------|-----------------------------------------------|-------|----------------------|----------------------------------------------------------------------------------------------------------------------------------------------------------------------------------------------------------------------------------------------------------------------------------------------------------------------------------------------------------|-----|-----|----------|-------|------|------|
| Rsa1.0_00163.1.g7262.t1 | <p>refNP_563972.1  uncharacterized protein [Arabidopsis thaliana]<br/> gi 30684315 ref NP_849667.1  uncharacterized protein [Arabidopsis thaliana]<br/> gi 21617951 gb AAM67001.1  unknown [Arabidopsis thaliana]<br/> gi 110742955 dbj BAE99372.1  hypothetical protein [Arabidopsis thaliana]<br/> gi 332191186 gb AEE29307.1  uncharacterized protein AT1G15350 [Arabidopsis thaliana]<br/> gi 332191187 gb AEE29308.1  uncharacterized protein AT1G15350 [Arabidopsis thaliana]<br/> ref NP_172988.1  ethylene-responsive transcription factor WIN1 [Arabidopsis thaliana]<br/> gi 75338622 sp Q9XI33.1 WIN1_ARATH<br/> RecName: Full=Ethylene-responsive transcription factor WIN1; AltName: Full=Protein SHINE 1; AltName: Full=WAX INDUCER 1<br/> gi 5103834 gb AAD39664.1 AC007591_29<br/> Similar to gb AB008104.1 ethylene responsive element binding factor 2 from Arabidopsis thaliana and contains an PF00847 AP2 domain. EST<br/> gb AA728476 comes from this gene [Arabidopsis thaliana]<br/> gi 26450944 dbj BAC42579.1  putative ethylene responsive element [Arabidopsis thaliana]<br/> gi 28950721 gb AAO63284.1  At1g15360 [Arabidopsis thaliana]<br/> gi 38426898 gb AAR20494.1  transcription factor wax inducer 1 [Arabidopsis thaliana]<br/> gi 332191189 gb AEE29310.1  ethylene-responsive transcription factor WIN1 [Arabidopsis thaliana]</p> | 215 | 154 | 2.00E-62 | 71.6  | 55.8 | 62.8 | uncharacterized protein                       | gbpln | Arabidopsis thaliana | <p>AT1G15350.1   Symbols:   unknown protein; BEST Arabidopsis thaliana protein match is: unknown protein (TAIR:AT3G15770.2); Has 148 Blast hits to 148 proteins in 25 species: Archae - 0; Bacteria - 0; Metazoa - 0; Fungi - 0; Plants - 141; Viruses - 0; Other Eukaryotes - 7 (source: NCBI BLink).   chr1:5278481-5279486 REVERSE LENGTH=154</p>     | 215 | 154 | 6.00E-65 | 71.6  | 55.8 | 62.8 |
| Rsa1.0_00163.1.g7263.t2 | <p>gi 26450944 dbj BAC42579.1  putative ethylene responsive element [Arabidopsis thaliana]<br/> gi 28950721 gb AAO63284.1  At1g15360 [Arabidopsis thaliana]<br/> gi 38426898 gb AAR20494.1  transcription factor wax inducer 1 [Arabidopsis thaliana]<br/> gi 332191189 gb AEE29310.1  ethylene-responsive transcription factor WIN1 [Arabidopsis thaliana]</p>                                                                                                                                                                                                                                                                                                                                                                                                                                                                                                                                                                                                                                                                                                                                                                                                                                                                                                                                                                                                           | 227 | 199 | 3.00E-73 | 87.7  | 70.0 | 75.8 | ethylene-responsive transcription factor WIN1 | gbpln | Arabidopsis thaliana | <p>AT1G15360.1   Symbols: SHN1, WIN1   Integrase-type DNA-binding superfamily protein   chr1:5283609-5284506 FORWARD LENGTH=199</p>                                                                                                                                                                                                                      | 227 | 199 | 8.00E-76 | 87.7  | 70.0 | 75.8 |
| Rsa1.0_00163.1.g7264.t1 | <p>gb EOA38607.1  hypothetical protein CARUB_v10010450mg [Capsella rubella]</p>                                                                                                                                                                                                                                                                                                                                                                                                                                                                                                                                                                                                                                                                                                                                                                                                                                                                                                                                                                                                                                                                                                                                                                                                                                                                                           | 172 | 174 | 6.00E-86 | 101.2 | 91.3 | 94.8 | hypothetical protein CARUB_v10010450mg        | gbpln | Capsella rubella     | <p>AT1G15380.2   Symbols:   Lactoylglutathione lyase / glyoxalase I family protein   chr1:5290955-5292287 FORWARD LENGTH=174</p>                                                                                                                                                                                                                         | 172 | 174 | 1.00E-85 | 101.2 | 89.0 | 93.0 |
| Rsa1.0_00163.1.g7265.t1 | <p>ref XP_002892864.1  hypothetical protein ARALYDRAFT_888930 [Arabidopsis lyrata subsp. lyrata]<br/> gi 297338706 gb EFH69123.1  hypothetical protein ARALYDRAFT_888930 [Arabidopsis lyrata subsp. lyrata]</p>                                                                                                                                                                                                                                                                                                                                                                                                                                                                                                                                                                                                                                                                                                                                                                                                                                                                                                                                                                                                                                                                                                                                                           | 76  | 76  | 7.00E-20 | 100.0 | 64.5 | 71.1 | hypothetical protein ARALYDRAFT_888930        | gbpln | Arabidopsis lyrata   | <p>AT1G15385.1   Symbols:   unknown protein; CONTAINS InterPro DOMAIN/s: Protein of unknown function DUF761, plant (InterPro:IPR008480); Has 6 Blast hits to 6 proteins in 3 species: Archae - 0; Bacteria - 0; Metazoa - 0; Fungi - 0; Plants - 6; Viruses - 0; Other Eukaryotes - 0 (source: NCBI BLink).   chr1:5292976-5293197 REVERSE LENGTH=73</p> | 76  | 73  | 3.00E-22 | 96.1  | 64.5 | 69.7 |
| Rsa1.0_00163.1.g7266.t1 | <p>ref NP_172994.1  uncharacterized protein [Arabidopsis thaliana]<br/> gi 5103841 gb AAD39671.1 AC007591_36 F9L1.37 [Arabidopsis thaliana]<br/> gi 332191199 gb AEE29320.1  uncharacterized protein AT1G15415 [Arabidopsis thaliana]</p>                                                                                                                                                                                                                                                                                                                                                                                                                                                                                                                                                                                                                                                                                                                                                                                                                                                                                                                                                                                                                                                                                                                                 | 50  | 96  | 8.00E-16 | 192.0 | 82.0 | 94.0 | uncharacterized protein                       | gbpln | Arabidopsis thaliana | <p>AT1G15415.1   Symbols:   The protein encoded by this gene was identified as a part of pollen proteome by mass spec analysis. It has weak homology to LEA (late embryo abundant) proteins. Encodes protein phosphatase 2A (PP2A) B'gamma subunit. Targeted to nucleus and cytosol.   chr1:5300931-5301412 REVERSE LENGTH=96</p>                        | 50  | 96  | 1.00E-18 | 192.0 | 82.0 | 94.0 |
| Rsa1.0_00163.1.g7267.t1 | <p>ref XP_002892867.1  hypothetical protein ARALYDRAFT_471743 [Arabidopsis lyrata subsp. lyrata]<br/> gi 297338709 gb EFH69126.1  hypothetical protein ARALYDRAFT_471743 [Arabidopsis lyrata subsp. lyrata]</p>                                                                                                                                                                                                                                                                                                                                                                                                                                                                                                                                                                                                                                                                                                                                                                                                                                                                                                                                                                                                                                                                                                                                                           | 269 | 278 | 2.00E-95 | 103.3 | 82.9 | 91.1 | hypothetical protein ARALYDRAFT_471743        | gbpln | Arabidopsis lyrata   | <p>AT1G15420.1   Symbols:   CONTAINS InterPro DOMAIN/s: Small-subunit processome, Utp12 (InterPro:IPR007148); Has 764 Blast hits to 656 proteins in 193 species: Archae - 0; Bacteria - 42; Metazoa - 237; Fungi - 154; Plants - 85; Viruses - 23; Other Eukaryotes - 223 (source: NCBI BLink).   chr1:5301794-5303296 REVERSE LENGTH=278</p>            | 269 | 278 | 2.00E-92 | 103.3 | 81.0 | 90.0 |
| Rsa1.0_00163.1.g7268.t1 | <p>ref XP_002890104.1  F9L1.39 [Arabidopsis lyrata subsp. lyrata]<br/> gi 297335946 gb EFH66363.1  F9L1.39 [Arabidopsis lyrata subsp. lyrata]</p>                                                                                                                                                                                                                                                                                                                                                                                                                                                                                                                                                                                                                                                                                                                                                                                                                                                                                                                                                                                                                                                                                                                                                                                                                         | 248 | 249 | 1.00E-78 | 100.4 | 64.9 | 73.8 | F9L1.39                                       | gbpln | Arabidopsis lyrata   | <p>AT1G15430.2   Symbols:   Protein of unknown function (DUF1644)   chr1:5305011-5305790 FORWARD LENGTH=259</p>                                                                                                                                                                                                                                          | 248 | 259 | 5.00E-80 | 104.4 | 65.7 | 74.6 |
| Rsa1.0_00163.1.g7269.t1 | <p>gb EOA39629.1  hypothetical protein CARUB_v10008260mg [Capsella rubella]</p>                                                                                                                                                                                                                                                                                                                                                                                                                                                                                                                                                                                                                                                                                                                                                                                                                                                                                                                                                                                                                                                                                                                                                                                                                                                                                           | 881 | 900 | 0        | 102.2 | 90.6 | 95.7 | hypothetical protein CARUB_v10008260mg        | gbpln | Capsella rubella     | <p>AT1G15440.1   Symbols: PWP2, ATPWP2   periodic tryptophan protein 2   chr1:5306159-5309460 REVERSE LENGTH=900</p>                                                                                                                                                                                                                                     | 881 | 900 | 0        | 102.2 | 88.9 | 95.1 |
| Rsa1.0_00163.1.g7270.t1 | <p>gb EOA39910.1  hypothetical protein CARUB_v10008598mg [Capsella rubella]</p>                                                                                                                                                                                                                                                                                                                                                                                                                                                                                                                                                                                                                                                                                                                                                                                                                                                                                                                                                                                                                                                                                                                                                                                                                                                                                           | 617 | 618 | 0        | 100.2 | 90.9 | 94.8 | hypothetical protein CARUB_v10008598mg        | gbpln | Capsella rubella     | <p>AT1G15500.1   Symbols: ATNTT2   TLC ATP/ADP transporter   chr1:5326426-5328688 FORWARD LENGTH=618</p>                                                                                                                                                                                                                                                 | 617 | 618 | 0        | 100.2 | 91.1 | 94.7 |

|                         |                                                                                                                                                                                                                                                                                                                                                                                                   |      |      |           |       |      |      |                                                                       |       |                      |                                                                                                                                                                                                                                                                                                                                                                          |      |      |           |       |      |      |
|-------------------------|---------------------------------------------------------------------------------------------------------------------------------------------------------------------------------------------------------------------------------------------------------------------------------------------------------------------------------------------------------------------------------------------------|------|------|-----------|-------|------|------|-----------------------------------------------------------------------|-------|----------------------|--------------------------------------------------------------------------------------------------------------------------------------------------------------------------------------------------------------------------------------------------------------------------------------------------------------------------------------------------------------------------|------|------|-----------|-------|------|------|
| Rsa1.0_00163.1.g7271.t8 | gb AAA51659.1  cyclin [Brassica napus]                                                                                                                                                                                                                                                                                                                                                            | 463  | 434  | 0         | 93.7  | 79.9 | 84.7 | cyclin                                                                | gbpln | Brassica napus       | AT1G15570.1   Symbols: CYGA2.3   CYCLIN A2.3   chr1:5363034-5365218 FORWARD LENGTH=450                                                                                                                                                                                                                                                                                   | 463  | 450  | 0         | 97.2  | 76.7 | 84.2 |
| Rsa1.0_00163.1.g7272.t1 | gb AET95910.1  AVP1-1 [Brassica rapa]                                                                                                                                                                                                                                                                                                                                                             | 771  | 769  | 0         | 99.7  | 98.6 | 99.1 | AVP1-1                                                                | gbpln | Brassica rapa        | AT1G15690.1   Symbols: AVP1, ATAVP3, AVP-3, ATVHP1.1   Inorganic H pyrophosphatase family protein   chr1:5399115-5402185 FORWARD LENGTH=770                                                                                                                                                                                                                              | 771  | 770  | 0         | 99.9  | 95.3 | 98.2 |
| Rsa1.0_00163.1.g7273.t1 | gb EOA37423.1  hypothetical protein CARUB_v10011380mg [Capsella rubella]                                                                                                                                                                                                                                                                                                                          | 374  | 386  | 0         | 103.2 | 87.4 | 93.3 | hypothetical protein CARUB_v10011380mg                                | gbpln | Capsella rubella     | AT1G15700.1   Symbols: ATPC2   ATPase, F1 complex, gamma subunit protein   chr1:5402629-5403789 REVERSE LENGTH=386                                                                                                                                                                                                                                                       | 374  | 386  | 1.00E-178 | 103.2 | 87.2 | 92.8 |
| Rsa1.0_00163.1.g7274.t4 | gb EOA39491.1  hypothetical protein CARUB_v10008096mg [Capsella rubella]                                                                                                                                                                                                                                                                                                                          | 1381 | 1344 | 0         | 97.3  | 82.2 | 87.7 | hypothetical protein CARUB_v10008096mg                                | gbpln | Capsella rubella     | AT1G15780.1   Symbols:   unknown protein; BEST Arabidopsis thaliana protein match is: unknown protein (TAIR:AT2G10440.1); Has 103701 Blast hits to 43153 proteins in 1828 species: Archae - 30; Bacteria - 7385; Metazoa - 38639; Fungi - 11331; Plants - 7727; Viruses - 307; Other Eukaryotes - 38082 (source: NCBI BLink).   chr1:5430446-5435921 REVERSE LENGTH=1335 | 1381 | 1335 | 0         | 96.7  | 81.7 | 87.3 |
| Rsa1.0_00163.1.g7275.t1 | ref NP_001154344.1  uncharacterized protein [Arabidopsis thaliana]<br>gi 240254082 ref NP_563983.4  uncharacterized protein [Arabidopsis thaliana]<br>gi 32815875 gb AAP88334.1  At1g15860 [Arabidopsis thaliana]<br>gi 332191253 gb AEE29374.1  uncharacterized protein AT1G15860 [Arabidopsis thaliana]<br>gi 332191254 gb AEE29375.1  uncharacterized protein AT1G15860 [Arabidopsis thaliana] | 281  | 227  | 4.00E-86  | 80.8  | 53.4 | 62.6 | uncharacterized protein                                               | gbpln | Arabidopsis thaliana | AT1G15860.2   Symbols:   Domain of unknown function (DUF298)   chr1:5455055-5456741 FORWARD LENGTH=227                                                                                                                                                                                                                                                                   | 281  | 227  | 1.00E-88  | 80.8  | 53.4 | 62.6 |
| Rsa1.0_00163.1.g7276.t1 | gb EOA36249.1  hypothetical protein CARUB_v10010239mg [Capsella rubella]                                                                                                                                                                                                                                                                                                                          | 222  | 223  | 1.00E-111 | 100.5 | 91.4 | 95.5 | hypothetical protein CARUB_v10010239mg                                | gbpln | Capsella rubella     | AT1G15880.1   Symbols: GOS11, atgos11   golgi snars 11   chr1:5458718-5460089 REVERSE LENGTH=223                                                                                                                                                                                                                                                                         | 222  | 223  | 1.00E-112 | 100.5 | 91.0 | 94.6 |
| Rsa1.0_00163.1.g7277.t1 | gb EOA36301.1  hypothetical protein CARUB_v10010589mg [Capsella rubella]                                                                                                                                                                                                                                                                                                                          | 144  | 142  | 1.00E-71  | 98.6  | 95.1 | 97.2 | hypothetical protein CARUB_v10010589mg                                | gbpln | Capsella rubella     | AT2G32060.2   Symbols:   Ribosomal protein L7Ae/L30e/S12e/Gadd45 family protein   chr2:13639228-13640104 REVERSE LENGTH=144                                                                                                                                                                                                                                              | 144  | 144  | 7.00E-63  | 100.0 | 87.5 | 94.4 |
| Rsa1.0_00163.1.g7278.t1 | ref NP_173046.2  aspartyl beta-hydroxylase N-terminal region domain-containing protein [Arabidopsis thaliana]<br>gi 6587800 gb AAF19491.1 AC010924.4 T24D18.4 [Arabidopsis thaliana]<br>gi 332191266 gb AEE29387.1  aspartyl beta-hydroxylase N-terminal region domain-containing protein [Arabidopsis thaliana]                                                                                  | 918  | 990  | 0         | 107.8 | 61.2 | 72.4 | aspartyl beta-hydroxylase N-terminal region domain-containing protein | gbpln | Arabidopsis thaliana | AT1G15940.1   Symbols:   Tudor/PWWP/MBT superfamily protein   chr1:5473672-5478050 FORWARD LENGTH=990                                                                                                                                                                                                                                                                    | 918  | 990  | 0         | 107.8 | 61.2 | 72.4 |
| Rsa1.0_00163.1.g7279.t1 | gb EOA38128.1  hypothetical protein CARUB_v10009599mg [Capsella rubella]                                                                                                                                                                                                                                                                                                                          | 364  | 349  | 1.00E-142 | 95.9  | 75.0 | 83.2 | hypothetical protein CARUB_v10009599mg                                | gbpln | Capsella rubella     | AT1G15970.1   Symbols:   DNA glycosylase superfamily protein   chr1:5486544-5488494 REVERSE LENGTH=352                                                                                                                                                                                                                                                                   | 364  | 352  | 1.00E-140 | 96.7  | 72.0 | 79.9 |
| Rsa1.0_00163.1.g7280.t1 | dbj BAJ34597.1  unnamed protein product [Thellungiella halophila]                                                                                                                                                                                                                                                                                                                                 | 655  | 647  | 0         | 98.8  | 93.9 | 96.8 | unnamed protein product                                               | ----  | ----                 | AT1G16030.1   Symbols: Hsp70b   heat shock protein 70B   chr1:5502386-5504326 REVERSE LENGTH=646                                                                                                                                                                                                                                                                         | 655  | 646  | 0         | 98.6  | 92.2 | 96.0 |
| Rsa1.0_00163.1.g7281.t1 | gb EOA33804.1  hypothetical protein CARUB_v10021275mg [Capsella rubella]                                                                                                                                                                                                                                                                                                                          | 88   | 93   | 2.00E-28  | 105.7 | 71.6 | 87.5 | hypothetical protein CARUB_v10021275mg                                | gbpln | Capsella rubella     | AT1G79660.1   Symbols:   unknown protein; BEST Arabidopsis thaliana protein match is: unknown protein (TAIR:AT1G16170.1); Has 30201 Blast hits to 17322 proteins in 780 species: Archae - 12; Bacteria - 1396; Metazoa - 17338; Fungi - 3422; Plants - 5037; Viruses - 0; Other Eukaryotes - 2996 (source: NCBI BLink).   chr1:29976294-29976575 FORWARD LENGTH=93       | 88   | 93   | 1.00E-30  | 105.7 | 71.6 | 85.2 |
| Rsa1.0_00163.1.g7282.t2 | ref XP_002890155.1  kelch repeat-containing F-box family protein [Arabidopsis lyrata subsp. lyrata]<br>gi 297335997 gb EFH66414.1  kelch repeat-containing F-box family protein [Arabidopsis lyrata subsp. lyrata]                                                                                                                                                                                | 854  | 404  | 0         | 47.3  | 41.3 | 43.3 | kelch repeat-containing F-box family protein                          | gbpln | Arabidopsis lyrata   | AT1G16250.1   Symbols:   Galactose oxidase/kelch repeat superfamily protein   chr1:5557214-5558697 FORWARD LENGTH=383                                                                                                                                                                                                                                                    | 854  | 383  | 0         | 44.8  | 41.0 | 43.1 |

|                          |                                                                                                                                                                                                                                                                                                                                                                                                                                                                                                                                                                                                                                                                                                                            |      |      |           |       |      |      |                                                  |       |                      |                                                                                                                                                                                                                                                                                                                                                 |      |     |           |       |      |      |
|--------------------------|----------------------------------------------------------------------------------------------------------------------------------------------------------------------------------------------------------------------------------------------------------------------------------------------------------------------------------------------------------------------------------------------------------------------------------------------------------------------------------------------------------------------------------------------------------------------------------------------------------------------------------------------------------------------------------------------------------------------------|------|------|-----------|-------|------|------|--------------------------------------------------|-------|----------------------|-------------------------------------------------------------------------------------------------------------------------------------------------------------------------------------------------------------------------------------------------------------------------------------------------------------------------------------------------|------|-----|-----------|-------|------|------|
| Rsa1.0_00163.1.g7283.t1  | refNP_173076.1   wall-associated receptor kinase-like 8 [Arabidopsis thaliana]<br>gi 334182612 refNP_001185009.1   wall-associated receptor kinase-like 8 [Arabidopsis thaliana]<br>gi 75265500 sp Q9SA25.1 WAKLG_ARAT H RecName: Full=Wall-associated receptor kinase-like 8; Flags: Precursor<br>gi 4966347 gb AAD34678.1 AC006341.6 Similar to gb AJ012423   wall-associated kinase 2 from Arabidopsis thaliana [Arabidopsis thaliana]<br>gi 110739498 dbj BAF01658.1   putative wall-associated kinase [Arabidopsis thaliana] gi 332191306 gb AEE29427.1   wall-associated receptor kinase-like 8 [Arabidopsis thaliana]<br>gi 332191307 gb AEE29428.1   wall-associated receptor kinase-like 8 [Arabidopsis thaliana] | 720  | 720  | 0         | 100.0 | 80.0 | 87.9 | wall-associated receptor kinase-like 8           | gbpln | Arabidopsis thaliana | AT1G16260.2   Symbols:   Wall-associated kinase family protein   chr1:5559708-5562018 REVERSE LENGTH=720                                                                                                                                                                                                                                        | 720  | 720 | 0         | 100.0 | 80.0 | 87.9 |
| Rsa1.0_00163.1.g7284.t18 | refXP_002892905.1   ATCHX1 [Arabidopsis lyrata subsp. lyrata]<br>gi 297338747 gb EFH69164.1   ATCHX1 [Arabidopsis lyrata subsp. lyrata]                                                                                                                                                                                                                                                                                                                                                                                                                                                                                                                                                                                    | 1484 | 785  | 0         | 52.9  | 44.5 | 48.1 | ATCHX1                                           | gbpln | Arabidopsis lyrata   | AT1G16380.1   Symbols: ATCHX1, CHX1   Cation/hydrogen exchanger family protein   chr1:5598453-5601367 REVERSE LENGTH=785                                                                                                                                                                                                                        | 1484 | 785 | 0         | 52.9  | 44.1 | 47.6 |
| Rsa1.0_00163.1.g7285.t1  | refXP_002890162.1   hypothetical protein ARALYDRAFT_471835 [Arabidopsis lyrata subsp. lyrata]<br>gi 297336004 gb EFH66421.1   hypothetical protein ARALYDRAFT_471835 [Arabidopsis lyrata subsp. lyrata]                                                                                                                                                                                                                                                                                                                                                                                                                                                                                                                    | 509  | 518  | 0         | 101.8 | 88.0 | 93.1 | hypothetical protein ARALYDRAFT_471835           | gbpln | Arabidopsis lyrata   | AT1G16390.1   Symbols: ATOCT3, 3-Oct   organic cation/carnitine transporter 3   chr1:5602921-5604477 FORWARD LENGTH=518                                                                                                                                                                                                                         | 509  | 518 | 0         | 101.8 | 87.2 | 92.9 |
| Rsa1.0_00163.1.g7286.t1  | gb EOA37332.1   hypothetical protein CARUB_v10011040mg [Capsella rubella]                                                                                                                                                                                                                                                                                                                                                                                                                                                                                                                                                                                                                                                  | 353  | 371  | 1.00E-125 | 105.1 | 66.0 | 79.6 | hypothetical protein CARUB_v10011040mg           | gbpln | Capsella rubella     | AT1G16420.1   Symbols: ATMCS, MC8   metacaspase 8   chr1:5612304-5613829 REVERSE LENGTH=381                                                                                                                                                                                                                                                     | 353  | 381 | 1.00E-122 | 107.9 | 64.0 | 79.0 |
| Rsa1.0_00163.1.g7287.t1  | refXP_002892909.1   hypothetical protein ARALYDRAFT_889039 [Arabidopsis lyrata subsp. lyrata]<br>gi 297338751 gb EFH69168.1   hypothetical protein ARALYDRAFT_889039 [Arabidopsis lyrata subsp. lyrata]                                                                                                                                                                                                                                                                                                                                                                                                                                                                                                                    | 1141 | 1038 | 0         | 91.0  | 77.5 | 83.1 | hypothetical protein ARALYDRAFT_889039           | gbpln | Arabidopsis lyrata   | AT1G16480.1   Symbols:   Tetratricopeptide repeat (TPR)-like superfamily protein   chr1:5625843-5628656 REVERSE LENGTH=937                                                                                                                                                                                                                      | 1141 | 937 | 0         | 82.1  | 72.3 | 76.6 |
| Rsa1.0_00164.1.g7288.t1  | gb EOA19416.1   hypothetical protein CARUB_v10001181mg [Capsella rubella]                                                                                                                                                                                                                                                                                                                                                                                                                                                                                                                                                                                                                                                  | 284  | 379  | 4.00E-43  | 133.5 | 29.2 | 32.0 | hypothetical protein CARUB_v10001181mg           | gbpln | Capsella rubella     | AT5G01700.2   Symbols:   Protein phosphatase 2C family protein   chr5:260848-262492 REVERSE LENGTH=382                                                                                                                                                                                                                                          | 284  | 382 | 2.00E-44  | 134.5 | 28.5 | 32.0 |
| Rsa1.0_00164.1.g7289.t2  | # # # # # # # # - ---- # # # # # #                                                                                                                                                                                                                                                                                                                                                                                                                                                                                                                                                                                                                                                                                         |      |      |           |       |      |      |                                                  |       |                      |                                                                                                                                                                                                                                                                                                                                                 |      |     |           |       |      |      |
| Rsa1.0_00164.1.g7290.t1  | refNP_195794.1   Nuclear transport factor 2 (NTF2) family protein [Arabidopsis thaliana]<br>gi 7329647 emb CAB82744.1   putative protein [Arabidopsis thaliana]<br>gi 19715593 gb AAL91620.1   AT5g01740/T20L15.10 [Arabidopsis thaliana] gi 48310614 gb AAT41853.1   At5g01740 [Arabidopsis thaliana]<br>gi 332003002 gb AED90385.1   Nuclear transport factor 2 (NTF2) family protein [Arabidopsis thaliana]                                                                                                                                                                                                                                                                                                             | 154  | 162  | 6.00E-60  | 105.2 | 73.4 | 77.3 | Nuclear transport factor 2 (NTF2) family protein | gbpln | Arabidopsis thaliana | AT5G01740.1   Symbols:   Nuclear transport factor 2 (NTF2) family protein   chr5:280793-281281 FORWARD LENGTH=162                                                                                                                                                                                                                               | 154  | 162 | 2.00E-62  | 105.2 | 73.4 | 77.3 |
| Rsa1.0_00164.1.g7291.t1  | # # # # # # # # - ---- # # # # # #                                                                                                                                                                                                                                                                                                                                                                                                                                                                                                                                                                                                                                                                                         |      |      |           |       |      |      |                                                  |       |                      |                                                                                                                                                                                                                                                                                                                                                 |      |     |           |       |      |      |
| Rsa1.0_00164.1.g7292.t1  | gb ABD64939.1   hypothetical protein 24.t00017 [Brassica oleracea]                                                                                                                                                                                                                                                                                                                                                                                                                                                                                                                                                                                                                                                         | 200  | 442  | 2.00E-46  | 221.0 | 48.5 | 56.5 | hypothetical protein 24.t00017                   | gbpln | Brassica oleracea    | AT2G13770.1   Symbols:   CONTAINS InterPro DOMAIN/s: Putative harbinger transposase-derived nuclease (InterPro:IPR006912); Has 451 Blast hits to 352 proteins in 33 species: Archae - 0; Bacteria - 0; Metazoa - 28; Fungi - 8; Plants - 388; Viruses - 0; Other Eukaryotes - 27 (source: NCBI BLINK)   chr2:5736603-5737847 FORWARD LENGTH=343 | 200  | 343 | 4.00E-21  | 171.5 | 27.0 | 35.0 |

|                         |                                                                                                                                                                                                                                                                                                                                                                                                                                                                                                                                                                                                                                                                                                                    |     |      |           |       |      |                                        |       |                      |                                                                                                                                           |     |     |           |       |      |      |
|-------------------------|--------------------------------------------------------------------------------------------------------------------------------------------------------------------------------------------------------------------------------------------------------------------------------------------------------------------------------------------------------------------------------------------------------------------------------------------------------------------------------------------------------------------------------------------------------------------------------------------------------------------------------------------------------------------------------------------------------------------|-----|------|-----------|-------|------|----------------------------------------|-------|----------------------|-------------------------------------------------------------------------------------------------------------------------------------------|-----|-----|-----------|-------|------|------|
| Rsa1.0_00164.1.g7293.t1 | refNP_850751.1   LURP-one-related 15 protein [Arabidopsis thaliana] gi 75181359 sp Q9LZK1.1   LOR15_ARAT H RecName: Full=Protein LURP-one-related 15 gi 13926237 gb AAK49593.1   AF372877.1 AT5g01750/T20L15.20 [Arabidopsis thaliana] gi 7329648 emb CAB82745.1   putative protein [Arabidopsis thaliana] gi 22655412 gb AAM98298.1   At5g01750/T20L15.20 [Arabidopsis thaliana] gi 332003004 gb AED90387.1   LURP-one-related 15 protein [Arabidopsis thaliana]                                                                                                                                                                                                                                                  | 221 | 217  | 1.00E-107 | 98.2  | 90.5 | LURP-one-related 15 protein            | gbpln | Arabidopsis thaliana | AT5G01750.2   Symbols:   Protein of unknown function (DUF567)   chr5:290034-291109 FORWARD LENGTH=217                                     | 221 | 217 | 1.00E-110 | 98.2  | 83.7 | 90.5 |
| Rsa1.0_00164.1.g7294.t1 | refXP_002872993.1   cbl-interacting protein kinase 15 [Arabidopsis lyrata subsp. lyrata] gi 297318830 gb EFH49252.1   cbl-interacting protein kinase 15 [Arabidopsis lyrata subsp. lyrata]                                                                                                                                                                                                                                                                                                                                                                                                                                                                                                                         | 426 | 423  | 0         | 99.3  | 80.3 | cbl-interacting protein kinase 15      | gbpln | Arabidopsis lyrata   | AT5G01810.2   Symbols: CIPK15, ATPK10, PKS3   CBL-interacting protein kinase 15   chr5:310460-311725 FORWARD LENGTH=421                   | 426 | 421 | 0         | 98.8  | 80.5 | 89.9 |
| Rsa1.0_00164.1.g7295.t1 | refXP_002870896.1   hypothetical protein ARALYDRAFT_486886 [Arabidopsis lyrata subsp. lyrata] gi 297316733 gb EFH47155.1   hypothetical protein ARALYDRAFT_486886 [Arabidopsis lyrata subsp. lyrata]                                                                                                                                                                                                                                                                                                                                                                                                                                                                                                               | 435 | 443  | 0         | 101.8 | 80.9 | hypothetical protein ARALYDRAFT_486886 | gbpln | Arabidopsis lyrata   | AT5G01820.1   Symbols: ATSR1, SnRK3.15, CIPK14, ATCIPK14, SR1   serine/threonine protein kinase 1   chr5:313423-314751 REVERSE LENGTH=442 | 435 | 442 | 0         | 101.6 | 80.9 | 86.2 |
| Rsa1.0_00164.1.g7296.t1 | #                                                                                                                                                                                                                                                                                                                                                                                                                                                                                                                                                                                                                                                                                                                  | #   | #    | #         | #     | #    | -                                      | ----  | ----                 | #                                                                                                                                         | #   | #   | #         | #     | #    | #    |
| Rsa1.0_00164.1.g7297.t1 | refNP_195804.1   ovate family protein 1 [Arabidopsis thaliana] gi 7329657 emb CAB82754.1   putative protein [Arabidopsis thaliana] gi 332003016 gb AED90399.1   ovate family protein 1 [Arabidopsis thaliana] refXP_002872990.1   hypothetical protein ARALYDRAFT_324798 [Arabidopsis lyrata subsp. lyrata] gi 297318827 gb EFH49249.1   hypothetical protein ARALYDRAFT_324798 [Arabidopsis lyrata subsp. lyrata]                                                                                                                                                                                                                                                                                                 | 267 | 270  | 8.00E-72  | 101.1 | 63.3 | ovate family protein 1                 | gbpln | Arabidopsis thaliana | AT5G01840.1   Symbols: ATOFP1, OPF1   ovate family protein 1   chr5:324552-325364 FORWARD LENGTH=270                                      | 267 | 270 | 2.00E-74  | 101.1 | 63.3 | 72.3 |
| Rsa1.0_00164.1.g7298.t1 | refXP_002872989.1   zinc finger family protein [Arabidopsis lyrata subsp. lyrata] gi 297318828 gb EFH49248.1   zinc finger family protein [Arabidopsis lyrata subsp. lyrata]                                                                                                                                                                                                                                                                                                                                                                                                                                                                                                                                       | 341 | 337  | 1.00E-169 | 98.8  | 86.2 | hypothetical protein ARALYDRAFT_324798 | gbpln | Arabidopsis lyrata   | AT5G01850.1   Symbols:   Protein kinase superfamily protein   chr5:332829-334180 FORWARD LENGTH=333                                       | 341 | 333 | 1.00E-163 | 97.7  | 84.5 | 88.9 |
| Rsa1.0_00164.1.g7299.t1 | refXP_002872989.1   zinc finger family protein [Arabidopsis lyrata subsp. lyrata] gi 297318828 gb EFH49248.1   zinc finger family protein [Arabidopsis lyrata subsp. lyrata]                                                                                                                                                                                                                                                                                                                                                                                                                                                                                                                                       | 235 | 224  | 2.00E-79  | 95.3  | 74.9 | zinc finger family protein             | gbpln | Arabidopsis lyrata   | AT5G01860.1   Symbols:   C2H2 and C2HC zinc fingers superfamily protein   chr5:335630-336277 FORWARD LENGTH=215                           | 235 | 215 | 1.00E-66  | 91.5  | 68.1 | 74.5 |
| Rsa1.0_00164.1.g7300.t1 | #                                                                                                                                                                                                                                                                                                                                                                                                                                                                                                                                                                                                                                                                                                                  | #   | #    | #         | #     | #    | -                                      | ----  | ----                 | #                                                                                                                                         | #   | #   | #         | #     | #    | #    |
| Rsa1.0_00164.1.g7301.t1 | refNP_195808.1   RING-H2 finger protein ATL74 [Arabidopsis thaliana] gi 68565316 sp Q9LZV8.1   ATL74_ARAT H RecName: Full=RING-H2 finger protein ATL74 gi 7329661 emb CAB82758.1   putative protein [Arabidopsis thaliana] gi 38454090 gb AAR20739.1   At5g01880 [Arabidopsis thaliana] gi 38604016 gb AR24751.1   At5g01880 [Arabidopsis thaliana] gi 110738314 db BAF01085.1   hypothetical protein [Arabidopsis thaliana] gi 332003021 gb AED90404.1   RING-H2 finger protein ATL74 [Arabidopsis thaliana] refXP_002870895.1   hypothetical protein ARALYDRAFT_486880 [Arabidopsis lyrata subsp. lyrata] gi 297316732 gb EFH47154.1   hypothetical protein ARALYDRAFT_486880 [Arabidopsis lyrata subsp. lyrata] | 153 | 159  | 1.00E-59  | 103.9 | 85.6 | RING-H2 finger protein ATL74           | gbpln | Arabidopsis thaliana | AT5G01880.1   Symbols:   RING/U-box superfamily protein   chr5:339017-339496 FORWARD LENGTH=159                                           | 153 | 159 | 5.00E-62  | 103.9 | 85.6 | 91.5 |
| Rsa1.0_00164.1.g7302.t1 | dbj BAB09923.1   copia-like retrotransposable element [Arabidopsis thaliana]                                                                                                                                                                                                                                                                                                                                                                                                                                                                                                                                                                                                                                       | 912 | 1342 | 0         | 147.1 | 37.1 | copia-like retrotransposable element   | gbpln | Arabidopsis thaliana | AT5G01890.1   Symbols:   Leucine-rich receptor-like protein kinase family protein   chr5:341661-344650 REVERSE LENGTH=967                 | 912 | 967 | 0         | 101.5 | 74.9 | 83.7 |
| Rsa1.0_00165.1.g7304.t1 | refXP_002889555.1   glycosyl hydrolase family 20 protein [Arabidopsis lyrata subsp. lyrata] gi 297335397 gb EFH65814.1   glycosyl hydrolase family 20 protein [Arabidopsis lyrata subsp. lyrata]                                                                                                                                                                                                                                                                                                                                                                                                                                                                                                                   | 578 | 578  | 0         | 100.0 | 85.1 | glycosyl hydrolase family 20 protein   | gbpln | Arabidopsis lyrata   | AT2G30290.2   Symbols: VSR2, AtVSR2   VACUOLAR SORTING RECEPTOR 2   chr2:12912569-12915781 REVERSE LENGTH=641                             | 578 | 580 | 0         | 100.3 | 84.4 | 90.5 |
|                         |                                                                                                                                                                                                                                                                                                                                                                                                                                                                                                                                                                                                                                                                                                                    |     |      |           |       |      |                                        |       |                      | AT1G05590.1   Symbols: HEXO2, ATHEX3   beta-hexosaminidase 2   chr1:1669871-1671686 FORWARD LENGTH=580                                    |     |     |           |       |      |      |

|                         |                                                                                                                                                                                                                                                                                                                                                                                                                                                                                                                                                                                    |      |      |           |       |      |      |                                                      |       |                      |                                                                                                                                              |      |      |           |       |      |      |
|-------------------------|------------------------------------------------------------------------------------------------------------------------------------------------------------------------------------------------------------------------------------------------------------------------------------------------------------------------------------------------------------------------------------------------------------------------------------------------------------------------------------------------------------------------------------------------------------------------------------|------|------|-----------|-------|------|------|------------------------------------------------------|-------|----------------------|----------------------------------------------------------------------------------------------------------------------------------------------|------|------|-----------|-------|------|------|
| Rsa1.0_00165.1.g7305.t1 | ref[XP_002878775.1] predicted protein [Arabidopsis lyrata subsp. lyrata] gi 297324614 gb EFH55034.1  predicted protein [Arabidopsis lyrata subsp. lyrata]                                                                                                                                                                                                                                                                                                                                                                                                                          | 290  | 208  | 4.00E-29  | 71.7  | 30.0 | 40.7 | predicted protein                                    | gbpln | Arabidopsis lyrata   | AT3G24850.1   Symbols:   Domain of unknown function (DUF313)   chr3:90711105-9072184 FORWARD LENGTH=359                                      | 290  | 359  | 8.00E-29  | 123.8 | 25.2 | 36.2 |
| Rsa1.0_00165.1.g7306.t1 | ref[NP_563745.1] putative uridine nucleosidase 2 [Arabidopsis thaliana] gi 75154756 sp Q8LAC4.1 URH2_ARATH RecName: Full=Probable uridine nucleosidase 2; AltName: Full=Uridine ribohydrolase 2 gi 21593497 gb AAM65464.1  unknown [Arabidopsis thaliana] gi 25083300 gb AAN72060.1  expressed protein [Arabidopsis thaliana] gi 30984540 gb AAP42733.1  At1g05620 [Arabidopsis thaliana] gi 332189745 gb AEE27866.1  putative uridine nucleosidase 2 [Arabidopsis thaliana]                                                                                                       | 323  | 322  | 1.00E-172 | 99.7  | 92.3 | 95.7 | putative uridine nucleosidase 2                      | gbpln | Arabidopsis thaliana | AT1G05620.1   Symbols: URH2   uridine-ribohydrolase 2   chr1:1679286-1681527 FORWARD LENGTH=322                                              | 323  | 322  | 1.00E-174 | 99.7  | 92.3 | 95.7 |
| Rsa1.0_00165.1.g7307.t1 | ref[XP_002892306.1] hypothetical protein ARALYDRAFT_887757 [Arabidopsis lyrata subsp. lyrata] gi 297338148 gb EFH68565.1  hypothetical protein ARALYDRAFT_887757 [Arabidopsis lyrata subsp. lyrata]                                                                                                                                                                                                                                                                                                                                                                                | 394  | 394  | 0         | 100.0 | 84.8 | 92.6 | hypothetical protein ARALYDRAFT_887757               | gbpln | Arabidopsis lyrata   | AT1G05650.1   Symbols:   Pectin lyase-like superfamily protein   chr1:1690264-1692126 REVERSE LENGTH=394                                     | 394  | 394  | 0         | 100.0 | 84.8 | 92.6 |
| Rsa1.0_00165.1.g7308.t8 | ref[NP_172054.3] Type I inositol-1,4,5-trisphosphate 5-phosphatase 13 [Arabidopsis thaliana] gi 332189747 gb AEE27868.1  Type I inositol-1,4,5-trisphosphate 5-phosphatase 13 [Arabidopsis thaliana] gb EOA37125.1  hypothetical protein CARUB_v10010380mg, partial [Capsella rubella]                                                                                                                                                                                                                                                                                             | 1386 | 1170 | 0         | 84.4  | 69.5 | 76.0 | Type I inositol-1,4,5-trisphosphate 5-phosphatase 13 | gbpln | Arabidopsis thaliana | AT1G05630.1   Symbols: AT5PTASE13, 5PTASE13   Endonuclease/exonuclease/phosphatase family protein   chr1:1682483-1687153 FORWARD LENGTH=1170 | 1386 | 1170 | 0         | 84.4  | 69.5 | 76.0 |
| Rsa1.0_00165.1.g7309.t2 | ref[XP_00289561.1] hypothetical protein ARALYDRAFT_470580 [Arabidopsis lyrata subsp. lyrata] gi 297335403 gb EFH65820.1  hypothetical protein ARALYDRAFT_470580 [Arabidopsis lyrata subsp. lyrata]                                                                                                                                                                                                                                                                                                                                                                                 | 182  | 188  | 2.00E-74  | 103.3 | 76.9 | 80.2 | hypothetical protein CARUB_v10010380mg, partial      | gbpln | Capsella rubella     | AT1G05720.1   Symbols:   selenoprotein family protein   chr1:1717677-1718849 REVERSE LENGTH=163                                              | 182  | 163  | 2.00E-76  | 89.6  | 76.4 | 80.8 |
| Rsa1.0_00165.1.g7310.t1 | ref[XP_00289561.1] hypothetical protein ARALYDRAFT_470580 [Arabidopsis lyrata subsp. lyrata]                                                                                                                                                                                                                                                                                                                                                                                                                                                                                       | 149  | 149  | 3.00E-75  | 100.0 | 90.6 | 96.6 | hypothetical protein ARALYDRAFT_470580               | gbpln | Arabidopsis lyrata   | AT1G05730.1   Symbols:   Eukaryotic protein of unknown function (DUF842)   chr1:1719107-1720159 FORWARD LENGTH=149                           | 149  | 149  | 3.00E-76  | 100.0 | 88.6 | 96.0 |
| Rsa1.0_00165.1.g7311.t1 | gb EOA30157.1  hypothetical protein CARUB_v10013272mg [Capsella rubella]                                                                                                                                                                                                                                                                                                                                                                                                                                                                                                           | 569  | 600  | 4.00E-56  | 105.4 | 23.2 | 28.3 | hypothetical protein CARUB_v10013272mg               | gbpln | Capsella rubella     | AT2G01280.1   Symbols: MEE65   Cyclin/Brf1-like TBP-binding protein   chr2:145676-148784 FORWARD LENGTH=548                                  | 569  | 548  | 7.00E-58  | 96.3  | 20.7 | 25.3 |
| Rsa1.0_00165.1.g7312.t1 | gb EOA38495.1  hypothetical protein CARUB_v10010263mg [Capsella rubella]                                                                                                                                                                                                                                                                                                                                                                                                                                                                                                           | 217  | 218  | 1.00E-114 | 100.5 | 93.5 | 95.9 | hypothetical protein CARUB_v10010263mg               | gbpln | Capsella rubella     | AT1G05810.1   Symbols: ARA, ARA-1, ATRAB11D, ATRABASE, RABASE   RAB GTPase homolog A5E   chr1:1748314-1749350 FORWARD LENGTH=261             | 217  | 261  | 1.00E-115 | 120.3 | 92.6 | 97.2 |
| Rsa1.0_00165.1.g7313.t1 | ref[NP_172074.6] histone-lysine N-methyltransferase ATX2 [Arabidopsis thaliana] gi 240254020 ref[NP_001077464.4] histone-lysine N-methyltransferase ATX2 [Arabidopsis thaliana] gi 257096236 sp POCB22.1 ATX2_ARATH RecName: Full=Histone-lysine N-methyltransferase ATX2; AltName: Full=Protein SET DOMAIN GROUP 30; AltName: Full=Trithorax-homolog protein 2; Short=TRX-homolog protein 2 gi 332189779 gb AEE27900.1  histone-lysine N-methyltransferase ATX2 [Arabidopsis thaliana] gi 332189780 gb AEE27901.1  histone-lysine N-methyltransferase ATX2 [Arabidopsis thaliana] | 1028 | 1083 | 0         | 105.4 | 83.9 | 90.4 | histone-lysine N-methyltransferase ATX2              | gbpln | Arabidopsis thaliana | AT1G05830.2   Symbols: ATX2   trithorax-like protein 2   chr1:1754452-1761225 FORWARD LENGTH=1083                                            | 1028 | 1083 | 0         | 105.4 | 83.9 | 90.4 |
| Rsa1.0_00165.1.g7314.t1 | ref[XP_002892309.1] aspartyl protease family protein [Arabidopsis lyrata subsp. lyrata] gi 297338151 gb EFH68568.1  aspartyl protease family protein [Arabidopsis lyrata subsp. lyrata]                                                                                                                                                                                                                                                                                                                                                                                            | 479  | 484  | 0         | 101.0 | 92.5 | 95.8 | aspartyl protease family protein                     | gbpln | Arabidopsis lyrata   | AT1G05840.1   Symbols:   Eukaryotic aspartyl protease family protein   chr1:1762843-1766150 REVERSE LENGTH=485                               | 479  | 485  | 0         | 101.3 | 90.2 | 92.9 |
| Rsa1.0_00165.1.g7315.t1 | ref[XP_002892311.1] hypothetical protein ARALYDRAFT_470598 [Arabidopsis lyrata subsp. lyrata] gi 297338153 gb EFH68570.1  hypothetical protein ARALYDRAFT_470598 [Arabidopsis lyrata subsp. lyrata]                                                                                                                                                                                                                                                                                                                                                                                | 160  | 187  | 8.00E-62  | 116.9 | 84.4 | 88.8 | hypothetical protein ARALYDRAFT_470598               | gbpln | Arabidopsis lyrata   | AT1G05870.4   Symbols:   Protein of unknown function (DUF1685)   chr1:1772454-1773228 REVERSE LENGTH=189                                     | 160  | 189  | 8.00E-63  | 118.1 | 81.9 | 88.8 |

|                         |                                                                                                                                                                                                                                                                                                        |      |      |           |        |      |      |                                                           |       |                      |                                                                                                                                                                                                                                                            |      |      |           |        |      |      |
|-------------------------|--------------------------------------------------------------------------------------------------------------------------------------------------------------------------------------------------------------------------------------------------------------------------------------------------------|------|------|-----------|--------|------|------|-----------------------------------------------------------|-------|----------------------|------------------------------------------------------------------------------------------------------------------------------------------------------------------------------------------------------------------------------------------------------------|------|------|-----------|--------|------|------|
| Rsa1.0_00165.1.g7316.t2 | refNP_973767.1  endonuclease III [Arabidopsis thaliana] gi 222423369 dbj BAH19657.1  AT1G05900 [Arabidopsis thaliana] gi 332189795 gb AE27916.1  endonuclease III [Arabidopsis thaliana]                                                                                                               | 384  | 386  | 1.00E-157 | 100.5  | 75.0 | 81.5 | endonuclease III                                          | gbpln | Arabidopsis thaliana | AT1G05900.2   Symbols: ATNTH2, NTH2   endonuclease III 2   chr1:1786896-1789502 FORWARD LENGTH=386                                                                                                                                                         | 384  | 386  | 1.00E-160 | 100.5  | 75.0 | 81.5 |
| Rsa1.0_00165.1.g7317.t1 | refXP_00289576.1  hypothetical protein ARALYDRAFT_470606 [Arabidopsis lyrata subsp. lyrata] gi 297335418 gb EFH65835.1  hypothetical protein ARALYDRAFT_470606 [Arabidopsis lyrata subsp. lyrata]                                                                                                      | 1214 | 1208 | 0         | 99.5   | 88.6 | 92.8 | hypothetical protein ARALYDRAFT_470606                    | gbpln | Arabidopsis lyrata   | AT1G05910.1   Symbols:   cell division cycle protein 48-related / CDC48-related   chr1:1790796-1796503 FORWARD LENGTH=1210                                                                                                                                 | 1214 | 1210 | 0         | 99.7   | 88.1 | 92.0 |
| Rsa1.0_00165.1.g7318.t1 | refXP_002892313.1  predicted protein [Arabidopsis lyrata subsp. lyrata] gi 297338155 gb EFH68572.1  predicted protein [Arabidopsis lyrata subsp. lyrata]                                                                                                                                               | 914  | 1634 | 0         | 178.8  | 46.8 | 53.5 | predicted protein                                         | gbpln | Arabidopsis lyrata   | AT1G05950.1   Symbols:   unknown protein; Has 50 Blast hits to 45 proteins in 14 species: Archae - 5; Bacteria - 0; Metazoa - 4; Fungi - 0; Plants - 34; Viruses - 0; Other Eukaryotes - 7 (source: NCBI BLINK).   chr1:1804573-1807471 REVERSE LENGTH=627 | 914  | 627  | 0         | 68.6   | 45.7 | 52.7 |
| Rsa1.0_00165.1.g7319.t3 | refXP_002892313.1  predicted protein [Arabidopsis lyrata subsp. lyrata] gi 297338155 gb EFH68572.1  predicted protein [Arabidopsis lyrata subsp. lyrata]                                                                                                                                               | 938  | 1634 | 9.00E-67  | 174.2  | 15.2 | 17.6 | predicted protein                                         | gbpln | Arabidopsis lyrata   | AT1G05950.1   Symbols:   unknown protein; Has 50 Blast hits to 45 proteins in 14 species: Archae - 5; Bacteria - 0; Metazoa - 4; Fungi - 0; Plants - 34; Viruses - 0; Other Eukaryotes - 7 (source: NCBI BLINK).   chr1:1804573-1807471 REVERSE LENGTH=627 | 938  | 627  | 4.00E-64  | 66.8   | 15.1 | 17.6 |
| Rsa1.0_00165.1.g7320.t1 | refNP_683294.2  phosphoglycerate mutase-like protein [Arabidopsis thaliana] gi 332190397 gb AEE28518.1  phosphoglycerate mutase-like protein [Arabidopsis thaliana]                                                                                                                                    | 206  | 231  | 1.00E-105 | 112.1  | 93.2 | 95.6 | phosphoglycerate mutase-like protein                      | gbpln | Arabidopsis thaliana | AT1G09935.1   Symbols:   Phosphoglycerate mutase family protein   chr1:3234060-3235530 REVERSE LENGTH=231                                                                                                                                                  | 206  | 231  | 1.00E-107 | 112.1  | 93.2 | 95.6 |
| Rsa1.0_00165.1.g7321.t1 | gb EOA36079.1  hypothetical protein CARUB_v10010176mg [Capsella rubella]                                                                                                                                                                                                                               | 227  | 234  | 1.00E-102 | 103.1  | 80.6 | 86.3 | hypothetical protein CARUB_v10010176mg                    | gbpln | Capsella rubella     | AT1G09950.1   Symbols: RAS1   RESPONSE TO ABA AND SALT 1   chr1:3240849-3241541 REVERSE LENGTH=230                                                                                                                                                         | 227  | 230  | 1.00E-101 | 101.3  | 82.8 | 89.4 |
| Rsa1.0_00165.1.g7322.t2 | gb AAG09191.1 AF175321.1 sucrose transporter SUT4 [Arabidopsis thaliana] gi 9957055 gb AAG09192.1 AF175322.1 sucrose transporter SUT4 [Arabidopsis thaliana]                                                                                                                                           | 523  | 510  | 0         | 97.5   | 89.5 | 93.1 | sucrose transporter SUT4                                  | gbpln | Arabidopsis thaliana | AT1G09960.1   Symbols: SUT4, ATSUT4, SUC4, ATSUC4   sucrose transporter 4   chr1:3244258-3246718 FORWARD LENGTH=510                                                                                                                                        | 523  | 510  | 0         | 97.5   | 89.3 | 92.9 |
| Rsa1.0_00165.1.g7323.t1 | refXP_002892542.1  hypothetical protein ARALYDRAFT_888257 [Arabidopsis lyrata subsp. lyrata] gi 297338384 gb EFH68801.1  hypothetical protein ARALYDRAFT_888257 [Arabidopsis lyrata subsp. lyrata]                                                                                                     | 797  | 802  | 0         | 100.6  | 88.6 | 93.6 | hypothetical protein ARALYDRAFT_888257                    | gbpln | Arabidopsis lyrata   | AT1G09980.1   Symbols:   Putative serine esterase family protein   chr1:3265541-3268866 REVERSE LENGTH=802                                                                                                                                                 | 797  | 802  | 0         | 100.6  | 86.6 | 93.0 |
| Rsa1.0_00165.1.g7324.t2 | refXP_002889784.1  hypothetical protein ARALYDRAFT_888258 [Arabidopsis lyrata subsp. lyrata] gi 297335626 gb EFH66043.1  hypothetical protein ARALYDRAFT_888258 [Arabidopsis lyrata subsp. lyrata]                                                                                                     | 479  | 491  | 0         | 102.5  | 81.4 | 88.7 | hypothetical protein ARALYDRAFT_888258                    | gbpln | Arabidopsis lyrata   | AT1G10010.1   Symbols: AAP8, ATAAP8   amino acid permease 8   chr1:3265976-3268726 FORWARD LENGTH=475                                                                                                                                                      | 479  | 475  | 0         | 99.2   | 74.9 | 85.4 |
| Rsa1.0_00165.1.g7325.t1 | refXP_004144665.1  PREDICTED: uncharacterized protein LOC101203090 isoform 1 [Cucumis sativus] gi 449453844 ref XP_004144666.1  PREDICTED: uncharacterized protein LOC101203090 isoform 2 [Cucumis sativus] gi 449522819 ref XP_004168423.1  PREDICTED: uncharacterized LOC101203090 [Cucumis sativus] | 65   | 776  | 8.00E-12  | 1193.8 | 50.8 | 56.9 | PREDICTED: uncharacterized protein LOC101203090 isoform 1 | gbpln | Cucumis sativus      | AT3G57880.1   Symbols:   Calcium-dependent lipid-binding (CaLB domain) plant phosphoribosyltransferase family protein   chr3:21431198-21433519 REVERSE LENGTH=773                                                                                          | 65   | 773  | 5.00E-14  | 1189.2 | 47.7 | 55.4 |
| Rsa1.0_00165.1.g7326.t1 | refXP_002889784.1  hypothetical protein ARALYDRAFT_888258 [Arabidopsis lyrata subsp. lyrata] gi 297335626 gb EFH66043.1  hypothetical protein ARALYDRAFT_888258 [Arabidopsis lyrata subsp. lyrata]                                                                                                     | 467  | 491  | 0         | 105.1  | 79.9 | 89.1 | hypothetical protein ARALYDRAFT_888258                    | gbpln | Arabidopsis lyrata   | AT1G10010.1   Symbols: AAP8, ATAAP8   amino acid permease 8   chr1:3265976-3268726 FORWARD LENGTH=475                                                                                                                                                      | 467  | 475  | 0         | 101.7  | 78.2 | 87.8 |
| Rsa1.0_00166.1.g7327.t1 | gb ACR48185.1  MYB domain protein 34-2 [Brassica rapa subsp. pekinensis]                                                                                                                                                                                                                               | 263  | 316  | 1.00E-110 | 120.2  | 77.6 | 86.3 | MYB domain protein 34-2                                   | gbpln | Brassica rapa        | AT5G60890.1   Symbols: ATMYB34, ATR1, MYB34   myb domain protein 34   chr5:24495029-24496220 FORWARD LENGTH=295                                                                                                                                            | 263  | 295  | 3.00E-94  | 112.2  | 71.9 | 79.5 |
| Rsa1.0_00166.1.g7328.t1 | dbj BAJ33723.1  unnamed protein product [Thellungiella halophila]                                                                                                                                                                                                                                      | 430  | 417  | 0         | 97.0   | 88.1 | 93.5 | unnamed protein product                                   | ----  | ----                 | AT5G65990.1   Symbols:   Transmembrane amino acid transporter family protein   chr5:26394955-26396321 FORWARD LENGTH=427                                                                                                                                   | 430  | 427  | 0         | 99.3   | 87.2 | 93.7 |

|                         |                                                                                                                                                                                                                                                                                                                                                                                                      |      |      |           |       |      |      |                                        |       |                      |                                                                                                                                                                                                                                                                                                                                                          |      |      |           |       |      |      |
|-------------------------|------------------------------------------------------------------------------------------------------------------------------------------------------------------------------------------------------------------------------------------------------------------------------------------------------------------------------------------------------------------------------------------------------|------|------|-----------|-------|------|------|----------------------------------------|-------|----------------------|----------------------------------------------------------------------------------------------------------------------------------------------------------------------------------------------------------------------------------------------------------------------------------------------------------------------------------------------------------|------|------|-----------|-------|------|------|
| Rsa1.0_00166.1.g7329.t1 | refXP_002866421.1   complex 1 family protein [Arabidopsis lyrata subsp. lyrata] gi 297312256 gb EFH42680.1   complex 1 family protein [Arabidopsis lyrata subsp. lyrata]                                                                                                                                                                                                                             | 87   | 87   | 3.00E-35  | 100.0 | 82.8 | 90.8 | complex 1 family protein               | gbpln | Arabidopsis lyrata   | AT5G61220.1   Symbols:   LYR family of Fe/S cluster biogenesis protein   chr5:24626057-24626320 REVERSE LENGTH=87                                                                                                                                                                                                                                        | 87   | 87   | 4.00E-37  | 100.0 | 80.5 | 89.7 |
| Rsa1.0_00166.1.g7330.t1 | refXP_002864727.1   hypothetical protein ARALYDRAFT_496281 [Arabidopsis lyrata subsp. lyrata] gi 297310582 gb EFH40986.1   hypothetical protein ARALYDRAFT_496281 [Arabidopsis lyrata subsp. lyrata]                                                                                                                                                                                                 | 412  | 499  | 1.00E-122 | 121.1 | 70.1 | 80.8 | hypothetical protein ARALYDRAFT_496281 | gbpln | Arabidopsis lyrata   | AT5G61260.1   Symbols:   Plant calmodulin-binding protein-related   chr5:24637109-24638599 FORWARD LENGTH=496                                                                                                                                                                                                                                            | 412  | 496  | 1.00E-117 | 120.4 | 69.2 | 81.8 |
| Rsa1.0_00166.1.g7331.t1 | #                                                                                                                                                                                                                                                                                                                                                                                                    | #    | #    | #         | #     | #    | #    | -                                      | ----  | ----                 | #                                                                                                                                                                                                                                                                                                                                                        | #    | #    | #         | #     | #    | #    |
| Rsa1.0_00166.1.g7332.t1 | #                                                                                                                                                                                                                                                                                                                                                                                                    | #    | #    | #         | #     | #    | #    | -                                      | ----  | ----                 | #                                                                                                                                                                                                                                                                                                                                                        | #    | #    | #         | #     | #    | #    |
| Rsa1.0_00166.1.g7333.t1 | ref NP_200971.1   uncharacterized protein [Arabidopsis thaliana] gi 91807084 g ABE66269.1   hypothetical protein At5g61630 [Arabidopsis thaliana] gi 332010116 g AED97499.1   uncharacterized protein AT5G61630 [Arabidopsis thaliana]                                                                                                                                                               | 150  | 147  | 6.00E-67  | 98.0  | 88.0 | 91.3 | uncharacterized protein                | gbpln | Arabidopsis thaliana | AT5G61630.1   Symbols:   unknown protein; BEST Arabidopsis thaliana protein match is: unknown protein (TAIR:AT5G07490.1); Has 1807 Blast hits to 1807 proteins in 277 species: Archae - 0; Bacteria - 0; Metazoa - 736; Fungi - 347; Plants - 385; Viruses - 0; Other Eukaryotes - 339 (source: NCBI BLink).   chr5:24773803-24774502 REVERSE LENGTH=147 | 150  | 147  | 2.00E-69  | 98.0  | 88.0 | 91.3 |
| Rsa1.0_00166.1.g7334.t1 | refXP_002864744.1   myb family transcription factor [Arabidopsis lyrata subsp. lyrata] gi 297310579 gb EFH41003.1   myb family transcription factor [Arabidopsis lyrata subsp. lyrata]                                                                                                                                                                                                               | 309  | 321  | 1.00E-137 | 103.9 | 79.0 | 88.3 | myb family transcription factor        | gbpln | Arabidopsis lyrata   | AT5G61620.1   Symbols:   myb-like transcription factor family protein   chr5:24772383-24773507 FORWARD LENGTH=317                                                                                                                                                                                                                                        | 309  | 317  | 1.00E-131 | 102.6 | 75.4 | 86.4 |
| Rsa1.0_00166.1.g7335.t1 | gb ADM89080.1   ethylene response factor 56 [Brassica napus]                                                                                                                                                                                                                                                                                                                                         | 243  | 219  | 4.00E-90  | 90.1  | 74.1 | 80.2 | ethylene response factor 56            | gbpln | Brassica napus       | AT5G61600.1   Symbols: ERF104   ethylene response factor 104   chr5:24766643-24767368 REVERSE LENGTH=241                                                                                                                                                                                                                                                 | 243  | 241  | 1.00E-78  | 99.2  | 72.0 | 79.4 |
| Rsa1.0_00166.1.g7336.t1 | ref NP_200964.2   U-box domain-containing protein 51 [Arabidopsis thaliana] gi 172045896 sp Q9FKG5.2 PUB51_ARA TH RecName: Full=U-box domain-containing protein 51; AltName: Full=Plant U-box protein 51; Includes: RecName: Full=E3 ubiquitin ligase; Includes: RecName: Full=Serine/threonine-protein kinase gi 332010105 g AED97488.1   U-box domain-containing protein 51 [Arabidopsis thaliana] | 761  | 796  | 0         | 104.6 | 85.9 | 93.3 | U-box domain-containing protein 51     | gbpln | Arabidopsis thaliana | AT5G61560.1   Symbols:   U-box domain-containing protein kinase family protein   chr5:24753476-24756506 FORWARD LENGTH=796                                                                                                                                                                                                                               | 761  | 796  | 0         | 104.6 | 85.9 | 93.3 |
| Rsa1.0_00166.1.g7337.t1 | gb EOA14619.1   hypothetical protein CARUB_v10027877mg [Capsella rubella]                                                                                                                                                                                                                                                                                                                            | 813  | 849  | 0         | 104.4 | 83.9 | 91.4 | hypothetical protein CARUB_v10027877mg | gbpln | Capsella rubella     | AT5G61550.2   Symbols:   U-box domain-containing protein kinase family protein   chr5:24748325-24751805 FORWARD LENGTH=860                                                                                                                                                                                                                               | 813  | 860  | 0         | 105.8 | 80.3 | 89.4 |
| Rsa1.0_00166.1.g7338.t1 | refXP_002866440.1   hypothetical protein ARALYDRAFT_496310 [Arabidopsis lyrata subsp. lyrata] gi 297312275 gb EFH42699.1   hypothetical protein ARALYDRAFT_496310 [Arabidopsis lyrata subsp. lyrata]                                                                                                                                                                                                 | 80   | 403  | 3.00E-14  | 503.8 | 52.5 | 62.5 | hypothetical protein ARALYDRAFT_496310 | gbpln | Arabidopsis lyrata   | AT5G61510.1   Symbols:   GroES-like zinc-binding alcohol dehydrogenase family protein   chr5:24737084-24738975 REVERSE LENGTH=406                                                                                                                                                                                                                        | 80   | 406  | 7.00E-17  | 507.5 | 52.5 | 62.5 |
| Rsa1.0_00166.1.g7339.t1 | gb EOA14619.1   hypothetical protein CARUB_v10027877mg [Capsella rubella]                                                                                                                                                                                                                                                                                                                            | 858  | 849  | 0         | 99.0  | 88.8 | 93.9 | hypothetical protein CARUB_v10027877mg | gbpln | Capsella rubella     | AT5G61550.1   Symbols:   U-box domain-containing protein kinase family protein   chr5:24748325-24751558 FORWARD LENGTH=845                                                                                                                                                                                                                               | 858  | 845  | 0         | 98.5  | 84.3 | 92.2 |
| Rsa1.0_00166.1.g7340.t1 | #                                                                                                                                                                                                                                                                                                                                                                                                    | #    | #    | #         | #     | #    | #    | -                                      | ----  | ----                 | #                                                                                                                                                                                                                                                                                                                                                        | #    | #    | #         | #     | #    | #    |
| Rsa1.0_00166.1.g7341.t1 | gb EOA12449.1   hypothetical protein CARUB_v10028614mg [Capsella rubella]                                                                                                                                                                                                                                                                                                                            | 269  | 291  | 3.00E-39  | 108.2 | 40.9 | 59.1 | hypothetical protein CARUB_v10028614mg | gbpln | Capsella rubella     | AT5G61470.1   Symbols:   C2H2-like zinc finger protein   chr5:24722870-24723784 FORWARD LENGTH=304                                                                                                                                                                                                                                                       | 269  | 304  | 4.00E-39  | 113.0 | 42.8 | 61.7 |
| Rsa1.0_00166.1.g7342.t1 | gb EOA14349.1   hypothetical protein CARUB_v10027529mg [Capsella rubella]                                                                                                                                                                                                                                                                                                                            | 227  | 222  | 3.00E-84  | 97.8  | 74.9 | 87.7 | hypothetical protein CARUB_v10027529mg | gbpln | Capsella rubella     | AT5G51860.2   Symbols:   K-box region and MADS-box transcription factor family protein   chr5:21081844-21084126 REVERSE LENGTH=202                                                                                                                                                                                                                       | 227  | 202  | 9.00E-60  | 89.0  | 55.5 | 70.0 |
| Rsa1.0_00166.1.g7343.t1 | refXP_002866435.1   ANAC100/ATNAC5 [Arabidopsis lyrata subsp. lyrata] gi 297312270 gb EFH42694.1   ANAC100/ATNAC5 [Arabidopsis lyrata subsp. lyrata]                                                                                                                                                                                                                                                 | 384  | 336  | 1.00E-156 | 87.5  | 69.8 | 71.6 | ANAC100/ATNAC5                         | gbpln | Arabidopsis lyrata   | AT5G61430.1   Symbols: ANAC100, ATNAC5, NAC100   NAC domain containing protein 100   chr5:24701328-24702553 REVERSE LENGTH=336                                                                                                                                                                                                                           | 384  | 336  | 1.00E-158 | 87.5  | 69.3 | 71.1 |
| Rsa1.0_00166.1.g7344.t1 | gb AAD32898.1   putative retroelement pol polyprotein [Arabidopsis thaliana]                                                                                                                                                                                                                                                                                                                         | 1367 | 1307 | 0         | 95.6  | 59.9 | 74.1 | putative retroelement pol polyprotein  | gbpln | Arabidopsis thaliana | AT4G23160.1   Symbols: CRK8   cysteine-rich RLK (RECEPTOR-like protein kinase) 8   chr4:12129485-12134086 FORWARD LENGTH=1262                                                                                                                                                                                                                            | 1367 | 1262 | 1.00E-96  | 92.3  | 14.0 | 21.5 |

|                         |                                                                                                                                                                                                                                                                                                                                                                                |      |      |           |       |      |      |                                                 |       |                      |                                                                                                                                                                                                                                                                                                                                                                                                                                                                                                                                                   |      |      |           |       |      |      |
|-------------------------|--------------------------------------------------------------------------------------------------------------------------------------------------------------------------------------------------------------------------------------------------------------------------------------------------------------------------------------------------------------------------------|------|------|-----------|-------|------|------|-------------------------------------------------|-------|----------------------|---------------------------------------------------------------------------------------------------------------------------------------------------------------------------------------------------------------------------------------------------------------------------------------------------------------------------------------------------------------------------------------------------------------------------------------------------------------------------------------------------------------------------------------------------|------|------|-----------|-------|------|------|
| Rsa1.0_00166.1.g7345.t1 | dbj BAM78213.1  Myb transcription factor BoMyb28-1 [Brassica oleracea var. viridis]                                                                                                                                                                                                                                                                                            | 363  | 352  | 1.00E-172 | 97.0  | 85.4 | 89.5 | Myb transcription factor BoMyb28-1              | gbpln | Brassica oleracea    | AT5G61420.2   Symbols: MYB28, HAG1   myb domain protein 28   chr5:24689475-24690795 REVERSE LENGTH=366                                                                                                                                                                                                                                                                                                                                                                                                                                            | 363  | 366  | 1.00E-157 | 100.8 | 77.7 | 84.6 |
| Rsa1.0_00166.1.g7346.t1 | ref XP_002866429.1  hypothetical protein ARALYDRAFT_919377 [Arabidopsis lyrata subsp. lyrata]   g 297312264 gb EFH42688.1  hypothetical protein ARALYDRAFT_919377 [Arabidopsis lyrata subsp. lyrata]                                                                                                                                                                           | 311  | 325  | 1.00E-112 | 104.5 | 78.5 | 86.5 | hypothetical protein ARALYDRAFT_919377          | gbpln | Arabidopsis lyrata   | AT5G61340.1   Symbols:   unknown protein; BEST Arabidopsis thaliana protein match is: unknown protein (TAIR:AT1G26650.1). Has 30201 Blast hits to 17322 proteins in 780 species: Archae - 12; Bacteria - 1396; Metazoa - 17338; Fungi - 3422; Plants - 5037; Viruses - 0; Other Eukaryotes - 2996 (source: NCBI BLINK).   chr5:24662064-24663044 REVERSE LENGTH=326                                                                                                                                                                               | 311  | 326  | 1.00E-113 | 104.8 | 78.1 | 85.2 |
| Rsa1.0_00166.1.g7347.t1 | ref XP_002864755.1  tudor domain-containing protein [Arabidopsis lyrata subsp. lyrata]   g 297310580 gb EFH41014.1  tudor domain-containing protein [Arabidopsis lyrata subsp. lyrata]                                                                                                                                                                                         | 985  | 983  | 0         | 99.8  | 89.8 | 94.5 | tudor domain-containing protein                 | gbpln | Arabidopsis lyrata   | AT5G61780.1   Symbols: Tudor2, AtTudor2, TSN2   TUDOR-SN protein 2   chr5:24822012-24826641 FORWARD LENGTH=985                                                                                                                                                                                                                                                                                                                                                                                                                                    | 985  | 985  | 0         | 100.0 | 89.4 | 94.0 |
| Rsa1.0_00166.1.g7348.t1 | ref XP_002866455.1  hypothetical protein ARALYDRAFT_496347 [Arabidopsis lyrata subsp. lyrata]   g 297312290 gb EFH42714.1  hypothetical protein ARALYDRAFT_496347 [Arabidopsis lyrata subsp. lyrata]                                                                                                                                                                           | 953  | 1401 | 0         | 147.0 | 49.4 | 51.3 | hypothetical protein ARALYDRAFT_496347          | gbpln | Arabidopsis lyrata   | AT5G61790.1   Symbols: CNX1, ATCNX1   calnexin 1   chr5:24827394-24829642 REVERSE LENGTH=530                                                                                                                                                                                                                                                                                                                                                                                                                                                      | 953  | 530  | 0         | 55.6  | 49.8 | 52.3 |
| Rsa1.0_00166.1.g7349.t1 | dbj BAH04509.1  leafy-like protein [Raphanus sativus]                                                                                                                                                                                                                                                                                                                          | 415  | 420  | 0         | 101.2 | 97.6 | 97.8 | leafy-like protein                              | gbpln | Raphanus sativus     | AT5G61850.1   Symbols: LFY, LFY3   floral meristem identity control protein LEAFY (LFY)   chr5:24844295-24846933 FORWARD LENGTH=420                                                                                                                                                                                                                                                                                                                                                                                                               | 415  | 420  | 1.00E-178 | 101.2 | 88.4 | 92.5 |
| Rsa1.0_00166.1.g7350.t1 | dbj BAB08881.1  unnamed protein product [Arabidopsis thaliana]                                                                                                                                                                                                                                                                                                                 | 1171 | 1134 | 0         | 96.8  | 38.7 | 47.4 | unnamed protein product                         | gbpln | Arabidopsis thaliana | AT5G61940.1   Symbols:   Ubiquitin carboxyl-terminal hydrolase-related protein   chr5:24868155-24872717 FORWARD LENGTH=1094                                                                                                                                                                                                                                                                                                                                                                                                                       | 1171 | 1094 | 0         | 93.4  | 38.7 | 47.4 |
| Rsa1.0_00167.1.g7351.t1 | #                                                                                                                                                                                                                                                                                                                                                                              | #    | #    | #         | #     | #    | #    | -                                               | ----  | ----                 | #                                                                                                                                                                                                                                                                                                                                                                                                                                                                                                                                                 | #    | #    | #         | #     | #    |      |
| Rsa1.0_00167.1.g7352.t1 | gb AAM62517.1  unknown [Arabidopsis thaliana]                                                                                                                                                                                                                                                                                                                                  | 388  | 390  | 0         | 100.5 | 87.1 | 95.1 | unknown                                         | gbpln | Arabidopsis thaliana | AT1G76520.2   Symbols:   Auxin efflux carrier family protein   chr1:28715384-28717289 FORWARD LENGTH=390                                                                                                                                                                                                                                                                                                                                                                                                                                          | 388  | 390  | 0         | 100.5 | 86.9 | 95.1 |
| Rsa1.0_00167.1.g7353.t1 | gb EOA35411.1  hypothetical protein CARUB_v10020611mg, partial [Capsella rubella]                                                                                                                                                                                                                                                                                              | 327  | 337  | 1.00E-167 | 103.1 | 86.5 | 92.4 | hypothetical protein CARUB_v10020611mg, partial | gbpln | Capsella rubella     | AT1G76570.1   Symbols:   Chlorophyll A-B binding family protein   chr1:28729132-28730754 FORWARD LENGTH=327                                                                                                                                                                                                                                                                                                                                                                                                                                       | 327  | 327  | 1.00E-167 | 100.0 | 87.5 | 91.4 |
| Rsa1.0_00167.1.g7354.t1 | ref XP_002887647.1  hypothetical protein ARALYDRAFT_895541 [Arabidopsis lyrata subsp. lyrata]   g 297333498 gb EFH63906.1  hypothetical protein ARALYDRAFT_895541 [Arabidopsis lyrata subsp. lyrata]                                                                                                                                                                           | 964  | 1034 | 0         | 107.3 | 80.5 | 86.9 | hypothetical protein ARALYDRAFT_895541          | gbpln | Arabidopsis lyrata   | AT1G76580.1   Symbols:   Squamosa promoter-binding protein-like (SBP domain) transcription factor family protein   chr1:28734600-28739451 FORWARD LENGTH=988                                                                                                                                                                                                                                                                                                                                                                                      | 964  | 988  | 0         | 102.5 | 76.1 | 83.6 |
| Rsa1.0_00167.1.g7355.t1 | #                                                                                                                                                                                                                                                                                                                                                                              | #    | #    | #         | #     | #    | #    | -                                               | ----  | ----                 | #                                                                                                                                                                                                                                                                                                                                                                                                                                                                                                                                                 | #    | #    | #         | #     | #    |      |
| Rsa1.0_00167.1.g7356.t1 | ref NP_565136.1  uncharacterized protein [Arabidopsis thaliana]   g 12323985 gb AAG51956.1 AC015450_17 unknown protein; 83277-83927 [Arabidopsis thaliana]   g 21592540 gb AAM64489.1  unknown [Arabidopsis thaliana]   g 23197634 gb AAN15344.1  Unknown protein [Arabidopsis thaliana]   g 332197742 gb AEE35863.1  uncharacterized protein AT1G76600 [Arabidopsis thaliana] | 208  | 216  | 6.00E-69  | 103.8 | 74.5 | 87.0 | uncharacterized protein                         | gbpln | Arabidopsis thaliana | AT1G76600.1   Symbols:   unknown protein; FUNCTIONS IN: molecular, function unknown; INVOLVED IN: N-terminal protein myristoylation; LOCATED IN: nucleolus, nucleus; EXPRESSED IN: 24 plant structures; EXPRESSED DURING: 15 growth stages; BEST Arabidopsis thaliana protein match is: unknown protein (TAIR:AT1G21010.1); Has 220 Blast hits to 220 proteins in 14 species: Archae - 0; Bacteria - 0; Metazoa - 0; Fungi - 0; Plants - 220; Viruses - 0; Other Eukaryotes - 0 (source: NCBI BLINK).   chr1:28746975-28747625 FORWARD LENGTH=216 | 208  | 216  | 2.00E-71  | 103.8 | 74.5 | 87.0 |
| Rsa1.0_00167.1.g7357.t1 | ref XP_002881678.1  hypothetical protein ARALYDRAFT_903237 [Arabidopsis lyrata subsp. lyrata]   g 297327517 gb EFH57937.1  hypothetical protein ARALYDRAFT_903237 [Arabidopsis lyrata subsp. lyrata]                                                                                                                                                                           | 169  | 159  | 1.00E-66  | 94.1  | 78.1 | 84.6 | hypothetical protein ARALYDRAFT_903237          | gbpln | Arabidopsis lyrata   | AT1G76640.1   Symbols:   Calcium-binding EF-hand family protein   chr1:28765324-28765803 REVERSE LENGTH=159                                                                                                                                                                                                                                                                                                                                                                                                                                       | 169  | 159  | 1.00E-66  | 94.1  | 77.5 | 83.4 |



|                         |                                                                                                                                                                                                                                                                                                                                                                                                                                                                                                                                                                                                                                                                                                                                                                                 |      |      |           |       |      |      |                                        |       |                      |                                                                                                                                                                                                                                                                                                                                                                                                                                                                                                                                                           |      |      |           |       |      |      |
|-------------------------|---------------------------------------------------------------------------------------------------------------------------------------------------------------------------------------------------------------------------------------------------------------------------------------------------------------------------------------------------------------------------------------------------------------------------------------------------------------------------------------------------------------------------------------------------------------------------------------------------------------------------------------------------------------------------------------------------------------------------------------------------------------------------------|------|------|-----------|-------|------|------|----------------------------------------|-------|----------------------|-----------------------------------------------------------------------------------------------------------------------------------------------------------------------------------------------------------------------------------------------------------------------------------------------------------------------------------------------------------------------------------------------------------------------------------------------------------------------------------------------------------------------------------------------------------|------|------|-----------|-------|------|------|
| Rsa1.0_00167.1.g7358.t1 | gb[EOA33381.1] hypothetical protein CARUB_v10020307mg [Capsella rubella]                                                                                                                                                                                                                                                                                                                                                                                                                                                                                                                                                                                                                                                                                                        | 374  | 441  | 2.33E-156 | 117.9 | 82.9 | 88.0 | hypothetical protein CARUB_v10020307mg | gbpln | Capsella rubella     | AT1G76660.1   Symbols:   FUNCTIONS IN: molecular function unknown; INVOLVED IN: biological_process unknown; LOCATED IN: plasma membrane; EXPRESSED IN: 22 plant structures; EXPRESSED DURING: 13 growth stages; BEST Arabidopsis thaliana protein match is: hydroxyproline-rich glycoprotein family protein (TAIR:AT5G52430.1); Has 353 Blast hits to 231 proteins in 60 species: Archae - 0; Bacteria - 6; Metazoa - 57; Fungi - 22; Plants - 125; Viruses - 4; Other Eukaryotes - 139 (source: NCBI BLINK).   chr1:28769157-28771036 REVERSE LENGTH=431 | 374  | 431  | 1.00E-142 | 115.2 | 80.2 | 84.5 |
| Rsa1.0_00167.1.g7359.t1 | dbj[BAJ33636.1] unnamed protein product [Thellungiella halophila]                                                                                                                                                                                                                                                                                                                                                                                                                                                                                                                                                                                                                                                                                                               | 372  | 374  | 0         | 100.5 | 92.2 | 96.2 | unnamed protein product                | ----  | ----                 | AT1G76680.1   Symbols: OPR1, ATOPR1   12-oxophytodienoate reductase 1   chr1:28776982-28778271 FORWARD LENGTH=372                                                                                                                                                                                                                                                                                                                                                                                                                                         | 372  | 372  | 0         | 100.0 | 89.5 | 94.6 |
| Rsa1.0_00167.1.g7360.t1 | gb[EOA35314.1] hypothetical protein CARUB_v10020489mg [Capsella rubella]                                                                                                                                                                                                                                                                                                                                                                                                                                                                                                                                                                                                                                                                                                        | 375  | 374  | 0         | 99.7  | 90.7 | 95.7 | hypothetical protein CARUB_v10020489mg | gbpln | Capsella rubella     | AT1G76680.1   Symbols: OPR1, ATOPR1   12-oxophytodienoate reductase 1   chr1:28776982-28778271 FORWARD LENGTH=372                                                                                                                                                                                                                                                                                                                                                                                                                                         | 375  | 372  | 0         | 99.2  | 87.7 | 93.3 |
| Rsa1.0_00167.1.g7361.t1 | gb[EOA27962.1] hypothetical protein CARUB_v10024133mg [Capsella rubella]                                                                                                                                                                                                                                                                                                                                                                                                                                                                                                                                                                                                                                                                                                        | 229  | 185  | 5.00E-28  | 80.8  | 31.0 | 33.6 | hypothetical protein CARUB_v10024133mg | gbpln | Capsella rubella     | AT2G24020.1   Symbols:   Uncharacterised BCR, YbaB family COG0718   chr2:10217869-10219269 REVERSE LENGTH=182                                                                                                                                                                                                                                                                                                                                                                                                                                             | 229  | 182  | 4.00E-30  | 79.5  | 31.4 | 34.5 |
| Rsa1.0_00167.1.g7362.t1 | ref[NP_177801.1] uncharacterized protein [Arabidopsis thaliana]   gi 75207334 sp Q9SRD8.1 EC1.1_ARATH RecName: Full=Egg cell-secreted protein 1.1; Flags: Precursor   gi 6143892 gb AAF04438.1 AC010718.7 hypothetical protein: 47879-48355 [Arabidopsis thaliana]   gi 52354237 gb AAU44439.1] hypothetical protein AT1G76750 [Arabidopsis thaliana]   gi 55740537 gb AAV63861.1] hypothetical protein At1g76750 [Arabidopsis thaliana]   gi 332197764 gb AEE35885.1] uncharacterized protein AT1G76750 [Arabidopsis thaliana]                                                                                                                                                                                                                                                 | 155  | 158  | 4.00E-61  | 101.9 | 74.8 | 86.5 | uncharacterized protein                | gbpln | Arabidopsis thaliana | AT1G76750.1   Symbols:   Protein of unknown function (DUF1278)   chr1:28811107-28811583 FORWARD LENGTH=158                                                                                                                                                                                                                                                                                                                                                                                                                                                | 155  | 158  | 1.00E-63  | 101.9 | 74.8 | 86.5 |
| Rsa1.0_00167.1.g7363.t3 | ref[NP_177804.1] HSP20-like chaperone [Arabidopsis thaliana]   gi 6143906 gb AAF04452.1 AC010718.21 putative heat shock protein: 53413-59028 [Arabidopsis thaliana]   gi 332197767 gb AEE35888.1] HSP20-like chaperone [Arabidopsis thaliana]   ref[NP_177806.1] vacuolar iron transporter-like protein [Arabidopsis thaliana]   gi 75207331 sp Q9SRD3.1 VITH2_ARATH RecName: Full=Vacuolar iron transporter homolog 2; AltName: Full=Protein NODULIN-LIKE 2   gi 6143895 gb AAF0444.1 AC010718.10 nodulin-like protein: 66117-66707 [Arabidopsis thaliana]   gi 48958481 gb AT47793.1] At1g76800 [Arabidopsis thaliana]   gi 51972059 gb AAU15133.1] At1g76800 [Arabidopsis thaliana]   gi 332197769 gb AEE35890.1] vacuolar iron transporter homolog 2 [Arabidopsis thaliana] | 5055 | 1871 | 2.00E-66  | 37.0  | 4.1  | 5.1  | HSP20-like chaperone                   | gbpln | Arabidopsis thaliana | AT1G76780.1   Symbols:   HSP20-like chaperones superfamily protein   chr1:28816641-2882256 FORWARD LENGTH=1871                                                                                                                                                                                                                                                                                                                                                                                                                                            | 5055 | 1871 | 5.00E-69  | 37.0  | 4.1  | 5.1  |
| Rsa1.0_00167.1.g7364.t1 | gi 6143895 gb AAF0444.1 AC010718.10 nodulin-like protein: 66117-66707 [Arabidopsis thaliana]   gi 48958481 gb AT47793.1] At1g76800 [Arabidopsis thaliana]   gi 51972059 gb AAU15133.1] At1g76800 [Arabidopsis thaliana]   gi 332197769 gb AEE35890.1] vacuolar iron transporter homolog 2 [Arabidopsis thaliana]                                                                                                                                                                                                                                                                                                                                                                                                                                                                | 194  | 196  | 7.00E-87  | 101.0 | 91.2 | 96.9 | vacuolar iron transporter-like protein | gbpln | Arabidopsis thaliana | AT1G76800.1   Symbols:   Vacuolar iron transporter (VIT) family protein   chr1:28829345-28829935 FORWARD LENGTH=196                                                                                                                                                                                                                                                                                                                                                                                                                                       | 194  | 196  | 3.00E-89  | 101.0 | 91.2 | 96.9 |
| Rsa1.0_00167.1.g7365.t1 | gb[EOA33550.1] hypothetical protein CARUB_v10019670mg [Capsella rubella]                                                                                                                                                                                                                                                                                                                                                                                                                                                                                                                                                                                                                                                                                                        | 225  | 1301 | 5.00E-70  | 578.2 | 53.8 | 58.7 | hypothetical protein CARUB_v10019670mg | gbpln | Capsella rubella     | AT1G76810.1   Symbols:   eukaryotic translation initiation factor 2 (eIF-2) family protein   chr1:28831366-28836310 REVERSE LENGTH=1294                                                                                                                                                                                                                                                                                                                                                                                                                   | 225  | 1294 | 8.00E-72  | 575.1 | 52.9 | 58.7 |
| Rsa1.0_00167.1.g7366.t3 | gb[EOA33550.1] hypothetical protein CARUB_v10019670mg [Capsella rubella]                                                                                                                                                                                                                                                                                                                                                                                                                                                                                                                                                                                                                                                                                                        | 1258 | 1301 | 0         | 103.4 | 76.6 | 83.8 | hypothetical protein CARUB_v10019670mg | gbpln | Capsella rubella     | AT1G76810.1   Symbols:   eukaryotic translation initiation factor 2 (eIF-2) family protein   chr1:28831366-28836310 REVERSE LENGTH=1294                                                                                                                                                                                                                                                                                                                                                                                                                   | 1258 | 1294 | 0         | 102.9 | 77.1 | 82.9 |
| Rsa1.0_00167.1.g7367.t1 | ref[XP_002889106.1] hypothetical protein ARALYDRAFT_895567 [Arabidopsis lyrata subsp. lyrata]   gi 297334947 gb EFH65365.1] hypothetical protein ARALYDRAFT_895567 [Arabidopsis lyrata subsp. lyrata]                                                                                                                                                                                                                                                                                                                                                                                                                                                                                                                                                                           | 97   | 98   | 1.00E-44  | 101.0 | 94.8 | 95.9 | hypothetical protein ARALYDRAFT_895567 | gbpln | Arabidopsis lyrata   | AT1G76860.1   Symbols:   Small nuclear ribonucleoprotein family protein   chr1:28854594-28855637 REVERSE LENGTH=98                                                                                                                                                                                                                                                                                                                                                                                                                                        | 97   | 98   | 5.00E-47  | 101.0 | 93.8 | 95.9 |

|                         |                                                                                                                                                                                                                                                                                                                                                            |     |     |           |       |      |      |                                                      |       |                      |                                                                                                                                                                     |     |     |           |       |      |      |
|-------------------------|------------------------------------------------------------------------------------------------------------------------------------------------------------------------------------------------------------------------------------------------------------------------------------------------------------------------------------------------------------|-----|-----|-----------|-------|------|------|------------------------------------------------------|-------|----------------------|---------------------------------------------------------------------------------------------------------------------------------------------------------------------|-----|-----|-----------|-------|------|------|
| Rsa1.0_00167.1.g7368.t1 | #                                                                                                                                                                                                                                                                                                                                                          | #   | #   | #         | #     | #    | #    | -                                                    | ----  | ----                 | #                                                                                                                                                                   | #   | #   | #         | #     | #    |      |
| Rsa1.0_00167.1.g7369.t1 | #                                                                                                                                                                                                                                                                                                                                                          | #   | #   | #         | #     | #    | #    | -                                                    | ----  | ----                 | #                                                                                                                                                                   | #   | #   | #         | #     | #    |      |
| Rsa1.0_00167.1.g7370.t1 | ref[XP_002887660.1] hypothetical protein ARALYDRAFT_895569 [Arabidopsis lyrata subsp. lyrata] gi 297333501 gb EFH4639.1  hypothetical protein ARALYDRAFT_895569 [Arabidopsis lyrata subsp. lyrata]                                                                                                                                                         | 590 | 598 | 0         | 101.4 | 65.6 | 71.5 | hypothetical protein ARALYDRAFT_895569               | gbpln | Arabidopsis lyrata   | AT1G78890.1   Symbols:   Duplicated homeodomain-like superfamily protein   chr1:28865594-28867931 FORWARD LENGTH=603                                                | 590 | 603 | 0         | 102.2 | 64.9 | 71.5 |
| Rsa1.0_00167.1.g7371.t1 | #                                                                                                                                                                                                                                                                                                                                                          | #   | #   | #         | #     | #    | #    | -                                                    | ----  | ----                 | #                                                                                                                                                                   | #   | #   | #         | #     | #    |      |
| Rsa1.0_00167.1.g7372.t1 | emb[CAA05997.1] GT2 [Arabidopsis thaliana]                                                                                                                                                                                                                                                                                                                 | 465 | 575 | 0         | 123.7 | 81.1 | 87.3 | GT2                                                  | gbpln | Arabidopsis thaliana | AT1G78890.2   Symbols: GT2, AT-GT2   Duplicated homeodomain-like superfamily protein   chr1:28873211-28875203 REVERSE LENGTH=575                                    | 465 | 575 | 0         | 123.7 | 81.1 | 87.3 |
| Rsa1.0_00168.1.g7373.t1 | ref[XP_002871370.1] hypothetical protein ARALYDRAFT_325494 [Arabidopsis lyrata subsp. lyrata] gi 297317207 gb EFH47629.1  hypothetical protein ARALYDRAFT_325494 [Arabidopsis lyrata subsp. lyrata]                                                                                                                                                        | 601 | 621 | 0         | 103.3 | 88.5 | 95.0 | hypothetical protein ARALYDRAFT_325494               | gbpln | Arabidopsis lyrata   | AT5G09420.1   Symbols: ATTOC64-V, MTOM64, TOC64-V, OM64, AtmtOM64   translocan at the outer membrane of chloroplasts 64-V   chr5:2928316-2931750 FORWARD LENGTH=603 | 601 | 603 | 0         | 100.3 | 86.2 | 94.0 |
| Rsa1.0_00168.1.g7374.t1 | ref[NP_196505.2] alpha/beta-hydrolase domain-containing protein [Arabidopsis thaliana] gi 67633792 gb AA78820.1  hydrolase [Arabidopsis thaliana] gi 332004009 gb AED91392.1  alpha/beta-hydrolase domain-containing protein [Arabidopsis thaliana]                                                                                                        | 312 | 311 | 1.00E-171 | 99.7  | 92.9 | 97.4 | alpha/beta-hydrolase domain-containing protein       | gbpln | Arabidopsis thaliana | AT5G09430.1   Symbols:   alpha/beta-Hydrolases superfamily protein   chr5:2932162-2933362 FORWARD LENGTH=311                                                        | 312 | 311 | 1.00E-173 | 99.7  | 92.9 | 97.4 |
| Rsa1.0_00168.1.g7375.t1 | ref[XP_002871372.1] hypothetical protein ARALYDRAFT_487757 [Arabidopsis lyrata subsp. lyrata] gi 297317209 gb EFH47631.1  hypothetical protein ARALYDRAFT_487757 [Arabidopsis lyrata subsp. lyrata]                                                                                                                                                        | 298 | 281 | 1.00E-135 | 94.3  | 81.5 | 88.3 | hypothetical protein ARALYDRAFT_487757               | gbpln | Arabidopsis lyrata   | AT5G64260.1   Symbols: EXL2   EXORDIUM like 2   chr5:25703980-25704897 FORWARD LENGTH=305                                                                           | 298 | 305 | 1.00E-136 | 102.3 | 79.5 | 86.9 |
| Rsa1.0_00168.1.g7376.t1 | gb[EOA23045.1] hypothetical protein CARUB_v10003815mg [Capsella rubella]                                                                                                                                                                                                                                                                                   | 407 | 331 | 1.00E-112 | 81.3  | 59.7 | 64.1 | hypothetical protein CARUB_v10003815mg               | gbpln | Capsella rubella     | AT5G09460.1   Symbols:   sequence-specific DNA binding transcription factors:transcription regulators   chr5:2944437-2945417 REVERSE LENGTH=326                     | 407 | 326 | 1.00E-107 | 80.1  | 59.0 | 63.4 |
| Rsa1.0_00168.1.g7377.t1 | gb[EOA22044.1] hypothetical protein CARUB_v10002569mg [Capsella rubella]                                                                                                                                                                                                                                                                                   | 149 | 139 | 3.00E-23  | 93.3  | 68.5 | 78.5 | hypothetical protein CARUB_v10002569mg               | gbpln | Capsella rubella     | AT5G09480.1   Symbols:   hydroxyproline-rich glycoprotein family protein   chr5:2951181-2951615 REVERSE LENGTH=144                                                  | 149 | 144 | 4.00E-19  | 96.6  | 52.3 | 57.0 |
| Rsa1.0_00168.1.g7378.t1 | gb[EOA21204.1] hypothetical protein CARUB_v10001551mg [Capsella rubella]                                                                                                                                                                                                                                                                                   | 259 | 306 | 5.00E-73  | 118.1 | 72.2 | 83.4 | hypothetical protein CARUB_v10001551mg               | gbpln | Capsella rubella     | AT5G09530.1   Symbols:   hydroxyproline-rich glycoprotein family protein   chr5:2960080-2961192 REVERSE LENGTH=370                                                  | 259 | 370 | 2.00E-65  | 142.9 | 71.0 | 81.5 |
| Rsa1.0_00168.1.g7379.t1 | ref[XP_002873410.1] DNAJ heat shock N-terminal domain-containing protein [Arabidopsis lyrata subsp. lyrata] gi 297319247 gb EFH49669.1  DNAJ heat shock N-terminal domain-containing protein [Arabidopsis lyrata subsp. lyrata]                                                                                                                            | 284 | 286 | 6.00E-99  | 100.7 | 69.0 | 77.5 | DNAJ heat shock N-terminal domain-containing protein | gbpln | Arabidopsis lyrata   | AT5G09540.1   Symbols:   Chaperone DnaJ-domain superfamily protein   chr5:2962422-2963264 REVERSE LENGTH=280                                                        | 284 | 280 | 2.00E-97  | 98.6  | 66.5 | 75.7 |
| Rsa1.0_00168.1.g7380.t1 | gb[EOA22581.1] hypothetical protein CARUB_v10003247mg [Capsella rubella]                                                                                                                                                                                                                                                                                   | 445 | 445 | 0         | 100.0 | 96.9 | 98.4 | hypothetical protein CARUB_v10003247mg               | gbpln | Capsella rubella     | AT5G09550.1   Symbols:   GDP dissociation inhibitor family protein / Rab GTPase activator family protein   chr5:2963850-2964465 FORWARD LENGTH=445                  | 445 | 445 | 0         | 100.0 | 96.9 | 98.7 |
| Rsa1.0_00168.1.g7381.t1 | ref[NP_196519.1] Cox19-like CHCH family protein [Arabidopsis thaliana] gi 7671432 emb CAB89373.1  putative protein [Arabidopsis thaliana] gi 26452406 dbj BAC43288.1  unknown protein [Arabidopsis thaliana] gi 28372814 gb AAO39889.1  At5g09570 [Arabidopsis thaliana] gi 332004028 gb AED91411.1  Cox19-like CHCH family protein [Arabidopsis thaliana] | 151 | 139 | 3.00E-47  | 92.1  | 64.2 | 77.5 | Cox19-like CHCH family protein                       | gbpln | Arabidopsis thaliana | AT5G09570.1   Symbols:   Cox19-like CHCH family protein   chr5:2970733-2971970 FORWARD LENGTH=139                                                                   | 151 | 139 | 1.00E-49  | 92.1  | 64.2 | 77.5 |
| Rsa1.0_00168.1.g7382.t1 | ref[XP_002871380.1] succinate dehydrogenase 3-1 [Arabidopsis lyrata subsp. lyrata] gi 297317217 gb EFH47639.1  succinate dehydrogenase 3-1 [Arabidopsis lyrata subsp. lyrata]                                                                                                                                                                              | 211 | 213 | 6.00E-83  | 100.9 | 77.3 | 84.4 | succinate dehydrogenase 3-1                          | gbpln | Arabidopsis lyrata   | AT5G09600.3   Symbols: SDH3-1   succinate dehydrogenase 3-1   chr5:2979220-2980527 FORWARD LENGTH=213                                                               | 211 | 213 | 7.00E-83  | 100.9 | 75.8 | 83.9 |

|                         |                                                                                                                                                                                                                                                                                                                                                                                                                                                                                                                                                                                        |     |     |           |       |      |      |                                             |       |                      |                                                                                                                                       |     |     |           |       |      |      |
|-------------------------|----------------------------------------------------------------------------------------------------------------------------------------------------------------------------------------------------------------------------------------------------------------------------------------------------------------------------------------------------------------------------------------------------------------------------------------------------------------------------------------------------------------------------------------------------------------------------------------|-----|-----|-----------|-------|------|------|---------------------------------------------|-------|----------------------|---------------------------------------------------------------------------------------------------------------------------------------|-----|-----|-----------|-------|------|------|
| Rsa1.0_00168.1.g7383.t1 | refXP_002873411.1   hypothetical protein ARALYDRAFT_487778 [Arabidopsis lyrata subsp. lyrata] gi 297319248 gb EFH49670.1   hypothetical protein ARALYDRAFT_487778 [Arabidopsis lyrata subsp. lyrata] emb CAM91988.1   sinapoylglucose:choline sinapoyltransferase [Brassica oleracea var. medullosa] gi 146189650 emb CAM91990.1   sinapoylglucose:choline sinapoyltransferase [Brassica napus var. napus]                                                                                                                                                                             | 485 | 514 | 1.00E-166 | 106.0 | 75.1 | 80.0 | hypothetical protein ARALYDRAFT_487778      | gbpln | Arabidopsis lyrata   | AT5G09620.1   Symbols:   Octicosapeptide/Phox/Bem1p family protein   chr5:2983757-2985352 REVERSE LENGTH=531                          | 485 | 531 | 1.00E-163 | 109.5 | 75.3 | 81.9 |
| Rsa1.0_00168.1.g7384.t2 | refXP_002873413.1   inorganic pyrophosphatase family protein [Arabidopsis lyrata subsp. lyrata] gi 297319250 gb EFH49672.1   inorganic pyrophosphatase family protein [Arabidopsis lyrata subsp. lyrata]                                                                                                                                                                                                                                                                                                                                                                               | 418 | 466 | 0         | 111.5 | 80.4 | 84.7 | sinapoylglucose:choline sinapoyltransferase | gbpln | Brassica napus       | AT5G09640.1   Symbols: SNG2, SCPL19   serine carboxypeptidase-like 19   chr5:2988373-2990966 FORWARD LENGTH=465                       | 418 | 465 | 0         | 111.2 | 78.7 | 85.9 |
| Rsa1.0_00168.1.g7385.t1 | refNP_196535.1   beta-xylosidase 3 [Arabidopsis thaliana] gi 75264323 sp Q9LXD6.1 BXL3_ARATH RecName: Full=Beta-D-xylosidase 3; Short=AtBXL3; AltName: Full=Alpha-L-arabinofuranosidase; Flags: Precursor gi 7671416 emb CAB889357.1   beta-xylosidase-like protein [Arabidopsis thaliana] gi 9759004 dbj BAB09531.1   beta-xylosidase [Arabidopsis thaliana] gi 15450735 gb AAK96639.1   AT5g09730/F17114.80 [Arabidopsis thaliana] gi 332004056 gb AED91439.1   beta-xylosidase 3 [Arabidopsis thaliana]                                                                             | 299 | 299 | 1.00E-148 | 100.0 | 89.3 | 93.6 | inorganic pyrophosphatase family protein    | gbpln | Arabidopsis lyrata   | AT5G09650.1   Symbols: AtPPa6, PPa6   pyrophosphorylase 6   chr5:2991331-2993117 REVERSE LENGTH=300                                   | 299 | 300 | 1.00E-151 | 100.3 | 90.3 | 94.3 |
| Rsa1.0_00168.1.g7386.t1 | gb EOA30902.1   hypothetical protein CARUB_v10014049mg [Capsella rubella]                                                                                                                                                                                                                                                                                                                                                                                                                                                                                                              | 359 | 358 | 0         | 99.7  | 92.5 | 96.9 | hypothetical protein CARUB_v10014049mg      | gbpln | Capsella rubella     | AT5G09660.1   Symbols: PMDH2   peroxisomal NAD-malate dehydrogenase 2   chr5:2983645-2985551 REVERSE LENGTH=354                       | 359 | 354 | 0         | 98.6  | 93.3 | 96.4 |
| Rsa1.0_00168.1.g7387.t1 | refNP_196535.1   beta-xylosidase 3 [Arabidopsis thaliana] gi 75264323 sp Q9LXD6.1 BXL3_ARATH RecName: Full=Beta-D-xylosidase 3; Short=AtBXL3; AltName: Full=Alpha-L-arabinofuranosidase; Flags: Precursor gi 7671416 emb CAB889357.1   beta-xylosidase-like protein [Arabidopsis thaliana] gi 9759004 dbj BAB09531.1   beta-xylosidase [Arabidopsis thaliana] gi 15450735 gb AAK96639.1   AT5g09730/F17114.80 [Arabidopsis thaliana] gi 332004056 gb AED91439.1   beta-xylosidase 3 [Arabidopsis thaliana]                                                                             | 970 | 773 | 0         | 79.7  | 63.9 | 70.4 | beta-xylosidase 3                           | gbpln | Arabidopsis thaliana | AT5G09730.1   Symbols: BXL3, ATBXL3, XYL3, ATBX3, BX3   beta-xylosidase 3   chr5:3015319-3018226 REVERSE LENGTH=773                   | 970 | 773 | 0         | 79.7  | 63.9 | 70.4 |
| Rsa1.0_00168.1.g7388.t1 | refXP_002873419.1   hypothetical protein ARALYDRAFT_487793 [Arabidopsis lyrata subsp. lyrata] gi 297319256 gb EFH49678.1   hypothetical protein ARALYDRAFT_487793 [Arabidopsis lyrata subsp. lyrata]                                                                                                                                                                                                                                                                                                                                                                                   | 445 | 441 | 0         | 99.1  | 93.0 | 94.4 | hypothetical protein ARALYDRAFT_487793      | gbpln | Arabidopsis lyrata   | AT5G09740.1   Symbols: HAM2   histone acetyltransferase of the MYST family 2   chr5:3022141-3024711 REVERSE LENGTH=445                | 445 | 445 | 0         | 100.0 | 92.8 | 94.4 |
| Rsa1.0_00168.1.g7389.t1 | refNP_196537.1   transcription factor HEC3 [Arabidopsis thaliana] gi 75311668 sp Q9LXD8.1 HEC3_ARATH RecName: Full=Transcription factor HEC3; AltName: Full=Basic helix-loop-helix protein 43; Short=AtbHLH43; Short=bHLH 43; AltName: Full=Protein HECATE 3; AltName: Full=Transcription factor EN 119; AltName: Full=bHLH transcription factor bHLH043 gi 7671414 emb CAB889355.1   putative protein [Arabidopsis thaliana] gi 9759006 dbj BAB09533.1   unnamed protein product [Arabidopsis thaliana] gi 332004059 gb AED91442.1   transcription factor HEC3 [Arabidopsis thaliana] | 221 | 224 | 3.00E-58  | 101.4 | 73.3 | 81.0 | transcription factor HEC3                   | gbpln | Arabidopsis thaliana | AT5G09750.1   Symbols: HEC3   basic helix-loop-helix (bHLH) DNA-binding superfamily protein   chr5:3026401-3027075 REVERSE LENGTH=224 | 221 | 224 | 1.00E-60  | 101.4 | 73.3 | 81.0 |

|                         |                                                                                                                                                                                                                                                                                                                                                                                                                                                                                                                                                                                                                                                                                                                                                                                                                        |      |      |           |       |      |      |                                                        |       |                      |                                                                                                                                   |      |      |           |       |      |      |
|-------------------------|------------------------------------------------------------------------------------------------------------------------------------------------------------------------------------------------------------------------------------------------------------------------------------------------------------------------------------------------------------------------------------------------------------------------------------------------------------------------------------------------------------------------------------------------------------------------------------------------------------------------------------------------------------------------------------------------------------------------------------------------------------------------------------------------------------------------|------|------|-----------|-------|------|------|--------------------------------------------------------|-------|----------------------|-----------------------------------------------------------------------------------------------------------------------------------|------|------|-----------|-------|------|------|
| Rsa1.0_00168.1.g7390.t1 | refNP_196538.1  Putative pectinesterase/pectinesterase inhibitor 51 [Arabidopsis thaliana] gi 75180831 sp Q9LXD9.1 PME51_ARAT H RecName: Full=Probable pectinesterase/pectinesterase inhibitor 51; Includes: RecName: Full=Pectinesterase inhibitor 51; AltName: Full=Pectin methyltransferase inhibitor 51; Includes: RecName: Full=Pectinesterase 51; Short=PE 51; AltName: Full=Pectin methyltransferase 51; Short=AtPME51; Flags: Precursor gi 7671413 emb CAB89354.1  pectin methyltransferase-like protein [Arabidopsis thaliana] gi 17979183 gb AAL49830.1  putative pectin methyltransferase [Arabidopsis thaliana] gi 29824167 gb AAP04044.1  putative pectin methyltransferase [Arabidopsis thaliana] gi 332004060 gb AED91443.1  Putative pectinesterase/pectinesterase inhibitor 51 [Arabidopsis thaliana] | 536  | 551  | 0         | 102.8 | 81.5 | 87.9 | Putative pectinesterase/pectinesterase inhibitor 51    | gbpln | Arabidopsis thaliana | AT5G09760.1   Symbols:   Plant invertase/pectin methyltransferase inhibitor superfamily   chr5:3032446-3034364 FORWARD LENGTH=551 | 536  | 551  | 0         | 102.8 | 81.5 | 87.9 |
| Rsa1.0_00168.1.g7391.t1 | gb EOA20839.1  hypothetical protein CARUB_v10001176mg [Capsella rubella]                                                                                                                                                                                                                                                                                                                                                                                                                                                                                                                                                                                                                                                                                                                                               | 388  | 380  | 0         | 97.9  | 83.2 | 90.7 | hypothetical protein CARUB_v10001176mg                 | gbpln | Capsella rubella     | AT5G09790.2   Symbols: ATXR5, SDG15   ARABIDOPSIS TRITHORAX-RELATED PROTEIN 5   chr5:3039204-3040970 REVERSE LENGTH=379           | 388  | 379  | 0         | 97.7  | 83.2 | 89.9 |
| Rsa1.0_00168.1.g7392.t1 | ref XP_002871385.1  hypothetical protein ARALYDRAFT_908929 [Arabidopsis lyrata subsp. lyrata] gi 297317222 gb EFH47644.1  hypothetical protein ARALYDRAFT_908929 [Arabidopsis lyrata subsp. lyrata]                                                                                                                                                                                                                                                                                                                                                                                                                                                                                                                                                                                                                    | 102  | 103  | 2.00E-31  | 101.0 | 77.5 | 86.3 | hypothetical protein ARALYDRAFT_908929                 | gbpln | Arabidopsis lyrata   | AT5G09805.1   Symbols: IDL3   inflorescence deficient in abscission (IDA)-like 3   chr5:3047218-3047517 FORWARD LENGTH=99         | 102  | 99   | 4.00E-33  | 97.1  | 74.5 | 82.4 |
| Rsa1.0_00168.1.g7393.t1 | #                                                                                                                                                                                                                                                                                                                                                                                                                                                                                                                                                                                                                                                                                                                                                                                                                      | #    | #    | #         | #     | #    | #    | -                                                      | ----  | ----                 | #                                                                                                                                 | #    | #    | #         | #     | #    |      |
| Rsa1.0_00168.1.g7394.t1 | gb AEN25580.1  actin 7 [Brassica rapa subsp. pekinensis]                                                                                                                                                                                                                                                                                                                                                                                                                                                                                                                                                                                                                                                                                                                                                               | 375  | 377  | 0         | 100.5 | 98.1 | 99.2 | actin 7                                                | gbpln | Brassica rapa        | AT5G09810.1   Symbols: ACT7   actin 7   chr5:3052809-3054220 FORWARD LENGTH=377                                                   | 375  | 377  | 0         | 100.5 | 97.6 | 98.9 |
| Rsa1.0_00168.1.g7395.t1 | ref NP_568217.1  BoA-like family protein [Arabidopsis thaliana] gi 9758961 dbj BAB09404.1  unnamed protein product [Arabidopsis thaliana] gi 21593245 gb AAM65194.1  unknown [Arabidopsis thaliana] gi 27808606 gb AAO24583.1  At5g09830 [Arabidopsis thaliana] gi 110736310 dbj BAF00125.1  hypothetical protein [Arabidopsis thaliana] gi 332004070 gb AED91453.1  BoA-like family protein [Arabidopsis thaliana]                                                                                                                                                                                                                                                                                                                                                                                                    | 94   | 93   | 5.00E-41  | 98.9  | 93.6 | 95.7 | BoA-like family protein                                | gbpln | Arabidopsis thaliana | AT5G09830.1   Symbols:   BoA-like family protein   chr5:3057816-3058769 REVERSE LENGTH=93                                         | 94   | 93   | 8.00E-44  | 98.9  | 93.6 | 95.7 |
| Rsa1.0_00168.1.g7396.t1 | ref NP_196546.1  Putative endonuclease or glycosyl hydrolase [Arabidopsis thaliana] gi 9758962 dbj BAB09405.1  unnamed protein product [Arabidopsis thaliana] gi 332004071 gb AED91454.1  Putative endonuclease or glycosyl hydrolase [Arabidopsis thaliana]                                                                                                                                                                                                                                                                                                                                                                                                                                                                                                                                                           | 883  | 924  | 0         | 104.6 | 66.7 | 79.4 | Putative endonuclease or glycosyl hydrolase            | gbpln | Arabidopsis thaliana | AT5G09840.1   Symbols:   Putative endonuclease or glycosyl hydrolase   chr5:3059027-3061970 FORWARD LENGTH=924                    | 883  | 924  | 0         | 104.6 | 66.7 | 79.4 |
| Rsa1.0_00168.1.g7397.t1 | ref NP_568218.1  Transcription elongation factor (TFIIS) family protein [Arabidopsis thaliana] gi 395406779 sp F4KFC7.1 MD26C_ARA TH RecName: Full=Probable mediator of RNA polymerase II transcription subunit 26c gi 332004072 gb AED91455.1  Transcription elongation factor (TFIIS) family protein [Arabidopsis thaliana]                                                                                                                                                                                                                                                                                                                                                                                                                                                                                          | 518  | 353  | 1.00E-147 | 68.1  | 53.7 | 59.3 | Transcription elongation factor (TFIIS) family protein | gbpln | Arabidopsis thaliana | AT5G09850.1   Symbols:   Transcription elongation factor (TFIIS) family protein   chr5:3063488-3065221 REVERSE LENGTH=353         | 518  | 353  | 1.00E-150 | 68.1  | 53.7 | 59.3 |
| Rsa1.0_00168.1.g7398.t1 | gb EOA18933.1  hypothetical protein CARUB_v10007564mg [Capsella rubella]                                                                                                                                                                                                                                                                                                                                                                                                                                                                                                                                                                                                                                                                                                                                               | 461  | 424  | 1.00E-134 | 92.0  | 57.9 | 69.8 | hypothetical protein CARUB_v10007564mg                 | gbpln | Capsella rubella     | AT1G05080.1   Symbols:   F-box/RNI-like/FBD-like domains-containing protein   chr1:1459091-1460579 FORWARD LENGTH=439             | 461  | 439  | 1.00E-121 | 95.2  | 53.8 | 69.0 |
| Rsa1.0_00168.1.g7399.t1 | gb AAG50751.1 AC079733_19 polyprotein, putative [Arabidopsis thaliana]                                                                                                                                                                                                                                                                                                                                                                                                                                                                                                                                                                                                                                                                                                                                                 | 1436 | 1468 | 0         | 102.2 | 50.0 | 68.2 | polyprotein, putative                                  | gbpln | Arabidopsis thaliana | AT4G23160.1   Symbols: CRK8   cysteine-rich RLK (RECEPTOR-like protein kinase) 8   chr4:12129485-12134086 FORWARD LENGTH=1262     | 1436 | 1262 | 1.00E-132 | 87.9  | 16.2 | 24.3 |

|                         |                                                                                                                                                                                                                                                                                                                                                                                                                                                                                                                                                       |      |      |           |       |      |      |                                                         |       |                      |                                                                                                                                                                                                                                                                                                                                                                                                                                                                                                                              |      |     |           |       |      |      |
|-------------------------|-------------------------------------------------------------------------------------------------------------------------------------------------------------------------------------------------------------------------------------------------------------------------------------------------------------------------------------------------------------------------------------------------------------------------------------------------------------------------------------------------------------------------------------------------------|------|------|-----------|-------|------|------|---------------------------------------------------------|-------|----------------------|------------------------------------------------------------------------------------------------------------------------------------------------------------------------------------------------------------------------------------------------------------------------------------------------------------------------------------------------------------------------------------------------------------------------------------------------------------------------------------------------------------------------------|------|-----|-----------|-------|------|------|
| Rsa1.0_00168.1.g7400.t1 | ref XP_002871390.1  hypothetical protein ARALYDRAFT_908937 [Arabidopsis lyrata subsp. lyrata] gi 297317227 gb EFH47649.1  hypothetical protein ARALYDRAFT_908937 [Arabidopsis lyrata subsp. lyrata]                                                                                                                                                                                                                                                                                                                                                   | 89   | 103  | 2.00E-17  | 115.7 | 69.7 | 82.0 | hypothetical protein ARALYDRAFT_908937                  | gbpln | Arabidopsis lyrata   | AT5G09876.1   Symbols:   unknown protein; FUNCTIONS IN: molecular_function unknown; INVOLVED IN: biological_process unknown; LOCATED IN: cellular_component unknown; Has 5 Blast hits to 5 proteins in 2 species: Archae - 0; Bacteria - 0; Metazoa - 0; Fungi - 0; Plants - 5; Viruses - 0; Other Eukaryotes - 0 (source: NCBI BLink).   chr5:3079987-3080304 FORWARD LENGTH=105                                                                                                                                            | 89   | 105 | 2.00E-19  | 118.0 | 64.0 | 79.8 |
| Rsa1.0_00168.1.g7401.t1 | ref XP_002873428.1  predicted protein [Arabidopsis lyrata subsp. lyrata] gi 297319265 gb EFH49687.1  predicted protein [Arabidopsis lyrata subsp. lyrata]                                                                                                                                                                                                                                                                                                                                                                                             | 504  | 520  | 0         | 103.2 | 81.5 | 88.5 | predicted protein                                       | gbpln | Arabidopsis lyrata   | AT5G09880.1   Symbols:   Splicing factor, CC1-like   chr5:3081646-3085179 REVERSE LENGTH=527                                                                                                                                                                                                                                                                                                                                                                                                                                 | 504  | 527 | 0         | 104.6 | 80.6 | 88.7 |
| Rsa1.0_00168.1.g7402.t1 | gb EOA19397.1  hypothetical protein CARUB_v10000967mg [Capsella rubella]                                                                                                                                                                                                                                                                                                                                                                                                                                                                              | 336  | 442  | 0         | 131.5 | 97.9 | 98.8 | hypothetical protein CARUB_v10000967mg                  | gbpln | Capsella rubella     | AT5G09900.2   Symbols: EMB2107, RPN5A MSA   265 proteasome regulatory subunit, putative (RPN5)   chr5:3089462-3092434 REVERSE LENGTH=442                                                                                                                                                                                                                                                                                                                                                                                     | 336  | 442 | 0         | 131.5 | 96.4 | 99.1 |
| Rsa1.0_00169.1.g7403.t1 | #                                                                                                                                                                                                                                                                                                                                                                                                                                                                                                                                                     | #    | #    | #         | #     | #    | #    | -                                                       | ----  | ----                 | #                                                                                                                                                                                                                                                                                                                                                                                                                                                                                                                            | #    | #   | #         | #     | #    |      |
| Rsa1.0_00169.1.g7404.t1 | dbj BAB08714.1  non-LTR retroelement reverse transcriptase-like protein [Arabidopsis thaliana]                                                                                                                                                                                                                                                                                                                                                                                                                                                        | 1109 | 1197 | 4.00E-71  | 107.9 | 11.3 | 16.2 | non-LTR retroelement reverse transcriptase-like protein | gbpln | Arabidopsis thaliana | AT2G06845.1   Symbols:   Beta-galactosidase related protein   chr2:2754666-2756008 FORWARD LENGTH=315                                                                                                                                                                                                                                                                                                                                                                                                                        | 1109 | 315 | 7.00E-23  | 28.4  | 6.2  | 8.2  |
| Rsa1.0_00169.1.g7405.t1 | ref XP_002883483.1  predicted protein [Arabidopsis lyrata subsp. lyrata] gi 297329323 gb EFH59742.1  predicted protein [Arabidopsis lyrata subsp. lyrata]                                                                                                                                                                                                                                                                                                                                                                                             | 335  | 335  | 1.00E-162 | 100.0 | 79.7 | 89.9 | predicted protein                                       | gbpln | Arabidopsis lyrata   | AT3G24130.1   Symbols:   Pectin lyase-like superfamily protein   chr3:8711663-8713361 REVERSE LENGTH=335                                                                                                                                                                                                                                                                                                                                                                                                                     | 335  | 335 | 1.00E-163 | 100.0 | 78.8 | 88.7 |
| Rsa1.0_00169.1.g7406.t1 | ref XP_002883481.1  hypothetical protein ARALYDRAFT_898955 [Arabidopsis lyrata subsp. lyrata] gi 297329321 gb EFH59740.1  hypothetical protein ARALYDRAFT_898955 [Arabidopsis lyrata subsp. lyrata]                                                                                                                                                                                                                                                                                                                                                   | 401  | 400  | 0         | 99.8  | 88.3 | 92.8 | hypothetical protein ARALYDRAFT_898955                  | gbpln | Arabidopsis lyrata   | AT3G24140.1   Symbols: FMA   basic helix-loop-helix (bHLH) DNA-binding superfamily protein   chr3:8715525-8717772 REVERSE LENGTH=414                                                                                                                                                                                                                                                                                                                                                                                         | 401  | 414 | 0         | 103.2 | 85.0 | 91.0 |
| Rsa1.0_00169.1.g7407.t1 | ref XP_002883480.1  hypothetical protein ARALYDRAFT_479917 [Arabidopsis lyrata subsp. lyrata] gi 297329320 gb EFH59739.1  hypothetical protein ARALYDRAFT_479917 [Arabidopsis lyrata subsp. lyrata]                                                                                                                                                                                                                                                                                                                                                   | 323  | 347  | 1.00E-138 | 107.4 | 82.0 | 89.5 | hypothetical protein ARALYDRAFT_479917                  | gbpln | Arabidopsis lyrata   | AT3G24150.1   Symbols:   unknown protein; BEST Arabidopsis thaliana protein match is: unknown protein (TAIR:AT4G32295.1); Has 50 Blast hits to 50 proteins in 12 species: Archae - 0; Bacteria - 0; Metazoa - 7; Fungi - 0; Plants - 41; Viruses - 0; Other Eukaryotes - 2 (source: NCBI BLink).   chr3:8724273-8725586 REVERSE LENGTH=343                                                                                                                                                                                   | 323  | 343 | 1.00E-135 | 106.2 | 79.9 | 87.3 |
| Rsa1.0_00169.1.g7408.t3 | ref NP_189058.1  putative type 1 membrane protein [Arabidopsis thaliana] gi 4206765 gb AAD11797.1  putative type 1 membrane protein [Arabidopsis thaliana] gi 11994235 dbj BAB01357.1  unnamed protein product [Arabidopsis thaliana] gi 15450743 gb AAK96643.1  AT3g24160/MUJ8_16 [Arabidopsis thaliana] gi 21537239 gb AAM61580.1  type 1 membrane protein, putative [Arabidopsis thaliana] gi 22137144 gb AAM91417.1  AT3g24160/MUJ8_16 [Arabidopsis thaliana] gi 332643343 gb AEE76864.1  putative type 1 membrane protein [Arabidopsis thaliana] | 382  | 364  | 1.00E-150 | 95.3  | 76.4 | 85.9 | putative type 1 membrane protein                        | gbpln | Arabidopsis thaliana | AT3G24160.1   Symbols: PMP   putative type 1 membrane protein   chr3:8726241-8729023 FORWARD LENGTH=364                                                                                                                                                                                                                                                                                                                                                                                                                      | 382  | 364 | 1.00E-153 | 95.3  | 76.4 | 85.9 |
| Rsa1.0_00169.1.g7409.t1 | ref XP_002883472.1  hypothetical protein ARALYDRAFT_898937 [Arabidopsis lyrata subsp. lyrata] gi 297329312 gb EFH59731.1  hypothetical protein ARALYDRAFT_898937 [Arabidopsis lyrata subsp. lyrata]                                                                                                                                                                                                                                                                                                                                                   | 345  | 295  | 5.00E-41  | 85.5  | 33.9 | 50.1 | hypothetical protein ARALYDRAFT_898937                  | gbpln | Arabidopsis lyrata   | AT3G24260.1   Symbols:   FUNCTIONS IN: molecular_function unknown; INVOLVED IN: biological_process unknown; LOCATED IN: chloroplast; CONTAINS InterPro DOMAIN/s: Histone deacetylase interacting (InterPro:IPR013194); BEST Arabidopsis thaliana protein match is: unknown protein (TAIR:AT3G28870.1); Has 220 Blast hits to 218 proteins in 65 species: Archae - 7; Bacteria - 6; Metazoa - 43; Fungi - 2; Plants - 115; Viruses - 0; Other Eukaryotes - 47 (source: NCBI BLink).   chr3:8793837-8794961 REVERSE LENGTH=374 | 345  | 374 | 2.00E-32  | 108.4 | 28.7 | 42.0 |
| Rsa1.0_00169.1.g7410.t1 | gb EOA30105.1  hypothetical protein CARUB_v10013216mg [Capsella rubella]                                                                                                                                                                                                                                                                                                                                                                                                                                                                              | 659  | 626  | 0         | 95.0  | 75.0 | 81.0 | hypothetical protein CARUB_v10013216mg                  | gbpln | Capsella rubella     | AT3G24210.1   Symbols:   Ankyrin repeat family protein   chr3:8753712-8755627 REVERSE LENGTH=607                                                                                                                                                                                                                                                                                                                                                                                                                             | 659  | 607 | 0         | 92.1  | 73.9 | 80.1 |

|                         |                                                                                                                                                                                                                                                                                                                                                                                                                                                                                                                                                                                                                                                                                                                                                                                                                                                                                                                                                        |     |      |           |       |      |      |                                              |       |                      |                                                                                                                                                                                                                                                                                                                                                                                                                                                                                                                                                                                                                                                 |     |      |           |       |      |      |
|-------------------------|--------------------------------------------------------------------------------------------------------------------------------------------------------------------------------------------------------------------------------------------------------------------------------------------------------------------------------------------------------------------------------------------------------------------------------------------------------------------------------------------------------------------------------------------------------------------------------------------------------------------------------------------------------------------------------------------------------------------------------------------------------------------------------------------------------------------------------------------------------------------------------------------------------------------------------------------------------|-----|------|-----------|-------|------|------|----------------------------------------------|-------|----------------------|-------------------------------------------------------------------------------------------------------------------------------------------------------------------------------------------------------------------------------------------------------------------------------------------------------------------------------------------------------------------------------------------------------------------------------------------------------------------------------------------------------------------------------------------------------------------------------------------------------------------------------------------------|-----|------|-----------|-------|------|------|
| Rsa1.0_00169.1.g7411.t1 | gb EOA33758.1  hypothetical protein CARUB_v10019951mg [Capsella rubella]                                                                                                                                                                                                                                                                                                                                                                                                                                                                                                                                                                                                                                                                                                                                                                                                                                                                               | 188 | 634  | 1.00E-22  | 337.2 | 32.4 | 38.8 | hypothetical protein CARUB_v10019951mg       | gbpln | Capsella rubella     | AT1G63080.1   Symbols:   Pentatricopeptide repeat (PPR) superfamily protein   chr1:23388884-23390728 REVERSE LENGTH=614                                                                                                                                                                                                                                                                                                                                                                                                                                                                                                                         | 188 | 614  | 4.00E-23  | 326.6 | 27.7 | 34.6 |
| Rsa1.0_00169.1.g7412.t1 | gb AAM98191.1  unknown protein [Arabidopsis thaliana]<br>gi 38603804 gb AAR24647.1  At2g23330 [Arabidopsis thaliana]<br>gi 110742535 dbj BAE99183.1  putative retroelement pol polyprotein [Arabidopsis thaliana]                                                                                                                                                                                                                                                                                                                                                                                                                                                                                                                                                                                                                                                                                                                                      | 256 | 776  | 1.00E-58  | 303.1 | 42.2 | 55.5 | unknown protein                              | gbpln | Arabidopsis thaliana | AT4G23160.1   Symbols: CRK8   cysteine-rich RLK (RECEPTOR-like protein kinase) 8   chr4:12129485-12134086 FORWARD LENGTH=1262                                                                                                                                                                                                                                                                                                                                                                                                                                                                                                                   | 256 | 1262 | 3.00E-40  | 493.0 | 32.0 | 50.0 |
| Rsa1.0_00169.1.g7413.t1 | gb AAL57176.1 AF343656.1<br>CLV3/ESR-related 19 [Brassica napus]<br>gi 18033507 gb AAL57176.1 AF343656.1<br>CLV3/ESR-related 19 [Brassica napus]                                                                                                                                                                                                                                                                                                                                                                                                                                                                                                                                                                                                                                                                                                                                                                                                       | 74  | 74   | 7.00E-23  | 100.0 | 75.7 | 83.8 | CLV3/ESR-related 19                          | gbpln | Brassica napus       | AT3G24225.1   Symbols: CLE19, ESR19, ATOLE19   CLAVATA3/ESR-RELATED 19   chr3:8768946-8769172 FORWARD LENGTH=74<br>AT3G24260.1   Symbols:   FUNCTIONS IN: molecular_function unknown; INVOLVED IN: biological_process unknown; LOCATED IN: chloroplast; CONTAINS InterPro DOMAIN/s: Histone deacetylase interacting (InterPro:IPR013194); BEST Arabidopsis thaliana protein match is: unknown protein (TAIR:AT3G28870.1); Has 220 Blast hits to 218 proteins in 65 species: Archae - 7; Bacteria - 6; Metazoa - 43; Fungi - 2; Plants - 115; Viruses - 0; Other Eukaryotes - 47 (source: NCBI BLINK).   chr3:8793837-8794961 REVERSE LENGTH=374 | 74  | 74   | 1.00E-23  | 100.0 | 73.0 | 85.1 |
| Rsa1.0_00169.1.g7414.t1 | ref XP_002883472.1  hypothetical protein ARALYDRAFT_898937 [Arabidopsis lyrata subsp. lyrata]<br>gi 297329312 gb EFH59731.1  hypothetical protein ARALYDRAFT_898937 [Arabidopsis lyrata subsp. lyrata]                                                                                                                                                                                                                                                                                                                                                                                                                                                                                                                                                                                                                                                                                                                                                 | 404 | 295  | 4.00E-43  | 73.0  | 27.5 | 36.6 | hypothetical protein ARALYDRAFT_898937       | gbpln | Arabidopsis lyrata   | AT3G23900.3   Symbols:   RNA recognition motif (RRM)-containing protein   chr3:8631941-8635852 REVERSE LENGTH=987                                                                                                                                                                                                                                                                                                                                                                                                                                                                                                                               | 404 | 374  | 2.00E-36  | 92.6  | 23.5 | 31.4 |
| Rsa1.0_00169.1.g7415.t1 | dbj BAB03007.1  unnamed protein product [Arabidopsis thaliana]                                                                                                                                                                                                                                                                                                                                                                                                                                                                                                                                                                                                                                                                                                                                                                                                                                                                                         | 862 | 1006 | 0         | 116.7 | 79.1 | 87.6 | unnamed protein product                      | gbpln | Arabidopsis thaliana | AT3G23900.3   Symbols:   RNA recognition motif (RRM)-containing protein   chr3:8631941-8635852 REVERSE LENGTH=987                                                                                                                                                                                                                                                                                                                                                                                                                                                                                                                               | 862 | 987  | 0         | 114.5 | 79.1 | 87.6 |
| Rsa1.0_00169.1.g7416.t1 | gb AAM65391.1  fatty acid elongase-like protein (cer2-like) [Arabidopsis thaliana]                                                                                                                                                                                                                                                                                                                                                                                                                                                                                                                                                                                                                                                                                                                                                                                                                                                                     | 423 | 420  | 1.00E-174 | 99.3  | 72.1 | 82.7 | fatty acid elongase-like protein (cer2-like) | gbpln | Arabidopsis thaliana | AT3G23840.1   Symbols:   HXXXD-type acyl-transferase family protein   chr3:8611177-8612559 FORWARD LENGTH=420                                                                                                                                                                                                                                                                                                                                                                                                                                                                                                                                   | 423 | 420  | 1.00E-175 | 99.3  | 71.6 | 82.0 |
| Rsa1.0_00169.1.g7417.t1 | ref NP_189024.1  UDP-D-glucuronate 4-epimerase 6 [Arabidopsis thaliana]<br>gi 75311206 sp Q9LJS3.1 GAE6 ARATH<br>RefName: Full=UDP-glucuronate 4-epimerase 6; AltName: Full=UDP-glucuronic acid epimerase 6; Short=AtUGlcAE2<br>gi 13877895 gb AAK44025.1 AF370210.1<br>putative NAD dependent epimerase [Arabidopsis thaliana]<br>gi 9294651 dbj BAB03000.1  nucleotide sugar epimerase-like protein [Arabidopsis thaliana]<br>gi 15810205 gb AAL07003.1  AT3g23820/F14O13.1 [Arabidopsis thaliana] gi 17065098 gb AAL32703.1  nucleotide sugar epimerase-like protein [Arabidopsis thaliana]<br>gi 22136952 gb AAM91705.1  putative NAD dependent epimerase [Arabidopsis thaliana] gi 59668636 emb CAI53858.1  UDP-D-glucuronate 4-epimerase [Arabidopsis thaliana]<br>gi 33264329 gb AEE76818.1  UDP-D-glucuronate 4-epimerase 6 [Arabidopsis thaliana] gi 385137880 gb AFI41201.1  UDP-D-glucuronate 4-epimerase 6, nartial [Arabidopsis thaliana] | 458 | 460  | 0         | 100.4 | 93.7 | 96.7 | UDP-D-glucuronate 4-epimerase 6              | gbpln | Arabidopsis thaliana | AT3G23820.1   Symbols: GAE6   UDP-D-glucuronate 4-epimerase 6   chr3:8603645-8605027 FORWARD LENGTH=460                                                                                                                                                                                                                                                                                                                                                                                                                                                                                                                                         | 458 | 460  | 0         | 100.4 | 93.7 | 96.7 |
| Rsa1.0_00169.1.g7418.t1 | dbj BAA97166.1  40S ribosomal protein S19 [Arabidopsis thaliana]                                                                                                                                                                                                                                                                                                                                                                                                                                                                                                                                                                                                                                                                                                                                                                                                                                                                                       | 209 | 244  | 3.00E-96  | 116.7 | 83.3 | 89.0 | 40S ribosomal protein S19                    | gbpln | Arabidopsis thaliana | AT5G47320.1   Symbols: RPS19   ribosomal protein S19   chr5:19203801-19204951 FORWARD LENGTH=212                                                                                                                                                                                                                                                                                                                                                                                                                                                                                                                                                | 209 | 212  | 1.00E-98  | 101.4 | 83.3 | 89.0 |

|                         |                                                                                                                                                                                                                                                                                                                                                                                                                                                                                                                                                                                                                                                                                                                      |      |      |           |       |      |      |                                                         |       |                      |                                                                                                                                                                                                                                                                                                                                               |      |      |           |       |      |      |
|-------------------------|----------------------------------------------------------------------------------------------------------------------------------------------------------------------------------------------------------------------------------------------------------------------------------------------------------------------------------------------------------------------------------------------------------------------------------------------------------------------------------------------------------------------------------------------------------------------------------------------------------------------------------------------------------------------------------------------------------------------|------|------|-----------|-------|------|------|---------------------------------------------------------|-------|----------------------|-----------------------------------------------------------------------------------------------------------------------------------------------------------------------------------------------------------------------------------------------------------------------------------------------------------------------------------------------|------|------|-----------|-------|------|------|
| Rsa1.0_00169.1.g7419.t1 | ref NP_189023.1 <br>adenosylhomocysteinase 2 [Arabidopsis thaliana]<br>gi 61216850 sp Q9LK36.1 SAHH2_ARATH<br>H RecName:<br>Full=Adenosylhomocysteinase 2;<br>Short=AdoHcyase 2; AltName: Full=S-adenosyl-L-homocysteine hydrolase 1;<br>AltName: Full=SAH hydrolase 2<br>gi 9293955 dbj BAB01858.1  S-adenosyl-L-homocystein hydrolase [Arabidopsis thaliana] gi 16649037 gb AAL24370.1  S-adenosyl L-homocystein hydrolase [Arabidopsis thaliana]<br>gi 20260074 gb AAM13384.1  S-adenosyl L-homocystein hydrolase [Arabidopsis thaliana]<br>gi 23297630 gb AANI2996.1  putative S-adenosyl-L-homocysteinase [Arabidopsis thaliana]<br>gi 332643296 gb AEE76817.1  adenosylhomocysteinase 2 [Arabidopsis thaliana] | 485  | 485  | 0         | 100.0 | 98.6 | 98.8 | adenosylhomocysteinase 2                                | gbpln | Arabidopsis thaliana | AT3G23810.1   Symbols: SAHH2, ATSAHH2   S-adenosyl-L-homocysteine (SAH) hydrolase 2   chr3:8588013-8589671 REVERSE LENGTH=485                                                                                                                                                                                                                 | 485  | 485  | 0         | 100.0 | 98.6 | 98.8 |
| Rsa1.0_00169.1.g7420.t1 | ref NP_566740.1  protein ralf-iiike 24 [Arabidopsis thaliana]<br>gi 75273714 sp Q9LK37.1 RLF24_ARATH<br>RecName: Full=Protein RALF-like 24;<br>Flags: Precursor<br>gi 9293954 dbj BAB01857.1  unnamed protein product [Arabidopsis thaliana]<br>gi 332643295 gb AEE76816.1  protein ralf-iiike 24 [Arabidopsis thaliana]                                                                                                                                                                                                                                                                                                                                                                                             | 113  | 118  | 8.00E-41  | 104.4 | 79.6 | 92.9 | protein ralf-like 24                                    | gbpln | Arabidopsis thaliana | AT3G23805.1   Symbols: RALFL24   ralf-like 24   chr3:8586467-858823 FORWARD LENGTH=118                                                                                                                                                                                                                                                        | 113  | 118  | 1.00E-43  | 104.4 | 79.6 | 92.9 |
| Rsa1.0_00169.1.g7421.t4 | gb ACP30604.1  disease resistance protein [Brassica rapa subsp. pekinensis]                                                                                                                                                                                                                                                                                                                                                                                                                                                                                                                                                                                                                                          | 132  | 1196 | 5.00E-38  | 906.1 | 56.8 | 62.1 | disease resistance protein                              | gbpln | Brassica rapa        | AT5G18370.1   Symbols:   Disease resistance protein (TIR-NBS-LRR class) family   chr5:6085036-6088926 REVERSE LENGTH=1210                                                                                                                                                                                                                     | 132  | 1210 | 6.00E-37  | 916.7 | 49.2 | 59.8 |
| Rsa1.0_00169.1.g7422.t3 | # # # # # # # #                                                                                                                                                                                                                                                                                                                                                                                                                                                                                                                                                                                                                                                                                                      |      |      |           |       |      |      | -                                                       | ----  | ----                 | # # # # # # # #                                                                                                                                                                                                                                                                                                                               |      |      |           |       |      |      |
| Rsa1.0_00169.1.g7423.t1 | gb EOA32655.1  hypothetical protein CARUB_v10015952mg [Capsella rubella]                                                                                                                                                                                                                                                                                                                                                                                                                                                                                                                                                                                                                                             | 169  | 476  | 3.00E-91  | 281.7 | 92.3 | 97.0 | hypothetical protein CARUB_v10015952mg                  | gbpln | Capsella rubella     | AT3G23770.1   Symbols:   O-Glycosyl hydrolases family 17 protein   chr3:8565556-8567196 FORWARD LENGTH=476                                                                                                                                                                                                                                    | 169  | 476  | 6.00E-89  | 281.7 | 89.9 | 92.3 |
| Rsa1.0_00169.1.g7424.t1 | ref XP_002864934.1  cyclin-dependent kinase C.2 [Arabidopsis lyrata subsp. lyrata] gi 297310769 gb EFH41193.1  cyclin-dependent kinase C.2 [Arabidopsis lyrata subsp. lyrata]                                                                                                                                                                                                                                                                                                                                                                                                                                                                                                                                        | 503  | 514  | 0         | 102.2 | 86.5 | 92.2 | cyclin-dependent kinase C.2                             | gbpln | Arabidopsis lyrata   | AT5G64960.1   Symbols: CDKC2, CDKC2   cyclin dependent kinase group C2   chr5:25955497-25958427 FORWARD LENGTH=513                                                                                                                                                                                                                            | 503  | 513  | 0         | 102.0 | 86.3 | 91.7 |
| Rsa1.0_00169.1.g7425.t1 | gb EOA29782.1  hypothetical protein CARUB_v10012876mg [Capsella rubella]                                                                                                                                                                                                                                                                                                                                                                                                                                                                                                                                                                                                                                             | 1047 | 1051 | 0         | 100.4 | 85.6 | 90.8 | hypothetical protein CARUB_v10012876mg                  | gbpln | Capsella rubella     | AT3G23640.2   Symbols: HGL1   heteroglycan glucosidase 1   chr3:8502355-8509358 FORWARD LENGTH=991                                                                                                                                                                                                                                            | 1047 | 991  | 0         | 94.7  | 82.5 | 87.9 |
| Rsa1.0_00169.1.g7426.t1 | ref XP_002883444.1  hypothetical protein ARALYDRAFT_898886 [Arabidopsis lyrata subsp. lyrata] gi 297329284 gb EFH59703.1  hypothetical protein ARALYDRAFT_898886 [Arabidopsis lyrata subsp. lyrata]                                                                                                                                                                                                                                                                                                                                                                                                                                                                                                                  | 998  | 998  | 0         | 99.0  | 85.9 | 93.1 | hypothetical protein ARALYDRAFT_898886                  | gbpln | Arabidopsis lyrata   | AT3G23640.2   Symbols: HGL1   heteroglycan glucosidase 1   chr3:8502355-8509358 FORWARD LENGTH=991                                                                                                                                                                                                                                            | 998  | 991  | 0         | 99.3  | 85.4 | 92.7 |
| Rsa1.0_00169.1.g7427.t1 | dbj BAE43829.1  isopentenyltransferase [Brassica rapa subsp. pekinensis]                                                                                                                                                                                                                                                                                                                                                                                                                                                                                                                                                                                                                                             | 332  | 332  | 1.00E-172 | 100.0 | 93.1 | 95.5 | isopentenyltransferase                                  | gbpln | Brassica rapa        | AT3G23630.1   Symbols: ATIPT7, IPT7   isopentenyltransferase 7   chr3:8488878-8489867 FORWARD LENGTH=329                                                                                                                                                                                                                                      | 332  | 329  | 1.00E-169 | 99.1  | 86.7 | 92.5 |
| Rsa1.0_00169.1.g7428.t1 | gb EOA31032.1  hypothetical protein CARUB_v10014181mg [Capsella rubella]                                                                                                                                                                                                                                                                                                                                                                                                                                                                                                                                                                                                                                             | 315  | 324  | 1.00E-154 | 102.9 | 84.8 | 91.1 | hypothetical protein CARUB_v10014181mg                  | gbpln | Capsella rubella     | AT3G23620.1   Symbols:   Ribosomal RNA processing Brix domain protein   chr3:8480147-8481873 FORWARD LENGTH=314                                                                                                                                                                                                                               | 315  | 314  | 2.33E-156 | 99.7  | 83.2 | 91.1 |
| Rsa1.0_00169.1.g7429.t1 | ref XP_002875592.1  alcohol dehydrogenase [Arabidopsis lyrata subsp. lyrata] gi 297321430 gb EFH51851.1  alcohol dehydrogenase [Arabidopsis lyrata subsp. lyrata]                                                                                                                                                                                                                                                                                                                                                                                                                                                                                                                                                    | 447  | 272  | 1.00E-129 | 60.9  | 52.8 | 55.9 | alcohol dehydrogenase                                   | gbpln | Arabidopsis lyrata   | AT3G42960.1   Symbols: ATA1, ASD, TA1   TAPETUM 1   chr3:15018735-15019656 REVERSE LENGTH=272                                                                                                                                                                                                                                                 | 447  | 272  | 1.00E-122 | 60.9  | 51.0 | 55.7 |
| Rsa1.0_00170.1.g7430.t1 | gb AAM63020.1  unknown [Arabidopsis thaliana]                                                                                                                                                                                                                                                                                                                                                                                                                                                                                                                                                                                                                                                                        | 182  | 177  | 7.00E-54  | 97.3  | 71.4 | 83.5 | unknown                                                 | gbpln | Arabidopsis thaliana | AT1G69760.1   Symbols:   unknown protein; BEST Arabidopsis thaliana protein match is: unknown protein (TAIR:AT1G26920.1); Has 51 Blast hits to 51 proteins in 15 species: Archae - 0; Bacteria - 2; Metazoa - 2; Fungi - 7; Plants - 29; Viruses - 0; Other Eukaryotes - 11 (source: NCBI BLINK).   chr1:26240094-26240627 REVERSE LENGTH=177 | 182  | 177  | 6.00E-55  | 97.3  | 70.3 | 83.0 |
| Rsa1.0_00170.1.g7431.t1 | dbj BAB09379.1  non-LTR retroelement reverse transcriptase-like protein [Arabidopsis thaliana]                                                                                                                                                                                                                                                                                                                                                                                                                                                                                                                                                                                                                       | 1148 | 1223 | 0         | 106.5 | 26.9 | 34.9 | non-LTR retroelement reverse transcriptase-like protein | gbpln | Arabidopsis thaliana | AT3G24255.1   Symbols:   RNA-directed DNA polymerase (reverse transcriptase)-related family protein   chr3:8789471-8793208 FORWARD LENGTH=746                                                                                                                                                                                                 | 1148 | 746  | 1.00E-110 | 65.0  | 18.0 | 23.4 |

|                         |                                                                                                                                                                                                                                                                                                                                                                                                                                                                                                                                                                                                                                                                                                                                                                               |     |      |           |       |      |      |                                                     |       |                      |                                                                                                                                                               |     |     |           |       |      |      |
|-------------------------|-------------------------------------------------------------------------------------------------------------------------------------------------------------------------------------------------------------------------------------------------------------------------------------------------------------------------------------------------------------------------------------------------------------------------------------------------------------------------------------------------------------------------------------------------------------------------------------------------------------------------------------------------------------------------------------------------------------------------------------------------------------------------------|-----|------|-----------|-------|------|------|-----------------------------------------------------|-------|----------------------|---------------------------------------------------------------------------------------------------------------------------------------------------------------|-----|-----|-----------|-------|------|------|
| Rsa1.0_00170.1.g7432.t1 | gb AAG51175.1 AC079285.8<br>hypothetical protein [Arabidopsis thaliana]                                                                                                                                                                                                                                                                                                                                                                                                                                                                                                                                                                                                                                                                                                       | 98  | 135  | 4.00E-49  | 137.8 | 95.9 | 98.0 | hypothetical protein                                | gbpln | Arabidopsis thaliana | AT1G66590.1   Symbols: ATCOX19-1, COX19-1   cytochrome c oxidase 19-1   chr1:24841191-24842157 FORWARD LENGTH=98                                              | 98  | 98  | 3.00E-51  | 100.0 | 95.9 | 98.0 |
| Rsa1.0_00170.1.g7433.t1 | ref NP_564878.1  60S ribosomal protein L10-3 [Arabidopsis thaliana]<br>gi 297838747 ref XP_002887255.1  60S ribosomal protein L10 [Arabidopsis lyrata subsp. lyrata]<br>gi 75249285 sp Q93W22.1 RL103_ARAT_H RecName: Full=60S ribosomal protein L10-3<br>gi 14194141 gb AAK56265.1 AF367276.1 At1g66580/T1217.3 [Arabidopsis thaliana]<br>gi 15777885 gb AAL05903.1 At1g66580/T1217.3 [Arabidopsis thaliana]<br>gi 21593025 gb AAM64974.1  60S ribosomal protein L10, putative [Arabidopsis thaliana]<br>gi 297333096 gb EFH63514.1  60S ribosomal protein L10 [Arabidopsis lyrata subsp. lyrata]<br>gi 332196410 gb AEE34531.1  60S ribosomal protein L10-3 [Arabidopsis thaliana]<br>gi 482569259 gb EOA33447.1  hypothetical protein CARUB_v10020922mg [Capsella rubella] | 221 | 221  | 1.00E-122 | 100.0 | 96.4 | 98.2 | 60S ribosomal protein L10-3                         | gbpln | Arabidopsis lyrata   | AT1G66580.1   Symbols: SAG24, RPL10C   senescence associated gene 24   chr1:24839208-24840439 FORWARD LENGTH=221                                              | 221 | 221 | 1.00E-125 | 100.0 | 96.4 | 98.2 |
| Rsa1.0_00170.1.g7434.t1 | gb AAK15323.1 AF332195.1<br>aminolevulinate dehydratase [Raphanus sativus]                                                                                                                                                                                                                                                                                                                                                                                                                                                                                                                                                                                                                                                                                                    | 426 | 426  | 0         | 100.0 | 99.1 | 99.3 | aminolevulinate dehydratase                         | gbpln | Raphanus sativus     | AT1G69740.2   Symbols: HEMB1   Aldolase superfamily protein   chr1:26232197-26234713 FORWARD LENGTH=430                                                       | 426 | 430 | 0         | 100.9 | 93.4 | 96.7 |
| Rsa1.0_00170.1.g7435.t2 | gb EMJ19697.1  hypothetical protein PRUPE_ppa012246mg [Prunus persica]                                                                                                                                                                                                                                                                                                                                                                                                                                                                                                                                                                                                                                                                                                        | 142 | 178  | 3.00E-63  | 125.4 | 82.4 | 90.8 | hypothetical protein PRUPE_ppa012246mg              | gbpln | Prunus persica       | AT5G02960.1   Symbols:   Ribosomal protein S12/S23 family protein   chr5:693280-694396 REVERSE LENGTH=142                                                     | 142 | 142 | 3.00E-62  | 100.0 | 80.3 | 87.3 |
| Rsa1.0_00170.1.g7436.t1 | ref XP_002887251.1  hypothetical protein ARALYDRAFT_476102 [Arabidopsis lyrata subsp. lyrata]<br>gi 297333092 gb EFH63510.1  hypothetical protein ARALYDRAFT_476102 [Arabidopsis lyrata subsp. lyrata]                                                                                                                                                                                                                                                                                                                                                                                                                                                                                                                                                                        | 189 | 184  | 4.00E-90  | 97.4  | 84.7 | 91.0 | hypothetical protein ARALYDRAFT_476102              | gbpln | Arabidopsis lyrata   | AT1G69700.1   Symbols: ATHVA22C, HVA22C   HVA22 homologue C   chr1:26220337-26221663 FORWARD LENGTH=184                                                       | 189 | 184 | 1.00E-90  | 97.4  | 83.1 | 89.9 |
| Rsa1.0_00170.1.g7437.t1 | db BAJ34416.1  unnamed protein product [Thellungiella halophila]                                                                                                                                                                                                                                                                                                                                                                                                                                                                                                                                                                                                                                                                                                              | 321 | 334  | 1.00E-126 | 104.0 | 89.4 | 92.2 | unnamed protein product                             | ----  | ----                 | AT1G69690.1   Symbols:   TCP family transcription factor   chr1:26216449-26217426 FORWARD LENGTH=325                                                          | 321 | 325 | 1.00E-112 | 101.2 | 81.9 | 87.5 |
| Rsa1.0_00170.1.g7438.t1 | # # # # # # # # # #                                                                                                                                                                                                                                                                                                                                                                                                                                                                                                                                                                                                                                                                                                                                                           | #   | #    | #         | #     | #    | #    | -                                                   | ----  | ----                 | # # # # # # # #                                                                                                                                               | #   | #   | #         | #     | #    | #    |
| Rsa1.0_00170.1.g7442.t1 | gb EOA30123.1  hypothetical protein CARUB_v10013233mg [Capsella rubella]                                                                                                                                                                                                                                                                                                                                                                                                                                                                                                                                                                                                                                                                                                      | 335 | 446  | 2.00E-15  | 133.1 | 11.3 | 13.1 | hypothetical protein CARUB_v10013233mg              | gbpln | Capsella rubella     | AT3G02280.1   Symbols:   Flavodoxin family protein   chr3:453646-457659 FORWARD LENGTH=623                                                                    | 335 | 623 | 3.00E-17  | 186.0 | 11.6 | 15.2 |
| Rsa1.0_00170.1.g7440.t1 | emb CAB82966.1  putative protein [Arabidopsis thaliana]                                                                                                                                                                                                                                                                                                                                                                                                                                                                                                                                                                                                                                                                                                                       | 707 | 705  | 0         | 99.7  | 77.2 | 86.6 | putative protein                                    | gbpln | Arabidopsis thaliana | AT3G42170.1   Symbols:   BED zinc finger :hAT family dimerisation domain   chr3:14321838-14323928 FORWARD LENGTH=696                                          | 707 | 696 | 5.00E-70  | 98.4  | 26.6 | 45.5 |
| Rsa1.0_00170.1.g7441.t1 | ref XP_002887249.1  predicted protein [Arabidopsis lyrata subsp. lyrata]<br>gi 297333090 gb EFH63508.1  predicted protein [Arabidopsis lyrata subsp. lyrata]                                                                                                                                                                                                                                                                                                                                                                                                                                                                                                                                                                                                                  | 202 | 202  | 1.00E-102 | 100.0 | 88.6 | 96.5 | predicted protein                                   | gbpln | Arabidopsis lyrata   | AT1G69680.1   Symbols:   Mog1/PsbP/DUF1795-like photosystem II reaction center PsbP family protein   chr1:26205148-26206568 FORWARD LENGTH=202                | 202 | 202 | 1.00E-103 | 100.0 | 88.1 | 95.0 |
| Rsa1.0_00170.1.g7442.t1 | gb EOA34585.1  hypothetical protein CARUB_v10022142mg, partial [Capsella rubella]                                                                                                                                                                                                                                                                                                                                                                                                                                                                                                                                                                                                                                                                                             | 316 | 283  | 1.00E-113 | 89.6  | 63.0 | 72.5 | hypothetical protein CARUB_v10022142mg, partial     | gbpln | Capsella rubella     | AT3G22080.1   Symbols:   TRAF-like family protein   chr3:7777818-7781718 REVERSE LENGTH=648                                                                   | 316 | 648 | 1.00E-108 | 205.1 | 61.7 | 75.0 |
| Rsa1.0_00170.1.g7443.t1 | gb AAD17398.1  putative non-LTR retroelement reverse transcriptase [Arabidopsis thaliana]                                                                                                                                                                                                                                                                                                                                                                                                                                                                                                                                                                                                                                                                                     | 581 | 1225 | 1.00E-90  | 210.8 | 39.8 | 55.8 | putative non-LTR retroelement reverse transcriptase | gbpln | Arabidopsis thaliana | AT4G29090.1   Symbols:   Ribonuclease H-like superfamily protein   chr4:14333528-14335255 FORWARD LENGTH=575                                                  | 581 | 575 | 7.00E-20  | 99.0  | 14.3 | 25.8 |
| Rsa1.0_00170.1.g7444.t1 | gb EOA35611.1  hypothetical protein CARUB_v10020825mg [Capsella rubella]                                                                                                                                                                                                                                                                                                                                                                                                                                                                                                                                                                                                                                                                                                      | 260 | 259  | 1.00E-140 | 99.6  | 91.5 | 96.5 | hypothetical protein CARUB_v10020825mg              | gbpln | Capsella rubella     | AT1G69640.1   Symbols: SBH1   sphingoid base hydroxylase 1   chr1:26193933-26195466 REVERSE LENGTH=260                                                        | 260 | 260 | 1.00E-134 | 100.0 | 92.3 | 96.5 |
| Rsa1.0_00170.1.g7445.t2 | gb EOA34014.1  hypothetical protein CARUB_v10021514mg [Capsella rubella]                                                                                                                                                                                                                                                                                                                                                                                                                                                                                                                                                                                                                                                                                                      | 388 | 387  | 1.00E-141 | 99.7  | 68.6 | 78.6 | hypothetical protein CARUB_v10021514mg              | gbpln | Capsella rubella     | AT1G26870.1   Symbols: FEZ, ANAC009   NAC (No Apical Meristem) domain transcriptional regulator superfamily protein   chr1:9312856-9314983 FORWARD LENGTH=425 | 388 | 425 | 1.00E-125 | 109.5 | 63.7 | 73.5 |
| Rsa1.0_00170.1.g7446.t1 | gb EOA35546.1  hypothetical protein CARUB_v10020752mg [Capsella rubella]                                                                                                                                                                                                                                                                                                                                                                                                                                                                                                                                                                                                                                                                                                      | 297 | 283  | 1.00E-104 | 95.3  | 58.9 | 70.0 | hypothetical protein CARUB_v10020752mg              | gbpln | Capsella rubella     | AT1G66620.1   Symbols:   Protein with RING/U-box and TRAF-like domains   chr1:24852806-24854044 REVERSE LENGTH=313                                            | 297 | 313 | 1.00E-105 | 105.4 | 59.9 | 72.1 |



|                         |                                                                                                                                                                                                                           |     |     |           |       |      |      |                                                 |       |                      |                                                                                                                                               |     |     |           |       |      |      |
|-------------------------|---------------------------------------------------------------------------------------------------------------------------------------------------------------------------------------------------------------------------|-----|-----|-----------|-------|------|------|-------------------------------------------------|-------|----------------------|-----------------------------------------------------------------------------------------------------------------------------------------------|-----|-----|-----------|-------|------|------|
| Rsa1.0_00170.1.g7447.t1 | ref NP_176835.1  E3 ubiquitin-protein ligase SINA-like 2 [Arabidopsis thaliana] gi 75169112 sp Q9C6H3.1 SINL2_ARATH RecName: Full=E3 ubiquitin-protein ligase SINA-like 2; AltName: Full=Seven in absentia-like protein 2 | 169 | 313 | 5.00E-36  | 185.2 | 47.3 | 55.0 | E3 ubiquitin-protein ligase SINA-like 2         | gbpln | Arabidopsis thaliana | AT1G66620.1   Symbols:   Protein with RING/U-box and TRAF-like domains   chr1:24852806-24854044 REVERSE LENGTH=313                            | 169 | 313 | 2.00E-38  | 185.2 | 47.3 | 55.0 |
| Rsa1.0_00170.1.g7448.t1 | ref NP_176835.1  E3 ubiquitin-protein ligase SINA-like 2 [Arabidopsis thaliana] gi 75169112 sp Q9C6H3.1 SINL2_ARATH RecName: Full=E3 ubiquitin-protein ligase SINA-like 2; AltName: Full=Seven in absentia-like protein 2 | 297 | 313 | 1.00E-98  | 105.4 | 59.9 | 69.0 | E3 ubiquitin-protein ligase SINA-like 2         | gbpln | Arabidopsis thaliana | AT1G66620.1   Symbols:   Protein with RING/U-box and TRAF-like domains   chr1:24852806-24854044 REVERSE LENGTH=313                            | 297 | 313 | 1.00E-101 | 105.4 | 59.9 | 69.0 |
| Rsa1.0_00170.1.g7449.t2 | gb EOA35904.1  hypothetical protein CARUB_v10021161mg [Capsella rubella]                                                                                                                                                  | 133 | 120 | 3.00E-56  | 90.2  | 85.7 | 88.7 | hypothetical protein CARUB_v10021161mg          | gbpln | Capsella rubella     | AT1G69620.1   Symbols: RPL34   ribosomal protein L34   chr1:26189900-26191081 FORWARD LENGTH=119                                              | 133 | 119 | 3.00E-58  | 89.5  | 85.0 | 87.2 |
| Rsa1.0_00170.1.g7450.t1 | gb EOA35643.1  hypothetical protein CARUB_v10020860mg [Capsella rubella]                                                                                                                                                  | 251 | 245 | 1.00E-104 | 97.6  | 80.5 | 87.6 | hypothetical protein CARUB_v10020860mg          | gbpln | Capsella rubella     | AT1G69600.1   Symbols: ZFHD1, ATHB29, ZHD11   zinc finger homeodomain 1   chr1:26182470-26183198 FORWARD LENGTH=242                           | 251 | 242 | 1.00E-104 | 96.4  | 76.9 | 84.1 |
| Rsa1.0_00170.1.g7451.t1 | gb EOA33235.1  hypothetical protein CARUB_v10021295mg [Capsella rubella]                                                                                                                                                  | 119 | 124 | 5.00E-37  | 104.2 | 68.1 | 77.3 | hypothetical protein CARUB_v10021295mg          | gbpln | Capsella rubella     | AT1G69588.1   Symbols: CLE45   CLAVATA3/ESR-RELATED 45   chr1:26178150-26178524 FORWARD LENGTH=124                                            | 119 | 124 | 3.00E-37  | 104.2 | 60.5 | 79.0 |
| Rsa1.0_00170.1.g7452.t1 | dbj BAJ34568.1  unnamed protein product [Thellungiella halophila]                                                                                                                                                         | 359 | 393 | 1.00E-147 | 109.5 | 80.5 | 85.2 | unnamed protein product                         | ----  | ----                 | AT1G69570.1   Symbols:   Dof-type zinc finger DNA-binding family protein   chr1:26161771-26163230 REVERSE LENGTH=399                          | 359 | 399 | 1.00E-137 | 111.1 | 76.9 | 83.8 |
| Rsa1.0_00170.1.g7453.t1 | ref XP_002877070.1  hypothetical protein ARALYDRAFT_484564 [Arabidopsis lyrata subsp. lyrata] gi 297322908 gb EFH53329.1  hypothetical protein ARALYDRAFT_484564 [Arabidopsis lyrata subsp. lyrata]                       | 425 | 430 | 0         | 101.2 | 91.8 | 95.3 | hypothetical protein ARALYDRAFT_484564          | gbpln | Arabidopsis lyrata   | AT3G27740.1   Symbols: CARA   carbamoyl phosphate synthetase A   chr3:10281470-10283792 REVERSE LENGTH=430                                    | 425 | 430 | 0         | 101.2 | 91.3 | 94.8 |
| Rsa1.0_00170.1.g7454.t1 | ref XP_002887243.1  MYB105 [Arabidopsis lyrata subsp. lyrata] gi 297333084 gb EFH63502.1  MYB105 [Arabidopsis lyrata subsp. lyrata]                                                                                       | 316 | 294 | 1.00E-115 | 93.0  | 67.4 | 73.7 | MYB105                                          | gbpln | Arabidopsis lyrata   | AT1G69560.1   Symbols: MYB105, LOF2, ATMYP105   myb domain protein 105   chr1:26157755-26158906 FORWARD LENGTH=330                            | 316 | 330 | 1.00E-117 | 104.4 | 69.6 | 77.5 |
| Rsa1.0_00170.1.g7455.t1 | ref NP_177113.3  protein agamous-like 94 [Arabidopsis thaliana] gi 41016522 dbj BAD07477.1  MADS-box protein [Arabidopsis thaliana] gi 332196826 gb AEE34947.1  protein agamous-like 94 [Arabidopsis thaliana]            | 386 | 344 | 1.00E-143 | 89.1  | 65.8 | 76.9 | protein agamous-like 94                         | gbpln | Arabidopsis thaliana | AT1G69540.1   Symbols: AGL94   AGAMOUS-like 94   chr1:26145306-26147159 REVERSE LENGTH=344                                                    | 386 | 344 | 2.33E-156 | 89.1  | 65.8 | 76.9 |
| Rsa1.0_00170.1.g7456.t1 | gb AGZ57921.1  expansin protein 1 [Brassica juncea] gi 283459396 gb ADB22388.1  expansin [Brassica juncea]                                                                                                                | 248 | 249 | 1.00E-134 | 100.4 | 95.6 | 96.8 | expansin protein 1                              | gbpln | Brassica juncea      | AT1G69530.2   Symbols: ATEXPA1, EXP1, AT-EXP1, ATEXP1, ATHEXP ALPHA 1.2, EXPA1   expansin A1   chr1:26142034-26143051 FORWARD LENGTH=250      | 248 | 250 | 1.00E-134 | 100.8 | 94.4 | 96.8 |
| Rsa1.0_00171.1.g7457.t1 | gb EOA17434.1  hypothetical protein CARUB_v10005737mg [Capsella rubella]                                                                                                                                                  | 189 | 208 | 3.00E-93  | 110.1 | 91.5 | 94.7 | hypothetical protein CARUB_v10005737mg          | gbpln | Capsella rubella     | AT4G28830.1   Symbols:   S-adenosyl-L-methionine-dependent methyltransferases superfamily protein   chr4:14232490-14233917 FORWARD LENGTH=208 | 189 | 208 | 3.00E-95  | 110.1 | 91.5 | 94.2 |
| Rsa1.0_00171.1.g7458.t1 | ref XP_004139852.1  PREDICTED: uncharacterized protein LOC101219957 [Cucumis sativus]                                                                                                                                     | 870 | 766 | 0         | 88.0  | 43.6 | 59.3 | PREDICTED: uncharacterized protein LOC101219957 | gbpln | Cucumis sativus      | AT5G33406.1   Symbols:   hAT dimerisation domain-containing protein / transposase-related   chr5:12676126-12678403 REVERSE LENGTH=509         | 870 | 509 | 1.00E-143 | 58.5  | 27.4 | 32.5 |
| Rsa1.0_00171.1.g7459.t2 | ref XP_002867436.1  zinc finger family protein [Arabidopsis lyrata subsp. lyrata] gi 297313272 gb EFH43695.1  zinc finger family protein [Arabidopsis lyrata subsp. lyrata]                                               | 139 | 173 | 6.00E-46  | 124.5 | 77.7 | 83.5 | zinc finger family protein                      | gbpln | Arabidopsis lyrata   | AT4G28820.1   Symbols:   HIT-type Zinc finger family protein   chr4:14230815-14232287 REVERSE LENGTH=173                                      | 139 | 173 | 1.00E-47  | 124.5 | 78.4 | 82.7 |
| Rsa1.0_00171.1.g7460.t1 | gb EOA15835.1  hypothetical protein CARUB_v10007459mg, partial [Capsella rubella]                                                                                                                                         | 475 | 453 | 2.00E-95  | 95.4  | 54.3 | 62.1 | hypothetical protein CARUB_v10007459mg, partial | gbpln | Capsella rubella     | AT4G28800.1   Symbols:   basic helix-loop-helix (bHLH) DNA-binding superfamily protein   chr4:14221970-14224075 FORWARD LENGTH=445            | 475 | 445 | 1.00E-94  | 93.7  | 52.4 | 59.6 |
| Rsa1.0_00171.1.g7461.t1 | #                                                                                                                                                                                                                         | #   | #   | #         | #     | #    | -    | ----                                            | ----  | ----                 | #                                                                                                                                             | #   | #   | #         | #     | #    | #    |
| Rsa1.0_00171.1.g7462.t1 | #                                                                                                                                                                                                                         | #   | #   | #         | #     | #    | -    | ----                                            | ----  | ----                 | #                                                                                                                                             | #   | #   | #         | #     | #    | #    |

|                          |                                                                                                                                                                                                                                                                                                                                                                                                                                                                                                                                                                                                                                                                                                                |      |      |           |       |      |      |                                                                              |       |                      |                                                                                                                                               |      |      |           |       |      |      |
|--------------------------|----------------------------------------------------------------------------------------------------------------------------------------------------------------------------------------------------------------------------------------------------------------------------------------------------------------------------------------------------------------------------------------------------------------------------------------------------------------------------------------------------------------------------------------------------------------------------------------------------------------------------------------------------------------------------------------------------------------|------|------|-----------|-------|------|------|------------------------------------------------------------------------------|-------|----------------------|-----------------------------------------------------------------------------------------------------------------------------------------------|------|------|-----------|-------|------|------|
| Rsa1.0_00171.1.g7463.t1  | ref NP_194607.1  GDSL esterase/lipase [Arabidopsis thaliana] gi 75212623 sp Q9SVU5.1 GDL67_ARAT H RecName: Full=GDSL esterase/lipase At4g28780; AltName: Full=Extracellular lipase At4g28780; Flags: Precursor gi 4218120 emb CAA22974.1  Proline-rich APG-like protein [Arabidopsis thaliana] gi 7269733 emb CAB81466.1  Proline-rich APG-like protein [Arabidopsis thaliana] gi 21592773 gb AAM64722.1  Proline-rich APG-like protein [Arabidopsis thaliana] gi 27754717 gb AAO22802.1  putative proline-rich APG protein [Arabidopsis thaliana] gi 28394103 gb AAO42459.1  putative proline-rich APG protein [Arabidopsis thaliana] gi 332660143 gb AEE85543.1  GDSL esterase/lipase [Arabidopsis thaliana] | 366  | 367  | 0         | 100.3 | 93.2 | 94.8 | GDSL esterase/lipase                                                         | gbpln | Arabidopsis thaliana | AT4G28780.1   Symbols:   GDSL-like Lipase/Acylhydrolase superfamily protein   chr4:14215603-14217159 FORWARD LENGTH=367                       | 366  | 367  | 0         | 100.3 | 93.2 | 94.8 |
| Rsa1.0_00171.1.g7464.t1  | gb EOA17197.1  hypothetical protein CARUB_v10005468mg [Capsella rubella]                                                                                                                                                                                                                                                                                                                                                                                                                                                                                                                                                                                                                                       | 269  | 275  | 1.00E-113 | 102.2 | 84.8 | 91.4 | hypothetical protein CARUB_v10005468mg                                       | gbpln | Capsella rubella     | AT4G28770.2   Symbols:   Tetraspanin family protein   chr4:14212177-14213896 REVERSE LENGTH=325                                               | 269  | 325  | 1.00E-108 | 120.8 | 84.0 | 90.7 |
| Rsa1.0_00171.1.g7465.t1  | ref XP_002869475.1  hypothetical protein ARALYDRAFT_491881 [Arabidopsis lyrata subsp. lyrata] gi 29731531 gb EFH45734.1  hypothetical protein ARALYDRAFT_491881 [Arabidopsis lyrata subsp. lyrata]                                                                                                                                                                                                                                                                                                                                                                                                                                                                                                             | 894  | 924  | 0         | 103.4 | 77.6 | 84.1 | hypothetical protein ARALYDRAFT_491881                                       | gbpln | Arabidopsis lyrata   | AT4G28760.2   Symbols:   Protein of unknown function (DUF3741)   chr4:14208640-14211811 FORWARD LENGTH=924                                    | 894  | 924  | 0         | 103.4 | 77.0 | 84.0 |
| Rsa1.0_00171.1.g7466.t1  | ref XP_002867438.1  hypothetical protein ARALYDRAFT_491882 [Arabidopsis lyrata subsp. lyrata] gi 297313274 gb EFH43697.1  hypothetical protein ARALYDRAFT_491882 [Arabidopsis lyrata subsp. lyrata]                                                                                                                                                                                                                                                                                                                                                                                                                                                                                                            | 140  | 143  | 1.00E-46  | 102.1 | 85.0 | 90.7 | hypothetical protein ARALYDRAFT_491882                                       | gbpln | Arabidopsis lyrata   | AT2G20260.1   Symbols:   PSAE-2   photosystem I subunit E-2   chr2:8736780-8737644 FORWARD LENGTH=145                                         | 140  | 145  | 2.00E-42  | 103.6 | 72.9 | 81.4 |
| Rsa1.0_00171.1.g7467.t1  | ref NP_194602.2  glutaredoxin-C5 [Arabidopsis thaliana] gi 75151040 sp Q8GWS0.1 GRXC5_ARA TH RecName: Full=Glutaredoxin-C5, chloroplastic; Short=AtGrxC5; Flags: Precursor gi 26452363 dbj BAC43267.1  unknown protein [Arabidopsis thaliana] gi 28372898 gb AAO39931.1  At4g28730 [Arabidopsis thaliana] gi 332660135 gb AEE85535.1  glutaredoxin-C5 [Arabidopsis thaliana]                                                                                                                                                                                                                                                                                                                                   | 177  | 174  | 3.00E-64  | 98.3  | 75.1 | 84.7 | glutaredoxin-C5                                                              | gbpln | Arabidopsis thaliana | AT4G28730.1   Symbols:   Glutaredoxin family protein   chr4:14199174-14200712 FORWARD LENGTH=174                                              | 177  | 174  | 1.00E-66  | 98.3  | 75.1 | 84.7 |
| Rsa1.0_00171.1.g7468.t1  | gb EOA18198.1  hypothetical protein CARUB_v10006681mg [Capsella rubella]                                                                                                                                                                                                                                                                                                                                                                                                                                                                                                                                                                                                                                       | 426  | 426  | 0         | 100.0 | 91.8 | 95.8 | hypothetical protein CARUB_v10006681mg                                       | gbpln | Capsella rubella     | AT4G28720.1   Symbols:   YUC8   Flavin-binding monooxygenase family protein   chr4:14192688-14193968 FORWARD LENGTH=426                       | 426  | 426  | 0         | 100.0 | 90.8 | 95.8 |
| Rsa1.0_00171.1.g7469.t1  | ref NP_567266.1  RNA-directed DNA polymerase (reverse transcriptase)-related family protein [Arabidopsis thaliana] gi 5732057 gb AAD48956.1 AF149414_5 contains similarity to a family of Arabidopsis thaliana predicted proteins, which have similarity to reverse transcriptases; see T14P8.10 (GB:AF069298) [Arabidopsis thaliana] gi 7267223 emb CAB80830.1  AT4g04650 [Arabidopsis thaliana] gi 332657009 gb AEE82409.1  RNA-directed DNA polymerase (reverse transcriptase)-related family protein [Arabidopsis thaliana]                                                                                                                                                                                | 267  | 332  | 1.00E-52  | 124.3 | 43.8 | 58.4 | RNA-directed DNA polymerase (reverse transcriptase)-related family protein   | gbpln | Arabidopsis thaliana | AT4G04650.1   Symbols:   RNA-directed DNA polymerase (reverse transcriptase)-related family protein   chr4:2353989-2355213 REVERSE LENGTH=332 | 267  | 332  | 3.00E-55  | 124.3 | 43.8 | 58.4 |
| Rsa1.0_00171.1.g7470.t1  | #                                                                                                                                                                                                                                                                                                                                                                                                                                                                                                                                                                                                                                                                                                              | #    | #    | #         | #     | #    | #    | -                                                                            | ----  | ----                 | #                                                                                                                                             | #    | #    | #         | #     | #    | #    |
| Rsa1.0_00171.1.g7471.t1  | sp Q9C7F1.2 PPR61_ARATH RecName: Full=Putative pentatricopeptide repeat-containing protein At1g28020                                                                                                                                                                                                                                                                                                                                                                                                                                                                                                                                                                                                           | 370  | 566  | 3.00E-90  | 153.0 | 46.2 | 61.1 | RecName: Full=Putative pentatricopeptide repeat-containing protein At1g28020 | ----  | ----                 | AT1G28020.1   Symbols:   Tetratricopeptide repeat (TPR)-like superfamily protein   chr1:9768395-9771157 REVERSE LENGTH=612                    | 370  | 612  | 8.00E-93  | 165.4 | 46.2 | 61.1 |
| Rsa1.0_00171.1.g7472.t10 | gb EOA18420.1  hypothetical protein CARUB_v10006964mg [Capsella rubella]                                                                                                                                                                                                                                                                                                                                                                                                                                                                                                                                                                                                                                       | 1967 | 1510 | 0         | 76.8  | 68.5 | 73.0 | hypothetical protein CARUB_v10006964mg                                       | gbpln | Capsella rubella     | AT4G28710.1   Symbols:   XIH, ATXIH   Myosin family protein with Dil domain   chr4:14172280-14181771 FORWARD LENGTH=1516                      | 1967 | 1516 | 0         | 77.1  | 68.0 | 72.4 |

|                         |                                                                                                                                                                                                                                                                                                                                                          |      |     |           |       |      |      |                                                 |       |                      |                                                                                                                                                                                                                                                                                                                                                                                                                                                                                                                                                                                                              |      |     |           |       |      |      |
|-------------------------|----------------------------------------------------------------------------------------------------------------------------------------------------------------------------------------------------------------------------------------------------------------------------------------------------------------------------------------------------------|------|-----|-----------|-------|------|------|-------------------------------------------------|-------|----------------------|--------------------------------------------------------------------------------------------------------------------------------------------------------------------------------------------------------------------------------------------------------------------------------------------------------------------------------------------------------------------------------------------------------------------------------------------------------------------------------------------------------------------------------------------------------------------------------------------------------------|------|-----|-----------|-------|------|------|
| Rsa1.0_00171.1.g7473.t1 | refXP_002869482.1   hypothetical protein ARALYDRAFT_491890 [Arabidopsis lyrata subsp. lyrata] gi 297315318 gb EFH45741.1   hypothetical protein ARALYDRAFT_491890 [Arabidopsis lyrata subsp. lyrata]                                                                                                                                                     | 113  | 109 | 5.00E-46  | 96.5  | 84.1 | 87.6 | hypothetical protein ARALYDRAFT_491890          | gbpln | Arabidopsis lyrata   | AT4G28703.1   Symbols:   RmC-like cupins superfamily protein   chr4:14166365-14166798 FORWARD LENGTH=107                                                                                                                                                                                                                                                                                                                                                                                                                                                                                                     | 113  | 107 | 6.00E-47  | 94.7  | 80.5 | 83.2 |
| Rsa1.0_00171.1.g7474.t1 | refXP_002869483.1   hypothetical protein ARALYDRAFT_913645 [Arabidopsis lyrata subsp. lyrata] gi 297315319 gb EFH45742.1   hypothetical protein ARALYDRAFT_913645 [Arabidopsis lyrata subsp. lyrata]                                                                                                                                                     | 503  | 505 | 0         | 100.4 | 88.7 | 95.2 | hypothetical protein ARALYDRAFT_913645          | gbpln | Arabidopsis lyrata   | AT4G28700.1   Symbols: AMT1:4   ammonium transporter 1:4   chr4:14161681-14163195 FORWARD LENGTH=504                                                                                                                                                                                                                                                                                                                                                                                                                                                                                                         | 503  | 504 | 0         | 100.2 | 88.3 | 95.0 |
| Rsa1.0_00171.1.g7475.t1 | refXP_002869484.1   hypothetical protein ARALYDRAFT_328829 [Arabidopsis lyrata subsp. lyrata] gi 297315320 gb EFH45743.1   hypothetical protein ARALYDRAFT_328829 [Arabidopsis lyrata subsp. lyrata]                                                                                                                                                     | 339  | 437 | 3.00E-56  | 128.9 | 49.9 | 62.5 | hypothetical protein ARALYDRAFT_328829          | gbpln | Arabidopsis lyrata   | AT4G28690.1   Symbols:   BEST Arabidopsis thaliana protein match is: RPM1 interacting protein 13 (TAIR:AT2G20310.1); Has 455 Blast hits to 438 proteins in 127 species: Archae - 0; Bacteria - 18; Metazoa - 148; Fungi - 91; Plants - 136; Viruses - 3; Other Eukaryotes - 59 (source: NCBI BLINK).   chr4:14159093-14160876 FORWARD LENGTH=448                                                                                                                                                                                                                                                             | 339  | 448 | 5.00E-55  | 132.2 | 47.8 | 59.6 |
| Rsa1.0_00171.1.g7476.t1 | gb EOA18065.1   hypothetical protein CARUB_v10006511mg [Capsella rubella]                                                                                                                                                                                                                                                                                | 1221 | 623 | 0         | 51.0  | 37.3 | 41.2 | hypothetical protein CARUB_v10006511mg          | gbpln | Capsella rubella     | AT4G28670.1   Symbols:   Protein kinase family protein with domain of unknown function (DUF26)   chr4:14151387-14153935 FORWARD LENGTH=625                                                                                                                                                                                                                                                                                                                                                                                                                                                                   | 1221 | 625 | 0         | 51.2  | 36.9 | 41.1 |
| Rsa1.0_00171.1.g7477.t1 | refXP_002869488.1   photosystem II reaction centre W family protein [Arabidopsis lyrata subsp. lyrata] gi 297315324 gb EFH45743.1   photosystem II reaction centre W family protein [Arabidopsis lyrata subsp. lyrata]                                                                                                                                   | 202  | 183 | 3.00E-83  | 90.6  | 79.2 | 85.1 | photosystem II reaction centre W family protein | gbpln | Arabidopsis lyrata   | AT4G28660.2   Symbols: PSB28   photosystem II reaction center PSB28 protein   chr4:14150008-14150933 FORWARD LENGTH=198                                                                                                                                                                                                                                                                                                                                                                                                                                                                                      | 202  | 198 | 3.00E-85  | 98.0  | 79.2 | 85.6 |
| Rsa1.0_00172.1.g7478.t1 | ref NP_974068.1   uncharacterized protein [Arabidopsis thaliana] gi 332195780 gb AEE33901.1   uncharacterized protein AT1G61900 [Arabidopsis thaliana]                                                                                                                                                                                                   | 152  | 413 | 4.00E-72  | 271.7 | 87.5 | 96.1 | uncharacterized protein                         | gbpln | Arabidopsis thaliana | AT1G61900.2   Symbols:   unknown protein; FUNCTIONS IN: molecular.function unknown; INVOLVED IN: biological.process unknown; LOCATED IN: anchored to plasma membrane, plasma membrane, anchored to membrane; EXPRESSED IN: 23 plant structures; EXPRESSED DURING: 13 growth stages; BEST Arabidopsis thaliana protein match is: unknown protein (TAIR:AT2G30700.1); Has 35333 Blast hits to 34131 proteins in 2444 species: Archae - 798; Bacteria - 22429; Metazoa - 974; Fungi - 991; Plants - 531; Viruses - 0; Other Eukaryotes - 9610 (source: NCBI BLINK).   chr1:22882561-22884722 REVERSE LENGTH=413 | 152  | 413 | 1.00E-74  | 271.7 | 87.5 | 96.1 |
| Rsa1.0_00172.1.g7479.t8 | ref NP_564788.1   uncharacterized protein [Arabidopsis thaliana] gi 3367524 gb AAC28509.1   F8K4.12 [Arabidopsis thaliana] gi 110740269 dbj BAF02031.1   hypothetical protein [Arabidopsis thaliana] gi 115311437 gb ABI93899.1   At1g61930 [Arabidopsis thaliana] gi 332195783 gb AEE33904.1   uncharacterized protein AT1G61930 [Arabidopsis thaliana] | 201  | 203 | 2.00E-69  | 101.0 | 77.6 | 86.6 | uncharacterized protein                         | gbpln | Arabidopsis thaliana | AT1G61930.1   Symbols:   Protein of unknown function, DUF584   chr1:22893218-22893829 FORWARD LENGTH=203                                                                                                                                                                                                                                                                                                                                                                                                                                                                                                     | 201  | 203 | 6.00E-72  | 101.0 | 77.6 | 86.6 |
| Rsa1.0_00172.1.g7480.t1 | gb EOA33363.1   hypothetical protein CARUB_v10020262mg [Capsella rubella]                                                                                                                                                                                                                                                                                | 506  | 461 | 2.33E-156 | 91.1  | 54.5 | 68.4 | hypothetical protein CARUB_v10020262mg          | gbpln | Capsella rubella     | AT1G62085.1   Symbols:   Mitochondrial transcription termination factor family protein   chr1:22948757-22950142 REVERSE LENGTH=461                                                                                                                                                                                                                                                                                                                                                                                                                                                                           | 506  | 461 | 1.00E-148 | 91.1  | 54.5 | 69.2 |
| Rsa1.0_00172.1.g7481.t1 | refXP_002888053.1   hypothetical protein ARALYDRAFT_475137 [Arabidopsis lyrata subsp. lyrata] gi 297333894 gb EFH64312.1   hypothetical protein ARALYDRAFT_475137 [Arabidopsis lyrata subsp. lyrata]                                                                                                                                                     | 420  | 419 | 1.00E-142 | 99.8  | 63.6 | 76.9 | hypothetical protein ARALYDRAFT_475137          | gbpln | Arabidopsis lyrata   | AT1G62120.1   Symbols:   Mitochondrial transcription termination factor family protein   chr1:22960326-22961639 REVERSE LENGTH=437                                                                                                                                                                                                                                                                                                                                                                                                                                                                           | 420  | 437 | 1.00E-142 | 104.0 | 62.9 | 77.1 |
| Rsa1.0_00172.1.g7482.t1 | refXP_002886466.1   hypothetical protein ARALYDRAFT_893233 [Arabidopsis lyrata subsp. lyrata] gi 297332307 gb EFH62725.1   hypothetical protein ARALYDRAFT_893233 [Arabidopsis lyrata subsp. lyrata]                                                                                                                                                     | 436  | 473 | 1.00E-151 | 108.5 | 60.6 | 75.9 | hypothetical protein ARALYDRAFT_893233          | gbpln | Arabidopsis lyrata   | AT1G61960.1   Symbols:   Mitochondrial transcription termination factor family protein   chr1:22902239-22903612 FORWARD LENGTH=457                                                                                                                                                                                                                                                                                                                                                                                                                                                                           | 436  | 457 | 1.00E-151 | 104.8 | 64.7 | 80.5 |

|                         |                                                                                                                                                                                                                                                                    |      |      |          |        |      |      |                                                                                                                                                                                                                              |       |                      |                                                                                                                                                                                                                                                                                                                                                                                                                                                                                                                                                                                 |      |      |          |       |      |      |
|-------------------------|--------------------------------------------------------------------------------------------------------------------------------------------------------------------------------------------------------------------------------------------------------------------|------|------|----------|--------|------|------|------------------------------------------------------------------------------------------------------------------------------------------------------------------------------------------------------------------------------|-------|----------------------|---------------------------------------------------------------------------------------------------------------------------------------------------------------------------------------------------------------------------------------------------------------------------------------------------------------------------------------------------------------------------------------------------------------------------------------------------------------------------------------------------------------------------------------------------------------------------------|------|------|----------|-------|------|------|
| Rsa1.0_00172.1.g7483.t1 | gb AAC28522.1  Contains similarity to ANK repeat region of Fowlpox virus BamHI-orf7 protein homolog C18F10.7 gi 485107 from Caenorhabditis elegans cosmid gb U00049. This gene is continued from unannotated gene on BAC F19K23 gb AC000375 [Arabidopsis thaliana] | 65   | 684  | 1.00E-21 | 1052.3 | 84.6 | 87.7 | Contains similarity to ANK repeat region of Fowlpox virus BamHI-orf7 protein homolog C18F10.7 gi 485107 from Caenorhabditis elegans cosmid gb U00049. This gene is continued from unannotated gene on BAC F19K23 gb AC000375 | gbpln | Arabidopsis thaliana | AT1G62045.1   Symbols:   BEST Arabidopsis thaliana protein match is: ankyrin repeat family protein (TAIR:AT1G11740.1); Has 26 Blast hits to 26 proteins in 7 species: Archae - 0; Bacteria - 0; Metazoa - 0; Fungi - 0; Plants - 26; Viruses - 0; Other Eukaryotes - 0 (source: NCBI BLink).   chr1:22934905-22935108 REVERSE LENGTH=67                                                                                                                                                                                                                                         | 65   | 67   | 2.00E-23 | 103.1 | 84.6 | 87.7 |
| Rsa1.0_00172.1.g7484.t1 | ref XP_002888042.1  predicted protein [Arabidopsis lyrata subsp. lyrata] gi 297333883 gb EFH64301.1  predicted protein [Arabidopsis lyrata subsp. lyrata]                                                                                                          | 353  | 378  | 3.00E-87 | 107.1  | 56.1 | 66.9 | predicted protein                                                                                                                                                                                                            | gbpln | Arabidopsis lyrata   | AT3G19560.1   Symbols:   F-box family protein   chr3:6793717-6794802 FORWARD LENGTH=361                                                                                                                                                                                                                                                                                                                                                                                                                                                                                         | 353  | 361  | 6.00E-67 | 102.3 | 47.9 | 61.8 |
| Rsa1.0_00172.1.g7485.t1 | ref XP_002875821.1  hypothetical protein ARALYDRAFT_485072 [Arabidopsis lyrata subsp. lyrata] gi 297321659 gb EFH52080.1  hypothetical protein ARALYDRAFT_485072 [Arabidopsis lyrata subsp. lyrata]                                                                | 217  | 433  | 4.00E-48 | 199.5  | 57.1 | 70.5 | hypothetical protein ARALYDRAFT_485072                                                                                                                                                                                       | gbpln | Arabidopsis lyrata   | AT1G62490.1   Symbols:   Mitochondrial transcription termination factor family protein   chr1:23130405-23131533 REVERSE LENGTH=334                                                                                                                                                                                                                                                                                                                                                                                                                                              | 217  | 334  | 2.00E-47 | 153.9 | 53.9 | 65.0 |
| Rsa1.0_00172.1.g7486.t1 | gb AAG51783.1 AC079679.3 reverse transcriptase, putative; 16838-20266 [Arabidopsis thaliana]                                                                                                                                                                       | 430  | 1142 | 3.00E-76 | 265.6  | 36.5 | 55.8 | reverse transcriptase, putative; 16838-20266                                                                                                                                                                                 | gbpln | Arabidopsis thaliana | AT4G20900.1   Symbols:   Ribonuclease H-like superfamily protein   chr4:14333528-14335255 FORWARD LENGTH=575<br>AT1G62225.1   Symbols:   unknown protein; FUNCTIONS IN: molecular_function unknown; INVOLVED IN: biological_process unknown; LOCATED IN: endomembrane system; BEST Arabidopsis thaliana protein match is: unknown protein (TAIR:AT1G62000.1); Has 41 Blast hits to 41 proteins in 5 species: Archae - 0; Bacteria - 2; Metazoa - 1; Fungi - 2; Plants - 36; Viruses - 0; Other Eukaryotes - 0 (source: NCBI BLink).   chr1:22989850-22990281 REVERSE LENGTH=143 | 430  | 575  | 2.00E-42 | 133.7 | 27.9 | 48.4 |
| Rsa1.0_00172.1.g7487.t1 | gb EOA33271.1  hypothetical protein CARUB_v10022438mg [Capsella rubella]                                                                                                                                                                                           | 144  | 145  | 3.00E-18 | 100.7  | 53.5 | 65.3 | hypothetical protein CARUB_v10022438mg                                                                                                                                                                                       | gbpln | Capsella rubella     | AT1G62260.1   Symbols: MEF9   mitochondrial editing factor 9   chr1:22997826-22999796 REVERSE LENGTH=656                                                                                                                                                                                                                                                                                                                                                                                                                                                                        | 144  | 143  | 1.00E-15 | 99.3  | 42.4 | 54.2 |
| Rsa1.0_00172.1.g7488.t1 | ref XP_002886483.1  hypothetical protein ARALYDRAFT_338156 [Arabidopsis lyrata subsp. lyrata] gi 297332324 gb EFH62742.1  hypothetical protein ARALYDRAFT_338156 [Arabidopsis lyrata subsp. lyrata]                                                                | 663  | 1243 | 0        | 187.5  | 76.8 | 84.8 | hypothetical protein ARALYDRAFT_338156                                                                                                                                                                                       | gbpln | Arabidopsis lyrata   | AT1G62262.1   Symbols: SLAH4   SLAC1 homologue 4   chr1:23000318-23001491 REVERSE LENGTH=365                                                                                                                                                                                                                                                                                                                                                                                                                                                                                    | 663  | 656  | 0        | 98.9  | 76.6 | 84.5 |
| Rsa1.0_00172.1.g7489.t1 | ref NP_001077757.1  SLAC1 homologue 4 [Arabidopsis thaliana] gi 322518637 sp A8MRV9.1 SLAH4_ARA TH RecName: Full=S-type anion channel SLAH4; AltName: Full=SLAC1-homolog protein 4 gi 332195822 gb AEE33943.1  SLAC1 homologue 4 [Arabidopsis thaliana]            | 368  | 365  | 0        | 99.2   | 86.7 | 91.6 | SLAC1 homologue 4                                                                                                                                                                                                            | gbpln | Arabidopsis thaliana | AT4G23160.1   Symbols: CRK8   cysteine-rich RLK (RECEPTOR-like protein kinase) 8   chr4:12129485-12134086 FORWARD LENGTH=1262                                                                                                                                                                                                                                                                                                                                                                                                                                                   | 368  | 365  | 0        | 99.2  | 86.7 | 91.6 |
| Rsa1.0_00172.1.g7490.t1 | emb CAD40121.3  OSJNBa0061C06.5 [Oryza sativa Japonica Group]                                                                                                                                                                                                      | 360  | 621  | 7.00E-54 | 172.5  | 39.2 | 53.3 | OSJNBa0061C06.5                                                                                                                                                                                                              | gbpln | Oryza sativa         | AT1G62280.1   Symbols: SLAH1   SLAC1 homologue 1   chr1:23007309-23008540 REVERSE LENGTH=385                                                                                                                                                                                                                                                                                                                                                                                                                                                                                    | 360  | 1262 | 2.00E-23 | 350.6 | 22.8 | 32.2 |
| Rsa1.0_00172.1.g7491.t1 | ref XP_002886482.1  C4-dicarboxylate transporter/malic acid transport family protein [Arabidopsis lyrata subsp. lyrata] gi 297332323 gb EFH62741.1  C4-dicarboxylate transporter/malic acid transport family protein [Arabidopsis lyrata subsp. lyrata]            | 381  | 385  | 0        | 101.0  | 82.4 | 88.5 | C4-dicarboxylate transporter/malic acid transport family protein                                                                                                                                                             | gbpln | Arabidopsis lyrata   | AT1G62300.1   Symbols: WRKY6, ATWRKY6   WRKY family transcription factor   chr1:23016887-23019155 REVERSE LENGTH=553                                                                                                                                                                                                                                                                                                                                                                                                                                                            | 381  | 385  | 0        | 101.0 | 81.4 | 87.9 |
| Rsa1.0_00172.1.g7492.t1 | # # # # # # # # # #                                                                                                                                                                                                                                                |      |      |          |        |      |      |                                                                                                                                                                                                                              |       |                      |                                                                                                                                                                                                                                                                                                                                                                                                                                                                                                                                                                                 |      |      |          |       |      |      |
| Rsa1.0_00172.1.g7493.t1 | gb AGI14403.1  WRKY6-1 transcription factor [Brassica napus]                                                                                                                                                                                                       | 550  | 553  | 0        | 100.5  | 94.4 | 96.0 | WRKY6-1 transcription factor                                                                                                                                                                                                 | gbpln | Brassica napus       | AT1G62310.1   Symbols:   transcription factor jumoni (jmc) domain-containing protein   chr1:23036039-23039301 REVERSE LENGTH=883                                                                                                                                                                                                                                                                                                                                                                                                                                                | 550  | 553  | 0        | 100.5 | 84.9 | 90.7 |
| Rsa1.0_00172.1.g7494.t1 | ref XP_002886476.1  predicted protein [Arabidopsis lyrata subsp. lyrata] gi 297332317 gb EFH62735.1  predicted protein [Arabidopsis lyrata subsp. lyrata]                                                                                                          | 1012 | 931  | 0        | 92.0   | 64.7 | 73.1 | predicted protein                                                                                                                                                                                                            | gbpln | Arabidopsis lyrata   | AT1G62320.1   Symbols:   ERD (early-responsive to dehydration stress) family protein   chr1:23041668-23044855 REVERSE LENGTH=769                                                                                                                                                                                                                                                                                                                                                                                                                                                | 1012 | 883  | 0        | 87.3  | 62.9 | 71.5 |
| Rsa1.0_00172.1.g7495.t1 | gb EOA33299.1  hypothetical protein CARUB_v10019839mg [Capsella rubella]                                                                                                                                                                                           | 779  | 774  | 0        | 99.4   | 88.6 | 94.4 | hypothetical protein CARUB_v10019839mg                                                                                                                                                                                       | gbpln | Capsella rubella     |                                                                                                                                                                                                                                                                                                                                                                                                                                                                                                                                                                                 | 779  | 769  | 0        | 98.7  | 87.2 | 92.6 |

|                         |                                                                                                                                                                                                                                                                                                                                                                                                                                                                                                                                                                                                                                                           |     |      |           |       |      |      |                                           |       |                      |                                                                                                                                                               |     |      |           |       |      |      |
|-------------------------|-----------------------------------------------------------------------------------------------------------------------------------------------------------------------------------------------------------------------------------------------------------------------------------------------------------------------------------------------------------------------------------------------------------------------------------------------------------------------------------------------------------------------------------------------------------------------------------------------------------------------------------------------------------|-----|------|-----------|-------|------|------|-------------------------------------------|-------|----------------------|---------------------------------------------------------------------------------------------------------------------------------------------------------------|-----|------|-----------|-------|------|------|
| Rsa1.0_00173.1.g7496.t1 | gb[EOA13765.1] hypothetical protein CARUB_v10026857mg [Capsella rubella]                                                                                                                                                                                                                                                                                                                                                                                                                                                                                                                                                                                  | 255 | 303  | 5.00E-58  | 118.8 | 45.5 | 63.5 | hypothetical protein CARUB_v10026857mg    | gbpln | Capsella rubella     | AT5G42670.1   Symbols:   Agenet domain-containing protein   chr5:17108262-17110235 FORWARD LENGTH=294                                                         | 255 | 294  | 5.00E-54  | 115.3 | 45.9 | 64.7 |
| Rsa1.0_00173.1.g7497.t1 | # # # # # # # #                                                                                                                                                                                                                                                                                                                                                                                                                                                                                                                                                                                                                                           |     |      |           |       |      |      | -                                         | ----  | ----                 | # # # # # # #                                                                                                                                                 |     |      |           |       |      |      |
| Rsa1.0_00173.1.g7498.t1 | gb[EOA13765.1] hypothetical protein CARUB_v10026857mg [Capsella rubella]                                                                                                                                                                                                                                                                                                                                                                                                                                                                                                                                                                                  | 288 | 303  | 6.00E-43  | 105.2 | 37.5 | 50.7 | hypothetical protein CARUB_v10026857mg    | gbpln | Capsella rubella     | AT5G42670.1   Symbols:   Agenet domain-containing protein   chr5:17108262-17110235 FORWARD LENGTH=294                                                         | 288 | 294  | 3.00E-32  | 102.1 | 25.0 | 33.3 |
| Rsa1.0_00173.1.g7499.t1 | ref[NP_199081.1] Agenet domain-containing protein [Arabidopsis thaliana] gi 10177270 dbj BAB10623.1  unnamed protein product [Arabidopsis thaliana] gi 332007462 gb AED94845.1  Agenet domain-containing protein [Arabidopsis thaliana]                                                                                                                                                                                                                                                                                                                                                                                                                   | 300 | 294  | 3.00E-49  | 98.0  | 36.0 | 52.3 | Agenet domain-containing protein          | gbpln | Arabidopsis thaliana | AT5G42670.1   Symbols:   Agenet domain-containing protein   chr5:17108262-17110235 FORWARD LENGTH=294                                                         | 300 | 294  | 9.00E-52  | 98.0  | 36.0 | 52.3 |
| Rsa1.0_00173.1.g7500.t1 | gb[AA169582.1] putative polyprotein [Oryza sativa Japonica Group] gi 52353546 gb AAU44112.1  putative polyprotein [Oryza sativa Japonica Group] ref[NP_200023.1] putative dihydrodipicolinate reductase 3 [Arabidopsis thaliana] gi 75262543 sp Q9FJ82.1 DAPB3 ARAT H RecName: Full=Putative 4-hydroxy-tetrahydrodipicolinate reductase 3, chloroplastic; Short=HTPA reductase 3; Flags: Precursor gi 10177745 dbj BAB11058.1  dihydrodipicolinate reductase-like protein [Arabidopsis thaliana] gi 124301156 gb ABN04830.1  At5g52100 [Arabidopsis thaliana] gi 332008788 gb AED96171.1  putative dihydrodipicolinate reductase 3 [Arabidopsis thaliana] | 256 | 1256 | 3.00E-43  | 490.6 | 35.9 | 50.0 | putative polyprotein                      | gbpln | Oryza sativa         | AT4G23160.1   Symbols: CRK8   cysteine-rich RLK (RECEPTOR-like protein kinase) 8   chr4:12129485-12134086 FORWARD LENGTH=1262                                 | 256 | 1262 | 5.00E-27  | 493.0 | 26.6 | 41.0 |
| Rsa1.0_00173.1.g7501.t1 | ref[NP_200024.1] uncharacterized protein [Arabidopsis thaliana] gi 79330641 ref NP_001032060.1  uncharacterized protein [Arabidopsis thaliana] gi 10177746 dbj BAB11059.1  unnamed protein product [Arabidopsis thaliana] gi 117959001 gb ABK59697.1  At5g52110 [Arabidopsis thaliana] gi 332008789 gb AED96172.1  uncharacterized protein AT5G52110 [Arabidopsis thaliana] gi 332008790 gb AED96173.1  uncharacterized protein AT5G52110 [Arabidopsis thaliana]                                                                                                                                                                                          | 300 | 298  | 1.00E-166 | 99.3  | 97.0 | 98.3 | putative dihydrodipicolinate reductase 3  | gbpln | Arabidopsis thaliana | AT5G52100.1   Symbols: crr1   Dihydrodipicolinate reductase, bacterial/plant   chr5:21170203-21172107 FORWARD LENGTH=298                                      | 300 | 298  | 1.00E-169 | 99.3  | 97.0 | 98.3 |
| Rsa1.0_00173.1.g7502.t1 | ref[XP_002865894.1] phloem protein 2-A14 [Arabidopsis lyrata subsp. lyrata] gi 297311729 gb EFH42153.1  phloem protein 2-A14 [Arabidopsis lyrata subsp. lyrata]                                                                                                                                                                                                                                                                                                                                                                                                                                                                                           | 278 | 275  | 1.00E-136 | 98.9  | 83.8 | 92.4 | uncharacterized protein                   | gbpln | Arabidopsis thaliana | AT5G52110.2   Symbols: HCF208   Protein of unknown function (DUF2930)   chr5:21172159-21173953 REVERSE LENGTH=275                                             | 278 | 275  | 1.00E-138 | 98.9  | 83.8 | 92.4 |
| Rsa1.0_00173.1.g7503.t1 | ref[XP_002865894.1] phloem protein 2-A14 [Arabidopsis lyrata subsp. lyrata] gi 297311729 gb EFH42153.1  phloem protein 2-A14 [Arabidopsis lyrata subsp. lyrata]                                                                                                                                                                                                                                                                                                                                                                                                                                                                                           | 419 | 287  | 1.00E-119 | 68.5  | 48.9 | 53.2 | phloem protein 2-A14                      | gbpln | Arabidopsis lyrata   | AT5G52120.1   Symbols: AtPP2-A14, PP2-A14   phloem protein 2-A14   chr5:21176661-21180143 REVERSE LENGTH=291                                                  | 419 | 291  | 1.00E-121 | 69.5  | 48.9 | 52.0 |
| Rsa1.0_00173.1.g7504.t1 | gb[EOA14892.1] hypothetical protein CARUB_v10028221mg [Capsella rubella]                                                                                                                                                                                                                                                                                                                                                                                                                                                                                                                                                                                  | 97  | 96   | 3.00E-30  | 99.0  | 70.1 | 79.4 | hypothetical protein CARUB_v10028221mg    | gbpln | Capsella rubella     | AT5G52160.1   Symbols:   Bifunctional inhibitor/lipid-transfer protein/seed storage 2S albumin superfamily protein   chr5:21195140-21195430 FORWARD LENGTH=96 | 97  | 96   | 2.00E-30  | 99.0  | 73.2 | 82.5 |
| Rsa1.0_00173.1.g7505.t1 | ref[XP_002865900.1] sugar isomerase domain-containing protein [Arabidopsis lyrata subsp. lyrata] gi 297311735 gb EFH42159.1  sugar isomerase domain-containing protein [Arabidopsis lyrata subsp. lyrata] ref[XP_002865901.1] hypothetical protein ARALYDRAFT_918263 [Arabidopsis lyrata subsp. lyrata] gi 297311736 gb EFH42160.1  hypothetical protein ARALYDRAFT_918263 [Arabidopsis lyrata subsp. lyrata]                                                                                                                                                                                                                                             | 200 | 208  | 2.00E-86  | 104.0 | 82.0 | 90.0 | sugar isomerase domain-containing protein | gbpln | Arabidopsis lyrata   | AT5G52190.1   Symbols:   Sugar isomerase (SIS) family protein   chr5:21201817-21202443 REVERSE LENGTH=208                                                     | 200 | 208  | 2.00E-87  | 104.0 | 79.0 | 87.0 |
| Rsa1.0_00173.1.g7506.t1 | ref[XP_002865900.1] sugar isomerase domain-containing protein [Arabidopsis lyrata subsp. lyrata] gi 297311735 gb EFH42159.1  sugar isomerase domain-containing protein [Arabidopsis lyrata subsp. lyrata] ref[XP_002865901.1] hypothetical protein ARALYDRAFT_918263 [Arabidopsis lyrata subsp. lyrata] gi 297311736 gb EFH42160.1  hypothetical protein ARALYDRAFT_918263 [Arabidopsis lyrata subsp. lyrata]                                                                                                                                                                                                                                             | 192 | 185  | 7.00E-52  | 96.4  | 65.6 | 78.1 | hypothetical protein ARALYDRAFT_918263    | gbpln | Arabidopsis lyrata   | AT5G52200.1   Symbols:   phosphoprotein phosphatase inhibitors   chr5:21202818-21204719 REVERSE LENGTH=191                                                    | 192 | 191  | 6.00E-53  | 99.5  | 69.8 | 80.7 |

|                         |                                                                                                                                                                                                                                                                                                                                                                                                                                                                                                                                                                                         |      |      |           |       |      |      |                                                                            |       |                      |                                                                                                                                                 |      |      |           |       |      |      |
|-------------------------|-----------------------------------------------------------------------------------------------------------------------------------------------------------------------------------------------------------------------------------------------------------------------------------------------------------------------------------------------------------------------------------------------------------------------------------------------------------------------------------------------------------------------------------------------------------------------------------------|------|------|-----------|-------|------|------|----------------------------------------------------------------------------|-------|----------------------|-------------------------------------------------------------------------------------------------------------------------------------------------|------|------|-----------|-------|------|------|
| Rsa1.0_00173.1.g7507.t1 | ref NP_200034.1  GTP-binding protein 1 [Arabidopsis thaliana] gi 30696156 ref NP_851175.1  GTP-binding protein 1 [Arabidopsis thaliana] gi 1184981 gb AAA87882.1  GTP-binding protein ATGB1 [Arabidopsis thaliana] gi 8885534 dbj BAA97464.1  GTP-binding protein-like [Arabidopsis thaliana] gi 2841661 gb AAO42836.1  At5g52210 [Arabidopsis thaliana] gi 110743285 dbj BAE99533.1  GTP-binding protein-like [Arabidopsis thaliana] gi 332008801 gb AED96184.1  GTP-binding protein 1 [Arabidopsis thaliana] gi 332008802 gb AED96185.1  GTP-binding protein 1 [Arabidopsis thaliana] | 205  | 205  | 1.00E-109 | 100.0 | 92.7 | 98.5 | GTP-binding protein 1                                                      | gbpln | Arabidopsis thaliana | AT5G52210.2   Symbols: ATARLB1, ATGB1, GB1   GTP-binding protein 1   chr5:21205567-21206840 FORWARD LENGTH=205                                  | 205  | 205  | 1.00E-112 | 100.0 | 92.7 | 98.5 |
| Rsa1.0_00173.1.g7508.t1 | gb AAM64761.1  contains similarity to photomorphogenesis repressor protein [Arabidopsis thaliana]                                                                                                                                                                                                                                                                                                                                                                                                                                                                                       | 342  | 385  | 1.00E-150 | 112.6 | 84.2 | 89.2 | contains similarity to photomorphogenesis repressor protein                | gbpln | Arabidopsis thaliana | AT5G52250.1   Symbols: RUP1   Transducin/WD40 repeat-like superfamily protein   chr5:21216898-21218055 FORWARD LENGTH=385                       | 342  | 385  | 1.00E-152 | 112.6 | 83.9 | 88.9 |
| Rsa1.0_00173.1.g7509.t1 | ref XP_002864161.1  hypothetical protein ARALYDRAFT_495295 [Arabidopsis lyrata subsp. lyrata] gi 297309996 gb EFH40420.1  hypothetical protein ARALYDRAFT_495295 [Arabidopsis lyrata subsp. lyrata]                                                                                                                                                                                                                                                                                                                                                                                     | 268  | 270  | 1.00E-113 | 100.7 | 81.0 | 91.0 | hypothetical protein ARALYDRAFT_495295                                     | gbpln | Arabidopsis lyrata   | AT5G52260.1   Symbols: AtMYB19, MYB19   myb domain protein 19   chr5:21220165-21221223 FORWARD LENGTH=268                                       | 268  | 268  | 1.00E-115 | 100.0 | 80.2 | 89.2 |
| Rsa1.0_00173.1.g7510.t2 | ref NP_197389.1  RNA-directed DNA polymerase (reverse transcriptase)-related family protein [Arabidopsis thaliana] gi 332005241 gb AED92624.1  RNA-directed DNA polymerase (reverse transcriptase)-related family protein [Arabidopsis thaliana]                                                                                                                                                                                                                                                                                                                                        | 206  | 295  | 4.00E-30  | 143.2 | 36.4 | 51.0 | RNA-directed DNA polymerase (reverse transcriptase)-related family protein | gbpln | Arabidopsis thaliana | AT5G18880.1   Symbols:   RNA-directed DNA polymerase (reverse transcriptase)-related family protein   chr5:6300535-6301422 REVERSE LENGTH=295   | 206  | 295  | 1.00E-32  | 143.2 | 36.4 | 51.0 |
| Rsa1.0_00173.1.g7511.t1 | gb EOA13973.1  hypothetical protein CARUB_v10027102mg [Capsella rubella]                                                                                                                                                                                                                                                                                                                                                                                                                                                                                                                | 160  | 219  | 1.00E-57  | 136.9 | 68.8 | 75.0 | hypothetical protein CARUB_v10027102mg                                     | gbpln | Capsella rubella     | AT5G52240.1   Symbols: MSBP1, ATMP1, AMAPR5   membrane steroid binding protein 1   chr5:21213121-21214557 FORWARD LENGTH=220                    | 160  | 220  | 1.00E-59  | 137.5 | 67.5 | 75.0 |
| Rsa1.0_00173.1.g7512.t1 | gb EOA13973.1  hypothetical protein CARUB_v10027102mg [Capsella rubella]                                                                                                                                                                                                                                                                                                                                                                                                                                                                                                                | 227  | 219  | 1.00E-72  | 96.5  | 65.6 | 74.0 | hypothetical protein CARUB_v10027102mg                                     | gbpln | Capsella rubella     | AT5G52240.1   Symbols: MSBP1, ATMP1, AMAPR5   membrane steroid binding protein 1   chr5:21213121-21214557 FORWARD LENGTH=220                    | 227  | 220  | 2.00E-73  | 96.9  | 63.9 | 70.9 |
| Rsa1.0_00173.1.g7513.t1 | # # # # # # # # - ---- ---- # # # # # # #                                                                                                                                                                                                                                                                                                                                                                                                                                                                                                                                               |      |      |           |       |      |      |                                                                            |       |                      |                                                                                                                                                 |      |      |           |       |      |      |
| Rsa1.0_00173.1.g7514.t3 | ref NP_200042.4  shortage in chiasmata 1 [Arabidopsis thaliana] gi 332008813 gb AED96196.1  shortage in chiasmata 1 [Arabidopsis thaliana]                                                                                                                                                                                                                                                                                                                                                                                                                                              | 1606 | 1594 | 0         | 99.3  | 75.1 | 84.5 | shortage in chiasmata 1                                                    | gbpln | Arabidopsis thaliana | AT5G52290.1   Symbols: SHOC1   shortage in chiasmata 1   chr5:21230353-21236554 REVERSE LENGTH=1594                                             | 1606 | 1594 | 0         | 99.3  | 75.1 | 84.5 |
| Rsa1.0_00173.1.g7515.t1 | gb EOA14447.1  hypothetical protein CARUB_v10027650mg [Capsella rubella]                                                                                                                                                                                                                                                                                                                                                                                                                                                                                                                | 593  | 634  | 1.00E-169 | 106.9 | 66.9 | 77.7 | hypothetical protein CARUB_v10027650mg                                     | gbpln | Capsella rubella     | AT5G52300.1   Symbols: RD29B, LTI65   CAP160 protein   chr5:21237205-21239404 FORWARD LENGTH=619                                                | 593  | 619  | 1.00E-166 | 104.4 | 63.9 | 75.9 |
| Rsa1.0_00173.1.g7516.t1 | ref XP_002865909.1  hypothetical protein ARALYDRAFT_495305 [Arabidopsis lyrata subsp. lyrata] gi 297311744 gb EFH42168.1  hypothetical protein ARALYDRAFT_495305 [Arabidopsis lyrata subsp. lyrata] gi 482550326 gb EOA14520.1  hypothetical protein CARUB_v10027750mg [Capsella rubella]                                                                                                                                                                                                                                                                                               | 130  | 137  | 4.00E-67  | 105.4 | 96.2 | 96.2 | hypothetical protein ARALYDRAFT_495305                                     | gbpln | Arabidopsis lyrata   | AT5G52360.1   Symbols: ADF10   actin depolymerizing factor 10   chr5:21258157-21259229 REVERSE LENGTH=137                                       | 130  | 137  | 2.00E-67  | 105.4 | 93.1 | 94.6 |
| Rsa1.0_00173.1.g7517.t1 | ref XP_002865910.1  zinc knuckle (CCHC-type) family protein [Arabidopsis lyrata subsp. lyrata] gi 297311745 gb EFH42169.1  zinc knuckle (CCHC-type) family protein [Arabidopsis lyrata subsp. lyrata]                                                                                                                                                                                                                                                                                                                                                                                   | 265  | 268  | 1.00E-109 | 101.1 | 85.7 | 91.7 | zinc knuckle (CCHC-type) family protein                                    | gbpln | Arabidopsis lyrata   | AT5G52380.1   Symbols:   VASCULAR-RELATED NAC-DOMAIN 6   chr5:21261521-21263061 REVERSE LENGTH=268                                              | 265  | 268  | 1.00E-112 | 101.1 | 84.9 | 91.7 |
| Rsa1.0_00173.1.g7518.t1 | gb EOA21683.1  hypothetical protein CARUB_v10002107mg [Capsella rubella]                                                                                                                                                                                                                                                                                                                                                                                                                                                                                                                | 140  | 171  | 1.00E-20  | 122.1 | 31.4 | 47.9 | hypothetical protein CARUB_v10002107mg                                     | gbpln | Capsella rubella     | AT5G42965.1   Symbols:   Polynucleotidyl transferase, ribonuclease H-like superfamily protein   chr5:17236736-17237125 FORWARD LENGTH=129       | 140  | 129  | 2.00E-11  | 92.1  | 23.6 | 38.6 |
| Rsa1.0_00173.1.g7519.t2 | gb AAG50806.1 AC079281.8 unknown protein [Arabidopsis thaliana]                                                                                                                                                                                                                                                                                                                                                                                                                                                                                                                         | 1670 | 1213 | 0         | 72.6  | 35.5 | 46.3 | unknown protein                                                            | gbpln | Arabidopsis thaliana | AT1G60720.1   Symbols:   RNA-directed DNA polymerase (reverse transcriptase)-related family protein   chr1:22357072-22357941 FORWARD LENGTH=289 | 1670 | 289  | 9.00E-70  | 17.3  | 7.7  | 10.8 |

|                          |                                                                                                                                                                                                                                                                                                                                                                                                                                                                        |      |      |           |       |      |      |                                                           |       |                      |                                                                                                                                                                                                                                                                                                                                                          |      |      |           |       |      |      |
|--------------------------|------------------------------------------------------------------------------------------------------------------------------------------------------------------------------------------------------------------------------------------------------------------------------------------------------------------------------------------------------------------------------------------------------------------------------------------------------------------------|------|------|-----------|-------|------|------|-----------------------------------------------------------|-------|----------------------|----------------------------------------------------------------------------------------------------------------------------------------------------------------------------------------------------------------------------------------------------------------------------------------------------------------------------------------------------------|------|------|-----------|-------|------|------|
| Rsa1.0_00173.1.g7520.t1  | refXP_002864167.1  hypothetical protein ARALYDRAFT_331608 [Arabidopsis lyrata subsp. lyrata] gi 297310002 gb EFH40426.1  hypothetical protein ARALYDRAFT_331608 [Arabidopsis lyrata subsp. lyrata]                                                                                                                                                                                                                                                                     | 517  | 530  | 0         | 102.5 | 88.6 | 93.4 | hypothetical protein ARALYDRAFT_331608                    | gbpln | Arabidopsis lyrata   | AT5G52400.1   Symbols: CYP715A1   cytochrome P450, family 715, subfamily A, polypeptide 1   chr5:21272949-21275509 FORWARD LENGTH=519                                                                                                                                                                                                                    | 517  | 519  | 0         | 100.4 | 87.4 | 92.6 |
| Rsa1.0_00173.1.g7521.t1  | gb EOA12724.1  hypothetical protein CARUB_v10028150mg [Capsella rubella]                                                                                                                                                                                                                                                                                                                                                                                               | 274  | 267  | 7.00E-99  | 97.4  | 72.3 | 78.1 | hypothetical protein CARUB_v10028150mg                    | gbpln | Capsella rubella     | AT5G52440.1   Symbols: HCF106   Bacterial sec-independent translocation protein mtA/Hcf106   chr5:21286896-21288613 FORWARD LENGTH=260                                                                                                                                                                                                                   | 274  | 260  | 3.00E-96  | 94.9  | 70.4 | 76.6 |
| Rsa1.0_00173.1.g7522.t1  | ref NP_190233.2  iron ion binding / oxidoreductase/ oxidoreductase protein [Arabidopsis thaliana] gi 332644644 gb AE78165.1  iron ion binding / oxidoreductase/ oxidoreductase protein [Arabidopsis thaliana]                                                                                                                                                                                                                                                          | 334  | 330  | 1.00E-148 | 98.8  | 76.3 | 84.4 | iron ion binding / oxidoreductase/ oxidoreductase protein | gbpln | Arabidopsis thaliana | AT3G46490.1   Symbols:   2-oxoglutarate (2OG) and Fe(II)-dependent oxygenase superfamily protein   chr3:17115629-17119451 FORWARD LENGTH=330                                                                                                                                                                                                             | 334  | 330  | 1.00E-151 | 98.8  | 76.3 | 84.4 |
| Rsa1.0_00173.1.g7523.t1  | gb ABL97978.1  metal ion binding [Brassica rapa]                                                                                                                                                                                                                                                                                                                                                                                                                       | 135  | 139  | 2.00E-42  | 103.0 | 70.4 | 81.5 | metal ion binding                                         | gbpln | Brassica rapa        | AT5G52760.1   Symbols:   Copper transport protein family   chr5:21386919-21387540 FORWARD LENGTH=126                                                                                                                                                                                                                                                     | 135  | 126  | 2.00E-34  | 93.3  | 64.4 | 75.6 |
| Rsa1.0_00173.1.g7524.t1  | gb EOA25898.1  hypothetical protein CARUB_v10019277mg [Capsella rubella]                                                                                                                                                                                                                                                                                                                                                                                               | 264  | 281  | 4.00E-86  | 106.4 | 62.9 | 77.3 | hypothetical protein CARUB_v10019277mg                    | gbpln | Capsella rubella     | AT3G5310.1   Symbols:   AP2/B3-like transcriptional factor family protein   chr3:19766927-19768368 REVERSE LENGTH=286                                                                                                                                                                                                                                    | 264  | 286  | 2.00E-75  | 108.3 | 57.6 | 73.9 |
| Rsa1.0_00173.1.g7525.t1  | refXP_002864198.1  hypothetical protein ARALYDRAFT_495348 [Arabidopsis lyrata subsp. lyrata] gi 297310033 gb EFH40457.1  hypothetical protein ARALYDRAFT_495348 [Arabidopsis lyrata subsp. lyrata]                                                                                                                                                                                                                                                                     | 212  | 169  | 5.00E-82  | 79.7  | 74.5 | 79.2 | hypothetical protein ARALYDRAFT_495348                    | gbpln | Arabidopsis lyrata   | AT5G52840.1   Symbols:   NADH-ubiquinone oxidoreductase-related   chr5:21413718-21414794 FORWARD LENGTH=169                                                                                                                                                                                                                                              | 212  | 169  | 1.00E-83  | 79.7  | 75.0 | 77.8 |
| Rsa1.0_00173.1.g7526.t1  | #                                                                                                                                                                                                                                                                                                                                                                                                                                                                      | #    | #    | #         | #     | #    | #    | -                                                         | ----  | ----                 | #                                                                                                                                                                                                                                                                                                                                                        | #    | #    | #         | #     | #    | #    |
| Rsa1.0_00173.1.g7527.t1  | ref NP_200099.1  uncharacterized protein [Arabidopsis thaliana] gi 75171557 sp Q9FLX4.1 MAKR5_ARAT H RecName: Full=Probable membrane-associated kinase regulator 5 gi 10177101 dbj BAB10435.1  unnamed protein product [Arabidopsis thaliana] gi 15028097 gb AAK76579.1  unknown protein [Arabidopsis thaliana] gi 20258915 gb AAM14151.1  unknown protein [Arabidopsis thaliana] gi 332008887 gb AED96270.1  uncharacterized protein AT5G52870 [Arabidopsis thaliana] | 317  | 326  | 4.00E-97  | 102.8 | 71.3 | 81.7 | uncharacterized protein                                   | gbpln | Arabidopsis thaliana | AT5G52870.1   Symbols:   unknown protein; BEST Arabidopsis thaliana protein match is: unknown protein (TAIR:AT1G64080.1); Has 1807 Blast hits to 1807 proteins in 277 species: Archae - 0; Bacteria - 0; Metazoa - 736; Fungi - 347; Plants - 385; Viruses - 0; Other Eukaryotes - 339 (source: NCBI BLINK).   chr5:21428191-21429367 REVERSE LENGTH=326 | 317  | 326  | 1.00E-99  | 102.8 | 71.3 | 81.7 |
| Rsa1.0_00173.1.g7528.t1  | refXP_002865936.1  ATP binding protein [Arabidopsis lyrata subsp. lyrata] gi 297311771 gb EFH42195.1  ATP binding protein [Arabidopsis lyrata subsp. lyrata]                                                                                                                                                                                                                                                                                                           | 819  | 830  | 0         | 101.3 | 91.9 | 95.7 | ATP binding protein                                       | gbpln | Arabidopsis lyrata   | AT5G52882.1   Symbols:   P-loop containing nucleoside triphosphate hydrolases superfamily protein   chr5:21434155-21438362 REVERSE LENGTH=829                                                                                                                                                                                                            | 819  | 829  | 0         | 101.2 | 91.9 | 95.6 |
| Rsa1.0_00173.1.g7529.t1  | refXP_002891891.1  hypothetical protein ARALYDRAFT_337726 [Arabidopsis lyrata subsp. lyrata] gi 297337733 gb EFH68150.1  hypothetical protein ARALYDRAFT_337726 [Arabidopsis lyrata subsp. lyrata]                                                                                                                                                                                                                                                                     | 183  | 183  | 2.00E-63  | 100.0 | 72.1 | 82.5 | hypothetical protein ARALYDRAFT_337726                    | gbpln | Arabidopsis lyrata   | AT1G54400.1   Symbols:   HSP20-like chaperones superfamily protein   chr1:20307667-20308768 FORWARD LENGTH=183                                                                                                                                                                                                                                           | 183  | 183  | 4.00E-61  | 100.0 | 68.9 | 80.3 |
| Rsa1.0_00173.1.g7530.t1  | ref NP_568780.1  uncharacterized protein [Arabidopsis thaliana] gi 75146673 sp Q84JK8.1 MAKR6_ARAT H RecName: Full=Probable membrane-associated kinase regulator 6 gi 28973707 gb AAO64170.1  unknown protein [Arabidopsis thaliana] gi 29824227 gb AAP04074.1  unknown protein [Arabidopsis thaliana] gi 110737043 dbj BAF00476.1  hypothetical protein [Arabidopsis thaliana] gi 332008892 gb AED96275.1  uncharacterized protein AT5G52900 [Arabidopsis thaliana]   | 230  | 235  | 4.00E-96  | 102.2 | 79.1 | 87.8 | uncharacterized protein                                   | gbpln | Arabidopsis thaliana | AT5G52900.1   Symbols:   unknown protein; Has 30201 Blast hits to 17322 proteins in 780 species: Archae - 12; Bacteria - 1396; Metazoa - 17338; Fungi - 3422; Plants - 5037; Viruses - 0; Other Eukaryotes - 2996 (source: NCBI BLINK).   chr5:21452893-21453692 REVERSE LENGTH=235                                                                      | 230  | 235  | 1.00E-98  | 102.2 | 79.1 | 87.8 |
| Rsa1.0_00173.1.g7531.t1  | #                                                                                                                                                                                                                                                                                                                                                                                                                                                                      | #    | #    | #         | #     | #    | #    | -                                                         | ----  | ----                 | #                                                                                                                                                                                                                                                                                                                                                        | #    | #    | #         | #     | #    | #    |
| Rsa1.0_00173.1.g7532.t22 | gb EMJ28231.1  hypothetical protein PRUPE_ppa000670mg [Prunus persica]                                                                                                                                                                                                                                                                                                                                                                                                 | 1007 | 1029 | 0         | 102.2 | 42.7 | 59.4 | hypothetical protein PRUPE_ppa000670mg                    | gbpln | Prunus persica       | AT5G53010.1   Symbols:   calcium-transporting ATPase, putative   chr5:21488899-21496537 REVERSE LENGTH=1049                                                                                                                                                                                                                                              | 1007 | 1049 | 0         | 104.2 | 37.0 | 42.6 |





|                          |                                                                                                                                                                                                                                                                                                                                                                                                                                                                                              |      |      |          |       |      |       |                                                 |       |                      |                                                                                                                                                                                                                                                                                                                                                                                                                                                                |      |     |          |       |      |      |
|--------------------------|----------------------------------------------------------------------------------------------------------------------------------------------------------------------------------------------------------------------------------------------------------------------------------------------------------------------------------------------------------------------------------------------------------------------------------------------------------------------------------------------|------|------|----------|-------|------|-------|-------------------------------------------------|-------|----------------------|----------------------------------------------------------------------------------------------------------------------------------------------------------------------------------------------------------------------------------------------------------------------------------------------------------------------------------------------------------------------------------------------------------------------------------------------------------------|------|-----|----------|-------|------|------|
| Rsa1.0_00174.1.g7552.t1  | refNP_564496.1  ethylene-responsive transcription factor RAP2-1 [Arabidopsis thaliana] gi 75245929 sp Q8LC30.1 RAP21_ARATH RecName: Full=Ethylene-responsive transcription factor RAP2-1; AltName: Full=Protein RELATED TO APETALA2 1 gi 21555563 gb AAAM63886.1  AP2 domain containing protein RAP2.1 [Arabidopsis thaliana] gi 88900408 gb ABD57516.1  At1g46768 [Arabidopsis thaliana] gi 332194008 gb AEE32129.1  ethylene-responsive transcription factor RAP2-1 [Arabidopsis thaliana] | 155  | 153  | 4.00E-54 | 98.7  | 76.1 | 81.3  | ethylene-responsive transcription factor RAP2-1 | gbpln | Arabidopsis thaliana | AT1G46768.1   Symbols: RAP2.1   related to AP2 1   chr1:17266046-17266507 REVERSE LENGTH=153                                                                                                                                                                                                                                                                                                                                                                   | 155  | 153 | 1.00E-56 | 98.7  | 76.1 | 81.3 |
| Rsa1.0_00174.1.g7553.t10 | gb AAG51783.1 AC079679_3 reverse transcriptase, putative; 16838-20266 [Arabidopsis thaliana]                                                                                                                                                                                                                                                                                                                                                                                                 | 1244 | 1142 | 0        | 91.8  | 40.5 | 53.7  | reverse transcriptase, putative; 16838-20266    | gbpln | Arabidopsis thaliana | AT4G29090.1   Symbols:   Ribonuclease H-like superfamily protein   chr4:14333528-14335255 FORWARD LENGTH=575                                                                                                                                                                                                                                                                                                                                                   | 1244 | 575 | 6.00E-61 | 46.2  | 12.7 | 20.2 |
| Rsa1.0_00174.1.g7554.t1  | #                                                                                                                                                                                                                                                                                                                                                                                                                                                                                            | #    | #    | #        | #     | #    | #     | -                                               | ----  | ----                 | #                                                                                                                                                                                                                                                                                                                                                                                                                                                              | #    | #   | #        | #     | #    |      |
| Rsa1.0_00175.1.g7555.t1  | #                                                                                                                                                                                                                                                                                                                                                                                                                                                                                            | #    | #    | #        | #     | #    | #     | -                                               | ----  | ----                 | #                                                                                                                                                                                                                                                                                                                                                                                                                                                              | #    | #   | #        | #     | #    |      |
| Rsa1.0_00175.1.g7556.t1  | dbj BAA23676.1  receptor kinase 1 [Brassica rapa subsp. oleifera]                                                                                                                                                                                                                                                                                                                                                                                                                            | 805  | 847  | 0        | 105.2 | 87.6 | 92.2  | receptor kinase 1                               | gbpln | Brassica rapa        | AT1G65800.1   Symbols: ARK2, RK2   receptor kinase 2   chr1:24473166-24476523 FORWARD LENGTH=847                                                                                                                                                                                                                                                                                                                                                               | 805  | 847 | 0        | 105.2 | 76.3 | 86.2 |
| Rsa1.0_00175.1.g7557.t1  | gb ACR10278.1  putative benzoate-CoA ligase [Brassica rapa subsp. pekinensis]                                                                                                                                                                                                                                                                                                                                                                                                                | 566  | 567  | 0        | 100.2 | 94.0 | 96.5  | putative benzoate-CoA ligase                    | gbpln | Brassica rapa        | AT1G65880.1   Symbols: BZO1   benzoyloxyglucosinolate 1   chr1:24508633-24510737 REVERSE LENGTH=580                                                                                                                                                                                                                                                                                                                                                            | 566  | 580 | 0        | 102.5 | 78.1 | 88.0 |
| Rsa1.0_00175.1.g7558.t1  | ref XP_002886975.1  predicted protein [Arabidopsis lyrata subsp. lyrata] gi 297332816 gb EFH63234.1  predicted protein [Arabidopsis lyrata subsp. lyrata]                                                                                                                                                                                                                                                                                                                                    | 846  | 845  | 0        | 99.9  | 74.6 | 85.7  | predicted protein                               | gbpln | Arabidopsis lyrata   | AT1G65800.1   Symbols: ARK2, RK2   receptor kinase 2   chr1:24473166-24476523 FORWARD LENGTH=847                                                                                                                                                                                                                                                                                                                                                               | 846  | 847 | 0        | 100.1 | 75.8 | 86.1 |
| Rsa1.0_00175.1.g7559.t1  | gb EOA35211.1  hypothetical protein CARUB_v10020361mg, partial [Capsella rubella]                                                                                                                                                                                                                                                                                                                                                                                                            | 410  | 419  | 0        | 102.2 | 84.6 | 92.0  | hypothetical protein CARUB_v10020361mg, partial | gbpln | Capsella rubella     | AT1G65900.1   Symbols:   unknown protein; FUNCTIONS IN: molecular_function unknown; INVOLVED IN: biological_process unknown; LOCATED IN: endomembrane system; EXPRESSED IN: 21 plant structures; EXPRESSED DURING: 13 growth stages; Has 306 Blast hits to 306 proteins in 119 species: Archae - 19; Bacteria - 238; Metazoa - 0; Fungi - 0; Plants - 34; Viruses - 0; Other Eukaryotes - 15 (source: NCBI BLINK).   chr1:24516023-24518325 REVERSE LENGTH=408 | 410  | 408 | 0        | 99.5  | 84.9 | 91.2 |
| Rsa1.0_00175.1.g7560.t1  | gb EOA35225.1  hypothetical protein CARUB_v10020383mg [Capsella rubella]                                                                                                                                                                                                                                                                                                                                                                                                                     | 410  | 410  | 0        | 100.0 | 98.5 | 99.5  | hypothetical protein CARUB_v10020383mg          | gbpln | Capsella rubella     | AT1G65930.1   Symbols: cICDH   cytosolic NADP+-dependent isocitrate dehydrogenase   chr1:24539088-24541861 FORWARD LENGTH=410                                                                                                                                                                                                                                                                                                                                  | 410  | 410 | 0        | 100.0 | 97.8 | 99.3 |
| Rsa1.0_00175.1.g7561.t2  | ref XP_002888468.1  ABC1 family protein [Arabidopsis lyrata subsp. lyrata] gi 297334309 gb EFH64727.1  ABC1 family protein [Arabidopsis lyrata subsp. lyrata]                                                                                                                                                                                                                                                                                                                                | 533  | 550  | 0        | 103.2 | 82.7 | 89.1  | ABC1 family protein                             | gbpln | Arabidopsis lyrata   | AT1G65950.1   Symbols:   Protein kinase superfamily protein   chr1:24546860-24551119 REVERSE LENGTH=551                                                                                                                                                                                                                                                                                                                                                        | 533  | 551 | 0        | 103.4 | 83.1 | 88.9 |
| Rsa1.0_00175.1.g7562.t1  | gb AAS79669.1  glutamate decarboxylase 2 [Brassica juncea]                                                                                                                                                                                                                                                                                                                                                                                                                                   | 494  | 494  | 0        | 100.0 | 97.6 | 99.0  | glutamate decarboxylase 2                       | gbpln | Brassica juncea      | AT1G65960.2   Symbols: GAD2   glutamate decarboxylase 2   chr1:24552094-24557253 FORWARD LENGTH=494                                                                                                                                                                                                                                                                                                                                                            | 494  | 494 | 0        | 100.0 | 92.1 | 96.2 |
| Rsa1.0_00175.1.g7563.t1  | gb AAD33602.1 AF133302_1 type 2 peroxiredoxin [Brassica rapa subsp. pekinensis] gi 83032224 gb ABB97029.1  unknown [Brassica rapa]                                                                                                                                                                                                                                                                                                                                                           | 162  | 162  | 6.00E-86 | 100.0 | 95.7 | 100.0 | type 2 peroxiredoxin                            | gbpln | Brassica rapa        | AT1G65980.1   Symbols: TPX1   thioredoxin-dependent peroxidase 1   chr1:24559524-24560753 REVERSE LENGTH=162                                                                                                                                                                                                                                                                                                                                                   | 162  | 162 | 6.00E-88 | 100.0 | 95.7 | 98.8 |
| Rsa1.0_00175.1.g7564.t1  | ref NP_178476.1  nonsense-mediated mRNA decay protein 3 [Arabidopsis thaliana] gi 4582430 gb AAD24816.1  putative nonsense-mediated mRNA decay protein [Arabidopsis thaliana] gi 20466624 gb AM20629.1  putative nonsense-mediated mRNA decay protein [Arabidopsis thaliana] gi 2136400 gb AM91278.1  putative nonsense-mediated mRNA decay protein [Arabidopsis thaliana] gi 330250660 gb AEC05754.1  nonsense-mediated mRNA decay protein 3 [Arabidopsis thaliana]                         | 520  | 516  | 0        | 99.2  | 89.2 | 92.1  | nonsense-mediated mRNA decay protein 3          | gbpln | Arabidopsis thaliana | AT2G03820.1   Symbols:   nonsense-mediated mRNA decay NMD3 family protein   chr2:1165149-1166699 REVERSE LENGTH=516                                                                                                                                                                                                                                                                                                                                            | 520  | 516 | 0        | 99.2  | 89.2 | 92.1 |

|                         |                                                                                                                                                                                                                                                                                                                                                                                                                                                                                                                                                                                                                                                                                                                                                                                                                                                                                                                                                                                                                                                                                                                                                                                                     |     |     |           |       |      |      |                                                        |       |                      |                                                                                                                          |     |     |           |       |      |      |
|-------------------------|-----------------------------------------------------------------------------------------------------------------------------------------------------------------------------------------------------------------------------------------------------------------------------------------------------------------------------------------------------------------------------------------------------------------------------------------------------------------------------------------------------------------------------------------------------------------------------------------------------------------------------------------------------------------------------------------------------------------------------------------------------------------------------------------------------------------------------------------------------------------------------------------------------------------------------------------------------------------------------------------------------------------------------------------------------------------------------------------------------------------------------------------------------------------------------------------------------|-----|-----|-----------|-------|------|------|--------------------------------------------------------|-------|----------------------|--------------------------------------------------------------------------------------------------------------------------|-----|-----|-----------|-------|------|------|
| Rsa1.0_00175.1.g7565.t1 | ref NP_174707.1  DC1 domain-containing protein [Arabidopsis thaliana] gi 8778258 gb AAF79267.1 AC023279_16 F12K21.20 [Arabidopsis thaliana] gi 12323862 gb AAG51903.1 AC023913_11 hypothetical protein; 1917-109 [Arabidopsis thaliana] gi 332193597 gb AEE31718.1  DC1 domain-containing protein [Arabidopsis thaliana]                                                                                                                                                                                                                                                                                                                                                                                                                                                                                                                                                                                                                                                                                                                                                                                                                                                                            | 704 | 602 | 1.00E-179 | 85.5  | 44.6 | 55.8 | DC1 domain-containing protein                          | gbpln | Arabidopsis thaliana | AT1G34480.1   Symbols:   Cysteine/Histidine-rich C1 domain family protein   chr1:12607276-12609084 FORWARD LENGTH=602    | 704 | 602 | 0         | 85.5  | 44.6 | 55.8 |
| Rsa1.0_00175.1.g7566.t1 | ref NP_564865.1  Translation initiation factor eIF3 subunit [Arabidopsis thaliana] gi 334183669 ref NP_001185326.1  Translation initiation factor eIF3 subunit [Arabidopsis thaliana] gi 12322607 gb AAG51301.1 AC026480_8 unknown protein [Arabidopsis thaliana] gi 17380828 gb AAL36101.1  unknown protein [Arabidopsis thaliana] gi 20259027 gb AAM14229.1  unknown protein [Arabidopsis thaliana] gi 332196337 gb AEE34458.1  Translation initiation factor eIF3 subunit [Arabidopsis thaliana] gi 332196338 gb AEE34459.1  Translation initiation factor eIF3 subunit [Arabidopsis thaliana] ref NP_564865.1  Translation initiation factor eIF3 subunit [Arabidopsis thaliana] gi 334183669 ref NP_001185326.1  Translation initiation factor eIF3 subunit [Arabidopsis thaliana] gi 12322607 gb AAG51301.1 AC026480_8 unknown protein [Arabidopsis thaliana] gi 17380828 gb AAL36101.1  unknown protein [Arabidopsis thaliana] gi 20259027 gb AAM14229.1  unknown protein [Arabidopsis thaliana] gi 332196337 gb AEE34458.1  Translation initiation factor eIF3 subunit [Arabidopsis thaliana] gi 332196338 gb AEE34459.1  Translation initiation factor eIF3 subunit [Arabidopsis thaliana] | 252 | 226 | 3.00E-82  | 89.7  | 71.4 | 79.0 | Translation initiation factor eIF3 subunit             | gbpln | Arabidopsis thaliana | AT1G66070.2   Symbols:   Translation initiation factor eIF3 subunit   chr1:24596194-24597520 REVERSE LENGTH=226          | 252 | 226 | 9.00E-85  | 89.7  | 71.4 | 79.0 |
| Rsa1.0_00175.1.g7567.t1 | ref NP_564865.1  Translation initiation factor eIF3 subunit [Arabidopsis thaliana] gi 334183669 ref NP_001185326.1  Translation initiation factor eIF3 subunit [Arabidopsis thaliana] gi 12322607 gb AAG51301.1 AC026480_8 unknown protein [Arabidopsis thaliana] gi 17380828 gb AAL36101.1  unknown protein [Arabidopsis thaliana] gi 20259027 gb AAM14229.1  unknown protein [Arabidopsis thaliana] gi 332196337 gb AEE34458.1  Translation initiation factor eIF3 subunit [Arabidopsis thaliana] gi 332196338 gb AEE34459.1  Translation initiation factor eIF3 subunit [Arabidopsis thaliana]                                                                                                                                                                                                                                                                                                                                                                                                                                                                                                                                                                                                   | 179 | 226 | 7.00E-42  | 126.3 | 52.5 | 62.0 | Translation initiation factor eIF3 subunit             | gbpln | Arabidopsis thaliana | AT1G66070.2   Symbols:   Translation initiation factor eIF3 subunit   chr1:24596194-24597520 REVERSE LENGTH=226          | 179 | 226 | 3.00E-44  | 126.3 | 52.5 | 62.0 |
| Rsa1.0_00175.1.g7568.t1 | ref XP_002888481.1  predicted protein [Arabidopsis lyrata subsp. lyrata] gi 297334322 gb EFH64740.1  predicted protein [Arabidopsis lyrata subsp. lyrata]                                                                                                                                                                                                                                                                                                                                                                                                                                                                                                                                                                                                                                                                                                                                                                                                                                                                                                                                                                                                                                           | 354 | 349 | 1.00E-114 | 98.6  | 59.6 | 73.2 | predicted protein                                      | gbpln | Arabidopsis lyrata   | AT1G66110.1   Symbols:   Family of unknown function (DUF577)   chr1:24609094-24610232 REVERSE LENGTH=338                 | 354 | 338 | 1.00E-103 | 95.5  | 55.6 | 69.8 |
| Rsa1.0_00175.1.g7569.t1 | ref NP_176787.1  Rossmann-fold NAD(P)-binding domain-containing protein [Arabidopsis thaliana] gi 12322603 gb AAG51297.1 AC026480_4 oxidoreductase, putative [Arabidopsis thaliana] gi 332196344 gb AEE34465.1  Rossmann-fold NAD(P)-binding domain-containing protein [Arabidopsis thaliana]                                                                                                                                                                                                                                                                                                                                                                                                                                                                                                                                                                                                                                                                                                                                                                                                                                                                                                       | 412 | 364 | 0         | 88.3  | 73.3 | 81.6 | Rossmann-fold NAD(P)-binding domain-containing protein | gbpln | Arabidopsis thaliana | AT1G66130.1   Symbols:   NAD(P)-binding Rossmann-fold superfamily protein   chr1:24615040-24616742 FORWARD LENGTH=364    | 412 | 364 | 0         | 88.3  | 73.3 | 81.6 |
| Rsa1.0_00175.1.g7570.t1 | gb EOA35598.1  hypothetical protein CARUB_v10020811mg [Capsella rubella]                                                                                                                                                                                                                                                                                                                                                                                                                                                                                                                                                                                                                                                                                                                                                                                                                                                                                                                                                                                                                                                                                                                            | 250 | 263 | 1.00E-80  | 105.2 | 76.0 | 85.2 | hypothetical protein CARUB_v10020811mg                 | gbpln | Capsella rubella     | AT1G66140.1   Symbols: ZFP4   zinc finger protein 4   chr1:24620063-24620845 REVERSE LENGTH=260                          | 250 | 260 | 9.00E-80  | 104.0 | 78.4 | 86.8 |
| Rsa1.0_00175.1.g7571.t1 | ref XP_002887010.1  hypothetical protein ARALYDRAFT_475717 [Arabidopsis lyrata subsp. lyrata] gi 297332851 gb EFH63269.1  hypothetical protein ARALYDRAFT_475717 [Arabidopsis lyrata subsp. lyrata]                                                                                                                                                                                                                                                                                                                                                                                                                                                                                                                                                                                                                                                                                                                                                                                                                                                                                                                                                                                                 | 935 | 937 | 0         | 100.2 | 89.0 | 93.3 | hypothetical protein ARALYDRAFT_475717                 | gbpln | Arabidopsis lyrata   | AT1G66150.1   Symbols: TMK1   transmembrane kinase 1   chr1:24631503-24634415 FORWARD LENGTH=942                         | 935 | 942 | 0         | 100.7 | 88.2 | 92.6 |
| Rsa1.0_00175.1.g7572.t1 | ref XP_002888489.1  subtilase family protein [Arabidopsis lyrata subsp. lyrata] gi 297334330 gb EFH64748.1  subtilase family protein [Arabidopsis lyrata subsp. lyrata]                                                                                                                                                                                                                                                                                                                                                                                                                                                                                                                                                                                                                                                                                                                                                                                                                                                                                                                                                                                                                             | 757 | 760 | 0         | 100.4 | 82.2 | 90.1 | subtilase family protein                               | gbpln | Arabidopsis lyrata   | AT1G66210.1   Symbols:   Subtilisin-like serine endopeptidase family protein   chr1:24665735-24668650 REVERSE LENGTH=759 | 757 | 759 | 0         | 100.3 | 81.5 | 90.1 |
| Rsa1.0_00175.1.g7573.t1 | ref XP_002887016.1  subtilase family protein [Arabidopsis lyrata subsp. lyrata] gi 297332857 gb EFH63275.1  subtilase family protein [Arabidopsis lyrata subsp. lyrata]                                                                                                                                                                                                                                                                                                                                                                                                                                                                                                                                                                                                                                                                                                                                                                                                                                                                                                                                                                                                                             | 757 | 753 | 0         | 99.5  | 79.3 | 88.8 | subtilase family protein                               | gbpln | Arabidopsis lyrata   | AT1G66220.1   Symbols:   Subtilase family protein   chr1:24670536-24673661 FORWARD LENGTH=753                            | 757 | 753 | 0         | 99.5  | 77.5 | 87.1 |

|                         |                                                                                                                                                                                                                                                                                                                                                      |     |     |           |       |      |      |                                                                               |       |                      |                                                                                                                                                                 |                                                                                                     |     |           |          |       |      |      |
|-------------------------|------------------------------------------------------------------------------------------------------------------------------------------------------------------------------------------------------------------------------------------------------------------------------------------------------------------------------------------------------|-----|-----|-----------|-------|------|------|-------------------------------------------------------------------------------|-------|----------------------|-----------------------------------------------------------------------------------------------------------------------------------------------------------------|-----------------------------------------------------------------------------------------------------|-----|-----------|----------|-------|------|------|
| Rsa1.0_00175.1.g7574.t3 | #                                                                                                                                                                                                                                                                                                                                                    | #   | #   | #         | #     | #    | #    | #                                                                             | -     | ----                 | ----                                                                                                                                                            | AT1G04510.1   Symbols: MAC3A   MOS4-associated complex 3A   chr1:1226749-1230592 FORWARD LENGTH=523 | 177 | 523       | 3.00E-12 | 295.5 | 17.5 | 20.3 |
| Rsa1.0_00175.1.g7575.t1 | ref[XP_002887017.1] hypothetical protein ARALYDRAFT_894261 [Arabidopsis lyrata subsp. lyrata] gi 297332856 gb EFH63276.1  hypothetical protein ARALYDRAFT_894261 [Arabidopsis lyrata subsp. lyrata]                                                                                                                                                  | 282 | 288 | 1.00E-116 | 102.1 | 82.3 | 91.1 | hypothetical protein ARALYDRAFT_894261                                        | gbpln | Arabidopsis lyrata   | AT1G66230.1   Symbols: MYB20. AtMYB20   myb domain protein 20   chr1:2467732-24678246 FORWARD LENGTH=282                                                        | 282                                                                                                 | 282 | 1.00E-107 | 100.0    | 77.7  | 88.7 |      |
| Rsa1.0_00175.1.g7576.t1 | #                                                                                                                                                                                                                                                                                                                                                    | #   | #   | #         | #     | #    | #    | -                                                                             | ----  | ----                 | #                                                                                                                                                               | #                                                                                                   | #   | #         | #        | #     |      |      |
| Rsa1.0_00175.1.g7577.t1 | ref[NP_199308.1] putative F-box/FBD/LRR-repeat protein [Arabidopsis thaliana] gi 75262649 sp Q9FLA2.1 FDL34_ARAT H RecName: Full=Putative F-box/FBD/LRR-repeat protein At5g44950 gi 10177487 dbj BAB10878.1  unnamed protein product [Arabidopsis thaliana] gi 332007796 gb AED95179.1  putative F-box/FBD/LRR-repeat protein [Arabidopsis thaliana] | 470 | 438 | 7.00E-73  | 93.2  | 39.1 | 49.6 | putative F-box/FBD/LRR-repeat protein                                         | gbpln | Arabidopsis thaliana | AT5G44950.1   Symbols:   F-box/RNI-like/FBD-like domains-containing protein   chr5:18151665-18153164 FORWARD LENGTH=438                                         | 470                                                                                                 | 438 | 2.00E-75  | 93.2     | 39.1  | 49.6 |      |
| Rsa1.0_00175.1.g7578.t1 | ref[NP_199308.1] putative F-box/FBD/LRR-repeat protein [Arabidopsis thaliana] gi 75262649 sp Q9FLA2.1 FDL34_ARAT H RecName: Full=Putative F-box/FBD/LRR-repeat protein At5g44950 gi 10177487 dbj BAB10878.1  unnamed protein product [Arabidopsis thaliana] gi 332007796 gb AED95179.1  putative F-box/FBD/LRR-repeat protein [Arabidopsis thaliana] | 551 | 438 | 3.00E-92  | 79.5  | 40.1 | 51.7 | putative F-box/FBD/LRR-repeat protein                                         | gbpln | Arabidopsis thaliana | AT5G44950.1   Symbols:   F-box/RNI-like/FBD-like domains-containing protein   chr5:18151665-18153164 FORWARD LENGTH=438                                         | 551                                                                                                 | 438 | 6.00E-95  | 79.5     | 40.1  | 51.7 |      |
| Rsa1.0_00175.1.g7579.t1 | ref[NP_199308.1] putative F-box/FBD/LRR-repeat protein [Arabidopsis thaliana] gi 75262649 sp Q9FLA2.1 FDL34_ARAT H RecName: Full=Putative F-box/FBD/LRR-repeat protein At5g44950 gi 10177487 dbj BAB10878.1  unnamed protein product [Arabidopsis thaliana] gi 332007796 gb AED95179.1  putative F-box/FBD/LRR-repeat protein [Arabidopsis thaliana] | 570 | 438 | 1.00E-98  | 76.8  | 39.1 | 50.9 | putative F-box/FBD/LRR-repeat protein                                         | gbpln | Arabidopsis thaliana | AT5G44950.1   Symbols:   F-box/RNI-like/FBD-like domains-containing protein   chr5:18151665-18153164 FORWARD LENGTH=438                                         | 570                                                                                                 | 438 | 1.00E-101 | 76.8     | 39.1  | 50.9 |      |
| Rsa1.0_00175.1.g7580.t1 | ref[NP_199308.1] putative F-box/FBD/LRR-repeat protein [Arabidopsis thaliana] gi 75262649 sp Q9FLA2.1 FDL34_ARAT H RecName: Full=Putative F-box/FBD/LRR-repeat protein At5g44950 gi 10177487 dbj BAB10878.1  unnamed protein product [Arabidopsis thaliana] gi 332007796 gb AED95179.1  putative F-box/FBD/LRR-repeat protein [Arabidopsis thaliana] | 567 | 438 | 9.00E-97  | 77.2  | 39.9 | 51.3 | putative F-box/FBD/LRR-repeat protein                                         | gbpln | Arabidopsis thaliana | AT5G44950.1   Symbols:   F-box/RNI-like/FBD-like domains-containing protein   chr5:18151665-18153164 FORWARD LENGTH=438                                         | 567                                                                                                 | 438 | 2.00E-99  | 77.2     | 39.9  | 51.3 |      |
| Rsa1.0_00175.1.g7581.t1 | gb EOA35523.1  hypothetical protein CARUB_v10020732mg [Capsella rubella]                                                                                                                                                                                                                                                                             | 293 | 294 | 7.00E-85  | 100.3 | 66.2 | 76.5 | hypothetical protein CARUB_v10020732mg                                        | gbpln | Capsella rubella     | AT1G66260.2   Symbols:   RNA-binding (RRM/FBD/RNP motifs) family protein   chr1:24695895-24697883 REVERSE LENGTH=295                                            | 293                                                                                                 | 295 | 9.00E-79  | 100.7    | 68.6  | 78.8 |      |
| Rsa1.0_00175.1.g7582.t1 | ref[XP_002888495.1] hypothetical protein ARALYDRAFT_475736 [Arabidopsis lyrata subsp. lyrata] gi 297334336 gb EFH64754.1  hypothetical protein ARALYDRAFT_475736 [Arabidopsis lyrata subsp. lyrata]                                                                                                                                                  | 422 | 416 | 0         | 98.6  | 84.8 | 88.2 | hypothetical protein ARALYDRAFT_475736                                        | gbpln | Arabidopsis lyrata   | AT1G66330.2   Symbols:   senescence-associated family protein   chr1:24729880-24732144 REVERSE LENGTH=417                                                       | 422                                                                                                 | 417 | 0         | 98.8     | 84.4  | 88.6 |      |
| Rsa1.0_00175.1.g7583.t1 | sp O49230.1 ETR1_BRAOL RecName: Full=Ethylene receptor 1 gi 2896029 gb AAC39497.1  ethylene receptor [Brassica oleracea]                                                                                                                                                                                                                             | 734 | 735 | 0         | 100.1 | 98.2 | 99.2 | RecName: Full=Ethylene receptor 1 gi 2896029 gb AAC39497.1  ethylene receptor | gbpln | Brassica oleracea    | AT1G66340.1   Symbols: ETR1, EIN1, ETR, AtETR1   Signal transduction histidine kinase, hybrid-type, ethylene sensor   chr1:24734698-24737366 FORWARD LENGTH=738 | 734                                                                                                 | 738 | 0         | 100.5    | 96.0  | 98.2 |      |
| Rsa1.0_00175.1.g7584.t1 | gb EOA33796.1  hypothetical protein CARUB_v10021265mg [Capsella rubella]                                                                                                                                                                                                                                                                             | 180 | 167 | 4.00E-60  | 92.8  | 66.1 | 71.1 | hypothetical protein CARUB_v10021265mg                                        | gbpln | Capsella rubella     | AT1G66360.1   Symbols:   Calcium-dependent lipid-binding (CaLB domain) family protein   chr1:24751431-24752607 FORWARD LENGTH=174                               | 180                                                                                                 | 174 | 4.00E-62  | 96.7     | 65.6  | 70.6 |      |

|                         |                                                                                                                                                                                                                                                                            |      |      |           |       |      |      |                                                     |       |                      |                                                                                                                                                                                                                                                                                    |      |     |           |       |      |      |
|-------------------------|----------------------------------------------------------------------------------------------------------------------------------------------------------------------------------------------------------------------------------------------------------------------------|------|------|-----------|-------|------|------|-----------------------------------------------------|-------|----------------------|------------------------------------------------------------------------------------------------------------------------------------------------------------------------------------------------------------------------------------------------------------------------------------|------|-----|-----------|-------|------|------|
| Rsa1.0_00175.1.g7585.t1 | gb ADP76651.1  MYB2 [Brassica oleracea var. botrytis]                                                                                                                                                                                                                      | 168  | 247  | 3.00E-77  | 147.0 | 85.7 | 89.9 | MYB2                                                | gbpln | Brassica oleracea    | AT1G66390.1   Symbols: ATMYB90, PAP2, MYB90   myb domain protein 90   chr1:24764052-24765400 FORWARD LENGTH=249                                                                                                                                                                    | 168  | 249 | 1.00E-54  | 148.2 | 64.3 | 74.4 |
| Rsa1.0_00176.1.g7586.t1 | dbj BAJ34079.1  unnamed protein product [Thellungiella halophila]                                                                                                                                                                                                          | 175  | 184  | 8.00E-79  | 105.1 | 86.9 | 93.1 | unnamed protein product                             | ----  | ----                 | AT5G67190.1   Symbols: DEAR2   DREB and EAR motif protein 2   chr5:26809135-26809689 REVERSE LENGTH=184                                                                                                                                                                            | 175  | 184 | 2.00E-76  | 105.1 | 85.1 | 92.6 |
| Rsa1.0_00176.1.g7587.t1 | gb AAN17412.1  putative protein [Arabidopsis thaliana] gi 25084238 gb AAN72203.1  putative protein [Arabidopsis thaliana]                                                                                                                                                  | 421  | 375  | 1.00E-176 | 89.1  | 75.3 | 81.5 | putative protein                                    | gbpln | Arabidopsis thaliana | AT5G67170.1   Symbols:   SEC-C motif-containing protein / OTU-like cysteine protease family protein   chr5:26799851-26801763 FORWARD LENGTH=375                                                                                                                                    | 421  | 375 | 1.00E-173 | 89.1  | 72.0 | 78.1 |
| Rsa1.0_00176.1.g7588.t1 | ref XP_002865022.1  hypothetical protein ARALYDRAFT_919995 [Arabidopsis lyrata subsp. lyrata] gi 297310857 gb EFH41281.1  hypothetical protein ARALYDRAFT_919995 [Arabidopsis lyrata subsp. lyrata]                                                                        | 453  | 448  | 0         | 98.9  | 76.4 | 82.6 | hypothetical protein ARALYDRAFT_919995              | gbpln | Arabidopsis lyrata   | AT5G67160.1   Symbols: EPS1   HXXXD-type acyl-transferase family protein   chr5:26797700-26799004 REVERSE LENGTH=434                                                                                                                                                               | 453  | 434 | 1.00E-145 | 95.8  | 60.9 | 71.7 |
| Rsa1.0_00176.1.g7589.t1 | ref XP_002866719.1  hypothetical protein ARALYDRAFT_920006 [Arabidopsis lyrata subsp. lyrata] gi 297312554 gb EFH42978.1  hypothetical protein ARALYDRAFT_920006 [Arabidopsis lyrata subsp. lyrata]                                                                        | 128  | 128  | 2.00E-49  | 100.0 | 78.1 | 84.4 | hypothetical protein ARALYDRAFT_920006              | gbpln | Arabidopsis lyrata   | AT5G67070.1   Symbols: RALFL34   ralfl-like 34   chr5:26768120-26768509 FORWARD LENGTH=129                                                                                                                                                                                         | 128  | 129 | 7.00E-50  | 100.8 | 78.1 | 82.8 |
| Rsa1.0_00176.1.g7590.t1 | gb EOA14640.1  hypothetical protein CARUB_v10027898mg [Capsella rubella]                                                                                                                                                                                                   | 207  | 242  | 5.00E-65  | 116.9 | 82.1 | 87.0 | hypothetical protein CARUB_v10027898mg              | gbpln | Capsella rubella     | AT5G67060.1   Symbols: HEC1   basic helix-loop-helix (bHLH) DNA-binding superfamily protein   chr5:26766276-26767001 FORWARD LENGTH=241                                                                                                                                            | 207  | 241 | 6.00E-66  | 116.4 | 79.2 | 84.1 |
| Rsa1.0_00176.1.g7591.t3 | ref XP_002865030.1  lipase class 3 family protein [Arabidopsis lyrata subsp. lyrata] gi 297310865 gb EFH41289.1  lipase class 3 family protein [Arabidopsis lyrata subsp. lyrata]                                                                                          | 470  | 479  | 0         | 101.9 | 83.4 | 91.5 | lipase class 3 family protein                       | gbpln | Arabidopsis lyrata   | AT5G67050.1   Symbols:   alpha/beta-Hydrolases superfamily protein   chr5:26759482-26761165 REVERSE LENGTH=477                                                                                                                                                                     | 470  | 477 | 0         | 101.5 | 80.6 | 90.6 |
| Rsa1.0_00176.1.g7592.t1 | gb AAC95175.1  putative non-LTR retroelement reverse transcriptase [Arabidopsis thaliana]                                                                                                                                                                                  | 1569 | 1352 | 0         | 86.2  | 44.0 | 58.7 | putative non-LTR retroelement reverse transcriptase | gbpln | Arabidopsis thaliana | AT3G24255.1   Symbols:   RNA-directed DNA polymerase (reverse transcriptase)-related family protein   chr3:8789471-8793208 FORWARD LENGTH=746                                                                                                                                      | 1569 | 746 | 1.00E-114 | 47.5  | 13.3 | 16.8 |
| Rsa1.0_00176.1.g7593.t1 | ref XP_002888458.1  hypothetical protein ARALYDRAFT_338787 [Arabidopsis lyrata subsp. lyrata] gi 297334299 gb EFH64717.1  hypothetical protein ARALYDRAFT_338787 [Arabidopsis lyrata subsp. lyrata]                                                                        | 267  | 278  | 2.00E-74  | 104.1 | 62.9 | 74.5 | hypothetical protein ARALYDRAFT_338787              | gbpln | Arabidopsis lyrata   | AT5G66990.1   Symbols:   RWP-RK domain-containing protein   chr5:26744257-26745362 REVERSE LENGTH=277                                                                                                                                                                              | 267  | 277 | 4.00E-74  | 103.7 | 61.4 | 74.2 |
| Rsa1.0_00176.1.g7594.t1 | ref NP_569043.1  uncharacterized protein [Arabidopsis thaliana] gi 21593797 gb AAM65764.1  unknown [Arabidopsis thaliana] gi 89111824 gb ABD60684.1  At5g66985 [Arabidopsis thaliana] gi 332010904 gb AED98287.1  uncharacterized protein AT5G66985 [Arabidopsis thaliana] | 86   | 83   | 2.00E-23  | 96.5  | 66.3 | 75.6 | uncharacterized protein                             | gbpln | Arabidopsis thaliana | AT5G66985.1   Symbols:   unknown protein; Has 30201 Blast hits to 17322 proteins in 780 species: Archae - 12; Bacteria - 1396; Metazoa - 17338; Fungi - 3422; Plants - 5037; Viruses - 0; Other Eukaryotes - 2996 (source: NCBI BLINK).   chr5:26743412-26743663 FORWARD LENGTH=83 | 86   | 83  | 4.00E-26  | 96.5  | 66.3 | 75.6 |
| Rsa1.0_00176.1.g7595.t1 | dbj BAJ33900.1  unnamed protein product [Thellungiella halophila]                                                                                                                                                                                                          | 425  | 626  | 1.00E-147 | 147.3 | 58.8 | 60.7 | unnamed protein product                             | ----  | ----                 | AT5G66760.1   Symbols: SDH1-1   succinate dehydrogenase 1-1   chr5:26653776-26657224 FORWARD LENGTH=634                                                                                                                                                                            | 425  | 634 | 1.00E-147 | 149.2 | 57.2 | 60.5 |
| Rsa1.0_00176.1.g7596.t1 | # # # # # # # #                                                                                                                                                                                                                                                            |      |      |           |       |      |      | -                                                   | ----  | ----                 | # # # # # # #                                                                                                                                                                                                                                                                      |      |     |           |       |      |      |
| Rsa1.0_00176.1.g7597.t1 | gb EOA29413.1  hypothetical protein CARUB_v10025704mg [Capsella rubella]                                                                                                                                                                                                   | 276  | 309  | 6.00E-22  | 112.0 | 17.4 | 25.4 | hypothetical protein CARUB_v10025704mg              | gbpln | Capsella rubella     | AT2G30130.1   Symbols: ASL5, LBD12, PKC1   Lateral organ boundaries (LOB) domain family protein   chr2:12868740-12869684 FORWARD LENGTH=193                                                                                                                                        | 276  | 193 | 8.00E-23  | 69.9  | 18.1 | 27.9 |
| Rsa1.0_00176.1.g7598.t3 | dbj BAJ33900.1  unnamed protein product [Thellungiella halophila]                                                                                                                                                                                                          | 1190 | 626  | 0         | 52.6  | 36.6 | 37.6 | unnamed protein product                             | ----  | ----                 | AT5G66760.1   Symbols: SDH1-1   succinate dehydrogenase 1-1   chr5:26653776-26657224 FORWARD LENGTH=634                                                                                                                                                                            | 1190 | 634 | 0         | 53.3  | 35.5 | 37.6 |
| Rsa1.0_00176.1.g7599.t1 | gb EOA13246.1  hypothetical protein CARUB_v10026275mg [Capsella rubella]                                                                                                                                                                                                   | 496  | 499  | 0         | 100.6 | 80.0 | 85.9 | hypothetical protein CARUB_v10026275mg              | gbpln | Capsella rubella     | AT5G66730.1   Symbols:   C2H2-like zinc finger protein   chr5:26641914-26643883 REVERSE LENGTH=500                                                                                                                                                                                 | 496  | 500 | 0         | 100.8 | 78.6 | 84.5 |
| Rsa1.0_00176.1.g7600.t1 | ref XP_002866744.1  hypothetical protein ARALYDRAFT_496930 [Arabidopsis lyrata subsp. lyrata] gi 297312579 gb EFH43003.1  hypothetical protein ARALYDRAFT_496930 [Arabidopsis lyrata subsp. lyrata]                                                                        | 413  | 406  | 1.00E-165 | 98.3  | 74.3 | 82.6 | hypothetical protein ARALYDRAFT_496930              | gbpln | Arabidopsis lyrata   | AT5G66710.1   Symbols:   Protein kinase superfamily protein   chr5:26636609-26638564 FORWARD LENGTH=405                                                                                                                                                                            | 413  | 405 | 1.00E-162 | 98.1  | 71.4 | 81.6 |

|                         |                                                                                                                                                                                                                                                                                                                                                                                                                                                                                                                                                                                                                                                                                                                                                                                                                                                                                                                                                                                                                                                                                                    |     |     |           |       |      |      |                                                          |             |                      |                                                                                                                                                                                |     |     |           |       |      |      |
|-------------------------|----------------------------------------------------------------------------------------------------------------------------------------------------------------------------------------------------------------------------------------------------------------------------------------------------------------------------------------------------------------------------------------------------------------------------------------------------------------------------------------------------------------------------------------------------------------------------------------------------------------------------------------------------------------------------------------------------------------------------------------------------------------------------------------------------------------------------------------------------------------------------------------------------------------------------------------------------------------------------------------------------------------------------------------------------------------------------------------------------|-----|-----|-----------|-------|------|------|----------------------------------------------------------|-------------|----------------------|--------------------------------------------------------------------------------------------------------------------------------------------------------------------------------|-----|-----|-----------|-------|------|------|
| Rsa1.0_00176.1.g7601.t1 | refXP_002866745.1   hypothetical protein ARALYDRAFT_332898 [Arabidopsis lyrata subsp. lyrata] gi 297312580 gb EFH43004.1                                                                                                                                                                                                                                                                                                                                                                                                                                                                                                                                                                                                                                                                                                                                                                                                                                                                                                                                                                           | 224 | 231 | 2.00E-86  | 103.1 | 81.7 | 88.8 | hypothetical protein ARALYDRAFT_332898                   | gbpln       | Arabidopsis lyrata   | AT5G66700.1   Symbols: HB53, HB-8, ATHB53   homeobox 53   chr5:26634406-26635762 FORWARD LENGTH=228                                                                            | 224 | 228 | 2.00E-86  | 101.8 | 81.3 | 87.5 |
| Rsa1.0_00176.1.g7602.t1 | hypothetical protein ARALYDRAFT_332898 [Arabidopsis lyrata subsp. lyrata] refXP_002866746.1   UDP-glucuronosyl/UDP-glucosyl transferase family protein [Arabidopsis lyrata subsp. lyrata] gi 297312581 gb EFH43005.1   UDP-glucuronosyl/UDP-glucosyl transferase family protein [Arabidopsis lyrata subsp. lyrata] refNP_569038.1                                                                                                                                                                                                                                                                                                                                                                                                                                                                                                                                                                                                                                                                                                                                                                  | 473 | 481 | 0         | 101.7 | 81.4 | 90.7 | UDP-glucuronosyl/UDP-glucosyl transferase family protein | gbpln       | Arabidopsis lyrata   | AT5G66690.1   Symbols: UGT72E2   UDP-Glycosyltransferase superfamily protein   chr5:26625155-26626600 FORWARD LENGTH=481                                                       | 473 | 481 | 0         | 101.7 | 80.5 | 90.3 |
| Rsa1.0_00176.1.g7603.t1 | oligosaccharyltransferase complex subunit beta [Arabidopsis thaliana] gi 75164192 sp Q944K2.1 OST48_ARAT H RecName: Full=Dolichyl-diphosphooligosaccharide-protein glycosyltransferase 48 kDa subunit; Short=Oligosaccharyl transferase 48 kDa subunit; AltName: Full=Protein DEFECTIVE GLYCOSYLATION 1; Flags: Precursor gi 16226812 gb AAL16268.1 AF428338.1 AT5g66680/MSN2.7 [Arabidopsis thaliana] gi 23297258 gb AANI2926.1   putative dolichyl-di-phosphooligosaccharide glycotransferase (oligosaccharyltransferase) [Arabidopsis thaliana] gi 332010868 gb AED98251.1   dolichyl-diphosphooligosaccharide-protein glycosyltransferase subunit [Arabidopsis thaliana] refXP_002865056.1   hypothetical protein ARALYDRAFT_496938 [Arabidopsis lyrata subsp. lyrata] gi 297310891 gb EFH41315.1                                                                                                                                                                                                                                                                                              | 435 | 437 | 0         | 100.5 | 96.1 | 99.1 | oligosaccharyltransferase complex subunit beta           | gbpln       | Arabidopsis thaliana | AT5G66680.1   Symbols: DGL1   dolichyl-diphosphooligosaccharide-protein glycosyltransferase 48kDa subunit family protein   chr5:26617840-26620581 REVERSE LENGTH=437           | 435 | 437 | 0         | 100.5 | 96.1 | 99.1 |
| Rsa1.0_00176.1.g7604.t1 | hypothetical protein ARALYDRAFT_496938 [Arabidopsis lyrata subsp. lyrata] dbj BAA97270.1   unnamed protein product [Arabidopsis thaliana] refNP_201463.1   protein DA1-related 6 [Arabidopsis thaliana] gi 75171127 sp Q9FJX8.1 DAR6_ARATH RecName: Full=Protein DA1-related 6 gi 10177543 dbj BAB10936.1   unnamed protein product [Arabidopsis thaliana] gi 332010857 gb AED98240.1   protein DA1-related 6 [Arabidopsis thaliana] refNP_201461.1   uncharacterized protein [Arabidopsis thaliana] gi 186532816 ref NP_001119511.1   uncharacterized protein [Arabidopsis thaliana] gi 10177541 dbj BAB10936.1   unnamed protein product [Arabidopsis thaliana] gi 61742773 gb AAX35207.1   hypothetical protein At5g66600 [Arabidopsis thaliana] gi 332010850 gb AED98233.1   uncharacterized protein AT5G66600 [Arabidopsis thaliana] gi 332010852 gb AED98235.1   uncharacterized protein AT5G66600 [Arabidopsis thaliana] refNP_001147033.1   pathogenesis-related protein PRB1-3 precursor [Zea mays] gi 195606704 gb ACG25182.1   pathogenesis-related protein PRB1-3 precursor [Zea mays] | 319 | 320 | 1.00E-135 | 100.3 | 75.9 | 88.4 | hypothetical protein ARALYDRAFT_496938                   | gbpln       | Arabidopsis lyrata   | AT5G66650.1   Symbols:   Protein of unknown function (DUF607)   chr5:26603204-26604257 REVERSE LENGTH=321                                                                      | 319 | 321 | 1.00E-134 | 100.6 | 73.4 | 86.8 |
| Rsa1.0_00176.1.g7605.t1 | dbj BAA97270.1   unnamed protein product [Arabidopsis thaliana] refNP_201463.1   protein DA1-related 6 [Arabidopsis thaliana] gi 75171127 sp Q9FJX8.1 DAR6_ARATH RecName: Full=Protein DA1-related 6 gi 10177543 dbj BAB10936.1   unnamed protein product [Arabidopsis thaliana] gi 332010857 gb AED98240.1   protein DA1-related 6 [Arabidopsis thaliana] refNP_201461.1   uncharacterized protein [Arabidopsis thaliana] gi 186532816 ref NP_001119511.1   uncharacterized protein [Arabidopsis thaliana] gi 10177541 dbj BAB10936.1   unnamed protein product [Arabidopsis thaliana] gi 61742773 gb AAX35207.1   hypothetical protein At5g66600 [Arabidopsis thaliana] gi 332010850 gb AED98233.1   uncharacterized protein AT5G66600 [Arabidopsis thaliana] gi 332010852 gb AED98235.1   uncharacterized protein AT5G66600 [Arabidopsis thaliana] refNP_001147033.1   pathogenesis-related protein PRB1-3 precursor [Zea mays] gi 195606704 gb ACG25182.1   pathogenesis-related protein PRB1-3 precursor [Zea mays]                                                                           | 522 | 451 | 1.00E-161 | 86.4  | 59.2 | 69.9 | unnamed protein product                                  | gbpln       | Arabidopsis thaliana | AT5G66640.1   Symbols: DAR3   DA1-related protein 3   chr5:26599818-26601765 FORWARD LENGTH=450                                                                                | 522 | 450 | 1.00E-163 | 86.2  | 58.8 | 69.5 |
| Rsa1.0_00176.1.g7606.t1 | refNP_201463.1   protein DA1-related 6 [Arabidopsis thaliana] gi 75171127 sp Q9FJX8.1 DAR6_ARATH RecName: Full=Protein DA1-related 6 gi 10177543 dbj BAB10936.1   unnamed protein product [Arabidopsis thaliana] gi 332010857 gb AED98240.1   protein DA1-related 6 [Arabidopsis thaliana] refNP_201461.1   uncharacterized protein [Arabidopsis thaliana] gi 186532816 ref NP_001119511.1   uncharacterized protein [Arabidopsis thaliana] gi 10177541 dbj BAB10936.1   unnamed protein product [Arabidopsis thaliana] gi 61742773 gb AAX35207.1   hypothetical protein At5g66600 [Arabidopsis thaliana] gi 332010850 gb AED98233.1   uncharacterized protein AT5G66600 [Arabidopsis thaliana] gi 332010852 gb AED98235.1   uncharacterized protein AT5G66600 [Arabidopsis thaliana] refNP_001147033.1   pathogenesis-related protein PRB1-3 precursor [Zea mays] gi 195606704 gb ACG25182.1   pathogenesis-related protein PRB1-3 precursor [Zea mays]                                                                                                                                           | 531 | 644 | 1.00E-155 | 121.3 | 55.9 | 68.7 | protein DA1-related 6                                    | gbpln       | Arabidopsis thaliana | AT5G66620.1   Symbols: DAR6   DA1-related protein 6   chr5:26588585-26592006 FORWARD LENGTH=644                                                                                | 531 | 644 | 1.00E-158 | 121.3 | 55.9 | 68.7 |
| Rsa1.0_00176.1.g7607.t3 | refNP_201463.1   protein DA1-related 6 [Arabidopsis thaliana] gi 75171127 sp Q9FJX8.1 DAR6_ARATH RecName: Full=Protein DA1-related 6 gi 10177543 dbj BAB10936.1   unnamed protein product [Arabidopsis thaliana] gi 332010857 gb AED98240.1   protein DA1-related 6 [Arabidopsis thaliana] refNP_201461.1   uncharacterized protein [Arabidopsis thaliana] gi 186532816 ref NP_001119511.1   uncharacterized protein [Arabidopsis thaliana] gi 10177541 dbj BAB10936.1   unnamed protein product [Arabidopsis thaliana] gi 61742773 gb AAX35207.1   hypothetical protein At5g66600 [Arabidopsis thaliana] gi 332010850 gb AED98233.1   uncharacterized protein AT5G66600 [Arabidopsis thaliana] gi 332010852 gb AED98235.1   uncharacterized protein AT5G66600 [Arabidopsis thaliana] refNP_001147033.1   pathogenesis-related protein PRB1-3 precursor [Zea mays] gi 195606704 gb ACG25182.1   pathogenesis-related protein PRB1-3 precursor [Zea mays]                                                                                                                                           | 575 | 614 | 0         | 106.8 | 77.6 | 84.7 | uncharacterized protein                                  | gbpln       | Arabidopsis thaliana | AT5G66600.3   Symbols:   Protein of unknown function, DUF547   chr5:26575105-26578315 REVERSE LENGTH=614                                                                       | 575 | 614 | 0         | 106.8 | 77.6 | 84.7 |
| Rsa1.0_00176.1.g7608.t1 | refNP_201463.1   protein DA1-related 6 [Arabidopsis thaliana] gi 75171127 sp Q9FJX8.1 DAR6_ARATH RecName: Full=Protein DA1-related 6 gi 10177543 dbj BAB10936.1   unnamed protein product [Arabidopsis thaliana] gi 332010857 gb AED98240.1   protein DA1-related 6 [Arabidopsis thaliana] refNP_201461.1   uncharacterized protein [Arabidopsis thaliana] gi 186532816 ref NP_001119511.1   uncharacterized protein [Arabidopsis thaliana] gi 10177541 dbj BAB10936.1   unnamed protein product [Arabidopsis thaliana] gi 61742773 gb AAX35207.1   hypothetical protein At5g66600 [Arabidopsis thaliana] gi 332010850 gb AED98233.1   uncharacterized protein AT5G66600 [Arabidopsis thaliana] gi 332010852 gb AED98235.1   uncharacterized protein AT5G66600 [Arabidopsis thaliana] refNP_001147033.1   pathogenesis-related protein PRB1-3 precursor [Zea mays] gi 195606704 gb ACG25182.1   pathogenesis-related protein PRB1-3 precursor [Zea mays]                                                                                                                                           | 183 | 180 | 9.00E-96  | 98.4  | 93.4 | 95.1 | pathogenesis-related protein PRB1-3 precursor            | gbenv/gbpln | Zea mays             | AT5G66590.1   Symbols:   CAP (Cysteine-rich secretory proteins, Antigen 5, and Pathogenesis-related 1 protein) superfamily protein   chr5:26574255-26574812 FORWARD LENGTH=185 | 183 | 185 | 1.00E-84  | 101.1 | 85.2 | 90.2 |

|                         |                                                                                                                                                                                                                                                                                                                                                                                                                                                                                                                                                                                                      |      |      |          |       |      |      |                                                                                                                                                     |       |                      |                                                                                                                                                                                                                                                                                                                                                                                                                                                                                                                                                                                                               |      |     |          |       |      |      |
|-------------------------|------------------------------------------------------------------------------------------------------------------------------------------------------------------------------------------------------------------------------------------------------------------------------------------------------------------------------------------------------------------------------------------------------------------------------------------------------------------------------------------------------------------------------------------------------------------------------------------------------|------|------|----------|-------|------|------|-----------------------------------------------------------------------------------------------------------------------------------------------------|-------|----------------------|---------------------------------------------------------------------------------------------------------------------------------------------------------------------------------------------------------------------------------------------------------------------------------------------------------------------------------------------------------------------------------------------------------------------------------------------------------------------------------------------------------------------------------------------------------------------------------------------------------------|------|-----|----------|-------|------|------|
| Rsa1.0_00176.1.g7609.t1 | ref NP_201459.1  uncharacterized protein [Arabidopsis thaliana] gi 10177539 dbj BAB10934.1  unnamed protein product [Arabidopsis thaliana] gi 28393574 gb AAO42207.1  unknown protein [Arabidopsis thaliana] gi 28972979 gb AAO63814.1  unknown protein [Arabidopsis thaliana] gi 332010848 gb AED98231.1  uncharacterized protein AT5G66580 [Arabidopsis thaliana]                                                                                                                                                                                                                                  | 154  | 156  | 1.00E-62 | 101.3 | 84.4 | 89.0 | uncharacterized protein                                                                                                                             | gbpln | Arabidopsis thaliana | AT5G66580.1   Symbols:   unknown protein; FUNCTIONS IN: molecular function unknown; INVOLVED IN: N-terminal protein myristoylation; LOCATED IN: cellular component unknown; BEST Arabidopsis thaliana protein match is: unknown protein (TAIR:AT3G08000.1); Has 1807 Blast hits to 1807 proteins in 277 species: Archae - 0; Bacteria - 0; Metazoa - 736; Fungi - 347; Plants - 385; Viruses - 0; Other Eukaryotes - 339 (source: NCBI BLink).   chr5:26572724-26573194 FORWARD LENGTH=156                                                                                                                    | 154  | 156 | 3.00E-65 | 101.3 | 84.4 | 89.0 |
| Rsa1.0_00176.1.g7610.t1 | gb EOA13683.1  hypothetical protein CARUB_v10026754mg [Capsella rubella]                                                                                                                                                                                                                                                                                                                                                                                                                                                                                                                             | 332  | 332  | 0        | 100.0 | 97.6 | 98.8 | hypothetical protein CARUB_v10026754mg                                                                                                              | gbpln | Capsella rubella     | AT5G66570.1   Symbols: PSBO-1, OEE1, OEE33, OE33, PSBO1, MSP-1   PS II oxygen-evolving complex 1   chr5:26568744-26570124 FORWARD LENGTH=332                                                                                                                                                                                                                                                                                                                                                                                                                                                                  | 332  | 332 | 0        | 100.0 | 96.7 | 98.2 |
| Rsa1.0_00176.1.g7611.t2 | ref XP_002865060.1  hypothetical protein ARALYDRAFT_496951 [Arabidopsis lyrata subsp. lyrata] gi 297310895 gb EFH41319.1  hypothetical protein ARALYDRAFT_496951 [Arabidopsis lyrata subsp. lyrata]                                                                                                                                                                                                                                                                                                                                                                                                  | 1398 | 522  | 0        | 37.3  | 29.8 | 32.8 | hypothetical protein ARALYDRAFT_496951                                                                                                              | gbpln | Arabidopsis lyrata   | AT5G66540.1   Symbols:   FUNCTIONS IN: molecular function unknown; INVOLVED IN: rRNA processing; LOCATED IN: cytosol, nucleolus, nucleus; EXPRESSED IN: 22 plant structures; EXPRESSED DURING: 12 growth stages; CONTAINS InterPro DOMAIN/s: U3 small nucleolar ribonucleoprotein complex, subunit Mpp10p (InterPro:IPR012173), Mpp10 protein (InterPro:IPR007151); Has 30201 Blast hits to 17322 proteins in 780 species: Archae - 12; Bacteria - 1396; Metazoa - 17338; Fungi - 3422; Plants - 5037; Viruses - 0; Other Eukaryotes - 2996 (source: NCBI BLink).   chr5:26556653-26559310 REVERSE LENGTH=524 | 1398 | 524 | 0        | 37.5  | 29.5 | 32.4 |
| Rsa1.0_00176.1.g7612.t2 | gb ABB45851.1  hypothetical protein [Eutrema halophilum]                                                                                                                                                                                                                                                                                                                                                                                                                                                                                                                                             | 1569 | 697  | 0        | 44.4  | 34.5 | 37.8 | hypothetical protein                                                                                                                                | gbpln | Eutrema halophilum   | AT3G47840.1   Symbols:   Tetratricopeptide repeat (TPR)-like superfamily protein   chr3:17651912-17654032 FORWARD LENGTH=706                                                                                                                                                                                                                                                                                                                                                                                                                                                                                  | 1569 | 706 | 0        | 45.0  | 34.0 | 38.0 |
| Rsa1.0_00176.1.g7613.t1 | gb ABB45850.1  hypothetical protein [Eutrema halophilum]                                                                                                                                                                                                                                                                                                                                                                                                                                                                                                                                             | 194  | 296  | 3.00E-53 | 152.6 | 63.9 | 72.2 | hypothetical protein                                                                                                                                | gbpln | Eutrema halophilum   | AT5G66450.1   Symbols:   Phosphatidic acid phosphatase (PAP2) family protein   chr5:26534801-26535951 FORWARD LENGTH=286                                                                                                                                                                                                                                                                                                                                                                                                                                                                                      | 194  | 286 | 2.00E-47 | 147.4 | 58.8 | 68.0 |
| Rsa1.0_00177.1.g7614.t1 | #                                                                                                                                                                                                                                                                                                                                                                                                                                                                                                                                                                                                    | #    | #    | #        | #     | #    | #    | -                                                                                                                                                   | ----  | ----                 | #                                                                                                                                                                                                                                                                                                                                                                                                                                                                                                                                                                                                             | #    | #   | #        | #     | #    |      |
| Rsa1.0_00177.1.g7615.t1 | ref NP_182302.1  nuclear transcription factor Y subunit B-5 [Arabidopsis thaliana] gi 75220231 sp O82248.1 NFYB5_ARAT H RecName: Full=Nuclear transcription factor Y subunit B-5; Short=AtNF-YB-5 gi 3738293 gb AAC63635.1  putative CCAAT-box binding transcription factor [Arabidopsis thaliana] gi 28393159 gb AAO42012.1  putative CCAAT-box binding transcription factor [Arabidopsis thaliana] gi 28827540 gb AAO50614.1  putative CCAAT-box binding transcription factor [Arabidopsis thaliana] gi 330255796 gb AEC10890.1  nuclear transcription factor Y subunit B-5 [Arabidopsis thaliana] | 114  | 160  | 4.00E-57 | 140.4 | 91.2 | 95.6 | nuclear transcription factor Y subunit B-5                                                                                                          | gbpln | Arabidopsis thaliana | AT2G47810.1   Symbols: NF-YB5   nuclear factor Y subunit B5   chr2:19582938-19583420 REVERSE LENGTH=160                                                                                                                                                                                                                                                                                                                                                                                                                                                                                                       | 114  | 160 | 7.00E-60 | 140.4 | 91.2 | 95.6 |
| Rsa1.0_00177.1.g7616.t1 | pir [S65812 RNA-directed DNA polymerase (EC 2.7.7.49) (clone DW15) - Arabidopsis thaliana retrotransposon Ta11-1 gi 976278 gb AAA75254.1  reverse transcriptase [Arabidopsis thaliana]                                                                                                                                                                                                                                                                                                                                                                                                               | 1796 | 1333 | 0        | 74.2  | 37.1 | 49.9 | RNA-directed DNA polymerase (EC 2.7.7.49) (clone DW15) - Arabidopsis thaliana retrotransposon Ta11-1 gi 976278 gb AAA75254.1  reverse transcriptase | gbpln | Arabidopsis thaliana | AT4G29090.1   Symbols:   Ribonuclease H-like superfamily protein   chr4:14333528-14335255 FORWARD LENGTH=575                                                                                                                                                                                                                                                                                                                                                                                                                                                                                                  | 1796 | 575 | 3.00E-85 | 32.0  | 9.2  | 14.6 |
| Rsa1.0_00177.1.g7617.t1 | #                                                                                                                                                                                                                                                                                                                                                                                                                                                                                                                                                                                                    | #    | #    | #        | #     | #    | #    | -                                                                                                                                                   | ----  | ----                 | #                                                                                                                                                                                                                                                                                                                                                                                                                                                                                                                                                                                                             | #    | #   | #        | #     | #    |      |
| Rsa1.0_00177.1.g7618.t1 | ref XP_002882009.1  hypothetical protein ARALYDRAFT_903981 [Arabidopsis lyrata subsp. lyrata] gi 297327848 gb EFH58268.1  hypothetical protein ARALYDRAFT_903981 [Arabidopsis lyrata subsp. lyrata]                                                                                                                                                                                                                                                                                                                                                                                                  | 207  | 308  | 4.00E-13 | 148.8 | 17.9 | 18.8 | hypothetical protein ARALYDRAFT_903981                                                                                                              | gbpln | Arabidopsis lyrata   | AT3G60800.1   Symbols:   DHHC-type zinc finger family protein   chr3:22467486-22469273 REVERSE LENGTH=307                                                                                                                                                                                                                                                                                                                                                                                                                                                                                                     | 207  | 307 | 5.00E-13 | 148.3 | 15.5 | 17.9 |
| Rsa1.0_00177.1.g7619.t1 | #                                                                                                                                                                                                                                                                                                                                                                                                                                                                                                                                                                                                    | #    | #    | #        | #     | #    | #    | -                                                                                                                                                   | ----  | ----                 | #                                                                                                                                                                                                                                                                                                                                                                                                                                                                                                                                                                                                             | #    | #   | #        | #     | #    |      |

|                         |                                                                                                                                                                                                                                                                                                                                                                                                                                                                                                                        |      |      |          |       |      |      |                                                               |       |                      |                                                                                                                                                                                                                                                                                                                                                                                                                                                                                                                                                          |      |      |           |       |      |      |
|-------------------------|------------------------------------------------------------------------------------------------------------------------------------------------------------------------------------------------------------------------------------------------------------------------------------------------------------------------------------------------------------------------------------------------------------------------------------------------------------------------------------------------------------------------|------|------|----------|-------|------|------|---------------------------------------------------------------|-------|----------------------|----------------------------------------------------------------------------------------------------------------------------------------------------------------------------------------------------------------------------------------------------------------------------------------------------------------------------------------------------------------------------------------------------------------------------------------------------------------------------------------------------------------------------------------------------------|------|------|-----------|-------|------|------|
| Rsa1.0_00177.1.g7620.t1 | ref[XP_002880325.1] hypothetical protein ARALYDRAFT_483966 [Arabidopsis lyrata subsp. lyrata] gi 297326164 gb EFH56584.1 hypothetical protein ARALYDRAFT_483966 [Arabidopsis lyrata subsp. lyrata]                                                                                                                                                                                                                                                                                                                     | 739  | 789  | 0        | 106.8 | 73.3 | 81.6 | hypothetical protein ARALYDRAFT_483966                        | gbpln | Arabidopsis lyrata   | AT2G47820.2   Symbols:   unknown protein; FUNCTIONS IN: molecular_function unknown; INVOLVED IN: biological_process unknown; LOCATED IN: cellular_component unknown; EXPRESSED IN: 17 plant structures; EXPRESSED DURING: 13 growth stages; BEST Arabidopsis thaliana protein match is: unknown protein (TAIR:AT1G09040.1).   chr2:19588122-19590629 FORWARD LENGTH=805                                                                                                                                                                                  | 739  | 805  | 0         | 108.9 | 70.6 | 80.4 |
| Rsa1.0_00177.1.g7621.t1 | ref[NP_182304.2] metal tolerance protein C1 [Arabidopsis thaliana] gi 71151963 sp Q8L725.1 MTPC1_ARAT H RecName: Full=Metal tolerance protein C1; Short=AtMTPc1; AltName: Full=AtMTP6 gi 22655099 gb AAM98140.1  unknown protein [Arabidopsis thaliana] gi 30387579 gb AAP31955.1  At2g47830 [Arabidopsis thaliana] gi 330255799 gb AEC10893.1  metal tolerance protein C1 [Arabidopsis thaliana]                                                                                                                      | 458  | 471  | 0        | 102.8 | 82.5 | 86.9 | metal tolerance protein C1                                    | gbpln | Arabidopsis thaliana | AT2G47830.1   Symbols:   Cation efflux family protein   chr2:19591094-19593973 REVERSE LENGTH=471                                                                                                                                                                                                                                                                                                                                                                                                                                                        | 458  | 471  | 0         | 102.8 | 82.5 | 86.9 |
| Rsa1.0_00177.1.g7622.t1 | gb AAC95175.1  putative non-LTR retroelement reverse transcriptase [Arabidopsis thaliana]                                                                                                                                                                                                                                                                                                                                                                                                                              | 1345 | 1352 | 0        | 100.5 | 46.4 | 63.9 | putative non-LTR retroelement reverse transcriptase           | gbpln | Arabidopsis thaliana | AT3G24255.1   Symbols:   RNA-directed DNA polymerase (reverse transcriptase)-related family protein   chr3:8789471-8793208 FORWARD LENGTH=746                                                                                                                                                                                                                                                                                                                                                                                                            | 1345 | 746  | 1.00E-100 | 55.5  | 13.7 | 18.8 |
| Rsa1.0_00177.1.g7623.t1 | #                                                                                                                                                                                                                                                                                                                                                                                                                                                                                                                      | #    | #    | #        | #     | #    | -    | -                                                             | ----  | ----                 | #                                                                                                                                                                                                                                                                                                                                                                                                                                                                                                                                                        | #    | #    | #         | #     | #    |      |
| Rsa1.0_00177.1.g7624.t1 | gb AAG51783.1 AC079679.3 reverse transcriptase, putative; 16838-20266 [Arabidopsis thaliana]                                                                                                                                                                                                                                                                                                                                                                                                                           | 2084 | 1142 | 0        | 54.8  | 29.7 | 37.5 | reverse transcriptase, putative; 16838-20266                  | gbpln | Arabidopsis thaliana | AT4G29090.1   Symbols:   Ribonuclease H-like superfamily protein   chr4:14333528-14335255 FORWARD LENGTH=575                                                                                                                                                                                                                                                                                                                                                                                                                                             | 2084 | 575  | 3.00E-75  | 27.6  | 8.3  | 13.5 |
| Rsa1.0_00177.1.g7625.t1 | ref[XP_002871294.1] mitochondrial transcription termination factor family protein [Arabidopsis lyrata subsp. lyrata] gi 297317131 gb EFH47553.1  mitochondrial transcription termination factor family protein [Arabidopsis lyrata subsp. lyrata]                                                                                                                                                                                                                                                                      | 401  | 404  | 0        | 100.7 | 81.5 | 88.5 | mitochondrial transcription termination factor family protein | gbpln | Arabidopsis lyrata   | AT5G07900.1   Symbols:   Mitochondrial transcription termination factor family protein   chr5:2520188-2521405 FORWARD LENGTH=405                                                                                                                                                                                                                                                                                                                                                                                                                         | 401  | 405  | 0         | 101.0 | 79.6 | 87.8 |
| Rsa1.0_00177.1.g7626.t1 | #                                                                                                                                                                                                                                                                                                                                                                                                                                                                                                                      | #    | #    | #        | #     | #    | -    | -                                                             | ----  | ----                 | #                                                                                                                                                                                                                                                                                                                                                                                                                                                                                                                                                        | #    | #    | #         | #     | #    |      |
| Rsa1.0_00177.1.g7627.t1 | #                                                                                                                                                                                                                                                                                                                                                                                                                                                                                                                      | #    | #    | #        | #     | #    | -    | -                                                             | ----  | ----                 | #                                                                                                                                                                                                                                                                                                                                                                                                                                                                                                                                                        | #    | #    | #         | #     | #    |      |
| Rsa1.0_00177.1.g7628.t1 | gb AAM64620.1  unknown [Arabidopsis thaliana]                                                                                                                                                                                                                                                                                                                                                                                                                                                                          | 138  | 128  | 5.00E-18 | 92.8  | 54.3 | 63.0 | unknown                                                       | gbpln | Arabidopsis thaliana | AT2G47950.1   Symbols:   unknown protein; FUNCTIONS IN: molecular_function unknown; INVOLVED IN: biological_process unknown; LOCATED IN: endomembrane system; EXPRESSED IN: root, flower; EXPRESSED DURING: petal differentiation and expansion stage; BEST Arabidopsis thaliana protein match is: unknown protein (TAIR:AT3G62990.1); Has 22 Blast hits to 22 proteins in 5 species: Archae - 0; Bacteria - 0; Metazoa - 0; Fungi - 0; Plants - 22; Viruses - 0; Other Eukaryotes - 0 (source: NCBI BLINK).   chr2:19624280-19624666 FORWARD LENGTH=128 | 138  | 128  | 5.00E-17  | 92.8  | 50.7 | 56.5 |
| Rsa1.0_00177.1.g7629.t1 | gb AAG51783.1 AC079679.3 reverse transcriptase, putative; 16838-20266 [Arabidopsis thaliana]                                                                                                                                                                                                                                                                                                                                                                                                                           | 185  | 1142 | 4.00E-30 | 617.3 | 43.8 | 58.4 | reverse transcriptase, putative; 16838-20266                  | gbpln | Arabidopsis thaliana | #                                                                                                                                                                                                                                                                                                                                                                                                                                                                                                                                                        | #    | #    | #         | #     | #    |      |
| Rsa1.0_00177.1.g7630.t1 | gb ACG60682.1  transposon-like ORF [Brassica oleracea var. alboglabra] ref[NP_180556.1] protein ELF4-like 1 [Arabidopsis thaliana] gi 75099965 sp O80877.1 EF4L1_ARATH RecName: Full=Protein ELF4-LIKE 1 gi 3420056 gb AAC31857.1  hypothetical protein [Arabidopsis thaliana] gi 49823506 gb AAT68736.1  hypothetical protein At2g29950 [Arabidopsis thaliana] gi 61742622 gb AX55132.1  hypothetical protein At2g29950 [Arabidopsis thaliana] gi 330253232 gb AEC08326.1  protein ELF4-like 1 [Arabidopsis thaliana] | 140  | 704  | 2.00E-39 | 502.9 | 55.7 | 60.7 | transposon-like ORF                                           | gbpln | Brassica oleracea    | #                                                                                                                                                                                                                                                                                                                                                                                                                                                                                                                                                        | #    | #    | #         | #     | #    |      |
| Rsa1.0_00177.1.g7631.t1 | ref[XP_002879240.1] ATPDR3/PDR3 [Arabidopsis lyrata subsp. lyrata] gi 297325079 gb EFH55499.1  ATPDR3/PDR3 [Arabidopsis lyrata subsp. lyrata]                                                                                                                                                                                                                                                                                                                                                                          | 1421 | 1428 | 0        | 100.5 | 91.1 | 96.1 | ATPDR3/PDR3                                                   | gbpln | Arabidopsis lyrata   | AT2G29950.1   Symbols:   ELF4-L1   ELF4-like 1   chr2:12767790-12768167 FORWARD LENGTH=125                                                                                                                                                                                                                                                                                                                                                                                                                                                               | 1421 | 125  | 2.00E-37  | 90.6  | 55.8 | 68.8 |
| Rsa1.0_00177.1.g7632.t1 | ref[XP_002879240.1] ATPDR3/PDR3 [Arabidopsis lyrata subsp. lyrata] gi 297325079 gb EFH55499.1  ATPDR3/PDR3 [Arabidopsis lyrata subsp. lyrata]                                                                                                                                                                                                                                                                                                                                                                          | 1421 | 1428 | 0        | 100.5 | 91.1 | 96.1 | ATPDR3/PDR3                                                   | gbpln | Arabidopsis lyrata   | AT2G29940.1   Symbols:   PDR3, ATPDR3   pleiotropic drug resistance 3   chr2:12760139-12766455 FORWARD LENGTH=1426                                                                                                                                                                                                                                                                                                                                                                                                                                       | 1421 | 1426 | 0         | 100.4 | 90.5 | 95.7 |

|                         |                                                                                                                                                                                                                                                                                                                                                                                                                                                 |      |      |           |       |       |       |                                                                                 |       |                      |                                                                                                                               |      |      |           |       |      |      |
|-------------------------|-------------------------------------------------------------------------------------------------------------------------------------------------------------------------------------------------------------------------------------------------------------------------------------------------------------------------------------------------------------------------------------------------------------------------------------------------|------|------|-----------|-------|-------|-------|---------------------------------------------------------------------------------|-------|----------------------|-------------------------------------------------------------------------------------------------------------------------------|------|------|-----------|-------|------|------|
| Rsa1.0_00177.1.g7633.t1 | emb[CAB75932.1] putative protein [Arabidopsis thaliana]                                                                                                                                                                                                                                                                                                                                                                                         | 1633 | 1339 | 0         | 82.0  | 44.0  | 57.3  | putative protein                                                                | gbpln | Arabidopsis thaliana | AT4G23160.1   Symbols: CRK8   cysteine-rich RLK (RECEPTOR-like protein kinase) 8   chr4:12128485-12134086 FORWARD LENGTH=1262 | 1633 | 1262 | 1.00E-109 | 77.3  | 12.5 | 19.1 |
| Rsa1.0_00178.1.g7634.t2 | ref[XP_004249683.1] PREDICTED: mitochondrial import inner membrane translocase subunit TIM14-1-like [Solanum lycopersicum]                                                                                                                                                                                                                                                                                                                      | 108  | 112  | 5.00E-46  | 103.7 | 82.4  | 99.8  | PREDICTED: mitochondrial import inner membrane translocase subunit TIM14-1-like | gbpln | Solanum lycopersicum | AT2G35795.1   Symbols:   Chaperone DnaJ-domain superfamily protein   chr2:15042321-15043334 FORWARD LENGTH=112                | 108  | 112  | 4.00E-48  | 103.7 | 80.6 | 90.7 |
| Rsa1.0_00178.1.g7635.t1 | ref[XP_002871004.1] hydrolase, alpha/beta fold family protein [Arabidopsis lyrata subsp. lyrata] g[29731684.1]g[EFH47263.1] hydrolase, alpha/beta fold family protein [Arabidopsis lyrata subsp. lyrata]                                                                                                                                                                                                                                        | 526  | 515  | 0         | 97.9  | 89.5  | 93.9  | hydrolase, alpha/beta fold family protein                                       | gbpln | Arabidopsis lyrata   | AT5G02970.1   Symbols:   alpha/beta-Hydrolases superfamily protein   chr5:695391-697412 FORWARD LENGTH=514                    | 526  | 514  | 0         | 97.7  | 87.8 | 93.2 |
| Rsa1.0_00178.1.g7636.t1 | gb[EOA21773.1] hypothetical protein CARUB_v10002234mg [Capsella rubella]                                                                                                                                                                                                                                                                                                                                                                        | 136  | 136  | 7.00E-72  | 100.0 | 100.0 | 100.0 | hypothetical protein CARUB_v10002234mg                                          | gbpln | Capsella rubella     | AT5G02960.1   Symbols:   Ribosomal protein S12/S23 family protein   chr5:693280-694396 REVERSE LENGTH=142                     | 136  | 142  | 7.00E-74  | 104.4 | 99.3 | 99.3 |
| Rsa1.0_00178.1.g7637.t1 | gb[EOA20616.1] hypothetical protein CARUB_v10000928mg [Capsella rubella]                                                                                                                                                                                                                                                                                                                                                                        | 456  | 456  | 0         | 100.0 | 75.9  | 87.1  | hypothetical protein CARUB_v10000928mg                                          | gbpln | Capsella rubella     | AT5G02910.1   Symbols:   F-box/RNI-like superfamily protein   chr5:677120-678907 FORWARD LENGTH=458                           | 456  | 458  | 0         | 100.4 | 72.1 | 84.0 |
| Rsa1.0_00178.1.g7638.t1 | dbj[BAB02857.1] unnamed protein product [Arabidopsis thaliana]                                                                                                                                                                                                                                                                                                                                                                                  | 797  | 507  | 3.00E-89  | 63.6  | 26.0  | 31.7  | unnamed protein product                                                         | gbpln | Arabidopsis thaliana | AT3G28410.1   Symbols:   F-box/RNI-like superfamily protein   chr3:10640152-10642071 REVERSE LENGTH=465                       | 797  | 465  | 1.00E-91  | 58.3  | 26.0 | 31.7 |
| Rsa1.0_00178.1.g7639.t1 | gb[EOA20937.1] hypothetical protein CARUB_v10001270mg [Capsella rubella]                                                                                                                                                                                                                                                                                                                                                                        | 343  | 357  | 1.00E-130 | 104.1 | 70.0  | 81.0  | hypothetical protein CARUB_v10001270mg                                          | gbpln | Capsella rubella     | AT5G02890.1   Symbols:   HXXXD-type acyl-transferase family protein   chr5:670207-671454 REVERSE LENGTH=353                   | 343  | 353  | 1.00E-131 | 102.9 | 69.1 | 78.7 |
| Rsa1.0_00178.1.g7640.t1 | dbj[BAC42280.1] putative 60S ribosomal protein [Arabidopsis thaliana]                                                                                                                                                                                                                                                                                                                                                                           | 406  | 407  | 0         | 100.2 | 92.4  | 96.3  | putative 60S ribosomal protein                                                  | gbpln | Arabidopsis thaliana | AT3G09630.1   Symbols:   Ribosomal protein L4/L1 family   chr3:2953813-2955444 FORWARD LENGTH=406                             | 406  | 406  | 0         | 100.0 | 92.9 | 96.8 |
| Rsa1.0_00178.1.g7641.t1 | gb[EOA20698.1] hypothetical protein CARUB_v10001011mg [Capsella rubella]                                                                                                                                                                                                                                                                                                                                                                        | 449  | 431  | 1.00E-134 | 96.0  | 73.1  | 78.8  | hypothetical protein CARUB_v10001011mg                                          | gbpln | Capsella rubella     | AT5G02850.1   Symbols:   hydroxyproline-rich glycoprotein family protein   chr5:652159-653439 FORWARD LENGTH=426              | 449  | 426  | 1.00E-135 | 94.9  | 73.3 | 79.1 |
| Rsa1.0_00178.1.g7642.t5 | emb[CAB86038.1] putative protein [Arabidopsis thaliana]                                                                                                                                                                                                                                                                                                                                                                                         | 302  | 307  | 1.00E-122 | 101.7 | 77.5  | 80.1  | putative protein                                                                | gbpln | Arabidopsis thaliana | AT5G02840.3   Symbols: LCL1   LHY/CCA1-like 1   chr5:648794-651204 FORWARD LENGTH=283                                         | 302  | 283  | 1.00E-119 | 93.7  | 75.5 | 78.8 |
| Rsa1.0_00178.1.g7643.t1 | gb[EOA19949.1] hypothetical protein CARUB_v10000200mg [Capsella rubella]                                                                                                                                                                                                                                                                                                                                                                        | 856  | 858  | 0         | 100.2 | 86.8  | 92.4  | hypothetical protein CARUB_v10000200mg                                          | gbpln | Capsella rubella     | AT5G02830.1   Symbols:   Tetratricopeptide repeat (TPR)-like superfamily protein   chr5:644458-648421 REVERSE LENGTH=852      | 856  | 852  | 0         | 99.5  | 85.6 | 91.2 |
| Rsa1.0_00178.1.g7644.t1 | ref[NP_195902.1] DNA topoisomerase 6 subunit A [Arabidopsis thaliana] g[297806215]ref[XP_002870991.1] hypothetical protein ARALYDRAFT_487058 [Arabidopsis lyrata subsp. lyrata] g[75335684]sp[Q9LZ03.1]TOP6A_ARAT H RecName: Full=DNA topoisomerase 6 subunit A; Short=ATOP6A; AltName: Full=Meiotic recombination protein SPO11-3; Short=AtSPO11-3; AltName: Full=Protein BRASSINOSTEROID INSENSITIVE 5; AltName: Full=Protein ROOT HAIRLESS 2 | 429  | 427  | 0         | 99.5  | 93.2  | 94.9  | DNA topoisomerase 6 subunit A                                                   | gbpln | Arabidopsis lyrata   | AT5G02820.1   Symbols: RHL2, BINS   Spo11/DNA topoisomerase VI, subunit A protein   chr5:642658-644123 FORWARD LENGTH=427     | 429  | 427  | 0         | 99.5  | 93.2 | 94.9 |
| Rsa1.0_00178.1.g7645.t1 | gb[ADA58346.1] pseudo-response regulator 7b [Brassica rapa]                                                                                                                                                                                                                                                                                                                                                                                     | 705  | 704  | 0         | 99.9  | 93.2  | 94.9  | pseudo-response regulator 7b                                                    | gbpln | Brassica rapa        | AT5G02810.1   Symbols: PRR7, APRR7   pseudo-response regulator 7   chr5:638283-641461 REVERSE LENGTH=727                      | 705  | 727  | 0         | 103.1 | 85.2 | 89.2 |
| Rsa1.0_00178.1.g7646.t1 | dbj[BAB09991.1] mutator-like transposase-like [Arabidopsis thaliana]                                                                                                                                                                                                                                                                                                                                                                            | 689  | 825  | 0         | 119.7 | 57.9  | 73.1  | mutator-like transposase-like                                                   | gbpln | Arabidopsis thaliana | #                                                                                                                             | #    | #    | #         | #     | #    |      |



|                         |                                                                                                                                                                                                                                                                                                                                                             |      |      |           |       |      |      |                                                 |       |                      |                                                                                                                                                                                                                                                                                                                                                                                                                                                         |      |     |           |       |      |      |
|-------------------------|-------------------------------------------------------------------------------------------------------------------------------------------------------------------------------------------------------------------------------------------------------------------------------------------------------------------------------------------------------------|------|------|-----------|-------|------|------|-------------------------------------------------|-------|----------------------|---------------------------------------------------------------------------------------------------------------------------------------------------------------------------------------------------------------------------------------------------------------------------------------------------------------------------------------------------------------------------------------------------------------------------------------------------------|------|-----|-----------|-------|------|------|
| Rsa1.0_00178.1.g7647.t1 | emb[CAB39638.1] RNA-directed DNA polymerase-like protein [Arabidopsis thaliana] gi 7267666 emb[CAB78094.1] RNA-directed DNA polymerase-like protein [Arabidopsis thaliana]                                                                                                                                                                                  | 1947 | 1274 | 0         | 65.4  | 31.3 | 43.2 | RNA-directed DNA polymerase-like protein        | gbpln | Arabidopsis thaliana | AT4G29090.1   Symbols:   Ribonuclease H-like superfamily protein   chr4:14333528-14335255 FORWARD LENGTH=575                                                                                                                                                                                                                                                                                                                                            | 1947 | 575 | 1.00E-73  | 29.5  | 9.5  | 14.4 |
| Rsa1.0_00178.1.g7648.t1 | gb[EOA22009.1] hypothetical protein CARUB_v10002532mg [Capsella rubella]                                                                                                                                                                                                                                                                                    | 752  | 746  | 0         | 99.2  | 83.4 | 90.4 | hypothetical protein CARUB_v10002532mg          | gbpln | Capsella rubella     | AT5G47580.1   Symbols:   unknown protein; BEST Arabidopsis thaliana protein match is: unknown protein (TAIR:AT4G17250.1). Has 1807 Blast hits to 1807 proteins in 277 species: Archae - 0; Bacteria - 0; Metazoa - 736; Fungi - 347; Plants - 385; Viruses - 0; Other Eukaryotes - 339 (source: NCBI BLink).   chr5:19294948-19297194 REVERSE LENGTH=748                                                                                                | 752  | 748 | 0         | 99.5  | 82.3 | 91.1 |
| Rsa1.0_00178.1.g7649.t1 | ref[XP_002873065.1] hypothetical protein ARALYDRAFT_487051 [Arabidopsis lyrata subsp. lyrata] gi 297318902 gb EFH49324.1  hypothetical protein ARALYDRAFT_487051 [Arabidopsis lyrata subsp. lyrata]                                                                                                                                                         | 209  | 214  | 2.00E-76  | 102.4 | 84.2 | 87.6 | hypothetical protein ARALYDRAFT_487051          | gbpln | Arabidopsis lyrata   | AT5G02770.1   Symbols:   unknown protein; Has 469 Blast hits to 336 proteins in 126 species: Archae - 0; Bacteria - 54; Metazoa - 249; Fungi - 22; Plants - 47; Viruses - 0; Other Eukaryotes - 97 (source: NCBI BLink).   chr5:628101-629168 REVERSE LENGTH=214                                                                                                                                                                                        | 209  | 214 | 1.00E-74  | 102.4 | 81.3 | 86.6 |
| Rsa1.0_00178.1.g7650.t1 | dbj[BAJ33929.1] unnamed protein product [Thellungiella halophila]                                                                                                                                                                                                                                                                                           | 370  | 370  | 0         | 100.0 | 87.8 | 93.5 | unnamed protein product                         | ----  | ----                 | AT5G02760.1   Symbols:   Protein phosphatase 2C family protein   chr5:625377-626817 FORWARD LENGTH=370                                                                                                                                                                                                                                                                                                                                                  | 370  | 370 | 0         | 100.0 | 85.1 | 91.6 |
| Rsa1.0_00178.1.g7651.t1 | ref[NP_566063.1] uncharacterized protein [Arabidopsis thaliana] gi 3702339 gb AAC82896.1  expressed protein [Arabidopsis thaliana] gi 18252159 gb AAL61912.1  unknown protein [Arabidopsis thaliana] gi 21386927 gb AAM47867.1  unknown protein [Arabidopsis thaliana] gi 330255547 gb AEC10641.1  uncharacterized protein AT2G46080 [Arabidopsis thaliana] | 176  | 347  | 6.00E-26  | 197.2 | 34.7 | 35.8 | uncharacterized protein                         | gbpln | Arabidopsis thaliana | AT2G46080.1   Symbols:   CONTAINS InterPro DOMAIN/s: Protein BYPASS related (InterPro:IPR008511); BEST Arabidopsis thaliana protein match is: Protein of unknown function (DUF793) (TAIR:AT1G01550.2); Has 153 Blast hits to 139 proteins in 20 species: Archae - 0; Bacteria - 2; Metazoa - 1; Fungi - 0; Plants - 150; Viruses - 0; Other Eukaryotes - 0 (source: NCBI BLink).   chr2:18948317-18949360 REVERSE LENGTH=347                            | 176  | 347 | 2.00E-28  | 197.2 | 34.7 | 35.8 |
| Rsa1.0_00178.1.g7652.t1 | ref[XP_002870987.1] zinc finger family protein [Arabidopsis lyrata subsp. lyrata] gi 297316824 gb EFH47246.1  zinc finger family protein [Arabidopsis lyrata subsp. lyrata]                                                                                                                                                                                 | 291  | 283  | 1.00E-119 | 97.3  | 84.5 | 89.3 | zinc finger family protein                      | gbpln | Arabidopsis lyrata   | AT5G02750.1   Symbols:   RING/U-box superfamily protein   chr5:620101-620952 FORWARD LENGTH=283                                                                                                                                                                                                                                                                                                                                                         | 291  | 283 | 1.00E-121 | 97.3  | 83.2 | 89.0 |
| Rsa1.0_00178.1.g7653.t1 | ref[XP_002870986.1] hypothetical protein ARALYDRAFT_487048 [Arabidopsis lyrata subsp. lyrata] gi 297316823 gb EFH47245.1  hypothetical protein ARALYDRAFT_487048 [Arabidopsis lyrata subsp. lyrata]                                                                                                                                                         | 239  | 228  | 3.00E-94  | 95.4  | 74.5 | 82.8 | hypothetical protein ARALYDRAFT_487048          | gbpln | Arabidopsis lyrata   | AT5G02740.1   Symbols:   Ribosomal protein S24e family protein   chr5:616517-618267 FORWARD LENGTH=228                                                                                                                                                                                                                                                                                                                                                  | 239  | 228 | 2.00E-93  | 95.4  | 72.4 | 82.4 |
| Rsa1.0_00178.1.g7654.t1 | ref[NP_195893.1] allergen V5/Tpx-1-related family protein [Arabidopsis thaliana] gi 7413548 emb[CAB86027.1] pathogenesis related protein-like [Arabidopsis thaliana] gi 332003127 gb AED90510.1  allergen V5/Tpx-1-related family protein [Arabidopsis thaliana]                                                                                            | 192  | 205  | 9.00E-71  | 106.8 | 66.1 | 74.0 | allergen V5/Tpx-1-related family protein        | gbpln | Arabidopsis thaliana | AT5G02730.1   Symbols:   CAP (Cysteine-rich secretory proteins, Antigen 5, and Pathogenesis-related 1 protein) superfamily protein   chr5:615610-616227 FORWARD LENGTH=205                                                                                                                                                                                                                                                                              | 192  | 205 | 3.00E-73  | 106.8 | 66.1 | 74.0 |
| Rsa1.0_00178.1.g7655.t1 | gb[EOA19661.1] hypothetical protein CARUB_v10003262mg [Capsella rubella]                                                                                                                                                                                                                                                                                    | 172  | 227  | 4.00E-67  | 132.0 | 69.8 | 77.9 | hypothetical protein CARUB_v10003262mg          | gbpln | Capsella rubella     | AT5G02720.1   Symbols:   unknown protein; BEST Arabidopsis thaliana protein match is: unknown protein (TAIR:AT3G53490.1). Has 47 Blast hits to 47 proteins in 13 species: Archae - 0; Bacteria - 0; Metazoa - 0; Fungi - 0; Plants - 47; Viruses - 0; Other Eukaryotes - 0 (source: NCBI BLink).   chr5:613782-614313 REVERSE LENGTH=138                                                                                                                | 172  | 138 | 4.00E-60  | 80.2  | 62.8 | 71.5 |
| Rsa1.0_00178.1.g7656.t1 | gb[EOA21455.1] hypothetical protein CARUB_v10001846mg, partial [Capsella rubella]                                                                                                                                                                                                                                                                           | 178  | 211  | 4.00E-84  | 118.5 | 86.5 | 91.6 | hypothetical protein CARUB_v10001846mg, partial | gbpln | Capsella rubella     | AT5G02710.1   Symbols:   unknown protein; LOCATED IN: chloroplast; EXPRESSED IN: 21 plant structures; EXPRESSED DURING: 13 growth stages; CONTAINS InterPro DOMAIN/s: Uncharacterized protein family UPF0153 (InterPro:IPR005358); Has 240 Blast hits to 240 proteins in 73 species: Archae - 10; Bacteria - 110; Metazoa - 0; Fungi - 0; Plants - 25; Viruses - 0; Other Eukaryotes - 95 (source: NCBI BLink).   chr5:612628-613480 FORWARD LENGTH=176 | 178  | 176 | 6.00E-83  | 98.9  | 83.7 | 89.9 |

|                         |                                                                                                                                                                                                                                                                                                                                                                                                                                                                                                                                                                                                                                                                                                                               |      |      |           |       |      |      |                                                                                                       |       |                      |                                                                                                                                                                                                                                                                                                                                          |      |     |           |       |      |      |
|-------------------------|-------------------------------------------------------------------------------------------------------------------------------------------------------------------------------------------------------------------------------------------------------------------------------------------------------------------------------------------------------------------------------------------------------------------------------------------------------------------------------------------------------------------------------------------------------------------------------------------------------------------------------------------------------------------------------------------------------------------------------|------|------|-----------|-------|------|------|-------------------------------------------------------------------------------------------------------|-------|----------------------|------------------------------------------------------------------------------------------------------------------------------------------------------------------------------------------------------------------------------------------------------------------------------------------------------------------------------------------|------|-----|-----------|-------|------|------|
| Rsa1.0_00178.1.g7657.t1 | refXP_002873064.1   hypothetical protein ARALYDRAFT_487043 [Arabidopsis lyrata subsp. lyrata] gi297318901 gb EFH49323.1   hypothetical protein ARALYDRAFT_487043 [Arabidopsis lyrata subsp. lyrata]                                                                                                                                                                                                                                                                                                                                                                                                                                                                                                                           | 159  | 158  | 2.00E-60  | 99.4  | 80.5 | 88.7 | hypothetical protein ARALYDRAFT_487043                                                                | gbpln | Arabidopsis lyrata   | AT5G02640.1   Symbols:   unknown protein; BEST Arabidopsis thaliana protein match is: unknown protein (TAIR:AT3G46300.1). Has 37 Blast hits to 37 proteins in 10 species: Archae - 0; Bacteria - 0; Metazoa - 0; Fungi - 0; Plants - 37; Viruses - 0; Other Eukaryotes - 0 (source: NCBI BLink).   chr5:594334-594819 REVERSE LENGTH=161 | 159  | 161 | 3.00E-61  | 101.3 | 78.0 | 86.2 |
| Rsa1.0_00178.1.g7658.t1 | dbj BAE98405.1   ankyrin like protein [Arabidopsis thaliana]                                                                                                                                                                                                                                                                                                                                                                                                                                                                                                                                                                                                                                                                  | 525  | 524  | 0         | 99.8  | 91.4 | 96.2 | ankyrin like protein                                                                                  | gbpln | Arabidopsis thaliana | AT5G02620.1   Symbols: ANK1, ATANK1   ankyrin-like1   chr5:589666-591536 FORWARD LENGTH=524                                                                                                                                                                                                                                              | 525  | 524 | 0         | 99.8  | 91.6 | 96.4 |
| Rsa1.0_00178.1.g7659.t1 | refXP_002870982.1   60S ribosomal protein L35 [Arabidopsis lyrata subsp. lyrata] gi297316819 gb EFH47241.1   60S ribosomal protein L35 [Arabidopsis lyrata subsp. lyrata]                                                                                                                                                                                                                                                                                                                                                                                                                                                                                                                                                     | 163  | 123  | 6.00E-57  | 75.5  | 69.3 | 73.0 | 60S ribosomal protein L35                                                                             | gbpln | Arabidopsis lyrata   | AT5G02610.1   Symbols:   Ribosomal L29 family protein   chr5:587611-588547 FORWARD LENGTH=123                                                                                                                                                                                                                                            | 163  | 123 | 2.00E-58  | 75.5  | 68.7 | 72.4 |
| Rsa1.0_00178.1.g7660.t2 | refNP_568105.1   heavy metal transport/detoxification domain-containing protein [Arabidopsis thaliana] gi42573253 refNP_974723.1   heavy metal transport/detoxification domain-containing protein [Arabidopsis thaliana] gi21553967 gb AAM63048.1   unknown [Arabidopsis thaliana] gi26449554 dbj BAC41903.1   unknown protein [Arabidopsis thaliana] gi30725362 gb AAP37703.1   At5g02600 [Arabidopsis thaliana] gi62320791 dbj BAD93718.1   hypothetical protein [Arabidopsis thaliana] gi332003112 gb AED90495.1   heavy metal transport/detoxification domain-containing protein [Arabidopsis thaliana] gi332003113 gb AED90496.1   heavy metal transport/detoxification domain-containing protein [Arabidopsis thaliana] | 348  | 319  | 1.00E-123 | 91.7  | 73.6 | 78.7 | heavy metal transport/detoxification domain-containing protein                                        | gbpln | Arabidopsis thaliana | AT5G02600.1   Symbols: NAKR1   Heavy metal transport/detoxification superfamily protein   chr5:58713-586855 REVERSE LENGTH=319                                                                                                                                                                                                           | 348  | 319 | 1.00E-126 | 91.7  | 73.6 | 78.7 |
| Rsa1.0_00178.1.g7661.t1 | refNP_974722.1   uncharacterized protein [Arabidopsis thaliana] gi332003109 gb AED90492.1   uncharacterized protein AT5G02580 [Arabidopsis thaliana]                                                                                                                                                                                                                                                                                                                                                                                                                                                                                                                                                                          | 244  | 66   | 1.00E-22  | 27.0  | 20.1 | 20.1 | uncharacterized protein                                                                               | gbpln | Arabidopsis thaliana | AT5G02580.2   Symbols:   Plant protein 1589 of unknown function   chr5:579965-580292 FORWARD LENGTH=66                                                                                                                                                                                                                                   | 244  | 66  | 4.00E-25  | 27.0  | 20.1 | 20.1 |
| Rsa1.0_00178.1.g7662.t1 | refXP_002882782.1   hypothetical protein ARALYDRAFT_478618 [Arabidopsis lyrata subsp. lyrata] gi297328622 gb EFH59041.1   hypothetical protein ARALYDRAFT_478618 [Arabidopsis lyrata subsp. lyrata]                                                                                                                                                                                                                                                                                                                                                                                                                                                                                                                           | 174  | 180  | 1.00E-86  | 103.4 | 89.7 | 94.3 | hypothetical protein ARALYDRAFT_478618                                                                | gbpln | Arabidopsis lyrata   | AT3G12600.1   Symbols: atnudt16, NUDT16   nuditaxylase homolog 16   chr3:4004809-4005995 FORWARD LENGTH=180                                                                                                                                                                                                                              | 174  | 180 | 2.00E-79  | 103.4 | 87.9 | 92.5 |
| Rsa1.0_00179.1.g7663.t1 | refXP_002884912.1   hypothetical protein ARALYDRAFT_897465 [Arabidopsis lyrata subsp. lyrata] gi297330752 gb EFH61171.1   hypothetical protein ARALYDRAFT_897465 [Arabidopsis lyrata subsp. lyrata]                                                                                                                                                                                                                                                                                                                                                                                                                                                                                                                           | 652  | 650  | 0         | 99.7  | 96.5 | 98.0 | hypothetical protein ARALYDRAFT_897465                                                                | gbpln | Arabidopsis lyrata   | AT3G12580.1   Symbols: HSP70, ATHSP70   heat shock protein 70   chr3:3991487-3993689 REVERSE LENGTH=650                                                                                                                                                                                                                                  | 652  | 650 | 0         | 99.7  | 96.8 | 98.3 |
| Rsa1.0_00179.1.g7664.t1 | dbj BAB02264.1   unnamed protein product [Arabidopsis thaliana]                                                                                                                                                                                                                                                                                                                                                                                                                                                                                                                                                                                                                                                               | 559  | 572  | 0         | 102.3 | 84.1 | 90.3 | unnamed protein product                                                                               | gbpln | Arabidopsis thaliana | AT3G12540.1   Symbols:   Protein of unknown function, DUF547   chr3:3975246-3977247 FORWARD LENGTH=505                                                                                                                                                                                                                                   | 559  | 505 | 0         | 90.3  | 77.8 | 83.0 |
| Rsa1.0_00179.1.g7665.t2 | gb ABB89769.1   At3g12520-like protein [Boechera stricta]                                                                                                                                                                                                                                                                                                                                                                                                                                                                                                                                                                                                                                                                     | 1133 | 678  | 0         | 59.8  | 51.5 | 54.5 | At3g12520-like protein                                                                                | gbpln | Boechera stricta     | AT3G12520.1   Symbols: SULTR4.2   sulfate transporter 4.2   chr3:3967976-3971891 REVERSE LENGTH=677                                                                                                                                                                                                                                      | 1133 | 677 | 0         | 59.8  | 51.1 | 55.0 |
| Rsa1.0_00179.1.g7666.t1 | #                                                                                                                                                                                                                                                                                                                                                                                                                                                                                                                                                                                                                                                                                                                             | #    | #    | #         | #     | #    | #    | -                                                                                                     | ----  | ----                 | #                                                                                                                                                                                                                                                                                                                                        | #    | #   | #         | #     | #    |      |
| Rsa1.0_00179.1.g7667.t1 | gb AAD22286.1   putative non-LTR retroelement reverse transcriptase [Arabidopsis thaliana]                                                                                                                                                                                                                                                                                                                                                                                                                                                                                                                                                                                                                                    | 189  | 1311 | 5.00E-19  | 693.7 | 33.3 | 47.1 | putative non-LTR retroelement reverse transcriptase                                                   | gbpln | Arabidopsis thaliana | AT1G10000.1   Symbols:   Ribonuclease H-like superfamily protein   chr1:3263877-3264788 REVERSE LENGTH=303                                                                                                                                                                                                                               | 189  | 303 | 6.00E-16  | 160.3 | 32.8 | 49.7 |
| Rsa1.0_00179.1.g7668.t1 | sp Q9AVB0.1 LECB_PHYAM RecName: Full=Lectin-B; AltName: Full=PL-B; Flags: Precursor gi13537555 dbj BAB40792.1   mitogen PL-B [Phytolacca americana]                                                                                                                                                                                                                                                                                                                                                                                                                                                                                                                                                                           | 261  | 361  | 3.00E-37  | 138.3 | 36.8 | 48.7 | RecName: Full=Lectin-B; AltName: Full=PL-B; Flags: Precursor gi13537555 dbj BAB40792.1   mitogen PL-B | gbpln | Phytolacca americana | #                                                                                                                                                                                                                                                                                                                                        | #    | #   | #         | #     | #    |      |
| Rsa1.0_00179.1.g7669.t1 | #                                                                                                                                                                                                                                                                                                                                                                                                                                                                                                                                                                                                                                                                                                                             | #    | #    | #         | #     | #    | #    | -                                                                                                     | ----  | ----                 | #                                                                                                                                                                                                                                                                                                                                        | #    | #   | #         | #     | #    |      |
| Rsa1.0_00179.1.g7670.t1 | #                                                                                                                                                                                                                                                                                                                                                                                                                                                                                                                                                                                                                                                                                                                             | #    | #    | #         | #     | #    | #    | -                                                                                                     | ----  | ----                 | #                                                                                                                                                                                                                                                                                                                                        | #    | #   | #         | #     | #    |      |

|                         |                                                                                                                                                                                                                                                                                                                                                                                                                                                                |      |      |           |       |      |      |                                                                                                      |       |                      |                                                                                                                                                                                                                                                                                                                                                                                                                                                                                                                                                  |      |      |           |       |      |      |
|-------------------------|----------------------------------------------------------------------------------------------------------------------------------------------------------------------------------------------------------------------------------------------------------------------------------------------------------------------------------------------------------------------------------------------------------------------------------------------------------------|------|------|-----------|-------|------|------|------------------------------------------------------------------------------------------------------|-------|----------------------|--------------------------------------------------------------------------------------------------------------------------------------------------------------------------------------------------------------------------------------------------------------------------------------------------------------------------------------------------------------------------------------------------------------------------------------------------------------------------------------------------------------------------------------------------|------|------|-----------|-------|------|------|
| Rsa1.0_00179.1.g7671.t1 | ref NP_176758.1  glutathione S-transferase [Arabidopsis thaliana]<br>gi 25991925 gb AAN76990.1 AF461148_1 MAPEG-like protein [Arabidopsis thaliana] gi 14517464 gb AAK62622.1  At1g65820/F1E22.4 [Arabidopsis thaliana] gi 17978909 gb AAL47424.1  At1g65820/F1E22.4 [Arabidopsis thaliana] gi 21617891 gb AAM66941.1  glutathione-s-transferase, putative [Arabidopsis thaliana] gi 332196306 gb AEE34427.1  glutathione S-transferase [Arabidopsis thaliana] | 270  | 146  | 2.00E-71  | 54.1  | 47.0 | 50.4 | glutathione S-transferase                                                                            | gbpln | Arabidopsis thaliana | AT1G65820.1   Symbols:   microsomal glutathione s-transferase, putative   chr1:24485213-24486682 FORWARD LENGTH=146                                                                                                                                                                                                                                                                                                                                                                                                                              | 270  | 146  | 5.00E-74  | 54.1  | 47.0 | 50.4 |
| Rsa1.0_00179.1.g7672.t2 | dbj BAJ34153.1  unnamed protein product [Thellungiella halophila]                                                                                                                                                                                                                                                                                                                                                                                              | 307  | 294  | 1.00E-112 | 95.8  | 78.5 | 82.4 | unnamed protein product                                                                              | ----  | ----                 | AT3G12480.1   Symbols: NF-YC11   nuclear factor Y, subunit C11   chr3:3958065-3960278 FORWARD LENGTH=293                                                                                                                                                                                                                                                                                                                                                                                                                                         | 307  | 293  | 1.00E-104 | 95.4  | 73.3 | 80.1 |
| Rsa1.0_00179.1.g7673.t1 | ref XP_002884901.1  ATELC [Arabidopsis lyrata subsp. lyrata] gi 297330741 gb EFH61160.1  ATELC [Arabidopsis lyrata subsp. lyrata]                                                                                                                                                                                                                                                                                                                              | 398  | 397  | 0         | 99.7  | 85.7 | 91.2 | ATELC                                                                                                | gbpln | Arabidopsis lyrata   | AT3G12400.1   Symbols: ELC, ATELC   Ubiquitin-conjugating enzyme/RWD-like protein   chr3:3944600-3945796 REVERSE LENGTH=398                                                                                                                                                                                                                                                                                                                                                                                                                      | 398  | 398  | 0         | 100.0 | 84.9 | 90.5 |
| Rsa1.0_00179.1.g7674.t1 | gb EOA31478.1  hypothetical protein CARUB_v10014664mg [Capsella rubella]                                                                                                                                                                                                                                                                                                                                                                                       | 203  | 203  | 1.00E-83  | 100.0 | 91.6 | 96.1 | hypothetical protein CARUB_v10014664mg                                                               | gbpln | Capsella rubella     | AT3G12390.1   Symbols:   Nascent polypeptide-associated complex (NAC), alpha subunit family protein   chr3:3942344-3943595 FORWARD LENGTH=203                                                                                                                                                                                                                                                                                                                                                                                                    | 203  | 203  | 1.00E-78  | 100.0 | 86.2 | 91.1 |
| Rsa1.0_00179.1.g7675.t1 | gb EOA32950.1  hypothetical protein CARUB_v10016278mg [Capsella rubella]                                                                                                                                                                                                                                                                                                                                                                                       | 268  | 272  | 1.00E-104 | 101.5 | 82.1 | 86.9 | hypothetical protein CARUB_v10016278mg                                                               | gbpln | Capsella rubella     | AT3G12320.1   Symbols:   unknown protein; BEST Arabidopsis thaliana protein match is: unknown protein (TAIR:AT5G06980.4). Has 102 Blast hits to 102 proteins in 16 species: Archae - 0; Bacteria - 0; Metazoa - 0; Fungi - 0; Plants - 98; Viruses - 0; Other Eukaryotes - 4 (source: NCBI BLink).   chr3:3924034-3925262 FORWARD LENGTH=269                                                                                                                                                                                                     | 268  | 269  | 1.00E-100 | 100.4 | 79.5 | 84.7 |
| Rsa1.0_00179.1.g7676.t2 | gb AAM62762.1  5,10-methylenetetrahydrofolate dehydrogenase:5,10-methylenetetrahydrofolate cyclohydrolase, putative [Arabidopsis thaliana]                                                                                                                                                                                                                                                                                                                     | 508  | 299  | 1.00E-149 | 58.9  | 52.2 | 54.7 | 5,10-methylenetetrahydrofolate dehydrogenase:5,10-methylenetetrahydrofolate cyclohydrolase, putative | gbpln | Arabidopsis thaliana | AT3G12290.1   Symbols:   Amino acid dehydrogenase family protein   chr3:3919591-3921326 FORWARD LENGTH=299                                                                                                                                                                                                                                                                                                                                                                                                                                       | 508  | 299  | 1.00E-151 | 58.9  | 52.0 | 54.7 |
| Rsa1.0_00179.1.g7677.t1 | ref XP_002884897.1  hypothetical protein ARALYDRAFT_897441 [Arabidopsis lyrata subsp. lyrata] gi 297330737 gb EFH61156.1  hypothetical protein ARALYDRAFT_897441 [Arabidopsis lyrata subsp. lyrata]                                                                                                                                                                                                                                                            | 132  | 190  | 6.00E-57  | 143.9 | 81.8 | 83.3 | hypothetical protein ARALYDRAFT_897441                                                               | gbpln | Arabidopsis lyrata   | AT3G12300.1   Symbols:   unknown protein; FUNCTIONS IN: molecular.function unknown; INVOLVED IN: biological.process unknown; LOCATED IN: endomembrane system; EXPRESSED IN: 23 plant structures; EXPRESSED DURING: 15 growth stages; CONTAINS InterPro DOMAIN/s: Protein of unknown function DUF667 (InterPro:IPR007114); Has 373 Blast hits to 371 proteins in 116 species: Archae - 0; Bacteria - 0; Metazoa - 213; Fungi - 4; Plants - 71; Viruses - 0; Other Eukaryotes - 85 (source: NCBI BLink).   chr3:3921787-3923092 REVERSE LENGTH=190 | 132  | 190  | 5.00E-59  | 143.9 | 81.1 | 83.3 |
| Rsa1.0_00179.1.g7678.t1 | gb AFJ64573.1  retinoblastoma-related protein 1 [Brassica juncea]                                                                                                                                                                                                                                                                                                                                                                                              | 1021 | 1017 | 0         | 99.6  | 86.4 | 92.4 | retinoblastoma-related protein 1                                                                     | gbpln | Brassica juncea      | AT3G12280.2   Symbols: RBRI   retinoblastoma-related 1   chr3:3913671-3918433 REVERSE LENGTH=1012                                                                                                                                                                                                                                                                                                                                                                                                                                                | 1021 | 1012 | 0         | 99.1  | 82.9 | 89.3 |
| Rsa1.0_00179.1.g7679.t1 | ref NP_187835.2  protein arginine N-methyltransferase 3 [Arabidopsis thaliana] gi 122230175 sp Q0WVD6.1 ANM3_ARA TH RecName: Full=Probable protein arginine N-methyltransferase 3 gi 110741943 dbj BAE98912.1  hypothetical protein [Arabidopsis thaliana] gi 332641657 gb AEE75178.1  protein arginine N-methyltransferase 3 [Arabidopsis thaliana]                                                                                                           | 585  | 601  | 0         | 102.7 | 81.2 | 90.4 | protein arginine N-methyltransferase 3                                                               | gbpln | Arabidopsis thaliana | AT3G12270.1   Symbols: ATPRMT3, PRMT3   protein arginine methyltransferase 3   chr3:3910642-3913122 FORWARD LENGTH=601                                                                                                                                                                                                                                                                                                                                                                                                                           | 585  | 601  | 0         | 102.7 | 81.2 | 90.4 |
| Rsa1.0_00179.1.g7680.t1 | ref XP_002884895.1  complex 1 family protein [Arabidopsis lyrata subsp. lyrata] gi 297330735 gb EFH61154.1  complex 1 family protein [Arabidopsis lyrata subsp. lyrata]                                                                                                                                                                                                                                                                                        | 133  | 133  | 2.00E-70  | 100.0 | 94.7 | 99.2 | complex 1 family protein                                                                             | gbpln | Arabidopsis lyrata   | AT3G12260.1   Symbols:   LYR family of Fe/S cluster biogenesis protein   chr3:3909252-3910337 REVERSE LENGTH=133                                                                                                                                                                                                                                                                                                                                                                                                                                 | 133  | 133  | 2.00E-72  | 100.0 | 94.0 | 98.5 |

|                         |                                                                                                                                                                                                                                                                                                                                                                                                                                                                                                                                                                                                                                                                                                                                                                                    |     |     |           |       |      |      |                                                 |       |                      |                                                                                                                                         |     |     |           |       |      |      |
|-------------------------|------------------------------------------------------------------------------------------------------------------------------------------------------------------------------------------------------------------------------------------------------------------------------------------------------------------------------------------------------------------------------------------------------------------------------------------------------------------------------------------------------------------------------------------------------------------------------------------------------------------------------------------------------------------------------------------------------------------------------------------------------------------------------------|-----|-----|-----------|-------|------|------|-------------------------------------------------|-------|----------------------|-----------------------------------------------------------------------------------------------------------------------------------------|-----|-----|-----------|-------|------|------|
| Rsa1.0_00179.1.g7681.t1 | refNP_566415.3 transcription factor TGA6 [Arabidopsis thaliana] gi 42572393 refNP_974292.1 transcription factor TGA6 [Arabidopsis thaliana] gi 44888355 sp Q39140.2 TGA6_ARATH RecName: Full=Transcription factor TGA6; AltName: Full=bZIP transcription factor 45; Short=AtbZIP45 gi 12322056 gb AA651079.1 AC069472.19 transcription factor HBP-1B-like; 31032-33264 [Arabidopsis thaliana] gi 14571607 emb CAC42807.1 transcription factor TGA6 [Arabidopsis thaliana] gi 119360085 gb ABL66771.1 At3g12250 [Arabidopsis thaliana] gi 225898635 dbj BAH30448.1 hypothetical protein [Arabidopsis thaliana] gi 332641651 gb AEE75172.1 transcription factor TGA6 [Arabidopsis thaliana] gi 332641652 gb AEE75173.1 transcription factor TGA6 [Arabidopsis thaliana]              | 332 | 330 | 1.00E-172 | 99.4  | 95.2 | 97.0 | transcription factor TGA6                       | gbpln | Arabidopsis thaliana | AT3G12250.2   Symbols: TGA6, BZIP45   TGACG motif-binding factor 6   chr3:3906351-3908583 FORWARD LENGTH=330                            | 332 | 330 | 1.00E-175 | 99.4  | 95.2 | 97.0 |
| Rsa1.0_00179.1.g7682.t3 | gb EOA32081.1  hypothetical protein CARUB_v10015328mg [Capsella rubella]                                                                                                                                                                                                                                                                                                                                                                                                                                                                                                                                                                                                                                                                                                           | 684 | 435 | 1.00E-172 | 63.6  | 42.1 | 49.7 | hypothetical protein CARUB_v10015328mg          | gbpln | Capsella rubella     | AT3G12240.1   Symbols: SCPL15   serine carboxypeptidase-like 15   chr3:3902436-3904918 REVERSE LENGTH=436                               | 684 | 436 | 1.00E-168 | 63.7  | 41.2 | 48.7 |
| Rsa1.0_00179.1.g7683.t1 | # # # # # # # # -                                                                                                                                                                                                                                                                                                                                                                                                                                                                                                                                                                                                                                                                                                                                                                  |     |     |           |       |      |      |                                                 | ----  | ----                 | #                                                                                                                                       | #   | #   | #         | #     | #    | #    |
| Rsa1.0_00179.1.g7684.t1 | refNP_187823.1 RAB GTPase-like protein A4D [Arabidopsis thaliana] gi 297834018 ref XP_002884891.1  predicted protein [Arabidopsis lyrata subsp. lyrata] gi 75334990 sp Q9LH50.1 RAA4D_ARATH RecName: Full=Ras-related protein RABA4d; Short=AtRABA4d gi 12322042 gb AA651065.1 AC069472.5 ras-related GTP-binding protein; 5118-4176 [Arabidopsis thaliana] gi 9294115 dbj BAB01966.1  GTP-binding protein-like [Arabidopsis thaliana] gi 67633628 gb AA78738.1 Ras-related GTP-binding family protein [Arabidopsis thaliana] gi 297330731 gb EFH61150.1  predicted protein [Arabidopsis lyrata subsp. lyrata] gi 332641639 gb AEE75160.1 RAB GTPase-like protein A4D [Arabidopsis thaliana] gi 482567210 gb EOA31399.1  hypothetical protein CARUB_v10014578mg [Capsella rubella] | 222 | 222 | 1.00E-126 | 100.0 | 98.2 | 99.5 | RAB GTPase-like protein A4D                     | gbpln | Arabidopsis lyrata   | AT3G12160.1   Symbols: ATRABA4D, RABA4D   RAB GTPase homolog A4D   chr3:3879495-3880437 REVERSE LENGTH=222                              | 222 | 222 | 1.00E-128 | 100.0 | 98.2 | 99.5 |
| Rsa1.0_00179.1.g7685.t1 | gb EOA32726.1  hypothetical protein CARUB_v10016030mg, partial [Capsella rubella]                                                                                                                                                                                                                                                                                                                                                                                                                                                                                                                                                                                                                                                                                                  | 339 | 465 | 1.00E-136 | 137.2 | 75.2 | 85.8 | hypothetical protein CARUB_v10016030mg, partial | gbpln | Capsella rubella     | AT3G11840.1   Symbols: PUB24   plant U-box 24   chr3:3736578-3738250 REVERSE LENGTH=470                                                 | 339 | 470 | 1.00E-134 | 138.6 | 73.5 | 84.1 |
| Rsa1.0_00179.1.g7686.t1 | refNP_187789.1  TCP-1/cpn60 chaperonin family protein [Arabidopsis thaliana] gi 6671939 gb AAF23199.1 AC016795.12 putative T-complex protein 1, ETA subunit [Arabidopsis thaliana] gi 17979243 gb AAL49938.1  AT3g11830/F26K24.12 [Arabidopsis thaliana] gi 20857172 gb AAM26704.1  AT3g11830/F26K24.12 [Arabidopsis thaliana] gi 332641584 gb AEE75105.1  TCP-1/cpn60 chaperonin family protein [Arabidopsis thaliana]                                                                                                                                                                                                                                                                                                                                                            | 547 | 557 | 0         | 101.8 | 94.3 | 95.4 | TCP-1/cpn60 chaperonin family protein           | gbpln | Arabidopsis thaliana | AT3G11830.1   Symbols:   TCP-1/cpn60 chaperonin family protein   chr3:3732734-3736156 FORWARD LENGTH=557                                | 547 | 557 | 0         | 101.8 | 94.3 | 95.4 |
| Rsa1.0_00179.1.g7687.t2 | ref XP_002884867.1  SYP121 [Arabidopsis lyrata subsp. lyrata] gi 297330707 gb EFH61126.1  SYP121 [Arabidopsis lyrata subsp. lyrata]                                                                                                                                                                                                                                                                                                                                                                                                                                                                                                                                                                                                                                                | 347 | 342 | 1.00E-148 | 98.6  | 86.2 | 89.9 | SYP121                                          | gbpln | Arabidopsis lyrata   | AT3G11820.1   Symbols: SYP121, AT-SYR1, ATSPY121, SYR1, ATSYR1, PEN1   syntaxin of plants 121   chr3:3729540-3730868 REVERSE LENGTH=346 | 347 | 346 | 1.00E-145 | 99.7  | 82.1 | 85.9 |

|                         |                                                                                                                                                                                                                                                                                                                                                                                                                                      |     |     |           |       |      |      |                                        |       |                      |                                                                                                                                                                                                                                                                                                                                                                                                                                                                                                                                       |     |     |           |       |      |      |
|-------------------------|--------------------------------------------------------------------------------------------------------------------------------------------------------------------------------------------------------------------------------------------------------------------------------------------------------------------------------------------------------------------------------------------------------------------------------------|-----|-----|-----------|-------|------|------|----------------------------------------|-------|----------------------|---------------------------------------------------------------------------------------------------------------------------------------------------------------------------------------------------------------------------------------------------------------------------------------------------------------------------------------------------------------------------------------------------------------------------------------------------------------------------------------------------------------------------------------|-----|-----|-----------|-------|------|------|
| Rsa1.0_00179.1.g7688.t1 | gb[EOA31323.1] hypothetical protein CARUB_v10014494mg [Capsella rubella]                                                                                                                                                                                                                                                                                                                                                             | 245 | 244 | 1.00E-127 | 99.6  | 90.2 | 95.9 | hypothetical protein CARUB_v10014494mg | gbpln | Capsella rubella     | AT3G11800.1   Symbols:   unknown protein; FUNCTIONS IN: molecular_function unknown; INVOLVED IN: biological_process unknown; LOCATED IN: endomembrane system; EXPRESSED IN: 24 plant structures; EXPRESSED DURING: 15 growth stages; BEST Arabidopsis thaliana protein match is: unknown protein (TAIR:AT3G44150.1); Has 74 Blast hits to 73 proteins in 18 species: Archae - 0; Bacteria - 0; Metazoa - 0; Fungi - 0; Plants - 72; Viruses - 0; Other Eukaryotes - 2 (source: NCBI BLink).   chr3:3726154-3727562 FORWARD LENGTH=246 | 245 | 246 | 1.00E-126 | 100.4 | 87.8 | 95.9 |
| Rsa1.0_00179.1.g7689.t1 | gb[EOA29650.1] hypothetical protein CARUB_v10015152mg [Capsella rubella]                                                                                                                                                                                                                                                                                                                                                             | 151 | 154 | 3.00E-67  | 102.0 | 84.8 | 91.4 | hypothetical protein CARUB_v10015152mg | gbpln | Capsella rubella     | AT3G11780.1   Symbols:   MD-2-related lipid recognition domain-containing protein / ML domain-containing protein   chr3:3724326-3725476 REVERSE LENGTH=153                                                                                                                                                                                                                                                                                                                                                                            | 151 | 153 | 3.00E-69  | 101.3 | 84.8 | 89.4 |
| Rsa1.0_00179.1.g7690.t1 | gb[EOA32890.1] hypothetical protein CARUB_v10016206mg [Capsella rubella]                                                                                                                                                                                                                                                                                                                                                             | 194 | 194 | 1.00E-102 | 100.0 | 92.3 | 97.4 | hypothetical protein CARUB_v10016206mg | gbpln | Capsella rubella     | AT3G11740.1   Symbols:   Protein of unknown function (DUF567)   chr3:3712427-3713389 FORWARD LENGTH=194                                                                                                                                                                                                                                                                                                                                                                                                                               | 194 | 194 | 1.00E-102 | 100.0 | 88.2 | 96.4 |
| Rsa1.0_00179.1.g7691.t2 | gb[AA04618.1] ypt-related protein [Brassica rapa subsp. oleifera]                                                                                                                                                                                                                                                                                                                                                                    | 244 | 206 | 1.00E-109 | 84.4  | 82.8 | 83.2 | ypt-related protein                    | gbpln | Brassica rapa        | AT3G11730.1   Symbols: ATPF8, ATRABD1, RABD1   Ras-related small GTP-binding family protein   chr3:3709490-3711397 REVERSE LENGTH=205                                                                                                                                                                                                                                                                                                                                                                                                 | 244 | 205 | 1.00E-109 | 84.0  | 82.0 | 83.2 |
| Rsa1.0_00179.1.g7692.t4 | ref[XP_002884860.1] hypothetical protein ARALYDRAFT_478517 [Arabidopsis lyrata subsp. lyrata] gi 297330700 gb EFH61119.1  hypothetical protein ARALYDRAFT_478517 [Arabidopsis lyrata subsp. lyrata]                                                                                                                                                                                                                                  | 505 | 545 | 1.00E-179 | 107.9 | 68.5 | 80.6 | hypothetical protein ARALYDRAFT_478517 | gbpln | Arabidopsis lyrata   | AT3G11720.3   Symbols:   Polyketide cyclase/dehydrase and lipid transport superfamily protein   chr3:3705991-3708721 REVERSE LENGTH=596                                                                                                                                                                                                                                                                                                                                                                                               | 505 | 596 | 0         | 118.0 | 68.1 | 80.6 |
| Rsa1.0_00179.1.g7693.t1 | ref[XP_002882740.1] 2-cys peroxiredoxin, chloroplast [Arabidopsis lyrata subsp. lyrata] gi 297328590 gb EFH59999.1  2-cys peroxiredoxin, chloroplast [Arabidopsis lyrata subsp. lyrata]                                                                                                                                                                                                                                              | 263 | 266 | 1.00E-122 | 101.1 | 92.4 | 96.2 | 2-cys peroxiredoxin, chloroplast       | gbpln | Arabidopsis lyrata   | AT3G11630.1   Symbols:   Thioredoxin superfamily protein   chr3:3672189-3673937 FORWARD LENGTH=266                                                                                                                                                                                                                                                                                                                                                                                                                                    | 263 | 266 | 1.00E-122 | 101.1 | 92.0 | 95.8 |
| Rsa1.0_00179.1.g7694.t1 | ref[XP_002884854.1] hypothetical protein ARALYDRAFT_897364 [Arabidopsis lyrata subsp. lyrata] gi 297330694 gb EFH61113.1  hypothetical protein ARALYDRAFT_897364 [Arabidopsis lyrata subsp. lyrata]                                                                                                                                                                                                                                  | 369 | 312 | 1.00E-160 | 84.6  | 72.1 | 79.4 | hypothetical protein ARALYDRAFT_897364 | gbpln | Arabidopsis lyrata   | AT3G11620.1   Symbols:   alpha/beta-Hydrolases superfamily protein   chr3:3669551-3671734 REVERSE LENGTH=312                                                                                                                                                                                                                                                                                                                                                                                                                          | 369 | 312 | 1.00E-161 | 84.6  | 72.1 | 78.9 |
| Rsa1.0_00179.1.g7695.t1 | ref[NP_566393.1] uncharacterized protein [Arabidopsis thaliana] gi 6041814 gb AAAF02129.1 AC009918.1 hypothetical protein [Arabidopsis thaliana] gi 21553924 gb AAM63007.1  unknown [Arabidopsis thaliana] gi 26450081 dbj BAC42160.1  unknown protein [Arabidopsis thaliana] gi 28827726 gb AAO50707.1  unknown protein [Arabidopsis thaliana] gi 332641551 gb AEE75072.1  uncharacterized protein AT3G11600 [Arabidopsis thaliana] | 119 | 117 | 1.00E-41  | 98.3  | 80.7 | 86.6 | uncharacterized protein                | gbpln | Arabidopsis thaliana | AT3G11600.1   Symbols:   unknown protein; FUNCTIONS IN: molecular_function unknown; INVOLVED IN: response_to_karrigin; EXPRESSED IN: 21 plant structures; EXPRESSED DURING: 12 growth stages; BEST Arabidopsis thaliana protein match is: unknown protein (TAIR:AT5G06270.1); Has 171 Blast hits to 171 proteins in 15 species: Archae - 0; Bacteria - 0; Metazoa - 0; Fungi - 0; Plants - 171; Viruses - 0; Other Eukaryotes - 0 (source: NCBI BLink).   chr3:3667337-3667690 FORWARD LENGTH=117                                     | 119 | 117 | 2.00E-44  | 98.3  | 80.7 | 86.6 |
| Rsa1.0_00179.1.g7696.t1 | ref[XP_002884852.1] hypothetical protein ARALYDRAFT_897360 [Arabidopsis lyrata subsp. lyrata] gi 297330692 gb EFH61111.1  hypothetical protein ARALYDRAFT_897360 [Arabidopsis lyrata subsp. lyrata]                                                                                                                                                                                                                                  | 236 | 263 | 1.00E-102 | 111.4 | 83.1 | 87.3 | hypothetical protein ARALYDRAFT_897360 | gbpln | Arabidopsis lyrata   | AT3G11580.1   Symbols:   AP2/B3-like transcriptional factor family protein   chr3:3649165-3651271 REVERSE LENGTH=267                                                                                                                                                                                                                                                                                                                                                                                                                  | 236 | 267 | 1.00E-100 | 113.1 | 81.8 | 85.2 |
| Rsa1.0_00179.1.g7697.t1 | # # # # # # # # - ----                                                                                                                                                                                                                                                                                                                                                                                                               |     |     |           |       |      |      |                                        |       |                      | # # # # # # # #                                                                                                                                                                                                                                                                                                                                                                                                                                                                                                                       |     |     |           |       |      |      |
| Rsa1.0_00179.1.g7698.t1 | gb[EOA32287.1] hypothetical protein CARUB_v10015549mg [Capsella rubella]                                                                                                                                                                                                                                                                                                                                                             | 425 | 423 | 0         | 99.5  | 86.1 | 92.0 | hypothetical protein CARUB_v10015549mg | gbpln | Capsella rubella     | AT3G11570.1   Symbols: TBL8   TRICHOME BIREFRINGENCE-LIKE 8   chr3:3645540-3647328 REVERSE LENGTH=427                                                                                                                                                                                                                                                                                                                                                                                                                                 | 425 | 427 | 0         | 100.5 | 87.5 | 92.9 |
| Rsa1.0_00179.1.g7699.t1 | gb[EOA32220.1] hypothetical protein CARUB_v10015479mg [Capsella rubella]                                                                                                                                                                                                                                                                                                                                                             | 204 | 204 | 4.00E-90  | 100.0 | 87.7 | 94.1 | hypothetical protein CARUB_v10015479mg | gbpln | Capsella rubella     | AT3G11550.1   Symbols:   Uncharacterised protein family (UPF0497)   chr3:3638262-3639052 FORWARD LENGTH=204                                                                                                                                                                                                                                                                                                                                                                                                                           | 204 | 204 | 6.00E-84  | 100.0 | 88.2 | 93.6 |
| Rsa1.0_00179.1.g7700.t1 | gb[EOA29834.1] hypothetical protein CARUB_v10012928mg [Capsella rubella]                                                                                                                                                                                                                                                                                                                                                             | 907 | 913 | 0         | 100.7 | 94.7 | 97.6 | hypothetical protein CARUB_v10012928mg | gbpln | Capsella rubella     | AT3G11540.1   Symbols: SPY   Tetratricopeptide repeat (TPR)-like superfamily protein   chr3:3632842-3637547 FORWARD LENGTH=914                                                                                                                                                                                                                                                                                                                                                                                                        | 907 | 914 | 0         | 100.8 | 94.6 | 97.2 |
| Rsa1.0_00179.1.g7701.t6 | gb[AA041731.1] cytoplasmic ribosomal protein S14 [Brassica napus]                                                                                                                                                                                                                                                                                                                                                                    | 335 | 150 | 1.00E-80  | 44.8  | 44.2 | 44.5 | cytoplasmic ribosomal protein S14      | gbpln | Brassica napus       | AT3G11510.1   Symbols:   Ribosomal protein S11 family protein   chr3:3623757-3624866 REVERSE LENGTH=150                                                                                                                                                                                                                                                                                                                                                                                                                               | 335 | 150 | 1.00E-74  | 44.8  | 39.7 | 40.9 |

|                         |                                                                                                                                                                                                                                                                                                                                                                                                                                                                                                                                                                                                                                                         |     |     |           |       |      |      |                                                      |       |                      |                                                                                                                                                                                                                                                                                                                                                                                                                                                                                                                                                  |     |     |           |       |      |      |
|-------------------------|---------------------------------------------------------------------------------------------------------------------------------------------------------------------------------------------------------------------------------------------------------------------------------------------------------------------------------------------------------------------------------------------------------------------------------------------------------------------------------------------------------------------------------------------------------------------------------------------------------------------------------------------------------|-----|-----|-----------|-------|------|------|------------------------------------------------------|-------|----------------------|--------------------------------------------------------------------------------------------------------------------------------------------------------------------------------------------------------------------------------------------------------------------------------------------------------------------------------------------------------------------------------------------------------------------------------------------------------------------------------------------------------------------------------------------------|-----|-----|-----------|-------|------|------|
| Rsa1.0_00179.1.g7702.t1 | ref XP_002882839.1  predicted protein [Arabidopsis lyrata subsp. lyrata] gi 297328679 gb EFH59098.1  predicted protein [Arabidopsis lyrata subsp. lyrata]                                                                                                                                                                                                                                                                                                                                                                                                                                                                                               | 212 | 339 | 2.00E-55  | 159.9 | 58.5 | 72.2 | predicted protein                                    | gbpln | Arabidopsis lyrata   | AT3G11060.1   Symbols:   unknown protein; FUNCTIONS IN: molecular_function unknown; INVOLVED IN: biological_process unknown; LOCATED IN: endomembrane system; EXPRESSED IN: flower; EXPRESSED DURING: petal differentiation and expansion stage; BEST Arabidopsis thaliana protein match is: unknown protein (TAIR:AT3G06545.1); Has 12 Blast hits to 12 proteins in 2 species: Archae - 0; Bacteria - 0; Metazoa - 0; Fungi - 0; Plants - 12; Viruses - 0; Other Eukaryotes - 0 (source: NCBI BLINK).   chr3:3466303-3466944 REVERSE LENGTH=213 | 212 | 213 | 3.00E-54  | 100.5 | 53.8 | 67.9 |
| Rsa1.0_00179.1.g7703.t1 | gb AAP57211.1  methyl transferase [Arabidopsis lyrata subsp. lyrata]                                                                                                                                                                                                                                                                                                                                                                                                                                                                                                                                                                                    | 383 | 380 | 0         | 99.2  | 83.3 | 92.4 | methyl transferase                                   | gbpln | Arabidopsis lyrata   | AT3G11480.1   Symbols: BSMT1, ATBSMT1   S-adenosyl-L-methionine-dependent methyltransferases superfamily protein   chr3:3614544-3617137 FORWARD LENGTH=379                                                                                                                                                                                                                                                                                                                                                                                       | 383 | 379 | 0         | 99.0  | 82.0 | 90.9 |
| Rsa1.0_00179.1.g7704.t1 | gb AAC19278.1  T14P8.10 [Arabidopsis thaliana] gi 7269009 emb CACAB80742.1  AT4g02490 [Arabidopsis thaliana]                                                                                                                                                                                                                                                                                                                                                                                                                                                                                                                                            | 647 | 657 | 2.33E-156 | 101.5 | 42.7 | 56.0 | T14P8.10                                             | gbpln | Arabidopsis thaliana | AT4G04650.1   Symbols:   RNA-directed DNA polymerase (reverse transcriptase)-related family protein   chr4:2353989-2355213 REVERSE LENGTH=332                                                                                                                                                                                                                                                                                                                                                                                                    | 647 | 332 | 2.00E-54  | 51.3  | 16.7 | 24.3 |
| Rsa1.0_00179.1.g7705.t1 | ref NP_187752.2  DnaJ homolog subfamily C member 2 [Arabidopsis thaliana] gi 332641527 gb AEE75048.1  DnaJ and Myb-like DNA-binding domain-containing protein [Arabidopsis thaliana]                                                                                                                                                                                                                                                                                                                                                                                                                                                                    | 641 | 647 | 0         | 100.9 | 67.4 | 79.3 | DnaJ homolog subfamily C member 2                    | gbpln | Arabidopsis thaliana | AT3G11450.1   Symbols:   DnaJ domain ;Myb-like DNA-binding domain   chr3:3605459-3607402 REVERSE LENGTH=647                                                                                                                                                                                                                                                                                                                                                                                                                                      | 641 | 647 | 0         | 100.9 | 67.4 | 79.3 |
| Rsa1.0_00179.1.g7706.t1 | gb EOA19642.1  hypothetical protein CARUB_v10003012mg [Capsella rubella]                                                                                                                                                                                                                                                                                                                                                                                                                                                                                                                                                                                | 397 | 390 | 4.00E-73  | 98.2  | 46.1 | 59.9 | hypothetical protein CARUB_v10003012mg               | gbpln | Capsella rubella     | AT4G04690.1   Symbols:   F-box and associated interaction domains-containing protein   chr4:2373999-2375135 REVERSE LENGTH=378                                                                                                                                                                                                                                                                                                                                                                                                                   | 397 | 378 | 2.00E-75  | 95.2  | 44.8 | 58.2 |
| Rsa1.0_00179.1.g7707.t1 | ref XP_002882730.1  hypothetical protein ARALYDRAFT.478479 [Arabidopsis lyrata subsp. lyrata] gi 297328570 gb EFH58989.1  hypothetical protein ARALYDRAFT.478479 [Arabidopsis lyrata subsp. lyrata]                                                                                                                                                                                                                                                                                                                                                                                                                                                     | 508 | 505 | 0         | 99.4  | 83.7 | 89.6 | hypothetical protein ARALYDRAFT.478479               | gbpln | Arabidopsis lyrata   | AT3G11420.1   Symbols:   Protein of unknown function (DUF604)   chr3:3591834-3594323 FORWARD LENGTH=505                                                                                                                                                                                                                                                                                                                                                                                                                                          | 508 | 505 | 0         | 99.4  | 82.1 | 89.6 |
| Rsa1.0_00179.1.g7708.t1 | ref NP_187747.1  translation initiation factor eIF-3 subunit 4 [Arabidopsis thaliana] gi 12322907 gb AAG51445.1 AC008153_18 putative eukaryotic translation initiation factor 3 subunit; 21071-22901 [Arabidopsis thaliana] gi 16226341 gb AAL16140.1 AF428308.1 AT3g11400/F24K9.7 [Arabidopsis thaliana] gi 9755847 emb CAC01929.1  translation initiation factor 3, subunit g (eIF3g) [Arabidopsis thaliana] gi 18377870 gb AAL67121.1  AT3g11400/F24K9.7 [Arabidopsis thaliana] gi 22137220 gb AAM91455.1  AT3g11400/F24K9.7 [Arabidopsis thaliana] gi 332641520 gb AEE75041.1  translation initiation factor eIF-3 subunit 4 [Arabidopsis thaliana] | 293 | 294 | 1.00E-157 | 100.3 | 92.8 | 95.6 | translation initiation factor eIF-3 subunit 4        | gbpln | Arabidopsis thaliana | AT3G11400.1   Symbols: EIF3G1, ATEIF3G1   eukaryotic translation initiation factor 3G1   chr3:3578536-3580366 FORWARD LENGTH=294                                                                                                                                                                                                                                                                                                                                                                                                                 | 293 | 294 | 1.00E-160 | 100.3 | 92.8 | 95.6 |
| Rsa1.0_00179.1.g7709.t1 | ref NP_001189860.1  cysteine/histidine-rich C1 domain-containing protein [Arabidopsis thaliana] gi 332641518 gb AEE75039.1  cysteine/histidine-rich C1 domain-containing protein [Arabidopsis thaliana]                                                                                                                                                                                                                                                                                                                                                                                                                                                 | 209 | 910 | 1.00E-115 | 435.4 | 94.3 | 96.2 | cysteine/histidine-rich C1 domain-containing protein | gbpln | Arabidopsis thaliana | AT3G11402.2   Symbols:   Cysteine/Histidine-rich C1 domain family protein   chr3:3573516-3577765 FORWARD LENGTH=910                                                                                                                                                                                                                                                                                                                                                                                                                              | 209 | 910 | 1.00E-118 | 435.4 | 94.3 | 96.2 |
| Rsa1.0_00179.1.g7710.t1 | gb EOA31992.1  hypothetical protein CARUB_v10015232mg [Capsella rubella]                                                                                                                                                                                                                                                                                                                                                                                                                                                                                                                                                                                | 711 | 749 | 0         | 105.3 | 56.7 | 70.3 | hypothetical protein CARUB_v10015232mg               | gbpln | Capsella rubella     | AT3G11380.1   Symbols:   Pentatricopeptide repeat (PPR) superfamily protein   chr3:3564079-3565779 FORWARD LENGTH=541                                                                                                                                                                                                                                                                                                                                                                                                                            | 711 | 541 | 1.00E-143 | 76.1  | 41.8 | 50.5 |
| Rsa1.0_00179.1.g7711.t1 | gb EOA31992.1  hypothetical protein CARUB_v10015232mg [Capsella rubella]                                                                                                                                                                                                                                                                                                                                                                                                                                                                                                                                                                                | 724 | 749 | 0         | 103.5 | 56.8 | 73.1 | hypothetical protein CARUB_v10015232mg               | gbpln | Capsella rubella     | AT3G11380.1   Symbols:   Pentatricopeptide repeat (PPR) superfamily protein   chr3:3564079-3565779 FORWARD LENGTH=541                                                                                                                                                                                                                                                                                                                                                                                                                            | 724 | 541 | 1.00E-153 | 74.7  | 44.6 | 55.0 |

|                         |                                                                                                                                                                                                                                                                                                                                                                                                                                                                                                                                         |      |      |           |       |      |      |                                           |       |                      |                                                                                                                                                                                                                                                                                                                                                                                                                                                                                                                                                  |      |      |           |       |      |      |
|-------------------------|-----------------------------------------------------------------------------------------------------------------------------------------------------------------------------------------------------------------------------------------------------------------------------------------------------------------------------------------------------------------------------------------------------------------------------------------------------------------------------------------------------------------------------------------|------|------|-----------|-------|------|------|-------------------------------------------|-------|----------------------|--------------------------------------------------------------------------------------------------------------------------------------------------------------------------------------------------------------------------------------------------------------------------------------------------------------------------------------------------------------------------------------------------------------------------------------------------------------------------------------------------------------------------------------------------|------|------|-----------|-------|------|------|
| Rsa1.0_00179.1.g7712.t1 | ref XP_002882839.1  predicted protein [Arabidopsis lyrata subsp. lyrata] gi 297328679 gb EFH59098.1  predicted protein [Arabidopsis lyrata subsp. lyrata]                                                                                                                                                                                                                                                                                                                                                                               | 393  | 339  | 2.00E-44  | 86.3  | 24.7 | 29.3 | predicted protein                         | gbpln | Arabidopsis lyrata   | AT3G11060.1   Symbols:   unknown protein; FUNCTIONS IN: molecular_function unknown; INVOLVED IN: biological_process unknown; LOCATED IN: endomembrane system; EXPRESSED IN: flower; EXPRESSED DURING: petal differentiation and expansion stage; BEST Arabidopsis thaliana protein match is: unknown protein (TAIR:AT3G06545.1); Has 12 Blast hits to 12 proteins in 2 species: Archae - 0; Bacteria - 0; Metazoa - 0; Fungi - 0; Plants - 12; Viruses - 0; Other Eukaryotes - 0 (source: NCBI BLink).   chr3:3466303-3466944 REVERSE LENGTH=213 | 393  | 213  | 2.00E-43  | 54.2  | 23.4 | 28.8 |
| Rsa1.0_00179.1.g7713.t1 | ref XP_002864337.1  hypothetical protein ARALYDRAFT_495531 [Arabidopsis lyrata subsp. lyrata] gi 297310172 gb EFH40596.1  hypothetical protein ARALYDRAFT_495531 [Arabidopsis lyrata subsp. lyrata]                                                                                                                                                                                                                                                                                                                                     | 183  | 204  | 4.00E-32  | 111.5 | 36.6 | 37.7 | hypothetical protein ARALYDRAFT_495531    | gbpln | Arabidopsis lyrata   | AT5G54500.2   Symbols: FQR1   flavodoxin-like quinone reductase 1   chr5:22124674-22126435 FORWARD LENGTH=244                                                                                                                                                                                                                                                                                                                                                                                                                                    | 183  | 244  | 3.00E-33  | 133.3 | 35.0 | 36.6 |
| Rsa1.0_00179.1.g7714.t1 | #                                                                                                                                                                                                                                                                                                                                                                                                                                                                                                                                       | #    | #    | #         | #     | #    | #    | -                                         | ----  | ----                 | #                                                                                                                                                                                                                                                                                                                                                                                                                                                                                                                                                | #    | #    | #         | #     | #    |      |
| Rsa1.0_00179.1.g7715.t1 | gb AAG50968.1 AC073395.10 hypothetical protein; 91861-89496 [Arabidopsis thaliana]                                                                                                                                                                                                                                                                                                                                                                                                                                                      | 537  | 537  | 0         | 100.0 | 78.2 | 86.0 | hypothetical protein; 91861-89496         | gbpln | Arabidopsis thaliana | AT3G11330.1   Symbols: PIRL9   plant intracellular ras group-related LRR 9   chr3:3552330-3554695 REVERSE LENGTH=499                                                                                                                                                                                                                                                                                                                                                                                                                             | 537  | 499  | 0         | 92.9  | 75.8 | 83.2 |
| Rsa1.0_00179.1.g7716.t1 | ref NP_187740.2  nucleotide-sugar transporter-like protein [Arabidopsis thaliana] gi 75110965 sp Q5XF09.1 PT311.ARATH RecName: Full=Probable sugar phosphate/phosphate translocator At3g11320 gi 53828521 gb AAU94370.1  At3g11320 [Arabidopsis thaliana] gi 110735735 dbj BAE99847.1  hypothetical protein [Arabidopsis thaliana] gi 332641508 gb AEE75029.1  probable sugar phosphate/phosphate translocator [Arabidopsis thaliana] gi 385137878 gb AFI41200.1  putative nucleotide-sugar transporter, partial [Arabidopsis thaliana] | 311  | 308  | 1.00E-169 | 99.0  | 95.8 | 97.1 | nucleotide-sugar transporter-like protein | gbpln | Arabidopsis thaliana | AT3G11320.1   Symbols:   Nucleotide-sugar transporter family protein   chr3:3547017-3548539 REVERSE LENGTH=308                                                                                                                                                                                                                                                                                                                                                                                                                                   | 311  | 308  | 1.00E-172 | 99.0  | 95.8 | 97.1 |
| Rsa1.0_00179.1.g7717.t1 | ref NP_001078135.1  yippee-like protein [Arabidopsis thaliana] gi 332641497 gb AEE75018.1  yippee-like protein [Arabidopsis thaliana]                                                                                                                                                                                                                                                                                                                                                                                                   | 130  | 162  | 3.00E-65  | 124.6 | 92.3 | 95.4 | yippee-like protein                       | gbpln | Arabidopsis thaliana | AT3G11230.2   Symbols:   Yippee family putative zinc-binding protein   chr3:3516683-3518193 FORWARD LENGTH=162                                                                                                                                                                                                                                                                                                                                                                                                                                   | 130  | 162  | 7.00E-68  | 124.6 | 92.3 | 95.4 |
| Rsa1.0_00179.1.g7718.t1 | gb EOA17856.1  hypothetical protein CARUB_v10006261mg [Capsella rubella]                                                                                                                                                                                                                                                                                                                                                                                                                                                                | 505  | 488  | 1.00E-117 | 96.6  | 46.9 | 56.4 | hypothetical protein CARUB_v10006261mg    | gbpln | Capsella rubella     | AT3G13590.1   Symbols:   Cysteine/Histidine-rich C1 domain family protein   chr3:4435316-4437334 REVERSE LENGTH=513                                                                                                                                                                                                                                                                                                                                                                                                                              | 505  | 513  | 1.00E-118 | 101.6 | 45.3 | 56.6 |
| Rsa1.0_00179.1.g7719.t1 | gb EOA31316.1  hypothetical protein CARUB_v10014489mg [Capsella rubella]                                                                                                                                                                                                                                                                                                                                                                                                                                                                | 245  | 246  | 1.00E-119 | 100.4 | 94.3 | 97.1 | hypothetical protein CARUB_v10014489mg    | gbpln | Capsella rubella     | AT3G11200.1   Symbols: AL2   alfin-like 2   chr3:3508387-3510418 REVERSE LENGTH=246                                                                                                                                                                                                                                                                                                                                                                                                                                                              | 245  | 246  | 1.00E-114 | 100.4 | 93.5 | 97.1 |
| Rsa1.0_00179.1.g7720.t1 | emb CAB85467.1  chloroplast omega-3 fatty acid desaturase [Brassica juncea]                                                                                                                                                                                                                                                                                                                                                                                                                                                             | 441  | 429  | 0         | 97.3  | 95.0 | 96.4 | chloroplast omega-3 fatty acid desaturase | gbpln | Brassica juncea      | AT3G11170.1   Symbols: FAD7, FADD   fatty acid desaturase 7   chr3:3499959-3502126 FORWARD LENGTH=446                                                                                                                                                                                                                                                                                                                                                                                                                                            | 441  | 446  | 0         | 101.1 | 90.2 | 93.7 |
| Rsa1.0_00179.1.g7721.t1 | ref XP_002884831.1  hypothetical protein ARALYDRAFT_478454 [Arabidopsis lyrata subsp. lyrata] gi 297330671 gb EFH61090.1  hypothetical protein ARALYDRAFT_478454 [Arabidopsis lyrata subsp. lyrata]                                                                                                                                                                                                                                                                                                                                     | 1724 | 1702 | 0         | 98.7  | 94.6 | 95.5 | hypothetical protein ARALYDRAFT_478454    | gbpln | Arabidopsis lyrata   | AT3G11130.1   Symbols:   Clathrin, heavy chain   chr3:3482575-3491667 REVERSE LENGTH=1705                                                                                                                                                                                                                                                                                                                                                                                                                                                        | 1724 | 1705 | 0         | 98.9  | 94.5 | 95.4 |
| Rsa1.0_00179.1.g7722.t1 | gb EOA24931.1  hypothetical protein CARUB_v10018222mg [Capsella rubella]                                                                                                                                                                                                                                                                                                                                                                                                                                                                | 134  | 134  | 1.00E-37  | 100.0 | 59.7 | 69.4 | hypothetical protein CARUB_v10018222mg    | gbpln | Capsella rubella     | AT5G36910.1   Symbols: THI2.2   thionin 2.2   chr5:14562053-14562673 REVERSE LENGTH=134                                                                                                                                                                                                                                                                                                                                                                                                                                                          | 134  | 134  | 7.00E-38  | 100.0 | 55.2 | 67.9 |
| Rsa1.0_00179.1.g7723.t1 | ref XP_002882716.1  zinc finger family protein [Arabidopsis lyrata subsp. lyrata] gi 297328556 gb EFH58975.1  zinc finger family protein [Arabidopsis lyrata subsp. lyrata]                                                                                                                                                                                                                                                                                                                                                             | 160  | 159  | 2.00E-60  | 99.4  | 75.0 | 84.4 | zinc finger family protein                | gbpln | Arabidopsis lyrata   | AT3G11110.1   Symbols:   RING/U-box superfamily protein   chr3:3479979-3480455 FORWARD LENGTH=158                                                                                                                                                                                                                                                                                                                                                                                                                                                | 160  | 158  | 4.00E-60  | 98.8  | 76.3 | 83.1 |
| Rsa1.0_00179.1.g7724.t1 | gb AAF01520.1 AC009991_16 putative disease resistance protein [Arabidopsis thaliana]                                                                                                                                                                                                                                                                                                                                                                                                                                                    | 892  | 957  | 0         | 107.3 | 63.8 | 75.2 | putative disease resistance protein       | gbpln | Arabidopsis thaliana | AT3G11080.1   Symbols: AtRLP35, RLP35   receptor like protein 35   chr3:3470481-3473312 FORWARD LENGTH=943                                                                                                                                                                                                                                                                                                                                                                                                                                       | 892  | 943  | 0         | 105.7 | 64.6 | 75.7 |

|                         |                                                                                                                                                                                                                                                                                                                                                                                                                                                                                       |      |     |           |       |      |      |                                                      |       |                      |                                                                                                                           |      |     |           |       |      |      |
|-------------------------|---------------------------------------------------------------------------------------------------------------------------------------------------------------------------------------------------------------------------------------------------------------------------------------------------------------------------------------------------------------------------------------------------------------------------------------------------------------------------------------|------|-----|-----------|-------|------|------|------------------------------------------------------|-------|----------------------|---------------------------------------------------------------------------------------------------------------------------|------|-----|-----------|-------|------|------|
| Rsa1.0.00179.1.g7725.t2 | ref NP_187718.1  outer membrane OMP85-like protein [Arabidopsis thaliana]<br>gi 6016688 gb AAFO1515.1 AC009991.11 unknown protein [Arabidopsis thaliana]<br>gi 12321882 gb AAG50978.1 AC073395.20 unknown protein: 4967-6981 [Arabidopsis thaliana]<br>gi 20466221 gb AAM20428.1  unknown protein [Arabidopsis thaliana]<br>gi 25084079 gb AAN72169.1  unknown protein [Arabidopsis thaliana]<br>gi 332641478 gb AEE74999.1  outer membrane OMP85-like protein [Arabidopsis thaliana] | 547  | 520 | 0         | 95.1  | 78.1 | 86.7 | outer membrane OMP85-like protein                    | gbpln | Arabidopsis thaliana | AT3G11070.1   Symbols:   Outer membrane OMP85 family protein   chr3:3467801-3469815 FORWARD LENGTH=520                    | 547  | 520 | 0         | 95.1  | 78.1 | 86.7 |
| Rsa1.0.00179.1.g7726.t1 | ref XP_002882712.1  hypothetical protein ARALYDRAFT_317904 [Arabidopsis lyrata subsp. lyrata]<br>gi 297328552 gb EFH58971.1  hypothetical protein ARALYDRAFT_317904 [Arabidopsis lyrata subsp. lyrata]                                                                                                                                                                                                                                                                                | 356  | 355 | 1.00E-123 | 99.7  | 62.4 | 76.1 | hypothetical protein ARALYDRAFT_317904               | gbpln | Arabidopsis lyrata   | AT2G24700.1   Symbols:   Transcriptional factor B3 family protein   chr2:10513049-10515288 REVERSE LENGTH=555             | 356  | 555 | 3.00E-73  | 155.9 | 41.0 | 59.3 |
| Rsa1.0.00179.1.g7727.t1 | ref XP_002882712.1  hypothetical protein ARALYDRAFT_317904 [Arabidopsis lyrata subsp. lyrata]<br>gi 297328552 gb EFH58971.1  hypothetical protein ARALYDRAFT_317904 [Arabidopsis lyrata subsp. lyrata]                                                                                                                                                                                                                                                                                | 189  | 355 | 8.00E-63  | 187.8 | 67.7 | 78.8 | hypothetical protein ARALYDRAFT_317904               | gbpln | Arabidopsis lyrata   | AT4G31615.1   Symbols:   Transcriptional factor B3 family protein   chr4:15320297-15322194 REVERSE LENGTH=487             | 189  | 487 | 2.00E-33  | 257.7 | 42.9 | 56.6 |
| Rsa1.0.00179.1.g7728.t1 | gb ABV08790.1  DREB2B [Eutrema halophilum]                                                                                                                                                                                                                                                                                                                                                                                                                                            | 346  | 316 | 6.00E-90  | 91.3  | 60.7 | 73.1 | DREB2B                                               | gbpln | Eutrema halophilum   | AT3G11020.1   Symbols: DREB2B, DREB2   DRE/CRT-binding protein 2B   chr3:3456009-3457001 FORWARD LENGTH=330               | 346  | 330 | 2.00E-80  | 95.4  | 59.2 | 71.4 |
| Rsa1.0.00179.1.g7729.t1 | gb EOA31502.1  hypothetical protein CARUB_v10014688mg [Capsella rubella]                                                                                                                                                                                                                                                                                                                                                                                                              | 197  | 197 | 9.00E-96  | 100.0 | 85.8 | 91.9 | hypothetical protein CARUB_v10014688mg               | gbpln | Capsella rubella     | AT3G10986.1   Symbols:   Protein of unknown function (DUF567)   chr3:3444203-3445672 REVERSE LENGTH=197                   | 197  | 197 | 1.00E-96  | 100.0 | 84.3 | 92.4 |
| Rsa1.0.00179.1.g7730.t1 | gb EOA32919.1  hypothetical protein CARUB_v10016246mg, partial [Capsella rubella]                                                                                                                                                                                                                                                                                                                                                                                                     | 214  | 161 | 7.00E-75  | 75.2  | 65.0 | 71.0 | hypothetical protein CARUB_v10016246mg, partial      | gbpln | Capsella rubella     | AT3G10985.1   Symbols: SAG20, WI12, ATW1-12   senescence associated gene 20   chr3:3442776-3443108 FORWARD LENGTH=110     | 214  | 110 | 7.00E-43  | 51.4  | 43.0 | 46.3 |
| Rsa1.0.00179.1.g7731.t1 | ref XP_002884818.1  predicted protein [Arabidopsis lyrata subsp. lyrata]<br>gi 297330658 gb EFH61077.1  predicted protein [Arabidopsis lyrata subsp. lyrata]                                                                                                                                                                                                                                                                                                                          | 415  | 415 | 0         | 100.0 | 74.9 | 84.8 | predicted protein                                    | gbpln | Arabidopsis lyrata   | AT3G10890.1   Symbols:   Glycosyl hydrolase superfamily protein   chr3:3407455-3409000 REVERSE LENGTH=414                 | 415  | 414 | 0         | 99.8  | 73.3 | 84.1 |
| Rsa1.0.00179.1.g7732.t1 | gb EOA30817.1  hypothetical protein CARUB_v10013960mg [Capsella rubella]                                                                                                                                                                                                                                                                                                                                                                                                              | 354  | 377 | 1.00E-112 | 106.5 | 61.6 | 73.7 | hypothetical protein CARUB_v10013960mg               | gbpln | Capsella rubella     | AT3G10820.2   Symbols:   Transcription elongation factor (TFIS) family protein   chr3:3387358-3390693 FORWARD LENGTH=580  | 354  | 580 | 1.00E-112 | 163.8 | 62.1 | 73.2 |
| Rsa1.0.00179.1.g7733.t1 | ref XP_002884814.1  hypothetical protein ARALYDRAFT_317879 [Arabidopsis lyrata subsp. lyrata]<br>gi 297330654 gb EFH61073.1  hypothetical protein ARALYDRAFT_317879 [Arabidopsis lyrata subsp. lyrata]                                                                                                                                                                                                                                                                                | 196  | 698 | 2.00E-78  | 356.1 | 68.9 | 79.6 | hypothetical protein ARALYDRAFT_317879               | gbpln | Arabidopsis lyrata   | AT3G10815.1   Symbols:   RING/U-box superfamily protein   chr3:3385009-3385608 REVERSE LENGTH=199                         | 196  | 199 | 7.00E-79  | 101.5 | 75.0 | 84.2 |
| Rsa1.0.00180.1.g7734.t1 | ref NP_199643.1  cysteine/histidine-rich C1 domain-containing protein [Arabidopsis thaliana]<br>gi 8978336 db BAA98189.1  unnamed protein product [Arabidopsis thaliana]<br>gi 332008268 gb AED95651.1  cysteine/histidine-rich C1 domain-containing protein [Arabidopsis thaliana]                                                                                                                                                                                                   | 682  | 977 | 0         | 143.3 | 54.3 | 64.5 | cysteine/histidine-rich C1 domain-containing protein | gbpln | Arabidopsis thaliana | AT5G48320.1   Symbols:   Cysteine/Histidine-rich C1 domain family protein   chr5:19581794-19584727 REVERSE LENGTH=977     | 682  | 977 | 0         | 143.3 | 54.3 | 64.5 |
| Rsa1.0.00180.1.g7735.t1 | ref XP_002873089.1  hypothetical protein ARALYDRAFT_908205 [Arabidopsis lyrata subsp. lyrata]<br>gi 297318926 gb EFH49348.1  hypothetical protein ARALYDRAFT_908205 [Arabidopsis lyrata subsp. lyrata]                                                                                                                                                                                                                                                                                | 377  | 384 | 1.00E-114 | 101.9 | 73.2 | 80.1 | hypothetical protein ARALYDRAFT_908205               | gbpln | Arabidopsis lyrata   | AT5G03380.1   Symbols:   Heavy metal transport/detoxification superfamily protein   chr5:832400-834301 REVERSE LENGTH=392 | 377  | 392 | 1.00E-115 | 104.0 | 73.5 | 81.2 |
| Rsa1.0.00180.1.g7736.t2 | ref XP_002871033.1  hypothetical protein ARALYDRAFT_487117 [Arabidopsis lyrata subsp. lyrata]<br>gi 297316870 gb EFH47292.1  hypothetical protein ARALYDRAFT_487117 [Arabidopsis lyrata subsp. lyrata]                                                                                                                                                                                                                                                                                | 1051 | 636 | 0         | 60.5  | 39.8 | 46.1 | hypothetical protein ARALYDRAFT_487117               | gbpln | Arabidopsis lyrata   | AT5G03420.1   Symbols:   5'-AMP-activated protein kinase-related   chr5:845641-848705 FORWARD LENGTH=598                  | 1051 | 598 | 0         | 56.9  | 38.1 | 43.3 |



|                         |                                                                                                                                                                                                                                                                                                                                                                                                                                                                                                                        |     |     |           |       |      |      |                                        |       |                      |                                                                                                                                                                                                                                                                                                                                                                                                                                                                           |     |     |           |       |      |      |
|-------------------------|------------------------------------------------------------------------------------------------------------------------------------------------------------------------------------------------------------------------------------------------------------------------------------------------------------------------------------------------------------------------------------------------------------------------------------------------------------------------------------------------------------------------|-----|-----|-----------|-------|------|------|----------------------------------------|-------|----------------------|---------------------------------------------------------------------------------------------------------------------------------------------------------------------------------------------------------------------------------------------------------------------------------------------------------------------------------------------------------------------------------------------------------------------------------------------------------------------------|-----|-----|-----------|-------|------|------|
| Rsa1.0_00180.1.g7737.t1 | gb EOA20483.1  hypothetical protein CARUB_v10000795mg [Capsella rubella]                                                                                                                                                                                                                                                                                                                                                                                                                                               | 501 | 498 | 0         | 99.4  | 91.8 | 95.6 | hypothetical protein CARUB_v10000795mg | gbpln | Capsella rubella     | AT5G03430.1   Symbols:   phosphoadenosine phosphosulfate (PAPS) reductase family protein   chr5:849237-852867 REVERSE LENGTH=497                                                                                                                                                                                                                                                                                                                                          | 501 | 497 | 0         | 99.2  | 91.8 | 95.6 |
| Rsa1.0_00180.1.g7738.t1 | ref XP_002871035.1  hypothetical protein ARALYDRAFT_487123 [Arabidopsis lyrata subsp. lyrata] gi 297316872 gb EFH47294.1  hypothetical protein ARALYDRAFT_487123 [Arabidopsis lyrata subsp. lyrata]                                                                                                                                                                                                                                                                                                                    | 112 | 88  | 6.00E-16  | 78.6  | 43.8 | 52.7 | hypothetical protein ARALYDRAFT_487123 | gbpln | Arabidopsis lyrata   | AT5G03460.1   Symbols:   unknown protein; FUNCTIONS IN: molecular.function unknown; INVOLVED IN: biological.process unknown; LOCATED IN: endomembrane system; EXPRESSED IN: 24 plant structures; EXPRESSED DURING: 15 growth stages; Has 30201 Blast hits to 17322 proteins in 780 species: Archae - 12; Bacteria - 1396; Metazoa - 17338; Fungi - 3422; Plants - 5037; Viruses - 0; Other Eukaryotes - 2996 (source: NCBI BLink).   chr5:864391-865509 FORWARD LENGTH=89 | 112 | 89  | 2.00E-18  | 79.5  | 43.8 | 52.7 |
| Rsa1.0_00180.1.g7739.t1 | ref NP_179537.1  casein kinase I-like 5 [Arabidopsis thaliana] gi 4191777 gb AAD10146.1  putative casein kinase I [Arabidopsis thaliana] gi 20466742 gb AAM20688.1  putative casein kinase I [Arabidopsis thaliana] gi 21592384 gb AAM64335.1  putative casein kinase I [Arabidopsis thaliana] gi 30387517 gb AAP31924.1  At2g19470 [Arabidopsis thaliana] gi 62996980 gb AAAY24534.1  casein kinase I-like protein 5 [Arabidopsis thaliana] gi 330251790 gb AEC06884.1  casein kinase I-like 5 [Arabidopsis thaliana] | 327 | 433 | 1.00E-134 | 132.4 | 71.6 | 78.6 | casein kinase I-like 5                 | gbpln | Arabidopsis thaliana | AT2G19470.1   Symbols: ckl5   casein kinase I-like 5   chr2:8433851-8436295 REVERSE LENGTH=433                                                                                                                                                                                                                                                                                                                                                                            | 327 | 433 | 1.00E-136 | 132.4 | 71.6 | 78.6 |
| Rsa1.0_00180.1.g7740.t1 | #                                                                                                                                                                                                                                                                                                                                                                                                                                                                                                                      | #   | #   | #         | #     | #    | -    | ----                                   | ----  | #                    | #                                                                                                                                                                                                                                                                                                                                                                                                                                                                         | #   | #   | #         | #     | #    |      |
| Rsa1.0_00180.1.g7741.t1 | ref NP_195971.1  C2H2-type zinc finger protein [Arabidopsis thaliana] gi 7378636 emb CAB83312.1  putative protein [Arabidopsis thaliana] gi 51971385 dbj BAD44357.1  unknown protein [Arabidopsis thaliana] gi 225898883 dbj BAH30572.1  hypothetical protein [Arabidopsis thaliana] gi 332003233 gb AED90616.1  C2H2-type zinc finger protein [Arabidopsis thaliana]                                                                                                                                                  | 267 | 292 | 1.00E-104 | 109.4 | 78.7 | 86.9 | C2H2-type zinc finger protein          | gbpln | Arabidopsis thaliana | AT5G03510.1   Symbols:   C2H2-type zinc finger family protein   chr5:880353-881231 FORWARD LENGTH=292                                                                                                                                                                                                                                                                                                                                                                     | 267 | 292 | 1.00E-107 | 109.4 | 78.7 | 86.9 |
| Rsa1.0_00180.1.g7742.t1 | gb EOA22635.1  hypothetical protein CARUB_v10003305mg [Capsella rubella]                                                                                                                                                                                                                                                                                                                                                                                                                                               | 211 | 210 | 1.00E-111 | 99.5  | 95.3 | 96.2 | hypothetical protein CARUB_v10003305mg | gbpln | Capsella rubella     | AT5G03530.1   Symbols: ATRAB ALPHA, ATRAB, ATRAB18B, ATRABC2A, RABC2A   RAB GTPase homolog C2A   chr5:885741-887061 REVERSE LENGTH=210                                                                                                                                                                                                                                                                                                                                    | 211 | 210 | 1.00E-113 | 99.5  | 95.3 | 96.7 |
| Rsa1.0_00180.1.g7743.t1 | gb AEI26267.1  Exo70A1 [Brassica oleracea var. viridis]                                                                                                                                                                                                                                                                                                                                                                                                                                                                | 638 | 638 | 0         | 100.0 | 98.4 | 99.7 | Exo70A1                                | gbpln | Brassica oleracea    | AT5G03540.1   Symbols: ATEXO70A1, EXO70A1   exocyst subunit exo70 family protein A1   chr5:889606-893916 FORWARD LENGTH=638                                                                                                                                                                                                                                                                                                                                               | 638 | 638 | 0         | 100.0 | 98.4 | 98.1 |
| Rsa1.0_00180.1.g7744.t1 | dbj BAH56827.1  AT5G03545 [Arabidopsis thaliana]                                                                                                                                                                                                                                                                                                                                                                                                                                                                       | 57  | 67  | 4.00E-17  | 117.5 | 78.9 | 87.7 | AT5G03545                              | gbpln | Arabidopsis thaliana | AT5G03545.1   Symbols: AT4, ATIPS2   Expressed in response to phosphate starvation, this response is enhanced by the presence of IAA.   chr5:895047-895259 FORWARD LENGTH=70                                                                                                                                                                                                                                                                                              | 57  | 70  | 3.00E-19  | 122.8 | 75.4 | 82.5 |
| Rsa1.0_00180.1.g7745.t1 | gb EOA19909.1  hypothetical protein CARUB_v10000159mg [Capsella rubella]                                                                                                                                                                                                                                                                                                                                                                                                                                               | 898 | 937 | 0         | 104.3 | 86.3 | 91.8 | hypothetical protein CARUB_v10000159mg | gbpln | Capsella rubella     | AT5G03640.1   Symbols:   Protein kinase superfamily protein   chr5:927915-930781 FORWARD LENGTH=926                                                                                                                                                                                                                                                                                                                                                                       | 898 | 926 | 0         | 103.1 | 85.2 | 90.3 |
| Rsa1.0_00180.1.g7746.t1 | gb EOA19974.1  hypothetical protein CARUB_v10000235mg [Capsella rubella]                                                                                                                                                                                                                                                                                                                                                                                                                                               | 847 | 822 | 0         | 97.0  | 86.9 | 91.3 | hypothetical protein CARUB_v10000235mg | gbpln | Capsella rubella     | AT5G03650.1   Symbols: SBE2.2   starch branching enzyme 2.2   chr5:931924-937470 FORWARD LENGTH=805                                                                                                                                                                                                                                                                                                                                                                       | 847 | 805 | 0         | 95.0  | 86.4 | 90.2 |
| Rsa1.0_00180.1.g7747.t1 | ref XP_002871051.1  hypothetical protein ARALYDRAFT_487145 [Arabidopsis lyrata subsp. lyrata] gi 297316888 gb EFH47310.1  hypothetical protein ARALYDRAFT_487145 [Arabidopsis lyrata subsp. lyrata]                                                                                                                                                                                                                                                                                                                    | 152 | 173 | 7.00E-62  | 113.8 | 86.8 | 96.1 | hypothetical protein ARALYDRAFT_487145 | gbpln | Arabidopsis lyrata   | AT5G03660.1   Symbols:   Family of unknown function (DUF662)   chr5:938068-939811 FORWARD LENGTH=173                                                                                                                                                                                                                                                                                                                                                                      | 152 | 173 | 8.00E-63  | 113.8 | 85.5 | 94.7 |
| Rsa1.0_00180.1.g7748.t1 | #                                                                                                                                                                                                                                                                                                                                                                                                                                                                                                                      | #   | #   | #         | #     | #    | -    | ----                                   | ----  | #                    | #                                                                                                                                                                                                                                                                                                                                                                                                                                                                         | #   | #   | #         | #     | #    |      |
| Rsa1.0_00180.1.g7749.t2 | ref XP_002871052.1  hypothetical protein ARALYDRAFT_487147 [Arabidopsis lyrata subsp. lyrata] gi 297316889 gb EFH47311.1  hypothetical protein ARALYDRAFT_487147 [Arabidopsis lyrata subsp. lyrata]                                                                                                                                                                                                                                                                                                                    | 520 | 516 | 0         | 99.2  | 78.7 | 85.0 | hypothetical protein ARALYDRAFT_487147 | gbpln | Arabidopsis lyrata   | AT5G03670.1   Symbols:   unknown protein; BEST Arabidopsis thaliana protein match is: unknown protein (TAIR:AT2G36420.1). Has 700 Blast hits to 624 proteins in 104 species: Archae - 0; Bacteria - 18; Metazoa - 333; Fungi - 60; Plants - 73; Viruses - 24; Other Eukaryotes - 192 (source: NCBI BLink).   chr5:947311-949898 FORWARD LENGTH=516                                                                                                                        | 520 | 516 | 0         | 99.2  | 78.2 | 85.0 |

|                         |                                                                                                                                                                                                                                                                                                                                                                                                                                                                               |      |      |           |       |      |      |                                             |       |                      |                                                                                                                                                                     |      |      |           |       |      |      |
|-------------------------|-------------------------------------------------------------------------------------------------------------------------------------------------------------------------------------------------------------------------------------------------------------------------------------------------------------------------------------------------------------------------------------------------------------------------------------------------------------------------------|------|------|-----------|-------|------|------|---------------------------------------------|-------|----------------------|---------------------------------------------------------------------------------------------------------------------------------------------------------------------|------|------|-----------|-------|------|------|
| Rsa1.0.00180.1.g7750.t1 | emb CAB39638.1  RNA-directed DNA polymerase-like protein [Arabidopsis thaliana] gi 7267666 emb CAB78094.1  RNA-directed DNA polymerase-like protein [Arabidopsis thaliana] ref NP_195988.1  trihelix DNA binding transcription factor [Arabidopsis thaliana] gi 75311735 sp Q9LZS0.1 PTL_ARATH RecName: Full=Trihelix transcription factor PTL; AltName: Full=Trihelix DNA-binding protein PETAL LOSS                                                                         | 129  | 1274 | 5.00E-18  | 987.6 | 40.3 | 54.3 | RNA-directed DNA polymerase-like protein    | gbpln | Arabidopsis thaliana | AT1G10000.1   Symbols:   Ribonuclease H-like superfamily protein   chr1:3263877-3264788 REVERSE LENGTH=303                                                          | 129  | 303  | 9.00E-15  | 234.9 | 35.7 | 48.8 |
| Rsa1.0.00180.1.g7751.t1 | gi 7340653 emb CAB82933.1  GT2-like protein [Arabidopsis thaliana] gi 332003258 gb AED9064.1  trihelix transcription factor PTLED96690 [Arabidopsis thaliana] ref NP_195990.1  PAN domain-containing protein [Arabidopsis thaliana] gi 75181333 sp Q9LZF8.1 Y5370_ARATH RecName: Full=PAN domain-containing protein At5g03700; Flags: Precursor                                                                                                                               | 582  | 591  | 0         | 101.5 | 86.6 | 90.2 | trihelix DNA binding transcription factor   | gbpln | Arabidopsis thaliana | AT5G03680.1   Symbols: PTL   Duplicated homeodomain-like superfamily protein   chr5:957858-960760 FORWARD LENGTH=591                                                | 582  | 591  | 0         | 101.5 | 86.6 | 90.2 |
| Rsa1.0.00180.1.g7752.t1 | gi 7340655 emb CAB82935.1  S-receptor kinase-like protein [Arabidopsis thaliana] gi 332003261 gb AED90644.1  PAN domain-containing protein [Arabidopsis thaliana] ref NP_002873110.1  AT-HSFA3 [Arabidopsis lyrata subsp. lyrata] gi 297318947 gb EFH49369.1  AT-HSFA3 [Arabidopsis lyrata subsp. lyrata]                                                                                                                                                                     | 810  | 482  | 0         | 59.5  | 48.1 | 51.5 | PAN domain-containing protein               | gbpln | Arabidopsis thaliana | AT5G03700.1   Symbols:   D-mannose binding lectin protein with Apple-like carbohydrate-binding domain   chr5:965874-967322 REVERSE LENGTH=482                       | 810  | 482  | 0         | 59.5  | 48.1 | 51.5 |
| Rsa1.0.00180.1.g7753.t1 | dbj BAJ34040.1  unnamed protein product [Theilungiella halophila]                                                                                                                                                                                                                                                                                                                                                                                                             | 828  | 815  | 0         | 98.4  | 89.9 | 92.0 | unnamed protein product                     | ----  | ----                 | AT5G03720.1   Symbols: AT-HSFA3, HSFA3   heat shock transcription factor A3   chr5:971913-973683 REVERSE LENGTH=412                                                 | 407  | 412  | 0         | 101.2 | 83.3 | 88.7 |
| Rsa1.0.00180.1.g7754.t1 | gb EOA21229.1  hypothetical protein CARUB_v10001577mg [Capsella rubella]                                                                                                                                                                                                                                                                                                                                                                                                      | 265  | 299  | 6.00E-74  | 112.8 | 68.3 | 79.2 | hypothetical protein CARUB_v10001577mg      | gbpln | Capsella rubella     | AT5G03730.1   Symbols: CTR1, SIS1, AtCTR1   Protein kinase superfamily protein   chr5:974958-979660 REVERSE LENGTH=821                                              | 828  | 821  | 0         | 99.2  | 89.1 | 92.1 |
| Rsa1.0.00180.1.g7755.t1 | ref XP_002873112.1  ATCSLA09 [Arabidopsis lyrata subsp. lyrata] gi 297318949 gb EFH49371.1  ATCSLA09 [Arabidopsis lyrata subsp. lyrata]                                                                                                                                                                                                                                                                                                                                       | 305  | 534  | 1.00E-172 | 175.1 | 95.4 | 97.7 | ATCSLA09                                    | gbpln | Arabidopsis lyrata   | AT5G03740.1   Symbols: HD2C, HDT3   histone deacetylase 2C   chr5:981994-983961 FORWARD LENGTH=294                                                                  | 265  | 294  | 4.00E-74  | 110.9 | 69.1 | 78.5 |
| Rsa1.0.00181.1.g7757.t1 | # # # # # # # # # #                                                                                                                                                                                                                                                                                                                                                                                                                                                           | #    | #    | #         | #     | #    | #    | -                                           | ----  | ----                 | AT5G03760.1   Symbols: ATCSLA09, CSLA09, ATCSLA9, CSLA9, RAT4   Nucleotide-diphospho-sugar transferases superfamily protein   chr5:985910-990087 REVERSE LENGTH=533 | 305  | 533  | 1.00E-174 | 174.8 | 95.7 | 97.4 |
| Rsa1.0.00181.1.g7758.t1 | ref NP_188919.1  leucine-rich repeat extensin-like protein 6 [Arabidopsis thaliana] gi 75335502 sp Q9LU1.1 LRX6_ARATH RecName: Full=Leucine-rich repeat extensin-like protein 6; Short=AtLRX6; Short=LRR/EXTENSIN6; AltName: Full=Cell wall hydroxyproline-rich glycoprotein; Flags: Precursor                                                                                                                                                                                | 425  | 470  | 0         | 110.6 | 75.8 | 81.2 | leucine-rich repeat extensin-like protein 6 | gbpln | Arabidopsis thaliana | AT3G22800.1   Symbols:   Leucine-rich repeat (LRR) family protein   chr3:8063063-8064475 REVERSE LENGTH=470                                                         | 425  | 470  | 0         | 110.6 | 75.8 | 81.2 |
| Rsa1.0.00181.1.g7759.t1 | gi 9279698 dbj BAB01255.1  extensin protein-like [Arabidopsis thaliana] gi 219291096 gb ACL13984.1  At3g22800 [Arabidopsis thaliana] gi 332643157 gb AEE76678.1  leucine-rich repeat extensin-like protein 6 [Arabidopsis thaliana] ref NP_188918.2  kinase interacting KIP1-like protein [Arabidopsis thaliana] gi 9279697 dbj BAB01254.1  centromere protein [Arabidopsis thaliana] gi 332643156 gb AEE76677.1  kinase interacting KIP1-like protein [Arabidopsis thaliana] | 1715 | 1728 | 0         | 100.8 | 83.4 | 91.8 | kinase interacting KIP1-like protein        | gbpln | Arabidopsis thaliana | AT3G22790.1   Symbols:   Kinase interacting (KIP1-like) family protein   chr3:8052446-8057888 REVERSE LENGTH=1728                                                   | 1715 | 1728 | 0         | 100.8 | 83.4 | 91.8 |
| Rsa1.0.00181.1.g7760.t3 | gb EOA29996.1  hypothetical protein CARUB_v10013101mg [Capsella rubella]                                                                                                                                                                                                                                                                                                                                                                                                      | 308  | 693  | 1.00E-118 | 225.0 | 70.1 | 75.0 | hypothetical protein CARUB_v10013101mg      | gbpln | Capsella rubella     | AT3G22780.1   Symbols: TSO1, ATTSO1   Tesmin/TSO1-like CXC domain-containing protein   chr3:8044827-8052058 FORWARD LENGTH=695                                      | 308  | 695  | 1.00E-119 | 225.6 | 68.5 | 74.4 |
| Rsa1.0.00181.1.g7761.t1 | ref XP_002883376.1  hypothetical protein ARALYDRAFT_898758 [Arabidopsis lyrata subsp. lyrata] gi 29732921 gb EFH59635.1  hypothetical protein ARALYDRAFT_898758 [Arabidopsis lyrata subsp. lyrata]                                                                                                                                                                                                                                                                            | 587  | 623  | 0         | 106.1 | 72.1 | 81.8 | hypothetical protein ARALYDRAFT_898758      | gbpln | Arabidopsis lyrata   | AT3G22760.1   Symbols: SOL1   Tesmin/TSO1-like CXC domain-containing protein   chr3:8044622-8047381 FORWARD LENGTH=609                                              | 587  | 609  | 0         | 103.7 | 68.1 | 78.7 |

| Rsa1.0_00181.1.g7762.t1 | #                                                                                                                                                                                                                                                                                                                                                                                                                                                                                                                                                                | #   | #   | #         | #     | #    | #     | -                                                                                  | ----  | ----                 | #                                                                                                                                                                                                                                                                                | #   | #   | #         | #     | #    |      |
|-------------------------|------------------------------------------------------------------------------------------------------------------------------------------------------------------------------------------------------------------------------------------------------------------------------------------------------------------------------------------------------------------------------------------------------------------------------------------------------------------------------------------------------------------------------------------------------------------|-----|-----|-----------|-------|------|-------|------------------------------------------------------------------------------------|-------|----------------------|----------------------------------------------------------------------------------------------------------------------------------------------------------------------------------------------------------------------------------------------------------------------------------|-----|-----|-----------|-------|------|------|
| Rsa1.0_00181.1.g7762.t1 | ref XP_002885523.1  hypothetical protein ARALYDRAFT_898756 [Arabidopsis lyrata subsp. lyrata] gi 297331363 gb EFH61782.1                                                                                                                                                                                                                                                                                                                                                                                                                                         | 381 | 378 | 0         | 99.2  | 93.7 | 97.9  | hypothetical protein ARALYDRAFT_898756                                             | gbpln | Arabidopsis lyrata   | AT3G22750.1   Symbols:   Protein kinase superfamily protein   chr3:8037364-8039096 REVERSE LENGTH=378                                                                                                                                                                            | 381 | 378 | 0         | 99.2  | 92.9 | 97.4 |
| Rsa1.0_00181.1.g7764.t1 | ref NP_188905.1  putative rRNA-processing protein EBP2-like protein [Arabidopsis thaliana] gi 21362538 sp Q9LUJ5.1 EBP2_ARATH RecName: Full=Probable rRNA-processing protein EBP2 homolog gi 9279684 dbj BAB01241.1  nucleolar protein-like [Arabidopsis thaliana] gi 16604529 gb AAL24270.1  AT3g22660/MW123.3 [Arabidopsis thaliana] gi 24111281 gb AAN46764.1  At3g22660/MW123.3 [Arabidopsis thaliana] gi 332643141 gb AEE76662.1  putative rRNA-processing protein EBP2-like protein [Arabidopsis thaliana]                                                 | 298 | 293 | 1.00E-135 | 98.3  | 84.2 | 91.3  | putative rRNA-processing protein EBP2-like protein                                 | gbpln | Arabidopsis thaliana | AT3G22660.1   Symbols:   rRNA processing protein-related   chr3:8016237-8017118 REVERSE LENGTH=293                                                                                                                                                                               | 298 | 293 | 1.00E-138 | 98.3  | 84.2 | 91.3 |
| Rsa1.0_00181.1.g7765.t1 | ref NP_566714.1  cupin family protein [Arabidopsis thaliana] gi 9279682 dbj BAB01239.1  unnamed protein product [Arabidopsis thaliana] gi 16604374 gb AAL24193.1  AT3g22640/MW123.1 [Arabidopsis thaliana] gi 19699204 gb AAL90968.1  AT3g22640/MW123.1 [Arabidopsis thaliana] gi 332643139 gb AEE76660.1  cupin family protein [Arabidopsis thaliana]                                                                                                                                                                                                           | 485 | 486 | 1.00E-169 | 100.2 | 69.1 | 82.3  | cupin family protein                                                               | gbpln | Arabidopsis thaliana | AT3G22640.1   Symbols: PAP85   cupin family protein   chr3:801902-8013883 REVERSE LENGTH=486                                                                                                                                                                                     | 485 | 486 | 1.00E-172 | 100.2 | 69.1 | 82.3 |
| Rsa1.0_00181.1.g7766.t1 | ref XP_002865424.1  hypothetical protein ARALYDRAFT_494656 [Arabidopsis lyrata subsp. lyrata] gi 297311259 gb EFH41683.1  hypothetical protein ARALYDRAFT_494656 [Arabidopsis lyrata subsp. lyrata]                                                                                                                                                                                                                                                                                                                                                              | 177 | 379 | 2.00E-34  | 214.1 | 51.4 | 65.5  | hypothetical protein ARALYDRAFT_494656                                             | gbpln | Arabidopsis lyrata   | AT5G43420.1   Symbols:   RING/U-box superfamily protein   chr5:17451790-17452917 FORWARD LENGTH=375                                                                                                                                                                              | 177 | 375 | 9.00E-33  | 211.9 | 48.0 | 62.7 |
| Rsa1.0_00181.1.g7767.t1 | ref XP_002885514.1  hypothetical protein ARALYDRAFT_898737 [Arabidopsis lyrata subsp. lyrata] gi 297331354 gb EFH61773.1  hypothetical protein ARALYDRAFT_898737 [Arabidopsis lyrata subsp. lyrata]                                                                                                                                                                                                                                                                                                                                                              | 204 | 204 | 1.00E-115 | 100.0 | 98.5 | 100.0 | hypothetical protein ARALYDRAFT_898737                                             | gbpln | Arabidopsis lyrata   | AT3G22630.1   Symbols: PBD1, PRCGB   20S proteasome beta subunit D1   chr3:8009709-8010774 REVERSE LENGTH=204                                                                                                                                                                    | 204 | 204 | 1.00E-116 | 100.0 | 97.5 | 99.5 |
| Rsa1.0_00181.1.g7768.t1 | gb EOA32748.1  hypothetical protein CARUB_v10016053mg [Capsella rubella]                                                                                                                                                                                                                                                                                                                                                                                                                                                                                         | 206 | 203 | 1.00E-79  | 98.5  | 76.2 | 84.0  | hypothetical protein CARUB_v10016053mg                                             | gbpln | Capsella rubella     | AT3G22620.1   Symbols:   Bifunctional inhibitor/lipid-transfer protein/seed storage 2S albumin superfamily protein   chr3:8008615-8009415 FORWARD LENGTH=203                                                                                                                     | 206 | 203 | 1.00E-81  | 98.5  | 82.0 | 89.8 |
| Rsa1.0_00181.1.g7769.t1 | gb EOA22856.1  hypothetical protein CARUB_v10003595mg [Capsella rubella]                                                                                                                                                                                                                                                                                                                                                                                                                                                                                         | 135 | 141 | 2.00E-43  | 104.4 | 74.1 | 84.4  | hypothetical protein CARUB_v10003595mg                                             | gbpln | Capsella rubella     | AT4G10910.1   Symbols:   unknown protein; Has 30201 Blast hits to 17322 proteins in 780 species: Archae - 12; Bacteria - 1396; Metazoa - 17338; Fungi - 3422; Plants - 5037; Viruses - 0; Other Eukaryotes - 2996 (source: NCBI BLINK)   chr4:6696933-6697343 FORWARD LENGTH=136 | 135 | 136 | 1.00E-43  | 100.7 | 71.9 | 79.3 |
| Rsa1.0_00181.1.g7770.t1 | ref NP_566712.1  bifunctional inhibitor/lipid-transfer protein/seed storage 2S albumin-like protein [Arabidopsis thaliana] gi 1194292 dbj BAB01475.1  unnamed protein product [Arabidopsis thaliana] gi 15010698 gb AAK74008.1  AT3g22600/F16J14.17 [Arabidopsis thaliana] gi 18958062 gb AAL79604.1  AT3g22600/F16J14.17 [Arabidopsis thaliana] gi 84778474 dbj BAE73264.1  xylogen like protein 8 [Arabidopsis thaliana] gi 332643136 gb AEE76657.1  bifunctional inhibitor/lipid-transfer protein/seed storage 2S albumin-like protein [Arabidopsis thaliana] | 170 | 170 | 2.00E-65  | 100.0 | 80.6 | 85.9  | bifunctional inhibitor/lipid-transfer protein/seed storage 2S albumin-like protein | gbpln | Arabidopsis thaliana | AT3G22600.1   Symbols:   Bifunctional inhibitor/lipid-transfer protein/seed storage 2S albumin superfamily protein   chr3:8006711-8007397 REVERSE LENGTH=170                                                                                                                     | 170 | 170 | 6.00E-68  | 100.0 | 80.6 | 85.9 |

|                         |                                                                                                                                                                                                                                                                                                                                                                                                                                                                                                       |     |     |           |       |      |      |                                                        |       |                      |                                                                                                                                                                                                                                                                                                                                                                                                                                                                                                                                           |     |     |           |       |      |      |
|-------------------------|-------------------------------------------------------------------------------------------------------------------------------------------------------------------------------------------------------------------------------------------------------------------------------------------------------------------------------------------------------------------------------------------------------------------------------------------------------------------------------------------------------|-----|-----|-----------|-------|------|------|--------------------------------------------------------|-------|----------------------|-------------------------------------------------------------------------------------------------------------------------------------------------------------------------------------------------------------------------------------------------------------------------------------------------------------------------------------------------------------------------------------------------------------------------------------------------------------------------------------------------------------------------------------------|-----|-----|-----------|-------|------|------|
| Rsa1.0_00181.1.g7771.t1 | refNP_188895.1   GCN5-related N-acetyltransferase (GNAT) family protein [Arabidopsis thaliana]<br>gi11994288[dbj]BAB01471.1   alanine acetyl transferase-like protein [Arabidopsis thaliana]<br>gi124301058[gb]ABN04781.1   At3g22560 [Arabidopsis thaliana]<br>gi332643132[gb]AEE76653.1   GCN5-related N-acetyltransferase (GNAT) family protein [Arabidopsis thaliana]                                                                                                                             | 171 | 175 | 3.00E-77  | 102.3 | 80.7 | 88.9 | GCN5-related N-acetyltransferase (GNAT) family protein | gbpln | Arabidopsis thaliana | AT3G22560.1   Symbols:   Acyl-CoA N-acyltransferases (NAT) superfamily protein   chr3:7998915-7999442 REVERSE LENGTH=175                                                                                                                                                                                                                                                                                                                                                                                                                  | 171 | 175 | 1.00E-79  | 102.3 | 80.7 | 88.9 |
| Rsa1.0_00181.1.g7772.t1 | gb EOA31246.1   hypothetical protein CARUB_v10014416mg [Capsella rubella]                                                                                                                                                                                                                                                                                                                                                                                                                             | 262 | 263 | 1.00E-112 | 100.4 | 83.6 | 87.0 | hypothetical protein CARUB_v10014416mg                 | gbpln | Capsella rubella     | AT3G22550.1   Symbols:   Protein of unknown function (DUF581)   chr3:7991827-7992805 REVERSE LENGTH=267<br>AT3G22530.1   Symbols:   unknown protein; FUNCTIONS IN: molecular_function unknown; INVOLVED IN: biological_process unknown; LOCATED IN: plasma membrane; EXPRESSED IN: 25 plant structures; EXPRESSED DURING: 15 growth stages;                                                                                                                                                                                               | 262 | 267 | 1.00E-112 | 101.9 | 83.6 | 87.4 |
| Rsa1.0_00181.1.g7773.t1 | ref XP_002885507.1   hypothetical protein ARALYDRAFT_479772 [Arabidopsis lyrata subsp. lyrata]<br>gi297331347[gb]EFH61766.1   hypothetical protein ARALYDRAFT_479772 [Arabidopsis lyrata subsp. lyrata]                                                                                                                                                                                                                                                                                               | 159 | 166 | 4.00E-62  | 104.4 | 83.6 | 88.1 | hypothetical protein ARALYDRAFT_479772                 | gbpln | Arabidopsis lyrata   | BEST Arabidopsis thaliana protein match is: unknown protein (TAIR:AT4G14830.1); Has 77 Blast hits to 77 proteins in 12 species: Archae - 0; Bacteria - 0; Metazoa - 0; Fungi - 0; Plants - 77; Viruses - 0; Other Eukaryotes - 0 (source: NCBI BLink).   chr3:7977774-7978370 REVERSE LENGTH=198                                                                                                                                                                                                                                          | 159 | 198 | 2.00E-63  | 124.5 | 84.3 | 88.1 |
| Rsa1.0_00181.1.g7774.t1 | refNP_188891.1   uncharacterized protein [Arabidopsis thaliana]<br>gi11994284[dbj]BAB01467.1   unnamed protein product [Arabidopsis thaliana]<br>gi17381094[gb]AAL36359.1   unknown protein [Arabidopsis thaliana]<br>gi20259295[gb]AAM14383.1   unknown protein [Arabidopsis thaliana]<br>gi332643128[gb]AEE76649.1   uncharacterized protein AT3G22520 [Arabidopsis thaliana]                                                                                                                       | 595 | 600 | 0         | 100.8 | 80.3 | 87.6 | uncharacterized protein                                | gbpln | Arabidopsis thaliana | AT3G22520.1   Symbols:   unknown protein; INVOLVED IN: biological_process unknown; LOCATED IN: chloroplast stroma, chloroplast, chloroplast envelope; EXPRESSED IN: 24 plant structures; EXPRESSED DURING: 13 growth stages; BEST Arabidopsis thaliana protein match is: unknown protein (TAIR:AT4G14840.1); Has 717 Blast hits to 703 proteins in 179 species: Archae - 14; Bacteria - 134; Metazoa - 141; Fungi - 74; Plants - 209; Viruses - 0; Other Eukaryotes - 145 (source: NCBI BLink).   chr3:7974984-7977406 FORWARD LENGTH=600 | 595 | 600 | 0         | 100.8 | 80.3 | 87.6 |
| Rsa1.0_00181.1.g7775.t1 | ref XP_002885521.1   hypothetical protein ARALYDRAFT_318995 [Arabidopsis lyrata subsp. lyrata]<br>gi297331361[gb]EFH61780.1   hypothetical protein ARALYDRAFT_318995 [Arabidopsis lyrata subsp. lyrata]                                                                                                                                                                                                                                                                                               | 448 | 383 | 5.00E-81  | 85.5  | 43.5 | 53.6 | hypothetical protein ARALYDRAFT_318995                 | gbpln | Arabidopsis lyrata   | AT3G22720.1   Symbols:   F-box and associated interaction domains-containing protein   chr3:8028961-8030097 REVERSE LENGTH=378                                                                                                                                                                                                                                                                                                                                                                                                            | 448 | 378 | 4.00E-76  | 84.4  | 41.1 | 52.5 |
| Rsa1.0_00181.1.g7776.t1 | ref NP_680377.1   Transcription factor IIS protein [Arabidopsis thaliana]<br>gi332007413[gb]AED94796.1   Transcription factor IIS protein [Arabidopsis thaliana]                                                                                                                                                                                                                                                                                                                                      | 69  | 233 | 1.00E-13  | 337.7 | 63.8 | 76.8 | Transcription factor IIS protein                       | gbpln | Arabidopsis thaliana | AT5G42325.1   Symbols:   Transcription factor IIS protein   chr5:16924102-16924851 REVERSE LENGTH=233                                                                                                                                                                                                                                                                                                                                                                                                                                     | 69  | 233 | 2.00E-16  | 337.7 | 63.8 | 76.8 |
| Rsa1.0_00181.1.g7777.t1 | gb EOA22909.1   hypothetical protein CARUB_v10003642mg [Capsella rubella]                                                                                                                                                                                                                                                                                                                                                                                                                             | 329 | 282 | 1.00E-18  | 85.7  | 23.7 | 32.8 | hypothetical protein CARUB_v10003642mg                 | gbpln | Capsella rubella     | AT5G22690.1   Symbols:   AGL93   AGAMOUS-like 93   chr5:9483251-9484120 REVERSE LENGTH=289                                                                                                                                                                                                                                                                                                                                                                                                                                                | 329 | 289 | 3.00E-14  | 87.8  | 23.7 | 32.8 |
| Rsa1.0_00181.1.g7778.t1 | ref NP_181801.1   F-box protein [Arabidopsis thaliana]<br>gi4512680[gb]AAD21734.1   hypothetical protein [Arabidopsis thaliana]<br>gi330255067[gb]AEC10161.1   F-box protein [Arabidopsis thaliana]                                                                                                                                                                                                                                                                                                   | 74  | 737 | 2.00E-16  | 995.9 | 63.5 | 74.3 | F-box protein                                          | gbpln | Arabidopsis thaliana | AT2G42730.1   Symbols:   F-box family protein   chr2:17787454-17791218 REVERSE LENGTH=737                                                                                                                                                                                                                                                                                                                                                                                                                                                 | 74  | 737 | 4.00E-19  | 995.9 | 63.5 | 74.3 |
| Rsa1.0_00181.1.g7779.t1 | gb EOA32037.1   hypothetical protein CARUB_v10015281mg [Capsella rubella]                                                                                                                                                                                                                                                                                                                                                                                                                             | 320 | 323 | 1.00E-126 | 100.9 | 78.1 | 84.7 | hypothetical protein CARUB_v10015281mg                 | gbpln | Capsella rubella     | AT3G22450.1   Symbols:   Ribosomal L18p/L5e family protein   chr3:7962443-7963378 FORWARD LENGTH=311                                                                                                                                                                                                                                                                                                                                                                                                                                      | 320 | 311 | 1.00E-117 | 97.2  | 76.3 | 82.8 |
| Rsa1.0_00181.1.g7780.t1 | ref NP_566709.1   FRIGIDA-like protein [Arabidopsis thaliana]<br>gi9293881[dbj]BAB01784.1   hydroxyproline-rich glycoprotein [Arabidopsis thaliana]<br>gi15292673[gb]AAK92705.1   unknown protein [Arabidopsis thaliana]<br>gi20465585[gb]AAM20275.1   putative hydroxyproline-rich glycoprotein [Arabidopsis thaliana]<br>gi21537354[gb]AAM61695.1   hydroxyproline-rich glycoprotein-like protein [Arabidopsis thaliana]<br>gi332643119[gb]AEE76640.1   FRIGIDA-like protein [Arabidopsis thaliana] | 530 | 532 | 0         | 100.4 | 86.0 | 89.6 | FRIGIDA-like protein                                   | gbpln | Arabidopsis thaliana | AT3G22440.1   Symbols:   FRIGIDA-like protein   chr3:7959854-7961886 FORWARD LENGTH=532                                                                                                                                                                                                                                                                                                                                                                                                                                                   | 530 | 532 | 0         | 100.4 | 86.0 | 89.6 |

|                         |                                                                                                                                                                                                                                                                                                                                                                                                                                                                                                                                                                                                                                                                                                                                                              |      |      |           |       |      |      |                                                     |       |                      |                                                                                                                                                                                                                                                                                                                                                  |      |      |           |       |      |      |
|-------------------------|--------------------------------------------------------------------------------------------------------------------------------------------------------------------------------------------------------------------------------------------------------------------------------------------------------------------------------------------------------------------------------------------------------------------------------------------------------------------------------------------------------------------------------------------------------------------------------------------------------------------------------------------------------------------------------------------------------------------------------------------------------------|------|------|-----------|-------|------|------|-----------------------------------------------------|-------|----------------------|--------------------------------------------------------------------------------------------------------------------------------------------------------------------------------------------------------------------------------------------------------------------------------------------------------------------------------------------------|------|------|-----------|-------|------|------|
| Rsa1.0_00181.1.g7781.t1 | gb ABD64939.1  hypothetical protein 24.t00017 [Brassica oleracea]                                                                                                                                                                                                                                                                                                                                                                                                                                                                                                                                                                                                                                                                                            | 143  | 442  | 3.00E-32  | 309.1 | 51.0 | 55.9 | hypothetical protein 24.t00017                      | gbpln | Brassica oleracea    | AT2G13770.1   Symbols:   CONTAINS InterPro DOMAIN/s: Putative harbinger transposase-derived nuclease (InterPro:IPR006912); Has 451 Blast hits to 352 proteins in 33 species: Archae - 0; Bacteria - 0; Metazoa - 28; Fungi - 8; Plants - 388; Viruses - 0; Other Eukaryotes - 27 (source: NCBI BLink).   chr2:5736603-5737847 FORWARD LENGTH=343 | 143  | 343  | 3.00E-19  | 239.9 | 28.7 | 33.6 |
| Rsa1.0_00181.1.g7782.t1 | gb ABD64940.1  hypothetical protein 24.t00018 [Brassica oleracea]                                                                                                                                                                                                                                                                                                                                                                                                                                                                                                                                                                                                                                                                                            | 250  | 380  | 3.00E-70  | 152.0 | 56.8 | 67.6 | hypothetical protein 24.t00018                      | gbpln | Brassica oleracea    | AT3G47680.1   Symbols:   DNA binding   chr3:17577483-17578391 REVERSE LENGTH=302                                                                                                                                                                                                                                                                 | 250  | 302  | 4.00E-54  | 120.8 | 48.0 | 65.6 |
| Rsa1.0_00181.1.g7783.t1 | # # # # # # # # # #                                                                                                                                                                                                                                                                                                                                                                                                                                                                                                                                                                                                                                                                                                                                          | #    | #    | #         | #     | #    | #    | -                                                   | ----  | ----                 | #                                                                                                                                                                                                                                                                                                                                                | #    | #    | #         | #     | #    |      |
| Rsa1.0_00181.1.g7784.t2 | ref NP_850625.1  Imidazoleglycerol-phosphate dehydratase 1 [Arabidopsis thaliana] gi 462273 sp P34047.1 HIS7A_ARATH RecName: Full=Imidazoleglycerol-phosphate dehydratase 1; Short=IGPD 1 gi 437213 gb AA93196.1  imidazoleglycerolphosphate dehydratase [Arabidopsis thaliana] gi 9293878 dbj BAB01781.1  imidazoleglycerol-phosphate dehydratase [Arabidopsis thaliana] gi 21593529 gb AM65496.1  imidazoleglycerol-phosphate dehydratase [Arabidopsis thaliana] gi 26452644 dbj BAC43405.1  putative imidazoleglycerolphosphate dehydratase [Arabidopsis thaliana] gi 51971000 dbj BAD44192.1  imidazoleglycerolphosphate dehydratase [Arabidopsis thaliana] gi 332643116 gb AEI76637.1  Imidazoleglycerol-phosphate dehydratase 1 [Arabidopsis thaliana] | 311  | 270  | 1.00E-117 | 86.8  | 71.1 | 75.6 | Imidazoleglycerol-phosphate dehydratase 1           | gbpln | Arabidopsis thaliana | AT3G22425.2   Symbols: IGPD   imidazoleglycerol-phosphate dehydratase   chr3:7951110-7952853 FORWARD LENGTH=270                                                                                                                                                                                                                                  | 311  | 270  | 1.00E-120 | 86.8  | 71.1 | 75.6 |
| Rsa1.0_00182.1.g7785.t4 | gb AAG00239.1 AC002130.4 F1N21.6 [Arabidopsis thaliana]                                                                                                                                                                                                                                                                                                                                                                                                                                                                                                                                                                                                                                                                                                      | 834  | 901  | 0         | 108.0 | 51.1 | 64.1 | F1N21.6                                             | gbpln | Arabidopsis thaliana | #                                                                                                                                                                                                                                                                                                                                                | #    | #    | #         | #     | #    |      |
| Rsa1.0_00182.1.g7786.t1 | gb EOA14157.1  hypothetical protein CARUB_v10027303mg [Capsella rubella]                                                                                                                                                                                                                                                                                                                                                                                                                                                                                                                                                                                                                                                                                     | 160  | 152  | 1.00E-21  | 95.0  | 35.6 | 56.3 | hypothetical protein CARUB_v10027303mg              | gbpln | Capsella rubella     | AT5G33393.1   Symbols:   unknown protein; LOCATED IN: chloroplast; Has 30201 Blast hits to 17322 proteins in 780 species: Archae - 12; Bacteria - 1396; Metazoa - 17338; Fungi - 3422; Plants - 5037; Viruses - 0; Other Eukaryotes - 2996 (source: NCBI BLink).   chr5:12656430-12658588 REVERSE LENGTH=435                                     | 160  | 435  | 1.00E-14  | 271.9 | 27.5 | 36.3 |
| Rsa1.0_00182.1.g7787.t1 | gb ABH07409.1  putative pol polyprotein [Brassica oleracea var. botrytis]                                                                                                                                                                                                                                                                                                                                                                                                                                                                                                                                                                                                                                                                                    | 564  | 1239 | 0         | 219.7 | 69.0 | 82.4 | putative pol polyprotein                            | gbpln | Brassica oleracea    | AT4G23160.1   Symbols: CRK8   cysteine-rich RLK (RECEPTOR-like protein kinase) 8   chr4:12129485-12134086 FORWARD LENGTH=1262                                                                                                                                                                                                                    | 564  | 1262 | 2.00E-96  | 223.8 | 31.9 | 47.9 |
| Rsa1.0_00182.1.g7788.t1 | ref XP_002871454.1  hypothetical protein ARALYDRAFT_487941 [Arabidopsis lyrata subsp. lyrata] gi 297317291 gb EFH47713.1  hypothetical protein ARALYDRAFT_487941 [Arabidopsis lyrata subsp. lyrata]                                                                                                                                                                                                                                                                                                                                                                                                                                                                                                                                                          | 208  | 223  | 6.00E-68  | 107.2 | 73.6 | 87.5 | hypothetical protein ARALYDRAFT_487941              | gbpln | Arabidopsis lyrata   | AT5G11090.1   Symbols:   serine-rich protein-related   chr5:3524796-3525449 FORWARD LENGTH=217                                                                                                                                                                                                                                                   | 208  | 217  | 6.00E-70  | 104.3 | 73.1 | 85.1 |
| Rsa1.0_00182.1.g7789.t1 | # # # # # # # # # #                                                                                                                                                                                                                                                                                                                                                                                                                                                                                                                                                                                                                                                                                                                                          | #    | #    | #         | #     | #    | #    | -                                                   | ----  | ----                 | #                                                                                                                                                                                                                                                                                                                                                | #    | #    | #         | #     | #    |      |
| Rsa1.0_00182.1.g7790.t1 | gb EOA19862.1  hypothetical protein CARUB_v10000113mg [Capsella rubella]                                                                                                                                                                                                                                                                                                                                                                                                                                                                                                                                                                                                                                                                                     | 1041 | 1049 | 0         | 100.8 | 86.6 | 92.0 | hypothetical protein CARUB_v10000113mg              | gbpln | Capsella rubella     | AT5G11110.1   Symbols: SPS1, ATSPS2F, KNS2, SP2F   sucrose phosphate synthase 2F   chr5:3536426-3540901 FORWARD LENGTH=1047                                                                                                                                                                                                                      | 1041 | 1047 | 0         | 100.6 | 85.5 | 91.0 |
| Rsa1.0_00182.1.g7791.t1 | ref NP_197913.4  putative glycosyltransferase [Arabidopsis thaliana] gi 292630776 sp Q3E7Q9.2 GLYT6_ARATH RecName: Full=Probable glycosyltransferase At5g25310 gi 332006042 gb AED93425.1  putative glycosyltransferase [Arabidopsis thaliana]                                                                                                                                                                                                                                                                                                                                                                                                                                                                                                               | 482  | 480  | 0         | 99.6  | 78.2 | 87.3 | putative glycosyltransferase                        | gbpln | Arabidopsis thaliana | AT5G25310.1   Symbols:   Exostosin family protein   chr5:8784820-8787235 FORWARD LENGTH=480                                                                                                                                                                                                                                                      | 482  | 480  | 0         | 99.6  | 78.2 | 87.3 |
| Rsa1.0_00182.1.g7792.t1 | ref NP_197914.1  ACT domain-containing protein [Arabidopsis thaliana] gi 332006043 gb AED93426.1  ACT domain-containing protein [Arabidopsis thaliana]                                                                                                                                                                                                                                                                                                                                                                                                                                                                                                                                                                                                       | 498  | 500  | 0         | 100.4 | 90.2 | 94.4 | ACT domain-containing protein                       | gbpln | Arabidopsis thaliana | AT5G25320.1   Symbols:   ACT-like superfamily protein   chr5:8787403-8789530 REVERSE LENGTH=500                                                                                                                                                                                                                                                  | 498  | 500  | 0         | 100.4 | 90.2 | 94.4 |
| Rsa1.0_00182.1.g7793.t1 | gb AAD29058.1  putative non-LTR retroelement reverse transcriptase [Arabidopsis thaliana]                                                                                                                                                                                                                                                                                                                                                                                                                                                                                                                                                                                                                                                                    | 1750 | 1229 | 0         | 70.2  | 28.3 | 39.7 | putative non-LTR retroelement reverse transcriptase | gbpln | Arabidopsis thaliana | AT4G11590.1   Symbols:   F-box associated ubiquitination effector family protein   chr4:7008603-7009796 FORWARD LENGTH=397                                                                                                                                                                                                                       | 1750 | 397  | 7.00E-61  | 22.7  | 8.6  | 11.4 |

|                         |                                                                                                                                                                                                                                                                                                                                                                                                                                                                                |      |      |           |       |      |      |                                                 |       |                      |                                                                                                                                                                                                                                                                         |      |     |           |       |      |      |
|-------------------------|--------------------------------------------------------------------------------------------------------------------------------------------------------------------------------------------------------------------------------------------------------------------------------------------------------------------------------------------------------------------------------------------------------------------------------------------------------------------------------|------|------|-----------|-------|------|------|-------------------------------------------------|-------|----------------------|-------------------------------------------------------------------------------------------------------------------------------------------------------------------------------------------------------------------------------------------------------------------------|------|-----|-----------|-------|------|------|
| Rsa1.0_00182.1.g7794.t2 | refXP_002872157.1   hypothetical protein ARALYDRAFT_489384 [Arabidopsis lyrata subsp. lyrata] gi 297317994 gb EFH48416.1   hypothetical protein ARALYDRAFT_489384 [Arabidopsis lyrata subsp. lyrata]                                                                                                                                                                                                                                                                           | 343  | 366  | 1.00E-166 | 106.7 | 84.0 | 90.4 | hypothetical protein ARALYDRAFT_489384          | gbpln | Arabidopsis lyrata   | AT5G25330.1   Symbols:   Core-2/1-branching beta-1,6-N-acetylglucosaminyltransferase family protein   chr5:8791564-8792664 FORWARD LENGTH=366                                                                                                                           | 343  | 366 | 1.00E-166 | 106.7 | 83.1 | 89.2 |
| Rsa1.0_00182.1.g7795.t1 | refXP_002872158.1   predicted protein [Arabidopsis lyrata subsp. lyrata] gi 297317995 gb EFH48417.1   predicted protein [Arabidopsis lyrata subsp. lyrata]                                                                                                                                                                                                                                                                                                                     | 210  | 208  | 2.00E-89  | 99.0  | 78.6 | 84.8 | predicted protein                               | gbpln | Arabidopsis lyrata   | AT5G25340.1   Symbols:   Ubiquitin-like superfamily protein   chr5:8793238-8794211 FORWARD LENGTH=208                                                                                                                                                                   | 210  | 208 | 2.00E-91  | 99.0  | 78.6 | 84.3 |
| Rsa1.0_00182.1.g7796.t1 | ref NP_197917.1  EIN3-binding F-box protein 2 [Arabidopsis thaliana] gi 75325708 sp Q708Y0.1 EBF2_ARATH RecName: Full=EIN3-binding F-box protein 2 gi 38705081 gb AAR27072.1  EIN3-binding F-box protein 2 [Arabidopsis thaliana] gi 40641627 emb CAE75865.1  F-box protein [Arabidopsis thaliana] gi 110735710 dbj BAE99835.1  leucine-rich repeats containing protein [Arabidopsis thaliana] gi 332006046 gb AED93429.1  EIN3-binding F-box protein 2 [Arabidopsis thaliana] | 638  | 623  | 0         | 97.6  | 81.8 | 89.8 | EIN3-binding F-box protein 2                    | gbpln | Arabidopsis thaliana | AT5G25350.1   Symbols: EBF2   EIN3-binding F box protein 2   chr5:8794842-8796882 REVERSE LENGTH=623                                                                                                                                                                    | 638  | 623 | 0         | 97.6  | 81.8 | 89.8 |
| Rsa1.0_00182.1.g7797.t2 | ref NP_197919.1  phospholipase D zeta [Arabidopsis thaliana] gi 20138932 sp P58766.1 PLDZ1_ARATH RecName: Full=Phospholipase D zeta; Short=AtPLDzeta; Short=PLD zeta gi 332006049 gb AED93432.1  phospholipase D zeta [Arabidopsis thaliana]                                                                                                                                                                                                                                   | 822  | 820  | 0         | 99.8  | 87.2 | 93.7 | phospholipase D zeta                            | gbpln | Arabidopsis thaliana | AT5G25370.1   Symbols: PLDALPHA3   phospholipase D alpha 3   chr5:8804240-8807547 REVERSE LENGTH=820                                                                                                                                                                    | 822  | 820 | 0         | 99.8  | 87.2 | 93.7 |
| Rsa1.0_00182.1.g7798.t1 | refXP_002874259.1   predicted protein [Arabidopsis lyrata subsp. lyrata] gi 297320096 gb EFH50518.1   predicted protein [Arabidopsis lyrata subsp. lyrata]                                                                                                                                                                                                                                                                                                                     | 602  | 547  | 0         | 90.9  | 78.4 | 82.9 | predicted protein                               | gbpln | Arabidopsis lyrata   | AT1G65550.1   Symbols:   Xanthine/uracil permease family protein   chr1:24367694-24370800 REVERSE LENGTH=541                                                                                                                                                            | 602  | 541 | 0         | 89.9  | 76.9 | 82.1 |
| Rsa1.0_00182.1.g7799.t1 | gb EOA22417.1  hypothetical protein CARUB_v10003060mg, partial [Capsella rubella]                                                                                                                                                                                                                                                                                                                                                                                              | 671  | 658  | 0         | 98.1  | 89.1 | 93.4 | hypothetical protein CARUB_v10003060mg, partial | gbpln | Capsella rubella     | AT5G25430.1   Symbols:   HCO3-transporter family   chr5:8851251-8854259 FORWARD LENGTH=671                                                                                                                                                                              | 671  | 671 | 0         | 100.0 | 89.0 | 93.1 |
| Rsa1.0_00182.1.g7800.t1 | ref NP_197928.1  uncharacterized protein [Arabidopsis thaliana] gi 14423450 gb AAK62407.1 AF386962.1 Unknown protein [Arabidopsis thaliana] gi 30725566 gb AAP37805.1  At5g25460 [Arabidopsis thaliana] gi 332006063 gb AED93446.1  uncharacterized protein AT5G25460 [Arabidopsis thaliana]                                                                                                                                                                                   | 367  | 369  | 0         | 100.5 | 91.8 | 96.7 | uncharacterized protein                         | gbpln | Arabidopsis thaliana | AT5G25460.1   Symbols:   Protein of unknown function, DUF642   chr5:8863430-8865394 FORWARD LENGTH=369                                                                                                                                                                  | 367  | 369 | 0         | 100.5 | 91.8 | 96.7 |
| Rsa1.0_00182.1.g7801.t1 | gb AAM62513.1  DNA methyltransferase PMT1-like protein [Arabidopsis thaliana]                                                                                                                                                                                                                                                                                                                                                                                                  | 403  | 383  | 0         | 95.0  | 80.6 | 86.4 | DNA methyltransferase PMT1-like protein         | gbpln | Arabidopsis thaliana | AT5G25480.1   Symbols: DNMT2, AtDNMT2   DNA methyltransferase-2   chr5:8870069-8872199 REVERSE LENGTH=383                                                                                                                                                               | 403  | 383 | 0         | 95.0  | 80.1 | 86.1 |
| Rsa1.0_00182.1.g7802.t1 | ref NP_197931.1  Ran BP2/NZF zinc finger-like protein [Arabidopsis thaliana] gi 26452848 dbj BAC43503.1  unknown protein [Arabidopsis thaliana] gi 28973315 gb AA063982.1  unknown protein [Arabidopsis thaliana] gi 332006071 gb AED93454.1  Ran BP2/NZF zinc finger-like protein [Arabidopsis thaliana]                                                                                                                                                                      | 169  | 170  | 5.00E-64  | 100.6 | 82.8 | 87.0 | Ran BP2/NZF zinc finger-like protein            | gbpln | Arabidopsis thaliana | AT5G25490.1   Symbols:   Ran BP2/NZF zinc finger-like superfamily protein   chr5:8876639-8877339 FORWARD LENGTH=170                                                                                                                                                     | 169  | 170 | 2.00E-66  | 100.6 | 82.8 | 87.0 |
| Rsa1.0_00182.1.g7803.t1 | refXP_002872168.1   hypothetical protein ARALYDRAFT_910610 [Arabidopsis lyrata subsp. lyrata] gi 297318005 gb EFH48427.1   hypothetical protein ARALYDRAFT_910610 [Arabidopsis lyrata subsp. lyrata]                                                                                                                                                                                                                                                                           | 414  | 420  | 0         | 101.4 | 81.9 | 89.6 | hypothetical protein ARALYDRAFT_910610          | gbpln | Arabidopsis lyrata   | AT5G25500.1   Symbols:   unknown protein; Has 1807 Blast hits to 1807 proteins in 277 species: Archaea - 0; Bacteria - 0; Metazoa - 736; Fungi - 347; Plants - 385; Viruses - 0; Other Eukaryotes - 339 (source: NCBI BLINK).   chr5:8881118-8882380 FORWARD LENGTH=420 | 414  | 420 | 0         | 101.4 | 80.2 | 88.4 |
| Rsa1.0_00182.1.g7804.t1 | gb EOA20475.1  hypothetical protein CARUB_v10000786mg [Capsella rubella]                                                                                                                                                                                                                                                                                                                                                                                                       | 493  | 501  | 0         | 101.6 | 86.4 | 91.7 | hypothetical protein CARUB_v10000786mg          | gbpln | Capsella rubella     | AT5G25510.1   Symbols:   Protein phosphatase 2A regulatory B subunit family protein   chr5:8882728-8884325 REVERSE LENGTH=500                                                                                                                                           | 493  | 500 | 0         | 101.4 | 85.2 | 89.0 |
| Rsa1.0_00182.1.g7805.t1 | gb EOA19885.1  hypothetical protein CARUB_v10000133mg [Capsella rubella]                                                                                                                                                                                                                                                                                                                                                                                                       | 1096 | 1004 | 0         | 91.6  | 63.0 | 69.8 | hypothetical protein CARUB_v10000133mg          | gbpln | Capsella rubella     | AT5G25520.2   Symbols:   SPOC domain / Transcription elongation factor S-II protein   chr5:8865550-8889484 FORWARD LENGTH=997                                                                                                                                           | 1096 | 997 | 0         | 91.0  | 61.0 | 67.7 |

|                         |                                                                                                                                                                                                                                                                                                                                                                                                                                             |      |      |           |       |      |      |                                                 |       |                      |                                                                                                                                                                                                                                                                                                                                       |      |     |           |       |      |      |
|-------------------------|---------------------------------------------------------------------------------------------------------------------------------------------------------------------------------------------------------------------------------------------------------------------------------------------------------------------------------------------------------------------------------------------------------------------------------------------|------|------|-----------|-------|------|------|-------------------------------------------------|-------|----------------------|---------------------------------------------------------------------------------------------------------------------------------------------------------------------------------------------------------------------------------------------------------------------------------------------------------------------------------------|------|-----|-----------|-------|------|------|
| Rsa1.0_00182.1.g7806.t1 | refXP_002874268.1  hypothetical protein ARALYDRAFT_910614 [Arabidopsis lyrata subsp. lyrata] gi 297320105 gb EFH50527.1                                                                                                                                                                                                                                                                                                                     | 175  | 182  | 3.00E-48  | 104.0 | 69.7 | 80.0 | hypothetical protein ARALYDRAFT_910614          | gbpln | Arabidopsis lyrata   | AT5G25540.1   Symbols: CID6   CTC-interacting domain 6   chr5:8891770-8892362 REVERSE LENGTH=175                                                                                                                                                                                                                                      | 175  | 175 | 6.00E-46  | 100.0 | 62.3 | 73.7 |
| Rsa1.0_00182.1.g7807.t1 | gb EOA22854.1  hypothetical protein CARUB_v10003584mg [Capsella rubella]                                                                                                                                                                                                                                                                                                                                                                    | 421  | 429  | 0         | 101.9 | 80.0 | 84.6 | hypothetical protein CARUB_v10003584mg          | gbpln | Capsella rubella     | AT5G25550.1   Symbols:   Leucine-rich repeat (LRR) family protein   chr5:8894179-8895480 FORWARD LENGTH=433                                                                                                                                                                                                                           | 421  | 433 | 0         | 102.9 | 78.1 | 83.1 |
| Rsa1.0_00182.1.g7808.t1 | ref NP_568475.1  uncharacterized protein [Arabidopsis thaliana] gi 42573476 ref NP_974834.1  uncharacterized protein [Arabidopsis thaliana] gi 21592308 gb AAM64259.1  unknown [Arabidopsis thaliana] gi 94807656 gb ABF47125.1  At5g25570 [Arabidopsis thaliana] gi 332006083 gb AED93466.1  uncharacterized protein AT5G25570 [Arabidopsis thaliana] gi 332006084 gb AED93467.1  uncharacterized protein AT5G25570 [Arabidopsis thaliana] | 98   | 99   | 4.00E-39  | 101.0 | 82.7 | 92.9 | uncharacterized protein                         | gbpln | Arabidopsis thaliana | AT5G25570.2   Symbols:   unknown protein; Has 35333 Blast hits to 34131 proteins in 2444 species: Archae - 798; Bacteria - 22429; Metazoa - 974; Fungi - 991; Plants - 531; Viruses - 0; Other Eukaryotes - 9610 (source: NCBI BLINK).   chr5:8901832-8902891 FORWARD LENGTH=99                                                       | 98   | 99  | 7.00E-42  | 101.0 | 82.7 | 92.9 |
| Rsa1.0_00182.1.g7809.t1 | refXP_002872175.1  hypothetical protein ARALYDRAFT_489418 [Arabidopsis lyrata subsp. lyrata] gi 297318012 gb EFH48434.1  hypothetical protein ARALYDRAFT_489418 [Arabidopsis lyrata subsp. lyrata]                                                                                                                                                                                                                                          | 421  | 402  | 1.00E-151 | 95.5  | 71.0 | 81.2 | hypothetical protein ARALYDRAFT_489418          | gbpln | Arabidopsis lyrata   | AT5G25580.1   Symbols:   BEST Arabidopsis thaliana protein match is: DDT domain superfamily (TAIR-AT1G18950.1); Has 178 Blast hits to 178 proteins in 75 species: Archae - 0; Bacteria - 4; Metazoa - 51; Fungi - 33; Plants - 60; Viruses - 1; Other Eukaryotes - 29 (source: NCBI BLINK).   chr5:8903550-8906108 FORWARD LENGTH=405 | 421  | 405 | 1.00E-149 | 96.2  | 68.4 | 77.7 |
| Rsa1.0_00182.1.g7810.t1 | #                                                                                                                                                                                                                                                                                                                                                                                                                                           | #    | #    | #         | #     | #    | #    | -                                               | ----  | ----                 | #                                                                                                                                                                                                                                                                                                                                     | #    | #   | #         | #     | #    |      |
| Rsa1.0_00182.1.g7811.t1 | gb AAQ57584.1  BURP domain-containing protein [Brassica napus]                                                                                                                                                                                                                                                                                                                                                                              | 387  | 387  | 0         | 100.0 | 96.9 | 97.9 | BURP domain-containing protein                  | gbpln | Brassica napus       | AT5G25610.1   Symbols: RD22, ATRD22   BURP domain-containing protein   chr5:8914498-8916684 REVERSE LENGTH=392                                                                                                                                                                                                                        | 387  | 392 | 0         | 101.3 | 87.6 | 92.0 |
| Rsa1.0_00182.1.g7812.t1 | gb EOA33837.1  hypothetical protein CARUB_v10021318mg, partial [Capsella rubella]                                                                                                                                                                                                                                                                                                                                                           | 134  | 290  | 2.00E-20  | 216.4 | 43.3 | 57.5 | hypothetical protein CARUB_v10021318mg, partial | gbpln | Capsella rubella     | AT4G04650.1   Symbols:   RNA-directed DNA polymerase (reverse transcriptase)-related family protein   chr4:2353989-2355213 REVERSE LENGTH=332                                                                                                                                                                                         | 134  | 332 | 5.00E-15  | 247.8 | 29.9 | 39.6 |
| Rsa1.0_00182.1.g7813.t1 | gb AAG50806.1 AC079281.8 unknown protein [Arabidopsis thaliana]                                                                                                                                                                                                                                                                                                                                                                             | 1027 | 1213 | 0         | 118.1 | 34.4 | 50.0 | unknown protein                                 | gbpln | Arabidopsis thaliana | AT1G43760.1   Symbols:   DNase I-like superfamily protein   chr1:16528880-16531065 REVERSE LENGTH=626                                                                                                                                                                                                                                 | 1027 | 626 | 3.00E-65  | 61.0  | 14.3 | 23.0 |
| Rsa1.0_00183.1.g7814.t1 | refXP_002881770.1  hypothetical protein ARALYDRAFT_903451 [Arabidopsis lyrata subsp. lyrata] gi 297327609 gb EFH58029.1  hypothetical protein ARALYDRAFT_903451 [Arabidopsis lyrata subsp. lyrata]                                                                                                                                                                                                                                          | 198  | 491  | 3.00E-86  | 248.0 | 91.9 | 93.9 | hypothetical protein ARALYDRAFT_903451          | gbpln | Arabidopsis lyrata   | AT2G41370.1   Symbols: BOP2   Ankyrin repeat family protein / BTB/POZ domain-containing protein   chr2:17238019-17240203 REVERSE LENGTH=491                                                                                                                                                                                           | 198  | 491 | 3.00E-88  | 248.0 | 89.4 | 91.4 |
| Rsa1.0_00183.1.g7815.t2 | refXP_002879921.1  glutaredoxin family protein [Arabidopsis lyrata subsp. lyrata] gi 297325760 gb EFH56180.1  glutaredoxin family protein [Arabidopsis lyrata subsp. lyrata]                                                                                                                                                                                                                                                                | 170  | 408  | 6.00E-37  | 240.0 | 44.1 | 53.5 | glutaredoxin family protein                     | gbpln | Arabidopsis lyrata   | AT2G41330.1   Symbols:   Glutaredoxin family protein   chr2:17227067-17228275 FORWARD LENGTH=402                                                                                                                                                                                                                                      | 170  | 402 | 2.00E-38  | 236.5 | 43.5 | 52.4 |
| Rsa1.0_00183.1.g7816.t1 | gb EOA27848.1  hypothetical protein CARUB_v10024006mg [Capsella rubella]                                                                                                                                                                                                                                                                                                                                                                    | 210  | 225  | 4.00E-95  | 107.1 | 88.1 | 91.9 | hypothetical protein CARUB_v10024006mg          | gbpln | Capsella rubella     | AT2G41310.1   Symbols: ATRR3, ARR8, RR3   response regulator 3   chr2:17222280-17223536 FORWARD LENGTH=225                                                                                                                                                                                                                            | 210  | 225 | 3.00E-95  | 107.1 | 89.0 | 92.9 |
| Rsa1.0_00183.1.g7817.t1 | refXP_002881767.1  hypothetical protein ARALYDRAFT_321816 [Arabidopsis lyrata subsp. lyrata] gi 297327606 gb EFH58026.1  hypothetical protein ARALYDRAFT_321816 [Arabidopsis lyrata subsp. lyrata]                                                                                                                                                                                                                                          | 369  | 370  | 0         | 100.3 | 88.1 | 95.1 | hypothetical protein ARALYDRAFT_321816          | gbpln | Arabidopsis lyrata   | AT2G41300.1   Symbols: SSL1   stricoidine synthase-like 1   chr2:17214312-17216292 REVERSE LENGTH=394                                                                                                                                                                                                                                 | 369  | 394 | 1.00E-171 | 106.8 | 77.0 | 81.6 |
| Rsa1.0_00183.1.g7818.t1 | gb ABD65170.1  hypothetical protein 40.t00057 [Brassica oleracea]                                                                                                                                                                                                                                                                                                                                                                           | 295  | 255  | 3.00E-66  | 86.4  | 45.4 | 59.7 | hypothetical protein 40.t00057                  | gbpln | Brassica oleracea    | AT3G47680.1   Symbols:   DNA binding   chr3:17577483-17578391 REVERSE LENGTH=302                                                                                                                                                                                                                                                      | 295  | 302 | 8.00E-52  | 102.4 | 41.7 | 60.7 |
| Rsa1.0_00183.1.g7819.t1 | refXP_002881766.1  hypothetical protein ARALYDRAFT_483200 [Arabidopsis lyrata subsp. lyrata] gi 297327605 gb EFH58025.1  hypothetical protein ARALYDRAFT_483200 [Arabidopsis lyrata subsp. lyrata]                                                                                                                                                                                                                                          | 375  | 376  | 0         | 100.3 | 83.5 | 89.9 | hypothetical protein ARALYDRAFT_483200          | gbpln | Arabidopsis lyrata   | AT2G41290.1   Symbols: SSL2   stricoidine synthase-like 2   chr2:17210599-17212904 REVERSE LENGTH=376                                                                                                                                                                                                                                 | 375  | 376 | 1.00E-180 | 100.3 | 81.6 | 89.6 |

|                         |                                                                                                                                                                                                                                                                                                     |     |     |           |       |      |      |                                        |       |                      |                                                                                                                                                                                                                                                                                                                                                                                                                                                                                           |     |     |           |       |      |      |
|-------------------------|-----------------------------------------------------------------------------------------------------------------------------------------------------------------------------------------------------------------------------------------------------------------------------------------------------|-----|-----|-----------|-------|------|------|----------------------------------------|-------|----------------------|-------------------------------------------------------------------------------------------------------------------------------------------------------------------------------------------------------------------------------------------------------------------------------------------------------------------------------------------------------------------------------------------------------------------------------------------------------------------------------------------|-----|-----|-----------|-------|------|------|
| Rsa1.0_00183.1.g7820.t1 | refXP_002879917.1   hypothetical protein ARALYDRAFT_903435 [Arabidopsis lyrata subsp. lyrata] gi 297325756 gb EFH56176.1   hypothetical protein ARALYDRAFT_903435 [Arabidopsis lyrata subsp. lyrata]                                                                                                | 246 | 272 | 1.00E-15  | 110.6 | 43.5 | 48.4 | hypothetical protein ARALYDRAFT_903435 | gbpln | Arabidopsis lyrata   | #                                                                                                                                                                                                                                                                                                                                                                                                                                                                                         | #   | #   | #         | #     | #    | #    |
| Rsa1.0_00183.1.g7821.t1 | #                                                                                                                                                                                                                                                                                                   | #   | #   | #         | #     | #    | #    | -                                      | ----  | ----                 | #                                                                                                                                                                                                                                                                                                                                                                                                                                                                                         | #   | #   | #         | #     | #    | #    |
| Rsa1.0_00183.1.g7822.t1 | #                                                                                                                                                                                                                                                                                                   | #   | #   | #         | #     | #    | #    | -                                      | ----  | ----                 | #                                                                                                                                                                                                                                                                                                                                                                                                                                                                                         | #   | #   | #         | #     | #    | #    |
| Rsa1.0_00183.1.g7823.t1 | gb EOA28546.1  hypothetical protein CARUB_v10024770mg [Capsella rubella]                                                                                                                                                                                                                            | 772 | 772 | 0         | 100.0 | 93.7 | 96.5 | hypothetical protein CARUB_v10024770mg | gbpln | Capsella rubella     | AT2G41210.1   Symbols: PIP5K5   phosphatidylinositol- 4-phosphate 5-kinase 5   chr2:17173627-17176575 FORWARD LENGTH=772                                                                                                                                                                                                                                                                                                                                                                  | 772 | 772 | 0         | 100.0 | 93.4 | 96.8 |
| Rsa1.0_00183.1.g7824.t1 | gb EOA26862.1  hypothetical protein CARUB_v10022954mg [Capsella rubella]                                                                                                                                                                                                                            | 525 | 538 | 0         | 102.5 | 84.6 | 90.1 | hypothetical protein CARUB_v10022954mg | gbpln | Capsella rubella     | AT2G41190.1   Symbols:   Transmembrane amino acid transporter family protein   chr2:17167561-17170145 REVERSE LENGTH=536                                                                                                                                                                                                                                                                                                                                                                  | 525 | 536 | 0         | 102.1 | 84.2 | 90.5 |
| Rsa1.0_00183.1.g7825.t1 | refXP_002879913.1   hypothetical protein ARALYDRAFT_483187 [Arabidopsis lyrata subsp. lyrata] gi 297325752 gb EFH56172.1   hypothetical protein ARALYDRAFT_483187 [Arabidopsis lyrata subsp. lyrata]                                                                                                | 140 | 140 | 3.00E-55  | 100.0 | 81.4 | 87.1 | hypothetical protein ARALYDRAFT_483187 | gbpln | Arabidopsis lyrata   | AT2G41180.1   Symbols:   VQ motif-containing protein   chr2:17165242-17165667 FORWARD LENGTH=141                                                                                                                                                                                                                                                                                                                                                                                          | 140 | 141 | 5.00E-55  | 100.7 | 80.0 | 86.4 |
| Rsa1.0_00183.1.g7826.t2 | gb EOA27338.1  hypothetical protein CARUB_v10023454mg [Capsella rubella]                                                                                                                                                                                                                            | 390 | 373 | 1.00E-166 | 95.6  | 73.6 | 82.6 | hypothetical protein CARUB_v10023454mg | gbpln | Capsella rubella     | AT2G41170.1   Symbols:   F-box family protein   chr2:17159310-17160845 REVERSE LENGTH=371                                                                                                                                                                                                                                                                                                                                                                                                 | 390 | 371 | 1.00E-164 | 95.1  | 75.4 | 83.1 |
| Rsa1.0_00183.1.g7827.t1 | ref NP_850346.1  Ubiquitin-associated (UBA) protein [Arabidopsis thaliana] gi 19347840 gb AL86004.1  unknown protein [Arabidopsis thaliana] gi 22136896 gb AAM91727.1  unknown protein [Arabidopsis thaliana] gi 330254845 gb AEC09939.1  Ubiquitin-associated (UBA) protein [Arabidopsis thaliana] | 290 | 287 | 1.00E-137 | 99.0  | 85.2 | 91.7 | Ubiquitin-associated (UBA) protein     | gbpln | Arabidopsis thaliana | AT2G41160.1   Symbols:   Ubiquitin-associated (UBA) protein   chr2:17156314-17158687 REVERSE LENGTH=287                                                                                                                                                                                                                                                                                                                                                                                   | 290 | 287 | 1.00E-139 | 99.0  | 85.2 | 91.7 |
| Rsa1.0_00183.1.g7828.t1 | refXP_002879912.1   hypothetical protein ARALYDRAFT_483184 [Arabidopsis lyrata subsp. lyrata] gi 297325751 gb EFH56171.1   hypothetical protein ARALYDRAFT_483184 [Arabidopsis lyrata subsp. lyrata]                                                                                                | 393 | 405 | 0         | 103.1 | 80.9 | 89.3 | hypothetical protein ARALYDRAFT_483184 | gbpln | Arabidopsis lyrata   | AT2G41150.2   Symbols:   unknown protein; FUNCTIONS IN: molecular_function unknown; INVOLVED IN: biological_process unknown; LOCATED IN: endomembrane system; EXPRESSED IN: leaf; BEST Arabidopsis thaliana protein match is: unknown protein (TAIR:AT3G56750.1); Has 127 Blast hits to 127 proteins in 16 species: Archae - 0; Bacteria - 0; Metazoa - 0; Fungi - 0; Plants - 117; Viruses - 0; Other Eukaryotes - 10 (source: NCBI BLlink);   chr2:17153851-17155633 FORWARD LENGTH=404 | 393 | 404 | 0         | 102.8 | 79.4 | 88.0 |
| Rsa1.0_00183.1.g7829.t1 | gb EOA26799.1  hypothetical protein CARUB_v10022894mg [Capsella rubella]                                                                                                                                                                                                                            | 592 | 576 | 0         | 97.3  | 91.6 | 93.8 | hypothetical protein CARUB_v10022894mg | gbpln | Capsella rubella     | AT2G41140.1   Symbols: CRK1, ATCRK1, ATCBK3   CDPK-related kinase 1   chr2:17150492-17153378 FORWARD LENGTH=576                                                                                                                                                                                                                                                                                                                                                                           | 592 | 576 | 0         | 97.3  | 90.9 | 93.9 |
| Rsa1.0_00183.1.g7830.t1 | #                                                                                                                                                                                                                                                                                                   | #   | #   | #         | #     | #    | #    | -                                      | ----  | ----                 | #                                                                                                                                                                                                                                                                                                                                                                                                                                                                                         | #   | #   | #         | #     | #    | #    |
| Rsa1.0_00183.1.g7831.t1 | refXP_002879910.1   basic helix-loop-helix family protein [Arabidopsis lyrata subsp. lyrata] gi 297325749 gb EFH56169.1   basic helix-loop-helix family protein [Arabidopsis lyrata subsp. lyrata]                                                                                                  | 253 | 253 | 1.00E-117 | 100.0 | 93.3 | 97.2 | basic helix-loop-helix family protein  | gbpln | Arabidopsis lyrata   | AT2G41130.1   Symbols:   basic helix-loop-helix (bHLH) DNA-binding superfamily protein   chr2:17143360-17144686 FORWARD LENGTH=253                                                                                                                                                                                                                                                                                                                                                        | 253 | 253 | 1.00E-119 | 100.0 | 92.9 | 97.2 |
| Rsa1.0_00183.1.g7832.t1 | gb EOA26357.1  hypothetical protein CARUB_v10022804mg [Capsella rubella]                                                                                                                                                                                                                            | 690 | 650 | 0         | 94.2  | 78.4 | 84.9 | hypothetical protein CARUB_v10022804mg | gbpln | Capsella rubella     | AT2G41080.1   Symbols:   Tetratricopeptide repeat (TPR)-like superfamily protein   chr2:17132857-17134554 FORWARD LENGTH=565                                                                                                                                                                                                                                                                                                                                                              | 690 | 565 | 0         | 81.9  | 69.6 | 75.2 |
| Rsa1.0_00183.1.g7833.t1 | refXP_002879906.1   hypothetical protein ARALYDRAFT_483175 [Arabidopsis lyrata subsp. lyrata] gi 297325745 gb EFH56165.1   hypothetical protein ARALYDRAFT_483175 [Arabidopsis lyrata subsp. lyrata]                                                                                                | 280 | 262 | 1.00E-110 | 93.6  | 78.2 | 82.9 | hypothetical protein ARALYDRAFT_483175 | gbpln | Arabidopsis lyrata   | AT2G41070.2   Symbols: EEL, ATBZIP12, DPBF4   Basic-leucine zipper (bZIP) transcription factor family protein   chr2:17131249-17132208 FORWARD LENGTH=262                                                                                                                                                                                                                                                                                                                                 | 280 | 262 | 1.00E-111 | 93.6  | 78.9 | 83.2 |
| Rsa1.0_00183.1.g7834.t1 | refXP_002881756.1   PQ-loop repeat family protein [Arabidopsis lyrata subsp. lyrata] gi 297327595 gb EFH58015.1   PQ-loop repeat family protein [Arabidopsis lyrata subsp. lyrata]                                                                                                                  | 383 | 380 | 0         | 99.2  | 86.2 | 91.9 | PQ-loop repeat family protein          | gbpln | Arabidopsis lyrata   | AT2G41050.1   Symbols:   PQ-loop repeat family protein / transmembrane family protein   chr2:17123388-17125622 REVERSE LENGTH=376                                                                                                                                                                                                                                                                                                                                                         | 383 | 376 | 0         | 98.2  | 84.3 | 89.8 |



|                         |                                                                                                                                                                                                                                                                                                                                                                                                                                                                                                                                                                                                                                                                                                                                                                                                                                                                                                                                                        |      |     |           |       |      |      |                                                               |       |                      |                                                                                                                                                                                                                                        |      |     |           |       |      |      |
|-------------------------|--------------------------------------------------------------------------------------------------------------------------------------------------------------------------------------------------------------------------------------------------------------------------------------------------------------------------------------------------------------------------------------------------------------------------------------------------------------------------------------------------------------------------------------------------------------------------------------------------------------------------------------------------------------------------------------------------------------------------------------------------------------------------------------------------------------------------------------------------------------------------------------------------------------------------------------------------------|------|-----|-----------|-------|------|------|---------------------------------------------------------------|-------|----------------------|----------------------------------------------------------------------------------------------------------------------------------------------------------------------------------------------------------------------------------------|------|-----|-----------|-------|------|------|
| Rsa1.0_00183.1.g7835.t1 | ref NP_181632.5  DHHC-type zinc finger-containing protein [Arabidopsis thaliana]<br>gi 374095470 sp O80685.3 ZDHC4_ARAT H RecName: Full=Probable S-acyltransferase At2g40990; AltName: Full=Probable palmitoyltransferase At2g40990; AltName: Full=Zinc finger DHHC domain-containing protein At2g40990<br>gi 330254816 gb AEC09910.1  probable S-acyltransferase [Arabidopsis thaliana]<br>gb AAN72059.1  unknown protein [Arabidopsis thaliana]<br>gi 30725514 gb AAP37779.1  At2g40980 [Arabidopsis thaliana]                                                                                                                                                                                                                                                                                                                                                                                                                                       | 394  | 411 | 1.00E-179 | 104.3 | 83.5 | 89.8 | DHHC-type zinc finger-containing protein                      | gbpln | Arabidopsis thaliana | AT2G40990.1   Symbols:   DHHC-type zinc finger family protein   chr2:17105097-17106773 REVERSE LENGTH=411                                                                                                                              | 394  | 411 | 0         | 104.3 | 83.5 | 89.8 |
| Rsa1.0_00183.1.g7836.t2 | ref NP_181630.1  myb family transcription factor [Arabidopsis thaliana]<br>gi 2623311 gb AAB86457.1  unknown protein [Arabidopsis thaliana]<br>gi 18252893 gb AAL62373.1  unknown protein [Arabidopsis thaliana]<br>gi 20197124 gb AAM14927.1  unknown protein [Arabidopsis thaliana]<br>gi 23197780 gb AAN15417.1  unknown protein [Arabidopsis thaliana]<br>gi 330254814 gb AEC09908.1  myb family transcription factor [Arabidopsis thaliana]                                                                                                                                                                                                                                                                                                                                                                                                                                                                                                       | 1329 | 698 | 0         | 52.5  | 45.2 | 48.8 | unknown protein                                               | gbpln | Arabidopsis thaliana | AT2G40980.1   Symbols:   Protein kinase superfamily protein   chr2:17102090-17104443 FORWARD LENGTH=617                                                                                                                                | 1329 | 617 | 0         | 46.4  | 32.7 | 35.3 |
| Rsa1.0_00183.1.g7837.t1 | ref NP_181630.1  myb family transcription factor [Arabidopsis thaliana]<br>gi 2623311 gb AAB86457.1  unknown protein [Arabidopsis thaliana]<br>gi 18252893 gb AAL62373.1  unknown protein [Arabidopsis thaliana]<br>gi 20197124 gb AAM14927.1  unknown protein [Arabidopsis thaliana]<br>gi 23197780 gb AAN15417.1  unknown protein [Arabidopsis thaliana]<br>gi 330254814 gb AEC09908.1  myb family transcription factor [Arabidopsis thaliana]                                                                                                                                                                                                                                                                                                                                                                                                                                                                                                       | 264  | 248 | 2.00E-87  | 93.9  | 75.8 | 81.4 | myb family transcription factor                               | gbpln | Arabidopsis thaliana | AT2G40970.1   Symbols: MYBC1   Homeodomain-like superfamily protein   chr2:17097772-17098518 REVERSE LENGTH=248                                                                                                                        | 264  | 248 | 5.00E-90  | 93.9  | 75.8 | 81.4 |
| Rsa1.0_00184.1.g7838.t1 | #                                                                                                                                                                                                                                                                                                                                                                                                                                                                                                                                                                                                                                                                                                                                                                                                                                                                                                                                                      | #    | #   | #         | #     | #    | #    | -                                                             | ----  | ----                 | #                                                                                                                                                                                                                                      | #    | #   | #         | #     | #    |      |
| Rsa1.0_00184.1.g7839.t1 | ref NP_564190.1  polyketide cyclase/dehydrase and lipid transport-like protein [Arabidopsis thaliana]<br>gi 2829899 gb AAC00607.1  similar to ripening-induced protein, gp AJ001449 2465015 and major#latex protein, gp X91961 1107495 [Arabidopsis thaliana]<br>gi 14517378 gb AAK62580.1  At1g23130/T26J12.10 [Arabidopsis thaliana]<br>gi 15450533 gb AAK96444.1  At1g23130/T26J12.10 [Arabidopsis thaliana]<br>gi 332192222 gb AEE30343.1  polyketide cyclase/dehydrase and lipid transport-like protein [Arabidopsis thaliana]                                                                                                                                                                                                                                                                                                                                                                                                                    | 161  | 160 | 4.00E-52  | 99.4  | 60.2 | 78.3 | polyketide cyclase/dehydrase and lipid transport-like protein | gbpln | Arabidopsis thaliana | AT1G23130.1   Symbols:   Polyketide cyclase/dehydrase and lipid transport superfamily protein   chr1:8200434-8200997 FORWARD LENGTH=160                                                                                                | 161  | 160 | 1.00E-54  | 99.4  | 60.2 | 78.3 |
| Rsa1.0_00184.1.g7840.t1 | gb AAF98181.1 AC000107.4 F17F8.5 [Arabidopsis thaliana]                                                                                                                                                                                                                                                                                                                                                                                                                                                                                                                                                                                                                                                                                                                                                                                                                                                                                                | 389  | 872 | 8.00E-46  | 224.2 | 27.0 | 37.8 | F17F8.5                                                       | gbpln | Arabidopsis thaliana | AT3G24255.1   Symbols:   RNA-directed DNA polymerase (reverse transcriptase)-related family protein   chr3:8789471-8793208 FORWARD LENGTH=746                                                                                          | 389  | 746 | 4.00E-40  | 191.8 | 24.2 | 33.4 |
| Rsa1.0_00184.1.g7841.t3 | ref NP_173724.2  uncharacterized protein [Arabidopsis thaliana]<br>gi 18647878 ref NP_001117336.1  uncharacterized protein [Arabidopsis thaliana]<br>gi 186478780 ref NP_001117337.1  uncharacterized protein [Arabidopsis thaliana]<br>gi 334192781 ref NP_001185068.1  uncharacterized protein [Arabidopsis thaliana]<br>gi 334182783 ref NP_001185069.1  uncharacterized protein [Arabidopsis thaliana]<br>gi 49823472 gb AAT68719.1  hypothetical protein At1g23110 [Arabidopsis thaliana]<br>gi 332192216 gb AEE30337.1  uncharacterized protein AT1G23110 [Arabidopsis thaliana]<br>gi 332192217 gb AEE30338.1  uncharacterized protein AT1G23110 [Arabidopsis thaliana]<br>gi 332192218 gb AEE30339.1  uncharacterized protein AT1G23110 [Arabidopsis thaliana]<br>gi 332192219 gb AEE30340.1  uncharacterized protein AT1G23110 [Arabidopsis thaliana]<br>gi 332192220 gb AEE30341.1  uncharacterized protein AT1G23110 [Arabidopsis thaliana] | 396  | 248 | 1.00E-124 | 62.6  | 55.6 | 57.3 | uncharacterized protein                                       | gbpln | Arabidopsis thaliana | AT1G23110.4   Symbols:   unknown protein; FUNCTIONS IN: molecular function unknown; LOCATED IN: chloroplast; BEST Arabidopsis thaliana protein match is: unknown protein (TAIR:AT1G70900.1).   chr1:8196608-8197665 REVERSE LENGTH=248 | 396  | 248 | 1.00E-126 | 62.6  | 55.6 | 57.3 |

|                         |                                                                                                                                                                                                                                                                                                                                                                                                                                                                     |      |      |           |       |      |      |                                                         |       |                      |                                                                                                                                                                                                                                                                                                                                                                        |      |      |           |       |      |      |
|-------------------------|---------------------------------------------------------------------------------------------------------------------------------------------------------------------------------------------------------------------------------------------------------------------------------------------------------------------------------------------------------------------------------------------------------------------------------------------------------------------|------|------|-----------|-------|------|------|---------------------------------------------------------|-------|----------------------|------------------------------------------------------------------------------------------------------------------------------------------------------------------------------------------------------------------------------------------------------------------------------------------------------------------------------------------------------------------------|------|------|-----------|-------|------|------|
| Rsa1.0_00184.1.g7842.t1 | dbj BAB08714.1  non-LTR retroelement reverse transcriptase-like protein [Arabidopsis thaliana]                                                                                                                                                                                                                                                                                                                                                                      | 581  | 1197 | 1.00E-122 | 206.0 | 46.3 | 59.4 | non-LTR retroelement reverse transcriptase-like protein | gbpln | Arabidopsis thaliana | AT4G29090.1   Symbols:   Ribonuclease H-like superfamily protein   chr4:14333528-14335255 FORWARD LENGTH=575                                                                                                                                                                                                                                                           | 581  | 575  | 3.00E-64  | 99.0  | 29.4 | 45.4 |
| Rsa1.0_00184.1.g7843.t1 | #                                                                                                                                                                                                                                                                                                                                                                                                                                                                   | #    | #    | #         | #     | #    | #    | -                                                       | ----  | ----                 | #                                                                                                                                                                                                                                                                                                                                                                      | #    | #    | #         | #     | #    | #    |
| Rsa1.0_00184.1.g7844.t1 | gb EOA39173.1  hypothetical protein CARUB_v10012133mg [Capsella rubella]                                                                                                                                                                                                                                                                                                                                                                                            | 631  | 631  | 0         | 100.0 | 95.6 | 97.6 | hypothetical protein CARUB_v10012133mg                  | gbpln | Capsella rubella     | AT1G23090.1   Symbols: AST91, SULTR3.3   sulfate transporter 91   chr1:8185238-8188954 REVERSE LENGTH=631                                                                                                                                                                                                                                                              | 631  | 631  | 0         | 100.0 | 94.3 | 97.0 |
| Rsa1.0_00184.1.g7845.t1 | ref NP_001077584.1  auxin efflux carrier component 7 [Arabidopsis thaliana] gi 222423080 dbj BAH19520.1  AT1G23080 [Arabidopsis thaliana] gi 332192213 gb AEE30334.1  auxin efflux carrier component 7 [Arabidopsis thaliana]                                                                                                                                                                                                                                       | 601  | 615  | 0         | 102.3 | 91.0 | 94.3 | auxin efflux carrier component 7                        | gbpln | Arabidopsis thaliana | AT1G23080.3   Symbols: PIN7   Auxin efflux carrier family protein   chr1:8180768-8183406 REVERSE LENGTH=615                                                                                                                                                                                                                                                            | 601  | 615  | 0         | 102.3 | 91.0 | 94.3 |
| Rsa1.0_00184.1.g7846.t1 | #                                                                                                                                                                                                                                                                                                                                                                                                                                                                   | #    | #    | #         | #     | #    | #    | -                                                       | ----  | ----                 | #                                                                                                                                                                                                                                                                                                                                                                      | #    | #    | #         | #     | #    | #    |
| Rsa1.0_00184.1.g7847.t2 | #                                                                                                                                                                                                                                                                                                                                                                                                                                                                   | #    | #    | #         | #     | #    | #    | -                                                       | ----  | ----                 | #                                                                                                                                                                                                                                                                                                                                                                      | #    | #    | #         | #     | #    | #    |
| Rsa1.0_00184.1.g7848.t1 | ref XP_002893258.1  hypothetical protein ARALYDRAFT_472556 [Arabidopsis lyrata subsp. lyrata] gi 297339100 gb EFH69517.1  hypothetical protein ARALYDRAFT_472556 [Arabidopsis lyrata subsp. lyrata]                                                                                                                                                                                                                                                                 | 382  | 364  | 1.00E-101 | 95.3  | 60.7 | 71.2 | hypothetical protein ARALYDRAFT_472556                  | gbpln | Arabidopsis lyrata   | AT1G23060.1   Symbols:   BEST Arabidopsis thaliana protein match is: TPX2 (targeting protein for Xklp2) protein family (TAIR:AT1G70950.1); Has 449 Blast hits to 419 proteins in 98 species: Archae - 0; Bacteria - 40; Metazoa - 139; Fungi - 21; Plants - 158; Viruses - 3; Other Eukaryotes - 88 (source: NCBI BLINK).   chr1:8170946-8172739 REVERSE LENGTH=367    | 382  | 367  | 1.00E-97  | 96.1  | 61.0 | 72.5 |
| Rsa1.0_00184.1.g7849.t1 | ref XP_002867009.1  hydrolase, alpha/beta fold family protein [Arabidopsis lyrata subsp. lyrata] gi 297312845 gb EFH43268.1  hydrolase, alpha/beta fold family protein [Arabidopsis lyrata subsp. lyrata] ref NP_568013.1  uncharacterized protein [Arabidopsis thaliana] gi 11762152 gb AAG40354.1 AF325002.1  AT4g37020 [Arabidopsis thaliana] gi 110736928 dbj BAF00421.1                                                                                        | 317  | 376  | 9.00E-79  | 118.6 | 48.6 | 50.8 | hydrolase, alpha/beta fold family protein               | gbpln | Arabidopsis lyrata   | AT4G36530.2   Symbols:   alpha/beta-Hydrolases superfamily protein   chr4:17240120-17241770 REVERSE LENGTH=378                                                                                                                                                                                                                                                         | 317  | 378  | 4.00E-76  | 119.2 | 47.3 | 50.2 |
| Rsa1.0_00184.1.g7850.t1 | ref NP_568013.1  uncharacterized protein [Arabidopsis thaliana] gi 11762152 gb AAG40354.1 AF325002.1  AT4g37020 [Arabidopsis thaliana] gi 110736928 dbj BAF00421.1  hypothetical protein [Arabidopsis thaliana] gi 332661336 gb AEE86736.1  uncharacterized protein AT4G37020 [Arabidopsis thaliana]                                                                                                                                                                | 124  | 212  | 1.00E-27  | 171.0 | 61.3 | 69.4 | uncharacterized protein                                 | gbpln | Arabidopsis thaliana | AT4G37020.1   Symbols:   BEST Arabidopsis thaliana protein match is: eukaryotic initiation factor 4A-III (TAIR:AT3G19760.1); Has 30201 Blast hits to 17322 proteins in 780 species: Archae - 12; Bacteria - 1396; Metazoa - 17338; Fungi - 3422; Plants - 5037; Viruses - 0; Other Eukaryotes - 2996 (source: NCBI BLINK).   chr4:17445778-17447135 FORWARD LENGTH=212 | 124  | 212  | 2.00E-30  | 171.0 | 61.3 | 69.4 |
| Rsa1.0_00184.1.g7851.t1 | ref NP_001031868.1  14-3-3-like protein GF14 lambda [Arabidopsis thaliana] gi 332004159 gb AED91542.1  14-3-3-like protein GF14 lambda [Arabidopsis thaliana]                                                                                                                                                                                                                                                                                                       | 137  | 246  | 4.00E-18  | 179.6 | 32.1 | 35.0 | 14-3-3-like protein GF14 lambda                         | gbpln | Arabidopsis thaliana | AT5G10450.2   Symbols: GRF6, AFT1, 14-3-3lambda   G-box regulating factor 6   chr5:3284452-3286261 REVERSE LENGTH=246                                                                                                                                                                                                                                                  | 137  | 246  | 1.00E-20  | 179.6 | 32.1 | 35.0 |
| Rsa1.0_00184.1.g7852.t1 | ref NP_564187.1  hydroxyproline-rich glycoprotein family protein [Arabidopsis thaliana] gi 2462823 gb AAB72158.1  unknown [Arabidopsis thaliana] gi 2829907 gb AAC00615.1  Unknown protein [Arabidopsis thaliana] gi 98960877 gb ABF58922.1  At1g23040 [Arabidopsis thaliana] gi 110738822 dbj BAF01334.1  predicted GPI-anchored protein [Arabidopsis thaliana] gi 332192205 gb AEE30326.1  hydroxyproline-rich glycoprotein family protein [Arabidopsis thaliana] | 144  | 144  | 1.00E-38  | 100.0 | 81.3 | 86.8 | hydroxyproline-rich glycoprotein family protein         | gbpln | Arabidopsis thaliana | AT1G23040.1   Symbols:   hydroxyproline-rich glycoprotein family protein   chr1:8165025-8165459 FORWARD LENGTH=144                                                                                                                                                                                                                                                     | 144  | 144  | 3.00E-41  | 100.0 | 81.3 | 86.8 |
| Rsa1.0_00184.1.g7853.t1 | ref XP_002890550.1  armadillo/beta-catenin repeat family protein [Arabidopsis lyrata subsp. lyrata] gi 297336392 gb EFH66809.1  armadillo/beta-catenin repeat family protein [Arabidopsis lyrata subsp. lyrata]                                                                                                                                                                                                                                                     | 599  | 612  | 0         | 102.2 | 85.5 | 92.8 | armadillo/beta-catenin repeat family protein            | gbpln | Arabidopsis lyrata   | AT1G23030.1   Symbols:   ARM repeat superfamily protein   chr1:8156745-8158842 FORWARD LENGTH=612                                                                                                                                                                                                                                                                      | 599  | 612  | 0         | 102.2 | 84.5 | 91.8 |
| Rsa1.0_00184.1.g7854.t1 | gb ADK47027.1  coronatine insensitive 1 [Brassica rapa subsp. chinensis]                                                                                                                                                                                                                                                                                                                                                                                            | 429  | 596  | 0         | 138.9 | 76.0 | 83.9 | coronatine insensitive 1                                | gbpln | Brassica rapa        | AT2G39940.1   Symbols: COI1   RNI-like superfamily protein   chr2:16672848-16675486 REVERSE LENGTH=592                                                                                                                                                                                                                                                                 | 429  | 592  | 1.00E-170 | 138.0 | 71.1 | 80.2 |
| Rsa1.0_00184.1.g7855.t1 | dbj BAB10503.1  retroelement pol polyprotein-like [Arabidopsis thaliana]                                                                                                                                                                                                                                                                                                                                                                                            | 1419 | 1475 | 0         | 103.9 | 59.1 | 73.7 | retroelement pol polyprotein-like                       | gbpln | Arabidopsis thaliana | AT4G23160.1   Symbols: CRK8   cysteine-rich RLK (RECEPTOR-like protein kinase) 8   chr4:12129485-12134086 FORWARD LENGTH=1262                                                                                                                                                                                                                                          | 1419 | 1262 | 0         | 88.9  | 22.1 | 28.3 |
| Rsa1.0_00184.1.g7856.t5 | gb EOA29164.1  hypothetical protein CARUB_v10025431mg [Capsella rubella]                                                                                                                                                                                                                                                                                                                                                                                            | 754  | 312  | 1.00E-108 | 41.4  | 26.4 | 31.4 | hypothetical protein CARUB_v10025431mg                  | gbpln | Capsella rubella     | AT2G27670.1   Symbols:   Domain of unknown function DUF220   chr2:11801568-11802891 REVERSE LENGTH=293                                                                                                                                                                                                                                                                 | 754  | 293  | 1.00E-99  | 38.9  | 24.8 | 29.3 |
| Rsa1.0_00184.1.g7857.t1 | gb EOA39878.1  hypothetical protein CARUB_v10008554mg, partial [Capsella rubella]                                                                                                                                                                                                                                                                                                                                                                                   | 84   | 641  | 1.00E-11  | 763.1 | 45.2 | 51.2 | hypothetical protein CARUB_v10008554mg, partial         | gbpln | Capsella rubella     | AT1G23170.2   Symbols:   Protein of unknown function DUF2359, transmembrane   chr1:8212724-8215516 FORWARD LENGTH=615                                                                                                                                                                                                                                                  | 84   | 615  | 7.00E-13  | 732.1 | 41.7 | 48.8 |

|                         |                                                                                                                                                                                                                                                                                                                                                                                                                                                                                                                                                                                                                                                                                                                                                                                                                                                                                                                                                                                                                                                                                                                                           |      |     |           |       |      |      |                                                 |       |                      |                                                                                                                                    |      |     |           |       |      |      |
|-------------------------|-------------------------------------------------------------------------------------------------------------------------------------------------------------------------------------------------------------------------------------------------------------------------------------------------------------------------------------------------------------------------------------------------------------------------------------------------------------------------------------------------------------------------------------------------------------------------------------------------------------------------------------------------------------------------------------------------------------------------------------------------------------------------------------------------------------------------------------------------------------------------------------------------------------------------------------------------------------------------------------------------------------------------------------------------------------------------------------------------------------------------------------------|------|-----|-----------|-------|------|------|-------------------------------------------------|-------|----------------------|------------------------------------------------------------------------------------------------------------------------------------|------|-----|-----------|-------|------|------|
| Rsa1.0_00184.1.g7858.t1 | gb EOA38639.1  hypothetical protein CARUB_v10010544mg.partial [Capsella rubella]                                                                                                                                                                                                                                                                                                                                                                                                                                                                                                                                                                                                                                                                                                                                                                                                                                                                                                                                                                                                                                                          | 112  | 154 | 2.00E-58  | 137.5 | 97.3 | 99.1 | hypothetical protein CARUB_v10010544mg.partial  | gbpln | Capsella rubella     | AT1G22840.1   Symbols: CYTC-1, ATCYTO-A   CYTOCHROME G-1   chr1:8079384-8080286 FORWARD LENGTH=114                                 | 112  | 114 | 3.00E-59  | 101.8 | 94.6 | 97.3 |
| Rsa1.0_00185.1.g7859.t1 | ref XP_002888096.1  hypothetical protein ARALYDRAFT_475199 [Arabidopsis lyrata subsp. lyrata] gi 297333937 gb EFH64355.1  hypothetical protein ARALYDRAFT_475199 [Arabidopsis lyrata subsp. lyrata]                                                                                                                                                                                                                                                                                                                                                                                                                                                                                                                                                                                                                                                                                                                                                                                                                                                                                                                                       | 425  | 425 | 0         | 100.0 | 93.6 | 95.8 | hypothetical protein ARALYDRAFT_475199          | gbpln | Arabidopsis lyrata   | AT1G61240.4   Symbols:   Protein of unknown function (DUF707)   chr1:22582537-22585050 FORWARD LENGTH=425                          | 425  | 425 | 0         | 100.0 | 92.5 | 95.8 |
| Rsa1.0_00185.1.g7860.t1 | emb CAC19877.1  long chain acyl-CoA synthetase [Brassica napus]                                                                                                                                                                                                                                                                                                                                                                                                                                                                                                                                                                                                                                                                                                                                                                                                                                                                                                                                                                                                                                                                           | 131  | 693 | 5.00E-46  | 529.0 | 68.7 | 77.9 | long chain acyl-CoA synthetase                  | gbpln | Brassica napus       | AT1G77590.1   Symbols: LACS9   long chain acyl-CoA synthetase 9   chr1:29148501-29151776 REVERSE LENGTH=691                        | 131  | 691 | 2.00E-38  | 527.5 | 54.2 | 71.0 |
| Rsa1.0_00185.1.g7861.t1 | ref NP_176320.1  secretory carrier-associated membrane protein 3 [Arabidopsis thaliana] gi 75185088 sp O9M5P2.1 SCAM3_ARATH RecName: Full=Secretory carrier-associated membrane protein 3; Short=AtSC3; Short=Secretory carrier membrane protein 3 gi 7109228 gb AAF36686.1 AF225920.1 secretory carrier membrane protein [Arabidopsis thaliana] gi 15027863 gb AAK76462.1  putative secretory carrier membrane protein [Arabidopsis thaliana] gi 19310673 gb AAL85067.1  putative secretory carrier membrane protein [Arabidopsis thaliana] gi 21555163 gb AAM63793.1  secretory carrier membrane protein [Arabidopsis thaliana] gi 332195690 gb AEE33811.1  secretory carrier-associated membrane protein 3 [Arabidopsis thaliana] ref NP_176328.1  putative FBD-associated F-box protein [Arabidopsis thaliana] gi 75219848 sp O64787.1 FBD4_ARATH RecName: Full=Putative FBD-associated F-box protein At1g61330 gi 3056597 gb AAC13908.1 AAC13908 T1F9.18 [Arabidopsis thaliana] gi 332195700 gb AEE33821.1  putative FBD-associated F-box protein [Arabidopsis thaliana]                                                             | 292  | 289 | 1.00E-152 | 99.0  | 90.4 | 94.9 | secretory carrier-associated membrane protein 3 | gbpln | Arabidopsis thaliana | AT1G61250.1   Symbols: SC3   secretory carrier 3   chr1:22586035-22588664 FORWARD LENGTH=289                                       | 292  | 289 | 1.00E-155 | 99.0  | 90.4 | 94.9 |
| Rsa1.0_00185.1.g7862.t1 | ref XP_002888090.1  F-box family protein [Arabidopsis lyrata subsp. lyrata] gi 297333931 gb EFH64349.1  F-box family protein [Arabidopsis lyrata subsp. lyrata] ref NP_564775.1  protein S-domain-1 29 [Arabidopsis thaliana] gi 75099194 sp O64782.1 SD129_ARATH RecName: Full=G-type lectin S-receptor-like serine/threonine-protein kinase SD1-29; AltName: Full=S-domain-1 (SD1) receptor kinase 29; Short=SD1-29; Flags: Precursor gi 3056592 gb AAC13903.1 AAC13903 T1F9.13 [Arabidopsis thaliana] gi 19699075 gb AAL9005.1  At1g61380/T1F9.13 [Arabidopsis thaliana] gi 23309469 gb AAN18204.1  At1g61380/T1F9.13 [Arabidopsis thaliana] gi 332195708 gb AEE33829.1  G-type lectin S-receptor-like serine/threonine-protein kinase SD1-29 [Arabidopsis thaliana] ref XP_002888077.1  hypothetical protein ARALYDRAFT_475164 [Arabidopsis lyrata subsp. lyrata] gi 297333918 gb EFH64336.1  hypothetical protein ARALYDRAFT_475164 [Arabidopsis lyrata subsp. lyrata] ref XP_002886526.1  ABC1 family protein [Arabidopsis lyrata subsp. lyrata] gi 297332367 gb EFH62785.1  ABC1 family protein [Arabidopsis lyrata subsp. lyrata] | 398  | 447 | 1.00E-102 | 112.3 | 51.8 | 68.1 | putative FBD-associated F-box protein           | gbpln | Arabidopsis thaliana | AT1G61330.1   Symbols:   FBD, F-box and Leucine Rich Repeat domains containing protein   chr1:22622975-22624527 FORWARD LENGTH=447 | 398  | 447 | 1.00E-104 | 112.3 | 51.8 | 68.1 |
| Rsa1.0_00185.1.g7863.t1 | ref XP_002888090.1  F-box family protein [Arabidopsis lyrata subsp. lyrata] gi 297333931 gb EFH64349.1  F-box family protein [Arabidopsis lyrata subsp. lyrata] ref NP_564775.1  protein S-domain-1 29 [Arabidopsis thaliana] gi 75099194 sp O64782.1 SD129_ARATH RecName: Full=G-type lectin S-receptor-like serine/threonine-protein kinase SD1-29; AltName: Full=S-domain-1 (SD1) receptor kinase 29; Short=SD1-29; Flags: Precursor gi 3056592 gb AAC13903.1 AAC13903 T1F9.13 [Arabidopsis thaliana] gi 19699075 gb AAL9005.1  At1g61380/T1F9.13 [Arabidopsis thaliana] gi 23309469 gb AAN18204.1  At1g61380/T1F9.13 [Arabidopsis thaliana] gi 332195708 gb AEE33829.1  G-type lectin S-receptor-like serine/threonine-protein kinase SD1-29 [Arabidopsis thaliana] ref XP_002888077.1  hypothetical protein ARALYDRAFT_475164 [Arabidopsis lyrata subsp. lyrata] gi 297333918 gb EFH64336.1  hypothetical protein ARALYDRAFT_475164 [Arabidopsis lyrata subsp. lyrata] ref XP_002886526.1  ABC1 family protein [Arabidopsis lyrata subsp. lyrata] gi 297332367 gb EFH62785.1  ABC1 family protein [Arabidopsis lyrata subsp. lyrata] | 182  | 186 | 1.00E-65  | 102.2 | 75.8 | 86.8 | F-box family protein                            | gbpln | Arabidopsis lyrata   | AT1G61340.1   Symbols:   F-box family protein   chr1:22628526-22629741 FORWARD LENGTH=185                                          | 182  | 185 | 4.00E-68  | 101.6 | 76.4 | 86.3 |
| Rsa1.0_00185.1.g7864.t2 | ref XP_002888090.1  F-box family protein [Arabidopsis lyrata subsp. lyrata] gi 297333931 gb EFH64349.1  F-box family protein [Arabidopsis lyrata subsp. lyrata] ref NP_564775.1  protein S-domain-1 29 [Arabidopsis thaliana] gi 75099194 sp O64782.1 SD129_ARATH RecName: Full=G-type lectin S-receptor-like serine/threonine-protein kinase SD1-29; AltName: Full=S-domain-1 (SD1) receptor kinase 29; Short=SD1-29; Flags: Precursor gi 3056592 gb AAC13903.1 AAC13903 T1F9.13 [Arabidopsis thaliana] gi 19699075 gb AAL9005.1  At1g61380/T1F9.13 [Arabidopsis thaliana] gi 23309469 gb AAN18204.1  At1g61380/T1F9.13 [Arabidopsis thaliana] gi 332195708 gb AEE33829.1  G-type lectin S-receptor-like serine/threonine-protein kinase SD1-29 [Arabidopsis thaliana] ref XP_002888077.1  hypothetical protein ARALYDRAFT_475164 [Arabidopsis lyrata subsp. lyrata] gi 297333918 gb EFH64336.1  hypothetical protein ARALYDRAFT_475164 [Arabidopsis lyrata subsp. lyrata] ref XP_002886526.1  ABC1 family protein [Arabidopsis lyrata subsp. lyrata] gi 297332367 gb EFH62785.1  ABC1 family protein [Arabidopsis lyrata subsp. lyrata] | 1306 | 805 | 0         | 61.6  | 49.1 | 54.3 | protein S-domain-1 29                           | gbpln | Arabidopsis thaliana | AT1G61380.1   Symbols: SD1-29   S-domain-1 29   chr1:22646277-22649401 REVERSE LENGTH=805                                          | 1306 | 805 | 0         | 61.6  | 49.1 | 54.3 |
| Rsa1.0_00185.1.g7865.t1 | ref XP_002888077.1  hypothetical protein ARALYDRAFT_475164 [Arabidopsis lyrata subsp. lyrata] gi 297333918 gb EFH64336.1  hypothetical protein ARALYDRAFT_475164 [Arabidopsis lyrata subsp. lyrata] ref XP_002886526.1  ABC1 family protein [Arabidopsis lyrata subsp. lyrata] gi 297332367 gb EFH62785.1  ABC1 family protein [Arabidopsis lyrata subsp. lyrata]                                                                                                                                                                                                                                                                                                                                                                                                                                                                                                                                                                                                                                                                                                                                                                         | 417  | 417 | 0         | 100.0 | 87.3 | 93.8 | hypothetical protein ARALYDRAFT_475164          | gbpln | Arabidopsis lyrata   | AT1G61630.1   Symbols: ATENT7, ENT7   equilibrative nucleoside transporter 7   chr1:22744207-22746111 FORWARD LENGTH=417           | 417  | 417 | 0         | 100.0 | 86.6 | 93.5 |
| Rsa1.0_00185.1.g7866.t1 | ref XP_002886526.1  ABC1 family protein [Arabidopsis lyrata subsp. lyrata] gi 297332367 gb EFH62785.1  ABC1 family protein [Arabidopsis lyrata subsp. lyrata]                                                                                                                                                                                                                                                                                                                                                                                                                                                                                                                                                                                                                                                                                                                                                                                                                                                                                                                                                                             | 577  | 619 | 0         | 107.3 | 75.9 | 87.3 | ABC1 family protein                             | gbpln | Arabidopsis lyrata   | AT1G61640.1   Symbols:   Protein kinase superfamily protein   chr1:22746629-22749053 REVERSE LENGTH=621                            | 577  | 621 | 0         | 107.6 | 75.0 | 86.7 |

|                         |                                                                                                                                                                                                                                                                                                                                                                                                               |      |      |           |        |      |      |                                                                   |       |                      |                                                                                                                                        |      |      |           |       |      |      |
|-------------------------|---------------------------------------------------------------------------------------------------------------------------------------------------------------------------------------------------------------------------------------------------------------------------------------------------------------------------------------------------------------------------------------------------------------|------|------|-----------|--------|------|------|-------------------------------------------------------------------|-------|----------------------|----------------------------------------------------------------------------------------------------------------------------------------|------|------|-----------|-------|------|------|
| Rsa1.0_00185.1.g7867.t1 | gb AAF18538.1 AC006551.24 Very similar to retrotransposon reverse transcriptase [Arabidopsis thaliana]                                                                                                                                                                                                                                                                                                        | 97   | 1231 | 5.00E-15  | 1269.1 | 50.5 | 67.0 | Very similar to retrotransposon reverse transcriptase             | gbpln | Arabidopsis thaliana | #                                                                                                                                      | #    | #    | #         | #     | #    | #    |
| Rsa1.0_00185.1.g7868.t1 | dbj BAB03186.1 En/Spm transposon protein-like [Arabidopsis thaliana]<br>ref NP_564782.1 transcription factor bHLH112 [Arabidopsis thaliana]<br>gi 75306605 sp Q94JL3.1 BH112_ARATH<br>RefName: Full=Transcription factor bHLH112; AltName: Full=Basic helix-loop-helix protein 112; Short=AbHLH112; Short=bHLH 112; AltName: Full=Transcription factor EN 64; AltName: Full=bHLH transcription factor bHLH112 | 909  | 1516 | 5.00E-79  | 166.8  | 21.9 | 32.6 | En/Spm transposon protein-like                                    | gbpln | Arabidopsis thaliana | #                                                                                                                                      | #    | #    | #         | #     | #    | #    |
| Rsa1.0_00185.1.g7869.t1 | gi 14190499 gb AAK55730.1 AF380649.1<br>At1g61660/T13M11.21 [Arabidopsis thaliana]<br>gi 21360529 gb AAM47380.1 <br>At1g61660/T13M11.21 [Arabidopsis thaliana]<br>gi 332195746 gb AEE33867.1 transcription factor bHLH112 [Arabidopsis thaliana]                                                                                                                                                              | 534  | 393  | 1.00E-167 | 73.6   | 57.5 | 63.1 | transcription factor bHLH112                                      | gbpln | Arabidopsis thaliana | AT1G61660.1   Symbols:   basic helix-loop-helix (bHLH) DNA-binding superfamily protein   chr1:22754003-22756171 REVERSE LENGTH=393     | 534  | 393  | 1.00E-170 | 73.6  | 57.5 | 63.1 |
| Rsa1.0_00185.1.g7870.t1 | #                                                                                                                                                                                                                                                                                                                                                                                                             | #    | #    | #         | #      | #    | -    | ----                                                              | ----  | #                    | #                                                                                                                                      | #    | #    | #         | #     | #    | #    |
| Rsa1.0_00185.1.g7871.t1 | gb AAT06463.1 At3g44205 [Arabidopsis thaliana]                                                                                                                                                                                                                                                                                                                                                                | 92   | 277  | 8.00E-13  | 301.1  | 37.0 | 44.6 | At3g44205                                                         | gbpln | Arabidopsis thaliana | #                                                                                                                                      | #    | #    | #         | #     | #    | #    |
| Rsa1.0_00185.1.g7872.t1 | #                                                                                                                                                                                                                                                                                                                                                                                                             | #    | #    | #         | #      | #    | -    | ----                                                              | ----  | #                    | #                                                                                                                                      | #    | #    | #         | #     | #    | #    |
| Rsa1.0_00185.1.g7873.t1 | gb AAM63037.1 unknown [Arabidopsis thaliana]                                                                                                                                                                                                                                                                                                                                                                  | 157  | 157  | 1.00E-74  | 100.0  | 91.7 | 95.5 | unknown                                                           | gbpln | Arabidopsis thaliana | AT1G61667.1   Symbols:   Protein of unknown function, DUF538   chr1:22767674-22768269 FORWARD LENGTH=156                               | 157  | 156  | 9.00E-77  | 99.4  | 86.6 | 89.8 |
| Rsa1.0_00185.1.g7874.t1 | #                                                                                                                                                                                                                                                                                                                                                                                                             | #    | #    | #         | #      | #    | -    | ----                                                              | ----  | #                    | #                                                                                                                                      | #    | #    | #         | #     | #    | #    |
| Rsa1.0_00185.1.g7875.t1 | gb EOA35046.1 hypothetical protein CARUB_v10020152mg [Capsella rubella]                                                                                                                                                                                                                                                                                                                                       | 515  | 514  | 0         | 99.8   | 84.9 | 91.5 | hypothetical protein CARUB_v10020152mg                            | gbpln | Capsella rubella     | AT1G61670.1   Symbols:   Lung seven transmembrane receptor family protein   chr1:22770132-22772258 FORWARD LENGTH=513                  | 515  | 513  | 0         | 99.6  | 83.9 | 91.7 |
| Rsa1.0_00185.1.g7876.t1 | ref NP_176377.1 cysteine/histidine-rich C1 domain-containing protein [Arabidopsis thaliana]<br>gi 3367532 gb AAC28517.1 Strong similarity to unknown protein T28M21.21 [g 2088661 from A. thaliana BAC gb AF002109 [Arabidopsis thaliana]<br>gi 332195773 gb AEE33894.1 cysteine/histidine-rich C1 domain-containing protein [Arabidopsis thaliana]                                                           | 624  | 814  | 0         | 130.4  | 59.0 | 72.0 | cysteine/histidine-rich C1 domain-containing protein              | gbpln | Arabidopsis thaliana | AT1G61840.1   Symbols:   Cysteine/Histidine-rich C1 domain family protein   chr1:22847389-22849833 FORWARD LENGTH=814                  | 624  | 814  | 0         | 130.4 | 59.0 | 72.0 |
| Rsa1.0_00185.1.g7877.t1 | ref NP_176362.3 phosphoinositide binding protein [Arabidopsis thaliana]<br>gi 38564274 gb AAR23716.1 At1g61690 [Arabidopsis thaliana]<br>gi 62319901 dbj BAD93965.1 hypothetical protein [Arabidopsis thaliana]<br>gi 332195755 gb AEE33876.1 phosphoinositide binding protein [Arabidopsis thaliana]                                                                                                         | 1093 | 1171 | 0         | 107.1  | 80.2 | 88.3 | phosphoinositide binding protein                                  | gbpln | Arabidopsis thaliana | AT1G61690.1   Symbols:   phosphoinositide binding   chr1:22782825-22786782 REVERSE LENGTH=1171                                         | 1093 | 1171 | 0         | 107.1 | 80.2 | 88.3 |
| Rsa1.0_00185.1.g7878.t1 | gb ABK20909.1 unknown [Picea sitchensis]<br>gi 116781551 gb ABK22149.1 unknown [Picea sitchensis]<br>gi 116789545 gb ABK25286.1 unknown [Picea sitchensis]                                                                                                                                                                                                                                                    | 71   | 71   | 2.00E-32  | 100.0  | 94.4 | 98.6 | unknown                                                           | gbpln | Picea sitchensis     | AT1G61700.1   Symbols:   RNA polymerases N / 8 kDa subunit   chr1:22787105-22788112 FORWARD LENGTH=71                                  | 71   | 71   | 9.00E-35  | 100.0 | 91.5 | 97.2 |
| Rsa1.0_00185.1.g7879.t1 | gb ACY30421.1 C.BANa [Brassica napus]                                                                                                                                                                                                                                                                                                                                                                         | 351  | 338  | 1.00E-165 | 96.3   | 83.8 | 90.9 | C.BANa                                                            | gbpln | Brassica napus       | AT1G61720.1   Symbols:   BAN   NAD(P)-binding Rossmann-fold superfamily protein   chr1:22791326-22792757 REVERSE LENGTH=340            | 351  | 340  | 1.00E-144 | 96.9  | 74.1 | 84.0 |
| Rsa1.0_00185.1.g7880.t1 | ref NP_564784.1 DNA-binding storekeeper protein-related transcriptional regulator [Arabidopsis thaliana]<br>gi 4508074 gb AAD21418.1 Unknown protein [Arabidopsis thaliana]<br>gi 222424594 dbj BAH20252.1 AT1G61730 [Arabidopsis thaliana]<br>gi 332195759 gb AEE33880.1 DNA-binding storekeeper protein-related transcriptional regulator [Arabidopsis thaliana]                                            | 332  | 376  | 4.00E-86  | 113.3  | 59.6 | 73.2 | DNA-binding storekeeper protein-related transcriptional regulator | gbpln | Arabidopsis thaliana | AT1G61730.1   Symbols:   DNA-binding storekeeper protein-related transcriptional regulator   chr1:22793447-22794577 REVERSE LENGTH=376 | 332  | 376  | 1.00E-88  | 113.3 | 59.6 | 73.2 |

|                         |                                                                                                                                                                                                                                                                                                                                                                                                                      |      |      |           |       |      |      |                                                                                                                                              |       |                         |                                                                                                                                            |      |     |           |       |      |      |
|-------------------------|----------------------------------------------------------------------------------------------------------------------------------------------------------------------------------------------------------------------------------------------------------------------------------------------------------------------------------------------------------------------------------------------------------------------|------|------|-----------|-------|------|------|----------------------------------------------------------------------------------------------------------------------------------------------|-------|-------------------------|--------------------------------------------------------------------------------------------------------------------------------------------|------|-----|-----------|-------|------|------|
| Rsa1.0_00185.1.g7881.t1 | ref NP_176367.1  Sulfite exporter<br>TauE/SaE family protein [Arabidopsis thaliana]<br>gi 13272465 gb AAK17171.1 AF325103.1<br>unknown protein [Arabidopsis thaliana]<br>gi 4508075 gb AAD21419.1  Unknown<br>protein [Arabidopsis thaliana]<br>gi 111074464 gb ABH04605.1 <br>At1g61740 [Arabidopsis thaliana]<br>gi 332195760 gb AEE33881.1  Sulfite<br>exporter TauE/SaE family protein<br>[Arabidopsis thaliana] | 203  | 458  | 6.00E-94  | 225.6 | 90.1 | 95.1 | Sulfite exporter<br>TauE/SaE family<br>protein                                                                                               | gbpln | Arabidopsis<br>thaliana | AT1G61740.1   Symbols:   Sulfite exporter<br>TauE/SaE family protein   chr1:22798365-<br>22801020 REVERSE LENGTH=458                       | 203  | 458 | 2.00E-96  | 225.6 | 90.1 | 95.1 |
| Rsa1.0_00186.1.g7882.t1 | #                                                                                                                                                                                                                                                                                                                                                                                                                    | #    | #    | #         | #     | #    | #    | -                                                                                                                                            | ----  | ----                    | #                                                                                                                                          | #    | #   | #         | #     | #    |      |
| Rsa1.0_00186.1.g7883.t3 | emb CAB39638.1  RNA-directed DNA<br>polymerase-like protein [Arabidopsis<br>thaliana] gi 267666 emb CAB78094.1 <br>RNA-directed DNA polymerase-like<br>protein [Arabidopsis thaliana]                                                                                                                                                                                                                                | 1733 | 1274 | 0         | 73.5  | 38.8 | 49.3 | RNA-directed DNA<br>polymerase-like<br>protein                                                                                               | gbpln | Arabidopsis<br>thaliana | AT4G2090.1   Symbols:   Ribonuclease H-<br>like superfamily protein   chr4:1433528-<br>14335255 FORWARD LENGTH=575                         | 1733 | 575 | 7.00E-55  | 33.2  | 9.7  | 14.4 |
| Rsa1.0_00186.1.g7884.t1 | dbj BAB02844.1  unnamed protein<br>product [Arabidopsis thaliana]                                                                                                                                                                                                                                                                                                                                                    | 491  | 565  | 0         | 115.1 | 80.7 | 89.0 | unnamed protein<br>product                                                                                                                   | gbpln | Arabidopsis<br>thaliana | AT3G21820.1   Symbols: ATXR2, SDG36  <br>histone-lysine N-methyltransferase ATXR2  <br>chr3:768829-769144 REVERSE<br>LENGTH=473            | 491  | 473 | 0         | 96.3  | 80.7 | 88.8 |
| Rsa1.0_00186.1.g7885.t1 | ref NP_188815.2  UDP-glucosyl<br>transferase 71B6 [Arabidopsis thaliana]<br>gi 75311545 sp Q9LSY6.1 U71B6_ARAT<br>H RecName: Full=UDP-<br>glucosyltransferase 71B6; AltName:<br>Full=Abcisic acid glucosyltransferase<br>gi 11994645 dbj BAB02840.1  UTP-<br>glucose glucosyltransferase<br>[Arabidopsis thaliana]<br>gi 332643030 gb AEE76551.1  UDP-<br>glucosyl transferase 71B6 [Arabidopsis<br>thaliana]        | 459  | 479  | 0         | 104.4 | 74.3 | 83.0 | UDP-glucosyl<br>transferase 71B6                                                                                                             | gbpln | Arabidopsis<br>thaliana | AT3G21780.1   Symbols: UGT71B6   UDP-<br>glucosyl transferase 71B6   chr3:7675051-<br>7676490 REVERSE LENGTH=479                           | 459  | 479 | 0         | 104.4 | 74.3 | 83.0 |
| Rsa1.0_00186.1.g7886.t1 | gb ACT35472.1  peroxidase 30, partial<br>[Brassica rapa]                                                                                                                                                                                                                                                                                                                                                             | 333  | 354  | 0         | 106.3 | 95.2 | 97.0 | peroxidase 30, partial                                                                                                                       | gbpln | Brassica<br>rapa        | AT3G21770.1   Symbols:   Peroxidase<br>superfamily protein   chr3:7673345-7674661<br>FORWARD LENGTH=329                                    | 333  | 329 | 1.00E-172 | 98.8  | 87.1 | 91.9 |
| Rsa1.0_00186.1.g7887.t1 | ref XP_002883317.1.1  UDP-<br>glucuronosyl/UDP-glucosyl transferase<br>family protein [Arabidopsis lyrata subsp.<br>lyrata] gi 297329157 gb EFH59576.1 <br>UDP-glucuronosyl/UDP-glucosyl<br>transferase family protein [Arabidopsis<br>lyrata subsp. lyrata]                                                                                                                                                         | 486  | 485  | 0         | 99.8  | 80.5 | 89.7 | UDP-<br>glucuronosyl/UDP-<br>glucosyl transferase<br>family protein                                                                          | gbpln | Arabidopsis<br>lyrata   | AT3G21760.1   Symbols: HYR1   UDP-<br>glucosyltransferase superfamily protein  <br>chr3:7667099-7668556 FORWARD<br>LENGTH=485              | 486  | 485 | 0         | 99.8  | 78.8 | 89.5 |
| Rsa1.0_00186.1.g7888.t1 | gb EOA33162.1  hypothetical protein<br>CARUB_v100153260mg, partial<br>[Capsella rubella]                                                                                                                                                                                                                                                                                                                             | 208  | 362  | 5.00E-65  | 174.0 | 54.8 | 62.0 | hypothetical protein<br>CARUB_v100153260mg<br>partial                                                                                        | gbpln | Capsella<br>rubella     | AT3G21750.1   Symbols: UGT71B1   UDP-<br>glucosyl transferase 71B1   chr3:7664565-<br>7665986 FORWARD LENGTH=473                           | 208  | 473 | 8.00E-65  | 227.4 | 52.4 | 61.1 |
| Rsa1.0_00186.1.g7889.t1 | #                                                                                                                                                                                                                                                                                                                                                                                                                    | #    | #    | #         | #     | #    | #    | -                                                                                                                                            | ----  | ----                    | #                                                                                                                                          | #    | #   | #         | #     | #    |      |
| Rsa1.0_00186.1.g7890.t1 | ref XP_002885464.1  hypothetical<br>protein ARALYDRAFT_318914<br>[Arabidopsis lyrata subsp. lyrata]<br>gi 297331304 gb EFH61723.1 <br>hypothetical protein<br>ARALYDRAFT_318914 [Arabidopsis<br>lyrata subsp. lyrata]                                                                                                                                                                                                | 338  | 337  | 1.00E-170 | 99.7  | 84.0 | 92.6 | hypothetical protein<br>ARALYDRAFT_318914                                                                                                    | gbpln | Arabidopsis<br>lyrata   | AT3G21740.1   Symbols: APO4   Arabidopsis<br>thaliana protein of unknown function<br>(DUF794)   chr3:7662542-7663638 REVERSE<br>LENGTH=337 | 338  | 337 | 1.00E-169 | 99.7  | 81.1 | 92.3 |
| Rsa1.0_00186.1.g7891.t1 | ref XP_002883316.1  UDP-<br>glucuronosyl/UDP-glucosyl transferase<br>family protein [Arabidopsis lyrata subsp.<br>lyrata] gi 297329156 gb EFH59575.1 <br>UDP-glucuronosyl/UDP-glucosyl<br>transferase family protein [Arabidopsis<br>lyrata subsp. lyrata]                                                                                                                                                           | 231  | 476  | 4.00E-40  | 206.1 | 38.5 | 51.5 | UDP-<br>glucuronosyl/UDP-<br>glucosyl transferase<br>family protein                                                                          | gbpln | Arabidopsis<br>lyrata   | AT3G21750.1   Symbols: UGT71B1   UDP-<br>glucosyl transferase 71B1   chr3:7664565-<br>7665986 FORWARD LENGTH=473                           | 231  | 473 | 2.00E-38  | 204.8 | 37.2 | 48.1 |
| Rsa1.0_00186.1.g7892.t1 | sp P25248.1 ACEA BRANA RecName:<br>Full=Isocitrate lyase; Short=ICL;<br>Short=Isocitrase; Short=Isocitratase<br>gi 167144 gb AAA32992.1  isocitrate<br>lyase [Brassica napus]<br>gi 255220 gb AAB23208.1  isocitrate<br>lyase, three-D S-isocitrate glyoxylate-<br>lyase, IL [EC 4.1.3.1] [Brassica napus,<br>seedlings, Peptide, 576 aa]<br>gi 447142 prf 1913424A isocitrate lyase                                 | 565  | 576  | 0         | 101.9 | 99.5 | 99.8 | RecName:<br>Full=Isocitrate lyase;<br>Short=ICL;<br>Short=Isocitrase;<br>Short=Isocitratase<br>gi 167144 gb AAA32992<br>.1  isocitrate lyase | gbpln | Brassica<br>napus       | AT3G21720.1   Symbols: ICL   isocitrate<br>lyase   chr3:7652789-7655873 REVERSE<br>LENGTH=576                                              | 565  | 576 | 0         | 101.9 | 95.6 | 98.4 |
| Rsa1.0_00186.1.g7893.t1 | ref NP_850622.1  Ras-related small<br>GTP-binding family protein [Arabidopsis<br>thaliana] gi 11994637 dbj BAB02832.1 <br>unnamed protein product [Arabidopsis<br>thaliana] gi 22316556 emb CAD44270.1 <br>monomeric G-protein [Arabidopsis<br>thaliana] gi 332643018 gb AEE76539.1 <br>Ras-related small GTP-binding family<br>protein [Arabidopsis thaliana]                                                       | 286  | 292  | 1.00E-133 | 102.1 | 89.2 | 93.7 | Ras-related small<br>GTP-binding family<br>protein                                                                                           | gbpln | Arabidopsis<br>thaliana | AT3G21700.3   Symbols: SCP2   Ras-related<br>small GTP-binding family protein  <br>chr3:7644581-7646190 FORWARD<br>LENGTH=292              | 286  | 292 | 1.00E-135 | 102.1 | 89.2 | 93.7 |

|                         |                                                                                                                                                                                                                                                                                                               |      |      |           |       |      |      |                                                                                                                                        |       |                      |                                                                                                                                                                                                                                                                                                                                                                                                                                                                     |      |      |           |       |      |      |
|-------------------------|---------------------------------------------------------------------------------------------------------------------------------------------------------------------------------------------------------------------------------------------------------------------------------------------------------------|------|------|-----------|-------|------|------|----------------------------------------------------------------------------------------------------------------------------------------|-------|----------------------|---------------------------------------------------------------------------------------------------------------------------------------------------------------------------------------------------------------------------------------------------------------------------------------------------------------------------------------------------------------------------------------------------------------------------------------------------------------------|------|------|-----------|-------|------|------|
| Rsa1.0_00186.1.g7894.t1 | ref[XP_002883313.1] mate efflux family protein [Arabidopsis lyrata subsp. lyrata] gi 297329153 gb EFH59572.1  mate efflux family protein [Arabidopsis lyrata subsp. lyrata]                                                                                                                                   | 140  | 506  | 2.00E-66  | 361.4 | 91.4 | 94.3 | mate efflux family protein                                                                                                             | gbpln | Arabidopsis lyrata   | AT3G21690.1   Symbols:   MATE efflux family protein   chr3:7638750-7641861 FORWARD LENGTH=506                                                                                                                                                                                                                                                                                                                                                                       | 140  | 506  | 3.00E-68  | 361.4 | 90.7 | 93.6 |
| Rsa1.0_00186.1.g7895.t1 | #                                                                                                                                                                                                                                                                                                             | #    | #    | #         | #     | #    | #    | -                                                                                                                                      | ----  | ----                 | #                                                                                                                                                                                                                                                                                                                                                                                                                                                                   | #    | #    | #         | #     | #    |      |
| Rsa1.0_00186.1.g7896.t1 | dbj BAJ34540.1  unnamed protein product [Theleungiella halophila]                                                                                                                                                                                                                                             | 323  | 505  | 1.00E-156 | 156.3 | 90.7 | 93.5 | unnamed protein product                                                                                                                | ----  | ----                 | AT3G21690.1   Symbols:   MATE efflux family protein   chr3:7638750-7641861 FORWARD LENGTH=506                                                                                                                                                                                                                                                                                                                                                                       | 323  | 506  | 1.00E-152 | 156.7 | 89.5 | 92.6 |
| Rsa1.0_00186.1.g7897.t1 | ref[NP_188806.1] mate efflux domain-containing protein [Arabidopsis thaliana] gi 11994404 dbj BAB02363.1  unnamed protein product [Arabidopsis thaliana] gi 51536586 gb AAU05531.1  At3g21690 [Arabidopsis thaliana] gi 332643017 gb AEE76538.1  mate efflux domain-containing protein [Arabidopsis thaliana] | 188  | 506  | 1.00E-93  | 269.1 | 89.9 | 94.7 | mate efflux domain-containing protein                                                                                                  | gbpln | Arabidopsis thaliana | AT3G21690.1   Symbols:   MATE efflux family protein   chr3:7638750-7641861 FORWARD LENGTH=506                                                                                                                                                                                                                                                                                                                                                                       | 188  | 506  | 5.00E-96  | 269.1 | 89.9 | 94.7 |
| Rsa1.0_00186.1.g7898.t1 | #                                                                                                                                                                                                                                                                                                             | #    | #    | #         | #     | #    | #    | -                                                                                                                                      | ----  | ----                 | #                                                                                                                                                                                                                                                                                                                                                                                                                                                                   | #    | #    | #         | #     | #    |      |
| Rsa1.0_00186.1.g7899.t2 | gb AAD08951.1  putative reverse transcriptase [Arabidopsis thaliana] gi 20197043 gb AM14892.1  putative reverse transcriptase [Arabidopsis thaliana]                                                                                                                                                          | 397  | 1412 | 4.00E-47  | 355.7 | 28.2 | 40.6 | putative reverse transcriptase                                                                                                         | gbpln | Arabidopsis thaliana | AT3G24255.1   Symbols:   RNA-directed DNA polymerase (reverse transcriptase)-related family protein   chr3:8789471-8793208 FORWARD LENGTH=746                                                                                                                                                                                                                                                                                                                       | 397  | 746  | 1.00E-35  | 187.9 | 18.4 | 21.2 |
| Rsa1.0_00186.1.g7900.t1 | #                                                                                                                                                                                                                                                                                                             | #    | #    | #         | #     | #    | #    | -                                                                                                                                      | ----  | ----                 | #                                                                                                                                                                                                                                                                                                                                                                                                                                                                   | #    | #    | #         | #     | #    |      |
| Rsa1.0_00186.1.g7901.t1 | #                                                                                                                                                                                                                                                                                                             | #    | #    | #         | #     | #    | #    | -                                                                                                                                      | ----  | ----                 | #                                                                                                                                                                                                                                                                                                                                                                                                                                                                   | #    | #    | #         | #     | #    |      |
| Rsa1.0_00186.1.g7902.t1 | gb EOA30183.1  hypothetical protein CARUB.v10013300mg [Capsella rubella]                                                                                                                                                                                                                                      | 589  | 589  | 0         | 100.0 | 90.0 | 95.1 | hypothetical protein CARUB.v10013300mg                                                                                                 | gbpln | Capsella rubella     | AT3G21670.1   Symbols:   Major facilitator superfamily protein   chr3:7626942-7628954 REVERSE LENGTH=590                                                                                                                                                                                                                                                                                                                                                            | 589  | 590  | 0         | 100.2 | 91.2 | 95.2 |
| Rsa1.0_00186.1.g7903.t1 | ref[XP_002885457.1] protein phosphatase 2A B [Arabidopsis lyrata subsp. lyrata] gi 297331297 gb EFH61716.1  protein phosphatase 2A B [Arabidopsis lyrata subsp. lyrata]                                                                                                                                       | 506  | 542  | 0         | 107.1 | 89.3 | 93.5 | protein phosphatase 2A B                                                                                                               | gbpln | Arabidopsis lyrata   | AT3G21650.1   Symbols:   Protein phosphatase 2A regulatory B subunit family protein   chr3:7621680-7623412 REVERSE LENGTH=546                                                                                                                                                                                                                                                                                                                                       | 506  | 546  | 0         | 107.9 | 87.9 | 92.7 |
| Rsa1.0_00187.1.g7904.t1 | #                                                                                                                                                                                                                                                                                                             | #    | #    | #         | #     | #    | #    | -                                                                                                                                      | ----  | ----                 | #                                                                                                                                                                                                                                                                                                                                                                                                                                                                   | #    | #    | #         | #     | #    |      |
| Rsa1.0_00187.1.g7905.t1 | #                                                                                                                                                                                                                                                                                                             | #    | #    | #         | #     | #    | #    | -                                                                                                                                      | ----  | ----                 | #                                                                                                                                                                                                                                                                                                                                                                                                                                                                   | #    | #    | #         | #     | #    |      |
| Rsa1.0_00187.1.g7906.t2 | gb EOA29603.1  hypothetical protein CARUB.v10013521mg, partial [Capsella rubella]                                                                                                                                                                                                                             | 772  | 498  | 3.00E-73  | 64.5  | 24.0 | 32.6 | hypothetical protein CARUB.v10013521mg, partial                                                                                        | gbpln | Capsella rubella     | AT3G31430.1   Symbols:   unknown protein; FUNCTIONS IN: molecular_function unknown; INVOLVED IN: biological_process unknown; LOCATED IN: endomembrane system; BEST Arabidopsis thaliana protein match is: unknown protein (TAIR:AT5G18636.1); Has 295 Blast hits to 291 proteins in 12 species: Archae - 0; Bacteria - 0; Metazoa - 0; Fungi - 0; Plants - 295; Viruses - 0; Other Eukaryotes - 0 (source: NCBI BLink).   chr3:12795861-12796871 REVERSE LENGTH=336 | 772  | 336  | 2.00E-24  | 43.5  | 8.4  | 12.6 |
| Rsa1.0_00187.1.g7907.t1 | gb EOA19880.1  hypothetical protein CARUB.v10000130mg [Capsella rubella] gi 482555689 gb EOA19881.1  hypothetical protein CARUB.v10000130mg [Capsella rubella]                                                                                                                                                | 1009 | 1009 | 0         | 100.0 | 80.9 | 88.9 | hypothetical protein CARUB.v10000130mg                                                                                                 | gbpln | Capsella rubella     | AT4G00700.1   Symbols:   C2 calcium/lipid-binding plant phosphoribosyltransferase family protein   chr4:286260-289369 FORWARD LENGTH=1006                                                                                                                                                                                                                                                                                                                           | 1009 | 1006 | 0         | 99.7  | 79.6 | 88.4 |
| Rsa1.0_00187.1.g7908.t1 | ref[XP_002875018.1] kinase family protein [Arabidopsis lyrata subsp. lyrata] gi 297320855 gb EFH51277.1  kinase family protein [Arabidopsis lyrata subsp. lyrata]                                                                                                                                             | 491  | 490  | 0         | 99.8  | 93.7 | 97.8 | kinase family protein                                                                                                                  | gbpln | Arabidopsis lyrata   | AT4G00710.1   Symbols: BSK3   BR-signaling kinase 3   chr4:290807-293096 FORWARD LENGTH=489                                                                                                                                                                                                                                                                                                                                                                         | 491  | 489  | 0         | 99.6  | 92.1 | 96.3 |
| Rsa1.0_00187.1.g7909.t1 | sp O04160.2 KSGT_BRANA RecName: Full=Shaggy-related protein kinase theta; AltName: Full=ASK-theta gi 2569950 emb CAA73214.1  shaggy-like protein kinase tetha [Brassica napus]                                                                                                                                | 474  | 468  | 0         | 98.7  | 93.2 | 96.0 | RecName: Full=Shaggy-related protein kinase theta; AltName: Full=ASK-theta gi 2569950 emb CAA73214.1  shaggy-like protein kinase tetha | gbpln | Brassica napus       | AT4G00720.1   Symbols: ATSK32, ASKTHETA, SK32   shaggy-like protein kinase 32   chr4:294116-297002 REVERSE LENGTH=472                                                                                                                                                                                                                                                                                                                                               | 474  | 472  | 0         | 99.6  | 90.9 | 93.5 |
| Rsa1.0_00187.1.g7910.t1 | dbj BAJ34339.1  unnamed protein product [Theleungiella halophila]                                                                                                                                                                                                                                             | 823  | 795  | 0         | 96.6  | 86.5 | 90.0 | unnamed protein product                                                                                                                | ----  | ----                 | AT4G00730.1   Symbols: ANL2, AHDP   Homeobox-leucine zipper family protein / lipid-binding START domain-containing protein   chr4:299741-304103 REVERSE LENGTH=802                                                                                                                                                                                                                                                                                                  | 823  | 802  | 0         | 97.4  | 85.8 | 90.2 |
| Rsa1.0_00187.1.g7911.t1 | ref[XP_002872931.1] UBX domain-containing protein [Arabidopsis lyrata subsp. lyrata] gi 297318768 gb EFH49190.1  UBX domain-containing protein [Arabidopsis lyrata subsp. lyrata]                                                                                                                             | 457  | 470  | 0         | 102.8 | 77.7 | 86.2 | UBX domain-containing protein                                                                                                          | gbpln | Arabidopsis lyrata   | AT4G00752.1   Symbols:   UBX domain-containing protein   chr4:317771-320793 REVERSE LENGTH=469                                                                                                                                                                                                                                                                                                                                                                      | 457  | 469  | 0         | 102.6 | 76.8 | 86.0 |

|                         |                                                                                                                                                                                                                                                                                                                                                                                                                                   |     |      |           |       |      |      |                                                                              |       |                      |                                                                                                                                                                                                                                                                                                                                             |     |      |           |       |      |      |
|-------------------------|-----------------------------------------------------------------------------------------------------------------------------------------------------------------------------------------------------------------------------------------------------------------------------------------------------------------------------------------------------------------------------------------------------------------------------------|-----|------|-----------|-------|------|------|------------------------------------------------------------------------------|-------|----------------------|---------------------------------------------------------------------------------------------------------------------------------------------------------------------------------------------------------------------------------------------------------------------------------------------------------------------------------------------|-----|------|-----------|-------|------|------|
| Rsa1.0_00187.1.g7912.t1 | gb AAC26240.1  contains similarity to reverse transcriptases (PFam: rvt.hmm, score: 116.22) [Arabidopsis thaliana]                                                                                                                                                                                                                                                                                                                | 370 | 1322 | 2.00E-16  | 357.3 | 19.7 | 28.1 | contains similarity to reverse transcriptases (PFam: rvt.hmm, score: 116.22) | gbpln | Arabidopsis thaliana | #                                                                                                                                                                                                                                                                                                                                           | #   | #    | #         | #     | #    | #    |
| Rsa1.0_00187.1.g7913.t1 | #                                                                                                                                                                                                                                                                                                                                                                                                                                 | #   | #    | #         | #     | #    | -    | ----                                                                         | ----  | ----                 | #                                                                                                                                                                                                                                                                                                                                           | #   | #    | #         | #     | #    | #    |
| Rsa1.0_00187.1.g7914.t1 | #                                                                                                                                                                                                                                                                                                                                                                                                                                 | #   | #    | #         | #     | #    | -    | ----                                                                         | ----  | ----                 | #                                                                                                                                                                                                                                                                                                                                           | #   | #    | #         | #     | #    | #    |
| Rsa1.0_00187.1.g7915.t1 | ref XP_002872909.1  hypothetical protein ARALYDRAFT_490459 [Arabidopsis lyrata subsp. lyrata] gi 297318746 gb EFH49168.1  hypothetical protein ARALYDRAFT_490459 [Arabidopsis lyrata subsp. lyrata]                                                                                                                                                                                                                               | 259 | 259  | 1.00E-105 | 100.0 | 76.1 | 85.7 | hypothetical protein ARALYDRAFT_490459                                       | gbpln | Arabidopsis lyrata   | AT4G01110.1   Symbols:   unknown protein; BEST Arabidopsis thaliana protein match is: unknown protein (TAIR:AT1G01453.1); Has 273 Blast hits to 272 proteins in 18 species: Archae - 0; Bacteria - 0; Metazoa - 0; Fungi - 0; Plants - 273; Viruses - 0; Other Eukaryotes - 0 (source: NCBI BLink).   chr4:480176-481056 REVERSE LENGTH=261 | 259 | 261  | 1.00E-105 | 100.8 | 75.7 | 84.9 |
| Rsa1.0_00187.1.g7916.t1 | gb EOA20942.1  hypothetical protein CARUB_v10001278mg [Capsella rubella]                                                                                                                                                                                                                                                                                                                                                          | 353 | 355  | 0         | 100.6 | 98.6 | 99.4 | hypothetical protein CARUB_v10001278mg                                       | gbpln | Capsella rubella     | AT4G01100.1   Symbols: ADNT1   adenine nucleotide transporter 1   chr4:477411-479590 FORWARD LENGTH=352                                                                                                                                                                                                                                     | 353 | 352  | 0         | 99.7  | 94.1 | 97.5 |
| Rsa1.0_00187.1.g7917.t1 | ref NP_192018.1  uncharacterized protein [Arabidopsis thaliana] gi 7267606 emb CAB80918.1  hypothetical protein [Arabidopsis thaliana] gi 17979014 gb AAL47466.1  AT4g01090/F2N1_13 [Arabidopsis thaliana] gi 20334762 gb AAM16242.1  AT4g01090/F2N1_13 [Arabidopsis thaliana] gi 222424660 dbj BAH20284.1  AT4G01090 [Arabidopsis thaliana] gi 332656580 gb AEE81980.1  uncharacterized protein AT4G01090 [Arabidopsis thaliana] | 594 | 714  | 0         | 120.2 | 74.9 | 82.5 | uncharacterized protein                                                      | gbpln | Arabidopsis thaliana | AT4G01090.1   Symbols:   Protein of unknown function (DUF3133)   chr4:470834-473248 REVERSE LENGTH=714                                                                                                                                                                                                                                      | 594 | 714  | 0         | 120.2 | 74.9 | 82.5 |
| Rsa1.0_00187.1.g7918.t1 | dbj BAJ34704.1  unnamed protein product [Thellungiella halophila]                                                                                                                                                                                                                                                                                                                                                                 | 481 | 480  | 0         | 99.8  | 82.7 | 89.4 | unnamed protein product                                                      | ----  | ----                 | AT4G01070.1   Symbols: GT72B1, UGT72B1   UDP-Glycosyltransferase superfamily protein   chr4:461858-463300 REVERSE LENGTH=480                                                                                                                                                                                                                | 481 | 480  | 0         | 99.8  | 78.6 | 87.9 |
| Rsa1.0_00187.1.g7919.t2 | ref XP_002874998.1  myb family transcription factor [Arabidopsis lyrata subsp. lyrata] gi 297320835 gb EFH51257.1  myb family transcription factor [Arabidopsis lyrata subsp. lyrata]                                                                                                                                                                                                                                             | 165 | 79   | 4.00E-24  | 47.9  | 33.3 | 38.2 | myb family transcription factor                                              | gbpln | Arabidopsis lyrata   | AT4G01060.2   Symbols: ETC3, CPL3   CAPRICE-like MYB3   chr4:460534-460967 FORWARD LENGTH=74                                                                                                                                                                                                                                                | 165 | 74   | 1.00E-25  | 44.8  | 32.7 | 37.0 |
| Rsa1.0_00187.1.g7920.t6 | ref NP_192013.1  glycosyl hydrolase family 18 protein [Arabidopsis thaliana] gi 7267601 emb CAB80913.1  hypothetical protein [Arabidopsis thaliana] gi 332656572 gb AEE81972.1  glycosyl hydrolase family 18 protein [Arabidopsis thaliana]                                                                                                                                                                                       | 426 | 430  | 0         | 100.9 | 86.2 | 92.0 | glycosyl hydrolase family 18 protein                                         | gbpln | Arabidopsis thaliana | AT4G01040.1   Symbols:   Glycosyl hydrolase superfamily protein   chr4:453383-455407 FORWARD LENGTH=430                                                                                                                                                                                                                                     | 426 | 430  | 0         | 100.9 | 86.2 | 92.0 |
| Rsa1.0_00187.1.g7921.t1 | dbj BAJ34300.1  unnamed protein product [Thellungiella halophila]                                                                                                                                                                                                                                                                                                                                                                 | 193 | 192  | 7.00E-98  | 99.5  | 88.6 | 93.8 | unnamed protein product                                                      | ----  | ----                 | AT4G01026.1   Symbols: PYL7, RCAR2   PYR1-like 7   chr4:447180-448109 FORWARD LENGTH=211                                                                                                                                                                                                                                                    | 193 | 211  | 7.00E-97  | 109.3 | 86.0 | 90.7 |
| Rsa1.0_00187.1.g7922.t2 | gb EOA20065.1  hypothetical protein CARUB_v10000339mg [Capsella rubella]                                                                                                                                                                                                                                                                                                                                                          | 330 | 710  | 1.00E-126 | 215.2 | 66.7 | 74.2 | hypothetical protein CARUB_v10000339mg                                       | gbpln | Capsella rubella     | AT4G01010.1   Symbols: ATONGC13, CNGC13   cyclic nucleotide-gated channel 13   chr4:434569-437242 REVERSE LENGTH=696                                                                                                                                                                                                                        | 330 | 696  | 1.00E-123 | 210.9 | 66.1 | 72.1 |
| Rsa1.0_00187.1.g7923.t1 | dbj BAB02990.1  retroelement pol polyprotein-like [Arabidopsis thaliana]                                                                                                                                                                                                                                                                                                                                                          | 607 | 1250 | 0         | 205.9 | 55.4 | 66.4 | retroelement pol polyprotein-like                                            | gbpln | Arabidopsis thaliana | AT4G23160.1   Symbols: CRK8   cysteine-rich RLK (RECEPTOR-like protein kinase) 8   chr4:12129485-12134086 FORWARD LENGTH=1262                                                                                                                                                                                                               | 607 | 1262 | 3.00E-89  | 207.9 | 26.9 | 42.3 |
| Rsa1.0_00187.1.g7924.t1 | pir  T10541 cyclic nucleotide gated channel homolog F3I3.30 - Arabidopsis thaliana                                                                                                                                                                                                                                                                                                                                                | 423 | 698  | 0         | 165.0 | 91.7 | 94.3 | cyclic nucleotide gated channel homolog F3I3.30 - Arabidopsis thaliana       | ----  | ----                 | AT4G01010.1   Symbols: ATONGC13, CNGC13   cyclic nucleotide-gated channel 13   chr4:434569-437242 REVERSE LENGTH=696                                                                                                                                                                                                                        | 423 | 696  | 0         | 164.5 | 91.7 | 94.3 |
| Rsa1.0_00187.1.g7925.t1 | dbj BAA97099.1  retroelement pol polyprotein-like [Arabidopsis thaliana]                                                                                                                                                                                                                                                                                                                                                          | 219 | 1098 | 5.00E-27  | 501.4 | 30.1 | 40.2 | retroelement pol polyprotein-like                                            | gbpln | Arabidopsis thaliana | #                                                                                                                                                                                                                                                                                                                                           | #   | #    | #         | #     | #    |      |
| Rsa1.0_00187.1.g7926.t5 | #                                                                                                                                                                                                                                                                                                                                                                                                                                 | #   | #    | #         | #     | #    | -    | ----                                                                         | ----  | ----                 | #                                                                                                                                                                                                                                                                                                                                           | #   | #    | #         | #     | #    |      |
| Rsa1.0_00187.1.g7927.t1 | gb EOA19940.1  hypothetical protein CARUB_v10000192mg [Capsella rubella]                                                                                                                                                                                                                                                                                                                                                          | 419 | 876  | 3.00E-55  | 209.1 | 29.4 | 34.8 | hypothetical protein CARUB_v10000192mg                                       | gbpln | Capsella rubella     | AT4G00990.1   Symbols:   Transcription factor jumonji (jmc) domain-containing protein   chr4:427035-431535 FORWARD LENGTH=840                                                                                                                                                                                                               | 419 | 840  | 2.00E-53  | 200.5 | 23.4 | 27.7 |
| Rsa1.0_00187.1.g7928.t2 | ref XP_002875004.1  transcription factor jumonji domain-containing protein [Arabidopsis lyrata subsp. lyrata] gi 297320841 gb EFH51263.1  transcription factor jumonji domain-containing protein [Arabidopsis lyrata subsp. lyrata]                                                                                                                                                                                               | 865 | 841  | 0         | 97.2  | 60.6 | 70.5 | transcription factor jumonji domain-containing protein                       | gbpln | Arabidopsis lyrata   | AT4G00990.1   Symbols:   Transcription factor jumonji (jmc) domain-containing protein   chr4:427035-431535 FORWARD LENGTH=840                                                                                                                                                                                                               | 865 | 840  | 0         | 97.1  | 59.7 | 69.9 |

|                         |                                                                                                                                                                                                                                                                                                                                                                                                                                                                                                                                                                                                                          |      |      |           |       |      |      |                                         |       |                      |                                                                                                                                                                                                                                                                                                                                                                                                                                                                                                                                                                                     |      |      |           |       |      |      |
|-------------------------|--------------------------------------------------------------------------------------------------------------------------------------------------------------------------------------------------------------------------------------------------------------------------------------------------------------------------------------------------------------------------------------------------------------------------------------------------------------------------------------------------------------------------------------------------------------------------------------------------------------------------|------|------|-----------|-------|------|------|-----------------------------------------|-------|----------------------|-------------------------------------------------------------------------------------------------------------------------------------------------------------------------------------------------------------------------------------------------------------------------------------------------------------------------------------------------------------------------------------------------------------------------------------------------------------------------------------------------------------------------------------------------------------------------------------|------|------|-----------|-------|------|------|
| Rsa1.0_00187.1.g7929.t1 | gb EOA19940.1  hypothetical protein CARUB_v10000192mg [Capsella rubella]                                                                                                                                                                                                                                                                                                                                                                                                                                                                                                                                                 | 856  | 876  | 0         | 102.3 | 63.3 | 75.0 | hypothetical protein CARUB_v10000192mg  | gbpln | Capsella rubella     | AT4G00990.1   Symbols:   Transcription factor jumonji (jmc) domain-containing protein   chr4:427035-431535 FORWARD LENGTH=840                                                                                                                                                                                                                                                                                                                                                                                                                                                       | 856  | 840  | 0         | 98.1  | 45.4 | 52.1 |
| Rsa1.0_00187.1.g7930.t1 | ref XP_002872891.1  GAMMA-TIP3/TIP1_3 [Arabidopsis lyrata subsp. lyrata] gi 297318726 gb EFH49150.1  GAMMA-TIP3/TIP1_3 [Arabidopsis lyrata subsp. lyrata]                                                                                                                                                                                                                                                                                                                                                                                                                                                                | 252  | 252  | 1.00E-130 | 100.0 | 94.8 | 97.2 | GAMMA-TIP3/TIP1_3                       | gbpln | Arabidopsis lyrata   | AT4G01470.1   Symbols: GAMMA-TIP3, TIP1.3, ATTP1.3   tonoplast intrinsic protein 1:3   chr4:625092-625850 REVERSE LENGTH=252                                                                                                                                                                                                                                                                                                                                                                                                                                                        | 252  | 252  | 1.00E-131 | 100.0 | 94.4 | 96.8 |
| Rsa1.0_00187.1.g7931.t1 | dbj BAF00422.1  hypothetical protein [Arabidopsis thaliana]                                                                                                                                                                                                                                                                                                                                                                                                                                                                                                                                                              | 149  | 95   | 1.00E-11  | 63.8  | 24.2 | 27.5 | hypothetical protein                    | gbpln | Arabidopsis thaliana | #                                                                                                                                                                                                                                                                                                                                                                                                                                                                                                                                                                                   | #    | #    | #         | #     | #    | #    |
| Rsa1.0_00187.1.g7932.t1 | #                                                                                                                                                                                                                                                                                                                                                                                                                                                                                                                                                                                                                        | #    | #    | #         | #     | #    | -    | ----                                    | ----  | ----                 | #                                                                                                                                                                                                                                                                                                                                                                                                                                                                                                                                                                                   | #    | #    | #         | #     | #    | #    |
| Rsa1.0_00187.1.g7933.t1 | gb EOA20915.1  hypothetical protein CARUB_v10001250mg [Capsella rubella]                                                                                                                                                                                                                                                                                                                                                                                                                                                                                                                                                 | 391  | 360  | 1.00E-138 | 92.1  | 60.6 | 68.3 | hypothetical protein CARUB_v10001250mg  | gbpln | Capsella rubella     | AT4G01450.1   Symbols:   nodulin MtN21 /EamA-like transporter family protein   chr4:608586-610487 FORWARD LENGTH=343                                                                                                                                                                                                                                                                                                                                                                                                                                                                | 391  | 343  | 1.00E-137 | 87.7  | 61.4 | 68.5 |
| Rsa1.0_00187.1.g7934.t1 | #                                                                                                                                                                                                                                                                                                                                                                                                                                                                                                                                                                                                                        | #    | #    | #         | #     | #    | -    | ----                                    | ----  | ----                 | #                                                                                                                                                                                                                                                                                                                                                                                                                                                                                                                                                                                   | #    | #    | #         | #     | #    | #    |
| Rsa1.0_00188.1.g7935.t1 | ref NP_567802.1  putative wound-responsive protein [Arabidopsis thaliana] gi 297799150 ref XP_002867459.1  hypothetical protein ARALYDRAFT_491951 [Arabidopsis lyrata subsp. lyrata] gi 15215820 gb AAK91455.1  AT4g28240/F26K10.120 [Arabidopsis thaliana] gi 21554087 gb AAM63168.1  putative wound induced protein [Arabidopsis thaliana] gi 22530932 gb AAM96970.1  putative wound-induced protein [Arabidopsis thaliana] gi 297313295 gb EFH43718.1  hypothetical protein ARALYDRAFT_491951 [Arabidopsis lyrata subsp. lyrata] gi 332660057 gb AEE85457.1  putative wound-responsive protein [Arabidopsis thaliana] | 86   | 86   | 2.00E-35  | 100.0 | 82.6 | 95.3 | putative wound-responsive protein       | gbpln | Arabidopsis lyrata   | AT4G28240.1   Symbols:   Wound-responsive family protein   chr4:13997979-13998239 REVERSE LENGTH=86                                                                                                                                                                                                                                                                                                                                                                                                                                                                                 | 86   | 86   | 3.00E-38  | 100.0 | 82.6 | 95.3 |
| Rsa1.0_00188.1.g7936.t1 | gb EOA15467.1  hypothetical protein CARUB_v10004327mg [Capsella rubella]                                                                                                                                                                                                                                                                                                                                                                                                                                                                                                                                                 | 656  | 653  | 0         | 99.5  | 78.7 | 88.6 | hypothetical protein CARUB_v10004327mg  | gbpln | Capsella rubella     | AT4G28200.1   Symbols:   FUNCTIONS IN: molecular_function unknown; INVOLVED IN: RNA processing; LOCATED IN: intracellular; EXPRESSED IN: 22 plant structures; EXPRESSED DURING: 13 growth stages; CONTAINS InterPro DOMAIN/s: RNA-processing protein, HAT helix (InterPro:IPR003107), U3 small nucleolar RNA-associated protein 6 (InterPro:IPR013949); Has 492 Blast hits to 480 proteins in 206 species: Archae - 0; Bacteria - 2; Metazoa - 128; Fungi - 191; Plants - 60; Viruses - 0; Other Eukaryotes - 111 (source: NCBI BLINK).   chr4:13987808-13990422 REVERSE LENGTH=648 | 656  | 648  | 0         | 98.8  | 76.8 | 86.6 |
| Rsa1.0_00188.1.g7937.t1 | ref XP_002867464.1  hypothetical protein ARALYDRAFT_491962 [Arabidopsis lyrata subsp. lyrata] gi 297313300 gb EFH43723.1  hypothetical protein ARALYDRAFT_491962 [Arabidopsis lyrata subsp. lyrata]                                                                                                                                                                                                                                                                                                                                                                                                                      | 287  | 278  | 1.00E-106 | 96.9  | 76.0 | 83.3 | hypothetical protein ARALYDRAFT_491962  | gbpln | Arabidopsis lyrata   | AT4G28140.1   Symbols:   Integrase-type DNA-binding superfamily protein   chr4:13974905-13975783 REVERSE LENGTH=292                                                                                                                                                                                                                                                                                                                                                                                                                                                                 | 287  | 292  | 1.00E-109 | 101.7 | 75.3 | 82.2 |
| Rsa1.0_00188.1.g7938.t1 | ref NP_194537.7  tetratricopeptide repeat domain protein [Arabidopsis thaliana] gi 332660036 gb AEE85436.1  tetratricopeptide repeat domain protein [Arabidopsis thaliana]                                                                                                                                                                                                                                                                                                                                                                                                                                               | 1756 | 1819 | 0         | 103.6 | 83.8 | 89.2 | tetratricopeptide repeat domain protein | gbpln | Arabidopsis thaliana | AT4G28080.1   Symbols:   Tetratricopeptide repeat (TPR)-like superfamily protein   chr4:13948993-13957840 REVERSE LENGTH=1819                                                                                                                                                                                                                                                                                                                                                                                                                                                       | 1756 | 1819 | 0         | 103.6 | 83.8 | 89.2 |
| Rsa1.0_00188.1.g7939.t1 | ref XP_002869522.1  nodulin MtN21 family protein [Arabidopsis lyrata subsp. lyrata] gi 297315358 gb EFH45781.1  nodulin MtN21 family protein [Arabidopsis lyrata subsp. lyrata]                                                                                                                                                                                                                                                                                                                                                                                                                                          | 322  | 359  | 1.00E-150 | 111.5 | 82.3 | 89.1 | nodulin MtN21 family protein            | gbpln | Arabidopsis lyrata   | AT4G28040.5   Symbols:   nodulin MtN21 /EamA-like transporter family protein   chr4:13940881-13942201 FORWARD LENGTH=359                                                                                                                                                                                                                                                                                                                                                                                                                                                            | 322  | 359  | 1.00E-151 | 111.5 | 81.4 | 89.1 |



|                         |                                                                                                                                                                                                                                                                                                                                                                                                                                                                                                                                                                                                                                                                                                                                                                                                                                                                                                                                                                                                                                                                                                                                                                                              |     |     |           |       |      |      |                                                     |       |                      |                                                                                                                                                                                                                                                                                                                                                                               |     |     |           |       |      |      |
|-------------------------|----------------------------------------------------------------------------------------------------------------------------------------------------------------------------------------------------------------------------------------------------------------------------------------------------------------------------------------------------------------------------------------------------------------------------------------------------------------------------------------------------------------------------------------------------------------------------------------------------------------------------------------------------------------------------------------------------------------------------------------------------------------------------------------------------------------------------------------------------------------------------------------------------------------------------------------------------------------------------------------------------------------------------------------------------------------------------------------------------------------------------------------------------------------------------------------------|-----|-----|-----------|-------|------|------|-----------------------------------------------------|-------|----------------------|-------------------------------------------------------------------------------------------------------------------------------------------------------------------------------------------------------------------------------------------------------------------------------------------------------------------------------------------------------------------------------|-----|-----|-----------|-------|------|------|
| Rsa1.0_00188.1.g7940.t2 | ref NP_194533.1  nodulin MtN21 /EamA-like transporter family protein [Arabidopsis thaliana] gi 42573063 ref NP_974628.1  nodulin MtN21 /EamA-like transporter family protein [Arabidopsis thaliana] gi 79325295 ref NP_001031735.1  nodulin MtN21 /EamA-like transporter family protein [Arabidopsis thaliana] gi 79325300 ref NP_001031736.1  nodulin MtN21 /EamA-like transporter family protein [Arabidopsis thaliana] gi 186514305 ref NP_001119071.1  nodulin MtN21 /EamA-like transporter family protein [Arabidopsis thaliana] gi 75209263 sp Q9SUD5.1 WTR36_ARAT H RecName: Full=WAT1-related protein At4g28040 gi 13899061 gb AAK48952.1 AF370525.1 Medicago nodulin N21-like protein [Arabidopsis thaliana] gi 4455363 emb CAB36773.1  Medicago nodulin N21-like protein [Arabidopsis thaliana] gi 7269658 emb CAB79606.1  Medicago nodulin N21-like protein [Arabidopsis thaliana] gi 20148375 gb AAM10078.1  Medicago nodulin N21-like protein [Arabidopsis thaliana] gi 222424181 dbj BAH20049.1  AT4G28040 [Arabidopsis thaliana] gi 332660026 gb AEE85426.1  nodulin MtN21 /EamA-like transporter family protein [Arabidopsis thaliana] -13933389-13935249 REVERSE LENGTH=359 | 238 | 359 | 5.00E-50  | 150.8 | 41.2 | 45.0 | nodulin MtN21 /EamA-like transporter family protein | gbpln | Arabidopsis thaliana | AT4G28040.5   Symbols:   nodulin MtN21 /EamA-like transporter family protein   chr4:13940881-13942201 FORWARD LENGTH=359                                                                                                                                                                                                                                                      | 238 | 359 | 2.00E-52  | 150.8 | 41.2 | 45.0 |
| Rsa1.0_00188.1.g7941.t1 | ref NP_567793.1  uncharacterized protein [Arabidopsis thaliana] gi 44917569 gb AAS49109.1  At4g28020 [Arabidopsis thaliana] gi 110741672 dbj BAE98782.1  hypothetical protein [Arabidopsis thaliana] gi 332660021 gb AEE85421.1  uncharacterized protein AT4G28020 [Arabidopsis thaliana]                                                                                                                                                                                                                                                                                                                                                                                                                                                                                                                                                                                                                                                                                                                                                                                                                                                                                                    | 346 | 351 | 1.00E-177 | 101.4 | 87.6 | 93.4 | uncharacterized protein                             | gbpln | Arabidopsis thaliana | AT4G28020.1   Symbols:   unknown protein; CONTAINS InterPro DOMAIN/s: Uncharacterised protein family UPF0066 (InterPro:IPR001378); Has 30201 Blast hits to 17322 proteins in 780 species: Archaea - 12; Bacteria - 1396; Metazoa - 17338; Fungi - 3422; Plants - 5037; Viruses - 0; Other Eukaryotes - 2996 (source: NCBI ELink).   chr4:13933389-13935249 REVERSE LENGTH=351 | 346 | 351 | 1.00E-179 | 101.4 | 87.6 | 93.4 |
| Rsa1.0_00188.1.g7942.t1 | gb EOA15737.1  hypothetical protein CARUB_v10006764mg [Capsella rubella]                                                                                                                                                                                                                                                                                                                                                                                                                                                                                                                                                                                                                                                                                                                                                                                                                                                                                                                                                                                                                                                                                                                     | 307 | 830 | 6.00E-42  | 270.4 | 34.2 | 40.1 | hypothetical protein CARUB_v10006764mg              | gbpln | Capsella rubella     | AT4G28000.1   Symbols:   P-loop containing nucleoside triphosphate hydrolases superfamily protein   chr4:13925456-13929280 FORWARD LENGTH=830                                                                                                                                                                                                                                 | 307 | 830 | 1.00E-43  | 270.4 | 33.6 | 40.1 |
| Rsa1.0_00188.1.g7943.t1 | ref NP_567792.1  SLAC1 homologue 2 [Arabidopsis thaliana] gi 75167715 sp Q9ASQ7.1 SLAH2_ARAT H RecName: Full=S-type anion channel SLAH2; AltName: Full=SLAC1-homolog protein 2 gi 13605877 gb AAK32924.1 AF367337.1 AT4g27970/T13J8.80 [Arabidopsis thaliana] gi 25090193 gb AAN72249.1  AT4g27970/T13J8.80 [Arabidopsis thaliana] gi 332660015 gb AEE85415.1  SLAC1 homologue 2 [Arabidopsis thaliana]                                                                                                                                                                                                                                                                                                                                                                                                                                                                                                                                                                                                                                                                                                                                                                                      | 545 | 519 | 0         | 95.2  | 77.4 | 84.8 | SLAC1 homologue 2                                   | gbpln | Arabidopsis thaliana | AT4G27970.1   Symbols: SLAH2   SLAC1 homologue 2   chr4:13918290-13920122 REVERSE LENGTH=519                                                                                                                                                                                                                                                                                  | 545 | 519 | 0         | 95.2  | 77.4 | 84.8 |
| Rsa1.0_00188.1.g7944.t1 | #                                                                                                                                                                                                                                                                                                                                                                                                                                                                                                                                                                                                                                                                                                                                                                                                                                                                                                                                                                                                                                                                                                                                                                                            | #   | #   | #         | #     | #    | #    | -                                                   | ----  | ----                 | #                                                                                                                                                                                                                                                                                                                                                                             | #   | #   | #         | #     | #    |      |

|                         |                                                                                                                                                                                                                                                                                                                                                                                                                                                                                                                                                                                                                                                                                                                                                                                                                                                                                                                                                                                                                                                                                                                                                                                                                                                                                                                                                                                                                                                                                                                               |     |     |           |       |      |      |                                                  |       |                      |                                                                                                                                    |     |     |           |       |      |      |
|-------------------------|-------------------------------------------------------------------------------------------------------------------------------------------------------------------------------------------------------------------------------------------------------------------------------------------------------------------------------------------------------------------------------------------------------------------------------------------------------------------------------------------------------------------------------------------------------------------------------------------------------------------------------------------------------------------------------------------------------------------------------------------------------------------------------------------------------------------------------------------------------------------------------------------------------------------------------------------------------------------------------------------------------------------------------------------------------------------------------------------------------------------------------------------------------------------------------------------------------------------------------------------------------------------------------------------------------------------------------------------------------------------------------------------------------------------------------------------------------------------------------------------------------------------------------|-----|-----|-----------|-------|------|------|--------------------------------------------------|-------|----------------------|------------------------------------------------------------------------------------------------------------------------------------|-----|-----|-----------|-------|------|------|
| Rsa1.0_00188.1.g7945.t1 | <p>ref NP_849462.1  SUMO-conjugating enzyme UBC9 [Arabidopsis thaliana] gi 464986 sp P35132.1 UBC9_ARATH RecName: Full=SUMO-conjugating enzyme UBC9; AltName: Full=UBCAT4B; AltName: Full=Ubiquitin carrier protein 9; AltName: Full=Ubiquitin-conjugating enzyme E2 9; AltName: Full=Ubiquitin-conjugating enzyme E2-17 kDa; AltName: Full=Ubiquitin-protein ligase 9 gi 297884 emb CAA78714.1  ubiquitin conjugating enzyme homolog [Arabidopsis thaliana] gi 349211 gb AA32894.1  ubiquitin conjugating enzyme [Arabidopsis thaliana] gi 600391 emb CAA51201.1  ubiquitin conjugating enzyme E2 [Arabidopsis thaliana] gi 4455355 emb CAB36765.1  ubiquitin-protein ligase UBC9 [Arabidopsis thaliana] gi 7269650 emb CAB79598.1  ubiquitin-protein ligase UBC9 [Arabidopsis thaliana] gi 23297139 gb AAN13102.1  E2 ubiquitin-conjugating enzyme 9 (UBC9) [Arabidopsis thaliana] gi 332660013 gb AEE85413.1  SUMO-conjugating enzyme UBC9 [Arabidopsis thaliana] gi 482553405 gb EOA17598.1  hypothetical protein CARUB_v10005960mg [Capsella rubella] gi 482553406 gb EOA17599.1 </p> <p>hypothetical protein ref NP_194524.2  ethylene-responsive transcription factor CRF4 [Arabidopsis thaliana] gi 334302779 sp Q9SUE3.2 CRF4_ARATH RecName: Full=Ethylene-responsive transcription factor CRF4; AltName: Full=Protein CYTOKININ RESPONSE FACTOR 4 gi 192571732 gb ACF04811.1  At4g27950 [Arabidopsis thaliana] gi 332660012 gb AEE85412.1  ethylene-responsive transcription factor CRF4 [Arabidopsis thaliana]</p> | 148 | 148 | 7.00E-81  | 100.0 | 98.6 | 98.6 | SUMO-conjugating enzyme UBC9                     | gbpln | Arabidopsis thaliana | AT4G27960.1   Symbols: UBC9   ubiquitin conjugating enzyme 9   chr4:13916065-13917203 REVERSE LENGTH=148                           | 148 | 148 | 2.00E-83  | 100.0 | 98.6 | 98.6 |
| Rsa1.0_00188.1.g7946.t1 | <p>ref XP_002879579.1  sucrose-phosphatase 1 [Arabidopsis lyrata subsp. lyrata] gi 297325418 gb EFH55838.1  sucrose-phosphatase 1 [Arabidopsis lyrata subsp. lyrata]</p> <p>ref NP_567790.1  manganese tracking factor for mitochondrial SOD2 [Arabidopsis thaliana] gi 75306049 sp Q944H5.1 MTM1_ARATH RecName: Full=Mitochondrial carrier protein MTM1; AltName: Full=Manganese tracking factor for mitochondrial SOD2 gi 16226567 gb AAL16202.1 AF428433.1 At4g27940/T13J8.50 [Arabidopsis thaliana] gi 21553497 gb AAM62590.1  unknown [Arabidopsis thaliana] gi 21928061 gb AAM78059.1  AT4g27940/T13J8.50 [Arabidopsis thaliana] gi 332660011 gb AEE85411.1  manganese tracking factor for mitochondrial SOD2 [Arabidopsis thaliana]</p>                                                                                                                                                                                                                                                                                                                                                                                                                                                                                                                                                                                                                                                                                                                                                                                | 322 | 335 | 1.00E-122 | 104.0 | 74.2 | 84.2 | ethylene-responsive transcription factor CRF4    | gbpln | Arabidopsis thaliana | AT4G27950.1   Symbols: CRF4   cytokinin response factor 4   chr4:13909732-13910739 REVERSE LENGTH=335                              | 322 | 335 | 1.00E-124 | 104.0 | 74.2 | 84.2 |
| Rsa1.0_00188.1.g7947.t1 | <p>ref XP_002879579.1  sucrose-phosphatase 1 [Arabidopsis lyrata subsp. lyrata] gi 297325418 gb EFH55838.1  sucrose-phosphatase 1 [Arabidopsis lyrata subsp. lyrata]</p>                                                                                                                                                                                                                                                                                                                                                                                                                                                                                                                                                                                                                                                                                                                                                                                                                                                                                                                                                                                                                                                                                                                                                                                                                                                                                                                                                      | 188 | 422 | 8.00E-90  | 224.5 | 86.2 | 89.9 | sucrose-phosphatase 1                            | gbpln | Arabidopsis lyrata   | AT2G35840.3   Symbols:   Sucrose-6F-phosphate phosphohydrolase family protein   chr2:15053952-15055776 FORWARD LENGTH=422          | 188 | 422 | 1.00E-90  | 224.5 | 85.1 | 89.9 |
| Rsa1.0_00188.1.g7948.t1 | <p>ref NP_567790.1  manganese tracking factor for mitochondrial SOD2 [Arabidopsis thaliana] gi 75306049 sp Q944H5.1 MTM1_ARATH RecName: Full=Mitochondrial carrier protein MTM1; AltName: Full=Manganese tracking factor for mitochondrial SOD2 gi 16226567 gb AAL16202.1 AF428433.1 At4g27940/T13J8.50 [Arabidopsis thaliana] gi 21553497 gb AAM62590.1  unknown [Arabidopsis thaliana] gi 21928061 gb AAM78059.1  AT4g27940/T13J8.50 [Arabidopsis thaliana] gi 332660011 gb AEE85411.1  manganese tracking factor for mitochondrial SOD2 [Arabidopsis thaliana]</p>                                                                                                                                                                                                                                                                                                                                                                                                                                                                                                                                                                                                                                                                                                                                                                                                                                                                                                                                                         | 407 | 413 | 0         | 101.5 | 79.6 | 86.2 | manganese tracking factor for mitochondrial SOD2 | gbpln | Arabidopsis thaliana | AT4G27940.1   Symbols: ATMTM1, MTM1   manganese tracking factor for mitochondrial SOD2   chr4:13904745-13907036 FORWARD LENGTH=413 | 407 | 413 | 0         | 101.5 | 79.6 | 86.2 |

|                         |                                                                                                                                                                                                                                                                                                                                                                                                                                                                                                                                                                                                       |     |     |           |       |      |      |                                                 |       |                      |                                                                                                                                                                                                                                                                                                                                                                                                                                                                                                                                                             |     |     |           |       |      |      |
|-------------------------|-------------------------------------------------------------------------------------------------------------------------------------------------------------------------------------------------------------------------------------------------------------------------------------------------------------------------------------------------------------------------------------------------------------------------------------------------------------------------------------------------------------------------------------------------------------------------------------------------------|-----|-----|-----------|-------|------|------|-------------------------------------------------|-------|----------------------|-------------------------------------------------------------------------------------------------------------------------------------------------------------------------------------------------------------------------------------------------------------------------------------------------------------------------------------------------------------------------------------------------------------------------------------------------------------------------------------------------------------------------------------------------------------|-----|-----|-----------|-------|------|------|
| Rsa1.0_00188.1.g7949.t1 | ref NP_194519.1  CCT motif family protein [Arabidopsis thaliana]<br>gi 3068777 ref NP_849461.1  CCT motif family protein [Arabidopsis thaliana]<br>gi 4455349 emb CAB36759.1  putative protein [Arabidopsis thaliana]<br>gi 7269644 emb CAB79592.1  putative protein [Arabidopsis thaliana]<br>gi 17064786 gb AAL32547.1  putative protein [Arabidopsis thaliana]<br>gi 20259898 gb AAM13296.1  putative protein [Arabidopsis thaliana]<br>gi 332660006 gb AEE85406.1  CCT motif family protein [Arabidopsis thaliana]<br>gi 332660007 gb AEE85407.1  CCT motif family protein [Arabidopsis thaliana] | 261 | 261 | 1.00E-107 | 100.0 | 80.5 | 88.1 | CCT motif family protein                        | gbpln | Arabidopsis thaliana | AT4G27900.2   Symbols:   CCT motif family protein   chr4:13890858-13892777 FORWARD LENGTH=261                                                                                                                                                                                                                                                                                                                                                                                                                                                               | 261 | 261 | 1.00E-109 | 100.0 | 80.5 | 88.1 |
| Rsa1.0_00188.1.g7950.t1 | gb EMJ19910.1  hypothetical protein PRUPE_ppa008943mg [Prunus persica]                                                                                                                                                                                                                                                                                                                                                                                                                                                                                                                                | 66  | 313 | 3.00E-23  | 474.2 | 74.2 | 80.3 | hypothetical protein PRUPE_ppa008943mg          | gbpln | Prunus persica       | AT4G27880.1   Symbols:   Protein with RING/U-box and TRAF-like domains   chr4:13883623-13884927 FORWARD LENGTH=327                                                                                                                                                                                                                                                                                                                                                                                                                                          | 66  | 327 | 2.00E-25  | 495.5 | 77.3 | 81.8 |
| Rsa1.0_00188.1.g7951.t1 | ref XP_004149777.1  PREDICTED: uncharacterized protein LOC101210214 [Cucumis sativus]                                                                                                                                                                                                                                                                                                                                                                                                                                                                                                                 | 583 | 803 | 1.00E-35  | 137.7 | 13.9 | 20.6 | PREDICTED: uncharacterized protein LOC101210214 | gbpln | Cucumis sativus      | AT4G27860.1   Symbols:   vacuolar iron transporter (VIT) family protein   chr4:13873808-13876240 FORWARD LENGTH=611                                                                                                                                                                                                                                                                                                                                                                                                                                         | 583 | 611 | 8.00E-38  | 104.8 | 14.2 | 21.6 |
| Rsa1.0_00188.1.g7952.t1 | ref NP_194504.2  yippee-like protein [Arabidopsis thaliana]<br>gi 122209321 sp Q2V3E2.1 YIPL5_ARAT H RecName: Full=Protein yippee-like At4g27740<br>gi 110738581 dbj BAF01216.1  hypothetical protein [Arabidopsis thaliana]<br>gi 332659987 gb AEE85387.1  yippee-like protein [Arabidopsis thaliana]                                                                                                                                                                                                                                                                                                | 105 | 105 | 5.00E-51  | 100.0 | 91.4 | 96.2 | yippee-like protein                             | gbpln | Arabidopsis thaliana | AT4G27740.1   Symbols:   Yippee family putative zinc-binding protein   chr4:13839148-13839616 FORWARD LENGTH=105                                                                                                                                                                                                                                                                                                                                                                                                                                            | 105 | 105 | 9.00E-54  | 100.0 | 91.4 | 96.2 |
| Rsa1.0_00188.1.g7953.t1 | ref XP_002869552.1  hypothetical protein ARALYDRAFT_492020 [Arabidopsis lyrata subsp. lyrata]<br>gi 297315388 gb EFH45811.1  hypothetical protein ARALYDRAFT_492020 [Arabidopsis lyrata subsp. lyrata]                                                                                                                                                                                                                                                                                                                                                                                                | 62  | 62  | 6.00E-24  | 100.0 | 87.1 | 96.8 | hypothetical protein ARALYDRAFT_492020          | gbpln | Arabidopsis lyrata   | AT4G27657.1   Symbols:   unknown protein; FUNCTIONS IN: molecular_function unknown; INVOLVED IN: biological_process unknown; LOCATED IN: endomembrane system; EXPRESSED IN: 15 plant structures; EXPRESSED DURING: 9 growth stages; BEST Arabidopsis thaliana protein match is: unknown protein (TAIR:AT5G54145.1); Has 30201 Blast hits to 17322 proteins in 780 species: Archae - 12; Bacteria - 1396; Metazoa - 17338; Fungi - 3422; Plants - 5037; Viruses - 0; Other Eukaryotes - 2996 (source: NCBI BLINK)   chr4:13813124-13813312 FORWARD LENGTH=62 | 62  | 62  | 1.00E-26  | 100.0 | 85.5 | 96.8 |
| Rsa1.0_00188.1.g7954.t4 | ref XP_002869553.1  hypothetical protein ARALYDRAFT_913767 [Arabidopsis lyrata subsp. lyrata]<br>gi 297315389 gb EFH45812.1  hypothetical protein ARALYDRAFT_913767 [Arabidopsis lyrata subsp. lyrata]                                                                                                                                                                                                                                                                                                                                                                                                | 62  | 62  | 3.00E-24  | 100.0 | 87.1 | 93.5 | hypothetical protein ARALYDRAFT_913767          | gbpln | Arabidopsis lyrata   | AT4G27657.1   Symbols:   unknown protein; FUNCTIONS IN: molecular_function unknown; INVOLVED IN: biological_process unknown; LOCATED IN: endomembrane system; EXPRESSED IN: 15 plant structures; EXPRESSED DURING: 9 growth stages; BEST Arabidopsis thaliana protein match is: unknown protein (TAIR:AT5G54145.1); Has 30201 Blast hits to 17322 proteins in 780 species: Archae - 12; Bacteria - 1396; Metazoa - 17338; Fungi - 3422; Plants - 5037; Viruses - 0; Other Eukaryotes - 2996 (source: NCBI BLINK)   chr4:13813124-13813312 FORWARD LENGTH=62 | 62  | 62  | 8.00E-27  | 100.0 | 88.7 | 93.5 |
| Rsa1.0_00188.1.g7955.t1 | #                                                                                                                                                                                                                                                                                                                                                                                                                                                                                                                                                                                                     | #   | #   | #         | #     | #    | #    | -                                               | ----  | ----                 | AT2G02520.1   Symbols:   RNA-directed DNA polymerase (reverse transcriptase)-related family protein   chr2:676771-678145 REVERSE LENGTH=211                                                                                                                                                                                                                                                                                                                                                                                                                 | 81  | 211 | 2.00E-12  | 260.5 | 39.5 | 49.4 |
| Rsa1.0_00188.1.g7956.t1 | ref XP_002869552.1  hypothetical protein ARALYDRAFT_492020 [Arabidopsis lyrata subsp. lyrata]<br>gi 297315388 gb EFH45811.1  hypothetical protein ARALYDRAFT_492020 [Arabidopsis lyrata subsp. lyrata]                                                                                                                                                                                                                                                                                                                                                                                                | 67  | 62  | 2.00E-20  | 92.5  | 77.6 | 83.6 | hypothetical protein ARALYDRAFT_492020          | gbpln | Arabidopsis lyrata   | AT4G27657.1   Symbols:   unknown protein; FUNCTIONS IN: molecular_function unknown; INVOLVED IN: biological_process unknown; LOCATED IN: endomembrane system; EXPRESSED IN: 15 plant structures; EXPRESSED DURING: 9 growth stages; BEST Arabidopsis thaliana protein match is: unknown protein (TAIR:AT5G54145.1); Has 30201 Blast hits to 17322 proteins in 780 species: Archae - 12; Bacteria - 1396; Metazoa - 17338; Fungi - 3422; Plants - 5037; Viruses - 0; Other Eukaryotes - 2996 (source: NCBI BLINK)   chr4:13813124-13813312 FORWARD LENGTH=62 | 67  | 62  | 5.00E-23  | 92.5  | 76.1 | 83.6 |
| Rsa1.0_00188.1.g7957.t1 | #                                                                                                                                                                                                                                                                                                                                                                                                                                                                                                                                                                                                     | #   | #   | #         | #     | #    | #    | -                                               | ----  | ----                 | #                                                                                                                                                                                                                                                                                                                                                                                                                                                                                                                                                           | #   | #   | #         | #     | #    | #    |

|                         |                                                                                                                                                                                                                                                                                                                                                                                                                                                                      |     |     |           |       |      |      |                                                       |       |                      |                                                                                                                                                                                                                                                                                                                                                                                                                                                                                                                                                              |     |     |           |       |      |      |
|-------------------------|----------------------------------------------------------------------------------------------------------------------------------------------------------------------------------------------------------------------------------------------------------------------------------------------------------------------------------------------------------------------------------------------------------------------------------------------------------------------|-----|-----|-----------|-------|------|------|-------------------------------------------------------|-------|----------------------|--------------------------------------------------------------------------------------------------------------------------------------------------------------------------------------------------------------------------------------------------------------------------------------------------------------------------------------------------------------------------------------------------------------------------------------------------------------------------------------------------------------------------------------------------------------|-----|-----|-----------|-------|------|------|
| Rsa1.0_00188.1.g7958.t1 | ref[XP_002869552.1] hypothetical protein ARALYDRAFT_492020 [Arabidopsis lyrata subsp. lyrata] gi 297315388 gb EFH45811.1   hypothetical protein ARALYDRAFT_492020 [Arabidopsis lyrata subsp. lyrata]                                                                                                                                                                                                                                                                 | 67  | 62  | 1.00E-21  | 92.5  | 80.6 | 85.1 | hypothetical protein ARALYDRAFT_492020                | gbpln | Arabidopsis lyrata   | AT4G27657.1   Symbols:   unknown protein; FUNCTIONS IN: molecular_function unknown; INVOLVED IN: biological_process unknown; LOCATED IN: endomembrane system; EXPRESSED IN: 15 plant structures; EXPRESSED DURING: 9 growth stages; BEST Arabidopsis thaliana protein match is: unknown protein (TAIR:AT5G54145.1); Has 30201 Blast hits to 17322 proteins in 780 species: Archae - 12; Bacteria - 1396; Metazoa - 17338; Fungi - 3422; Plants - 5037; Viruses - 0; Other Eukaryotes - 2996 (source: NCBI BLink).   chr4:13813124-13813312 FORWARD LENGTH=62 | 67  | 62  | 3.00E-24  | 92.5  | 79.1 | 85.1 |
| Rsa1.0_00189.1.g7959.t1 | gb AAL36413.1  putative peptide transporter protein [Arabidopsis thaliana]                                                                                                                                                                                                                                                                                                                                                                                           | 122 | 582 | 4.00E-49  | 477.0 | 75.4 | 86.1 | putative peptide transporter protein                  | gbpln | Arabidopsis thaliana | AT5G46050.1   Symbols: ATPTR3, PTR3   peptide transporter 3   chr5:18675062-18679071 REVERSE LENGTH=582                                                                                                                                                                                                                                                                                                                                                                                                                                                      | 122 | 582 | 1.00E-44  | 477.0 | 74.6 | 86.1 |
| Rsa1.0_00189.1.g7960.t1 | gb EOA14228.1  hypothetical protein CARUB_v10027385mg [Capsella rubella]                                                                                                                                                                                                                                                                                                                                                                                             | 124 | 120 | 2.00E-41  | 96.8  | 80.6 | 86.3 | hypothetical protein CARUB_v10027385mg                | gbpln | Capsella rubella     | AT5G46030.1   Symbols:   unknown protein; CONTAINS InterPro DOMAIN/s: Protein of unknown function DUF701, zinc-binding putative (InterPro:IPRO07808); Has 30201 Blast hits to 17322 proteins in 780 species: Archae - 12; Bacteria - 1396; Metazoa - 17338; Fungi - 3422; Plants - 5037; Viruses - 0; Other Eukaryotes - 2996 (source: NCBI BLink).   chr5:18670531-18671138 FORWARD LENGTH=120                                                                                                                                                              | 124 | 120 | 1.00E-39  | 96.8  | 79.0 | 86.3 |
| Rsa1.0_00189.1.g7961.t1 | #                                                                                                                                                                                                                                                                                                                                                                                                                                                                    | #   | #   | #         | #     | #    | #    | -                                                     | ----  | ----                 | #                                                                                                                                                                                                                                                                                                                                                                                                                                                                                                                                                            | #   | #   | #         | #     | #    |      |
| Rsa1.0_00189.1.g7962.t1 | ref[XP_002522509.1] 28 kDa heat- and acid-stable phosphoprotein, putative [Ricinus communis] gi 223538200 gb EEF39809.1  28 kDa heat- and acid-stable phosphoprotein, putative [Ricinus communis]                                                                                                                                                                                                                                                                    | 163 | 164 | 3.00E-54  | 100.6 | 75.5 | 85.3 | 28 kDa heat- and acid-stable phosphoprotein, putative | gbpln | Ricinus communis     | AT5G46020.1   Symbols:   CONTAINS InterPro DOMAIN/s: Casein kinase substrate, phosphoprotein PP28 (InterPro:IPRO19380); Has 30201 Blast hits to 17322 proteins in 780 species: Archae - 12; Bacteria - 1396; Metazoa - 17338; Fungi - 3422; Plants - 5037; Viruses - 0; Other Eukaryotes - 2996 (source: NCBI BLink).   chr5:18663075-18664629 REVERSE LENGTH=164                                                                                                                                                                                            | 163 | 164 | 2.00E-55  | 100.6 | 87.7 | 93.3 |
| Rsa1.0_00189.1.g7963.t1 | ref[NP_199410.2] WUSCHEL-related homeobox 8 [Arabidopsis thaliana] gi 61217284 sp Q6X7J5.1 WOX8_ARATH RecName: Full=WUSCHEL-related homeobox 8 gi 37955180 gb AAP37138.1  WOX8 protein [Arabidopsis thaliana] gi 332007940 gb AED95323.1  WUSCHEL-related homeobox 8 [Arabidopsis thaliana] emb CAA16721.1  MuDR transposable element - like protein [Arabidopsis thaliana] gi 7268634 emb CAB78843.1  MuDR transposable element-like protein [Arabidopsis thaliana] | 309 | 325 | 1.00E-111 | 105.2 | 70.6 | 79.6 | WUSCHEL-related homeobox 8                            | gbpln | Arabidopsis thaliana | AT5G45980.1   Symbols: WOX8, STPL   WUSCHEL related homeobox 8   chr5:18648921-18650698 FORWARD LENGTH=325                                                                                                                                                                                                                                                                                                                                                                                                                                                   | 309 | 325 | 1.00E-114 | 105.2 | 70.6 | 79.6 |
| Rsa1.0_00189.1.g7964.t1 | emb CAA16721.1  MuDR transposable element - like protein [Arabidopsis thaliana] gi 7268634 emb CAB78843.1  MuDR transposable element-like protein [Arabidopsis thaliana]                                                                                                                                                                                                                                                                                             | 541 | 633 | 1.00E-160 | 117.0 | 51.6 | 66.7 | MuDR transposable element - like protein              | gbpln | Arabidopsis thaliana | AT1G49920.1   Symbols:   MuDR family transposase   chr1:18481798-18484233 REVERSE LENGTH=785                                                                                                                                                                                                                                                                                                                                                                                                                                                                 | 541 | 785 | 6.00E-13  | 145.1 | 17.4 | 34.2 |
| Rsa1.0_00189.1.g7965.t1 | dbj BAB09034.1  unnamed protein product [Arabidopsis thaliana]                                                                                                                                                                                                                                                                                                                                                                                                       | 164 | 154 | 4.00E-34  | 93.9  | 44.5 | 64.6 | unnamed protein product                               | gbpln | Arabidopsis thaliana | AT5G15690.1   Symbols:   zinc ion binding   chr5:5113823-5114402 REVERSE LENGTH=169                                                                                                                                                                                                                                                                                                                                                                                                                                                                          | 164 | 169 | 2.00E-18  | 103.0 | 28.0 | 42.1 |
| Rsa1.0_00189.1.g7966.t1 | gb EOA14025.1  hypothetical protein CARUB_v10027157mg [Capsella rubella]                                                                                                                                                                                                                                                                                                                                                                                             | 187 | 201 | 9.00E-85  | 107.5 | 80.2 | 82.4 | hypothetical protein CARUB_v10027157mg                | gbpln | Capsella rubella     | AT5G45970.1   Symbols: ARAC2, RAC2, ROP7, ATRAC2, ATROP7   RAC-like 2   chr5:18643761-18645758 FORWARD LENGTH=201                                                                                                                                                                                                                                                                                                                                                                                                                                            | 187 | 201 | 8.00E-87  | 107.5 | 80.2 | 81.8 |
| Rsa1.0_00189.1.g7967.t1 | #                                                                                                                                                                                                                                                                                                                                                                                                                                                                    | #   | #   | #         | #     | #    | #    | -                                                     | ----  | ----                 | #                                                                                                                                                                                                                                                                                                                                                                                                                                                                                                                                                            | #   | #   | #         | #     | #    |      |
| Rsa1.0_00189.1.g7968.t2 | ref[XP_002522519.1] zinc finger protein, putative [Ricinus communis] gi 223538210 gb EEF39819.1  zinc finger protein, putative [Ricinus communis]                                                                                                                                                                                                                                                                                                                    | 621 | 297 | 2.00E-82  | 47.8  | 24.6 | 30.8 | zinc finger protein, putative                         | gbpln | Ricinus communis     | AT5G45960.1   Symbols:   GDSL-like Lipase/Acylhydrolase superfamily protein   chr5:18637174-18640319 REVERSE LENGTH=375                                                                                                                                                                                                                                                                                                                                                                                                                                      | 621 | 375 | 4.00E-63  | 60.4  | 18.4 | 19.3 |
| Rsa1.0_00189.1.g7969.t1 | gb EOA13600.1  hypothetical protein CARUB_v10026665mg [Capsella rubella]                                                                                                                                                                                                                                                                                                                                                                                             | 261 | 357 | 5.00E-62  | 136.8 | 44.1 | 47.1 | hypothetical protein CARUB_v10026665mg                | gbpln | Capsella rubella     | AT5G45950.1   Symbols:   GDSL-like Lipase/Acylhydrolase superfamily protein   chr5:18634155-18636512 FORWARD LENGTH=357                                                                                                                                                                                                                                                                                                                                                                                                                                      | 261 | 357 | 5.00E-61  | 136.8 | 41.4 | 46.7 |
| Rsa1.0_00189.1.g7970.t1 | ref[NP_199406.1] nudix hydrolase 11 [Arabidopsis thaliana] gi 68565910 sp Q8LET2.2 NUD11_ARATH RecName: Full=Nudix hydrolase 11; Short=AtNUDT11; AltName: Full=Coenzyme A diphosphatase NUDT11 gi 9758941 dbj BAB09322.1  unnamed protein product [Arabidopsis thaliana] gi 332007934 gb AED95317.1  nudix hydrolase 11 [Arabidopsis thaliana]                                                                                                                       | 221 | 222 | 1.00E-103 | 100.5 | 84.2 | 91.4 | nudix hydrolase 11                                    | gbpln | Arabidopsis thaliana | AT5G45940.1   Symbols: atnudt11, NUDT11   nudix hydrolase homolog 11   chr5:18629665-18630597 REVERSE LENGTH=222                                                                                                                                                                                                                                                                                                                                                                                                                                             | 221 | 222 | 1.00E-105 | 100.5 | 84.2 | 91.4 |

|                         |                                                                                                                                                                                                                                                                                                                                                  |      |      |          |       |      |       |                                                              |       |                      |                                                                                                                                                                                                                                                                                                                                                                                                                                                                       |      |      |          |       |      |       |
|-------------------------|--------------------------------------------------------------------------------------------------------------------------------------------------------------------------------------------------------------------------------------------------------------------------------------------------------------------------------------------------|------|------|----------|-------|------|-------|--------------------------------------------------------------|-------|----------------------|-----------------------------------------------------------------------------------------------------------------------------------------------------------------------------------------------------------------------------------------------------------------------------------------------------------------------------------------------------------------------------------------------------------------------------------------------------------------------|------|------|----------|-------|------|-------|
| Rsa1.0_00189.1.g7971.t1 | gb AAM98163.1  magnesium chelatase subunit of protochlorophyllide reductase [Arabidopsis thaliana]                                                                                                                                                                                                                                               | 420  | 418  | 0        | 99.5  | 87.4 | 92.9  | magnesium chelatase subunit of protochlorophyllide reductase | gbpln | Arabidopsis thaliana | AT5G45930.1   Symbols: CHL12, CHL12, CHL1-2   magnesium chelatase 12   chr5:18628095-18629565 FORWARD LENGTH=418                                                                                                                                                                                                                                                                                                                                                      | 420  | 418  | 0        | 99.5  | 87.6 | 93.1  |
| Rsa1.0_00189.1.g7972.t1 | ref XP_002865219.1  hypothetical protein ARALYDRAFT_916858 [Arabidopsis lyrata subsp. lyrata] gi 297311054 gb EFH441478.1  hypothetical protein ARALYDRAFT_916858 [Arabidopsis lyrata subsp. lyrata]                                                                                                                                             | 697  | 697  | 0        | 100.0 | 86.9 | 91.4  | hypothetical protein ARALYDRAFT_916858                       | gbpln | Arabidopsis lyrata   | AT5G45900.1   Symbols: APG7, ATAPG7, ATG7, ATATG7   ThiF family protein   chr5:18615304-18618436 FORWARD LENGTH=697                                                                                                                                                                                                                                                                                                                                                   | 697  | 697  | 0        | 100.0 | 87.2 | 91.7  |
| Rsa1.0_00189.1.g7973.t1 | gb AAD5301.1 AF089848.1 senescence-specific cysteine protease [Brassica napus]                                                                                                                                                                                                                                                                   | 346  | 346  | 0        | 100.0 | 94.5 | 96.0  | senescence-specific cysteine protease                        | gbpln | Brassica napus       | AT5G45890.1   Symbols: SAG12   senescence-associated gene 12   chr5:18613300-18614759 FORWARD LENGTH=346                                                                                                                                                                                                                                                                                                                                                              | 346  | 346  | 0        | 100.0 | 86.7 | 92.8  |
| Rsa1.0_00189.1.g7974.t1 | ref NP_001031546.1  uncharacterized protein [Arabidopsis thaliana] gi 330255535 gb AEC10629.1  uncharacterized protein AT2G45990 [Arabidopsis thaliana]                                                                                                                                                                                          | 123  | 263  | 2.00E-14 | 213.8 | 35.8 | 43.1  | uncharacterized protein                                      | gbpln | Arabidopsis thaliana | AT2G45990.3   Symbols:   unknown protein; FUNCTIONS IN: molecular_function unknown; INVOLVED IN: biological_process unknown; LOCATED IN: chloroplast; EXPRESSED IN: 22 plant structures; EXPRESSED DURING: 13 growth stages; Has 35333 Blast hits to 34131 proteins in 2444 species: Archae - 798; Bacteria - 22429; Metazoa - 974; Fungi - 991; Plants - 531; Viruses - 0; Other Eukaryotes - 9610 (source: NCBI BLINK).   chr2:18919402-18921043 FORWARD LENGTH=263 | 123  | 263  | 3.00E-17 | 213.8 | 35.8 | 43.1  |
| Rsa1.0_00189.1.g7975.t1 | emb CAN77974.1  hypothetical protein VITISV_006175 [Vitis vinifera]                                                                                                                                                                                                                                                                              | 256  | 1501 | 6.00E-78 | 586.3 | 57.8 | 72.3  | hypothetical protein VITISV_006175                           | gbpln | Vitis vinifera       | #                                                                                                                                                                                                                                                                                                                                                                                                                                                                     | #    | #    | #        | #     | #    | #     |
| Rsa1.0_00189.1.g7976.t2 | #                                                                                                                                                                                                                                                                                                                                                | #    | #    | #        | #     | #    | -     | -                                                            | ----  | ----                 | #                                                                                                                                                                                                                                                                                                                                                                                                                                                                     | #    | #    | #        | #     | #    | #     |
| Rsa1.0_00189.1.g7977.t1 | ref NP_567562.1  pollen Ole e 1 allergen and extensin family protein [Arabidopsis thaliana] gi 44681468 gb AAS47674.1  At4g18596 [Arabidopsis thaliana] gi 62320348 dbj BAD94719.1  pollen-specific protein - like [Arabidopsis thaliana] gi 332658666 gb AEE84066.1  pollen Ole e 1 allergen and extensin family protein [Arabidopsis thaliana] | 174  | 172  | 6.00E-84 | 98.9  | 87.4 | 94.3  | pollen Ole e 1 allergen and extensin family protein          | gbpln | Arabidopsis thaliana | AT4G18596.1   Symbols:   Pollen Ole e 1 allergen and extensin family protein   chr4:10239114-10239728 FORWARD LENGTH=172                                                                                                                                                                                                                                                                                                                                              | 174  | 172  | 3.00E-86 | 98.9  | 87.4 | 94.3  |
| Rsa1.0_00190.1.g7978.t1 | sp P93820.3 Y1439_ARATH RecName: Full=BTB/POZ domain-containing protein At1g04390                                                                                                                                                                                                                                                                | 989  | 1002 | 0        | 101.3 | 86.1 | 92.2  | RecName: Full=BTB/POZ domain-containing protein At1g04390    | ----  | ----                 | AT1G04390.1   Symbols:   BTB/POZ domain-containing protein   chr1:1179678-1183615 REVERSE LENGTH=849                                                                                                                                                                                                                                                                                                                                                                  | 989  | 849  | 0        | 85.8  | 38.6 | 41.2  |
| Rsa1.0_00190.1.g7979.t1 | gb ADU19845.1  cryptochrome 2b [Brassica napus] gi 327082233 gb AEA29691.1  cryptochrome 2b [Brassica napus]                                                                                                                                                                                                                                     | 601  | 575  | 0        | 95.7  | 90.3 | 92.7  | cryptochrome 2b                                              | gbpln | Brassica napus       | AT1G04400.1   Symbols: CRY2, FHA, AT-PHH1, PHH1, ATCRY2   cryptochrome 2   chr1:1185719-1187901 REVERSE LENGTH=612                                                                                                                                                                                                                                                                                                                                                    | 601  | 612  | 0        | 101.8 | 83.4 | 88.2  |
| Rsa1.0_00190.1.g7980.t1 | gb AGB34187.1  malate dehydrogenase [Brassica oleracea]                                                                                                                                                                                                                                                                                          | 332  | 332  | 0        | 100.0 | 99.4 | 99.7  | malate dehydrogenase                                         | gbpln | Brassica oleracea    | AT1G04410.1   Symbols:   Lactate/malate dehydrogenase family protein   chr1:1189418-1191267 REVERSE LENGTH=332                                                                                                                                                                                                                                                                                                                                                        | 332  | 332  | 0        | 100.0 | 96.1 | 98.8  |
| Rsa1.0_00190.1.g7981.t1 | ref XP_002889502.1  aldo/keto reductase family protein [Arabidopsis lyrata subsp. lyrata] gi 297335344 gb EFH65761.1  aldo/keto reductase family protein [Arabidopsis lyrata subsp. lyrata]                                                                                                                                                      | 419  | 412  | 0        | 98.3  | 82.3 | 88.8  | aldo/keto reductase family protein                           | gbpln | Arabidopsis lyrata   | AT1G04420.1   Symbols:   NAD(P)-linked oxidoreductase superfamily protein   chr1:1191634-1193699 FORWARD LENGTH=412                                                                                                                                                                                                                                                                                                                                                   | 419  | 412  | 0        | 98.3  | 81.6 | 88.1  |
| Rsa1.0_00190.1.g7982.t1 | gb EOA38884.1  hypothetical protein CARUB_v10011254mg [Capsella rubella]                                                                                                                                                                                                                                                                         | 622  | 623  | 0        | 100.2 | 92.3 | 97.6  | hypothetical protein CARUB_v10011254mg                       | gbpln | Capsella rubella     | AT1G04430.2   Symbols:   S-adenosyl-L-methionine-dependent methyltransferases superfamily protein   chr1:1198860-1201301 FORWARD LENGTH=623                                                                                                                                                                                                                                                                                                                           | 622  | 623  | 0        | 100.2 | 92.1 | 96.9  |
| Rsa1.0_00190.1.g7983.t1 | gb EOA36675.1  hypothetical protein CARUB_v10012017mg [Capsella rubella]                                                                                                                                                                                                                                                                         | 468  | 468  | 0        | 100.0 | 87.4 | 92.9  | hypothetical protein CARUB_v10012017mg                       | gbpln | Capsella rubella     | AT1G04440.1   Symbols: CKL13   casein kinase like 13   chr1:1202815-1205664 FORWARD LENGTH=468                                                                                                                                                                                                                                                                                                                                                                        | 468  | 468  | 0        | 100.0 | 86.5 | 93.4  |
| Rsa1.0_00190.1.g7984.t1 | ref XP_002889506.1  hypothetical protein ARALYDRAFT_470423 [Arabidopsis lyrata subsp. lyrata] gi 297335348 gb EFH65765.1  hypothetical protein ARALYDRAFT_470423 [Arabidopsis lyrata subsp. lyrata]                                                                                                                                              | 175  | 154  | 2.00E-34 | 88.0  | 46.9 | 57.7  | hypothetical protein ARALYDRAFT_470423                       | gbpln | Arabidopsis lyrata   | AT1G04445.1   Symbols:   C2H2-like zinc finger protein   chr1:1207344-1207862 FORWARD LENGTH=172                                                                                                                                                                                                                                                                                                                                                                      | 175  | 172  | 1.00E-29 | 98.3  | 46.3 | 60.0  |
| Rsa1.0_00190.1.g7985.t1 | gb EOA39245.1  hypothetical protein CARUB_v10012233mg [Capsella rubella]                                                                                                                                                                                                                                                                         | 1031 | 1032 | 0        | 100.1 | 87.2 | 91.9  | hypothetical protein CARUB_v10012233mg                       | gbpln | Capsella rubella     | AT1G04470.1   Symbols:   Protein of unknown function (DUF810)   chr1:1211177-1214591 REVERSE LENGTH=1035                                                                                                                                                                                                                                                                                                                                                              | 1031 | 1035 | 0        | 100.4 | 86.2 | 91.9  |
| Rsa1.0_00190.1.g7986.t1 | gb EOA31608.1  hypothetical protein CARUB_v10014805mg, partial [Capsella rubella]                                                                                                                                                                                                                                                                | 140  | 161  | 1.00E-74 | 115.0 | 99.3 | 100.0 | hypothetical protein CARUB_v10014805mg, partial              | gbpln | Capsella rubella     | AT3G04400.1   Symbols: emb2171   Ribosomal protein L14p/L23e family protein   chr3:1167339-1168308 FORWARD LENGTH=140                                                                                                                                                                                                                                                                                                                                                 | 140  | 140  | 1.00E-76 | 100.0 | 99.3 | 100.0 |

|                         |                                                                                                                                                                                                                                                                                                                                                                                                                                          |      |      |           |       |      |      |                                                           |       |                      |                                                                                                                                 |      |      |           |       |      |      |
|-------------------------|------------------------------------------------------------------------------------------------------------------------------------------------------------------------------------------------------------------------------------------------------------------------------------------------------------------------------------------------------------------------------------------------------------------------------------------|------|------|-----------|-------|------|------|-----------------------------------------------------------|-------|----------------------|---------------------------------------------------------------------------------------------------------------------------------|------|------|-----------|-------|------|------|
| Rsa1.0_00190.1.g7987.t1 | gb AAB70425.1  EST gb T21788 comes from this gene [Arabidopsis thaliana]                                                                                                                                                                                                                                                                                                                                                                 | 413  | 412  | 1.00E-103 | 99.8  | 56.7 | 70.7 | EST gb T21788 comes from this gene                        | gbpln | Arabidopsis thaliana | AT1G04490.2   Symbols:   Protein of unknown function (DUF3527)   chr1:1218020-1219325 REVERSE LENGTH=401                        | 413  | 401  | 1.00E-106 | 97.1  | 56.4 | 70.7 |
| Rsa1.0_00190.1.g7988.t3 | ref NP_171944.2  CCT motif-containing protein [Arabidopsis thaliana]   gi 91805737 gb ABE65597.1  zinc finger CONSTANS-like protein [Arabidopsis thaliana]   gi 22587874 dbj BAH30269.1  hypothetical protein [Arabidopsis thaliana]   gi 332189584 gb AEE27705.1  CCT motif-containing protein [Arabidopsis thaliana]                                                                                                                   | 380  | 386  | 1.00E-169 | 101.6 | 82.6 | 87.6 | CCT motif-containing protein                              | gbpln | Arabidopsis thaliana | AT1G04500.1   Symbols:   CCT motif family protein   chr1:1221757-1224235 REVERSE LENGTH=386                                     | 380  | 386  | 1.00E-172 | 101.6 | 82.6 | 87.6 |
| Rsa1.0_00190.1.g7989.t1 | gb EOA40141.1  hypothetical protein CARUB_v10008852mg [Capsella rubella]                                                                                                                                                                                                                                                                                                                                                                 | 531  | 522  | 0         | 98.3  | 90.0 | 94.7 | hypothetical protein CARUB_v10008852mg                    | gbpln | Capsella rubella     | AT1G04510.1   Symbols: MAC3A   MOS4-associated complex 3A   chr1:1226749-1230592 FORWARD LENGTH=523                             | 531  | 523  | 0         | 98.5  | 89.5 | 93.8 |
| Rsa1.0_00190.1.g7990.t1 | ref NP_171946.2  cysteine-rich repeat secretory protein 3 [Arabidopsis thaliana]   gi 75127023 sp O6NM73.1 CRR3_ARATH RecName: Full=Cysteine-rich repeat secretory protein 3; Flags: Precursor   gi 38566686 gb AAR24233.1  At1g04520 [Arabidopsis thaliana]   gi 45592918 gb AAS68113.1  At1g04520 [Arabidopsis thaliana]   gi 332189588 gb AEE27709.1  cysteine-rich repeat secretory protein 3 [Arabidopsis thaliana]                 | 286  | 307  | 1.00E-123 | 107.3 | 86.0 | 90.2 | cysteine-rich repeat secretory protein 3                  | gbpln | Arabidopsis thaliana | AT1G04520.1   Symbols: PDL2   plasmodesmata-located protein 2   chr1:1231852-1233787 FORWARD LENGTH=307                         | 286  | 307  | 1.00E-126 | 107.3 | 86.0 | 90.2 |
| Rsa1.0_00190.1.g7991.t1 | ref XP_002892222.1  hypothetical protein ARALYDRAFT_470433 [Arabidopsis lyrata subsp. lyrata]   gi 297338064 gb EFH68481.1  hypothetical protein ARALYDRAFT_470433 [Arabidopsis lyrata subsp. lyrata]                                                                                                                                                                                                                                    | 299  | 308  | 1.00E-114 | 103.0 | 75.6 | 84.9 | hypothetical protein ARALYDRAFT_470433                    | gbpln | Arabidopsis lyrata   | AT1G04530.1   Symbols: TPR4   Tetratricopeptide repeat (TPR)-like superfamily protein   chr1:1234456-1235895 REVERSE LENGTH=310 | 299  | 310  | 1.00E-114 | 103.7 | 73.9 | 83.6 |
| Rsa1.0_00190.1.g7992.t1 | ref NP_171948.1  calcium-dependent lipid-binding domain-containing protein [Arabidopsis thaliana]   gi 332189590 gb AEE27711.1  calcium-dependent lipid-binding domain-containing protein [Arabidopsis thaliana]                                                                                                                                                                                                                         | 598  | 601  | 0         | 100.5 | 75.9 | 83.8 | calcium-dependent lipid-binding domain-containing protein | gbpln | Arabidopsis thaliana | AT1G04540.1   Symbols:   Calcium-dependent lipid-binding (CaLB domain) family protein   chr1:1237256-1239061 FORWARD LENGTH=601 | 598  | 601  | 0         | 100.5 | 75.9 | 83.8 |
| Rsa1.0_00190.1.g7993.t2 | ref XP_00289513.1  hypothetical protein ARALYDRAFT_470436 [Arabidopsis lyrata subsp. lyrata]   gi 297335355 gb EFH65772.1  hypothetical protein ARALYDRAFT_470436 [Arabidopsis lyrata subsp. lyrata]                                                                                                                                                                                                                                     | 233  | 239  | 9.00E-94  | 102.6 | 85.4 | 93.6 | hypothetical protein ARALYDRAFT_470436                    | gbpln | Arabidopsis lyrata   | AT1G04550.2   Symbols: IAA12, BDL   AUX/IAA transcriptional regulator family protein   chr1:1240582-1241810 FORWARD LENGTH=239  | 233  | 239  | 4.00E-95  | 102.6 | 85.0 | 92.7 |
| Rsa1.0_00190.1.g7994.t1 | gb EOA39346.1  hypothetical protein CARUB_v10012389mg [Capsella rubella]                                                                                                                                                                                                                                                                                                                                                                 | 184  | 184  | 3.00E-92  | 100.0 | 90.8 | 95.7 | hypothetical protein CARUB_v10012389mg                    | gbpln | Capsella rubella     | AT1G04560.1   Symbols:   AWP19-like family protein   chr1:1245070-1245888 FORWARD LENGTH=186                                    | 184  | 186  | 4.00E-93  | 101.1 | 89.7 | 95.7 |
| Rsa1.0_00190.1.g7995.t1 | ref XP_002892226.1  hypothetical protein ARALYDRAFT_887628 [Arabidopsis lyrata subsp. lyrata]   gi 297338068 gb EFH68485.1  hypothetical protein ARALYDRAFT_887628 [Arabidopsis lyrata subsp. lyrata]                                                                                                                                                                                                                                    | 534  | 542  | 0         | 101.5 | 83.9 | 91.9 | hypothetical protein ARALYDRAFT_887628                    | gbpln | Arabidopsis lyrata   | AT1G04570.1   Symbols:   Major facilitator superfamily protein   chr1:1246859-1248600 REVERSE LENGTH=542                        | 534  | 542  | 0         | 101.5 | 85.2 | 92.1 |
| Rsa1.0_00190.1.g7996.t1 | ref NP_563711.1  aldehyde oxidase 4 [Arabidopsis thaliana]   gi 62899864 sp G7G191.2 ALDO4_ARATH RecName: Full=Benzaldehyde dehydrogenase (NAD(+)); AltName: Full=Aldehyde oxidase 4; Short=AO-4; Short=ATAO-4; Short=ATAO2; AltName: Full=Indole-3-acetaldehyde oxidase; Short=IAA oxidase   gi 6758368 dbj BAA90299.1  aldehyde oxidase [Arabidopsis thaliana]   gi 332189596 gb AEE27717.1  aldehyde oxidase 4 [Arabidopsis thaliana] | 1373 | 1337 | 0         | 97.4  | 84.3 | 90.9 | aldehyde oxidase 4                                        | gbpln | Arabidopsis thaliana | AT1G04580.1   Symbols: AAO4, ATAO-4, ATAO2, AO4   aldehyde oxidase 4   chr1:1252212-1257510 REVERSE LENGTH=1337                 | 1373 | 1337 | 0         | 97.4  | 84.3 | 90.9 |

|                         |                                                                                                                                                                                                                                                                                                                                                                                                                                                                                                                                                                                                                                                                                                                                                                                                           |     |     |           |       |      |       |                                                             |       |                         |                                                                                                                                                                                                                                                                                                                                                                 |     |     |           |       |      |       |
|-------------------------|-----------------------------------------------------------------------------------------------------------------------------------------------------------------------------------------------------------------------------------------------------------------------------------------------------------------------------------------------------------------------------------------------------------------------------------------------------------------------------------------------------------------------------------------------------------------------------------------------------------------------------------------------------------------------------------------------------------------------------------------------------------------------------------------------------------|-----|-----|-----------|-------|------|-------|-------------------------------------------------------------|-------|-------------------------|-----------------------------------------------------------------------------------------------------------------------------------------------------------------------------------------------------------------------------------------------------------------------------------------------------------------------------------------------------------------|-----|-----|-----------|-------|------|-------|
| Rsa1.0_00190.1.g7997.t1 | ref XP_002892228.1  EMB2748<br>[Arabidopsis lyrata subsp. lyrata]<br>gi 297338070 gb EFH68487.1  EMB2748<br>[Arabidopsis lyrata subsp. lyrata]                                                                                                                                                                                                                                                                                                                                                                                                                                                                                                                                                                                                                                                            | 772 | 395 | 1.00E-159 | 51.2  | 36.9 | 40.4  | EMB2748                                                     | gbpln | Arabidopsis<br>lyrata   | AT1G04590.1   Symbols:   BEST Arabidopsis thaliana protein match is: Pentatricopeptide repeat (PPR) superfamily protein (TAIR:AT4G21190.1); Has 111 Blast hits to 111 proteins in 15 species: Archae - 0; Bacteria - 0; Metazoa - 0; Fungi - 0; Plants - 109; Viruses - 0; Other Eukaryotes - 2 (source: NCBI BLINK).   chr1:1258760-1261411 REVERSE LENGTH=381 | 772 | 381 | 1.00E-157 | 49.4  | 36.7 | 40.0  |
| Rsa1.0_00190.1.g7998.t1 | gb EOA36577.1  hypothetical protein CARUB_v10011757mg [Capsella rubella]                                                                                                                                                                                                                                                                                                                                                                                                                                                                                                                                                                                                                                                                                                                                  | 436 | 436 | 0         | 100.0 | 94.3 | 97.7  | hypothetical protein CARUB_v10011757mg                      | gbpln | Capsella<br>rubella     | AT1G04610.1   Symbols: YUC3   YUCCA 3   chr1:1279524-1281331 FORWARD LENGTH=437                                                                                                                                                                                                                                                                                 | 436 | 437 | 0         | 100.2 | 93.3 | 97.5  |
| Rsa1.0_00190.1.g7999.t5 | ref NP_565761.1  NADH dehydrogenase [Arabidopsis thaliana]<br>gi 297823115 ref XP_002879440.1  hypothetical protein ARALYDRAFT_482258 [Arabidopsis lyrata subsp. lyrata]<br>gi 75219577 sp O49313.1 NDADB_ARAT H RecName: Full=NADH dehydrogenase [ubiquinone] 1 alpha subcomplex subunit 13-B<br>gi 2924772 gb AAC04901.1  expressed protein [Arabidopsis thaliana]<br>gi 17529030 gb AL38725.1  unknown protein [Arabidopsis thaliana]<br>gi 20259081 gb AAM14256.1  unknown protein [Arabidopsis thaliana]<br>gi 21618056 gb AAM67106.1  unknown [Arabidopsis thaliana]<br>gi 297325279 gb EFH55699.1  hypothetical protein ARALYDRAFT_482258 [Arabidopsis lyrata subsp. lyrata]<br>gi 330253707 gb AEC08801.1  NADH dehydrogenase [ubiquinone] 1 alpha subcomplex subunit 13-B [Arabidopsis thaliana] | 143 | 143 | 6.00E-77  | 100.0 | 99.3 | 100.0 | NADH dehydrogenase                                          | gbpln | Arabidopsis<br>lyrata   | AT2G33220.1   Symbols:   GRIM-19 protein   chr2:14078974-14079929 FORWARD LENGTH=143                                                                                                                                                                                                                                                                            | 143 | 143 | 2.00E-79  | 100.0 | 99.3 | 100.0 |
| Rsa1.0_00190.1.g8000.t1 | gb AAB80636.1  Contains similarity to Mycobacterium LIPB gene (gb Q104041) [Arabidopsis thaliana]                                                                                                                                                                                                                                                                                                                                                                                                                                                                                                                                                                                                                                                                                                         | 386 | 333 | 1.00E-168 | 86.3  | 76.2 | 81.3  | Contains similarity to Mycobacterium LIPB gene (gb Q104041) | gbpln | Arabidopsis<br>thaliana | AT1G04640.2   Symbols: LIP2   lipoyltransferase 2   chr1:1292541-1293248 FORWARD LENGTH=235                                                                                                                                                                                                                                                                     | 386 | 235 | 1.00E-125 | 60.9  | 55.2 | 57.8  |
| Rsa1.0_00190.1.g8001.t1 | ref NP_171959.2  uncharacterized protein [Arabidopsis thaliana]<br>gi 332189608 gb AEE27729.1  uncharacterized protein AT1G04650 [Arabidopsis thaliana]                                                                                                                                                                                                                                                                                                                                                                                                                                                                                                                                                                                                                                                   | 982 | 997 | 0         | 101.5 | 81.7 | 89.6  | uncharacterized protein                                     | gbpln | Arabidopsis<br>thaliana | AT1G04650.1   Symbols:   unknown protein; Has 30201 Blast hits to 17322 proteins in 780 species: Archae - 12; Bacteria - 1396; Metazoa - 17338; Fungi - 3422; Plants - 5037; Viruses - 0; Other Eukaryotes - 2996 (source: NCBI BLINK).   chr1:1294893-1298903 REVERSE LENGTH=997                                                                               | 982 | 997 | 0         | 101.5 | 81.7 | 89.6  |
| Rsa1.0_00190.1.g8002.t1 | ref XP_002892235.1  predicted protein [Arabidopsis lyrata subsp. lyrata]<br>gi 297338077 gb EFH68494.1  predicted protein [Arabidopsis lyrata subsp. lyrata]                                                                                                                                                                                                                                                                                                                                                                                                                                                                                                                                                                                                                                              | 196 | 207 | 2.00E-19  | 105.6 | 24.0 | 27.0  | predicted protein                                           | gbpln | Arabidopsis<br>lyrata   | AT1G04660.1   Symbols:   glycine-rich protein   chr1:1300668-1301306 REVERSE LENGTH=212                                                                                                                                                                                                                                                                         | 196 | 212 | 3.00E-21  | 108.2 | 24.0 | 26.5  |
| Rsa1.0_00190.1.g8003.t1 | ref NP_171961.1  uncharacterized protein [Arabidopsis thaliana]<br>gi 55978673 gb AAV68798.1  hypothetical protein AT1G04670 [Arabidopsis thaliana]<br>gi 60547523 gb AAX23725.1  hypothetical protein At1g04670 [Arabidopsis thaliana]<br>gi 332189610 gb AEE27731.1  uncharacterized protein AT1G04670 [Arabidopsis thaliana]                                                                                                                                                                                                                                                                                                                                                                                                                                                                           | 94  | 126 | 2.00E-38  | 134.0 | 90.4 | 93.6  | uncharacterized protein                                     | gbpln | Arabidopsis<br>thaliana | AT1G04670.1   Symbols:   unknown protein; Has 40 Blast hits to 40 proteins in 14 species: Archae - 2; Bacteria - 5; Metazoa - 1; Fungi - 2; Plants - 30; Viruses - 0; Other Eukaryotes - 0 (source: NCBI BLINK).   chr1:1301985-1302532 FORWARD LENGTH=126                                                                                                      | 94  | 126 | 3.00E-41  | 134.0 | 90.4 | 93.6  |
| Rsa1.0_00190.1.g8004.t1 | ref NP_563715.1  putative pectate lyase 1 [Arabidopsis thaliana]<br>gi 2129844 sp O94001.2 PEL1_ARATH RecName: Full=Probable pectate lyase 1; AltName: Full=Pectate lyase A1; Flags: Precursor<br>gi 2494113 gb AAB80622.1  Strong similarity to Musa pectate lyase (gb X92943). ESTs gb AA042458, gb ATTS4502, gb N38552 come from this gene [Arabidopsis thaliana]<br>gi 18086433 gb AAL57671.1  At1g04680/T1G11.6 [Arabidopsis thaliana]<br>gi 21593312 gb AAM65261.1  putative pectate lyase A11 [Arabidopsis thaliana]<br>gi 332189611 gb AEE27732.1  putative pectate lyase 1 [Arabidopsis thaliana]                                                                                                                                                                                                | 431 | 431 | 0         | 100.0 | 94.2 | 97.4  | putative pectate lyase 1                                    | gbpln | Arabidopsis<br>thaliana | AT1G04680.1   Symbols:   Pectin lyase-like superfamily protein   chr1:1304052-1307780 REVERSE LENGTH=431                                                                                                                                                                                                                                                        | 431 | 431 | 0         | 100.0 | 94.2 | 97.4  |

|                         |                                                                                                                                                                                                                                                                                                                                                                                                                                                                                                                                                                                                                                                                                     |      |      |           |       |      |      |                                                                             |       |                      |                                                                                                                                                   |      |      |           |       |      |      |
|-------------------------|-------------------------------------------------------------------------------------------------------------------------------------------------------------------------------------------------------------------------------------------------------------------------------------------------------------------------------------------------------------------------------------------------------------------------------------------------------------------------------------------------------------------------------------------------------------------------------------------------------------------------------------------------------------------------------------|------|------|-----------|-------|------|------|-----------------------------------------------------------------------------|-------|----------------------|---------------------------------------------------------------------------------------------------------------------------------------------------|------|------|-----------|-------|------|------|
| Rsa1.0_00190.1.g8005.t1 | refXP_002889520.1  hypothetical protein ARALYDRAFT_470455 [Arabidopsis lyrata subsp. lyrata] gi 297335362 gb EFH65779.1  hypothetical protein ARALYDRAFT_470455 [Arabidopsis lyrata subsp. lyrata]                                                                                                                                                                                                                                                                                                                                                                                                                                                                                  | 466  | 328  | 0         | 70.4  | 69.1 | 70.2 | hypothetical protein ARALYDRAFT_470455                                      | gbpln | Arabidopsis lyrata   | AT1G04690.1   Symbols: KAB1, KV-BETA1   potassium channel beta subunit 1   chr1:1313662-1315420 FORWARD LENGTH=328                                | 466  | 328  | 0         | 70.4  | 68.9 | 70.2 |
| Rsa1.0_00190.1.g8006.t1 | refXP_002889521.1  kinase family protein [Arabidopsis lyrata subsp. lyrata] gi 297335363 gb EFH65780.1  kinase family protein [Arabidopsis lyrata subsp. lyrata]                                                                                                                                                                                                                                                                                                                                                                                                                                                                                                                    | 1015 | 1043 | 0         | 102.8 | 83.3 | 89.1 | kinase family protein                                                       | gbpln | Arabidopsis lyrata   | AT1G04700.1   Symbols:   PB1 domain-containing protein tyrosine kinase   chr1:1316919-1320653 FORWARD LENGTH=1042                                 | 1015 | 1042 | 0         | 102.7 | 82.7 | 88.8 |
| Rsa1.0_00190.1.g8007.t1 | gb EOA39837.1  hypothetical protein CARUB_v10008506mg [Capsella rubella]                                                                                                                                                                                                                                                                                                                                                                                                                                                                                                                                                                                                            | 672  | 671  | 0         | 99.9  | 93.0 | 97.5 | hypothetical protein CARUB_v10008506mg                                      | gbpln | Capsella rubella     | AT1G50920.1   Symbols:   Nuclear GTP-binding protein   chr1:18870555-18872570 FORWARD LENGTH=671                                                  | 672  | 671  | 0         | 99.9  | 90.8 | 96.3 |
| Rsa1.0_00190.1.g8008.t2 | ref NP_171966.2  chromosome transmission fidelity protein 18 [Arabidopsis thaliana] gi 332189616 gb AEE27737.1  chromosome transmission fidelity protein 18 [Arabidopsis thaliana]                                                                                                                                                                                                                                                                                                                                                                                                                                                                                                  | 958  | 943  | 0         | 98.4  | 85.1 | 91.0 | chromosome transmission fidelity protein 18                                 | gbpln | Arabidopsis thaliana | AT1G04730.1   Symbols: CTF18   P-loop containing nucleoside triphosphate hydrolases superfamily protein   chr1:1325385-1331086 REVERSE LENGTH=943 | 958  | 943  | 0         | 98.4  | 85.1 | 91.0 |
| Rsa1.0_00190.1.g8009.t2 | gb EOA37088.1  hypothetical protein CARUB_v10010251mg [Capsella rubella]                                                                                                                                                                                                                                                                                                                                                                                                                                                                                                                                                                                                            | 267  | 219  | 1.00E-108 | 82.0  | 80.1 | 82.0 | hypothetical protein CARUB_v10010251mg                                      | gbpln | Capsella rubella     | AT1G04750.1   Symbols: VAMP7B, VAMP721, ATVAMP721, AT VAMP7B   vesicle-associated membrane protein 721   chr1:1331857-1333426 REVERSE LENGTH=219  | 267  | 219  | 1.00E-110 | 82.0  | 80.1 | 82.0 |
| Rsa1.0_00190.1.g8010.t1 | gb AAF40459.1 AC004809.17 Strong similarity to the beta-9 tubulin gene (178 gene product) gb AF060248 [Arabidopsis thaliana]                                                                                                                                                                                                                                                                                                                                                                                                                                                                                                                                                        | 298  | 364  | 1.00E-151 | 122.1 | 89.9 | 93.3 | Strong similarity to the beta-9 tubulin gene (178 gene product) gb AF060248 | gbpln | Arabidopsis thaliana | AT1G04770.1   Symbols:   Tetratricopeptide repeat (TPR)-like superfamily protein   chr1:1336564-1337767 REVERSE LENGTH=303                        | 298  | 303  | 1.00E-153 | 101.7 | 89.9 | 93.3 |
| Rsa1.0_00190.1.g8011.t1 | #                                                                                                                                                                                                                                                                                                                                                                                                                                                                                                                                                                                                                                                                                   | #    | #    | #         | #     | #    | #    | -                                                                           | ----  | ----                 | #                                                                                                                                                 | #    | #    | #         | #     | #    |      |
| Rsa1.0_00190.1.g8012.t1 | ref NP_563716.3  ankyrin repeat-containing protein [Arabidopsis thaliana] gi 26451052 dbj BAC42631.1  unknown protein [Arabidopsis thaliana] gi 332189622 gb AEE27743.1  ankyrin repeat-containing protein [Arabidopsis thaliana]                                                                                                                                                                                                                                                                                                                                                                                                                                                   | 750  | 664  | 0         | 88.5  | 76.1 | 80.3 | ankyrin repeat-containing protein                                           | gbpln | Arabidopsis thaliana | AT1G04780.1   Symbols:   Ankyrin repeat family protein   chr1:1340891-1342965 REVERSE LENGTH=664                                                  | 750  | 664  | 0         | 88.5  | 76.1 | 80.3 |
| Rsa1.0_00190.1.g8013.t2 | refXP_002889524.1  zinc finger family protein [Arabidopsis lyrata subsp. lyrata] gi 297335366 gb EFH65783.1  zinc finger family protein [Arabidopsis lyrata subsp. lyrata]                                                                                                                                                                                                                                                                                                                                                                                                                                                                                                          | 671  | 634  | 1.00E-175 | 94.5  | 60.2 | 69.4 | zinc finger family protein                                                  | gbpln | Arabidopsis lyrata   | AT1G04790.1   Symbols:   RING/U-box superfamily protein   chr1:1345469-1348143 FORWARD LENGTH=634                                                 | 671  | 634  | 1.00E-176 | 94.5  | 61.0 | 69.4 |
| Rsa1.0_00190.1.g8014.t1 | refXP_002892243.1  predicted protein [Arabidopsis lyrata subsp. lyrata] gi 297338085 gb EFH68502.1  predicted protein [Arabidopsis lyrata subsp. lyrata]                                                                                                                                                                                                                                                                                                                                                                                                                                                                                                                            | 190  | 198  | 3.00E-13  | 104.2 | 18.9 | 22.6 | predicted protein                                                           | gbpln | Arabidopsis lyrata   | #                                                                                                                                                 | #    | #    | #         | #     | #    |      |
| Rsa1.0_00190.1.g8015.t1 | ref NP_974195.1  F-box protein [Arabidopsis thaliana] gi 332198353 gb AEE36474.1  F-box protein [Arabidopsis thaliana]                                                                                                                                                                                                                                                                                                                                                                                                                                                                                                                                                              | 413  | 462  | 1.00E-102 | 111.9 | 53.5 | 65.9 | F-box protein                                                               | gbpln | Arabidopsis thaliana | AT1G80960.3   Symbols:   F-box and Leucine Rich Repeat domains containing protein   chr1:30416065-30418220 FORWARD LENGTH=462                     | 413  | 462  | 1.00E-105 | 111.9 | 53.5 | 65.9 |
| Rsa1.0_00190.1.g8016.t2 | refXP_002892245.1  pentatricopeptide repeat-containing protein [Arabidopsis lyrata subsp. lyrata] gi 297338087 gb EFH68504.1  pentatricopeptide repeat-containing protein [Arabidopsis lyrata subsp. lyrata]                                                                                                                                                                                                                                                                                                                                                                                                                                                                        | 1047 | 664  | 0         | 63.4  | 50.4 | 55.2 | pentatricopeptide repeat-containing protein                                 | gbpln | Arabidopsis lyrata   | AT1G04840.1   Symbols:   Tetratricopeptide repeat (TPR)-like superfamily protein   chr1:1362867-1364962 REVERSE LENGTH=665                        | 1047 | 665  | 0         | 63.5  | 50.0 | 55.1 |
| Rsa1.0_00190.1.g8017.t1 | ref NP_171980.1  high mobility group-box and ARID domain-binding domain-containing protein [Arabidopsis thaliana] gi 75192516 sp Q9MAT6.1 HMG15_ARAT H RecName: Full=High mobility group B protein 15; AltName: Full=Nucleosome/chromatin assembly factor group D 15 gi 7211978 gb AAF40449.1 AC004809.7 Contains similarity to the high mobility group family PF 00505 [Arabidopsis thaliana] gi 56236040 gb AAV84476.1  At1g04880 [Arabidopsis thaliana] gi 56790208 gb AAW30021.1  At1g04880 [Arabidopsis thaliana] gi 225897878 dbj BAH30271.1  hypothetical protein [Arabidopsis thaliana] gi 332189634 gb AEE27755.1  high mobility group B protein 15 [Arabidopsis thaliana] | 420  | 448  | 1.00E-160 | 106.7 | 73.8 | 84.3 | high mobility group-box and ARID domain-binding domain-containing protein   | gbpln | Arabidopsis thaliana | AT1G04880.1   Symbols:   HMG (high mobility group) box protein with ARID/BRIGHT DNA-binding domain   chr1:1376106-1378264 REVERSE LENGTH=448      | 420  | 448  | 1.00E-163 | 106.7 | 73.8 | 84.3 |



|                         |                                                                                                                                                                                                                                                                                                                                                                                                                                                                                                                                                                                                                                                                                                                                                                                                                                                                                                                                                                                                                                                     |     |     |           |       |      |      |                                                |       |                      |                                                                                                                                       |     |     |           |       |      |      |
|-------------------------|-----------------------------------------------------------------------------------------------------------------------------------------------------------------------------------------------------------------------------------------------------------------------------------------------------------------------------------------------------------------------------------------------------------------------------------------------------------------------------------------------------------------------------------------------------------------------------------------------------------------------------------------------------------------------------------------------------------------------------------------------------------------------------------------------------------------------------------------------------------------------------------------------------------------------------------------------------------------------------------------------------------------------------------------------------|-----|-----|-----------|-------|------|------|------------------------------------------------|-------|----------------------|---------------------------------------------------------------------------------------------------------------------------------------|-----|-----|-----------|-------|------|------|
| Rsa1.0_00190.1.g8018.t1 | gb[EOA38922.1] hypothetical protein CARUB_v10011320mg [Capsella rubella]                                                                                                                                                                                                                                                                                                                                                                                                                                                                                                                                                                                                                                                                                                                                                                                                                                                                                                                                                                            | 532 | 568 | 0         | 106.8 | 73.1 | 84.0 | hypothetical protein CARUB_v10011320mg         | gbpln | Capsella rubella     | AT1G04890.1   Symbols:   Protein of unknown function, DUF593   chr1:1381116-1382546 REVERSE LENGTH=411                                | 532 | 411 | 1.00E-144 | 77.3  | 57.5 | 62.4 |
| Rsa1.0_00190.1.g8019.t1 | ref[XP_00289527.1] hypothetical protein ARALYDRAFT_470475 [Arabidopsis lyrata subsp. lyrata] gi 297335369 gb EFH65786.1] hypothetical protein ARALYDRAFT_470475 [Arabidopsis lyrata subsp. lyrata] ref[XP_002892251.1] hypothetical protein ARALYDRAFT_470476 [Arabidopsis lyrata subsp. lyrata] gi 297338093 gb EFH68510.1] hypothetical protein ARALYDRAFT_470476 [Arabidopsis lyrata subsp. lyrata] ref[NP_180843.2] proline-rich uncharacterized protein [Arabidopsis thaliana] gi 26450185 bj BAC42211.1] unknown protein [Arabidopsis thaliana] gi 28827576 gb AA050632.1] unknown protein [Arabidopsis thaliana] gi 330253655 gb AEC08749.1] proline-rich uncharacterized protein [Arabidopsis thaliana]                                                                                                                                                                                                                                                                                                                                     | 448 | 447 | 0         | 99.8  | 92.2 | 95.8 | hypothetical protein ARALYDRAFT_470475         | gbpln | Arabidopsis lyrata   | AT1G04900.1   Symbols:   Protein of unknown function (DUF185)   chr1:1383912-1387561 FORWARD LENGTH=442                               | 448 | 442 | 0         | 98.7  | 91.7 | 94.6 |
| Rsa1.0_00190.1.g8020.t2 | ref[XP_002892251.1] hypothetical protein ARALYDRAFT_470476 [Arabidopsis lyrata subsp. lyrata] gi 297338093 gb EFH68510.1] hypothetical protein ARALYDRAFT_470476 [Arabidopsis lyrata subsp. lyrata] ref[NP_180843.2] proline-rich uncharacterized protein [Arabidopsis thaliana] gi 26450185 bj BAC42211.1] unknown protein [Arabidopsis thaliana] gi 28827576 gb AA050632.1] unknown protein [Arabidopsis thaliana] gi 330253655 gb AEC08749.1] proline-rich uncharacterized protein [Arabidopsis thaliana]                                                                                                                                                                                                                                                                                                                                                                                                                                                                                                                                        | 541 | 519 | 0         | 95.9  | 88.7 | 91.3 | hypothetical protein ARALYDRAFT_470476         | gbpln | Arabidopsis lyrata   | AT1G04910.1   Symbols:   O-fucosyltransferase family protein   chr1:1388101-1391074 REVERSE LENGTH=519                                | 541 | 519 | 0         | 95.9  | 88.5 | 90.8 |
| Rsa1.0_00190.1.g8021.t1 | ref[XP_00289528.1] hypothetical protein ARALYDRAFT_887669 [Arabidopsis lyrata subsp. lyrata] gi 297335370 gb EFH65787.1] hypothetical protein ARALYDRAFT_887669 [Arabidopsis lyrata subsp. lyrata]                                                                                                                                                                                                                                                                                                                                                                                                                                                                                                                                                                                                                                                                                                                                                                                                                                                  | 342 | 337 | 2.00E-77  | 98.5  | 53.2 | 62.9 | proline-rich uncharacterized protein           | gbpln | Arabidopsis thaliana | AT2G32840.1   Symbols:   proline-rich family protein   chr2:13933101-13934836 REVERSE LENGTH=337                                      | 342 | 337 | 5.00E-80  | 98.5  | 53.2 | 62.9 |
| Rsa1.0_00190.1.g8022.t1 | ref[XP_00289528.1] hypothetical protein ARALYDRAFT_887669 [Arabidopsis lyrata subsp. lyrata] gi 297335370 gb EFH65787.1] hypothetical protein ARALYDRAFT_887669 [Arabidopsis lyrata subsp. lyrata]                                                                                                                                                                                                                                                                                                                                                                                                                                                                                                                                                                                                                                                                                                                                                                                                                                                  | 273 | 273 | 1.00E-125 | 100.0 | 86.8 | 91.2 | hypothetical protein ARALYDRAFT_887669         | gbpln | Arabidopsis lyrata   | AT1G04940.1   Symbols: TIC20   translocon at the inner envelope membrane of chloroplasts 20   chr1:1399588-1400616 FORWARD LENGTH=274 | 273 | 274 | 1.00E-126 | 100.4 | 85.7 | 90.5 |
| Rsa1.0_00190.1.g8023.t1 | gb[EOA40075.1] hypothetical protein CARUB_v10008770mg [Capsella rubella] ref[XP_002863818.1] mitochondrial substrate carrier family protein [Arabidopsis lyrata subsp. lyrata] gi 297309653 gb EFH40077.1] mitochondrial substrate carrier family protein [Arabidopsis lyrata subsp. lyrata]                                                                                                                                                                                                                                                                                                                                                                                                                                                                                                                                                                                                                                                                                                                                                        | 867 | 547 | 0         | 63.1  | 53.6 | 56.7 | hypothetical protein CARUB_v10008770mg         | gbpln | Capsella rubella     | AT1G04950.3   Symbols: TAFI59, TAF6, ATTA6   TATA BOX ASSOCIATED FACTOR II 59   chr1:1403606-1407184 REVERSE LENGTH=549               | 867 | 549 | 0         | 63.3  | 53.7 | 56.9 |
| Rsa1.0_00190.1.g8024.t1 | ref[XP_002863818.1] mitochondrial substrate carrier family protein [Arabidopsis lyrata subsp. lyrata] gi 297309653 gb EFH40077.1] mitochondrial substrate carrier family protein [Arabidopsis lyrata subsp. lyrata]                                                                                                                                                                                                                                                                                                                                                                                                                                                                                                                                                                                                                                                                                                                                                                                                                                 | 400 | 412 | 1.00E-180 | 103.0 | 84.0 | 90.3 | mitochondrial substrate carrier family protein | gbpln | Arabidopsis lyrata   | AT5G42130.1   Symbols:   Mitochondrial substrate carrier family protein   chr5:16835572-16836810 REVERSE LENGTH=412                   | 400 | 412 | 0         | 103.0 | 83.3 | 91.0 |
| Rsa1.0_00190.1.g8025.t1 | gb[EOA40204.1] hypothetical protein CARUB_v10008924mg [Capsella rubella] ref[XP_002892256.1] hypothetical protein ARALYDRAFT_470488 [Arabidopsis lyrata subsp. lyrata] gi 297338098 gb EFH68515.1] hypothetical protein ARALYDRAFT_470488 [Arabidopsis lyrata subsp. lyrata] ref[XP_002879672.1] hypothetical protein ARALYDRAFT_345475 [Arabidopsis lyrata subsp. lyrata] gi 29732551.1 gb EFH55931.1] hypothetical protein ARALYDRAFT_345475 [Arabidopsis lyrata subsp. lyrata] ref[NP_171990.3] protein disulfide-isomerase A6 [Arabidopsis thaliana] gi 310947346 sp Q9MAU6.2 PDI22_ARAT H RecName: Full=Protein disulfide-isomerase like 2-2; Short=AtPDIL2-2; AltName: Full=Protein disulfide-isomerase 10; Short=PDI10; AltName: Full=Protein disulfide-isomerase like 5-1; Short=AtPDIL5-1; Flags: Precursor gi 332189652 gb AEE2773.1] protein disulfide-isomerase like 2-2 [Arabidopsis thaliana] ref[XP_002889536.1] MAPKKK18 [Arabidopsis lyrata subsp. lyrata] gi 297335378 gb EFH65795.1] MAPKKK18 [Arabidopsis lyrata subsp. lyrata] | 365 | 502 | 0         | 137.5 | 87.7 | 93.4 | hypothetical protein CARUB_v10008924mg         | gbpln | Capsella rubella     | AT1G04970.1   Symbols:   lipid-binding serum glycoprotein family protein   chr1:1411216-1413431 FORWARD LENGTH=488                    | 365 | 488 | 0         | 133.7 | 85.5 | 91.0 |
| Rsa1.0_00190.1.g8026.t1 | ref[XP_002892256.1] hypothetical protein ARALYDRAFT_470488 [Arabidopsis lyrata subsp. lyrata] gi 297338098 gb EFH68515.1] hypothetical protein ARALYDRAFT_470488 [Arabidopsis lyrata subsp. lyrata] ref[XP_002879672.1] hypothetical protein ARALYDRAFT_345475 [Arabidopsis lyrata subsp. lyrata] gi 29732551.1 gb EFH55931.1] hypothetical protein ARALYDRAFT_345475 [Arabidopsis lyrata subsp. lyrata] ref[NP_171990.3] protein disulfide-isomerase A6 [Arabidopsis thaliana] gi 310947346 sp Q9MAU6.2 PDI22_ARAT H RecName: Full=Protein disulfide-isomerase like 2-2; Short=AtPDIL2-2; AltName: Full=Protein disulfide-isomerase 10; Short=PDI10; AltName: Full=Protein disulfide-isomerase like 5-1; Short=AtPDIL5-1; Flags: Precursor gi 332189652 gb AEE2773.1] protein disulfide-isomerase like 2-2 [Arabidopsis thaliana] ref[XP_002889536.1] MAPKKK18 [Arabidopsis lyrata subsp. lyrata] gi 297335378 gb EFH65795.1] MAPKKK18 [Arabidopsis lyrata subsp. lyrata]                                                                          | 333 | 442 | 7.00E-88  | 132.7 | 50.8 | 55.9 | hypothetical protein ARALYDRAFT_470488         | gbpln | Arabidopsis lyrata   | AT1G04980.1   Symbols: ATPDIL2-2, ATPD10, PDI10, PDIL2-2   PDI-like 2-2   chr1:1413869-1416120 REVERSE LENGTH=447                     | 333 | 447 | 6.00E-89  | 134.2 | 50.2 | 55.0 |
| Rsa1.0_00190.1.g8027.t1 | ref[XP_002879672.1] hypothetical protein ARALYDRAFT_345475 [Arabidopsis lyrata subsp. lyrata] gi 29732551.1 gb EFH55931.1] hypothetical protein ARALYDRAFT_345475 [Arabidopsis lyrata subsp. lyrata] ref[NP_171990.3] protein disulfide-isomerase A6 [Arabidopsis thaliana] gi 310947346 sp Q9MAU6.2 PDI22_ARAT H RecName: Full=Protein disulfide-isomerase like 2-2; Short=AtPDIL2-2; AltName: Full=Protein disulfide-isomerase 10; Short=PDI10; AltName: Full=Protein disulfide-isomerase like 5-1; Short=AtPDIL5-1; Flags: Precursor gi 332189652 gb AEE2773.1] protein disulfide-isomerase like 2-2 [Arabidopsis thaliana] ref[XP_002889536.1] MAPKKK18 [Arabidopsis lyrata subsp. lyrata] gi 297335378 gb EFH65795.1] MAPKKK18 [Arabidopsis lyrata subsp. lyrata]                                                                                                                                                                                                                                                                              | 201 | 232 | 8.00E-27  | 115.4 | 38.8 | 54.2 | hypothetical protein ARALYDRAFT_345475         | gbpln | Arabidopsis lyrata   | AT2G37435.1   Symbols:   Cystatin/monellin superfamily protein   chr2:15709823-15710528 FORWARD LENGTH=171                            | 201 | 171 | 1.00E-27  | 85.1  | 32.8 | 48.8 |
| Rsa1.0_00190.1.g8028.t1 | ref[XP_002879672.1] hypothetical protein ARALYDRAFT_345475 [Arabidopsis lyrata subsp. lyrata] gi 29732551.1 gb EFH55931.1] hypothetical protein ARALYDRAFT_345475 [Arabidopsis lyrata subsp. lyrata] ref[NP_171990.3] protein disulfide-isomerase A6 [Arabidopsis thaliana] gi 310947346 sp Q9MAU6.2 PDI22_ARAT H RecName: Full=Protein disulfide-isomerase like 2-2; Short=AtPDIL2-2; AltName: Full=Protein disulfide-isomerase 10; Short=PDI10; AltName: Full=Protein disulfide-isomerase like 5-1; Short=AtPDIL5-1; Flags: Precursor gi 332189652 gb AEE2773.1] protein disulfide-isomerase like 2-2 [Arabidopsis thaliana] ref[XP_002889536.1] MAPKKK18 [Arabidopsis lyrata subsp. lyrata] gi 297335378 gb EFH65795.1] MAPKKK18 [Arabidopsis lyrata subsp. lyrata]                                                                                                                                                                                                                                                                              | 444 | 447 | 0         | 100.7 | 88.3 | 93.0 | protein disulfide-isomerase A6                 | gbpln | Arabidopsis thaliana | AT1G04980.1   Symbols: ATPDIL2-2, ATPD10, PDI10, PDIL2-2   PDI-like 2-2   chr1:1413869-1416120 REVERSE LENGTH=447                     | 444 | 447 | 0         | 100.7 | 88.3 | 93.0 |
| Rsa1.0_00190.1.g8029.t1 | ref[XP_002889536.1] MAPKKK18 [Arabidopsis lyrata subsp. lyrata] gi 297335378 gb EFH65795.1] MAPKKK18 [Arabidopsis lyrata subsp. lyrata]                                                                                                                                                                                                                                                                                                                                                                                                                                                                                                                                                                                                                                                                                                                                                                                                                                                                                                             | 334 | 341 | 1.00E-167 | 102.1 | 86.5 | 93.1 | MAPKKK18                                       | gbpln | Arabidopsis lyrata   | AT1G05100.1   Symbols: MAPKKK18   mitogen-activated protein kinase kinase 18   chr1:1469679-1470698 FORWARD LENGTH=339                | 334 | 339 | 1.00E-165 | 101.5 | 84.1 | 90.7 |

|                         |                                                                                                                                                                                                                                                                                                                                                                                                                                                                                                                      |     |     |           |       |      |      |                                         |       |                      |                                                                                                                                                                                                                                                                                   |     |     |           |       |      |      |
|-------------------------|----------------------------------------------------------------------------------------------------------------------------------------------------------------------------------------------------------------------------------------------------------------------------------------------------------------------------------------------------------------------------------------------------------------------------------------------------------------------------------------------------------------------|-----|-----|-----------|-------|------|------|-----------------------------------------|-------|----------------------|-----------------------------------------------------------------------------------------------------------------------------------------------------------------------------------------------------------------------------------------------------------------------------------|-----|-----|-----------|-------|------|------|
| Rsa1.0_00190.1.g8030.t1 | ref NP_172004.1  Helicase protein with RING/U-box domain [Arabidopsis thaliana] gi 332189671 gb AEE27792.1  Helicase protein with RING/U-box domain [Arabidopsis thaliana]                                                                                                                                                                                                                                                                                                                                           | 867 | 833 | 0         | 96.1  | 78.1 | 84.7 | Helicase protein with RING/U-box domain | gbpln | Arabidopsis thaliana | AT1G05120.1   Symbols:   Helicase protein with RING/U-box domain   chr1:1471624-1476067 REVERSE LENGTH=833                                                                                                                                                                        | 867 | 833 | 0         | 96.1  | 78.1 | 84.7 |
| Rsa1.0_00190.1.g8031.t1 | gb EOA39063.1  hypothetical protein CARUB_v10011717mg [Capsella rubella]                                                                                                                                                                                                                                                                                                                                                                                                                                             | 442 | 448 | 0         | 101.4 | 81.2 | 87.1 | hypothetical protein CARUB_v10011717mg  | gbpln | Capsella rubella     | AT1G05140.1   Symbols:   Pentidase M50 family protein   chr1:1482681-1484006 FORWARD LENGTH=441                                                                                                                                                                                   | 442 | 441 | 0         | 99.8  | 84.6 | 91.0 |
| Rsa1.0_00190.1.g8032.t2 | ref NP_172004.1  Helicase protein with RING/U-box domain [Arabidopsis thaliana] gi 332189671 gb AEE27792.1  Helicase protein with RING/U-box domain [Arabidopsis thaliana]                                                                                                                                                                                                                                                                                                                                           | 796 | 833 | 0         | 104.6 | 73.1 | 82.2 | Helicase protein with RING/U-box domain | gbpln | Arabidopsis thaliana | AT1G05120.1   Symbols:   Helicase protein with RING/U-box domain   chr1:1471624-1476067 REVERSE LENGTH=833                                                                                                                                                                        | 796 | 833 | 0         | 104.6 | 73.1 | 82.2 |
| Rsa1.0_00190.1.g8033.t1 | gb EOA37664.1  hypothetical protein CARUB_v10012243mg [Capsella rubella]                                                                                                                                                                                                                                                                                                                                                                                                                                             | 806 | 808 | 0         | 100.2 | 92.2 | 95.4 | hypothetical protein CARUB_v10012243mg  | gbpln | Capsella rubella     | AT1G05150.1   Symbols:   Calcium-binding tetratricopeptide family protein   chr1:1484280-1486706 REVERSE LENGTH=808                                                                                                                                                               | 806 | 808 | 0         | 100.2 | 91.3 | 94.5 |
| Rsa1.0_00190.1.g8034.t1 | ref NP_172008.1  Ent-kaurenoic acid oxidase 1 [Arabidopsis thaliana] gi 5915848 sp O23051.1 KAO1_ARATH RecName: Full=Ent-kaurenoic acid oxidase 1; Short=ATKAO1; AltName: Full=Cytochrome P450 88A3 gi 2388581 gb AAB71462.1  Similar to Zea DWARF3 (gb U32579) [Arabidopsis thaliana] gi 110737917 dbj BAF00896.1  cytochrome P450 like protein [Arabidopsis thaliana] gi 115546749 gb ABJ17104.1  At1g05160 [Arabidopsis thaliana] gi 332189675 gb AEE27796.1  Ent-kaurenoic acid oxidase 1 [Arabidopsis thaliana] | 871 | 490 | 0         | 56.3  | 49.0 | 51.9 | Ent-kaurenoic acid oxidase 1            | gbpln | Arabidopsis thaliana | AT1G05160.1   Symbols: CYP88A3, ATKAO1, KAO1   cytochrome P450, family 88, subfamily A, polypeptide 3   chr1:1487640-1489828 REVERSE LENGTH=490                                                                                                                                   | 871 | 490 | 0         | 56.3  | 49.0 | 51.9 |
| Rsa1.0_00190.1.g8035.t4 | gb EOA37082.1  hypothetical protein CARUB_v10010237mg [Capsella rubella]                                                                                                                                                                                                                                                                                                                                                                                                                                             | 456 | 223 | 1.00E-113 | 48.9  | 44.3 | 45.4 | hypothetical protein CARUB_v10010237mg  | gbpln | Capsella rubella     | AT1G05190.1   Symbols: emb2394   Ribosomal protein L6 family   chr1:1502515-1503738 REVERSE LENGTH=223                                                                                                                                                                            | 456 | 223 | 1.00E-114 | 48.9  | 43.6 | 45.4 |
| Rsa1.0_00190.1.g8036.t1 | ref NP_172900.2  Ankyrin repeat family protein [Arabidopsis thaliana] gi 7262691 gb AAF43949.1 AC012188_26 Contains similarity to a hypothetical protein from Arabidopsis thaliana gi AF080119.1 and contains Ankyrin PF 00023 repeats [Arabidopsis thaliana] gi 332191048 gb AEE29169.1  Ankyrin repeat family protein [Arabidopsis thaliana]                                                                                                                                                                       | 171 | 441 | 2.00E-27  | 257.9 | 38.6 | 46.2 | Ankyrin repeat family protein           | gbpln | Arabidopsis thaliana | AT1G14480.1   Symbols:   Ankyrin repeat family protein   chr1:4956404-4957888 FORWARD LENGTH=441                                                                                                                                                                                  | 171 | 441 | 6.00E-30  | 257.9 | 38.6 | 46.2 |
| Rsa1.0_00190.1.g8037.t1 | #                                                                                                                                                                                                                                                                                                                                                                                                                                                                                                                    | #   | #   | #         | #     | #    | #    | -                                       | ----  | ----                 | #                                                                                                                                                                                                                                                                                 | #   | #   | #         | #     | #    |      |
| Rsa1.0_00191.1.g8038.t1 | ref XP_002867990.1  hypothetical protein ARALYDRAFT_914837 [Arabidopsis lyrata subsp. lyrata] gi 297313826 gb EFH44249.1  hypothetical protein ARALYDRAFT_914837 [Arabidopsis lyrata subsp. lyrata]                                                                                                                                                                                                                                                                                                                  | 305 | 304 | 1.00E-114 | 99.7  | 73.4 | 82.3 | hypothetical protein ARALYDRAFT_914837  | gbpln | Arabidopsis lyrata   | AT4G18450.1   Symbols:   Integrase-type DNA-binding superfamily protein   chr4:10190250-10191161 REVERSE LENGTH=303                                                                                                                                                               | 305 | 303 | 1.00E-110 | 99.3  | 70.8 | 80.7 |
| Rsa1.0_00191.1.g8039.t1 | gb EOA16437.1  hypothetical protein CARUB_v10004589mg [Capsella rubella]                                                                                                                                                                                                                                                                                                                                                                                                                                             | 540 | 523 | 0         | 96.9  | 84.3 | 91.3 | hypothetical protein CARUB_v10004589mg  | gbpln | Capsella rubella     | AT1G36280.1   Symbols:   L-Aspartase-like family protein   chr1:13640600-13642908 FORWARD LENGTH=527                                                                                                                                                                              | 540 | 527 | 0         | 97.6  | 85.0 | 91.5 |
| Rsa1.0_00191.1.g8040.t1 | gb EOA17406.1  hypothetical protein CARUB_v10005708mg [Capsella rubella]                                                                                                                                                                                                                                                                                                                                                                                                                                             | 216 | 217 | 1.00E-109 | 100.5 | 87.5 | 94.0 | hypothetical protein CARUB_v10005708mg  | gbpln | Capsella rubella     | AT4G18430.1   Symbols: AtRABA1e, RABA1e   RAB GTPase homolog A1E   chr4:10183903-10185223 REVERSE LENGTH=217                                                                                                                                                                      | 216 | 217 | 1.00E-112 | 100.5 | 87.5 | 94.0 |
| Rsa1.0_00191.1.g8041.t1 | ref XP_002867993.1  hypothetical protein ARALYDRAFT_914840 [Arabidopsis lyrata subsp. lyrata] gi 297313829 gb EFH44252.1  hypothetical protein ARALYDRAFT_914840 [Arabidopsis lyrata subsp. lyrata]                                                                                                                                                                                                                                                                                                                  | 223 | 213 | 1.00E-110 | 95.5  | 87.0 | 89.2 | hypothetical protein ARALYDRAFT_914840  | gbpln | Arabidopsis lyrata   | AT4G18425.1   Symbols:   Protein of unknown function (DUF679)   chr4:10181421-10182062 REVERSE LENGTH=213                                                                                                                                                                         | 223 | 213 | 1.00E-111 | 95.5  | 85.7 | 87.9 |
| Rsa1.0_00191.1.g8042.t1 | ref NP_001154252.1  uncharacterized protein [Arabidopsis thaliana] gi 332658643 gb AEE84043.1  uncharacterized protein AT4G18422 [Arabidopsis thaliana]                                                                                                                                                                                                                                                                                                                                                              | 81  | 88  | 7.00E-25  | 108.6 | 79.0 | 84.0 | uncharacterized protein                 | gbpln | Arabidopsis thaliana | AT4G18422.1   Symbols:   unknown protein; FUNCTIONS IN: molecular_function unknown; INVOLVED IN: biological_process unknown; LOCATED IN: cellular_component unknown; Has 0 Blast hits to 0 proteins in 0 species (source: NCBI BLINK).   chr4:10176264-10176530 REVERSE LENGTH=88 | 81  | 88  | 1.00E-27  | 108.6 | 79.0 | 84.0 |

|                         |                                                                                                                                                                                                                                                                                                                                                                                                                                                                                                                                                                                     |     |     |           |       |      |      |                                                 |       |                      |                                                                                                                                                                                                                                                                                                                                                                                                                                                                        |     |     |           |       |      |      |
|-------------------------|-------------------------------------------------------------------------------------------------------------------------------------------------------------------------------------------------------------------------------------------------------------------------------------------------------------------------------------------------------------------------------------------------------------------------------------------------------------------------------------------------------------------------------------------------------------------------------------|-----|-----|-----------|-------|------|------|-------------------------------------------------|-------|----------------------|------------------------------------------------------------------------------------------------------------------------------------------------------------------------------------------------------------------------------------------------------------------------------------------------------------------------------------------------------------------------------------------------------------------------------------------------------------------------|-----|-----|-----------|-------|------|------|
| Rsa1.0_00191.1.g8043.t1 | gb EOA17708.1  hypothetical protein CARUB_v10006080mg [Capsella rubella]                                                                                                                                                                                                                                                                                                                                                                                                                                                                                                            | 139 | 107 | 2.00E-32  | 77.0  | 61.2 | 66.9 | hypothetical protein CARUB_v10006080mg          | gbpln | Capsella rubella     | AT4G18400.1   Symbols:   unknown protein; FUNCTIONS IN: molecular_function unknown; INVOLVED IN: biological_process unknown; LOCATED IN: chloroplast; EXPRESSED IN: 22 plant structures; EXPRESSED DURING: 13 growth stages; Has 30201 Blast hits to 17322 proteins in 780 species: Archae - 12; Bacteria - 1396; Metazoa - 17338; Fungi - 3422; Plants - 5037; Viruses - 0; Other Eukaryotes - 2996 (source: NCBI ELink).   chr4:10170024-10171221 REVERSE LENGTH=107 | 139 | 107 | 8.00E-31  | 77.0  | 61.2 | 66.2 |
| Rsa1.0_00191.1.g8044.t1 | dbj BAJ33883.1  unnamed protein product [Thellungiella halophila]                                                                                                                                                                                                                                                                                                                                                                                                                                                                                                                   | 387 | 379 | 1.00E-150 | 97.9  | 82.2 | 86.0 | unnamed protein product                         | ----  | ----                 | AT4G18390.2   Symbols: TCP2   TEOSINTE BRANCHED 1, cycloidea and PCF transcription factor 2   chr4:10163212-10164309 REVERSE LENGTH=365                                                                                                                                                                                                                                                                                                                                | 387 | 365 | 1.00E-138 | 94.3  | 75.7 | 79.1 |
| Rsa1.0_00191.1.g8045.t1 | gb EOA16709.1  hypothetical protein CARUB_v10004910mg, partial [Capsella rubella]                                                                                                                                                                                                                                                                                                                                                                                                                                                                                                   | 382 | 418 | 1.00E-165 | 109.4 | 82.5 | 88.5 | hypothetical protein CARUB_v10004910mg, partial | gbpln | Capsella rubella     | AT4G18380.2   Symbols:   F-box family protein   chr4:10157957-10159099 FORWARD LENGTH=380                                                                                                                                                                                                                                                                                                                                                                              | 382 | 380 | 1.00E-161 | 99.5  | 82.2 | 88.5 |
| Rsa1.0_00191.1.g8046.t1 | ref NP_193572.1  KH domain-containing protein [Arabidopsis thaliana]<br>gi 15214341 sp P58223.1 Y4837_ARATH RecName: Full=KH domain-containing protein At4g18375<br>gi 22136632 gb AAM91635.1  unknown protein [Arabidopsis thaliana]<br>gi 332658636 gb AEE84036.1  KH domain-containing protein [Arabidopsis thaliana]                                                                                                                                                                                                                                                            | 601 | 606 | 0         | 100.8 | 65.6 | 77.7 | KH domain-containing protein                    | gbpln | Arabidopsis thaliana | AT4G18375.2   Symbols:   RNA-binding KH domain-containing protein   chr4:10152825-10155125 FORWARD LENGTH=606                                                                                                                                                                                                                                                                                                                                                          | 601 | 606 | 0         | 100.8 | 65.6 | 77.7 |
| Rsa1.0_00191.1.g8047.t1 | gb EOA18560.1  hypothetical protein CARUB_v10007117mg [Capsella rubella]                                                                                                                                                                                                                                                                                                                                                                                                                                                                                                            | 112 | 109 | 1.00E-49  | 97.3  | 88.4 | 93.8 | hypothetical protein CARUB_v10007117mg          | gbpln | Capsella rubella     | AT4G18372.1   Symbols:   Small nuclear ribonucleoprotein family protein   chr4:10151349-10151687 REVERSE LENGTH=112                                                                                                                                                                                                                                                                                                                                                    | 112 | 112 | 7.00E-51  | 100.0 | 85.7 | 92.9 |
| Rsa1.0_00191.1.g8048.t1 | ref XP_002870050.1  hypothetical protein ARALYDRAFT_493027 [Arabidopsis lyrata subsp. lyrata]<br>gi 297315886 gb EFH46309.1  hypothetical protein ARALYDRAFT_493027 [Arabidopsis lyrata subsp. lyrata]                                                                                                                                                                                                                                                                                                                                                                              | 319 | 320 | 1.00E-134 | 100.3 | 79.0 | 84.6 | hypothetical protein ARALYDRAFT_493027          | gbpln | Arabidopsis lyrata   | AT4G18370.1   Symbols: DEG5, DEGP5, HHOA   DEGP protease 5   chr4:10149235-10151051 FORWARD LENGTH=323                                                                                                                                                                                                                                                                                                                                                                 | 319 | 323 | 1.00E-126 | 101.3 | 74.6 | 80.9 |
| Rsa1.0_00191.1.g8049.t1 | ref XP_002868001.1  hypothetical protein ARALYDRAFT_914854 [Arabidopsis lyrata subsp. lyrata]<br>gi 297313837 gb EFH44260.1  hypothetical protein ARALYDRAFT_914854 [Arabidopsis lyrata subsp. lyrata]                                                                                                                                                                                                                                                                                                                                                                              | 400 | 368 | 1.00E-169 | 92.0  | 74.0 | 78.8 | hypothetical protein ARALYDRAFT_914854          | gbpln | Arabidopsis lyrata   | AT4G18360.1   Symbols:   Aldolase-type TIM barrel family protein   chr4:10146141-10148386 REVERSE LENGTH=368                                                                                                                                                                                                                                                                                                                                                           | 400 | 368 | 1.00E-171 | 92.0  | 73.8 | 78.5 |
| Rsa1.0_00191.1.g8050.t1 | ref NP_193569.1  9-cis-epoxycarotenoid dioxygenase NCED2 [Arabidopsis thaliana]<br>gi 75098750 sp O49505.1 NCED2_ARATH RecName: Full=9-cis-epoxycarotenoid dioxygenase NCED2, chloroplastic; Short=AtNCED2; Flags: Precursor gi 2832640 emb CAA16715.1  neoxanthin cleavage enzyme - like protein [Arabidopsis thaliana]<br>gi 7268628 emb CAB78837.1  neoxanthin cleavage enzyme-like protein [Arabidopsis thaliana]<br>gi 133778876 gb ABO38778.1  At4g18350 [Arabidopsis thaliana]<br>gi 332658630 gb AEE84030.1  9-cis-epoxycarotenoid dioxygenase NCED2 [Arabidopsis thaliana] | 580 | 583 | 0         | 100.5 | 88.3 | 93.6 | 9-cis-epoxycarotenoid dioxygenase NCED2         | gbpln | Arabidopsis thaliana | AT4G18350.1   Symbols: NCED2, ATNCED2   nine-cis-epoxycarotenoid dioxygenase 2   chr4:10142672-10144423 FORWARD LENGTH=583                                                                                                                                                                                                                                                                                                                                             | 580 | 583 | 0         | 100.5 | 88.3 | 93.6 |

|                         |                                                                                                                                                                                                                                                                                                                                                                                                                                                                                            |      |      |           |       |      |       |                                                                   |       |                      |                                                                                                                                                 |      |      |           |       |      |       |
|-------------------------|--------------------------------------------------------------------------------------------------------------------------------------------------------------------------------------------------------------------------------------------------------------------------------------------------------------------------------------------------------------------------------------------------------------------------------------------------------------------------------------------|------|------|-----------|-------|------|-------|-------------------------------------------------------------------|-------|----------------------|-------------------------------------------------------------------------------------------------------------------------------------------------|------|------|-----------|-------|------|-------|
| Rsa1.0_00191.1.g8051.t1 | ref[NP_193550.1] putative calcium-activated outward-rectifying potassium channel 6 [Arabidopsis thaliana] gi 38605078 sp Q9SVV6.1 TPK3_ARATH RecName: Full=Two-pore potassium channel 3; Short=ATPK3; AltName: Full=Calcium-activated outward-rectifying potassium channel 6; Short=ATKCO6                                                                                                                                                                                                 | 172  | 436  | 5.00E-31  | 253.5 | 44.8 | 48.8  | putative calcium-activated outward-rectifying potassium channel 6 | gbpln | Arabidopsis thaliana | AT4G18160.1   Symbols: KCO6, ATTPK3, ATKCO6, TPK3   Ca2+ activated outward rectifying K+ channel 6   chr4:10055696-10057546 FORWARD LENGTH=436  | 172  | 436  | 2.00E-33  | 253.5 | 44.8 | 48.8  |
| Rsa1.0_00191.1.g8052.t1 | gi 5817002 emb CAB53657.1  potassium channel-like protein [Arabidopsis thaliana] gi 7268609 emb CAB78818.1  potassium channel-like protein [Arabidopsis thaliana] gi 332658605 gb AEE84005.1  putative calcium-activated outward-rectifying potassium channel 6 [Arabidopsis thaliana] ref[XP_002870067.1] hypothetical protein ARALYDRAFT_914875 [Arabidopsis lyrata subsp. lyrata] gi 297315903 gb EFH46326.1  hypothetical protein ARALYDRAFT_914875 [Arabidopsis lyrata subsp. lyrata] | 447  | 438  | 0         | 98.0  | 81.7 | 87.0  | hypothetical protein ARALYDRAFT_914875                            | gbpln | Arabidopsis lyrata   | AT4G18160.1   Symbols: KCO6, ATTPK3, ATKCO6, TPK3   Ca2+ activated outward rectifying K+ channel 6   chr4:10055696-10057546 FORWARD LENGTH=436  | 447  | 436  | 0         | 97.5  | 81.0 | 85.9  |
| Rsa1.0_00191.1.g8053.t1 | ref[XP_002870069.1] predicted protein [Arabidopsis lyrata subsp. lyrata] gi 297315905 gb EFH46328.1  predicted protein [Arabidopsis lyrata subsp. lyrata]                                                                                                                                                                                                                                                                                                                                  | 792  | 802  | 0         | 101.3 | 77.7 | 86.0  | predicted protein                                                 | gbpln | Arabidopsis lyrata   | AT4G18150.1   Symbols:   Kinase-related protein of unknown function (DUF1296)   chr4:10050211-10053790 FORWARD LENGTH=758                       | 792  | 758  | 0         | 95.7  | 68.2 | 77.4  |
| Rsa1.0_00191.1.g8054.t1 | ref[NP_193547.4] phytochrome E [Arabidopsis thaliana] gi 332278136 sp P42498.2 PHYE_ARATH RecName: Full=Phytochrome E gi 332658600 gb AEE84000.1  phytochrome E [Arabidopsis thaliana]                                                                                                                                                                                                                                                                                                     | 1106 | 1112 | 0         | 100.5 | 89.8 | 94.3  | phytochrome E                                                     | gbpln | Arabidopsis thaliana | AT4G18130.1   Symbols: PHYE   phytochrome E   chr4:10042312-10045948 REVERSE LENGTH=1112                                                        | 1106 | 1112 | 0         | 100.5 | 89.8 | 94.3  |
| Rsa1.0_00191.1.g8055.t1 | gb EOA16128.1  hypothetical protein CARUB_v10004261mg [Capsella rubella]                                                                                                                                                                                                                                                                                                                                                                                                                   | 717  | 706  | 0         | 98.5  | 72.2 | 79.2  | hypothetical protein CARUB_v10004261mg                            | gbpln | Capsella rubella     | AT4G18120.2   Symbols: AML3, ML3   MEI2-like 3   chr4:10038878-10041950 FORWARD LENGTH=730                                                      | 717  | 730  | 0         | 101.8 | 67.9 | 75.5  |
| Rsa1.0_00191.1.g8056.t1 | #                                                                                                                                                                                                                                                                                                                                                                                                                                                                                          | #    | #    | #         | #     | #    | #     | -                                                                 | ----  | ----                 | #                                                                                                                                               | #    | #    | #         | #     | #    | #     |
| Rsa1.0_00191.1.g8057.t1 | gb EOA17641.1  hypothetical protein CARUB_v10006007mg [Capsella rubella]                                                                                                                                                                                                                                                                                                                                                                                                                   | 133  | 133  | 2.00E-71  | 100.0 | 99.2 | 100.0 | hypothetical protein CARUB_v10006007mg                            | gbpln | Capsella rubella     | AT4G18100.1   Symbols:   Ribosomal protein L32a   chr4:10035719-10036475 REVERSE LENGTH=133                                                     | 133  | 133  | 6.00E-74  | 100.0 | 98.5 | 100.0 |
| Rsa1.0_00191.1.g8058.t1 | gb ADK94607.1  translation initiation factor eIF4E.a [Brassica rapa] gi 430007156 gb AGA20262.1  eukaryotic translation initiation factor eIF4E.a [Brassica napus] gi 459284110 gb AGG54049.1  eukaryotic translation initiation factor 4E.a [Brassica rapa subsp. pekinensis] ref[NP_193537.2] putative methyltransferase PMT14 [Arabidopsis thaliana] gi 75250016 sp O94EJ6.1 PMTE_ARATH RecName: Full=Probable methyltransferase PMT14                                                  | 230  | 228  | 1.00E-113 | 99.1  | 87.0 | 90.0  | translation initiation factor eIF4E.a                             | gbpln | Brassica napus       | AT4G18040.1   Symbols: EIF4E, CUM1, AT_EIF4E1, eIF4E1   eukaryotic translation initiation factor 4E   chr4:10016724-10018151 REVERSE LENGTH=235 | 230  | 235  | 1.00E-103 | 102.2 | 83.0 | 88.7  |
| Rsa1.0_00191.1.g8059.t1 | gi 15294146 gb AAK95250.1 AF410264.1 AT4g18030/T6K21.210 [Arabidopsis thaliana] gi 24797056 gb AAN64540.1  AT4g18030/T6K21.210 [Arabidopsis thaliana] gi 332658586 gb AEE83986.1  putative methyltransferase PMT14 [Arabidopsis thaliana]                                                                                                                                                                                                                                                  | 621  | 621  | 0         | 100.0 | 89.7 | 94.0  | putative methyltransferase PMT14                                  | gbpln | Arabidopsis thaliana | AT4G18030.1   Symbols:   S-adenosyl-L-methionine-dependent methyltransferases superfamily protein   chr4:10012850-10015267 REVERSE LENGTH=621   | 621  | 621  | 0         | 100.0 | 89.7 | 94.0  |
| Rsa1.0_00191.1.g8060.t2 | ref[XP_002868017.1] pseudo-response regulator 2 [Arabidopsis lyrata subsp. lyrata] gi 297313853 gb EFH44276.1  pseudo-response regulator 2 [Arabidopsis lyrata subsp. lyrata]                                                                                                                                                                                                                                                                                                              | 511  | 533  | 0         | 104.3 | 78.3 | 85.3  | pseudo-response regulator 2                                       | gbpln | Arabidopsis lyrata   | AT4G18020.6   Symbols: APRR2   CheY-like two-component responsive regulator family protein   chr4:10003738-10006682 REVERSE LENGTH=535          | 511  | 535  | 0         | 104.7 | 78.7 | 86.5  |
| Rsa1.0_00191.1.g8061.t1 | ref[XP_002868018.1] hypothetical protein ARALYDRAFT_914893 [Arabidopsis lyrata subsp. lyrata] gi 297313854 gb EFH44277.1  hypothetical protein ARALYDRAFT_914893 [Arabidopsis lyrata subsp. lyrata]                                                                                                                                                                                                                                                                                        | 631  | 646  | 0         | 102.4 | 87.6 | 92.1  | hypothetical protein ARALYDRAFT_914893                            | gbpln | Arabidopsis lyrata   | AT4G18010.1   Symbols: IP5PII, AT5PTASE2, 5PTASE2   myo-inositol polyphosphate 5-phosphatase 2   chr4:9991194-9994099 REVERSE LENGTH=646        | 631  | 646  | 0         | 102.4 | 87.2 | 91.3  |
| Rsa1.0_00191.1.g8062.t1 | ref[XP_002865175.1] kinase family protein [Arabidopsis lyrata subsp. lyrata] gi 297311010 gb EFH41434.1  kinase family protein [Arabidopsis lyrata subsp. lyrata]                                                                                                                                                                                                                                                                                                                          | 497  | 489  | 0         | 98.4  | 83.9 | 90.5  | kinase family protein                                             | gbpln | Arabidopsis lyrata   | AT5G46570.1   Symbols: BSK2   BR-signaling kinase 2   chr5:18994687-18997198 FORWARD LENGTH=489                                                 | 497  | 489  | 0         | 98.4  | 83.1 | 90.5  |

|                         |                                                                                                                                                                                                                                                                                                                                                                                                                                                                                                                                                                                                                                                                                                                                                                                                                                                     |     |      |           |       |      |      |                                                                 |       |                      |                                                                                                                                                                                                                                                                                                                                            |     |     |           |       |      |      |
|-------------------------|-----------------------------------------------------------------------------------------------------------------------------------------------------------------------------------------------------------------------------------------------------------------------------------------------------------------------------------------------------------------------------------------------------------------------------------------------------------------------------------------------------------------------------------------------------------------------------------------------------------------------------------------------------------------------------------------------------------------------------------------------------------------------------------------------------------------------------------------------------|-----|------|-----------|-------|------|------|-----------------------------------------------------------------|-------|----------------------|--------------------------------------------------------------------------------------------------------------------------------------------------------------------------------------------------------------------------------------------------------------------------------------------------------------------------------------------|-----|-----|-----------|-------|------|------|
| Rsa1.0_00191.1.g8063.t1 | gb EOA15827.1  hypothetical protein CARUB_v10007390mg, partial [Capsella rubella]                                                                                                                                                                                                                                                                                                                                                                                                                                                                                                                                                                                                                                                                                                                                                                   | 289 | 262  | 1.00E-117 | 90.7  | 72.3 | 79.2 | hypothetical protein CARUB_v10007390mg, partial                 | gbpln | Capsella rubella     | AT4G17980.1   Symbols: anac071, NAC071   NAC domain containing protein 71   chr4:9978850-9800038 REVERSE LENGTH=262                                                                                                                                                                                                                        | 289 | 262 | 1.00E-110 | 90.7  | 69.9 | 76.1 |
| Rsa1.0_00191.1.g8064.t1 | gb EOA17564.1  hypothetical protein CARUB_v10005925mg [Capsella rubella]                                                                                                                                                                                                                                                                                                                                                                                                                                                                                                                                                                                                                                                                                                                                                                            | 164 | 158  | 1.00E-65  | 96.3  | 76.2 | 84.8 | hypothetical protein CARUB_v10005925mg                          | gbpln | Capsella rubella     | AT4G17960.1   Symbols:   unknown protein; BEST Arabidopsis thaliana protein match is: unknown protein (TAIR:AT5G46620.1). Has 46 Blast hits to 45 proteins in 13 species: Archae - 0; Bacteria - 0; Metazoa - 0; Fungi - 0; Plants - 46; Viruses - 0; Other Eukaryotes - 0 (source: NCBI BLINK).   chr4:9971154-9972227 FORWARD LENGTH=154 | 164 | 154 | 3.00E-67  | 93.9  | 78.7 | 83.5 |
| Rsa1.0_00191.1.g8065.t1 | ref NP_567546.1  AT hook motif DNA-binding family protein [Arabidopsis thaliana] gi 15451060 gb AAK96801.1  putative protein [Arabidopsis thaliana] gi 20148333 gb AAM10057.1  putative protein [Arabidopsis thaliana] gi 119657370 tpd FAA00284.1  TPA: AT-hook motif nuclear localized protein 13 [Arabidopsis thaliana] gi 33265857 gb AEE83971.1  AT hook motif DNA-binding family protein [Arabidopsis thaliana]                                                                                                                                                                                                                                                                                                                                                                                                                               | 431 | 439  | 1.00E-126 | 101.9 | 69.4 | 78.4 | AT hook motif DNA-binding family protein                        | gbpln | Arabidopsis thaliana | AT4G17950.1   Symbols:   AT hook motif DNA-binding family protein   chr4:9967295-9969007 REVERSE LENGTH=439                                                                                                                                                                                                                                | 431 | 439 | 1.00E-129 | 101.9 | 69.4 | 78.4 |
| Rsa1.0_00191.1.g8066.t1 | gb EOA17188.1  hypothetical protein CARUB_v10005460mg [Capsella rubella]                                                                                                                                                                                                                                                                                                                                                                                                                                                                                                                                                                                                                                                                                                                                                                            | 243 | 276  | 8.00E-83  | 113.6 | 77.4 | 86.8 | hypothetical protein CARUB_v10005460mg                          | gbpln | Capsella rubella     | AT4G17940.1   Symbols:   Tetratricopeptide repeat (TPR)-like superfamily protein   chr4:9965787-9966778 FORWARD LENGTH=274                                                                                                                                                                                                                 | 243 | 274 | 9.00E-81  | 112.8 | 75.3 | 84.4 |
| Rsa1.0_00191.1.g8067.t1 | ref XP_002868029.1  zinc finger family protein [Arabidopsis lyrata subsp. lyrata] gi 29731386 gb EFH44288.1  zinc finger family protein [Arabidopsis lyrata subsp. lyrata]                                                                                                                                                                                                                                                                                                                                                                                                                                                                                                                                                                                                                                                                          | 299 | 294  | 1.00E-129 | 98.3  | 78.3 | 83.6 | zinc finger family protein                                      | gbpln | Arabidopsis lyrata   | AT4G17920.1   Symbols:   RING/U-box superfamily protein   chr4:9963221-9964090 REVERSE LENGTH=289                                                                                                                                                                                                                                          | 299 | 289 | 1.00E-130 | 96.7  | 80.6 | 86.0 |
| Rsa1.0_00191.1.g8068.t1 | emb CAA17134.1  putative protein [Arabidopsis thaliana] gi 7268543 emb CAB78793.1  putative protein [Arabidopsis thaliana]                                                                                                                                                                                                                                                                                                                                                                                                                                                                                                                                                                                                                                                                                                                          | 305 | 1208 | 1.00E-137 | 396.1 | 77.4 | 85.6 | putative protein                                                | gbpln | Arabidopsis thaliana | AT4G17905.1   Symbols: ATL4H   RING/U-box superfamily protein   chr4:9948853-9949785 REVERSE LENGTH=310                                                                                                                                                                                                                                    | 305 | 310 | 1.00E-139 | 101.6 | 78.0 | 86.2 |
| Rsa1.0_00191.1.g8069.t1 | gb EOA17250.1  hypothetical protein CARUB_v10005524mg, partial [Capsella rubella]                                                                                                                                                                                                                                                                                                                                                                                                                                                                                                                                                                                                                                                                                                                                                                   | 227 | 262  | 1.00E-123 | 115.4 | 92.1 | 97.4 | hypothetical protein CARUB_v10005524mg, partial                 | gbpln | Capsella rubella     | AT4G17900.1   Symbols:   PLATZ transcription factor family protein   chr4:9946046-9947697 FORWARD LENGTH=227                                                                                                                                                                                                                               | 227 | 227 | 1.00E-125 | 100.0 | 91.6 | 96.0 |
| Rsa1.0_00191.1.g8070.t2 | emb CAA18234.1  putative protein [Arabidopsis thaliana] gi 7269488 emb CAB79491.1  putative protein [Arabidopsis thaliana]                                                                                                                                                                                                                                                                                                                                                                                                                                                                                                                                                                                                                                                                                                                          | 884 | 1141 | 4.00E-99  | 129.1 | 19.6 | 26.7 | putative protein                                                | gbpln | Arabidopsis thaliana | AT1G43760.1   Symbols:   DNase I-like superfamily protein   chr1:16528880-16531065 REVERSE LENGTH=626                                                                                                                                                                                                                                      | 884 | 626 | 4.00E-38  | 70.8  | 10.5 | 16.5 |
| Rsa1.0_00191.1.g8071.t1 | #                                                                                                                                                                                                                                                                                                                                                                                                                                                                                                                                                                                                                                                                                                                                                                                                                                                   | #   | #    | #         | #     | #    | #    | -                                                               | ----  | ----                 | #                                                                                                                                                                                                                                                                                                                                          | #   | #   | #         | #     | #    |      |
| Rsa1.0_00191.1.g8072.t1 | ref NP_567543.1  putative ADP-ribosylation factor GTPase-activating protein AGD8 [Arabidopsis thaliana] gi 75244593 sp Q8H100.1 AGD8_ARATH RecName: Full=Probable ADP-ribosylation factor GTPase-activating protein AGD8; Short=ARF GAP AGD8; AltName: Full=Protein ARF-GAP DOMAIN 8; Short=AtAGD8 gi 2403042 gb AAN41368.1  unknown protein [Arabidopsis thaliana] gi 51970716 dbj BAD44050.1  unknown protein [Arabidopsis thaliana] gi 51971433 dbj BAD44381.1  unknown protein [Arabidopsis thaliana] gi 62319827 dbj BAD93852.1  hypothetical protein [Arabidopsis thaliana] gi 6232009 dbj BAD94263.1  hypothetical protein [Arabidopsis thaliana] gi 110739292 dbj BAF01559.1  hypothetical protein [Arabidopsis thaliana] gi 33265856 gb AEE83961.1  putative ADP-ribosylation factor GTPase-activating protein AGD8 [Arabidopsis thaliana] | 414 | 413  | 0         | 99.8  | 86.7 | 93.0 | putative ADP-ribosylation factor GTPase-activating protein AGD8 | gbpln | Arabidopsis thaliana | AT4G17890.1   Symbols: AGD8   ARF-GAP domain 8   chr4:9937121-9939146 FORWARD LENGTH=413                                                                                                                                                                                                                                                   | 414 | 413 | 0         | 99.8  | 86.7 | 93.0 |
| Rsa1.0_00191.1.g8073.t1 | gb ABD65632.1  basic helix-loop-helix (bHLH) family transcription factor [Brassica oleracea]                                                                                                                                                                                                                                                                                                                                                                                                                                                                                                                                                                                                                                                                                                                                                        | 599 | 586  | 0         | 97.8  | 85.0 | 89.8 | basic helix-loop-helix (bHLH) family transcription factor       | gbpln | Brassica oleracea    | AT4G17880.1   Symbols:   Basic helix-loop-helix (bHLH) DNA-binding family protein   chr4:9933702-9935471 REVERSE LENGTH=589                                                                                                                                                                                                                | 599 | 589 | 0         | 98.3  | 72.5 | 81.3 |
| Rsa1.0_00191.1.g8074.t1 | gb ABD65631.1  Streptomyces cyclase/dehydrase family protein [Brassica oleracea]                                                                                                                                                                                                                                                                                                                                                                                                                                                                                                                                                                                                                                                                                                                                                                    | 124 | 281  | 3.00E-49  | 226.6 | 75.0 | 76.6 | Streptomyces cyclase/dehydrase family protein                   | gbpln | Brassica oleracea    | AT4G17870.1   Symbols: PYR1, RCAR11   Polyketide cyclase/dehydrase and lipid transport superfamily protein   chr4:9928792-9928367 FORWARD LENGTH=191                                                                                                                                                                                       | 124 | 191 | 7.00E-47  | 154.0 | 67.7 | 71.8 |

| Rsa1.0_00191.1.g8075.t1 | #                                                                                                                                                                                                     | #    | #    | #         | #     | #    | #    | -                                          | ----  | ----                 | #                                                                                                                                                                                                                                                                                                                                                                                                                                                                                                                                                                                                                          | #    | #   | #         | #     | #    |      |
|-------------------------|-------------------------------------------------------------------------------------------------------------------------------------------------------------------------------------------------------|------|------|-----------|-------|------|------|--------------------------------------------|-------|----------------------|----------------------------------------------------------------------------------------------------------------------------------------------------------------------------------------------------------------------------------------------------------------------------------------------------------------------------------------------------------------------------------------------------------------------------------------------------------------------------------------------------------------------------------------------------------------------------------------------------------------------------|------|-----|-----------|-------|------|------|
| Rsa1.0_00191.1.g8076.t1 | gb ABD65621.1  hypothetical protein 23.t00063 [Brassica oleracea]                                                                                                                                     | 262  | 360  | 1.00E-111 | 137.4 | 83.2 | 89.3 | hypothetical protein 23.t00063             | gbpln | Brassica oleracea    | AT4G17850.1   Symbols:   BEST Arabidopsis thaliana protein match is: RING/FYVE/PHD zinc finger superfamily protein (TAIR:AT3G02890.1); Has 200 Blast hits to 194 proteins in 51 species: Archae - 0; Bacteria - 0; Metazoa - 61; Fungi - 11; Plants - 116; Viruses - 0; Other Eukaryotes - 12 (source: NCBI BLink).   chr4:9922990-9923850 FORWARD LENGTH=187                                                                                                                                                                                                                                                              | 262  | 187 | 1.00E-33  | 71.4  | 36.6 | 46.9 |
| Rsa1.0_00191.1.g8077.t1 | gb ABD65620.1  hypothetical protein 23.t00062 [Brassica oleracea]                                                                                                                                     | 225  | 200  | 3.00E-75  | 88.9  | 68.0 | 74.7 | hypothetical protein 23.t00062             | gbpln | Brassica oleracea    | AT4G17850.1   Symbols:   BEST Arabidopsis thaliana protein match is: RING/FYVE/PHD zinc finger superfamily protein (TAIR:AT3G02890.1); Has 200 Blast hits to 194 proteins in 51 species: Archae - 0; Bacteria - 0; Metazoa - 61; Fungi - 11; Plants - 116; Viruses - 0; Other Eukaryotes - 12 (source: NCBI BLink).   chr4:9922990-9923850 FORWARD LENGTH=187                                                                                                                                                                                                                                                              | 225  | 187 | 1.00E-26  | 83.1  | 28.9 | 40.0 |
| Rsa1.0_00191.1.g8078.t1 | gb ABD65619.1  hypothetical protein 23.t00061 [Brassica oleracea]                                                                                                                                     | 220  | 223  | 2.00E-98  | 101.4 | 84.5 | 88.6 | hypothetical protein 23.t00061             | gbpln | Brassica oleracea    | AT4G17850.1   Symbols:   BEST Arabidopsis thaliana protein match is: RING/FYVE/PHD zinc finger superfamily protein (TAIR:AT3G02890.1); Has 200 Blast hits to 194 proteins in 51 species: Archae - 0; Bacteria - 0; Metazoa - 61; Fungi - 11; Plants - 116; Viruses - 0; Other Eukaryotes - 12 (source: NCBI BLink).   chr4:9922990-9923850 FORWARD LENGTH=187                                                                                                                                                                                                                                                              | 220  | 187 | 1.00E-18  | 85.0  | 25.0 | 35.0 |
| Rsa1.0_00191.1.g8079.t1 | gb ABD65626.1  hypothetical protein 23.t00040 [Brassica oleracea]                                                                                                                                     | 404  | 409  | 0         | 101.2 | 92.8 | 95.0 | hypothetical protein 23.t00040             | gbpln | Brassica oleracea    | AT4G17840.1   Symbols:   FUNCTIONS IN: molecular_function unknown; INVOLVED IN: biological_process unknown; LOCATED IN: chloroplast, membrane; EXPRESSED IN: 23 plant structures; EXPRESSED DURING: 13 growth stages; CONTAINS InterPro DOMAIN/s: Abortive infection protein (InterPro:IPR003675); BEST Arabidopsis thaliana protein match is: unknown protein (TAIR:AT2G35260.1); Has 30201 Blast hits to 17322 proteins in 780 species: Archae - 12; Bacteria - 1396; Metazoa - 17338; Fungi - 3422; Plants - 5037; Viruses - 0; Other Eukaryotes - 2996 (source: NCBI BLink).   chr4:9918222-9920190 REVERSE LENGTH=422 | 404  | 422 | 0         | 104.5 | 89.1 | 93.3 |
| Rsa1.0_00191.1.g8080.t1 | gb ABD65616.1  zinc finger (C2H2 type) containing protein [Brassica oleracea]                                                                                                                         | 206  | 196  | 2.00E-94  | 95.1  | 84.5 | 85.9 | zinc finger (C2H2 type) containing protein | gbpln | Brassica oleracea    | AT4G17810.1   Symbols:   C2H2 and C2HC zinc fingers superfamily protein   chr4:9906918-9907532 FORWARD LENGTH=204                                                                                                                                                                                                                                                                                                                                                                                                                                                                                                          | 206  | 204 | 1.00E-87  | 99.0  | 79.6 | 84.5 |
| Rsa1.0_00191.1.g8081.t1 | emb CAB39638.1  RNA-directed DNA polymerase-like protein [Arabidopsis thaliana]   gi 7267666 emb CAB78094.1  RNA-directed DNA polymerase-like protein [Arabidopsis thaliana]                          | 1868 | 1274 | 0         | 68.2  | 31.3 | 41.8 | RNA-directed DNA polymerase-like protein   | gbpln | Arabidopsis thaliana | AT4G29090.1   Symbols:   Ribonuclease H-like superfamily protein   chr4:14333528-14335255 FORWARD LENGTH=575                                                                                                                                                                                                                                                                                                                                                                                                                                                                                                               | 1868 | 575 | 3.00E-67  | 30.8  | 8.9  | 14.7 |
| Rsa1.0_00191.1.g8082.t1 | emb CAB39638.1  RNA-directed DNA polymerase-like protein [Arabidopsis thaliana]   gi 7267666 emb CAB78094.1  RNA-directed DNA polymerase-like protein [Arabidopsis thaliana]                          | 2011 | 1274 | 0         | 63.4  | 31.3 | 42.4 | RNA-directed DNA polymerase-like protein   | gbpln | Arabidopsis thaliana | AT4G29090.1   Symbols:   Ribonuclease H-like superfamily protein   chr4:14333528-14335255 FORWARD LENGTH=575                                                                                                                                                                                                                                                                                                                                                                                                                                                                                                               | 2011 | 575 | 1.00E-71  | 28.6  | 8.9  | 13.6 |
| Rsa1.0_00192.1.g8083.t1 | ref XP_002871317.1  predicted protein [Arabidopsis lyrata subsp. lyrata]   gi 297317154 gb EFH47576.1  predicted protein [Arabidopsis lyrata subsp. lyrata]                                           | 243  | 313  | 1.00E-30  | 128.8 | 33.3 | 43.6 | predicted protein                          | gbpln | Arabidopsis lyrata   | AT5G03480.1   Symbols:   RNA-binding (RRM/RBD/RNP motifs) family protein   chr5:869208-870855 REVERSE LENGTH=321                                                                                                                                                                                                                                                                                                                                                                                                                                                                                                           | 243  | 321 | 2.00E-30  | 132.1 | 34.2 | 44.4 |
| Rsa1.0_00192.1.g8084.t1 | gb AAR13701.1  protein kinase [Brassica oleracea]                                                                                                                                                     | 268  | 353  | 1.00E-110 | 131.7 | 73.9 | 82.1 | protein kinase                             | gbpln | Brassica oleracea    | AT5G07620.1   Symbols:   Protein kinase superfamily protein   chr5:2407401-2409066 REVERSE LENGTH=359                                                                                                                                                                                                                                                                                                                                                                                                                                                                                                                      | 268  | 359 | 1.00E-110 | 134.0 | 70.1 | 76.5 |
| Rsa1.0_00192.1.g8085.t1 | gb AAR15502.1  F-box protein [Arabidopsis arenosa]                                                                                                                                                    | 441  | 421  | 1.00E-149 | 95.5  | 64.9 | 76.0 | F-box protein                              | gbpln | Arabidopsis arenosa  | AT5G07610.1   Symbols:   F-box family protein   chr5:2406068-2407330 FORWARD LENGTH=420                                                                                                                                                                                                                                                                                                                                                                                                                                                                                                                                    | 441  | 420 | 1.00E-150 | 95.2  | 63.7 | 75.5 |
| Rsa1.0_00192.1.g8086.t2 | ref XP_002871277.1  hypothetical protein ARALYDRAFT_487594 [Arabidopsis lyrata subsp. lyrata]   gi 297317114 gb EFH47536.1  hypothetical protein ARALYDRAFT_487594 [Arabidopsis lyrata subsp. lyrata] | 100  | 111  | 8.00E-12  | 111.0 | 41.0 | 45.0 | hypothetical protein ARALYDRAFT_487594     | gbpln | Arabidopsis lyrata   | AT5G07572.1   Symbols:   unknown protein; FUNCTIONS IN: molecular_function unknown; INVOLVED IN: biological_process unknown; LOCATED IN: cellular_component unknown; Has 30201 Blast hits to 17322 proteins in 780 species: Archae - 12; Bacteria - 1396; Metazoa - 17338; Fungi - 3422; Plants - 5037; Viruses - 0; Other Eukaryotes - 2996 (source: NCBI BLink).   chr5:2396913-2397263 FORWARD LENGTH=116                                                                                                                                                                                                               | 100  | 116 | 5.00E-14  | 116.0 | 43.0 | 52.0 |

|                         |                                                                                                                                                                                                                                                                                                                                                                                                                                                                                                                                          |     |     |           |       |      |      |                                                 |       |                        |                                                                                                                                                                                                                                                                                                                                                                                                             |     |     |           |       |      |      |
|-------------------------|------------------------------------------------------------------------------------------------------------------------------------------------------------------------------------------------------------------------------------------------------------------------------------------------------------------------------------------------------------------------------------------------------------------------------------------------------------------------------------------------------------------------------------------|-----|-----|-----------|-------|------|------|-------------------------------------------------|-------|------------------------|-------------------------------------------------------------------------------------------------------------------------------------------------------------------------------------------------------------------------------------------------------------------------------------------------------------------------------------------------------------------------------------------------------------|-----|-----|-----------|-------|------|------|
| Rsa1.0_00192.1.g8087.t1 | ref[XP_002871277.1] hypothetical protein ARALYDRAFT_487594 [Arabidopsis lyrata subsp. lyrata] gi 297317114 gb EFH47536.1                                                                                                                                                                                                                                                                                                                                                                                                                 | 190 | 111 | 5.00E-14  | 58.4  | 27.4 | 28.9 | hypothetical protein ARALYDRAFT_487594          | gbpln | Arabidopsis lyrata     | AT5G07572.1   Symbols:   unknown protein; FUNCTIONS IN: molecular_function unknown; INVOLVED IN: biological_process unknown; LOCATED IN: cellular_component unknown; Has 30201 Blast hits to 17322 proteins in 780 species: Archae - 12; Bacteria - 1396; Metazoa - 17338; Fungi - 342; Plants - 5037; Viruses - 0; Other Eukaryotes - 2996 (source: NCBI BLINK).   chr5:2386913-2397263 FORWARD LENGTH=116 | 190 | 116 | 2.00E-13  | 61.1  | 24.7 | 26.8 |
| Rsa1.0_00192.1.g8088.t1 | emb[CAA64800.1] oleosin-like protein [Brassica napus]                                                                                                                                                                                                                                                                                                                                                                                                                                                                                    | 168 | 207 | 1.00E-48  | 123.2 | 75.6 | 82.1 | oleosin-like protein                            | gbpln | Brassica napus         | AT5G07530.2   Symbols: GRP17, ATGRP17, ATGRP-7   glycine rich protein 17   chr5:2382629-2384495 REVERSE LENGTH=512                                                                                                                                                                                                                                                                                          | 168 | 512 | 2.00E-29  | 304.8 | 36.9 | 45.8 |
| Rsa1.0_00192.1.g8089.t1 | emb[CAA64800.1] oleosin-like protein [Brassica napus]                                                                                                                                                                                                                                                                                                                                                                                                                                                                                    | 233 | 207 | 2.00E-42  | 88.8  | 50.6 | 58.4 | oleosin-like protein                            | gbpln | Brassica napus         | AT5G07530.2   Symbols: GRP17, ATGRP17, ATGRP-7   glycine rich protein 17   chr5:2382629-2384495 REVERSE LENGTH=512                                                                                                                                                                                                                                                                                          | 233 | 512 | 2.00E-39  | 219.7 | 33.0 | 39.1 |
| Rsa1.0_00192.1.g8090.t1 | gb[AAR15475.1] hypothetical protein Op_7490 [Olimarabidopsis pumila]                                                                                                                                                                                                                                                                                                                                                                                                                                                                     | 150 | 150 | 9.00E-71  | 100.0 | 86.0 | 92.7 | hypothetical protein Op_7490                    | gbpln | Olimarabidopsis pumila | AT5G07490.1   Symbols:   unknown protein; BEST Arabidopsis thaliana protein match is: unknown protein (TAIR:AT5G61630.1). Has 50 Blast hits to 50 proteins in 9 species: Archae - 0; Bacteria - 0; Metazoa - 0; Fungi - 0; Plants - 50; Viruses - 0; Other Eukaryotes - 0 (source: NCBI BLINK).   chr5:2370248-2371003 FORWARD LENGTH=149                                                                   | 150 | 149 | 7.00E-73  | 99.3  | 86.7 | 92.7 |
| Rsa1.0_00192.1.g8091.t1 | gb[AAR15424.1] Cu2+ plastocyanin-like [Sisymbrium irio]                                                                                                                                                                                                                                                                                                                                                                                                                                                                                  | 194 | 195 | 6.00E-90  | 100.5 | 82.5 | 88.1 | Cu2+ plastocyanin-like                          | gbpln | Sisymbrium irio        | AT5G07475.1   Symbols:   Cupredoxin superfamily protein   chr5:2364827-2365536 REVERSE LENGTH=192                                                                                                                                                                                                                                                                                                           | 194 | 192 | 3.00E-86  | 99.0  | 78.4 | 86.1 |
| Rsa1.0_00192.1.g8092.t1 | gb[AAR15472.1] peptide methionine sulfoxide reductase [Olimarabidopsis pumila]                                                                                                                                                                                                                                                                                                                                                                                                                                                           | 184 | 202 | 8.00E-82  | 109.8 | 76.6 | 86.4 | peptide methionine sulfoxide reductase          | gbpln | Olimarabidopsis pumila | AT5G07470.1   Symbols: PMSR3, ATMSRA3   peptidemethionine sulfoxide reductase 3   chr5:2362760-2364286 REVERSE LENGTH=202                                                                                                                                                                                                                                                                                   | 184 | 202 | 4.00E-81  | 109.8 | 75.0 | 83.2 |
| Rsa1.0_00192.1.g8093.t1 | gb[AAR15472.1] peptide methionine sulfoxide reductase [Olimarabidopsis pumila]                                                                                                                                                                                                                                                                                                                                                                                                                                                           | 195 | 202 | 1.00E-80  | 103.6 | 73.3 | 82.1 | peptide methionine sulfoxide reductase          | gbpln | Olimarabidopsis pumila | AT5G07470.1   Symbols: PMSR3, ATMSRA3   peptidemethionine sulfoxide reductase 3   chr5:2362760-2364286 REVERSE LENGTH=202                                                                                                                                                                                                                                                                                   | 195 | 202 | 4.00E-80  | 103.6 | 71.8 | 79.5 |
| Rsa1.0_00192.1.g8094.t1 | gb[AAR15486.1] peptide methionine sulfoxide reductase [Arabidopsis arenosa]                                                                                                                                                                                                                                                                                                                                                                                                                                                              | 144 | 202 | 8.00E-51  | 140.3 | 73.6 | 81.9 | peptide methionine sulfoxide reductase          | gbpln | Arabidopsis arenosa    | AT5G07470.1   Symbols: PMSR3, ATMSRA3   peptidemethionine sulfoxide reductase 3   chr5:2362760-2364286 REVERSE LENGTH=202                                                                                                                                                                                                                                                                                   | 144 | 202 | 2.00E-52  | 140.3 | 72.9 | 80.6 |
| Rsa1.0_00192.1.g8095.t1 | gb[AAR15485.1] peptide methionine sulfoxide reductase [Arabidopsis arenosa]                                                                                                                                                                                                                                                                                                                                                                                                                                                              | 221 | 221 | 1.00E-106 | 100.0 | 81.4 | 91.4 | peptide methionine sulfoxide reductase          | gbpln | Arabidopsis arenosa    | AT5G07460.1   Symbols: PMSR2, ATMSRA2   peptidemethionine sulfoxide reductase 2   chr5:2360844-2361885 REVERSE LENGTH=218                                                                                                                                                                                                                                                                                   | 221 | 218 | 1.00E-106 | 98.6  | 81.4 | 90.5 |
| Rsa1.0_00192.1.g8096.t1 | ref[NP_196361.1] glutamate dehydrogenase 2 [Arabidopsis thaliana] gi 186521018 ref[NP_001119183.1] glutamate dehydrogenase 2 [Arabidopsis thaliana] gi 297806777 ref[XP_002871272.1] hypothetical protein ARALYDRAFT_487575 [Arabidopsis lyrata subsp. lyrata] gi 12229806 sp Q38946.1 DHE2_ARATH RecName: Full=Glutamate dehydrogenase 2; Short=GDH 2 gi 1336084 gb AAB01222.1  glutamate dehydrogenase 2 [Arabidopsis thaliana] gi 7576182 emb CAB87933.1  glutamate dehydrogenase 2 [Arabidopsis thaliana] gi 297317109 gb EFH47531.1 | 90  | 411 | 7.00E-34  | 456.7 | 74.4 | 75.6 | glutamate dehydrogenase 2                       | gbpln | Arabidopsis lyrata     | AT5G07440.2   Symbols: GDH2   glutamate dehydrogenase 2   chr5:2356153-2358012 FORWARD LENGTH=411                                                                                                                                                                                                                                                                                                           | 90  | 411 | 1.00E-36  | 456.7 | 74.4 | 75.6 |
| Rsa1.0_00192.1.g8097.t1 | gb[AAR15485.1] peptide methionine sulfoxide reductase [Arabidopsis arenosa]                                                                                                                                                                                                                                                                                                                                                                                                                                                              | 223 | 221 | 1.00E-100 | 99.1  | 77.1 | 87.9 | peptide methionine sulfoxide reductase          | gbpln | Arabidopsis arenosa    | AT5G07460.1   Symbols: PMSR2, ATMSRA2   peptidemethionine sulfoxide reductase 2   chr5:2360844-2361885 REVERSE LENGTH=218                                                                                                                                                                                                                                                                                   | 223 | 218 | 1.00E-100 | 97.8  | 76.2 | 87.0 |
| Rsa1.0_00192.1.g8098.t1 | gb[EOA20446.1] hypothetical protein CARUB_v10000757mg, partial [Capsella rubella]                                                                                                                                                                                                                                                                                                                                                                                                                                                        | 411 | 509 | 0         | 123.8 | 96.6 | 99.8 | hypothetical protein CARUB_v10000757mg, partial | gbpln | Capsella rubella       | AT5G07440.2   Symbols: GDH2   glutamate dehydrogenase 2   chr5:2356153-2358012 FORWARD LENGTH=411                                                                                                                                                                                                                                                                                                           | 411 | 411 | 0         | 100.0 | 96.4 | 99.8 |

|                         |                                                                                                                                                                                                                                                                                                                                                                                                             |      |      |           |       |      |      |                                                       |       |                      |                                                                                                                                               |      |      |           |       |      |      |
|-------------------------|-------------------------------------------------------------------------------------------------------------------------------------------------------------------------------------------------------------------------------------------------------------------------------------------------------------------------------------------------------------------------------------------------------------|------|------|-----------|-------|------|------|-------------------------------------------------------|-------|----------------------|-----------------------------------------------------------------------------------------------------------------------------------------------|------|------|-----------|-------|------|------|
| Rsa1.0_00192.1.g8099.t1 | ref[NP_196360.1] putative pectinesterase 50 [Arabidopsis thaliana] gi 75180992 sp Q9LY17.1 PME50_ARAT H RecName: Full=Probable pectinesterase 50; Short=PE 50; AltName: Full=Pectin methyl-esterase 50; Short=AtPME50; Flags: Precursor gi 7576181 emb CAB87932.1  pectin methyl-esterase-like protein [Arabidopsis thaliana] gi 332003773 gb AED91156.1  putative pectinesterase 50 [Arabidopsis thaliana] | 361  | 361  | 0         | 100.0 | 89.8 | 96.4 | putative pectinesterase 50                            | gbpln | Arabidopsis thaliana | AT5G07430.1   Symbols:   Pectin lyase-like superfamily protein   chr5:2352549-2354069 FORWARD LENGTH=361                                      | 361  | 361  | 0         | 100.0 | 89.8 | 96.4 |
| Rsa1.0_00192.1.g8100.t1 | ref[XP_002873307.1] respiratory burst oxidase protein A [Arabidopsis lyrata subsp. lyrata] gi 297319144 gb EFH49566.1  respiratory burst oxidase protein A [Arabidopsis lyrata subsp. lyrata]                                                                                                                                                                                                               | 831  | 897  | 0         | 107.9 | 68.8 | 81.3 | respiratory burst oxidase protein A                   | gbpln | Arabidopsis lyrata   | AT5G07390.1   Symbols: ATRBOHA, RBOHA   respiratory burst oxidase homolog A   chr5:2336063-2339728 REVERSE LENGTH=902                         | 831  | 902  | 0         | 108.5 | 68.0 | 81.0 |
| Rsa1.0_00192.1.g8101.t1 | gb AAF18538.1 AC006551_24 Very similar to retrotransposon reverse transcriptase [Arabidopsis thaliana]                                                                                                                                                                                                                                                                                                      | 708  | 1231 | 0         | 173.9 | 48.3 | 65.7 | Very similar to retrotransposon reverse transcriptase | gbpln | Arabidopsis thaliana | AT4G2090.1   Symbols:   Ribonuclease H-like superfamily protein   chr4:14333528-14335255 FORWARD LENGTH=575                                   | 708  | 575  | 1.00E-102 | 81.2  | 29.0 | 44.2 |
| Rsa1.0_00192.1.g8102.t1 | gb EOA19890.1  hypothetical protein CARUB_v10000137mg [Capsella rubella]                                                                                                                                                                                                                                                                                                                                    | 990  | 991  | 0         | 100.1 | 89.3 | 95.6 | hypothetical protein CARUB_v10000137mg                | gbpln | Capsella rubella     | AT5G07350.1   Symbols: Tudor1, AtTudor1, TSN1   TUDOR-SN protein 1   chr5:2320344-2324892 REVERSE LENGTH=991                                  | 990  | 991  | 0         | 100.1 | 88.9 | 94.8 |
| Rsa1.0_00192.1.g8103.t1 | gb ABK28684.1  unknown [Arabidopsis thaliana]                                                                                                                                                                                                                                                                                                                                                               | 255  | 264  | 1.00E-102 | 103.5 | 85.5 | 89.4 | unknown                                               | gbpln | Arabidopsis thaliana | AT5G07310.1   Symbols:   Integrase-type DNA-binding superfamily protein   chr5:2305684-2306660 FORWARD LENGTH=263                             | 255  | 263  | 1.00E-105 | 103.1 | 85.5 | 89.4 |
| Rsa1.0_00192.1.g8104.t2 | gb AAG50806.1 AC079281_8 unknown protein [Arabidopsis thaliana]                                                                                                                                                                                                                                                                                                                                             | 458  | 1213 | 1.00E-111 | 264.8 | 45.9 | 59.6 | unknown protein                                       | gbpln | Arabidopsis thaliana | AT3G24255.1   Symbols:   RNA-directed DNA polymerase (reverse transcriptase)-related family protein   chr3:8789471-8793208 FORWARD LENGTH=746 | 458  | 746  | 7.00E-42  | 162.9 | 23.4 | 35.6 |
| Rsa1.0_00192.1.g8105.t2 | ref[XP_002871263.1] hypothetical protein ARALYDRAFT_487555 [Arabidopsis lyrata subsp. lyrata] gi 297317100 gb EFH47522.1  hypothetical protein ARALYDRAFT_487555 [Arabidopsis lyrata subsp. lyrata]                                                                                                                                                                                                         | 585  | 587  | 0         | 100.3 | 87.9 | 93.3 | hypothetical protein ARALYDRAFT_487555                | gbpln | Arabidopsis lyrata   | AT5G07300.1   Symbols: BON2   Calcium-dependent phospholipid-binding Copine family protein   chr5:2298996-2303040 FORWARD LENGTH=586          | 585  | 586  | 0         | 100.2 | 87.7 | 93.5 |
| Rsa1.0_00192.1.g8106.t1 | gb EOA20989.1  hypothetical protein CARUB_v10001321mg [Capsella rubella]                                                                                                                                                                                                                                                                                                                                    | 324  | 346  | 1.00E-110 | 106.8 | 67.0 | 75.9 | hypothetical protein CARUB_v10001321mg                | gbpln | Capsella rubella     | AT5G07250.1   Symbols: ATRBL3, RBL3   RHOMBROID-like protein 3   chr5:2274437-2275935 REVERSE LENGTH=346                                      | 324  | 346  | 1.00E-104 | 106.8 | 66.4 | 75.0 |
| Rsa1.0_00192.1.g8107.t1 | ref[XP_002871260.1] IQ-domain 24 [Arabidopsis lyrata subsp. lyrata] gi 297317097 gb EFH47519.1  IQ-domain 24 [Arabidopsis lyrata subsp. lyrata]                                                                                                                                                                                                                                                             | 370  | 401  | 1.00E-120 | 108.4 | 75.1 | 80.8 | IQ-domain 24                                          | gbpln | Arabidopsis lyrata   | AT5G07240.1   Symbols: IQD24   IQ-domain 24   chr5:2272028-2274051 FORWARD LENGTH=401                                                         | 370  | 401  | 1.00E-118 | 108.4 | 73.8 | 80.0 |
| Rsa1.0_00192.1.g8108.t2 | ref[NP_196338.1] putative two-component response regulator ARR21 [Arabidopsis thaliana] gi 7546699 emb CAB87277.1  putative protein [Arabidopsis thaliana] gi 332003739 gb AED91122.1  putative two-component response regulator ARR21 [Arabidopsis thaliana]                                                                                                                                               | 734  | 621  | 1.00E-156 | 84.6  | 39.2 | 46.0 | putative two-component response regulator ARR21       | gbpln | Arabidopsis thaliana | AT5G07210.1   Symbols: ARR21, RR21   response regulator 21   chr5:2252237-2256018 FORWARD LENGTH=621                                          | 734  | 621  | 1.00E-159 | 84.6  | 39.2 | 46.0 |
| Rsa1.0_00192.1.g8109.t1 | #                                                                                                                                                                                                                                                                                                                                                                                                           | #    | #    | #         | #     | #    | #    | -                                                     | ----  | ----                 | #                                                                                                                                             | #    | #    | #         | #     | #    | #    |
| Rsa1.0_00192.1.g8110.t1 | gb EOA22960.1  hypothetical protein CARUB_v10003698mg, partial [Capsella rubella]                                                                                                                                                                                                                                                                                                                           | 217  | 165  | 6.00E-29  | 76.0  | 33.2 | 45.2 | hypothetical protein CARUB_v10003698mg, partial       | gbpln | Capsella rubella     | AT5G03495.1   Symbols:   RNA-binding (RRM/RBD/RNP motifs) family protein   chr5:873804-875025 REVERSE LENGTH=226                              | 217  | 226  | 5.00E-25  | 104.1 | 32.3 | 45.2 |
| Rsa1.0_00192.1.g8111.t1 | gb EMT25720.1  TATA-box-binding protein 2 [Aegilops tauschii]                                                                                                                                                                                                                                                                                                                                               | 129  | 260  | 3.00E-48  | 201.6 | 75.2 | 82.9 | TATA-box-binding protein 2                            | gbpln | Aegilops tauschii    | AT3G13445.1   Symbols: TBP1, TFIIID-1   TATA binding protein 1   chr3:4380317-4381869 FORWARD LENGTH=200                                      | 129  | 200  | 6.00E-51  | 155.0 | 74.4 | 83.7 |
| Rsa1.0_00192.1.g8112.t1 | ref[XP_002871223.1] hypothetical protein ARALYDRAFT_908591 [Arabidopsis lyrata subsp. lyrata] gi 297317060 gb EFH47482.1  hypothetical protein ARALYDRAFT_908591 [Arabidopsis lyrata subsp. lyrata]                                                                                                                                                                                                         | 370  | 368  | 1.00E-180 | 99.5  | 84.1 | 90.3 | hypothetical protein ARALYDRAFT_908591                | gbpln | Arabidopsis lyrata   | AT5G06610.1   Symbols:   Protein of unknown function (DUF620)   chr5:2029953-2033620 FORWARD LENGTH=368                                       | 370  | 368  | 0         | 99.5  | 82.4 | 90.3 |
| Rsa1.0_00192.1.g8113.t1 | dbj BAJ34172.1  unnamed protein product [Thellungiella halophila]                                                                                                                                                                                                                                                                                                                                           | 1140 | 1115 | 0         | 97.8  | 93.9 | 96.2 | unnamed protein product                               | ----  | ----                 | AT5G06600.1   Symbols: UBPI2   ubiquitin-specific protease 12   chr5:2019545-2027834 REVERSE LENGTH=1116                                      | 1140 | 1116 | 0         | 97.9  | 93.2 | 95.5 |



|                         |                                                                                                                                                                                                                                                                                                                                                                                                                                                                                                                                                                                                                                                                                                                                                                                                                                                                                                                            |     |      |           |       |      |      |                                                     |       |                      |                                                                                                                                                                                                                                                                                                                                                                                   |     |     |           |       |      |      |
|-------------------------|----------------------------------------------------------------------------------------------------------------------------------------------------------------------------------------------------------------------------------------------------------------------------------------------------------------------------------------------------------------------------------------------------------------------------------------------------------------------------------------------------------------------------------------------------------------------------------------------------------------------------------------------------------------------------------------------------------------------------------------------------------------------------------------------------------------------------------------------------------------------------------------------------------------------------|-----|------|-----------|-------|------|------|-----------------------------------------------------|-------|----------------------|-----------------------------------------------------------------------------------------------------------------------------------------------------------------------------------------------------------------------------------------------------------------------------------------------------------------------------------------------------------------------------------|-----|-----|-----------|-------|------|------|
| Rsa1.0_00192.1.g8114.t1 | refNP_196275.1   alpha/beta hydrolase fold-containing protein [Arabidopsis thaliana] gi 30681513 refNP_850782.1   alpha/beta hydrolase fold-containing protein [Arabidopsis thaliana] gi 75333783 sp Q9FG13.1 CXE15_ARAT H RecName: Full=Probable carboxylesterase 15; AltName: Full=AtCXE15 gi 10178113 dbj BAB11406.1   unnamed protein product [Arabidopsis thaliana] gi 26452184 dbj BAC43180.1   unknown protein [Arabidopsis thaliana] gi 30725374 gb AAP37709.1   At5g06570 [Arabidopsis thaliana] gi 332003652 gb AED91035.1   probable carboxylesterase 15 [Arabidopsis thaliana] gi 332003653 gb AED91036.1   alpha/beta hydrolase fold-containing protein [Arabidopsis thaliana] refNP_196265.1   Glutaredoxin family protein [Arabidopsis thaliana] gi 9758427 dbj BAB08969.1   unnamed protein product [Arabidopsis thaliana] gi 332003638 gb AED91021.1   Glutaredoxin family protein [Arabidopsis thaliana] | 216 | 329  | 2.00E-29  | 152.3 | 28.2 | 32.9 | alpha/beta hydrolase fold-containing protein        | gbpln | Arabidopsis thaliana | AT5G06570.2   Symbols:   alpha/beta-Hydrolases superfamily protein   chr5:2008075-20311013 REVERSE LENGTH=329                                                                                                                                                                                                                                                                     | 216 | 329 | 7.00E-32  | 152.3 | 28.2 | 32.9 |
| Rsa1.0_00192.1.g8115.t1 | refNP_196263.1   DnaQ-like exonuclease domain-containing protein [Arabidopsis thaliana] gi 73921148 sp Q9FNG3.1 Y5645_ARAT H RecName: Full=Uncharacterized protein At5g06450 gi 9758425 dbj BAB08967.1   unnamed protein product [Arabidopsis thaliana] gi 19347954 gb AAL86312.1   unknown protein [Arabidopsis thaliana] gi 21436419 gb AAM51410.1   unknown protein [Arabidopsis thaliana] gi 332003636 gb AED91019.1   DnaQ-like exonuclease domain-containing protein [Arabidopsis thaliana]                                                                                                                                                                                                                                                                                                                                                                                                                          | 246 | 239  | 1.00E-113 | 97.2  | 82.9 | 91.9 | Glutaredoxin family protein                         | gbpln | Arabidopsis thaliana | AT5G06470.1   Symbols:   Glutaredoxin family protein   chr5:1974659-1975378 REVERSE LENGTH=239                                                                                                                                                                                                                                                                                    | 246 | 239 | 1.00E-115 | 97.2  | 82.9 | 91.9 |
| Rsa1.0_00192.1.g8116.t1 | refNP_196263.1   DnaQ-like exonuclease domain-containing protein [Arabidopsis thaliana] gi 73921148 sp Q9FNG3.1 Y5645_ARAT H RecName: Full=Uncharacterized protein At5g06450 gi 9758425 dbj BAB08967.1   unnamed protein product [Arabidopsis thaliana] gi 19347954 gb AAL86312.1   unknown protein [Arabidopsis thaliana] gi 21436419 gb AAM51410.1   unknown protein [Arabidopsis thaliana] gi 332003636 gb AED91019.1   DnaQ-like exonuclease domain-containing protein [Arabidopsis thaliana]                                                                                                                                                                                                                                                                                                                                                                                                                          | 200 | 206  | 2.00E-89  | 103.0 | 84.0 | 91.0 | DnaQ-like exonuclease domain-containing protein     | gbpln | Arabidopsis thaliana | AT5G06450.1   Symbols:   Polynucleotidyl transferase, ribonuclease H-like superfamily protein   chr5:1967869-1968489 REVERSE LENGTH=206                                                                                                                                                                                                                                           | 200 | 206 | 8.00E-92  | 103.0 | 84.0 | 91.0 |
| Rsa1.0_00192.1.g8117.t3 | refXP_002873256.1   hypothetical protein ARALYDRAFT_487451 [Arabidopsis lyrata subsp. lyrata] gi 297319093 gb EFH49515.1   hypothetical protein ARALYDRAFT_487451 [Arabidopsis lyrata subsp. lyrata]                                                                                                                                                                                                                                                                                                                                                                                                                                                                                                                                                                                                                                                                                                                       | 667 | 480  | 1.00E-128 | 72.0  | 37.9 | 45.3 | hypothetical protein ARALYDRAFT_487451              | gbpln | Arabidopsis lyrata   | AT5G06440.3   Symbols:   BEST Arabidopsis thaliana protein match is: Polyketide cyclase/dehydrase and lipid transport superfamily protein (TAIR:AT3G11720.3); Has 157 Blast hits to 155 proteins in 41 species: Archae - 0; Bacteria - 6; Metazoa - 5; Fungi - 6; Plants - 99; Viruses - 0; Other Eukaryotes - 41 (source: NCBI BLINK).   chr5:1964641-1966807 REVERSE LENGTH=479 | 667 | 479 | 1.00E-127 | 71.8  | 37.5 | 45.0 |
| Rsa1.0_00192.1.g8118.t1 | dbj BAB08961.1   unnamed protein product [Arabidopsis thaliana]                                                                                                                                                                                                                                                                                                                                                                                                                                                                                                                                                                                                                                                                                                                                                                                                                                                            | 442 | 465  | 0         | 105.2 | 89.4 | 93.2 | unnamed protein product                             | gbpln | Arabidopsis thaliana | AT5G06390.1   Symbols: FLA17   FASCICLIN-like arabinogalactan protein 17 precursor   chr5:1952939-1955047 FORWARD LENGTH=458                                                                                                                                                                                                                                                      | 442 | 458 | 0         | 103.6 | 89.1 | 93.0 |
| Rsa1.0_00192.1.g8119.t1 | refXP_002873253.1   NC domain-containing protein [Arabidopsis lyrata subsp. lyrata] gi 297319090 gb EFH49512.1   NC domain-containing protein [Arabidopsis lyrata subsp. lyrata]                                                                                                                                                                                                                                                                                                                                                                                                                                                                                                                                                                                                                                                                                                                                           | 202 | 259  | 5.00E-99  | 128.2 | 86.1 | 88.6 | NC domain-containing protein                        | gbpln | Arabidopsis lyrata   | AT5G06370.1   Symbols:   NC domain-containing protein-related   chr5:1947299-1948432 REVERSE LENGTH=259                                                                                                                                                                                                                                                                           | 202 | 259 | 1.00E-101 | 128.2 | 86.1 | 87.6 |
| Rsa1.0_00192.1.g8120.t2 | #                                                                                                                                                                                                                                                                                                                                                                                                                                                                                                                                                                                                                                                                                                                                                                                                                                                                                                                          | #   | #    | #         | #     | #    | #    | -                                                   | ----  | ----                 | #                                                                                                                                                                                                                                                                                                                                                                                 | #   | #   | #         | #     | #    |      |
| Rsa1.0_00192.1.g8121.t2 | dbj BAJ34098.1   unnamed protein product [Theillungiella halophila]                                                                                                                                                                                                                                                                                                                                                                                                                                                                                                                                                                                                                                                                                                                                                                                                                                                        | 235 | 235  | 1.00E-105 | 100.0 | 87.2 | 94.0 | unnamed protein product                             | ----  | ----                 | AT5G06320.1   Symbols: NHL3   NDR1/HIN1-like 3   chr5:1931016-1931711 REVERSE LENGTH=231                                                                                                                                                                                                                                                                                          | 235 | 231 | 2.00E-97  | 98.3  | 83.0 | 89.4 |
| Rsa1.0_00192.1.g8122.t1 | refXP_002871317.1   predicted protein [Arabidopsis lyrata subsp. lyrata] gi 297317154 gb EFH47576.1   predicted protein [Arabidopsis lyrata subsp. lyrata]                                                                                                                                                                                                                                                                                                                                                                                                                                                                                                                                                                                                                                                                                                                                                                 | 245 | 313  | 6.00E-24  | 127.8 | 30.6 | 44.1 | predicted protein                                   | gbpln | Arabidopsis lyrata   | AT5G03480.1   Symbols:   RNA-binding (RRM/RBD/RNP motifs) family protein   chr5:869208-870855 REVERSE LENGTH=321                                                                                                                                                                                                                                                                  | 245 | 321 | 4.00E-23  | 131.0 | 26.5 | 37.6 |
| Rsa1.0_00192.1.g8123.t1 | gb AAC33226.1   putative non-LTR retroelement reverse transcriptase [Arabidopsis thaliana]                                                                                                                                                                                                                                                                                                                                                                                                                                                                                                                                                                                                                                                                                                                                                                                                                                 | 649 | 1529 | 1.00E-139 | 235.6 | 37.4 | 52.7 | putative non-LTR retroelement reverse transcriptase | gbpln | Arabidopsis thaliana | AT3G24255.1   Symbols:   RNA-directed DNA polymerase (reverse transcriptase)-related family protein   chr3:8789471-8793208 FORWARD LENGTH=746                                                                                                                                                                                                                                     | 649 | 746 | 1.00E-97  | 114.9 | 27.7 | 38.4 |
| Rsa1.0_00193.1.g8124.t1 | dbj BAJ34509.1   unnamed protein product [Theillungiella halophila]                                                                                                                                                                                                                                                                                                                                                                                                                                                                                                                                                                                                                                                                                                                                                                                                                                                        | 280 | 284  | 1.00E-113 | 101.4 | 82.5 | 87.5 | unnamed protein product                             | ----  | ----                 | AT4G00950.1   Symbols: MEE47   Protein of unknown function (DUF688)   chr4:405984-407087 REVERSE LENGTH=291                                                                                                                                                                                                                                                                       | 280 | 291 | 1.00E-100 | 103.9 | 75.7 | 85.0 |
| Rsa1.0_00193.1.g8125.t1 | gb EOA36597.1   hypothetical protein CARUB_v10011796mg [Capsella rubella]                                                                                                                                                                                                                                                                                                                                                                                                                                                                                                                                                                                                                                                                                                                                                                                                                                                  | 561 | 572  | 0         | 102.0 | 68.3 | 78.6 | hypothetical protein CARUB_v10011796mg              | gbpln | Capsella rubella     | AT1G43245.1   Symbols:   SET domain-containing protein   chr1:16308982-16310883 REVERSE LENGTH=558                                                                                                                                                                                                                                                                                | 561 | 558 | 0         | 99.5  | 66.7 | 76.1 |

|                         |                                                                                                                                                                                                                                                                                                                                                                                                                                                                                                                                                                                                                                                                                                                        |      |      |           |       |      |      |                                          |       |                      |                                                                                                                                  |      |      |           |       |      |      |
|-------------------------|------------------------------------------------------------------------------------------------------------------------------------------------------------------------------------------------------------------------------------------------------------------------------------------------------------------------------------------------------------------------------------------------------------------------------------------------------------------------------------------------------------------------------------------------------------------------------------------------------------------------------------------------------------------------------------------------------------------------|------|------|-----------|-------|------|------|------------------------------------------|-------|----------------------|----------------------------------------------------------------------------------------------------------------------------------|------|------|-----------|-------|------|------|
| Rsa1.0_00193.1.g8126.t1 | gb EOA21258.1  hypothetical protein CARUB_v10001609mg [Capsella rubella] gi 482557067 gb EOA21259.1  hypothetical protein CARUB_v10001609mg [Capsella rubella]                                                                                                                                                                                                                                                                                                                                                                                                                                                                                                                                                         | 283  | 292  | 1.00E-105 | 103.2 | 73.9 | 82.7 | hypothetical protein CARUB_v10001609mg   | gbpln | Capsella rubella     | AT4G00940.1   Symbols:   Dof-type zinc finger DNA-binding family protein   chr4:403320-404204 REVERSE LENGTH=294                 | 283  | 294  | 1.00E-102 | 103.9 | 67.1 | 74.6 |
| Rsa1.0_00193.1.g8127.t1 | ref NP_179553.1  F-box protein [Arabidopsis thaliana] gi 75216815 sp Q9ZUN0.1 FB113_ARAT H RecName: Full=Putative F-box protein At2g19630 gi 4191792 gb AAD10161.1  hypothetical protein [Arabidopsis thaliana] gi 330251810 gb AEC06904.1  F-box protein [Arabidopsis thaliana]                                                                                                                                                                                                                                                                                                                                                                                                                                       | 308  | 297  | 4.00E-23  | 96.4  | 26.6 | 34.7 | F-box protein                            | gbpln | Arabidopsis thaliana | AT2G19630.1   Symbols:   F-box and associated interaction domains-containing protein   chr2:8490217-8491110 REVERSE LENGTH=297   | 308  | 297  | 1.00E-25  | 96.4  | 26.6 | 34.7 |
| Rsa1.0_00193.1.g8128.t1 | gb EOA23025.1  hypothetical protein CARUB_v10003790mg [Capsella rubella]                                                                                                                                                                                                                                                                                                                                                                                                                                                                                                                                                                                                                                               | 484  | 485  | 0         | 100.2 | 83.5 | 91.7 | hypothetical protein CARUB_v10003790mg   | gbpln | Capsella rubella     | AT4G00910.1   Symbols:   Aluminium activated malate transporter family protein   chr4:389370-391287 REVERSE LENGTH=497           | 484  | 497  | 0         | 102.7 | 84.5 | 90.9 |
| Rsa1.0_00193.1.g8129.t1 | ref XP_002875007.1  hypothetical protein ARALYDRAFT_490474 [Arabidopsis lyrata subsp. lyrata] gi 297320844 gb EFH51266.1  hypothetical protein ARALYDRAFT_490474 [Arabidopsis lyrata subsp. lyrata] ref NP_191999.1  Ca2+-transporting ATPase [Arabidopsis thaliana] gi 12230024 sp Q23087.1 ECA2_ARATH RecName: Full=Calcium-transporting ATPase 2, endoplasmic reticulum-type gi 2252852 gb AAB62850.1  similar to the cation transport ATPases family [Arabidopsis thaliana] gi 4185853 emb CAA10659.1  Ca2+-ATPase [Arabidopsis thaliana] gi 7267429 emb CAB80899.1  Ca2+-transporting ATPase-like protein [Arabidopsis thaliana] gi 332656553 gb AEE81953.1  calcium-transporting ATPase 2 [Arabidopsis thaliana] | 255  | 263  | 1.00E-122 | 103.1 | 86.3 | 91.4 | hypothetical protein ARALYDRAFT_490474   | gbpln | Arabidopsis lyrata   | AT4G00905.1   Symbols:   NC domain-containing protein-related   chr4:387865-389060 FORWARD LENGTH=263                            | 255  | 263  | 1.00E-123 | 103.1 | 85.1 | 92.2 |
| Rsa1.0_00193.1.g8130.t1 | ref NP_191999.1  Ca2+-transporting ATPase [Arabidopsis thaliana] gi 12230024 sp Q23087.1 ECA2_ARATH RecName: Full=Calcium-transporting ATPase 2, endoplasmic reticulum-type gi 2252852 gb AAB62850.1  similar to the cation transport ATPases family [Arabidopsis thaliana] gi 4185853 emb CAA10659.1  Ca2+-ATPase [Arabidopsis thaliana] gi 7267429 emb CAB80899.1  Ca2+-transporting ATPase-like protein [Arabidopsis thaliana] gi 332656553 gb AEE81953.1  calcium-transporting ATPase 2 [Arabidopsis thaliana]                                                                                                                                                                                                     | 1058 | 1054 | 0         | 99.6  | 93.2 | 96.2 | Ca2+-transporting ATPase                 | gbpln | Arabidopsis thaliana | AT4G00900.1   Symbols: ECA2, ATECA2   ER-type Ca2+-ATPase 2   chr4:382690-386226 REVERSE LENGTH=1054                             | 1058 | 1054 | 0         | 99.6  | 93.2 | 96.2 |
| Rsa1.0_00193.1.g8131.t1 | ref XP_002880980.1  hypothetical protein ARALYDRAFT_901765 [Arabidopsis lyrata subsp. lyrata] gi 297326819 gb EFH57239.1  hypothetical protein ARALYDRAFT_901765 [Arabidopsis lyrata subsp. lyrata]                                                                                                                                                                                                                                                                                                                                                                                                                                                                                                                    | 302  | 356  | 5.00E-83  | 117.9 | 55.3 | 67.9 | hypothetical protein ARALYDRAFT_901765   | gbpln | Arabidopsis lyrata   | AT5G47300.1   Symbols:   F-box and associated interaction domains-containing protein   chr5:19198125-19199375 FORWARD LENGTH=416 | 302  | 416  | 3.00E-81  | 137.7 | 53.6 | 70.2 |
| Rsa1.0_00193.1.g8132.t1 | emb CAB39638.1  RNA-directed DNA polymerase-like protein [Arabidopsis thaliana] gi 7267666 emb CAB78094.1  RNA-directed DNA polymerase-like protein [Arabidopsis thaliana]                                                                                                                                                                                                                                                                                                                                                                                                                                                                                                                                             | 327  | 1274 | 9.00E-50  | 389.6 | 39.1 | 50.5 | RNA-directed DNA polymerase-like protein | gbpln | Arabidopsis thaliana | AT1G10000.1   Symbols:   Ribonuclease H-like superfamily protein   chr1:3263877-3264788 REVERSE LENGTH=303                       | 327  | 303  | 7.00E-42  | 92.7  | 32.4 | 49.5 |
| Rsa1.0_00193.1.g8133.t1 | ref XP_002883182.1  pseudouridine synthase family protein [Arabidopsis lyrata subsp. lyrata] gi 297329022 gb EFH59441.1  pseudouridine synthase family protein [Arabidopsis lyrata subsp. lyrata]                                                                                                                                                                                                                                                                                                                                                                                                                                                                                                                      | 472  | 477  | 0         | 101.1 | 86.4 | 92.4 | pseudouridine synthase family protein    | gbpln | Arabidopsis lyrata   | AT3G19440.1   Symbols:   Pseudouridine synthase family protein   chr3:6740778-6743132 FORWARD LENGTH=477                         | 472  | 477  | 0         | 101.1 | 84.7 | 91.5 |

|                         |                                                                                                                                                                                                                                                                                                                                                                                                                                                                                                                                                                                                                                                                                                                                                                                                                                                                                                                                                                                                                                                                                                                                                                                                                                                                                                                                                                                                                                                                                                                                                                                                                                                                                                                                        |     |     |           |       |      |      |                                        |       |                      |                                                                                                                                                                                                                                                                                                                                                                                                                                               |     |     |           |       |      |      |
|-------------------------|----------------------------------------------------------------------------------------------------------------------------------------------------------------------------------------------------------------------------------------------------------------------------------------------------------------------------------------------------------------------------------------------------------------------------------------------------------------------------------------------------------------------------------------------------------------------------------------------------------------------------------------------------------------------------------------------------------------------------------------------------------------------------------------------------------------------------------------------------------------------------------------------------------------------------------------------------------------------------------------------------------------------------------------------------------------------------------------------------------------------------------------------------------------------------------------------------------------------------------------------------------------------------------------------------------------------------------------------------------------------------------------------------------------------------------------------------------------------------------------------------------------------------------------------------------------------------------------------------------------------------------------------------------------------------------------------------------------------------------------|-----|-----|-----------|-------|------|------|----------------------------------------|-------|----------------------|-----------------------------------------------------------------------------------------------------------------------------------------------------------------------------------------------------------------------------------------------------------------------------------------------------------------------------------------------------------------------------------------------------------------------------------------------|-----|-----|-----------|-------|------|------|
| Rsa1.0_00193.1.g8134.t1 | <p>ref NP_188576.1  cinnamyl alcohol dehydrogenase 4 [Arabidopsis thaliana]<br/> gi 1345655 sp P48523.1 CADH4_ARATH<br/> RecName: Full=Cinnamyl alcohol dehydrogenase 4; Short=AtCAD4;<br/> AltName: Full=Cinnamyl alcohol dehydrogenase C<br/> gi 13877997 gb AAK44076.1 AF370261_1<br/> putative cinnamyl alcohol dehydrogenase [Arabidopsis thaliana]<br/> gi 757535 emb CAA83508.1  cinnamyl alcohol dehydrogenase [Arabidopsis thaliana]<br/> gi 11994469 dbj BAB02470.1  cinnamyl alcohol dehydrogenase 2 [Arabidopsis thaliana]<br/> gi 17104723 gb AAL34250.1  putative cinnamyl alcohol dehydrogenase [Arabidopsis thaliana]<br/> gi 31880041 gb AAP59434.1  cinnamyl alcohol dehydrogenase [Arabidopsis thaliana]<br/> gi 169635512 emb CAP0910.1  cinnamyl alcohol dehydrogenase [Arabidopsis thaliana]<br/> gi 169635514 emb CAP0911.1  cinnamyl alcohol dehydrogenase [Arabidopsis thaliana]<br/> gi 169635516 emb CAP0912.1  cinnamyl alcohol dehydrogenase [Arabidopsis thaliana]<br/> gi 169635518 emb CAP0913.1  cinnamyl alcohol dehydrogenase [Arabidopsis thaliana]<br/> ref NP_566635.1  reticulon-like protein B11 [Arabidopsis thaliana]<br/> gi 75274072 sp Q9L177.1 RTNLK_ARATH<br/> H RecName: Full=Reticulon-like protein B11; Short=ARTNLB11<br/> gi 11994468 dbj BAB02471.1  unnamed protein product [Arabidopsis thaliana]<br/> gi 26449615 dbj BAC41933.1  unknown protein [Arabidopsis thaliana]<br/> gi 28950723 gb AAO63285.1  At3g19460 [Arabidopsis thaliana]<br/> gi 332642721 gb AEE76242.1  reticulon-like protein B11 [Arabidopsis thaliana]<br/> ref XP_002885310.1  ATNHD1 [Arabidopsis lyrata subsp. lyrata]<br/> gi 297331150 gb EFH61569.1  ATNHD1 [Arabidopsis lyrata subsp. lyrata]</p> | 365 | 365 | 0         | 100.0 | 93.4 | 96.4 | cinnamyl alcohol dehydrogenase 4       | gbpln | Arabidopsis thaliana | AT3G19450.1   Symbols: CAD4, ATCAD4, CAD, CAD-C   GroES-like zinc-binding alcohol dehydrogenase family protein   chr3:6744859-6747005 FORWARD LENGTH=365                                                                                                                                                                                                                                                                                      | 365 | 365 | 0         | 100.0 | 93.4 | 96.4 |
| Rsa1.0_00193.1.g8135.t1 | <p>ref NP_566635.1  reticulon-like protein B11 [Arabidopsis thaliana]<br/> gi 75274072 sp Q9L177.1 RTNLK_ARATH<br/> H RecName: Full=Reticulon-like protein B11; Short=ARTNLB11<br/> gi 11994468 dbj BAB02471.1  unnamed protein product [Arabidopsis thaliana]<br/> gi 26449615 dbj BAC41933.1  unknown protein [Arabidopsis thaliana]<br/> gi 28950723 gb AAO63285.1  At3g19460 [Arabidopsis thaliana]<br/> gi 332642721 gb AEE76242.1  reticulon-like protein B11 [Arabidopsis thaliana]<br/> ref XP_002885310.1  ATNHD1 [Arabidopsis lyrata subsp. lyrata]<br/> gi 297331150 gb EFH61569.1  ATNHD1 [Arabidopsis lyrata subsp. lyrata]</p>                                                                                                                                                                                                                                                                                                                                                                                                                                                                                                                                                                                                                                                                                                                                                                                                                                                                                                                                                                                                                                                                                           | 196 | 200 | 1.00E-81  | 102.0 | 78.6 | 88.3 | reticulon-like protein B11             | gbpln | Arabidopsis thaliana | AT3G19460.1   Symbols:   Reticulon family protein   chr3:6747600-6748904 FORWARD LENGTH=200                                                                                                                                                                                                                                                                                                                                                   | 196 | 200 | 4.00E-84  | 102.0 | 78.6 | 88.3 |
| Rsa1.0_00193.1.g8136.t1 | <p>ref XP_002885310.1  ATNHD1 [Arabidopsis lyrata subsp. lyrata]<br/> gi 297331150 gb EFH61569.1  ATNHD1 [Arabidopsis lyrata subsp. lyrata]</p>                                                                                                                                                                                                                                                                                                                                                                                                                                                                                                                                                                                                                                                                                                                                                                                                                                                                                                                                                                                                                                                                                                                                                                                                                                                                                                                                                                                                                                                                                                                                                                                        | 580 | 575 | 0         | 99.1  | 90.2 | 94.8 | ATNHD1                                 | gbpln | Arabidopsis lyrata   | AT3G19490.1   Symbols: ATNHD1, NHD1   sodium/hydrogen antiporter 1   chr3:6754875-6758127 REVERSE LENGTH=576                                                                                                                                                                                                                                                                                                                                  | 580 | 576 | 0         | 99.3  | 88.3 | 94.0 |
| Rsa1.0_00193.1.g8137.t2 | <p>gb AAM61088.1  unknown [Arabidopsis thaliana]</p>                                                                                                                                                                                                                                                                                                                                                                                                                                                                                                                                                                                                                                                                                                                                                                                                                                                                                                                                                                                                                                                                                                                                                                                                                                                                                                                                                                                                                                                                                                                                                                                                                                                                                   | 256 | 270 | 1.00E-104 | 105.5 | 76.2 | 82.4 | unknown                                | gbpln | Arabidopsis thaliana | AT3G19500.1   Symbols:   basic helix-loop-helix (bHLH) DNA-binding superfamily protein   chr3:6759289-6760893 REVERSE LENGTH=270                                                                                                                                                                                                                                                                                                              | 256 | 270 | 1.00E-106 | 105.5 | 75.8 | 82.4 |
| Rsa1.0_00193.1.g8138.t1 | <p>ref NP_188582.1  homeobox protein HAT3.1 [Arabidopsis thaliana]<br/> gi 148886602 sp Q04996.3 HAT31_ARATH<br/> H RecName: Full=Homeobox protein HAT3.1; gi 26449313 dbj BAC41784.1  putative homeobox protein HAT3.1 [Arabidopsis thaliana]<br/> gi 29029042 gb AAO64900.1  At3g19510 [Arabidopsis thaliana]<br/> gi 332642729 gb AEE76250.1  homeobox protein HAT3.1 [Arabidopsis thaliana]</p>                                                                                                                                                                                                                                                                                                                                                                                                                                                                                                                                                                                                                                                                                                                                                                                                                                                                                                                                                                                                                                                                                                                                                                                                                                                                                                                                    | 695 | 723 | 0         | 104.0 | 69.2 | 79.7 | homeobox protein HAT3.1                | gbpln | Arabidopsis thaliana | AT3G19510.1   Symbols: HAT3.1   Homeodomain-like protein with RING/FYVE/PHD-type zinc finger domain   chr3:6763205-6766049 REVERSE LENGTH=723                                                                                                                                                                                                                                                                                                 | 695 | 723 | 0         | 104.0 | 69.2 | 79.7 |
| Rsa1.0_00193.1.g8139.t1 | <p>gb EOA30442.1  hypothetical protein CARUB_v10013565mg [Capsella rubella]</p>                                                                                                                                                                                                                                                                                                                                                                                                                                                                                                                                                                                                                                                                                                                                                                                                                                                                                                                                                                                                                                                                                                                                                                                                                                                                                                                                                                                                                                                                                                                                                                                                                                                        | 471 | 484 | 0         | 102.8 | 89.8 | 93.8 | hypothetical protein CARUB_v10013565mg | gbpln | Capsella rubella     | AT3G19540.1   Symbols:   Protein of unknown function (DUF820)   chr3:6780762-6782633 FORWARD LENGTH=485                                                                                                                                                                                                                                                                                                                                       | 471 | 485 | 0         | 103.0 | 89.6 | 93.6 |
| Rsa1.0_00193.1.g8140.t1 | <p>ref XP_002885314.1  hypothetical protein ARALYDRAFT_479468 [Arabidopsis lyrata subsp. lyrata]<br/> gi 297331154 gb EFH61573.1  hypothetical protein ARALYDRAFT_479468 [Arabidopsis lyrata subsp. lyrata]</p>                                                                                                                                                                                                                                                                                                                                                                                                                                                                                                                                                                                                                                                                                                                                                                                                                                                                                                                                                                                                                                                                                                                                                                                                                                                                                                                                                                                                                                                                                                                        | 110 | 110 | 2.00E-41  | 100.0 | 78.2 | 86.4 | hypothetical protein ARALYDRAFT_479468 | gbpln | Arabidopsis lyrata   | AT3G19550.1   Symbols:   unknown protein; FUNCTIONS IN: molecular function unknown; INVOLVED IN: biological process unknown; LOCATED IN: mitochondrion; EXPRESSED IN: 15 plant structures; EXPRESSED DURING: 9 growth stages; Has 36 Blast hits to 36 proteins in 8 species: Archae - 0; Bacteria - 0; Metazoa - 0; Fungi - 0; Plants - 36; Viruses - 0; Other Eukaryotes - 0 (source: NCBI BLINK).   chr3:6787462-6788165 REVERSE LENGTH=110 | 110 | 110 | 3.00E-43  | 100.0 | 76.4 | 83.6 |

|                         |                                                                                                                                                                                                                                                                                                                                      |      |      |           |       |      |      |                                                                                                          |       |                      |                                                                                                                                   |      |      |          |       |      |      |
|-------------------------|--------------------------------------------------------------------------------------------------------------------------------------------------------------------------------------------------------------------------------------------------------------------------------------------------------------------------------------|------|------|-----------|-------|------|------|----------------------------------------------------------------------------------------------------------|-------|----------------------|-----------------------------------------------------------------------------------------------------------------------------------|------|------|----------|-------|------|------|
| Rsa1.0_00193.1.g8141.t1 | gb AAF9727.1 AC004557.6 F17L21.7 [Arabidopsis thaliana]                                                                                                                                                                                                                                                                              | 1101 | 1534 | 0         | 139.3 | 70.0 | 81.2 | F17L21.7                                                                                                 | gbpln | Arabidopsis thaliana | AT4G23160.1   Symbols: CRK8   cysteine-rich RLK (RECEPTOR-like protein kinase) 8   chr4:12129485-12134086 FORWARD LENGTH=1262     | 1101 | 1262 | 2.00E-96 | 114.6 | 17.3 | 26.6 |
| Rsa1.0_00193.1.g8142.t1 | # # # # # # # # # # # # # # # #                                                                                                                                                                                                                                                                                                      |      |      |           |       |      |      |                                                                                                          | ----  | ----                 | #                                                                                                                                 | #    | #    | #        | #     | #    | #    |
| Rsa1.0_00193.1.g8143.t1 | ref NP_188589.1  Amino acid permease family protein [Arabidopsis thaliana]  g 75311166 sp Q9LH39.1 PHSD_ARATH RecName: Full=Probable polyamine transporter At3g19553  g 9294126 dbj BAB01977.1  unnamed protein product [Arabidopsis thaliana]  g 332642736 gb AAE76257.1  Amino acid permease family protein [Arabidopsis thaliana] | 453  | 479  | 0         | 105.7 | 92.9 | 96.7 | Amino acid permease family protein                                                                       | gbpln | Arabidopsis thaliana | AT3G19553.1   Symbols:   Amino acid permease family protein   chr3:6790988-6792507 REVERSE LENGTH=479                             | 453  | 479  | 0        | 105.7 | 92.9 | 96.7 |
| Rsa1.0_00193.1.g8144.t1 | ref XP_002883191.1  hypothetical protein ARALYDRAFT_898339 [Arabidopsis lyrata subsp. lyrata]  g 297329031 gb EFH59450.1  hypothetical protein ARALYDRAFT_898339 [Arabidopsis lyrata subsp. lyrata]                                                                                                                                  | 381  | 360  | 3.00E-84  | 94.5  | 49.6 | 64.3 | hypothetical protein ARALYDRAFT_898339                                                                   | gbpln | Arabidopsis lyrata   | AT3G19560.1   Symbols:   F-box family protein   chr3:6793717-6794802 FORWARD LENGTH=361                                           | 381  | 361  | 3.00E-77 | 94.8  | 44.9 | 59.3 |
| Rsa1.0_00193.1.g8145.t1 | # # # # # # # # # # # # # # # #                                                                                                                                                                                                                                                                                                      |      |      |           |       |      |      |                                                                                                          | ----  | ----                 | #                                                                                                                                 | #    | #    | #        | #     | #    | #    |
| Rsa1.0_00193.1.g8146.t1 | gb AAG51783.1 AC079679_3 reverse transcriptase, putative: 16838-20266 [Arabidopsis thaliana]                                                                                                                                                                                                                                         | 247  | 1142 | 1.00E-42  | 462.3 | 37.7 | 50.2 | reverse transcriptase, putative: 16838-20266                                                             | gbpln | Arabidopsis thaliana | AT4G2090.1   Symbols:   Ribonuclease H-like superfamily protein   chr4:14333528-14335255 FORWARD LENGTH=575                       | 247  | 575  | 2.00E-22 | 232.8 | 26.3 | 41.3 |
| Rsa1.0_00193.1.g8147.t1 | sp Q9CA02.1 FB198_ARATH RecName: Full=F-box protein At3g49510  g 12324446 gb AAG52186.1 AC012329_13 unknown protein: 74683-75849 [Arabidopsis thaliana]  g 33589708 gb AAQ22620.1  At3g49510 [Arabidopsis thaliana]  g 110735675 dbj BAE99818.1  hypothetical protein [Arabidopsis thaliana]                                         | 470  | 388  | 2.00E-69  | 82.6  | 37.0 | 49.4 | RecName: Full=F-box protein At3g49510  g 12324446 gb AAG52186.1 AC012329_13 unknown protein: 74683-75849 | gbpln | Arabidopsis thaliana | AT3G49510.1   Symbols:   F-box family protein   chr3:18353891-18356508 FORWARD LENGTH=662                                         | 470  | 662  | 5.00E-69 | 140.9 | 34.7 | 46.6 |
| Rsa1.0_00193.1.g8148.t2 | sp Q9CA02.1 FB198_ARATH RecName: Full=F-box protein At3g49510  g 12324446 gb AAG52186.1 AC012329_13 unknown protein: 74683-75849 [Arabidopsis thaliana]  g 33589708 gb AAQ22620.1  At3g49510 [Arabidopsis thaliana]  g 110735675 dbj BAE99818.1  hypothetical protein [Arabidopsis thaliana]                                         | 377  | 388  | 9.00E-75  | 102.9 | 46.9 | 63.9 | RecName: Full=F-box protein At3g49510  g 12324446 gb AAG52186.1 AC012329_13 unknown protein: 74683-75849 | gbpln | Arabidopsis thaliana | AT3G49510.1   Symbols:   F-box family protein   chr3:18353891-18356508 FORWARD LENGTH=662                                         | 377  | 662  | 3.00E-75 | 175.6 | 44.6 | 61.0 |
| Rsa1.0_00193.1.g8149.t1 | # # # # # # # # # # # # # # # #                                                                                                                                                                                                                                                                                                      |      |      |           |       |      |      |                                                                                                          | ----  | ----                 | #                                                                                                                                 | #    | #    | #        | #     | #    | #    |
| Rsa1.0_00193.1.g8150.t1 | # # # # # # # # # # # # # # # #                                                                                                                                                                                                                                                                                                      |      |      |           |       |      |      |                                                                                                          | ----  | ----                 | #                                                                                                                                 | #    | #    | #        | #     | #    | #    |
| Rsa1.0_00193.1.g8151.t1 | ref XP_002883191.1  hypothetical protein ARALYDRAFT_898339 [Arabidopsis lyrata subsp. lyrata]  g 297329031 gb EFH59450.1  hypothetical protein ARALYDRAFT_898339 [Arabidopsis lyrata subsp. lyrata]                                                                                                                                  | 367  | 360  | 2.00E-72  | 98.1  | 47.7 | 63.8 | hypothetical protein ARALYDRAFT_898339                                                                   | gbpln | Arabidopsis lyrata   | AT3G13680.1   Symbols:   F-box and associated interaction domains-containing protein   chr3:4477534-4478721 REVERSE LENGTH=395    | 367  | 395  | 6.00E-69 | 107.6 | 45.5 | 62.4 |
| Rsa1.0_00193.1.g8152.t1 | gb ABI74621.1  C2H2 zinc finger protein 1 [Eutrema halophilum]  g 312282663 dbj BAJ34197.1  unnamed protein product [Thellungiella halophila]                                                                                                                                                                                        | 285  | 276  | 5.00E-83  | 96.8  | 72.3 | 80.0 | C2H2 zinc finger protein 1                                                                               | gbpln | Eutrema halophilum   | AT3G19580.2   Symbols: AZF2, ZF2   zinc-finger protein 2   chr3:6803293-6804114 REVERSE LENGTH=273                                | 285  | 273  | 5.00E-83 | 95.8  | 73.3 | 80.7 |
| Rsa1.0_00193.1.g8153.t1 | ref NP_00118664.1  haloacid dehalogenase-like hydrolase domain-containing protein [Arabidopsis thaliana]  g 9294424 dbj BAB02544.1  unnamed protein product [Arabidopsis thaliana]  g 332642743 gb AAE76264.1  haloacid dehalogenase-like hydrolase domain-containing protein [Arabidopsis thaliana]                                 | 308  | 307  | 4.00E-93  | 99.7  | 59.4 | 72.4 | haloacid dehalogenase-like hydrolase domain-containing protein                                           | gbpln | Arabidopsis thaliana | AT3G19595.1   Symbols:   Haloacid dehalogenase-like hydrolase (HAD) superfamily protein   chr3:6808585-6809508 REVERSE LENGTH=307 | 308  | 307  | 1.00E-95 | 99.7  | 59.4 | 72.4 |
| Rsa1.0_00193.1.g8154.t1 | # # # # # # # # # # # # # # # #                                                                                                                                                                                                                                                                                                      |      |      |           |       |      |      |                                                                                                          | ----  | ----                 | #                                                                                                                                 | #    | #    | #        | #     | #    | #    |
| Rsa1.0_00194.1.g8155.t1 | dbj BAJ33811.1  unnamed protein product [Thellungiella halophila]                                                                                                                                                                                                                                                                    | 328  | 213  | 1.00E-105 | 64.9  | 56.7 | 59.8 | unnamed protein product                                                                                  | ----  | ----                 | AT3G03190.1   Symbols: ATGSTF11, ATGSTF6, GSTF11   glutathione S-transferase F11   chr3:735071-735877 FORWARD LENGTH=214          | 328  | 214  | 4.00E-97 | 65.2  | 51.8 | 55.5 |

|                         |                                                                                                                                                                                                                                                                                                                                                                                                                                                                                                                                                                                                                                                                                                                                   |      |      |           |       |      |      |                                          |       |                      |                                                                                                                                                                                                                                                                                                                                                                                                                                                                                                                                                                                                                                                              |      |      |           |       |      |      |
|-------------------------|-----------------------------------------------------------------------------------------------------------------------------------------------------------------------------------------------------------------------------------------------------------------------------------------------------------------------------------------------------------------------------------------------------------------------------------------------------------------------------------------------------------------------------------------------------------------------------------------------------------------------------------------------------------------------------------------------------------------------------------|------|------|-----------|-------|------|------|------------------------------------------|-------|----------------------|--------------------------------------------------------------------------------------------------------------------------------------------------------------------------------------------------------------------------------------------------------------------------------------------------------------------------------------------------------------------------------------------------------------------------------------------------------------------------------------------------------------------------------------------------------------------------------------------------------------------------------------------------------------|------|------|-----------|-------|------|------|
| Rsa1.0_00194.1.g8156.t1 | ref[XP_002882276.1] hypothetical protein ARALYDRAFT_477563 [Arabidopsis lyrata subsp. lyrata] gi 297328116 gb EFH58535.1  hypothetical protein ARALYDRAFT_477563 [Arabidopsis lyrata subsp. lyrata]                                                                                                                                                                                                                                                                                                                                                                                                                                                                                                                               | 130  | 130  | 2.00E-67  | 100.0 | 93.8 | 99.2 | hypothetical protein ARALYDRAFT_477563   | gbpln | Arabidopsis lyrata   | AT3G03160.1   Symbols:   FUNCTIONS IN: molecular function unknown; INVOLVED IN: intracellular protein transport; LOCATED IN: endomembrane system, integral to membrane, endoplasmic reticulum; EXPRESSED IN: 23 plant structures; EXPRESSED DURING: 15 growth stages; CONTAINS InterPro DOMAIN/s: B-cell receptor-associated 31-like (InterPro:IPR008417); BEST Arabidopsis thaliana protein match is: unknown protein (TAIR:AT5G17190.1); Has 102 Blast hits to 102 proteins in 17 species: Archae - 0; Bacteria - 0; Metazoa - 0; Fungi - 0; Plants - 102; Viruses - 0; Other Eukaryotes - 0 (source: NCBI BLink).   chr3:729876-730268 FORWARD LENGTH=130 | 130  | 130  | 4.00E-70  | 100.0 | 93.8 | 99.2 |
| Rsa1.0_00194.1.g8157.t1 | gb AAP37967.1  seed specific protein Bn15D1B [Brassica napus]                                                                                                                                                                                                                                                                                                                                                                                                                                                                                                                                                                                                                                                                     | 119  | 120  | 4.00E-58  | 100.8 | 95.8 | 96.6 | seed specific protein Bn15D1B            | gbpln | Brassica napus       | Arabidopsis thaliana protein match is: unknown protein (TAIR:AT5G17165.1); Has 39 Blast hits to 39 proteins in 11 species: Archae - 0; Bacteria - 0; Metazoa - 0; Fungi - 0; Plants - 39; Viruses - 0; Other Eukaryotes - 0 (source: NCBI BLink).   chr3:727733-729357 REVERSE LENGTH=121                                                                                                                                                                                                                                                                                                                                                                    | 119  | 121  | 5.00E-50  | 101.7 | 80.7 | 86.6 |
| Rsa1.0_00194.1.g8158.t1 | gb EOA32118.1  hypothetical protein CARUB_v10015369mg [Capsella rubella]                                                                                                                                                                                                                                                                                                                                                                                                                                                                                                                                                                                                                                                          | 755  | 761  | 0         | 100.8 | 80.9 | 86.5 | hypothetical protein CARUB_v10015369mg   | gbpln | Capsella rubella     | AT3G03140.1   Symbols:   Tudor/PWPF/MBT superfamily protein   chr3:724348-727093 FORWARD LENGTH=769                                                                                                                                                                                                                                                                                                                                                                                                                                                                                                                                                          | 755  | 769  | 0         | 101.9 | 79.3 | 85.8 |
| Rsa1.0_00194.1.g8159.t1 | gb EOA31520.1  hypothetical protein CARUB_v10014710mg [Capsella rubella]                                                                                                                                                                                                                                                                                                                                                                                                                                                                                                                                                                                                                                                          | 212  | 192  | 1.00E-102 | 90.6  | 87.3 | 89.2 | hypothetical protein CARUB_v10014710mg   | gbpln | Capsella rubella     | AT3G03120.1   Symbols: ATARFB1C, ARFB1C   ADP-ribosylation factor B1C   chr3:717345-718914 FORWARD LENGTH=192                                                                                                                                                                                                                                                                                                                                                                                                                                                                                                                                                | 212  | 192  | 1.00E-104 | 90.6  | 86.8 | 89.6 |
| Rsa1.0_00194.1.g8160.t1 | emb CAB39638.1  RNA-directed DNA polymerase-like protein [Arabidopsis thaliana] gi 7267666 emb CAB78094.1  RNA-directed DNA polymerase-like protein [Arabidopsis thaliana]                                                                                                                                                                                                                                                                                                                                                                                                                                                                                                                                                        | 2341 | 1274 | 0         | 54.4  | 23.5 | 32.4 | RNA-directed DNA polymerase-like protein | gbpln | Arabidopsis thaliana | AT3G03110.1   Symbols: XPO1B, CRM1B   exportin 1B   chr3:708966-716879 FORWARD LENGTH=1076                                                                                                                                                                                                                                                                                                                                                                                                                                                                                                                                                                   | 2341 | 1076 | 0         | 46.0  | 16.5 | 19.9 |
| Rsa1.0_00194.1.g8161.t8 | ref[XP_002882274.1] hypothetical protein ARALYDRAFT_896304 [Arabidopsis lyrata subsp. lyrata] gi 297328114 gb EFH58533.1  hypothetical protein ARALYDRAFT_896304 [Arabidopsis lyrata subsp. lyrata]                                                                                                                                                                                                                                                                                                                                                                                                                                                                                                                               | 475  | 1076 | 0         | 226.5 | 73.7 | 83.4 | hypothetical protein ARALYDRAFT_896304   | gbpln | Arabidopsis lyrata   | AT3G03110.1   Symbols: XPO1B, CRM1B   exportin 1B   chr3:708966-716879 FORWARD LENGTH=1076                                                                                                                                                                                                                                                                                                                                                                                                                                                                                                                                                                   | 475  | 1076 | 0         | 226.5 | 72.8 | 82.9 |
| Rsa1.0_00194.1.g8162.t1 | ref[NP_566192.1] putative NADH dehydrogenase [ubiquinone] 1 alpha subcomplex subunit 12 [Arabidopsis thaliana] gi 12644540 sp Q9M9M9.1 NDUAC, ARATH RecName: Full=Probable NADH dehydrogenase [ubiquinone] 1 alpha subcomplex subunit 12 gi 6714426 gb AAF26114.1 AC012328.17 unknown protein [Arabidopsis thaliana] gi 13878173 gb AAK44164.1 AF370349.1 unknown protein [Arabidopsis thaliana] gi 17104529 gb AAL34153.1  unknown protein [Arabidopsis thaliana] gi 21593289 gb AAM65238.1  probable NADH-ubiquinone oxidoreductase subunit B17.2 (Complex I-B17.2) (CI-B17.2) [Arabidopsis thaliana] gi 332640380 gb AEE73901.1  putative NADH dehydrogenase [ubiquinone] 1 alpha subcomplex subunit 12 [Arabidopsis thaliana] | 159  | 159  | 7.00E-86  | 100.0 | 94.3 | 98.1 | putative NADH dehydrogenase              | gbpln | Arabidopsis thaliana | AT3G03100.1   Symbols:   NADH:ubiquinone oxidoreductase, 17.2kDa subunit   chr3:705564-707578 REVERSE LENGTH=159                                                                                                                                                                                                                                                                                                                                                                                                                                                                                                                                             | 159  | 159  | 2.00E-88  | 100.0 | 94.3 | 98.1 |

|                         |                                                                                                                                                                                                                                                                                                                                                                                                                      |      |      |           |       |      |       |                                                                 |       |                      |                                                                                                                                                       |      |      |           |       |      |      |
|-------------------------|----------------------------------------------------------------------------------------------------------------------------------------------------------------------------------------------------------------------------------------------------------------------------------------------------------------------------------------------------------------------------------------------------------------------|------|------|-----------|-------|------|-------|-----------------------------------------------------------------|-------|----------------------|-------------------------------------------------------------------------------------------------------------------------------------------------------|------|------|-----------|-------|------|------|
| Rsa1.0_00194.1.g8163.t1 | ref NP_186959.2  D-xylose-proton symporter-like 1 [Arabidopsis thaliana] gi 75329736 sp Q8L6Z8.1 XYLL1_ARATH RecName: Full=D-xylose-proton symporter-like 1 gi 22655210 gb AAM98195.1  unknown protein [Arabidopsis thaliana] gi 34098871 gb AAQ56818.1  At3g03090 [Arabidopsis thaliana] gi 332640379 gb AEE73900.1  D-xylose-proton symporter-like 1 [Arabidopsis thaliana]                                        | 505  | 503  | 0         | 99.6  | 86.5 | 93.3  | D-xylose-proton symporter-like 1                                | gbpln | Arabidopsis thaliana | AT3G03090.1   Symbols: AtVGT1, VGT1   vacuolar glucose transporter 1   chr3:700749-704579 REVERSE LENGTH=503                                          | 505  | 503  | 0         | 99.6  | 86.5 | 93.3 |
| Rsa1.0_00194.1.g8164.t1 | # # # # # # # # # #                                                                                                                                                                                                                                                                                                                                                                                                  |      |      |           |       |      |       |                                                                 |       |                      |                                                                                                                                                       |      |      |           |       |      |      |
| Rsa1.0_00194.1.g8165.t1 | gb EOA32971.1  hypothetical protein CARUB_v10016301mg [Capsella rubella]                                                                                                                                                                                                                                                                                                                                             | 345  | 350  | 1.00E-171 | 101.4 | 84.1 | 91.9  | hypothetical protein CARUB_v10016301mg                          | gbpln | Capsella rubella     | AT3G03090.1   Symbols:   Zinc-binding dehydrogenase family protein   chr3:698530-700278 REVERSE LENGTH=350                                            | 345  | 350  | 1.00E-171 | 101.4 | 83.8 | 90.7 |
| Rsa1.0_00194.1.g8166.t1 | ref XP_002884357.1  predicted protein [Arabidopsis lyrata subsp. lyrata] gi 297330197 gb EFH60616.1  predicted protein [Arabidopsis lyrata subsp. lyrata]                                                                                                                                                                                                                                                            | 352  | 351  | 1.00E-173 | 99.7  | 83.2 | 90.9  | predicted protein                                               | gbpln | Arabidopsis lyrata   | AT3G03080.1   Symbols:   Zinc-binding dehydrogenase family protein   chr3:698530-700278 REVERSE LENGTH=350                                            | 352  | 350  | 1.00E-174 | 99.4  | 83.2 | 90.6 |
| Rsa1.0_00194.1.g8167.t1 | ref XP_002882270.1  hypothetical protein ARALYDRAFT_340454 [Arabidopsis lyrata subsp. lyrata] gi 297328110 gb EFH58529.1  hypothetical protein ARALYDRAFT_340454 [Arabidopsis lyrata subsp. lyrata]                                                                                                                                                                                                                  | 618  | 642  | 0         | 103.9 | 91.4 | 95.0  | hypothetical protein ARALYDRAFT_340454                          | gbpln | Arabidopsis lyrata   | AT3G03060.1   Symbols:   P-loop containing nucleoside triphosphate hydrolases superfamily protein   chr3:692188-695424 FORWARD LENGTH=628             | 618  | 628  | 0         | 101.6 | 89.8 | 93.9 |
| Rsa1.0_00194.1.g8168.t1 | gb EOA29758.1  hypothetical protein CARUB_v10012847mg [Capsella rubella]                                                                                                                                                                                                                                                                                                                                             | 1159 | 1147 | 0         | 99.0  | 95.6 | 97.6  | hypothetical protein CARUB_v10012847mg                          | gbpln | Capsella rubella     | AT3G03050.1   Symbols: CSLD3, KJK, ATCSLD3   cellulose synthase-like D3   chr3:687873-691629 FORWARD LENGTH=1145                                      | 1159 | 1145 | 0         | 98.8  | 94.3 | 96.5 |
| Rsa1.0_00194.1.g8169.t1 | ref XP_002884336.1  phosphatase 2C family protein [Arabidopsis lyrata subsp. lyrata] gi 297330176 gb EFH60595.1  phosphatase 2C family protein [Arabidopsis lyrata subsp. lyrata]                                                                                                                                                                                                                                    | 462  | 490  | 0         | 106.1 | 85.3 | 91.6  | phosphatase 2C family protein                                   | gbpln | Arabidopsis lyrata   | AT3G02750.2   Symbols:   Protein phosphatase 2C family protein   chr3:593601-595457 REVERSE LENGTH=492                                                | 462  | 492  | 0         | 106.5 | 83.5 | 89.8 |
| Rsa1.0_00194.1.g8170.t1 | gb AAF36996.1 AF236092.1 isopentenyl pyrophosphate:dimethylallyl pyrophosphate isomerase [Brassica oleracea var. botrytis]                                                                                                                                                                                                                                                                                           | 310  | 281  | 2.33E-156 | 90.6  | 87.4 | 88.7  | isopentenyl pyrophosphate:dimethylallyl pyrophosphate isomerase | gbpln | Brassica oleracea    | AT3G02780.1   Symbols: IPP2, IPIAT1, IDI2   isopentenyl pyrophosphate:dimethylallyl pyrophosphate isomerase 2   chr3:602578-604648 REVERSE LENGTH=284 | 310  | 284  | 1.00E-135 | 91.6  | 82.9 | 84.5 |
| Rsa1.0_00194.1.g8171.t1 | db BAJ34455.1  unnamed protein product [Thellungiella halophila]                                                                                                                                                                                                                                                                                                                                                     | 105  | 105  | 2.00E-51  | 100.0 | 97.1 | 100.0 | unnamed protein product                                         | ----- | -----                | AT3G02790.1   Symbols:   zinc finger (C2H2 type) family protein   chr3:604926-605243 FORWARD LENGTH=105                                               | 105  | 105  | 1.00E-52  | 100.0 | 96.2 | 97.1 |
| Rsa1.0_00194.1.g8172.t1 | ref NP_186929.2  tyrosine specific protein phosphatase-like protein [Arabidopsis thaliana] gi 51969092 db BAD43238.1  unknown protein [Arabidopsis thaliana] gi 332640340 gb AEE73861.1  atypical dual-specificity phosphatase [Arabidopsis thaliana]                                                                                                                                                                | 215  | 203  | 1.00E-82  | 94.4  | 70.2 | 76.3  | tyrosine specific protein phosphatase-like protein              | gbpln | Arabidopsis thaliana | AT3G02800.1   Symbols:   Tyrosine phosphatase family protein   chr3:606638-607704 REVERSE LENGTH=203                                                  | 215  | 203  | 4.00E-85  | 94.4  | 70.2 | 76.3 |
| Rsa1.0_00194.1.g8173.t1 | ref NP_186930.1  protein kinase domain-containing protein [Arabidopsis thaliana] gi 6728981 gb AAF26979.1 AC018363.24 putative protein kinase [Arabidopsis thaliana] gi 28393294 gb AAO42074.1  putative protein kinase [Arabidopsis thaliana] gi 28827262 gb AAO50475.1  putative protein kinase [Arabidopsis thaliana] gi 332640341 gb AEE73862.1  protein kinase domain-containing protein [Arabidopsis thaliana] | 468  | 558  | 0         | 119.2 | 82.3 | 90.4  | protein kinase domain-containing protein                        | gbpln | Arabidopsis thaliana | AT3G02810.1   Symbols:   Protein kinase superfamily protein   chr3:608729-610785 REVERSE LENGTH=558                                                   | 468  | 558  | 0         | 119.2 | 82.3 | 90.4 |
| Rsa1.0_00194.1.g8174.t1 | ref NP_186931.2  CCHC-type zinc knuckle protein [Arabidopsis thaliana] gi 26453004 db BAC43578.1  putative CCHC-type zinc finger protein [Arabidopsis thaliana] gi 106879191 gb ABF82625.1  At3g02820 [Arabidopsis thaliana] gi 332640342 gb AEE73863.1  CCHC-type zinc knuckle protein [Arabidopsis thaliana]                                                                                                       | 300  | 282  | 1.00E-128 | 94.0  | 78.7 | 84.7  | CCHC-type zinc knuckle protein                                  | gbpln | Arabidopsis thaliana | AT3G02820.1   Symbols:   zinc knuckle (CCHC-type) family protein   chr3:611573-613294 FORWARD LENGTH=282                                              | 300  | 282  | 1.00E-130 | 94.0  | 78.7 | 84.7 |

|                         |                                                                                                                                                                                                                                                                                                                                                                                                                                                                                                                                          |     |     |           |       |      |      |                                                                    |             |                      |                                                                                                                                                                                                                                                                                                                                           |     |     |           |       |      |      |
|-------------------------|------------------------------------------------------------------------------------------------------------------------------------------------------------------------------------------------------------------------------------------------------------------------------------------------------------------------------------------------------------------------------------------------------------------------------------------------------------------------------------------------------------------------------------------|-----|-----|-----------|-------|------|------|--------------------------------------------------------------------|-------------|----------------------|-------------------------------------------------------------------------------------------------------------------------------------------------------------------------------------------------------------------------------------------------------------------------------------------------------------------------------------------|-----|-----|-----------|-------|------|------|
| Rsa1.0_00194.1.g8175.t1 | ref[NP_566183.1] zinc finger CCH domain-containing protein 33 [Arabidopsis thaliana] gi 62901378 sp Q8GX7.1 C3H33_ARAT H RecName: Full=Zinc finger CCH domain-containing protein 33; Short=AtC3H33; AltName: Full=Zinc finger CCH domain-containing protein ZFN1 gi 26451016 dbj BAC42614.1  putative zinc finger protein 1 zfn1 [Arabidopsis thaliana] gi 109134113 gb ABG25055.1  At3g02830 [Arabidopsis thaliana] gi 332640343 gb AEE73864.1  zinc finger CCH domain-containing protein 33 [Arabidopsis thaliana]                     | 376 | 397 | 0         | 105.6 | 88.8 | 92.3 | zinc finger CCH domain-containing protein 33                       | gbpln       | Arabidopsis thaliana | AT3G02830.1   Symbols: ZFN1   zinc finger protein   chr3:614075-615916 FORWARD LENGTH=397                                                                                                                                                                                                                                                 | 376 | 397 | 0         | 105.6 | 88.8 | 92.3 |
| Rsa1.0_00194.1.g8176.t1 | ref[NP_566184.1] armadillo/beta-catenin-like repeat-containing protein [Arabidopsis thaliana] gi 6728978 gb AAF26976.1 AC018363.21 unknown protein [Arabidopsis thaliana] gi 26452125 dbj BAC43151.1  unknown protein [Arabidopsis thaliana] gi 27311855 gb AA000893.1  expressed protein [Arabidopsis thaliana] gi 30725622 gb AAP37833.1  At3g02840 [Arabidopsis thaliana] gi 332640344 gb AEE73865.1  armadillo/beta-catenin-like repeat-containing protein [Arabidopsis thaliana]                                                    | 386 | 379 | 1.00E-159 | 98.2  | 77.7 | 86.8 | armadillo/beta-catenin-like repeat-containing protein              | gbpln       | Arabidopsis thaliana | AT3G02840.1   Symbols:   ARM repeat superfamily protein   chr3:618480-619619 FORWARD LENGTH=379                                                                                                                                                                                                                                           | 386 | 379 | 1.00E-161 | 98.2  | 77.7 | 86.8 |
| Rsa1.0_00194.1.g8177.t1 | gb EOA29886.1  hypothetical protein CARUB_v10012982mg [Capsella rubella]                                                                                                                                                                                                                                                                                                                                                                                                                                                                 | 833 | 830 | 0         | 99.6  | 90.8 | 94.0 | hypothetical protein CARUB_v10012982mg                             | gbpln       | Capsella rubella     | AT3G02850.1   Symbols: SKOR   STELAR K+ outward rectifier   chr3:619701-623473 REVERSE LENGTH=828                                                                                                                                                                                                                                         | 833 | 828 | 0         | 99.4  | 90.5 | 93.5 |
| Rsa1.0_00194.1.g8178.t1 | ref[XP_002884343.1] hypothetical protein ARALYDRAFT_477531 [Arabidopsis lyrata subsp. lyrata] gi 297330183 gb EFH60602.1  hypothetical protein ARALYDRAFT_477531 [Arabidopsis lyrata subsp. lyrata]                                                                                                                                                                                                                                                                                                                                      | 271 | 271 | 1.00E-139 | 100.0 | 91.9 | 95.9 | hypothetical protein ARALYDRAFT_477531                             | gbpln       | Arabidopsis lyrata   | AT3G02870.1   Symbols: VTC4   Inositol monophosphatase family protein   chr3:627742-629682 REVERSE LENGTH=271                                                                                                                                                                                                                             | 271 | 271 | 1.00E-140 | 100.0 | 91.9 | 95.6 |
| Rsa1.0_00195.1.g8179.t1 | gb EOA30625.1  hypothetical protein CARUB_v10013760mg, partial [Capsella rubella]                                                                                                                                                                                                                                                                                                                                                                                                                                                        | 332 | 429 | 3.00E-61  | 129.2 | 47.0 | 59.0 | hypothetical protein CARUB_v10013760mg, partial                    | gbpln       | Capsella rubella     | AT3G17570.1   Symbols:   F-box and associated interaction domains-containing protein   chr3:6009413-6010558 FORWARD LENGTH=381                                                                                                                                                                                                            | 332 | 381 | 1.00E-61  | 114.8 | 47.6 | 59.3 |
| Rsa1.0_00195.1.g8180.t1 | ref[XP_003521839.1] PREDICTED: translation initiation factor eIF-2B subunit alpha-like [Glycine max]                                                                                                                                                                                                                                                                                                                                                                                                                                     | 64  | 382 | 1.00E-18  | 596.9 | 70.3 | 73.4 | PREDICTED: translation initiation factor eIF-2B subunit alpha-like | gbenv/gbpln | Glycine max          | AT1G72340.1   Symbols:   NagB/RpiA/CoA transferase-like superfamily protein   chr1:27236898-27238482 FORWARD LENGTH=382                                                                                                                                                                                                                   | 64  | 382 | 3.00E-21  | 596.9 | 70.3 | 73.4 |
| Rsa1.0_00195.1.g8181.t1 | ref[XP_002883069.1] hypothetical protein ARALYDRAFT_898099 [Arabidopsis lyrata subsp. lyrata] gi 297328909 gb EFH59328.1  hypothetical protein ARALYDRAFT_898099 [Arabidopsis lyrata subsp. lyrata]                                                                                                                                                                                                                                                                                                                                      | 82  | 80  | 2.00E-35  | 97.6  | 89.0 | 92.7 | hypothetical protein ARALYDRAFT_898099                             | gbpln       | Arabidopsis lyrata   | AT3G17580.1   Symbols:   unknown protein; BEST Arabidopsis thaliana protein match is: unknown protein (TAIR:AT1G48330.1); Has 40 Blast hits to 40 proteins in 11 species: Archae - 0; Bacteria - 0; Metazoa - 0; Fungi - 0; Plants - 40; Viruses - 0; Other Eukaryotes - 0 (source: NCBI BLINK).   chr3:6015276-6015518 FORWARD LENGTH=80 | 82  | 80  | 3.00E-34  | 97.6  | 80.5 | 84.1 |
| Rsa1.0_00195.1.g8182.t1 | ref[NP_850605.1] transcription factor HY5-like protein [Arabidopsis thaliana] gi 55976199 sp Q8W191.1 HYH_ARATH RecName: Full=Transcription factor HY5-like; AltName: Full=HY5 homolog gi 18042111 gb AAL57834.1 AF453477.1 HY5-like protein [Arabidopsis thaliana] gi 51969022 dbj BAD43203.1  bZip transcription factor AtbZip64 [Arabidopsis thaliana] gi 51969186 dbj BAD43286.1  bZip transcription factor AtbZip64 [Arabidopsis thaliana] gi 332642454 gb AEE75975.1  transcription factor HY5-like protein [Arabidopsis thaliana] | 150 | 149 | 2.00E-60  | 99.3  | 86.7 | 90.0 | transcription factor HY5-like protein                              | gbpln       | Arabidopsis thaliana | AT3G17609.2   Symbols: HYH   HY5-homolog   chr3:6023971-6024585 FORWARD LENGTH=149                                                                                                                                                                                                                                                        | 150 | 149 | 6.00E-63  | 99.3  | 86.7 | 90.0 |
| Rsa1.0_00195.1.g8183.t1 | dbj BAB02051.1  unnamed protein product [Arabidopsis thaliana]                                                                                                                                                                                                                                                                                                                                                                                                                                                                           | 339 | 506 | 1.00E-151 | 149.3 | 83.2 | 91.2 | unnamed protein product                                            | gbpln       | Arabidopsis thaliana | AT3G17611.1   Symbols: ATRBL14, RBL14   RHOMBROID-like protein 14   chr3:6024946-6026173 FORWARD LENGTH=334                                                                                                                                                                                                                               | 339 | 334 | 1.00E-151 | 98.5  | 83.2 | 91.2 |

|                         |                                                                                                                                                                                                                                                                                                                                                                                                                                                                                                                                                   |      |     |           |       |      |      |                                        |       |                      |                                                                                                                                     |      |     |           |       |      |      |
|-------------------------|---------------------------------------------------------------------------------------------------------------------------------------------------------------------------------------------------------------------------------------------------------------------------------------------------------------------------------------------------------------------------------------------------------------------------------------------------------------------------------------------------------------------------------------------------|------|-----|-----------|-------|------|------|----------------------------------------|-------|----------------------|-------------------------------------------------------------------------------------------------------------------------------------|------|-----|-----------|-------|------|------|
| Rsa1.0_00195.1.g8184.t1 | gb[EOA29911.1] hypothetical protein CARUB_v10013004mg [Capsella rubella] gi 482565723 gb EOA29912.1  hypothetical protein CARUB_v10013004mg [Capsella rubella]                                                                                                                                                                                                                                                                                                                                                                                    | 800  | 800 | 0         | 100.0 | 89.8 | 95.6 | hypothetical protein CARUB_v10013004mg | gbpln | Capsella rubella     | AT3G17630.1   Symbols: ATCHX19, CHX19   cation/H <sup>+</sup> exchanger 19   chr3:6029201-6031773 FORWARD LENGTH=800                | 800  | 800 | 0         | 100.0 | 89.6 | 95.0 |
| Rsa1.0_00195.1.g8185.t1 | # # # # # # # # # # # # # # # #                                                                                                                                                                                                                                                                                                                                                                                                                                                                                                                   |      |     |           |       |      |      |                                        |       |                      |                                                                                                                                     |      |     |           |       |      |      |
| Rsa1.0_00195.1.g8186.t1 | ref NP_179323.1  protein SUPPRESSOR OF NIM1 1 [Arabidopsis thaliana] gi 75272519 sp Q8LL17.1 SON1_ARATH RecName: Full=Protein SUPPRESSOR OF NIM1 1 gi 22023774 gb AAM89220.1 AF472589.1 suppressor of nim1-1 [Arabidopsis thaliana] gi 330251518 gb AEC06612.1  protein SUPPRESSOR OF NIM1 1 [Arabidopsis thaliana]                                                                                                                                                                                                                               | 364  | 370 | 1.00E-101 | 101.6 | 58.0 | 71.7 | protein SUPPRESSOR OF NIM1 1           | gbpln | Arabidopsis thaliana | AT2G17310.1   Symbols: SON1   F-box and associated interaction domains-containing protein   chr2:7531212-7532324 FORWARD LENGTH=370 | 364  | 370 | 1.00E-104 | 101.6 | 58.0 | 71.7 |
| Rsa1.0_00195.1.g8187.t1 | ref NP_179323.1  protein SUPPRESSOR OF NIM1 1 [Arabidopsis thaliana] gi 75272519 sp Q8LL17.1 SON1_ARATH RecName: Full=Protein SUPPRESSOR OF NIM1 1 gi 22023774 gb AAM89220.1 AF472589.1 suppressor of nim1-1 [Arabidopsis thaliana] gi 330251518 gb AEC06612.1  protein SUPPRESSOR OF NIM1 1 [Arabidopsis thaliana]                                                                                                                                                                                                                               | 306  | 370 | 9.00E-75  | 120.9 | 52.3 | 65.0 | protein SUPPRESSOR OF NIM1 1           | gbpln | Arabidopsis thaliana | AT2G17310.1   Symbols: SON1   F-box and associated interaction domains-containing protein   chr2:7531212-7532324 FORWARD LENGTH=370 | 306  | 370 | 2.00E-77  | 120.9 | 52.3 | 65.0 |
| Rsa1.0_00195.1.g8188.t1 | ref XP_002883075.1  hypothetical protein ARALYDRAFT_479246 [Arabidopsis lyrata subsp. lyrata] gi 297328915 gb EFH59334.1  hypothetical protein ARALYDRAFT_479246 [Arabidopsis lyrata subsp. lyrata]                                                                                                                                                                                                                                                                                                                                               | 710  | 714 | 0         | 100.6 | 92.3 | 95.9 | hypothetical protein ARALYDRAFT_479246 | gbpln | Arabidopsis lyrata   | AT3G17650.1   Symbols: YSL5, PDE321   YELLOW STRIPE like 5   chr3:6034307-6037087 FORWARD LENGTH=714                                | 710  | 714 | 0         | 100.6 | 91.8 | 95.6 |
| Rsa1.0_00195.1.g8189.t1 | ref XP_002883076.1  ARF-GAP domain 15 [Arabidopsis lyrata subsp. lyrata] gi 297328916 gb EFH59335.1  ARF-GAP domain 15 [Arabidopsis lyrata subsp. lyrata]                                                                                                                                                                                                                                                                                                                                                                                         | 256  | 253 | 1.00E-121 | 98.8  | 80.9 | 85.9 | ARF-GAP domain 15                      | gbpln | Arabidopsis lyrata   | AT3G17660.1   Symbols: AGD15   ARF-GAP domain 15   chr3:6037717-6039092 FORWARD LENGTH=232                                          | 256  | 232 | 1.00E-118 | 90.6  | 78.9 | 84.0 |
| Rsa1.0_00195.1.g8190.t1 | ref XP_002883077.1  hypothetical protein ARALYDRAFT_479249 [Arabidopsis lyrata subsp. lyrata] gi 297328917 gb EFH59336.1  hypothetical protein ARALYDRAFT_479249 [Arabidopsis lyrata subsp. lyrata]                                                                                                                                                                                                                                                                                                                                               | 122  | 136 | 2.00E-52  | 111.5 | 83.6 | 91.0 | hypothetical protein ARALYDRAFT_479249 | gbpln | Arabidopsis lyrata   | AT3G17668.1   Symbols: ENA   DnaJ/Hsp40 cysteine-rich domain superfamily protein   chr3:6039640-6040324 FORWARD LENGTH=135          | 122  | 135 | 2.00E-53  | 110.7 | 81.1 | 88.5 |
| Rsa1.0_00195.1.g8191.t1 | ref NP_188396.2  cyclic nucleotide gated channel 19 [Arabidopsis thaliana] gi 38503200 sp Q9LDR2.1 CNG19_ARATH RecName: Full=Putative cyclic nucleotide-gated ion channel 19; AltName: Full=Cyclic nucleotide-binding transporter 2 gi 8131900 gb AAF73129.1 AF148542.1 cyclic nucleotide-binding transporter 2 [Arabidopsis thaliana] gi 9294159 dbj BAB02061.1  cyclic nucleotide and calmodulin-regulated ion channel protein-like [Arabidopsis thaliana] gi 33264242 gb AEE75993.1  cyclic nucleotide gated channel 19 [Arabidopsis thaliana] | 1405 | 729 | 0         | 51.9  | 41.6 | 45.0 | cyclic nucleotide gated channel 19     | gbpln | Arabidopsis thaliana | AT3G17690.1   Symbols: ATCNGC19, CNGC19   cyclic nucleotide gated channel 19   chr3:6045382-6048339 FORWARD LENGTH=729              | 1405 | 729 | 0         | 51.9  | 41.6 | 45.0 |
| Rsa1.0_00195.1.g8192.t1 | ref XP_002884782.1  hypothetical protein ARALYDRAFT_317819 [Arabidopsis lyrata subsp. lyrata] gi 297330622 gb EFH61041.1  hypothetical protein ARALYDRAFT_317819 [Arabidopsis lyrata subsp. lyrata]                                                                                                                                                                                                                                                                                                                                               | 73   | 79  | 2.00E-11  | 108.2 | 57.5 | 69.9 | hypothetical protein ARALYDRAFT_317819 | gbpln | Arabidopsis lyrata   | AT3G10195.1   Symbols:   Putative membrane lipoprotein   chr3:3156630-3156976 REVERSE LENGTH=81                                     | 73   | 81  | 3.00E-11  | 111.0 | 52.1 | 63.0 |



|                         |                                                                                                                                                                                                                                                                                                                                                                                                                                                                                                                                                                                                                                                               |      |      |           |       |      |      |                                                     |       |                      |                                                                                                                                               |      |     |           |       |      |      |
|-------------------------|---------------------------------------------------------------------------------------------------------------------------------------------------------------------------------------------------------------------------------------------------------------------------------------------------------------------------------------------------------------------------------------------------------------------------------------------------------------------------------------------------------------------------------------------------------------------------------------------------------------------------------------------------------------|------|------|-----------|-------|------|------|-----------------------------------------------------|-------|----------------------|-----------------------------------------------------------------------------------------------------------------------------------------------|------|-----|-----------|-------|------|------|
| Rsa1.0_00195.1.g8193.t1 | refNP_566585.1   cyclic nucleotide gated channel [Arabidopsis thaliana]<br>gi 38503198 sp Q9LD37.1 CNG20_ARATH RecName: Full=Probable cyclic nucleotide-gated ion channel 20, chloroplastic; AltName: Full=Cyclic nucleotide-binding transporter 1; Flags: Precursor<br>gi 8131898 gb AAF73128.1 AF148541.1 cyclic nucleotide-binding transporter 1 [Arabidopsis thaliana]<br>gi 8131901 gb AAF73130.1 AF148542.2 cyclic nucleotide-binding transporter 1 [Arabidopsis thaliana]<br>gi 9294160 dbj BAB02062.1   unnamed protein product [Arabidopsis thaliana]<br>gi 332642473 gb AEE75994.1   cyclic nucleotide-binding transporter 1 [Arabidopsis thaliana] | 760  | 764  | 0         | 100.5 | 88.2 | 92.6 | cyclic nucleotide gated channel                     | gbpln | Arabidopsis thaliana | AT3G17700.1   Symbols: CNBT1, CNGC20, ATONGC20   cyclic nucleotide-binding transporter 1   chr3:6049074-6052449 FORWARD LENGTH=764            | 760  | 764 | 0         | 100.5 | 88.2 | 92.6 |
| Rsa1.0_00195.1.g8194.t1 | gb AAC95175.1   putative non-LTR retroelement reverse transcriptase [Arabidopsis thaliana]                                                                                                                                                                                                                                                                                                                                                                                                                                                                                                                                                                    | 1621 | 1352 | 0         | 83.4  | 42.8 | 57.0 | putative non-LTR retroelement reverse transcriptase | gbpln | Arabidopsis thaliana | AT3G24255.1   Symbols:   RNA-directed DNA polymerase (reverse transcriptase)-related family protein   chr3:8789471-8793208 FORWARD LENGTH=746 | 1621 | 746 | 1.00E-107 | 46.0  | 11.6 | 14.8 |
| Rsa1.0_00195.1.g8195.t1 | refNP_188403.1   glutamate decarboxylase 5 [Arabidopsis thaliana]<br>gi 23847980.1 refNP_001154621.1   glutamate decarboxylase 5 [Arabidopsis thaliana]<br>gi 75311525 sp Q9LSH2.1 DCE5_ARATH RecName: Full=Glutamate decarboxylase 5; Short=GAD 5<br>gi 9294589 dbj BAB02670.1   glutamate decarboxylase [Arabidopsis thaliana]<br>gi 332642482 gb AEE76003.1   glutamate decarboxylase 5 [Arabidopsis thaliana]<br>gi 332642483 gb AEE76004.1   glutamate decarboxylase 5 [Arabidopsis thaliana]                                                                                                                                                            | 490  | 494  | 0         | 100.8 | 93.7 | 97.1 | glutamate decarboxylase 5                           | gbpln | Arabidopsis thaliana | AT3G17760.2   Symbols: GAD5   glutamate decarboxylase 5   chr3:6078893-6080838 REVERSE LENGTH=494                                             | 490  | 494 | 0         | 100.8 | 93.7 | 97.1 |
| Rsa1.0_00195.1.g8196.t2 | gb EOA32502.1   hypothetical protein CARUB_v10015783mg [Capsella rubella]                                                                                                                                                                                                                                                                                                                                                                                                                                                                                                                                                                                     | 511  | 398  | 1.00E-119 | 77.9  | 45.4 | 54.4 | hypothetical protein CARUB_v10015783mg              | gbpln | Capsella rubella     | AT3G16740.1   Symbols:   F-box and associated interaction domains-containing protein   chr3:5699476-5700651 FORWARD LENGTH=391                | 511  | 391 | 1.00E-115 | 76.5  | 43.4 | 54.2 |
| Rsa1.0_00195.1.g8197.t1 | ref XP_002891431.1   hypothetical protein ARALYDRAFT_473983 [Arabidopsis lyrata subsp. lyrata]<br>gi 297337273 gb EFH67690.1   hypothetical protein ARALYDRAFT_473983 [Arabidopsis lyrata subsp. lyrata]                                                                                                                                                                                                                                                                                                                                                                                                                                                      | 129  | 129  | 6.00E-60  | 100.0 | 89.1 | 92.2 | hypothetical protein ARALYDRAFT_473983              | gbpln | Arabidopsis lyrata   | AT1G48440.1   Symbols:   B-cell receptor-associated 31-like   chr1:17907075-17908327 FORWARD LENGTH=129                                       | 129  | 129 | 6.00E-62  | 100.0 | 87.6 | 91.5 |
| Rsa1.0_00195.1.g8198.t1 | gb ABW82644.1   purple acid phosphatase 17 [Brassica napus]<br>gi 158905970 gb ABW82645.1   purple acid phosphatase 17 [Brassica napus]<br>gi 295854825 gb ADG45869.1   purple acid phosphatase 17 isoform 2 [Brassica oleracea var. viridis]<br>gi 295854833 gb ADG45873.1   purple acid phosphatase 17 isoform 2 [Brassica oleracea var. viridis]                                                                                                                                                                                                                                                                                                           | 311  | 333  | 0         | 107.1 | 98.1 | 99.4 | purple acid phosphatase 17                          | gbpln | Brassica napus       | AT3G17790.1   Symbols: ATACP5, ATPAP17, PAPI17   purple acid phosphatase 17   chr3:6089779-6090988 FORWARD LENGTH=338                         | 311  | 338 | 1.00E-168 | 108.7 | 87.5 | 94.9 |
| Rsa1.0_00195.1.g8199.t1 | refNP_188408.1   pyrimidine 1 [Arabidopsis thaliana]<br>gi 9294485 dbj BAB02704.1   senescence-related protein; dihydroorotate dehydrogenase-like protein [Arabidopsis thaliana]<br>gi 14334712 gb AAK59534.1   putative dehydrogenase [Arabidopsis thaliana]<br>gi 16323430 gb AAL15209.1   putative dehydrogenase [Arabidopsis thaliana]<br>gi 24850451 gb AAN64919.1   putative dehydrogenase [Arabidopsis thaliana]<br>gi 332642489 gb AEE76010.1   pyrimidine 1 [Arabidopsis thaliana]                                                                                                                                                                   | 425  | 426  | 0         | 100.2 | 91.8 | 96.5 | pyrimidine 1                                        | gbpln | Arabidopsis thaliana | AT3G17810.1   Symbols: PYD1   pyrimidine 1   chr3:6094279-6096289 FORWARD LENGTH=426                                                          | 425  | 426 | 0         | 100.2 | 91.8 | 96.5 |
| Rsa1.0_00195.1.g8200.t1 | dbj BAA04994.1   glutamine synthetase [Raphanus sativus]                                                                                                                                                                                                                                                                                                                                                                                                                                                                                                                                                                                                      | 354  | 354  | 0         | 100.0 | 96.6 | 99.2 | glutamine synthetase                                | gbpln | Raphanus sativus     | AT3G17820.1   Symbols: ATGSKB6, GLN1.3, GLN1:3   glutamine synthetase 1.3   chr3:6097503-6099408 FORWARD LENGTH=354                           | 354  | 354 | 0         | 100.0 | 92.9 | 96.9 |

|                         |                                                                                                                                                                                                                                                                                                                                                        |      |      |           |       |      |       |                                              |       |                      |                                                                                                                                                      |      |      |           |       |      |      |
|-------------------------|--------------------------------------------------------------------------------------------------------------------------------------------------------------------------------------------------------------------------------------------------------------------------------------------------------------------------------------------------------|------|------|-----------|-------|------|-------|----------------------------------------------|-------|----------------------|------------------------------------------------------------------------------------------------------------------------------------------------------|------|------|-----------|-------|------|------|
| Rsa1.0_00195.1.g8201.t1 | refXP_002883091.1  hypothetical protein ARALYDRAFT_479268 [Arabidopsis lyrata subsp. lyrata] gi 297328931 gb EFH59350.1  hypothetical protein ARALYDRAFT_479268 [Arabidopsis lyrata subsp. lyrata]                                                                                                                                                     | 631  | 639  | 0         | 101.3 | 83.7 | 89.5  | hypothetical protein ARALYDRAFT_479268       | gbpln | Arabidopsis lyrata   | AT3G17840.1   Symbols: RLK902   receptor-like kinase 902   chr3:6106092-6108430 FORWARD LENGTH=647                                                   | 631  | 647  | 0         | 102.5 | 82.7 | 89.1 |
| Rsa1.0_00195.1.g8202.t1 | refXP_002885231.1  predicted protein [Arabidopsis lyrata subsp. lyrata] gi 297331071 gb EFH61490.1  predicted protein [Arabidopsis lyrata subsp. lyrata]                                                                                                                                                                                               | 414  | 1327 | 7.00E-54  | 320.5 | 34.8 | 39.1  | predicted protein                            | gbpln | Arabidopsis lyrata   | AT3G17850.1   Symbols:   Protein kinase superfamily protein   chr3:6109854-6116245 REVERSE LENGTH=1296                                               | 414  | 1296 | 2.00E-51  | 313.0 | 32.4 | 37.2 |
| Rsa1.0_00195.1.g8203.t1 | #                                                                                                                                                                                                                                                                                                                                                      | #    | #    | #         | #     | #    | -     | ----                                         | ----  | ----                 | #                                                                                                                                                    | #    | #    | #         | #     | #    |      |
| Rsa1.0_00195.1.g8204.t2 | refNP_188457.1  zinc finger protein-like protein [Arabidopsis thaliana] gi 20453199 gb AAM19839.1  AT3g18290/MIE15.8 [Arabidopsis thaliana] gi 29028750 gb AAO64754.1  At3g18290/MIE15.8 [Arabidopsis thaliana] gi 332642556 gb AEE76077.1  zinc finger protein-like protein [Arabidopsis thaliana]                                                    | 1253 | 1254 | 0         | 100.1 | 89.4 | 93.2  | zinc finger protein-like protein             | gbpln | Arabidopsis thaliana | AT3G18290.1   Symbols: EMB2454, BTS   zinc finger protein-related   chr3:6274308-6280174 FORWARD LENGTH=1254                                         | 1253 | 1254 | 0         | 100.1 | 89.4 | 93.2 |
| Rsa1.0_00195.1.g8205.t1 | refNP_188458.1  uncharacterized protein [Arabidopsis thaliana] gi 11994092 dbj BAB01095.1  unnamed protein product [Arabidopsis thaliana] gi 40822865 gb AFR92245.1  At3g18295 [Arabidopsis thaliana] gi 45752676 gb AAS76237.1  At3g18295 [Arabidopsis thaliana] gi 332642559 gb AEE76079.1  uncharacterized protein AT3G18295 [Arabidopsis thaliana] | 181  | 216  | 3.00E-41  | 119.3 | 66.9 | 75.7  | uncharacterized protein                      | gbpln | Arabidopsis thaliana | AT3G18295.1   Symbols:   Protein of unknown function (DUF1639)   chr3:6281268-63282000 FORWARD LENGTH=216                                            | 181  | 216  | 1.00E-43  | 119.3 | 66.9 | 75.7 |
| Rsa1.0_00195.1.g8206.t2 | gb EOA29997.1  hypothetical protein CARUB_v10013102mg [Capsella rubella]                                                                                                                                                                                                                                                                               | 686  | 692  | 0         | 100.9 | 88.8 | 94.2  | hypothetical protein CARUB_v10013102mg       | gbpln | Capsella rubella     | AT3G18350.1   Symbols:   Plant protein of unknown function (DUF639)   chr3:6297524-6300500 FORWARD LENGTH=692                                        | 686  | 692  | 0         | 100.9 | 89.2 | 94.8 |
| Rsa1.0_00195.1.g8207.t1 | gb EOA32835.1  hypothetical protein CARUB_v10016148mg [Capsella rubella]                                                                                                                                                                                                                                                                               | 279  | 268  | 4.00E-67  | 96.1  | 68.8 | 77.8  | hypothetical protein CARUB_v10016148mg       | gbpln | Capsella rubella     | AT3G18360.1   Symbols:   VQ motif-containing protein   chr3:6300827-6301684 REVERSE LENGTH=285                                                       | 279  | 285  | 8.00E-67  | 102.2 | 68.5 | 77.8 |
| Rsa1.0_00195.1.g8208.t1 | gb EOA30946.1  hypothetical protein CARUB_v10014092mg [Capsella rubella]                                                                                                                                                                                                                                                                               | 344  | 346  | 1.00E-157 | 100.6 | 83.1 | 87.2  | hypothetical protein CARUB_v10014092mg       | gbpln | Capsella rubella     | AT3G18380.3   Symbols:   sequence-specific DNA binding transcription factors:sequence-specific DNA binding   chr3:6311002-6313181 REVERSE LENGTH=346 | 344  | 346  | 1.00E-158 | 100.6 | 82.6 | 87.5 |
| Rsa1.0_00195.1.g8209.t1 | refXP_002885255.1  predicted protein [Arabidopsis lyrata subsp. lyrata] gi 297331095 gb EFH61514.1  predicted protein [Arabidopsis lyrata subsp. lyrata]                                                                                                                                                                                               | 296  | 314  | 1.00E-141 | 106.1 | 89.5 | 93.2  | predicted protein                            | gbpln | Arabidopsis lyrata   | AT3G18400.1   Symbols: anac058, NAC058   NAC domain containing protein 58   chr3:6318745-6320593 REVERSE LENGTH=314                                  | 296  | 314  | 1.00E-143 | 106.1 | 89.2 | 92.9 |
| Rsa1.0_00195.1.g8210.t1 | #                                                                                                                                                                                                                                                                                                                                                      | #    | #    | #         | #     | #    | -     | ----                                         | ----  | ----                 | #                                                                                                                                                    | #    | #    | #         | #     | #    |      |
| Rsa1.0_00195.1.g8211.t1 | refXP_002883130.1  hypothetical protein ARALYDRAFT_479342 [Arabidopsis lyrata subsp. lyrata] gi 297328970 gb EFH59389.1  hypothetical protein ARALYDRAFT_479342 [Arabidopsis lyrata subsp. lyrata]                                                                                                                                                     | 106  | 106  | 3.00E-55  | 100.0 | 97.2 | 100.0 | hypothetical protein ARALYDRAFT_479342       | gbpln | Arabidopsis lyrata   | AT3G18410.2   Symbols:   Complex I subunit NDUFS6   chr3:6323203-6323761 FORWARD LENGTH=106                                                          | 106  | 106  | 3.00E-57  | 100.0 | 96.2 | 99.1 |
| Rsa1.0_00195.1.g8212.t2 | gb EOA30007.1  hypothetical protein CARUB_v10013111mg [Capsella rubella]                                                                                                                                                                                                                                                                               | 1303 | 690  | 0         | 53.0  | 50.1 | 51.3  | hypothetical protein CARUB_v10013111mg       | gbpln | Capsella rubella     | AT3G18480.1   Symbols: AtCASP, CASP   CCAAT-displacement protein alternatively spliced product   chr3:6336924-6341596 FORWARD LENGTH=689             | 1303 | 689  | 0         | 52.9  | 49.9 | 51.1 |
| Rsa1.0_00195.1.g8213.t1 | #                                                                                                                                                                                                                                                                                                                                                      | #    | #    | #         | #     | #    | -     | ----                                         | ----  | ----                 | #                                                                                                                                                    | #    | #    | #         | #     | #    |      |
| Rsa1.0_00195.1.g8214.t1 | dbj BAJ33681.1  unnamed protein product [Thellungiella halophila]                                                                                                                                                                                                                                                                                      | 505  | 502  | 0         | 99.4  | 85.7 | 91.7  | unnamed protein product                      | ----  | ----                 | AT3G18490.1   Symbols:   Eukaryotic aspartyl protease family protein   chr3:6349090-6350592 REVERSE LENGTH=500                                       | 505  | 500  | 0         | 99.0  | 83.6 | 90.7 |
| Rsa1.0_00196.1.g8215.t1 | gb EOA31118.1  hypothetical protein CARUB_v10014278mg [Capsella rubella]                                                                                                                                                                                                                                                                               | 304  | 299  | 1.00E-130 | 98.4  | 81.3 | 88.2  | hypothetical protein CARUB_v10014278mg       | gbpln | Capsella rubella     | AT3G07350.1   Symbols:   Protein of unknown function (DUF506)   chr3:2347674-2348570 FORWARD LENGTH=298                                              | 304  | 298  | 1.00E-132 | 98.0  | 81.3 | 88.8 |
| Rsa1.0_00196.1.g8216.t1 | refXP_002862652.1  armadillo/beta-catenin repeat family protein [Arabidopsis lyrata subsp. lyrata] gi 297308299 gb EFH38910.1  armadillo/beta-catenin repeat family protein [Arabidopsis lyrata subsp. lyrata]                                                                                                                                         | 451  | 460  | 0         | 102.0 | 87.4 | 92.7  | armadillo/beta-catenin repeat family protein | gbpln | Arabidopsis lyrata   | AT3G07360.1   Symbols: PUB9, ATPUB9   plant U-box 9   chr3:2354884-2356613 FORWARD LENGTH=460                                                        | 451  | 460  | 0         | 102.0 | 87.4 | 92.9 |
| Rsa1.0_00196.1.g8217.t1 | gb EOA31335.1  hypothetical protein CARUB_v10014508mg [Capsella rubella]                                                                                                                                                                                                                                                                               | 232  | 241  | 6.00E-81  | 103.9 | 70.3 | 78.9  | hypothetical protein CARUB_v10014508mg       | gbpln | Capsella rubella     | AT3G07390.1   Symbols: AIR12   auxin-responsive family protein   chr3:2365452-2366273 FORWARD LENGTH=273                                             | 232  | 273  | 2.00E-80  | 117.7 | 70.3 | 78.9 |

|                         |                                                                                                                                                                                                                                                                                                                                                                                                                                                                                   |     |     |           |       |      |      |                                                                          |       |                      |                                                                                                                                             |     |     |           |       |      |      |
|-------------------------|-----------------------------------------------------------------------------------------------------------------------------------------------------------------------------------------------------------------------------------------------------------------------------------------------------------------------------------------------------------------------------------------------------------------------------------------------------------------------------------|-----|-----|-----------|-------|------|------|--------------------------------------------------------------------------|-------|----------------------|---------------------------------------------------------------------------------------------------------------------------------------------|-----|-----|-----------|-------|------|------|
| Rsa1.0_00196.1.g8218.t1 | ref XP_002884647.1  hypothetical protein ARALYDRAFT_896904 [Arabidopsis lyrata subsp. lyrata] gi 297330487 gb EFH60906.1                                                                                                                                                                                                                                                                                                                                                          | 213 | 217 | 1.00E-113 | 101.9 | 96.2 | 99.1 | hypothetical protein ARALYDRAFT_896904                                   | gbpln | Arabidopsis lyrata   | AT3G07410.1   Symbols: ATRABA5b, RABA5b   RAB GTPase homolog A5B   chr3:2372485-2373482 REVERSE LENGTH=217                                  | 213 | 217 | 1.00E-115 | 101.9 | 95.8 | 98.6 |
| Rsa1.0_00196.1.g8219.t1 | #                                                                                                                                                                                                                                                                                                                                                                                                                                                                                 | #   | #   | #         | #     | #    | #    | -                                                                        | ----  | ----                 | #                                                                                                                                           | #   | #   | #         | #     | #    |      |
| Rsa1.0_00196.1.g8220.t1 | gb EOA31586.1  hypothetical protein CARUB_v10014780mg [Capsella rubella]                                                                                                                                                                                                                                                                                                                                                                                                          | 167 | 171 | 4.00E-66  | 102.4 | 74.3 | 84.4 | hypothetical protein CARUB_v10014780mg                                   | gbpln | Capsella rubella     | AT3G07460.1   Symbols:   Protein of unknown function, DUF538   chr3:2384837-2385617 REVERSE LENGTH=177                                      | 167 | 177 | 1.00E-63  | 106.0 | 72.5 | 83.8 |
| Rsa1.0_00196.1.g8221.t1 | ref NP_187405.1  calmodulin-like protein 3 [Arabidopsis thaliana] gi 297829300 ref XP_002882532.1  ARF-GAP domain 11 [Arabidopsis lyrata subsp. lyrata] gi 75337571 sp Q9SRR7.1 CML3_ARATH RecName: Full=Calmodulin-like protein 3 gi 6041859 gb AAAF02168.1 AC009853_28 putative calmodulin [Arabidopsis thaliana] gi 297328372 gb EFH58791.1  ARF-GAP domain 11 [Arabidopsis lyrata subsp. lyrata] gi 332641028 gb AEE74549.1  calmodulin-like protein 3 [Arabidopsis thaliana] | 149 | 153 | 5.00E-63  | 102.7 | 89.9 | 97.3 | calmodulin-like protein 3                                                | gbpln | Arabidopsis lyrata   | AT3G07490.1   Symbols: AGD11   ARF-GAP domain 11   chr3:2391189-2391650 FORWARD LENGTH=153                                                  | 149 | 153 | 1.00E-65  | 102.7 | 89.9 | 97.3 |
| Rsa1.0_00196.1.g8222.t1 | gb EOA31112.1  hypothetical protein CARUB_v10014265mg [Capsella rubella]                                                                                                                                                                                                                                                                                                                                                                                                          | 288 | 302 | 5.00E-55  | 104.9 | 37.8 | 39.6 | hypothetical protein CARUB_v10014265mg                                   | gbpln | Capsella rubella     | AT3G07560.1   Symbols: APM2, PEX13   peroxin 13   chr3:2411616-2413310 REVERSE LENGTH=304                                                   | 288 | 304 | 3.00E-57  | 105.6 | 37.8 | 39.9 |
| Rsa1.0_00196.1.g8223.t1 | ref XP_002882536.1  hypothetical protein ARALYDRAFT_478080 [Arabidopsis lyrata subsp. lyrata] gi 297328376 gb EFH58795.1  hypothetical protein ARALYDRAFT_478080 [Arabidopsis lyrata subsp. lyrata]                                                                                                                                                                                                                                                                               | 230 | 251 | 1.00E-101 | 109.1 | 83.5 | 90.4 | hypothetical protein ARALYDRAFT_478080                                   | gbpln | Arabidopsis lyrata   | AT3G07565.1   Symbols:   Protein of unknown function (DUF3755)   chr3:2413823-2415872 FORWARD LENGTH=258                                    | 230 | 258 | 1.00E-100 | 112.2 | 80.4 | 90.4 |
| Rsa1.0_00196.1.g8224.t1 | gb EOA30840.1  hypothetical protein CARUB_v10013985mg [Capsella rubella]                                                                                                                                                                                                                                                                                                                                                                                                          | 370 | 369 | 1.00E-171 | 99.7  | 78.6 | 86.8 | hypothetical protein CARUB_v10013985mg                                   | gbpln | Capsella rubella     | AT3G07570.1   Symbols:   Cytochrome b561/ferric reductase transmembrane with DOMON related domain   chr3:2418205-2420206 REVERSE LENGTH=369 | 370 | 369 | 1.00E-173 | 99.7  | 79.2 | 86.2 |
| Rsa1.0_00196.1.g8225.t1 | ref XP_002884658.1  predicted protein [Arabidopsis lyrata subsp. lyrata] gi 297330498 gb EFH60917.1  predicted protein [Arabidopsis lyrata subsp. lyrata]                                                                                                                                                                                                                                                                                                                         | 251 | 467 | 6.00E-77  | 186.1 | 57.0 | 65.7 | predicted protein                                                        | gbpln | Arabidopsis lyrata   | AT3G07570.1   Symbols:   Cytochrome b561/ferric reductase transmembrane with DOMON related domain   chr3:2418205-2420206 REVERSE LENGTH=369 | 251 | 369 | 9.00E-79  | 147.0 | 57.0 | 64.5 |
| Rsa1.0_00196.1.g8226.t1 | ref NP_566313.2  Cytochrome b561/ferric reductase transmembrane with DOMON related domain [Arabidopsis thaliana] gi 110736322 dbj BAF00131.1  hypothetical protein [Arabidopsis thaliana] gi 332641046 gb AEE74567.1  Cytochrome b561/ferric reductase transmembrane with DOMON related domain [Arabidopsis thaliana]                                                                                                                                                             | 424 | 369 | 1.00E-140 | 87.0  | 61.8 | 69.1 | Cytochrome b561/ferric reductase transmembrane with DOMON related domain | gbpln | Arabidopsis thaliana | AT3G07570.1   Symbols:   Cytochrome b561/ferric reductase transmembrane with DOMON related domain   chr3:2418205-2420206 REVERSE LENGTH=369 | 424 | 369 | 1.00E-143 | 87.0  | 61.8 | 69.1 |
| Rsa1.0_00196.1.g8227.t1 | gb ABC00745.1  putative small nuclear ribonucleoprotein D1 [Brassica napus]                                                                                                                                                                                                                                                                                                                                                                                                       | 159 | 118 | 7.00E-60  | 74.2  | 74.2 | 74.2 | putative small nuclear ribonucleoprotein D1                              | gbpln | Brassica napus       | AT3G07590.2   Symbols:   Small nuclear ribonucleoprotein family protein   chr3:2423146-2423958 FORWARD LENGTH=114                           | 159 | 114 | 3.00E-49  | 71.7  | 59.1 | 61.0 |
| Rsa1.0_00196.1.g8228.t1 | ref NP_187419.1  putative glycosyltransferase [Arabidopsis thaliana] gi 75207507 sp Q9SSE8.1 GLYT1_ARATH RecName: Full=Probable glycosyltransferase At3g07620 gi 6466945 gb AAF13080.1 AC009176_7 hypothetical protein [Arabidopsis thaliana] gi 332641059 gb AEE74576.1  putative glycosyltransferase [Arabidopsis thaliana]                                                                                                                                                     | 601 | 470 | 0         | 78.2  | 66.4 | 68.2 | putative glycosyltransferase                                             | gbpln | Arabidopsis thaliana | AT3G07620.1   Symbols:   Exostosin family protein   chr3:2433267-2434988 REVERSE LENGTH=470                                                 | 601 | 470 | 0         | 78.2  | 66.4 | 68.2 |

|                         |                                                                                                                                                                                                                                                                                                                                                                                                                                                                                                                                                                                                                                                                                                                                                                                                                                                                                                                                                                                              |     |     |           |       |      |      |                                        |       |                      |                                                                                                                                                                                                                                                                                                                                                          |     |     |           |       |      |      |
|-------------------------|----------------------------------------------------------------------------------------------------------------------------------------------------------------------------------------------------------------------------------------------------------------------------------------------------------------------------------------------------------------------------------------------------------------------------------------------------------------------------------------------------------------------------------------------------------------------------------------------------------------------------------------------------------------------------------------------------------------------------------------------------------------------------------------------------------------------------------------------------------------------------------------------------------------------------------------------------------------------------------------------|-----|-----|-----------|-------|------|------|----------------------------------------|-------|----------------------|----------------------------------------------------------------------------------------------------------------------------------------------------------------------------------------------------------------------------------------------------------------------------------------------------------------------------------------------------------|-----|-----|-----------|-------|------|------|
| Rsa1.0_00196.1.g8229.t2 | refNP_187422.1 zinc finger protein CONSTANS-LIKE 9 [Arabidopsis thaliana] gi42572309[refNP_974250.1 zinc finger protein CONSTANS-LIKE 9 [Arabidopsis thaliana] gi79313159[refNP_001030659.1 zinc finger protein CONSTANS-LIKE 9 [Arabidopsis thaliana] gi186509893[refNP_001118599.1 zinc finger protein CONSTANS-LIKE 9 [Arabidopsis thaliana] gi17433084[sp Q9SSE5.1 COL9_ARATH RecName: Full=Zinc finger protein CONSTANS-LIKE 9 gi6466948[gb AAF13083.1 AC009176_10 unknown protein [Arabidopsis thaliana] gi119360037[gb ABL66747.1 At3g07650 [Arabidopsis thaliana] gi22242327[dbj BAH19639.1 AT3G07650 [Arabidopsis thaliana] gi332641059[gb AEE74580.1] zinc finger protein CONSTANS-LIKE 9 [Arabidopsis thaliana] gi332641060[gb AEE74581.1] zinc finger protein CONSTANS-LIKE 9 [Arabidopsis thaliana] gi332641061[gb AEE74582.1] zinc finger protein CONSTANS-LIKE 9 [Arabidopsis thaliana] gi332641062[gb AEE74583.1] zinc finger protein CONSTANS-LIKE 9 [Arabidopsis thaliana] | 366 | 372 | 1.00E-178 | 101.6 | 84.4 | 90.4 | zinc finger protein CONSTANS-LIKE 9    | gbpln | Arabidopsis thaliana | AT3G07650.1   Symbols: COL9   CONSTANS-like 9   chr3:2442494-2443901 FORWARD LENGTH=372                                                                                                                                                                                                                                                                  | 366 | 372 | 0         | 101.6 | 84.4 | 90.4 |
| Rsa1.0_00196.1.g8230.t1 | gb EOA29878.1  hypothetical protein CARUB_v10012975mg [Capsella rubella]                                                                                                                                                                                                                                                                                                                                                                                                                                                                                                                                                                                                                                                                                                                                                                                                                                                                                                                     | 837 | 838 | 0         | 100.1 | 81.1 | 86.7 | hypothetical protein CARUB_v10012975mg | gbpln | Capsella rubella     | AT3G07660.1   Symbols:   Kinase-related protein of unknown function (DUF1296)   chr3:2445275-2450372 REVERSE LENGTH=841                                                                                                                                                                                                                                  | 837 | 841 | 0         | 100.5 | 81.0 | 86.6 |
| Rsa1.0_00196.1.g8231.t3 | gb EOA30367.1  hypothetical protein CARUB_v10013490mg [Capsella rubella]                                                                                                                                                                                                                                                                                                                                                                                                                                                                                                                                                                                                                                                                                                                                                                                                                                                                                                                     | 608 | 507 | 7.00E-54  | 83.4  | 27.3 | 36.5 | hypothetical protein CARUB_v10013490mg | gbpln | Capsella rubella     | AT3G07730.1   Symbols:   unknown protein; BEST Arabidopsis thaliana protein match is: unknown protein (TAIR:AT4G01170.1); Has 1299 Blast hits to 1149 proteins in 206 species: Archae - 3; Bacteria - 100; Metazoa - 453; Fungi - 114; Plants - 108; Viruses - 2; Other Eukaryotes - 519 (source: NCBI BLink).   chr3:2468185-2469606 FORWARD LENGTH=473 | 608 | 473 | 1.00E-54  | 77.8  | 26.8 | 35.2 |
| Rsa1.0_00196.1.g8232.t1 | refNP_566318.1 3'-5'-exoribonuclease family protein [Arabidopsis thaliana] gi30680427[refNP_850537.1] 3'-5'-exoribonuclease family protein [Arabidopsis thaliana] gi11762184[gb AAG40370.1 AF325018.1 AT3g07750 [Arabidopsis thaliana] gi26453010[dbj BAC43581.1] putative 3' exoribonuclease [Arabidopsis thaliana] gi56744222[gb AAW28551.1] At3g07750 [Arabidopsis thaliana] gi332641077[gb AEE74598.1] 3'-5'-exoribonuclease family protein [Arabidopsis thaliana] gi332641078[gb AEE74599.1] 3'-5'-exoribonuclease family protein [Arabidopsis thaliana]                                                                                                                                                                                                                                                                                                                                                                                                                                | 288 | 286 | 1.00E-151 | 99.3  | 92.4 | 95.8 | 3'-5'-exoribonuclease family protein   | gbpln | Arabidopsis thaliana | AT3G07750.2   Symbols:   3'-5'-exoribonuclease family protein   chr3:2473486-2475218 FORWARD LENGTH=286                                                                                                                                                                                                                                                  | 288 | 286 | 1.00E-153 | 99.3  | 92.4 | 95.8 |
| Rsa1.0_00196.1.g8233.t1 | #                                                                                                                                                                                                                                                                                                                                                                                                                                                                                                                                                                                                                                                                                                                                                                                                                                                                                                                                                                                            | #   | #   | #         | #     | #    | -    | ----                                   | ----  | #                    | #                                                                                                                                                                                                                                                                                                                                                        | #   | #   | #         | #     | #    |      |
| Rsa1.0_00196.1.g8234.t1 | refXP_002882548.1 hypothetical protein ARALYDRAFT_896947 [Arabidopsis lyrata subsp. lyrata] gi297328388[gb EFH58807.1] hypothetical protein ARALYDRAFT_896947 [Arabidopsis lyrata subsp. lyrata]                                                                                                                                                                                                                                                                                                                                                                                                                                                                                                                                                                                                                                                                                                                                                                                             | 145 | 140 | 7.00E-67  | 96.6  | 87.6 | 88.3 | hypothetical protein ARALYDRAFT_896947 | gbpln | Arabidopsis lyrata   | AT3G07760.2   Symbols:   Sterile alpha motif (SAM) domain-containing protein   chr3:2476723-2477947 FORWARD LENGTH=125                                                                                                                                                                                                                                   | 145 | 125 | 1.00E-66  | 86.2  | 82.1 | 82.1 |
| Rsa1.0_00196.1.g8235.t3 | gb EOA32302.1  hypothetical protein CARUB_v10015564mg [Capsella rubella]                                                                                                                                                                                                                                                                                                                                                                                                                                                                                                                                                                                                                                                                                                                                                                                                                                                                                                                     | 774 | 799 | 0         | 103.2 | 90.4 | 95.1 | hypothetical protein CARUB_v10015564mg | gbpln | Capsella rubella     | AT3G07770.1   Symbols: Hsp89.1, AtHsp90.6, AtHsp90-6   HEAT SHOCK PROTEIN 89.1   chr3:2479611-2483970 FORWARD LENGTH=799                                                                                                                                                                                                                                 | 774 | 799 | 0         | 103.2 | 89.1 | 94.3 |
| Rsa1.0_00196.1.g8236.t1 | gb EOA30228.1  hypothetical protein CARUB_v10013350mg [Capsella rubella] gi482566040[gb EOA30229.1] hypothetical protein CARUB_v10013350mg [Capsella rubella]                                                                                                                                                                                                                                                                                                                                                                                                                                                                                                                                                                                                                                                                                                                                                                                                                                | 550 | 566 | 0         | 102.9 | 85.6 | 91.1 | hypothetical protein CARUB_v10013350mg | gbpln | Capsella rubella     | AT3G07780.1   Symbols: OBE1   Protein of unknown function (DUF1423)   chr3:2485104-2486876 FORWARD LENGTH=566                                                                                                                                                                                                                                            | 550 | 566 | 0         | 102.9 | 84.4 | 91.5 |



|                         |                                                                                                                                                                                                     |      |      |           |       |      |      |                                                 |       |                      |                                                                                                                                                                                                                                                                                                                                                                                                                                                                                                                             |      |      |           |       |      |      |
|-------------------------|-----------------------------------------------------------------------------------------------------------------------------------------------------------------------------------------------------|------|------|-----------|-------|------|------|-------------------------------------------------|-------|----------------------|-----------------------------------------------------------------------------------------------------------------------------------------------------------------------------------------------------------------------------------------------------------------------------------------------------------------------------------------------------------------------------------------------------------------------------------------------------------------------------------------------------------------------------|------|------|-----------|-------|------|------|
| Rsa1.0_00197.1.g8248.t1 | ref XP_002892507.1  hypothetical protein ARALYDRAFT_471040 [Arabidopsis lyrata subsp. lyrata] gi 297338349 gb EFH68766.1  hypothetical protein ARALYDRAFT_471040 [Arabidopsis lyrata subsp. lyrata] | 357  | 336  | 1.00E-152 | 94.1  | 80.7 | 86.0 | hypothetical protein ARALYDRAFT_471040          | gbpln | Arabidopsis lyrata   | AT1G09470.1   Symbols:   unknown protein; FUNCTIONS IN: molecular_function unknown; EXPRESSED IN: cotyledon; BEST Arabidopsis thaliana protein match is: unknown protein (TAIR:AT5G26770.1); Has 55019 Blast hits to 30094 proteins in 2088 species: Archae - 730; Bacteria - 6553; Metazoa - 28961; Fungi - 4800; Plants - 2559; Viruses - 111; Other Eukaryotes - 11305 (source: NCBI BLINK).   chr1:3055391-3056931 REVERSE LENGTH=336                                                                                   | 357  | 336  | 1.00E-154 | 94.1  | 80.1 | 85.7 |
| Rsa1.0_00197.1.g8249.t1 | gb ACP20258.1  cinnamyl-alcohol dehydrogenase [Brassica rapa subsp. oleifera]                                                                                                                       | 295  | 322  | 1.00E-155 | 109.2 | 92.5 | 96.6 | cinnamyl-alcohol dehydrogenase                  | gbpln | Brassica rapa        | AT1G09480.1   Symbols:   NAD(P)-binding Rossmann-fold superfamily protein   chr1:3057975-3060661 FORWARD LENGTH=369                                                                                                                                                                                                                                                                                                                                                                                                         | 295  | 369  | 1.00E-133 | 125.1 | 78.0 | 89.8 |
| Rsa1.0_00197.1.g8250.t1 | dbj BAJ33939.1  unnamed protein product [Thellungiella halophila]                                                                                                                                   | 322  | 336  | 1.00E-151 | 104.3 | 79.8 | 89.4 | unnamed protein product                         | ----  | ----                 | AT1G09490.1   Symbols:   NAD(P)-binding Rossmann-fold superfamily protein   chr1:3064172-3065815 FORWARD LENGTH=322                                                                                                                                                                                                                                                                                                                                                                                                         | 322  | 322  | 1.00E-148 | 100.0 | 79.5 | 87.0 |
| Rsa1.0_00197.1.g8251.t1 | gb ACP20258.1  cinnamyl-alcohol dehydrogenase [Brassica rapa subsp. oleifera]                                                                                                                       | 329  | 322  | 1.00E-152 | 97.9  | 83.3 | 88.4 | cinnamyl-alcohol dehydrogenase                  | gbpln | Brassica rapa        | AT1G09490.1   Symbols:   NAD(P)-binding Rossmann-fold superfamily protein   chr1:3064172-3065815 FORWARD LENGTH=322                                                                                                                                                                                                                                                                                                                                                                                                         | 329  | 322  | 1.00E-145 | 97.9  | 77.2 | 86.0 |
| Rsa1.0_00197.1.g8252.t1 | gb EOA36734.1  hypothetical protein CARUB_v10012528mg [Capsella rubella]                                                                                                                            | 244  | 266  | 8.00E-69  | 109.0 | 58.2 | 72.1 | hypothetical protein CARUB_v10012528mg          | gbpln | Capsella rubella     | AT1G09520.1   Symbols:   LOCATED IN: chloroplast; EXPRESSED IN: 21 plant structures; EXPRESSED DURING: 12 growth stages; CONTAINS InterPro DOMAIN/s: Zinc finger, PHD-type, conserved site (InterPro:IPR019786). BEST Arabidopsis thaliana protein match is: PHD finger family protein (TAIR:AT3G17460.1); Has 56 Blast hits to 56 proteins in 17 species: Archae - 0; Bacteria - 2; Metazoa - 0; Fungi - 4; Plants - 46; Viruses - 0; Other Eukaryotes - 4 (source: NCBI BLINK).   chr1:3071248-3072030 REVERSE LENGTH=260 | 244  | 260  | 1.00E-69  | 106.6 | 61.5 | 74.6 |
| Rsa1.0_00197.1.g8253.t1 | emb CAA16721.1  MuDR transposable element - like protein [Arabidopsis thaliana] gi 7268634 emb CAB78843.1  MuDR transposable element-like protein [Arabidopsis thaliana]                            | 323  | 633  | 5.00E-68  | 196.0 | 39.6 | 50.2 | MuDR transposable element - like protein        | gbpln | Arabidopsis thaliana | #                                                                                                                                                                                                                                                                                                                                                                                                                                                                                                                           | #    | #    | #         | #     | #    |      |
| Rsa1.0_00197.1.g8254.t1 | ref XP_00289756.1  hypothetical protein ARALYDRAFT_471048 [Arabidopsis lyrata subsp. lyrata] gi 297335598 gb EFH66015.1  hypothetical protein ARALYDRAFT_471048 [Arabidopsis lyrata subsp. lyrata]  | 507  | 522  | 0         | 103.0 | 81.3 | 88.2 | hypothetical protein ARALYDRAFT_471048          | gbpln | Arabidopsis lyrata   | AT1G09530.2   Symbols: PIF3, POC1, PAP3   phytochrome interacting factor 3   chr1:3077216-3079367 FORWARD LENGTH=524                                                                                                                                                                                                                                                                                                                                                                                                        | 507  | 524  | 0         | 103.4 | 81.1 | 87.2 |
| Rsa1.0_00197.1.g8255.t1 | gb EOA38027.1  hypothetical protein CARUB_v10009497mg [Capsella rubella]                                                                                                                            | 351  | 369  | 1.00E-171 | 105.1 | 88.3 | 93.7 | hypothetical protein CARUB_v10009497mg          | gbpln | Capsella rubella     | AT1G09540.1   Symbols: MYB61, ATMYB61   myb domain protein 61   chr1:3086333-3087689 FORWARD LENGTH=366                                                                                                                                                                                                                                                                                                                                                                                                                     | 351  | 366  | 1.00E-165 | 104.3 | 87.2 | 91.7 |
| Rsa1.0_00197.1.g8256.t1 | ref XP_002892509.1  hypothetical protein ARALYDRAFT_311997 [Arabidopsis lyrata subsp. lyrata] gi 297338351 gb EFH68768.1  hypothetical protein ARALYDRAFT_311997 [Arabidopsis lyrata subsp. lyrata] | 346  | 363  | 1.00E-153 | 104.9 | 78.9 | 84.7 | hypothetical protein ARALYDRAFT_311997          | gbpln | Arabidopsis lyrata   | AT1G09550.1   Symbols:   Pectinacetyltransferase family protein   chr1:3089733-3092254 REVERSE LENGTH=388                                                                                                                                                                                                                                                                                                                                                                                                                   | 346  | 388  | 1.00E-151 | 112.1 | 77.5 | 83.5 |
| Rsa1.0_00197.1.g8257.t1 | gb EOA38478.1  hypothetical protein CARUB_v10010233mg [Capsella rubella]                                                                                                                            | 217  | 225  | 1.00E-104 | 103.7 | 86.2 | 88.9 | hypothetical protein CARUB_v10010233mg          | gbpln | Capsella rubella     | AT1G09560.1   Symbols: GLP5   germin-like protein 5   chr1:3093896-3094639 FORWARD LENGTH=219                                                                                                                                                                                                                                                                                                                                                                                                                               | 217  | 219  | 1.00E-105 | 100.9 | 85.3 | 88.5 |
| Rsa1.0_00197.1.g8258.t1 | dbj BAA99410.1  phytochrome A [Armoracia rusticana]                                                                                                                                                 | 1121 | 1122 | 0         | 100.1 | 95.2 | 97.9 | phytochrome A                                   | gbpln | Armoracia rusticana  | AT1G09570.1   Symbols: PHYA, PHY2, FRE1, HY8   phytochrome A   chr1:3095498-3099216 REVERSE LENGTH=1122                                                                                                                                                                                                                                                                                                                                                                                                                     | 1121 | 1122 | 0         | 100.1 | 95.4 | 98.3 |
| Rsa1.0_00197.1.g8259.t1 | ref XP_002892511.1  predicted protein [Arabidopsis lyrata subsp. lyrata] gi 297338353 gb EFH68770.1  predicted protein [Arabidopsis lyrata subsp. lyrata]                                           | 297  | 293  | 1.00E-137 | 98.7  | 82.8 | 90.9 | predicted protein                               | gbpln | Arabidopsis lyrata   | AT1G09575.1   Symbols:   Protein of unknown function (DUF607)   chr1:3101851-3102832 REVERSE LENGTH=292                                                                                                                                                                                                                                                                                                                                                                                                                     | 297  | 292  | 1.00E-136 | 98.3  | 82.5 | 90.2 |
| Rsa1.0_00197.1.g8260.t2 | gb EOA38463.1  hypothetical protein CARUB_v10010159mg, partial [Capsella rubella]                                                                                                                   | 214  | 238  | 8.00E-98  | 111.2 | 80.8 | 91.6 | hypothetical protein CARUB_v10010159mg, partial | gbpln | Capsella rubella     | AT1G09580.1   Symbols:   emp24/gp25L/p24 family/GOLD family protein   chr1:3104657-3106092 FORWARD LENGTH=217                                                                                                                                                                                                                                                                                                                                                                                                               | 214  | 217  | 1.00E-98  | 101.4 | 79.9 | 90.2 |
| Rsa1.0_00197.1.g8261.t1 | ref XP_00289760.1  60S ribosomal protein L21 [Arabidopsis lyrata subsp. lyrata] gi 297335602 gb EFH66019.1  60S ribosomal protein L21 [Arabidopsis lyrata subsp. lyrata]                            | 164  | 164  | 2.00E-87  | 100.0 | 97.0 | 98.2 | 60S ribosomal protein L21                       | gbpln | Arabidopsis lyrata   | AT1G09690.1   Symbols:   Translation protein SH3-like family protein   chr1:3136407-3137430 REVERSE LENGTH=164                                                                                                                                                                                                                                                                                                                                                                                                              | 164  | 164  | 2.00E-89  | 100.0 | 96.3 | 97.6 |
| Rsa1.0_00197.1.g8262.t1 | gb AAC33218.1  Similar to cdc2 protein kinases [Arabidopsis thaliana]                                                                                                                               | 967  | 967  | 0         | 100.0 | 78.6 | 86.0 | Similar to cdc2 protein kinases                 | gbpln | Arabidopsis thaliana | AT1G09600.1   Symbols:   Protein kinase superfamily protein   chr1:3108617-3111318 FORWARD LENGTH=714                                                                                                                                                                                                                                                                                                                                                                                                                       | 967  | 714  | 0         | 73.8  | 55.3 | 61.4 |

|                         |                                                                                                                                                                                                                                                                                                                                                                                                                                                                                                                                                                                                                                                                       |      |      |           |       |      |      |                                                 |             |                      |                                                                                                                                                                                                                                                                                                                                                                  |      |      |           |       |      |      |
|-------------------------|-----------------------------------------------------------------------------------------------------------------------------------------------------------------------------------------------------------------------------------------------------------------------------------------------------------------------------------------------------------------------------------------------------------------------------------------------------------------------------------------------------------------------------------------------------------------------------------------------------------------------------------------------------------------------|------|------|-----------|-------|------|------|-------------------------------------------------|-------------|----------------------|------------------------------------------------------------------------------------------------------------------------------------------------------------------------------------------------------------------------------------------------------------------------------------------------------------------------------------------------------------------|------|------|-----------|-------|------|------|
| Rsa1.0_00197.1.g8263.t1 | ref[XP_002892512.1] ATP binding protein [Arabidopsis lyrata subsp. lyrata] gi 297338354 gb EFH68771.1  ATP binding protein [Arabidopsis lyrata subsp. lyrata]                                                                                                                                                                                                                                                                                                                                                                                                                                                                                                         | 1083 | 1091 | 0         | 100.7 | 92.3 | 96.7 | ATP binding protein                             | gbpln       | Arabidopsis lyrata   | AT1G09620.1   Symbols:   ATP binding;leucine-tRNA ligases;aminoacyl-tRNA ligases;nucleotide binding;ATP binding;aminoacyl-tRNA ligases   chr1:3113077-3116455 REVERSE LENGTH=1091                                                                                                                                                                                | 1083 | 1091 | 0         | 100.7 | 88.4 | 94.4 |
| Rsa1.0_00197.1.g8264.t1 | ref[NP_001147252.1] ras-related protein Rab11C [Zea mays] gi 195609118 gb ACG26389.1  ras-related protein Rab11C [Zea mays] ref[NP_563848.1] elongation factor EF-1 gamma subunit [Arabidopsis thaliana] gi 13626364 sp O04487.1 EF1G1_ARATH RecName: Full=Probable elongation factor 1-gamma 1; Short=EF-1-gamma 1; AltName: Full=eEF-1B gamma 1 gi 2160158 gb AAB60721.1  Similar to elongation factor 1-gamma (gb EF1G_XENLA). ESTs gb T20564.gb T45940.gb T04527 come from this gene [Arabidopsis thaliana] gi 222424502 dbj BAH20206.1  AT1G09640 [Arabidopsis thaliana] gi 332190351 gb AEE28472.1  elongation factor EF-1 gamma subunit [Arabidopsis thaliana] | 218  | 217  | 1.00E-119 | 99.5  | 96.8 | 98.2 | ras-related protein Rab11C                      | gbenv/gbpln | Zea mays             | AT1G09630.1   Symbols: ATRAB11C, ATRABA2A, ATRAB-A2A, RAB-A2A, RAB11c   RAB GTPase 11C (chr1:3118350-3119571 REVERSE LENGTH=217                                                                                                                                                                                                                                  | 218  | 217  | 1.00E-119 | 99.5  | 94.5 | 97.7 |
| Rsa1.0_00197.1.g8265.t2 | ref[NP_563848.1] elongation factor EF-1 gamma subunit [Arabidopsis thaliana] gi 13626364 sp O04487.1 EF1G1_ARATH RecName: Full=Probable elongation factor 1-gamma 1; Short=EF-1-gamma 1; AltName: Full=eEF-1B gamma 1 gi 2160158 gb AAB60721.1  Similar to elongation factor 1-gamma (gb EF1G_XENLA). ESTs gb T20564.gb T45940.gb T04527 come from this gene [Arabidopsis thaliana] gi 222424502 dbj BAH20206.1  AT1G09640 [Arabidopsis thaliana] gi 332190351 gb AEE28472.1  elongation factor EF-1 gamma subunit [Arabidopsis thaliana]                                                                                                                             | 425  | 414  | 0         | 97.4  | 87.1 | 91.5 | elongation factor EF-1 gamma subunit            | gbpln       | Arabidopsis thaliana | AT1G09640.1   Symbols:   Translation elongation factor EF1B, gamma chain   chr1:3120162-3122152 FORWARD LENGTH=414                                                                                                                                                                                                                                               | 425  | 414  | 0         | 97.4  | 87.1 | 91.5 |
| Rsa1.0_00197.1.g8266.t1 | ref[XP_002889763.1] hypothetical protein ARALYDRAFT_888210 [Arabidopsis lyrata subsp. lyrata] gi 297335605 gb EFH66022.1  hypothetical protein ARALYDRAFT_888210 [Arabidopsis lyrata subsp. lyrata]                                                                                                                                                                                                                                                                                                                                                                                                                                                                   | 105  | 105  | 6.00E-28  | 100.0 | 70.5 | 72.4 | hypothetical protein ARALYDRAFT_888210          | gbpln       | Arabidopsis lyrata   | AT1G09645.1   Symbols:   unknown protein; BEST Arabidopsis thaliana protein match is: unknown protein (TAIR:AT1G57765.1); Has 35333 Blast hits to 34131 proteins in 2444 species: Archae - 798; Bacteria - 22429; Metazoa - 974; Fungi - 991; Plants - 531; Viruses - 0; Other Eukaryotes - 9610 (source: NCBI BLINK).   chr1:3123155-3124347 FORWARD LENGTH=106 | 105  | 106  | 2.00E-30  | 101.0 | 76.2 | 85.7 |
| Rsa1.0_00197.1.g8267.t1 | #                                                                                                                                                                                                                                                                                                                                                                                                                                                                                                                                                                                                                                                                     | #    | #    | #         | #     | #    | #    | -                                               | ----        | ----                 | #                                                                                                                                                                                                                                                                                                                                                                | #    | #    | #         | #     | #    |      |
| Rsa1.0_00197.1.g8268.t1 | ref[XP_002892515.1] hypothetical protein ARALYDRAFT_471067 [Arabidopsis lyrata subsp. lyrata] gi 297338357 gb EFH68774.1  hypothetical protein ARALYDRAFT_471067 [Arabidopsis lyrata subsp. lyrata]                                                                                                                                                                                                                                                                                                                                                                                                                                                                   | 300  | 298  | 1.00E-137 | 99.3  | 86.3 | 90.7 | hypothetical protein ARALYDRAFT_471067          | gbpln       | Arabidopsis lyrata   | AT1G09660.1   Symbols:   RNA-binding KH domain-containing protein   chr1:3128032-3130791 REVERSE LENGTH=298                                                                                                                                                                                                                                                      | 300  | 298  | 1.00E-138 | 99.3  | 84.7 | 90.3 |
| Rsa1.0_00197.1.g8269.t1 | gb EOA36110.1  hypothetical protein CARUB_v10011501mg, partial [Capsella rubella]                                                                                                                                                                                                                                                                                                                                                                                                                                                                                                                                                                                     | 174  | 175  | 1.00E-71  | 100.6 | 78.2 | 86.8 | hypothetical protein CARUB_v10011501mg, partial | gbpln       | Capsella rubella     | AT1G09665.1   Symbols:   Toll-Interleukin-Resistance (TIR) domain family protein   chr1:3133095-3133674 FORWARD LENGTH=165                                                                                                                                                                                                                                       | 174  | 165  | 2.00E-71  | 94.8  | 73.0 | 79.3 |
| Rsa1.0_00197.1.g8270.t1 | ref[XP_002892516.1] pentatricopeptide repeat-containing protein [Arabidopsis lyrata subsp. lyrata] gi 297338358 gb EFH68775.1  pentatricopeptide repeat-containing protein [Arabidopsis lyrata subsp. lyrata]                                                                                                                                                                                                                                                                                                                                                                                                                                                         | 600  | 607  | 0         | 101.2 | 84.5 | 90.3 | pentatricopeptide repeat-containing protein     | gbpln       | Arabidopsis lyrata   | AT1G09680.1   Symbols:   Pentatricopeptide repeat (PPR) superfamily protein   chr1:3134107-3135930 REVERSE LENGTH=607                                                                                                                                                                                                                                            | 600  | 607  | 0         | 101.2 | 83.8 | 90.0 |
| Rsa1.0_00198.1.g8271.t1 | gb EOA15681.1  hypothetical protein CARUB_v10006371mg [Capsella rubella]                                                                                                                                                                                                                                                                                                                                                                                                                                                                                                                                                                                              | 160  | 494  | 2.00E-35  | 308.8 | 53.1 | 67.5 | hypothetical protein CARUB_v10006371mg          | gbpln       | Capsella rubella     | AT4G26000.1   Symbols: PEP   RNA-binding KH domain-containing protein   chr4:13197280-13199539 FORWARD LENGTH=495                                                                                                                                                                                                                                                | 160  | 495  | 1.00E-35  | 309.4 | 53.8 | 68.1 |
| Rsa1.0_00198.1.g8272.t1 | #                                                                                                                                                                                                                                                                                                                                                                                                                                                                                                                                                                                                                                                                     | #    | #    | #         | #     | #    | #    | -                                               | ----        | ----                 | #                                                                                                                                                                                                                                                                                                                                                                | #    | #    | #         | #     | #    |      |
| Rsa1.0_00198.1.g8273.t2 | ref[XP_002867585.1] hypothetical protein ARALYDRAFT_354188 [Arabidopsis lyrata subsp. lyrata] gi 297313421 gb EFH43844.1  hypothetical protein ARALYDRAFT_354188 [Arabidopsis lyrata subsp. lyrata]                                                                                                                                                                                                                                                                                                                                                                                                                                                                   | 345  | 392  | 3.00E-97  | 113.6 | 67.0 | 75.1 | hypothetical protein ARALYDRAFT_354188          | gbpln       | Arabidopsis lyrata   | AT4G25990.1   Symbols: CIL   CCT motif family protein   chr4:13191937-13193543 REVERSE LENGTH=394                                                                                                                                                                                                                                                                | 345  | 394  | 4.00E-94  | 114.2 | 62.9 | 71.0 |
| Rsa1.0_00198.1.g8274.t6 | ref[NP_194328.1] peroxidase 43 [Arabidopsis thaliana] gi 7433052 pir T04253 peroxidase homolog F20B18.90 - Arabidopsis thaliana gi 4538927 emb CAB39663.1  putative peroxidase [Arabidopsis thaliana] gi 7269449 emb CAB79453.1  putative peroxidase [Arabidopsis thaliana] gi 332659739 gb AEE85139.1  peroxidase 43 [Arabidopsis thaliana]                                                                                                                                                                                                                                                                                                                          | 326  | 371  | 1.00E-171 | 113.8 | 87.7 | 95.4 | peroxidase 43                                   | gbpln       | Arabidopsis thaliana | AT4G25980.1   Symbols:   Peroxidase superfamily protein   chr4:13189393-13191507 FORWARD LENGTH=371                                                                                                                                                                                                                                                              | 326  | 371  | 1.00E-173 | 113.8 | 87.7 | 95.4 |

|                          |                                                                                                                                                                                                                                                                                                                                                                                                                                                                        |      |      |           |       |      |      |                                                                                |       |                      |                                                                                                                                                                                                                                                                                                                                                                                      |      |      |           |       |      |      |
|--------------------------|------------------------------------------------------------------------------------------------------------------------------------------------------------------------------------------------------------------------------------------------------------------------------------------------------------------------------------------------------------------------------------------------------------------------------------------------------------------------|------|------|-----------|-------|------|------|--------------------------------------------------------------------------------|-------|----------------------|--------------------------------------------------------------------------------------------------------------------------------------------------------------------------------------------------------------------------------------------------------------------------------------------------------------------------------------------------------------------------------------|------|------|-----------|-------|------|------|
| Rsa1.0_00198.1.g8275.t1  | emb[CAA71277.1] P-glycoprotein-2 [Arabidopsis thaliana] gi 2108254 emb[CAA71276.1] P-glycoprotein-2 [Arabidopsis thaliana] gi 4538925 emb[CAB39661.1] P-glycoprotein-2 (pgp2) [Arabidopsis thaliana] gi 7269447 emb[CAB79451.1] P-glycoprotein-2 (pgp2) [Arabidopsis thaliana]                                                                                                                                                                                         | 1234 | 1233 | 0         | 99.9  | 92.1 | 96.5 | P-glycoprotein-2                                                               | gbpln | Arabidopsis thaliana | AT4G25960.1   Symbols: PGP2   P-glycoprotein 2   chr4:13177438-13183425 FORWARD LENGTH=1273                                                                                                                                                                                                                                                                                          | 1234 | 1273 | 0         | 103.2 | 92.1 | 96.5 |
| Rsa1.0_00198.1.g8276.t3  | ref[XP_002867586.1] hypothetical protein ARALYDRAFT_492222 [Arabidopsis lyrata subsp. lyrata] gi 297313422 gb EFH43845.1  hypothetical protein ARALYDRAFT_492222 [Arabidopsis lyrata subsp. lyrata]                                                                                                                                                                                                                                                                    | 108  | 108  | 4.00E-50  | 100.0 | 93.5 | 99.1 | hypothetical protein ARALYDRAFT_492222                                         | gbpln | Arabidopsis lyrata   | AT4G25950.1   Symbols: VATG3   vacuolar ATP synthase G3   chr4:13173815-13174324 REVERSE LENGTH=108                                                                                                                                                                                                                                                                                  | 108  | 108  | 5.00E-51  | 100.0 | 91.7 | 96.3 |
| Rsa1.0_00198.1.g8277.t1  | ref[NP_567735.1] NifU-like protein 3 [Arabidopsis thaliana] gi 75147908 sp Q84RQ7.1 NIFU3_ARAT H RecName: Full=NifU-like protein 3, chloroplastic; Short=AtCNfu3; Short=AtCnfU-IVa; Flags: Precursor gi 28207820 emb CAD55560.1  NIFU3 protein [Arabidopsis thaliana] gi 88196759 gb ABD43022.1  At4g25910 [Arabidopsis thaliana] gi 222423670 dbj BAH19802.1  AT4G25910 [Arabidopsis thaliana] gi 332659732 gb AEE85132.1  NifU-like protein 3 [Arabidopsis thaliana] | 237  | 236  | 1.00E-113 | 99.6  | 87.3 | 93.2 | NifU-like protein 3                                                            | gbpln | Arabidopsis thaliana | AT4G25910.1   Symbols: NFU3, ATCNFU3   NFU domain protein 3   chr4:13164128-13165094 FORWARD LENGTH=236                                                                                                                                                                                                                                                                              | 237  | 236  | 1.00E-116 | 99.6  | 87.3 | 93.2 |
| Rsa1.0_00198.1.g8278.t2  | gb[EOA16987.1] hypothetical protein CARUB_v10005219mg [Capsella rubella]                                                                                                                                                                                                                                                                                                                                                                                               | 316  | 332  | 1.00E-145 | 105.1 | 80.4 | 88.9 | hypothetical protein CARUB_v10005219mg                                         | gbpln | Capsella rubella     | AT4G25900.1   Symbols:   Galactose mutarotase-like superfamily protein   chr4:13161487-13163397 FORWARD LENGTH=318                                                                                                                                                                                                                                                                   | 316  | 318  | 1.00E-141 | 100.6 | 77.8 | 87.0 |
| Rsa1.0_00198.1.g8279.t1  | gb[EOA15920.1] hypothetical protein CARUB_v10004014mg [Capsella rubella]                                                                                                                                                                                                                                                                                                                                                                                               | 1159 | 1171 | 0         | 101.0 | 81.5 | 88.9 | hypothetical protein CARUB_v10004014mg                                         | gbpln | Capsella rubella     | AT4G38120.1   Symbols:   ARM repeat superfamily protein   chr4:17888668-17896060 REVERSE LENGTH=1165                                                                                                                                                                                                                                                                                 | 1159 | 1165 | 0         | 100.5 | 81.1 | 88.4 |
| Rsa1.0_00198.1.g8280.t1  | ref[XP_002869646.1] hypothetical protein ARALYDRAFT_913980 [Arabidopsis lyrata subsp. lyrata] gi 297315482 gb EFH45905.1  hypothetical protein ARALYDRAFT_913980 [Arabidopsis lyrata subsp. lyrata]                                                                                                                                                                                                                                                                    | 779  | 858  | 0         | 110.1 | 81.3 | 87.3 | hypothetical protein ARALYDRAFT_913980                                         | gbpln | Arabidopsis lyrata   | AT4G25880.1   Symbols: APUM6, PUM6   pumilio 6   chr4:13155518-13159078 FORWARD LENGTH=861                                                                                                                                                                                                                                                                                           | 779  | 861  | 0         | 110.5 | 80.2 | 86.5 |
| Rsa1.0_00198.1.g8281.t1  | pir[[T00833 RNA-directed DNA polymerase homolog T13L16.7 - Arabidopsis thaliana (fragment)                                                                                                                                                                                                                                                                                                                                                                             | 1394 | 1365 | 0         | 97.9  | 44.8 | 61.3 | RNA-directed DNA polymerase homolog T13L16.7 - Arabidopsis thaliana (fragment) | ----  | ----                 | AT4G29090.1   Symbols:   Ribonuclease H-like superfamily protein   chr4:14333528-14335255 FORWARD LENGTH=575                                                                                                                                                                                                                                                                         | 1394 | 575  | 6.00E-90  | 41.2  | 13.7 | 21.2 |
| Rsa1.0_00198.1.g8282.t1  | gb[EOA16782.1] hypothetical protein CARUB_v10005002mg [Capsella rubella] gi 482552590 gb EOA16783.1  hypothetical protein CARUB_v10005002mg [Capsella rubella]                                                                                                                                                                                                                                                                                                         | 380  | 391  | 0         | 102.9 | 91.6 | 95.3 | hypothetical protein CARUB_v10005002mg                                         | gbpln | Capsella rubella     | AT4G25870.1   Symbols:   Core-2/I-branching beta-1,6-N-acetylglucosaminyltransferase family protein   chr4:13149831-13151737 REVERSE LENGTH=389                                                                                                                                                                                                                                      | 380  | 389  | 0         | 102.4 | 90.8 | 95.0 |
| Rsa1.0_00198.1.g8283.t14 | gb[EOA17897.1] hypothetical protein CARUB_v10006306mg [Capsella rubella]                                                                                                                                                                                                                                                                                                                                                                                               | 116  | 118  | 3.00E-41  | 101.7 | 74.1 | 81.9 | hypothetical protein CARUB_v10006306mg                                         | gbpln | Capsella rubella     | AT4G25845.1   Symbols:   BEST Arabidopsis thaliana protein match is: OSBP(oxysterol binding protein)-related protein 4B (TAIR:AT4G25850.2); Has 35333 Blast hits to 34131 proteins in 2444 species: Archae - 798; Bacteria - 22429; Metazoa - 974; Fungi - 991; Plants - 531; Viruses - 0; Other Eukaryotes - 9610 (source: NCBI ELink).   chr4:13142270-13142632 FORWARD LENGTH=120 | 116  | 120  | 4.00E-44  | 103.4 | 73.3 | 83.6 |
| Rsa1.0_00198.1.g8284.t1  | gb[EOA16463.1] hypothetical protein CARUB_v10004616mg [Capsella rubella]                                                                                                                                                                                                                                                                                                                                                                                               | 507  | 507  | 0         | 100.0 | 80.1 | 87.2 | hypothetical protein CARUB_v10004616mg                                         | gbpln | Capsella rubella     | AT4G25835.1   Symbols:   P-loop containing nucleoside triphosphate hydrolases superfamily protein   chr4:13136117-13137637 FORWARD LENGTH=506                                                                                                                                                                                                                                        | 507  | 506  | 0         | 99.8  | 79.7 | 86.2 |
| Rsa1.0_00198.1.g8285.t1  | ref[XP_002869651.1] predicted protein [Arabidopsis lyrata subsp. lyrata] gi 341958571 sp D7MFV5.1 CSPL4_ARA LL RecName: Full=CASP-like protein ARALYDRAFT_657503 gi 297315487 gb EFH45910.1  predicted protein [Arabidopsis lyrata subsp. lyrata]                                                                                                                                                                                                                      | 175  | 175  | 4.00E-81  | 100.0 | 82.9 | 90.9 | predicted protein                                                              | gbpln | Arabidopsis lyrata   | AT4G25830.1   Symbols:   Uncharacterised protein family (UPF0497)   chr4:13133727-13134790 FORWARD LENGTH=175                                                                                                                                                                                                                                                                        | 175  | 175  | 3.00E-83  | 100.0 | 82.9 | 90.9 |



|                         |                                                                                                                                                                                                                                                                                                                                                                                                                                                                                                                                                                                                                                                               |     |     |           |       |      |      |                                                 |       |                      |                                                                                                                                                                                                                                                                                                         |     |     |           |       |      |      |
|-------------------------|---------------------------------------------------------------------------------------------------------------------------------------------------------------------------------------------------------------------------------------------------------------------------------------------------------------------------------------------------------------------------------------------------------------------------------------------------------------------------------------------------------------------------------------------------------------------------------------------------------------------------------------------------------------|-----|-----|-----------|-------|------|------|-------------------------------------------------|-------|----------------------|---------------------------------------------------------------------------------------------------------------------------------------------------------------------------------------------------------------------------------------------------------------------------------------------------------|-----|-----|-----------|-------|------|------|
| Rsa1.0_00198.1.g8286.t1 | gb EOA17900.1  hypothetical protein CARUB_v10006309mg [Capsella rubella]                                                                                                                                                                                                                                                                                                                                                                                                                                                                                                                                                                                      | 284 | 289 | 1.00E-144 | 101.8 | 87.0 | 92.6 | hypothetical protein CARUB_v10006309mg          | gbpln | Capsella rubella     | AT4G25820.1   Symbols: XTR9, XTH14, ATXTH14   xyloglucan endotransglucosylase/hydrolase 14   chr4:13130349-13131615 FORWARD LENGTH=287                                                                                                                                                                  | 284 | 287 | 1.00E-135 | 101.1 | 82.7 | 90.1 |
| Rsa1.0_00198.1.g8287.t1 | ref NP_194311.1  xyloglucan:xyloglucosyl transferase [Arabidopsis thaliana] gi 38605152 sp Q38910.1 XTH23_ARATH RecName: Full=Probable xyloglucan endotransglucosylase/hydrolase protein 23; Short=At-XTH23; Short=XTH-23; Flags: Precursor gi 1244758 gb AAB18367.1  xyloglucan endotransglucosylase-related protein [Arabidopsis thaliana] gi 4539299 emb CAB39602.1  xyloglucan endo-1, 4-beta-D-glucanase (XTR-6) [Arabidopsis thaliana] gi 7269432 emb CAB79436.1  xyloglucan endo-1, 4-beta-D-glucanase (XTR-6) [Arabidopsis thaliana] gi 332659717 gb AEE85117.1  probable xyloglucan endotransglucosylase/hydrolase protein 23 [Arabidopsis thaliana] | 281 | 286 | 1.00E-151 | 101.8 | 91.5 | 95.7 | xyloglucan:xyloglucosyl transferase             | gbpln | Arabidopsis thaliana | AT4G25810.1   Symbols: XTR6, XTH23   xyloglucan endotransglucosylase 6   chr4:13128694-13129715 FORWARD LENGTH=286                                                                                                                                                                                      | 281 | 286 | 1.00E-154 | 101.8 | 91.5 | 95.7 |
| Rsa1.0_00198.1.g8288.t1 | ref XP_002869655.1  calmodulin-binding protein [Arabidopsis lyrata subsp. lyrata] gi 297315491 gb EFH45914.1  calmodulin-binding protein [Arabidopsis lyrata subsp. lyrata]                                                                                                                                                                                                                                                                                                                                                                                                                                                                                   | 589 | 600 | 0         | 101.9 | 77.1 | 86.4 | calmodulin-binding protein                      | gbpln | Arabidopsis lyrata   | AT4G25800.2   Symbols:   Calmodulin-binding protein   chr4:13125224-13127765 FORWARD LENGTH=601                                                                                                                                                                                                         | 589 | 601 | 0         | 102.0 | 75.6 | 84.7 |
| Rsa1.0_00198.1.g8289.t1 | gb EOA18029.1  hypothetical protein CARUB_v10006471mg [Capsella rubella]                                                                                                                                                                                                                                                                                                                                                                                                                                                                                                                                                                                      | 209 | 208 | 1.00E-103 | 99.5  | 89.0 | 92.3 | hypothetical protein CARUB_v10006471mg          | gbpln | Capsella rubella     | AT4G25790.1   Symbols:   CAP (Cysteine-rich secretory proteins, Antigen 5, and Pathogenesis-related 1 protein) superfamily protein   chr4:13122248-13123290 REVERSE LENGTH=210                                                                                                                          | 209 | 210 | 2.00E-93  | 100.5 | 84.7 | 89.5 |
| Rsa1.0_00198.1.g8290.t1 | ref XP_002869656.1  hypothetical protein ARALYDRAFT_492242 [Arabidopsis lyrata subsp. lyrata] gi 297315492 gb EFH45915.1  hypothetical protein ARALYDRAFT_492242 [Arabidopsis lyrata subsp. lyrata]                                                                                                                                                                                                                                                                                                                                                                                                                                                           | 204 | 190 | 2.00E-78  | 93.1  | 69.6 | 80.9 | hypothetical protein ARALYDRAFT_492242          | gbpln | Arabidopsis lyrata   | AT4G25780.1   Symbols:   CAP (Cysteine-rich secretory proteins, Antigen 5, and Pathogenesis-related 1 protein) superfamily protein   chr4:13121107-13121679 FORWARD LENGTH=190                                                                                                                          | 204 | 190 | 6.00E-79  | 93.1  | 68.6 | 79.4 |
| Rsa1.0_00198.1.g8291.t1 | ref XP_002867591.1  hypothetical protein ARALYDRAFT_492243 [Arabidopsis lyrata subsp. lyrata] gi 297313427 gb EFH43850.1  hypothetical protein ARALYDRAFT_492243 [Arabidopsis lyrata subsp. lyrata]                                                                                                                                                                                                                                                                                                                                                                                                                                                           | 419 | 418 | 0         | 99.8  | 85.4 | 90.5 | hypothetical protein ARALYDRAFT_492243          | gbpln | Arabidopsis lyrata   | AT4G25770.1   Symbols:   alpha/beta-Hydrolases superfamily protein   chr4:13117821-13119982 REVERSE LENGTH=418                                                                                                                                                                                          | 419 | 418 | 0         | 99.8  | 85.4 | 90.0 |
| Rsa1.0_00198.1.g8292.t1 | ref NP_567728.1  glutamine dumper 2 [Arabidopsis thaliana] gi 75266435 sp Q9SW07.1 GDU2_ARATH RecName: Full=Protein GLUTAMINE DUMPER 2 gi 4539294 emb CAB39597.1  hypothetical protein [Arabidopsis thaliana] gi 7269426 emb CAB81386.1  hypothetical protein [Arabidopsis thaliana] gi 332659710 gb AEE85110.1  glutamine dumper 2 [Arabidopsis thaliana]                                                                                                                                                                                                                                                                                                    | 138 | 129 | 3.00E-53  | 93.5  | 74.6 | 81.9 | glutamine dumper 2                              | gbpln | Arabidopsis thaliana | AT4G25760.1   Symbols: ATGDU2, GDU2   glutamine dumper 2   chr4:13116149-13116538 FORWARD LENGTH=129                                                                                                                                                                                                    | 138 | 129 | 7.00E-56  | 93.5  | 74.6 | 81.9 |
| Rsa1.0_00198.1.g8293.t1 | gb EOA13969.1  hypothetical protein CARUB_v10027094mg, partial [Capsella rubella]                                                                                                                                                                                                                                                                                                                                                                                                                                                                                                                                                                             | 181 | 220 | 2.00E-75  | 121.5 | 86.2 | 90.1 | hypothetical protein CARUB_v10027094mg, partial | gbpln | Capsella rubella     | AT4G25740.1   Symbols:   RNA binding Plectin/S10 domain-containing protein   chr4:13107488-13108751 REVERSE LENGTH=177                                                                                                                                                                                  | 181 | 177 | 1.00E-70  | 97.8  | 88.4 | 91.2 |
| Rsa1.0_00198.1.g8294.t1 | gb EOA17044.1  hypothetical protein CARUB_v10005281mg [Capsella rubella]                                                                                                                                                                                                                                                                                                                                                                                                                                                                                                                                                                                      | 324 | 317 | 1.00E-148 | 97.8  | 79.9 | 87.7 | hypothetical protein CARUB_v10005281mg          | gbpln | Capsella rubella     | AT4G25720.1   Symbols: ATQC, QC, QCT   glutaminyl cyclase   chr4:13099929-13102470 REVERSE LENGTH=320                                                                                                                                                                                                   | 324 | 320 | 1.00E-140 | 98.8  | 77.2 | 85.2 |
| Rsa1.0_00198.1.g8295.t1 | gb ACS45170.1  beta-carotene hydroxylase [Brassica rapa subsp. pekinensis]                                                                                                                                                                                                                                                                                                                                                                                                                                                                                                                                                                                    | 296 | 306 | 2.33E-156 | 103.4 | 90.2 | 93.6 | beta-carotene hydroxylase                       | gbpln | Brassica rapa        | AT4G25700.1   Symbols: BETA-OHASE 1, B1, chy1, BCH1   beta-hydroxylase 1   chr4:13094142-13095866 REVERSE LENGTH=310                                                                                                                                                                                    | 296 | 310 | 1.00E-136 | 104.7 | 81.1 | 88.5 |
| Rsa1.0_00198.1.g8296.t1 | emb CAB43698.1  hypothetical protein [Arabidopsis thaliana] gi 7269417 emb CAB81377.1  hypothetical protein [Arabidopsis thaliana]                                                                                                                                                                                                                                                                                                                                                                                                                                                                                                                            | 307 | 247 | 7.00E-86  | 80.5  | 58.0 | 62.9 | hypothetical protein                            | gbpln | Arabidopsis thaliana | AT4G25670.2   Symbols:   unknown protein; LOCATED IN: cellular_component unknown; EXPRESSED IN: male gametophyte, pollen tube; EXPRESSED DURING: M germinated pollen stage; BEST Arabidopsis thaliana protein match is: unknown protein (TAIR:AT4G25690.2).   chr4:13085431-13085997 REVERSE LENGTH=188 | 307 | 188 | 1.00E-70  | 61.2  | 46.9 | 50.8 |

|                         |                                                                                                                                                                                                                                                                                                                                                                                                                                                                                                                                                                                                                                                                                                                                                                                                                                                                                                                                                                                                                                                                                                                                                                        |     |     |           |       |      |      |                                                 |       |                      |                                                                                                                                                                                                                                                                                                         |     |     |           |       |      |      |
|-------------------------|------------------------------------------------------------------------------------------------------------------------------------------------------------------------------------------------------------------------------------------------------------------------------------------------------------------------------------------------------------------------------------------------------------------------------------------------------------------------------------------------------------------------------------------------------------------------------------------------------------------------------------------------------------------------------------------------------------------------------------------------------------------------------------------------------------------------------------------------------------------------------------------------------------------------------------------------------------------------------------------------------------------------------------------------------------------------------------------------------------------------------------------------------------------------|-----|-----|-----------|-------|------|------|-------------------------------------------------|-------|----------------------|---------------------------------------------------------------------------------------------------------------------------------------------------------------------------------------------------------------------------------------------------------------------------------------------------------|-----|-----|-----------|-------|------|------|
| Rsa1.0_00198.1.g8297.t1 | gb EOA17297.1  hypothetical protein CARUB_v10005569mg [Capsella rubella]                                                                                                                                                                                                                                                                                                                                                                                                                                                                                                                                                                                                                                                                                                                                                                                                                                                                                                                                                                                                                                                                                               | 252 | 252 | 1.00E-126 | 100.0 | 86.5 | 92.5 | hypothetical protein CARUB_v10005569mg          | gbpln | Capsella rubella     | AT4G25680.1   Symbols:   PPPDE putative thiol peptidase family protein   chr4:13089425-13089952 FORWARD LENGTH=252                                                                                                                                                                                      | 252 | 252 | 1.00E-127 | 100.0 | 86.5 | 92.5 |
| Rsa1.0_00198.1.g8298.t1 | emb CAB43698.1  hypothetical protein [Arabidopsis thaliana] gi 7269417 emb CAB81377.1  hypothetical protein [Arabidopsis thaliana]                                                                                                                                                                                                                                                                                                                                                                                                                                                                                                                                                                                                                                                                                                                                                                                                                                                                                                                                                                                                                                     | 235 | 247 | 9.00E-92  | 105.1 | 80.9 | 87.2 | hypothetical protein                            | gbpln | Arabidopsis thaliana | AT4G25670.2   Symbols:   unknown protein; LOCATED IN: cellular component unknown; EXPRESSED IN: male gametophyte, pollen tube; EXPRESSED DURING: M germinated pollen stage; BEST Arabidopsis thaliana protein match is: unknown protein (TAIR:AT4G25690.2).   chr4:13085431-13085997 REVERSE LENGTH=188 | 235 | 188 | 2.00E-78  | 80.0  | 65.5 | 70.2 |
| Rsa1.0_00198.1.g8299.t1 | ref NP_194296.1  PPPDE putative thiol peptidase family protein [Arabidopsis thaliana] gi 4914458 emb CAB43697.1  putative protein [Arabidopsis thaliana] gi 7269416 emb CAB81376.1  putative protein [Arabidopsis thaliana] gi 25082894 gb AAN72011.1  putative protein [Arabidopsis thaliana] gi 33942049 gb AAQ55277.1  At4g25660 [Arabidopsis thaliana] gi 332659690 gb AEE85090.1  PPPDE putative thiol peptidase family protein [Arabidopsis thaliana] ref NP_567725.1  ACD1-like protein [Arabidopsis thaliana] gi 15983402 gb AAL11569.1 AF424575.1 AT4g25650/L73G19_30 [Arabidopsis thaliana] gi 15810259 gb AA07017.1  unknown protein [Arabidopsis thaliana] gi 37962888 gb AAR05798.1  LLS1-like protein [Arabidopsis thaliana] gi 332659688 gb AEE85088.1  ACD1-like protein [Arabidopsis thaliana]                                                                                                                                                                                                                                                                                                                                                        | 246 | 255 | 1.00E-120 | 103.7 | 83.7 | 92.3 | PPPDE putative thiol peptidase family protein   | gbpln | Arabidopsis thaliana | AT4G25660.1   Symbols:   PPPDE putative thiol peptidase family protein   chr4:13083677-13084989 FORWARD LENGTH=255                                                                                                                                                                                      | 246 | 255 | 1.00E-123 | 103.7 | 83.7 | 92.3 |
| Rsa1.0_00198.1.g8300.t1 | ref NP_567725.1  ACD1-like protein [Arabidopsis thaliana] gi 15983402 gb AAL11569.1 AF424575.1 AT4g25650/L73G19_30 [Arabidopsis thaliana] gi 15810259 gb AA07017.1  unknown protein [Arabidopsis thaliana] gi 37962888 gb AAR05798.1  LLS1-like protein [Arabidopsis thaliana] gi 332659688 gb AEE85088.1  ACD1-like protein [Arabidopsis thaliana]                                                                                                                                                                                                                                                                                                                                                                                                                                                                                                                                                                                                                                                                                                                                                                                                                    | 539 | 536 | 0         | 99.4  | 82.4 | 88.5 | ACD1-like protein                               | gbpln | Arabidopsis thaliana | AT4G25650.1   Symbols: ACD1-LIKE, PTC52, TIC55-IV   ACD1-like   chr4:13081021-13083153 REVERSE LENGTH=536                                                                                                                                                                                               | 539 | 536 | 0         | 99.4  | 82.4 | 88.5 |
| Rsa1.0_00198.1.g8301.t1 | dbj BAJ33972.1  unnamed protein product [Thellungiella halophila]                                                                                                                                                                                                                                                                                                                                                                                                                                                                                                                                                                                                                                                                                                                                                                                                                                                                                                                                                                                                                                                                                                      | 489 | 488 | 0         | 99.8  | 89.8 | 95.1 | unnamed protein product                         | ----  | ----                 | AT4G25640.1   Symbols: ATDTX35, FFT, DTX35   detoxifying efflux carrier 35   chr4:13076953-13078965 REVERSE LENGTH=488                                                                                                                                                                                  | 489 | 488 | 0         | 99.8  | 91.2 | 95.9 |
| Rsa1.0_00198.1.g8302.t1 | ref NP_567724.1  rRNA 2'-O-methyltransferase fibrillarin 2 [Arabidopsis thaliana] gi 67461067 sp Q94AH9.2 MD36A_ARAT H RecName: Full=Mediator of RNA polymerase II transcription subunit 36a; AltName: Full=Fibrillarin-like protein 2; AltName: Full=rRNA 2'-O-methyltransferase fibrillarin 2 gi 9965655 gb AAG10104.1 AF233444_1 fibrillarin 2 [Arabidopsis thaliana] gi 4914455 emb CAB43694.1  fibrillarin-like protein [Arabidopsis thaliana] gi 7269413 emb CAB81373.1  fibrillarin-like protein [Arabidopsis thaliana] gi 9965796 gb AAG10153.1  fibrillarin 2 [Arabidopsis thaliana] gi 21536840 gb AAM61172.1  fibrillarin 2 (AtFib2) [Arabidopsis thaliana] gi 23297150 gb AAN13105.1  fibrillarin 2 (AtFib2) [Arabidopsis thaliana] gi 332659685 gb AEE85085.1  rRNA 2'-O-methyltransferase fibrillarin 2 [Arabidopsis thaliana] ref NP_194292.2  hydroxyproline-rich glycoprotein family protein [Arabidopsis thaliana] gi 26449762 dbj BAC42004.1  unknown protein [Arabidopsis thaliana] gi 28951011 gb AA063429.1  At4g25620 [Arabidopsis thaliana] gi 332659684 gb AEE85084.1  hydroxyproline-rich glycoprotein family protein [Arabidopsis thaliana] | 313 | 320 | 1.00E-133 | 102.2 | 73.8 | 76.4 | rRNA 2'-O-methyltransferase fibrillarin 2       | gbpln | Arabidopsis thaliana | AT4G25630.1   Symbols: FIB2, ATFIB2   fibrillarin 2   chr4:13074239-13076205 FORWARD LENGTH=320                                                                                                                                                                                                         | 313 | 320 | 1.00E-136 | 102.2 | 73.8 | 76.4 |
| Rsa1.0_00198.1.g8303.t1 | ref NP_194292.2  hydroxyproline-rich glycoprotein family protein [Arabidopsis thaliana] gi 26449762 dbj BAC42004.1  unknown protein [Arabidopsis thaliana] gi 28951011 gb AA063429.1  At4g25620 [Arabidopsis thaliana] gi 332659684 gb AEE85084.1  hydroxyproline-rich glycoprotein family protein [Arabidopsis thaliana]                                                                                                                                                                                                                                                                                                                                                                                                                                                                                                                                                                                                                                                                                                                                                                                                                                              | 457 | 449 | 1.00E-154 | 98.2  | 72.6 | 79.2 | hydroxyproline-rich glycoprotein family protein | gbpln | Arabidopsis thaliana | AT4G25620.1   Symbols:   hydroxyproline-rich glycoprotein family protein   chr4:13067447-13069296 REVERSE LENGTH=449                                                                                                                                                                                    | 457 | 449 | 1.00E-157 | 98.2  | 72.6 | 79.2 |
| Rsa1.0_00198.1.g8304.t2 | ref NP_194291.2  C2H2-like zinc finger protein [Arabidopsis thaliana] gi 19698995 gb AAL91183.1  unknown protein [Arabidopsis thaliana] gi 23198356 gb AAN15705.1  unknown protein [Arabidopsis thaliana] gi 332659682 gb AEE85082.1  C2H2-like zinc finger protein [Arabidopsis thaliana]                                                                                                                                                                                                                                                                                                                                                                                                                                                                                                                                                                                                                                                                                                                                                                                                                                                                             | 628 | 586 | 0         | 93.3  | 74.2 | 81.5 | C2H2-like zinc finger protein                   | gbpln | Arabidopsis thaliana | AT4G25610.1   Symbols:   C2H2-like zinc finger protein   chr4:13063801-13066860 FORWARD LENGTH=586                                                                                                                                                                                                      | 628 | 586 | 0         | 93.3  | 74.2 | 81.5 |

|                         |                                                                                                                                                                                                                                                                                                                                                                                                                                                                           |     |     |           |       |      |      |                                        |       |                      |                                                                                                                                                                                                                                                                                                                                                                     |     |     |           |       |      |      |
|-------------------------|---------------------------------------------------------------------------------------------------------------------------------------------------------------------------------------------------------------------------------------------------------------------------------------------------------------------------------------------------------------------------------------------------------------------------------------------------------------------------|-----|-----|-----------|-------|------|------|----------------------------------------|-------|----------------------|---------------------------------------------------------------------------------------------------------------------------------------------------------------------------------------------------------------------------------------------------------------------------------------------------------------------------------------------------------------------|-----|-----|-----------|-------|------|------|
| Rsa1.0_00198.1.g8305.t2 | refNP_194290.2  Oxoglutarate/iron-dependent oxygenase [Arabidopsis thaliana] gi26451153 dbj BAC42680.1  unknown protein [Arabidopsis thaliana] gi29893542 gb AAP06823.1  unknown protein [Arabidopsis thaliana] gi332659681 gb AEE85081.1  Oxoglutarate/iron-dependent oxygenase [Arabidopsis thaliana]                                                                                                                                                                   | 269 | 291 | 1.00E-96  | 108.2 | 65.4 | 71.7 | Oxoglutarate/iron-dependent oxygenase  | gbpln | Arabidopsis thaliana | AT4G25600.1   Symbols:   Oxoglutarate/iron-dependent oxygenase   chr4:13060712-13062359 FORWARD LENGTH=291                                                                                                                                                                                                                                                          | 269 | 291 | 4.00E-99  | 108.2 | 65.4 | 71.7 |
| Rsa1.0_00198.1.g8306.t1 | gb EOA18372.1  hypothetical protein CARUB_v10006893mg [Capsella rubella]                                                                                                                                                                                                                                                                                                                                                                                                  | 170 | 137 | 2.00E-69  | 80.6  | 76.5 | 78.2 | hypothetical protein CARUB_v10006893mg | gbpln | Capsella rubella     | AT4G25590.1   Symbols: ADF7   actin depolymerizing factor 7   chr4:13059137-13060050 REVERSE LENGTH=137                                                                                                                                                                                                                                                             | 170 | 137 | 9.00E-71  | 80.6  | 75.9 | 77.6 |
| Rsa1.0_00198.1.g8307.t1 | refNP_194286.1  transcription factor LAF1 [Arabidopsis thaliana] gi55976604 sp Q9M0K4.2 LAF1_ARATH RecName: Full=Transcription factor LAF1; AltName: Full=Myb-related protein 18; Short=AtMYB18; AltName: Full=Protein LONG AFTER FAR-RED LIGHT 1 gi2980794 emb CAA18170.1  myb-like protein [Arabidopsis thaliana] gi41619336 gb AAS10079.1  MYB transcription factor [Arabidopsis thaliana] gi332659677 gb AEE85077.1  transcription factor LAF1 [Arabidopsis thaliana] | 273 | 283 | 1.00E-106 | 103.7 | 74.0 | 82.4 | transcription factor LAF1              | gbpln | Arabidopsis thaliana | AT4G25560.1   Symbols: ADF7   actin depolymerizing factor 7   chr4:13059137-13060050 REVERSE LENGTH=137                                                                                                                                                                                                                                                             | 273 | 283 | 1.00E-108 | 103.7 | 74.0 | 82.4 |
| Rsa1.0_00198.1.g8308.t1 | gb EOA17453.1  hypothetical protein CARUB_v10005772mg [Capsella rubella]                                                                                                                                                                                                                                                                                                                                                                                                  | 200 | 200 | 1.00E-113 | 100.0 | 97.5 | 99.0 | hypothetical protein CARUB_v10005772mg | gbpln | Capsella rubella     | AT4G25550.1   Symbols:   Cleavage/polyadenylation specificity factor, 25kDa subunit   chr4:13048519-13050873 FORWARD LENGTH=200                                                                                                                                                                                                                                     | 200 | 200 | 1.00E-114 | 100.0 | 95.5 | 98.0 |
| Rsa1.0_00198.1.g8309.t1 | refXP_002865885.1  hypothetical protein ARALYDRAFT_495266 [Arabidopsis lyrata subsp. lyrata] gi297311720 gb EFH42144.1  hypothetical protein ARALYDRAFT_495266 [Arabidopsis lyrata subsp. lyrata]                                                                                                                                                                                                                                                                         | 119 | 440 | 1.00E-33  | 369.7 | 54.6 | 58.8 | hypothetical protein ARALYDRAFT_495266 | gbpln | Arabidopsis lyrata   | AT4G25440.1   Symbols: ZFWD1   zinc finger WD40 repeat protein 1   chr4:13007107-13009381 REVERSE LENGTH=430                                                                                                                                                                                                                                                        | 119 | 430 | 1.00E-35  | 361.3 | 56.3 | 59.7 |
| Rsa1.0_00198.1.g8310.t2 | refNP_849443.2  nudix hydrolase 10 [Arabidopsis thaliana] gi68565889 sp Q6NPD7.1 NUD10_ARATH RecName: Full=Nudix hydrolase 10; Short=AtNUDT10; AltName: Full=ADP-ribose pyrophosphatase; AltName: Full=NADH pyrophosphatase gi338564312 gb AAR23735.1  At4g25434 [Arabidopsis thaliana] gi38604044 gb AAR24765.1  At4g25434 [Arabidopsis thaliana] gi332659658 gb AEE85058.1  nudix hydrolase 10 [Arabidopsis thaliana]                                                   | 278 | 277 | 1.00E-133 | 99.6  | 85.3 | 90.3 | nudix hydrolase 10                     | gbpln | Arabidopsis thaliana | AT4G25434.1   Symbols: ATNUDT10, NUDT10   nudix hydrolase homolog 10   chr4:13004043-13005771 REVERSE LENGTH=277                                                                                                                                                                                                                                                    | 278 | 277 | 1.00E-136 | 99.6  | 85.3 | 90.3 |
| Rsa1.0_00198.1.g8311.t1 | refXP_002867610.1  predicted protein [Arabidopsis lyrata subsp. lyrata] gi297313446 gb EFH43869.1  predicted protein [Arabidopsis lyrata subsp. lyrata]                                                                                                                                                                                                                                                                                                                   | 114 | 114 | 1.00E-41  | 100.0 | 72.8 | 84.2 | predicted protein                      | gbpln | Arabidopsis lyrata   | AT4G25433.1   Symbols:   peptidoglycan-binding LysM domain-containing protein   chr4:13001463-13001795 REVERSE LENGTH=110                                                                                                                                                                                                                                           | 114 | 110 | 2.00E-43  | 96.5  | 72.8 | 82.5 |
| Rsa1.0_00198.1.g8312.t1 | gb EOA14349.1  hypothetical protein CARUB_v10027529mg [Capsella rubella]                                                                                                                                                                                                                                                                                                                                                                                                  | 219 | 222 | 4.00E-77  | 101.4 | 70.3 | 84.9 | hypothetical protein CARUB_v10027529mg | gbpln | Capsella rubella     | AT5G51860.2   Symbols:   K-box region and MADS-box transcription factor family protein   chr5:21081844-21084126 REVERSE LENGTH=202                                                                                                                                                                                                                                  | 219 | 202 | 2.00E-58  | 92.2  | 58.0 | 72.6 |
| Rsa1.0_00198.1.g8313.t1 | refNP_194273.2  uncharacterized protein [Arabidopsis thaliana] gi332659656 gb AEE85056.1  uncharacterized protein AT4G25430 [Arabidopsis thaliana]                                                                                                                                                                                                                                                                                                                        | 176 | 459 | 5.00E-39  | 260.8 | 56.8 | 73.3 | uncharacterized protein                | gbpln | Arabidopsis thaliana | AT4G25430.1   Symbols:   unknown protein; BEST Arabidopsis thaliana protein match is: unknown protein (TAIR:AT5G51850.1); Has 30201 Blast hits to 17322 proteins in 780 species: Archae - 12; Bacteria - 1396; Metazoa - 17338; Fungi - 3422; Plants - 5037; Viruses - 0; Other Eukaryotes - 2996 (source: NCBI BLINK).   chr4:12998571-13000211 FORWARD LENGTH=459 | 176 | 459 | 2.00E-41  | 260.8 | 56.8 | 73.3 |
| Rsa1.0_00198.1.g8314.t1 | dbj BAM73279.1  gibberellin 20 oxidase 1 [Raphanus sativus]                                                                                                                                                                                                                                                                                                                                                                                                               | 380 | 381 | 0         | 100.3 | 85.5 | 91.8 | gibberellin 20 oxidase 1               | gbpln | Raphanus sativus     | AT4G25420.1   Symbols: GA5, GA20OX1, AT2301, ATGA20OX1   2-oxoglutarate (2OG) and Fe(II)-dependent oxygenase superfamily protein   chr4:12990982-12992409 REVERSE LENGTH=377                                                                                                                                                                                        | 380 | 377 | 0         | 99.2  | 85.3 | 90.0 |

|                         |                                                                                                                                                                                                                                                                                                                 |      |      |          |       |      |      |                                                            |       |                      |                                                                                                                                                                                                                                                                                                                                                                                                                                                              |      |     |          |       |      |      |
|-------------------------|-----------------------------------------------------------------------------------------------------------------------------------------------------------------------------------------------------------------------------------------------------------------------------------------------------------------|------|------|----------|-------|------|------|------------------------------------------------------------|-------|----------------------|--------------------------------------------------------------------------------------------------------------------------------------------------------------------------------------------------------------------------------------------------------------------------------------------------------------------------------------------------------------------------------------------------------------------------------------------------------------|------|-----|----------|-------|------|------|
| Rsa1.0_00199.1.g8315.t1 | ref[NP_199137.2] uncharacterized protein [Arabidopsis thaliana] gi 332007543 gb AED94926.1  uncharacterized protein AT5G43230 [Arabidopsis thaliana]                                                                                                                                                            | 598  | 848  | 0        | 141.8 | 55.5 | 59.4 | uncharacterized protein                                    | gbpln | Arabidopsis thaliana | AT5G43230.1   Symbols:   unknown protein; BEST Arabidopsis thaliana protein match is: unknown protein (TAIR:AT3G01810.3); Has 30201 Blast hits to 17322 proteins in 780 species: Archae - 12; Bacteria - 1396; Metazoa - 17338; Fungi - 3422; Plants - 5037; Viruses - 0; Other Eukaryotes - 2996 (source: NCBI BLINK).   chr5:17349125-17352747 FORWARD LENGTH=848                                                                                          | 598  | 848 | 0        | 141.8 | 55.5 | 59.4 |
| Rsa1.0_00199.1.g8316.t1 | emb[CAB81573.1] putative protein [Arabidopsis thaliana]                                                                                                                                                                                                                                                         | 356  | 510  | 7.00E-22 | 143.3 | 18.5 | 27.5 | putative protein                                           | gbpln | Arabidopsis thaliana | #                                                                                                                                                                                                                                                                                                                                                                                                                                                            | #    | #   | #        | #     | #    |      |
| Rsa1.0_00199.1.g8317.t1 | ref[NP_199135.1] endo/excinuclease amino terminal domain-containing protein [Arabidopsis thaliana] gi 10177383 dbj BAB10584.1  unnamed protein product [Arabidopsis thaliana] gi 332007541 gb AED94924.1  endo/excinuclease amino terminal domain-containing protein [Arabidopsis thaliana]                     | 183  | 170  | 7.00E-70 | 92.9  | 73.2 | 81.4 | endo/excinuclease amino terminal domain-containing protein | gbpln | Arabidopsis thaliana | AT5G43210.1   Symbols:   Excinuclease ABC, C subunit, N-terminal   chr5:17347567-17348379 FORWARD LENGTH=170                                                                                                                                                                                                                                                                                                                                                 | 183  | 170 | 3.00E-72 | 92.9  | 73.2 | 81.4 |
| Rsa1.0_00199.1.g8318.t1 | #                                                                                                                                                                                                                                                                                                               | #    | #    | #        | #     | #    | -    | ----                                                       | ----  | Arabidopsis thaliana | #                                                                                                                                                                                                                                                                                                                                                                                                                                                            | #    | #   | #        | #     | #    |      |
| Rsa1.0_00199.1.g8319.t1 | dbj BAE98403.1  putative non-LTR reverse transcriptase [Arabidopsis thaliana]                                                                                                                                                                                                                                   | 286  | 278  | 2.00E-52 | 97.2  | 39.9 | 54.9 | putative non-LTR reverse transcriptase                     | gbpln | Arabidopsis thaliana | AT5G18880.1   Symbols:   RNA-directed DNA polymerase (reverse transcriptase)-related family protein   chr5:6300535-6301422 REVERSE LENGTH=295                                                                                                                                                                                                                                                                                                                | 286  | 295 | 3.00E-49 | 103.1 | 36.4 | 50.3 |
| Rsa1.0_00199.1.g8320.t1 | #                                                                                                                                                                                                                                                                                                               | #    | #    | #        | #     | #    | -    | ----                                                       | ----  | Arabidopsis thaliana | #                                                                                                                                                                                                                                                                                                                                                                                                                                                            | #    | #   | #        | #     | #    |      |
| Rsa1.0_00199.1.g8321.t2 | ref[XP_002865450.1] hypothetical protein ARALYDRAFT_917371 [Arabidopsis lyrata subsp. lyrata] gi 297311285 gb EFH41709.1  hypothetical protein ARALYDRAFT_917371 [Arabidopsis lyrata subsp. lyrata]                                                                                                             | 94   | 91   | 1.00E-36 | 96.8  | 81.9 | 85.1 | hypothetical protein ARALYDRAFT_917371                     | gbpln | Arabidopsis lyrata   | AT5G43150.1   Symbols:   unknown protein; FUNCTIONS IN: molecular function unknown; INVOLVED IN: biological process unknown; LOCATED IN: mitochondrion; EXPRESSED IN: 22 plant structures; EXPRESSED DURING: 13 growth stages; Has 1807 Blast hits to 1807 proteins in 277 species: Archae - 0; Bacteria - 0; Metazoa - 736; Fungi - 347; Plants - 385; Viruses - 0; Other Eukaryotes - 339 (source: NCBI BLINK).   chr5:17325076-17325689 FORWARD LENGTH=91 | 94   | 91  | 2.00E-36 | 96.8  | 78.7 | 85.1 |
| Rsa1.0_00199.1.g8322.t1 | gb AAF18538.1 AC006551.24 Very similar to retrotransposon reverse transcriptase [Arabidopsis thaliana]                                                                                                                                                                                                          | 147  | 1231 | 2.00E-25 | 837.4 | 42.9 | 58.5 | Very similar to retrotransposon reverse transcriptase      | gbpln | Arabidopsis thaliana | AT5G19270.1   Symbols:   unknown protein; BEST Arabidopsis thaliana protein match is: unknown protein (TAIR:AT4G03566.1); Has 30201 Blast hits to 17322 proteins in 780 species: Archae - 12; Bacteria - 1396; Metazoa - 17338; Fungi - 3422; Plants - 5037; Viruses - 0; Other Eukaryotes - 2996 (source: NCBI BLINK).   chr5:6485617-6487009 REVERSE LENGTH=365                                                                                            | 147  | 365 | 4.00E-13 | 248.3 | 29.9 | 48.3 |
| Rsa1.0_00199.1.g8323.t1 | #                                                                                                                                                                                                                                                                                                               | #    | #    | #        | #     | #    | -    | ----                                                       | ----  | Arabidopsis thaliana | #                                                                                                                                                                                                                                                                                                                                                                                                                                                            | #    | #   | #        | #     | #    |      |
| Rsa1.0_00199.1.g8324.t2 | gb AAF63106.1 AC006423.7 Hypothetical protein [Arabidopsis thaliana]                                                                                                                                                                                                                                            | 506  | 570  | 2.00E-12 | 112.6 | 14.0 | 25.3 | Hypothetical protein                                       | gbpln | Arabidopsis thaliana | #                                                                                                                                                                                                                                                                                                                                                                                                                                                            | #    | #   | #        | #     | #    |      |
| Rsa1.0_00199.1.g8325.t1 | gb AAF79618.1 AC027665.19 F5M15.26 [Arabidopsis thaliana]                                                                                                                                                                                                                                                       | 742  | 1838 | 0        | 247.7 | 54.3 | 69.3 | F5M15.26                                                   | gbpln | Arabidopsis thaliana | #                                                                                                                                                                                                                                                                                                                                                                                                                                                            | #    | #   | #        | #     | #    |      |
| Rsa1.0_00199.1.g8326.t1 | ref[NP_199127.3] TBP-associated factor 4 [Arabidopsis thaliana] gi 38490053 gb AAR21620.1  TATA-binding protein associated factor 4b [Arabidopsis thaliana] gi 110738778 dbj BAF01312.1  hypothetical protein [Arabidopsis thaliana] gi 332007530 gb AED94913.1  TBP-associated factor 4 [Arabidopsis thaliana] | 1036 | 823  | 0        | 79.4  | 65.0 | 68.8 | TBP-associated factor 4                                    | gbpln | Arabidopsis thaliana | AT5G43130.1   Symbols: TAF4, TAF4B   TBP-associated factor 4   chr5:17315608-17321144 REVERSE LENGTH=823                                                                                                                                                                                                                                                                                                                                                     | 1036 | 823 | 0        | 79.4  | 65.0 | 68.8 |

|                         |                                                                                                                                                                                                                                                                                                                                                                                                                                                                                                                                                                                                                                                                                                                                                                                                                                                                                                                              |      |      |           |       |      |      |                                                 |       |                      |                                                                                                                       |      |      |           |       |      |      |
|-------------------------|------------------------------------------------------------------------------------------------------------------------------------------------------------------------------------------------------------------------------------------------------------------------------------------------------------------------------------------------------------------------------------------------------------------------------------------------------------------------------------------------------------------------------------------------------------------------------------------------------------------------------------------------------------------------------------------------------------------------------------------------------------------------------------------------------------------------------------------------------------------------------------------------------------------------------|------|------|-----------|-------|------|------|-------------------------------------------------|-------|----------------------|-----------------------------------------------------------------------------------------------------------------------|------|------|-----------|-------|------|------|
| Rsa1.0_00199.1.g8327.t1 | ref NP_199115.1  regulatory particle triple-A ATPase 4A [Arabidopsis thaliana]<br>gi 75337115 g O9SEI3.1 PS10A_ARATH<br>RefName: Full=26S protease regulatory subunit 10B homolog A; AltName: Full=26S proteasome AAA-ATPase subunit RPT4a; AltName: Full=26S proteasome subunit 10B homolog A; AltName: Full=Regulatory particle triple-A ATPase subunit 4a<br>gi 6652884 g AAF22524.1 AF123393.1<br>26S proteasome AAA-ATPase subunit RPT4a [Arabidopsis thaliana]<br>gi 13937183 g AAK50085.1 AF372945.1<br>AT5g43010/MBD2.21 [Arabidopsis thaliana]<br>gi 9758590 db BAB09203.1 <br>26S proteasome AAA-ATPase subunit RPT4a [Arabidopsis thaliana]<br>gi 18700262 g AAL77741.1 <br>AT5g43010/MBD2.21 [Arabidopsis thaliana]<br>gi 332007517 g AED94900.1 <br>regulatory particle triple-A ATPase 4A [Arabidopsis thaliana]<br>gi 482549284 g EOA13478.1 <br>hypothetical protein<br>CARUB_v10026536mg [Capsella rubella] | 399  | 399  | 0         | 100.0 | 97.5 | 99.5 | regulatory particle triple-A ATPase 4A          | gbpln | Arabidopsis thaliana | AT5G43010.1   Symbols: RPT4A   regulatory particle triple-A ATPase 4A   chr5:17248563-17251014 REVERSE LENGTH=399     | 399  | 399  | 0         | 100.0 | 97.5 | 99.5 |
| Rsa1.0_00199.1.g8328.t1 | emb CAN61630.1  hypothetical protein VITISV_003191 [Vitis vinifera]                                                                                                                                                                                                                                                                                                                                                                                                                                                                                                                                                                                                                                                                                                                                                                                                                                                          | 1083 | 1208 | 0         | 111.5 | 41.5 | 61.0 | hypothetical protein VITISV_003191              | gbpln | Vitis vinifera       | ATMG00300.1   Symbols: ORF145A   Gag-Pol-related retrotransposon family protein   chrM:89617-90054 REVERSE LENGTH=145 | 1083 | 145  | 2.00E-26  | 13.4  | 5.0  | 7.0  |
| Rsa1.0_00199.1.g8329.t1 | gb AAM15254.1  putative retroelement pol polyprotein [Arabidopsis thaliana]                                                                                                                                                                                                                                                                                                                                                                                                                                                                                                                                                                                                                                                                                                                                                                                                                                                  | 322  | 930  | 2.00E-25  | 288.8 | 24.8 | 36.0 | putative retroelement pol polyprotein           | gbpln | Arabidopsis thaliana | AT2G14000.1   Symbols:   Arabidopsis retrotransposon ORF-1 protein   chr2:5884600-5885985 REVERSE LENGTH=346          | 322  | 346  | 1.00E-13  | 107.5 | 11.2 | 19.9 |
| Rsa1.0_00199.1.g8330.t1 | #                                                                                                                                                                                                                                                                                                                                                                                                                                                                                                                                                                                                                                                                                                                                                                                                                                                                                                                            | #    | #    | #         | #     | #    | -    | ----                                            | ----  | #                    | #                                                                                                                     | #    | #    | #         | #     | #    |      |
| Rsa1.0_00199.1.g8331.t3 | #                                                                                                                                                                                                                                                                                                                                                                                                                                                                                                                                                                                                                                                                                                                                                                                                                                                                                                                            | #    | #    | #         | #     | #    | -    | ----                                            | ----  | #                    | #                                                                                                                     | #    | #    | #         | #     | #    |      |
| Rsa1.0_00199.1.g8332.t1 | #                                                                                                                                                                                                                                                                                                                                                                                                                                                                                                                                                                                                                                                                                                                                                                                                                                                                                                                            | #    | #    | #         | #     | #    | -    | ----                                            | ----  | #                    | #                                                                                                                     | #    | #    | #         | #     | #    |      |
| Rsa1.0_00199.1.g8333.t1 | ref NP_568607.1  B-cell receptor-associated 31-like protein [Arabidopsis thaliana]<br>gi 15450826 g AAK96684.1 <br>Unknown protein [Arabidopsis thaliana]<br>gi 88196723 g ABD43004.1  At5g42570 [Arabidopsis thaliana]<br>gi 332007447 g AED94830.1  B-cell receptor-associated 31-like protein [Arabidopsis thaliana]                                                                                                                                                                                                                                                                                                                                                                                                                                                                                                                                                                                                      | 218  | 218  | 1.00E-112 | 100.0 | 93.1 | 95.4 | B-cell receptor-associated 31-like protein      | gbpln | Arabidopsis thaliana | AT5G42570.1   Symbols:   B-cell receptor-associated 31-like   chr5:17021459-17022497 REVERSE LENGTH=218               | 218  | 218  | 1.00E-115 | 100.0 | 93.1 | 95.4 |
| Rsa1.0_00199.1.g8334.t3 | ref NP_567695.1  ATP binding microtubule motor family protein [Arabidopsis thaliana]<br>gi 332659459 g AEB4858.1  ATP binding microtubule motor family protein [Arabidopsis thaliana]                                                                                                                                                                                                                                                                                                                                                                                                                                                                                                                                                                                                                                                                                                                                        | 1180 | 1004 | 0         | 85.1  | 52.5 | 64.0 | ATP binding microtubule motor family protein    | gbpln | Arabidopsis thaliana | AT4G24170.1   Symbols:   ATP binding microtubule motor family protein   chr4:12543206-12546805 FORWARD LENGTH=1004    | 1180 | 1004 | 0         | 85.1  | 52.5 | 64.0 |
| Rsa1.0_00199.1.g8335.t1 | #                                                                                                                                                                                                                                                                                                                                                                                                                                                                                                                                                                                                                                                                                                                                                                                                                                                                                                                            | #    | #    | #         | #     | #    | -    | ----                                            | ----  | #                    | #                                                                                                                     | #    | #    | #         | #     | #    |      |
| Rsa1.0_00199.1.g8336.t1 | gb AGB34186.1  allene oxide synthase [Brassica oleracea]                                                                                                                                                                                                                                                                                                                                                                                                                                                                                                                                                                                                                                                                                                                                                                                                                                                                     | 529  | 529  | 0         | 100.0 | 95.5 | 97.2 | allene oxide synthase                           | gbpln | Brassica oleracea    | AT5G42650.1   Symbols: AOS, CYP74A, DDE2   allene oxide synthase   chr5:17097803-17099359 REVERSE LENGTH=518          | 529  | 518  | 0         | 97.9  | 82.6 | 90.0 |
| Rsa1.0_00199.1.g8337.t1 | ref NP_180318.1  dephospho-CoA kinase [Arabidopsis thaliana]<br>gi 30683542 ref NP_850102.1 <br>dephospho-CoA kinase [Arabidopsis thaliana]<br>gi 4314391 g AAD15601.1 <br>unknown protein [Arabidopsis thaliana]<br>gi 110737255 db BAF00575.1 <br>hypothetical protein [Arabidopsis thaliana]<br>gi 117168209 g ABK32187.1 <br>At2g27490 [Arabidopsis thaliana]<br>gi 330252908 g AEC08002.1 <br>dephospho-CoA kinase [Arabidopsis thaliana]<br>gi 330252909 g AEC08003.1 <br>dephospho-CoA kinase [Arabidopsis thaliana]                                                                                                                                                                                                                                                                                                                                                                                                  | 72   | 232  | 6.00E-21  | 322.2 | 70.8 | 77.8 | dephospho-CoA kinase                            | gbpln | Arabidopsis thaliana | AT2G27490.2   Symbols: ATCOAE   dephospho-CoA kinase family   chr2:11748087-11749009 REVERSE LENGTH=232               | 72   | 232  | 9.00E-24  | 322.2 | 70.8 | 77.8 |
| Rsa1.0_00199.1.g8338.t1 | gb AAG51783.1 AC079679_3 reverse transcriptase, putative: 16838-20266 [Arabidopsis thaliana]                                                                                                                                                                                                                                                                                                                                                                                                                                                                                                                                                                                                                                                                                                                                                                                                                                 | 654  | 1142 | 3.00E-65  | 174.6 | 19.0 | 24.9 | reverse transcriptase, putative: 16838-20266    | gbpln | Arabidopsis thaliana | AT3G09510.1   Symbols:   Ribonuclease H-like superfamily protein   chr3:2921804-2923258 FORWARD LENGTH=484            | 654  | 484  | 6.00E-26  | 74.0  | 12.2 | 17.9 |
| Rsa1.0_00199.1.g8339.t1 | gb EOA23804.1  hypothetical protein CARUB_v10017017mg, partial [Capsella rubella]                                                                                                                                                                                                                                                                                                                                                                                                                                                                                                                                                                                                                                                                                                                                                                                                                                            | 505  | 521  | 8.00E-30  | 103.2 | 14.9 | 20.8 | hypothetical protein CARUB_v10017017mg, partial | gbpln | Capsella rubella     | #                                                                                                                     | #    | #    | #         | #     | #    |      |

|                         |                                                                                                                                                                                                                                                                                                                                                                                                                                                                                                                                                                                                                                   |      |      |           |       |      |      |                                                                                |       |                      |                                                                                                                                                                                                                                                                                                                                                                                                            |      |      |           |       |      |      |
|-------------------------|-----------------------------------------------------------------------------------------------------------------------------------------------------------------------------------------------------------------------------------------------------------------------------------------------------------------------------------------------------------------------------------------------------------------------------------------------------------------------------------------------------------------------------------------------------------------------------------------------------------------------------------|------|------|-----------|-------|------|------|--------------------------------------------------------------------------------|-------|----------------------|------------------------------------------------------------------------------------------------------------------------------------------------------------------------------------------------------------------------------------------------------------------------------------------------------------------------------------------------------------------------------------------------------------|------|------|-----------|-------|------|------|
| Rsa1.0_00199.1.g8340.t1 | refNP_178356.1  RNA-directed DNA polymerase (reverse transcriptase)-related family protein [Arabidopsis thaliana] gi 3184287 gb AAC18934.1  putative non-LTR retroelement reverse transcriptase [Arabidopsis thaliana] gi 330250497 gb AEC0559.1  RNA-directed DNA polymerase (reverse transcriptase)-related family protein [Arabidopsis thaliana] emb CAB39638.1  RNA-directed DNA polymerase-like protein [Arabidopsis thaliana] gi 7267666 emb CAB78094.1  RNA-directed DNA polymerase-like protein [Arabidopsis thaliana]                                                                                                    | 139  | 211  | 8.00E-34  | 151.8 | 48.2 | 66.9 | RNA-directed DNA polymerase (reverse transcriptase)-related family protein     | gbpln | Arabidopsis thaliana | AT2G02520.1   Symbols:   RNA-directed DNA polymerase (reverse transcriptase)-related family protein   chr2:676771-678145 REVERSE LENGTH=211                                                                                                                                                                                                                                                                | 139  | 211  | 2.00E-36  | 151.8 | 48.2 | 66.9 |
| Rsa1.0_00199.1.g8341.t1 | emb CAB39638.1  RNA-directed DNA polymerase-like protein [Arabidopsis thaliana] gi 7267666 emb CAB78094.1  RNA-directed DNA polymerase-like protein [Arabidopsis thaliana]                                                                                                                                                                                                                                                                                                                                                                                                                                                        | 384  | 1274 | 8.00E-73  | 331.8 | 40.9 | 58.3 | RNA-directed DNA polymerase-like protein                                       | gbpln | Arabidopsis thaliana | AT4G29090.1   Symbols:   Ribonuclease H-like superfamily protein   chr4:14333528-14335255 FORWARD LENGTH=575                                                                                                                                                                                                                                                                                               | 384  | 575  | 7.00E-31  | 149.7 | 31.3 | 49.0 |
| Rsa1.0_00199.1.g8342.t1 | #                                                                                                                                                                                                                                                                                                                                                                                                                                                                                                                                                                                                                                 | #    | #    | #         | #     | #    | #    | -                                                                              | ----  | ----                 | #                                                                                                                                                                                                                                                                                                                                                                                                          | #    | #    | #         | #     | #    | #    |
| Rsa1.0_00199.1.g8343.t2 | #                                                                                                                                                                                                                                                                                                                                                                                                                                                                                                                                                                                                                                 | #    | #    | #         | #     | #    | #    | -                                                                              | ----  | ----                 | #                                                                                                                                                                                                                                                                                                                                                                                                          | #    | #    | #         | #     | #    | #    |
| Rsa1.0_00199.1.g8344.t1 | #                                                                                                                                                                                                                                                                                                                                                                                                                                                                                                                                                                                                                                 | #    | #    | #         | #     | #    | #    | -                                                                              | ----  | ----                 | #                                                                                                                                                                                                                                                                                                                                                                                                          | #    | #    | #         | #     | #    | #    |
| Rsa1.0_00199.1.g8345.t1 | gb AAC28189.1  contains similarity to Arabidopsis thaliana retrotransposon Athila (GB:X81801) [Arabidopsis thaliana]                                                                                                                                                                                                                                                                                                                                                                                                                                                                                                              | 593  | 940  | 6.00E-66  | 158.5 | 20.7 | 26.0 | contains similarity to Arabidopsis thaliana retrotransposon Athila (GB:X81801) | gbpln | Arabidopsis thaliana | #                                                                                                                                                                                                                                                                                                                                                                                                          | #    | #    | #         | #     | #    | #    |
| Rsa1.0_00199.1.g8346.t1 | gb AAF79797.1 AC020646_20 T32E20.30 [Arabidopsis thaliana]                                                                                                                                                                                                                                                                                                                                                                                                                                                                                                                                                                        | 1365 | 1397 | 0         | 102.3 | 48.8 | 65.7 | T32E20.30                                                                      | gbpln | Arabidopsis thaliana | AT1G67020.1   Symbols:   unknown protein; FUNCTIONS IN: molecular.function unknown; INVOLVED IN: biological.process unknown; LOCATED IN: cellular.component unknown; EXPRESSED IN: leaf; Has 72 Blast hits to 72 proteins in 9 species: Archae - 0; Bacteria - 0; Metazoa - 0; Fungi - 0; Plants - 72; Viruses - 0; Other Eukaryotes - 0 (source: NCBI BLINK).   chr1:25011008-25012987 REVERSE LENGTH=659 | 1365 | 659  | 1.00E-14  | 48.3  | 2.3  | 3.8  |
| Rsa1.0_00199.1.g8347.t1 | #                                                                                                                                                                                                                                                                                                                                                                                                                                                                                                                                                                                                                                 | #    | #    | #         | #     | #    | #    | -                                                                              | ----  | ----                 | #                                                                                                                                                                                                                                                                                                                                                                                                          | #    | #    | #         | #     | #    | #    |
| Rsa1.0_00199.1.g8348.t2 | gb AAZ41811.1  O1P13-1 [Brassica rapa subsp. pekinensis]                                                                                                                                                                                                                                                                                                                                                                                                                                                                                                                                                                          | 1241 | 1545 | 0         | 124.5 | 61.9 | 77.6 | O1P13-1                                                                        | gbpln | Brassica rapa        | AT4G23160.1   Symbols: CRK8   cysteine-rich RLK (RECEPTOR-like protein kinase) 8   chr4:12129485-12134086 FORWARD LENGTH=1262                                                                                                                                                                                                                                                                              | 1241 | 1262 | 3.00E-70  | 101.7 | 12.8 | 19.0 |
| Rsa1.0_00199.1.g8349.t1 | gb AAK51235.1 AF287471.1 polyprotein [Arabidopsis thaliana]                                                                                                                                                                                                                                                                                                                                                                                                                                                                                                                                                                       | 176  | 1453 | 6.00E-73  | 825.6 | 73.9 | 84.7 | polyprotein                                                                    | gbpln | Arabidopsis thaliana | ATMG00810.1   Symbols: ORF240B   DNA/RNA polymerases superfamily protein   chrM:227709-228431 REVERSE LENGTH=240                                                                                                                                                                                                                                                                                           | 176  | 240  | 3.00E-57  | 136.4 | 57.4 | 73.9 |
| Rsa1.0_00199.1.g8350.t1 | gb AAZ66952.1 117M18.33 [Brassica rapa]                                                                                                                                                                                                                                                                                                                                                                                                                                                                                                                                                                                           | 658  | 681  | 6.00E-81  | 103.5 | 27.4 | 35.4 | 117M18.33                                                                      | gbpln | Brassica rapa        | AT4G23160.1   Symbols: CRK8   cysteine-rich RLK (RECEPTOR-like protein kinase) 8   chr4:12129485-12134086 FORWARD LENGTH=1262                                                                                                                                                                                                                                                                              | 658  | 1262 | 7.00E-23  | 191.8 | 8.2  | 14.1 |
| Rsa1.0_00200.1.g8351.t1 | ref YP_717161.1  hypothetical protein BrnapMp064 [Brassica napus] gi 353526385 ref YP_004927457.1 orf448 (mitochondrion) [Brassica oleracea] gi 353526703 ref YP_004927873.1 orf448 (mitochondrion) [Brassica rapa subsp. oleifera] gi 353531385 ref YP_004927776.1 orf448 (mitochondrion) [Brassica juncea] gi 37591109 dbj BAC98910.1  hypothetical protein [Brassica napus] gi 33535489.1 gb AEH43447.1 orf448 [Brassica rapa subsp. oleifera] gi 335354930 gb AEH43485.1 orf448 [Brassica oleracea] gi 335355118 gb AEH43671.1 orf448 [Brassica juncea] gi 339511319 emb CBX48374.1  unnamed protein product [Brassica napus] | 126  | 448  | 4.00E-28  | 355.6 | 46.8 | 48.4 | hypothetical protein BrnapMp064                                                | gbpln | Brassica juncea      | #                                                                                                                                                                                                                                                                                                                                                                                                          | #    | #    | #         | #     | #    | #    |
| Rsa1.0_00200.1.g8352.t1 | ref XP_002331327.1  predicted protein [Populus trichocarpa] gi 222873910 gb EEF11041.1  predicted protein [Populus trichocarpa]                                                                                                                                                                                                                                                                                                                                                                                                                                                                                                   | 78   | 596  | 1.00E-16  | 764.1 | 56.4 | 60.3 | predicted protein                                                              | gbpln | Populus trichocarpa  | AT1G53510.1   Symbols: ATPMK18, MPK18   mitogen-activated protein kinase 18   chr1:19970961-19974158 REVERSE LENGTH=615                                                                                                                                                                                                                                                                                    | 78   | 615  | 2.00E-19  | 788.5 | 56.4 | 61.5 |
| Rsa1.0_00200.1.g8353.t1 | #                                                                                                                                                                                                                                                                                                                                                                                                                                                                                                                                                                                                                                 | #    | #    | #         | #     | #    | #    | -                                                                              | ----  | ----                 | #                                                                                                                                                                                                                                                                                                                                                                                                          | #    | #    | #         | #     | #    | #    |
| Rsa1.0_00200.1.g8354.t2 | ref NP_001031695.1  PHD finger and bromo-adjacent homology domain-containing protein [Arabidopsis thaliana] gi 62321730 dbj BAD95354.1  receptor like protein [Arabidopsis thaliana] gi 332659163 gb AEB84563.1  PHD finger and bromo-adjacent homology domain-containing protein [Arabidopsis thaliana]                                                                                                                                                                                                                                                                                                                          | 255  | 224  | 1.00E-124 | 87.8  | 82.7 | 83.9 | PHD finger and bromo-adjacent homology domain-containing protein               | gbpln | Arabidopsis thaliana | AT4G22140.2   Symbols: EBS   PHD finger family protein / bromo-adjacent homology (BAH) domain-containing protein   chr4:11728093-11730230 REVERSE LENGTH=224                                                                                                                                                                                                                                               | 255  | 224  | 1.00E-126 | 87.8  | 82.7 | 83.9 |

|                         |                                                                                                                                                                                                                                                                                                |      |      |           |       |      |      |                                        |       |                      |                                                                                                                                                                                                                                                                                                                                |      |      |           |       |      |      |
|-------------------------|------------------------------------------------------------------------------------------------------------------------------------------------------------------------------------------------------------------------------------------------------------------------------------------------|------|------|-----------|-------|------|------|----------------------------------------|-------|----------------------|--------------------------------------------------------------------------------------------------------------------------------------------------------------------------------------------------------------------------------------------------------------------------------------------------------------------------------|------|------|-----------|-------|------|------|
| Rsa1.0_00200.1.g8355.t1 | gb EOA18522.1  hypothetical protein CARUB_v10007075mg [Capsella rubella]                                                                                                                                                                                                                       | 389  | 401  | 1.00E-107 | 103.1 | 57.1 | 69.9 | hypothetical protein CARUB_v10007075mg | gbpln | Capsella rubella     | AT4G22180.1   Symbols:   F-box family protein with a domain of unknown function (DUF295)   chr4:11738574-11739782 FORWARD LENGTH=402                                                                                                                                                                                           | 389  | 402  | 1.00E-110 | 103.3 | 56.3 | 70.4 |
| Rsa1.0_00200.1.g8356.t1 | ref NP_567650.2  uncharacterized protein [Arabidopsis thaliana]   gi 20466282 gb AAM20458.1  unknown protein [Arabidopsis thaliana]   gi 22136352 gb AAM91254.1  unknown protein [Arabidopsis thaliana]   gi 332659170 gb AEE84570.1  uncharacterized protein AT4G22190 [Arabidopsis thaliana] | 350  | 387  | 1.00E-109 | 110.6 | 73.1 | 80.0 | uncharacterized protein                | gbpln | Arabidopsis thaliana | AT4G22190.1   Symbols:   unknown protein; Has 283 Blast hits to 154 proteins in 44 species: Archae - 0; Bacteria - 2; Metazoa - 24; Fungi - 12; Plants - 48; Viruses - 0; Other Eukaryotes - 197 (source: NCBI BLink).   chr4:11742102-11743265 REVERSE LENGTH=387                                                             | 350  | 387  | 1.00E-112 | 110.6 | 73.1 | 80.0 |
| Rsa1.0_00200.1.g8357.t1 | ref XP_002867780.1  hypothetical protein ARALYDRAFT_492641 [Arabidopsis lyrata subsp. lyrata]   gi 297313616 gb EFH44039.1  hypothetical protein ARALYDRAFT_492641 [Arabidopsis lyrata subsp. lyrata]                                                                                          | 656  | 214  | 1.00E-72  | 32.6  | 24.1 | 25.6 | hypothetical protein ARALYDRAFT_492641 | gbpln | Arabidopsis lyrata   | AT4G22250.1   Symbols:   RING/U-box superfamily protein   chr4:11767685-11768329 REVERSE LENGTH=214                                                                                                                                                                                                                            | 656  | 214  | 4.00E-69  | 32.6  | 23.3 | 25.5 |
| Rsa1.0_00200.1.g8358.t1 | gb EOA16917.1  hypothetical protein CARUB_v10005140mg [Capsella rubella]                                                                                                                                                                                                                       | 196  | 353  | 5.00E-39  | 180.1 | 43.4 | 44.4 | hypothetical protein CARUB_v10005140mg | gbpln | Capsella rubella     | AT4G22260.1   Symbols: IM, IM1   Alternative oxidase family protein   chr4:11769967-11772350 REVERSE LENGTH=351                                                                                                                                                                                                                | 196  | 351  | 7.00E-40  | 179.1 | 42.3 | 43.9 |
| Rsa1.0_00200.1.g8359.t1 | gb EOA16620.1  hypothetical protein CARUB_v10004790mg [Capsella rubella]                                                                                                                                                                                                                       | 439  | 443  | 0         | 100.9 | 88.4 | 92.7 | hypothetical protein CARUB_v10004790mg | gbpln | Capsella rubella     | AT4G22270.1   Symbols: MRB1, ATMRB1   Protein of unknown function (DUF3537)   chr4:11773396-11775782 FORWARD LENGTH=437                                                                                                                                                                                                        | 439  | 437  | 0         | 99.5  | 84.1 | 90.0 |
| Rsa1.0_00200.1.g8360.t1 | ref XP_002868681.1  hypothetical protein ARALYDRAFT_916271 [Arabidopsis lyrata subsp. lyrata]   gi 297314517 gb EFH44940.1  hypothetical protein ARALYDRAFT_916271 [Arabidopsis lyrata subsp. lyrata]                                                                                          | 1097 | 1168 | 0         | 106.5 | 90.1 | 94.8 | hypothetical protein ARALYDRAFT_916271 | gbpln | Arabidopsis lyrata   | AT4G10320.1   Symbols:   tRNA synthetase class I (L, L, M and V) family protein   chr4:6397526-6404509 REVERSE LENGTH=1190                                                                                                                                                                                                     | 1097 | 1190 | 0         | 108.5 | 81.6 | 90.2 |
| Rsa1.0_00200.1.g8361.t1 | ref XP_002868681.1  hypothetical protein ARALYDRAFT_916271 [Arabidopsis lyrata subsp. lyrata]   gi 297314517 gb EFH44940.1  hypothetical protein ARALYDRAFT_916271 [Arabidopsis lyrata subsp. lyrata]                                                                                          | 1104 | 1168 | 0         | 105.8 | 90.1 | 94.7 | hypothetical protein ARALYDRAFT_916271 | gbpln | Arabidopsis lyrata   | AT4G10320.1   Symbols:   tRNA synthetase class I (L, L, M and V) family protein   chr4:6397526-6404509 REVERSE LENGTH=1190                                                                                                                                                                                                     | 1104 | 1190 | 0         | 107.8 | 83.6 | 91.3 |
| Rsa1.0_00200.1.g8362.t1 | gb EOA18195.1  hypothetical protein CARUB_v10006678mg [Capsella rubella]                                                                                                                                                                                                                       | 435  | 417  | 1.00E-147 | 95.9  | 63.0 | 73.8 | hypothetical protein CARUB_v10006678mg | gbpln | Capsella rubella     | AT4G22280.1   Symbols:   F-box/RNI-like superfamily protein   chr4:11776054-11777517 REVERSE LENGTH=415                                                                                                                                                                                                                        | 435  | 415  | 1.00E-131 | 95.4  | 60.2 | 71.0 |
| Rsa1.0_00200.1.g8363.t1 | ref XP_002883939.1  hypothetical protein ARALYDRAFT_899844 [Arabidopsis lyrata subsp. lyrata]   gi 297329779 gb EFH60198.1  hypothetical protein ARALYDRAFT_899844 [Arabidopsis lyrata subsp. lyrata]                                                                                          | 161  | 1439 | 4.00E-12  | 893.8 | 23.6 | 24.8 | hypothetical protein ARALYDRAFT_899844 | gbpln | Arabidopsis lyrata   | AT2G42550.1   Symbols:   Protein kinase superfamily protein   chr2:17713196-17714230 FORWARD LENGTH=344                                                                                                                                                                                                                        | 161  | 344  | 9.00E-14  | 213.7 | 21.7 | 29.2 |
| Rsa1.0_00200.1.g8364.t1 | gb EOA16644.1  hypothetical protein CARUB_v10004819mg [Capsella rubella]                                                                                                                                                                                                                       | 444  | 442  | 0         | 99.5  | 91.4 | 95.3 | hypothetical protein CARUB_v10004819mg | gbpln | Capsella rubella     | AT4G22290.1   Symbols:   Ubiquitin-specific protease family C19-related protein   chr4:11783199-11785730 REVERSE LENGTH=445                                                                                                                                                                                                    | 444  | 445  | 0         | 100.2 | 90.8 | 94.4 |
| Rsa1.0_00200.1.g8365.t1 | gb EOA17233.1  hypothetical protein CARUB_v10005506mg [Capsella rubella]                                                                                                                                                                                                                       | 263  | 266  | 1.00E-119 | 101.1 | 83.7 | 88.2 | hypothetical protein CARUB_v10005506mg | gbpln | Capsella rubella     | AT4G22300.1   Symbols: SOBER1   carboxylesterases   chr4:11787560-11789252 REVERSE LENGTH=262                                                                                                                                                                                                                                  | 263  | 262  | 1.00E-120 | 99.6  | 81.7 | 88.2 |
| Rsa1.0_00200.1.g8366.t1 | ref XP_002869829.1  hypothetical protein ARALYDRAFT_492636 [Arabidopsis lyrata subsp. lyrata]   gi 297315665 gb EFH46088.1  hypothetical protein ARALYDRAFT_492636 [Arabidopsis lyrata subsp. lyrata]                                                                                          | 108  | 108  | 5.00E-51  | 100.0 | 88.0 | 95.4 | hypothetical protein ARALYDRAFT_492636 | gbpln | Arabidopsis lyrata   | AT4G22310.1   Symbols:   Uncharacterised protein family (UPF0041)   chr4:11791443-11792638 FORWARD LENGTH=108                                                                                                                                                                                                                  | 108  | 108  | 1.00E-53  | 100.0 | 87.0 | 95.4 |
| Rsa1.0_00200.1.g8367.t1 | ref XP_002867776.1  hypothetical protein ARALYDRAFT_492635 [Arabidopsis lyrata subsp. lyrata]   gi 297313612 gb EFH44035.1  hypothetical protein ARALYDRAFT_492635 [Arabidopsis lyrata subsp. lyrata]                                                                                          | 210  | 234  | 3.00E-53  | 111.4 | 66.2 | 81.0 | hypothetical protein ARALYDRAFT_492635 | gbpln | Arabidopsis lyrata   | AT4G22320.2   Symbols:   unknown protein; FUNCTIONS IN: molecular.function unknown; INVOLVED IN: biological_process unknown; EXPRESSED IN: 24 plant structures; EXPRESSED DURING: 14 growth stages; BEST Arabidopsis thaliana protein match is: unknown protein (TAIR:AT5G5210.1).   chr4:11793129-11794596 REVERSE LENGTH=237 | 210  | 237  | 5.00E-50  | 112.9 | 63.8 | 81.0 |
| Rsa1.0_00200.1.g8368.t1 | gb EOA17285.1  hypothetical protein CARUB_v10005555mg [Capsella rubella]                                                                                                                                                                                                                       | 255  | 255  | 1.00E-148 | 100.0 | 98.4 | 99.2 | hypothetical protein CARUB_v10005555mg | gbpln | Capsella rubella     | AT4G22330.1   Symbols: ATCES1   Alkaline phytyceramidase (aPHC)   chr4:11798483-11799549 FORWARD LENGTH=255                                                                                                                                                                                                                    | 255  | 255  | 1.00E-149 | 100.0 | 97.3 | 98.8 |

|                         |                                                                                                                                                                                                                                                                                                                                                                                |     |      |           |       |      |       |                                                                                                                                                                   |       |                      |                                                                                                                                                                                                                                                                                                                                                                                                                       |     |     |           |       |      |       |
|-------------------------|--------------------------------------------------------------------------------------------------------------------------------------------------------------------------------------------------------------------------------------------------------------------------------------------------------------------------------------------------------------------------------|-----|------|-----------|-------|------|-------|-------------------------------------------------------------------------------------------------------------------------------------------------------------------|-------|----------------------|-----------------------------------------------------------------------------------------------------------------------------------------------------------------------------------------------------------------------------------------------------------------------------------------------------------------------------------------------------------------------------------------------------------------------|-----|-----|-----------|-------|------|-------|
| Rsa1.0_00200.1.g8369.t1 | refXP_002867774.1 ubiquitin carboxyl-terminal hydrolase family protein [Arabidopsis lyrata subsp. lyrata] gi 297313610 gb EFH44033.1 ubiquitin carboxyl-terminal hydrolase family protein [Arabidopsis lyrata subsp. lyrata]                                                                                                                                                   | 491 | 506  | 0         | 103.1 | 92.9 | 95.9  | ubiquitin carboxyl-terminal hydrolase family protein                                                                                                              | gbpln | Arabidopsis lyrata   | AT4G22350.1   Symbols:   Ubiquitin C-terminal hydrolases superfamily protein   chr4:11804073-11806939 REVERSE LENGTH=510                                                                                                                                                                                                                                                                                              | 491 | 510 | 0         | 103.9 | 92.7 | 94.7  |
| Rsa1.0_00200.1.g8370.t1 | refXP_002869827.1 hypothetical protein ARALYDRAFT.492627 [Arabidopsis lyrata subsp. lyrata] gi 297315663 gb EFH46086.1 hypothetical protein ARALYDRAFT.492627 [Arabidopsis lyrata subsp. lyrata]                                                                                                                                                                               | 367 | 370  | 1.00E-147 | 100.8 | 82.6 | 88.0  | hypothetical protein ARALYDRAFT.492627                                                                                                                            | gbpln | Arabidopsis lyrata   | AT4G22360.1   Symbols:   SWIB complex BAF60b domain-containing protein   chr4:11807811-11809660 FORWARD LENGTH=385                                                                                                                                                                                                                                                                                                    | 367 | 385 | 1.00E-148 | 104.9 | 81.5 | 86.1  |
| Rsa1.0_00200.1.g8371.t1 | gb EOA17661.1 hypothetical protein CARUB_v10006030mg [Capsella rubella]                                                                                                                                                                                                                                                                                                        | 123 | 123  | 5.00E-40  | 100.0 | 73.2 | 79.7  | hypothetical protein CARUB_v10006030mg                                                                                                                            | gbpln | Capsella rubella     | AT4G22490.1   Symbols:   Bifunctional inhibitor/lipid-transfer protein/seed storage 2S albumin superfamily protein   chr4:11849933-11850295 REVERSE LENGTH=120                                                                                                                                                                                                                                                        | 123 | 120 | 4.00E-39  | 97.6  | 62.6 | 69.1  |
| Rsa1.0_00200.1.g8372.t1 | #                                                                                                                                                                                                                                                                                                                                                                              | #   | #    | #         | #     | #    | #     | -                                                                                                                                                                 | ----  | ----                 | #                                                                                                                                                                                                                                                                                                                                                                                                                     | #   | #   | #         | #     | #    | #     |
| Rsa1.0_00200.1.g8373.t1 | gb AAD21687.1 Strong similarity to gi 3600044 T12H20.12 protease homolog from Arabidopsis thaliana BAC gb AF080119 and is a member of the reverse transcriptase family PF 00078 [Arabidopsis thaliana]                                                                                                                                                                         | 264 | 1415 | 1.00E-102 | 536.0 | 68.2 | 79.2  | Strong similarity to gi 3600044 T12H20.12 protease homolog from Arabidopsis thaliana BAC gb AF080119 and is a member of the reverse transcriptase family PF 00078 | gbpln | Arabidopsis thaliana | AT5G48050.1   Symbols:   CONTAINS InterPro DOMAIN/s: Retrotransposon gag protein (InterPro:IPR005162); BEST Arabidopsis thaliana protein match is: unknown protein (TAIR:AT1G34070.1); Has 1807 Blast hits to 1807 proteins in 277 species: Archae - 0; Bacteria - 0; Metazoa - 736; Fungi - 347; Plants - 385; Viruses - 0; Other Eukaryotes - 339 (source: NCBI BLink).   chr3:19472661-19473770 REVERSE LENGTH=369 | 264 | 369 | 1.00E-18  | 139.8 | 19.3 | 36.4  |
| Rsa1.0_00200.1.g8374.t1 | refXP_002867764.1 oxysterol-binding family protein [Arabidopsis lyrata subsp. lyrata] gi 297313600 gb EFH44023.1 oxysterol-binding family protein [Arabidopsis lyrata subsp. lyrata]                                                                                                                                                                                           | 97  | 721  | 4.00E-25  | 743.3 | 60.8 | 64.9  | oxysterol-binding family protein                                                                                                                                  | gbpln | Arabidopsis lyrata   | AT4G22540.4   Symbols: ORP2A   OSBP(oxysterol binding protein)-related protein 2A   chr4:11860969-11863886 REVERSE LENGTH=510                                                                                                                                                                                                                                                                                         | 97  | 510 | 1.00E-27  | 525.8 | 59.8 | 64.9  |
| Rsa1.0_00200.1.g8375.t1 | gb EOA17503.1 hypothetical protein CARUB_v10005836mg [Capsella rubella]                                                                                                                                                                                                                                                                                                        | 183 | 183  | 8.00E-99  | 100.0 | 98.4 | 100.0 | hypothetical protein CARUB_v10005836mg                                                                                                                            | gbpln | Capsella rubella     | AT4G22570.1   Symbols: APT3   adenine phosphoribosyl transferase 3   chr4:11882310-11885250 REVERSE LENGTH=183                                                                                                                                                                                                                                                                                                        | 183 | 183 | 1.00E-101 | 100.0 | 98.4 | 100.0 |
| Rsa1.0_00200.1.g8376.t1 | ref NP_193991.1 uncharacterized protein [Arabidopsis thaliana] gi 3892715 emb CAA22165.1 hypothetical protein [Arabidopsis thaliana] gi 7269106 emb CAB79215.1 hypothetical protein [Arabidopsis thaliana] gi 93007376 gb ABE97191.1 hypothetical protein At4g22600 [Arabidopsis thaliana] gi 332659229 gb AEE84629.1 uncharacterized protein AT4G22600 [Arabidopsis thaliana] | 363 | 273  | 2.00E-37  | 75.2  | 27.3 | 39.1  | uncharacterized protein                                                                                                                                           | gbpln | Arabidopsis thaliana | AT4G22600.1   Symbols:   unknown protein; Has 26 Blast hits to 26 proteins in 8 species: Archae - 0; Bacteria - 0; Metazoa - 0; Fungi - 0; Plants - 26; Viruses - 0; Other Eukaryotes - 0 (source: NCBI BLink).   chr4:11900211-11901032 REVERSE LENGTH=273                                                                                                                                                           | 363 | 273 | 5.00E-40  | 75.2  | 27.3 | 39.1  |
| Rsa1.0_00200.1.g8377.t1 | ref NP_193991.1 uncharacterized protein [Arabidopsis thaliana] gi 3892715 emb CAA22165.1 hypothetical protein [Arabidopsis thaliana] gi 7269106 emb CAB79215.1 hypothetical protein [Arabidopsis thaliana] gi 93007376 gb ABE97191.1 hypothetical protein At4g22600 [Arabidopsis thaliana] gi 332659229 gb AEE84629.1 uncharacterized protein AT4G22600 [Arabidopsis thaliana] | 376 | 273  | 4.00E-20  | 72.6  | 19.1 | 25.5  | uncharacterized protein                                                                                                                                           | gbpln | Arabidopsis thaliana | AT4G22600.1   Symbols:   unknown protein; Has 26 Blast hits to 26 proteins in 8 species: Archae - 0; Bacteria - 0; Metazoa - 0; Fungi - 0; Plants - 26; Viruses - 0; Other Eukaryotes - 0 (source: NCBI BLink).   chr4:11900211-11901032 REVERSE LENGTH=273                                                                                                                                                           | 376 | 273 | 1.00E-22  | 72.6  | 19.1 | 25.5  |
| Rsa1.0_00200.1.g8378.t1 | gb EOA16835.1 hypothetical protein CARUB_v10005056mg [Capsella rubella]                                                                                                                                                                                                                                                                                                        | 359 | 377  | 0         | 105.0 | 91.6 | 95.5  | hypothetical protein CARUB_v10005056mg                                                                                                                            | gbpln | Capsella rubella     | AT4G22590.1   Symbols: TPPG   Haloacid dehalogenase-like hydrolase (HAD) superfamily protein   chr4:11893707-11895371 REVERSE LENGTH=377                                                                                                                                                                                                                                                                              | 359 | 377 | 0         | 105.0 | 90.3 | 95.3  |
| Rsa1.0_00200.1.g8379.t1 | gb EOA37612.1 hypothetical protein CARUB_v10012000mg [Capsella rubella]                                                                                                                                                                                                                                                                                                        | 510 | 562  | 1.00E-80  | 110.2 | 35.9 | 55.3  | hypothetical protein CARUB_v10012000mg                                                                                                                            | gbpln | Capsella rubella     | AT1G52950.1   Symbols:   Nucleic acid-binding, OB-fold-like protein chr1:19725483-19728007 FORWARD LENGTH=566                                                                                                                                                                                                                                                                                                         | 510 | 566 | 7.00E-81  | 111.0 | 34.1 | 55.7  |
| Rsa1.0_00200.1.g8380.t1 | dbj BAB11364.1 helicase [Arabidopsis thaliana]                                                                                                                                                                                                                                                                                                                                 | 561 | 1523 | 1.00E-112 | 271.5 | 34.9 | 44.6  | helicase                                                                                                                                                          | gbpln | Arabidopsis thaliana | #                                                                                                                                                                                                                                                                                                                                                                                                                     | #   | #   | #         | #     | #    | #     |



|                         |                                                                                                                                                                                                     |     |     |           |       |      |      |                                        |       |                    |                                                                                                                                                                                                                                                                                                                                                                                                                                                                                                                                                |     |     |           |       |      |      |
|-------------------------|-----------------------------------------------------------------------------------------------------------------------------------------------------------------------------------------------------|-----|-----|-----------|-------|------|------|----------------------------------------|-------|--------------------|------------------------------------------------------------------------------------------------------------------------------------------------------------------------------------------------------------------------------------------------------------------------------------------------------------------------------------------------------------------------------------------------------------------------------------------------------------------------------------------------------------------------------------------------|-----|-----|-----------|-------|------|------|
| Rsa1.0_00201.1.g8381.t1 | ref[XP_002882044.1] hypothetical protein ARALYDRAFT_904051 [Arabidopsis lyrata subsp. lyrata] gi 297327893 gb EFH58303.1] hypothetical protein ARALYDRAFT_904051 [Arabidopsis lyrata subsp. lyrata] | 255 | 265 | 1.00E-95  | 103.9 | 75.7 | 84.7 | hypothetical protein ARALYDRAFT_904051 | gbpln | Arabidopsis lyrata | AT2G45980.1   Symbols:   unknown protein; FUNCTIONS IN: molecular_function unknown; INVOLVED IN: biological_process unknown; LOCATED IN: cellular_component unknown; EXPRESSED IN: 25 plant structures; EXPRESSED DURING: 15 growth stages; BEST Arabidopsis thaliana protein match is: unknown protein (TAIR:AT4G00355.2); Has 93 Blast hits to 90 proteins in 15 species: Archae - 0; Bacteria - 0; Metazoa - 0; Fungi - 0; Plants - 93; Viruses - 0; Other Eukaryotes - 0 (source: NCBI BLink).   chr2:18917680-18918569 REVERSE LENGTH=256 | 255 | 256 | 4.00E-94  | 100.4 | 73.3 | 80.8 |
| Rsa1.0_00201.1.g8382.t1 | ref[XP_002880212.1] hypothetical protein ARALYDRAFT_904052 [Arabidopsis lyrata subsp. lyrata] gi 297327893 gb EFH58303.1] hypothetical protein ARALYDRAFT_904052 [Arabidopsis lyrata subsp. lyrata] | 269 | 268 | 1.00E-137 | 99.6  | 92.9 | 96.3 | hypothetical protein ARALYDRAFT_904052 | gbpln | Arabidopsis lyrata | AT2G45990.2   Symbols:   unknown protein; FUNCTIONS IN: molecular_function unknown; INVOLVED IN: biological_process unknown; LOCATED IN: chloroplast; EXPRESSED IN: 22 plant structures; EXPRESSED DURING: 13 growth stages; Has 312 Blast hits to 312 proteins in 90 species: Archae - 0; Bacteria - 131; Metazoa - 0; Fungi - 0; Plants - 67; Viruses - 0; Other Eukaryotes - 114 (source: NCBI BLink).   chr2:18919402-18921043 FORWARD LENGTH=268                                                                                          | 269 | 268 | 1.00E-137 | 99.6  | 91.4 | 95.2 |
| Rsa1.0_00201.1.g8383.t1 | ref[XP_002882045.1] hypothetical protein ARALYDRAFT_483745 [Arabidopsis lyrata subsp. lyrata] gi 297327884 gb EFH58304.1] hypothetical protein ARALYDRAFT_483745 [Arabidopsis lyrata subsp. lyrata] | 206 | 206 | 9.00E-86  | 100.0 | 77.7 | 86.4 | hypothetical protein ARALYDRAFT_483745 | gbpln | Arabidopsis lyrata | AT2G46000.1   Symbols:   FUNCTIONS IN: molecular_function unknown; INVOLVED IN: biological_process unknown; LOCATED IN: endomembrane system; EXPRESSED IN: 24 plant structures; EXPRESSED DURING: 15 growth stages; CONTAINS InterPro DOMAIN/s: Mesoderm development candidate 2 (InterPro:IPR019330); Has 31 Blast hits to 31 proteins in 13 species: Archae - 0; Bacteria - 0; Metazoa - 5; Fungi - 0; Plants - 26; Viruses - 0; Other Eukaryotes - 0 (source: NCBI BLink).   chr2:18921194-18922047 REVERSE LENGTH=208                      | 206 | 208 | 6.00E-76  | 101.0 | 79.1 | 85.9 |
| Rsa1.0_00201.1.g8384.t1 | gb EOA26811.1] hypothetical protein CARUB_v10022904mg [Capsella rubella]                                                                                                                            | 535 | 560 | 1.00E-179 | 104.7 | 64.3 | 77.0 | hypothetical protein CARUB_v10022904mg | gbpln | Capsella rubella   | AT2G46040.1   Symbols:   ARID/BRIGHT DNA-binding domain; ELM2 domain protein   chr2:18935684-18937807 REVERSE LENGTH=562                                                                                                                                                                                                                                                                                                                                                                                                                       | 535 | 562 | 1.00E-179 | 105.0 | 64.5 | 77.0 |
| Rsa1.0_00201.1.g8385.t1 | gb EOA28383.1] hypothetical protein CARUB_v10024588mg [Capsella rubella]                                                                                                                            | 559 | 583 | 0         | 104.3 | 77.3 | 87.1 | hypothetical protein CARUB_v10024588mg | gbpln | Capsella rubella   | AT2G46050.1   Symbols:   Pentatricopeptide repeat (PPR-like) superfamily protein   chr2:18939262-18941034 FORWARD LENGTH=590                                                                                                                                                                                                                                                                                                                                                                                                                   | 559 | 590 | 0         | 105.5 | 75.0 | 85.9 |
| Rsa1.0_00201.1.g8386.t1 | ref[XP_002882047.1] hypothetical protein ARALYDRAFT_483751 [Arabidopsis lyrata subsp. lyrata] gi 297327896 gb EFH58306.1] hypothetical protein ARALYDRAFT_483751 [Arabidopsis lyrata subsp. lyrata] | 812 | 808 | 0         | 99.5  | 86.8 | 93.3 | hypothetical protein ARALYDRAFT_483751 | gbpln | Arabidopsis lyrata | AT2G46060.1   Symbols:   transmembrane protein-related   chr2:18941355-18945000 REVERSE LENGTH=807                                                                                                                                                                                                                                                                                                                                                                                                                                             | 812 | 807 | 0         | 99.4  | 84.6 | 92.2 |
| Rsa1.0_00201.1.g8387.t1 | ref[XP_002882049.1] hypothetical protein ARALYDRAFT_322261 [Arabidopsis lyrata subsp. lyrata] gi 297327888 gb EFH58308.1] hypothetical protein ARALYDRAFT_322261 [Arabidopsis lyrata subsp. lyrata] | 372 | 406 | 0         | 109.1 | 94.9 | 96.8 | hypothetical protein ARALYDRAFT_322261 | gbpln | Arabidopsis lyrata | AT2G46070.1   Symbols:   ATPMK12, MAPK12, MPK12   mitogen-activated protein kinase 12   chr2:18946134-18947770 REVERSE LENGTH=372                                                                                                                                                                                                                                                                                                                                                                                                              | 372 | 372 | 0         | 100.0 | 91.9 | 93.5 |
| Rsa1.0_00201.1.g8388.t1 | ref[XP_002882050.1] hypothetical protein ARALYDRAFT_904061 [Arabidopsis lyrata subsp. lyrata] gi 297327889 gb EFH58309.1] hypothetical protein ARALYDRAFT_904061 [Arabidopsis lyrata subsp. lyrata] | 97  | 347 | 3.00E-32  | 357.7 | 69.1 | 75.3 | hypothetical protein ARALYDRAFT_904061 | gbpln | Arabidopsis lyrata | AT2G46080.1   Symbols:   CONTAINS InterPro DOMAIN/s: Protein BYPASS related (InterPro:IPR008511); BEST Arabidopsis thaliana protein match is: protein of unknown function (DUF793) (TAIR:AT1G01550.2); Has 153 Blast hits to 139 proteins in 20 species: Archae - 0; Bacteria - 2; Metazoa - 1; Fungi - 0; Plants - 150; Viruses - 0; Other Eukaryotes - 0 (source: NCBI BLink).   chr2:18948317-18949360 REVERSE LENGTH=347                                                                                                                   | 97  | 347 | 2.00E-34  | 357.7 | 68.0 | 74.2 |

|                         |                                                                                                                                                                                                                                                                                                                                                                                                                                                    |     |      |           |        |      |      |                                                              |       |                      |                                                                                                                                                                                                                                                                                                                                |     |      |           |        |      |      |
|-------------------------|----------------------------------------------------------------------------------------------------------------------------------------------------------------------------------------------------------------------------------------------------------------------------------------------------------------------------------------------------------------------------------------------------------------------------------------------------|-----|------|-----------|--------|------|------|--------------------------------------------------------------|-------|----------------------|--------------------------------------------------------------------------------------------------------------------------------------------------------------------------------------------------------------------------------------------------------------------------------------------------------------------------------|-----|------|-----------|--------|------|------|
| Rsa1.0_00201.1.g8389.t3 | refNP_182134.2  Nuclear transport factor 2 (NTF2) family protein [Arabidopsis thaliana] gi 48310194 gb AAT41772.1  At2g46100 [Arabidopsis thaliana] gi 50198900 gb AAT70469.1  At2g46100 [Arabidopsis thaliana] gi 330255549 gb AEC10643.1  Nuclear transport factor 2 (NTF2) family protein [Arabidopsis thaliana]                                                                                                                                | 246 | 240  | 1.00E-110 | 97.6   | 82.9 | 88.2 | Nuclear transport factor 2 (NTF2) family protein             | gbpln | Arabidopsis thaliana | AT2G46100.1   Symbols:   Nuclear transport factor 2 (NTF2) family protein   chr2:18953326-18954467 FORWARD LENGTH=240                                                                                                                                                                                                          | 246 | 240  | 1.00E-113 | 97.6   | 82.9 | 88.2 |
| Rsa1.0_00201.1.g8390.t1 | dbj BAA97156.1  unnamed protein product [Arabidopsis thaliana]                                                                                                                                                                                                                                                                                                                                                                                     | 293 | 329  | 7.00E-57  | 112.3  | 42.7 | 54.3 | unnamed protein product                                      | gbpln | Arabidopsis thaliana | AT2G34320.1   Symbols:   Polynucleotidyl transferase, ribonuclease H-like superfamily protein   chr2:14484959-14485837 FORWARD LENGTH=292                                                                                                                                                                                      | 293 | 292  | 6.00E-32  | 99.7   | 28.7 | 44.0 |
| Rsa1.0_00201.1.g8391.t1 | ref XP_004295930.1  PREDICTED: uncharacterized protein LOC101294643 [Fragaria vesca subsp. vesca]                                                                                                                                                                                                                                                                                                                                                  | 97  | 2166 | 8.00E-11  | 2233.0 | 45.4 | 52.6 | PREDICTED: uncharacterized protein LOC101294643              | gbpln | Fragaria vesca       | AT4G22970.2   Symbols: ESP   homolog of separase   chr4:12033703-12043572 REVERSE LENGTH=2177                                                                                                                                                                                                                                  | 97  | 2177 | 2.00E-12  | 2244.3 | 48.5 | 58.8 |
| Rsa1.0_00201.1.g8392.t1 | ref NP_198207.1  uncharacterized protein [Arabidopsis thaliana] gi 332006430 gb AED93813.1  uncharacterized protein AT5G28550 [Arabidopsis thaliana]                                                                                                                                                                                                                                                                                               | 147 | 286  | 3.00E-25  | 194.6  | 39.5 | 51.0 | uncharacterized protein                                      | gbpln | Arabidopsis thaliana | AT5G28550.1   Symbols:   BEST Arabidopsis thaliana protein match is: homolog of separase (TAIR:AT4G22970.2); Has 25 Blast hits to 25 proteins in 6 species: Archae - 0; Bacteria - 0; Metazoa - 0; Fungi - 0; Plants - 25; Viruses - 0; Other Eukaryotes - 0 (source: NCBI BLINK).   chr5:10557722-10559779 REVERSE LENGTH=286 | 147 | 286  | 9.00E-28  | 194.6  | 39.5 | 51.0 |
| Rsa1.0_00201.1.g8393.t1 | ref XP_002890219.1  hypothetical protein ARALYDRAFT_483759 [Arabidopsis lyrata subsp. lyrata] gi 297326058 gb EFH56478.1  hypothetical protein ARALYDRAFT_483759 [Arabidopsis lyrata subsp. lyrata]                                                                                                                                                                                                                                                | 166 | 166  | 2.00E-81  | 100.0  | 91.0 | 95.2 | hypothetical protein ARALYDRAFT_483759                       | gbpln | Arabidopsis lyrata   | AT2G46140.1   Symbols:   Late embryogenesis abundant protein   chr2:18959163-18960362 FORWARD LENGTH=166                                                                                                                                                                                                                       | 166 | 166  | 8.00E-84  | 100.0  | 91.0 | 95.2 |
| Rsa1.0_00201.1.g8394.t1 | ref NP_182138.1  late embryogenesis abundant hydroxyproline-rich glycoprotein [Arabidopsis thaliana] gi 3702334 gb AAC62891.1  hypothetical protein [Arabidopsis thaliana] gi 21805750 gb AAM76770.1  hypothetical protein [Arabidopsis thaliana] gi 50058829 gb AAT69159.1  hypothetical protein AT2g46150 [Arabidopsis thaliana] gi 330255555 gb AEC10649.1  late embryogenesis abundant hydroxyproline-rich glycoprotein [Arabidopsis thaliana] | 220 | 221  | 1.00E-95  | 100.5  | 79.1 | 87.7 | late embryogenesis abundant hydroxyproline-rich glycoprotein | gbpln | Arabidopsis thaliana | AT2G46150.1   Symbols:   Late embryogenesis abundant (LEA) hydroxyproline-rich glycoprotein family   chr2:18961424-18962089 FORWARD LENGTH=221                                                                                                                                                                                 | 220 | 221  | 4.00E-98  | 100.5  | 79.1 | 87.7 |
| Rsa1.0_00201.1.g8395.t1 | gb EOA27826.1  hypothetical protein CARUB_v10023982mg, partial [Capsella rubella]                                                                                                                                                                                                                                                                                                                                                                  | 211 | 233  | 3.00E-89  | 110.4  | 87.7 | 90.0 | hypothetical protein CARUB_v10023982mg, partial              | gbpln | Capsella rubella     | AT2G46160.1   Symbols:   RING/U-box superfamily protein   chr2:18963109-18963753 FORWARD LENGTH=214                                                                                                                                                                                                                            | 211 | 214  | 2.00E-86  | 101.4  | 86.7 | 89.1 |
| Rsa1.0_00201.1.g8396.t1 | gb EOA27748.1  hypothetical protein CARUB_v10023902mg [Capsella rubella]                                                                                                                                                                                                                                                                                                                                                                           | 263 | 255  | 1.00E-116 | 97.0   | 83.3 | 88.6 | hypothetical protein CARUB_v10023902mg                       | gbpln | Capsella rubella     | AT2G46170.1   Symbols:   Reticulon family protein   chr2:18965410-18966940 FORWARD LENGTH=255                                                                                                                                                                                                                                  | 263 | 255  | 1.00E-118 | 97.0   | 82.9 | 87.5 |
| Rsa1.0_00201.1.g8397.t1 | ref XP_002882054.1  hypothetical protein ARALYDRAFT_483767 [Arabidopsis lyrata subsp. lyrata] gi 297327893 gb EFH58313.1  hypothetical protein ARALYDRAFT_483767 [Arabidopsis lyrata subsp. lyrata]                                                                                                                                                                                                                                                | 387 | 385  | 0         | 99.5   | 81.7 | 89.7 | hypothetical protein ARALYDRAFT_483767                       | gbpln | Arabidopsis lyrata   | AT2G46200.2   Symbols:   unknown protein; Has 35333 Blast hits to 34131 proteins in 2444 species: Archae - 798; Bacteria - 22429; Metazoa - 974; Fungi - 991; Plants - 531; Viruses - 0; Other Eukaryotes - 9610 (source: NCBI BLINK).   chr2:18974864-18976646 REVERSE LENGTH=382                                             | 387 | 382  | 0         | 98.7   | 80.9 | 89.7 |
| Rsa1.0_00201.1.g8398.t1 | emb CAA11857.1  delta-8 sphingolipid desaturase [Brassica napus]                                                                                                                                                                                                                                                                                                                                                                                   | 449 | 449  | 0         | 100.0  | 96.9 | 98.7 | delta-8 sphingolipid desaturase                              | gbpln | Brassica napus       | AT2G46210.1   Symbols:   Fatty acid/sphingolipid desaturase   chr2:18977542-18978991 FORWARD LENGTH=449                                                                                                                                                                                                                        | 449 | 449  | 0         | 100.0  | 90.9 | 96.4 |
| Rsa1.0_00201.1.g8399.t1 | gb AAB03378.1  transcription factor [Brassica napus]                                                                                                                                                                                                                                                                                                                                                                                               | 377 | 376  | 0         | 99.7   | 91.8 | 95.5 | transcription factor                                         | gbpln | Brassica napus       | AT2G46270.1   Symbols: GBF3   G-box binding factor 3   chr2:19000859-19002901 FORWARD LENGTH=382                                                                                                                                                                                                                               | 377 | 382  | 1.00E-170 | 101.3  | 85.4 | 89.1 |
| Rsa1.0_00201.1.g8400.t1 | ref NP_182153.2  late embryogenesis abundant hydroxyproline-rich glycoprotein [Arabidopsis thaliana] gi 91806363 gb ABE65909.1  unknown [Arabidopsis thaliana] gi 330255579 gb AEC10673.1  late embryogenesis abundant hydroxyproline-rich glycoprotein [Arabidopsis thaliana]                                                                                                                                                                     | 254 | 252  | 6.00E-92  | 99.2   | 76.4 | 86.6 | late embryogenesis abundant hydroxyproline-rich glycoprotein | gbpln | Arabidopsis thaliana | AT2G46300.1   Symbols:   Late embryogenesis abundant (LEA) hydroxyproline-rich glycoprotein family   chr2:19008392-19009247 FORWARD LENGTH=252                                                                                                                                                                                 | 254 | 252  | 2.00E-94  | 99.2   | 76.4 | 86.6 |
| Rsa1.0_00201.1.g8401.t1 | gb EOA27821.1  hypothetical protein CARUB_v10023769mg [Capsella rubella]                                                                                                                                                                                                                                                                                                                                                                           | 301 | 290  | 1.00E-80  | 96.3   | 62.1 | 70.8 | hypothetical protein CARUB_v10023769mg                       | gbpln | Capsella rubella     | AT2G46310.1   Symbols: CRF5   cytokinin response factor 5   chr2:19011614-19012498 FORWARD LENGTH=294                                                                                                                                                                                                                          | 301 | 294  | 1.00E-82  | 97.7   | 64.5 | 72.4 |

|                         |                                                                                                                                                                                                                                                                                                                                                                                                                                                                                                                                                                                                                                                                                                                                                                                                                                                                                                                                                     |      |      |           |       |      |      |                                                 |       |                      |                                                                                                                                                                                                                                                                                                                                             |      |      |           |       |      |      |
|-------------------------|-----------------------------------------------------------------------------------------------------------------------------------------------------------------------------------------------------------------------------------------------------------------------------------------------------------------------------------------------------------------------------------------------------------------------------------------------------------------------------------------------------------------------------------------------------------------------------------------------------------------------------------------------------------------------------------------------------------------------------------------------------------------------------------------------------------------------------------------------------------------------------------------------------------------------------------------------------|------|------|-----------|-------|------|------|-------------------------------------------------|-------|----------------------|---------------------------------------------------------------------------------------------------------------------------------------------------------------------------------------------------------------------------------------------------------------------------------------------------------------------------------------------|------|------|-----------|-------|------|------|
| Rsa1.0_00201.1.g8402.t1 | gb EOA27354.1  hypothetical protein CARUB_v10023475mg [Capsella rubella]                                                                                                                                                                                                                                                                                                                                                                                                                                                                                                                                                                                                                                                                                                                                                                                                                                                                            | 378  | 367  | 1.00E-174 | 97.1  | 83.9 | 86.5 | hypothetical protein CARUB_v10023475mg          | gbpln | Capsella rubella     | AT2G46320.1   Symbols:   Mitochondrial substrate carrier family protein   chr2:19015998-19018020 FORWARD LENGTH=361                                                                                                                                                                                                                         | 378  | 361  | 1.00E-177 | 95.5  | 84.7 | 89.2 |
| Rsa1.0_00201.1.g8403.t1 | ref NP_566070.3  arabinogalactan protein 16 [Arabidopsis thaliana]   gi 297828351 ref XP_002882058.1  hypothetical protein ARALYDRAFT.483786 [Arabidopsis lyrata subsp. lyrata]   gi 75100629 sp O82337.1 AGP16_ARAT H RecName: Full=Arabinogalactan peptide 16; Short=AG-peptide 16; Flags: Precursor   gi 10680509 gb AAG24284.1 AF195897.1 arabinogalactan protein [Arabidopsis thaliana]   gi 15294170 gb AAK95262.1 AF410276.1 At2g46330/F11C10.2 [Arabidopsis thaliana]   gi 4559376 gb AAD23036.1  expressed protein [Arabidopsis thaliana]   gi 20197373 gb AAM15047.1  expressed protein [Arabidopsis thaliana]   gi 20453295 gb AAM19886.1  At2g46330/F11C10.2 [Arabidopsis thaliana]   gi 21553759 gb AAM62852.1  unknown [Arabidopsis thaliana]   gi 297327897 gb EFH58317.1  hypothetical protein ARALYDRAFT.483786 [Arabidopsis lyrata subsp. lyrata]   gi 330255586 gb AEC10680.1  arabinogalactan protein 16 [Arabidopsis thaliana] | 73   | 73   | 6.00E-29  | 100.0 | 93.2 | 95.9 | arabinogalactan protein 16                      | gbpln | Arabidopsis lyrata   | AT2G46330.1   Symbols: AGP16, ATAGP16   arabinogalactan protein 16   chr2:19018730-19019108 REVERSE LENGTH=73                                                                                                                                                                                                                               | 73   | 73   | 1.00E-31  | 100.0 | 93.2 | 95.9 |
| Rsa1.0_00201.1.g8404.t2 | ref NP_182157.2  protein SUPPRESSOR OF PHYA-105 1 [Arabidopsis thaliana]   gi 75337885 sp Q9SYX2.1 SPA1_ARATH RecName: Full=Protein SUPPRESSOR OF PHYA-105 1   gi 4809171 gb AAD30124.1 AF135455.1 phytochrome A suppressor spa1 [Arabidopsis thaliana]   gi 330255587 gb AEC10681.1  protein SUPPRESSOR OF PHYA-105 1 [Arabidopsis thaliana]                                                                                                                                                                                                                                                                                                                                                                                                                                                                                                                                                                                                       | 1052 | 1029 | 0         | 97.8  | 81.7 | 88.4 | protein SUPPRESSOR OF PHYA-105 1                | gbpln | Arabidopsis thaliana | AT2G46340.1   Symbols: SPA1   SPA (suppressor of phyA-105) protein family   chr2:19022572-19026821 REVERSE LENGTH=1029                                                                                                                                                                                                                      | 1052 | 1029 | 0         | 97.8  | 81.7 | 88.4 |
| Rsa1.0_00201.1.g8405.t1 | ref NP_188381.1  putative F-box/kelch-repeat protein [Arabidopsis thaliana]   gi 75274267 sp Q9LLP4.1 FBK60_ARAT H RecName: Full=Putative F-box/kelch-repeat protein At3g17540   gi 9294141 dbj BAB02043.1  unnamed protein product [Arabidopsis thaliana]   gi 332642445 gb AEE75966.1  putative F-box/kelch-repeat protein [Arabidopsis thaliana]                                                                                                                                                                                                                                                                                                                                                                                                                                                                                                                                                                                                 | 390  | 396  | 9.00E-77  | 101.5 | 47.4 | 63.8 | putative F-box/kelch-repeat protein             | gbpln | Arabidopsis thaliana | AT3G17540.1   Symbols:   F-box and associated interaction domains-containing protein   chr3:6002783-6003973 FORWARD LENGTH=396                                                                                                                                                                                                              | 390  | 396  | 2.00E-79  | 101.5 | 47.4 | 63.8 |
| Rsa1.0_00201.1.g8406.t1 | ref NP_182159.1  uncharacterized protein [Arabidopsis thaliana]   gi 4559379 gb AAD23039.1  hypothetical protein [Arabidopsis thaliana]   gi 18491281 gb AAL69465.1  At2g46360/F11C10.5 [Arabidopsis thaliana]   gi 330255588 gb AEC10682.1  uncharacterized protein AT2G46360 [Arabidopsis thaliana]                                                                                                                                                                                                                                                                                                                                                                                                                                                                                                                                                                                                                                               | 93   | 97   | 2.00E-28  | 104.3 | 78.5 | 87.1 | uncharacterized protein                         | gbpln | Arabidopsis thaliana | AT2G46360.1   Symbols:   unknown protein; Has 5 Blast hits to 5 proteins in 2 species: Archae - 0; Bacteria - 0; Metazoa - 0; Fungi - 0; Plants - 5; Viruses - 0; Other Eukaryotes - 0 (source: NCBI BLink).   chr2:19028507-19028800 FORWARD LENGTH=97                                                                                     | 93   | 97   | 3.00E-31  | 104.3 | 78.5 | 87.1 |
| Rsa1.0_00201.1.g8407.t1 | gb EOA26758.1  hypothetical protein CARUB_v10022844mg, partial [Capsella rubella]                                                                                                                                                                                                                                                                                                                                                                                                                                                                                                                                                                                                                                                                                                                                                                                                                                                                   | 579  | 605  | 0         | 104.5 | 90.2 | 95.5 | hypothetical protein CARUB_v10022844mg, partial | gbpln | Capsella rubella     | AT2G46370.4   Symbols: JAR1   Auxin-responsive GH3 family protein   chr2:19034233-19036369 FORWARD LENGTH=586                                                                                                                                                                                                                               | 579  | 586  | 0         | 101.2 | 90.0 | 95.7 |
| Rsa1.0_00201.1.g8408.t1 | gb EOA28441.1  hypothetical protein CARUB_v10024648mg [Capsella rubella]                                                                                                                                                                                                                                                                                                                                                                                                                                                                                                                                                                                                                                                                                                                                                                                                                                                                            | 125  | 133  | 1.00E-21  | 106.4 | 49.6 | 64.0 | hypothetical protein CARUB_v10024648mg          | gbpln | Capsella rubella     | AT2G46375.1   Symbols:   unknown protein; BEST Arabidopsis thaliana protein match is: unknown protein (TAIR:AT3G61660.1); Has 12 Blast hits to 12 proteins in 4 species: Archae - 0; Bacteria - 0; Metazoa - 0; Fungi - 0; Plants - 12; Viruses - 0; Other Eukaryotes - 0 (source: NCBI BLink).   chr2:19037958-19038329 FORWARD LENGTH=123 | 125  | 123  | 6.00E-23  | 98.4  | 44.0 | 54.4 |

|                         |                                                                                                                                                                                                                                                                                                                                                                                                                                                                                                                                                      |     |     |           |       |      |      |                                                 |       |                      |                                                                                                                                                                                                                                                                                                                                             |     |     |           |       |      |      |
|-------------------------|------------------------------------------------------------------------------------------------------------------------------------------------------------------------------------------------------------------------------------------------------------------------------------------------------------------------------------------------------------------------------------------------------------------------------------------------------------------------------------------------------------------------------------------------------|-----|-----|-----------|-------|------|------|-------------------------------------------------|-------|----------------------|---------------------------------------------------------------------------------------------------------------------------------------------------------------------------------------------------------------------------------------------------------------------------------------------------------------------------------------------|-----|-----|-----------|-------|------|------|
| Rsa1.0_00201.1.g8409.t2 | refNP_182161.3  uncharacterized protein [Arabidopsis thaliana] gi 110741891 dbj BAE98887.1  hypothetical protein [Arabidopsis thaliana] gi 330255594 gb AEC10688.1  uncharacterized protein AT2G46380 [Arabidopsis thaliana]                                                                                                                                                                                                                                                                                                                         | 679 | 768 | 0         | 113.1 | 70.4 | 79.1 | uncharacterized protein                         | gbpln | Arabidopsis thaliana | AT2G46380.1   Symbols:   Protein of unknown function (DUF3133)   chr2:19039377-19042171 FORWARD LENGTH=768                                                                                                                                                                                                                                  | 679 | 768 | 0         | 113.1 | 70.4 | 79.1 |
| Rsa1.0_00201.1.g8410.t1 | gb ADM32893.1  WRKY46 [Brassica rapa subsp. chinensis]                                                                                                                                                                                                                                                                                                                                                                                                                                                                                               | 300 | 285 | 1.00E-128 | 95.0  | 81.7 | 85.7 | WRKY46                                          | gbpln | Brassica rapa        | AT2G46400.1   Symbols: WRKY46. ATWRKY46   WRKY DNA-binding protein 46   chr2:19043676-19044754 REVERSE LENGTH=295                                                                                                                                                                                                                           | 300 | 295 | 1.00E-116 | 98.3  | 73.7 | 82.7 |
| Rsa1.0_00201.1.g8411.t1 | refNP_182164.1  transcription factor CPC [Arabidopsis thaliana] gi 75317955 sp Q22059.1 CPC.ARATH RecName: Full=Transcription factor CPC; AltName: Full=Protein CAPRICE gi 2346966 dbj BAA21917.1  CPC [Arabidopsis thaliana] gi 4559383 gb AAD23043.1  putative MYB family transcription factor [Arabidopsis thaliana] gi 18491257 gb AAL69453.1  At2g46410.F11C10.10 [Arabidopsis thaliana] gi 41618962 gb AAS09991.1  MYB transcription factor [Arabidopsis thaliana] gi 330255597 gb AEC10691.1  transcription factor CPC [Arabidopsis thaliana] | 85  | 94  | 6.00E-39  | 110.6 | 94.1 | 97.6 | transcription factor CPC                        | gbpln | Arabidopsis thaliana | AT2G46410.1   Symbols: CPC   Homeodomain-like superfamily protein   chr2:19049315-19050185 REVERSE LENGTH=94                                                                                                                                                                                                                                | 85  | 94  | 1.00E-41  | 110.6 | 94.1 | 97.6 |
| Rsa1.0_00201.1.g8412.t2 | refNP_566074.1  uncharacterized protein [Arabidopsis thaliana] gi 1545051 gb AAK96548.1  At2g46420.F11C10.11 [Arabidopsis thaliana] gi 20197824 gb AAD23044.2  expressed protein [Arabidopsis thaliana] gi 27363256 gb AAO11547.1  At2g46420.F11C10.11 [Arabidopsis thaliana] gi 330255598 gb AEC10692.1  uncharacterized protein AT2G46420 [Arabidopsis thaliana]                                                                                                                                                                                   | 344 | 363 | 1.00E-175 | 105.5 | 90.4 | 94.5 | uncharacterized protein                         | gbpln | Arabidopsis thaliana | AT2G46420.1   Symbols:   Plant protein 1589 of unknown function   chr2:19054891-19056830 FORWARD LENGTH=363                                                                                                                                                                                                                                 | 344 | 363 | 1.00E-177 | 105.5 | 90.4 | 94.5 |
| Rsa1.0_00201.1.g8413.t1 | refXP_002880240.1  ATCNGC3 [Arabidopsis lyrata subsp. lyrata] gi 297326079 gb EFH56499.1  ATCNGC3 [Arabidopsis lyrata subsp. lyrata]                                                                                                                                                                                                                                                                                                                                                                                                                 | 727 | 704 | 0         | 96.8  | 82.8 | 88.6 | ATCNGC3                                         | gbpln | Arabidopsis lyrata   | AT2G46430.2   Symbols: ATCNGC3, CNGC3, CNGC3.C   cyclic nucleotide gated channel 3   chr2:19058472-19061273 FORWARD LENGTH=706                                                                                                                                                                                                              | 727 | 706 | 0         | 97.1  | 81.8 | 88.0 |
| Rsa1.0_00201.1.g8414.t3 | refNP_850455.4  OxaA/YidC-like membrane insertion protein [Arabidopsis thaliana] gi 330255606 gb AEC10700.1  OxaA/YidC-like membrane insertion protein [Arabidopsis thaliana]                                                                                                                                                                                                                                                                                                                                                                        | 395 | 186 | 2.00E-34  | 47.1  | 25.1 | 30.1 | OxaA/YidC-like membrane insertion protein       | gbpln | Arabidopsis thaliana | AT2G46455.1   Symbols:   OxaA/YidC-like membrane insertion protein   chr2:19069844-19070833 REVERSE LENGTH=186                                                                                                                                                                                                                              | 395 | 186 | 5.00E-37  | 47.1  | 25.1 | 30.1 |
| Rsa1.0_00201.1.g8415.t2 | gb EOA29241.1  hypothetical protein CARUB_v10025515mg. partial [Capsella rubella]                                                                                                                                                                                                                                                                                                                                                                                                                                                                    | 677 | 646 | 0         | 95.4  | 64.0 | 72.8 | hypothetical protein CARUB_v10025515mg. partial | gbpln | Capsella rubella     | AT2G46480.1   Symbols: GAUT2, LGT2   galacturonosyltransferase 2   chr2:19076405-19078386 REVERSE LENGTH=528                                                                                                                                                                                                                                | 677 | 528 | 0         | 78.0  | 59.5 | 67.8 |
| Rsa1.0_00201.1.g8416.t1 | refNP_182172.1  uncharacterized protein [Arabidopsis thaliana] gi 4415930 gb AAD20160.1  unknown protein [Arabidopsis thaliana] gi 17979199 gb AAL49838.1  unknown protein [Arabidopsis thaliana] gi 20197822 gb AAM15264.1  unknown protein [Arabidopsis thaliana] gi 21436075 gb AAM51238.1  unknown protein [Arabidopsis thaliana] gi 330255610 gb AEC10704.1  uncharacterized protein AT2G46490 [Arabidopsis thaliana]                                                                                                                           | 129 | 134 | 1.00E-38  | 103.9 | 73.6 | 82.2 | uncharacterized protein                         | gbpln | Arabidopsis thaliana | AT2G46490.1   Symbols:   unknown protein; BEST Arabidopsis thaliana protein match is: unknown protein (TAIR:AT5G35110.1); Has 34 Blast hits to 34 proteins in 7 species: Archae - 0; Bacteria - 0; Metazoa - 1; Fungi - 0; Plants - 33; Viruses - 0; Other Eukaryotes - 0 (source: NCBI BLink).   chr2:19079457-19079861 FORWARD LENGTH=134 | 129 | 134 | 2.00E-41  | 103.9 | 73.6 | 82.2 |
| Rsa1.0_00201.1.g8417.t1 | refXP_002882072.1  hypothetical protein ARALYDRAFT_904117 [Arabidopsis lyrata subsp. lyrata] gi 297327911 gb EFH58331.1  hypothetical protein ARALYDRAFT_904117 [Arabidopsis lyrata subsp. lyrata]                                                                                                                                                                                                                                                                                                                                                   | 142 | 148 | 2.00E-46  | 104.2 | 71.1 | 87.3 | hypothetical protein ARALYDRAFT_904117          | gbpln | Arabidopsis lyrata   | AT2G46505.1   Symbols: SDH4   succinate dehydrogenase subunit 4   chr2:19090013-19090468 REVERSE LENGTH=151                                                                                                                                                                                                                                 | 142 | 151 | 2.00E-46  | 106.3 | 64.8 | 86.6 |
| Rsa1.0_00201.1.g8418.t1 | refXP_002882073.1  basic helix-loop-helix family protein [Arabidopsis lyrata subsp. lyrata] gi 297327912 gb EFH58332.1  basic helix-loop-helix family protein [Arabidopsis lyrata subsp. lyrata]                                                                                                                                                                                                                                                                                                                                                     | 490 | 563 | 0         | 114.9 | 78.0 | 86.7 | basic helix-loop-helix family protein           | gbpln | Arabidopsis lyrata   | AT2G46510.1   Symbols: ATAIB, AIB   ABA-inducible BHLH-type transcription factor   chr2:19091187-19092887 REVERSE LENGTH=566                                                                                                                                                                                                                | 490 | 566 | 1.00E-122 | 115.5 | 42.2 | 47.8 |

|                         |                                                                                                                                                                                                                                                                                                                                                                                                                               |      |      |           |       |      |      |                                                         |       |                      |                                                                                                                                                                                                                                                                                                                                                                                                                                                            |      |      |           |       |      |      |
|-------------------------|-------------------------------------------------------------------------------------------------------------------------------------------------------------------------------------------------------------------------------------------------------------------------------------------------------------------------------------------------------------------------------------------------------------------------------|------|------|-----------|-------|------|------|---------------------------------------------------------|-------|----------------------|------------------------------------------------------------------------------------------------------------------------------------------------------------------------------------------------------------------------------------------------------------------------------------------------------------------------------------------------------------------------------------------------------------------------------------------------------------|------|------|-----------|-------|------|------|
| Rsa1.0_00201.1.g8419.t1 | refXP_002880249.1  hypothetical protein ARALYDRAFT_904119 [Arabidopsis lyrata subsp. lyrata] gi 297326088 gb EFH56508.1                                                                                                                                                                                                                                                                                                       | 962  | 972  | 0         | 101.0 | 86.5 | 94.4 | hypothetical protein ARALYDRAFT_904119                  | gbpln | Arabidopsis lyrata   | AT2G46520.1   Symbols:   cellular apoptosis susceptibility protein, putative / importin-alpha re-exporter, putative   chr2:19096867-19099785 FORWARD LENGTH=972                                                                                                                                                                                                                                                                                            | 962  | 972  | 0         | 101.0 | 84.7 | 92.5 |
| Rsa1.0_00201.1.g8420.t1 | gb AAC35532.1  contains similarity to proteases [Arabidopsis thaliana]                                                                                                                                                                                                                                                                                                                                                        | 1105 | 1392 | 0         | 126.0 | 44.3 | 54.6 | contains similarity to proteases                        | gbpln | Arabidopsis thaliana | ATMG00810.1   Symbols: ORF240B   DNA/RNA polymerases superfamily protein   chrM:227709-228431 REVERSE LENGTH=240                                                                                                                                                                                                                                                                                                                                           | 1105 | 240  | 2.00E-55  | 21.7  | 9.0  | 11.4 |
| Rsa1.0_00201.1.g8421.t2 | gb AFD01310.1  auxin response factor 11 [Brassica rapa subsp. pekinensis]                                                                                                                                                                                                                                                                                                                                                     | 359  | 584  | 1.00E-109 | 162.7 | 55.2 | 56.5 | auxin response factor 11                                | gbpln | Brassica rapa        | AT2G46530.1   Symbols: ARF11   auxin response factor 11   chr2:19104993-19108029 FORWARD LENGTH=601                                                                                                                                                                                                                                                                                                                                                        | 359  | 601  | 1.00E-104 | 167.4 | 53.2 | 55.4 |
| Rsa1.0_00201.1.g8422.t1 | gb EOA29267.1  hypothetical protein CARUB_v10025541mg [Capsella rubella]                                                                                                                                                                                                                                                                                                                                                      | 122  | 174  | 1.00E-30  | 142.6 | 73.8 | 82.0 | hypothetical protein CARUB_v10025541mg                  | gbpln | Capsella rubella     | AT2G46535.1   Symbols:   unknown protein; CONTAINS InterPro DOMAIN/s: Protein of unknown function DUF688 (InterPro:IPR007789); BEST Arabidopsis thaliana protein match is: Protein of unknown function (DUF688) (TAIR:AT3G61840.1); Has 48 Blast hits to 48 proteins in 8 species: Archae - 0; Bacteria - 0; Metazoa - 0; Fungi - 0; Plants - 48; Viruses - 0; Other Eukaryotes - 0 (source: NCBI BLink).   chr2:19109698-19110320 FORWARD LENGTH=175      | 122  | 175  | 1.00E-29  | 143.4 | 71.3 | 77.9 |
| Rsa1.0_00201.1.g8423.t1 | refNP_566079.1  uncharacterized protein [Arabidopsis thaliana] gi 15215610 gb AAK91350.1  F11C10.23/F11C10.23 [Arabidopsis thaliana] gi 20197774 gb AAD20165.2  expressed protein [Arabidopsis thaliana] gi 20334882 gb AAM16197.1  At2g46540/F11C10.23 [Arabidopsis thaliana] gi 21554416 gb AAM63521.1  unknown [Arabidopsis thaliana] gi 330255624 gb AEC10718.1  uncharacterized protein AT2G46540 [Arabidopsis thaliana] | 65   | 65   | 5.00E-27  | 100.0 | 96.9 | 98.5 | uncharacterized protein                                 | gbpln | Arabidopsis thaliana | AT2G46540.1   Symbols:   unknown protein; FUNCTIONS IN: molecular_function unknown; INVOLVED IN: biological_process unknown; LOCATED IN: mitochondrion, membrane; EXPRESSED IN: 25 plant structures; EXPRESSED DURING: 16 growth stages; Has 42 Blast hits to 42 proteins in 11 species: Archae - 0; Bacteria - 0; Metazoa - 0; Fungi - 0; Plants - 42; Viruses - 0; Other Eukaryotes - 0 (source: NCBI BLink).   chr2:19110687-19111681 REVERSE LENGTH=65 | 65   | 65   | 7.00E-30  | 100.0 | 96.9 | 98.5 |
| Rsa1.0_00201.1.g8424.t2 | #                                                                                                                                                                                                                                                                                                                                                                                                                             | #    | #    | #         | #     | #    | #    | -                                                       | ----  | ----                 | #                                                                                                                                                                                                                                                                                                                                                                                                                                                          | #    | #    | #         | #     | #    | #    |
| Rsa1.0_00201.1.g8425.t1 | gb AAM98127.1  expressed protein [Arabidopsis thaliana] gi 25083763 gb AAN72116.1  expressed protein [Arabidopsis thaliana]                                                                                                                                                                                                                                                                                                   | 379  | 397  | 1.00E-144 | 104.7 | 76.5 | 82.6 | expressed protein                                       | gbpln | Arabidopsis thaliana | AT2G46550.1   Symbols:   unknown protein; BEST Arabidopsis thaliana protein match is: unknown protein (TAIR:AT1G01240.3). Has 72 Blast hits to 68 proteins in 13 species: Archae - 0; Bacteria - 0; Metazoa - 1; Fungi - 0; Plants - 71; Viruses - 0; Other Eukaryotes - 0 (source: NCBI BLink).   chr2:19112264-19113457 REVERSE LENGTH=397                                                                                                               | 379  | 397  | 2.33E-156 | 104.7 | 76.5 | 82.3 |
| Rsa1.0_00201.1.g8426.t1 | refNP_182179.3  transducin family protein / WD-40 repeat family protein [Arabidopsis thaliana] gi 330255627 gb AEC10721.1  transducin family protein / WD-40 repeat family protein [Arabidopsis thaliana]                                                                                                                                                                                                                     | 2445 | 2513 | 0         | 102.8 | 82.2 | 89.0 | transducin family protein / WD-40 repeat family protein | gbpln | Arabidopsis thaliana | AT2G46560.1   Symbols:   transducin family protein / WD-40 repeat family protein   chr2:19115570-19125856 REVERSE LENGTH=2513                                                                                                                                                                                                                                                                                                                              | 2445 | 2513 | 0         | 102.8 | 82.2 | 89.0 |
| Rsa1.0_00201.1.g8427.t1 | #                                                                                                                                                                                                                                                                                                                                                                                                                             | #    | #    | #         | #     | #    | #    | -                                                       | ----  | ----                 | #                                                                                                                                                                                                                                                                                                                                                                                                                                                          | #    | #    | #         | #     | #    | #    |
| Rsa1.0_00202.1.g8428.t1 | refNP_189304.2  protein kinase family protein [Arabidopsis thaliana] gi 332643680 gb AEE77201.1  protein kinase family protein [Arabidopsis thaliana]                                                                                                                                                                                                                                                                         | 375  | 380  | 1.00E-176 | 101.3 | 83.7 | 90.4 | protein kinase family protein                           | gbpln | Arabidopsis thaliana | AT3G26700.1   Symbols:   Protein kinase superfamily protein   chr3:9810669-9812356 FORWARD LENGTH=380                                                                                                                                                                                                                                                                                                                                                      | 375  | 380  | 1.00E-179 | 101.3 | 83.7 | 90.4 |
| Rsa1.0_00202.1.g8429.t1 | refXP_002875334.1  hypothetical protein ARALYDRAFT_484443 [Arabidopsis lyrata subsp. lyrata] gi 297321172 gb EFH51593.1  hypothetical protein ARALYDRAFT_484443 [Arabidopsis lyrata subsp. lyrata]                                                                                                                                                                                                                            | 267  | 267  | 1.00E-135 | 100.0 | 91.4 | 94.0 | hypothetical protein ARALYDRAFT_484443                  | gbpln | Arabidopsis lyrata   | AT3G26710.1   Symbols: CCB1   cofactor assembly of complex C   chr3:9813550-9814606 FORWARD LENGTH=267                                                                                                                                                                                                                                                                                                                                                     | 267  | 267  | 1.00E-136 | 100.0 | 90.3 | 94.4 |
| Rsa1.0_00202.1.g8430.t1 | refNP_189307.2  RING/U-box domain-containing protein [Arabidopsis thaliana] gi 11994306 db BAB01736.1  unnamed protein product [Arabidopsis thaliana] gi 18377743 gb AAL67021.1  putative RING zinc finger protein [Arabidopsis thaliana] gi 27754738 gb AAO22812.1  putative RING zinc finger protein [Arabidopsis thaliana] gi 332643684 gb AEE77205.1  RING/U-box domain-containing protein [Arabidopsis thaliana]         | 759  | 772  | 0         | 101.7 | 79.2 | 84.6 | RING/U-box domain-containing protein                    | gbpln | Arabidopsis thaliana | AT3G26730.1   Symbols:   RING/U-box superfamily protein   chr3:9823770-9827270 FORWARD LENGTH=772                                                                                                                                                                                                                                                                                                                                                          | 759  | 772  | 0         | 101.7 | 79.2 | 84.6 |

|                         |                                                                                                                                                                                                                                                                                                                                                                                                                                                                                                       |     |     |           |       |      |      |                                                                 |       |                      |                                                                                                                              |     |     |           |       |      |      |
|-------------------------|-------------------------------------------------------------------------------------------------------------------------------------------------------------------------------------------------------------------------------------------------------------------------------------------------------------------------------------------------------------------------------------------------------------------------------------------------------------------------------------------------------|-----|-----|-----------|-------|------|------|-----------------------------------------------------------------|-------|----------------------|------------------------------------------------------------------------------------------------------------------------------|-----|-----|-----------|-------|------|------|
| Rsa1.0_00202.1.g8431.t1 | gb ABV89628.1  light regulated protein-like protein [Brassica rapa]                                                                                                                                                                                                                                                                                                                                                                                                                                   | 142 | 138 | 7.00E-52  | 97.2  | 84.5 | 88.0 | light regulated protein-like protein                            | gbpln | Brassica rapa        | AT3G26740.1   Symbols: GCL   CCR-like   chr3:9827868-9828461 FORWARD LENGTH=141                                              | 142 | 141 | 1.00E-40  | 99.3  | 68.3 | 76.8 |
| Rsa1.0_00202.1.g8432.t1 | ref XP_002875343.1  auxin signaling F-box 2 [Arabidopsis lyrata subsp. lyrata] gi 297321181 gb EFH51602.1  auxin signaling F-box 2 [Arabidopsis lyrata subsp. lyrata]                                                                                                                                                                                                                                                                                                                                 | 575 | 575 | 0         | 100.0 | 92.2 | 97.6 | auxin signaling F-box 2                                         | gbpln | Arabidopsis lyrata   | AT3G26810.1   Symbols: AFB2   auxin signaling F-box 2   chr3:9868342-9870464 FORWARD LENGTH=575                              | 575 | 575 | 0         | 100.0 | 92.0 | 97.4 |
| Rsa1.0_00202.1.g8433.t1 | ref XP_002512872.1  translocon-associated protein, beta subunit precursor, putative [Ricinus communis] gi 223547883 gb EEF49375.1  translocon-associated protein, beta subunit precursor, putative [Ricinus communis]                                                                                                                                                                                                                                                                                 | 237 | 208 | 2.00E-55  | 87.8  | 43.9 | 59.5 | translocon-associated protein, beta subunit precursor, putative | gbpln | Ricinus communis     | AT5G14030.4   Symbols:   translocon-associated protein beta (TRAPB) family protein   chr5:4526878-4528253 FORWARD LENGTH=195 | 237 | 195 | 6.00E-54  | 82.3  | 44.3 | 59.5 |
| Rsa1.0_00202.1.g8434.t1 | #                                                                                                                                                                                                                                                                                                                                                                                                                                                                                                     | #   | #   | #         | #     | #    | #    | -                                                               | ----  | ----                 | #                                                                                                                            | #   | #   | #         | #     | #    | #    |
| Rsa1.0_00202.1.g8435.t1 | ref NP_566801.1  acyltransferase-like protein [Arabidopsis thaliana] gi 75335577 sp Q9LW26.1 Y3684_ARATH RecName: Full=Acyltransferase-like protein At3g26840, chloroplastic; Flags: Precursor gi 13430466 gb AAK25855.1 AF361045.1 unknown protein [Arabidopsis thaliana] gi 9279674 db BAB01231.1  unnamed protein product [Arabidopsis thaliana] gi 15810663 gb AAL07256.1  unknown protein [Arabidopsis thaliana] gi 332643700 gb AEE77221.1  acyltransferase-like protein [Arabidopsis thaliana] | 671 | 701 | 0         | 104.5 | 78.1 | 87.0 | acyltransferase-like protein                                    | gbpln | Arabidopsis thaliana | AT3G26840.1   Symbols:   Esterase/lipase/thioesterase family protein   chr3:9892808-9896154 FORWARD LENGTH=701               | 671 | 701 | 0         | 104.5 | 78.1 | 87.0 |
| Rsa1.0_00202.1.g8436.t1 | #                                                                                                                                                                                                                                                                                                                                                                                                                                                                                                     | #   | #   | #         | #     | #    | #    | -                                                               | ----  | ----                 | #                                                                                                                            | #   | #   | #         | #     | #    | #    |
| Rsa1.0_00202.1.g8437.t1 | #                                                                                                                                                                                                                                                                                                                                                                                                                                                                                                     | #   | #   | #         | #     | #    | #    | -                                                               | ----  | ----                 | #                                                                                                                            | #   | #   | #         | #     | #    | #    |
| Rsa1.0_00202.1.g8438.t1 | ref XP_002875348.1  esterase/lipase/thioesterase family protein [Arabidopsis lyrata subsp. lyrata] gi 297321186 gb EFH51607.1  esterase/lipase/thioesterase family protein [Arabidopsis lyrata subsp. lyrata]                                                                                                                                                                                                                                                                                         | 720 | 695 | 0         | 96.5  | 71.9 | 82.9 | esterase/lipase/thioesterase family protein                     | gbpln | Arabidopsis lyrata   | AT3G26840.1   Symbols:   Esterase/lipase/thioesterase family protein   chr3:9892808-9896154 FORWARD LENGTH=701               | 720 | 701 | 0         | 97.4  | 71.9 | 82.5 |
| Rsa1.0_00202.1.g8439.t1 | ref XP_002875348.1  esterase/lipase/thioesterase family protein [Arabidopsis lyrata subsp. lyrata] gi 297321186 gb EFH51607.1  esterase/lipase/thioesterase family protein [Arabidopsis lyrata subsp. lyrata]                                                                                                                                                                                                                                                                                         | 659 | 695 | 0         | 105.5 | 73.4 | 84.7 | esterase/lipase/thioesterase family protein                     | gbpln | Arabidopsis lyrata   | AT3G26840.1   Symbols:   Esterase/lipase/thioesterase family protein   chr3:9892808-9896154 FORWARD LENGTH=701               | 659 | 701 | 0         | 106.4 | 73.6 | 84.1 |
| Rsa1.0_00202.1.g8440.t2 | ref XP_002875348.1  esterase/lipase/thioesterase family protein [Arabidopsis lyrata subsp. lyrata] gi 297321186 gb EFH51607.1  esterase/lipase/thioesterase family protein [Arabidopsis lyrata subsp. lyrata]                                                                                                                                                                                                                                                                                         | 538 | 695 | 0         | 129.2 | 73.2 | 84.0 | esterase/lipase/thioesterase family protein                     | gbpln | Arabidopsis lyrata   | AT3G26840.1   Symbols:   Esterase/lipase/thioesterase family protein   chr3:9892808-9896154 FORWARD LENGTH=701               | 538 | 701 | 0         | 130.3 | 73.2 | 83.6 |
| Rsa1.0_00202.1.g8441.t2 | ref XP_002877001.1  hydroxyproline-rich glycoprotein family protein [Arabidopsis lyrata subsp. lyrata] gi 297322839 gb EFH53260.1  hydroxyproline-rich glycoprotein family protein [Arabidopsis lyrata subsp. lyrata]                                                                                                                                                                                                                                                                                 | 785 | 616 | 0         | 78.5  | 53.0 | 56.9 | hydroxyproline-rich glycoprotein family protein                 | gbpln | Arabidopsis lyrata   | AT3G26910.1   Symbols:   hydroxyproline-rich glycoprotein family protein   chr3:9915338-9918511 REVERSE LENGTH=608           | 785 | 608 | 0         | 77.5  | 51.7 | 56.3 |
| Rsa1.0_00202.1.g8442.t1 | #                                                                                                                                                                                                                                                                                                                                                                                                                                                                                                     | #   | #   | #         | #     | #    | #    | -                                                               | ----  | ----                 | #                                                                                                                            | #   | #   | #         | #     | #    | #    |
| Rsa1.0_00202.1.g8443.t1 | ref XP_002877005.1  dsRNA-binding protein 3 [Arabidopsis lyrata subsp. lyrata] gi 297322843 gb EFH53264.1  dsRNA-binding protein 3 [Arabidopsis lyrata subsp. lyrata]                                                                                                                                                                                                                                                                                                                                 | 378 | 356 | 1.00E-132 | 94.2  | 69.8 | 75.4 | dsRNA-binding protein 3                                         | gbpln | Arabidopsis lyrata   | AT3G26932.2   Symbols: DRB3   dsRNA-binding protein 3   chr3:9930460-9931714 REVERSE LENGTH=359                              | 378 | 359 | 1.00E-130 | 95.0  | 67.5 | 73.0 |
| Rsa1.0_00202.1.g8444.t2 | gb EOA24039.1  hypothetical protein CARUB_v10017257mg [Capsella rubella]                                                                                                                                                                                                                                                                                                                                                                                                                              | 445 | 443 | 0         | 99.6  | 93.0 | 96.4 | hypothetical protein CARUB_v10017257mg                          | gbpln | Capsella rubella     | AT3G26935.1   Symbols:   DHHC-type zinc finger family protein   chr3:9933001-9935218 REVERSE LENGTH=443                      | 445 | 443 | 0         | 99.6  | 93.3 | 96.2 |
| Rsa1.0_00202.1.g8445.t1 | db BAC67214.1  protein kinase CDG1 [Arabidopsis thaliana]                                                                                                                                                                                                                                                                                                                                                                                                                                             | 420 | 431 | 1.00E-103 | 102.6 | 49.3 | 61.0 | protein kinase CDG1                                             | gbpln | Arabidopsis thaliana | AT3G26940.1   Symbols: CDG1   Protein kinase superfamily protein   chr3:9936707-9938936 REVERSE LENGTH=432                   | 420 | 432 | 1.00E-106 | 102.9 | 49.3 | 61.0 |
| Rsa1.0_00202.1.g8446.t1 | ref XP_002890104.1  F9L1.39 [Arabidopsis lyrata subsp. lyrata] gi 297335946 gb EFH6363.1  F9L1.39 [Arabidopsis lyrata subsp. lyrata]                                                                                                                                                                                                                                                                                                                                                                  | 174 | 249 | 4.00E-49  | 143.1 | 56.3 | 70.7 | F9L1.39                                                         | gbpln | Arabidopsis lyrata   | AT1G15430.2   Symbols:   Protein of unknown function (DUF1644)   chr1:5305011-5305790 FORWARD LENGTH=259                     | 174 | 259 | 1.00E-49  | 148.9 | 55.2 | 70.7 |

|                         |                                                                                                                                                                                                                                                                                                                                                                                                                                          |     |      |           |       |      |      |                                                                                                                                                                                                                         |       |                      |                                                                                                                                                                                                                                                                                                                                                                                                                                                                                                                                        |     |     |           |       |      |      |
|-------------------------|------------------------------------------------------------------------------------------------------------------------------------------------------------------------------------------------------------------------------------------------------------------------------------------------------------------------------------------------------------------------------------------------------------------------------------------|-----|------|-----------|-------|------|------|-------------------------------------------------------------------------------------------------------------------------------------------------------------------------------------------------------------------------|-------|----------------------|----------------------------------------------------------------------------------------------------------------------------------------------------------------------------------------------------------------------------------------------------------------------------------------------------------------------------------------------------------------------------------------------------------------------------------------------------------------------------------------------------------------------------------------|-----|-----|-----------|-------|------|------|
| Rsa1.0_00202.1.g8447.t2 | gb AAD22286.1  putative non-LTR retroelement reverse transcriptase [Arabidopsis thaliana]                                                                                                                                                                                                                                                                                                                                                | 254 | 1311 | 4.00E-17  | 516.1 | 33.9 | 52.0 | putative non-LTR retroelement reverse transcriptase                                                                                                                                                                     | gbpln | Arabidopsis thaliana | AT4G09490.1   Symbols:   Polynucleotidyl transferase, ribonuclease H-like superfamily protein   chr4:6015583-6016575 REVERSE LENGTH=170                                                                                                                                                                                                                                                                                                                                                                                                | 254 | 170 | 2.00E-14  | 66.9  | 18.9 | 26.0 |
| Rsa1.0_00203.1.g8448.t1 | ref NP_001189903.1  phospholipase/carboxylesterase family protein [Arabidopsis thaliana] gi 332642188 gb AE75709.1  phospholipase/carboxylesterase family protein [Arabidopsis thaliana]                                                                                                                                                                                                                                                 | 248 | 274  | 1.00E-129 | 110.5 | 93.5 | 95.2 | phospholipase/carboxyl esterase family protein                                                                                                                                                                          | gbpln | Arabidopsis thaliana | AT3G15650.2   Symbols:   alpha/beta-Hydrolases superfamily protein   chr3:5306006-5307764 FORWARD LENGTH=274                                                                                                                                                                                                                                                                                                                                                                                                                           | 248 | 274 | 1.00E-132 | 110.5 | 93.5 | 95.2 |
| Rsa1.0_00203.1.g8449.t1 | gb EOA31587.1  hypothetical protein CARUB_v10014783mg [Capsella rubella]                                                                                                                                                                                                                                                                                                                                                                 | 166 | 169  | 8.00E-77  | 101.8 | 83.7 | 91.6 | hypothetical protein CARUB_v10014783mg                                                                                                                                                                                  | gbpln | Capsella rubella     | AT3G15660.2   Symbols:   ATGRX4, GRX4   glutaredoxin 4   chr3:5308134-5309383 REVERSE LENGTH=169                                                                                                                                                                                                                                                                                                                                                                                                                                       | 166 | 169 | 7.00E-78  | 101.8 | 82.5 | 91.0 |
| Rsa1.0_00203.1.g8450.t1 | dbj BAB88877.1  late embryogenesis-abundant protein [Brassica napus]                                                                                                                                                                                                                                                                                                                                                                     | 229 | 226  | 1.00E-102 | 98.7  | 92.1 | 94.3 | late embryogenesis-abundant protein                                                                                                                                                                                     | gbpln | Brassica napus       | AT3G15670.1   Symbols:   Late embryogenesis abundant protein (LEA) family protein   chr3:5310141-5310901 REVERSE LENGTH=225                                                                                                                                                                                                                                                                                                                                                                                                            | 229 | 225 | 1.00E-88  | 98.3  | 84.7 | 90.0 |
| Rsa1.0_00203.1.g8451.t1 | ref NP_188189.1  Ran BP2/NZF zinc finger-like protein [Arabidopsis thaliana] gi 11994340 dbj BAB02299.1  zinc finger protein-like; Ser/Thr protein kinase-like protein [Arabidopsis thaliana] gi 89274153 gb ABD65597.1  At3g15680 [Arabidopsis thaliana] gi 332642192 gb AEE75713.1  Ran BP2/NZF zinc finger-like protein [Arabidopsis thaliana]                                                                                        | 164 | 164  | 3.00E-75  | 100.0 | 91.5 | 94.5 | Ran BP2/NZF zinc finger-like protein                                                                                                                                                                                    | gbpln | Arabidopsis thaliana | AT3G15680.1   Symbols:   Ran BP2/NZF zinc finger-like superfamily protein   chr3:5315437-5316048 FORWARD LENGTH=164                                                                                                                                                                                                                                                                                                                                                                                                                    | 164 | 164 | 9.00E-78  | 100.0 | 91.5 | 94.5 |
| Rsa1.0_00203.1.g8452.t1 | ref XP_002882958.1  hypothetical protein ARALYDRAFT_479023 [Arabidopsis lyrata subsp. lyrata] gi 297328798 gb EFH59217.1  hypothetical protein ARALYDRAFT_479023 [Arabidopsis lyrata subsp. lyrata]                                                                                                                                                                                                                                      | 293 | 263  | 1.00E-111 | 89.8  | 72.4 | 80.2 | hypothetical protein ARALYDRAFT_479023                                                                                                                                                                                  | gbpln | Arabidopsis lyrata   | AT3G15690.2   Symbols:   Single hybrid motif superfamily protein   chr3:5317108-5319435 FORWARD LENGTH=263                                                                                                                                                                                                                                                                                                                                                                                                                             | 293 | 263 | 1.00E-112 | 89.8  | 71.7 | 80.5 |
| Rsa1.0_00203.1.g8453.t1 | gb EOA33124.1  hypothetical protein CARUB_v10016462mg [Capsella rubella]                                                                                                                                                                                                                                                                                                                                                                 | 66  | 451  | 9.00E-11  | 683.3 | 54.5 | 59.1 | hypothetical protein CARUB_v10016462mg                                                                                                                                                                                  | gbpln | Capsella rubella     | # # # # # # #                                                                                                                                                                                                                                                                                                                                                                                                                                                                                                                          |     |     |           |       |      |      |
| Rsa1.0_00203.1.g8454.t1 | gb EOA33124.1  hypothetical protein CARUB_v10016462mg [Capsella rubella]                                                                                                                                                                                                                                                                                                                                                                 | 398 | 451  | 0         | 113.3 | 83.7 | 87.9 | hypothetical protein CARUB_v10016462mg                                                                                                                                                                                  | gbpln | Capsella rubella     | AT3G15700.1   Symbols:   P-loop containing nucleoside triphosphate hydrolases superfamily protein   chr3:5321136-5322376 REVERSE LENGTH=375                                                                                                                                                                                                                                                                                                                                                                                            | 398 | 375 | 0         | 94.2  | 83.7 | 87.7 |
| Rsa1.0_00203.1.g8455.t1 | ref XP_002885105.1  hypothetical protein ARALYDRAFT_479026 [Arabidopsis lyrata subsp. lyrata] gi 297330945 gb EFH61364.1  hypothetical protein ARALYDRAFT_479026 [Arabidopsis lyrata subsp. lyrata]                                                                                                                                                                                                                                      | 180 | 180  | 3.00E-87  | 100.0 | 88.3 | 95.0 | hypothetical protein ARALYDRAFT_479026                                                                                                                                                                                  | gbpln | Arabidopsis lyrata   | AT1G52600.1   Symbols:   Peptidase S24/S26A/S26B/S26C family protein   chr1:19590612-19592466 FORWARD LENGTH=180                                                                                                                                                                                                                                                                                                                                                                                                                       | 180 | 180 | 1.00E-89  | 100.0 | 89.4 | 93.9 |
| Rsa1.0_00203.1.g8456.t1 | sp P55939.2 PLDA2_BRAOC RecName: Full=Phospholipase D alpha 2; Short=PLD 2; AltName: Full=Choline phosphatase 2; AltName: Full=Phosphatidylcholine-hydrolyzing phospholipase D 2; Flags: Precursor gi 3639087 gb AAC78486.1  phospholipase D2 [Brassica oleracea var. capitata] gi 3924621 gb AAC79125.1  phospholipase D [Brassica oleracea var. capitata] gi 4324971 gb AAD17209.1  phospholipase D2 [Brassica oleracea var. capitata] | 811 | 812  | 0         | 100.1 | 97.4 | 99.5 | RecName: Full=Phospholipase D alpha 2; Short=PLD 2; AltName: Full=Choline phosphatase 2; AltName: Full=Phosphatidylcholin e-hydrolyzing phospholipase D 2; Flags: Precursor gi 3639087 gb AAC7848 6.1  phospholipase D2 | gbpln | Brassica oleracea    | AT3G15730.1   Symbols:   PLDALPHA1, PLD   phospholipase D alpha 1   chr3:5330835-5333474 FORWARD LENGTH=810                                                                                                                                                                                                                                                                                                                                                                                                                            | 811 | 810 | 0         | 99.9  | 90.9 | 96.9 |
| Rsa1.0_00203.1.g8457.t1 | ref XP_002882960.1  predicted protein [Arabidopsis lyrata subsp. lyrata] gi 297328800 gb EFH59219.1  predicted protein [Arabidopsis lyrata subsp. lyrata]                                                                                                                                                                                                                                                                                | 146 | 135  | 6.00E-47  | 92.5  | 71.2 | 77.4 | predicted protein                                                                                                                                                                                                       | gbpln | Arabidopsis lyrata   | AT3G15760.1   Symbols:   unknown protein; FUNCTIONS IN: molecular_function unknown; INVOLVED IN: biological_process unknown; LOCATED IN: endomembrane system; EXPRESSED IN: 22 plant structures; EXPRESSED DURING: 10 growth stages; BEST Arabidopsis thaliana protein match is: unknown protein (TAIR:AT1G52565.1). Has 42 Blast hits to 42 proteins in 10 species: Archaea - 0; Bacteria - 0; Metazoa - 0; Fungi - 0; Plants - 42; Viruses - 0; Other Eukaryotes - 0 (source: NCBI BLINK).   chr3:5337734-5338219 FORWARD LENGTH=135 | 146 | 135 | 6.00E-43  | 92.5  | 67.8 | 74.0 |

|                         |                                                                                                                                                                                                                                                                                                                                                                                                                                                                                                                                                                                                                                                                                                                                                                               |      |      |           |       |      |      |                                        |       |                      |                                                                                                                                                                                                                                                                                                                                                                                                                                                                                                                                                                                      |      |      |           |       |      |      |
|-------------------------|-------------------------------------------------------------------------------------------------------------------------------------------------------------------------------------------------------------------------------------------------------------------------------------------------------------------------------------------------------------------------------------------------------------------------------------------------------------------------------------------------------------------------------------------------------------------------------------------------------------------------------------------------------------------------------------------------------------------------------------------------------------------------------|------|------|-----------|-------|------|------|----------------------------------------|-------|----------------------|--------------------------------------------------------------------------------------------------------------------------------------------------------------------------------------------------------------------------------------------------------------------------------------------------------------------------------------------------------------------------------------------------------------------------------------------------------------------------------------------------------------------------------------------------------------------------------------|------|------|-----------|-------|------|------|
| Rsa1.0_00203.1.g8458.t1 | refNP_188199.1  uncharacterized protein [Arabidopsis thaliana] gi 11994350 dbj BAB02309.1  unnamed protein product [Arabidopsis thaliana] gi 17065466 gb AAL32887.1  Unknown protein [Arabidopsis thaliana] gi 20148569 gb AAM10175.1  unknown protein [Arabidopsis thaliana] gi 332642205 gb AEE75726.1  uncharacterized protein AT3G15780 [Arabidopsis thaliana]                                                                                                                                                                                                                                                                                                                                                                                                            | 129  | 117  | 2.00E-24  | 90.7  | 69.8 | 74.4 | uncharacterized protein                | gbpln | Arabidopsis thaliana | AT3G15780.1   Symbols:   unknown protein; BEST Arabidopsis thaliana protein match is: unknown protein (TAIR:AT1G52550.1); Has 20 Blast hits to 20 proteins in 5 species: Archae - 0; Bacteria - 0; Metazoa - 0; Fungi - 0; Plants - 20; Viruses - 0; Other Eukaryotes - 0 (source: NCBI BLink).   chr3:5341434-5342351 FORWARD LENGTH=117                                                                                                                                                                                                                                            | 129  | 117  | 4.00E-27  | 90.7  | 69.8 | 74.4 |
| Rsa1.0_00203.1.g8459.t1 | refXP_002882963.1  hypothetical protein ARALYDRAFT_897878 [Arabidopsis lyrata subsp. lyrata] gi 297328803 gb EFH59222.1  hypothetical protein ARALYDRAFT_897878 [Arabidopsis lyrata subsp. lyrata]                                                                                                                                                                                                                                                                                                                                                                                                                                                                                                                                                                            | 273  | 255  | 6.00E-92  | 93.4  | 72.2 | 79.5 | hypothetical protein ARALYDRAFT_897878 | gbpln | Arabidopsis lyrata   | AT3G15790.1   Symbols: MBD11, ATMBD11   methyl-CPG-binding domain 11   chr3:5343209-5344386 FORWARD LENGTH=254                                                                                                                                                                                                                                                                                                                                                                                                                                                                       | 273  | 254  | 2.00E-85  | 93.0  | 68.9 | 77.7 |
| Rsa1.0_00203.1.g8460.t1 | gb EOA30744.1  hypothetical protein CARUB_v10013894mg [Capsella rubella]                                                                                                                                                                                                                                                                                                                                                                                                                                                                                                                                                                                                                                                                                                      | 394  | 397  | 0         | 100.8 | 81.0 | 86.5 | hypothetical protein CARUB_v10013894mg | gbpln | Capsella rubella     | AT3G15800.1   Symbols:   Glycosyl hydrolase superfamily protein   chr3:5345051-5346988 FORWARD LENGTH=399                                                                                                                                                                                                                                                                                                                                                                                                                                                                            | 394  | 399  | 0         | 101.3 | 77.9 | 82.0 |
| Rsa1.0_00203.1.g8461.t1 | refXP_002882965.1  hypothetical protein ARALYDRAFT_897881 [Arabidopsis lyrata subsp. lyrata] gi 297328805 gb EFH59224.1  hypothetical protein ARALYDRAFT_897881 [Arabidopsis lyrata subsp. lyrata]                                                                                                                                                                                                                                                                                                                                                                                                                                                                                                                                                                            | 289  | 301  | 1.00E-118 | 104.2 | 75.8 | 84.1 | hypothetical protein ARALYDRAFT_897881 | gbpln | Arabidopsis lyrata   | AT3G15820.1   Symbols: ROD1   phosphatidic acid phosphatase-related / PAP2-related   chr3:5351217-5353573 FORWARD LENGTH=301                                                                                                                                                                                                                                                                                                                                                                                                                                                         | 289  | 301  | 1.00E-118 | 104.2 | 74.0 | 83.0 |
| Rsa1.0_00203.1.g8462.t1 | refNP_188207.1  uncharacterized protein [Arabidopsis thaliana] gi 52354305 gb AAU44473.1  hypothetical protein AT3G15860 [Arabidopsis thaliana] gi 55740627 gb AAV63906.1  hypothetical protein AT3g15860 [Arabidopsis thaliana] gi 332642217 gb AEE75738.1  uncharacterized protein AT3G15860 [Arabidopsis thaliana]                                                                                                                                                                                                                                                                                                                                                                                                                                                         | 166  | 170  | 3.00E-84  | 102.4 | 88.0 | 94.0 | uncharacterized protein                | gbpln | Arabidopsis thaliana | AT3G15860.1   Symbols:   FUNCTIONS IN: molecular function unknown; INVOLVED IN: biological process unknown; LOCATED IN: endomembrane system; EXPRESSED IN: pollen tube; CONTAINS InterPro DOMAIN/s: Plant self-incompatibility S1 (InterPro:IPR010264); BEST Arabidopsis thaliana protein match is: Plant self-incompatibility protein S1 family (TAIR:AT5G26090.1); Has 19 Blast hits to 16 proteins in 2 species: Archae - 0; Bacteria - 0; Metazoa - 0; Fungi - 0; Plants - 19; Viruses - 0; Other Eukaryotes - 0 (source: NCBI BLink).   chr3:5361207-5361719 REVERSE LENGTH=170 | 166  | 170  | 1.00E-86  | 102.4 | 88.0 | 94.0 |
| Rsa1.0_00203.1.g8463.t1 | refNP_188048.1  pectinesterase 3 [Arabidopsis thaliana] gi 229891485 sp O49006.2 PME3_ARAT H RecName: Full=Pectinesterase/pectinesterase inhibitor 3; Includes: RecName: Full=Pectinesterase inhibitor 3; AltName: Full=Pectin methylsterase inhibitor 3; Includes: RecName: Full=Pectinesterase 3; Short=PE 3; AltName: Full=Pectin methylsterase 27; Short=AtPME27; AltName: Full=Pectin methylsterase 3; Flags: Precursor gi 9279579 dbj BAB01037.1  pectinesterase [Arabidopsis thaliana] gi 14335010 gb AAK59769.1  AT3g14310/MLN21.9 [Arabidopsis thaliana] gi 15529256 gb AAK97722.1  AT3g14310/MLN21.9 [Arabidopsis thaliana] gi 23506059 gb AAN28889.1  At3g14310/MLN21.9 [Arabidopsis thaliana] gi 332641979 gb AEE75500.1  pectinesterase 3 [Arabidopsis thaliana] | 592  | 592  | 0         | 100.0 | 89.0 | 94.1 | pectinesterase 3                       | gbpln | Arabidopsis thaliana | AT3G14310.1   Symbols: ATPME3, PME3   pectin methylsterase 3   chr3:4772214-4775095 REVERSE LENGTH=592                                                                                                                                                                                                                                                                                                                                                                                                                                                                               | 592  | 592  | 0         | 100.0 | 89.0 | 94.1 |
| Rsa1.0_00203.1.g8464.t1 | refNP_851003.2  Topless-related protein 4 [Arabidopsis thaliana] gi 298352695 sp Q27GK.2 TPR4_ARAT H RecName: Full=Topless-related protein 4; AltName: Full=WUS-interacting protein 2 gi 332642219 gb AEE75740.1  Topless-related protein 4 [Arabidopsis thaliana]                                                                                                                                                                                                                                                                                                                                                                                                                                                                                                            | 1124 | 1135 | 0         | 101.0 | 93.1 | 96.4 | Topless-related protein 4              | gbpln | Arabidopsis thaliana | AT3G15880.1   Symbols: WSIP2, TPR4   WUS-interacting protein 2   chr3:5364792-5371869 REVERSE LENGTH=1135                                                                                                                                                                                                                                                                                                                                                                                                                                                                            | 1124 | 1135 | 0         | 101.0 | 93.1 | 96.4 |
| Rsa1.0_00203.1.g8465.t1 | refXP_002882968.1  hypothetical protein ARALYDRAFT_479045 [Arabidopsis lyrata subsp. lyrata] gi 297328808 gb EFH59227.1  hypothetical protein ARALYDRAFT_479045 [Arabidopsis lyrata subsp. lyrata]                                                                                                                                                                                                                                                                                                                                                                                                                                                                                                                                                                            | 345  | 359  | 1.00E-153 | 104.1 | 78.3 | 88.4 | hypothetical protein ARALYDRAFT_479045 | gbpln | Arabidopsis lyrata   | AT3G15890.1   Symbols:   Protein kinase superfamily protein   chr3:5374389-5376114 FORWARD LENGTH=361                                                                                                                                                                                                                                                                                                                                                                                                                                                                                | 345  | 361  | 1.00E-153 | 104.6 | 76.5 | 87.2 |



|                         |                                                                                                                                                                                                                                                                                                                                                                         |      |      |           |       |      |      |                                              |       |                      |                                                                                                                                                                                                                                                                                                                                                                                                                                                    |      |      |          |       |      |      |
|-------------------------|-------------------------------------------------------------------------------------------------------------------------------------------------------------------------------------------------------------------------------------------------------------------------------------------------------------------------------------------------------------------------|------|------|-----------|-------|------|------|----------------------------------------------|-------|----------------------|----------------------------------------------------------------------------------------------------------------------------------------------------------------------------------------------------------------------------------------------------------------------------------------------------------------------------------------------------------------------------------------------------------------------------------------------------|------|------|----------|-------|------|------|
| Rsa1.0_00203.1.g8466.t1 | ref XP_002885114.1  hypothetical protein ARALYDRAFT_479046 [Arabidopsis lyrata subsp. lyrata] gi 297330954 gb EFH61373.1  hypothetical protein ARALYDRAFT_479046 [Arabidopsis lyrata subsp. lyrata]                                                                                                                                                                     | 140  | 140  | 2.00E-44  | 100.0 | 72.9 | 80.7 | hypothetical protein ARALYDRAFT_479046       | gbpln | Arabidopsis lyrata   | AT3G15900.1   Symbols:   unknown protein; FUNCTIONS IN: molecular_function unknown; INVOLVED IN: biological_process unknown; LOCATED IN: chloroplast; EXPRESSED DURING: 23 plant structures; EXPRESSED DURING: 13 growth stages; Has 26 Blast hits to 26 proteins in 10 species: Archaea - 0; Bacteria - 0; Metazoa - 0; Fungi - 0; Plants - 26; Viruses - 0; Other Eukaryotes - 0 (source: NCBI BLINK).   chr3:5376356-5376972 REVERSE LENGTH=141 | 140  | 141  | 9.00E-47 | 100.7 | 65.7 | 72.9 |
| Rsa1.0_00203.1.g8467.t1 | ref XP_002885115.1  phox domain-containing protein [Arabidopsis lyrata subsp. lyrata] gi 297330955 gb EFH61374.1  phox domain-containing protein [Arabidopsis lyrata subsp. lyrata]                                                                                                                                                                                     | 700  | 757  | 0         | 108.1 | 81.7 | 89.1 | phox domain-containing protein               | gbpln | Arabidopsis lyrata   | AT3G15920.1   Symbols:   Phox (PX) domain-containing protein   chr3:5383768-5386955 REVERSE LENGTH=755                                                                                                                                                                                                                                                                                                                                             | 700  | 755  | 0        | 107.9 | 80.6 | 88.6 |
| Rsa1.0_00203.1.g8468.t1 | dbj BAB02877.1  unnamed protein product [Arabidopsis thaliana]                                                                                                                                                                                                                                                                                                          | 649  | 695  | 0         | 107.1 | 81.2 | 88.6 | unnamed protein product                      | gbpln | Arabidopsis thaliana | AT3G15930.1   Symbols:   Pentatricopeptide repeat (PPR) superfamily protein   chr3:5387444-5389690 FORWARD LENGTH=687                                                                                                                                                                                                                                                                                                                              | 649  | 687  | 0        | 105.9 | 81.2 | 88.6 |
| Rsa1.0_00203.1.g8469.t1 | dbj BAB02797.1  unnamed protein product [Arabidopsis thaliana]                                                                                                                                                                                                                                                                                                          | 280  | 345  | 2.00E-45  | 123.2 | 38.9 | 50.4 | unnamed protein product                      | gbpln | Arabidopsis thaliana | AT3G13280.1   Symbols:   Putative endonuclease or glycosyl hydrolase   chr3:4295327-4297000 REVERSE LENGTH=383                                                                                                                                                                                                                                                                                                                                     | 280  | 383  | 1.00E-28 | 136.8 | 32.9 | 47.1 |
| Rsa1.0_00203.1.g8470.t1 | ref NP_188216.2  DNA topoisomerase-like protein [Arabidopsis thaliana] gi 9294600 dbj BAB02881.1  unnamed protein product [Arabidopsis thaliana] gi 2153951.1 gb AAM53308.1  unknown protein [Arabidopsis thaliana] gi 24899759 gb AAN65094.1  unknown protein [Arabidopsis thaliana] gi 332642230 gb AEE75751.1  DNA topoisomerase-like protein [Arabidopsis thaliana] | 744  | 772  | 0         | 103.8 | 76.7 | 85.5 | DNA topoisomerase-like protein               | gbpln | Arabidopsis thaliana | AT3G15950.1   Symbols:   NAI2   DNA topoisomerase-related   chr3:5397783-5402610 REVERSE LENGTH=772                                                                                                                                                                                                                                                                                                                                                | 744  | 772  | 0        | 103.8 | 76.7 | 85.5 |
| Rsa1.0_00203.1.g8471.t1 | ref NP_188217.4  mismatched DNA binding / ATP binding protein [Arabidopsis thaliana] gi 332642232 gb AEE75753.1  mismatched DNA binding / ATP binding protein [Arabidopsis thaliana]                                                                                                                                                                                    | 492  | 490  | 2.00E-65  | 99.6  | 28.5 | 40.0 | mismatched DNA binding / ATP binding protein | gbpln | Arabidopsis thaliana | AT3G15960.1   Symbols:   mismatched DNA binding/ATP binding   chr3:5404000-5406461 REVERSE LENGTH=490                                                                                                                                                                                                                                                                                                                                              | 492  | 490  | 6.00E-68 | 99.6  | 28.5 | 40.0 |
| Rsa1.0_00203.1.g8472.t1 | gb EOA32454.1  hypothetical protein CARUB_v10015730mg [Capsella rubella]                                                                                                                                                                                                                                                                                                | 226  | 543  | 2.00E-41  | 240.3 | 38.1 | 58.4 | hypothetical protein CARUB_v10015730mg       | gbpln | Capsella rubella     | AT1G52950.1   Symbols:   Nucleic acid-binding, OB-fold-like protein   chr1:19725483-19728007 FORWARD LENGTH=566                                                                                                                                                                                                                                                                                                                                    | 226  | 566  | 2.00E-41 | 250.4 | 39.4 | 59.3 |
| Rsa1.0_00204.1.g8473.t1 | gb AAG51783.1 AC079679_3 reverse transcriptase, putative; 16838-20266 [Arabidopsis thaliana]                                                                                                                                                                                                                                                                            | 196  | 1142 | 2.00E-31  | 582.7 | 41.8 | 58.7 | reverse transcriptase, putative; 16838-20266 | gbpln | Arabidopsis thaliana | AT2G34320.1   Symbols:   Polynucleotidyl transferase, ribonuclease H-like superfamily protein   chr2:14484959-14485837 FORWARD LENGTH=292                                                                                                                                                                                                                                                                                                          | 196  | 292  | 5.00E-12 | 149.0 | 29.6 | 49.5 |
| Rsa1.0_00204.1.g8474.t1 | ref XP_002893408.1  hypothetical protein ARALYDRAFT_472786 [Arabidopsis lyrata subsp. lyrata] gi 297339250 gb EFH69667.1  hypothetical protein ARALYDRAFT_472786 [Arabidopsis lyrata subsp. lyrata]                                                                                                                                                                     | 356  | 351  | 1.00E-180 | 98.6  | 86.2 | 92.4 | hypothetical protein ARALYDRAFT_472786       | gbpln | Arabidopsis lyrata   | AT1G26320.1   Symbols:   Zinc-binding dehydrogenase family protein   chr1:9105240-9107029 FORWARD LENGTH=351                                                                                                                                                                                                                                                                                                                                       | 356  | 351  | 0        | 98.6  | 86.0 | 91.9 |
| Rsa1.0_00204.1.g8475.t1 | ref XP_002893407.1  predicted protein [Arabidopsis lyrata subsp. lyrata] gi 297339249 gb EFH69666.1  predicted protein [Arabidopsis lyrata subsp. lyrata]                                                                                                                                                                                                               | 1275 | 1194 | 0         | 93.6  | 67.4 | 76.0 | predicted protein                            | gbpln | Arabidopsis lyrata   | AT1G26330.1   Symbols:   DNA binding   chr1:9107625-9113520 FORWARD LENGTH=1189                                                                                                                                                                                                                                                                                                                                                                    | 1275 | 1189 | 0        | 93.3  | 65.3 | 74.8 |
| Rsa1.0_00204.1.g8476.t1 | gb EOA37106.1  hypothetical protein CARUB_v10010310mg [Capsella rubella]                                                                                                                                                                                                                                                                                                | 188  | 205  | 3.00E-62  | 109.0 | 60.6 | 64.4 | hypothetical protein CARUB_v10010310mg       | gbpln | Capsella rubella     | AT1G26340.1   Symbols:   B5 #6, ATCB5-A, CB5-A   cytochrome B5 isoform A   chr1:9113992-9114755 FORWARD LENGTH=135                                                                                                                                                                                                                                                                                                                                 | 188  | 135  | 2.00E-62 | 71.8  | 58.5 | 63.8 |
| Rsa1.0_00204.1.g8477.t1 | gb ABD65606.1  hypothetical protein 23.t00002 [Brassica oleracea]                                                                                                                                                                                                                                                                                                       | 367  | 433  | 3.00E-73  | 118.0 | 48.5 | 62.9 | hypothetical protein 23.t00002               | gbpln | Brassica oleracea    | #                                                                                                                                                                                                                                                                                                                                                                                                                                                  | #    | #    | #        | #     | #    |      |
| Rsa1.0_00204.1.g8478.t1 | gb EOA39748.1  hypothetical protein CARUB_v10008395mg [Capsella rubella]                                                                                                                                                                                                                                                                                                | 682  | 717  | 0         | 105.1 | 80.5 | 89.3 | hypothetical protein CARUB_v10008395mg       | gbpln | Capsella rubella     | AT1G26370.1   Symbols:   RNA helicase family protein   chr1:9122030-9125368 REVERSE LENGTH=717                                                                                                                                                                                                                                                                                                                                                     | 682  | 717  | 0        | 105.1 | 80.2 | 89.3 |
| Rsa1.0_00204.1.g8479.t1 | ref XP_002890663.1  FAD-binding domain-containing protein [Arabidopsis lyrata subsp. lyrata] gi 297336505 gb EFH66922.1  FAD-binding domain-containing protein [Arabidopsis lyrata subsp. lyrata]                                                                                                                                                                       | 529  | 530  | 0         | 100.2 | 86.8 | 94.1 | FAD-binding domain-containing protein        | gbpln | Arabidopsis lyrata   | AT1G26390.1   Symbols:   FAD-binding Berberine family protein   chr1:9130164-9131756 REVERSE LENGTH=530                                                                                                                                                                                                                                                                                                                                            | 529  | 530  | 0        | 100.2 | 83.0 | 91.1 |

|                         |                                                                                                                                                                                                                                                                                                                                                                                                                                      |     |     |           |       |      |      |                                                 |       |                      |                                                                                                                                                                                                                                                                                                                                                                                                                                                                                                                             |     |     |           |       |      |      |
|-------------------------|--------------------------------------------------------------------------------------------------------------------------------------------------------------------------------------------------------------------------------------------------------------------------------------------------------------------------------------------------------------------------------------------------------------------------------------|-----|-----|-----------|-------|------|------|-------------------------------------------------|-------|----------------------|-----------------------------------------------------------------------------------------------------------------------------------------------------------------------------------------------------------------------------------------------------------------------------------------------------------------------------------------------------------------------------------------------------------------------------------------------------------------------------------------------------------------------------|-----|-----|-----------|-------|------|------|
| Rsa1.0_00204.1.g8480.t1 | refNP_173966.1  FAD-binding and BBE domain-containing protein [Arabidopsis thaliana]<br>gi 9797756 gb AAF98574.1 AC013427.17<br>Contains weak similarity to berberine bridge enzyme (bbe1) from Berberis stolonifera gb AF049347 and contains a FAD binding PF 01565 domain [Arabidopsis thaliana]<br>gi 332192567 gb AEE30688.1  FAD-binding and BBE domain-containing protein [Arabidopsis thaliana]<br>ref XP_002890658.1  ATUPS5 | 527 | 529 | 0         | 100.4 | 83.1 | 90.7 | FAD-binding and BBE domain-containing protein   | gbpln | Arabidopsis thaliana | AT1G26420.2   Symbols:   FAD-binding Berberine family protein   chr1:9141715-9143304 REVERSE LENGTH=529                                                                                                                                                                                                                                                                                                                                                                                                                     | 527 | 529 | 0         | 100.4 | 83.1 | 90.7 |
| Rsa1.0_00204.1.g8481.t1 | [Arabidopsis lyrata subsp. lyrata] gi 297336500 gb EFH66917.1  ATUPS5 [Arabidopsis lyrata subsp. lyrata] dbj BAB01155.1  unnamed protein product [Arabidopsis thaliana] gi 49823524 gb AAT68745.1                                                                                                                                                                                                                                    | 410 | 410 | 0         | 100.0 | 87.1 | 93.7 | ATUPS5                                          | gbpln | Arabidopsis lyrata   | AT1G26440.2   Symbols: ATUPS5, UPS5   uride permease 5   chr1:9144109-9145673 REVERSE LENGTH=413                                                                                                                                                                                                                                                                                                                                                                                                                            | 410 | 413 | 0         | 100.7 | 86.6 | 93.4 |
| Rsa1.0_00204.1.g8482.t1 | hypothetical protein At3g17200 [Arabidopsis thaliana] gi 60547763 gb AAX23845.1  hypothetical protein At3g17200 [Arabidopsis thaliana]                                                                                                                                                                                                                                                                                               | 308 | 310 | 8.00E-58  | 100.6 | 37.0 | 51.9 | unnamed protein product                         | gbpln | Arabidopsis thaliana | AT3G24255.1   Symbols:   RNA-directed DNA polymerase (reverse transcriptase)-related family protein   chr3:8789471-8793208 FORWARD LENGTH=746                                                                                                                                                                                                                                                                                                                                                                               | 308 | 746 | 3.00E-36  | 242.2 | 26.9 | 36.4 |
| Rsa1.0_00204.1.g8483.t1 | ref XP_002893403.1  pentatricopeptide repeat-containing protein [Arabidopsis lyrata subsp. lyrata] gi 297339245 gb EFH69662.1  pentatricopeptide repeat-containing protein [Arabidopsis lyrata subsp. lyrata]                                                                                                                                                                                                                        | 623 | 630 | 0         | 101.1 | 83.8 | 92.8 | pentatricopeptide repeat-containing protein     | gbpln | Arabidopsis lyrata   | AT1G26460.1   Symbols:   Tetratricopeptide repeat (TPR)-like superfamily protein   chr1:9151616-9154407 FORWARD LENGTH=630                                                                                                                                                                                                                                                                                                                                                                                                  | 623 | 630 | 0         | 101.1 | 83.3 | 92.5 |
| Rsa1.0_00204.1.g8484.t1 | gb EOA36298.1  hypothetical protein CARUB_v10010577mg, partial [Capsella rubella]                                                                                                                                                                                                                                                                                                                                                    | 146 | 146 | 5.00E-48  | 100.0 | 84.2 | 87.0 | hypothetical protein CARUB_v10010577mg, partial | gbpln | Capsella rubella     | AT1G26470.1   Symbols:   FUNCTIONS IN: molecular function unknown; INVOLVED IN: regulation of transcription; LOCATED IN: nucleus, H4/H2A histone acetyltransferase complex; EXPRESSED IN: 23 plant structures; EXPRESSED DURING: 15 growth stages; CONTAINS InterPro DOMAIN/s: CT20 (InterPro:IPRO12423); Has 60 Blast hits to 60 proteins in 27 species: Archae - 0; Bacteria - 0; Metazoa - 26; Fungi - 2; Plants - 30; Viruses - 0; Other Eukaryotes - 2 (source: NCBI BLINK).   chr1:9155134-9156036 FORWARD LENGTH=133 | 146 | 133 | 7.00E-45  | 91.1  | 83.6 | 87.0 |
| Rsa1.0_00204.1.g8485.t1 | gb EOA36455.1  hypothetical protein CARUB_v10011021mg [Capsella rubella]                                                                                                                                                                                                                                                                                                                                                             | 267 | 268 | 1.00E-147 | 100.4 | 94.4 | 98.9 | hypothetical protein CARUB_v10011021mg          | gbpln | Capsella rubella     | AT1G26480.1   Symbols: GRF12, GF14 IOTA   general regulatory factor 12   chr1:9156573-9157845 REVERSE LENGTH=268                                                                                                                                                                                                                                                                                                                                                                                                            | 267 | 268 | 1.00E-149 | 100.4 | 94.0 | 98.5 |
| Rsa1.0_00204.1.g8486.t1 | gb EOA39416.1  hypothetical protein CARUB_v10012523mg [Capsella rubella]                                                                                                                                                                                                                                                                                                                                                             | 528 | 499 | 0         | 94.5  | 79.9 | 87.3 | hypothetical protein CARUB_v10012523mg          | gbpln | Capsella rubella     | AT1G26500.1   Symbols:   Pentatricopeptide repeat (PPR) superfamily protein   chr1:9158380-9158997 FORWARD LENGTH=505                                                                                                                                                                                                                                                                                                                                                                                                       | 528 | 505 | 0         | 95.6  | 78.0 | 84.8 |
| Rsa1.0_00204.1.g8487.t1 | refNP_173974.3  Cobalamin biosynthesis CobW-like protein [Arabidopsis thaliana] gi 63147374 gb AAY34160.1  At1g26520 [Arabidopsis thaliana] gi 332192579 gb AEE30700.1  Cobalamin biosynthesis CobW-like protein [Arabidopsis thaliana]                                                                                                                                                                                              | 365 | 374 | 0         | 102.5 | 89.0 | 94.2 | Cobalamin biosynthesis CobW-like protein        | gbpln | Arabidopsis thaliana | AT1G26520.1   Symbols:   Cobalamin biosynthesis CobW-like protein   chr1:9163448-9165594 REVERSE LENGTH=374                                                                                                                                                                                                                                                                                                                                                                                                                 | 365 | 374 | 0         | 102.5 | 89.0 | 94.2 |
| Rsa1.0_00204.1.g8488.t1 | gb ACJ86035.1  unknown [Medicago truncatula] gi 388515981 gb AFK46052.1  unknown [Medicago truncatula] ref NP_173978.1  beta glucosidase 40 [Arabidopsis thaliana] gi 75309954 sp Q9FZE0.1 BGL40 ARAT H RecName: Full=beta-glucosidase 40; Short=AtBGLU40; Flags: Precursor gi 9797746 gb AAF98564.1 AC013427.7 Strong similarity to beta-glucosidase (BG60) from Hordeum vulgare                                                    | 127 | 144 | 1.00E-51  | 113.4 | 90.6 | 93.7 | unknown                                         | gbpln | Medicago truncatula  | AT1G26550.1   Symbols:   FKBP-like peptidyl-prolyl cis-trans isomerase family protein   chr1:9171800-9172716 FORWARD LENGTH=142                                                                                                                                                                                                                                                                                                                                                                                             | 127 | 142 | 7.00E-48  | 111.8 | 83.5 | 84.3 |
| Rsa1.0_00204.1.g8489.t1 | gb L41869 and is a member of the Glycosyl hydrolase PF 00232 family. ESTs gb AV561121. gb AV565991 come from this gene [Arabidopsis thaliana] gi 15028209 gb AAK76601.1  putative beta-glucosidase [Arabidopsis thaliana] gi 23296824 gb AANI13179.1  putative beta-glucosidase [Arabidopsis thaliana] gi 332192583 gb AEE30704.1  beta glucosidase 40 [Arabidopsis thaliana]                                                        | 493 | 510 | 0         | 103.4 | 93.3 | 95.7 | beta glucosidase 40                             | gbpln | Arabidopsis thaliana | AT1G26560.1   Symbols: BGLU40   beta glucosidase 40   chr1:9178513-9181726 FORWARD LENGTH=510                                                                                                                                                                                                                                                                                                                                                                                                                               | 493 | 510 | 0         | 103.4 | 93.3 | 95.7 |

| Rsa1.0_00204.1.g8490.t1                                                                                                                                                                                                                                                                                                                                                                                                                                                                                                                                      | #                                                                                                                                                                                                                                                                                                                                                                                                                                                   | #   | #   | #         | #     | #    | #    | -                                                     | ----  | ----                 | #                                                                                                                                                                                                                                                                                                                                                                                                                                                                                                                                             | #   | #   | #         | #     | #    |      |
|--------------------------------------------------------------------------------------------------------------------------------------------------------------------------------------------------------------------------------------------------------------------------------------------------------------------------------------------------------------------------------------------------------------------------------------------------------------------------------------------------------------------------------------------------------------|-----------------------------------------------------------------------------------------------------------------------------------------------------------------------------------------------------------------------------------------------------------------------------------------------------------------------------------------------------------------------------------------------------------------------------------------------------|-----|-----|-----------|-------|------|------|-------------------------------------------------------|-------|----------------------|-----------------------------------------------------------------------------------------------------------------------------------------------------------------------------------------------------------------------------------------------------------------------------------------------------------------------------------------------------------------------------------------------------------------------------------------------------------------------------------------------------------------------------------------------|-----|-----|-----------|-------|------|------|
| ref NP_173979.1  UDP-glucose dehydrogenase 1 [Arabidopsis thaliana] gi 9797743 gb AAF98561.1 AC013427.4 Strong similarity to UDP-Glucose 6-Dehydrogenase from Glycine max gb 6136119 and is a member of the UDP-glucose/GDP-mannose dehydrogenase PF 00984 family. ESTs gb AV566422.gb AV555903 come from this gene [Arabidopsis thaliana] gi 17979522 gb AAL50096.1 At1g26570/T1K7.6 [Arabidopsis thaliana] gi 23506003 gb AAN28861.1 At1g26570/T1K7.6 [Arabidopsis thaliana] gi 332192584 gb AEE30705.1 UDP-glucose dehydrogenase 1 [Arabidopsis thaliana] |                                                                                                                                                                                                                                                                                                                                                                                                                                                     |     |     |           |       |      |      |                                                       |       |                      |                                                                                                                                                                                                                                                                                                                                                                                                                                                                                                                                               |     |     |           |       |      |      |
| Rsa1.0_00204.1.g8491.t1                                                                                                                                                                                                                                                                                                                                                                                                                                                                                                                                      |                                                                                                                                                                                                                                                                                                                                                                                                                                                     | 479 | 481 | 0         | 100.4 | 91.2 | 96.5 | UDP-glucose dehydrogenase 1                           | gbpln | Arabidopsis thaliana | AT1G26570.1   Symbols: UGD1, ATUGD1   UDP-glucose dehydrogenase 1   chr1:9182801-9184246 FORWARD LENGTH=481                                                                                                                                                                                                                                                                                                                                                                                                                                   | 479 | 481 | 0         | 100.4 | 91.2 | 96.5 |
| Rsa1.0_00204.1.g8492.t1                                                                                                                                                                                                                                                                                                                                                                                                                                                                                                                                      | gb EOA40241.1  hypothetical protein CARUB_v10008961mg [Capsella rubella] gi 482576055 gb EOA40242.1  hypothetical protein CARUB_v10008961mg [Capsella rubella]                                                                                                                                                                                                                                                                                      | 379 | 492 | 1.00E-134 | 129.8 | 68.3 | 78.4 | hypothetical protein CARUB_v10008961mg                | gbpln | Capsella rubella     | AT1G26580.1   Symbols:   FUNCTIONS IN: molecular_function unknown; INVOLVED IN: biological_process unknown; LOCATED IN: cellular_component unknown; EXPRESSED IN: 24 plant structures; EXPRESSED DURING: 15 growth stages; BEST Arabidopsis thaliana protein match is: ELM2 domain-containing protein (TAIR:AT2G03470.1); Has 161 Blast hits to 161 proteins in 17 species: Archae - 0; Bacteria - 0; Metazoa - 1; Fungi - 4; Plants - 156; Viruses - 0; Other Eukaryotes - 0 (source: NCBI BLINK).   chr1:9185620-9187213 FORWARD LENGTH=493 | 379 | 493 | 1.00E-137 | 130.1 | 68.3 | 78.6 |
| Rsa1.0_00204.1.g8493.t1                                                                                                                                                                                                                                                                                                                                                                                                                                                                                                                                      | ref NP_173981.1  C2H2-like zinc finger protein [Arabidopsis thaliana] gi 9797741 gb AAF98559.1 AC013427.2 Contains similarity to C2H2 zinc finger protein (PEThyZPT4-2) from Petunia hybrida gb AB000456 and contains three Zinc finger (C2H2 type) PF 00096 motifs. [Arabidopsis thaliana] gi 225897970 db BAH30317.1  hypothetical protein [Arabidopsis thaliana] gi 332192586 gb AEE30707.1 C2H2-like zinc finger protein [Arabidopsis thaliana] | 293 | 361 | 2.00E-36  | 123.2 | 47.1 | 57.0 | C2H2-like zinc finger protein                         | gbpln | Arabidopsis thaliana | AT1G26590.1   Symbols:   C2H2-like zinc finger protein   chr1:9189624-9190709 FORWARD LENGTH=361                                                                                                                                                                                                                                                                                                                                                                                                                                              | 293 | 361 | 6.00E-39  | 123.2 | 47.1 | 57.0 |
| Rsa1.0_00204.1.g8494.t1                                                                                                                                                                                                                                                                                                                                                                                                                                                                                                                                      | ref NP_564251.1  protein CLAVATA3/ESR-related 9 [Arabidopsis thaliana] gi 313471278 sp Q9FZE4.2 CLE9_ARAT H RecName: Full=CLAVATA3/ESR (CLE)-related protein 9; Contains: RecName: Full=CLE9p; Flags: Precursor gi 332192587 gb AEE30708.1  protein CLAVATA3/ESR-related 9 [Arabidopsis thaliana]                                                                                                                                                   | 114 | 120 | 6.00E-34  | 105.3 | 69.3 | 79.8 | protein CLAVATA3/ESR-related 9                        | gbpln | Arabidopsis thaliana | AT1G26600.1   Symbols: CLE9   CLAVATA3/ESR-RELATED 9   chr1:9191684-9192046 FORWARD LENGTH=120                                                                                                                                                                                                                                                                                                                                                                                                                                                | 114 | 120 | 9.00E-37  | 105.3 | 69.3 | 79.8 |
| Rsa1.0_00204.1.g8495.t1                                                                                                                                                                                                                                                                                                                                                                                                                                                                                                                                      | db BAF73724.1  pentatricopeptide repeat protein [Raphanus sativus]                                                                                                                                                                                                                                                                                                                                                                                  | 143 | 687 | 4.00E-42  | 480.4 | 63.6 | 72.0 | pentatricopeptide repeat protein                      | gbpln | Raphanus sativus     | AT1G63630.1   Symbols:   Tetratricopeptide repeat (TPR)-like superfamily protein   chr1:23587298-23588220 FORWARD LENGTH=257                                                                                                                                                                                                                                                                                                                                                                                                                  | 143 | 257 | 9.00E-26  | 179.7 | 37.8 | 52.4 |
| Rsa1.0_00204.1.g8496.t1                                                                                                                                                                                                                                                                                                                                                                                                                                                                                                                                      | gb ADK92391.1  C2H2 zinc finger transcription factor [Brassica rapa subsp. chinensis]                                                                                                                                                                                                                                                                                                                                                               | 457 | 452 | 0         | 98.9  | 87.3 | 91.5 | C2H2 zinc finger transcription factor                 | gbpln | Brassica rapa        | AT1G26610.1   Symbols:   C2H2-like zinc finger protein   chr1:9193735-9195102 FORWARD LENGTH=455                                                                                                                                                                                                                                                                                                                                                                                                                                              | 457 | 455 | 1.00E-178 | 99.6  | 78.1 | 84.7 |
| Rsa1.0_00204.1.g8497.t1                                                                                                                                                                                                                                                                                                                                                                                                                                                                                                                                      | ref XP_002890651.1  predicted protein [Arabidopsis lyrata subsp. lyrata] gi 297336493 gb EFH66910.1  predicted protein [Arabidopsis lyrata subsp. lyrata]                                                                                                                                                                                                                                                                                           | 808 | 861 | 0         | 106.6 | 74.0 | 81.8 | predicted protein                                     | gbpln | Arabidopsis lyrata   | AT1G26620.1   Symbols:   Plant protein of unknown function (DUF863)   chr1:9195838-9198719 REVERSE LENGTH=867                                                                                                                                                                                                                                                                                                                                                                                                                                 | 808 | 867 | 0         | 107.3 | 71.5 | 80.6 |
| Rsa1.0_00204.1.g8498.t1                                                                                                                                                                                                                                                                                                                                                                                                                                                                                                                                      | gb AAR91929.1  eukaryotic translation initiation factor-5A [Brassica napus]                                                                                                                                                                                                                                                                                                                                                                         | 159 | 159 | 2.00E-82  | 100.0 | 95.6 | 96.9 | eukaryotic translation initiation factor-5A           | gbpln | Brassica napus       | AT1G26630.1   Symbols: FBR12, ATELF5A-2, ELF5A-2   Eukaryotic translation initiation factor 5A-1 (eIF-5A 1) protein   chr1:9205968-9207098 FORWARD LENGTH=159                                                                                                                                                                                                                                                                                                                                                                                 | 159 | 159 | 7.00E-79  | 100.0 | 87.4 | 94.3 |
| Rsa1.0_00204.1.g8499.t1                                                                                                                                                                                                                                                                                                                                                                                                                                                                                                                                      | ref XP_002890650.1  aspartate/glutamate/uridylylate kinase family protein [Arabidopsis lyrata subsp. lyrata] gi 297336492 gb EFH66909.1  aspartate/glutamate/uridylylate kinase family protein [Arabidopsis lyrata subsp. lyrata]                                                                                                                                                                                                                   | 333 | 330 | 1.00E-171 | 99.1  | 91.3 | 94.3 | aspartate/glutamate/uridylylate kinase family protein | gbpln | Arabidopsis lyrata   | AT1G26640.1   Symbols:   Amino acid kinase family protein   chr1:9207620-9209766 REVERSE LENGTH=332                                                                                                                                                                                                                                                                                                                                                                                                                                           | 333 | 332 | 1.00E-171 | 99.7  | 89.8 | 94.6 |

|                         |                                                                                                                                                                                                                                                                                                                                                                                                                                                                                                                                                                                                                                      |     |     |           |       |      |      |                                          |       |                      |                                                                                                                                                                                                                                                                                                                                                                                                                                                                                                                                                      |     |     |           |       |      |      |
|-------------------------|--------------------------------------------------------------------------------------------------------------------------------------------------------------------------------------------------------------------------------------------------------------------------------------------------------------------------------------------------------------------------------------------------------------------------------------------------------------------------------------------------------------------------------------------------------------------------------------------------------------------------------------|-----|-----|-----------|-------|------|------|------------------------------------------|-------|----------------------|------------------------------------------------------------------------------------------------------------------------------------------------------------------------------------------------------------------------------------------------------------------------------------------------------------------------------------------------------------------------------------------------------------------------------------------------------------------------------------------------------------------------------------------------------|-----|-----|-----------|-------|------|------|
| Rsa1.0_00204.1.g8500.t1 | ref[XP_002893390.1] hypothetical protein ARALYDRAFT.472743 [Arabidopsis lyrata subsp. lyrata] gi 297339232 gb EFH69649.1  hypothetical protein ARALYDRAFT.472743 [Arabidopsis lyrata subsp. lyrata]                                                                                                                                                                                                                                                                                                                                                                                                                                  | 339 | 335 | 1.00E-166 | 98.8  | 84.7 | 92.9 | hypothetical protein ARALYDRAFT.472743   | gbpln | Arabidopsis lyrata   | AT1G26650.1   Symbols:   unknown protein; BEST Arabidopsis thaliana protein match is: unknown protein (TAIR:AT1G69430.1); Has 205 Blast hits to 204 proteins in 17 species: Archae - 0; Bacteria - 0; Metazoa - 0; Fungi - 0; Plants - 205; Viruses - 0; Other Eukaryotes - 0 (source: NCBI BLink).   chr1:9210335-9211342 FORWARD LENGTH=335                                                                                                                                                                                                        | 339 | 335 | 1.00E-168 | 98.8  | 84.7 | 92.9 |
| Rsa1.0_00204.1.g8501.t1 | #                                                                                                                                                                                                                                                                                                                                                                                                                                                                                                                                                                                                                                    | #   | #   | #         | #     | #    | #    | -                                        | ----  | ----                 | #                                                                                                                                                                                                                                                                                                                                                                                                                                                                                                                                                    | #   | #   | #         | #     | #    |      |
| Rsa1.0_00204.1.g8502.t1 | gb AAB88009.1  heat shock cognate protein HSC70 [Brassica napus]                                                                                                                                                                                                                                                                                                                                                                                                                                                                                                                                                                     | 648 | 645 | 0         | 99.5  | 95.5 | 97.7 | heat shock cognate protein HSC70         | gbpln | Brassica napus       | AT5G02500.1   Symbols: HSC70-1, HSP70-1, AT-HSC70-1, HSC70   heat shock cognate protein 70-1   chr5:554055-556334 REVERSE LENGTH=651                                                                                                                                                                                                                                                                                                                                                                                                                 | 648 | 651 | 0         | 100.5 | 96.0 | 98.3 |
| Rsa1.0_00204.1.g8503.t1 | gb EOA37780.1  hypothetical protein CARUB_v10012647mg [Capsella rubella]                                                                                                                                                                                                                                                                                                                                                                                                                                                                                                                                                             | 178 | 757 | 6.00E-58  | 425.3 | 64.6 | 75.3 | hypothetical protein CARUB_v10012647mg   | gbpln | Capsella rubella     | AT1G17690.1   Symbols: NOF1   FUNCTIONS IN: molecular function unknown; INVOLVED IN: biological_process unknown; LOCATED IN: nucleus; EXPRESSED IN: 24 plant structures; EXPRESSED DURING: 13 growth stages; CONTAINS InterPro DOMAIN/s: Digestive organ expansion factor, predicted (InterPro:IPR010678); Has 25006 Blast hits to 13379 proteins in 904 species: Archae - 102; Bacteria - 5571; Metazoa - 7448; Fungi - 3168; Plants - 1056; Viruses - 466; Other Eukaryotes - 7195 (source: NCBI BLink).   chr1:6082878-6088157 REVERSE LENGTH=754 | 178 | 754 | 8.00E-58  | 423.6 | 61.2 | 74.7 |
| Rsa1.0_00205.1.g8504.t1 | ref[NP_194322.2] uncharacterized protein [Arabidopsis thaliana] gi 23296353 gb AANI3050.1  unknown protein [Arabidopsis thaliana] gi 332659733 gb AEE85133.1  uncharacterized protein AT4G25920 [Arabidopsis thaliana]                                                                                                                                                                                                                                                                                                                                                                                                               | 570 | 390 | 6.00E-68  | 68.4  | 24.7 | 31.4 | uncharacterized protein                  | gbpln | Arabidopsis thaliana | AT4G25920.1   Symbols:   Protein of unknown function (DUF295)   chr4:13165475-13166841 FORWARD LENGTH=390                                                                                                                                                                                                                                                                                                                                                                                                                                            | 570 | 390 | 2.00E-70  | 68.4  | 24.7 | 31.4 |
| Rsa1.0_00205.1.g8505.t1 | ref[NP_194322.2] uncharacterized protein [Arabidopsis thaliana] gi 23296353 gb AANI3050.1  unknown protein [Arabidopsis thaliana] gi 332659733 gb AEE85133.1  uncharacterized protein AT4G25920 [Arabidopsis thaliana]                                                                                                                                                                                                                                                                                                                                                                                                               | 376 | 390 | 1.00E-119 | 103.7 | 61.2 | 75.5 | uncharacterized protein                  | gbpln | Arabidopsis thaliana | AT4G25920.1   Symbols:   Protein of unknown function (DUF295)   chr4:13165475-13166841 FORWARD LENGTH=390                                                                                                                                                                                                                                                                                                                                                                                                                                            | 376 | 390 | 1.00E-122 | 103.7 | 61.2 | 75.5 |
| Rsa1.0_00205.1.g8506.t1 | ref[NP_194330.1] RNA-binding KH domain-containing protein [Arabidopsis thaliana] gi 4538929 emb CAB39665.1  putative nucleic acid binding protein [Arabidopsis thaliana] gi 7269451 emb CAB79455.1  putative nucleic acid binding protein [Arabidopsis thaliana] gi 15810499 gb AAL07137.1  putative nucleic acid binding protein [Arabidopsis thaliana] gi 20466386 gb AAM20510.1  putative nucleic acid binding protein [Arabidopsis thaliana] gi 21280915 gb AAM45112.1  putative nucleic acid binding protein [Arabidopsis thaliana] gi 332659742 gb AEE85142.1  RNA-binding KH domain-containing protein [Arabidopsis thaliana] | 480 | 495 | 0         | 103.1 | 79.4 | 87.5 | RNA-binding KH domain-containing protein | gbpln | Arabidopsis thaliana | AT4G26000.1   Symbols: PEP   RNA-binding KH domain-containing protein   chr4:13197280-13199539 FORWARD LENGTH=495                                                                                                                                                                                                                                                                                                                                                                                                                                    | 480 | 495 | 0         | 103.1 | 79.4 | 87.5 |
| Rsa1.0_00205.1.g8507.t1 | ref[NP_001119059.1] uncharacterized protein [Arabidopsis thaliana] gi 332659750 gb AEE85150.1  uncharacterized protein AT4G26055 [Arabidopsis thaliana]                                                                                                                                                                                                                                                                                                                                                                                                                                                                              | 62  | 62  | 8.00E-21  | 100.0 | 79.0 | 88.7 | uncharacterized protein                  | gbpln | Arabidopsis thaliana | AT4G26055.1   Symbols:   unknown protein; FUNCTIONS IN: molecular function unknown; INVOLVED IN: biological_process unknown; LOCATED IN: endomembrane system; BEST Arabidopsis thaliana protein match is: unknown protein (TAIR:AT5G57080.1); Has 30201 Blast hits to 17322 proteins in 780 species: Archae - 12; Bacteria - 1396; Metazoa - 17338; Fungi - 3422; Plants - 5037; Viruses - 0; Other Eukaryotes - 2996 (source: NCBI BLink).   chr4:13214098-13214429 REVERSE LENGTH=62                                                               | 62  | 62  | 1.00E-23  | 100.0 | 79.0 | 88.7 |

|                         |                                                                                                                                                                                                                                                                                                                                                                                                                                                                                                                                                       |     |      |           |       |      |      |                                                                                                          |       |                      |                                                                                                                                                               |     |     |           |       |      |      |
|-------------------------|-------------------------------------------------------------------------------------------------------------------------------------------------------------------------------------------------------------------------------------------------------------------------------------------------------------------------------------------------------------------------------------------------------------------------------------------------------------------------------------------------------------------------------------------------------|-----|------|-----------|-------|------|------|----------------------------------------------------------------------------------------------------------|-------|----------------------|---------------------------------------------------------------------------------------------------------------------------------------------------------------|-----|-----|-----------|-------|------|------|
| Rsa1.0_00205.1.g8508.t1 | refNP_194336.1  ribosomal protein L18ae family protein [Arabidopsis thaliana] gi 4538935 emb CAB39671.1  putative protein [Arabidopsis thaliana] gi 7269457 emb CAB79461.1  putative protein [Arabidopsis thaliana] gi 106879161 gb ABF82610.1  At4g26060 [Arabidopsis thaliana] gi 332659751 gb AEE85151.1  ribosomal protein L18ae family protein [Arabidopsis thaliana]                                                                                                                                                                            | 135 | 133  | 7.00E-63  | 98.5  | 86.7 | 91.9 | ribosomal protein L18ae family protein                                                                   | gbpln | Arabidopsis thaliana | AT4G26060.1   Symbols:   Ribosomal protein L18ae family   chr4:13214972-13215955 REVERSE LENGTH=133                                                           | 135 | 133 | 2.00E-65  | 98.5  | 86.7 | 91.9 |
| Rsa1.0_00205.1.g8509.t1 | dbj BAJ34574.1  unnamed protein product [Thellungiella halophila]                                                                                                                                                                                                                                                                                                                                                                                                                                                                                     | 424 | 439  | 0         | 103.5 | 91.5 | 95.8 | unnamed protein product                                                                                  | ----  | ----                 | AT4G26080.1   Symbols: ABI1, AtABI1   Protein phosphatase 2C family protein   chr4:13220231-13221828 REVERSE LENGTH=434                                       | 424 | 434 | 0         | 102.4 | 86.6 | 91.5 |
| Rsa1.0_00205.1.g8510.t1 | gb AAA50234.1  nucleosome assembly protein 1-like protein; similar to mouse nap 1, PIR Accession Number JS0707, partial [Arabidopsis thaliana]                                                                                                                                                                                                                                                                                                                                                                                                        | 361 | 382  | 1.00E-135 | 105.8 | 80.6 | 92.0 | nucleosome assembly protein 1-like protein; similar to mouse nap 1, PIR Accession Number JS0707, partial | gbpln | Arabidopsis thaliana | AT4G26110.1   Symbols: NAP1:1, ATNAP1:1   nucleosome assembly protein1:1   chr4:13232712-13235502 FORWARD LENGTH=372                                          | 361 | 372 | 1.00E-137 | 103.0 | 80.6 | 92.0 |
| Rsa1.0_00205.1.g8511.t1 | gb EOA18191.1  hypothetical protein CARUB_v10006670mg [Capsella rubella]                                                                                                                                                                                                                                                                                                                                                                                                                                                                              | 335 | 337  | 1.00E-164 | 100.6 | 84.2 | 99.9 | hypothetical protein CARUB_v10006670mg                                                                   | gbpln | Capsella rubella     | AT5G23790.1   Symbols: AtGolS5, GolS5   galactinol synthase 5   chr5:8020183-8021597 REVERSE LENGTH=333                                                       | 335 | 333 | 1.00E-166 | 99.4  | 83.0 | 89.9 |
| Rsa1.0_00205.1.g8512.t1 | ref XP_002869622.1  mitochondrial ATP synthase g subunit family protein [Arabidopsis lyrata subsp. lyrata] gi 297315458 gb EFH45881.1  mitochondrial ATP synthase g subunit family protein [Arabidopsis lyrata subsp. lyrata]                                                                                                                                                                                                                                                                                                                         | 313 | 122  | 5.00E-46  | 39.0  | 31.6 | 32.3 | mitochondrial ATP synthase g subunit family protein                                                      | gbpln | Arabidopsis lyrata   | AT4G26210.2   Symbols:   Mitochondrial ATP synthase subunit G protein   chr4:13282370-13283118 FORWARD LENGTH=122                                             | 313 | 122 | 2.00E-47  | 39.0  | 30.7 | 32.3 |
| Rsa1.0_00205.1.g8513.t1 | ref XP_002867571.1  arginyl-tRNA synthetase [Arabidopsis lyrata subsp. lyrata] gi 297313407 gb EFH43830.1  arginyl-tRNA synthetase [Arabidopsis lyrata subsp. lyrata]                                                                                                                                                                                                                                                                                                                                                                                 | 594 | 590  | 0         | 99.3  | 83.8 | 91.6 | arginyl-tRNA synthetase                                                                                  | gbpln | Arabidopsis lyrata   | AT4G26300.1   Symbols: emb1027   Arginyl-tRNA synthetase, class Ic   chr4:13308400-13313109 REVERSE LENGTH=642                                                | 594 | 642 | 0         | 108.1 | 83.5 | 91.2 |
| Rsa1.0_00205.1.g8514.t1 | # # # # # # # # -                                                                                                                                                                                                                                                                                                                                                                                                                                                                                                                                     | #   | #    | #         | #     | #    | #    | -                                                                                                        | ----  | ----                 | #                                                                                                                                                             | #   | #   | #         | #     | #    | #    |
| Rsa1.0_00205.1.g8515.t2 | ref XP_002864440.1  predicted protein [Arabidopsis lyrata subsp. lyrata] gi 297310275 gb EFH40699.1  predicted protein [Arabidopsis lyrata subsp. lyrata]                                                                                                                                                                                                                                                                                                                                                                                             | 469 | 448  | 1.00E-147 | 95.5  | 54.2 | 66.1 | predicted protein                                                                                        | gbpln | Arabidopsis lyrata   | AT5G56190.1   Symbols:   Transducin/WD40 repeat-like superfamily protein   chr5:22742563-22744909 FORWARD LENGTH=441                                          | 469 | 441 | 1.00E-148 | 94.0  | 53.1 | 65.7 |
| Rsa1.0_00205.1.g8516.t1 | refNP_194393.3  DEK domain-containing chromatin associated protein [Arabidopsis thaliana] gi 79325273 ref NP_001031724.1  DEK domain-containing chromatin associated protein [Arabidopsis thaliana] gi 4938501 emb CAB43859.1  putative protein [Arabidopsis thaliana] gi 7269515 emb CAB79518.1  putative protein [Arabidopsis thaliana] gi 332659828 gb AEE85228.1  DEK domain-containing chromatin associated protein [Arabidopsis thaliana] gi 332659829 gb AEE85229.1  DEK domain-containing chromatin associated protein [Arabidopsis thaliana] | 867 | 763  | 1.00E-170 | 88.0  | 42.9 | 47.8 | DEK domain-containing chromatin associated protein                                                       | gbpln | Arabidopsis thaliana | AT4G26630.2   Symbols:   DEK domain-containing chromatin associated protein   chr4:13430873-13434877 REVERSE LENGTH=763                                       | 867 | 763 | 1.00E-173 | 88.0  | 42.9 | 47.8 |
| Rsa1.0_00205.1.g8517.t5 | gb EOA16243.1  hypothetical protein CARUB_v10004390mg [Capsella rubella]                                                                                                                                                                                                                                                                                                                                                                                                                                                                              | 99  | 615  | 1.00E-22  | 621.2 | 62.6 | 67.7 | hypothetical protein CARUB_v10004390mg                                                                   | gbpln | Capsella rubella     | AT4G26640.2   Symbols: WRKY20, AtWRKY20   WRKY family transcription factor family protein   chr4:13437298-13440693 REVERSE LENGTH=557                         | 99  | 557 | 1.00E-24  | 562.6 | 71.7 | 78.8 |
| Rsa1.0_00205.1.g8518.t1 | gb EOA28640.1  hypothetical protein CARUB_v10024862mg, partial [Capsella rubella]                                                                                                                                                                                                                                                                                                                                                                                                                                                                     | 493 | 490  | 2.00E-73  | 99.4  | 33.9 | 54.6 | hypothetical protein CARUB_v10024862mg, partial                                                          | gbpln | Capsella rubella     | AT1G52950.1   Symbols:   Nucleic acid-binding, OB-fold-like protein   chr1:19725483-19728007 FORWARD LENGTH=566                                               | 493 | 566 | 3.00E-75  | 114.8 | 32.7 | 54.6 |
| Rsa1.0_00205.1.g8519.t1 | gb AAG51081.1 AC027032.1 hypothetical protein [Arabidopsis thaliana]                                                                                                                                                                                                                                                                                                                                                                                                                                                                                  | 932 | 1678 | 0         | 180.0 | 35.6 | 47.1 | hypothetical protein                                                                                     | gbpln | Arabidopsis thaliana | AT3G51700.1   Symbols:   PIF1 helicase   chr3:19179443-19181145 REVERSE LENGTH=344                                                                            | 932 | 344 | 1.00E-71  | 36.9  | 15.0 | 20.4 |
| Rsa1.0_00205.1.g8520.t1 | gb EOA16575.1  hypothetical protein CARUB_v10004740mg [Capsella rubella]                                                                                                                                                                                                                                                                                                                                                                                                                                                                              | 59  | 467  | 3.00E-23  | 791.5 | 84.7 | 88.1 | hypothetical protein CARUB_v10004740mg                                                                   | gbpln | Capsella rubella     | AT4G26650.2   Symbols:   RNA-binding (RRM/RBD/RNP motifs) family protein   chr4:13445265-13447592 FORWARD LENGTH=452                                          | 59  | 452 | 1.00E-25  | 766.1 | 83.1 | 88.1 |
| Rsa1.0_00205.1.g8521.t1 | gb EOA17427.1  hypothetical protein CARUB_v10005731mg [Capsella rubella]                                                                                                                                                                                                                                                                                                                                                                                                                                                                              | 208 | 210  | 3.00E-94  | 101.0 | 86.1 | 92.8 | hypothetical protein CARUB_v10005731mg                                                                   | gbpln | Capsella rubella     | AT4G26670.1   Symbols:   Mitochondrial import inner membrane translocase subunit Tim17/Tim22/Tim23 family protein   chr4:13452257-13453579 FORWARD LENGTH=210 | 208 | 210 | 2.00E-96  | 101.0 | 87.5 | 91.8 |

|                         |                                                                                                                                                                                                                                                                                 |     |      |           |       |      |      |                                                 |       |                      |                                                                                                                                                                                                                                                                                                                                                                                                                                                         |     |     |           |       |      |      |
|-------------------------|---------------------------------------------------------------------------------------------------------------------------------------------------------------------------------------------------------------------------------------------------------------------------------|-----|------|-----------|-------|------|------|-------------------------------------------------|-------|----------------------|---------------------------------------------------------------------------------------------------------------------------------------------------------------------------------------------------------------------------------------------------------------------------------------------------------------------------------------------------------------------------------------------------------------------------------------------------------|-----|-----|-----------|-------|------|------|
| Rsa1.0_00205.1.g8522.t1 | refXP_002867547.1  hypothetical protein ARALYDRAFT_913883 [Arabidopsis lyrata subsp. lyrata] gi 297313383 gb EFH43806.1                                                                                                                                                         | 61  | 61   | 2.00E-24  | 100.0 | 90.2 | 93.4 | hypothetical protein ARALYDRAFT_913883          | gbpln | Arabidopsis lyrata   | AT3G11591.1   Symbols:   unknown protein; Has 30201 Blast hits to 17322 proteins in 780 species: Archae - 12; Bacteria - 1396; Metazoa - 17338; Fungi - 3422; Plants - 5037; Viruses - 0; Other Eukaryotes - 2996 (source: NCBI BLINK).   chr3:3663780-3663971 REVERSE LENGTH=63                                                                                                                                                                        | 61  | 63  | 9.00E-13  | 103.3 | 49.2 | 67.2 |
| Rsa1.0_00205.1.g8523.t3 | refXP_002867534.1  galactosyltransferase family protein [Arabidopsis lyrata subsp. lyrata] gi 297313370 gb EFH43793.1  galactosyltransferase family protein [Arabidopsis lyrata subsp. lyrata]                                                                                  | 588 | 407  | 1.00E-149 | 69.2  | 46.6 | 47.8 | galactosyltransferase family protein            | gbpln | Arabidopsis lyrata   | AT4G26940.1   Symbols:   Galactosyltransferase family protein   chr4:13529911-13532387 REVERSE LENGTH=407                                                                                                                                                                                                                                                                                                                                               | 588 | 407 | 1.00E-150 | 69.2  | 45.9 | 47.6 |
| Rsa1.0_00205.1.g8524.t1 | dbj BAF00377.1  hypothetical protein [Arabidopsis thaliana]                                                                                                                                                                                                                     | 116 | 138  | 4.00E-25  | 119.0 | 68.1 | 72.4 | hypothetical protein                            | gbpln | Arabidopsis thaliana | AT4G26960.1   Symbols:   unknown protein; FUNCTIONS IN: molecular_function unknown; INVOLVED IN: biological_process unknown; LOCATED IN: chloroplast; BEST Arabidopsis thaliana protein match is: unknown protein (TAIR:AT5G54970.1); Has 22 Blast hits to 22 proteins in 8 species: Archae - 0; Bacteria - 0; Metazoa - 0; Fungi - 0; Plants - 22; Viruses - 0; Other Eukaryotes - 0 (source: NCBI BLINK).   chr4:13538923-13539653 REVERSE LENGTH=156 | 116 | 156 | 7.00E-28  | 134.5 | 69.8 | 75.9 |
| Rsa1.0_00205.1.g8525.t2 | refXP_002869585.1  NADH:ubiquinone oxidoreductase family protein [Arabidopsis lyrata subsp. lyrata] gi 297315421 gb EFH45844.1  NADH:ubiquinone oxidoreductase family protein [Arabidopsis lyrata subsp. lyrata]                                                                | 163 | 184  | 5.00E-70  | 112.9 | 91.4 | 95.1 | NADH:ubiquinone oxidoreductase family protein   | gbpln | Arabidopsis lyrata   | AT4G26965.1   Symbols:   NADH:ubiquinone oxidoreductase, 17.2kDa subunit   chr4:13539717-13542041 FORWARD LENGTH=184                                                                                                                                                                                                                                                                                                                                    | 163 | 184 | 3.00E-70  | 112.9 | 89.6 | 93.3 |
| Rsa1.0_00205.1.g8526.t1 | gb EOA16728.1  hypothetical protein CARUB_v10004931mg [Capsella rubella]                                                                                                                                                                                                        | 418 | 413  | 1.00E-148 | 98.8  | 72.0 | 76.3 | hypothetical protein CARUB_v10004931mg          | gbpln | Capsella rubella     | AT4G27000.1   Symbols:   ATRBP45C   RNA-binding (RRM/RBD/RNP motifs) family protein   chr4:13554983-13557763 REVERSE LENGTH=415                                                                                                                                                                                                                                                                                                                         | 418 | 415 | 1.00E-147 | 99.3  | 72.5 | 76.3 |
| Rsa1.0_00205.1.g8527.t1 | gb AAG51783.1 AC079679_3 reverse transcriptase, putative; 16838-20266 [Arabidopsis thaliana]                                                                                                                                                                                    | 178 | 1142 | 2.00E-32  | 641.6 | 45.5 | 53.9 | reverse transcriptase, putative; 16838-20266    | gbpln | Arabidopsis thaliana | AT2G34320.1   Symbols:   Polynucleotidyl transferase, ribonuclease H-like superfamily protein   chr2:14484959-14485837 FORWARD LENGTH=292                                                                                                                                                                                                                                                                                                               | 178 | 292 | 9.00E-13  | 164.0 | 25.8 | 44.4 |
| Rsa1.0_00205.1.g8528.t1 | #                                                                                                                                                                                                                                                                               | #   | #    | #         | #     | #    | -    | -                                               | ----  | ----                 | #                                                                                                                                                                                                                                                                                                                                                                                                                                                       | #   | #   | #         | #     | #    |      |
| Rsa1.0_00205.1.g8529.t1 | #                                                                                                                                                                                                                                                                               | #   | #    | #         | #     | #    | -    | -                                               | ----  | ----                 | #                                                                                                                                                                                                                                                                                                                                                                                                                                                       | #   | #   | #         | #     | #    |      |
| Rsa1.0_00205.1.g8530.t1 | refNP_194433.1  fatty acid desaturase A [Arabidopsis thaliana] gi 4455226 emb CAB36549.1  putative protein [Arabidopsis thaliana] gi 7269556 emb CAB79588.1  putative protein [Arabidopsis thaliana] gi 332659886 gb AEE85286.1  fatty acid desaturase A [Arabidopsis thaliana] | 290 | 323  | 1.00E-120 | 111.4 | 74.5 | 83.4 | fatty acid desaturase A                         | gbpln | Arabidopsis thaliana | AT4G27030.1   Symbols:   FAD4, FADA   fatty acid desaturase A   chr4:13571951-13572922 FORWARD LENGTH=323                                                                                                                                                                                                                                                                                                                                               | 290 | 323 | 1.00E-122 | 111.4 | 74.5 | 83.4 |
| Rsa1.0_00205.1.g8531.t1 | gb EOA18002.1  hypothetical protein CARUB_v10006437mg [Capsella rubella]                                                                                                                                                                                                        | 294 | 313  | 1.00E-150 | 106.5 | 88.1 | 93.2 | hypothetical protein CARUB_v10006437mg          | gbpln | Capsella rubella     | AT4G27030.1   Symbols:   FAD4, FADA   fatty acid desaturase A   chr4:13571951-13572922 FORWARD LENGTH=323                                                                                                                                                                                                                                                                                                                                               | 294 | 323 | 1.00E-147 | 109.9 | 86.1 | 92.9 |
| Rsa1.0_00205.1.g8532.t1 | gb EOA15725.1  hypothetical protein CARUB_v10006633mg, partial [Capsella rubella]                                                                                                                                                                                               | 161 | 483  | 2.00E-31  | 300.0 | 43.5 | 64.0 | hypothetical protein CARUB_v10006633mg, partial | gbpln | Capsella rubella     | AT1G52950.1   Symbols:   Nucleic acid-binding, OB-fold-like protein   chr1:19725483-19728007 FORWARD LENGTH=566                                                                                                                                                                                                                                                                                                                                         | 161 | 566 | 8.00E-18  | 351.6 | 30.4 | 52.8 |
| Rsa1.0_00205.1.g8533.t1 | #                                                                                                                                                                                                                                                                               | #   | #    | #         | #     | #    | -    | -                                               | ----  | ----                 | AT4G28890.1   Symbols:   RING/U-box superfamily protein   chr4:14256437-14257735 REVERSE LENGTH=432                                                                                                                                                                                                                                                                                                                                                     | 73  | 432 | 3.00E-11  | 591.8 | 43.8 | 47.9 |
| Rsa1.0_00205.1.g8534.t2 | gb EOA33328.1  hypothetical protein CARUB_v10022104mg [Capsella rubella]                                                                                                                                                                                                        | 278 | 298  | 1.00E-104 | 107.2 | 68.0 | 79.5 | hypothetical protein CARUB_v10022104mg          | gbpln | Capsella rubella     | AT5G65370.1   Symbols:   ENTH/ANTH/VHS superfamily protein   chr5:26121708-26122749 FORWARD LENGTH=295                                                                                                                                                                                                                                                                                                                                                  | 278 | 295 | 1.00E-105 | 106.1 | 65.8 | 77.0 |

|                         |                                                                                                                                                                                                                                                                                                                                                                                                                                                                                                                                                                                                                                                                |     |     |          |       |      |      |                                                                                                                                                                                                           |       |                      |                                                                                                                                                    |     |     |          |       |      |      |
|-------------------------|----------------------------------------------------------------------------------------------------------------------------------------------------------------------------------------------------------------------------------------------------------------------------------------------------------------------------------------------------------------------------------------------------------------------------------------------------------------------------------------------------------------------------------------------------------------------------------------------------------------------------------------------------------------|-----|-----|----------|-------|------|------|-----------------------------------------------------------------------------------------------------------------------------------------------------------------------------------------------------------|-------|----------------------|----------------------------------------------------------------------------------------------------------------------------------------------------|-----|-----|----------|-------|------|------|
| Rsa1.0_00205.1.g8535.t1 | ref[NP_567765.2] protein PDI-like 5-4 [Arabidopsis thaliana] gi 75213708 sp Q9T042.1 PDI54_ARATH RecName: Full=Protein disulfide-isomerase 5-4; Short=AtPDIL5-4; AltName: Full=Protein disulfide-isomerase 7; Short=PD17; AltName: Full=Protein disulfide-isomerase 8-2; Short=AtPDIL8-2; Flags: Precursor gi 4490704 emb CAB38838.1  putative protein [Arabidopsis thaliana] gi 7269561 emb CAB79563.1  putative protein [Arabidopsis thaliana] gi 15450832 gb AAK96687.1  putative protein [Arabidopsis thaliana] gi 20259836 gb AAM13265.1  putative protein [Arabidopsis thaliana] gi 332659897 gb AEE85297.1  protein PDI-like 5-4 [Arabidopsis thaliana] | 503 | 480 | 0        | 95.4  | 82.9 | 89.7 | protein PDI-like 5-4                                                                                                                                                                                      | gbpln | Arabidopsis thaliana | AT4G27080.1   Symbols: ATPDIL5-4, ATPD17, PD17, PDIL5-4   PDI-like 5-4   chr4:13589156-13593335 FORWARD LENGTH=480                                 | 503 | 480 | 0        | 95.4  | 82.9 | 89.7 |
| Rsa1.0_00205.1.g8536.t1 | gb EOA17638.1  hypothetical protein CARUB_v10006004mg [Capsella rubella]                                                                                                                                                                                                                                                                                                                                                                                                                                                                                                                                                                                       | 134 | 134 | 3.00E-67 | 100.0 | 97.0 | 99.3 | hypothetical protein CARUB_v10006004mg                                                                                                                                                                    | gbpln | Capsella rubella     | AT4G27090.1   Symbols:   Ribosomal protein L14   chr4:13594104-13595187 REVERSE LENGTH=134                                                         | 134 | 134 | 7.00E-69 | 100.0 | 96.3 | 98.5 |
| Rsa1.0_00205.1.g8537.t1 | emb CAB38841.1  putative protein [Arabidopsis thaliana] gi 7269564 emb CAB79566.1  putative protein [Arabidopsis thaliana]                                                                                                                                                                                                                                                                                                                                                                                                                                                                                                                                     | 820 | 717 | 0        | 87.4  | 69.5 | 75.1 | putative protein                                                                                                                                                                                          | gbpln | Arabidopsis thaliana | AT4G27110.1   Symbols: COBL11   COBRA-like protein 11 precursor   chr4:13599236-13601521 REVERSE LENGTH=668                                        | 820 | 668 | 0        | 81.5  | 64.6 | 69.8 |
| Rsa1.0_00205.1.g8538.t1 | sp P27740.1 2SSB BRANA RecName: Full=Napin-B; AltName: Full=1.7S seed storage protein; Contains: RecName: Full=Napin-B small chain; Contains: RecName: Full=Napin-B large chain; Flags: Precursor gi 17835 emb CAA41150.1  napin [Brassica napus]                                                                                                                                                                                                                                                                                                                                                                                                              | 174 | 178 | 4.00E-56 | 102.3 | 71.8 | 82.2 | RecName: Full=Napin-B; AltName: Full=1.7S seed storage protein; Contains: RecName: Full=Napin-B small chain; Contains: RecName: Full=Napin-B large chain; Flags: Precursor gi 17835 emb CAA41150.1  napin | gbpln | Brassica napus       | AT4G27170.1   Symbols: SES4, AT2S4   seed storage albumin 4   chr4:13613637-13614137 FORWARD LENGTH=166                                            | 174 | 166 | 4.00E-52 | 95.4  | 59.2 | 72.4 |
| Rsa1.0_00205.1.g8539.t1 | ref XP_002869569.1  hypothetical protein ARALYDRAFT_913814 [Arabidopsis lyrata subsp. lyrata] gi 297315405 gb EFH45828.1  hypothetical protein ARALYDRAFT_913814 [Arabidopsis lyrata subsp. lyrata]                                                                                                                                                                                                                                                                                                                                                                                                                                                            | 178 | 191 | 2.00E-46 | 107.3 | 55.6 | 61.8 | hypothetical protein ARALYDRAFT_913814                                                                                                                                                                    | gbpln | Arabidopsis lyrata   | AT4G27310.1   Symbols:   B-box type zinc finger family protein   chr4:13675853-13676616 FORWARD LENGTH=223                                         | 178 | 223 | 3.00E-45 | 125.3 | 57.9 | 67.4 |
| Rsa1.0_00205.1.g8540.t1 | gb AAD22702.1  putative TNP1-like transposon protein [Arabidopsis thaliana]                                                                                                                                                                                                                                                                                                                                                                                                                                                                                                                                                                                    | 187 | 531 | 7.00E-49 | 284.0 | 51.9 | 71.1 | putative TNP1-like transposon protein                                                                                                                                                                     | gbpln | Arabidopsis thaliana | #                                                                                                                                                  | #   | #   | #        | #     | #    | #    |
| Rsa1.0_00205.1.g8541.t1 | gb EOA17257.1  hypothetical protein CARUB_v10005532mg [Capsella rubella]                                                                                                                                                                                                                                                                                                                                                                                                                                                                                                                                                                                       | 213 | 260 | 3.00E-71 | 122.1 | 79.3 | 82.6 | hypothetical protein CARUB_v10005532mg                                                                                                                                                                    | gbpln | Capsella rubella     | AT4G27320.1   Symbols: ATPHOS34, PHOS34   Adenine nucleotide alpha hydrolases-like superfamily protein   chr4:13678860-13680717 REVERSE LENGTH=260 | 213 | 260 | 2.00E-71 | 122.1 | 78.4 | 81.2 |
| Rsa1.0_00205.1.g8542.t1 | sp Q9LUJ6.1 FB176 ARATH RecName: Full=Putative F-box protein At3g22650 gi 9279683 dbj BAB01240.1  unnamed protein product [Arabidopsis thaliana]                                                                                                                                                                                                                                                                                                                                                                                                                                                                                                               | 447 | 383 | 1.00E-46 | 85.7  | 30.4 | 47.2 | RecName: Full=Putative F-box protein At3g22650 gi 9279683 dbj BAB01240.1  unnamed protein product                                                                                                         | gbpln | Arabidopsis thaliana | AT3G22650.1   Symbols: AT3FL61, SFL61, CEG   F-box and associated interaction domains-containing protein   chr3:8014809-8015960 FORWARD LENGTH=372 | 447 | 372 | 6.00E-43 | 83.2  | 29.1 | 45.4 |
| Rsa1.0_00205.1.g8543.t1 | gb ADE43101.1  restricted tev movement 3 [Arabidopsis thaliana] gi 302608327 emb CBW45911.1  RTM3 protein [Arabidopsis thaliana] gi 302608852 emb CBW45917.1  RTM3 protein [Arabidopsis thaliana] gi 302608858 emb CBW45920.1  RTM3 protein [Arabidopsis thaliana] gi 302608870 emb CBW45926.1  RTM3 protein [Arabidopsis thaliana] gi 302608876 emb CBW45929.1  RTM3 protein [Arabidopsis thaliana] gi 302608878 emb CBW45930.1  RTM3 protein [Arabidopsis thaliana] gi 302608888 emb CBW45935.1  RTM3 protein [Arabidopsis thaliana] gi 302608892 emb CBW45937.1  RTM3 protein [Arabidopsis thaliana]                                                        | 84  | 301 | 1.00E-23 | 358.3 | 72.6 | 85.7 | restricted tev movement 3                                                                                                                                                                                 | gbpln | Arabidopsis thaliana | AT3G58350.1   Symbols: RTM3   RESTRICTED TEV MOVEMENT 3   chr3:21591618-21592836 REVERSE LENGTH=301                                                | 84  | 301 | 6.00E-26 | 358.3 | 71.4 | 84.5 |
| Rsa1.0_00205.1.g8544.t1 | #                                                                                                                                                                                                                                                                                                                                                                                                                                                                                                                                                                                                                                                              | #   | #   | #        | #     | #    | -    | ----                                                                                                                                                                                                      | ----  | ----                 | #                                                                                                                                                  | #   | #   | #        | #     | #    | #    |
| Rsa1.0_00205.1.g8545.t3 | gb ABJ88950.2  glyoxalase I [Arachis hypogaea]                                                                                                                                                                                                                                                                                                                                                                                                                                                                                                                                                                                                                 | 280 | 187 | 6.00E-35 | 66.8  | 32.5 | 33.6 | glyoxalase I                                                                                                                                                                                              | gbpln | Arachis hypogaea     | AT1G64100.2   Symbols:   pentatricopeptide (PPR) repeat-containing protein   chr1:23791585-23795563 FORWARD LENGTH=806                             | 280 | 806 | 2.00E-37 | 287.9 | 27.1 | 33.9 |

|                          |                                                                                                                                                                                                                                                                                                                                                                                                                                                                                                                                                                                                                                                                                                                                                                                                                                                                                                                                                                                                                                                                            |      |      |           |       |      |      |                                                                            |       |                      |                                                                                                                                                                                                                                                                                                                                             |      |      |           |       |      |      |
|--------------------------|----------------------------------------------------------------------------------------------------------------------------------------------------------------------------------------------------------------------------------------------------------------------------------------------------------------------------------------------------------------------------------------------------------------------------------------------------------------------------------------------------------------------------------------------------------------------------------------------------------------------------------------------------------------------------------------------------------------------------------------------------------------------------------------------------------------------------------------------------------------------------------------------------------------------------------------------------------------------------------------------------------------------------------------------------------------------------|------|------|-----------|-------|------|------|----------------------------------------------------------------------------|-------|----------------------|---------------------------------------------------------------------------------------------------------------------------------------------------------------------------------------------------------------------------------------------------------------------------------------------------------------------------------------------|------|------|-----------|-------|------|------|
| Rsa1.0_00205.1.g8546.t1  | refNP_200248.1   late embryogenesis abundant protein-like protein [Arabidopsis thaliana] gi 10257484 dbj BAB10109.1   root cap protein 2-like protein [Arabidopsis thaliana] gi 71143048 gb AAZ23915.1   At5g54370 [Arabidopsis thaliana] gi 332009106 gb AED96489.1   late embryogenesis abundant protein-like protein [Arabidopsis thaliana] ref NP_194478.3   Core-2/1-branching beta-1,6-N-acetylglucosaminyltransferase family protein [Arabidopsis thaliana] gi 186514118 ref NP_001119069.1   Core-2/1-branching beta-1,6-N-acetylglucosaminyltransferase family protein [Arabidopsis thaliana] gi 332659947 gb AEE85347.1   Core-2/1-branching beta-1,6-N-acetylglucosaminyltransferase family protein [Arabidopsis thaliana] gi 332659948 gb AEE85348.1   Core-2/1-branching beta-1,6-N-acetylglucosaminyltransferase family protein [Arabidopsis thaliana] ref XP_002869559.1   hypothetical protein ARALYDRAFT_328945 [Arabidopsis lyrata subsp. lyrata] gi 297315395 gb EFH45818.1   hypothetical protein ARALYDRAFT_328945 [Arabidopsis lyrata subsp. lyrata] | 338  | 337  | 1.00E-130 | 99.7  | 66.9 | 78.7 | late embryogenesis abundant protein-like protein                           | gbpln | Arabidopsis thaliana | AT5G54370.1   Symbols:   Late embryogenesis abundant (LEA) protein-related   chr5:22075334-22076567 FORWARD LENGTH=337                                                                                                                                                                                                                      | 338  | 337  | 1.00E-132 | 99.7  | 66.9 | 78.7 |
| Rsa1.0_00205.1.g8547.t1  | refXP_002869559.1   hypothetical protein ARALYDRAFT_328945 [Arabidopsis lyrata subsp. lyrata] gi 297315395 gb EFH45818.1   hypothetical protein ARALYDRAFT_328945 [Arabidopsis lyrata subsp. lyrata]                                                                                                                                                                                                                                                                                                                                                                                                                                                                                                                                                                                                                                                                                                                                                                                                                                                                       | 421  | 421  | 0         | 100.0 | 90.5 | 94.8 | Core-2/1-branching beta-1,6-N-acetylglucosaminyltransferase family protein | gbpln | Arabidopsis thaliana | AT4G27480.2   Symbols:   Core-2/1-branching beta-1,6-N-acetylglucosaminyltransferase family protein   chr4:13736835-13738317 REVERSE LENGTH=421                                                                                                                                                                                             | 421  | 421  | 0         | 100.0 | 90.5 | 94.8 |
| Rsa1.0_00205.1.g8548.t1  | refXP_002869558.1   hypothetical protein ARALYDRAFT_492040 [Arabidopsis lyrata subsp. lyrata] gi 297315394 gb EFH45817.1   hypothetical protein ARALYDRAFT_492040 [Arabidopsis lyrata subsp. lyrata]                                                                                                                                                                                                                                                                                                                                                                                                                                                                                                                                                                                                                                                                                                                                                                                                                                                                       | 621  | 617  | 0         | 99.4  | 77.8 | 86.8 | hypothetical protein ARALYDRAFT_328945                                     | gbpln | Arabidopsis lyrata   | AT4G27500.1   Symbols: PPI1   proton pump interactor 1   chr4:13743614-13745900 FORWARD LENGTH=612                                                                                                                                                                                                                                          | 621  | 612  | 0         | 98.6  | 75.0 | 83.7 |
| Rsa1.0_00205.1.g8549.t1  | refXP_002869558.1   hypothetical protein ARALYDRAFT_492040 [Arabidopsis lyrata subsp. lyrata] gi 297315394 gb EFH45817.1   hypothetical protein ARALYDRAFT_492040 [Arabidopsis lyrata subsp. lyrata]                                                                                                                                                                                                                                                                                                                                                                                                                                                                                                                                                                                                                                                                                                                                                                                                                                                                       | 131  | 132  | 2.00E-34  | 100.8 | 63.4 | 80.9 | hypothetical protein ARALYDRAFT_492040                                     | gbpln | Arabidopsis lyrata   | AT4G27530.1   Symbols:   unknown protein; BEST Arabidopsis thaliana protein match is: unknown protein (TAIR:AT5G53895.1); Has 14 Blast hits to 14 proteins in 3 species: Archae - 0; Bacteria - 0; Metazoa - 0; Fungi - 0; Plants - 14; Viruses - 0; Other Eukaryotes - 0 (source: NCBI BLINK).   chr4:13752640-13753122 FORWARD LENGTH=130 | 131  | 130  | 6.00E-37  | 99.2  | 61.1 | 79.4 |
| Rsa1.0_00205.1.g8550.t1  | gb EOA33547.1   hypothetical protein CARUB_v10019666mg [Capsella rubella]                                                                                                                                                                                                                                                                                                                                                                                                                                                                                                                                                                                                                                                                                                                                                                                                                                                                                                                                                                                                  | 1368 | 1348 | 0         | 98.5  | 59.1 | 72.4 | hypothetical protein CARUB_v10019666mg                                     | gbpln | Capsella rubella     | AT1G65010.1   Symbols:   Plant protein of unknown function (DUF827)   chr1:24149543-24154024 FORWARD LENGTH=1345                                                                                                                                                                                                                            | 1368 | 1345 | 0         | 98.3  | 58.9 | 72.4 |
| Rsa1.0_00206.1.g8551.t12 | refXP_002869986.1   protein binding protein [Arabidopsis lyrata subsp. lyrata] gi 297315822 gb EFH46245.1   protein binding protein [Arabidopsis lyrata subsp. lyrata]                                                                                                                                                                                                                                                                                                                                                                                                                                                                                                                                                                                                                                                                                                                                                                                                                                                                                                     | 2563 | 1044 | 0         | 40.7  | 37.1 | 38.7 | protein binding protein                                                    | gbpln | Arabidopsis lyrata   | AT4G19490.2   Symbols: ATVPS54, VPS54   VPS54   chr4:10616017-10622934 FORWARD LENGTH=1034                                                                                                                                                                                                                                                  | 2563 | 1034 | 0         | 40.3  | 36.5 | 38.1 |
| Rsa1.0_00206.1.g8552.t1  | #                                                                                                                                                                                                                                                                                                                                                                                                                                                                                                                                                                                                                                                                                                                                                                                                                                                                                                                                                                                                                                                                          | #    | #    | #         | #     | #    | #    | -                                                                          | ----  | ----                 | #                                                                                                                                                                                                                                                                                                                                           | #    | #    | #         | #     | #    |      |
| Rsa1.0_00206.1.g8553.t1  | gb EOA18464.1   hypothetical protein CARUB_v10007010mg [Capsella rubella]                                                                                                                                                                                                                                                                                                                                                                                                                                                                                                                                                                                                                                                                                                                                                                                                                                                                                                                                                                                                  | 723  | 364  | 1.00E-47  | 50.3  | 13.7 | 15.9 | hypothetical protein CARUB_v10007010mg                                     | gbpln | Capsella rubella     | AT4G19570.1   Symbols:   Chaperone DnaJ-domain superfamily protein   chr4:10665516-10667192 FORWARD LENGTH=558                                                                                                                                                                                                                              | 723  | 558  | 2.00E-49  | 77.2  | 13.7 | 17.0 |
| Rsa1.0_00206.1.g8554.t1  | refNP_193694.1   chaperone DnaJ-domain containing protein [Arabidopsis thaliana] gi 2853086 emb CAA16936.1   putative protein [Arabidopsis thaliana] gi 7268755 emb CAB78961.1   putative protein [Arabidopsis thaliana] gi 332658802 gb AEE84202.1   chaperone DnaJ-domain containing protein [Arabidopsis thaliana]                                                                                                                                                                                                                                                                                                                                                                                                                                                                                                                                                                                                                                                                                                                                                      | 525  | 345  | 3.00E-60  | 65.7  | 20.2 | 23.0 | chaperone DnaJ-domain containing protein                                   | gbpln | Arabidopsis thaliana | AT4G19590.1   Symbols:   Chaperone DnaJ-domain superfamily protein   chr4:10671199-10672290 FORWARD LENGTH=345                                                                                                                                                                                                                              | 525  | 345  | 6.00E-63  | 65.7  | 20.2 | 23.0 |
| Rsa1.0_00206.1.g8555.t1  | refNP_193696.3   nucleotide/nucleic acid binding protein [Arabidopsis thaliana] gi 332658804 gb AEE84204.1   nucleotide/nucleic acid binding protein [Arabidopsis thaliana]                                                                                                                                                                                                                                                                                                                                                                                                                                                                                                                                                                                                                                                                                                                                                                                                                                                                                                | 1563 | 816  | 0         | 52.2  | 37.5 | 43.1 | nucleotide/nucleic acid binding protein                                    | gbpln | Arabidopsis thaliana | AT4G19610.1   Symbols:   nucleotide binding/nucleic acid binding/RNA binding   chr4:10677482-10681623 FORWARD LENGTH=816                                                                                                                                                                                                                    | 1563 | 816  | 0         | 52.2  | 37.5 | 43.1 |
| Rsa1.0_00206.1.g8556.t1  | #                                                                                                                                                                                                                                                                                                                                                                                                                                                                                                                                                                                                                                                                                                                                                                                                                                                                                                                                                                                                                                                                          | #    | #    | #         | #     | #    | #    | -                                                                          | ----  | ----                 | #                                                                                                                                                                                                                                                                                                                                           | #    | #    | #         | #     | #    |      |
| Rsa1.0_00206.1.g8557.t3  | gb EOA17450.1   hypothetical protein CARUB_v10005769mg [Capsella rubella]                                                                                                                                                                                                                                                                                                                                                                                                                                                                                                                                                                                                                                                                                                                                                                                                                                                                                                                                                                                                  | 864  | 201  | 1.00E-105 | 23.3  | 21.8 | 22.1 | hypothetical protein CARUB_v10005769mg                                     | gbpln | Capsella rubella     | AT4G19640.1   Symbols: ARA7, ARA-7, ATRABF2B, ATRAB5B, RABF2B, ATRAB-F2B, RAB-F2B   Ras-related small GTP-binding family protein   chr4:10687441-10689449 REVERSE LENGTH=200                                                                                                                                                                | 864  | 200  | 1.00E-106 | 23.1  | 21.4 | 21.9 |



|                         |                                                                                                                                                                                                                                                                                                                                                                                                                                                                                                                                                                                  |     |     |           |       |      |      |                                                  |       |                      |                                                                                                                                                    |     |     |           |       |      |      |
|-------------------------|----------------------------------------------------------------------------------------------------------------------------------------------------------------------------------------------------------------------------------------------------------------------------------------------------------------------------------------------------------------------------------------------------------------------------------------------------------------------------------------------------------------------------------------------------------------------------------|-----|-----|-----------|-------|------|------|--------------------------------------------------|-------|----------------------|----------------------------------------------------------------------------------------------------------------------------------------------------|-----|-----|-----------|-------|------|------|
| Rsa1.0_00206.1.g8558.t1 | refXP_002867929.1   hypothetical protein ARALYDRAFT_492902 [Arabidopsis lyrata subsp. lyrata] gi 297313765 gb EFH44186.1   hypothetical protein ARALYDRAFT_492902 [Arabidopsis lyrata subsp. lyrata]                                                                                                                                                                                                                                                                                                                                                                             | 268 | 268 | 1.00E-135 | 100.0 | 87.7 | 93.3 | hypothetical protein ARALYDRAFT_492902           | gbpln | Arabidopsis lyrata   | AT4G19645.2   Symbols:   TRAM, LAG1 and CLN8 (TLC) lipid-sensing domain containing protein   chr4:10689941-10691298 REVERSE LENGTH=268             | 268 | 268 | 1.00E-134 | 100.0 | 85.4 | 91.8 |
| Rsa1.0_00206.1.g8559.t1 | #                                                                                                                                                                                                                                                                                                                                                                                                                                                                                                                                                                                | #   | #   | #         | #     | #    | #    | -                                                | ----  | ----                 | #                                                                                                                                                  | #   | #   | #         | #     | #    |      |
| Rsa1.0_00206.1.g8560.t1 | gb EOA16280.1   hypothetical protein CARUB_v10004425mg [Capsella rubella]                                                                                                                                                                                                                                                                                                                                                                                                                                                                                                        | 579 | 592 | 0         | 102.2 | 83.8 | 91.9 | hypothetical protein CARUB_v10004425mg           | gbpln | Capsella rubella     | AT4G19650.1   Symbols:   Mitochondrial transcription termination factor family protein   chr4:10691674-10695166 FORWARD LENGTH=575                 | 579 | 575 | 0         | 99.3  | 72.0 | 78.4 |
| Rsa1.0_00206.1.g8561.t1 | refXP_002867927.1   hypothetical protein ARALYDRAFT_354789 [Arabidopsis lyrata subsp. lyrata] gi 297313763 gb EFH44186.1   hypothetical protein ARALYDRAFT_354789 [Arabidopsis lyrata subsp. lyrata]                                                                                                                                                                                                                                                                                                                                                                             | 767 | 777 | 0         | 101.3 | 68.8 | 80.1 | hypothetical protein ARALYDRAFT_354789           | gbpln | Arabidopsis lyrata   | AT3G18100.1   Symbols: MYB4R1, AtMYB4R1   myb domain protein 4r1   chr3:6200689-6204583 FORWARD LENGTH=847                                         | 767 | 847 | 0         | 110.4 | 62.3 | 74.6 |
| Rsa1.0_00206.1.g8562.t1 | dbj BAJ34281.1   unnamed protein product [Thellungiella halophila]                                                                                                                                                                                                                                                                                                                                                                                                                                                                                                               | 675 | 588 | 0         | 87.1  | 75.1 | 79.9 | unnamed protein product                          | ----  | ----                 | AT4G19660.1   Symbols: NPR4, ATNPR4   NPR1-like protein 4   chr4:10696266-10698243 REVERSE LENGTH=574                                              | 675 | 574 | 0         | 85.0  | 67.9 | 74.2 |
| Rsa1.0_00206.1.g8563.t1 | refXP_002867925.1   zinc finger family protein [Arabidopsis lyrata subsp. lyrata] gi 297313761 gb EFH44184.1   zinc finger family protein [Arabidopsis lyrata subsp. lyrata]                                                                                                                                                                                                                                                                                                                                                                                                     | 543 | 532 | 0         | 98.0  | 85.1 | 91.7 | zinc finger family protein                       | gbpln | Arabidopsis lyrata   | AT4G19670.2   Symbols:   RING/U-box superfamily protein   chr4:10699383-10701342 REVERSE LENGTH=532                                                | 543 | 532 | 0         | 98.0  | 84.0 | 91.0 |
| Rsa1.0_00206.1.g8564.t1 | ref NP_001031670.1   Fe(2+) transport protein 2 [Arabidopsis thaliana] gi 37079162 sp O81850.1 IRT2_ARATH RecName: Full=Fe(2+) transport protein 2; AltName: Full=Fe(II) transport protein 2; AltName: Full=Iron-regulated transporter 2; Flags: Precursor gi 3250677 emb CAA19685.1   putative Fe(II) transport protein [Arabidopsis thaliana] gi 7268764 emb CAB78970.1   putative Fe(II) transport protein [Arabidopsis thaliana] gi 56461764 gb AAV91338.1   At4g19680 [Arabidopsis thaliana] gi 332658815 gb AEE84215.1   Fe(2+) transport protein 2 [Arabidopsis thaliana] | 359 | 350 | 1.00E-172 | 97.5  | 85.5 | 90.8 | Fe(2+) transport protein 2                       | gbpln | Arabidopsis thaliana | AT4G19680.2   Symbols: IRT2   iron regulated transporter 2   chr4:10703385-10704621 FORWARD LENGTH=350                                             | 359 | 350 | 1.00E-174 | 97.5  | 85.5 | 90.8 |
| Rsa1.0_00206.1.g8565.t1 | gb EOA18607.1   hypothetical protein CARUB_v10007180mg [Capsella rubella]                                                                                                                                                                                                                                                                                                                                                                                                                                                                                                        | 339 | 345 | 1.00E-161 | 101.8 | 83.5 | 90.9 | hypothetical protein CARUB_v10007180mg           | gbpln | Capsella rubella     | AT4G19690.2   Symbols: IRT1   iron-regulated transporter 1   chr4:10707487-10708723 FORWARD LENGTH=347                                             | 339 | 347 | 1.00E-158 | 102.4 | 82.3 | 89.7 |
| Rsa1.0_00206.1.g8566.t1 | #                                                                                                                                                                                                                                                                                                                                                                                                                                                                                                                                                                                | #   | #   | #         | #     | #    | #    | -                                                | ----  | ----                 | AT4G09490.1   Symbols:   Polynucleotidyl transferase, ribonuclease H-like superfamily protein   chr4:6015583-6016575 REVERSE LENGTH=170            | 93  | 170 | 6.00E-13  | 182.8 | 41.9 | 63.4 |
| Rsa1.0_00206.1.g8567.t1 | gb EOA18607.1   hypothetical protein CARUB_v10007180mg [Capsella rubella]                                                                                                                                                                                                                                                                                                                                                                                                                                                                                                        | 345 | 345 | 0         | 100.0 | 90.7 | 95.7 | hypothetical protein CARUB_v10007180mg           | gbpln | Capsella rubella     | AT4G19690.2   Symbols: IRT1   iron-regulated transporter 1   chr4:10707487-10708723 FORWARD LENGTH=347                                             | 345 | 347 | 1.00E-176 | 100.6 | 90.7 | 95.4 |
| Rsa1.0_00206.1.g8568.t1 | gb EOA18607.1   hypothetical protein CARUB_v10007180mg [Capsella rubella]                                                                                                                                                                                                                                                                                                                                                                                                                                                                                                        | 345 | 345 | 0         | 100.0 | 90.4 | 96.5 | hypothetical protein CARUB_v10007180mg           | gbpln | Capsella rubella     | AT4G19690.2   Symbols: IRT1   iron-regulated transporter 1   chr4:10707487-10708723 FORWARD LENGTH=347                                             | 345 | 347 | 1.00E-176 | 100.6 | 89.3 | 95.4 |
| Rsa1.0_00207.1.g8569.t1 | #                                                                                                                                                                                                                                                                                                                                                                                                                                                                                                                                                                                | #   | #   | #         | #     | #    | #    | -                                                | ----  | ----                 | #                                                                                                                                                  | #   | #   | #         | #     | #    |      |
| Rsa1.0_00207.1.g8570.t1 | ref NP_200248.1   late embryogenesis abundant protein-like protein [Arabidopsis thaliana] gi 10257484 dbj BAB10109.1   root cap protein 2-like protein [Arabidopsis thaliana] gi 71143048 gb AAZ23915.1   At5g54370 [Arabidopsis thaliana] gi 332009106 gb AED96489.1   late embryogenesis abundant protein-like protein [Arabidopsis thaliana]                                                                                                                                                                                                                                  | 337 | 337 | 0         | 100.0 | 92.0 | 97.6 | late embryogenesis abundant protein-like protein | gbpln | Arabidopsis thaliana | AT5G54370.1   Symbols:   Late embryogenesis abundant (LEA) protein-related   chr5:22075334-22076567 FORWARD LENGTH=337                             | 337 | 337 | 0         | 100.0 | 92.0 | 97.6 |
| Rsa1.0_00207.1.g8571.t1 | gb EOA12897.1   hypothetical protein CARUB_v10025871mg [Capsella rubella]                                                                                                                                                                                                                                                                                                                                                                                                                                                                                                        | 837 | 860 | 0         | 102.7 | 84.3 | 90.0 | hypothetical protein CARUB_v10025871mg           | gbpln | Capsella rubella     | AT5G54380.1   Symbols: THE1   protein kinase family protein   chr5:22077313-22079880 REVERSE LENGTH=855                                            | 837 | 855 | 0         | 102.2 | 85.1 | 90.8 |
| Rsa1.0_00207.1.g8572.t1 | refXP_002864334.1   hypothetical protein ARALYDRAFT_918574 [Arabidopsis lyrata subsp. lyrata] gi 297310169 gb EFH40593.1   hypothetical protein ARALYDRAFT_918574 [Arabidopsis lyrata subsp. lyrata]                                                                                                                                                                                                                                                                                                                                                                             | 251 | 247 | 1.00E-76  | 98.4  | 78.1 | 84.9 | hypothetical protein ARALYDRAFT_918574           | gbpln | Arabidopsis lyrata   | AT5G54430.1   Symbols: ATPHOS32, PHOS32   Adenine nucleotide alpha hydrolases-like superfamily protein   chr5:22097563-22099693 REVERSE LENGTH=242 | 251 | 242 | 5.00E-78  | 96.4  | 77.7 | 83.7 |
| Rsa1.0_00207.1.g8573.t2 | #                                                                                                                                                                                                                                                                                                                                                                                                                                                                                                                                                                                | #   | #   | #         | #     | #    | #    | -                                                | ----  | ----                 | #                                                                                                                                                  | #   | #   | #         | #     | #    |      |

|                         |                                                                                                                                                                                                                                                                                                                                                                                                                                                                                                     |     |      |           |       |      |      |                                             |       |                      |                                                                                                                                                                                                                                                                                     |     |      |           |       |      |      |
|-------------------------|-----------------------------------------------------------------------------------------------------------------------------------------------------------------------------------------------------------------------------------------------------------------------------------------------------------------------------------------------------------------------------------------------------------------------------------------------------------------------------------------------------|-----|------|-----------|-------|------|------|---------------------------------------------|-------|----------------------|-------------------------------------------------------------------------------------------------------------------------------------------------------------------------------------------------------------------------------------------------------------------------------------|-----|------|-----------|-------|------|------|
| Rsa1.0_00207.1.g8574.t1 | gb[EOA14018.1] hypothetical protein CARUB_v10027151mg [Capsella rubella]                                                                                                                                                                                                                                                                                                                                                                                                                            | 194 | 204  | 1.00E-104 | 105.2 | 96.9 | 99.0 | hypothetical protein CARUB_v10027151mg      | gbpln | Capsella rubella     | AT5G54500.1   Symbols: FQR1   flavodoxin-like quinone reductase 1   chr5:22124674-22126256 FORWARD LENGTH=204                                                                                                                                                                       | 194 | 204  | 1.00E-104 | 105.2 | 93.8 | 97.4 |
| Rsa1.0_00207.1.g8575.t1 | ref[XP_002871167.1] exonuclease family protein [Arabidopsis lyrata subsp. lyrata] gi 297317004 gb EFH47426.1  exonuclease family protein [Arabidopsis lyrata subsp. lyrata]<br>ref[NP_200262.1] indole-3-acetic acid-amido synthetase GH3.6 [Arabidopsis thaliana]<br>gi 82900334 sp O9LSO4.1 GH36 ARATH<br>RefName: Full=Indole-3-acetic acid-amido synthetase GH3.6; AltName: Full=Auxin-responsive GH3-like protein 6; Short=AtGH3-6; AltName: Full=Protein DWARF IN LIGHT 1; Short=DFL-1        | 97  | 464  | 8.00E-24  | 478.4 | 60.8 | 76.3 | exonuclease family protein                  | gbpln | Arabidopsis lyrata   | AT5G05540.1   Symbols: SDN2   small RNA degrading nuclease 2   chr5:1636419-1638759 FORWARD LENGTH=466                                                                                                                                                                              | 97  | 466  | 2.00E-25  | 480.4 | 58.8 | 77.3 |
| Rsa1.0_00207.1.g8576.t1 | gi 8885594 dbj BAA97524.1  auxin-responsive-like protein [Arabidopsis thaliana] gi 11041726 dbj BAB17304.1  auxin-responsive GH3 homologue [Arabidopsis thaliana]<br>gi 59958336 gb AAK12878.1  At5g54510 [Arabidopsis thaliana]<br>gi 209414530 gb AC146505.1  At5g54510 [Arabidopsis thaliana]<br>gi 332009121 gb AED96504.1  indole-3-acetic acid-amido synthetase GH3.6 [Arabidopsis thaliana]                                                                                                  | 612 | 612  | 0         | 100.0 | 93.6 | 96.9 | indole-3-acetic acid-amido synthetase GH3.6 | gbpln | Arabidopsis thaliana | AT5G54510.1   Symbols: GH3.6, DFL1   Auxin-responsive GH3 family protein   chr5:22131321-22133564 REVERSE LENGTH=612                                                                                                                                                                | 612 | 612  | 0         | 100.0 | 93.6 | 96.9 |
| Rsa1.0_00207.1.g8577.t1 | dbj BAB02990.1  retroelement pol polyprotein-like [Arabidopsis thaliana]                                                                                                                                                                                                                                                                                                                                                                                                                            | 818 | 1250 | 1.00E-179 | 152.8 | 38.8 | 44.3 | retroelement pol polyprotein-like           | gbpln | Arabidopsis thaliana | AT4G23160.1   Symbols: CRK8   cysteine-rich RLK (RECEPTOR-like protein kinase) 8   chr4:12129485-12134086 FORWARD LENGTH=1262                                                                                                                                                       | 818 | 1262 | 2.00E-65  | 154.3 | 16.7 | 27.4 |
| Rsa1.0_00207.1.g8578.t1 | gb[EOA14680.1] hypothetical protein CARUB_v10027952mg [Capsella rubella]                                                                                                                                                                                                                                                                                                                                                                                                                            | 450 | 450  | 0         | 100.0 | 78.9 | 88.0 | hypothetical protein CARUB_v10027952mg      | gbpln | Capsella rubella     | AT5G54520.1   Symbols:   Transducin/WD40 repeat-like superfamily protein   chr5:22146781-22149089 REVERSE LENGTH=457                                                                                                                                                                | 450 | 457  | 0         | 101.6 | 80.7 | 89.1 |
| Rsa1.0_00207.1.g8579.t1 | ref[XP_002864345.1] RNA recognition motif-containing protein [Arabidopsis lyrata subsp. lyrata] gi 297310180 gb EFH40604.1  RNA recognition motif-containing protein [Arabidopsis lyrata subsp. lyrata]<br>ref[NP_680435.1] uncharacterized protein [Arabidopsis thaliana] gi 17380702 gb AAL36181.1  unknown protein [Arabidopsis thaliana] gi 20465573 gb AAM20269.1  unknown protein [Arabidopsis thaliana] gi 332009130 gb AED96513.1  uncharacterized protein AT5G54585 [Arabidopsis thaliana] | 157 | 156  | 2.00E-68  | 99.4  | 83.4 | 89.2 | RNA recognition motif-containing protein    | gbpln | Arabidopsis lyrata   | AT5G54580.1   Symbols:   RNA-binding (RRM/RBD/RNP motifs) family protein   chr5:22171332-22172656 FORWARD LENGTH=156                                                                                                                                                                | 157 | 156  | 3.00E-70  | 99.4  | 82.8 | 88.5 |
| Rsa1.0_00207.1.g8580.t1 | gi 20465573 gb AAM20269.1  unknown protein [Arabidopsis thaliana] gi 332009130 gb AED96513.1  uncharacterized protein AT5G54585 [Arabidopsis thaliana]                                                                                                                                                                                                                                                                                                                                              | 125 | 132  | 2.00E-43  | 105.6 | 82.4 | 91.2 | uncharacterized protein                     | gbpln | Arabidopsis thaliana | AT5G54585.1   Symbols:   unknown protein; Has 30201 Blast hits to 17322 proteins in 780 species: Archae - 12; Bacteria - 1396; Metazoa - 17338; Fungi - 3422; Plants - 5037; Viruses - 0; Other Eukaryotes - 2996 (source: NCBI BLINK).   chr5:22175688-22176509 FORWARD LENGTH=132 | 125 | 132  | 3.00E-46  | 105.6 | 82.4 | 91.2 |
| Rsa1.0_00207.1.g8581.t2 | gb ABY47994.1  carotenoid cleavage dioxygenase 1 [Rosa x damascena]                                                                                                                                                                                                                                                                                                                                                                                                                                 | 107 | 552  | 4.00E-30  | 515.9 | 57.0 | 61.7 | carotenoid cleavage dioxygenase 1           | gbpln | Rosa x               | AT3G63520.1   Symbols: CCD1, ATCCD1, ATNCED1, NCED1   carotenoid cleavage dioxygenase 1   chr3:23452940-23455896 FORWARD LENGTH=538                                                                                                                                                 | 107 | 538  | 6.00E-32  | 502.8 | 57.9 | 61.7 |
| Rsa1.0_00207.1.g8582.t2 | gb ACP30591.1  disease resistance protein [Brassica rapa subsp. pekinensis]<br>ref[XP_002864347.1] kinase family protein [Arabidopsis lyrata subsp. lyrata] gi 297310182 gb EFH40606.1  kinase family protein [Arabidopsis lyrata subsp. lyrata]                                                                                                                                                                                                                                                    | 246 | 1555 | 4.00E-22  | 632.1 | 30.1 | 43.1 | disease resistance protein                  | gbpln | Brassica rapa        | AT1G10000.1   Symbols:   Ribonuclease H-like superfamily protein   chr1:3263877-3264788 REVERSE LENGTH=303                                                                                                                                                                          | 246 | 303  | 7.00E-21  | 123.2 | 27.2 | 42.3 |
| Rsa1.0_00207.1.g8583.t1 | ref[XP_002864347.1] kinase family protein [Arabidopsis lyrata subsp. lyrata] gi 297310182 gb EFH40606.1  kinase family protein [Arabidopsis lyrata subsp. lyrata]                                                                                                                                                                                                                                                                                                                                   | 439 | 437  | 0         | 99.5  | 87.9 | 92.9 | kinase family protein                       | gbpln | Arabidopsis lyrata   | AT5G54590.2   Symbols: CRLK1   Protein kinase superfamily protein   chr5:22180480-22182698 FORWARD LENGTH=440                                                                                                                                                                       | 439 | 440  | 0         | 100.2 | 88.2 | 93.2 |
| Rsa1.0_00207.1.g8584.t2 | ref[NP_200273.1] ankyrin repeat-containing protein [Arabidopsis thaliana] gi 332009136 gb AED96519.1  ankyrin repeat-containing protein [Arabidopsis thaliana]                                                                                                                                                                                                                                                                                                                                      | 529 | 431  | 1.00E-132 | 81.5  | 42.9 | 49.7 | ankyrin repeat-containing protein           | gbpln | Arabidopsis thaliana | AT5G54620.1   Symbols:   Ankyrin repeat family protein   chr5:22187761-22189746 REVERSE LENGTH=431                                                                                                                                                                                  | 529 | 431  | 1.00E-134 | 81.5  | 42.9 | 49.7 |
| Rsa1.0_00207.1.g8585.t2 | ref[XP_002866054.1] hypothetical protein ARALYDRAFT_495546 [Arabidopsis lyrata subsp. lyrata] gi 297311889 gb EFH42313.1  hypothetical protein ARALYDRAFT_495546 [Arabidopsis lyrata subsp. lyrata]                                                                                                                                                                                                                                                                                                 | 840 | 902  | 0         | 107.4 | 80.6 | 86.7 | hypothetical protein ARALYDRAFT_495546      | gbpln | Arabidopsis lyrata   | AT5G54650.2   Symbols: Fh5, ATFH5   formin homology5   chr5:22197856-22201649 REVERSE LENGTH=900                                                                                                                                                                                    | 840 | 900  | 0         | 107.1 | 79.0 | 85.4 |

|                         |                                                                                                                                                                                                                                                                                                                                                                                                                                                                                                                                                                                                                                                                                                                                                                                                                                                                                                                                                                                                                                                                                                                                                                                 |     |     |           |        |      |      |                                        |       |                      |                                                                                                                                                                                                                                                                                                                                                                                                                                                                                    |     |     |           |        |      |      |
|-------------------------|---------------------------------------------------------------------------------------------------------------------------------------------------------------------------------------------------------------------------------------------------------------------------------------------------------------------------------------------------------------------------------------------------------------------------------------------------------------------------------------------------------------------------------------------------------------------------------------------------------------------------------------------------------------------------------------------------------------------------------------------------------------------------------------------------------------------------------------------------------------------------------------------------------------------------------------------------------------------------------------------------------------------------------------------------------------------------------------------------------------------------------------------------------------------------------|-----|-----|-----------|--------|------|------|----------------------------------------|-------|----------------------|------------------------------------------------------------------------------------------------------------------------------------------------------------------------------------------------------------------------------------------------------------------------------------------------------------------------------------------------------------------------------------------------------------------------------------------------------------------------------------|-----|-----|-----------|--------|------|------|
| Rsa1.0_00207.1.g8586.t2 | refNP_568811.1  kinesin 3 [Arabidopsis thaliana]<br>gi 1170621 sp P46875.1 ATK3_ARATH<br>RecName: Full=Kinesin-3; AltName: Full=Kinesin-like protein C<br>gi 1438844 dbj BAA04674.1  heavy chain polypeptide of kinesin-like protein [Arabidopsis thaliana]<br>gi 27808616 gb AAO24588.1  At5g54670 [Arabidopsis thaliana]<br>gi 110736249 dbj BAF00095.1  heavy chain polypeptide of kinesin like protein [Arabidopsis thaliana]<br>gi 332009142 gb AED96525.1  kinesin 3 [Arabidopsis thaliana]                                                                                                                                                                                                                                                                                                                                                                                                                                                                                                                                                                                                                                                                               | 65  | 754 | 1.00E-18  | 1160.0 | 78.5 | 83.1 | kinesin 3                              | gbpln | Arabidopsis thaliana | AT5G54670.1   Symbols: ATK3, KATC   kinesin 3   chr5:22209912-22213843 FORWARD LENGTH=754                                                                                                                                                                                                                                                                                                                                                                                          | 65  | 754 | 2.00E-21  | 1160.0 | 78.5 | 83.1 |
| Rsa1.0_00207.1.g8587.t1 | #                                                                                                                                                                                                                                                                                                                                                                                                                                                                                                                                                                                                                                                                                                                                                                                                                                                                                                                                                                                                                                                                                                                                                                               | #   | #   | #         | #      | #    | #    | -                                      | ----  | ----                 | #                                                                                                                                                                                                                                                                                                                                                                                                                                                                                  | #   | #   | #         | #      | #    |      |
| Rsa1.0_00207.1.g8588.t1 | refNP_200279.1  transcription factor ILR3 [Arabidopsis thaliana]<br>gi 297792933 ref XP_002864351.1  hypothetical protein ARALYDRAFT_495549 [Arabidopsis lyrata subsp. lyrata]<br>gi 75309075 sp Q9FH37.1 ILR3_ARATH<br>RecName: Full=Transcription factor ILR3; AltName: Full=Basic helix-loop-helix protein 105; Short=AtbHLH105; Short=bHLH 105; AltName: Full=Protein IAA-LEUCINE RESISTANT 3; AltName: Full=Transcription factor EN 133; AltName: Full=bHLH transcription factor bHLH105<br>gi 20127111 gb AAAM10964.1 AF488629.1 putative bHLH transcription factor [Arabidopsis thaliana]<br>gi 10176795 dbj BAB09934.1  unnamed protein product [Arabidopsis thaliana]<br>gi 15451010 gb AAK96776.1  Unknown protein [Arabidopsis thaliana]<br>gi 25084222 gb AAN72200.1  Unknown protein [Arabidopsis thaliana]<br>gi 297310186 gb EFH40610.1  hypothetical protein ARALYDRAFT_495549 [Arabidopsis lyrata subsp. lyrata]<br>gi 332009143 gb AED96526.1  transcription factor ILR3 [Arabidopsis thaliana]<br>ref XP_002866055.1  GAUT12/IRX8/LGT6 [Arabidopsis lyrata subsp. lyrata]<br>gi 297311890 gb EFH42314.1  GAUT12/IRX8/LGT6 [Arabidopsis lyrata subsp. lyrata] | 178 | 234 | 2.00E-30  | 131.5  | 50.6 | 58.4 | transcription factor ILR3              | gbpln | Arabidopsis lyrata   | AT5G54680.1   Symbols: ILR3, bHLH105   basic helix-loop-helix (bHLH) DNA-binding superfamily protein   chr5:22217270-22218993 FORWARD LENGTH=234                                                                                                                                                                                                                                                                                                                                   | 178 | 234 | 6.00E-33  | 131.5  | 50.6 | 58.4 |
| Rsa1.0_00207.1.g8589.t1 | gi 20127111 gb AAAM10964.1 AF488629.1 putative bHLH transcription factor [Arabidopsis thaliana]<br>gi 10176795 dbj BAB09934.1  unnamed protein product [Arabidopsis thaliana]<br>gi 15451010 gb AAK96776.1  Unknown protein [Arabidopsis thaliana]<br>gi 25084222 gb AAN72200.1  Unknown protein [Arabidopsis thaliana]<br>gi 297310186 gb EFH40610.1  hypothetical protein ARALYDRAFT_495549 [Arabidopsis lyrata subsp. lyrata]<br>gi 332009143 gb AED96526.1  transcription factor ILR3 [Arabidopsis thaliana]<br>ref XP_002866055.1  GAUT12/IRX8/LGT6 [Arabidopsis lyrata subsp. lyrata]<br>gi 297311890 gb EFH42314.1  GAUT12/IRX8/LGT6 [Arabidopsis lyrata subsp. lyrata]                                                                                                                                                                                                                                                                                                                                                                                                                                                                                                  | 513 | 535 | 0         | 104.3  | 95.7 | 98.1 | GAUT12/IRX8/LGT6                       | gbpln | Arabidopsis lyrata   | AT5G54690.1   Symbols: GAUT12, LGT6, IRX8   galacturonosyltransferase 12   chr5:22219435-22221769 REVERSE LENGTH=535                                                                                                                                                                                                                                                                                                                                                               | 513 | 535 | 0         | 104.3  | 95.7 | 98.1 |
| Rsa1.0_00207.1.g8590.t1 | gb EOA25229.1  hypothetical protein CARUB_v10018542mg [Capsella rubella]                                                                                                                                                                                                                                                                                                                                                                                                                                                                                                                                                                                                                                                                                                                                                                                                                                                                                                                                                                                                                                                                                                        | 488 | 431 | 1.00E-155 | 88.3   | 61.1 | 72.1 | hypothetical protein CARUB_v10018542mg | gbpln | Capsella rubella     | AT5G50140.1   Symbols:   Ankyrin repeat family protein   chr5:20395856-20398197 FORWARD LENGTH=535                                                                                                                                                                                                                                                                                                                                                                                 | 488 | 535 | 1.00E-132 | 109.6  | 53.5 | 68.6 |
| Rsa1.0_00207.1.g8591.t1 | #                                                                                                                                                                                                                                                                                                                                                                                                                                                                                                                                                                                                                                                                                                                                                                                                                                                                                                                                                                                                                                                                                                                                                                               | #   | #   | #         | #      | #    | #    | -                                      | ----  | ----                 | #                                                                                                                                                                                                                                                                                                                                                                                                                                                                                  | #   | #   | #         | #      | #    |      |
| Rsa1.0_00207.1.g8592.t1 | dbj BAJ34327.1  unnamed protein product [Thellungiella halophila]                                                                                                                                                                                                                                                                                                                                                                                                                                                                                                                                                                                                                                                                                                                                                                                                                                                                                                                                                                                                                                                                                                               | 112 | 112 | 3.00E-54  | 100.0  | 91.1 | 97.3 | unnamed protein product                | ----  | ----                 | #                                                                                                                                                                                                                                                                                                                                                                                                                                                                                  | #   | #   | #         | #      | #    |      |
| Rsa1.0_00207.1.g8593.t1 | refNP_200308.1  uncharacterized protein [Arabidopsis thaliana]<br>gi 9758277 dbj BAB08776.1  unnamed protein product [Arabidopsis thaliana]<br>gi 117168079 gb ABK32122.1  At5g54970 [Arabidopsis thaliana]<br>gi 332009181 gb AED96564.1  uncharacterized protein AT5G54970 [Arabidopsis thaliana]                                                                                                                                                                                                                                                                                                                                                                                                                                                                                                                                                                                                                                                                                                                                                                                                                                                                             | 118 | 125 | 1.00E-32  | 105.9  | 72.9 | 80.5 | uncharacterized protein                | gbpln | Arabidopsis thaliana | AT5G54940.2   Symbols:   Translation initiation factor SU11 family protein   chr5:22308420-22308758 REVERSE LENGTH=112<br>AT5G54970.1   Symbols:   unknown protein; BEST Arabidopsis thaliana protein match is: unknown protein (TAIR:AT4G26960.1); Has 1807 Blast hits to 1807 proteins in 277 species: Archae - 0; Bacteria - 0; Metazoa - 736; Fungi - 347; Plants - 385; Viruses - 0; Other Eukaryotes - 339 (source: NCBI BLINK).   chr5:22313271-22313648 FORWARD LENGTH=125 | 118 | 125 | 2.00E-35  | 105.9  | 72.9 | 80.5 |
| Rsa1.0_00207.1.g8594.t1 | gb EOA14046.1  hypothetical protein CARUB_v10027181mg [Capsella rubella]                                                                                                                                                                                                                                                                                                                                                                                                                                                                                                                                                                                                                                                                                                                                                                                                                                                                                                                                                                                                                                                                                                        | 110 | 193 | 2.00E-44  | 175.5  | 85.5 | 90.0 | hypothetical protein CARUB_v10027181mg | gbpln | Capsella rubella     | AT5G54980.1   Symbols:   Uncharacterised protein family (UPF0497)   chr5:22315799-22316560 FORWARD LENGTH=194<br>AT5G5000.2   Symbols: FIP2   potassium channel tetramerisation domain-containing protein   pentapeptide repeat-containing protein   chr5:22318644-22321599 FORWARD LENGTH=298                                                                                                                                                                                     | 110 | 194 | 1.00E-44  | 176.4  | 81.8 | 89.1 |
| Rsa1.0_00207.1.g8595.t1 | gb EOA13786.1  hypothetical protein CARUB_v10026879mg [Capsella rubella]                                                                                                                                                                                                                                                                                                                                                                                                                                                                                                                                                                                                                                                                                                                                                                                                                                                                                                                                                                                                                                                                                                        | 278 | 298 | 1.00E-134 | 107.2  | 87.8 | 93.2 | hypothetical protein CARUB_v10026879mg | gbpln | Capsella rubella     | AT5G5000.2   Symbols: FIP2   potassium channel tetramerisation domain-containing protein   pentapeptide repeat-containing protein   chr5:22318644-22321599 FORWARD LENGTH=298                                                                                                                                                                                                                                                                                                      | 278 | 298 | 1.00E-136 | 107.2  | 88.1 | 93.5 |

|                         |                                                                                                                                                                                                        |     |      |           |       |      |      |                                                 |       |                      |                                                                                                                                                                                                                                                                                                                                                                                                                                                                                                                                                    |     |     |           |       |      |      |
|-------------------------|--------------------------------------------------------------------------------------------------------------------------------------------------------------------------------------------------------|-----|------|-----------|-------|------|------|-------------------------------------------------|-------|----------------------|----------------------------------------------------------------------------------------------------------------------------------------------------------------------------------------------------------------------------------------------------------------------------------------------------------------------------------------------------------------------------------------------------------------------------------------------------------------------------------------------------------------------------------------------------|-----|-----|-----------|-------|------|------|
| Rsa1.0_00207.1.g8596.t1 | dbj BAB10576.1  unnamed protein product [Arabidopsis thaliana]                                                                                                                                         | 568 | 581  | 1.00E-179 | 102.3 | 79.2 | 84.2 | unnamed protein product                         | gbpln | Arabidopsis thaliana | AT5G55020.1   Symbols: ATMYB120, MYB120   myb domain protein 120   chr5:22324599-22326248 REVERSE LENGTH=523                                                                                                                                                                                                                                                                                                                                                                                                                                       | 568 | 523 | 1.00E-144 | 92.1  | 66.7 | 71.0 |
| Rsa1.0_00207.1.g8597.t1 | #                                                                                                                                                                                                      | #   | #    | #         | #     | #    | #    | -                                               | ----  | ----                 | #                                                                                                                                                                                                                                                                                                                                                                                                                                                                                                                                                  | #   | #   | #         | #     | #    |      |
| Rsa1.0_00207.1.g8598.t1 | gb EOA13535.1  hypothetical protein CARUB_v10026598mg [Capsella rubella]                                                                                                                               | 377 | 378  | 0         | 100.3 | 84.1 | 92.6 | hypothetical protein CARUB_v10026598mg          | gbpln | Capsella rubella     | AT5G55050.1   Symbols:   GDSL-like Lipase/Acylhydrolase superfamily protein   chr5:22337745-22339741 FORWARD LENGTH=376                                                                                                                                                                                                                                                                                                                                                                                                                            | 377 | 376 | 1.00E-179 | 99.7  | 84.6 | 93.4 |
| Rsa1.0_00207.1.g8599.t1 | gb EOA13535.1  hypothetical protein CARUB_v10026598mg [Capsella rubella]                                                                                                                               | 376 | 378  | 1.00E-174 | 100.5 | 79.8 | 90.7 | hypothetical protein CARUB_v10026598mg          | gbpln | Capsella rubella     | AT5G55050.1   Symbols:   GDSL-like Lipase/Acylhydrolase superfamily protein   chr5:22337745-22339741 FORWARD LENGTH=376                                                                                                                                                                                                                                                                                                                                                                                                                            | 376 | 376 | 1.00E-169 | 100.0 | 80.3 | 91.8 |
| Rsa1.0_00207.1.g8600.t1 | gb EOA13535.1  hypothetical protein CARUB_v10026598mg [Capsella rubella]                                                                                                                               | 319 | 378  | 1.00E-114 | 118.5 | 66.1 | 78.1 | hypothetical protein CARUB_v10026598mg          | gbpln | Capsella rubella     | AT5G55050.1   Symbols:   GDSL-like Lipase/Acylhydrolase superfamily protein   chr5:22337745-22339741 FORWARD LENGTH=376                                                                                                                                                                                                                                                                                                                                                                                                                            | 319 | 376 | 1.00E-109 | 117.9 | 67.1 | 78.4 |
| Rsa1.0_00207.1.g8601.t1 | gb EOA13041.1  hypothetical protein CARUB_v10026040mg [Capsella rubella]                                                                                                                               | 635 | 660  | 0         | 103.9 | 80.9 | 89.0 | hypothetical protein CARUB_v10026040mg          | gbpln | Capsella rubella     | AT5G55060.1   Symbols:   unknown protein; FUNCTIONS IN: molecular_function unknown; INVOLVED IN: biological_process unknown; LOCATED IN: cellular_component unknown; EXPRESSED IN: 25 plant structures; EXPRESSED DURING: 15 growth stages; BEST Arabidopsis thaliana protein match is: unknown protein (TAIR:AT5G5510.1); Has 223 Blast hits to 218 proteins in 80 species: Archae - 0; Bacteria - 2; Metazoa - 117; Fungi - 6; Plants - 65; Viruses - 0; Other Eukaryotes - 33 (source: NCBI BLINK).   chr5:22342079-22346400 FORWARD LENGTH=662 | 635 | 662 | 0         | 104.3 | 81.9 | 88.2 |
| Rsa1.0_00207.1.g8602.t1 | emb CAA11553.1  2-oxoglutarate dehydrogenase E2 subunit [Arabidopsis thaliana]                                                                                                                         | 465 | 462  | 0         | 99.4  | 92.5 | 95.7 | 2-oxoglutarate dehydrogenase E2 subunit         | gbpln | Arabidopsis thaliana | AT5G55070.1   Symbols:   Dihydroliipoamide succinyltransferase   chr5:22347637-22350409 FORWARD LENGTH=464                                                                                                                                                                                                                                                                                                                                                                                                                                         | 465 | 464 | 0         | 99.8  | 92.0 | 94.6 |
| Rsa1.0_00208.1.g8603.t1 | gb EOA22057.1  hypothetical protein CARUB_v10002597mg, partial [Capsella rubella]                                                                                                                      | 61  | 221  | 1.00E-15  | 362.3 | 67.2 | 72.1 | hypothetical protein CARUB_v10002597mg, partial | gbpln | Capsella rubella     | AT5G23350.1   Symbols:   GRAM domain-containing protein / ABA-responsive protein-related   chr5:7858545-7859387 REVERSE LENGTH=280                                                                                                                                                                                                                                                                                                                                                                                                                 | 61  | 280 | 2.00E-16  | 459.0 | 63.9 | 67.2 |
| Rsa1.0_00208.1.g8604.t1 | gb AAD26943.1  putative retroelement pol polyprotein [Arabidopsis thaliana]                                                                                                                            | 708 | 1454 | 1.00E-133 | 205.4 | 32.3 | 38.4 | putative retroelement pol polyprotein           | gbpln | Arabidopsis thaliana | AT2G47250.1   Symbols:   RNA helicase family protein   chr2:19399923-19402981 REVERSE LENGTH=729                                                                                                                                                                                                                                                                                                                                                                                                                                                   | 708 | 729 | 1.00E-113 | 103.0 | 30.6 | 39.1 |
| Rsa1.0_00208.1.g8605.t1 | gb EOA21466.1  hypothetical protein CARUB_v10001858mg [Capsella rubella]                                                                                                                               | 244 | 236  | 6.00E-86  | 96.7  | 77.0 | 86.9 | hypothetical protein CARUB_v10001858mg          | gbpln | Capsella rubella     | AT5G23420.1   Symbols:   HMG66   high-mobility group box 6   chr5:7888712-7890111 REVERSE LENGTH=241                                                                                                                                                                                                                                                                                                                                                                                                                                               | 244 | 241 | 6.00E-69  | 98.8  | 61.1 | 70.1 |
| Rsa1.0_00208.1.g8606.t1 | ref XP_002866559.1  F-box/LRR-repeat protein At5g63520 [Arabidopsis lyrata subsp. lyrata]<br>gi 297312394 gb EFH42818.1  F-box/LRR-repeat protein At5g63520 [Arabidopsis lyrata subsp. lyrata]         | 488 | 526  | 0         | 107.8 | 68.9 | 80.1 | F-box/LRR-repeat protein At5g63520              | gbpln | Arabidopsis lyrata   | AT5G63520.1   Symbols:   CONTAINS InterPro DOMAIN/s: F-box domain, Skp2-like (InterPro:IPR022364), FIST C domain (InterPro:IPR019494), FIST domain, N-terminal (InterPro:IPR013702); Has 137 Blast hits to 137 proteins in 56 species: Archae - 0; Bacteria - 88; Metazoa - 6; Fungi - 0; Plants - 32; Viruses - 0; Other Eukaryotes - 11 (source: NCBI BLINK).   chr5:25426300-25429093 REVERSE LENGTH=519                                                                                                                                        | 488 | 519 | 0         | 106.4 | 67.8 | 79.3 |
| Rsa1.0_00208.1.g8607.t1 | gb EOA15135.1  hypothetical protein CARUB_v10028510mg [Capsella rubella]                                                                                                                               | 112 | 120  | 3.00E-41  | 107.1 | 75.0 | 83.9 | hypothetical protein CARUB_v10028510mg          | gbpln | Capsella rubella     | AT5G52975.1   Symbols:   Protein of unknown function (DUF1278)   chr5:21481514-21481879 FORWARD LENGTH=121                                                                                                                                                                                                                                                                                                                                                                                                                                         | 112 | 121 | 2.00E-42  | 108.0 | 75.0 | 83.0 |
| Rsa1.0_00208.1.g8608.t1 | #                                                                                                                                                                                                      | #   | #    | #         | #     | #    | #    | -                                               | ----  | ----                 | #                                                                                                                                                                                                                                                                                                                                                                                                                                                                                                                                                  | #   | #   | #         | #     | #    |      |
| Rsa1.0_00208.1.g8609.t1 | gb ABV89629.1  lipoic acid synthase-like protein [Brassica rapa]                                                                                                                                       | 154 | 155  | 3.00E-57  | 100.6 | 80.5 | 84.4 | lipoic acid synthase-like protein               | gbpln | Brassica rapa        | AT5G23440.1   Symbols:   FTRA1   ferredoxin/thioredoxin reductase subunit A (variable subunit)   chr5:7903230-7903778 REVERSE LENGTH=182                                                                                                                                                                                                                                                                                                                                                                                                           | 154 | 182 | 8.00E-54  | 118.2 | 75.3 | 87.7 |
| Rsa1.0_00208.1.g8610.t1 | ref XP_002874132.1  ATLCBK1 [Arabidopsis lyrata subsp. lyrata]<br>gi 297319969 gb EFH50391.1  ATLCBK1 [Arabidopsis lyrata subsp. lyrata]                                                               | 743 | 763  | 0         | 102.7 | 89.1 | 94.5 | ATLCBK1                                         | gbpln | Arabidopsis lyrata   | AT5G23450.2   Symbols:   ATLCBK1, LCBK1   long-chain base (LCB) kinase 1   chr5:7905041-7908960 REVERSE LENGTH=763                                                                                                                                                                                                                                                                                                                                                                                                                                 | 743 | 763 | 0         | 102.7 | 89.0 | 94.3 |
| Rsa1.0_00208.1.g8611.t1 | ref XP_002872058.1  hypothetical protein ARALYDRAFT_351368 [Arabidopsis lyrata subsp. lyrata]<br>gi 297317895 gb EFH48317.1  hypothetical protein ARALYDRAFT_351368 [Arabidopsis lyrata subsp. lyrata] | 511 | 604  | 1.00E-141 | 118.2 | 63.4 | 75.9 | hypothetical protein ARALYDRAFT_351368          | gbpln | Arabidopsis lyrata   | AT5G23480.1   Symbols:   SWIB/MDM2 domainPlus-3.GYF   chr5:7916314-7919155 FORWARD LENGTH=570                                                                                                                                                                                                                                                                                                                                                                                                                                                      | 511 | 570 | 1.00E-133 | 111.5 | 60.5 | 73.4 |
| Rsa1.0_00208.1.g8612.t1 | gb EOA20507.1  hypothetical protein CARUB_v10000821mg [Capsella rubella]                                                                                                                               | 528 | 490  | 0         | 92.8  | 78.2 | 84.7 | hypothetical protein CARUB_v10000821mg          | gbpln | Capsella rubella     | AT5G23580.1   Symbols:   CDPK9, ATCDPK9, CPK12, ATCPK12   calmodulin-like domain protein kinase 9   chr5:7950388-7952433 REVERSE LENGTH=490                                                                                                                                                                                                                                                                                                                                                                                                        | 528 | 490 | 0         | 92.8  | 78.6 | 84.5 |

|                          |                                                                                                                                                                                                                                                                                                                                                                                                                                                                                                                                                                                                                        |      |      |           |       |      |      |                                                                                 |       |                      |                                                                                                                                                                                                                                                                                                                                                                                                                                        |      |      |           |       |      |      |
|--------------------------|------------------------------------------------------------------------------------------------------------------------------------------------------------------------------------------------------------------------------------------------------------------------------------------------------------------------------------------------------------------------------------------------------------------------------------------------------------------------------------------------------------------------------------------------------------------------------------------------------------------------|------|------|-----------|-------|------|------|---------------------------------------------------------------------------------|-------|----------------------|----------------------------------------------------------------------------------------------------------------------------------------------------------------------------------------------------------------------------------------------------------------------------------------------------------------------------------------------------------------------------------------------------------------------------------------|------|------|-----------|-------|------|------|
| Rsa1.0_00208.1.g8613.t1  | gb EOA20507.1  hypothetical protein CARUB_v10000821mg [Capsella rubella]                                                                                                                                                                                                                                                                                                                                                                                                                                                                                                                                               | 502  | 490  | 0         | 97.6  | 77.5 | 86.3 | hypothetical protein CARUB_v10000821mg                                          | gbpln | Capsella rubella     | AT5G23580.1   Symbols: CDPK9, ATGDPK9, CPK12, ATGPK12   calmodulin-like domain protein kinase 9   chr5:7950388-7952433 REVERSE LENGTH=490                                                                                                                                                                                                                                                                                              | 502  | 490  | 0         | 97.6  | 75.3 | 83.7 |
| Rsa1.0_00208.1.g8614.t1  | gb EOA20507.1  hypothetical protein CARUB_v10000821mg [Capsella rubella]                                                                                                                                                                                                                                                                                                                                                                                                                                                                                                                                               | 487  | 490  | 0         | 100.6 | 83.0 | 89.9 | hypothetical protein CARUB_v10000821mg                                          | gbpln | Capsella rubella     | AT5G23580.1   Symbols: CDPK9, ATGDPK9, CPK12, ATGPK12   calmodulin-like domain protein kinase 9   chr5:7950388-7952433 REVERSE LENGTH=490                                                                                                                                                                                                                                                                                              | 487  | 490  | 0         | 100.6 | 82.3 | 89.5 |
| Rsa1.0_00208.1.g8615.t1  | dbj BAA97287.1  retroelement pol polyprotein-like [Arabidopsis thaliana]                                                                                                                                                                                                                                                                                                                                                                                                                                                                                                                                               | 1580 | 1491 | 0         | 94.4  | 55.6 | 69.9 | retroelement pol polyprotein-like                                               | gbpln | Arabidopsis thaliana | AT4G23180.1   Symbols: CRK8   cysteine-rich RLK (RECEPTOR-like protein kinase) 8   chr4:12129485-12134086 FORWARD LENGTH=1262                                                                                                                                                                                                                                                                                                          | 1580 | 1262 | 1.00E-136 | 79.9  | 14.8 | 21.5 |
| Rsa1.0_00208.1.g8616.t1  | gb EOA33603.1  hypothetical protein CARUB_v10019755mg [Capsella rubella]                                                                                                                                                                                                                                                                                                                                                                                                                                                                                                                                               | 978  | 902  | 0         | 92.2  | 54.4 | 69.5 | hypothetical protein CARUB_v10019755mg                                          | gbpln | Capsella rubella     | AT1G58390.1   Symbols:   Disease resistance protein (CC-NBS-LRR class) family   chr1:21690962-21693891 REVERSE LENGTH=907                                                                                                                                                                                                                                                                                                              | 978  | 907  | 0         | 92.7  | 50.7 | 66.0 |
| Rsa1.0_00208.1.g8617.t1  | ref NP_001031931.2  uncharacterized protein [Arabidopsis thaliana]   gi 332005808 gb AED93191.1  uncharacterized protein AT5G23610 [Arabidopsis thaliana]                                                                                                                                                                                                                                                                                                                                                                                                                                                              | 531  | 500  | 1.00E-117 | 94.2  | 46.9 | 61.2 | uncharacterized protein                                                         | gbpln | Arabidopsis thaliana | AT5G23610.2   Symbols:   INVOLVED IN: biological_process unknown; EXPRESSED IN: 24 plant structures; EXPRESSED DURING: 15 growth stages; BEST Arabidopsis thaliana protein match is: SWITCH1 (TAIR:AT5G51330.1); Has 173 Blast hits to 168 proteins in 34 species: Archae - 3; Bacteria - 10; Metazoa - 6; Fungi - 2; Plants - 115; Viruses - 0; Other Eukaryotes - 37 (source: NCBI BLINK).   chr5:7957641-7959968 REVERSE LENGTH=500 | 531  | 500  | 1.00E-119 | 94.2  | 46.9 | 61.2 |
| Rsa1.0_00208.1.g8618.t5  | ref XP_002872065.1  predicted protein [Arabidopsis lyrata subsp. lyrata]   gi 297317902 gb EFH48324.1  predicted protein [Arabidopsis lyrata subsp. lyrata]                                                                                                                                                                                                                                                                                                                                                                                                                                                            | 455  | 327  | 5.00E-73  | 71.9  | 33.0 | 42.0 | predicted protein                                                               | gbpln | Arabidopsis lyrata   | AT5G23650.1   Symbols:   Homeodomain-like transcriptional regulator   chr5:7969812-7971019 FORWARD LENGTH=337                                                                                                                                                                                                                                                                                                                          | 455  | 337  | 3.00E-75  | 74.1  | 33.4 | 42.2 |
| Rsa1.0_00208.1.g8619.t1  | ref NP_974827.1  Pectinacetyltransferase family protein [Arabidopsis thaliana]   gi 222423206 dbj BAH19580.1  AT5G23870 [Arabidopsis thaliana]   gi 332005843 gb AED93226.1  Pectinacetyltransferase family protein [Arabidopsis thaliana]                                                                                                                                                                                                                                                                                                                                                                             | 568  | 451  | 0         | 79.4  | 58.3 | 63.2 | Pectinacetyltransferase family protein                                          | gbpln | Arabidopsis thaliana | AT5G23870.3   Symbols:   Pectinacetyltransferase family protein   chr5:8046060-8049999 REVERSE LENGTH=451                                                                                                                                                                                                                                                                                                                              | 568  | 451  | 0         | 79.4  | 58.3 | 63.2 |
| Rsa1.0_00208.1.g8620.t1  | gb AAK51235.1 AF287471.1 polyprotein [Arabidopsis thaliana]                                                                                                                                                                                                                                                                                                                                                                                                                                                                                                                                                            | 375  | 1453 | 1.00E-108 | 387.5 | 50.4 | 58.7 | polyprotein                                                                     | gbpln | Arabidopsis thaliana | ATMG00810.1   Symbols: ORF240B   DNA/RNA polymerases superfamily protein   chrM:227709-228431 REVERSE LENGTH=240                                                                                                                                                                                                                                                                                                                       | 375  | 240  | 1.00E-53  | 64.0  | 26.7 | 33.9 |
| Rsa1.0_00208.1.g8621.t1  | ref XP_002870649.1  hypothetical protein ARALYDRAFT_355852 [Arabidopsis lyrata subsp. lyrata]   gi 297316485 gb EFH46908.1  hypothetical protein ARALYDRAFT_355852 [Arabidopsis lyrata subsp. lyrata]                                                                                                                                                                                                                                                                                                                                                                                                                  | 706  | 634  | 1.00E-127 | 89.8  | 42.1 | 53.1 | hypothetical protein ARALYDRAFT_355852                                          | gbpln | Arabidopsis lyrata   | AT5G41690.1   Symbols:   RNA-binding (RRM/RBD/RNP motifs) family protein   chr5:16670126-16674189 REVERSE LENGTH=567                                                                                                                                                                                                                                                                                                                   | 706  | 567  | 1.00E-112 | 80.3  | 38.2 | 49.9 |
| Rsa1.0_00208.1.g8622.t1  | ref NP_197782.1  BAH1 acyltransferase DCR [Arabidopsis thaliana]   gi 75170176 sp Q9FF86.1 DCR_ARATH RecName: Full=BAH1 acyltransferase DCR; AltName: Full=Protein DEFECTIVE IN CUTICULAR RIDGES; AltName: Full=Protein PERMEABLE LEAVES 3   gi 10176861 dbj BAB10067.1  acyltransferase [Arabidopsis thaliana]   gi 22135843 gb AAM91107.1  AT5g23940/MRO11.2 [Arabidopsis thaliana]   gi 23397255 gb AAN31909.1  putative acyltransferase [Arabidopsis thaliana]   gi 24111347 gb AAN46797.1  At5g23940/MRO11.2 [Arabidopsis thaliana]   gi 332005853 gb AED93236.1  BAH1 acyltransferase DCR [Arabidopsis thaliana] | 473  | 484  | 0         | 102.3 | 85.2 | 91.3 | BAH1 acyltransferase DCR                                                        | gbpln | Arabidopsis thaliana | AT5G23940.1   Symbols: EMB3009, PEL3, DCR   HXXXD-type acyl-transferase family protein   chr5:8076616-8079677 REVERSE LENGTH=484                                                                                                                                                                                                                                                                                                       | 473  | 484  | 0         | 102.3 | 85.2 | 91.3 |
| Rsa1.0_00208.1.g8623.t1  | gb EOA22500.1  hypothetical protein CARUB_v10003155mg, partial [Capsella rubella]                                                                                                                                                                                                                                                                                                                                                                                                                                                                                                                                      | 459  | 1112 | 0         | 242.3 | 83.9 | 91.7 | hypothetical protein CARUB_v10003155mg, partial                                 | gbpln | Capsella rubella     | AT5G23980.1   Symbols: ATFRO4, FRO4   ferric reduction oxidase 4   chr5:8098167-8101282 REVERSE LENGTH=699                                                                                                                                                                                                                                                                                                                             | 459  | 699  | 0         | 152.3 | 84.1 | 91.1 |
| Rsa1.0_00209.1.g8624.t1  | gb EOA27051.1  hypothetical protein CARUB_v10023147mg, partial [Capsella rubella]                                                                                                                                                                                                                                                                                                                                                                                                                                                                                                                                      | 432  | 467  | 0         | 108.1 | 78.2 | 87.3 | hypothetical protein CARUB_v10023147mg, partial                                 | gbpln | Capsella rubella     | AT2G28590.1   Symbols:   Protein kinase superfamily protein   chr2:12249835-12251490 FORWARD LENGTH=424                                                                                                                                                                                                                                                                                                                                | 432  | 424  | 0         | 98.1  | 77.5 | 85.9 |
| Rsa1.0_00209.1.g8625.t16 | gb AAC33958.1  contains similarity to Zea mays embryogenesis transmembrane protein (GB:X97570) [Arabidopsis thaliana]                                                                                                                                                                                                                                                                                                                                                                                                                                                                                                  | 488  | 417  | 1.00E-129 | 85.5  | 54.5 | 65.2 | contains similarity to Zea mays embryogenesis transmembrane protein (GB:X97570) | gbpln | Arabidopsis thaliana | AT4G11000.1   Symbols:   Ankyrin repeat family protein   chr4:6731020-6732464 FORWARD LENGTH=406                                                                                                                                                                                                                                                                                                                                       | 488  | 406  | 2.00E-98  | 83.2  | 44.9 | 57.2 |

|                         |                                                                                                                                                                                                                                                                                                                                                                                                                              |      |      |           |       |      |      |                                                     |       |                      |                                                                                                                                 |      |      |          |       |      |      |
|-------------------------|------------------------------------------------------------------------------------------------------------------------------------------------------------------------------------------------------------------------------------------------------------------------------------------------------------------------------------------------------------------------------------------------------------------------------|------|------|-----------|-------|------|------|-----------------------------------------------------|-------|----------------------|---------------------------------------------------------------------------------------------------------------------------------|------|------|----------|-------|------|------|
| Rsa1.0_00209.1.g8626.t2 | gb AAC69114.1  putative gag-protease polyprotein [Arabidopsis thaliana]                                                                                                                                                                                                                                                                                                                                                      | 948  | 627  | 3.00E-66  | 66.1  | 20.6 | 33.5 | putative gag-protease polyprotein                   | gbpln | Arabidopsis thaliana | #                                                                                                                               | #    | #    | #        | #     | #    |      |
| Rsa1.0_00209.1.g8627.t1 | gb ACP30598.1  disease resistance protein [Brassica rapa subsp. pekinensis]                                                                                                                                                                                                                                                                                                                                                  | 1303 | 2301 | 0         | 176.6 | 46.1 | 58.3 | disease resistance protein                          | gbpln | Brassica rapa        | AT4G23160.1   Symbols: CRK8   cysteine-rich RLK (RECEPTOR-like protein kinase) 8   chr4:12129485-12134086 FORWARD LENGTH=1262   | 1303 | 1262 | 3.00E-92 | 96.9  | 13.4 | 19.5 |
| Rsa1.0_00209.1.g8628.t4 | ref XP_002879871.1  predicted protein [Arabidopsis lyrata subsp. lyrata] gi 297325710 gb EFH56130.1  predicted protein [Arabidopsis lyrata subsp. lyrata]                                                                                                                                                                                                                                                                    | 233  | 582  | 1.00E-102 | 249.8 | 81.1 | 83.7 | predicted protein                                   | gbpln | Arabidopsis lyrata   | AT2G40460.1   Symbols:   Major facilitator superfamily protein   chr2:16897123-16901171 FORWARD LENGTH=583                      | 233  | 583  | 8.00E-95 | 250.2 | 79.0 | 83.3 |
| Rsa1.0_00209.1.g8629.t1 | gb AAF18641.1 AC006228_12 F5J5.16 [Arabidopsis thaliana]                                                                                                                                                                                                                                                                                                                                                                     | 810  | 1024 | 2.00E-76  | 126.4 | 20.7 | 27.9 | F5J5.16                                             | gbpln | Arabidopsis thaliana | #                                                                                                                               | #    | #    | #        | #     | #    |      |
| Rsa1.0_00209.1.g8630.t1 | gb AAD22286.1  putative non-LTR retroelement reverse transcriptase [Arabidopsis thaliana]                                                                                                                                                                                                                                                                                                                                    | 908  | 1311 | 1.00E-117 | 144.4 | 34.6 | 46.6 | putative non-LTR retroelement reverse transcriptase | gbpln | Arabidopsis thaliana | AT1G10000.1   Symbols:   Ribonuclease H-like superfamily protein   chr1:3263877-3264788 REVERSE LENGTH=303                      | 908  | 303  | 6.00E-28 | 33.4  | 10.5 | 16.2 |
| Rsa1.0_00209.1.g8631.t1 | gb AAC62785.1  F11O4.11 [Arabidopsis thaliana] gi 7268192 emb CAB77719.1  putative transposon protein [Arabidopsis thaliana]                                                                                                                                                                                                                                                                                                 | 557  | 577  | 7.00E-62  | 103.6 | 33.2 | 46.1 | F11O4.11                                            | gbpln | Arabidopsis thaliana | AT5G36228.1   Symbols:   nucleic acid binding:zinc ion binding   chr5:14271691-14272776 FORWARD LENGTH=361                      | 557  | 361  | 2.00E-16 | 64.8  | 7.5  | 11.3 |
| Rsa1.0_00209.1.g8632.t1 | gb EOA27812.1  hypothetical protein CARUB_v10023966mg [Capsella rubella]                                                                                                                                                                                                                                                                                                                                                     | 240  | 237  | 5.00E-99  | 98.8  | 81.7 | 88.3 | hypothetical protein CARUB_v10023966mg              | gbpln | Capsella rubella     | AT2G28605.1   Symbols:   Photosystem II reaction center PsbP family protein   chr2:12254911-12255889 FORWARD LENGTH=232         | 240  | 232  | 9.00E-97 | 96.7  | 76.3 | 81.7 |
| Rsa1.0_00209.1.g8633.t2 | ref NP_173321.4  Isochorismate synthase 2 [Arabidopsis thaliana] gi 205930866 sp Q9M9V6.2 ICS2_ARAT_H RefName: Full=Isochorismate synthase 2, chloroplastic; Short=AtIcs2; AltName: Full=Isochorismate mutase 2; AltName: Full=menF-like protein 2; Flags: Precursor gi 183229349 gb ACC60228.1  isochorismate synthase 2 [Arabidopsis thaliana] gi 332191652 gb AEE29773.1  Isochorismate synthase 2 [Arabidopsis thaliana] | 352  | 562  | 4.00E-61  | 159.7 | 35.5 | 42.3 | Isochorismate synthase 2                            | gbpln | Arabidopsis thaliana | AT1G18970.1   Symbols: ICS2, ATICS2   isochorismate synthase 2   chr1:6515486-6519176 FORWARD LENGTH=562                        | 352  | 562  | 9.00E-64 | 159.7 | 35.5 | 42.3 |
| Rsa1.0_00209.1.g8634.t1 | ref NP_175703.1  Nucleic acid-binding, OB-fold-like protein [Arabidopsis thaliana] gi 12324642 gb AAG52278.1 AC019018_15 putative replication protein; 94555-97079 [Arabidopsis thaliana] gi 332194750 gb AEE32871.1  Nucleic acid-binding, OB-fold-like protein [Arabidopsis thaliana]                                                                                                                                      | 507  | 566  | 1.00E-76  | 111.6 | 33.9 | 55.6 | Nucleic acid-binding, OB-fold-like protein          | gbpln | Arabidopsis thaliana | AT1G52950.1   Symbols:   Nucleic acid-binding, OB-fold-like protein   chr2:19725483-19728007 FORWARD LENGTH=566                 | 507  | 566  | 3.00E-79 | 111.6 | 33.9 | 55.6 |
| Rsa1.0_00209.1.g8635.t1 | gb AAD32757.1  putative helicase [Arabidopsis thaliana]                                                                                                                                                                                                                                                                                                                                                                      | 1270 | 1241 | 0         | 97.7  | 26.8 | 35.8 | putative helicase                                   | gbpln | Arabidopsis thaliana | AT3G51700.1   Symbols:   PIF1 helicase   chr3:19179443-19181145 REVERSE LENGTH=344                                              | 1270 | 344  | 4.00E-61 | 27.1  | 9.4  | 12.8 |
| Rsa1.0_00209.1.g8636.t1 | #                                                                                                                                                                                                                                                                                                                                                                                                                            | #    | #    | #         | #     | #    | -    | ----                                                | ----  | #                    | #                                                                                                                               | #    | #    | #        | #     | #    |      |
| Rsa1.0_00209.1.g8637.t1 | #                                                                                                                                                                                                                                                                                                                                                                                                                            | #    | #    | #         | #     | #    | -    | ----                                                | ----  | #                    | #                                                                                                                               | #    | #    | #        | #     | #    |      |
| Rsa1.0_00209.1.g8638.t1 | #                                                                                                                                                                                                                                                                                                                                                                                                                            | #    | #    | #         | #     | #    | -    | ----                                                | ----  | #                    | #                                                                                                                               | #    | #    | #        | #     | #    |      |
| Rsa1.0_00209.1.g8639.t1 | ref XP_002879170.1  hypothetical protein ARALYDRAFT_481772 [Arabidopsis lyrata subsp. lyrata] gi 297325009 gb EFH55429.1  hypothetical protein ARALYDRAFT_481772 [Arabidopsis lyrata subsp. lyrata]                                                                                                                                                                                                                          | 194  | 242  | 1.00E-66  | 124.7 | 74.2 | 80.4 | hypothetical protein ARALYDRAFT_481772              | gbpln | Arabidopsis lyrata   | AT2G28610.1   Symbols: PRS, WOX3, PRS1   Homeodomain-like superfamily protein   chr2:12262115-12263286 FORWARD LENGTH=244       | 194  | 244  | 5.00E-68 | 125.8 | 74.7 | 81.4 |
| Rsa1.0_00209.1.g8640.t1 | ref XP_002892051.1  CYP86A4 [Arabidopsis lyrata subsp. lyrata] gi 297337893 gb EFH66310.1  CYP86A4 [Arabidopsis lyrata subsp. lyrata]                                                                                                                                                                                                                                                                                        | 59   | 554  | 3.00E-17  | 939.0 | 71.2 | 79.7 | CYP86A4                                             | gbpln | Arabidopsis lyrata   | AT1G01600.1   Symbols: CYP86A4   cytochrome P450, family 86, subfamily A, polypeptide 4   chr1:219200-220994 FORWARD LENGTH=554 | 59   | 554  | 1.00E-19 | 939.0 | 71.2 | 79.7 |
| Rsa1.0_00209.1.g8641.t2 | gb AAC95170.1  copia-like retroelement pol polyprotein [Arabidopsis thaliana]                                                                                                                                                                                                                                                                                                                                                | 269  | 916  | 7.00E-11  | 340.5 | 13.0 | 20.4 | copia-like retroelement pol polyprotein             | gbpln | Arabidopsis thaliana | #                                                                                                                               | #    | #    | #        | #     | #    |      |
| Rsa1.0_00210.1.g8642.t1 | #                                                                                                                                                                                                                                                                                                                                                                                                                            | #    | #    | #         | #     | #    | -    | ----                                                | ----  | #                    | #                                                                                                                               | #    | #    | #        | #     | #    |      |

|                         |                                                                                                                                                                                                                                                                                                                                                                                                                                                                                                                         |      |      |           |       |      |      |                                                         |       |                      |                                                                                                                                                                                                                                                                                                                                                         |      |      |           |       |      |      |
|-------------------------|-------------------------------------------------------------------------------------------------------------------------------------------------------------------------------------------------------------------------------------------------------------------------------------------------------------------------------------------------------------------------------------------------------------------------------------------------------------------------------------------------------------------------|------|------|-----------|-------|------|------|---------------------------------------------------------|-------|----------------------|---------------------------------------------------------------------------------------------------------------------------------------------------------------------------------------------------------------------------------------------------------------------------------------------------------------------------------------------------------|------|------|-----------|-------|------|------|
| Rsa1.0_00210.1.g8643.t1 | ref NP_199276.1  alpha-barbatene synthase [Arabidopsis thaliana] gi 254810224 sp Q4KSH9.2 BARS_ARAT H RecName: Full=Alpha-barbatene synthase; Short=ATBS; AltName: Full=Beta-chamigrene synthase; AltName: Full=Terpendeoid synthase 11; Short=AtTPS11; AltName: Full=Thujopsene synthase gi 126352284 gb ABO09887.1  At5g44630 [Arabidopsis thaliana] gi 332007757 gb AED95140.1  alpha-barbatene synthase [Arabidopsis thaliana]                                                                                      | 499  | 557  | 0         | 111.6 | 70.9 | 81.6 | alpha-barbatene synthase                                | gbpln | Arabidopsis thaliana | AT5G44630.1   Symbols:   Terpenoid cyclases/Protein prenyltransferases superfamily protein   chr5:18003280-18005616 FORWARD LENGTH=557                                                                                                                                                                                                                  | 499  | 557  | 0         | 111.6 | 70.9 | 81.6 |
| Rsa1.0_00210.1.g8644.t1 | gb ABA96113.2  retrotransposon protein, putative, Ty1-copia subclass [Oryza sativa Japonica Group]                                                                                                                                                                                                                                                                                                                                                                                                                      | 526  | 676  | 1.00E-122 | 128.5 | 47.5 | 62.2 | retrotransposon protein, putative, Ty1-copia subclass   | gbpln | Oryza sativa         | AT4G23160.1   Symbols: CRK8   cysteine-rich RLK (RECEPTOR-like protein kinase) 8   chr4:12129485-12134086 FORWARD LENGTH=1262                                                                                                                                                                                                                           | 526  | 1262 | 2.00E-19  | 239.9 | 9.9  | 13.7 |
| Rsa1.0_00210.1.g8645.t1 | ref NP_199276.1  alpha-barbatene synthase [Arabidopsis thaliana] gi 254810224 sp Q4KSH9.2 BARS_ARAT H RecName: Full=Alpha-barbatene synthase; Short=ATBS; AltName: Full=Beta-chamigrene synthase; AltName: Full=Terpendeoid synthase 11; Short=AtTPS11; AltName: Full=Thujopsene synthase gi 126352284 gb ABO09887.1  At5g44630 [Arabidopsis thaliana] gi 332007757 gb AED95140.1  alpha-barbatene synthase [Arabidopsis thaliana]                                                                                      | 502  | 557  | 0         | 111.0 | 70.5 | 82.3 | alpha-barbatene synthase                                | gbpln | Arabidopsis thaliana | AT5G44630.1   Symbols:   Terpenoid cyclases/Protein prenyltransferases superfamily protein   chr5:18003280-18005616 FORWARD LENGTH=557                                                                                                                                                                                                                  | 502  | 557  | 0         | 111.0 | 70.5 | 82.3 |
| Rsa1.0_00210.1.g8646.t1 | ref NP_199275.1  cytochrome P450, family 706, subfamily A, polypeptide 3 [Arabidopsis thaliana] gi 8953760 db BAA98115.1  flavonoid 3',5'-hydroxylase-like; cytochrome P450 [Arabidopsis thaliana] gi 332007756 gb AED95139.1  cytochrome P450, family 706, subfamily A, polypeptide 3 [Arabidopsis thaliana] ref XP_002863555.1  minichromosome maintenance family protein [Arabidopsis lyrata subsp. lyrata] gi 297309390 gb EFH39814.1  minichromosome maintenance family protein [Arabidopsis lyrata subsp. lyrata] | 518  | 519  | 0         | 100.2 | 77.2 | 89.2 | cytochrome P450, family 706, subfamily A, polypeptide 3 | gbpln | Arabidopsis thaliana | AT5G44620.1   Symbols: CYP706A3   cytochrome P450, family 706, subfamily A, polypeptide 3   chr5:17997908-17999539 REVERSE LENGTH=519                                                                                                                                                                                                                   | 518  | 519  | 0         | 100.2 | 77.2 | 89.2 |
| Rsa1.0_00210.1.g8647.t1 | ref XP_002863555.1  minichromosome maintenance family protein [Arabidopsis lyrata subsp. lyrata] gi 297309390 gb EFH39814.1  minichromosome maintenance family protein [Arabidopsis lyrata subsp. lyrata]                                                                                                                                                                                                                                                                                                               | 830  | 830  | 0         | 100.0 | 97.0 | 98.3 | minichromosome maintenance family protein               | gbpln | Arabidopsis lyrata   | AT5G44635.1   Symbols: MCM6   minichromosome maintenance (MCM2/3/5) family protein   chr5:18006431-18010542 REVERSE LENGTH=831                                                                                                                                                                                                                          | 830  | 831  | 0         | 100.1 | 96.5 | 98.6 |
| Rsa1.0_00210.1.g8648.t3 | gb EOA14938.1  hypothetical protein CARUB_v10028282mg [Capsella rubella]                                                                                                                                                                                                                                                                                                                                                                                                                                                | 352  | 284  | 3.00E-58  | 80.7  | 37.2 | 44.6 | hypothetical protein CARUB_v10028282mg                  | gbpln | Capsella rubella     | AT5G44650.1   Symbols: CEST, AtCEST   Encodes a chloroplast protein that induces tolerance to multiple environmental stresses and reduces photooxidative damage.   chr5:18013396-18015292 FORWARD LENGTH=280                                                                                                                                            | 352  | 280  | 1.00E-59  | 79.5  | 36.9 | 44.9 |
| Rsa1.0_00210.1.g8649.t1 | gb EOA14735.1  hypothetical protein CARUB_v10028028mg [Capsella rubella]                                                                                                                                                                                                                                                                                                                                                                                                                                                | 357  | 360  | 1.00E-151 | 100.8 | 82.6 | 91.6 | hypothetical protein CARUB_v10028028mg                  | gbpln | Capsella rubella     | AT5G44660.1   Symbols:   unknown protein; BEST Arabidopsis thaliana protein match is: unknown protein (TAIR:AT4G20190.1); Has 944 Blast hits to 462 proteins in 141 species: Archae - 2; Bacteria - 370; Metazoa - 161; Fungi - 102; Plants - 64; Viruses - 6; Other Eukaryotes - 239 (source: NCBI BLINK).   chr3:18015810-18017081 FORWARD LENGTH=423 | 357  | 423  | 1.00E-141 | 118.5 | 81.2 | 89.6 |
| Rsa1.0_00210.1.g8650.t1 | ref NP_199280.1  uncharacterized protein [Arabidopsis thaliana] gi 13605503 gb AAK32745.1 AF361577.1 At5g44670/K15C23_12 [Arabidopsis thaliana] gi 8953765 db BAA98120.1  unnamed protein product [Arabidopsis thaliana] gi 25090160 gb AAN72243.1  At5g44670/K15C23_12 [Arabidopsis thaliana] gi 332007762 gb AED95145.1  uncharacterized protein AT5G44670 [Arabidopsis thaliana]                                                                                                                                     | 543  | 519  | 0         | 95.6  | 80.5 | 87.8 | uncharacterized protein                                 | gbpln | Arabidopsis thaliana | AT5G44670.1   Symbols:   Domain of unknown function (DUF23)   chr5:18019209-18021266 REVERSE LENGTH=519                                                                                                                                                                                                                                                 | 543  | 519  | 0         | 95.6  | 80.5 | 87.8 |
| Rsa1.0_00210.1.g8651.t1 | gb AAG51783.1 AC079679.3 reverse transcriptase, putative; 16838-20266 [Arabidopsis thaliana]                                                                                                                                                                                                                                                                                                                                                                                                                            | 297  | 1142 | 4.00E-43  | 384.5 | 40.1 | 54.2 | reverse transcriptase, putative; 16838-20266            | gbpln | Arabidopsis thaliana | #                                                                                                                                                                                                                                                                                                                                                       | #    | #    | #         | #     | #    | #    |
| Rsa1.0_00210.1.g8652.t2 | gb AAF69161.1 AC007915_13 F27F5.19 [Arabidopsis thaliana]                                                                                                                                                                                                                                                                                                                                                                                                                                                               | 1284 | 1309 | 0         | 101.9 | 43.8 | 59.5 | F27F5.19                                                | gbpln | Arabidopsis thaliana | AT4G23160.1   Symbols: CRK8   cysteine-rich RLK (RECEPTOR-like protein kinase) 8   chr4:12129485-12134086 FORWARD LENGTH=1262                                                                                                                                                                                                                           | 1284 | 1262 | 1.00E-161 | 98.3  | 21.7 | 28.0 |

|                         |                                                                                                                                                 |     |      |           |       |      |      |                                                                                |       |                      |                                                                                                                                                                                                                                                                                                                                                 |     |     |           |       |      |      |
|-------------------------|-------------------------------------------------------------------------------------------------------------------------------------------------|-----|------|-----------|-------|------|------|--------------------------------------------------------------------------------|-------|----------------------|-------------------------------------------------------------------------------------------------------------------------------------------------------------------------------------------------------------------------------------------------------------------------------------------------------------------------------------------------|-----|-----|-----------|-------|------|------|
| Rsa1.0_00210.1.g8653.t1 | #                                                                                                                                               | #   | #    | #         | #     | #    | #    | #                                                                              | -     | ----                 | ----                                                                                                                                                                                                                                                                                                                                            | #   | #   | #         | #     | #    | #    |
|                         | ref NP_565299.1  putative DNA-binding protein [Arabidopsis thaliana]                                                                            |     |      |           |       |      |      |                                                                                |       |                      |                                                                                                                                                                                                                                                                                                                                                 |     |     |           |       |      |      |
|                         | g 15027927 gb AAK76494.1  putative helicase [Arabidopsis thaliana]                                                                              |     |      |           |       |      |      |                                                                                |       |                      |                                                                                                                                                                                                                                                                                                                                                 |     |     |           |       |      |      |
|                         | g 20197343 gb AAM15033.1  putative helicase [Arabidopsis thaliana]                                                                              |     |      |           |       |      |      |                                                                                |       |                      |                                                                                                                                                                                                                                                                                                                                                 |     |     |           |       |      |      |
| Rsa1.0_00210.1.g8654.t1 | g 20197741 gb AAD17447.2  putative helicase [Arabidopsis thaliana]                                                                              | 81  | 639  | 7.00E-17  | 788.9 | 56.8 | 60.5 | putative DNA-binding protein                                                   | gbpln | Arabidopsis thaliana | AT2G03270.1   Symbols:   DNA-binding protein, putative   chr2:994071-995990 FORWARD LENGTH=639                                                                                                                                                                                                                                                  | 81  | 639 | 1.00E-19  | 788.9 | 56.8 | 60.5 |
|                         | g 20259169 gb AAM14300.1  putative helicase [Arabidopsis thaliana]                                                                              |     |      |           |       |      |      |                                                                                |       |                      |                                                                                                                                                                                                                                                                                                                                                 |     |     |           |       |      |      |
|                         | g 330250587 gb AEC05681.1  putative DNA-binding protein [Arabidopsis thaliana]                                                                  |     |      |           |       |      |      |                                                                                |       |                      |                                                                                                                                                                                                                                                                                                                                                 |     |     |           |       |      |      |
| Rsa1.0_00210.1.g8655.t1 | ref NP_178819.1  Zinc knuckle (CCHC-type) family protein [Arabidopsis thaliana]                                                                 | 448 | 530  | 3.00E-41  | 118.3 | 17.0 | 21.4 | Zinc knuckle (CCHC-type) family protein                                        | gbpln | Arabidopsis thaliana | AT2G07760.1   Symbols:   Zinc knuckle (CCHC-type) family protein   chr2:3584420-3586278 REVERSE LENGTH=530                                                                                                                                                                                                                                      | 448 | 530 | 8.00E-44  | 118.3 | 17.0 | 21.4 |
|                         | g 3327395 gb AAC26677.1  putative Ta11-like non-LTR retroelement protein [Arabidopsis thaliana]                                                 |     |      |           |       |      |      |                                                                                |       |                      |                                                                                                                                                                                                                                                                                                                                                 |     |     |           |       |      |      |
|                         | g 330251037 gb AEC06131.1  Zinc knuckle (CCHC-type) family protein [Arabidopsis thaliana]                                                       |     |      |           |       |      |      |                                                                                |       |                      |                                                                                                                                                                                                                                                                                                                                                 |     |     |           |       |      |      |
| Rsa1.0_00210.1.g8656.t2 | dbj BAB10790.1  retroelement pol polyprotein-like [Arabidopsis thaliana]                                                                        | 497 | 1864 | 1.00E-83  | 375.1 | 39.2 | 52.5 | retroelement pol polyprotein-like                                              | gbpln | Arabidopsis thaliana | #                                                                                                                                                                                                                                                                                                                                               | #   | #   | #         | #     | #    | #    |
| Rsa1.0_00210.1.g8657.t1 | pir  T00833 RNA-directed DNA polymerase homolog T13L16.7 - Arabidopsis thaliana (fragment)                                                      | 647 | 1365 | 1.00E-141 | 211.0 | 43.1 | 60.1 | RNA-directed DNA polymerase homolog T13L16.7 - Arabidopsis thaliana (fragment) | ----  | ----                 | AT4G29090.1   Symbols:   Ribonuclease H-like superfamily protein   chr4:14333528-14335255 FORWARD LENGTH=575                                                                                                                                                                                                                                    | 647 | 575 | 5.00E-79  | 88.9  | 26.9 | 43.0 |
| Rsa1.0_00210.1.g8658.t1 | ref NP_197284.1  peroxidase 57 [Arabidopsis thaliana]                                                                                           | 317 | 313  | 1.00E-113 | 98.7  | 64.7 | 76.7 | peroxidase 57                                                                  | gbpln | Arabidopsis thaliana | AT5G17820.1   Symbols:   Peroxidase superfamily protein   chr5:5888195-5890101 REVERSE LENGTH=313                                                                                                                                                                                                                                               | 317 | 313 | 1.00E-116 | 98.7  | 64.7 | 76.7 |
|                         | g 26397647 sp C43729.1 PER57_ARATH RecName: Full=Peroxidase 57; Short=Atperox P57; AltName: Full=ATP13a; AltName: Full=PRXR10; Flags: Precursor |     |      |           |       |      |      |                                                                                |       |                      |                                                                                                                                                                                                                                                                                                                                                 |     |     |           |       |      |      |
|                         | g 1402900 emb CAA66966.1  peroxidase [Arabidopsis thaliana]                                                                                     |     |      |           |       |      |      |                                                                                |       |                      |                                                                                                                                                                                                                                                                                                                                                 |     |     |           |       |      |      |
|                         | g 1429219 emb CAA67312.1  peroxidase ATP13a [Arabidopsis thaliana]                                                                              |     |      |           |       |      |      |                                                                                |       |                      |                                                                                                                                                                                                                                                                                                                                                 |     |     |           |       |      |      |
|                         | g 9759059 dbj BAB09581.1  peroxidase [Arabidopsis thaliana]                                                                                     |     |      |           |       |      |      |                                                                                |       |                      |                                                                                                                                                                                                                                                                                                                                                 |     |     |           |       |      |      |
|                         | g 31745133 gb AAO22769.2  putative peroxidase [Arabidopsis thaliana]                                                                            |     |      |           |       |      |      |                                                                                |       |                      |                                                                                                                                                                                                                                                                                                                                                 |     |     |           |       |      |      |
|                         | g 42494609 gb AAS17635.1  peroxidase ATP13A [Arabidopsis thaliana]                                                                              |     |      |           |       |      |      |                                                                                |       |                      |                                                                                                                                                                                                                                                                                                                                                 |     |     |           |       |      |      |
|                         | g 33200509 gb AED92474.1  peroxidase 57 [Arabidopsis thaliana]                                                                                  |     |      |           |       |      |      |                                                                                |       |                      |                                                                                                                                                                                                                                                                                                                                                 |     |     |           |       |      |      |
| Rsa1.0_00211.1.g8659.t1 | ref XP_002866894.1  hypothetical protein ARALYDRAFT_912482 [Arabidopsis lyrata subsp. lyrata]                                                   | 336 | 350  | 1.00E-126 | 104.2 | 74.1 | 85.4 | hypothetical protein ARALYDRAFT_912482                                         | gbpln | Arabidopsis lyrata   | AT4G39920.1   Symbols:   POR, TFC C   C-CAP/cofactor C-like domain-containing protein   chr4:18515882-18516919 FORWARD LENGTH=345                                                                                                                                                                                                               | 336 | 345 | 1.00E-128 | 102.7 | 74.7 | 84.2 |
|                         | g 297312730 gb EFH43153.1  hypothetical protein ARALYDRAFT_912482 [Arabidopsis lyrata subsp. lyrata]                                            |     |      |           |       |      |      |                                                                                |       |                      |                                                                                                                                                                                                                                                                                                                                                 |     |     |           |       |      |      |
| Rsa1.0_00211.1.g8660.t1 | dbj BAJ34631.1  unnamed protein product [Theleungiella halophila]                                                                               | 214 | 213  | 1.00E-107 | 99.5  | 95.8 | 98.6 | unnamed protein product                                                        | ----  | ----                 | AT4G39890.1   Symbols:   AtRABH1c, RABH1c   RAB GTPase homolog H1C   chr4:18506112-18507459 FORWARD LENGTH=214                                                                                                                                                                                                                                  | 214 | 214 | 1.00E-103 | 100.0 | 90.2 | 94.9 |
| Rsa1.0_00211.1.g8661.t1 | gb AAM63197.1  unknown [Arabidopsis thaliana]                                                                                                   | 178 | 178  | 4.00E-83  | 100.0 | 87.6 | 94.4 | unknown                                                                        | gbpln | Arabidopsis thaliana | AT4G39880.1   Symbols:   Ribosomal protein L23/L15e family protein   chr4:18504601-18505137 FORWARD LENGTH=178                                                                                                                                                                                                                                  | 178 | 178 | 3.00E-78  | 100.0 | 87.6 | 93.8 |
| Rsa1.0_00211.1.g8662.t1 | gb EOA16799.1  hypothetical protein CARUB_v10005018mg [Capsella rubella]                                                                        | 397 | 387  | 1.00E-157 | 97.5  | 78.1 | 85.4 | hypothetical protein CARUB_v10005018mg                                         | gbpln | Capsella rubella     | AT4G39870.2   Symbols:   TLD-domain containing nuclear protein   chr4:18502234-18504275 FORWARD LENGTH=394                                                                                                                                                                                                                                      | 397 | 394 | 1.00E-156 | 99.2  | 78.3 | 86.1 |
| Rsa1.0_00211.1.g8663.t1 | ref XP_002866889.1  hypothetical protein ARALYDRAFT_912474 [Arabidopsis lyrata subsp. lyrata]                                                   | 303 | 297  | 1.00E-140 | 98.0  | 86.1 | 90.4 | hypothetical protein ARALYDRAFT_912474                                         | gbpln | Arabidopsis lyrata   | AT4G39860.1   Symbols:   unknown protein; BEST Arabidopsis thaliana protein match is: unknown protein (TAIR:AT2G2270.1); Has 152 Blast hits to 146 proteins in 19 species: Archaea = 0; Bacteria = 0; Metazoa = 0; Fungi = 2; Plants = 146; Viruses = 0; Other Eukaryotes = 4 (source: NCBI BLINK).   chr4:18499909-18501472 FORWARD LENGTH=299 | 303 | 299 | 1.00E-136 | 98.7  | 86.1 | 89.8 |
|                         | g 297312725 gb EFH43148.1  hypothetical protein ARALYDRAFT_912474 [Arabidopsis lyrata subsp. lyrata]                                            |     |      |           |       |      |      |                                                                                |       |                      |                                                                                                                                                                                                                                                                                                                                                 |     |     |           |       |      |      |
| Rsa1.0_00211.1.g8664.t1 | dbj BAB02797.1  unnamed protein product [Arabidopsis thaliana]                                                                                  | 302 | 345  | 2.00E-32  | 114.2 | 29.1 | 42.4 | unnamed protein product                                                        | gbpln | Arabidopsis thaliana | AT3G13280.1   Symbols:   Putative endonuclease or glycosyl hydrolase   chr3:4295327-4297000 REVERSE LENGTH=383                                                                                                                                                                                                                                  | 302 | 383 | 2.00E-18  | 126.8 | 18.5 | 28.1 |



|                         |                                                                                                                                                                                                                                                                                                                                                                                                                                                                                                                                                                                                                                                                                                                                                                                                                                                                                                                                                                                                                                                                                                                                                                                                                                        |      |      |           |       |      |      |                                              |       |                      |                                                                                                                                         |      |      |           |       |      |      |
|-------------------------|----------------------------------------------------------------------------------------------------------------------------------------------------------------------------------------------------------------------------------------------------------------------------------------------------------------------------------------------------------------------------------------------------------------------------------------------------------------------------------------------------------------------------------------------------------------------------------------------------------------------------------------------------------------------------------------------------------------------------------------------------------------------------------------------------------------------------------------------------------------------------------------------------------------------------------------------------------------------------------------------------------------------------------------------------------------------------------------------------------------------------------------------------------------------------------------------------------------------------------------|------|------|-----------|-------|------|------|----------------------------------------------|-------|----------------------|-----------------------------------------------------------------------------------------------------------------------------------------|------|------|-----------|-------|------|------|
| Rsa1.0_00211.1.g8665.t1 | ref[XP_002866888.1] peroxisomal abc transporter [Arabidopsis lyrata subsp. lyrata] gi 297312724 gb EFH43147.1  peroxisomal abc transporter [Arabidopsis lyrata subsp. lyrata]                                                                                                                                                                                                                                                                                                                                                                                                                                                                                                                                                                                                                                                                                                                                                                                                                                                                                                                                                                                                                                                          | 1339 | 1337 | 0         | 99.9  | 93.2 | 96.3 | peroxisomal abc transporter                  | gbpln | Arabidopsis lyrata   | AT4G39850.2   Symbols: PXA1   peroxisomal ABC transporter 1   chr4:18489220-18496762 FORWARD LENGTH=1338                                | 1339 | 1338 | 0         | 99.9  | 92.9 | 95.9 |
| Rsa1.0_00211.1.g8666.t1 | ref[NP_195693.1] putative L-ascorbate oxidase [Arabidopsis thaliana] gi 3080452 emb CAA18769.1  putative L-ascorbate oxidase [Arabidopsis thaliana] gi 7271038 emb CAB80646.1  putative L-ascorbate oxidase [Arabidopsis thaliana] gi 51536490 gb AAU05483.1  At4g39830 [Arabidopsis thaliana] gi 53850489 gb AAU95421.1  At4g39830 [Arabidopsis thaliana] gi 332661724 gb AEE87124.1  putative L-ascorbate oxidase [Arabidopsis thaliana]                                                                                                                                                                                                                                                                                                                                                                                                                                                                                                                                                                                                                                                                                                                                                                                             | 581  | 582  | 0         | 100.2 | 85.7 | 91.6 | putative L-ascorbate oxidase                 | gbpln | Arabidopsis thaliana | AT4G39830.1   Symbols: Cupredoxin superfamily protein   chr4:18479103-18481184 FORWARD LENGTH=582                                       | 581  | 582  | 0         | 100.2 | 85.7 | 91.6 |
| Rsa1.0_00211.1.g8667.t1 | gb EOA17274.1  hypothetical protein CARUB_v10005547mg [Capsella rubella]                                                                                                                                                                                                                                                                                                                                                                                                                                                                                                                                                                                                                                                                                                                                                                                                                                                                                                                                                                                                                                                                                                                                                               | 255  | 256  | 1.00E-131 | 100.4 | 91.8 | 96.9 | hypothetical protein CARUB_v10005547mg       | gbpln | Capsella rubella     | AT4G39810.1   Symbols: Polynucleotidyl transferase, ribonuclease H-like superfamily protein   chr4:18474608-18475735 REVERSE LENGTH=255 | 255  | 255  | 1.00E-132 | 100.0 | 89.4 | 95.7 |
| Rsa1.0_00211.1.g8668.t2 | ref[XP_002866884.1] predicted protein [Arabidopsis lyrata subsp. lyrata] gi 297312720 gb EFH43143.1  predicted protein [Arabidopsis lyrata subsp. lyrata]                                                                                                                                                                                                                                                                                                                                                                                                                                                                                                                                                                                                                                                                                                                                                                                                                                                                                                                                                                                                                                                                              | 121  | 132  | 2.00E-48  | 109.1 | 81.8 | 84.3 | predicted protein                            | gbpln | Arabidopsis lyrata   | AT4G39795.1   Symbols: Protein of unknown function (DUF581)   chr4:18466621-18467325 FORWARD LENGTH=126                                 | 121  | 126  | 4.00E-45  | 104.1 | 73.6 | 80.2 |
| Rsa1.0_00211.1.g8669.t6 | gb AAG51783.1 AC079679.3 reverse transcriptase, putative: 16838-20266 [Arabidopsis thaliana] ref[NP_195651.1] putative WRKY transcription factor 13 [Arabidopsis thaliana] gi 29839686 sp Q9SVB7.1 WRK13_ARAT H RecName: Full=Probable WRKY transcription factor 13; AltName: Full=WRKY DNA-binding protein 13 gi 15991730 gb AAL13042.1 AF421153_1 WRKY transcription factor 13 [Arabidopsis thaliana] gi 5042157 emb CAB44676.1  putative WRKY DNA-binding protein [Arabidopsis thaliana] gi 7270925 emb CAB80604.1  putative WRKY DNA-binding protein [Arabidopsis thaliana] gi 225898873 dbj BAH30567.1  hypothetical protein [Arabidopsis thaliana] gi 332661671 gb AEE87071.1  putative WRKY transcription factor 13 [Arabidopsis thaliana] ref[NP_195644.1] uncharacterized protein [Arabidopsis thaliana] gi 75213705 sp Q9T039.1 EC14_ARATH RecName: Full=Egg cell-secreted protein 1.4; Flags: Precursor gi 4914446 emb CAB43649.1  hypothetical protein [Arabidopsis thaliana] gi 7270918 emb CAB80597.1  hypothetical protein [Arabidopsis thaliana] gi 91805627 gb ABE65542.1  hypothetical protein At4g39340 [Arabidopsis thaliana] gi 332661659 gb AEE87058.1  uncharacterized protein AT4G39340 [Arabidopsis thaliana] | 503  | 1142 | 9.00E-89  | 227.0 | 31.8 | 40.4 | reverse transcriptase, putative: 16838-20266 | gbpln | Arabidopsis thaliana | AT4G29090.1   Symbols: Ribonuclease H-like superfamily protein   chr4:14333528-14335255 FORWARD LENGTH=575                              | 503  | 575  | 6.00E-30  | 114.3 | 11.1 | 17.3 |
| Rsa1.0_00211.1.g8670.t1 | ref[XP_002866884.1] predicted protein [Arabidopsis lyrata subsp. lyrata] gi 297312720 gb EFH43143.1  predicted protein [Arabidopsis lyrata subsp. lyrata] gi 5042157 emb CAB44676.1  putative WRKY DNA-binding protein [Arabidopsis thaliana] gi 7270925 emb CAB80604.1  putative WRKY DNA-binding protein [Arabidopsis thaliana] gi 225898873 dbj BAH30567.1  hypothetical protein [Arabidopsis thaliana] gi 332661671 gb AEE87071.1  putative WRKY transcription factor 13 [Arabidopsis thaliana] ref[NP_195644.1] uncharacterized protein [Arabidopsis thaliana] gi 75213705 sp Q9T039.1 EC14_ARATH RecName: Full=Egg cell-secreted protein 1.4; Flags: Precursor gi 4914446 emb CAB43649.1  hypothetical protein [Arabidopsis thaliana] gi 7270918 emb CAB80597.1  hypothetical protein [Arabidopsis thaliana] gi 91805627 gb ABE65542.1  hypothetical protein At4g39340 [Arabidopsis thaliana] gi 332661659 gb AEE87058.1  uncharacterized protein AT4G39340 [Arabidopsis thaliana]                                                                                                                                                                                                                                               | 233  | 304  | 4.00E-75  | 130.5 | 72.1 | 78.1 | putative WRKY transcription factor 13        | gbpln | Arabidopsis thaliana | AT4G39410.1   Symbols: WRKY13, ATWRKY13   WRKY DNA-binding protein 13   chr4:18332937-18334789 REVERSE LENGTH=304                       | 233  | 304  | 1.00E-77  | 130.5 | 72.1 | 78.1 |
| Rsa1.0_00211.1.g8671.t1 | ref[NP_195644.1] uncharacterized protein [Arabidopsis thaliana] gi 75213705 sp Q9T039.1 EC14_ARATH RecName: Full=Egg cell-secreted protein 1.4; Flags: Precursor gi 4914446 emb CAB43649.1  hypothetical protein [Arabidopsis thaliana] gi 7270918 emb CAB80597.1  hypothetical protein [Arabidopsis thaliana] gi 91805627 gb ABE65542.1  hypothetical protein At4g39340 [Arabidopsis thaliana] gi 332661659 gb AEE87058.1  uncharacterized protein AT4G39340 [Arabidopsis thaliana]                                                                                                                                                                                                                                                                                                                                                                                                                                                                                                                                                                                                                                                                                                                                                   | 127  | 127  | 1.00E-52  | 100.0 | 83.5 | 90.6 | uncharacterized protein                      | gbpln | Arabidopsis thaliana | AT4G39340.1   Symbols: Protein of unknown function (DUF1278)   chr4:18293129-18293512 REVERSE LENGTH=127                                | 127  | 127  | 2.00E-55  | 100.0 | 83.5 | 90.6 |
| Rsa1.0_00211.1.g8672.t1 | gb EOA16882.1  hypothetical protein CARUB_v10005116mg [Capsella rubella]                                                                                                                                                                                                                                                                                                                                                                                                                                                                                                                                                                                                                                                                                                                                                                                                                                                                                                                                                                                                                                                                                                                                                               | 360  | 360  | 0         | 100.0 | 91.4 | 97.8 | hypothetical protein CARUB_v10005116mg       | gbpln | Capsella rubella     | AT4G39330.1   Symbols: ATCAD9, CAD9   cinnamyl alcohol dehydrogenase 9   chr4:18291268-18292772 FORWARD LENGTH=360                      | 360  | 360  | 0         | 100.0 | 90.8 | 97.2 |
| Rsa1.0_00211.1.g8673.t1 | ref[XP_002866840.1] hypothetical protein ARALYDRAFT_912391 [Arabidopsis lyrata subsp. lyrata] gi 297312676 gb EFH43099.1  hypothetical protein ARALYDRAFT_912391 [Arabidopsis lyrata subsp. lyrata]                                                                                                                                                                                                                                                                                                                                                                                                                                                                                                                                                                                                                                                                                                                                                                                                                                                                                                                                                                                                                                    | 135  | 173  | 2.00E-36  | 128.1 | 73.3 | 80.0 | hypothetical protein ARALYDRAFT_912391       | gbpln | Arabidopsis lyrata   | AT4G39320.1   Symbols: microtubule-associated protein-related   chr4:18289102-18289702 FORWARD LENGTH=166                               | 135  | 166  | 1.00E-34  | 123.0 | 70.4 | 76.3 |

|                         |                                                                                                                                                                                                                                                                                                                                                                                                                                                                                                                                                                                                                                                                                                                                 |     |     |           |       |      |      |                                        |       |                      |                                                                                                                                                                                                                                                                                                                                                                    |     |     |           |       |      |      |
|-------------------------|---------------------------------------------------------------------------------------------------------------------------------------------------------------------------------------------------------------------------------------------------------------------------------------------------------------------------------------------------------------------------------------------------------------------------------------------------------------------------------------------------------------------------------------------------------------------------------------------------------------------------------------------------------------------------------------------------------------------------------|-----|-----|-----------|-------|------|------|----------------------------------------|-------|----------------------|--------------------------------------------------------------------------------------------------------------------------------------------------------------------------------------------------------------------------------------------------------------------------------------------------------------------------------------------------------------------|-----|-----|-----------|-------|------|------|
| Rsa1.0_00211.1.g8674.t1 | refXP_002866838.1  hypothetical protein ARALYDRAFT_490704 [Arabidopsis lyrata subsp. lyrata] gi 297312674 gb EFH43097.1  hypothetical protein ARALYDRAFT_490704 [Arabidopsis lyrata subsp. lyrata] refNP_195635.1  F-box/kelch-repeat protein [Arabidopsis thaliana] gi 75213699 sp Q9T031.1 FBK96_ARATH RecName: Full=F-box/kelch-repeat protein At4g39240 gi 13877533 gb AAK43844.1 AF370467.1 putative protein [Arabidopsis thaliana] gi 4914436 emb CAB43639.1  putative protein [Arabidopsis thaliana] gi 7270907 emb CAB80587.1  putative protein [Arabidopsis thaliana] gi 22136486 gb AAM91321.1  putative protein [Arabidopsis thaliana] gi 332661642 gb AEE87042.1  F-box/kelch-repeat protein [Arabidopsis thaliana] | 960 | 864 | 0         | 90.0  | 73.8 | 80.1 | hypothetical protein ARALYDRAFT_490704 | gbpln | Arabidopsis lyrata   | AT4G39270.1   Symbols:   Leucine-rich repeat protein kinase family protein   chr4:18276874-18279710 FORWARD LENGTH=864                                                                                                                                                                                                                                             | 960 | 864 | 0         | 90.0  | 71.7 | 78.3 |
| Rsa1.0_00211.1.g8675.t1 | refNP_195635.1  F-box/kelch-repeat protein [Arabidopsis thaliana] gi 75213699 sp Q9T031.1 FBK96_ARATH RecName: Full=F-box/kelch-repeat protein At4g39240 gi 13877533 gb AAK43844.1 AF370467.1 putative protein [Arabidopsis thaliana] gi 4914436 emb CAB43639.1  putative protein [Arabidopsis thaliana] gi 7270907 emb CAB80587.1  putative protein [Arabidopsis thaliana] gi 22136486 gb AAM91321.1  putative protein [Arabidopsis thaliana] gi 332661642 gb AEE87042.1  F-box/kelch-repeat protein [Arabidopsis thaliana]                                                                                                                                                                                                    | 359 | 375 | 1.00E-114 | 104.5 | 59.3 | 72.7 | F-box/kelch-repeat protein             | gbpln | Arabidopsis thaliana | AT4G39240.1   Symbols:   Galactose oxidase/kelch repeat superfamily protein   chr4:18269599-18270726 REVERSE LENGTH=375                                                                                                                                                                                                                                            | 359 | 375 | 1.00E-117 | 104.5 | 59.3 | 72.7 |
| Rsa1.0_00211.1.g8676.t1 | refNP_195635.1  F-box/kelch-repeat protein [Arabidopsis thaliana] gi 75213699 sp Q9T031.1 FBK96_ARATH RecName: Full=F-box/kelch-repeat protein At4g39240 gi 13877533 gb AAK43844.1 AF370467.1 putative protein [Arabidopsis thaliana] gi 4914436 emb CAB43639.1  putative protein [Arabidopsis thaliana] gi 7270907 emb CAB80587.1  putative protein [Arabidopsis thaliana] gi 22136486 gb AAM91321.1  putative protein [Arabidopsis thaliana] gi 332661642 gb AEE87042.1  F-box/kelch-repeat protein [Arabidopsis thaliana]                                                                                                                                                                                                    | 380 | 375 | 1.00E-125 | 98.7  | 60.3 | 75.0 | F-box/kelch-repeat protein             | gbpln | Arabidopsis thaliana | AT4G39240.1   Symbols:   Galactose oxidase/kelch repeat superfamily protein   chr4:18269599-18270726 REVERSE LENGTH=375                                                                                                                                                                                                                                            | 380 | 375 | 1.00E-128 | 98.7  | 60.3 | 75.0 |
| Rsa1.0_00211.1.g8677.t1 | refXP_002866837.1  hypothetical protein ARALYDRAFT_490696 [Arabidopsis lyrata subsp. lyrata] gi 297312673 gb EFH43096.1  hypothetical protein ARALYDRAFT_490696 [Arabidopsis lyrata subsp. lyrata]                                                                                                                                                                                                                                                                                                                                                                                                                                                                                                                              | 115 | 89  | 1.00E-31  | 77.4  | 67.8 | 73.0 | hypothetical protein ARALYDRAFT_490696 | gbpln | Arabidopsis lyrata   | AT4G39235.1   Symbols:   unknown protein; BEST Arabidopsis thaliana protein match is: unknown protein (TAIR:AT3G05570.1); Has 30201 Blast hits to 17322 proteins in 780 species: Archae - 12; Bacteria - 1396; Metazoa - 17338; Fungi - 3422; Plants - 5037; Viruses - 0; Other Eukaryotes - 2996 (source: NCBI BLINK).   chr4:18268514-18269034 FORWARD LENGTH=86 | 115 | 86  | 3.00E-32  | 74.8  | 65.2 | 69.6 |
| Rsa1.0_00211.1.g8678.t1 | refNP_195633.1  protein RER1A [Arabidopsis thaliana] gi 6225938 sp O48670.1 RER1A_ARATH RecName: Full=Protein RER1A; Short=AtRER1A gi 2865175 dbj BAA24803.1  AtRer1A [Arabidopsis thaliana] gi 4914434 emb CAB43637.1  AtRer1A [Arabidopsis thaliana] gi 7270905 emb CAB80585.1  AtRer1A [Arabidopsis thaliana] gi 14994255 gb AAK73262.1  AtRer1A [Arabidopsis thaliana] gi 21554242 gb AAM63317.1  AtRer1A [Arabidopsis thaliana] gi 24030322 gb AAN41329.1  putative AtRer1A protein [Arabidopsis thaliana] gi 332661639 gb AEE87039.1  protein RER1A [Arabidopsis thaliana]                                                                                                                                                | 191 | 191 | 3.00E-94  | 100.0 | 91.1 | 94.2 | protein RER1A                          | gbpln | Arabidopsis thaliana | AT4G39220.1   Symbols:   ATRER1A   Rer1 family protein   chr4:18264280-18265531 FORWARD LENGTH=191                                                                                                                                                                                                                                                                 | 191 | 191 | 1.00E-96  | 100.0 | 91.1 | 94.2 |
| Rsa1.0_00211.1.g8679.t1 | dbj BAJ34261.1  unnamed protein product [Thellungiella halophila]                                                                                                                                                                                                                                                                                                                                                                                                                                                                                                                                                                                                                                                               | 523 | 521 | 0         | 99.6  | 92.0 | 95.0 | unnamed protein product                | ----  | ----                 | AT4G39210.1   Symbols:   APL3   Glucose-1-phosphate adenylyltransferase family protein   chr4:18260332-18263181 FORWARD LENGTH=521                                                                                                                                                                                                                                 | 523 | 521 | 0         | 99.6  | 90.1 | 94.8 |

|                         |                                                                                                                                                                                                                                                                                                                                                                                                                                                                                                                                                                                                                                                                                                                                                                                                                                                                                                                                                                                                                                                                                                                                                                                                                                                       |     |     |           |       |       |       |                                        |       |                      |                                                                                                                                                                                                                                                                                                                                                                |     |     |           |       |       |       |
|-------------------------|-------------------------------------------------------------------------------------------------------------------------------------------------------------------------------------------------------------------------------------------------------------------------------------------------------------------------------------------------------------------------------------------------------------------------------------------------------------------------------------------------------------------------------------------------------------------------------------------------------------------------------------------------------------------------------------------------------------------------------------------------------------------------------------------------------------------------------------------------------------------------------------------------------------------------------------------------------------------------------------------------------------------------------------------------------------------------------------------------------------------------------------------------------------------------------------------------------------------------------------------------------|-----|-----|-----------|-------|-------|-------|----------------------------------------|-------|----------------------|----------------------------------------------------------------------------------------------------------------------------------------------------------------------------------------------------------------------------------------------------------------------------------------------------------------------------------------------------------------|-----|-----|-----------|-------|-------|-------|
| Rsa1.0_00211.1.g8680.t1 | ref NP_195631.1  40S ribosomal protein S25-4 [Arabidopsis thaliana]<br>gi 30580493 sp Q9T029.1 RS254_ARATH RecName: Full=40S ribosomal protein S25-4 gi 4914432 emb CAB43635.1 ribosomal protein S25 [Arabidopsis thaliana] gi 7270900 emb CAB80583.1 ribosomal protein S25 [Arabidopsis thaliana] gi 14335026 gb AAK59777.1 AT4G39200/T22F8.100 [Arabidopsis thaliana] gi 16323232 gb AAL15350.1 AT4G39200/T22F8.100 [Arabidopsis thaliana] gi 21553704 gb AAM62797.1 ribosomal protein S25 [Arabidopsis thaliana] gi 332661636 gb AEE87036.1 40S ribosomal protein S25-4 [Arabidopsis thaliana] gi 482553510 gb EOA17703.1 hypothetical protein CARUB_v10006075mg [Capsella rubella]                                                                                                                                                                                                                                                                                                                                                                                                                                                                                                                                                                | 108 | 108 | 1.00E-55  | 100.0 | 100.0 | 100.0 | 40S ribosomal protein S25-4            | gbpln | Arabidopsis thaliana | AT4G39200.1   Symbols:   Ribosomal protein S25 family protein   chr4:18257464-18258464 FORWARD LENGTH=108                                                                                                                                                                                                                                                      | 108 | 108 | 2.00E-58  | 100.0 | 100.0 | 100.0 |
| Rsa1.0_00211.1.g8681.t1 | ref NP_195630.1  uncharacterized protein [Arabidopsis thaliana] gi 4914431 emb CAB43634.1 hypothetical protein [Arabidopsis thaliana] gi 7270902 emb CAB80582.1 hypothetical protein [Arabidopsis thaliana] gi 52354433 gb AAU4537.1 hypothetical protein AT4G39190 [Arabidopsis thaliana] gi 332661635 gb AEE87035.1 uncharacterized protein AT4G39190 [Arabidopsis thaliana]                                                                                                                                                                                                                                                                                                                                                                                                                                                                                                                                                                                                                                                                                                                                                                                                                                                                        | 275 | 277 | 1.00E-93  | 100.7 | 70.5  | 82.9  | uncharacterized protein                | gbpln | Arabidopsis thaliana | AT4G39190.1   Symbols:   unknown protein; BEST Arabidopsis thaliana protein match is: unknown protein (TAIR:AT2G21560.1); Has 5536 Blast hits to 3562 proteins in 401 species: Archae - 12; Bacteria - 497; Metazoa - 1363; Fungi - 374; Plants - 149; Viruses - 22; Other Eukaryotes - 3119 (source: NCBI BLINK).   chr4:18252032-18252865 REVERSE LENGTH=277 | 275 | 277 | 4.00E-96  | 100.7 | 70.5  | 82.9  |
| Rsa1.0_00211.1.g8682.t2 | gb EOA18818.1  hypothetical protein CARUB_v10007432mg [Capsella rubella]                                                                                                                                                                                                                                                                                                                                                                                                                                                                                                                                                                                                                                                                                                                                                                                                                                                                                                                                                                                                                                                                                                                                                                              | 519 | 556 | 0         | 107.1 | 71.3  | 80.3  | hypothetical protein CARUB_v10007432mg | gbpln | Capsella rubella     | AT4G39180.1   Symbols: SEC14, ATSEC14   Sec14p-like phosphatidylinositol transfer family protein   chr4:18244006-18246673 REVERSE LENGTH=554                                                                                                                                                                                                                   | 519 | 554 | 0         | 106.7 | 70.9  | 79.8  |
| Rsa1.0_00211.1.g8683.t1 | ref XP_002866831.1  DNA binding protein [Arabidopsis lyrata subsp. lyrata] gi 297312667 gb EFH43090.1 DNA binding protein [Arabidopsis lyrata subsp. lyrata]<br>ref NP_195825.1  HING/U-box domain-containing protein [Arabidopsis thaliana] gi 30692196 ref NP_849522.1  RING/U-box domain-containing protein [Arabidopsis thaliana] gi 42573229 ref NP_974711.1  RING/U-box domain-containing protein [Arabidopsis thaliana] gi 42573231 ref NP_974712.1  RING/U-box domain-containing protein [Arabidopsis thaliana] gi 145334267 ref NP_001078514.1  RING/U-box domain-containing protein [Arabidopsis thaliana] gi 4914426 emb CAB43629.1  putative protein [Arabidopsis thaliana] gi 7270897 emb CAB80577.1  putative protein [Arabidopsis thaliana] gi 17065052 gb AAL32680.1  putative protein [Arabidopsis thaliana] gi 22136224 gb AAM91190.1  putative protein [Arabidopsis thaliana] gi 66865959 gb AAV57613.1  RING finger family protein [Arabidopsis thaliana] gi 332661622 gb AEE87022.1  RING/U-box domain-containing protein [Arabidopsis thaliana] gi 332661623 gb AEE87023.1  RING/U-box domain-containing protein [Arabidopsis thaliana] gi 332661624 gb AEE87024.1  RING/U-box domain-containing protein [Arabidopsis thaliana] | 537 | 600 | 1.00E-151 | 111.7 | 66.1  | 76.9  | DNA binding protein                    | gbpln | Arabidopsis lyrata   | AT4G39160.1   Symbols:   Homeodomain-like superfamily protein   chr4:18236829-18239744 FORWARD LENGTH=601                                                                                                                                                                                                                                                      | 537 | 601 | 1.00E-147 | 111.9 | 63.9  | 74.9  |
| Rsa1.0_00211.1.g8684.t1 | ref NP_195825.1  HING/U-box domain-containing protein [Arabidopsis thaliana] gi 30692196 ref NP_849522.1  RING/U-box domain-containing protein [Arabidopsis thaliana] gi 42573229 ref NP_974711.1  RING/U-box domain-containing protein [Arabidopsis thaliana] gi 42573231 ref NP_974712.1  RING/U-box domain-containing protein [Arabidopsis thaliana] gi 145334267 ref NP_001078514.1  RING/U-box domain-containing protein [Arabidopsis thaliana] gi 4914426 emb CAB43629.1  putative protein [Arabidopsis thaliana] gi 7270897 emb CAB80577.1  putative protein [Arabidopsis thaliana] gi 17065052 gb AAL32680.1  putative protein [Arabidopsis thaliana] gi 22136224 gb AAM91190.1  putative protein [Arabidopsis thaliana] gi 66865959 gb AAV57613.1  RING finger family protein [Arabidopsis thaliana] gi 332661622 gb AEE87022.1  RING/U-box domain-containing protein [Arabidopsis thaliana] gi 332661623 gb AEE87023.1  RING/U-box domain-containing protein [Arabidopsis thaliana] gi 332661624 gb AEE87024.1  RING/U-box domain-containing protein [Arabidopsis thaliana]                                                                                                                                                                 | 313 | 429 | 1.00E-127 | 137.1 | 80.2  | 87.2  | RING/U-box domain-containing protein   | gbpln | Arabidopsis thaliana | AT4G39140.5   Symbols:   RING/U-box superfamily protein   chr4:18229637-18231282 REVERSE LENGTH=429                                                                                                                                                                                                                                                            | 313 | 429 | 1.00E-129 | 137.1 | 80.2  | 87.2  |
| Rsa1.0_00211.1.g8685.t1 | ref XP_002868886.1  kinase family protein [Arabidopsis lyrata subsp. lyrata] gi 297314722 gb EFH45145.1 kinase family protein [Arabidopsis lyrata subsp. lyrata]                                                                                                                                                                                                                                                                                                                                                                                                                                                                                                                                                                                                                                                                                                                                                                                                                                                                                                                                                                                                                                                                                      | 854 | 882 | 0         | 103.3 | 91.2  | 94.4  | kinase family protein                  | gbpln | Arabidopsis lyrata   | AT4G39110.1   Symbols:   Malectin/receptor-like protein kinase family protein   chr4:18222483-18225119 REVERSE LENGTH=878                                                                                                                                                                                                                                      | 854 | 878 | 0         | 102.8 | 91.0  | 93.9  |

|                         |                                                                                                                                                                                                                                                                                                                                                                                                                                                                                           |      |      |           |       |       |       |                                                           |       |                      |                                                                                                                                        |      |      |           |       |       |       |
|-------------------------|-------------------------------------------------------------------------------------------------------------------------------------------------------------------------------------------------------------------------------------------------------------------------------------------------------------------------------------------------------------------------------------------------------------------------------------------------------------------------------------------|------|------|-----------|-------|-------|-------|-----------------------------------------------------------|-------|----------------------|----------------------------------------------------------------------------------------------------------------------------------------|------|------|-----------|-------|-------|-------|
| Rsa1.0_00211.1.g8686.t1 | refNP_195616.2  Kinesin motor family protein [Arabidopsis thaliana]<br>gi 16902294 dbj BAB71852.1  kinesin-related protein [Arabidopsis thaliana]<br>gi 23297817 gb AANI3032.1  putative kinesin protein [Arabidopsis thaliana]<br>gi 332661612 gb AEE87012.1  Kinesin motor family protein [Arabidopsis thaliana]                                                                                                                                                                        | 1056 | 1055 | 0         | 99.9  | 88.6  | 92.9  | Kinesin motor family protein                              | gbpln | Arabidopsis thaliana | AT4G39050.1   Symbols:   Kinesin motor family protein   chr4:18193462-18200148 FORWARD LENGTH=1055                                     | 1056 | 1055 | 0         | 99.9  | 88.6  | 92.9  |
| Rsa1.0_00211.1.g8687.t1 | refNP_195615.1  putative RNA-binding protein containing KH domain protein [Arabidopsis thaliana]<br>gi 4539323 emb CAB38824.1  putative protein [Arabidopsis thaliana]<br>gi 7270887 emb CAB80567.1  putative protein [Arabidopsis thaliana]<br>gi 26452052 dbj BAC43116.1  unknown protein [Arabidopsis thaliana]<br>gi 28950859 gb AAO63353.1  At4g39040 [Arabidopsis thaliana]<br>gi 332661610 gb AEE87010.1  putative RNA-binding protein containing KH domain [Arabidopsis thaliana] | 286  | 296  | 6.00E-85  | 103.5 | 69.9  | 78.7  | putative RNA-binding protein containing KH domain protein | gbpln | Arabidopsis thaliana | AT4G39040.1   Symbols:   RNA-binding CRS1 / YhbY (CRM) domain protein   chr4:18189249-18190535 REVERSE LENGTH=296                      | 286  | 296  | 2.00E-87  | 103.5 | 69.9  | 78.7  |
| Rsa1.0_00211.1.g8688.t1 | refXP_002887270.1  hypothetical protein ARALYDRAFT_894796 [Arabidopsis lyrata subsp. lyrata]<br>gi 29733311 gb EFH63529.1  hypothetical protein ARALYDRAFT_894796 [Arabidopsis lyrata subsp. lyrata]                                                                                                                                                                                                                                                                                      | 345  | 177  | 7.00E-21  | 51.3  | 15.7  | 18.3  | hypothetical protein ARALYDRAFT_894796                    | gbpln | Arabidopsis lyrata   | AT1G70040.1   Symbols:   Protein of unknown function (DUF1163)   chr1:26381233-26381908 FORWARD LENGTH=193                             | 345  | 193  | 5.00E-22  | 55.9  | 14.8  | 17.7  |
| Rsa1.0_00211.1.g8689.t1 | refXP_002868879.1  hypothetical protein ARALYDRAFT_912358 [Arabidopsis lyrata subsp. lyrata]<br>gi 297314715 gb EFH45138.1  hypothetical protein ARALYDRAFT_912358 [Arabidopsis lyrata subsp. lyrata]                                                                                                                                                                                                                                                                                     | 466  | 509  | 0         | 109.2 | 91.4  | 95.5  | hypothetical protein ARALYDRAFT_912358                    | gbpln | Arabidopsis lyrata   | AT4G36220.1   Symbols: FAH1, CYP84A1   ferulic acid 5-hydroxylase   chr4:17137584-17139619 REVERSE LENGTH=520                          | 466  | 520  | 0         | 111.6 | 63.5  | 81.8  |
| Rsa1.0_00211.1.g8690.t1 | refXP_004148537.1  PREDICTED: DNA-binding protein HEXBP-like [Cucumis sativus]<br>gi 449519884 ref XP_004166964.1  PREDICTED: DNA-binding protein HEXBP-like [Cucumis sativus]                                                                                                                                                                                                                                                                                                            | 246  | 260  | 6.00E-93  | 105.7 | 70.3  | 81.3  | PREDICTED: DNA-binding protein HEXBP-like                 | gbpln | Cucumis sativus      | AT1G75560.2   Symbols:   zinc knuckle (OHC-type) family protein   chr1:28371420-28372717 REVERSE LENGTH=257                            | 246  | 257  | 4.00E-68  | 104.5 | 53.3  | 68.7  |
| Rsa1.0_00211.1.g8691.t1 | refXP_002868877.1  glycosyl hydrolase family 9 protein [Arabidopsis lyrata subsp. lyrata]<br>gi 297314713 gb EFH45136.1  glycosyl hydrolase family 9 protein [Arabidopsis lyrata subsp. lyrata]                                                                                                                                                                                                                                                                                           | 491  | 491  | 0         | 100.0 | 82.3  | 89.6  | glycosyl hydrolase family 9 protein                       | gbpln | Arabidopsis lyrata   | AT4G39000.1   Symbols: AtGH9B17, GH9B17   glycosyl hydrolase 9B17   chr4:18171722-18173797 REVERSE LENGTH=493                          | 491  | 493  | 0         | 100.4 | 80.7  | 90.2  |
| Rsa1.0_00211.1.g8692.t1 | refXP_002868874.1  hypothetical protein ARALYDRAFT_490667 [Arabidopsis lyrata subsp. lyrata]<br>gi 297314710 gb EFH45133.1  hypothetical protein ARALYDRAFT_490667 [Arabidopsis lyrata subsp. lyrata]                                                                                                                                                                                                                                                                                     | 393  | 393  | 0         | 100.0 | 96.7  | 99.0  | hypothetical protein ARALYDRAFT_490667                    | gbpln | Arabidopsis lyrata   | AT4G38970.1   Symbols: FBA2   fructose-bisphosphate aldolase 2   chr4:18163714-18165659 REVERSE LENGTH=398                             | 393  | 398  | 0         | 101.3 | 97.2  | 99.2  |
| Rsa1.0_00211.1.g8693.t1 | gb EOA17498.1  hypothetical protein CARUB_v10005832mg [Capsella rubella]                                                                                                                                                                                                                                                                                                                                                                                                                  | 180  | 183  | 1.00E-91  | 101.7 | 92.2  | 96.1  | hypothetical protein CARUB_v10005832mg                    | gbpln | Capsella rubella     | AT4G38960.1   Symbols:   B-box type zinc finger family protein   chr4:18161576-18163045 FORWARD LENGTH=183                             | 180  | 183  | 3.00E-93  | 101.7 | 91.7  | 95.0  |
| Rsa1.0_00211.1.g8694.t1 | refXP_002868873.1  kinesin motor family protein [Arabidopsis lyrata subsp. lyrata]<br>gi 297314709 gb EFH45132.1  kinesin motor family protein [Arabidopsis lyrata subsp. lyrata]                                                                                                                                                                                                                                                                                                         | 595  | 836  | 1.00E-106 | 140.5 | 35.8  | 42.2  | kinesin motor family protein                              | gbpln | Arabidopsis lyrata   | AT4G38950.2   Symbols:   ATP binding microtubule motor family protein   chr4:18154606-18158461 REVERSE LENGTH=836                      | 595  | 836  | 1.00E-108 | 140.5 | 35.6  | 41.8  |
| Rsa1.0_00211.1.g8695.t1 | refXP_002866825.1  kelch repeat-containing F-box family protein [Arabidopsis lyrata subsp. lyrata]<br>gi 297312661 gb EFH43084.1  kelch repeat-containing F-box family protein [Arabidopsis lyrata subsp. lyrata]                                                                                                                                                                                                                                                                         | 366  | 368  | 1.00E-156 | 100.5 | 76.2  | 83.9  | kelch repeat-containing F-box family protein              | gbpln | Arabidopsis lyrata   | AT4G38940.1   Symbols:   Galactose oxidase/kelch repeat superfamily protein   chr4:18152848-18153960 FORWARD LENGTH=370                | 366  | 370  | 1.00E-151 | 101.1 | 73.0  | 81.4  |
| Rsa1.0_00211.1.g8696.t1 | refXP_002313006.1  predicted protein [Populus trichocarpa]<br>gi 222849414 gb EEE86961.1  predicted protein [Populus trichocarpa]                                                                                                                                                                                                                                                                                                                                                         | 164  | 207  | 6.00E-85  | 126.2 | 100.0 | 100.0 | predicted protein                                         | gbpln | Populus trichocarpa  | AT4G34720.1   Symbols: AVA-P1, VHA-C1, ATVHA-C1   ATPase, FO/V0 complex, subunit C protein   chr4:16568223-16569165 REVERSE LENGTH=164 | 164  | 164  | 4.00E-87  | 100.0 | 100.0 | 100.0 |
| Rsa1.0_00211.1.g8697.t1 | gb ABU63288.1  GAGA-motif binding transcriptional activator, partial [Cardamine pratensis]                                                                                                                                                                                                                                                                                                                                                                                                | 269  | 275  | 1.00E-127 | 102.2 | 82.2  | 91.4  | GAGA-motif binding transcriptional activator, partial     | gbpln | Cardamine pratensis  | AT4G38910.2   Symbols: BPC5   basic pentacyclic 5   chr4:18145478-18146429 REVERSE LENGTH=283                                          | 269  | 283  | 1.00E-120 | 105.2 | 78.4  | 88.5  |

|                         |                                                                                                                                                                                                                                                                                                                                                                                                                                                                                                              |     |     |           |       |      |      |                                                        |       |                      |                                                                                                                                                                                                                                                                                                                                                                |     |     |           |       |      |      |
|-------------------------|--------------------------------------------------------------------------------------------------------------------------------------------------------------------------------------------------------------------------------------------------------------------------------------------------------------------------------------------------------------------------------------------------------------------------------------------------------------------------------------------------------------|-----|-----|-----------|-------|------|------|--------------------------------------------------------|-------|----------------------|----------------------------------------------------------------------------------------------------------------------------------------------------------------------------------------------------------------------------------------------------------------------------------------------------------------------------------------------------------------|-----|-----|-----------|-------|------|------|
| Rsa1.0_00211.1.g8698.t1 | refNP_849520.1  basic leucine zipper transcription factor-like protein [Arabidopsis thaliana]<br>gi 79326483 refNP_001031810.1  basic leucine zipper transcription factor-like protein [Arabidopsis thaliana]<br>gi 23297471 gb AANI2977.1  unknown protein [Arabidopsis thaliana]<br>gi 332661589 gb AEE86989.1  basic leucine zipper transcription factor-like protein [Arabidopsis thaliana]<br>gi 332661590 gb AEE86990.1  basic leucine zipper transcription factor-like protein [Arabidopsis thaliana] | 492 | 547 | 1.00E-170 | 111.2 | 75.2 | 84.1 | basic leucine zipper transcription factor-like protein | gbpln | Arabidopsis thaliana | AT4G38900.3   Symbols:   Basic-leucine zipper (bZIP) transcription factor family protein   chr4:18139564-18141520 REVERSE LENGTH=547                                                                                                                                                                                                                           | 492 | 547 | 1.00E-173 | 111.2 | 75.2 | 84.1 |
| Rsa1.0_00211.1.g8699.t1 | gb EOA15659.1  hypothetical protein CARUB_v10006088mg [Capsella rubella]                                                                                                                                                                                                                                                                                                                                                                                                                                     | 104 | 105 | 4.00E-51  | 101.0 | 96.2 | 99.0 | hypothetical protein CARUB_v10006088mg                 | gbpln | Capsella rubella     | AT4G38860.1   Symbols:   SAUR-like auxin-responsive protein family   chr4:18130357-18130674 FORWARD LENGTH=105                                                                                                                                                                                                                                                 | 104 | 105 | 4.00E-53  | 101.0 | 95.2 | 98.1 |
| Rsa1.0_00212.1.g8700.t1 | gb EOA34319.1  hypothetical protein CARUB_v10021839mg [Capsella rubella]                                                                                                                                                                                                                                                                                                                                                                                                                                     | 585 | 901 | 0         | 154.0 | 63.6 | 75.0 | hypothetical protein CARUB_v10021839mg                 | gbpln | Capsella rubella     | AT1G66910.1   Symbols:   Protein kinase superfamily protein   chr1:24961634-24963941 REVERSE LENGTH=666                                                                                                                                                                                                                                                        | 585 | 666 | 0         | 113.8 | 61.9 | 72.3 |
| Rsa1.0_00212.1.g8701.t1 | refNP_193380.3  pentatricopeptide (PPR) repeat-containing protein [Arabidopsis thaliana]<br>gi 223635634 sp O23491.2 PP315_ARAT H RecName: Full=Penatricopeptide repeat-containing protein At4g16470<br>gi 332658358 gb AEE83758.1  pentatricopeptide (PPR) repeat-containing protein [Arabidopsis thaliana]                                                                                                                                                                                                 | 518 | 501 | 0         | 96.7  | 65.8 | 76.8 | pentatricopeptide (PPR) repeat-containing protein      | gbpln | Arabidopsis thaliana | AT4G16470.1   Symbols:   Tetratricopeptide repeat (TPR)-like superfamily protein   chr4:9287862-9289541 REVERSE LENGTH=501                                                                                                                                                                                                                                     | 518 | 501 | 0         | 96.7  | 65.8 | 76.8 |
| Rsa1.0_00212.1.g8702.t1 | gb EOA15472.1  hypothetical protein CARUB_v10004447mg [Capsella rubella]                                                                                                                                                                                                                                                                                                                                                                                                                                     | 581 | 582 | 0         | 100.2 | 94.5 | 97.8 | hypothetical protein CARUB_v10004447mg                 | gbpln | Capsella rubella     | AT4G16480.1   Symbols: ATINT4, INT4   inositol transporter 4   chr4:9291246-9293083 FORWARD LENGTH=582                                                                                                                                                                                                                                                         | 581 | 582 | 0         | 100.2 | 94.7 | 97.1 |
| Rsa1.0_00212.1.g8703.t1 | gb EOA15494.1  hypothetical protein CARUB_v10004739mg [Capsella rubella]                                                                                                                                                                                                                                                                                                                                                                                                                                     | 469 | 468 | 0         | 99.8  | 92.5 | 96.4 | hypothetical protein CARUB_v10004739mg                 | gbpln | Capsella rubella     | AT4G16490.1   Symbols:   ARM repeat superfamily protein   chr4:9293891-9295530 REVERSE LENGTH=472                                                                                                                                                                                                                                                              | 469 | 472 | 0         | 100.6 | 93.0 | 96.8 |
| Rsa1.0_00212.1.g8704.t1 | gb AAO22603.1  putative cysteine proteinase inhibitor [Arabidopsis thaliana]                                                                                                                                                                                                                                                                                                                                                                                                                                 | 111 | 117 | 5.00E-16  | 105.4 | 37.8 | 50.5 | putative cysteine proteinase inhibitor                 | gbpln | Arabidopsis thaliana | AT4G16500.1   Symbols:   Cystatin/monellin superfamily protein   chr4:9301530-9301883 REVERSE LENGTH=117                                                                                                                                                                                                                                                       | 111 | 117 | 3.00E-18  | 105.4 | 36.9 | 49.5 |
| Rsa1.0_00212.1.g8705.t1 | gb AAO22603.1  putative cysteine proteinase inhibitor [Arabidopsis thaliana]                                                                                                                                                                                                                                                                                                                                                                                                                                 | 69  | 117 | 2.00E-14  | 169.6 | 59.4 | 73.9 | putative cysteine proteinase inhibitor                 | gbpln | Arabidopsis thaliana | AT4G16500.1   Symbols:   Cystatin/monellin superfamily protein   chr4:9301530-9301883 REVERSE LENGTH=117                                                                                                                                                                                                                                                       | 69  | 117 | 3.00E-17  | 169.6 | 59.4 | 72.5 |
| Rsa1.0_00212.1.g8706.t1 | gb EOA17680.1  hypothetical protein CARUB_v10006049mg [Capsella rubella]                                                                                                                                                                                                                                                                                                                                                                                                                                     | 111 | 118 | 2.00E-22  | 106.3 | 66.7 | 78.4 | hypothetical protein CARUB_v10006049mg                 | gbpln | Capsella rubella     | AT4G16500.1   Symbols:   Cystatin/monellin superfamily protein   chr4:9301530-9301883 REVERSE LENGTH=117                                                                                                                                                                                                                                                       | 111 | 117 | 2.00E-24  | 105.4 | 45.9 | 60.4 |
| Rsa1.0_00212.1.g8707.t1 | gb EOA17672.1  hypothetical protein CARUB_v10006041mg [Capsella rubella]                                                                                                                                                                                                                                                                                                                                                                                                                                     | 241 | 121 | 8.00E-53  | 50.2  | 43.2 | 44.4 | hypothetical protein CARUB_v10006041mg                 | gbpln | Capsella rubella     | AT4G16520.2   Symbols: ATG8F   Ubiquitin-like superfamily protein   chr4:9306882-9308113 REVERSE LENGTH=121                                                                                                                                                                                                                                                    | 241 | 121 | 1.00E-54  | 50.2  | 42.7 | 44.0 |
| Rsa1.0_00212.1.g8708.t1 | gb EOA28276.1  hypothetical protein CARUB_v10024470mg [Capsella rubella]<br>gi 482564087 gb EOA28277.1  hypothetical protein CARUB_v10024470mg [Capsella rubella]                                                                                                                                                                                                                                                                                                                                            | 56  | 56  | 2.00E-15  | 100.0 | 62.5 | 89.3 | hypothetical protein CARUB_v10024470mg                 | gbpln | Capsella rubella     | AT2G35736.2   Symbols:   unknown protein; FUNCTIONS IN: molecular_function unknown; INVOLVED IN: biological_process unknown; LOCATED IN: endomembrane system; EXPRESSED IN: 22 plant structures; EXPRESSED DURING: 13 growth stages; BEST Arabidopsis thaliana protein match is: unknown protein (TAIRAT4G25225.1).   chr2:15023084-15023254 REVERSE LENGTH=56 | 56  | 56  | 1.00E-17  | 100.0 | 60.7 | 83.9 |
| Rsa1.0_00212.1.g8709.t1 | gb AAA33006.1  napin prepropeptide [Brassica napus]                                                                                                                                                                                                                                                                                                                                                                                                                                                          | 175 | 178 | 2.00E-80  | 101.7 | 92.0 | 94.3 | napin prepropeptide                                    | gbpln | Brassica napus       | AT4G27170.1   Symbols: SESA4, AT2S4   seed storage albumin 4   chr4:13613637-13614137 FORWARD LENGTH=166                                                                                                                                                                                                                                                       | 175 | 166 | 9.00E-56  | 94.9  | 63.4 | 74.3 |
| Rsa1.0_00212.1.g8710.t2 | gb EOA16489.1  hypothetical protein CARUB_v10004647mg [Capsella rubella]                                                                                                                                                                                                                                                                                                                                                                                                                                     | 265 | 497 | 2.00E-89  | 187.5 | 63.4 | 74.3 | hypothetical protein CARUB_v10004647mg                 | gbpln | Capsella rubella     | AT4G16550.1   Symbols:   HSP20-like chaperone   chr4:9318442-9324254 REVERSE LENGTH=743                                                                                                                                                                                                                                                                        | 265 | 743 | 5.00E-91  | 280.4 | 62.6 | 74.3 |
| Rsa1.0_00212.1.g8711.t1 | dbj BAJ33622.1  unnamed protein product [Thellungiella halophila]                                                                                                                                                                                                                                                                                                                                                                                                                                            | 454 | 481 | 0         | 105.9 | 86.8 | 91.4 | unnamed protein product                                | ----  | ----                 | AT4G15900.1   Symbols: PRL1   pleiotropic regulatory locus 1   chr4:9023775-9027443 FORWARD LENGTH=486                                                                                                                                                                                                                                                         | 454 | 486 | 0         | 107.0 | 84.4 | 90.7 |
| Rsa1.0_00212.1.g8712.t1 | gb EOA16489.1  hypothetical protein CARUB_v10004647mg [Capsella rubella]                                                                                                                                                                                                                                                                                                                                                                                                                                     | 264 | 497 | 7.00E-89  | 188.3 | 62.1 | 73.1 | hypothetical protein CARUB_v10004647mg                 | gbpln | Capsella rubella     | AT4G16550.1   Symbols:   HSP20-like chaperone   chr4:9318442-9324254 REVERSE LENGTH=743                                                                                                                                                                                                                                                                        | 264 | 743 | 5.00E-91  | 281.4 | 61.4 | 74.2 |
| Rsa1.0_00212.1.g8713.t1 | gb EOA16489.1  hypothetical protein CARUB_v10004647mg [Capsella rubella]                                                                                                                                                                                                                                                                                                                                                                                                                                     | 231 | 497 | 1.00E-60  | 215.2 | 53.2 | 68.8 | hypothetical protein CARUB_v10004647mg                 | gbpln | Capsella rubella     | AT2G03020.1   Symbols:   Heat shock protein HSP20/alpha crystallin family   chr2:882927-884081 REVERSE LENGTH=255                                                                                                                                                                                                                                              | 231 | 255 | 5.00E-63  | 110.4 | 52.4 | 66.7 |
| Rsa1.0_00212.1.g8714.t1 | ref XP_002868119.1  aspartyl protease family protein [Arabidopsis lyrata subsp. lyrata]<br>gi 297313955 gb EFH44378.1  aspartyl protease family protein [Arabidopsis lyrata subsp. lyrata]                                                                                                                                                                                                                                                                                                                   | 491 | 499 | 0         | 101.6 | 85.7 | 91.4 | aspartyl protease family protein                       | gbpln | Arabidopsis lyrata   | AT4G16563.1   Symbols:   Eukaryotic aspartyl protease family protein   chr4:9329933-9331432 REVERSE LENGTH=499                                                                                                                                                                                                                                                 | 491 | 499 | 0         | 101.6 | 84.5 | 90.8 |

|                         |                                                                                                                                                                                                                                                                                                                                                                                                           |     |     |           |       |      |      |                                                                                                                                                                 |       |                      |                                                                                                                                |     |     |           |       |      |      |
|-------------------------|-----------------------------------------------------------------------------------------------------------------------------------------------------------------------------------------------------------------------------------------------------------------------------------------------------------------------------------------------------------------------------------------------------------|-----|-----|-----------|-------|------|------|-----------------------------------------------------------------------------------------------------------------------------------------------------------------|-------|----------------------|--------------------------------------------------------------------------------------------------------------------------------|-----|-----|-----------|-------|------|------|
| Rsa1.0_00212.1.g8715.t4 | refXP_002868115.1  histidine triad family protein [Arabidopsis lyrata subsp. lyrata] gi 297313951 gb EFH44374.1  histidine triad family protein [Arabidopsis lyrata subsp. lyrata]                                                                                                                                                                                                                        | 235 | 146 | 6.00E-70  | 62.1  | 53.2 | 57.0 | histidine triad family protein                                                                                                                                  | gbpln | Arabidopsis lyrata   | AT4G16566.1   Symbols: HINT4   histidine triad nucleotide-binding 4   chr4:9334873-9335884 REVERSE LENGTH=146                  | 235 | 146 | 1.00E-71  | 62.1  | 52.3 | 57.0 |
| Rsa1.0_00212.1.g8716.t1 | refXP_002870146.1  predicted protein [Arabidopsis lyrata subsp. lyrata] gi 297315982 gb EFH46405.1  predicted protein [Arabidopsis lyrata subsp. lyrata]                                                                                                                                                                                                                                                  | 700 | 729 | 0         | 104.1 | 83.1 | 88.0 | predicted protein                                                                                                                                               | gbpln | Arabidopsis lyrata   | AT4G16570.1   Symbols: ATPRMT7, PRMT7   protein arginine methyltransferase 7   chr4:9336815-9340692 FORWARD LENGTH=724         | 700 | 724 | 0         | 103.4 | 82.9 | 87.4 |
| Rsa1.0_00212.1.g8717.t1 | gb EOA16566.1  hypothetical protein CARUB_v10004725mg [Capsella rubella]                                                                                                                                                                                                                                                                                                                                  | 472 | 475 | 0         | 100.6 | 84.5 | 89.6 | hypothetical protein CARUB_v10004725mg                                                                                                                          | gbpln | Capsella rubella     | AT4G16580.1   Symbols:   Protein phosphatase 2C family protein   chr4:9341152-9342555 REVERSE LENGTH=467                       | 472 | 467 | 0         | 98.9  | 84.3 | 88.6 |
| Rsa1.0_00212.1.g8718.t1 | sp Q84W54.1 CSLA1_ARATH RecName: Full=Probable mannan synthase 1; AltName: Full=Cellulose synthase-like protein A1; Short=AtCslA1 gi 28393622 gb AAO4230.1  putative cellulose synthase [Arabidopsis thaliana]                                                                                                                                                                                            | 554 | 553 | 0         | 99.8  | 89.7 | 95.5 | RecName: Full=Probable mannan synthase 1; AltName: Full=Cellulose synthase-like protein A1; Short=AtCslA1 gi 28393622 gb AAO4230.1  putative cellulose synthase | gbpln | Arabidopsis thaliana | AT1G24070.1   Symbols: ATCSLA10, CSLA10   cellulose synthase-like A10   chr1:8516437-8519734 REVERSE LENGTH=552                | 554 | 552 | 0         | 99.6  | 68.4 | 82.7 |
| Rsa1.0_00212.1.g8719.t1 | ref NP_193393.4  GT8-glycogenin domain-containing protein [Arabidopsis thaliana] gi 385178636 sp F4JMI5.1 GUX7_ARATH RecName: Full=Putative glucuronosyltransferase PG SIP7; AltName: Full=Glycogenin-like protein 7; AltName: Full=Plant glycogenin-like starch initiation protein 7 gi 332658375 gb AEE83775.1  putative glucuronosyltransferase PG SIP7 [Arabidopsis thaliana]                         | 493 | 494 | 0         | 100.2 | 88.4 | 93.5 | GT8-glycogenin domain-containing protein                                                                                                                        | gbpln | Arabidopsis thaliana | AT4G16600.1   Symbols:   Nucleotide-diphospho-sugar transferases superfamily protein   chr4:9350039-9352707 FORWARD LENGTH=494 | 493 | 494 | 0         | 100.2 | 88.4 | 93.5 |
| Rsa1.0_00212.1.g8720.t1 | refXP_002868113.1  hypothetical protein ARALYDRAFT_493215 [Arabidopsis lyrata subsp. lyrata] gi 297313949 gb EFH44372.1  hypothetical protein ARALYDRAFT_493215 [Arabidopsis lyrata subsp. lyrata]                                                                                                                                                                                                        | 196 | 201 | 5.00E-66  | 102.6 | 73.0 | 82.1 | hypothetical protein ARALYDRAFT_493215                                                                                                                          | gbpln | Arabidopsis lyrata   | AT4G16610.1   Symbols:   C2H2-like zinc finger protein   chr4:9354568-9355182 REVERSE LENGTH=204                               | 196 | 204 | 5.00E-67  | 104.1 | 75.0 | 82.7 |
| Rsa1.0_00212.1.g8721.t1 | ref NP_193397.1  matrix metalloprotease domain-containing protein [Arabidopsis thaliana] gi 2245019 emb CAB10439.1  proteinase like protein [Arabidopsis thaliana] gi 7268414 emb CAB78706.1  proteinase like protein [Arabidopsis thaliana] gi 332658379 gb AEE83779.1  matrix metalloprotease domain-containing protein [Arabidopsis thaliana]                                                          | 628 | 364 | 1.00E-160 | 58.0  | 45.1 | 49.0 | matrix metalloprotease domain-containing protein                                                                                                                | gbpln | Arabidopsis thaliana | AT4G16640.1   Symbols:   Matrixin family protein   chr4:9367396-9368490 REVERSE LENGTH=364                                     | 628 | 364 | 1.00E-163 | 58.0  | 45.1 | 49.0 |
| Rsa1.0_00212.1.g8722.t1 | refXP_002870141.1  hypothetical protein ARALYDRAFT_493211 [Arabidopsis lyrata subsp. lyrata] gi 297315977 gb EFH46400.1  hypothetical protein ARALYDRAFT_493211 [Arabidopsis lyrata subsp. lyrata]                                                                                                                                                                                                        | 542 | 549 | 0         | 101.3 | 93.5 | 95.9 | hypothetical protein ARALYDRAFT_493211                                                                                                                          | gbpln | Arabidopsis lyrata   | AT4G16650.1   Symbols:   O-fucosyltransferase family protein   chr4:9372727-9375910 FORWARD LENGTH=549                         | 542 | 549 | 0         | 101.3 | 92.3 | 95.2 |
| Rsa1.0_00212.1.g8723.t1 | ref NP_567510.1  hypoxia up-regulated 1 [Arabidopsis thaliana] gi 378548353 sp F4JMJ1.1 HSP7R_ARATH RecName: Full=Heat shock 70 kDa protein 17; AltName: Full=Heat shock protein 70-17; Short=AtHsp70-17; Flags: Precursor gi 332658381 gb AEE83781.1  heat shock 70 kDa protein 17 [Arabidopsis thaliana]                                                                                                | 859 | 867 | 0         | 100.9 | 89.6 | 94.4 | hypoxia up-regulated 1                                                                                                                                          | gbpln | Arabidopsis thaliana | AT4G16660.1   Symbols:   heat shock protein 70 (Hsp 70) family protein   chr4:9377225-9381232 FORWARD LENGTH=867               | 859 | 867 | 0         | 100.9 | 89.6 | 94.4 |
| Rsa1.0_00213.1.g8724.t1 | ref NP_187488.1  protein kinase domain-containing protein [Arabidopsis thaliana] gi 12322736 gb AAG51360.1 AC012562.21 putative protein kinase: 70907-69052 [Arabidopsis thaliana] gi 194294570 gb ACF40324.1  At3g08760 [Arabidopsis thaliana] gi 222424853 dbj BAH20378.1  AT3G08760 [Arabidopsis thaliana] gi 332641153 gb AEE74674.1  protein kinase domain-containing protein [Arabidopsis thaliana] | 570 | 557 | 0         | 97.7  | 89.5 | 93.3 | protein kinase domain-containing protein                                                                                                                        | gbpln | Arabidopsis thaliana | AT3G08760.1   Symbols: ATSIK   Protein kinase superfamily protein   chr3:2658129-2659984 REVERSE LENGTH=557                    | 570 | 557 | 0         | 97.7  | 89.5 | 93.3 |

|                         |                                                                                                                                                                                                                                                                                                                                                                                                                                                                                                                                                                                                                                                                                                                                                                                                                                                                                                                                                                                                                                                                                                                                                                                                                                                                                                                                                                                                                                                                                                                                                                                                                                                                                                                                                                                                                                                                                                                                                                                                                                |     |     |          |       |      |      |                                              |       |                      |                                                                                                                                 |     |     |          |       |      |      |
|-------------------------|--------------------------------------------------------------------------------------------------------------------------------------------------------------------------------------------------------------------------------------------------------------------------------------------------------------------------------------------------------------------------------------------------------------------------------------------------------------------------------------------------------------------------------------------------------------------------------------------------------------------------------------------------------------------------------------------------------------------------------------------------------------------------------------------------------------------------------------------------------------------------------------------------------------------------------------------------------------------------------------------------------------------------------------------------------------------------------------------------------------------------------------------------------------------------------------------------------------------------------------------------------------------------------------------------------------------------------------------------------------------------------------------------------------------------------------------------------------------------------------------------------------------------------------------------------------------------------------------------------------------------------------------------------------------------------------------------------------------------------------------------------------------------------------------------------------------------------------------------------------------------------------------------------------------------------------------------------------------------------------------------------------------------------|-----|-----|----------|-------|------|------|----------------------------------------------|-------|----------------------|---------------------------------------------------------------------------------------------------------------------------------|-----|-----|----------|-------|------|------|
| Rsa1.0_00213.1.g8725.t1 | gb ACD79975.1  serine/threonine-protein kinase ATPK19/ATPK2 [Brassica rapa]                                                                                                                                                                                                                                                                                                                                                                                                                                                                                                                                                                                                                                                                                                                                                                                                                                                                                                                                                                                                                                                                                                                                                                                                                                                                                                                                                                                                                                                                                                                                                                                                                                                                                                                                                                                                                                                                                                                                                    | 822 | 458 | 0        | 55.7  | 50.7 | 52.1 | serine/threonine-protein kinase ATPK19/ATPK2 | gbpln | Brassica rapa        | AT3G08730.1   Symbols: ATPK1, ATPK6, ATS6K1, PK6, PK1, S6K1   protein-serine kinase 1   chr3:2651581-2653363 REVERSE LENGTH=465 | 822 | 465 | 0        | 56.6  | 47.6 | 51.7 |
| Rsa1.0_00213.1.g8726.t1 | ref NP_187484.1  serine/threonine protein kinase 2 [Arabidopsis thaliana] gi 30680612 ref NP_850543.1  serine/threonine protein kinase 2 [Arabidopsis thaliana] gi 21431798 sp Q39030.2 KPK2_ARATH RecName: Full=Serine/threonine-protein kinase AtPK2/ATPK19; AltName: Full=Ribosomal-protein S6 kinase homolog 2 gi 12322721 gb AAG51345.1 AC012562.6 putative ribosomal-protein S6 kinase (ATPK19); 61330-59548 [Arabidopsis thaliana] gi 13272447 gb AAK17162.1 AF325094.1 putative ribosomal-protein S6 kinase (ATPK19) [Arabidopsis thaliana] gi 111074206 gb ABH04476.1  At3g08720 [Arabidopsis thaliana] gi 222422905 dbj BAH19439.1  AT3G08720 [Arabidopsis thaliana] gi 332641148 gb AEE74669.1  serine/threonine protein kinase 2 [Arabidopsis thaliana] gi 332641149 gb AEE74670.1  serine/threonine protein kinase 2 [Arabidopsis thaliana] ref NP_366331.1  ubiquitin-conjugating enzyme E2 11 [Arabidopsis thaliana] gi 334185174 ref NP_001189841.1  ubiquitin-conjugating enzyme E2 11 [Arabidopsis thaliana] gi 297829396 ref XP_002882580.1  ubiquitin-conjugating enzyme 11 [Arabidopsis lyrata subsp. lyrata] gi 12643427 sp P35134.2 UBC11_ARATH RecName: Full=Ubiquitin-conjugating enzyme E2 11; AltName: Full=Ubiquitin carrier protein 11; AltName: Full=Ubiquitin-conjugating enzyme E2-17 kDa 11; AltName: Full=Ubiquitin-protein ligase 11 gi 12322738 gb AAG51362.1 AC012562.23 putative ubiquitin conjugating enzyme; 52410-53412 [Arabidopsis thaliana] gi 17380790 gb AAL36225.1  putative E2 ubiquitin-conjugating enzyme UBC11 [Arabidopsis thaliana] gi 20259611 gb AAM14162.1  putative ubiquitin conjugating enzyme 11 (UBC11) [Arabidopsis thaliana] gi 21554241 gb AAM63316.1  E2 ubiquitin-conjugating enzyme UBC11 [Arabidopsis thaliana] gi 66354432 gb AAY44851.1  ubiquitinating enzyme [Arabidopsis thaliana] gi 110736468 dbj BAF00202.1  putative ubiquitin conjugating enzyme [Arabidopsis thaliana] gi 297328420 gb EFH58839.1  ubiquitin-conjugating enzyme 11 [Arabidopsis | 449 | 471 | 0        | 104.9 | 86.6 | 94.2 | serine/threonine protein kinase 2            | gbpln | Arabidopsis thaliana | AT3G08720.2   Symbols: ATPK19, ATPK2   serine/threonine protein kinase 2   chr3:2648625-2650407 REVERSE LENGTH=471              | 449 | 471 | 0        | 104.9 | 86.6 | 94.2 |
| Rsa1.0_00213.1.g8727.t1 | gi 12322738 gb AAG51362.1 AC012562.23 putative ubiquitin conjugating enzyme; 52410-53412 [Arabidopsis thaliana] gi 17380790 gb AAL36225.1  putative E2 ubiquitin-conjugating enzyme UBC11 [Arabidopsis thaliana] gi 20259611 gb AAM14162.1  putative ubiquitin conjugating enzyme 11 (UBC11) [Arabidopsis thaliana] gi 21554241 gb AAM63316.1  E2 ubiquitin-conjugating enzyme UBC11 [Arabidopsis thaliana] gi 66354432 gb AAY44851.1  ubiquitinating enzyme [Arabidopsis thaliana] gi 110736468 dbj BAF00202.1  putative ubiquitin conjugating enzyme [Arabidopsis thaliana] gi 297328420 gb EFH58839.1  ubiquitin-conjugating enzyme 11 [Arabidopsis                                                                                                                                                                                                                                                                                                                                                                                                                                                                                                                                                                                                                                                                                                                                                                                                                                                                                                                                                                                                                                                                                                                                                                                                                                                                                                                                                                         | 254 | 148 | 6.00E-82 | 58.3  | 57.1 | 58.3 | ubiquitin-conjugating enzyme E2 11           | gbpln | Arabidopsis lyrata   | AT3G08690.2   Symbols: UBC11   ubiquitin-conjugating enzyme 11   chr3:2641487-2642489 FORWARD LENGTH=148                        | 254 | 148 | 2.00E-84 | 58.3  | 57.1 | 58.3 |

|                         |                                                                                                                                                                                                                                                                                                                                                                                                                                                                                                                                                                                                                                                             |     |     |           |       |      |      |                                        |       |                      |                                                                                                                                                                                                                                                                                                                                                                       |     |     |           |       |      |      |
|-------------------------|-------------------------------------------------------------------------------------------------------------------------------------------------------------------------------------------------------------------------------------------------------------------------------------------------------------------------------------------------------------------------------------------------------------------------------------------------------------------------------------------------------------------------------------------------------------------------------------------------------------------------------------------------------------|-----|-----|-----------|-------|------|------|----------------------------------------|-------|----------------------|-----------------------------------------------------------------------------------------------------------------------------------------------------------------------------------------------------------------------------------------------------------------------------------------------------------------------------------------------------------------------|-----|-----|-----------|-------|------|------|
| Rsa1.0_00213.1.g8728.t1 | refNP_187480.1 putative inactive receptor kinase [Arabidopsis thaliana] gi 42572323 refNP_974257.1 putative inactive receptor kinase [Arabidopsis thaliana] gi 75333601 sp Q9C9Y8.1 Y3868_ARATH RecName: Full=Probable inactive receptor kinase At3g08680; Flags: Precursor gi 12322735 gb AAG51359.1 AC012562.20 putative protein kinase; 49514-51513 [Arabidopsis thaliana] gi 224589559 gb ACN59313.1  leucine-rich repeat receptor-like protein kinase [Arabidopsis thaliana] gi 332641141 gb AEE74662.1  putative inactive receptor kinase [Arabidopsis thaliana] gi 332641142 gb AEE74663.1  putative inactive receptor kinase [Arabidopsis thaliana] | 643 | 640 | 0         | 99.5  | 86.2 | 92.5 | putative inactive receptor kinase      | gbpln | Arabidopsis thaliana | AT3G08680.2   Symbols:   Leucine-rich repeat protein kinase family protein   chr3:2638591-2640590 FORWARD LENGTH=640                                                                                                                                                                                                                                                  | 643 | 640 | 0         | 99.5  | 86.2 | 92.5 |
| Rsa1.0_00213.1.g8729.t1 | gb EOA30227.1  hypothetical protein CARUB_v10013349mg [Capsella rubella]                                                                                                                                                                                                                                                                                                                                                                                                                                                                                                                                                                                    | 555 | 567 | 0         | 102.2 | 87.6 | 93.3 | hypothetical protein CARUB_v10013349mg | gbpln | Capsella rubella     | AT3G08670.1   Symbols:   unknown protein; BEST Arabidopsis thaliana protein match is: unknown protein (TAIR:AT3G51540.1); Has 48380 Blast hits to 29827 proteins in 1356 species: Archae - 46; Bacteria - 5599; Metazoa - 17361; Fungi - 13192; Plants - 2237; Viruses - 905; Other Eukaryotes - 9050 (source: NCBI BLink).   chr3:2633946-2636536 FORWARD LENGTH=567 | 555 | 567 | 0         | 102.2 | 86.7 | 91.4 |
| Rsa1.0_00213.1.g8730.t1 | refNP_195254.1 C2H2-like zinc finger protein [Arabidopsis thaliana] gi 75318572 sp O65499.1 ZAT3_ARATH RecName: Full=Zinc finger protein ZAT3; AltName: Full=Protein DUO1-ACTIVATED ZINC FINGER 2 gi 3080422 emb CAA18741.1  putative zinc-finger protein [Arabidopsis thaliana] gi 7270480 emb CAB80245.1  putative zinc-finger protein [Arabidopsis thaliana] gi 91806770 gb ABE66112.1  zinc finger family protein [Arabidopsis thaliana] gi 225898853 dbj BAH30557.1  hypothetical protein [Arabidopsis thaliana] gi 332661089 gb AEE86489.1  C2H2-like zinc finger protein [Arabidopsis thaliana]                                                      | 289 | 284 | 1.00E-117 | 98.3  | 77.2 | 83.0 | C2H2-like zinc finger protein          | gbpln | Arabidopsis thaliana | AT4G35280.1   Symbols:   C2H2-like zinc finger protein   chr4:16787429-16788283 REVERSE LENGTH=284                                                                                                                                                                                                                                                                    | 289 | 284 | 1.00E-119 | 98.3  | 77.2 | 83.0 |
| Rsa1.0_00213.1.g8731.t1 | gb EOA30171.1  hypothetical protein CARUB_v10013288mg [Capsella rubella]                                                                                                                                                                                                                                                                                                                                                                                                                                                                                                                                                                                    | 581 | 595 | 0         | 102.4 | 87.1 | 90.5 | hypothetical protein CARUB_v10013288mg | gbpln | Capsella rubella     | AT3G08650.2   Symbols:   ZIP metal ion transporter family   chr3:2624694-2627308 REVERSE LENGTH=619                                                                                                                                                                                                                                                                   | 581 | 619 | 0         | 106.5 | 87.6 | 90.9 |
| Rsa1.0_00213.1.g8732.t1 | gb ABW81126.1  short chain dehydrogenase-21 [Boechera divaricarpa]                                                                                                                                                                                                                                                                                                                                                                                                                                                                                                                                                                                          | 264 | 261 | 1.00E-131 | 98.9  | 87.1 | 92.0 | short chain dehydrogenase-21           | gbpln | Boechera divaricarpa | AT1G07440.1   Symbols:   NAD(P)-binding Rossmann-fold superfamily protein   chr1:2286436-2287665 REVERSE LENGTH=266                                                                                                                                                                                                                                                   | 264 | 266 | 1.00E-101 | 100.8 | 66.3 | 81.1 |
| Rsa1.0_00213.1.g8733.t1 | gb EOA32200.1  hypothetical protein CARUB_v10015456mg [Capsella rubella]                                                                                                                                                                                                                                                                                                                                                                                                                                                                                                                                                                                    | 328 | 337 | 1.00E-132 | 102.7 | 79.3 | 86.3 | hypothetical protein CARUB_v10015456mg | gbpln | Capsella rubella     | AT3G08630.1   Symbols:   Protein of unknown function (DUF3411)   chr3:2620943-2621962 FORWARD LENGTH=339                                                                                                                                                                                                                                                              | 328 | 339 | 1.00E-132 | 103.4 | 78.4 | 85.7 |
| Rsa1.0_00213.1.g8734.t1 | gb EOA31180.1  hypothetical protein CARUB_v10014346mg [Capsella rubella]                                                                                                                                                                                                                                                                                                                                                                                                                                                                                                                                                                                    | 283 | 281 | 1.00E-149 | 99.3  | 92.6 | 96.5 | hypothetical protein CARUB_v10014346mg | gbpln | Capsella rubella     | AT3G08620.1   Symbols:   RNA-binding KH domain-containing protein   chr3:2617925-2620314 FORWARD LENGTH=283                                                                                                                                                                                                                                                           | 283 | 283 | 1.00E-140 | 100.0 | 90.8 | 95.4 |
| Rsa1.0_00213.1.g8735.t1 | gb AAP21180.1  At3g08610 [Arabidopsis thaliana]                                                                                                                                                                                                                                                                                                                                                                                                                                                                                                                                                                                                             | 65  | 73  | 1.00E-29  | 112.3 | 96.9 | 98.5 | At3g08610                              | gbpln | Arabidopsis thaliana | AT3G08610.1   Symbols:   unknown protein; Has 40 Blast hits to 40 proteins in 15 species: Archae - 0; Bacteria - 0; Metazoa - 0; Fungi - 0; Plants - 40; Viruses - 0; Other Eukaryotes - 0 (source: NCBI BLink).   chr3:2616435-2616768 REVERSE LENGTH=65                                                                                                             | 65  | 65  | 3.00E-32  | 100.0 | 96.9 | 98.5 |
| Rsa1.0_00213.1.g8736.t1 | ref XP_002882573.1  hypothetical protein ARALYDRAFT_478161 [Arabidopsis lyrata subsp. lyrata] gi 297328413 gb EFH58832.1  hypothetical protein ARALYDRAFT_478161 [Arabidopsis lyrata subsp. lyrata]                                                                                                                                                                                                                                                                                                                                                                                                                                                         | 322 | 315 | 1.00E-101 | 97.8  | 73.3 | 82.6 | hypothetical protein ARALYDRAFT_478161 | gbpln | Arabidopsis lyrata   | AT3G08600.1   Symbols:   Protein of unknown function (DUF1191)   chr3:2612646-2613596 FORWARD LENGTH=316                                                                                                                                                                                                                                                              | 322 | 316 | 1.00E-102 | 98.1  | 70.2 | 78.0 |
| Rsa1.0_00213.1.g8737.t1 | dbj BAJ33789.1  unnamed protein product [Thellungiella halophila]                                                                                                                                                                                                                                                                                                                                                                                                                                                                                                                                                                                           | 593 | 560 | 0         | 94.4  | 88.0 | 91.7 | unnamed protein product                | ----  | ----                 | AT3G08590.2   Symbols:   Phosphoglycerate mutase, 2,3-bisphosphoglycerate-independent   chr3:2608683-2611237 REVERSE LENGTH=560                                                                                                                                                                                                                                       | 593 | 560 | 0         | 94.4  | 86.5 | 90.7 |



|                         |                                                                                                                                                                                                                                                                                                                                                                                                                    |      |      |           |       |      |      |                                               |       |                      |                                                                                                                                                                                                                                                                                                                                                           |      |      |           |       |      |      |
|-------------------------|--------------------------------------------------------------------------------------------------------------------------------------------------------------------------------------------------------------------------------------------------------------------------------------------------------------------------------------------------------------------------------------------------------------------|------|------|-----------|-------|------|------|-----------------------------------------------|-------|----------------------|-----------------------------------------------------------------------------------------------------------------------------------------------------------------------------------------------------------------------------------------------------------------------------------------------------------------------------------------------------------|------|------|-----------|-------|------|------|
| Rsa1.0_00213.1.g8738.t1 | refNP_187467.1  elongation defective 1 protein / ELD1 protein [Arabidopsis thaliana]<br>gi 12322724 gb AAG51348.1 AC012562.9 hypothetical protein; 7436-10438 [Arabidopsis thaliana]<br>gi 23452834 gb AAN33186.1  elongation defective 1 [Arabidopsis thaliana]<br>gi 332641124 gb AEE74645.1  elongation defective 1 protein / ELD1 protein [Arabidopsis thaliana]                                               | 301  | 533  | 2.00E-61  | 177.1 | 47.8 | 51.2 | elongation defective 1 protein / ELD1 protein | gbpln | Arabidopsis thaliana | AT3G08550.1   Symbols: ELD1, ABI8, KOB1   elongation defective 1 protein / ELD1 protein   chr3:2596513-2599515 FORWARD LENGTH=533                                                                                                                                                                                                                         | 301  | 533  | 5.00E-64  | 177.1 | 47.8 | 51.2 |
| Rsa1.0_00213.1.g8739.t1 | refXP_002884683.1  hypothetical protein ARALYDRAFT_896987 [Arabidopsis lyrata subsp. lyrata]<br>gi 297330523 gb EFH60942.1  hypothetical protein ARALYDRAFT_896987 [Arabidopsis lyrata subsp. lyrata]                                                                                                                                                                                                              | 1710 | 1703 | 0         | 99.6  | 87.1 | 92.5 | hypothetical protein ARALYDRAFT_896987        | gbpln | Arabidopsis lyrata   | AT3G08530.1   Symbols:   Clathrin, heavy chain   chr3:2587171-2595411 REVERSE LENGTH=1703                                                                                                                                                                                                                                                                 | 1710 | 1703 | 0         | 99.6  | 86.8 | 92.4 |
| Rsa1.0_00213.1.g8740.t1 | gb EOA30191.1  hypothetical protein CARUB_v10013310mg [Capsella rubella]                                                                                                                                                                                                                                                                                                                                           | 582  | 584  | 0         | 100.3 | 93.3 | 96.7 | hypothetical protein CARUB_v10013310mg        | gbpln | Capsella rubella     | AT3G08510.2   Symbols: ATPLC2, PLC2   phospholipase C 2   chr3:2582626-2585556 REVERSE LENGTH=581                                                                                                                                                                                                                                                         | 582  | 581  | 0         | 99.8  | 93.0 | 95.9 |
| Rsa1.0_00213.1.g8741.t1 | refXP_002882569.1  predicted protein [Arabidopsis lyrata subsp. lyrata]<br>gi 297328409 gb EFH58828.1  predicted protein [Arabidopsis lyrata subsp. lyrata]                                                                                                                                                                                                                                                        | 65   | 63   | 1.00E-10  | 96.9  | 80.0 | 84.6 | predicted protein                             | gbpln | Arabidopsis lyrata   | #                                                                                                                                                                                                                                                                                                                                                         | #    | #    | #         | #     | #    | #    |
| Rsa1.0_00213.1.g8742.t1 | refXP_002884680.1  hypothetical protein ARALYDRAFT_478147 [Arabidopsis lyrata subsp. lyrata]<br>gi 297330520 gb EFH60939.1  hypothetical protein ARALYDRAFT_478147 [Arabidopsis lyrata subsp. lyrata]                                                                                                                                                                                                              | 338  | 342  | 1.00E-148 | 101.2 | 83.7 | 90.8 | hypothetical protein ARALYDRAFT_478147        | gbpln | Arabidopsis lyrata   | AT3G08500.1   Symbols: MYB83, AtMYB83   myb domain protein 83   chr3:2576958-2578072 REVERSE LENGTH=343                                                                                                                                                                                                                                                   | 338  | 343  | 1.00E-145 | 101.5 | 80.2 | 89.3 |
| Rsa1.0_00213.1.g8743.t1 | refNP_187462.1  uncharacterized protein [Arabidopsis thaliana]<br>gi 12321556 gb AAG50832.1 AC074395.6 hypothetical protein [Arabidopsis thaliana]<br>gi 49660145 gb AAT68363.1  hypothetical protein At3g08490 [Arabidopsis thaliana]<br>gi 50058945 gb AAT69217.1  hypothetical protein At3g08490 [Arabidopsis thaliana]<br>gi 332641115 gb AEE74636.1  uncharacterized protein AT3G08490 [Arabidopsis thaliana] | 304  | 271  | 1.00E-111 | 89.1  | 64.1 | 74.7 | uncharacterized protein                       | gbpln | Arabidopsis thaliana | AT3G08490.1   Symbols:   BEST Arabidopsis thaliana protein match is: Late embryogenesis abundant protein, group 2 (TAIR:AT3G24600.1); Has 161 Blast hits to 158 proteins in 15 species: Archae - 0; Bacteria - 0; Metazoa - 0; Fungi - 0; Plants - 161; Viruses - 0; Other Eukaryotes - 0 (source: NCBI BLINK);   chr3:2574105-2575125 REVERSE LENGTH=271 | 304  | 271  | 1.00E-114 | 89.1  | 64.1 | 74.7 |
| Rsa1.0_00213.1.g8744.t1 | refXP_002884678.1  hypothetical protein ARALYDRAFT_478146 [Arabidopsis lyrata subsp. lyrata]<br>gi 297330518 gb EFH60937.1  hypothetical protein ARALYDRAFT_478146 [Arabidopsis lyrata subsp. lyrata]                                                                                                                                                                                                              | 531  | 530  | 0         | 99.8  | 79.8 | 89.5 | hypothetical protein ARALYDRAFT_478146        | gbpln | Arabidopsis lyrata   | AT3G08040.2   Symbols: FRD3, MAN1, ATFRD3   MATE efflux family protein   chr3:2566593-2569397 REVERSE LENGTH=526                                                                                                                                                                                                                                          | 531  | 526  | 0         | 99.1  | 79.7 | 89.5 |
| Rsa1.0_00213.1.g8745.t1 | gb EOA30873.1  hypothetical protein CARUB_v10014019mg [Capsella rubella]                                                                                                                                                                                                                                                                                                                                           | 364  | 365  | 1.00E-176 | 100.3 | 87.1 | 91.2 | hypothetical protein CARUB_v10014019mg        | gbpln | Capsella rubella     | AT3G08030.1   Symbols:   Protein of unknown function, DUF642   chr3:2564191-2565819 FORWARD LENGTH=365                                                                                                                                                                                                                                                    | 364  | 365  | 1.00E-175 | 100.3 | 86.3 | 90.1 |
| Rsa1.0_00213.1.g8746.t1 | gb EOA31641.1  hypothetical protein CARUB_v10014853mg [Capsella rubella]                                                                                                                                                                                                                                                                                                                                           | 149  | 146  | 5.00E-53  | 98.0  | 76.5 | 85.2 | hypothetical protein CARUB_v10014853mg        | gbpln | Capsella rubella     | AT3G08000.1   Symbols:   RNA-binding (RBM/RBD/RNP motifs) family protein   chr3:2555034-2555829 REVERSE LENGTH=143                                                                                                                                                                                                                                        | 149  | 143  | 2.00E-54  | 96.0  | 75.2 | 84.6 |
| Rsa1.0_00213.1.g8747.t1 | gb EOA30533.1  hypothetical protein CARUB_v10013654mg [Capsella rubella]                                                                                                                                                                                                                                                                                                                                           | 461  | 460  | 0         | 99.8  | 88.9 | 92.4 | hypothetical protein CARUB_v10013654mg        | gbpln | Capsella rubella     | AT3G07990.1   Symbols: SCPL27   serine carboxypeptidase-like 27   chr3:2552544-2554644 FORWARD LENGTH=459                                                                                                                                                                                                                                                 | 461  | 459  | 0         | 99.6  | 87.0 | 92.0 |
| Rsa1.0_00213.1.g8748.t1 | #                                                                                                                                                                                                                                                                                                                                                                                                                  | #    | #    | #         | #     | #    | #    | -                                             | ----  | ----                 | #                                                                                                                                                                                                                                                                                                                                                         | #    | #    | #         | #     | #    |      |
| Rsa1.0_00213.1.g8749.t1 | refXP_002882564.1  predicted protein [Arabidopsis lyrata subsp. lyrata]<br>gi 297328404 gb EFH58823.1  predicted protein [Arabidopsis lyrata subsp. lyrata]                                                                                                                                                                                                                                                        | 438  | 439  | 0         | 100.2 | 85.2 | 91.3 | predicted protein                             | gbpln | Arabidopsis lyrata   | AT3G07970.1   Symbols: QRT2   Pectin lyase-like superfamily protein   chr3:2541006-2543370 FORWARD LENGTH=439                                                                                                                                                                                                                                             | 438  | 439  | 0         | 100.2 | 83.8 | 91.1 |
| Rsa1.0_00213.1.g8750.t1 | refXP_002882562.1  hypothetical protein ARALYDRAFT_896969 [Arabidopsis lyrata subsp. lyrata]<br>gi 297328402 gb EFH58821.1  hypothetical protein ARALYDRAFT_896969 [Arabidopsis lyrata subsp. lyrata]                                                                                                                                                                                                              | 304  | 304  | 1.00E-158 | 100.0 | 94.1 | 96.7 | hypothetical protein ARALYDRAFT_896969        | gbpln | Arabidopsis lyrata   | AT3G07950.1   Symbols:   rhomboid protein-related   chr3:2531982-2534277 FORWARD LENGTH=304                                                                                                                                                                                                                                                               | 304  | 304  | 1.00E-158 | 100.0 | 92.1 | 95.7 |

|                         |                                                                                                                                                                                                                                                                                                                                                                                                                                                                                                                                                                                                                                                                                                                                                                                                                              |      |      |           |       |      |      |                                        |       |                          |                                                                                                                                                                                                                                                                                                                                                                                                                                                                                                                               |      |      |           |       |      |      |
|-------------------------|------------------------------------------------------------------------------------------------------------------------------------------------------------------------------------------------------------------------------------------------------------------------------------------------------------------------------------------------------------------------------------------------------------------------------------------------------------------------------------------------------------------------------------------------------------------------------------------------------------------------------------------------------------------------------------------------------------------------------------------------------------------------------------------------------------------------------|------|------|-----------|-------|------|------|----------------------------------------|-------|--------------------------|-------------------------------------------------------------------------------------------------------------------------------------------------------------------------------------------------------------------------------------------------------------------------------------------------------------------------------------------------------------------------------------------------------------------------------------------------------------------------------------------------------------------------------|------|------|-----------|-------|------|------|
| Rsa1.0_00213.1.g8751.t1 | refXP_002882559.1   hypothetical protein ARALYDRAFT_478135 [Arabidopsis lyrata subsp. lyrata] gi 297328399 gb EFH58818.1   hypothetical protein ARALYDRAFT_478135 [Arabidopsis lyrata subsp. lyrata]                                                                                                                                                                                                                                                                                                                                                                                                                                                                                                                                                                                                                         | 406  | 383  | 0         | 94.3  | 86.0 | 88.9 | hypothetical protein ARALYDRAFT_478135 | gbpln | Arabidopsis lyrata       | AT3G07940.1   Symbols:   Calcium-dependent ARF-type GTPase activating protein family   chr3:2529542-2531368 FORWARD LENGTH=385                                                                                                                                                                                                                                                                                                                                                                                                | 406  | 385  | 0         | 94.8  | 85.0 | 88.9 |
| Rsa1.0_00213.1.g8752.t1 | gb EIE18866.1   hypothetical protein COCSUDRAFT_26086 [Coccomyxa subellipsoidea C-169]                                                                                                                                                                                                                                                                                                                                                                                                                                                                                                                                                                                                                                                                                                                                       | 73   | 75   | 8.00E-21  | 102.7 | 63.0 | 82.2 | hypothetical protein COCSUDRAFT_26086  | gbpln | Coccomyxa subellipsoidea | AT3G07910.1   Symbols:   FUNCTIONS IN: molecular function unknown; INVOLVED IN: biological process unknown; LOCATED IN: endomembrane system; EXPRESSED IN: 24 plant structures; EXPRESSED DURING: 15 growth stages; CONTAINS InterPro DOMAIN/s: Reactive oxygen species modulator 1 (InterPro:IPRO18450); Has 192 Blast hits to 192 proteins in 80 species: Archae - 0; Bacteria - 0; Metazoa - 139; Fungi - 6; Plants - 39; Viruses - 0; Other Eukaryotes - 8 (source: NCBI BLink).   chr3:2523367-2524048 REVERSE LENGTH=74 | 73   | 74   | 5.00E-19  | 101.4 | 79.5 | 89.0 |
| Rsa1.0_00213.1.g8753.t1 | refXP_002882556.1   hypothetical protein ARALYDRAFT_478129 [Arabidopsis lyrata subsp. lyrata] gi 297328396 gb EFH58815.1   hypothetical protein ARALYDRAFT_478129 [Arabidopsis lyrata subsp. lyrata]                                                                                                                                                                                                                                                                                                                                                                                                                                                                                                                                                                                                                         | 556  | 572  | 0         | 102.9 | 82.9 | 88.3 | hypothetical protein ARALYDRAFT_478129 | gbpln | Arabidopsis lyrata       | AT3G07900.1   Symbols:   O-fucosyltransferase family protein   chr3:2520826-2523008 FORWARD LENGTH=579                                                                                                                                                                                                                                                                                                                                                                                                                        | 556  | 579  | 0         | 104.1 | 82.9 | 88.7 |
| Rsa1.0_00214.1.g8754.t2 | gb AAB87099.1   putative retroelement pol polyprotein [Arabidopsis thaliana]                                                                                                                                                                                                                                                                                                                                                                                                                                                                                                                                                                                                                                                                                                                                                 | 1335 | 1496 | 0         | 112.1 | 57.9 | 72.7 | putative retroelement pol polyprotein  | gbpln | Arabidopsis thaliana     | AT4G23160.1   Symbols: CRK8   cysteine-rich RLK (RECEPTOR-like protein kinase) 8   chr4:12129485-12134086 FORWARD LENGTH=1262                                                                                                                                                                                                                                                                                                                                                                                                 | 1335 | 1262 | 1.00E-109 | 94.5  | 14.5 | 20.7 |
| Rsa1.0_00214.1.g8755.t1 | #                                                                                                                                                                                                                                                                                                                                                                                                                                                                                                                                                                                                                                                                                                                                                                                                                            | #    | #    | #         | #     | #    | -    | -                                      | ----  | ----                     | #                                                                                                                                                                                                                                                                                                                                                                                                                                                                                                                             | #    | #    | #         | #     | #    |      |
| Rsa1.0_00214.1.g8756.t1 | #                                                                                                                                                                                                                                                                                                                                                                                                                                                                                                                                                                                                                                                                                                                                                                                                                            | #    | #    | #         | #     | #    | -    | -                                      | ----  | ----                     | #                                                                                                                                                                                                                                                                                                                                                                                                                                                                                                                             | #    | #    | #         | #     | #    |      |
| Rsa1.0_00214.1.g8757.t1 | gb EOA32081.1   hypothetical protein CARUB_v10015328mg [Capsella rubella] ref NP_191964.2   digalactosyl diacylglycerol synthase 2 [Arabidopsis thaliana] gi 75161985 sp Q8W1S1.1 DGDG2_ARAT H RecName: Full=Digalactosyl diacylglycerol synthase 2, chloroplastic gi 18141112 gb AAL60504.1 AF421193.1   digalactosyl diacylglycerol synthase [Arabidopsis thaliana] gi 33589694 gb AAQ22613.1  At4g00550 [Arabidopsis thaliana] gi 110736406 dbj BAF00170.1   digalactosyl diacylglycerol synthase [Arabidopsis thaliana] gi 332656498 gb AEE81898.1   digalactosyl diacylglycerol synthase 2 [Arabidopsis thaliana] ref XP_002872940.1   hypothetical protein ARALYDRAFT_912183 [Arabidopsis lyrata subsp. lyrata] gi 297318777 gb EFH49199.1   hypothetical protein ARALYDRAFT_912183 [Arabidopsis lyrata subsp. lyrata] | 434  | 435  | 1.00E-170 | 100.2 | 67.3 | 79.3 | hypothetical protein CARUB_v10015328mg | gbpln | Capsella rubella         | AT3G12240.1   Symbols: SCPL15   serine carboxypeptidase-like 15   chr3:3902436-3904918 REVERSE LENGTH=436                                                                                                                                                                                                                                                                                                                                                                                                                     | 434  | 436  | 1.00E-167 | 100.5 | 64.3 | 77.4 |
| Rsa1.0_00214.1.g8758.t1 | ref NP_191964.2   digalactosyl diacylglycerol synthase 2 [Arabidopsis thaliana] gi 18141112 gb AAL60504.1 AF421193.1   digalactosyl diacylglycerol synthase [Arabidopsis thaliana] gi 33589694 gb AAQ22613.1  At4g00550 [Arabidopsis thaliana] gi 110736406 dbj BAF00170.1   digalactosyl diacylglycerol synthase [Arabidopsis thaliana] gi 332656498 gb AEE81898.1   digalactosyl diacylglycerol synthase 2 [Arabidopsis thaliana] ref XP_002872940.1   hypothetical protein ARALYDRAFT_912183 [Arabidopsis lyrata subsp. lyrata] gi 297318777 gb EFH49199.1   hypothetical protein ARALYDRAFT_912183 [Arabidopsis lyrata subsp. lyrata]                                                                                                                                                                                    | 475  | 473  | 0         | 99.6  | 87.8 | 93.3 | digalactosyl diacylglycerol synthase 2 | gbpln | Arabidopsis thaliana     | AT4G00550.1   Symbols: DGD2   digalactosyl diacylglycerol deficient 2   chr4:238154-240019 REVERSE LENGTH=473                                                                                                                                                                                                                                                                                                                                                                                                                 | 475  | 473  | 0         | 99.6  | 87.8 | 93.3 |
| Rsa1.0_00214.1.g8759.t1 | ref XP_002872940.1   hypothetical protein ARALYDRAFT_912183 [Arabidopsis lyrata subsp. lyrata] gi 297318777 gb EFH49199.1   hypothetical protein ARALYDRAFT_912183 [Arabidopsis lyrata subsp. lyrata]                                                                                                                                                                                                                                                                                                                                                                                                                                                                                                                                                                                                                        | 607  | 607  | 0         | 100.0 | 93.4 | 96.7 | hypothetical protein ARALYDRAFT_912183 | gbpln | Arabidopsis lyrata       | AT4G00570.1   Symbols: NAD-ME2   NAD-dependent malic enzyme 2   chr4:242817-246522 REVERSE LENGTH=607                                                                                                                                                                                                                                                                                                                                                                                                                         | 607  | 607  | 0         | 100.0 | 92.6 | 96.5 |
| Rsa1.0_00214.1.g8760.t1 | #                                                                                                                                                                                                                                                                                                                                                                                                                                                                                                                                                                                                                                                                                                                                                                                                                            | #    | #    | #         | #     | #    | -    | -                                      | ----  | ----                     | #                                                                                                                                                                                                                                                                                                                                                                                                                                                                                                                             | #    | #    | #         | #     | #    |      |
| Rsa1.0_00214.1.g8761.t1 | emb CB140290.3   unnamed protein product [Vitis vinifera]                                                                                                                                                                                                                                                                                                                                                                                                                                                                                                                                                                                                                                                                                                                                                                    | 66   | 185  | 3.00E-21  | 280.3 | 71.2 | 75.8 | unnamed protein product                | gbpln | Vitis vinifera           | AT4G00585.1   Symbols:   unknown protein; Has 47 Blast hits to 47 proteins in 22 species: Archae - 0; Bacteria - 0; Metazoa - 3; Fungi - 7; Plants - 33; Viruses - 0; Other Eukaryotes - 4 (source: NCBI BLink).   chr4:251157-252284 REVERSE LENGTH=88                                                                                                                                                                                                                                                                       | 66   | 88   | 5.00E-22  | 133.3 | 71.2 | 74.2 |
| Rsa1.0_00214.1.g8762.t1 | ref XP_002875021.1   hypothetical protein ARALYDRAFT_490508 [Arabidopsis lyrata subsp. lyrata] gi 297320858 gb EFH51280.1   hypothetical protein ARALYDRAFT_490508 [Arabidopsis lyrata subsp. lyrata]                                                                                                                                                                                                                                                                                                                                                                                                                                                                                                                                                                                                                        | 407  | 407  | 0         | 100.0 | 83.8 | 90.4 | hypothetical protein ARALYDRAFT_490508 | gbpln | Arabidopsis lyrata       | AT4G00590.1   Symbols:   N-terminal nucleophile aminohydrolases (Ntn hydrolases) superfamily protein   chr4:252835-254880 FORWARD LENGTH=408                                                                                                                                                                                                                                                                                                                                                                                  | 407  | 408  | 0         | 100.2 | 82.6 | 89.4 |

|                         |                                                                                                                                                                                                                                                                                                                                                                                                                                                                                                                                                                                              |     |      |           |       |      |      |                                         |       |                      |                                                                                                                               |     |      |           |       |      |      |
|-------------------------|----------------------------------------------------------------------------------------------------------------------------------------------------------------------------------------------------------------------------------------------------------------------------------------------------------------------------------------------------------------------------------------------------------------------------------------------------------------------------------------------------------------------------------------------------------------------------------------------|-----|------|-----------|-------|------|------|-----------------------------------------|-------|----------------------|-------------------------------------------------------------------------------------------------------------------------------|-----|------|-----------|-------|------|------|
| Rsa1.0_00214.1.g8763.t1 | refNP_191971.1  Amino acid dehydrogenase family protein [Arabidopsis thaliana] gi 3047116 gb AAC13627.1  F6N23.26 gene product [Arabidopsis thaliana] gi 7267401 emb CAB80871.1  putative tetrahydrofolate synthase [Arabidopsis thaliana] gi 16649149 gb AAL24426.1  Unknown protein [Arabidopsis thaliana] gi 23197716 gb AAN15385.1  Unknown protein [Arabidopsis thaliana] gi 332656510 gb AEE81910.1  Amino acid dehydrogenase family protein [Arabidopsis thaliana]                                                                                                                    | 348 | 360  | 1.00E-169 | 103.4 | 83.9 | 91.4 | Amino acid dehydrogenase family protein | gbpln | Arabidopsis thaliana | AT4G00620.1   Symbols:   Amino acid dehydrogenase family protein   chr4:259265-260788 REVERSE LENGTH=360                      | 348 | 360  | 1.00E-171 | 103.4 | 83.9 | 91.4 |
| Rsa1.0_00214.1.g8764.t1 | #                                                                                                                                                                                                                                                                                                                                                                                                                                                                                                                                                                                            | #   | #    | #         | #     | #    | #    | -                                       | ----  | ----                 | #                                                                                                                             | #   | #    | #         | #     | #    |      |
| Rsa1.0_00214.1.g8765.t1 | gb AFP47629.1  nitrile-specifier protein [Schouwia purpurea]                                                                                                                                                                                                                                                                                                                                                                                                                                                                                                                                 | 508 | 467  | 0         | 91.9  | 70.9 | 80.9 | nitrile-specifier protein               | gbpln | Schouwia purpurea    | AT3G16400.2   Symbols: ATMLP-470   nitrile specifier protein 1   chr3:5566516-5568330 FORWARD LENGTH=470                      | 508 | 470  | 0         | 92.5  | 67.5 | 78.3 |
| Rsa1.0_00214.1.g8766.t1 | #                                                                                                                                                                                                                                                                                                                                                                                                                                                                                                                                                                                            | #   | #    | #         | #     | #    | #    | -                                       | ----  | ----                 | #                                                                                                                             | #   | #    | #         | #     | #    |      |
| Rsa1.0_00214.1.g8767.t1 | gb AAD19784.1  putative retroelement pol polyprotein [Arabidopsis thaliana]                                                                                                                                                                                                                                                                                                                                                                                                                                                                                                                  | 181 | 1501 | 2.00E-34  | 829.3 | 48.1 | 63.5 | putative retroelement pol polyprotein   | gbpln | Arabidopsis thaliana | AT4G23160.1   Symbols: CRK8   cysteine-rich RLK (RECEPTOR-like protein kinase) 8   chr4:12129485-12134086 FORWARD LENGTH=1262 | 181 | 1262 | 2.00E-16  | 697.2 | 25.4 | 47.0 |
| Rsa1.0_00214.1.g8768.t1 | refNP_191975.2  DEAD-box ATP-dependent RNA helicase 8 [Arabidopsis thaliana] gi 30678703 refNP_849535.1  DEAD-box ATP-dependent RNA helicase 8 [Arabidopsis thaliana] gi 75330763 sp Q8RXK6.1 RH8_ARATH RecName: Full=DEAD-box ATP-dependent RNA helicase 8 gi 19423939 gb AL87312.1  putative RNA helicase [Arabidopsis thaliana] gi 21280839 gb AAM45033.1  putative RNA helicase [Arabidopsis thaliana] gi 332656515 gb AEE81915.1  DEAD-box ATP-dependent RNA helicase 8 [Arabidopsis thaliana] gi 332656516 gb AEE81916.1  DEAD-box ATP-dependent RNA helicase 8 [Arabidopsis thaliana] | 547 | 505  | 0         | 92.3  | 85.2 | 87.6 | DEAD-box ATP-dependent RNA helicase 8   | gbpln | Arabidopsis thaliana | AT4G00660.1   Symbols: RH8, ATRH8   RNAhelicase-like 8   chr4:274638-277438 FORWARD LENGTH=505                                | 547 | 505  | 0         | 92.3  | 85.2 | 87.6 |
| Rsa1.0_00214.1.g8769.t1 | refNP_191976.2  Remorin family protein [Arabidopsis thaliana] gi 48310044 gb AAT41742.1  At4g00670 [Arabidopsis thaliana] gi 54606860 gb AAV34778.1  At4g00670 [Arabidopsis thaliana] gi 332656517 gb AEE81917.1  Remorin family protein [Arabidopsis thaliana]                                                                                                                                                                                                                                                                                                                              | 117 | 123  | 3.00E-39  | 105.1 | 72.6 | 85.5 | Remorin family protein                  | gbpln | Arabidopsis thaliana | AT4G00670.1   Symbols:   Remorin family protein   chr4:278434-279170 REVERSE LENGTH=123                                       | 117 | 123  | 5.00E-42  | 105.1 | 72.6 | 85.5 |
| Rsa1.0_00214.1.g8770.t1 | refXP_002872934.1  hypothetical protein ARALYDRAFT_490501 [Arabidopsis lyrata subsp. lyrata] gi 297318771 gb EFH49193.1  hypothetical protein ARALYDRAFT_490501 [Arabidopsis lyrata subsp. lyrata]                                                                                                                                                                                                                                                                                                                                                                                           | 139 | 140  | 3.00E-69  | 100.7 | 89.2 | 96.4 | hypothetical protein ARALYDRAFT_490501  | gbpln | Arabidopsis lyrata   | AT4G00680.1   Symbols: ADF8   actin depolymerizing factor 8   chr4:279780-280608 REVERSE LENGTH=140                           | 139 | 140  | 7.00E-72  | 100.7 | 89.2 | 96.4 |
| Rsa1.0_00214.1.g8771.t1 | refXP_002875018.1  kinase family protein [Arabidopsis lyrata subsp. lyrata] gi 297320855 gb EFH51277.1  kinase family protein [Arabidopsis lyrata subsp. lyrata]                                                                                                                                                                                                                                                                                                                                                                                                                             | 459 | 490  | 0         | 106.8 | 94.3 | 97.6 | kinase family protein                   | gbpln | Arabidopsis lyrata   | AT4G00710.1   Symbols: BSK3   BR-signaling kinase 3   chr4:290807-293096 FORWARD LENGTH=489                                   | 459 | 489  | 0         | 106.5 | 93.2 | 96.7 |
| Rsa1.0_00214.1.g8772.t1 | refXP_002872933.1  hypothetical protein ARALYDRAFT_490498 [Arabidopsis lyrata subsp. lyrata] gi 297318770 gb EFH49192.1  hypothetical protein ARALYDRAFT_490498 [Arabidopsis lyrata subsp. lyrata]                                                                                                                                                                                                                                                                                                                                                                                           | 484 | 472  | 0         | 97.5  | 91.5 | 94.4 | hypothetical protein ARALYDRAFT_490498  | gbpln | Arabidopsis lyrata   | AT4G00720.1   Symbols: ATSK32, ASKTHETA, SK32   shaggy-like protein kinase 32   chr4:294116-297002 REVERSE LENGTH=472         | 484 | 472  | 0         | 97.5  | 90.9 | 94.2 |
| Rsa1.0_00214.1.g8773.t2 | #                                                                                                                                                                                                                                                                                                                                                                                                                                                                                                                                                                                            | #   | #    | #         | #     | #    | #    | -                                       | ----  | ----                 | #                                                                                                                             | #   | #    | #         | #     | #    |      |
| Rsa1.0_00214.1.g8774.t1 | refXP_002875016.1  F-box family protein [Arabidopsis lyrata subsp. lyrata] gi 297320853 gb EFH51275.1  F-box family protein [Arabidopsis lyrata subsp. lyrata]                                                                                                                                                                                                                                                                                                                                                                                                                               | 338 | 380  | 1.00E-128 | 112.4 | 68.9 | 80.5 | F-box family protein                    | gbpln | Arabidopsis lyrata   | AT4G00755.2   Symbols:   F-box family protein   chr4:325294-326787 FORWARD LENGTH=377                                         | 338 | 377  | 1.00E-127 | 111.5 | 68.0 | 79.6 |

|                         |                                                                                                                                                                                                                                                                                                                                                                                                                                                                                                                                                                                                                                                                                                                                                                                               |     |      |           |       |      |      |                                                 |       |                      |                                                                                                                                                                                                                                                                                                                                                                                                                                                        |     |     |           |       |      |      |
|-------------------------|-----------------------------------------------------------------------------------------------------------------------------------------------------------------------------------------------------------------------------------------------------------------------------------------------------------------------------------------------------------------------------------------------------------------------------------------------------------------------------------------------------------------------------------------------------------------------------------------------------------------------------------------------------------------------------------------------------------------------------------------------------------------------------------------------|-----|------|-----------|-------|------|------|-------------------------------------------------|-------|----------------------|--------------------------------------------------------------------------------------------------------------------------------------------------------------------------------------------------------------------------------------------------------------------------------------------------------------------------------------------------------------------------------------------------------------------------------------------------------|-----|-----|-----------|-------|------|------|
| Rsa1.0_00214.1.g8775.t2 | refNP_567185.1  F-box protein [Arabidopsis thaliana] gi 30678731 refNP_849277.1  F-box protein [Arabidopsis thaliana] gi 75246091 sp Q8LQ03.1 FB345_ARATH RecName: Full=F-box protein At4g00755 gi 21536774 gb AAM61106.1  unknown [Arabidopsis thaliana] gi 332656531 gb AEE81931.1  F-box protein [Arabidopsis thaliana] gi 332656532 gb AEE81932.1  F-box protein [Arabidopsis thaliana] refNP_564284.1  adenine phosphoribosyltransferase 1 [Arabidopsis thaliana] gi 38503396 sp P31166.2 APT1_ARATH RecName: Full=Adenine phosphoribosyltransferase 1, chloroplastic; Short=APRT 1; Flags: Precursor gi 21536559 gb AAM60891.1  adenine phosphoribosyltransferase 1, APRT [Arabidopsis thaliana] gi 332192710 gb AEE30831.1  adenine phosphoribosyltransferase 1 [Arabidopsis thaliana] | 585 | 377  | 1.00E-107 | 64.4  | 36.4 | 44.1 | F-box protein                                   | gbpln | Arabidopsis thaliana | AT4G00755.2   Symbols:   F-box family protein   chr4:325294-326787 FORWARD LENGTH=377                                                                                                                                                                                                                                                                                                                                                                  | 585 | 377 | 1.00E-110 | 64.4  | 36.4 | 44.1 |
| Rsa1.0_00215.1.g8776.t1 | refNP_564285.1  no pollen germination related 1 protein [Arabidopsis thaliana] gi 9802536 gb AAF99738.1 ACO04557_17 F17L21.25 [Arabidopsis thaliana] gi 16226498 gb AAL16183.1 AF428415_1 At1g27460/F17L21.26 [Arabidopsis thaliana] gi 33589668 gb AAQ22600.1  At1g27460/F17L21.26 [Arabidopsis thaliana] gi 332192713 gb AEE30834.1  no pollen germination related 1 protein [Arabidopsis thaliana]                                                                                                                                                                                                                                                                                                                                                                                         | 242 | 243  | 2.00E-97  | 100.4 | 79.8 | 86.8 | adenine phosphoribosyltransferase 1             | gbpln | Arabidopsis thaliana | AT1G27450.1   Symbols: APT1, ATAPT1   adenine phosphoribosyl transferase 1   chr1:9532042-9533807 FORWARD LENGTH=243                                                                                                                                                                                                                                                                                                                                   | 242 | 243 | 1.00E-100 | 100.4 | 79.8 | 86.8 |
| Rsa1.0_00215.1.g8777.t1 | refNP_001117385.1  uncharacterized protein [Arabidopsis thaliana] gi 98961611 gb ABF59135.1  unknown protein [Arabidopsis thaliana] gi 332192714 gb AEE30835.1  uncharacterized protein AT1G27461 [Arabidopsis thaliana]                                                                                                                                                                                                                                                                                                                                                                                                                                                                                                                                                                      | 709 | 694  | 0         | 97.9  | 82.7 | 90.8 | no pollen germination related 1 protein         | gbpln | Arabidopsis thaliana | AT1G27460.1   Symbols: NPGRT1   no pollen germination related 1   chr1:9534977-9537424 FORWARD LENGTH=694                                                                                                                                                                                                                                                                                                                                              | 709 | 694 | 0         | 97.9  | 82.7 | 90.8 |
| Rsa1.0_00215.1.g8778.t1 | refXP_002893471.1  hypothetical protein ARALYDRAFT_472955 [Arabidopsis lyrata subsp. lyrata] gi 297339313 gb EFH69730.1  hypothetical protein ARALYDRAFT_472955 [Arabidopsis lyrata subsp. lyrata]                                                                                                                                                                                                                                                                                                                                                                                                                                                                                                                                                                                            | 388 | 354  | 1.00E-138 | 91.2  | 67.5 | 76.8 | uncharacterized protein                         | gbpln | Arabidopsis thaliana | AT1G27461.1   Symbols:   unknown protein; Has 30201 Blast hits to 17322 proteins in 780 species: Archae - 12; Bacteria - 1396; Metazoa - 17338; Fungi - 3422; Plants - 5037; Viruses - 0; Other Eukaryotes - 2996 (source: NCBI BLINK).   chr1:9537948-9539012 REVERSE LENGTH=354                                                                                                                                                                      | 388 | 354 | 1.00E-140 | 91.2  | 67.5 | 76.8 |
| Rsa1.0_00215.1.g8779.t5 | refXP_002893472.1  predicted protein [Arabidopsis lyrata subsp. lyrata] gi 297339314 gb EFH69731.1  predicted protein [Arabidopsis lyrata subsp. lyrata]                                                                                                                                                                                                                                                                                                                                                                                                                                                                                                                                                                                                                                      | 671 | 645  | 0         | 96.1  | 77.8 | 86.3 | hypothetical protein ARALYDRAFT_472955          | gbpln | Arabidopsis lyrata   | AT1G27500.1   Symbols:   Tetratricopeptide repeat (TPR)-like superfamily protein   chr1:9551629-9553654 REVERSE LENGTH=650                                                                                                                                                                                                                                                                                                                             | 671 | 650 | 0         | 96.9  | 78.2 | 86.7 |
| Rsa1.0_00215.1.g8780.t1 | refXP_002893472.1  predicted protein [Arabidopsis lyrata subsp. lyrata] gi 297339314 gb EFH69731.1  predicted protein [Arabidopsis lyrata subsp. lyrata]                                                                                                                                                                                                                                                                                                                                                                                                                                                                                                                                                                                                                                      | 646 | 647  | 0         | 100.2 | 77.4 | 86.8 | predicted protein                               | gbpln | Arabidopsis lyrata   | AT1G27510.1   Symbols:   Protein of unknown function (DUF3506)   chr1:9554945-9558293 REVERSE LENGTH=651                                                                                                                                                                                                                                                                                                                                               | 646 | 651 | 0         | 100.8 | 74.0 | 83.9 |
| Rsa1.0_00215.1.g8781.t1 | gb EOA37527.1  hypothetical protein CARUB_v10011729mg [Capsella rubella]                                                                                                                                                                                                                                                                                                                                                                                                                                                                                                                                                                                                                                                                                                                      | 174 | 174  | 3.00E-97  | 100.0 | 98.3 | 98.9 | hypothetical protein CARUB_v10011729mg          | gbpln | Capsella rubella     | AT1G27530.1   Symbols:   CONTAINS InterPro DOMAIN/s: Ubiquitin-conjugating enzyme/RWD-like (InterPro:IPR016135), Ubiquitin-fold modifier-conjugating enzyme 1 (InterPro:IPR014806); Has 269 Blast hits to 269 proteins in 110 species: Archae - 0; Bacteria - 0; Metazoa - 175; Fungi - 0; Plants - 42; Viruses - 0; Other Eukaryotes - 52 (source: NCBI BLINK).   chr1:9562761-9563887 REVERSE LENGTH=174                                             | 174 | 174 | 1.00E-98  | 100.0 | 97.1 | 98.3 |
| Rsa1.0_00215.1.g8782.t7 | refXP_002890733.1  T17H3.9 [Arabidopsis lyrata subsp. lyrata] gi 297336575 gb EFH66992.1  T17H3.9 [Arabidopsis lyrata subsp. lyrata]                                                                                                                                                                                                                                                                                                                                                                                                                                                                                                                                                                                                                                                          | 246 | 1290 | 1.00E-110 | 524.4 | 79.7 | 84.6 | T17H3.9                                         | gbpln | Arabidopsis lyrata   | AT1G27590.1   Symbols:   CONTAINS InterPro DOMAIN/s: Protein of unknown function DUF3453 (InterPro:IPR021850); BEST Arabidopsis thaliana protein match is: phosphatidylinositol 3- and 4-kinase family protein (TAIR:AT1G27570.1); Has 109 Blast hits to 109 proteins in 38 species: Archae - 0; Bacteria - 0; Metazoa - 65; Fungi - 4; Plants - 38; Viruses - 0; Other Eukaryotes - 2 (source: NCBI BLINK).   chr1:9592293-9593912 FORWARD LENGTH=264 | 246 | 264 | 1.00E-110 | 107.3 | 79.7 | 83.7 |
| Rsa1.0_00215.1.g8783.t1 | gb EOA30313.1  hypothetical protein CARUB_v10013439mg, partial [Capsella rubella]                                                                                                                                                                                                                                                                                                                                                                                                                                                                                                                                                                                                                                                                                                             | 464 | 530  | 0         | 114.2 | 82.5 | 91.2 | hypothetical protein CARUB_v10013439mg, partial | gbpln | Capsella rubella     | AT2G18193.1   Symbols:   P-loop containing nucleoside triphosphate hydrolases superfamily protein   chr2:7917621-7919184 REVERSE LENGTH=495                                                                                                                                                                                                                                                                                                            | 464 | 495 | 0         | 106.7 | 80.2 | 87.7 |

|                         |                                                                                                                                                                                                                                                                                                                                                                                                                                                                                                                                                  |     |      |           |       |      |      |                                        |       |                      |                                                                                                                                                                                                                                                                                                                           |     |     |           |       |      |      |
|-------------------------|--------------------------------------------------------------------------------------------------------------------------------------------------------------------------------------------------------------------------------------------------------------------------------------------------------------------------------------------------------------------------------------------------------------------------------------------------------------------------------------------------------------------------------------------------|-----|------|-----------|-------|------|------|----------------------------------------|-------|----------------------|---------------------------------------------------------------------------------------------------------------------------------------------------------------------------------------------------------------------------------------------------------------------------------------------------------------------------|-----|-----|-----------|-------|------|------|
| Rsa1.0_00215.1.g8784.t1 | gb EOA37898.1  hypothetical protein CARUB_v10009365mg [Capsella rubella]                                                                                                                                                                                                                                                                                                                                                                                                                                                                         | 385 | 395  | 0         | 102.6 | 84.4 | 91.7 | hypothetical protein CARUB_v10009365mg | gbpln | Capsella rubella     | AT1G27600.2   Symbols: IRX9-L 19H   Nucleotide-diphospho-sugar transferases superfamily protein   chr1:9604083-9605881 REVERSE LENGTH=394                                                                                                                                                                                 | 385 | 394 | 0         | 102.3 | 83.6 | 90.6 |
| Rsa1.0_00215.1.g8785.t1 | ref XP_002890739.1  transferase family protein [Arabidopsis lyrata subsp. lyrata] gi 297336581 gb EFH66998.1  transferase family protein [Arabidopsis lyrata subsp. lyrata]                                                                                                                                                                                                                                                                                                                                                                      | 442 | 442  | 0         | 100.0 | 83.9 | 91.2 | transferase family protein             | gbpln | Arabidopsis lyrata   | AT1G27620.1   Symbols:   HXXXD-type acyl-transferase family protein   chr1:9608444-9610432 FORWARD LENGTH=442                                                                                                                                                                                                             | 442 | 442 | 0         | 100.0 | 83.9 | 90.7 |
| Rsa1.0_00215.1.g8786.t1 | gb EOA38290.1  hypothetical protein CARUB_v10009784mg [Capsella rubella]                                                                                                                                                                                                                                                                                                                                                                                                                                                                         | 363 | 317  | 2.33E-156 | 87.3  | 78.5 | 83.2 | hypothetical protein CARUB_v10009784mg | gbpln | Capsella rubella     | AT1G27630.1   Symbols: CYGT1.3   cyclin T 1:3   chr1:9611647-9613967 FORWARD LENGTH=317                                                                                                                                                                                                                                   | 363 | 317 | 1.00E-148 | 87.3  | 77.7 | 82.4 |
| Rsa1.0_00215.1.g8787.t1 | dbj BAJ34257.1  unnamed protein product [Thellungiella halophila]                                                                                                                                                                                                                                                                                                                                                                                                                                                                                | 293 | 308  | 1.00E-117 | 105.1 | 83.6 | 89.4 | unnamed protein product                | ----  | ----                 | AT1G27650.1   Symbols: ATU2AF35A   U2 snRNP auxiliary factor small subunit, putative   chr1:9615152-9616042 FORWARD LENGTH=296                                                                                                                                                                                            | 293 | 296 | 1.00E-116 | 101.0 | 81.2 | 87.4 |
| Rsa1.0_00215.1.g8788.t1 | ref XP_002890742.1  hypothetical protein ARALYDRAFT_472970 [Arabidopsis lyrata subsp. lyrata] gi 297336584 gb EFH67001.1  hypothetical protein ARALYDRAFT_472970 [Arabidopsis lyrata subsp. lyrata]                                                                                                                                                                                                                                                                                                                                              | 443 | 449  | 0         | 101.4 | 87.1 | 92.1 | hypothetical protein ARALYDRAFT_472970 | gbpln | Arabidopsis lyrata   | AT1G27660.1   Symbols:   basic helix-loop-helix (bHLH) DNA-binding superfamily protein   chr1:9621701-9625666 FORWARD LENGTH=453                                                                                                                                                                                          | 443 | 453 | 0         | 102.3 | 86.9 | 92.8 |
| Rsa1.0_00215.1.g8789.t1 | gb EOA36870.1  hypothetical protein CARUB_v10008862mg [Capsella rubella]                                                                                                                                                                                                                                                                                                                                                                                                                                                                         | 114 | 519  | 1.00E-27  | 455.3 | 55.3 | 63.2 | hypothetical protein CARUB_v10008862mg | gbpln | Capsella rubella     | AT1G27680.1   Symbols: APL2   ADPGLC-PPase large subunit   chr1:9631630-9634450 FORWARD LENGTH=518                                                                                                                                                                                                                        | 114 | 518 | 1.00E-29  | 454.4 | 53.5 | 63.2 |
| Rsa1.0_00215.1.g8790.t1 | #                                                                                                                                                                                                                                                                                                                                                                                                                                                                                                                                                | #   | #    | #         | #     | #    | #    | -                                      | ----  | ----                 | AT1G27695.2   Symbols:   glycine-rich protein   chr1:9639214-9640002 FORWARD LENGTH=91                                                                                                                                                                                                                                    | 86  | 91  | 2.00E-11  | 105.8 | 89.5 | 95.3 |
| Rsa1.0_00215.1.g8791.t1 | ref XP_002893486.1  hypothetical protein ARALYDRAFT_472976 [Arabidopsis lyrata subsp. lyrata] gi 297336928 gb EFH69745.1  hypothetical protein ARALYDRAFT_472976 [Arabidopsis lyrata subsp. lyrata]                                                                                                                                                                                                                                                                                                                                              | 292 | 297  | 1.00E-138 | 101.7 | 85.3 | 91.4 | hypothetical protein ARALYDRAFT_472976 | gbpln | Arabidopsis lyrata   | AT1G27700.1   Symbols:   Syntaxin/t-SNARE family protein   chr1:9640394-9641752 REVERSE LENGTH=297                                                                                                                                                                                                                        | 292 | 297 | 1.00E-136 | 101.7 | 83.6 | 89.7 |
| Rsa1.0_00215.1.g8792.t1 | gb AAK92721.1  putative actin protein [Arabidopsis thaliana]                                                                                                                                                                                                                                                                                                                                                                                                                                                                                     | 160 | 421  | 2.00E-11  | 263.1 | 22.5 | 27.5 | putative actin protein                 | gbpln | Arabidopsis thaliana | AT3G33520.1   Symbols: ATARP6, ARP6, SUF3, ESD1   actin-related protein 6   chr3:14093791-14095476 REVERSE LENGTH=421                                                                                                                                                                                                     | 160 | 421 | 6.00E-14  | 263.1 | 22.5 | 27.5 |
| Rsa1.0_00215.1.g8793.t2 | gb AAF24959.1 AC012375.22 T22C5.18 [Arabidopsis thaliana]                                                                                                                                                                                                                                                                                                                                                                                                                                                                                        | 203 | 265  | 1.00E-63  | 130.5 | 69.5 | 74.9 | T22C5.18                               | gbpln | Arabidopsis thaliana | AT1G27730.1   Symbols: STZ, ZAT10   salt tolerance zinc finger   chr1:9648302-9648985 REVERSE LENGTH=227                                                                                                                                                                                                                  | 203 | 227 | 8.00E-66  | 111.8 | 69.5 | 74.9 |
| Rsa1.0_00215.1.g8794.t1 | ref NP_564293.1  transcription factor bHLH54 [Arabidopsis thaliana] gi 75301354 sp Q8LEG1.1 BH054 ARAT H RecName: Full=Transcription factor bHLH54; AltName: Full=Basic helix-loop-helix protein 54; Short=AtbHLH54; Short=bHLH 54; AltName: Full=Transcription factor EN 114; AltName: Full=bHLH transcription factor bHLH054 gi 21553570 gb AAM62663.1  unknown [Arabidopsis thaliana] gi 225897974 dbj BAH30319.1  hypothetical protein [Arabidopsis thaliana] gi 332192750 gb AEE30871.1  transcription factor bHLH54 [Arabidopsis thaliana] | 254 | 258  | 1.00E-121 | 101.6 | 87.4 | 92.1 | transcription factor bHLH54            | gbpln | Arabidopsis thaliana | AT1G27740.1   Symbols: RSL4   root hair defective 6-like 4   chr1:9654753-9655806 FORWARD LENGTH=258                                                                                                                                                                                                                      | 254 | 258 | 1.00E-124 | 101.6 | 87.4 | 92.1 |
| Rsa1.0_00215.1.g8795.t1 | ref NP_001077611.1  Ubiquitin system component Cue protein [Arabidopsis thaliana] gi 332192752 gb AEE30873.1  Ubiquitin system component Cue protein [Arabidopsis thaliana]                                                                                                                                                                                                                                                                                                                                                                      | 934 | 873  | 0         | 93.5  | 79.6 | 84.2 | Ubiquitin system component Cue protein | gbpln | Arabidopsis thaliana | AT1G27752.1   Symbols:   Ubiquitin system component Cue protein   chr1:9662250-9667318 FORWARD LENGTH=873                                                                                                                                                                                                                 | 934 | 873 | 0         | 93.5  | 79.6 | 84.2 |
| Rsa1.0_00215.1.g8796.t1 | dbj BAA97287.1  retroelement pol polyprotein-like [Arabidopsis thaliana]                                                                                                                                                                                                                                                                                                                                                                                                                                                                         | 336 | 1491 | 2.00E-68  | 443.8 | 40.8 | 55.1 | retroelement pol polyprotein-like      | gbpln | Arabidopsis thaliana | AT1G21280.1   Symbols:   CONTAINS InterPro DOMAIN/s: Retrotransposon gag protein (InterPro:IPR005162); Has 707 Blast hits to 705 proteins in 25 species: Archae - 0; Bacteria - 0; Metazoa - 4; Fungi - 0; Plants - 703; Viruses - 0; Other Eukaryotes - 0 (source: NCBI BLINK)   chr1:7447690-7448403 REVERSE LENGTH=237 | 336 | 237 | 3.00E-20  | 70.5  | 18.8 | 28.6 |
| Rsa1.0_00215.1.g8797.t1 | gb EOA39804.1  hypothetical protein CARUB_v10008467mg [Capsella rubella]                                                                                                                                                                                                                                                                                                                                                                                                                                                                         | 133 | 699  | 7.00E-67  | 525.6 | 95.5 | 97.0 | hypothetical protein CARUB_v10008467mg | gbpln | Capsella rubella     | AT1G27900.1   Symbols:   RNA helicase family protein   chr1:9715615-9720346 REVERSE LENGTH=700                                                                                                                                                                                                                            | 133 | 700 | 2.00E-68  | 526.3 | 94.7 | 96.2 |
| Rsa1.0_00215.1.g8798.t1 | gb EOA39726.1  hypothetical protein CARUB_v10008370mg [Capsella rubella]                                                                                                                                                                                                                                                                                                                                                                                                                                                                         | 770 | 768  | 0         | 99.7  | 90.9 | 95.1 | hypothetical protein CARUB_v10008370mg | gbpln | Capsella rubella     | AT1G27910.1   Symbols: PUB45, ATPUB45   plant U-box 45   chr1:9720962-9723975 REVERSE LENGTH=768                                                                                                                                                                                                                          | 770 | 768 | 0         | 99.7  | 90.5 | 95.5 |

|                         |                                                                                                                                                                                                                                                                                                                                                                                           |     |     |           |       |      |      |                                                             |       |                      |                                                                                                                                                                                                                                                                                                                                            |     |     |           |       |      |      |
|-------------------------|-------------------------------------------------------------------------------------------------------------------------------------------------------------------------------------------------------------------------------------------------------------------------------------------------------------------------------------------------------------------------------------------|-----|-----|-----------|-------|------|------|-------------------------------------------------------------|-------|----------------------|--------------------------------------------------------------------------------------------------------------------------------------------------------------------------------------------------------------------------------------------------------------------------------------------------------------------------------------------|-----|-----|-----------|-------|------|------|
| Rsa1.0_00215.1.g8799.t1 | refNP_850204.2  Haloacid dehalogenase-like hydrolase [Arabidopsis thaliana] gi 20196855 gb AAM14806.1  unknown protein [Arabidopsis thaliana] gi 330253712 gb AEC08806.1  Haloacid dehalogenase-like hydrolase [Arabidopsis thaliana]                                                                                                                                                     | 169 | 245 | 6.00E-38  | 145.0 | 52.7 | 58.0 | Haloacid dehalogenase-like hydrolase                        | gbpln | Arabidopsis thaliana | AT2G33255.1   Symbols:   Haloacid dehalogenase-like hydrolase (HAD) superfamily protein   chr2:14098795-14100358 FORWARD LENGTH=245                                                                                                                                                                                                        | 169 | 245 | 2.00E-40  | 145.0 | 52.7 | 58.0 |
| Rsa1.0_00215.1.g8800.t1 | refXP_002890752.1  hypothetical protein ARALYDRAFT_890328 [Arabidopsis lyrata subsp. lyrata] gi 297336594 gb EFH67011.1  hypothetical protein ARALYDRAFT_890328 [Arabidopsis lyrata subsp. lyrata]                                                                                                                                                                                        | 183 | 197 | 1.00E-67  | 107.7 | 75.4 | 86.3 | hypothetical protein ARALYDRAFT_890328                      | gbpln | Arabidopsis lyrata   | AT1G27950.1   Symbols: LTPG1   glycosylphosphatidylinositol-anchored lipid protein transfer 1   chr1:9740740-9741991 FORWARD LENGTH=193                                                                                                                                                                                                    | 183 | 193 | 1.00E-66  | 105.5 | 73.2 | 82.5 |
| Rsa1.0_00215.1.g8801.t1 | refXP_002893496.1  evolutionarily conserved C-terminal region 9 [Arabidopsis lyrata subsp. lyrata] gi 297339338 gb EFH69755.1  evolutionarily conserved C-terminal region 9 [Arabidopsis lyrata subsp. lyrata]                                                                                                                                                                            | 536 | 559 | 1.00E-175 | 104.3 | 68.5 | 75.7 | evolutionarily conserved C-terminal region 9                | gbpln | Arabidopsis lyrata   | AT1G27960.1   Symbols: ECT9   evolutionarily conserved C-terminal region 9   chr1:9742359-9745648 REVERSE LENGTH=539                                                                                                                                                                                                                       | 536 | 539 | 1.00E-173 | 100.6 | 66.8 | 75.6 |
| Rsa1.0_00215.1.g8802.t7 | refXP_002890754.1  pyridoxal-dependent decarboxylase family protein [Arabidopsis lyrata subsp. lyrata] gi 297336596 gb EFH67013.1  pyridoxal-dependent decarboxylase family protein [Arabidopsis lyrata subsp. lyrata]                                                                                                                                                                    | 578 | 544 | 0         | 94.1  | 86.0 | 90.0 | pyridoxal-dependent decarboxylase family protein            | gbpln | Arabidopsis lyrata   | AT1G27980.1   Symbols: DPL1, ATDPL1   dihydroshingosine phosphate lyase   chr1:9748812-9752618 FORWARD LENGTH=544                                                                                                                                                                                                                          | 578 | 544 | 0         | 94.1  | 85.6 | 89.6 |
| Rsa1.0_00215.1.g8803.t1 | refXP_002893503.1  zinc finger (B-box type) family protein [Arabidopsis lyrata subsp. lyrata] gi 297339345 gb EFH69762.1  zinc finger (B-box type) family protein [Arabidopsis lyrata subsp. lyrata]                                                                                                                                                                                      | 424 | 428 | 1.00E-161 | 100.9 | 75.0 | 82.8 | zinc finger (B-box type) family protein                     | gbpln | Arabidopsis lyrata   | AT1G28050.1   Symbols:   B-box type zinc finger protein with CCT domain   chr1:9775768-9777657 REVERSE LENGTH=433                                                                                                                                                                                                                          | 424 | 433 | 1.00E-154 | 102.1 | 74.5 | 82.1 |
| Rsa1.0_00215.1.g8804.t1 | gb EOA39702.1  hypothetical protein CARUB_v10008347mg [Capsella rubella]                                                                                                                                                                                                                                                                                                                  | 759 | 787 | 0         | 103.7 | 76.4 | 85.4 | hypothetical protein CARUB_v10008347mg                      | gbpln | Capsella rubella     | AT1G28060.1   Symbols:   Pre-mRNA-splicing factor 3   chr1:9779167-9782486 FORWARD LENGTH=786                                                                                                                                                                                                                                              | 759 | 786 | 0         | 103.6 | 75.8 | 84.1 |
| Rsa1.0_00215.1.g8805.t1 | refNP_174128.1  uncharacterized protein [Arabidopsis thaliana] gi 12323005 gb AAG51495.1 AC069471.26 hypothetical protein [Arabidopsis thaliana] gi 44681470 gb AAS47675.1  At1g28070 [Arabidopsis thaliana] gi 82318580 dbj BAD94977.1  hypothetical protein [Arabidopsis thaliana] gi 332192787 gb AEE30908.1  uncharacterized protein AT1G28070 [Arabidopsis thaliana]                 | 176 | 176 | 3.00E-46  | 100.0 | 65.3 | 77.3 | uncharacterized protein                                     | gbpln | Arabidopsis thaliana | AT1G28070.1   Symbols:   unknown protein; BEST Arabidopsis thaliana protein match is: unknown protein (TAIR:AT2G33510.1); Has 85 Blast hits to 77 proteins in 15 species: Archae - 0; Bacteria - 0; Metazoa - 0; Fungi - 0; Plants - 85; Viruses - 0; Other Eukaryotes - 0 (source: NCBI BLINK).   chr1:9783082-9783864 FORWARD LENGTH=176 | 176 | 176 | 1.00E-48  | 100.0 | 65.3 | 77.3 |
| Rsa1.0_00215.1.g8806.t1 | refXP_002890758.1  hypothetical protein ARALYDRAFT_313512 [Arabidopsis lyrata subsp. lyrata] gi 297336600 gb EFH67017.1  hypothetical protein ARALYDRAFT_313512 [Arabidopsis lyrata subsp. lyrata]                                                                                                                                                                                        | 264 | 296 | 2.00E-91  | 112.1 | 72.7 | 80.3 | hypothetical protein ARALYDRAFT_313512                      | gbpln | Arabidopsis lyrata   | AT1G28080.1   Symbols:   RING finger protein   chr1:9789826-9790918 FORWARD LENGTH=291                                                                                                                                                                                                                                                     | 264 | 291 | 2.00E-85  | 110.2 | 65.5 | 75.0 |
| Rsa1.0_00215.1.g8807.t2 | gb EOA37308.1  hypothetical protein CARUB_v10010972mg [Capsella rubella]                                                                                                                                                                                                                                                                                                                  | 457 | 459 | 0         | 100.4 | 94.1 | 96.9 | hypothetical protein CARUB_v10010972mg                      | gbpln | Capsella rubella     | AT1G28110.2   Symbols: SCPL45   serine carboxypeptidase-like 45   chr1:9804153-9806832 REVERSE LENGTH=461                                                                                                                                                                                                                                  | 457 | 461 | 0         | 100.9 | 92.8 | 96.3 |
| Rsa1.0_00215.1.g8808.t1 | dbj BAB10652.1  cell cycle control crn (crooked neck) protein-like [Arabidopsis thaliana]                                                                                                                                                                                                                                                                                                 | 127 | 665 | 1.00E-25  | 523.6 | 47.2 | 52.8 | cell cycle control crn (crooked neck) protein-like          | gbpln | Arabidopsis thaliana | AT5G41770.1   Symbols:   crooked neck protein, putative / cell cycle protein, putative   chr5:16718021-16720936 FORWARD LENGTH=705                                                                                                                                                                                                         | 127 | 705 | 3.00E-28  | 555.1 | 47.2 | 52.8 |
| Rsa1.0_00216.1.g8809.t2 | refNP_195180.1  NmrA-like negative transcriptional regulator family protein [Arabidopsis thaliana] gi 3641839 emb CAA18833.1  isoflavone reductase-like protein [Arabidopsis thaliana] gi 7270404 emb CAB80171.1  isoflavone reductase-like protein [Arabidopsis thaliana] gi 332600990 gb AEE86390.1  NmrA-like negative transcriptional regulator family protein [Arabidopsis thaliana] | 227 | 306 | 4.00E-27  | 134.8 | 30.0 | 35.7 | NmrA-like negative transcriptional regulator family protein | gbpln | Arabidopsis thaliana | AT4G34540.1   Symbols:   NmrA-like negative transcriptional regulator family protein   chr4:16500506-16501932 FORWARD LENGTH=306                                                                                                                                                                                                           | 227 | 306 | 1.00E-29  | 134.8 | 30.0 | 35.7 |

|                         |                                                                                                                                                                                                                                                                                                                                                                                                                                                                                                                                                                                                                                                                                                                                                                                                                                                                                                                                                                                                                                                                                                                                                                                                                                                                                                                                                                                                                                                                                                                                                                                                 |     |     |           |        |      |      |                                             |       |                      |                                                                                                                                        |     |      |           |        |      |      |
|-------------------------|-------------------------------------------------------------------------------------------------------------------------------------------------------------------------------------------------------------------------------------------------------------------------------------------------------------------------------------------------------------------------------------------------------------------------------------------------------------------------------------------------------------------------------------------------------------------------------------------------------------------------------------------------------------------------------------------------------------------------------------------------------------------------------------------------------------------------------------------------------------------------------------------------------------------------------------------------------------------------------------------------------------------------------------------------------------------------------------------------------------------------------------------------------------------------------------------------------------------------------------------------------------------------------------------------------------------------------------------------------------------------------------------------------------------------------------------------------------------------------------------------------------------------------------------------------------------------------------------------|-----|-----|-----------|--------|------|------|---------------------------------------------|-------|----------------------|----------------------------------------------------------------------------------------------------------------------------------------|-----|------|-----------|--------|------|------|
| Rsa1.0_00216.1.g8810.t1 | refNP_174345.1  hercules receptor kinase 2 [Arabidopsis thaliana] gi 75336895 sp Q9SA72.1 Y1357_ARATH RecName: Full=Probable receptor-like protein kinase At1g30570; Flags: Precursor gi 4587513 gb AAD25744.1 AC007060.2 Contains eukaryotic protein kinase domain PF00069 [Arabidopsis thaliana] gi 332193124 gb AEE31245.1  hercules receptor kinase 2 [Arabidopsis thaliana] refNP_174346.1  GTP-binding protein [Arabidopsis thaliana] gi 4587514 gb AAD25745.1 AC007060.3 Similar to WO8E3.3 gi 3880615 putative GTP-binding protein from C. elegans cosmid gb 292773. EST gb AA597331 comes from this gene [Arabidopsis thaliana] gi 109134111 gb ABG25054.1  At1g30580 [Arabidopsis thaliana] gi 332193125 gb AEE31246.1  GTP-binding protein [Arabidopsis thaliana] refNP_174348.1  subtilase-like protein [Arabidopsis thaliana] gi 4587516 gb AAD25747.1 AC007060.5 Strong similarity to gb U80583 proteinase TMP from Lycopersicon esculentum and is a member of the PFI00082 subtilase family [Arabidopsis thaliana] gi 18175992 gb AAL59964.1  putative serine proteinase [Arabidopsis thaliana] gi 20465293 gb AAM20050.1  putative serine proteinase [Arabidopsis thaliana] gi 332193127 gb AEE31248.1  subtilase-like protein [Arabidopsis thaliana] refNP_001185117.1  pentatricopeptide repeat-containing protein [Arabidopsis thaliana] gi 332193129 gb AEE31250.1  pentatricopeptide repeat-containing protein [Arabidopsis thaliana] refXP_002890881.1  EMB2279 [Arabidopsis lyrata subsp. lyrata] gi 297336723 gb EFH67140.1  EMB2279 [Arabidopsis lyrata subsp. lyrata] | 854 | 849 | 0         | 99.4   | 85.2 | 91.0 | hercules receptor kinase 2                  | gbpln | Arabidopsis thaliana | AT1G30570.1   Symbols: HERK2   hercules receptor kinase 2   chr1:10828933-10831482 FORWARD LENGTH=849                                  | 854 | 849  | 0         | 99.4   | 85.2 | 91.0 |
| Rsa1.0_00216.1.g8811.t1 | refNP_174348.1  subtilase-like protein [Arabidopsis thaliana] gi 4587516 gb AAD25747.1 AC007060.5 Strong similarity to gb U80583 proteinase TMP from Lycopersicon esculentum and is a member of the PFI00082 subtilase family [Arabidopsis thaliana] gi 18175992 gb AAL59964.1  putative serine proteinase [Arabidopsis thaliana] gi 20465293 gb AAM20050.1  putative serine proteinase [Arabidopsis thaliana] gi 332193127 gb AEE31248.1  subtilase-like protein [Arabidopsis thaliana] refNP_001185117.1  pentatricopeptide repeat-containing protein [Arabidopsis thaliana] gi 332193129 gb AEE31250.1  pentatricopeptide repeat-containing protein [Arabidopsis thaliana] refXP_002890881.1  EMB2279 [Arabidopsis lyrata subsp. lyrata] gi 297336723 gb EFH67140.1  EMB2279 [Arabidopsis lyrata subsp. lyrata]                                                                                                                                                                                                                                                                                                                                                                                                                                                                                                                                                                                                                                                                                                                                                                              | 394 | 394 | 0         | 100.0  | 93.7 | 97.2 | GTP-binding protein                         | gbpln | Arabidopsis thaliana | AT1G30580.1   Symbols:   GTP binding   chr1:10831953-10835454 REVERSE LENGTH=394                                                       | 394 | 394  | 0         | 100.0  | 93.7 | 97.2 |
| Rsa1.0_00216.1.g8812.t1 | refNP_001185117.1  pentatricopeptide repeat-containing protein [Arabidopsis thaliana] gi 332193129 gb AEE31250.1  pentatricopeptide repeat-containing protein [Arabidopsis thaliana] refXP_002890881.1  EMB2279 [Arabidopsis lyrata subsp. lyrata] gi 297336723 gb EFH67140.1  EMB2279 [Arabidopsis lyrata subsp. lyrata]                                                                                                                                                                                                                                                                                                                                                                                                                                                                                                                                                                                                                                                                                                                                                                                                                                                                                                                                                                                                                                                                                                                                                                                                                                                                       | 833 | 832 | 0         | 99.9   | 88.8 | 94.7 | subtilase-like protein                      | gbpln | Arabidopsis thaliana | AT1G30600.1   Symbols:   Subtilase family protein   chr1:10841341-10844906 REVERSE LENGTH=832                                          | 833 | 832  | 0         | 99.9   | 88.8 | 94.7 |
| Rsa1.0_00216.1.g8813.t1 | refNP_001185117.1  pentatricopeptide repeat-containing protein [Arabidopsis thaliana] gi 332193129 gb AEE31250.1  pentatricopeptide repeat-containing protein [Arabidopsis thaliana] refXP_002890881.1  EMB2279 [Arabidopsis lyrata subsp. lyrata] gi 297336723 gb EFH67140.1  EMB2279 [Arabidopsis lyrata subsp. lyrata]                                                                                                                                                                                                                                                                                                                                                                                                                                                                                                                                                                                                                                                                                                                                                                                                                                                                                                                                                                                                                                                                                                                                                                                                                                                                       | 922 | 978 | 0         | 106.1  | 79.7 | 87.6 | pentatricopeptide repeat-containing protein | gbpln | Arabidopsis thaliana | AT1G30610.2   Symbols: EMB2279   pentatricopeptide (PPR) repeat-containing protein   chr1:10846676-10850517 FORWARD LENGTH=978         | 922 | 978  | 0         | 106.1  | 79.7 | 87.6 |
| Rsa1.0_00216.1.g8814.t1 | refXP_002890881.1  EMB2279 [Arabidopsis lyrata subsp. lyrata] gi 297336723 gb EFH67140.1  EMB2279 [Arabidopsis lyrata subsp. lyrata]                                                                                                                                                                                                                                                                                                                                                                                                                                                                                                                                                                                                                                                                                                                                                                                                                                                                                                                                                                                                                                                                                                                                                                                                                                                                                                                                                                                                                                                            | 73  | 913 | 1.00E-12  | 1250.7 | 49.3 | 53.4 | EMB2279                                     | gbpln | Arabidopsis lyrata   | AT1G30610.1   Symbols: EMB88, EMB2279   pentatricopeptide (PPR) repeat-containing protein   chr1:10846676-10850517 FORWARD LENGTH=1006 | 73  | 1006 | 3.00E-15  | 1378.1 | 49.3 | 53.4 |
| Rsa1.0_00216.1.g8815.t1 | gb AAF19546.1 AC007190.14 F23N19.13 [Arabidopsis thaliana]                                                                                                                                                                                                                                                                                                                                                                                                                                                                                                                                                                                                                                                                                                                                                                                                                                                                                                                                                                                                                                                                                                                                                                                                                                                                                                                                                                                                                                                                                                                                      | 565 | 633 | 1.00E-154 | 112.0  | 50.4 | 69.2 | F23N19.13                                   | gbpln | Arabidopsis thaliana | AT3G42170.1   Symbols:   BED zinc finger hAT family dimerisation domain   chr3:14321838-14323928 FORWARD LENGTH=696                    | 565 | 696  | 1.00E-29  | 123.2  | 23.7 | 41.8 |
| Rsa1.0_00216.1.g8816.t1 | refXP_002890883.1  hypothetical protein ARALYDRAFT_890616 [Arabidopsis lyrata subsp. lyrata] gi 297336725 gb EFH67142.1  hypothetical protein ARALYDRAFT_890616 [Arabidopsis lyrata subsp. lyrata]                                                                                                                                                                                                                                                                                                                                                                                                                                                                                                                                                                                                                                                                                                                                                                                                                                                                                                                                                                                                                                                                                                                                                                                                                                                                                                                                                                                              | 420 | 418 | 0         | 99.5   | 96.2 | 97.6 | hypothetical protein ARALYDRAFT_890616      | gbpln | Arabidopsis lyrata   | AT1G30620.2   Symbols: HSR8, MUR4, UXE1   NAD(P)-binding Rossmann-fold superfamily protein   chr1:10855496-10857970 FORWARD LENGTH=419 | 420 | 419  | 0         | 99.8   | 94.8 | 97.4 |
| Rsa1.0_00216.1.g8817.t1 | gb EOA39367.1  hypothetical protein CARUB_v10009903mg [Capsella rubella]                                                                                                                                                                                                                                                                                                                                                                                                                                                                                                                                                                                                                                                                                                                                                                                                                                                                                                                                                                                                                                                                                                                                                                                                                                                                                                                                                                                                                                                                                                                        | 294 | 292 | 1.00E-161 | 99.3   | 93.9 | 96.9 | hypothetical protein CARUB_v10009903mg      | gbpln | Capsella rubella     | AT1G30630.1   Symbols:   Coatomer epsilon subunit   chr1:10858546-10860173 REVERSE LENGTH=292                                          | 294 | 292  | 1.00E-163 | 99.3   | 93.9 | 96.9 |
| Rsa1.0_00216.1.g8818.t2 | refXP_002890884.1  hypothetical protein ARALYDRAFT_313702 [Arabidopsis lyrata subsp. lyrata] gi 297336726 gb EFH67143.1  hypothetical protein ARALYDRAFT_313702 [Arabidopsis lyrata subsp. lyrata] refXP_002890885.1  WRKY DNA-binding protein 14 [Arabidopsis lyrata subsp. lyrata] gi 297336727 gb EFH67144.1  WRKY DNA-binding protein 14 [Arabidopsis lyrata subsp. lyrata]                                                                                                                                                                                                                                                                                                                                                                                                                                                                                                                                                                                                                                                                                                                                                                                                                                                                                                                                                                                                                                                                                                                                                                                                                 | 562 | 564 | 0         | 100.4  | 91.8 | 96.1 | hypothetical protein ARALYDRAFT_313702      | gbpln | Arabidopsis lyrata   | AT1G30640.1   Symbols:   Protein kinase family protein   chr1:10861297-10864700 FORWARD LENGTH=562                                     | 562 | 562  | 0         | 100.0  | 89.1 | 93.2 |
| Rsa1.0_00216.1.g8819.t1 | refXP_002890885.1  WRKY DNA-binding protein 14 [Arabidopsis lyrata subsp. lyrata] gi 297336727 gb EFH67144.1  WRKY DNA-binding protein 14 [Arabidopsis lyrata subsp. lyrata]                                                                                                                                                                                                                                                                                                                                                                                                                                                                                                                                                                                                                                                                                                                                                                                                                                                                                                                                                                                                                                                                                                                                                                                                                                                                                                                                                                                                                    | 405 | 425 | 1.00E-164 | 104.9  | 81.5 | 88.1 | WRKY DNA-binding protein 14                 | gbpln | Arabidopsis lyrata   | AT1G30650.1   Symbols: WRKY14, ATWRKY14, AR411   WRKY DNA-binding protein 14   chr1:10868612-10870973 FORWARD LENGTH=430               | 405 | 430  | 1.00E-167 | 106.2  | 81.0 | 88.6 |
| Rsa1.0_00216.1.g8820.t1 | #                                                                                                                                                                                                                                                                                                                                                                                                                                                                                                                                                                                                                                                                                                                                                                                                                                                                                                                                                                                                                                                                                                                                                                                                                                                                                                                                                                                                                                                                                                                                                                                               | #   | #   | #         | #      | #    | -    | ----                                        | ----  | #                    | #                                                                                                                                      | #   | #    | #         | #      | #    |      |
| Rsa1.0_00216.1.g8821.t1 | #                                                                                                                                                                                                                                                                                                                                                                                                                                                                                                                                                                                                                                                                                                                                                                                                                                                                                                                                                                                                                                                                                                                                                                                                                                                                                                                                                                                                                                                                                                                                                                                               | #   | #   | #         | #      | #    | -    | ----                                        | ----  | #                    | #                                                                                                                                      | #   | #    | #         | #      | #    |      |
| Rsa1.0_00216.1.g8822.t1 | gb EOA39325.1  hypothetical protein CARUB_v10012366mg [Capsella rubella]                                                                                                                                                                                                                                                                                                                                                                                                                                                                                                                                                                                                                                                                                                                                                                                                                                                                                                                                                                                                                                                                                                                                                                                                                                                                                                                                                                                                                                                                                                                        | 710 | 715 | 0         | 100.7  | 83.7 | 91.4 | hypothetical protein CARUB_v10012366mg      | gbpln | Capsella rubella     | AT1G30680.1   Symbols:   topiram domain-containing protein   chr1:10881665-10886060 FORWARD LENGTH=709                                 | 710 | 709  | 0         | 99.9   | 82.8 | 88.6 |

|                         |                                                                                                                                                                                                                                                                                                                              |      |      |           |       |      |      |                                                 |       |                      |                                                                                                                                                                                                                                                                                                                                                                                                                |      |      |           |       |      |      |
|-------------------------|------------------------------------------------------------------------------------------------------------------------------------------------------------------------------------------------------------------------------------------------------------------------------------------------------------------------------|------|------|-----------|-------|------|------|-------------------------------------------------|-------|----------------------|----------------------------------------------------------------------------------------------------------------------------------------------------------------------------------------------------------------------------------------------------------------------------------------------------------------------------------------------------------------------------------------------------------------|------|------|-----------|-------|------|------|
| Rsa1.0_00216.1.g8823.t1 | ref[XP_002890888.1] predicted protein [Arabidopsis lyrata subsp. lyrata] gi 297336730 gb EFH67147.1  predicted protein [Arabidopsis lyrata subsp. lyrata]                                                                                                                                                                    | 563  | 546  | 0         | 97.0  | 70.9 | 80.6 | predicted protein                               | gbpln | Arabidopsis lyrata   | AT1G30690.2   Symbols:   Sec14p-like phosphatidylinositol transfer family protein   chr1:10888284-10890085 FORWARD LENGTH=540                                                                                                                                                                                                                                                                                  | 563  | 540  | 0         | 95.9  | 71.4 | 80.6 |
| Rsa1.0_00216.1.g8824.t1 | # # # # # # # #                                                                                                                                                                                                                                                                                                              |      |      |           |       |      |      |                                                 |       |                      |                                                                                                                                                                                                                                                                                                                                                                                                                |      |      |           |       |      |      |
| Rsa1.0_00216.1.g8825.t1 | gb[EOA40123.1] hypothetical protein CARUB_v10008825mg [Capsella rubella]                                                                                                                                                                                                                                                     | 530  | 530  | 0         | 100.0 | 86.2 | 92.3 | hypothetical protein CARUB_v10008825mg          | gbpln | Capsella rubella     | AT1G30700.1   Symbols:   FAD-binding Berberine family protein   chr1:10892623-10894437 FORWARD LENGTH=527                                                                                                                                                                                                                                                                                                      | 530  | 527  | 0         | 99.4  | 85.3 | 93.0 |
| Rsa1.0_00216.1.g8826.t1 | gb[EOA39278.1] hypothetical protein CARUB_v10012287mg [Capsella rubella]                                                                                                                                                                                                                                                     | 531  | 531  | 0         | 100.0 | 88.1 | 93.6 | hypothetical protein CARUB_v10012287mg          | gbpln | Capsella rubella     | AT1G30710.1   Symbols:   FAD-binding Berberine family protein   chr1:10895280-10896875 FORWARD LENGTH=531                                                                                                                                                                                                                                                                                                      | 531  | 531  | 0         | 100.0 | 86.3 | 92.7 |
| Rsa1.0_00216.1.g8827.t1 | ref[NP_174364.2] F-box domain-containing protein [Arabidopsis thaliana] gi 302425247 sp Q9SY17.2 FB314_ARAT H RecName: Full=Probable F-box protein At1g30780 gi 332193150 gb AEE31271.1  F-box domain-containing protein [Arabidopsis thaliana]                                                                              | 142  | 482  | 1.00E-39  | 339.4 | 66.9 | 75.4 | F-box domain-containing protein                 | gbpln | Arabidopsis thaliana | AT1G30780.1   Symbols:   F-box associated ubiquitination effector family protein   chr1:10923919-10926561 REVERSE LENGTH=482                                                                                                                                                                                                                                                                                   | 142  | 482  | 4.00E-42  | 339.4 | 66.9 | 75.4 |
| Rsa1.0_00216.1.g8828.t2 | gb[EOA39649.1] hypothetical protein CARUB_v10008288mg, partial [Capsella rubella]                                                                                                                                                                                                                                            | 830  | 855  | 0         | 103.0 | 85.4 | 91.6 | hypothetical protein CARUB_v10008288mg, partial | gbpln | Capsella rubella     | AT1G30810.2   Symbols:   Transcription factor jumonji (jm) family protein / zinc finger (C5HC2 type) family protein   chr1:10938139-10941505 REVERSE LENGTH=819                                                                                                                                                                                                                                                | 830  | 819  | 0         | 98.7  | 84.8 | 90.1 |
| Rsa1.0_00216.1.g8829.t1 | ref[NP_001031120.1] uncharacterized protein [Arabidopsis thaliana] gi 186479080 ref NP_001117392.1  uncharacterized protein [Arabidopsis thaliana] gi 332193156 gb AEE31277.1  uncharacterized protein AT1G30814 [Arabidopsis thaliana] gi 332193156 gb AEE31279.1  uncharacterized protein AT1G30814 [Arabidopsis thaliana] | 291  | 305  | 3.00E-41  | 104.8 | 40.5 | 53.3 | uncharacterized protein                         | gbpln | Arabidopsis thaliana | AT1G30814.3   Symbols:   unknown protein; FUNCTIONS IN: molecular_function unknown; INVOLVED IN: biological_process unknown; LOCATED IN: cellular_component unknown; Has 30201 Blast hits to 17322 proteins in 780 species: Archae - 12; Bacteria - 1396; Metazoa - 17338; Fungi - 3422; Plants - 5037; Viruses - 0; Other Eukaryotes - 2996 (source: NCBI BLINK).   chr1:10942826-10944225 REVERSE LENGTH=305 | 291  | 305  | 9.00E-44  | 104.8 | 40.5 | 53.3 |
| Rsa1.0_00217.1.g8830.t2 | ref[XP_002883160.1] hypothetical protein ARALYDRAFT_479423 [Arabidopsis lyrata subsp. lyrata] gi 297329000 gb EFH59419.1  hypothetical protein ARALYDRAFT_479423 [Arabidopsis lyrata subsp. lyrata]                                                                                                                          | 2789 | 2771 | 0         | 99.4  | 82.6 | 89.3 | hypothetical protein ARALYDRAFT_479423          | gbpln | Arabidopsis lyrata   | AT3G19050.1   Symbols:   POK2   phragmoplast orienting kinesin 2   chr3:6578047-6590106 FORWARD LENGTH=2771                                                                                                                                                                                                                                                                                                    | 2789 | 2771 | 0         | 99.4  | 82.5 | 89.1 |
| Rsa1.0_00217.1.g8831.t5 | ref[NP_188538.1] SWIB complex BAF60b domain-containing protein [Arabidopsis thaliana] gi 332642670 gb AEE76191.1  SWIB complex BAF60b domain-containing protein [Arabidopsis thaliana]                                                                                                                                       | 505  | 462  | 1.00E-172 | 91.5  | 69.9 | 77.0 | SWIB complex BAF60b domain-containing protein   | gbpln | Arabidopsis thaliana | AT3G19080.1   Symbols:   SWIB complex BAF60b domain-containing protein   chr3:6596082-6598667 FORWARD LENGTH=462                                                                                                                                                                                                                                                                                               | 505  | 462  | 1.00E-175 | 91.5  | 69.9 | 77.0 |
| Rsa1.0_00217.1.g8832.t1 | emb[CAB40035.1] retrotransposon like protein [Arabidopsis thaliana] gi 7267767 emb CAB81170.1  retrotransposon like protein [Arabidopsis thaliana]                                                                                                                                                                           | 1436 | 1515 | 0         | 105.5 | 57.7 | 73.6 | retrotransposon like protein                    | gbpln | Arabidopsis thaliana | AT4G23160.1   Symbols:   CRK8   cysteine-rich RLK (RECEPTOR-like protein kinase) 8   chr4:12129485-12134086 FORWARD LENGTH=1262                                                                                                                                                                                                                                                                                | 1436 | 1262 | 7.00E-95  | 87.9  | 12.5 | 18.5 |
| Rsa1.0_00217.1.g8833.t1 | gb[EOA32461.1] hypothetical protein CARUB_v10015738mg [Capsella rubella]                                                                                                                                                                                                                                                     | 442  | 456  | 0         | 103.2 | 81.9 | 88.7 | hypothetical protein CARUB_v10015738mg          | gbpln | Capsella rubella     | AT3G19090.1   Symbols:   RNA-binding protein   chr3:6601466-6603709 FORWARD LENGTH=455                                                                                                                                                                                                                                                                                                                         | 442  | 455  | 0         | 102.9 | 80.8 | 87.3 |
| Rsa1.0_00217.1.g8834.t1 | ref[XP_002862200.1] hypothetical protein ARALYDRAFT_921091 [Arabidopsis lyrata subsp. lyrata] gi 297307451 gb EFH38458.1  hypothetical protein ARALYDRAFT_921091 [Arabidopsis lyrata subsp. lyrata]                                                                                                                          | 418  | 417  | 0         | 99.8  | 93.1 | 97.4 | hypothetical protein ARALYDRAFT_921091          | gbpln | Arabidopsis lyrata   | AT3G19100.1   Symbols:   Protein kinase superfamily protein   chr3:6605681-6608980 FORWARD LENGTH=599                                                                                                                                                                                                                                                                                                          | 418  | 599  | 0         | 143.3 | 92.6 | 96.7 |
| Rsa1.0_00217.1.g8835.t2 | gb[EOA30594.1] hypothetical protein CARUB_v10013726mg [Capsella rubella]                                                                                                                                                                                                                                                     | 436  | 438  | 1.00E-157 | 100.5 | 67.9 | 73.4 | hypothetical protein CARUB_v10013726mg          | gbpln | Capsella rubella     | AT3G19130.1   Symbols:   ATRBP47B, RBP47B   RNA-binding protein 47B   chr3:6611398-6613823 REVERSE LENGTH=435                                                                                                                                                                                                                                                                                                  | 436  | 435  | 1.00E-158 | 99.8  | 67.9 | 74.3 |



|                         |                                                                                                                                                                                                                                                                                                                                                                                                                                                                                                                                                                                                                                                                                                                                                                                                                                                                                                                                             |      |      |          |       |      |      |                                                 |       |                      |                                                                                                                                                                                                                                                                                                                                            |      |      |          |       |      |      |
|-------------------------|---------------------------------------------------------------------------------------------------------------------------------------------------------------------------------------------------------------------------------------------------------------------------------------------------------------------------------------------------------------------------------------------------------------------------------------------------------------------------------------------------------------------------------------------------------------------------------------------------------------------------------------------------------------------------------------------------------------------------------------------------------------------------------------------------------------------------------------------------------------------------------------------------------------------------------------------|------|------|----------|-------|------|------|-------------------------------------------------|-------|----------------------|--------------------------------------------------------------------------------------------------------------------------------------------------------------------------------------------------------------------------------------------------------------------------------------------------------------------------------------------|------|------|----------|-------|------|------|
| Rsa1.0_00217.1.g8836.t1 | ref[NP_188546.1] cyclin-dependent kinase inhibitor 6 [Arabidopsis thaliana] gi 152032530 sp QOWNX9.2 KRP6_ARAT H RecName: Full=Cyclin-dependent kinase inhibitor 6; AltName: Full=Cyclin-dependent kinase inhibitor p22ack1; AltName: Full=Inhibitor/interactor of CDK protein 4; AltName: Full=KIP-related protein 6 gi 8789105 gb AAF77612.2 AF106705.1 cyclin dependent kinase inhibitor [Arabidopsis thaliana] gi 9294616 dbj BAB02955.1  unnamed protein product [Arabidopsis thaliana] gi 14422295 emb CAC41620.1  cyclin-dependent kinase inhibitor 6 [Arabidopsis thaliana] gi 149944321 gb ABR46203.1  At3g19150 [Arabidopsis thaliana] gi 332642677 gb AEE76198.1  cyclin-dependent kinase inhibitor 6 [Arabidopsis thaliana] ref[XP_002883164.1] hypothetical protein ARALYDRAFT_318673 [Arabidopsis lyrata subsp. lyrata] gi 297329004 gb EFH59423.1  hypothetical protein ARALYDRAFT_318673 [Arabidopsis lyrata subsp. lyrata] | 178  | 196  | 3.00E-19 | 110.1 | 52.2 | 63.5 | cyclin-dependent kinase inhibitor 6             | gbpln | Arabidopsis thaliana | AT3G19150.1   Symbols: KRP6, ICK4, ACK1   KIP-related protein 6   chr3:6616628-6617655 REVERSE LENGTH=196                                                                                                                                                                                                                                  | 178  | 196  | 1.00E-21 | 110.1 | 52.2 | 63.5 |
| Rsa1.0_00217.1.g8837.t3 | ref[XP_002883164.1] hypothetical protein ARALYDRAFT_318673 [Arabidopsis lyrata subsp. lyrata] gi 297329004 gb EFH59423.1  hypothetical protein ARALYDRAFT_318673 [Arabidopsis lyrata subsp. lyrata]                                                                                                                                                                                                                                                                                                                                                                                                                                                                                                                                                                                                                                                                                                                                         | 810  | 835  | 0        | 103.1 | 82.8 | 88.3 | hypothetical protein ARALYDRAFT_318673          | gbpln | Arabidopsis lyrata   | AT3G19180.1   Symbols: ARC6H, PARC6, ATCDP1, CDP1   paralog of ARC6   chr3:6632810-6636953 FORWARD LENGTH=819                                                                                                                                                                                                                              | 810  | 819  | 0        | 101.1 | 82.0 | 87.7 |
| Rsa1.0_00217.1.g8838.t2 | gb ADU79134.1  autophagy-related protein 2 [Arabidopsis thaliana]                                                                                                                                                                                                                                                                                                                                                                                                                                                                                                                                                                                                                                                                                                                                                                                                                                                                           | 1879 | 1892 | 0        | 100.7 | 82.1 | 89.1 | autophagy-related protein 2                     | gbpln | Arabidopsis thaliana | AT3G19190.1   Symbols: ATATG2, ATG2   autophagy 2   chr3:6639879-6648274 FORWARD LENGTH=1839                                                                                                                                                                                                                                               | 1879 | 1839 | 0        | 97.9  | 79.4 | 86.3 |
| Rsa1.0_00217.1.g8839.t1 | ref[NP_188551.1] uncharacterized protein [Arabidopsis thaliana] gi 9294623 dbj BAB02962.1  unnamed protein product [Arabidopsis thaliana] gi 61742707 gb AAX55174.1  hypothetical protein AT3g19200 [Arabidopsis thaliana] gi 332642686 gb AEE76207.1  uncharacterized protein AT3G19200 [Arabidopsis thaliana] ref[XP_002885300.1] hypothetical protein ARALYDRAFT_479436 [Arabidopsis lyrata subsp. lyrata] gi 297331140 gb EFH61559.1  hypothetical protein ARALYDRAFT_479436 [Arabidopsis lyrata subsp. lyrata]                                                                                                                                                                                                                                                                                                                                                                                                                         | 149  | 143  | 5.00E-57 | 96.0  | 79.9 | 84.6 | uncharacterized protein                         | gbpln | Arabidopsis thaliana | AT3G19200.1   Symbols:   unknown protein; BEST Arabidopsis thaliana protein match is: unknown protein (TAIR:AT4G34419.1); Has 51 Blast hits to 51 proteins in 10 species: Archae - 0; Bacteria - 0; Metazoa - 0; Fungi - 0; Plants - 51; Viruses - 0; Other Eukaryotes - 0 (source: NCBI BLink).   chr3:6649478-6650006 REVERSE LENGTH=143 | 149  | 143  | 1.00E-59 | 96.0  | 79.9 | 84.6 |
| Rsa1.0_00217.1.g8840.t7 | ref[XP_002885300.1] hypothetical protein ARALYDRAFT_479436 [Arabidopsis lyrata subsp. lyrata] gi 297331140 gb EFH61559.1  hypothetical protein ARALYDRAFT_479436 [Arabidopsis lyrata subsp. lyrata]                                                                                                                                                                                                                                                                                                                                                                                                                                                                                                                                                                                                                                                                                                                                         | 954  | 910  | 0        | 95.4  | 85.7 | 89.5 | hypothetical protein ARALYDRAFT_479436          | gbpln | Arabidopsis lyrata   | AT3G19210.1   Symbols: ATRAD54, CHR25, RAD54   homolog of RAD54   chr3:6652799-6658876 REVERSE LENGTH=910                                                                                                                                                                                                                                  | 954  | 910  | 0        | 95.4  | 86.0 | 89.3 |
| Rsa1.0_00217.1.g8841.t1 | gb EOA31498.1  hypothetical protein CARUB_v10014684mg [Capsella rubella]                                                                                                                                                                                                                                                                                                                                                                                                                                                                                                                                                                                                                                                                                                                                                                                                                                                                    | 191  | 198  | 1.00E-87 | 103.7 | 84.8 | 90.6 | hypothetical protein CARUB_v10014684mg          | gbpln | Capsella rubella     | AT3G19220.1   Symbols: CYO1, SCO2   protein disulfide isomerases   chr3:6659207-6660488 FORWARD LENGTH=187                                                                                                                                                                                                                                 | 191  | 187  | 5.00E-87 | 97.9  | 83.2 | 88.5 |
| Rsa1.0_00217.1.g8842.t1 | ref[NP_188554.1] leucine-rich repeat-containing protein [Arabidopsis thaliana] gi 332642690 gb AEE76211.1  leucine-rich repeat-containing protein [Arabidopsis thaliana]                                                                                                                                                                                                                                                                                                                                                                                                                                                                                                                                                                                                                                                                                                                                                                    | 517  | 519  | 0        | 100.4 | 82.0 | 89.0 | leucine-rich repeat-containing protein          | gbpln | Arabidopsis thaliana | AT3G19230.1   Symbols:   Leucine-rich repeat (LRR) family protein   chr3:6661088-6663519 REVERSE LENGTH=519                                                                                                                                                                                                                                | 517  | 519  | 0        | 100.4 | 82.0 | 89.0 |
| Rsa1.0_00217.1.g8843.t1 | gb EOA30075.1  hypothetical protein CARUB_v10013181mg [Capsella rubella]                                                                                                                                                                                                                                                                                                                                                                                                                                                                                                                                                                                                                                                                                                                                                                                                                                                                    | 636  | 646  | 0        | 101.6 | 87.6 | 93.9 | hypothetical protein CARUB_v10013181mg          | gbpln | Capsella rubella     | AT3G19240.1   Symbols:   Vacuolar import/degradation, Vid27-related protein   chr3:6664383-6666423 FORWARD LENGTH=648                                                                                                                                                                                                                      | 636  | 648  | 0        | 101.9 | 86.6 | 93.6 |
| Rsa1.0_00218.1.g8844.t1 | # # # # # # # # -                                                                                                                                                                                                                                                                                                                                                                                                                                                                                                                                                                                                                                                                                                                                                                                                                                                                                                                           | #    | #    | #        | #     | #    | #    | ----                                            | ----  | #                    | #                                                                                                                                                                                                                                                                                                                                          | #    | #    | #        | #     | #    |      |
| Rsa1.0_00218.1.g8845.t4 | ref[NP_196926.2] protoporphyrinogen oxidase [Arabidopsis thaliana] gi 18700121 gb AAL77672.1  AT5g14220/MUA22.22 [Arabidopsis thaliana] gi 20856027 gb AAM26644.1  AT5g14220/MUA22.22 [Arabidopsis thaliana] gi 332004619 gb AED92001.1  protoporphyrinogen oxidase [Arabidopsis thaliana]                                                                                                                                                                                                                                                                                                                                                                                                                                                                                                                                                                                                                                                  | 538  | 508  | 0        | 94.4  | 85.9 | 88.7 | protoporphyrinogen oxidase                      | gbpln | Arabidopsis thaliana | AT5G14220.1   Symbols: HEMG2, MEE61, PPO2   Flavin containing amine oxidoreductase family   chr5:4583506-4587369 REVERSE LENGTH=508                                                                                                                                                                                                        | 538  | 508  | 0        | 94.4  | 85.9 | 88.7 |
| Rsa1.0_00218.1.g8846.t1 | ref[NP_196925.2] leucine-rich repeat protein kinase-like protein [Arabidopsis thaliana] gi 224589671 gb ACN59367.1  leucine-rich repeat receptor-like protein kinase [Arabidopsis thaliana] gi 332004617 gb AED92000.1  leucine-rich repeat protein kinase-like protein [Arabidopsis thaliana]                                                                                                                                                                                                                                                                                                                                                                                                                                                                                                                                                                                                                                              | 776  | 775  | 0        | 99.9  | 86.2 | 90.6 | leucine-rich repeat protein kinase-like protein | gbpln | Arabidopsis thaliana | AT5G14210.1   Symbols:   Leucine-rich repeat protein kinase family protein   chr5:4578503-4581374 REVERSE LENGTH=775                                                                                                                                                                                                                       | 776  | 775  | 0        | 99.9  | 86.2 | 90.6 |

|                         |                                                                                                                                                                                                                                                                                                                                                                                                                                                                                                                                                                                                                                                                              |     |     |           |       |      |      |                                             |             |                      |                                                                                                                                                                                                                                                                                |     |     |           |       |      |      |
|-------------------------|------------------------------------------------------------------------------------------------------------------------------------------------------------------------------------------------------------------------------------------------------------------------------------------------------------------------------------------------------------------------------------------------------------------------------------------------------------------------------------------------------------------------------------------------------------------------------------------------------------------------------------------------------------------------------|-----|-----|-----------|-------|------|------|---------------------------------------------|-------------|----------------------|--------------------------------------------------------------------------------------------------------------------------------------------------------------------------------------------------------------------------------------------------------------------------------|-----|-----|-----------|-------|------|------|
| Rsa1.0_00218.1.g8847.t1 | ref[NP_568295.2] triacylglycerol lipase 2 [Arabidopsis thaliana]<br>gi 75322727 sp Q67ZU1.1 LIP2_ARATH<br>RecName: Full=Triacylglycerol lipase 2;<br>Flags: Precursor<br>gi 51970194 dbj BAD43789.1  unnamed protein product [Arabidopsis thaliana]<br>gi 332004613 gb AED91996.1  triacylglycerol lipase 2 [Arabidopsis thaliana]                                                                                                                                                                                                                                                                                                                                           | 455 | 418 | 0         | 91.9  | 73.8 | 80.4 | triacylglycerol lipase 2                    | gbpln       | Arabidopsis thaliana | AT5G14180.1   Symbols: MPL1   Myzus persicae-induced lipase 1   chr5:4571442-4574413 REVERSE LENGTH=418                                                                                                                                                                        | 455 | 418 | 0         | 91.9  | 73.8 | 80.4 |
| Rsa1.0_00218.1.g8848.t1 | gb EOA20357.1  hypothetical protein CARUB_v10000669mg [Capsella rubella]<br>gi 482556166 gb EOA20358.1  hypothetical protein CARUB_v10000669mg [Capsella rubella]<br>gi 482556167 gb EOA20359.1  hypothetical protein CARUB_v10000669mg [Capsella rubella]                                                                                                                                                                                                                                                                                                                                                                                                                   | 549 | 536 | 0         | 97.6  | 82.7 | 87.1 | hypothetical protein CARUB_v10000669mg      | gbpln       | Capsella rubella     | AT5G14170.1   Symbols: CHC1   SWIB/MDM2 domain superfamily protein   chr5:4568696-4570444 REVERSE LENGTH=534                                                                                                                                                                   | 549 | 534 | 0         | 97.3  | 83.2 | 87.4 |
| Rsa1.0_00218.1.g8849.t1 | gb EOA21047.1  hypothetical protein CARUB_v10001386mg [Capsella rubella]                                                                                                                                                                                                                                                                                                                                                                                                                                                                                                                                                                                                     | 322 | 335 | 1.00E-139 | 104.0 | 76.4 | 84.2 | hypothetical protein CARUB_v10001386mg      | gbpln       | Capsella rubella     | AT5G14130.1   Symbols: Peroxidase superfamily protein   chr5:4558862-4560028 REVERSE LENGTH=330                                                                                                                                                                                | 322 | 330 | 1.00E-139 | 102.5 | 75.8 | 84.2 |
| Rsa1.0_00218.1.g8850.t1 | dbj BAJ34083.1  unnamed protein product [Thellungiella halophila]                                                                                                                                                                                                                                                                                                                                                                                                                                                                                                                                                                                                            | 580 | 579 | 0         | 99.8  | 88.8 | 94.0 | unnamed protein product                     | ----        | ----                 | AT5G14120.1   Symbols: Major facilitator superfamily protein   chr5:4556308-4558447 FORWARD LENGTH=579                                                                                                                                                                         | 580 | 579 | 0         | 99.8  | 87.9 | 94.3 |
| Rsa1.0_00218.1.g8851.t1 | gb ACG47680.1  hypothetical protein [Zea mays]<br>gi 413946083 gb AFW78732.1  hypothetical protein ZEAMMB73_647957 [Zea mays]                                                                                                                                                                                                                                                                                                                                                                                                                                                                                                                                                | 56  | 72  | 2.00E-17  | 128.6 | 78.6 | 85.7 | hypothetical protein                        | gbenv/gbpln | Zea mays             | AT5G14105.1   Symbols: unknown protein; Has 30201 Blast hits to 17322 proteins in 780 species: Archae - 12; Bacteria - 1396; Metazoa - 17338; Fungi - 3422; Plants - 5037; Viruses - 0; Other Eukaryotes - 2996 (source: NCBI BLINK).   chr5:4552169-4552901 REVERSE LENGTH=76 | 56  | 76  | 7.00E-16  | 135.7 | 66.1 | 69.6 |
| Rsa1.0_00218.1.g8852.t1 | ref[NP_196914.1] ABC transporter I family member 11 [Arabidopsis thaliana]<br>gi 75330013 sp Q8LEF6.1 AB11I_ARATH<br>RecName: Full=ABC transporter I family member 11, chloroplastic; Short=ABC transporter ABCI11; Short=AtABC11; AltName: Full=Non-intrinsic ABC protein 14; Flags: Precursor<br>gi 21553579 gb AAM62672.1  contains similarity to ABC transporter, ATP-binding protein [Arabidopsis thaliana]<br>gi 26452494 dbj BAC43332.1  unknown protein [Arabidopsis thaliana]<br>gi 29824157 gb AAP04039.1  putative ABC transporter family protein [Arabidopsis thaliana]<br>gi 332004604 gb AED91987.1  ABC transporter I family member 11 [Arabidopsis thaliana] | 275 | 278 | 1.00E-131 | 101.1 | 91.3 | 94.2 | ABC transporter I family member 11          | gbpln       | Arabidopsis thaliana | AT5G14100.1   Symbols: ATNAP14, NAP14   non-intrinsic ABC protein 14   chr5:4549706-4551632 REVERSE LENGTH=278                                                                                                                                                                 | 275 | 278 | 1.00E-134 | 101.1 | 91.3 | 94.2 |
| Rsa1.0_00218.1.g8853.t1 | gb EOA20940.1  hypothetical protein CARUB_v10001273mg [Capsella rubella]                                                                                                                                                                                                                                                                                                                                                                                                                                                                                                                                                                                                     | 409 | 357 | 1.00E-135 | 87.3  | 63.1 | 70.2 | hypothetical protein CARUB_v10001273mg      | gbpln       | Capsella rubella     | AT5G14090.1   Symbols: unknown protein; Has 56 Blast hits to 56 proteins in 18 species: Archae - 0; Bacteria - 0; Metazoa - 0; Fungi - 2; Plants - 46; Viruses - 0; Other Eukaryotes - 8 (source: NCBI BLINK).   chr5:4547230-4549214 FORWARD LENGTH=358                       | 409 | 358 | 1.00E-137 | 87.5  | 63.1 | 71.4 |
| Rsa1.0_00218.1.g8854.t1 | ref XP_002873646.1  pentatricopeptide repeat-containing protein [Arabidopsis lyrata subsp. lyrata]<br>gi 297319483 gb EFH49905.1  pentatricopeptide repeat-containing protein [Arabidopsis lyrata subsp. lyrata]                                                                                                                                                                                                                                                                                                                                                                                                                                                             | 640 | 634 | 0         | 99.1  | 87.8 | 93.6 | pentatricopeptide repeat-containing protein | gbpln       | Arabidopsis lyrata   | AT5G14080.1   Symbols: Tetratricopeptide repeat (TPR)-like superfamily protein   chr5:4543265-4545256 REVERSE LENGTH=634                                                                                                                                                       | 640 | 634 | 0         | 99.1  | 86.6 | 92.3 |
| Rsa1.0_00218.1.g8855.t1 | gb EOA21767.1  hypothetical protein CARUB_v10002222mg [Capsella rubella]                                                                                                                                                                                                                                                                                                                                                                                                                                                                                                                                                                                                     | 134 | 140 | 1.00E-57  | 104.5 | 84.3 | 91.0 | hypothetical protein CARUB_v10002222mg      | gbpln       | Capsella rubella     | AT5G14070.1   Symbols: ROXY2   Thioredoxin superfamily protein   chr5:4541915-4542337 FORWARD LENGTH=140                                                                                                                                                                       | 134 | 140 | 5.00E-60  | 104.5 | 84.3 | 90.3 |

|                         |                                                                                                                                                                                                                                                                                                                                                                                                                                                                                                                                                              |      |      |           |       |      |      |                                                           |       |                      |                                                                                                                                                                                                                                                                                                                                                        |      |      |           |       |      |      |
|-------------------------|--------------------------------------------------------------------------------------------------------------------------------------------------------------------------------------------------------------------------------------------------------------------------------------------------------------------------------------------------------------------------------------------------------------------------------------------------------------------------------------------------------------------------------------------------------------|------|------|-----------|-------|------|------|-----------------------------------------------------------|-------|----------------------|--------------------------------------------------------------------------------------------------------------------------------------------------------------------------------------------------------------------------------------------------------------------------------------------------------------------------------------------------------|------|------|-----------|-------|------|------|
| Rsa1.0_00218.1.g8856.t1 | refNP_196909.1   U3 small nucleolar RNA-associated protein 18-like protein [Arabidopsis thaliana]<br>gi 17366762 sp Q9FMU5.1 UTP18_ARAT H RecName: Full=U3 small nucleolar RNA-associated protein 18 homolog<br>gi 9757786 dbj BAB08284.1   unnamed protein product [Arabidopsis thaliana]<br>gi 18700147 gb AAL77685.1<br>AT5g14050/MUA22.5 [Arabidopsis thaliana]<br>gi 22137238 gb AAM91464.1   AT5g14050/MUA22.5 [Arabidopsis thaliana]<br>gi 332004598 gb AED91981.1   U3 small nucleolar RNA-associated protein 18-like protein [Arabidopsis thaliana] | 526  | 546  | 0         | 103.8 | 81.0 | 88.4 | U3 small nucleolar RNA-associated protein 18-like protein | gbpln | Arabidopsis thaliana | AT5G14050.1   Symbols:   Transducin/WD40 repeat-like superfamily protein   chr5:4533539-4535179 FORWARD LENGTH=546                                                                                                                                                                                                                                     | 526  | 546  | 0         | 103.8 | 81.0 | 88.4 |
| Rsa1.0_00218.1.g8857.t1 | gb EOA20732.1   hypothetical protein CARUB_v10001054mg [Capsella rubella]                                                                                                                                                                                                                                                                                                                                                                                                                                                                                    | 422  | 419  | 0         | 99.3  | 85.1 | 89.1 | hypothetical protein CARUB_v10001054mg                    | gbpln | Capsella rubella     | AT5G13730.1   Symbols: SIG4, SIGD   sigma factor 4   chr5:4429132-4430744 REVERSE LENGTH=419                                                                                                                                                                                                                                                           | 422  | 419  | 0         | 99.3  | 83.9 | 88.2 |
| Rsa1.0_00218.1.g8858.t1 | refNP_196876.1   uncharacterized protein [Arabidopsis thaliana]<br>gi 9758038 dbj BAB08699.1   unnamed protein product [Arabidopsis thaliana]<br>gi 23297285 gb AAN12932.1   unknown protein [Arabidopsis thaliana]<br>gi 332004549 gb AED91932.1   uncharacterized protein AT5G13720 [Arabidopsis thaliana]                                                                                                                                                                                                                                                 | 264  | 262  | 1.00E-106 | 99.2  | 81.4 | 87.5 | uncharacterized protein                                   | gbpln | Arabidopsis thaliana | AT5G13720.1   Symbols:   Uncharacterised protein family (UPF0114)   chr5:4427960-4429029 FORWARD LENGTH=262                                                                                                                                                                                                                                            | 264  | 262  | 1.00E-109 | 99.2  | 81.4 | 87.5 |
| Rsa1.0_00218.1.g8859.t1 | refXP_002873623.1   aba-overly sensitive 1 [Arabidopsis lyrata subsp. lyrata]<br>gi 297319460 gb EFH49882.1   aba-overly sensitive 1 [Arabidopsis lyrata subsp. lyrata]                                                                                                                                                                                                                                                                                                                                                                                      | 1306 | 1317 | 0         | 100.8 | 87.7 | 93.1 | aba-overly sensitive 1                                    | gbpln | Arabidopsis lyrata   | AT5G13680.1   Symbols: ELO2, ABO1   IKI3 family protein   chr5:4410522-4415471 REVERSE LENGTH=1319                                                                                                                                                                                                                                                     | 1306 | 1319 | 0         | 101.0 | 87.8 | 93.0 |
| Rsa1.0_00218.1.g8860.t1 | refNP_196871.1   nodulin MtN21 /EamA-like transporter family protein [Arabidopsis thaliana]<br>gi 75171811 sp Q9FNA5.1 WTR39_ARAT H RecName: Full=WAT1--related protein At5g13670<br>gi 9758033 dbj BAB08694.1   unnamed protein product [Arabidopsis thaliana]<br>gi 21536666 gb AAM60998.1   nodulin-like protein [Arabidopsis thaliana]<br>gi 332004543 gb AED91926.1   nodulin MtN21 /EamA-like transporter family protein [Arabidopsis thaliana]                                                                                                        | 358  | 377  | 1.00E-165 | 105.3 | 81.3 | 88.8 | nodulin MtN21 /EamA-like transporter family protein       | gbpln | Arabidopsis thaliana | AT5G13670.1   Symbols:   nodulin MtN21 /EamA-like transporter family protein   chr5:4407205-4408955 REVERSE LENGTH=377                                                                                                                                                                                                                                 | 358  | 377  | 1.00E-167 | 105.3 | 81.3 | 88.8 |
| Rsa1.0_00218.1.g8861.t2 | refXP_002871578.1   elongation factor family protein [Arabidopsis lyrata subsp. lyrata]<br>gi 297317415 gb EFH47837.1   elongation factor family protein [Arabidopsis lyrata subsp. lyrata]                                                                                                                                                                                                                                                                                                                                                                  | 694  | 675  | 0         | 97.3  | 94.1 | 95.4 | elongation factor family protein                          | gbpln | Arabidopsis lyrata   | AT5G13650.1   Symbols:   elongation factor family protein   chr5:4397821-4402364 FORWARD LENGTH=675                                                                                                                                                                                                                                                    | 694  | 675  | 0         | 97.3  | 93.7 | 95.2 |
| Rsa1.0_00218.1.g8862.t1 | refXP_002871577.1   predicted protein [Arabidopsis lyrata subsp. lyrata]<br>gi 297317414 gb EFH47836.1   predicted protein [Arabidopsis lyrata subsp. lyrata]                                                                                                                                                                                                                                                                                                                                                                                                | 675  | 672  | 0         | 99.6  | 91.4 | 94.2 | predicted protein                                         | gbpln | Arabidopsis lyrata   | AT5G13640.1   Symbols: ATPDAT, PDAT, PDAT1   phospholipid:diacylglycerol acyltransferase   chr5:4393529-4397213 FORWARD LENGTH=671                                                                                                                                                                                                                     | 675  | 671  | 0         | 99.4  | 90.2 | 94.2 |
| Rsa1.0_00218.1.g8863.t1 | gb EOA22855.1   hypothetical protein CARUB_v10003585mg [Capsella rubella]                                                                                                                                                                                                                                                                                                                                                                                                                                                                                    | 290  | 318  | 1.00E-68  | 109.7 | 49.7 | 65.2 | hypothetical protein CARUB_v10003585mg                    | gbpln | Capsella rubella     | AT5G13620.1   Symbols:   unknown protein; BEST Arabidopsis thaliana protein match is: unknown protein (TAIR:AT1G49290.1); Has 1807 Blast hits to 1807 proteins in 277 species: Archae - 0; Bacteria - 0; Metazoa - 736; Fungi - 347; Plants - 385; Viruses - 0; Other Eukaryotes - 339 (source: NCBI BLink).   chr5:4385385-4386373 REVERSE LENGTH=301 | 290  | 301  | 2.00E-62  | 103.8 | 49.7 | 64.1 |
| Rsa1.0_00218.1.g8864.t1 | refNP_196865.1   uncharacterized protein [Arabidopsis thaliana]<br>gi 9758026 dbj BAB08687.1   unnamed protein product [Arabidopsis thaliana]<br>gi 22022566 gb AAM83240.1   AT5g13610/MSH12.7 [Arabidopsis thaliana]<br>gi 23308429 gb AAN18184.1   At5g13610/MSH12.7 [Arabidopsis thaliana]<br>gi 332004534 gb AED91917.1   uncharacterized protein AT5G13610 [Arabidopsis thaliana]                                                                                                                                                                       | 403  | 402  | 1.00E-157 | 99.8  | 74.2 | 81.9 | uncharacterized protein                                   | gbpln | Arabidopsis thaliana | AT5G13610.1   Symbols:   Protein of unknown function (DUF155)   chr5:4383073-4384808 FORWARD LENGTH=402                                                                                                                                                                                                                                                | 403  | 402  | 1.00E-160 | 99.8  | 74.2 | 81.9 |
| Rsa1.0_00218.1.g8865.t1 | gb EOA22003.1   hypothetical protein CARUB_v10002526mg [Capsella rubella]                                                                                                                                                                                                                                                                                                                                                                                                                                                                                    | 572  | 591  | 0         | 103.3 | 75.0 | 84.3 | hypothetical protein CARUB_v10002526mg                    | gbpln | Capsella rubella     | AT5G13600.1   Symbols:   Phototropic-responsive NPH3 family protein   chr5:4380432-4382497 FORWARD LENGTH=591                                                                                                                                                                                                                                          | 572  | 591  | 0         | 103.3 | 74.5 | 83.0 |

|                         |                                                                                                                                                                                                                                                                                                                                                                                                                                                                                                                                                                                                                                                                                                                                                                     |      |      |           |       |      |      |                                        |       |                      |                                                                                                                                                                                                                                                                                                                                                                                                                                                                                                                                                             |      |      |           |       |      |      |
|-------------------------|---------------------------------------------------------------------------------------------------------------------------------------------------------------------------------------------------------------------------------------------------------------------------------------------------------------------------------------------------------------------------------------------------------------------------------------------------------------------------------------------------------------------------------------------------------------------------------------------------------------------------------------------------------------------------------------------------------------------------------------------------------------------|------|------|-----------|-------|------|------|----------------------------------------|-------|----------------------|-------------------------------------------------------------------------------------------------------------------------------------------------------------------------------------------------------------------------------------------------------------------------------------------------------------------------------------------------------------------------------------------------------------------------------------------------------------------------------------------------------------------------------------------------------------|------|------|-----------|-------|------|------|
| Rsa1.0_00218.1.g8866.t1 | refXP_002873619.1   hypothetical protein ARALYDRAFT_909311 [Arabidopsis lyrata subsp. lyrata] gi 297319456 gb EFH49878.1   hypothetical protein ARALYDRAFT_909311 [Arabidopsis lyrata subsp. lyrata]                                                                                                                                                                                                                                                                                                                                                                                                                                                                                                                                                                | 1078 | 1217 | 0         | 112.9 | 65.0 | 75.5 | hypothetical protein ARALYDRAFT_909311 | gbpln | Arabidopsis lyrata   | AT5G13590.1   Symbols:   unknown protein; Has 150 Blast hits to 121 proteins in 42 species: Archae - 0; Bacteria - 8; Metazoa - 80; Fungi - 5; Plants - 17; Viruses - 0; Other Eukaryotes - 40 (source: NCBI BLink).   chr5:4374718-4378647 REVERSE LENGTH=1168                                                                                                                                                                                                                                                                                             | 1078 | 1168 | 0         | 108.3 | 62.8 | 73.7 |
| Rsa1.0_00218.1.g8867.t1 | refXP_002871574.1   abc transporter family protein [Arabidopsis lyrata subsp. lyrata] gi 297317411 gb EFH47833.1   abc transporter family protein [Arabidopsis lyrata subsp. lyrata]                                                                                                                                                                                                                                                                                                                                                                                                                                                                                                                                                                                | 728  | 726  | 0         | 99.7  | 91.5 | 95.1 | abc transporter family protein         | gbpln | Arabidopsis lyrata   | AT5G13580.1   Symbols:   ABC-2 type transporter family protein   chr5:4370879-4373062 FORWARD LENGTH=727                                                                                                                                                                                                                                                                                                                                                                                                                                                    | 728  | 727  | 0         | 99.9  | 90.9 | 94.6 |
| Rsa1.0_00218.1.g8868.t1 | ref NP_001190304.1   mRNA-decapping enzyme subunit 2 [Arabidopsis thaliana] gi 332004530 gb AED91913.1   mRNA-decapping enzyme subunit 2 [Arabidopsis thaliana]                                                                                                                                                                                                                                                                                                                                                                                                                                                                                                                                                                                                     | 84   | 386  | 5.00E-26  | 459.5 | 81.0 | 84.5 | mRNA-decapping enzyme subunit 2        | gbpln | Arabidopsis thaliana | AT5G13570.2   Symbols: DCP2   decapping 2   chr5:4367532-4369992 FORWARD LENGTH=386                                                                                                                                                                                                                                                                                                                                                                                                                                                                         | 84   | 386  | 8.00E-29  | 459.5 | 81.0 | 84.5 |
| Rsa1.0_00218.1.g8869.t1 | refXP_002873618.1   hypothetical protein ARALYDRAFT_909308 [Arabidopsis lyrata subsp. lyrata] gi 297319455 gb EFH49877.1   hypothetical protein ARALYDRAFT_909308 [Arabidopsis lyrata subsp. lyrata]                                                                                                                                                                                                                                                                                                                                                                                                                                                                                                                                                                | 679  | 679  | 0         | 100.0 | 87.2 | 92.5 | hypothetical protein ARALYDRAFT_909308 | gbpln | Arabidopsis lyrata   | AT5G13560.1   Symbols:   unknown protein; BEST Arabidopsis thaliana protein match is: unknown protein (TAIR:AT2G37370.1); Has 12055 Blast hits to 3846 proteins in 811 species: Archae - 217; Bacteria - 1046; Metazoa - 6104; Fungi - 1115; Plants - 528; Viruses - 14; Other Eukaryotes - 3031 (source: NCBI BLink).   chr5:4361579-4366318 REVERSE LENGTH=679                                                                                                                                                                                            | 679  | 679  | 0         | 100.0 | 86.7 | 92.6 |
| Rsa1.0_00218.1.g8870.t4 | refXP_002882782.1   hypothetical protein ARALYDRAFT_478618 [Arabidopsis lyrata subsp. lyrata] gi 297328622 gb EFH59041.1   hypothetical protein ARALYDRAFT_478618 [Arabidopsis lyrata subsp. lyrata]                                                                                                                                                                                                                                                                                                                                                                                                                                                                                                                                                                | 176  | 180  | 2.00E-78  | 102.3 | 80.1 | 87.5 | hypothetical protein ARALYDRAFT_478618 | gbpln | Arabidopsis lyrata   | AT3G12600.1   Symbols: atnudt16, NUDT16   nudix hydrolase homolog 16   chr3:4004809-4005995 FORWARD LENGTH=180                                                                                                                                                                                                                                                                                                                                                                                                                                              | 176  | 180  | 3.00E-71  | 102.3 | 79.0 | 86.9 |
| Rsa1.0_00218.1.g8871.t1 | gb EOA20189.1   hypothetical protein CARUB_v10000485mg [Capsella rubella]                                                                                                                                                                                                                                                                                                                                                                                                                                                                                                                                                                                                                                                                                           | 611  | 616  | 0         | 100.8 | 87.9 | 94.3 | hypothetical protein CARUB_v10000485mg | gbpln | Capsella rubella     | AT5G13520.1   Symbols:   peptidase M1 family protein   chr5:4342117-4344571 REVERSE LENGTH=616                                                                                                                                                                                                                                                                                                                                                                                                                                                              | 611  | 616  | 0         | 100.8 | 87.4 | 93.9 |
| Rsa1.0_00218.1.g8872.t1 | refXP_002871572.1   ribosomal protein L10 family protein [Arabidopsis lyrata subsp. lyrata] gi 297317409 gb EFH47831.1   ribosomal protein L10 family protein [Arabidopsis lyrata subsp. lyrata]                                                                                                                                                                                                                                                                                                                                                                                                                                                                                                                                                                    | 221  | 220  | 1.00E-109 | 99.5  | 92.3 | 94.6 | ribosomal protein L10 family protein   | gbpln | Arabidopsis lyrata   | AT5G13510.1   Symbols:   Ribosomal protein L10 family protein   chr5:4341294-4341956 FORWARD LENGTH=220                                                                                                                                                                                                                                                                                                                                                                                                                                                     | 221  | 220  | 1.00E-111 | 99.5  | 92.3 | 94.6 |
| Rsa1.0_00218.1.g8873.t1 | ref NP_196854.1   uncharacterized protein [Arabidopsis thaliana] gi 30684435 ref NP_850813.1   uncharacterized protein [Arabidopsis thaliana] gi 4257336  ref NP_974777.1   uncharacterized protein [Arabidopsis thaliana] gi 9955542 emb CAC05427.1   putative protein [Arabidopsis thaliana] gi 19699009 gb AAL91240.1   putative protein [Arabidopsis thaliana] gi 21594054 gb AAM65972.1   unknown [Arabidopsis thaliana] gi 23198096 gb AAN15575.1   putative protein [Arabidopsis thaliana] gi 332004520 gb AED91903.1   uncharacterized protein AT5G13500 [Arabidopsis thaliana] gi 332004521 gb AED91904.1   uncharacterized protein AT5G13500 [Arabidopsis thaliana] gi 332004522 gb AED91905.1   uncharacterized protein AT5G13500 [Arabidopsis thaliana] | 264  | 358  | 1.00E-137 | 135.6 | 89.8 | 95.5 | uncharacterized protein                | gbpln | Arabidopsis thaliana | AT5G13500.3   Symbols:   unknown protein; FUNCTIONS IN: molecular_function unknown; INVOLVED IN: biological_process unknown; LOCATED IN: endomembrane system; EXPRESSED IN: 22 plant structures; EXPRESSED DURING: 13 growth stages; BEST Arabidopsis thaliana protein match is: unknown protein (TAIR:AT5G25265.1); Has 35333 Blast hits to 34131 proteins in 2444 species: Archae - 798; Bacteria - 22429; Metazoa - 974; Fungi - 991; Plants - 531; Viruses - 0; Other Eukaryotes - 9610 (source: NCBI BLink).   chr5:4338676-4340827 FORWARD LENGTH=358 | 264  | 358  | 1.00E-139 | 135.6 | 89.8 | 95.5 |
| Rsa1.0_00218.1.g8874.t1 | refXP_002871570.1   hypothetical protein ARALYDRAFT_488169 [Arabidopsis lyrata subsp. lyrata] gi 297317407 gb EFH47829.1   hypothetical protein ARALYDRAFT_488169 [Arabidopsis lyrata subsp. lyrata]                                                                                                                                                                                                                                                                                                                                                                                                                                                                                                                                                                | 380  | 384  | 0         | 101.1 | 91.8 | 95.3 | hypothetical protein ARALYDRAFT_488169 | gbpln | Arabidopsis lyrata   | AT5G13490.2   Symbols: AAC2   ADP/ATP carrier 2   chr5:4336034-4337379 FORWARD LENGTH=385                                                                                                                                                                                                                                                                                                                                                                                                                                                                   | 380  | 385  | 0         | 101.3 | 87.9 | 93.2 |
| Rsa1.0_00218.1.g8875.t1 | gb EOA22855.1   hypothetical protein CARUB_v10003585mg [Capsella rubella]                                                                                                                                                                                                                                                                                                                                                                                                                                                                                                                                                                                                                                                                                           | 259  | 318  | 3.00E-58  | 122.8 | 47.5 | 60.6 | hypothetical protein CARUB_v10003585mg | gbpln | Capsella rubella     | AT5G13620.1   Symbols:   unknown protein; BEST Arabidopsis thaliana protein match is: unknown protein (TAIR:AT1G49290.1); Has 1807 Blast hits to 1807 proteins in 277 species: Archae - 0; Bacteria - 0; Metazoa - 736; Fungi - 347; Plants - 385; Viruses - 0; Other Eukaryotes - 339 (source: NCBI BLink).   chr5:4385385-4386373 REVERSE LENGTH=301                                                                                                                                                                                                      | 259  | 301  | 4.00E-58  | 116.2 | 47.9 | 60.2 |

|                         |                                                                                                                                                                                                                         |      |      |           |       |      |      |                                                     |       |                      |                                                                                                                                                                                                                                                                                                                                                                                                                                                                     |      |      |           |       |      |      |
|-------------------------|-------------------------------------------------------------------------------------------------------------------------------------------------------------------------------------------------------------------------|------|------|-----------|-------|------|------|-----------------------------------------------------|-------|----------------------|---------------------------------------------------------------------------------------------------------------------------------------------------------------------------------------------------------------------------------------------------------------------------------------------------------------------------------------------------------------------------------------------------------------------------------------------------------------------|------|------|-----------|-------|------|------|
| Rsa1.0_00218.1.g8876.t1 | ref[XP_002871569.1] predicted protein [Arabidopsis lyrata subsp. lyrata] gi 297317406 gb EFH47828.1  predicted protein [Arabidopsis lyrata subsp. lyrata]                                                               | 165  | 163  | 1.00E-43  | 98.8  | 57.6 | 64.2 | predicted protein                                   | gbpln | Arabidopsis lyrata   | AT5G13470.1   Symbols:   unknown protein; Has 1807 Blast hits to 1807 proteins in 277 species: Archaea - 0; Bacteria - 0; Metazoa - 736; Fungi - 347; Plants - 385; Viruses - 0; Other Eukaryotes - 339 (source: NCBI BLINK).   chr5:4318562-4319720 FORWARD LENGTH=159                                                                                                                                                                                             | 165  | 159  | 3.00E-45  | 96.4  | 61.2 | 69.1 |
| Rsa1.0_00218.1.g8877.t1 | gb ABL97953.1  hydrogen-transporting ATP synthase [Brassica rapa]                                                                                                                                                       | 244  | 244  | 1.00E-135 | 100.0 | 97.5 | 98.4 | hydrogen-transporting ATP synthase                  | gbpln | Brassica rapa        | AT5G13450.1   Symbols: ATP5   delta subunit of Mt ATP synthase   chr5:4310558-4311941 REVERSE LENGTH=238                                                                                                                                                                                                                                                                                                                                                            | 244  | 238  | 1.00E-119 | 97.5  | 84.4 | 90.6 |
| Rsa1.0_00218.1.g8878.t1 | ref[XP_002873613.1] hypothetical protein ARALYDRAFT_488163 [Arabidopsis lyrata subsp. lyrata] gi 297319450 gb EFH49872.1  hypothetical protein ARALYDRAFT_488163 [Arabidopsis lyrata subsp. lyrata]                     | 272  | 274  | 1.00E-147 | 100.7 | 93.0 | 97.4 | hypothetical protein ARALYDRAFT_488163              | gbpln | Arabidopsis lyrata   | AT5G13430.1   Symbols:   Ubiquinol-cytochrome C reductase iron-sulfur subunit   chr5:4305414-4307399 REVERSE LENGTH=272                                                                                                                                                                                                                                                                                                                                             | 272  | 272  | 1.00E-145 | 100.0 | 91.9 | 95.6 |
| Rsa1.0_00218.1.g8879.t1 | ref[XP_002873613.1] hypothetical protein ARALYDRAFT_488163 [Arabidopsis lyrata subsp. lyrata] gi 297319450 gb EFH49872.1  hypothetical protein ARALYDRAFT_488163 [Arabidopsis lyrata subsp. lyrata]                     | 271  | 274  | 1.00E-141 | 101.1 | 92.6 | 96.3 | hypothetical protein ARALYDRAFT_488163              | gbpln | Arabidopsis lyrata   | AT5G13430.1   Symbols:   Ubiquinol-cytochrome C reductase iron-sulfur subunit   chr5:4305414-4307399 REVERSE LENGTH=272                                                                                                                                                                                                                                                                                                                                             | 271  | 272  | 1.00E-141 | 100.4 | 93.4 | 95.6 |
| Rsa1.0_00218.1.g8880.t1 | ref[XP_002873611.1] hypothetical protein ARALYDRAFT_488161 [Arabidopsis lyrata subsp. lyrata] gi 297319448 gb EFH49870.1  hypothetical protein ARALYDRAFT_488161 [Arabidopsis lyrata subsp. lyrata]                     | 440  | 436  | 0         | 99.1  | 92.3 | 94.8 | hypothetical protein ARALYDRAFT_488161              | gbpln | Arabidopsis lyrata   | AT5G13420.1   Symbols:   Aldolase-type TIM barrel family protein   chr5:4302080-4304212 REVERSE LENGTH=438                                                                                                                                                                                                                                                                                                                                                          | 440  | 438  | 0         | 99.5  | 92.5 | 95.2 |
| Rsa1.0_00218.1.g8881.t1 | ref[XP_002871567.1] hypothetical protein ARALYDRAFT_488158 [Arabidopsis lyrata subsp. lyrata] gi 297317404 gb EFH47826.1  hypothetical protein ARALYDRAFT_488158 [Arabidopsis lyrata subsp. lyrata]                     | 1135 | 1123 | 0         | 98.9  | 87.4 | 94.1 | hypothetical protein ARALYDRAFT_488158              | gbpln | Arabidopsis lyrata   | AT5G13390.1   Symbols: NEF1   no exine formation   chr5:4292809-4296572 FORWARD LENGTH=1123                                                                                                                                                                                                                                                                                                                                                                         | 1135 | 1123 | 0         | 98.9  | 86.9 | 93.7 |
| Rsa1.0_00218.1.g8882.t1 | ref[NP_196838.1] uncharacterized protein [Arabidopsis thaliana] gi 7529289 emb CAB86641.1  putative protein [Arabidopsis thaliana] gi 332004499 gb AED91882.1  uncharacterized protein AT5G13340 [Arabidopsis thaliana] | 650  | 242  | 9.00E-70  | 37.2  | 27.8 | 29.7 | uncharacterized protein                             | gbpln | Arabidopsis thaliana | AT5G13340.1   Symbols:   unknown protein; FUNCTIONS IN: molecular function unknown; INVOLVED IN: biological process unknown; LOCATED IN: chloroplast; BEST Arabidopsis thaliana protein match is: unknown protein (TAIR:AT1G10890.1); Has 1807 Blast hits to 1807 proteins in 277 species: Archaea - 0; Bacteria - 0; Metazoa - 736; Fungi - 347; Plants - 385; Viruses - 0; Other Eukaryotes - 339 (source: NCBI BLINK).   chr5:4277939-4279397 REVERSE LENGTH=242 | 650  | 242  | 2.00E-72  | 37.2  | 27.8 | 29.7 |
| Rsa1.0_00218.1.g8883.t1 | dbj BAJ34121.1  unnamed protein product [Thellungiella halophila]                                                                                                                                                       | 234  | 231  | 6.00E-80  | 98.7  | 79.5 | 82.9 | unnamed protein product                             | ----  | ----                 | AT5G13330.1   Symbols: Rap2.6L   related to AP2.6L   chr5:4272384-4274461 FORWARD LENGTH=212                                                                                                                                                                                                                                                                                                                                                                        | 234  | 212  | 4.00E-65  | 90.6  | 55.6 | 59.8 |
| Rsa1.0_00219.1.g8884.t1 | gb AEX20385.1  cytochrome P450 family 78 subfamily A polypeptide 8 [Brassica napus]                                                                                                                                     | 450  | 534  | 0         | 118.7 | 89.8 | 94.2 | cytochrome P450 family 78 subfamily A polypeptide 8 | gbpln | Brassica napus       | AT1G01190.1   Symbols: CYP78A8   cytochrome P450, family 78, subfamily A, polypeptide 8   chr1:83045-84864 REVERSE LENGTH=535                                                                                                                                                                                                                                                                                                                                       | 450  | 535  | 0         | 118.9 | 88.0 | 92.9 |
| Rsa1.0_00219.1.g8885.t1 | dbj BAA97156.1  unnamed protein product [Arabidopsis thaliana]                                                                                                                                                          | 109  | 329  | 6.00E-17  | 301.8 | 35.8 | 52.3 | unnamed protein product                             | gbpln | Arabidopsis thaliana | # # # # # # #                                                                                                                                                                                                                                                                                                                                                                                                                                                       | #    | #    | #         | #     | #    | #    |
| Rsa1.0_00219.1.g8886.t4 | gb AAC33226.1  putative non-LTR retroelement reverse transcriptase [Arabidopsis thaliana]                                                                                                                               | 1362 | 1529 | 1.00E-168 | 112.3 | 30.3 | 45.3 | putative non-LTR retroelement reverse transcriptase | gbpln | Arabidopsis thaliana | AT3G24255.1   Symbols:   RNA-directed DNA polymerase (reverse transcriptase)-related family protein   chr3:8789471-8793208 FORWARD LENGTH=746                                                                                                                                                                                                                                                                                                                       | 1362 | 746  | 5.00E-54  | 54.8  | 10.4 | 14.1 |
| Rsa1.0_00219.1.g8887.t2 | gb EOA38549.1  hypothetical protein CARUB_v10010354mg [Capsella rubella]                                                                                                                                                | 243  | 195  | 2.00E-64  | 80.2  | 68.7 | 71.2 | hypothetical protein CARUB_v10010354mg              | gbpln | Capsella rubella     | AT1G01160.2   Symbols: GIF2   GRF1-interacting factor 2   chr1:72583-73883 FORWARD LENGTH=229                                                                                                                                                                                                                                                                                                                                                                       | 243  | 229  | 3.00E-64  | 94.2  | 69.1 | 73.7 |
| Rsa1.0_00219.1.g8888.t1 | ref[XP_002266993.1] PREDICTED: uncharacterized protein LOC100264313 [Vitis vinifera]                                                                                                                                    | 97   | 453  | 6.00E-12  | 467.0 | 39.2 | 55.7 | PREDICTED: uncharacterized protein LOC100264313     | gbpln | Vitis vinifera       | # # # # # # #                                                                                                                                                                                                                                                                                                                                                                                                                                                       | #    | #    | #         | #     | #    | #    |
| Rsa1.0_00219.1.g8889.t1 | gb EOA40404.1  hypothetical protein CARUB_v10009130mg [Capsella rubella]                                                                                                                                                | 445  | 447  | 0         | 100.4 | 91.9 | 95.3 | hypothetical protein CARUB_v10009130mg              | gbpln | Capsella rubella     | AT1G01140.1   Symbols: CIPK9, SnRK3.12, PKS6   CBL-interacting protein kinase 9   chr1:64398-67512 REVERSE LENGTH=447                                                                                                                                                                                                                                                                                                                                               | 445  | 447  | 0         | 100.4 | 92.4 | 95.5 |
| Rsa1.0_00219.1.g8890.t1 | gb EOA39259.1  hypothetical protein CARUB_v10012263mg [Capsella rubella]                                                                                                                                                | 520  | 528  | 0         | 101.5 | 94.0 | 96.9 | hypothetical protein CARUB_v10012263mg              | gbpln | Capsella rubella     | AT1G01120.1   Symbols: KCS1   3-ketoacyl-CoA synthase 1   chr1:57392-58978 REVERSE LENGTH=528                                                                                                                                                                                                                                                                                                                                                                       | 520  | 528  | 0         | 101.5 | 94.6 | 96.7 |
| Rsa1.0_00219.1.g8891.t1 | gb AAM64427.1  acidic ribosomal protein, putative [Arabidopsis thaliana]                                                                                                                                                | 114  | 112  | 1.00E-34  | 98.2  | 86.8 | 88.6 | acidic ribosomal protein, putative                  | gbpln | Arabidopsis thaliana | AT4G00810.2   Symbols:   60S acidic ribosomal protein family   chr4:346179-346957 REVERSE LENGTH=113                                                                                                                                                                                                                                                                                                                                                                | 114  | 113  | 4.00E-37  | 99.1  | 86.0 | 89.5 |

|                         |                                                                                                                                                                                                                                                                                                                                                                                                                        |     |      |           |       |      |       |                                                                                              |       |                      |                                                                                                                                                                                                                                                                                                                                                                     |     |     |           |       |      |       |
|-------------------------|------------------------------------------------------------------------------------------------------------------------------------------------------------------------------------------------------------------------------------------------------------------------------------------------------------------------------------------------------------------------------------------------------------------------|-----|------|-----------|-------|------|-------|----------------------------------------------------------------------------------------------|-------|----------------------|---------------------------------------------------------------------------------------------------------------------------------------------------------------------------------------------------------------------------------------------------------------------------------------------------------------------------------------------------------------------|-----|-----|-----------|-------|------|-------|
| Rsa1.0_00219.1.g8892.t2 | gb[EOA40477.1] hypothetical protein CARUB_v10009201mg [Capsella rubella]                                                                                                                                                                                                                                                                                                                                               | 447 | 430  | 0         | 96.2  | 89.5 | 91.7  | hypothetical protein CARUB_v10009201mg                                                       | gbpln | Capsella rubella     | AT1G01090.1   Symbols: PDH-E1 ALPHA   pyruvate dehydrogenase E1 alpha   chr1:47705-49166 REVERSE LENGTH=428                                                                                                                                                                                                                                                         | 447 | 428 | 0         | 95.7  | 87.0 | 91.1  |
| Rsa1.0_00219.1.g8893.t3 | ref[XP_002889387.1] nodulin MtN21 family protein [Arabidopsis lyrata subsp. lyrata] gi 297335229 gb EFH65646.1  nodulin MtN21 family protein [Arabidopsis lyrata subsp. lyrata]                                                                                                                                                                                                                                        | 367 | 361  | 1.00E-141 | 98.4  | 65.1 | 77.7  | nodulin MtN21 family protein                                                                 | gbpln | Arabidopsis lyrata   | AT1G01070.1   Symbols:   nodulin MtN21 /EamA-like transporter family protein   chr1:38898-40877 REVERSE LENGTH=365                                                                                                                                                                                                                                                  | 367 | 365 | 1.00E-142 | 99.5  | 65.9 | 79.6  |
| Rsa1.0_00219.1.g8894.t2 | gb[EOA30236.1] hypothetical protein CARUB_v10013358mg [Capsella rubella]                                                                                                                                                                                                                                                                                                                                               | 282 | 564  | 1.00E-28  | 200.0 | 25.2 | 35.5  | hypothetical protein CARUB_v10013358mg                                                       | gbpln | Capsella rubella     | AT4G05360.1   Symbols:   Zinc knuckle (GCHC-type) family protein   chr4:2728204-2732337 FORWARD LENGTH=735                                                                                                                                                                                                                                                          | 282 | 735 | 5.00E-25  | 260.6 | 25.2 | 34.4  |
| Rsa1.0_00219.1.g8895.t1 | #                                                                                                                                                                                                                                                                                                                                                                                                                      | #   | #    | #         | #     | #    | #     | -                                                                                            | ----  | ----                 | #                                                                                                                                                                                                                                                                                                                                                                   | #   | #   | #         | #     | #    |       |
| Rsa1.0_00219.1.g8896.t1 | gb[AAF06087.1]AC007918.11 Similar to gi 4325351 T25H8.2 TNP2 protein homolog from Arabidopsis thaliana BAC gb AF128394 [Arabidopsis thaliana]                                                                                                                                                                                                                                                                          | 271 | 1121 | 3.00E-24  | 413.7 | 26.2 | 34.7  | Similar to gi 4325351 T25H8.2 TNP2 protein homolog from Arabidopsis thaliana BAC gb AF128394 | gbpln | Arabidopsis thaliana | #                                                                                                                                                                                                                                                                                                                                                                   | #   | #   | #         | #     | #    |       |
| Rsa1.0_00219.1.g8897.t1 | dbj BAB10790.1  retroelement pol polyprotein-like [Arabidopsis thaliana]                                                                                                                                                                                                                                                                                                                                               | 650 | 1864 | 5.00E-60  | 286.8 | 28.0 | 45.1  | retroelement pol polyprotein-like                                                            | gbpln | Arabidopsis thaliana | #                                                                                                                                                                                                                                                                                                                                                                   | #   | #   | #         | #     | #    |       |
| Rsa1.0_00220.1.g8898.t1 | gb[EOA17641.1] hypothetical protein CARUB_v10006007mg [Capsella rubella]                                                                                                                                                                                                                                                                                                                                               | 133 | 133  | 2.00E-71  | 100.0 | 99.2 | 100.0 | hypothetical protein CARUB_v10006007mg                                                       | gbpln | Capsella rubella     | AT4G18100.1   Symbols:   Ribosomal protein L32e   chr4:10035715-10036475 REVERSE LENGTH=133                                                                                                                                                                                                                                                                         | 133 | 133 | 6.00E-74  | 100.0 | 98.5 | 100.0 |
| Rsa1.0_00220.1.g8899.t1 | ref[XP_002884509.1] hypothetical protein ARALYDRAFT_477824 [Arabidopsis lyrata subsp. lyrata] gi 297330349 gb EFH60768.1  hypothetical protein ARALYDRAFT_477824 [Arabidopsis lyrata subsp. lyrata]                                                                                                                                                                                                                    | 751 | 786  | 0         | 104.7 | 61.1 | 71.4  | hypothetical protein ARALYDRAFT_477824                                                       | gbpln | Arabidopsis lyrata   | AT3G05360.1   Symbols: AtRLP30, RLP30   receptor like protein 30   chr3:1530900-1533260 REVERSE LENGTH=786                                                                                                                                                                                                                                                          | 751 | 786 | 0         | 104.7 | 61.1 | 72.6  |
| Rsa1.0_00220.1.g8900.t2 | gb[EOA17179.1] hypothetical protein CARUB_v10005450mg [Capsella rubella]                                                                                                                                                                                                                                                                                                                                               | 233 | 278  | 1.00E-25  | 119.3 | 54.1 | 63.1  | hypothetical protein CARUB_v10005450mg                                                       | gbpln | Capsella rubella     | AT4G18070.4   Symbols:   unknown protein; BEST Arabidopsis thaliana protein match is: unknown protein (TAIR:AT1G29530.1); Has 30201 Blast hits to 17322 proteins in 780 species: Archae - 12; Bacteria - 1396; Metazoa - 17338; Fungi - 3422; Plants - 5037; Viruses - 0; Other Eukaryotes - 2996 (source: NCBI BLINK);   chr4:10030839-10032329 FORWARD LENGTH=262 | 233 | 262 | 2.00E-20  | 112.4 | 29.6 | 35.6  |
| Rsa1.0_00220.1.g8901.t1 | gb AGI37652.1  translation initiation factor eIF4E.c5 [Brassica rapa subsp. pekinensis]                                                                                                                                                                                                                                                                                                                                | 270 | 234  | 1.00E-115 | 86.7  | 78.9 | 80.4  | translation initiation factor eIF4E.c5                                                       | gbpln | Brassica rapa        | AT4G18040.1   Symbols: EIF4E, CUM1, AT EIF4E1, eIF4E1   eukaryotic translation initiation factor 4E   chr4:10016724-10018151 REVERSE LENGTH=235                                                                                                                                                                                                                     | 270 | 235 | 1.00E-104 | 87.0  | 72.2 | 76.3  |
| Rsa1.0_00220.1.g8902.t1 | ref[NP_567546.1] AT hook motif DNA-binding family protein [Arabidopsis thaliana] gi 15451060 gb AAK96801.1  putative protein [Arabidopsis thaliana] gi 20148333 gb AAM10057.1  putative protein [Arabidopsis thaliana] gi 119657370 tpd FAA00284.1  TPA: AT-hook motif nuclear localized protein 13 [Arabidopsis thaliana] gi 332658571 gb AEE83971.1  AT hook motif DNA-binding family protein [Arabidopsis thaliana] | 288 | 439  | 1.00E-101 | 152.4 | 74.3 | 81.9  | AT hook motif DNA-binding family protein                                                     | gbpln | Arabidopsis thaliana | AT4G17950.1   Symbols:   AT hook motif DNA-binding family protein   chr4:9967295-9969007 REVERSE LENGTH=439                                                                                                                                                                                                                                                         | 288 | 439 | 1.00E-103 | 152.4 | 74.3 | 81.9  |
| Rsa1.0_00220.1.g8903.t1 | gb[EOA17188.1] hypothetical protein CARUB_v10005460mg [Capsella rubella]                                                                                                                                                                                                                                                                                                                                               | 254 | 276  | 1.00E-79  | 108.7 | 77.2 | 84.6  | hypothetical protein CARUB_v10005460mg                                                       | gbpln | Capsella rubella     | AT4G17940.1   Symbols:   Tetratricopeptide repeat (TPR)-like superfamily protein   chr4:9965787-9966778 FORWARD LENGTH=274                                                                                                                                                                                                                                          | 254 | 274 | 3.00E-81  | 107.9 | 74.0 | 83.9  |
| Rsa1.0_00220.1.g8904.t1 | gb ABW81018.1  gag-pol polymerase [Arabidopsis lyrata subsp. lyrata]                                                                                                                                                                                                                                                                                                                                                   | 224 | 672  | 9.00E-39  | 300.0 | 33.0 | 46.0  | gag-pol polymerase                                                                           | gbpln | Arabidopsis lyrata   | #                                                                                                                                                                                                                                                                                                                                                                   | #   | #   | #         | #     | #    |       |
| Rsa1.0_00220.1.g8905.t1 | gb AAF18538.1 AC006551_24 Very similar to retrotransposon reverse transcriptase [Arabidopsis thaliana]                                                                                                                                                                                                                                                                                                                 | 614 | 1231 | 1.00E-179 | 200.5 | 49.7 | 67.1  | Very similar to retrotransposon reverse transcriptase                                        | gbpln | Arabidopsis thaliana | AT4G29090.1   Symbols:   Ribonuclease H-like superfamily protein   chr4:14333528-14335255 FORWARD LENGTH=575                                                                                                                                                                                                                                                        | 614 | 575 | 6.00E-99  | 93.6  | 31.9 | 50.0  |
| Rsa1.0_00220.1.g8906.t1 | #                                                                                                                                                                                                                                                                                                                                                                                                                      | #   | #    | #         | #     | #    | #     | -                                                                                            | ----  | ----                 | #                                                                                                                                                                                                                                                                                                                                                                   | #   | #   | #         | #     | #    |       |
| Rsa1.0_00220.1.g8907.t1 | gb[EOA18343.1] hypothetical protein CARUB_v10006864mg [Capsella rubella]                                                                                                                                                                                                                                                                                                                                               | 89  | 345  | 1.00E-42  | 387.6 | 87.6 | 95.5  | hypothetical protein CARUB_v10006864mg                                                       | gbpln | Capsella rubella     | AT4G17785.1   Symbols: MYB39   myb domain protein 39   chr4:9881867-9883368 REVERSE LENGTH=360                                                                                                                                                                                                                                                                      | 89  | 360 | 2.00E-45  | 404.5 | 87.6 | 95.5  |
| Rsa1.0_00220.1.g8908.t1 | gb ABD65167.1  myb family transcription factor [Brassica oleracea]                                                                                                                                                                                                                                                                                                                                                     | 197 | 337  | 1.00E-57  | 171.1 | 59.4 | 64.5  | myb family transcription factor                                                              | gbpln | Brassica oleracea    | AT4G17785.1   Symbols: MYB39   myb domain protein 39   chr4:9881867-9883368 REVERSE LENGTH=360                                                                                                                                                                                                                                                                      | 197 | 360 | 1.00E-58  | 182.7 | 57.9 | 68.5  |

|                         |                                                                                                                                                                                                                                                                                                                                                                                                                                                                                                                                                                                                       |     |      |           |       |      |      |                                                      |       |                      |                                                                                                                                       |     |     |           |       |      |      |
|-------------------------|-------------------------------------------------------------------------------------------------------------------------------------------------------------------------------------------------------------------------------------------------------------------------------------------------------------------------------------------------------------------------------------------------------------------------------------------------------------------------------------------------------------------------------------------------------------------------------------------------------|-----|------|-----------|-------|------|------|------------------------------------------------------|-------|----------------------|---------------------------------------------------------------------------------------------------------------------------------------|-----|-----|-----------|-------|------|------|
| Rsa1.0_00220.1.g8909.t1 | ref[NP_193506.2] homeobox-leucine zipper protein HDG4 [Arabidopsis thaliana]<br>gi 75329764 sp Q8L7H4.1 HDG4_ARATH<br>RecName: Full=Homeobox-leucine zipper protein HDG4; AltName: Full=HD-ZIP protein HDG4; AltName: Full=Homeodomain GLABRA 2-like protein 4; AltName: Full=Homeodomain transcription factor HDG4; AltName: Full=Protein HOMEODOMAIN GLABROUS 4<br>gi 22136630 gb AAM91634.1  putative GLABRA2 protein [Arabidopsis thaliana]<br>gi 332658537 gb AEE83937.1  homeobox-leucine zipper protein HDG4 [Arabidopsis thaliana]                                                            | 734 | 709  | 0         | 96.6  | 63.2 | 77.1 | homeobox-leucine zipper protein HDG4                 | gbpln | Arabidopsis thaliana | AT4G17710.1   Symbols: HDG4   homeodomain GLABROUS 4   chr4:9856327-9859288 REVERSE LENGTH=709                                        | 734 | 709 | 0         | 96.6  | 63.2 | 77.1 |
| Rsa1.0_00220.1.g8910.t1 | db BAJ34541.1  unnamed protein product [Theellungiella halophila]                                                                                                                                                                                                                                                                                                                                                                                                                                                                                                                                     | 296 | 302  | 1.00E-127 | 102.0 | 79.1 | 85.5 | unnamed protein product                              | ----  | ----                 | AT4G17695.1   Symbols: KAN3   Homeodomain-like superfamily protein   chr4:9848134-9850698 REVERSE LENGTH=322                          | 296 | 322 | 1.00E-111 | 108.8 | 76.4 | 83.8 |
| Rsa1.0_00220.1.g8911.t1 | #                                                                                                                                                                                                                                                                                                                                                                                                                                                                                                                                                                                                     | #   | #    | #         | #     | #    | #    | -                                                    | ----  | ----                 | #                                                                                                                                     | #   | #   | #         | #     | #    | #    |
| Rsa1.0_00220.1.g8912.t1 | gb ABD65075.1  kinase domain containing protein [Brassica oleracea]                                                                                                                                                                                                                                                                                                                                                                                                                                                                                                                                   | 396 | 396  | 0         | 100.0 | 90.7 | 94.4 | kinase domain containing protein                     | gbpln | Brassica oleracea    | AT4G17660.1   Symbols:   Protein kinase superfamily protein   chr4:9831401-9833006 FORWARD LENGTH=388                                 | 396 | 388 | 0         | 98.0  | 78.5 | 86.9 |
| Rsa1.0_00220.1.g8913.t1 | gb AAF02855.1 AC009324.4 Similar to retrotransposon proteins [Arabidopsis thaliana]                                                                                                                                                                                                                                                                                                                                                                                                                                                                                                                   | 219 | 1522 | 4.00E-26  | 695.0 | 26.0 | 30.6 | Similar to retrotransposon proteins                  | gbpln | Arabidopsis thaliana | #                                                                                                                                     | #   | #   | #         | #     | #    |      |
| Rsa1.0_00220.1.g8914.t1 | gb ABD65071.1  GATA zinc finger containing protein [Brassica oleracea]                                                                                                                                                                                                                                                                                                                                                                                                                                                                                                                                | 530 | 508  | 0         | 95.8  | 84.2 | 87.7 | GATA zinc finger containing protein                  | gbpln | Brassica oleracea    | AT4G17570.3   Symbols: GATA26   GATA transcription factor 26   chr4:9784329-9786974 REVERSE LENGTH=514                                | 530 | 514 | 0         | 97.0  | 77.2 | 83.0 |
| Rsa1.0_00220.1.g8915.t1 | gb ABD65070.1  plastid ribosomal protein L19, putative [Brassica oleracea]                                                                                                                                                                                                                                                                                                                                                                                                                                                                                                                            | 211 | 224  | 4.00E-93  | 106.2 | 90.0 | 93.4 | plastid ribosomal protein L19, putative              | gbpln | Brassica oleracea    | AT4G17560.1   Symbols:   Ribosomal protein L19 family protein   chr4:9780343-9781752 FORWARD LENGTH=225                               | 211 | 225 | 2.00E-82  | 106.6 | 82.9 | 88.6 |
| Rsa1.0_00220.1.g8916.t1 | gb ABD65069.1  transporter, putative [Brassica oleracea]                                                                                                                                                                                                                                                                                                                                                                                                                                                                                                                                              | 534 | 539  | 0         | 100.9 | 92.3 | 95.1 | transporter, putative                                | gbpln | Brassica oleracea    | AT4G17550.1   Symbols:   Major facilitator superfamily protein   chr4:9779738-9779738 REVERSE LENGTH=544                              | 534 | 544 | 0         | 101.9 | 89.5 | 93.8 |
| Rsa1.0_00220.1.g8917.t1 | gb EOA14024.1  hypothetical protein CARUB_v10027156mg [Capsella rubella]                                                                                                                                                                                                                                                                                                                                                                                                                                                                                                                              | 202 | 202  | 1.00E-115 | 100.0 | 99.5 | 99.5 | hypothetical protein CARUB_v10027156mg               | gbpln | Capsella rubella     | AT5G47200.1   Symbols: ATRABD2B, ATRAB1A, RAB1A   RAB GTPase homolog 1A   chr5:19167029-19168718 FORWARD LENGTH=202                   | 202 | 202 | 1.00E-117 | 100.0 | 99.0 | 99.0 |
| Rsa1.0_00220.1.g8918.t1 | gb ABD65067.1  nuclear RNA binding protein, putative [Brassica oleracea]                                                                                                                                                                                                                                                                                                                                                                                                                                                                                                                              | 377 | 367  | 1.00E-162 | 97.3  | 89.4 | 91.0 | nuclear RNA binding protein, putative                | gbpln | Brassica oleracea    | AT4G17520.1   Symbols:   Hyaluronan / mRNA binding family   chr4:9771496-9773313 FORWARD LENGTH=360                                   | 377 | 360 | 1.00E-120 | 95.5  | 70.0 | 76.7 |
| Rsa1.0_00220.1.g8919.t1 | ref[NP_567530.4] ethylene-responsive transcription factor 1A [Arabidopsis thaliana]<br>gi 21264420 sp O80337.2 EF100_ARATH<br>RecName: Full=Ethylene-responsive transcription factor 1A; Short=ATERF1A; AltName: Full=Ethylene-responsive element-binding factor 1A; Short=EREBP-1A<br>gi 16648795 gb AAL25588.1  AT4g17500/d4785w [Arabidopsis thaliana]<br>gi 17064914 gb AAL32611.1  Unknown protein [Arabidopsis thaliana]<br>gi 27311945 gb AAO00938.1  Unknown protein [Arabidopsis thaliana]<br>gi 332658503 gb AEE83903.1  ethylene-responsive transcription factor 1A [Arabidopsis thaliana] | 257 | 268  | 1.00E-94  | 104.3 | 78.6 | 83.7 | ethylene-responsive transcription factor 1A          | gbpln | Arabidopsis thaliana | AT4G17500.1   Symbols: ATERF-1, ERF-1   ethylene responsive element binding factor 1   chr4:9759405-9760211 FORWARD LENGTH=268        | 257 | 268 | 3.00E-97  | 104.3 | 78.6 | 83.7 |
| Rsa1.0_00220.1.g8920.t1 | #                                                                                                                                                                                                                                                                                                                                                                                                                                                                                                                                                                                                     | #   | #    | #         | #     | #    | #    | -                                                    | ----  | ----                 | #                                                                                                                                     | #   | #   | #         | #     | #    |      |
| Rsa1.0_00220.1.g8921.t1 | gb ABD65051.1  ethylene responsive element binding factor, putative [Brassica oleracea]                                                                                                                                                                                                                                                                                                                                                                                                                                                                                                               | 284 | 290  | 1.00E-131 | 102.1 | 87.7 | 93.0 | ethylene responsive element binding factor, putative | gbpln | Brassica oleracea    | AT4G17490.1   Symbols: ATERF6, ERF-6-6, ERF6   ethylene responsive element binding factor 6   chr4:9752973-9753821 REVERSE LENGTH=282 | 284 | 282 | 9.00E-99  | 99.3  | 71.5 | 79.6 |
| Rsa1.0_00220.1.g8922.t1 | ref[NP_567528.2] PPPDE putative thiol peptidase-like protein [Arabidopsis thaliana]<br>gi 57012715 sp G93V8.1 PPDEX_ARATH<br>RecName: Full=DeSI-like protein At4g17486<br>gi 14194147 gb AAK56268.1 AF367279.1 AT4g17486/AT4g17486 [Arabidopsis thaliana]<br>gi 15777887 gb AAL05904.1  AT4g17486/AT4g17486 [Arabidopsis thaliana]<br>gi 332658500 gb AEE83900.1  PPPDE putative thiol peptidase-like protein [Arabidopsis thaliana]                                                                                                                                                                  | 227 | 224  | 1.00E-110 | 98.7  | 88.1 | 92.5 | PPPDE putative thiol peptidase-like protein          | gbpln | Arabidopsis thaliana | AT4G17486.1   Symbols:   PPPDE putative thiol peptidase family protein   chr4:9749992-9751201 REVERSE LENGTH=224                      | 227 | 224 | 1.00E-112 | 98.7  | 88.1 | 92.5 |

|                         |                                                                                                                                                                                                                                                                                                                                                                                                                                                                                                                                                                                                                                                                                                                                                                                                            |     |      |           |       |      |      |                                                           |       |                      |                                                                                                                                                                                                                                                                                                                                                                                   |     |     |           |       |      |      |
|-------------------------|------------------------------------------------------------------------------------------------------------------------------------------------------------------------------------------------------------------------------------------------------------------------------------------------------------------------------------------------------------------------------------------------------------------------------------------------------------------------------------------------------------------------------------------------------------------------------------------------------------------------------------------------------------------------------------------------------------------------------------------------------------------------------------------------------------|-----|------|-----------|-------|------|------|-----------------------------------------------------------|-------|----------------------|-----------------------------------------------------------------------------------------------------------------------------------------------------------------------------------------------------------------------------------------------------------------------------------------------------------------------------------------------------------------------------------|-----|-----|-----------|-------|------|------|
| Rsa1.0_00220.1.g8923.t1 | gb ABD65081.1  palmitoyl protein thioesterase family protein [Brassica oleracea]                                                                                                                                                                                                                                                                                                                                                                                                                                                                                                                                                                                                                                                                                                                           | 295 | 298  | 1.00E-157 | 101.0 | 90.2 | 93.6 | palmitoyl protein thioesterase family protein             | gbpln | Brassica oleracea    | AT4G17483.1   Symbols:   alpha/beta-Hydrolases superfamily protein   chr:4:9747375-9748892 REVERSE LENGTH=300                                                                                                                                                                                                                                                                     | 295 | 300 | 1.00E-139 | 101.7 | 79.0 | 87.5 |
| Rsa1.0_00220.1.g8924.t1 | dbj BAB09501.1  unnamed protein product [Arabidopsis thaliana]                                                                                                                                                                                                                                                                                                                                                                                                                                                                                                                                                                                                                                                                                                                                             | 386 | 312  | 1.00E-28  | 80.8  | 23.8 | 36.3 | unnamed protein product                                   | gbpln | Arabidopsis thaliana | AT4G03728.1   Symbols:   unknown protein; FUNCTIONS IN: molecular function unknown; INVOLVED IN: biological process unknown; LOCATED IN: cellular component unknown; Has 6 Blast hits to 6 proteins in 2 species: Archae - 0; Bacteria - 0; Metazoa - 0; Fungi - 0; Plants - 6; Viruses - 0; Other Eukaryotes - 0 (source: NCBI BLink).   chr4:1652242-1652976 REVERSE LENGTH=141 | 386 | 141 | 2.00E-15  | 36.5  | 9.6  | 15.0 |
| Rsa1.0_00220.1.g8925.t1 | dbj BAB09502.1  transposon protein-like [Arabidopsis thaliana]                                                                                                                                                                                                                                                                                                                                                                                                                                                                                                                                                                                                                                                                                                                                             | 286 | 1089 | 4.00E-40  | 380.8 | 35.0 | 50.3 | transposon protein-like                                   | gbpln | Arabidopsis thaliana | #                                                                                                                                                                                                                                                                                                                                                                                 | #   | #   | #         | #     | #    | #    |
| Rsa1.0_00221.1.g8926.t1 | ref NP_182273.1  fumarate hydratase, class II [Arabidopsis thaliana]<br>gi 145331433 ref NP_001078075.1  fumarate hydratase, class II [Arabidopsis thaliana]<br>gi 39931311 sp P93033.2 FUM1_ARATH RecName: Full=Fumarate hydratase 1, mitochondrial; Short=Fumarase 1; Flags: Precursor gi 2443751 gb AAB71399.1  fumarase [Arabidopsis thaliana]<br>gi 2529676 gb AAC62859.1  putative fumarase [Arabidopsis thaliana]<br>gi 15809966 gb AAL06911.1  At2g47510.T30B22.19 [Arabidopsis thaliana] gi 17064768 gb AAL32538.1  putative fumarase [Arabidopsis thaliana]<br>gi 28059023 gb AAO29979.1  putative fumarase [Arabidopsis thaliana]<br>gi 330255758 gb AEC10852.1  fumarate hydratase, class II [Arabidopsis thaliana]<br>gi 330255759 gb AEC10853.1  fumarate hydratase 1 [Arabidopsis thaliana] | 498 | 492  | 0         | 98.8  | 96.0 | 97.2 | fumarate hydratase, class II                              | gbpln | Arabidopsis thaliana | AT2G47510.2   Symbols: FUM1   fumarase 1   chr2:19498614-19502020 FORWARD LENGTH=492                                                                                                                                                                                                                                                                                              | 498 | 492 | 0         | 98.8  | 96.0 | 97.2 |
| Rsa1.0_00221.1.g8927.t1 | gb AAC31157.1  ethylene response sensor [Brassica oleracea]                                                                                                                                                                                                                                                                                                                                                                                                                                                                                                                                                                                                                                                                                                                                                | 613 | 613  | 0         | 100.0 | 99.3 | 99.7 | ethylene response sensor                                  | gbpln | Brassica oleracea    | AT2G40940.1   Symbols: ERS1, ERS   ethylene response sensor 1   chr2:17084635-17086819 REVERSE LENGTH=613                                                                                                                                                                                                                                                                         | 613 | 613 | 0         | 100.0 | 94.8 | 97.2 |
| Rsa1.0_00221.1.g8928.t1 | ref XP_002880311.1  pollen ole e 1 allergen and extensin family protein [Arabidopsis lyrata subsp. lyrata]<br>gi 297326150 gb EFH56570.1  pollen ole e 1 allergen and extensin family protein [Arabidopsis lyrata subsp. lyrata]                                                                                                                                                                                                                                                                                                                                                                                                                                                                                                                                                                           | 162 | 174  | 2.00E-77  | 107.4 | 89.5 | 94.4 | pollen ole e 1 allergen and extensin family protein       | gbpln | Arabidopsis lyrata   | AT2G47540.1   Symbols:   Pollen Ole e 1 allergen and extensin family protein   chr2:19505901-19506504 FORWARD LENGTH=173                                                                                                                                                                                                                                                          | 162 | 173 | 1.00E-79  | 106.8 | 89.5 | 93.2 |
| Rsa1.0_00221.1.g8929.t1 | gb AAK84428.1  papillar cell-specific pectin methylesterase-like protein [Brassica napus]                                                                                                                                                                                                                                                                                                                                                                                                                                                                                                                                                                                                                                                                                                                  | 562 | 562  | 0         | 100.0 | 95.7 | 98.4 | papillar cell-specific pectin methylesterase-like protein | gbpln | Brassica napus       | AT2G47550.1   Symbols:   Plant invertase/pectin methylesterase inhibitor superfamily   chr2:19509024-19511604 FORWARD LENGTH=560                                                                                                                                                                                                                                                  | 562 | 560 | 0         | 99.6  | 88.3 | 94.5 |
| Rsa1.0_00221.1.g8930.t1 | ref NP_191828.1  RING-H2 finger protein ATL5 [Arabidopsis thaliana]<br>gi 68565315 sp Q9LZJ6.1 ATL5_ARATH RecName: Full=RING-H2 finger protein ATL5 gi 7362749 emb CAB83119.1  RING-H2 zinc finger protein ATL5 [Arabidopsis thaliana]<br>gi 32189289 gb AAP75799.1  At3g62690 [Arabidopsis thaliana]<br>gi 110736661 dbj BAF00294.1  RING-H2 zinc finger protein ATL5 [Arabidopsis thaliana] gi 332646859 gb AEE80380.1  RING-H2 finger protein ATL5 [Arabidopsis thaliana]                                                                                                                                                                                                                                                                                                                               | 222 | 257  | 2.00E-65  | 115.8 | 71.2 | 83.8 | RING-H2 finger protein ATL5                               | gbpln | Arabidopsis thaliana | AT3G62690.1   Symbols: ATL5   AtL5   chr:3:23185829-23186602 REVERSE LENGTH=257                                                                                                                                                                                                                                                                                                   | 222 | 257 | 7.00E-68  | 115.8 | 71.2 | 83.8 |
| Rsa1.0_00221.1.g8931.t1 | #                                                                                                                                                                                                                                                                                                                                                                                                                                                                                                                                                                                                                                                                                                                                                                                                          | #   | #    | #         | #     | #    | #    | -                                                         | ----  | ----                 | #                                                                                                                                                                                                                                                                                                                                                                                 | #   | #   | #         | #     | #    | #    |



|                         |                                                                                                                                                                                                                                                                                                                                                                                                                                                                                                                                                                                                                                                                                                                                                     |      |      |           |       |      |      |                                                |       |                      |                                                                                                                                          |      |      |           |       |      |      |
|-------------------------|-----------------------------------------------------------------------------------------------------------------------------------------------------------------------------------------------------------------------------------------------------------------------------------------------------------------------------------------------------------------------------------------------------------------------------------------------------------------------------------------------------------------------------------------------------------------------------------------------------------------------------------------------------------------------------------------------------------------------------------------------------|------|------|-----------|-------|------|------|------------------------------------------------|-------|----------------------|------------------------------------------------------------------------------------------------------------------------------------------|------|------|-----------|-------|------|------|
| Rsa1.0_00221.1.g8932.t1 | refNP_182280.1  spliceosomal protein U1A [Arabidopsis thaliana] gi 75319458 sp G39244.1 RU1A_ARATH RecName: Full=U1 small nuclear ribonucleoprotein A; Short=U1 snRNP protein A gi 1050430 emb CAA90283.1  U1snRNP-specific protein [Arabidopsis thaliana] gi 2529669 gb AAC62852.1  small nuclear ribonucleoprotein U1A [Arabidopsis thaliana] gi 15450591 gb AAK96567.1  At2g47580/T30B22.12 [Arabidopsis thaliana] gi 16649011 gb AAL24357.1  small nuclear ribonucleoprotein U1A [Arabidopsis thaliana] gi 20259986 gb AAM13340.1  small nuclear ribonucleoprotein U1A [Arabidopsis thaliana] gi 22655484 gb AAM98334.1  At2g47580/T30B22.12 [Arabidopsis thaliana] gi 330255767 gb AEC10861.1  spliceosomal protein U1A [Arabidopsis thaliana] | 282  | 250  | 1.00E-99  | 88.7  | 69.1 | 75.5 | spliceosomal protein U1A                       | gbpln | Arabidopsis thaliana | AT2G47580.1   Symbols: U1A   spliceosomal protein U1A   chr2:19517229-19518686 FORWARD LENGTH=250                                        | 282  | 250  | 1.00E-102 | 88.7  | 69.1 | 75.5 |
| Rsa1.0_00221.1.g8933.t1 | refXP_002880314.1  photolyase/blue-light receptor 2 [Arabidopsis lyrata subsp. lyrata] gi 297326153 gb EFH56573.1  photolyase/blue-light receptor 2 [Arabidopsis lyrata subsp. lyrata] refXP_002882124.1  hypothetical protein ARALYDRAFT_904236 [Arabidopsis lyrata subsp. lyrata] gi 297327963 gb EFH58383.1  hypothetical protein ARALYDRAFT_904236 [Arabidopsis lyrata subsp. lyrata]                                                                                                                                                                                                                                                                                                                                                           | 443  | 448  | 0         | 101.1 | 87.6 | 93.0 | photolyase/blue-light receptor 2               | gbpln | Arabidopsis lyrata   | AT2G47590.1   Symbols: PHR2   photolyase/blue-light receptor 2   chr2:19521888-19523732 FORWARD LENGTH=447                               | 443  | 447  | 0         | 100.9 | 86.5 | 91.6 |
| Rsa1.0_00221.1.g8934.t1 | refXP_002882124.1  hypothetical protein ARALYDRAFT_904236 [Arabidopsis lyrata subsp. lyrata] gi 297327963 gb EFH58383.1  hypothetical protein ARALYDRAFT_904236 [Arabidopsis lyrata subsp. lyrata]                                                                                                                                                                                                                                                                                                                                                                                                                                                                                                                                                  | 535  | 539  | 0         | 100.7 | 90.7 | 95.3 | hypothetical protein ARALYDRAFT_904236         | gbpln | Arabidopsis lyrata   | AT2G47600.1   Symbols: ATMHX, MHX1, ATMHX1, MHX   magnesium/proton exchanger   chr2:19524518-19526828 REVERSE LENGTH=539                 | 535  | 539  | 0         | 100.7 | 90.3 | 95.3 |
| Rsa1.0_00221.1.g8935.t1 | gb EOA27436.1  hypothetical protein CARUB_v10023573mg [Capsella rubella]                                                                                                                                                                                                                                                                                                                                                                                                                                                                                                                                                                                                                                                                            | 377  | 338  | 1.00E-142 | 89.7  | 69.5 | 72.4 | hypothetical protein CARUB_v10023573mg         | gbpln | Capsella rubella     | AT3G62870.1   Symbols:   Ribosomal protein L7Ae/L30e/S12e/Gadd45 family protein   chr3:23242862-23244273 REVERSE LENGTH=256              | 377  | 256  | 1.00E-141 | 67.9  | 64.5 | 66.3 |
| Rsa1.0_00221.1.g8936.t1 | refXP_002882126.1  hypothetical protein ARALYDRAFT_904242 [Arabidopsis lyrata subsp. lyrata] gi 297327965 gb EFH58385.1  hypothetical protein ARALYDRAFT_904242 [Arabidopsis lyrata subsp. lyrata]                                                                                                                                                                                                                                                                                                                                                                                                                                                                                                                                                  | 209  | 205  | 2.00E-76  | 98.1  | 70.3 | 80.4 | hypothetical protein ARALYDRAFT_904242         | gbpln | Arabidopsis lyrata   | AT2G47670.1   Symbols:   Plant invertase/pectin methylesterase inhibitor superfamily protein   chr2:19544131-19544757 REVERSE LENGTH=208 | 209  | 208  | 2.00E-72  | 99.5  | 73.2 | 85.2 |
| Rsa1.0_00221.1.g8937.t4 | gb EOA26511.1  hypothetical protein CARUB_v10022564mg [Capsella rubella]                                                                                                                                                                                                                                                                                                                                                                                                                                                                                                                                                                                                                                                                            | 1013 | 1010 | 0         | 99.7  | 84.9 | 91.1 | hypothetical protein CARUB_v10022564mg         | gbpln | Capsella rubella     | AT2G47680.1   Symbols:   zinc finger (CCH type) helix family protein   chr2:19545828-19550871 REVERSE LENGTH=1015                        | 1013 | 1015 | 0         | 100.2 | 85.2 | 91.6 |
| Rsa1.0_00221.1.g8938.t1 | refXP_002882128.1  zinc finger family protein [Arabidopsis lyrata subsp. lyrata] gi 297327967 gb EFH58387.1  zinc finger family protein [Arabidopsis lyrata subsp. lyrata]                                                                                                                                                                                                                                                                                                                                                                                                                                                                                                                                                                          | 376  | 351  | 1.00E-142 | 93.4  | 71.3 | 78.7 | zinc finger family protein                     | gbpln | Arabidopsis lyrata   | AT2G47700.1   Symbols: RF12   RING/U-box superfamily protein   chr2:19552506-19554351 REVERSE LENGTH=358                                 | 376  | 358  | 1.00E-142 | 95.2  | 71.3 | 78.2 |
| Rsa1.0_00221.1.g8939.t1 | dbj BAJ33672.1  unnamed protein product [Thehungiella halophila]                                                                                                                                                                                                                                                                                                                                                                                                                                                                                                                                                                                                                                                                                    | 162  | 162  | 9.00E-80  | 100.0 | 87.7 | 93.2 | unnamed protein product                        | ----  | ----                 | AT2G47710.1   Symbols:   Adenine nucleotide alpha hydrolases-like superfamily protein   chr2:19555045-19555956 REVERSE LENGTH=162        | 162  | 162  | 5.00E-79  | 100.0 | 84.6 | 92.6 |
| Rsa1.0_00221.1.g8940.t1 | dbj BAJ33833.1  unnamed protein product [Thehungiella halophila]                                                                                                                                                                                                                                                                                                                                                                                                                                                                                                                                                                                                                                                                                    | 215  | 215  | 1.00E-103 | 100.0 | 83.3 | 90.7 | unnamed protein product                        | ----  | ----                 | AT2G47730.1   Symbols: ATGSTF8, ATGSTF5, GST6, GSTF8   glutathione S-transferase phi 8   chr2:19558213-19559266 FORWARD LENGTH=263       | 215  | 263  | 4.00E-99  | 122.3 | 77.7 | 87.9 |
| Rsa1.0_00221.1.g8941.t1 | refXP_002867794.1  glycosyl hydrolase family 1 protein [Arabidopsis lyrata subsp. lyrata] gi 297313630 gb EFH44053.1  glycosyl hydrolase family 1 protein [Arabidopsis lyrata subsp. lyrata]                                                                                                                                                                                                                                                                                                                                                                                                                                                                                                                                                        | 82   | 501  | 5.00E-13  | 611.0 | 46.3 | 47.6 | glycosyl hydrolase family 1 protein            | gbpln | Arabidopsis lyrata   | AT4G22100.1   Symbols: BGLU3   beta glucosidase 2   chr4:11707370-11709932 REVERSE LENGTH=507                                            | 82   | 507  | 3.00E-15  | 618.3 | 47.6 | 54.9 |
| Rsa1.0_00221.1.g8942.t3 | gb ACJ68117.1  putative indole-3-acetic acid-amido synthetase [Brassica napus]                                                                                                                                                                                                                                                                                                                                                                                                                                                                                                                                                                                                                                                                      | 646  | 594  | 0         | 92.0  | 84.4 | 86.5 | putative indole-3-acetic acid-amido synthetase | gbpln | Brassica napus       | AT2G47750.1   Symbols: GH3.9   putative indole-3-acetic acid-amido synthetase GH3.9   chr2:19560307-19562974 REVERSE LENGTH=585          | 646  | 585  | 0         | 90.6  | 79.6 | 84.7 |
| Rsa1.0_00221.1.g8943.t4 | refXP_002882131.1  At2g47760/F17A22.15 [Arabidopsis lyrata subsp. lyrata] gi 297327970 gb EFH58390.1  At2g47760/F17A22.15 [Arabidopsis lyrata subsp. lyrata]                                                                                                                                                                                                                                                                                                                                                                                                                                                                                                                                                                                        | 416  | 439  | 1.00E-128 | 105.5 | 61.3 | 66.3 | At2g47760/F17A22.15                            | gbpln | Arabidopsis lyrata   | AT2G47760.3   Symbols: ALG3, AtALG3   asparagine-linked glycosylation 3   chr2:19565933-19568221 REVERSE LENGTH=380                      | 416  | 380  | 1.00E-129 | 91.3  | 59.9 | 65.1 |

|                         |                                                                                                                                                                                                                                                                                                                                                                                                                                                                                                                                                                                                                                                                                                                                                                                                                                                                                                                                                                                                                                                                                                                                                                                                                                                                                                                                                                                                                                                             |     |     |          |       |      |      |                                            |       |                      |                                                                                                                       |     |     |           |       |      |      |
|-------------------------|-------------------------------------------------------------------------------------------------------------------------------------------------------------------------------------------------------------------------------------------------------------------------------------------------------------------------------------------------------------------------------------------------------------------------------------------------------------------------------------------------------------------------------------------------------------------------------------------------------------------------------------------------------------------------------------------------------------------------------------------------------------------------------------------------------------------------------------------------------------------------------------------------------------------------------------------------------------------------------------------------------------------------------------------------------------------------------------------------------------------------------------------------------------------------------------------------------------------------------------------------------------------------------------------------------------------------------------------------------------------------------------------------------------------------------------------------------------|-----|-----|----------|-------|------|------|--------------------------------------------|-------|----------------------|-----------------------------------------------------------------------------------------------------------------------|-----|-----|-----------|-------|------|------|
| Rsa1.0_00221.1.g8944.t1 | refNP_182299.1   Rubber elongation factor protein (REF) [Arabidopsis thaliana]<br>gi 14424099 sp O82246.1 Y2778_ARATH RecName: Full=REF/SRPP-like protein At2g47780  gi 3738291 gb AAC63633.1   unknown protein [Arabidopsis thaliana] gi 23306436 gb AAN17445.1   unknown protein [Arabidopsis thaliana] gi 25084024 gb AAN72157.1   unknown protein [Arabidopsis thaliana] gi 330255793 gb AEC10887.1   Rubber elongation factor protein (REF) [Arabidopsis thaliana]                                                                                                                                                                                                                                                                                                                                                                                                                                                                                                                                                                                                                                                                                                                                                                                                                                                                                                                                                                                     | 224 | 235 | 6.00E-95 | 104.9 | 79.5 | 86.6 | Rubber elongation factor protein (REF)     | gbpln | Arabidopsis thaliana | AT2G47780.1   Symbols:   Rubber elongation factor protein (REF)   chr2:19570076-19570864 FORWARD LENGTH=235           | 224 | 235 | 2.00E-97  | 104.9 | 79.5 | 86.6 |
| Rsa1.0_00221.1.g8945.t1 | refNP_182302.1   nuclear transcription factor Y subunit B-5 [Arabidopsis thaliana]<br>gi 75220231 sp O82248.1 NFYB5_ARATH RecName: Full=Nuclear transcription factor Y subunit B-5; Short=AtNF-YB-5  gi 3738293 gb AAC63635.1   putative CCAAT-box binding transcription factor [Arabidopsis thaliana] gi 26393159 gb AAO42012.1   putative CCAAT-box binding transcription factor [Arabidopsis thaliana] gi 28827540 gb AAO50614.1   putative CCAAT-box binding transcription factor [Arabidopsis thaliana] gi 330255796 gb AEC10890.1   nuclear transcription factor Y subunit B-5 [Arabidopsis thaliana]                                                                                                                                                                                                                                                                                                                                                                                                                                                                                                                                                                                                                                                                                                                                                                                                                                                 | 516 | 160 | 4.00E-61 | 31.0  | 21.7 | 23.1 | nuclear transcription factor Y subunit B-5 | gbpln | Arabidopsis thaliana | AT2G47810.1   Symbols: NF-YB5   nuclear factor Y, subunit B5   chr2:19582938-19583420 REVERSE LENGTH=160              | 516 | 160 | 1.00E-63  | 31.0  | 21.7 | 23.1 |
| Rsa1.0_00221.1.g8946.t1 | #                                                                                                                                                                                                                                                                                                                                                                                                                                                                                                                                                                                                                                                                                                                                                                                                                                                                                                                                                                                                                                                                                                                                                                                                                                                                                                                                                                                                                                                           | #   | #   | #        | #     | #    | #    | -                                          | ----  | ----                 | #                                                                                                                     | #   | #   | #         | #     | #    |      |
| Rsa1.0_00221.1.g8947.t1 | gb EOA27039.1   hypothetical protein CARUB_v10023134mg [Capsella rubella]                                                                                                                                                                                                                                                                                                                                                                                                                                                                                                                                                                                                                                                                                                                                                                                                                                                                                                                                                                                                                                                                                                                                                                                                                                                                                                                                                                                   | 458 | 471 | 0        | 102.8 | 78.2 | 85.4 | hypothetical protein CARUB_v10023134mg     | gbpln | Capsella rubella     | AT2G47850.3   Symbols:   Zinc finger C-x8-C-x5-C-x3-H type family protein   chr2:19595953-19598119 FORWARD LENGTH=468 | 458 | 468 | 1.00E-180 | 102.2 | 77.9 | 84.9 |
| Rsa1.0_00221.1.g8948.t1 | ref XP_002863057.1   glutaredoxin family protein [Arabidopsis lyrata subsp. lyrata]<br>gi 297824891 ref XP_002880328.1   glutaredoxin family protein [Arabidopsis lyrata subsp. lyrata] gi 297308863 gb EFH39316.1   glutaredoxin family protein [Arabidopsis lyrata subsp. lyrata] gi 297326167 gb EFH56587.1   glutaredoxin family protein [Arabidopsis lyrata subsp. lyrata] ref NP_182309.1   glutaredoxin-C13 [Arabidopsis thaliana] gi 297790318 ref XP_002863058.1   glutaredoxin family protein [Arabidopsis lyrata subsp. lyrata] gi 297824893 ref XP_002880329.1   glutaredoxin family protein [Arabidopsis lyrata subsp. lyrata] gi 75100580 sp O82255.1 GRC13_ARATH RecName: Full=Glutaredoxin-C13; Short=AtGrxC13; AltName: Full=Protein ROXY 9  gi 3738300 gb AAC63642.1   putative glutaredoxin [Arabidopsis thaliana] gi 20197557 gb AAM15127.1   putative glutaredoxin [Arabidopsis thaliana] gi 21554200 gb AAM63279.1   putative glutaredoxin [Arabidopsis thaliana] gi 62320234 gb BAD94488.1   putative glutaredoxin [Arabidopsis thaliana] gi 90962952 gb ABE02400.1   At2g47880 [Arabidopsis thaliana] gi 226348196 gb ACO50414.1   glutaredoxin [Arabidopsis thaliana] gi 297308864 gb EFH39317.1   glutaredoxin family protein [Arabidopsis lyrata subsp. lyrata] gi 297326168 gb EFH56588.1   glutaredoxin family protein [Arabidopsis lyrata subsp. lyrata] gi 330255810 gb AEC10904.1   glutaredoxin-C13 [Arabidopsis thaliana] | 103 | 103 | 8.00E-48 | 100.0 | 89.3 | 95.1 | glutaredoxin family protein                | gbpln | Arabidopsis lyrata   | AT2G47870.1   Symbols:   Thioredoxin superfamily protein   chr2:19603339-19603650 FORWARD LENGTH=103                  | 103 | 103 | 5.00E-48  | 100.0 | 85.4 | 92.2 |
| Rsa1.0_00221.1.g8949.t1 | putative glutaredoxin [Arabidopsis thaliana] gi 21554200 gb AAM63279.1   putative glutaredoxin [Arabidopsis thaliana] gi 62320234 gb BAD94488.1   putative glutaredoxin [Arabidopsis thaliana] gi 90962952 gb ABE02400.1   At2g47880 [Arabidopsis thaliana] gi 226348196 gb ACO50414.1   glutaredoxin [Arabidopsis thaliana] gi 297308864 gb EFH39317.1   glutaredoxin family protein [Arabidopsis lyrata subsp. lyrata] gi 297326168 gb EFH56588.1   glutaredoxin family protein [Arabidopsis lyrata subsp. lyrata] gi 330255810 gb AEC10904.1   glutaredoxin-C13 [Arabidopsis thaliana]                                                                                                                                                                                                                                                                                                                                                                                                                                                                                                                                                                                                                                                                                                                                                                                                                                                                   | 102 | 102 | 5.00E-49 | 100.0 | 93.1 | 98.0 | glutaredoxin-C13                           | gbpln | Arabidopsis lyrata   | AT2G47880.1   Symbols:   Glutaredoxin family protein   chr2:19605124-19605432 FORWARD LENGTH=102                      | 102 | 102 | 8.00E-52  | 100.0 | 93.1 | 98.0 |
| Rsa1.0_00221.1.g8950.t1 | #                                                                                                                                                                                                                                                                                                                                                                                                                                                                                                                                                                                                                                                                                                                                                                                                                                                                                                                                                                                                                                                                                                                                                                                                                                                                                                                                                                                                                                                           | #   | #   | #        | #     | #    | #    | -                                          | ----  | ----                 | #                                                                                                                     | #   | #   | #         | #     | #    |      |

|                         |                                                                                                                                                                                                                                                                                                                                                                                                                                                                                                                         |      |      |           |       |      |      |                                          |       |                      |                                                                                                                                                                                                                                                                                                                                                          |      |      |           |       |      |      |
|-------------------------|-------------------------------------------------------------------------------------------------------------------------------------------------------------------------------------------------------------------------------------------------------------------------------------------------------------------------------------------------------------------------------------------------------------------------------------------------------------------------------------------------------------------------|------|------|-----------|-------|------|------|------------------------------------------|-------|----------------------|----------------------------------------------------------------------------------------------------------------------------------------------------------------------------------------------------------------------------------------------------------------------------------------------------------------------------------------------------------|------|------|-----------|-------|------|------|
| Rsa1.0_00221.1.g8951.t1 | ref[XP_002880330.1] zinc finger (B-box type) family protein [Arabidopsis lyrata subsp. lyrata] gi 297326169 gb EFH56589.1  zinc finger (B-box type) family protein [Arabidopsis lyrata subsp. lyrata]                                                                                                                                                                                                                                                                                                                   | 334  | 324  | 1.00E-119 | 97.0  | 70.1 | 80.5 | zinc finger (B-box type) family protein  | gbpln | Arabidopsis lyrata   | AT2G47890.1   Symbols:   B-box type zinc finger protein with CCT domain   chr2:19608245-19609476 FORWARD LENGTH=332                                                                                                                                                                                                                                      | 334  | 332  | 1.00E-118 | 99.4  | 70.1 | 80.2 |
| Rsa1.0_00221.1.g8952.t1 | ref[XP_002880334.1] hypothetical protein ARALYDRAFT_904269 [Arabidopsis lyrata subsp. lyrata] gi 297326173 gb EFH56593.1  hypothetical protein ARALYDRAFT_904269 [Arabidopsis lyrata subsp. lyrata]                                                                                                                                                                                                                                                                                                                     | 153  | 226  | 3.00E-37  | 147.7 | 64.1 | 70.6 | hypothetical protein ARALYDRAFT_904269   | gbpln | Arabidopsis lyrata   | AT2G47920.1   Symbols:   Kinase interacting (KIP-like) family protein   chr2:19616003-19616761 FORWARD LENGTH=225                                                                                                                                                                                                                                        | 153  | 225  | 7.00E-39  | 147.1 | 60.1 | 69.3 |
| Rsa1.0_00221.1.g8953.t1 | gb ACP30598.1  disease resistance protein [Brassica rapa subsp. pekinensis]                                                                                                                                                                                                                                                                                                                                                                                                                                             | 1601 | 2301 | 0         | 143.7 | 61.5 | 71.4 | disease resistance protein               | gbpln | Brassica rapa        | AT4G23160.1   Symbols: CRK8   cysteine-rich RLK (RECEPTOR-like protein kinase) 8   chr4:12129485-12134086 FORWARD LENGTH=1262                                                                                                                                                                                                                            | 1601 | 1262 | 1.00E-108 | 78.8  | 11.9 | 18.4 |
| Rsa1.0_00221.1.g8954.t1 | ref[NP_566117.1] uncharacterized protein [Arabidopsis thaliana] gi 16226796 gb AAL16264.1 AF428334_1 At2g47960/T8J23.10 [Arabidopsis thaliana] gi 1837797 gb AAL67048.1  unknown protein [Arabidopsis thaliana] gi 20197311 gb AAC63650.2  expressed protein [Arabidopsis thaliana] gi 20197565 gb AAM15133.1  expressed protein [Arabidopsis thaliana] gi 21281259 gb AAM4502.1  unknown protein [Arabidopsis thaliana] gi 330255823 gb AEC10917.1  uncharacterized protein AT2G47960 [Arabidopsis thaliana]           | 444  | 442  | 0         | 99.5  | 88.1 | 92.1 | uncharacterized protein                  | gbpln | Arabidopsis thaliana | AT2G47960.1   Symbols:   unknown protein; CONTAINS InterPro DOMAIN/s: Protein of unknown function DUF974 (InterPro:IPR010378); Has 285 Blast hits to 284 proteins in 126 species: Archae - 0; Bacteria - 0; Metazoa - 150; Fungi - 68; Plants - 32; Viruses - 0; Other Eukaryotes - 35 (source: NCBI BLINK).   chr2:19625631-19628869 FORWARD LENGTH=442 | 444  | 442  | 0         | 99.5  | 88.1 | 92.1 |
| Rsa1.0_00222.1.g8955.t1 | ref[XP_002881751.1] bZIP transcription factor family protein [Arabidopsis lyrata subsp. lyrata] gi 297327590 gb EFH58010.1  bZIP transcription factor family protein [Arabidopsis lyrata subsp. lyrata]                                                                                                                                                                                                                                                                                                                 | 660  | 724  | 0         | 109.7 | 82.1 | 87.4 | bZIP transcription factor family protein | gbpln | Arabidopsis lyrata   | AT2G40950.1   Symbols: BZIP17   Basic-leucine zipper (bZIP) transcription factor family protein   chr2:17087823-17090326 REVERSE LENGTH=721                                                                                                                                                                                                              | 660  | 721  | 0         | 109.2 | 81.4 | 87.3 |
| Rsa1.0_00222.1.g8956.t1 | ref[NP_565945.1] PLAC8 domain-containing protein [Arabidopsis thaliana] gi 75160519 sp Q85878.1 PCR10_ARATH RecName: Full=Protein PLANT CADMIUM RESISTANCE 10; Short=AtPCR10 gi 20196932 gb AAM14839.1  Expressed protein [Arabidopsis thaliana] gi 21537314 gb AAM61655.1  unknown [Arabidopsis thaliana] gi 117958399 gb ABK59670.1  At2g40935 [Arabidopsis thaliana] gi 330254808 gb AEC09902.1  PLAC8 domain-containing protein [Arabidopsis thaliana]                                                              | 186  | 190  | 3.00E-83  | 102.2 | 83.9 | 90.3 | PLAC8 domain-containing protein          | gbpln | Arabidopsis thaliana | AT2G40935.1   Symbols:   PLAC8 family protein   chr2:17083199-17084216 FORWARD LENGTH=190                                                                                                                                                                                                                                                                | 186  | 190  | 1.00E-85  | 102.2 | 83.9 | 90.3 |
| Rsa1.0_00222.1.g8957.t1 | gb EOA27257.1  hypothetical protein CARUB_v10023376mg [Capsella rubella]                                                                                                                                                                                                                                                                                                                                                                                                                                                | 393  | 393  | 0         | 100.0 | 83.2 | 90.3 | hypothetical protein CARUB_v10023376mg   | gbpln | Capsella rubella     | AT2G40900.1   Symbols:   nodulin MtN21 /EamA-like transporter family protein   chr2:17063396-17065514 REVERSE LENGTH=394                                                                                                                                                                                                                                 | 393  | 394  | 0         | 100.3 | 85.0 | 91.1 |
| Rsa1.0_00222.1.g8958.t1 | ref[NP_181616.3] 4-alpha-glucanotransferase [Arabidopsis thaliana] gi 75158841 sp Q8RXD9.1 DPE2_ARATH RecName: Full=4-alpha-glucanotransferase DPE2; AltName: Full=Amylomaltase; AltName: Full=Disproportionating enzyme; Short=D-enzyme; AltName: Full=Protein DISPROPORTIONATING ENZYME 2 gi 19698937 gb AAL91204.1  4-alpha-glucanotransferase [Arabidopsis thaliana] gi 34098849 gb AAQ56807.1  At2g40840 [Arabidopsis thaliana] gi 330254795 gb AEC09889.1  4-alpha-glucanotransferase DPE2 [Arabidopsis thaliana] | 953  | 955  | 0         | 100.2 | 91.5 | 95.2 | 4-alpha-glucanotransferase               | gbpln | Arabidopsis thaliana | AT2G40840.1   Symbols: DPE2   disproportionating enzyme 2   chr2:17045368-17050779 FORWARD LENGTH=955                                                                                                                                                                                                                                                    | 953  | 955  | 0         | 100.2 | 91.5 | 95.2 |
| Rsa1.0_00222.1.g8959.t1 | gb EOA27483.1  hypothetical protein CARUB_v10023620mg [Capsella rubella]                                                                                                                                                                                                                                                                                                                                                                                                                                                | 327  | 327  | 1.00E-129 | 100.0 | 79.5 | 87.2 | hypothetical protein CARUB_v10023620mg   | gbpln | Capsella rubella     | AT2G40830.3   Symbols: RHC1A   RING-H2 finger C1A   chr2:17043642-17044628 FORWARD LENGTH=328                                                                                                                                                                                                                                                            | 327  | 328  | 1.00E-129 | 100.3 | 78.9 | 85.3 |

|                         |                                                                                                                                                                                                                                                                                                                                                                                                                                                                                                  |     |     |           |       |      |      |                                           |       |                      |                                                                                                                                                                                                                                                                                                                                                                                                                                                                                                                                      |     |     |           |       |      |      |
|-------------------------|--------------------------------------------------------------------------------------------------------------------------------------------------------------------------------------------------------------------------------------------------------------------------------------------------------------------------------------------------------------------------------------------------------------------------------------------------------------------------------------------------|-----|-----|-----------|-------|------|------|-------------------------------------------|-------|----------------------|--------------------------------------------------------------------------------------------------------------------------------------------------------------------------------------------------------------------------------------------------------------------------------------------------------------------------------------------------------------------------------------------------------------------------------------------------------------------------------------------------------------------------------------|-----|-----|-----------|-------|------|------|
| Rsa1.0_00222.1.g8960.t1 | ref NP_181614.7  uncharacterized protein [Arabidopsis thaliana] gi 33025479 gb AEC09885.1  uncharacterized protein AT2G40820 [Arabidopsis thaliana]                                                                                                                                                                                                                                                                                                                                              | 493 | 492 | 0         | 99.8  | 86.8 | 93.3 | uncharacterized protein                   | gbpln | Arabidopsis thaliana | AT2G40820.1   Symbols:   FUNCTIONS IN: molecular function unknown; INVOLVED IN: biological_process unknown; LOCATED IN: plasma membrane; EXPRESSED IN: 21 plant structures; EXPRESSED DURING: 13 growth stages; BEST Arabidopsis thaliana protein match is: myosin heavy chain-related (TAIR:AT3G56480.1); Has 203 Blast hits to 195 proteins in 64 species: Archae - 3; Bacteria - 13; Metazoa - 26; Fungi - 15; Plants - 101; Viruses - 0; Other Eukaryotes - 45 (source: NCBI BLink).   chr2:17036768-17039474 REVERSE LENGTH=492 | 493 | 492 | 0         | 99.8  | 86.8 | 93.3 |
| Rsa1.0_00222.1.g8961.t1 | ref NP_181612.1  uncharacterized protein [Arabidopsis thaliana] gi 17473709 gb AAL38308.1  unknown protein [Arabidopsis thaliana] gi 20148507 gb AAM10144.1  unknown protein [Arabidopsis thaliana] gi 33025478 gb AEC09880.1  uncharacterized protein AT2G40800 [Arabidopsis thaliana]                                                                                                                                                                                                          | 365 | 377 | 1.00E-167 | 103.3 | 86.0 | 92.1 | uncharacterized protein                   | gbpln | Arabidopsis thaliana | AT2G40800.1   Symbols:   unknown protein; BEST Arabidopsis thaliana protein match is: unknown protein (TAIR:AT3G56430.1); Has 43 Blast hits to 43 proteins in 15 species: Archae - 0; Bacteria - 0; Metazoa - 0; Fungi - 0; Plants - 41; Viruses - 0; Other Eukaryotes - 2 (source: NCBI BLink).   chr2:17024653-17026769 REVERSE LENGTH=377                                                                                                                                                                                         | 365 | 377 | 1.00E-169 | 103.3 | 86.0 | 92.1 |
| Rsa1.0_00222.1.g8962.t1 | #                                                                                                                                                                                                                                                                                                                                                                                                                                                                                                | #   | #   | #         | #     | #    | #    | -                                         | ----  | ----                 | #                                                                                                                                                                                                                                                                                                                                                                                                                                                                                                                                    | #   | #   | #         | #     | #    |      |
| Rsa1.0_00222.1.g8963.t1 | dbj BAJ33964.1  unnamed protein product [Theilingella halophila]                                                                                                                                                                                                                                                                                                                                                                                                                                 | 336 | 338 | 1.00E-144 | 100.6 | 75.9 | 84.2 | unnamed protein product                   | ----  | ----                 | AT2G40750.1   Symbols: WRKY54, ATWRKY54   WRKY DNA-binding protein 54   chr2:17000636-17002354 REVERSE LENGTH=346                                                                                                                                                                                                                                                                                                                                                                                                                    | 336 | 346 | 1.00E-132 | 103.0 | 71.7 | 81.0 |
| Rsa1.0_00222.1.g8964.t1 | gb EOA28303.1  hypothetical protein CARUB_v10024501mg [Capsella rubella]                                                                                                                                                                                                                                                                                                                                                                                                                         | 624 | 610 | 0         | 97.8  | 86.7 | 91.0 | hypothetical protein CARUB_v10024501mg    | gbpln | Capsella rubella     | AT2G40700.1   Symbols:   P-loop containing nucleoside triphosphate hydrolases superfamily protein   chr2:16976783-16979392 FORWARD LENGTH=609                                                                                                                                                                                                                                                                                                                                                                                        | 624 | 609 | 0         | 97.6  | 85.7 | 91.0 |
| Rsa1.0_00222.1.g8965.t1 | gb EOA26998.1  hypothetical protein CARUB_v10023092mg [Capsella rubella]                                                                                                                                                                                                                                                                                                                                                                                                                         | 386 | 489 | 1.00E-172 | 126.7 | 83.7 | 90.2 | hypothetical protein CARUB_v10023092mg    | gbpln | Capsella rubella     | AT2G40660.1   Symbols:   Nucleic acid-binding, OB-fold-like protein   chr2:16966011-16968866 FORWARD LENGTH=389                                                                                                                                                                                                                                                                                                                                                                                                                      | 386 | 389 | 1.00E-164 | 100.8 | 81.3 | 88.9 |
| Rsa1.0_00222.1.g8966.t1 | emb CAB06697.1  b-Zip DNA binding protein [Arabidopsis thaliana]                                                                                                                                                                                                                                                                                                                                                                                                                                 | 373 | 367 | 1.00E-158 | 98.4  | 81.5 | 85.8 | b-Zip DNA binding protein                 | gbpln | Arabidopsis thaliana | AT2G40620.1   Symbols:   Basic-leucine zipper (bZIP) transcription factor family protein   chr2:16954804-16956872 REVERSE LENGTH=367                                                                                                                                                                                                                                                                                                                                                                                                 | 373 | 367 | 1.00E-160 | 98.4  | 81.5 | 85.5 |
| Rsa1.0_00222.1.g8967.t1 | ref NP_181593.1  expansin A8 [Arabidopsis thaliana] gi 20138147 sp O22874.1 EXPA8_ARAT H RecName: Full=Expansin-A8; Short=AtEXPA8; AltName: Full=Alpha-expansin-8; Short=At-EXP8; Short=AtEx8; AltName: Full=Ath-ExpAlpha-1.1.1; Flags: Precursor                                                                                                                                                                                                                                                | 257 | 253 | 1.00E-132 | 98.4  | 90.3 | 93.8 | expansin A8                               | gbpln | Arabidopsis thaliana | AT2G40610.1   Symbols: ATEXPA8, EXP8, ATEXP8, ATHEXP ALPHA 1.1.1, EXPA8   expansin A8   chr2:16949121-16950472 REVERSE LENGTH=253                                                                                                                                                                                                                                                                                                                                                                                                    | 257 | 253 | 1.00E-135 | 98.4  | 90.3 | 93.8 |
| Rsa1.0_00222.1.g8968.t1 | gi 21555274 gb AAM63821.1  Alpha-expansin 8 precursor (At-EXP8) (AtEx8) (Ath-ExpAlpha-1.1.1) [Arabidopsis thaliana] gi 110737287 dbj BAF00590.1  Expansin [Arabidopsis thaliana] gi 330254760 gb AEC09854.1  expansin A8 [Arabidopsis thaliana] ref NP_030605.2  appr-1-p processing enzyme family protein [Arabidopsis thaliana] gi 24030242 gb AAN41297.1  unknown protein [Arabidopsis thaliana] gi 330254759 gb AEC09853.1  appr-1-p processing enzyme family protein [Arabidopsis thaliana] | 142 | 257 | 2.00E-65  | 181.0 | 84.5 | 91.5 | appr-1-p processing enzyme family protein | gbpln | Arabidopsis thaliana | AT2G40600.1   Symbols:   appr-1-p processing enzyme family protein   chr2:16947012-16948537 REVERSE LENGTH=257                                                                                                                                                                                                                                                                                                                                                                                                                       | 142 | 257 | 7.00E-68  | 181.0 | 84.5 | 91.5 |
| Rsa1.0_00222.1.g8969.t1 | ref XP_002892188.1  hypothetical protein ARALYDRAFT_887556 [Arabidopsis lyrata subsp. lyrata] gi 297338030 gb EFH68447.1  hypothetical protein ARALYDRAFT_887556 [Arabidopsis lyrata subsp. lyrata]                                                                                                                                                                                                                                                                                              | 264 | 357 | 1.00E-37  | 135.2 | 32.2 | 41.7 | hypothetical protein ARALYDRAFT_887556    | gbpln | Arabidopsis lyrata   | AT1G03490.1   Symbols: ANAC006, NAC006   NAC domain containing protein 6   chr1:871874-872906 FORWARD LENGTH=281                                                                                                                                                                                                                                                                                                                                                                                                                     | 264 | 281 | 3.00E-27  | 106.4 | 21.2 | 26.1 |
| Rsa1.0_00222.1.g8970.t1 | gb EOA28443.1  hypothetical protein CARUB_v10024650mg [Capsella rubella]                                                                                                                                                                                                                                                                                                                                                                                                                         | 778 | 795 | 0         | 102.2 | 92.0 | 96.5 | hypothetical protein CARUB_v10024650mg    | gbpln | Capsella rubella     | AT2G40540.2   Symbols: KT2, ATK2, SHY3, KUP2, ATKUP2, TRK2   potassium transporter 2   chr2:16931445-16934516 FORWARD LENGTH=794                                                                                                                                                                                                                                                                                                                                                                                                     | 778 | 794 | 0         | 102.1 | 91.6 | 96.3 |

|                         |                                                                                                                                                                                                                                                                                     |      |      |           |       |      |      |                                                                             |       |                      |                                                                                                                                                                                                                                                                                                                                                                                                                                                                                                                       |      |      |           |       |      |      |
|-------------------------|-------------------------------------------------------------------------------------------------------------------------------------------------------------------------------------------------------------------------------------------------------------------------------------|------|------|-----------|-------|------|------|-----------------------------------------------------------------------------|-------|----------------------|-----------------------------------------------------------------------------------------------------------------------------------------------------------------------------------------------------------------------------------------------------------------------------------------------------------------------------------------------------------------------------------------------------------------------------------------------------------------------------------------------------------------------|------|------|-----------|-------|------|------|
| Rsa1.0_00222.1.g8971.t1 | ref[NP_565935.1] uncharacterized protein [Arabidopsis thaliana] gi 2651304 gb AAB87584.1  expressed protein [Arabidopsis thaliana] gi 88900366 gb ABD57495.1  At2g40530 [Arabidopsis thaliana] gi 330254750 gb AEC09844.1  uncharacterized protein AT2G40530 [Arabidopsis thaliana] | 101  | 105  | 1.00E-22  | 104.0 | 72.3 | 80.2 | uncharacterized protein                                                     | gbpln | Arabidopsis thaliana | AT2G40530.1   Symbols:   unknown protein; FUNCTIONS IN: molecular_function unknown; INVOLVED IN: biological_process unknown; LOCATED IN: endomembrane system; EXPRESSED IN: leaf apex, inflorescence meristem, petal, flower; EXPRESSED DURING: 4 anthesis, petal differentiation and expansion stage; Has 5 Blast hits to 5 proteins in 2 species: Archae - 0; Bacteria - 0; Metazoa - 0; Fungi - 0; Plants - 5; Viruses - 0; Other Eukaryotes - 0 (source: NCBI BLink).   chr2:16927600-16927917 FORWARD LENGTH=105 | 101  | 105  | 2.00E-25  | 104.0 | 72.3 | 80.2 |
| Rsa1.0_00222.1.g8972.t1 | gb[EOA26742.1] hypothetical protein CARUB_v10022828mg [Capsella rubella]                                                                                                                                                                                                            | 510  | 619  | 0         | 121.4 | 74.9 | 82.9 | hypothetical protein CARUB_v10022828mg                                      | gbpln | Capsella rubella     | AT3G56320.1   Symbols:   PAP/OAS1 substrate-binding domain superfamily   chr3:20886193-20888624 REVERSE LENGTH=603                                                                                                                                                                                                                                                                                                                                                                                                    | 510  | 603  | 0         | 118.2 | 65.3 | 76.7 |
| Rsa1.0_00222.1.g8973.t1 | ref[XP_002892188.1] hypothetical protein ARALYDRAFT_887556 [Arabidopsis lyrata subsp. lyrata] gi 297338030 gb EFH68447.1  hypothetical protein ARALYDRAFT_887556 [Arabidopsis lyrata subsp. lyrata]                                                                                 | 549  | 357  | 1.00E-37  | 65.0  | 15.7 | 20.6 | hypothetical protein ARALYDRAFT_887556                                      | gbpln | Arabidopsis lyrata   | AT1G03490.1   Symbols: ANAC006, NAC006   NAC domain containing protein 6   chr1:871874-872906 FORWARD LENGTH=281                                                                                                                                                                                                                                                                                                                                                                                                      | 549  | 281  | 3.00E-27  | 51.2  | 10.0 | 12.6 |
| Rsa1.0_00222.1.g8974.t1 | #                                                                                                                                                                                                                                                                                   | #    | #    | #         | #     | #    | #    | -                                                                           | ----  | ----                 | #                                                                                                                                                                                                                                                                                                                                                                                                                                                                                                                     | #    | #    | #         | #     | #    |      |
| Rsa1.0_00222.1.g8975.t1 | ref[XP_002881725.1] hypothetical protein ARALYDRAFT_903340 [Arabidopsis lyrata subsp. lyrata] gi 297327564 gb EFH57984.1  hypothetical protein ARALYDRAFT_903340 [Arabidopsis lyrata subsp. lyrata]                                                                                 | 198  | 192  | 8.00E-57  | 97.0  | 75.3 | 83.3 | hypothetical protein ARALYDRAFT_903340                                      | gbpln | Arabidopsis lyrata   | AT2G40475.1   Symbols:   unknown protein; BEST Arabidopsis thaliana protein match is: unknown protein (TAIR:AT3G56260.2); Has 477 Blast hits to 219 proteins in 41 species: Archae - 0; Bacteria - 4; Metazoa - 91; Fungi - 61; Plants - 144; Viruses - 0; Other Eukaryotes - 177 (source: NCBI BLink).   chr2:16907222-16907803 REVERSE LENGTH=193                                                                                                                                                                   | 198  | 193  | 5.00E-51  | 97.5  | 73.7 | 80.8 |
| Rsa1.0_00222.1.g8976.t1 | gb[AAC33963.1] contains similarity to reverse transcriptases (Pfam; rvt.hmm, score: 11.19) [Arabidopsis thaliana]                                                                                                                                                                   | 1542 | 1633 | 0         | 105.9 | 47.1 | 64.3 | contains similarity to reverse transcriptases (Pfam; rvt.hmm, score: 11.19) | gbpln | Arabidopsis thaliana | AT4G23160.1   Symbols: CRK8   cysteine-rich RLK (RECEPTOR-like protein kinase) 8   chr4:12129485-12134086 FORWARD LENGTH=1262                                                                                                                                                                                                                                                                                                                                                                                         | 1542 | 1262 | 1.00E-178 | 81.8  | 19.6 | 26.1 |
| Rsa1.0_00222.1.g8977.t1 | ref[XP_002878835.1] hypothetical protein ARALYDRAFT_901144 [Arabidopsis lyrata subsp. lyrata] gi 297324674 gb EFH55094.1  hypothetical protein ARALYDRAFT_901144 [Arabidopsis lyrata subsp. lyrata]                                                                                 | 200  | 200  | 1.00E-77  | 100.0 | 70.5 | 84.5 | hypothetical protein ARALYDRAFT_901144                                      | gbpln | Arabidopsis lyrata   | AT2G40450.1   Symbols:   BTB/POZ domain-containing protein   chr2:16892024-16892790 REVERSE LENGTH=209                                                                                                                                                                                                                                                                                                                                                                                                                | 200  | 209  | 1.00E-59  | 104.5 | 62.0 | 76.5 |
| Rsa1.0_00222.1.g8978.t2 | ref[XP_002879870.1] hypothetical protein ARALYDRAFT_483101 [Arabidopsis lyrata subsp. lyrata] gi 297325709 gb EFH56129.1  hypothetical protein ARALYDRAFT_483101 [Arabidopsis lyrata subsp. lyrata]                                                                                 | 158  | 158  | 2.00E-75  | 100.0 | 86.1 | 94.3 | hypothetical protein ARALYDRAFT_483101                                      | gbpln | Arabidopsis lyrata   | AT2G40435.1   Symbols:   BEST Arabidopsis thaliana protein match is: transcription regulators (TAIR:AT3G56220.1); Has 289 Blast hits to 289 proteins in 30 species: Archae - 0; Bacteria - 0; Metazoa - 0; Fungi - 0; Plants - 289; Viruses - 0; Other Eukaryotes - 0 (source: NCBI BLink).   chr2:16887048-16888407 FORWARD LENGTH=158                                                                                                                                                                               | 158  | 158  | 2.00E-75  | 100.0 | 84.2 | 92.4 |
| Rsa1.0_00222.1.g8979.t1 | gb[EOA29100.1] hypothetical protein CARUB_v10025367mg, partial [Capsella rubella]                                                                                                                                                                                                   | 385  | 381  | 1.00E-152 | 99.0  | 74.3 | 83.9 | hypothetical protein CARUB_v10025367mg, partial                             | gbpln | Capsella rubella     | AT2G40430.3   Symbols:   FUNCTIONS IN: molecular_function unknown; INVOLVED IN: biological_process unknown; LOCATED IN: cellular_component unknown; EXPRESSED IN: 22 plant structures; EXPRESSED DURING: 13 growth stages; CONTAINS InterPro DOMAIN/s: Tumour suppressor protein Gltscr2 (InterPro:IPR011211), P60-like (InterPro:IPR011687).   chr2:16879466-16882365 REVERSE LENGTH=441                                                                                                                             | 385  | 441  | 1.00E-141 | 114.5 | 74.0 | 83.6 |
| Rsa1.0_00222.1.g8980.t1 | ref[NP_973649.1] Ca(2+)-dependent nuclease-like protein [Arabidopsis thaliana] gi 330254731 gb AEC09825.1  Ca(2+)-dependent nuclease-like protein [Arabidopsis thaliana]                                                                                                            | 333  | 332  | 1.00E-171 | 99.7  | 88.3 | 94.3 | Ca(2+)-dependent nuclease-like protein                                      | gbpln | Arabidopsis thaliana | AT2G40410.2   Symbols:   Staphylococcal nuclease homologue   chr2:16873509-16875215 FORWARD LENGTH=332                                                                                                                                                                                                                                                                                                                                                                                                                | 333  | 332  | 1.00E-173 | 99.7  | 88.3 | 94.3 |
| Rsa1.0_00222.1.g8981.t1 | #                                                                                                                                                                                                                                                                                   | #    | #    | #         | #     | #    | #    | -                                                                           | ----  | ----                 | #                                                                                                                                                                                                                                                                                                                                                                                                                                                                                                                     | #    | #    | #         | #     | #    |      |
| Rsa1.0_00222.1.g8982.t1 | gb[EOA26978.1] hypothetical protein CARUB_v10023075mg [Capsella rubella]                                                                                                                                                                                                            | 496  | 496  | 0         | 100.0 | 88.3 | 94.0 | hypothetical protein CARUB_v10023075mg                                      | gbpln | Capsella rubella     | AT2G40390.1   Symbols:   unknown protein; BEST Arabidopsis thaliana protein match is: unknown protein (TAIR:AT5G64190.1); Has 75 Blast hits to 75 proteins in 11 species: Archae - 0; Bacteria - 0; Metazoa - 0; Fungi - 0; Plants - 74; Viruses - 0; Other Eukaryotes - 1 (source: NCBI BLink).   chr2:16867385-16868961 FORWARD LENGTH=496                                                                                                                                                                          | 496  | 496  | 0         | 100.0 | 89.3 | 93.5 |

|                         |                                                                                                                                                                                                                                                                                                                                                                                                                                                                                                                                                                                                                                                                                                                                |      |      |           |       |      |      |                                        |       |                      |                                                                                                                                       |      |      |           |       |      |      |
|-------------------------|--------------------------------------------------------------------------------------------------------------------------------------------------------------------------------------------------------------------------------------------------------------------------------------------------------------------------------------------------------------------------------------------------------------------------------------------------------------------------------------------------------------------------------------------------------------------------------------------------------------------------------------------------------------------------------------------------------------------------------|------|------|-----------|-------|------|------|----------------------------------------|-------|----------------------|---------------------------------------------------------------------------------------------------------------------------------------|------|------|-----------|-------|------|------|
| Rsa1.0_00222.1.g8983.t1 | gb[EOA28822.1] hypothetical protein CARUB_v10025061mg [Capsella rubella]                                                                                                                                                                                                                                                                                                                                                                                                                                                                                                                                                                                                                                                       | 214  | 213  | 8.00E-84  | 99.5  | 89.7 | 94.9 | hypothetical protein CARUB_v10025061mg | gbpln | Capsella rubella     | AT2G40380.1   Symbols: PRA1.B2   prenylated RAB acceptor 1.B2   chr2:16864734-16865375 REVERSE LENGTH=213                             | 214  | 213  | 1.00E-85  | 99.5  | 89.7 | 94.4 |
| Rsa1.0_00222.1.g8984.t1 | gb[EOA26796.1] hypothetical protein CARUB_v10022891mg [Capsella rubella]                                                                                                                                                                                                                                                                                                                                                                                                                                                                                                                                                                                                                                                       | 578  | 579  | 0         | 100.2 | 93.1 | 95.3 | hypothetical protein CARUB_v10022891mg | gbpln | Capsella rubella     | AT2G40370.1   Symbols: LAC5   lacase 5   chr2:16858192-16860593 REVERSE LENGTH=580                                                    | 578  | 580  | 0         | 100.3 | 92.2 | 95.2 |
| Rsa1.0_00222.1.g8985.t1 | #                                                                                                                                                                                                                                                                                                                                                                                                                                                                                                                                                                                                                                                                                                                              | #    | #    | #         | #     | #    | #    | -                                      | ----  | ----                 | #                                                                                                                                     | #    | #    | #         | #     | #    | #    |
| Rsa1.0_00222.1.g8986.t1 | #                                                                                                                                                                                                                                                                                                                                                                                                                                                                                                                                                                                                                                                                                                                              | #    | #    | #         | #     | #    | #    | -                                      | ----  | ----                 | #                                                                                                                                     | #    | #    | #         | #     | #    | #    |
| Rsa1.0_00222.1.g8987.t1 | #                                                                                                                                                                                                                                                                                                                                                                                                                                                                                                                                                                                                                                                                                                                              | #    | #    | #         | #     | #    | #    | -                                      | ----  | ----                 | #                                                                                                                                     | #    | #    | #         | #     | #    | #    |
| Rsa1.0_00222.1.g8988.t1 | ref[XP_002881715.1] bet v I allergen family protein [Arabidopsis lyrata subsp. lyrata] gi 297327554 gb EFH57974.1  bet v I allergen family protein [Arabidopsis lyrata subsp. lyrata] ref[NP_565255.1] Lipid phosphate phosphatase 1 [Arabidopsis thaliana] gi 41017426 sp Q9ZU49.2 LPP1_ARATH RecName: Full=Lipid phosphate phosphatase 1; Short=ATLPP1; AltName: Full=Phosphatidic acid phosphatase 1; Short=ATPAP1; AltName: Full=Prenyl diphosphate phosphatase gi 14020927 dbj BAB47575.1  phosphatidic acid phosphatase [Arabidopsis thaliana] gi 20197584 gb AAD14518.2  putative phosphatidic acid phosphatase [Arabidopsis thaliana] gi 330250318 gb AEC05412.1  Lipid phosphate phosphatase 1 [Arabidopsis thaliana] | 217  | 215  | 9.00E-81  | 99.1  | 71.0 | 81.6 | bet v I allergen family protein        | gbpln | Arabidopsis lyrata   | AT2G40330.1   Symbols: PVL6, RCAR9   PYRI-like 6   chr2:16845177-16845824 REVERSE LENGTH=215                                          | 217  | 215  | 2.00E-81  | 99.1  | 70.0 | 78.8 |
| Rsa1.0_00223.1.g8989.t1 | ref[NP_565253.1] putative E3 ubiquitin-protein ligase RHA2B [Arabidopsis thaliana] gi 51316550 sp Q9ZU51.2 RHA2B_ARATH RecName: Full=Probable E3 ubiquitin-protein ligase RHA2B; AltName: Full=RING-H2 zinc finger protein RHA2b gi 3790571 gb AAC68672.1  RING-H2 zinc finger protein RHA2b [Arabidopsis thaliana] gi 20197589 gb AAD14516.2  RING-H2 zinc finger protein RHA2b [Arabidopsis thaliana] gi 98960889 gb ABF58928.1  At2g01150 [Arabidopsis thaliana] gi 330250313 gb AEC05407.1  putative E3 ubiquitin-protein ligase RHA2B [Arabidopsis thaliana]                                                                                                                                                              | 298  | 327  | 1.00E-157 | 109.7 | 87.9 | 93.6 | Lipid phosphate phosphatase 1          | gbpln | Arabidopsis thaliana | AT2G01180.1   Symbols: ATPAP1, PAPI, LPP1, ATLPP1   phosphatidic acid phosphatase 1   chr2:107182-108555 REVERSE LENGTH=327           | 298  | 327  | 1.00E-159 | 109.7 | 87.9 | 93.6 |
| Rsa1.0_00223.1.g8990.t1 | gb AAL86294.1  putative amino acid or GABA permease [Arabidopsis thaliana]                                                                                                                                                                                                                                                                                                                                                                                                                                                                                                                                                                                                                                                     | 517  | 516  | 0         | 99.8  | 93.0 | 96.3 | putative amino acid or GABA permease   | gbpln | Arabidopsis thaliana | AT2G01170.1   Symbols: BAT1   bidirectional amino acid transporter 1   chr2:102364-104462 REVERSE LENGTH=516                          | 517  | 516  | 0         | 99.8  | 92.8 | 96.3 |
| Rsa1.0_00223.1.g8991.t1 | #                                                                                                                                                                                                                                                                                                                                                                                                                                                                                                                                                                                                                                                                                                                              | #    | #    | #         | #     | #    | #    | -                                      | ----  | ----                 | #                                                                                                                                     | #    | #    | #         | #     | #    | #    |
| Rsa1.0_00223.1.g8992.t1 | dbj BAB11200.1  copia-type polyprotein [Arabidopsis thaliana] gi 13872710 emb CAC37622.1  polyprotein [Arabidopsis thaliana]                                                                                                                                                                                                                                                                                                                                                                                                                                                                                                                                                                                                   | 1131 | 1334 | 0         | 117.9 | 69.8 | 83.0 | copia-type polyprotein                 | gbpln | Arabidopsis thaliana | AT4G23160.1   Symbols: CRK8   cysteine-rich RLK (RECEPTOR-like protein kinase) 8   chr4:12129485-12134086 FORWARD LENGTH=1262         | 1131 | 1262 | 3.00E-83  | 111.6 | 14.9 | 22.4 |
| Rsa1.0_00223.1.g8994.t1 | gb[EOA23425.1] hypothetical protein CARUB_v10016608mg [Capsella rubella]                                                                                                                                                                                                                                                                                                                                                                                                                                                                                                                                                                                                                                                       | 1131 | 1118 | 0         | 98.9  | 84.4 | 90.6 | hypothetical protein CARUB_v10016608mg | gbpln | Capsella rubella     | AT2G01130.1   Symbols:   DEA(D/H)-box RNA helicase family protein   chr2:88847-94635 REVERSE LENGTH=1113                              | 1131 | 1113 | 0         | 98.4  | 83.0 | 89.7 |
| Rsa1.0_00223.1.g8995.t1 | gb[EOA25931.1] hypothetical protein CARUB_v10019313mg [Capsella rubella]                                                                                                                                                                                                                                                                                                                                                                                                                                                                                                                                                                                                                                                       | 413  | 417  | 0         | 101.0 | 91.0 | 95.2 | hypothetical protein CARUB_v10019313mg | gbpln | Capsella rubella     | AT2G01120.1   Symbols: ORC4, ATORC4   origin recognition complex subunit 4   chr2:85444-88027 FORWARD LENGTH=418                      | 413  | 418  | 0         | 101.2 | 88.9 | 93.9 |
| Rsa1.0_00223.1.g8996.t1 | gb[EOA24317.1] hypothetical protein CARUB_v10017557mg [Capsella rubella]                                                                                                                                                                                                                                                                                                                                                                                                                                                                                                                                                                                                                                                       | 350  | 347  | 1.00E-163 | 99.1  | 87.1 | 91.4 | hypothetical protein CARUB_v10017557mg | gbpln | Capsella rubella     | AT2G01110.1   Symbols: APG2, UNE3, PGA2, TATC   Sec-independent periplasmic protein translocase   chr2:83786-85088 REVERSE LENGTH=340 | 350  | 340  | 1.00E-158 | 97.1  | 86.6 | 90.9 |
| Rsa1.0_00223.1.g8997.t1 | ref[XP_003609124.1] ATP-dependent DNA helicase PIF1 [Medicago truncatula] gi 355510179 gb AES91321.1  ATP-dependent DNA helicase PIF1 [Medicago truncatula]                                                                                                                                                                                                                                                                                                                                                                                                                                                                                                                                                                    | 1657 | 1558 | 0         | 94.0  | 40.4 | 55.8 | ATP-dependent DNA helicase PIF1        | gbpln | Medicago truncatula  | AT5G2780.1   Symbols:   PIF1 helicase   chr5:10812907-10814173 REVERSE LENGTH=337                                                     | 1657 | 337  | 3.00E-73  | 20.3  | 8.3  | 11.4 |
| Rsa1.0_00223.1.g8998.t1 | gb[EOA39027.1] hypothetical protein CARUB_v10011597mg [Capsella rubella]                                                                                                                                                                                                                                                                                                                                                                                                                                                                                                                                                                                                                                                       | 186  | 186  | 1.00E-15  | 100.0 | 28.0 | 48.4 | hypothetical protein CARUB_v10011597mg | gbpln | Capsella rubella     | AT5G53910.1   Symbols:   RING/U-box superfamily protein   chr5:21890643-21891335 FORWARD LENGTH=230                                   | 186  | 230  | 4.00E-11  | 123.7 | 14.0 | 19.9 |

|                         |                                                                                                                                                                                                                                                                                                                                                                                     |      |      |           |       |      |      |                                                 |       |                      |                                                                                                                                          |      |      |           |       |      |      |
|-------------------------|-------------------------------------------------------------------------------------------------------------------------------------------------------------------------------------------------------------------------------------------------------------------------------------------------------------------------------------------------------------------------------------|------|------|-----------|-------|------|------|-------------------------------------------------|-------|----------------------|------------------------------------------------------------------------------------------------------------------------------------------|------|------|-----------|-------|------|------|
| Rsa1.0_00223.1.g8999.t1 | gb ABD65090.1  hypothetical protein 27.100116 [Brassica oleracea]                                                                                                                                                                                                                                                                                                                   | 583  | 484  | 5.00E-90  | 83.0  | 28.0 | 34.5 | hypothetical protein 27.100116                  | gbpln | Brassica oleracea    | AT1G52950.1   Symbols:   Nucleic acid-binding, OB-fold-like protein   chr1:192725483-19728007 FORWARD LENGTH=566                         | 583  | 566  | 2.00E-14  | 97.1  | 16.1 | 30.7 |
| Rsa1.0_00223.1.g9000.t1 | ref XP_002875058.1  hypothetical protein ARALYDRAFT_484014 [Arabidopsis lyrata subsp. lyrata] gi 297320896 gb EFH51317.1  hypothetical protein ARALYDRAFT_484014 [Arabidopsis lyrata subsp. lyrata]                                                                                                                                                                                 | 222  | 231  | 6.00E-80  | 104.1 | 66.7 | 71.2 | hypothetical protein ARALYDRAFT_484014          | gbpln | Arabidopsis lyrata   | AT2G01080.1   Symbols:   Late embryogenesis abundant (LEA) hydroxyproline-rich glycoprotein family   chr2:78038-79176 FORWARD LENGTH=231 | 222  | 231  | 7.00E-82  | 104.1 | 66.2 | 71.2 |
| Rsa1.0_00223.1.g9001.t1 | ref NP_178217.3  lung seven transmembrane receptor-like protein [Arabidopsis thaliana] gi 330250300 gb AEC05394.1  lung seven transmembrane receptor-like protein [Arabidopsis thaliana]                                                                                                                                                                                            | 500  | 496  | 0         | 99.2  | 85.2 | 90.8 | lung seven transmembrane receptor-like protein  | gbpln | Arabidopsis thaliana | AT2G01070.1   Symbols:   Lung seven transmembrane receptor family protein   chr2:75596-77625 FORWARD LENGTH=496                          | 500  | 496  | 0         | 99.2  | 85.2 | 90.8 |
| Rsa1.0_00223.1.g9002.t1 | gb EOA24516.1  hypothetical protein CARUB_v10017769mg [Capsella rubella]                                                                                                                                                                                                                                                                                                            | 287  | 286  | 1.00E-142 | 99.7  | 89.2 | 92.7 | hypothetical protein CARUB_v10017769mg          | gbpln | Capsella rubella     | AT2G01060.1   Symbols:   myb-like HTH transcriptional regulator family protein   chr2:73456-74902 REVERSE LENGTH=286                     | 287  | 286  | 1.00E-143 | 99.7  | 88.5 | 92.3 |
| Rsa1.0_00223.1.g9003.t1 | gb EOA12493.1  hypothetical protein CARUB_v10026096mg [Capsella rubella]                                                                                                                                                                                                                                                                                                            | 637  | 614  | 0         | 96.4  | 85.4 | 91.2 | hypothetical protein CARUB_v10026096mg          | gbpln | Capsella rubella     | AT5G47780.1   Symbols: GAUT4   galacturonosyltransferase 4   chr5:19347991-19350517 FORWARD LENGTH=616                                   | 637  | 616  | 0         | 96.7  | 85.9 | 91.1 |
| Rsa1.0_00223.1.g9004.t1 | #                                                                                                                                                                                                                                                                                                                                                                                   | #    | #    | #         | #     | #    | #    | -                                               | ----  | ----                 | #                                                                                                                                        | #    | #    | #         | #     | #    | #    |
| Rsa1.0_00223.1.g9005.t1 | #                                                                                                                                                                                                                                                                                                                                                                                   | #    | #    | #         | #     | #    | #    | -                                               | ----  | ----                 | #                                                                                                                                        | #    | #    | #         | #     | #    | #    |
| Rsa1.0_00223.1.g9006.t1 | gb EOA39558.1  hypothetical protein CARUB_v10008175mg [Capsella rubella]                                                                                                                                                                                                                                                                                                            | 1055 | 1024 | 0         | 97.1  | 87.1 | 92.1 | hypothetical protein CARUB_v10008175mg          | gbpln | Capsella rubella     | AT1G03370.1   Symbols:   C2 calcium/lipid-binding and GRAM domain containing protein   chr1:830968-834996 FORWARD LENGTH=1020            | 1055 | 1020 | 0         | 96.7  | 85.6 | 90.4 |
| Rsa1.0_00223.1.g9007.t1 | gb AAF79618.1 AC027665_19 F5M15.26 [Arabidopsis thaliana]                                                                                                                                                                                                                                                                                                                           | 1834 | 1838 | 0         | 100.2 | 42.9 | 56.9 | F5M15.26                                        | gbpln | Arabidopsis thaliana | #                                                                                                                                        | #    | #    | #         | #     | #    | #    |
| Rsa1.0_00223.1.g9008.t2 | ref XP_002308735.1  predicted protein [Populus trichocarpa] gi 22285471.1 gb EEE92258.1  predicted protein [Populus trichocarpa]                                                                                                                                                                                                                                                    | 919  | 542  | 1.00E-131 | 59.0  | 29.7 | 37.4 | predicted protein                               | gbpln | Populus trichocarpa  | AT5G60710.1   Symbols:   Zinc finger (C3HC4-type RING finger) family protein   chr5:24410953-24414849 REVERSE LENGTH=704                 | 919  | 704  | 3.00E-31  | 76.6  | 12.4 | 19.9 |
| Rsa1.0_00223.1.g9009.t1 | gb EOA23919.1  hypothetical protein CARUB_v10017134mg, partial [Capsella rubella]                                                                                                                                                                                                                                                                                                   | 444  | 477  | 0         | 107.4 | 88.7 | 93.0 | hypothetical protein CARUB_v10017134mg, partial | gbpln | Capsella rubella     | AT5G47810.1   Symbols: PFK2   phosphofructokinase 2   chr5:19356569-19357989 REVERSE LENGTH=444                                          | 444  | 444  | 0         | 100.0 | 88.1 | 93.0 |
| Rsa1.0_00223.1.g9010.t1 | db BAJ34459.1  unnamed protein product [Thellungiella halophila]                                                                                                                                                                                                                                                                                                                    | 571  | 562  | 0         | 98.4  | 88.1 | 92.6 | unnamed protein product                         | ----  | ----                 | AT5G47800.1   Symbols:   Phototropic-responsive NPH3 family protein   chr5:19354171-19356126 FORWARD LENGTH=559                          | 571  | 559  | 0         | 97.9  | 85.6 | 92.3 |
| Rsa1.0_00223.1.g9011.t1 | ref NP_199590.1  SMAD/FHA domain-containing protein [Arabidopsis thaliana] gi 10177915 db BAB11326.1  unnamed protein product [Arabidopsis thaliana] gi 18700141 gb AAL77682.1  AT5g47790/MCA23.11 [Arabidopsis thaliana] gi 33589742 gb AAQ22637.1  AT5g47790/MCA23.11 [Arabidopsis thaliana] gi 332008189 gb AED9572.1  SMAD/FHA domain-containing protein [Arabidopsis thaliana] | 375  | 369  | 1.00E-170 | 98.4  | 84.3 | 87.7 | SMAD/FHA domain-containing protein              | gbpln | Arabidopsis thaliana | AT5G47790.1   Symbols:   SMAD/FHA domain-containing protein   chr5:19351396-19352579 FORWARD LENGTH=369                                  | 375  | 369  | 1.00E-173 | 98.4  | 84.3 | 87.7 |
| Rsa1.0_00224.1.g9012.t1 | #                                                                                                                                                                                                                                                                                                                                                                                   | #    | #    | #         | #     | #    | #    | -                                               | ----  | ----                 | #                                                                                                                                        | #    | #    | #         | #     | #    | #    |
| Rsa1.0_00224.1.g9013.t1 | ref XP_002873602.1  nodulin MtN3 family protein [Arabidopsis lyrata subsp. lyrata] gi 297319439 gb EFH49861.1  nodulin MtN3 family protein [Arabidopsis lyrata subsp. lyrata]                                                                                                                                                                                                       | 314  | 295  | 1.00E-130 | 93.9  | 75.2 | 84.1 | nodulin MtN3 family protein                     | gbpln | Arabidopsis lyrata   | AT5G13170.1   Symbols: SAG29, SWEET15, AtSWEET15   senescence-associated gene 29   chr5:4181331-4183171 REVERSE LENGTH=292               | 314  | 292  | 1.00E-128 | 93.0  | 74.5 | 82.5 |
| Rsa1.0_00224.1.g9014.t1 | ref XP_002871549.1  avrPphB susceptible 1 [Arabidopsis lyrata subsp. lyrata] gi 297317386 gb EFH47808.1  avrPphB susceptible 1 [Arabidopsis lyrata subsp. lyrata]                                                                                                                                                                                                                   | 456  | 456  | 0         | 100.0 | 95.2 | 98.0 | avrPphB susceptible 1                           | gbpln | Arabidopsis lyrata   | AT5G13160.1   Symbols: PBS1   Protein kinase superfamily protein   chr5:4176854-4179682 FORWARD LENGTH=456                               | 456  | 456  | 0         | 100.0 | 95.0 | 98.2 |
| Rsa1.0_00224.1.g9015.t1 | ref XP_002873601.1  ATEXO70C1 [Arabidopsis lyrata subsp. lyrata] gi 297319438 gb EFH49860.1  ATEXO70C1 [Arabidopsis lyrata subsp. lyrata]                                                                                                                                                                                                                                           | 640  | 650  | 0         | 101.6 | 82.7 | 87.8 | ATEXO70C1                                       | gbpln | Arabidopsis lyrata   | AT5G13150.1   Symbols: ATEXO70C1, EXO70C1   exocyst subunit exo70 family protein C1   chr5:4172969-4174930 REVERSE LENGTH=653            | 640  | 653  | 0         | 102.0 | 80.5 | 86.7 |
| Rsa1.0_00224.1.g9016.t1 | ref XP_002873600.1  hypothetical protein ARALYDRAFT_488130 [Arabidopsis lyrata subsp. lyrata] gi 297319437 gb EFH49859.1  hypothetical protein ARALYDRAFT_488130 [Arabidopsis lyrata subsp. lyrata]                                                                                                                                                                                 | 231  | 267  | 4.00E-85  | 115.6 | 81.8 | 88.3 | hypothetical protein ARALYDRAFT_488130          | gbpln | Arabidopsis lyrata   | AT5G13140.1   Symbols:   Pollen Ole e 1 allergen and extensin family protein   chr5:4170688-4171744 REVERSE LENGTH=267                   | 231  | 267  | 1.00E-81  | 115.6 | 77.5 | 84.0 |

|                         |                                                                                                                                                                                                                                                                                                            |      |      |           |       |      |      |                                                    |       |                      |                                                                                                                                                                                                                                                                                                                                                                                                                                                                                                                                                        |      |      |           |       |      |      |
|-------------------------|------------------------------------------------------------------------------------------------------------------------------------------------------------------------------------------------------------------------------------------------------------------------------------------------------------|------|------|-----------|-------|------|------|----------------------------------------------------|-------|----------------------|--------------------------------------------------------------------------------------------------------------------------------------------------------------------------------------------------------------------------------------------------------------------------------------------------------------------------------------------------------------------------------------------------------------------------------------------------------------------------------------------------------------------------------------------------------|------|------|-----------|-------|------|------|
| Rsa1.0_00224.1.g9017.t1 | ref XP_002871548.1  ATP binding protein [Arabidopsis lyrata subsp. lyrata]  gi 297317385 gb EFH47807.1  ATP binding protein [Arabidopsis lyrata subsp. lyrata]                                                                                                                                             | 873  | 710  | 0         | 81.3  | 54.5 | 61.3 | ATP binding protein                                | gbpln | Arabidopsis lyrata   | AT5G13130.1   Symbols:   Histidine kinase-, DNA gyrase B-, and HSP90-like ATPase family protein   chr5:4166755-4170324 FORWARD LENGTH=708                                                                                                                                                                                                                                                                                                                                                                                                              | 873  | 708  | 0         | 81.1  | 54.6 | 61.7 |
| Rsa1.0_00224.1.g9018.t1 | gb AAM63489.1  unknown [Arabidopsis thaliana]                                                                                                                                                                                                                                                              | 268  | 272  | 1.00E-62  | 101.5 | 61.6 | 72.0 | unknown                                            | gbpln | Arabidopsis thaliana | AT5G13090.1   Symbols:   unknown protein; BEST Arabidopsis thaliana protein match is: unknown protein (TAIR:AT1G24270.1). Has 30201 Blast hits to 17322 proteins in 780 species: Archae - 12; Bacteria - 1396; Metazoa - 17338; Fungi - 3422; Plants - 5037; Viruses - 0; Other Eukaryotes - 2996 (source: NCBI BLINK).   chr5:4153758-4154567 REVERSE LENGTH=269                                                                                                                                                                                      | 268  | 269  | 3.00E-63  | 100.4 | 61.2 | 71.3 |
| Rsa1.0_00224.1.g9019.t1 | gb AC114409.1  WRKY75-1 transcription factor [Brassica napus]                                                                                                                                                                                                                                              | 147  | 147  | 5.00E-68  | 100.0 | 86.4 | 89.8 | WRKY75-1 transcription factor                      | gbpln | Brassica napus       | AT5G13080.1   Symbols: WRKY75, ATWRKY75   WRKY DNA-binding protein 75   chr5:4149928-4151019 REVERSE LENGTH=145                                                                                                                                                                                                                                                                                                                                                                                                                                        | 147  | 145  | 5.00E-65  | 98.6  | 87.8 | 91.2 |
| Rsa1.0_00224.1.g9020.t1 | ref NP_196810.5  ARMADILLO BTB protein 1 [Arabidopsis thaliana]  gi 325529879 sp B7U179.1 ABAP1_ARATH RecName: Full=ARMADILLO BTB ARABIDOPSIS PROTEIN 1; Short=ABAP1  gi 213391123 gb AGJ46331.1  ABAP1 [Arabidopsis thaliana]  gi 332004463 gb AED91846.1  ARMADILLO BTB protein 1 [Arabidopsis thaliana] | 708  | 737  | 0         | 104.1 | 85.6 | 92.7 | ARMADILLO BTB protein 1                            | gbpln | Arabidopsis thaliana | AT5G13060.1   Symbols: ABAP1   ARMADILLO BTB protein 1   chr5:4142958-4146952 FORWARD LENGTH=737                                                                                                                                                                                                                                                                                                                                                                                                                                                       | 708  | 737  | 0         | 104.1 | 85.6 | 92.7 |
| Rsa1.0_00224.1.g9021.t2 | emb CAC05433.1  5-formyltetrahydrofolate cyclo-ligase-like protein [Arabidopsis thaliana]                                                                                                                                                                                                                  | 260  | 287  | 1.00E-111 | 110.4 | 80.0 | 85.4 | 5-formyltetrahydrofolate cyclo-ligase-like protein | gbpln | Arabidopsis thaliana | AT5G13050.1   Symbols: 5-FCL   5-formyltetrahydrofolate cyclo-ligase   chr5:4136912-4138711 REVERSE LENGTH=277                                                                                                                                                                                                                                                                                                                                                                                                                                         | 260  | 277  | 1.00E-112 | 106.5 | 79.6 | 85.0 |
| Rsa1.0_00224.1.g9022.t1 | gb EOA20163.1  hypothetical protein CARUB_v10000455mg [Capsella rubella]                                                                                                                                                                                                                                   | 636  | 633  | 0         | 99.5  | 90.1 | 95.0 | hypothetical protein CARUB_v10000455mg             | gbpln | Capsella rubella     | AT5G13030.1   Symbols:   unknown protein; FUNCTIONS IN: molecular_function unknown; INVOLVED IN: biological_process unknown; LOCATED IN: chloroplast; EXPRESSED IN: 23 plant structures; EXPRESSED DURING: 13 growth stages; CONTAINS InterPro DOMAIN/s: Uncharacterised protein family UPF0061 (InterPro:IPR003846); Has 5046 Blast hits to 4997 proteins in 1211 species: Archae - 8; Bacteria - 2327; Metazoa - 120; Fungi - 134; Plants - 48; Viruses - 0; Other Eukaryotes - 2409 (source: NCBI BLINK).   chr5:4133216-4136461 FORWARD LENGTH=633 | 636  | 633  | 0         | 99.5  | 88.8 | 93.7 |
| Rsa1.0_00224.1.g9023.t1 | ref NP_196804.6  callose synthase [Arabidopsis thaliana]  gi 357529555 sp Q9LXT9.3 CAL3_ARATH RecName: Full=Callose synthase 3; AltName: Full=1,3-beta-glucan synthase; AltName: Full=Protein GLUCAN SYNTHASE-LIKE 12  gi 332004456 gb AED91839.1  callose synthase [Arabidopsis thaliana]                 | 1957 | 1955 | 0         | 99.9  | 96.1 | 98.0 | callose synthase                                   | gbpln | Arabidopsis thaliana | AT5G13000.1   Symbols: ATGSL12, gsl12   glucan synthase-like 12   chr5:4110445-4121202 REVERSE LENGTH=1955                                                                                                                                                                                                                                                                                                                                                                                                                                             | 1957 | 1955 | 0         | 99.9  | 96.1 | 98.0 |
| Rsa1.0_00224.1.g9024.t1 | ref XP_002873592.1  hypothetical protein ARALYDRAFT_488115 [Arabidopsis lyrata subsp. lyrata]  gi 297319429 gb EFH49851.1  hypothetical protein ARALYDRAFT_488115 [Arabidopsis lyrata subsp. lyrata]                                                                                                       | 83   | 80   | 4.00E-22  | 96.4  | 65.1 | 74.7 | hypothetical protein ARALYDRAFT_488115             | gbpln | Arabidopsis lyrata   | AT5G12990.1   Symbols: GLE40   CLAVATA3/ESR-RELATED 40   chr5:4109234-4109768 REVERSE LENGTH=80                                                                                                                                                                                                                                                                                                                                                                                                                                                        | 83   | 80   | 4.00E-19  | 96.4  | 61.4 | 69.9 |
| Rsa1.0_00224.1.g9025.t1 | ref XP_002873591.1  hypothetical protein ARALYDRAFT_909249 [Arabidopsis lyrata subsp. lyrata]  gi 297319428 gb EFH49850.1  hypothetical protein ARALYDRAFT_909249 [Arabidopsis lyrata subsp. lyrata]                                                                                                       | 293  | 308  | 1.00E-114 | 105.1 | 71.7 | 81.9 | hypothetical protein ARALYDRAFT_909249             | gbpln | Arabidopsis lyrata   | AT5G12980.1   Symbols:   Cell differentiation, Red1-like protein   chr5:4105562-4108139 REVERSE LENGTH=311                                                                                                                                                                                                                                                                                                                                                                                                                                             | 293  | 311  | 1.00E-115 | 106.1 | 70.6 | 81.6 |
| Rsa1.0_00224.1.g9026.t1 | gb EOA22845.1  hypothetical protein CARUB_v10003573mg [Capsella rubella]                                                                                                                                                                                                                                   | 769  | 769  | 0         | 100.0 | 95.6 | 98.7 | hypothetical protein CARUB_v10003573mg             | gbpln | Capsella rubella     | AT5G12970.1   Symbols:   Calcium-dependent lipid-binding (CaLB domain) plant phosphoribosyltransferase family protein   chr5:4102992-4105301 FORWARD LENGTH=769                                                                                                                                                                                                                                                                                                                                                                                        | 769  | 769  | 0         | 100.0 | 95.2 | 98.4 |



|                         |                                                                                                                                                                                                                                                                                                                                                   |      |      |           |       |      |      |                                        |       |                      |                                                                                                                                                                                                                                                                                                                                                                                                                                                                                                                                          |      |      |           |       |      |      |
|-------------------------|---------------------------------------------------------------------------------------------------------------------------------------------------------------------------------------------------------------------------------------------------------------------------------------------------------------------------------------------------|------|------|-----------|-------|------|------|----------------------------------------|-------|----------------------|------------------------------------------------------------------------------------------------------------------------------------------------------------------------------------------------------------------------------------------------------------------------------------------------------------------------------------------------------------------------------------------------------------------------------------------------------------------------------------------------------------------------------------------|------|------|-----------|-------|------|------|
| Rsa1.0_00224.1.g9027.t1 | refNP_196799.1   uncharacterized protein [Arabidopsis thaliana] gi 7630051 emb CAB88259.1   putative protein [Arabidopsis thaliana] gi 26451123 dbj BA042665.1   unknown protein [Arabidopsis thaliana] gi 332004451 gb AED91834.1   uncharacterized protein AT5G12950 [Arabidopsis thaliana]                                                     | 133  | 861  | 6.00E-46  | 647.4 | 74.4 | 83.5 | uncharacterized protein                | gbpln | Arabidopsis thaliana | AT5G12950.1   Symbols:   Putative glycosyl hydrolase of unknown function (DUF1680)   chr5:4093117-4096806 FORWARD LENGTH=861                                                                                                                                                                                                                                                                                                                                                                                                             | 133  | 861  | 1.00E-48  | 647.4 | 74.4 | 83.5 |
| Rsa1.0_00224.1.g9028.t1 | refXP_002871534.1   hypothetical protein ARALYDRAFT_909242 [Arabidopsis lyrata subsp. lyrata] gi 297317371 gb EFH47793.1   hypothetical protein ARALYDRAFT_909242 [Arabidopsis lyrata subsp. lyrata]                                                                                                                                              | 375  | 371  | 1.00E-172 | 98.9  | 79.2 | 88.8 | hypothetical protein ARALYDRAFT_909242 | gbpln | Arabidopsis lyrata   | AT5G12940.1   Symbols:   Leucine-rich repeat (LRR) family protein   chr5:4087782-4088997 FORWARD LENGTH=371                                                                                                                                                                                                                                                                                                                                                                                                                              | 375  | 371  | 1.00E-172 | 98.9  | 77.3 | 88.0 |
| Rsa1.0_00224.1.g9029.t1 | refXP_002871534.1   hypothetical protein ARALYDRAFT_909242 [Arabidopsis lyrata subsp. lyrata] gi 297317371 gb EFH47793.1   hypothetical protein ARALYDRAFT_909242 [Arabidopsis lyrata subsp. lyrata]                                                                                                                                              | 376  | 371  | 1.00E-165 | 98.7  | 76.9 | 85.1 | hypothetical protein ARALYDRAFT_909242 | gbpln | Arabidopsis lyrata   | AT5G12940.1   Symbols:   Leucine-rich repeat (LRR) family protein   chr5:4087782-4088997 FORWARD LENGTH=371                                                                                                                                                                                                                                                                                                                                                                                                                              | 376  | 371  | 1.00E-164 | 98.7  | 75.0 | 84.0 |
| Rsa1.0_00224.1.g9030.t2 | dbj BAB09269.1   unnamed protein product [Arabidopsis thaliana]                                                                                                                                                                                                                                                                                   | 257  | 422  | 4.00E-28  | 164.2 | 26.8 | 36.2 | unnamed protein product                | gbpln | Arabidopsis thaliana | AT5G18880.1   Symbols:   RNA-directed DNA polymerase (reverse transcriptase)-related family protein   chr5:6300535-6301422 REVERSE LENGTH=295                                                                                                                                                                                                                                                                                                                                                                                            | 257  | 295  | 7.00E-17  | 114.8 | 25.7 | 33.9 |
| Rsa1.0_00224.1.g9031.t1 | refXP_002873586.1   hypothetical protein ARALYDRAFT_488108 [Arabidopsis lyrata subsp. lyrata] gi 297319423 gb EFH49845.1   hypothetical protein ARALYDRAFT_488108 [Arabidopsis lyrata subsp. lyrata]                                                                                                                                              | 1078 | 559  | 0         | 51.9  | 44.9 | 47.9 | hypothetical protein ARALYDRAFT_488108 | gbpln | Arabidopsis lyrata   | AT5G12900.1   Symbols:   unknown protein; FUNCTIONS IN: molecular_function unknown; INVOLVED IN: biological_process unknown; LOCATED IN: chloroplast; EXPRESSED IN: 21 plant structures; EXPRESSED DURING: 13 growth stages; BEST Arabidopsis thaliana protein match is: unknown protein (TAIR:AT1G12330.1); Has 1807 Blast hits to 1807 proteins in 277 species: Archae - 0; Bacteria - 0; Metazoa - 736; Fungi - 347; Plants - 385; Viruses - 0; Other Eukaryotes - 339 (source: NCBI BLINK)   chr5:4072151-4074445 REVERSE LENGTH=562 | 1078 | 562  | 0         | 52.1  | 45.1 | 48.0 |
| Rsa1.0_00224.1.g9032.t1 | refNP_196792.1   proline-rich family protein [Arabidopsis thaliana] gi 7630044 emb CAB88252.1   putative protein [Arabidopsis thaliana] gi 38566520 gb AAR24150.1   At5g12880 [Arabidopsis thaliana] gi 40823652 gb AAR92296.1   At5g12880 [Arabidopsis thaliana] gi 332004442 gb AED91825.1   proline-rich family protein [Arabidopsis thaliana] | 76   | 73   | 5.00E-25  | 96.1  | 81.6 | 82.9 | proline-rich family protein            | gbpln | Arabidopsis thaliana | AT5G12880.1   Symbols:   proline-rich family protein   chr5:4068714-4068935 REVERSE LENGTH=73                                                                                                                                                                                                                                                                                                                                                                                                                                            | 76   | 73   | 8.00E-28  | 96.1  | 81.6 | 82.9 |
| Rsa1.0_00224.1.g9033.t1 | refXP_002871525.1   hypothetical protein ARALYDRAFT_488087 [Arabidopsis lyrata subsp. lyrata] gi 297317362 gb EFH47784.1   hypothetical protein ARALYDRAFT_488087 [Arabidopsis lyrata subsp. lyrata]                                                                                                                                              | 377  | 1581 | 1.00E-63  | 419.4 | 52.0 | 61.0 | hypothetical protein ARALYDRAFT_488087 | gbpln | Arabidopsis lyrata   | AT5G12400.1   Symbols:   DNA binding; zinc ion binding; DNA binding   chr5:4013813-4021018 FORWARD LENGTH=1602                                                                                                                                                                                                                                                                                                                                                                                                                           | 377  | 1602 | 2.00E-64  | 424.9 | 50.1 | 59.7 |
| Rsa1.0_00224.1.g9034.t1 | refXP_002873568.1   binding protein [Arabidopsis lyrata subsp. lyrata] gi 297319405 gb EFH49827.1   binding protein [Arabidopsis lyrata subsp. lyrata]                                                                                                                                                                                            | 191  | 167  | 2.00E-71  | 87.4  | 73.3 | 79.6 | binding protein                        | gbpln | Arabidopsis lyrata   | AT5G12390.1   Symbols: FIS1B   Tetratricopeptide repeat (TPR)-like superfamily protein   chr5:4010948-4011950 REVERSE LENGTH=167                                                                                                                                                                                                                                                                                                                                                                                                         | 191  | 167  | 2.00E-72  | 87.4  | 73.3 | 78.5 |
| Rsa1.0_00224.1.g9035.t1 | refXP_002871524.1   hypothetical protein ARALYDRAFT_488086 [Arabidopsis lyrata subsp. lyrata] gi 297317361 gb EFH47783.1   hypothetical protein ARALYDRAFT_488086 [Arabidopsis lyrata subsp. lyrata]                                                                                                                                              | 294  | 315  | 2.33E-156 | 107.1 | 87.1 | 91.2 | hypothetical protein ARALYDRAFT_488086 | gbpln | Arabidopsis lyrata   | AT5G12380.1   Symbols: ANNAT8   annexin 8   chr5:4009223-4010687 FORWARD LENGTH=316                                                                                                                                                                                                                                                                                                                                                                                                                                                      | 294  | 316  | 1.00E-144 | 107.5 | 84.7 | 88.8 |
| Rsa1.0_00224.1.g9036.t4 | gb EOA22673.1   hypothetical protein CARUB_v10003376mg [Capsella rubella]                                                                                                                                                                                                                                                                         | 827  | 825  | 0         | 99.8  | 92.1 | 95.6 | hypothetical protein CARUB_v10003376mg | gbpln | Capsella rubella     | AT5G12370.2   Symbols: SEC10   exocyst complex component sec10   chr5:4003002-4008445 REVERSE LENGTH=825                                                                                                                                                                                                                                                                                                                                                                                                                                 | 827  | 825  | 0         | 99.8  | 91.8 | 95.3 |

|                         |                                                                                                                                                                                                                                                                                                                                                                                                                |      |      |           |       |      |      |                                               |       |                      |                                                                                                                                                                                                                                                                                                                                                                   |      |      |           |       |      |      |
|-------------------------|----------------------------------------------------------------------------------------------------------------------------------------------------------------------------------------------------------------------------------------------------------------------------------------------------------------------------------------------------------------------------------------------------------------|------|------|-----------|-------|------|------|-----------------------------------------------|-------|----------------------|-------------------------------------------------------------------------------------------------------------------------------------------------------------------------------------------------------------------------------------------------------------------------------------------------------------------------------------------------------------------|------|------|-----------|-------|------|------|
| Rsa1.0_00224.1.g9037.t1 | ref[XP_002873566.1] hypothetical protein ARALYDRAFT_488082 [Arabidopsis lyrata subsp. lyrata] gi 297319403 gb EFH49825.1  hypothetical protein ARALYDRAFT_488082 [Arabidopsis lyrata subsp. lyrata]                                                                                                                                                                                                            | 190  | 196  | 8.00E-80  | 103.2 | 76.8 | 86.8 | hypothetical protein ARALYDRAFT_488082        | gbpln | Arabidopsis lyrata   | AT5G12360.1   Symbols:   unknown protein; BEST Arabidopsis thaliana protein match is: unknown protein (TAIR:AT3G14190.1); Has 30201 Blast hits to 17322 proteins in 780 species: Archae - 12; Bacteria - 1396; Metazoa - 17338; Fungi - 3422; Plants - 5037; Viruses - 0; Other Eukaryotes - 2996 (source: NCBI BLINK).   chr5:4000890-4002248 REVERSE LENGTH=194 | 190  | 194  | 9.00E-73  | 102.1 | 77.9 | 85.8 |
| Rsa1.0_00224.1.g9038.t2 | gb[EOA19846.1] hypothetical protein CARUB_v10000094mg [Capsella rubella]                                                                                                                                                                                                                                                                                                                                       | 1063 | 1075 | 0         | 101.1 | 92.3 | 96.0 | hypothetical protein CARUB_v10000094mg        | gbpln | Capsella rubella     | AT5G12350.1   Symbols:   Regulator of chromosome condensation (RCC1) family with FYVE zinc finger domain   chr5:3995789-4000545 FORWARD LENGTH=1075                                                                                                                                                                                                               | 1063 | 1075 | 0         | 101.1 | 92.4 | 95.5 |
| Rsa1.0_00224.1.g9039.t1 | gb[EOA22373.1] hypothetical protein CARUB_v10003004mg [Capsella rubella]                                                                                                                                                                                                                                                                                                                                       | 548  | 461  | 1.00E-161 | 84.1  | 57.1 | 63.7 | hypothetical protein CARUB_v10003004mg        | gbpln | Capsella rubella     | AT5G12330.4   Symbols: LRP1   Lateral root primordium (LRP) protein-related   chr5:3987677-3989408 REVERSE LENGTH=407                                                                                                                                                                                                                                             | 548  | 407  | 1.00E-163 | 74.3  | 59.1 | 64.1 |
| Rsa1.0_00224.1.g9040.t1 | dbj[BAJ08162.1] ankyrin repeats protein [Brassica rapa subsp. chinensis]                                                                                                                                                                                                                                                                                                                                       | 144  | 144  | 2.00E-72  | 100.0 | 94.4 | 95.8 | ankyrin repeats protein                       | gbpln | Brassica rapa        | AT5G12320.1   Symbols:   ankyrin repeat family protein   chr5:3982762-3983899 FORWARD LENGTH=144                                                                                                                                                                                                                                                                  | 144  | 144  | 5.00E-69  | 100.0 | 86.1 | 93.8 |
| Rsa1.0_00224.1.g9041.t2 | ref[XP_002873563.1] zinc finger family protein [Arabidopsis lyrata subsp. lyrata] gi 297319400 gb EFH49822.1  zinc finger family protein [Arabidopsis lyrata subsp. lyrata]                                                                                                                                                                                                                                    | 305  | 252  | 2.00E-87  | 82.6  | 59.7 | 66.6 | zinc finger family protein                    | gbpln | Arabidopsis lyrata   | AT5G12310.1   Symbols:   RING/U-box superfamily protein   chr5:3980485-3982093 REVERSE LENGTH=254                                                                                                                                                                                                                                                                 | 305  | 254  | 9.00E-89  | 83.3  | 60.7 | 66.2 |
| Rsa1.0_00224.1.g9042.t1 | ref[XP_002871521.1] predicted protein [Arabidopsis lyrata subsp. lyrata] gi 297317358 gb EFH47780.1  predicted protein [Arabidopsis lyrata subsp. lyrata]                                                                                                                                                                                                                                                      | 627  | 631  | 0         | 100.6 | 78.1 | 87.1 | predicted protein                             | gbpln | Arabidopsis lyrata   | AT5G12260.1   Symbols:   BEST Arabidopsis thaliana protein match is: glycosyltransferase family protein 2 (TAIR:AT5G60700.1); Has 1807 Blast hits to 1807 proteins in 277 species: Archae - 0; Bacteria - 0; Metazoa - 736; Fungi - 347; Plants - 385; Viruses - 0; Other Eukaryotes - 339 (source: NCBI BLINK).   chr5:3966417-3968684 FORWARD LENGTH=624        | 627  | 624  | 0         | 99.5  | 77.4 | 86.6 |
| Rsa1.0_00224.1.g9043.t1 | dbj[BAJ34332.1] unnamed protein product [Theilingella halophila]                                                                                                                                                                                                                                                                                                                                               | 448  | 450  | 0         | 100.4 | 98.7 | 99.3 | unnamed protein product                       | ----  | ----                 | AT5G12250.1   Symbols: TUB6   beta-6 tubulin   chr5:3961317-3962971 REVERSE LENGTH=449                                                                                                                                                                                                                                                                            | 448  | 449  | 0         | 100.2 | 98.0 | 98.7 |
| Rsa1.0_00224.1.g9044.t2 | ref[NP_001190294.1] uncharacterized protein [Arabidopsis thaliana] gi 34365673 gb AAQ65148.1  At5g12240 [Arabidopsis thaliana] gi 51969328 dbj BAD43356.1  unnamed protein product [Arabidopsis thaliana] gi 332004399 gb AED91782.1  uncharacterized protein AT5G12240 [Arabidopsis thaliana]                                                                                                                 | 121  | 114  | 1.00E-37  | 94.2  | 71.1 | 81.0 | uncharacterized protein                       | gbpln | Arabidopsis thaliana | AT5G12240.2   Symbols:   unknown protein; FUNCTIONS IN: molecular function unknown; INVOLVED IN: biological process unknown; LOCATED IN: cellular component unknown; EXPRESSED IN: 19 plant structures; EXPRESSED DURING: 10 growth stages.   chr5:3959120-3960777 REVERSE LENGTH=114                                                                             | 121  | 114  | 2.00E-40  | 94.2  | 71.1 | 81.0 |
| Rsa1.0_00224.1.g9045.t1 | gb[AAR20782.1] At5g12230 [Arabidopsis thaliana] gi 44681434 gb AAS47657.1  At5g12230 [Arabidopsis thaliana]                                                                                                                                                                                                                                                                                                    | 239  | 238  | 1.00E-52  | 99.6  | 64.9 | 73.6 | At5g12230                                     | gbpln | Arabidopsis thaliana | AT5G12230.1   Symbols: MED19A   MED19A; BEST Arabidopsis thaliana protein match is: unknown protein (TAIR:AT5G19480.2); Has 1807 Blast hits to 1807 proteins in 277 species: Archae - 0; Bacteria - 0; Metazoa - 736; Fungi - 347; Plants - 385; Viruses - 0; Other Eukaryotes - 339 (source: NCBI BLINK).   chr5:3953915-3955285 REVERSE LENGTH=221              | 239  | 221  | 5.00E-55  | 92.5  | 65.3 | 74.1 |
| Rsa1.0_00224.1.g9046.t1 | ref[NP_568259.1] RAB geranylgeranyl transferase beta subunit 1 [Arabidopsis thaliana] gi 28466947 gb AAO44082.1  At5g12210 [Arabidopsis thaliana] gi 28466951 gb AAO44084.1  At4g26580 [Arabidopsis thaliana] gi 110743899 dbj BAE99784.1  Rab geranylgeranyltransferase, beta subunit [Arabidopsis thaliana] gi 332004391 gb AED91774.1  RAB geranylgeranyl transferase beta subunit 1 [Arabidopsis thaliana] | 323  | 321  | 1.00E-164 | 99.4  | 89.5 | 95.4 | RAB geranylgeranyl transferase beta subunit 1 | gbpln | Arabidopsis thaliana | AT5G12210.1   Symbols: ATRGTB1, RGTB1   RAB geranylgeranyl transferase beta subunit 1   chr5:3947254-3949595 FORWARD LENGTH=321                                                                                                                                                                                                                                   | 323  | 321  | 1.00E-167 | 99.4  | 89.5 | 95.4 |
| Rsa1.0_00224.1.g9047.t1 | ref[XP_002873555.1] dihydropyrimidinase [Arabidopsis lyrata subsp. lyrata] gi 297319392 gb EFH49814.1  dihydropyrimidinase [Arabidopsis lyrata subsp. lyrata]                                                                                                                                                                                                                                                  | 540  | 531  | 0         | 98.3  | 92.0 | 95.0 | dihydropyrimidinase                           | gbpln | Arabidopsis lyrata   | AT5G12200.1   Symbols: PYD2   pyrimidine 2   chr5:3941700-3944727 REVERSE LENGTH=531                                                                                                                                                                                                                                                                              | 540  | 531  | 0         | 98.3  | 90.9 | 94.8 |
| Rsa1.0_00224.1.g9048.t1 | gb[EOA23032.1] hypothetical protein CARUB_v10003798mg [Capsella rubella]                                                                                                                                                                                                                                                                                                                                       | 124  | 124  | 9.00E-62  | 100.0 | 91.9 | 95.2 | hypothetical protein CARUB_v10003798mg        | gbpln | Capsella rubella     | AT5G12190.1   Symbols:   RNA-binding (RRM/RBD/RNP motifs) family protein   chr5:3940731-3941105 REVERSE LENGTH=124                                                                                                                                                                                                                                                | 124  | 124  | 3.00E-64  | 100.0 | 91.1 | 95.2 |
| Rsa1.0_00224.1.g9049.t1 | gb[EOA22225.1] hypothetical protein CARUB_v10002812mg [Capsella rubella]                                                                                                                                                                                                                                                                                                                                       | 523  | 530  | 0         | 101.3 | 96.7 | 98.5 | hypothetical protein CARUB_v10002812mg        | gbpln | Capsella rubella     | AT5G12180.1   Symbols: CPK17   calcium-dependent protein kinase 17   chr5:3937136-3939323 FORWARD LENGTH=528                                                                                                                                                                                                                                                      | 523  | 528  | 0         | 101.0 | 96.2 | 98.1 |

|                         |                                                                                                                                                                                                                                                                                                                                                                                                                                                                                                                                              |     |      |           |       |      |      |                                                        |       |                      |                                                                                                                                                                                                                                                                                                                                                        |     |     |           |       |      |      |
|-------------------------|----------------------------------------------------------------------------------------------------------------------------------------------------------------------------------------------------------------------------------------------------------------------------------------------------------------------------------------------------------------------------------------------------------------------------------------------------------------------------------------------------------------------------------------------|-----|------|-----------|-------|------|------|--------------------------------------------------------|-------|----------------------|--------------------------------------------------------------------------------------------------------------------------------------------------------------------------------------------------------------------------------------------------------------------------------------------------------------------------------------------------------|-----|-----|-----------|-------|------|------|
| Rsa1.0_00224.1.g9050.t1 | gb[EOA19967.1] hypothetical protein CARUB_v10000228mg [Capsella rubella]                                                                                                                                                                                                                                                                                                                                                                                                                                                                     | 836 | 829  | 0         | 99.2  | 87.2 | 91.6 | hypothetical protein CARUB_v10000228mg                 | gbpln | Capsella rubella     | AT5G12150.1   Symbols:   Rho GTPase activation protein (RhoGAP) with PH domain   chr5:3924393-3930100 REVERSE LENGTH=827                                                                                                                                                                                                                               | 836 | 827 | 0         | 98.9  | 88.3 | 92.7 |
| Rsa1.0_00224.1.g9051.t1 | gb AAQ03209.1 AF408862.1 phytocystatin [Brassica rapa subsp. pekinensis]<br>ref NP_568257.1  TerC integral membrane domain-containing protein [Arabidopsis thaliana]                                                                                                                                                                                                                                                                                                                                                                         | 101 | 101  | 3.00E-48  | 100.0 | 95.0 | 95.0 | phytocystatin                                          | gbpln | Brassica rapa        | AT5G12140.1   Symbols: ATCYS1, CYS1   cystatin-1   chr5:3923295-3923936 REVERSE LENGTH=101                                                                                                                                                                                                                                                             | 101 | 101 | 5.00E-48  | 100.0 | 86.1 | 94.1 |
| Rsa1.0_00224.1.g9052.t1 | gi 332004383 gb AED91766.1  protein pigment defective 149 [Arabidopsis thaliana]                                                                                                                                                                                                                                                                                                                                                                                                                                                             | 368 | 384  | 1.00E-169 | 104.3 | 86.7 | 92.9 | TerC integral membrane domain-containing protein       | gbpln | Arabidopsis thaliana | AT5G12130.1   Symbols: PDE149, ATTERC   integral membrane TerC family protein   chr5:3919613-3922154 FORWARD LENGTH=384                                                                                                                                                                                                                                | 368 | 384 | 1.00E-172 | 104.3 | 86.7 | 92.9 |
| Rsa1.0_00224.1.g9053.t1 | gb[EOA20213.1] hypothetical protein CARUB_v10000507mg [Capsella rubella]                                                                                                                                                                                                                                                                                                                                                                                                                                                                     | 601 | 605  | 0         | 100.7 | 76.4 | 85.2 | hypothetical protein CARUB_v10000507mg                 | gbpln | Capsella rubella     | AT5G12120.1   Symbols:   Ubiquitin-associated/translation elongation factor EF1B protein   chr5:3916229-3918088 REVERSE LENGTH=619                                                                                                                                                                                                                     | 601 | 619 | 0         | 103.0 | 75.2 | 83.7 |
| Rsa1.0_00224.1.g9054.t1 | gb[EOA19454.1] hypothetical protein CARUB_v10001845mg, partial [Capsella rubella]<br>ref NP_196771.1  pentatricopeptide repeat-containing protein [Arabidopsis thaliana]                                                                                                                                                                                                                                                                                                                                                                     | 229 | 240  | 1.00E-102 | 104.8 | 86.9 | 93.0 | hypothetical protein CARUB_v10001845mg, partial        | gbpln | Capsella rubella     | AT5G12110.1   Symbols:   Glutathione S-transferase, C-terminal-like, Translation elongation factor EF1B/ribosomal protein S6   chr5:3914483-3915732 FORWARD LENGTH=228                                                                                                                                                                                 | 229 | 228 | 1.00E-99  | 99.6  | 85.6 | 90.0 |
| Rsa1.0_00224.1.g9055.t1 | gi 75171712 sp Q9FMQ1.1 PP376_ARAT H RecName: Full=Pentatricopeptide repeat-containing protein At5g12100, mitochondrial; Flags: Precursor<br>gi 9759377 db BAB10028.1  unnamed protein product [Arabidopsis thaliana]<br>gi 28973713 gb AAO64173.1  unknown protein [Arabidopsis thaliana]<br>gi 29824237 gb AAP04079.1  unknown protein [Arabidopsis thaliana]<br>gi 110737169 db BAF00534.1  hypothetical protein [Arabidopsis thaliana]<br>gi 332004380 gb AED91763.1  pentatricopeptide repeat-containing protein [Arabidopsis thaliana] | 824 | 816  | 0         | 99.0  | 80.0 | 87.9 | pentatricopeptide repeat-containing protein            | gbpln | Arabidopsis thaliana | AT5G12100.1   Symbols:   pentatricopeptide (PPR) repeat-containing protein   chr5:3911388-3913638 FORWARD LENGTH=816                                                                                                                                                                                                                                   | 824 | 816 | 0         | 99.0  | 80.0 | 87.9 |
| Rsa1.0_00224.1.g9056.t1 | ref XP_002873549.1  mechanosensitive ion channel domain-containing protein [Arabidopsis lyrata subsp. lyrata]<br>gi 297319386 gb EFH49808.1  mechanosensitive ion channel domain-containing protein [Arabidopsis lyrata subsp. lyrata]                                                                                                                                                                                                                                                                                                       | 744 | 732  | 0         | 98.4  | 83.5 | 90.3 | mechanosensitive ion channel domain-containing protein | gbpln | Arabidopsis lyrata   | AT5G12080.3   Symbols: MSL10, ATMSL10   mechanosensitive channel of small conductance-like 10   chr5:3898182-3900923 REVERSE LENGTH=734                                                                                                                                                                                                                | 744 | 734 | 0         | 98.7  | 82.4 | 89.7 |
| Rsa1.0_00224.1.g9057.t1 | ref XP_002871510.1  hypothetical protein ARALYDRAFT_488048 [Arabidopsis lyrata subsp. lyrata]<br>gi 297317347 gb EFH47769.1  hypothetical protein ARALYDRAFT_488048 [Arabidopsis lyrata subsp. lyrata]                                                                                                                                                                                                                                                                                                                                       | 350 | 364  | 1.00E-109 | 104.0 | 78.3 | 85.4 | hypothetical protein ARALYDRAFT_488048                 | gbpln | Arabidopsis lyrata   | AT5G12050.1   Symbols:   unknown protein; BEST Arabidopsis thaliana protein match is: unknown protein (TAIR:AT3G13980.1). Has 1807 Blast hits to 1807 proteins in 277 species: Archae - 0; Bacteria - 0; Metazoa - 736; Fungi - 347; Plants - 385; Viruses - 0; Other Eukaryotes - 339 (source: NCBI BLink).   chr5:3890213-3891301 FORWARD LENGTH=362 | 350 | 362 | 1.00E-111 | 103.4 | 78.3 | 84.9 |
| Rsa1.0_00225.1.g9058.t1 | #                                                                                                                                                                                                                                                                                                                                                                                                                                                                                                                                            | #   | #    | #         | #     | #    | -    | ----                                                   | ----  | ----                 | #                                                                                                                                                                                                                                                                                                                                                      | #   | #   | #         | #     | #    |      |
| Rsa1.0_00225.1.g9059.t1 | #                                                                                                                                                                                                                                                                                                                                                                                                                                                                                                                                            | #   | #    | #         | #     | #    | -    | ----                                                   | ----  | ----                 | #                                                                                                                                                                                                                                                                                                                                                      | #   | #   | #         | #     | #    |      |
| Rsa1.0_00225.1.g9060.t1 | gb AAD20646.1  putative TNP2-like transposon protein [Arabidopsis thaliana]                                                                                                                                                                                                                                                                                                                                                                                                                                                                  | 345 | 1040 | 3.00E-77  | 301.4 | 39.7 | 47.8 | putative TNP2-like transposon protein                  | gbpln | Arabidopsis thaliana | #                                                                                                                                                                                                                                                                                                                                                      | #   | #   | #         | #     | #    |      |
| Rsa1.0_00225.1.g9061.t1 | #                                                                                                                                                                                                                                                                                                                                                                                                                                                                                                                                            | #   | #    | #         | #     | #    | -    | ----                                                   | ----  | ----                 | #                                                                                                                                                                                                                                                                                                                                                      | #   | #   | #         | #     | #    |      |
| Rsa1.0_00225.1.g9062.t1 | gb AAB48344.1  reverse transcriptase, partial [Arabidopsis thaliana]                                                                                                                                                                                                                                                                                                                                                                                                                                                                         | 369 | 199  | 2.00E-39  | 53.9  | 20.6 | 26.8 | reverse transcriptase, partial                         | gbpln | Arabidopsis thaliana | AT1G10000.1   Symbols:   Ribonuclease H-like superfamily protein   chr1:3263877-3264788 REVERSE LENGTH=303                                                                                                                                                                                                                                             | 369 | 303 | 3.00E-30  | 82.1  | 19.5 | 26.8 |
| Rsa1.0_00225.1.g9063.t1 | ref NP_174523.2  nitrate transporter 1.5 [Arabidopsis thaliana]<br>gi 310947340 sp Q9LQL2.2 PTR14_ARA TH RecName: Full=Nitrate transporter 1.5 gi 332193367 gb AEE31488.1  nitrate transporter 1.5 [Arabidopsis thaliana]                                                                                                                                                                                                                                                                                                                    | 604 | 614  | 0         | 101.7 | 90.6 | 94.9 | nitrate transporter 1.5                                | gbpln | Arabidopsis thaliana | AT1G32450.1   Symbols: NRT1.5   nitrate transporter 1.5   chr1:11715337-11719807 REVERSE LENGTH=614                                                                                                                                                                                                                                                    | 604 | 614 | 0         | 101.7 | 90.6 | 94.9 |

|                         |                                                                                                                                                                                                                                                                                                                                                                                                                                                                                                                                                                                                                                                                                                                                                                                                                                                                                                                                                                                                                                                                                                                                                                                                                                                                                                                                                                                                                                                                                                                                               |     |     |           |       |      |      |                                                             |       |                      |                                                                                                                                  |     |     |           |       |      |      |
|-------------------------|-----------------------------------------------------------------------------------------------------------------------------------------------------------------------------------------------------------------------------------------------------------------------------------------------------------------------------------------------------------------------------------------------------------------------------------------------------------------------------------------------------------------------------------------------------------------------------------------------------------------------------------------------------------------------------------------------------------------------------------------------------------------------------------------------------------------------------------------------------------------------------------------------------------------------------------------------------------------------------------------------------------------------------------------------------------------------------------------------------------------------------------------------------------------------------------------------------------------------------------------------------------------------------------------------------------------------------------------------------------------------------------------------------------------------------------------------------------------------------------------------------------------------------------------------|-----|-----|-----------|-------|------|------|-------------------------------------------------------------|-------|----------------------|----------------------------------------------------------------------------------------------------------------------------------|-----|-----|-----------|-------|------|------|
| Rsa1.0_00225.1.g9064.t1 | ref NP_564401.1  pentatricopeptide repeat-containing protein [Arabidopsis thaliana]<br>gi 193806407 sp POC7R0.1 PPR69_ARA TH RecName: Full=Pentatricopeptide repeat-containing protein At1g32415. mitochondrial; Flags: Precursor<br>gi 332193363 gb AEE31484.1  pentatricopeptide repeat-containing protein [Arabidopsis thaliana]<br>ref NP_564400.1  vacuolar protein sorting-associated protein 55-like protein [Arabidopsis thaliana]<br>gi 30692698 ref NP_849741.1  vacuolar protein sorting-associated protein 55-like protein [Arabidopsis thaliana]<br>gi 145324108 ref NP_001077643.1  vacuolar protein sorting-associated protein 55-like protein [Arabidopsis thaliana]<br>gi 145324110 ref NP_001077644.1  vacuolar protein sorting-associated protein 55-like protein [Arabidopsis thaliana]<br>gi 145324112 ref NP_001077645.1  vacuolar protein sorting-associated protein 55-like protein [Arabidopsis thaliana]<br>gi 75167725 sp Q9AST6.1 VSP55_ARAT H RecName: Full=Vacuolar protein sorting-associated protein 55 homolog<br>gi 13605734 gb AAK32860.1 AF361848.1 At1g32410/F5D14.6 [Arabidopsis thaliana]<br>gi 17978901 gb AAL47420.1 At1g32410/F5D14.6 [Arabidopsis thaliana]<br>gi 51972031 dbj BAD44680.1  unknown protein [Arabidopsis thaliana]<br>gi 110741330 dbj BAF02215.1  hypothetical protein [Arabidopsis thaliana]<br>gi 332193358 gb AEE31479.1  vacuolar protein sorting-associated protein 55-like protein [Arabidopsis thaliana]<br>gi 332193359 gb AEE31480.1  vacuolar protein sorting-associated | 787 | 761 | 0         | 96.7  | 83.9 | 90.9 | pentatricopeptide repeat-containing protein                 | gbpln | Arabidopsis thaliana | AT1G32415.1   Symbols:   pentatricopeptide (PPR) repeat-containing protein   chr1:11695611-11697896 FORWARD LENGTH=761           | 787 | 761 | 0         | 96.7  | 83.9 | 90.9 |
| Rsa1.0_00225.1.g9065.t1 | gi 75167725 sp Q9AST6.1 VSP55_ARAT H RecName: Full=Vacuolar protein sorting-associated protein 55 homolog<br>gi 13605734 gb AAK32860.1 AF361848.1 At1g32410/F5D14.6 [Arabidopsis thaliana]<br>gi 17978901 gb AAL47420.1 At1g32410/F5D14.6 [Arabidopsis thaliana]<br>gi 51972031 dbj BAD44680.1  unknown protein [Arabidopsis thaliana]<br>gi 110741330 dbj BAF02215.1  hypothetical protein [Arabidopsis thaliana]<br>gi 332193358 gb AEE31479.1  vacuolar protein sorting-associated protein 55-like protein [Arabidopsis thaliana]<br>gi 332193359 gb AEE31480.1  vacuolar protein sorting-associated                                                                                                                                                                                                                                                                                                                                                                                                                                                                                                                                                                                                                                                                                                                                                                                                                                                                                                                                       | 140 | 140 | 2.00E-66  | 100.0 | 90.7 | 95.0 | vacuolar protein sorting-associated protein 55-like protein | gbpln | Arabidopsis thaliana | AT1G32410.5   Symbols:   Vacuolar protein sorting 55 (VPS55) family protein   chr1:11694398-11695297 FORWARD LENGTH=140          | 140 | 140 | 5.00E-69  | 100.0 | 90.7 | 95.0 |
| Rsa1.0_00225.1.g9066.t1 | dbj BAJ34310.1  unnamed protein product [Theellungiella halophila]                                                                                                                                                                                                                                                                                                                                                                                                                                                                                                                                                                                                                                                                                                                                                                                                                                                                                                                                                                                                                                                                                                                                                                                                                                                                                                                                                                                                                                                                            | 278 | 280 | 1.00E-129 | 100.7 | 92.1 | 96.4 | unnamed protein product                                     | ----  | ----                 | AT1G32400.3   Symbols: TOM2A   tobamovirus multiplication 2A   chr1:11689393-11690873 REVERSE LENGTH=280                         | 278 | 280 | 1.00E-129 | 100.7 | 89.9 | 95.3 |
| Rsa1.0_00225.1.g9067.t1 | ref NP_174578.1  F-box and associated interaction domain-containing protein [Arabidopsis thaliana]<br>gi 378405165 sp Q9MAP1.2 FB33_ARAT H RecName: Full=Putative F-box protein At1g33020<br>gi 332193429 gb AEE31550.1  F-box and associated interaction domain-containing protein [Arabidopsis thaliana]                                                                                                                                                                                                                                                                                                                                                                                                                                                                                                                                                                                                                                                                                                                                                                                                                                                                                                                                                                                                                                                                                                                                                                                                                                    | 417 | 548 | 2.00E-82  | 131.4 | 46.0 | 57.6 | F-box and associated interaction domain-containing protein  | gbpln | Arabidopsis thaliana | AT1G33020.1   Symbols:   F-box and associated interaction domains-containing protein   chr1:11962746-11964832 FORWARD LENGTH=548 | 417 | 548 | 4.00E-85  | 131.4 | 46.0 | 57.6 |
| Rsa1.0_00225.1.g9068.t2 | emb CAA22150.1  hypothetical protein [Arabidopsis thaliana]<br>gi 7269091 emb CAB79200.1  hypothetical protein [Arabidopsis thaliana]                                                                                                                                                                                                                                                                                                                                                                                                                                                                                                                                                                                                                                                                                                                                                                                                                                                                                                                                                                                                                                                                                                                                                                                                                                                                                                                                                                                                         | 201 | 457 | 2.00E-33  | 227.4 | 34.3 | 40.3 | hypothetical protein                                        | gbpln | Arabidopsis thaliana | #                                                                                                                                | #   | #   | #         | #     | #    |      |
| Rsa1.0_00225.1.g9069.t1 | ref XP_002890988.1  ribose-phosphate pyrophosphokinase 2 [Arabidopsis lyrata subsp. lyrata]<br>gi 297336830 gb EFH67247.1  ribose-phosphate pyrophosphokinase 2 [Arabidopsis lyrata subsp. lyrata]                                                                                                                                                                                                                                                                                                                                                                                                                                                                                                                                                                                                                                                                                                                                                                                                                                                                                                                                                                                                                                                                                                                                                                                                                                                                                                                                            | 394 | 400 | 0         | 101.5 | 95.4 | 98.5 | ribose-phosphate pyrophosphokinase 2                        | gbpln | Arabidopsis lyrata   | AT1G32380.1   Symbols: PRS2   phosphoribosyl pyrophosphate (PRPP) synthase 2   chr1:11682033-11684229 FORWARD LENGTH=400         | 394 | 400 | 0         | 101.5 | 95.4 | 98.5 |
| Rsa1.0_00225.1.g9070.t1 | ref NP_564397.1  tobamovirus multiplication 2B protein [Arabidopsis thaliana]<br>gi 21594393 gb AAM66003.1  unknown [Arabidopsis thaliana]<br>gi 332193350 gb AEE31471.1  tobamovirus multiplication 2B protein [Arabidopsis thaliana]                                                                                                                                                                                                                                                                                                                                                                                                                                                                                                                                                                                                                                                                                                                                                                                                                                                                                                                                                                                                                                                                                                                                                                                                                                                                                                        | 121 | 131 | 2.00E-55  | 108.3 | 93.4 | 98.3 | tobamovirus multiplication 2B protein                       | gbpln | Arabidopsis thaliana | AT1G32370.2   Symbols: TOM2B, TTM1   tobamovirus multiplication 2B   chr1:11677005-11678088 FORWARD LENGTH=131                   | 121 | 131 | 4.00E-58  | 108.3 | 93.4 | 98.3 |
| Rsa1.0_00225.1.g9071.t1 | ref XP_002890985.1  zinc finger (CCCH-type) family protein [Arabidopsis lyrata subsp. lyrata]<br>gi 297336827 gb EFH67244.1  zinc finger (CCCH-type) family protein [Arabidopsis lyrata subsp. lyrata]                                                                                                                                                                                                                                                                                                                                                                                                                                                                                                                                                                                                                                                                                                                                                                                                                                                                                                                                                                                                                                                                                                                                                                                                                                                                                                                                        | 387 | 385 | 1.00E-162 | 99.5  | 84.8 | 88.9 | zinc finger (CCCH-type) family protein                      | gbpln | Arabidopsis lyrata   | AT1G32380.1   Symbols:   Zinc finger (CCCH-type) family protein   chr1:11673325-11675162 FORWARD LENGTH=384                      | 387 | 384 | 1.00E-164 | 99.2  | 84.2 | 88.6 |

| Rsa1.0_00225.1.g9072.t1 | #                                                                                                                                                                                                                                                                                                                                                                                                                                                                                                                                                                | #    | #    | #         | #     | #    | #    | -                                                 | ---   | ----                 | #                                                                                                                                                    | #    | #    | #         | #     | #    |      |
|-------------------------|------------------------------------------------------------------------------------------------------------------------------------------------------------------------------------------------------------------------------------------------------------------------------------------------------------------------------------------------------------------------------------------------------------------------------------------------------------------------------------------------------------------------------------------------------------------|------|------|-----------|-------|------|------|---------------------------------------------------|-------|----------------------|------------------------------------------------------------------------------------------------------------------------------------------------------|------|------|-----------|-------|------|------|
| Rsa1.0_00225.1.g9073.t1 | gb AAC19267.1  T14P8.13 [Arabidopsis thaliana]                                                                                                                                                                                                                                                                                                                                                                                                                                                                                                                   | 161  | 423  | 5.00E-11  | 262.7 | 34.8 | 52.2 | T14P8.13                                          | gbpln | Arabidopsis thaliana | #                                                                                                                                                    | #    | #    | #         | #     | #    |      |
| Rsa1.0_00225.1.g9074.t1 | ref XP_002887975.1  hypothetical protein ARALYDRAFT_893153 [Arabidopsis lyrata subsp. lyrata] gi 297333816 gb EFH64234.1  hypothetical protein ARALYDRAFT_893153 [Arabidopsis lyrata subsp. lyrata]                                                                                                                                                                                                                                                                                                                                                              | 380  | 381  | 1.00E-158 | 100.3 | 73.9 | 83.2 | hypothetical protein ARALYDRAFT_893153            | gbpln | Arabidopsis lyrata   | AT1G77520.1   Symbols:   O-methyltransferase family protein   chr1:29130557-29132007 FORWARD LENGTH=381                                              | 380  | 381  | 1.00E-157 | 100.3 | 69.5 | 79.7 |
| Rsa1.0_00225.1.g9075.t1 | gb AAG51783.1 AC079679.3 reverse transcriptase, putative; 16838-20266 [Arabidopsis thaliana]                                                                                                                                                                                                                                                                                                                                                                                                                                                                     | 263  | 1142 | 1.00E-34  | 434.2 | 33.5 | 49.0 | reverse transcriptase, putative; 16838-20266      | gbpln | Arabidopsis thaliana | AT2G34320.1   Symbols:   Polynucleotidyl transferase, ribonuclease H-like superfamily protein   chr2:14484959-14485837 FORWARD LENGTH=292            | 263  | 292  | 9.00E-21  | 111.0 | 24.7 | 41.4 |
| Rsa1.0_00226.1.g9076.t1 | dbj BAA77394.1  SAE1-S9-protein [Brassica rapa]                                                                                                                                                                                                                                                                                                                                                                                                                                                                                                                  | 246  | 255  | 2.00E-55  | 103.7 | 45.5 | 54.1 | SAE1-S9-protein                                   | gbpln | Brassica rapa        | AT5G18880.1   Symbols:   RNA-directed DNA polymerase (reverse transcriptase)-related family protein   chr5:6300535-6301422 REVERSE LENGTH=295        | 246  | 295  | 9.00E-53  | 119.9 | 39.8 | 50.8 |
| Rsa1.0_00226.1.g9077.t1 | ref XP_002864336.1  pinoid-binding protein 1 [Arabidopsis lyrata subsp. lyrata] gi 297310171 gb EFH40595.1  pinoid-binding protein 1 [Arabidopsis lyrata subsp. lyrata]                                                                                                                                                                                                                                                                                                                                                                                          | 131  | 131  | 7.00E-60  | 100.0 | 85.5 | 91.6 | pinoid-binding protein 1                          | gbpln | Arabidopsis lyrata   | AT5G54490.1   Symbols:   PBP1   pinoid-binding protein 1   chr5:22121458-22121841 FORWARD LENGTH=127                                                 | 131  | 127  | 2.00E-60  | 96.9  | 84.0 | 90.8 |
| Rsa1.0_00226.1.g9078.t1 | ref NP_173378.1  Kelch repeat-containing protein [Arabidopsis thaliana] gi 122215562 sp Q3ED93.1 Y1946_ARAT H RecName: Full=Kelch repeat-containing protein At1g19460 gi 332191733 gb AEE29854.1  Kelch repeat-containing protein [Arabidopsis thaliana]                                                                                                                                                                                                                                                                                                         | 410  | 416  | 9.00E-76  | 101.5 | 43.7 | 60.5 | Kelch repeat-containing protein                   | gbpln | Arabidopsis thaliana | AT1G19460.1   Symbols:   Galactose oxidase/kelch repeat superfamily protein   chr1:6738484-6739734 FORWARD LENGTH=416                                | 410  | 416  | 2.00E-78  | 101.5 | 43.7 | 60.5 |
| Rsa1.0_00226.1.g9079.t1 | ref XP_002866044.1  hypothetical protein ARALYDRAFT_495528 [Arabidopsis lyrata subsp. lyrata] gi 297311879 gb EFH42303.1  hypothetical protein ARALYDRAFT_495528 [Arabidopsis lyrata subsp. lyrata]                                                                                                                                                                                                                                                                                                                                                              | 201  | 209  | 1.00E-46  | 104.0 | 59.7 | 69.7 | hypothetical protein ARALYDRAFT_495528            | gbpln | Arabidopsis lyrata   | AT5G54470.1   Symbols:   B-box type zinc finger family protein   chr5:22114584-22115315 REVERSE LENGTH=215                                           | 201  | 215  | 5.00E-47  | 107.0 | 61.7 | 70.1 |
| Rsa1.0_00226.1.g9080.t1 | gb EOA13904.1  hypothetical protein CARUB_v10027020mg [Capsella rubella]                                                                                                                                                                                                                                                                                                                                                                                                                                                                                         | 242  | 241  | 2.00E-85  | 99.6  | 83.1 | 87.6 | hypothetical protein CARUB_v10027020mg            | gbpln | Capsella rubella     | AT5G54430.1   Symbols:   ATPHOS32, PHOS32   Adenine nucleotide alpha hydrolases-like superfamily protein   chr5:22097563-22099693 REVERSE LENGTH=242 | 242  | 242  | 3.00E-84  | 100.0 | 84.3 | 88.8 |
| Rsa1.0_00226.1.g9081.t1 | ref XP_002866042.1  hypothetical protein ARALYDRAFT_331786 [Arabidopsis lyrata subsp. lyrata] gi 297311877 gb EFH42301.1  hypothetical protein ARALYDRAFT_331786 [Arabidopsis lyrata subsp. lyrata]                                                                                                                                                                                                                                                                                                                                                              | 1277 | 1259 | 0         | 98.6  | 91.8 | 95.5 | hypothetical protein ARALYDRAFT_331786            | gbpln | Arabidopsis lyrata   | AT5G54440.1   Symbols:   CLUB, AtTRS130   CLUB   chr5:22100056-22107695 FORWARD LENGTH=1259                                                          | 1277 | 1259 | 0         | 98.6  | 91.3 | 95.1 |
| Rsa1.0_00226.1.g9082.t1 | ref XP_002864329.1  predicted protein [Arabidopsis lyrata subsp. lyrata] gi 297310164 gb EFH40588.1  predicted protein [Arabidopsis lyrata subsp. lyrata]                                                                                                                                                                                                                                                                                                                                                                                                        | 293  | 292  | 1.00E-154 | 99.7  | 91.5 | 96.6 | predicted protein                                 | gbpln | Arabidopsis lyrata   | AT5G54400.1   Symbols:   S-adenosyl-L-methionine-dependent methyltransferases superfamily protein   chr5:22090680-22091998 FORWARD LENGTH=292        | 293  | 292  | 1.00E-157 | 99.7  | 91.1 | 96.2 |
| Rsa1.0_00226.1.g9083.t1 | gb AAB94051.1  PAP-specific phosphatase [Arabidopsis thaliana]                                                                                                                                                                                                                                                                                                                                                                                                                                                                                                   | 367  | 373  | 0         | 101.6 | 90.2 | 95.4 | PAP-specific phosphatase                          | gbpln | Arabidopsis thaliana | AT5G54390.1   Symbols:   AHL, ATAHL, HL   HAL2-like   chr5:22086133-22087586 FORWARD LENGTH=373                                                      | 367  | 373  | 0         | 101.6 | 89.6 | 94.8 |
| Rsa1.0_00226.1.g9084.t1 | ref NP_563720.1  putative protein arginine N-methyltransferase 4.2 [Arabidopsis thaliana] gi 75336166 sp Q9MAT5.1 ANM10_ARAT H RecName: Full=Protein arginine N-methyltransferase PRMT10 gi 7211979 gb AAF04050.1 AC004809.8 Similar to protein arginine N-methyltransferase from Rattus norvegicus gb U60882. ESTs gb Z30908 and gb Z29205 come from this gene [Arabidopsis thaliana] gi 22135775 gb AAM91044.1  At1g04870/F13M7.12 [Arabidopsis thaliana] gi 332189633 gb AEE27754.1  putative protein arginine N-methyltransferase 4.2 [Arabidopsis thaliana] | 381  | 383  | 0         | 100.5 | 85.8 | 90.6 | putative protein arginine N-methyltransferase 4.2 | gbpln | Arabidopsis thaliana | AT1G04870.2   Symbols:   PRMT10, ATPRMT10   protein arginine methyltransferase 10   chr1:1373485-1375598 REVERSE LENGTH=383                          | 381  | 383  | 0         | 100.5 | 85.8 | 90.6 |
| Rsa1.0_00226.1.g9085.t1 | gb EOA13308.1  hypothetical protein CARUB_v10026343mg [Capsella rubella]                                                                                                                                                                                                                                                                                                                                                                                                                                                                                         | 467  | 471  | 0         | 100.9 | 75.8 | 85.0 | hypothetical protein CARUB_v10026343mg            | gbpln | Capsella rubella     | AT5G42240.1   Symbols:   scpl42   serine carboxypeptidase-like 42   chr5:16888717-16890931 FORWARD LENGTH=473                                        | 467  | 473  | 0         | 101.3 | 74.5 | 82.9 |

| Rsa1.0_00226.1.g9086.t1 | #                                                                                                                                                                                                                                                                                                                                                                                                                                                                                                                                                                                                                                                                                              | #    | #    | #         | #     | #    | #    | -                                                            | ----  | ----                 | #                                                                                                                                                                                                                                                                                                                                                                                                                                                                              | #    | #    | #         | #     | #    |      |
|-------------------------|------------------------------------------------------------------------------------------------------------------------------------------------------------------------------------------------------------------------------------------------------------------------------------------------------------------------------------------------------------------------------------------------------------------------------------------------------------------------------------------------------------------------------------------------------------------------------------------------------------------------------------------------------------------------------------------------|------|------|-----------|-------|------|------|--------------------------------------------------------------|-------|----------------------|--------------------------------------------------------------------------------------------------------------------------------------------------------------------------------------------------------------------------------------------------------------------------------------------------------------------------------------------------------------------------------------------------------------------------------------------------------------------------------|------|------|-----------|-------|------|------|
| Rsa1.0_00226.1.g9086.t1 | ref NP_200248.1  late embryogenesis abundant protein-like protein [Arabidopsis thaliana]<br>gi 10257484 dbj BAB10109.1  root cap protein 2-like protein [Arabidopsis thaliana] gi 71143049 gb AA223915.1  AT5G54370 [Arabidopsis thaliana] gi 332009106 gb AED96489.1  late embryogenesis abundant protein-like protein [Arabidopsis thaliana]                                                                                                                                                                                                                                                                                                                                                 | 337  | 337  | 0         | 100.0 | 93.8 | 97.9 | late embryogenesis abundant protein-like protein             | gbpln | Arabidopsis thaliana | AT5G54370.1   Symbols:   Late embryogenesis abundant (LEA) protein-related   chr5:22075334-22076567 FORWARD LENGTH=337                                                                                                                                                                                                                                                                                                                                                         | 337  | 337  | 0         | 100.0 | 93.8 | 97.9 |
| Rsa1.0_00226.1.g9088.t1 | gb EOA12434.1  hypothetical protein CARUB_v10028316mg [Capsella rubella]                                                                                                                                                                                                                                                                                                                                                                                                                                                                                                                                                                                                                       | 482  | 480  | 0         | 99.6  | 85.9 | 90.7 | hypothetical protein CARUB_v10028316mg                       | gbpln | Capsella rubella     | AT5G54310.1   Symbols: NEV, AGD5   ARF-GAP domain 5   chr5:22057262-22061066 REVERSE LENGTH=483                                                                                                                                                                                                                                                                                                                                                                                | 482  | 483  | 0         | 100.2 | 83.6 | 88.8 |
| Rsa1.0_00226.1.g9089.t1 | ref NP_200241.1  uncharacterized protein [Arabidopsis thaliana] gi 9759503 dbj BAB10753.1  cotton fiber expressed protein 1-like protein [Arabidopsis thaliana] gi 20466706 gb AAM20670.1  cotton fiber expressed protein 1-like protein [Arabidopsis thaliana] gi 23198238 gb AAN15646.1  cotton fiber expressed protein 1-like protein [Arabidopsis thaliana] gi 332009099 gb AED96482.1  uncharacterized protein AT5G54300 [Arabidopsis thaliana]                                                                                                                                                                                                                                           | 327  | 326  | 1.00E-103 | 99.7  | 66.4 | 75.8 | uncharacterized protein                                      | gbpln | Arabidopsis thaliana | AT5G54300.1   Symbols:   Protein of unknown function (DUF761)   chr5:22054270-22055342 REVERSE LENGTH=326                                                                                                                                                                                                                                                                                                                                                                      | 327  | 326  | 1.00E-105 | 99.7  | 66.4 | 75.8 |
| Rsa1.0_00226.1.g9091.t1 | ref NP_001190537.1  cytochrome c-type biogenesis ccda-like chloroplastic protein [Arabidopsis thaliana] gi 332009098 gb AED96481.1  cytochrome c-type biogenesis ccda-like chloroplastic protein [Arabidopsis thaliana]                                                                                                                                                                                                                                                                                                                                                                                                                                                                        | 353  | 355  | 1.00E-161 | 100.6 | 89.8 | 95.2 | cytochrome c-type biogenesis ccda-like chloroplastic protein | gbpln | Arabidopsis thaliana | AT5G54290.2   Symbols: CcdA   cytochrome c biogenesis protein family   chr5:22051097-22053923 FORWARD LENGTH=355                                                                                                                                                                                                                                                                                                                                                               | 353  | 355  | 1.00E-164 | 100.6 | 89.8 | 95.2 |
| Rsa1.0_00226.1.g9092.t2 | ref XP_002866036.1  predicted protein [Arabidopsis lyrata subsp. lyrata] gi 297311871 gb EFH42295.1  predicted protein [Arabidopsis lyrata subsp. lyrata]                                                                                                                                                                                                                                                                                                                                                                                                                                                                                                                                      | 1204 | 1219 | 0         | 101.2 | 89.9 | 94.0 | predicted protein                                            | gbpln | Arabidopsis lyrata   | AT5G54280.2   Symbols: ATM2, ATMYOS1, ATM4   myosin 2   chr5:22039606-22045592 REVERSE LENGTH=1220                                                                                                                                                                                                                                                                                                                                                                             | 1204 | 1220 | 0         | 101.3 | 89.8 | 94.1 |
| Rsa1.0_00226.1.g9093.t1 | ref NP_200238.1  light-harvesting chlorophyll B-binding protein 3 [Arabidopsis thaliana] gi 4741952 gb AAD28773.1 AF134126.1 Lhcb3 protein [Arabidopsis thaliana] gi 5002210 gb AAD37362.1 AF143691.1 type III chlorophyll a/b binding protein [Arabidopsis thaliana] gi 13605754 gb AAK32870.1 AF361858.1 AT5G54270/MDK4.9 [Arabidopsis thaliana] gi 13926339 gb AAK49633.1 AF372917.1 AT5G54270/MDK4.9 [Arabidopsis thaliana] gi 9759500 dbj BAB10750.1  Lhcb3 chlorophyll a/b binding protein [Arabidopsis thaliana] gi 16323262 gb AAL15365.1  AT5G54270/MDK4.9 [Arabidopsis thaliana] gi 332009094 gb AED96477.1  light-harvesting chlorophyll B-binding protein 3 [Arabidopsis thaliana] | 265  | 265  | 1.00E-150 | 100.0 | 98.9 | 99.2 | light-harvesting chlorophyll B-binding protein 3             | gbpln | Arabidopsis thaliana | AT5G54270.1   Symbols: LHCB3, LHCB3*1   light-harvesting chlorophyll B-binding protein 3   chr5:22038424-22039383 FORWARD LENGTH=265                                                                                                                                                                                                                                                                                                                                           | 265  | 265  | 1.00E-152 | 100.0 | 98.9 | 99.2 |
| Rsa1.0_00226.1.g9094.t1 | ref XP_002864331.1  hypothetical protein ARALYDRAFT.495522 [Arabidopsis lyrata subsp. lyrata] gi 297310166 gb EFH40590.1  hypothetical protein ARALYDRAFT.495522 [Arabidopsis lyrata subsp. lyrata]                                                                                                                                                                                                                                                                                                                                                                                                                                                                                            | 369  | 369  | 1.00E-114 | 100.0 | 58.8 | 72.9 | hypothetical protein ARALYDRAFT.495522                       | gbpln | Arabidopsis lyrata   | AT5G54450.1   Symbols:   Protein of unknown function (DUF295)   chr5:22108273-22109379 REVERSE LENGTH=368                                                                                                                                                                                                                                                                                                                                                                      | 369  | 368  | 1.00E-116 | 99.7  | 60.7 | 71.8 |
| Rsa1.0_00227.1.g9095.t1 | ref XP_002876320.1  hypothetical protein ARALYDRAFT.485995 [Arabidopsis lyrata subsp. lyrata] gi 297322158 gb EFH52579.1  hypothetical protein ARALYDRAFT.485995 [Arabidopsis lyrata subsp. lyrata]                                                                                                                                                                                                                                                                                                                                                                                                                                                                                            | 185  | 139  | 2.00E-44  | 75.1  | 55.1 | 61.6 | hypothetical protein ARALYDRAFT.485995                       | gbpln | Arabidopsis lyrata   | AT3G55646.1   Symbols:   unknown protein; FUNCTIONS IN: molecular_function unknown; INVOLVED IN: biological_process unknown; LOCATED IN: chloroplast; BEST Arabidopsis thaliana protein match is: unknown protein (TAIR:AT3G39855.2); Has 35333 Blast hits to 34131 proteins in 2444 species: Archae - 798; Bacteria - 22429; Metazoa - 974; Fungi - 991; Plants - 531; Viruses - 0; Other Eukaryotes - 9610 (source: NCBI BLINK).   chr3:20645087-20646148 FORWARD LENGTH=146 | 185  | 146  | 7.00E-42  | 78.9  | 55.7 | 62.7 |

|                         |                                                                                                                                                                                                                                                                                                                                                                              |      |      |           |       |      |      |                                                 |       |                      |                                                                                                                                                                                                                                                                                                                                                 |      |     |           |       |      |      |
|-------------------------|------------------------------------------------------------------------------------------------------------------------------------------------------------------------------------------------------------------------------------------------------------------------------------------------------------------------------------------------------------------------------|------|------|-----------|-------|------|------|-------------------------------------------------|-------|----------------------|-------------------------------------------------------------------------------------------------------------------------------------------------------------------------------------------------------------------------------------------------------------------------------------------------------------------------------------------------|------|-----|-----------|-------|------|------|
| Rsa1.0_00227.1.g9096.t1 | gb EOA24465.1  hypothetical protein CARUB_v10017721mg [Capsella rubella]                                                                                                                                                                                                                                                                                                     | 245  | 302  | 1.00E-139 | 123.3 | 98.8 | 99.6 | hypothetical protein CARUB_v10017721mg          | gbpln | Capsella rubella     | AT3G55620.1   Symbols: emb1624   Translation initiation factor IF6   chr3:20634581-20636312 FORWARD LENGTH=245                                                                                                                                                                                                                                  | 245  | 245 | 1.00E-140 | 100.0 | 97.6 | 99.6 |
| Rsa1.0_00227.1.g9097.t1 | #                                                                                                                                                                                                                                                                                                                                                                            | #    | #    | #         | #     | #    | #    | -                                               | ----  | ----                 | #                                                                                                                                                                                                                                                                                                                                               | #    | #   | #         | #     | #    | #    |
| Rsa1.0_00227.1.g9098.t1 | #                                                                                                                                                                                                                                                                                                                                                                            | #    | #    | #         | #     | #    | #    | -                                               | ----  | ----                 | #                                                                                                                                                                                                                                                                                                                                               | #    | #   | #         | #     | #    | #    |
| Rsa1.0_00227.1.g9099.t1 | gb AAK01361.1 AF314812.1 delta 1-pyrroline-5-carboxylate synthetase B [Brassica napus]                                                                                                                                                                                                                                                                                       | 726  | 727  | 0         | 100.1 | 93.7 | 96.4 | delta 1-pyrroline-5-carboxylate synthetase B    | gbpln | Brassica napus       | AT3G55610.1   Symbols: P5CS2   delta 1-pyrroline-5-carboxylate synthase 2   chr3:20624278-20628989 REVERSE LENGTH=726                                                                                                                                                                                                                           | 726  | 726 | 0         | 100.0 | 91.2 | 95.3 |
| Rsa1.0_00227.1.g9100.t1 | ref NP_567025.1  Mitochondrial glycoprotein family protein [Arabidopsis thaliana] gi 21554314 gb AAM63419.1 unknown [Arabidopsis thaliana] gi 30102600 gb AAP21218.1  At3g55605 [Arabidopsis thaliana] gi 110743885 dbj BAE99777.1  hypothetical protein [Arabidopsis thaliana] gi 332645886 gb AEE79407.1  Mitochondrial glycoprotein family protein [Arabidopsis thaliana] | 252  | 258  | 4.00E-98  | 102.4 | 79.0 | 86.1 | Mitochondrial glycoprotein family protein       | gbpln | Arabidopsis thaliana | AT3G55605.1   Symbols:   Mitochondrial glycoprotein family protein   chr3:20622668-20623889 FORWARD LENGTH=258                                                                                                                                                                                                                                  | 252  | 258 | 1.00E-100 | 102.4 | 79.0 | 86.1 |
| Rsa1.0_00227.1.g9101.t1 | ref XP_002878040.1  hypothetical protein ARALYDRAFT_906983 [Arabidopsis lyrata subsp. lyrata] gi 29732387 gb EFH54298.1  hypothetical protein ARALYDRAFT_906983 [Arabidopsis lyrata subsp. lyrata]                                                                                                                                                                           | 81   | 139  | 4.00E-33  | 171.6 | 82.7 | 87.7 | hypothetical protein ARALYDRAFT_906983          | gbpln | Arabidopsis lyrata   | AT3G55570.1   Symbols:   unknown protein; BEST Arabidopsis thaliana protein match is: unknown protein (TAIR:AT5G41761.1); Has 128 Blast hits to 128 proteins in 12 species: Archae - 0; Bacteria - 0; Metazoa - 0; Fungi - 0; Plants - 128; Viruses - 0; Other Eukaryotes - 0 (source: NCBI BLink).   chr3:20610166-20610671 REVERSE LENGTH=109 | 81   | 109 | 5.00E-35  | 134.6 | 82.7 | 86.4 |
| Rsa1.0_00227.1.g9102.t1 | gb AAG51754.1 AC068667.33 reverse transcriptase, putative; 100033-105622 [Arabidopsis thaliana]                                                                                                                                                                                                                                                                              | 1566 | 1557 | 0         | 99.4  | 40.9 | 58.9 | reverse transcriptase, putative; 100033-105622  | gbpln | Arabidopsis thaliana | ATMG00310.1   Symbols: ORF154   RNA-directed DNA polymerase (reverse transcriptase)-related family protein   chrM:90883-91347 REVERSE LENGTH=154                                                                                                                                                                                                | 1566 | 154 | 3.00E-34  | 9.8   | 4.3  | 6.4  |
| Rsa1.0_00227.1.g9103.t1 | ref XP_002878039.1  hypothetical protein ARALYDRAFT_906980 [Arabidopsis lyrata subsp. lyrata] gi 29732387 gb EFH54298.1  hypothetical protein ARALYDRAFT_906980 [Arabidopsis lyrata subsp. lyrata]                                                                                                                                                                           | 303  | 308  | 1.00E-125 | 101.7 | 87.8 | 94.4 | hypothetical protein ARALYDRAFT_906980          | gbpln | Arabidopsis lyrata   | AT3G55560.1   Symbols: AGF2, AHL15   AT-hook protein of GA feedback 2   chr3:20604904-20605836 REVERSE LENGTH=310                                                                                                                                                                                                                               | 303  | 310 | 1.00E-127 | 102.3 | 87.8 | 94.4 |
| Rsa1.0_00227.1.g9104.t1 | gb EOA11936.1  hypothetical protein CARUB_v10016547mg, partial [Capsella rubella]                                                                                                                                                                                                                                                                                            | 117  | 149  | 3.00E-16  | 127.4 | 40.2 | 56.4 | hypothetical protein CARUB_v10016547mg, partial | gbpln | Capsella rubella     | #                                                                                                                                                                                                                                                                                                                                               | #    | #   | #         | #     | #    | #    |
| Rsa1.0_00227.1.g9105.t1 | gb EOA23348.1  hypothetical protein CARUB_v10019451mg [Capsella rubella]                                                                                                                                                                                                                                                                                                     | 638  | 682  | 0         | 106.9 | 87.1 | 92.3 | hypothetical protein CARUB_v10019451mg          | gbpln | Capsella rubella     | AT3G55550.1   Symbols:   Concanavalin A-like lectin protein kinase family protein   chr3:20600019-20602073 REVERSE LENGTH=684                                                                                                                                                                                                                   | 638  | 684 | 0         | 107.2 | 86.8 | 91.8 |
| Rsa1.0_00227.1.g9106.t1 | dbj BAB02146.1  copia retroelement pol polyprotein-like [Arabidopsis thaliana]                                                                                                                                                                                                                                                                                               | 350  | 526  | 1.00E-13  | 150.3 | 10.0 | 12.9 | copia retroelement pol polyprotein-like         | gbpln | Arabidopsis thaliana | #                                                                                                                                                                                                                                                                                                                                               | #    | #   | #         | #     | #    | #    |
| Rsa1.0_00227.1.g9107.t1 | ref XP_002876307.1  hypothetical protein ARALYDRAFT_906973 [Arabidopsis lyrata subsp. lyrata] gi 297322145 gb EFH52566.1  hypothetical protein ARALYDRAFT_906973 [Arabidopsis lyrata subsp. lyrata]                                                                                                                                                                          | 88   | 80   | 8.00E-21  | 90.9  | 59.1 | 68.2 | hypothetical protein ARALYDRAFT_906973          | gbpln | Arabidopsis lyrata   | AT3G55515.1   Symbols: DVL8, RTFL7   ROTUNDIFOLIA like 7   chr3:20590923-20591162 FORWARD LENGTH=79                                                                                                                                                                                                                                             | 88   | 79  | 3.00E-22  | 89.8  | 55.7 | 70.5 |
| Rsa1.0_00227.1.g9108.t1 | #                                                                                                                                                                                                                                                                                                                                                                            | #    | #    | #         | #     | #    | #    | -                                               | ----  | ----                 | #                                                                                                                                                                                                                                                                                                                                               | #    | #   | #         | #     | #    | #    |
| Rsa1.0_00227.1.g9109.t1 | ref XP_002876306.1  hypothetical protein ARALYDRAFT_485977 [Arabidopsis lyrata subsp. lyrata] gi 297322144 gb EFH52565.1  hypothetical protein ARALYDRAFT_485977 [Arabidopsis lyrata subsp. lyrata]                                                                                                                                                                          | 415  | 601  | 1.00E-81  | 144.8 | 41.7 | 48.0 | hypothetical protein ARALYDRAFT_485977          | gbpln | Arabidopsis lyrata   | AT3G55510.1   Symbols: RBL   Noc2p family   chr3:20579232-20582124 FORWARD LENGTH=594                                                                                                                                                                                                                                                           | 415  | 594 | 5.00E-83  | 143.1 | 41.7 | 47.5 |
| Rsa1.0_00227.1.g9110.t1 | ref XP_002878036.1  ATEXPA16 [Arabidopsis lyrata subsp. lyrata] gi 297323874 gb EFH54295.1  ATEXPA16 [Arabidopsis lyrata subsp. lyrata]                                                                                                                                                                                                                                      | 260  | 260  | 1.00E-137 | 100.0 | 90.4 | 95.0 | ATEXPA16                                        | gbpln | Arabidopsis lyrata   | AT3G55500.1   Symbols: ATEXPA16, EXP16, ATEXP16, ATHEXP ALPHA 1.7, EXPA16   expansin A16   chr3:20575073-20576102 REVERSE LENGTH=260                                                                                                                                                                                                            | 260  | 260 | 1.00E-138 | 100.0 | 89.2 | 94.6 |
| Rsa1.0_00227.1.g9111.t1 | gb EOA24879.1  hypothetical protein CARUB_v10018170mg [Capsella rubella]                                                                                                                                                                                                                                                                                                     | 154  | 155  | 9.00E-73  | 100.6 | 86.4 | 92.9 | hypothetical protein CARUB_v10018170mg          | gbpln | Capsella rubella     | AT3G55470.2   Symbols:   Calcium-dependent lipid-binding (CaLB domain) family protein   chr3:20564356-20566092 FORWARD LENGTH=155                                                                                                                                                                                                               | 154  | 155 | 7.00E-75  | 100.6 | 85.1 | 93.5 |
| Rsa1.0_00227.1.g9112.12 | gb EOA24419.1  hypothetical protein CARUB_v10017670mg, partial [Capsella rubella]                                                                                                                                                                                                                                                                                            | 350  | 315  | 4.00E-45  | 90.0  | 51.4 | 52.9 | hypothetical protein CARUB_v10017670mg, partial | gbpln | Capsella rubella     | AT3G55460.1   Symbols: SCL30, At-SCL30   SC35-like splicing factor 30   chr3:20561024-20563502 FORWARD LENGTH=262                                                                                                                                                                                                                               | 350  | 262 | 4.00E-26  | 74.9  | 18.0 | 20.6 |

|                         |                                                                                                                                                                                                                                                                                                 |     |     |           |       |      |       |                                                                                                  |       |                      |                                                                                                                                                       |     |     |           |       |      |       |
|-------------------------|-------------------------------------------------------------------------------------------------------------------------------------------------------------------------------------------------------------------------------------------------------------------------------------------------|-----|-----|-----------|-------|------|-------|--------------------------------------------------------------------------------------------------|-------|----------------------|-------------------------------------------------------------------------------------------------------------------------------------------------------|-----|-----|-----------|-------|------|-------|
| Rsa1.0_00228.1.g9113.t1 | emb CAB85500.1  putative protein [Arabidopsis thaliana]                                                                                                                                                                                                                                         | 420 | 837 | 1.00E-106 | 199.3 | 54.0 | 62.6  | putative protein                                                                                 | gbpln | Arabidopsis thaliana | AT5G03800.1   Symbols: EMB175, emb1899, EMB166   Pentatricopeptide repeat (PPR) superfamily protein   chr5:1010894-1013584 REVERSE LENGTH=896         | 420 | 896 | 1.00E-108 | 213.3 | 54.0 | 62.6  |
| Rsa1.0_00228.1.g9114.t1 | gb EOA19541.1  hypothetical protein CARUB_v10002513mg [Capsella rubella]                                                                                                                                                                                                                        | 177 | 353 | 5.00E-65  | 199.4 | 67.8 | 73.4  | hypothetical protein CARUB_v10002513mg                                                           | gbpln | Capsella rubella     | AT5G03810.1   Symbols:   GDSL-like Lipase/Acylhydrolase family protein   chr5:1013839-1015345 REVERSE LENGTH=353                                      | 177 | 353 | 9.00E-61  | 199.4 | 61.6 | 70.1  |
| Rsa1.0_00228.1.g9115.t1 | ref XP_002873117.1  hypothetical protein ARALYDRAFT_487163 [Arabidopsis lyrata subsp. lyrata] gi 166065101 gb ABY79195.1  At5g03840-like protein [Arabidopsis lyrata] gi 297318954 gb EFH49376.1  hypothetical protein ARALYDRAFT_487163 [Arabidopsis lyrata subsp. lyrata]                     | 179 | 177 | 1.00E-88  | 98.9  | 90.5 | 95.5  | hypothetical protein ARALYDRAFT_487163                                                           | gbpln | Arabidopsis lyrata   | AT5G03840.1   Symbols: TFL1, TFL-1   PEBP (phosphatidylethanolamine-binding protein) family protein   chr5:1024760-1025796 REVERSE LENGTH=177         | 179 | 177 | 4.00E-90  | 98.9  | 89.4 | 95.0  |
| Rsa1.0_00228.1.g9116.t1 | gb EOA31777.1  hypothetical protein CARUB_v10014999mg, partial [Capsella rubella]                                                                                                                                                                                                               | 64  | 92  | 4.00E-28  | 143.8 | 98.4 | 100.0 | hypothetical protein CARUB_v10014999mg, partial                                                  | gbpln | Capsella rubella     | AT5G64140.1   Symbols: RPS28   ribosomal protein S28   chr5:25667529-25667723 REVERSE LENGTH=64                                                       | 64  | 64  | 2.00E-30  | 100.0 | 98.4 | 100.0 |
| Rsa1.0_00228.1.g9117.t1 | gb EOA29177.1  hypothetical protein CARUB_v10025449mg [Capsella rubella]                                                                                                                                                                                                                        | 195 | 535 | 2.00E-63  | 274.4 | 59.5 | 64.1  | hypothetical protein CARUB_v10025449mg                                                           | gbpln | Capsella rubella     | AT2G31865.2   Symbols: PARG2   poly(ADP-ribose) glycohydrolase 2   chr2:13546790-13549472 REVERSE LENGTH=532                                          | 195 | 532 | 4.00E-63  | 272.8 | 57.9 | 62.1  |
| Rsa1.0_00228.1.g9118.t1 | gb EOA30214.1  hypothetical protein CARUB_v10013336mg [Capsella rubella]                                                                                                                                                                                                                        | 99  | 571 | 8.00E-13  | 576.8 | 53.5 | 56.6  | hypothetical protein CARUB_v10013336mg                                                           | gbpln | Capsella rubella     | AT3G12200.2   Symbols: Nek7   NIMA-related kinase 7   chr3:3887173-3890550 REVERSE LENGTH=581                                                         | 99  | 581 | 2.00E-14  | 586.9 | 48.5 | 54.5  |
| Rsa1.0_00228.1.g9119.t1 | sp P13244.1 MASY_BRANA RecName: Full=Malate synthase, glyoxysomal gi 167150 gb AAA32996.1  malate synthase (EC 4.1.3.2) [Brassica napus]                                                                                                                                                        | 561 | 561 | 0         | 100.0 | 97.3 | 99.1  | RecName: Full=Malate synthase, glyoxysomal gi 167150 gb AAA32996.1  malate synthase (EC 4.1.3.2) | gbpln | Brassica napus       | AT5G03860.2   Symbols: MLS   malate synthase   chr5:1032276-1034527 REVERSE LENGTH=562                                                                | 561 | 562 | 0         | 100.2 | 94.8 | 98.6  |
| Rsa1.0_00228.1.g9120.t1 | ref NP_196007.1  Glutaredoxin family protein [Arabidopsis thaliana] gi 7406397 emb CAB85507.1  putative protein [Arabidopsis thaliana] gi 9758016 dbj BAB08613.1  unnamed protein product [Arabidopsis thaliana] gi 332003282 gb AED90665.1  Glutaredoxin family protein [Arabidopsis thaliana] | 363 | 384 | 1.00E-155 | 105.8 | 83.7 | 90.1  | Glutaredoxin family protein                                                                      | gbpln | Arabidopsis thaliana | AT5G03870.1   Symbols:   Glutaredoxin family protein   chr5:1035813-1036967 REVERSE LENGTH=384                                                        | 363 | 384 | 1.00E-157 | 105.8 | 83.7 | 90.1  |
| Rsa1.0_00228.1.g9121.t1 | dbj BAJ34555.1  unnamed protein product [Thellungiella halophila]                                                                                                                                                                                                                               | 525 | 523 | 0         | 99.6  | 89.3 | 94.7  | unnamed protein product                                                                          | ----  | ----                 | AT5G03900.2   Symbols:   Iron-sulphur cluster biosynthesis family protein   chr5:1048338-1051869 FORWARD LENGTH=523                                   | 525 | 523 | 0         | 99.6  | 85.3 | 92.0  |
| Rsa1.0_00228.1.g9122.t1 | gb EOA22053.1  hypothetical protein CARUB_v10002593mg [Capsella rubella]                                                                                                                                                                                                                        | 154 | 158 | 5.00E-66  | 102.6 | 82.5 | 90.9  | hypothetical protein CARUB_v10002593mg                                                           | gbpln | Capsella rubella     | AT5G03905.1   Symbols:   Iron-sulphur cluster biosynthesis family protein   chr5:1052728-1054041 FORWARD LENGTH=158                                   | 154 | 158 | 3.00E-63  | 102.6 | 78.6 | 87.7  |
| Rsa1.0_00228.1.g9123.t1 | gb EOA22946.1  hypothetical protein CARUB_v10003682mg [Capsella rubella]                                                                                                                                                                                                                        | 567 | 564 | 0         | 99.5  | 87.7 | 94.0  | hypothetical protein CARUB_v10003682mg                                                           | gbpln | Capsella rubella     | AT5G03940.1   Symbols: FFC, 54CP, CPSRP54, SRP54CP   chloroplast signal recognition particle 54 kDa subunit   chr5:1060265-1063257 REVERSE LENGTH=564 | 567 | 564 | 0         | 99.5  | 87.1 | 92.6  |
| Rsa1.0_00228.1.g9124.t1 | ref XP_002873125.1  IQ-domain 12 [Arabidopsis lyrata subsp. lyrata] gi 297318962 gb EFH49384.1  IQ-domain 12 [Arabidopsis lyrata subsp. lyrata]                                                                                                                                                 | 379 | 403 | 1.00E-147 | 106.3 | 81.0 | 88.9  | IQ-domain 12                                                                                     | gbpln | Arabidopsis lyrata   | AT5G03960.1   Symbols: IQD12   IQ-domain 12   chr5:1068333-1069683 REVERSE LENGTH=403                                                                 | 379 | 403 | 1.00E-149 | 106.3 | 80.2 | 89.7  |
| Rsa1.0_00228.1.g9125.t1 | gb ABD65606.1  hypothetical protein 23.t00002 [Brassica oleracea]                                                                                                                                                                                                                               | 493 | 433 | 5.00E-64  | 87.8  | 33.9 | 45.4  | hypothetical protein 23.t00002                                                                   | gbpln | Brassica oleracea    | AT3G61090.1   Symbols:   Putative endonuclease or glycosyl hydrolase   chr3:22609094-22609822 REVERSE LENGTH=180                                      | 493 | 180 | 7.00E-12  | 36.5  | 7.7  | 13.2  |
| Rsa1.0_00228.1.g9126.t1 | gb ABD65606.1  hypothetical protein 23.t00002 [Brassica oleracea]                                                                                                                                                                                                                               | 486 | 433 | 4.00E-64  | 89.1  | 34.6 | 46.5  | hypothetical protein 23.t00002                                                                   | gbpln | Brassica oleracea    | # # # # # #                                                                                                                                           |     |     |           |       |      |       |
| Rsa1.0_00228.1.g9127.t1 | ref NP_178368.1  RNase H domain-containing protein [Arabidopsis thaliana] gi 3184275 gb AAC18922.1  putative reverse transcriptase [Arabidopsis thaliana] gi 330250513 gb AEC05607.1  RNase H domain-containing protein [Arabidopsis thaliana]                                                  | 161 | 365 | 1.00E-36  | 226.7 | 47.8 | 60.2  | RNase H domain-containing protein                                                                | gbpln | Arabidopsis thaliana | AT2G02650.1   Symbols:   Ribonuclease H-like superfamily protein   chr2:735411-736546 FORWARD LENGTH=365                                              | 161 | 365 | 4.00E-39  | 226.7 | 47.8 | 60.2  |
| Rsa1.0_00228.1.g9128.t1 | gb ABA70759.1  baby boom interacting protein 1B [Brassica napus]                                                                                                                                                                                                                                | 258 | 711 | 1.00E-98  | 275.6 | 69.0 | 72.5  | baby boom interacting protein 1B                                                                 | gbpln | Brassica napus       | AT1G73360.1   Symbols: HDG11, EDT1, ATHDG11   homeodomain GLABROUS 11   chr1:27578893-27581820 REVERSE LENGTH=722                                     | 258 | 722 | 7.00E-86  | 279.8 | 63.6 | 67.8  |



|                         |                                                                                                                                                                                                                                                                                                                                                                                                                                                                                                                                                                                                                                                                                                                                                                                                                                                                                                  |      |      |           |       |      |      |                                                                             |       |                      |                                                                                                                                                                                                                                                                                                                                                                                                                                                    |      |      |           |       |      |      |
|-------------------------|--------------------------------------------------------------------------------------------------------------------------------------------------------------------------------------------------------------------------------------------------------------------------------------------------------------------------------------------------------------------------------------------------------------------------------------------------------------------------------------------------------------------------------------------------------------------------------------------------------------------------------------------------------------------------------------------------------------------------------------------------------------------------------------------------------------------------------------------------------------------------------------------------|------|------|-----------|-------|------|------|-----------------------------------------------------------------------------|-------|----------------------|----------------------------------------------------------------------------------------------------------------------------------------------------------------------------------------------------------------------------------------------------------------------------------------------------------------------------------------------------------------------------------------------------------------------------------------------------|------|------|-----------|-------|------|------|
| Rsa1.0_00228.1.g9129.t1 | refNP_196024.1  triacylglycerol lipase SDP1 [Arabidopsis thaliana]<br>gi 75181222 sp Q9LZA6.1 SDP1_ARATH<br>RecName: Full=Triacylglycerol lipase SDP1; AltName: Full=Protein SUGAR-DEPENDENT 1<br>gi 7406414 emb CAB85524.1  putative protein [Arabidopsis thaliana]<br>gi 22531263 gb AAM97135.1  putative protein [Arabidopsis thaliana]<br>gi 332003304 gb AED90687.1  triacylglycerol lipase SDP1 [Arabidopsis thaliana]                                                                                                                                                                                                                                                                                                                                                                                                                                                                     | 778  | 825  | 0         | 106.0 | 87.1 | 91.4 | triacylglycerol lipase SDP1                                                 | gbpln | Arabidopsis thaliana | AT5G04040.1   Symbols: SDP1   Patatin-like phospholipase family protein   chr5:1090346-1093003 FORWARD LENGTH=825                                                                                                                                                                                                                                                                                                                                  | 778  | 825  | 0         | 106.0 | 87.1 | 91.4 |
| Rsa1.0_00228.1.g9130.t2 | refNP_196028.2  uncharacterized protein [Arabidopsis thaliana]<br>gi 38603900 gb AAR24695.1  At5g04080 [Arabidopsis thaliana]<br>gi 41349906 gb AAS00338.1  At5g04080 [Arabidopsis thaliana]<br>gi 332003311 gb AED90694.1  uncharacterized protein AT5G04080 [Arabidopsis thaliana]                                                                                                                                                                                                                                                                                                                                                                                                                                                                                                                                                                                                             | 66   | 63   | 4.00E-21  | 95.5  | 78.8 | 84.8 | uncharacterized protein                                                     | gbpln | Arabidopsis thaliana | AT5G04080.1   Symbols:   unknown protein; FUNCTIONS IN: molecular_function unknown; INVOLVED IN: biological_process unknown; LOCATED IN: plasma membrane; EXPRESSED IN: 16 plant structures; EXPRESSED DURING: 9 growth stages; Has 115 Blast hits to 115 proteins in 16 species: Archae - 0; Bacteria - 0; Metazoa - 0; Fungi - 5; Plants - 110; Viruses - 0; Other Eukaryotes - 0 (source: NCBI BLINK).   chr5:1104815-1105186 FORWARD LENGTH=63 | 66   | 63   | 7.00E-24  | 95.5  | 78.8 | 84.8 |
| Rsa1.0_00228.1.g9131.t1 | emb CAB39638.1  RNA-directed DNA polymerase-like protein [Arabidopsis thaliana]<br>gi 7267666 emb CAB78094.1  RNA-directed DNA polymerase-like protein [Arabidopsis thaliana]<br>ref XP_002871076.1  phosphoglycerate/bisphosphoglycerate mutase family protein [Arabidopsis                                                                                                                                                                                                                                                                                                                                                                                                                                                                                                                                                                                                                     | 494  | 1274 | 2.00E-97  | 257.9 | 39.1 | 56.7 | RNA-directed DNA polymerase-like protein                                    | gbpln | Arabidopsis thaliana | AT4G29090.1   Symbols:   Ribonuclease H-like superfamily protein   chr4:1433528-1433255 FORWARD LENGTH=575                                                                                                                                                                                                                                                                                                                                         | 494  | 575  | 1.00E-54  | 116.4 | 30.2 | 45.1 |
| Rsa1.0_00228.1.g9132.t1 | lyrata subsp. lyrata]<br>gi 297316913 gb EFH47335.1  phosphoglycerate/bisphosphoglycerate mutase family protein [Arabidopsis lyrata subsp. lyrata]                                                                                                                                                                                                                                                                                                                                                                                                                                                                                                                                                                                                                                                                                                                                               | 238  | 238  | 1.00E-122 | 100.0 | 90.3 | 94.5 | phosphoglycerate/bisphosphoglycerate mutase family protein                  | gbpln | Arabidopsis lyrata   | AT5G04120.1   Symbols:   Phosphoglycerate mutase family protein   chr5:1120091-1121605 FORWARD LENGTH=238                                                                                                                                                                                                                                                                                                                                          | 238  | 238  | 1.00E-123 | 100.0 | 88.7 | 94.1 |
| Rsa1.0_00228.1.g9133.t1 | gb ABD65606.1  hypothetical protein 23.t00002 [Brassica oleracea]                                                                                                                                                                                                                                                                                                                                                                                                                                                                                                                                                                                                                                                                                                                                                                                                                                | 390  | 433  | 2.00E-41  | 111.0 | 34.1 | 49.2 | hypothetical protein 23.t00002                                              | gbpln | Brassica oleracea    | #                                                                                                                                                                                                                                                                                                                                                                                                                                                  | #    | #    | #         | #     | #    | #    |
| Rsa1.0_00228.1.g9134.t1 | gb ABD65606.1  hypothetical protein 23.t00002 [Brassica oleracea]                                                                                                                                                                                                                                                                                                                                                                                                                                                                                                                                                                                                                                                                                                                                                                                                                                | 399  | 433  | 4.00E-63  | 108.5 | 42.6 | 55.6 | hypothetical protein 23.t00002                                              | gbpln | Brassica oleracea    | #                                                                                                                                                                                                                                                                                                                                                                                                                                                  | #    | #    | #         | #     | #    | #    |
| Rsa1.0_00228.1.g9135.t1 | refNP_568133.1  DNA gyrase subunit B [Arabidopsis thaliana]<br>gi 75165162 sp Q94BZ7.1 GYRBM_ARATH<br>H RecName: Full=DNA gyrase subunit B, mitochondrial; Flags: Precursor<br>gi 14517374 gb AAK62578.1  AT3g10270/F14P13.13 [Arabidopsis thaliana]<br>gi 22655426 gb AAM98305.1  AT3g10270/F14P13.13 [Arabidopsis thaliana]<br>gi 332003319 gb AED90702.1  DNA gyrase subunit B [Arabidopsis thaliana]                                                                                                                                                                                                                                                                                                                                                                                                                                                                                         | 978  | 732  | 0         | 74.8  | 63.8 | 66.5 | DNA gyrase subunit B                                                        | gbpln | Arabidopsis thaliana | AT5G04130.1   Symbols: GYRB2   DNA GYRASE B2   chr5:1122084-1128031 REVERSE LENGTH=732                                                                                                                                                                                                                                                                                                                                                             | 978  | 732  | 0         | 74.8  | 63.8 | 66.5 |
| Rsa1.0_00228.1.g9136.t1 | #                                                                                                                                                                                                                                                                                                                                                                                                                                                                                                                                                                                                                                                                                                                                                                                                                                                                                                | #    | #    | #         | #     | #    | #    | -                                                                           | ----  | ----                 | #                                                                                                                                                                                                                                                                                                                                                                                                                                                  | #    | #    | #         | #     | #    | #    |
| Rsa1.0_00228.1.g9137.t1 | refNP_196040.1  metacaspase 9 [Arabidopsis thaliana]<br>gi 75263209 sp Q9FYE1.1 MCA9_ARATH<br>RecName: Full=Metacaspase-9;<br>Short=AtMC9; Contains: RecName: Full=Metacaspase-9 subunit p20; Contains: RecName: Full=Metacaspase-9 subunit p10; AltName: Full=Metacaspase 2f; Short=AtMCP2f<br>gi 9955575 emb CAC05502.1  latex-abundant protein-like [Arabidopsis thaliana]<br>gi 17380712 gb AAL36186.1  putative latex-abundant protein [Arabidopsis thaliana]<br>gi 20259063 gb AAM14247.1  putative latex-abundant protein [Arabidopsis thaliana]<br>gi 32482824 gb AAP84712.1  metacaspase 9 [Arabidopsis thaliana]<br>gi 37788561 gb AAP44522.1  metacaspase 9 precursor [Arabidopsis thaliana]<br>gi 332003327 gb AED90710.1  metacaspase 9 [Arabidopsis thaliana]<br>gb AAC33963.1  contains similarity to reverse transcriptases (Pfam; rvt.hmm, score: 11.19) [Arabidopsis thaliana] | 322  | 325  | 1.00E-162 | 100.9 | 86.3 | 93.2 | metacaspase 9                                                               | gbpln | Arabidopsis thaliana | AT5G04200.1   Symbols: AtMC9, MC9   metacaspase 9   chr5:1153893-1154870 FORWARD LENGTH=325                                                                                                                                                                                                                                                                                                                                                        | 322  | 325  | 1.00E-165 | 100.9 | 86.3 | 93.2 |
| Rsa1.0_00229.1.g9138.t1 | gb AAC33963.1  contains similarity to reverse transcriptases (Pfam; rvt.hmm, score: 11.19) [Arabidopsis thaliana]                                                                                                                                                                                                                                                                                                                                                                                                                                                                                                                                                                                                                                                                                                                                                                                | 1346 | 1633 | 0         | 121.3 | 49.4 | 62.2 | contains similarity to reverse transcriptases (Pfam; rvt.hmm, score: 11.19) | gbpln | Arabidopsis thaliana | AT4G23160.1   Symbols: CRK8   cysteine-rich RLK (RECEPTOR-like protein kinase) 8   chr4:12129485-12134086 FORWARD LENGTH=1262                                                                                                                                                                                                                                                                                                                      | 1346 | 1262 | 1.00E-165 | 93.8  | 21.2 | 27.3 |

|                         |                                                                                                                                                                                                                                                                                                                                                                                                                                                                                                                                                                                                      |      |      |           |       |      |      |                                                      |       |                      |                                                                                                                                                                                                                                                                                                                                                                                                                                                                                                                                                                                  |      |      |           |       |      |      |
|-------------------------|------------------------------------------------------------------------------------------------------------------------------------------------------------------------------------------------------------------------------------------------------------------------------------------------------------------------------------------------------------------------------------------------------------------------------------------------------------------------------------------------------------------------------------------------------------------------------------------------------|------|------|-----------|-------|------|------|------------------------------------------------------|-------|----------------------|----------------------------------------------------------------------------------------------------------------------------------------------------------------------------------------------------------------------------------------------------------------------------------------------------------------------------------------------------------------------------------------------------------------------------------------------------------------------------------------------------------------------------------------------------------------------------------|------|------|-----------|-------|------|------|
| Rsa1.0_00229.1.g9139.t1 | ref NP_001189585.1  zinc binding motif and SET domain-containing protein [Arabidopsis thaliana] gi 306526268 sp O4827.3 SUVR5_ARAT H RecName: Full=Histone-lysine N-methyltransferase SUVR5; AltName: Full=C2H2 zinc finger-SET histone methyltransferase; Short=Protein C2H2 SET; AltName: Full=Protein SET DOMAIN GROUP 6; AltName: Full=Suppressor of variegation 3-9-related protein 5; Short=Su(var)3-9-related protein 5 gi 227204171 dbj BAH56937.1  AT2G23740 [Arabidopsis thaliana] gi 330252390 gb AEC07484.1  zinc binding motif and SET domain-containing protein [Arabidopsis thaliana] | 1370 | 1382 | 0         | 100.9 | 76.0 | 83.6 | zinc binding motif and SET domain-containing protein | gbpln | Arabidopsis thaliana | AT2G23740.2   Symbols:   nucleic acid binding; sequence-specific DNA binding transcription factors: zinc ion binding   chr2:10098213-10103229 FORWARD LENGTH=1382                                                                                                                                                                                                                                                                                                                                                                                                                | 1370 | 1382 | 0         | 100.9 | 76.0 | 83.6 |
| Rsa1.0_00229.1.g9140.t1 | ref NP_179950.1  uncharacterized protein [Arabidopsis thaliana] gi 20197175 gb AAC17092.2  unknown protein [Arabidopsis thaliana] gi 330252388 gb AEC07482.1  uncharacterized protein AT2G23700 [Arabidopsis thaliana]                                                                                                                                                                                                                                                                                                                                                                               | 682  | 707  | 0         | 103.7 | 83.3 | 90.6 | uncharacterized protein                              | gbpln | Arabidopsis thaliana | AT2G23700.1   Symbols:   Protein of unknown function, DUF547   chr2:10076624-10079849 REVERSE LENGTH=707                                                                                                                                                                                                                                                                                                                                                                                                                                                                         | 682  | 707  | 0         | 103.7 | 83.3 | 90.6 |
| Rsa1.0_00229.1.g9141.t1 | gb EOA25391.1  hypothetical protein CARUB_v10018723mg [Capsella rubella]                                                                                                                                                                                                                                                                                                                                                                                                                                                                                                                             | 157  | 156  | 6.00E-63  | 99.4  | 74.5 | 83.4 | hypothetical protein CARUB_v10018723mg               | gbpln | Capsella rubella     | AT1G64100.2   Symbols:   pentatricopeptide (PPR) repeat-containing protein   chr1:23791585-23795563 FORWARD LENGTH=806                                                                                                                                                                                                                                                                                                                                                                                                                                                           | 157  | 806  | 6.00E-46  | 513.4 | 54.1 | 68.8 |
| Rsa1.0_00229.1.g9142.t1 | gb EOA25391.1  hypothetical protein CARUB_v10018723mg [Capsella rubella]                                                                                                                                                                                                                                                                                                                                                                                                                                                                                                                             | 157  | 156  | 9.00E-63  | 99.4  | 72.6 | 84.1 | hypothetical protein CARUB_v10018723mg               | gbpln | Capsella rubella     | AT1G64100.2   Symbols:   pentatricopeptide (PPR) repeat-containing protein   chr1:23791585-23795563 FORWARD LENGTH=806                                                                                                                                                                                                                                                                                                                                                                                                                                                           | 157  | 806  | 2.00E-45  | 513.4 | 52.2 | 68.8 |
| Rsa1.0_00229.1.g9143.t1 | ref XP_002883241.1  hypothetical protein ARALYDRAFT_479561 [Arabidopsis lyrata subsp. lyrata] gi 297329081 gb EFH59500.1  hypothetical protein ARALYDRAFT_479561 [Arabidopsis lyrata subsp. lyrata]                                                                                                                                                                                                                                                                                                                                                                                                  | 369  | 385  | 8.00E-99  | 104.3 | 49.1 | 63.4 | hypothetical protein ARALYDRAFT_479561               | gbpln | Arabidopsis lyrata   | AT3G20370.1   Symbols:   TRAF-like family protein   chr3:7105481-7107079 FORWARD LENGTH=379                                                                                                                                                                                                                                                                                                                                                                                                                                                                                      | 369  | 379  | 2.00E-96  | 102.7 | 47.4 | 60.7 |
| Rsa1.0_00229.1.g9144.t1 | gb EOA28028.1  hypothetical protein CARUB_v10024204mg [Capsella rubella]                                                                                                                                                                                                                                                                                                                                                                                                                                                                                                                             | 164  | 164  | 3.00E-71  | 100.0 | 85.4 | 91.5 | hypothetical protein CARUB_v10024204mg               | gbpln | Capsella rubella     | AT2G23690.1   Symbols:   unknown protein; FUNCTIONS IN: molecular_function unknown; INVOLVED IN: N-terminal protein myristoylation; LOCATED IN: cellular_component unknown; EXPRESSED IN: 7 plant structures; EXPRESSED DURING: petal differentiation and expansion stage; BEST Arabidopsis thaliana protein match is: unknown protein (TAIR:AT4G37240.1); Has 243 Blast hits to 243 proteins in 15 species: Archae - 0; Bacteria - 0; Metazoa - 0; Fungi - 0; Plants - 241; Viruses - 0; Other Eukaryotes - 2 (source: NCBI BLink).   chr2:10072297-10072768 FORWARD LENGTH=163 | 164  | 163  | 4.00E-73  | 99.4  | 88.4 | 92.1 |
| Rsa1.0_00229.1.g9145.t1 | ref NP_565556.1  synechocystis YCF37-like protein [Arabidopsis thaliana] gi 3152615 gb AAC17094.1  expressed protein [Arabidopsis thaliana] gi 16649702 gb AAL25543.1  At2g23670/F26B6.32 [Arabidopsis thaliana] gi 20197003 gb AAM14867.1  expressed protein [Arabidopsis thaliana] gi 20334912 gb AAM1621.1  At2g23670/F26B6.32 [Arabidopsis thaliana] gi 206748360 gb ACI22363.1  YCF37-like protein [Arabidopsis thaliana] gi 330252384 gb AEC07478.1  synechocystis YCF37-like protein [Arabidopsis thaliana]                                                                                   | 162  | 167  | 3.00E-71  | 103.1 | 86.4 | 88.3 | synechocystis YCF37-like protein                     | gbpln | Arabidopsis thaliana | AT2G23670.1   Symbols: YCF37   homolog of Synechocystis YCF37   chr2:10063307-10063810 REVERSE LENGTH=167                                                                                                                                                                                                                                                                                                                                                                                                                                                                        | 162  | 167  | 1.00E-73  | 103.1 | 86.4 | 88.3 |
| Rsa1.0_00229.1.g9146.t1 | # # # # # # # # # # # #                                                                                                                                                                                                                                                                                                                                                                                                                                                                                                                                                                              | #    | #    | #         | #     | #    | -    | ----                                                 | ----  | #                    | #                                                                                                                                                                                                                                                                                                                                                                                                                                                                                                                                                                                | #    | #    | #         | #     | #    |      |
| Rsa1.0_00229.1.g9147.t1 | ref XP_002880519.1  LOB domain family protein [Arabidopsis lyrata subsp. lyrata] gi 297326358 gb EFH56778.1  LOB domain family protein [Arabidopsis lyrata subsp. lyrata]                                                                                                                                                                                                                                                                                                                                                                                                                            | 309  | 311  | 1.00E-138 | 100.6 | 85.8 | 91.9 | LOB domain family protein                            | gbpln | Arabidopsis lyrata   | AT2G23660.2   Symbols: LBD10   LOB domain-containing protein 10   chr2:10060242-10061177 REVERSE LENGTH=311                                                                                                                                                                                                                                                                                                                                                                                                                                                                      | 309  | 311  | 1.00E-137 | 100.6 | 85.1 | 91.3 |
| Rsa1.0_00229.1.g9148.t1 | # # # # # # # # # # # #                                                                                                                                                                                                                                                                                                                                                                                                                                                                                                                                                                              | #    | #    | #         | #     | #    | -    | ----                                                 | ----  | #                    | #                                                                                                                                                                                                                                                                                                                                                                                                                                                                                                                                                                                | #    | #    | #         | #     | #    |      |
| Rsa1.0_00229.1.g9149.t1 | # # # # # # # # # # # #                                                                                                                                                                                                                                                                                                                                                                                                                                                                                                                                                                              | #    | #    | #         | #     | #    | -    | ----                                                 | ----  | #                    | #                                                                                                                                                                                                                                                                                                                                                                                                                                                                                                                                                                                | #    | #    | #         | #     | #    |      |

|                         |                                                                                                                                                                                                                                                                                                                                                                                                                                                                                                                                                                                                                                                                                                 |      |      |           |       |      |      |                                                                                                                                            |       |                      |                                                                                                                                                 |      |     |           |       |      |      |
|-------------------------|-------------------------------------------------------------------------------------------------------------------------------------------------------------------------------------------------------------------------------------------------------------------------------------------------------------------------------------------------------------------------------------------------------------------------------------------------------------------------------------------------------------------------------------------------------------------------------------------------------------------------------------------------------------------------------------------------|------|------|-----------|-------|------|------|--------------------------------------------------------------------------------------------------------------------------------------------|-------|----------------------|-------------------------------------------------------------------------------------------------------------------------------------------------|------|-----|-----------|-------|------|------|
| Rsa1.0_00229.1.g9150.t1 | gb[EOA29060.1] hypothetical protein CARUB_v10025315mg [Capsella rubella]                                                                                                                                                                                                                                                                                                                                                                                                                                                                                                                                                                                                                        | 539  | 540  | 0         | 100.2 | 87.4 | 94.1 | hypothetical protein CARUB_v10025315mg                                                                                                     | gbpln | Capsella rubella     | AT2G23630.1   Symbols: sks16   SKU5 similar 16   chr2:10052581-10055311 REVERSE LENGTH=541                                                      | 539  | 541 | 0         | 100.4 | 87.2 | 93.7 |
| Rsa1.0_00229.1.g9151.t1 | # # # # # # # #                                                                                                                                                                                                                                                                                                                                                                                                                                                                                                                                                                                                                                                                                 |      |      |           |       |      |      | -                                                                                                                                          | ----  | ----                 | # # # # # # #                                                                                                                                   |      |     |           |       |      |      |
| Rsa1.0_00230.1.g9152.t1 | ref[NP_566156.2] putative translation factor [Arabidopsis thaliana] gi[6091731]gb[AAF03443.1]AC010797_19 hypothetical protein [Arabidopsis thaliana] gi[1931049]gb[AAL84979.1] At3g1920/F28J7.25 [Arabidopsis thaliana] gi[23505865]gb[AA28792.1] At3g1920/F28J7.25 [Arabidopsis thaliana] gi[332640214]gb[AEE73735.1] Sua5/YcIO/YrdC domain-containing protein [Arabidopsis thaliana]                                                                                                                                                                                                                                                                                                          | 296  | 307  | 1.00E-148 | 103.7 | 88.2 | 92.6 | putative translation factor                                                                                                                | gbpln | Arabidopsis thaliana | AT3G01920.1   Symbols:   DHBP synthase RibB-like alpha/beta domain   chr3:317449-319001 FORWARD LENGTH=307                                      | 296  | 307 | 1.00E-151 | 103.7 | 88.2 | 92.6 |
| Rsa1.0_00230.1.g9153.t1 | sp[P41128.1]RL131.BRANA RecName: Full=60S ribosomal protein L13-1; AltName: Full=Cold-induced protein C24A gi[398918]emb[CAA80341.1] cold induced protein (BnC24A) [Brassica napus]                                                                                                                                                                                                                                                                                                                                                                                                                                                                                                             | 206  | 206  | 1.00E-113 | 100.0 | 97.6 | 98.5 | RecName: Full=60S ribosomal protein L13-1; AltName: Full=Cold-induced protein C24A gi[398918]emb[CAA80341.1] cold induced protein (BnC24A) | gbpln | Brassica napus       | AT3G49010.3   Symbols: ATBBC1, BBC1, RSU2   breast basic conserved 1   chr3:18166971-18168047 REVERSE LENGTH=206                                | 206  | 206 | 1.00E-104 | 100.0 | 86.4 | 90.3 |
| Rsa1.0_00230.1.g9154.t1 | gb[EOA21517.1] hypothetical protein CARUB_v10001929mg [Capsella rubella]                                                                                                                                                                                                                                                                                                                                                                                                                                                                                                                                                                                                                        | 244  | 219  | 1.00E-108 | 89.8  | 79.9 | 84.0 | hypothetical protein CARUB_v10001929mg                                                                                                     | gbpln | Capsella rubella     | AT5G19830.1   Symbols:   Peptidyl-tRNA hydrolase family protein   chr5:6703383-6705125 FORWARD LENGTH=219                                       | 244  | 219 | 1.00E-109 | 89.8  | 79.1 | 84.0 |
| Rsa1.0_00230.1.g9155.t1 | gb[AAC33226.1] putative non-LTR retroelement reverse transcriptase [Arabidopsis thaliana]                                                                                                                                                                                                                                                                                                                                                                                                                                                                                                                                                                                                       | 979  | 1529 | 0         | 156.2 | 54.3 | 72.1 | putative non-LTR retroelement reverse transcriptase                                                                                        | gbpln | Arabidopsis thaliana | AT3G24255.1   Symbols:   RNA-directed DNA polymerase (reverse transcriptase)-related family protein   chr3:8789471-8793208 FORWARD LENGTH=746   | 979  | 746 | 1.00E-110 | 76.2  | 20.9 | 27.1 |
| Rsa1.0_00230.1.g9156.t1 | gb[AAC33226.1] putative non-LTR retroelement reverse transcriptase [Arabidopsis thaliana]                                                                                                                                                                                                                                                                                                                                                                                                                                                                                                                                                                                                       | 503  | 1529 | 7.00E-69  | 304.0 | 29.2 | 43.7 | putative non-LTR retroelement reverse transcriptase                                                                                        | gbpln | Arabidopsis thaliana | AT2G07760.1   Symbols:   Zinc knuckle (CCHC-type) family protein   chr2:3584420-3586278 REVERSE LENGTH=530                                      | 503  | 530 | 3.00E-15  | 105.4 | 8.3  | 13.1 |
| Rsa1.0_00230.1.g9157.t1 | # # # # # # # #                                                                                                                                                                                                                                                                                                                                                                                                                                                                                                                                                                                                                                                                                 |      |      |           |       |      |      | -                                                                                                                                          | ----  | ----                 | # # # # # # #                                                                                                                                   |      |     |           |       |      |      |
| Rsa1.0_00230.1.g9158.t1 | gb[AAC67331.1] putative non-LTR retroelement reverse transcriptase [Arabidopsis thaliana]                                                                                                                                                                                                                                                                                                                                                                                                                                                                                                                                                                                                       | 204  | 1449 | 6.00E-42  | 710.3 | 42.6 | 62.7 | putative non-LTR retroelement reverse transcriptase                                                                                        | gbpln | Arabidopsis thaliana | AT3G24255.1   Symbols:   RNA-directed DNA polymerase (reverse transcriptase)-related family protein   chr3:8789471-8793208 FORWARD LENGTH=746   | 204  | 746 | 1.00E-29  | 365.7 | 38.7 | 59.8 |
| Rsa1.0_00230.1.g9159.t1 | ref[NP_190481.1] peroxidase 34 [Arabidopsis thaliana] gi[25453220]sp[G9SMU8.1]PER34.ARAT H RecName: Full=Peroxidase 34; Short=Atperox P34; AltName: Full=ATPCB; Flags: Precursor gi[11908066]gb[AAG41462.1]AF326880.1 putative peroxidase [Arabidopsis thaliana] gi[12642880]gb[AAK00382.1]AF339700.1 putative peroxidase [Arabidopsis thaliana] gi[16930431]gb[AAL31901.1]AF419569.1 AT3g49120/T2J13.40 [Arabidopsis thaliana] gi[6522554]emb[CAB61998.1] peroxidase [Arabidopsis thaliana] gi[19310513]gb[AAL84990.1] AT3g49120/T2J13.40 [Arabidopsis thaliana] gi[21593509]gb[AAM65476.1] peroxidase [Arabidopsis thaliana] gi[332644980]gb[AEE78501.1] peroxidase 34 [Arabidopsis thaliana] | 449  | 353  | 0         | 78.6  | 72.4 | 74.6 | peroxidase 34                                                                                                                              | gbpln | Arabidopsis thaliana | AT3G49120.1   Symbols: ATPERX34, PERX34, PRXCB, ATPCB, PRX34   peroxidase CB   chr3:18207819-18210041 FORWARD LENGTH=353                        | 449  | 353 | 0         | 78.6  | 72.4 | 74.6 |
| Rsa1.0_00230.1.g9160.t1 | gb[EOA22500.1] hypothetical protein CARUB_v10003155mg, partial [Capsella rubella]                                                                                                                                                                                                                                                                                                                                                                                                                                                                                                                                                                                                               | 577  | 1112 | 0         | 192.7 | 64.1 | 73.0 | hypothetical protein CARUB_v10003155mg, partial                                                                                            | gbpln | Capsella rubella     | AT5G23980.1   Symbols: ATFRO4, FRO4   ferric reduction oxidase 4   chr5:8098167-8101282 REVERSE LENGTH=699                                      | 577  | 699 | 0         | 121.1 | 62.9 | 71.2 |
| Rsa1.0_00230.1.g9161.t1 | gb[AAD17398.1] putative non-LTR retroelement reverse transcriptase [Arabidopsis thaliana]                                                                                                                                                                                                                                                                                                                                                                                                                                                                                                                                                                                                       | 520  | 1225 | 1.00E-65  | 235.6 | 25.2 | 37.1 | putative non-LTR retroelement reverse transcriptase                                                                                        | gbpln | Arabidopsis thaliana | AT4G29090.1   Symbols:   Ribonuclease H-like superfamily protein   chr4:14333528-14335255 FORWARD LENGTH=575                                    | 520  | 575 | 3.00E-28  | 110.6 | 12.7 | 20.6 |
| Rsa1.0_00230.1.g9162.t1 | gb[AAG51783.1]AC079679_3 reverse transcriptase, putative; 16838-20266 [Arabidopsis thaliana]                                                                                                                                                                                                                                                                                                                                                                                                                                                                                                                                                                                                    | 402  | 1142 | 1.00E-60  | 284.1 | 30.1 | 38.8 | reverse transcriptase, putative; 16838-20266                                                                                               | gbpln | Arabidopsis thaliana | AT4G29090.1   Symbols:   Ribonuclease H-like superfamily protein   chr4:14333528-14335255 FORWARD LENGTH=575                                    | 402  | 575 | 3.00E-25  | 143.0 | 17.7 | 29.1 |
| Rsa1.0_00230.1.g9163.t1 | dbj[BAA97290.1] non-LTR retroelement reverse transcriptase-like [Arabidopsis thaliana]                                                                                                                                                                                                                                                                                                                                                                                                                                                                                                                                                                                                          | 1509 | 1072 | 1.00E-158 | 71.0  | 17.3 | 23.0 | non-LTR retroelement reverse transcriptase-like                                                                                            | gbpln | Arabidopsis thaliana | AT1G60720.1   Symbols:   RNA-directed DNA polymerase (reverse transcriptase)-related family protein   chr1:22357072-22357941 FORWARD LENGTH=289 | 1509 | 289 | 9.00E-75  | 19.2  | 8.9  | 12.5 |
| Rsa1.0_00230.1.g9164.t1 | # # # # # # # #                                                                                                                                                                                                                                                                                                                                                                                                                                                                                                                                                                                                                                                                                 |      |      |           |       |      |      | -                                                                                                                                          | ----  | ----                 | # # # # # # #                                                                                                                                   |      |     |           |       |      |      |
| Rsa1.0_00230.1.g9165.t9 | gb[EOA25470.1] hypothetical protein CARUB_v10018807mg [Capsella rubella]                                                                                                                                                                                                                                                                                                                                                                                                                                                                                                                                                                                                                        | 1763 | 684  | 0         | 38.8  | 33.7 | 35.7 | hypothetical protein CARUB_v10018807mg                                                                                                     | gbpln | Capsella rubella     | AT3G49142.1   Symbols:   Tetratricopeptide repeat (TPR)-like superfamily protein   chr3:18215788-18217848 REVERSE LENGTH=686                    | 1763 | 686 | 0         | 38.9  | 33.6 | 35.8 |

|                         |                                                                                                                                                                                                                                                                                                                                                                                                                                                                                                          |     |      |          |       |      |      |                                                 |       |                      |                                                                                                                                                                                                                                                                                                                                                                                                                                                                                                                                                                      |     |      |          |       |      |      |
|-------------------------|----------------------------------------------------------------------------------------------------------------------------------------------------------------------------------------------------------------------------------------------------------------------------------------------------------------------------------------------------------------------------------------------------------------------------------------------------------------------------------------------------------|-----|------|----------|-------|------|------|-------------------------------------------------|-------|----------------------|----------------------------------------------------------------------------------------------------------------------------------------------------------------------------------------------------------------------------------------------------------------------------------------------------------------------------------------------------------------------------------------------------------------------------------------------------------------------------------------------------------------------------------------------------------------------|-----|------|----------|-------|------|------|
| Rsa1.0_00230.1.g9166.t1 | refNP_001118381.1  uncharacterized protein [Arabidopsis thaliana] gi 330252550 gb AEC07644.1  uncharacterized protein AT2G24960 [Arabidopsis thaliana]                                                                                                                                                                                                                                                                                                                                                   | 131 | 774  | 3.00E-51 | 590.8 | 77.9 | 86.3 | uncharacterized protein                         | gbpln | Arabidopsis thaliana | AT2G24960.2   Symbols:   unknown protein; FUNCTIONS IN: molecular_function unknown; INVOLVED IN: biological_process unknown; LOCATED IN: cellular_component unknown; EXPRESSED IN: 21 plant structures; EXPRESSED DURING: 12 growth stages; BEST Arabidopsis thaliana protein match is: unknown protein (TAIR:ATG02210.2). Has 30201 Blast hits to 17322 proteins in 780 species: Archaea - 12; Bacteria - 1396; Metazoa - 1738; Fungi - 3422; Plants - 5037; Viruses - 0; Other Eukaryotes - 2996 (source: NCBI BLINK).   chr2:10617263-10620034 FORWARD LENGTH=774 | 131 | 774  | 7.00E-54 | 590.8 | 77.9 | 86.3 |
| Rsa1.0_00230.1.g9167.t1 | refNP_190485.1  pyruvate kinase [Arabidopsis thaliana] gi 75183756 sp Q9M3B6.1 PKP4_ARATH RecName: Full=Plastidial pyruvate kinase 4, chloroplastic; Short=PKp4; Flags: Precursor gi 6723386 emb CAB66395.1  pyruvate kinase-like protein [Arabidopsis thaliana] gi 18176182 gb AAL59999.1  putative pyruvate kinase [Arabidopsis thaliana] gi 20465435 gb AAM20177.1  putative pyruvate kinase [Arabidopsis thaliana] gi 332644985 gb AEE78906.1  pyruvate kinase family protein [Arabidopsis thaliana] | 710 | 710  | 0        | 100.0 | 77.9 | 85.9 | pyruvate kinase                                 | gbpln | Arabidopsis thaliana | AT3G49180.1   Symbols:   pyruvate kinase family protein   chr3:18222132-18224415 REVERSE LENGTH=710                                                                                                                                                                                                                                                                                                                                                                                                                                                                  | 710 | 710  | 0        | 100.0 | 77.9 | 85.9 |
| Rsa1.0_00230.1.g9168.t1 | refXP_002875954.1  hypothetical protein ARALYDRAFT_485276 [Arabidopsis lyrata subsp. lyrata] gi 297321782 gb EFH52213.1  hypothetical protein ARALYDRAFT_485276 [Arabidopsis lyrata subsp. lyrata]                                                                                                                                                                                                                                                                                                       | 440 | 438  | 0        | 99.5  | 80.2 | 88.6 | hypothetical protein ARALYDRAFT_485276          | gbpln | Arabidopsis lyrata   | AT3G49180.1   Symbols: RID3   Transducin/WD40 repeat-like superfamily protein   chr3:18229810-18231874 FORWARD LENGTH=438                                                                                                                                                                                                                                                                                                                                                                                                                                            | 440 | 438  | 0        | 99.5  | 78.2 | 88.9 |
| Rsa1.0_00230.1.g9169.t2 | refNP_190489.1  O-acyltransferase (WSD1-like) family protein [Arabidopsis thaliana] gi 6723390 emb CAB66399.1  putative protein [Arabidopsis thaliana] gi 332644989 gb AEE78510.1  O-acyltransferase (WSD1-like) family protein [Arabidopsis thaliana]                                                                                                                                                                                                                                                   | 410 | 507  | 0        | 123.7 | 79.8 | 88.5 | O-acyltransferase (WSD1-like) family protein    | gbpln | Arabidopsis thaliana | AT3G49200.1   Symbols:   O-acyltransferase (WSD1-like) family protein   chr3:18235445-18237646 REVERSE LENGTH=507                                                                                                                                                                                                                                                                                                                                                                                                                                                    | 410 | 507  | 0        | 123.7 | 79.8 | 88.5 |
| Rsa1.0_00230.1.g9170.t1 | #                                                                                                                                                                                                                                                                                                                                                                                                                                                                                                        | #   | #    | #        | #     | #    | #    | -                                               | ----  | ----                 | #                                                                                                                                                                                                                                                                                                                                                                                                                                                                                                                                                                    | #   | #    | #        | #     | #    |      |
| Rsa1.0_00230.1.g9171.t1 | refNP_190489.1  O-acyltransferase (WSD1-like) family protein [Arabidopsis thaliana] gi 6723390 emb CAB66399.1  putative protein [Arabidopsis thaliana] gi 332644989 gb AEE78510.1  O-acyltransferase (WSD1-like) family protein [Arabidopsis thaliana]                                                                                                                                                                                                                                                   | 84  | 507  | 3.00E-22 | 603.6 | 71.4 | 82.1 | O-acyltransferase (WSD1-like) family protein    | gbpln | Arabidopsis thaliana | AT3G49200.1   Symbols:   O-acyltransferase (WSD1-like) family protein   chr3:18235445-18237646 REVERSE LENGTH=507                                                                                                                                                                                                                                                                                                                                                                                                                                                    | 84  | 507  | 5.00E-25 | 603.6 | 71.4 | 82.1 |
| Rsa1.0_00230.1.g9172.t1 | refNP_190490.1  O-acyltransferase (WSD1-like) family protein [Arabidopsis thaliana] gi 6723391 emb CAB66400.1  putative protein [Arabidopsis thaliana] gi 332644990 gb AEE78511.1  O-acyltransferase (WSD1-like) family protein [Arabidopsis thaliana]                                                                                                                                                                                                                                                   | 416 | 518  | 0        | 124.5 | 83.9 | 91.1 | O-acyltransferase (WSD1-like) family protein    | gbpln | Arabidopsis thaliana | AT3G49210.1   Symbols:   O-acyltransferase (WSD1-like) family protein   chr3:18238216-18241161 REVERSE LENGTH=518                                                                                                                                                                                                                                                                                                                                                                                                                                                    | 416 | 518  | 0        | 124.5 | 83.9 | 91.1 |
| Rsa1.0_00231.1.g9173.t1 | refXP_002871102.1  hypothetical protein ARALYDRAFT_487239 [Arabidopsis lyrata subsp. lyrata] gi 297316939 gb EFH47361.1  hypothetical protein ARALYDRAFT_487239 [Arabidopsis lyrata subsp. lyrata]                                                                                                                                                                                                                                                                                                       | 914 | 1987 | 0        | 218.5 | 61.5 | 70.0 | hypothetical protein ARALYDRAFT_487239          | gbpln | Arabidopsis lyrata   | AT5G04560.2   Symbols: DME   HhH-GPD base excision DNA repair family protein   chr5:1309786-1318091 FORWARD LENGTH=1987                                                                                                                                                                                                                                                                                                                                                                                                                                              | 914 | 1987 | 0        | 217.4 | 60.0 | 69.3 |
| Rsa1.0_00231.1.g9174.t1 | refNP_200114.3  Ribonuclease P protein subunit P38-like protein [Arabidopsis thaliana] gi 8809591 db BAA97142.1  unnamed protein product [Arabidopsis thaliana] gi 332008907 gb AED96290.1  Ribonuclease P protein subunit P38-like protein [Arabidopsis thaliana]                                                                                                                                                                                                                                       | 690 | 720  | 0        | 104.3 | 78.3 | 87.0 | Ribonuclease P protein subunit P38-like protein | gbpln | Arabidopsis thaliana | AT5G53020.1   Symbols:   Ribonuclease P protein subunit P38-related   chr5:21499899-21502235 FORWARD LENGTH=720                                                                                                                                                                                                                                                                                                                                                                                                                                                      | 690 | 720  | 0        | 104.3 | 78.3 | 87.0 |

|                         |                                                                                                                                                                                                                                                                                                                                                                                                                                                                                                                                                                                                  |      |      |           |       |      |      |                                        |       |                      |                                                                                                                                                                                                                                                                                                                                                                                                                                                                                                                                                   |      |      |           |       |      |      |
|-------------------------|--------------------------------------------------------------------------------------------------------------------------------------------------------------------------------------------------------------------------------------------------------------------------------------------------------------------------------------------------------------------------------------------------------------------------------------------------------------------------------------------------------------------------------------------------------------------------------------------------|------|------|-----------|-------|------|------|----------------------------------------|-------|----------------------|---------------------------------------------------------------------------------------------------------------------------------------------------------------------------------------------------------------------------------------------------------------------------------------------------------------------------------------------------------------------------------------------------------------------------------------------------------------------------------------------------------------------------------------------------|------|------|-----------|-------|------|------|
| Rsa1.0_00231.1.g9175.t1 | ref NP_568783.1  PP2A regulatory subunit TAP46 [Arabidopsis thaliana] gi 83305913 sp Q8LDQ4.2 TAP46_ARAT H RecName: Full=PP2A regulatory subunit TAP46; AltName: Full=2A phosphatase-associated protein of 46 kDa gi 5107033 gb AAD39930.1 AF133708.1 PP2A regulatory subunit [Arabidopsis thaliana] gi 28393350 gb AAO42099.1 putative PP2A regulatory subunit [Arabidopsis thaliana] gi 29824349 gb AAP04135.1 putative PP2A regulatory subunit [Arabidopsis thaliana] gi 332008905 gb AED96288.1 PP2A regulatory subunit TAP46 [Arabidopsis thaliana]                                         | 405  | 405  | 0         | 100.0 | 92.1 | 96.0 | PP2A regulatory subunit TAP46          | gbpln | Arabidopsis thaliana | AT5G53000.1   Symbols: TAP46   2A phosphatase associated protein of 46 kD   chr5:21485654-21487869 REVERSE LENGTH=405                                                                                                                                                                                                                                                                                                                                                                                                                             | 405  | 405  | 0         | 100.0 | 92.1 | 96.0 |
| Rsa1.0_00231.1.g9176.t1 | gb EOA13841.1  hypothetical protein CARUB_v10026944mg [Capsella rubella]                                                                                                                                                                                                                                                                                                                                                                                                                                                                                                                         | 263  | 274  | 1.00E-104 | 104.2 | 77.9 | 86.7 | hypothetical protein CARUB_v10026944mg | gbpln | Capsella rubella     | AT5G52990.1   Symbols:   SNARE-like superfamily protein   chr5:21484188-21485006 FORWARD LENGTH=272                                                                                                                                                                                                                                                                                                                                                                                                                                               | 263  | 272  | 1.00E-106 | 103.4 | 76.8 | 86.7 |
| Rsa1.0_00231.1.g9177.t1 | # # # # # # # # # #                                                                                                                                                                                                                                                                                                                                                                                                                                                                                                                                                                              |      |      |           |       |      |      | -                                      | ----  | ----                 | # # # # # # #                                                                                                                                                                                                                                                                                                                                                                                                                                                                                                                                     |      |      |           |       |      |      |
| Rsa1.0_00231.1.g9178.t1 | ref NP_200110.1  uncharacterized protein [Arabidopsis thaliana] gi 8809587 dbj BAA97138.1  unnamed protein product [Arabidopsis thaliana] gi 46518365 gb AAS99664.1  At5g52980 [Arabidopsis thaliana] gi 48310362 gb AAT41806.1  At5g52980 [Arabidopsis thaliana] gi 110743071 dbj BAE99428.1  hypothetical protein [Arabidopsis thaliana] gi 332008903 gb AED96286.1  uncharacterized protein AT5G52980 [Arabidopsis thaliana]                                                                                                                                                                  | 238  | 222  | 1.00E-105 | 93.3  | 83.2 | 87.8 | uncharacterized protein                | gbpln | Arabidopsis thaliana | AT5G52980.1   Symbols:   CONTAINS InterPro DOMAIN/s: ATPase, vacuolar ER assembly factor, Vma12 (InterPro:IPR021013); Has 1807 Blast hits to 1807 proteins in 277 species: Archae - 0; Bacteria - 0; Metazoa - 736; Fungi - 347; Plants - 385; Viruses - 0; Other Eukaryotes - 339 (source: NCBI BLink).   chr5:21482329-21483642 REVERSE LENGTH=222                                                                                                                                                                                              | 238  | 222  | 1.00E-108 | 93.3  | 83.2 | 87.8 |
| Rsa1.0_00231.1.g9179.t1 | ref NP_200108.1  uncharacterized protein [Arabidopsis thaliana] gi 8809585 dbj BAA97136.1  unnamed protein product [Arabidopsis thaliana] gi 2153436 gb AAM62529.1  unknown [Arabidopsis thaliana] gi 26449336 dbj BAC41795.1  unknown protein [Arabidopsis thaliana] gi 28372880 gb AAO39922.1  At5g52960 [Arabidopsis thaliana] gi 332008899 gb AED96282.1  uncharacterized protein AT5G52960 [Arabidopsis thaliana]                                                                                                                                                                           | 163  | 170  | 6.00E-73  | 104.3 | 87.1 | 92.0 | uncharacterized protein                | gbpln | Arabidopsis thaliana | AT5G52960.1   Symbols:   unknown protein; FUNCTIONS IN: molecular function unknown; INVOLVED IN: biological process unknown; LOCATED IN: chloroplast; EXPRESSED IN: 23 plant structures; EXPRESSED DURING: 13 growth stages; CONTAINS InterPro DOMAIN/s: Protein of unknown function DUF3143 (InterPro:IPR021489); Has 1807 Blast hits to 1807 proteins in 277 species: Archae - 0; Bacteria - 0; Metazoa - 736; Fungi - 347; Plants - 385; Viruses - 0; Other Eukaryotes - 339 (source: NCBI BLink).   chr5:21477250-21478269 FORWARD LENGTH=170 | 163  | 170  | 2.00E-75  | 104.3 | 87.1 | 92.0 |
| Rsa1.0_00231.1.g9180.t1 | gb AAF79797.1 AC020646_20 T32E20.30 [Arabidopsis thaliana]                                                                                                                                                                                                                                                                                                                                                                                                                                                                                                                                       | 188  | 1397 | 1.00E-19  | 743.1 | 26.6 | 33.5 | T32E20.30                              | gbpln | Arabidopsis thaliana | #                                                                                                                                                                                                                                                                                                                                                                                                                                                                                                                                                 | #    | #    | #         | #     | #    | #    |
| Rsa1.0_00231.1.g9181.t1 | ref NP_200104.1  pyruvate kinase [Arabidopsis thaliana] gi 75309198 sp Q9FLW9.1 PKP2_ARATH RecName: Full=Plastidial pyruvate kinase 2; Short=PKp2; AltName: Full=Plastidial pyruvate kinase 1; Short=PKP1; AltName: Full=Pyruvate kinase III; AltName: Full=Pyruvate kinase isozyme B1, chloroplastic; Short=PKP-BETA1; Short=Plastidic pyruvate kinase beta subunit 1; Flags: Precursor gi 10177106 dbj BAB10440.1  pyruvate kinase [Arabidopsis thaliana] gi 21536743 gb AAM61075.1  pyruvate kinase [Arabidopsis thaliana] gi 332008895 gb AED96278.1  pyruvate kinase [Arabidopsis thaliana] | 583  | 579  | 0         | 99.3  | 94.9 | 97.1 | pyruvate kinase                        | gbpln | Arabidopsis thaliana | AT5G52920.1   Symbols: PKP1, PKP-BETA1, PKP2   plastidic pyruvate kinase beta subunit 1   chr5:21463680-21466612 FORWARD LENGTH=579                                                                                                                                                                                                                                                                                                                                                                                                               | 583  | 579  | 0         | 99.3  | 94.9 | 97.1 |
| Rsa1.0_00231.1.g9182.t1 | gb EOA12459.1  hypothetical protein CARUB_v10025761mg [Capsella rubella]                                                                                                                                                                                                                                                                                                                                                                                                                                                                                                                         | 1172 | 1185 | 0         | 101.1 | 82.8 | 89.3 | hypothetical protein CARUB_v10025761mg | gbpln | Capsella rubella     | AT5G52910.1   Symbols: ATIM   timeless family protein   chr5:21457774-21463159 REVERSE LENGTH=1141                                                                                                                                                                                                                                                                                                                                                                                                                                                | 1172 | 1141 | 0         | 97.4  | 80.8 | 87.2 |
| Rsa1.0_00231.1.g9183.t1 | # # # # # # # # # #                                                                                                                                                                                                                                                                                                                                                                                                                                                                                                                                                                              |      |      |           |       |      |      | -                                      | ----  | ----                 | # # # # # # #                                                                                                                                                                                                                                                                                                                                                                                                                                                                                                                                     |      |      |           |       |      |      |
| Rsa1.0_00231.1.g9184.t1 | dbj BAB10438.1  unnamed protein product [Arabidopsis thaliana]                                                                                                                                                                                                                                                                                                                                                                                                                                                                                                                                   | 231  | 236  | 5.00E-96  | 102.2 | 81.0 | 86.6 | unnamed protein product                | gbpln | Arabidopsis thaliana | AT5G52900.1   Symbols:   unknown protein; Has 30201 Blast hits to 17322 proteins in 780 species: Archae - 12; Bacteria - 1396; Metazoa - 17338; Fungi - 3422; Plants - 5037; Viruses - 0; Other Eukaryotes - 2996 (source: NCBI BLink).   chr5:21452893-21453692 REVERSE LENGTH=235                                                                                                                                                                                                                                                               | 231  | 235  | 1.00E-97  | 101.7 | 80.5 | 86.1 |

|                         |                                                                                                                                                                                                                                                                                     |      |      |           |       |      |      |                                                                                |       |                      |                                                                                                                                                                                                                                                                                                                                                         |                                                                                                                                             |      |           |          |       |      |      |
|-------------------------|-------------------------------------------------------------------------------------------------------------------------------------------------------------------------------------------------------------------------------------------------------------------------------------|------|------|-----------|-------|------|------|--------------------------------------------------------------------------------|-------|----------------------|---------------------------------------------------------------------------------------------------------------------------------------------------------------------------------------------------------------------------------------------------------------------------------------------------------------------------------------------------------|---------------------------------------------------------------------------------------------------------------------------------------------|------|-----------|----------|-------|------|------|
| Rsa1.0_00231.1.g9185.t1 | #                                                                                                                                                                                                                                                                                   | #    | #    | #         | #     | #    | #    | #                                                                              | -     | ----                 | ----                                                                                                                                                                                                                                                                                                                                                    | AT3G17365.1   Symbols:   S-adenosyl-L-methionine-dependent methyltransferases superfamily protein   chr3:5947144-5948766 REVERSE LENGTH=239 | 107  | 239       | 2.00E-11 | 223.4 | 28.0 | 32.7 |
| Rsa1.0_00231.1.g9186.t1 | pir T00833 RNA-directed DNA polymerase homolog T13L16.7 - Arabidopsis thaliana (fragment)                                                                                                                                                                                           | 1486 | 1365 | 0         | 91.9  | 41.4 | 55.6 | RNA-directed DNA polymerase homolog T13L16.7 - Arabidopsis thaliana (fragment) | ----  | ----                 | ----                                                                                                                                                                                                                                                                                                                                                    | AT4G29090.1   Symbols:   Ribonuclease H-like superfamily protein   chr4:1433528-14335255 FORWARD LENGTH=575                                 | 1486 | 575       | 7.00E-87 | 38.7  | 12.2 | 17.8 |
| Rsa1.0_00231.1.g9187.t1 | ref NP_200101.2  AT hook motif-containing protein [Arabidopsis thaliana] gi 57222118 gb AAW39966.1  At5g52890 [Arabidopsis thaliana] gi 57222216 gb AAW39015.1  At5g52890 [Arabidopsis thaliana] gi 332008890 gb AED6273.1  AT hook motif-containing protein [Arabidopsis thaliana] | 373  | 357  | 2.00E-79  | 95.7  | 46.6 | 52.0 | AT hook motif-containing protein                                               | gbpln | Arabidopsis thaliana | AT5G52890.1   Symbols:   AT hook motif-containing protein   chr5:21445040-21446197 REVERSE LENGTH=357                                                                                                                                                                                                                                                   | 373                                                                                                                                         | 357  | 6.00E-82  | 95.7     | 46.6  | 52.0 |      |
| Rsa1.0_00231.1.g9188.t1 | #                                                                                                                                                                                                                                                                                   | #    | #    | #         | #     | #    | #    | -                                                                              | ----  | ----                 | ----                                                                                                                                                                                                                                                                                                                                                    | #                                                                                                                                           | #    | #         | #        | #     | #    | #    |
| Rsa1.0_00231.1.g9189.t1 | #                                                                                                                                                                                                                                                                                   | #    | #    | #         | #     | #    | #    | -                                                                              | ----  | ----                 | ----                                                                                                                                                                                                                                                                                                                                                    | #                                                                                                                                           | #    | #         | #        | #     | #    | #    |
| Rsa1.0_00232.1.g9190.t1 | #                                                                                                                                                                                                                                                                                   | #    | #    | #         | #     | #    | #    | -                                                                              | ----  | ----                 | ----                                                                                                                                                                                                                                                                                                                                                    | #                                                                                                                                           | #    | #         | #        | #     | #    | #    |
| Rsa1.0_00232.1.g9191.t1 | gb ABK28184.1  unknown [Arabidopsis thaliana]                                                                                                                                                                                                                                       | 351  | 488  | 3.00E-15  | 139.0 | 12.0 | 18.8 | unknown                                                                        | gbpln | Arabidopsis thaliana | #                                                                                                                                                                                                                                                                                                                                                       | #                                                                                                                                           | #    | #         | #        | #     | #    |      |
| Rsa1.0_00232.1.g9192.t1 | ref XP_002883436.1  hypothetical protein ARALYDRAFT_479868 [Arabidopsis lyrata subsp. lyrata] gi 297329276 gb EFH59695.1  hypothetical protein ARALYDRAFT_479868 [Arabidopsis lyrata subsp. lyrata]                                                                                 | 1310 | 1309 | 0         | 99.9  | 89.1 | 94.7 | hypothetical protein ARALYDRAFT_479868                                         | gbpln | Arabidopsis lyrata   | AT3G23590.1   Symbols: RFR1, MED33A   REF4-related 1   chr3:8467638-8473469 FORWARD LENGTH=1309                                                                                                                                                                                                                                                         | 1310                                                                                                                                        | 1309 | 0         | 99.9     | 89.2  | 94.5 |      |
| Rsa1.0_00232.1.g9193.t6 | ref XP_002883478.1  hypothetical protein ARALYDRAFT_479911 [Arabidopsis lyrata subsp. lyrata] gi 297329318 gb EFH59737.1  hypothetical protein ARALYDRAFT_479911 [Arabidopsis lyrata subsp. lyrata]                                                                                 | 1255 | 950  | 0         | 75.7  | 67.4 | 70.4 | hypothetical protein ARALYDRAFT_479911                                         | gbpln | Arabidopsis lyrata   | AT3G24180.2   Symbols:   Beta-glucosidase, GBA2 type family protein   chr3:8735011-8741147 REVERSE LENGTH=950                                                                                                                                                                                                                                           | 1255                                                                                                                                        | 950  | 0         | 75.7     | 67.2  | 70.5 |      |
| Rsa1.0_00232.1.g9194.t7 | ref XP_002883439.1  dual specificity protein phosphatase [Arabidopsis lyrata subsp. lyrata] gi 297329279 gb EFH59698.1  dual specificity protein phosphatase [Arabidopsis lyrata subsp. lyrata]                                                                                     | 338  | 203  | 1.00E-84  | 60.1  | 43.8 | 48.2 | dual specificity protein phosphatase                                           | gbpln | Arabidopsis lyrata   | AT3G23610.2   Symbols: DSPTP1   dual specificity protein phosphatase 1   chr3:8478280-8479641 FORWARD LENGTH=201                                                                                                                                                                                                                                        | 338                                                                                                                                         | 201  | 3.00E-86  | 59.5     | 43.8  | 47.6 |      |
| Rsa1.0_00232.1.g9195.t1 | gb EOA31032.1  hypothetical protein CARUB_v10014181mg [Capsella rubella]                                                                                                                                                                                                            | 344  | 324  | 1.00E-150 | 94.2  | 77.3 | 84.0 | hypothetical protein CARUB_v10014181mg                                         | gbpln | Capsella rubella     | AT3G23620.1   Symbols:   Ribosomal RNA processing Brix domain protein   chr3:8480147-8481873 FORWARD LENGTH=314                                                                                                                                                                                                                                         | 344                                                                                                                                         | 314  | 1.00E-141 | 91.3     | 75.6  | 84.0 |      |
| Rsa1.0_00232.1.g9196.t1 | #                                                                                                                                                                                                                                                                                   | #    | #    | #         | #     | #    | #    | -                                                                              | ----  | ----                 | ----                                                                                                                                                                                                                                                                                                                                                    | #                                                                                                                                           | #    | #         | #        | #     | #    |      |
| Rsa1.0_00232.1.g9197.t1 | dbj BAE43829.1  isopentenyltransferase [Brassica rapa subsp. pekinensis]                                                                                                                                                                                                            | 332  | 332  | 1.00E-179 | 100.0 | 96.1 | 97.6 | isopentenyltransferase                                                         | gbpln | Brassica rapa        | AT3G23630.1   Symbols: ATIPT7, IPT7   isopentenyltransferase 7   chr3:8488878-8489867 FORWARD LENGTH=329                                                                                                                                                                                                                                                | 332                                                                                                                                         | 329  | 1.00E-169 | 99.1     | 86.7  | 91.0 |      |
| Rsa1.0_00232.1.g9198.t1 | #                                                                                                                                                                                                                                                                                   | #    | #    | #         | #     | #    | #    | -                                                                              | ----  | ----                 | ----                                                                                                                                                                                                                                                                                                                                                    | #                                                                                                                                           | #    | #         | #        | #     | #    |      |
| Rsa1.0_00232.1.g9199.t1 | gb EOA28939.1  hypothetical protein CARUB_v10025187mg [Capsella rubella]                                                                                                                                                                                                            | 408  | 752  | 1.00E-12  | 184.3 | 8.6  | 13.2 | hypothetical protein CARUB_v10025187mg                                         | gbpln | Capsella rubella     | #                                                                                                                                                                                                                                                                                                                                                       | #                                                                                                                                           | #    | #         | #        | #     |      |      |
| Rsa1.0_00232.1.g9200.t1 | #                                                                                                                                                                                                                                                                                   | #    | #    | #         | #     | #    | #    | -                                                                              | ----  | ----                 | ----                                                                                                                                                                                                                                                                                                                                                    | #                                                                                                                                           | #    | #         | #        | #     | #    |      |
| Rsa1.0_00233.1.g9201.t3 | ref XP_002864410.1  hypothetical protein ARALYDRAFT_357817 [Arabidopsis lyrata subsp. lyrata] gi 297310245 gb EFH40669.1  hypothetical protein ARALYDRAFT_357817 [Arabidopsis lyrata subsp. lyrata]                                                                                 | 1811 | 1781 | 0         | 98.3  | 61.7 | 72.1 | hypothetical protein ARALYDRAFT_357817                                         | gbpln | Arabidopsis lyrata   | AT5G55820.1   Symbols:   CONTAINS InterPro DOMAIN/s: Inner centromere protein, ARK-binding region (InterPro:IPR005635). Has 1807 Blast hits to 1807 proteins in 277 species: Archae - 0; Bacteria - 0; Metazoa - 736; Fungi - 347; Plants - 385; Viruses - 0; Other Eukaryotes - 339 (source: NCBI BLINK).   chr5:22586287-22594035 FORWARD LENGTH=1826 | 1811                                                                                                                                        | 1826 | 0         | 100.8    | 46.2  | 52.8 |      |
| Rsa1.0_00233.1.g9202.t1 | gb EOA25654.1  hypothetical protein CARUB_v10019004mg [Capsella rubella]                                                                                                                                                                                                            | 263  | 240  | 1.00E-101 | 91.3  | 71.9 | 79.5 | hypothetical protein CARUB_v10019004mg                                         | gbpln | Capsella rubella     | AT5G55810.1   Symbols: AtNMNAT, NMNAT   nicotinate/nicotinamide mononucleotide adenyltransferase   chr5:22584229-22586239 REVERSE LENGTH=238                                                                                                                                                                                                            | 263                                                                                                                                         | 238  | 1.00E-104 | 90.5     | 71.5  | 78.7 |      |

|                         |                                                                                                                                                                                                                                                                                                                                                                                                                                                                                                                                                                                                                                                                                                                                                                     |     |     |           |       |      |      |                                                      |       |                      |                                                                                                                                                                                                                                                                                                                                                                                                                    |     |     |           |       |      |      |
|-------------------------|---------------------------------------------------------------------------------------------------------------------------------------------------------------------------------------------------------------------------------------------------------------------------------------------------------------------------------------------------------------------------------------------------------------------------------------------------------------------------------------------------------------------------------------------------------------------------------------------------------------------------------------------------------------------------------------------------------------------------------------------------------------------|-----|-----|-----------|-------|------|------|------------------------------------------------------|-------|----------------------|--------------------------------------------------------------------------------------------------------------------------------------------------------------------------------------------------------------------------------------------------------------------------------------------------------------------------------------------------------------------------------------------------------------------|-----|-----|-----------|-------|------|------|
| Rsa1.0_00233.1.g9203.t1 | ref NP_565474.1  uncharacterized protein [Arabidopsis thaliana]<br>gi 20198088 gb AAM15393.1  Expressed protein [Arabidopsis thaliana]<br>gi 30794122 gb AAP40503.1  unknown protein [Arabidopsis thaliana]<br>gi 56236118 gb AAV84515.1  At2g20515 [Arabidopsis thaliana]<br>gi 89001021 gb ABD59100.1  At2g20515 [Arabidopsis thaliana]<br>gi 330251927 gb AEC07021.1  uncharacterized protein AT2G20515 [Arabidopsis thaliana]                                                                                                                                                                                                                                                                                                                                   | 225 | 155 | 5.00E-72  | 68.9  | 57.3 | 61.8 | uncharacterized protein                              | gbpln | Arabidopsis thaliana | AT2G20515.1   Symbols:   unknown protein; FUNCTIONS IN: molecular_function unknown; INVOLVED IN: biological_process unknown; LOCATED IN: endomembrane system; EXPRESSED DURING: 7 growth stages; Has 71 Blast hits to 71 proteins in 14 species: Archae - 0; Bacteria - 0; Metazoa - 0; Fungi - 0; Plants - 71; Viruses - 0; Other Eukaryotes - 0 (source: NCBI BLINK).   chr:2:8839041-8839595 REVERSE LENGTH=155 | 225 | 155 | 2.00E-74  | 68.9  | 57.3 | 61.8 |
| Rsa1.0_00233.1.g9204.t1 | gb EOA13175.1  hypothetical protein CARUB_v10026199mg [Capsella rubella]                                                                                                                                                                                                                                                                                                                                                                                                                                                                                                                                                                                                                                                                                            | 467 | 540 | 0         | 115.6 | 88.9 | 95.3 | hypothetical protein CARUB_v10026199mg               | gbpln | Capsella rubella     | AT5G55760.1   Symbols: SRT1   sirtuin 1   chr:5:22567282-22570716 FORWARD LENGTH=473                                                                                                                                                                                                                                                                                                                               | 467 | 473 | 0         | 101.3 | 88.2 | 95.7 |
| Rsa1.0_00233.1.g9205.t1 | gb EOA13191.1  hypothetical protein CARUB_v10026217mg [Capsella rubella]                                                                                                                                                                                                                                                                                                                                                                                                                                                                                                                                                                                                                                                                                            | 536 | 531 | 0         | 99.1  | 89.9 | 94.4 | hypothetical protein CARUB_v10026217mg               | gbpln | Capsella rubella     | AT5G55700.1   Symbols: BMY6, BAM4   beta-amyglase 4   chr:5:22551873-22554702 FORWARD LENGTH=531                                                                                                                                                                                                                                                                                                                   | 536 | 531 | 0         | 99.1  | 89.2 | 93.8 |
| Rsa1.0_00233.1.g9206.t1 | ref NP_200380.1  MADS-box protein AGL47 [Arabidopsis thaliana]<br>gi 8758603 dbj BAB09236.1  unnamed protein product [Arabidopsis thaliana]<br>gi 32402392 gb AAN52778.1  MADS-box protein AGL47 [Arabidopsis thaliana]<br>gi 109946439 gb ABG48398.1  At5g55690 [Arabidopsis thaliana]<br>gi 332009285 gb AED96668.1  MADS-box protein AGL47 [Arabidopsis thaliana]                                                                                                                                                                                                                                                                                                                                                                                                | 273 | 277 | 1.00E-111 | 101.5 | 72.9 | 82.8 | MADS-box protein AGL47                               | gbpln | Arabidopsis thaliana | AT5G55690.1   Symbols:   MADS-box transcription factor family protein   chr:5:22548790-22549623 REVERSE LENGTH=277                                                                                                                                                                                                                                                                                                 | 273 | 277 | 1.00E-114 | 101.5 | 72.9 | 82.8 |
| Rsa1.0_00233.1.g9207.t1 | sp Q9LHD3.2 FB190_ARATH RecName: Full=F-box protein At3g28330                                                                                                                                                                                                                                                                                                                                                                                                                                                                                                                                                                                                                                                                                                       | 479 | 397 | 2.00E-91  | 82.9  | 43.4 | 54.3 | RecName: Full=F-box protein At3g28330                | ----- | -----                | AT3G28223.1   Symbols:   F-box family protein   chr:3:10527669-10528921 REVERSE LENGTH=391                                                                                                                                                                                                                                                                                                                         | 479 | 391 | 5.00E-80  | 81.6  | 38.8 | 48.6 |
| Rsa1.0_00233.1.g9208.t1 | ref NP_200378.1  RNA recognition motif-containing protein [Arabidopsis thaliana]<br>gi 8758601 dbj BAB09234.1  unnamed protein product [Arabidopsis thaliana]<br>gi 332009282 gb AED96665.1  RNA recognition motif-containing protein [Arabidopsis thaliana]                                                                                                                                                                                                                                                                                                                                                                                                                                                                                                        | 656 | 710 | 0         | 108.2 | 75.8 | 83.7 | RNA recognition motif-containing protein             | gbpln | Arabidopsis thaliana | AT5G55670.1   Symbols:   RNA-binding (RRM/RBD/RNP motifs) family protein   chr:5:22544669-22546801 REVERSE LENGTH=710                                                                                                                                                                                                                                                                                              | 656 | 710 | 0         | 108.2 | 75.8 | 83.7 |
| Rsa1.0_00233.1.g9209.t2 | ref NP_199643.1  cysteine/histidine-rich C1 domain-containing protein [Arabidopsis thaliana]<br>gi 8978336 dbj BAA98189.1  unnamed protein product [Arabidopsis thaliana]<br>gi 332008268 gb AED95651.1  cysteine/histidine-rich C1 domain-containing protein [Arabidopsis thaliana]                                                                                                                                                                                                                                                                                                                                                                                                                                                                                | 662 | 977 | 1.00E-133 | 147.6 | 36.0 | 42.4 | cysteine/histidine-rich C1 domain-containing protein | gbpln | Arabidopsis thaliana | AT5G48320.1   Symbols:   Cysteine/Histidine-rich C1 domain family protein   chr:5:19581794-19584727 REVERSE LENGTH=977                                                                                                                                                                                                                                                                                             | 662 | 977 | 1.00E-136 | 147.6 | 36.0 | 42.4 |
| Rsa1.0_00233.1.g9210.t1 | gb EOA36883.1  hypothetical protein CARUB_v10008966mg [Capsella rubella]                                                                                                                                                                                                                                                                                                                                                                                                                                                                                                                                                                                                                                                                                            | 211 | 491 | 8.00E-46  | 232.7 | 44.1 | 48.3 | hypothetical protein CARUB_v10008966mg               | gbpln | Capsella rubella     | AT1G11880.1   Symbols:   transferases, transferring hexosyl groups   chr:1:4007909-4010327 REVERSE LENGTH=489                                                                                                                                                                                                                                                                                                      | 211 | 489 | 4.00E-47  | 231.8 | 44.5 | 49.3 |
| Rsa1.0_00233.1.g9211.t1 | gb AAM64705.1  outward rectifying potassium channel KCO [Arabidopsis thaliana]                                                                                                                                                                                                                                                                                                                                                                                                                                                                                                                                                                                                                                                                                      | 370 | 363 | 1.00E-168 | 98.1  | 84.9 | 92.4 | outward rectifying potassium channel KCO             | gbpln | Arabidopsis thaliana | AT5G55630.2   Symbols: KCO1, TPK1   Outward rectifying potassium channel protein   chr:5:22531718-22532893 FORWARD LENGTH=363                                                                                                                                                                                                                                                                                      | 370 | 363 | 1.00E-171 | 98.1  | 84.9 | 92.2 |
| Rsa1.0_00233.1.g9212.t1 | ref NP_197207.1  Flavonoid 3-O-glucosyltransferase [Arabidopsis thaliana]<br>gi 75311137 sp Q9LFJ8.1 U78D2_ARATH RecName: Full=UDP-glycosyltransferase 78D2; AltName: Full=Anthocyanin 3-O-glucosyltransferase; AltName: Full=Flavonol 3-O-glucosyltransferase; AltName: Full=UDP-glucose:flavonoid 3-O-glucosyltransferase<br>gi 8755706 emb CAC01718.1  UDP-glucose:flavonoid 3-o-glucosyltransferase-like protein [Arabidopsis thaliana]<br>gi 18252199 gb AAL61932.1  UDP-glucose:flavonoid 3-o-glucosyltransferase-like protein [Arabidopsis thaliana]<br>gi 22136122 gb AAM91139.1  UDP-glucose:flavonoid 3-o-glucosyltransferase-like protein [Arabidopsis thaliana]<br>gi 332004994 gb AED92377.1  Flavonoid 3-O-glucosyltransferase [Arabidopsis thaliana] | 446 | 460 | 0         | 103.1 | 73.1 | 84.5 | Flavonoid 3-O-glucosyltransferase                    | gbpln | Arabidopsis thaliana | AT5G17050.1   Symbols: UGT78D2   UDP-glucosyl transferase 78D2   chr:5:5607828-5609392 REVERSE LENGTH=460                                                                                                                                                                                                                                                                                                          | 446 | 460 | 0         | 103.1 | 73.1 | 84.5 |

|                         |                                                                                                                                                                                                                                                                                                                                                                                                                                                                                  |     |     |           |       |       |       |                                                               |       |                      |                                                                                                                                                                                                                                                                                                                                                                     |     |     |           |       |      |      |
|-------------------------|----------------------------------------------------------------------------------------------------------------------------------------------------------------------------------------------------------------------------------------------------------------------------------------------------------------------------------------------------------------------------------------------------------------------------------------------------------------------------------|-----|-----|-----------|-------|-------|-------|---------------------------------------------------------------|-------|----------------------|---------------------------------------------------------------------------------------------------------------------------------------------------------------------------------------------------------------------------------------------------------------------------------------------------------------------------------------------------------------------|-----|-----|-----------|-------|------|------|
| Rsa1.0_00233.1.g9213.t1 | ref[XP_002892315.1] hypothetical protein ARALYDRAFT_887793 [Arabidopsis lyrata subsp. lyrata] gi 297338157 gb EFH68574.1  hypothetical protein ARALYDRAFT_887793 [Arabidopsis lyrata subsp. lyrata]                                                                                                                                                                                                                                                                              | 432 | 434 | 0         | 100.5 | 80.8  | 88.7  | hypothetical protein ARALYDRAFT_887793                        | gbpln | Arabidopsis lyrata   | AT1G06000.1   Symbols:   UDP-Glycosyltransferase superfamily protein   chr1:1820495-1821802 REVERSE LENGTH=435                                                                                                                                                                                                                                                      | 432 | 435 | 0         | 100.7 | 78.5 | 88.0 |
| Rsa1.0_00233.1.g9214.t1 | gb[EOA12607.1] hypothetical protein CARUB_v10027338mg, partial [Capsella rubella]                                                                                                                                                                                                                                                                                                                                                                                                | 100 | 140 | 5.00E-42  | 140.0 | 84.0  | 92.0  | hypothetical protein CARUB_v10027338mg, partial               | gbpln | Capsella rubella     | AT5G55620.1   Symbols:   unknown protein; BEST Arabidopsis thaliana protein match is: unknown protein (TAIR:AT3G09950.1); Has 30201 Blast hits to 17322 proteins in 780 species: Archae - 12; Bacteria - 1396; Metazoa - 17338; Fungi - 3422; Plants - 5037; Viruses - 0; Other Eukaryotes - 2996 (source: NCBI BLINK).   chr5:22530373-22530678 FORWARD LENGTH=101 | 100 | 101 | 3.00E-39  | 101.0 | 85.0 | 90.0 |
| Rsa1.0_00233.1.g9215.t1 | ref[XP_002866105.1] hypothetical protein ARALYDRAFT_495647 [Arabidopsis lyrata subsp. lyrata] gi 297311940 gb EFH42364.1  hypothetical protein ARALYDRAFT_495647 [Arabidopsis lyrata subsp. lyrata]                                                                                                                                                                                                                                                                              | 651 | 664 | 0         | 102.0 | 81.7  | 89.4  | hypothetical protein ARALYDRAFT_495647                        | gbpln | Arabidopsis lyrata   | AT5G55600.3   Symbols:   agenet domain-containing protein / bromo-adjacent homology (BAH) domain-containing protein   chr5:22522232-22524796 REVERSE LENGTH=663                                                                                                                                                                                                     | 651 | 663 | 0         | 101.8 | 81.7 | 88.6 |
| Rsa1.0_00233.1.g9216.t1 | ref[XP_002864399.1] mitochondrial transcription termination factor family protein [Arabidopsis lyrata subsp. lyrata] gi 297310234 gb EFH40658.1  mitochondrial transcription termination factor family protein [Arabidopsis lyrata subsp. lyrata]                                                                                                                                                                                                                                | 503 | 493 | 0         | 98.0  | 87.9  | 91.5  | mitochondrial transcription termination factor family protein | gbpln | Arabidopsis lyrata   | AT5G55580.1   Symbols:   Mitochondrial transcription termination factor family protein   chr5:22515601-22517408 FORWARD LENGTH=496                                                                                                                                                                                                                                  | 503 | 496 | 0         | 98.6  | 86.3 | 90.7 |
| Rsa1.0_00233.1.g9217.t1 | gb[EOA14704.1] hypothetical protein CARUB_v10027981mg [Capsella rubella]                                                                                                                                                                                                                                                                                                                                                                                                         | 356 | 562 | 1.00E-112 | 157.9 | 63.5  | 69.1  | hypothetical protein CARUB_v10027981mg                        | gbpln | Capsella rubella     | AT4G26640.2   Symbols: WRKY20, ATWRKY20   WRKY family transcription factor family protein   chr4:13437298-13440693 REVERSE LENGTH=557                                                                                                                                                                                                                               | 356 | 557 | 1.00E-111 | 156.5 | 57.6 | 65.4 |
| Rsa1.0_00233.1.g9218.t1 | ref[NP_200367.2] putative serine/threonine-protein kinase WNK11 [Arabidopsis thaliana] gi 75323650 sp Q6ICW6.1 WNK11_ARAT H RecName: Full=Probable serine/threonine-protein kinase WNK11; Short=AWNK11; AltName: Full=Protein kinase with no lysine 11 gi 48596991 gb AAT46036.1  At5g55560 [Arabidopsis thaliana] gi 50198956 gb AAT70481.1  At5g55560 [Arabidopsis thaliana] gi 332009266 gb AED96649.1  putative serine/threonine-protein kinase WNK11 [Arabidopsis thaliana] | 311 | 314 | 1.00E-149 | 101.0 | 83.3  | 88.1  | putative serine/threonine-protein kinase WNK11                | gbpln | Arabidopsis thaliana | AT5G55560.1   Symbols:   Protein kinase superfamily protein   chr5:22506477-22507757 REVERSE LENGTH=314                                                                                                                                                                                                                                                             | 311 | 314 | 1.00E-152 | 101.0 | 83.3 | 88.1 |
| Rsa1.0_00233.1.g9219.t1 | #                                                                                                                                                                                                                                                                                                                                                                                                                                                                                | #   | #   | #         | #     | #     | #     | -                                                             | ----  | ----                 | #                                                                                                                                                                                                                                                                                                                                                                   | #   | #   | #         | #     | #    |      |
| Rsa1.0_00234.1.g9220.t2 | gb[EOA15965.1] hypothetical protein CARUB_v10004060mg [Capsella rubella]                                                                                                                                                                                                                                                                                                                                                                                                         | 997 | 996 | 0         | 99.9  | 88.4  | 93.9  | hypothetical protein CARUB_v10004060mg                        | gbpln | Capsella rubella     | AT4G20270.1   Symbols: BAM3   Leucine-rich receptor-like protein kinase family protein   chr4:10949822-10952924 FORWARD LENGTH=992                                                                                                                                                                                                                                  | 997 | 992 | 0         | 99.5  | 87.3 | 92.5 |
| Rsa1.0_00234.1.g9221.t1 | gb[EOA18090.1] hypothetical protein CARUB_v10006542mg [Capsella rubella]                                                                                                                                                                                                                                                                                                                                                                                                         | 376 | 480 | 0         | 127.7 | 100.0 | 100.0 | hypothetical protein CARUB_v10006542mg                        | gbpln | Capsella rubella     | AT4G20360.1   Symbols: ATRAB8D, ATRABE1B, RABE1b   RAB GTPase homolog E1B   chr4:10990036-10991466 FORWARD LENGTH=476                                                                                                                                                                                                                                               | 376 | 476 | 0         | 126.6 | 97.6 | 99.2 |
| Rsa1.0_00234.1.g9222.t1 | ref[NP_199269.1] vacuolar protein sorting-associated protein 2-2 [Arabidopsis thaliana] gi 22698193 sp Q0WY4.2 VPS2B_ARA TH RecName: Full=Vacuolar protein sorting-associated protein 2 homolog 2; Short=AtVPS2-2; AltName: Full=Charged multivesicular body protein 2 homolog 2; AltName: Full=ESCRT-III complex subunit VPS2 homolog 2 gi 332007740 gb AED95123.1  vacuolar protein sorting-associated protein 2-2 [Arabidopsis thaliana]                                      | 276 | 222 | 8.00E-95  | 80.4  | 70.3  | 72.5  | vacuolar protein sorting-associated protein 2-2               | gbpln | Arabidopsis thaliana | AT5G44560.1   Symbols: VPS2.2   SNF7 family protein   chr5:17946081-17948222 FORWARD LENGTH=222                                                                                                                                                                                                                                                                     | 276 | 222 | 2.00E-97  | 80.4  | 70.3 | 72.5 |
| Rsa1.0_00234.1.g9223.t1 | gb ADK63407.1  zinc finger protein [Brassica rapa]                                                                                                                                                                                                                                                                                                                                                                                                                               | 61  | 191 | 1.00E-14  | 313.1 | 83.6  | 90.2  | zinc finger protein                                           | gbpln | Brassica rapa        | #                                                                                                                                                                                                                                                                                                                                                                   | #   | #   | #         | #     | #    |      |



|                         |                                                                                                                                                                                                                                                                                       |      |      |           |       |      |      |                                                                                |       |                      |                                                                                                                                                      |      |      |           |       |      |      |
|-------------------------|---------------------------------------------------------------------------------------------------------------------------------------------------------------------------------------------------------------------------------------------------------------------------------------|------|------|-----------|-------|------|------|--------------------------------------------------------------------------------|-------|----------------------|------------------------------------------------------------------------------------------------------------------------------------------------------|------|------|-----------|-------|------|------|
| Rsa1.0_00234.1.g9224.t4 | ref[XP_002869933.1] integral membrane family protein [Arabidopsis lyrata subsp. lyrata]<br>gi 341958556 sp D7MFJ8.1 CSPLC_ARA_LL RecName: Full=CASP-like protein ARALYDRAFT_492822<br>gi 297315769 gb EFH46192.1  integral membrane family protein [Arabidopsis lyrata subsp. lyrata] | 197  | 197  | 9.00E-81  | 100.0 | 82.2 | 88.3 | integral membrane family protein                                               | gbpln | Arabidopsis lyrata   | AT4G20390.1   Symbols:   Uncharacterised protein family (UPF0497)   chr4:11007068-11007869 FORWARD LENGTH=197                                        | 197  | 197  | 6.00E-78  | 100.0 | 83.8 | 89.8 |
| Rsa1.0_00234.1.g9225.t2 | gb[EOA17129.1] hypothetical protein CARUB_v10005391mg [Capsella rubella]                                                                                                                                                                                                              | 139  | 291  | 4.00E-40  | 209.4 | 61.2 | 66.2 | hypothetical protein CARUB_v10005391mg                                         | gbpln | Capsella rubella     | AT4G20410.1   Symbols: GSNAP, GAMMA-SNAP   gamma-soluble NSF attachment protein   chr4:11014099-11016454 REVERSE LENGTH=291                          | 139  | 291  | 3.00E-42  | 209.4 | 61.2 | 66.2 |
| Rsa1.0_00234.1.g9226.t1 | gb[ABA00707.1] putative tapetum-specific A3 [Brassica napus]                                                                                                                                                                                                                          | 132  | 139  | 3.00E-46  | 105.3 | 75.8 | 84.8 | putative tapetum-specific A3                                                   | gbpln | Brassica napus       | AT4G20420.1   Symbols:   Tapetum specific protein TAP35/TAP44   chr4:11017041-11017469 FORWARD LENGTH=142                                            | 132  | 142  | 1.00E-38  | 107.6 | 66.7 | 78.0 |
| Rsa1.0_00234.1.g9227.t1 | db [BAD43836.1] unknown protein [Arabidopsis thaliana]                                                                                                                                                                                                                                | 249  | 254  | 2.00E-73  | 102.0 | 68.7 | 72.3 | unknown protein                                                                | gbpln | Arabidopsis thaliana | AT5G44500.2   Symbols:   Small nuclear ribonucleoprotein family protein   chr5:17927505-17928269 FORWARD LENGTH=254                                  | 249  | 254  | 4.00E-72  | 102.0 | 65.9 | 69.5 |
| Rsa1.0_00234.1.g9228.t1 | gb[AAB82639.1] putative non-LTR retroelement reverse transcriptase [Arabidopsis thaliana]<br>ref[NP_193779.2] putative UDP-arabinose 4-epimerase 3 [Arabidopsis thaliana]                                                                                                             | 1786 | 1374 | 0         | 76.9  | 39.8 | 51.9 | putative non-LTR retroelement reverse transcriptase                            | gbpln | Arabidopsis thaliana | AT4G20909.1   Symbols:   Ribonuclease H-like superfamily protein   chr4:14333528-14335255 FORWARD LENGTH=575                                         | 1786 | 575  | 1.00E-147 | 32.2  | 13.4 | 18.1 |
| Rsa1.0_00234.1.g9229.t1 | gi 332278213 sp Q9SUN3.3 ARAE3_ARA_TH RecName: Full=Probable UDP-arabinose 4-epimerase 3; AltName: Full=UDP-D-xylose 4-epimerase 3<br>gi 332658935 gb AEE84335.1  putative UDP-arabinose 4-epimerase 3 [Arabidopsis thaliana]                                                         | 411  | 411  | 0         | 100.0 | 95.1 | 97.6 | putative UDP-arabinose 4-epimerase 3                                           | gbpln | Arabidopsis thaliana | AT4G20460.1   Symbols:   NAD(P)-binding Rossmann-fold superfamily protein   chr4:11029767-11031765 REVERSE LENGTH=411                                | 411  | 411  | 0         | 100.0 | 95.1 | 97.6 |
| Rsa1.0_00234.1.g9230.t1 | gb[EOA18170.1] hypothetical protein CARUB_v10006646mg [Capsella rubella]                                                                                                                                                                                                              | 185  | 189  | 3.00E-79  | 102.2 | 82.2 | 89.7 | hypothetical protein CARUB_v10006646mg                                         | gbpln | Capsella rubella     | AT4G20780.1   Symbols: CML42   calmodulin like 42   chr4:11133309-11133884 REVERSE LENGTH=191                                                        | 185  | 191  | 8.00E-81  | 103.2 | 80.5 | 88.6 |
| Rsa1.0_00234.1.g9231.t1 | pir [T00833 RNA-directed DNA polymerase homolog T13L16.7 - Arabidopsis thaliana (fragment)                                                                                                                                                                                            | 1005 | 1365 | 0         | 135.8 | 47.3 | 64.1 | RNA-directed DNA polymerase homolog T13L16.7 - Arabidopsis thaliana (fragment) | ----  | ----                 | AT4G29090.1   Symbols:   Ribonuclease H-like superfamily protein   chr4:14333528-14335255 FORWARD LENGTH=575                                         | 1005 | 575  | 1.00E-88  | 57.2  | 17.6 | 27.4 |
| Rsa1.0_00234.1.g9232.t1 | #                                                                                                                                                                                                                                                                                     | #    | #    | #         | #     | #    | #    | -                                                                              | ----  | ----                 | AT1G71720.1   Symbols:   Nucleic acid-binding proteins superfamily   chr1:26983744-26985893 FORWARD LENGTH=500                                       | 149  | 500  | 2.00E-12  | 335.6 | 33.6 | 38.9 |
| Rsa1.0_00234.1.g9233.t1 | gb[EOA18748.1] hypothetical protein CARUB_v10007331mg [Capsella rubella]                                                                                                                                                                                                              | 531  | 555  | 0         | 104.5 | 76.6 | 88.3 | hypothetical protein CARUB_v10007331mg                                         | gbpln | Capsella rubella     | AT4G20840.1   Symbols:   FAD-binding Berberine family protein   chr4:11157916-11159535 FORWARD LENGTH=539                                            | 531  | 539  | 0         | 101.5 | 77.8 | 86.8 |
| Rsa1.0_00234.1.g9234.t1 | ref[XP_002863368.1] farnesyl diphosphate synthase short form [Arabidopsis lyrata subsp. lyrata]<br>gi 297309203 gb EFH39627.1  farnesyl diphosphate synthase short form [Arabidopsis lyrata subsp. lyrata]                                                                            | 111  | 343  | 4.00E-27  | 309.0 | 52.3 | 57.7 | farnesyl diphosphate synthase short form                                       | gbpln | Arabidopsis lyrata   | AT5G47770.1   Symbols: FPS1   farnesyl diphosphate synthase 1   chr5:19345297-19347415 FORWARD LENGTH=384                                            | 111  | 384  | 8.00E-30  | 345.9 | 52.3 | 57.7 |
| Rsa1.0_00234.1.g9235.t1 | emb[CAA75349.1] ERT2 [Arabidopsis thaliana]                                                                                                                                                                                                                                           | 362  | 407  | 4.00E-43  | 112.4 | 36.7 | 40.6 | ERT2                                                                           | gbpln | Arabidopsis thaliana | AT4G20880.1   Symbols:   ethylene-responsive nuclear protein / ethylene-regulated nuclear protein (ERT2)   chr4:11179389-11180606 REVERSE LENGTH=405 | 362  | 405  | 5.00E-45  | 111.9 | 33.1 | 35.4 |
| Rsa1.0_00234.1.g9236.t1 | gb[EOA16631.1] hypothetical protein CARUB_v10004805mg [Capsella rubella]                                                                                                                                                                                                              | 445  | 445  | 0         | 100.0 | 98.2 | 99.3 | hypothetical protein CARUB_v10004805mg                                         | gbpln | Capsella rubella     | AT4G20890.1   Symbols: TUB9   tubulin beta-9 chain   chr4:11182218-11183840 FORWARD LENGTH=444                                                       | 445  | 444  | 0         | 99.8  | 97.8 | 98.4 |
| Rsa1.0_00234.1.g9237.t3 | ref[XP_002867829.1] hypothetical protein ARALYDRAFT_492703 [Arabidopsis lyrata subsp. lyrata]<br>gi 297313665 gb EFH44088.1  hypothetical protein ARALYDRAFT_492703 [Arabidopsis lyrata subsp. lyrata]                                                                                | 1228 | 1188 | 0         | 96.7  | 88.7 | 92.4 | hypothetical protein ARALYDRAFT_492703                                         | gbpln | Arabidopsis lyrata   | AT4G21710.1   Symbols: NRPB2, EMB1989, RPB2   DNA-directed RNA polymerase family protein   chr4:11535684-11542200 REVERSE LENGTH=1188                | 1228 | 1188 | 0         | 96.7  | 88.7 | 92.3 |
| Rsa1.0_00234.1.g9238.t1 | ref[XP_002869872.1] gibberellin 3-oxidase 3 [Arabidopsis lyrata subsp. lyrata]<br>gi 297315708 gb EFH46131.1  gibberellin 3-oxidase 3 [Arabidopsis lyrata subsp. lyrata]                                                                                                              | 489  | 348  | 1.00E-166 | 71.2  | 58.1 | 62.4 | gibberellin 3-oxidase 3                                                        | gbpln | Arabidopsis lyrata   | AT4G21690.1   Symbols: ATGA3OX3, GA3OX3   gibberellin 3-oxidase 3   chr4:11527229-11529060 FORWARD LENGTH=349                                        | 489  | 349  | 1.00E-167 | 71.4  | 57.9 | 62.6 |
| Rsa1.0_00234.1.g9239.t1 | gb[ACP30598.1] disease resistance protein [Brassica rapa subsp. pekinensis]                                                                                                                                                                                                           | 1720 | 2301 | 0         | 133.8 | 45.6 | 59.5 | disease resistance protein                                                     | gbpln | Brassica rapa        | AT4G23160.1   Symbols: CRK8   cysteine-rich RLK (RECEPTOR-like protein kinase) 8   chr4:12129485-12134086 FORWARD LENGTH=1262                        | 1720 | 1262 | 6.00E-83  | 73.4  | 9.8  | 14.9 |

|                         |                                                                                                                                                                                                                                                                                                                                                                                                                                                                                                                                                                                                          |      |      |           |       |      |      |                                                                                                    |       |                      |                                                                                                                                             |      |     |           |       |      |      |
|-------------------------|----------------------------------------------------------------------------------------------------------------------------------------------------------------------------------------------------------------------------------------------------------------------------------------------------------------------------------------------------------------------------------------------------------------------------------------------------------------------------------------------------------------------------------------------------------------------------------------------------------|------|------|-----------|-------|------|------|----------------------------------------------------------------------------------------------------|-------|----------------------|---------------------------------------------------------------------------------------------------------------------------------------------|------|-----|-----------|-------|------|------|
| Rsa1.0_00234.1.g9240.t1 | dbj BAJ34582.1 unnamed protein product [Theilingella halophila]                                                                                                                                                                                                                                                                                                                                                                                                                                                                                                                                          | 294  | 294  | 1.00E-167 | 100.0 | 98.3 | 99.3 | unnamed protein product                                                                            | ----  | ----                 | AT4G21570.1   Symbols:   Protein of unknown function (DUF300)   chr4:11471126-11472269 REVERSE LENGTH=294                                   | 294  | 294 | 1.00E-162 | 100.0 | 93.2 | 97.3 |
| Rsa1.0_00234.1.g9241.t1 | gb AAD48972.1 AF162444.4 contains similarity to S. cerevisiae vacuolar protein sorting-associated protein VPS28 (GB:U39205) [Arabidopsis thaliana] gi 7267259 emb CAB81042.1 AT4g05000 [Arabidopsis thaliana] ref NP_001190787.1 Diacylglycerol kinase family protein [Arabidopsis thaliana]                                                                                                                                                                                                                                                                                                             | 212  | 209  | 1.00E-102 | 98.6  | 84.4 | 92.5 | contains similarity to S. cerevisiae vacuolar protein sorting-associated protein VPS28 (GB:U39205) | gbpln | Arabidopsis thaliana | AT4G05000.2   Symbols: VPS28-1   Vacuolar protein sorting-associated protein VPS28 family protein   chr4:2563953-2564585 FORWARD LENGTH=210 | 212  | 210 | 1.00E-104 | 99.1  | 84.9 | 92.9 |
| Rsa1.0_00234.1.g9242.t1 | gi 48752361.1 sp F2Y4A3.1 SPHK2_ARATH RecName: Full=Sphingosine kinase 2 gi 322656782 gb ADZ38930.1  sphingosine kinase 2 [Arabidopsis thaliana] gi 332659064 gb AEE84464.1  Diacylglycerol kinase family protein [Arabidopsis thaliana]                                                                                                                                                                                                                                                                                                                                                                 | 478  | 481  | 0         | 100.6 | 77.8 | 89.7 | Diacylglycerol kinase family protein                                                               | gbpln | Arabidopsis thaliana | AT4G21534.1   Symbols:   Diacylglycerol kinase family protein   chr4:11456230-11458820 FORWARD LENGTH=481                                   | 478  | 481 | 0         | 100.6 | 77.8 | 89.7 |
| Rsa1.0_00234.1.g9243.t1 | gb EOA16902.1 hypothetical protein CARUB.v10005126mg.partial [Capsella rubella]                                                                                                                                                                                                                                                                                                                                                                                                                                                                                                                          | 289  | 357  | 1.00E-139 | 123.5 | 91.0 | 94.1 | hypothetical protein CARUB.v10005126mg.partial                                                     | gbpln | Capsella rubella     | AT4G21450.1   Symbols:   PapD-like superfamily protein   chr4:11426136-11428125 FORWARD LENGTH=295                                          | 289  | 295 | 1.00E-139 | 102.1 | 92.7 | 94.8 |
| Rsa1.0_00234.1.g9244.t1 | # # # # # # # #                                                                                                                                                                                                                                                                                                                                                                                                                                                                                                                                                                                          |      |      |           |       |      |      | -                                                                                                  | ----  | ----                 | # # # # # # # #                                                                                                                             |      |     |           |       |      |      |
| Rsa1.0_00234.1.g9245.t1 | ref XP_002867846.1 hypothetical protein ARALYDRAFT_492740 [Arabidopsis lyrata subsp. lyrata] gi 297313682 gb EFH44105.1 hypothetical protein ARALYDRAFT_492740 [Arabidopsis lyrata subsp. lyrata] ref NP_193872.2 cysteine-rich receptor-like protein kinase 29 [Arabidopsis thaliana] gi 75330985 sp Q8S9L6.1 CRK29_ARATH RecName: Full=Cysteine-rich receptor-like protein kinase 29; Short=Cysteine-rich RLK29; Flags: Precursor gi 18650594 gb AAL75897.1 AT4g21410.T6K22.140 [Arabidopsis thaliana] gi 332659049 gb AEE84449.1 cysteine-rich receptor-like protein kinase 29 [Arabidopsis thaliana] | 346  | 350  | 1.00E-134 | 101.2 | 76.9 | 84.4 | hypothetical protein ARALYDRAFT_492740                                                             | gbpln | Arabidopsis lyrata   | AT4G21440.1   Symbols: ATMYB102, ATM4, MYB102   MYB-like 102   chr4:11418425-11419652 REVERSE LENGTH=350                                    | 346  | 350 | 1.00E-136 | 101.2 | 76.9 | 84.4 |
| Rsa1.0_00234.1.g9246.t1 | ref XP_002869900.1 predicted protein [Arabidopsis lyrata subsp. lyrata] gi 297315736 gb EFH46159.1 predicted protein [Arabidopsis lyrata subsp. lyrata] ref XP_002869900.1 predicted protein [Arabidopsis lyrata subsp. lyrata] gi 297315736 gb EFH46159.1 predicted protein [Arabidopsis lyrata subsp. lyrata]                                                                                                                                                                                                                                                                                          | 430  | 679  | 1.00E-172 | 157.9 | 74.2 | 81.6 | cysteine-rich receptor-like protein kinase 29                                                      | gbpln | Arabidopsis thaliana | AT4G21410.1   Symbols: CRK29   cysteine-rich RLK (RECEPTOR-like protein kinase) 29   chr4:11402463-11405025 REVERSE LENGTH=679              | 430  | 679 | 1.00E-175 | 157.9 | 74.2 | 81.6 |
| Rsa1.0_00234.1.g9247.t1 | ref XP_002869900.1 predicted protein [Arabidopsis lyrata subsp. lyrata] gi 297315736 gb EFH46159.1 predicted protein [Arabidopsis lyrata subsp. lyrata]                                                                                                                                                                                                                                                                                                                                                                                                                                                  | 184  | 338  | 1.00E-98  | 183.7 | 90.8 | 96.2 | predicted protein                                                                                  | gbpln | Arabidopsis lyrata   | AT4G21200.1   Symbols: ATGA20X8, GA20X8   gibberellin 2-oxidase 8   chr4:11302751-11306601 FORWARD LENGTH=338                               | 184  | 338 | 1.00E-100 | 183.7 | 90.2 | 95.1 |
| Rsa1.0_00234.1.g9248.t1 | ref XP_002869900.1 predicted protein [Arabidopsis lyrata subsp. lyrata] gi 297315736 gb EFH46159.1 predicted protein [Arabidopsis lyrata subsp. lyrata]                                                                                                                                                                                                                                                                                                                                                                                                                                                  | 159  | 338  | 1.00E-74  | 212.6 | 84.3 | 89.9 | predicted protein                                                                                  | gbpln | Arabidopsis lyrata   | AT4G21200.3   Symbols: ATGA20X8, GA20X8   gibberellin 2-oxidase 8   chr4:11302751-11304032 FORWARD LENGTH=181                               | 159  | 181 | 3.00E-75  | 113.8 | 81.8 | 88.7 |
| Rsa1.0_00235.1.g9249.t1 | gb AFI23585.1 vernalization 2 [Brassica oleracea var. italica] gi 384597743 gb AFI23588.1 vernalization 2 [Brassica oleracea var. italica]                                                                                                                                                                                                                                                                                                                                                                                                                                                               | 295  | 425  | 4.00E-52  | 144.1 | 46.8 | 57.3 | vernalization 2                                                                                    | gbpln | Brassica oleracea    | AT4G16845.2   Symbols: VRN2   VEFS-Box of polycomb protein   chr4:9477246-9479725 FORWARD LENGTH=380                                        | 295  | 380 | 1.00E-42  | 128.8 | 42.0 | 53.6 |
| Rsa1.0_00235.1.g9250.t1 | ref XP_002868098.1 hydroxyproline-rich glycoprotein family protein [Arabidopsis lyrata subsp. lyrata] gi 297313934 gb EFH44357.1 hydroxyproline-rich glycoprotein family protein [Arabidopsis lyrata subsp. lyrata] ref NP_567515.1 lipase class 3 family protein [Arabidopsis thaliana] gi 374095438 sp O23522.2 PLA14_ARATH RecName: Full=Phospholipase A1-beta2, chloroplastic; Flags: Precursor gi 332658408 gb AEE83808.1 phospholipase A1-beta2 [Arabidopsis thaliana]                                                                                                                             | 165  | 461  | 4.00E-52  | 279.4 | 72.7 | 80.6 | hydroxyproline-rich glycoprotein family protein                                                    | gbpln | Arabidopsis lyrata   | AT4G16790.1   Symbols:   hydroxyproline-rich glycoprotein family protein   chr4:9451747-9453168 REVERSE LENGTH=473                          | 165  | 473 | 4.00E-52  | 286.7 | 72.1 | 78.2 |
| Rsa1.0_00235.1.g9251.t1 | ref NP_567515.1 lipase class 3 family protein [Arabidopsis thaliana] gi 374095438 sp O23522.2 PLA14_ARATH RecName: Full=Phospholipase A1-beta2, chloroplastic; Flags: Precursor gi 332658408 gb AEE83808.1 phospholipase A1-beta2 [Arabidopsis thaliana]                                                                                                                                                                                                                                                                                                                                                 | 280  | 517  | 1.00E-109 | 184.6 | 71.8 | 75.4 | lipase class 3 family protein                                                                      | gbpln | Arabidopsis thaliana | AT4G16820.1   Symbols: PLA-[beta]2   alpha/beta-Hydrolases superfamily protein   chr4:9467563-9469116 FORWARD LENGTH=517                    | 280  | 517 | 1.00E-111 | 184.6 | 71.8 | 75.4 |
| Rsa1.0_00235.1.g9252.t1 | gb AAG50806.1 AC079281_8 unknown protein [Arabidopsis thaliana]                                                                                                                                                                                                                                                                                                                                                                                                                                                                                                                                          | 1392 | 1213 | 0         | 87.1  | 32.2 | 48.7 | unknown protein                                                                                    | gbpln | Arabidopsis thaliana | AT1G43760.1   Symbols:   DNAse I-like superfamily protein   chr1:16528880-16531065 REVERSE LENGTH=626                                       | 1392 | 626 | 6.00E-65  | 45.0  | 9.2  | 16.1 |

|                         |                                                                                                                                                                                                                                                                                                                                                                                                                                                                                                                                                                                                                                                                                                                                                                                                                                                                                              |     |      |           |       |      |      |                                                 |       |                      |                                                                                                                                            |     |      |           |       |      |      |
|-------------------------|----------------------------------------------------------------------------------------------------------------------------------------------------------------------------------------------------------------------------------------------------------------------------------------------------------------------------------------------------------------------------------------------------------------------------------------------------------------------------------------------------------------------------------------------------------------------------------------------------------------------------------------------------------------------------------------------------------------------------------------------------------------------------------------------------------------------------------------------------------------------------------------------|-----|------|-----------|-------|------|------|-------------------------------------------------|-------|----------------------|--------------------------------------------------------------------------------------------------------------------------------------------|-----|------|-----------|-------|------|------|
| Rsa1.0_00235.1.g9253.t1 | ref[XP_002885228.1] F-box family protein [Arabidopsis lyrata subsp. lyrata] gi 297331068 gb EFH61487.1  F-box family protein [Arabidopsis lyrata subsp. lyrata]                                                                                                                                                                                                                                                                                                                                                                                                                                                                                                                                                                                                                                                                                                                              | 439 | 371  | 1.00E-105 | 84.5  | 49.7 | 61.3 | F-box family protein                            | gbpln | Arabidopsis lyrata   | AT3G19470.2   Symbols:   F-box and associated interaction domains-containing protein   chr3:6749766-6750914 FORWARD LENGTH=382             | 439 | 382  | 1.00E-102 | 87.0  | 47.6 | 60.1 |
| Rsa1.0_00235.1.g9254.t1 | gb AFI23585.1  vernalization 2 [Brassica oleracea var. italica] gi 384597743 gb AFI23588.1  vernalization 2 [Brassica oleracea var. italica]                                                                                                                                                                                                                                                                                                                                                                                                                                                                                                                                                                                                                                                                                                                                                 | 468 | 425  | 1.00E-110 | 90.8  | 48.9 | 60.7 | vernalization 2                                 | gbpln | Brassica oleracea    | AT4G16845.1   Symbols: VRN2   VEFS-Box of polycomb protein   chr4:9476708-9479725 FORWARD LENGTH=440                                       | 468 | 440  | 5.00E-93  | 94.0  | 43.6 | 54.9 |
| Rsa1.0_00235.1.g9255.t1 | ref[XP_002868098.1] hydroxyproline-rich glycoprotein family protein [Arabidopsis lyrata subsp. lyrata] gi 297313934 gb EFH44357.1  hydroxyproline-rich glycoprotein family protein [Arabidopsis lyrata subsp. lyrata]                                                                                                                                                                                                                                                                                                                                                                                                                                                                                                                                                                                                                                                                        | 478 | 461  | 1.00E-147 | 96.4  | 69.9 | 78.9 | hydroxyproline-rich glycoprotein family protein | gbpln | Arabidopsis lyrata   | AT4G16790.1   Symbols:   hydroxyproline-rich glycoprotein family protein   chr4:9451747-9453168 REVERSE LENGTH=473                         | 478 | 473  | 1.00E-149 | 99.0  | 71.1 | 79.7 |
| Rsa1.0_00235.1.g9256.t1 | ref[NP_193411.1] homeobox-leucine zipper protein HAT4 [Arabidopsis thaliana] gi 462281 sp Q05466.1 HAT4_ARATH RecName: Full=Homeobox-leucine zipper protein HAT4; AltName: Full=HD-ZIP protein ATHB-2; AltName: Full=Homeodomain transcription factor ATHB-2; AltName: Full=Homeodomain-leucine zipper protein HAT4; Short=HD-ZIP protein 4 gi 14030725 gb AAK53037.1 AF375453.1 AT4g16780/di4415w [Arabidopsis thaliana] gi 16180 emb CAA48246.1  Athb-2 [Arabidopsis thaliana] gi 16332 emb CAA48248.1  DNA binding protein [Arabidopsis thaliana] gi 2245033 emb CAB10452.1  DNA-binding homeotic protein Athb-2 [Arabidopsis thaliana] gi 7268428 emb CAB78720.1  DNA-binding homeotic protein Athb-2 [Arabidopsis thaliana] gi 19548073 gb AAL87400.1  AT4g16780/di4415w [Arabidopsis thaliana] gi 332658403 gb AEE83803.1  homeobox-leucine zipper protein HAT4 [Arabidopsis thaliana] | 271 | 284  | 1.00E-126 | 104.8 | 90.4 | 92.6 | homeobox-leucine zipper protein HAT4            | gbpln | Arabidopsis thaliana | AT4G16780.1   Symbols: ATHB-2, HAT4, ATHB2, HB-2   homeobox protein 2   chr4:9449291-9450604 FORWARD LENGTH=284                            | 271 | 284  | 1.00E-128 | 104.8 | 90.4 | 92.6 |
| Rsa1.0_00235.1.g9257.t2 | gb EOA36857.1  hypothetical protein CARUB_v10008803mg [Capsella rubella]                                                                                                                                                                                                                                                                                                                                                                                                                                                                                                                                                                                                                                                                                                                                                                                                                     | 676 | 536  | 7.00E-87  | 79.3  | 23.1 | 30.5 | hypothetical protein CARUB_v10008803mg          | gbpln | Capsella rubella     | AT2G07760.1   Symbols:   Zinc knuckle (CCHC-type) family protein   chr2:3584420-3586278 REVERSE LENGTH=530                                 | 676 | 530  | 1.00E-50  | 78.4  | 12.3 | 15.5 |
| Rsa1.0_00235.1.g9258.t1 | gb AAG09097.1 AC009323.8 Putative retroelement polyprotein [Arabidopsis thaliana]                                                                                                                                                                                                                                                                                                                                                                                                                                                                                                                                                                                                                                                                                                                                                                                                            | 474 | 1486 | 0         | 313.5 | 69.6 | 82.5 | Putative retroelement polyprotein               | gbpln | Arabidopsis thaliana | AT4G23160.1   Symbols: CRK8   cysteine-rich RLK (RECEPTOR-like protein kinase) 8   chr4:12129485-12134086 FORWARD LENGTH=1262              | 474 | 1262 | 1.00E-122 | 266.2 | 41.4 | 63.1 |
| Rsa1.0_00235.1.g9259.t1 | #                                                                                                                                                                                                                                                                                                                                                                                                                                                                                                                                                                                                                                                                                                                                                                                                                                                                                            | #   | #    | #         | #     | #    | -    | ----                                            | ----  | #                    | #                                                                                                                                          | #   | #    | #         | #     | #    |      |
| Rsa1.0_00235.1.g9260.t2 | emb CAB96197.1  hypothetical protein [Capsella rubella]                                                                                                                                                                                                                                                                                                                                                                                                                                                                                                                                                                                                                                                                                                                                                                                                                                      | 322 | 315  | 1.00E-124 | 97.8  | 68.6 | 75.8 | hypothetical protein                            | gbpln | Capsella rubella     | AT4G16770.1   Symbols:   2-oxoglutarate (2OG) and Fe(II)-dependent oxygenase superfamily protein   chr4:9434571-9437168 REVERSE LENGTH=325 | 322 | 325  | 1.00E-127 | 100.9 | 68.0 | 75.5 |
| Rsa1.0_00235.1.g9261.t1 | #                                                                                                                                                                                                                                                                                                                                                                                                                                                                                                                                                                                                                                                                                                                                                                                                                                                                                            | #   | #    | #         | #     | #    | -    | ----                                            | ----  | #                    | #                                                                                                                                          | #   | #    | #         | #     | #    |      |
| Rsa1.0_00235.1.g9262.t1 | gb EOA16175.1  hypothetical protein CARUB_v10004312mg [Capsella rubella]                                                                                                                                                                                                                                                                                                                                                                                                                                                                                                                                                                                                                                                                                                                                                                                                                     | 664 | 664  | 0         | 100.0 | 93.4 | 97.1 | hypothetical protein CARUB_v10004312mg          | gbpln | Capsella rubella     | AT4G16760.1   Symbols: ACX1, ATACX1   acyl-CoA oxidase 1   chr4:9424930-9428689 REVERSE LENGTH=664                                         | 664 | 664  | 0         | 100.0 | 92.6 | 97.4 |

|                         |                                                                                                                                                                                                                                                                                                                                                                                                                                                                                                                                                                                                                                                                                                                                                                                                                                                                                                                                                                                                                    |     |      |           |       |      |       |                                                                                                                                                                         |       |                      |                                                                                                                   |     |     |           |       |      |       |
|-------------------------|--------------------------------------------------------------------------------------------------------------------------------------------------------------------------------------------------------------------------------------------------------------------------------------------------------------------------------------------------------------------------------------------------------------------------------------------------------------------------------------------------------------------------------------------------------------------------------------------------------------------------------------------------------------------------------------------------------------------------------------------------------------------------------------------------------------------------------------------------------------------------------------------------------------------------------------------------------------------------------------------------------------------|-----|------|-----------|-------|------|-------|-------------------------------------------------------------------------------------------------------------------------------------------------------------------------|-------|----------------------|-------------------------------------------------------------------------------------------------------------------|-----|-----|-----------|-------|------|-------|
| Rsa1.0_00235.1.g9263.t1 | ref NP_193408.1  ethylene-responsive transcription factor ERF039 [Arabidopsis thaliana] gi 75337675 sp Q9SUK8.1 ERF39_ARATH RecName: Full=Ethylene-responsive transcription factor ERF039 gi 5302798 emb CAB46040.1  apetal2 domain TINY like protein [Arabidopsis thaliana] gi 7268425 emb CAB78717.1  apetal2 domain TINY like protein [Arabidopsis thaliana] gi 44021914 gb AA546629.1  At4g16750 [Arabidopsis thaliana] gi 48479340 gb AAT44941.1  putative AP2/EREBP transcription factor [Arabidopsis thaliana] gi 58652080 gb AAW80865.1  At4g16750 [Arabidopsis thaliana] gi 332658397 gb AEE83797.1  ethylene-responsive transcription factor ERF039 [Arabidopsis thaliana]                                                                                                                                                                                                                                                                                                                               | 181 | 179  | 2.00E-71  | 98.9  | 82.9 | 90.1  | ethylene-responsive transcription factor ERF039                                                                                                                         | gbpln | Arabidopsis thaliana | AT4G16750.1   Symbols:   Integrase-type DNA-binding superfamily protein   chr4:9421121-9421660 REVERSE LENGTH=179 | 181 | 179 | 8.00E-74  | 98.9  | 82.9 | 90.1  |
| Rsa1.0_00235.1.g9264.t1 | gb EOA19151.1  hypothetical protein CARUB_v10007826mg [Capsella rubella]                                                                                                                                                                                                                                                                                                                                                                                                                                                                                                                                                                                                                                                                                                                                                                                                                                                                                                                                           | 547 | 545  | 0         | 99.6  | 85.7 | 93.1  | hypothetical protein CARUB_v10007826mg                                                                                                                                  | gbpln | Capsella rubella     | AT4G16745.1   Symbols:   Exostosin family protein   chr4:9412185-9414053 FORWARD LENGTH=542                       | 547 | 542 | 0         | 99.1  | 86.1 | 94.3  |
| Rsa1.0_00235.1.g9265.t1 | emb CAB39638.1  RNA-directed DNA polymerase-like protein [Arabidopsis thaliana] gi 7267666 emb CAB78094.1  RNA-directed DNA polymerase-like protein [Arabidopsis thaliana]                                                                                                                                                                                                                                                                                                                                                                                                                                                                                                                                                                                                                                                                                                                                                                                                                                         | 927 | 1274 | 0         | 137.4 | 50.1 | 66.1  | RNA-directed DNA polymerase-like protein                                                                                                                                | gbpln | Arabidopsis thaliana | AT4G29090.1   Symbols:   Ribonuclease H-like superfamily protein   chr4:14333528-14335255 FORWARD LENGTH=575      | 927 | 575 | 3.00E-71  | 62.0  | 18.7 | 29.2  |
| Rsa1.0_00235.1.g9266.t1 | sp P0CJ43.1 OCISB_ARATH RecName: Full=(E)-beta-ocimene synthase, chloroplastic; AltName: Full=(E)-alpha-farnesene synthase; AltName: Full=Terpenoid synthase 2; Short=AtTPS02; Flags: Precursor                                                                                                                                                                                                                                                                                                                                                                                                                                                                                                                                                                                                                                                                                                                                                                                                                    | 591 | 589  | 0         | 99.7  | 78.2 | 85.8  | RecName: Full=(E)-beta-ocimene synthase, chloroplastic; AltName: Full=(E)-alpha-farnesene synthase; AltName: Full=Terpenoid synthase 2; Short=AtTPS02; Flags: Precursor | ----  | ----                 | AT4G16730.1   Symbols: TPS02   terpene synthase 02   chr4:9403119-9406003 FORWARD LENGTH=539                      | 591 | 539 | 0         | 91.2  | 71.2 | 78.3  |
| Rsa1.0_00235.1.g9267.t1 | ref NP_193405.1  60S ribosomal protein L15-1 [Arabidopsis thaliana] gi 297800374 ref XP_002868071.1  60S ribosomal protein L15 [Arabidopsis lyrata subsp. lyrata] gi 3122673 sp O23515.1 RL151_ARATH RecName: Full=60S ribosomal protein L15-1 gi 13878179 gb AAK44167.1 AF370352.1 putative ribosomal protein [Arabidopsis thaliana] gi 2245027 emb CAB10447.1  ribosomal protein [Arabidopsis thaliana] gi 7268422 emb CAB78714.1  ribosomal protein [Arabidopsis thaliana] gi 16604446 gb AAL24229.1  AT4g16720/dl4385c [Arabidopsis thaliana] gi 19715591 gb AAL91619.1  AT4g16720/dl4385c [Arabidopsis thaliana] gi 21592436 gb AAM64387.1  ribosomal protein [Arabidopsis thaliana] gi 22136774 gb AAM91731.1  putative ribosomal protein [Arabidopsis thaliana] gi 23505795 gb AAN28757.1  At4g16720/dl4385c [Arabidopsis thaliana] gi 297313907 gb EFH44330.1  60S ribosomal protein L15 [Arabidopsis lyrata subsp. lyrata] gi 332658391 gb AEE83791.1  60S ribosomal protein L15-1 [Arabidopsis thaliana] | 204 | 204  | 1.00E-113 | 100.0 | 99.5 | 100.0 | 60S ribosomal protein L15-1                                                                                                                                             | gbpln | Arabidopsis lyrata   | AT4G16720.1   Symbols:   Ribosomal protein L23/L15e family protein   chr4:9400156-9401315 REVERSE LENGTH=204      | 204 | 204 | 1.00E-115 | 100.0 | 99.5 | 100.0 |

|                         |                                                                                                                                                                                                                                                                                                                                                                                                                                                                                                                                                                                                                                                      |     |     |           |       |      |      |                                                                                      |       |                      |                                                                                                                                                                                                                                                                                                                                                                               |     |      |           |       |      |      |
|-------------------------|------------------------------------------------------------------------------------------------------------------------------------------------------------------------------------------------------------------------------------------------------------------------------------------------------------------------------------------------------------------------------------------------------------------------------------------------------------------------------------------------------------------------------------------------------------------------------------------------------------------------------------------------------|-----|-----|-----------|-------|------|------|--------------------------------------------------------------------------------------|-------|----------------------|-------------------------------------------------------------------------------------------------------------------------------------------------------------------------------------------------------------------------------------------------------------------------------------------------------------------------------------------------------------------------------|-----|------|-----------|-------|------|------|
| Rsa1.0_00235.1.g9268.t1 | refNP_193404.1  beta-1,4-N-acetylglucosaminyltransferase [Arabidopsis thaliana] gi 30683771 ref NP_849397.1  beta-1,4-N-acetylglucosaminyltransferase [Arabidopsis thaliana] gi 2245026 emb CAB10446.1  hypothetical protein [Arabidopsis thaliana] gi 7268421 emb CAB78713.1  hypothetical protein [Arabidopsis thaliana] gi 33589780 gb AAQ22656.1  At4g16710 [Arabidopsis thaliana] gi 110739298 dbj BAF01562.1  hypothetical protein [Arabidopsis thaliana] gi 332658389 gb AEE83789.1  glycosyltransferase family protein 28 [Arabidopsis thaliana] gi 332658390 gb AEE83790.1  beta-1,4-N-acetylglucosaminyltransferase [Arabidopsis thaliana] | 178 | 176 | 3.00E-85  | 98.9  | 88.8 | 92.7 | beta-1,4-N-acetylglucosaminyltransferase                                             | gbpln | Arabidopsis thaliana | AT4G16710.2   Symbols:   glycosyltransferase family protein 28   chr4:9398818-9399618 FORWARD LENGTH=176                                                                                                                                                                                                                                                                      | 178 | 176  | 1.00E-87  | 98.9  | 88.8 | 92.7 |
| Rsa1.0_00235.1.g9269.t1 | refNP_193403.2  phosphatidylserine decarboxylase [Arabidopsis thaliana] gi 29468598 gb AAO38842.1  phosphatidylserine decarboxylase [Arabidopsis thaliana] gi 109946625 gb ABQ48491.1  At4g16700 [Arabidopsis thaliana] gi 332658388 gb AEE83788.1  phosphatidylserine decarboxylase [Arabidopsis thaliana]                                                                                                                                                                                                                                                                                                                                          | 446 | 453 | 0         | 101.6 | 86.3 | 92.6 | phosphatidylserine decarboxylase                                                     | gbpln | Arabidopsis thaliana | AT4G16700.1   Symbols: PSD1   phosphatidylserine decarboxylase 1   chr4:9395815-9398261 REVERSE LENGTH=453                                                                                                                                                                                                                                                                    | 446 | 453  | 0         | 101.6 | 86.3 | 92.6 |
| Rsa1.0_00235.1.g9270.t1 | refNP_849396.1  uncharacterized protein [Arabidopsis thaliana] gi 26451302 dbj BAC42752.1  unknown protein [Arabidopsis thaliana] gi 332658386 gb AEE83786.1  uncharacterized protein AT4G16695 [Arabidopsis thaliana]                                                                                                                                                                                                                                                                                                                                                                                                                               | 53  | 57  | 6.00E-18  | 107.5 | 92.5 | 96.2 | uncharacterized protein                                                              | gbpln | Arabidopsis thaliana | AT4G16695.1   Symbols:   unknown protein; FUNCTIONS IN: molecular function unknown; INVOLVED IN: biological process unknown; LOCATED IN: endomembrane system; Has 21 Blast hits to 21 proteins in 11 species: Archae - 0; Bacteria - 0; Metazoa - 0; Fungi - 0; Plants - 21; Viruses - 0; Other Eukaryotes - 0 (source: NCBI BLINK).   chr4:9394259-9395251 FORWARD LENGTH=57 | 53  | 57   | 1.00E-20  | 107.5 | 92.5 | 96.2 |
| Rsa1.0_00235.1.g9271.t1 | sp Q2V0W1.1 PPD_RAPSA RecName: Full=Pheophorbidase; Short-RsPPD gi 83699291 dbj BAE54383.1  pheophorbidase [Raphanus sativus]                                                                                                                                                                                                                                                                                                                                                                                                                                                                                                                        | 263 | 263 | 1.00E-148 | 100.0 | 98.1 | 98.1 | RecName: Full=Pheophorbidase; Short-RsPPD gi 83699291 dbj BAE54383.1  pheophorbidase | gbpln | Raphanus sativus     | AT4G16690.1   Symbols: ATMES16, MES16   methyl esterase 16   chr4:9392405-9393424 REVERSE LENGTH=262                                                                                                                                                                                                                                                                          | 263 | 262  | 1.00E-128 | 99.6  | 82.9 | 89.0 |
| Rsa1.0_00235.1.g9272.t1 | gb EOA15451.1  hypothetical protein CARUB_v10004093mg [Capsella rubella]                                                                                                                                                                                                                                                                                                                                                                                                                                                                                                                                                                             | 847 | 915 | 0         | 108.0 | 75.4 | 86.0 | hypothetical protein CARUB_v10004093mg                                               | gbpln | Capsella rubella     | AT1G32490.1   Symbols: EMB2733, ESP3   RNA helicase family protein   chr1:11742356-11749286 REVERSE LENGTH=1044                                                                                                                                                                                                                                                               | 847 | 1044 | 0         | 123.3 | 58.6 | 73.2 |
| Rsa1.0_00235.1.g9273.t1 | gb AAO41942.1  unknown protein [Arabidopsis thaliana]                                                                                                                                                                                                                                                                                                                                                                                                                                                                                                                                                                                                | 439 | 429 | 1.00E-163 | 97.7  | 77.7 | 84.1 | unknown protein                                                                      | gbpln | Arabidopsis thaliana | AT4G16670.1   Symbols:   Plant protein of unknown function (DUF828) with plant pleckstrin homology-like region   chr4:9385326-9387570 FORWARD LENGTH=429                                                                                                                                                                                                                      | 439 | 429  | 1.00E-166 | 97.7  | 77.9 | 84.3 |
| Rsa1.0_00236.1.g9274.t1 | refNP_173137.1  F-box/RNI-like/FBD-like domains-containing protein [Arabidopsis thaliana] gi 75263252 sp Q9FZ52.1 FDL3_ARATH RecName: Full=F-box/FBD/LRR-repeat protein At1g16930 gi 9802769 gb AAF99838.1 AC051629.5 Hypothetical protein [Arabidopsis thaliana] gi 332191402 gb AEE29523.1  F-box/RNI-like/FBD-like domains-containing protein [Arabidopsis thaliana]                                                                                                                                                                                                                                                                              | 90  | 449 | 3.00E-14  | 498.9 | 57.8 | 72.2 | F-box/RNI-like/FBD-like domains-containing protein                                   | gbpln | Arabidopsis thaliana | AT1G16930.1   Symbols:   F-box/RNI-like/FBD-like domains-containing protein   chr1:5789987-5791534 FORWARD LENGTH=449                                                                                                                                                                                                                                                         | 90  | 449  | 4.00E-17  | 498.9 | 57.8 | 72.2 |
| Rsa1.0_00236.1.g9275.t2 | refNP_173137.1  F-box/RNI-like/FBD-like domains-containing protein [Arabidopsis thaliana] gi 75263252 sp Q9FZ52.1 FDL3_ARATH RecName: Full=F-box/FBD/LRR-repeat protein At1g16930 gi 9802769 gb AAF99838.1 AC051629.5 Hypothetical protein [Arabidopsis thaliana] gi 332191402 gb AEE29523.1  F-box/RNI-like/FBD-like domains-containing protein [Arabidopsis thaliana]                                                                                                                                                                                                                                                                              | 494 | 449 | 1.00E-152 | 90.9  | 58.5 | 67.0 | F-box/RNI-like/FBD-like domains-containing protein                                   | gbpln | Arabidopsis thaliana | AT1G16930.1   Symbols:   F-box/RNI-like/FBD-like domains-containing protein   chr1:5789987-5791534 FORWARD LENGTH=449                                                                                                                                                                                                                                                         | 494 | 449  | 1.00E-155 | 90.9  | 58.5 | 67.0 |

|                         |                                                                                                                                                                                                                                                                                                                                                                          |      |      |          |       |      |      |                                                          |                      |                                                                                                                                                                                                                                                                                                                                                                                                                                                                |      |      |           |       |      |      |
|-------------------------|--------------------------------------------------------------------------------------------------------------------------------------------------------------------------------------------------------------------------------------------------------------------------------------------------------------------------------------------------------------------------|------|------|----------|-------|------|------|----------------------------------------------------------|----------------------|----------------------------------------------------------------------------------------------------------------------------------------------------------------------------------------------------------------------------------------------------------------------------------------------------------------------------------------------------------------------------------------------------------------------------------------------------------------|------|------|-----------|-------|------|------|
| Rsa1.0_00236.1.g9276.t1 | ref NP_173137.1  F-box/RNI-like/FBD-like domains-containing protein [Arabidopsis thaliana] gi 75263252 sp Q9FZ52.1 FDL3_ARATH RecName: Full=F-box/FBD/LRR-repeat protein At1g16930 gi 9802769 gb AAAF99838.1 AC051629.5 Hypothetical protein [Arabidopsis thaliana] gi 332191402 gb AEE29523.1 F-box/RNI-like/FBD-like domains-containing protein [Arabidopsis thaliana] | 446  | 449  | 0        | 100.7 | 77.1 | 87.7 | F-box/RNI-like/FBD-like domains-containing gbpln protein | Arabidopsis thaliana | AT1G16930.1   Symbols:   F-box/RNI-like/FBD-like domains-containing protein   chr1:5789987-5791534 FORWARD LENGTH=449                                                                                                                                                                                                                                                                                                                                          | 446  | 449  | 0         | 100.7 | 77.1 | 87.7 |
| Rsa1.0_00236.1.g9277.t1 | ref NP_173137.1  F-box/RNI-like/FBD-like domains-containing protein [Arabidopsis thaliana] gi 75263252 sp Q9FZ52.1 FDL3_ARATH RecName: Full=F-box/FBD/LRR-repeat protein At1g16930 gi 9802769 gb AAAF99838.1 AC051629.5 Hypothetical protein [Arabidopsis thaliana] gi 332191402 gb AEE29523.1 F-box/RNI-like/FBD-like domains-containing protein [Arabidopsis thaliana] | 863  | 449  | 0        | 52.0  | 38.7 | 43.6 | F-box/RNI-like/FBD-like domains-containing gbpln protein | Arabidopsis thaliana | AT1G16930.1   Symbols:   F-box/RNI-like/FBD-like domains-containing protein   chr1:5789987-5791534 FORWARD LENGTH=449                                                                                                                                                                                                                                                                                                                                          | 863  | 449  | 0         | 52.0  | 38.7 | 43.6 |
| Rsa1.0_00236.1.g9278.t1 | ref XP_002890194.1  hypothetical protein ARALYDRAFT_889088 [Arabidopsis lyrata subsp. lyrata] gi 297336036 gb EFH66453.1 hypothetical protein ARALYDRAFT_889088 [Arabidopsis lyrata subsp. lyrata]                                                                                                                                                                       | 102  | 93   | 3.00E-32 | 91.2  | 71.6 | 78.4 | hypothetical protein ARALYDRAFT_889088 gbpln             | Arabidopsis lyrata   | AT1G16950.1   Symbols:   unknown protein; FUNCTIONS IN: molecular function unknown; INVOLVED IN: biological process unknown; LOCATED IN: endomembrane system; EXPRESSED DURING: 4 anthesis; Has 17 Blast hits to 17 proteins in 5 species: Archae - 0; Bacteria - 0; Metazoa - 0; Fungi - 0; Plants - 17; Viruses - 0; Other Eukaryotes - 0 (source: NCBI BLink).   chr1:5796083-5796364 FORWARD LENGTH=93                                                     | 102  | 93   | 9.00E-34  | 91.2  | 70.6 | 77.5 |
| Rsa1.0_00236.1.g9279.t1 | gb EOA39908.1  hypothetical protein CARUB_v10008595mg [Capsella rubella]                                                                                                                                                                                                                                                                                                 | 683  | 620  | 0        | 90.8  | 79.4 | 85.9 | hypothetical protein CARUB_v10008595mg gbpln             | Capsella rubella     | AT1G16970.1   Symbols: KUJ70, ATKU70   KUJ70 homolog   chr1:5801159-5805724 REVERSE LENGTH=621                                                                                                                                                                                                                                                                                                                                                                 | 683  | 621  | 0         | 90.9  | 79.2 | 85.5 |
| Rsa1.0_00236.1.g9280.t1 | ref XP_002890196.1  hypothetical protein ARALYDRAFT_312668 [Arabidopsis lyrata subsp. lyrata] gi 297336038 gb EFH66455.1 hypothetical protein ARALYDRAFT_312668 [Arabidopsis lyrata subsp. lyrata]                                                                                                                                                                       | 866  | 842  | 0        | 97.2  | 78.2 | 86.7 | hypothetical protein ARALYDRAFT_312668 gbpln             | Arabidopsis lyrata   | AT1G16980.1   Symbols: ATTPS2, TPS2   trehalose-phosphatase/synthase 2   chr1:5807311-5811488 FORWARD LENGTH=821                                                                                                                                                                                                                                                                                                                                               | 866  | 821  | 0         | 94.8  | 76.4 | 85.3 |
| Rsa1.0_00236.1.g9281.t1 | ref XP_002890196.1  hypothetical protein ARALYDRAFT_312668 [Arabidopsis lyrata subsp. lyrata] gi 297336038 gb EFH66455.1 hypothetical protein ARALYDRAFT_312668 [Arabidopsis lyrata subsp. lyrata]                                                                                                                                                                       | 817  | 842  | 0        | 103.1 | 78.5 | 87.8 | hypothetical protein ARALYDRAFT_312668 gbpln             | Arabidopsis lyrata   | AT1G16980.1   Symbols: ATTPS2, TPS2   trehalose-phosphatase/synthase 2   chr1:5807311-5811488 FORWARD LENGTH=821                                                                                                                                                                                                                                                                                                                                               | 817  | 821  | 0         | 100.5 | 76.4 | 86.3 |
| Rsa1.0_00236.1.g9282.t1 | ref XP_002887744.1  RHM1/ROL1 [Arabidopsis lyrata subsp. lyrata] gi 297333585 gb EFH64003.1 RHM1/ROL1 [Arabidopsis lyrata subsp. lyrata]                                                                                                                                                                                                                                 | 672  | 669  | 0        | 99.6  | 92.4 | 96.7 | RHM1/ROL1 gbpln                                          | Arabidopsis lyrata   | AT1G78570.1   Symbols: RHM1, ROL1, ATRHM1   rhamnose biosynthesis 1   chr1:29550110-29552207 FORWARD LENGTH=669                                                                                                                                                                                                                                                                                                                                                | 672  | 669  | 0         | 99.6  | 91.8 | 96.7 |
| Rsa1.0_00236.1.g9283.t1 | gb EOA38725.1  hypothetical protein CARUB_v10010858mg [Capsella rubella]                                                                                                                                                                                                                                                                                                 | 240  | 357  | 5.00E-70 | 148.8 | 52.1 | 55.8 | hypothetical protein CARUB_v10010858mg gbpln             | Capsella rubella     | AT1G17010.1   Symbols:   2-oxoglutarate (2OG) and Fe(II)-dependent oxygenase superfamily protein   chr1:5817667-5819183 FORWARD LENGTH=361                                                                                                                                                                                                                                                                                                                     | 240  | 361  | 1.00E-69  | 150.4 | 50.0 | 55.0 |
| Rsa1.0_00236.1.g9284.t1 | gb ACP30598.1  disease resistance protein [Brassica rapa subsp. pekinensis]                                                                                                                                                                                                                                                                                              | 1493 | 2301 | 0        | 154.1 | 66.3 | 78.6 | disease resistance protein gbpln                         | Brassica rapa        | AT4G23160.1   Symbols: CRK8   cysteine-rich RLK (RECEPTOR-like protein kinase) 8   chr4:12129485-12134086 FORWARD LENGTH=1262                                                                                                                                                                                                                                                                                                                                  | 1493 | 1262 | 1.00E-110 | 84.5  | 14.2 | 21.5 |
| Rsa1.0_00236.1.g9285.t1 | ref XP_002890199.1  hypothetical protein ARALYDRAFT_334969 [Arabidopsis lyrata subsp. lyrata] gi 297336041 gb EFH66458.1 hypothetical protein ARALYDRAFT_334969 [Arabidopsis lyrata subsp. lyrata]                                                                                                                                                                       | 502  | 501  | 0        | 99.8  | 88.0 | 93.4 | hypothetical protein ARALYDRAFT_334969 gbpln             | Arabidopsis lyrata   | AT1G17030.1   Symbols:   unknown protein; FUNCTIONS IN: molecular function unknown; INVOLVED IN: biological process unknown; LOCATED IN: endomembrane system; BEST Arabidopsis thaliana protein match is: unknown protein (TAIR:AT2G47010.2); Has 70 Blast hits to 70 proteins in 13 species: Archae - 0; Bacteria - 0; Metazoa - 0; Fungi - 0; Plants - 69; Viruses - 0; Other Eukaryotes - 1 (source: NCBI BLink).   chr1:5822487-5824424 FORWARD LENGTH=502 | 502  | 502  | 0         | 100.0 | 87.6 | 93.6 |

|                         |                                                                                                                                                                                                                                                                                                                  |     |     |           |       |      |      |                                                                                                                                                                                                            |       |                      |                                                                                                                                                      |     |     |           |       |      |      |
|-------------------------|------------------------------------------------------------------------------------------------------------------------------------------------------------------------------------------------------------------------------------------------------------------------------------------------------------------|-----|-----|-----------|-------|------|------|------------------------------------------------------------------------------------------------------------------------------------------------------------------------------------------------------------|-------|----------------------|------------------------------------------------------------------------------------------------------------------------------------------------------|-----|-----|-----------|-------|------|------|
| Rsa1.0_00236.1.g9286.t2 | gb EOA37410.1  hypothetical protein CARUB_v10011338mg [Capsella rubella]                                                                                                                                                                                                                                         | 688 | 673 | 0         | 97.8  | 80.2 | 87.4 | hypothetical protein CARUB_v10011338mg                                                                                                                                                                     | gbpln | Capsella rubella     | AT1G17040.1   Symbols: SHA, ATSHA, STATLA   SH2 domain protein A   chr1:5825109-5828056 FORWARD LENGTH=641                                           | 688 | 641 | 0         | 93.2  | 76.7 | 83.7 |
| Rsa1.0_00236.1.g9287.t1 | gb EOA40503.1  hypothetical protein CARUB_v10009229mg [Capsella rubella]                                                                                                                                                                                                                                         | 420 | 424 | 0         | 101.0 | 89.8 | 95.0 | hypothetical protein CARUB_v10009229mg                                                                                                                                                                     | gbpln | Capsella rubella     | AT1G17050.1   Symbols: SPS2   solanesyl diphosphate synthase 2   chr1:5829289-5831215 FORWARD LENGTH=417                                             | 420 | 417 | 0         | 99.3  | 88.3 | 93.1 |
| Rsa1.0_00236.1.g9288.t1 | sp Q9SHG5.2 C72C1_ARATH RecName: Full=Cytochrome P450 72C1; AltName: Full=Protein CHIBI 2; AltName: Full=Protein DWARFISH WITH LOW FERTILITY; AltName: Full=Protein SHRINK 1; AltName: Full=Protein SUPPRESSOR OF PHYB-4 PROTEIN 7                                                                               | 519 | 519 | 0         | 100.0 | 92.3 | 96.1 | RecName: Full=Cytochrome P450 72C1; AltName: Full=Protein CHIBI 2; AltName: Full=Protein DWARFISH WITH LOW FERTILITY; AltName: Full=Protein SHRINK 1; AltName: Full=Protein SUPPRESSOR OF PHYB-4 PROTEIN 7 | ----  | ----                 | AT1G17060.1   Symbols: CYP72C1, SOB7   cytochrome p450 72c1   chr1:5832282-5835255 REVERSE LENGTH=476                                                | 519 | 476 | 0         | 91.7  | 85.4 | 89.0 |
| Rsa1.0_00236.1.g9289.t1 | ref NP_173150.1  tuftelin-interacting protein 11 [Arabidopsis thaliana] gi 5734758 gb AAD50023.1 AC007651.1 8 Similar to tuftelin-interacting protein [Arabidopsis thaliana] gi 332191416 gb AE29537.1  GC-rich sequence DNA-binding factor-like protein with tuftelin interacting domain [Arabidopsis thaliana] | 840 | 849 | 0         | 101.1 | 84.2 | 90.4 | tuftelin-interacting protein 11                                                                                                                                                                            | gbpln | Arabidopsis thaliana | AT1G17070.1   Symbols:   GC-rich sequence DNA-binding factor-like protein with Tuftelin interacting domain   chr1:5837653-5840202 FORWARD LENGTH=849 | 840 | 849 | 0         | 101.1 | 84.2 | 90.4 |
| Rsa1.0_00236.1.g9290.t1 | dbj BAJ33660.1  unnamed protein product [Thellungiella halophila]                                                                                                                                                                                                                                                | 230 | 254 | 1.00E-107 | 110.4 | 80.4 | 84.8 | unnamed protein product                                                                                                                                                                                    | ----  | ----                 | AT1G17100.1   Symbols:   SOUL heme-binding family protein   chr1:5844766-5845539 FORWARD LENGTH=232                                                  | 230 | 232 | 1.00E-105 | 100.9 | 76.5 | 83.9 |
| Rsa1.0_00236.1.g9291.t1 | gb EOA39021.1  hypothetical protein CARUB_v10011568mg [Capsella rubella]                                                                                                                                                                                                                                         | 893 | 938 | 0         | 105.0 | 83.2 | 88.5 | hypothetical protein CARUB_v10011568mg                                                                                                                                                                     | gbpln | Capsella rubella     | AT1G17110.1   Symbols: UBPI5   ubiquitin-specific protease 15   chr1:5845816-5849889 REVERSE LENGTH=924                                              | 893 | 924 | 0         | 103.5 | 83.7 | 88.0 |
| Rsa1.0_00236.1.g9292.t1 | ref NP_173156.1  uncharacterized protein [Arabidopsis thaliana] gi 5734754 gb AAD50019.1 AC007651_14 Unknown protein [Arabidopsis thaliana] gi 44681362 gb AAS47621.1  At1g17130 [Arabidopsis thaliana] gi 45773888 gb AAS76748.1  At1g17130 [Arabidopsis thaliana] gi 110737612 dbj BAF00747.1                  | 336 | 331 | 1.00E-162 | 98.5  | 89.0 | 92.6 | uncharacterized protein                                                                                                                                                                                    | gbpln | Arabidopsis thaliana | AT1G17130.1   Symbols:   Family of unknown function (DUF572)   chr1:5854264-5856472 FORWARD LENGTH=331                                               | 336 | 331 | 1.00E-164 | 98.5  | 89.0 | 92.6 |
| Rsa1.0_00236.1.g9293.t1 | hypothetical protein [Arabidopsis thaliana] gi 332191424 gb AE29545.1  uncharacterized protein AT1G17130 [Arabidopsis thaliana]                                                                                                                                                                                  |     |     |           |       |      |      |                                                                                                                                                                                                            |       |                      |                                                                                                                                                      |     |     |           |       |      |      |
| Rsa1.0_00236.1.g9293.t1 | gb EOA38153.1  hypothetical protein CARUB_v10009626mg [Capsella rubella]                                                                                                                                                                                                                                         | 345 | 344 | 1.00E-143 | 99.7  | 79.4 | 88.1 | hypothetical protein CARUB_v10009626mg                                                                                                                                                                     | gbpln | Capsella rubella     | AT1G17140.2   Symbols: ICR1, RIP1   interactor of constitutive active rops 1   chr1:5856740-5857861 REVERSE LENGTH=344                               | 345 | 344 | 1.00E-142 | 99.7  | 80.3 | 90.4 |
| Rsa1.0_00236.1.g9294.t1 | ref XP_002892936.1  hypothetical protein ARALYDRAFT_471915 [Arabidopsis lyrata subsp. lyrata] gi 297338778 gb EFH69195.1  hypothetical protein ARALYDRAFT_471915 [Arabidopsis lyrata subsp. lyrata]                                                                                                              | 337 | 334 | 1.00E-135 | 99.1  | 75.7 | 86.6 | hypothetical protein ARALYDRAFT_471915                                                                                                                                                                     | gbpln | Arabidopsis lyrata   | AT1G17145.1   Symbols:   RING/U-box superfamily protein   chr1:5860351-5862241 REVERSE LENGTH=335                                                    | 337 | 335 | 1.00E-136 | 99.4  | 76.3 | 86.6 |
| Rsa1.0_00236.1.g9295.t1 | ref XP_002892937.1  hypothetical protein ARALYDRAFT_471916 [Arabidopsis lyrata subsp. lyrata] gi 297338779 gb EFH69196.1  hypothetical protein ARALYDRAFT_471916 [Arabidopsis lyrata subsp. lyrata]                                                                                                              | 91  | 98  | 9.00E-40  | 107.7 | 91.2 | 93.4 | hypothetical protein ARALYDRAFT_471916                                                                                                                                                                     | gbpln | Arabidopsis lyrata   | AT1G17147.1   Symbols:   VQ motif-containing protein   chr1:5863654-5863950 REVERSE LENGTH=98                                                        | 91  | 98  | 4.00E-41  | 107.7 | 87.9 | 93.4 |
| Rsa1.0_00236.1.g9296.t1 | ref XP_002890206.1  glycoside hydrolase family 28 protein [Arabidopsis lyrata subsp. lyrata] gi 297336048 gb EFH66465.1  glycoside hydrolase family 28 protein [Arabidopsis lyrata subsp. lyrata]                                                                                                                | 580 | 401 | 1.00E-123 | 69.1  | 36.0 | 44.8 | glycoside hydrolase family 28 protein                                                                                                                                                                      | gbpln | Arabidopsis lyrata   | AT1G17150.1   Symbols:   Pectin lyase-like superfamily protein   chr1:5865707-5867495 FORWARD LENGTH=402                                             | 580 | 402 | 1.00E-118 | 69.3  | 33.8 | 43.3 |
| Rsa1.0_00236.1.g9297.t1 | gb EOA37961.1  hypothetical protein CARUB_v10009429mg [Capsella rubella]                                                                                                                                                                                                                                         | 377 | 383 | 1.00E-178 | 101.6 | 85.9 | 91.2 | hypothetical protein CARUB_v10009429mg                                                                                                                                                                     | gbpln | Capsella rubella     | AT1G17160.1   Symbols:   pfkB-like carbohydrate kinase family protein   chr1:5867678-5868215 FORWARD LENGTH=379                                      | 377 | 379 | 1.00E-179 | 100.5 | 85.7 | 91.0 |
| Rsa1.0_00236.1.g9298.t1 | ref XP_002890207.1  hypothetical protein ARALYDRAFT_471920 [Arabidopsis lyrata subsp. lyrata] gi 297336049 gb EFH66466.1  hypothetical protein ARALYDRAFT_471920 [Arabidopsis lyrata subsp. lyrata]                                                                                                              | 205 | 218 | 1.00E-90  | 106.3 | 79.0 | 86.3 | hypothetical protein ARALYDRAFT_471920                                                                                                                                                                     | gbpln | Arabidopsis lyrata   | AT1G17170.1   Symbols: ATGSTU24, GST, GSTU24   glutathione S-transferase TAU 24   chr1:5868895-5870691 FORWARD LENGTH=218                            | 205 | 218 | 5.00E-92  | 106.3 | 77.6 | 86.3 |

|                         |                                                                                                                                                                                                                                                                                                                                                                                                                                                                                                        |     |     |           |       |      |      |                                        |       |                      |                                                                                                                                                                                                                                                                                                                                                                                                                                                                                                                                                                                                                            |     |     |           |       |      |      |
|-------------------------|--------------------------------------------------------------------------------------------------------------------------------------------------------------------------------------------------------------------------------------------------------------------------------------------------------------------------------------------------------------------------------------------------------------------------------------------------------------------------------------------------------|-----|-----|-----------|-------|------|------|----------------------------------------|-------|----------------------|----------------------------------------------------------------------------------------------------------------------------------------------------------------------------------------------------------------------------------------------------------------------------------------------------------------------------------------------------------------------------------------------------------------------------------------------------------------------------------------------------------------------------------------------------------------------------------------------------------------------------|-----|-----|-----------|-------|------|------|
| Rsa1.0_00236.1.g9299.t1 | ref[NP_173160.1] glutathione S-transferase TAU 24 [Arabidopsis thaliana]<br>gi 75337229 sp Q9SHH6.1 GSTUO_ARATH RecName: Full=Glutathione S-transferase U24; Short=AtGSTU24; AltName: Full=GST class=tau member 24<br>gi 5734751 gb AAD50016.1 AC007651.1 Putative glutathione transferase [Arabidopsis thaliana]<br>gi 45752760 gb AAS76278.1  At1g17170 [Arabidopsis thaliana]<br>gi 332191433 gb AEE29554.1  glutathione S-transferase TAU 24 [Arabidopsis thaliana]                                | 105 | 218 | 1.00E-49  | 207.6 | 88.6 | 93.3 | glutathione S-transferase TAU 24       | gbpln | Arabidopsis thaliana | AT1G17170.1   Symbols: ATGSTU24, GST, GSTU24   glutathione S-transferase TAU 24   chr1:5869895-5870691 FORWARD LENGTH=218                                                                                                                                                                                                                                                                                                                                                                                                                                                                                                  | 105 | 218 | 2.00E-52  | 207.6 | 88.6 | 93.3 |
| Rsa1.0_00237.1.g9300.t1 | gb EOA16153.1  hypothetical protein CARUB_v10004291mg [Capsella rubella]                                                                                                                                                                                                                                                                                                                                                                                                                               | 696 | 676 | 0         | 97.1  | 83.3 | 90.2 | hypothetical protein CARUB_v10004291mg | gbpln | Capsella rubella     | AT4G33630.2   Symbols: EX1   Protein of unknown function (DUF3506)   chr4:16155560-16159094 FORWARD LENGTH=684<br>AT4G33625.2   Symbols:   FUNCTIONS IN: molecular_function unknown; INVOLVED IN: biological_process unknown; LOCATED IN: plasma membrane; EXPRESSED IN: cultured cell; CONTAINS InterPro DOMAIN/s: Golgi apparatus membrane protein TVP15 (InterPro:IPR013714); Has 30201 Blast hits to 17322 proteins in 780 species: Archae - 12; Bacteria - 1396; Metazoa - 17338; Fungi - 3422; Plants - 5037; Viruses - 0; Other Eukaryotes - 2996 (source: NCBI BLINK).   chr4:16153114-16154543 REVERSE LENGTH=199 | 696 | 684 | 0         | 98.3  | 83.5 | 91.1 |
| Rsa1.0_00237.1.g9301.t2 | ref[NP_001119110.1] uncharacterized protein [Arabidopsis thaliana]<br>gi 332660856 gb AEE86256.1  uncharacterized protein AT4G33625 [Arabidopsis thaliana]                                                                                                                                                                                                                                                                                                                                             | 197 | 199 | 4.00E-83  | 101.0 | 74.1 | 83.8 | uncharacterized protein                | gbpln | Arabidopsis thaliana | AT1G61190.1   Symbols:   LRR and NB-ARC domains-containing disease resistance protein   chr1:22557602-22560687 FORWARD LENGTH=967<br>AT5G51470.1   Symbols:   Auxin-responsive GH3 family protein   chr5:20907287-20909340 FORWARD LENGTH=581                                                                                                                                                                                                                                                                                                                                                                              | 197 | 199 | 1.00E-85  | 101.0 | 74.1 | 83.8 |
| Rsa1.0_00237.1.g9302.t1 | gb ACP30605.1  disease resistance protein [Brassica rapa subsp. pekinensis]                                                                                                                                                                                                                                                                                                                                                                                                                            | 803 | 860 | 0         | 107.1 | 84.2 | 87.4 | disease resistance protein             | gbpln | Brassica rapa        | AT1G61190.1   Symbols:   LRR and NB-ARC domains-containing disease resistance protein   chr1:22557602-22560687 FORWARD LENGTH=967                                                                                                                                                                                                                                                                                                                                                                                                                                                                                          | 803 | 967 | 0         | 120.4 | 63.5 | 74.7 |
| Rsa1.0_00237.1.g9303.t1 | #                                                                                                                                                                                                                                                                                                                                                                                                                                                                                                      | #   | #   | #         | #     | #    | -    | -                                      | ----  | ----                 | #                                                                                                                                                                                                                                                                                                                                                                                                                                                                                                                                                                                                                          | #   | #   | #         | #     | #    |      |
| Rsa1.0_00237.1.g9304.t1 | gb EOA14669.1  hypothetical protein CARUB_v10027941mg [Capsella rubella]                                                                                                                                                                                                                                                                                                                                                                                                                               | 572 | 579 | 0         | 101.2 | 64.7 | 78.1 | hypothetical protein CARUB_v10027941mg | gbpln | Capsella rubella     | AT5G51470.1   Symbols:   Auxin-responsive GH3 family protein   chr5:20907287-20909340 FORWARD LENGTH=581                                                                                                                                                                                                                                                                                                                                                                                                                                                                                                                   | 572 | 581 | 0         | 101.6 | 64.5 | 77.8 |
| Rsa1.0_00237.1.g9305.t1 | gb AAF79324.1 AC002304.17 F14J16.29 [Arabidopsis thaliana]                                                                                                                                                                                                                                                                                                                                                                                                                                             | 145 | 143 | 5.00E-34  | 98.6  | 63.4 | 70.3 | F14J16.29                              | gbpln | Arabidopsis thaliana | #                                                                                                                                                                                                                                                                                                                                                                                                                                                                                                                                                                                                                          | #   | #   | #         | #     | #    |      |
| Rsa1.0_00237.1.g9306.t1 | gb EOA19007.1  hypothetical protein CARUB_v10007658mg [Capsella rubella]                                                                                                                                                                                                                                                                                                                                                                                                                               | 462 | 454 | 0         | 98.3  | 79.4 | 89.6 | hypothetical protein CARUB_v10007658mg | gbpln | Capsella rubella     | AT4G33590.1   Symbols:   unknown protein; BEST Arabidopsis thaliana protein match is: unknown protein (TAIR:AT4G33600.1); Has 126 Blast hits to 126 proteins in 35 species: Archae - 0; Bacteria - 12; Metazoa - 0; Fungi - 21; Plants - 62; Viruses - 0; Other Eukaryotes - 31 (source: NCBI BLINK).   chr4:16142585-16143985 REVERSE LENGTH=466                                                                                                                                                                                                                                                                          | 462 | 466 | 0         | 100.9 | 80.3 | 90.7 |
| Rsa1.0_00237.1.g9307.t1 | ref[NP_567928.1] beta carbonic anhydrase 5 [Arabidopsis thaliana]<br>gi 14334479 gb AAK59437.1  putative carbonate dehydratase [Arabidopsis thaliana] gi 21594039 gb AAM65957.1  carbonate dehydratase-like protein [Arabidopsis thaliana]<br>gi 21689751 gb AAM67519.1  putative carbonate dehydratase [Arabidopsis thaliana] gi 62321082 dbj BAD94173.1  carbonate dehydratase - like protein [Arabidopsis thaliana]<br>gi 332660848 gb AEE86248.1  beta carbonic anhydrase 5 [Arabidopsis thaliana] | 248 | 301 | 1.00E-124 | 121.4 | 86.7 | 91.9 | beta carbonic anhydrase 5              | gbpln | Arabidopsis thaliana | AT4G33580.1   Symbols: ATBCA5, BCA5   beta carbonic anhydrase 5   chr4:16139406-16141363 FORWARD LENGTH=301                                                                                                                                                                                                                                                                                                                                                                                                                                                                                                                | 248 | 301 | 1.00E-127 | 121.4 | 86.7 | 91.9 |
| Rsa1.0_00237.1.g9308.t1 | ref[XP_002869206.1] hypothetical protein ARALYDRAFT_328381 [Arabidopsis lyrata subsp. lyrata]<br>gi 297315042 gb EFH45465.1  hypothetical protein ARALYDRAFT_328381 [Arabidopsis lyrata subsp. lyrata]                                                                                                                                                                                                                                                                                                 | 300 | 315 | 1.00E-82  | 105.0 | 66.0 | 78.0 | hypothetical protein ARALYDRAFT_328381 | gbpln | Arabidopsis lyrata   | AT4G33565.1   Symbols:   RING/U-box superfamily protein   chr4:16136821-16137924 FORWARD LENGTH=367                                                                                                                                                                                                                                                                                                                                                                                                                                                                                                                        | 300 | 367 | 1.00E-79  | 122.3 | 64.7 | 76.0 |
| Rsa1.0_00237.1.g9309.t1 | #                                                                                                                                                                                                                                                                                                                                                                                                                                                                                                      | #   | #   | #         | #     | #    | -    | -                                      | ----  | ----                 | #                                                                                                                                                                                                                                                                                                                                                                                                                                                                                                                                                                                                                          | #   | #   | #         | #     | #    |      |
| Rsa1.0_00237.1.g9310.t3 | emb CAB38802.1  putative protein [Arabidopsis thaliana]<br>gi 7270292 emb CAB80061.1  putative protein [Arabidopsis thaliana]                                                                                                                                                                                                                                                                                                                                                                          | 301 | 462 | 6.00E-73  | 153.5 | 46.2 | 50.5 | putative protein                       | gbpln | Arabidopsis thaliana | AT4G33440.1   Symbols:   Pectin lyase-like superfamily protein   chr4:16092020-16094732 FORWARD LENGTH=475                                                                                                                                                                                                                                                                                                                                                                                                                                                                                                                 | 301 | 475 | 5.00E-75  | 157.8 | 45.5 | 48.8 |



|                         |                                                                                                                                                                                                                                                                                                                                                                                                                                                                                                        |     |      |           |        |      |      |                                                                                      |       |                      |                                                                                                                                                                                                                                                              |     |     |           |       |      |      |
|-------------------------|--------------------------------------------------------------------------------------------------------------------------------------------------------------------------------------------------------------------------------------------------------------------------------------------------------------------------------------------------------------------------------------------------------------------------------------------------------------------------------------------------------|-----|------|-----------|--------|------|------|--------------------------------------------------------------------------------------|-------|----------------------|--------------------------------------------------------------------------------------------------------------------------------------------------------------------------------------------------------------------------------------------------------------|-----|-----|-----------|-------|------|------|
| Rsa1.0_00237.1.g9311.t1 | gb ACF23029.1  ST63-2 [Eutrema halophilum]                                                                                                                                                                                                                                                                                                                                                                                                                                                             | 97  | 90   | 2.00E-30  | 92.8   | 68.0 | 79.4 | ST63-2                                                                               | gbpln | Eutrema halophilum   | AT4G33467.2   Symbols:   unknown protein; Has 25 Blast hits to 25 proteins in 9 species: Archaea - 0; Bacteria - 0; Metazoa - 0; Fungi - 0; Plants - 25; Viruses - 0; Other Eukaryotes - 0 (source: NCBI BLink).   chr4:16101691-16102084 REVERSE LENGTH=101 | 97  | 101 | 8.00E-32  | 104.1 | 71.1 | 85.6 |
| Rsa1.0_00237.1.g9312.t2 | db BAA97099.1  retroelement pol polyprotein-like [Arabidopsis thaliana] ref NP_195070.2  glycoside hydrolase family 28 protein / polygalacturonase (pectinase) family protein [Arabidopsis thaliana] gi 27754320 gb AAO22613.1  putative polygalacturonase [Arabidopsis thaliana] gi 28393981 gb AAO42348.1  putative polygalacturonase [Arabidopsis thaliana] gi 332660825 gb AEE86225.1  glycoside hydrolase family 28 protein / polygalacturonase (pectinase) family protein [Arabidopsis thaliana] | 96  | 1098 | 2.00E-18  | 1143.8 | 45.8 | 54.2 | retroelement pol polyprotein-like                                                    | gbpln | Arabidopsis thaliana | #                                                                                                                                                                                                                                                            | #   | #   | #         | #     | #    |      |
| Rsa1.0_00237.1.g9313.t1 | gb AF067895.1  leucine-rich repeat receptor-like kinase (mitochondrion) [Brassica rapa subsp. oleifera]                                                                                                                                                                                                                                                                                                                                                                                                | 473 | 475  | 0         | 100.4  | 89.6 | 95.3 | glycoside hydrolase family 28 protein / polygalacturonase (pectinase) family protein | gbpln | Arabidopsis thaliana | AT4G33440.1   Symbols:   Pectin lyase-like superfamily protein   chr4:16084020-16094732 FORWARD LENGTH=475                                                                                                                                                   | 473 | 475 | 0         | 100.4 | 89.6 | 95.3 |
| Rsa1.0_00237.1.g9314.t1 | gb EOA15571.1  hypothetical protein CARUB_v10005237mg [Capsella rubella]                                                                                                                                                                                                                                                                                                                                                                                                                               | 615 | 632  | 0         | 102.8  | 95.3 | 97.1 | leucine-rich repeat receptor-like kinase (mitochondrion)                             | gbpln | Brassica rapa        | AT4G33430.1   Symbols: BAK1, RKS10, SERK3, ELG, ATSERK3, ATBAK1   BR1-associated receptor kinase   chr4:16086654-16090288 REVERSE LENGTH=615                                                                                                                 | 615 | 615 | 0         | 100.0 | 94.6 | 96.6 |
| Rsa1.0_00237.1.g9315.t1 | gb EOA16846.1  hypothetical protein CARUB_v10005069mg [Capsella rubella]                                                                                                                                                                                                                                                                                                                                                                                                                               | 304 | 325  | 1.00E-160 | 106.9  | 87.5 | 94.4 | hypothetical protein CARUB_v10005237mg                                               | gbpln | Capsella rubella     | AT4G33420.1   Symbols:   Peroxidase superfamily protein   chr4:16084656-16086105 FORWARD LENGTH=325                                                                                                                                                          | 304 | 325 | 1.00E-162 | 106.9 | 88.2 | 93.8 |
| Rsa1.0_00237.1.g9316.t1 | gb EOA18471.1  hypothetical protein CARUB_v10007017mg [Capsella rubella]                                                                                                                                                                                                                                                                                                                                                                                                                               | 373 | 372  | 0         | 99.7   | 91.7 | 97.1 | hypothetical protein CARUB_v10005069mg                                               | gbpln | Capsella rubella     | AT4G33410.1   Symbols: ATSPPL1, SPPL1   SIGNAL PEPTIDE PEPTIDASE-LIKE 1   chr4:16081640-16083119 FORWARD LENGTH=372                                                                                                                                          | 373 | 372 | 0         | 99.7  | 91.4 | 97.3 |
| Rsa1.0_00237.1.g9317.t1 | #                                                                                                                                                                                                                                                                                                                                                                                                                                                                                                      | #   | #    | #         | #      | #    | #    | -                                                                                    | ----  | ----                 | #                                                                                                                                                                                                                                                            | #   | #   | #         | #     | #    |      |
| Rsa1.0_00237.1.g9318.t1 | gb EOA18471.1  hypothetical protein CARUB_v10007017mg [Capsella rubella]                                                                                                                                                                                                                                                                                                                                                                                                                               | 689 | 791  | 0         | 114.8  | 71.0 | 82.9 | hypothetical protein CARUB_v10007017mg                                               | gbpln | Capsella rubella     | AT4G33390.1   Symbols:   Plant protein of unknown function (DUF827)   chr4:16075282-16077706 FORWARD LENGTH=779                                                                                                                                              | 689 | 779 | 2.33E-156 | 113.1 | 46.0 | 57.2 |
| Rsa1.0_00237.1.g9319.t2 | gb EOA18933.1  hypothetical protein CARUB_v10007564mg [Capsella rubella]                                                                                                                                                                                                                                                                                                                                                                                                                               | 459 | 424  | 1.00E-131 | 92.4   | 59.0 | 70.4 | hypothetical protein CARUB_v10007564mg                                               | gbpln | Capsella rubella     | AT1G05080.1   Symbols:   F-box/RNI-like/FBD-like domains-containing protein   chr1:1459091-1460579 FORWARD LENGTH=439                                                                                                                                        | 459 | 439 | 1.00E-111 | 95.6  | 51.6 | 66.7 |
| Rsa1.0_00237.1.g9320.t1 | ref XP_002867184.1  predicted protein [Arabidopsis lyrata subsp. lyrata] gi 297313020 gb EFH43443.1  predicted protein [Arabidopsis lyrata subsp. lyrata] ref NP_680758.3  non-specific lipid-transfer protein 11 [Arabidopsis thaliana] gi 122209302 sp Q2V3C1.1 NLTPB_ARA TH RecName: Full=Non-specific lipid-transfer protein 11; Short=LTP 11; Flags: Precursor                                                                                                                                    | 335 | 343  | 1.00E-175 | 102.4  | 88.1 | 95.5 | predicted protein                                                                    | gbpln | Arabidopsis lyrata   | AT4G33360.1   Symbols: FLDH   NAD(P)-binding Rossmann-fold superfamily protein   chr4:16067989-16069374 REVERSE LENGTH=344                                                                                                                                   | 335 | 344 | 1.00E-174 | 102.7 | 85.4 | 94.6 |
| Rsa1.0_00237.1.g9321.t1 | gi 33266081 gb AEE86211.1  non-specific lipid-transfer protein 11 [Arabidopsis thaliana] emb CAB38786.1  hypothetical protein [Arabidopsis thaliana] gi 1220276 emb CAB80045.1  hypothetical protein [Arabidopsis thaliana]                                                                                                                                                                                                                                                                            | 120 | 119  | 6.00E-43  | 99.2   | 71.7 | 83.3 | non-specific lipid-transfer protein 11                                               | gbpln | Arabidopsis thaliana | AT4G33355.1   Symbols:   Bifunctional inhibitor/lipid-transfer protein/seed storage 2S albumin superfamily protein   chr4:16067097-16067568 FORWARD LENGTH=119                                                                                               | 120 | 119 | 1.00E-45  | 99.2  | 71.7 | 83.3 |
| Rsa1.0_00237.1.g9322.t1 | ref XP_002867190.1  CDC20.1 [Arabidopsis lyrata subsp. lyrata] gi 297313026 gb EFH43449.1  CDC20.1 [Arabidopsis lyrata subsp. lyrata] ref XP_002867193.1  pectinesterase family protein [Arabidopsis lyrata subsp. lyrata] gi 297313029 gb EFH43452.1  pectinesterase family protein [Arabidopsis lyrata subsp. lyrata] gb AAF97281.1 AC010164.3 Hypothetical protein [Arabidopsis thaliana] gi 12324507 gb AAG52212.1 AC022288_11 putative gag-pol polyprotein; 76173-77576 [Arabidopsis thaliana]    | 671 | 461  | 1.00E-133 | 68.7   | 39.5 | 44.7 | hypothetical protein                                                                 | gbpln | Arabidopsis thaliana | AT4G33280.1   Symbols:   AP2/B3-like transcriptional factor family protein   chr4:16047357-16049310 REVERSE LENGTH=337                                                                                                                                       | 671 | 337 | 1.00E-132 | 50.2  | 35.2 | 40.5 |
| Rsa1.0_00237.1.g9323.t1 | ref XP_002867190.1  CDC20.1 [Arabidopsis lyrata subsp. lyrata] gi 297313026 gb EFH43449.1  CDC20.1 [Arabidopsis lyrata subsp. lyrata] ref XP_002867193.1  pectinesterase family protein [Arabidopsis lyrata subsp. lyrata] gi 297313029 gb EFH43452.1  pectinesterase family protein [Arabidopsis lyrata subsp. lyrata] gb AAF97281.1 AC010164.3 Hypothetical protein [Arabidopsis thaliana] gi 12324507 gb AAG52212.1 AC022288_11 putative gag-pol polyprotein; 76173-77576 [Arabidopsis thaliana]    | 455 | 456  | 0         | 100.2  | 93.2 | 96.0 | CDC20.1                                                                              | gbpln | Arabidopsis lyrata   | AT4G33270.1   Symbols: CDC20.1   Transducin family protein / WD-40 repeat family protein   chr4:16044545-16046590 REVERSE LENGTH=457                                                                                                                         | 455 | 457 | 0         | 100.4 | 93.4 | 96.3 |
| Rsa1.0_00237.1.g9324.t1 | ref XP_002867193.1  pectinesterase family protein [Arabidopsis lyrata subsp. lyrata] gi 297313029 gb EFH43452.1  pectinesterase family protein [Arabidopsis lyrata subsp. lyrata] gb AAF97281.1 AC010164.3 Hypothetical protein [Arabidopsis thaliana] gi 12324507 gb AAG52212.1 AC022288_11 putative gag-pol polyprotein; 76173-77576 [Arabidopsis thaliana]                                                                                                                                          | 603 | 609  | 0         | 101.0  | 84.6 | 91.4 | pectinesterase family protein                                                        | gbpln | Arabidopsis lyrata   | AT4G33230.1   Symbols:   Plant invertase/pectin methyltransferase inhibitor superfamily   chr4:16026591-16028754 REVERSE LENGTH=609                                                                                                                          | 603 | 609 | 0         | 101.0 | 82.6 | 90.2 |
| Rsa1.0_00237.1.g9325.t1 | gb AAF97281.1 AC010164.3 Hypothetical protein [Arabidopsis thaliana] gi 12324507 gb AAG52212.1 AC022288_11 putative gag-pol polyprotein; 76173-77576 [Arabidopsis thaliana]                                                                                                                                                                                                                                                                                                                            | 423 | 467  | 1.00E-139 | 110.4  | 58.4 | 74.9 | Hypothetical protein                                                                 | gbpln | Arabidopsis thaliana | #                                                                                                                                                                                                                                                            | #   | #   | #         | #     | #    |      |
| Rsa1.0_00237.1.g9326.t1 | #                                                                                                                                                                                                                                                                                                                                                                                                                                                                                                      | #   | #    | #         | #      | #    | #    | -                                                                                    | ----  | ----                 | #                                                                                                                                                                                                                                                            | #   | #   | #         | #     | #    |      |

|                         |                                                                                                                                                                                                                                                                                          |      |      |           |       |      |      |                                        |       |                      |                                                                                                                                                                                                                                                               |      |      |           |       |      |      |
|-------------------------|------------------------------------------------------------------------------------------------------------------------------------------------------------------------------------------------------------------------------------------------------------------------------------------|------|------|-----------|-------|------|------|----------------------------------------|-------|----------------------|---------------------------------------------------------------------------------------------------------------------------------------------------------------------------------------------------------------------------------------------------------------|------|------|-----------|-------|------|------|
| Rsa1.0_00237.1.g9327.t1 | ref[XP_002867194.1] predicted protein [Arabidopsis lyrata subsp. lyrata] gi 297313030 gb EFH43453.1  predicted protein [Arabidopsis lyrata subsp. lyrata]                                                                                                                                | 967  | 990  | 0         | 102.4 | 90.2 | 94.0 | predicted protein                      | gbpln | Arabidopsis lyrata   | AT4G33210.1   Symbols: SLOMO   F-box family protein   chr4:16015971-16020697 REVERSE LENGTH=990                                                                                                                                                               | 967  | 990  | 0         | 102.4 | 89.9 | 94.6 |
| Rsa1.0_00237.1.g9328.t1 | ref[XP_002867195.1] hypothetical protein ARALYDRAFT_913100 [Arabidopsis lyrata subsp. lyrata] gi 297313031 gb EFH43454.1  hypothetical protein ARALYDRAFT_913100 [Arabidopsis lyrata subsp. lyrata]                                                                                      | 1532 | 1522 | 0         | 99.3  | 88.5 | 93.3 | hypothetical protein ARALYDRAFT_913100 | gbpln | Arabidopsis lyrata   | AT4G33200.1   Symbols: XI-1, ATXI-1, XI-15   myosin, putative   chr4:16002768-16014792 REVERSE LENGTH=1522                                                                                                                                                    | 1532 | 1522 | 0         | 99.3  | 88.3 | 93.0 |
| Rsa1.0_00237.1.g9329.t1 | ref[XP_002869220.1] hypothetical protein ARALYDRAFT_491367 [Arabidopsis lyrata subsp. lyrata] gi 297315056 gb EFH45479.1  hypothetical protein ARALYDRAFT_491367 [Arabidopsis lyrata subsp. lyrata]                                                                                      | 307  | 308  | 1.00E-164 | 100.3 | 90.6 | 95.4 | hypothetical protein ARALYDRAFT_491367 | gbpln | Arabidopsis lyrata   | AT4G33180.1   Symbols:   alpha/beta-Hydrolases superfamily protein   chr4:16000282-16002055 FORWARD LENGTH=307                                                                                                                                                | 307  | 307  | 1.00E-164 | 100.0 | 89.3 | 93.5 |
| Rsa1.0_00237.1.g9330.t1 | ref[NP_567915.3] F-box only protein 13 [Arabidopsis thaliana] gi 33430282 g Q9SMZ3.2 FBX13_ARA TH RecName: Full=F-box only protein 13 gi 332660785 gb AEE86185.1  F-box only protein 13 [Arabidopsis thaliana]                                                                           | 412  | 457  | 1.00E-163 | 110.9 | 73.3 | 84.0 | F-box only protein 13                  | gbpln | Arabidopsis thaliana | AT4G33160.1   Symbols:   F-box family protein   chr4:15994160-15995533 FORWARD LENGTH=457                                                                                                                                                                     | 412  | 457  | 1.00E-166 | 110.9 | 73.3 | 84.0 |
| Rsa1.0_00237.1.g9331.t1 | ref[XP_002869238.1] hypothetical protein ARALYDRAFT_491409 [Arabidopsis lyrata subsp. lyrata] gi 297315074 gb EFH45497.1  hypothetical protein ARALYDRAFT_491409 [Arabidopsis lyrata subsp. lyrata]                                                                                      | 182  | 157  | 4.00E-56  | 86.3  | 55.5 | 68.7 | hypothetical protein ARALYDRAFT_491409 | gbpln | Arabidopsis lyrata   | AT4G32870.1   Symbols:   Polyketide cyclase/dehydrase and lipid transport superfamily protein   chr4:15862168-15862641 FORWARD LENGTH=157                                                                                                                     | 182  | 157  | 1.00E-57  | 86.3  | 54.9 | 69.2 |
| Rsa1.0_00237.1.g9332.t1 | ref[NP_195012.2] uncharacterized protein [Arabidopsis thaliana] gi 38566612 g AAR24196.1  At4g32860 [Arabidopsis thaliana] gi 40824060 g AAR92334.1  At4g32860 [Arabidopsis thaliana] gi 332660736 gb AEE86136.1  uncharacterized protein AT4G32860 [Arabidopsis thaliana]               | 195  | 199  | 2.00E-90  | 102.1 | 84.1 | 91.8 | uncharacterized protein                | gbpln | Arabidopsis thaliana | AT4G32860.1   Symbols:   unknown protein; Has 46 Blast hits to 46 proteins in 10 species: Archaea - 0; Bacteria - 0; Metazoa - 0; Fungi - 0; Plants - 46; Viruses - 0; Other Eukaryotes - 0 (source: NCBI BLINK).   chr4:15856710-15857309 REVERSE LENGTH=199 | 195  | 199  | 8.00E-93  | 102.1 | 84.1 | 91.8 |
| Rsa1.0_00237.1.g9333.t1 | gb EOA15715.1  hypothetical protein CARUB_v10006567mg [Capsella rubella]                                                                                                                                                                                                                 | 320  | 228  | 2.00E-67  | 71.3  | 45.9 | 49.4 | hypothetical protein CARUB_v10006567mg | gbpln | Capsella rubella     | AT4G32800.1   Symbols:   Integrase-type DNA-binding superfamily protein   chr4:15819812-15820477 FORWARD LENGTH=221                                                                                                                                           | 320  | 221  | 7.00E-69  | 69.1  | 45.3 | 49.4 |
| Rsa1.0_00237.1.g9334.t2 | gb AFB74210.1  tocopherol cyclase [Brassica napus]                                                                                                                                                                                                                                       | 504  | 490  | 0         | 97.2  | 93.7 | 95.0 | tocopherol cyclase                     | gbpln | Brassica napus       | AT4G32770.1   Symbols: VTE1, ATSDX1   tocopherol cyclase, chloroplast / vitamin E deficient 1 (VTE1) / sucrose export defective 1 (SXD1)   chr4:15804981-15807790 FORWARD LENGTH=488                                                                          | 504  | 488  | 0         | 96.8  | 87.1 | 91.3 |
| Rsa1.0_00237.1.g9335.t1 | ref[NP_195002.2] ENTH/VHS/GAT family protein [Arabidopsis thaliana] gi 21539459 gb AAM53282.1  putative protein [Arabidopsis thaliana] gi 23197650 gb AANI5352.1  putative protein [Arabidopsis thaliana] gi 332660714 gb AEE86114.1  ENTH/VHS/GAT family protein [Arabidopsis thaliana] | 651  | 675  | 0         | 103.7 | 87.9 | 91.2 | ENTH/VHS/GAT family protein            | gbpln | Arabidopsis thaliana | AT4G32760.1   Symbols:   ENTH/VHS/GAT family protein   chr4:15799376-15803832 FORWARD LENGTH=675                                                                                                                                                              | 651  | 675  | 0         | 103.7 | 87.9 | 91.2 |
| Rsa1.0_00237.1.g9336.t1 | ref[NP_974718.1] myb-related protein 3R-1 [Arabidopsis thaliana] gi 332660712 gb AEE86112.1  myb-related protein 3R-1 [Arabidopsis thaliana]                                                                                                                                             | 936  | 995  | 0         | 106.3 | 76.8 | 83.8 | myb-related protein 3R-1               | gbpln | Arabidopsis thaliana | AT4G32730.2   Symbols: PC-MYB1, MYB3R-1, ATMYB3R-1, ATMYB3R1   Homeodomain-like protein   chr4:15791039-15795643 FORWARD LENGTH=995                                                                                                                           | 936  | 995  | 0         | 106.3 | 76.8 | 83.8 |
| Rsa1.0_00237.1.g9337.t1 | #                                                                                                                                                                                                                                                                                        | #    | #    | #         | #     | #    | #    | -                                      | ----  | ----                 | #                                                                                                                                                                                                                                                             | #    | #    | #         | #     | #    |      |

|                         |                                                                                                                                                                                                                                                                                                                                                                                                                                                                                                                                                                                                                                                                                                                                                                                                                                                |     |     |          |       |      |      |                                                         |       |                      |                                                                                                                                                                                                                                                                                                                                           |     |     |          |       |      |      |
|-------------------------|------------------------------------------------------------------------------------------------------------------------------------------------------------------------------------------------------------------------------------------------------------------------------------------------------------------------------------------------------------------------------------------------------------------------------------------------------------------------------------------------------------------------------------------------------------------------------------------------------------------------------------------------------------------------------------------------------------------------------------------------------------------------------------------------------------------------------------------------|-----|-----|----------|-------|------|------|---------------------------------------------------------|-------|----------------------|-------------------------------------------------------------------------------------------------------------------------------------------------------------------------------------------------------------------------------------------------------------------------------------------------------------------------------------------|-----|-----|----------|-------|------|------|
| Rsa1.0_00237.1.g9338.t2 | ref NP_194991.1  Potassium channel KAT3 [Arabidopsis thaliana] gi 44888078 sp P92960.1 KAT3_ARATH RecName: Full=Potassium channel KAT3; AltName: Full=AKT4; AltName: Full=AtKC1; AltName: Full=Potassium channel TKC gi 1708777 emb CAB05669.1  potassium channel [Arabidopsis thaliana] gi 3063705 emb CAA18596.1  potassium channel protein [Arabidopsis thaliana] gi 4090537 gb AAC98810.1  K+ inward rectifying channel protein [Arabidopsis thaliana] gi 4098949 gb AAD00503.1  K+ inward rectifying channel [Arabidopsis thaliana] gi 7270169 emb CAB79982.1  potassium channel protein AtKC [Arabidopsis thaliana] gi 15529218 gb AAK97703.1  At4g32650/F4D11.150 [Arabidopsis thaliana] gi 2777709 gb AAO23890.1  At4g32650/F4D11.150 [Arabidopsis thaliana] gi 332660697 gb AEE86097.1  Potassium channel KAT3 [Arabidopsis thaliana] | 685 | 662 | 0        | 96.6  | 80.7 | 88.0 | Potassium channel KAT3                                  | gbpln | Arabidopsis thaliana | AT4G32650.1   Symbols: ATKC1, KAT3, KC1, ATLKT1   potassium channel in Arabidopsis thaliana 3   chr4:15751482-15754797 REVERSE LENGTH=662                                                                                                                                                                                                 | 685 | 662 | 0        | 96.6  | 80.7 | 88.0 |
| Rsa1.0_00237.1.g9339.t1 | emb CAA18600.1  putative protein [Arabidopsis thaliana] gi 7270165 emb CAB79978.1  putative protein [Arabidopsis thaliana] ref XP_002869264.1  hypothetical protein ARALYDRAFT_491464 [Arabidopsis lyrata subsp. lyrata] gi 297315100 gb EFH45523.1  hypothetical protein ARALYDRAFT_491464 [Arabidopsis lyrata subsp. lyrata]                                                                                                                                                                                                                                                                                                                                                                                                                                                                                                                 | 300 | 557 | 3.00E-59 | 185.7 | 77.7 | 86.0 | putative protein                                        | gbpln | Arabidopsis thaliana | AT4G32610.1   Symbols:   copper ion binding   chr4:15728376-15729897 REVERSE LENGTH=315                                                                                                                                                                                                                                                   | 300 | 315 | 7.00E-62 | 105.0 | 77.3 | 86.3 |
| Rsa1.0_00237.1.g9340.t5 | ref NP_180132.1  V-type H+-transporting ATPase 21kDa proteolipid subunit [Arabidopsis thaliana] gi 4874301 gb AAD31363.1  putative vacuolar ATP synthase proteolipid subunit [Arabidopsis thaliana] gi 21536776 gb AAM61108.1  putative vacuolar ATP synthase proteolipid subunit [Arabidopsis thaliana] gi 109946567 gb ABG48462.1  At2g25610 [Arabidopsis thaliana] gi 330252630 gb AEC07724.1  ATPase, F0/V0 complex, subunit C protein [Arabidopsis thaliana]                                                                                                                                                                                                                                                                                                                                                                              | 923 | 920 | 0        | 99.7  | 72.9 | 75.7 | hypothetical protein ARALYDRAFT_491464                  | gbpln | Arabidopsis lyrata   | AT4G32551.1   Symbols: LUG, RON2   LisH dimerisation motif:WD40/YVTN repeat-like-containing domain   chr4:15707863-15713359 FORWARD LENGTH=931                                                                                                                                                                                            | 923 | 931 | 0        | 100.9 | 72.6 | 75.8 |
| Rsa1.0_00237.1.g9341.t3 | ref NP_180132.1  V-type H+-transporting ATPase 21kDa proteolipid subunit [Arabidopsis thaliana] gi 4874301 gb AAD31363.1  putative vacuolar ATP synthase proteolipid subunit [Arabidopsis thaliana] gi 21536776 gb AAM61108.1  putative vacuolar ATP synthase proteolipid subunit [Arabidopsis thaliana] gi 109946567 gb ABG48462.1  At2g25610 [Arabidopsis thaliana] gi 330252630 gb AEC07724.1  ATPase, F0/V0 complex, subunit C protein [Arabidopsis thaliana]                                                                                                                                                                                                                                                                                                                                                                              | 347 | 178 | 3.00E-89 | 51.3  | 49.9 | 50.7 | V-type H+-transporting ATPase 21kDa proteolipid subunit | gbpln | Arabidopsis thaliana | AT2G25610.1   Symbols:   ATPase, F0/V0 complex, subunit C protein   chr2:10901585-10902494 REVERSE LENGTH=178                                                                                                                                                                                                                             | 347 | 178 | 9.00E-92 | 51.3  | 49.9 | 50.7 |
| Rsa1.0_00237.1.g9342.t1 | gb EOA16174.1  hypothetical protein CARUB_v10004311mg, partial [Capsella rubella]                                                                                                                                                                                                                                                                                                                                                                                                                                                                                                                                                                                                                                                                                                                                                              | 653 | 666 | 0        | 102.0 | 90.4 | 94.3 | hypothetical protein CARUB_v10004311mg, partial         | gbpln | Capsella rubella     | AT4G32510.1   Symbols:   HCO3-transporter family   chr4:15685903-15688811 REVERSE LENGTH=673                                                                                                                                                                                                                                              | 653 | 673 | 0        | 103.1 | 89.6 | 94.0 |
| Rsa1.0_00238.1.g9343.t1 | gb EOA28992.1  hypothetical protein CARUB_v10025243mg [Capsella rubella]                                                                                                                                                                                                                                                                                                                                                                                                                                                                                                                                                                                                                                                                                                                                                                       | 159 | 119 | 7.00E-13 | 74.8  | 27.0 | 37.1 | hypothetical protein CARUB_v10025243mg                  | gbpln | Capsella rubella     | AT3G55430.1   Symbols:   O-Glycosyl hydrolases family 17 protein   chr3:20549806-20552004 REVERSE LENGTH=449                                                                                                                                                                                                                              | 159 | 449 | 9.00E-13 | 282.4 | 20.8 | 30.2 |
| Rsa1.0_00238.1.g9344.t1 | gb EOA17998.1  hypothetical protein CARUB_v10006433mg [Capsella rubella]                                                                                                                                                                                                                                                                                                                                                                                                                                                                                                                                                                                                                                                                                                                                                                       | 119 | 119 | 3.00E-58 | 100.0 | 95.8 | 97.5 | hypothetical protein CARUB_v10006433mg                  | gbpln | Capsella rubella     | AT5G56710.1   Symbols:   Ribosomal protein L31e family protein   chr5:22944003-22944767 REVERSE LENGTH=119                                                                                                                                                                                                                                | 119 | 119 | 3.00E-60 | 100.0 | 94.1 | 97.5 |
| Rsa1.0_00238.1.g9345.t1 | ref NP_178239.1  uncharacterized protein [Arabidopsis thaliana] gi 4262237 gb AAD14530.1  predicted by gscan and genefinder [Arabidopsis thaliana] gi 17529142 gb AAL38797.1  unknown protein [Arabidopsis thaliana] gi 21436241 gb AAM51259.1  unknown protein [Arabidopsis thaliana] gi 49660101 gb AAT68341.1  hypothetical protein At2g01300 [Arabidopsis thaliana] gi 60547691 gb AAX23809.1  hypothetical protein At2g01300 [Arabidopsis thaliana] gi 330250336 gb AEC05430.1  uncharacterized protein AT2G01300 [Arabidopsis thaliana]                                                                                                                                                                                                                                                                                                  | 141 | 156 | 3.00E-56 | 110.6 | 81.6 | 86.5 | uncharacterized protein                                 | gbpln | Arabidopsis thaliana | AT2G01300.1   Symbols:   unknown protein; BEST Arabidopsis thaliana protein match is: unknown protein (TAIR:AT1G15010.1); Has 73 Blast hits to 73 proteins in 12 species: Archaea - 0; Bacteria - 0; Metazoa - 0; Fungi - 0; Plants - 73; Viruses - 0; Other Eukaryotes - 0 (source: NCBI BLINK).   chr2:151221-151691 REVERSE LENGTH=156 | 141 | 156 | 7.00E-59 | 110.6 | 81.6 | 86.5 |

|                         |                                                                                                                                                                                                                                                                                                  |     |      |           |       |      |      |                                                 |       |                          |                                                                                                                                                                                                                                                                                                                            |     |     |           |       |      |      |
|-------------------------|--------------------------------------------------------------------------------------------------------------------------------------------------------------------------------------------------------------------------------------------------------------------------------------------------|-----|------|-----------|-------|------|------|-------------------------------------------------|-------|--------------------------|----------------------------------------------------------------------------------------------------------------------------------------------------------------------------------------------------------------------------------------------------------------------------------------------------------------------------|-----|-----|-----------|-------|------|------|
| Rsa1.0_00238.1.g9346.t1 | refNP_178248.2   pentatricopeptide repeat-containing protein [Arabidopsis thaliana]<br>gi 218546783 sp Q9ZU29.2 PP139_ARAT H RecName: Full=Pentatricopeptide repeat-containing protein At2g01390 gi 330250351 gb AEC05445.1   pentatricopeptide repeat-containing protein [Arabidopsis thaliana] | 203 | 577  | 5.00E-75  | 284.2 | 69.0 | 76.4 | pentatricopeptide repeat-containing protein     | gbpln | Arabidopsis thaliana     | AT2G01390.1   Symbols:   Tetratricopeptide repeat (TPR)-like superfamily protein   chr2:172256-174137 FORWARD LENGTH=577                                                                                                                                                                                                   | 203 | 577 | 2.00E-77  | 284.2 | 69.0 | 76.4 |
| Rsa1.0_00238.1.g9347.t1 | gb EOA17840.1  hypothetical protein CARUB_v10006241mg, partial [Capsella rubella]                                                                                                                                                                                                                | 279 | 230  | 2.00E-34  | 82.4  | 35.1 | 49.8 | hypothetical protein CARUB_v10006241mg, partial | gbpln | Capsella rubella         | AT4G11310.1   Symbols:   Papain family cysteine protease   chr4:6883594-6885318 FORWARD LENGTH=364                                                                                                                                                                                                                         | 279 | 364 | 7.00E-20  | 130.5 | 28.7 | 42.3 |
| Rsa1.0_00238.1.g9348.t2 | dbj BAA96887.1  copia-like retroelement pol polyprotein [Arabidopsis thaliana]                                                                                                                                                                                                                   | 610 | 1140 | 1.00E-59  | 186.9 | 22.8 | 35.4 | copia-like retroelement pol polyprotein         | gbpln | Arabidopsis thaliana     | #                                                                                                                                                                                                                                                                                                                          | #   | #   | #         | #     | #    | #    |
| Rsa1.0_00238.1.g9349.t1 | gb AAC67205.1  putative retroelement pol polyprotein [Arabidopsis thaliana]                                                                                                                                                                                                                      | 699 | 1413 | 5.00E-64  | 202.1 | 23.2 | 30.9 | putative retroelement pol polyprotein           | gbpln | Arabidopsis thaliana     | AT1G21280.1   Symbols:   CONTAINS InterPro DOMAIN/s: Retrotransposon gag protein (InterPro:IPR005162); Has 707 Blast hits to 705 proteins in 25 species: Archae - 0; Bacteria - 0; Metazoa - 4; Fungi - 0; Plants - 703; Viruses - 0; Other Eukaryotes - 0 (source: NCBI BLINK).   chr1:7447690-7448403 REVERSE LENGTH=237 | 699 | 237 | 3.00E-15  | 33.9  | 6.9  | 12.0 |
| Rsa1.0_00238.1.g9350.t1 | ref XP_002870216.1  hypothetical protein ARALYDRAFT_915224 [Arabidopsis lyrata subsp. lyrata]<br>gi 297316052 gb EFH46475.1   hypothetical protein ARALYDRAFT_915224 [Arabidopsis lyrata subsp. lyrata]                                                                                          | 200 | 185  | 3.00E-44  | 92.5  | 47.5 | 63.0 | hypothetical protein ARALYDRAFT_915224          | gbpln | Arabidopsis lyrata       | AT4G15715.1   Symbols:   Proteinase inhibitor I25, cystatin, conserved region   chr4:8945317-8945673 FORWARD LENGTH=118                                                                                                                                                                                                    | 200 | 118 | 6.00E-32  | 59.0  | 30.0 | 39.5 |
| Rsa1.0_00238.1.g9351.t1 | refNP_178248.2   pentatricopeptide repeat-containing protein [Arabidopsis thaliana]<br>gi 218546783 sp Q9ZU29.2 PP139_ARAT H RecName: Full=Pentatricopeptide repeat-containing protein At2g01390 gi 330250351 gb AEC05445.1   pentatricopeptide repeat-containing protein [Arabidopsis thaliana] | 354 | 577  | 2.33E-156 | 163.0 | 73.7 | 82.5 | pentatricopeptide repeat-containing protein     | gbpln | Arabidopsis thaliana     | AT2G01390.1   Symbols:   Tetratricopeptide repeat (TPR)-like superfamily protein   chr2:172256-174137 FORWARD LENGTH=577                                                                                                                                                                                                   | 354 | 577 | 1.00E-149 | 163.0 | 73.7 | 82.5 |
| Rsa1.0_00238.1.g9352.t1 | gb EOA22812.1  hypothetical protein CARUB_v10003530mg [Capsella rubella]                                                                                                                                                                                                                         | 258 | 288  | 7.00E-82  | 111.6 | 62.4 | 73.3 | hypothetical protein CARUB_v10003530mg          | gbpln | Capsella rubella         | AT1G45063.2   Symbols:   copper ion binding;electron carriers   chr1:17034068-17034886 REVERSE LENGTH=272                                                                                                                                                                                                                  | 258 | 272 | 3.00E-73  | 105.4 | 57.4 | 69.8 |
| Rsa1.0_00238.1.g9353.t1 | gb EOA23655.1  hypothetical protein CARUB_v10016856mg [Capsella rubella]                                                                                                                                                                                                                         | 560 | 612  | 0         | 109.3 | 89.6 | 92.3 | hypothetical protein CARUB_v10016856mg          | gbpln | Capsella rubella         | AT2G01420.1   Symbols: PIN4, ATPIN4   Auxin efflux carrier family protein   chr2:180478-183199 REVERSE LENGTH=612                                                                                                                                                                                                          | 560 | 612 | 0         | 109.3 | 88.9 | 92.9 |
| Rsa1.0_00238.1.g9354.t1 | refNP_174108.1   RNase H domain-containing protein [Arabidopsis thaliana]<br>gi 12320885 gb AAG50576.1 AC079280_7 hypothetical protein [Arabidopsis thaliana] gi 332192765 gb AEE30886.1   RNase H domain-containing protein [Arabidopsis thaliana]                                              | 137 | 213  | 6.00E-11  | 155.5 | 27.0 | 40.1 | RNase H domain-containing protein               | gbpln | Arabidopsis thaliana     | AT1G27870.1   Symbols:   Polynucleotidyl transferase, ribonuclease H-like superfamily protein   chr1:9706657-9707298 REVERSE LENGTH=213                                                                                                                                                                                    | 137 | 213 | 2.00E-13  | 155.5 | 27.0 | 40.1 |
| Rsa1.0_00238.1.g9355.t1 | ref WP_001871707.1  hypothetical protein [Streptococcus agalactiae]<br>gi 77173851 gb EAO76897.1   hypothetical protein SAI_2423 [Streptococcus agalactiae H36B]                                                                                                                                 | 417 | 181  | 3.00E-17  | 43.4  | 10.8 | 12.0 | hypothetical protein                            | gbpct | Streptococcus agalactiae | #                                                                                                                                                                                                                                                                                                                          | #   | #   | #         | #     | #    | #    |
| Rsa1.0_00238.1.g9356.t1 | ref XP_002876750.1  hypothetical protein ARALYDRAFT_346639 [Arabidopsis lyrata subsp. lyrata]<br>gi 297322588 gb EFH53009.1   hypothetical protein ARALYDRAFT_346639 [Arabidopsis lyrata subsp. lyrata]                                                                                          | 380 | 201  | 4.00E-54  | 52.9  | 28.4 | 30.5 | hypothetical protein ARALYDRAFT_346639          | gbpln | Arabidopsis lyrata       | AT2G01430.1   Symbols: ATHB17, ATHB-17, HB17   homeobox-leucine zipper protein 17   chr2:187798-190369 REVERSE LENGTH=275                                                                                                                                                                                                  | 380 | 275 | 2.00E-54  | 72.4  | 27.6 | 30.0 |
| Rsa1.0_00238.1.g9357.t2 | #                                                                                                                                                                                                                                                                                                | #   | #    | #         | #     | #    | -    | ----                                            | ----  | #                        | #                                                                                                                                                                                                                                                                                                                          | #   | #   | #         | #     | #    | #    |
| Rsa1.0_00238.1.g9358.t1 | #                                                                                                                                                                                                                                                                                                | #   | #    | #         | #     | #    | -    | ----                                            | ----  | #                        | #                                                                                                                                                                                                                                                                                                                          | #   | #   | #         | #     | #    | #    |
| Rsa1.0_00238.1.g9359.t1 | ref NP_178253.3  ATP-dependent DNA helicase RecG [Arabidopsis thaliana]<br>gi 330250357 gb AEC05451.1   DEAD/DEAH box RNA helicase family protein [Arabidopsis thaliana]                                                                                                                         | 980 | 973  | 0         | 99.3  | 82.6 | 90.7 | ATP-dependent DNA helicase RecG                 | gbpln | Arabidopsis thaliana     | AT2G01440.1   Symbols:   DEAD/DEAH box RNA helicase family protein   chr2:193950-199056 REVERSE LENGTH=973                                                                                                                                                                                                                 | 980 | 973 | 0         | 99.3  | 82.6 | 90.7 |
| Rsa1.0_00238.1.g9360.t1 | gb EOA24893.1  hypothetical protein CARUB_v10018184mg [Capsella rubella]                                                                                                                                                                                                                         | 151 | 151  | 5.00E-76  | 100.0 | 88.1 | 94.7 | hypothetical protein CARUB_v10018184mg          | gbpln | Capsella rubella         | AT2G01520.1   Symbols: MLP328   MLP-like protein 328   chr2:235992-236881 FORWARD LENGTH=151                                                                                                                                                                                                                               | 151 | 151 | 4.00E-78  | 100.0 | 88.1 | 94.0 |
| Rsa1.0_00238.1.g9361.t1 | gb EOA36058.1  hypothetical protein CARUB_v10008394mg [Capsella rubella]                                                                                                                                                                                                                         | 129 | 743  | 1.00E-15  | 576.0 | 41.9 | 45.7 | hypothetical protein CARUB_v10008394mg          | gbpln | Capsella rubella         | AT1G17980.1   Symbols: PAPS1   poly(A) polymerase 1   chr1:6187742-6191418 REVERSE LENGTH=713                                                                                                                                                                                                                              | 129 | 713 | 4.00E-14  | 552.7 | 38.0 | 41.1 |

|                         |                                                                                                                                                                                                                  |     |     |           |       |      |      |                                                                                                                                                           |       |                    |                                                                                                                                                                                                                                                                                                                                                 |     |     |           |       |      |      |
|-------------------------|------------------------------------------------------------------------------------------------------------------------------------------------------------------------------------------------------------------|-----|-----|-----------|-------|------|------|-----------------------------------------------------------------------------------------------------------------------------------------------------------|-------|--------------------|-------------------------------------------------------------------------------------------------------------------------------------------------------------------------------------------------------------------------------------------------------------------------------------------------------------------------------------------------|-----|-----|-----------|-------|------|------|
| Rsa1.0_00238.1.g9362.t1 | gb ADK63403.1  C2 domain-containing protein [Brassica rapa]                                                                                                                                                      | 181 | 180 | 1.00E-95  | 99.4  | 91.2 | 96.1 | C2 domain-containing protein                                                                                                                              | gbpln | Brassica rapa      | AT2G01540.1   Symbols:   Calcium-dependent lipid-binding (CaLB domain) family protein   chr2:242297-243233 REVERSE LENGTH=180                                                                                                                                                                                                                   | 181 | 180 | 1.00E-94  | 99.4  | 88.4 | 92.8 |
| Rsa1.0_00239.1.g9363.t1 | ref XP_002885164.1  hypothetical protein ARALYDRAFT_897993 [Arabidopsis lyrata subsp. lyrata]   g 297331004 gb EFH61423.1  hypothetical protein ARALYDRAFT_897993 [Arabidopsis lyrata subsp. lyrata]             | 623 | 683 | 0         | 109.6 | 78.7 | 85.6 | hypothetical protein ARALYDRAFT_897993                                                                                                                    | gbpln | Arabidopsis lyrata | AT3G16730.1   Symbols:   CONTAINS InterPro DOMAIN/s: Non-SMC condensin II complex, subunit H2-like (InterPro:IPR009378). Has 249 Blast hits to 211 proteins in 82 species: Archaee - 0; Bacteria - 0; Metazoa - 145; Fungi - 8; Plants - 30; Viruses - 0; Other Eukaryotes - 66 (source: NCBI BLINK).   chr3:5695633-5698863 REVERSE LENGTH=683 | 623 | 683 | 0         | 109.6 | 78.0 | 85.6 |
| Rsa1.0_00239.1.g9364.t1 | ref XP_002883022.1  hypothetical protein ARALYDRAFT_479140 [Arabidopsis lyrata subsp. lyrata]   g 297328862 gb EFH59281.1  hypothetical protein ARALYDRAFT_479140 [Arabidopsis lyrata subsp. lyrata]             | 259 | 304 | 1.00E-50  | 117.4 | 54.8 | 63.3 | hypothetical protein ARALYDRAFT_479140                                                                                                                    | gbpln | Arabidopsis lyrata | AT3G16720.1   Symbols: AT2L2, TL2   TOXICOS EN LEVADURA 2   chr3:5692880-5693794 FORWARD LENGTH=304                                                                                                                                                                                                                                             | 259 | 304 | 9.00E-52  | 117.4 | 53.3 | 62.5 |
| Rsa1.0_00239.1.g9365.t1 | ref XP_002883022.1  hypothetical protein ARALYDRAFT_479140 [Arabidopsis lyrata subsp. lyrata]   g 297328862 gb EFH59281.1  hypothetical protein ARALYDRAFT_479140 [Arabidopsis lyrata subsp. lyrata]             | 198 | 304 | 3.00E-40  | 153.5 | 44.9 | 49.0 | hypothetical protein ARALYDRAFT_479140                                                                                                                    | gbpln | Arabidopsis lyrata | AT3G16720.1   Symbols: AT2L2, TL2   TOXICOS EN LEVADURA 2   chr3:5692880-5693794 FORWARD LENGTH=304                                                                                                                                                                                                                                             | 198 | 304 | 9.00E-42  | 153.5 | 42.9 | 47.5 |
| Rsa1.0_00239.1.g9366.t1 | ref XP_002883022.1  hypothetical protein ARALYDRAFT_479140 [Arabidopsis lyrata subsp. lyrata]   g 297328862 gb EFH59281.1  hypothetical protein ARALYDRAFT_479140 [Arabidopsis lyrata subsp. lyrata]             | 285 | 304 | 2.00E-41  | 106.7 | 36.5 | 44.9 | hypothetical protein ARALYDRAFT_479140                                                                                                                    | gbpln | Arabidopsis lyrata | AT3G16720.1   Symbols: AT2L2, TL2   TOXICOS EN LEVADURA 2   chr3:5692880-5693794 FORWARD LENGTH=304                                                                                                                                                                                                                                             | 285 | 304 | 2.00E-42  | 106.7 | 35.4 | 43.2 |
| Rsa1.0_00239.1.g9367.t1 | ref XP_002883021.1  hypothetical protein ARALYDRAFT_479138 [Arabidopsis lyrata subsp. lyrata]   g 297328861 gb EFH59280.1  hypothetical protein ARALYDRAFT_479138 [Arabidopsis lyrata subsp. lyrata]             | 490 | 504 | 0         | 102.9 | 68.2 | 80.4 | hypothetical protein ARALYDRAFT_479138                                                                                                                    | gbpln | Arabidopsis lyrata | AT3G16710.1   Symbols:   Pentatricopeptide repeat (PPR) superfamily protein   chr3:5689020-5691543 FORWARD LENGTH=507                                                                                                                                                                                                                           | 490 | 507 | 0         | 103.5 | 68.6 | 80.2 |
| Rsa1.0_00239.1.g9368.t1 | ref XP_002883020.1  fumarylacetoacetate hydrolase family protein [Arabidopsis lyrata subsp. lyrata]   g 297328860 gb EFH59279.1  fumarylacetoacetate hydrolase family protein [Arabidopsis lyrata subsp. lyrata] | 225 | 226 | 1.00E-119 | 100.4 | 92.9 | 96.9 | fumarylacetoacetate hydrolase family protein                                                                                                              | gbpln | Arabidopsis lyrata | AT3G16700.1   Symbols:   Fumarylacetoacetate (FAA) hydrolase family   chr3:5687809-5689664 FORWARD LENGTH=224                                                                                                                                                                                                                                   | 225 | 224 | 1.00E-121 | 99.6  | 91.1 | 96.0 |
| Rsa1.0_00239.1.g9369.t1 | gb EOA31331.1  hypothetical protein CARUB_v10014504mg, partial [Capsella rubella]                                                                                                                                | 231 | 242 | 1.00E-110 | 104.8 | 85.3 | 92.2 | hypothetical protein CARUB_v10014504mg, partial                                                                                                           | gbpln | Capsella rubella   | AT3G16690.1   Symbols: SWEET16, ASWEET16   Nodulin M3 family protein   chr3:5684563-5686425 REVERSE LENGTH=230                                                                                                                                                                                                                                  | 231 | 230 | 1.00E-112 | 99.6  | 84.8 | 92.2 |
| Rsa1.0_00239.1.g9370.t1 | gb EOA31400.1  hypothetical protein CARUB_v10014579mg, partial [Capsella rubella]                                                                                                                                | 188 | 222 | 5.00E-29  | 118.1 | 37.2 | 46.8 | hypothetical protein CARUB_v10014579mg, partial                                                                                                           | gbpln | Capsella rubella   | AT3G16660.1   Symbols:   Pollen Ole e 1 allergen and extensin family protein   chr3:5676904-5677788 FORWARD LENGTH=180                                                                                                                                                                                                                          | 188 | 180 | 6.00E-30  | 95.7  | 37.2 | 46.8 |
| Rsa1.0_00239.1.g9371.t1 | sp Q944W6.1 TCTP_BRAOL RecName: Full=Translationally-controlled tumor protein homolog; Short=TCTP   g 16033628 gb AAL13303.1 AF418663_1 translationally controlled tumor protein [Brassica oleracea]             | 168 | 168 | 2.00E-86  | 100.0 | 93.5 | 96.4 | RecName: Full=Translationally-controlled tumor protein homolog; Short=TCTP   g 16033628 gb AAL13303.1 AF418663_1 translationally controlled tumor protein | gbpln | Brassica oleracea  | AT3G16640.1   Symbols: TCTP   translationally controlled tumor protein   chr3:5669709-5670729 REVERSE LENGTH=168                                                                                                                                                                                                                                | 168 | 168 | 4.00E-86  | 100.0 | 89.9 | 94.6 |
| Rsa1.0_00239.1.g9372.t1 | ref XP_002885159.1  ATKINESIN-13A/KINESIN-13A [Arabidopsis lyrata subsp. lyrata]   g 297330999 gb EFH61418.1  ATKINESIN-13A/KINESIN-13A [Arabidopsis lyrata subsp. lyrata]                                       | 789 | 783 | 0         | 99.2  | 91.3 | 94.7 | ATKINESIN-13A/KINESIN-13A                                                                                                                                 | gbpln | Arabidopsis lyrata | AT3G16630.2   Symbols: ATKINESIN-13A, KINESIN-13A   P-loop containing nucleoside triphosphate hydrolases superfamily protein   chr3:5662660-5667261 REVERSE LENGTH=794                                                                                                                                                                          | 789 | 794 | 0         | 100.6 | 91.6 | 94.7 |
| Rsa1.0_00239.1.g9373.t1 | ref XP_002875029.1  hypothetical protein ARALYDRAFT_912211 [Arabidopsis lyrata subsp. lyrata]   g 297320866 gb EFH51288.1  hypothetical protein ARALYDRAFT_912211 [Arabidopsis lyrata subsp. lyrata]             | 567 | 653 | 1.00E-115 | 115.2 | 45.0 | 54.0 | hypothetical protein ARALYDRAFT_912211                                                                                                                    | gbpln | Arabidopsis lyrata | AT3G16010.1   Symbols:   Pentatricopeptide repeat (PPR-like) superfamily protein   chr3:5434142-5436244 FORWARD LENGTH=642                                                                                                                                                                                                                      | 567 | 642 | 2.00E-94  | 113.2 | 37.4 | 46.2 |

|                         |                                                                                                                                                                                                                                         |      |      |           |       |      |      |                                                 |       |                      |                                                                                                                                                                                                                                                                                                                                         |      |      |           |       |      |      |
|-------------------------|-----------------------------------------------------------------------------------------------------------------------------------------------------------------------------------------------------------------------------------------|------|------|-----------|-------|------|------|-------------------------------------------------|-------|----------------------|-----------------------------------------------------------------------------------------------------------------------------------------------------------------------------------------------------------------------------------------------------------------------------------------------------------------------------------------|------|------|-----------|-------|------|------|
| Rsa1.0_00239.1.g9374.t1 | refXP_002885144.1   hypothetical protein ARALYDRAFT_479112 [Arabidopsis lyrata subsp. lyrata] gi 297330984 gb EFH61403.1   hypothetical protein ARALYDRAFT_479112 [Arabidopsis lyrata subsp. lyrata]                                    | 286  | 345  | 9.00E-76  | 120.6 | 70.6 | 77.6 | hypothetical protein ARALYDRAFT_479112          | gbpln | Arabidopsis lyrata   | AT3G16510.1   Symbols:   Calcium-dependent lipid-binding (CaLB domain) family protein   chr3:5617112-5618194 REVERSE LENGTH=360                                                                                                                                                                                                         | 286  | 360  | 8.00E-68  | 125.9 | 66.1 | 73.8 |
| Rsa1.0_00239.1.g9375.t1 | dbj BAA97287.1  retroelement pol polyprotein-like [Arabidopsis thaliana]                                                                                                                                                                | 1460 | 1491 | 0         | 102.1 | 65.4 | 78.6 | retroelement pol polyprotein-like               | gbpln | Arabidopsis thaliana | AT4G23160.1   Symbols: CRK8   cysteine-rich RLK (RECEPTOR-like protein kinase) 8   chr4:12129485-12134086 FORWARD LENGTH=1262                                                                                                                                                                                                           | 1460 | 1262 | 1.00E-143 | 86.4  | 16.4 | 23.4 |
| Rsa1.0_00239.1.g9376.t1 | dbj BAJ34060.1  unnamed protein product [Theilungiella halophila]                                                                                                                                                                       | 231  | 270  | 1.00E-107 | 116.9 | 85.7 | 90.0 | unnamed protein product                         | ----  | ----                 | AT3G16500.1   Symbols: PAP1, IAA26   phytochrome-associated protein 1   chr3:5612801-5614208 REVERSE LENGTH=269                                                                                                                                                                                                                         | 231  | 269  | 1.00E-103 | 116.5 | 82.3 | 86.6 |
| Rsa1.0_00239.1.g9377.t1 | refXP_002885142.1   IQ-domain 26 [Arabidopsis lyrata subsp. lyrata] gi 297330982 gb EFH61401.1   IQ-domain 26 [Arabidopsis lyrata subsp. lyrata]                                                                                        | 391  | 390  | 0         | 99.7  | 89.8 | 93.4 | IQ-domain 26                                    | gbpln | Arabidopsis lyrata   | AT3G16490.1   Symbols: IQD26   IQ-domain 26   chr3:5603962-5605489 REVERSE LENGTH=389                                                                                                                                                                                                                                                   | 391  | 389  | 0         | 99.5  | 89.8 | 92.8 |
| Rsa1.0_00239.1.g9378.t1 | gb EOA36857.1  hypothetical protein CARUB_v10008803mg [Capsella rubella]                                                                                                                                                                | 700  | 536  | 2.00E-94  | 76.6  | 30.6 | 42.7 | hypothetical protein CARUB_v10008803mg          | gbpln | Capsella rubella     | AT2G07760.1   Symbols:   Zinc knuckle (OCHC-type) family protein   chr2:3584420-3586278 REVERSE LENGTH=530                                                                                                                                                                                                                              | 700  | 530  | 3.00E-52  | 75.7  | 13.7 | 17.3 |
| Rsa1.0_00239.1.g9379.t1 | emb CAA72271.1  jasmonate inducible protein [Brassica napus]                                                                                                                                                                            | 452  | 680  | 0         | 150.4 | 75.4 | 84.5 | jasmonate inducible protein                     | gbpln | Brassica napus       | AT3G16460.2   Symbols:   Mannose-binding lectin superfamily protein   chr3:5593029-5595522 FORWARD LENGTH=705                                                                                                                                                                                                                           | 452  | 705  | 1.00E-156 | 156.0 | 63.9 | 77.2 |
| Rsa1.0_00239.1.g9380.t1 | refXP_002883008.1   hypothetical protein ARALYDRAFT_479101 [Arabidopsis lyrata subsp. lyrata] gi 297328848 gb EFH5267.1   hypothetical protein ARALYDRAFT_479101 [Arabidopsis lyrata subsp. lyrata]                                     | 300  | 300  | 1.00E-143 | 100.0 | 83.3 | 92.0 | hypothetical protein ARALYDRAFT_479101          | gbpln | Arabidopsis lyrata   | AT3G16440.1   Symbols: ATMLP-300B, MEE36, MLP-300B   myrosinase-binding protein-like protein-300B   chr3:5586087-5587541 FORWARD LENGTH=300                                                                                                                                                                                             | 300  | 300  | 1.00E-140 | 100.0 | 83.0 | 92.0 |
| Rsa1.0_00239.1.g9381.t1 | refXP_002883007.1   hypothetical protein ARALYDRAFT_897956 [Arabidopsis lyrata subsp. lyrata] gi 297328847 gb EFH59266.1   hypothetical protein ARALYDRAFT_897956 [Arabidopsis lyrata subsp. lyrata]                                    | 92   | 298  | 4.00E-31  | 323.9 | 69.6 | 82.6 | hypothetical protein ARALYDRAFT_897956          | gbpln | Arabidopsis lyrata   | AT3G16450.3   Symbols:   Mannose-binding lectin superfamily protein   chr3:5588593-5589792 FORWARD LENGTH=300                                                                                                                                                                                                                           | 92   | 300  | 9.00E-33  | 326.1 | 66.3 | 79.3 |
| Rsa1.0_00240.1.g9382.t1 | gb ADA60971.1  stylish [Brassica rapa subsp. pekinensis]                                                                                                                                                                                | 361  | 363  | 1.00E-149 | 100.6 | 85.3 | 88.6 | stylish                                         | gbpln | Brassica rapa        | AT3G51060.1   Symbols: STY1, SRS1   Lateral root primordium (LRP) protein-related   chr3:18964606-18966130 FORWARD LENGTH=370                                                                                                                                                                                                           | 361  | 370  | 1.00E-143 | 102.5 | 85.6 | 91.4 |
| Rsa1.0_00240.1.g9383.t1 | refXP_002877786.1   hypothetical protein ARALYDRAFT_485457 [Arabidopsis lyrata subsp. lyrata] gi 297323624 gb EFH54045.1   hypothetical protein ARALYDRAFT_485457 [Arabidopsis lyrata subsp. lyrata]                                    | 226  | 231  | 1.00E-107 | 102.2 | 82.3 | 90.3 | hypothetical protein ARALYDRAFT_485457          | gbpln | Arabidopsis lyrata   | AT3G51040.3   Symbols: RTH   RTE1-homolog   chr3:18952281-18953060 REVERSE LENGTH=231                                                                                                                                                                                                                                                   | 226  | 231  | 1.00E-105 | 102.2 | 79.6 | 88.9 |
| Rsa1.0_00240.1.g9384.t1 | gb EOA24308.1  hypothetical protein CARUB_v10017549mg, partial [Capsella rubella]                                                                                                                                                       | 559  | 351  | 1.00E-170 | 62.8  | 50.1 | 53.7 | hypothetical protein CARUB_v10017549mg, partial | gbpln | Capsella rubella     | AT3G51000.1   Symbols:   alpha/beta-Hydrolases superfamily protein   chr3:18945258-18946499 REVERSE LENGTH=323                                                                                                                                                                                                                          | 559  | 323  | 1.00E-169 | 57.8  | 49.4 | 53.1 |
| Rsa1.0_00240.1.g9385.t1 | gb AAK43926.1 AF370607.1 putative mitochondrial protein [Arabidopsis thaliana] gi 4835244 emb CAB42922.1   putative mitochondrial protein [Arabidopsis thaliana] gi 20856863 gb AAM26687.1   AT3g50930/F18B3.210 [Arabidopsis thaliana] | 538  | 534  | 0         | 99.3  | 67.1 | 76.6 | putative mitochondrial protein                  | gbpln | Arabidopsis thaliana | AT3G50930.1   Symbols: BCS1   cytochrome BC1 synthesis   chr3:18929817-18931547 FORWARD LENGTH=576                                                                                                                                                                                                                                      | 538  | 576  | 0         | 107.1 | 67.1 | 76.6 |
| Rsa1.0_00240.1.g9386.t1 | gb EOA22499.1  hypothetical protein CARUB_v10003154mg [Capsella rubella]                                                                                                                                                                | 146  | 143  | 1.00E-25  | 27.9  | 56.8 | 65.8 | hypothetical protein CARUB_v10003154mg          | gbpln | Capsella rubella     | AT5G17280.1   Symbols:   CONTAINS InterPro DOMAIN/s: Oxidoreductase-like, N-terminal (InterPro:IPR019180); Has 1807 Blast hits to 1807 proteins in 277 species: Archae - 0; Bacteria - 0; Metazoa - 736; Fungi - 347; Plants - 385; Viruses - 0; Other Eukaryotes - 339 (source: NCBI BLINK).   chr5:5686355-5686762 FORWARD LENGTH=135 | 146  | 135  | 1.00E-27  | 92.5  | 56.2 | 65.8 |
| Rsa1.0_00240.1.g9387.t1 | gb EOA22340.1  hypothetical protein CARUB_v10002957mg [Capsella rubella]                                                                                                                                                                | 484  | 503  | 0         | 103.9 | 79.1 | 86.2 | hypothetical protein CARUB_v10002957mg          | gbpln | Capsella rubella     | AT5G17240.1   Symbols: SDG40   SET domain group 40   chr5:5666854-5668849 FORWARD LENGTH=491                                                                                                                                                                                                                                            | 484  | 491  | 0         | 101.4 | 77.9 | 86.0 |
| Rsa1.0_00240.1.g9388.t1 | #                                                                                                                                                                                                                                       | #    | #    | #         | #     | #    | #    | -                                               | ----  | ----                 | #                                                                                                                                                                                                                                                                                                                                       | #    | #    | #         | #     | #    | #    |

|                         |                                                                                                                                                                                                                                                                                                                                                                                                                                                                                                                                  |      |      |           |       |      |      |                                                                                                                                                                                                       |       |                      |                                                                                                                                                                                                                                                                                                                                                                                                                                                                                                                                                                                                                                                                          |      |     |           |       |      |      |
|-------------------------|----------------------------------------------------------------------------------------------------------------------------------------------------------------------------------------------------------------------------------------------------------------------------------------------------------------------------------------------------------------------------------------------------------------------------------------------------------------------------------------------------------------------------------|------|------|-----------|-------|------|------|-------------------------------------------------------------------------------------------------------------------------------------------------------------------------------------------------------|-------|----------------------|--------------------------------------------------------------------------------------------------------------------------------------------------------------------------------------------------------------------------------------------------------------------------------------------------------------------------------------------------------------------------------------------------------------------------------------------------------------------------------------------------------------------------------------------------------------------------------------------------------------------------------------------------------------------------|------|-----|-----------|-------|------|------|
| Rsa1.0_00240.1.g9389.t1 | gb EOA39894.1  hypothetical protein CARUB_v10008573mg [Capsella rubella]                                                                                                                                                                                                                                                                                                                                                                                                                                                         | 1014 | 630  | 1.00E-81  | 62.1  | 17.3 | 24.1 | hypothetical protein CARUB_v10008573mg                                                                                                                                                                | gbpln | Capsella rubella     | AT1G31150.1   Symbols:   Domain of unknown function (DUF1985)   chr:1.1120097-11122412 FORWARD LENGTH=673                                                                                                                                                                                                                                                                                                                                                                                                                                                                                                                                                                | 1014 | 673 | 3.00E-63  | 66.4  | 13.7 | 19.5 |
| Rsa1.0_00240.1.g9390.t1 | emb CAB80843.1  hypothetical protein [Arabidopsis thaliana]                                                                                                                                                                                                                                                                                                                                                                                                                                                                      | 170  | 381  | 5.00E-21  | 224.1 | 27.1 | 43.5 | hypothetical protein                                                                                                                                                                                  | gbpln | Arabidopsis thaliana | AT4G04775.1   Symbols:   zinc ion binding   chr:4.2431120-2431695 FORWARD LENGTH=150                                                                                                                                                                                                                                                                                                                                                                                                                                                                                                                                                                                     | 170  | 150 | 2.00E-23  | 88.2  | 27.1 | 43.5 |
| Rsa1.0_00240.1.g9391.t1 | gb AAF78267.1 AC020576_11 Contains weak similarity to 25.7 kDa protein from <i>Cicer arietinum</i> gb AJ276422 and contains a transposase mutator PF 00872 domain. ESTs gb T13756, gb AA712647, gb AA585980 come from this gene [Arabidopsis thaliana]                                                                                                                                                                                                                                                                           | 942  | 1206 | 0         | 128.0 | 46.8 | 63.9 | Contains weak similarity to 25.7 kDa protein from <i>Cicer arietinum</i> gb AJ276422 and contains a transposase mutator PF 00872 domain. ESTs gb T13756, gb AA712647, gb AA585980 come from this gene | gbpln | Arabidopsis thaliana | AT1G64260.1   Symbols:   MuDR family transposase   chr:1.23847756-23849915 FORWARD LENGTH=719                                                                                                                                                                                                                                                                                                                                                                                                                                                                                                                                                                            | 942  | 719 | 3.00E-33  | 76.3  | 13.9 | 23.9 |
| Rsa1.0_00240.1.g9392.t1 | gb AAM62787.1  phytoene synthase [Arabidopsis thaliana]                                                                                                                                                                                                                                                                                                                                                                                                                                                                          | 415  | 422  | 0         | 101.7 | 89.4 | 92.3 | phytoene synthase                                                                                                                                                                                     | gbpln | Arabidopsis thaliana | AT5G17230.2   Symbols: PSY   PHYTOENE SYNTHASE   chr:5.5659839-5662087 REVERSE LENGTH=422                                                                                                                                                                                                                                                                                                                                                                                                                                                                                                                                                                                | 415  | 422 | 0         | 101.7 | 89.4 | 92.3 |
| Rsa1.0_00240.1.g9393.t1 | db BAJ34302.1  unnamed protein product [Theillungiella halophila]                                                                                                                                                                                                                                                                                                                                                                                                                                                                | 213  | 214  | 1.00E-107 | 100.5 | 86.9 | 94.4 | unnamed protein product                                                                                                                                                                               | ----  | ----                 | AT5G17220.1   Symbols: ATGSTF12, GST26, TT19, GSTF12   glutathione S-transferase phi 12   chr:5.5658528-5659322 FORWARD LENGTH=214                                                                                                                                                                                                                                                                                                                                                                                                                                                                                                                                       | 213  | 214 | 1.00E-105 | 100.5 | 84.0 | 93.4 |
| Rsa1.0_00240.1.g9394.t1 | ref XP_002871754.1  hypothetical protein ARALYDRAFT_488583 [Arabidopsis lyrata subsp. lyrata] gi 297317591 gb EFH48013.1  hypothetical protein ARALYDRAFT_488583 [Arabidopsis lyrata subsp. lyrata]                                                                                                                                                                                                                                                                                                                              | 211  | 212  | 8.00E-80  | 100.5 | 68.7 | 80.1 | hypothetical protein ARALYDRAFT_488583                                                                                                                                                                | gbpln | Arabidopsis lyrata   | AT5G17210.1   Symbols:   Protein of unknown function (DUF218)   chr:5.5656519-5657970 FORWARD LENGTH=209                                                                                                                                                                                                                                                                                                                                                                                                                                                                                                                                                                 | 211  | 209 | 2.00E-78  | 99.1  | 66.4 | 78.7 |
| Rsa1.0_00240.1.g9395.t1 | gb EOA22760.1  hypothetical protein CARUB_v10003473mg [Capsella rubella]                                                                                                                                                                                                                                                                                                                                                                                                                                                         | 428  | 422  | 1.00E-177 | 98.6  | 70.1 | 82.2 | hypothetical protein CARUB_v10003473mg                                                                                                                                                                | gbpln | Capsella rubella     | AT5G17200.1   Symbols:   Pectin lyase-like superfamily protein   chr:5.5653524-5655336 REVERSE LENGTH=421                                                                                                                                                                                                                                                                                                                                                                                                                                                                                                                                                                | 428  | 421 | 1.00E-179 | 98.4  | 71.3 | 81.1 |
| Rsa1.0_00240.1.g9396.t1 | ref NP_197221.1  uncharacterized protein [Arabidopsis thaliana] gi 10177064 db BAB10506.1  unnamed protein product [Arabidopsis thaliana] gi 17381008 gb AAL36316.1  unknown protein [Arabidopsis thaliana] gi 21280895 gb AAM45077.1  unknown protein [Arabidopsis thaliana] gi 110741078 db BAE98633.1  hypothetical protein [Arabidopsis thaliana] gi 332005011 gb AED92394.1  uncharacterized protein AT5G17190 [Arabidopsis thaliana] gi 482555310 gb EOA19502.1  hypothetical protein CARUB_v10002249mg [Capsella rubella] | 130  | 130  | 3.00E-68  | 100.0 | 96.2 | 99.2 | uncharacterized protein                                                                                                                                                                               | gbpln | Arabidopsis thaliana | AT5G17190.1   Symbols:   FUNCTIONS IN: molecular function unknown; INVOLVED IN: intracellular protein transport; LOCATED IN: endomembrane system, integral to membrane, endoplasmic reticulum; EXPRESSED IN: 23 plant structures; EXPRESSED DURING: 13 growth stages; CONTAINS InterPro DOMAIN/s: B-cell receptor-associated 31-like (InterPro:IPR008417); BEST Arabidopsis thaliana protein match is: unknown protein (TAIR:AT3G03160.1); Has 1807 Blast hits to 1807 proteins in 277 species: Archae - 0; Bacteria - 0; Metazoa - 736; Fungi - 347; Plants - 385; Viruses - 0; Other Eukaryotes - 339 (source: NCBI BLINK).   chr:5.5652310-5652702 FORWARD LENGTH=130 | 130  | 130 | 5.00E-71  | 100.0 | 96.2 | 99.2 |
| Rsa1.0_00240.1.g9397.t1 | gb EOA21343.1  hypothetical protein CARUB_v10001706mg [Capsella rubella]                                                                                                                                                                                                                                                                                                                                                                                                                                                         | 277  | 271  | 1.00E-135 | 97.8  | 89.5 | 93.5 | hypothetical protein CARUB_v10001706mg                                                                                                                                                                | gbpln | Capsella rubella     | AT5G17170.1   Symbols: ENH1   rubredoxin family protein   chr:5.5649335-5650975 FORWARD LENGTH=271                                                                                                                                                                                                                                                                                                                                                                                                                                                                                                                                                                       | 277  | 271 | 1.00E-132 | 97.8  | 89.5 | 93.9 |
| Rsa1.0_00240.1.g9398.t1 | ref XP_002873814.1  hypothetical protein ARALYDRAFT_488576 [Arabidopsis lyrata subsp. lyrata] gi 297319651 gb EFH50073.1  hypothetical protein ARALYDRAFT_488576 [Arabidopsis lyrata subsp. lyrata]                                                                                                                                                                                                                                                                                                                              | 601  | 568  | 1.00E-136 | 94.5  | 61.2 | 68.4 | hypothetical protein ARALYDRAFT_488576                                                                                                                                                                | gbpln | Arabidopsis lyrata   | AT5G17160.1   Symbols:   unknown protein; BEST Arabidopsis thaliana protein match is: unknown protein (TAIR:AT3G03130.1); Has 14330 Blast hits to 10381 proteins in 896 species: Archae - 94; Bacteria - 2881; Metazoa - 4019; Fungi - 1576; Plants - 515; Viruses - 110; Other Eukaryotes - 5135 (source: NCBI BLINK).   chr:5.5639843-5642427 REVERSE LENGTH=569                                                                                                                                                                                                                                                                                                       | 601  | 569 | 1.00E-134 | 94.7  | 59.7 | 68.4 |
| Rsa1.0_00240.1.g9399.t1 | gb EOA20368.1  hypothetical protein CARUB_v10000682mg [Capsella rubella]                                                                                                                                                                                                                                                                                                                                                                                                                                                         | 352  | 533  | 4.00E-63  | 151.4 | 53.1 | 63.9 | hypothetical protein CARUB_v10000682mg                                                                                                                                                                | gbpln | Capsella rubella     | AT5G17160.1   Symbols:   unknown protein; BEST Arabidopsis thaliana protein match is: unknown protein (TAIR:AT3G03130.1); Has 14330 Blast hits to 10381 proteins in 896 species: Archae - 94; Bacteria - 2881; Metazoa - 4019; Fungi - 1576; Plants - 515; Viruses - 110; Other Eukaryotes - 5135 (source: NCBI BLINK).   chr:5.5639843-5642427 REVERSE LENGTH=569                                                                                                                                                                                                                                                                                                       | 352  | 569 | 5.00E-65  | 161.6 | 50.3 | 58.5 |

|                         |                                                                                                                                                                                                                                                                                                                                                                                                                                                                                                                                                                                                                                                                                                                                                                                                                                                                                                                                                                                                                                                                                                                                                                                                                                                                                                                                                                                                                                                                                                                                                |      |      |           |       |      |      |                                        |       |                      |                                                                                                                     |      |      |           |       |      |      |
|-------------------------|------------------------------------------------------------------------------------------------------------------------------------------------------------------------------------------------------------------------------------------------------------------------------------------------------------------------------------------------------------------------------------------------------------------------------------------------------------------------------------------------------------------------------------------------------------------------------------------------------------------------------------------------------------------------------------------------------------------------------------------------------------------------------------------------------------------------------------------------------------------------------------------------------------------------------------------------------------------------------------------------------------------------------------------------------------------------------------------------------------------------------------------------------------------------------------------------------------------------------------------------------------------------------------------------------------------------------------------------------------------------------------------------------------------------------------------------------------------------------------------------------------------------------------------------|------|------|-----------|-------|------|------|----------------------------------------|-------|----------------------|---------------------------------------------------------------------------------------------------------------------|------|------|-----------|-------|------|------|
| Rsa1.0_00240.1.g9400.t1 | ref[NP_197207.1] Flavonoid 3-O-glucosyltransferase [Arabidopsis thaliana]<br>gi 75311137 sp Q9LFJ8.1 U78D2_ARAT H RecName: Full=UDP-glycosyltransferase 78D2; AltName: Full=Anthocyanin 3-O-glucosyltransferase; AltName: Full=Flavonol 3-O-glucosyltransferase.; AltName: Full=UDP glucose:flavonoid 3-O-glucosyltransferase<br>gi 9755706 emb CAC01718.1  UDP glucose:flavonoid 3-o-glucosyltransferase-like protein [Arabidopsis thaliana]<br>gi 18252199 gb AAL61932.1  UDP glucose:flavonoid 3-o-glucosyltransferase-like protein [Arabidopsis thaliana]<br>gi 22136122 gb AAM91139.1  UDP glucose:flavonoid 3-o-glucosyltransferase-like protein [Arabidopsis thaliana]<br>gi 332004994 gb AED92377.1  Flavonoid 3-O-glucosyltransferase [Arabidopsis thaliana]<br>ref[NP_197207.1] Flavonoid 3-O-glucosyltransferase [Arabidopsis thaliana]<br>gi 75311137 sp Q9LFJ8.1 U78D2_ARAT H RecName: Full=UDP-glycosyltransferase 78D2; AltName: Full=Anthocyanin 3-O-glucosyltransferase; AltName: Full=Flavonol 3-O-glucosyltransferase.; AltName: Full=UDP glucose:flavonoid 3-O-glucosyltransferase<br>gi 9755706 emb CAC01718.1  UDP glucose:flavonoid 3-o-glucosyltransferase-like protein [Arabidopsis thaliana]<br>gi 18252199 gb AAL61932.1  UDP glucose:flavonoid 3-o-glucosyltransferase-like protein [Arabidopsis thaliana]<br>gi 22136122 gb AAM91139.1  UDP glucose:flavonoid 3-o-glucosyltransferase-like protein [Arabidopsis thaliana]<br>gi 332004994 gb AED92377.1  Flavonoid 3-O-glucosyltransferase [Arabidopsis thaliana] | 761  | 460  | 0         | 60.4  | 45.9 | 51.6 | Flavonoid 3-O-glucosyltransferase      | gbpln | Arabidopsis thaliana | AT5G17050.1   Symbols: UGT78D2   UDP-glucosyl transferase 78D2   chr5:5607828-5609392 REVERSE LENGTH=460            | 761  | 460  | 0         | 60.4  | 45.9 | 51.6 |
| Rsa1.0_00240.1.g9401.t1 | ref[XP_002871746.1] hypothetical protein ARALYDRAFT_909689 [Arabidopsis lyrata subsp. lyrata]<br>gi 297317583 gb EFH48005.1  hypothetical protein ARALYDRAFT_909689 [Arabidopsis lyrata subsp. lyrata]<br>ref[XP_002873804.1] sugar transporter family protein [Arabidopsis lyrata subsp. lyrata]<br>gi 297319641 gb EFH50063.1  sugar transporter family protein [Arabidopsis lyrata subsp. lyrata]<br>gb AAD49963.1 AF147263.5 contains similarity to transposases [Arabidopsis thaliana]<br>gi 7267311 emb CAB81093.1 AT4g05510 [Arabidopsis thaliana]<br>ref[XP_002873800.1] predicted protein [Arabidopsis lyrata subsp. lyrata]<br>gi 297319637 gb EFH50059.1  predicted protein [Arabidopsis lyrata subsp. lyrata]<br>ref[NP_197195.2] AAA-type ATPase family protein [Arabidopsis thaliana]<br>gi 19424059 gb AAL87351.1  unknown protein [Arabidopsis thaliana]<br>gi 22136966 gb AAM91712.1  unknown protein [Arabidopsis thaliana]<br>gi 332004976 gb AED92359.1  AAA-type ATPase family protein [Arabidopsis thaliana]                                                                                                                                                                                                                                                                                                                                                                                                                                                                                                             | 460  | 460  | 0         | 100.0 | 78.9 | 87.8 | Flavonoid 3-O-glucosyltransferase      | gbpln | Arabidopsis thaliana | AT5G17050.1   Symbols: UGT78D2   UDP-glucosyl transferase 78D2   chr5:5607828-5609392 REVERSE LENGTH=460            | 460  | 460  | 0         | 100.0 | 78.9 | 87.8 |
| Rsa1.0_00240.1.g9402.t1 | ref[XP_002871746.1] hypothetical protein ARALYDRAFT_909689 [Arabidopsis lyrata subsp. lyrata]<br>gi 297317583 gb EFH48005.1  hypothetical protein ARALYDRAFT_909689 [Arabidopsis lyrata subsp. lyrata]                                                                                                                                                                                                                                                                                                                                                                                                                                                                                                                                                                                                                                                                                                                                                                                                                                                                                                                                                                                                                                                                                                                                                                                                                                                                                                                                         | 1087 | 1076 | 0         | 99.0  | 95.1 | 97.1 | hypothetical protein ARALYDRAFT_909689 | gbpln | Arabidopsis lyrata   | AT5G17020.1   Symbols: XPO1A, ATORM1, ATXPO1, XPO1, HIT2   exportin 1A   chr5:5594904-5602467 FORWARD LENGTH=1075   | 1087 | 1075 | 0         | 98.9  | 94.5 | 96.5 |
| Rsa1.0_00240.1.g9403.t1 | ref[XP_002873804.1] sugar transporter family protein [Arabidopsis lyrata subsp. lyrata]<br>gi 297319641 gb EFH50063.1  sugar transporter family protein [Arabidopsis lyrata subsp. lyrata]                                                                                                                                                                                                                                                                                                                                                                                                                                                                                                                                                                                                                                                                                                                                                                                                                                                                                                                                                                                                                                                                                                                                                                                                                                                                                                                                                     | 493  | 502  | 0         | 101.8 | 89.0 | 92.9 | sugar transporter family protein       | gbpln | Arabidopsis lyrata   | AT5G17010.3   Symbols:   Major facilitator superfamily protein   chr5:5587851-5592332 REVERSE LENGTH=503            | 493  | 503  | 0         | 102.0 | 89.7 | 92.9 |
| Rsa1.0_00240.1.g9404.t1 | gb AAD49963.1 AF147263.5 contains similarity to transposases [Arabidopsis thaliana]<br>gi 7267311 emb CAB81093.1 AT4g05510 [Arabidopsis thaliana]                                                                                                                                                                                                                                                                                                                                                                                                                                                                                                                                                                                                                                                                                                                                                                                                                                                                                                                                                                                                                                                                                                                                                                                                                                                                                                                                                                                              | 288  | 604  | 6.00E-50  | 209.7 | 33.7 | 39.9 | contains similarity to transposases    | gbpln | Arabidopsis thaliana | AT3G42170.1   Symbols:   BED zinc finger hAT family dimerisation domain   chr3:14321838-14323928 FORWARD LENGTH=696 | 288  | 696  | 2.00E-15  | 241.7 | 17.0 | 29.2 |
| Rsa1.0_00240.1.g9405.t2 | ref[XP_002873800.1] predicted protein [Arabidopsis lyrata subsp. lyrata]<br>gi 297319637 gb EFH50059.1  predicted protein [Arabidopsis lyrata subsp. lyrata]                                                                                                                                                                                                                                                                                                                                                                                                                                                                                                                                                                                                                                                                                                                                                                                                                                                                                                                                                                                                                                                                                                                                                                                                                                                                                                                                                                                   | 348  | 346  | 1.00E-175 | 99.4  | 85.6 | 91.4 | predicted protein                      | gbpln | Arabidopsis lyrata   | AT5G16960.1   Symbols:   Zinc-binding dehydrogenase family protein   chr5:5574537-5575884 REVERSE LENGTH=346        | 348  | 346  | 1.00E-173 | 99.4  | 83.6 | 89.9 |
| Rsa1.0_00240.1.g9406.t4 | ref[NP_197195.2] AAA-type ATPase family protein [Arabidopsis thaliana]<br>gi 19424059 gb AAL87351.1  unknown protein [Arabidopsis thaliana]<br>gi 22136966 gb AAM91712.1  unknown protein [Arabidopsis thaliana]<br>gi 332004976 gb AED92359.1  AAA-type ATPase family protein [Arabidopsis thaliana]                                                                                                                                                                                                                                                                                                                                                                                                                                                                                                                                                                                                                                                                                                                                                                                                                                                                                                                                                                                                                                                                                                                                                                                                                                          | 655  | 644  | 0         | 98.3  | 83.8 | 88.1 | AAA-type ATPase family protein         | gbpln | Arabidopsis thaliana | AT5G16930.1   Symbols:   AAA-type ATPase family protein   chr5:5588578-5571565 FORWARD LENGTH=644                   | 655  | 644  | 0         | 98.3  | 83.8 | 88.1 |



|                         |                                                                                                                                                                                                                                                                                       |      |      |           |       |       |       |                                                      |       |                      |                                                                                                                                                    |      |      |           |       |      |      |
|-------------------------|---------------------------------------------------------------------------------------------------------------------------------------------------------------------------------------------------------------------------------------------------------------------------------------|------|------|-----------|-------|-------|-------|------------------------------------------------------|-------|----------------------|----------------------------------------------------------------------------------------------------------------------------------------------------|------|------|-----------|-------|------|------|
| Rsa1.0_00240.1.g9407.t1 | gb ABK28699.1  unknown [Arabidopsis thaliana]                                                                                                                                                                                                                                         | 257  | 257  | 4.00E-95  | 100.0 | 73.9  | 82.5  | unknown                                              | gbpln | Arabidopsis thaliana | AT5G16920.1   Symbols:   Fasciclin-like arabinogalactan family protein   chr5:5567084-5567854 FORWARD LENGTH=256                                   | 257  | 256  | 2.00E-97  | 99.6  | 73.9 | 82.5 |
| Rsa1.0_00240.1.g9408.t1 | ref XP_002871742.1  hypothetical protein ARALYDRAFT_488554 [Arabidopsis lyrata subsp. lyrata] gi 297317579 gb EFH48001.1  hypothetical protein ARALYDRAFT_488554 [Arabidopsis lyrata subsp. lyrata]                                                                                   | 1139 | 1143 | 0         | 100.4 | 89.8  | 95.0  | hypothetical protein ARALYDRAFT_488554               | gbpln | Arabidopsis lyrata   | AT5G16910.1   Symbols:   ATCSLD2, CSLD2   cellulose-synthase like D2   chr5:5561679-5565290 FORWARD LENGTH=1145                                    | 1139 | 1145 | 0         | 100.5 | 89.0 | 94.7 |
| Rsa1.0_00241.1.g9409.t1 | ref NP_178530.2  cysteine/histidine-rich C1 domain-containing protein [Arabidopsis thaliana] gi 50058853 gb AAT69171.1  hypothetical protein At2g04500 [Arabidopsis thaliana] gi 330250746 gb AEC05840.1  cysteine/histidine-rich C1 domain-containing protein [Arabidopsis thaliana] | 135  | 495  | 6.00E-15  | 366.7 | 41.5  | 60.7  | cysteine/histidine-rich C1 domain-containing protein | gbpln | Arabidopsis thaliana | AT2G04500.1   Symbols:   Cysteine/Histidine-rich C1 domain family protein   chr2:1566492-1569979 FORWARD LENGTH=495                                | 135  | 495  | 1.00E-17  | 366.7 | 41.5 | 60.7 |
| Rsa1.0_00241.1.g9410.t1 | #                                                                                                                                                                                                                                                                                     | #    | #    | #         | #     | #     | #     | -                                                    | ----  | ----                 | #                                                                                                                                                  | #    | #    | #         | #     | #    |      |
| Rsa1.0_00241.1.g9411.t1 | ref XP_002883420.1  hypothetical protein ARALYDRAFT_479845 [Arabidopsis lyrata subsp. lyrata] gi 297329260 gb EFH59679.1  hypothetical protein ARALYDRAFT_479845 [Arabidopsis lyrata subsp. lyrata]                                                                                   | 616  | 614  | 0         | 99.7  | 92.4  | 95.5  | hypothetical protein ARALYDRAFT_479845               | gbpln | Arabidopsis lyrata   | AT3G23300.1   Symbols:   S-adenosyl-L-methionine-dependent methyltransferases superfamily protein   chr3:8333521-8335902 FORWARD LENGTH=611        | 616  | 611  | 0         | 99.2  | 91.9 | 95.9 |
| Rsa1.0_00241.1.g9412.t1 | #                                                                                                                                                                                                                                                                                     | #    | #    | #         | #     | #     | #     | -                                                    | ----  | ----                 | #                                                                                                                                                  | #    | #    | #         | #     | #    |      |
| Rsa1.0_00241.1.g9413.t4 | gb EOA30221.1  hypothetical protein CARUB_v10013343mg [Capsella rubella]                                                                                                                                                                                                              | 533  | 568  | 0         | 106.6 | 85.6  | 89.5  | hypothetical protein CARUB_v10013343mg               | gbpln | Capsella rubella     | AT3G23310.1   Symbols:   AGC (cAMP-dependent, cGMP-dependent and protein kinase C) kinase family protein   chr3:8339799-8343355 FORWARD LENGTH=568 | 533  | 568  | 0         | 106.6 | 84.8 | 88.2 |
| Rsa1.0_00241.1.g9414.t1 | gb AAF79687.1 AC022314_28 F9C16.9 [Arabidopsis thaliana]                                                                                                                                                                                                                              | 891  | 946  | 0         | 106.2 | 52.0  | 64.6  | F9C16.9                                              | gbpln | Arabidopsis thaliana | AT1G64260.1   Symbols:   MuDR family transposase   chr1:2384756-23849915 FORWARD LENGTH=719                                                        | 891  | 719  | 2.00E-20  | 80.7  | 13.0 | 24.9 |
| Rsa1.0_00241.1.g9415.t1 | gb AAF68011.1  Hypothetical protein T10118.4 [Arabidopsis thaliana]                                                                                                                                                                                                                   | 129  | 156  | 7.00E-28  | 120.9 | 49.6  | 66.7  | Hypothetical protein T10118.4                        | gbpln | Arabidopsis thaliana | #                                                                                                                                                  | #    | #    | #         | #     | #    |      |
| Rsa1.0_00241.1.g9416.t2 | ref XP_004245305.1  PREDICTED: uncharacterized protein At3g23325-like [Solanum lycopersicum]                                                                                                                                                                                          | 130  | 87   | 2.00E-45  | 66.9  | 65.4  | 66.9  | PREDICTED: uncharacterized protein At3g23325-like    | gbpln | Solanum lycopersicum | AT3G23325.1   Symbols:   Splicing factor 3B subunit 5/RDS3 complex subunit 10   chr3:8345808-8346856 FORWARD LENGTH=87                             | 130  | 87   | 3.00E-47  | 66.9  | 64.6 | 66.2 |
| Rsa1.0_00241.1.g9417.t4 | ref XP_002883423.1  pentatricopeptide repeat-containing protein [Arabidopsis lyrata subsp. lyrata] gi 297329263 gb EFH59682.1  pentatricopeptide repeat-containing protein [Arabidopsis lyrata subsp. lyrata]                                                                         | 1085 | 679  | 0         | 62.6  | 55.4  | 59.9  | pentatricopeptide repeat-containing protein          | gbpln | Arabidopsis lyrata   | AT3G23330.1   Symbols:   Tetratricopeptide repeat (TPR)-like superfamily protein   chr3:8347200-8349347 FORWARD LENGTH=715                         | 1085 | 715  | 0         | 65.9  | 56.3 | 60.5 |
| Rsa1.0_00241.1.g9418.t2 | gb EOA32666.1  hypothetical protein CARUB_v10015964mg [Capsella rubella]                                                                                                                                                                                                              | 258  | 264  | 1.00E-105 | 102.3 | 74.4  | 83.7  | hypothetical protein CARUB_v10015964mg               | gbpln | Capsella rubella     | AT3G23360.1   Symbols:   Protein phosphatase 2C family protein   chr3:8355257-8356381 REVERSE LENGTH=260                                           | 258  | 260  | 1.00E-106 | 100.8 | 74.4 | 83.3 |
| Rsa1.0_00241.1.g9419.t1 | ref XP_002883427.1  nucleic acid binding protein [Arabidopsis lyrata subsp. lyrata] gi 297329267 gb EFH59686.1  nucleic acid binding protein [Arabidopsis lyrata subsp. lyrata]                                                                                                       | 615  | 785  | 1.00E-173 | 127.6 | 61.5  | 76.1  | nucleic acid binding protein                         | gbpln | Arabidopsis lyrata   | AT3G23370.1   Symbols:   RNA-binding (RRM/RBD/RNP motifs) family protein   chr3:8357613-8360792 FORWARD LENGTH=811                                 | 615  | 811  | 1.00E-138 | 131.9 | 48.9 | 60.8 |
| Rsa1.0_00241.1.g9420.t1 | gb EOA32791.1  hypothetical protein CARUB_v10016101mg [Capsella rubella]                                                                                                                                                                                                              | 171  | 205  | 1.00E-49  | 119.9 | 73.7  | 83.0  | hypothetical protein CARUB_v10016101mg               | gbpln | Capsella rubella     | AT3G23380.1   Symbols:   RIC5   ROP-interactive CRIB motif-containing protein 5   chr3:8373947-8374708 FORWARD LENGTH=193                          | 171  | 193  | 7.00E-48  | 112.9 | 70.8 | 81.9 |
| Rsa1.0_00241.1.g9421.t1 | gb AAK94425.1 AF398144_1 60S ribosomal protein L144 [Brassica rapa subsp. pekinensis]                                                                                                                                                                                                 | 105  | 119  | 2.00E-52  | 113.3 | 100.0 | 100.0 | 60S ribosomal protein L144                           | gbpln | Brassica rapa        | AT4G14320.1   Symbols:   Zinc-binding ribosomal protein family protein   chr4:8242684-8243805 REVERSE LENGTH=105                                   | 105  | 105  | 4.00E-53  | 100.0 | 96.2 | 97.1 |
| Rsa1.0_00241.1.g9422.t1 | dbj BAJ34097.1  unnamed protein product [Thellungiella halophila]                                                                                                                                                                                                                     | 279  | 282  | 1.00E-130 | 101.1 | 88.2  | 94.3  | unnamed protein product                              | ----  | ----                 | AT3G23400.1   Symbols:   FIB4   Plastid-lipid associated protein PAP / fibrillin family protein   chr3:8376636-8378225 REVERSE LENGTH=284          | 279  | 284  | 1.00E-109 | 101.8 | 80.3 | 85.3 |

|                         |                                                                                                                                                                                                                                                                                                        |      |      |           |       |      |      |                                              |       |                      |                                                                                                                                                                    |      |      |           |       |      |      |
|-------------------------|--------------------------------------------------------------------------------------------------------------------------------------------------------------------------------------------------------------------------------------------------------------------------------------------------------|------|------|-----------|-------|------|------|----------------------------------------------|-------|----------------------|--------------------------------------------------------------------------------------------------------------------------------------------------------------------|------|------|-----------|-------|------|------|
| Rsa1.0_00241.1.g9423.t1 | ref XP_002883430.1  hypothetical protein ARALYDRAFT_479855 [Arabidopsis lyrata subsp. lyrata] gi 297329270 gb EFH59689.1  hypothetical protein ARALYDRAFT_479855 [Arabidopsis lyrata subsp. lyrata]                                                                                                    | 744  | 743  | 0         | 99.9  | 84.8 | 91.4 | hypothetical protein ARALYDRAFT_479855       | gbpln | Arabidopsis lyrata   | AT3G23410.1   Symbols: ATFAO3, FAO3   fatty alcohol oxidase 3   chr3:8382860-8386024 FORWARD LENGTH=746                                                            | 744  | 746  | 0         | 100.3 | 82.7 | 90.6 |
| Rsa1.0_00241.1.g9424.t1 | gb EOA29920.1  hypothetical protein CARUB_v10013014mg [Capsella rubella]                                                                                                                                                                                                                               | 784  | 785  | 0         | 100.1 | 92.3 | 96.2 | hypothetical protein CARUB_v10013014mg       | gbpln | Capsella rubella     | AT3G23430.1   Symbols: PHO1, ATPH01   phosphate 1   chr3:8387818-8393242 REVERSE LENGTH=782                                                                        | 784  | 782  | 0         | 99.7  | 88.3 | 93.0 |
| Rsa1.0_00242.1.g9425.t1 | #                                                                                                                                                                                                                                                                                                      | #    | #    | #         | #     | #    | #    | -                                            | ----  | ----                 | #                                                                                                                                                                  | #    | #    | #         | #     | #    |      |
| Rsa1.0_00242.1.g9426.t1 | gb EOA39560.1  hypothetical protein CARUB_v10008178mg [Capsella rubella]                                                                                                                                                                                                                               | 178  | 1022 | 2.00E-69  | 574.2 | 74.7 | 82.0 | hypothetical protein CARUB_v10008178mg       | gbpln | Capsella rubella     | AT1G29720.1   Symbols:   Leucine-rich repeat transmembrane protein kinase   chr1:10393894-10399771 REVERSE LENGTH=1019                                             | 178  | 1019 | 4.00E-65  | 572.5 | 73.6 | 80.9 |
| Rsa1.0_00242.1.g9427.t1 | gb AAD32756.1  putative replication protein A1 [Arabidopsis thaliana]                                                                                                                                                                                                                                  | 451  | 458  | 1.00E-66  | 101.6 | 31.9 | 53.0 | putative replication protein A1              | gbpln | Arabidopsis thaliana | AT1G52950.1   Symbols:   Nucleic acid-binding, OB-fold-like protein   chr1:19725483-19728007 FORWARD LENGTH=566                                                    | 451  | 566  | 2.00E-67  | 125.5 | 33.3 | 57.0 |
| Rsa1.0_00242.1.g9428.t1 | gb EOA39560.1  hypothetical protein CARUB_v10008178mg [Capsella rubella]                                                                                                                                                                                                                               | 2256 | 1022 | 0         | 45.3  | 22.4 | 24.7 | hypothetical protein CARUB_v10008178mg       | gbpln | Capsella rubella     | AT1G29720.1   Symbols:   Leucine-rich repeat transmembrane protein kinase   chr1:10393894-10399771 REVERSE LENGTH=1019                                             | 2256 | 1019 | 0         | 45.2  | 22.0 | 24.9 |
| Rsa1.0_00242.1.g9429.t2 | gb AAG51783.1 AC079679.3 reverse transcriptase, putative; 16838-20266 [Arabidopsis thaliana]                                                                                                                                                                                                           | 994  | 1142 | 1.00E-160 | 114.9 | 30.0 | 41.9 | reverse transcriptase, putative; 16838-20266 | gbpln | Arabidopsis thaliana | AT4G29090.1   Symbols:   Ribonuclease H-like superfamily protein   chr4:14333528-14335255 FORWARD LENGTH=575                                                       | 994  | 575  | 1.00E-42  | 57.8  | 12.9 | 20.9 |
| Rsa1.0_00242.1.g9430.t2 | gb AAD28663.1  hypothetical protein [Arabidopsis thaliana]                                                                                                                                                                                                                                             | 359  | 356  | 1.00E-19  | 99.2  | 18.9 | 32.6 | hypothetical protein                         | gbpln | Arabidopsis thaliana | #                                                                                                                                                                  | #    | #    | #         | #     | #    |      |
| Rsa1.0_00242.1.g9431.t1 | gb AAD20433.1  putative retroelement pol polyprotein [Arabidopsis thaliana]                                                                                                                                                                                                                            | 127  | 889  | 5.00E-40  | 700.0 | 58.3 | 75.6 | putative retroelement pol polyprotein        | gbpln | Arabidopsis thaliana | #                                                                                                                                                                  | #    | #    | #         | #     | #    |      |
| Rsa1.0_00242.1.g9432.t1 | gb ACG60682.1  transposon-like ORF [Brassica oleracea var. alboglabra]                                                                                                                                                                                                                                 | 960  | 704  | 1.00E-101 | 73.3  | 21.4 | 24.3 | transposon-like ORF                          | gbpln | Brassica oleracea    | #                                                                                                                                                                  | #    | #    | #         | #     | #    |      |
| Rsa1.0_00242.1.g9433.t1 | gb AAG51228.1 AC035249.3 Tam3-like transposon protein; 93317-95488 [Arabidopsis thaliana] gi 12323055 gb AAG51515.1 AC068324.3 hAT-element transposase, putative [Arabidopsis thaliana]                                                                                                                | 617  | 723  | 1.00E-174 | 117.2 | 53.5 | 68.6 | Tam3-like transposon protein; 93317-95488    | gbpln | Arabidopsis thaliana | AT3G42170.1   Symbols:   BED zinc finger ;hAT family dimerisation domain   chr3:14321838-14323928 FORWARD LENGTH=696                                               | 617  | 696  | 3.00E-41  | 112.8 | 20.9 | 37.9 |
| Rsa1.0_00242.1.g9434.t2 | #                                                                                                                                                                                                                                                                                                      | #    | #    | #         | #     | #    | #    | -                                            | ----  | ----                 | #                                                                                                                                                                  | #    | #    | #         | #     | #    |      |
| Rsa1.0_00242.1.g9435.t1 | #                                                                                                                                                                                                                                                                                                      | #    | #    | #         | #     | #    | #    | -                                            | ----  | ----                 | #                                                                                                                                                                  | #    | #    | #         | #     | #    |      |
| Rsa1.0_00242.1.g9436.t1 | gb EOA38810.1  hypothetical protein CARUB_v10011128mg [Capsella rubella]                                                                                                                                                                                                                               | 216  | 1008 | 1.00E-84  | 466.7 | 74.1 | 83.3 | hypothetical protein CARUB_v10011128mg       | gbpln | Capsella rubella     | AT1G29720.1   Symbols:   Leucine-rich repeat transmembrane protein kinase   chr1:10393894-10399771 REVERSE LENGTH=1019                                             | 216  | 1019 | 5.00E-67  | 471.8 | 61.6 | 71.3 |
| Rsa1.0_00242.1.g9437.t2 | gb EOA38810.1  hypothetical protein CARUB_v10011128mg [Capsella rubella]                                                                                                                                                                                                                               | 593  | 1008 | 0         | 170.0 | 74.9 | 84.5 | hypothetical protein CARUB_v10011128mg       | gbpln | Capsella rubella     | AT1G29720.1   Symbols:   Leucine-rich repeat transmembrane protein kinase   chr1:10393894-10399771 REVERSE LENGTH=1019                                             | 593  | 1019 | 0         | 171.8 | 73.7 | 84.0 |
| Rsa1.0_00242.1.g9438.t1 | pir E85079 hypothetical protein AT4g08070 [imported] - Arabidopsis thaliana gi 5724773 gb AAD48077.1 AF160183.4 contains similarity to Antirrhinum majus hypothetical protein TNP2 (GB:X57297); may be a pseudogene [Arabidopsis thaliana] gi 7267447 emb CAB81144.1  AT4g08070 [Arabidopsis thaliana] | 99   | 767  | 3.00E-33  | 774.7 | 68.7 | 76.8 | hypothetical protein AT4g08070               | gbpln | Arabidopsis thaliana | #                                                                                                                                                                  | #    | #    | #         | #     | #    |      |
| Rsa1.0_00242.1.g9439.t1 | #                                                                                                                                                                                                                                                                                                      | #    | #    | #         | #     | #    | #    | -                                            | ----  | ----                 | #                                                                                                                                                                  | #    | #    | #         | #     | #    |      |
| Rsa1.0_00242.1.g9440.t1 | gb ABD65060.1  hypothetical protein 27.t00039 [Brassica oleracea]                                                                                                                                                                                                                                      | 157  | 1367 | 1.00E-80  | 870.7 | 92.4 | 94.9 | hypothetical protein 27.t00039               | gbpln | Brassica oleracea    | #                                                                                                                                                                  | #    | #    | #         | #     | #    |      |
| Rsa1.0_00243.1.g9441.t1 | gb EOA13979.1  hypothetical protein CARUB_v10027111mg [Capsella rubella]                                                                                                                                                                                                                               | 201  | 217  | 6.00E-60  | 108.0 | 66.7 | 78.1 | hypothetical protein CARUB_v10027111mg       | gbpln | Capsella rubella     | AT5G48657.2   Symbols:   defense protein-related   chr5:19734120-19735516 REVERSE LENGTH=219                                                                       | 201  | 219  | 8.00E-58  | 109.0 | 65.7 | 77.1 |
| Rsa1.0_00243.1.g9442.t1 | ref XP_002865657.1  hypothetical protein ARALYDRAFT_494930 [Arabidopsis lyrata subsp. lyrata] gi 297311492 gb EFH41916.1  hypothetical protein ARALYDRAFT_494930 [Arabidopsis lyrata subsp. lyrata]                                                                                                    | 199  | 203  | 5.00E-68  | 102.0 | 78.9 | 83.4 | hypothetical protein ARALYDRAFT_494930       | gbpln | Arabidopsis lyrata   | AT5G48655.3   Symbols:   RING/U-box superfamily protein   chr5:19731575-19732486 REVERSE LENGTH=203                                                                | 199  | 203  | 8.00E-69  | 102.0 | 76.9 | 80.9 |
| Rsa1.0_00243.1.g9443.t1 | dbj BAB10698.1  RNA-binding protein-like [Arabidopsis thaliana]                                                                                                                                                                                                                                        | 503  | 461  | 1.00E-125 | 91.7  | 57.1 | 66.4 | RNA-binding protein-like                     | gbpln | Arabidopsis thaliana | AT5G48650.1   Symbols:   Nuclear transport factor 2 (NTF2) family protein with RNA binding (RRM-RBD-RNP motifs) domain   chr5:19727279-19729533 FORWARD LENGTH=458 | 503  | 458  | 1.00E-125 | 91.1  | 56.5 | 65.8 |

|                         |                                                                                                                                                                                                                                                                                                                                                                                                                                                                                                                                                                                                                                                                                                                                                                                                                                                            |     |     |           |       |      |      |                                        |       |                      |                                                                                                                                                                                                                                                                                                                                            |     |     |           |       |      |      |
|-------------------------|------------------------------------------------------------------------------------------------------------------------------------------------------------------------------------------------------------------------------------------------------------------------------------------------------------------------------------------------------------------------------------------------------------------------------------------------------------------------------------------------------------------------------------------------------------------------------------------------------------------------------------------------------------------------------------------------------------------------------------------------------------------------------------------------------------------------------------------------------------|-----|-----|-----------|-------|------|------|----------------------------------------|-------|----------------------|--------------------------------------------------------------------------------------------------------------------------------------------------------------------------------------------------------------------------------------------------------------------------------------------------------------------------------------------|-----|-----|-----------|-------|------|------|
| Rsa1.0_00243.1.g9444.t2 | gb[EOA13886.1] hypothetical protein CARUB_v10026989mg [Capsella rubella]                                                                                                                                                                                                                                                                                                                                                                                                                                                                                                                                                                                                                                                                                                                                                                                   | 271 | 252 | 1.00E-125 | 93.0  | 81.5 | 88.9 | hypothetical protein CARUB_v10026989mg | gbpln | Capsella rubella     | AT5G48640.1   Symbols:   Cyclin family protein   chr5:19723653-19725641 REVERSE LENGTH=253                                                                                                                                                                                                                                                 | 271 | 253 | 1.00E-126 | 93.4  | 81.9 | 88.6 |
| Rsa1.0_00243.1.g9445.t1 | gb[EOA13279.1] hypothetical protein CARUB_v10026310mg [Capsella rubella] gi 482549086 gb EOA13280.1  hypothetical protein CARUB_v10026310mg [Capsella rubella]                                                                                                                                                                                                                                                                                                                                                                                                                                                                                                                                                                                                                                                                                             | 465 | 484 | 1.00E-133 | 104.1 | 65.4 | 77.6 | hypothetical protein CARUB_v10026310mg | gbpln | Capsella rubella     | AT5G48610.1   Symbols:   unknown protein; Has 43043 Blast hits to 23769 proteins in 1327 species: Archae - 108; Bacteria - 3952; Metazoa - 17076; Fungi - 3614; Plants - 1643; Viruses - 204; Other Eukaryotes - 16446 (source: NCBI BLink).   chr5:19712614-19714861 FORWARD LENGTH=354                                                   | 465 | 354 | 2.00E-72  | 76.1  | 42.4 | 50.5 |
| Rsa1.0_00243.1.g9446.t1 | gb[EOA13641.1] hypothetical protein CARUB_v10026712mg [Capsella rubella]                                                                                                                                                                                                                                                                                                                                                                                                                                                                                                                                                                                                                                                                                                                                                                                   | 343 | 345 | 1.00E-152 | 100.6 | 81.6 | 87.8 | hypothetical protein CARUB_v10026712mg | gbpln | Capsella rubella     | AT5G48590.1   Symbols:   Protein of unknown function (DUF760)   chr5:19698476-19699771 FORWARD LENGTH=344                                                                                                                                                                                                                                  | 343 | 344 | 1.00E-150 | 100.3 | 78.4 | 85.1 |
| Rsa1.0_00243.1.g9447.t1 | ref NP_199669.1  FK506-binding protein 2-2 [Arabidopsis thaliana] gi 23396587 sp Q38936.2 FK152_ARATH RecName: Full=Peptidyl-prolyl cis-trans isomerase FKBP15-2; Short=PP1ase FKBP15-2; AltName: Full=15 kDa FK506-binding protein; Short=15 kDa FKBP; AltName: Full=FK506-binding protein 15-2; Short=AtFKBP15-2; AltName: Full=Rotamase; Flags: Precursor<br>gi 13277793 gb AAK43974.1 AF370159.1 putative peptidyl-prolyl cis-trans isomerase [Arabidopsis thaliana] gi 10177348 db BAB10691.1  peptidyl-prolyl cis-trans isomerase-like protein [Arabidopsis thaliana] gi 16323516 gb AAL15252.1  putative peptidyl-prolyl cis-trans isomerase [Arabidopsis thaliana] gi 21553433 gb AAM62526.1  peptidyl-prolyl cis-trans isomerase-like protein [Arabidopsis thaliana] gi 332008308 gb AED95691.1  FK506-binding protein 2-2 [Arabidopsis thaliana] | 176 | 163 | 2.00E-68  | 92.6  | 79.0 | 82.4 | FK506-binding protein 2-2              | gbpln | Arabidopsis thaliana | AT5G48580.1   Symbols: FKBP15-2   FK506-and rapamycin-binding protein 15 kD-2   chr5:19696156-19697304 REVERSE LENGTH=163                                                                                                                                                                                                                  | 176 | 163 | 9.00E-71  | 92.6  | 79.0 | 82.4 |
| Rsa1.0_00243.1.g9448.t1 | ref XP_002865651.1  hypothetical protein ARALYDRAFT_494919 [Arabidopsis lyrata subsp. lyrata] gi 297311486 gb EFH41908.1  hypothetical protein ARALYDRAFT_494919 [Arabidopsis lyrata subsp. lyrata]                                                                                                                                                                                                                                                                                                                                                                                                                                                                                                                                                                                                                                                        | 573 | 570 | 0         | 99.5  | 89.0 | 94.9 | hypothetical protein ARALYDRAFT_494919 | gbpln | Arabidopsis lyrata   | AT5G48570.1   Symbols: ROF2, ATKBP65, FKBP65   FKBP-type peptidyl-prolyl cis-trans isomerase family protein   chr5:19690746-19693656 REVERSE LENGTH=578                                                                                                                                                                                    | 573 | 578 | 0         | 100.9 | 87.1 | 93.9 |
| Rsa1.0_00243.1.g9449.t1 | gb AAM10957.1 AF488610.1 putative bHLH transcription factor [Arabidopsis thaliana]                                                                                                                                                                                                                                                                                                                                                                                                                                                                                                                                                                                                                                                                                                                                                                         | 417 | 498 | 1.00E-143 | 119.4 | 76.3 | 80.3 | putative bHLH transcription factor     | gbpln | Arabidopsis thaliana | AT5G48560.1   Symbols:   basic helix-loop-helix (bHLH) DNA-binding superfamily protein   chr5:19654160-19686871 FORWARD LENGTH=498                                                                                                                                                                                                         | 417 | 498 | 1.00E-144 | 119.4 | 74.1 | 78.9 |
| Rsa1.0_00243.1.g9450.t1 | ref XP_002863905.1  histidine triad family protein [Arabidopsis lyrata subsp. lyrata] gi 297309740 gb EFH40164.1  histidine triad family protein [Arabidopsis lyrata subsp. lyrata]                                                                                                                                                                                                                                                                                                                                                                                                                                                                                                                                                                                                                                                                        | 195 | 198 | 6.00E-92  | 101.5 | 90.3 | 92.3 | histidine triad family protein         | gbpln | Arabidopsis lyrata   | AT5G48545.1   Symbols: HINT3   histidine triad nucleotide-binding 3   chr5:19676228-19677945 FORWARD LENGTH=197                                                                                                                                                                                                                            | 195 | 197 | 1.00E-90  | 101.0 | 88.2 | 90.3 |
| Rsa1.0_00243.1.g9451.t2 | # # # # # # # #                                                                                                                                                                                                                                                                                                                                                                                                                                                                                                                                                                                                                                                                                                                                                                                                                                            | #   | #   | #         | #     | #    | #    | -                                      | ----  | ----                 | #                                                                                                                                                                                                                                                                                                                                          | #   | #   | #         | #     | #    |      |
| Rsa1.0_00243.1.g9452.t1 | ref XP_002865649.1  hypothetical protein ARALYDRAFT_494916 [Arabidopsis lyrata subsp. lyrata] gi 297311484 gb EFH41908.1  hypothetical protein ARALYDRAFT_494916 [Arabidopsis lyrata subsp. lyrata]                                                                                                                                                                                                                                                                                                                                                                                                                                                                                                                                                                                                                                                        | 261 | 263 | 1.00E-134 | 100.8 | 88.5 | 93.5 | hypothetical protein ARALYDRAFT_494916 | gbpln | Arabidopsis lyrata   | AT5G48540.1   Symbols:   receptor-like protein kinase-related family protein   chr5:19669096-19669887 REVERSE LENGTH=263                                                                                                                                                                                                                   | 261 | 263 | 1.00E-133 | 100.8 | 86.6 | 92.0 |
| Rsa1.0_00243.1.g9453.t1 | ref XP_002882529.1  hypothetical protein ARALYDRAFT_896908 [Arabidopsis lyrata subsp. lyrata] gi 297328369 gb EFH58788.1  hypothetical protein ARALYDRAFT_896908 [Arabidopsis lyrata subsp. lyrata]                                                                                                                                                                                                                                                                                                                                                                                                                                                                                                                                                                                                                                                        | 236 | 235 | 1.00E-104 | 99.6  | 83.1 | 90.3 | hypothetical protein ARALYDRAFT_896908 | gbpln | Arabidopsis lyrata   | AT3G07440.1   Symbols:   unknown protein; BEST Arabidopsis thaliana protein match is: unknown protein (TAIR:AT5G48530.1); Has 37 Blast hits to 37 proteins in 13 species: Archae - 0; Bacteria - 0; Metazoa - 0; Fungi - 0; Plants - 35; Viruses - 0; Other Eukaryotes - 2 (source: NCBI BLink).   chr3:2381411-2382902 FORWARD LENGTH=235 | 236 | 235 | 1.00E-103 | 99.6  | 80.1 | 89.4 |

|                         |                                                                                                                                                                                                                                                                                                                                                   |     |     |           |       |      |      |                                                 |             |                      |                                                                                                                                                                                                                                                                                                                                                                                                                                                                        |     |     |           |       |      |      |
|-------------------------|---------------------------------------------------------------------------------------------------------------------------------------------------------------------------------------------------------------------------------------------------------------------------------------------------------------------------------------------------|-----|-----|-----------|-------|------|------|-------------------------------------------------|-------------|----------------------|------------------------------------------------------------------------------------------------------------------------------------------------------------------------------------------------------------------------------------------------------------------------------------------------------------------------------------------------------------------------------------------------------------------------------------------------------------------------|-----|-----|-----------|-------|------|------|
| Rsa1.0_00243.1.g9454.t1 | refNP_199663.2  uncharacterized protein [Arabidopsis thaliana] gi 110737416 dbj BAF00652.1  hypothetical protein [Arabidopsis thaliana] gi 332008298 gb AED95681.1  uncharacterized protein AT5G48520 [Arabidopsis thaliana]                                                                                                                      | 636 | 617 | 0         | 97.0  | 93.7 | 95.6 | uncharacterized protein                         | gbpln       | Arabidopsis thaliana | AT5G48520.1   Symbols:   unknown protein; Has 609 Blast hits to 593 proteins in 129 species: Archae - 0; Bacteria - 41; Metazoa - 390; Fungi - 40; Plants - 64; Viruses - 0; Other Eukaryotes - 74 (source: NCBI BLink).   chr5:19661407-19666147 FORWARD LENGTH=617                                                                                                                                                                                                   | 636 | 617 | 0         | 97.0  | 93.7 | 95.6 |
| Rsa1.0_00243.1.g9455.t1 | # # # # # # # # -                                                                                                                                                                                                                                                                                                                                 |     |     |           |       |      |      |                                                 | ----        | ----                 | #                                                                                                                                                                                                                                                                                                                                                                                                                                                                      | #   | #   | #         | #     | #    |      |
| Rsa1.0_00243.1.g9456.t1 | refNP_568700.1  uncharacterized protein [Arabidopsis thaliana] gi 21553505 gb AAM62598.1  unknown [Arabidopsis thaliana] gi 27754391 gb AAO22644.1  unknown protein [Arabidopsis thaliana] gi 28393943 gb AAO42379.1  unknown protein [Arabidopsis thaliana] gi 332008295 gb AED95678.1  uncharacterized protein AT5G48500 [Arabidopsis thaliana] | 166 | 167 | 2.00E-68  | 100.6 | 84.9 | 90.4 | uncharacterized protein                         | gbpln       | Arabidopsis thaliana | AT5G48500.1   Symbols:   unknown protein; BEST Arabidopsis thaliana protein match is: unknown protein (TAIR:AT2G10930.1); Has 30201 Blast hits to 17322 proteins in 780 species: Archae - 12; Bacteria - 1396; Metazoa - 17338; Fungi - 3422; Plants - 5037; Viruses - 0; Other Eukaryotes - 2996 (source: NCBI BLink).   chr5:19653235-19654017 FORWARD LENGTH=167                                                                                                    | 166 | 167 | 6.00E-71  | 100.6 | 84.9 | 90.4 |
| Rsa1.0_00243.1.g9457.t1 | gb EOA12589.1  hypothetical protein CARUB_v10027068mg, partial [Capsella rubella]                                                                                                                                                                                                                                                                 | 166 | 226 | 2.00E-43  | 136.1 | 65.7 | 76.5 | hypothetical protein CARUB_v10027068mg, partial | gbpln       | Capsella rubella     | AT5G48480.1   Symbols:   Lactoylglutathione lyase / glyoxalase I family protein   chr5:19644814-19645658 FORWARD LENGTH=166                                                                                                                                                                                                                                                                                                                                            | 166 | 166 | 1.00E-44  | 100.0 | 65.7 | 74.7 |
| Rsa1.0_00243.1.g9458.t2 | dbj BAA96967.1  unnamed protein product [Arabidopsis thaliana]                                                                                                                                                                                                                                                                                    | 275 | 364 | 1.00E-65  | 132.4 | 53.1 | 59.3 | unnamed protein product                         | gbpln       | Arabidopsis thaliana | AT5G48470.1   Symbols:   unknown protein; FUNCTIONS IN: molecular_function unknown; INVOLVED IN: biological_process unknown; LOCATED IN: chloroplast; EXPRESSED IN: 22 plant structures; EXPRESSED DURING: 13 growth stages; Has 30201 Blast hits to 17322 proteins in 780 species: Archae - 12; Bacteria - 1396; Metazoa - 17338; Fungi - 3422; Plants - 5037; Viruses - 0; Other Eukaryotes - 2996 (source: NCBI BLink).   chr5:19641810-19644127 FORWARD LENGTH=397 | 275 | 397 | 2.00E-65  | 144.4 | 53.1 | 59.3 |
| Rsa1.0_00243.1.g9459.t1 | refNP_186837.1  uncharacterized protein [Arabidopsis thaliana] gi 6091728 gb AAF03440.1 AC010797.16 hypothetical protein [Arabidopsis thaliana] gi 6513943 gb AAF14847.1 AC011664.29 hypothetical protein [Arabidopsis thaliana] gi 332640208 gb AEE73729.1  uncharacterized protein AT3G01880 [Arabidopsis thaliana]                             | 987 | 592 | 0         | 60.0  | 38.6 | 45.1 | uncharacterized protein                         | gbpln       | Arabidopsis thaliana | AT3G01880.1   Symbols:   Plant protein of unknown function (DUF946)   chr3:307782-309560 FORWARD LENGTH=592                                                                                                                                                                                                                                                                                                                                                            | 987 | 592 | 0         | 60.0  | 38.6 | 45.1 |
| Rsa1.0_00243.1.g9460.t1 | gb ABO71664.1  ZIP4/SPO22 [Arabidopsis thaliana]                                                                                                                                                                                                                                                                                                  | 978 | 936 | 0         | 95.7  | 84.9 | 90.3 | ZIP4/SPO22                                      | gbpln       | Arabidopsis thaliana | AT5G48390.1   Symbols: ATZIP4   Tetratricopeptide repeat (TPR)-like superfamily protein   chr5:19612078-19615363 FORWARD LENGTH=936                                                                                                                                                                                                                                                                                                                                    | 978 | 936 | 0         | 95.7  | 84.9 | 90.2 |
| Rsa1.0_00243.1.g9461.t1 | gb EOA13159.1  hypothetical protein CARUB_v10026179mg [Capsella rubella]                                                                                                                                                                                                                                                                          | 597 | 556 | 0         | 93.1  | 80.7 | 85.8 | hypothetical protein CARUB_v10026179mg          | gbpln       | Capsella rubella     | AT5G48385.1   Symbols:   FRIGIDA-like protein   chr5:19609471-19611712 FORWARD LENGTH=558                                                                                                                                                                                                                                                                                                                                                                              | 597 | 558 | 0         | 93.5  | 80.1 | 85.1 |
| Rsa1.0_00243.1.g9462.t1 | gb ABW81051.1  tn7 reverse transcriptase [Arabidopsis lyrata subsp. lyrata]                                                                                                                                                                                                                                                                       | 296 | 441 | 2.00E-67  | 149.0 | 43.6 | 62.2 | tn7 reverse transcriptase                       | gbpln       | Arabidopsis lyrata   | AT3G24255.1   Symbols:   RNA-directed DNA polymerase (reverse transcriptase)-related family protein   chr3:8789471-8793208 FORWARD LENGTH=746                                                                                                                                                                                                                                                                                                                          | 296 | 746 | 1.00E-54  | 252.0 | 35.8 | 49.7 |
| Rsa1.0_00243.1.g9463.t1 | dbj BAJ33754.1  unnamed protein product [Thellungiella halophila]                                                                                                                                                                                                                                                                                 | 624 | 622 | 0         | 99.7  | 84.1 | 89.4 | unnamed protein product                         | ----        | ----                 | AT5G48380.1   Symbols: BIR1   BAK1-interacting receptor-like kinase 1   chr5:19604584-19606532 REVERSE LENGTH=620                                                                                                                                                                                                                                                                                                                                                      | 624 | 620 | 0         | 99.4  | 79.2 | 87.7 |
| Rsa1.0_00243.1.g9464.t1 | dbj BAA98193.1  unnamed protein product [Arabidopsis thaliana]                                                                                                                                                                                                                                                                                    | 816 | 780 | 0         | 95.6  | 62.9 | 74.4 | unnamed protein product                         | gbpln       | Arabidopsis thaliana | AT5G48360.1   Symbols:   Actin-binding FH2 (formin homology 2) family protein   chr5:19595716-19598331 FORWARD LENGTH=782                                                                                                                                                                                                                                                                                                                                              | 816 | 782 | 0         | 95.8  | 63.0 | 74.6 |
| Rsa1.0_00243.1.g9465.t1 | refXP_002863889.1  predicted protein [Arabidopsis lyrata subsp. lyrata] gi 297309724 gb EFH40148.1  predicted protein [Arabidopsis lyrata subsp. lyrata]                                                                                                                                                                                          | 494 | 515 | 0         | 104.3 | 66.8 | 75.5 | predicted protein                               | gbpln       | Arabidopsis lyrata   | AT5G48340.1   Symbols:   unknown protein; Has 1807 Blast hits to 1807 proteins in 277 species: Archae - 0; Bacteria - 0; Metazoa - 736; Fungi - 347; Plants - 385; Viruses - 0; Other Eukaryotes - 339 (source: NCBI BLink).   chr5:19590785-19592487 FORWARD LENGTH=510                                                                                                                                                                                               | 494 | 510 | 0         | 103.2 | 66.2 | 75.1 |
| Rsa1.0_00243.1.g9466.t2 | refXP_003528812.1  PREDICTED: 60S ribosomal protein L5-like [Glycine max]                                                                                                                                                                                                                                                                         | 322 | 298 | 1.00E-136 | 92.5  | 73.0 | 82.3 | PREDICTED: 60S ribosomal protein L5-like        | gbenv/gbpln | Glycine max          | AT5G39740.2   Symbols: RPL5B   ribosomal protein L5 B   chr5:15903484-15905185 FORWARD LENGTH=301                                                                                                                                                                                                                                                                                                                                                                      | 322 | 301 | 1.00E-135 | 93.5  | 72.7 | 80.4 |

|                         |                                                                                                                                                                                                                                                                                                                                                                                                                                                   |      |      |           |       |      |      |                                                                             |       |                      |                                                                                                                                                                                                                                                                                                                                                                          |      |      |           |       |      |      |
|-------------------------|---------------------------------------------------------------------------------------------------------------------------------------------------------------------------------------------------------------------------------------------------------------------------------------------------------------------------------------------------------------------------------------------------------------------------------------------------|------|------|-----------|-------|------|------|-----------------------------------------------------------------------------|-------|----------------------|--------------------------------------------------------------------------------------------------------------------------------------------------------------------------------------------------------------------------------------------------------------------------------------------------------------------------------------------------------------------------|------|------|-----------|-------|------|------|
| Rsa1.0_00243.1.g9467.t1 | ref NP_001190489.1  uncharacterized protein [Arabidopsis thaliana] gi 332008267 gb AED95650.1  uncharacterized protein AT5G48310 [Arabidopsis thaliana]                                                                                                                                                                                                                                                                                           | 1139 | 1129 | 0         | 99.1  | 80.2 | 87.7 | uncharacterized protein                                                     | gbpln | Arabidopsis thaliana | AT5G48310.2   Symbols:   unknown protein; FUNCTIONS IN: molecular_function unknown; INVOLVED IN: biological_process unknown; LOCATED IN: cellular_component unknown; EXPRESSED IN: 18 plant structures; EXPRESSED DURING: 13 growth stages; BEST Arabidopsis thaliana protein match is: unknown protein (TAIR:AT4G24610.1).   chr5:19574961-19580362 REVERSE LENGTH=1129 | 1139 | 1129 | 0         | 99.1  | 80.2 | 87.7 |
| Rsa1.0_00244.1.g9468.t1 | gb EOA28312.1  hypothetical protein CARUB_v10024512mg [Capsella rubella]                                                                                                                                                                                                                                                                                                                                                                          | 306  | 595  | 1.00E-161 | 194.4 | 86.3 | 95.4 | hypothetical protein CARUB_v10024512mg                                      | gbpln | Capsella rubella     | AT2G47040.1   Symbols: VGD1   Plant invertase/pectin methyltransferase inhibitor superfamily   chr2:19328186-19330060 REVERSE LENGTH=595                                                                                                                                                                                                                                 | 306  | 595  | 1.00E-163 | 194.4 | 85.9 | 95.4 |
| Rsa1.0_00244.1.g9469.t1 | ref XP_002882100.1  P-glycoprotein 4, P-glycoprotein4 [Arabidopsis lyrata subsp. lyrata] gi 297327939 gb EFH58359.1  P-glycoprotein 4, P-glycoprotein4 [Arabidopsis lyrata subsp. lyrata]                                                                                                                                                                                                                                                         | 1287 | 1286 | 0         | 99.9  | 93.2 | 97.4 | P-glycoprotein 4, P-glycoprotein4                                           | gbpln | Arabidopsis lyrata   | AT2G47000.1   Symbols: MDR4, PGP4, ABCB4, ATPGP4   ATP binding cassette subfamily B4   chr2:19310008-19314750 REVERSE LENGTH=1286                                                                                                                                                                                                                                        | 1287 | 1286 | 0         | 99.9  | 93.2 | 97.3 |
| Rsa1.0_00244.1.g9470.t1 | gb ADB93654.2  indole-3-acetic acid inducible 20 [Arabidopsis thaliana]                                                                                                                                                                                                                                                                                                                                                                           | 165  | 164  | 2.00E-59  | 99.4  | 74.5 | 78.8 | indole-3-acetic acid inducible 20                                           | gbpln | Arabidopsis thaliana | AT2G46990.1   Symbols: IAA20   indole-3-acetic acid inducible 20   chr2:19307861-19308869 FORWARD LENGTH=175                                                                                                                                                                                                                                                             | 165  | 175  | 1.00E-59  | 106.1 | 80.6 | 84.8 |
| Rsa1.0_00244.1.g9471.t1 | ref XP_002862757.1  hypothetical protein ARALYDRAFT_497309 [Arabidopsis lyrata subsp. lyrata] gi 297308467 gb EFH39015.1  hypothetical protein ARALYDRAFT_497309 [Arabidopsis lyrata subsp. lyrata]                                                                                                                                                                                                                                               | 308  | 312  | 1.00E-126 | 101.3 | 84.4 | 89.6 | hypothetical protein ARALYDRAFT_497309                                      | gbpln | Arabidopsis lyrata   | AT2G46870.1   Symbols: NGA1   AP2/B3-like transcriptional factor family protein   chr2:19261313-19262245 FORWARD LENGTH=310                                                                                                                                                                                                                                              | 308  | 310  | 1.00E-126 | 100.6 | 84.4 | 88.3 |
| Rsa1.0_00244.1.g9472.t1 | ref XP_002880270.1  hypothetical protein ARALYDRAFT_483853 [Arabidopsis lyrata subsp. lyrata] gi 297326109 gb EFH56529.1  hypothetical protein ARALYDRAFT_483853 [Arabidopsis lyrata subsp. lyrata]                                                                                                                                                                                                                                               | 207  | 216  | 1.00E-115 | 104.3 | 97.1 | 98.1 | hypothetical protein ARALYDRAFT_483853                                      | gbpln | Arabidopsis lyrata   | AT2G46860.1   Symbols: AtPPa3, PPa3   pyrophosphorylase 3   chr2:19253843-19255060 FORWARD LENGTH=216                                                                                                                                                                                                                                                                    | 207  | 216  | 1.00E-116 | 104.3 | 96.1 | 97.6 |
| Rsa1.0_00244.1.g9473.t3 | ref NP_190471.1  FBD-associated F-box protein [Arabidopsis thaliana] gi 75337426 sp Q9SMT9.1 FBD9_ARATH RecName: Full=FBD-associated F-box protein At3g49020 gi 6522564 emb CAB62008.1  putative protein [Arabidopsis thaliana] gi 67633680 gb AA78764.1  F-box family protein [Arabidopsis thaliana] gi 11074508 gb ABH04627.1  At3g49020 [Arabidopsis thaliana] gi 332644966 gb AEE78487.1  FBD-associated F-box protein [Arabidopsis thaliana] | 397  | 447  | 3.00E-98  | 112.6 | 57.2 | 68.5 | FBD-associated F-box protein                                                | gbpln | Arabidopsis thaliana | AT3G49020.1   Symbols:   FBD, F-box and Leucine Rich Repeat domains containing protein   chr3:18169079-18170660 FORWARD LENGTH=447                                                                                                                                                                                                                                       | 397  | 447  | 1.00E-101 | 112.6 | 57.2 | 68.5 |
| Rsa1.0_00244.1.g9474.t4 | gb AAC33963.1  contains similarity to reverse transcriptases (Pfam; rvt,hmm, score: 11.19) [Arabidopsis thaliana]                                                                                                                                                                                                                                                                                                                                 | 1430 | 1633 | 0         | 114.2 | 64.4 | 74.2 | contains similarity to reverse transcriptases (Pfam; rvt,hmm, score: 11.19) | gbpln | Arabidopsis thaliana | AT4G23160.1   Symbols: CRK8   cysteine-rich RLK (RECEPTOR-like protein kinase) 8   chr4:12129485-12134086 FORWARD LENGTH=1262                                                                                                                                                                                                                                            | 1430 | 1262 | 1.00E-173 | 88.3  | 20.4 | 27.1 |
| Rsa1.0_00244.1.g9475.t1 | # # # # # # # #                                                                                                                                                                                                                                                                                                                                                                                                                                   |      |      |           |       |      |      | -                                                                           | ----  | ----                 | # # # # # # #                                                                                                                                                                                                                                                                                                                                                            |      |      |           |       |      |      |
| Rsa1.0_00244.1.g9476.t1 | gb EOA28676.1  hypothetical protein CARUB_v10024900mg [Capsella rubella]                                                                                                                                                                                                                                                                                                                                                                          | 1332 | 901  | 0         | 67.6  | 55.4 | 61.4 | hypothetical protein CARUB_v10024900mg                                      | gbpln | Capsella rubella     | AT5G28780.1   Symbols:   PIF1 helicase   chr5:10812907-10814173 REVERSE LENGTH=337                                                                                                                                                                                                                                                                                       | 1332 | 337  | 6.00E-72  | 25.3  | 10.4 | 13.9 |
| Rsa1.0_00244.1.g9477.t3 | ref XP_002863367.1  hypothetical protein ARALYDRAFT_356287 [Arabidopsis lyrata subsp. lyrata] gi 297309202 gb EFH39626.1  hypothetical protein ARALYDRAFT_356287 [Arabidopsis lyrata subsp. lyrata]                                                                                                                                                                                                                                               | 277  | 426  | 2.00E-39  | 153.8 | 35.0 | 42.6 | hypothetical protein ARALYDRAFT_356287                                      | gbpln | Arabidopsis lyrata   | #                                                                                                                                                                                                                                                                                                                                                                        | #    | #    | #         | #     | #    |      |
| Rsa1.0_00244.1.g9478.t1 | gb EMT02183.1  hypothetical protein F775_04897 [Aegilops tauschii]                                                                                                                                                                                                                                                                                                                                                                                | 376  | 765  | 3.00E-21  | 203.5 | 12.2 | 14.1 | hypothetical protein F775_04897                                             | gbpln | Aegilops tauschii    | #                                                                                                                                                                                                                                                                                                                                                                        | #    | #    | #         | #     | #    |      |
| Rsa1.0_00244.1.g9479.t1 | gb EOA27989.1  hypothetical protein CARUB_v10024165mg [Capsella rubella]                                                                                                                                                                                                                                                                                                                                                                          | 168  | 175  | 5.00E-41  | 104.2 | 65.5 | 72.0 | hypothetical protein CARUB_v10024165mg                                      | gbpln | Capsella rubella     | AT2G46820.2   Symbols: PTAC8, TMP14, PSAP, PSI-P   photosystem I P subunit   chr2:19243729-19244870 FORWARD LENGTH=174                                                                                                                                                                                                                                                   | 168  | 174  | 2.00E-30  | 103.6 | 59.5 | 67.9 |
| Rsa1.0_00244.1.g9480.t1 | ref XP_002880266.1  hypothetical protein ARALYDRAFT_904152 [Arabidopsis lyrata subsp. lyrata] gi 297326105 gb EFH56525.1  hypothetical protein ARALYDRAFT_904152 [Arabidopsis lyrata subsp. lyrata]                                                                                                                                                                                                                                               | 273  | 354  | 3.00E-83  | 129.7 | 69.6 | 79.1 | hypothetical protein ARALYDRAFT_904152                                      | gbpln | Arabidopsis lyrata   | AT2G46810.1   Symbols:   basic helix-loop-helix (bHLH) DNA-binding superfamily protein   chr2:19239694-19242373 FORWARD LENGTH=371                                                                                                                                                                                                                                       | 273  | 371  | 1.00E-85  | 135.9 | 69.6 | 79.9 |

|                         |                                                                                                                                                                                                                                                                                                                                                                                                                                                  |     |     |           |       |      |      |                                                                    |       |                      |                                                                                                                                                                           |     |     |           |       |      |      |
|-------------------------|--------------------------------------------------------------------------------------------------------------------------------------------------------------------------------------------------------------------------------------------------------------------------------------------------------------------------------------------------------------------------------------------------------------------------------------------------|-----|-----|-----------|-------|------|------|--------------------------------------------------------------------|-------|----------------------|---------------------------------------------------------------------------------------------------------------------------------------------------------------------------|-----|-----|-----------|-------|------|------|
| Rsa1.0_00244.1.g9481.t1 | gb AAO83658.1  cation-efflux transporter [Brassica juncea]                                                                                                                                                                                                                                                                                                                                                                                       | 386 | 387 | 0         | 100.3 | 92.0 | 92.7 | cation-efflux transporter                                          | gbpln | Brassica juncea      | AT2G46800.2   Symbols: ZAT, ATMTP1, MTP1, ZAT1, ATCDF1   zinc transporter of Arabidopsis thaliana   chr2:19238128-19239324 FORWARD LENGTH=398                             | 386 | 398 | 1.00E-172 | 103.1 | 84.7 | 88.9 |
| Rsa1.0_00244.1.g9482.t1 | dbj BAJ34373.1  unnamed protein product [Theilingiella halophila]                                                                                                                                                                                                                                                                                                                                                                                | 472 | 486 | 0         | 103.0 | 76.3 | 85.2 | unnamed protein product                                            | ----  | ----                 | AT2G46790.1   Symbols: APRR9, PRR9, TL1   pseudo-response regulator 9   chr2:19232874-19234901 FORWARD LENGTH=468                                                         | 472 | 468 | 0         | 99.2  | 72.9 | 82.0 |
| Rsa1.0_00244.1.g9483.t1 | ref NP_182201.4  RNA-binding (RRM/RBD/RNP motifs) family protein [Arabidopsis thaliana] gi 33003980 gb AAZ25469.1  At2g46780 [Arabidopsis thaliana] gi 330255657 gb AEC10751.1  RNA-binding (RRM/RBD/RNP motifs) family protein [Arabidopsis thaliana]                                                                                                                                                                                           | 323 | 336 | 1.00E-120 | 104.0 | 84.5 | 88.9 | RNA-binding (RRM/RBD/RNP motifs) family protein                    | gbpln | Arabidopsis thaliana | AT2G46780.1   Symbols:   RNA-binding (RRM/RBD/RNP motifs) family protein   chr2:19229516-19231043 FORWARD LENGTH=336                                                      | 323 | 336 | 1.00E-122 | 104.0 | 84.5 | 88.9 |
| Rsa1.0_00244.1.g9484.t1 | #                                                                                                                                                                                                                                                                                                                                                                                                                                                | #   | #   | #         | #     | #    | -    | ----                                                               | ----  | ----                 | #                                                                                                                                                                         | #   | #   | #         | #     | #    | #    |
| Rsa1.0_00244.1.g9485.t1 | #                                                                                                                                                                                                                                                                                                                                                                                                                                                | #   | #   | #         | #     | #    | -    | ----                                                               | ----  | ----                 | #                                                                                                                                                                         | #   | #   | #         | #     | #    | #    |
| Rsa1.0_00244.1.g9486.t1 | ref NP_182200.2  NAC domain-containing protein 43 [Arabidopsis thaliana] gi 97180062 sp Q84WP6.2 NAC43_ARAT H RecName: Full=NAC domain-containing protein 43; Short=ANAC043; AltName: Full=Protein EMBRYO DEFECTIVE 2301; AltName: Full=Protein NAC SECONDARY WALL THICKENING PROMOTING FACTOR 1 gi 56550701 gb AAV97804.1  At2g46770 [Arabidopsis thaliana] gi 330255656 gb AEC10750.1  NAC domain-containing protein 43 [Arabidopsis thaliana] | 367 | 365 | 0         | 99.5  | 85.8 | 91.3 | NAC domain-containing protein 43                                   | gbpln | Arabidopsis thaliana | AT2G46770.1   Symbols: NST1, EMB2301, ANAC043   NAC (No Apical Meristem) domain transcriptional regulator superfamily protein   chr2:19220917-19222822 REVERSE LENGTH=365 | 367 | 365 | 0         | 99.5  | 85.8 | 91.3 |
| Rsa1.0_00245.1.g9487.t2 | ref XP_002864780.1  hypothetical protein ARALYDRAFT_496402 [Arabidopsis lyrata subsp. lyrata] gi 297310615 gb EFH41039.1  hypothetical protein ARALYDRAFT_496402 [Arabidopsis lyrata subsp. lyrata]                                                                                                                                                                                                                                              | 416 | 771 | 1.00E-138 | 185.3 | 70.0 | 74.8 | hypothetical protein ARALYDRAFT_496402                             | gbpln | Arabidopsis lyrata   | AT5G62260.1   Symbols:   AT hook motif DNA-binding family protein   chr5:25009331-25011348 FORWARD LENGTH=404                                                             | 416 | 404 | 1.00E-139 | 97.1  | 70.2 | 75.2 |
| Rsa1.0_00245.1.g9488.t1 | ref XP_002864781.1  hypothetical protein ARALYDRAFT_332462 [Arabidopsis lyrata subsp. lyrata] gi 297310616 gb EFH41040.1  hypothetical protein ARALYDRAFT_332462 [Arabidopsis lyrata subsp. lyrata]                                                                                                                                                                                                                                              | 244 | 235 | 1.00E-112 | 96.3  | 87.3 | 91.8 | hypothetical protein ARALYDRAFT_332462                             | gbpln | Arabidopsis lyrata   | AT5G62280.1   Symbols:   Protein of unknown function (DUF1442)   chr5:25017165-25017985 FORWARD LENGTH=236                                                                | 244 | 236 | 1.00E-106 | 96.7  | 87.3 | 92.2 |
| Rsa1.0_00245.1.g9489.t1 | ref NP_001119478.1  nucleotide-sensitive chloride conductance regulator family protein [Arabidopsis thaliana] gi 332010209 gb AED97592.1  chloride conductance regulatory protein ICln [Arabidopsis thaliana]                                                                                                                                                                                                                                    | 230 | 228 | 2.00E-96  | 99.1  | 83.9 | 90.4 | nucleotide-sensitive chloride conductance regulator family protein | gbpln | Arabidopsis thaliana | AT5G62290.2   Symbols:   nucleotide-sensitive chloride conductance regulator (ICln) family protein   chr5:25019568-25020972 FORWARD LENGTH=228                            | 230 | 228 | 6.00E-99  | 99.1  | 83.9 | 90.4 |
| Rsa1.0_00245.1.g9490.t1 | gb AAM67138.1  ripening-related protein-like [Arabidopsis thaliana]                                                                                                                                                                                                                                                                                                                                                                              | 198 | 202 | 6.00E-44  | 102.0 | 54.5 | 69.2 | ripening-related protein-like                                      | gbpln | Arabidopsis thaliana | AT5G62350.1   Symbols:   Plant invertase/pectin methylesterase inhibitor superfamily protein   chr5:25037504-25038112 FORWARD LENGTH=202                                  | 198 | 202 | 9.00E-40  | 102.0 | 54.0 | 69.7 |
| Rsa1.0_00245.1.g9491.t1 | gb EOA14032.1  hypothetical protein CARUB.v10027165mg [Capsella rubella]                                                                                                                                                                                                                                                                                                                                                                         | 201 | 199 | 1.00E-91  | 99.0  | 82.1 | 89.6 | hypothetical protein CARUB.v10027165mg                             | gbpln | Capsella rubella     | AT5G62350.1   Symbols:   Plant invertase/pectin methylesterase inhibitor superfamily protein   chr5:25037504-25038112 FORWARD LENGTH=202                                  | 201 | 202 | 1.00E-86  | 100.5 | 73.6 | 81.1 |
| Rsa1.0_00245.1.g9492.t1 | gb ABD65000.1  hypothetical protein 26.t00020 [Brassica oleracea]                                                                                                                                                                                                                                                                                                                                                                                | 293 | 302 | 2.00E-62  | 103.1 | 48.8 | 60.4 | hypothetical protein 26.t00020                                     | gbpln | Brassica oleracea    | AT5G41220.1   Symbols: ATGSTT3, GST10C, GSTT3   glutathione S-transferase THETA 3   chr5:16494560-16496969 REVERSE LENGTH=590                                             | 293 | 590 | 3.00E-22  | 201.4 | 30.4 | 43.3 |
| Rsa1.0_00245.1.g9493.t1 | ref NP_201044.1  NAC-domain protein 101 [Arabidopsis thaliana] gi 8809651 dbj BAA97202.1  NAM (no apical meristem)-like protein [Arabidopsis thaliana] gi 67633908 gb AAZ78878.1  no apical meristem family protein [Arabidopsis thaliana] gi 111074488 gb ABH04617.1  At5g62380 [Arabidopsis thaliana] gi 332010219 gb AED97602.1  NAC-domain protein 101 [Arabidopsis thaliana]                                                                | 350 | 348 | 1.00E-177 | 99.4  | 91.4 | 94.3 | NAC-domain protein 101                                             | gbpln | Arabidopsis thaliana | AT5G62380.1   Symbols: VND6, ANAC101, NAC101   NAC-domain protein 101   chr5:25050684-25051858 FORWARD LENGTH=348                                                         | 350 | 348 | 1.00E-179 | 99.4  | 91.4 | 94.3 |
| Rsa1.0_00245.1.g9494.t1 | #                                                                                                                                                                                                                                                                                                                                                                                                                                                | #   | #   | #         | #     | #    | -    | ----                                                               | ----  | ----                 | #                                                                                                                                                                         | #   | #   | #         | #     | #    | #    |

|                         |                                                                                                                                                                                                                                                                                                                                                                                                                                     |     |      |           |       |      |      |                                              |       |                      |                                                                                                                                                                                                                                                                                                                                                  |     |     |           |       |      |      |
|-------------------------|-------------------------------------------------------------------------------------------------------------------------------------------------------------------------------------------------------------------------------------------------------------------------------------------------------------------------------------------------------------------------------------------------------------------------------------|-----|------|-----------|-------|------|------|----------------------------------------------|-------|----------------------|--------------------------------------------------------------------------------------------------------------------------------------------------------------------------------------------------------------------------------------------------------------------------------------------------------------------------------------------------|-----|-----|-----------|-------|------|------|
| Rsa1.0_00245.1.g9495.t1 | refXP_002864795.1  aldo/keto reductase family protein [Arabidopsis lyrata subsp. lyrata] gi 297310630 gb EFH41054.1  aldo/keto reductase family protein [Arabidopsis lyrata subsp. lyrata]                                                                                                                                                                                                                                          | 316 | 316  | 1.00E-173 | 100.0 | 91.8 | 95.9 | aldo/keto reductase family protein           | gbpln | Arabidopsis lyrata   | AT5G62420.1   Symbols:   NAD(P)-linked oxidoreductase superfamily protein   chr5:25064835-25066111 FORWARD LENGTH=316                                                                                                                                                                                                                            | 316 | 316 | 1.00E-175 | 100.0 | 92.1 | 95.6 |
| Rsa1.0_00245.1.g9496.t1 | dbj BAJ34539.1  unnamed protein product [Theilungiella halophila]                                                                                                                                                                                                                                                                                                                                                                   | 297 | 307  | 1.00E-135 | 103.4 | 83.2 | 90.6 | unnamed protein product                      | ----  | ----                 | AT5G62430.1   Symbols: CDF1   cycling DOF factor 1   chr5:25069298-25070787 REVERSE LENGTH=298                                                                                                                                                                                                                                                   | 297 | 298 | 1.00E-131 | 100.3 | 78.1 | 87.9 |
| Rsa1.0_00245.1.g9497.t1 | refXP_002866491.1  hypothetical protein ARALYDRAFT_496421 [Arabidopsis lyrata subsp. lyrata] gi 297312326 gb EFH42750.1  hypothetical protein ARALYDRAFT_496421 [Arabidopsis lyrata subsp. lyrata]                                                                                                                                                                                                                                  | 194 | 203  | 9.00E-68  | 104.6 | 72.7 | 77.3 | hypothetical protein ARALYDRAFT_496421       | gbpln | Arabidopsis lyrata   | AT5G62440.1   Symbols:   Protein of unknown function (DUF3223)   chr5:25072620-25073917 REVERSE LENGTH=202                                                                                                                                                                                                                                       | 194 | 202 | 1.00E-69  | 104.1 | 72.2 | 77.3 |
| Rsa1.0_00245.1.g9498.t2 | gb EOA13766.1  hypothetical protein CARUB_v10026858mg [Capsella rubella]                                                                                                                                                                                                                                                                                                                                                            | 319 | 303  | 3.00E-91  | 95.0  | 67.1 | 71.2 | hypothetical protein CARUB_v10026858mg       | gbpln | Capsella rubella     | AT5G62460.1   Symbols:   RING/FYVE/PHD zinc finger superfamily protein   chr5:25075545-25077072 FORWARD LENGTH=307                                                                                                                                                                                                                               | 319 | 307 | 5.00E-93  | 96.2  | 69.0 | 74.0 |
| Rsa1.0_00245.1.g9499.t1 | dbj BAJ34253.1  unnamed protein product [Theilungiella halophila]                                                                                                                                                                                                                                                                                                                                                                   | 346 | 355  | 1.00E-168 | 102.6 | 87.0 | 91.9 | unnamed protein product                      | ----  | ----                 | AT5G62470.2   Symbols: MYB96   myb domain protein 96   chr5:25079434-25080858 REVERSE LENGTH=352                                                                                                                                                                                                                                                 | 346 | 352 | 1.00E-161 | 101.7 | 84.1 | 89.0 |
| Rsa1.0_00245.1.g9500.t1 | gb AAG51783.1 AC079679.3 reverse transcriptase, putative; 16838-20266 [Arabidopsis thaliana]                                                                                                                                                                                                                                                                                                                                        | 145 | 1142 | 2.00E-13  | 787.6 | 30.3 | 46.9 | reverse transcriptase, putative; 16838-20266 | gbpln | Arabidopsis thaliana | #                                                                                                                                                                                                                                                                                                                                                | #   | #   | #         | #     | #    | #    |
| Rsa1.0_00245.1.g9501.t1 | gb EOA17213.1  hypothetical protein CARUB_v10005487mg [Capsella rubella]                                                                                                                                                                                                                                                                                                                                                            | 271 | 271  | 1.00E-119 | 100.0 | 80.8 | 90.8 | hypothetical protein CARUB_v10005487mg       | gbpln | Capsella rubella     | AT4G28360.1   Symbols:   Ribosomal protein L22p/L17e family protein   chr4:14029294-14030926 REVERSE LENGTH=271                                                                                                                                                                                                                                  | 271 | 271 | 1.00E-121 | 100.0 | 80.4 | 91.5 |
| Rsa1.0_00245.1.g9502.t1 | gb EOA14913.1  hypothetical protein CARUB_v10028253mg [Capsella rubella]                                                                                                                                                                                                                                                                                                                                                            | 189 | 168  | 2.00E-70  | 88.9  | 72.5 | 79.4 | hypothetical protein CARUB_v10028253mg       | gbpln | Capsella rubella     | AT5G62490.1   Symbols: ATHVA22B, HYA22B   HYA22 homologue B   chr5:25090206-25091345 FORWARD LENGTH=167                                                                                                                                                                                                                                          | 189 | 167 | 3.00E-72  | 88.4  | 72.5 | 79.4 |
| Rsa1.0_00245.1.g9503.t1 | gb AAF63110.1 AC006423.11 putative retroelement pol polyprotein [Arabidopsis thaliana]                                                                                                                                                                                                                                                                                                                                              | 613 | 1150 | 1.00E-135 | 187.6 | 40.0 | 54.5 | putative retroelement pol polyprotein        | gbpln | Arabidopsis thaliana | #                                                                                                                                                                                                                                                                                                                                                | #   | #   | #         | #     | #    | #    |
| Rsa1.0_00245.1.g9504.t1 | refXP_002864798.1  ATEB1B [Arabidopsis lyrata subsp. lyrata] gi 297310633 gb EFH41057.1  ATEB1B [Arabidopsis lyrata subsp. lyrata]                                                                                                                                                                                                                                                                                                  | 278 | 288  | 1.00E-140 | 103.6 | 86.0 | 91.7 | ATEB1B                                       | gbpln | Arabidopsis lyrata   | AT5G62500.1   Symbols: ATEB1B, ATEB1, EB1B   end binding protein 1B   chr5:25092929-25095006 FORWARD LENGTH=293                                                                                                                                                                                                                                  | 278 | 293 | 1.00E-142 | 105.4 | 86.3 | 91.0 |
| Rsa1.0_00245.1.g9505.t4 | gb EOA14515.1  hypothetical protein CARUB_v10027743mg [Capsella rubella]                                                                                                                                                                                                                                                                                                                                                            | 426 | 316  | 1.00E-134 | 74.2  | 56.1 | 61.3 | hypothetical protein CARUB_v10027743mg       | gbpln | Capsella rubella     | AT5G62520.1   Symbols: SRO5   similar to RCD one 5   chr5:25098071-25099264 FORWARD LENGTH=309                                                                                                                                                                                                                                                   | 426 | 309 | 1.00E-132 | 72.5  | 55.4 | 61.0 |
| Rsa1.0_00246.1.g9506.t1 | gb ABD64939.1  hypothetical protein 24.t00017 [Brassica oleracea]                                                                                                                                                                                                                                                                                                                                                                   | 173 | 442  | 6.00E-59  | 255.5 | 61.8 | 75.7 | hypothetical protein 24.t00017               | gbpln | Brassica oleracea    | AT2G13770.1   Symbols:   CONTAINS InterPro DOMAIN/s: Putative harbinger transposase-derived nuclease (InterPro:IPR006912). Has 451 Blast hits to 352 proteins in 33 species: Archae - 0; Bacteria - 0; Metazoa - 28; Fungi - 8; Plants - 388; Viruses - 0; Other Eukaryotes - 27 (source: NCBI BLINK).   chr2:5736603-5737847 FORWARD LENGTH=343 | 173 | 343 | 4.00E-33  | 198.3 | 34.1 | 43.9 |
| Rsa1.0_00246.1.g9507.t1 | refNP_193436.2  expansin-like B1 [Arabidopsis thaliana] gi 22095652 sp O23547.2 EXLB1_ARATH RecName: Full=Expansin-like B1; Short=At-EXPR1; Short=ATEXLB1; Short=AtEXPR1; AltName: Full=Ath-ExpBeta-3.1; Flags: Precursor gi 29028846 gb AAO64802.1  At4g17030 [Arabidopsis thaliana] gi 110736418 dbj BAF00176.1  Expansin-like protein [Arabidopsis thaliana] gi 332658441 gb AEE83841.1  expansin-like B1 [Arabidopsis thaliana] | 230 | 250  | 1.00E-101 | 108.7 | 81.7 | 86.5 | expansin-like B1                             | gbpln | Arabidopsis thaliana | AT4G17030.1   Symbols: ATEXLB1, EXPR, AT-EXPR, ATEXPR1, ATHEXP BETA 3.1, EXLB1   expansin-like B1   chr4:9581817-9583181 REVERSE LENGTH=250                                                                                                                                                                                                      | 230 | 250 | 1.00E-103 | 108.7 | 81.7 | 86.5 |
| Rsa1.0_00246.1.g9508.t1 | refXP_002868088.1  hypothetical protein ARALYDRAFT_493172 [Arabidopsis lyrata subsp. lyrata] gi 297313924 gb EFH44347.1  hypothetical protein ARALYDRAFT_493172 [Arabidopsis lyrata subsp. lyrata]                                                                                                                                                                                                                                  | 307 | 305  | 1.00E-156 | 99.3  | 94.5 | 97.1 | hypothetical protein ARALYDRAFT_493172       | gbpln | Arabidopsis lyrata   | AT4G17040.1   Symbols: CLPR4   CLP protease R subunit 4   chr4:9586740-9589297 REVERSE LENGTH=305                                                                                                                                                                                                                                                | 307 | 305 | 1.00E-158 | 99.3  | 93.8 | 96.4 |
| Rsa1.0_00246.1.g9509.t1 | gb EOA16651.1  hypothetical protein CARUB_v10004844mg [Capsella rubella]                                                                                                                                                                                                                                                                                                                                                            | 420 | 434  | 1.00E-162 | 103.3 | 84.5 | 90.2 | hypothetical protein CARUB_v10004844mg       | gbpln | Capsella rubella     | AT4G17060.1   Symbols: FIP2   FRIGIDA interacting protein 2   chr4:9593721-9594653 REVERSE LENGTH=310                                                                                                                                                                                                                                            | 420 | 310 | 1.00E-111 | 73.8  | 58.1 | 62.6 |

|                         |                                                                                                                                                                                                                                                                                                                                                                                                                                                                                                                                                                                                                                                                                                                                                                                                                                                                                                                                                                                        |     |     |           |       |      |       |                                                      |       |                    |                                                                                                                                                                                                                                                                                                                                                                                                                                                           |     |     |           |       |      |       |
|-------------------------|----------------------------------------------------------------------------------------------------------------------------------------------------------------------------------------------------------------------------------------------------------------------------------------------------------------------------------------------------------------------------------------------------------------------------------------------------------------------------------------------------------------------------------------------------------------------------------------------------------------------------------------------------------------------------------------------------------------------------------------------------------------------------------------------------------------------------------------------------------------------------------------------------------------------------------------------------------------------------------------|-----|-----|-----------|-------|------|-------|------------------------------------------------------|-------|--------------------|-----------------------------------------------------------------------------------------------------------------------------------------------------------------------------------------------------------------------------------------------------------------------------------------------------------------------------------------------------------------------------------------------------------------------------------------------------------|-----|-----|-----------|-------|------|-------|
| Rsa1.0_00246.1.g9510.t1 | ref[XP_002868086.1] predicted protein [Arabidopsis lyrata subsp. lyrata] gi 297313922 gb EFH44345.1  predicted protein [Arabidopsis lyrata subsp. lyrata]                                                                                                                                                                                                                                                                                                                                                                                                                                                                                                                                                                                                                                                                                                                                                                                                                              | 345 | 342 | 1.00E-166 | 99.1  | 83.8 | 89.3  | predicted protein                                    | gbpln | Arabidopsis lyrata | AT4G17070.1   Symbols:   peptidyl-prolyl cis-trans isomerases   chr4:9595523-9598066 REVERSE LENGTH=343                                                                                                                                                                                                                                                                                                                                                   | 345 | 343 | 1.00E-168 | 99.4  | 84.3 | 88.7  |
| Rsa1.0_00246.1.g9511.t1 | gb ACK37362.1  MORN [Brassica rapa subsp. pekinensis]                                                                                                                                                                                                                                                                                                                                                                                                                                                                                                                                                                                                                                                                                                                                                                                                                                                                                                                                  | 500 | 502 | 0         | 100.4 | 93.4 | 94.8  | MORN                                                 | gbpln | Brassica rapa      | AT4G17080.1   Symbols:   Histone H3 K4-specific methyltransferase SET7/9 family protein   chr4:9601570-9603815 FORWARD LENGTH=513                                                                                                                                                                                                                                                                                                                         | 500 | 513 | 0         | 102.6 | 84.6 | 88.8  |
| Rsa1.0_00246.1.g9512.t1 | dbj BAJ34236.1  unnamed protein product [Theellungiella halophila]                                                                                                                                                                                                                                                                                                                                                                                                                                                                                                                                                                                                                                                                                                                                                                                                                                                                                                                     | 559 | 548 | 0         | 98.0  | 90.9 | 94.3  | unnamed protein product                              | ----  | ----               | AT4G17090.1   Symbols: CT-BMY, BAM3, BMY8   chloroplast beta-amylase   chr4:9605266-9607250 REVERSE LENGTH=548                                                                                                                                                                                                                                                                                                                                            | 559 | 548 | 0         | 98.0  | 89.8 | 93.2  |
| Rsa1.0_00246.1.g9513.t1 | ref[NP_193450.1] RAB GTPase homolog B1C [Arabidopsis thaliana] gi 297800394 ref[XP_002868081.1] hypothetical protein ARALYDRAFT_493160 [Arabidopsis lyrata subsp. lyrata] gi 75279776 sp P92963.1 RAB1C_ARAT H RecName: Full=Ras-related protein RAB1c; Short=AtRAB1c; AltName: Full=Ras-related protein Rab2A; Short=AtRab2A gi 1765896 emb CAA70498.1  Rab2-like protein [Arabidopsis thaliana] gi 5281023 emb CAB45962.1  GTP-binding RAB2A like protein [Arabidopsis thaliana] gi 7268468 emb CAB90988.1  GTP-binding RAB2A like protein [Arabidopsis thaliana] gi 27311815 gb AAO00873.1  GTP-binding RAB2A like protein [Arabidopsis thaliana] gi 30023652 gb AAP13359.1  At4g17170 [Arabidopsis thaliana] gi 297313917 gb EFH44340.1  hypothetical protein ARALYDRAFT_493160 [Arabidopsis lyrata subsp. lyrata] gi 332658457 gb AEE83857.1  RAB GTPase homolog B1C [Arabidopsis thaliana] gi 482553233 gb EOA17426.1  hypothetical protein CARUB_v10005730mg [Capsella rubella] | 211 | 211 | 1.00E-120 | 100.0 | 98.6 | 100.0 | RAB GTPase homolog B1C                               | gbpln | Arabidopsis lyrata | AT4G17170.1   Symbols: AT-RAB2, ATRAB1C, ATRAB2A, RAB2A, RAB1C, ATRAB-B1B, RAB-B1B   RAB GTPase homolog B1C   chr4:9644908-9646220 REVERSE LENGTH=211                                                                                                                                                                                                                                                                                                     | 211 | 211 | 1.00E-123 | 100.0 | 98.6 | 100.0 |
| Rsa1.0_00246.1.g9514.t1 | gb ABD65105.1  glycosyl hydrolase family protein [Brassica oleracea]                                                                                                                                                                                                                                                                                                                                                                                                                                                                                                                                                                                                                                                                                                                                                                                                                                                                                                                   | 478 | 475 | 0         | 99.4  | 95.8 | 97.5  | glycosyl hydrolase family protein                    | gbpln | Brassica oleracea  | AT4G17180.1   Symbols:   O-Glycosyl hydrolases family 17 protein   chr4:9646541-9648045 FORWARD LENGTH=475                                                                                                                                                                                                                                                                                                                                                | 478 | 475 | 0         | 99.4  | 87.9 | 92.7  |
| Rsa1.0_00246.1.g9515.t1 | gb ABD65106.1  ubiquitin family protein [Brassica oleracea]                                                                                                                                                                                                                                                                                                                                                                                                                                                                                                                                                                                                                                                                                                                                                                                                                                                                                                                            | 452 | 863 | 0         | 190.9 | 83.6 | 90.5  | ubiquitin family protein                             | gbpln | Brassica oleracea  | AT4G17210.1   Symbols:   Plant protein of unknown function (DUF827)   chr4:9652585-9654257 REVERSE LENGTH=527                                                                                                                                                                                                                                                                                                                                             | 452 | 527 | 1.00E-170 | 116.6 | 72.6 | 83.6  |
| Rsa1.0_00246.1.g9516.t1 | gb ABD65106.1  ubiquitin family protein [Brassica oleracea]                                                                                                                                                                                                                                                                                                                                                                                                                                                                                                                                                                                                                                                                                                                                                                                                                                                                                                                            | 367 | 863 | 1.00E-180 | 235.1 | 86.6 | 89.6  | ubiquitin family protein                             | gbpln | Brassica oleracea  | AT4G06599.1   Symbols:   ubiquitin family protein   chr4:3666079-3667495 REVERSE LENGTH=340                                                                                                                                                                                                                                                                                                                                                               | 367 | 340 | 1.00E-154 | 92.6  | 74.7 | 79.8  |
| Rsa1.0_00246.1.g9517.t1 | gb ABD65108.1  hypothetical protein 31.t00008 [Brassica oleracea]                                                                                                                                                                                                                                                                                                                                                                                                                                                                                                                                                                                                                                                                                                                                                                                                                                                                                                                      | 156 | 157 | 2.00E-69  | 100.6 | 89.1 | 91.0  | hypothetical protein 31.t00008                       | gbpln | Brassica oleracea  | AT4G17215.1   Symbols:   Pollen Ole e 1 allergen and extensin family protein   chr4:9655884-9656425 FORWARD LENGTH=150                                                                                                                                                                                                                                                                                                                                    | 156 | 150 | 4.00E-52  | 96.2  | 73.1 | 79.5  |
| Rsa1.0_00246.1.g9518.t1 | gb ABD65109.1  Myosin II heavy chain-like domain containing protein [Brassica oleracea]                                                                                                                                                                                                                                                                                                                                                                                                                                                                                                                                                                                                                                                                                                                                                                                                                                                                                                | 499 | 508 | 0         | 101.8 | 90.6 | 92.6  | Myosin II heavy chain-like domain containing protein | gbpln | Brassica oleracea  | AT4G17220.1   Symbols: ATMAP70-5, MAP70-5   microtubule-associated proteins 70-5   chr4:9657008-9659405 REVERSE LENGTH=513                                                                                                                                                                                                                                                                                                                                | 499 | 513 | 0         | 102.8 | 85.6 | 92.8  |
| Rsa1.0_00246.1.g9519.t1 | gb ABD65111.1  hypothetical protein 31.t00013 [Brassica oleracea]                                                                                                                                                                                                                                                                                                                                                                                                                                                                                                                                                                                                                                                                                                                                                                                                                                                                                                                      | 338 | 335 | 1.00E-149 | 99.1  | 92.6 | 95.9  | hypothetical protein 31.t00013                       | gbpln | Brassica oleracea  | AT4G17240.1   Symbols:   unknown protein; FUNCTIONS IN: molecular_function unknown; INVOLVED IN: biological_process unknown; LOCATED IN: chloroplast; EXPRESSED IN: 16 plant structures; EXPRESSED DURING: 8 growth stages; Has 1142 Blast hits to 1055 proteins in 252 species: Archae - 22; Bacteria - 318; Metazoa - 248; Fungi - 96; Plants - 59; Viruses - 3; Other Eukaryotes - 396 (source: NCBI BLINK).   chr4:9666799-9668292 REVERSE LENGTH=343 | 338 | 343 | 1.00E-148 | 101.5 | 85.8 | 92.6  |
| Rsa1.0_00246.1.g9520.t1 | gb ABD65113.1  hypothetical protein 31.t00019 [Brassica oleracea]                                                                                                                                                                                                                                                                                                                                                                                                                                                                                                                                                                                                                                                                                                                                                                                                                                                                                                                      | 455 | 418 | 0         | 91.9  | 82.9 | 85.5  | hypothetical protein 31.t00019                       | gbpln | Brassica oleracea  | AT2G31290.2   Symbols:   Ubiquitin carboxyl-terminal hydrolase family protein   chr2:13344151-13345398 FORWARD LENGTH=415                                                                                                                                                                                                                                                                                                                                 | 455 | 415 | 0         | 91.2  | 74.3 | 80.0  |



|                         |                                                                                                                                                                                                                                                                                                                                                                                                                                                                           |     |     |           |       |      |      |                                        |       |                            |                                                                                                                                                                                                                                                                                                                                                                                                                                                            |     |     |           |       |      |      |
|-------------------------|---------------------------------------------------------------------------------------------------------------------------------------------------------------------------------------------------------------------------------------------------------------------------------------------------------------------------------------------------------------------------------------------------------------------------------------------------------------------------|-----|-----|-----------|-------|------|------|----------------------------------------|-------|----------------------------|------------------------------------------------------------------------------------------------------------------------------------------------------------------------------------------------------------------------------------------------------------------------------------------------------------------------------------------------------------------------------------------------------------------------------------------------------------|-----|-----|-----------|-------|------|------|
| Rsa1.0_00246.1.g9521.t1 | ref NP_193457.5  uncharacterized protein [Arabidopsis thaliana]   g 332658466 gb AEE83866.1  uncharacterized protein AT4G17240 [Arabidopsis thaliana]                                                                                                                                                                                                                                                                                                                     | 94  | 343 | 1.00E-18  | 364.9 | 50.0 | 56.4 | uncharacterized protein                | gbpln | Arabidopsis thaliana       | AT4G17240.1   Symbols:   unknown protein; FUNCTIONS IN: molecular_function unknown; INVOLVED IN: biological_process unknown; LOCATED IN: chloroplast; EXPRESSED IN: 16 plant structures; EXPRESSED DURING: 8 growth stages; Has 1142 Blast hits to 1055 proteins in 252 species: Archae = 22; Bacteria = 318; Metazoa = 248; Fungi = 96; Plants = 59; Viruses = 3; Other Eukaryotes = 396 (source: NCBI BLLink).   chr4:9666799-9668292 REVERSE LENGTH=343 | 94  | 343 | 2.00E-21  | 364.9 | 50.0 | 56.4 |
| Rsa1.0_00246.1.g9522.t1 | gb ABD65113.1  hypothetical protein 31.t00019 [Brassica oleracea]                                                                                                                                                                                                                                                                                                                                                                                                         | 152 | 418 | 4.00E-64  | 275.0 | 88.2 | 89.5 | hypothetical protein 31.t00019         | gbpln | Brassica oleracea          | AT2G31290.2   Symbols:   Ubiquitin carboxyl-terminal hydrolase family protein   chr2:13344151-13345398 FORWARD LENGTH=415                                                                                                                                                                                                                                                                                                                                  | 152 | 415 | 5.00E-66  | 273.0 | 80.3 | 84.9 |
| Rsa1.0_00246.1.g9523.t1 | gb ABD65114.1  L-lactate dehydrogenase, putative [Brassica oleracea]                                                                                                                                                                                                                                                                                                                                                                                                      | 350 | 350 | 0         | 100.0 | 95.1 | 98.0 | L-lactate dehydrogenase, putative      | gbpln | Brassica oleracea          | AT4G17260.1   Symbols:   Lactate/malate dehydrogenase family protein   chr4:9674057-9675309 FORWARD LENGTH=353                                                                                                                                                                                                                                                                                                                                             | 350 | 353 | 0         | 100.9 | 92.0 | 96.0 |
| Rsa1.0_00246.1.g9524.t1 | gb ABD65115.1  hypothetical protein 31.t00023 [Brassica oleracea]                                                                                                                                                                                                                                                                                                                                                                                                         | 402 | 380 | 0         | 94.5  | 90.8 | 93.3 | hypothetical protein 31.t00023         | gbpln | Brassica oleracea          | AT4G17280.1   Symbols:   Auxin-responsive family protein   chr4:9678887-9680277 REVERSE LENGTH=402                                                                                                                                                                                                                                                                                                                                                         | 402 | 402 | 0         | 100.0 | 90.3 | 95.3 |
| Rsa1.0_00246.1.g9525.t2 | ref XP_002870111.1  hypothetical protein ARALYDRAFT_914989 [Arabidopsis lyrata subsp. lyrata]   g 297315947 gb EFH46370.1  hypothetical protein ARALYDRAFT_914989 [Arabidopsis lyrata subsp. lyrata]                                                                                                                                                                                                                                                                      | 580 | 567 | 0         | 97.8  | 88.3 | 92.4 | hypothetical protein ARALYDRAFT_914989 | gbpln | Arabidopsis lyrata         | AT4G17300.1   Symbols: NS1, OVA8, ATNS1   Class II aminoacyl-tRNA and biotin synthetases superfamily protein   chr4:9681558-9684833 FORWARD LENGTH=567                                                                                                                                                                                                                                                                                                     | 580 | 567 | 0         | 97.8  | 88.4 | 91.9 |
| Rsa1.0_00246.1.g9526.t1 | gb ABD65120.1  Tonoplast intrinsic protein, putative [Brassica oleracea]                                                                                                                                                                                                                                                                                                                                                                                                  | 239 | 250 | 1.00E-123 | 104.6 | 98.7 | 98.7 | Tonoplast intrinsic protein, putative  | gbpln | Brassica oleracea          | AT5G47450.1   Symbols: ATTIP2.3, TIP2.3, DELTA-TIP3   tonoplast intrinsic protein 2.3   chr5:19248509-19249466 REVERSE LENGTH=250                                                                                                                                                                                                                                                                                                                          | 239 | 250 | 1.00E-122 | 104.6 | 92.9 | 97.9 |
| Rsa1.0_00246.1.g9527.t1 | ref XP_002888967.1  leucine-rich repeat family protein [Arabidopsis lyrata subsp. lyrata]   g 297334806 gb EFH65226.1  leucine-rich repeat family protein [Arabidopsis lyrata subsp. lyrata]                                                                                                                                                                                                                                                                              | 926 | 966 | 0         | 104.3 | 51.2 | 67.2 | leucine-rich repeat family protein     | gbpln | Arabidopsis lyrata         | AT1G58190.1   Symbols: AtRLP9, RLP9   receptor like protein 9   chr1:21540720-21544330 FORWARD LENGTH=932                                                                                                                                                                                                                                                                                                                                                  | 926 | 932 | 0         | 100.6 | 52.4 | 68.0 |
| Rsa1.0_00246.1.g9528.t1 | gb EOA17308.1  hypothetical protein CARUB_v10005581mg [Capsella rubella]                                                                                                                                                                                                                                                                                                                                                                                                  | 239 | 250 | 1.00E-122 | 104.6 | 96.7 | 98.3 | hypothetical protein CARUB_v10005581mg | gbpln | Capsella rubella           | AT5G47450.1   Symbols: ATTIP2.3, TIP2.3, DELTA-TIP3   tonoplast intrinsic protein 2.3   chr5:19248509-19249466 REVERSE LENGTH=250                                                                                                                                                                                                                                                                                                                          | 239 | 250 | 1.00E-122 | 104.6 | 92.1 | 97.5 |
| Rsa1.0_00246.1.g9529.t1 | ref NP_193466.2  uncharacterized protein [Arabidopsis thaliana]   g 54606846 gb AAV34771.1  At4g17350 [Arabidopsis thaliana]   g 98960971 gb ABF58969.1  At4g17350 [Arabidopsis thaliana]   g 332658479 gb AEE83879.1  uncharacterized protein AT4G17350 [Arabidopsis thaliana]                                                                                                                                                                                           | 406 | 405 | 0         | 99.8  | 88.2 | 92.6 | uncharacterized protein                | gbpln | Arabidopsis thaliana       | AT4G17350.1   Symbols:   Plant protein of unknown function (DUF828) with plant pleckstrin homology-like region   chr4:9701582-9703358 FORWARD LENGTH=405                                                                                                                                                                                                                                                                                                   | 406 | 405 | 0         | 99.8  | 88.2 | 92.6 |
| Rsa1.0_00246.1.g9530.t1 | gb EOA15683.1  hypothetical protein CARUB_v10006392mg [Capsella rubella]                                                                                                                                                                                                                                                                                                                                                                                                  | 334 | 328 | 1.00E-180 | 98.2  | 90.7 | 93.7 | hypothetical protein CARUB_v10006392mg | gbpln | Capsella rubella           | AT4G17360.1   Symbols:   Formyl transferase   chr4:9703698-9705468 REVERSE LENGTH=328                                                                                                                                                                                                                                                                                                                                                                      | 334 | 328 | 0         | 98.2  | 90.4 | 92.8 |
| Rsa1.0_00246.1.g9531.t1 | gb ABD65123.1  hypothetical protein 31.t00039 [Brassica oleracea]                                                                                                                                                                                                                                                                                                                                                                                                         | 889 | 862 | 0         | 97.0  | 68.6 | 70.0 | hypothetical protein 31.t00039         | gbpln | Brassica oleracea          | AT4G17410.1   Symbols:   DWN domain, a CCHC-type zinc finger   chr4:9716360-9721642 FORWARD LENGTH=826                                                                                                                                                                                                                                                                                                                                                     | 889 | 826 | 0         | 92.9  | 57.8 | 63.3 |
| Rsa1.0_00246.1.g9532.t1 | ref XP_002974570.1  hypothetical protein SELMODRAFT_442529 [Selaginella moellendorffii]   g 300157465 gb EFJ24090.1  hypothetical protein SELMODRAFT_442529 [Selaginella moellendorffii]                                                                                                                                                                                                                                                                                  | 604 | 516 | 1.00E-40  | 85.4  | 38.2 | 44.7 | hypothetical protein SELMODRAFT_442529 | gbpln | Selaginella moellendorffii | AT4G13390.1   Symbols:   Proline-rich extensin-like family protein   chr4:7783856-7785145 FORWARD LENGTH=429                                                                                                                                                                                                                                                                                                                                               | 604 | 429 | 1.00E-37  | 71.0  | 53.6 | 59.3 |
| Rsa1.0_00247.1.g9533.t2 | ref NP_850863.1  cytokinin dehydrogenase 7 [Arabidopsis thaliana]   g 66773939 sp Q9FUJ1.1 CKX7_ARATH RecName: Full=Cytokinin dehydrogenase 7; AltName: Full=Cytokinin oxidase 7; Short=AtCKX5; Short=AtCKX7; Short=CKO7   g 11120514 gb AAG30908.1 AF303981.1 cytokinin oxidase [Arabidopsis thaliana]   g 29294045 gb AAO73882.1  FAD-linked oxidoreductase family [Arabidopsis thaliana]   g 332005568 gb AED92951.1  cytokinin dehydrogenase 7 [Arabidopsis thaliana] | 459 | 524 | 0         | 114.2 | 82.4 | 88.0 | cytokinin dehydrogenase 7              | gbpln | Arabidopsis thaliana       | AT5G21482.1   Symbols: CKX7, ATCKX5   cytokinin oxidase 7   chr5:7226842-7230052 FORWARD LENGTH=524                                                                                                                                                                                                                                                                                                                                                        | 459 | 524 | 0         | 114.2 | 82.4 | 88.0 |

|                         |                                                                                                                                                                                                                                                                                                                                                                                                                                       |     |     |           |       |       |       |                                                      |       |                      |                                                                                                                                     |     |     |           |       |      |       |
|-------------------------|---------------------------------------------------------------------------------------------------------------------------------------------------------------------------------------------------------------------------------------------------------------------------------------------------------------------------------------------------------------------------------------------------------------------------------------|-----|-----|-----------|-------|-------|-------|------------------------------------------------------|-------|----------------------|-------------------------------------------------------------------------------------------------------------------------------------|-----|-----|-----------|-------|------|-------|
| Rsa1.0_00247.1.g9534.t2 | ref[XP_002871975.1] DNAJ heat shock N-terminal domain-containing protein [Arabidopsis lyrata subsp. lyrata] gi 297317812 gb EFH48234.1  DNAJ heat shock N-terminal domain-containing protein [Arabidopsis lyrata subsp. lyrata]                                                                                                                                                                                                       | 443 | 218 | 4.00E-97  | 49.2  | 44.0  | 46.7  | DNAJ heat shock N-terminal domain-containing protein | gbpln | Arabidopsis lyrata   | AT5G21430.1   Symbols:   Chaperone DnaJ-domain superfamily protein   chr5:7222294-7223400 FORWARD LENGTH=218                        | 443 | 218 | 1.00E-97  | 49.2  | 42.9 | 46.0  |
| Rsa1.0_00247.1.g9535.t1 | ref[NP_850861.2] CBL-interacting serine/threonine-protein kinase 26 [Arabidopsis thaliana] gi 189082529 sp Q84VQ3.2 CJPKQ_ARA TH RecName: Full=CBL-interacting serine/threonine-protein kinase 26; AltName: Full=SNF1-related kinase 3.26; AltName: Full=SOS2-like protein kinase PKS26 gi 332005565 gb AED92948.1  CBL-interacting serine/threonine-protein kinase 26 [Arabidopsis thaliana]                                         | 441 | 439 | 0         | 99.5  | 91.8  | 95.7  | CBL-interacting serine/threonine-protein kinase 26   | gbpln | Arabidopsis thaliana | AT5G21326.1   Symbols:   Ca2+regulated serine-threonine protein kinase family protein   chr5:7218081-7221743 FORWARD LENGTH=439     | 441 | 439 | 0         | 99.5  | 91.8 | 95.7  |
| Rsa1.0_00247.1.g9536.t1 | ref[XP_004251248.1] PREDICTED: calmodulin-like isoform 1 [Solanum lycopersicum]                                                                                                                                                                                                                                                                                                                                                       | 149 | 180 | 4.00E-80  | 120.8 | 100.0 | 100.0 | PREDICTED: calmodulin-like isoform 1                 | gbpln | Solanum lycopersicum | AT2G27030.3   Symbols: CAM5   calmodulin 5   chr2:11532069-11534176 FORWARD LENGTH=181                                              | 149 | 181 | 6.00E-82  | 121.5 | 98.7 | 100.0 |
| Rsa1.0_00247.1.g9537.t1 | ref[NP_850859.2] SNF1-like protein kinase [Arabidopsis thaliana] gi 75160582 sp Q8S9D1.1 PP395_ARAT H RecName: Full=Pentatricopeptide repeat-containing protein At5g21222; AltName: Full=SNF1-like protein kinase AtC401 gi 19071860 dbj BA85674.1  SNF1-like protein kinase [Arabidopsis thaliana] gi 332005563 gb AED92946.1  pentatricopeptide repeat and serine/threonine kinase domain-containing protein [Arabidopsis thaliana] | 839 | 831 | 0         | 99.0  | 85.8  | 90.9  | SNF1-like protein kinase                             | gbpln | Arabidopsis thaliana | AT5G21222.1   Symbols:   protein kinase family protein   chr5:7209422-7213700 FORWARD LENGTH=831                                    | 839 | 831 | 0         | 99.0  | 85.8 | 90.9  |
| Rsa1.0_00247.1.g9538.t1 | ref[XP_002871972.1] AMP-activated protein kinase [Arabidopsis lyrata subsp. lyrata] gi 297317809 gb EFH48231.1  AMP-activated protein kinase [Arabidopsis lyrata subsp. lyrata]                                                                                                                                                                                                                                                       | 322 | 319 | 1.00E-140 | 99.1  | 84.8  | 88.2  | AMP-activated protein kinase                         | gbpln | Arabidopsis lyrata   | AT5G21170.2   Symbols: AKINBETA1   5'-AMP-activated protein kinase beta-2 subunit protein   chr5:7205718-7208239 FORWARD LENGTH=320 | 322 | 320 | 1.00E-142 | 99.4  | 84.5 | 88.5  |
| Rsa1.0_00247.1.g9539.t1 | ref[XP_002874032.1] La domain-containing protein [Arabidopsis lyrata subsp. lyrata] gi 297319869 gb EFH50291.1  La domain-containing protein [Arabidopsis lyrata subsp. lyrata]                                                                                                                                                                                                                                                       | 859 | 838 | 0         | 97.6  | 77.6  | 85.1  | La domain-containing protein                         | gbpln | Arabidopsis lyrata   | AT5G21160.1   Symbols:   LA RNA-binding protein   chr5:7199191-7203879 REVERSE LENGTH=826                                           | 859 | 826 | 0         | 96.2  | 75.9 | 83.5  |
| Rsa1.0_00247.1.g9540.t1 | ref[XP_002871971.1] PAZ domain-containing protein [Arabidopsis lyrata subsp. lyrata] gi 297317808 gb EFH48230.1  PAZ domain-containing protein [Arabidopsis lyrata subsp. lyrata]                                                                                                                                                                                                                                                     | 906 | 902 | 0         | 99.6  | 73.1  | 84.4  | PAZ domain-containing protein                        | gbpln | Arabidopsis lyrata   | AT5G21150.1   Symbols: AGO9   Argonaute family protein   chr5:7193472-7198113 FORWARD LENGTH=896                                    | 906 | 896 | 0         | 98.9  | 73.4 | 85.1  |
| Rsa1.0_00247.1.g9541.t1 | gb EOA21152.1  hypothetical protein CARUB_v10001499mg [Capsella rubella]                                                                                                                                                                                                                                                                                                                                                              | 321 | 315 | 1.00E-152 | 98.1  | 82.9  | 89.1  | hypothetical protein CARUB_v10001499mg               | gbpln | Capsella rubella     | AT5G21140.1   Symbols: emb1379   embryo defective 1379   chr5:7187416-7189521 REVERSE LENGTH=312                                    | 321 | 312 | 1.00E-148 | 97.2  | 82.2 | 88.2  |
| Rsa1.0_00247.1.g9542.t1 | gb EOA20396.1  hypothetical protein CARUB_v10000708mg [Capsella rubella]                                                                                                                                                                                                                                                                                                                                                              | 557 | 524 | 1.00E-159 | 94.1  | 60.7  | 70.0  | hypothetical protein CARUB_v10000708mg               | gbpln | Capsella rubella     | AT5G21120.1   Symbols: EIL2   ETHYLENE-INSENSITIVE3-like 2   chr5:7182629-7184185 FORWARD LENGTH=518                                | 557 | 518 | 1.00E-151 | 93.0  | 57.6 | 67.0  |
| Rsa1.0_00247.1.g9543.t1 | dbj BAG50513.1  ascorbic acid oxidase [Brassica rapa subsp. chinensis]                                                                                                                                                                                                                                                                                                                                                                | 535 | 577 | 0         | 107.9 | 93.8  | 96.4  | ascorbic acid oxidase                                | gbpln | Brassica rapa        | AT5G21105.1   Symbols:   Plant L-ascorbate oxidase   chr5:7172727-7177409 FORWARD LENGTH=588                                        | 535 | 588 | 0         | 109.9 | 83.7 | 90.5  |
| Rsa1.0_00247.1.g9544.t1 | gb AAF20931.1 AF206721.1 ascorbate oxidase [Brassica juncea]                                                                                                                                                                                                                                                                                                                                                                          | 574 | 574 | 0         | 100.0 | 80.7  | 87.1  | ascorbate oxidase                                    | gbpln | Brassica juncea      | AT5G21100.1   Symbols:   Plant L-ascorbate oxidase   chr5:7168312-7170719 FORWARD LENGTH=573                                        | 574 | 573 | 0         | 99.8  | 76.3 | 84.8  |
| Rsa1.0_00247.1.g9545.t1 | gb AAF20931.1 AF206721.1 ascorbate oxidase [Brassica juncea]                                                                                                                                                                                                                                                                                                                                                                          | 572 | 574 | 0         | 100.3 | 92.7  | 96.2  | ascorbate oxidase                                    | gbpln | Brassica juncea      | AT5G21100.1   Symbols:   Plant L-ascorbate oxidase   chr5:7168312-7170719 FORWARD LENGTH=573                                        | 572 | 573 | 0         | 100.2 | 80.2 | 88.1  |

|                         |                                                                                                                                                                                                                                                                                                                                                                                                                                                                                                                                                                                                                                                                                                                 |      |      |           |       |      |      |                                        |       |                      |                                                                                                                                                                                                                                                                                                                                                                                                                                                                                        |      |      |           |       |      |      |
|-------------------------|-----------------------------------------------------------------------------------------------------------------------------------------------------------------------------------------------------------------------------------------------------------------------------------------------------------------------------------------------------------------------------------------------------------------------------------------------------------------------------------------------------------------------------------------------------------------------------------------------------------------------------------------------------------------------------------------------------------------|------|------|-----------|-------|------|------|----------------------------------------|-------|----------------------|----------------------------------------------------------------------------------------------------------------------------------------------------------------------------------------------------------------------------------------------------------------------------------------------------------------------------------------------------------------------------------------------------------------------------------------------------------------------------------------|------|------|-----------|-------|------|------|
| Rsa1.0_00247.1.g9546.t1 | ref NP_197608.1  leucine-rich repeat-containing protein [Arabidopsis thaliana]<br>gi 11762126 gb AAG40341.1 AF324989.1 AT5g21090 [Arabidopsis thaliana]<br>gi 13899097 gb AAK48970.1 AF370543.1 Unknown protein [Arabidopsis thaliana]<br>gi 20148427 gb AAAM10104.1  unknown protein [Arabidopsis thaliana]<br>gi 27311823 gb AAO00877.1  Unknown protein [Arabidopsis thaliana]<br>gi 29294060 gb AAO73897.1  leucine rich repeat protein (LRP), putative [Arabidopsis thaliana]<br>gi 30023686 gb AAP13376.1  At5g21090 [Arabidopsis thaliana]<br>gi 222424256 dbj BAH20085.1  AT5G21090 [Arabidopsis thaliana]<br>gi 332005547 gb AED92930.1  leucine-rich repeat-containing protein [Arabidopsis thaliana] | 209  | 218  | 1.00E-100 | 104.3 | 89.5 | 93.3 | leucine-rich repeat-containing protein | gbpln | Arabidopsis thaliana | AT5G21090.1   Symbols:   Leucine-rich repeat (LRR) family protein   chr5:7164758-7166904 FORWARD LENGTH=218                                                                                                                                                                                                                                                                                                                                                                            | 209  | 218  | 1.00E-102 | 104.3 | 89.5 | 93.3 |
| Rsa1.0_00247.1.g9547.t1 | gb EOA21314.1  hypothetical protein CARUB_v10001673mg [Capsella rubella]                                                                                                                                                                                                                                                                                                                                                                                                                                                                                                                                                                                                                                        | 226  | 278  | 1.00E-118 | 123.0 | 96.5 | 98.2 | hypothetical protein CARUB_v10001673mg | gbpln | Capsella rubella     | AT5G21070.1   Symbols:   unknown protein; Has 115 Blast hits to 115 proteins in 34 species: Archae - 1; Bacteria - 36; Metazoa - 0; Fungi - 0; Plants - 60; Viruses - 0; Other Eukaryotes - 18 (source: NCBI BLINK).   chr5:7158356-7157490 FORWARD LENGTH=225                                                                                                                                                                                                                         | 226  | 225  | 1.00E-120 | 99.6  | 95.6 | 97.3 |
| Rsa1.0_00247.1.g9548.t4 | gb EOA22042.1  hypothetical protein CARUB_v10002567mg [Capsella rubella]                                                                                                                                                                                                                                                                                                                                                                                                                                                                                                                                                                                                                                        | 374  | 378  | 1.00E-180 | 101.1 | 86.4 | 92.2 | hypothetical protein CARUB_v10002567mg | gbpln | Capsella rubella     | AT5G21060.2   Symbols:   Glyceraldehyde-3-phosphate dehydrogenase-like family protein   chr5:7149153-7152745 REVERSE LENGTH=378                                                                                                                                                                                                                                                                                                                                                        | 374  | 378  | 1.00E-178 | 101.1 | 84.8 | 89.8 |
| Rsa1.0_00247.1.g9549.t1 | ref NP_197604.1  uncharacterized protein [Arabidopsis thaliana]<br>gi 332005541 gb AED92924.1  uncharacterized protein AT5G21050 [Arabidopsis thaliana]                                                                                                                                                                                                                                                                                                                                                                                                                                                                                                                                                         | 346  | 355  | 1.00E-150 | 102.6 | 80.1 | 86.4 | uncharacterized protein                | gbpln | Arabidopsis thaliana | AT5G21050.1   Symbols:   LOCATED IN: chloroplast; EXPRESSED IN: 14 plant structures; EXPRESSED DURING: 8 growth stages; CONTAINS InterPro DOMAIN/s: Hyccin (InterPro:IPR018619); BEST Arabidopsis thaliana protein match is: unknown protein (TAIR:AT5G64090.1); Has 206 Blast hits to 206 proteins in 60 species: Archae - 0; Bacteria - 0; Metazoa - 145; Fungi - 0; Plants - 50; Viruses - 0; Other Eukaryotes - 11 (source: NCBI BLINK).   chr5:7147890-7148957 FORWARD LENGTH=355 | 346  | 355  | 1.00E-153 | 102.6 | 80.1 | 86.4 |
| Rsa1.0_00247.1.g9550.t1 | gb EOA22287.1  hypothetical protein CARUB_v10002885mg [Capsella rubella]                                                                                                                                                                                                                                                                                                                                                                                                                                                                                                                                                                                                                                        | 543  | 540  | 0         | 99.4  | 79.7 | 85.8 | hypothetical protein CARUB_v10002885mg | gbpln | Capsella rubella     | AT5G21040.2   Symbols: FBX2   F-box protein 2   chr5:7145058-7146677 REVERSE LENGTH=539                                                                                                                                                                                                                                                                                                                                                                                                | 543  | 539  | 0         | 99.3  | 83.1 | 89.7 |
| Rsa1.0_00247.1.g9551.t1 | ref XP_002874028.1  PAZ domain-containing protein [Arabidopsis lyrata subsp. lyrata]<br>gi 297319865 gb EFH50287.1  PAZ domain-containing protein [Arabidopsis lyrata subsp. lyrata]                                                                                                                                                                                                                                                                                                                                                                                                                                                                                                                            | 1081 | 848  | 0         | 78.4  | 57.9 | 65.0 | PAZ domain-containing protein          | gbpln | Arabidopsis lyrata   | AT5G21150.1   Symbols: AGO9   Argonaute family protein   chr5:7193472-7198113 FORWARD LENGTH=896                                                                                                                                                                                                                                                                                                                                                                                       | 1081 | 896  | 0         | 82.9  | 54.2 | 64.5 |
| Rsa1.0_00247.1.g9552.t1 | ref XP_002874026.1  hypothetical protein ARALYDRAFT_489009 [Arabidopsis lyrata subsp. lyrata]<br>gi 297319863 gb EFH50285.1  hypothetical protein ARALYDRAFT_489009 [Arabidopsis lyrata subsp. lyrata]                                                                                                                                                                                                                                                                                                                                                                                                                                                                                                          | 808  | 810  | 0         | 100.2 | 90.0 | 94.6 | hypothetical protein ARALYDRAFT_489009 | gbpln | Arabidopsis lyrata   | AT5G20980.2   Symbols: ATMS3, MS3   methionine synthase 3   chr5:7124397-7128353 REVERSE LENGTH=812                                                                                                                                                                                                                                                                                                                                                                                    | 808  | 812  | 0         | 100.5 | 91.1 | 95.3 |
| Rsa1.0_00247.1.g9553.t1 | ref NP_197597.1  heat shock family protein [Arabidopsis thaliana]<br>gi 332005531 gb AED92914.1  heat shock family protein [Arabidopsis thaliana]                                                                                                                                                                                                                                                                                                                                                                                                                                                                                                                                                               | 278  | 249  | 1.00E-90  | 89.6  | 67.3 | 76.6 | heat shock family protein              | gbpln | Arabidopsis thaliana | AT5G20970.1   Symbols:   HSP20-like chaperones superfamily protein   chr5:7123132-7124001 FORWARD LENGTH=249                                                                                                                                                                                                                                                                                                                                                                           | 278  | 249  | 3.00E-93  | 89.6  | 67.3 | 76.6 |
| Rsa1.0_00247.1.g9554.t2 | dbj BAE93768.1  aldehyde oxidase [Brassica rapa subsp. pekinensis]                                                                                                                                                                                                                                                                                                                                                                                                                                                                                                                                                                                                                                              | 1374 | 1349 | 0         | 98.2  | 92.1 | 95.4 | aldehyde oxidase                       | gbpln | Brassica rapa        | AT5G20960.2   Symbols: AAO1, AO1, ATAO, AT-AO1, AOalpha, ATA01   aldehyde oxidase 1   chr5:7116783-7122338 FORWARD LENGTH=1368                                                                                                                                                                                                                                                                                                                                                         | 1374 | 1368 | 0         | 99.6  | 83.1 | 91.4 |
| Rsa1.0_00248.1.g9555.t1 | gb EOA23232.1  hypothetical protein CARUB_v10016925mg [Capsella rubella]                                                                                                                                                                                                                                                                                                                                                                                                                                                                                                                                                                                                                                        | 74   | 578  | 1.00E-20  | 781.1 | 68.9 | 75.7 | hypothetical protein CARUB_v10016925mg | gbpln | Capsella rubella     | AT4G22760.1   Symbols:   Tetratricopeptide repeat (TPR)-like superfamily protein   chr4:11960553-11962289 FORWARD LENGTH=578                                                                                                                                                                                                                                                                                                                                                           | 74   | 578  | 2.00E-21  | 781.1 | 64.9 | 74.3 |

|                         |                                                                                                                                                                                                                                                                                                                                                                                                                                                                                                                                                                                                                                                                                                                                                                                                                                                                                                                                                                                                                                                                                                                                                                                                                                                                                                                                                                                     |      |      |           |       |      |      |                                                                       |       |                      |                                                                                                                               |      |      |           |       |      |      |
|-------------------------|-------------------------------------------------------------------------------------------------------------------------------------------------------------------------------------------------------------------------------------------------------------------------------------------------------------------------------------------------------------------------------------------------------------------------------------------------------------------------------------------------------------------------------------------------------------------------------------------------------------------------------------------------------------------------------------------------------------------------------------------------------------------------------------------------------------------------------------------------------------------------------------------------------------------------------------------------------------------------------------------------------------------------------------------------------------------------------------------------------------------------------------------------------------------------------------------------------------------------------------------------------------------------------------------------------------------------------------------------------------------------------------|------|------|-----------|-------|------|------|-----------------------------------------------------------------------|-------|----------------------|-------------------------------------------------------------------------------------------------------------------------------|------|------|-----------|-------|------|------|
| Rsa1.0_00248.1.g9556.t1 | refNP_194008.1  AT hook motif DNA-binding family protein [Arabidopsis thaliana] gi 2827554 emb CAA16562.1  putative DNA binding protein [Arabidopsis thaliana] gi 7269124 emb CAB79232.1  putative DNA binding protein [Arabidopsis thaliana] gi 21537115 gb AAM61456.1  putative DNA binding protein [Arabidopsis thaliana] gi 111074368 gb ABH04557.1  At4g22770 [Arabidopsis thaliana] gi 119657348 tpd FAA00273.1  TPA: AT-hook motif nuclear localized protein 2 [Arabidopsis thaliana] gi 225898799 dbj BAH30530.1  hypothetical protein [Arabidopsis thaliana] gi 332659256 gb AEE84656.1  AT hook motif DNA-binding family protein [Arabidopsis thaliana] emb CAB40035.1  retrotransposon like protein [Arabidopsis thaliana] gi 7267767 emb CAB81170.1  retrotransposon like protein [Arabidopsis thaliana]                                                                                                                                                                                                                                                                                                                                                                                                                                                                                                                                                                | 330  | 334  | 1.00E-135 | 101.2 | 82.4 | 88.2 | AT hook motif DNA-binding family protein                              | gbpln | Arabidopsis thaliana | AT4G22770.1   Symbols:   AT hook motif DNA-binding family protein   chr4:11963879-11965439 REVERSE LENGTH=334                 | 330  | 334  | 1.00E-137 | 101.2 | 82.4 | 88.2 |
| Rsa1.0_00248.1.g9557.t1 | refXP_002867750.1  hypothetical protein ARALYDRAFT_492590 [Arabidopsis lyrata subsp. lyrata] gi 297313586 gb EFH44009.1  hypothetical protein ARALYDRAFT_492590 [Arabidopsis lyrata subsp. lyrata]                                                                                                                                                                                                                                                                                                                                                                                                                                                                                                                                                                                                                                                                                                                                                                                                                                                                                                                                                                                                                                                                                                                                                                                  | 1402 | 1515 | 0         | 108.1 | 60.8 | 75.4 | retrotransposon like protein                                          | gbpln | Arabidopsis thaliana | AT4G23160.1   Symbols: CRK8   cysteine-rich RLK (RECEPTOR-like protein kinase) 8   chr4:12129485-12134086 FORWARD LENGTH=1262 | 1402 | 1262 | 1.00E-104 | 90.0  | 14.0 | 20.7 |
| Rsa1.0_00248.1.g9558.t1 | refXP_002867750.1  hypothetical protein ARALYDRAFT_492590 [Arabidopsis lyrata subsp. lyrata] gi 297313586 gb EFH44009.1  hypothetical protein ARALYDRAFT_492590 [Arabidopsis lyrata subsp. lyrata]                                                                                                                                                                                                                                                                                                                                                                                                                                                                                                                                                                                                                                                                                                                                                                                                                                                                                                                                                                                                                                                                                                                                                                                  | 462  | 449  | 0         | 97.2  | 86.8 | 91.1 | hypothetical protein ARALYDRAFT_492590                                | gbpln | Arabidopsis lyrata   | AT4G22780.1   Symbols: ACR7   ACT domain repeat 7   chr4:11968696-11970956 REVERSE LENGTH=449                                 | 462  | 449  | 0         | 97.2  | 86.8 | 90.7 |
| Rsa1.0_00248.1.g9559.t1 | gb EOA16509.1  hypothetical protein CARUB_v10004667mg [Capsella rubella]                                                                                                                                                                                                                                                                                                                                                                                                                                                                                                                                                                                                                                                                                                                                                                                                                                                                                                                                                                                                                                                                                                                                                                                                                                                                                                            | 491  | 492  | 0         | 100.2 | 81.5 | 89.4 | hypothetical protein CARUB_v10004667mg                                | gbpln | Capsella rubella     | AT4G22790.1   Symbols:   MATE efflux family protein   chr4:11975153-11976628 REVERSE LENGTH=491                               | 491  | 491  | 0         | 100.0 | 79.0 | 87.6 |
| Rsa1.0_00248.1.g9560.t1 | refXP_002869805.1  hypothetical protein ARALYDRAFT_492588 [Arabidopsis lyrata subsp. lyrata] gi 297315641 gb EFH44064.1  hypothetical protein ARALYDRAFT_492588 [Arabidopsis lyrata subsp. lyrata] refNP_194013.1  zinc finger A20 and AN1 domain-containing stress-associated protein 9 [Arabidopsis thaliana] gi 42572995 refNP_974594.1  zinc finger A20 and AN1 domain-containing stress-associated protein 9 [Arabidopsis thaliana] gi 75318397 sp O49663.1 SAP9 ARATH RecName: Full=Zinc finger A20 and AN1 domain-containing stress-associated protein 9; Short=ATSAP9 gi 2827559 emb CAA16567.1  predicted protein [Arabidopsis thaliana] gi 3292808 emb CAA19798.1  putative protein [Arabidopsis thaliana] gi 7269129 emb CAB79237.1  predicted protein [Arabidopsis thaliana] gi 25082838 gb AAN72006.1  predicted protein [Arabidopsis thaliana] gi 30102906 gb AAP21371.1  At4g22820 [Arabidopsis thaliana] gi 332659261 gb AEE84661.1  zinc finger A20 and AN1 domain-containing stress-associated protein 9 [Arabidopsis thaliana] gi 332659262 gb AEE84662.1  zinc finger A20 and AN1 domain-containing stress-associated protein 9 [Arabidopsis thaliana] refXP_002867746.1  bile acid:sodium symporter family protein [Arabidopsis lyrata subsp. lyrata] gi 297313582 gb EFH44005.1  bile acid:sodium symporter family protein [Arabidopsis lyrata subsp. lyrata] | 324  | 319  | 1.00E-111 | 98.5  | 85.8 | 88.3 | hypothetical protein ARALYDRAFT_492588                                | gbpln | Arabidopsis lyrata   | AT4G22810.1   Symbols:   Predicted AT-hook DNA-binding family protein   chr4:11984432-11985406 FORWARD LENGTH=324             | 324  | 324  | 1.00E-113 | 100.0 | 86.4 | 89.2 |
| Rsa1.0_00248.1.g9561.t1 | refXP_002867746.1  bile acid:sodium symporter family protein [Arabidopsis lyrata subsp. lyrata] gi 297313582 gb EFH44005.1  bile acid:sodium symporter family protein [Arabidopsis lyrata subsp. lyrata]                                                                                                                                                                                                                                                                                                                                                                                                                                                                                                                                                                                                                                                                                                                                                                                                                                                                                                                                                                                                                                                                                                                                                                            | 172  | 176  | 2.00E-72  | 102.3 | 85.5 | 89.0 | zinc finger A20 and AN1 domain-containing stress-associated protein 9 | gbpln | Arabidopsis thaliana | AT4G22820.2   Symbols:   A20/AN1-like zinc finger family protein   chr4:11987871-11988401 REVERSE LENGTH=176                  | 172  | 176  | 8.00E-75  | 102.3 | 85.5 | 89.0 |
| Rsa1.0_00248.1.g9562.t2 | refXP_002867746.1  bile acid:sodium symporter family protein [Arabidopsis lyrata subsp. lyrata] gi 297313582 gb EFH44005.1  bile acid:sodium symporter family protein [Arabidopsis lyrata subsp. lyrata]                                                                                                                                                                                                                                                                                                                                                                                                                                                                                                                                                                                                                                                                                                                                                                                                                                                                                                                                                                                                                                                                                                                                                                            | 414  | 406  | 0         | 98.1  | 86.7 | 93.0 | bile acid:sodium symporter family protein                             | gbpln | Arabidopsis lyrata   | AT4G22840.1   Symbols:   Sodium Bile acid symporter family   chr4:11991636-11993676 REVERSE LENGTH=409                        | 414  | 409  | 0         | 98.8  | 86.0 | 92.0 |
| Rsa1.0_00248.1.g9563.t1 | #                                                                                                                                                                                                                                                                                                                                                                                                                                                                                                                                                                                                                                                                                                                                                                                                                                                                                                                                                                                                                                                                                                                                                                                                                                                                                                                                                                                   | #    | #    | #         | #     | #    | #    | -                                                                     | ----  | ----                 | #                                                                                                                             | #    | #    | #         | #     | #    |      |

|                         |                                                                                                                                                                                                                                                                                                                                                                                                                                                                                                                                                                                                                                                                                          |     |     |           |       |      |      |                                                     |       |                      |                                                                                                                              |     |     |           |       |      |      |
|-------------------------|------------------------------------------------------------------------------------------------------------------------------------------------------------------------------------------------------------------------------------------------------------------------------------------------------------------------------------------------------------------------------------------------------------------------------------------------------------------------------------------------------------------------------------------------------------------------------------------------------------------------------------------------------------------------------------------|-----|-----|-----------|-------|------|------|-----------------------------------------------------|-------|----------------------|------------------------------------------------------------------------------------------------------------------------------|-----|-----|-----------|-------|------|------|
| Rsa1.0_00248.1.g9564.t1 | ref NP_194017.3  Cell cycle regulated microtubule associated protein [Arabidopsis thaliana]<br>gi 66792640 gb AA56422.1  At4g22860 [Arabidopsis thaliana]<br>gi 332659268 gb AEE84668.1  Cell cycle regulated microtubule associated protein [Arabidopsis thaliana]<br>gb ABY89681.1  anthocyanidin synthase 1 protein [Brassica rapa subsp. oleifera]<br>gi 166798273 gb ABY89682.1                                                                                                                                                                                                                                                                                                     | 523 | 509 | 0         | 97.3  | 71.5 | 78.6 | Cell cycle regulated microtubule associated protein | gbpln | Arabidopsis thaliana | AT4G22860.1   Symbols:   Cell cycle regulated microtubule associated protein   chr4:11997735-12001281 FORWARD LENGTH=509     | 523 | 509 | 0         | 97.3  | 71.5 | 78.6 |
| Rsa1.0_00248.1.g9565.t1 | anthocyanidin synthase 2 protein [Brassica rapa subsp. oleifera]<br>gi 288551983 gb ADC53481.1 <br>anthocyanidin synthase [Brassica rapa var. purpuraria]                                                                                                                                                                                                                                                                                                                                                                                                                                                                                                                                | 357 | 358 | 0         | 100.3 | 93.3 | 96.9 | anthocyanidin synthase 1 protein                    | gbpln | Brassica rapa        | AT4G22880.2   Symbols: LDOX, TDS4, TT18, ANS   leucoanthocyanidin dioxygenase   chr4:12004905-12006059 REVERSE LENGTH=356    | 357 | 356 | 0         | 99.7  | 89.4 | 94.1 |
| Rsa1.0_00248.1.g9566.t1 | ref NP_567672.1  PGR5-like protein 1A [Arabidopsis thaliana]<br>gi 30685973 ref NP_849422.1  PGR5-like protein 1A [Arabidopsis thaliana]<br>gi 30685977 ref NP_849423.1  PGR5-like protein 1A [Arabidopsis thaliana]<br>gi 75151862 sp Q8H112.1  PGL1A ARAT H RecName: Full=PGR5-like protein 1A, chloroplastic; AltName: Full=Ferredoxin-plastoquinone reductase 1; Flags: Precursor gi 24030260 gb AAN41305.1  unknown protein [Arabidopsis thaliana]<br>gi 332659274 gb AEE84674.1  PGR5-like protein 1A [Arabidopsis thaliana]<br>gi 332659275 gb AEE84675.1  PGR5-like protein 1A [Arabidopsis thaliana]<br>gi 332659276 gb AEE84676.1  PGR5-like protein 1A [Arabidopsis thaliana] | 325 | 324 | 1.00E-164 | 99.7  | 88.9 | 95.1 | PGR5-like protein 1A                                | gbpln | Arabidopsis thaliana | AT4G22890.2   Symbols: PGR5-LIKE A   PGR5-LIKE A   chr4:12007157-12009175 FORWARD LENGTH=324                                 | 325 | 324 | 1.00E-167 | 99.7  | 88.9 | 95.1 |
| Rsa1.0_00248.1.g9567.t1 | ref XP_002869799.1  hypothetical protein ARALYDRAFT_914316 [Arabidopsis lyrata subsp. lyrata]<br>gi 297315635 gb EFH46058.1 <br>hypothetical protein ARALYDRAFT_914316 [Arabidopsis lyrata subsp. lyrata]                                                                                                                                                                                                                                                                                                                                                                                                                                                                                | 342 | 342 | 1.00E-155 | 100.0 | 83.0 | 88.6 | hypothetical protein ARALYDRAFT_914316              | gbpln | Arabidopsis lyrata   | AT4G22900.1   Symbols:   Protein of unknown function (DUF191)   chr4:12010221-12011252 FORWARD LENGTH=343                    | 342 | 343 | 1.00E-157 | 100.3 | 81.6 | 88.9 |
| Rsa1.0_00248.1.g9568.t1 | ref NP_198226.1  pre-mRNA-splicing factor SYF1 [Arabidopsis thaliana]<br>gi 7682783 gb AAF67364.1  Hypothetical protein T32B20.g [Arabidopsis thaliana]<br>gi 332006447 gb ED93830.1 <br>tetratricopeptide repeat (TPR)-like superfamily protein [Arabidopsis thaliana]                                                                                                                                                                                                                                                                                                                                                                                                                  | 105 | 917 | 1.00E-13  | 873.3 | 49.5 | 62.9 | pre-mRNA-splicing factor SYF1                       | gbpln | Arabidopsis thaliana | AT5G28740.1   Symbols:   Tetratricopeptide repeat (TPR)-like superfamily protein   chr5:10780774-10783772 FORWARD LENGTH=917 | 105 | 917 | 2.00E-16  | 873.3 | 49.5 | 62.9 |
| Rsa1.0_00248.1.g9569.t1 | # # # # # # # # - ---- ---- # # # # # #                                                                                                                                                                                                                                                                                                                                                                                                                                                                                                                                                                                                                                                  |     |     |           |       |      |      |                                                     |       |                      |                                                                                                                              |     |     |           |       |      |      |
| Rsa1.0_00248.1.g9570.t1 | ref XP_002869798.1  WD-40 repeat family protein [Arabidopsis lyrata subsp. lyrata]<br>gi 297315634 gb EFH46057.1 <br>WD-40 repeat family protein [Arabidopsis lyrata subsp. lyrata]                                                                                                                                                                                                                                                                                                                                                                                                                                                                                                      | 459 | 476 | 0         | 103.7 | 88.5 | 93.7 | WD-40 repeat family protein                         | gbpln | Arabidopsis lyrata   | AT4G22910.1   Symbols: FZR2, CCS52A1   FIZZY-related 2   chr4:12012743-12015663 FORWARD LENGTH=483                           | 459 | 483 | 0         | 105.2 | 88.7 | 93.5 |
| Rsa1.0_00248.1.g9571.t1 | gb EOA17219.1  hypothetical protein CARUB_v10005494mg [Capsella rubella]                                                                                                                                                                                                                                                                                                                                                                                                                                                                                                                                                                                                                 | 268 | 268 | 1.00E-129 | 100.0 | 83.6 | 89.9 | hypothetical protein CARUB_v10005494mg              | gbpln | Capsella rubella     | AT4G22920.1   Symbols: ATNYE1, NYE1   non-yellowing 1   chr4:12016776-12017969 REVERSE LENGTH=268                            | 268 | 268 | 1.00E-130 | 100.0 | 82.1 | 89.6 |
| Rsa1.0_00248.1.g9572.t1 | gb EOA16740.1  hypothetical protein CARUB_v10004941mg, partial [Capsella rubella]                                                                                                                                                                                                                                                                                                                                                                                                                                                                                                                                                                                                        | 511 | 409 | 0         | 80.0  | 70.1 | 71.8 | hypothetical protein CARUB_v10004941mg, partial     | gbpln | Capsella rubella     | AT4G22930.1   Symbols: PYR4, DHOASE   pyrimidin 4   chr4:12019315-12021200 FORWARD LENGTH=377                                | 511 | 377 | 0         | 73.8  | 67.5 | 70.1 |
| Rsa1.0_00248.1.g9573.t3 | # # # # # # # # - ---- ---- # # # # # #                                                                                                                                                                                                                                                                                                                                                                                                                                                                                                                                                                                                                                                  |     |     |           |       |      |      |                                                     |       |                      |                                                                                                                              |     |     |           |       |      |      |
| Rsa1.0_00248.1.g9574.t3 | gb EOA16739.1  hypothetical protein CARUB_v10004941mg, partial [Capsella rubella]                                                                                                                                                                                                                                                                                                                                                                                                                                                                                                                                                                                                        | 158 | 386 | 1.00E-71  | 244.3 | 81.0 | 83.5 | hypothetical protein CARUB_v10004941mg, partial     | gbpln | Capsella rubella     | AT4G22930.1   Symbols: PYR4, DHOASE   pyrimidin 4   chr4:12019315-12021200 FORWARD LENGTH=377                                | 158 | 377 | 1.00E-72  | 238.6 | 79.1 | 81.6 |
| Rsa1.0_00248.1.g9575.t6 | gb EOA15611.1  hypothetical protein CARUB_v10005697mg [Capsella rubella]                                                                                                                                                                                                                                                                                                                                                                                                                                                                                                                                                                                                                 | 63  | 220 | 2.00E-24  | 349.2 | 88.9 | 93.7 | hypothetical protein CARUB_v10005697mg              | gbpln | Capsella rubella     | AT4G22950.1   Symbols: AGL19, GL19   AGAMOUS-like 19   chr4:12023946-12027421 REVERSE LENGTH=219                             | 63  | 219 | 3.00E-27  | 347.6 | 88.9 | 93.7 |
| Rsa1.0_00248.1.g9576.t1 | ref NP_567383.1  uncharacterized protein [Arabidopsis thaliana]<br>gi 21553726 gb AAM62819.1  unknown [Arabidopsis thaliana]<br>gi 11073871.1 dbj BAF01280.1 <br>hypothetical protein [Arabidopsis thaliana]<br>gi 332657659 gb AEE83059.1 <br>uncharacterized protein AT4G11860 [Arabidopsis thaliana]                                                                                                                                                                                                                                                                                                                                                                                  | 532 | 682 | 1.00E-108 | 128.2 | 51.5 | 64.7 | uncharacterized protein                             | gbpln | Arabidopsis thaliana | AT4G11860.1   Symbols:   Protein of unknown function (DUF544)   chr4:7134237-7138361 REVERSE LENGTH=682                      | 532 | 682 | 1.00E-111 | 128.2 | 51.5 | 64.7 |

|                          |                                                                                                                                                                                                                                                                                                                                                                                       |      |      |           |       |      |      |                                                              |       |                      |                                                                                                                                               |      |      |           |       |      |      |
|--------------------------|---------------------------------------------------------------------------------------------------------------------------------------------------------------------------------------------------------------------------------------------------------------------------------------------------------------------------------------------------------------------------------------|------|------|-----------|-------|------|------|--------------------------------------------------------------|-------|----------------------|-----------------------------------------------------------------------------------------------------------------------------------------------|------|------|-----------|-------|------|------|
| Rsa1.0_00248.1.g9577.t1  | refXP_002867740.1  hypothetical protein ARALYDRAFT_492569 [Arabidopsis lyrata subsp. lyrata] gi 297313576 gb EFH43999.1                                                                                                                                                                                                                                                               | 746  | 2186 | 1.00E-134 | 293.0 | 33.2 | 40.6 | hypothetical protein ARALYDRAFT_492569                       | gbpln | Arabidopsis lyrata   | AT4G22970.2   Symbols: ESP   homolog of separate   chr4:12033703-12043572 REVERSE LENGTH=2177                                                 | 746  | 2177 | 1.00E-132 | 291.8 | 32.3 | 39.8 |
| Rsa1.0_00248.1.g9578.t2  | hypothetical protein ARALYDRAFT_492569 [Arabidopsis lyrata subsp. lyrata]<br>refXP_004152730.1  PREDICTED: uncharacterized protein LOC101204257 [Cucumis sativus] gi 449496008 ref XP_004160010.1  PREDICTED: uncharacterized LOC101204257 [Cucumis sativus]                                                                                                                          | 982  | 1025 | 0         | 104.4 | 71.8 | 83.5 | PREDICTED: uncharacterized protein LOC101204257              | gbpln | Cucumis sativus      | AT4G23000.1   Symbols:   Calcineurin-like metallo-phosphoesterase superfamily protein   chr4:12055241-12060028 FORWARD LENGTH=1015            | 982  | 1015 | 0         | 103.4 | 52.1 | 56.2 |
| Rsa1.0_00248.1.g9579.t1  | refNP_001078433.1  UDP-galactose transporter 2 [Arabidopsis thaliana] gi 3292827 emb CAA19817.1  putative protein [Arabidopsis thaliana] gi 7269148 emb CAB79256.1  putative protein [Arabidopsis thaliana] gi 67764062 gb AA79163.1  Golgi-localized UDP-galactose transporter [Arabidopsis thaliana] gi 332659293 gb AEE84693.1  UDP-galactose transporter 2 [Arabidopsis thaliana] | 301  | 362  | 1.00E-149 | 120.3 | 92.7 | 94.4 | UDP-galactose transporter 2                                  | gbpln | Arabidopsis thaliana | AT4G23010.2   Symbols: ATUTR2, UTR2   UDP-galactose transporter 2   chr4:12060318-12062486 REVERSE LENGTH=362                                 | 301  | 362  | 1.00E-152 | 120.3 | 92.7 | 94.4 |
| Rsa1.0_00248.1.g9580.t1  | gb EOA17838.1  hypothetical protein CARUB_v10006239mg [Capsella rubella]                                                                                                                                                                                                                                                                                                              | 236  | 509  | 1.00E-114 | 215.7 | 90.3 | 94.9 | hypothetical protein CARUB_v10006239mg                       | gbpln | Capsella rubella     | AT4G23030.1   Symbols:   MATE efflux family protein   chr4:12072857-12074365 FORWARD LENGTH=502                                               | 236  | 502  | 1.00E-111 | 212.7 | 87.3 | 91.9 |
| Rsa1.0_00248.1.g9581.t1  | refNP_567676.1  PAS domain-containing protein tyrosine kinase family protein [Arabidopsis thaliana] gi 15810437 gb AAL07106.1  putative serine/threonine kinase [Arabidopsis thaliana] gi 332659299 gb AEE84699.1  PAS domain-containing protein tyrosine kinase family protein [Arabidopsis thaliana]                                                                                | 734  | 735  | 0         | 100.1 | 83.5 | 89.5 | PAS domain-containing protein tyrosine kinase family protein | gbpln | Arabidopsis thaliana | AT4G23050.1   Symbols:   PAS domain-containing protein tyrosine kinase family protein   chr4:12080112-12083708 FORWARD LENGTH=735             | 734  | 735  | 0         | 100.1 | 83.5 | 89.5 |
| Rsa1.0_00248.1.g9582.t1  | refNP_194037.2  protein IQ-domain 22 [Arabidopsis thaliana] gi 56693675 gb AAW2634.1  calmodulin binding protein IQD22 [Arabidopsis thaliana] gi 332659301 gb AEE84701.1  protein IQ-domain 22 [Arabidopsis thaliana]                                                                                                                                                                 | 644  | 484  | 1.00E-173 | 75.2  | 55.6 | 60.6 | protein IQ-domain 22                                         | gbpln | Arabidopsis thaliana | AT4G23060.1   Symbols: IQD22   IQ-domain 22   chr4:12087283-12090408 FORWARD LENGTH=484                                                       | 644  | 484  | 1.00E-176 | 75.2  | 55.6 | 60.6 |
| Rsa1.0_00249.1.g9583.t1  | gb AAD32759.1  putative retroelement pol polyprotein [Arabidopsis thaliana]                                                                                                                                                                                                                                                                                                           | 193  | 1356 | 9.00E-76  | 702.6 | 65.8 | 86.5 | putative retroelement pol polyprotein                        | gbpln | Arabidopsis thaliana | ATMG00810.1   Symbols: ORF240B   DNA/RNA polymerases superfamily protein   chrM:227709-228431 REVERSE LENGTH=240                              | 193  | 240  | 2.00E-22  | 124.4 | 33.7 | 50.8 |
| Rsa1.0_00249.1.g9584.t12 | dbj BAB09379.1  non-LTR retroelement reverse transcriptase-like protein [Arabidopsis thaliana]                                                                                                                                                                                                                                                                                        | 1872 | 1223 | 0         | 65.3  | 23.6 | 31.9 | non-LTR retroelement reverse transcriptase-like protein      | gbpln | Arabidopsis thaliana | AT3G24255.1   Symbols:   RNA-directed DNA polymerase (reverse transcriptase)-related family protein   chr3:8789471-8793208 FORWARD LENGTH=746 | 1872 | 746  | 1.00E-47  | 39.9  | 5.3  | 6.5  |
| Rsa1.0_00249.1.g9585.t1  | gb ABD65091.1  hypothetical protein 31.t00049 [Brassica oleracea]                                                                                                                                                                                                                                                                                                                     | 476  | 530  | 7.00E-96  | 111.3 | 44.1 | 60.1 | hypothetical protein 31.t00049                               | gbpln | Brassica oleracea    | #                                                                                                                                             | #    | #    | #         | #     | #    |      |
| Rsa1.0_00249.1.g9586.t1  | gb ABW81051.1  tn7 reverse transcriptase [Arabidopsis lyrata subsp. lyrata]                                                                                                                                                                                                                                                                                                           | 182  | 441  | 1.00E-36  | 242.3 | 43.4 | 64.3 | tn7 reverse transcriptase                                    | gbpln | Arabidopsis lyrata   | AT3G24255.1   Symbols:   RNA-directed DNA polymerase (reverse transcriptase)-related family protein   chr3:8789471-8793208 FORWARD LENGTH=746 | 182  | 746  | 5.00E-30  | 409.9 | 36.3 | 51.6 |
| Rsa1.0_00249.1.g9587.t1  | gb EOA30096.1  hypothetical protein CARUB_v10013206mg [Capsella rubella]                                                                                                                                                                                                                                                                                                              | 631  | 629  | 0         | 99.7  | 83.5 | 90.6 | hypothetical protein CARUB_v10013206mg                       | gbpln | Capsella rubella     | AT2G17525.1   Symbols:   Pentatricopeptide repeat (PPR) superfamily protein   chr2:7624178-7626058 FORWARD LENGTH=626                         | 631  | 626  | 0         | 99.2  | 82.1 | 90.3 |
| Rsa1.0_00249.1.g9588.t1  | refXP_002884065.1  hypothetical protein ARALYDRAFT_343373 [Arabidopsis lyrata subsp. lyrata] gi 297329905 gb EFH60324.1  hypothetical protein ARALYDRAFT_343373 [Arabidopsis lyrata subsp. lyrata]                                                                                                                                                                                    | 437  | 1056 | 0         | 241.6 | 91.5 | 95.9 | hypothetical protein ARALYDRAFT_343373                       | gbpln | Arabidopsis lyrata   | AT2G17530.3   Symbols:   Protein kinase superfamily protein   chr2:7626518-7628624 FORWARD LENGTH=440                                         | 437  | 440  | 0         | 100.7 | 91.1 | 95.9 |

|                          |                                                                                                                                                                                                                                                                                                               |      |      |           |       |      |      |                                                                                                                                                                                                |       |                      |                                                                                                                                                                                                                                                                                                                                                                                                                                                                                                                                                      |      |     |           |       |      |      |
|--------------------------|---------------------------------------------------------------------------------------------------------------------------------------------------------------------------------------------------------------------------------------------------------------------------------------------------------------|------|------|-----------|-------|------|------|------------------------------------------------------------------------------------------------------------------------------------------------------------------------------------------------|-------|----------------------|------------------------------------------------------------------------------------------------------------------------------------------------------------------------------------------------------------------------------------------------------------------------------------------------------------------------------------------------------------------------------------------------------------------------------------------------------------------------------------------------------------------------------------------------------|------|-----|-----------|-------|------|------|
| Rsa1.0_00249.1.g9589.t1  | gb EOA31017.1  hypothetical protein CARUB_v10014165mg [Capsella rubella] gi 48256689 gb EOA31018.1  hypothetical protein CARUB_v10014165mg [Capsella rubella]                                                                                                                                                 | 284  | 329  | 2.00E-72  | 115.8 | 70.4 | 79.9 | hypothetical protein CARUB_v10014165mg                                                                                                                                                         | gbpln | Capsella rubella     | AT2G17540.3   Symbols:   unknown protein; FUNCTIONS IN: molecular_function unknown; INVOLVED IN: biological_process unknown; LOCATED IN: chloroplast; EXPRESSED IN: 21 plant structures; EXPRESSED DURING: 13 growth stages; BEST Arabidopsis thaliana protein match is: unknown protein (TAIR:AT4G35510.1); Has 30201 Blast hits to 17322 proteins in 780 species: Archae - 12; Bacteria - 1396; Metazoa - 17338; Fungi - 3422; Plants - 5037; Viruses - 0; Other Eukaryotes - 2996 (source: NCBI BLink).   chr2:7630662-7631489 REVERSE LENGTH=275 | 284  | 275 | 5.00E-55  | 96.8  | 58.1 | 66.2 |
| Rsa1.0_00249.1.g9590.t1  | #                                                                                                                                                                                                                                                                                                             | #    | #    | #         | #     | #    | #    | -                                                                                                                                                                                              | ----  | ----                 | #                                                                                                                                                                                                                                                                                                                                                                                                                                                                                                                                                    | #    | #   | #         | #     | #    |      |
| Rsa1.0_00249.1.g9591.t1  | ref XP_002886120.1  hypothetical protein ARALYDRAFT_343376 [Arabidopsis lyrata subsp. lyrata] gi 297331960 gb EFH62379.1  hypothetical protein ARALYDRAFT_343376 [Arabidopsis lyrata subsp. lyrata]                                                                                                           | 787  | 781  | 0         | 99.2  | 83.1 | 89.5 | hypothetical protein ARALYDRAFT_343376                                                                                                                                                         | gbpln | Arabidopsis lyrata   | AT2G17550.1   Symbols:   unknown protein; Has 264 Blast hits to 258 proteins in 65 species: Archae - 5; Bacteria - 5; Metazoa - 66; Fungi - 16; Plants - 107; Viruses - 0; Other Eukaryotes - 65 (source: NCBI BLink).   chr2:7634495-7637212 REVERSE LENGTH=779                                                                                                                                                                                                                                                                                     | 787  | 779 | 0         | 99.0  | 83.5 | 89.7 |
| Rsa1.0_00249.1.g9592.t1  | ref XP_002886121.1  hypothetical protein ARALYDRAFT_480649 [Arabidopsis lyrata subsp. lyrata] gi 297331961 gb EFH62380.1  hypothetical protein ARALYDRAFT_480649 [Arabidopsis lyrata subsp. lyrata]                                                                                                           | 137  | 143  | 3.00E-50  | 104.4 | 78.8 | 90.5 | hypothetical protein ARALYDRAFT_480649                                                                                                                                                         | gbpln | Arabidopsis lyrata   | AT2G17560.2   Symbols: HMGB4, NFD4, NFD04   high mobility group B4   chr2:7642486-7643468 REVERSE LENGTH=138                                                                                                                                                                                                                                                                                                                                                                                                                                         | 137  | 138 | 4.00E-51  | 100.7 | 74.5 | 88.3 |
| Rsa1.0_00249.1.g9593.t1  | #                                                                                                                                                                                                                                                                                                             | #    | #    | #         | #     | #    | #    | -                                                                                                                                                                                              | ----  | ----                 | #                                                                                                                                                                                                                                                                                                                                                                                                                                                                                                                                                    | #    | #   | #         | #     | #    |      |
| Rsa1.0_00249.1.g9594.t1  | gb AAF78267.1 AC020576.11 Contains weak similarity to 25.7 kDa protein from Cicer arietinum gb AJ276422 and contains a transposase mutator PF 00872 domain. ESTs gb T13756, gb AA712647, gb AA585980 come from this gene [Arabidopsis thaliana]                                                               | 977  | 1206 | 0         | 123.4 | 43.6 | 57.2 | Contains weak similarity to 25.7 kDa protein from Cicer arietinum gb AJ276422 and contains a transposase mutator PF 00872 domain. ESTs gb T13756, gb AA712647, gb AA585980 come from this gene | gbpln | Arabidopsis thaliana | AT1G64260.1   Symbols:   MuDR family transposase   chr1:23847756-23849915 FORWARD LENGTH=719                                                                                                                                                                                                                                                                                                                                                                                                                                                         | 977  | 719 | 2.00E-35  | 73.6  | 12.6 | 21.0 |
| Rsa1.0_00249.1.g9595.t14 | gb AAF78272.1 AC020576.16 Contains similarity to a putative protein T32A11_100 gi 7413627 from Arabidopsis thaliana BAC T32A11 gb AL138653 [Arabidopsis thaliana]                                                                                                                                             | 1538 | 1075 | 1.00E-74  | 69.9  | 11.4 | 16.8 | Contains similarity to a putative protein T32A11_100 gi 7413627 from Arabidopsis thaliana BAC T32A11 gb AL138653                                                                               | gbpln | Arabidopsis thaliana | AT1G31150.1   Symbols:   Domain of unknown function (DUF1985)   chr1:11120097-11122412 FORWARD LENGTH=673                                                                                                                                                                                                                                                                                                                                                                                                                                            | 1538 | 673 | 9.00E-52  | 43.8  | 9.3  | 13.7 |
| Rsa1.0_00249.1.g9596.t1  | ref XP_002884068.1  undecaprenyl pyrophosphate synthetase family protein [Arabidopsis lyrata subsp. lyrata] gi 297329908 gb EFH60327.1  undecaprenyl pyrophosphate synthetase family protein [Arabidopsis lyrata subsp. lyrata]                                                                               | 277  | 296  | 1.00E-133 | 106.9 | 84.1 | 92.4 | undecaprenyl pyrophosphate synthetase family protein                                                                                                                                           | gbpln | Arabidopsis lyrata   | AT2G17570.1   Symbols:   Undecaprenyl pyrophosphate synthetase family protein   chr2:7645086-7645973 FORWARD LENGTH=295                                                                                                                                                                                                                                                                                                                                                                                                                              | 277  | 295 | 1.00E-132 | 106.5 | 83.8 | 91.7 |
| Rsa1.0_00249.1.g9597.t2  | ref XP_002884073.1  AMP-dependent synthetase and ligase family protein [Arabidopsis lyrata subsp. lyrata] gi 297329913 gb EFH60332.1  AMP-dependent synthetase and ligase family protein [Arabidopsis lyrata subsp. lyrata]                                                                                   | 565  | 596  | 0         | 105.5 | 87.8 | 92.2 | AMP-dependent synthetase and ligase family protein                                                                                                                                             | gbpln | Arabidopsis lyrata   | AT2G17650.1   Symbols:   AMP-dependent synthetase and ligase family protein   chr2:7671041-7672936 FORWARD LENGTH=603                                                                                                                                                                                                                                                                                                                                                                                                                                | 565  | 603 | 0         | 106.7 | 86.9 | 93.5 |
| Rsa1.0_00249.1.g9598.t1  | ref NP_179357.1  RPM1-interacting protein 4-like protein [Arabidopsis thaliana] gi 11762120 gb AAG40338.1 AF324986.1 At2g17680 [Arabidopsis thaliana] gi 115646839 gb ABJ17136.1  At2g17680 [Arabidopsis thaliana] gi 330251568 gb AEC06662.1  RPM1-interacting protein 4-like protein [Arabidopsis thaliana] | 69   | 69   | 1.00E-29  | 100.0 | 92.8 | 97.1 | RPM1-interacting protein 4-like protein                                                                                                                                                        | gbpln | Arabidopsis thaliana | AT2G17660.1   Symbols:   RPM1-interacting protein 4 (RIN4) family protein   chr2:7673359-7673568 FORWARD LENGTH=69                                                                                                                                                                                                                                                                                                                                                                                                                                   | 69   | 69  | 2.00E-32  | 100.0 | 92.8 | 97.1 |
| Rsa1.0_00249.1.g9599.t1  | ref XP_002887164.1  predicted protein [Arabidopsis lyrata subsp. lyrata] gi 297333005 gb EFH63423.1  predicted protein [Arabidopsis lyrata subsp. lyrata]                                                                                                                                                     | 127  | 360  | 2.00E-37  | 283.5 | 59.1 | 79.5 | predicted protein                                                                                                                                                                              | gbpln | Arabidopsis lyrata   | AT1G68170.1   Symbols:   nodulin MtN21 /EamA-like transporter family protein   chr1:25551925-25554258 FORWARD LENGTH=356                                                                                                                                                                                                                                                                                                                                                                                                                             | 127  | 356 | 9.00E-40  | 280.3 | 59.1 | 78.0 |

|                         |                                                                                                                                                                                                                                                           |      |      |           |       |      |      |                                                                                                                                                                |       |                      |                                                                                                                                                                                                                                                                                                                                                                                                                |      |     |           |       |      |      |
|-------------------------|-----------------------------------------------------------------------------------------------------------------------------------------------------------------------------------------------------------------------------------------------------------|------|------|-----------|-------|------|------|----------------------------------------------------------------------------------------------------------------------------------------------------------------|-------|----------------------|----------------------------------------------------------------------------------------------------------------------------------------------------------------------------------------------------------------------------------------------------------------------------------------------------------------------------------------------------------------------------------------------------------------|------|-----|-----------|-------|------|------|
| Rsa1.0_00249.1.g9600.t4 | emb[CAB39638.1] RNA-directed DNA polymerase-like protein [Arabidopsis thaliana] gi 7267666 emb[CAB78094.1] RNA-directed DNA polymerase-like protein [Arabidopsis thaliana]                                                                                | 1007 | 1274 | 1.00E-142 | 126.5 | 25.1 | 34.5 | RNA-directed DNA polymerase-like protein                                                                                                                       | gbpln | Arabidopsis thaliana | AT1G43760.1   Symbols:   DNase I-like superfamily protein   chr1:16528880-16531065 REVERSE LENGTH=626                                                                                                                                                                                                                                                                                                          | 1007 | 626 | 7.00E-35  | 62.2  | 11.4 | 18.5 |
| Rsa1.0_00250.1.g9601.t1 | gb ABV21212.1  Ty1 Copia-element protein [Arabidopsis thaliana]                                                                                                                                                                                           | 529  | 438  | 1.00E-82  | 82.8  | 32.3 | 45.4 | Ty1 Copia-element protein                                                                                                                                      | gbpln | Arabidopsis thaliana | AT3G24255.1   Symbols:   RNA-directed DNA polymerase (reverse transcriptase)-related family protein   chr3:8789471-8793208 FORWARD LENGTH=746                                                                                                                                                                                                                                                                  | 529  | 746 | 4.00E-56  | 141.0 | 28.5 | 42.9 |
| Rsa1.0_00250.1.g9602.t1 | ref XP_002875082.1  hypothetical protein ARALYDRAFT_904366 [Arabidopsis lyrata subsp. lyrata] gi 297320920 gb EFH51341.1  hypothetical protein ARALYDRAFT_904366 [Arabidopsis lyrata subsp. lyrata]                                                       | 576  | 562  | 0         | 97.6  | 85.2 | 89.6 | hypothetical protein ARALYDRAFT_904366                                                                                                                         | gbpln | Arabidopsis lyrata   | AT2G01600.1   Symbols:   ENTH/ANTH/VHS superfamily protein   chr2:268975-272356 FORWARD LENGTH=571                                                                                                                                                                                                                                                                                                             | 576  | 571 | 0         | 99.1  | 85.9 | 90.8 |
| Rsa1.0_00250.1.g9603.t1 | ref NP_190144.1  RING/U-box protein with C6HC-type zinc finger [Arabidopsis thaliana] gi 6996261 emb CAF75487.1  putative protein [Arabidopsis thaliana] gi 392644525 gb AEI78046.1  RING/U-box protein with C6HC-type zinc finger [Arabidopsis thaliana] | 432  | 408  | 1.00E-108 | 94.4  | 46.3 | 61.1 | RING/U-box protein with C6HC-type zinc finger                                                                                                                  | gbpln | Arabidopsis thaliana | AT3G45580.1   Symbols:   RING/U-box protein with C6HC-type zinc finger   chr3:16729989-16731511 REVERSE LENGTH=408                                                                                                                                                                                                                                                                                             | 432  | 408 | 1.00E-111 | 94.4  | 46.3 | 61.1 |
| Rsa1.0_00250.1.g9604.t1 | ref XP_002875081.1  hypothetical protein ARALYDRAFT_346658 [Arabidopsis lyrata subsp. lyrata] gi 297320919 gb EFH51340.1  hypothetical protein ARALYDRAFT_346658 [Arabidopsis lyrata subsp. lyrata]                                                       | 156  | 167  | 3.00E-60  | 107.1 | 82.1 | 90.4 | hypothetical protein ARALYDRAFT_346658                                                                                                                         | gbpln | Arabidopsis lyrata   | AT2G01590.1   Symbols:   CRR3   chlororespiratory reduction 3   chr2:266675-267379 FORWARD LENGTH=174                                                                                                                                                                                                                                                                                                          | 156  | 174 | 6.00E-58  | 111.5 | 77.6 | 88.5 |
| Rsa1.0_00250.1.g9605.t2 | sp Q9ZSR8.1 RSSA_BRANA RecName: Full=40S ribosomal protein SA; AltName: Full=Laminin receptor-like protein; AltName: Full=p40 gi 3769681 gb AAC97937.1  laminin receptor-like protein [Brassica napus]                                                    | 231  | 292  | 5.00E-37  | 126.4 | 39.8 | 42.0 | RecName: Full=40S ribosomal protein SA; AltName: Full=Laminin receptor-like protein; AltName: Full=p40 gi 3769681 gb AAC97937.1  laminin receptor-like protein | gbpln | Brassica napus       | AT1G72370.2   Symbols:   P40, AP40, RP40, RPSAA   40s ribosomal protein SA   chr1:27243148-27244842 REVERSE LENGTH=294                                                                                                                                                                                                                                                                                         | 231  | 294 | 2.00E-36  | 127.3 | 39.4 | 42.4 |
| Rsa1.0_00250.1.g9606.t1 | ref NP_565780.1  cysteine proteinase-like protein [Arabidopsis thaliana] gi 2342728 gb AAB97626.1  cysteine proteinase [Arabidopsis thaliana] gi 33025382 gb AEC08915.1  cysteine proteinase-like protein [Arabidopsis thaliana]                          | 238  | 345  | 1.00E-76  | 145.0 | 59.2 | 70.6 | cysteine proteinase-like protein                                                                                                                               | gbpln | Arabidopsis thaliana | AT2G34080.1   Symbols:   Cysteine proteinases superfamily protein   chr2:14393431-14394777 REVERSE LENGTH=345                                                                                                                                                                                                                                                                                                  | 238  | 345 | 3.00E-79  | 145.0 | 59.2 | 70.6 |
| Rsa1.0_00250.1.g9607.t2 | gb ADK63403.1  C2 domain-containing protein [Brassica rapa]                                                                                                                                                                                               | 193  | 180  | 1.00E-96  | 93.3  | 90.2 | 91.2 | C2 domain-containing protein                                                                                                                                   | gbpln | Brassica rapa        | AT2G01540.1   Symbols:   Calcium-dependent lipid-binding (CaLB domain) family protein   chr2:242297-243233 REVERSE LENGTH=180                                                                                                                                                                                                                                                                                  | 193  | 180 | 1.00E-92  | 93.3  | 82.9 | 86.5 |
| Rsa1.0_00250.1.g9608.t1 | ref XP_002875076.1  hypothetical protein ARALYDRAFT_904347 [Arabidopsis lyrata subsp. lyrata] gi 297320914 gb EFH51335.1  hypothetical protein ARALYDRAFT_904347 [Arabidopsis lyrata subsp. lyrata]                                                       | 184  | 151  | 1.00E-70  | 82.1  | 71.7 | 76.6 | hypothetical protein ARALYDRAFT_904347                                                                                                                         | gbpln | Arabidopsis lyrata   | AT2G01520.1   Symbols:   MLP328   MLP-like protein 328   chr2:235992-236881 FORWARD LENGTH=151                                                                                                                                                                                                                                                                                                                 | 184  | 151 | 9.00E-73  | 82.1  | 71.7 | 76.1 |
| Rsa1.0_00250.1.g9609.t1 | gb EOA29259.1  hypothetical protein CARUB_v10025533mg, partial [Capsella rubella]                                                                                                                                                                         | 248  | 293  | 5.00E-65  | 118.1 | 55.2 | 65.3 | hypothetical protein CARUB_v10025533mg, partial                                                                                                                | gbpln | Capsella rubella     | AT1G34070.1   Symbols:   CONTAINS InterPro DOMAIN's: Retrotransposon gag protein (InterPro:IPR005162); BEST Arabidopsis thaliana protein match is: unknown protein (TAIR:AT5G48050.1); Has 648 Blast hits to 647 proteins in 29 species: Archae = 0; Bacteria = 0; Metazoa = 16; Fungi = 25; Plants = 607; Viruses = 0; Other Eukaryotes = 0 (source: NCBI BLINK).   chr1:12402283-12403209 FORWARD LENGTH=308 | 248  | 308 | 2.00E-54  | 124.2 | 46.4 | 57.3 |
| Rsa1.0_00250.1.g9610.t1 | #                                                                                                                                                                                                                                                         | #    | #    | #         | #     | #    | #    | -                                                                                                                                                              | ----  | ----                 | #                                                                                                                                                                                                                                                                                                                                                                                                              | #    | #   | #         | #     | #    | #    |
| Rsa1.0_00250.1.g9611.t1 | #                                                                                                                                                                                                                                                         | #    | #    | #         | #     | #    | #    | -                                                                                                                                                              | ----  | ----                 | #                                                                                                                                                                                                                                                                                                                                                                                                              | #    | #   | #         | #     | #    | #    |
| Rsa1.0_00250.1.g9612.t1 | ref XP_002870668.1  WD-40 repeat family protein [Arabidopsis lyrata subsp. lyrata] gi 297316504 gb EFH46927.1  WD-40 repeat family protein [Arabidopsis lyrata subsp. lyrata]                                                                             | 439  | 466  | 0         | 106.2 | 76.5 | 84.5 | WD-40 repeat family protein                                                                                                                                    | gbpln | Arabidopsis lyrata   | AT5G40880.1   Symbols:   WD-40 repeat family protein / zfw3 protein (ZFW3)   chr5:16379481-16381205 FORWARD LENGTH=472                                                                                                                                                                                                                                                                                         | 439  | 472 | 0         | 107.5 | 74.0 | 83.1 |
| Rsa1.0_00250.1.g9613.t1 | gb EOA24970.1  hypothetical protein CARUB_v10018267mg [Capsella rubella]                                                                                                                                                                                  | 107  | 115  | 1.00E-21  | 107.5 | 62.6 | 66.4 | hypothetical protein CARUB_v10018267mg                                                                                                                         | gbpln | Capsella rubella     | AT2G01505.1   Symbols:   CLE16   CLAVATA3/ESR-RELATED 16   chr2:228926-229237 REVERSE LENGTH=103                                                                                                                                                                                                                                                                                                               | 107  | 103 | 1.00E-23  | 96.3  | 49.5 | 57.9 |



|                         |                                                                                                                                                                                                                                                                                                                                                                                                                                                                                                                                                                                                                                                                                                                                                                                                                                                                                                                                                                                                                                                       |     |     |           |       |      |      |                                        |       |                      |                                                                                                                                                                                                                                                         |     |     |           |       |      |      |
|-------------------------|-------------------------------------------------------------------------------------------------------------------------------------------------------------------------------------------------------------------------------------------------------------------------------------------------------------------------------------------------------------------------------------------------------------------------------------------------------------------------------------------------------------------------------------------------------------------------------------------------------------------------------------------------------------------------------------------------------------------------------------------------------------------------------------------------------------------------------------------------------------------------------------------------------------------------------------------------------------------------------------------------------------------------------------------------------|-----|-----|-----------|-------|------|------|----------------------------------------|-------|----------------------|---------------------------------------------------------------------------------------------------------------------------------------------------------------------------------------------------------------------------------------------------------|-----|-----|-----------|-------|------|------|
| Rsa1.0_00250.1.g9614.t1 | ref[XP_002875075.1] hypothetical protein ARALYDRAFT_484067 [Arabidopsis lyrata subsp. lyrata] gi 297320913 gb EFH51334.1  hypothetical protein ARALYDRAFT_484067 [Arabidopsis lyrata subsp. lyrata]                                                                                                                                                                                                                                                                                                                                                                                                                                                                                                                                                                                                                                                                                                                                                                                                                                                   | 300 | 284 | 1.00E-145 | 94.7  | 86.7 | 91.7 | hypothetical protein ARALYDRAFT_484067 | gbpln | Arabidopsis lyrata   | AT2G01490.1   Symbols:   phytanoyl-CoA dioxygenase (PhyH) family protein   chr2:221316-223187 FORWARD LENGTH=283                                                                                                                                        | 300 | 283 | 1.00E-147 | 94.3  | 85.7 | 90.7 |
| Rsa1.0_00250.1.g9615.t1 | gb EOA25557.1  hypothetical protein CARUB_v10018910mg [Capsella rubella]                                                                                                                                                                                                                                                                                                                                                                                                                                                                                                                                                                                                                                                                                                                                                                                                                                                                                                                                                                              | 952 | 962 | 0         | 101.1 | 94.6 | 96.7 | hypothetical protein CARUB_v10018910mg | gbpln | Capsella rubella     | AT2G01460.1   Symbols:   P-loop containing nucleoside triphosphate hydrolases superfamily protein   chr2:206136-211765 FORWARD LENGTH=955                                                                                                               | 952 | 955 | 0         | 100.3 | 94.0 | 96.2 |
| Rsa1.0_00250.1.g9616.t1 | ref[NP_178254.2] mitogen-activated protein kinase 17 [Arabidopsis thaliana] gi 79316341 ref[NP_001030939.1] mitogen-activated protein kinase 17 [Arabidopsis thaliana] gi 79316349 ref[NP_001030940.1] mitogen-activated protein kinase 17 [Arabidopsis thaliana] gi 79316359 ref[NP_001030941.1] mitogen-activated protein kinase 17 [Arabidopsis thaliana] gi 75327927 sp Q84M93.1 MPK17_ARAT H RecName: Full=Mitogen-activated protein kinase 17; Short=AtMPK17; Short=MAP kinase 17 gi 30102718 gb AAP21277.1  At2g01450 [Arabidopsis thaliana] gi 110736492 dbj BAF00214.1  putative MAP kinase [Arabidopsis thaliana] gi 222423803 dbj BAH19867.1  AT2G01450 [Arabidopsis thaliana] gi 330250358 gb AEC05452.1  mitogen-activated protein kinase 17 [Arabidopsis thaliana] gi 330250359 gb AEC05453.1  mitogen-activated protein kinase 17 [Arabidopsis thaliana] gi 330250360 gb AEC05454.1  mitogen-activated protein kinase 17 [Arabidopsis thaliana] gi 330250361 gb AEC05455.1  mitogen-activated protein kinase 17 [Arabidopsis thaliana] | 509 | 486 | 0         | 95.5  | 90.2 | 92.5 | mitogen-activated protein kinase 17    | gbpln | Arabidopsis thaliana | AT2G01450.4   Symbols: ATMPK17, MPK17   MAP kinase 17   chr2:199722-202010 REVERSE LENGTH=486                                                                                                                                                           | 509 | 486 | 0         | 95.5  | 90.2 | 92.5 |
| Rsa1.0_00250.1.g9617.t1 | ref[XP_002876750.1] hypothetical protein ARALYDRAFT_346639 [Arabidopsis lyrata subsp. lyrata] gi 297322588 gb EFH53009.1  hypothetical protein ARALYDRAFT_346639 [Arabidopsis lyrata subsp. lyrata]                                                                                                                                                                                                                                                                                                                                                                                                                                                                                                                                                                                                                                                                                                                                                                                                                                                   | 196 | 201 | 4.00E-98  | 102.6 | 92.3 | 94.9 | hypothetical protein ARALYDRAFT_346639 | gbpln | Arabidopsis lyrata   | AT2G01430.1   Symbols: ATHB17, ATHB-17, HB17   homeobox-leucine zipper protein 17   chr2:187798-190369 REVERSE LENGTH=275                                                                                                                               | 196 | 275 | 1.00E-95  | 140.3 | 89.3 | 92.9 |
| Rsa1.0_00250.1.g9618.t1 | ref[NP_565261.1] auxin efflux carrier component 4 [Arabidopsis thaliana] gi 7109715 gb AAF36769.1  auxin transporter splice variant b [Arabidopsis thaliana] gi 20197401 gb AAC67319.2  putative auxin transport protein [Arabidopsis thaliana] gi 20197591 gb AAM15143.1  putative auxin transport protein [Arabidopsis thaliana] gi 330250354 gb AEC05448.1  auxin efflux carrier component 4 [Arabidopsis thaliana]                                                                                                                                                                                                                                                                                                                                                                                                                                                                                                                                                                                                                                | 601 | 612 | 0         | 101.8 | 90.8 | 93.7 | auxin efflux carrier component 4       | gbpln | Arabidopsis thaliana | AT2G01420.1   Symbols: PIN4, ATPIN4   Auxin efflux carrier family protein   chr2:180478-183199 REVERSE LENGTH=612                                                                                                                                       | 601 | 612 | 0         | 101.8 | 90.8 | 93.7 |
| Rsa1.0_00250.1.g9619.t1 | ref[XP_002875071.1] hypothetical protein ARALYDRAFT_322483 [Arabidopsis lyrata subsp. lyrata] gi 297320909 gb EFH51330.1  hypothetical protein ARALYDRAFT_322483 [Arabidopsis lyrata subsp. lyrata]                                                                                                                                                                                                                                                                                                                                                                                                                                                                                                                                                                                                                                                                                                                                                                                                                                                   | 151 | 142 | 2.00E-51  | 94.0  | 72.2 | 81.5 | hypothetical protein ARALYDRAFT_322483 | gbpln | Arabidopsis lyrata   | AT2G01400.1   Symbols:   unknown protein; Has 19 Blast hits to 19 proteins in 6 species: Archae - 0; Bacteria - 0; Metazoa - 0; Fungi - 0; Plants - 19; Viruses - 0; Other Eukaryotes - 0 (source: NCBI BLink).   chr2:174315-175080 FORWARD LENGTH=146 | 151 | 146 | 8.00E-53  | 96.7  | 74.8 | 84.8 |
| Rsa1.0_00250.1.g9620.t1 | gb EOA24307.1  hypothetical protein CARUB_v10017546mg [Capsella rubella]                                                                                                                                                                                                                                                                                                                                                                                                                                                                                                                                                                                                                                                                                                                                                                                                                                                                                                                                                                              | 353 | 351 | 0         | 99.4  | 93.8 | 97.2 | hypothetical protein CARUB_v10017546mg | gbpln | Capsella rubella     | AT2G01350.1   Symbols: QPT   quinolinate phosphoribosyltransferase   chr2:165332-167209 REVERSE LENGTH=348                                                                                                                                              | 353 | 348 | 0         | 98.6  | 90.9 | 94.9 |

|                         |      |     |           |       |      |      |                                        |       |                      |                                                                                                                                                                                                                                                                                                                                          |      |     |           |       |      |      |
|-------------------------|------|-----|-----------|-------|------|------|----------------------------------------|-------|----------------------|------------------------------------------------------------------------------------------------------------------------------------------------------------------------------------------------------------------------------------------------------------------------------------------------------------------------------------------|------|-----|-----------|-------|------|------|
| Rsa1.0_00250.1.g9621.t1 | 221  | 215 | 2.00E-87  | 97.3  | 82.8 | 86.9 | uncharacterized protein                | gbpln | Arabidopsis thaliana | AT2G01340.1   Symbols: At17.1   Encodes a protein whose expression is responsive to nematode infection.   chr2:164014-165068 FORWARD LENGTH=215                                                                                                                                                                                          | 221  | 215 | 6.00E-90  | 97.3  | 82.8 | 86.9 |
| Rsa1.0_00250.1.g9622.t2 | 376  | 612 | 4.00E-64  | 162.8 | 45.5 | 49.2 | hypothetical protein CARUB_v10016855mg | gbpln | Capsella rubella     | AT2G01330.2   Symbols:   nucleotide binding   chr2:158417-160755 REVERSE LENGTH=611                                                                                                                                                                                                                                                      | 376  | 611 | 3.00E-64  | 162.5 | 44.7 | 49.5 |
| Rsa1.0_00250.1.g9623.t6 | 1123 | 729 | 0         | 64.9  | 58.3 | 61.4 | abc transporter family protein         | gbpln | Arabidopsis lyrata   | AT2G01320.2   Symbols:   ABC-2 type transporter family protein   chr2:154487-158063 REVERSE LENGTH=727                                                                                                                                                                                                                                   | 1123 | 727 | 0         | 64.7  | 57.7 | 61.0 |
| Rsa1.0_00250.1.g9624.t1 | 155  | 156 | 1.00E-66  | 100.6 | 83.2 | 89.0 | uncharacterized protein                | gbpln | Arabidopsis thaliana | AT2G01300.1   Symbols:   unknown protein; BEST Arabidopsis thaliana protein match is: unknown protein (TAIR:AT1G15010.1). Has 73 Blast hits to 73 proteins in 12 species: Archae - 0; Bacteria - 0; Metazoa - 0; Fungi - 0; Plants - 73; Viruses - 0; Other Eukaryotes - 0 (source: NCBI BLink).   chr2:151221-151691 REVERSE LENGTH=156 | 155  | 156 | 3.00E-69  | 100.6 | 83.2 | 89.0 |
| Rsa1.0_00250.1.g9625.t1 | 268  | 265 | 1.00E-128 | 98.9  | 87.7 | 92.9 | ribose 5-phosphate isomerase A         | gbpln | Arabidopsis thaliana | AT2G01290.1   Symbols: RPI2   ribose-5-phosphate isomerase 2   chr2:149192-149989 REVERSE LENGTH=265                                                                                                                                                                                                                                     | 268  | 265 | 1.00E-131 | 98.9  | 87.7 | 92.9 |
| Rsa1.0_00250.1.g9626.t4 | 256  | 259 | 1.00E-122 | 101.2 | 84.8 | 91.0 | hypothetical protein CARUB_v10018459mg | gbpln | Capsella rubella     | AT2G01275.2   Symbols:   RING/FYVE/PHD zinc finger superfamily protein   chr2:142610-143809 REVERSE LENGTH=259                                                                                                                                                                                                                           | 256  | 259 | 1.00E-118 | 101.2 | 83.6 | 91.4 |
| Rsa1.0_00250.1.g9627.t1 | 506  | 495 | 0         | 97.8  | 85.4 | 93.1 | quiescin-sulfhydryl oxidase 2          | gbpln | Arabidopsis thaliana | AT2G01270.1   Symbols: AtQSOX2, QSOX2   quiescin-sulfhydryl oxidase 2   chr2:139457-142141 FORWARD LENGTH=495                                                                                                                                                                                                                            | 506  | 495 | 0         | 97.8  | 85.4 | 93.1 |

|                         |                                                                                                                                                                                                                                                                                                                                                                             |      |      |           |       |      |      |                                                                           |       |                      |                                                                                                                                                    |      |     |           |       |      |      |
|-------------------------|-----------------------------------------------------------------------------------------------------------------------------------------------------------------------------------------------------------------------------------------------------------------------------------------------------------------------------------------------------------------------------|------|------|-----------|-------|------|------|---------------------------------------------------------------------------|-------|----------------------|----------------------------------------------------------------------------------------------------------------------------------------------------|------|-----|-----------|-------|------|------|
| Rsa1.0_00250.1.g9628.t1 | refNP_565257.1  uncharacterized protein [Arabidopsis thaliana] gi 20197590 gb AAD14526.2  predicted by gencan and genfinder [Arabidopsis thaliana] gi 30725294 gb AAP37669.1  At2g01260 [Arabidopsis thaliana] gi 110736023 dbj BAE9984.1  hypothetical protein [Arabidopsis thaliana] gi 330250328 gb AEC05422.1  uncharacterized protein AT2G01260 [Arabidopsis thaliana] | 380  | 369  | 1.00E-143 | 97.1  | 74.7 | 80.5 | uncharacterized protein                                                   | gbpln | Arabidopsis thaliana | AT2G01260.1   Symbols:   Protein of unknown function (DUF789)   chr2:135494-137504 REVERSE LENGTH=369                                              | 380  | 369 | 2.33E-156 | 97.1  | 74.7 | 80.5 |
| Rsa1.0_00250.1.g9629.t1 | gb AAG51754.1 AC068667.33 reverse transcriptase, putative; 100033-105622 [Arabidopsis thaliana]                                                                                                                                                                                                                                                                             | 1581 | 1557 | 0         | 98.5  | 44.3 | 58.9 | reverse transcriptase, putative; 100033-105622                            | gbpln | Arabidopsis thaliana | AT4G29090.1   Symbols:   Ribonuclease H-like superfamily protein   chr4:14333528-14335255 FORWARD LENGTH=575                                       | 1581 | 575 | 1.00E-54  | 36.4  | 6.8  | 10.9 |
| Rsa1.0_00251.1.g9630.t1 | gb AAG51783.1 AC079679.3 reverse transcriptase, putative; 16838-20266 [Arabidopsis thaliana]                                                                                                                                                                                                                                                                                | 196  | 1142 | 1.00E-31  | 582.7 | 42.3 | 59.2 | reverse transcriptase, putative; 16838-20266                              | gbpln | Arabidopsis thaliana | #                                                                                                                                                  | #    | #   | #         | #     | #    | #    |
| Rsa1.0_00251.1.g9631.t1 | ref XP_002874383.1  ATGID1C/GID1C [Arabidopsis lyrata subsp. lyrata] gi 297320220 gb EFH50642.1  ATGID1C/GID1C [Arabidopsis lyrata subsp. lyrata]                                                                                                                                                                                                                           | 343  | 344  | 0         | 100.3 | 92.7 | 96.2 | ATGID1C/GID1C                                                             | gbpln | Arabidopsis lyrata   | AT5G27320.1   Symbols: ATGID1C, GID1C   alpha/beta-Hydrolases superfamily protein   chr5:96329254-9630746 FORWARD LENGTH=344                       | 343  | 344 | 0         | 100.3 | 92.7 | 95.3 |
| Rsa1.0_00251.1.g9632.t1 | ref NP_198085.1  Prefoldin chaperone subunit family protein [Arabidopsis thaliana] gi 332006290 gb AED93673.1  Prefoldin chaperone subunit family protein [Arabidopsis thaliana]                                                                                                                                                                                            | 603  | 628  | 0         | 104.1 | 71.1 | 84.6 | Prefoldin chaperone subunit family protein                                | gbpln | Arabidopsis thaliana | AT5G27330.1   Symbols:   Prefoldin chaperone subunit family protein   chr5:96329297-9634883 REVERSE LENGTH=628                                     | 603  | 628 | 0         | 104.1 | 71.1 | 84.6 |
| Rsa1.0_00251.1.g9633.t1 | emb CAB39638.1  RNA-directed DNA polymerase-like protein [Arabidopsis thaliana] gi 7267666 emb CAB78094.1  RNA-directed DNA polymerase-like protein [Arabidopsis thaliana]                                                                                                                                                                                                  | 805  | 1274 | 0         | 158.3 | 57.5 | 71.1 | RNA-directed DNA polymerase-like protein                                  | gbpln | Arabidopsis thaliana | AT4G29090.1   Symbols:   Ribonuclease H-like superfamily protein   chr4:14333528-14335255 FORWARD LENGTH=575                                       | 805  | 575 | 8.00E-36  | 71.4  | 16.6 | 25.7 |
| Rsa1.0_00251.1.g9634.t1 | ref XP_002874378.1  predicted protein [Arabidopsis lyrata subsp. lyrata] gi 297320215 gb EFH50637.1  predicted protein [Arabidopsis lyrata subsp. lyrata]                                                                                                                                                                                                                   | 69   | 463  | 2.00E-21  | 671.0 | 71.0 | 82.6 | predicted protein                                                         | gbpln | Arabidopsis lyrata   | AT5G27360.1   Symbols: SFP2   Major facilitator superfamily protein   chr5:9657119-9662425 FORWARD LENGTH=478                                      | 69   | 478 | 2.00E-23  | 692.8 | 69.6 | 82.6 |
| Rsa1.0_00251.1.g9635.t1 | gb AAG50806.1 AC079281.8 unknown protein [Arabidopsis thaliana]                                                                                                                                                                                                                                                                                                             | 1741 | 1213 | 0         | 69.7  | 26.4 | 38.8 | unknown protein                                                           | gbpln | Arabidopsis thaliana | AT5G18880.1   Symbols:   RNA-directed DNA polymerase (reverse transcriptase)-related family protein   chr5:6300535-6301422 REVERSE LENGTH=295      | 1741 | 295 | 4.00E-79  | 16.9  | 8.4  | 11.7 |
| Rsa1.0_00251.1.g9636.t1 | gb ACX70133.1  glutathione synthetase [Brassica rapa subsp. chinensis]                                                                                                                                                                                                                                                                                                      | 459  | 478  | 0         | 104.1 | 94.1 | 96.7 | glutathione synthetase                                                    | gbpln | Brassica rapa        | AT5G27380.1   Symbols: GSH2, GSHB   glutathione synthetase 2   chr5:9668211-9670912 REVERSE LENGTH=539                                             | 459  | 539 | 0         | 117.4 | 83.9 | 92.2 |
| Rsa1.0_00251.1.g9637.t2 | ref XP_002872273.1  protein translocase [Arabidopsis lyrata subsp. lyrata] gi 297318110 gb EFH48532.1  protein translocase [Arabidopsis lyrata subsp. lyrata]                                                                                                                                                                                                               | 314  | 314  | 1.00E-148 | 100.0 | 82.2 | 87.3 | protein translocase                                                       | gbpln | Arabidopsis lyrata   | AT5G27395.1   Symbols:   Mitochondrial inner membrane translocase complex, subunit Tim44-related protein   chr5:9671845-9674085 REVERSE LENGTH=313 | 314  | 313 | 1.00E-147 | 99.7  | 81.2 | 86.0 |
| Rsa1.0_00251.1.g9638.t1 | ref NP_198091.2  Mog1/PsbP/DUF1795-like photosystem II reaction center PsbP family protein [Arabidopsis thaliana] gi 332006299 gb AED93681.1  Mog1/PsbP/DUF1795-like photosystem II reaction center PsbP family protein [Arabidopsis thaliana]                                                                                                                              | 238  | 241  | 2.00E-87  | 101.3 | 76.1 | 80.7 | Mog1/PsbP/DUF1795-like photosystem II reaction center PsbP family protein | gbpln | Arabidopsis thaliana | AT5G27390.1   Symbols:   Mog1/PsbP/DUF1795-like photosystem II reaction center PsbP family protein   chr5:9674634-9676118 REVERSE LENGTH=241       | 238  | 241 | 6.00E-90  | 101.3 | 76.1 | 80.7 |
| Rsa1.0_00251.1.g9639.t1 | ref XP_002874375.1  hypothetical protein ARALYDRAFT_910844 [Arabidopsis lyrata subsp. lyrata] gi 297320212 gb EFH50634.1  hypothetical protein ARALYDRAFT_910844 [Arabidopsis lyrata subsp. lyrata]                                                                                                                                                                         | 367  | 369  | 0         | 100.5 | 85.0 | 91.0 | hypothetical protein ARALYDRAFT_910844                                    | gbpln | Arabidopsis lyrata   | AT5G27400.1   Symbols:   S-adenosyl-L-methionine-dependent methyltransferases superfamily protein   chr5:9676362-9678285 FORWARD LENGTH=369        | 367  | 369 | 1.00E-177 | 100.5 | 82.0 | 89.1 |
| Rsa1.0_00251.1.g9640.t1 | ref NP_001190410.1  branched-chain-amino-acid aminotransferase-like protein 2 [Arabidopsis thaliana] gi 332006301 gb AED93684.1  branched-chain-amino-acid aminotransferase-like protein 2 [Arabidopsis thaliana]                                                                                                                                                           | 558  | 936  | 0         | 167.7 | 92.8 | 96.4 | branched-chain-amino-acid aminotransferase-like protein 2                 | gbpln | Arabidopsis thaliana | AT5G27410.2   Symbols:   D-aminoacid aminotransferase-like PLP-dependent enzymes superfamily protein   chr5:9676362-9682468 FORWARD LENGTH=936     | 558  | 936 | 0         | 167.7 | 92.8 | 96.4 |
| Rsa1.0_00251.1.g9641.t1 | ref XP_002874373.1  zinc finger family protein [Arabidopsis lyrata subsp. lyrata] gi 297320210 gb EFH50632.1  zinc finger family protein [Arabidopsis lyrata subsp. lyrata]                                                                                                                                                                                                 | 253  | 370  | 6.00E-85  | 146.2 | 62.5 | 73.1 | zinc finger family protein                                                | gbpln | Arabidopsis lyrata   | AT5G27420.1   Symbols: CNII, ATL31   carbon/nitrogen insensitive 1   chr5:9684119-9685225 FORWARD LENGTH=368                                       | 253  | 368 | 3.00E-86  | 145.5 | 62.8 | 71.5 |

|                          |                                                                                                                                                                                                                                                                                                                                                                                                                                                                                                   |      |     |           |       |      |      |                                                                                                                                                                        |       |                      |                                                                                                                                  |      |     |           |       |      |      |
|--------------------------|---------------------------------------------------------------------------------------------------------------------------------------------------------------------------------------------------------------------------------------------------------------------------------------------------------------------------------------------------------------------------------------------------------------------------------------------------------------------------------------------------|------|-----|-----------|-------|------|------|------------------------------------------------------------------------------------------------------------------------------------------------------------------------|-------|----------------------|----------------------------------------------------------------------------------------------------------------------------------|------|-----|-----------|-------|------|------|
| Rsa1.0_00251.1.g9642.t1  | refNP_198094.1  E3 ubiquitin-protein ligase ATL31 [Arabidopsis thaliana] gi 88565208 sp Q8LGA5.2 ATL31.ARATH RecName: Full=E3 ubiquitin-protein ligase ATL31; AltName: Full=Protein CARBON/NITROGEN INSENSITIVE 1; AltName: Full=Protein SUPER SURVIVAL 1; AltName: Full=RING-H2 finger protein ATL31; Flags: Precursor gi 110742271 dbj BAE99061.1  RING-H2 zinc finger protein-like [Arabidopsis thaliana] gi 332006302 gb AED93685.1  E3 ubiquitin-protein ligase ATL31 [Arabidopsis thaliana] | 295  | 368 | 1.00E-75  | 124.7 | 53.2 | 63.1 | E3 ubiquitin-protein ligase ATL31                                                                                                                                      | gbpln | Arabidopsis thaliana | AT5G27420.1   Symbols: CNI1, ATL31   carbon/nitrogen insensitive 1   chr5:9684119-9685225 FORWARD LENGTH=368                     | 295  | 368 | 3.00E-78  | 124.7 | 53.2 | 63.1 |
| Rsa1.0_00251.1.g9643.t1  | #                                                                                                                                                                                                                                                                                                                                                                                                                                                                                                 | #    | #   | #         | #     | #    | #    | -                                                                                                                                                                      | ----  | ----                 | #                                                                                                                                | #    | #   | #         | #     | #    |      |
| Rsa1.0_00251.1.g9644.t1  | gb EOA21694.1  hypothetical protein CARUB_v10002121mg [Capsella rubella] gi 482557503 gb EOA21695.1  hypothetical protein CARUB_v10002121mg [Capsella rubella]                                                                                                                                                                                                                                                                                                                                    | 167  | 167 | 3.00E-90  | 100.0 | 94.6 | 98.8 | hypothetical protein CARUB_v10002121mg                                                                                                                                 | gbpln | Capsella rubella     | AT5G27430.1   Symbols:   Signal peptidase subunit   chr5:9687470-9689185 FORWARD LENGTH=167                                      | 167  | 167 | 1.00E-92  | 100.0 | 94.6 | 98.8 |
| Rsa1.0_00251.1.g9645.t1  | ref XP_002877486.1  predicted protein [Arabidopsis lyrata subsp. lyrata] gi 297323324 gb EFH53745.1  predicted protein [Arabidopsis lyrata subsp. lyrata]                                                                                                                                                                                                                                                                                                                                         | 196  | 362 | 8.00E-41  | 184.7 | 48.0 | 53.6 | predicted protein                                                                                                                                                      | gbpln | Arabidopsis lyrata   | AT2G34280.1   Symbols:   F-box and associated interaction domains-containing protein   chr2:14470335-14471510 REVERSE LENGTH=391 | 196  | 391 | 2.00E-32  | 199.5 | 41.8 | 50.5 |
| Rsa1.0_00251.1.g9646.t1  | ref XP_002872268.1  mitochondrial substrate carrier family protein [Arabidopsis lyrata subsp. lyrata] gi 297318105 gb EFH48527.1  mitochondrial substrate carrier family protein [Arabidopsis lyrata subsp. lyrata]                                                                                                                                                                                                                                                                               | 299  | 321 | 1.00E-120 | 107.4 | 70.9 | 74.6 | mitochondrial substrate carrier family protein                                                                                                                         | gbpln | Arabidopsis lyrata   | AT5G27520.1   Symbols: PNC2   peroxisomal adenine nucleotide carrier 2   chr5:9714664-9716244 REVERSE LENGTH=321                 | 299  | 321 | 1.00E-122 | 107.4 | 70.9 | 74.2 |
| Rsa1.0_00251.1.g9647.t8  | gb EOA20124.1  hypothetical protein CARUB_v10000404mg, partial [Capsella rubella]                                                                                                                                                                                                                                                                                                                                                                                                                 | 619  | 664 | 0         | 107.3 | 84.2 | 90.5 | hypothetical protein CARUB_v10000404mg, partial                                                                                                                        | gbpln | Capsella rubella     | AT5G27540.2   Symbols: MIRO1   MIRO-related GTP-ase 1   chr5:9722816-9727112 FORWARD LENGTH=648                                  | 619  | 648 | 0         | 104.7 | 83.5 | 90.1 |
| Rsa1.0_00251.1.g9648.t1  | gb EOA23059.1  hypothetical protein CARUB_v10003829mg [Capsella rubella]                                                                                                                                                                                                                                                                                                                                                                                                                          | 698  | 698 | 0         | 100.0 | 88.7 | 95.4 | hypothetical protein CARUB_v10003829mg                                                                                                                                 | gbpln | Capsella rubella     | AT5G27600.1   Symbols: LACS7, ATLACS7   long-chain acyl-CoA synthetase 7   chr5:9742616-9746795 FORWARD LENGTH=700               | 698  | 700 | 0         | 100.3 | 87.1 | 94.3 |
| Rsa1.0_00251.1.g9649.t1  | ref NP_198113.2  protein ALWAYS EARLY 1 [Arabidopsis thaliana] gi 296439606 sp Q6A331.2 ALY1.ARATH RecName: Full=Protein ALWAYS EARLY 1; Short=ATALY1 gi 225898943 dbj BAH30602.1  hypothetical protein [Arabidopsis thaliana] gi 332006323 gb AED93706.1  protein ALWAYS EARLY 1 [Arabidopsis thaliana]                                                                                                                                                                                          | 1054 | 971 | 0         | 92.1  | 59.5 | 68.7 | protein ALWAYS EARLY 1                                                                                                                                                 | gbpln | Arabidopsis thaliana | AT5G27610.1   Symbols: ATALY1, ALY1   DIRP_Myb-like DNA-binding domain   chr5:9764852-9769706 FORWARD LENGTH=971                 | 1054 | 971 | 0         | 92.1  | 59.5 | 68.7 |
| Rsa1.0_00251.1.g9650.t1  | gb EOA20680.1  hypothetical protein CARUB_v10000993mg [Capsella rubella]                                                                                                                                                                                                                                                                                                                                                                                                                          | 432  | 435 | 0         | 100.7 | 87.0 | 93.5 | hypothetical protein CARUB_v10000993mg                                                                                                                                 | gbpln | Capsella rubella     | AT5G27660.1   Symbols:   Trypsin family protein with PDZ domain   chr5:9789835-9792235 REVERSE LENGTH=428                        | 432  | 428 | 0         | 99.1  | 78.9 | 86.6 |
| Rsa1.0_00251.1.g9651.t1  | ref NP_198119.1  histone H2A 7 [Arabidopsis thaliana] gi 75306451 sp Q94F49.1 H2A5.ARATH RecName: Full=Probable histone H2A.5; AltName: Full=HTA7 gi 14326516 gb AAK60303.1 AF385711.1 AT5g27670/F15A18_130 [Arabidopsis thaliana] gi 18700220 gb AAL77720.1 AT5g27670/F15A18_130 [Arabidopsis thaliana] gi 332006330 gb AED93713.1  histone H2A 7 [Arabidopsis thaliana]                                                                                                                         | 155  | 150 | 2.00E-66  | 96.8  | 83.2 | 89.0 | histone H2A 7                                                                                                                                                          | gbpln | Arabidopsis thaliana | AT5G27670.1   Symbols: HTA7   histone H2A 7   chr5:9792807-9793365 REVERSE LENGTH=150                                            | 155  | 150 | 5.00E-69  | 96.8  | 83.2 | 89.0 |
| Rsa1.0_00251.1.g9652.t14 | gb AAO52679.1  putative DNA helicase RecQsim [Brassica napus]                                                                                                                                                                                                                                                                                                                                                                                                                                     | 949  | 880 | 0         | 92.7  | 75.8 | 79.8 | putative DNA helicase RecQsim                                                                                                                                          | gbpln | Brassica napus       | AT5G27680.1   Symbols: RECQSIM   RECQ helicase SIM   chr5:9794244-9798637 REVERSE LENGTH=858                                     | 949  | 858 | 0         | 90.4  | 70.1 | 75.3 |
| Rsa1.0_00251.1.g9653.t1  | gb EOA21987.1  hypothetical protein CARUB_v10002364mg [Capsella rubella]                                                                                                                                                                                                                                                                                                                                                                                                                          | 82   | 82  | 9.00E-40  | 100.0 | 93.9 | 97.6 | hypothetical protein CARUB_v10002364mg                                                                                                                                 | gbpln | Capsella rubella     | AT5G27700.1   Symbols:   Ribosomal protein S21e   chr5:9807541-9808048 REVERSE LENGTH=82                                         | 82   | 82  | 2.00E-42  | 100.0 | 93.9 | 97.6 |
| Rsa1.0_00251.1.g9654.t1  | sp Q43582.1 LSM4.TOBAC RecName: Full=Probable U6 snRNA-associated Sm-like protein LSM4; AltName: Full=Glycine-rich protein 10; Short=GRP 10 gi 790473 emb CAA58702.1  unnamed protein product [Nicotiana tabacum]                                                                                                                                                                                                                                                                                 | 134  | 146 | 1.00E-50  | 109.0 | 73.1 | 74.6 | RecName: Full=Probable U6 snRNA-associated Sm-like protein LSM4; AltName: Full=Glycine-rich protein 10; Short=GRP 10 gi 790473 emb CAA58702.1  unnamed protein product | gbpln | Nicotiana tabacum    | AT5G27720.1   Symbols: emb1644   Small nuclear ribonucleoprotein family protein   chr5:9815904-9817304 FORWARD LENGTH=129        | 134  | 129 | 3.00E-50  | 96.3  | 67.2 | 67.2 |

|                         |                                                                                                                                                                                                                                                                                                                                                                                                                                                                          |     |     |           |       |      |      |                                        |       |                      |                                                                                                                                                                                                                                                                                                                                                                                                                          |     |     |           |       |      |      |
|-------------------------|--------------------------------------------------------------------------------------------------------------------------------------------------------------------------------------------------------------------------------------------------------------------------------------------------------------------------------------------------------------------------------------------------------------------------------------------------------------------------|-----|-----|-----------|-------|------|------|----------------------------------------|-------|----------------------|--------------------------------------------------------------------------------------------------------------------------------------------------------------------------------------------------------------------------------------------------------------------------------------------------------------------------------------------------------------------------------------------------------------------------|-----|-----|-----------|-------|------|------|
| Rsa1.0_00251.1.g9655.t2 | refNP_198126.1  replication factor C subunit 3/5 [Arabidopsis thaliana] gi 18389268 gb AAL67077.1  putative replication factor C [Arabidopsis thaliana] gi 20259637 gb AAM14175.1  putative replication factor C [Arabidopsis thaliana] gi 332006337 gb AED93720.1  protein embryo defective 161 [Arabidopsis thaliana]                                                                                                                                                  | 432 | 354 | 0         | 81.9  | 75.0 | 75.9 | replication factor C subunit 3/5       | gbpln | Arabidopsis thaliana | AT5G27740.1   Symbols: EMB161, EMB2775, EMB251, RFC3   ATPase family associated with various cellular activities (AAA)   chr:5:9823831-9826869 FORWARD LENGTH=354                                                                                                                                                                                                                                                        | 432 | 354 | 0         | 81.9  | 75.0 | 75.9 |
| Rsa1.0_00251.1.g9656.t1 | db BAJ34418.1  unnamed protein product [Theillungiella halophila]                                                                                                                                                                                                                                                                                                                                                                                                        | 126 | 124 | 3.00E-50  | 98.4  | 92.1 | 95.2 | unnamed protein product                | ----  | ----                 | AT3G05560.3   Symbols:   Ribosomal L22e protein family   chr3:1614641-1615204 FORWARD LENGTH=124                                                                                                                                                                                                                                                                                                                         | 126 | 124 | 1.00E-51  | 98.4  | 90.5 | 94.4 |
| Rsa1.0_00251.1.g9657.t2 | refNP_001190413.1  uncharacterized protein [Arabidopsis thaliana] gi 332006350 gb AED93733.1  uncharacterized protein AT5G27830 [Arabidopsis thaliana]                                                                                                                                                                                                                                                                                                                   | 420 | 322 | 1.00E-129 | 76.7  | 58.6 | 63.8 | uncharacterized protein                | gbpln | Arabidopsis thaliana | AT5G27830.4   Symbols:   FUNCTIONS IN: molecular_function unknown; INVOLVED IN: response to oxidative stress; EXPRESSED IN: 22 plant structures; EXPRESSED DURING: 13 growth stages; CONTAINS InterPro DOMAIN/s: Folate receptor, conserved region (InterPro:IPR018143).   chr:5:9861203-9862742 FORWARD LENGTH=322                                                                                                      | 420 | 322 | 1.00E-131 | 76.7  | 58.6 | 63.8 |
| Rsa1.0_00251.1.g9658.t1 | refXP_002872257.1  hypothetical protein ARALYDRAFT_489548 [Arabidopsis lyrata subsp. lyrata] gi 297318094 gb EFH48516.1  hypothetical protein ARALYDRAFT_489548 [Arabidopsis lyrata subsp. lyrata]                                                                                                                                                                                                                                                                       | 371 | 318 | 1.00E-177 | 85.7  | 81.7 | 83.0 | hypothetical protein ARALYDRAFT_489548 | gbpln | Arabidopsis lyrata   | AT5G27840.2   Symbols: TOPP8   Calcineurin-like metallo-phosphoesterase superfamily protein   chr5:9863465-9864828 REVERSE LENGTH=324                                                                                                                                                                                                                                                                                    | 371 | 324 | 1.00E-179 | 87.3  | 81.4 | 82.7 |
| Rsa1.0_00251.1.g9659.t1 | refNP_187210.1  60S ribosomal protein L18-2 [Arabidopsis thaliana] gi 21431838 sp P42791.2 RL182_ARATH RecName: Full=60S ribosomal protein L18-2 gi 6714451 gb AAF26138.1 AC011620.14 putative 60S ribosomal protein L18 [Arabidopsis thaliana] gi 14335090 gb AAK59824.1  AT3g05590/F18C1_14 [Arabidopsis thaliana] gi 16974509 gb AAL31164.1  AT3g05590/F18C1_14 [Arabidopsis thaliana] gi 332640742 gb AEE74263.1  60S ribosomal protein L18-2 [Arabidopsis thaliana] | 187 | 187 | 3.00E-96  | 100.0 | 94.7 | 96.8 | 60S ribosomal protein L18-2            | gbpln | Arabidopsis thaliana | AT3G05590.1   Symbols: RPL18   ribosomal protein L18   chr3:1621511-1622775 FORWARD LENGTH=187                                                                                                                                                                                                                                                                                                                           | 187 | 187 | 1.00E-98  | 100.0 | 94.7 | 96.8 |
| Rsa1.0_00251.1.g9660.t1 | refNP_198138.2  uncharacterized protein [Arabidopsis thaliana] gi 238481400 refNP_001154743.1  uncharacterized protein [Arabidopsis thaliana] gi 332006354 gb AED93737.1  uncharacterized protein AT5G27860 [Arabidopsis thaliana] gi 332006355 gb AED93738.1  uncharacterized protein AT5G27860 [Arabidopsis thaliana]                                                                                                                                                  | 180 | 177 | 2.00E-37  | 98.3  | 52.2 | 54.4 | uncharacterized protein                | gbpln | Arabidopsis thaliana | AT5G27860.2   Symbols:   unknown protein; FUNCTIONS IN: molecular_function unknown; INVOLVED IN: biological_process unknown; LOCATED IN: chloroplast; EXPRESSED IN: pollen tube; Has 23049 Blast hits to 11981 proteins in 648 species: Archae - 2; Bacteria - 589; Metazoa - 13464; Fungi - 1977; Plants - 1635; Viruses - 89; Other Eukaryotes - 5293 (source: NCBI BLINK).   chr:5:9875068-9876442 REVERSE LENGTH=177 | 180 | 177 | 9.00E-40  | 98.3  | 52.2 | 54.4 |
| Rsa1.0_00251.1.g9661.t1 | #                                                                                                                                                                                                                                                                                                                                                                                                                                                                        | #   | #   | #         | #     | #    | -    | ----                                   | ----  | #                    | #                                                                                                                                                                                                                                                                                                                                                                                                                        | #   | #   | #         | #     | #    |      |
| Rsa1.0_00251.1.g9662.t1 | refNP_198139.1  pectinesterase 28 [Arabidopsis thaliana] gi 122214224 sp Q3E8Z8.1 PME28_ARATH RecName: Full=Putative pectinesterase/pectinesterase inhibitor 28; Includes: RecName: Full=Pectinesterase inhibitor 28; AltName: Full=Pectin methyltransferase inhibitor 28; Includes: RecName: Full=Pectinesterase 28; Short=PE 28; AltName: Full=Pectin methyltransferase 28; Short=AtPME28 gi 332006356 gb AED93739.1  pectinesterase 28 [Arabidopsis thaliana]         | 688 | 732 | 0         | 106.4 | 73.3 | 84.2 | pectinesterase 28                      | gbpln | Arabidopsis thaliana | AT5G27870.1   Symbols:   Plant invertase/pectin methyltransferase inhibitor superfamily   chr5:9878991-9881806 REVERSE LENGTH=732                                                                                                                                                                                                                                                                                        | 688 | 732 | 0         | 106.4 | 73.3 | 84.2 |
| Rsa1.0_00251.1.g9663.t1 | gb EOA22296.1  hypothetical protein CARUB_v10002897mg [Capsella rubella]                                                                                                                                                                                                                                                                                                                                                                                                 | 295 | 278 | 3.00E-68  | 94.2  | 54.2 | 64.4 | hypothetical protein CARUB_v10002897mg | gbpln | Capsella rubella     | AT5G27880.1   Symbols:   C2H2 and C2HC zinc fingers superfamily protein   chr:5:9885908-9886744 FORWARD LENGTH=278                                                                                                                                                                                                                                                                                                       | 295 | 278 | 7.00E-71  | 94.2  | 53.6 | 64.7 |
| Rsa1.0_00251.1.g9664.t1 | #                                                                                                                                                                                                                                                                                                                                                                                                                                                                        | #   | #   | #         | #     | #    | -    | ----                                   | ----  | #                    | #                                                                                                                                                                                                                                                                                                                                                                                                                        | #   | #   | #         | #     | #    |      |
| Rsa1.0_00251.1.g9665.t1 | refXP_002874340.1  predicted protein [Arabidopsis lyrata subsp. lyrata] gi 297320177 gb EFH50599.1  predicted protein [Arabidopsis lyrata subsp. lyrata]                                                                                                                                                                                                                                                                                                                 | 104 | 144 | 4.00E-15  | 138.5 | 49.0 | 57.7 | predicted protein                      | gbpln | Arabidopsis lyrata   | #                                                                                                                                                                                                                                                                                                                                                                                                                        | #   | #   | #         | #     | #    |      |

|                         |                                                                                                                                                                                                                   |      |      |           |       |      |      |                                        |       |                      |                                                                                                                                                                                                                                                                                                                                                                                                                                                                                                                         |      |      |           |       |      |      |
|-------------------------|-------------------------------------------------------------------------------------------------------------------------------------------------------------------------------------------------------------------|------|------|-----------|-------|------|------|----------------------------------------|-------|----------------------|-------------------------------------------------------------------------------------------------------------------------------------------------------------------------------------------------------------------------------------------------------------------------------------------------------------------------------------------------------------------------------------------------------------------------------------------------------------------------------------------------------------------------|------|------|-----------|-------|------|------|
| Rsa1.0_00251.1.g9666.t1 | #                                                                                                                                                                                                                 | #    | #    | #         | #     | #    | #    | #                                      | -     | ----                 | ----                                                                                                                                                                                                                                                                                                                                                                                                                                                                                                                    | #    | #    | #         | #     | #    | #    |
|                         | refXP_002874340.1   predicted protein [Arabidopsis lyrata subsp. lyrata]                                                                                                                                          |      |      |           |       |      |      |                                        |       |                      |                                                                                                                                                                                                                                                                                                                                                                                                                                                                                                                         |      |      |           |       |      |      |
| Rsa1.0_00251.1.g9667.t1 |                                                                                                                                                                                                                   | 94   | 144  | 3.00E-14  | 153.2 | 52.1 | 59.6 | predicted protein                      | gbpln | Arabidopsis lyrata   | #                                                                                                                                                                                                                                                                                                                                                                                                                                                                                                                       | #    | #    | #         | #     | #    | #    |
|                         | refXP_002874340.1   predicted protein [Arabidopsis lyrata subsp. lyrata]                                                                                                                                          |      |      |           |       |      |      |                                        |       |                      |                                                                                                                                                                                                                                                                                                                                                                                                                                                                                                                         |      |      |           |       |      |      |
| Rsa1.0_00251.1.g9668.t1 | #                                                                                                                                                                                                                 | #    | #    | #         | #     | #    | #    | -                                      | ----  | ----                 | #                                                                                                                                                                                                                                                                                                                                                                                                                                                                                                                       | #    | #    | #         | #     | #    | #    |
| Rsa1.0_00251.1.g9669.t1 | #                                                                                                                                                                                                                 | #    | #    | #         | #     | #    | #    | -                                      | ----  | ----                 | #                                                                                                                                                                                                                                                                                                                                                                                                                                                                                                                       | #    | #    | #         | #     | #    | #    |
| Rsa1.0_00251.1.g9670.t1 | #                                                                                                                                                                                                                 | #    | #    | #         | #     | #    | #    | -                                      | ----  | ----                 | #                                                                                                                                                                                                                                                                                                                                                                                                                                                                                                                       | #    | #    | #         | #     | #    | #    |
|                         | refXP_002872252.1   F-box family protein [Arabidopsis lyrata subsp. lyrata]                                                                                                                                       |      |      |           |       |      |      |                                        |       |                      |                                                                                                                                                                                                                                                                                                                                                                                                                                                                                                                         |      |      |           |       |      |      |
| Rsa1.0_00251.1.g9671.t1 |                                                                                                                                                                                                                   | 642  | 642  | 0         | 100.0 | 86.1 | 92.5 | F-box family protein                   | gbpln | Arabidopsis lyrata   | AT5G27920.1   Symbols:   F-box family protein   chr5:9942063-9944507 REVERSE LENGTH=642                                                                                                                                                                                                                                                                                                                                                                                                                                 | 642  | 642  | 0         | 100.0 | 84.6 | 91.9 |
|                         | refXP_002872242.1   hypothetical protein ARALYDRAFT_489519 [Arabidopsis lyrata subsp. lyrata]                                                                                                                     |      |      |           |       |      |      |                                        |       |                      |                                                                                                                                                                                                                                                                                                                                                                                                                                                                                                                         |      |      |           |       |      |      |
| Rsa1.0_00251.1.g9672.t1 |                                                                                                                                                                                                                   | 1031 | 991  | 0         | 96.1  | 85.1 | 88.7 | hypothetical protein ARALYDRAFT_489519 | gbpln | Arabidopsis lyrata   | AT5G26860.1   Symbols: LON_ARA_ARA_LON1   lon protease 1   chr5:9451183-9456631 FORWARD LENGTH=940                                                                                                                                                                                                                                                                                                                                                                                                                      | 1031 | 940  | 0         | 91.2  | 82.0 | 85.4 |
|                         | refXP_002872242.1   hypothetical protein ARALYDRAFT_489519 [Arabidopsis lyrata subsp. lyrata]                                                                                                                     |      |      |           |       |      |      |                                        |       |                      |                                                                                                                                                                                                                                                                                                                                                                                                                                                                                                                         |      |      |           |       |      |      |
| Rsa1.0_00251.1.g9673.t1 |                                                                                                                                                                                                                   | 694  | 713  | 0         | 102.7 | 88.6 | 93.7 | hypothetical protein CARUB_v10002922mg | gbpln | Capsella rubella     | AT5G26830.1   Symbols:   Threonyl-tRNA synthetase   chr5:9437351-9441568 FORWARD LENGTH=709                                                                                                                                                                                                                                                                                                                                                                                                                             | 694  | 709  | 0         | 102.2 | 86.2 | 91.9 |
|                         | gb[EOA22321.1] hypothetical protein CARUB_v10002922mg [Capsella rubella]                                                                                                                                          |      |      |           |       |      |      |                                        |       |                      |                                                                                                                                                                                                                                                                                                                                                                                                                                                                                                                         |      |      |           |       |      |      |
|                         | refXP_002886961.1   hypothetical protein ARALYDRAFT_894161 [Arabidopsis lyrata subsp. lyrata]                                                                                                                     |      |      |           |       |      |      |                                        |       |                      |                                                                                                                                                                                                                                                                                                                                                                                                                                                                                                                         |      |      |           |       |      |      |
| Rsa1.0_00251.1.g9674.t1 |                                                                                                                                                                                                                   | 283  | 299  | 5.00E-41  | 105.7 | 42.0 | 55.5 | hypothetical protein ARALYDRAFT_894161 | gbpln | Arabidopsis lyrata   | AT1G23950.5   Symbols:   Protein of unknown function (DUF626)   chr1:8469712-8471353 REVERSE LENGTH=343                                                                                                                                                                                                                                                                                                                                                                                                                 | 283  | 343  | 1.00E-23  | 121.2 | 35.3 | 51.9 |
|                         | refNP_198033.2   putative pectinesterase 52 [Arabidopsis thaliana]                                                                                                                                                |      |      |           |       |      |      |                                        |       |                      |                                                                                                                                                                                                                                                                                                                                                                                                                                                                                                                         |      |      |           |       |      |      |
| Rsa1.0_00251.1.g9675.t2 |                                                                                                                                                                                                                   | 336  | 293  | 1.00E-117 | 87.2  | 64.3 | 73.8 | putative pectinesterase 52             | gbpln | Arabidopsis thaliana | AT5G26810.1   Symbols:   Pectin lyase-like superfamily protein   chr5:9430952-9432969 FORWARD LENGTH=293                                                                                                                                                                                                                                                                                                                                                                                                                | 336  | 293  | 1.00E-119 | 87.2  | 64.3 | 73.8 |
|                         | refNP_198033.2   putative pectinesterase 52; Short=PE 52; AltName: Full=Pectin methyltransferase 52; Short=AtPME52; Flags: Precursor [332006225]   AED93608.1   putative pectinesterase 52 [Arabidopsis thaliana] |      |      |           |       |      |      |                                        |       |                      |                                                                                                                                                                                                                                                                                                                                                                                                                                                                                                                         |      |      |           |       |      |      |
|                         | refNP_198032.2   uncharacterized protein [Arabidopsis thaliana]                                                                                                                                                   |      |      |           |       |      |      |                                        |       |                      |                                                                                                                                                                                                                                                                                                                                                                                                                                                                                                                         |      |      |           |       |      |      |
| Rsa1.0_00251.1.g9676.t1 |                                                                                                                                                                                                                   | 111  | 112  | 3.00E-44  | 100.9 | 81.1 | 88.3 | uncharacterized protein                | gbpln | Arabidopsis thaliana | AT5G26800.1   Symbols:   FUNCTIONS IN: molecular_function unknown; INVOLVED IN: biological_process unknown; LOCATED IN: mitochondrion; CONTAINS InterPro DOMAIN/s: IGR protein motif (InterPro:IPR019083); BEST Arabidopsis thaliana protein match is: unknown protein (TAIR:AT3G05810.1); Has 1807 Blast hits to 1807 proteins in 277 species: Archae - 0; Bacteria - 0; Metazoa - 736; Fungi - 347; Plants - 385; Viruses - 0; Other Eukaryotes - 339 (source: NCBI BLINK).   chr5:9425224-9426485 FORWARD LENGTH=112 | 111  | 112  | 5.00E-47  | 100.9 | 81.1 | 88.3 |
|                         | refXP_002872235.1   hypothetical protein ARALYDRAFT_489512 [Arabidopsis lyrata subsp. lyrata]                                                                                                                     |      |      |           |       |      |      |                                        |       |                      |                                                                                                                                                                                                                                                                                                                                                                                                                                                                                                                         |      |      |           |       |      |      |
| Rsa1.0_00251.1.g9677.t1 |                                                                                                                                                                                                                   | 110  | 66   | 5.00E-16  | 60.0  | 41.8 | 44.5 | hypothetical protein ARALYDRAFT_489512 | gbpln | Arabidopsis lyrata   | AT5G26790.1   Symbols:   unknown protein; BEST Arabidopsis thaliana protein match is: unknown protein (TAIR:AT1G06475.1); Has 30201 Blast hits to 17322 proteins in 780 species: Archae - 12; Bacteria - 1396; Metazoa - 17338; Fungi - 3422; Plants - 5037; Viruses - 0; Other Eukaryotes - 2996 (source: NCBI BLINK).   chr5:9423151-9423357 FORWARD LENGTH=68                                                                                                                                                        | 110  | 68   | 1.00E-13  | 61.8  | 44.5 | 47.3 |
|                         | refXP_002872235.1   hypothetical protein ARALYDRAFT_489512 [Arabidopsis lyrata subsp. lyrata]                                                                                                                     |      |      |           |       |      |      |                                        |       |                      |                                                                                                                                                                                                                                                                                                                                                                                                                                                                                                                         |      |      |           |       |      |      |
| Rsa1.0_00252.1.g9678.t1 |                                                                                                                                                                                                                   | 153  | 149  | 2.00E-66  | 97.4  | 82.4 | 90.8 | hypothetical protein CARUB_v10028186mg | gbpln | Capsella rubella     | AT5G59040.1   Symbols: COPT3   copper transporter 3   chr5:23836724-23837179 FORWARD LENGTH=151                                                                                                                                                                                                                                                                                                                                                                                                                         | 153  | 151  | 4.00E-63  | 98.7  | 83.0 | 90.2 |
|                         | gb[EOA14861.1] hypothetical protein CARUB_v10028186mg [Capsella rubella]                                                                                                                                          |      |      |           |       |      |      |                                        |       |                      |                                                                                                                                                                                                                                                                                                                                                                                                                                                                                                                         |      |      |           |       |      |      |
|                         | refXP_002875373.1   hypothetical protein ARALYDRAFT_322858 [Arabidopsis lyrata subsp. lyrata]                                                                                                                     |      |      |           |       |      |      |                                        |       |                      |                                                                                                                                                                                                                                                                                                                                                                                                                                                                                                                         |      |      |           |       |      |      |
| Rsa1.0_00252.1.g9679.t2 |                                                                                                                                                                                                                   | 272  | 1047 | 1.00E-43  | 384.9 | 36.0 | 39.7 | hypothetical protein ARALYDRAFT_322858 | gbpln | Arabidopsis lyrata   | AT3G27325.2   Symbols:   hydrolases, acting on ester bonds   chr3:10095956-10102087 FORWARD LENGTH=1121                                                                                                                                                                                                                                                                                                                                                                                                                 | 272  | 1121 | 1.00E-45  | 412.1 | 35.3 | 39.3 |
|                         | refXP_002865336.1   helicase domain-containing protein [Arabidopsis lyrata subsp. lyrata]                                                                                                                         |      |      |           |       |      |      |                                        |       |                      |                                                                                                                                                                                                                                                                                                                                                                                                                                                                                                                         |      |      |           |       |      |      |
| Rsa1.0_00252.1.g9680.t1 |                                                                                                                                                                                                                   | 1238 | 1251 | 0         | 101.1 | 74.7 | 84.0 | helicase domain-containing protein     | gbpln | Arabidopsis lyrata   | AT1G33390.1   Symbols: ATFAS4, FAS4   RNA helicase family protein   chr1:12099738-12104108 REVERSE LENGTH=1237                                                                                                                                                                                                                                                                                                                                                                                                          | 1238 | 1237 | 0         | 99.9  | 73.8 | 83.1 |
|                         | refXP_002865336.1   helicase domain-containing protein [Arabidopsis lyrata subsp. lyrata]                                                                                                                         |      |      |           |       |      |      |                                        |       |                      |                                                                                                                                                                                                                                                                                                                                                                                                                                                                                                                         |      |      |           |       |      |      |

|                         |                                                                                                                                                                                                                                                                                                                                                                                                                                                                                                                                                                                                         |     |     |           |       |      |      |                                                                   |       |                      |                                                                                                                                                                                                                                                                                                                                                  |     |      |           |       |      |      |
|-------------------------|---------------------------------------------------------------------------------------------------------------------------------------------------------------------------------------------------------------------------------------------------------------------------------------------------------------------------------------------------------------------------------------------------------------------------------------------------------------------------------------------------------------------------------------------------------------------------------------------------------|-----|-----|-----------|-------|------|------|-------------------------------------------------------------------|-------|----------------------|--------------------------------------------------------------------------------------------------------------------------------------------------------------------------------------------------------------------------------------------------------------------------------------------------------------------------------------------------|-----|------|-----------|-------|------|------|
| Rsa1.0_00252.1.g9681.t1 | ref[XP_002875372.1] hypothetical protein ARALYDRAFT_484517 [Arabidopsis lyrata subsp. lyrata] gi 297321210 gb EFH51631.1                                                                                                                                                                                                                                                                                                                                                                                                                                                                                | 448 | 460 | 0         | 102.7 | 87.9 | 92.0 | hypothetical protein ARALYDRAFT_484517                            | gbpln | Arabidopsis lyrata   | AT3G27320.1   Symbols:   alpha/beta-Hydrolases superfamily protein   chr:3:10090307-10092391 FORWARD LENGTH=460                                                                                                                                                                                                                                  | 448 | 460  | 0         | 102.7 | 87.9 | 91.5 |
| Rsa1.0_00252.1.g9682.t1 | ref[XP_002875371.1] predicted protein [Arabidopsis lyrata subsp. lyrata] gi 297321209 gb EFH51630.1  predicted protein [Arabidopsis lyrata subsp. lyrata]                                                                                                                                                                                                                                                                                                                                                                                                                                               | 443 | 479 | 0         | 108.1 | 73.6 | 84.9 | predicted protein                                                 | gbpln | Arabidopsis lyrata   | AT5G11250.1   Symbols:   Disease resistance protein (TIR-NBS-LRR class)   chr:5:3587978-3591960 REVERSE LENGTH=1189                                                                                                                                                                                                                              | 443 | 1189 | 1.00E-145 | 268.4 | 59.4 | 74.0 |
| Rsa1.0_00252.1.g9683.t1 | ref[NP_189363.1] TRAM, LAG1 and CLN8 (TLC) lipid-sensing domain containing protein [Arabidopsis thaliana] gi 9294220 dbj BAB02122.1  unnamed protein product [Arabidopsis thaliana] gi 48310204 gb AAT41774.1  At3g27270 [Arabidopsis thaliana] gi 52218804 gb AAU29472.1  At3g27270 [Arabidopsis thaliana] gi 332643765 gb AEE77286.1  TRAM, LAG1 and CLN8 (TLC) lipid-sensing domain containing protein [Arabidopsis thaliana]                                                                                                                                                                        | 344 | 249 | 1.00E-106 | 72.4  | 54.1 | 58.4 | TRAM, LAG1 and CLN8 (TLC) lipid-sensing domain containing protein | gbpln | Arabidopsis thaliana | AT3G27270.1   Symbols:   TRAM, LAG1 and CLN8 (TLC) lipid-sensing domain containing protein   chr:3:10073315-10074064 FORWARD LENGTH=249                                                                                                                                                                                                          | 344 | 249  | 1.00E-109 | 72.4  | 54.1 | 58.4 |
| Rsa1.0_00252.1.g9684.t3 | gb AAC26234.1  contains similarity to maize transposon MuDR (GB:M76978) [Arabidopsis thaliana]                                                                                                                                                                                                                                                                                                                                                                                                                                                                                                          | 903 | 940 | 0         | 104.1 | 47.1 | 61.4 | contains similarity to maize transposon MuDR (GB:M76978)          | gbpln | Arabidopsis thaliana | #                                                                                                                                                                                                                                                                                                                                                | #   | #    | #         | #     | #    | #    |
| Rsa1.0_00252.1.g9685.t1 | ref[XP_002877435.1] hypothetical protein ARALYDRAFT_905750 [Arabidopsis lyrata subsp. lyrata] gi 297323273 gb EFH53694.1  hypothetical protein ARALYDRAFT_905750 [Arabidopsis lyrata subsp. lyrata]                                                                                                                                                                                                                                                                                                                                                                                                     | 171 | 175 | 1.00E-33  | 102.3 | 42.7 | 58.5 | hypothetical protein ARALYDRAFT_905750                            | gbpln | Arabidopsis lyrata   | #                                                                                                                                                                                                                                                                                                                                                | #   | #    | #         | #     | #    | #    |
| Rsa1.0_00252.1.g9686.t1 | ref[NP_189361.1] uncharacterized protein [Arabidopsis thaliana] gi 9294218 dbj BAB02120.1  unnamed protein product [Arabidopsis thaliana] gi 46931316 gb AAT06462.1  At3g27250 [Arabidopsis thaliana] gi 62320492 dbj BAD95032.1  hypothetical protein [Arabidopsis thaliana] gi 332643762 gb AEE77283.1  uncharacterized protein AT3G27250 [Arabidopsis thaliana]                                                                                                                                                                                                                                      | 277 | 282 | 1.00E-122 | 101.8 | 78.3 | 87.4 | uncharacterized protein                                           | gbpln | Arabidopsis thaliana | AT3G27250.1   Symbols:   unknown protein; BEST Arabidopsis thaliana protein match is: unknown protein (TAIR:AT5G40800.1); Has 104 Blast hits to 104 proteins in 13 species: Archae - 0; Bacteria - 0; Metazoa - 0; Fungi - 0; Plants - 104; Viruses - 0; Other Eukaryotes - 0 (source: NCBI BLINK).   chr:3:10061633-10062481 FORWARD LENGTH=282 | 277 | 282  | 1.00E-124 | 101.8 | 78.3 | 87.4 |
| Rsa1.0_00252.1.g9687.t1 | ref[XP_002509561.1] cytochrome C1, putative [Ricinus communis] gi 223549460 gb EEF50948.1  cytochrome C1, putative [Ricinus communis]                                                                                                                                                                                                                                                                                                                                                                                                                                                                   | 309 | 310 | 1.00E-160 | 100.3 | 86.4 | 93.5 | cytochrome C1, putative                                           | gbpln | Ricinus communis     | AT3G27240.1   Symbols:   Cytochrome C1 family   chr:3:10056144-10058370 REVERSE LENGTH=307                                                                                                                                                                                                                                                       | 309 | 307  | 1.00E-161 | 99.4  | 95.8 | 97.1 |
| Rsa1.0_00252.1.g9688.t1 | #                                                                                                                                                                                                                                                                                                                                                                                                                                                                                                                                                                                                       | #   | #   | #         | #     | #    | #    | -                                                                 | ----  | ----                 | #                                                                                                                                                                                                                                                                                                                                                | #   | #    | #         | #     | #    |      |
| Rsa1.0_00252.1.g9689.t1 | ref[NP_565406.1] LysM domain-containing GPI-anchored protein 2 [Arabidopsis thaliana] gi 39257899 sp C23006.1 LYM2_ARATH RecName: Full=LysM domain-containing GPI-anchored protein 2; AltName: Full=Chitin elicitor-binding protein LYM2; Short=CeBiP LYM2; Flags: Precursor gi 16226689 gb AAL16233.1 AF428464.1 delta-8 sphingolipid desaturase [Arabidopsis thaliana] gi 15810365 gb AAL07070.1  unknown protein [Arabidopsis thaliana] gi 21928083 gb AAM78070.1  At2g17120 [Arabidopsis thaliana] gi 330251493 gb AEC06587.1  LysM domain-containing GPI-anchored protein 2 [Arabidopsis thaliana] | 111 | 350 | 3.00E-32  | 315.3 | 67.6 | 73.0 | LysM domain-containing GPI-anchored protein 2                     | gbpln | Arabidopsis thaliana | AT2G17120.1   Symbols:   LYM2   lysm domain GPI-anchored protein 2 precursor   chr:2:7459156-7460648 FORWARD LENGTH=350                                                                                                                                                                                                                          | 111 | 350  | 5.00E-35  | 315.3 | 67.6 | 73.0 |

|                         |                                                                                                                                                                                                                                                                                                                                                                                                                |     |     |           |       |      |      |                                                 |       |                      |                                                                                                                                                                                                                                                                                                                                                                                                                                                                                                           |     |     |           |       |      |      |
|-------------------------|----------------------------------------------------------------------------------------------------------------------------------------------------------------------------------------------------------------------------------------------------------------------------------------------------------------------------------------------------------------------------------------------------------------|-----|-----|-----------|-------|------|------|-------------------------------------------------|-------|----------------------|-----------------------------------------------------------------------------------------------------------------------------------------------------------------------------------------------------------------------------------------------------------------------------------------------------------------------------------------------------------------------------------------------------------------------------------------------------------------------------------------------------------|-----|-----|-----------|-------|------|------|
| Rsa1.0_00252.1.g9690.t1 | ref[XP_002877027.1] hypothetical protein ARALYDRAFT_484504 [Arabidopsis lyrata subsp. lyrata] gi 297322855 gb EFH53286.1  hypothetical protein ARALYDRAFT_484504 [Arabidopsis lyrata subsp. lyrata]                                                                                                                                                                                                            | 246 | 241 | 2.00E-68  | 98.0  | 73.6 | 80.5 | hypothetical protein ARALYDRAFT_484504          | gbpln | Arabidopsis lyrata   | AT3G27210.1   Symbols:   unknown protein; FUNCTIONS IN: molecular function unknown; INVOLVED IN: N-terminal protein myristoylation; LOCATED IN: plasma membrane; EXPRESSED IN: 22 plant structures; BEST Arabidopsis thaliana protein match is: unknown protein (TAIR:AT5G40860.1); Has 133 Blast hits to 98 proteins in 25 species: Archae - 0; Bacteria - 6; Metazoa - 32; Fungi - 7; Plants - 70; Viruses - 0; Other Eukaryotes - 18 (source: NCBI BLINK).   chr3:10045458-10047222 REVERSE LENGTH=234 | 246 | 234 | 8.00E-65  | 95.1  | 69.1 | 75.6 |
| Rsa1.0_00252.1.g9691.t1 | gb EOA24837.1  hypothetical protein CARUB_v10018126mg [Capsella rubella]                                                                                                                                                                                                                                                                                                                                       | 160 | 171 | 2.00E-56  | 106.9 | 65.6 | 71.3 | hypothetical protein CARUB_v10018126mg          | gbpln | Capsella rubella     | AT3G27200.1   Symbols:   Cupredoxin superfamily protein   chr3:10043738-10044340 REVERSE LENGTH=174                                                                                                                                                                                                                                                                                                                                                                                                       | 160 | 174 | 8.00E-58  | 108.8 | 63.8 | 70.6 |
| Rsa1.0_00252.1.g9692.t1 | gb EOA23905.1  hypothetical protein CARUB_v10017120mg [Capsella rubella]                                                                                                                                                                                                                                                                                                                                       | 483 | 483 | 0         | 100.0 | 94.0 | 96.5 | hypothetical protein CARUB_v10017120mg          | gbpln | Capsella rubella     | AT3G27190.1   Symbols: UKL2   uridine kinase-like 2   chr3:10039504-10042917 REVERSE LENGTH=483                                                                                                                                                                                                                                                                                                                                                                                                           | 483 | 483 | 0         | 100.0 | 93.6 | 96.7 |
| Rsa1.0_00252.1.g9693.t1 | gb EOA23519.1  hypothetical protein CARUB_v10016713mg [Capsella rubella]                                                                                                                                                                                                                                                                                                                                       | 783 | 779 | 0         | 99.5  | 91.7 | 95.5 | hypothetical protein CARUB_v10016713mg          | gbpln | Capsella rubella     | AT3G27170.1   Symbols: CLC-B, ATCLC-B   chloride channel B   chr3:10024147-10026921 FORWARD LENGTH=780                                                                                                                                                                                                                                                                                                                                                                                                    | 783 | 780 | 0         | 99.6  | 91.2 | 94.8 |
| Rsa1.0_00252.1.g9694.t1 | gb EOA23280.1  hypothetical protein CARUB_v10018089mg [Capsella rubella]                                                                                                                                                                                                                                                                                                                                       | 188 | 183 | 6.00E-58  | 97.3  | 71.8 | 77.1 | hypothetical protein CARUB_v10018089mg          | gbpln | Capsella rubella     | AT3G27160.1   Symbols: GHS1   Ribosomal protein S21 family protein   chr3:10017531-10018854 FORWARD LENGTH=183                                                                                                                                                                                                                                                                                                                                                                                            | 188 | 183 | 8.00E-56  | 97.3  | 72.3 | 76.6 |
| Rsa1.0_00252.1.g9695.t1 | gb EOA25852.1  hypothetical protein CARUB_v10019230mg [Capsella rubella]                                                                                                                                                                                                                                                                                                                                       | 411 | 420 | 0         | 102.2 | 81.3 | 89.3 | hypothetical protein CARUB_v10019230mg          | gbpln | Capsella rubella     | AT3G27150.1   Symbols:   Galactose oxidase/kelch repeat superfamily protein   chr3:10009692-10010960 REVERSE LENGTH=422                                                                                                                                                                                                                                                                                                                                                                                   | 411 | 422 | 0         | 102.7 | 80.8 | 89.1 |
| Rsa1.0_00252.1.g9696.t2 | gb EOA25231.1  hypothetical protein CARUB_v10018544mg [Capsella rubella]                                                                                                                                                                                                                                                                                                                                       | 675 | 667 | 0         | 98.8  | 86.5 | 90.7 | hypothetical protein CARUB_v10018544mg          | gbpln | Capsella rubella     | AT3G27120.1   Symbols:   P-loop containing nucleoside triphosphate hydrolases superfamily protein   chr3:10000248-10003265 REVERSE LENGTH=476                                                                                                                                                                                                                                                                                                                                                             | 675 | 476 | 0         | 70.5  | 64.6 | 67.3 |
| Rsa1.0_00252.1.g9697.t1 | ref[NP_189345.1] DCD (Development and Cell Death) domain protein [Arabidopsis thaliana] gi 9279632 dbj BAB01090.1  unnamed protein product [Arabidopsis thaliana] gi 16604450 gb AAL24231.1  AT3g27090/MOJ10.18 [Arabidopsis thaliana] gi 21655279 gb AAM65351.1  AT3g27090/MOJ10.18 [Arabidopsis thaliana] gi 332643744 gb AEE77265.1  DCD (Development and Cell Death) domain protein [Arabidopsis thaliana] | 284 | 296 | 1.00E-128 | 104.2 | 84.9 | 89.1 | DCD (Development and Cell Death) domain protein | gbpln | Arabidopsis thaliana | AT3G27090.1   Symbols:   DCD (Development and Cell Death) domain protein   chr3:9900020-9991407 FORWARD LENGTH=296                                                                                                                                                                                                                                                                                                                                                                                        | 284 | 296 | 1.00E-130 | 104.2 | 84.9 | 89.1 |
| Rsa1.0_00252.1.g9698.t1 | ref[XP_002877017.1] TOM20-3 [Arabidopsis lyrata subsp. lyrata] gi 297322855 gb EFH53276.1  TOM20-3 [Arabidopsis lyrata subsp. lyrata]                                                                                                                                                                                                                                                                          | 199 | 202 | 2.00E-68  | 101.5 | 62.3 | 77.9 | TOM20-3                                         | gbpln | Arabidopsis lyrata   | AT3G27080.1   Symbols: TOM20-3   translocase of outer membrane 20 kDa subunit 3   chr3:9985212-9986560 REVERSE LENGTH=202                                                                                                                                                                                                                                                                                                                                                                                 | 199 | 202 | 1.00E-69  | 101.5 | 62.8 | 75.4 |
| Rsa1.0_00252.1.g9699.t1 | gb EOA25773.1  hypothetical protein CARUB_v10019136mg [Capsella rubella]                                                                                                                                                                                                                                                                                                                                       | 332 | 332 | 0         | 100.0 | 94.6 | 96.7 | hypothetical protein CARUB_v10019136mg          | gbpln | Capsella rubella     | AT3G27060.1   Symbols: TSO2, ATTSO2   Ferritin/ribonucleotide reductase-like family protein   chr3:9979971-9981057 REVERSE LENGTH=332                                                                                                                                                                                                                                                                                                                                                                     | 332 | 332 | 0         | 100.0 | 94.6 | 97.0 |
| Rsa1.0_00253.1.g9700.t1 | gb EOA33645.1  hypothetical protein CARUB_v100198120mg [Capsella rubella]                                                                                                                                                                                                                                                                                                                                      | 800 | 814 | 0         | 101.8 | 86.1 | 91.4 | hypothetical protein CARUB_v100198120mg         | gbpln | Capsella rubella     | AT1G76350.1   Symbols:   Plant regulator RWP-RK family protein   chr1:28640143-28642817 FORWARD LENGTH=808                                                                                                                                                                                                                                                                                                                                                                                                | 800 | 808 | 0         | 101.0 | 86.5 | 91.6 |
| Rsa1.0_00253.1.g9701.t1 | ref[XP_002889077.1] hypothetical protein ARALYDRAFT_476789 [Arabidopsis lyrata subsp. lyrata] gi 297334918 gb EFH65336.1  hypothetical protein ARALYDRAFT_476789 [Arabidopsis lyrata subsp. lyrata]                                                                                                                                                                                                            | 423 | 506 | 0         | 119.6 | 81.6 | 88.9 | hypothetical protein ARALYDRAFT_476789          | gbpln | Arabidopsis lyrata   | AT1G76360.1   Symbols:   Protein kinase superfamily protein   chr1:28643242-28646483 REVERSE LENGTH=484                                                                                                                                                                                                                                                                                                                                                                                                   | 423 | 484 | 0         | 114.4 | 81.3 | 88.7 |
| Rsa1.0_00253.1.g9702.t1 | ref[XP_002889078.1] predicted protein [Arabidopsis lyrata subsp. lyrata] gi 297334919 gb EFH65337.1  predicted protein [Arabidopsis lyrata subsp. lyrata]                                                                                                                                                                                                                                                      | 364 | 381 | 0         | 104.7 | 86.5 | 92.3 | predicted protein                               | gbpln | Arabidopsis lyrata   | AT1G76370.1   Symbols:   Protein kinase superfamily protein   chr1:28648660-28650239 REVERSE LENGTH=381                                                                                                                                                                                                                                                                                                                                                                                                   | 364 | 381 | 0         | 104.7 | 84.9 | 91.5 |
| Rsa1.0_00253.1.g9703.t1 | ref[XP_002889079.1] hypothetical protein ARALYDRAFT_476793 [Arabidopsis lyrata subsp. lyrata] gi 297334920 gb EFH65338.1  hypothetical protein ARALYDRAFT_476793 [Arabidopsis lyrata subsp. lyrata]                                                                                                                                                                                                            | 598 | 591 | 0         | 98.8  | 70.4 | 78.8 | hypothetical protein ARALYDRAFT_476793          | gbpln | Arabidopsis lyrata   | AT1G76380.1   Symbols:   DNA-binding bromodomain-containing protein   chr1:28651416-28654536 REVERSE LENGTH=579                                                                                                                                                                                                                                                                                                                                                                                           | 598 | 579 | 0         | 96.8  | 67.9 | 76.6 |



|                         |                                                                                                                                                                                                                                                                                                                                                                                                                                                                                                                                                                                                                                                                                                                                                                                                                                                                                                            |     |     |           |       |      |      |                                              |       |                      |                                                                                                                                                                                                                                                                                                                                                                                                                                                                                                                                          |     |     |           |       |      |      |
|-------------------------|------------------------------------------------------------------------------------------------------------------------------------------------------------------------------------------------------------------------------------------------------------------------------------------------------------------------------------------------------------------------------------------------------------------------------------------------------------------------------------------------------------------------------------------------------------------------------------------------------------------------------------------------------------------------------------------------------------------------------------------------------------------------------------------------------------------------------------------------------------------------------------------------------------|-----|-----|-----------|-------|------|------|----------------------------------------------|-------|----------------------|------------------------------------------------------------------------------------------------------------------------------------------------------------------------------------------------------------------------------------------------------------------------------------------------------------------------------------------------------------------------------------------------------------------------------------------------------------------------------------------------------------------------------------------|-----|-----|-----------|-------|------|------|
| Rsa1.0_00253.1.g9704.t1 | refXP_002887635.1  armadillo/beta-catenin repeat family protein [Arabidopsis lyrata subsp. lyrata] gi 297333476 gb EFH63894.1  armadillo/beta-catenin repeat family protein [Arabidopsis lyrata subsp. lyrata]                                                                                                                                                                                                                                                                                                                                                                                                                                                                                                                                                                                                                                                                                             | 810 | 811 | 0         | 100.1 | 85.9 | 92.5 | armadillo/beta-catenin repeat family protein | gbpln | Arabidopsis lyrata   | AT1G76390.2   Symbols:   ARM repeat superfamily protein   chr1:28655914-28658531 FORWARD LENGTH=811                                                                                                                                                                                                                                                                                                                                                                                                                                      | 810 | 811 | 0         | 100.1 | 85.4 | 91.6 |
| Rsa1.0_00253.1.g9705.t1 | ref NP_177766.1  Ribophorin I [Arabidopsis thaliana] gi 75204631 sp Q9SFX3.1 OST1A_ARAT H RecName: Full=Dolichyl-diphosphooligosaccharide-protein glycosyltransferase subunit 1A; AltName: Full=Ribophorin IA; Short=RPN-IA; AltName: Full=Ribophorin-1A; Flags: Precursor gi 6554479 gb AAF16661.1 AC012394_10 putative ribophorin I (dolichyl-diphosphooligosaccharide-protein glycosyltransferase); 43789-46748 [Arabidopsis thaliana] gi 19698901 gb AAL91186.1  putative dolichyl-diphosphooligosaccharide-protein glycosyltransferase [Arabidopsis thaliana] gi 22136202 gb AAM91179.1  putative dolichyl-diphosphooligosaccharide-protein glycosyltransferase [Arabidopsis thaliana] gi 22655006 gb AAM98094.1  At1g76400/F15M4.10 [Arabidopsis thaliana] gi 332197714 gb AEE35835.1  Ribophorin I [Arabidopsis thaliana]                                                                           | 616 | 614 | 0         | 99.7  | 89.6 | 95.3 | Ribophorin I                                 | gbpln | Arabidopsis thaliana | AT1G76400.1   Symbols:   Ribophorin I   chr1:28658713-28661672 REVERSE LENGTH=614                                                                                                                                                                                                                                                                                                                                                                                                                                                        | 616 | 614 | 0         | 99.7  | 89.6 | 95.3 |
| Rsa1.0_00253.1.g9706.t2 | refXP_002887636.1  hypothetical protein ARALYDRAFT_476797 [Arabidopsis lyrata subsp. lyrata] gi 297333477 gb EFH63895.1  hypothetical protein ARALYDRAFT_476797 [Arabidopsis lyrata subsp. lyrata]                                                                                                                                                                                                                                                                                                                                                                                                                                                                                                                                                                                                                                                                                                         | 168 | 167 | 1.00E-85  | 99.4  | 89.3 | 92.3 | hypothetical protein ARALYDRAFT_476797       | gbpln | Arabidopsis lyrata   | AT1G76405.2   Symbols:   unknown protein; FUNCTIONS IN: molecular_function unknown; INVOLVED IN: biological_process unknown; LOCATED IN: chloroplast envelope; EXPRESSED IN: 21 plant structures; EXPRESSED DURING: 13 growth stages; BEST Arabidopsis thaliana protein match is: unknown protein (TAIR:AT1G20816.1); Has 52 Blast hits to 52 proteins in 19 species: Archae - 0; Bacteria - 0; Metazoa - 0; Fungi - 0; Plants - 50; Viruses - 0; Other Eukaryotes - 2 (source: NCBI BLink).   chr1:28661994-28663673 FORWARD LENGTH=167 | 168 | 167 | 1.00E-87  | 99.4  | 88.1 | 91.7 |
| Rsa1.0_00253.1.g9707.t1 | refXP_002887637.1  hypothetical protein ARALYDRAFT_316562 [Arabidopsis lyrata subsp. lyrata] gi 297333478 gb EFH63896.1  hypothetical protein ARALYDRAFT_316562 [Arabidopsis lyrata subsp. lyrata] ref NP_177769.1  putative inorganic phosphate transporter 1-9 [Arabidopsis thaliana] gi 75313014 sp Q9S735.1 PHT19_ARAT H RecName: Full=Probable inorganic phosphate transporter 1-9; Short=AtPht1.9; AltName: Full=H(+)/Pi cotransporter gi 6554476 gb AAF16658.1 AC012394_7 putative phosphate transporter; 23587-26346 [Arabidopsis thaliana] gi 12323970 gb AAG51941.1 AC015450_2 putative phosphate transporter; 18176-15417 [Arabidopsis thaliana] gi 30725322 gb AAP37683.1  At1g76430 [Arabidopsis thaliana] gi 110736507 dbj BAF00221.1  putative phosphate transporter [Arabidopsis thaliana] gi 332197719 gb AEE35840.1  putative inorganic phosphate transporter 1-9 [Arabidopsis thaliana] | 186 | 186 | 4.00E-80  | 100.0 | 79.0 | 88.2 | hypothetical protein ARALYDRAFT_316562       | gbpln | Arabidopsis lyrata   | AT1G76410.1   Symbols: ATL8   RING/U-box superfamily protein   chr1:28668915-28669472 FORWARD LENGTH=185                                                                                                                                                                                                                                                                                                                                                                                                                                 | 186 | 185 | 1.00E-75  | 99.5  | 80.1 | 87.1 |
| Rsa1.0_00253.1.g9708.t1 | refXP_002889083.1  hypothetical protein ARALYDRAFT_476800 [Arabidopsis lyrata subsp. lyrata] gi 297334924 gb EFH65342.1  hypothetical protein ARALYDRAFT_476800 [Arabidopsis lyrata subsp. lyrata]                                                                                                                                                                                                                                                                                                                                                                                                                                                                                                                                                                                                                                                                                                         | 287 | 531 | 1.00E-139 | 185.0 | 86.4 | 91.3 | hypothetical protein ARALYDRAFT_476800       | gbpln | Arabidopsis lyrata   | AT1G76430.1   Symbols: PHT1.9   phosphate transporter 1.9   chr1:28679115-28681874 REVERSE LENGTH=532                                                                                                                                                                                                                                                                                                                                                                                                                                    | 287 | 532 | 1.00E-141 | 185.4 | 86.1 | 90.2 |
| Rsa1.0_00253.1.g9709.t1 | refXP_002887638.1  hypothetical protein ARALYDRAFT_476797 [Arabidopsis lyrata subsp. lyrata] gi 297333477 gb EFH63895.1  hypothetical protein ARALYDRAFT_476797 [Arabidopsis lyrata subsp. lyrata]                                                                                                                                                                                                                                                                                                                                                                                                                                                                                                                                                                                                                                                                                                         | 536 | 532 | 0         | 99.3  | 79.7 | 86.9 | putative inorganic phosphate transporter 1-9 | gbpln | Arabidopsis thaliana | AT1G76430.1   Symbols: PHT1.9   phosphate transporter 1.9   chr1:28679115-28681874 REVERSE LENGTH=532                                                                                                                                                                                                                                                                                                                                                                                                                                    | 536 | 532 | 0         | 99.3  | 79.7 | 86.9 |

|                         |                                                                                                                                                                                                                                                                                                                                                                                                 |     |     |           |       |      |      |                                                 |       |                      |                                                                                                                                  |     |     |           |       |      |      |
|-------------------------|-------------------------------------------------------------------------------------------------------------------------------------------------------------------------------------------------------------------------------------------------------------------------------------------------------------------------------------------------------------------------------------------------|-----|-----|-----------|-------|------|------|-------------------------------------------------|-------|----------------------|----------------------------------------------------------------------------------------------------------------------------------|-----|-----|-----------|-------|------|------|
| Rsa1.0_00253.1.g9710.t1 | ref XP_002889083.1  hypothetical protein ARALYDRAFT_476800 [Arabidopsis lyrata subsp. lyrata] gi 297334924 gb EFH65342.1                                                                                                                                                                                                                                                                        | 237 | 531 | 1.00E-113 | 224.1 | 85.7 | 89.5 | hypothetical protein ARALYDRAFT_476800          | gbpln | Arabidopsis lyrata   | AT1G76430.1   Symbols: PHT1.9   phosphate transporter 1.9   chr1:28679115-28681874 REVERSE LENGTH=532                            | 237 | 532 | 1.00E-116 | 224.5 | 85.2 | 88.6 |
| Rsa1.0_00253.1.g9711.t1 | hypothetical protein ARALYDRAFT_476800 [Arabidopsis lyrata subsp. lyrata] ref XP_002889084.1  hypothetical protein ARALYDRAFT_476801 [Arabidopsis lyrata subsp. lyrata] gi 297334925 gb EFH65343.1                                                                                                                                                                                              | 139 | 141 | 2.00E-63  | 101.4 | 86.3 | 92.8 | hypothetical protein ARALYDRAFT_476801          | gbpln | Arabidopsis lyrata   | AT1G76440.3   Symbols:   HSP20-like chaperones superfamily protein   chr1:28682371-28682999 REVERSE LENGTH=143                   | 139 | 143 | 2.00E-62  | 102.9 | 82.0 | 88.5 |
| Rsa1.0_00253.1.g9712.t1 | ref XP_002887640.1  hypothetical protein ARALYDRAFT_895527 [Arabidopsis lyrata subsp. lyrata] gi 297333481 gb EFH63899.1                                                                                                                                                                                                                                                                        | 467 | 494 | 0         | 105.8 | 80.5 | 89.5 | hypothetical protein ARALYDRAFT_895527          | gbpln | Arabidopsis lyrata   | AT2G33630.1   Symbols:   NAD(P)-binding Rossmann-fold superfamily protein   chr2:14236951-14238734 REVERSE LENGTH=480            | 467 | 480 | 1.00E-140 | 102.8 | 51.6 | 68.7 |
| Rsa1.0_00253.1.g9713.t1 | hypothetical protein ARALYDRAFT_895527 [Arabidopsis lyrata subsp. lyrata] ref NP_565131.1  PsbP domain-containing protein 3 [Arabidopsis thaliana] gi 18203439 sp Q9S720.2 PPD3_ARATH RecName: Full=PsbP domain-containing protein 3, chloroplastic; AltName: Full=OEC23-like protein 2; Flags: Precursor gi 32815945 gb AAP88357.1  At1g76450 [Arabidopsis thaliana] gi 110742837 db BAE9317.1 | 261 | 247 | 1.00E-116 | 94.6  | 80.8 | 86.6 | PsbP domain-containing protein 3                | gbpln | Arabidopsis thaliana | AT1G76450.1   Symbols:   Photosystem II reaction center PsbP family protein   chr1:28684618-28686109 FORWARD LENGTH=247          | 261 | 247 | 1.00E-118 | 94.6  | 80.8 | 86.6 |
| Rsa1.0_00253.1.g9714.t1 | hypothetical protein [Arabidopsis thaliana] gi 332197723 gb AEE35844.1  PsbP domain-containing protein 3 [Arabidopsis thaliana] ref NP_565132.2  RNA recognition motif-containing protein [Arabidopsis thaliana] gi 332197724 gb AEE35845.1  RNA recognition motif-containing protein [Arabidopsis thaliana]                                                                                    | 339 | 285 | 1.00E-121 | 84.1  | 71.1 | 75.2 | RNA recognition motif-containing protein        | gbpln | Arabidopsis thaliana | AT1G76460.1   Symbols:   RNA-binding (RRM/RBD/RNP motifs) family protein   chr1:28686932-28688506 REVERSE LENGTH=285             | 339 | 285 | 1.00E-124 | 84.1  | 71.1 | 75.2 |
| Rsa1.0_00253.1.g9715.t1 | gb EOA35402.1  hypothetical protein CARUB_v10020605mg, partial [Capsella rubella]                                                                                                                                                                                                                                                                                                               | 333 | 339 | 1.00E-151 | 101.8 | 77.5 | 88.0 | hypothetical protein CARUB_v10020605mg, partial | gbpln | Capsella rubella     | AT1G76470.1   Symbols:   NAD(P)-binding Rossmann-fold superfamily protein   chr1:28689955-28691405 REVERSE LENGTH=325            | 333 | 325 | 1.00E-145 | 97.6  | 78.4 | 88.0 |
| Rsa1.0_00253.1.g9716.t1 | emb CAA48611.1  hydroxymethylglutaryl-CoA reductase (NADPH) [Raphanus sativus]                                                                                                                                                                                                                                                                                                                  | 572 | 573 | 0         | 100.2 | 98.3 | 99.1 | hydroxymethylglutaryl-CoA reductase (NADPH)     | gbpln | Raphanus sativus     | AT1G76490.1   Symbols: HMG1, HMGR1, ATHMGR1   hydroxy methylglutaryl CoA reductase 1   chr1:28695801-28698206 FORWARD LENGTH=642 | 572 | 642 | 0         | 112.2 | 89.7 | 94.1 |
| Rsa1.0_00253.1.g9717.t1 | emb CAA48611.1  hydroxymethylglutaryl-CoA reductase (NADPH) [Raphanus sativus]                                                                                                                                                                                                                                                                                                                  | 100 | 573 | 6.00E-35  | 573.0 | 70.0 | 73.0 | hydroxymethylglutaryl-CoA reductase (NADPH)     | gbpln | Raphanus sativus     | AT1G76490.1   Symbols: HMG1, HMGR1, ATHMGR1   hydroxy methylglutaryl CoA reductase 1   chr1:28695801-28698206 FORWARD LENGTH=642 | 100 | 642 | 3.00E-37  | 642.0 | 69.0 | 73.0 |
| Rsa1.0_00253.1.g9718.t1 | emb CAA48611.1  hydroxymethylglutaryl-CoA reductase (NADPH) [Raphanus sativus]                                                                                                                                                                                                                                                                                                                  | 471 | 573 | 0         | 121.7 | 84.5 | 87.9 | hydroxymethylglutaryl-CoA reductase (NADPH)     | gbpln | Raphanus sativus     | AT1G76490.1   Symbols: HMG1, HMGR1, ATHMGR1   hydroxy methylglutaryl CoA reductase 1   chr1:28695801-28698206 FORWARD LENGTH=642 | 471 | 642 | 0         | 136.3 | 83.7 | 90.9 |
| Rsa1.0_00253.1.g9719.t1 | ref XP_002887643.1  hypothetical protein ARALYDRAFT_476807 [Arabidopsis lyrata subsp. lyrata] gi 297333484 gb EFH63902.1                                                                                                                                                                                                                                                                        | 290 | 289 | 1.00E-100 | 99.7  | 81.0 | 87.6 | hypothetical protein ARALYDRAFT_476807          | gbpln | Arabidopsis lyrata   | AT1G76500.1   Symbols: SOB3, AHL29   Predicted AT-hook DNA-binding family protein   chr1:28705532-28706440 FORWARD LENGTH=302    | 290 | 302 | 3.00E-93  | 104.1 | 76.2 | 83.1 |

|                         |                                                                                                                                                                                                                                                                                                                                                                                                                                                                                                                                                                                                                                                                                                 |      |      |           |       |      |      |                                                               |       |                      |                                                                                                                                                              |      |      |           |       |      |      |
|-------------------------|-------------------------------------------------------------------------------------------------------------------------------------------------------------------------------------------------------------------------------------------------------------------------------------------------------------------------------------------------------------------------------------------------------------------------------------------------------------------------------------------------------------------------------------------------------------------------------------------------------------------------------------------------------------------------------------------------|------|------|-----------|-------|------|------|---------------------------------------------------------------|-------|----------------------|--------------------------------------------------------------------------------------------------------------------------------------------------------------|------|------|-----------|-------|------|------|
| Rsa1.0_00253.1.g9720.t1 | refNP_177777.3  ARID/BRIGHT DNA-binding domain-containing protein [Arabidopsis thaliana] gi 42572131 refNP_974156.1  ARID/BRIGHT DNA-binding domain-containing protein [Arabidopsis thaliana] gi 122229971 sp QOWNR6.1 ARID5_ARATH RecName: Full=AT-rich interactive domain-containing protein 5; Short=ARID domain-containing protein 5 gi 110738615 dbj BAF01233.1  putative DNA-binding protein [Arabidopsis thaliana] gi 222424365 dbj BAH20138.1  AT1G76510 [Arabidopsis thaliana] gi 332197730 gb AE35851.1  ARID/BRIGHT DNA-binding domain-containing protein [Arabidopsis thaliana] gi 332197731 gb AE35852.1  ARID/BRIGHT DNA-binding domain-containing protein [Arabidopsis thaliana] | 404  | 434  | 1.00E-174 | 107.4 | 81.2 | 88.6 | ARID/BRIGHT DNA-binding domain-containing protein             | gbpln | Arabidopsis thaliana | AT1G76510.2   Symbols:   ARID/BRIGHT DNA-binding domain-containing protein   chr1:28708927-28712498 REVERSE LENGTH=434                                       | 404  | 434  | 1.00E-177 | 107.4 | 81.2 | 88.6 |
| Rsa1.0_00253.1.g9721.t1 | #                                                                                                                                                                                                                                                                                                                                                                                                                                                                                                                                                                                                                                                                                               | #    | #    | #         | #     | #    | -    | ----                                                          | ----  | #                    | #                                                                                                                                                            | #    | #    | #         | #     | #    |      |
| Rsa1.0_00253.1.g9722.t2 | gb AAM62517.1  unknown [Arabidopsis thaliana]                                                                                                                                                                                                                                                                                                                                                                                                                                                                                                                                                                                                                                                   | 384  | 390  | 0         | 101.6 | 87.5 | 95.3 | unknown                                                       | gbpln | Arabidopsis thaliana | AT1G76520.2   Symbols:   Auxin efflux carrier family protein   chr1:28715384-28717289 FORWARD LENGTH=390                                                     | 384  | 390  | 0         | 101.6 | 87.2 | 95.3 |
| Rsa1.0_00253.1.g9723.t1 | gb EOA33990.1  hypothetical protein CARUB_v10021486mg [Capsella rubella]                                                                                                                                                                                                                                                                                                                                                                                                                                                                                                                                                                                                                        | 313  | 313  | 1.00E-171 | 100.0 | 91.7 | 96.5 | hypothetical protein CARUB_v10021486mg                        | gbpln | Capsella rubella     | AT1G76540.1   Symbols:   CKKB2.1   cyclin-dependent kinase B2.1   chr1:28720554-28722351 REVERSE LENGTH=313                                                  | 313  | 313  | 1.00E-173 | 100.0 | 90.7 | 96.8 |
| Rsa1.0_00253.1.g9724.t1 | gb EOA34911.1  hypothetical protein CARUB_v10019988mg [Capsella rubella]                                                                                                                                                                                                                                                                                                                                                                                                                                                                                                                                                                                                                        | 617  | 617  | 0         | 100.0 | 95.3 | 97.9 | hypothetical protein CARUB_v10019988mg                        | gbpln | Capsella rubella     | AT1G76550.1   Symbols:   Phosphofructokinase family protein   chr1:28722900-28726929 REVERSE LENGTH=617                                                      | 617  | 617  | 0         | 100.0 | 94.7 | 97.4 |
| Rsa1.0_00253.1.g9725.t1 | ref XP_002887645.1  hypothetical protein ARALYDRAFT_895539 [Arabidopsis lyrata subsp. lyrata] gi 297333486 gb EFH63904.1  hypothetical protein ARALYDRAFT_895539 [Arabidopsis lyrata subsp. lyrata]                                                                                                                                                                                                                                                                                                                                                                                                                                                                                             | 141  | 135  | 7.00E-52  | 95.7  | 75.9 | 84.4 | hypothetical protein ARALYDRAFT_895539                        | gbpln | Arabidopsis lyrata   | AT1G76560.1   Symbols:   CP12-3   CP12 domain-containing protein 3   chr1:28728285-28728689 FORWARD LENGTH=134                                               | 141  | 134  | 1.00E-51  | 95.0  | 73.0 | 81.6 |
| Rsa1.0_00253.1.g9726.t1 | sp Q3EA38.2 FDL48_ARATH RecName: Full=Putative F-box/FBD/LRR-repeat protein At4g13965                                                                                                                                                                                                                                                                                                                                                                                                                                                                                                                                                                                                           | 427  | 427  | 1.00E-68  | 100.0 | 43.8 | 58.5 | RecName: Full=Putative F-box/FBD/LRR-repeat protein At4g13965 | ----  | ----                 | AT4G00160.1   Symbols:   F-box/RNI-like/FBD-like domains-containing protein   chr4:63465-65365 FORWARD LENGTH=453                                            | 427  | 453  | 1.00E-66  | 106.1 | 41.0 | 55.5 |
| Rsa1.0_00253.1.g9727.t1 | ref XP_002887647.1  hypothetical protein ARALYDRAFT_895541 [Arabidopsis lyrata subsp. lyrata] gi 297333488 gb EFH63906.1  hypothetical protein ARALYDRAFT_895541 [Arabidopsis lyrata subsp. lyrata]                                                                                                                                                                                                                                                                                                                                                                                                                                                                                             | 1022 | 1034 | 0         | 101.2 | 77.9 | 85.9 | hypothetical protein ARALYDRAFT_895541                        | gbpln | Arabidopsis lyrata   | AT1G76580.1   Symbols:   Squamosa promoter-binding protein-like (SBP domain) transcription factor family protein   chr1:28734600-28738451 FORWARD LENGTH=988 | 1022 | 988  | 0         | 96.7  | 72.8 | 81.4 |
| Rsa1.0_00253.1.g9728.t1 | gb EOA34127.1  hypothetical protein CARUB_v10021628mg [Capsella rubella]                                                                                                                                                                                                                                                                                                                                                                                                                                                                                                                                                                                                                        | 159  | 164  | 2.00E-36  | 103.1 | 55.3 | 66.7 | hypothetical protein CARUB_v10021628mg                        | gbpln | Capsella rubella     | AT3G55252.1   Symbols:   Plant self-incompatibility protein S1 family   chr3:20480799-20481299 REVERSE LENGTH=166                                            | 159  | 166  | 1.00E-23  | 104.4 | 38.4 | 50.3 |
| Rsa1.0_00253.1.g9729.t3 | dbj BAJ34637.1  unnamed protein product [Thellungiella halophila]                                                                                                                                                                                                                                                                                                                                                                                                                                                                                                                                                                                                                               | 275  | 250  | 3.00E-21  | 90.9  | 21.5 | 23.6 | unnamed protein product                                       | ----  | ----                 | AT3G11100.1   Symbols:   sequence-specific DNA binding transcription factors   chr3:3476490-3477320 REVERSE LENGTH=249                                       | 275  | 249  | 7.00E-23  | 90.5  | 20.7 | 23.6 |
| Rsa1.0_00253.1.g9730.t1 | ref XP_002887651.1  hypothetical protein ARALYDRAFT_476820 [Arabidopsis lyrata subsp. lyrata] gi 297333492 gb EFH63910.1  hypothetical protein ARALYDRAFT_476820 [Arabidopsis lyrata subsp. lyrata]                                                                                                                                                                                                                                                                                                                                                                                                                                                                                             | 527  | 526  | 0         | 99.8  | 79.7 | 86.5 | hypothetical protein ARALYDRAFT_476820                        | gbpln | Arabidopsis lyrata   | AT1G76620.1   Symbols:   Protein of unknown function, DUF547   chr1:28756787-28759131 FORWARD LENGTH=527                                                     | 527  | 527  | 0         | 100.0 | 82.2 | 90.1 |
| Rsa1.0_00253.1.g9731.t1 | ref NP_001185412.1  superkiller protein 3-like protein [Arabidopsis thaliana] gi 332197746 gb AE35867.1  superkiller protein 3 [Arabidopsis thaliana]                                                                                                                                                                                                                                                                                                                                                                                                                                                                                                                                           | 1171 | 1168 | 0         | 99.7  | 90.3 | 94.8 | superkiller protein 3-like protein                            | gbpln | Arabidopsis thaliana | AT1G76630.2   Symbols:   Tetratricopeptide repeat (TPR)-like superfamily protein   chr1:28759699-28765042 FORWARD LENGTH=1168                                | 1171 | 1168 | 0         | 99.7  | 90.3 | 94.8 |
| Rsa1.0_00253.1.g9732.t1 | ref XP_002881678.1  hypothetical protein ARALYDRAFT_903237 [Arabidopsis lyrata subsp. lyrata] gi 297327517 gb EFH57937.1  hypothetical protein ARALYDRAFT_903237 [Arabidopsis lyrata subsp. lyrata]                                                                                                                                                                                                                                                                                                                                                                                                                                                                                             | 169  | 159  | 4.00E-72  | 94.1  | 83.4 | 87.6 | hypothetical protein ARALYDRAFT_903237                        | gbpln | Arabidopsis lyrata   | AT1G76640.1   Symbols:   Calcium-binding EF-hand family protein   chr1:28765324-28765803 REVERSE LENGTH=159                                                  | 169  | 159  | 8.00E-72  | 94.1  | 81.7 | 85.8 |

|                         |                                                                                                                                                                                                                                                                                                                                                                                                                                                                                                                                                                                                                                                                                     |      |      |           |       |      |      |                                          |       |                      |                                                                                                                                                                                                                                                                                                                                                                                                                                                                                                                                                           |      |      |           |       |      |      |
|-------------------------|-------------------------------------------------------------------------------------------------------------------------------------------------------------------------------------------------------------------------------------------------------------------------------------------------------------------------------------------------------------------------------------------------------------------------------------------------------------------------------------------------------------------------------------------------------------------------------------------------------------------------------------------------------------------------------------|------|------|-----------|-------|------|------|------------------------------------------|-------|----------------------|-----------------------------------------------------------------------------------------------------------------------------------------------------------------------------------------------------------------------------------------------------------------------------------------------------------------------------------------------------------------------------------------------------------------------------------------------------------------------------------------------------------------------------------------------------------|------|------|-----------|-------|------|------|
| Rsa1.0_00253.1.g9733.t1 | refNP_177791.1  calcium-binding protein CML38 [Arabidopsis thaliana] gi 334183948 refNP_001185413.1  calcium-binding protein CML38 [Arabidopsis thaliana] gi 75337561 sp Q9SRE6.1 CML38_ARAT H RecName: Full=Calcium-binding protein CML38; AltName: Full=Calmodulin-like protein 38 gi 6143901 gb AAF04447.1 AC010718.16 putative calmodulin; 4214-3681 [Arabidopsis thaliana] gi 27311631 gb AAO00781.1  putative calmodulin [Arabidopsis thaliana] gi 30102892 gb AAP21364.1  At1g76650 [Arabidopsis thaliana] gi 332197748 gb AEE35869.1  calcium-binding protein CML38 [Arabidopsis thaliana] gi 332197750 gb AEE35871.1  calcium-binding protein CML38 [Arabidopsis thaliana] | 178  | 177  | 4.00E-76  | 99.4  | 82.0 | 89.3 | calcium-binding protein CML38            | gbpln | Arabidopsis thaliana | AT1G76650.3   Symbols: CML38   calmodulin-like 38   chr1:28766909-28767442 REVERSE LENGTH=177                                                                                                                                                                                                                                                                                                                                                                                                                                                             | 178  | 177  | 1.00E-78  | 99.4  | 82.0 | 89.3 |
| Rsa1.0_00253.1.g9734.t1 | refXP_002889094.1  hypothetical protein ARALYDRAFT_476825 [Arabidopsis lyrata subsp. lyrata] gi 297334935 gb EFH65353.1  hypothetical protein ARALYDRAFT_476825 [Arabidopsis lyrata subsp. lyrata]                                                                                                                                                                                                                                                                                                                                                                                                                                                                                  | 410  | 440  | 1.00E-173 | 107.3 | 85.1 | 87.8 | hypothetical protein ARALYDRAFT_476825   | gbpln | Arabidopsis lyrata   | AT1G76660.1   Symbols:   FUNCTIONS IN: molecular_function unknown; INVOLVED IN: biological_process unknown; LOCATED IN: plasma membrane; EXPRESSED IN: 22 plant structures; EXPRESSED DURING: 13 growth stages; BEST Arabidopsis thaliana protein match is: hydroxyproline-rich glycoprotein family protein (TAIR:AT5G52430.1); Has 353 Blast hits to 231 proteins in 60 species: Archae - 0; Bacteria - 6; Metazoa - 57; Fungi - 22; Plants - 125; Viruses - 4; Other Eukaryotes - 139 (source: NCBI BLINK).   chr1:28769157-28771036 REVERSE LENGTH=431 | 410  | 431  | 1.00E-173 | 105.1 | 83.4 | 86.6 |
| Rsa1.0_00253.1.g9735.t1 | dbj BAJ33722.1  unnamed protein product [Thellungiella halophila]                                                                                                                                                                                                                                                                                                                                                                                                                                                                                                                                                                                                                   | 345  | 348  | 0         | 100.9 | 94.2 | 98.0 | unnamed protein product                  | ----  | ----                 | AT1G76670.1   Symbols:   Nucleotide-sugar transporter family protein   chr1:28772890-28774569 REVERSE LENGTH=347                                                                                                                                                                                                                                                                                                                                                                                                                                          | 345  | 347  | 1.00E-179 | 100.6 | 90.4 | 95.9 |
| Rsa1.0_00253.1.g9736.t1 | refNP_177797.2  histone-lysine N-methyltransferase ASHH1 [Arabidopsis thaliana] gi 42572135 refNP_974158.1  histone-lysine N-methyltransferase ASHH1 [Arabidopsis thaliana] gi 75243465 sp Q84WW6.1 ASHH1_ARAT H RecName: Full=Histone-lysine N-methyltransferase ASHH1; AltName: Full=ASH1 homolog 1; AltName: Full=Protein SET DOMAIN GROUP 26 gi 25054844 gb AAN71912.1  unknown protein [Arabidopsis thaliana] gi 225898088 dbj BAH30376.1  hypothetical protein [Arabidopsis thaliana] gi 332197758 gb AEE35879.1  histone-lysine N-methyltransferase ASHH1 [Arabidopsis thaliana] gi 332197759 gb AEE35880.1  histone-lysine N-methyltransferase ASHH1 [Arabidopsis thaliana] | 848  | 492  | 0         | 58.0  | 44.3 | 47.2 | histone-lysine N-methyltransferase ASHH1 | gbpln | Arabidopsis thaliana | AT1G76710.2   Symbols: ASHH1   SET domain group 26   chr1:28789887-28792371 REVERSE LENGTH=492                                                                                                                                                                                                                                                                                                                                                                                                                                                            | 848  | 492  | 0         | 58.0  | 44.3 | 47.2 |
| Rsa1.0_00253.1.g9737.t1 | gb AAC35532.1  contains similarity to proteases [Arabidopsis thaliana]                                                                                                                                                                                                                                                                                                                                                                                                                                                                                                                                                                                                              | 1309 | 1392 | 0         | 106.3 | 57.2 | 71.4 | contains similarity to proteases         | gbpln | Arabidopsis thaliana | AT4G23160.1   Symbols: CRK8   cysteine-rich RLK (RECEPTOR-like protein kinase) 8   chr4:12129485-12134086 FORWARD LENGTH=1262                                                                                                                                                                                                                                                                                                                                                                                                                             | 1309 | 1262 | 2.00E-83  | 96.4  | 13.4 | 20.1 |
| Rsa1.0_00253.1.g9738.t1 | # # # # # # # # -                                                                                                                                                                                                                                                                                                                                                                                                                                                                                                                                                                                                                                                                   | #    | #    | #         | #     | #    | #    | -                                        | ----  | ----                 | # # # # # # #                                                                                                                                                                                                                                                                                                                                                                                                                                                                                                                                             | #    | #    | #         | #     | #    | #    |
| Rsa1.0_00254.1.g9739.t1 | gb EOA31423.1  hypothetical protein CARUB_v10014603mg [Capsella rubella]                                                                                                                                                                                                                                                                                                                                                                                                                                                                                                                                                                                                            | 219  | 215  | 2.00E-90  | 98.2  | 77.6 | 87.2 | hypothetical protein CARUB_v10014603mg   | gbpln | Capsella rubella     | AT2G18550.1   Symbols: HB-2, ATHB21, HB21   homeobox protein 21   chr2:8049663-8051213 REVERSE LENGTH=220                                                                                                                                                                                                                                                                                                                                                                                                                                                 | 219  | 220  | 1.00E-91  | 100.5 | 75.8 | 87.2 |
| Rsa1.0_00254.1.g9740.t1 | refXP_002866997.1  hypothetical protein ARALYDRAFT_490965 [Arabidopsis lyrata subsp. lyrata] gi 297312833 gb EFH43256.1  hypothetical protein ARALYDRAFT_490965 [Arabidopsis lyrata subsp. lyrata]                                                                                                                                                                                                                                                                                                                                                                                                                                                                                  | 557  | 567  | 0         | 101.8 | 73.1 | 81.1 | hypothetical protein ARALYDRAFT_490965   | gbpln | Arabidopsis lyrata   | AT4G36690.4   Symbols: ATU2AF65A   U2 snRNP auxiliary factor, large subunit, splicing factor   chr4:17294139-17297609 REVERSE LENGTH=551                                                                                                                                                                                                                                                                                                                                                                                                                  | 557  | 551  | 0         | 98.9  | 70.6 | 79.2 |
| Rsa1.0_00254.1.g9741.t1 | gb EOA30658.1  hypothetical protein CARUB_v10013794mg [Capsella rubella]                                                                                                                                                                                                                                                                                                                                                                                                                                                                                                                                                                                                            | 429  | 420  | 0         | 97.9  | 80.2 | 86.2 | hypothetical protein CARUB_v10013794mg   | gbpln | Capsella rubella     | AT2G18520.1   Symbols:   Tetratricopeptide repeat (TPR)-like superfamily protein   chr2:8034036-8035292 REVERSE LENGTH=418                                                                                                                                                                                                                                                                                                                                                                                                                                | 429  | 418  | 0         | 97.4  | 78.1 | 84.8 |

|                         |                                                                                                                                                                                                                                                                                                                                                                                                                                                                            |      |      |           |       |      |      |                                              |       |                      |                                                                                                                                                                                                                                                                                                                                                                                                                                                                                                                                             |      |     |           |       |      |      |
|-------------------------|----------------------------------------------------------------------------------------------------------------------------------------------------------------------------------------------------------------------------------------------------------------------------------------------------------------------------------------------------------------------------------------------------------------------------------------------------------------------------|------|------|-----------|-------|------|------|----------------------------------------------|-------|----------------------|---------------------------------------------------------------------------------------------------------------------------------------------------------------------------------------------------------------------------------------------------------------------------------------------------------------------------------------------------------------------------------------------------------------------------------------------------------------------------------------------------------------------------------------------|------|-----|-----------|-------|------|------|
| Rsa1.0_00254.1.g9742.t1 | refXP_002886178.1   hypothetical protein ARALYDRAFT_480759 [Arabidopsis lyrata subsp. lyrata] gi 297332018 gb EFH62437.1   hypothetical protein ARALYDRAFT_480759 [Arabidopsis lyrata subsp. lyrata]                                                                                                                                                                                                                                                                       | 366  | 364  | 1.00E-118 | 99.5  | 68.9 | 73.0 | hypothetical protein ARALYDRAFT_480759       | gbpln | Arabidopsis lyrata   | AT2G18510.1   Symbols: emb2444   RNA-binding (RRM/RBD/RNP motifs) family protein   chr2:8031554-8033517 REVERSE LENGTH=363                                                                                                                                                                                                                                                                                                                                                                                                                  | 366  | 363 | 1.00E-120 | 99.2  | 68.6 | 73.0 |
| Rsa1.0_00254.1.g9743.t1 | gb AAG51783.1 AC079679.3 reverse transcriptase, putative: 16838-20266 [Arabidopsis thaliana]                                                                                                                                                                                                                                                                                                                                                                               | 2044 | 1142 | 0         | 55.9  | 27.9 | 37.2 | reverse transcriptase, putative: 16838-20266 | gbpln | Arabidopsis thaliana | AT4G29090.1   Symbols:   Ribonuclease H-like superfamily protein   chr4:14333528-14335255 FORWARD LENGTH=575                                                                                                                                                                                                                                                                                                                                                                                                                                | 2044 | 575 | 8.00E-92  | 28.1  | 9.2  | 15.2 |
| Rsa1.0_00254.1.g9744.t1 | refXP_002866083.1   hypothetical protein ARALYDRAFT_495611 [Arabidopsis lyrata subsp. lyrata] gi 297311918 gb EFH42342.1   hypothetical protein ARALYDRAFT_495611 [Arabidopsis lyrata subsp. lyrata]                                                                                                                                                                                                                                                                       | 386  | 386  | 0         | 100.0 | 95.9 | 97.2 | hypothetical protein ARALYDRAFT_495611       | gbpln | Arabidopsis lyrata   | AT5G5250.1   Symbols: IAMT1   IAA carboxylmethyltransferase 1   chr5:22407589-22410854 REVERSE LENGTH=386                                                                                                                                                                                                                                                                                                                                                                                                                                   | 386  | 386 | 0         | 100.0 | 93.8 | 97.2 |
| Rsa1.0_00254.1.g9745.t1 | ref NP_200335.1  peroxygenase 2 [Arabidopsis thaliana] gi 75171505 sp Q9FLN9.1 PXG2_ARATH RecName: Full=Peroxygenase 2; Short=AtPXG2; AltName: Full=Caleosin-2; AltName: Full=Embryo-specific protein 2; AltName: Full=Putative embryo-specific protein 1 (ATS2) gi 9758121 db BAB08593.1  embryo-specific protein 1; Ca2+-binding EF-hand protein-like [Arabidopsis thaliana] gi 28393110 gb AAO41988.1  putative embryo-specific protein 1 (ATS1) [Arabidopsis thaliana] | 243  | 243  | 1.00E-128 | 100.0 | 89.7 | 95.1 | peroxygenase 2                               | gbpln | Arabidopsis thaliana | AT5G5240.1   Symbols: ATPXG2   ARABIDOPSIS THALIANA PEROXYGENASE 2   chr5:22405963-22407158 FORWARD LENGTH=243                                                                                                                                                                                                                                                                                                                                                                                                                              | 243  | 243 | 1.00E-130 | 100.0 | 89.7 | 95.1 |
| Rsa1.0_00254.1.g9746.t1 | refXP_002864385.1   atmap65-1 [Arabidopsis lyrata subsp. lyrata] gi 297310220 gb EFH40644.1   atmap65-1 [Arabidopsis lyrata subsp. lyrata]                                                                                                                                                                                                                                                                                                                                 | 588  | 587  | 0         | 99.8  | 93.2 | 96.6 | atmap65-1                                    | gbpln | Arabidopsis lyrata   | AT5G5230.1   Symbols: ATMAP65-1, MAP65-1   microtubule-associated proteins 65-1   chr5:22402716-22405182 FORWARD LENGTH=587                                                                                                                                                                                                                                                                                                                                                                                                                 | 588  | 587 | 0         | 99.8  | 92.3 | 96.4 |
| Rsa1.0_00254.1.g9747.t1 | refXP_002864384.1   trigger factor type chaperone family protein [Arabidopsis lyrata subsp. lyrata] gi 297310219 gb EFH40643.1   trigger factor type chaperone family protein [Arabidopsis lyrata subsp. lyrata]                                                                                                                                                                                                                                                           | 66   | 551  | 3.00E-12  | 834.8 | 66.7 | 69.7 | trigger factor type chaperone family protein | gbpln | Arabidopsis lyrata   | AT5G5220.1   Symbols:   trigger factor type chaperone family protein   chr5:22397677-22400678 FORWARD LENGTH=547                                                                                                                                                                                                                                                                                                                                                                                                                            | 66   | 547 | 2.00E-14  | 828.8 | 63.6 | 69.7 |
| Rsa1.0_00254.1.g9748.t1 | #                                                                                                                                                                                                                                                                                                                                                                                                                                                                          | #    | #    | #         | #     | #    | #    | -                                            | ----  | ----                 | #                                                                                                                                                                                                                                                                                                                                                                                                                                                                                                                                           | #    | #   | #         | #     | #    |      |
| Rsa1.0_00254.1.g9749.t1 | ref NP_200332.1  uncharacterized protein [Arabidopsis thaliana] gi 9758118 db BAB08590.1  unnamed protein product [Arabidopsis thaliana] gi 194708822 gb ACF88495.1   At5g55210 [Arabidopsis thaliana] gi 332009217 gb AED96600.1   uncharacterized protein AT5G55210 [Arabidopsis thaliana]                                                                                                                                                                               | 162  | 168  | 3.00E-64  | 103.7 | 85.8 | 92.0 | uncharacterized protein                      | gbpln | Arabidopsis thaliana | AT5G55210.1   Symbols:   unknown protein; FUNCTIONS IN: molecular_function unknown; INVOLVED IN: biological_process unknown; LOCATED IN: chloroplast; EXPRESSED IN: 23 plant structures; EXPRESSED DURING: 13 growth stages; BEST Arabidopsis thaliana protein match is: unknown protein (TAIR:AT4G22320.1); Has 1807 Blast hits to 1807 proteins in 277 species: Archae - 0; Bacteria - 0; Metazoa - 736; Fungi - 347; Plants - 385; Viruses - 0; Other Eukaryotes - 339 (source: NCBI BLINK).   chr5:22396707-22397374 REVERSE LENGTH=168 | 162  | 168 | 1.00E-66  | 103.7 | 85.8 | 92.0 |
| Rsa1.0_00254.1.g9750.t1 | refXP_002864383.1   hypothetical protein ARALYDRAFT_495605 [Arabidopsis lyrata subsp. lyrata] gi 297310218 gb EFH40642.1   hypothetical protein ARALYDRAFT_495605 [Arabidopsis lyrata subsp. lyrata]                                                                                                                                                                                                                                                                       | 294  | 302  | 1.00E-122 | 102.7 | 77.6 | 87.1 | hypothetical protein ARALYDRAFT_495605       | gbpln | Arabidopsis lyrata   | AT5G5200.1   Symbols:   Co-chaperone GrpE family protein   chr5:22394705-22396335 FORWARD LENGTH=302                                                                                                                                                                                                                                                                                                                                                                                                                                        | 294  | 302 | 1.00E-122 | 102.7 | 77.2 | 87.4 |
| Rsa1.0_00254.1.g9751.t1 | gb EMJ23759.1  hypothetical protein PRUPE_ppa008371mg [Prunus persica]                                                                                                                                                                                                                                                                                                                                                                                                     | 221  | 335  | 1.00E-130 | 151.6 | 98.6 | 99.5 | hypothetical protein PRUPE_ppa008371mg       | gbpln | Prunus persica       | AT5G55190.1   Symbols: RAN3, ATRAN3   RAN GTPase 3   chr5:22392285-22393957 FORWARD LENGTH=221                                                                                                                                                                                                                                                                                                                                                                                                                                              | 221  | 221 | 1.00E-130 | 100.0 | 98.6 | 99.5 |
| Rsa1.0_00254.1.g9752.t1 | emb CAA67923.1  ubiquitin-like protein [Arabidopsis thaliana]                                                                                                                                                                                                                                                                                                                                                                                                              | 103  | 104  | 1.00E-45  | 101.0 | 88.3 | 93.2 | ubiquitin-like protein                       | gbpln | Arabidopsis thaliana | AT5G55160.1   Symbols: SUM2, SUMO 2, SUMO2, ATSUMO2   small ubiquitin-like modifier 2   chr5:22383747-22384772 REVERSE LENGTH=103                                                                                                                                                                                                                                                                                                                                                                                                           | 103  | 103 | 4.00E-46  | 100.0 | 85.4 | 90.3 |

|                         |                                                                                                                                                                                                                                                                                                                                                                                                     |      |      |           |       |      |      |                                        |       |                      |                                                                                                                                                                                                                                                                                    |      |      |           |       |      |      |
|-------------------------|-----------------------------------------------------------------------------------------------------------------------------------------------------------------------------------------------------------------------------------------------------------------------------------------------------------------------------------------------------------------------------------------------------|------|------|-----------|-------|------|------|----------------------------------------|-------|----------------------|------------------------------------------------------------------------------------------------------------------------------------------------------------------------------------------------------------------------------------------------------------------------------------|------|------|-----------|-------|------|------|
| Rsa1.0_00254.1.g9753.t1 | refNP_568821.1   large subunit ribosomal protein L30 [Arabidopsis thaliana] gi 21617966 gb AAM67016.1   unknown [Arabidopsis thaliana] gi 88011078 gb ABD38899.1   At5g55140 [Arabidopsis thaliana] gi 332009208 gb AED96591.1   large subunit ribosomal protein L30 [Arabidopsis thaliana]                                                                                                         | 109  | 109  | 2.00E-53  | 100.0 | 93.6 | 96.3 | large subunit ribosomal protein L30    | gbpln | Arabidopsis thaliana | AT5G55140.1   Symbols:   ribosomal protein L30 family protein   chr5:22381370-22381787 FORWARD LENGTH=109                                                                                                                                                                          | 109  | 109  | 3.00E-56  | 100.0 | 93.6 | 96.3 |
| Rsa1.0_00254.1.g9754.t1 | refNP_680438.1   uncharacterized protein [Arabidopsis thaliana] gi 91807044 gb ABE66249.1   hypothetical protein At5g55135 [Arabidopsis thaliana] gi 332009207 gb AED96590.1   uncharacterized protein AT5G55135 [Arabidopsis thaliana]                                                                                                                                                             | 103  | 112  | 7.00E-28  | 108.7 | 64.1 | 74.8 | uncharacterized protein                | gbpln | Arabidopsis thaliana | AT5G55135.1   Symbols:   unknown protein; Has 30201 Blast hits to 17322 proteins in 780 species: Archae - 12; Bacteria - 1396; Metazoa - 17338; Fungi - 3422; Plants - 5037; Viruses - 0; Other Eukaryotes - 2996 (source: NCBI BLINK)   chr5:22379959-22380386 FORWARD LENGTH=112 | 103  | 112  | 1.00E-30  | 108.7 | 64.1 | 74.8 |
| Rsa1.0_00254.1.g9755.t1 | dbj BAJ33776.1   unnamed protein product [Thellungiella halophila]                                                                                                                                                                                                                                                                                                                                  | 409  | 466  | 0         | 113.9 | 88.0 | 93.6 | unnamed protein product                | ----  | ----                 | AT5G55130.1   Symbols: CNX5, SIR1   co-factor for nitrate, reductase and xanthine dehydrogenase 5   chr5:22373374-22376028 REVERSE LENGTH=464                                                                                                                                      | 409  | 464  | 0         | 113.4 | 86.8 | 91.9 |
| Rsa1.0_00254.1.g9756.t1 | gb EOA14782.1   hypothetical protein CARUB_v10028082mg [Capsella rubella]                                                                                                                                                                                                                                                                                                                           | 142  | 76   | 2.00E-28  | 53.5  | 46.5 | 49.3 | hypothetical protein CARUB_v10028082mg | gbpln | Capsella rubella     | AT5G55125.2   Symbols:   Ribosomal protein L31   chr5:22372737-22372967 FORWARD LENGTH=76                                                                                                                                                                                          | 142  | 76   | 4.00E-28  | 53.5  | 39.4 | 40.8 |
| Rsa1.0_00254.1.g9757.t1 | refXP_002864375.1   hypothetical protein ARALYDRAFT_918651 [Arabidopsis lyrata subsp. lyrata] gi 29731021 0 gb EFH40634.1   hypothetical protein ARALYDRAFT_918651 [Arabidopsis lyrata subsp. lyrata]                                                                                                                                                                                               | 156  | 429  | 3.00E-28  | 275.0 | 42.9 | 44.9 | hypothetical protein ARALYDRAFT_918651 | gbpln | Arabidopsis lyrata   | AT5G55120.1   Symbols: VTC5   galactose-1-phosphate guanylyltransferase (GDP)s;GDP-D-glucose phosphorylases;quercetin 4'-O-glucosyltransferases   chr5:22369515-22371709 FORWARD LENGTH=431                                                                                        | 156  | 431  | 5.00E-30  | 276.3 | 42.3 | 44.2 |
| Rsa1.0_00254.1.g9758.t1 | refXP_002864374.1   stigma-specific Stig1 family protein [Arabidopsis lyrata subsp. lyrata] gi 297310209 gb EFH40633.1   stigma-specific Stig1 family protein [Arabidopsis lyrata subsp. lyrata]                                                                                                                                                                                                    | 165  | 163  | 6.00E-71  | 98.8  | 82.4 | 90.3 | stigma-specific Stig1 family protein   | gbpln | Arabidopsis lyrata   | AT5G55110.1   Symbols:   Stigma-specific Stig1 family protein   chr5:22367870-22368361 FORWARD LENGTH=163                                                                                                                                                                          | 165  | 163  | 5.00E-71  | 98.8  | 80.6 | 89.1 |
| Rsa1.0_00254.1.g9759.t1 | #                                                                                                                                                                                                                                                                                                                                                                                                   | #    | #    | #         | #     | #    | #    | -                                      | ----  | ----                 | #                                                                                                                                                                                                                                                                                  | #    | #    | #         | #     | #    | #    |
| Rsa1.0_00255.1.g9760.t2 | refXP_002875262.1   hypothetical protein ARALYDRAFT_484318 [Arabidopsis lyrata subsp. lyrata] gi 297321100 gb EFH51521.1   hypothetical protein ARALYDRAFT_484318 [Arabidopsis lyrata subsp. lyrata]                                                                                                                                                                                                | 374  | 389  | 0         | 104.0 | 86.6 | 91.4 | hypothetical protein ARALYDRAFT_484318 | gbpln | Arabidopsis lyrata   | AT3G25585.4   Symbols: AAPT2, ATAAPT2   aminalcoholphosphotransferase   chr3:9295856-9298271 FORWARD LENGTH=389                                                                                                                                                                    | 374  | 389  | 0         | 104.0 | 85.6 | 91.2 |
| Rsa1.0_00255.1.g9761.t1 | gb EOA24080.1   hypothetical protein CARUB_v10017307mg [Capsella rubella]                                                                                                                                                                                                                                                                                                                           | 387  | 429  | 1.00E-142 | 110.9 | 77.5 | 84.0 | hypothetical protein CARUB_v10017307mg | gbpln | Capsella rubella     | AT3G25590.1   Symbols:   unknown protein; Has 149 Blast hits to 140 proteins in 44 species: Archae - 0; Bacteria - 6; Metazoa - 40; Fungi - 6; Plants - 39; Viruses - 0; Other Eukaryotes - 58 (source: NCBI BLINK)   chr3:9302271-9303542 FORWARD LENGTH=423                      | 387  | 423  | 1.00E-139 | 109.3 | 78.3 | 85.3 |
| Rsa1.0_00255.1.g9762.t1 | refNP_189189.1   phospholipid-transporting ATPase 10 [Arabidopsis thaliana] gi 12229653 sp Q9L183.1 ALA10_ARATH RecName: Full=Phospholipid-transporting ATPase 10; Short=AtALA10; AltName: Full=Aminophospholipid flippase 10 gi 11994751 dbj BAB03080.1   P-type transporting ATPase [Arabidopsis thaliana] gi 33264352 gb AEE77042.1   phospholipid-transporting ATPase 10 [Arabidopsis thaliana] | 1202 | 1202 | 0         | 100.0 | 94.7 | 97.1 | phospholipid-transporting ATPase 10    | gbpln | Arabidopsis thaliana | AT3G25610.1   Symbols:   ATPase E1-E2 type family protein / haloacid dehalogenase-like hydrolase family protein   chr3:9308942-9313353 REVERSE LENGTH=1202                                                                                                                         | 1202 | 1202 | 0         | 100.0 | 94.7 | 97.1 |
| Rsa1.0_00255.1.g9763.t1 | #                                                                                                                                                                                                                                                                                                                                                                                                   | #    | #    | #         | #     | #    | #    | -                                      | ----  | ----                 | #                                                                                                                                                                                                                                                                                  | #    | #    | #         | #     | #    | #    |
| Rsa1.0_00255.1.g9764.t1 | #                                                                                                                                                                                                                                                                                                                                                                                                   | #    | #    | #         | #     | #    | #    | -                                      | ----  | ----                 | #                                                                                                                                                                                                                                                                                  | #    | #    | #         | #     | #    | #    |
| Rsa1.0_00255.1.g9765.t1 | refXP_002875266.1   hypothetical protein ARALYDRAFT_904728 [Arabidopsis lyrata subsp. lyrata] gi 297321104 gb EFH51525.1   hypothetical protein ARALYDRAFT_904728 [Arabidopsis lyrata subsp. lyrata]                                                                                                                                                                                                | 264  | 266  | 1.00E-121 | 100.8 | 86.4 | 95.1 | hypothetical protein ARALYDRAFT_904728 | gbpln | Arabidopsis lyrata   | AT3G25640.1   Symbols:   Protein of unknown function, DUF617   chr3:9333775-9334578 FORWARD LENGTH=267                                                                                                                                                                             | 264  | 267  | 1.00E-120 | 101.1 | 84.5 | 94.3 |
| Rsa1.0_00255.1.g9766.t1 | gb EOA23779.1   hypothetical protein CARUB_v10016991mg [Capsella rubella]                                                                                                                                                                                                                                                                                                                           | 108  | 534  | 1.00E-11  | 494.4 | 33.3 | 37.0 | hypothetical protein CARUB_v10016991mg | gbpln | Capsella rubella     | AT3G25660.1   Symbols:   Amidase family protein   chr3:9339840-9342044 REVERSE LENGTH=537                                                                                                                                                                                          | 108  | 537  | 2.00E-14  | 497.2 | 33.3 | 37.0 |

|                         |                                                                                                                                                                                                                                                                                                                                                                                                                                                                                                                                                                                                                                                                                                                                                                                                                                                     |      |      |           |       |      |      |                                        |       |                      |                                                                                                                                                                                                                                                                                                                                          |      |      |           |       |      |      |
|-------------------------|-----------------------------------------------------------------------------------------------------------------------------------------------------------------------------------------------------------------------------------------------------------------------------------------------------------------------------------------------------------------------------------------------------------------------------------------------------------------------------------------------------------------------------------------------------------------------------------------------------------------------------------------------------------------------------------------------------------------------------------------------------------------------------------------------------------------------------------------------------|------|------|-----------|-------|------|------|----------------------------------------|-------|----------------------|------------------------------------------------------------------------------------------------------------------------------------------------------------------------------------------------------------------------------------------------------------------------------------------------------------------------------------------|------|------|-----------|-------|------|------|
| Rsa1.0_00255.1.g9767.t1 | gb EOA24019.1  hypothetical protein CARUB_v10017234mg [Capsella rubella]                                                                                                                                                                                                                                                                                                                                                                                                                                                                                                                                                                                                                                                                                                                                                                            | 450  | 452  | 0         | 100.4 | 87.1 | 92.9 | hypothetical protein CARUB_v10017234mg | gbpln | Capsella rubella     | AT3G25700.1   Symbols: Eukaryotic aspartyl protease family protein   chr3:9358937-9360295 FORWARD LENGTH=452                                                                                                                                                                                                                             | 450  | 452  | 0         | 100.4 | 84.9 | 90.4 |
| Rsa1.0_00255.1.g9768.t1 | ref NP_189199.1  transcription factor AIG1 [Arabidopsis thaliana] gi 75311510 sp Q9LS08.1 BH032_ARAT H RecName: Full=Transcription factor AIG1; Short=AtAIG1; AltName: Full=Basic helix-loop-helix protein 32; Short=AtbHLH32; Short=bHLH 32; AltName: Full=Protein TARGET OF MOOPTEROS 5; AltName: Full=Transcription factor EN 54; AltName: Full=bHLH transcription factor bHLH032 gi 7839557 gb BAA95758.1  DNA-binding protein-like [Arabidopsis thaliana] gi 16604444 gb AAL24228.1  AT3g25710/K13N2.1 [Arabidopsis thaliana] gi 18958020 gb AAL79583.1  AT3g25710/K13N2.1 [Arabidopsis thaliana] gi 21592500 gb AAM64450.1  putative HLH DNA-binding protein [Arabidopsis thaliana] gi 76589372 gb ABA54263.1  ABA-regulated protein AIG1 [Arabidopsis thaliana] gi 332643535 gb AEE77056.1  transcription factor AIG1 [Arabidopsis thaliana] | 332  | 344  | 1.00E-145 | 103.6 | 85.2 | 90.4 | transcription factor AIG1              | gbpln | Arabidopsis thaliana | AT3G25710.1   Symbols: BHLH32, ATAIG1, TMO5   basic helix-loop-helix 32   chr3:9369598-9371096 FORWARD LENGTH=344                                                                                                                                                                                                                        | 332  | 344  | 1.00E-148 | 103.6 | 85.2 | 90.4 |
| Rsa1.0_00255.1.g9769.t1 | #                                                                                                                                                                                                                                                                                                                                                                                                                                                                                                                                                                                                                                                                                                                                                                                                                                                   | #    | #    | #         | #     | #    | #    | -                                      | ----  | ----                 | #                                                                                                                                                                                                                                                                                                                                        | #    | #    | #         | #     | #    |      |
| Rsa1.0_00255.1.g9770.t1 | #                                                                                                                                                                                                                                                                                                                                                                                                                                                                                                                                                                                                                                                                                                                                                                                                                                                   | #    | #    | #         | #     | #    | #    | -                                      | ----  | ----                 | #                                                                                                                                                                                                                                                                                                                                        | #    | #    | #         | #     | #    |      |
| Rsa1.0_00255.1.g9771.t3 | gb AAG50751.1 AC079733_19 polyprotein, putative [Arabidopsis thaliana]                                                                                                                                                                                                                                                                                                                                                                                                                                                                                                                                                                                                                                                                                                                                                                              | 1319 | 1468 | 0         | 111.3 | 46.8 | 66.4 | polyprotein, putative                  | gbpln | Arabidopsis thaliana | AT4G23160.1   Symbols: CRK8   cysteine-rich RLK (RECEPTOR-like protein kinase) 8   chr4:12129485-12134086 FORWARD LENGTH=1262                                                                                                                                                                                                            | 1319 | 1262 | 1.00E-115 | 95.7  | 15.5 | 23.8 |
| Rsa1.0_00255.1.g9772.t1 | gb EOA38964.1  hypothetical protein CARUB_v10011383mg [Capsella rubella]                                                                                                                                                                                                                                                                                                                                                                                                                                                                                                                                                                                                                                                                                                                                                                            | 331  | 511  | 1.00E-101 | 154.4 | 57.7 | 70.7 | hypothetical protein CARUB_v10011383mg | gbpln | Capsella rubella     | AT1G28430.1   Symbols: CYP705A24   cytochrome P450, family 705, subfamily A, polypeptide 24   chr1:9992986-9994642 REVERSE LENGTH=521                                                                                                                                                                                                    | 331  | 521  | 1.00E-101 | 157.4 | 57.7 | 72.5 |
| Rsa1.0_00255.1.g9773.t1 | gb ABD65028.1  hypothetical protein 26.t00082 [Brassica oleracea]                                                                                                                                                                                                                                                                                                                                                                                                                                                                                                                                                                                                                                                                                                                                                                                   | 133  | 220  | 2.00E-12  | 165.4 | 28.6 | 33.1 | hypothetical protein 26.t00082         | gbpln | Brassica oleracea    | AT1G14800.1   Symbols: Nucleic acid-binding, OB-fold-like protein   chr1:5099572-5102558 FORWARD LENGTH=384                                                                                                                                                                                                                              | 133  | 384  | 2.00E-13  | 288.7 | 23.3 | 27.8 |
| Rsa1.0_00255.1.g9774.t3 | gb AAC35532.1  contains similarity to proteases [Arabidopsis thaliana]                                                                                                                                                                                                                                                                                                                                                                                                                                                                                                                                                                                                                                                                                                                                                                              | 1286 | 1392 | 0         | 108.2 | 30.3 | 39.9 | contains similarity to proteases       | gbpln | Arabidopsis thaliana | AT4G23160.1   Symbols: CRK8   cysteine-rich RLK (RECEPTOR-like protein kinase) 8   chr4:12129485-12134086 FORWARD LENGTH=1262                                                                                                                                                                                                            | 1286 | 1262 | 1.00E-79  | 98.1  | 12.2 | 19.1 |
| Rsa1.0_00255.1.g9775.t1 | ref NP_566781.1  Copper transport protein family [Arabidopsis thaliana] gi 21592740 gb AAM64689.1  unknown [Arabidopsis thaliana] gi 88900374 gb ABD57499.1  At3g25855 [Arabidopsis thaliana] gi 332643558 gb AEE77079.1  Copper transport protein family [Arabidopsis thaliana]                                                                                                                                                                                                                                                                                                                                                                                                                                                                                                                                                                    | 85   | 112  | 3.00E-23  | 131.8 | 75.3 | 84.7 | Copper transport protein family        | gbpln | Arabidopsis thaliana | AT3G25855.1   Symbols: Copper transport protein family   chr3:9459608-9460267 REVERSE LENGTH=112                                                                                                                                                                                                                                         | 85   | 112  | 4.00E-26  | 131.8 | 75.3 | 84.7 |
| Rsa1.0_00255.1.g9776.t1 | gb EOA24857.1  hypothetical protein CARUB_v10018148mg [Capsella rubella]                                                                                                                                                                                                                                                                                                                                                                                                                                                                                                                                                                                                                                                                                                                                                                            | 161  | 163  | 2.00E-49  | 101.2 | 73.3 | 80.7 | hypothetical protein CARUB_v10018148mg | gbpln | Capsella rubella     | AT3G25870.1   Symbols: unknown protein; BEST Arabidopsis thaliana protein match is: unknown protein (TAIR:AT1G13360.1); Has 50 Blast hits to 50 proteins in 12 species: Archae - 0; Bacteria - 0; Metazoa - 0; Fungi - 0; Plants - 50; Viruses - 0; Other Eukaryotes - 0 (source: NCBI BLink).   chr3:8463665-9464177 REVERSE LENGTH=170 | 161  | 170  | 6.00E-45  | 105.6 | 70.8 | 75.8 |
| Rsa1.0_00255.1.g9777.t2 | gb AAG03119.1 AC004133_13 F5A9.24 [Arabidopsis thaliana]                                                                                                                                                                                                                                                                                                                                                                                                                                                                                                                                                                                                                                                                                                                                                                                            | 286  | 1254 | 6.00E-39  | 438.5 | 28.3 | 38.5 | F5A9.24                                | gbpln | Arabidopsis thaliana | ATMG00310.1   Symbols: ORF154   RNA-directed DNA polymerase (reverse transcriptase)-related family protein   chrM:90883-91347 REVERSE LENGTH=154                                                                                                                                                                                         | 286  | 154  | 2.00E-18  | 53.8  | 15.0 | 20.6 |
| Rsa1.0_00255.1.g9778.t1 | #                                                                                                                                                                                                                                                                                                                                                                                                                                                                                                                                                                                                                                                                                                                                                                                                                                                   | #    | #    | #         | #     | #    | #    | -                                      | ----  | ----                 | #                                                                                                                                                                                                                                                                                                                                        | #    | #    | #         | #     | #    |      |
| Rsa1.0_00256.1.g9779.t1 | #                                                                                                                                                                                                                                                                                                                                                                                                                                                                                                                                                                                                                                                                                                                                                                                                                                                   | #    | #    | #         | #     | #    | #    | -                                      | ----  | ----                 | #                                                                                                                                                                                                                                                                                                                                        | #    | #    | #         | #     | #    |      |
| Rsa1.0_00256.1.g9780.t1 | #                                                                                                                                                                                                                                                                                                                                                                                                                                                                                                                                                                                                                                                                                                                                                                                                                                                   | #    | #    | #         | #     | #    | #    | -                                      | ----  | ----                 | #                                                                                                                                                                                                                                                                                                                                        | #    | #    | #         | #     | #    |      |
| Rsa1.0_00256.1.g9781.t1 | ref XP_002868207.1  transferase family protein [Arabidopsis lyrata subsp. lyrata] gi 297314043 gb EFH44466.1  transferase family protein [Arabidopsis lyrata subsp. lyrata]                                                                                                                                                                                                                                                                                                                                                                                                                                                                                                                                                                                                                                                                         | 437  | 436  | 1.00E-145 | 99.8  | 63.6 | 76.9 | transferase family protein             | gbpln | Arabidopsis lyrata   | AT4G15400.1   Symbols: HXXXD-type acyl-transferase family protein   chr4:8812121-8813428 REVERSE LENGTH=435                                                                                                                                                                                                                              | 437  | 435  | 1.00E-145 | 99.5  | 62.0 | 75.7 |
| Rsa1.0_00256.1.g9782.t1 | #                                                                                                                                                                                                                                                                                                                                                                                                                                                                                                                                                                                                                                                                                                                                                                                                                                                   | #    | #    | #         | #     | #    | #    | -                                      | ----  | ----                 | #                                                                                                                                                                                                                                                                                                                                        | #    | #    | #         | #     | #    |      |

|                         |                                                                                                                                                                                                                                                                                                                                                                                                                                                                                                                                                                                                                                                                                                             |      |      |           |       |      |      |                                                         |       |                      |                                                                                                                                       |      |      |           |       |      |      |
|-------------------------|-------------------------------------------------------------------------------------------------------------------------------------------------------------------------------------------------------------------------------------------------------------------------------------------------------------------------------------------------------------------------------------------------------------------------------------------------------------------------------------------------------------------------------------------------------------------------------------------------------------------------------------------------------------------------------------------------------------|------|------|-----------|-------|------|------|---------------------------------------------------------|-------|----------------------|---------------------------------------------------------------------------------------------------------------------------------------|------|------|-----------|-------|------|------|
| Rsa1.0_00256.1.g9783.t1 | refNP_179876.1  serine carboxypeptidase-like 12 [Arabidopsis thaliana]<br>gi 75100032 sp O81009.1 SCP12_ARATH<br>RecName: Full=Serine carboxypeptidase-like 12; Flags: Precursor gi 3445209 gb AAC32439.1  putative serine carboxypeptidase I [Arabidopsis thaliana]<br>gi 330252279 gb AEC07373.1  serine carboxypeptidase-like 12 [Arabidopsis thaliana]                                                                                                                                                                                                                                                                                                                                                  | 264  | 435  | 1.00E-110 | 164.8 | 72.7 | 87.5 | serine carboxypeptidase-like 12                         | gbpln | Arabidopsis thaliana | AT2G22920.2   Symbols: SCPL12   serine carboxypeptidase-like 12   chr2:9753938-9757420 FORWARD LENGTH=435                             | 264  | 435  | 1.00E-113 | 164.8 | 72.7 | 87.5 |
| Rsa1.0_00256.1.g9784.t1 | gb AAD32898.1  putative retroelement pol polyprotein [Arabidopsis thaliana]                                                                                                                                                                                                                                                                                                                                                                                                                                                                                                                                                                                                                                 | 1370 | 1307 | 0         | 95.4  | 60.4 | 74.0 | putative retroelement pol polyprotein                   | gbpln | Arabidopsis thaliana | AT4G23160.1   Symbols: CRK8   cysteine-rich RLK (RECEPTOR-like protein kinase) 8   chr4:12129485-12134086 FORWARD LENGTH=1262         | 1370 | 1262 | 1.00E-100 | 92.1  | 13.6 | 21.7 |
| Rsa1.0_00256.1.g9785.t1 | refXP_002880473.1  hypothetical protein ARALYDRAFT_481174 [Arabidopsis lyrata subsp. lyrata]<br>gi 297326312 gb EFH56732.1  hypothetical protein ARALYDRAFT_481174 [Arabidopsis lyrata subsp. lyrata]                                                                                                                                                                                                                                                                                                                                                                                                                                                                                                       | 337  | 334  | 1.00E-179 | 99.1  | 90.2 | 94.7 | hypothetical protein ARALYDRAFT_481174                  | gbpln | Arabidopsis lyrata   | AT2G23030.1   Symbols: SNRK2-9, SNRK2.9   SNF1-related protein kinase 2.9   chr2:9803753-9806603 REVERSE LENGTH=339                   | 337  | 339  | 1.00E-178 | 100.6 | 89.6 | 94.1 |
| Rsa1.0_00256.1.g9786.t1 | #                                                                                                                                                                                                                                                                                                                                                                                                                                                                                                                                                                                                                                                                                                           | #    | #    | #         | #     | #    | #    | -                                                       | ----  | ----                 | #                                                                                                                                     | #    | #    | #         | #     | #    | #    |
| Rsa1.0_00256.1.g9787.t1 | refNP_179887.1  Phototropic-responsive NPH3-like protein [Arabidopsis thaliana]<br>gi 75274987 sp O64814.1 NPY4_ARATH<br>RecName: Full=BTB/POZ domain-containing protein NPY4; AltName: Full=Protein NAKED PINS IN YUC MUTANTS 4 gi 3169178 gb AAC17821.1  hypothetical protein [Arabidopsis thaliana]<br>gi 21805663 gb AAM76746.1  hypothetical protein [Arabidopsis thaliana]<br>gi 26450059 gb BAC42149.1  unknown protein [Arabidopsis thaliana]<br>gi 28973417 gb AAO64033.1  unknown protein [Arabidopsis thaliana]<br>gi 61742600 gb AAX55121.1  hypothetical protein At2g23050 [Arabidopsis thaliana]<br>gi 330252306 gb AEC07400.1  BTB/POZ domain-containing protein NPY4 [Arabidopsis thaliana] | 479  | 481  | 0         | 100.4 | 85.2 | 91.9 | Phototropic-responsive NPH3-like protein                | gbpln | Arabidopsis thaliana | AT2G23050.1   Symbols: NPY4   Phototropic-responsive NPH3 family protein   chr2:9810785-9812468 FORWARD LENGTH=481                    | 479  | 481  | 0         | 100.4 | 85.2 | 91.9 |
| Rsa1.0_00256.1.g9788.t1 | refXP_002880477.1  hypothetical protein ARALYDRAFT_900772 [Arabidopsis lyrata subsp. lyrata]<br>gi 297326316 gb EFH56736.1  hypothetical protein ARALYDRAFT_900772 [Arabidopsis lyrata subsp. lyrata]                                                                                                                                                                                                                                                                                                                                                                                                                                                                                                       | 401  | 412  | 0         | 102.7 | 89.8 | 94.8 | hypothetical protein ARALYDRAFT_900772                  | gbpln | Arabidopsis lyrata   | AT2G23060.1   Symbols:   Acyl-CoA N-acyltransferases (NAT) superfamily protein   chr2:9812839-9814633 REVERSE LENGTH=413              | 401  | 413  | 0         | 103.0 | 88.5 | 93.8 |
| Rsa1.0_00256.1.g9789.t1 | refXP_002891097.1  esterase/lipase/thioesterase family protein [Arabidopsis lyrata subsp. lyrata]<br>gi 297336939 gb EFH67356.1  esterase/lipase/thioesterase family protein [Arabidopsis lyrata subsp. lyrata]                                                                                                                                                                                                                                                                                                                                                                                                                                                                                             | 178  | 529  | 9.00E-37  | 297.2 | 43.8 | 48.3 | esterase/lipase/thioesterase family protein             | gbpln | Arabidopsis lyrata   | AT1G34340.1   Symbols:   alpha/beta-Hydrolases superfamily protein   chr1:12530936-12534031 FORWARD LENGTH=530                        | 178  | 530  | 6.00E-39  | 297.8 | 44.4 | 47.8 |
| Rsa1.0_00256.1.g9790.t3 | gb EOA31029.1  hypothetical protein CARUB_v10014175mg [Capsella rubella]                                                                                                                                                                                                                                                                                                                                                                                                                                                                                                                                                                                                                                    | 181  | 326  | 3.00E-22  | 180.1 | 38.7 | 47.5 | hypothetical protein CARUB_v10014175mg                  | gbpln | Capsella rubella     | AT3G06060.1   Symbols:   NAD(P)-binding Rossmann-fold superfamily protein   chr3:1828296-1830160 REVERSE LENGTH=326                   | 181  | 326  | 1.00E-24  | 180.1 | 36.5 | 47.0 |
| Rsa1.0_00256.1.g9791.t1 | refNP_177970.1  cytochrome P450, family 708, subfamily A, polypeptide 3 [Arabidopsis thaliana]<br>gi 17473541 gb AAL38249.1  similar to cytochrome P450 [Arabidopsis thaliana]<br>gi 30387575 gb AAP31953.1  At1g78490 [Arabidopsis thaliana]<br>gi 332197991 gb AEE36112.1  cytochrome P450, family 708, subfamily A, polypeptide 3 [Arabidopsis thaliana]                                                                                                                                                                                                                                                                                                                                                 | 481  | 479  | 1.00E-179 | 99.6  | 63.2 | 78.2 | cytochrome P450, family 708, subfamily A, polypeptide 3 | gbpln | Arabidopsis thaliana | AT1G78490.1   Symbols: CYP708A3   cytochrome P450, family 708, subfamily A, polypeptide 3   chr1:29528349-29530391 FORWARD LENGTH=479 | 481  | 479  | 0         | 99.6  | 63.2 | 78.2 |
| Rsa1.0_00256.1.g9792.t2 | emb CAD12663.1  casein kinase II alpha subunit [Sinapis alba]                                                                                                                                                                                                                                                                                                                                                                                                                                                                                                                                                                                                                                               | 419  | 414  | 0         | 98.8  | 93.3 | 95.7 | casein kinase II alpha subunit                          | gbpln | Sinapis alba         | AT2G23070.1   Symbols:   Protein kinase superfamily protein   chr2:9824162-9826871 REVERSE LENGTH=432                                 | 419  | 432  | 0         | 103.1 | 89.7 | 92.4 |
| Rsa1.0_00256.1.g9793.t1 | #                                                                                                                                                                                                                                                                                                                                                                                                                                                                                                                                                                                                                                                                                                           | #    | #    | #         | #     | #    | #    | -                                                       | ----  | ----                 | #                                                                                                                                     | #    | #    | #         | #     | #    | #    |



|                         |                                                                                                                                                                                                                                                                                                                                                                                                                                                                                                                                                                                                     |     |     |           |       |      |      |                                                     |       |                      |                                                                                                                                    |     |     |           |       |      |      |
|-------------------------|-----------------------------------------------------------------------------------------------------------------------------------------------------------------------------------------------------------------------------------------------------------------------------------------------------------------------------------------------------------------------------------------------------------------------------------------------------------------------------------------------------------------------------------------------------------------------------------------------------|-----|-----|-----------|-------|------|------|-----------------------------------------------------|-------|----------------------|------------------------------------------------------------------------------------------------------------------------------------|-----|-----|-----------|-------|------|------|
| Rsa1.0_00256.1.g9794.t2 | ref[NP_564860.3] putative expansin-B2 [Arabidopsis thaliana] gi 20138423 sp Q9SHY6.2 EXPB2_ARAT H RecName: Full=Putative expansin-B2; Short=At-EXPB2; Short=AtEXPB2; AltName: Full=AtH-ExpBeta-1.4; AltName: Full=Beta-expansin-2; Flags: Precursor gi 332196289 gb AEE34410.1  putative expansin-B2 [Arabidopsis thaliana]                                                                                                                                                                                                                                                                         | 321 | 273 | 1.00E-103 | 85.0  | 56.4 | 62.6 | putative expansin-B2                                | gbpln | Arabidopsis thaliana | AT1G65680.1   Symbols: ATEXPB2, EXPB2, ATHEXP BETA 1.4   expansin B2   chr1:24427266-24428399 FORWARD LENGTH=273                   | 321 | 273 | 1.00E-106 | 85.0  | 56.4 | 62.6 |
| Rsa1.0_00256.1.g9795.t1 | ref[NP_179895.6] RING/U-box domain and ARM repeat-containing protein [Arabidopsis thaliana] gi 330252323 gb AEC07417.1  RING/U-box domain and ARM repeat-containing protein [Arabidopsis thaliana]                                                                                                                                                                                                                                                                                                                                                                                                  | 772 | 829 | 0         | 107.4 | 88.3 | 92.2 | RING/U-box domain and ARM repeat-containing protein | gbpln | Arabidopsis thaliana | AT2G23140.1   Symbols:   RING/U-box superfamily protein with ARM repeat domain   chr2:9845696-9849105 REVERSE LENGTH=829           | 772 | 829 | 0         | 107.4 | 88.3 | 92.2 |
| Rsa1.0_00257.1.g9796.t1 | ref[XP_002888863.1] zinc finger family protein [Arabidopsis lyrata subsp. lyrata] gi 297334704 gb EFH65122.1  zinc finger family protein [Arabidopsis lyrata subsp. lyrata]                                                                                                                                                                                                                                                                                                                                                                                                                         | 359 | 426 | 1.00E-120 | 118.7 | 73.3 | 80.2 | zinc finger family protein                          | gbpln | Arabidopsis lyrata   | AT1G72220.1   Symbols:   RING/U-box superfamily protein   chr1:27184388-27185629 REVERSE LENGTH=413                                | 359 | 413 | 1.00E-122 | 115.0 | 73.5 | 80.8 |
| Rsa1.0_00257.1.g9797.t1 | # # # # # # # # - ---- ---- # # # # # #                                                                                                                                                                                                                                                                                                                                                                                                                                                                                                                                                             |     |     |           |       |      |      |                                                     |       |                      |                                                                                                                                    |     |     |           |       |      |      |
| Rsa1.0_00257.1.g9798.t1 | ref[NP_177366.1] transcription factor bHLH96 [Arabidopsis thaliana] gi 75308860 sp Q9C774.1 BH096_ARAT H RecName: Full=Transcription factor bHLH96; AltName: Full=Basic helix-loop-helix protein 96; Short=AtbHLH96; Short=bHLH 96; AltName: Full=Transcription factor EN 15; AltName: Full=bHLH transcription factor bHLH096                                                                                                                                                                                                                                                                       | 318 | 320 | 1.00E-132 | 100.6 | 79.9 | 88.4 | transcription factor bHLH96                         | gbpln | Arabidopsis thaliana | AT1G72210.1   Symbols:   basic helix-loop-helix (bHLH) DNA-binding superfamily protein   chr1:27180066-27182268 FORWARD LENGTH=320 | 318 | 320 | 1.00E-135 | 100.6 | 79.9 | 88.4 |
| Rsa1.0_00257.1.g9799.t1 | gi 12323671 gb AAG51804.1 AC067754_20 unknown protein; 44011-46213 [Arabidopsis thaliana] gi 20520637 emb CAD30833.1  basic-helix-loop-helix transcription factor [Arabidopsis thaliana] gi 28392970 gb AAO41920.1  putative bHLH protein [Arabidopsis thaliana] gi 29824221 gb AAP04071.1  putative bHLH protein [Arabidopsis thaliana] gi 332197168 gb AEE35289.1  transcription factor bHLH96 [Arabidopsis thaliana] ref[XP_002888862.1] zinc finger family protein [Arabidopsis lyrata subsp. lyrata] gi 297334703 gb EFH65121.1  zinc finger family protein [Arabidopsis lyrata subsp. lyrata] | 403 | 403 | 1.00E-171 | 100.0 | 77.7 | 85.1 | zinc finger family protein                          | gbpln | Arabidopsis lyrata   | AT1G72200.1   Symbols:   RING/U-box superfamily protein   chr1:27169935-27171149 REVERSE LENGTH=404                                | 403 | 404 | 1.00E-171 | 100.2 | 76.7 | 85.1 |
| Rsa1.0_00257.1.g9800.t1 | ref[XP_002888862.1] zinc finger family protein [Arabidopsis lyrata subsp. lyrata] gi 297334703 gb EFH65121.1  zinc finger family protein [Arabidopsis lyrata subsp. lyrata]                                                                                                                                                                                                                                                                                                                                                                                                                         | 310 | 403 | 1.00E-106 | 130.0 | 67.4 | 79.0 | zinc finger family protein                          | gbpln | Arabidopsis lyrata   | AT1G72200.1   Symbols:   RING/U-box superfamily protein   chr1:27169935-27171149 REVERSE LENGTH=404                                | 310 | 404 | 1.00E-107 | 130.3 | 66.1 | 78.4 |
| Rsa1.0_00257.1.g9801.t1 | gb EOA35070.1  hypothetical protein CARUB.v10020182mg [Capsella rubella]                                                                                                                                                                                                                                                                                                                                                                                                                                                                                                                            | 239 | 496 | 4.00E-80  | 207.5 | 61.9 | 63.6 | hypothetical protein CARUB.v10020182mg              | gbpln | Capsella rubella     | AT1G72160.1   Symbols:   Sec14p-like phosphatidylinositol transfer family protein   chr1:27153823-27155609 REVERSE LENGTH=490      | 239 | 490 | 3.00E-82  | 205.0 | 61.5 | 63.2 |
| Rsa1.0_00257.1.g9802.t1 | gb EOA34977.1  hypothetical protein CARUB.v10020065mg [Capsella rubella]                                                                                                                                                                                                                                                                                                                                                                                                                                                                                                                            | 557 | 567 | 0         | 101.8 | 81.7 | 87.1 | hypothetical protein CARUB.v10020065mg              | gbpln | Capsella rubella     | AT1G72150.1   Symbols: PATL1   PATELLIN 1   chr1:27148558-27150652 FORWARD LENGTH=573                                              | 557 | 573 | 0         | 102.9 | 76.5 | 82.2 |
| Rsa1.0_00257.1.g9803.t1 | ref[NP_177359.1] putative peptide/nitrate transporter [Arabidopsis thaliana] gi 75169388 sp Q9C7U1.1 PTR25_ARAT H RecName: Full=Probable peptide/nitrate transporter At1g72140 gi 12323658 gb AAG51791.1 AC067754_7 peptide transporter PTR2-B, putative; 5822-8291 [Arabidopsis thaliana] gi 50897244 gb AAT85761.1  At1g72140 [Arabidopsis thaliana] gi 332197159 gb AEE35280.1  probable peptide/nitrate transporter [Arabidopsis thaliana]                                                                                                                                                      | 553 | 555 | 0         | 100.4 | 81.4 | 90.6 | putative peptide/nitrate transporter                | gbpln | Arabidopsis thaliana | AT1G72140.1   Symbols:   Major facilitator superfamily protein   chr1:27141877-27144346 FORWARD LENGTH=555                         | 553 | 555 | 0         | 100.4 | 81.4 | 90.6 |

|                         |                                                                                                                                                                                                                                                                                                                                                                                                                                                                                                                                                                              |     |      |           |       |      |      |                                                   |       |                      |                                                                                                                                                                                                                                                                                                                                            |     |      |           |       |      |      |
|-------------------------|------------------------------------------------------------------------------------------------------------------------------------------------------------------------------------------------------------------------------------------------------------------------------------------------------------------------------------------------------------------------------------------------------------------------------------------------------------------------------------------------------------------------------------------------------------------------------|-----|------|-----------|-------|------|------|---------------------------------------------------|-------|----------------------|--------------------------------------------------------------------------------------------------------------------------------------------------------------------------------------------------------------------------------------------------------------------------------------------------------------------------------------------|-----|------|-----------|-------|------|------|
| Rsa1.0_00257.1.g9804.t1 | ref[XP_002887414.1] hypothetical protein ARALYDRAFT_316182 [Arabidopsis lyrata subsp. lyrata] gi 29733255 gb EFH63673.1                                                                                                                                                                                                                                                                                                                                                                                                                                                      | 529 | 535  | 0         | 101.1 | 79.4 | 88.5 | hypothetical protein ARALYDRAFT_316182            | gbpln | Arabidopsis lyrata   | AT1G72130.1   Symbols:   Major facilitator superfamily protein   chr1:27137201-27139223 FORWARD LENGTH=538                                                                                                                                                                                                                                 | 529 | 538  | 0         | 101.7 | 77.1 | 87.7 |
| Rsa1.0_00257.1.g9805.t3 | gb ABD65090.1  hypothetical protein 27.00116 [Brassica oleracea]                                                                                                                                                                                                                                                                                                                                                                                                                                                                                                             | 402 | 484  | 8.00E-47  | 120.4 | 29.6 | 36.3 | hypothetical protein 27.00116                     | gbpln | Brassica oleracea    | #                                                                                                                                                                                                                                                                                                                                          | #   | #    | #         | #     | #    | #    |
| Rsa1.0_00258.1.g9806.t1 | ref[XP_002893211.1] hypothetical protein ARALYDRAFT_472444 [Arabidopsis lyrata subsp. lyrata] gi 297339053 gb EFH69470.1                                                                                                                                                                                                                                                                                                                                                                                                                                                     | 273 | 290  | 3.00E-77  | 106.2 | 72.9 | 81.0 | hypothetical protein ARALYDRAFT_472444            | gbpln | Arabidopsis lyrata   | AT1G22110.1   Symbols:   structural constituent of ribosome   chr1:7801625-7802473 REVERSE LENGTH=282                                                                                                                                                                                                                                      | 273 | 282  | 5.00E-77  | 103.3 | 71.8 | 82.1 |
| Rsa1.0_00258.1.g9807.t1 | ref[NP_564162.1] Endoplasmic reticulum vesicle transporter protein [Arabidopsis thaliana] gi 9454530 gb AAF67853.1 AC073942.7 Contains similarity to a PRO0989 protein from Homo sapiens gi 7959731. EST gb A195648 comes from this gene [Arabidopsis thaliana] gi 13878151 gb AAK44153.1 AF370338.1 unknown protein [Arabidopsis thaliana] gi 21281042 gb AAM44956.1  unknown protein [Arabidopsis thaliana] gi 21553754 gb AAM62847.1  unknown [Arabidopsis thaliana] gi 332192089 gb AEE30210.1  Endoplasmic reticulum vesicle transporter protein [Arabidopsis thaliana] | 382 | 386  | 0         | 101.0 | 93.7 | 98.2 | Endoplasmic reticulum vesicle transporter protein | gbpln | Arabidopsis thaliana | AT1G22200.1   Symbols:   Endoplasmic reticulum vesicle transporter protein   chr1:7837857-7840602 REVERSE LENGTH=386                                                                                                                                                                                                                       | 382 | 386  | 0         | 101.0 | 93.7 | 98.2 |
| Rsa1.0_00258.1.g9808.t1 | ref[XP_002890499.1] hypothetical protein ARALYDRAFT_313108 [Arabidopsis lyrata subsp. lyrata] gi 297336341 gb EFH66758.1                                                                                                                                                                                                                                                                                                                                                                                                                                                     | 314 | 329  | 1.00E-151 | 104.8 | 84.1 | 90.8 | hypothetical protein ARALYDRAFT_313108            | gbpln | Arabidopsis lyrata   | AT1G22210.1   Symbols:   TPPC   Haloacid dehalogenase-like hydrolase (HAD) superfamily protein   chr1:7841518-7843812 FORWARD LENGTH=320                                                                                                                                                                                                   | 314 | 320  | 1.00E-153 | 101.9 | 83.4 | 90.4 |
| Rsa1.0_00258.1.g9809.t1 | #                                                                                                                                                                                                                                                                                                                                                                                                                                                                                                                                                                            | #   | #    | #         | #     | #    | #    | -                                                 | ----  | ----                 | #                                                                                                                                                                                                                                                                                                                                          | #   | #    | #         | #     | #    | #    |
| Rsa1.0_00258.1.g9810.t3 | gb EOA38282.1  hypothetical protein CARUB_v10009775mg [Capsella rubella] ref[NP_173644.2] uncharacterized protein [Arabidopsis thaliana] gi 9454525 gb AAF67848.1 AC073942.2 Contains similarity to a hypothetical protein T11111.1 gi 6587865 from Arabidopsis thaliana BAC gb AC012680 [Arabidopsis thaliana] gi 26450950 dbj BAC42582.1  unknown protein [Arabidopsis thaliana] gi 332192095 gb AEE30216.1  uncharacterized protein AT1G22250 [Arabidopsis thaliana]                                                                                                      | 427 | 318  | 1.00E-119 | 74.5  | 52.2 | 60.0 | hypothetical protein CARUB_v10009775mg            | gbpln | Capsella rubella     | AT1G22220.1   Symbols:   F-box family protein   chr1:7846694-7847638 FORWARD LENGTH=314                                                                                                                                                                                                                                                    | 427 | 314  | 1.00E-114 | 73.5  | 52.0 | 58.5 |
| Rsa1.0_00258.1.g9811.t1 | ref[NP_173644.2] uncharacterized protein [Arabidopsis thaliana] gi 9454525 gb AAF67848.1 AC073942.2 Contains similarity to a hypothetical protein T11111.1 gi 6587865 from Arabidopsis thaliana BAC gb AC012680 [Arabidopsis thaliana] gi 26450950 dbj BAC42582.1  unknown protein [Arabidopsis thaliana] gi 332192095 gb AEE30216.1  uncharacterized protein AT1G22250 [Arabidopsis thaliana]                                                                                                                                                                               | 182 | 200  | 2.00E-64  | 109.9 | 72.0 | 84.1 | uncharacterized protein                           | gbpln | Arabidopsis thaliana | AT1G22250.1   Symbols:   unknown protein; BEST Arabidopsis thaliana protein match is: unknown protein (TAIR:AT1G78170.1); Has 64 Blast hits to 64 proteins in 10 species: Archae - 0; Bacteria - 0; Metazoa - 0; Fungi - 0; Plants - 64; Viruses - 0; Other Eukaryotes - 0 (source: NCBI BLink).   chr1:7858961-7859648 FORWARD LENGTH=200 | 182 | 200  | 6.00E-67  | 109.9 | 72.0 | 84.1 |
| Rsa1.0_00258.1.g9812.t1 | gb ACN73532.1  1433-1 [Brassica napus] gi 224981571 gb ACN73533.1  1433-1 [Brassica napus]                                                                                                                                                                                                                                                                                                                                                                                                                                                                                   | 833 | 253  | 1.00E-133 | 30.4  | 29.4 | 29.9 | 1433-1                                            | gbpln | Brassica napus       | AT1G22300.2   Symbols:   GRF10, GF14 EPSILON   general regulatory factor 10   chr1:7879244-7881103 REVERSE LENGTH=254                                                                                                                                                                                                                      | 833 | 254  | 1.00E-129 | 30.5  | 28.3 | 29.7 |
| Rsa1.0_00258.1.g9813.t1 | ref[XP_002890509.1] hypothetical protein ARALYDRAFT_313119 [Arabidopsis lyrata subsp. lyrata] gi 297336351 gb EFH66768.1                                                                                                                                                                                                                                                                                                                                                                                                                                                     | 270 | 291  | 2.00E-93  | 107.8 | 77.8 | 83.3 | hypothetical protein ARALYDRAFT_313119            | gbpln | Arabidopsis lyrata   | AT1G22330.1   Symbols:   RNA-binding (RRM/RBD/RNP motifs) family protein   chr1:7886693-7889241 FORWARD LENGTH=291                                                                                                                                                                                                                         | 270 | 291  | 1.00E-89  | 107.8 | 78.1 | 83.3 |
| Rsa1.0_00258.1.g9814.t2 | gb EOA22419.1  hypothetical protein CARUB_v10003062mg [Capsella rubella]                                                                                                                                                                                                                                                                                                                                                                                                                                                                                                     | 194 | 1160 | 4.00E-53  | 597.9 | 50.5 | 51.0 | hypothetical protein CARUB_v10003062mg            | gbpln | Capsella rubella     | AT5G04930.1   Symbols:   ALA1   aminophospholipid ATPase 1   chr5:1445509-1449568 FORWARD LENGTH=1158                                                                                                                                                                                                                                      | 194 | 1158 | 2.00E-55  | 596.9 | 50.5 | 51.0 |
| Rsa1.0_00258.1.g9815.t1 | gb EOA37563.1  hypothetical protein CARUB_v10011877mg [Capsella rubella]                                                                                                                                                                                                                                                                                                                                                                                                                                                                                                     | 483 | 486  | 0         | 100.6 | 80.3 | 90.7 | hypothetical protein CARUB_v10011877mg            | gbpln | Capsella rubella     | AT1G22380.1   Symbols:   AtUGT85A3, UGT85A3   UDP-glucosyl transferase 85A3   chr1:7900522-7902332 REVERSE LENGTH=488                                                                                                                                                                                                                      | 483 | 488  | 0         | 101.0 | 80.1 | 88.4 |

|                         |                                                                                                                                                                                                                                                                                                                                                                                                                                                                                                                                                                                                                                                                                                                                                                                                                    |      |      |           |       |      |      |                                                     |       |                      |                                                                                                                                        |      |      |           |       |      |      |
|-------------------------|--------------------------------------------------------------------------------------------------------------------------------------------------------------------------------------------------------------------------------------------------------------------------------------------------------------------------------------------------------------------------------------------------------------------------------------------------------------------------------------------------------------------------------------------------------------------------------------------------------------------------------------------------------------------------------------------------------------------------------------------------------------------------------------------------------------------|------|------|-----------|-------|------|------|-----------------------------------------------------|-------|----------------------|----------------------------------------------------------------------------------------------------------------------------------------|------|------|-----------|-------|------|------|
| Rsa1.0_00258.1.g9816.t1 | ref[NP_173656.1] cytokinin-O-glucosyltransferase 2 [Arabidopsis thaliana]<br>gi 66774037 sp Q9SK82.1 U85A1_ARAT H RecName: Full=UDP-glycosyltransferase 85A1; AltName: Full=Cytokinin-O-glucosyltransferase 2; AltName: Full=Zeatin O-glucosyltransferase 2; Short=AtZOG2<br>gi 6587848 gb AAFI8537.1 AC006551.23 Putative UDP-glucose glucosyltransferase [Arabidopsis thaliana] gi 19698985 gb AAL91228.1  putative UDP-glucose glucosyltransferase [Arabidopsis thaliana] gi 31376401 gb AAP49527.1  At g22400 [Arabidopsis thaliana] gi 332192116 gb AEE30237.1  cytokinin-O-glucosyltransferase 2 [Arabidopsis thaliana]<br>ref[XP_002893224.1] UDP-glucosyl transferase 85A1 [Arabidopsis lyrata subsp. lyrata] gi 297339066 gb EFH69483.1  UDP-glucosyl transferase 85A1 [Arabidopsis lyrata subsp. lyrata] | 488  | 489  | 0         | 100.2 | 75.8 | 88.7 | cytokinin-O-glucosyltransferase 2                   | gbpln | Arabidopsis thaliana | AT1G22400.1   Symbols: UGT85A1, ATUGT85A1   UDP-Glycosyltransferase superfamily protein   chr1:7903851-7906607 REVERSE LENGTH=489      | 488  | 489  | 0         | 100.2 | 75.8 | 88.7 |
| Rsa1.0_00258.1.g9817.t1 | ref[XP_002893224.1] UDP-glucosyl transferase 85A1 [Arabidopsis lyrata subsp. lyrata] gi 297339066 gb EFH69483.1  UDP-glucosyl transferase 85A1 [Arabidopsis lyrata subsp. lyrata]                                                                                                                                                                                                                                                                                                                                                                                                                                                                                                                                                                                                                                  | 488  | 486  | 0         | 99.6  | 79.3 | 88.5 | UDP-glucosyl transferase 85A1                       | gbpln | Arabidopsis lyrata   | AT1G22400.1   Symbols: UGT85A1, ATUGT85A1   UDP-Glycosyltransferase superfamily protein   chr1:7903851-7906607 REVERSE LENGTH=489      | 488  | 489  | 0         | 100.2 | 78.3 | 87.9 |
| Rsa1.0_00259.1.g9818.t1 | gb EOA33354.1  hypothetical protein CARUB_v10020212mg [Capsella rubella]                                                                                                                                                                                                                                                                                                                                                                                                                                                                                                                                                                                                                                                                                                                                           | 67   | 481  | 2.00E-17  | 717.9 | 65.7 | 71.6 | hypothetical protein CARUB_v10020212mg              | gbpln | Capsella rubella     | AT1G70580.4   Symbols: AOAT2, GGT2   alanine-2-oxoglutarate aminotransferase 2   chr1:26613222-26615845 FORWARD LENGTH=481             | 67   | 481  | 7.00E-20  | 717.9 | 64.2 | 71.6 |
| Rsa1.0_00259.1.g9819.t1 | #                                                                                                                                                                                                                                                                                                                                                                                                                                                                                                                                                                                                                                                                                                                                                                                                                  | #    | #    | #         | #     | #    | #    | -                                                   | ----  | ----                 | #                                                                                                                                      | #    | #    | #         | #     | #    |      |
| Rsa1.0_00259.1.g9820.t1 | dbj BAH59426.1  putative disease resistance protein [Arabidopsis thaliana]                                                                                                                                                                                                                                                                                                                                                                                                                                                                                                                                                                                                                                                                                                                                         | 1285 | 1217 | 0         | 94.7  | 66.0 | 74.9 | putative disease resistance protein                 | gbpln | Arabidopsis thaliana | AT5G45250.1   Symbols: RPS4   Disease resistance protein (TIR-NBS-LRR class) family   chr5:18321914-18326022 REVERSE LENGTH=1217       | 1285 | 1217 | 0         | 94.7  | 65.9 | 74.9 |
| Rsa1.0_00259.1.g9821.t1 | ref[NP_199337.2] TIR-NBS-LRR class disease resistance protein [Arabidopsis thaliana] gi 332007837 gb AED95220.1  TIR-NBS-LRR class disease resistance protein [Arabidopsis thaliana]                                                                                                                                                                                                                                                                                                                                                                                                                                                                                                                                                                                                                               | 690  | 812  | 1.00E-100 | 117.7 | 33.8 | 46.8 | TIR-NBS-LRR class disease resistance protein        | gbpln | Arabidopsis thaliana | AT5G45240.1   Symbols:   Disease resistance protein (TIR-NBS-LRR class)   chr5:18313706-18319089 FORWARD LENGTH=812                    | 690  | 812  | 1.00E-103 | 117.7 | 33.8 | 46.8 |
| Rsa1.0_00259.1.g9822.t1 | gb AAC63844.1  putative non-LTR retroelement reverse transcriptase [Arabidopsis thaliana]                                                                                                                                                                                                                                                                                                                                                                                                                                                                                                                                                                                                                                                                                                                          | 1854 | 1231 | 0         | 66.4  | 40.8 | 50.5 | putative non-LTR retroelement reverse transcriptase | gbpln | Arabidopsis thaliana | AT2G01050.1   Symbols:   zinc ion binding:nucleic acid binding   chr2:68337-69884 REVERSE LENGTH=515                                   | 1854 | 515  | 1.00E-120 | 27.8  | 12.7 | 16.3 |
| Rsa1.0_00259.1.g9823.t1 | ref[XP_002863506.1] predicted protein [Arabidopsis lyrata subsp. lyrata] gi 297309341 gb EFH39765.1  predicted protein [Arabidopsis lyrata subsp. lyrata]                                                                                                                                                                                                                                                                                                                                                                                                                                                                                                                                                                                                                                                          | 165  | 1168 | 2.00E-62  | 707.9 | 72.1 | 81.2 | predicted protein                                   | gbpln | Arabidopsis lyrata   | AT5G45230.1   Symbols:   Disease resistance protein (TIR-NBS-LRR class) family   chr5:18302147-18308303 REVERSE LENGTH=1231            | 165  | 1231 | 8.00E-54  | 746.1 | 64.2 | 76.4 |
| Rsa1.0_00259.1.g9824.t1 | ref[XP_002863510.1] hypothetical protein ARALYDRAFT_494460 [Arabidopsis lyrata subsp. lyrata] gi 297309345 gb EFH39769.1  hypothetical protein ARALYDRAFT_494460 [Arabidopsis lyrata subsp. lyrata]                                                                                                                                                                                                                                                                                                                                                                                                                                                                                                                                                                                                                | 1072 | 1188 | 0         | 110.8 | 60.5 | 70.5 | hypothetical protein ARALYDRAFT_494460              | gbpln | Arabidopsis lyrata   | AT5G45230.1   Symbols:   Disease resistance protein (TIR-NBS-LRR class) family   chr5:18302147-18308303 REVERSE LENGTH=1231            | 1072 | 1231 | 0         | 114.8 | 59.9 | 70.1 |
| Rsa1.0_00259.1.g9825.t1 | #                                                                                                                                                                                                                                                                                                                                                                                                                                                                                                                                                                                                                                                                                                                                                                                                                  | #    | #    | #         | #     | #    | #    | -                                                   | ----  | ----                 | #                                                                                                                                      | #    | #    | #         | #     | #    |      |
| Rsa1.0_00259.1.g9826.t1 | gb EOA14759.1  hypothetical protein CARUB_v10028056mg [Capsella rubella]                                                                                                                                                                                                                                                                                                                                                                                                                                                                                                                                                                                                                                                                                                                                           | 359  | 270  | 3.00E-49  | 75.2  | 26.7 | 32.3 | hypothetical protein CARUB_v10028056mg              | gbpln | Capsella rubella     | AT1G51270.3   Symbols:   structural molecules:transmembrane receptors:structural molecules   chr1:19007577-19011225 FORWARD LENGTH=637 | 359  | 637  | 1.00E-36  | 177.4 | 19.2 | 28.1 |
| Rsa1.0_00259.1.g9827.t1 | gb ACB59223.1  glutathione S-transferase [Brassica oleracea]                                                                                                                                                                                                                                                                                                                                                                                                                                                                                                                                                                                                                                                                                                                                                       | 177  | 523  | 2.00E-28  | 295.5 | 43.5 | 55.4 | glutathione S-transferase                           | gbpln | Brassica oleracea    | #                                                                                                                                      | #    | #    | #         | #     | #    |      |
| Rsa1.0_00259.1.g9828.t1 | dbj BAB11392.1  unnamed protein product [Arabidopsis thaliana]                                                                                                                                                                                                                                                                                                                                                                                                                                                                                                                                                                                                                                                                                                                                                     | 545  | 583  | 0         | 107.0 | 89.0 | 92.8 | unnamed protein product                             | gbpln | Arabidopsis thaliana | AT5G45190.1   Symbols:   Cyclin family protein   chr5:18277808-18280733 REVERSE LENGTH=579                                             | 545  | 579  | 0         | 106.2 | 88.4 | 92.3 |
| Rsa1.0_00259.1.g9829.t1 | ref[XP_002865280.1] hypothetical protein ARALYDRAFT_494469 [Arabidopsis lyrata subsp. lyrata] gi 297311115 gb EFH41539.1  hypothetical protein ARALYDRAFT_494469 [Arabidopsis lyrata subsp. lyrata]                                                                                                                                                                                                                                                                                                                                                                                                                                                                                                                                                                                                                | 586  | 586  | 0         | 100.0 | 82.1 | 88.6 | hypothetical protein ARALYDRAFT_494469              | gbpln | Arabidopsis lyrata   | AT5G45110.1   Symbols: NPR3, ATNPR3   NPR1-like protein 3   chr5:18229319-18231334 FORWARD LENGTH=586                                  | 586  | 586  | 0         | 100.0 | 83.8 | 91.1 |
| Rsa1.0_00259.1.g9830.t1 | #                                                                                                                                                                                                                                                                                                                                                                                                                                                                                                                                                                                                                                                                                                                                                                                                                  | #    | #    | #         | #     | #    | #    | -                                                   | ----  | ----                 | #                                                                                                                                      | #    | #    | #         | #     | #    |      |
| Rsa1.0_00259.1.g9831.t1 | #                                                                                                                                                                                                                                                                                                                                                                                                                                                                                                                                                                                                                                                                                                                                                                                                                  | #    | #    | #         | #     | #    | #    | -                                                   | ----  | ----                 | #                                                                                                                                      | #    | #    | #         | #     | #    |      |

|                         |                                                                                                                                                                                                                                                                                                                                                                 |     |     |           |       |      |      |                                                         |       |                      |                                                                                                                                                                                                                                                                                                                                                                                    |     |     |           |       |      |      |
|-------------------------|-----------------------------------------------------------------------------------------------------------------------------------------------------------------------------------------------------------------------------------------------------------------------------------------------------------------------------------------------------------------|-----|-----|-----------|-------|------|------|---------------------------------------------------------|-------|----------------------|------------------------------------------------------------------------------------------------------------------------------------------------------------------------------------------------------------------------------------------------------------------------------------------------------------------------------------------------------------------------------------|-----|-----|-----------|-------|------|------|
| Rsa1.0_00259.1.g9832.t1 | ref[XP_002880000.1] hypothetical protein ARALYDRAFT_483365 [Arabidopsis lyrata subsp. lyrata] gi 297325839 gb EFH56259.1                                                                                                                                                                                                                                        | 263 | 838 | 5.00E-29  | 318.6 | 28.1 | 31.2 | hypothetical protein ARALYDRAFT_483365                  | gbpln | Arabidopsis lyrata   | AT2G42700.2   Symbols:   FUNCTIONS IN: molecular_function unknown; INVOLVED IN: vesicle-mediated transport, vesicle docking involved in exocytosis; LOCATED IN: cellular_component unknown; EXPRESSED IN: 22 plant structures; EXPRESSED DURING: 14 growth stages; CONTAINS InterPro DOMAIN/s: Sec1-like protein (InterPro:IPR001619).   chr2:17778464-17782034 FORWARD LENGTH=867 | 263 | 867 | 4.00E-31  | 329.7 | 28.1 | 30.8 |
| Rsa1.0_00259.1.g9833.t1 | gb AAB88009.1  heat shock cognate protein HSC70 [Brassica napus]                                                                                                                                                                                                                                                                                                | 650 | 645 | 0         | 99.2  | 95.7 | 98.3 | heat shock cognate protein HSC70                        | gbpln | Brassica napus       | AT5G02500.1   Symbols: HSC70-1, HSP70-1, AT-HSC70-1, HSC70   heat shock cognate protein 70-1   chr5:554055-556334 REVERSE LENGTH=651                                                                                                                                                                                                                                               | 650 | 651 | 0         | 100.2 | 94.9 | 97.7 |
| Rsa1.0_00259.1.g9834.t1 | #                                                                                                                                                                                                                                                                                                                                                               | #   | #   | #         | #     | #    | #    | -                                                       | ----  | ----                 | #                                                                                                                                                                                                                                                                                                                                                                                  | #   | #   | #         | #     | #    |      |
| Rsa1.0_00260.1.g9835.t2 | ref[XP_002868593.1] hypothetical protein ARALYDRAFT_916060 [Arabidopsis lyrata subsp. lyrata] gi 297314429 gb EFH44852.1                                                                                                                                                                                                                                        | 265 | 522 | 1.00E-120 | 197.0 | 75.8 | 78.9 | hypothetical protein ARALYDRAFT_916060                  | gbpln | Arabidopsis lyrata   | AT5G41460.1   Symbols:   Protein of unknown function (DUF604)   chr5:16589724-16592197 REVERSE LENGTH=524                                                                                                                                                                                                                                                                          | 265 | 524 | 1.00E-121 | 197.7 | 75.8 | 78.5 |
| Rsa1.0_00260.1.g9836.t1 | dbj BAJ33952.1  unnamed protein product [Theilungella halophila]                                                                                                                                                                                                                                                                                                | 595 | 597 | 0         | 100.3 | 86.4 | 90.3 | unnamed protein product                                 | ----  | ----                 | AT5G41410.1   Symbols: BEL1   POX (plant homeobox) family protein   chr5:16580424-16583770 FORWARD LENGTH=611                                                                                                                                                                                                                                                                      | 595 | 611 | 0         | 102.7 | 81.5 | 89.1 |
| Rsa1.0_00260.1.g9837.t1 | gb ABK28735.1  unknown [Arabidopsis thaliana]                                                                                                                                                                                                                                                                                                                   | 274 | 265 | 1.00E-112 | 96.7  | 76.6 | 79.2 | unknown                                                 | gbpln | Arabidopsis thaliana | AT5G41390.1   Symbols:   PLAC8 family protein   chr5:16565576-16567253 FORWARD LENGTH=264                                                                                                                                                                                                                                                                                          | 274 | 264 | 1.00E-114 | 96.4  | 76.3 | 78.8 |
| Rsa1.0_00260.1.g9838.t1 | ref[XP_002868599.1] hypothetical protein ARALYDRAFT_493840 [Arabidopsis lyrata subsp. lyrata] gi 297314435 gb EFH44858.1                                                                                                                                                                                                                                        | 308 | 308 | 1.00E-120 | 100.0 | 81.2 | 86.7 | hypothetical protein ARALYDRAFT_493840                  | gbpln | Arabidopsis lyrata   | AT5G41380.1   Symbols:   CCT motif family protein   chr5:16562129-16563553 REVERSE LENGTH=307                                                                                                                                                                                                                                                                                      | 308 | 307 | 1.00E-118 | 99.7  | 77.6 | 84.7 |
| Rsa1.0_00260.1.g9839.t1 | ref[XP_002870640.1] DNA repair and transcription factor XPB1 [Arabidopsis lyrata subsp. lyrata] gi 297316476 gb EFH46899.1   DNA repair and transcription factor XPB1 [Arabidopsis lyrata subsp. lyrata]                                                                                                                                                        | 768 | 767 | 0         | 99.9  | 91.4 | 95.7 | DNA repair and transcription factor XPB1                | gbpln | Arabidopsis lyrata   | AT5G41370.1   Symbols: XPB1, ATXPB1   homolog of xeroderma pigmentosum complementation group B 1   chr5:16551337-16555792 FORWARD LENGTH=767                                                                                                                                                                                                                                       | 768 | 767 | 0         | 99.9  | 92.7 | 95.8 |
| Rsa1.0_00260.1.g9840.t1 | ref[XP_002868602.1] zinc finger family protein [Arabidopsis lyrata subsp. lyrata] gi 297314438 gb EFH44861.1   zinc finger family protein [Arabidopsis lyrata subsp. lyrata]                                                                                                                                                                                    | 214 | 212 | 1.00E-101 | 99.1  | 86.4 | 92.5 | zinc finger family protein                              | gbpln | Arabidopsis lyrata   | AT5G41350.1   Symbols:   RING/U-box superfamily protein   chr5:16542026-16543092 REVERSE LENGTH=212                                                                                                                                                                                                                                                                                | 214 | 212 | 1.00E-103 | 99.1  | 86.0 | 92.5 |
| Rsa1.0_00260.1.g9841.t1 | gb EOA35717.1  hypothetical protein CARUB_v10020943mg, partial [Capsella rubella]                                                                                                                                                                                                                                                                               | 186 | 214 | 6.00E-93  | 115.1 | 89.2 | 94.6 | hypothetical protein CARUB_v10020943mg, partial         | gbpln | Capsella rubella     | AT1G63800.1   Symbols: UBC5   ubiquitin-conjugating enzyme 5   chr1:23667888-23669003 REVERSE LENGTH=185                                                                                                                                                                                                                                                                           | 186 | 185 | 1.00E-92  | 99.5  | 87.6 | 94.1 |
| Rsa1.0_00260.1.g9842.t1 | ref[NP_198949.1] BTB/POZ domain with WD40/YVTN repeat-containing protein [Arabidopsis thaliana] gi 75171793 sp Q9FN67.1 Y5133_ARATH RecName: Full=BTB/POZ domain-containing protein At5g41330 gi 9758042 dbj BAB08505.1  unnamed protein product [Arabidopsis thaliana] gi 54606858 gb AAV34777.1  At5g41330 [Arabidopsis thaliana] gi 110741213 dbj BAF02157.1 | 450 | 458 | 0         | 101.8 | 82.4 | 91.6 | BTB/POZ domain with WD40/YVTN repeat-containing protein | gbpln | Arabidopsis thaliana | AT5G41330.1   Symbols:   BTB/POZ domain with WD40/YVTN repeat-like protein   chr5:16536452-16537828 REVERSE LENGTH=458                                                                                                                                                                                                                                                             | 450 | 458 | 0         | 101.8 | 82.4 | 91.6 |
| Rsa1.0_00260.1.g9843.t1 | ref[NP_198948.1] uncharacterized protein [Arabidopsis thaliana] gi 9758041 dbj BAB08504.1  unnamed protein product [Arabidopsis thaliana] gi 332007282 gb AED94665.1   uncharacterized protein AT5G41320 [Arabidopsis thaliana]                                                                                                                                 | 449 | 515 | 1.00E-102 | 114.7 | 60.6 | 71.9 | uncharacterized protein                                 | gbpln | Arabidopsis thaliana | AT5G41320.1   Symbols:   unknown protein; Has 1807 Blast hits to 1807 proteins in 277 species: Archae - 0; Bacteria - 0; Metazoa - 736; Fungi - 347; Plants - 385; Viruses - 0; Other Eukaryotes - 339 (source: NCBI BLINK).   chr5:16534442-16535989 FORWARD LENGTH=515                                                                                                           | 449 | 515 | 1.00E-105 | 114.7 | 60.6 | 71.9 |
| Rsa1.0_00260.1.g9844.t1 | ref[XP_002870642.1] hypothetical protein ARALYDRAFT_493847 [Arabidopsis lyrata subsp. lyrata] gi 297316478 gb EFH46901.1                                                                                                                                                                                                                                        | 627 | 637 | 0         | 101.6 | 84.7 | 90.0 | hypothetical protein ARALYDRAFT_493847                  | gbpln | Arabidopsis lyrata   | AT5G41315.1   Symbols: GL3, MYC6.2   basic helix-loop-helix (bHLH) DNA-binding superfamily protein   chr5:16529457-16532866 FORWARD LENGTH=637                                                                                                                                                                                                                                     | 627 | 637 | 0         | 101.6 | 84.4 | 89.5 |

|                          |                                                                                                                                                                                                                                                                                                                                                                     |      |      |           |       |      |      |                                                     |       |                      |                                                                                                                                                                                                                                                                                                                                                                                                                                                                                            |      |     |           |       |      |      |
|--------------------------|---------------------------------------------------------------------------------------------------------------------------------------------------------------------------------------------------------------------------------------------------------------------------------------------------------------------------------------------------------------------|------|------|-----------|-------|------|------|-----------------------------------------------------|-------|----------------------|--------------------------------------------------------------------------------------------------------------------------------------------------------------------------------------------------------------------------------------------------------------------------------------------------------------------------------------------------------------------------------------------------------------------------------------------------------------------------------------------|------|-----|-----------|-------|------|------|
| Rsa1.0_00260.1.g9845.t1  | emb[CAB39638.1] RNA-directed DNA polymerase-like protein [Arabidopsis thaliana] gi 7267666 emb[CAB78094.1] RNA-directed DNA polymerase-like protein [Arabidopsis thaliana]                                                                                                                                                                                          | 1522 | 1274 | 0         | 83.7  | 26.3 | 35.2 | RNA-directed DNA polymerase-like protein            | gbpln | Arabidopsis thaliana | AT1G10000.1   Symbols:   Ribonuclease H-like superfamily protein   chr1:3263877-3264788 REVERSE LENGTH=303                                                                                                                                                                                                                                                                                                                                                                                 | 1522 | 303 | 1.00E-37  | 19.9  | 6.4  | 9.2  |
| Rsa1.0_00260.1.g9846.t1  | #                                                                                                                                                                                                                                                                                                                                                                   | #    | #    | #         | #     | #    | #    | -                                                   | ----  | ----                 | #                                                                                                                                                                                                                                                                                                                                                                                                                                                                                          | #    | #   | #         | #     | #    | #    |
| Rsa1.0_00261.1.g9847.t2  | #                                                                                                                                                                                                                                                                                                                                                                   | #    | #    | #         | #     | #    | #    | -                                                   | ----  | ----                 | #                                                                                                                                                                                                                                                                                                                                                                                                                                                                                          | #    | #   | #         | #     | #    | #    |
| Rsa1.0_00261.1.g9848.t1  | ref NP_201459.1  uncharacterized protein [Arabidopsis thaliana] gi 10177539 dbj BAB10934.1  unnamed protein product [Arabidopsis thaliana] gi 28393574 gb AAO42207.1  unknown protein [Arabidopsis thaliana] gi 28972979 gb AAO63814.1  unknown protein [Arabidopsis thaliana] gi 332010848 gb AED98231.1  uncharacterized protein AT5G66580 [Arabidopsis thaliana] | 147  | 156  | 1.00E-53  | 106.1 | 81.0 | 85.7 | uncharacterized protein                             | gbpln | Arabidopsis thaliana | AT5G66580.1   Symbols:   unknown protein; FUNCTIONS IN: molecular function unknown; INVOLVED IN: N-terminal protein myristoylation; LOCATED IN: cellular_component unknown; BEST Arabidopsis thaliana protein match is: unknown protein (TAIR:AT3G50800.1); Has 1807 Blast hits to 1807 proteins in 277 species: Archae - 0; Bacteria - 0; Metazoa - 736; Fungi - 347; Plants - 385; Viruses - 0; Other Eukaryotes - 339 (source: NCBI BLINK).   chr5:26572724-26573194 FORWARD LENGTH=156 | 147  | 156 | 3.00E-56  | 106.1 | 81.0 | 85.7 |
| Rsa1.0_00261.1.g9849.t2  | gb EOA13097.1  hypothetical protein CARUB_v10026104mg [Capsella rubella]                                                                                                                                                                                                                                                                                            | 582  | 608  | 0         | 104.5 | 77.1 | 84.5 | hypothetical protein CARUB_v10026104mg              | gbpln | Capsella rubella     | AT5G66600.4   Symbols:   Protein of unknown function, DUF547   chr5:26575105-26578315 REVERSE LENGTH=629                                                                                                                                                                                                                                                                                                                                                                                   | 582  | 629 | 0         | 108.1 | 78.7 | 85.4 |
| Rsa1.0_00261.1.g9850.t1  | ref XP_002866745.1  hypothetical protein ARALYDRAFT_332898 [Arabidopsis lyrata subsp. lyrata] gi 297312580 gb EFH43004.1  hypothetical protein ARALYDRAFT_332898 [Arabidopsis lyrata subsp. lyrata]                                                                                                                                                                 | 231  | 231  | 3.00E-86  | 100.0 | 81.0 | 85.7 | hypothetical protein ARALYDRAFT_332898              | gbpln | Arabidopsis lyrata   | AT5G66700.1   Symbols: HB53, HB-8, ATH855   homeobox 53   chr5:26634406-26635762 FORWARD LENGTH=228                                                                                                                                                                                                                                                                                                                                                                                        | 231  | 228 | 4.00E-85  | 98.7  | 79.2 | 84.4 |
| Rsa1.0_00261.1.g9851.t1  | gb EOA13246.1  hypothetical protein CARUB_v10026275mg [Capsella rubella]                                                                                                                                                                                                                                                                                            | 544  | 499  | 0         | 91.7  | 71.5 | 77.2 | hypothetical protein CARUB_v10026275mg              | gbpln | Capsella rubella     | AT5G66730.1   Symbols:   C2H2-like zinc finger protein   chr5:26641914-26643883 REVERSE LENGTH=500                                                                                                                                                                                                                                                                                                                                                                                         | 544  | 500 | 0         | 91.9  | 72.2 | 77.0 |
| Rsa1.0_00261.1.g9852.t1  | ref NP_201475.4  uncharacterized protein [Arabidopsis thaliana] gi 332010875 gb AED98258.1  uncharacterized protein AT5G66740 [Arabidopsis thaliana]                                                                                                                                                                                                                | 369  | 370  | 0         | 100.3 | 93.0 | 96.5 | uncharacterized protein                             | gbpln | Arabidopsis thaliana | AT5G66740.1   Symbols:   Protein of unknown function (DUF620)   chr5:26647114-26648558 FORWARD LENGTH=370                                                                                                                                                                                                                                                                                                                                                                                  | 369  | 370 | 0         | 100.3 | 93.0 | 96.5 |
| Rsa1.0_00261.1.g9853.t2  | gb EOA12951.1  hypothetical protein CARUB_v10025933mg [Capsella rubella]                                                                                                                                                                                                                                                                                            | 659  | 760  | 0         | 115.3 | 82.4 | 88.0 | hypothetical protein CARUB_v10025933mg              | gbpln | Capsella rubella     | AT5G66850.1   Symbols: MAPKKK5   mitogen-activated protein kinase kinase 5   chr5:26695965-26699159 REVERSE LENGTH=716                                                                                                                                                                                                                                                                                                                                                                     | 659  | 716 | 0         | 108.6 | 81.6 | 86.8 |
| Rsa1.0_00261.1.g9854.t13 | gb AAC67331.1  putative non-LTR retroelement reverse transcriptase [Arabidopsis thaliana]                                                                                                                                                                                                                                                                           | 1399 | 1449 | 1.00E-101 | 103.6 | 24.4 | 37.6 | putative non-LTR retroelement reverse transcriptase | gbpln | Arabidopsis thaliana | AT1G43760.1   Symbols:   DNAse I-like superfamily protein   chr1:1652880-16531065 REVERSE LENGTH=626                                                                                                                                                                                                                                                                                                                                                                                       | 1399 | 626 | 4.00E-44  | 44.7  | 8.7  | 14.4 |
| Rsa1.0_00261.1.g9855.t1  | gb EOA13733.1  hypothetical protein CARUB_v10026811mg [Capsella rubella]                                                                                                                                                                                                                                                                                            | 319  | 313  | 1.00E-112 | 98.1  | 72.7 | 80.3 | hypothetical protein CARUB_v10026811mg              | gbpln | Capsella rubella     | AT5G66870.1   Symbols: ASL1, LBD36   ASYMMETRIC LEAVES 2-like 1   chr5:26706621-26707562 FORWARD LENGTH=313                                                                                                                                                                                                                                                                                                                                                                                | 319  | 313 | 1.00E-111 | 98.1  | 74.6 | 81.5 |
| Rsa1.0_00261.1.g9856.t1  | #                                                                                                                                                                                                                                                                                                                                                                   | #    | #    | #         | #     | #    | #    | -                                                   | ----  | ----                 | #                                                                                                                                                                                                                                                                                                                                                                                                                                                                                          | #    | #   | #         | #     | #    | #    |
| Rsa1.0_00261.1.g9857.t1  | ref XP_002865045.1  predicted protein [Arabidopsis lyrata subsp. lyrata] gi 297310880 gb EFH41304.1  predicted protein [Arabidopsis lyrata subsp. lyrata]                                                                                                                                                                                                           | 418  | 421  | 0         | 100.7 | 77.3 | 88.8 | predicted protein                                   | gbpln | Arabidopsis lyrata   | AT5G66890.1   Symbols:   Leucine-rich repeat (LRR) family protein   chr5:26712944-26714383 REVERSE LENGTH=415                                                                                                                                                                                                                                                                                                                                                                              | 418  | 415 | 0         | 99.3  | 77.0 | 87.8 |
| Rsa1.0_00261.1.g9858.t1  | ref XP_002866726.1  predicted protein [Arabidopsis lyrata subsp. lyrata] gi 297312561 gb EFH42985.1  predicted protein [Arabidopsis lyrata subsp. lyrata]                                                                                                                                                                                                           | 544  | 543  | 0         | 99.8  | 86.6 | 90.4 | predicted protein                                   | gbpln | Arabidopsis lyrata   | AT5G66920.1   Symbols: sks17   SKU5 similar 17   chr5:26722963-26725370 FORWARD LENGTH=546                                                                                                                                                                                                                                                                                                                                                                                                 | 544  | 546 | 0         | 100.4 | 89.3 | 93.9 |
| Rsa1.0_00261.1.g9859.t1  | gb EOA14640.1  hypothetical protein CARUB_v10027898mg [Capsella rubella]                                                                                                                                                                                                                                                                                            | 231  | 242  | 7.00E-77  | 104.8 | 84.4 | 89.2 | hypothetical protein CARUB_v10027898mg              | gbpln | Capsella rubella     | AT5G67060.1   Symbols: HEC1   basic helix-loop-helix (bHLH) DNA-binding superfamily protein   chr5:26766276-26767001 FORWARD LENGTH=241                                                                                                                                                                                                                                                                                                                                                    | 231  | 241 | 6.00E-78  | 104.3 | 87.0 | 89.2 |
| Rsa1.0_00261.1.g9860.t1  | ref XP_002866719.1  hypothetical protein ARALYDRAFT_920006 [Arabidopsis lyrata subsp. lyrata] gi 297312554 gb EFH42978.1  hypothetical protein ARALYDRAFT_920006 [Arabidopsis lyrata subsp. lyrata]                                                                                                                                                                 | 130  | 128  | 2.00E-43  | 98.5  | 76.9 | 84.6 | hypothetical protein ARALYDRAFT_920006              | gbpln | Arabidopsis lyrata   | AT5G67070.1   Symbols: RALFL34   ralfl-like 34   chr5:26768120-26768509 FORWARD LENGTH=129                                                                                                                                                                                                                                                                                                                                                                                                 | 130  | 129 | 3.00E-44  | 99.2  | 73.8 | 80.0 |
| Rsa1.0_00261.1.g9861.t1  | emb[CAB39638.1] RNA-directed DNA polymerase-like protein [Arabidopsis thaliana] gi 7267666 emb[CAB78094.1] RNA-directed DNA polymerase-like protein [Arabidopsis thaliana]                                                                                                                                                                                          | 417  | 1274 | 5.00E-76  | 305.5 | 38.6 | 58.8 | RNA-directed DNA polymerase-like protein            | gbpln | Arabidopsis thaliana | AT1G10000.1   Symbols:   Ribonuclease H-like superfamily protein   chr1:3263877-3264788 REVERSE LENGTH=303                                                                                                                                                                                                                                                                                                                                                                                 | 417  | 303 | 6.00E-40  | 72.7  | 26.1 | 36.5 |
| Rsa1.0_00261.1.g9862.t1  | #                                                                                                                                                                                                                                                                                                                                                                   | #    | #    | #         | #     | #    | #    | -                                                   | ----  | ----                 | #                                                                                                                                                                                                                                                                                                                                                                                                                                                                                          | #    | #   | #         | #     | #    | #    |

|                         |                                                                                                                                                                                                                                                                                                                                                                                                                                         |      |      |           |       |      |      |                                              |       |                      |                                                                                                                                            |      |      |           |       |      |      |
|-------------------------|-----------------------------------------------------------------------------------------------------------------------------------------------------------------------------------------------------------------------------------------------------------------------------------------------------------------------------------------------------------------------------------------------------------------------------------------|------|------|-----------|-------|------|------|----------------------------------------------|-------|----------------------|--------------------------------------------------------------------------------------------------------------------------------------------|------|------|-----------|-------|------|------|
| Rsa1.0_00261.1.g9863.t4 | emb[CAA18107.1] LTR retrotransposon like protein [Arabidopsis thaliana] gi 7269049 emb[CAB79159.1] LTR retrotransposon like protein [Arabidopsis thaliana]                                                                                                                                                                                                                                                                              | 551  | 1109 | 1.00E-66  | 201.3 | 29.9 | 37.7 | LTR retrotransposon like protein             | gbpln | Arabidopsis thaliana | AT4G23160.1   Symbols: CRK8   cysteine-rich RLK (RECEPTOR-like protein kinase) 8   chr4:12129485-12134086 FORWARD LENGTH=1262              | 551  | 1262 | 6.00E-37  | 229.0 | 19.1 | 28.3 |
| Rsa1.0_00261.1.g9864.t1 | emb[CCD74510.1] unknown, partial [Arabidopsis halleri subsp. halleri]                                                                                                                                                                                                                                                                                                                                                                   | 219  | 300  | 9.00E-31  | 137.0 | 35.6 | 44.3 | unknown, partial                             | gbpln | Arabidopsis halleri  | AT1G10000.1   Symbols:   Ribonuclease H-like superfamily protein   chr1:3263877-3264788 REVERSE LENGTH=303                                 | 219  | 303  | 4.00E-33  | 138.4 | 36.5 | 52.1 |
| Rsa1.0_00261.1.g9865.t5 | gb[EMJ11389.1] hypothetical protein PRUPE_ppa017790mg [Prunus persica]                                                                                                                                                                                                                                                                                                                                                                  | 1093 | 1485 | 0         | 135.9 | 39.9 | 53.2 | hypothetical protein PRUPE_ppa017790mg       | gbpln | Prunus persica       | AT4G21380.1   Symbols: ARK3, RK3   receptor kinase 3   chr4:11389219-11393090 REVERSE LENGTH=850                                           | 1093 | 850  | 1.00E-72  | 77.8  | 12.4 | 13.9 |
| Rsa1.0_00261.1.g9866.t1 | dbj[BAB69682.1] receptor kinase 3 [Brassica rapa]                                                                                                                                                                                                                                                                                                                                                                                       | 297  | 847  | 1.00E-111 | 285.2 | 69.7 | 78.1 | receptor kinase 3                            | gbpln | Brassica rapa        | AT4G21380.1   Symbols: ARK3, RK3   receptor kinase 3   chr4:11389219-11393090 REVERSE LENGTH=850                                           | 297  | 850  | 3.00E-80  | 286.2 | 49.2 | 66.7 |
| Rsa1.0_00261.1.g9867.t1 | gb[EOA37218.1] hypothetical protein CARUB_v10010700mg [Capsella rubella]                                                                                                                                                                                                                                                                                                                                                                | 203  | 112  | 2.00E-11  | 55.2  | 17.2 | 17.7 | hypothetical protein CARUB_v10010700mg       | gbpln | Capsella rubella     | AT5G44270.1   Symbols:   TPX2 (targeting protein for Xklp2) protein family   chr5:17833636-17835740 FORWARD LENGTH=309                     | 203  | 309  | 2.00E-13  | 152.2 | 16.7 | 17.2 |
| Rsa1.0_00262.1.g9868.t1 | gb[EOA26386.1] hypothetical protein CARUB_v10023505mg [Capsella rubella]                                                                                                                                                                                                                                                                                                                                                                | 330  | 358  | 3.00E-13  | 108.5 | 15.2 | 24.8 | hypothetical protein CARUB_v10023505mg       | gbpln | Capsella rubella     | #                                                                                                                                          | #    | #    | #         | #     | #    | #    |
| Rsa1.0_00262.1.g9869.t9 | #                                                                                                                                                                                                                                                                                                                                                                                                                                       | #    | #    | #         | #     | #    | #    | -                                            | ----  | ----                 | AT3G02880.1   Symbols:   Leucine-rich repeat protein kinase family protein   chr3:634819-636982 FORWARD LENGTH=627                         | 544  | 627  | 5.00E-11  | 115.3 | 5.5  | 6.3  |
| Rsa1.0_00262.1.g9870.t1 | #                                                                                                                                                                                                                                                                                                                                                                                                                                       | #    | #    | #         | #     | #    | #    | -                                            | ----  | ----                 | #                                                                                                                                          | #    | #    | #         | #     | #    | #    |
| Rsa1.0_00262.1.g9871.t1 | #                                                                                                                                                                                                                                                                                                                                                                                                                                       | #    | #    | #         | #     | #    | #    | -                                            | ----  | ----                 | #                                                                                                                                          | #    | #    | #         | #     | #    | #    |
| Rsa1.0_00262.1.g9872.t1 | ref[XP_002892212.1] hypothetical protein ARALYDRAFT_470414 [Arabidopsis lyrata subsp. lyrata] gi 297338054 gb[EFH68471.1] hypothetical protein ARALYDRAFT_470414 [Arabidopsis lyrata subsp. lyrata]                                                                                                                                                                                                                                     | 355  | 346  | 1.00E-159 | 97.5  | 80.0 | 88.5 | hypothetical protein ARALYDRAFT_470414       | gbpln | Arabidopsis lyrata   | AT1G04380.1   Symbols:   2-oxoglutarate (2OG) and Fe(II)-dependent oxygenase superfamily protein   chr1:1177142-1178384 REVERSE LENGTH=345 | 355  | 345  | 1.00E-156 | 97.2  | 76.9 | 85.9 |
| Rsa1.0_00262.1.g9873.t1 | gb[EOA38791.1] hypothetical protein CARUB_v10011057mg [Capsella rubella]                                                                                                                                                                                                                                                                                                                                                                | 138  | 130  | 7.00E-45  | 94.2  | 81.9 | 89.1 | hypothetical protein CARUB_v10011057mg       | gbpln | Capsella rubella     | AT1G04370.1   Symbols: ATERF14, ERF14   Ethylene-responsive element binding factor 14   chr1:1175177-1175578 FORWARD LENGTH=133            | 138  | 133  | 1.00E-45  | 96.4  | 76.8 | 83.3 |
| Rsa1.0_00262.1.g9874.t1 | ref[XP_002892211.1] hypothetical protein ARALYDRAFT_887598 [Arabidopsis lyrata subsp. lyrata] gi 297338053 gb[EFH68470.1] hypothetical protein ARALYDRAFT_887598 [Arabidopsis lyrata subsp. lyrata]                                                                                                                                                                                                                                     | 369  | 382  | 1.00E-148 | 103.5 | 78.6 | 85.4 | hypothetical protein ARALYDRAFT_887598       | gbpln | Arabidopsis lyrata   | AT1G04360.1   Symbols:   RING/U-box superfamily protein   chr1:1167507-1168652 REVERSE LENGTH=381                                          | 369  | 381  | 1.00E-140 | 103.3 | 77.8 | 85.6 |
| Rsa1.0_00262.1.g9875.t1 | ref[XP_00289500.1] hypothetical protein ARALYDRAFT_470412 [Arabidopsis lyrata subsp. lyrata] gi 297335342 gb[EFH65759.1] hypothetical protein ARALYDRAFT_470412 [Arabidopsis lyrata subsp. lyrata]                                                                                                                                                                                                                                      | 346  | 361  | 1.00E-151 | 104.3 | 77.2 | 87.0 | hypothetical protein ARALYDRAFT_470412       | gbpln | Arabidopsis lyrata   | AT1G04350.1   Symbols:   2-oxoglutarate (2OG) and Fe(II)-dependent oxygenase superfamily protein   chr1:1165296-1166538 FORWARD LENGTH=360 | 346  | 360  | 1.00E-151 | 104.0 | 75.7 | 85.8 |
| Rsa1.0_00262.1.g9876.t1 | ref[XP_002869619.1] ATGOLS6 [Arabidopsis lyrata subsp. lyrata] gi 297315455 gb[EFH45878.1] ATGOLS6 [Arabidopsis lyrata subsp. lyrata]                                                                                                                                                                                                                                                                                                   | 329  | 333  | 1.00E-165 | 101.2 | 85.4 | 91.2 | ATGOLS6                                      | gbpln | Arabidopsis lyrata   | AT5G23790.1   Symbols: AtGolS5, GolS5   galactinol synthase 5   chr5:8020183-8021597 REVERSE LENGTH=333                                    | 329  | 333  | 1.00E-167 | 101.2 | 84.2 | 90.9 |
| Rsa1.0_00262.1.g9877.t1 | ref[INP_171929.1] HR-like lesion-inducing protein-like protein [Arabidopsis thaliana] gi 2341039 gb[AAB70443.1] Similar to Nicotiana lesion-inducing ORF (gi U66269) [Arabidopsis thaliana] gi 17979509 gb[AAL50090.1] At1g04340/F19P19.23 [Arabidopsis thaliana] gi 20147297 gb[AAM10362.1] At1g04340/F19P19.23 [Arabidopsis thaliana] gi 332189565 gb[AEE27686.1] HR-like lesion-inducing protein-like protein [Arabidopsis thaliana] | 162  | 159  | 2.00E-73  | 98.1  | 89.5 | 93.2 | HR-like lesion-inducing protein-like protein | gbpln | Arabidopsis thaliana | AT1G04340.1   Symbols:   HR-like lesion-inducing protein-related   chr1:1163345-1164737 REVERSE LENGTH=159                                 | 162  | 159  | 8.00E-76  | 98.1  | 89.5 | 93.2 |

|                         |                                                                                                                                                                                                                                                                                                                                                                                                                                                                                                                                                                                                                                                                                                                                                                                                                                                                                                                                                                                                                                                                                                                        |      |      |           |       |      |       |                                                      |       |                      |                                                                                                                                                                                                                                                                                                                                                                                                                                                        |      |      |           |       |      |      |
|-------------------------|------------------------------------------------------------------------------------------------------------------------------------------------------------------------------------------------------------------------------------------------------------------------------------------------------------------------------------------------------------------------------------------------------------------------------------------------------------------------------------------------------------------------------------------------------------------------------------------------------------------------------------------------------------------------------------------------------------------------------------------------------------------------------------------------------------------------------------------------------------------------------------------------------------------------------------------------------------------------------------------------------------------------------------------------------------------------------------------------------------------------|------|------|-----------|-------|------|-------|------------------------------------------------------|-------|----------------------|--------------------------------------------------------------------------------------------------------------------------------------------------------------------------------------------------------------------------------------------------------------------------------------------------------------------------------------------------------------------------------------------------------------------------------------------------------|------|------|-----------|-------|------|------|
| Rsa1.0_00262.1.g9878.t1 | refNP_171928.1   uncharacterized protein [Arabidopsis thaliana]<br>gi 2341040 gb AAB70444.1  EST gb H76414 comes from this gene [Arabidopsis thaliana]<br>gi 38454052 gb AAR20720.1  At1g04330 [Arabidopsis thaliana]<br>gi 38603978 gb AAR24732.1  At1g04330 [Arabidopsis thaliana]<br>gi 332189564 gb AEE27685.1  uncharacterized protein AT1G04330 [Arabidopsis thaliana]                                                                                                                                                                                                                                                                                                                                                                                                                                                                                                                                                                                                                                                                                                                                           | 98   | 100  | 2.00E-39  | 102.0 | 86.7 | 90.8  | uncharacterized protein                              | gbpln | Arabidopsis thaliana | AT1G04330.1   Symbols:   unknown protein; FUNCTIONS IN: molecular_function unknown; INVOLVED IN: biological_process unknown; LOCATED IN: chloroplast; BEST Arabidopsis thaliana protein match is: unknown protein (TAIR:AT3G23170.1); Has 74 Blast hits to 74 proteins in 6 species: Archaea = 0; Bacteria = 0; Metazoa = 0; Fungi = 0; Plants = 74; Viruses = 0; Other Eukaryotes = 0 (source: NCBI BLINK);   chr1:1161584-1161886 REVERSE LENGTH=100 | 98   | 100  | 3.00E-42  | 102.0 | 86.7 | 90.8 |
| Rsa1.0_00262.1.g9879.t1 | refXP_002892208.1   predicted protein [Arabidopsis lyrata subsp. lyrata]<br>gi 297338050 gb EFH68467.1  predicted protein [Arabidopsis lyrata subsp. lyrata]                                                                                                                                                                                                                                                                                                                                                                                                                                                                                                                                                                                                                                                                                                                                                                                                                                                                                                                                                           | 643  | 652  | 0         | 101.4 | 78.8 | 85.4  | predicted protein                                    | gbpln | Arabidopsis lyrata   | AT1G04310.1   Symbols: ERS2   ethylene response sensor 2   chr1:1155116-1157125 REVERSE LENGTH=645                                                                                                                                                                                                                                                                                                                                                     | 643  | 645  | 0         | 100.3 | 77.6 | 84.3 |
| Rsa1.0_00262.1.g9880.t1 | refXP_002892207.1   hypothetical protein ARALYDRAFT_470409 [Arabidopsis lyrata subsp. lyrata]<br>gi 297338049 gb EFH68466.1  hypothetical protein ARALYDRAFT_470409 [Arabidopsis lyrata subsp. lyrata]                                                                                                                                                                                                                                                                                                                                                                                                                                                                                                                                                                                                                                                                                                                                                                                                                                                                                                                 | 1082 | 1071 | 0         | 99.0  | 78.7 | 85.8  | hypothetical protein ARALYDRAFT_470409               | gbpln | Arabidopsis lyrata   | AT1G04300.1   Symbols:   TRAF-like superfamily protein   chr1:1148818-1153895 REVERSE LENGTH=1074                                                                                                                                                                                                                                                                                                                                                      | 1082 | 1074 | 0         | 99.3  | 77.8 | 85.8 |
| Rsa1.0_00262.1.g9881.t1 | refXP_002892206.1   thioesterase family protein [Arabidopsis lyrata subsp. lyrata]<br>gi 297338048 gb EFH68465.1  thioesterase family protein [Arabidopsis lyrata subsp. lyrata]                                                                                                                                                                                                                                                                                                                                                                                                                                                                                                                                                                                                                                                                                                                                                                                                                                                                                                                                       | 134  | 155  | 1.00E-51  | 115.7 | 81.3 | 88.8  | thioesterase family protein                          | gbpln | Arabidopsis lyrata   | AT1G04290.1   Symbols:   Thioesterase superfamily protein   chr1:1147721-1148352 REVERSE LENGTH=155                                                                                                                                                                                                                                                                                                                                                    | 134  | 155  | 2.00E-52  | 115.7 | 79.9 | 85.8 |
| Rsa1.0_00262.1.g9882.t1 | gb EOA39428.1  hypothetical protein CARUB_v10012550mg [Capsella rubella]                                                                                                                                                                                                                                                                                                                                                                                                                                                                                                                                                                                                                                                                                                                                                                                                                                                                                                                                                                                                                                               | 535  | 538  | 0         | 100.6 | 82.8 | 90.3  | hypothetical protein CARUB_v10012550mg               | gbpln | Capsella rubella     | AT1G04280.1   Symbols:   P-loop containing nucleoside triphosphate hydrolases superfamily protein   chr1:1143643-1146541 REVERSE LENGTH=534                                                                                                                                                                                                                                                                                                            | 535  | 534  | 0         | 99.8  | 79.6 | 88.2 |
| Rsa1.0_00262.1.g9883.t1 | gb EOA36082.1  hypothetical protein CARUB_v10010394mg, partial [Capsella rubella]                                                                                                                                                                                                                                                                                                                                                                                                                                                                                                                                                                                                                                                                                                                                                                                                                                                                                                                                                                                                                                      | 152  | 186  | 1.00E-81  | 122.4 | 98.7 | 100.0 | hypothetical protein CARUB_v10010394mg, partial      | gbpln | Capsella rubella     | AT1G04270.1   Symbols: RPS15   cytosolic ribosomal protein S15   chr1:1141852-1142960 REVERSE LENGTH=152                                                                                                                                                                                                                                                                                                                                               | 152  | 152  | 8.00E-84  | 100.0 | 99.3 | 99.3 |
| Rsa1.0_00262.1.g9884.t1 | refXP_002889499.1   hypothetical protein ARALYDRAFT_470401 [Arabidopsis lyrata subsp. lyrata]<br>gi 297335341 gb EFH65758.1  hypothetical protein ARALYDRAFT_470401 [Arabidopsis lyrata subsp. lyrata]                                                                                                                                                                                                                                                                                                                                                                                                                                                                                                                                                                                                                                                                                                                                                                                                                                                                                                                 | 230  | 229  | 1.00E-105 | 99.6  | 82.6 | 86.5  | hypothetical protein ARALYDRAFT_470401               | gbpln | Arabidopsis lyrata   | AT1G04250.1   Symbols: AXR3, IAA17   AUX/IAA transcriptional regulator family protein   chr1:1136382-1138340 FORWARD LENGTH=229                                                                                                                                                                                                                                                                                                                        | 230  | 229  | 1.00E-108 | 99.6  | 82.2 | 85.7 |
| Rsa1.0_00262.1.g9885.t1 | gb AAD21699.1  Contains reverse transcriptase domain (rvt) PF 00078 [Arabidopsis thaliana]                                                                                                                                                                                                                                                                                                                                                                                                                                                                                                                                                                                                                                                                                                                                                                                                                                                                                                                                                                                                                             | 341  | 1253 | 2.00E-37  | 367.4 | 26.7 | 41.3  | Contains reverse transcriptase domain (rvt) PF 00078 | gbpln | Arabidopsis thaliana | AT1G60720.1   Symbols:   RNA-directed DNA polymerase (reverse transcriptase)-related family protein   chr1:22357072-22357941 FORWARD LENGTH=289                                                                                                                                                                                                                                                                                                        | 341  | 289  | 2.00E-38  | 84.8  | 27.6 | 41.9 |
| Rsa1.0_00262.1.g9886.t1 | ref NP_171920.1  auxin-responsive protein IAA3 [Arabidopsis thaliana]<br>gi 12643742 sp Q38822.1 IAA3_ARATH<br>RecName: Full=Auxin-responsive protein IAA3; AltName: Full=Indoleacetic acid-induced protein 3; AltName: Full=Short hypocotyl; AltName: Full=Suppressor of HY2<br>gi 12083196 gb AAG48757.1 AF332393.1 auxin-induced protein IAA3 [Arabidopsis thaliana]<br>gi 97291.1 gb AAC49045.1  IAA3 [Arabidopsis thaliana]<br>gi 1903369 gb AAB70452.1  Match to Arabidopsis IAA3 (gb U18406). EST gb T04296 comes from this gene [Arabidopsis thaliana]<br>gi 17381102 gb AL36363.1  putative auxin-induced protein IAA3 [Arabidopsis thaliana]<br>gi 164604668 gb ABY61894.1  At1g04240 [Arabidopsis thaliana]<br>gi 164604670 gb ABY61895.1  At1g04240 [Arabidopsis thaliana]<br>gi 164604672 gb ABY61896.1  At1g04240 [Arabidopsis thaliana]<br>gi 164604674 gb ABY61897.1  At1g04240 [Arabidopsis thaliana]<br>gi 164604676 gb ABY61898.1  At1g04240 [Arabidopsis thaliana]<br>gi 164604678 gb ABY61899.1  At1g04240 [Arabidopsis thaliana]<br>gi 164604682 gb ABY61901.1  At1g04240 [Arabidopsis thaliana] | 186  | 189  | 7.00E-87  | 101.6 | 84.9 | 91.9  | auxin-responsive protein IAA3                        | gbpln | Arabidopsis thaliana | AT1G04240.1   Symbols: SHY2, IAA3   AUX/IAA transcriptional regulator family protein   chr1:1128564-1129319 REVERSE LENGTH=189                                                                                                                                                                                                                                                                                                                         | 186  | 189  | 3.00E-89  | 101.6 | 84.9 | 91.9 |

|                          |                                                                                                                                                                                                                                                                                                                                                                                                               |      |      |           |       |      |      |                                                     |       |                      |                                                                                                                                                                                                                                                                                                                                                                                                                                                                                                                      |      |      |           |       |      |      |
|--------------------------|---------------------------------------------------------------------------------------------------------------------------------------------------------------------------------------------------------------------------------------------------------------------------------------------------------------------------------------------------------------------------------------------------------------|------|------|-----------|-------|------|------|-----------------------------------------------------|-------|----------------------|----------------------------------------------------------------------------------------------------------------------------------------------------------------------------------------------------------------------------------------------------------------------------------------------------------------------------------------------------------------------------------------------------------------------------------------------------------------------------------------------------------------------|------|------|-----------|-------|------|------|
| Rsa1.0_00262.1.g9887.t1  | refXP_002892201.1  hypothetical protein ARALYDRAFT_470398 [Arabidopsis lyrata subsp. lyrata] gi 297338043 gb EFH6460.1                                                                                                                                                                                                                                                                                        | 273  | 524  | 1.00E-130 | 191.9 | 84.6 | 88.6 | hypothetical protein ARALYDRAFT_470398              | gbpln | Arabidopsis lyrata   | AT1G04220.1   Symbols: KCS2   3-ketoacyl-CoA synthase 2   chr1:1119853-1122483 REVERSE LENGTH=528                                                                                                                                                                                                                                                                                                                                                                                                                    | 273  | 528  | 1.00E-131 | 193.4 | 82.8 | 87.9 |
| Rsa1.0_00262.1.g9888.t1  | refXP_002889497.1  leucine-rich repeat family protein [Arabidopsis lyrata subsp. lyrata] gi 297335333 gb EFH65756.1  leucine-rich repeat family protein [Arabidopsis lyrata subsp. lyrata]                                                                                                                                                                                                                    | 1132 | 1115 | 0         | 98.5  | 80.1 | 86.1 | leucine-rich repeat family protein                  | gbpln | Arabidopsis lyrata   | AT1G04210.1   Symbols:   Leucine-rich repeat protein kinase family protein   chr1:1114696-1119383 FORWARD LENGTH=1112                                                                                                                                                                                                                                                                                                                                                                                                | 1132 | 1112 | 0         | 98.2  | 80.0 | 86.7 |
| Rsa1.0_00262.1.g9889.t1  | gb EOA36813.1  hypothetical protein CARUB_v10008423mg [Capsella rubella]                                                                                                                                                                                                                                                                                                                                      | 739  | 733  | 0         | 99.2  | 91.1 | 94.6 | hypothetical protein CARUB_v10008423mg              | gbpln | Capsella rubella     | AT1G04200.1   Symbols:   FUNCTIONS IN: molecular function unknown; INVOLVED IN: N-terminal protein myristoylation; LOCATED IN: cellular component unknown; EXPRESSED IN: 22 plant structures; EXPRESSED DURING: 13 growth stages; CONTAINS InterPro DOMAIN/s: Dymeclin (InterPro:IPR019142); Has 395 Blast hits to 389 proteins in 117 species: Archae - 0; Bacteria - 0; Metazoa - 262; Fungi - 21; Plants - 68; Viruses - 0; Other Eukaryotes - 44 (source: NCBI BLINK).   chr1:1109676-1113875 FORWARD LENGTH=732 | 739  | 732  | 0         | 99.1  | 91.7 | 94.5 |
| Rsa1.0_00262.1.g9890.t1  | refXP_002889495.1  flavin-containing monooxygenase family protein [Arabidopsis lyrata subsp. lyrata] gi 297335337 gb EFH65754.1  flavin-containing monooxygenase family protein [Arabidopsis lyrata subsp. lyrata]                                                                                                                                                                                            | 422  | 421  | 0         | 99.8  | 94.8 | 97.9 | flavin-containing monooxygenase family protein      | gbpln | Arabidopsis lyrata   | AT1G04180.1   Symbols: YUC9   YUCCA 9   chr1:1104623-1105988 FORWARD LENGTH=421                                                                                                                                                                                                                                                                                                                                                                                                                                      | 422  | 421  | 0         | 99.8  | 94.3 | 97.4 |
| Rsa1.0_00262.1.g9891.t1  | gb EOA40138.1  hypothetical protein CARUB_v10008849mg, partial [Capsella rubella]                                                                                                                                                                                                                                                                                                                             | 465  | 523  | 0         | 112.5 | 96.6 | 98.9 | hypothetical protein CARUB_v10008849mg, partial     | gbpln | Capsella rubella     | AT1G04170.1   Symbols: EIF2 GAMMA   eukaryotic translation initiation factor 2 gamma subunit   chr1:1097423-1099702 FORWARD LENGTH=465                                                                                                                                                                                                                                                                                                                                                                               | 465  | 465  | 0         | 100.0 | 96.6 | 98.7 |
| Rsa1.0_00263.1.g9892.t1  | #                                                                                                                                                                                                                                                                                                                                                                                                             | #    | #    | #         | #     | #    | -    | ----                                                | ----  | ----                 | #                                                                                                                                                                                                                                                                                                                                                                                                                                                                                                                    | #    | #    | #         | #     | #    | #    |
| Rsa1.0_00263.1.g9893.t1  | gb AEI17372.1  Knox-like protein 1 [Arabidopsis lyrata]                                                                                                                                                                                                                                                                                                                                                       | 72   | 388  | 3.00E-35  | 538.9 | 94.4 | 95.8 | Knox-like protein 1                                 | gbpln | Arabidopsis lyrata   | AT4G08150.1   Symbols: KNAT1, BP, BP1   KNOTTED-like from Arabidopsis thaliana   chr4:5147969-5150610 REVERSE LENGTH=398                                                                                                                                                                                                                                                                                                                                                                                             | 72   | 398  | 7.00E-38  | 552.8 | 94.4 | 94.4 |
| Rsa1.0_00263.1.g9894.t19 | dbj BAB03186.1  En/Spm transposon protein-like [Arabidopsis thaliana]                                                                                                                                                                                                                                                                                                                                         | 1470 | 1516 | 0         | 103.1 | 34.6 | 41.2 | En/Spm transposon protein-like                      | gbpln | Arabidopsis thaliana | #                                                                                                                                                                                                                                                                                                                                                                                                                                                                                                                    | #    | #    | #         | #     | #    | #    |
| Rsa1.0_00263.1.g9895.t2  | gb ACS28249.1  BREVIPEDICELLUS [Brassica rapa]                                                                                                                                                                                                                                                                                                                                                                | 262  | 383  | 1.00E-132 | 146.2 | 95.4 | 96.6 | BREVIPEDICELLUS                                     | gbpln | Brassica rapa        | AT4G08150.1   Symbols: KNAT1, BP, BP1   KNOTTED-like from Arabidopsis thaliana   chr4:5147969-5150610 REVERSE LENGTH=398                                                                                                                                                                                                                                                                                                                                                                                             | 262  | 398  | 1.00E-119 | 151.9 | 87.0 | 92.4 |
| Rsa1.0_00263.1.g9896.t1  | #                                                                                                                                                                                                                                                                                                                                                                                                             | #    | #    | #         | #     | #    | -    | ----                                                | ----  | ----                 | #                                                                                                                                                                                                                                                                                                                                                                                                                                                                                                                    | #    | #    | #         | #     | #    | #    |
| Rsa1.0_00263.1.g9897.t1  | #                                                                                                                                                                                                                                                                                                                                                                                                             | #    | #    | #         | #     | #    | -    | ----                                                | ----  | ----                 | #                                                                                                                                                                                                                                                                                                                                                                                                                                                                                                                    | #    | #    | #         | #     | #    | #    |
| Rsa1.0_00263.1.g9898.t1  | gb AAD15377.1  putative non-LTR retroelement reverse transcriptase [Arabidopsis thaliana]                                                                                                                                                                                                                                                                                                                     | 331  | 1044 | 6.00E-13  | 315.4 | 13.0 | 19.9 | putative non-LTR retroelement reverse transcriptase | gbpln | Arabidopsis thaliana | #                                                                                                                                                                                                                                                                                                                                                                                                                                                                                                                    | #    | #    | #         | #     | #    | #    |
| Rsa1.0_00263.1.g9899.t1  | ref NP_192558.2  OSBP(oxysterol binding protein)-related protein 1C [Arabidopsis thaliana] gi 75154096 sp Q8L751.1 ORP1C_ARAT H RecName: Full=Oxysterol-binding protein-related protein 1C; AltName: Full=OSBP-related protein 1C gi 22654958 gb AAM98072.1  AT4g08180/T12G13.20 [Arabidopsis thaliana] gi 332657206 gb AEE82606.1  OSBP(oxysterol binding protein)-related protein 1C [Arabidopsis thaliana] | 786  | 814  | 0         | 103.6 | 87.3 | 92.2 | OSBP(oxysterol binding protein)-related protein 1C  | gbpln | Arabidopsis thaliana | AT4G08180.1   Symbols: ORP1C   OSBP(oxysterol binding protein)-related protein 1C   chr4:5169727-5173360 FORWARD LENGTH=814                                                                                                                                                                                                                                                                                                                                                                                          | 786  | 814  | 0         | 103.6 | 87.3 | 92.2 |
| Rsa1.0_00263.1.g9900.t1  | ref NP_192563.2  glycine-rich protein [Arabidopsis thaliana] gi 18252943 gb AAL62398.1  unknown protein [Arabidopsis thaliana] gi 23198028 gb AAN15541.1  unknown protein [Arabidopsis thaliana] gi 332657210 gb AEE82610.1  glycine-rich protein [Arabidopsis thaliana]                                                                                                                                      | 117  | 113  | 1.00E-35  | 96.6  | 84.6 | 85.5 | glycine-rich protein                                | gbpln | Arabidopsis thaliana | AT4G08230.1   Symbols:   glycine-rich protein   chr4:5188047-5189574 REVERSE LENGTH=113                                                                                                                                                                                                                                                                                                                                                                                                                              | 117  | 113  | 2.00E-38  | 96.6  | 84.6 | 85.5 |
| Rsa1.0_00263.1.g9901.t1  | gb ACB98704.1  phospholipase D gamma 1 [Brassica oleracea var. capitata]                                                                                                                                                                                                                                                                                                                                      | 818  | 859  | 0         | 105.0 | 76.9 | 84.5 | phospholipase D gamma 1                             | gbpln | Brassica oleracea    | AT4G11850.1   Symbols: PLDGAMMA1, MEE54   phospholipase D gamma 1   chr4:7129352-7132937 REVERSE LENGTH=858                                                                                                                                                                                                                                                                                                                                                                                                          | 818  | 858  | 0         | 104.9 | 76.8 | 85.0 |



|                         |                                                                                                                                                                                                                                                                                             |      |      |           |        |      |      |                                              |       |                      |                                                                                                                                                                                                                                                                                                                                                                             |      |      |           |        |      |      |
|-------------------------|---------------------------------------------------------------------------------------------------------------------------------------------------------------------------------------------------------------------------------------------------------------------------------------------|------|------|-----------|--------|------|------|----------------------------------------------|-------|----------------------|-----------------------------------------------------------------------------------------------------------------------------------------------------------------------------------------------------------------------------------------------------------------------------------------------------------------------------------------------------------------------------|------|------|-----------|--------|------|------|
| Rsa1.0_00263.1.g9902.t1 | refXP_002872384.1   hypothetical protein ARALYDRAFT_489738 [Arabidopsis lyrata subsp. lyrata] gi 297318221 gb EFH48643.1   hypothetical protein ARALYDRAFT_489738 [Arabidopsis lyrata subsp. lyrata]                                                                                        | 133  | 136  | 5.00E-55  | 102.3  | 85.0 | 91.7 | hypothetical protein ARALYDRAFT_489738       | gbpln | Arabidopsis lyrata   | AT4G08240.1   Symbols:   unknown protein; Has 30201 Blast hits to 17322 proteins in 780 species: Archae - 12; Bacteria - 1396; Metazoa - 17338; Fungi - 3422; Plants - 5037; Viruses - 0; Other Eukaryotes - 2996 (source: NCBI BLINK).   chr4:5194713-5195756 FORWARD LENGTH=136                                                                                           | 133  | 136  | 7.00E-56  | 102.3  | 83.5 | 88.0 |
| Rsa1.0_00263.1.g9903.t1 | refNP_568713.1   uncharacterized protein [Arabidopsis thaliana] gi 16604643 gb AAL24114.1   unknown protein [Arabidopsis thaliana] gi 23296703 gb AAN13151.1   unknown protein [Arabidopsis thaliana] gi 332008476 gb AED95859.1   uncharacterized protein AT5G49820 [Arabidopsis thaliana] | 469  | 497  | 0         | 106.0  | 88.7 | 93.2 | uncharacterized protein                      | gbpln | Arabidopsis thaliana | AT5G49820.1   Symbols: EMB1879, RUS6   Protein of unknown function, DUF647   chr5:20246753-20249432 REVERSE LENGTH=497                                                                                                                                                                                                                                                      | 469  | 497  | 0         | 106.0  | 88.7 | 93.2 |
| Rsa1.0_00263.1.g9904.t1 | refNP_192575.3   global transcription factor group A2 [Arabidopsis thaliana] gi 374095445 sp Q9STN3.2 SPT51_ARA TH RecName: Full=Putative transcription elongation factor SPT5 homolog 1 gi 332657229 gb AEE82629.1   global transcription factor group A2 [Arabidopsis thaliana]           | 1042 | 1041 | 0         | 99.9   | 88.2 | 92.3 | global transcription factor group A2         | gbpln | Arabidopsis thaliana | AT4G08350.1   Symbols: GTA02, GTA2   global transcription factor group A2   chr4:5286351-5292072 FORWARD LENGTH=1041                                                                                                                                                                                                                                                        | 1042 | 1041 | 0         | 99.9   | 88.2 | 92.3 |
| Rsa1.0_00263.1.g9905.t1 | refXP_002893426.1   predicted protein [Arabidopsis lyrata subsp. lyrata] gi 297339268 gb EFH69685.1   predicted protein [Arabidopsis lyrata subsp. lyrata]                                                                                                                                  | 293  | 384  | 1.00E-42  | 131.1  | 28.7 | 32.1 | predicted protein                            | gbpln | Arabidopsis lyrata   | AT3G20370.1   Symbols:   TRAF-like family protein   chr3:7105481-7107079 FORWARD LENGTH=379                                                                                                                                                                                                                                                                                 | 293  | 379  | 1.00E-41  | 129.4  | 26.6 | 30.4 |
| Rsa1.0_00263.1.g9906.t1 | #                                                                                                                                                                                                                                                                                           | #    | #    | #         | #      | #    | #    | -                                            | ----  | ----                 | #                                                                                                                                                                                                                                                                                                                                                                           | #    | #    | #         | #      | #    |      |
| Rsa1.0_00263.1.g9907.t2 | gb AAG51783.1 AC079679.3 reverse transcriptase, putative: 16838-20266 [Arabidopsis thaliana]                                                                                                                                                                                                | 262  | 1142 | 2.00E-30  | 435.9  | 30.5 | 43.5 | reverse transcriptase, putative: 16838-20266 | gbpln | Arabidopsis thaliana | AT3G09510.1   Symbols:   Ribonuclease H-like superfamily protein   chr3:2921804-2923258 FORWARD LENGTH=484                                                                                                                                                                                                                                                                  | 262  | 484  | 1.00E-15  | 184.7  | 16.8 | 25.2 |
| Rsa1.0_00263.1.g9908.t1 | refXP_002872397.1   BTB/POZ domain-containing protein [Arabidopsis lyrata subsp. lyrata] gi 297318234 gb EFH48656.1   BTB/POZ domain-containing protein [Arabidopsis lyrata subsp. lyrata]                                                                                                  | 267  | 243  | 1.00E-125 | 91.0   | 82.0 | 86.9 | BTB/POZ domain-containing protein            | gbpln | Arabidopsis lyrata   | AT4G08455.1   Symbols:   BTB/POZ domain-containing protein   chr4:5375891-5376922 FORWARD LENGTH=243                                                                                                                                                                                                                                                                        | 267  | 243  | 1.00E-126 | 91.0   | 80.9 | 86.5 |
| Rsa1.0_00263.1.g9909.t1 | refXP_002874536.1   hypothetical protein ARALYDRAFT_489753 [Arabidopsis lyrata subsp. lyrata] gi 297320373 gb EFH50795.1   hypothetical protein ARALYDRAFT_489753 [Arabidopsis lyrata subsp. lyrata]                                                                                        | 280  | 277  | 6.00E-94  | 98.9   | 63.6 | 72.5 | hypothetical protein ARALYDRAFT_489753       | gbpln | Arabidopsis lyrata   | AT4G08460.3   Symbols:   Protein of unknown function (DUF1644)   chr4:5377378-5378202 REVERSE LENGTH=274                                                                                                                                                                                                                                                                    | 280  | 274  | 2.00E-89  | 97.9   | 63.2 | 69.6 |
| Rsa1.0_00263.1.g9910.t1 | refNP_194047.2   cysteine-rich receptor-like protein kinase 8 [Arabidopsis thaliana] gi 332659317 gb AEE84717.1   cysteine-rich receptor-like protein kinase 8 [Arabidopsis thaliana]                                                                                                       | 104  | 1262 | 8.00E-29  | 1213.5 | 58.7 | 76.9 | cysteine-rich receptor-like protein kinase 8 | gbpln | Arabidopsis thaliana | AT4G23160.1   Symbols: CRK8   cysteine-rich RLK (RECEPTOR-like protein kinase) 8   chr4:12129485-12134086 FORWARD LENGTH=1262                                                                                                                                                                                                                                               | 104  | 1262 | 1.00E-31  | 1213.5 | 58.7 | 76.9 |
| Rsa1.0_00263.1.g9911.t1 | emb CAA08997.1  MAP3K beta 1 protein kinase [Brassica napus]                                                                                                                                                                                                                                | 619  | 575  | 0         | 92.9   | 70.8 | 78.2 | MAP3K beta 1 protein kinase                  | gbpln | Brassica napus       | AT4G08500.1   Symbols: MEKK1, ATMEKK1, MAPKK8, ARAKIN   MAPK/ERK kinase 1   chr4:5404272-5407062 REVERSE LENGTH=608                                                                                                                                                                                                                                                         | 619  | 608  | 0         | 98.2   | 65.9 | 74.5 |
| Rsa1.0_00263.1.g9912.t1 | #                                                                                                                                                                                                                                                                                           | #    | #    | #         | #      | #    | #    | -                                            | ----  | ----                 | #                                                                                                                                                                                                                                                                                                                                                                           | #    | #    | #         | #      | #    |      |
| Rsa1.0_00263.1.g9913.t1 | refXP_002872399.1   hypothetical protein ARALYDRAFT_489756 [Arabidopsis lyrata subsp. lyrata] gi 297318236 gb EFH48658.1   hypothetical protein ARALYDRAFT_489756 [Arabidopsis lyrata subsp. lyrata]                                                                                        | 461  | 551  | 1.00E-106 | 119.5  | 61.0 | 71.6 | hypothetical protein ARALYDRAFT_489756       | gbpln | Arabidopsis lyrata   | AT4G08510.1   Symbols:   unknown protein; LOCATED IN: chloroplast; BEST Arabidopsis thaliana protein match is: unknown protein (TAIRAT1G36990.1); Has 888 Blast hits to 321 proteins in 121 species: Archae - 0; Bacteria - 120; Metazoa - 86; Fungi - 24; Plants - 79; Viruses - 0; Other Eukaryotes - 579 (source: NCBI BLINK).   chr4:5411023-5413016 FORWARD LENGTH=551 | 461  | 551  | 1.00E-107 | 119.5  | 59.9 | 70.5 |
| Rsa1.0_00263.1.g9914.t1 | #                                                                                                                                                                                                                                                                                           | #    | #    | #         | #      | #    | #    | -                                            | ----  | ----                 | #                                                                                                                                                                                                                                                                                                                                                                           | #    | #    | #         | #      | #    |      |
| Rsa1.0_00263.1.g9915.t1 | refXP_002872399.1   hypothetical protein ARALYDRAFT_489756 [Arabidopsis lyrata subsp. lyrata] gi 297318236 gb EFH48658.1   hypothetical protein ARALYDRAFT_489756 [Arabidopsis lyrata subsp. lyrata]                                                                                        | 376  | 551  | 4.00E-94  | 146.5  | 62.5 | 73.1 | hypothetical protein ARALYDRAFT_489756       | gbpln | Arabidopsis lyrata   | AT4G08510.1   Symbols:   unknown protein; LOCATED IN: chloroplast; BEST Arabidopsis thaliana protein match is: unknown protein (TAIRAT1G36990.1); Has 888 Blast hits to 321 proteins in 121 species: Archae - 0; Bacteria - 120; Metazoa - 86; Fungi - 24; Plants - 79; Viruses - 0; Other Eukaryotes - 579 (source: NCBI BLINK).   chr4:5411023-5413016 FORWARD LENGTH=551 | 376  | 551  | 3.00E-95  | 146.5  | 60.6 | 71.3 |
| Rsa1.0_00264.1.g9916.t1 | #                                                                                                                                                                                                                                                                                           | #    | #    | #         | #      | #    | #    | -                                            | ----  | ----                 | #                                                                                                                                                                                                                                                                                                                                                                           | #    | #    | #         | #      | #    |      |

|                         |                                                                                                                                                                                                                                                                                                                                                                                        |     |      |           |       |      |      |                                                       |       |                      |                                                                                                                                                                                                                                                          |     |      |           |       |      |      |
|-------------------------|----------------------------------------------------------------------------------------------------------------------------------------------------------------------------------------------------------------------------------------------------------------------------------------------------------------------------------------------------------------------------------------|-----|------|-----------|-------|------|------|-------------------------------------------------------|-------|----------------------|----------------------------------------------------------------------------------------------------------------------------------------------------------------------------------------------------------------------------------------------------------|-----|------|-----------|-------|------|------|
| Rsa1.0_00264.1.g9917.t1 | refNP_564941.1   protein IDA [Arabidopsis thaliana] gi 75154765 sp Q8LAD7.1 IDA_ARATH RecName: Full=Protein IDA; AltName: Full=Protein INFLORESCENCE DEFICIENT IN ABSCISSION; Flags: Precursor gi 21593468 gb AAM65435.1  unknown [Arabidopsis thaliana] gi 94807658 gb ABF47126.1  At1g68765 [Arabidopsis thaliana] gi 332196716 gb AEE34837.1   protein IDA [Arabidopsis thaliana]   | 75  | 77   | 1.00E-19  | 102.7 | 78.7 | 86.7 | protein IDA                                           | gbpln | Arabidopsis thaliana | AT1G68765.1   Symbols: IDA   Putative membrane lipoprotein   chr1:25830157-25830390 REVERSE LENGTH=77                                                                                                                                                    | 75  | 77   | 2.00E-22  | 102.7 | 78.7 | 86.7 |
| Rsa1.0_00264.1.g9918.t1 | refXP_002888681.1   leucine-rich repeat family protein [Arabidopsis lyrata subsp. lyrata] gi 297334522 gb EFH64940.1   leucine-rich repeat family protein [Arabidopsis lyrata subsp. lyrata]                                                                                                                                                                                           | 431 | 430  | 0         | 99.8  | 84.7 | 92.3 | leucine-rich repeat family protein                    | gbpln | Arabidopsis lyrata   | AT1G68780.1   Symbols:   RNI-like superfamily protein   chr1:25831881-25833335 REVERSE LENGTH=432                                                                                                                                                        | 431 | 432  | 0         | 100.2 | 84.5 | 92.1 |
| Rsa1.0_00264.1.g9919.t1 | #                                                                                                                                                                                                                                                                                                                                                                                      | #   | #    | #         | #     | #    | #    | -                                                     | ----  | ----                 | #                                                                                                                                                                                                                                                        | #   | #    | #         | #     | #    | #    |
| Rsa1.0_00264.1.g9920.t1 | #                                                                                                                                                                                                                                                                                                                                                                                      | #   | #    | #         | #     | #    | #    | -                                                     | ----  | ----                 | #                                                                                                                                                                                                                                                        | #   | #    | #         | #     | #    | #    |
| Rsa1.0_00264.1.g9921.t1 | refXP_002888683.1   predicted protein [Arabidopsis lyrata subsp. lyrata] gi 297334524 gb EFH64942.1   predicted protein [Arabidopsis lyrata subsp. lyrata]                                                                                                                                                                                                                             | 254 | 121  | 8.00E-25  | 47.6  | 24.0 | 26.4 | predicted protein                                     | gbpln | Arabidopsis lyrata   | AT1G68795.1   Symbols: CLE12   CLAYATA3/ESR-RELATED 12   chr1:25841079-25841435 REVERSE LENGTH=118                                                                                                                                                       | 254 | 118  | 3.00E-26  | 46.5  | 23.6 | 25.6 |
| Rsa1.0_00264.1.g9922.t1 | #                                                                                                                                                                                                                                                                                                                                                                                      | #   | #    | #         | #     | #    | #    | -                                                     | ----  | ----                 | #                                                                                                                                                                                                                                                        | #   | #    | #         | #     | #    | #    |
| Rsa1.0_00264.1.g9923.t1 | emb CAB39638.1   RNA-directed DNA polymerase-like protein [Arabidopsis thaliana] gi 7267666 emb CAB78094.1   RNA-directed DNA polymerase-like protein [Arabidopsis thaliana]                                                                                                                                                                                                           | 566 | 1274 | 1.00E-112 | 225.1 | 41.0 | 57.4 | RNA-directed DNA polymerase-like protein              | gbpln | Arabidopsis thaliana | AT4G29090.1   Symbols:   Ribonuclease H-like superfamily protein   chr4:14333528-14335255 FORWARD LENGTH=575                                                                                                                                             | 566 | 575  | 7.00E-77  | 101.6 | 30.0 | 49.3 |
| Rsa1.0_00264.1.g9924.t1 | gb AAD32898.1   putative retroelement pol polyprotein [Arabidopsis thaliana]                                                                                                                                                                                                                                                                                                           | 713 | 1307 | 1.00E-149 | 183.3 | 43.1 | 54.4 | putative retroelement pol polyprotein                 | gbpln | Arabidopsis thaliana | AT4G23160.1   Symbols: CRK8   cysteine-rich RLK (RECEPTOR-like protein kinase) 8   chr4:12129485-12134086 FORWARD LENGTH=1262                                                                                                                            | 713 | 1262 | 9.00E-56  | 177.0 | 17.5 | 27.9 |
| Rsa1.0_00264.1.g9925.t1 | refXP_002887206.1   basic helix-loop-helix family protein [Arabidopsis lyrata subsp. lyrata] gi 297333047 gb EFH63465.1   basic helix-loop-helix family protein [Arabidopsis lyrata subsp. lyrata]                                                                                                                                                                                     | 353 | 360  | 1.00E-160 | 102.0 | 87.8 | 91.2 | basic helix-loop-helix family protein                 | gbpln | Arabidopsis lyrata   | AT1G68810.1   Symbols:   basic helix-loop-helix (bHLH) DNA-binding superfamily protein   chr1:25861289-2586282 FORWARD LENGTH=368                                                                                                                        | 353 | 368  | 1.00E-160 | 104.2 | 88.7 | 91.5 |
| Rsa1.0_00264.1.g9926.t1 | gb AAF18538.1 AC006551_24 Very similar to retrotransposon reverse transcriptase [Arabidopsis thaliana]                                                                                                                                                                                                                                                                                 | 383 | 1231 | 3.00E-93  | 321.4 | 46.0 | 63.2 | Very similar to retrotransposon reverse transcriptase | gbpln | Arabidopsis thaliana | AT4G29090.1   Symbols:   Ribonuclease H-like superfamily protein   chr4:14333528-14335255 FORWARD LENGTH=575                                                                                                                                             | 383 | 575  | 2.00E-52  | 150.1 | 29.2 | 48.3 |
| Rsa1.0_00264.1.g9927.t3 | refNP_564945.1   Transmembrane Fragile-X-F-associated protein [Arabidopsis thaliana] gi 13878073 gb AAK44114.1 AF370299.1 unknown protein [Arabidopsis thaliana] gi 17104741 gb AAL34259.1   unknown protein [Arabidopsis thaliana] gi 332196722 gb AEE34843.1   Transmembrane Fragile-X-F-associated protein [Arabidopsis thaliana]                                                   | 476 | 468  | 0         | 98.3  | 93.7 | 96.4 | Transmembrane Fragile-X-F-associated protein          | gbpln | Arabidopsis thaliana | AT1G68820.1   Symbols:   Transmembrane Fragile-X-F-associated protein   chr1:25865852-25868800 FORWARD LENGTH=468                                                                                                                                        | 476 | 468  | 0         | 98.3  | 93.7 | 96.4 |
| Rsa1.0_00264.1.g9928.t1 | #                                                                                                                                                                                                                                                                                                                                                                                      | #   | #    | #         | #     | #    | #    | -                                                     | ----  | ----                 | #                                                                                                                                                                                                                                                        | #   | #    | #         | #     | #    | #    |
| Rsa1.0_00264.1.g9929.t1 | refNP_00107795.1   protein ROTUNDIFOLIA like 15 [Arabidopsis thaliana] gi 238479011 ref NP_001154459.1   protein ROTUNDIFOLIA like 15 [Arabidopsis thaliana] gi 37955430 gb AAP13820.1   DVL5 [Arabidopsis thaliana] gi 332196723 gb AEE34844.1   protein ROTUNDIFOLIA like 15 [Arabidopsis thaliana] gi 332196724 gb AEE34845.1   protein ROTUNDIFOLIA like 15 [Arabidopsis thaliana] | 46  | 46   | 1.00E-16  | 100.0 | 95.7 | 95.7 | protein ROTUNDIFOLIA like 15                          | gbpln | Arabidopsis thaliana | AT1G68825.2   Symbols: DVL5, RTFL15   ROTUNDIFOLIA like 15   chr1:25869946-25870086 REVERSE LENGTH=46                                                                                                                                                    | 46  | 46   | 2.00E-19  | 100.0 | 95.7 | 95.7 |
| Rsa1.0_00264.1.g9930.t1 | gb EOA34625.1   hypothetical protein CARUB_v10022188mg [Capsella rubella]                                                                                                                                                                                                                                                                                                              | 561 | 564  | 0         | 100.5 | 93.4 | 96.6 | hypothetical protein CARUB_v10022188mg                | gbpln | Capsella rubella     | AT1G68830.1   Symbols: STN7   STT7 homolog STN7   chr1:25872654-25875473 REVERSE LENGTH=562                                                                                                                                                              | 561 | 562  | 0         | 100.2 | 92.2 | 96.8 |
| Rsa1.0_00264.1.g9931.t1 | refXP_002888686.1   hypothetical protein ARALYDRAFT_315905 [Arabidopsis lyrata subsp. lyrata] gi 297334527 gb EFH64945.1   hypothetical protein ARALYDRAFT_315905 [Arabidopsis lyrata subsp. lyrata]                                                                                                                                                                                   | 514 | 140  | 4.00E-39  | 27.2  | 17.3 | 20.4 | hypothetical protein ARALYDRAFT_315905                | gbpln | Arabidopsis lyrata   | AT1G68845.1   Symbols:   unknown protein; Has 2 Blast hits to 2 proteins in 1 species: Archae - 0; Bacteria - 0; Metazoa - 0; Fungi - 0; Plants - 2; Viruses - 0; Other Eukaryotes - 0 (source: NCBI BLink).   chr1:25882434-25882918 FORWARD LENGTH=138 | 514 | 138  | 2.00E-34  | 26.8  | 16.1 | 19.3 |

|                         |                                                                                                                                                                                                                                                                                                                                                                                                                                                                                                                                                                                                                                                                                                                                                                                                                                                                                                                                                                                          |      |      |           |       |      |      |                                        |       |                      |                                                                                                                                                                                   |      |      |           |       |      |      |
|-------------------------|------------------------------------------------------------------------------------------------------------------------------------------------------------------------------------------------------------------------------------------------------------------------------------------------------------------------------------------------------------------------------------------------------------------------------------------------------------------------------------------------------------------------------------------------------------------------------------------------------------------------------------------------------------------------------------------------------------------------------------------------------------------------------------------------------------------------------------------------------------------------------------------------------------------------------------------------------------------------------------------|------|------|-----------|-------|------|------|----------------------------------------|-------|----------------------|-----------------------------------------------------------------------------------------------------------------------------------------------------------------------------------|------|------|-----------|-------|------|------|
| Rsa1.0_00264.1.g9932.t1 | refNP_564948.1  peroxidase 11 [Arabidopsis thaliana] gi 25453204 sp Q96519.1 PER1_1_ARATH RecName: Full=Peroxidase 11; Short=Atperox P11; AltName: Full=ATP23a/ATP23b; Flags: Precursor gi 12323216 gb AAG51588.1 AC011665_9 peroxidase ATP23a [Arabidopsis thaliana] gi 12324132 gb AAG52033.1 AC011914_3 peroxidase ATP23a; 12312-13683 [Arabidopsis thaliana] gi 1620371 emb CAA70035.1  peroxidase ATP23a [Arabidopsis thaliana] gi 332196729 gb AEE34850.1  peroxidase 11 [Arabidopsis thaliana]                                                                                                                                                                                                                                                                                                                                                                                                                                                                                    | 335  | 336  | 0         | 100.3 | 92.2 | 96.4 | peroxidase 11                          | gbpln | Arabidopsis thaliana | AT1G68850.1   Symbols:   Peroxidase superfamily protein   chr1:25883806-25885177 REVERSE LENGTH=336                                                                               | 335  | 336  | 0         | 100.3 | 92.2 | 96.4 |
| Rsa1.0_00264.1.g9933.t1 | gb EOA33892.1  hypothetical protein CARUB_v10021384mg [Capsella rubella]                                                                                                                                                                                                                                                                                                                                                                                                                                                                                                                                                                                                                                                                                                                                                                                                                                                                                                                 | 146  | 149  | 9.00E-41  | 102.1 | 72.6 | 81.5 | hypothetical protein CARUB_v10021384mg | gbpln | Capsella rubella     | AT1G68870.1   Symbols:   ATSOFL2, SOFL2   SOB five-like 2   chr1:25889117-25889560 FORWARD LENGTH=147                                                                             | 146  | 147  | 1.00E-40  | 100.7 | 74.0 | 80.8 |
| Rsa1.0_00265.1.g9934.t1 | refXP_002878191.1  hypothetical protein ARALYDRAFT_907288 [Arabidopsis lyrata subsp. lyrata] gi 297324029 gb EFH54450.1  hypothetical protein ARALYDRAFT_907288 [Arabidopsis lyrata subsp. lyrata] refXP_002876459.1  hypothetical protein ARALYDRAFT_907290 [Arabidopsis lyrata subsp. lyrata] gi 297322297 gb EFH52718.1                                                                                                                                                                                                                                                                                                                                                                                                                                                                                                                                                                                                                                                               | 214  | 195  | 2.00E-73  | 91.1  | 65.4 | 76.6 | hypothetical protein ARALYDRAFT_907288 | gbpln | Arabidopsis lyrata   | AT3G58150.1   Symbols:   Optic atrophy 3 protein (OPA3)   chr3:21532947-21534072 REVERSE LENGTH=194                                                                               | 214  | 194  | 2.00E-75  | 90.7  | 65.0 | 78.0 |
| Rsa1.0_00265.1.g9935.t1 | refXP_002876459.1  hypothetical protein ARALYDRAFT_907290 [Arabidopsis lyrata subsp. lyrata] gi 297322297 gb EFH52718.1  hypothetical protein ARALYDRAFT_907290 [Arabidopsis lyrata subsp. lyrata] refNP_191378.1  LOB domain-containing protein 29 [Arabidopsis thaliana] gi 29428017 sp Q9M2J7.1 LBD29_ARATH RecName: Full=LOB domain-containing protein 29; AltName: Full=ASYMMETRIC LEAVES 2-like protein 16; Short=AS2-like protein 16 gi 17227168 gb AAL38038.1 AF447893_1 LOB DOMAIN 29 [Arabidopsis thaliana] gi 6735331 emb CAB68157.1  putative protein [Arabidopsis thaliana] gi 94442495 gb ABF19035.1  At3g58190 [Arabidopsis thaliana] gi 219307106 dtj BAH10560.1  ASYMMETRIC LEAVES2-like 16 protein [Arabidopsis thaliana] gi 332646231 gb AEE79752.1  LOB domain-containing protein 29 [Arabidopsis thaliana] refXP_002876187.1  predicted protein [Arabidopsis lyrata subsp. lyrata] gi 297322025 gb EFH52446.1  predicted protein [Arabidopsis lyrata subsp. lyrata] | 1241 | 1249 | 0         | 100.6 | 87.0 | 93.6 | hypothetical protein ARALYDRAFT_907290 | gbpln | Arabidopsis lyrata   | AT3G58160.1   Symbols:   XIJ, ATXIJ, ATMYSO3, MYA3, XI-16   P-loop containing nucleoside triphosphate hydrolases superfamily protein   chr3:21534797-21541877 FORWARD LENGTH=1242 | 1241 | 1242 | 0         | 100.1 | 86.4 | 93.0 |
| Rsa1.0_00265.1.g9936.t1 | gi 29428017 sp Q9M2J7.1 LBD29_ARATH RecName: Full=LOB domain-containing protein 29; AltName: Full=ASYMMETRIC LEAVES 2-like protein 16; Short=AS2-like protein 16 gi 17227168 gb AAL38038.1 AF447893_1 LOB DOMAIN 29 [Arabidopsis thaliana] gi 6735331 emb CAB68157.1  putative protein [Arabidopsis thaliana] gi 94442495 gb ABF19035.1  At3g58190 [Arabidopsis thaliana] gi 219307106 dtj BAH10560.1  ASYMMETRIC LEAVES2-like 16 protein [Arabidopsis thaliana] gi 332646231 gb AEE79752.1  LOB domain-containing protein 29 [Arabidopsis thaliana] refXP_002876187.1  predicted protein [Arabidopsis lyrata subsp. lyrata] gi 297322025 gb EFH52446.1  predicted protein [Arabidopsis lyrata subsp. lyrata]                                                                                                                                                                                                                                                                            | 216  | 218  | 1.00E-100 | 100.9 | 83.3 | 88.9 | LOB domain-containing protein 29       | gbpln | Arabidopsis thaliana | AT3G58190.1   Symbols:   LBD29, ASL16   lateral organ boundaries-domain 29   chr3:21548716-21549488 REVERSE LENGTH=218                                                            | 216  | 218  | 1.00E-102 | 100.9 | 83.3 | 88.9 |
| Rsa1.0_00265.1.g9937.t1 | refXP_002876187.1  predicted protein [Arabidopsis lyrata subsp. lyrata] gi 297322025 gb EFH52446.1  predicted protein [Arabidopsis lyrata subsp. lyrata]                                                                                                                                                                                                                                                                                                                                                                                                                                                                                                                                                                                                                                                                                                                                                                                                                                 | 118  | 155  | 4.00E-25  | 131.4 | 53.4 | 67.8 | predicted protein                      | gbpln | Arabidopsis lyrata   | AT3G53080.1   Symbols:   D-galactoside/L-rhamnose binding SUEL lectin protein   chr3:19678013-19678578 FORWARD LENGTH=155                                                         | 118  | 155  | 3.00E-27  | 131.4 | 55.9 | 69.5 |
| Rsa1.0_00265.1.g9938.t1 | gb EOA36691.1  hypothetical protein CARUB_v10012096mg [Capsella rubella]                                                                                                                                                                                                                                                                                                                                                                                                                                                                                                                                                                                                                                                                                                                                                                                                                                                                                                                 | 331  | 327  | 1.00E-120 | 98.8  | 64.4 | 77.3 | hypothetical protein CARUB_v10012096mg | gbpln | Capsella rubella     | AT5G43690.1   Symbols:   P-loop containing nucleoside triphosphate hydrolases superfamily protein   chr5:17546273-17547268 FORWARD LENGTH=331                                     | 331  | 331  | 1.00E-122 | 100.0 | 65.9 | 77.6 |
| Rsa1.0_00265.1.g9939.t2 | gb EOA25716.1  hypothetical protein CARUB_v10019067mg [Capsella rubella]                                                                                                                                                                                                                                                                                                                                                                                                                                                                                                                                                                                                                                                                                                                                                                                                                                                                                                                 | 191  | 494  | 1.00E-36  | 258.6 | 46.6 | 66.5 | hypothetical protein CARUB_v10019067mg | gbpln | Capsella rubella     | AT3G58410.1   Symbols:   TRAF-like family protein   chr3:21604871-21606229 REVERSE LENGTH=328                                                                                     | 191  | 328  | 3.00E-37  | 171.7 | 41.4 | 50.8 |
| Rsa1.0_00265.1.g9940.t2 | refNP_191400.1  TRAF-like family protein [Arabidopsis thaliana] gi 6735353 emb CAB68179.1  putative protein [Arabidopsis thaliana] gi 332646257 gb AEE79778.1  TRAF-like family protein [Arabidopsis thaliana] refNP_191400.1  TRAF-like family protein [Arabidopsis thaliana] gi 6735353 emb CAB68179.1  putative protein [Arabidopsis thaliana] gi 332646257 gb AEE79778.1  TRAF-like family protein [Arabidopsis thaliana]                                                                                                                                                                                                                                                                                                                                                                                                                                                                                                                                                            | 323  | 328  | 1.00E-108 | 101.5 | 64.1 | 77.1 | TRAF-like family protein               | gbpln | Arabidopsis thaliana | AT3G58410.1   Symbols:   TRAF-like family protein   chr3:21604871-21606229 REVERSE LENGTH=328                                                                                     | 323  | 328  | 1.00E-111 | 101.5 | 64.1 | 77.1 |
| Rsa1.0_00265.1.g9941.t1 | refNP_191400.1  TRAF-like family protein [Arabidopsis thaliana] gi 6735353 emb CAB68179.1  putative protein [Arabidopsis thaliana] gi 332646257 gb AEE79778.1  TRAF-like family protein [Arabidopsis thaliana]                                                                                                                                                                                                                                                                                                                                                                                                                                                                                                                                                                                                                                                                                                                                                                           | 192  | 328  | 6.00E-59  | 170.8 | 58.9 | 70.3 | TRAF-like family protein               | gbpln | Arabidopsis thaliana | AT3G58410.1   Symbols:   TRAF-like family protein   chr3:21604871-21606229 REVERSE LENGTH=328                                                                                     | 192  | 328  | 2.00E-61  | 170.8 | 58.9 | 70.3 |
| Rsa1.0_00265.1.g9942.t1 | # # # # # # # # - ----                                                                                                                                                                                                                                                                                                                                                                                                                                                                                                                                                                                                                                                                                                                                                                                                                                                                                                                                                                   |      |      |           |       |      |      |                                        |       |                      | # # # # # # #                                                                                                                                                                     |      |      |           |       |      |      |
| Rsa1.0_00265.1.g9943.t2 | gb EOA25745.1  hypothetical protein CARUB_v10019107mg [Capsella rubella]                                                                                                                                                                                                                                                                                                                                                                                                                                                                                                                                                                                                                                                                                                                                                                                                                                                                                                                 | 563  | 577  | 0         | 102.5 | 86.9 | 92.0 | hypothetical protein CARUB_v10019107mg | gbpln | Capsella rubella     | AT3G58480.1   Symbols:   calmodulin-binding family protein   chr3:21629341-21631853 FORWARD LENGTH=575                                                                            | 563  | 575  | 0         | 102.1 | 85.6 | 91.3 |

|                         |                                                                                                                                                                                                                                                                                                                                                                                                                                                                                                                                                                                                                                                                                                                                                                                                                                                                                                                                                                                                                                                                                                          |     |     |           |       |      |      |                                                                                    |       |                      |                                                                                                                                                                |     |     |           |       |      |      |
|-------------------------|----------------------------------------------------------------------------------------------------------------------------------------------------------------------------------------------------------------------------------------------------------------------------------------------------------------------------------------------------------------------------------------------------------------------------------------------------------------------------------------------------------------------------------------------------------------------------------------------------------------------------------------------------------------------------------------------------------------------------------------------------------------------------------------------------------------------------------------------------------------------------------------------------------------------------------------------------------------------------------------------------------------------------------------------------------------------------------------------------------|-----|-----|-----------|-------|------|------|------------------------------------------------------------------------------------|-------|----------------------|----------------------------------------------------------------------------------------------------------------------------------------------------------------|-----|-----|-----------|-------|------|------|
| Rsa1.0_00265.1.g9944.t6 | gb[EOA19018.1] hypothetical protein CARUB_v10007669mg [Capsella rubella]                                                                                                                                                                                                                                                                                                                                                                                                                                                                                                                                                                                                                                                                                                                                                                                                                                                                                                                                                                                                                                 | 668 | 882 | 1.00E-116 | 132.0 | 37.4 | 40.0 | hypothetical protein CARUB_v10007669mg                                             | gbpln | Capsella rubella     | AT4G12780.2   Symbols:   Chaperone DnaJ-domain superfamily protein   chr4:7512200-7516655 FORWARD LENGTH=894                                                   | 668 | 894 | 1.00E-114 | 133.8 | 32.3 | 34.1 |
| Rsa1.0_00265.1.g9945.t1 | gb[EOA15602.1] hypothetical protein CARUB_v10005649mg [Capsella rubella]                                                                                                                                                                                                                                                                                                                                                                                                                                                                                                                                                                                                                                                                                                                                                                                                                                                                                                                                                                                                                                 | 63  | 232 | 3.00E-18  | 368.3 | 82.5 | 88.9 | hypothetical protein CARUB_v10005649mg                                             | gbpln | Capsella rubella     | AT4G26220.1   Symbols:   S-adenosyl-L-methionine-dependent methyltransferases superfamily protein   chr4:13284179-13285146 FORWARD LENGTH=232                  | 63  | 232 | 1.00E-19  | 368.3 | 82.5 | 88.9 |
| Rsa1.0_00265.1.g9946.t1 | ref[XP_002275766.1] PREDICTED: auxilin-related protein 2-like [Vitis vinifera]                                                                                                                                                                                                                                                                                                                                                                                                                                                                                                                                                                                                                                                                                                                                                                                                                                                                                                                                                                                                                           | 402 | 949 | 8.00E-77  | 236.1 | 33.3 | 35.3 | PREDICTED: auxilin-related protein 2-like                                          | gbpln | Vitis vinifera       | AT4G12770.1   Symbols:   Chaperone DnaJ-domain superfamily protein   chr4:7506736-7511408 REVERSE LENGTH=891                                                   | 402 | 891 | 9.00E-74  | 221.6 | 38.3 | 42.8 |
| Rsa1.0_00265.1.g9947.t1 | ref[NP_567066.1] serine/threonine-protein phosphatase PP2A-3 catalytic subunit [Arabidopsis thaliana] gi 297820682 ref[XP_002878224.1] protein phosphatase 2A-3 [Arabidopsis lyrata subsp. lyrata] gi 1352664 sp P48578.1 PP2A3_ARATH RecName: Full=Serine/threonine-protein phosphatase PP2A-3 catalytic subunit; AltName: Full=Protein phosphatase 2A isoform 3 gi 473259 gb AAA6494.1.1  Ser/Thr protein phosphatase [Arabidopsis thaliana] gi 4204949 gb AAD10855.1  serine/threonine protein phosphatase 2A-4 catalytic subunit [Arabidopsis thaliana] gi 15810367 gb AAL07071.1  putative phosphoprotein phosphatase 2A isoform 4 [Arabidopsis thaliana] gi 6209682 gb AAL14399.1  AT3g58500/F14P22.90 [Arabidopsis thaliana] gi 21360431 gb AAM47331.1  AT3g58500/F14P22.90 [Arabidopsis thaliana] gi 297324062 gb EFH54483.1  protein phosphatase 2A-3 [Arabidopsis lyrata subsp. lyrata] gi 332646269 gb AEE79790.1  serine/threonine-protein phosphatase PP2A-3 catalytic subunit [Arabidopsis thaliana] gi 482560231 gb EOA24422.1  hypothetical protein CARUB_v10017673mg [Capsella rubella] | 346 | 313 | 1.00E-171 | 90.5  | 85.5 | 87.9 | serine/threonine-protein phosphatase PP2A-3 catalytic subunit                      | gbpln | Arabidopsis lyrata   | AT3G58500.1   Symbols:   PP2A-4   protein phosphatase 2A-4   chr3:21635503-21638911 REVERSE LENGTH=313                                                         | 346 | 313 | 1.00E-174 | 90.5  | 85.5 | 87.9 |
| Rsa1.0_00265.1.g9948.t1 | # # # # # # # # - - - - # # # # # # #                                                                                                                                                                                                                                                                                                                                                                                                                                                                                                                                                                                                                                                                                                                                                                                                                                                                                                                                                                                                                                                                    |     |     |           |       |      |      |                                                                                    |       |                      |                                                                                                                                                                |     |     |           |       |      |      |
| Rsa1.0_00265.1.g9949.t1 | ref[NP_191414.1] bifunctional inhibitor/lipid-transfer protein/seed storage 2S albumin-like protein [Arabidopsis thaliana] gi 6735372 emb CAB68193.1  putative protein [Arabidopsis thaliana] gi 26453160 dbj BAC43656.1  GPI-anchored protein [Arabidopsis thaliana] gi 28372968 gb AAO39966.1  At3g58550 [Arabidopsis thaliana] gi 332646277 gb AEE79798.1  bifunctional inhibitor/lipid-transfer protein/seed storage 2S albumin-like protein [Arabidopsis thaliana]                                                                                                                                                                                                                                                                                                                                                                                                                                                                                                                                                                                                                                  | 166 | 177 | 2.00E-77  | 106.6 | 83.7 | 93.4 | bifunctional inhibitor/lipid-transfer protein/seed storage 2S albumin-like protein | gbpln | Arabidopsis thaliana | AT3G58550.1   Symbols:   Bifunctional inhibitor/lipid-transfer protein/seed storage 2S albumin superfamily protein   chr3:21649506-21650233 REVERSE LENGTH=177 | 166 | 177 | 7.00E-80  | 106.6 | 83.7 | 93.4 |
| Rsa1.0_00265.1.g9950.t1 | gb[EOA23679.1] hypothetical protein CARUB_v10016885mg [Capsella rubella]                                                                                                                                                                                                                                                                                                                                                                                                                                                                                                                                                                                                                                                                                                                                                                                                                                                                                                                                                                                                                                 | 601 | 600 | 0         | 99.8  | 92.7 | 95.8 | hypothetical protein CARUB_v10016885mg                                             | gbpln | Capsella rubella     | AT3G58580.1   Symbols:   DNase I-like superfamily protein   chr3:21600806-21663697 REVERSE LENGTH=603                                                          | 601 | 603 | 0         | 100.3 | 92.2 | 96.3 |
| Rsa1.0_00265.1.g9951.t1 | gb AAD48963.1 AF147263.5 contains similarity to transposases [Arabidopsis thaliana] gi 726731 emb CAB81093.1  AT4g05510 [Arabidopsis thaliana]                                                                                                                                                                                                                                                                                                                                                                                                                                                                                                                                                                                                                                                                                                                                                                                                                                                                                                                                                           | 76  | 604 | 3.00E-14  | 794.7 | 53.9 | 64.5 | contains similarity to transposases                                                | gbpln | Arabidopsis thaliana | #                                                                                                                                                              | #   | #   | #         | #     | #    |      |
| Rsa1.0_00265.1.g9952.t1 | ref[XP_002876469.1] pentatricopeptide repeat-containing protein [Arabidopsis lyrata subsp. lyrata] gi 297322307 gb EFH52728.1  pentatricopeptide repeat-containing protein [Arabidopsis lyrata subsp. lyrata]                                                                                                                                                                                                                                                                                                                                                                                                                                                                                                                                                                                                                                                                                                                                                                                                                                                                                            | 755 | 741 | 0         | 98.1  | 76.8 | 84.6 | pentatricopeptide repeat-containing protein                                        | gbpln | Arabidopsis lyrata   | AT3G58590.1   Symbols:   Pentatricopeptide repeat (PPR) superfamily protein   chr3:2166262-21668487 FORWARD LENGTH=741                                         | 755 | 741 | 0         | 98.1  | 76.3 | 83.8 |
| Rsa1.0_00265.1.g9953.t1 | ref[XP_002878229.1] hypothetical protein ARALYDRAFT_486311 [Arabidopsis lyrata subsp. lyrata] gi 297324067 gb EFH54488.1  hypothetical protein ARALYDRAFT_486311 [Arabidopsis lyrata subsp. lyrata]                                                                                                                                                                                                                                                                                                                                                                                                                                                                                                                                                                                                                                                                                                                                                                                                                                                                                                      | 289 | 297 | 1.00E-131 | 102.8 | 90.3 | 93.8 | hypothetical protein ARALYDRAFT_486311                                             | gbpln | Arabidopsis lyrata   | AT3G58600.1   Symbols:   Adaptin ear-binding coat-associated protein 1 NECAP-1   chr3:21668746-21670999 REVERSE LENGTH=302                                     | 289 | 302 | 1.00E-129 | 104.5 | 89.3 | 93.1 |

|                         |                                                                                                                                                                                                                                                                                                                                                                                                                                                                                                                                                                                                                                                                                                                                                                                                                                                                                                                                                                                                                                                                                                                                                                                           |     |     |           |       |      |       |                                           |       |                      |                                                                                                                                                                                                                                                                                                                                                                                                                                                                                                                                                  |     |     |           |       |      |       |
|-------------------------|-------------------------------------------------------------------------------------------------------------------------------------------------------------------------------------------------------------------------------------------------------------------------------------------------------------------------------------------------------------------------------------------------------------------------------------------------------------------------------------------------------------------------------------------------------------------------------------------------------------------------------------------------------------------------------------------------------------------------------------------------------------------------------------------------------------------------------------------------------------------------------------------------------------------------------------------------------------------------------------------------------------------------------------------------------------------------------------------------------------------------------------------------------------------------------------------|-----|-----|-----------|-------|------|-------|-------------------------------------------|-------|----------------------|--------------------------------------------------------------------------------------------------------------------------------------------------------------------------------------------------------------------------------------------------------------------------------------------------------------------------------------------------------------------------------------------------------------------------------------------------------------------------------------------------------------------------------------------------|-----|-----|-----------|-------|------|-------|
| Rsa1.0_00265.1.g9954.t1 | gb[EOA23697.1] hypothetical protein CARUB_v10016904mg [Capsella rubella]                                                                                                                                                                                                                                                                                                                                                                                                                                                                                                                                                                                                                                                                                                                                                                                                                                                                                                                                                                                                                                                                                                                  | 587 | 591 | 0         | 100.7 | 93.0 | 96.8  | hypothetical protein CARUB_v10016904mg    | gbpln | Capsella rubella     | AT3G58610.3   Symbols:   ketol-acid reductoisomerase   chr3:21671561-21674639 FORWARD LENGTH=591                                                                                                                                                                                                                                                                                                                                                                                                                                                 | 587 | 591 | 0         | 100.7 | 94.5 | 97.3  |
| Rsa1.0_00265.1.g9955.t1 | #                                                                                                                                                                                                                                                                                                                                                                                                                                                                                                                                                                                                                                                                                                                                                                                                                                                                                                                                                                                                                                                                                                                                                                                         | #   | #   | #         | #     | #    | #     | -                                         | ----  | ----                 | #                                                                                                                                                                                                                                                                                                                                                                                                                                                                                                                                                | #   | #   | #         | #     | #    |       |
| Rsa1.0_00265.1.g9956.t1 | refNP_191424.5] uncharacterized protein [Arabidopsis thaliana] gi 6735382 emb CAB68203.1  putative protein [Arabidopsis thaliana] gi 332646290 gb AEE79811.1  uncharacterized protein AT3G58650 [Arabidopsis thaliana]                                                                                                                                                                                                                                                                                                                                                                                                                                                                                                                                                                                                                                                                                                                                                                                                                                                                                                                                                                    | 661 | 820 | 0         | 124.1 | 79.6 | 88.7  | uncharacterized protein                   | gbpln | Arabidopsis thaliana | AT3G58650.1   Symbols:   unknown protein; FUNCTIONS IN: molecular_function unknown; INVOLVED IN: biological_process unknown; LOCATED IN: plasma membrane; EXPRESSED IN: 14 plant structures; EXPRESSED DURING: 8 growth stages; BEST Arabidopsis thaliana protein match is: unknown protein (TAIR:AT5G26910.1); Has 2350 Blast hits to 1412 proteins in 248 species: Archae - 0; Bacteria - 487; Metazoa - 577; Fungi - 236; Plants - 184; Viruses - 4; Other Eukaryotes - 882 (source: NCBI BLINK).   chr3:21696349-21699219 REVERSE LENGTH=820 | 661 | 820 | 0         | 124.1 | 79.6 | 88.7  |
| Rsa1.0_00265.1.g9957.t1 | refNP_191425.1] ribosomal protein L1p/L10e family protein [Arabidopsis thaliana] gi 7630061 emb CAB88283.1  putative protein [Arabidopsis thaliana] gi 17979348 gb AAL49900.1  unknown protein [Arabidopsis thaliana] gi 332646291 gb AEE79812.1  ribosomal protein L1p/L10e family protein [Arabidopsis thaliana]                                                                                                                                                                                                                                                                                                                                                                                                                                                                                                                                                                                                                                                                                                                                                                                                                                                                        | 411 | 446 | 1.00E-140 | 108.5 | 69.8 | 80.5  | ribosomal protein L1p/L10e family protein | gbpln | Arabidopsis thaliana | AT3G58660.1   Symbols:   Ribosomal protein L1p/L10e family   chr3:21701574-21702914 FORWARD LENGTH=446                                                                                                                                                                                                                                                                                                                                                                                                                                           | 411 | 446 | 1.00E-143 | 108.5 | 69.8 | 80.5  |
| Rsa1.0_00265.1.g9958.t1 | gb[EOA24666.1] hypothetical protein CARUB_v10017939mg [Capsella rubella] gi 482560476 gb EOA24667.1  hypothetical protein CARUB_v10017939mg [Capsella rubella]                                                                                                                                                                                                                                                                                                                                                                                                                                                                                                                                                                                                                                                                                                                                                                                                                                                                                                                                                                                                                            | 242 | 242 | 1.00E-135 | 100.0 | 95.0 | 97.5  | hypothetical protein CARUB_v10017939mg    | gbpln | Capsella rubella     | AT3G58670.3   Symbols:   Protein of unknown function (DUF1637)   chr3:21703693-21705314 REVERSE LENGTH=242                                                                                                                                                                                                                                                                                                                                                                                                                                       | 242 | 242 | 1.00E-133 | 100.0 | 92.6 | 96.3  |
| Rsa1.0_00265.1.g9959.t2 | gb[EOA24914.1] hypothetical protein CARUB_v10018205mg [Capsella rubella]                                                                                                                                                                                                                                                                                                                                                                                                                                                                                                                                                                                                                                                                                                                                                                                                                                                                                                                                                                                                                                                                                                                  | 167 | 142 | 4.00E-68  | 85.0  | 80.2 | 83.2  | hypothetical protein CARUB_v10018205mg    | gbpln | Capsella rubella     | AT3G58680.1   Symbols:   MBF1B, ATMBF1B   multiprotein bridging factor 1B   chr3:21707367-21708625 FORWARD LENGTH=142                                                                                                                                                                                                                                                                                                                                                                                                                            | 167 | 142 | 8.00E-68  | 85.0  | 77.2 | 82.0  |
| Rsa1.0_00265.1.g9960.t1 | ref NP_191429.1  60S ribosomal protein L11-2 [Arabidopsis thaliana] gi 18415161 ref NP_567563.1  60S ribosomal protein L11-2 [Arabidopsis thaliana] gi 30694822 ref NP_568649.2  60S ribosomal protein L11-2 [Arabidopsis thaliana] gi 27735235 sp P42794.2 RL112_ARATH RecName: Full=60S ribosomal protein L11-2; AltName: Full=L16 gi 11908058 gb AAG41458.1 AF326876_1 putative ribosomal protein L11 [Arabidopsis thaliana] gi 12642874 gb AAK00379.1 AF339697_1 putative ribosomal protein L11 [Arabidopsis thaliana] gi 14326537 gb AAK60313.1 AF385722_1 AT4g18730/F28A21_140 [Arabidopsis thaliana] gi 7630065 emb CAB88287.1  ribosomal protein L11-like [Arabidopsis thaliana] gi 9758681 dbj BAB09220.1  ribosomal protein L11-like [Arabidopsis thaliana] gi 14517470 gb AAK62625.1  AT4g18730/F28A21_140 [Arabidopsis thaliana] gi 18700224 gb AAL7722.1  AT4g18730/F28A21_140 [Arabidopsis thaliana] gi 21553372 gb AAM62465.1  ribosomal protein L11, cytosolic [Arabidopsis thaliana] gi 21592421 gb AAM64372.1  ribosomal protein L11, cytosolic [Arabidopsis thaliana] gi 22136574 gb AAM91073.1  AT4g18730/F28A21_140 [Arabidopsis thaliana] gi 22290761 gb AAM95997.1 | 182 | 182 | 1.00E-101 | 100.0 | 98.9 | 100.0 | 60S ribosomal protein L11-2               | gbpln | Arabidopsis thaliana | AT5G45775.2   Symbols:   Ribosomal L5P family protein   chr5:18565281-18566496 REVERSE LENGTH=182                                                                                                                                                                                                                                                                                                                                                                                                                                                | 182 | 182 | 1.00E-104 | 100.0 | 98.9 | 100.0 |

|                         |                                                                                                                                                                                                                                                                                                                                                                                                                                                                      |      |      |           |       |      |      |                                               |       |                      |                                                                                                                                                                           |      |      |           |       |      |      |
|-------------------------|----------------------------------------------------------------------------------------------------------------------------------------------------------------------------------------------------------------------------------------------------------------------------------------------------------------------------------------------------------------------------------------------------------------------------------------------------------------------|------|------|-----------|-------|------|------|-----------------------------------------------|-------|----------------------|---------------------------------------------------------------------------------------------------------------------------------------------------------------------------|------|------|-----------|-------|------|------|
| Rsa1.0_00265.1.g9961.t1 | ref[NP_567073.2] putative WRKY transcription factor 69 [Arabidopsis thaliana]<br>gi 29839599 sp Q93WV5.1 WRK69_ARAT H RecName: Full=Probable WRKY transcription factor 69; AltName: Full=WRKY DNA-binding protein 69<br>gi 15991736 gb AAL13045.1 AF421156.1 WRKY transcription factor 69 [Arabidopsis thaliana]<br>gi 332646300 gb AEE79821.1  putative WRKY transcription factor 69 [Arabidopsis thaliana]                                                         | 278  | 271  | 1.00E-122 | 97.5  | 86.7 | 90.3 | putative WRKY transcription factor 69         | gbpln | Arabidopsis thaliana | AT3G58710.2   Symbols: WRKY69, ATWRKY69   WRKY DNA-binding protein 69   chr3:21715192-21716766 FORWARD LENGTH=271                                                         | 278  | 271  | 1.00E-124 | 97.5  | 86.7 | 90.3 |
| Rsa1.0_00265.1.g9962.t1 | gb EOA24594.1  hypothetical protein CARUB_v10017860mg [Capsella rubella]                                                                                                                                                                                                                                                                                                                                                                                             | 261  | 261  | 1.00E-143 | 100.0 | 97.3 | 97.7 | hypothetical protein CARUB_v10017860mg        | gbpln | Capsella rubella     | AT3G58730.1   Symbols:   vacuolar ATP synthase subunit D (VATD) / V-ATPase D subunit / vacuolar proton pump D subunit (VATPD)   chr3:21718495-21719280 REVERSE LENGTH=261 | 261  | 261  | 1.00E-144 | 100.0 | 96.2 | 97.7 |
| Rsa1.0_00265.1.g9963.t3 | dbj BAJ34181.1  unnamed protein product [Theellungiella halophila]                                                                                                                                                                                                                                                                                                                                                                                                   | 488  | 508  | 0         | 104.1 | 79.5 | 86.3 | unnamed protein product                       | ----  | ----                 | AT3G58750.1   Symbols: CSY2   citrate synthase 2   chr3:21724564-21727458 REVERSE LENGTH=514                                                                              | 488  | 514  | 0         | 105.3 | 77.5 | 85.7 |
| Rsa1.0_00265.1.g9964.t1 | ref XP_002876477.1  predicted protein [Arabidopsis lyrata subsp. lyrata]<br>gi 297322315 gb EFH52736.1  predicted protein [Arabidopsis lyrata subsp. lyrata]                                                                                                                                                                                                                                                                                                         | 468  | 474  | 0         | 101.3 | 90.2 | 93.6 | predicted protein                             | gbpln | Arabidopsis lyrata   | AT3G58760.1   Symbols:   Integrin-linked protein kinase family   chr3:21728756-21731740 FORWARD LENGTH=471                                                                | 468  | 471  | 0         | 100.6 | 88.9 | 92.7 |
| Rsa1.0_00266.1.g9965.t1 | ref XP_002865872.1  1-aminocyclopropane-1-carboxylate synthase 12 [Arabidopsis lyrata subsp. lyrata]<br>gi 297311707 gb EFH42131.1  1-aminocyclopropane-1-carboxylate synthase 12 [Arabidopsis lyrata subsp. lyrata]                                                                                                                                                                                                                                                 | 510  | 495  | 0         | 97.1  | 88.2 | 92.7 | 1-aminocyclopropane-1-carboxylate synthase 12 | gbpln | Arabidopsis lyrata   | AT5G51690.1   Symbols: ACS12   1-aminocyclopropane-1-carboxylate synthase 12   chr5:20999015-21000957 REVERSE LENGTH=495                                                  | 510  | 495  | 0         | 97.1  | 87.1 | 92.2 |
| Rsa1.0_00266.1.g9966.t1 | dbj BAB11237.1  unnamed protein product [Arabidopsis thaliana]                                                                                                                                                                                                                                                                                                                                                                                                       | 329  | 325  | 3.00E-49  | 98.8  | 63.2 | 70.2 | unnamed protein product                       | gbpln | Arabidopsis thaliana | AT5G51680.1   Symbols:   hydroxyproline-rich glycoprotein family protein   chr5:20997591-20998755 FORWARD LENGTH=343                                                      | 329  | 343  | 2.00E-47  | 104.3 | 57.1 | 63.5 |
| Rsa1.0_00266.1.g9967.t1 | ref XP_002864121.1  predicted protein [Arabidopsis lyrata subsp. lyrata]<br>gi 297309956 gb EFH40380.1  predicted protein [Arabidopsis lyrata subsp. lyrata]                                                                                                                                                                                                                                                                                                         | 460  | 474  | 0         | 103.0 | 89.1 | 93.7 | predicted protein                             | gbpln | Arabidopsis lyrata   | AT5G51670.1   Symbols:   Protein of unknown function (DUF668)   chr5:20993560-20995096 FORWARD LENGTH=474                                                                 | 460  | 474  | 0         | 103.0 | 88.5 | 93.0 |
| Rsa1.0_00266.1.g9968.t1 | ref NP_201383.1  pentatricopeptide repeat-containing protein [Arabidopsis thaliana]<br>gi 75170571 sp Q9FH87.1 PP447_ARAT H RecName: Full=Putative pentatricopeptide repeat-containing protein At5g65820<br>gi 9758569 dbj BAB09050.1  unnamed protein product [Arabidopsis thaliana]<br>gi 332010728 gb AED98111.1  pentatricopeptide repeat-containing protein [Arabidopsis thaliana]                                                                              | 118  | 637  | 2.00E-47  | 539.8 | 78.8 | 90.7 | pentatricopeptide repeat-containing protein   | gbpln | Arabidopsis thaliana | AT5G65820.1   Symbols:   Pentatricopeptide repeat (PPR) superfamily protein   chr5:26339876-26341789 REVERSE LENGTH=637                                                   | 118  | 637  | 4.00E-50  | 539.8 | 78.8 | 90.7 |
| Rsa1.0_00266.1.g9969.t1 | #                                                                                                                                                                                                                                                                                                                                                                                                                                                                    | #    | #    | #         | #     | #    | #    | -                                             | ----  | ----                 | #                                                                                                                                                                         | #    | #    | #         | #     | #    | #    |
| Rsa1.0_00266.1.g9970.t1 | #                                                                                                                                                                                                                                                                                                                                                                                                                                                                    | #    | #    | #         | #     | #    | #    | -                                             | ----  | ----                 | #                                                                                                                                                                         | #    | #    | #         | #     | #    | #    |
| Rsa1.0_00266.1.g9971.t1 | gb AAK43485.1 AC084807.10 polyprotein, putative [Arabidopsis thaliana]<br>gi 225898008 dbj BAH30336.1  hypothetical protein [Arabidopsis thaliana]                                                                                                                                                                                                                                                                                                                   | 1292 | 1459 | 0         | 112.9 | 57.9 | 73.8 | polyprotein, putative                         | gbpln | Arabidopsis thaliana | AT4G23160.1   Symbols: CRK8   cysteine-rich RLK (RECEPTOR-like protein kinase) 8   chr4:12129485-12134086 FORWARD LENGTH=1262                                             | 1292 | 1262 | 2.00E-97  | 97.7  | 13.6 | 19.5 |
| Rsa1.0_00266.1.g9972.t1 | ref NP_199977.1  uncharacterized protein [Arabidopsis thaliana]<br>gi 9758206 dbj BAB08680.1  unnamed protein product [Arabidopsis thaliana]<br>gi 13122292 dbj BAB32887.1  leaf-senescence-related protein [Arabidopsis thaliana]<br>gi 19424021 gb AAL87282.1  unknown protein [Arabidopsis thaliana]<br>gi 22136926 gb AAM91807.1  unknown protein [Arabidopsis thaliana]<br>gi 332008727 gb AED96110.1  uncharacterized protein AT5G51640 [Arabidopsis thaliana] | 466  | 501  | 0         | 107.5 | 85.0 | 92.1 | uncharacterized protein                       | gbpln | Arabidopsis thaliana | AT5G51640.1   Symbols: YLS7, TBL17   Plant protein of unknown function (DUF828)   chr5:20975401-20977378 REVERSE LENGTH=501                                               | 466  | 501  | 0         | 107.5 | 85.0 | 92.1 |
| Rsa1.0_00266.1.g9973.t1 | gb EOA13428.1  hypothetical protein CARUB_v10026469mg [Capsella rubella]                                                                                                                                                                                                                                                                                                                                                                                             | 401  | 423  | 1.00E-119 | 105.5 | 69.3 | 79.3 | hypothetical protein CARUB_v10026469mg        | gbpln | Capsella rubella     | AT5G51590.1   Symbols:   AT hook motif DNA-binding family protein   chr5:20956863-20958929 REVERSE LENGTH=419                                                             | 401  | 419  | 1.00E-112 | 104.5 | 70.3 | 78.1 |
| Rsa1.0_00266.1.g9974.t5 | gb EOA17792.1  hypothetical protein CARUB_v10006186mg [Capsella rubella]                                                                                                                                                                                                                                                                                                                                                                                             | 550  | 405  | 1.00E-103 | 73.6  | 38.7 | 45.5 | hypothetical protein CARUB_v10006186mg        | gbpln | Capsella rubella     | AT5G58800.1   Symbols:   Protein with RNI-like/FBD-like domains   chr5:22972989-22974208 FORWARD LENGTH=344                                                               | 550  | 344  | 8.00E-62  | 62.5  | 22.0 | 26.7 |

|                          |                                                                                                                                                                                                                                                                                                                                                                                                  |     |      |           |       |      |      |                                                                              |       |                      |                                                                                                                                                                                                                                                                                                                                                                                      |     |     |           |       |      |      |
|--------------------------|--------------------------------------------------------------------------------------------------------------------------------------------------------------------------------------------------------------------------------------------------------------------------------------------------------------------------------------------------------------------------------------------------|-----|------|-----------|-------|------|------|------------------------------------------------------------------------------|-------|----------------------|--------------------------------------------------------------------------------------------------------------------------------------------------------------------------------------------------------------------------------------------------------------------------------------------------------------------------------------------------------------------------------------|-----|-----|-----------|-------|------|------|
| Rsa1.0_00266.1.g9975.t1  | dbj BAB10837.1 retroelement pol polyprotein-like [Arabidopsis thaliana]                                                                                                                                                                                                                                                                                                                          | 606 | 1462 | 3.00E-50  | 241.3 | 19.3 | 32.8 | retroelement pol polyprotein-like                                            | gbpln | Arabidopsis thaliana | AT1G21280.1   Symbols:   CONTAINS InterPro DOMAIN's: Retrotransposon gag protein (InterPro:IPR005162); Has 707 Blast hits to 705 proteins in 25 species: Archae - 0; Bacteria - 0; Metazoa - 4; Fungi - 0; Plants - 703; Viruses - 0; Other Eukaryotes - 0 (source: NCBI BLINK).   chr1:7447690-7448403 REVERSE LENGTH=237                                                           | 606 | 237 | 1.00E-24  | 39.1  | 9.7  | 15.8 |
| Rsa1.0_00266.1.g9976.t1  | ref NP_199968.1  protein EXORDIUM like 3 [Arabidopsis thaliana] gi 16226762 gb AAL16255.1 AF428325.1 AT5g51550/K17N15.10 [Arabidopsis thaliana] gi 9758197 dbj BAB08671.1  unnamed protein product [Arabidopsis thaliana] gi 332008714 gb AED96097.1  protein EXORDIUM like 3 [Arabidopsis thaliana]                                                                                             | 337 | 337  | 1.00E-178 | 100.0 | 94.1 | 96.1 | protein EXORDIUM like 3                                                      | gbpln | Arabidopsis thaliana | AT5G51550.1   Symbols: EXL3   EXORDIUM like 3   chr5:20939793-20940806 REVERSE LENGTH=337                                                                                                                                                                                                                                                                                            | 337 | 337 | 1.00E-180 | 100.0 | 94.1 | 96.1 |
| Rsa1.0_00266.1.g9977.t1  | ref NP_199965.1  plant invertase/pectin methyltransferase inhibitor domain-containing protein [Arabidopsis thaliana] gi 9758194 dbj BAB08668.1  ripening-related protein-like [Arabidopsis thaliana] gi 67633876 gb AA778662.1  invertase [Arabidopsis thaliana] gi 332008710 gb AED96093.1  plant invertase/pectin methyltransferase inhibitor domain-containing protein [Arabidopsis thaliana] | 204 | 204  | 6.00E-94  | 100.0 | 82.8 | 90.2 | plant invertase/pectin methyltransferase inhibitor domain-containing protein | gbpln | Arabidopsis thaliana | AT5G51520.1   Symbols:   Plant invertase/pectin methyltransferase inhibitor superfamily protein   chr5:20925980-20926594 FORWARD LENGTH=204                                                                                                                                                                                                                                          | 204 | 204 | 2.00E-96  | 100.0 | 82.8 | 90.2 |
| Rsa1.0_00266.1.g9978.t1  | #                                                                                                                                                                                                                                                                                                                                                                                                | #   | #    | #         | #     | #    | #    | -                                                                            | ----  | ----                 | #                                                                                                                                                                                                                                                                                                                                                                                    | #   | #   | #         | #     | #    |      |
| Rsa1.0_00266.1.g9979.t1  | gb EOA14518.1  hypothetical protein CARUB_v10027747mg [Capsella rubella]                                                                                                                                                                                                                                                                                                                         | 635 | 538  | 0         | 84.7  | 67.7 | 71.8 | hypothetical protein CARUB_v10027747mg                                       | gbpln | Capsella rubella     | AT5G51490.1   Symbols:   Plant invertase/pectin methyltransferase inhibitor superfamily   chr5:20913680-20915606 REVERSE LENGTH=536                                                                                                                                                                                                                                                  | 635 | 536 | 0         | 84.4  | 68.2 | 73.4 |
| Rsa1.0_00266.1.g9980.t1  | ref XP_002864114.1  hypothetical protein ARALYDRAFT_918182 [Arabidopsis lyrata subsp. lyrata] gi 297309949 gb EFH40373.1  hypothetical protein ARALYDRAFT_918182 [Arabidopsis lyrata subsp. lyrata]                                                                                                                                                                                              | 596 | 592  | 0         | 99.3  | 80.4 | 87.9 | hypothetical protein ARALYDRAFT_918182                                       | gbpln | Arabidopsis lyrata   | AT5G51480.1   Symbols: SKS2   SKU5 similar 2   chr5:20910433-20913153 FORWARD LENGTH=592                                                                                                                                                                                                                                                                                             | 596 | 592 | 0         | 99.3  | 79.2 | 87.1 |
| Rsa1.0_00267.1.g9981.t1  | gb AAD17398.1  putative non-LTR retroelement reverse transcriptase [Arabidopsis thaliana]                                                                                                                                                                                                                                                                                                        | 591 | 1225 | 1.00E-172 | 207.3 | 50.8 | 68.9 | putative non-LTR retroelement reverse transcriptase                          | gbpln | Arabidopsis thaliana | AT1G43760.1   Symbols:   DNase I-like superfamily protein   chr1:16528890-16531065 REVERSE LENGTH=826                                                                                                                                                                                                                                                                                | 591 | 626 | 8.00E-21  | 105.9 | 15.7 | 26.9 |
| Rsa1.0_00267.1.g9982.t1  | gb AAG51783.1 AC079679.3 reverse transcriptase, putative; 16838-20266 [Arabidopsis thaliana]                                                                                                                                                                                                                                                                                                     | 433 | 1142 | 9.00E-31  | 263.7 | 18.0 | 29.3 | reverse transcriptase, putative; 16838-20266                                 | gbpln | Arabidopsis thaliana | AT2G22440.1   Symbols:   BEST Arabidopsis thaliana protein match is: Ribonuclease H-like superfamily protein (TAIR:AT4G29090.1); Has 208 Blast hits to 191 proteins in 10 species: Archae - 0; Bacteria - 0; Metazoa - 0; Fungi - 0; Plants - 208; Viruses - 0; Other Eukaryotes - 0 (source: NCBI BLINK).   chr2:9528910-9529917 FORWARD LENGTH=256                                 | 433 | 256 | 5.00E-30  | 59.1  | 19.9 | 29.8 |
| Rsa1.0_00267.1.g9983.t1  | ref NP_001154616.1  uncharacterized protein [Arabidopsis thaliana] gi 3322641874 gb AEE75395.1  uncharacterized protein AT3G13677 [Arabidopsis thaliana]                                                                                                                                                                                                                                         | 112 | 76   | 5.00E-23  | 67.9  | 47.3 | 49.1 | uncharacterized protein                                                      | gbpln | Arabidopsis thaliana | AT3G13677.2   Symbols:   unknown protein; FUNCTIONS IN: molecular_function unknown; INVOLVED IN: biological_process unknown; LOCATED IN: cellular_component unknown; Has 24 Blast hits to 24 proteins in 11 species: Archae - 0; Bacteria - 0; Metazoa - 0; Fungi - 0; Plants - 24; Viruses - 0; Other Eukaryotes - 0 (source: NCBI BLINK).   chr3:4476296-4476611 FORWARD LENGTH=76 | 112 | 76  | 9.00E-26  | 67.9  | 47.3 | 49.1 |
| Rsa1.0_00267.1.g9984.t2  | #                                                                                                                                                                                                                                                                                                                                                                                                | #   | #    | #         | #     | #    | #    | -                                                                            | ----  | ----                 | #                                                                                                                                                                                                                                                                                                                                                                                    | #   | #   | #         | #     | #    |      |
| Rsa1.0_00267.1.g9985.t1  | #                                                                                                                                                                                                                                                                                                                                                                                                | #   | #    | #         | #     | #    | #    | -                                                                            | ----  | ----                 | #                                                                                                                                                                                                                                                                                                                                                                                    | #   | #   | #         | #     | #    |      |
| Rsa1.0_00267.1.g9986.t1  | #                                                                                                                                                                                                                                                                                                                                                                                                | #   | #    | #         | #     | #    | #    | -                                                                            | ----  | ----                 | #                                                                                                                                                                                                                                                                                                                                                                                    | #   | #   | #         | #     | #    |      |
| Rsa1.0_00267.1.g9987.t1  | #                                                                                                                                                                                                                                                                                                                                                                                                | #   | #    | #         | #     | #    | #    | -                                                                            | ----  | ----                 | #                                                                                                                                                                                                                                                                                                                                                                                    | #   | #   | #         | #     | #    |      |
| Rsa1.0_00267.1.g9988.t1  | gb EOA29826.1  hypothetical protein CARUB_v10012921mg [Capsella rubella]                                                                                                                                                                                                                                                                                                                         | 934 | 932  | 0         | 99.8  | 92.6 | 95.9 | hypothetical protein CARUB_v10012921mg                                       | gbpln | Capsella rubella     | AT2G05170.1   Symbols: ATVPS11, VPS11   vacuolar protein sorting 11   chr2:1870020-1873278 FORWARD LENGTH=932                                                                                                                                                                                                                                                                        | 934 | 932 | 0         | 99.8  | 91.4 | 95.1 |
| Rsa1.0_00267.1.g9989.t1  | #                                                                                                                                                                                                                                                                                                                                                                                                | #   | #    | #         | #     | #    | #    | -                                                                            | ----  | ----                 | #                                                                                                                                                                                                                                                                                                                                                                                    | #   | #   | #         | #     | #    |      |
| Rsa1.0_00267.1.g9990.t10 | gb AAD50007.1 AC007651.2 Similar to mudrA protein [Arabidopsis thaliana]                                                                                                                                                                                                                                                                                                                         | 469 | 622  | 6.00E-32  | 132.6 | 17.1 | 21.1 | Similar to mudrA protein                                                     | gbpln | Arabidopsis thaliana | #                                                                                                                                                                                                                                                                                                                                                                                    | #   | #   | #         | #     | #    |      |
| Rsa1.0_00267.1.g9991.t1  | gb ABD64958.1  ethylene responsive element binding factor -related [Brassica oleracea]                                                                                                                                                                                                                                                                                                           | 144 | 954  | 3.00E-27  | 662.5 | 47.9 | 60.4 | ethylene responsive element binding factor -related                          | gbpln | Brassica oleracea    | #                                                                                                                                                                                                                                                                                                                                                                                    | #   | #   | #         | #     | #    |      |
| Rsa1.0_00267.1.g9992.t1  | #                                                                                                                                                                                                                                                                                                                                                                                                | #   | #    | #         | #     | #    | #    | -                                                                            | ----  | ----                 | #                                                                                                                                                                                                                                                                                                                                                                                    | #   | #   | #         | #     | #    |      |

|                          |                                                                                                                                                                                                                                                                                                                                                                                                                                                                                                                                                                             |      |      |           |        |      |      |                                                                                                                                   |       |                      |                                                                                                                                                                                                                                                                                                                                                                                                                                                                                                                                                                                                |     |      |          |        |      |      |
|--------------------------|-----------------------------------------------------------------------------------------------------------------------------------------------------------------------------------------------------------------------------------------------------------------------------------------------------------------------------------------------------------------------------------------------------------------------------------------------------------------------------------------------------------------------------------------------------------------------------|------|------|-----------|--------|------|------|-----------------------------------------------------------------------------------------------------------------------------------|-------|----------------------|------------------------------------------------------------------------------------------------------------------------------------------------------------------------------------------------------------------------------------------------------------------------------------------------------------------------------------------------------------------------------------------------------------------------------------------------------------------------------------------------------------------------------------------------------------------------------------------------|-----|------|----------|--------|------|------|
| Rsa1.0_00267.1.g9993.t1  | refNP_001154316.1 calcineurin-like metallo-phosphoesterase-like protein [Arabidopsis thaliana]<br>gi 332189946 gb AE28067.1  calcineurin-like metallo-phosphoesterase-like protein [Arabidopsis thaliana]                                                                                                                                                                                                                                                                                                                                                                   | 104  | 400  | 1.00E-24  | 384.6  | 55.8 | 59.6 | calcineurin-like metallo-phosphoesterase-like protein                                                                             | gbpln | Arabidopsis thaliana | AT1G07010.3   Symbols: Calcineurin-like metallo-phosphoesterase superfamily protein   chr1:2152949-2154968 FORWARD LENGTH=400                                                                                                                                                                                                                                                                                                                                                                                                                                                                  | 104 | 400  | 2.00E-27 | 384.6  | 55.8 | 59.6 |
| Rsa1.0_00267.1.g9994.t1  | dbj BAA85462.1  transposon-like ORF [Brassica rapa]                                                                                                                                                                                                                                                                                                                                                                                                                                                                                                                         | 112  | 703  | 8.00E-39  | 627.7  | 83.9 | 88.4 | transposon-like ORF                                                                                                               | gbpln | Brassica rapa        | #                                                                                                                                                                                                                                                                                                                                                                                                                                                                                                                                                                                              | #   | #    | #        | #      | #    |      |
| Rsa1.0_00267.1.g9995.t1  | dbj BAB09502.1  transposon protein-like [Arabidopsis thaliana]                                                                                                                                                                                                                                                                                                                                                                                                                                                                                                              | 159  | 1089 | 3.00E-16  | 684.9  | 25.2 | 34.0 | transposon protein-like                                                                                                           | gbpln | Arabidopsis thaliana | #                                                                                                                                                                                                                                                                                                                                                                                                                                                                                                                                                                                              | #   | #    | #        | #      | #    |      |
| Rsa1.0_00267.1.g9996.t1  | gb ABD65035.1  hypothetical protein 26.t00052 [Brassica oleracea]                                                                                                                                                                                                                                                                                                                                                                                                                                                                                                           | 707  | 695  | 0         | 98.3   | 57.0 | 68.3 | hypothetical protein 26.t00052                                                                                                    | gbpln | Brassica oleracea    | AT1G51172.1   Symbols: unknown protein; FUNCTIONS IN: molecular function unknown; INVOLVED IN: biological process unknown; LOCATED IN: cellular component unknown; CONTAINS InterPro DOMAIN/s: Protein of unknown function DUF601 (InterPro:IPR006736); BEST Arabidopsis thaliana protein match is: Protein of unknown function, DUF601 (TAIR:AT1G46696.1); Has 1849 Blast hits to 1554 proteins in 272 species: Archae - 15; Bacteria - 116; Metazoa - 677; Fungi - 267; Plants - 154; Viruses - 11; Other Eukaryotes - 609 (source: NCBI BLINK).   chr1:18963205-18965571 FORWARD LENGTH=681 | 707 | 681  | 2.00E-25 | 96.3   | 9.5  | 14.7 |
| Rsa1.0_00267.1.g9997.t11 | emb CAN78623.1  hypothetical protein VITISV_010098 [Vitis vinifera]                                                                                                                                                                                                                                                                                                                                                                                                                                                                                                         | 1943 | 905  | 7.00E-74  | 46.6   | 8.5  | 12.2 | hypothetical protein VITISV_010098                                                                                                | gbpln | Vitis vinifera       | #                                                                                                                                                                                                                                                                                                                                                                                                                                                                                                                                                                                              | #   | #    | #        | #      | #    |      |
| Rsa1.0_00267.1.g9998.t1  | ref XP_002865287.1  predicted protein [Arabidopsis lyrata subsp. lyrata]<br>gi 297311122 gb EFH41546.1  predicted protein [Arabidopsis lyrata subsp. lyrata]                                                                                                                                                                                                                                                                                                                                                                                                                | 355  | 329  | 1.00E-133 | 92.7   | 68.7 | 75.8 | predicted protein                                                                                                                 | gbpln | Arabidopsis lyrata   | AT5G45070.1   Symbols: AtPP2-A8, PP2-A8   phloem protein 2-A8   chr5:18187899-18189362 REVERSE LENGTH=354                                                                                                                                                                                                                                                                                                                                                                                                                                                                                      | 355 | 354  | 2.00E-77 | 99.7   | 43.9 | 64.8 |
| Rsa1.0_00267.1.g9999.t1  | gb AAD17351.1  contains similarity to retrovirus-related polyproteins and to CCHC zinc finger protein (Pfam: PF00098, Score=16.3, E=0.051, E= 1) [Arabidopsis thaliana]<br>gi 7267432 emb CAB77944.1  putative polyprotein [Arabidopsis thaliana]                                                                                                                                                                                                                                                                                                                           | 656  | 1138 | 1.00E-169 | 173.5  | 50.9 | 59.5 | contains similarity to retrovirus-related polyproteins and to CCHC zinc finger protein (Pfam: PF00098, Score=16.3, E=0.051, E= 1) | gbpln | Arabidopsis thaliana | ATMG00860.1   Symbols: ORF158   DNA/RNA polymerases superfamily protein   chrM:235916-236392 FORWARD LENGTH=158                                                                                                                                                                                                                                                                                                                                                                                                                                                                                | 656 | 158  | 4.00E-24 | 24.1   | 8.4  | 12.2 |
| Rsa1.0_00267.1.g10000.t1 | gb AAD17351.1  contains similarity to retrovirus-related polyproteins and to CCHC zinc finger protein (Pfam: PF00098, Score=16.3, E=0.051, E= 1) [Arabidopsis thaliana]<br>gi 7267432 emb CAB77944.1  putative polyprotein [Arabidopsis thaliana]                                                                                                                                                                                                                                                                                                                           | 506  | 1138 | 2.00E-89  | 224.9  | 40.3 | 52.8 | contains similarity to retrovirus-related polyproteins and to CCHC zinc finger protein (Pfam: PF00098, Score=16.3, E=0.051, E= 1) | gbpln | Arabidopsis thaliana | #                                                                                                                                                                                                                                                                                                                                                                                                                                                                                                                                                                                              | #   | #    | #        | #      | #    |      |
| Rsa1.0_00267.1.g10001.t1 | ref XP_002889521.1  kinase family protein [Arabidopsis lyrata subsp. lyrata]<br>gi 297335363 gb EFH65780.1  kinase family protein [Arabidopsis lyrata subsp. lyrata]                                                                                                                                                                                                                                                                                                                                                                                                        | 57   | 1043 | 8.00E-13  | 1829.8 | 56.1 | 64.9 | kinase family protein                                                                                                             | gbpln | Arabidopsis lyrata   | AT1G04700.1   Symbols: PB1 domain-containing protein tyrosine kinase   chr1:1316919-1320653 FORWARD LENGTH=1042                                                                                                                                                                                                                                                                                                                                                                                                                                                                                | 57  | 1042 | 8.00E-15 | 1828.1 | 54.4 | 63.2 |
| Rsa1.0_00267.1.g10002.t3 | ref NP_172041.2  calcium-dependent lipid-binding domain-containing protein [Arabidopsis thaliana]<br>gi 75301121 sp Q8L706.1 SYT5 ARATH RecName: Full=Synaptotagmin-5; AltName: Full=NTMC2T2.1; AltName: Full=Synaptotagmin E<br>gi 22655178 gb AAM98179.1  Ca2+-dependent lipid-binding protein, putative [Arabidopsis thaliana]<br>gi 31711980 gb AAP68346.1  At1g05500 [Arabidopsis thaliana]<br>gi 110737090 dbj BAF00497.1  putative Ca2+-dependent lipid-binding protein [Arabidopsis thaliana]<br>gi 332189725 gb AEE27846.1  synaptotagmin-5 [Arabidopsis thaliana] | 208  | 560  | 6.00E-66  | 269.2  | 64.4 | 69.2 | calcium-dependent lipid-binding domain-containing protein                                                                         | gbpln | Arabidopsis thaliana | AT1G05500.1   Symbols: SYTE, ATSYTE, NTMC2TYPE2.1, NTMC2T2.1, SYT5   Calcium-dependent lipid-binding (CaLB domain) family protein   chr1:1625098-1628940 FORWARD LENGTH=560                                                                                                                                                                                                                                                                                                                                                                                                                    | 208 | 560  | 2.00E-68 | 269.2  | 64.4 | 69.2 |



|                          |                                                                                                                                                                                                                                                                                                                                                                                                                                                                                                                                                                                                                                                     |      |      |           |       |      |      |                                                       |       |                      |                                                                                                                               |      |      |           |       |      |      |
|--------------------------|-----------------------------------------------------------------------------------------------------------------------------------------------------------------------------------------------------------------------------------------------------------------------------------------------------------------------------------------------------------------------------------------------------------------------------------------------------------------------------------------------------------------------------------------------------------------------------------------------------------------------------------------------------|------|------|-----------|-------|------|------|-------------------------------------------------------|-------|----------------------|-------------------------------------------------------------------------------------------------------------------------------|------|------|-----------|-------|------|------|
| Rsa1.0_00267.1.g10003.t1 | refNP_568825.1   beta-(1,2)-xylosyltransferase [Arabidopsis thaliana]<br>gi 17369167 sp Q9LDH0.1 XYLT_ARATH<br>RecName: Full=Beta-(1,2)-xylosyltransferase<br>gi 15724166 gb AAL06475.1 AF411785.1<br>AT5g55500/MTE17.21 [Arabidopsis thaliana]<br>gi 7671513 emb CAB89489.1 beta1.2-xylosyltransferase [Arabidopsis thaliana]<br>gi 7768105 emb CAB90610.1 beta1.2-xylosyltransferase [Arabidopsis thaliana]<br>gi 9758182 dbj BAB08567.1 unnamed protein product [Arabidopsis thaliana]<br>gi 23505973 gb AAN28846.1 AT5g55500/MTE17.21 [Arabidopsis thaliana]<br>gi 332009252 gb AED96635.1 beta-(1,2)-xylosyltransferase [Arabidopsis thaliana] | 166  | 534  | 1.00E-27  | 321.7 | 33.1 | 41.0 | beta-(1,2)-xylosyltransferase                         | gbpln | Arabidopsis thaliana | AT5G55500.1   Symbols: ATXYLT, XYLT   beta-1,2-xylosyltransferase   chr5:22482386-2248417 FORWARD LENGTH=534                  | 166  | 534  | 5.00E-30  | 321.7 | 33.1 | 41.0 |
| Rsa1.0_00267.1.g10004.t1 | dbj BAB10503.1  retroelement pol polyprotein-like [Arabidopsis thaliana]                                                                                                                                                                                                                                                                                                                                                                                                                                                                                                                                                                            | 1269 | 1475 | 0         | 116.2 | 54.9 | 69.7 | retroelement pol polyprotein-like                     | gbpln | Arabidopsis thaliana | AT4G23160.1   Symbols: CRK8   cysteine-rich RLK (RECEPTOR-like protein kinase) 8   chr4:12129485-12134086 FORWARD LENGTH=1262 | 1269 | 1262 | 1.00E-162 | 99.4  | 21.9 | 29.3 |
| Rsa1.0_00268.1.g10005.t1 | gb EOA13182.1  hypothetical protein CARUB_v10026208mg [Capsella rubella]                                                                                                                                                                                                                                                                                                                                                                                                                                                                                                                                                                            | 484  | 534  | 0         | 110.3 | 74.8 | 85.7 | hypothetical protein CARUB_v10026208mg                | gbpln | Capsella rubella     | AT5G50990.1   Symbols:   Tetratricopeptide repeat (TPR)-like superfamily protein   chr5:20739453-20741281 FORWARD LENGTH=534  | 484  | 534  | 0         | 110.3 | 75.0 | 84.9 |
| Rsa1.0_00268.1.g10006.t1 | refNP_199903.1  armadillo/beta-catenin-like repeat-containing protein [Arabidopsis thaliana]<br>gi 9758237 dbj BAB08736.1  unnamed protein product [Arabidopsis thaliana]<br>gi 58652072 gb AAW80861.1  AT5g50900 [Arabidopsis thaliana]<br>gi 190576485 gb ACE79043.1  AT5g50900 [Arabidopsis thaliana]<br>gi 332008624 gb AED96007.1  armadillo/beta-catenin-like repeat-containing protein [Arabidopsis thaliana]                                                                                                                                                                                                                                | 535  | 555  | 0         | 103.7 | 80.0 | 89.2 | armadillo/beta-catenin-like repeat-containing protein | gbpln | Arabidopsis thaliana | AT5G50900.1   Symbols:   ARM repeat superfamily protein   chr5:20705051-20706718 REVERSE LENGTH=555                           | 535  | 555  | 0         | 103.7 | 80.0 | 89.2 |
| Rsa1.0_00268.1.g10007.t1 | refNP_199902.1  lipase domain-containing protein [Arabidopsis thaliana]<br>gi 9758236 dbj BAB08735.1  unnamed protein product [Arabidopsis thaliana]<br>gi 332008623 gb AED96006.1  lipase domain-containing protein [Arabidopsis thaliana]                                                                                                                                                                                                                                                                                                                                                                                                         | 413  | 408  | 0         | 98.8  | 84.7 | 91.0 | lipase domain-containing protein                      | gbpln | Arabidopsis thaliana | AT5G50890.1   Symbols:   alpha/beta-Hydrolases superfamily protein   chr5:20702684-20704235 FORWARD LENGTH=408                | 413  | 408  | 0         | 98.8  | 84.7 | 91.0 |
| Rsa1.0_00268.1.g10008.t1 | #                                                                                                                                                                                                                                                                                                                                                                                                                                                                                                                                                                                                                                                   | #    | #    | #         | #     | #    | -    | ---                                                   | ---   | #                    | #                                                                                                                             | #    | #    | #         | #     | #    |      |
| Rsa1.0_00268.1.g10009.t1 | refXP_002870549.1  predicted protein [Arabidopsis lyrata subsp. lyrata]<br>gi 297316385 gb EFH46808.1  predicted protein [Arabidopsis lyrata subsp. lyrata]                                                                                                                                                                                                                                                                                                                                                                                                                                                                                         | 584  | 614  | 1.00E-161 | 105.1 | 55.0 | 69.2 | predicted protein                                     | gbpln | Arabidopsis lyrata   | AT5G37650.1   Symbols:   Family of unknown function (DUF577)   chr5:14954011-14955834 REVERSE LENGTH=607                      | 584  | 607  | 1.00E-154 | 103.9 | 52.9 | 67.6 |
| Rsa1.0_00268.1.g10010.t1 | gb AAF79618.1 AC027665_19 F5M15.26 [Arabidopsis thaliana]                                                                                                                                                                                                                                                                                                                                                                                                                                                                                                                                                                                           | 518  | 1838 | 8.00E-56  | 354.8 | 31.3 | 49.4 | F5M15.26                                              | gbpln | Arabidopsis thaliana | #                                                                                                                             | #    | #    | #         | #     | #    |      |
| Rsa1.0_00268.1.g10011.t1 | gb AAD20101.1  putative retroelement pol polyprotein [Arabidopsis thaliana]                                                                                                                                                                                                                                                                                                                                                                                                                                                                                                                                                                         | 775  | 764  | 6.00E-30  | 98.6  | 11.6 | 16.5 | putative retroelement pol polyprotein                 | gbpln | Arabidopsis thaliana | #                                                                                                                             | #    | #    | #         | #     | #    |      |
| Rsa1.0_00268.1.g10012.t1 | refXP_002870549.1  predicted protein [Arabidopsis lyrata subsp. lyrata]<br>gi 297316385 gb EFH46808.1  predicted protein [Arabidopsis lyrata subsp. lyrata]                                                                                                                                                                                                                                                                                                                                                                                                                                                                                         | 446  | 614  | 1.00E-82  | 137.7 | 37.4 | 46.0 | predicted protein                                     | gbpln | Arabidopsis lyrata   | AT5G37650.1   Symbols:   Family of unknown function (DUF577)   chr5:14954011-14955834 REVERSE LENGTH=607                      | 446  | 607  | 8.00E-81  | 136.1 | 37.0 | 45.1 |
| Rsa1.0_00268.1.g10013.t1 | refXP_002872029.1  methylthioalkylmalate synthase a [Arabidopsis lyrata subsp. lyrata]<br>gi 98985860 emb CAJ55515.1  methylthioalkylmalate synthase a [Arabidopsis lyrata subsp. lyrata]<br>gi 297317866 gb EFH48288.1  methylthioalkylmalate synthase a [Arabidopsis lyrata subsp. lyrata]                                                                                                                                                                                                                                                                                                                                                        | 633  | 507  | 1.00E-169 | 80.1  | 44.9 | 49.8 | methylthioalkylmalate synthase a                      | gbpln | Arabidopsis lyrata   | AT5G23010.1   Symbols: MAM1, IMS3   methylthioalkylmalate synthase 1   chr5:7703173-7706769 FORWARD LENGTH=506                | 633  | 506  | 1.00E-170 | 79.9  | 44.7 | 49.8 |
| Rsa1.0_00268.1.g10014.t5 | dbj BAJ34206.1  unnamed protein product [Thellungiella halophila]                                                                                                                                                                                                                                                                                                                                                                                                                                                                                                                                                                                   | 623  | 366  | 0         | 58.7  | 55.2 | 55.5 | unnamed protein product                               | ---   | ---                  | AT5G50850.1   Symbols: MAB1   Transketolase family protein   chr5:20689671-20692976 FORWARD LENGTH=363                        | 623  | 363  | 0         | 58.3  | 53.9 | 54.6 |
| Rsa1.0_00268.1.g10015.t2 | #                                                                                                                                                                                                                                                                                                                                                                                                                                                                                                                                                                                                                                                   | #    | #    | #         | #     | #    | -    | ---                                                   | ---   | #                    | #                                                                                                                             | #    | #    | #         | #     | #    |      |
| Rsa1.0_00268.1.g10016.t1 | dbj BAD93953.1  hypothetical protein [Arabidopsis thaliana]                                                                                                                                                                                                                                                                                                                                                                                                                                                                                                                                                                                         | 182  | 260  | 1.00E-17  | 142.9 | 24.7 | 24.7 | hypothetical protein                                  | gbpln | Arabidopsis thaliana | AT1G25500.2   Symbols:   Plasma-membrane choline transporter family protein   chr1:8955437-8957793 REVERSE LENGTH=488         | 182  | 488  | 6.00E-20  | 268.1 | 24.7 | 24.7 |

|                          |                                                                                                                                                                                                                                                                                                                                                                                                                            |     |      |           |       |      |      |                                                   |       |                      |                                                                                                                                                                                                                                                                                                                                                                                                                                                                                                                                                                                                  |     |     |           |       |      |      |
|--------------------------|----------------------------------------------------------------------------------------------------------------------------------------------------------------------------------------------------------------------------------------------------------------------------------------------------------------------------------------------------------------------------------------------------------------------------|-----|------|-----------|-------|------|------|---------------------------------------------------|-------|----------------------|--------------------------------------------------------------------------------------------------------------------------------------------------------------------------------------------------------------------------------------------------------------------------------------------------------------------------------------------------------------------------------------------------------------------------------------------------------------------------------------------------------------------------------------------------------------------------------------------------|-----|-----|-----------|-------|------|------|
| Rsa1.0_00268.1.g10017.t1 | gb EOA14605.1  hypothetical protein CARUB_v10027856mg [Capsella rubella]                                                                                                                                                                                                                                                                                                                                                   | 388 | 406  | 1.00E-153 | 104.6 | 76.5 | 87.4 | hypothetical protein CARUB_v10027856mg            | gbpln | Capsella rubella     | AT5G50840.1   Symbols:   CONTAINS InterPro DOMAIN/s: Taxilin (InterPro:IPR019132); Has 30201 Blast hits to 17322 proteins in 780 species: Archae - 12; Bacteria - 1396; Metazoa - 17338; Fungi - 3422; Plants - 5037; Viruses - 0; Other Eukaryotes - 2996 (source: NCBI BLink).   chr5:20685903-20688739 FORWARD LENGTH=404                                                                                                                                                                                                                                                                     | 388 | 404 | 1.00E-152 | 104.1 | 76.5 | 86.6 |
| Rsa1.0_00268.1.g10018.t1 | gb AAG51783.1 AC079679_3 reverse transcriptase, putative; 16838-20266 [Arabidopsis thaliana]                                                                                                                                                                                                                                                                                                                               | 164 | 1142 | 4.00E-20  | 696.3 | 32.9 | 47.6 | reverse transcriptase, putative; 16838-20266      | gbpln | Arabidopsis thaliana | AT2G34320.1   Symbols:   Polynucleotidyl transferase, ribonuclease H-like superfamily protein   chr2:14484959-14485837 FORWARD LENGTH=292                                                                                                                                                                                                                                                                                                                                                                                                                                                        | 164 | 292 | 3.00E-13  | 178.0 | 24.4 | 42.7 |
| Rsa1.0_00268.1.g10019.t1 | emb CAM59671.1  parvulin-type peptidyl-prolyl cis/trans isomerase [Lotus japonicus] gi 388496576 gb AFK36354.1  unknown [Lotus japonicus]                                                                                                                                                                                                                                                                                  | 87  | 122  | 8.00E-12  | 140.2 | 41.4 | 43.7 | parvulin-type peptidyl-prolyl cis/trans isomerase | gbpln | Lotus japonicus      | AT2G18040.1   Symbols: PIN1AT   peptidylprolyl cis/trans isomerase, NIMA-interacting 1   chr2:7842346-7843537 FORWARD LENGTH=119                                                                                                                                                                                                                                                                                                                                                                                                                                                                 | 87  | 119 | 2.00E-13  | 136.8 | 40.2 | 42.5 |
| Rsa1.0_00268.1.g10020.t1 | gb EOA14430.1  hypothetical protein CARUB_v10027633mg [Capsella rubella]                                                                                                                                                                                                                                                                                                                                                   | 273 | 268  | 3.00E-89  | 98.2  | 75.8 | 82.8 | hypothetical protein CARUB_v10027633mg            | gbpln | Capsella rubella     | AT5G50830.1   Symbols:   unknown protein; FUNCTIONS IN: molecular function unknown; INVOLVED IN: N-terminal protein myristoylation; LOCATED IN: cellular component unknown; EXPRESSED IN: 11 plant structures; EXPRESSED DURING: L mature pollen stage, M germinated pollen stage, 4 anthesis, C globular stage, petal differentiation and expansion stage; Has 4984 Blast hits to 3288 proteins in 342 species: Archae - 12; Bacteria - 257; Metazoa - 1366; Fungi - 452; Plants - 199; Viruses - 77; Other Eukaryotes - 2621 (source: NCBI BLink).   chr5:20683452-20684549 FORWARD LENGTH=281 | 273 | 281 | 4.00E-86  | 102.9 | 73.6 | 82.1 |
| Rsa1.0_00269.1.g10021.t1 | gb AAZ67609.1  80A08_24 [Brassica rapa subsp. pekinensis] ref XP_002869011.1  hypothetical protein ARALYDRAFT_490932 [Arabidopsis lyrata subsp. lyrata] gi 297314847 gb EFH45270.1  hypothetical protein ARALYDRAFT_490932 [Arabidopsis lyrata subsp. lyrata]                                                                                                                                                              | 315 | 475  | 4.00E-13  | 150.8 | 22.9 | 26.3 | 80A08_24                                          | gbpln | Brassica rapa        | # # # # # # #                                                                                                                                                                                                                                                                                                                                                                                                                                                                                                                                                                                    |     |     |           |       |      |      |
| Rsa1.0_00269.1.g10022.t1 | gb EOA18087.1  hypothetical protein CARUB_v10006539mg [Capsella rubella] ref NP_849513.1  myb family transcription factor [Arabidopsis thaliana] gi 332661362 gb AEE86762.1  myb family transcription factor [Arabidopsis thaliana]                                                                                                                                                                                        | 217 | 256  | 3.00E-94  | 118.0 | 76.5 | 85.7 | hypothetical protein ARALYDRAFT_490932            | gbpln | Arabidopsis lyrata   | AT4G37150.1   Symbols: ATMES9, MES9   methyl esterase 9   chr4:17492985-17494057 REVERSE LENGTH=256                                                                                                                                                                                                                                                                                                                                                                                                                                                                                              | 217 | 256 | 1.00E-94  | 118.0 | 75.1 | 82.9 |
| Rsa1.0_00269.1.g10023.t1 | gb EOA18087.1  hypothetical protein CARUB_v10006539mg [Capsella rubella] ref NP_849513.1  myb family transcription factor [Arabidopsis thaliana] gi 332661362 gb AEE86762.1  myb family transcription factor [Arabidopsis thaliana]                                                                                                                                                                                        | 540 | 540  | 0         | 100.0 | 92.0 | 95.9 | hypothetical protein CARUB_v10006539mg            | gbpln | Capsella rubella     | AT4G37160.1   Symbols: sks15   SKU5 similar 15   chr4:17494820-17497124 REVERSE LENGTH=541                                                                                                                                                                                                                                                                                                                                                                                                                                                                                                       | 540 | 541 | 0         | 100.2 | 91.7 | 95.6 |
| Rsa1.0_00269.1.g10024.t1 | ref NP_195436.1  uncharacterized protein [Arabidopsis thaliana] gi 4006861 emb CAB16779.1  tubulin-like protein [Arabidopsis thaliana] gi 7270668 emb CAB80385.1  tubulin-like protein [Arabidopsis thaliana] gi 71143064 gb AAZ23923.1  At4g37190 [Arabidopsis thaliana] gi 19430666 gb ACF41946.1  At4g37190 [Arabidopsis thaliana] gi 332661364 gb AEE86764.1  uncharacterized protein AT4G37190 [Arabidopsis thaliana] | 254 | 363  | 4.00E-82  | 142.9 | 74.0 | 83.5 | myb family transcription factor                   | gbpln | Arabidopsis thaliana | AT4G37180.2   Symbols:   Homeodomain-like superfamily protein   chr4:17504648-17506107 FORWARD LENGTH=363                                                                                                                                                                                                                                                                                                                                                                                                                                                                                        | 254 | 363 | 1.00E-84  | 142.9 | 74.0 | 83.5 |
| Rsa1.0_00269.1.g10025.t1 | ref NP_195436.1  uncharacterized protein [Arabidopsis thaliana] gi 4006861 emb CAB16779.1  tubulin-like protein [Arabidopsis thaliana] gi 7270668 emb CAB80385.1  tubulin-like protein [Arabidopsis thaliana] gi 71143064 gb AAZ23923.1  At4g37190 [Arabidopsis thaliana] gi 19430666 gb ACF41946.1  At4g37190 [Arabidopsis thaliana] gi 332661364 gb AEE86764.1  uncharacterized protein AT4G37190 [Arabidopsis thaliana] | 550 | 562  | 0         | 102.2 | 85.8 | 92.4 | uncharacterized protein                           | gbpln | Arabidopsis thaliana | AT4G37190.1   Symbols:   LOCATED IN: cytosol, plasma membrane; EXPRESSED IN: 20 plant structures; EXPRESSED DURING: 13 growth stages; CONTAINS InterPro DOMAIN/s: Beta tubulin, autoregulation binding site (InterPro:IPR013838), Misato Segment II, myosin-like (InterPro:IPR019605), Tubulin/FtsZ, N-terminal (InterPro:IPR019746); Has 345 Blast hits to 341 proteins in 161 species: Archae - 0; Bacteria - 0; Metazoa - 131; Fungi - 140; Plants - 55; Viruses - 0; Other Eukaryotes - 19 (source: NCBI BLink).   chr4:17507155-17509512 FORWARD LENGTH=562                                 | 550 | 562 | 0         | 102.2 | 85.8 | 92.4 |
| Rsa1.0_00269.1.g10026.t1 | ref XP_002866983.1  hypothetical protein ARALYDRAFT_328078 [Arabidopsis lyrata subsp. lyrata] gi 297312819 gb EFH43242.1  hypothetical protein ARALYDRAFT_328078 [Arabidopsis lyrata subsp. lyrata]                                                                                                                                                                                                                        | 319 | 328  | 1.00E-152 | 102.8 | 85.3 | 91.5 | hypothetical protein ARALYDRAFT_328078            | gbpln | Arabidopsis lyrata   | AT5G66570.1   Symbols: PSBO-1, OEE1, OEE33, OE33, PSBO1, MSP-1   PS II oxygen-evolving complex 1   chr5:26568744-26570124 FORWARD LENGTH=332                                                                                                                                                                                                                                                                                                                                                                                                                                                     | 319 | 332 | 1.00E-136 | 104.1 | 75.2 | 81.8 |

|                          |                                                                                                                                                                                                                                                                                                                                                                                                                                                                                          |     |     |           |       |      |      |                                                                                          |       |                      |                                                                                                                                                                                                                                                                                                                                                                                                                                                                                                                                                                              |     |     |           |       |      |      |
|--------------------------|------------------------------------------------------------------------------------------------------------------------------------------------------------------------------------------------------------------------------------------------------------------------------------------------------------------------------------------------------------------------------------------------------------------------------------------------------------------------------------------|-----|-----|-----------|-------|------|------|------------------------------------------------------------------------------------------|-------|----------------------|------------------------------------------------------------------------------------------------------------------------------------------------------------------------------------------------------------------------------------------------------------------------------------------------------------------------------------------------------------------------------------------------------------------------------------------------------------------------------------------------------------------------------------------------------------------------------|-----|-----|-----------|-------|------|------|
| Rsa1.0_00269.1.g10027.t1 | gb EOA15637.1  hypothetical protein CARUB_v10005881mg [Capsella rubella]                                                                                                                                                                                                                                                                                                                                                                                                                 | 177 | 173 | 3.00E-68  | 97.7  | 80.8 | 85.9 | hypothetical protein CARUB_v10005881mg                                                   | gbpln | Capsella rubella     | AT4G37240.1   Symbols:   unknown protein; FUNCTIONS IN: molecular function unknown; INVOLVED IN: N-terminal protein myristoylation; LOCATED IN: cellular component unknown; EXPRESSED IN: 22 plant structures; EXPRESSED DURING: 13 growth stages; BEST Arabidopsis thaliana protein match is: unknown protein (TAIR:AT2G23690.1); Has 30201 Blast hits to 17322 proteins in 780 species: Archae - 12; Bacteria - 1396; Metazoa - 17338; Fungi - 3422; Plants - 5037; Viruses - 0; Other Eukaryotes - 2996 (source: NCBI BLink).   chr4:17524546-17525052 FORWARD LENGTH=168 | 177 | 168 | 2.00E-65  | 94.9  | 78.0 | 84.7 |
| Rsa1.0_00269.1.g10028.t1 | #                                                                                                                                                                                                                                                                                                                                                                                                                                                                                        | #   | #   | #         | #     | #    | -    | ----                                                                                     | ----  | ----                 | #                                                                                                                                                                                                                                                                                                                                                                                                                                                                                                                                                                            | #   | #   | #         | #     | #    |      |
| Rsa1.0_00269.1.g10029.t1 | ref XP_002869018.1  GNS1/SUR4 membrane family protein [Arabidopsis lyrata subsp. lyrata] gi 297314854 gb EFH45277.1  GNS1/SUR4 membrane family protein [Arabidopsis lyrata subsp. lyrata]                                                                                                                                                                                                                                                                                                | 360 | 297 | 1.00E-148 | 82.5  | 72.5 | 75.0 | GNS1/SUR4 membrane family protein                                                        | gbpln | Arabidopsis lyrata   | AT4G36830.1   Symbols: HOS3-1   GNS1/SUR4 membrane protein family   chr4:17349511-17350380 FORWARD LENGTH=289                                                                                                                                                                                                                                                                                                                                                                                                                                                                | 360 | 289 | 1.00E-143 | 80.3  | 69.7 | 72.5 |
| Rsa1.0_00269.1.g10030.t1 | gb EOA16793.1  hypothetical protein CARUB_v10005013mg, partial [Capsella rubella]                                                                                                                                                                                                                                                                                                                                                                                                        | 344 | 388 | 1.00E-154 | 112.8 | 78.2 | 86.6 | hypothetical protein CARUB_v10005013mg, partial                                          | gbpln | Capsella rubella     | AT4G36820.1   Symbols:   Protein of unknown function (DUF607)   chr4:17346889-17347994 FORWARD LENGTH=338                                                                                                                                                                                                                                                                                                                                                                                                                                                                    | 344 | 338 | 1.00E-149 | 98.3  | 74.4 | 85.5 |
| Rsa1.0_00269.1.g10031.t1 | #                                                                                                                                                                                                                                                                                                                                                                                                                                                                                        | #   | #   | #         | #     | #    | -    | ----                                                                                     | ----  | ----                 | #                                                                                                                                                                                                                                                                                                                                                                                                                                                                                                                                                                            | #   | #   | #         | #     | #    |      |
| Rsa1.0_00269.1.g10032.t1 | gb AAD18103.1  putative calmodulin-binding protein [Arabidopsis thaliana] gi 40823412 gb AAR92281.1  At2g24300 [Arabidopsis thaliana] gi 46518419 gb AAS99691.1  At2g24300 [Arabidopsis thaliana]                                                                                                                                                                                                                                                                                        | 71  | 503 | 2.00E-22  | 708.5 | 85.9 | 90.1 | putative calmodulin-binding protein                                                      | gbpln | Arabidopsis thaliana | AT2G24300.1   Symbols:   Calmodulin-binding protein   chr2:10341431-10343457 FORWARD LENGTH=552                                                                                                                                                                                                                                                                                                                                                                                                                                                                              | 71  | 552 | 6.00E-25  | 777.5 | 85.9 | 90.1 |
| Rsa1.0_00269.1.g10033.t1 | gb EOA24339.1  hypothetical protein CARUB_v10017576mg [Capsella rubella]                                                                                                                                                                                                                                                                                                                                                                                                                 | 167 | 341 | 1.00E-46  | 204.2 | 70.7 | 80.8 | hypothetical protein CARUB_v10017576mg                                                   | gbpln | Capsella rubella     | AT3G59990.4   Symbols: MAP2B   methionine aminopeptidase 2B   chr3:22155921-22158551 REVERSE LENGTH=439                                                                                                                                                                                                                                                                                                                                                                                                                                                                      | 167 | 439 | 1.00E-43  | 262.9 | 67.1 | 73.1 |
| Rsa1.0_00269.1.g10034.t1 | gb ACI16426.1  RUB1-conjugation enzyme [Brassica juncea]                                                                                                                                                                                                                                                                                                                                                                                                                                 | 185 | 185 | 1.00E-103 | 100.0 | 96.8 | 98.4 | RUB1-conjugation enzyme                                                                  | gbpln | Brassica juncea      | AT4G36800.2   Symbols: RCE1   RUB1 conjugating enzyme 1   chr4:17341237-17342148 REVERSE LENGTH=184                                                                                                                                                                                                                                                                                                                                                                                                                                                                          | 185 | 184 | 1.00E-104 | 99.5  | 96.8 | 98.4 |
| Rsa1.0_00269.1.g10035.t1 | sp Q94A43.1 BEH2_ARATH RecName: Full=BES1/BZR1 homolog protein 2 gi 15215731 gb AAK91411.1  AT4g36780/C7A10_580 [Arabidopsis thaliana] gi 20453269 gb AAM19873.1  AT4g36780/C7A10_580 [Arabidopsis thaliana]                                                                                                                                                                                                                                                                             | 312 | 318 | 1.00E-137 | 101.9 | 89.1 | 91.7 | RecName: Full=BES1/BZR1 homolog protein 2 gi 15215731 gb AAK91411.1  AT4g36780/C7A10_580 | gbpln | Arabidopsis thaliana | AT4G36780.1   Symbols: BEH2   BES1/BZR1 homolog 2   chr4:17332989-17334212 REVERSE LENGTH=265                                                                                                                                                                                                                                                                                                                                                                                                                                                                                | 312 | 265 | 3.00E-77  | 84.9  | 58.0 | 59.3 |
| Rsa1.0_00269.1.g10036.t1 | gb EOA16414.1  hypothetical protein CARUB_v10004567mg, partial [Capsella rubella]                                                                                                                                                                                                                                                                                                                                                                                                        | 251 | 531 | 1.00E-123 | 211.6 | 84.9 | 88.8 | hypothetical protein CARUB_v10004567mg, partial                                          | gbpln | Capsella rubella     | AT4G36380.1   Symbols: ROT3   Cytochrome P450 superfamily protein   chr4:17187973-17192202 REVERSE LENGTH=524                                                                                                                                                                                                                                                                                                                                                                                                                                                                | 251 | 524 | 1.00E-124 | 208.8 | 85.3 | 88.8 |
| Rsa1.0_00269.1.g10037.t1 | ref NP_568001.1  beta-galactosidase 3 [Arabidopsis thaliana] gi 75202767 sp Q9SCV9.1 BGAL3_ARATH RecName: Full=Beta-galactosidase 3; Short=Lactase 3; Flags: Precursor gi 6686878 emb CAB64739.1  putative beta-galactosidase [Arabidopsis thaliana] gi 15810493 gb AAL07134.1  putative beta-galactosidase [Arabidopsis thaliana] gi 20259271 gb AAM14371.1  putative beta-galactosidase [Arabidopsis thaliana] gi 332661246 gb AEE86646.1  beta-galactosidase 3 [Arabidopsis thaliana] | 856 | 856 | 0         | 100.0 | 93.9 | 97.5 | beta-galactosidase 3                                                                     | gbpln | Arabidopsis thaliana | AT4G36360.1   Symbols: BGAL3   beta-galactosidase 3   chr4:17176840-17181143 REVERSE LENGTH=856                                                                                                                                                                                                                                                                                                                                                                                                                                                                              | 856 | 856 | 0         | 100.0 | 93.9 | 97.5 |

|                           |                                                                                                                                                                                                                                                                                                                                                                                                                                                                                                                                                                                                        |     |      |           |       |      |      |                                          |       |                      |                                                                                                                                           |     |     |           |       |      |      |
|---------------------------|--------------------------------------------------------------------------------------------------------------------------------------------------------------------------------------------------------------------------------------------------------------------------------------------------------------------------------------------------------------------------------------------------------------------------------------------------------------------------------------------------------------------------------------------------------------------------------------------------------|-----|------|-----------|-------|------|------|------------------------------------------|-------|----------------------|-------------------------------------------------------------------------------------------------------------------------------------------|-----|-----|-----------|-------|------|------|
| Rsa1.0_00269.1.g10038.t1  | refNP_176033.1   purple acid phosphatase 6 [Arabidopsis thaliana] gi 75268138 sp Q9C510.1 PPA6_ARATH RecName: Full=Purple acid phosphatase 6; Flags: Precursor gi 12321764 gb AAG50924.1 AC069159_25 purple acid phosphatase, putative [Arabidopsis thaliana] gi 12323034 gb AA51511.1 AC058785_14 purple acid phosphatase, putative [Arabidopsis thaliana] gi 91805975 gb ABE65716.1  calcineurin-like phosphoesterase family protein [Arabidopsis thaliana] gi 11074186 gb ABH04466.1  At1g56360 [Arabidopsis thaliana] gi 332195262 gb AEE33383.1  purple acid phosphatase 6 [Arabidopsis thaliana] | 460 | 466  | 0         | 101.3 | 84.1 | 90.2 | purple acid phosphatase 6                | gbpln | Arabidopsis thaliana | AT1G56360.1   Symbols: PAP6, ATPAP6   purple acid phosphatase 6   chr1:21098603-21100842 REVERSE LENGTH=466                               | 460 | 466 | 0         | 101.3 | 84.1 | 90.2 |
| Rsa1.0_00269.1.g10039.t13 | refXP_002867022.1   predicted protein [Arabidopsis lyrata subsp. lyrata] gi 297312858 gb EFH43281.1  predicted protein [Arabidopsis lyrata subsp. lyrata]                                                                                                                                                                                                                                                                                                                                                                                                                                              | 180 | 631  | 6.00E-32  | 350.6 | 45.0 | 50.6 | predicted protein                        | gbpln | Arabidopsis lyrata   | AT4G36290.1   Symbols: CRT1   compromised recognition of TCV 1   chr4:17169669-17173187 REVERSE LENGTH=635                                | 180 | 635 | 7.00E-32  | 352.8 | 39.4 | 48.9 |
| Rsa1.0_00269.1.g10040.t1  | gb ADA60974.1  stylish 2b [Brassica rapa subsp. pekinensis]                                                                                                                                                                                                                                                                                                                                                                                                                                                                                                                                            | 310 | 321  | 1.00E-132 | 103.5 | 93.5 | 96.5 | stylish 2b                               | gbpln | Brassica rapa        | AT4G36260.1   Symbols: STY2, SRS2   Lateral root primordium (LRP) protein-related   chr4:17155705-17157006 REVERSE LENGTH=322             | 310 | 322 | 1.00E-115 | 103.9 | 84.5 | 89.4 |
| Rsa1.0_00269.1.g10041.t1  | refXP_002867032.1   hypothetical protein ARALYDRAFT_491017 [Arabidopsis lyrata subsp. lyrata] gi 297312868 gb EFH43291.1  hypothetical protein ARALYDRAFT_491017 [Arabidopsis lyrata subsp. lyrata]                                                                                                                                                                                                                                                                                                                                                                                                    | 370 | 376  | 0         | 101.6 | 85.4 | 90.8 | hypothetical protein ARALYDRAFT_491017   | gbpln | Arabidopsis lyrata   | AT4G36160.1   Symbols: ANAC076, VND2, NAC076   NAC domain containing protein 76   chr4:17110877-17112891 REVERSE LENGTH=377               | 370 | 377 | 0         | 101.9 | 85.4 | 90.3 |
| Rsa1.0_00269.1.g10042.t1  | refXP_002869043.1   60S ribosomal protein L8 [Arabidopsis lyrata subsp. lyrata] gi 297314879 gb EFH45302.1  60S ribosomal protein L8 [Arabidopsis lyrata subsp. lyrata]                                                                                                                                                                                                                                                                                                                                                                                                                                | 258 | 258  | 1.00E-144 | 100.0 | 97.3 | 99.2 | 60S ribosomal protein L8                 | gbpln | Arabidopsis lyrata   | AT4G36130.1   Symbols:   Ribosomal protein L2 family   chr4:17097613-17098656 FORWARD LENGTH=258                                          | 258 | 258 | 2.33E-156 | 100.0 | 96.5 | 99.2 |
| Rsa1.0_00269.1.g10043.t1  | refXP_002869044.1   hypothetical protein ARALYDRAFT_491020 [Arabidopsis lyrata subsp. lyrata] gi 297314880 gb EFH45303.1  hypothetical protein ARALYDRAFT_491020 [Arabidopsis lyrata subsp. lyrata]                                                                                                                                                                                                                                                                                                                                                                                                    | 108 | 104  | 3.00E-47  | 96.3  | 82.4 | 89.8 | hypothetical protein ARALYDRAFT_491020   | gbpln | Arabidopsis lyrata   | AT4G36110.1   Symbols:   SAUR-like auxin-responsive protein family   chr4:17090031-17090345 FORWARD LENGTH=104                            | 108 | 104 | 4.00E-49  | 96.3  | 82.4 | 88.9 |
| Rsa1.0_00269.1.g10044.t1  | gb AAL91266.1  AT4g36060/T19K4_190 [Arabidopsis thaliana] gi 23308269 gb AAN18104.1  AT4g36060/T19K4_190 [Arabidopsis thaliana]                                                                                                                                                                                                                                                                                                                                                                                                                                                                        | 132 | 268  | 3.00E-17  | 203.0 | 34.8 | 43.9 | AT4g36060/T19K4_190                      | gbpln | Arabidopsis thaliana | AT4G36060.2   Symbols: bHLH11   basic helix-loop-helix (bHLH) DNA-binding superfamily protein   chr4:17055521-17056567 FORWARD LENGTH=268 | 132 | 268 | 6.00E-20  | 203.0 | 34.8 | 43.9 |
| Rsa1.0_00269.1.g10045.t1  | refXP_002869044.1   hypothetical protein ARALYDRAFT_491020 [Arabidopsis lyrata subsp. lyrata] gi 297314880 gb EFH45303.1  hypothetical protein ARALYDRAFT_491020 [Arabidopsis lyrata subsp. lyrata]                                                                                                                                                                                                                                                                                                                                                                                                    | 103 | 104  | 1.00E-47  | 101.0 | 88.3 | 93.2 | hypothetical protein ARALYDRAFT_491020   | gbpln | Arabidopsis lyrata   | AT4G36110.1   Symbols:   SAUR-like auxin-responsive protein family   chr4:17090031-17090345 FORWARD LENGTH=104                            | 103 | 104 | 1.00E-49  | 101.0 | 88.3 | 92.2 |
| Rsa1.0_00269.1.g10046.t1  | emb CAB39638.1  RNA-directed DNA polymerase-like protein [Arabidopsis thaliana] gi 7267666 emb CAB78094.1  RNA-directed DNA polymerase-like protein [Arabidopsis thaliana]                                                                                                                                                                                                                                                                                                                                                                                                                             | 312 | 1274 | 1.00E-53  | 408.3 | 38.5 | 54.2 | RNA-directed DNA polymerase-like protein | gbpln | Arabidopsis thaliana | AT1G10000.1   Symbols:   Ribonuclease H-like superfamily protein   chr1:3263877-3264788 REVERSE LENGTH=303                                | 312 | 303 | 2.00E-40  | 97.1  | 35.3 | 49.0 |
| Rsa1.0_00269.1.g10047.t1  | refNP_195331.2   calcium-dependent protein kinase 18 [Arabidopsis thaliana] gi 122244077 sp Q1PE17.1 CDPK1_ARATH RecName: Full=Calcium-dependent protein kinase 18 gi 91806778 gb ABE66116.1  calcium-dependent protein kinase family protein/CDPK family protein [Arabidopsis thaliana] gi 332661210 gb AEE86610.1  calcium-dependent protein kinase 18 [Arabidopsis thaliana]                                                                                                                                                                                                                        | 541 | 534  | 0         | 98.7  | 87.8 | 91.9 | calcium-dependent protein kinase 18      | gbpln | Arabidopsis thaliana | AT4G36070.1   Symbols: CPK18   calcium-dependent protein kinase 18   chr4:17056907-17059595 REVERSE LENGTH=534                            | 541 | 534 | 0         | 98.7  | 87.8 | 91.9 |

|                          |                                                                                                                                                                                                                                                                                                                                                                                                                                                                                                                                                                                                                                                                                                                                                                                                                                                                                                                                                                                                                                                                                                                                                                                                                                                                                                                                                                                                                                                                                                                                                                                                   |     |     |           |       |      |      |                                                 |       |                      |                                                                                                                                                                                                                                                                                                                                                                         |     |     |           |       |      |      |
|--------------------------|---------------------------------------------------------------------------------------------------------------------------------------------------------------------------------------------------------------------------------------------------------------------------------------------------------------------------------------------------------------------------------------------------------------------------------------------------------------------------------------------------------------------------------------------------------------------------------------------------------------------------------------------------------------------------------------------------------------------------------------------------------------------------------------------------------------------------------------------------------------------------------------------------------------------------------------------------------------------------------------------------------------------------------------------------------------------------------------------------------------------------------------------------------------------------------------------------------------------------------------------------------------------------------------------------------------------------------------------------------------------------------------------------------------------------------------------------------------------------------------------------------------------------------------------------------------------------------------------------|-----|-----|-----------|-------|------|------|-------------------------------------------------|-------|----------------------|-------------------------------------------------------------------------------------------------------------------------------------------------------------------------------------------------------------------------------------------------------------------------------------------------------------------------------------------------------------------------|-----|-----|-----------|-------|------|------|
| Rsa1.0_00269.1.g10048.t1 | refXP_002869046.1   basic helix-loop-helix family protein [Arabidopsis lyrata subsp. lyrata]<br>gi 297314882 gb EFH45305.1   basic helix-loop-helix family protein [Arabidopsis lyrata subsp. lyrata]                                                                                                                                                                                                                                                                                                                                                                                                                                                                                                                                                                                                                                                                                                                                                                                                                                                                                                                                                                                                                                                                                                                                                                                                                                                                                                                                                                                             | 261 | 266 | 4.00E-74  | 101.9 | 64.0 | 73.2 | basic helix-loop-helix family protein           | gbpln | Arabidopsis lyrata   | AT4G36060.2   Symbols: bHLH11   basic helix-loop-helix (bHLH) DNA-binding superfamily protein   chr4:17055521-17056567 FORWARD LENGTH=268                                                                                                                                                                                                                               | 261 | 268 | 8.00E-75  | 102.7 | 59.0 | 69.3 |
| Rsa1.0_00269.1.g10049.t1 | #                                                                                                                                                                                                                                                                                                                                                                                                                                                                                                                                                                                                                                                                                                                                                                                                                                                                                                                                                                                                                                                                                                                                                                                                                                                                                                                                                                                                                                                                                                                                                                                                 | #   | #   | #         | #     | #    | -    |                                                 | ----  | ----                 | #                                                                                                                                                                                                                                                                                                                                                                       | #   | #   | #         | #     | #    |      |
| Rsa1.0_00269.1.g10050.t1 | refXP_002867040.1   armadillo/beta-catenin repeat family protein [Arabidopsis lyrata subsp. lyrata]<br>gi 297312876 gb EFH43299.1   armadillo/beta-catenin repeat family protein [Arabidopsis lyrata subsp. lyrata]                                                                                                                                                                                                                                                                                                                                                                                                                                                                                                                                                                                                                                                                                                                                                                                                                                                                                                                                                                                                                                                                                                                                                                                                                                                                                                                                                                               | 652 | 669 | 0         | 102.6 | 89.3 | 94.9 | armadillo/beta-catenin repeat family protein    | gbpln | Arabidopsis lyrata   | AT4G36030.1   Symbols: ARO3   armadillo repeat only 3   chr4:17045084-17047096 REVERSE LENGTH=670                                                                                                                                                                                                                                                                       | 652 | 670 | 0         | 102.8 | 89.3 | 94.8 |
| Rsa1.0_00269.1.g10051.t1 | refNP_195326.1   cellular nucleic acid-binding protein [Arabidopsis thaliana]<br>gi 75318587 sp O65639.1 CSP1_ARATH<br>RecName: Full=Gold shock protein 1; Short=ACSP1; AltName: Full=Cold shock domain-containing protein 1<br>gi 3036806 emb CAA18496.1   glycine-rich protein [Arabidopsis thaliana]<br>gi 7270554 emb CAB8151.1   glycine-rich protein [Arabidopsis thaliana]<br>gi 11074194 dbj BAE989.1   glycine-rich protein [Arabidopsis thaliana]<br>gi 332661203 gb AEE86603.1   cold shock protein 1 [Arabidopsis thaliana]<br>refNP_567995.1<br>senescence/dehydration-associated protein [Arabidopsis thaliana]<br>gi 332661198 gb AEE86598.1   senescence/dehydration-associated protein [Arabidopsis thaliana]<br>refNP_179371.1   Rac-like GTP-binding protein ARAC1 [Arabidopsis thaliana]<br>gi 145328750 refNP_001077910.1   Rac-like GTP-binding protein ARAC1 [Arabidopsis thaliana]<br>gi 2500190 sp Q38902.1 ARAC1_ARATH<br>RecName: Full=Rac-like GTP-binding protein ARAC1; AltName: Full=GTPase protein ROP3; Flags: Precursor<br>gi 7211191 gb AAF40237.1 AF115466.1 Arac1 [Arabidopsis thaliana]<br>gi 1292908 gb AAC49851.1   GTP binding protein [Arabidopsis thaliana]<br>gi 4097563 gb AAD00113.1   ATGP2 [Arabidopsis thaliana]<br>gi 20260294 gb AAM13045.1   unknown protein [Arabidopsis thaliana]<br>gi 23198370 gb AAN15712.1   unknown protein [Arabidopsis thaliana]<br>gi 330251595 gb AEC06689.1   Rac-like GTP-binding protein ARAC1 [Arabidopsis thaliana]<br>gi 330251596 gb AEC06690.1   Rac-like GTP-binding protein ARAC1 [Arabidopsis thaliana] | 265 | 299 | 3.00E-84  | 112.8 | 70.6 | 80.0 | cellular nucleic acid-binding protein           | gbpln | Arabidopsis thaliana | AT4G36020.1   Symbols: CSDP1   cold shock domain protein 1   chr4:17043443-17044342 REVERSE LENGTH=299                                                                                                                                                                                                                                                                  | 265 | 299 | 1.00E-86  | 112.8 | 70.6 | 80.0 |
| Rsa1.0_00269.1.g10052.t1 | refNP_567995.1<br>senescence/dehydration-associated protein [Arabidopsis thaliana]<br>gi 332661198 gb AEE86598.1   senescence/dehydration-associated protein [Arabidopsis thaliana]<br>refNP_179371.1   Rac-like GTP-binding protein ARAC1 [Arabidopsis thaliana]<br>gi 145328750 refNP_001077910.1   Rac-like GTP-binding protein ARAC1 [Arabidopsis thaliana]<br>gi 2500190 sp Q38902.1 ARAC1_ARATH<br>RecName: Full=Rac-like GTP-binding protein ARAC1; AltName: Full=GTPase protein ROP3; Flags: Precursor<br>gi 7211191 gb AAF40237.1 AF115466.1 Arac1 [Arabidopsis thaliana]<br>gi 1292908 gb AAC49851.1   GTP binding protein [Arabidopsis thaliana]<br>gi 4097563 gb AAD00113.1   ATGP2 [Arabidopsis thaliana]<br>gi 20260294 gb AAM13045.1   unknown protein [Arabidopsis thaliana]<br>gi 23198370 gb AAN15712.1   unknown protein [Arabidopsis thaliana]<br>gi 330251595 gb AEC06689.1   Rac-like GTP-binding protein ARAC1 [Arabidopsis thaliana]<br>gi 330251596 gb AEC06690.1   Rac-like GTP-binding protein ARAC1 [Arabidopsis thaliana]                                                                                                                                                                                                                                                                                                                                                                                                                                                                                                                                            | 434 | 448 | 0         | 103.2 | 83.2 | 91.9 | senescence/dehydration-associated protein       | gbpln | Arabidopsis thaliana | AT4G35985.1   Symbols:   Senescence/dehydration-associated protein-related   chr4:17032268-17033862 REVERSE LENGTH=448                                                                                                                                                                                                                                                  | 434 | 448 | 0         | 103.2 | 83.2 | 91.9 |
| Rsa1.0_00269.1.g10053.t1 | refNP_179371.1   Rac-like GTP-binding protein ARAC1 [Arabidopsis thaliana]<br>gi 145328750 refNP_001077910.1   Rac-like GTP-binding protein ARAC1 [Arabidopsis thaliana]<br>gi 2500190 sp Q38902.1 ARAC1_ARATH<br>RecName: Full=Rac-like GTP-binding protein ARAC1; AltName: Full=GTPase protein ROP3; Flags: Precursor<br>gi 7211191 gb AAF40237.1 AF115466.1 Arac1 [Arabidopsis thaliana]<br>gi 1292908 gb AAC49851.1   GTP binding protein [Arabidopsis thaliana]<br>gi 4097563 gb AAD00113.1   ATGP2 [Arabidopsis thaliana]<br>gi 20260294 gb AAM13045.1   unknown protein [Arabidopsis thaliana]<br>gi 23198370 gb AAN15712.1   unknown protein [Arabidopsis thaliana]<br>gi 330251595 gb AEC06689.1   Rac-like GTP-binding protein ARAC1 [Arabidopsis thaliana]<br>gi 330251596 gb AEC06690.1   Rac-like GTP-binding protein ARAC1 [Arabidopsis thaliana]                                                                                                                                                                                                                                                                                                                                                                                                                                                                                                                                                                                                                                                                                                                                   | 197 | 197 | 1.00E-110 | 100.0 | 98.5 | 99.5 | Rac-like GTP-binding protein ARAC1              | gbpln | Arabidopsis thaliana | AT2G17800.2   Symbols: ARAC1, ATGP2, ATRAC1, ROP3, ATROP3   Arabidopsis Rac-like 1   chr2:7740313-7741942 FORWARD LENGTH=197                                                                                                                                                                                                                                            | 197 | 197 | 1.00E-112 | 100.0 | 98.5 | 99.5 |
| Rsa1.0_00269.1.g10054.t1 | refXP_002869049.1   hypothetical protein ARALYDRAFT_491042 [Arabidopsis lyrata subsp. lyrata]<br>gi 297314885 gb EFH45308.1   hypothetical protein ARALYDRAFT_491042 [Arabidopsis lyrata subsp. lyrata]                                                                                                                                                                                                                                                                                                                                                                                                                                                                                                                                                                                                                                                                                                                                                                                                                                                                                                                                                                                                                                                                                                                                                                                                                                                                                                                                                                                           | 361 | 352 | 3.00E-84  | 97.5  | 66.5 | 74.2 | hypothetical protein ARALYDRAFT_491042          | gbpln | Arabidopsis lyrata   | AT4G35940.2   Symbols:   unknown protein; FUNCTIONS IN: molecular function unknown; INVOLVED IN: biological process unknown; LOCATED IN: cellular component unknown; EXPRESSED IN: 24 plant structures; EXPRESSED DURING: 15 growth stages; BEST Arabidopsis thaliana protein match is: unknown protein (TAIR:AT2G17787.1).   chr4:17021672-17023593 FORWARD LENGTH=395 | 361 | 395 | 2.00E-69  | 109.4 | 56.0 | 68.7 |
| Rsa1.0_00269.1.g10055.t1 | gb EOA17076.1  hypothetical protein CARUB_v10005325mg [Capsella rubella]                                                                                                                                                                                                                                                                                                                                                                                                                                                                                                                                                                                                                                                                                                                                                                                                                                                                                                                                                                                                                                                                                                                                                                                                                                                                                                                                                                                                                                                                                                                          | 297 | 306 | 1.00E-135 | 103.0 | 82.8 | 89.6 | hypothetical protein CARUB_v10005325mg          | gbpln | Capsella rubella     | AT4G35930.1   Symbols:   F-box family protein   chr4:17019482-17020744 FORWARD LENGTH=321                                                                                                                                                                                                                                                                               | 297 | 321 | 1.00E-131 | 108.1 | 83.5 | 91.2 |
| Rsa1.0_00269.1.g10056.t1 | refXP_004308303.1   PREDICTED: uncharacterized protein LOC101292460 [Fragaria vesca subsp. vesca]                                                                                                                                                                                                                                                                                                                                                                                                                                                                                                                                                                                                                                                                                                                                                                                                                                                                                                                                                                                                                                                                                                                                                                                                                                                                                                                                                                                                                                                                                                 | 713 | 689 | 0         | 96.6  | 70.1 | 80.9 | PREDICTED: uncharacterized protein LOC101292460 | gbpln | Fragaria vesca       | AT3G17450.1   Symbols:   hAT dimerisation domain-containing protein   chr3:5972793-5975684 REVERSE LENGTH=877                                                                                                                                                                                                                                                           | 713 | 877 | 2.00E-43  | 123.0 | 17.3 | 30.4 |

|                          |                                                                                                                                                                                                                                                                                                                                                                                                                                                                                                                                                                                                                                                                                                                                                                                                                                                                              |     |     |           |       |      |      |                                                              |       |                      |                                                                                                                                                                                                                                                                                                                                                                         |     |     |           |       |      |      |
|--------------------------|------------------------------------------------------------------------------------------------------------------------------------------------------------------------------------------------------------------------------------------------------------------------------------------------------------------------------------------------------------------------------------------------------------------------------------------------------------------------------------------------------------------------------------------------------------------------------------------------------------------------------------------------------------------------------------------------------------------------------------------------------------------------------------------------------------------------------------------------------------------------------|-----|-----|-----------|-------|------|------|--------------------------------------------------------------|-------|----------------------|-------------------------------------------------------------------------------------------------------------------------------------------------------------------------------------------------------------------------------------------------------------------------------------------------------------------------------------------------------------------------|-----|-----|-----------|-------|------|------|
| Rsa1.0_00269.1.g10057.t1 | ref[NP_195317.2] PLAC8 domain-containing protein [Arabidopsis thaliana] gi 30690520[ref][NP_849503.1] PLAC8 domain-containing protein [Arabidopsis thaliana] gi 42570170[ref][NP_849504.2] PLAC8 domain-containing protein [Arabidopsis thaliana] gi 75154155[sp][Q8L7E9.1][MCA1_ARAT H RecName: Full=Protein MID1-COMPLEMENTING ACTIVITY 1 gi 22530910[gb][AAM96959.1] putative protein [Arabidopsis thaliana] gi 28059788[gb][AAO30093.1] putative protein [Arabidopsis thaliana] gi 124484595[db][BAF46389.1] Mca1 [Arabidopsis thaliana] gi 222423156[db][BAH19557.1] AT4G35920 [Arabidopsis thaliana] gi 332661189[gb][AEE86589.1] protein MID1-complementing activity 1 [Arabidopsis thaliana] gi 332661190[gb][AEE86590.1] PLAC8 domain-containing protein [Arabidopsis thaliana] gi 332661191[gb][AEE86591.1] PLAC8 domain-containing protein [Arabidopsis thaliana] | 407 | 421 | 0         | 103.4 | 88.2 | 93.9 | PLAC8 domain-containing protein                              | gbpln | Arabidopsis thaliana | AT4G35920.2   Symbols: MCA1   PLAC8 family protein   chr4:17012106-17014192 REVERSE LENGTH=421                                                                                                                                                                                                                                                                          | 407 | 421 | 0         | 103.4 | 88.2 | 93.9 |
| Rsa1.0_00269.1.g10058.t2 | ref[XP_002867048.1] hypothetical protein ARALYDRAFT_491048 [Arabidopsis lyrata subsp. lyrata] gi 297312884[gb][EFH45307.1] hypothetical protein ARALYDRAFT_491048 [Arabidopsis lyrata subsp. lyrata]                                                                                                                                                                                                                                                                                                                                                                                                                                                                                                                                                                                                                                                                         | 99  | 77  | 1.00E-28  | 77.8  | 70.7 | 74.7 | hypothetical protein ARALYDRAFT_491048                       | gbpln | Arabidopsis lyrata   | AT4G35905.1   Symbols:   unknown protein; CONTAINS InterPro DOMAIN/s: Protein of unknown function DUF343 (InterPro:IPR005651); Has 30201 Blast hits to 17322 proteins in 780 species: Archae - 12; Bacteria - 1396; Metazoa - 17338; Fungi - 3422; Plants - 5037; Viruses - 0; Other Eukaryotes - 2996 (source: NCBI BLink).   chr4:17007284-17008067 REVERSE LENGTH=77 | 99  | 77  | 9.00E-31  | 77.8  | 69.7 | 73.7 |
| Rsa1.0_00269.1.g10059.t1 | ref[XP_002869051.1] predicted protein [Arabidopsis lyrata subsp. lyrata] gi 297314887[gb][EFH45310.1] predicted protein [Arabidopsis lyrata subsp. lyrata]                                                                                                                                                                                                                                                                                                                                                                                                                                                                                                                                                                                                                                                                                                                   | 259 | 282 | 5.00E-90  | 108.9 | 77.2 | 84.6 | predicted protein                                            | gbpln | Arabidopsis lyrata   | AT4G35900.1   Symbols: FD, FD-1, atbzip14   Basic-leucine zipper (bZIP) transcription factor family protein   chr4:17004746-17005952 FORWARD LENGTH=285                                                                                                                                                                                                                 | 259 | 285 | 2.00E-87  | 110.0 | 75.3 | 83.4 |
| Rsa1.0_00269.1.g10060.t1 | #                                                                                                                                                                                                                                                                                                                                                                                                                                                                                                                                                                                                                                                                                                                                                                                                                                                                            | #   | #   | #         | #     | #    | -    | ----                                                         | ----  | #                    | #                                                                                                                                                                                                                                                                                                                                                                       | #   | #   | #         | #     | #    |      |
| Rsa1.0_00269.1.g10061.t1 | ref[NP_567991.1] winged-helix DNA-binding transcription factor family protein [Arabidopsis thaliana] gi 13877889[gb][AAK44022.1] AF370207_1 unknown protein [Arabidopsis thaliana] gi 22136918[gb][AAM91803.1] unknown protein [Arabidopsis thaliana] gi 332661185[gb][AEE86585.1] winged-helix DNA-binding transcription factor family protein [Arabidopsis thaliana]                                                                                                                                                                                                                                                                                                                                                                                                                                                                                                       | 483 | 523 | 1.00E-142 | 108.3 | 68.1 | 77.6 | winged-helix DNA-binding transcription factor family protein | gbpln | Arabidopsis thaliana | AT4G35890.1   Symbols:   winged-helix DNA-binding transcription factor family protein   chr4:16997433-17000410 FORWARD LENGTH=523                                                                                                                                                                                                                                       | 483 | 523 | 1.00E-145 | 108.3 | 68.1 | 77.6 |
| Rsa1.0_00269.1.g10062.t1 | gb EOA17424.1] hypothetical protein CARUB_v10005728mg [Capsella rubella]                                                                                                                                                                                                                                                                                                                                                                                                                                                                                                                                                                                                                                                                                                                                                                                                     | 211 | 211 | 1.00E-120 | 100.0 | 99.1 | 99.5 | hypothetical protein CARUB_v10005728mg                       | gbpln | Capsella rubella     | AT4G35860.1   Symbols: ATRABB1B, ATGB2, ATRAB2C, GB2   GTP-binding 2   chr4:16987118-16988839 REVERSE LENGTH=211                                                                                                                                                                                                                                                        | 211 | 211 | 1.00E-121 | 100.0 | 97.2 | 99.1 |
| Rsa1.0_00269.1.g10063.t1 | ref[XP_002869057.1] zinc finger family protein [Arabidopsis lyrata subsp. lyrata] gi 297314893[gb][EFH45316.1] zinc finger family protein [Arabidopsis lyrata subsp. lyrata]                                                                                                                                                                                                                                                                                                                                                                                                                                                                                                                                                                                                                                                                                                 | 236 | 236 | 1.00E-118 | 100.0 | 89.8 | 93.6 | zinc finger family protein                                   | gbpln | Arabidopsis lyrata   | AT4G35840.1   Symbols:   RING/U-box superfamily protein   chr4:16981083-16982266 FORWARD LENGTH=236                                                                                                                                                                                                                                                                     | 236 | 236 | 1.00E-120 | 100.0 | 88.6 | 93.6 |
| Rsa1.0_00269.1.g10064.t1 | #                                                                                                                                                                                                                                                                                                                                                                                                                                                                                                                                                                                                                                                                                                                                                                                                                                                                            | #   | #   | #         | #     | #    | -    | ----                                                         | ----  | #                    | #                                                                                                                                                                                                                                                                                                                                                                       | #   | #   | #         | #     | #    |      |
| Rsa1.0_00269.1.g10065.t1 | dbj BAJ34379.1] unnamed protein product [Thellungiella halophila]                                                                                                                                                                                                                                                                                                                                                                                                                                                                                                                                                                                                                                                                                                                                                                                                            | 862 | 860 | 0         | 99.8  | 88.4 | 93.6 | unnamed protein product                                      | ----  | ----                 | AT4G35790.2   Symbols: ATPLDELTA, PLDELTA   phospholipase D delta   chr4:16955774-16959875 REVERSE LENGTH=857                                                                                                                                                                                                                                                           | 862 | 857 | 0         | 99.4  | 84.8 | 92.1 |
| Rsa1.0_00269.1.g10066.t1 | dbj BAJ34379.1] unnamed protein product [Thellungiella halophila]                                                                                                                                                                                                                                                                                                                                                                                                                                                                                                                                                                                                                                                                                                                                                                                                            | 124 | 860 | 3.00E-28  | 693.5 | 48.4 | 53.2 | unnamed protein product                                      | ----  | ----                 | AT4G35790.2   Symbols: ATPLDELTA, PLDELTA   phospholipase D delta   chr4:16955774-16959875 REVERSE LENGTH=857                                                                                                                                                                                                                                                           | 124 | 857 | 5.00E-29  | 691.1 | 45.2 | 50.0 |

|                          |                                                                                                                                                                                                                                                                                                                                                                                                                                                                                                                                                                                                                                                                                                                                                                                                                                                                        |     |     |           |       |       |       |                                                                           |       |                      |                                                                                                                                          |     |     |           |       |      |       |
|--------------------------|------------------------------------------------------------------------------------------------------------------------------------------------------------------------------------------------------------------------------------------------------------------------------------------------------------------------------------------------------------------------------------------------------------------------------------------------------------------------------------------------------------------------------------------------------------------------------------------------------------------------------------------------------------------------------------------------------------------------------------------------------------------------------------------------------------------------------------------------------------------------|-----|-----|-----------|-------|-------|-------|---------------------------------------------------------------------------|-------|----------------------|------------------------------------------------------------------------------------------------------------------------------------------|-----|-----|-----------|-------|------|-------|
| Rsa1.0_00270.1.g10067.t1 | gb AAF65512.1  ADP-ribosylation factor [Capsicum annuum] gi 37791223 gb AAR03592.1  ARF-like small GTPase [Brassica juncea] gi 482560625 gb EOA24816.1  hypothetical protein CARUB_v10018102mg [Capsella rubella] gi 482564310 gb EOA28500.1  hypothetical protein CARUB_v10024713mg [Capsella rubella]                                                                                                                                                                                                                                                                                                                                                                                                                                                                                                                                                                | 181 | 181 | 1.00E-102 | 100.0 | 100.0 | 100.0 | ADP-ribosylation factor                                                   | gbpln | Brassica juncea      | AT3G62290.3   Symbols: ARFA1E   ADP-ribosylation factor A1E   chr3:23052287-23053545 FORWARD LENGTH=181                                  | 181 | 181 | 1.00E-104 | 100.0 | 99.4 | 100.0 |
| Rsa1.0_00270.1.g10068.t1 | gb EOA23568.1  hypothetical protein CARUB_v10016761mg [Capsella rubella]                                                                                                                                                                                                                                                                                                                                                                                                                                                                                                                                                                                                                                                                                                                                                                                               | 731 | 703 | 0         | 96.2  | 90.4  | 92.1  | hypothetical protein CARUB_v10016761mg                                    | gbpln | Capsella rubella     | AT3G62270.1   Symbols:   HCO3-transporter family   chr3:23042528-23045633 REVERSE LENGTH=703                                             | 731 | 703 | 0         | 96.2  | 89.9 | 92.3  |
| Rsa1.0_00270.1.g10069.t4 | ref XP_002878445.1  hypothetical protein ARALYDRAFT_486731 [Arabidopsis lyrata subsp. lyrata] gi 297324283 gb EFH54704.1  hypothetical protein ARALYDRAFT_486731 [Arabidopsis lyrata subsp. lyrata]                                                                                                                                                                                                                                                                                                                                                                                                                                                                                                                                                                                                                                                                    | 309 | 384 | 4.00E-65  | 124.3 | 42.4  | 47.9  | hypothetical protein ARALYDRAFT_486731                                    | gbpln | Arabidopsis lyrata   | AT3G62260.2   Symbols:   Protein phosphatase 2C family protein   chr3:23038516-23040391 REVERSE LENGTH=384                               | 309 | 384 | 6.00E-67  | 124.3 | 42.4 | 47.2  |
| Rsa1.0_00270.1.g10070.t2 | ref XP_004151860.1  PREDICTED: SUMO-conjugating enzyme SCE1-like [Cucumis sativus]                                                                                                                                                                                                                                                                                                                                                                                                                                                                                                                                                                                                                                                                                                                                                                                     | 174 | 160 | 6.00E-77  | 92.0  | 79.9  | 84.5  | PREDICTED: SUMO-conjugating enzyme SCE1-like                              | gbpln | Cucumis sativus      | AT3G57870.1   Symbols: AHUS5, EMB1637, SCE1, SCE1A, ATSC1   sumo conjugation enzyme 1   chr3:21428831-21430110 REVERSE LENGTH=160        | 174 | 160 | 2.00E-75  | 92.0  | 75.9 | 82.2  |
| Rsa1.0_00270.1.g10071.t1 | ref NP_191784.1  ubiquitin-40S ribosomal protein S27a-3 [Arabidopsis thaliana] gi 302393706 sp P59233.2 R27AC_ARAT H RecName: Full=Ubiquitin-40S ribosomal protein S27a-3; Contains: RecName: Full=Ubiquitin; Contains: RecName: Full=40S ribosomal protein S27a-3; Flags: Precursor gi 166934 gb AA32906.1  ubiquitin extension protein (UBQ5) [Arabidopsis thaliana] gi 6899935 emb CAB71885.1  ubiquitin extension protein (UBQ5) [Arabidopsis thaliana] gi 15529190 gb AAK97689.1  AT3g62250/T17J13.210 [Arabidopsis thaliana] gi 21537196 gb AAM61537.1  ubiquitin extension protein UBQ5 [Arabidopsis thaliana] gi 22655050 gb AAM98116.1  At3g62250/T17J13.210 [Arabidopsis thaliana] gi 110742096 dbj BAE98979.1  ubiquitin extension protein [Arabidopsis thaliana] gi 332646806 gb AEE80327.1  ubiquitin-40S ribosomal protein S27a-3 [Arabidopsis thaliana] | 157 | 157 | 1.00E-85  | 100.0 | 98.7  | 99.4  | ubiquitin-40S ribosomal protein S27a-3                                    | gbpln | Arabidopsis thaliana | AT3G62250.1   Symbols: UBQ5   ubiquitin 5   chr3:23037138-23037611 FORWARD LENGTH=157                                                    | 157 | 157 | 3.00E-88  | 100.0 | 98.7 | 99.4  |
| Rsa1.0_00270.1.g10072.t1 | gb EOA28377.1  hypothetical protein CARUB_v10024582mg [Capsella rubella]                                                                                                                                                                                                                                                                                                                                                                                                                                                                                                                                                                                                                                                                                                                                                                                               | 462 | 464 | 1.00E-141 | 100.4 | 56.1  | 71.6  | hypothetical protein CARUB_v10024582mg                                    | gbpln | Capsella rubella     | AT3G62230.1   Symbols:   F-box family protein   chr3:23031589-23032974 FORWARD LENGTH=461                                                | 462 | 461 | 1.00E-114 | 99.8  | 45.9 | 64.1  |
| Rsa1.0_00270.1.g10073.t1 | gb EOA24104.1  hypothetical protein CARUB_v10017335mg, partial [Capsella rubella]                                                                                                                                                                                                                                                                                                                                                                                                                                                                                                                                                                                                                                                                                                                                                                                      | 349 | 417 | 1.00E-162 | 119.5 | 82.5  | 89.7  | hypothetical protein CARUB_v10017335mg, partial                           | gbpln | Capsella rubella     | AT3G62220.1   Symbols:   Protein kinase superfamily protein   chr3:23029276-23030864 REVERSE LENGTH=361                                  | 349 | 361 | 1.00E-162 | 103.4 | 81.7 | 88.8  |
| Rsa1.0_00270.1.g10074.t1 | ref NP_191777.1  plant invertase/pectin methylesterase inhibitor domain-containing protein [Arabidopsis thaliana] gi 6899928 emb CAB71878.1  putative protein [Arabidopsis thaliana] gi 124301092 gb ABN04798.1  At3g62180 [Arabidopsis thaliana] gi 332646798 gb AEE80319.1  plant invertase/pectin methylesterase inhibitor domain-containing protein [Arabidopsis thaliana]                                                                                                                                                                                                                                                                                                                                                                                                                                                                                         | 215 | 215 | 5.00E-94  | 100.0 | 80.0  | 87.9  | plant invertase/pectin methylesterase inhibitor domain-containing protein | gbpln | Arabidopsis thaliana | AT3G62180.1   Symbols:   Plant invertase/pectin methylesterase inhibitor superfamily protein   chr3:23019832-23020479 REVERSE LENGTH=215 | 215 | 215 | 2.00E-96  | 100.0 | 80.0 | 87.9  |

|                          |                                                                                                                                                                                                                                                                                                                                                                                |     |      |           |       |      |      |                                                                                                                                                                                                                                                                                                     |       |                      |                                                                                                                                    |     |     |           |       |      |      |
|--------------------------|--------------------------------------------------------------------------------------------------------------------------------------------------------------------------------------------------------------------------------------------------------------------------------------------------------------------------------------------------------------------------------|-----|------|-----------|-------|------|------|-----------------------------------------------------------------------------------------------------------------------------------------------------------------------------------------------------------------------------------------------------------------------------------------------------|-------|----------------------|------------------------------------------------------------------------------------------------------------------------------------|-----|-----|-----------|-------|------|------|
| Rsa1.0_00270.1.g10075.t1 | sp P41510.1 PME_BRANA<br>RecName: Full=Probable pectinesterase/pectinesterase inhibitor; Includes: RecName: Full=Pectinesterase inhibitor; AltName: Full=Pectin methylsterase inhibitor; Includes: RecName: Full=Pectinesterase; Short=PE; AltName: Full=Pectin methylsterase; Flags: Precursor g 17784 emb CAA39658.1  Bp19 [Brassica napus]                                  | 575 | 584  | 0         | 101.6 | 83.1 | 92.2 | RecName: Full=Probable pectinesterase/pectinesterase inhibitor; Includes: RecName: Full=Pectinesterase inhibitor; AltName: Full=Pectin methylsterase inhibitor; Includes: RecName: Full=Pectinesterase; Short=PE; AltName: Full=Pectin methylsterase; Flags: Precursor g 17784 emb CAA39658.1  Bp19 | gbpln | Brassica napus       | AT3G62170.1   Symbols: VGDH2   VANGUARD 1 homolog 2   chr3:23016495-23018337 REVERSE LENGTH=588                                    | 575 | 588 | 0         | 102.3 | 83.7 | 91.7 |
| Rsa1.0_00270.1.g10076.t1 | gb EOA23181.1  hypothetical protein CARUB_v10018117mg [Capsella rubella]                                                                                                                                                                                                                                                                                                       | 172 | 174  | 5.00E-78  | 101.2 | 92.4 | 95.9 | hypothetical protein CARUB_v10018117mg                                                                                                                                                                                                                                                              | gbpln | Capsella rubella     | AT3G62100.1   Symbols: IAA30   indole-3-acetic acid inducible 30   chr3:2295835-22956593 FORWARD LENGTH=172                        | 172 | 172 | 2.00E-75  | 100.0 | 89.5 | 95.3 |
| Rsa1.0_00270.1.g10077.t1 | ref NP_191765.2  Pectinacylesterase family protein [Arabidopsis thaliana] g 28392968 gb AAO41919.1  putative pectinacylesterase [Arabidopsis thaliana] g 28827554 gb AAO50621.1  putative pectinacylesterase [Arabidopsis thaliana] g 33264678 gb AEE80302.1  Pectinacylesterase family protein [Arabidopsis thaliana]                                                         | 416 | 419  | 0         | 100.7 | 88.9 | 93.3 | Pectinacylesterase family protein                                                                                                                                                                                                                                                                   | gbpln | Arabidopsis thaliana | AT3G62060.1   Symbols:   Pectinacylesterase family protein   chr3:22980123-22982734 FORWARD LENGTH=419                             | 416 | 419 | 0         | 100.7 | 88.9 | 93.3 |
| Rsa1.0_00270.1.g10078.t1 | gb EOA23175.1  hypothetical protein CARUB_v10017856mg [Capsella rubella]                                                                                                                                                                                                                                                                                                       | 260 | 262  | 1.00E-127 | 100.8 | 87.3 | 92.7 | hypothetical protein CARUB_v10017856mg                                                                                                                                                                                                                                                              | gbpln | Capsella rubella     | AT3G62030.1   Symbols: ROC4   rotamase CYP 4   chr3:22973708-22975139 FORWARD LENGTH=260                                           | 260 | 260 | 1.00E-127 | 100.0 | 86.5 | 92.7 |
| Rsa1.0_00270.1.g10079.t1 | gb EOA24918.1  hypothetical protein CARUB_v10018209mg [Capsella rubella]                                                                                                                                                                                                                                                                                                       | 109 | 141  | 7.00E-28  | 129.4 | 51.4 | 63.3 | hypothetical protein CARUB_v10018209mg                                                                                                                                                                                                                                                              | gbpln | Capsella rubella     | AT3G62050.1   Symbols:   Putative endonuclease or glycosyl hydrolase   chr3:22978305-22978944 FORWARD LENGTH=157                   | 109 | 157 | 5.00E-30  | 144.0 | 52.3 | 63.3 |
| Rsa1.0_00270.1.g10080.t1 | gb EOA25822.1  hypothetical protein CARUB_v10019191mg [Capsella rubella]                                                                                                                                                                                                                                                                                                       | 89  | 118  | 3.00E-27  | 132.6 | 71.9 | 75.3 | hypothetical protein CARUB_v10019191mg                                                                                                                                                                                                                                                              | gbpln | Capsella rubella     | AT3G61980.1   Symbols:   serine protease inhibitor, Kazal-type family protein   chr3:22956344-22956697 REVERSE LENGTH=117          | 89  | 117 | 3.00E-28  | 131.5 | 65.2 | 70.8 |
| Rsa1.0_00270.1.g10081.t1 | ref XP_002878424.1  serine protease inhibitor, Kazal-type family protein [Arabidopsis lyrata subsp. lyrata] g 297324262 gb EFH54683.1  serine protease inhibitor, Kazal-type family protein [Arabidopsis lyrata subsp. lyrata]                                                                                                                                                 | 95  | 117  | 9.00E-22  | 123.2 | 58.9 | 70.5 | serine protease inhibitor, Kazal-type family protein                                                                                                                                                                                                                                                | gbpln | Arabidopsis lyrata   | AT3G61980.1   Symbols:   serine protease inhibitor, Kazal-type family protein   chr3:22956344-22956697 REVERSE LENGTH=117          | 95  | 117 | 4.00E-22  | 123.2 | 54.7 | 68.4 |
| Rsa1.0_00270.1.g10082.t1 | # # # # # # # #                                                                                                                                                                                                                                                                                                                                                                | #   | #    | #         | #     | #    | #    | -                                                                                                                                                                                                                                                                                                   | ----  | ----                 | #                                                                                                                                  | #   | #   | #         | #     | #    |      |
| Rsa1.0_00270.1.g10083.t1 | gb AAD17398.1  putative non-LTR retroelement reverse transcriptase [Arabidopsis thaliana] ref NP_191756.1  B3 domain-containing transcription factor NGA2 [Arabidopsis thaliana] g 75182616 sp O9M268.1 NGA2_ARATH RecName: Full=B3 domain-containing transcription factor NGA2; AltName: Full=Protein NGATHA 2                                                                | 461 | 1225 | 1.00E-90  | 265.7 | 39.7 | 52.3 | putative non-LTR retroelement reverse transcriptase                                                                                                                                                                                                                                                 | gbpln | Arabidopsis thaliana | AT4G29090.1   Symbols:   Ribonuclease H-like superfamily protein   chr4:14333528-14335255 FORWARD LENGTH=575                       | 461 | 575 | 1.00E-54  | 124.7 | 29.3 | 45.6 |
| Rsa1.0_00270.1.g10084.t1 | ref NP_191756.1  B3 domain-containing transcription factor NGA2 [Arabidopsis thaliana] g 6899895 emb CAB71904.1  RAV-like protein [Arabidopsis thaliana] g 106385265 gb ABF65768.1  At3g61970 [Arabidopsis thaliana] g 227060687 gb AOP18972.1  NGATHA2 [Arabidopsis thaliana] g 33264678 gb AEE80288.1  B3 domain-containing transcription factor NGA2 [Arabidopsis thaliana] | 318 | 299  | 1.00E-127 | 94.0  | 77.7 | 84.9 | B3 domain-containing transcription factor NGA2                                                                                                                                                                                                                                                      | gbpln | Arabidopsis thaliana | AT3G61970.1   Symbols: NGA2   AP2/B3-like transcriptional factor family protein   chr3:22951829-22952728 FORWARD LENGTH=299        | 318 | 299 | 1.00E-129 | 94.0  | 77.7 | 84.9 |
| Rsa1.0_00270.1.g10085.t1 | gb EOA25299.1  hypothetical protein CARUB_v10018614mg [Capsella rubella]                                                                                                                                                                                                                                                                                                       | 319 | 360  | 1.00E-109 | 112.9 | 73.4 | 81.8 | hypothetical protein CARUB_v10018614mg                                                                                                                                                                                                                                                              | gbpln | Capsella rubella     | AT3G61950.1   Symbols:   basic helix-loop-helix (bHLH) DNA-binding superfamily protein   chr3:22939661-22941332 FORWARD LENGTH=358 | 319 | 358 | 1.00E-106 | 112.2 | 72.4 | 82.1 |
| Rsa1.0_00271.1.g10086.t1 | # # # # # # # #                                                                                                                                                                                                                                                                                                                                                                | #   | #    | #         | #     | #    | #    | -                                                                                                                                                                                                                                                                                                   | ----  | ----                 | #                                                                                                                                  | #   | #   | #         | #     | #    |      |
| Rsa1.0_00271.1.g10087.t1 | gb EOA13117.1  hypothetical protein CARUB_v10026139mg [Capsella rubella]                                                                                                                                                                                                                                                                                                       | 572 | 586  | 0         | 102.4 | 90.4 | 94.6 | hypothetical protein CARUB_v10026139mg                                                                                                                                                                                                                                                              | gbpln | Capsella rubella     | AT5G47750.1   Symbols: D6PKL2, PK5   D6 protein kinase like 2   chr5:19339947-19341864 REVERSE LENGTH=586                          | 572 | 586 | 0         | 102.4 | 90.9 | 94.8 |



|                           |                                                                                                                                                                                                                                                                                                                                                                                                                                                         |      |      |           |       |      |      |                                                                 |       |                      |                                                                                                                                                                                                                                                                                     |      |      |           |       |      |      |
|---------------------------|---------------------------------------------------------------------------------------------------------------------------------------------------------------------------------------------------------------------------------------------------------------------------------------------------------------------------------------------------------------------------------------------------------------------------------------------------------|------|------|-----------|-------|------|------|-----------------------------------------------------------------|-------|----------------------|-------------------------------------------------------------------------------------------------------------------------------------------------------------------------------------------------------------------------------------------------------------------------------------|------|------|-----------|-------|------|------|
| Rsa1.0_00271.1.g10088.t1  | refXP_002865104.1  hypothetical protein ARALYDRAFT_494188 [Arabidopsis lyrata subsp. lyrata] gi 297310939 gb EFH41363.1  hypothetical protein ARALYDRAFT_494188 [Arabidopsis lyrata subsp. lyrata]                                                                                                                                                                                                                                                      | 247  | 242  | 4.00E-80  | 98.0  | 69.2 | 81.4 | hypothetical protein ARALYDRAFT_494188                          | gbpln | Arabidopsis lyrata   | AT5G47740.1   Symbols:   Adenine nucleotide alpha hydrolases-like superfamily protein   chr5:19338688-19339683 FORWARD LENGTH=244                                                                                                                                                   | 247  | 244  | 2.00E-80  | 98.8  | 63.6 | 76.5 |
| Rsa1.0_00271.1.g10089.t2  | gb EOA13661.1  hypothetical protein CARUB_v10026730mg [Capsella rubella]                                                                                                                                                                                                                                                                                                                                                                                | 327  | 341  | 1.00E-171 | 104.3 | 88.4 | 93.3 | hypothetical protein CARUB_v10026730mg                          | gbpln | Capsella rubella     | AT5G47730.1   Symbols:   Sec14p-like phosphatidylinositol transfer family protein   chr5:19334592-19336618 REVERSE LENGTH=341                                                                                                                                                       | 327  | 341  | 1.00E-168 | 104.3 | 89.0 | 93.6 |
| Rsa1.0_00271.1.g10090.t1  | gb ABD64985.1  C2 domain containing protein [Brassica oleracea]                                                                                                                                                                                                                                                                                                                                                                                         | 165  | 168  | 1.00E-84  | 101.8 | 96.4 | 97.6 | C2 domain containing protein                                    | gbpln | Brassica oleracea    | AT5G47710.2   Symbols:   Calcium-dependent lipid-binding (CaLB domain) family protein   chr5:19330470-19331178 FORWARD LENGTH=166                                                                                                                                                   | 165  | 166  | 9.00E-86  | 100.6 | 92.1 | 97.6 |
| Rsa1.0_00271.1.g10091.t1  | gb EOA40410.1  hypothetical protein CARUB_v10009137mg [Capsella rubella]                                                                                                                                                                                                                                                                                                                                                                                | 447  | 445  | 1.00E-153 | 99.6  | 68.2 | 77.2 | hypothetical protein CARUB_v10009137mg                          | gbpln | Capsella rubella     | AT1G01690.1   Symbols:   ATPRD3, PRD3   putative recombination initiation defects 3   chr1:249242-252221 FORWARD LENGTH=449                                                                                                                                                         | 447  | 449  | 1.00E-132 | 100.4 | 60.9 | 69.4 |
| Rsa1.0_00271.1.g10092.t1  | gb ABD64989.1  hypothetical protein 26.t00005 [Brassica oleracea]                                                                                                                                                                                                                                                                                                                                                                                       | 1649 | 1681 | 0         | 101.9 | 80.5 | 88.3 | hypothetical protein 26.t00005                                  | gbpln | Brassica oleracea    | AT5G47690.3   Symbols:   binding   chr5:19317899-19327014 FORWARD LENGTH=1607                                                                                                                                                                                                       | 1649 | 1607 | 0         | 97.5  | 78.7 | 85.0 |
| Rsa1.0_00271.1.g10093.t1  | ref NP_568687.1  nudix hydrolase 2 [Arabidopsis thaliana] gi 68565924 sp Q94B74.1 NUDT2_ARAT H RecName: Full=Nudix hydrolase 2; Short=AtNUDT2; AltName: Full=ADP-ribose pyrophosphatase; AltName: Full=NAHDH pyrophosphatase gi 14596037 gb AAK68746.1  MutT domain protein-like [Arabidopsis thaliana] gi 17978727 gb AAL47357.1  MutT domain protein-like [Arabidopsis thaliana] gi 332008163 gb AED95546.1  nudix hydrolase 2 [Arabidopsis thaliana] | 333  | 278  | 1.00E-124 | 83.5  | 64.6 | 69.7 | nudix hydrolase 2                                               | gbpln | Arabidopsis thaliana | AT5G47650.1   Symbols:   ATNUDT2, ATNUDX2, NUDT2   nudix hydrolase homolog 2   chr5:19310391-19312084 REVERSE LENGTH=278                                                                                                                                                            | 333  | 278  | 1.00E-127 | 83.5  | 64.6 | 69.7 |
| Rsa1.0_00271.1.g10094.t1  | gb ABD64968.1  hypothetical protein 25.t00005 [Brassica oleracea]                                                                                                                                                                                                                                                                                                                                                                                       | 251  | 299  | 1.00E-106 | 119.1 | 82.1 | 88.0 | hypothetical protein 25.t00005                                  | gbpln | Brassica oleracea    | AT5G47590.1   Symbols:   Heat shock protein HSP20/alpha crystallin family   chr5:19297945-19299099 REVERSE LENGTH=264                                                                                                                                                               | 251  | 264  | 5.00E-88  | 105.2 | 64.5 | 78.1 |
| Rsa1.0_00271.1.g10095.t1  | gb ABD64967.1  hypothetical protein 25.t00004 [Brassica oleracea]                                                                                                                                                                                                                                                                                                                                                                                       | 149  | 149  | 2.00E-66  | 100.0 | 84.6 | 91.3 | hypothetical protein 25.t00004                                  | gbpln | Brassica oleracea    | AT5G47600.1   Symbols:   HSP20-like chaperones superfamily protein   chr5:19299945-19300456 REVERSE LENGTH=131                                                                                                                                                                      | 149  | 131  | 3.00E-41  | 87.9  | 53.7 | 64.4 |
| Rsa1.0_00271.1.g10096.t20 | gb AAC28221.1  similar to reverse transcriptases (PFam: rvt.hmm, score: 60.13) [Arabidopsis thaliana]                                                                                                                                                                                                                                                                                                                                                   | 1379 | 1164 | 1.00E-161 | 84.4  | 24.3 | 36.3 | similar to reverse transcriptases (PFam: rvt.hmm, score: 60.13) | gbpln | Arabidopsis thaliana | AT5G47635.1   Symbols:   Pollen Ole e 1 allergen and extensin family protein   chr5:19307281-19307849 REVERSE LENGTH=164                                                                                                                                                            | 1379 | 164  | 2.00E-66  | 11.9  | 9.2  | 10.2 |
| Rsa1.0_00271.1.g10097.t1  | gb ABD64960.1  zinc finger, C3HC4 type (RING finger) containing protein [Brassica oleracea]                                                                                                                                                                                                                                                                                                                                                             | 176  | 218  | 2.00E-75  | 123.9 | 78.4 | 81.3 | zinc finger, C3HC4 type (RING finger) containing protein        | gbpln | Brassica oleracea    | AT5G47610.1   Symbols:   RING/U-box superfamily protein   chr5:19301399-19301899 REVERSE LENGTH=166                                                                                                                                                                                 | 176  | 166  | 1.00E-67  | 94.3  | 70.5 | 77.8 |
| Rsa1.0_00271.1.g10098.t1  | gb ABD64966.1  hypothetical protein 25.t00003 [Brassica oleracea]                                                                                                                                                                                                                                                                                                                                                                                       | 259  | 259  | 1.00E-135 | 100.0 | 91.9 | 96.9 | hypothetical protein 25.t00003                                  | gbpln | Brassica oleracea    | AT5G47590.1   Symbols:   Heat shock protein HSP20/alpha crystallin family   chr5:19297945-19299099 REVERSE LENGTH=264                                                                                                                                                               | 259  | 264  | 7.00E-89  | 101.9 | 64.5 | 76.1 |
| Rsa1.0_00271.1.g10099.t1  | gb ABD64967.1  hypothetical protein 25.t00004 [Brassica oleracea]                                                                                                                                                                                                                                                                                                                                                                                       | 150  | 149  | 4.00E-70  | 99.3  | 87.3 | 94.7 | hypothetical protein 25.t00004                                  | gbpln | Brassica oleracea    | AT5G47600.1   Symbols:   HSP20-like chaperones superfamily protein   chr5:19299945-19300456 REVERSE LENGTH=131                                                                                                                                                                      | 150  | 131  | 3.00E-43  | 87.3  | 50.7 | 63.3 |
| Rsa1.0_00271.1.g10100.t1  | gb ABD64967.1  hypothetical protein 25.t00004 [Brassica oleracea]                                                                                                                                                                                                                                                                                                                                                                                       | 150  | 149  | 2.00E-50  | 99.3  | 64.0 | 68.7 | hypothetical protein 25.t00004                                  | gbpln | Brassica oleracea    | AT5G47600.1   Symbols:   HSP20-like chaperones superfamily protein   chr5:19299945-19300456 REVERSE LENGTH=131                                                                                                                                                                      | 150  | 131  | 1.00E-30  | 87.3  | 41.3 | 50.0 |
| Rsa1.0_00271.1.g10101.t1  | gb ABD64968.1  hypothetical protein 25.t00005 [Brassica oleracea]                                                                                                                                                                                                                                                                                                                                                                                       | 266  | 299  | 1.00E-111 | 112.4 | 84.6 | 88.7 | hypothetical protein 25.t00005                                  | gbpln | Brassica oleracea    | AT5G47590.1   Symbols:   Heat shock protein HSP20/alpha crystallin family   chr5:19297945-19299099 REVERSE LENGTH=264                                                                                                                                                               | 266  | 264  | 3.00E-86  | 99.2  | 59.8 | 71.4 |
| Rsa1.0_00271.1.g10102.t1  | gb ABD64969.1  hypothetical protein 25.t00006 [Brassica oleracea]                                                                                                                                                                                                                                                                                                                                                                                       | 197  | 134  | 4.00E-56  | 68.0  | 54.8 | 56.3 | hypothetical protein 25.t00006                                  | gbpln | Brassica oleracea    | AT5G47570.1   Symbols:   unknown protein; Has 30201 Blast hits to 17322 proteins in 780 species: Archae - 12; Bacteria - 1396; Metazoa - 17338; Fungi - 3422; Plants - 5037; Viruses - 0; Other Eukaryotes - 2996 (source: NCBI BLINK).   chr5:19292869-19294666 REVERSE LENGTH=125 | 197  | 125  | 9.00E-47  | 63.5  | 51.8 | 52.8 |
| Rsa1.0_00271.1.g10103.t1  | #                                                                                                                                                                                                                                                                                                                                                                                                                                                       | #    | #    | #         | #     | #    | #    | -                                                               | ----  | ----                 | #                                                                                                                                                                                                                                                                                   | #    | #    | #         | #     | #    | #    |
| Rsa1.0_00271.1.g10104.t1  | ref XP_002863336.1  ATSDAT [Arabidopsis lyrata subsp. lyrata] gi 297309171 gb EFH39595.1  ATSDAT [Arabidopsis lyrata subsp. lyrata]                                                                                                                                                                                                                                                                                                                     | 541  | 540  | 0         | 99.8  | 90.2 | 94.6 | ATSDAT                                                          | gbpln | Arabidopsis lyrata   | AT5G47560.1   Symbols:   ATTDAT, ATSDAT, TDT   tonoplast dicarboxylate transporter   chr5:19287895-19290347 REVERSE LENGTH=540                                                                                                                                                      | 541  | 540  | 0         | 99.8  | 89.3 | 94.3 |

|                          |                                                                                                                                                                                                                                                                                                                                                                                                                                                                                                                                                                          |      |      |           |       |      |      |                                                     |       |                      |                                                                                                                          |      |     |           |       |      |      |
|--------------------------|--------------------------------------------------------------------------------------------------------------------------------------------------------------------------------------------------------------------------------------------------------------------------------------------------------------------------------------------------------------------------------------------------------------------------------------------------------------------------------------------------------------------------------------------------------------------------|------|------|-----------|-------|------|------|-----------------------------------------------------|-------|----------------------|--------------------------------------------------------------------------------------------------------------------------|------|-----|-----------|-------|------|------|
| Rsa1.0_00271.1.g10105.t1 | gb ADD10748.1  phycocystatin 5 [Brassica rapa subsp. pekinensis]                                                                                                                                                                                                                                                                                                                                                                                                                                                                                                         | 121  | 120  | 1.00E-44  | 99.2  | 82.6 | 90.1 | phycocystatin 5                                     | gbpln | Brassica rapa        | AT5G47550.1   Symbols:   Cystatin/monellin superfamily protein   chr5:19286596-19286964 REVERSE LENGTH=122               | 121  | 122 | 1.00E-35  | 100.8 | 58.7 | 70.2 |
| Rsa1.0_00271.1.g10106.t1 | gb ABD64974.1  MO25 protein -related [Brassica oleracea]                                                                                                                                                                                                                                                                                                                                                                                                                                                                                                                 | 340  | 340  | 0         | 100.0 | 98.8 | 99.4 | MO25 protein -related                               | gbpln | Brassica oleracea    | AT5G47540.1   Symbols:   Mo25 family protein   chr5:19283265-19285328 REVERSE LENGTH=343                                 | 340  | 343 | 0         | 100.9 | 95.6 | 98.2 |
| Rsa1.0_00271.1.g10107.t1 | gb ABD64975.1  Ras family GTP-binding protein [Brassica oleracea]                                                                                                                                                                                                                                                                                                                                                                                                                                                                                                        | 222  | 221  | 1.00E-123 | 99.5  | 97.3 | 98.6 | Ras family GTP-binding protein                      | gbpln | Brassica oleracea    | AT5G47520.1   Symbols:   ATRABA5a, RABA5a   RAB GTPase homolog A5A   chr5:19277596-19278366 REVERSE LENGTH=221           | 222  | 221 | 1.00E-121 | 99.5  | 94.1 | 97.7 |
| Rsa1.0_00272.1.g10108.t1 | dbj BAA83905.1  SRK13 [Brassica oleracea]                                                                                                                                                                                                                                                                                                                                                                                                                                                                                                                                | 878  | 854  | 1.00E-178 | 97.3  | 42.0 | 57.3 | SRK13                                               | gbpln | Brassica oleracea    | AT4G21380.1   Symbols:   ARK3, RK3   receptor kinase 3   chr4:11389219-11393090 REVERSE LENGTH=850                       | 878  | 850 | 1.00E-174 | 96.8  | 41.2 | 56.3 |
| Rsa1.0_00272.1.g10109.t1 | gb AFJ66186.1  hypothetical protein 11M19.5 [Arabidopsis halleri]                                                                                                                                                                                                                                                                                                                                                                                                                                                                                                        | 268  | 1557 | 3.00E-70  | 581.0 | 54.1 | 66.8 | hypothetical protein 11M19.5                        | gbpln | Arabidopsis halleri  | #                                                                                                                        | #    | #   | #         | #     | #    | #    |
| Rsa1.0_00272.1.g10110.t1 | #                                                                                                                                                                                                                                                                                                                                                                                                                                                                                                                                                                        | #    | #    | #         | #     | #    | #    | -                                                   | ----  | #                    | #                                                                                                                        | #    | #   | #         | #     | #    | #    |
| Rsa1.0_00272.1.g10111.t1 | #                                                                                                                                                                                                                                                                                                                                                                                                                                                                                                                                                                        | #    | #    | #         | #     | #    | #    | -                                                   | ----  | #                    | #                                                                                                                        | #    | #   | #         | #     | #    | #    |
| Rsa1.0_00272.1.g10112.t1 | gb AAG52024.1 AC022456.5 Tam1 transposon protein TNP2, putative; 12762-16371 [Arabidopsis thaliana]                                                                                                                                                                                                                                                                                                                                                                                                                                                                      | 316  | 887  | 5.00E-28  | 280.7 | 21.2 | 25.9 | Tam1 transposon protein TNP2, putative; 12762-16371 | gbpln | Arabidopsis thaliana | #                                                                                                                        | #    | #   | #         | #     | #    | #    |
| Rsa1.0_00272.1.g10113.t5 | gb AAC69114.1  putative gag-protease polyprotein [Arabidopsis thaliana]                                                                                                                                                                                                                                                                                                                                                                                                                                                                                                  | 584  | 627  | 6.00E-17  | 107.4 | 15.4 | 24.3 | putative gag-protease polyprotein                   | gbpln | Arabidopsis thaliana | #                                                                                                                        | #    | #   | #         | #     | #    | #    |
| Rsa1.0_00272.1.g10114.t1 | emb CAB39638.1  RNA-directed DNA polymerase-like protein [Arabidopsis thaliana] gi 7267666 emb CAB78094.1  RNA-directed DNA polymerase-like protein [Arabidopsis thaliana]                                                                                                                                                                                                                                                                                                                                                                                               | 1755 | 1274 | 0         | 72.6  | 29.6 | 41.0 | RNA-directed DNA polymerase-like protein            | gbpln | Arabidopsis thaliana | AT4G29090.1   Symbols:   Ribonuclease H-like superfamily protein   chr4:14333528-14335255 FORWARD LENGTH=575             | 1755 | 575 | 7.00E-46  | 32.8  | 8.0  | 13.3 |
| Rsa1.0_00272.1.g10115.t3 | ref XP_002893979.1  CYCA1_1 [Arabidopsis lyrata subsp. lyrata] gi 297339821 gb EFH70238.1  CYCA1_1 [Arabidopsis lyrata subsp. lyrata]                                                                                                                                                                                                                                                                                                                                                                                                                                    | 437  | 467  | 0         | 106.9 | 83.1 | 88.6 | CYCA1_1                                             | gbpln | Arabidopsis lyrata   | AT1G44110.1   Symbols:   CYCA1:1   Cyclin A1:1   chr1:16775035-16777182 REVERSE LENGTH=460                               | 437  | 460 | 0         | 105.3 | 80.8 | 86.7 |
| Rsa1.0_00272.1.g10116.t2 | ref XP_002888606.1  ALDH3H1 [Arabidopsis lyrata subsp. lyrata] gi 297334447 gb EFH64865.1  ALDH3H1 [Arabidopsis lyrata subsp. lyrata]                                                                                                                                                                                                                                                                                                                                                                                                                                    | 505  | 484  | 0         | 95.8  | 84.6 | 91.5 | ALDH3H1                                             | gbpln | Arabidopsis lyrata   | AT1G44170.2   Symbols:   ALDH3H1, ALDH4   aldehyde dehydrogenase 3H1   chr1:16796564-16800031 REVERSE LENGTH=484         | 505  | 484 | 0         | 95.8  | 84.2 | 91.9 |
| Rsa1.0_00272.1.g10117.t1 | gb EOA38139.1  hypothetical protein CARUB_v10009610mg [Capsella rubella]                                                                                                                                                                                                                                                                                                                                                                                                                                                                                                 | 301  | 347  | 7.00E-31  | 115.3 | 18.9 | 24.9 | hypothetical protein CARUB_v10009610mg              | gbpln | Capsella rubella     | AT1G44191.1   Symbols:   ECA1 gametogenesis related family protein   chr1:16813654-16814733 REVERSE LENGTH=359           | 301  | 359 | 1.00E-18  | 119.3 | 14.0 | 17.6 |
| Rsa1.0_00272.1.g10118.t1 | ref NP_175092.1  photosystem II 22 kDa protein [Arabidopsis thaliana] gi 17380270 sp Q9XF91.1 PSBS_ARATH RecName: Full=Photosystem II 22 kDa protein, chloroplastic; AltName: Full=CP22; Flags: Precursor gi 4741962 gb AAD28778.1 AF134131.1 PsbS protein [Arabidopsis thaliana] gi 13876505 gb AAK43481.1 AC084807.6 photosystem II 22kDa protein, putative [Arabidopsis thaliana] gi 62320751 dbj BAD95419.1  Photosystem II chlorophyll-binding protein PsbS [Arabidopsis thaliana] gi 332193918 gb AAE32039.1  photosystem II 22 kDa protein [Arabidopsis thaliana] | 265  | 265  | 1.00E-122 | 100.0 | 95.1 | 96.6 | photosystem II 22 kDa protein                       | gbpln | Arabidopsis thaliana | AT1G44575.1   Symbols:   NPO4, PSBS   Chlorophyll A-B binding family protein   chr1:16871768-16873194 FORWARD LENGTH=265 | 265  | 265 | 1.00E-125 | 100.0 | 95.1 | 96.6 |
| Rsa1.0_00272.1.g10119.t1 | gb EOA38028.1  hypothetical protein CARUB_v10009499mg [Capsella rubella]                                                                                                                                                                                                                                                                                                                                                                                                                                                                                                 | 359  | 369  | 1.00E-176 | 102.8 | 90.0 | 95.0 | hypothetical protein CARUB_v10009499mg              | gbpln | Capsella rubella     | AT1G44750.2   Symbols:   ATPUP11, PUP11   purine permease 11   chr1:16893825-16895168 FORWARD LENGTH=367                 | 359  | 367 | 1.00E-171 | 102.2 | 90.0 | 95.3 |
| Rsa1.0_00272.1.g10120.t1 | gb AAG51783.1 AC079679.3 reverse transcriptase, putative; 16838-20266 [Arabidopsis thaliana]                                                                                                                                                                                                                                                                                                                                                                                                                                                                             | 465  | 1142 | 1.00E-122 | 245.6 | 50.1 | 64.9 | reverse transcriptase, putative; 16838-20266        | gbpln | Arabidopsis thaliana | AT4G29090.1   Symbols:   Ribonuclease H-like superfamily protein   chr4:14333528-14335255 FORWARD LENGTH=575             | 465  | 575 | 3.00E-57  | 123.7 | 32.3 | 53.3 |
| Rsa1.0_00272.1.g10121.t1 | ref XP_004153378.1  PREDICTED: uncharacterized protein LOC101218423 [Cucumis sativus]                                                                                                                                                                                                                                                                                                                                                                                                                                                                                    | 386  | 207  | 2.00E-13  | 53.6  | 10.6 | 15.8 | PREDICTED: uncharacterized protein LOC101218423     | gbpln | Cucumis sativus      | #                                                                                                                        | #    | #   | #         | #     | #    | #    |
| Rsa1.0_00272.1.g10122.t1 | gb AAG51228.1 AC035249.3 Tam3-like transposon protein; 93317-95488 [Arabidopsis thaliana] gi 12323055 gb AAG51515.1 AC068324.3 hAT-element transposase, putative [Arabidopsis thaliana]                                                                                                                                                                                                                                                                                                                                                                                  | 723  | 723  | 0         | 100.0 | 56.0 | 71.8 | Tam3-like transposon protein; 93317-95488           | gbpln | Arabidopsis thaliana | AT3G42170.1   Symbols:   BED zinc finger hAT family dimerisation domain   chr3:14321838-14323928 FORWARD LENGTH=696      | 723  | 696 | 3.00E-54  | 96.3  | 24.1 | 41.9 |

|                          |                                                                                                                                                                                                                                                                                                                                                                      |      |      |           |       |      |      |                                                                    |       |                      |                                                                                                                                                                                                                                                                   |      |      |           |       |      |      |
|--------------------------|----------------------------------------------------------------------------------------------------------------------------------------------------------------------------------------------------------------------------------------------------------------------------------------------------------------------------------------------------------------------|------|------|-----------|-------|------|------|--------------------------------------------------------------------|-------|----------------------|-------------------------------------------------------------------------------------------------------------------------------------------------------------------------------------------------------------------------------------------------------------------|------|------|-----------|-------|------|------|
| Rsa1.0_00272.1.g10123.t1 | refNP_175105.2  YbaK/aminocyl-tRNA synthetase-associated domain-containing protein [Arabidopsis thaliana] gi 26451543 dbj BAC42869.1  unknown protein [Arabidopsis thaliana] gi 28973135 gb AA063892.1  unknown protein [Arabidopsis thaliana] gi 332193936 gb AEE32057.1  YbaK/aminocyl-tRNA synthetase-associated domain-containing protein [Arabidopsis thaliana] | 311  | 307  | 1.00E-144 | 98.7  | 83.9 | 89.7 | YbaK/aminocyl-tRNA synthetase-associated domain-containing protein | gbpln | Arabidopsis thaliana | AT1G44835.1   Symbols:   YbaK/aminocyl-tRNA synthetase-associated domain   chr1:16939909-16942337 FORWARD LENGTH=307                                                                                                                                              | 311  | 307  | 2.33E-156 | 98.7  | 83.9 | 89.7 |
| Rsa1.0_00272.1.g10124.t1 | refXP_002891303.1  ATP binding protein [Arabidopsis lyrata subsp. lyrata] gi 297337145 gb EFH67562.1  ATP binding protein [Arabidopsis lyrata subsp. lyrata]                                                                                                                                                                                                         | 165  | 935  | 8.00E-51  | 566.7 | 72.1 | 84.2 | ATP binding protein                                                | gbpln | Arabidopsis lyrata   | AT1G44900.1   Symbols: MCM2, ATMCM2   minichromosome maintenance (MCM2/3/5) family protein   chr1:16970291-16974457 FORWARD LENGTH=936                                                                                                                            | 165  | 936  | 6.00E-53  | 567.3 | 72.7 | 84.8 |
| Rsa1.0_00272.1.g10125.t4 | refXP_002888245.1  hypothetical protein ARALYDRAFT_475439 [Arabidopsis lyrata subsp. lyrata] gi 297334086 gb EFH64504.1  hypothetical protein ARALYDRAFT_475439 [Arabidopsis lyrata subsp. lyrata]                                                                                                                                                                   | 2158 | 2607 | 0         | 120.8 | 70.3 | 79.9 | hypothetical protein ARALYDRAFT_475439                             | gbpln | Arabidopsis lyrata   | AT1G58250.1   Symbols: SAB   Golgi-body localisation protein domain ;RNA pol II promoter Fmp27 protein domain   chr1:21587317-21601373 REVERSE LENGTH=2607                                                                                                        | 2158 | 2607 | 0         | 120.8 | 69.6 | 79.6 |
| Rsa1.0_00272.1.g10126.t1 | #                                                                                                                                                                                                                                                                                                                                                                    | #    | #    | #         | #     | #    | #    | -                                                                  | ----  | ----                 | #                                                                                                                                                                                                                                                                 | #    | #    | #         | #     | #    | #    |
| Rsa1.0_00272.1.g10127.t3 | #                                                                                                                                                                                                                                                                                                                                                                    | #    | #    | #         | #     | #    | #    | -                                                                  | ----  | ----                 | #                                                                                                                                                                                                                                                                 | #    | #    | #         | #     | #    | #    |
| Rsa1.0_00272.1.g10128.t1 | gb EOA39875.1  hypothetical protein CARUB_v10008552mg [Capsella rubella]                                                                                                                                                                                                                                                                                             | 649  | 642  | 0         | 98.9  | 91.8 | 95.8 | hypothetical protein CARUB_v10008552mg                             | gbpln | Capsella rubella     | AT1G45150.1   Symbols:   unknown protein; Has 219 Blast hits to 202 proteins in 78 species: Archae - 0; Bacteria - 166; Metazoa - 0; Fungi - 0; Plants - 36; Viruses - 0; Other Eukaryotes - 17 (source: NOBI BLink).   chr1:17077615-17082330 REVERSE LENGTH=643 | 649  | 643  | 0         | 99.1  | 90.6 | 94.8 |
| Rsa1.0_00272.1.g10129.t1 | refXP_002871511.1  hypothetical protein ARALYDRAFT_350399 [Arabidopsis lyrata subsp. lyrata] gi 297317348 gb EFH47770.1  hypothetical protein ARALYDRAFT_350399 [Arabidopsis lyrata subsp. lyrata]                                                                                                                                                                   | 353  | 1202 | 3.00E-96  | 340.5 | 51.8 | 69.4 | hypothetical protein ARALYDRAFT_350399                             | gbpln | Arabidopsis lyrata   | AT5G12090.1   Symbols:   Protein kinase superfamily protein   chr5:3909703-3910877 FORWARD LENGTH=369                                                                                                                                                             | 353  | 369  | 7.00E-85  | 104.5 | 47.0 | 60.1 |
| Rsa1.0_00272.1.g10130.t1 | gb EOA39275.1  hypothetical protein CARUB_v10012282mg [Capsella rubella]                                                                                                                                                                                                                                                                                             | 1014 | 1060 | 0         | 104.5 | 83.4 | 88.9 | hypothetical protein CARUB_v10012282mg                             | gbpln | Capsella rubella     | AT1G45160.2   Symbols:   Protein kinase superfamily protein   chr1:17083814-17090277 REVERSE LENGTH=1067                                                                                                                                                          | 1014 | 1067 | 0         | 105.2 | 82.8 | 89.5 |
| Rsa1.0_00272.1.g10131.t1 | gb EOA39964.1  hypothetical protein CARUB_v10008653mg, partial [Capsella rubella]                                                                                                                                                                                                                                                                                    | 519  | 593  | 0         | 114.3 | 79.4 | 86.3 | hypothetical protein CARUB_v10008653mg, partial                    | gbpln | Capsella rubella     | AT1G45207.2   Symbols:   Remorin family protein   chr1:17130703-17133548 REVERSE LENGTH=555                                                                                                                                                                       | 519  | 555  | 0         | 106.9 | 79.0 | 85.7 |
| Rsa1.0_00272.1.g10132.t1 | #                                                                                                                                                                                                                                                                                                                                                                    | #    | #    | #         | #     | #    | #    | -                                                                  | ----  | ----                 | #                                                                                                                                                                                                                                                                 | #    | #    | #         | #     | #    | #    |
| Rsa1.0_00272.1.g10133.t1 | gb AAG09097.1 AC009323.8 Putative retroelement polyprotein [Arabidopsis thaliana]                                                                                                                                                                                                                                                                                    | 1370 | 1486 | 0         | 108.5 | 23.2 | 28.3 | Putative retroelement polyprotein                                  | gbpln | Arabidopsis thaliana | AT4G23160.1   Symbols: CRK8   cysteine-rich RLK (RECEPTOR-like protein kinase) 8   chr4:12129485-12134086 FORWARD LENGTH=1262                                                                                                                                     | 1370 | 1262 | 1.00E-118 | 92.1  | 15.0 | 22.2 |
| Rsa1.0_00273.1.g10134.t1 | emb CAA07573.1  src2-like protein [Arabidopsis thaliana]                                                                                                                                                                                                                                                                                                             | 305  | 324  | 1.00E-104 | 106.2 | 70.5 | 74.8 | src2-like protein                                                  | gbpln | Arabidopsis thaliana | AT1G09070.1   Symbols: SRC2, (AT)SRC2   soybean gene regulated by cold-2   chr1:2927767-2928741 FORWARD LENGTH=324                                                                                                                                                | 305  | 324  | 1.00E-106 | 106.2 | 70.2 | 74.4 |
| Rsa1.0_00273.1.g10135.t2 | refNP_001184945.1  ATP-dependent Clp protease proteolytic subunit-related protein 3 [Arabidopsis thaliana] gi 332190278 gb AEE28399.1  ATP-dependent Clp protease proteolytic subunit-related protein 3 [Arabidopsis thaliana]                                                                                                                                       | 321  | 370  | 1.00E-169 | 115.3 | 92.2 | 95.3 | ATP-dependent Clp protease proteolytic subunit-related protein 3   | gbpln | Arabidopsis thaliana | AT1G09130.3   Symbols:   ATP-dependent caseinolytic (Clp) protease/crotonase family protein   chr1:2939731-2942217 REVERSE LENGTH=370                                                                                                                             | 321  | 370  | 1.00E-172 | 115.3 | 92.2 | 95.3 |
| Rsa1.0_00273.1.g10136.t1 | refNP_563837.1  F-box protein PP2-B15 [Arabidopsis thaliana] gi 334302842 sp O60494.2 P2B15_ARAT H RecName: Full=F-box protein PP2-B15; AltName: Full=Protein PHLOEM PROTEIN 2-LIKE B15; Short=AtPP2-B15 gi 332190282 gb AEE28403.1  F-box protein PP2-B15 [Arabidopsis thaliana]                                                                                    | 292  | 289  | 1.00E-123 | 99.0  | 76.4 | 83.6 | F-box protein PP2-B15                                              | gbpln | Arabidopsis thaliana | AT1G09155.1   Symbols: AtPP2-B15, PP2-B15   phloem protein 2-B15   chr1:2949831-2950842 REVERSE LENGTH=289                                                                                                                                                        | 292  | 289  | 1.00E-126 | 99.0  | 76.4 | 83.6 |
| Rsa1.0_00273.1.g10137.t2 | dbj BAJ34364.1  unnamed protein product [Thellungiella halophila]                                                                                                                                                                                                                                                                                                    | 431  | 428  | 0         | 99.3  | 91.2 | 95.6 | unnamed protein product                                            | ----  | ----                 | AT1G09160.1   Symbols:   Protein phosphatase 2C family protein   chr1:2953199-2955059 REVERSE LENGTH=428                                                                                                                                                          | 431  | 428  | 0         | 99.3  | 88.9 | 94.2 |
| Rsa1.0_00273.1.g10138.t1 | #                                                                                                                                                                                                                                                                                                                                                                    | #    | #    | #         | #     | #    | #    | -                                                                  | ----  | ----                 | #                                                                                                                                                                                                                                                                 | #    | #    | #         | #     | #    | #    |

|                          |                                                                                                                                                                                                                                                                                                                                                                                                                                                                                                                                                                                                                                                                                                                                                                                                                                                                                                           |     |     |           |       |       |       |                                                |             |                      |                                                                                                                                                                                                                                                                                                                                                                                                                                                                                                                                                                  |     |     |           |       |       |       |
|--------------------------|-----------------------------------------------------------------------------------------------------------------------------------------------------------------------------------------------------------------------------------------------------------------------------------------------------------------------------------------------------------------------------------------------------------------------------------------------------------------------------------------------------------------------------------------------------------------------------------------------------------------------------------------------------------------------------------------------------------------------------------------------------------------------------------------------------------------------------------------------------------------------------------------------------------|-----|-----|-----------|-------|-------|-------|------------------------------------------------|-------------|----------------------|------------------------------------------------------------------------------------------------------------------------------------------------------------------------------------------------------------------------------------------------------------------------------------------------------------------------------------------------------------------------------------------------------------------------------------------------------------------------------------------------------------------------------------------------------------------|-----|-----|-----------|-------|-------|-------|
| Rsa1.0_00273.1.g10139.t1 | gb EOA37562.1  hypothetical protein CARUB_v10011869mg [Capsella rubella]                                                                                                                                                                                                                                                                                                                                                                                                                                                                                                                                                                                                                                                                                                                                                                                                                                  | 550 | 545 | 0         | 99.1  | 79.5  | 87.3  | hypothetical protein CARUB_v10011869mg         | gbpln       | Capsella rubella     | AT1G09195.2   Symbols:   FUNCTIONS IN: molecular_function unknown; INVOLVED IN: biological_process unknown; CONTAINS InterPro DOMAIN/s: Meta-dependent phosphohydrolase, HD subdomain (InterPro:IPR006674), Pox/GppA phosphatase (InterPro:IPR003695).   chr1:2968137-2971457 REVERSE LENGTH=600                                                                                                                                                                                                                                                                 | 550 | 600 | 0         | 109.1 | 76.2  | 85.5  |
| Rsa1.0_00273.1.g10140.t1 | ref XP_002894638.1  secretion-associated ras [Arabidopsis lyrata subsp. lyrata]<br>gi 297340480 gb EFH70897.1  secretion-associated ras [Arabidopsis lyrata subsp. lyrata]                                                                                                                                                                                                                                                                                                                                                                                                                                                                                                                                                                                                                                                                                                                                | 226 | 210 | 1.00E-102 | 92.9  | 82.7  | 85.8  | secretion-associated ras                       | gbpln       | Arabidopsis lyrata   | AT1G56330.1   Symbols: SARI, ATSARI, ATSARA1B, ATSARIb, SARIb   secretion-associated RAS 1B   chr1:21086845-21088478 REVERSE LENGTH=193                                                                                                                                                                                                                                                                                                                                                                                                                          | 226 | 193 | 1.00E-101 | 85.4  | 81.0  | 82.7  |
| Rsa1.0_00273.1.g10141.t1 | tpg DAA55311.1  TPA: histone H3.2 [Zea mays]                                                                                                                                                                                                                                                                                                                                                                                                                                                                                                                                                                                                                                                                                                                                                                                                                                                              | 136 | 245 | 1.00E-72  | 180.1 | 100.0 | 100.0 | TPA: histone H3.2                              | gbenv/gbpln | Zea mays             | AT5G65360.1   Symbols:   Histone superfamily protein   chr5:26120099-26120509 REVERSE LENGTH=136                                                                                                                                                                                                                                                                                                                                                                                                                                                                 | 136 | 136 | 5.00E-74  | 100.0 | 100.0 | 100.0 |
| Rsa1.0_00273.1.g10142.t5 | gb AAM63796.1  putative calcium-binding protein, calreticulin [Arabidopsis thaliana]                                                                                                                                                                                                                                                                                                                                                                                                                                                                                                                                                                                                                                                                                                                                                                                                                      | 450 | 424 | 0         | 94.2  | 84.2  | 88.0  | putative calcium-binding protein, calreticulin | gbpln       | Arabidopsis thaliana | AT1G09210.1   Symbols: CRT1b, ALCRT1b   calreticulin 1b   chr1:2973217-2976655 REVERSE LENGTH=424                                                                                                                                                                                                                                                                                                                                                                                                                                                                | 450 | 424 | 0         | 94.2  | 84.0  | 87.8  |
| Rsa1.0_00273.1.g10143.t1 | gb EOA37676.1  hypothetical protein CARUB_v10012313mg [Capsella rubella]                                                                                                                                                                                                                                                                                                                                                                                                                                                                                                                                                                                                                                                                                                                                                                                                                                  | 490 | 506 | 0         | 103.3 | 83.9  | 90.8  | hypothetical protein CARUB_v10012313mg         | gbpln       | Capsella rubella     | AT1G09220.1   Symbols:   Pentatricopeptide repeat (PPR) superfamily protein   chr1:2977952-2979466 REVERSE LENGTH=504                                                                                                                                                                                                                                                                                                                                                                                                                                            | 490 | 504 | 0         | 102.9 | 83.3  | 91.0  |
| Rsa1.0_00273.1.g10144.t1 | gb ABO21639.1  importin alpha-like protein [Brassica napus]<br>gi 126572504 gb ABO21640.1  importin alpha-like protein [Brassica napus]                                                                                                                                                                                                                                                                                                                                                                                                                                                                                                                                                                                                                                                                                                                                                                   | 540 | 542 | 0         | 100.4 | 97.0  | 98.7  | importin alpha-like protein                    | gbpln       | Brassica napus       | AT1G09270.2   Symbols: IMPA-4   importin alpha isoform 4   chr1:2994506-2997833 FORWARD LENGTH=538                                                                                                                                                                                                                                                                                                                                                                                                                                                               | 540 | 538 | 0         | 99.6  | 92.6  | 96.1  |
| Rsa1.0_00273.1.g10145.t2 | ref XP_002892498.1  hypothetical protein ARALYDRAFT_471019 [Arabidopsis lyrata subsp. lyrata]<br>gi 297338340 gb EFH68757.1  hypothetical protein ARALYDRAFT_471019 [Arabidopsis lyrata subsp. lyrata]                                                                                                                                                                                                                                                                                                                                                                                                                                                                                                                                                                                                                                                                                                    | 488 | 348 | 1.00E-145 | 71.3  | 55.5  | 59.6  | hypothetical protein ARALYDRAFT_471019         | gbpln       | Arabidopsis lyrata   | AT1G09290.1   Symbols:   unknown protein; Has 73 Blast hits to 71 proteins in 26 species: Archae - 0; Bacteria - 0; Metazoa - 5; Fungi - 11; Plants - 54; Viruses - 0; Other Eukaryotes - 3 (source: NCBI BLINK).   chr1:3001682-3003715 REVERSE LENGTH=348                                                                                                                                                                                                                                                                                                      | 488 | 348 | 1.00E-147 | 71.3  | 55.7  | 59.4  |
| Rsa1.0_00273.1.g10146.t1 | ref XP_002889741.1  hypothetical protein ARALYDRAFT_471021 [Arabidopsis lyrata subsp. lyrata]<br>gi 297335583 gb EFH66000.1  hypothetical protein ARALYDRAFT_471021 [Arabidopsis lyrata subsp. lyrata]<br>ref NP_563841.1  uncharacterized protein [Arabidopsis thaliana]<br>gi 13194796 gb AAK15560.1 AF348589_1 unknown protein [Arabidopsis thaliana]<br>gi 4337175 gb AAD18096.1  ESTs<br>gb T20589, gb T04648, gb AA597906, gb T04111, gb R84180, gb R65428, gb T44439, gb T76570, gb R90004, gb T45020, gb T42457, gb T20921, gb AA042762 and gb AA720210 come from this gene [Arabidopsis thaliana]<br>gi 15028183 gb AAK76588.1  unknown protein [Arabidopsis thaliana]<br>gi 19310813 gb AAL85137.1  unknown protein [Arabidopsis thaliana]<br>gi 21536763 gb AAM61095.1  unknown [Arabidopsis thaliana]<br>gi 332190307 gb AEE28428.1  uncharacterized protein AT1G09310 [Arabidopsis thaliana] | 478 | 480 | 0         | 100.4 | 89.7  | 95.2  | hypothetical protein ARALYDRAFT_471021         | gbpln       | Arabidopsis lyrata   | AT1G09300.1   Symbols:   Metallopeptidase M24 family protein   chr1:3003981-3008131 FORWARD LENGTH=493                                                                                                                                                                                                                                                                                                                                                                                                                                                           | 478 | 493 | 0         | 103.1 | 88.5  | 94.8  |
| Rsa1.0_00273.1.g10147.t1 | gb AA042762 and gb AA720210 come from this gene [Arabidopsis thaliana]<br>gi 15028183 gb AAK76588.1  unknown protein [Arabidopsis thaliana]<br>gi 19310813 gb AAL85137.1  unknown protein [Arabidopsis thaliana]<br>gi 21536763 gb AAM61095.1  unknown [Arabidopsis thaliana]<br>gi 332190307 gb AEE28428.1  uncharacterized protein AT1G09310 [Arabidopsis thaliana]                                                                                                                                                                                                                                                                                                                                                                                                                                                                                                                                     | 168 | 179 | 5.00E-76  | 106.5 | 86.9  | 95.2  | uncharacterized protein                        | gbpln       | Arabidopsis thaliana | AT1G09310.1   Symbols:   Protein of unknown function, DUF538   chr1:3009109-3009648 FORWARD LENGTH=179                                                                                                                                                                                                                                                                                                                                                                                                                                                           | 168 | 179 | 2.00E-78  | 106.5 | 86.9  | 95.2  |
| Rsa1.0_00273.1.g10148.t1 | gb EOA39357.1  hypothetical protein CARUB_v10012409mg [Capsella rubella]                                                                                                                                                                                                                                                                                                                                                                                                                                                                                                                                                                                                                                                                                                                                                                                                                                  | 185 | 185 | 3.00E-94  | 100.0 | 94.6  | 96.2  | hypothetical protein CARUB_v10012409mg         | gbpln       | Capsella rubella     | AT1G09330.1   Symbols:   unknown protein; FUNCTIONS IN: molecular_function unknown; INVOLVED IN: biological_process unknown; LOCATED IN: integral to membrane; EXPRESSED IN: 24 plant structures; EXPRESSED DURING: 15 growth stages; CONTAINS InterPro DOMAIN/s: Protein of unknown function DUF846, eukaryotic (InterPro:IPR008564); Has 518 Blast hits to 518 proteins in 206 species: Archae - 0; Bacteria - 0; Metazoa - 193; Fungi - 145; Plants - 73; Viruses - 0; Other Eukaryotes - 107 (source: NCBI BLINK).   chr1:3013003-3014903 REVERSE LENGTH=186 | 185 | 186 | 3.00E-96  | 100.5 | 94.1  | 96.2  |

|                          |                                                                                                                                                                                                                                                                                                                                                                                                                                                                                                                                                                                                                                                                                                                                                |     |     |           |       |      |      |                                                  |       |                      |                                                                                                                                                                                                                                                                                                                                                                   |     |     |           |       |      |      |
|--------------------------|------------------------------------------------------------------------------------------------------------------------------------------------------------------------------------------------------------------------------------------------------------------------------------------------------------------------------------------------------------------------------------------------------------------------------------------------------------------------------------------------------------------------------------------------------------------------------------------------------------------------------------------------------------------------------------------------------------------------------------------------|-----|-----|-----------|-------|------|------|--------------------------------------------------|-------|----------------------|-------------------------------------------------------------------------------------------------------------------------------------------------------------------------------------------------------------------------------------------------------------------------------------------------------------------------------------------------------------------|-----|-----|-----------|-------|------|------|
| Rsa1.0_00273.1.g10149.t1 | ref[XP_00289763.1] hypothetical protein ARALYDRAFT_888210 [Arabidopsis lyrata subsp. lyrata] gi 297335605 gb EFH66022.1 hypothetical protein ARALYDRAFT_888210 [Arabidopsis lyrata subsp. lyrata]                                                                                                                                                                                                                                                                                                                                                                                                                                                                                                                                              | 218 | 105 | 4.00E-28  | 48.2  | 35.3 | 37.6 | hypothetical protein ARALYDRAFT_888210           | gbpln | Arabidopsis lyrata   | AT1G09645.1   Symbols:   unknown protein; BEST Arabidopsis thaliana protein match is: unknown protein (TAIR:AT1G57765.1); Has 35333 Blast hits to 34131 proteins in 2444 species: Archaea - 798; Bacteria - 22429; Metazoa - 974; Fungi - 991; Plants - 531; Viruses - 0; Other Eukaryotes - 9610 (source: NCBI BLINK).   chr1:3123155-3124347 FORWARD LENGTH=106 | 218 | 106 | 2.00E-30  | 48.6  | 34.9 | 37.2 |
| Rsa1.0_00273.1.g10150.t2 | ref[XP_002892515.1] hypothetical protein ARALYDRAFT_471067 [Arabidopsis lyrata subsp. lyrata] gi 297338357 gb EFH68774.1 hypothetical protein ARALYDRAFT_471067 [Arabidopsis lyrata subsp. lyrata]                                                                                                                                                                                                                                                                                                                                                                                                                                                                                                                                             | 317 | 298 | 1.00E-148 | 94.0  | 83.3 | 88.6 | hypothetical protein ARALYDRAFT_471067           | gbpln | Arabidopsis lyrata   | AT1G09660.1   Symbols:   RNA-binding KH domain-containing protein   chr1:3128032-3130791 REVERSE LENGTH=298                                                                                                                                                                                                                                                       | 317 | 298 | 1.00E-148 | 94.0  | 81.7 | 87.7 |
| Rsa1.0_00273.1.g10151.t1 | ref[XP_002899760.1] 60S ribosomal protein L21 [Arabidopsis lyrata subsp. lyrata] gi 297335602 gb EFH66019.1 60S ribosomal protein L21 [Arabidopsis lyrata subsp. lyrata]                                                                                                                                                                                                                                                                                                                                                                                                                                                                                                                                                                       | 164 | 164 | 1.00E-88  | 100.0 | 98.2 | 98.8 | 60S ribosomal protein L21                        | gbpln | Arabidopsis lyrata   | AT1G09690.1   Symbols:   Translation protein SH3-like family protein   chr1:3136407-3137430 REVERSE LENGTH=164                                                                                                                                                                                                                                                    | 164 | 164 | 2.00E-90  | 100.0 | 97.0 | 98.2 |
| Rsa1.0_00273.1.g10152.t2 | gb AAT77417.1  dsRNA-binding protein LH2 [Brassica oleracea var. capitata]                                                                                                                                                                                                                                                                                                                                                                                                                                                                                                                                                                                                                                                                     | 295 | 278 | 1.00E-124 | 94.2  | 85.8 | 88.5 | dsRNA-binding protein LH2                        | gbpln | Brassica oleracea    | AT1G09700.1   Symbols: HYL1, DRB1   dsRNA-binding domain-like superfamily protein   chr1:3137960-3140118 REVERSE LENGTH=419                                                                                                                                                                                                                                       | 295 | 419 | 1.00E-111 | 142.0 | 74.2 | 82.0 |
| Rsa1.0_00273.1.g10153.t1 | ref[NP_001184951.1] putative ubiquitin-like-specific protease 2B [Arabidopsis thaliana] gi 357529069 sp Q8L7S0.3 ULP2B_ARATH RecName: Full=Probable ubiquitin-like-specific protease 2B gi 215400502 gb ACJ66287.1  EL5 SUMO protease [Arabidopsis thaliana] gi 332190365 gb AEE28486.1  putative ubiquitin-like-specific protease 2B [Arabidopsis thaliana]                                                                                                                                                                                                                                                                                                                                                                                   | 978 | 931 | 0         | 95.2  | 70.3 | 77.2 | putative ubiquitin-like-specific protease 2B     | gbpln | Arabidopsis thaliana | AT1G09730.2   Symbols:   Cysteine proteinases superfamily protein   chr1:3148017-3154236 REVERSE LENGTH=931                                                                                                                                                                                                                                                       | 978 | 931 | 0         | 95.2  | 70.3 | 77.2 |
| Rsa1.0_00273.1.g10154.t1 | ref[NP_172445.2] adenine nucleotide alpha hydrolases-like protein [Arabidopsis thaliana] gi 29028798 gb AAO64778.1  At1g09740 [Arabidopsis thaliana] gi 110736422 dbj BAF00178.1  putative ER6 protein [Arabidopsis thaliana] gi 332190366 gb AEE28487.1  adenine nucleotide alpha hydrolases-like protein [Arabidopsis thaliana]                                                                                                                                                                                                                                                                                                                                                                                                              | 154 | 171 | 7.00E-60  | 111.0 | 79.2 | 85.7 | adenine nucleotide alpha hydrolases-like protein | gbpln | Arabidopsis thaliana | AT1G09740.1   Symbols:   Adenine nucleotide alpha hydrolases-like superfamily protein   chr1:3154603-3155834 FORWARD LENGTH=171                                                                                                                                                                                                                                   | 154 | 171 | 2.00E-62  | 111.0 | 79.2 | 85.7 |
| Rsa1.0_00273.1.g10155.t1 | gb EOA40162.1  hypothetical protein CARUB_v10008880mg [Capsella rubella]                                                                                                                                                                                                                                                                                                                                                                                                                                                                                                                                                                                                                                                                       | 452 | 513 | 0         | 113.5 | 81.4 | 88.5 | hypothetical protein CARUB_v10008880mg           | gbpln | Capsella rubella     | AT1G09750.1   Symbols:   Eukaryotic aspartyl protease family protein   chr1:3157541-3158960 FORWARD LENGTH=449                                                                                                                                                                                                                                                    | 452 | 449 | 0         | 99.3  | 83.4 | 89.2 |
| Rsa1.0_00273.1.g10156.t1 | emb CAA48890.1  U2 small nuclear ribonucleoprotein A' [Arabidopsis thaliana]                                                                                                                                                                                                                                                                                                                                                                                                                                                                                                                                                                                                                                                                   | 255 | 249 | 1.00E-123 | 97.6  | 86.7 | 94.1 | U2 small nuclear ribonucleoprotein A'            | gbpln | Arabidopsis thaliana | AT1G09760.1   Symbols: U2A'   U2 small nuclear ribonucleoprotein A   chr1:3159476-3161603 REVERSE LENGTH=249                                                                                                                                                                                                                                                      | 255 | 249 | 1.00E-126 | 97.6  | 86.7 | 94.1 |
| Rsa1.0_00273.1.g10157.t1 | ref[NP_172448.1] cell division cycle 5-like protein [Arabidopsis thaliana] gi 288561907 sp P92948.2 CDC5L_ARATH RecName: Full=Cell division cycle 5-like protein; Short=Cdc5-like protein; AltName: Full=Atypical R2R3-MYB transcription factor CDC5; AltName: Full=MOS4-associated complex protein 1; Short=MAC protein 1; AltName: Full=Protein MYB DOMAIN CELL DIVISION CYCLE 5; Short=AtMYBCD5 gi 2160167 gb AAB60730.1  Identical to A. thaliana Myb-like protein (gb D58424) [Arabidopsis thaliana] gi 20260316 gb AAM13056.1  putative Myb DNA-binding protein [Arabidopsis thaliana] gi 31711768 gb AAP68240.1  At1g09770 [Arabidopsis thaliana] gi 332190369 gb AEE28490.1  cell division cycle 5-like protein [Arabidopsis thaliana] | 836 | 844 | 0         | 101.0 | 89.5 | 94.9 | cell division cycle 5-like protein               | gbpln | Arabidopsis thaliana | AT1G09770.1   Symbols: ATCDC5, CDC5, ATMYBCD5   cell division cycle 5   chr1:3162002-3165122 FORWARD LENGTH=844                                                                                                                                                                                                                                                   | 836 | 844 | 0         | 101.0 | 89.5 | 94.9 |

|                          |                                                                                                                                                                                                                                                                                                                                                                                                                                                                                                                                                                                                                                                                                                                                                                                              |      |      |          |       |      |      |                                                               |       |                      |                                                                                                                                                                                                                                                                                                                                             |      |      |           |       |      |      |
|--------------------------|----------------------------------------------------------------------------------------------------------------------------------------------------------------------------------------------------------------------------------------------------------------------------------------------------------------------------------------------------------------------------------------------------------------------------------------------------------------------------------------------------------------------------------------------------------------------------------------------------------------------------------------------------------------------------------------------------------------------------------------------------------------------------------------------|------|------|----------|-------|------|------|---------------------------------------------------------------|-------|----------------------|---------------------------------------------------------------------------------------------------------------------------------------------------------------------------------------------------------------------------------------------------------------------------------------------------------------------------------------------|------|------|-----------|-------|------|------|
| Rsa1.0_00273.1.g10158.t1 | ref NP_563852.1  2,3-bisphosphoglycerate-independent phosphoglycerate mutase 1 [Arabidopsis thaliana] gi 30316342 sp O04499.3 PMG1_ARATH RecName: Full=2,3-bisphosphoglycerate-independent phosphoglycerate mutase 1; Short=BPG-independent PGAM 1; Short=Phosphoglyceromutase 1; AltName: Full=PGAM-1 gi 21592310 gb AAM64261.1  putative 2,3-bisphosphoglycerate-independent phosphoglycerate mutase [Arabidopsis thaliana] gi 23297457 gb AAN12974.1  putative 2,3-bisphosphoglycerate-independent phosphoglycerate mutase [Arabidopsis thaliana] gi 23397261 gb AAN31912.1  putative 2,3-bisphosphoglycerate-independent phosphoglycerate mutase [Arabidopsis thaliana] gi 332190370 gb AEE28491.1  2,3-bisphosphoglycerate-independent phosphoglycerate mutase 1 [Arabidopsis thaliana] | 557  | 557  | 0        | 100.0 | 94.1 | 97.3 | 2,3-bisphosphoglycerate-independent phosphoglycerate mutase 1 | gbpln | Arabidopsis thaliana | AT1G09780.1   Symbols:   Phosphoglycerate mutase, 2,3-bisphosphoglycerate-independent   chr1:3165550-3167812 REVERSE LENGTH=557                                                                                                                                                                                                             | 557  | 557  | 0         | 100.0 | 94.1 | 97.3 |
| Rsa1.0_00273.1.g10159.t1 | gb EOA38932.1  hypothetical protein CARUB_v10011331mg [Capsella rubella]                                                                                                                                                                                                                                                                                                                                                                                                                                                                                                                                                                                                                                                                                                                     | 436  | 442  | 0        | 101.4 | 76.1 | 84.9 | hypothetical protein CARUB_v10011331mg                        | gbpln | Capsella rubella     | AT1G09790.1   Symbols:   COBL6   COBRA-like protein 6 precursor   chr1:3168568-3170819 REVERSE LENGTH=454                                                                                                                                                                                                                                   | 436  | 454  | 0         | 104.1 | 72.2 | 81.7 |
| Rsa1.0_00273.1.g10160.t1 | ref XP_002889771.1  hypothetical protein ARALYDRAFT_334263 [Arabidopsis lyrata subsp. lyrata] gi 297335613 gb EFH66030.1  hypothetical protein ARALYDRAFT_334263 [Arabidopsis lyrata subsp. lyrata]                                                                                                                                                                                                                                                                                                                                                                                                                                                                                                                                                                                          | 623  | 128  | 3.00E-44 | 20.5  | 16.5 | 18.0 | hypothetical protein ARALYDRAFT_334263                        | gbpln | Arabidopsis lyrata   | AT1G09812.1   Symbols:   unknown protein; BEST Arabidopsis thaliana protein match is: unknown protein (TAIR-AT1G58007.2); Has 93 Blast hits to 93 proteins in 13 species: Archaea - 0; Bacteria - 0; Metazoa - 0; Fungi - 0; Plants - 93; Viruses - 0; Other Eukaryotes - 0 (source: NCBI BLINK).   chr1:3187817-3188580 FORWARD LENGTH=128 | 623  | 128  | 1.00E-45  | 20.5  | 16.1 | 18.0 |
| Rsa1.0_00273.1.g10161.t1 | ref NP_172454.1  phosphoribosylamine--glycine ligase [Arabidopsis thaliana] gi 12644306 sp P52420.2 PUR2_ARATH RecName: Full=Phosphoribosylamine--glycine ligase, chloroplastic; AltName: Full=Glycinamide ribonucleotide synthetase; Short=GARS; AltName: Full=Phosphoribosylglycinamide synthetase; Flags: Precursor gi 2160174 gb AAB60737.1  Identical to A. thaliana PUR2 (gb X74766). ESTs gb ATTS3927.gb N96446 come from this gene [Arabidopsis thaliana] gi 15292773 gb AAK92755.1  putative phosphoribosylglycinamide synthetase [Arabidopsis thaliana] gi 20259251 gb AAM14361.1  putative phosphoribosylglycinamide synthetase [Arabidopsis thaliana] gi 332190379 gb AEE28500.1  phosphoribosylamine--glycine ligase [Arabidopsis thaliana]                                     | 534  | 532  | 0        | 99.6  | 88.0 | 92.1 | phosphoribosylamine--glycine ligase                           | gbpln | Arabidopsis thaliana | AT1G09830.1   Symbols:   Glycinamide ribonucleotide (GAR) synthetase   chr1:3192783-3194936 REVERSE LENGTH=532                                                                                                                                                                                                                              | 534  | 532  | 0         | 99.6  | 88.0 | 92.1 |
| Rsa1.0_00273.1.g10162.t1 | gb EOA40520.1  hypothetical protein CARUB_v10009250mg [Capsella rubella]                                                                                                                                                                                                                                                                                                                                                                                                                                                                                                                                                                                                                                                                                                                     | 422  | 421  | 0        | 99.8  | 94.8 | 96.9 | hypothetical protein CARUB_v10009250mg                        | gbpln | Capsella rubella     | AT1G09840.6   Symbols:   ATSK41, SK41   shaggy-like protein kinase 41   chr1:3196114-3199524 REVERSE LENGTH=421                                                                                                                                                                                                                             | 422  | 421  | 0         | 99.8  | 94.3 | 96.7 |
| Rsa1.0_00273.1.g10163.t2 | ref XP_002892532.1  predicted protein [Arabidopsis lyrata subsp. lyrata] gi 297338374 gb EFH68791.1  predicted protein [Arabidopsis lyrata subsp. lyrata]                                                                                                                                                                                                                                                                                                                                                                                                                                                                                                                                                                                                                                    | 695  | 664  | 0        | 95.5  | 82.9 | 89.2 | predicted protein                                             | gbpln | Arabidopsis lyrata   | AT1G09880.1   Symbols:   Rhamnogalacturonate lyase family protein   chr1:3208828-3211653 REVERSE LENGTH=631                                                                                                                                                                                                                                 | 695  | 631  | 0         | 90.8  | 77.4 | 84.2 |
| Rsa1.0_00273.1.g10164.t1 | ref XP_002892536.1  hypothetical protein ARALYDRAFT_312036 [Arabidopsis lyrata subsp. lyrata] gi 297338378 gb EFH68795.1  hypothetical protein ARALYDRAFT_312036 [Arabidopsis lyrata subsp. lyrata]                                                                                                                                                                                                                                                                                                                                                                                                                                                                                                                                                                                          | 247  | 259  | 9.00E-94 | 104.9 | 71.3 | 83.8 | hypothetical protein ARALYDRAFT_312036                        | gbpln | Arabidopsis lyrata   | AT1G09932.2   Symbols:   Phosphoglycerate mutase family protein   chr1:3230716-3232924 REVERSE LENGTH=253                                                                                                                                                                                                                                   | 247  | 253  | 5.00E-96  | 102.4 | 69.2 | 81.4 |
| Rsa1.0_00273.1.g10165.t1 | # # # # # # # # - ----                                                                                                                                                                                                                                                                                                                                                                                                                                                                                                                                                                                                                                                                                                                                                                       | #    | #    | #        | #     | #    | #    | -                                                             | ----  | ----                 | #                                                                                                                                                                                                                                                                                                                                           | #    | #    | #         | #     | #    | #    |
| Rsa1.0_00273.1.g10166.t1 | gb ACP30598.1  disease resistance protein [Brassica rapa subsp. pekinensis]                                                                                                                                                                                                                                                                                                                                                                                                                                                                                                                                                                                                                                                                                                                  | 1478 | 2301 | 0        | 155.7 | 67.4 | 79.4 | disease resistance protein                                    | gbpln | Brassica rapa        | AT4G23160.1   Symbols:   CRK8   cysteine-rich RLK (RECEPTOR-like protein kinase) 8   chr4:12129485-12134086 FORWARD LENGTH=1262                                                                                                                                                                                                             | 1478 | 1262 | 1.00E-109 | 85.4  | 13.1 | 20.8 |

|                          |                                                                                                                                                                                                                                                                                                                                                                                                               |     |     |           |       |      |      |                                                                            |       |                      |                                                                                                                                               |     |     |           |       |      |      |
|--------------------------|---------------------------------------------------------------------------------------------------------------------------------------------------------------------------------------------------------------------------------------------------------------------------------------------------------------------------------------------------------------------------------------------------------------|-----|-----|-----------|-------|------|------|----------------------------------------------------------------------------|-------|----------------------|-----------------------------------------------------------------------------------------------------------------------------------------------|-----|-----|-----------|-------|------|------|
| Rsa1.0_00273.1.g10167.t1 | refNP_172499.1  Core-2/I-branching beta-1,6-N-acetylglucosaminyltransferase family protein [Arabidopsis thaliana] gi 4914330 gb AAD32878.1 AC005489_16 F14N23.16 [Arabidopsis thaliana] gi 117168053 gb ABK32109.1  At1g10280 [Arabidopsis thaliana] gi 332190440 gb AEE28561.1  Core-2/I-branching beta-1,6-N-acetylglucosaminyltransferase family protein [Arabidopsis thaliana]                            | 415 | 412 | 0         | 99.3  | 88.4 | 94.2 | Core-2/I-branching beta-1,6-N-acetylglucosaminyltransferase family protein | gbpln | Arabidopsis thaliana | AT1G10280.1   Symbols:   Core-2/I-branching beta-1,6-N-acetylglucosaminyltransferase family protein   chr1:3366795-3368739 REVERSE LENGTH=412 | 415 | 412 | 0         | 99.3  | 88.4 | 94.2 |
| Rsa1.0_00273.1.g10168.t1 | gb AAF22291.1 AF180732.1 dynamin-like protein 6 [Arabidopsis thaliana]                                                                                                                                                                                                                                                                                                                                        | 922 | 914 | 0         | 99.1  | 92.6 | 97.1 | dynamin-like protein 6                                                     | gbpln | Arabidopsis thaliana | AT1G10290.1   Symbols: ADL6, DRP2A   dynamin-like protein 6   chr1:3370774-3377120 FORWARD LENGTH=914                                         | 922 | 914 | 0         | 99.1  | 92.5 | 97.0 |
| Rsa1.0_00273.1.g10169.t1 | refNP_563866.1  Rossmann-fold NAD(P)-binding domain-containing protein [Arabidopsis thaliana] gi 4914333 gb AAD32881.1 AC005489_19 F14N23.19 [Arabidopsis thaliana] gi 51971537 dbj BAD44433.1  unknown protein [Arabidopsis thaliana] gi 107738340 gb ABF83679.1  At1g10310 [Arabidopsis thaliana] gi 332190443 gb AEE28564.1  Rossmann-fold NAD(P)-binding domain-containing protein [Arabidopsis thaliana] | 252 | 242 | 1.00E-126 | 96.0  | 89.3 | 93.7 | Rossmann-fold NAD(P)-binding domain-containing protein                     | gbpln | Arabidopsis thaliana | AT1G10310.1   Symbols:   NAD(P)-binding Rossmann-fold superfamily protein   chr1:3381733-3383874 REVERSE LENGTH=242                           | 252 | 242 | 1.00E-128 | 96.0  | 89.3 | 93.7 |
| Rsa1.0_00273.1.g10170.t2 | refNP_172503.1  zinc finger CCH domain-containing protein 5 [Arabidopsis thaliana] gi 229621703 sp Q9SY74.2 C3H5 ARAT H RecName: Full=Zinc finger CCH domain-containing protein 5; Short=AtC3H5 gi 332190444 gb AEE28565.1  zinc finger CCH domain-containing protein 5 [Arabidopsis thaliana]                                                                                                                | 751 | 757 | 0         | 100.8 | 66.0 | 73.9 | zinc finger CCH domain-containing protein 5                                | gbpln | Arabidopsis thaliana | AT1G10320.1   Symbols:   Zinc finger C-x8-C-x5-C-x3-H type family protein   chr1:3384164-3388373 REVERSE LENGTH=757                           | 751 | 757 | 0         | 100.8 | 66.0 | 73.9 |
| Rsa1.0_00273.1.g10171.t1 | refNP_563867.1  ankyrin repeat-containing protein [Arabidopsis thaliana] gi 4914336 gb AAD32884.1 AC005489_22 F14N23.22 [Arabidopsis thaliana] gi 13937240 gb AAK50112.1 AF372975.1 At1g10340/F14N23.22 [Arabidopsis thaliana] gi 19548017 gb AAL87372.1  At1g10340/F14N23.22 [Arabidopsis thaliana] gi 332190446 gb AEE28567.1  ankyrin repeat-containing protein [Arabidopsis thaliana]                     | 578 | 578 | 0         | 100.0 | 73.5 | 81.1 | ankyrin repeat-containing protein                                          | gbpln | Arabidopsis thaliana | AT1G10340.1   Symbols:   Ankyrin repeat family protein   chr1:3390475-3392481 REVERSE LENGTH=578                                              | 578 | 578 | 0         | 100.0 | 73.5 | 81.1 |
| Rsa1.0_00273.1.g10172.t1 | refNP_172506.1  putative DNAJ heat-shock protein [Arabidopsis thaliana] gi 4914337 gb AAD32885.1 AC005489_23 F14N23.23 [Arabidopsis thaliana] gi 13430680 gb AAK25962.1 AF360252.1 putative heat-shock protein [Arabidopsis thaliana] gi 14532888 gb AAK64126.1  putative heat-shock protein [Arabidopsis thaliana] gi 332190448 gb AEE28569.1  putative DNAJ heat-shock protein [Arabidopsis thaliana]       | 622 | 349 | 1.00E-129 | 56.1  | 39.9 | 44.1 | putative DNAJ heat-shock protein                                           | gbpln | Arabidopsis thaliana | AT1G10350.1   Symbols:   DNAJ heat shock family protein   chr1:3393595-3394860 REVERSE LENGTH=349                                             | 622 | 349 | 1.00E-132 | 56.1  | 39.9 | 44.1 |
| Rsa1.0_00273.1.g10173.t1 | refNP_563869.1  Vps51/Vps67 family (components of vesicular transport) protein [Arabidopsis thaliana] gi 332190452 gb AEE28573.1  Vps51/Vps67 family (components of vesicular transport) protein [Arabidopsis thaliana]                                                                                                                                                                                       | 758 | 754 | 0         | 99.5  | 93.8 | 97.4 | Vps51/Vps67 family (components of vesicular transport) protein             | gbpln | Arabidopsis thaliana | AT1G10385.1   Symbols:   Vps51/Vps67 family (components of vesicular transport) protein   chr1:3403224-3405856 FORWARD LENGTH=754             | 758 | 754 | 0         | 99.5  | 93.8 | 97.4 |

|                          |                                                                                                                                                                                                                                                                                                                                                                                                                                                                                                                                |      |      |           |       |      |      |                                                                       |       |                      |                                                                                                                                               |      |      |          |       |      |      |
|--------------------------|--------------------------------------------------------------------------------------------------------------------------------------------------------------------------------------------------------------------------------------------------------------------------------------------------------------------------------------------------------------------------------------------------------------------------------------------------------------------------------------------------------------------------------|------|------|-----------|-------|------|------|-----------------------------------------------------------------------|-------|----------------------|-----------------------------------------------------------------------------------------------------------------------------------------------|------|------|----------|-------|------|------|
| Rsa1.0_00273.1.g10174.t1 | refNP_172510.2  Nucleoporin autopeptidase [Arabidopsis thaliana] gi 79317517 refNP_001031018.1  Nucleoporin autopeptidase [Arabidopsis thaliana] gi 19310423 gb AAL84948.1  At1g10390/F14N23.29 [Arabidopsis thaliana] gi 27764948 gb AAO23595.1  At1g10390/F14N23.29 [Arabidopsis thaliana] gi 11074221 dbj BAE99032.1  hypothetical protein [Arabidopsis thaliana] gi 332190453 gb AEE28574.1  Nucleoporin autopeptidase [Arabidopsis thaliana] gi 332190454 gb AEE28575.1  Nucleoporin autopeptidase [Arabidopsis thaliana] | 1032 | 1041 | 0         | 100.9 | 84.9 | 90.9 | Nucleoporin autopeptidase                                             | gbpln | Arabidopsis thaliana | AT1G10390.2   Symbols:   Nucleoporin autopeptidase   chr1:3407265-3412045 REVERSE LENGTH=1041                                                 | 1032 | 1041 | 0        | 100.9 | 84.9 | 90.9 |
| Rsa1.0_00273.1.g10175.t1 | refNP_172511.3  UDP-glycosyltransferase-like protein [Arabidopsis thaliana] gi 75213386 sp O9S584.1 U90A2 ARAT H RecName: Full=UDP-glycosyltransferase 90A2 gi 4914344 gb AAD32892.1 AC005489_30 F14N23.30 [Arabidopsis thaliana] gi 332190455 gb AEE28576.1  UDP-glycosyltransferase 90A2 [Arabidopsis thaliana]                                                                                                                                                                                                              | 466  | 467  | 0         | 100.2 | 86.1 | 91.4 | UDP-glycosyltransferase-like protein                                  | gbpln | Arabidopsis thaliana | AT1G10400.1   Symbols:   UDP-Glycosyltransferase superfamily protein   chr1:3414869-3416358 REVERSE LENGTH=467                                | 466  | 467  | 0        | 100.2 | 86.1 | 91.4 |
| Rsa1.0_00273.1.g10176.t1 | refXP_002892573.1  hypothetical protein ARALYDRAFT_888316 [Arabidopsis lyrata subsp. lyrata] gi 297338415 gb EFH68832.1  hypothetical protein ARALYDRAFT_888316 [Arabidopsis lyrata subsp. lyrata]                                                                                                                                                                                                                                                                                                                             | 257  | 258  | 1.00E-102 | 100.4 | 80.5 | 86.8 | hypothetical protein ARALYDRAFT_888316                                | gbpln | Arabidopsis lyrata   | AT1G10470.1   Symbols: ARR4, MEE7, ATRR1, IBC7   response regulator 4   chr1:3442624-3443759 REVERSE LENGTH=259                               | 257  | 259  | 4.00E-96 | 100.8 | 80.9 | 86.0 |
| Rsa1.0_00273.1.g10177.t1 | gb ABD65629.1  hypothetical protein Z3.t00046 [Brassica oleracea]                                                                                                                                                                                                                                                                                                                                                                                                                                                              | 109  | 147  | 2.00E-35  | 134.9 | 62.4 | 73.4 | hypothetical protein Z3.t00046                                        | gbpln | Brassica oleracea    | AT3G24255.1   Symbols:   RNA-directed DNA polymerase (reverse transcriptase)-related family protein   chr3:8789471-8793208 FORWARD LENGTH=746 | 109  | 746  | 2.00E-16 | 684.4 | 39.4 | 48.6 |
| Rsa1.0_00273.1.g10178.t1 | refXP_002889811.1  zinc finger protein 5, ZFP5 [Arabidopsis lyrata subsp. lyrata] gi 297335655 gb EFH66070.1  zinc finger protein 5, ZFP5 [Arabidopsis lyrata subsp. lyrata]                                                                                                                                                                                                                                                                                                                                                   | 205  | 205  | 1.00E-82  | 100.0 | 85.4 | 91.7 | zinc finger protein 5, ZFP5                                           | gbpln | Arabidopsis lyrata   | AT1G10480.1   Symbols: ZFP5   zinc finger protein 5   chr1:3449734-3450369 FORWARD LENGTH=211                                                 | 205  | 211  | 5.00E-83 | 102.9 | 83.4 | 91.2 |
| Rsa1.0_00273.1.g10179.t1 | gb EOA36696.1  hypothetical protein CARUB_v10012139mg [Capsella rubella]                                                                                                                                                                                                                                                                                                                                                                                                                                                       | 1027 | 1028 | 0         | 100.1 | 92.1 | 96.5 | hypothetical protein CARUB_v10012139mg                                | gbpln | Capsella rubella     | AT1G10490.1   Symbols:   Domain of unknown function (DUF1726) :Putative ATPase (DUF699)   chr1:3453589-3459925 FORWARD LENGTH=1028            | 1027 | 1028 | 0        | 100.1 | 91.4 | 96.2 |
| Rsa1.0_00273.1.g10180.t1 | dbj BAJ34349.1  unnamed protein product [Thellungiella halophila]                                                                                                                                                                                                                                                                                                                                                                                                                                                              | 179  | 177  | 3.00E-86  | 98.9  | 89.9 | 92.2 | unnamed protein product                                               | ----  | ----                 | AT1G10500.1   Symbols: ATCPISCA, CPISCA   chloroplast-localized ISCA-like protein   chr1:3460160-3461340 REVERSE LENGTH=180                   | 179  | 180  | 1.00E-77 | 100.6 | 83.8 | 88.3 |
| Rsa1.0_00273.1.g10181.t1 | refXP_002889813.1  EMB2004 [Arabidopsis lyrata subsp. lyrata] gi 297335655 gb EFH66072.1  EMB2004 [Arabidopsis lyrata subsp. lyrata]                                                                                                                                                                                                                                                                                                                                                                                           | 611  | 605  | 0         | 99.0  | 90.7 | 94.1 | EMB2004                                                               | gbpln | Arabidopsis lyrata   | AT1G10510.1   Symbols: emb2004   RNI-like superfamily protein   chr1:3461771-3465590 FORWARD LENGTH=605                                       | 611  | 605  | 0        | 99.0  | 90.0 | 93.8 |
| Rsa1.0_00273.1.g10182.t1 | refNP_172522.2  DNA polymerase lambda subunit [Arabidopsis thaliana] gi 12053869 emb CAC21394.1  DNA polymerase lambda [Arabidopsis thaliana] gi 91805767 gb ABE65612.1  DNA polymerase lambda [Arabidopsis thaliana] gi 304440990 gb ADM33939.1  DNA pol lambda [Arabidopsis thaliana] gi 332190467 gb AEE28588.1  DNA polymerase lambda subunit [Arabidopsis thaliana]                                                                                                                                                       | 531  | 529  | 0         | 99.6  | 85.5 | 91.9 | DNA polymerase lambda subunit                                         | gbpln | Arabidopsis thaliana | AT1G10520.1   Symbols:   DNA polymerase lambda (POL)   chr1:3465964-3469248 FORWARD LENGTH=529                                                | 531  | 529  | 0        | 99.6  | 85.5 | 91.9 |
| Rsa1.0_00273.1.g10183.t7 | emb CAB91581.1  putative protein [Arabidopsis thaliana]                                                                                                                                                                                                                                                                                                                                                                                                                                                                        | 1337 | 1752 | 0         | 131.0 | 42.6 | 56.5 | putative protein                                                      | gbpln | Arabidopsis thaliana | AT1G52950.1   Symbols:   Nucleic acid-binding, OB-fold-like protein   chr1:19725483-19728007 FORWARD LENGTH=566                               | 1337 | 566  | 2.00E-30 | 42.3  | 7.3  | 12.3 |
| Rsa1.0_00274.1.g10184.t1 | gb ABD65624.1  hypothetical protein Z3.t00036 [Brassica oleracea]                                                                                                                                                                                                                                                                                                                                                                                                                                                              | 913  | 842  | 1.00E-120 | 92.2  | 34.6 | 50.8 | hypothetical protein Z3.t00036                                        | gbpln | Brassica oleracea    | AT1G31150.1   Symbols:   Domain of unknown function (DUF1985)   chr1:11120097-11122412 FORWARD LENGTH=673                                     | 913  | 673  | 1.00E-34 | 73.7  | 11.0 | 16.1 |
| Rsa1.0_00274.1.g10185.t1 | gb ABD65615.1  hypothetical protein Z3.t00033 [Brassica oleracea]                                                                                                                                                                                                                                                                                                                                                                                                                                                              | 167  | 326  | 7.00E-16  | 195.2 | 34.1 | 52.1 | hypothetical protein Z3.t00033                                        | gbpln | Brassica oleracea    | #                                                                                                                                             | #    | #    | #        | #     | #    |      |
| Rsa1.0_00274.1.g10186.t1 | gb AFO66528.1  putative eukaryotic translation initiation factor SUI1 family protein [Brassica napus]                                                                                                                                                                                                                                                                                                                                                                                                                          | 223  | 704  | 7.00E-72  | 315.7 | 57.0 | 69.1 | putative eukaryotic translation initiation factor SUI1 family protein | gbpln | Brassica napus       | AT2G24700.1   Symbols:   Transcriptional factor B3 family protein   chr2:10513049-10515288 REVERSE LENGTH=555                                 | 223  | 555  | 8.00E-35 | 248.9 | 36.8 | 56.5 |



|                          |                                                                                                                                                                                                                                                                                                                                                                                                                                                                                                                                                                                                                                                                                                                                                                                                                                                                                                                                                                     |      |      |           |       |      |      |                                                                |       |                         |                                                                                                                                                          |      |     |           |       |      |      |
|--------------------------|---------------------------------------------------------------------------------------------------------------------------------------------------------------------------------------------------------------------------------------------------------------------------------------------------------------------------------------------------------------------------------------------------------------------------------------------------------------------------------------------------------------------------------------------------------------------------------------------------------------------------------------------------------------------------------------------------------------------------------------------------------------------------------------------------------------------------------------------------------------------------------------------------------------------------------------------------------------------|------|------|-----------|-------|------|------|----------------------------------------------------------------|-------|-------------------------|----------------------------------------------------------------------------------------------------------------------------------------------------------|------|-----|-----------|-------|------|------|
| Rsa1.0_00274.1.g10187.t2 | gb AAF99763.1 AC003981.13<br>F22O13.21 [Arabidopsis thaliana]<br>gi 9293930 dbj BAB01833.1  Mutator-<br>like transposase [Arabidopsis thaliana]<br>gi 10177478 dbj BAB10869.1  mutator-<br>like transposase [Arabidopsis thaliana]<br>ref XP_002892938.1  pfkB-type<br>carbohydrate kinase family protein<br>[Arabidopsis lyrata subsp. lyrata]                                                                                                                                                                                                                                                                                                                                                                                                                                                                                                                                                                                                                     | 503  | 915  | 1.00E-139 | 181.9 | 47.3 | 66.2 | F22O13.21                                                      | gbpln | Arabidopsis<br>thaliana | AT1G64260.1   Symbols:   MuDR family<br>transposase   chr1:23847756-23849915<br>FORWARD LENGTH=719                                                       | 503  | 719 | 9.00E-29  | 142.9 | 20.7 | 35.4 |
| Rsa1.0_00274.1.g10188.t3 | gb AAF18641.1 AC006228.12 F5J5.16<br>[Arabidopsis thaliana]<br>ref XP_002892938.1  pfkB-type<br>carbohydrate kinase family protein<br>[Arabidopsis lyrata subsp. lyrata]                                                                                                                                                                                                                                                                                                                                                                                                                                                                                                                                                                                                                                                                                                                                                                                            | 181  | 380  | 5.00E-15  | 209.9 | 19.9 | 26.0 | pfkB-type<br>carbohydrate kinase<br>family protein             | gbpln | Arabidopsis<br>lyrata   | AT1G17160.1   Symbols:   pfkB-like<br>carbohydrate kinase family protein  <br>chr1:5867678-5869215 FORWARD<br>LENGTH=379                                 | 181  | 379 | 9.00E-17  | 209.4 | 19.9 | 25.4 |
| Rsa1.0_00274.1.g10189.t3 | gb ABD65615.1  hypothetical protein<br>23.t00033 [Brassica oleracea]                                                                                                                                                                                                                                                                                                                                                                                                                                                                                                                                                                                                                                                                                                                                                                                                                                                                                                | 451  | 326  | 6.00E-24  | 72.3  | 15.5 | 24.8 | hypothetical protein<br>23.t00033                              | gbpln | Brassica<br>oleracea    | #                                                                                                                                                        | #    | #   | #         | #     | #    | #    |
| Rsa1.0_00274.1.g10190.t3 | gb AAF18641.1 AC006228.12 F5J5.16<br>[Arabidopsis thaliana]                                                                                                                                                                                                                                                                                                                                                                                                                                                                                                                                                                                                                                                                                                                                                                                                                                                                                                         | 465  | 1024 | 1.00E-38  | 220.2 | 25.4 | 33.8 | F5J5.16                                                        | gbpln | Arabidopsis<br>thaliana | #                                                                                                                                                        | #    | #   | #         | #     | #    | #    |
| Rsa1.0_00274.1.g10191.t1 | gb AAF18538.1 AC006551.24 Very<br>similar to retrotransposon reverse<br>transcriptase [Arabidopsis thaliana]                                                                                                                                                                                                                                                                                                                                                                                                                                                                                                                                                                                                                                                                                                                                                                                                                                                        | 186  | 1231 | 3.00E-44  | 661.8 | 53.2 | 71.5 | Very similar to<br>retrotransposon<br>reverse transcriptase    | gbpln | Arabidopsis<br>thaliana | AT4G29090.1   Symbols:   Ribonuclease H-<br>like superfamily protein   chr4:14333528-<br>14335255 FORWARD LENGTH=575                                     | 186  | 575 | 6.00E-18  | 309.1 | 37.1 | 58.1 |
| Rsa1.0_00274.1.g10192.t1 | gb AAL60579.1 AF454957.1<br>senescence-associated cysteine<br>protease [Brassica oleracea]                                                                                                                                                                                                                                                                                                                                                                                                                                                                                                                                                                                                                                                                                                                                                                                                                                                                          | 463  | 460  | 0         | 99.4  | 96.1 | 97.6 | senescence-<br>associated cysteine<br>protease                 | gbpln | Brassica<br>oleracea    | AT5G43060.1   Symbols:   Granulin repeat<br>cysteine protease family protein  <br>chr5:17269784-17272117 REVERSE<br>LENGTH=463                           | 463  | 463 | 0         | 100.0 | 87.0 | 92.2 |
| Rsa1.0_00274.1.g10193.t1 | #                                                                                                                                                                                                                                                                                                                                                                                                                                                                                                                                                                                                                                                                                                                                                                                                                                                                                                                                                                   | #    | #    | #         | #     | #    | #    | -                                                              | ----  | ----                    | #                                                                                                                                                        | #    | #   | #         | #     | #    | #    |
| Rsa1.0_00274.1.g10194.t2 | dbj BAB09379.1  non-LTR retroelement<br>reverse transcriptase-like protein<br>[Arabidopsis thaliana]                                                                                                                                                                                                                                                                                                                                                                                                                                                                                                                                                                                                                                                                                                                                                                                                                                                                | 1388 | 1223 | 0         | 88.1  | 40.8 | 54.5 | non-LTR retroelement<br>reverse transcriptase-<br>like protein | gbpln | Arabidopsis<br>thaliana | AT3G24255.1   Symbols:   RNA-directed<br>DNA polymerase (reverse transcriptase)-<br>related family protein   chr3:8789471-<br>8793208 FORWARD LENGTH=746 | 1388 | 746 | 2.00E-94  | 53.7  | 13.5 | 17.1 |
| Rsa1.0_00274.1.g10195.t1 | ref XP_002863700.1  hypothetical<br>protein ARALYDRAFT_494701<br>[Arabidopsis lyrata subsp. lyrata]<br>gi 297309535 gb EFH39959.1 <br>hypothetical protein<br>ARALYDRAFT_494701 [Arabidopsis<br>lyrata subsp. lyrata]                                                                                                                                                                                                                                                                                                                                                                                                                                                                                                                                                                                                                                                                                                                                               | 677  | 669  | 0         | 98.8  | 86.4 | 90.7 | hypothetical protein<br>ARALYDRAFT_494701                      | gbpln | Arabidopsis<br>lyrata   | AT5G43020.1   Symbols:   Leucine-rich<br>repeat protein kinase family protein  <br>chr5:17255426-17257742 REVERSE<br>LENGTH=669                          | 677  | 669 | 0         | 98.8  | 86.0 | 90.0 |
| Rsa1.0_00274.1.g10196.t1 | gb AAG51783.1 AC079679.3 reverse<br>transcriptase, putative: 16838-20266<br>[Arabidopsis thaliana]                                                                                                                                                                                                                                                                                                                                                                                                                                                                                                                                                                                                                                                                                                                                                                                                                                                                  | 962  | 1142 | 0         | 118.7 | 34.6 | 43.9 | reverse transcriptase,<br>putative: 16838-20266                | gbpln | Arabidopsis<br>thaliana | AT1G43760.1   Symbols:   DNase I-like<br>superfamily protein   chr1:16528880-<br>16531065 REVERSE LENGTH=626                                             | 962  | 626 | 2.00E-37  | 65.1  | 10.9 | 18.7 |
| Rsa1.0_00274.1.g10197.t1 | #                                                                                                                                                                                                                                                                                                                                                                                                                                                                                                                                                                                                                                                                                                                                                                                                                                                                                                                                                                   | #    | #    | #         | #     | #    | #    | -                                                              | ----  | ----                    | #                                                                                                                                                        | #    | #   | #         | #     | #    | #    |
| Rsa1.0_00274.1.g10198.t1 | #                                                                                                                                                                                                                                                                                                                                                                                                                                                                                                                                                                                                                                                                                                                                                                                                                                                                                                                                                                   | #    | #    | #         | #     | #    | #    | -                                                              | ----  | ----                    | #                                                                                                                                                        | #    | #   | #         | #     | #    | #    |
| Rsa1.0_00274.1.g10199.t1 | #                                                                                                                                                                                                                                                                                                                                                                                                                                                                                                                                                                                                                                                                                                                                                                                                                                                                                                                                                                   | #    | #    | #         | #     | #    | #    | -                                                              | ----  | ----                    | #                                                                                                                                                        | #    | #   | #         | #     | #    | #    |
| Rsa1.0_00274.1.g10200.t1 | gb AAG50652.1 AC073433.4<br>transposase, putative [Arabidopsis<br>thaliana]                                                                                                                                                                                                                                                                                                                                                                                                                                                                                                                                                                                                                                                                                                                                                                                                                                                                                         | 204  | 659  | 2.00E-47  | 323.0 | 49.0 | 64.7 | transposase, putative                                          | gbpln | Arabidopsis<br>thaliana | AT3G42170.1   Symbols:   BED zinc finger<br>:hAT family dimerisation domain  <br>chr3:14321838-14323928 FORWARD<br>LENGTH=696                            | 204  | 696 | 1.00E-17  | 341.2 | 27.5 | 46.1 |
| Rsa1.0_00274.1.g10201.t1 | ref NP_199115.1  regulatory particle<br>triple-A ATPase 4A [Arabidopsis<br>thaliana]<br>gi 75337115 sp Q9SEI3.1 PS10A_ARATH<br>RecName: Full=26S protease regulatory<br>subunit 10B homolog A; AltName:<br>Full=26S proteasome AAA-ATPase<br>subunit RPT4a; AltName: Full=26S<br>proteasome subunit 10B homolog A;<br>AltName: Full=Regulatory particle<br>triple-A ATPase subunit 4a<br>gi 6652884 gb AAF22524.1 AF123393.1<br>26S proteasome AAA-ATPase subunit<br>RPT4a [Arabidopsis thaliana]<br>gi 13937183 gb AAK50085.1 AF372945.1<br>AT5g43010/MBD2.21 [Arabidopsis<br>thaliana] gi 9758590 dbj BAB09203.1 <br>26S proteasome AAA-ATPase subunit<br>RPT4a [Arabidopsis thaliana]<br>gi 18700262 gb AAL77741.1 <br>AT5g43010/MBD2.21 [Arabidopsis<br>thaliana] gi 33200751 gb AED94900.1 <br>regulatory particle triple-A ATPase 4A<br>[Arabidopsis thaliana]<br>gi 482549284 gb EOA13478.1 <br>hypothetical protein<br>CARUB_v10026536mg [Capsella rubella] | 399  | 399  | 0         | 100.0 | 97.5 | 99.2 | regulatory particle<br>triple-A ATPase 4A                      | gbpln | Arabidopsis<br>thaliana | AT5G43010.1   Symbols: RPT4A   regulatory<br>particle triple-A ATPase 4A  <br>chr5:17248563-17251014 REVERSE<br>LENGTH=399                               | 399  | 399 | 0         | 100.0 | 97.5 | 99.2 |
| Rsa1.0_00274.1.g10202.t1 | gb AAC33226.1  putative non-LTR<br>retroelement reverse transcriptase<br>[Arabidopsis thaliana]                                                                                                                                                                                                                                                                                                                                                                                                                                                                                                                                                                                                                                                                                                                                                                                                                                                                     | 987  | 1529 | 0         | 154.9 | 53.2 | 69.0 | putative non-LTR<br>retroelement reverse<br>transcriptase      | gbpln | Arabidopsis<br>thaliana | AT3G24255.1   Symbols:   RNA-directed<br>DNA polymerase (reverse transcriptase)-<br>related family protein   chr3:8789471-<br>8793208 FORWARD LENGTH=746 | 987  | 746 | 1.00E-113 | 75.6  | 20.5 | 27.2 |
| Rsa1.0_00274.1.g10203.t1 | #                                                                                                                                                                                                                                                                                                                                                                                                                                                                                                                                                                                                                                                                                                                                                                                                                                                                                                                                                                   | #    | #    | #         | #     | #    | #    | -                                                              | ----  | ----                    | #                                                                                                                                                        | #    | #   | #         | #     | #    | #    |

|                          |                                                                                                                                                                                                                                                                                                                                                                                                                                                                                                                                                                |     |      |           |       |      |      |                                            |       |                      |                                                                                                                                                                                                                                                                                                                                                                                                                                                   |     |     |          |       |      |      |
|--------------------------|----------------------------------------------------------------------------------------------------------------------------------------------------------------------------------------------------------------------------------------------------------------------------------------------------------------------------------------------------------------------------------------------------------------------------------------------------------------------------------------------------------------------------------------------------------------|-----|------|-----------|-------|------|------|--------------------------------------------|-------|----------------------|---------------------------------------------------------------------------------------------------------------------------------------------------------------------------------------------------------------------------------------------------------------------------------------------------------------------------------------------------------------------------------------------------------------------------------------------------|-----|-----|----------|-------|------|------|
| Rsa1.0_00274.1.g10204.t1 | gb AAD25557.1 AC005850.14<br>Hypothetical protein [Arabidopsis thaliana]                                                                                                                                                                                                                                                                                                                                                                                                                                                                                       | 415 | 404  | 3.00E-51  | 97.3  | 25.5 | 30.6 | Hypothetical protein                       | gbpln | Arabidopsis thaliana | AT1G43722.1   Symbols:   unknown protein; BEST Arabidopsis thaliana protein match is: unknown protein (TAIR:AT5G28730.1); Has 924 Blast hits to 912 proteins in 109 species: Archae - 0; Bacteria - 0; Metazoa - 222; Fungi - 31; Plants - 661; Viruses - 0; Other Eukaryotes - 10 (source: NCBI BLINK).   chr1:16496403-16497377 FORWARD LENGTH=324                                                                                              | 415 | 324 | 8.00E-20 | 78.1  | 12.5 | 19.3 |
| Rsa1.0_00274.1.g10205.t1 | gb AAG51228.1 AC035249.3 Tam3-like transposon protein; 93317-95488 [Arabidopsis thaliana]<br>gi 12323055 gb AAG51515.1 AC068324.3 hAT-element transposase, putative [Arabidopsis thaliana]                                                                                                                                                                                                                                                                                                                                                                     | 483 | 723  | 1.00E-103 | 149.7 | 41.2 | 53.6 | Tam3-like transposon protein; 93317-95488  | gbpln | Arabidopsis thaliana | AT3G42170.1   Symbols:   BED zinc finger hAT family dimerisation domain   chr3:14321838-14323928 FORWARD LENGTH=696                                                                                                                                                                                                                                                                                                                               | 483 | 696 | 4.00E-13 | 144.1 | 13.9 | 23.0 |
| Rsa1.0_00274.1.g10206.t1 | ref NP_974873.1  THO complex, subunit 5 [Arabidopsis thaliana]<br>gi 332007505 gb AED94888.1  THO complex, subunit 5 [Arabidopsis thaliana]                                                                                                                                                                                                                                                                                                                                                                                                                    | 821 | 819  | 0         | 99.8  | 85.5 | 91.6 | THO complex, subunit 5                     | gbpln | Arabidopsis thaliana | AT5G42920.2   Symbols: THO5, AtTHO5   THO complex, subunit 5   chr5:17206310-17209522 REVERSE LENGTH=819                                                                                                                                                                                                                                                                                                                                          | 821 | 819 | 0        | 99.8  | 85.5 | 91.6 |
| Rsa1.0_00274.1.g10207.t1 | ref NP_199105.1  abscisic acid-insensitive 5-like protein 8 [Arabidopsis thaliana]<br>gi 75309215 sp Q9FMM7.1 A15L8 ARATH RecName: Full=ABSCISIC ACID-INSENSITIVE 5-like protein 8; AltName: Full=bZIP transcription factor 15; Short=AtbZIP15<br>gi 9758580 dbj BAB09193.1  abscisic acid responsive elements-binding factor-like protein [Arabidopsis thaliana] gi 1865605 emb CAD11866.1  basic leucine zipper transcription factor [Arabidopsis thaliana]<br>gi 332007503 gb AED94886.1  abscisic acid-insensitive 5-like protein 8 [Arabidopsis thaliana] | 404 | 370  | 2.00E-82  | 91.6  | 50.2 | 63.1 | abscisic acid-insensitive 5-like protein 8 | gbpln | Arabidopsis thaliana | AT5G42910.1   Symbols:   Basic-leucine zipper (bZIP) transcription factor family protein   chr5:17203908-17205211 FORWARD LENGTH=370                                                                                                                                                                                                                                                                                                              | 404 | 370 | 4.00E-85 | 91.6  | 50.2 | 63.1 |
| Rsa1.0_00274.1.g10208.t1 | #                                                                                                                                                                                                                                                                                                                                                                                                                                                                                                                                                              | #   | #    | #         | #     | #    | #    | -                                          | ----  | ----                 | #                                                                                                                                                                                                                                                                                                                                                                                                                                                 | #   | #   | #        | #     | #    |      |
| Rsa1.0_00274.1.g10209.t1 | #                                                                                                                                                                                                                                                                                                                                                                                                                                                                                                                                                              | #   | #    | #         | #     | #    | #    | -                                          | ----  | ----                 | #                                                                                                                                                                                                                                                                                                                                                                                                                                                 | #   | #   | #        | #     | #    |      |
| Rsa1.0_00274.1.g10210.t1 | ref XP_002863724.1  hypothetical protein ARALYDRAFT_356828 [Arabidopsis lyrata subsp. lyrata]<br>gi 297309559 gb EFH39983.1  hypothetical protein ARALYDRAFT_356828 [Arabidopsis lyrata subsp. lyrata]                                                                                                                                                                                                                                                                                                                                                         | 223 | 253  | 7.00E-72  | 113.5 | 71.7 | 78.0 | hypothetical protein ARALYDRAFT_356828     | gbpln | Arabidopsis lyrata   | AT5G42900.2   Symbols:   cold regulated gene 27   chr5:17198366-17199712 REVERSE LENGTH=246                                                                                                                                                                                                                                                                                                                                                       | 223 | 246 | 1.00E-71 | 110.3 | 73.5 | 79.8 |
| Rsa1.0_00275.1.g10211.t1 | gb AAD20658.1  putative retroelement pol polyprotein [Arabidopsis thaliana]                                                                                                                                                                                                                                                                                                                                                                                                                                                                                    | 323 | 1611 | 6.00E-94  | 498.8 | 52.3 | 68.4 | putative retroelement pol polyprotein      | gbpln | Arabidopsis thaliana | #                                                                                                                                                                                                                                                                                                                                                                                                                                                 | #   | #   | #        | #     | #    |      |
| Rsa1.0_00275.1.g10212.t1 | gb EOA28594.1  hypothetical protein CARUB_v10024814mg [Capsella rubella]                                                                                                                                                                                                                                                                                                                                                                                                                                                                                       | 435 | 436  | 0         | 100.2 | 93.6 | 97.9 | hypothetical protein CARUB_v10024814mg     | gbpln | Capsella rubella     | AT2G45310.1   Symbols: GAE4   UDP-D-glucuronate 4-epimerase 4   chr2:18682652-18683965 FORWARD LENGTH=437                                                                                                                                                                                                                                                                                                                                         | 435 | 437 | 0        | 100.5 | 91.7 | 95.9 |
| Rsa1.0_00275.1.g10213.t1 | gb EOA27266.1  hypothetical protein CARUB_v10023386mg [Capsella rubella]                                                                                                                                                                                                                                                                                                                                                                                                                                                                                       | 393 | 391  | 0         | 99.5  | 84.5 | 91.9 | hypothetical protein CARUB_v10023386mg     | gbpln | Capsella rubella     | AT2G45320.1   Symbols:   unknown protein; FUNCTIONS IN: molecular function unknown; INVOLVED IN: biological process unknown; LOCATED IN: mitochondrion; EXPRESSED IN: 20 plant structures; EXPRESSED DURING: 10 growth stages; Has 45 Blast hits to 45 proteins in 16 species: Archae - 0; Bacteria - 8; Metazoa - 0; Fungi - 0; Plants - 37; Viruses - 0; Other Eukaryotes - 0 (source: NCBI BLINK).   chr2:18684182-18686107 REVERSE LENGTH=392 | 393 | 392 | 0        | 99.7  | 83.7 | 91.9 |
| Rsa1.0_00275.1.g10214.t1 | ref XP_002868031.1  hypothetical protein ARALYDRAFT_354960 [Arabidopsis lyrata subsp. lyrata]<br>gi 297313867 gb EFH44290.1  hypothetical protein ARALYDRAFT_354960 [Arabidopsis lyrata subsp. lyrata]                                                                                                                                                                                                                                                                                                                                                         | 464 | 746  | 0         | 160.8 | 87.3 | 92.7 | hypothetical protein ARALYDRAFT_354960     | gbpln | Arabidopsis lyrata   | AT4G17910.1   Symbols:   transferases, transferring acyl groups   chr4:9951322-9953689 REVERSE LENGTH=434                                                                                                                                                                                                                                                                                                                                         | 464 | 434 | 0        | 93.5  | 78.4 | 84.1 |
| Rsa1.0_00275.1.g10215.t1 | ref XP_002882010.1  hypothetical protein ARALYDRAFT_903982 [Arabidopsis lyrata subsp. lyrata]<br>gi 297327849 gb EFH58269.1  hypothetical protein ARALYDRAFT_903982 [Arabidopsis lyrata subsp. lyrata]                                                                                                                                                                                                                                                                                                                                                         | 364 | 442  | 1.00E-124 | 121.4 | 62.9 | 72.3 | hypothetical protein ARALYDRAFT_903982     | gbpln | Arabidopsis lyrata   | AT1G10270.1   Symbols: GRP23   glutamine-rich protein 23   chr1:3363535-3366276 FORWARD LENGTH=913                                                                                                                                                                                                                                                                                                                                                | 364 | 913 | 1.00E-69 | 250.8 | 43.4 | 63.5 |

|                          |                                                                                                                                                                                                                                                                                                                                                                                                                                                                                                                                                                                                                                                                                                                                                                                                                                                                                                                                                                                                                                                                                                                                                                                                                                          |     |      |           |       |      |      |                                                    |       |                      |                                                                                                                                                           |     |      |           |       |      |      |  |
|--------------------------|------------------------------------------------------------------------------------------------------------------------------------------------------------------------------------------------------------------------------------------------------------------------------------------------------------------------------------------------------------------------------------------------------------------------------------------------------------------------------------------------------------------------------------------------------------------------------------------------------------------------------------------------------------------------------------------------------------------------------------------------------------------------------------------------------------------------------------------------------------------------------------------------------------------------------------------------------------------------------------------------------------------------------------------------------------------------------------------------------------------------------------------------------------------------------------------------------------------------------------------|-----|------|-----------|-------|------|------|----------------------------------------------------|-------|----------------------|-----------------------------------------------------------------------------------------------------------------------------------------------------------|-----|------|-----------|-------|------|------|--|
| Rsa1.0_00275.1.g10216.t1 | ref[XP_002880177.1] predicted protein [Arabidopsis lyrata subsp. lyrata] gi 297326016 gb EFH56436.1  predicted protein [Arabidopsis lyrata subsp. lyrata]                                                                                                                                                                                                                                                                                                                                                                                                                                                                                                                                                                                                                                                                                                                                                                                                                                                                                                                                                                                                                                                                                | 438 | 455  | 1.00E-175 | 103.9 | 74.7 | 83.6 | predicted protein                                  | gbpln | Arabidopsis lyrata   | AT1G10270.1   Symbols: GRP23   glutamine-rich protein 23   chr1:3363535-3366276 FORWARD LENGTH=913                                                        | 438 | 913  | 8.00E-78  | 208.4 | 39.5 | 56.2 |  |
| Rsa1.0_00275.1.g10217.t1 | gb AAC02664.1  polyprotein [Arabidopsis thaliana]                                                                                                                                                                                                                                                                                                                                                                                                                                                                                                                                                                                                                                                                                                                                                                                                                                                                                                                                                                                                                                                                                                                                                                                        | 382 | 1451 | 1.00E-140 | 379.8 | 65.2 | 79.1 | polyprotein                                        | gbpln | Arabidopsis thaliana | AT4G23160.1   Symbols: CRK8   cysteine-rich RLK (RECEPTOR-like protein kinase) 8   chr4:12129485-12134086 FORWARD LENGTH=1262                             | 382 | 1262 | 1.00E-55  | 330.4 | 27.0 | 43.7 |  |
| Rsa1.0_00275.1.g10218.t1 | ref NP_567151.1  40S ribosomal protein S13-2 [Arabidopsis thaliana] gi 27808638 sp P59224.1 RS132_ARATH RecName: Full=40S ribosomal protein S13-2 gi 13877541 gb AAK43848.1 AF370471_1 similar to ribosomal protein S13 [Arabidopsis thaliana] gi 6521012 dbj BAA88058.1  cytoplasmic ribosomal protein S13 [Arabidopsis thaliana] gi 15982874 gb AAO9784.1  AT4g00100/F6N15.7 [Arabidopsis thaliana] gi 21593617 gb AAM65584.1  putative ribosomal protein S13 [Arabidopsis thaliana] gi 30102866 gb AAP21351.1  At4g00100 [Arabidopsis thaliana] gi 332656423 gb AEE81823.1  40S ribosomal protein S13-2 [Arabidopsis thaliana]                                                                                                                                                                                                                                                                                                                                                                                                                                                                                                                                                                                                        | 164 | 151  | 2.00E-62  | 92.1  | 79.3 | 80.5 | 40S ribosomal protein S13-2                        | gbpln | Arabidopsis thaliana | AT4G00100.1   Symbols: ATRPS13A, RPS13, PFL2, RPS13A   ribosomal protein S13A   chr4:37172-38123 FORWARD LENGTH=151                                       | 164 | 151  | 9.00E-65  | 92.1  | 79.3 | 80.5 |  |
| Rsa1.0_00275.1.g10219.t1 | gb EOA18130.1  hypothetical protein CARUB_v10006591mg [Capsella rubella]                                                                                                                                                                                                                                                                                                                                                                                                                                                                                                                                                                                                                                                                                                                                                                                                                                                                                                                                                                                                                                                                                                                                                                 | 138 | 256  | 4.00E-11  | 185.5 | 29.7 | 43.5 | hypothetical protein CARUB_v10006591mg             | gbpln | Capsella rubella     | AT2G33160.1   Symbols:   glycoside hydrolase family 28 protein / polygalacturonase (pectinase) family protein   chr2:14053404-14056246 FORWARD LENGTH=664 | 138 | 664  | 5.00E-12  | 481.2 | 26.1 | 42.8 |  |
| Rsa1.0_00275.1.g10220.t1 | # # # # # # # # # #                                                                                                                                                                                                                                                                                                                                                                                                                                                                                                                                                                                                                                                                                                                                                                                                                                                                                                                                                                                                                                                                                                                                                                                                                      |     |      |           |       |      |      |                                                    |       |                      |                                                                                                                                                           |     |      |           |       |      |      |  |
| Rsa1.0_00275.1.g10221.t1 | ref NP_182089.1  agamous-like MADS-box protein AGL6 [Arabidopsis thaliana] gi 1351899 sp P29386.2 AGL6_ARATH RecName: Full=Agamous-like MADS-box protein AGL6 gi 1019925 gb AAA79328.1  transcription factor [Arabidopsis thaliana] gi 2979564 gb AAC06173.1  MADS-box protein (AGL6) [Arabidopsis thaliana] gi 91806361 gb ABE65908.1  MADS-box protein [Arabidopsis thaliana] gi 33025548 gb AEC10582.1  agamous-like MADS-box protein AGL6 [Arabidopsis thaliana] gi 399140006 gb AFP23735.1  AGAMOUS-like protein 6 [Arabidopsis thaliana] gi 399140008 gb AFP23736.1  AGAMOUS-like protein 6 [Arabidopsis thaliana] gi 399140020 gb AFP23742.1  AGAMOUS-like protein 6 [Arabidopsis thaliana] gi 399140022 gb AFP23743.1  AGAMOUS-like protein 6 [Arabidopsis thaliana] gi 399140026 gb AFP23745.1  AGAMOUS-like protein 6 [Arabidopsis thaliana] gi 399140028 gb AFP23746.1  AGAMOUS-like protein 6 [Arabidopsis thaliana] gi 399140030 gb AFP23747.1  AGAMOUS-like protein 6 [Arabidopsis thaliana] gi 399140034 gb AFP23749.1  AGAMOUS-like protein 6 [Arabidopsis thaliana] gi 399140044 gb AFP23754.1  AGAMOUS-like protein 6 [Arabidopsis thaliana] gi 399140048 gb AFP23756.1  AGAMOUS-like protein 6 [Arabidopsis thaliana] | 211 | 252  | 8.00E-66  | 119.4 | 59.7 | 66.8 | agamous-like MADS-box protein AGL6                 | gbpln | Arabidopsis thaliana | AT2G45650.1   Symbols: AGL6   AGAMOUS-like 6   chr2:18804453-18806291 FORWARD LENGTH=252                                                                  | 211 | 252  | 3.00E-68  | 119.4 | 59.7 | 66.8 |  |
| Rsa1.0_00275.1.g10222.t1 | gb AAB41526.1  transcription factor SaMADS A [Sinapis alba]                                                                                                                                                                                                                                                                                                                                                                                                                                                                                                                                                                                                                                                                                                                                                                                                                                                                                                                                                                                                                                                                                                                                                                              | 213 | 213  | 1.00E-119 | 100.0 | 99.5 | 99.5 | transcription factor SaMADS A                      | gbpln | Sinapis alba         | AT2G45660.1   Symbols: AGL20, SOC1, ATSO1   AGAMOUS-like 20   chr2:18807799-18810193 REVERSE LENGTH=214                                                   | 213 | 214  | 1.00E-111 | 100.5 | 96.2 | 99.1 |  |
| Rsa1.0_00275.1.g10223.t1 | ref XP_002283163.1  PREDICTED: mRNA cap guanine-N7 methyltransferase 1 [Vitis vinifera] gi 302143175 emb CB120470.3  unnamed protein product [Vitis vinifera]                                                                                                                                                                                                                                                                                                                                                                                                                                                                                                                                                                                                                                                                                                                                                                                                                                                                                                                                                                                                                                                                            | 156 | 372  | 1.00E-22  | 238.5 | 32.7 | 40.4 | PREDICTED: mRNA cap guanine-N7 methyltransferase 1 | gbpln | Vitis vinifera       | AT3G20650.2   Symbols:   mRNA capping enzyme family protein   chr3:7221168-7223939 REVERSE LENGTH=369                                                     | 156 | 369  | 1.00E-20  | 236.5 | 36.5 | 41.7 |  |

|                          |                                                                                                                                                                                                                                                                                                                                                                                                                                  |     |     |           |       |      |      |                                                 |       |                      |                                                                                                                                  |     |     |           |       |      |      |
|--------------------------|----------------------------------------------------------------------------------------------------------------------------------------------------------------------------------------------------------------------------------------------------------------------------------------------------------------------------------------------------------------------------------------------------------------------------------|-----|-----|-----------|-------|------|------|-------------------------------------------------|-------|----------------------|----------------------------------------------------------------------------------------------------------------------------------|-----|-----|-----------|-------|------|------|
| Rsa1.0_00275.1.g10224.t1 | ref[XP_002882025.1] hypothetical protein ARALYDRAFT_483703 [Arabidopsis lyrata subsp. lyrata] gi 297327864 gb EFH58284.1  hypothetical protein ARALYDRAFT_483703 [Arabidopsis lyrata subsp. lyrata]                                                                                                                                                                                                                              | 526 | 528 | 0         | 100.4 | 83.1 | 89.7 | hypothetical protein ARALYDRAFT_483703          | gbpln | Arabidopsis lyrata   | AT2G45670.1   Symbols:   calcineurin B subunit-related   chr2:18815070-18818382 REVERSE LENGTH=539                               | 526 | 539 | 0         | 102.5 | 82.7 | 90.1 |
| Rsa1.0_00275.1.g10225.t1 | gb AAZ20121.1  putative shrunken seed protein [Brassica napus]                                                                                                                                                                                                                                                                                                                                                                   | 366 | 366 | 1.00E-175 | 100.0 | 86.9 | 91.8 | putative shrunken seed protein                  | gbpln | Brassica napus       | AT2G45690.1   Symbols: SSE1, SSE, PEX16, ATPEX16   shrunken seed protein (SSE1)   chr2:18823465-18825601 REVERSE LENGTH=367      | 366 | 367 | 1.00E-166 | 100.3 | 79.2 | 88.0 |
| Rsa1.0_00275.1.g10226.t2 | ref[NP_001078064.1] ubiquitin-related modifier 1-1 [Arabidopsis thaliana] gi 229557933 sp A0MDQ1.2 URM11_ARA TH RecName: Full=Ubiquitin-related modifier 1 homolog 1 gi 62318675 dbj BAD95172.1  hypothetical protein [Arabidopsis thaliana] gi 98961773 gb ABF59216.1  unknown protein [Arabidopsis thaliana] gi 330255494 gb AEC10588.1  ubiquitin-related modifier 1-1 [Arabidopsis thaliana]                                 | 99  | 101 | 4.00E-44  | 102.0 | 89.9 | 97.0 | ubiquitin-related modifier 1-1                  | gbpln | Arabidopsis thaliana | AT2G45695.1   Symbols:   Ubiquitin related modifier 1   chr2:18826043-18826744 FORWARD LENGTH=101                                | 99  | 101 | 7.00E-47  | 102.0 | 89.9 | 97.0 |
| Rsa1.0_00275.1.g10227.t1 | ref[XP_002880193.1] armadillo/beta-catenin repeat family protein [Arabidopsis lyrata subsp. lyrata] gi 297326032 gb EFH56452.1  armadillo/beta-catenin repeat family protein [Arabidopsis lyrata subsp. lyrata]                                                                                                                                                                                                                  | 550 | 553 | 0         | 100.5 | 86.7 | 92.4 | armadillo/beta-catenin repeat family protein    | gbpln | Arabidopsis lyrata   | AT2G45720.2   Symbols:   ARM repeat superfamily protein   chr2:18834468-18836129 FORWARD LENGTH=553                              | 550 | 553 | 0         | 100.5 | 86.9 | 92.0 |
| Rsa1.0_00275.1.g10228.t2 | gb EOA27117.1  hypothetical protein CARUB_v10023215mg [Capsella rubella]                                                                                                                                                                                                                                                                                                                                                         | 447 | 446 | 0         | 99.8  | 81.4 | 87.5 | hypothetical protein CARUB_v10023215mg          | gbpln | Capsella rubella     | AT2G45730.1   Symbols:   eukaryotic initiation factor 3 gamma subunit family protein   chr2:18836519-18839123 REVERSE LENGTH=446 | 447 | 446 | 0         | 99.8  | 83.4 | 89.5 |
| Rsa1.0_00275.1.g10229.t1 | ref[XP_002890194.1] peroxisomal biogenesis factor 11 family protein [Arabidopsis lyrata subsp. lyrata] gi 297326033 gb EFH56453.1  peroxisomal biogenesis factor 11 family protein [Arabidopsis lyrata subsp. lyrata]                                                                                                                                                                                                            | 238 | 236 | 1.00E-126 | 99.2  | 94.1 | 95.4 | peroxisomal biogenesis factor 11 family protein | gbpln | Arabidopsis lyrata   | AT2G45740.3   Symbols: PEX11D   peroxin 11D   chr2:18839865-18841102 FORWARD LENGTH=236                                          | 238 | 236 | 1.00E-127 | 99.2  | 92.9 | 95.0 |
| Rsa1.0_00275.1.g10230.t1 | ref[XP_002882032.1] hypothetical protein ARALYDRAFT_483714 [Arabidopsis lyrata subsp. lyrata] gi 297327871 gb EFH58291.1  hypothetical protein ARALYDRAFT_483714 [Arabidopsis lyrata subsp. lyrata]                                                                                                                                                                                                                              | 204 | 200 | 3.00E-75  | 98.0  | 70.6 | 83.8 | hypothetical protein ARALYDRAFT_483714          | gbpln | Arabidopsis lyrata   | AT2G45760.1   Symbols: BAP2, BAL   BON association protein 2   chr2:18847125-18847748 REVERSE LENGTH=207                         | 204 | 207 | 1.00E-77  | 101.5 | 71.1 | 82.4 |
| Rsa1.0_00275.1.g10231.t1 | ref[XP_002872639.1] bile acid:sodium symporter family protein [Arabidopsis lyrata subsp. lyrata] gi 297318476 gb EFH48898.1  bile acid:sodium symporter family protein [Arabidopsis lyrata subsp. lyrata]                                                                                                                                                                                                                        | 408 | 409 | 0         | 100.2 | 89.0 | 93.9 | bile acid:sodium symporter family protein       | gbpln | Arabidopsis lyrata   | AT4G12030.2   Symbols: BAT5, BASS5   bile acid transporter 5   chr4:7210981-7212713 FORWARD LENGTH=407                           | 408 | 407 | 0         | 99.8  | 89.0 | 94.1 |
| Rsa1.0_00275.1.g10232.t1 | ref[NP_192933.2] PGR5-like protein 1B [Arabidopsis thaliana] gi 75151402 sp Q8GYC7.1 PGL1B_ARAT H RecName: Full=PGR5-like protein 1B, chloroplastic; AltName: Full=Ferredoxin-plastoquinone reductase 2; Flags: Precursor gi 26450517 dbj BAC42372.1  unknown protein [Arabidopsis thaliana] gi 28950891 gb AAO63369.1  At4g11960 [Arabidopsis thaliana] gi 332657674 gb AEE83074.1  PGR5-like protein 1B [Arabidopsis thaliana] | 322 | 313 | 1.00E-156 | 97.2  | 88.8 | 92.9 | PGR5-like protein 1B                            | gbpln | Arabidopsis thaliana | AT4G11960.1   Symbols: PGL1B   PGR5-like B   chr4:7175340-7177709 REVERSE LENGTH=313                                             | 322 | 313 | 1.00E-158 | 97.2  | 88.8 | 92.9 |
| Rsa1.0_00275.1.g10233.t1 | gb EOA18445.1  hypothetical protein CARUB_v10006988mg [Capsella rubella]                                                                                                                                                                                                                                                                                                                                                         | 697 | 683 | 0         | 98.0  | 54.4 | 69.0 | hypothetical protein CARUB_v10006988mg          | gbpln | Capsella rubella     | AT3G42170.1   Symbols:   BED zinc finger hAT family dimerisation domain   chr3:14321838-14323928 FORWARD LENGTH=696              | 697 | 696 | 3.00E-41  | 99.9  | 22.4 | 39.3 |
| Rsa1.0_00275.1.g10234.t1 | gb EOA20561.1  hypothetical protein CARUB_v10000874mg [Capsella rubella]                                                                                                                                                                                                                                                                                                                                                         | 484 | 473 | 0         | 97.7  | 81.4 | 86.4 | hypothetical protein CARUB_v10000874mg          | gbpln | Capsella rubella     | AT4G11920.1   Symbols: CCS52A2, FZR1   cell cycle switch protein 52 A2   chr4:7160618-7163257 REVERSE LENGTH=475                 | 484 | 475 | 0         | 98.1  | 81.6 | 86.8 |
| Rsa1.0_00275.1.g10235.t1 | ref[XP_002863072.1] kelch repeat-containing F-box family protein [Arabidopsis lyrata subsp. lyrata] gi 297308883 gb EFH39331.1  kelch repeat-containing F-box family protein [Arabidopsis lyrata subsp. lyrata]                                                                                                                                                                                                                  | 379 | 387 | 1.00E-100 | 102.1 | 54.6 | 68.6 | kelch repeat-containing F-box family protein    | gbpln | Arabidopsis lyrata   | AT5G48990.1   Symbols:   Galactose oxidase/kelch repeat superfamily protein   chr5:19860724-19861923 FORWARD LENGTH=399          | 379 | 399 | 1.00E-100 | 105.3 | 53.6 | 68.9 |

|                          |                                                                                                                                                                                                                                                                                                                                                                                                                                                                                                                                                                                                                                                                                                    |     |     |           |       |      |      |                                              |       |                      |                                                                                                                                                                                                                                                                                                                                                                                                 |     |     |           |       |      |      |
|--------------------------|----------------------------------------------------------------------------------------------------------------------------------------------------------------------------------------------------------------------------------------------------------------------------------------------------------------------------------------------------------------------------------------------------------------------------------------------------------------------------------------------------------------------------------------------------------------------------------------------------------------------------------------------------------------------------------------------------|-----|-----|-----------|-------|------|------|----------------------------------------------|-------|----------------------|-------------------------------------------------------------------------------------------------------------------------------------------------------------------------------------------------------------------------------------------------------------------------------------------------------------------------------------------------------------------------------------------------|-----|-----|-----------|-------|------|------|
| Rsa1.0_00275.1.g10236.t1 | ref[XP_002863072.1] kelch repeat-containing F-box family protein [Arabidopsis lyrata subsp. lyrata] gi 297308883 gb EFH3931.1  kelch repeat-containing F-box family protein [Arabidopsis lyrata subsp. lyrata] ref[NP_199710.1] F-box/kelch-repeat protein [Arabidopsis thaliana] gi 75170772 sp Q9FI71.1 FK121_ARATH RecName: Full=F-box/kelch-repeat protein At5g48990                                                                                                                                                                                                                                                                                                                           | 338 | 387 | 2.00E-87  | 114.5 | 54.7 | 67.8 | kelch repeat-containing F-box family protein | gbpln | Arabidopsis lyrata   | AT5G48990.1   Symbols:   Galactose oxidase/kelch repeat superfamily protein   chr5:19862340-19863458 FORWARD LENGTH=372                                                                                                                                                                                                                                                                         | 338 | 372 | 3.00E-88  | 110.1 | 54.7 | 66.6 |
| Rsa1.0_00275.1.g10237.t1 | gi 10177189 dbj BAB10323.1  unnamed protein product [Arabidopsis thaliana] gi 18175611 gb AAL59896.1  unknown protein [Arabidopsis thaliana] gi 21689859 gb AAM67490.1  unknown protein [Arabidopsis thaliana] gi 332008370 gb AED95753.1  F-box/kelch-repeat protein [Arabidopsis thaliana] ref[NP_195670.1] putative F-box/kelch-repeat protein [Arabidopsis thaliana] gi 75210846 sp Q9SV98.1 FK103_ARATH RecName: Full=Putative F-box/kelch-repeat protein At4g39600                                                                                                                                                                                                                           | 289 | 372 | 2.00E-61  | 128.7 | 50.9 | 59.5 | F-box/kelch-repeat protein                   | gbpln | Arabidopsis thaliana | AT5G48990.1   Symbols:   Galactose oxidase/kelch repeat superfamily protein   chr5:19862340-19863458 FORWARD LENGTH=372                                                                                                                                                                                                                                                                         | 289 | 372 | 6.00E-64  | 128.7 | 50.9 | 59.5 |
| Rsa1.0_00275.1.g10238.t1 | gi 5042176 emb CAB44695.1  putative protein [Arabidopsis thaliana] gi 7270944 emb CAB80623.1  putative protein [Arabidopsis thaliana] gi 332661692 gb AEE87092.1  putative F-box/kelch-repeat protein [Arabidopsis thaliana]                                                                                                                                                                                                                                                                                                                                                                                                                                                                       | 236 | 367 | 3.00E-61  | 155.5 | 50.4 | 64.8 | putative F-box/kelch-repeat protein          | gbpln | Arabidopsis thaliana | AT4G39600.1   Symbols:   Galactose oxidase/kelch repeat superfamily protein   chr4:18389436-18390539 REVERSE LENGTH=367                                                                                                                                                                                                                                                                         | 236 | 367 | 8.00E-64  | 155.5 | 50.4 | 64.8 |
| Rsa1.0_00275.1.g10239.t1 | #                                                                                                                                                                                                                                                                                                                                                                                                                                                                                                                                                                                                                                                                                                  | #   | #   | #         | #     | #    | #    | -                                            | ----  | ----                 | #                                                                                                                                                                                                                                                                                                                                                                                               | #   | #   | #         | #     | #    | #    |
| Rsa1.0_00275.1.g10240.t1 | gb EOA21319.1  hypothetical protein CARUB_v10001681mg [Capsella rubella]                                                                                                                                                                                                                                                                                                                                                                                                                                                                                                                                                                                                                           | 261 | 272 | 1.00E-121 | 104.2 | 81.2 | 86.2 | hypothetical protein CARUB_v10001681mg       | gbpln | Capsella rubella     | AT4G11910.1   Symbols:   INVOLVED IN: biological_process unknown; LOCATED IN: chloroplast; BEST Arabidopsis thaliana protein match is: non-yellowing 1 (TAIR:AT4G22920.1); Has 206 Blast hits to 202 proteins in 67 species: Archae - 0; Bacteria - 86; Metazoa - 0; Fungi - 0; Plants - 118; Viruses - 0; Other Eukaryotes - 2 (source: NCBI BLINK).   chr4:7156435-7157839 FORWARD LENGTH=271 | 261 | 271 | 1.00E-121 | 103.8 | 82.4 | 86.6 |
| Rsa1.0_00276.1.g10241.t1 | ref[NP_192145.1] uncharacterized protein [Arabidopsis thaliana] gi 3193298 gb AAC19282.1  T14P8.17 [Arabidopsis thaliana] gi 7268996 emb CAB80729.1  putative protein [Arabidopsis thaliana] gi 332656759 gb AEE82159.1  uncharacterized protein AT4G02360 [Arabidopsis thaliana] ref[NP_567228.1] putative epoxide hydrolase [Arabidopsis thaliana] gi 3193297 gb AAC19281.1  T14P8.15 [Arabidopsis thaliana] gi 7268994 emb CAB80727.1  AT4g02340 [Arabidopsis thaliana] gi 20856515 gb AAM26670.1  AT4g02340/T14P8.15 [Arabidopsis thaliana] gi 23308303 gb AAN18121.1  AT4g02340/T14P8.15 [Arabidopsis thaliana] gi 332656757 gb AEE82157.1  putative epoxide hydrolase [Arabidopsis thaliana] | 150 | 154 | 3.00E-61  | 102.7 | 80.0 | 84.0 | uncharacterized protein                      | gbpln | Arabidopsis thaliana | AT4G02360.1   Symbols:   Protein of unknown function, DUF538   chr4:1041179-1041643 FORWARD LENGTH=154                                                                                                                                                                                                                                                                                          | 150 | 154 | 9.00E-64  | 102.7 | 80.0 | 84.0 |
| Rsa1.0_00276.1.g10242.t1 | AT4g02340 [Arabidopsis thaliana] gi 20856515 gb AAM26670.1  AT4g02340/T14P8.15 [Arabidopsis thaliana] gi 23308303 gb AAN18121.1  AT4g02340/T14P8.15 [Arabidopsis thaliana] gi 332656757 gb AEE82157.1  putative epoxide hydrolase [Arabidopsis thaliana]                                                                                                                                                                                                                                                                                                                                                                                                                                           | 315 | 324 | 1.00E-163 | 102.9 | 87.0 | 94.3 | putative epoxide hydrolase                   | gbpln | Arabidopsis thaliana | AT4G02340.1   Symbols:   alpha/beta-Hydrolases superfamily protein   chr4:1035722-1037403 FORWARD LENGTH=324                                                                                                                                                                                                                                                                                    | 315 | 324 | 1.00E-165 | 102.9 | 87.0 | 94.3 |

|                          |                                                                                                                                                                                                                                                                                                                                                                                                                                                                                                                                                                                                                                                                                                                                                                       |      |      |          |       |      |      |                                                                                |       |                      |                                                                                                                                             |      |     |          |       |      |      |
|--------------------------|-----------------------------------------------------------------------------------------------------------------------------------------------------------------------------------------------------------------------------------------------------------------------------------------------------------------------------------------------------------------------------------------------------------------------------------------------------------------------------------------------------------------------------------------------------------------------------------------------------------------------------------------------------------------------------------------------------------------------------------------------------------------------|------|------|----------|-------|------|------|--------------------------------------------------------------------------------|-------|----------------------|---------------------------------------------------------------------------------------------------------------------------------------------|------|-----|----------|-------|------|------|
| Rsa1.0_00276.1.g10243.t2 | ref NP_567227.1 pectinesterase 41 [Arabidopsis thaliana] gi 229891482 sp Q8RXK7.2 PME41_ARA TH RecName: Full=Probable pectinesterase/pectinesterase inhibitor 41; Includes: RecName: Full=Pectinesterase inhibitor 41; AltName: Full=Pectin methyltransferase inhibitor 41; Includes: RecName: Full=Pectinesterase 41; Short=PE 41; AltName: Full=AtPME41; Flags: Precursor gi 3193296 gb AAC19280.1 T14P8.14 [Arabidopsis thaliana] gi 7268993 emb CAB80726.1 AT4g02330 [Arabidopsis thaliana] gi 23297461 gb AANI2975.1 unknown protein [Arabidopsis thaliana] gi 332656756 gb AEE82156.1 pectinesterase 41 [Arabidopsis thaliana]                                                                                                                                  | 1046 | 573  | 0        | 54.8  | 49.3 | 51.9 | pectinesterase 41                                                              | gbpln | Arabidopsis thaliana | AT4G02330.1   Symbols: ATPMEPCRB   Plant invertase/pectin methyltransferase inhibitor superfamily   chr4:1032479-1034928 FORWARD LENGTH=573 | 1046 | 573 | 0        | 54.8  | 49.3 | 51.9 |
| Rsa1.0_00276.1.g10244.t1 | ref XP_002889264.1 predicted protein [Arabidopsis lyrata subsp. lyrata] gi 297335105 gb EFH65523.1 predicted protein [Arabidopsis lyrata subsp. lyrata]                                                                                                                                                                                                                                                                                                                                                                                                                                                                                                                                                                                                               | 233  | 619  | 4.00E-35 | 265.7 | 33.5 | 42.9 | predicted protein                                                              | gbpln | Arabidopsis lyrata   | AT1G16120.1   Symbols: WAKL1   wall associated kinase-like 1   chr1:5522639-5524983 FORWARD LENGTH=730                                      | 233  | 730 | 4.00E-36 | 313.3 | 33.0 | 42.5 |
| Rsa1.0_00276.1.g10245.t1 | #                                                                                                                                                                                                                                                                                                                                                                                                                                                                                                                                                                                                                                                                                                                                                                     | #    | #    | #        | #     | #    | #    | -                                                                              | ----  | ----                 | #                                                                                                                                           | #    | #   | #        | #     | #    |      |
| Rsa1.0_00276.1.g10246.t1 | gb ABD5034.1 Ulp1 protease family protein [Brassica oleracea]                                                                                                                                                                                                                                                                                                                                                                                                                                                                                                                                                                                                                                                                                                         | 176  | 863  | 2.00E-63 | 490.3 | 68.8 | 80.7 | Ulp1 protease family protein                                                   | gbpln | Brassica oleracea    | AT5G45570.1   Symbols:   Ulp1 protease family protein   chr5:18472301-18475574 FORWARD LENGTH=921                                           | 176  | 921 | 3.00E-25 | 523.3 | 42.0 | 55.7 |
| Rsa1.0_00276.1.g10247.t1 | gb ACG60684.1 maize transposon MuDR-like protein [Brassica oleracea var. alboglabra]                                                                                                                                                                                                                                                                                                                                                                                                                                                                                                                                                                                                                                                                                  | 384  | 622  | 7.00E-61 | 162.0 | 31.0 | 48.7 | maize transposon MuDR-like protein                                             | gbpln | Brassica oleracea    | AT1G64260.1   Symbols:   MuDR family transposase   chr1:23847756-23849915 FORWARD LENGTH=719                                                | 384  | 719 | 2.00E-16 | 187.2 | 11.5 | 18.8 |
| Rsa1.0_00276.1.g10248.t1 | gb AAC28197.1 contains similarity to reverse transcriptases [Arabidopsis thaliana] gi 7267156 emb CAB77868.1 putative reverse transcriptase [Arabidopsis thaliana]                                                                                                                                                                                                                                                                                                                                                                                                                                                                                                                                                                                                    | 257  | 1077 | 5.00E-20 | 419.1 | 23.7 | 33.9 | contains similarity to reverse transcriptases                                  | gbpln | Arabidopsis thaliana | #                                                                                                                                           | #    | #   | #        | #     | #    |      |
| Rsa1.0_00276.1.g10249.t1 | gb EOA20378.1 hypothetical protein CARUB_v10000691mg [Capsella rubella]                                                                                                                                                                                                                                                                                                                                                                                                                                                                                                                                                                                                                                                                                               | 503  | 530  | 0        | 105.4 | 75.9 | 88.3 | hypothetical protein CARUB_v10000691mg                                         | gbpln | Capsella rubella     | AT4G02320.1   Symbols:   Plant invertase/pectin methyltransferase inhibitor superfamily   chr4:1022725-1026118 REVERSE LENGTH=516           | 503  | 518 | 0        | 103.0 | 74.4 | 83.9 |
| Rsa1.0_00276.1.g10250.t1 | gb ACJ68111.1 pectinesterase [Brassica napus]                                                                                                                                                                                                                                                                                                                                                                                                                                                                                                                                                                                                                                                                                                                         | 521  | 521  | 0        | 100.0 | 88.5 | 91.9 | pectinesterase                                                                 | gbpln | Brassica napus       | AT4G02300.1   Symbols:   Plant invertase/pectin methyltransferase inhibitor superfamily   chr4:1009366-1013034 REVERSE LENGTH=532           | 521  | 532 | 0        | 102.1 | 68.1 | 81.2 |
| Rsa1.0_00276.1.g10251.t1 | ref XP_002872847.1 glycosyl hydrolase family 9 protein [Arabidopsis lyrata subsp. lyrata] gi 297318684 gb EFH49106.1 glycosyl hydrolase family 9 protein [Arabidopsis lyrata subsp. lyrata] ref NP_192137.1 sucrose synthase 3 [Arabidopsis thaliana] gi 75264545 sp Q9M111.1 SUS3_ARATH RecName: Full=Sucrose synthase 3; Short=AtSUS3; AltName: Full=Sucrose-UDP glucosyltransferase 3 gi 7268988 emb CAB80721.1 putative sucrose synthetase [Arabidopsis thaliana] gi 15293135 gb AAK93678.1 putative sucrose synthetase [Arabidopsis thaliana] gi 15982721 gb AL09730.1 AT4g02280/T2H3.8 [Arabidopsis thaliana] gi 23296413 gb AANI3112.1 putative sucrose synthetase [Arabidopsis thaliana] gi 332656750 gb AEE82150.1 sucrose synthase 3 [Arabidopsis thaliana] | 480  | 511  | 0        | 106.5 | 91.3 | 95.6 | glycosyl hydrolase family 9 protein                                            | gbpln | Arabidopsis lyrata   | AT4G02290.1   Symbols: AtGH9B13, GH9B13   glycosyl hydrolase 9B13   chr4:1002654-1005125 REVERSE LENGTH=516                                 | 480  | 516 | 0        | 107.5 | 90.2 | 95.0 |
| Rsa1.0_00276.1.g10252.t1 | ref NP_192137.1 sucrose synthase 3 [Arabidopsis thaliana] gi 75264545 sp Q9M111.1 SUS3_ARATH RecName: Full=Sucrose synthase 3; Short=AtSUS3; AltName: Full=Sucrose-UDP glucosyltransferase 3 gi 7268988 emb CAB80721.1 putative sucrose synthetase [Arabidopsis thaliana] gi 15293135 gb AAK93678.1 putative sucrose synthetase [Arabidopsis thaliana] gi 15982721 gb AL09730.1 AT4g02280/T2H3.8 [Arabidopsis thaliana] gi 23296413 gb AANI3112.1 putative sucrose synthetase [Arabidopsis thaliana] gi 332656750 gb AEE82150.1 sucrose synthase 3 [Arabidopsis thaliana]                                                                                                                                                                                             | 801  | 809  | 0        | 101.0 | 92.3 | 96.9 | sucrose synthase 3                                                             | gbpln | Arabidopsis thaliana | AT4G02280.1   Symbols: SUS3, ATSUS3   sucrose synthase 3   chr4:995166-998719 FORWARD LENGTH=809                                            | 801  | 809 | 0        | 101.0 | 92.3 | 96.9 |
| Rsa1.0_00276.1.g10253.t1 | pir [T00833 RNA-directed DNA polymerase homolog T13L16.7 - Arabidopsis thaliana (fragment)                                                                                                                                                                                                                                                                                                                                                                                                                                                                                                                                                                                                                                                                            | 1179 | 1365 | 0        | 115.8 | 44.1 | 60.6 | RNA-directed DNA polymerase homolog T13L16.7 - Arabidopsis thaliana (fragment) | ----  | ----                 | AT4G29090.1   Symbols:   Ribonuclease H-like superfamily protein   chr4:14333528-14335255 FORWARD LENGTH=575                                | 1179 | 575 | 1.00E-61 | 48.8  | 13.5 | 21.6 |

|                          |                                                                                                                                                                                                                                                                                                                                                                                                                                                                                                                                                                                                                                                                          |     |     |           |       |      |       |                                                 |       |                      |                                                                                                                                               |     |     |           |       |      |      |
|--------------------------|--------------------------------------------------------------------------------------------------------------------------------------------------------------------------------------------------------------------------------------------------------------------------------------------------------------------------------------------------------------------------------------------------------------------------------------------------------------------------------------------------------------------------------------------------------------------------------------------------------------------------------------------------------------------------|-----|-----|-----------|-------|------|-------|-------------------------------------------------|-------|----------------------|-----------------------------------------------------------------------------------------------------------------------------------------------|-----|-----|-----------|-------|------|------|
| Rsa1.0_00276.1.g10254.t8 | refXP_002874925.1   hypothetical protein ARALYDRAFT_490346 [Arabidopsis lyrata subsp. lyrata] gi 297320762 gb EFH51184.1   hypothetical protein ARALYDRAFT_490346 [Arabidopsis lyrata subsp. lyrata]                                                                                                                                                                                                                                                                                                                                                                                                                                                                     | 906 | 883 | 0         | 97.5  | 83.1 | 86.1  | hypothetical protein ARALYDRAFT_490346          | gbpln | Arabidopsis lyrata   | AT4G02260.2   Symbols: RSH1, AT-RSH1   RELA/SPOT homolog 1   chr4:985451-991178 FORWARD LENGTH=883                                            | 906 | 883 | 0         | 97.5  | 82.6 | 86.0 |
| Rsa1.0_00276.1.g10255.t1 | gb AAT41847.1  At4g02250 [Arabidopsis thaliana]                                                                                                                                                                                                                                                                                                                                                                                                                                                                                                                                                                                                                          | 184 | 184 | 6.00E-91  | 100.0 | 89.1 | 95.7  | At4g02250                                       | gbpln | Arabidopsis thaliana | AT4G02250.1   Symbols:   Plant invertase/pectin methyltransferase inhibitor superfamily protein   chr4:983970-984523 FORWARD LENGTH=160       | 184 | 160 | 9.00E-75  | 87.0  | 76.6 | 83.2 |
| Rsa1.0_00276.1.g10256.t1 | gb EOA31438.1  hypothetical protein CARUB_v10014622mg [Capsella rubella]                                                                                                                                                                                                                                                                                                                                                                                                                                                                                                                                                                                                 | 199 | 210 | 5.00E-95  | 105.5 | 88.4 | 91.5  | hypothetical protein CARUB_v10014622mg          | gbpln | Capsella rubella     | AT3G16780.1   Symbols:   Ribosomal protein L19a family protein   chr3:5708982-5710249 FORWARD LENGTH=209                                      | 199 | 209 | 1.00E-95  | 105.0 | 86.4 | 89.9 |
| Rsa1.0_00277.1.g10257.t2 | gb EOA25402.1  hypothetical protein CARUB_v10018734mg [Capsella rubella]                                                                                                                                                                                                                                                                                                                                                                                                                                                                                                                                                                                                 | 312 | 285 | 1.00E-77  | 91.3  | 47.1 | 62.2  | hypothetical protein CARUB_v10018734mg          | gbpln | Capsella rubella     | AT4G30640.1   Symbols:   RNI-like superfamily protein   chr4:14952670-14953682 FORWARD LENGTH=301                                             | 312 | 301 | 8.00E-76  | 96.5  | 46.8 | 58.0 |
| Rsa1.0_00277.1.g10258.t1 | gb EOA33864.1  hypothetical protein CARUB_v10021355mg, partial [Capsella rubella]                                                                                                                                                                                                                                                                                                                                                                                                                                                                                                                                                                                        | 397 | 750 | 2.00E-51  | 188.9 | 29.7 | 41.6  | hypothetical protein CARUB_v10021355mg, partial | gbpln | Capsella rubella     | AT1G77340.1   Symbols:   Pentatricopeptide repeat (PPR) superfamily protein   chr1:29068620-29069828 REVERSE LENGTH=402                       | 397 | 402 | 2.00E-47  | 101.3 | 31.0 | 44.8 |
| Rsa1.0_00277.1.g10259.t1 | refXP_002869367.1   F-box family protein [Arabidopsis lyrata subsp. lyrata] gi 297315203 gb EFH45626.1   F-box family protein [Arabidopsis lyrata subsp. lyrata]                                                                                                                                                                                                                                                                                                                                                                                                                                                                                                         | 284 | 301 | 1.00E-129 | 106.0 | 77.8 | 87.7  | F-box family protein                            | gbpln | Arabidopsis lyrata   | AT4G30640.1   Symbols:   RNI-like superfamily protein   chr4:14952670-14953682 FORWARD LENGTH=301                                             | 284 | 301 | 1.00E-128 | 106.0 | 75.0 | 86.3 |
| Rsa1.0_00277.1.g10260.t1 | gb AAT11798.1  salt and low temperature response protein [Brassica rapa subsp. pekinensis]                                                                                                                                                                                                                                                                                                                                                                                                                                                                                                                                                                               | 74  | 74  | 2.00E-33  | 100.0 | 95.9 | 100.0 | salt and low temperature response protein       | gbpln | Brassica rapa        | AT4G30650.1   Symbols:   Low temperature and salt responsive protein family   chr4:14954403-14954698 FORWARD LENGTH=73                        | 74  | 73  | 2.00E-31  | 98.6  | 89.2 | 94.6 |
| Rsa1.0_00277.1.g10261.t1 | gb EOA15666.1  hypothetical protein CARUB_v10006167mg [Capsella rubella]                                                                                                                                                                                                                                                                                                                                                                                                                                                                                                                                                                                                 | 75  | 74  | 6.00E-29  | 98.7  | 85.3 | 94.7  | hypothetical protein CARUB_v10006167mg          | gbpln | Capsella rubella     | AT4G30660.2   Symbols:   Low temperature and salt responsive protein family   chr4:14955470-14955944 FORWARD LENGTH=74                        | 75  | 74  | 2.00E-30  | 98.7  | 80.0 | 93.3 |
| Rsa1.0_00277.1.g10262.t1 | # # # # # # # # - ----                                                                                                                                                                                                                                                                                                                                                                                                                                                                                                                                                                                                                                                   |     |     |           |       |      |       |                                                 |       |                      | # # # # # # # #                                                                                                                               |     |     |           |       |      |      |
| Rsa1.0_00277.1.g10263.t1 | refXP_002871796.1   predicted protein [Arabidopsis lyrata subsp. lyrata] gi 297317633 gb EFH48055.1   predicted protein [Arabidopsis lyrata subsp. lyrata]                                                                                                                                                                                                                                                                                                                                                                                                                                                                                                               | 266 | 277 | 1.00E-71  | 104.1 | 52.6 | 67.7  | predicted protein                               | gbpln | Arabidopsis lyrata   | AT4G29770.2   Symbols:   Target of trans acting-siR480/255.   chr4:14575718-14577465 FORWARD LENGTH=329                                       | 266 | 329 | 5.00E-73  | 123.7 | 51.1 | 66.9 |
| Rsa1.0_00277.1.g10264.t1 | refXP_002867334.1   hypothetical protein ARALYDRAFT_353746 [Arabidopsis lyrata subsp. lyrata] gi 297313170 gb EFH43593.1   hypothetical protein ARALYDRAFT_353746 [Arabidopsis lyrata subsp. lyrata]                                                                                                                                                                                                                                                                                                                                                                                                                                                                     | 791 | 745 | 0         | 94.2  | 78.6 | 84.3  | hypothetical protein ARALYDRAFT_353746          | gbpln | Arabidopsis lyrata   | AT2G24050.1   Symbols: eFiso4G2   MIF4G domain-containing protein / MA3 domain-containing protein   chr2:10225500-10228456 REVERSE LENGTH=747 | 791 | 747 | 0         | 94.4  | 66.6 | 76.9 |
| Rsa1.0_00277.1.g10265.t1 | refNP_194799.1   pentatricopeptide repeat-containing protein [Arabidopsis thaliana] gi 75208664 sp Q9SUH6.1 PP341_ARAT H RecName: Full=Pentatricopeptide repeat-containing protein At4g30700; AltName: Full=Protein DYW9 gi 5725434 emb CAB52443.1   putative protein [Arabidopsis thaliana] gi 7269971 emb CAB79788.1   putative protein [Arabidopsis thaliana] gi 332660398 gb AEE85798.1   pentatricopeptide repeat-containing protein [Arabidopsis thaliana] refNP_194800.1   uncharacterized protein [Arabidopsis thaliana] gi 5725433 emb CAB52444.1   putative protein [Arabidopsis thaliana] gi 7269972 emb CAB79789.1   putative protein [Arabidopsis thaliana] | 793 | 792 | 0         | 99.9  | 84.7 | 91.7  | pentatricopeptide repeat-containing protein     | gbpln | Arabidopsis thaliana | AT4G30700.1   Symbols:   Pentatricopeptide repeat (PPR) superfamily protein   chr4:14962617-14964995 REVERSE LENGTH=792                       | 793 | 792 | 0         | 99.9  | 84.7 | 91.7 |
| Rsa1.0_00277.1.g10266.t1 | gi 27311861 gb AA00896.1   putative protein [Arabidopsis thaliana] gi 110742694 dbj BAE9258.1   hypothetical protein [Arabidopsis thaliana] gi 332660399 gb AEE85799.1   uncharacterized protein AT4G30710 [Arabidopsis thaliana]                                                                                                                                                                                                                                                                                                                                                                                                                                        | 646 | 644 | 0         | 99.7  | 84.8 | 91.0  | uncharacterized protein                         | gbpln | Arabidopsis thaliana | AT4G30710.1   Symbols: QWRF8   Family of unknown function (DJF566)   chr4:14965538-14967881 REVERSE LENGTH=644                                | 646 | 644 | 0         | 99.7  | 84.8 | 91.0 |

|                          |                                                                                                                                                                                                                                                                                                                                                                                                                                                                                                                                       |      |      |           |       |      |      |                                             |       |                      |                                                                                                                                                                                                                                                                                                                                                                                                                                                                                                 |      |      |          |       |      |      |
|--------------------------|---------------------------------------------------------------------------------------------------------------------------------------------------------------------------------------------------------------------------------------------------------------------------------------------------------------------------------------------------------------------------------------------------------------------------------------------------------------------------------------------------------------------------------------|------|------|-----------|-------|------|------|---------------------------------------------|-------|----------------------|-------------------------------------------------------------------------------------------------------------------------------------------------------------------------------------------------------------------------------------------------------------------------------------------------------------------------------------------------------------------------------------------------------------------------------------------------------------------------------------------------|------|------|----------|-------|------|------|
| Rsa1.0_00277.1.g10267.t1 | refXP_002867329.1   hypothetical protein ARALYDRAFT_913400 [Arabidopsis lyrata subsp. lyrata] gi 297313185 gb EFH43588.1   hypothetical protein ARALYDRAFT_913400 [Arabidopsis lyrata subsp. lyrata]                                                                                                                                                                                                                                                                                                                                  | 153  | 157  | 1.00E-71  | 102.6 | 85.6 | 95.4 | hypothetical protein ARALYDRAFT_913400      | gbpln | Arabidopsis lyrata   | AT4G30770.1   Symbols:   Putative membrane lipoprotein   chr4:14986140-14986613 REVERSE LENGTH=157                                                                                                                                                                                                                                                                                                                                                                                              | 153  | 157  | 3.00E-65 | 102.6 | 84.3 | 92.8 |
| Rsa1.0_00277.1.g10268.t1 | gb EOA16289.1   hypothetical protein CARUB_v10004435mg [Capsella rubella]                                                                                                                                                                                                                                                                                                                                                                                                                                                             | 564  | 586  | 0         | 103.9 | 86.3 | 91.3 | hypothetical protein CARUB_v10004435mg      | gbpln | Capsella rubella     | AT4G30780.1   Symbols:   unknown protein; BEST Arabidopsis thaliana protein match is: unknown protein (TAIR:AT2G24100.1); Has 109 Blast hits to 109 proteins in 18 species: Archae - 0; Bacteria - 0; Metazoa - 1; Fungi - 0; Plants - 95; Viruses - 0; Other Eukaryotes - 13 (source: NCBI BLINK).   chr4:14990523-14992855 FORWARD LENGTH=589                                                                                                                                                 | 564  | 589  | 0        | 104.4 | 85.8 | 91.3 |
| Rsa1.0_00277.1.g10269.t1 | refNP_194808.1   uncharacterized protein [Arabidopsis thaliana] gi 5725443 emb CAB52452.1   putative protein [Arabidopsis thaliana] gi 7269980 emb CAB79797.1   putative protein [Arabidopsis thaliana] gi 332660409 gb AEE85809.1   uncharacterized protein AT4G30790 [Arabidopsis thaliana]                                                                                                                                                                                                                                         | 1123 | 1148 | 0         | 102.2 | 87.3 | 93.7 | uncharacterized protein                     | gbpln | Arabidopsis thaliana | AT4G30790.1   Symbols:   INVOLVED IN: autophagy; EXPRESSED IN: 24 plant structures; EXPRESSED DURING: 15 growth stages; CONTAINS InterPro DOMAIN/s: Autophagy-related protein 17 (InterPro:IPR007240), Autophagy-related protein 11 (InterPro:IPR019460); Has 8793 Blast hits to 6268 proteins in 570 species: Archae - 89; Bacteria - 657; Metazoa - 4844; Fungi - 808; Plants - 441; Viruses - 15; Other Eukaryotes - 1939 (source: NCBI BLINK).   chr4:14993383-14997785 REVERSE LENGTH=1148 | 1123 | 1148 | 0        | 102.2 | 87.3 | 93.7 |
| Rsa1.0_00277.1.g10270.t1 | refXP_002869361.1   hypothetical protein ARALYDRAFT_491673 [Arabidopsis lyrata subsp. lyrata] gi 297315197 gb EFH45620.1   hypothetical protein ARALYDRAFT_491673 [Arabidopsis lyrata subsp. lyrata]                                                                                                                                                                                                                                                                                                                                  | 477  | 479  | 0         | 100.4 | 84.5 | 90.6 | hypothetical protein ARALYDRAFT_491673      | gbpln | Arabidopsis lyrata   | AT4G30810.1   Symbols: scp129   serine carboxypeptidase-like 29   chr4:15003474-15006017 FORWARD LENGTH=479                                                                                                                                                                                                                                                                                                                                                                                     | 477  | 479  | 0        | 100.4 | 83.2 | 90.4 |
| Rsa1.0_00277.1.g10271.t1 | refNP_567854.1   carboxypeptidase D [Arabidopsis thaliana] gi 75332010 sp Q949Q7.1   SCP29_ARAT H RecName: Full=Serine carboxypeptidase-like 29; Flags: Precursor gi 15293049 gb AAK93635.1   putative serine carboxypeptidase II [Arabidopsis thaliana] gi 22136958 gb AAM91708.1   putative serine carboxypeptidase II [Arabidopsis thaliana] gi 332660411 gb AEE85811.1   serine carboxypeptidase-like 29 [Arabidopsis thaliana]                                                                                                   | 472  | 479  | 0         | 101.5 | 82.6 | 90.0 | carboxypeptidase D                          | gbpln | Arabidopsis thaliana | AT4G30810.1   Symbols: scp129   serine carboxypeptidase-like 29   chr4:15003474-15006017 FORWARD LENGTH=479                                                                                                                                                                                                                                                                                                                                                                                     | 472  | 479  | 0        | 101.5 | 82.6 | 90.0 |
| Rsa1.0_00277.1.g10272.t1 | refXP_002869359.1   pentatricopeptide repeat-containing protein [Arabidopsis lyrata subsp. lyrata] gi 297315195 gb EFH45618.1   pentatricopeptide repeat-containing protein [Arabidopsis lyrata subsp. lyrata]                                                                                                                                                                                                                                                                                                                        | 885  | 906  | 0         | 102.4 | 84.3 | 91.4 | pentatricopeptide repeat-containing protein | gbpln | Arabidopsis lyrata   | AT4G30825.1   Symbols:   Tetratricopeptide repeat (TPR)-like superfamily protein   chr4:15009605-15012319 FORWARD LENGTH=904                                                                                                                                                                                                                                                                                                                                                                    | 885  | 904  | 0        | 102.1 | 81.4 | 88.5 |
| Rsa1.0_00277.1.g10273.t1 | refNP_194814.2   heptahelical transmembrane protein2 [Arabidopsis thaliana] gi 42573093 refNP_974643.1   heptahelical transmembrane protein2 [Arabidopsis thaliana] gi 30385618 gb AAP23168.1   HHP2 [Arabidopsis thaliana] gi 60543323 gb AAX22259.1   At4g30850 [Arabidopsis thaliana] gi 94442447 gb ABF19011.1   At4g30850 [Arabidopsis thaliana] gi 332660419 gb AEE85819.1   heptahelical transmembrane protein2 [Arabidopsis thaliana] gi 332660420 gb AEE85820.1   heptahelical transmembrane protein2 [Arabidopsis thaliana] | 362  | 358  | 1.00E-179 | 98.9  | 87.3 | 90.3 | heptahelical transmembrane protein2         | gbpln | Arabidopsis thaliana | AT4G30850.2   Symbols: HHP2   heptahelical transmembrane protein2   chr4:15020540-15022278 REVERSE LENGTH=358                                                                                                                                                                                                                                                                                                                                                                                   | 362  | 358  | 0        | 98.9  | 87.3 | 90.3 |
| Rsa1.0_00277.1.g10274.t1 | gb AAP37971.1   seed specific protein Bn15D18B [Brassica napus]                                                                                                                                                                                                                                                                                                                                                                                                                                                                       | 109  | 109  | 2.00E-50  | 100.0 | 92.7 | 94.5 | seed specific protein Bn15D18B              | gbpln | Brassica napus       | AT4G30880.1   Symbols:   Bifunctional inhibitor/lipid-transfer protein/seed storage 2S albumin superfamily protein   chr4:15035229-15035750 FORWARD LENGTH=109                                                                                                                                                                                                                                                                                                                                  | 109  | 109  | 5.00E-48 | 100.0 | 82.6 | 90.8 |
| Rsa1.0_00277.1.g10275.t1 | gb EOA16186.1   hypothetical protein CARUB_v10004326mg [Capsella rubella]                                                                                                                                                                                                                                                                                                                                                                                                                                                             | 606  | 551  | 0         | 90.9  | 72.1 | 76.9 | hypothetical protein CARUB_v10004326mg      | gbpln | Capsella rubella     | AT4G30890.3   Symbols: UBP24   ubiquitin-specific protease 24   chr4:15036383-15038825 REVERSE LENGTH=551                                                                                                                                                                                                                                                                                                                                                                                       | 606  | 551  | 0        | 90.9  | 70.8 | 75.4 |



|                          |                                                                                                                                                                                                                                                                                                                                                                                                                                                                                                                                                                                                                     |      |      |           |       |      |      |                                                                                                                          |       |                      |                                                                                                                                                                                                                                                                                                                                                                                                                                                                                    |      |      |           |       |      |      |
|--------------------------|---------------------------------------------------------------------------------------------------------------------------------------------------------------------------------------------------------------------------------------------------------------------------------------------------------------------------------------------------------------------------------------------------------------------------------------------------------------------------------------------------------------------------------------------------------------------------------------------------------------------|------|------|-----------|-------|------|------|--------------------------------------------------------------------------------------------------------------------------|-------|----------------------|------------------------------------------------------------------------------------------------------------------------------------------------------------------------------------------------------------------------------------------------------------------------------------------------------------------------------------------------------------------------------------------------------------------------------------------------------------------------------------|------|------|-----------|-------|------|------|
| Rsa1.0_00277.1.g10276.t1 | refXP_002869355.1  hypothetical protein ARALYDRAFT_913382 [Arabidopsis lyrata subsp. lyrata] gi 297315191 gb EFH45614.1                                                                                                                                                                                                                                                                                                                                                                                                                                                                                             | 314  | 320  | 1.00E-170 | 101.9 | 91.4 | 95.5 | hypothetical protein ARALYDRAFT_913382                                                                                   | gbpln | Arabidopsis lyrata   | AT4G30900.2   Symbols:   DNase I-like superfamily protein   chr4:15040021-15042203 FORWARD LENGTH=316                                                                                                                                                                                                                                                                                                                                                                              | 314  | 316  | 1.00E-169 | 100.6 | 89.8 | 94.3 |
| Rsa1.0_00277.1.g10277.t1 | hypothetical protein ARALYDRAFT_913382 [Arabidopsis lyrata subsp. lyrata] refXP_002867321.1  cytosol aminopeptidase family protein [Arabidopsis lyrata subsp. lyrata] gi 297313157 gb EFH43580.1  cytosol aminopeptidase family protein [Arabidopsis lyrata subsp. lyrata]                                                                                                                                                                                                                                                                                                                                          | 583  | 583  | 0         | 100.0 | 93.3 | 96.4 | cytosol aminopeptidase family protein                                                                                    | gbpln | Arabidopsis lyrata   | AT4G30920.1   Symbols:   Cytosol aminopeptidase family protein   chr4:15046589-15049304 REVERSE LENGTH=583                                                                                                                                                                                                                                                                                                                                                                         | 583  | 583  | 0         | 100.0 | 92.8 | 96.1 |
| Rsa1.0_00277.1.g10278.t4 | refXP_002888202.1  ZCF125 [Arabidopsis lyrata subsp. lyrata] gi 297334043 gb EFH64461.1  ZCF125 [Arabidopsis lyrata subsp. lyrata]                                                                                                                                                                                                                                                                                                                                                                                                                                                                                  | 167  | 827  | 2.00E-50  | 495.2 | 59.9 | 62.3 | ZCF125                                                                                                                   | gbpln | Arabidopsis lyrata   | AT1G59540.1   Symbols: ZCF125   P-loop containing nucleoside triphosphate hydrolases superfamily protein   chr1:21874083-21879382 FORWARD LENGTH=823                                                                                                                                                                                                                                                                                                                               | 167  | 823  | 9.00E-52  | 492.8 | 58.7 | 61.7 |
| Rsa1.0_00277.1.g10279.t1 | ref NP_567861.1  50S ribosomal protein L21 [Arabidopsis thaliana] gi 298395556 sp Q8L9A0.1 RM21_ARATH RecName: Full=50S ribosomal protein L21, mitochondrial; Flags: Precursor gi 12641613 emb CAC27453.1  putative ribosomal protein L21 [Arabidopsis thaliana] gi 21595368 gb AAM66095.1  unknown [Arabidopsis thaliana] gi 29028852 gb AAO64805.1  At4g30930 [Arabidopsis thaliana] gi 110736393 db BAF00165.1  hypothetical protein [Arabidopsis thaliana] gi 225898835 db BAH30548.1  hypothetical protein [Arabidopsis thaliana] gi 332660431 gb AEE85831.1  50S ribosomal protein L21 [Arabidopsis thaliana] | 259  | 270  | 1.00E-105 | 104.2 | 82.6 | 88.0 | 50S ribosomal protein L21                                                                                                | gbpln | Arabidopsis thaliana | AT4G30930.1   Symbols: NFD1   Ribosomal protein L21   chr4:15050170-15051630 REVERSE LENGTH=270                                                                                                                                                                                                                                                                                                                                                                                    | 259  | 270  | 1.00E-107 | 104.2 | 82.6 | 88.0 |
| Rsa1.0_00277.1.g10280.t1 | emb CAB43840.1  hypothetical protein [Arabidopsis thaliana] gi 7269905 emb CAB80998.1  hypothetical protein [Arabidopsis thaliana]                                                                                                                                                                                                                                                                                                                                                                                                                                                                                  | 124  | 150  | 3.00E-14  | 121.0 | 42.7 | 62.1 | hypothetical protein                                                                                                     | gbpln | Arabidopsis thaliana | AT4G30050.1   Symbols:   unknown protein; FUNCTIONS IN: molecular_function unknown; INVOLVED IN: biological_process unknown; LOCATED IN: endomembrane system; EXPRESSED IN: leaf whorl, sepal, flower; EXPRESSED DURING: petal differentiation and expansion stage; Has 6 Blast hits to 6 proteins in 2 species: Archae - 0; Bacteria - 0; Metazoa - 0; Fungi - 0; Plants - 6; Viruses - 0; Other Eukaryotes - 0 (source: NCBI BLINK).   chr4:14687206-14687607 REVERSE LENGTH=133 | 124  | 133  | 7.00E-17  | 107.3 | 42.7 | 62.1 |
| Rsa1.0_00277.1.g10281.t1 | #                                                                                                                                                                                                                                                                                                                                                                                                                                                                                                                                                                                                                   | #    | #    | #         | #     | #    | #    | -                                                                                                                        | ----  | ----                 | #                                                                                                                                                                                                                                                                                                                                                                                                                                                                                  | #    | #    | #         | #     | #    | #    |
| Rsa1.0_00277.1.g10282.t1 | sp P48627.1 FAD6C_BRANA RecName: Full=Omega-6 fatty acid desaturase, chloroplastic; Flags: Precursor gi 457631 gb AAA50157.1  omega-6 desaturase [Brassica napus]                                                                                                                                                                                                                                                                                                                                                                                                                                                   | 445  | 443  | 0         | 99.6  | 96.2 | 97.3 | RecName: Full=Omega-6 fatty acid desaturase, chloroplastic; Flags: Precursor gi 457631 gb AAA50157.1  omega-6 desaturase | gbpln | Brassica napus       | AT4G30950.1   Symbols: FAD6, FADC, SFD4   fatty acid desaturase 6   chr4:15057278-15059673 REVERSE LENGTH=448                                                                                                                                                                                                                                                                                                                                                                      | 445  | 448  | 0         | 100.7 | 91.7 | 95.5 |
| Rsa1.0_00277.1.g10283.t1 | #                                                                                                                                                                                                                                                                                                                                                                                                                                                                                                                                                                                                                   | #    | #    | #         | #     | #    | #    | -                                                                                                                        | ----  | ----                 | #                                                                                                                                                                                                                                                                                                                                                                                                                                                                                  | #    | #    | #         | #     | #    | #    |
| Rsa1.0_00277.1.g10284.t1 | #                                                                                                                                                                                                                                                                                                                                                                                                                                                                                                                                                                                                                   | #    | #    | #         | #     | #    | #    | -                                                                                                                        | ----  | ----                 | #                                                                                                                                                                                                                                                                                                                                                                                                                                                                                  | #    | #    | #         | #     | #    | #    |
| Rsa1.0_00278.1.g10285.t4 | refXP_002868324.1  zinc ion binding protein [Arabidopsis lyrata subsp. lyrata] gi 297314160 gb EFH44583.1  zinc ion binding protein [Arabidopsis lyrata subsp. lyrata]                                                                                                                                                                                                                                                                                                                                                                                                                                              | 620  | 776  | 0         | 125.2 | 76.6 | 84.5 | zinc ion binding protein                                                                                                 | gbpln | Arabidopsis lyrata   | AT4G13970.1   Symbols:   zinc ion binding   chr4:8070696-8074134 REVERSE LENGTH=778                                                                                                                                                                                                                                                                                                                                                                                                | 620  | 778  | 0         | 125.5 | 76.5 | 83.4 |
| Rsa1.0_00278.1.g10286.t1 | gb AAB87099.1  putative retroelement pol polyprotein [Arabidopsis thaliana]                                                                                                                                                                                                                                                                                                                                                                                                                                                                                                                                         | 1463 | 1496 | 0         | 102.3 | 56.5 | 71.1 | putative retroelement pol polyprotein                                                                                    | gbpln | Arabidopsis thaliana | AT4G23160.1   Symbols: CRK8   cysteine-rich RLK (RECEPTOR-like protein kinase) 8   chr4:12129485-12134086 FORWARD LENGTH=1262                                                                                                                                                                                                                                                                                                                                                      | 1463 | 1262 | 1.00E-138 | 86.3  | 16.3 | 23.6 |
| Rsa1.0_00278.1.g10287.t3 | refXP_004289565.1  PREDICTED: uncharacterized protein LOC101298842 [Fragaria vesca subsp. vesca]                                                                                                                                                                                                                                                                                                                                                                                                                                                                                                                    | 84   | 688  | 3.00E-25  | 819.0 | 59.5 | 64.3 | PREDICTED: uncharacterized protein LOC101298842                                                                          | gbpln | Fragaria vesca       | AT1G65910.1   Symbols: anac028, NAC028   NAC domain containing protein 28   chr1:24520933-24524108 REVERSE LENGTH=631                                                                                                                                                                                                                                                                                                                                                              | 84   | 631  | 1.00E-27  | 751.2 | 58.3 | 64.3 |
| Rsa1.0_00278.1.g10288.t1 | gb EOA38131.1  hypothetical protein CARUB_v10009602mg [Capsella rubella]                                                                                                                                                                                                                                                                                                                                                                                                                                                                                                                                            | 370  | 349  | 1.00E-177 | 94.3  | 85.4 | 88.6 | hypothetical protein CARUB_v10009602mg                                                                                   | gbpln | Capsella rubella     | AT1G54320.1   Symbols:   LEM3 (ligand-effect modulator 3) family protein / CDC50 family protein   chr1:20275732-20277793 REVERSE LENGTH=349                                                                                                                                                                                                                                                                                                                                        | 370  | 349  | 1.00E-177 | 94.3  | 84.9 | 87.6 |

|                          |                                                                                                                                                                                                                                                                                                                                                                                                                                                                                                                                                                                |      |      |           |       |      |      |                                                                  |       |                      |                                                                                                                                                                                                                                                                                                                                                                                                                                                                                                                                                                                                                                                                                                                                                                                                                                                                                                                                                                                                                                                                                                                            |      |      |           |       |      |      |
|--------------------------|--------------------------------------------------------------------------------------------------------------------------------------------------------------------------------------------------------------------------------------------------------------------------------------------------------------------------------------------------------------------------------------------------------------------------------------------------------------------------------------------------------------------------------------------------------------------------------|------|------|-----------|-------|------|------|------------------------------------------------------------------|-------|----------------------|----------------------------------------------------------------------------------------------------------------------------------------------------------------------------------------------------------------------------------------------------------------------------------------------------------------------------------------------------------------------------------------------------------------------------------------------------------------------------------------------------------------------------------------------------------------------------------------------------------------------------------------------------------------------------------------------------------------------------------------------------------------------------------------------------------------------------------------------------------------------------------------------------------------------------------------------------------------------------------------------------------------------------------------------------------------------------------------------------------------------------|------|------|-----------|-------|------|------|
| Rsa1.0_00278.1.g10289.t1 | ref NP_201396.4  uncharacterized protein [Arabidopsis thaliana] gi 332010749 gb AED98131.1  uncharacterized protein AT5G65950 [Arabidopsis thaliana]                                                                                                                                                                                                                                                                                                                                                                                                                           | 1220 | 1190 | 0         | 97.5  | 82.9 | 88.9 | uncharacterized protein                                          | gbpln | Arabidopsis thaliana | AT5G65950.1   Symbols:   FUNCTIONS IN: molecular_function unknown; INVOLVED IN: biological_process unknown; LOCATED IN: cellular_component unknown; EXPRESSED IN: 25 plant structures; EXPRESSED DURING: 15 growth stages; CONTAINS InterPro DOMAIN/s: Protein of unknown function DUF1683, C-terminal (InterPro:IPRO12880), Foie gras liver health family 1 (InterPro:IPRO21773); Has 30201 Blast hits to 17322 proteins in 780 species: Archae - 12; Bacteria - 1396; Metazoa - 17338; Fungi - 3422; Plants - 5037; Viruses - 0; Other Eukaryotes - 2996 (source: NCBI BLINK).   chr5:26380290-26384960 FORWARD LENGTH=1190 AT1G56180.1   Symbols:   unknown protein; INVOLVED IN: biological_process unknown; LOCATED IN: chloroplast; EXPRESSED IN: 23 plant structures; EXPRESSED DURING: 15 growth stages; BEST Arabidopsis thaliana protein match is: unknown protein (TAIR:AT5G27290.1); Has 436 Blast hits to 436 proteins in 83 species: Archae - 0; Bacteria - 153; Metazoa - 0; Fungi - 0; Plants - 160; Viruses - 0; Other Eukaryotes - 123 (source: NCBI BLINK).   chr1:21026243-21028047 REVERSE LENGTH=389 | 1220 | 1190 | 0         | 97.5  | 82.9 | 88.9 |
| Rsa1.0_00278.1.g10291.t1 | ref XP_002894564.1  hypothetical protein ARALYDRAFT_474687 [Arabidopsis lyrata subsp. lyrata] gi 297340406 gb EFH70823.1  hypothetical protein ARALYDRAFT_474687 [Arabidopsis lyrata subsp. lyrata]                                                                                                                                                                                                                                                                                                                                                                            | 378  | 385  | 1.00E-170 | 101.9 | 80.2 | 87.3 | hypothetical protein ARALYDRAFT_474687                           | gbpln | Arabidopsis lyrata   | AT1G56160.1   Symbols:   S-adenosyl-L-methionine-dependent methyltransferases superfamily protein   chr3:20823243-20826357 FORWARD LENGTH=468                                                                                                                                                                                                                                                                                                                                                                                                                                                                                                                                                                                                                                                                                                                                                                                                                                                                                                                                                                              | 378  | 389  | 1.00E-172 | 102.9 | 79.4 | 87.6 |
| Rsa1.0_00278.1.g10291.t1 | ref NP_176012.1  myb domain protein 72 [Arabidopsis thaliana] gi 6056369 gb AAF02833.1 AC009894.4 Putative transcription factor [Arabidopsis thaliana] gi 12321743 gb AAG50903.1 AC069159_4 Myb-family transcription factor, putative [Arabidopsis thaliana] gi 332195231 gb AEE33352.1  myb domain protein 72 [Arabidopsis thaliana]                                                                                                                                                                                                                                          | 309  | 296  | 1.00E-104 | 95.8  | 68.6 | 78.3 | myb domain protein 72                                            | gbpln | Arabidopsis thaliana | AT1G56160.1   Symbols:   S-adenosyl-L-methionine-dependent methyltransferases superfamily protein   chr3:20823243-20826357 FORWARD LENGTH=468                                                                                                                                                                                                                                                                                                                                                                                                                                                                                                                                                                                                                                                                                                                                                                                                                                                                                                                                                                              | 309  | 296  | 1.00E-106 | 95.8  | 68.6 | 78.3 |
| Rsa1.0_00278.1.g10292.t1 | #                                                                                                                                                                                                                                                                                                                                                                                                                                                                                                                                                                              | #    | #    | #         | #     | #    | #    | -                                                                | ----  | ----                 | #                                                                                                                                                                                                                                                                                                                                                                                                                                                                                                                                                                                                                                                                                                                                                                                                                                                                                                                                                                                                                                                                                                                          | #    | #    | #         | #     | #    |      |
| Rsa1.0_00278.1.g10293.t1 | #                                                                                                                                                                                                                                                                                                                                                                                                                                                                                                                                                                              | #    | #    | #         | #     | #    | #    | -                                                                | ----  | ----                 | #                                                                                                                                                                                                                                                                                                                                                                                                                                                                                                                                                                                                                                                                                                                                                                                                                                                                                                                                                                                                                                                                                                                          | #    | #    | #         | #     | #    |      |
| Rsa1.0_00278.1.g10294.t2 | ref NP_567034.1  S-adenosyl-L-methionine-dependent methyltransferase-like protein [Arabidopsis thaliana] gi 75163665 sp Q93YU6.1 TRM51_ARAT H RecName: Full=tRNA (guanine(37)-N1)-methyltransferase 1; AltName: Full=M1G-methyltransferase 1; AltName: Full=tRNA [GM37] methyltransferase 1; AltName: Full=tRNA methyltransferase 5 homolog 1 gi 16604635 gb AAL24110.1  unknown protein [Arabidopsis thaliana] gi 28393917 gb AAO42366.1  unknown protein [Arabidopsis thaliana] gi 332645959 gb AEE79480.1  tRNA (guanine(37)-N1)-methyltransferase 1 [Arabidopsis thaliana] | 270  | 468  | 3.00E-15  | 173.3 | 14.4 | 15.2 | S-adenosyl-L-methionine-dependent methyltransferase-like protein | gbpln | Arabidopsis thaliana | AT1G56140.1   Symbols:   Leucine-rich repeat transmembrane protein kinase   chr1:21001708-21007725 REVERSE LENGTH=1033                                                                                                                                                                                                                                                                                                                                                                                                                                                                                                                                                                                                                                                                                                                                                                                                                                                                                                                                                                                                     | 270  | 468  | 8.00E-18  | 173.3 | 14.4 | 15.2 |
| Rsa1.0_00278.1.g10295.t1 | ref NP_564709.2  Leucine-rich repeat transmembrane protein kinase [Arabidopsis thaliana] gi 264664587 sp COLGH3.2 Y5614_ARAT H RecName: Full=Probable LRR receptor-like serine/threonine-protein kinase At1g56140; Flags: Precursor gi 332195227 gb AEE33348.1  Leucine-rich repeat transmembrane protein kinase [Arabidopsis thaliana]                                                                                                                                                                                                                                        | 1034 | 1033 | 0         | 99.9  | 87.3 | 93.4 | Leucine-rich repeat transmembrane protein kinase                 | gbpln | Arabidopsis thaliana | AT1G56130.1   Symbols:   Leucine-rich repeat transmembrane protein kinase   chr1:20994931-21000887 REVERSE LENGTH=1032                                                                                                                                                                                                                                                                                                                                                                                                                                                                                                                                                                                                                                                                                                                                                                                                                                                                                                                                                                                                     | 1034 | 1033 | 0         | 99.9  | 87.3 | 93.4 |
| Rsa1.0_00278.1.g10296.t9 | ref XP_002894562.1  leucine-rich repeat family protein [Arabidopsis lyrata subsp. lyrata] gi 297340404 gb EFH70821.1  leucine-rich repeat family protein [Arabidopsis lyrata subsp. lyrata]                                                                                                                                                                                                                                                                                                                                                                                    | 1033 | 1031 | 0         | 99.8  | 80.5 | 88.8 | leucine-rich repeat family protein                               | gbpln | Arabidopsis lyrata   | AT1G56110.1   Symbols:   NOP56   homolog of nucleolar protein NOP56   chr1:20984544-20986893 REVERSE LENGTH=522                                                                                                                                                                                                                                                                                                                                                                                                                                                                                                                                                                                                                                                                                                                                                                                                                                                                                                                                                                                                            | 1033 | 1032 | 0         | 99.9  | 78.9 | 87.6 |
| Rsa1.0_00278.1.g10297.t1 | ref XP_002894559.1  hypothetical protein ARALYDRAFT_474678 [Arabidopsis lyrata subsp. lyrata] gi 297340401 gb EFH70818.1  hypothetical protein ARALYDRAFT_474678 [Arabidopsis lyrata subsp. lyrata]                                                                                                                                                                                                                                                                                                                                                                            | 462  | 522  | 0         | 113.0 | 81.8 | 84.6 | hypothetical protein ARALYDRAFT_474678                           | gbpln | Arabidopsis lyrata   |                                                                                                                                                                                                                                                                                                                                                                                                                                                                                                                                                                                                                                                                                                                                                                                                                                                                                                                                                                                                                                                                                                                            | 462  | 522  | 0         | 113.0 | 82.0 | 85.1 |

|                          |                                                                                                                                                                                                                                                                                                                                                                                                                                                                                                                                                                                                                   |     |     |           |       |      |      |                                                          |       |                        |                                                                                                                                    |     |     |           |       |      |      |
|--------------------------|-------------------------------------------------------------------------------------------------------------------------------------------------------------------------------------------------------------------------------------------------------------------------------------------------------------------------------------------------------------------------------------------------------------------------------------------------------------------------------------------------------------------------------------------------------------------------------------------------------------------|-----|-----|-----------|-------|------|------|----------------------------------------------------------|-------|------------------------|------------------------------------------------------------------------------------------------------------------------------------|-----|-----|-----------|-------|------|------|
| Rsa1.0_00278.1.g10298.t1 | gb AAC26234.1  contains similarity to maize transposon MuDR (GB:M76978) [Arabidopsis thaliana]                                                                                                                                                                                                                                                                                                                                                                                                                                                                                                                    | 579 | 940 | 3.00E-95  | 162.3 | 31.8 | 40.9 | contains similarity to maize transposon MuDR (GB:M76978) | gbpln | Arabidopsis thaliana   | #                                                                                                                                  | #   | #   | #         | #     | #    |      |
| Rsa1.0_00278.1.g10299.t1 | #                                                                                                                                                                                                                                                                                                                                                                                                                                                                                                                                                                                                                 | #   | #   | #         | #     | #    | -    |                                                          | ----  | ----                   | #                                                                                                                                  | #   | #   | #         | #     | #    |      |
| Rsa1.0_00278.1.g10300.t1 | ref NP_564708.1  tetratricopeptide repeat-containing protein [Arabidopsis thaliana] gi 21592954 gb AAM64904.1  unknown [Arabidopsis thaliana] gi 109946435 gb ABG48396.1  At g56090 [Arabidopsis thaliana] gi 110738830 dbj BAF01338.1  hypothetical protein [Arabidopsis thaliana] gi 332195220 gb AEE33341.1  tetratricopeptide repeat-containing protein [Arabidopsis thaliana]                                                                                                                                                                                                                                | 252 | 272 | 1.00E-91  | 107.9 | 75.8 | 86.5 | tetratricopeptide repeat-containing protein              | gbpln | Arabidopsis thaliana   | AT1G56090.1   Symbols:   Tetratricopeptide repeat (TPR)-like superfamily protein   chr1:20977989-20979185 REVERSE LENGTH=272       | 252 | 272 | 3.00E-94  | 107.9 | 75.8 | 86.5 |
| Rsa1.0_00278.1.g10301.t1 | gb ABA18089.1  actin-related protein 6 [Olimarabidopsis pumila]                                                                                                                                                                                                                                                                                                                                                                                                                                                                                                                                                   | 430 | 423 | 0         | 98.4  | 83.3 | 89.5 | actin-related protein 6                                  | gbpln | Olimarabidopsis pumila | AT3G33520.1   Symbols: ATARP6, ARP6, SUF3, ESD1   actin-related protein 6   chr3:14093791-14095476 REVERSE LENGTH=421              | 430 | 421 | 0         | 97.9  | 85.6 | 91.2 |
| Rsa1.0_00278.1.g10302.t2 | ref XP_002891769.1  hypothetical protein ARALYDRAFT_474506 [Arabidopsis lyrata subsp. lyrata] gi 29733761.1 gb EFH68028.1  hypothetical protein ARALYDRAFT_474506 [Arabidopsis lyrata subsp. lyrata]                                                                                                                                                                                                                                                                                                                                                                                                              | 519 | 508 | 0         | 97.9  | 76.1 | 79.6 | hypothetical protein ARALYDRAFT_474506                   | gbpln | Arabidopsis lyrata     | AT1G53720.1   Symbols: ATCYP59, CYP59   cyclophilin 59   chr1:20057012-20059508 FORWARD LENGTH=506                                 | 519 | 506 | 0         | 97.5  | 73.6 | 78.4 |
| Rsa1.0_00278.1.g10303.t1 | ref XP_002894549.1  predicted protein [Arabidopsis lyrata subsp. lyrata] gi 29734039.1 gb EFH70808.1  predicted protein [Arabidopsis lyrata subsp. lyrata]                                                                                                                                                                                                                                                                                                                                                                                                                                                        | 318 | 318 | 1.00E-153 | 100.0 | 85.5 | 89.3 | predicted protein                                        | gbpln | Arabidopsis lyrata     | AT1G56010.2   Symbols: NAC1, ANAC022   NAC domain containing protein 1   chr1:20946852-20949144 REVERSE LENGTH=324                 | 318 | 324 | 1.00E-154 | 101.9 | 84.6 | 88.7 |
| Rsa1.0_00278.1.g10304.t4 | gb AAT38562.1  chloroplast serine acetyltransferase [Thlaspi goeingense]                                                                                                                                                                                                                                                                                                                                                                                                                                                                                                                                          | 326 | 319 | 1.00E-147 | 97.9  | 81.3 | 87.7 | chloroplast serine acetyltransferase                     | gbpln | Thlaspi goeingense     | AT1G55920.1   Symbols: ATSERAT2.1, SAT5, SAT1, SERAT2.1   serine acetyltransferase 2.1   chr1:20912378-20913322 FORWARD LENGTH=314 | 326 | 314 | 2.33E-156 | 96.3  | 79.1 | 86.2 |
| Rsa1.0_00278.1.g10305.t1 | ref XP_002891861.1  zinc ion binding protein [Arabidopsis lyrata subsp. lyrata] gi 297337703 gb EFH68120.1  zinc ion binding protein [Arabidopsis lyrata subsp. lyrata]                                                                                                                                                                                                                                                                                                                                                                                                                                           | 426 | 401 | 1.00E-176 | 94.1  | 72.5 | 80.0 | zinc ion binding protein                                 | gbpln | Arabidopsis lyrata     | AT1G55915.1   Symbols:   zinc ion binding   chr1:20907663-20909429 FORWARD LENGTH=404                                              | 426 | 404 | 1.00E-178 | 94.8  | 73.0 | 79.8 |
| Rsa1.0_00278.1.g10306.t1 | ref NP_198562.1  uncharacterized protein [Arabidopsis thaliana] gi 10177785 dbj BAB10967.1  unnamed protein product [Arabidopsis thaliana] gi 332006807 gb AED94190.1  uncharacterized protein AT5G37460 [Arabidopsis thaliana]                                                                                                                                                                                                                                                                                                                                                                                   | 527 | 622 | 1.00E-132 | 118.0 | 51.0 | 71.0 | uncharacterized protein                                  | gbpln | Arabidopsis thaliana   | AT5G37460.1   Symbols:   Family of unknown function (DUF577)   chr5:14858494-14860362 REVERSE LENGTH=622                           | 527 | 622 | 1.00E-135 | 118.0 | 51.0 | 71.0 |
| Rsa1.0_00278.1.g10307.t1 | dbj BAK52341.1  S9 Tyrosyl aminopeptidase [Raphanus sativus]                                                                                                                                                                                                                                                                                                                                                                                                                                                                                                                                                      | 684 | 685 | 0         | 100.1 | 95.2 | 97.5 | S9 Tyrosyl aminopeptidase                                | gbpln | Raphanus sativus       | AT5G36210.1   Symbols:   alpha/beta-Hydrolases superfamily protein   chr5:14248202-14253272 REVERSE LENGTH=730                     | 684 | 730 | 0         | 106.7 | 89.5 | 95.0 |
| Rsa1.0_00278.1.g10308.t1 | ref NP_564703.1  zinc transporter 11 [Arabidopsis thaliana] gi 37090404 sp Q94EG9.1 ZIP11_ARATH RecName: Full=Zinc transporter 11; AltName: Full=ZRT/IRT-like protein 11; Flags: Precursor gi 15294274 gb AAK95314.1 AF410328.1 At g55910/F14J16.22 [Arabidopsis thaliana] gi 18369839 gb AAL67952.1 AF367763.1 putative metal transporter ZIP11 [Arabidopsis thaliana] gi 18369841 gb AAL67953.1 AF367764.1 putative metal transporter ZIP11 [Arabidopsis thaliana] gi 20147287 gb AAM10357.1  At g55910/F14J16.22 [Arabidopsis thaliana] gi 332195197 gb AEE33318.1  zinc transporter 11 [Arabidopsis thaliana] | 326 | 326 | 1.00E-152 | 100.0 | 83.1 | 88.3 | zinc transporter 11                                      | gbpln | Arabidopsis thaliana   | AT1G55910.1   Symbols: ZIP11   zinc transporter 11 precursor   chr1:20906161-20907225 FORWARD LENGTH=326                           | 326 | 326 | 1.00E-155 | 100.0 | 83.1 | 88.3 |

|                          |                                                                                                                                                                                                                                                                                                                                                                                                                                                                                                                                           |     |      |           |       |      |      |                                                               |       |                      |                                                                                                                                                     |     |     |           |       |      |      |
|--------------------------|-------------------------------------------------------------------------------------------------------------------------------------------------------------------------------------------------------------------------------------------------------------------------------------------------------------------------------------------------------------------------------------------------------------------------------------------------------------------------------------------------------------------------------------------|-----|------|-----------|-------|------|------|---------------------------------------------------------------|-------|----------------------|-----------------------------------------------------------------------------------------------------------------------------------------------------|-----|-----|-----------|-------|------|------|
| Rsa1.0_00278.1.g10309.t1 | ref[NP_175986.2] mitochondrial import inner membrane translocase subunit TIM50 [Arabidopsis thaliana] gi 75161466 sp Q8VYE2.1 TIM50_ARATH RecName: Full=Mitochondrial import inner membrane translocase subunit TIM50; AltName: Full=Protein EMBRYO DEFECTIVE 1860; Flags: Precursor gi 18175981 gb AAL59962.1  unknown protein [Arabidopsis thaliana] gi 21689895 gb AAM67508.1  unknown protein [Arabidopsis thaliana] gi 332195195 gb AEE33316.1  mitochondrial import inner membrane translocase subunit TIM50 [Arabidopsis thaliana] | 381 | 376  | 1.00E-148 | 98.7  | 75.6 | 82.4 | mitochondrial import inner membrane translocase subunit TIM50 | gbpln | Arabidopsis thaliana | AT1G55900.1   Symbols: TIM50, emb1860   Halocacid dehalogenase-like hydrolase (HAD) superfamily protein   chr1:20903163-20905420 FORWARD LENGTH=376 | 381 | 376 | 1.00E-151 | 98.7  | 75.6 | 82.4 |
| Rsa1.0_00278.1.g10310.t1 | gb EOA36706.1  hypothetical protein CARUB_v10012240mg [Capsella rubella]                                                                                                                                                                                                                                                                                                                                                                                                                                                                  | 728 | 732  | 0         | 100.5 | 81.6 | 88.7 | hypothetical protein CARUB_v10012240mg                        | gbpln | Capsella rubella     | AT1G55850.1   Symbols: ATCSLE1, CSLE1   cellulose synthase like E1   chr1:20876752-20879414 FORWARD LENGTH=729                                      | 728 | 729 | 0         | 100.1 | 82.7 | 90.1 |
| Rsa1.0_00278.1.g10311.t2 | ref[NP_175980.1] sec.4-like phosphatidylinositol transfer protein [Arabidopsis thaliana] gi 16930447 gb AAL31909.1 AF419577.1 At1g55840/F14J16.2 [Arabidopsis thaliana] gi 19310517 gb AAL84992.1  At1g55840/F14J16.2 [Arabidopsis thaliana] gi 332195185 gb AEE33306.1  sec.4-like phosphatidylinositol transfer protein [Arabidopsis thaliana]                                                                                                                                                                                          | 328 | 325  | 1.00E-175 | 99.1  | 89.9 | 94.8 | sec.4-like phosphatidylinositol transfer protein              | gbpln | Arabidopsis thaliana | AT1G55840.1   Symbols:   Sec14p-like phosphatidylinositol transfer family protein   chr1:20873891-20876018 FORWARD LENGTH=325                       | 328 | 325 | 1.00E-177 | 99.1  | 89.9 | 94.8 |
| Rsa1.0_00278.1.g10312.t1 | emb CAB39638.1  RNA-directed DNA polymerase-like protein [Arabidopsis thaliana] gi 7267666 emb CAB78094.1  RNA-directed DNA polymerase-like protein [Arabidopsis thaliana]                                                                                                                                                                                                                                                                                                                                                                | 640 | 1274 | 3.00E-88  | 199.1 | 23.4 | 31.4 | RNA-directed DNA polymerase-like protein                      | gbpln | Arabidopsis thaliana | ATMG01250.1   Symbols: ORF102   RNA-directed DNA polymerase (reverse transcriptase)   chrM:310514-310882 FORWARD LENGTH=122                         | 640 | 122 | 9.00E-24  | 19.1  | 7.7  | 8.8  |
| Rsa1.0_00278.1.g10313.t1 | gb EOA40331.1  hypothetical protein CARUB_v10009058mg [Capsella rubella]                                                                                                                                                                                                                                                                                                                                                                                                                                                                  | 444 | 466  | 0         | 105.0 | 93.7 | 95.7 | hypothetical protein CARUB_v10009058mg                        | gbpln | Capsella rubella     | AT1G55810.3   Symbols: UKL3   uridine kinase-like 3   chr1:20861273-20864003 FORWARD LENGTH=466                                                     | 444 | 466 | 0         | 105.0 | 93.9 | 96.6 |
| Rsa1.0_00278.1.g10314.t1 | ref[NP_564702.2] BoA-like-like protein [Arabidopsis thaliana] gi 51968914 dbj BAD43149.1  BoA like protein [Arabidopsis thaliana] gi 332195178 gb AEE33299.1  BoA-like-like protein [Arabidopsis thaliana]                                                                                                                                                                                                                                                                                                                                | 161 | 160  | 9.00E-59  | 99.4  | 79.5 | 85.1 | BoA-like-like protein                                         | gbpln | Arabidopsis thaliana | AT1G55805.1   Symbols:   BoA-like family protein   chr1:20858956-20859438 REVERSE LENGTH=160                                                        | 161 | 160 | 3.00E-61  | 99.4  | 79.5 | 85.1 |
| Rsa1.0_00278.1.g10315.t1 | ref[XP_002894530.1] hypothetical protein ARALYDRAFT_892585 [Arabidopsis lyrata subsp. lyrata] gi 297340372 gb EFH70789.1  hypothetical protein ARALYDRAFT_892585 [Arabidopsis lyrata subsp. lyrata]                                                                                                                                                                                                                                                                                                                                       | 492 | 480  | 5.00E-60  | 97.6  | 30.1 | 35.2 | hypothetical protein ARALYDRAFT_892585                        | gbpln | Arabidopsis lyrata   | AT1G55790.1   Symbols:   Domain of unknown function (DUF2431)   chr1:20852685-20856069 REVERSE LENGTH=515                                           | 492 | 515 | 3.00E-40  | 104.7 | 16.7 | 20.9 |
| Rsa1.0_00278.1.g10316.t1 | #                                                                                                                                                                                                                                                                                                                                                                                                                                                                                                                                         | #   | #    | #         | #     | #    | -    | ----                                                          | ----  | #                    | #                                                                                                                                                   | #   | #   | #         | #     | #    |      |
| Rsa1.0_00278.1.g10317.t1 | ref[NP_564700.2] uncharacterized protein [Arabidopsis thaliana] gi 332195175 gb AEE33296.1  uncharacterized protein AT1G55790 [Arabidopsis thaliana]                                                                                                                                                                                                                                                                                                                                                                                      | 152 | 515  | 9.00E-44  | 338.8 | 63.2 | 75.7 | uncharacterized protein                                       | gbpln | Arabidopsis thaliana | AT1G55790.1   Symbols:   Domain of unknown function (DUF2431)   chr1:20852685-20856069 REVERSE LENGTH=515                                           | 152 | 515 | 3.00E-46  | 338.8 | 63.2 | 75.7 |
| Rsa1.0_00278.1.g10318.t1 | ref[XP_002894528.1] invertase/pectin methylesterase inhibitor family protein [Arabidopsis lyrata subsp. lyrata] gi 297340370 gb EFH70787.1  invertase/pectin methylesterase inhibitor family protein [Arabidopsis lyrata subsp. lyrata]                                                                                                                                                                                                                                                                                                   | 175 | 175  | 5.00E-63  | 100.0 | 76.0 | 86.9 | invertase/pectin methylesterase inhibitor family protein      | gbpln | Arabidopsis lyrata   | AT1G55770.1   Symbols:   Plant invertase/pectin methylesterase inhibitor superfamily protein   chr1:20851039-20851566 REVERSE LENGTH=175            | 175 | 175 | 2.00E-61  | 100.0 | 72.6 | 84.0 |
| Rsa1.0_00278.1.g10319.t1 | ref[NP_175972.1] BTB/POZ domain-containing protein [Arabidopsis thaliana] gi 75271590 sp Q680K8.1 Y1576_ARATH RecName: Full=BTB/POZ domain-containing protein At1g55760 gi 51969392 dbj BAD43388.1  unknown protein [Arabidopsis thaliana] gi 51969860 dbj BAD43622.1  unknown protein [Arabidopsis thaliana] gi 63147370 gb AAAY34158.1  At1g55760 [Arabidopsis thaliana] gi 332195173 gb AEE33294.1  BTB/POZ domain-containing protein [Arabidopsis thaliana]                                                                           | 329 | 329  | 1.00E-180 | 100.0 | 90.9 | 97.0 | BTB/POZ domain-containing protein                             | gbpln | Arabidopsis thaliana | AT1G55760.1   Symbols:   BTB/POZ domain-containing protein   chr1:20847117-20848507 REVERSE LENGTH=329                                              | 329 | 329 | 0         | 100.0 | 90.9 | 97.0 |

|                          |                                                                                                                                                                                                                                                                                                                                                                                                                                                                                                                                  |     |     |           |       |      |      |                                          |       |                      |                                                                                                                                                                                                                                                                                                                                            |     |     |          |       |      |      |
|--------------------------|----------------------------------------------------------------------------------------------------------------------------------------------------------------------------------------------------------------------------------------------------------------------------------------------------------------------------------------------------------------------------------------------------------------------------------------------------------------------------------------------------------------------------------|-----|-----|-----------|-------|------|------|------------------------------------------|-------|----------------------|--------------------------------------------------------------------------------------------------------------------------------------------------------------------------------------------------------------------------------------------------------------------------------------------------------------------------------------------|-----|-----|----------|-------|------|------|
| Rsa1.0_00278.1.g10320.t1 | gb EOA23321.1  hypothetical protein CARUB_v10019219mg [Capsella rubella]                                                                                                                                                                                                                                                                                                                                                                                                                                                         | 437 | 444 | 1.00E-116 | 101.6 | 53.1 | 62.9 | hypothetical protein CARUB_v10019219mg   | gbpln | Capsella rubella     | AT2G40920.1   Symbols:   F-box and associated interaction domains-containing protein   chr2:17072586-17074012 REVERSE LENGTH=436                                                                                                                                                                                                           | 437 | 436 | 9.00E-72 | 99.8  | 38.2 | 51.9 |
| Rsa1.0_00278.1.g10321.t3 | gb AAD48963.1 AF147263.5 contains similarity to transposases [Arabidopsis thaliana] gi 7267311 emb CAB81093.1 AT4g05510 [Arabidopsis thaliana]                                                                                                                                                                                                                                                                                                                                                                                   | 592 | 604 | 0         | 102.0 | 58.8 | 72.1 | contains similarity to transposases      | gbpln | Arabidopsis thaliana | AT3G42170.1   Symbols:   BED zinc finger hAT family dimerisation domain   chr3:14321838-14323928 FORWARD LENGTH=696                                                                                                                                                                                                                        | 592 | 696 | 3.00E-47 | 117.6 | 19.8 | 33.1 |
| Rsa1.0_00279.1.g10322.t1 | dbj BAJ33681.1  unnamed protein product [Theilungiella halophila]                                                                                                                                                                                                                                                                                                                                                                                                                                                                | 491 | 502 | 0         | 102.2 | 85.9 | 92.1 | unnamed protein product                  | ----  | ----                 | AT3G18490.1   Symbols:   Eukaryotic aspartyl protease family protein   chr3:6349090-6350592 REVERSE LENGTH=500                                                                                                                                                                                                                             | 491 | 500 | 0        | 101.8 | 81.5 | 90.8 |
| Rsa1.0_00279.1.g10323.t1 | gb EOA30478.1  hypothetical protein CARUB_v10013601mg [Capsella rubella]                                                                                                                                                                                                                                                                                                                                                                                                                                                         | 449 | 477 | 0         | 106.2 | 83.3 | 90.4 | hypothetical protein CARUB_v10013601mg   | gbpln | Capsella rubella     | AT3G18500.3   Symbols:   DNAse I-like superfamily protein   chr3:6352544-6355297 FORWARD LENGTH=449                                                                                                                                                                                                                                        | 449 | 449 | 0        | 100.0 | 78.8 | 87.3 |
| Rsa1.0_00279.1.g10324.t1 | ref NP_188480.1  uncharacterized protein [Arabidopsis thaliana] gi 26450999 dbj BAC42606.1  unknown protein [Arabidopsis thaliana] gi 28416737 gb AA042899.1  At3g18510 [Arabidopsis thaliana] gi 332642587 gb AEE76108.1  uncharacterized protein AT3G18510 [Arabidopsis thaliana]                                                                                                                                                                                                                                              | 67  | 67  | 3.00E-26  | 100.0 | 86.6 | 92.5 | uncharacterized protein                  | gbpln | Arabidopsis thaliana | AT3G18510.1   Symbols:   unknown protein; Has 15 Blast hits to 15 proteins in 9 species: Archae - 0; Bacteria - 0; Metazoa - 0; Fungi - 0; Plants - 15; Viruses - 0; Other Eukaryotes - 0 (source: NCBI BLINK).   chr3:6355711-6355984 FORWARD LENGTH=67                                                                                   | 67  | 67  | 5.00E-29 | 100.0 | 86.6 | 92.5 |
| Rsa1.0_00279.1.g10325.t1 | #                                                                                                                                                                                                                                                                                                                                                                                                                                                                                                                                | #   | #   | #         | #     | #    | #    | -                                        | ----  | ----                 | #                                                                                                                                                                                                                                                                                                                                          | #   | #   | #        | #     | #    | #    |
| Rsa1.0_00279.1.g10326.t2 | ref NP_001185366.1  protein kinase domain-containing protein [Arabidopsis thaliana] gi 332196988 gb AEE35109.1  protein kinase domain-containing protein [Arabidopsis thaliana]                                                                                                                                                                                                                                                                                                                                                  | 207 | 425 | 7.00E-51  | 205.3 | 46.4 | 52.7 | protein kinase domain-containing protein | gbpln | Arabidopsis thaliana | AT1G70740.2   Symbols:   Protein kinase superfamily protein   chr1:26673847-26675651 REVERSE LENGTH=425                                                                                                                                                                                                                                    | 207 | 425 | 2.00E-53 | 205.3 | 46.4 | 52.7 |
| Rsa1.0_00279.1.g10327.t2 | gb EOA30252.1  hypothetical protein CARUB_v10013374mg [Capsella rubella]                                                                                                                                                                                                                                                                                                                                                                                                                                                         | 541 | 556 | 0         | 102.8 | 86.3 | 93.2 | hypothetical protein CARUB_v10013374mg   | gbpln | Capsella rubella     | AT3G18520.1   Symbols:   HDA15, ATHDA15   histone deacetylase 15   chr3:6361605-6365367 FORWARD LENGTH=552                                                                                                                                                                                                                                 | 541 | 552 | 0        | 102.0 | 86.0 | 93.7 |
| Rsa1.0_00279.1.g10328.t1 | ref XP_002883140.1  hypothetical protein ARALYDRAFT_898225 [Arabidopsis lyrata subsp. lyrata] gi 297328980 gb EFH59399.1  hypothetical protein ARALYDRAFT_898225 [Arabidopsis lyrata subsp. lyrata]                                                                                                                                                                                                                                                                                                                              | 169 | 195 | 4.00E-41  | 115.4 | 62.7 | 73.4 | hypothetical protein ARALYDRAFT_898225   | gbpln | Arabidopsis lyrata   | AT3G18560.1   Symbols:   unknown protein; BEST Arabidopsis thaliana protein match is: unknown protein (TAIR:AT1G49000.1); Has 95 Blast hits to 95 proteins in 13 species: Archae - 0; Bacteria - 0; Metazoa - 0; Fungi - 0; Plants - 95; Viruses - 0; Other Eukaryotes - 0 (source: NCBI BLINK).   chr3:6393984-6394571 FORWARD LENGTH=195 | 169 | 195 | 2.00E-40 | 115.4 | 59.8 | 71.6 |
| Rsa1.0_00279.1.g10329.t1 | gb EOA33015.1  hypothetical protein CARUB_v10016346mg [Capsella rubella]                                                                                                                                                                                                                                                                                                                                                                                                                                                         | 165 | 166 | 1.00E-61  | 100.6 | 78.8 | 88.5 | hypothetical protein CARUB_v10016346mg   | gbpln | Capsella rubella     | AT3G18570.1   Symbols:   Oleosin family protein   chr3:6396072-6396572 REVERSE LENGTH=166                                                                                                                                                                                                                                                  | 165 | 166 | 2.00E-63 | 100.6 | 78.8 | 87.9 |
| Rsa1.0_00279.1.g10330.t1 | ref NP_188488.1  single-strand DNA-binding protein [Arabidopsis thaliana] gi 9294319 dbj BAB02216.1  unnamed protein product [Arabidopsis thaliana] gi 332642598 gb AEE76119.1  single-strand DNA-binding protein [Arabidopsis thaliana]                                                                                                                                                                                                                                                                                         | 216 | 217 | 2.00E-96  | 100.5 | 85.2 | 90.7 | single-strand DNA-binding protein        | gbpln | Arabidopsis thaliana | AT3G18580.1   Symbols:   Nucleic acid-binding, OB-fold-like protein   chr3:6396940-6398068 REVERSE LENGTH=217                                                                                                                                                                                                                              | 216 | 217 | 7.00E-99 | 100.5 | 85.2 | 90.7 |
| Rsa1.0_00279.1.g10331.t1 | gb ABL97946.1  copper ion binding/electron transporter [Brassica rapa]                                                                                                                                                                                                                                                                                                                                                                                                                                                           | 188 | 203 | 5.00E-66  | 108.0 | 75.5 | 85.1 | copper ion binding/electron transporter  | gbpln | Brassica rapa        | AT3G18590.1   Symbols:   ENODL5, AENODL5   early nodulin-like protein 5   chr3:6398670-6399337 FORWARD LENGTH=188                                                                                                                                                                                                                          | 188 | 188 | 4.00E-65 | 100.0 | 76.6 | 86.2 |
| Rsa1.0_00279.1.g10332.t1 | ref NP_188490.1  DEAD-box ATP-dependent RNA helicase 51 [Arabidopsis thaliana] gi 75335038 sp Q9LIH9.1 RH51_ARATH RecName: Full=DEAD-box ATP-dependent RNA helicase 51 gi 9294321 dbj BAB02218.1  DEAD-box ATP-dependent RNA helicase [Arabidopsis thaliana] gi 17979083 gb AAL49809.1  putative DEAD box helicase protein [Arabidopsis thaliana] gi 20465335 gb AAM20071.1  putative DEAD box helicase protein [Arabidopsis thaliana] gi 332642600 gb AEE76121.1  DEAD-box ATP-dependent RNA helicase 51 [Arabidopsis thaliana] | 742 | 568 | 0         | 76.5  | 63.1 | 68.9 | DEAD-box ATP-dependent RNA helicase 51   | gbpln | Arabidopsis thaliana | AT3G18600.1   Symbols:   P-loop containing nucleoside triphosphate hydrolases superfamily protein   chr3:6399724-6403007 REVERSE LENGTH=568                                                                                                                                                                                                | 742 | 568 | 0        | 76.5  | 63.1 | 68.9 |

|                          |                                                                                                                                                                                                                                                                                                                                                                                                                                                                                                                                                                                  |     |      |           |       |      |      |                                          |       |                      |                                                                                                                  |     |     |           |       |      |      |
|--------------------------|----------------------------------------------------------------------------------------------------------------------------------------------------------------------------------------------------------------------------------------------------------------------------------------------------------------------------------------------------------------------------------------------------------------------------------------------------------------------------------------------------------------------------------------------------------------------------------|-----|------|-----------|-------|------|------|------------------------------------------|-------|----------------------|------------------------------------------------------------------------------------------------------------------|-----|-----|-----------|-------|------|------|
| Rsa1.0_00279.1.g10333.t2 | refNP_188491.1  nucleolin [Arabidopsis thaliana]<br>gi 122225307 sp Q1PEP5.1 NUCL2_ARA TH RecName: Full=Nucleolin 2; AltName: Full=Protein NUCLEOLIN LIKE 2; Short=AtNUC-L2; AltName: Full=Protein PARALLEL LIKE 1; Short=AtPARLL1<br>gi 91806437 gb ABE65946.1  nucleolin [Arabidopsis thaliana]<br>gi 332642601 gb AEE76122.1  nucleolin like 2 [Arabidopsis thaliana]                                                                                                                                                                                                         | 597 | 636  | 6.00E-78  | 106.5 | 56.6 | 69.0 | nucleolin                                | gbpln | Arabidopsis thaliana | AT3G18610.1   Symbols: PARLL1, ATNUC-L2, NUC-L2   nucleolin like 2   chr3:6404270-6407822 REVERSE LENGTH=636     | 597 | 636 | 2.00E-80  | 106.5 | 56.6 | 69.0 |
| Rsa1.0_00279.1.g10334.t3 | # # # # # # # # - ---- # # # # # #                                                                                                                                                                                                                                                                                                                                                                                                                                                                                                                                               |     |      |           |       |      |      |                                          |       |                      |                                                                                                                  |     |     |           |       |      |      |
| Rsa1.0_00279.1.g10335.t2 | gb EOA13744.1  hypothetical protein CARUB_v10026820mg [Capsella rubella]                                                                                                                                                                                                                                                                                                                                                                                                                                                                                                         | 115 | 310  | 5.00E-33  | 269.6 | 72.2 | 80.9 | hypothetical protein CARUB_v10026820mg   | gbpln | Capsella rubella     | AT5G08640.2   Symbols: FLS1   flavonol synthase 1   chr5:2804009-2805175 FORWARD LENGTH=336                      | 115 | 336 | 3.00E-23  | 292.2 | 53.0 | 69.6 |
| Rsa1.0_00279.1.g10336.t1 | # # # # # # # # - ---- # # # # # #                                                                                                                                                                                                                                                                                                                                                                                                                                                                                                                                               |     |      |           |       |      |      |                                          |       |                      |                                                                                                                  |     |     |           |       |      |      |
| Rsa1.0_00279.1.g10337.t1 | refXP_002874638.1  PHD finger family protein [Arabidopsis lyrata subsp. lyrata] gi 297320475 gb EFH50897.1  PHD finger family protein [Arabidopsis lyrata subsp. lyrata]                                                                                                                                                                                                                                                                                                                                                                                                         | 231 | 230  | 5.00E-66  | 99.6  | 64.5 | 72.7 | PHD finger family protein                | gbpln | Arabidopsis lyrata   | AT4G10600.1   Symbols:   RING/FYVE/PHD zinc finger superfamily protein   chr4:6547934-6548647 REVERSE LENGTH=237 | 231 | 237 | 4.00E-67  | 102.6 | 63.2 | 71.0 |
| Rsa1.0_00279.1.g10338.t1 | gb EOA30017.1  hypothetical protein CARUB_v10013117mg [Capsella rubella]                                                                                                                                                                                                                                                                                                                                                                                                                                                                                                         | 314 | 686  | 3.00E-55  | 218.5 | 41.7 | 56.4 | hypothetical protein CARUB_v10013117mg   | gbpln | Capsella rubella     | AT3G18610.1   Symbols: PARLL1, ATNUC-L2, NUC-L2   nucleolin like 2   chr3:6404270-6407822 REVERSE LENGTH=636     | 314 | 636 | 5.00E-55  | 202.5 | 41.1 | 55.7 |
| Rsa1.0_00279.1.g10339.t1 | refNP_188492.2  putative S-acyltransferase [Arabidopsis thaliana] gi 75273387 sp Q9LIH7.1 ZDHC7_ARAT H RecName: Full=Probable S-acyltransferase At3g18620; AltName: Full=Probable palmitoyltransferase At3g18620; AltName: Full=Zinc finger DHHC domain-containing protein At3g18620 gi 9294323 dbj BAB02220.1  unnamed protein product [Arabidopsis thaliana] gi 19424025 gb AAL87266.1  unknown protein [Arabidopsis thaliana] gi 21281223 gb AAM45051.1  unknown protein [Arabidopsis thaliana] gi 332642602 gb AEE76123.1  putative S-acyltransferase [Arabidopsis thaliana] | 390 | 345  | 1.00E-174 | 88.5  | 74.9 | 80.8 | putative S-acyltransferase               | gbpln | Arabidopsis thaliana | AT3G18620.1   Symbols:   DHHC-type zinc finger family protein   chr3:6408849-6410716 FORWARD LENGTH=345          | 390 | 345 | 1.00E-176 | 88.5  | 74.9 | 80.8 |
| Rsa1.0_00279.1.g10340.t1 | refXP_002885267.1  uracil DNA glycosylase family protein [Arabidopsis lyrata subsp. lyrata] gi 297331107 gb EFH61526.1  uracil DNA glycosylase family protein [Arabidopsis lyrata subsp. lyrata]                                                                                                                                                                                                                                                                                                                                                                                 | 327 | 329  | 1.00E-154 | 100.6 | 85.3 | 90.8 | uracil DNA glycosylase family protein    | gbpln | Arabidopsis lyrata   | AT3G18630.1   Symbols: ATUNG, UNG   uracil dna glycosylase   chr3:6411325-6413002 REVERSE LENGTH=330             | 327 | 330 | 1.00E-154 | 100.9 | 83.8 | 89.9 |
| Rsa1.0_00279.1.g10341.t1 | refNP_188495.1  protein agamous-like 103 [Arabidopsis thaliana] gi 9293888 dbj BAB01791.1  unnamed protein product [Arabidopsis thaliana] gi 119360153 gb ABL66805.1  At3g18650 [Arabidopsis thaliana] gi 332642605 gb AEE76126.1  protein agamous-like 103 [Arabidopsis thaliana]                                                                                                                                                                                                                                                                                               | 370 | 386  | 9.00E-81  | 104.3 | 51.4 | 62.7 | protein agamous-like 103                 | gbpln | Arabidopsis thaliana | AT3G18650.1   Symbols: AGL103   AGAMOUS-like 103   chr3:6417344-6418504 REVERSE LENGTH=386                       | 370 | 386 | 2.00E-83  | 104.3 | 51.4 | 62.7 |
| Rsa1.0_00279.1.g10342.t1 | emb CAB39638.1  RNA-directed DNA polymerase-like protein [Arabidopsis thaliana] gi 7267666 emb CAB78094.1  RNA-directed DNA polymerase-like protein [Arabidopsis thaliana]                                                                                                                                                                                                                                                                                                                                                                                                       | 356 | 1274 | 8.00E-49  | 357.9 | 30.9 | 46.3 | RNA-directed DNA polymerase-like protein | gbpln | Arabidopsis thaliana | AT1G10000.1   Symbols:   Ribonuclease H-like superfamily protein   chr1:3263877-3264788 REVERSE LENGTH=303       | 356 | 303 | 7.00E-48  | 85.1  | 32.6 | 45.8 |
| Rsa1.0_00279.1.g10343.t1 | refXP_002885271.1  predicted protein [Arabidopsis lyrata subsp. lyrata] gi 297331111 gb EFH61530.1  predicted protein [Arabidopsis lyrata subsp. lyrata]                                                                                                                                                                                                                                                                                                                                                                                                                         | 632 | 605  | 0         | 95.7  | 81.3 | 86.1 | predicted protein                        | gbpln | Arabidopsis lyrata   | AT3G18670.1   Symbols:   Ankyrin repeat family protein   chr3:6424135-6426471 REVERSE LENGTH=598                 | 632 | 598 | 0         | 94.6  | 78.0 | 83.1 |
| Rsa1.0_00280.1.g10344.t1 | refXP_002871027.1  hypothetical protein ARALYDRAFT_487104 [Arabidopsis lyrata subsp. lyrata] gi 297316864 gb EFH47286.1  hypothetical protein ARALYDRAFT_487104 [Arabidopsis lyrata subsp. lyrata]                                                                                                                                                                                                                                                                                                                                                                               | 345 | 350  | 1.00E-160 | 101.4 | 84.3 | 91.6 | hypothetical protein ARALYDRAFT_487104   | gbpln | Arabidopsis lyrata   | AT5G03330.2   Symbols:   Cysteine proteinases superfamily protein   chr5:807728-809608 FORWARD LENGTH=356        | 345 | 356 | 1.00E-159 | 103.2 | 85.5 | 93.0 |
| Rsa1.0_00280.1.g10345.t1 | gb EOA20730.1  hypothetical protein CARUB_v10001049mg [Capsella rubella]                                                                                                                                                                                                                                                                                                                                                                                                                                                                                                         | 424 | 420  | 0         | 99.1  | 84.7 | 91.0 | hypothetical protein CARUB_v10001049mg   | gbpln | Capsella rubella     | AT5G03320.1   Symbols:   Protein kinase superfamily protein   chr5:802759-804242 FORWARD LENGTH=420              | 424 | 420 | 0         | 99.1  | 82.5 | 89.2 |

|                          |                                                                                                                                                                                                                                                                                                                                                                                                                                                                                                                                                              |      |      |           |       |       |       |                                                 |       |                      |                                                                                                                                                         |      |      |           |       |       |       |
|--------------------------|--------------------------------------------------------------------------------------------------------------------------------------------------------------------------------------------------------------------------------------------------------------------------------------------------------------------------------------------------------------------------------------------------------------------------------------------------------------------------------------------------------------------------------------------------------------|------|------|-----------|-------|-------|-------|-------------------------------------------------|-------|----------------------|---------------------------------------------------------------------------------------------------------------------------------------------------------|------|------|-----------|-------|-------|-------|
| Rsa1.0_00280.1.g10346.t1 | ref[NP_195951.1] SAUR-like auxin-responsive protein [Arabidopsis thaliana] gi 737861 emb[CAB83287.1] putative protein [Arabidopsis thaliana] gi 9757782 dbj BAB08391.1  unnamed protein product [Arabidopsis thaliana] gi 45752614 gb AAS76205.1  At5g03310 [Arabidopsis thaliana] gi 52218822 gb AAU29481.1  At5g03310 [Arabidopsis thaliana] gi 332003200 gb AED90583.1  SAUR-like auxin-responsive protein [Arabidopsis thaliana]                                                                                                                         | 106  | 114  | 7.00E-47  | 107.5 | 87.7  | 91.5  | SAUR-like auxin-responsive protein              | gbpln | Arabidopsis thaliana | AT5G03310.1   Symbols:   SAUR-like auxin-responsive protein family   chr5:799302-799646 REVERSE LENGTH=114                                              | 106  | 114  | 1.00E-49  | 107.5 | 87.7  | 91.5  |
| Rsa1.0_00280.1.g10347.t1 | gb EOA20984.1  hypothetical protein CARUB_v10001331mg [Capsella rubella]                                                                                                                                                                                                                                                                                                                                                                                                                                                                                     | 345  | 345  | 0         | 100.0 | 97.4  | 99.1  | hypothetical protein CARUB_v10001331mg          | gbpln | Capsella rubella     | AT5G03300.1   Symbols: ADK2   adenosine kinase 2   chr5:796573-798997 FORWARD LENGTH=345                                                                | 345  | 345  | 0         | 100.0 | 97.1  | 99.1  |
| Rsa1.0_00280.1.g10348.t1 | ref[XP_002871023.1] hypothetical protein ARALYDRAFT.487101 [Arabidopsis lyrata subsp. lyrata] gi 297316860 gb EFH47282.1  hypothetical protein ARALYDRAFT.487101 [Arabidopsis lyrata subsp. lyrata]                                                                                                                                                                                                                                                                                                                                                          | 335  | 373  | 1.00E-178 | 111.3 | 94.6  | 96.7  | hypothetical protein ARALYDRAFT.487101          | gbpln | Arabidopsis lyrata   | AT5G03290.1   Symbols: IDH-V   isocitrate dehydrogenase V   chr5:794043-795939 FORWARD LENGTH=374                                                       | 335  | 374  | 1.00E-176 | 111.6 | 94.3  | 97.3  |
| Rsa1.0_00280.1.g10349.t1 | dbj BAJ33707.1  unnamed protein product [Theilungiella halophila]                                                                                                                                                                                                                                                                                                                                                                                                                                                                                            | 1380 | 1297 | 0         | 94.0  | 84.7  | 89.1  | unnamed protein product                         | ----  | ----                 | AT5G03280.1   Symbols: EIN2, PIR2, CKR1, ERA3, ORE3, ORE2, ATEIN2   NRAMP metal ion transporter family protein   chr5:788589-793066 FORWARD LENGTH=1294 | 1380 | 1294 | 0         | 93.8  | 82.2  | 86.9  |
| Rsa1.0_00280.1.g10350.t1 | gb EOA20218.1  hypothetical protein CARUB_v10000520mg, partial [Capsella rubella]                                                                                                                                                                                                                                                                                                                                                                                                                                                                            | 561  | 598  | 0         | 106.6 | 94.1  | 97.1  | hypothetical protein CARUB_v10000520mg, partial | gbpln | Capsella rubella     | AT5G03260.1   Symbols: LAC11   laccase 11   chr5:777198-779338 REVERSE LENGTH=557                                                                       | 561  | 557  | 0         | 99.3  | 92.3  | 95.7  |
| Rsa1.0_00280.1.g10351.t1 | ref[NP_195945.1] Phototropic-responsive NPH3 family protein [Arabidopsis thaliana] gi 7526444 gq O9L_YW0.1 Y5325_ARAT H RecName: Full=BTB/POZ domain-containing protein At5g03250 gi 7413602 emb CAB86092.1  photoreceptor-interacting protein-like [Arabidopsis thaliana] gi 9757776 dbj BAB08385.1  non-phototropic hypocotyl-like protein [Arabidopsis thaliana] gi 110741901 dbj BAE98892.1  photoreceptor-interacting like protein [Arabidopsis thaliana] gi 332003194 gb AED90577.1  Phototropic-responsive NPH3 family protein [Arabidopsis thaliana] | 586  | 592  | 0         | 101.0 | 88.2  | 93.5  | Phototropic-responsive NPH3 family protein      | gbpln | Arabidopsis thaliana | AT5G03250.1   Symbols:   Phototropic-responsive NPH3 family protein   chr5:774591-776855 FORWARD LENGTH=592                                             | 586  | 592  | 0         | 101.0 | 88.2  | 93.5  |
| Rsa1.0_00280.1.g10352.t1 | # # # # # # # # # #                                                                                                                                                                                                                                                                                                                                                                                                                                                                                                                                          |      |      |           |       |       |       | -                                               | ----  | ----                 | #                                                                                                                                                       |      |      |           |       |       |       |
| Rsa1.0_00280.1.g10353.t1 | gb EOA20766.1  hypothetical protein CARUB_v10001095mg, partial [Capsella rubella]                                                                                                                                                                                                                                                                                                                                                                                                                                                                            | 382  | 407  | 0         | 106.5 | 100.0 | 100.0 | hypothetical protein CARUB_v10001095mg, partial | gbpln | Capsella rubella     | AT5G20620.1   Symbols: UBO4   ubiquitin 4   chr5:6973315-6974463 REVERSE LENGTH=382                                                                     | 382  | 382  | 0         | 100.0 | 100.0 | 100.0 |
| Rsa1.0_00280.1.g10354.t1 | gb EOA21689.1  hypothetical protein CARUB_v10002114mg [Capsella rubella]                                                                                                                                                                                                                                                                                                                                                                                                                                                                                     | 177  | 169  | 4.00E-62  | 95.5  | 77.4  | 84.2  | hypothetical protein CARUB_v10002114mg          | gbpln | Capsella rubella     | AT5G03230.1   Symbols:   Protein of unknown function, DUF584   chr5:769636-770136 FORWARD LENGTH=166                                                    | 177  | 166  | 2.00E-59  | 93.8  | 75.1  | 82.5  |

|                          |                                                                                                                                                                                                                                                                                                                                                                                                                                                                                                                                                                                                                                                                                                                                                                                                                                                                                                                              |     |     |          |       |      |      |                                        |       |                      |                                                                                                                                                                                                                                                                                                                                                                                                                                               |     |     |          |       |      |      |
|--------------------------|------------------------------------------------------------------------------------------------------------------------------------------------------------------------------------------------------------------------------------------------------------------------------------------------------------------------------------------------------------------------------------------------------------------------------------------------------------------------------------------------------------------------------------------------------------------------------------------------------------------------------------------------------------------------------------------------------------------------------------------------------------------------------------------------------------------------------------------------------------------------------------------------------------------------------|-----|-----|----------|-------|------|------|----------------------------------------|-------|----------------------|-----------------------------------------------------------------------------------------------------------------------------------------------------------------------------------------------------------------------------------------------------------------------------------------------------------------------------------------------------------------------------------------------------------------------------------------------|-----|-----|----------|-------|------|------|
| Rsa1.0_00280.1.g10355.t1 | ref NP_001078525.1  Mediator complex, subunit Med7 [Arabidopsis thaliana] gi 145357596 ref NP_195970.2  Mediator complex, subunit Med7 [Arabidopsis thaliana] gi 334187401 ref NP_001190215.1  Mediator complex, subunit Med7 [Arabidopsis thaliana] gi 75181253 sp Q9LZD7.1 MED7B_ARAT H RecName: Full=Mediator of RNA polymerase II transcription subunit 7b gi 7378634 emb CAB83310.1  transcriptional co-activator-like protein [Arabidopsis thaliana] gi 19715581 gb AAL91616.1  At5g03505/C320EPLZ3M [Arabidopsis thaliana] gi 20453355 gb AAM19916.1  At5g03505/C320EPLZ3M [Arabidopsis thaliana] gi 222424056 dbj BAH19989.1  AT5G03500 [Arabidopsis thaliana] gi 332003230 gb AED90613.1  Mediator complex, subunit Med7 [Arabidopsis thaliana] gi 332003231 gb AED90614.1  Mediator complex, subunit Med7 [Arabidopsis thaliana] gi 332003232 gb AED90615.1  Mediator complex, subunit Med7 [Arabidopsis thaliana] | 202 | 168 | 2.00E-58 | 83.2  | 66.8 | 71.8 | Mediator complex, subunit Med7         | gbpln | Arabidopsis thaliana | AT5G03500.3   Symbols:   Mediator complex, subunit Med7   chr5:876673-877660 REVERSE LENGTH=168                                                                                                                                                                                                                                                                                                                                               | 202 | 168 | 8.00E-61 | 83.2  | 66.8 | 71.8 |
| Rsa1.0_00280.1.g10356.t1 | #                                                                                                                                                                                                                                                                                                                                                                                                                                                                                                                                                                                                                                                                                                                                                                                                                                                                                                                            | #   | #   | #        | #     | #    | #    | -                                      | ----  | ----                 | #                                                                                                                                                                                                                                                                                                                                                                                                                                             | #   | #   | #        | #     | #    |      |
| Rsa1.0_00280.1.g10357.t1 | ref XP_002873081.1  hypothetical protein ARALYDRAFT_908186 [Arabidopsis lyrata subsp. lyrata] gi 297318918 gb EFH49340.1  hypothetical protein ARALYDRAFT_908186 [Arabidopsis lyrata subsp. lyrata]                                                                                                                                                                                                                                                                                                                                                                                                                                                                                                                                                                                                                                                                                                                          | 136 | 65  | 1.00E-15 | 47.8  | 30.1 | 35.3 | hypothetical protein ARALYDRAFT_908186 | gbpln | Arabidopsis lyrata   | AT5G03210.1   Symbols:   unknown protein; FUNCTIONS IN: molecular function unknown; INVOLVED IN: biological process unknown; LOCATED IN: endomembrane system; EXPRESSED IN: 11 plant structures; EXPRESSED DURING: 7 growth stages; Has 6 Blast hits to 6 proteins in 2 species: Archae - 0; Bacteria - 0; Metazoa - 0; Fungi - 0; Plants - 6; Viruses - 0; Other Eukaryotes - 0 (source: NCBI BLink).   chr5:763070-763258 REVERSE LENGTH=62 | 136 | 62  | 1.00E-15 | 45.6  | 27.9 | 30.9 |
| Rsa1.0_00280.1.g10358.t8 | ref NP_195940.1  RING/U-box domain-containing protein [Arabidopsis thaliana] gi 75311709 sp Q9LYW5.1 LUL1_ARATH RecName: Full=Probable E3 ubiquitin-protein ligase LUL1; AltName: Full=Protein LOG2-LIKE UBIQUITIN LIGASE 1; AltName: Full=RING finger protein 370 gi 7413597 emb CAB86087.1  putative protein [Arabidopsis thaliana] gi 9757771 dbj BAB08380.1  RING zinc finger protein-like [Arabidopsis thaliana] gi 108385412 gb ABF85785.1  At5g03200 [Arabidopsis thaliana] gi 332003186 gb AED90569.1  probable E3 ubiquitin-protein ligase LUL1 [Arabidopsis thaliana]                                                                                                                                                                                                                                                                                                                                              | 334 | 337 | 8.00E-87 | 100.9 | 57.5 | 68.6 | RING/U-box domain-containing protein   | gbpln | Arabidopsis thaliana | AT5G03200.1   Symbols:   RING/U-box superfamily protein   chr5:760450-761667 REVERSE LENGTH=337                                                                                                                                                                                                                                                                                                                                               | 334 | 337 | 2.00E-89 | 100.9 | 57.5 | 68.6 |
| Rsa1.0_00280.1.g10359.t1 | #                                                                                                                                                                                                                                                                                                                                                                                                                                                                                                                                                                                                                                                                                                                                                                                                                                                                                                                            | #   | #   | #        | #     | #    | #    | -                                      | ----  | ----                 | #                                                                                                                                                                                                                                                                                                                                                                                                                                             | #   | #   | #        | #     | #    |      |
| Rsa1.0_00280.1.g10360.t1 | gb EOA20532.1  hypothetical protein CARUB_v10000846mg [Capsella rubella]                                                                                                                                                                                                                                                                                                                                                                                                                                                                                                                                                                                                                                                                                                                                                                                                                                                     | 484 | 482 | 0        | 99.6  | 84.3 | 87.8 | hypothetical protein CARUB_v10000846mg | gbpln | Capsella rubella     | AT5G03160.1   Symbols: ATP58IPK, P58IPK   homolog of mammalian P58IPK   chr5:750286-752671 FORWARD LENGTH=482                                                                                                                                                                                                                                                                                                                                 | 484 | 482 | 0        | 99.6  | 86.0 | 90.3 |
| Rsa1.0_00280.1.g10361.t1 | ref XP_002871015.1  zinc finger family protein [Arabidopsis lyrata subsp. lyrata] gi 297316852 gb EFH47274.1  zinc finger family protein [Arabidopsis lyrata subsp. lyrata]                                                                                                                                                                                                                                                                                                                                                                                                                                                                                                                                                                                                                                                                                                                                                  | 513 | 505 | 0        | 98.4  | 87.9 | 90.8 | zinc finger family protein             | gbpln | Arabidopsis lyrata   | AT5G03150.1   Symbols: JKD   C2H2-like zinc finger protein   chr5:745849-748678 FORWARD LENGTH=503                                                                                                                                                                                                                                                                                                                                            | 513 | 503 | 0        | 98.1  | 88.1 | 91.4 |
| Rsa1.0_00280.1.g10362.t1 | ref NP_195928.1  dolichyldiphosphatase [Arabidopsis thaliana] gi 38564298 gb JAR23728.1  At5g03080 [Arabidopsis thaliana] gi 4640248 gb AAS92345.1  At5g03080 [Arabidopsis thaliana] gi 110737805 dbj BAF00841.1  hypothetical protein [Arabidopsis thaliana] gi 332003171 gb AED90554.1  lipid phosphate phosphatase gamma [Arabidopsis thaliana]                                                                                                                                                                                                                                                                                                                                                                                                                                                                                                                                                                           | 296 | 226 | 8.00E-23 | 76.4  | 18.6 | 19.9 | dolichyldiphosphatase                  | gbpln | Arabidopsis thaliana | AT5G03080.1   Symbols:   Phosphatidic acid phosphatase (PAP2) family protein   chr5:721976-722656 FORWARD LENGTH=226                                                                                                                                                                                                                                                                                                                          | 296 | 226 | 2.00E-25 | 76.4  | 18.6 | 19.9 |



|                          |                                                                                                                                                                                                                                                                                                                                                                                                                                                                                                                                                                                                                                                                                                                                                                                            |     |     |           |       |      |      |                                        |       |                      |                                                                                                                                                                                                                                                                                                                                                                  |     |     |           |       |      |      |
|--------------------------|--------------------------------------------------------------------------------------------------------------------------------------------------------------------------------------------------------------------------------------------------------------------------------------------------------------------------------------------------------------------------------------------------------------------------------------------------------------------------------------------------------------------------------------------------------------------------------------------------------------------------------------------------------------------------------------------------------------------------------------------------------------------------------------------|-----|-----|-----------|-------|------|------|----------------------------------------|-------|----------------------|------------------------------------------------------------------------------------------------------------------------------------------------------------------------------------------------------------------------------------------------------------------------------------------------------------------------------------------------------------------|-----|-----|-----------|-------|------|------|
| Rsa1.0_00280.1.g10363.t1 | refXP_002870990.1   predicted protein [Arabidopsis lyrata subsp. lyrata] gi 297316827 gb EFH47249.1   predicted protein [Arabidopsis lyrata subsp. lyrata]                                                                                                                                                                                                                                                                                                                                                                                                                                                                                                                                                                                                                                 | 496 | 468 | 9.00E-99  | 94.4  | 47.4 | 58.7 | predicted protein                      | gbpln | Arabidopsis lyrata   | AT5G02700.1   Symbols:   F-box/RNI-like superfamily protein   chr5:609381-611679 REVERSE LENGTH=456                                                                                                                                                                                                                                                              | 496 | 456 | 1.00E-100 | 91.9  | 45.8 | 58.9 |
| Rsa1.0_00280.1.g10364.t1 | refXP_002877865.1   hypothetical protein ARALYDRAFT_906617 [Arabidopsis lyrata subsp. lyrata] gi 297323703 gb EFH54124.1   hypothetical protein ARALYDRAFT_906617 [Arabidopsis lyrata subsp. lyrata]                                                                                                                                                                                                                                                                                                                                                                                                                                                                                                                                                                                       | 326 | 345 | 5.00E-82  | 105.8 | 54.6 | 68.1 | hypothetical protein ARALYDRAFT_906617 | gbpln | Arabidopsis lyrata   | AT1G20320.1   Symbols:   Haloacid dehalogenase-like hydrolase (HAD) superfamily protein   chr1:7033846-7034874 REVERSE LENGTH=342                                                                                                                                                                                                                                | 326 | 342 | 4.00E-38  | 104.9 | 30.4 | 48.2 |
| Rsa1.0_00280.1.g10365.t1 | refXP_002877864.1   hypothetical protein ARALYDRAFT_906616 [Arabidopsis lyrata subsp. lyrata] gi 297323702 gb EFH54123.1   hypothetical protein ARALYDRAFT_906616 [Arabidopsis lyrata subsp. lyrata]                                                                                                                                                                                                                                                                                                                                                                                                                                                                                                                                                                                       | 274 | 284 | 2.00E-89  | 103.6 | 65.3 | 74.5 | hypothetical protein ARALYDRAFT_906616 | gbpln | Arabidopsis lyrata   | AT2G04930.1   Symbols:   Haloacid dehalogenase-like hydrolase (HAD) superfamily protein   chr2:1733638-1734471 REVERSE LENGTH=277                                                                                                                                                                                                                                | 274 | 277 | 3.00E-44  | 101.1 | 42.0 | 56.9 |
| Rsa1.0_00280.1.g10366.t1 | #                                                                                                                                                                                                                                                                                                                                                                                                                                                                                                                                                                                                                                                                                                                                                                                          | #   | #   | #         | #     | #    | #    | -                                      | ----  | ----                 | #                                                                                                                                                                                                                                                                                                                                                                | #   | #   | #         | #     | #    |      |
| Rsa1.0_00280.1.g10367.t1 | refXP_002877865.1   hypothetical protein ARALYDRAFT_906617 [Arabidopsis lyrata subsp. lyrata] gi 297323703 gb EFH54124.1   hypothetical protein ARALYDRAFT_906617 [Arabidopsis lyrata subsp. lyrata]                                                                                                                                                                                                                                                                                                                                                                                                                                                                                                                                                                                       | 315 | 345 | 4.00E-82  | 109.5 | 54.9 | 68.9 | hypothetical protein ARALYDRAFT_906617 | gbpln | Arabidopsis lyrata   | AT1G20320.1   Symbols:   Haloacid dehalogenase-like hydrolase (HAD) superfamily protein   chr1:7033846-7034874 REVERSE LENGTH=342                                                                                                                                                                                                                                | 315 | 342 | 1.00E-33  | 108.6 | 30.2 | 45.7 |
| Rsa1.0_00280.1.g10368.t2 | refXP_00286501.1   hypothetical protein ARALYDRAFT_496871 [Arabidopsis lyrata subsp. lyrata] gi 297310846 gb EFH41270.1   hypothetical protein ARALYDRAFT_496871 [Arabidopsis lyrata subsp. lyrata]                                                                                                                                                                                                                                                                                                                                                                                                                                                                                                                                                                                        | 222 | 403 | 1.00E-39  | 181.5 | 37.8 | 39.6 | hypothetical protein ARALYDRAFT_496871 | gbpln | Arabidopsis lyrata   | AT5G67290.1   Symbols:   FAD-dependent oxidoreductase family protein   chr5:26848419-26849755 REVERSE LENGTH=406                                                                                                                                                                                                                                                 | 222 | 406 | 6.00E-42  | 182.9 | 37.8 | 39.6 |
| Rsa1.0_00280.1.g10369.t1 | refXP_002877864.1   hypothetical protein ARALYDRAFT_906616 [Arabidopsis lyrata subsp. lyrata] gi 297323702 gb EFH54123.1   hypothetical protein ARALYDRAFT_906616 [Arabidopsis lyrata subsp. lyrata]                                                                                                                                                                                                                                                                                                                                                                                                                                                                                                                                                                                       | 275 | 284 | 1.00E-100 | 103.3 | 70.2 | 79.3 | hypothetical protein ARALYDRAFT_906616 | gbpln | Arabidopsis lyrata   | AT2G04930.1   Symbols:   Haloacid dehalogenase-like hydrolase (HAD) superfamily protein   chr2:1733638-1734471 REVERSE LENGTH=277                                                                                                                                                                                                                                | 275 | 277 | 2.00E-46  | 100.7 | 43.6 | 57.1 |
| Rsa1.0_00280.1.g10370.t1 | refNP_195927.2   importin alpha isoform 9 [Arabidopsis thaliana] gi 332003170 gb AED90553.1   importin alpha isoform 9 [Arabidopsis thaliana]                                                                                                                                                                                                                                                                                                                                                                                                                                                                                                                                                                                                                                              | 408 | 519 | 1.00E-179 | 127.2 | 81.1 | 86.3 | importin alpha isoform 9               | gbpln | Arabidopsis thaliana | AT5G03070.1   Symbols:   IMPA-9   importin alpha isoform 9   chr5:718468-721395 REVERSE LENGTH=519                                                                                                                                                                                                                                                               | 408 | 519 | 0         | 127.2 | 81.1 | 86.3 |
| Rsa1.0_00280.1.g10371.t1 | refXP_002873074.1   hypothetical protein ARALYDRAFT_487079 [Arabidopsis lyrata subsp. lyrata] gi 297318911 gb EFH49333.1   hypothetical protein ARALYDRAFT_487079 [Arabidopsis lyrata subsp. lyrata]                                                                                                                                                                                                                                                                                                                                                                                                                                                                                                                                                                                       | 244 | 292 | 5.00E-22  | 119.7 | 36.9 | 53.3 | hypothetical protein ARALYDRAFT_487079 | gbpln | Arabidopsis lyrata   | AT5G03060.1   Symbols:   unknown protein; BEST Arabidopsis thaliana protein match is: unknown protein (TAIR:AT4G11100.2); Has 14506 Blast hits to 10808 proteins in 1083 species: Archae - 280; Bacteria - 2737; Metazoa - 4707; Fungi - 940; Plants - 571; Viruses - 106; Other Eukaryotes - 5165 (source: NCBI BLINK).   chr5:716722-717678 REVERSE LENGTH=292 | 244 | 292 | 3.00E-23  | 119.7 | 38.1 | 53.3 |
| Rsa1.0_00281.1.g10372.t2 | refNP_187424.1   rubisco methyltransferase-like protein [Arabidopsis thaliana] gi 6466950 gb AAF13085.1 AC009176_12 putative ribulose-1,5-bisphosphate carboxylase/oxygenase small subunit N-methyltransferase 1 [Arabidopsis thaliana] gi 6648179 gb AAF21177.1 AC013483_1 putative ribulose-1,5-bisphosphate carboxylase/oxygenase small subunit N-methyltransferase 1 [Arabidopsis thaliana] gi 15028205 gb AAK76599.1   putative ribulose-1,5-bisphosphate carboxylase/oxygenase small subunit N-methyltransferase 1 [Arabidopsis thaliana] gi 19310671 gb AAL85066.1   putative ribulose-1,5-bisphosphate carboxylase/oxygenase small subunit N-methyltransferase 1 [Arabidopsis thaliana] gi 332641064 gb AEE74585.1   rubisco methyltransferase-like protein [Arabidopsis thaliana] | 121 | 504 | 1.00E-20  | 416.5 | 53.7 | 60.3 | rubisco methyltransferase-like protein | gbpln | Arabidopsis thaliana | AT3G07670.1   Symbols:   Rubisco methyltransferase family protein   chr3:2451651-2454617 FORWARD LENGTH=504                                                                                                                                                                                                                                                      | 121 | 504 | 2.00E-23  | 416.5 | 53.7 | 60.3 |
| Rsa1.0_00281.1.g10373.t3 | gb EOA17249.1   hypothetical protein CARUB_v10005523mg [Capsella rubella]                                                                                                                                                                                                                                                                                                                                                                                                                                                                                                                                                                                                                                                                                                                  | 261 | 262 | 1.00E-137 | 100.4 | 94.6 | 98.5 | hypothetical protein CARUB_v10005523mg | gbpln | Capsella rubella     | AT4G34670.1   Symbols:   Ribosomal protein S3Ae   chr4:16548724-16550222 FORWARD LENGTH=262                                                                                                                                                                                                                                                                      | 261 | 262 | 1.00E-137 | 100.4 | 93.5 | 96.9 |

|                          |                                                                                                                                                                                                                                                                                                                                            |     |      |           |        |       |       |                                                     |             |                      |                                                                                                                                               |     |     |           |       |       |       |
|--------------------------|--------------------------------------------------------------------------------------------------------------------------------------------------------------------------------------------------------------------------------------------------------------------------------------------------------------------------------------------|-----|------|-----------|--------|-------|-------|-----------------------------------------------------|-------------|----------------------|-----------------------------------------------------------------------------------------------------------------------------------------------|-----|-----|-----------|-------|-------|-------|
| Rsa1.0_00281.1.g10374.t1 | db BAJ33857.1  unnamed protein product [Thelungiella halophila]                                                                                                                                                                                                                                                                            | 263 | 269  | 1.00E-122 | 102.3  | 87.1  | 91.3  | unnamed protein product                             | ----        | ----                 | AT4G34680.2   Symbols: GATA3   GATA transcription factor 3   chr4:16553700-16554610 FORWARD LENGTH=269                                        | 263 | 269 | 1.00E-110 | 102.3 | 81.0  | 87.5  |
| Rsa1.0_00281.1.g10375.t1 | gb EOA17609.1  hypothetical protein CARUB_v10005980mg, partial [Capsella rubella]                                                                                                                                                                                                                                                          | 117 | 140  | 2.00E-61  | 119.7  | 95.7  | 99.1  | hypothetical protein CARUB_v10005980mg, partial     | gbpln       | Capsella rubella     | AT4G34700.1   Symbols: CIB22, AtCIB22   L'YR family of Fe/S cluster biogenesis protein   chr4:16559874-16558362 FORWARD LENGTH=117            | 117 | 117 | 9.00E-64  | 100.0 | 96.6  | 98.3  |
| Rsa1.0_00281.1.g10376.t1 | gb AAF26435.1  arginine decarboxylase [Brassica juncea]                                                                                                                                                                                                                                                                                    | 697 | 680  | 0         | 97.6   | 89.5  | 92.7  | arginine decarboxylase                              | gbpln       | Brassica juncea      | AT4G34710.2   Symbols: ADC2, SPE2, ATADC2   arginine decarboxylase 2   chr4:16560315-16562450 REVERSE LENGTH=711                              | 697 | 711 | 0         | 102.0 | 86.1  | 92.7  |
| Rsa1.0_00281.1.g10377.t1 | ref XP_002313006.1  predicted protein [Populus trichocarpa]<br>gi 222849414 gb EEE86961.1  predicted protein [Populus trichocarpa]                                                                                                                                                                                                         | 164 | 207  | 6.00E-85  | 126.2  | 100.0 | 100.0 | predicted protein                                   | gbpln       | Populus trichocarpa  | AT4G34720.1   Symbols: AVA-P1, VHA-C1, ATVHA-C1   ATPase, F0/V0 complex, subunit C protein   chr4:16568223-16569165 REVERSE LENGTH=164        | 164 | 164 | 4.00E-87  | 100.0 | 100.0 | 100.0 |
| Rsa1.0_00281.1.g10378.t1 | ref NP_001147174.1  SAUR9 - auxin-responsive SAUR family member [Zea mays]<br>gi 195608008 gb ACG25834.1  SAUR9 - auxin-responsive SAUR family member [Zea mays]                                                                                                                                                                           | 107 | 107  | 5.00E-54  | 100.0  | 94.4  | 99.1  | SAUR9 - auxin-responsive SAUR family member         | gbenv/gbpln | Zea mays             | AT4G34760.1   Symbols:   SAUR-like auxin-responsive protein family   chr4:16582471-16582794 REVERSE LENGTH=107                                | 107 | 107 | 2.00E-55  | 100.0 | 92.5  | 97.2  |
| Rsa1.0_00281.1.g10379.t1 | gb EOA15376.1  hypothetical protein CARUB_v10006095mg [Capsella rubella]                                                                                                                                                                                                                                                                   | 105 | 104  | 3.00E-48  | 99.0   | 90.5  | 93.3  | hypothetical protein CARUB_v10006095mg              | gbpln       | Capsella rubella     | AT4G34770.1   Symbols:   SAUR-like auxin-responsive protein family   chr4:16591352-16591666 FORWARD LENGTH=104                                | 105 | 104 | 2.00E-50  | 99.0  | 90.5  | 92.4  |
| Rsa1.0_00281.1.g10380.t1 | gb AAD26953.1  putative non-LTR retroelement reverse transcriptase [Arabidopsis thaliana]                                                                                                                                                                                                                                                  | 305 | 323  | 3.00E-66  | 105.9  | 44.9  | 57.7  | putative non-LTR retroelement reverse transcriptase | gbpln       | Arabidopsis thaliana | AT4G04650.1   Symbols:   RNA-directed DNA polymerase (reverse transcriptase)-related family protein   chr4:2353989-2355213 REVERSE LENGTH=332 | 305 | 332 | 4.00E-65  | 108.9 | 40.3  | 55.1  |
| Rsa1.0_00281.1.g10381.t1 | ref XP_002869125.1  auxin-responsive family protein [Arabidopsis lyrata subsp. lyrata]<br>gi 297314961 gb EFH45384.1  auxin-responsive family protein [Arabidopsis lyrata subsp. lyrata]                                                                                                                                                   | 93  | 94   | 1.00E-44  | 101.1  | 96.8  | 98.9  | auxin-responsive family protein                     | gbpln       | Arabidopsis lyrata   | AT4G34800.1   Symbols:   SAUR-like auxin-responsive protein family   chr4:16596860-16597144 FORWARD LENGTH=94                                 | 93  | 94  | 6.00E-47  | 101.1 | 95.7  | 98.9  |
| Rsa1.0_00281.1.g10382.t2 | gb EOA18631.1  hypothetical protein CARUB_v10007206mg [Capsella rubella]                                                                                                                                                                                                                                                                   | 100 | 104  | 2.00E-40  | 104.0  | 83.0  | 90.0  | hypothetical protein CARUB_v10007206mg              | gbpln       | Capsella rubella     | AT4G34810.1   Symbols:   SAUR-like auxin-responsive protein family   chr4:16599104-16599421 FORWARD LENGTH=105                                | 100 | 105 | 1.00E-41  | 105.0 | 86.0  | 91.0  |
| Rsa1.0_00281.1.g10383.t1 | #                                                                                                                                                                                                                                                                                                                                          | #   | #    | #         | #      | #     | #     | -                                                   | ----        | ----                 | #                                                                                                                                             | #   | #   | #         | #     | #     | #     |
| Rsa1.0_00281.1.g10384.t1 | gb ACP30591.1  disease resistance protein [Brassica rapa subsp. pekinensis]                                                                                                                                                                                                                                                                | 102 | 1555 | 4.00E-14  | 1524.5 | 46.1  | 61.8  | disease resistance protein                          | gbpln       | Brassica rapa        | AT4G09490.1   Symbols:   Polynucleotidyl transferase, ribonuclease H-like superfamily protein   chr4:6015583-6016575 REVERSE LENGTH=170       | 102 | 170 | 1.00E-11  | 166.7 | 33.3  | 50.0  |
| Rsa1.0_00281.1.g10385.t1 | ref XP_002869114.1  actin binding protein [Arabidopsis lyrata subsp. lyrata]<br>gi 297314950 gb EFH45373.1  actin binding protein [Arabidopsis lyrata subsp. lyrata]                                                                                                                                                                       | 142 | 141  | 9.00E-71  | 99.3   | 89.4  | 96.5  | actin binding protein                               | gbpln       | Arabidopsis lyrata   | AT4G34970.1   Symbols: ADF9   actin depolymerizing factor 9   chr4:16653784-16654593 FORWARD LENGTH=141                                       | 142 | 141 | 5.00E-73  | 99.3  | 88.7  | 96.5  |
| Rsa1.0_00281.1.g10386.t1 | ref XP_002867098.1  hypothetical protein ARALYDRAFT_491159 [Arabidopsis lyrata subsp. lyrata]<br>gi 297312934 gb EFH43357.1  hypothetical protein ARALYDRAFT_491159 [Arabidopsis lyrata subsp. lyrata]                                                                                                                                     | 728 | 764  | 0         | 104.9  | 94.5  | 97.8  | hypothetical protein ARALYDRAFT_491159              | gbpln       | Arabidopsis lyrata   | AT4G34980.1   Symbols: SLP2   subtilisin-like serine protease 2   chr4:16656929-16659223 REVERSE LENGTH=764                                   | 728 | 764 | 0         | 104.9 | 93.8  | 97.7  |
| Rsa1.0_00281.1.g10387.t1 | ref XP_002867097.1  AtMYB32 [Arabidopsis lyrata subsp. lyrata]<br>gi 297312933 gb EFH43356.1  AtMYB32 [Arabidopsis lyrata subsp. lyrata]                                                                                                                                                                                                   | 275 | 278  | 1.00E-108 | 101.1  | 78.5  | 84.4  | AtMYB32                                             | gbpln       | Arabidopsis lyrata   | AT4G34990.1   Symbols: AtMYB32, MYB32   myb domain protein 32   chr4:16661370-16662289 REVERSE LENGTH=274                                     | 275 | 274 | 1.00E-110 | 99.6  | 76.7  | 82.9  |
| Rsa1.0_00281.1.g10388.t1 | gb AEO78932.1  ascorbate peroxidase [Brassica oleracea var. italica]                                                                                                                                                                                                                                                                       | 287 | 287  | 1.00E-159 | 100.0  | 97.6  | 99.0  | ascorbate peroxidase                                | gbpln       | Brassica oleracea    | AT4G35000.1   Symbols: APX3   ascorbate peroxidase 3   chr4:16665007-16667541 REVERSE LENGTH=287                                              | 287 | 287 | 1.00E-147 | 100.0 | 89.5  | 95.5  |
| Rsa1.0_00281.1.g10389.t1 | ref NP_567973.1  beta-galactosidase 11 [Arabidopsis thaliana]<br>gi 75202765 sp Q9SCV1.1 BGL11_ARAT H RecName: Full=Beta-galactosidase 11; Short=Lactase 11; Flags: Precursor<br>gi 6686994 emb CAB64747.1  putative beta-galactosidase [Arabidopsis thaliana]<br>gi 332661046 gb AEE86446.1  beta-galactosidase 11 [Arabidopsis thaliana] | 844 | 845  | 0         | 100.1  | 89.3  | 94.9  | beta-galactosidase 11                               | gbpln       | Arabidopsis thaliana | AT4G35010.1   Symbols: BGAL11   beta-galactosidase 11   chr4:16668075-16671974 REVERSE LENGTH=845                                             | 844 | 845 | 0         | 100.1 | 89.3  | 94.9  |
| Rsa1.0_00281.1.g10390.t1 | ref XP_002869110.1  hypothetical protein ARALYDRAFT_491149 [Arabidopsis lyrata subsp. lyrata]<br>gi 297314946 gb EFH45369.1  hypothetical protein ARALYDRAFT_491149 [Arabidopsis lyrata subsp. lyrata]                                                                                                                                     | 239 | 265  | 2.00E-88  | 110.9  | 76.2  | 83.7  | hypothetical protein ARALYDRAFT_491149              | gbpln       | Arabidopsis lyrata   | AT4G35070.1   Symbols:   SBP (S-ribonuclease binding protein) family protein   chr4:16694488-16695387 FORWARD LENGTH=265                      | 239 | 265 | 6.00E-90  | 110.9 | 74.9  | 85.4  |
| Rsa1.0_00281.1.g10391.t1 | gb AAF71742.1 AF248491_1 catalase [Raphanus sativus]                                                                                                                                                                                                                                                                                       | 485 | 492  | 0         | 101.4  | 99.8  | 99.8  | catalase                                            | gbpln       | Raphanus sativus     | AT4G35090.1   Symbols: CAT2   catalase 2   chr4:16700937-16703215 REVERSE LENGTH=492                                                          | 485 | 492 | 0         | 101.4 | 98.1  | 99.4  |

|                          |                                                                                                                                                                                                                                                                                                                                                                                                                          |     |     |           |       |      |      |                                              |       |                      |                                                                                                                                                                                                                                                                                                                                                                                                                                                                                                                                                     |     |     |           |       |      |      |
|--------------------------|--------------------------------------------------------------------------------------------------------------------------------------------------------------------------------------------------------------------------------------------------------------------------------------------------------------------------------------------------------------------------------------------------------------------------|-----|-----|-----------|-------|------|------|----------------------------------------------|-------|----------------------|-----------------------------------------------------------------------------------------------------------------------------------------------------------------------------------------------------------------------------------------------------------------------------------------------------------------------------------------------------------------------------------------------------------------------------------------------------------------------------------------------------------------------------------------------------|-----|-----|-----------|-------|------|------|
| Rsa1.0_00281.1.g10392.t1 | gb AAG30607.1 AF314656.1 aquaporin [Brassica oleracea]                                                                                                                                                                                                                                                                                                                                                                   | 281 | 281 | 1.00E-153 | 100.0 | 95.4 | 96.1 | aquaporin                                    | gbpln | Brassica oleracea    | AT4G35100.2   Symbols: PIP3   plasma membrane intrinsic protein 3   chr4:16708672-16709958 FORWARD LENGTH=280                                                                                                                                                                                                                                                                                                                                                                                                                                       | 281 | 280 | 1.00E-155 | 99.6  | 95.0 | 96.8 |
| Rsa1.0_00281.1.g10393.t1 | #                                                                                                                                                                                                                                                                                                                                                                                                                        | #   | #   | #         | #     | #    | #    | -                                            | ----  | ----                 | AT4G33090.1   Symbols: APM1, ATAPM1   aminopeptidase M1   chr4:15965915-15970418 REVERSE LENGTH=879                                                                                                                                                                                                                                                                                                                                                                                                                                                 | 238 | 879 | 3.00E-12  | 369.3 | 18.5 | 23.9 |
| Rsa1.0_00281.1.g10394.t1 | ref XP_002869107.1  kelch repeat-containing F-box family protein [Arabidopsis lyrata subsp. lyrata] gi 297314943 gb EFH45366.1  kelch repeat-containing F-box family protein [Arabidopsis lyrata subsp. lyrata]                                                                                                                                                                                                          | 419 | 413 | 5.00E-71  | 98.6  | 44.6 | 59.4 | kelch repeat-containing F-box family protein | gbpln | Arabidopsis lyrata   | AT4G35120.1   Symbols:   Galactose oxidase/kelch repeat superfamily protein   chr4:16716806-16718017 FORWARD LENGTH=389                                                                                                                                                                                                                                                                                                                                                                                                                             | 419 | 389 | 2.00E-57  | 92.8  | 40.3 | 52.3 |
| Rsa1.0_00281.1.g10395.t1 | gb AAQ01577.1  O-methyltransferase-like protein [Brassica rapa subsp. pekinensis]                                                                                                                                                                                                                                                                                                                                        | 106 | 158 | 3.00E-53  | 149.1 | 96.2 | 99.1 | O-methyltransferase-like protein             | gbpln | Brassica rapa        | AT4G35160.1   Symbols:   O-methyltransferase family protein   chr4:16730989-16732808 REVERSE LENGTH=382                                                                                                                                                                                                                                                                                                                                                                                                                                             | 106 | 382 | 4.00E-53  | 360.4 | 89.6 | 96.2 |
| Rsa1.0_00282.1.g10396.t2 | ref NP_197803.1  Squalene monooxygenase 1.1 [Arabidopsis thaliana] gi 11467948 sp O65404.2 ERG11_ARATH RecName: Full=Squalene monooxygenase 1.1; AltName: Full=Squalene epoxidase 1.1; Short=SE 1.1 gi 9757924 dbj BAB08406.1  squalene monooxygenase [Arabidopsis thaliana] gi 222422893 dbj BAH19428.1  AT5G24150 [Arabidopsis thaliana] gi 332005879 gb AED93262.1  Squalene monooxygenase 1.1 [Arabidopsis thaliana] | 517 | 516 | 0         | 99.8  | 77.9 | 87.8 | Squalene monooxygenase 1.1                   | gbpln | Arabidopsis thaliana | AT5G24150.1   Symbols: SQP1, SQE5   FAD/NAD(P)-binding oxidoreductase family protein   chr5:8172594-8175395 REVERSE LENGTH=516                                                                                                                                                                                                                                                                                                                                                                                                                      | 517 | 516 | 0         | 99.8  | 77.9 | 87.8 |
| Rsa1.0_00282.1.g10397.t1 | ref XP_002874172.1  predicted protein [Arabidopsis lyrata subsp. lyrata] gi 297320009 gb EFH50431.1  predicted protein [Arabidopsis lyrata subsp. lyrata]                                                                                                                                                                                                                                                                | 120 | 519 | 3.00E-15  | 432.5 | 34.2 | 39.2 | predicted protein                            | gbpln | Arabidopsis lyrata   | AT5G24160.1   Symbols: SQE6   squalene monooxygenase 6   chr5:8183291-8186601 REVERSE LENGTH=517                                                                                                                                                                                                                                                                                                                                                                                                                                                    | 120 | 517 | 8.00E-18  | 430.8 | 34.2 | 38.3 |
| Rsa1.0_00282.1.g10398.t1 | gb EOA21899.1  hypothetical protein CARUB_v10002380mg [Capsella rubella]                                                                                                                                                                                                                                                                                                                                                 | 81  | 75  | 4.00E-30  | 92.6  | 86.4 | 90.1 | hypothetical protein CARUB_v10002380mg       | gbpln | Capsella rubella     | AT5G24165.1   Symbols:   unknown protein; FUNCTIONS IN: molecular_function unknown; LOCATED IN: biological_process unknown; LOCATED IN: chloroplast; EXPRESSED IN: 22 plant structures; EXPRESSED DURING: 13 growth stages; BEST Arabidopsis thaliana protein match is: unknown protein (TAIR:AT4G23885.1); Has 30201 Blast hits to 17322 proteins in 780 species; Archaea - 12; Bacteria - 1396; Metazoa - 17338; Fungi - 3422; Plants - 5037; Viruses - 0; Other Eukaryotes - 2996 (source: NCBI BLINK).   chr5:8188622-8189087 FORWARD LENGTH=75 | 81  | 75  | 4.00E-31  | 92.6  | 82.7 | 88.9 |
| Rsa1.0_00282.1.g10399.t1 | ref NP_197811.2  lipase class 3-related protein [Arabidopsis thaliana] gi 26453202 dbj BAC43675.1  unknown protein [Arabidopsis thaliana] gi 28950935 gb AAO63391.1  At5g24230 [Arabidopsis thaliana] gi 332005890 gb AED93273.1  lipase class 3-related protein [Arabidopsis thaliana]                                                                                                                                  | 367 | 369 | 0         | 100.5 | 92.4 | 96.2 | lipase class 3-related protein               | gbpln | Arabidopsis thaliana | AT5G24230.1   Symbols:   Lipase class 3-related protein   chr5:8229182-8230841 FORWARD LENGTH=369                                                                                                                                                                                                                                                                                                                                                                                                                                                   | 367 | 369 | 0         | 100.5 | 92.4 | 96.2 |
| Rsa1.0_00282.1.g10400.t1 | ref XP_002880544.1  hypothetical protein ARALYDRAFT_900901 [Arabidopsis lyrata subsp. lyrata] gi 297326383 gb EFH56803.1  hypothetical protein ARALYDRAFT_900901 [Arabidopsis lyrata subsp. lyrata]                                                                                                                                                                                                                      | 216 | 277 | 2.00E-18  | 128.2 | 38.0 | 48.1 | hypothetical protein ARALYDRAFT_900901       | gbpln | Arabidopsis lyrata   | AT2G24080.1   Symbols:   Protein of unknown function (DUF295)   chr2:10237604-10238779 REVERSE LENGTH=374                                                                                                                                                                                                                                                                                                                                                                                                                                           | 216 | 374 | 3.00E-11  | 173.1 | 16.7 | 20.4 |
| Rsa1.0_00282.1.g10401.t1 | gb AAM63232.1  unknown [Arabidopsis thaliana]                                                                                                                                                                                                                                                                                                                                                                            | 245 | 289 | 2.00E-58  | 118.0 | 52.2 | 64.5 | unknown                                      | gbpln | Arabidopsis thaliana | AT2G01660.1   Symbols: PDLP6   plasmodesmata-located protein 6   chr2:290973-292496 REVERSE LENGTH=288                                                                                                                                                                                                                                                                                                                                                                                                                                              | 245 | 288 | 1.00E-60  | 117.6 | 52.2 | 64.5 |
| Rsa1.0_00282.1.g10402.t1 | gb EOA24506.1  hypothetical protein CARUB_v10017762mg [Capsella rubella]                                                                                                                                                                                                                                                                                                                                                 | 265 | 287 | 2.00E-58  | 108.3 | 46.8 | 62.3 | hypothetical protein CARUB_v10017762mg       | gbpln | Capsella rubella     | AT2G01660.2   Symbols: PDLP6   plasmodesmata-located protein 6   chr2:291717-292496 REVERSE LENGTH=259                                                                                                                                                                                                                                                                                                                                                                                                                                              | 265 | 259 | 8.00E-61  | 97.7  | 48.3 | 65.7 |
| Rsa1.0_00282.1.g10403.t1 | gb EOA38519.1  hypothetical protein CARUB_v10010308mg [Capsella rubella]                                                                                                                                                                                                                                                                                                                                                 | 157 | 206 | 3.00E-13  | 131.2 | 36.3 | 51.6 | hypothetical protein CARUB_v10010308mg       | gbpln | Capsella rubella     | #                                                                                                                                                                                                                                                                                                                                                                                                                                                                                                                                                   | #   | #   | #         | #     | #    |      |
| Rsa1.0_00282.1.g10404.t1 | dbj BAB08928.1  unnamed protein product [Arabidopsis thaliana]                                                                                                                                                                                                                                                                                                                                                           | 161 | 552 | 3.00E-12  | 342.9 | 21.1 | 22.4 | unnamed protein product                      | gbpln | Arabidopsis thaliana | AT5G24450.1   Symbols:   Transcription factor IIIc, subunit 5   chr5:8348780-8353130 FORWARD LENGTH=554                                                                                                                                                                                                                                                                                                                                                                                                                                             | 161 | 554 | 1.00E-14  | 344.1 | 21.1 | 22.4 |

|                          |                                                                                                                                                                                                                                                                                                                                                                                                                                                                                          |      |      |           |       |      |      |                                                    |       |                      |                                                                                                                                                                                                                                                                                                                                                 |      |      |           |        |      |      |
|--------------------------|------------------------------------------------------------------------------------------------------------------------------------------------------------------------------------------------------------------------------------------------------------------------------------------------------------------------------------------------------------------------------------------------------------------------------------------------------------------------------------------|------|------|-----------|-------|------|------|----------------------------------------------------|-------|----------------------|-------------------------------------------------------------------------------------------------------------------------------------------------------------------------------------------------------------------------------------------------------------------------------------------------------------------------------------------------|------|------|-----------|--------|------|------|
| Rsa1.0_00282.1.g10405.t1 | gb AAD19784.1  putative retroelement pol polyprotein [Arabidopsis thaliana]                                                                                                                                                                                                                                                                                                                                                                                                              | 1116 | 1501 | 0         | 134.5 | 52.7 | 65.2 | putative retroelement pol polyprotein              | gbpln | Arabidopsis thaliana | AT4G23160.1   Symbols: CRK8   cysteine-rich RLK (RECEPTOR-like protein kinase) 8   chr4:12129485-12134086 FORWARD LENGTH=1262                                                                                                                                                                                                                   | 1116 | 1262 | 1.00E-132 | 113.1  | 21.1 | 30.6 |
| Rsa1.0_00282.1.g10406.t3 | gb ACP30619.1  disease resistance protein [Brassica rapa subsp. pekinensis]                                                                                                                                                                                                                                                                                                                                                                                                              | 819  | 889  | 0         | 108.5 | 61.2 | 73.3 | disease resistance protein                         | gbpln | Brassica rapa        | AT1G59620.1   Symbols: CW9   Disease resistance protein (CC-NBS-LRR class) family   chr1:21902627-21905527 FORWARD LENGTH=842                                                                                                                                                                                                                   | 819  | 842  | 0         | 102.8  | 55.4 | 68.1 |
| Rsa1.0_00282.1.g10407.t1 | gb AAC02664.1  polyprotein [Arabidopsis thaliana]                                                                                                                                                                                                                                                                                                                                                                                                                                        | 1428 | 1451 | 0         | 101.6 | 62.0 | 74.6 | polyprotein                                        | gbpln | Arabidopsis thaliana | AT4G23160.1   Symbols: CRK8   cysteine-rich RLK (RECEPTOR-like protein kinase) 8   chr4:12129485-12134086 FORWARD LENGTH=1262                                                                                                                                                                                                                   | 1428 | 1262 | 1.00E-102 | 88.4   | 13.7 | 20.4 |
| Rsa1.0_00282.1.g10408.t1 | dbj BAF00918.1  putative reverse transcriptase [Arabidopsis thaliana]                                                                                                                                                                                                                                                                                                                                                                                                                    | 215  | 910  | 5.00E-25  | 423.3 | 23.7 | 30.7 | putative reverse transcriptase                     | gbpln | Arabidopsis thaliana | AT5G24350.2   Symbols:   FUNCTIONS IN: molecular_function unknown; INVOLVED IN: biological_process unknown; LOCATED IN: cellular_component unknown; EXPRESSED IN: 23 plant structures; EXPRESSED DURING: 13 growth stages; CONTAINS InterPro DOMAIN/s: Secretory pathway Sec39 (InterPro:IPRO13244),   chr5:8301537-8310746 FORWARD LENGTH=2396 | 215  | 2396 | 7.00E-12  | 1114.4 | 18.1 | 22.3 |
| Rsa1.0_00282.1.g10409.t3 | gb AEM36350.1  At1g58602 [Arabidopsis thaliana]                                                                                                                                                                                                                                                                                                                                                                                                                                          | 1131 | 1133 | 0         | 100.2 | 53.1 | 68.4 | At1g58602                                          | gbpln | Arabidopsis thaliana | AT1G58602.2   Symbols:   LRR and NB-ARC domains-containing disease resistance protein   chr1:21760167-21763765 FORWARD LENGTH=1138                                                                                                                                                                                                              | 1131 | 1138 | 0         | 100.6  | 52.9 | 68.3 |
| Rsa1.0_00282.1.g10410.t1 | #                                                                                                                                                                                                                                                                                                                                                                                                                                                                                        | #    | #    | #         | #     | #    | #    | -                                                  | ----  | ----                 | #                                                                                                                                                                                                                                                                                                                                               | #    | #    | #         | #      | #    | #    |
| Rsa1.0_00282.1.g10411.t1 | ref NP_197833.2  Transcription factor IIIc, subunit 5 [Arabidopsis thaliana]   gi 332005929 gb AED93312.1  Transcription factor IIIc, subunit 5 [Arabidopsis thaliana]                                                                                                                                                                                                                                                                                                                   | 588  | 554  | 0         | 94.2  | 75.5 | 83.3 | Transcription factor IIIc, subunit 5               | gbpln | Arabidopsis thaliana | AT5G24450.1   Symbols:   Transcription factor IIIc, subunit 5   chr5:8348780-8353130 FORWARD LENGTH=554                                                                                                                                                                                                                                         | 588  | 554  | 0         | 94.2   | 75.5 | 83.3 |
| Rsa1.0_00282.1.g10412.t3 | gb EOA20292.1  hypothetical protein CARUB_v10000600mg [Capsella rubella]                                                                                                                                                                                                                                                                                                                                                                                                                 | 93   | 561  | 1.00E-18  | 603.2 | 48.4 | 55.9 | hypothetical protein CARUB_v10000600mg             | gbpln | Capsella rubella     | AT5G24470.1   Symbols: APRR5, PRR5   pseudo-response regulator 5   chr5:8356204-8358873 REVERSE LENGTH=667                                                                                                                                                                                                                                      | 93   | 667  | 8.00E-21  | 717.2  | 52.7 | 64.5 |
| Rsa1.0_00282.1.g10413.t1 | gb ADA58345.1  pseudo-response regulator 5b [Brassica rapa]                                                                                                                                                                                                                                                                                                                                                                                                                              | 483  | 628  | 0         | 130.0 | 82.0 | 87.2 | pseudo-response regulator 5b                       | gbpln | Brassica rapa        | AT5G24470.1   Symbols: APRR5, PRR5   pseudo-response regulator 5   chr5:8356204-8358873 REVERSE LENGTH=667                                                                                                                                                                                                                                      | 483  | 667  | 0         | 138.1  | 76.0 | 82.6 |
| Rsa1.0_00282.1.g10414.t1 | ref XP_002874202.1  hypothetical protein ARALYDRAFT_326742 [Arabidopsis lyrata subsp. lyrata]   gi 297320039 gb EFH50461.1  hypothetical protein ARALYDRAFT_326742 [Arabidopsis lyrata subsp. lyrata]                                                                                                                                                                                                                                                                                    | 341  | 305  | 2.00E-67  | 89.4  | 54.0 | 62.2 | hypothetical protein ARALYDRAFT_326742             | gbpln | Arabidopsis lyrata   | AT5G24500.1   Symbols:   unknown protein; Has 133 Blast hits to 129 proteins in 40 species: Archae - 2; Bacteria - 0; Metazoa - 60; Fungi - 5; Plants - 29; Viruses - 0; Other Eukaryotes - 37 (source: NCBI BLINK).   chr5:8367469-8368715 REVERSE LENGTH=334                                                                                  | 341  | 334  | 5.00E-66  | 97.9   | 49.0 | 58.7 |
| Rsa1.0_00282.1.g10415.t1 | #                                                                                                                                                                                                                                                                                                                                                                                                                                                                                        | #    | #    | #         | #     | #    | #    | -                                                  | ----  | ----                 | #                                                                                                                                                                                                                                                                                                                                               | #    | #    | #         | #      | #    | #    |
| Rsa1.0_00282.1.g10416.t1 | dbj BAB10503.1  retroelement pol polyprotein-like [Arabidopsis thaliana]                                                                                                                                                                                                                                                                                                                                                                                                                 | 1352 | 1475 | 0         | 109.1 | 57.9 | 72.0 | retroelement pol polyprotein-like                  | gbpln | Arabidopsis thaliana | AT4G23160.1   Symbols: CRK8   cysteine-rich RLK (RECEPTOR-like protein kinase) 8   chr4:12129485-12134086 FORWARD LENGTH=1262                                                                                                                                                                                                                   | 1352 | 1262 | 0         | 93.3   | 22.9 | 30.0 |
| Rsa1.0_00282.1.g10417.t1 | ref NP_197841.1  downy mildew resistance 6 protein / oxidoreductase [Arabidopsis thaliana]   gi 14423476 gb AAK62420.1 AF386975.1 flavanone 3-hydroxylase-like protein [Arabidopsis thaliana]   gi 10177853 dbj BAB11205.1  flavanone 3-hydroxylase-like protein [Arabidopsis thaliana]   gi 20148253 gb AAM10017.1  flavanone 3-hydroxylase-like protein [Arabidopsis thaliana]   gi 332005939 gb AED93322.1  downy mildew resistance 6 protein / oxidoreductase [Arabidopsis thaliana] | 341  | 341  | 0         | 100.0 | 88.6 | 94.7 | downy mildew resistance 6 protein / oxidoreductase | gbpln | Arabidopsis thaliana | AT5G24530.1   Symbols: DMR6   2-oxoglutarate (2OG) and Fe(II)-dependent oxygenase superfamily protein   chr5:8378964-8383154 FORWARD LENGTH=341                                                                                                                                                                                                 | 341  | 341  | 0         | 100.0  | 88.6 | 94.7 |
| Rsa1.0_00283.1.g10418.t1 | gb EOA13779.1  hypothetical protein CARUB_v10026873mg [Capsella rubella]                                                                                                                                                                                                                                                                                                                                                                                                                 | 280  | 299  | 1.00E-116 | 106.8 | 82.9 | 92.9 | hypothetical protein CARUB_v10026873mg             | gbpln | Capsella rubella     | AT5G53400.1   Symbols: BOB1   HSP20-like chaperones superfamily protein   chr5:21661588-21663383 FORWARD LENGTH=304                                                                                                                                                                                                                             | 280  | 304  | 1.00E-115 | 108.6  | 81.4 | 91.1 |
| Rsa1.0_00283.1.g10419.t2 | gb AAG03119.1 AC004133.13 F5A9.24 [Arabidopsis thaliana]                                                                                                                                                                                                                                                                                                                                                                                                                                 | 1450 | 1254 | 0         | 86.5  | 34.1 | 45.2 | F5A9.24                                            | gbpln | Arabidopsis thaliana | AT4G29090.1   Symbols:   Ribonuclease H-like superfamily protein   chr4:14333528-14335255 FORWARD LENGTH=575                                                                                                                                                                                                                                    | 1450 | 575  | 4.00E-43  | 39.7   | 6.5  | 9.5  |

|                          |                                                                                                                                                                                                                                                                                    |      |      |           |       |      |      |                                        |       |                      |                                                                                                                                                                                                                                                                                                                                                                                                                                                                                                                                                                                                                                                                                      |      |      |           |       |      |      |
|--------------------------|------------------------------------------------------------------------------------------------------------------------------------------------------------------------------------------------------------------------------------------------------------------------------------|------|------|-----------|-------|------|------|----------------------------------------|-------|----------------------|--------------------------------------------------------------------------------------------------------------------------------------------------------------------------------------------------------------------------------------------------------------------------------------------------------------------------------------------------------------------------------------------------------------------------------------------------------------------------------------------------------------------------------------------------------------------------------------------------------------------------------------------------------------------------------------|------|------|-----------|-------|------|------|
| Rsa1.0_00283.1.g10420.t1 | ref NP_568793.1  CCT motif family protein [Arabidopsis thaliana] gi 20466574 gb AAM20604.1  putative protein [Arabidopsis thaliana] gi 23198144 gb AAN15599.1  putative protein [Arabidopsis thaliana] gi 332008967 gb AED96350.1  CCT motif family protein [Arabidopsis thaliana] | 273  | 264  | 1.00E-125 | 96.7  | 82.1 | 89.4 | CCT motif family protein               | gbpln | Arabidopsis thaliana | AT5G53420.1   Symbols:   CCT motif family protein   chr5:21673683-21675469 FORWARD LENGTH=264                                                                                                                                                                                                                                                                                                                                                                                                                                                                                                                                                                                        | 273  | 264  | 1.00E-127 | 96.7  | 82.1 | 89.4 |
| Rsa1.0_00283.1.g10421.t1 | ref NP_200156.1  uncharacterized protein [Arabidopsis thaliana] gi 8843773 dbj BA97321.1  unnamed protein product [Arabidopsis thaliana] gi 332008971 gb AED96354.1  uncharacterized protein AT5G53440 [Arabidopsis thaliana]                                                      | 1090 | 1181 | 0         | 108.3 | 50.2 | 56.2 | uncharacterized protein                | gbpln | Arabidopsis thaliana | AT5G53440.1   Symbols:   unknown protein; FUNCTIONS IN: molecular_function unknown; INVOLVED IN: biological_process unknown; LOCATED IN: cytosol; EXPRESSED DURING: 25 plant structures; EXPRESSED DURING: 15 growth stages; Has 1807 Blast hits to 1807 proteins in 277 species: Archae = 0; Bacteria = 0; Metazoa = 736; Fungi = 347; Plants = 385; Viruses = 0; Other Eukaryotes = 339 (source: NCBI BLink).   chr5:21683679-21687970 REVERSE LENGTH=1181                                                                                                                                                                                                                         | 1090 | 1181 | 0         | 108.3 | 50.2 | 56.2 |
| Rsa1.0_00283.1.g10422.t1 | gb EOA12453.1  hypothetical protein CARUB_v10025734mg [Capsella rubella]                                                                                                                                                                                                           | 2206 | 2208 | 0         | 100.1 | 94.0 | 97.1 | hypothetical protein CARUB_v10025734mg | gbpln | Capsella rubella     | AT5G53460.3   Symbols: GLT1   NADH-dependent glutamate synthase 1   chr5:21700518-21709629 FORWARD LENGTH=2208                                                                                                                                                                                                                                                                                                                                                                                                                                                                                                                                                                       | 2206 | 2208 | 0         | 100.1 | 93.7 | 96.5 |
| Rsa1.0_00283.1.g10423.t1 | ref XP_002865975.1  WD-40 repeat family protein [Arabidopsis lyrata subsp. lyrata] gi 297311810 gb EFH42234.1  WD-40 repeat family protein [Arabidopsis lyrata subsp. lyrata]                                                                                                      | 583  | 654  | 0         | 112.2 | 77.5 | 85.8 | WD-40 repeat family protein            | gbpln | Arabidopsis lyrata   | AT5G53500.1   Symbols:   Transducin/WD40 repeat-like superfamily protein   chr5:21726167-21728524 REVERSE LENGTH=654                                                                                                                                                                                                                                                                                                                                                                                                                                                                                                                                                                 | 583  | 654  | 0         | 112.2 | 77.4 | 85.8 |
| Rsa1.0_00283.1.g10424.t1 | # # # # # # # # #                                                                                                                                                                                                                                                                  | #    | #    | #         | #     | #    | #    | -                                      | ----  | ----                 | #                                                                                                                                                                                                                                                                                                                                                                                                                                                                                                                                                                                                                                                                                    | #    | #    | #         | #     | #    | #    |
| Rsa1.0_00283.1.g10425.t1 | ref XP_002864247.1  ATOPT9 [Arabidopsis lyrata subsp. lyrata] gi 297310082 gb EFH40506.1  ATOPT9 [Arabidopsis lyrata subsp. lyrata]                                                                                                                                                | 741  | 741  | 0         | 100.0 | 89.3 | 95.1 | ATOPT9                                 | gbpln | Arabidopsis lyrata   | AT5G53510.1   Symbols: ATOPT9, OPT9   oligopeptide transporter 9   chr5:21743450-21742082 FORWARD LENGTH=741                                                                                                                                                                                                                                                                                                                                                                                                                                                                                                                                                                         | 741  | 741  | 0         | 100.0 | 88.8 | 95.4 |
| Rsa1.0_00283.1.g10426.t1 | ref XP_002864248.1  predicted protein [Arabidopsis lyrata subsp. lyrata] gi 297310083 gb EFH40507.1  predicted protein [Arabidopsis lyrata subsp. lyrata]                                                                                                                          | 739  | 739  | 0         | 100.0 | 88.0 | 95.5 | predicted protein                      | gbpln | Arabidopsis lyrata   | AT5G53520.1   Symbols: ATOPT8, OPT8   oligopeptide transporter 8   chr5:21743450-21745981 FORWARD LENGTH=733                                                                                                                                                                                                                                                                                                                                                                                                                                                                                                                                                                         | 739  | 733  | 0         | 99.2  | 87.1 | 94.6 |
| Rsa1.0_00283.1.g10427.t1 | gb EOA12739.1  hypothetical protein CARUB_v10028247mg [Capsella rubella]                                                                                                                                                                                                           | 431  | 436  | 1.00E-110 | 101.2 | 54.3 | 68.9 | hypothetical protein CARUB_v10028247mg | gbpln | Capsella rubella     | AT1G51370.1   Symbols:   F-box/RNI-like/FBD-like domains-containing protein   chr1:19045615-19047141 FORWARD LENGTH=435                                                                                                                                                                                                                                                                                                                                                                                                                                                                                                                                                              | 431  | 435  | 1.00E-112 | 100.9 | 53.1 | 68.4 |
| Rsa1.0_00283.1.g10428.t2 | gb EOA13468.1  hypothetical protein CARUB_v10026523mg [Capsella rubella]                                                                                                                                                                                                           | 403  | 402  | 1.00E-165 | 99.8  | 71.2 | 80.9 | hypothetical protein CARUB_v10026523mg | gbpln | Capsella rubella     | AT5G53540.1   Symbols:   P-loop containing nucleoside triphosphate hydrolases superfamily protein   chr5:21749561-21751099 REVERSE LENGTH=403                                                                                                                                                                                                                                                                                                                                                                                                                                                                                                                                        | 403  | 403  | 1.00E-165 | 100.0 | 69.0 | 78.4 |
| Rsa1.0_00283.1.g10429.t1 | ref NP_200226.4  uncharacterized protein [Arabidopsis thaliana] gi 332009076 gb AED96459.1  uncharacterized protein AT5G54150 [Arabidopsis thaliana]                                                                                                                               | 184  | 160  | 1.00E-51  | 87.0  | 53.8 | 62.0 | uncharacterized protein                | gbpln | Arabidopsis thaliana | AT5G54150.1   Symbols:   unknown protein; BEST Arabidopsis thaliana protein match is: unknown protein (TAIR:AT5G54148.1); Has 103 Blast hits to 99 proteins in 23 species: Archae = 0; Bacteria = 0; Metazoa = 8; Fungi = 0; Plants = 90; Viruses = 0; Other Eukaryotes = 5 (source: NCBI BLink).   chr5:21977461-21978237 REVERSE LENGTH=160                                                                                                                                                                                                                                                                                                                                        | 184  | 160  | 4.00E-54  | 87.0  | 53.8 | 62.0 |
| Rsa1.0_00283.1.g10430.t2 | gb EOA16742.1  hypothetical protein CARUB_v10004943mg [Capsella rubella]                                                                                                                                                                                                           | 361  | 408  | 1.00E-168 | 113.0 | 81.4 | 87.3 | hypothetical protein CARUB_v10004943mg | gbpln | Capsella rubella     | AT4G27585.1   Symbols:   SPFH/Band 7/PHB domain-containing membrane-associated protein family   chr4:13766984-13769832 REVERSE LENGTH=411                                                                                                                                                                                                                                                                                                                                                                                                                                                                                                                                            | 361  | 411  | 1.00E-167 | 113.9 | 80.9 | 87.8 |
| Rsa1.0_00283.1.g10431.t1 | gb EOA14373.1  hypothetical protein CARUB_v10027559mg [Capsella rubella]                                                                                                                                                                                                           | 101  | 130  | 6.00E-19  | 128.7 | 69.3 | 74.3 | hypothetical protein CARUB_v10027559mg | gbpln | Capsella rubella     | AT5G54095.1   Symbols:   unknown protein; FUNCTIONS IN: molecular_function unknown; INVOLVED IN: N-terminal protein myristoylation; LOCATED IN: cellular_component unknown; EXPRESSED IN: 9 plant structures; EXPRESSED DURING: L mature pollen stage, M germinated pollen stage, 4 anthesis, C globular stage, petal differentiation and expansion stage; BEST Arabidopsis thaliana protein match is: unknown protein (TAIR:AT4G27580.1); Has 30201 Blast hits to 17322 proteins in 780 species: Archae = 12; Bacteria = 1396; Metazoa = 17338; Fungi = 3422; Plants = 5037; Viruses = 0; Other Eukaryotes = 2996 (source: NCBI BLink).   chr5:21952868-21953369 REVERSE LENGTH=135 | 101  | 135  | 4.00E-13  | 133.7 | 42.6 | 42.6 |

|                          |                                                                                                                                                                                                                                                                                                                                                                                                                                                                                               |      |      |           |       |      |      |                                                        |       |                      |                                                                                                                                                                                                                                                                                                                                                                                                                                                           |      |      |           |       |      |      |
|--------------------------|-----------------------------------------------------------------------------------------------------------------------------------------------------------------------------------------------------------------------------------------------------------------------------------------------------------------------------------------------------------------------------------------------------------------------------------------------------------------------------------------------|------|------|-----------|-------|------|------|--------------------------------------------------------|-------|----------------------|-----------------------------------------------------------------------------------------------------------------------------------------------------------------------------------------------------------------------------------------------------------------------------------------------------------------------------------------------------------------------------------------------------------------------------------------------------------|------|------|-----------|-------|------|------|
| Rsa1.0_00283.1.g10432.t1 | ref NP_200212.1  glycosyltransferase domain-containing protein [Arabidopsis thaliana]<br>gi 75171779 sp Q9FN26.1 U79B6_ARAT H RecName: Full=UDP-glycosyltransferase 79B6<br>gi 10177263 dbj BAB10731.1  flavonol 3-O-glucosyltransferase-like protein [Arabidopsis thaliana]<br>gi 56236076 gb AAV84494.1  At5g54010 [Arabidopsis thaliana]<br>gi 56790204 gb AAW30019.1  At5g54010 [Arabidopsis thaliana]<br>gi 332009055 gb AED96438.1  UDP-glycosyltransferase 79B6 [Arabidopsis thaliana] | 371  | 453  | 0         | 122.1 | 85.4 | 92.2 | glycosyltransferase domain-containing protein          | gbpln | Arabidopsis thaliana | AT5G54010.1   Symbols:   UDP-Glycosyltransferase superfamily protein   chr5:21919819-21921180 REVERSE LENGTH=453                                                                                                                                                                                                                                                                                                                                          | 371  | 453  | 0         | 122.1 | 85.4 | 92.2 |
| Rsa1.0_00284.1.g10433.t1 | gb EOA17212.1  hypothetical protein CARUB_v10005485mg [Capsella rubella]                                                                                                                                                                                                                                                                                                                                                                                                                      | 240  | 271  | 1.00E-114 | 112.9 | 84.6 | 94.2 | hypothetical protein CARUB_v10005485mg                 | gbpln | Capsella rubella     | AT4G37470.1   Symbols:   alpha/beta-Hydrolases superfamily protein   chr4:17617045-17618363 REVERSE LENGTH=270                                                                                                                                                                                                                                                                                                                                            | 240  | 270  | 1.00E-113 | 112.5 | 82.5 | 93.8 |
| Rsa1.0_00284.1.g10434.t1 | ref NP_001118516.1  RAB GTPase activator protein [Arabidopsis thaliana]<br>gi 330255185 gb AEC10279.1  RAB GTPase activator protein [Arabidopsis thaliana]                                                                                                                                                                                                                                                                                                                                    | 740  | 743  | 0         | 100.4 | 84.7 | 89.9 | RAB GTPase activator protein                           | gbpln | Arabidopsis thaliana | AT2G43490.4   Symbols:   Ypt/Rab-GAP domain of gyp1p superfamily protein   chr2:18055106-18058179 REVERSE LENGTH=743                                                                                                                                                                                                                                                                                                                                      | 740  | 743  | 0         | 100.4 | 84.7 | 89.9 |
| Rsa1.0_00284.1.g10435.t1 | gb EOA29017.1  hypothetical protein CARUB_v10025271mg [Capsella rubella]                                                                                                                                                                                                                                                                                                                                                                                                                      | 505  | 540  | 1.00E-174 | 106.9 | 79.6 | 85.5 | hypothetical protein CARUB_v10025271mg                 | gbpln | Capsella rubella     | AT2G43970.1   Symbols:   RNA-binding protein   chr2:18205535-18208031 REVERSE LENGTH=545                                                                                                                                                                                                                                                                                                                                                                  | 505  | 545  | 1.00E-167 | 107.9 | 74.5 | 81.6 |
| Rsa1.0_00284.1.g10436.t1 | ref XP_002881944.1  inositol 1,3,4-trisphosphate 5/6-kinase family protein [Arabidopsis lyrata subsp. lyrata]<br>gi 297327783 gb EFH58203.1  inositol 1,3,4-trisphosphate 5/6-kinase family protein [Arabidopsis lyrata subsp. lyrata]                                                                                                                                                                                                                                                        | 491  | 490  | 0         | 99.8  | 86.8 | 92.1 | inositol 1,3,4-trisphosphate 5/6-kinase family protein | gbpln | Arabidopsis lyrata   | AT2G43980.1   Symbols:   AtITPK4, ITPK4   inositol 1,3,4-trisphosphate 5/6-kinase 4   chr2:18208437-18211604 REVERSE LENGTH=488                                                                                                                                                                                                                                                                                                                           | 491  | 488  | 0         | 99.4  | 85.1 | 90.6 |
| Rsa1.0_00284.1.g10437.t1 | ref NP_181927.1  uncharacterized protein [Arabidopsis thaliana]<br>gi 3212856 gb AAC23407.1  hypothetical protein [Arabidopsis thaliana]<br>gi 330255265 gb AEC10359.1  uncharacterized protein AT2G43990 [Arabidopsis thaliana]                                                                                                                                                                                                                                                              | 550  | 632  | 1.00E-175 | 114.9 | 74.4 | 81.1 | uncharacterized protein                                | gbpln | Arabidopsis thaliana | AT2G43990.1   Symbols:   unknown protein; FUNCTIONS IN: molecular_function unknown; INVOLVED IN: biological_process unknown; LOCATED IN: chloroplast; EXPRESSED IN: 9 plant structures; EXPRESSED DURING: 6 growth stages; Has 1419 Blast hits to 494 proteins in 144 species: Archae - 0; Bacteria - 300; Metazoa - 246; Fungi - 102; Plants - 31; Viruses - 2; Other Eukaryotes - 738 (source: NCBI BLINK).   chr2:18211974-18213872 FORWARD LENGTH=632 | 550  | 632  | 1.00E-177 | 114.9 | 74.4 | 81.1 |
| Rsa1.0_00284.1.g10438.t1 | ref XP_002880077.1  hypothetical protein ARALYDRAFT_483519 [Arabidopsis lyrata subsp. lyrata]<br>gi 297325916 gb EFH56336.1  hypothetical protein ARALYDRAFT_483519 [Arabidopsis lyrata subsp. lyrata]                                                                                                                                                                                                                                                                                        | 198  | 209  | 1.00E-66  | 105.6 | 69.7 | 79.3 | hypothetical protein ARALYDRAFT_483519                 | gbpln | Arabidopsis lyrata   | AT2G44000.1   Symbols:   Late embryogenesis abundant (LEA) hydroxyproline-rich glycoprotein family   chr2:18214627-18215256 FORWARD LENGTH=209                                                                                                                                                                                                                                                                                                            | 198  | 209  | 1.00E-61  | 105.6 | 68.2 | 79.3 |
| Rsa1.0_00284.1.g10439.t1 | gb EOA28560.1  hypothetical protein CARUB_v10024778mg [Capsella rubella]                                                                                                                                                                                                                                                                                                                                                                                                                      | 101  | 100  | 8.00E-38  | 99.0  | 78.2 | 86.1 | hypothetical protein CARUB_v10024778mg                 | gbpln | Capsella rubella     | AT2G44010.1   Symbols:   unknown protein; BEST Arabidopsis thaliana protein match is: unknown protein (TAIR:AT3G59880.1); Has 18 Blast hits to 18 proteins in 7 species: Archae - 0; Bacteria - 0; Metazoa - 0; Fungi - 0; Plants - 18; Viruses - 0; Other Eukaryotes - 0 (source: NCBI BLINK).   chr2:18216879-18217184 FORWARD LENGTH=101                                                                                                               | 101  | 101  | 1.00E-38  | 100.0 | 77.2 | 85.1 |
| Rsa1.0_00284.1.g10440.t1 | ref XP_002881945.1  hypothetical protein ARALYDRAFT_903808 [Arabidopsis lyrata subsp. lyrata]<br>gi 297327784 gb EFH58204.1  hypothetical protein ARALYDRAFT_903808 [Arabidopsis lyrata subsp. lyrata]                                                                                                                                                                                                                                                                                        | 448  | 508  | 0         | 113.4 | 91.3 | 97.1 | hypothetical protein ARALYDRAFT_903808                 | gbpln | Arabidopsis lyrata   | AT2G44020.1   Symbols:   Mitochondrial transcription termination factor family protein   chr2:18217737-18219260 REVERSE LENGTH=507                                                                                                                                                                                                                                                                                                                        | 448  | 507  | 0         | 113.2 | 90.8 | 96.9 |
| Rsa1.0_00284.1.g10441.t1 | gb EOA24733.1  hypothetical protein CARUB_v10018009mg [Capsella rubella]                                                                                                                                                                                                                                                                                                                                                                                                                      | 215  | 214  | 1.00E-107 | 99.5  | 91.2 | 96.3 | hypothetical protein CARUB_v10018009mg                 | gbpln | Capsella rubella     | AT2G44065.2   Symbols:   Ribosomal protein L2 family   chr2:18228860-18230368 FORWARD LENGTH=214                                                                                                                                                                                                                                                                                                                                                          | 215  | 214  | 1.00E-109 | 99.5  | 89.8 | 95.8 |
| Rsa1.0_00284.1.g10442.t6 | dbj BAB09923.1  copia-like retrotransposable element [Arabidopsis thaliana]                                                                                                                                                                                                                                                                                                                                                                                                                   | 1134 | 1342 | 0         | 118.3 | 47.5 | 64.9 | copia-like retrotransposable element                   | gbpln | Arabidopsis thaliana | AT4G23160.1   Symbols:   CRK8   cysteine-rich RLK (RECEPTOR-like protein kinase) 8   chr4:12129485-12134086 FORWARD LENGTH=1262                                                                                                                                                                                                                                                                                                                           | 1134 | 1262 | 1.00E-48  | 111.3 | 9.4  | 13.9 |
| Rsa1.0_00284.1.g10443.t2 | gb ACP30623.1  disease resistance protein [Brassica rapa subsp. pekinensis]                                                                                                                                                                                                                                                                                                                                                                                                                   | 884  | 1262 | 1.00E-142 | 142.8 | 43.4 | 53.2 | disease resistance protein                             | gbpln | Brassica rapa        | AT5G18370.1   Symbols:   Disease resistance protein (TIR-NBS-LRR class) family   chr5:6085036-6088926 REVERSE LENGTH=1210                                                                                                                                                                                                                                                                                                                                 | 884  | 1210 | 1.00E-98  | 136.9 | 35.3 | 49.1 |

|                          |                                                                                                                                                                                                                                                                                                                                                                                                                                                                                                                                                                                                                                                                                                                                                                                   |     |     |           |       |      |      |                                                   |       |                      |                                                                                                                                                                                                                                                                                                                                                                                                                                                                                                                                                                |     |     |           |       |      |      |
|--------------------------|-----------------------------------------------------------------------------------------------------------------------------------------------------------------------------------------------------------------------------------------------------------------------------------------------------------------------------------------------------------------------------------------------------------------------------------------------------------------------------------------------------------------------------------------------------------------------------------------------------------------------------------------------------------------------------------------------------------------------------------------------------------------------------------|-----|-----|-----------|-------|------|------|---------------------------------------------------|-------|----------------------|----------------------------------------------------------------------------------------------------------------------------------------------------------------------------------------------------------------------------------------------------------------------------------------------------------------------------------------------------------------------------------------------------------------------------------------------------------------------------------------------------------------------------------------------------------------|-----|-----|-----------|-------|------|------|
| Rsa1.0_00284.1.g10444.t1 | gb[EOA17608.1] hypothetical protein CARUB_v10005968mg [Capsella rubella] gi 482557559 gb EOA21751.1  hypothetical protein CARUB_v10002207mg [Capsella rubella]                                                                                                                                                                                                                                                                                                                                                                                                                                                                                                                                                                                                                    | 146 | 146 | 1.00E-74  | 100.0 | 92.5 | 95.9 | hypothetical protein CARUB_v10005968mg            | gbpln | Capsella rubella     | AT5G18380.1   Symbols:   Ribosomal protein S5 domain 2-like superfamily protein   chr5:6090253-6090693 REVERSE LENGTH=146                                                                                                                                                                                                                                                                                                                                                                                                                                      | 146 | 146 | 2.00E-76  | 100.0 | 91.8 | 95.9 |
| Rsa1.0_00284.1.g10445.t1 | gb[EOA22127.1] hypothetical protein CARUB_v10002685mg, partial [Capsella rubella]                                                                                                                                                                                                                                                                                                                                                                                                                                                                                                                                                                                                                                                                                                 | 268 | 313 | 1.00E-118 | 116.8 | 82.5 | 89.9 | hypothetical protein CARUB_v10002685mg, partial   | gbpln | Capsella rubella     | AT5G18400.3   Symbols:   Cytokine-induced anti-apoptosis inhibitor 1, Fe-S biogenesis   chr5:6092955-6094876 REVERSE LENGTH=272                                                                                                                                                                                                                                                                                                                                                                                                                                | 268 | 272 | 1.00E-108 | 101.5 | 79.5 | 88.1 |
| Rsa1.0_00284.1.g10446.t1 | gb[EOA20665.1] hypothetical protein CARUB_v10000977mg [Capsella rubella]                                                                                                                                                                                                                                                                                                                                                                                                                                                                                                                                                                                                                                                                                                          | 455 | 440 | 0         | 96.7  | 77.4 | 86.6 | hypothetical protein CARUB_v10000977mg            | gbpln | Capsella rubella     | AT5G18420.1   Symbols:   unknown protein; FUNCTIONS IN: molecular function unknown; INVOLVED IN: biological process unknown; LOCATED IN: cellular component unknown; EXPRESSED IN: 25 plant structures; EXPRESSED DURING: 15 growth stages; CONTAINS InterPro DOMAIN/s: Protein of unknown function DUF2363 (InterPro:IPR019312); Has 1807 Blast hits to 1807 proteins in 277 species: Archae - 0; Bacteria - 0; Metazoa - 736; Fungi - 347; Plants - 385; Viruses - 0; Other Eukaryotes - 339 (source: NCBI BLink).   chr5:6105638-6109337 REVERSE LENGTH=441 | 455 | 441 | 0         | 96.9  | 77.1 | 86.6 |
| Rsa1.0_00284.1.g10447.t1 | ref NP_001078603.1  uncharacterized protein [Arabidopsis thaliana] gi 145358174 ref NP_197345.2  uncharacterized protein [Arabidopsis thaliana] gi 60547897 gb AAX23912.1  hypothetical protein At5g18440 [Arabidopsis thaliana] gi 71905555 gb AAZ52755.1  hypothetical protein At5g18440 [Arabidopsis thaliana] gi 71905557 gb AAZ52756.1  hypothetical protein At5g18440 [Arabidopsis thaliana] gi 332005180 gb AED92563.1  uncharacterized protein AT5G18440 [Arabidopsis thaliana] gi 332005181 gb AED92564.1  uncharacterized protein AT5G18440 [Arabidopsis thaliana] ref XP_002873895.1  hypothetical protein ARALYDRAFT_909855 [Arabidopsis lyrata subsp. lyrata] gi 297319732 gb EFH50154.1  hypothetical protein ARALYDRAFT_909855 [Arabidopsis lyrata subsp. lyrata.] | 411 | 470 | 1.00E-107 | 114.4 | 63.0 | 71.8 | uncharacterized protein                           | gbpln | Arabidopsis thaliana | AT5G18440.2   Symbols:   FUNCTIONS IN: molecular function unknown; INVOLVED IN: biological process unknown; EXPRESSED IN: 22 plant structures; EXPRESSED DURING: 13 growth stages; CONTAINS InterPro DOMAIN/s: Nuclear fragile X mental retardation-interacting protein 1, conserved region (InterPro:IPR019496); Has 1333 Blast hits to 1211 proteins in 205 species: Archae - 0; Bacteria - 137; Metazoa - 339; Fungi - 162; Plants - 70; Viruses - 6; Other Eukaryotes - 619 (source: NCBI BLink).   chr5:6113092-6115748 FORWARD LENGTH=470                | 411 | 470 | 1.00E-109 | 114.4 | 63.0 | 71.8 |
| Rsa1.0_00284.1.g10448.t1 | ref XP_002873895.1  hypothetical protein ARALYDRAFT_909855 [Arabidopsis lyrata subsp. lyrata] gi 297319732 gb EFH50154.1  hypothetical protein ARALYDRAFT_909855 [Arabidopsis lyrata subsp. lyrata.]                                                                                                                                                                                                                                                                                                                                                                                                                                                                                                                                                                              | 304 | 310 | 1.00E-121 | 102.0 | 77.0 | 85.9 | hypothetical protein ARALYDRAFT_909855            | gbpln | Arabidopsis lyrata   | AT5G18450.1   Symbols:   Integrase-type DNA-binding superfamily protein   chr5:6116097-6117020 REVERSE LENGTH=307                                                                                                                                                                                                                                                                                                                                                                                                                                              | 304 | 307 | 1.00E-120 | 101.0 | 76.6 | 83.6 |
| Rsa1.0_00284.1.g10449.t1 | #                                                                                                                                                                                                                                                                                                                                                                                                                                                                                                                                                                                                                                                                                                                                                                                 | #   | #   | #         | #     | #    | #    | -                                                 | ----  | ----                 | #                                                                                                                                                                                                                                                                                                                                                                                                                                                                                                                                                              | #   | #   | #         | #     | #    |      |
| Rsa1.0_00284.1.g10450.t1 | gb[EOA20676.1] hypothetical protein CARUB_v10000988mg [Capsella rubella]                                                                                                                                                                                                                                                                                                                                                                                                                                                                                                                                                                                                                                                                                                          | 434 | 437 | 0         | 100.7 | 89.6 | 92.6 | hypothetical protein CARUB_v10000988mg            | gbpln | Capsella rubella     | AT5G18460.1   Symbols:   Protein of Unknown Function (DUF239)   chr5:6123205-6126505 FORWARD LENGTH=430                                                                                                                                                                                                                                                                                                                                                                                                                                                        | 434 | 430 | 0         | 99.1  | 86.9 | 90.1 |
| Rsa1.0_00284.1.g10451.t1 | ref NP_175273.1  F-box/RNI-like/FBD-like domain-containing protein [Arabidopsis thaliana] gi 5733869 gb AAD49757.1 AC007932.5 Contains F-box domain PF 00646 [Arabidopsis thaliana] gi 332194164 gb AEE32285.1  F-box/LRR-repeat protein [Arabidopsis thaliana]                                                                                                                                                                                                                                                                                                                                                                                                                                                                                                                   | 512 | 513 | 1.00E-124 | 100.2 | 53.1 | 64.5 | F-box/RNI-like/FBD-like domain-containing protein | gbpln | Arabidopsis thaliana | AT1G48400.1   Symbols:   F-box/RNI-like/FBD-like domains-containing protein   chr1:17882136-17883855 REVERSE LENGTH=513                                                                                                                                                                                                                                                                                                                                                                                                                                        | 512 | 513 | 1.00E-126 | 100.2 | 53.1 | 64.5 |
| Rsa1.0_00284.1.g10452.t1 | ref XP_002873898.1  hypothetical protein ARALYDRAFT_909860 [Arabidopsis lyrata subsp. lyrata] gi 297319735 gb EFH50157.1  hypothetical protein ARALYDRAFT_909860 [Arabidopsis lyrata subsp. lyrata.]                                                                                                                                                                                                                                                                                                                                                                                                                                                                                                                                                                              | 551 | 553 | 0         | 100.4 | 87.1 | 93.3 | hypothetical protein ARALYDRAFT_909860            | gbpln | Arabidopsis lyrata   | AT5G18490.1   Symbols:   Plant protein of unknown function (DUF946)   chr5:6134275-6136554 REVERSE LENGTH=553                                                                                                                                                                                                                                                                                                                                                                                                                                                  | 551 | 553 | 0         | 100.4 | 86.6 | 92.7 |
| Rsa1.0_00284.1.g10453.t6 | dbj BAD98296.1  glutamate dehydrogenase [Brassica oleracea]                                                                                                                                                                                                                                                                                                                                                                                                                                                                                                                                                                                                                                                                                                                       | 278 | 260 | 8.00E-58  | 93.5  | 41.4 | 42.8 | glutamate dehydrogenase                           | gbpln | Brassica oleracea    | AT5G18170.1   Symbols:   GDH1   glutamate dehydrogenase 1   chr5:6006172-6008248 FORWARD LENGTH=411                                                                                                                                                                                                                                                                                                                                                                                                                                                            | 278 | 411 | 5.00E-59  | 147.8 | 40.6 | 42.4 |
| Rsa1.0_00284.1.g10454.t1 | gb[EOA20522.1] hypothetical protein CARUB_v10000836mg [Capsella rubella]                                                                                                                                                                                                                                                                                                                                                                                                                                                                                                                                                                                                                                                                                                          | 493 | 485 | 0         | 98.4  | 93.1 | 95.9 | hypothetical protein CARUB_v10000836mg            | gbpln | Capsella rubella     | AT5G18500.2   Symbols:   Protein kinase superfamily protein   chr5:6139263-6141283 FORWARD LENGTH=484                                                                                                                                                                                                                                                                                                                                                                                                                                                          | 493 | 484 | 0         | 98.2  | 92.1 | 95.3 |
| Rsa1.0_00284.1.g10455.t1 | gb[EOA20650.1] hypothetical protein CARUB_v10000963mg [Capsella rubella]                                                                                                                                                                                                                                                                                                                                                                                                                                                                                                                                                                                                                                                                                                          | 446 | 443 | 0         | 99.3  | 93.0 | 96.9 | hypothetical protein CARUB_v10000963mg            | gbpln | Capsella rubella     | AT5G18520.1   Symbols:   Lung seven transmembrane receptor family protein   chr5:6145027-6146349 FORWARD LENGTH=440                                                                                                                                                                                                                                                                                                                                                                                                                                            | 446 | 440 | 0         | 98.7  | 93.3 | 96.4 |

|                          |                                                                                                                                                                                                                                                                             |      |      |           |       |      |       |                                        |       |                      |                                                                                                                                                                                                                                                                                                                                                                                                                                                    |      |      |           |       |      |      |
|--------------------------|-----------------------------------------------------------------------------------------------------------------------------------------------------------------------------------------------------------------------------------------------------------------------------|------|------|-----------|-------|------|-------|----------------------------------------|-------|----------------------|----------------------------------------------------------------------------------------------------------------------------------------------------------------------------------------------------------------------------------------------------------------------------------------------------------------------------------------------------------------------------------------------------------------------------------------------------|------|------|-----------|-------|------|------|
| Rsa1.0_00284.1.g10456.t1 | refNP_974804.4  protein serine/threonine kinase [Arabidopsis thaliana] gi 332005192 gb AED92575.1  protein serine/threonine kinase [Arabidopsis thaliana]                                                                                                                   | 1602 | 1639 | 0         | 102.3 | 87.3 | 92.0  | protein serine/threonine kinase        | gbpln | Arabidopsis thaliana | AT5G18525.1   Symbols:   protein serine/threonine kinases;protein tyrosine kinases;ATP binding;protein kinases   chr5:6146932-6153658 REVERSE LENGTH=1639                                                                                                                                                                                                                                                                                          | 1602 | 1639 | 0         | 102.3 | 87.3 | 92.0 |
| Rsa1.0_00284.1.g10457.t1 | gb EOA20563.1  hypothetical protein CARUB_v10000876mg [Capsella rubella]                                                                                                                                                                                                    | 449  | 473  | 1.00E-172 | 105.3 | 77.5 | 85.1  | hypothetical protein CARUB_v10000876mg | gbpln | Capsella rubella     | AT5G18550.1   Symbols:   Zinc finger C-x8-C-x5-x3-H type family protein   chr5:6160515-6162729 FORWARD LENGTH=465                                                                                                                                                                                                                                                                                                                                  | 449  | 465  | 1.00E-173 | 103.6 | 79.7 | 85.7 |
| Rsa1.0_00284.1.g10458.t1 | ref NP_197357.2  ethylene response factor PUCHI [Arabidopsis thaliana] gi 334302788 sp Q6J9Q2.2 ERF86_ARATH RecName: Full=Ethylene-responsive transcription factor ERF086 gi 332005196 gb AED92579.1  ethylene response factor PUCHI [Arabidopsis thaliana]                 | 318  | 348  | 1.00E-145 | 109.4 | 87.4 | 91.5  | ethylene response factor PUCHI         | gbpln | Arabidopsis thaliana | AT5G18560.1   Symbols: PUCHI   Integrase-type DNA-binding superfamily protein   chr5:6164859-6165905 REVERSE LENGTH=348                                                                                                                                                                                                                                                                                                                            | 318  | 348  | 1.00E-148 | 109.4 | 87.4 | 91.5 |
| Rsa1.0_00284.1.g10459.t1 | #                                                                                                                                                                                                                                                                           | #    | #    | #         | #     | #    | #     | -                                      | ----  | ----                 | #                                                                                                                                                                                                                                                                                                                                                                                                                                                  | #    | #    | #         | #     | #    |      |
| Rsa1.0_00284.1.g10460.t3 | gb EOA20539.1  hypothetical protein CARUB_v10000854mg [Capsella rubella]                                                                                                                                                                                                    | 167  | 480  | 7.00E-25  | 287.4 | 34.7 | 35.9  | hypothetical protein CARUB_v10000854mg | gbpln | Capsella rubella     | AT5G18580.1   Symbols: FASS, TON2, EMB40, FS1, GDO, FASS 2   tonneau 2 (TON2)   chr5:6175154-6178214 FORWARD LENGTH=480                                                                                                                                                                                                                                                                                                                            | 167  | 480  | 3.00E-27  | 287.4 | 34.7 | 35.9 |
| Rsa1.0_00284.1.g10461.t1 | ref XP_002873905.1  kelch repeat-containing protein [Arabidopsis lyrata subsp. lyrata] gi 297319742 gb EFH50164.1  kelch repeat-containing protein [Arabidopsis lyrata subsp. lyrata]                                                                                       | 712  | 709  | 0         | 99.6  | 88.5 | 93.3  | kelch repeat-containing protein        | gbpln | Arabidopsis lyrata   | AT5G18590.2   Symbols:   Galactose oxidase/kelch repeat superfamily protein   chr5:6178516-6182186 REVERSE LENGTH=708                                                                                                                                                                                                                                                                                                                              | 712  | 708  | 0         | 99.4  | 88.9 | 94.1 |
| Rsa1.0_00284.1.g10462.t1 | gb EOA21854.1  hypothetical protein CARUB_v10002321mg [Capsella rubella]                                                                                                                                                                                                    | 102  | 102  | 2.00E-50  | 100.0 | 93.1 | 100.0 | hypothetical protein CARUB_v10002321mg | gbpln | Capsella rubella     | AT5G18600.1   Symbols:   Thioredoxin superfamily protein   chr5:6183466-6183774 REVERSE LENGTH=102                                                                                                                                                                                                                                                                                                                                                 | 102  | 102  | 7.00E-53  | 100.0 | 94.1 | 98.0 |
| Rsa1.0_00285.1.g10463.t1 | ref NP_001031828.1  putative glycosyltransferase [Arabidopsis thaliana] gi 292630778 sp Q9FFN2.2 GLYT3_ARATH RecName: Full=Probable glycosyltransferase At5g03795 gi 332003272 gb AED90655.1  putative glycosyltransferase [Arabidopsis thaliana]                           | 192  | 518  | 4.00E-47  | 269.8 | 68.2 | 77.6  | putative glycosyltransferase           | gbpln | Arabidopsis thaliana | AT5G03795.1   Symbols:   Exostosin family protein   chr5:1007554-1010373 REVERSE LENGTH=518                                                                                                                                                                                                                                                                                                                                                        | 192  | 518  | 1.00E-49  | 269.8 | 68.2 | 77.6 |
| Rsa1.0_00285.1.g10464.t1 | gb EOA19541.1  hypothetical protein CARUB_v10002513mg [Capsella rubella]                                                                                                                                                                                                    | 297  | 353  | 1.00E-130 | 118.9 | 75.1 | 84.2  | hypothetical protein CARUB_v10002513mg | gbpln | Capsella rubella     | AT5G03810.1   Symbols:   GDSL-like Lipase/Acylhydrolase family protein   chr5:1013939-1015345 REVERSE LENGTH=353                                                                                                                                                                                                                                                                                                                                   | 297  | 353  | 1.00E-132 | 118.9 | 75.1 | 84.5 |
| Rsa1.0_00285.1.g10465.t2 | ref XP_002873122.1  hypothetical protein ARALYDRAFT_487166 [Arabidopsis lyrata subsp. lyrata] gi 297318959 gb EFH49381.1  hypothetical protein ARALYDRAFT_487166 [Arabidopsis lyrata subsp. lyrata]                                                                         | 380  | 336  | 1.00E-138 | 88.4  | 71.3 | 75.8  | hypothetical protein ARALYDRAFT_487166 | gbpln | Arabidopsis lyrata   | AT5G03880.1   Symbols:   Thioredoxin family protein   chr5:1038674-1041453 REVERSE LENGTH=339                                                                                                                                                                                                                                                                                                                                                      | 380  | 339  | 1.00E-135 | 89.2  | 69.5 | 73.9 |
| Rsa1.0_00285.1.g10466.t1 | gb EOA21663.1  hypothetical protein CARUB_v10002084mg [Capsella rubella]                                                                                                                                                                                                    | 173  | 178  | 9.00E-65  | 102.9 | 74.0 | 83.8  | hypothetical protein CARUB_v10002084mg | gbpln | Capsella rubella     | AT5G03890.1   Symbols:   unknown protein; INVOLVED IN: N-terminal protein myristoylation; LOCATED IN: cellular component unknown; BEST Arabidopsis thaliana protein match is: unknown protein (TAIR:AT3G10120.1); Has 1807 Blast hits to 1807 proteins in 277 species: Archae - 0; Bacteria - 0; Metazoa - 736; Fungi - 347; Plants - 385; Viruses - 0; Other Eukaryotes - 339 (source: NCBI BLink).   chr5:1047150-1047689 FORWARD LENGTH=179     | 173  | 179  | 2.00E-59  | 103.5 | 73.4 | 80.3 |
| Rsa1.0_00285.1.g10467.t1 | ref XP_002871068.1  sugar-dependent1 [Arabidopsis lyrata subsp. lyrata] gi 297316905 gb EFH47327.1  sugar-dependent1 [Arabidopsis lyrata subsp. lyrata]                                                                                                                     | 774  | 824  | 0         | 106.5 | 87.7 | 92.5  | sugar-dependent1                       | gbpln | Arabidopsis lyrata   | AT5G04040.1   Symbols: SDP1   Patatin-like phospholipase family protein   chr5:1090346-1093003 FORWARD LENGTH=825                                                                                                                                                                                                                                                                                                                                  | 774  | 825  | 0         | 106.6 | 87.7 | 92.5 |
| Rsa1.0_00285.1.g10468.t2 | ref NP_196028.2  uncharacterized protein [Arabidopsis thaliana] gi 38603900 gb AAR24695.1  At5g04080 [Arabidopsis thaliana] gi 41349906 gb AAS00338.1  At5g04080 [Arabidopsis thaliana] gi 33200331 gb AED90694.1  uncharacterized protein AT5G04080 [Arabidopsis thaliana] | 66   | 63   | 2.00E-15  | 95.5  | 63.6 | 71.2  | uncharacterized protein                | gbpln | Arabidopsis thaliana | AT5G04080.1   Symbols:   unknown protein; FUNCTIONS IN: molecular function unknown; INVOLVED IN: biological process unknown; LOCATED IN: plasma membrane; EXPRESSED IN: 16 plant structures; EXPRESSED DURING: 9 growth stages; Has 115 Blast hits to 115 proteins in 16 species: Archae - 0; Bacteria - 0; Metazoa - 0; Fungi - 5; Plants - 110; Viruses - 0; Other Eukaryotes - 0 (source: NCBI BLink).   chr5:1104815-1105186 FORWARD LENGTH=63 | 66   | 63   | 3.00E-18  | 95.5  | 63.6 | 71.2 |



|                           |                                                                                                                                                                                                                                                                                                                                                                                               |      |      |           |       |      |      |                                                                  |       |                      |                                                                                                                                                            |      |     |           |       |      |      |
|---------------------------|-----------------------------------------------------------------------------------------------------------------------------------------------------------------------------------------------------------------------------------------------------------------------------------------------------------------------------------------------------------------------------------------------|------|------|-----------|-------|------|------|------------------------------------------------------------------|-------|----------------------|------------------------------------------------------------------------------------------------------------------------------------------------------------|------|-----|-----------|-------|------|------|
| Rsa1.0_00285.1.g10469.t1  | gb[EOA20379.1] hypothetical protein CARUB_v10000692mg [Capsella rubella]                                                                                                                                                                                                                                                                                                                      | 500  | 530  | 1.00E-161 | 106.0 | 64.6 | 76.0 | hypothetical protein CARUB_v10000692mg                           | gbpln | Capsella rubella     | AT5G04110.1   Symbols: GYRB3   DNA GYRASE B3   chr5:1110757-1114112 REVERSE LENGTH=546                                                                     | 500  | 546 | 1.00E-150 | 109.2 | 60.4 | 73.6 |
| Rsa1.0_00285.1.g10470.t1  | ref[NP_568133.1] DNA gyrase subunit B [Arabidopsis thaliana]<br>gi 75165162 spl Q94BZ7.1 GYRBM ARAT H RecName: Full=DNA gyrase subunit B, mitochondrial; Flags: Precursor<br>gi 14517374 gb AAK62578.1 AT3g10270/F14P13.13 [Arabidopsis thaliana] gi 22655426 gb AAM98305.1 AT3g10270/F14P13.13 [Arabidopsis thaliana] gi 332003319 gb AED90702.1 DNA gyrase subunit B [Arabidopsis thaliana] | 708  | 732  | 0         | 103.4 | 89.5 | 93.8 | DNA gyrase subunit B                                             | gbpln | Arabidopsis thaliana | AT5G04130.1   Symbols: GYRB2   DNA GYRASE B2   chr5:1122084-1128031 REVERSE LENGTH=732                                                                     | 708  | 732 | 0         | 103.4 | 89.5 | 93.8 |
| Rsa1.0_00285.1.g10471.t1  | dbj BAJ34136.1  unnamed protein product [Thellungiella halophila]                                                                                                                                                                                                                                                                                                                             | 264  | 272  | 1.00E-103 | 103.0 | 78.8 | 86.4 | unnamed protein product                                          | ----  | ----                 | AT5G04150.1   Symbols: BHLH101   basic helix-loop-helix (bHLH) DNA-binding superfamily protein   chr5:1138559-1139476 REVERSE LENGTH=240                   | 264  | 240 | 4.00E-80  | 90.9  | 69.7 | 77.3 |
| Rsa1.0_00285.1.g10472.t1  | ref[XP_002871083.1] hypothetical protein ARALYDRAFT_908309 [Arabidopsis lyrata subsp. lyrata] gi 297316920 gb EFH47342.1  hypothetical protein ARALYDRAFT_908309 [Arabidopsis lyrata subsp. lyrata]                                                                                                                                                                                           | 352  | 345  | 1.00E-167 | 98.0  | 84.4 | 87.2 | hypothetical protein ARALYDRAFT_908309                           | gbpln | Arabidopsis lyrata   | AT5G04250.2   Symbols:   Cysteine proteinases superfamily protein   chr5:1176397-1178492 FORWARD LENGTH=345                                                | 352  | 345 | 1.00E-169 | 98.0  | 83.8 | 88.1 |
| Rsa1.0_00285.1.g10473.t3  | ref[XP_002871084.1] hypothetical protein ARALYDRAFT_487209 [Arabidopsis lyrata subsp. lyrata] gi 297316921 gb EFH47343.1  hypothetical protein ARALYDRAFT_487209 [Arabidopsis lyrata subsp. lyrata]                                                                                                                                                                                           | 402  | 307  | 1.00E-109 | 76.4  | 60.7 | 64.2 | hypothetical protein ARALYDRAFT_487209                           | gbpln | Arabidopsis lyrata   | AT5G04280.1   Symbols:   RNA-binding (RRM/RBD/RNP motifs) family protein with retrovirus zinc finger-like domain   chr5:1192461-1195413 FORWARD LENGTH=310 | 402  | 310 | 1.00E-106 | 77.1  | 60.2 | 63.9 |
| Rsa1.0_00285.1.g10474.t1  | ref[NP_196051.2] pectate lyase family protein [Arabidopsis thaliana] gi 332003342 gb AED90725.1  pectate lyase family protein [Arabidopsis thaliana]                                                                                                                                                                                                                                          | 525  | 518  | 0         | 98.7  | 87.4 | 91.8 | pectate lyase family protein                                     | gbpln | Arabidopsis thaliana | AT5G04310.1   Symbols:   Pectin lyase-like superfamily protein   chr5:1203356-1207352 REVERSE LENGTH=518                                                   | 525  | 518 | 0         | 98.7  | 87.4 | 91.8 |
| Rsa1.0_00285.1.g10475.t1  | ref[XP_002872217.1] hypothetical protein ARALYDRAFT_910715 [Arabidopsis lyrata subsp. lyrata] gi 297316054 gb EFH48476.1  hypothetical protein ARALYDRAFT_910715 [Arabidopsis lyrata subsp. lyrata]                                                                                                                                                                                           | 86   | 81   | 3.00E-11  | 94.2  | 43.0 | 47.7 | hypothetical protein ARALYDRAFT_910715                           | gbpln | Arabidopsis lyrata   | AT5G26717.1   Symbols:   Putative membrane lipoprotein   chr5:9284612-9284857 FORWARD LENGTH=81                                                            | 86   | 81  | 3.00E-12  | 94.2  | 39.5 | 46.5 |
| Rsa1.0_00285.1.g10476.t12 | ref[XP_002871086.1] hypothetical protein ARALYDRAFT_487213 [Arabidopsis lyrata subsp. lyrata] gi 297316923 gb EFH47345.1  hypothetical protein ARALYDRAFT_487213 [Arabidopsis lyrata subsp. lyrata]                                                                                                                                                                                           | 647  | 413  | 1.00E-134 | 63.8  | 42.8 | 48.5 | hypothetical protein ARALYDRAFT_487213                           | gbpln | Arabidopsis lyrata   | AT5G04320.2   Symbols:   Shugoshin C terminus   chr5:1209613-1212376 FORWARD LENGTH=470                                                                    | 647  | 470 | 1.00E-135 | 72.6  | 43.3 | 49.6 |
| Rsa1.0_00285.1.g10477.t2  | ref[NP_196057.1] S-adenosyl-L-methionine-dependent methyltransferase-like protein [Arabidopsis thaliana] gi 332003350 gb AED90733.1  S-adenosyl-L-methionine-dependent methyltransferase-like protein [Arabidopsis thaliana]                                                                                                                                                                  | 500  | 396  | 0         | 79.2  | 62.2 | 69.0 | S-adenosyl-L-methionine-dependent methyltransferase-like protein | gbpln | Arabidopsis thaliana | AT5G04370.1   Symbols: NAMT1   S-adenosyl-L-methionine-dependent methyltransferases superfamily protein   chr5:1232027-1233888 FORWARD LENGTH=396          | 500  | 396 | 0         | 79.2  | 62.2 | 69.0 |
| Rsa1.0_00285.1.g10478.t1  | ref[NP_196059.1] C2H2-type zinc finger protein [Arabidopsis thaliana] gi 26392996 gb AAO41934.1  putative zinc finger transcription factor [Arabidopsis thaliana] gi 28827440 gb AAO50564.1  putative zinc finger transcription factor [Arabidopsis thaliana] gi 332003354 gb AED90737.1  C2H2-type zinc finger protein [Arabidopsis thaliana]                                                | 368  | 362  | 1.00E-147 | 98.4  | 78.5 | 84.5 | C2H2-type zinc finger protein                                    | gbpln | Arabidopsis thaliana | AT5G04390.1   Symbols:   C2H2-type zinc finger family protein   chr5:1239166-1240254 FORWARD LENGTH=362                                                    | 368  | 362 | 1.00E-150 | 98.4  | 78.5 | 84.5 |
| Rsa1.0_00285.1.g10479.t1  | emb CAB39638.1  RNA-directed DNA polymerase-like protein [Arabidopsis thaliana] gi 7267666 emb CAB78094.1  RNA-directed DNA polymerase-like protein [Arabidopsis thaliana]                                                                                                                                                                                                                    | 1987 | 1274 | 0         | 64.1  | 35.8 | 46.0 | RNA-directed DNA polymerase-like protein                         | gbpln | Arabidopsis thaliana | AT4G29090.1   Symbols:   Ribonuclease H-like superfamily protein   chr4:14333528-14335255 FORWARD LENGTH=575                                               | 1987 | 575 | 1.00E-65  | 28.9  | 8.9  | 13.6 |

|                          |                                                                                                                                                                                                                                                                                                                                                                                                                                                                                                                                                                                                                                                                                                                                                                        |     |     |           |       |      |       |                                                |       |                      |                                                                                                                       |     |     |           |       |      |       |
|--------------------------|------------------------------------------------------------------------------------------------------------------------------------------------------------------------------------------------------------------------------------------------------------------------------------------------------------------------------------------------------------------------------------------------------------------------------------------------------------------------------------------------------------------------------------------------------------------------------------------------------------------------------------------------------------------------------------------------------------------------------------------------------------------------|-----|-----|-----------|-------|------|-------|------------------------------------------------|-------|----------------------|-----------------------------------------------------------------------------------------------------------------------|-----|-----|-----------|-------|------|-------|
| Rsa1.0_00285.1.g10480.t1 | ref[XP_002871092.1] hypothetical protein ARALYDRAFT_908325 [Arabidopsis lyrata subsp. lyrata] gi 297316929 gb EFH47351.1  hypothetical protein ARALYDRAFT_908325 [Arabidopsis lyrata subsp. lyrata]                                                                                                                                                                                                                                                                                                                                                                                                                                                                                                                                                                    | 570 | 568 | 0         | 99.6  | 80.0 | 87.7  | hypothetical protein ARALYDRAFT_908325         | gbpln | Arabidopsis lyrata   | AT5G04410.1   Symbols: NAC2, anac078   NAC domain containing protein 2   chr5:1243980-1246416 FORWARD LENGTH=567      | 570 | 567 | 0         | 99.5  | 77.4 | 85.6  |
| Rsa1.0_00285.1.g10481.t1 | ref[NP_196062.1] kelch repeat-containing protein [Arabidopsis thaliana] gi 79326940 ref[NP_001031832.1] kelch repeat-containing protein [Arabidopsis thaliana] gi 79326969 ref[NP_001031833.1] kelch repeat-containing protein [Arabidopsis thaliana] gi 7406446 emb CAB85548.1  putative protein [Arabidopsis thaliana] gi 53850551 gb AAU95452.1  At5g04420 [Arabidopsis thaliana] gi 63003778 gb AA25418.1  At5g04420 [Arabidopsis thaliana] gi 222424058 dbj BAH19990.1  AT5G04420 [Arabidopsis thaliana] gi 332003357 gb AED90740.1  kelch repeat-containing protein [Arabidopsis thaliana] gi 332003358 gb AED90741.1  kelch repeat-containing protein [Arabidopsis thaliana] gi 332003359 gb AED90742.1  kelch repeat-containing protein [Arabidopsis thaliana] | 505 | 514 | 0         | 101.8 | 88.3 | 92.1  | kelch repeat-containing protein                | gbpln | Arabidopsis thaliana | AT5G04420.3   Symbols:   Galactose oxidase/kelch repeat superfamily protein   chr5:1246867-1249455 REVERSE LENGTH=514 | 505 | 514 | 0         | 101.8 | 88.3 | 92.1  |
| Rsa1.0_00285.1.g10482.t1 | gb EOA21054.1  hypothetical protein CARUB_v10001394mg [Capsella rubella]                                                                                                                                                                                                                                                                                                                                                                                                                                                                                                                                                                                                                                                                                               | 243 | 334 | 1.00E-106 | 137.4 | 79.8 | 83.1  | hypothetical protein CARUB_v10001394mg         | gbpln | Capsella rubella     | AT5G04430.2   Symbols: BTR1, BTR1L   binding to TOMV RNA 1L (long form)   chr5:1250802-1253523 REVERSE LENGTH=334     | 243 | 334 | 1.00E-108 | 137.4 | 79.8 | 82.7  |
| Rsa1.0_00286.1.g10483.t1 | ref[XP_002869911.1] Dof-type zinc finger domain-containing protein [Arabidopsis lyrata subsp. lyrata] gi 297315747 gb EFH46170.1  Dof-type zinc finger domain-containing protein [Arabidopsis lyrata subsp. lyrata]                                                                                                                                                                                                                                                                                                                                                                                                                                                                                                                                                    | 166 | 223 | 2.00E-21  | 134.3 | 39.8 | 48.2  | Dof-type zinc finger domain-containing protein | gbpln | Arabidopsis lyrata   | AT4G21050.1   Symbols:   Dof-type zinc finger domain-containing protein   chr4:11238441-11239073 FORWARD LENGTH=210   | 166 | 210 | 1.00E-15  | 126.5 | 27.7 | 37.3  |
| Rsa1.0_00286.1.g10484.t2 | #                                                                                                                                                                                                                                                                                                                                                                                                                                                                                                                                                                                                                                                                                                                                                                      | #   | #   | #         | #     | #    | -     | ----                                           | ----  | #                    | #                                                                                                                     | #   | #   | #         | #     | #    |       |
| Rsa1.0_00286.1.g10485.t1 | ref[XP_002869910.1] predicted protein [Arabidopsis lyrata subsp. lyrata] gi 297315746 gb EFH46169.1  predicted protein [Arabidopsis lyrata subsp. lyrata]                                                                                                                                                                                                                                                                                                                                                                                                                                                                                                                                                                                                              | 81  | 741 | 4.00E-21  | 914.8 | 64.2 | 67.9  | predicted protein                              | gbpln | Arabidopsis lyrata   | AT4G21060.1   Symbols:   Galactosyltransferase family protein   chr4:11240730-11244860 FORWARD LENGTH=741             | 81  | 741 | 3.00E-22  | 914.8 | 61.7 | 65.4  |
| Rsa1.0_00286.1.g10486.t1 | gb EOA17786.1  hypothetical protein CARUB_v10006179mg [Capsella rubella]                                                                                                                                                                                                                                                                                                                                                                                                                                                                                                                                                                                                                                                                                               | 68  | 68  | 1.00E-31  | 100.0 | 98.5 | 100.0 | hypothetical protein CARUB_v10006179mg         | gbpln | Capsella rubella     | AT4G21105.1   Symbols:   cytochrome-c oxidases;electron carriers   chr4:11266273-11266724 FORWARD LENGTH=68           | 68  | 68  | 6.00E-34  | 100.0 | 95.6 | 100.0 |
| Rsa1.0_00286.1.g10487.t1 | gb EOA17579.1  hypothetical protein CARUB_v10005939mg [Capsella rubella]                                                                                                                                                                                                                                                                                                                                                                                                                                                                                                                                                                                                                                                                                               | 145 | 145 | 9.00E-77  | 100.0 | 95.2 | 98.6  | hypothetical protein CARUB_v10005939mg         | gbpln | Capsella rubella     | AT4G21110.1   Symbols:   G10 family protein   chr4:11267673-11268774 FORWARD LENGTH=145                               | 145 | 145 | 7.00E-79  | 100.0 | 94.5 | 97.9  |
| Rsa1.0_00286.1.g10488.t1 | ref[XP_002869906.1] hypothetical protein ARALYDRAFT_329490 [Arabidopsis lyrata subsp. lyrata] gi 297315742 gb EFH46165.1  hypothetical protein ARALYDRAFT_329490 [Arabidopsis lyrata subsp. lyrata]                                                                                                                                                                                                                                                                                                                                                                                                                                                                                                                                                                    | 597 | 599 | 0         | 100.3 | 89.3 | 95.5  | hypothetical protein ARALYDRAFT_329490         | gbpln | Arabidopsis lyrata   | AT4G21120.1   Symbols: AAT1, CAT1   amino acid transporter 1   chr4:11270318-11273775 FORWARD LENGTH=594              | 597 | 594 | 0         | 99.5  | 88.3 | 94.0  |
| Rsa1.0_00286.1.g10489.t3 | ref[NP_193847.2] ribophorin II (RPN2) family protein [Arabidopsis thaliana] gi 334186764 ref[NP_001190785.1] ribophorin II (RPN2) family protein [Arabidopsis thaliana] gi 75163691 sp Q93216.1 RPN2_ARATH RecName: Full=Dolichyl-diphosphooligosaccharide--protein glycosyltransferase subunit 2; AltName: Full=Protein HAPLESS 6; AltName: Full=Ribophorin II; Short=RPN-II; AltName: Full=Ribophorin-2; Flags: Precursor gi 16604454 gb AAL24233.1  AT4g21150/F7J7_90 [Arabidopsis thaliana] gi 18958022 gb AAL79584.1  AT4g21150/F7J7_90 [Arabidopsis thaliana] gi 332659008 gb AEE84408.1  ribophorin II (RPN2) family protein [Arabidopsis thaliana] gi 332659010 gb AEE84410.1  ribophorin II (RPN2) family protein [Arabidopsis thaliana]                      | 686 | 691 | 0         | 100.7 | 87.2 | 91.8  | ribophorin II (RPN2) family protein            | gbpln | Arabidopsis thaliana | AT4G21150.3   Symbols: HAP6   ribophorin II (RPN2) family protein   chr4:11278646-11283599 FORWARD LENGTH=691         | 686 | 691 | 0         | 100.7 | 87.2 | 91.8  |

|                          |                                                                                                                                                                                                                                                                                                                                                                                                                                                                                                                           |      |      |           |       |      |      |                                                           |       |                      |                                                                                                                                                                                                                                                                                    |      |      |           |       |      |      |
|--------------------------|---------------------------------------------------------------------------------------------------------------------------------------------------------------------------------------------------------------------------------------------------------------------------------------------------------------------------------------------------------------------------------------------------------------------------------------------------------------------------------------------------------------------------|------|------|-----------|-------|------|------|-----------------------------------------------------------|-------|----------------------|------------------------------------------------------------------------------------------------------------------------------------------------------------------------------------------------------------------------------------------------------------------------------------|------|------|-----------|-------|------|------|
| Rsa1.0_00286.1.g10490.t1 | gb AAM65970.1  putative GTPase activating protein [Arabidopsis thaliana]                                                                                                                                                                                                                                                                                                                                                                                                                                                  | 339  | 337  | 1.00E-173 | 99.4  | 87.6 | 92.6 | putative GTPase activating protein                        | gbpln | Arabidopsis thaliana | AT4G21160.4   Symbols: ZAC   Calcium-dependent ARF-type GTPase activating protein family   chr4:11284694-11286532 FORWARD LENGTH=337                                                                                                                                               | 339  | 337  | 1.00E-174 | 99.4  | 87.3 | 92.3 |
| Rsa1.0_00286.1.g10491.t1 | gb EOA17090.1  hypothetical protein CARUB_v10005340mg [Capsella rubella]                                                                                                                                                                                                                                                                                                                                                                                                                                                  | 291  | 304  | 1.00E-138 | 104.5 | 84.2 | 90.7 | hypothetical protein CARUB_v10005340mg                    | gbpln | Capsella rubella     | AT4G21190.1   Symbols: emb1417   Pentatricopeptide repeat (PPR) superfamily protein   chr4:11292493-11293763 REVERSE LENGTH=307                                                                                                                                                    | 291  | 307  | 1.00E-133 | 105.5 | 78.0 | 84.2 |
| Rsa1.0_00286.1.g10492.t1 | ref NP_001078417.1  cytochrome c oxidase biogenesis protein Cmc1-like protein [Arabidopsis thaliana] gi 145333595 ref NP_001078418.1  cytochrome c oxidase biogenesis protein Cmc1-like protein [Arabidopsis thaliana] gi 110743950 dbj BAE99808.1  hypothetical protein [Arabidopsis thaliana] gi 332659018 gb AEE84418.1  cytochrome c oxidase biogenesis protein Cmc1-like protein [Arabidopsis thaliana] gi 332659019 gb AEE84419.1  cytochrome c oxidase biogenesis protein Cmc1-like protein [Arabidopsis thaliana] | 80   | 80   | 5.00E-35  | 100.0 | 92.5 | 95.0 | cytochrome c oxidase biogenesis protein Cmc1-like protein | gbpln | Arabidopsis thaliana | AT4G21192.2   Symbols:   Cytochrome c oxidase biogenesis protein Cmc1-like   chr4:11294563-11295192 FORWARD LENGTH=80                                                                                                                                                              | 80   | 80   | 8.00E-38  | 100.0 | 92.5 | 95.0 |
| Rsa1.0_00286.1.g10493.t2 | gb EOA15848.1  hypothetical protein CARUB_v10007608mg [Capsella rubella]                                                                                                                                                                                                                                                                                                                                                                                                                                                  | 269  | 338  | 7.00E-96  | 125.7 | 60.6 | 62.8 | hypothetical protein CARUB_v10007608mg                    | gbpln | Capsella rubella     | AT4G21200.1   Symbols: ATGA20X8, GA20X8   gibberellin 2-oxidase 8   chr4:11302751-11306601 FORWARD LENGTH=338                                                                                                                                                                      | 269  | 338  | 3.00E-98  | 125.7 | 60.2 | 62.8 |
| Rsa1.0_00286.1.g10494.t2 | ref NP_974583.1  uncharacterized protein [Arabidopsis thaliana] gi 222423130 dbj BAH19544.1  AT4G21215 [Arabidopsis thaliana] gi 332659027 gb AEE84427.1  uncharacterized protein AT4G21215 [Arabidopsis thaliana]                                                                                                                                                                                                                                                                                                        | 197  | 199  | 5.00E-81  | 101.0 | 81.2 | 88.8 | uncharacterized protein                                   | gbpln | Arabidopsis thaliana | AT4G21215.2   Symbols:   unknown protein; Has 35333 Blast hits to 34131 proteins in 2444 species: Archae - 798; Bacteria - 22429; Metazoa - 974; Fungi - 991; Plants - 531; Viruses - 0; Other Eukaryotes - 9610 (source: NCBI BLINK);   chr4:11310890-11313421 REVERSE LENGTH=199 | 197  | 199  | 2.00E-83  | 101.0 | 81.2 | 88.8 |
| Rsa1.0_00286.1.g10495.t1 | gb EOA17156.1  hypothetical protein CARUB_v10005424mg [Capsella rubella]                                                                                                                                                                                                                                                                                                                                                                                                                                                  | 288  | 286  | 1.00E-158 | 99.3  | 93.8 | 98.3 | hypothetical protein CARUB_v10005424mg                    | gbpln | Capsella rubella     | AT4G21320.1   Symbols: HSA32   Aldolase-type TIM barrel family protein   chr4:11340492-11341732 FORWARD LENGTH=286                                                                                                                                                                 | 288  | 286  | 1.00E-160 | 99.3  | 93.4 | 97.9 |
| Rsa1.0_00286.1.g10496.t1 | #                                                                                                                                                                                                                                                                                                                                                                                                                                                                                                                         | #    | #    | #         | #     | #    | #    | -                                                         | ----  | ----                 | #                                                                                                                                                                                                                                                                                  | #    | #    | #         | #     | #    | #    |
| Rsa1.0_00286.1.g10497.t1 | ref NP_567624.1  Subtilase family protein [Arabidopsis thaliana] gi 332659040 gb AEE84440.1  Subtilase family protein [Arabidopsis thaliana]                                                                                                                                                                                                                                                                                                                                                                              | 802  | 803  | 0         | 100.1 | 70.7 | 80.9 | Subtilase family protein                                  | gbpln | Arabidopsis thaliana | AT4G21323.1   Symbols:   Subtilase family protein   chr4:11342494-11345632 FORWARD LENGTH=803                                                                                                                                                                                      | 802  | 803  | 0         | 100.1 | 70.7 | 80.9 |
| Rsa1.0_00286.1.g10498.t1 | emb CC61494.1  unnamed protein product [Arabidopsis halleri]                                                                                                                                                                                                                                                                                                                                                                                                                                                              | 750  | 756  | 0         | 100.8 | 67.9 | 80.8 | unnamed protein product                                   | gbpln | Arabidopsis halleri  | AT4G21326.1   Symbols: ATSBT3.12, SBT3.12   subtilase 3.12   chr4:11346685-11349653 FORWARD LENGTH=754                                                                                                                                                                             | 750  | 754  | 0         | 100.5 | 66.9 | 81.1 |
| Rsa1.0_00286.1.g10499.t1 | gb ABV21217.1  At4g21410 [Arabidopsis thaliana]                                                                                                                                                                                                                                                                                                                                                                                                                                                                           | 625  | 679  | 0         | 108.6 | 78.6 | 87.2 | At4g21410                                                 | gbpln | Arabidopsis thaliana | AT4G21410.1   Symbols: CRK29   cysteine-rich RLK (RECEPTOR-like protein kinase) 29   chr4:11402463-11405025 REVERSE LENGTH=679                                                                                                                                                     | 625  | 679  | 0         | 108.6 | 78.7 | 87.2 |
| Rsa1.0_00286.1.g10500.t1 | ref XP_002867848.1  hypothetical protein ARALYDRAFT_914534 [Arabidopsis lyrata subsp. lyrata] gi 297313684 gb EFH44107.1  hypothetical protein ARALYDRAFT_914534 [Arabidopsis lyrata subsp. lyrata]                                                                                                                                                                                                                                                                                                                       | 1000 | 937  | 0         | 93.7  | 71.7 | 79.3 | hypothetical protein ARALYDRAFT_914534                    | gbpln | Arabidopsis lyrata   | AT4G21430.1   Symbols: B160   Zinc finger, RING-type; Transcription factor jumoni/asparyl beta-hydroxylase   chr4:11407835-11412159 REVERSE LENGTH=927                                                                                                                             | 1000 | 927  | 0         | 92.7  | 70.7 | 77.9 |
| Rsa1.0_00287.1.g10501.t1 | gb AAC69114.1  putative gag-protease polyprotein [Arabidopsis thaliana]                                                                                                                                                                                                                                                                                                                                                                                                                                                   | 572  | 627  | 6.00E-42  | 109.6 | 24.5 | 39.9 | putative gag-protease polyprotein                         | gbpln | Arabidopsis thaliana | #                                                                                                                                                                                                                                                                                  | #    | #    | #         | #     | #    | #    |
| Rsa1.0_00287.1.g10502.t1 | ref XP_002894513.1  WRKY10 [Arabidopsis lyrata subsp. lyrata] gi 297340355 gb EFH70772.1  WRKY10 [Arabidopsis lyrata subsp. lyrata]                                                                                                                                                                                                                                                                                                                                                                                       | 202  | 495  | 3.00E-38  | 245.0 | 50.0 | 65.8 | WRKY10                                                    | gbpln | Arabidopsis lyrata   | AT1G55600.1   Symbols: WRKY10, ATWRKY10, MINI3   WRKY DNA-binding protein 10   chr1:20774049-20776293 REVERSE LENGTH=485                                                                                                                                                           | 202  | 485  | 6.00E-38  | 240.1 | 51.5 | 68.3 |
| Rsa1.0_00287.1.g10503.t1 | ref XP_002894389.1  hypothetical protein ARALYDRAFT_474385 [Arabidopsis lyrata subsp. lyrata] gi 297340231 gb EFH70648.1  hypothetical protein ARALYDRAFT_474385 [Arabidopsis lyrata subsp. lyrata]                                                                                                                                                                                                                                                                                                                       | 168  | 172  | 5.00E-87  | 102.4 | 95.2 | 97.6 | hypothetical protein ARALYDRAFT_474385                    | gbpln | Arabidopsis lyrata   | AT1G52590.1   Symbols:   Putative thiol-disulphide oxidoreductase DCC   chr1:19589224-19590231 REVERSE LENGTH=172                                                                                                                                                                  | 168  | 172  | 3.00E-89  | 102.4 | 94.6 | 97.0 |
| Rsa1.0_00287.1.g10504.t1 | gb EOA37169.1  hypothetical protein CARUB_v10010503mg, partial [Capsella rubella]                                                                                                                                                                                                                                                                                                                                                                                                                                         | 135  | 163  | 8.00E-61  | 120.7 | 94.1 | 97.0 | hypothetical protein CARUB_v10010503mg, partial           | gbpln | Capsella rubella     | AT1G52740.1   Symbols: HTA9   histone H2A protein 9   chr1:19645409-19646221 FORWARD LENGTH=134                                                                                                                                                                                    | 135  | 134  | 4.00E-63  | 99.3  | 94.1 | 97.0 |
| Rsa1.0_00287.1.g10505.t1 | gb ABA94365.1  retrotransposon protein, putative, unclassified [Oryza sativa Japonica Group]                                                                                                                                                                                                                                                                                                                                                                                                                              | 1171 | 1064 | 1.00E-163 | 90.9  | 25.1 | 31.3 | retrotransposon protein, putative, unclassified           | gbpln | Oryza sativa         | AT4G23160.1   Symbols: CRK8   cysteine-rich RLK (RECEPTOR-like protein kinase) 8   chr4:12129485-12134086 FORWARD LENGTH=1262                                                                                                                                                      | 1171 | 1262 | 3.00E-76  | 107.8 | 14.3 | 22.4 |

|                          |                                                                                                                                                                                                                                                                                                                                                                                                |     |      |           |       |      |      |                                                                 |       |                      |                                                                                                                                                                                                                                                             |     |      |           |       |      |      |
|--------------------------|------------------------------------------------------------------------------------------------------------------------------------------------------------------------------------------------------------------------------------------------------------------------------------------------------------------------------------------------------------------------------------------------|-----|------|-----------|-------|------|------|-----------------------------------------------------------------|-------|----------------------|-------------------------------------------------------------------------------------------------------------------------------------------------------------------------------------------------------------------------------------------------------------|-----|------|-----------|-------|------|------|
| Rsa1.0_00287.1.g10506.t1 | refXP_002891715.1  phototropic-responsive NPH3 family protein [Arabidopsis lyrata subsp. lyrata] gi 29733757 gb EFH67974.1  phototropic-responsive NPH3 family protein [Arabidopsis lyrata subsp. lyrata]                                                                                                                                                                                      | 432 | 456  | 1.00E-128 | 105.6 | 59.7 | 70.1 | phototropic-responsive NPH3 family protein                      | gbpln | Arabidopsis lyrata   | AT1G52770.1   Symbols:   Phototropic-responsive NPH3 family protein   chr1:19656009-19657546 FORWARD LENGTH=454                                                                                                                                             | 432 | 454  | 1.00E-130 | 105.1 | 60.0 | 70.8 |
| Rsa1.0_00287.1.g10507.t1 | #                                                                                                                                                                                                                                                                                                                                                                                              | #   | #    | #         | #     | #    | #    | -                                                               | ----  | ----                 | #                                                                                                                                                                                                                                                           | #   | #    | #         | #     | #    | #    |
| Rsa1.0_00287.1.g10508.t1 | dbj BAB11196.1  mutator-like transposase [Arabidopsis thaliana]                                                                                                                                                                                                                                                                                                                                | 399 | 797  | 2.00E-22  | 199.7 | 16.5 | 25.1 | mutator-like transposase                                        | gbpln | Arabidopsis thaliana | #                                                                                                                                                                                                                                                           | #   | #    | #         | #     | #    | #    |
| Rsa1.0_00287.1.g10509.t1 | gb EOA38369.1  hypothetical protein CARUB_v10009902mg [Capsella rubella]                                                                                                                                                                                                                                                                                                                       | 329 | 292  | 1.00E-150 | 88.8  | 80.9 | 82.7 | hypothetical protein CARUB_v10009902mg                          | gbpln | Capsella rubella     | AT1G53000.1   Symbols: KDSB   Nucleotide-diphospho-sugar transferases superfamily protein   chr1:19745330-19747133 REVERSE LENGTH=290                                                                                                                       | 329 | 290  | 1.00E-145 | 88.1  | 80.9 | 83.6 |
| Rsa1.0_00287.1.g10510.t1 | dbj BAC42437.1  putative ubiquitin-conjugating enzyme [Arabidopsis thaliana] gi 29028948 gb AAO64853.1  At1g53020 [Arabidopsis thaliana]                                                                                                                                                                                                                                                       | 441 | 543  | 1.00E-166 | 123.1 | 73.2 | 84.1 | putative ubiquitin-conjugating enzyme                           | gbpln | Arabidopsis thaliana | AT1G53025.1   Symbols:   Ubiquitin-conjugating enzyme family protein   chr1:19757072-19759474 REVERSE LENGTH=543                                                                                                                                            | 441 | 543  | 1.00E-169 | 123.1 | 73.2 | 84.1 |
| Rsa1.0_00287.1.g10511.t1 | gb EOA24465.1  hypothetical protein CARUB_v10017721mg [Capsella rubella]                                                                                                                                                                                                                                                                                                                       | 446 | 302  | 1.00E-113 | 67.7  | 43.5 | 48.9 | hypothetical protein CARUB_v10017721mg                          | gbpln | Capsella rubella     | AT3G55620.1   Symbols: emb1624   Translation initiation factor IF6   chr3:20634581-20636312 FORWARD LENGTH=245                                                                                                                                              | 446 | 245  | 1.00E-113 | 54.9  | 42.8 | 48.9 |
| Rsa1.0_00287.1.g10512.t1 | emb CAN80991.1  hypothetical protein VITISV_021529 [Vitis vinifera]                                                                                                                                                                                                                                                                                                                            | 227 | 1033 | 2.00E-51  | 455.1 | 53.7 | 66.5 | hypothetical protein VITISV_021529                              | gbpln | Vitis vinifera       | AT3G29785.1   Symbols:   unknown protein; Has 90 Blast hits to 90 proteins in 7 species: Archae - 0; Bacteria - 0; Metazoa - 0; Fungi - 0; Plants - 90; Viruses - 0; Other Eukaryotes - 0 (source: NCBI BLINK).   chr3:11612357-11612686 REVERSE LENGTH=109 | 227 | 109  | 2.00E-28  | 48.0  | 26.0 | 31.3 |
| Rsa1.0_00287.1.g10513.t1 | dbj BAJ34063.1  unnamed protein product [Thellungiella halophila]                                                                                                                                                                                                                                                                                                                              | 263 | 267  | 1.00E-127 | 101.5 | 84.4 | 92.0 | unnamed protein product                                         | ----  | ----                 | AT3G01980.4   Symbols:   NAD(P)-binding Rossmann-fold superfamily protein   chr3:327747-328833 REVERSE LENGTH=266                                                                                                                                           | 263 | 266  | 1.00E-124 | 101.1 | 79.1 | 87.8 |
| Rsa1.0_00287.1.g10514.t1 | #                                                                                                                                                                                                                                                                                                                                                                                              | #   | #    | #         | #     | #    | #    | -                                                               | ----  | ----                 | #                                                                                                                                                                                                                                                           | #   | #    | #         | #     | #    | #    |
| Rsa1.0_00287.1.g10515.t1 | gb EOA38074.1  hypothetical protein CARUB_v10009543mg, partial [Capsella rubella]                                                                                                                                                                                                                                                                                                              | 252 | 358  | 6.00E-12  | 142.1 | 13.9 | 15.1 | hypothetical protein CARUB_v10009543mg, partial                 | gbpln | Capsella rubella     | AT1G16560.4   Symbols:   Per1-like family protein   chr1:5669234-5670343 FORWARD LENGTH=287                                                                                                                                                                 | 252 | 287  | 3.00E-14  | 113.9 | 13.9 | 15.1 |
| Rsa1.0_00287.1.g10516.t1 | ref NP_175712.2  uncharacterized protein [Arabidopsis thaliana] gi 42571845 ref NP_974013.1  uncharacterized protein [Arabidopsis thaliana] gi 110738523 dbj BAF01187.1  hypothetical protein [Arabidopsis thaliana] gi 332194761 gb AEE32882.1  uncharacterized protein AT1G53040 [Arabidopsis thaliana] gi 332194762 gb AEE32883.1  uncharacterized protein AT1G53040 [Arabidopsis thaliana] | 536 | 540  | 0         | 100.7 | 89.2 | 95.1 | uncharacterized protein                                         | gbpln | Arabidopsis thaliana | AT1G53040.2   Symbols:   Protein of unknown function (DUF616)   chr1:19764567-19766870 REVERSE LENGTH=540                                                                                                                                                   | 536 | 540  | 0         | 100.7 | 89.2 | 95.1 |
| Rsa1.0_00287.1.g10517.t1 | #                                                                                                                                                                                                                                                                                                                                                                                              | #   | #    | #         | #     | #    | #    | -                                                               | ----  | ----                 | #                                                                                                                                                                                                                                                           | #   | #    | #         | #     | #    | #    |
| Rsa1.0_00287.1.g10518.t1 | ref NP_175713.1  protein kinase-like protein [Arabidopsis thaliana] gi 9454540 gb AAF87863.1 AC022520.7 similar to cdc2 protein kinase [Arabidopsis thaliana] gi 332194763 gb AEE32884.1  protein kinase-like protein [Arabidopsis thaliana]                                                                                                                                                   | 674 | 694  | 0         | 103.0 | 91.5 | 95.4 | protein kinase-like protein                                     | gbpln | Arabidopsis thaliana | AT1G53050.1   Symbols:   Protein kinase superfamily protein   chr1:19772574-19775531 FORWARD LENGTH=694                                                                                                                                                     | 674 | 694  | 0         | 103.0 | 91.5 | 95.4 |
| Rsa1.0_00287.1.g10519.t3 | ref XP_002894424.1  hypothetical protein ARALYDRAFT_474430 [Arabidopsis lyrata subsp. lyrata] gi 297340266 gb EFH70683.1  hypothetical protein ARALYDRAFT_474430 [Arabidopsis lyrata subsp. lyrata]                                                                                                                                                                                            | 424 | 406  | 1.00E-180 | 95.8  | 74.3 | 80.4 | hypothetical protein ARALYDRAFT_474430                          | gbpln | Arabidopsis lyrata   | AT1G53100.1   Symbols:   Core-2/1-branching beta-1,6-N-acetylglucosaminyltransferase family protein   chr1:19786990-19788504 REVERSE LENGTH=423                                                                                                             | 424 | 423  | 0         | 99.8  | 74.5 | 81.4 |
| Rsa1.0_00287.1.g10520.t1 | gb AAC28221.1  similar to reverse transcriptases (PFam: rvt.hmm, score: 60.13) [Arabidopsis thaliana]                                                                                                                                                                                                                                                                                          | 579 | 1164 | 1.00E-109 | 201.0 | 35.9 | 51.3 | similar to reverse transcriptases (PFam: rvt.hmm, score: 60.13) | gbpln | Arabidopsis thaliana | AT3G24255.1   Symbols:   RNA-directed DNA polymerase (reverse transcriptase)-related family protein   chr3:8789471-8793208 FORWARD LENGTH=746                                                                                                               | 579 | 746  | 2.00E-48  | 128.8 | 21.9 | 34.0 |
| Rsa1.0_00287.1.g10521.t1 | dbj BAA97086.1  unnamed protein product [Arabidopsis thaliana]                                                                                                                                                                                                                                                                                                                                 | 81  | 341  | 8.00E-12  | 421.0 | 44.4 | 50.6 | unnamed protein product                                         | gbpln | Arabidopsis thaliana | #                                                                                                                                                                                                                                                           | #   | #    | #         | #     | #    | #    |
| Rsa1.0_00288.1.g10522.t1 | gb EOA14818.1  hypothetical protein CARUB_v10028127mg [Capsella rubella]                                                                                                                                                                                                                                                                                                                       | 662 | 1261 | 0         | 190.5 | 67.1 | 78.2 | hypothetical protein CARUB_v10028127mg                          | gbpln | Capsella rubella     | AT3G42670.1   Symbols: CHR38, CLSY   chromatin remodeling, 38   chr3:14755906-14760085 REVERSE LENGTH=1256                                                                                                                                                  | 662 | 1256 | 0         | 189.7 | 67.2 | 79.0 |

|                          |                                                                                                                                                                                                                                                                                                                                                                                                                                                                                                                                      |      |      |           |       |      |      |                                                          |       |                      |                                                                                                                                                                                                                                                                                                                                           |      |      |           |       |      |      |
|--------------------------|--------------------------------------------------------------------------------------------------------------------------------------------------------------------------------------------------------------------------------------------------------------------------------------------------------------------------------------------------------------------------------------------------------------------------------------------------------------------------------------------------------------------------------------|------|------|-----------|-------|------|------|----------------------------------------------------------|-------|----------------------|-------------------------------------------------------------------------------------------------------------------------------------------------------------------------------------------------------------------------------------------------------------------------------------------------------------------------------------------|------|------|-----------|-------|------|------|
| Rsa1.0_00288.1.g10523.t1 | refNP_567526.4  uncharacterized protein [Arabidopsis thaliana] gi 16323155 gb AAL15312.1  AT4g17250/dl4660w [Arabidopsis thaliana] gi 2350602 gb AAN28870.1  AT4g17250/dl4660w [Arabidopsis thaliana] gi 332658469 gb AEE83869.1  uncharacterized protein AT4G17250 [Arabidopsis thaliana]                                                                                                                                                                                                                                           | 730  | 741  | 0         | 101.5 | 80.5 | 88.9 | uncharacterized protein                                  | gbpln | Arabidopsis thaliana | AT4G17250.1   Symbols:   unknown protein; BEST Arabidopsis thaliana protein match is: unknown protein (TAIR:AT5G47580.1); Has 31 Blast hits to 31 proteins in 6 species: Archae - 0; Bacteria - 0; Metazoa - 0; Fungi - 0; Plants - 31; Viruses - 0; Other Eukaryotes - 0 (source: NCBI BLink).   chr4:9671104-9673329 FORWARD LENGTH=741 | 730  | 741  | 0         | 101.5 | 80.5 | 88.9 |
| Rsa1.0_00288.1.g10524.t1 | gb EOA14157.1  hypothetical protein CARUB.v10027303mg [Capsella rubella]                                                                                                                                                                                                                                                                                                                                                                                                                                                             | 160  | 152  | 3.00E-25  | 95.0  | 37.5 | 60.0 | hypothetical protein CARUB.v10027303mg                   | gbpln | Capsella rubella     | AT5G33393.1   Symbols:   unknown protein; LOCATED IN: chloroplast; Has 30201 Blast hits to 17322 proteins in 780 species: Archae - 12; Bacteria - 1396; Metazoa - 17338; Fungi - 3422; Plants - 5037; Viruses - 0; Other Eukaryotes - 2996 (source: NCBI BLink).   chr5:12656430-12658588 REVERSE LENGTH=435                              | 160  | 435  | 1.00E-14  | 271.9 | 26.9 | 39.4 |
| Rsa1.0_00288.1.g10525.t1 | gb AAC26234.1  contains similarity to maize transposon MuDR (GB:M76978) [Arabidopsis thaliana]                                                                                                                                                                                                                                                                                                                                                                                                                                       | 946  | 940  | 0         | 99.4  | 55.2 | 68.3 | contains similarity to maize transposon MuDR (GB:M76978) | gbpln | Arabidopsis thaliana | #                                                                                                                                                                                                                                                                                                                                         | #    | #    | #         | #     | #    |      |
| Rsa1.0_00288.1.g10526.t2 | ref XP_002870111.1  hypothetical protein ARALYDRAFT_914989 [Arabidopsis lyrata subsp. lyrata] gi 297315947 gb EFH46370.1  hypothetical protein ARALYDRAFT_914989 [Arabidopsis lyrata subsp. lyrata]                                                                                                                                                                                                                                                                                                                                  | 562  | 567  | 0         | 100.9 | 91.6 | 96.1 | hypothetical protein ARALYDRAFT_914989                   | gbpln | Arabidopsis lyrata   | AT4G17300.1   Symbols: NS1, OVA8, ATNS1   Class II aminoacyl-tRNA and biotin synthetases superfamily protein   chr4:9681558-9684833 FORWARD LENGTH=567                                                                                                                                                                                    | 562  | 567  | 0         | 100.9 | 91.1 | 95.4 |
| Rsa1.0_00288.1.g10527.t1 | ref XP_002870115.1  zinc finger family protein [Arabidopsis lyrata subsp. lyrata] gi 297315951 gb EFH46374.1  zinc finger family protein [Arabidopsis lyrata subsp. lyrata]                                                                                                                                                                                                                                                                                                                                                          | 152  | 166  | 7.00E-58  | 109.2 | 73.7 | 83.6 | zinc finger family protein                               | gbpln | Arabidopsis lyrata   | AT4G17245.1   Symbols:   RING/U-box superfamily protein   chr4:9669383-9669883 FORWARD LENGTH=166                                                                                                                                                                                                                                         | 152  | 166  | 9.00E-59  | 109.2 | 72.4 | 82.9 |
| Rsa1.0_00288.1.g10528.t1 | ref NP_568685.1  RNA recognition motif-containing protein [Arabidopsis thaliana] gi 30695248 ref NP_851149.1  RNA recognition motif-containing protein [Arabidopsis thaliana] gi 17528972 gb AAL38696.1  putative RNA-binding protein [Arabidopsis thaliana] gi 23297042 gb AANI13229.1  putative RNA-binding protein [Arabidopsis thaliana] gi 332008155 gb AED95538.1  RNA recognition motif-containing protein [Arabidopsis thaliana] gi 332008156 gb AED95539.1  RNA recognition motif-containing protein [Arabidopsis thaliana] | 390  | 431  | 1.00E-122 | 110.5 | 64.4 | 75.6 | RNA recognition motif-containing protein                 | gbpln | Arabidopsis thaliana | AT5G47620.2   Symbols:   RNA-binding (RRM/RBD/RNP motifs) family protein   chr5:19302548-19304278 REVERSE LENGTH=431                                                                                                                                                                                                                      | 390  | 431  | 1.00E-124 | 110.5 | 64.4 | 75.6 |
| Rsa1.0_00288.1.g10529.t2 | gb AAD19784.1  putative retroelement pol polyprotein [Arabidopsis thaliana]                                                                                                                                                                                                                                                                                                                                                                                                                                                          | 1331 | 1501 | 0         | 112.8 | 55.4 | 70.7 | putative retroelement pol polyprotein                    | gbpln | Arabidopsis thaliana | AT4G23160.1   Symbols: CRK8   cysteine-rich RLK (RECEPTOR-like protein kinase) 8   chr4:12129485-12134086 FORWARD LENGTH=1262                                                                                                                                                                                                             | 1331 | 1262 | 1.00E-100 | 94.8  | 15.0 | 21.0 |
| Rsa1.0_00288.1.g10530.t1 | #                                                                                                                                                                                                                                                                                                                                                                                                                                                                                                                                    | #    | #    | #         | #     | #    | -    | -                                                        | ----  | ----                 | #                                                                                                                                                                                                                                                                                                                                         | #    | #    | #         | #     | #    |      |
| Rsa1.0_00288.1.g10531.t1 | dbj BAJ33904.1  unnamed protein product [Thellungiella halophila]                                                                                                                                                                                                                                                                                                                                                                                                                                                                    | 526  | 532  | 0         | 101.1 | 89.7 | 94.7 | unnamed protein product                                  | ----  | ----                 | AT4G17230.1   Symbols: SCL13   SCARECROW-like 13   chr4:9661218-9662807 REVERSE LENGTH=529                                                                                                                                                                                                                                                | 526  | 529  | 0         | 100.6 | 85.7 | 91.1 |
| Rsa1.0_00288.1.g10532.t1 | gb ABD65130.1  hypothetical protein 40.t00005 [Brassica oleracea]                                                                                                                                                                                                                                                                                                                                                                                                                                                                    | 510  | 530  | 0         | 103.9 | 80.0 | 86.9 | hypothetical protein 40.t00005                           | gbpln | Brassica oleracea    | AT4G17210.1   Symbols:   Plant protein of unknown function (DUF827)   chr4:9652585-9654257 REVERSE LENGTH=527                                                                                                                                                                                                                             | 510  | 527  | 0         | 103.3 | 75.5 | 86.3 |

|                          |                                                                                                                                                                                                                                                                                                                                                                                                                                                                                                                                                                                                                                                                                                                                                                                                                                                                                                                                                                                                                                |      |      |           |       |      |      |                                                    |       |                      |                                                                                                                                                         |      |      |           |       |      |      |
|--------------------------|--------------------------------------------------------------------------------------------------------------------------------------------------------------------------------------------------------------------------------------------------------------------------------------------------------------------------------------------------------------------------------------------------------------------------------------------------------------------------------------------------------------------------------------------------------------------------------------------------------------------------------------------------------------------------------------------------------------------------------------------------------------------------------------------------------------------------------------------------------------------------------------------------------------------------------------------------------------------------------------------------------------------------------|------|------|-----------|-------|------|------|----------------------------------------------------|-------|----------------------|---------------------------------------------------------------------------------------------------------------------------------------------------------|------|------|-----------|-------|------|------|
| Rsa1.0_00288.1.g10533.t2 | ref NP_193450.1  RAB GTPase homolog B1C [Arabidopsis thaliana]<br>gi 297800394 ref XP_002868081.1  hypothetical protein<br>ARALYDRAFT_493160 [Arabidopsis lyrata subsp. lyrata]<br>gi 75279776 sp P92963.1 RAB1C, ARAT H RecName: Full=Ras-related protein RAB1c; Short=AtRAB1c; AltName: Full=Ras-related protein Rab2A; Short=AtRab2A<br>gi 1765896 emb CAA70498.1  Rab2-like protein [Arabidopsis thaliana]<br>gi 5281023 emb CAB45962.1  GTP-binding RAB2A like protein [Arabidopsis thaliana]<br>gi 7268468 emb CAB80988.1  GTP-binding RAB2A like protein [Arabidopsis thaliana]<br>gi 27311815 gb AAO00873.1  GTP-binding RAB2A like protein [Arabidopsis thaliana]<br>gi 30023652 gb AAP13359.1  At4g17170 [Arabidopsis thaliana]<br>gi 297313917 gb EFH44340.1  hypothetical protein<br>ARALYDRAFT_493160 [Arabidopsis lyrata subsp. lyrata]<br>gi 332658457 gb AEE83857.1  RAB GTPase homolog B1C [Arabidopsis thaliana]<br>gi 482553233 gb EOA17426.1  hypothetical protein<br>CARUB_v10005730mg [Capsella rubella] | 230  | 211  | 1.00E-113 | 91.7  | 88.3 | 90.4 | RAB GTPase homolog B1C                             | gbpln | Arabidopsis lyrata   | AT4G17170.1   Symbols: AT-RAB2, ATRABB1C, ATRAB2A, RAB2A, RABB1C, ATRAB-B1B, RAB-B1B   RAB GTPase homolog B1C   chr4:9644908-9646220 REVERSE LENGTH=211 | 230  | 211  | 1.00E-115 | 91.7  | 88.3 | 90.4 |
| Rsa1.0_00288.1.g10534.t1 | ref XP_002870121.1  hypothetical protein ARALYDRAFT_915007 [Arabidopsis lyrata subsp. lyrata]<br>gi 297315957 gb EFH46380.1  hypothetical protein<br>ARALYDRAFT_915007 [Arabidopsis lyrata subsp. lyrata]                                                                                                                                                                                                                                                                                                                                                                                                                                                                                                                                                                                                                                                                                                                                                                                                                      | 513  | 501  | 0         | 97.7  | 77.4 | 84.2 | hypothetical protein ARALYDRAFT_915007             | gbpln | Arabidopsis lyrata   | AT4G17150.1   Symbols:   alpha/beta-Hydrolases superfamily protein   chr4:9638591-9641648 FORWARD LENGTH=502                                            | 513  | 502  | 0         | 97.9  | 78.0 | 84.2 |
| Rsa1.0_00288.1.g10535.t6 | ref NP_001190747.1  pleckstrin homology (PH) domain-containing protein [Arabidopsis thaliana]<br>gi 332658453 gb AEE83853.1  pleckstrin homology (PH) domain-containing protein [Arabidopsis thaliana]                                                                                                                                                                                                                                                                                                                                                                                                                                                                                                                                                                                                                                                                                                                                                                                                                         | 4236 | 4219 | 0         | 99.6  | 88.3 | 93.5 | pleckstrin homology (PH) domain-containing protein | gbpln | Arabidopsis thaliana | AT4G17140.3   Symbols:   pleckstrin homology (PH) domain-containing protein   chr4:9613617-9636618 REVERSE LENGTH=4219                                  | 4236 | 4219 | 0         | 99.6  | 88.3 | 93.5 |
| Rsa1.0_00288.1.g10536.t1 | ref XP_002870122.1  hypothetical protein ARALYDRAFT_329817 [Arabidopsis lyrata subsp. lyrata]<br>gi 297315958 gb EFH46381.1  hypothetical protein<br>ARALYDRAFT_329817 [Arabidopsis lyrata subsp. lyrata]                                                                                                                                                                                                                                                                                                                                                                                                                                                                                                                                                                                                                                                                                                                                                                                                                      | 59   | 57   | 1.00E-20  | 96.6  | 88.1 | 93.2 | hypothetical protein ARALYDRAFT_329817             | gbpln | Arabidopsis lyrata   | AT4G17085.1   Symbols:   Putative membrane lipoprotein   chr4:9604527-9604804 FORWARD LENGTH=57                                                         | 59   | 57   | 1.00E-22  | 96.6  | 88.1 | 91.5 |
| Rsa1.0_00288.1.g10537.t1 | gb EOA16451.1  hypothetical protein<br>CARUB_v10004606mg [Capsella rubella]                                                                                                                                                                                                                                                                                                                                                                                                                                                                                                                                                                                                                                                                                                                                                                                                                                                                                                                                                    | 440  | 513  | 0         | 116.6 | 86.8 | 92.5 | hypothetical protein<br>CARUB_v10004606mg          | gbpln | Capsella rubella     | AT4G17080.1   Symbols:   Histone H3 K4-specific methyltransferase SET7/9 family protein   chr4:9601570-9603815 FORWARD LENGTH=513                       | 440  | 513  | 0         | 116.6 | 86.4 | 92.3 |
| Rsa1.0_00288.1.g10538.t1 | ref XP_002868086.1  predicted protein [Arabidopsis lyrata subsp. lyrata]<br>gi 297313922 gb EFH44345.1  predicted protein [Arabidopsis lyrata subsp. lyrata]                                                                                                                                                                                                                                                                                                                                                                                                                                                                                                                                                                                                                                                                                                                                                                                                                                                                   | 337  | 342  | 1.00E-175 | 101.5 | 88.1 | 94.4 | predicted protein                                  | gbpln | Arabidopsis lyrata   | AT4G17070.1   Symbols:   peptidyl-prolyl cis-trans isomerases   chr4:9595523-9598066 REVERSE LENGTH=343                                                 | 337  | 343  | 1.00E-175 | 101.8 | 88.1 | 93.8 |
| Rsa1.0_00288.1.g10539.t1 | #                                                                                                                                                                                                                                                                                                                                                                                                                                                                                                                                                                                                                                                                                                                                                                                                                                                                                                                                                                                                                              | #    | #    | #         | #     | #    | -    | ----                                               | ----  | #                    | #                                                                                                                                                       | #    | #    | #         | #     | #    |      |
| Rsa1.0_00288.1.g10540.t1 | #                                                                                                                                                                                                                                                                                                                                                                                                                                                                                                                                                                                                                                                                                                                                                                                                                                                                                                                                                                                                                              | #    | #    | #         | #     | #    | -    | ----                                               | ----  | #                    | #                                                                                                                                                       | #    | #    | #         | #     | #    |      |

|                          |                                                                                                                                                                                                                                                                                                                                                                                                                                                                                                                                                                                                                                                                                                                                                                                                                                               |     |      |           |       |      |      |                                                                                                                                                              |       |                      |                                                                                                                             |     |     |          |       |      |      |
|--------------------------|-----------------------------------------------------------------------------------------------------------------------------------------------------------------------------------------------------------------------------------------------------------------------------------------------------------------------------------------------------------------------------------------------------------------------------------------------------------------------------------------------------------------------------------------------------------------------------------------------------------------------------------------------------------------------------------------------------------------------------------------------------------------------------------------------------------------------------------------------|-----|------|-----------|-------|------|------|--------------------------------------------------------------------------------------------------------------------------------------------------------------|-------|----------------------|-----------------------------------------------------------------------------------------------------------------------------|-----|-----|----------|-------|------|------|
| Rsa1.0_00288.1.g10541.t1 | ref NP_564041.2  homeobox-leucine zipper protein HDG12 [Arabidopsis thaliana]<br>gi 75264044 sp Q9LMT8.1 HDG12_ARAT<br>H RecName: Full=Homeobox-leucine zipper protein HDG12; AltName: Full=HD-ZIP protein HDG12; AltName: Full=Homeodomain GLABRA 2-like protein 12; AltName: Full=Homeodomain transcription factor HDG12; AltName: Full=Protein HOMEODOMAIN GLABROUS 12<br>gi 9665069 gb AAF97271.1 AC034106_14<br>Strong similarity to meristem L1 layer homeobox protein (ATML1) from Arabidopsis thaliana gb U37589 and contains Transposase PF 01527, Homeobox PF 00046, and START PF 01852 domains. EST gb A995645 comes from this gene [Arabidopsis thaliana]<br>gi 225897942 dbj BAH30303.1  hypothetical protein [Arabidopsis thaliana]<br>gi 332191531 gb AEE29652.1  homeobox-leucine zipper protein HDG12 [Arabidopsis thaliana] | 139 | 687  | 2.00E-40  | 494.2 | 63.3 | 71.9 | homeobox-leucine zipper protein HDG12                                                                                                                        | gbpln | Arabidopsis thaliana | AT1G17920.1   Symbols: HDG12   homeodomain GLABROUS 12   chr1:6162214-6165033 REVERSE LENGTH=687                            | 139 | 687 | 4.00E-43 | 494.2 | 63.3 | 71.9 |
| Rsa1.0_00288.1.g10542.t1 | db BAC42864.1  unknown protein [Arabidopsis thaliana]                                                                                                                                                                                                                                                                                                                                                                                                                                                                                                                                                                                                                                                                                                                                                                                         | 387 | 434  | 1.00E-130 | 112.1 | 79.3 | 87.1 | unknown protein                                                                                                                                              | gbpln | Arabidopsis thaliana | AT4G17060.1   Symbols: FIP2   FRIGIDA interacting protein 2   chr4:9593721-9594653 REVERSE LENGTH=310                       | 387 | 310 | 7.00E-85 | 80.1  | 53.5 | 58.9 |
| Rsa1.0_00289.1.g10543.t2 | gb EMJ11389.1  hypothetical protein PRUPE_ppa017790mg [Prunus persica]                                                                                                                                                                                                                                                                                                                                                                                                                                                                                                                                                                                                                                                                                                                                                                        | 260 | 1485 | 2.00E-44  | 571.2 | 33.1 | 40.0 | hypothetical protein PRUPE_ppa017790mg                                                                                                                       | gbpln | Prunus persica       | ATMG00860.1   Symbols: ORF158   DNA/RNA polymerases superfamily protein   chrM:235916-236392 FORWARD LENGTH=158             | 260 | 158 | 5.00E-15 | 60.8  | 13.5 | 19.6 |
| Rsa1.0_00289.1.g10544.t1 | ref NP_849388.1  tubulin alpha-6 chain [Arabidopsis thaliana]<br>gi 222422983 dbj BAH19475.1  AT4G14960 [Arabidopsis thaliana]<br>gi 332658129 gb AEE83529.1  tubulin alpha-6 chain [Arabidopsis thaliana]                                                                                                                                                                                                                                                                                                                                                                                                                                                                                                                                                                                                                                    | 390 | 427  | 0         | 109.5 | 98.7 | 99.0 | tubulin alpha-6 chain                                                                                                                                        | gbpln | Arabidopsis thaliana | AT4G14960.1   Symbols: TUA6   Tubulin/Fts2 family protein   chr4:8548753-8550319 REVERSE LENGTH=427                         | 390 | 427 | 0        | 109.5 | 98.7 | 99.0 |
| Rsa1.0_00289.1.g10545.t1 | gb EOA37944.1  hypothetical protein CARUB_v10009411mg [Capsella rubella]                                                                                                                                                                                                                                                                                                                                                                                                                                                                                                                                                                                                                                                                                                                                                                      | 389 | 387  | 0         | 99.5  | 94.6 | 97.9 | hypothetical protein CARUB_v10009411mg                                                                                                                       | gbpln | Capsella rubella     | AT1G49970.1   Symbols: CLPR1, NCLPP5, SVR2   CLP protease proteolytic subunit 1   chr1:18501936-18504462 REVERSE LENGTH=387 | 389 | 387 | 0        | 99.5  | 93.6 | 97.4 |
| Rsa1.0_00289.1.g10546.t1 | gb AAF76447.1 AC015445_14 Identical to permease homolog (At PER-X) partial cds gb U83501 and contains a Xanthine/Uracil Permease PF 00860 domain. EST gb AA712474 comes from this gene [Arabidopsis thaliana]                                                                                                                                                                                                                                                                                                                                                                                                                                                                                                                                                                                                                                 | 522 | 529  | 0         | 101.3 | 94.1 | 97.3 | Identical to permease homolog (At PER-X) partial cds gb U83501 and contains a Xanthine/Uracil Permease PF 00860 domain. EST gb AA712474 comes from this gene | gbpln | Arabidopsis thaliana | AT1G49960.1   Symbols:   Xanthine/uracil permease family protein   chr1:18498700-18501699 FORWARD LENGTH=526                | 522 | 526 | 0        | 100.8 | 94.6 | 97.9 |
| Rsa1.0_00289.1.g10547.t1 | gb EOA36147.1  hypothetical protein CARUB_v10009836mg [Capsella rubella]                                                                                                                                                                                                                                                                                                                                                                                                                                                                                                                                                                                                                                                                                                                                                                      | 292 | 307  | 2.00E-79  | 105.1 | 68.8 | 82.9 | hypothetical protein CARUB_v10009836mg                                                                                                                       | gbpln | Capsella rubella     | AT1G49950.1   Symbols: TRB1, ATTRB1   telomere repeat binding factor 1   chr1:18494439-18496713 REVERSE LENGTH=300          | 292 | 300 | 5.00E-75 | 102.7 | 64.0 | 78.8 |
| Rsa1.0_00289.1.g10548.t1 | gb EOA38178.1  hypothetical protein CARUB_v10009656mg [Capsella rubella]                                                                                                                                                                                                                                                                                                                                                                                                                                                                                                                                                                                                                                                                                                                                                                      | 339 | 339  | 0         | 100.0 | 93.8 | 97.9 | hypothetical protein CARUB_v10009656mg                                                                                                                       | gbpln | Capsella rubella     | AT1G49910.1   Symbols: BUB3.2   Transducin/WD40 repeat-like superfamily protein   chr1:18479025-18481271 FORWARD LENGTH=339 | 339 | 339 | 0        | 100.0 | 93.5 | 97.1 |
| Rsa1.0_00289.1.g10549.t2 | ref XP_002891526.1  hypothetical protein ARALYDRAFT_337115 [Arabidopsis lyrata subsp. lyrata]<br>gi 297337368 gb EFH67785.1  hypothetical protein ARALYDRAFT_337115 [Arabidopsis lyrata subsp. lyrata]<br>ref NP_175473.1  UDP-glycosyltransferase-like protein [Arabidopsis thaliana]<br>gi 75178225 sp Q9LPS8.1 U79B5_ARAT<br>H RecName: Full=UDP-glycosyltransferase 79B5<br>gi 9454554 gb AAF87877.1 AC012561_10<br>Putative glucosyl transferase [Arabidopsis thaliana]<br>gi 12322328 gb AAG51184.1 AC079279_5<br>UDP-rhamnose: anthocyanidin-3-glucoside rhamnosyltransferase, putative [Arabidopsis thaliana]<br>gi 332194445 gb AEE32566.1  UDP-glycosyltransferase 79B5 [Arabidopsis thaliana]                                                                                                                                      | 398 | 824  | 8.00E-65  | 207.0 | 34.4 | 47.2 | hypothetical protein ARALYDRAFT_337115                                                                                                                       | gbpln | Arabidopsis lyrata   | AT2G07190.1   Symbols:   Domain of unknown function (DUF195)   chr2:2987367-2988945 FORWARD LENGTH=452                      | 398 | 452 | 1.00E-42 | 113.6 | 22.6 | 32.7 |
| Rsa1.0_00289.1.g10550.t1 | Putative glucosyl transferase [Arabidopsis thaliana]<br>gi 12322328 gb AAG51184.1 AC079279_5<br>UDP-rhamnose: anthocyanidin-3-glucoside rhamnosyltransferase, putative [Arabidopsis thaliana]<br>gi 332194445 gb AEE32566.1  UDP-glycosyltransferase 79B5 [Arabidopsis thaliana]                                                                                                                                                                                                                                                                                                                                                                                                                                                                                                                                                              | 442 | 448  | 0         | 101.4 | 78.7 | 86.4 | UDP-glycosyltransferase-like protein                                                                                                                         | gbpln | Arabidopsis thaliana | AT1G50580.1   Symbols:   UDP-Glycosyltransferase superfamily protein   chr1:18730831-18732177 FORWARD LENGTH=448            | 442 | 448 | 0        | 101.4 | 78.7 | 86.4 |

|                          |                                                                                                                                                                                                                                                                                                                                                                                                                                                                                                                                                                                                                                                                                                                                                                       |      |      |           |       |      |      |                                             |       |                      |                                                                                                                                                                                                                                                                                                                                                                                                                                                                               |      |     |          |       |      |      |
|--------------------------|-----------------------------------------------------------------------------------------------------------------------------------------------------------------------------------------------------------------------------------------------------------------------------------------------------------------------------------------------------------------------------------------------------------------------------------------------------------------------------------------------------------------------------------------------------------------------------------------------------------------------------------------------------------------------------------------------------------------------------------------------------------------------|------|------|-----------|-------|------|------|---------------------------------------------|-------|----------------------|-------------------------------------------------------------------------------------------------------------------------------------------------------------------------------------------------------------------------------------------------------------------------------------------------------------------------------------------------------------------------------------------------------------------------------------------------------------------------------|------|-----|----------|-------|------|------|
| Rsa1.0_00289.1.g10551.t1 | gb AAG60167.1 AC074110.5<br>hypothetical protein [Arabidopsis thaliana]                                                                                                                                                                                                                                                                                                                                                                                                                                                                                                                                                                                                                                                                                               | 559  | 722  | 0         | 129.2 | 76.7 | 82.5 | hypothetical protein                        | gbpln | Arabidopsis thaliana | AT1G49890.1   Symbols: QWRF2   Family of unknown function (DUF566)   chr1:18470282-18473463 FORWARD LENGTH=659                                                                                                                                                                                                                                                                                                                                                                | 559  | 659 | 0        | 117.9 | 76.7 | 82.6 |
| Rsa1.0_00289.1.g10552.t2 | gb AAM63908.1  unknown [Arabidopsis thaliana]                                                                                                                                                                                                                                                                                                                                                                                                                                                                                                                                                                                                                                                                                                                         | 224  | 190  | 1.00E-90  | 84.8  | 75.9 | 78.6 | unknown                                     | gbpln | Arabidopsis thaliana | AT1G49880.1   Symbols: Erv1   Erv1/Alr family protein   chr1:18464081-18465914 FORWARD LENGTH=191                                                                                                                                                                                                                                                                                                                                                                             | 224  | 191 | 4.00E-91 | 85.3  | 75.9 | 78.6 |
| Rsa1.0_00289.1.g10553.t1 | gb AAG50806.1 AC079281.8 unknown protein [Arabidopsis thaliana]                                                                                                                                                                                                                                                                                                                                                                                                                                                                                                                                                                                                                                                                                                       | 1616 | 1213 | 0         | 75.1  | 23.8 | 35.1 | unknown protein                             | gbpln | Arabidopsis thaliana | AT1G43760.1   Symbols:   DNase I-like superfamily protein   chr1:16528880-16531065 REVERSE LENGTH=626                                                                                                                                                                                                                                                                                                                                                                         | 1616 | 626 | 1.00E-65 | 38.7  | 11.0 | 17.9 |
| Rsa1.0_00289.1.g10554.t1 | ref NP_175409.1  uncharacterized protein [Arabidopsis thaliana]<br>gi 12323598 gb AAG51774.1 AC079674.7 hypothetical protein; 28681-31893 [Arabidopsis thaliana]<br>gi 332194364 gb AEE32485.1  uncharacterized protein AT1G49870 [Arabidopsis thaliana]                                                                                                                                                                                                                                                                                                                                                                                                                                                                                                              | 835  | 828  | 0         | 99.2  | 82.8 | 89.0 | uncharacterized protein                     | gbpln | Arabidopsis thaliana | AT1G49870.1   Symbols:   unknown protein; LOCATED IN: chloroplast; EXPRESSED IN: 10 plant structures; EXPRESSED DURING: F mature embryo stage, petal differentiation and expansion stage, E expanded cotyledon stage, D bilateral stage; Has 6518 Blast hits to 5022 proteins in 522 species: Archae - 49; Bacteria - 635; Metazoa - 3264; Fungi - 379; Plants - 242; Viruses - 9; Other Eukaryotes - 1940 (source: NCBI BLLink).   chr1:18460345-18463557 FORWARD LENGTH=828 | 835  | 828 | 0        | 99.2  | 82.8 | 89.0 |
| Rsa1.0_00290.1.g10555.t1 | ref XP_002870829.1  hypothetical protein ARALYDRAFT_494099 [Arabidopsis lyrata subsp. lyrata]<br>gi 297316665 gb EFH47088.1  hypothetical protein ARALYDRAFT_494099 [Arabidopsis lyrata subsp. lyrata]                                                                                                                                                                                                                                                                                                                                                                                                                                                                                                                                                                | 476  | 476  | 0         | 100.0 | 88.9 | 95.2 | hypothetical protein ARALYDRAFT_494099      | gbpln | Arabidopsis lyrata   | AT5G38710.1   Symbols:   Methylene tetrahydrofolate reductase family protein   chr5:15501340-15503899 FORWARD LENGTH=476                                                                                                                                                                                                                                                                                                                                                      | 476  | 476 | 0        | 100.0 | 89.1 | 96.0 |
| Rsa1.0_00290.1.g10556.t1 | #                                                                                                                                                                                                                                                                                                                                                                                                                                                                                                                                                                                                                                                                                                                                                                     | #    | #    | #         | #     | #    | #    | -                                           | ----  | ----                 | #                                                                                                                                                                                                                                                                                                                                                                                                                                                                             | #    | #   | #        | #     | #    | #    |
| Rsa1.0_00290.1.g10557.t1 | ref NP_198688.2  uncharacterized protein [Arabidopsis thaliana]<br>gi 26450395 dbj BAC42312.1  unknown protein [Arabidopsis thaliana]<br>gi 29824303 gb AAP04112.1  unknown protein [Arabidopsis thaliana]<br>gi 332006970 gb AED94353.1  uncharacterized protein AT5G38720 [Arabidopsis thaliana]                                                                                                                                                                                                                                                                                                                                                                                                                                                                    | 324  | 306  | 1.00E-78  | 94.4  | 58.6 | 70.7 | uncharacterized protein                     | gbpln | Arabidopsis thaliana | AT5G38720.1   Symbols:   unknown protein; Has 13419 Blast hits to 9093 proteins in 698 species: Archae - 38; Bacteria - 1038; Metazoa - 4949; Fungi - 1086; Plants - 485; Viruses - 44; Other Eukaryotes - 5779 (source: NCBI BLLink).   chr5:15508417-15510472 REVERSE LENGTH=306                                                                                                                                                                                            | 324  | 306 | 3.00E-81 | 94.4  | 58.6 | 70.7 |
| Rsa1.0_00290.1.g10558.t1 | gb ABD64939.1  hypothetical protein 24.t00017 [Brassica oleracea]                                                                                                                                                                                                                                                                                                                                                                                                                                                                                                                                                                                                                                                                                                     | 421  | 442  | 1.00E-168 | 105.0 | 67.9 | 78.4 | hypothetical protein 24.t00017              | gbpln | Brassica oleracea    | AT2G13770.1   Symbols:   CONTAINS InterPro DOMAIN/s: Putative harbinger transposase-derived nuclease (InterPro:IPR006912); Has 451 Blast hits to 352 proteins in 33 species: Archae - 0; Bacteria - 0; Metazoa - 28; Fungi - 8; Plants - 388; Viruses - 0; Other Eukaryotes - 27 (source: NCBI BLLink).   chr2:5736603-5737847 FORWARD LENGTH=343                                                                                                                             | 421  | 343 | 6.00E-34 | 81.5  | 14.7 | 18.5 |
| Rsa1.0_00290.1.g10559.t1 | gb ABD65099.1  hypothetical protein 31.t00074 [Brassica oleracea]                                                                                                                                                                                                                                                                                                                                                                                                                                                                                                                                                                                                                                                                                                     | 247  | 258  | 3.00E-54  | 104.5 | 52.6 | 66.8 | hypothetical protein 31.t00074              | gbpln | Brassica oleracea    | AT3G47680.1   Symbols:   DNA binding   chr3:17577483-17578391 REVERSE LENGTH=302                                                                                                                                                                                                                                                                                                                                                                                              | 247  | 302 | 1.00E-45 | 122.3 | 49.8 | 67.6 |
| Rsa1.0_00290.1.g10560.t1 | #                                                                                                                                                                                                                                                                                                                                                                                                                                                                                                                                                                                                                                                                                                                                                                     | #    | #    | #         | #     | #    | #    | -                                           | ----  | ----                 | #                                                                                                                                                                                                                                                                                                                                                                                                                                                                             | #    | #   | #        | #     | #    | #    |
| Rsa1.0_00290.1.g10561.t1 | ref NP_198689.1  pentatricopeptide repeat-containing protein [Arabidopsis thaliana]<br>gi 75171307 sp Q9FKR3.1 PP404_ARATH RecName: Full=Pentatricopeptide repeat-containing protein At5g38730<br>gi 10176899 dbj BAB10131.1  unnamed protein product [Arabidopsis thaliana]<br>gi 332006971 gb AED94354.1  pentatricopeptide repeat-containing protein [Arabidopsis thaliana]<br>ref NP_198716.1  putative receptor-like protein kinase [Arabidopsis thaliana]<br>gi 75333906 sp Q9FID8.1 Y5900_ARATH RecName: Full=Putative receptor-like protein kinase At5g39000; Flags: Precursor<br>gi 10177545 dbj BAB10824.1  receptor-like protein kinase [Arabidopsis thaliana]<br>gi 332007002 gb AED94385.1  putative receptor-like protein kinase [Arabidopsis thaliana] | 695  | 596  | 0         | 85.8  | 73.4 | 80.3 | pentatricopeptide repeat-containing protein | gbpln | Arabidopsis thaliana | AT5G38730.1   Symbols:   Tetratricopeptide repeat (TPR)-like superfamily protein   chr5:15510901-15512691 FORWARD LENGTH=596                                                                                                                                                                                                                                                                                                                                                  | 695  | 596 | 0        | 85.8  | 73.4 | 80.3 |
| Rsa1.0_00290.1.g10562.t1 | ref NP_198716.1  putative receptor-like protein kinase [Arabidopsis thaliana]<br>gi 75333906 sp Q9FID8.1 Y5900_ARATH RecName: Full=Putative receptor-like protein kinase At5g39000; Flags: Precursor<br>gi 10177545 dbj BAB10824.1  receptor-like protein kinase [Arabidopsis thaliana]<br>gi 332007002 gb AED94385.1  putative receptor-like protein kinase [Arabidopsis thaliana]                                                                                                                                                                                                                                                                                                                                                                                   | 884  | 873  | 0         | 98.8  | 69.7 | 82.0 | putative receptor-like protein kinase       | gbpln | Arabidopsis thaliana | AT5G39000.1   Symbols:   Malectin/receptor-like protein kinase family protein   chr5:15611860-15614481 FORWARD LENGTH=873                                                                                                                                                                                                                                                                                                                                                     | 884  | 873 | 0        | 98.8  | 69.7 | 82.0 |



|                          |                                                                                                                                                                                                                                                                                                                                                                                                                            |     |     |           |       |      |      |                                                                                                                                                              |       |                      |                                                                                                                                                                                                                                                                                                                                             |     |     |           |       |      |      |
|--------------------------|----------------------------------------------------------------------------------------------------------------------------------------------------------------------------------------------------------------------------------------------------------------------------------------------------------------------------------------------------------------------------------------------------------------------------|-----|-----|-----------|-------|------|------|--------------------------------------------------------------------------------------------------------------------------------------------------------------|-------|----------------------|---------------------------------------------------------------------------------------------------------------------------------------------------------------------------------------------------------------------------------------------------------------------------------------------------------------------------------------------|-----|-----|-----------|-------|------|------|
| Rsa1.0_00290.1.g10563.t1 | refNP_198716.1  putative receptor-like protein kinase [Arabidopsis thaliana] gi 7533906 sp Q9FID8.1 Y5900_ARATH RecName: Full=Putative receptor-like protein kinase At5g39000; Flags: Precursor gi 10177545 dbj BAB10824.1  receptor-like protein kinase [Arabidopsis thaliana] gi 332007002 gb AED94385.1  putative receptor-like protein kinase [Arabidopsis thaliana]                                                   | 830 | 873 | 0         | 105.2 | 69.9 | 80.5 | putative receptor-like protein kinase                                                                                                                        | gbpln | Arabidopsis thaliana | AT5G39000.1   Symbols:   Maleictin/receptor-like protein kinase family protein   chr5:15611860-15614481 FORWARD LENGTH=873                                                                                                                                                                                                                  | 830 | 873 | 0         | 105.2 | 69.9 | 80.5 |
| Rsa1.0_00290.1.g10564.t1 | refXP_002870805.1  ATTAP2 [Arabidopsis lyrata subsp. lyrata] gi 297316641 gb EFH47064.1  ATTAP2 [Arabidopsis lyrata subsp. lyrata]                                                                                                                                                                                                                                                                                         | 641 | 644 | 0         | 100.5 | 92.8 | 96.6 | ATTAP2                                                                                                                                                       | gbpln | Arabidopsis lyrata   | AT5G39040.1   Symbols: ALS1, ATTAP2, TAP2   transporter associated with antigen processing protein 2   chr5:15625660-15629621 FORWARD LENGTH=644                                                                                                                                                                                            | 641 | 644 | 0         | 100.5 | 92.7 | 96.6 |
| Rsa1.0_00290.1.g10565.t1 | gb EOA16596.1  hypothetical protein CARUB_v10004762mg [Capsella rubella]                                                                                                                                                                                                                                                                                                                                                   | 468 | 462 | 0         | 98.7  | 74.4 | 87.6 | hypothetical protein CARUB_v10004762mg                                                                                                                       | gbpln | Capsella rubella     | AT5G39050.1   Symbols:   HXXXD-type acyl-transferase family protein   chr5:15634596-15636005 FORWARD LENGTH=469                                                                                                                                                                                                                             | 468 | 469 | 0         | 100.2 | 75.6 | 86.1 |
| Rsa1.0_00290.1.g10566.t1 | refXP_002868739.1  predicted protein [Arabidopsis lyrata subsp. lyrata] gi 297314575 gb EFH44998.1  predicted protein [Arabidopsis lyrata subsp. lyrata]                                                                                                                                                                                                                                                                   | 222 | 223 | 1.00E-109 | 100.5 | 88.3 | 93.2 | predicted protein                                                                                                                                            | gbpln | Arabidopsis lyrata   | AT5G39110.1   Symbols:   RmlC-like cupins superfamily protein   chr5:15657802-15658584 REVERSE LENGTH=222                                                                                                                                                                                                                                   | 222 | 222 | 1.00E-109 | 100.0 | 84.2 | 91.9 |
| Rsa1.0_00290.1.g10567.t1 | refNP_198738.2  hydrolase, alpha/beta fold family protein [Arabidopsis thaliana] gi 28393576 gb AAO42208.1  unknown protein [Arabidopsis thaliana] gi 28973006 gb AAO63827.1  unknown protein [Arabidopsis thaliana] gi 332007026 gb AED94409.1  hydrolase, alpha/beta fold family protein [Arabidopsis thaliana]                                                                                                          | 333 | 330 | 1.00E-173 | 99.1  | 89.8 | 94.6 | hydrolase, alpha/beta fold family protein                                                                                                                    | gbpln | Arabidopsis thaliana | AT5G39220.1   Symbols:   alpha/beta-Hydrolases superfamily protein   chr5:15705913-15708039 FORWARD LENGTH=330                                                                                                                                                                                                                              | 333 | 330 | 1.00E-176 | 99.1  | 89.8 | 94.6 |
| Rsa1.0_00290.1.g10568.t1 | refXP_002868736.1  hypothetical protein ARALYDRAFT_916399 [Arabidopsis lyrata subsp. lyrata] gi 297314572 gb EFH44995.1  hypothetical protein ARALYDRAFT_916399 [Arabidopsis lyrata subsp. lyrata]                                                                                                                                                                                                                         | 121 | 114 | 2.00E-29  | 94.2  | 65.3 | 76.9 | hypothetical protein ARALYDRAFT_916399                                                                                                                       | gbpln | Arabidopsis lyrata   | AT5G39240.1   Symbols:   unknown protein; BEST Arabidopsis thaliana protein match is: unknown protein (TAIR:AT3G29370.1). Has 15 Blast hits to 15 proteins in 4 species: Archae - 0; Bacteria - 0; Metazoa - 0; Fungi - 0; Plants - 15; Viruses - 0; Other Eukaryotes - 0 (source: NCBI BLINK).   chr5:15712683-15713003 REVERSE LENGTH=106 | 121 | 106 | 1.00E-30  | 87.6  | 64.5 | 72.7 |
| Rsa1.0_00290.1.g10569.t1 | refNP_198741.1  F-box family protein [Arabidopsis thaliana] gi 75262644 sp Q9FL82.1 FB270_ARATH RecName: Full=F-box protein At5g39250 gi 9758854 dbj BAB09380.1  unnamed protein product [Arabidopsis thaliana] gi 20259549 gb AAM13894.1  unknown protein [Arabidopsis thaliana] gi 2168971 gb AAM67477.1  unknown protein [Arabidopsis thaliana] gi 332007029 gb AED94412.1  F-box family protein [Arabidopsis thaliana] | 251 | 252 | 1.00E-123 | 100.4 | 84.1 | 92.8 | F-box family protein                                                                                                                                         | gbpln | Arabidopsis thaliana | AT5G39250.1   Symbols:   F-box family protein   chr5:15724860-15725618 FORWARD LENGTH=252                                                                                                                                                                                                                                                   | 251 | 252 | 1.00E-125 | 100.4 | 84.1 | 92.8 |
| Rsa1.0_00290.1.g10570.t1 | sp Q9FL80.3 EXP22_ARATH RecName: Full=Expansin-A22; Short=AtEXPA22; AltName: Full=Alpha-expansin-22; Short=At-EXP22; Short=AtEx22; AltName: Full=AtH-ExpAlpha-1.15; Flags: Precursor                                                                                                                                                                                                                                       | 273 | 279 | 1.00E-119 | 102.2 | 75.8 | 86.1 | RecName: Full=Expansin-A22; Short=AtEXPA22; AltName: Full=Alpha-expansin-22; Short=At-EXP22; Short=AtEx22; AltName: Full=AtH-ExpAlpha-1.15; Flags: Precursor | ----  | ----                 | AT5G39270.1   Symbols: ATEXPA22, EXP22, ATEXP22, ATHEXP ALPHA 1.15, EXPA22   expansin A22   chr5:15729118-15730150 REVERSE LENGTH=263                                                                                                                                                                                                       | 273 | 263 | 1.00E-118 | 96.3  | 74.0 | 82.8 |
| Rsa1.0_00291.1.g10571.t1 | #                                                                                                                                                                                                                                                                                                                                                                                                                          | #   | #   | #         | #     | #    | #    | -                                                                                                                                                            | ----  | ----                 | #                                                                                                                                                                                                                                                                                                                                           | #   | #   | #         | #     | #    |      |
| Rsa1.0_00291.1.g10572.t1 | refXP_002887249.1  predicted protein [Arabidopsis lyrata subsp. lyrata] gi 297333090 gb EFH63508.1  predicted protein [Arabidopsis lyrata subsp. lyrata]                                                                                                                                                                                                                                                                   | 203 | 202 | 7.00E-98  | 99.5  | 85.2 | 93.6 | predicted protein                                                                                                                                            | gbpln | Arabidopsis lyrata   | AT1G69680.1   Symbols:   Mog1/PsbP/DUF1795-like photosystem II reaction center PsbP family protein   chr1:26205148-26206568 FORWARD LENGTH=202                                                                                                                                                                                              | 203 | 202 | 2.00E-98  | 99.5  | 83.3 | 91.6 |
| Rsa1.0_00291.1.g10573.t1 | gb EOA36886.1  hypothetical protein CARUB_v10008981mg, partial [Capsella rubella]                                                                                                                                                                                                                                                                                                                                          | 472 | 486 | 0         | 103.0 | 73.9 | 83.7 | hypothetical protein CARUB_v10008981mg, partial                                                                                                              | gbpln | Capsella rubella     | AT1G28760.1   Symbols:   Uncharacterized conserved protein (DUF2215)   chr1:10103158-10104588 FORWARD LENGTH=476                                                                                                                                                                                                                            | 472 | 476 | 0         | 100.8 | 72.5 | 83.5 |
| Rsa1.0_00291.1.g10574.t1 | gb EOA34585.1  hypothetical protein CARUB_v10022142mg, partial [Capsella rubella]                                                                                                                                                                                                                                                                                                                                          | 316 | 283 | 1.00E-104 | 89.6  | 57.6 | 70.6 | hypothetical protein CARUB_v10022142mg, partial                                                                                                              | gbpln | Capsella rubella     | AT3G22080.1   Symbols:   TRAF-like family protein   chr3:7777818-7781718 REVERSE LENGTH=648                                                                                                                                                                                                                                                 | 316 | 648 | 1.00E-104 | 205.1 | 59.8 | 73.1 |
| Rsa1.0_00291.1.g10575.t1 | refNP_188846.2  TRAF-like family protein [Arabidopsis thaliana] gi 332643066 gb AEE76587.1  TRAF-like family protein [Arabidopsis thaliana]                                                                                                                                                                                                                                                                                | 339 | 648 | 1.00E-97  | 191.2 | 54.3 | 67.8 | TRAF-like family protein                                                                                                                                     | gbpln | Arabidopsis thaliana | AT3G22080.1   Symbols:   TRAF-like family protein   chr3:7777818-7781718 REVERSE LENGTH=648                                                                                                                                                                                                                                                 | 339 | 648 | 1.00E-100 | 191.2 | 54.3 | 67.8 |

|                          |                                                                                                                                                                                                                                                                                                                                                                                                  |      |      |           |       |      |      |                                          |       |                      |                                                                                                                                                                                                                                                             |      |      |           |       |      |      |
|--------------------------|--------------------------------------------------------------------------------------------------------------------------------------------------------------------------------------------------------------------------------------------------------------------------------------------------------------------------------------------------------------------------------------------------|------|------|-----------|-------|------|------|------------------------------------------|-------|----------------------|-------------------------------------------------------------------------------------------------------------------------------------------------------------------------------------------------------------------------------------------------------------|------|------|-----------|-------|------|------|
| Rsa1.0_00291.1.g10576.t1 | gb[EOA35904.1] hypothetical protein CARUB_v10021161mg [Capsella rubella]                                                                                                                                                                                                                                                                                                                         | 120  | 120  | 7.00E-59  | 100.0 | 95.0 | 98.3 | hypothetical protein CARUB_v10021161mg   | gbpln | Capsella rubella     | AT1G69620.1   Symbols: RPL34   ribosomal protein L34   chr1:26189900-26191081 FORWARD LENGTH=119                                                                                                                                                            | 120  | 119  | 1.00E-60  | 99.2  | 93.3 | 96.7 |
| Rsa1.0_00291.1.g10577.t1 | gb[EOA33235.1] hypothetical protein CARUB_v10021295mg [Capsella rubella]                                                                                                                                                                                                                                                                                                                         | 124  | 124  | 2.00E-42  | 100.0 | 67.7 | 78.2 | hypothetical protein CARUB_v10021295mg   | gbpln | Capsella rubella     | AT1G69588.1   Symbols: CLE45   CLAVATA3/ESR-RELATED 45   chr1:26178150-26178524 FORWARD LENGTH=124                                                                                                                                                          | 124  | 124  | 5.00E-43  | 100.0 | 62.1 | 80.6 |
| Rsa1.0_00291.1.g10578.t1 | #                                                                                                                                                                                                                                                                                                                                                                                                | #    | #    | #         | #     | #    | #    | -                                        | ----  | ----                 | #                                                                                                                                                                                                                                                           | #    | #    | #         | #     | #    |      |
| Rsa1.0_00291.1.g10579.t1 | dbj[BAJ34568.1] unnamed protein product [Thellungiella halophila]                                                                                                                                                                                                                                                                                                                                | 391  | 393  | 1.00E-164 | 100.5 | 81.6 | 86.4 | unnamed protein product                  | ----  | ----                 | AT1G69570.1   Symbols:   Dof-type zinc finger DNA-binding family protein   chr1:26161771-26163230 REVERSE LENGTH=399                                                                                                                                        | 391  | 399  | 1.00E-150 | 102.0 | 77.5 | 85.2 |
| Rsa1.0_00291.1.g10580.t1 | ref[XP_002887243.1] MYB105 [Arabidopsis lyrata subsp. lyrata] gi 29733084 gb EFH63502.1  MYB105 [Arabidopsis lyrata subsp. lyrata]                                                                                                                                                                                                                                                               | 296  | 294  | 1.00E-128 | 99.3  | 75.7 | 83.1 | MYB105                                   | gbpln | Arabidopsis lyrata   | AT1G69560.1   Symbols: MYB105, LOF2, ATMYB105   myb domain protein 105   chr1:26157755-26158906 FORWARD LENGTH=330                                                                                                                                          | 296  | 330  | 1.00E-124 | 111.5 | 72.3 | 80.7 |
| Rsa1.0_00291.1.g10581.t1 | #                                                                                                                                                                                                                                                                                                                                                                                                | #    | #    | #         | #     | #    | #    | -                                        | ----  | ----                 | #                                                                                                                                                                                                                                                           | #    | #    | #         | #     | #    |      |
| Rsa1.0_00291.1.g10582.t1 | ref[XP_002863569.1] hypothetical protein ARALYDRAFT_917150 [Arabidopsis lyrata subsp. lyrata] gi 297309404 gb EFH39828.1  hypothetical protein ARALYDRAFT_917150 [Arabidopsis lyrata subsp. lyrata]                                                                                                                                                                                              | 1419 | 1177 | 0         | 82.9  | 35.0 | 44.8 | hypothetical protein ARALYDRAFT_917150   | gbpln | Arabidopsis lyrata   | AT5G44510.1   Symbols: TAO1   target of AVR8 operation1   chr5:17929673-17934188 REVERSE LENGTH=1187                                                                                                                                                        | 1419 | 1187 | 0         | 83.7  | 34.2 | 44.8 |
| Rsa1.0_00291.1.g10583.t1 | #                                                                                                                                                                                                                                                                                                                                                                                                | #    | #    | #         | #     | #    | #    | -                                        | ----  | ----                 | #                                                                                                                                                                                                                                                           | #    | #    | #         | #     | #    |      |
| Rsa1.0_00291.1.g10584.t2 | ref[XP_002863569.1] hypothetical protein ARALYDRAFT_917150 [Arabidopsis lyrata subsp. lyrata] gi 297309404 gb EFH39828.1  hypothetical protein ARALYDRAFT_917150 [Arabidopsis lyrata subsp. lyrata]                                                                                                                                                                                              | 971  | 1177 | 0         | 121.2 | 49.7 | 64.1 | hypothetical protein ARALYDRAFT_917150   | gbpln | Arabidopsis lyrata   | AT5G44510.1   Symbols: TAO1   target of AVR8 operation1   chr5:17929673-17934188 REVERSE LENGTH=1187                                                                                                                                                        | 971  | 1187 | 0         | 122.2 | 48.4 | 64.0 |
| Rsa1.0_00291.1.g10585.t1 | dbj[BAJ34610.1] unnamed protein product [Thellungiella halophila]                                                                                                                                                                                                                                                                                                                                | 265  | 272  | 1.00E-131 | 102.6 | 89.1 | 93.2 | unnamed protein product                  | ----  | ----                 | AT1G69490.1   Symbols: NAP, ANAC029, ATNAP   NAC-like, activated by AP3/PI   chr1:26122233-26123222 FORWARD LENGTH=268                                                                                                                                      | 265  | 268  | 1.00E-132 | 101.1 | 88.7 | 91.7 |
| Rsa1.0_00291.1.g10586.t1 | emb[CAB39638.1] RNA-directed DNA polymerase-like protein [Arabidopsis thaliana] gi 267666 emb[CAB78094.1] RNA-directed DNA polymerase-like protein [Arabidopsis thaliana]                                                                                                                                                                                                                        | 313  | 1274 | 1.00E-74  | 407.0 | 47.6 | 63.6 | RNA-directed DNA polymerase-like protein | gbpln | Arabidopsis thaliana | AT1G10000.1   Symbols:   Ribonuclease H-like superfamily protein   chr1:3263877-3264788 REVERSE LENGTH=303                                                                                                                                                  | 313  | 303  | 2.00E-49  | 96.8  | 36.7 | 52.4 |
| Rsa1.0_00291.1.g10587.t1 | gb[AAK51235.1]AF287471.1 polyprotein [Arabidopsis thaliana]                                                                                                                                                                                                                                                                                                                                      | 1035 | 1453 | 0         | 140.4 | 59.8 | 72.8 | polyprotein                              | gbpln | Arabidopsis thaliana | ATMG00820.1   Symbols: ORF170   Reverse transcriptase (RNA-dependent DNA polymerase)   chrM:228573-229085 REVERSE LENGTH=170                                                                                                                                | 1035 | 170  | 3.00E-38  | 16.4  | 7.1  | 9.4  |
| Rsa1.0_00291.1.g10588.t1 | ref[NP_177103.1] argonaute-like protein [Arabidopsis thaliana] gi 75169275 sp Q9C793.1 AGO7 ARATH RecName: Full=Protein argonaute 7; AltName: Full=Protein ZIPPY gi 12597784 gb AAG60096.1 AC073178_7 pinhead-like protein [Arabidopsis thaliana] gi 37528855 gb AAQ92355.1  ZIPPY [Arabidopsis thaliana] gi 332196804 gb AEE34925.1  protein argonaute 7 (protein ZIPPY) [Arabidopsis thaliana] | 978  | 990  | 0         | 101.2 | 84.9 | 90.1 | argonaute-like protein                   | gbpln | Arabidopsis thaliana | AT1G69440.1   Symbols: AGO7, ZIP   Argonaute family protein   chr1:26101565-26105016 REVERSE LENGTH=990                                                                                                                                                     | 978  | 990  | 0         | 101.2 | 84.9 | 90.1 |
| Rsa1.0_00291.1.g10589.t1 | #                                                                                                                                                                                                                                                                                                                                                                                                | #    | #    | #         | #     | #    | #    | -                                        | ----  | ----                 | #                                                                                                                                                                                                                                                           | #    | #    | #         | #     | #    |      |
| Rsa1.0_00291.1.g10590.t1 | ref[XP_002867758.1] hypothetical protein ARALYDRAFT_914352 [Arabidopsis lyrata subsp. lyrata] gi 297313594 gb EFH44017.1  hypothetical protein ARALYDRAFT_914352 [Arabidopsis lyrata subsp. lyrata]                                                                                                                                                                                              | 424  | 272  | 7.00E-42  | 64.2  | 27.1 | 35.1 | hypothetical protein ARALYDRAFT_914352   | gbpln | Arabidopsis lyrata   | AT4G22600.1   Symbols:   unknown protein; Has 26 Blast hits to 26 proteins in 8 species: Archae - 0; Bacteria - 0; Metazoa - 0; Fungi - 0; Plants - 26; Viruses - 0; Other Eukaryotes - 0 (source: NCBI BLINK).   chr4:11900211-11901032 REVERSE LENGTH=273 | 424  | 273  | 3.00E-42  | 64.4  | 26.7 | 36.1 |
| Rsa1.0_00291.1.g10591.t1 | gb[AAZ23773.1] plastid division regulator MinE [Brassica napus]                                                                                                                                                                                                                                                                                                                                  | 132  | 224  | 3.00E-64  | 169.7 | 92.4 | 97.0 | plastid division regulator MinE          | gbpln | Brassica napus       | AT1G69390.1   Symbols: ATMINE1, MINE1, ARC12   homologue of bacterial MinE 1   chr1:26084721-26086284 FORWARD LENGTH=229                                                                                                                                    | 132  | 229  | 1.00E-65  | 173.5 | 89.4 | 94.7 |
| Rsa1.0_00291.1.g10592.t2 | ref[XP_002887231.1] hypothetical protein ARALYDRAFT_894718 [Arabidopsis lyrata subsp. lyrata] gi 297333072 gb EFH63490.1  hypothetical protein ARALYDRAFT_894718 [Arabidopsis lyrata subsp. lyrata]                                                                                                                                                                                              | 322  | 319  | 1.00E-141 | 99.1  | 82.3 | 88.5 | hypothetical protein ARALYDRAFT_894718   | gbpln | Arabidopsis lyrata   | AT1G69370.1   Symbols: CM3, cm-3   chorismate mutase 3   chr1:26080098-26081559 FORWARD LENGTH=316                                                                                                                                                          | 322  | 316  | 1.00E-141 | 98.1  | 79.5 | 86.3 |

|                          |                                                                                                                                                                                                                                                                                                                                                                                |      |      |           |       |      |      |                                              |       |                      |                                                                                                                                                                    |      |      |           |       |      |      |
|--------------------------|--------------------------------------------------------------------------------------------------------------------------------------------------------------------------------------------------------------------------------------------------------------------------------------------------------------------------------------------------------------------------------|------|------|-----------|-------|------|------|----------------------------------------------|-------|----------------------|--------------------------------------------------------------------------------------------------------------------------------------------------------------------|------|------|-----------|-------|------|------|
| Rsa1.0_00291.1.g10593.t1 | refXP_002887226.1   hypothetical protein ARALYDRAFT_894705 [Arabidopsis lyrata subsp. lyrata] gi 297333057 gb EFH63485.1   hypothetical protein ARALYDRAFT_894705 [Arabidopsis lyrata subsp. lyrata]                                                                                                                                                                           | 409  | 446  | 1.00E-100 | 109.0 | 51.1 | 66.7 | hypothetical protein ARALYDRAFT_894705       | gbpln | Arabidopsis lyrata   | AT1G69250.1   Symbols:   Nuclear transport factor 2 (NTF2) family protein with RNA binding (RIM-RBD-RNP motifs) domain   chr1:26033163-26035301 FORWARD LENGTH=427 | 409  | 427  | 4.00E-97  | 104.4 | 50.4 | 67.5 |
| Rsa1.0_00292.1.g10594.t1 | refXP_002881620.1   yellow-leaf-specific gene 5 [Arabidopsis lyrata subsp. lyrata] gi 297327459 gb EFH57879.1   yellow-leaf-specific gene 5 [Arabidopsis lyrata subsp. lyrata]                                                                                                                                                                                                 | 398  | 398  | 0         | 100.0 | 89.2 | 95.5 | yellow-leaf-specific gene 5                  | gbpln | Arabidopsis lyrata   | AT2G38860.2   Symbols: YLS5   Class I glutamine amidotransferase-like superfamily protein   chr2:16233629-16235207 REVERSE LENGTH=398                              | 398  | 398  | 0         | 100.0 | 88.7 | 94.7 |
| Rsa1.0_00292.1.g10595.t1 | refNP_001031074.1   high mobility group B2 protein [Arabidopsis thaliana] gi 297845040 refXP_002890401.1   hypothetical protein ARALYDRAFT_472301 [Arabidopsis lyrata subsp. lyrata] gi 297336243 gb EFH66660.1   hypothetical protein ARALYDRAFT_472301 [Arabidopsis lyrata subsp. lyrata] gi 332191886 gb AEE30007.1   high mobility group B2 protein [Arabidopsis thaliana] | 144  | 142  | 4.00E-65  | 98.6  | 91.0 | 95.1 | high mobility group B2 protein               | gbpln | Arabidopsis lyrata   | AT1G20693.2   Symbols: HMGB2, HMG BETA 1, NFD2, NFD02   high mobility group B2   chr1:7177282-7178487 FORWARD LENGTH=142                                           | 144  | 142  | 1.00E-67  | 98.6  | 91.0 | 95.1 |
| Rsa1.0_00292.1.g10596.t1 | refNP_001077570.1   high mobility group B3 protein [Arabidopsis thaliana] gi 332191890 gb AEE30011.1   high mobility group B3 protein [Arabidopsis thaliana]                                                                                                                                                                                                                   | 104  | 140  | 9.00E-29  | 134.6 | 75.0 | 80.8 | high mobility group B3 protein               | gbpln | Arabidopsis thaliana | AT1G20696.3   Symbols: HMGB3, NFD3, NFD03   high mobility group B3   chr1:7179825-7181170 FORWARD LENGTH=140                                                       | 104  | 140  | 1.00E-31  | 134.6 | 75.0 | 80.8 |
| Rsa1.0_00292.1.g10597.t4 | dbj BAF00918.1   putative reverse transcriptase [Arabidopsis thaliana]                                                                                                                                                                                                                                                                                                         | 1478 | 910  | 0         | 61.6  | 27.0 | 36.4 | putative reverse transcriptase               | gbpln | Arabidopsis thaliana | AT1G43760.1   Symbols:   DNase I-like superfamily protein   chr1:16528880-16531065 REVERSE LENGTH=626                                                              | 1478 | 626  | 1.00E-109 | 42.4  | 13.2 | 18.6 |
| Rsa1.0_00292.1.g10598.t1 | refXP_002865328.1   molybdenum cofactor sulfurase family protein [Arabidopsis lyrata subsp. lyrata] gi 297311163 gb EFH41587.1   molybdenum cofactor sulfurase family protein [Arabidopsis lyrata subsp. lyrata]                                                                                                                                                               | 102  | 308  | 1.00E-13  | 302.0 | 45.1 | 50.0 | molybdenum cofactor sulfurase family protein | gbpln | Arabidopsis lyrata   | AT5G44720.1   Symbols:   Molybdenum cofactor sulfurase family protein   chr5:18043086-18045275 FORWARD LENGTH=308                                                  | 102  | 308  | 1.00E-15  | 302.0 | 44.1 | 48.0 |
| Rsa1.0_00292.1.g10599.t1 | refXP_002890402.1   hypothetical protein ARALYDRAFT_472304 [Arabidopsis lyrata subsp. lyrata] gi 297336244 gb EFH66661.1   hypothetical protein ARALYDRAFT_472304 [Arabidopsis lyrata subsp. lyrata]                                                                                                                                                                           | 143  | 141  | 4.00E-55  | 98.6  | 79.7 | 88.8 | hypothetical protein ARALYDRAFT_472304       | gbpln | Arabidopsis lyrata   | AT1G20696.3   Symbols: HMGB3, NFD3, NFD03   high mobility group B3   chr1:7179825-7181170 FORWARD LENGTH=140                                                       | 143  | 140  | 2.00E-56  | 97.9  | 78.3 | 88.8 |
| Rsa1.0_00292.1.g10600.t1 | gb EOA39693.1   hypothetical protein CARUB_v10008332mg [Capsella rubella]                                                                                                                                                                                                                                                                                                      | 801  | 801  | 0         | 100.0 | 84.8 | 92.8 | hypothetical protein CARUB_v10008332mg       | gbpln | Capsella rubella     | AT1G20780.1   Symbols: PUB44, ATPUB44, SAUL1   senescence-associated E3 ubiquitin ligase 1   chr1:7217812-7220609 FORWARD LENGTH=801                               | 801  | 801  | 0         | 100.0 | 84.8 | 91.5 |
| Rsa1.0_00292.1.g10601.t1 | dbj BAB10503.1   retroelement pol polyprotein-like [Arabidopsis thaliana]                                                                                                                                                                                                                                                                                                      | 1464 | 1475 | 0         | 100.8 | 60.6 | 74.9 | retroelement pol polyprotein-like            | gbpln | Arabidopsis thaliana | AT4G23160.1   Symbols: CRK8   cysteine-rich RLK (RECEPTOR-like protein kinase) 8   chr4:12129485-12134086 FORWARD LENGTH=1262                                      | 1464 | 1262 | 0         | 86.2  | 22.5 | 29.0 |
| Rsa1.0_00292.1.g10602.t1 | #                                                                                                                                                                                                                                                                                                                                                                              | #    | #    | #         | #     | #    | #    | -                                            | ----  | ----                 | #                                                                                                                                                                  | #    | #    | #         | #     | #    |      |
| Rsa1.0_00292.1.g10603.t1 | gb ABK56013.1   zinc finger protein [Brassica rapa]                                                                                                                                                                                                                                                                                                                            | 199  | 196  | 3.00E-95  | 98.5  | 90.5 | 95.0 | zinc finger protein                          | gbpln | Brassica rapa        | AT1G20823.1   Symbols:   RING/U-box superfamily protein   chr1:7238880-7239473 FORWARD LENGTH=197                                                                  | 199  | 197  | 4.00E-83  | 99.0  | 82.4 | 86.4 |
| Rsa1.0_00292.1.g10604.t1 | refXP_002890413.1   hypothetical protein ARALYDRAFT_472321 [Arabidopsis lyrata subsp. lyrata] gi 297336255 gb EFH66672.1   hypothetical protein ARALYDRAFT_472321 [Arabidopsis lyrata subsp. lyrata]                                                                                                                                                                           | 300  | 357  | 1.00E-143 | 119.0 | 82.0 | 87.0 | hypothetical protein ARALYDRAFT_472321       | gbpln | Arabidopsis lyrata   | AT1G20850.1   Symbols: XCP2   xylem cysteine peptidase 2   chr1:7252208-7253537 FORWARD LENGTH=356                                                                 | 300  | 356  | 1.00E-140 | 118.7 | 78.7 | 82.7 |
| Rsa1.0_00292.1.g10605.t1 | refXP_002893135.1   hypothetical protein ARALYDRAFT_472323 [Arabidopsis lyrata subsp. lyrata] gi 297338977 gb EFH69394.1   hypothetical protein ARALYDRAFT_472323 [Arabidopsis lyrata subsp. lyrata]                                                                                                                                                                           | 453  | 465  | 1.00E-161 | 102.6 | 69.5 | 82.8 | hypothetical protein ARALYDRAFT_472323       | gbpln | Arabidopsis lyrata   | AT1G20870.1   Symbols:   HSP20-like chaperones superfamily protein   chr1:7259287-7260775 REVERSE LENGTH=463                                                       | 453  | 463  | 1.00E-162 | 102.2 | 67.8 | 81.0 |

|                          |                                                                                                                                                                                                     |      |      |           |       |      |      |                                            |       |                      |                                                                                                                                                                                                                                                                                                                                                                                                                                                                                                                                                                                                                                                           |      |      |           |       |      |      |
|--------------------------|-----------------------------------------------------------------------------------------------------------------------------------------------------------------------------------------------------|------|------|-----------|-------|------|------|--------------------------------------------|-------|----------------------|-----------------------------------------------------------------------------------------------------------------------------------------------------------------------------------------------------------------------------------------------------------------------------------------------------------------------------------------------------------------------------------------------------------------------------------------------------------------------------------------------------------------------------------------------------------------------------------------------------------------------------------------------------------|------|------|-----------|-------|------|------|
| Rsa1.0_00292.1.g10606.t1 | ref XP_002885269.1  hypothetical protein ARALYDRAFT_479371 [Arabidopsis lyrata subsp. lyrata] gi 297331109 gb EFH61528.1                                                                            | 182  | 363  | 4.00E-20  | 199.5 | 30.2 | 34.1 | hypothetical protein ARALYDRAFT_479371     | gbpln | Arabidopsis lyrata   | AT3G18650.1   Symbols: AGL103   AGAMOUS-like 103   chr:3:6417344-6418504 REVERSE LENGTH=386                                                                                                                                                                                                                                                                                                                                                                                                                                                                                                                                                               | 182  | 386  | 6.00E-20  | 212.1 | 29.1 | 33.5 |
| Rsa1.0_00292.1.g10607.t1 | gb EOA38418.1  hypothetical protein CARUB_v1000992mg [Capsella rubella]                                                                                                                             | 189  | 274  | 4.00E-66  | 145.0 | 68.8 | 74.1 | hypothetical protein CARUB_v1000992mg      | gbpln | Capsella rubella     | AT1G20880.2   Symbols:   RNA-binding (RRM/RNP motifs) family protein   chr:1:7262879-7264834 REVERSE LENGTH=274<br>AT1G20890.1   Symbols:   unknown protein; FUNCTIONS IN: molecular function unknown; INVOLVED IN: biological process unknown; LOCATED IN: endomembrane system; EXPRESSED IN: 24 plant structures; EXPRESSED DURING: 14 growth stages; BEST Arabidopsis thaliana protein match is: unknown protein (TAIR:AT1G76480.2); Has 33 Blast hits to 33 proteins in 11 species: Archae - 0; Bacteria - 0; Metazoa - 2; Fungi - 0; Plants - 31; Viruses - 0; Other Eukaryotes - 0 (source: NCBI BLINK).   chr:1:7266088-7267060 REVERSE LENGTH=197 | 189  | 274  | 3.00E-66  | 145.0 | 65.6 | 72.0 |
| Rsa1.0_00292.1.g10608.t1 | gb EOA36255.1  hypothetical protein CARUB_v10010341mg [Capsella rubella]                                                                                                                            | 194  | 197  | 6.00E-59  | 101.5 | 59.8 | 67.0 | hypothetical protein CARUB_v10010341mg     | gbpln | Capsella rubella     | AT1G52950.1   Symbols:   Nucleic acid-binding, OB-fold-like protein   chr:1:19725483-19728007 FORWARD LENGTH=566                                                                                                                                                                                                                                                                                                                                                                                                                                                                                                                                          | 194  | 197  | 1.00E-60  | 101.5 | 59.8 | 66.5 |
| Rsa1.0_00292.1.g10609.t1 | gb ABD65118.1  hypothetical protein 31.t00031 [Brassica oleracea]                                                                                                                                   | 514  | 467  | 1.00E-140 | 90.9  | 48.6 | 60.3 | hypothetical protein 31.t00031             | gbpln | Brassica oleracea    | AT1G52950.1   Symbols:   Nucleic acid-binding, OB-fold-like protein   chr:1:19725483-19728007 FORWARD LENGTH=566                                                                                                                                                                                                                                                                                                                                                                                                                                                                                                                                          | 514  | 566  | 3.00E-80  | 110.1 | 32.9 | 55.1 |
| Rsa1.0_00292.1.g10610.t1 | gb ABD65101.1  hypothetical protein 31.t00082 [Brassica oleracea]                                                                                                                                   | 247  | 226  | 2.00E-46  | 91.5  | 40.1 | 57.5 | hypothetical protein 31.t00082             | gbpln | Brassica oleracea    | # # # # # #                                                                                                                                                                                                                                                                                                                                                                                                                                                                                                                                                                                                                                               |      |      |           |       |      |      |
| Rsa1.0_00292.1.g10611.t1 | gb AAK51235.1 AF287471.1 polypeptide [Arabidopsis thaliana]                                                                                                                                         | 964  | 1453 | 1.00E-147 | 150.7 | 33.0 | 39.3 | polyprotein                                | gbpln | Arabidopsis thaliana | ATMG00810.1   Symbols: ORF240B   DNA/RNA polymerases superfamily protein   chr:M:227709-228431 REVERSE LENGTH=240                                                                                                                                                                                                                                                                                                                                                                                                                                                                                                                                         | 964  | 240  | 2.00E-53  | 24.9  | 11.5 | 13.8 |
| Rsa1.0_00293.1.g10612.t1 | db BAB17226.1  myrosinase [Raphanus sativus]                                                                                                                                                        | 545  | 548  | 0         | 100.6 | 96.9 | 97.6 | myrosinase                                 | gbpln | Raphanus sativus     | AT5G26000.1   Symbols: TGG1, BGLU38   thioglucoside glucosyltransferase 1   chr:5:9079678-9082347 REVERSE LENGTH=541                                                                                                                                                                                                                                                                                                                                                                                                                                                                                                                                      | 545  | 541  | 0         | 99.3  | 68.3 | 78.7 |
| Rsa1.0_00293.1.g10613.t1 | ref NP_001185258.1  DNA-binding bromodomain-containing protein [Arabidopsis thaliana] gi 332195366 gb AEE33487.1  DNA-binding bromodomain-containing protein [Arabidopsis thaliana]                 | 226  | 573  | 7.00E-52  | 253.5 | 52.2 | 63.3 | DNA-binding bromodomain-containing protein | gbpln | Arabidopsis thaliana | AT1G58025.3   Symbols:   DNA-binding bromodomain-containing protein   chr:1:21458219-21461757 REVERSE LENGTH=573                                                                                                                                                                                                                                                                                                                                                                                                                                                                                                                                          | 226  | 573  | 2.00E-54  | 253.5 | 52.2 | 63.3 |
| Rsa1.0_00293.1.g10614.t1 | gb ABS83902.1  pheres1 [Arabidopsis lyrata] gi 154690693 gb ABS83919.1  pheres1 [Arabidopsis lyrata] gi 154690709 gb ABS83927.1  pheres1 [Arabidopsis lyrata]                                       | 141  | 274  | 2.00E-22  | 194.3 | 39.7 | 55.3 | pheres1                                    | gbpln | Arabidopsis lyrata   | AT5G26650.1   Symbols: AGL36   AGAMOUS-like 36   chr:5:9343785-9344885 FORWARD LENGTH=366                                                                                                                                                                                                                                                                                                                                                                                                                                                                                                                                                                 | 141  | 366  | 2.00E-24  | 259.6 | 39.7 | 53.2 |
| Rsa1.0_00293.1.g10615.t1 | gb AAX68547.1  myrosinase [Brassica rapa var. parachinensis]                                                                                                                                        | 161  | 548  | 9.00E-43  | 340.4 | 59.0 | 64.6 | myrosinase                                 | gbpln | Brassica rapa        | AT5G25980.2   Symbols: TGG2, BGLU37   glucoside glucosyltransferase 2   chr:5:9072730-9075477 FORWARD LENGTH=547                                                                                                                                                                                                                                                                                                                                                                                                                                                                                                                                          | 161  | 547  | 1.00E-36  | 339.8 | 47.2 | 55.9 |
| Rsa1.0_00293.1.g10616.t1 | gb ABS83897.1  pheres1 [Arabidopsis lyrata]                                                                                                                                                         | 265  | 269  | 2.00E-28  | 101.5 | 37.0 | 52.5 | pheres1                                    | gbpln | Arabidopsis lyrata   | AT5G26650.1   Symbols: AGL36   AGAMOUS-like 36   chr:5:9343785-9344885 FORWARD LENGTH=366                                                                                                                                                                                                                                                                                                                                                                                                                                                                                                                                                                 | 265  | 366  | 2.00E-29  | 138.1 | 28.3 | 38.9 |
| Rsa1.0_00293.1.g10617.t1 | gb EOA12793.1  hypothetical protein CARUB_v10025741mg [Capsella rubella]                                                                                                                            | 1111 | 1478 | 0         | 133.0 | 83.3 | 88.7 | hypothetical protein CARUB_v10025741mg     | gbpln | Capsella rubella     | AT5G67100.1   Symbols: ICU2   DNA-directed DNA polymerases   chr:5:26776994-26785104 FORWARD LENGTH=1524                                                                                                                                                                                                                                                                                                                                                                                                                                                                                                                                                  | 1111 | 1524 | 0         | 137.2 | 82.6 | 88.7 |
| Rsa1.0_00293.1.g10618.t1 | ref XP_002865027.1  hypothetical protein ARALYDRAFT_496889 [Arabidopsis lyrata subsp. lyrata] gi 297310862 gb EFH41286.1  hypothetical protein ARALYDRAFT_496889 [Arabidopsis lyrata subsp. lyrata] | 194  | 206  | 4.00E-69  | 106.2 | 78.4 | 82.0 | hypothetical protein ARALYDRAFT_496889     | gbpln | Arabidopsis lyrata   | AT5G67110.1   Symbols: ALC   basic helix-loop-helix (bHLH) DNA-binding superfamily protein   chr:5:26785332-26786338 REVERSE LENGTH=210                                                                                                                                                                                                                                                                                                                                                                                                                                                                                                                   | 194  | 210  | 2.00E-70  | 108.2 | 77.3 | 81.4 |
| Rsa1.0_00293.1.g10619.t2 | ref XP_002868988.1  CYP91A2 [Arabidopsis lyrata subsp. lyrata] gi 297314824 gb EFH45247.1  CYP91A2 [Arabidopsis lyrata subsp. lyrata]                                                               | 375  | 500  | 1.00E-120 | 133.3 | 66.9 | 75.7 | CYP91A2                                    | gbpln | Arabidopsis lyrata   | AT4G37430.1   Symbols: CYP91A2, CYP81F1   cytochrome P450, family 91, subfamily A, polypeptide 2   chr:4:17597242-17598829 FORWARD LENGTH=500                                                                                                                                                                                                                                                                                                                                                                                                                                                                                                             | 375  | 500  | 1.00E-111 | 133.3 | 58.4 | 65.3 |

|                          |                                                                                                                                                                                                                                                                                                                                                                                                                                                                                                                                                                                                                                                                                                                                                                           |      |      |           |       |      |      |                                                  |       |                      |                                                                                                                                                                                                                                                                                                                                                                                                              |      |     |           |       |      |      |
|--------------------------|---------------------------------------------------------------------------------------------------------------------------------------------------------------------------------------------------------------------------------------------------------------------------------------------------------------------------------------------------------------------------------------------------------------------------------------------------------------------------------------------------------------------------------------------------------------------------------------------------------------------------------------------------------------------------------------------------------------------------------------------------------------------------|------|------|-----------|-------|------|------|--------------------------------------------------|-------|----------------------|--------------------------------------------------------------------------------------------------------------------------------------------------------------------------------------------------------------------------------------------------------------------------------------------------------------------------------------------------------------------------------------------------------------|------|-----|-----------|-------|------|------|
| Rsa1.0_00293.1.g10620.t1 | refNP_850879.1  transcription factor MYB86 [Arabidopsis thaliana] gi 56749347 sp Q8LPH6.1 MYB86_ARAT H RecName: Full=Transcription factor MYB86; AltName: Full=Myb homolog 4; Short=AtMyb4; AltName: Full=Myb-related protein 86; Short=AtMYB86 gi 20466622 gb AAM20628.1  transcription factor ATMYB4 [Arabidopsis thaliana] gi 30984580 gb AAP42753.1  At5g26655 [Arabidopsis thaliana] gi 41619424 gb AAS10099.1  MYB transcription factor [Arabidopsis thaliana] gi 332006197 gb AED93580.1  transcription factor MYB86 [Arabidopsis thaliana] refXP_002872226.1  heavy-metal-associated domain-containing protein [Arabidopsis lyrata subsp. lyrata] gi 297318063 gb EFH48485.1  heavy-metal-associated domain-containing protein [Arabidopsis lyrata subsp. lyrata] | 340  | 352  | 1.00E-148 | 103.5 | 80.9 | 85.9 | transcription factor MYB86                       | gbpln | Arabidopsis thaliana | AT5G26660.1   Symbols: ATMYB86, MYB86   myb domain protein 86   chr5:9331775-9333044 REVERSE LENGTH=352                                                                                                                                                                                                                                                                                                      | 340  | 352 | 1.00E-150 | 103.5 | 80.9 | 85.9 |
| Rsa1.0_00293.1.g10621.t1 | refXP_002872226.1  heavy-metal-associated domain-containing protein [Arabidopsis lyrata subsp. lyrata] gi 297318063 gb EFH48485.1  heavy-metal-associated domain-containing protein [Arabidopsis lyrata subsp. lyrata]                                                                                                                                                                                                                                                                                                                                                                                                                                                                                                                                                    | 125  | 114  | 9.00E-31  | 91.2  | 63.2 | 79.2 | heavy-metal-associated domain-containing protein | gbpln | Arabidopsis lyrata   | AT5G26690.1   Symbols:   Heavy metal transport/detoxification superfamily protein   chr5:9310905-9311411 FORWARD LENGTH=114                                                                                                                                                                                                                                                                                  | 125  | 114 | 3.00E-32  | 91.2  | 61.6 | 78.4 |
| Rsa1.0_00293.1.g10622.t1 | gb EOA22223.1  hypothetical protein CARUB_v10002810mg [Capsella rubella]                                                                                                                                                                                                                                                                                                                                                                                                                                                                                                                                                                                                                                                                                                  | 217  | 216  | 9.00E-90  | 99.5  | 75.1 | 85.3 | hypothetical protein CARUB_v10002810mg           | gbpln | Capsella rubella     | AT5G26700.1   Symbols:   RmlC-like cupins superfamily protein   chr5:9308439-9309548 REVERSE LENGTH=213                                                                                                                                                                                                                                                                                                      | 217  | 213 | 4.00E-90  | 98.2  | 73.7 | 82.9 |
| Rsa1.0_00293.1.g10623.t1 | refNP_850874.1  glutamyl-tRNA synthetase [Arabidopsis thaliana] gi 3435196 gb AAC36469.1  glutamyl-tRNA synthetase [Arabidopsis thaliana] gi 20466252 gb AAM20443.1  glutamyl-tRNA synthetase [Arabidopsis thaliana] gi 231980863 gb AAN15567.1  glutamyl-tRNA synthetase [Arabidopsis thaliana] gi 110740992 dbj BAE98590.1  glutamyl-tRNA synthetase [Arabidopsis thaliana] gi 332006190 gb AED93573.1  glutamyl/glutamyl-tRNA synthetase, class Ic [Arabidopsis thaliana] refXP_002872223.1  hypothetical protein ARALYDRAFT_489490 [Arabidopsis lyrata subsp. lyrata] gi 297318060 gb EFH48482.1  hypothetical protein ARALYDRAFT_489490 [Arabidopsis lyrata subsp. lyrata]                                                                                           | 732  | 719  | 0         | 98.2  | 85.7 | 92.1 | glutamyl-tRNA synthetase                         | gbpln | Arabidopsis thaliana | AT5G26710.1   Symbols:   Glutamyl/glutamyl-tRNA synthetase, class Ic   chr5:9305673-9308247 FORWARD LENGTH=719                                                                                                                                                                                                                                                                                               | 732  | 719 | 0         | 98.2  | 85.7 | 92.1 |
| Rsa1.0_00293.1.g10624.t1 | refXP_002872223.1  hypothetical protein ARALYDRAFT_489490 [Arabidopsis lyrata subsp. lyrata] gi 297318060 gb EFH48482.1  hypothetical protein ARALYDRAFT_489490 [Arabidopsis lyrata subsp. lyrata]                                                                                                                                                                                                                                                                                                                                                                                                                                                                                                                                                                        | 115  | 135  | 5.00E-15  | 117.4 | 59.1 | 70.4 | hypothetical protein ARALYDRAFT_489490           | gbpln | Arabidopsis lyrata   | AT5G26720.1   Symbols:   unknown protein; Has 15 Blast hits to 15 proteins in 5 species: Archae - 0; Bacteria - 0; Metazoa - 0; Fungi - 0; Plants - 15; Viruses - 0; Other Eukaryotes - 0 (source: NCBI BLink).   chr5:9304105-9304509 FORWARD LENGTH=134                                                                                                                                                    | 115  | 134 | 4.00E-17  | 116.5 | 60.0 | 72.2 |
| Rsa1.0_00293.1.g10625.t1 | refNP_850872.1  Fasciclin-like arabinogalactan family protein [Arabidopsis thaliana] gi 332006188 gb AED93571.1  Fasciclin-like arabinogalactan family protein [Arabidopsis thaliana]                                                                                                                                                                                                                                                                                                                                                                                                                                                                                                                                                                                     | 110  | 268  | 8.00E-34  | 243.6 | 80.9 | 85.5 | Fasciclin-like arabinogalactan family protein    | gbpln | Arabidopsis thaliana | AT5G26730.1   Symbols:   Fasciclin-like arabinogalactan family protein   chr5:9300422-9301990 FORWARD LENGTH=268                                                                                                                                                                                                                                                                                             | 110  | 268 | 1.00E-36  | 243.6 | 80.9 | 85.5 |
| Rsa1.0_00293.1.g10626.t1 | gb EOA19480.1  hypothetical protein CARUB_v10002163mg, partial [Capsella rubella]                                                                                                                                                                                                                                                                                                                                                                                                                                                                                                                                                                                                                                                                                         | 103  | 158  | 1.00E-35  | 153.4 | 73.8 | 86.4 | hypothetical protein CARUB_v10002163mg, partial  | gbpln | Capsella rubella     | AT3G05936.1   Symbols:   unknown protein; FUNCTIONS IN: molecular_function unknown; INVOLVED IN: biological_process unknown; LOCATED IN: cellular_component unknown; Has 30201 Blast hits to 17322 proteins in 780 species: Archae - 12; Bacteria - 1396; Metazoa - 17338; Fungi - 3422; Plants - 5037; Viruses - 0; Other Eukaryotes - 2996 (source: NCBI BLink).   chr3:1774062-1774403 REVERSE LENGTH=113 | 103  | 113 | 2.00E-25  | 109.7 | 56.3 | 73.8 |
| Rsa1.0_00293.1.g10627.t1 | gb ACP30609.1  disease resistance protein [Brassica rapa subsp. pekinensis]                                                                                                                                                                                                                                                                                                                                                                                                                                                                                                                                                                                                                                                                                               | 1557 | 2726 | 0         | 175.1 | 57.8 | 73.7 | disease resistance protein                       | gbpln | Brassica rapa        | ATMG00860.1   Symbols: ORF158   DNA/RNA polymerases superfamily protein   chrM:235916-236392 FORWARD LENGTH=158                                                                                                                                                                                                                                                                                              | 1557 | 158 | 5.00E-34  | 10.1  | 4.6  | 5.4  |
| Rsa1.0_00293.1.g10628.t1 | gb EOA20719.1  hypothetical protein CARUB_v10001039mg [Capsella rubella]                                                                                                                                                                                                                                                                                                                                                                                                                                                                                                                                                                                                                                                                                                  | 424  | 422  | 0         | 99.5  | 95.3 | 97.6 | hypothetical protein CARUB_v10001039mg           | gbpln | Capsella rubella     | AT5G26740.3   Symbols:   Protein of unknown function (DUF300)   chr5:9292436-9294407 FORWARD LENGTH=422                                                                                                                                                                                                                                                                                                      | 424  | 422 | 0         | 99.5  | 94.6 | 97.4 |
| Rsa1.0_00293.1.g10629.t1 | emb CAA09196.1  RNA helicase [Arabidopsis thaliana]                                                                                                                                                                                                                                                                                                                                                                                                                                                                                                                                                                                                                                                                                                                       | 740  | 748  | 0         | 101.1 | 89.7 | 93.8 | RNA helicase                                     | gbpln | Arabidopsis thaliana | AT5G26742.2   Symbols: emb1138   DEAD box RNA helicase (RH3)   chr5:9285540-9288871 REVERSE LENGTH=748                                                                                                                                                                                                                                                                                                       | 740  | 748 | 0         | 101.1 | 89.3 | 93.5 |
| Rsa1.0_00293.1.g10630.t1 | gb EOA19326.1  hypothetical protein CARUB_v10003355mg [Capsella rubella]                                                                                                                                                                                                                                                                                                                                                                                                                                                                                                                                                                                                                                                                                                  | 86   | 84   | 9.00E-11  | 97.7  | 44.2 | 54.7 | hypothetical protein CARUB_v10003355mg           | gbpln | Capsella rubella     | AT5G26673.1   Symbols:   Putative membrane lipoprotein   chr5:9278309-9279611 FORWARD LENGTH=100                                                                                                                                                                                                                                                                                                             | 86   | 100 | 6.00E-12  | 116.3 | 44.2 | 50.0 |
| Rsa1.0_00293.1.g10631.t1 | emb CAA09196.1  RNA helicase [Arabidopsis thaliana]                                                                                                                                                                                                                                                                                                                                                                                                                                                                                                                                                                                                                                                                                                                       | 139  | 748  | 2.00E-27  | 538.1 | 75.5 | 79.1 | RNA helicase                                     | gbpln | Arabidopsis thaliana | AT5G26742.1   Symbols: emb1138   DEAD box RNA helicase (RH3)   chr5:9285540-9288871 REVERSE LENGTH=747                                                                                                                                                                                                                                                                                                       | 139  | 747 | 4.00E-23  | 537.4 | 74.8 | 78.4 |

|                           |                                                                                                                                                                                                                                                                                                                                                                                                                                             |      |      |           |       |      |      |                                                 |       |                      |                                                                                                                                                                                                                                                                                 |      |     |           |       |      |      |
|---------------------------|---------------------------------------------------------------------------------------------------------------------------------------------------------------------------------------------------------------------------------------------------------------------------------------------------------------------------------------------------------------------------------------------------------------------------------------------|------|------|-----------|-------|------|------|-------------------------------------------------|-------|----------------------|---------------------------------------------------------------------------------------------------------------------------------------------------------------------------------------------------------------------------------------------------------------------------------|------|-----|-----------|-------|------|------|
| Rsa1.0_00293.1.g10632.t1  | gb EOA19326.1  hypothetical protein CARUB_v10003355mg [Capsella rubella]                                                                                                                                                                                                                                                                                                                                                                    | 86   | 84   | 8.00E-11  | 97.7  | 44.2 | 54.7 | hypothetical protein CARUB_v10003355mg          | gbpln | Capsella rubella     | AT5G26717.1   Symbols:   Putative membrane lipoprotein   chr5:9284612-9284857 FORWARD LENGTH=81                                                                                                                                                                                 | 86   | 81  | 1.00E-11  | 94.2  | 37.2 | 46.5 |
| Rsa1.0_00293.1.g10633.t1  | gb EOA19326.1  hypothetical protein CARUB_v10003355mg [Capsella rubella]                                                                                                                                                                                                                                                                                                                                                                    | 86   | 84   | 1.00E-10  | 97.7  | 44.2 | 54.7 | hypothetical protein CARUB_v10003355mg          | gbpln | Capsella rubella     | AT5G26717.1   Symbols:   Putative membrane lipoprotein   chr5:9284612-9284857 FORWARD LENGTH=81                                                                                                                                                                                 | 86   | 81  | 9.00E-12  | 94.2  | 38.4 | 46.5 |
| Rsa1.0_00293.1.g10634.t1  | gb EOA23342.1  hypothetical protein CARUB_v10019413mg [Capsella rubella]                                                                                                                                                                                                                                                                                                                                                                    | 530  | 381  | 2.00E-67  | 71.9  | 30.0 | 41.5 | hypothetical protein CARUB_v10019413mg          | gbpln | Capsella rubella     | AT3G28270.1   Symbols:   Protein of unknown function (DUF677)   chr3:10538725-10539849 FORWARD LENGTH=374                                                                                                                                                                       | 530  | 374 | 8.00E-63  | 70.6  | 28.5 | 42.6 |
| Rsa1.0_00293.1.g10635.t2  | gb EOA23342.1  hypothetical protein CARUB_v10019413mg [Capsella rubella]                                                                                                                                                                                                                                                                                                                                                                    | 766  | 381  | 3.00E-69  | 49.7  | 19.8 | 30.2 | hypothetical protein CARUB_v10019413mg          | gbpln | Capsella rubella     | AT3G28270.1   Symbols:   Protein of unknown function (DUF677)   chr3:10538725-10539849 FORWARD LENGTH=374                                                                                                                                                                       | 766  | 374 | 2.00E-64  | 48.8  | 19.2 | 29.1 |
| Rsa1.0_00293.1.g10636.t1  | #                                                                                                                                                                                                                                                                                                                                                                                                                                           | #    | #    | #         | #     | #    | #    | -                                               | ----  | ----                 | #                                                                                                                                                                                                                                                                               | #    | #   | #         | #     | #    | #    |
| Rsa1.0_00293.1.g10637.t1  | #                                                                                                                                                                                                                                                                                                                                                                                                                                           | #    | #    | #         | #     | #    | #    | -                                               | ----  | ----                 | #                                                                                                                                                                                                                                                                               | #    | #   | #         | #     | #    | #    |
| Rsa1.0_00293.1.g10638.t1  | gb EOA32454.1  hypothetical protein CARUB_v10015730mg [Capsella rubella]                                                                                                                                                                                                                                                                                                                                                                    | 455  | 543  | 3.00E-63  | 119.3 | 31.2 | 45.7 | hypothetical protein CARUB_v10015730mg          | gbpln | Capsella rubella     | AT1G52950.1   Symbols:   Nucleic acid-binding, OB-fold-like protein   chr1:19725483-19728007 FORWARD LENGTH=566                                                                                                                                                                 | 455  | 566 | 6.00E-64  | 124.4 | 29.7 | 48.4 |
| Rsa1.0_00293.1.g10639.t1  | gb ABD65063.1  hypothetical protein 27.100041 [Brassica oleracea]                                                                                                                                                                                                                                                                                                                                                                           | 199  | 198  | 2.00E-50  | 99.5  | 53.8 | 70.9 | hypothetical protein 27.100041                  | gbpln | Brassica oleracea    | AT2G35280.1   Symbols:   F-box family protein   chr2:14859709-14860200 REVERSE LENGTH=163                                                                                                                                                                                       | 199  | 163 | 7.00E-11  | 81.9  | 17.1 | 28.6 |
| Rsa1.0_00293.1.g10640.t2  | gb EOA28640.1  hypothetical protein CARUB_v10024862mg, partial [Capsella rubella]                                                                                                                                                                                                                                                                                                                                                           | 489  | 490  | 1.00E-85  | 100.2 | 38.0 | 58.3 | hypothetical protein CARUB_v10024862mg, partial | gbpln | Capsella rubella     | AT1G52950.1   Symbols:   Nucleic acid-binding, OB-fold-like protein   chr1:19725483-19728007 FORWARD LENGTH=566                                                                                                                                                                 | 489  | 566 | 2.00E-84  | 115.7 | 35.4 | 60.3 |
| Rsa1.0_00293.1.g10641.t1  | emb CAB91581.1  putative protein [Arabidopsis thaliana]                                                                                                                                                                                                                                                                                                                                                                                     | 1700 | 1752 | 0         | 103.1 | 49.3 | 63.2 | putative protein                                | gbpln | Arabidopsis thaliana | AT3G51690.1   Symbols:   PIF1 helicase   chr3:19176731-19178107 REVERSE LENGTH=331                                                                                                                                                                                              | 1700 | 331 | 7.00E-71  | 19.5  | 8.0  | 11.4 |
| Rsa1.0_00293.1.g10642.t15 | ref NP_197952.2  small RNA degrading nuclease 5 [Arabidopsis thaliana] gi 215274964 sp Q8L7M4.2 SDN5_ARAT H RecName: Full=Small RNA degrading nuclease 5 gi 332006106 gb AED93489.1  small RNA degrading nuclease 5 [Arabidopsis thaliana]                                                                                                                                                                                                  | 957  | 567  | 0         | 59.2  | 47.3 | 51.8 | small RNA degrading nuclease 5                  | gbpln | Arabidopsis thaliana | AT5G25800.1   Symbols:   Polynucleotidyl transferase, ribonuclease H-like superfamily protein   chr5:8979761-8982724 REVERSE LENGTH=567                                                                                                                                         | 957  | 567 | 0         | 59.2  | 47.3 | 51.8 |
| Rsa1.0_00293.1.g10643.t1  | gb EOA20503.1  hypothetical protein CARUB_v10000816mg, partial [Capsella rubella]                                                                                                                                                                                                                                                                                                                                                           | 383  | 491  | 9.00E-80  | 128.2 | 52.2 | 65.0 | hypothetical protein CARUB_v10000816mg, partial | gbpln | Capsella rubella     | AT5G25790.1   Symbols:   Tesmin/TSO1-like CXO domain-containing protein   chr5:8977233-8979181 REVERSE LENGTH=459                                                                                                                                                               | 383  | 459 | 7.00E-82  | 119.8 | 52.2 | 64.5 |
| Rsa1.0_00293.1.g10644.t1  | ref XP_002874282.1  predicted protein [Arabidopsis lyrata subsp. lyrata] gi 297320119 gb EFH50541.1  predicted protein [Arabidopsis lyrata subsp. lyrata]                                                                                                                                                                                                                                                                                   | 576  | 402  | 1.00E-169 | 69.8  | 50.7 | 57.3 | predicted protein                               | gbpln | Arabidopsis lyrata   | AT5G25770.2   Symbols:   alpha/beta-Hydrolases superfamily protein   chr5:8969308-8971806 REVERSE LENGTH=418                                                                                                                                                                    | 576  | 418 | 1.00E-169 | 72.6  | 48.4 | 55.6 |
| Rsa1.0_00293.1.g10645.t15 | ref XP_002874282.1  predicted protein [Arabidopsis lyrata subsp. lyrata] gi 297320119 gb EFH50541.1  predicted protein [Arabidopsis lyrata subsp. lyrata]                                                                                                                                                                                                                                                                                   | 725  | 402  | 1.00E-160 | 55.4  | 37.2 | 42.9 | predicted protein                               | gbpln | Arabidopsis lyrata   | AT5G25770.3   Symbols:   alpha/beta-Hydrolases superfamily protein   chr5:8969308-8971806 REVERSE LENGTH=421                                                                                                                                                                    | 725  | 421 | 1.00E-161 | 58.1  | 36.8 | 42.6 |
| Rsa1.0_00293.1.g10646.t1  | gb EOA20666.1  hypothetical protein CARUB_v10000978mg, partial [Capsella rubella]                                                                                                                                                                                                                                                                                                                                                           | 424  | 439  | 0         | 103.5 | 83.7 | 89.6 | hypothetical protein CARUB_v10000978mg, partial | gbpln | Capsella rubella     | AT5G25620.2   Symbols:   YUC6   Flavin-binding monooxygenase family protein   chr5:8935312-8938200 REVERSE LENGTH=426                                                                                                                                                           | 424  | 426 | 0         | 100.5 | 84.2 | 89.6 |
| Rsa1.0_00293.1.g10647.t1  | gb AAQ57584.1  BURP domain-containing protein [Brassica napus]                                                                                                                                                                                                                                                                                                                                                                              | 387  | 387  | 0         | 100.0 | 92.2 | 96.4 | BURP domain-containing protein                  | gbpln | Brassica napus       | AT5G25610.1   Symbols:   RD22, ATRD22   BURP domain-containing protein   chr5:8914498-8916684 REVERSE LENGTH=392                                                                                                                                                                | 387  | 392 | 0         | 101.3 | 87.1 | 92.0 |
| Rsa1.0_00293.1.g10648.t1  | ref NP_568475.1  uncharacterized protein [Arabidopsis thaliana] gi 42573475 ref NP_974834.1  uncharacterized protein [Arabidopsis thaliana] gi 21592308 gb AAM64259.1  unknown [Arabidopsis thaliana] gi 94807656 gb ABF47125.1  At5g25570 [Arabidopsis thaliana] gi 332006083 gb AED93466.1  uncharacterized protein AT5G25570 [Arabidopsis thaliana] gi 332006084 gb AED93467.1  uncharacterized protein AT5G25570 [Arabidopsis thaliana] | 215  | 99   | 3.00E-19  | 46.0  | 24.7 | 26.5 | uncharacterized protein                         | gbpln | Arabidopsis thaliana | AT5G25570.2   Symbols:   unknown protein; Has 35333 Blast hits to 34131 proteins in 2444 species: Archaea - 798; Bacteria - 22429; Metazoa - 974; Fungi - 991; Plants - 531; Viruses - 0; Other Eukaryotes - 9610 (source: NCBI BLINK)   chr5:8901832-8902891 FORWARD LENGTH=99 | 215  | 99  | 1.00E-21  | 46.0  | 24.7 | 26.5 |
| Rsa1.0_00293.1.g10649.t3  | ref XP_002872173.1  zinc finger family protein [Arabidopsis lyrata subsp. lyrata] gi 297318010 gb EFH48432.1  zinc finger family protein [Arabidopsis lyrata subsp. lyrata]                                                                                                                                                                                                                                                                 | 306  | 308  | 1.00E-148 | 100.7 | 84.0 | 90.8 | zinc finger family protein                      | gbpln | Arabidopsis lyrata   | AT5G25560.1   Symbols:   CHY-type/CTHY-type/RING-type Zinc finger protein   chr5:8899486-8901391 FORWARD LENGTH=308                                                                                                                                                             | 306  | 308 | 1.00E-149 | 100.7 | 83.0 | 91.2 |

|                          |                                                                                                                                                                                                                                                                                                                                                                                           |      |      |           |       |      |      |                                                                                             |       |                      |                                                                                                                                               |      |      |           |       |      |      |
|--------------------------|-------------------------------------------------------------------------------------------------------------------------------------------------------------------------------------------------------------------------------------------------------------------------------------------------------------------------------------------------------------------------------------------|------|------|-----------|-------|------|------|---------------------------------------------------------------------------------------------|-------|----------------------|-----------------------------------------------------------------------------------------------------------------------------------------------|------|------|-----------|-------|------|------|
| Rsa1.0_00293.1.g10650.t1 | gb[EOA21958.1] hypothetical protein CARUB_v10002457mg [Capsella rubella]                                                                                                                                                                                                                                                                                                                  | 331  | 339  | 1.00E-163 | 102.4 | 88.5 | 94.0 | hypothetical protein CARUB_v10002457mg                                                      | gbpln | Capsella rubella     | AT5G25530.1   Symbols:   DNAJ heat shock family protein   chr5:8889665-8890954 REVERSE LENGTH=347                                             | 331  | 347  | 1.00E-164 | 104.8 | 88.2 | 93.4 |
| Rsa1.0_00293.1.g10651.t1 | ref[XP_002874266.1] hypothetical protein ARALYDRAFT_489409 [Arabidopsis lyrata subsp. lyrata] gi 297320103 gb EFH50525.1] hypothetical protein ARALYDRAFT_489409 [Arabidopsis lyrata subsp. lyrata]                                                                                                                                                                                       | 490  | 499  | 0         | 101.8 | 84.7 | 92.2 | hypothetical protein ARALYDRAFT_489409                                                      | gbpln | Arabidopsis lyrata   | AT5G25510.1   Symbols:   Protein phosphatase 2A regulatory B subunit family protein   chr5:8882728-8884325 REVERSE LENGTH=500                 | 490  | 500  | 0         | 102.0 | 84.7 | 92.2 |
| Rsa1.0_00293.1.g10652.t1 | ref[XP_002874263.1] predicted protein [Arabidopsis lyrata subsp. lyrata] gi 297320100 gb EFH50522.1] predicted protein [Arabidopsis lyrata subsp. lyrata]                                                                                                                                                                                                                                 | 278  | 280  | 1.00E-79  | 100.7 | 57.2 | 69.4 | predicted protein                                                                           | gbpln | Arabidopsis lyrata   | AT5G25470.2   Symbols:   AP2/B3-like transcriptional factor family protein   chr5:8865854-8867234 REVERSE LENGTH=280                          | 278  | 280  | 4.00E-79  | 100.7 | 55.0 | 68.3 |
| Rsa1.0_00293.1.g10653.t2 | ref[XP_002872166.1] hypothetical protein ARALYDRAFT_910605 [Arabidopsis lyrata subsp. lyrata] gi 297318003 gb EFH48425.1] hypothetical protein ARALYDRAFT_910605 [Arabidopsis lyrata subsp. lyrata]                                                                                                                                                                                       | 435  | 369  | 0         | 84.8  | 76.1 | 81.4 | hypothetical protein ARALYDRAFT_910605                                                      | gbpln | Arabidopsis lyrata   | AT5G25460.1   Symbols:   Protein of unknown function, DUF642   chr5:8863430-8865394 FORWARD LENGTH=369                                        | 435  | 369  | 0         | 84.8  | 76.1 | 81.1 |
| Rsa1.0_00293.1.g10654.t1 | #                                                                                                                                                                                                                                                                                                                                                                                         | #    | #    | #         | #     | #    | -    | ----                                                                                        | ----  | #                    | #                                                                                                                                             | #    | #    | #         | #     | #    | #    |
| Rsa1.0_00293.1.g10655.t1 | ref[NP_197927.1] ubiquinol-cytochrome c reductase subunit 7 [Arabidopsis thaliana] gi 403399498 sp F4JWS8.1 QCR72_ARA TH RecName: Full=Cytochrome b-c1 complex subunit 7-2; AltName: Full=Complex III subunit VII gi 332006061 gb AED93444.1] ubiquinol-cytochrome c reductase subunit 7 [Arabidopsis thaliana]                                                                           | 144  | 122  | 1.00E-54  | 84.7  | 77.1 | 81.9 | ubiquinol-cytochrome c reductase subunit 7                                                  | gbpln | Arabidopsis thaliana | AT5G25450.1   Symbols:   Cytochrome bd ubiquinol oxidase, 14kDa subunit   chr5:8857036-8857849 FORWARD LENGTH=122                             | 144  | 122  | 4.00E-57  | 84.7  | 77.1 | 81.9 |
| Rsa1.0_00293.1.g10656.t1 | #                                                                                                                                                                                                                                                                                                                                                                                         | #    | #    | #         | #     | #    | -    | ----                                                                                        | ----  | #                    | #                                                                                                                                             | #    | #    | #         | #     | #    | #    |
| Rsa1.0_00293.1.g10657.t1 | #                                                                                                                                                                                                                                                                                                                                                                                         | #    | #    | #         | #     | #    | -    | ----                                                                                        | ----  | #                    | #                                                                                                                                             | #    | #    | #         | #     | #    | #    |
| Rsa1.0_00294.1.g10658.t1 | gb[EOA12915.1] hypothetical protein CARUB_v10025891mg [Capsella rubella]                                                                                                                                                                                                                                                                                                                  | 299  | 828  | 1.00E-112 | 276.9 | 66.6 | 79.3 | hypothetical protein CARUB_v10025891mg                                                      | gbpln | Capsella rubella     | AT5G55390.2   Symbols: EDM2   ENHANCED DOWNY MILDEW 2   chr5:22448152-22454414 REVERSE LENGTH=1297                                            | 299  | 1297 | 1.00E-52  | 433.8 | 43.1 | 59.5 |
| Rsa1.0_00294.1.g10659.t1 | ref[NP_199617.1] C2 calcium/lipid-binding and phosphoribosyltransferase C-terminal domain-containing protein [Arabidopsis thaliana] gi 10177757 dbj BAB11070.1] phosphoribosylanthranilate transferase-like protein [Arabidopsis thaliana] gi 332008232 gb AED95615.1] C2 calcium/lipid-binding and phosphoribosyltransferase C-terminal domain-containing protein [Arabidopsis thaliana] | 1080 | 1036 | 0         | 95.9  | 86.4 | 89.8 | C2 calcium/lipid-binding and phosphoribosyltransferase C-terminal domain-containing protein | gbpln | Arabidopsis thaliana | AT5G48060.1   Symbols:   C2 calcium/lipid-binding plant phosphoribosyltransferase family protein   chr5:19475296-19478878 FORWARD LENGTH=1036 | 1080 | 1036 | 0         | 95.9  | 86.4 | 89.8 |
| Rsa1.0_00294.1.g10660.t1 | ref[NP_199615.1] ubiquitin carboxyl-terminal hydrolase-like protein [Arabidopsis thaliana] gi 10177755 dbj BAB11068.1] unnamed protein product [Arabidopsis thaliana] gi 55740679 gb AAV63932.1] hypothetical protein At5g48040 [Arabidopsis thaliana] gi 332008230 gb AED95613.1] ubiquitin carboxyl-terminal hydrolase-like protein [Arabidopsis thaliana]                              | 426  | 422  | 1.00E-177 | 99.1  | 73.9 | 81.2 | ubiquitin carboxyl-terminal hydrolase-like protein                                          | gbpln | Arabidopsis thaliana | AT5G48040.1   Symbols:   Ubiquitin carboxyl-terminal hydrolase family protein   chr5:19470461-19471729 FORWARD LENGTH=422                     | 426  | 422  | 1.00E-179 | 99.1  | 73.9 | 81.2 |
| Rsa1.0_00294.1.g10661.t1 | ref[NP_568690.1] gametophytic factor 2 [Arabidopsis thaliana] gi 26452200 dbj BAC43188.1] putative DnaJ protein [Arabidopsis thaliana] gi 332008229 gb AED95612.1] gametophytic factor 2 [Arabidopsis thaliana]                                                                                                                                                                           | 454  | 456  | 0         | 100.4 | 83.7 | 90.7 | gametophytic factor 2                                                                       | gbpln | Arabidopsis thaliana | AT5G48030.1   Symbols: GFA2   gametophytic factor 2   chr5:19466298-19469753 REVERSE LENGTH=456                                               | 454  | 456  | 0         | 100.4 | 83.7 | 90.7 |
| Rsa1.0_00294.1.g10662.t1 | ref[XP_002865589.1] hypothetical protein ARALYDRAFT_917648 [Arabidopsis lyrata subsp. lyrata] gi 297311424 gb EFH41848.1] hypothetical protein ARALYDRAFT_917648 [Arabidopsis lyrata subsp. lyrata]                                                                                                                                                                                       | 360  | 355  | 0         | 98.6  | 93.9 | 96.7 | hypothetical protein ARALYDRAFT_917648                                                      | gbpln | Arabidopsis lyrata   | AT5G48020.1   Symbols:   2-oxoglutarate (2OG) and Fe(II)-dependent oxygenase superfamily protein   chr5:19462888-19464790 REVERSE LENGTH=355  | 360  | 355  | 0         | 98.6  | 90.3 | 93.6 |

|                          |                                                                                                                                                                                                                                                                                                                                                                           |     |     |           |       |      |       |                                                 |       |                      |                                                                                                                                                                                                                                                                                                                                                                                                                                                                                                                               |     |     |           |       |      |       |
|--------------------------|---------------------------------------------------------------------------------------------------------------------------------------------------------------------------------------------------------------------------------------------------------------------------------------------------------------------------------------------------------------------------|-----|-----|-----------|-------|------|-------|-------------------------------------------------|-------|----------------------|-------------------------------------------------------------------------------------------------------------------------------------------------------------------------------------------------------------------------------------------------------------------------------------------------------------------------------------------------------------------------------------------------------------------------------------------------------------------------------------------------------------------------------|-----|-----|-----------|-------|------|-------|
| Rsa1.0_00294.1.g10663.t1 | ref[XP_002863846.1] small molecular weight G-protein 1 [Arabidopsis lyrata subsp. lyrata] gi 297309681 gb EFH40105.1  small molecular weight G-protein 1 [Arabidopsis lyrata subsp. lyrata]                                                                                                                                                                               | 223 | 223 | 1.00E-121 | 100.0 | 94.6 | 96.9  | small molecular weight G-protein 1              | gbpln | Arabidopsis lyrata   | AT5G47960.1   Symbols: SMG1, ATRABA4C, RABA4C   RAB GTPase homolog A4C   chr5:19421533-19422473 REVERSE LENGTH=223                                                                                                                                                                                                                                                                                                                                                                                                            | 223 | 223 | 1.00E-123 | 100.0 | 94.6 | 96.4  |
| Rsa1.0_00294.1.g10664.t3 | ref[XP_002865581.1] predicted protein [Arabidopsis lyrata subsp. lyrata] gi 297311416 gb EFH41840.1  predicted protein [Arabidopsis lyrata subsp. lyrata]                                                                                                                                                                                                                 | 734 | 755 | 0         | 102.9 | 64.4 | 74.8  | predicted protein                               | gbpln | Arabidopsis lyrata   | AT5G47940.1   Symbols:   unknown protein; Has 1807 Blast hits to 1807 proteins in 277 species: Archae - 0; Bacteria - 0; Metazoa - 736; Fungi - 347; Plants - 385; Viruses - 0; Other Eukaryotes - 339 (source: NCBI BLink).   chr5:19409407-19411893 REVERSE LENGTH=749                                                                                                                                                                                                                                                      | 734 | 749 | 0         | 102.0 | 63.4 | 73.7  |
| Rsa1.0_00294.1.g10665.t2 | gb EOA24972.1  hypothetical protein CARUB_v10018269mg, partial [Capsella rubella]                                                                                                                                                                                                                                                                                         | 84  | 115 | 3.00E-42  | 136.9 | 97.6 | 100.0 | hypothetical protein CARUB_v10018269mg, partial | gbpln | Capsella rubella     | AT3G61110.1   Symbols: ARS27A, RS27A   ribosomal protein S27   chr3:22611710-22612632 FORWARD LENGTH=86                                                                                                                                                                                                                                                                                                                                                                                                                       | 84  | 86  | 8.00E-44  | 102.4 | 96.4 | 100.0 |
| Rsa1.0_00294.1.g10666.t1 | gb EOA14052.1  hypothetical protein CARUB_v10027188mg [Capsella rubella]                                                                                                                                                                                                                                                                                                  | 168 | 191 | 2.00E-62  | 113.7 | 78.0 | 88.7  | hypothetical protein CARUB_v10027188mg          | gbpln | Capsella rubella     | AT5G47920.1   Symbols:   unknown protein; BEST Arabidopsis thaliana protein match is: unknown protein (TAIR:AT5G13800.1); Has 1807 Blast hits to 1807 proteins in 277 species: Archae - 0; Bacteria - 0; Metazoa - 736; Fungi - 347; Plants - 385; Viruses - 0; Other Eukaryotes - 339 (source: NCBI BLink).   chr5:19403458-19404021 REVERSE LENGTH=187                                                                                                                                                                      | 168 | 187 | 2.00E-64  | 111.3 | 79.2 | 88.7  |
| Rsa1.0_00294.1.g10667.t2 | #                                                                                                                                                                                                                                                                                                                                                                         | #   | #   | #         | #     | #    | #     | -                                               | ----  | ----                 | #                                                                                                                                                                                                                                                                                                                                                                                                                                                                                                                             | #   | #   | #         | #     | #    |       |
| Rsa1.0_00294.1.g10668.t1 | gb EOA12295.1  hypothetical protein CARUB_v10007974mg [Capsella rubella]                                                                                                                                                                                                                                                                                                  | 923 | 921 | 0         | 99.8  | 90.9 | 95.7  | hypothetical protein CARUB_v10007974mg          | gbpln | Capsella rubella     | AT5G47910.1   Symbols: RBOHD, ATRBOHD   respiratory burst oxidase homologue D   chr5:19397585-19401768 FORWARD LENGTH=921                                                                                                                                                                                                                                                                                                                                                                                                     | 923 | 921 | 0         | 99.8  | 91.5 | 95.7  |
| Rsa1.0_00294.1.g10669.t3 | ref[NP_199601.2] uncharacterized protein [Arabidopsis thaliana] gi 332008203 gb AED95586.1  uncharacterized protein AT5G47900 [Arabidopsis thaliana]                                                                                                                                                                                                                      | 472 | 440 | 0         | 93.2  | 82.4 | 86.4  | uncharacterized protein                         | gbpln | Arabidopsis thaliana | AT5G47900.1   Symbols:   Protein of unknown function (DUF1624)   chr5:19392408-19394963 FORWARD LENGTH=440                                                                                                                                                                                                                                                                                                                                                                                                                    | 472 | 440 | 0         | 93.2  | 82.4 | 86.4  |
| Rsa1.0_00294.1.g10670.t1 | ref[XP_002863829.1] hypothetical protein ARALYDRAFT_494832 [Arabidopsis lyrata subsp. lyrata] gi 297309664 gb EFH40088.1  hypothetical protein ARALYDRAFT_494832 [Arabidopsis lyrata subsp. lyrata]                                                                                                                                                                       | 98  | 97  | 1.00E-42  | 99.0  | 85.7 | 95.9  | hypothetical protein ARALYDRAFT_494832          | gbpln | Arabidopsis lyrata   | AT5G47890.1   Symbols:   NADH-ubiquinone oxidoreductase B8 subunit, putative   chr5:19388806-19390409 FORWARD LENGTH=97                                                                                                                                                                                                                                                                                                                                                                                                       | 98  | 97  | 6.00E-45  | 99.0  | 84.7 | 94.9  |
| Rsa1.0_00294.1.g10671.t1 | gb ADE87483.1  eukaryotic release factor 1-1 [Brassica oleracea var. botrytis]                                                                                                                                                                                                                                                                                            | 404 | 434 | 0         | 107.4 | 98.8 | 99.3  | eukaryotic release factor 1-1                   | gbpln | Brassica oleracea    | AT5G47880.2   Symbols: ERF1-1   eukaryotic release factor 1-1   chr5:19386555-19387865 REVERSE LENGTH=436                                                                                                                                                                                                                                                                                                                                                                                                                     | 404 | 436 | 0         | 107.9 | 93.8 | 97.3  |
| Rsa1.0_00294.1.g10672.t1 | gb EOA13902.1  hypothetical protein CARUB_v10027018mg [Capsella rubella]                                                                                                                                                                                                                                                                                                  | 206 | 242 | 4.00E-90  | 117.5 | 79.6 | 86.4  | hypothetical protein CARUB_v10027018mg          | gbpln | Capsella rubella     | AT5G47870.1   Symbols:   FUNCTIONS IN: molecular function unknown; INVOLVED IN: biological process unknown; LOCATED IN: chloroplast; EXPRESSED IN: 22 plant structures; EXPRESSED DURING: 13 growth stages; BEST Arabidopsis thaliana protein match is: cobalt ion binding (TAIR:AT1G71310.1); Has 1807 Blast hits to 1807 proteins in 277 species: Archae - 0; Bacteria - 0; Metazoa - 736; Fungi - 347; Plants - 385; Viruses - 0; Other Eukaryotes - 339 (source: NCBI BLink).   chr5:19384555-19385808 REVERSE LENGTH=199 | 206 | 199 | 5.00E-84  | 96.6  | 79.6 | 84.5  |
| Rsa1.0_00294.1.g10673.t1 | ref[NP_199597.1] uncharacterized protein [Arabidopsis thaliana] gi 10177922 dbj BAB11333.1  unnamed protein product [Arabidopsis thaliana] gi 16648766 gb AAL25574.1  At5g47860/MCA23_20 [Arabidopsis thaliana] gi 22655374 gb AAM98279.1  At5g47860/MCA23_20 [Arabidopsis thaliana] gi 332008198 gb AED95581.1  uncharacterized protein AT5G47860 [Arabidopsis thaliana] | 767 | 431 | 0         | 56.2  | 50.1 | 52.3  | uncharacterized protein                         | gbpln | Arabidopsis thaliana | AT5G47860.1   Symbols:   Protein of unknown function (DUF1350)   chr5:19381656-19384310 FORWARD LENGTH=431                                                                                                                                                                                                                                                                                                                                                                                                                    | 767 | 431 | 0         | 56.2  | 50.1 | 52.3  |
| Rsa1.0_00294.1.g10674.t2 | dbj BAB11330.1  unnamed protein product [Arabidopsis thaliana]                                                                                                                                                                                                                                                                                                            | 200 | 202 | 3.00E-80  | 101.0 | 77.5 | 84.5  | unnamed protein product                         | gbpln | Arabidopsis thaliana | AT5G47830.1   Symbols:   unknown protein; Has 35333 Blast hits to 34131 proteins in 2444 species: Archae - 798; Bacteria - 22429; Metazoa - 974; Fungi - 991; Plants - 531; Viruses - 0; Other Eukaryotes - 9610 (source: NCBI BLink).   chr5:19373013-19374300 REVERSE LENGTH=173                                                                                                                                                                                                                                            | 200 | 173 | 3.00E-78  | 86.5  | 74.5 | 79.5  |



|                          |                                                                                                                                                                                                                                                                                                                                                                                                                                                                               |      |      |           |       |      |      |                                                                                                                                                                                                                                                                                                      |       |                      |                                                                                                                                                                 |      |      |           |       |      |      |
|--------------------------|-------------------------------------------------------------------------------------------------------------------------------------------------------------------------------------------------------------------------------------------------------------------------------------------------------------------------------------------------------------------------------------------------------------------------------------------------------------------------------|------|------|-----------|-------|------|------|------------------------------------------------------------------------------------------------------------------------------------------------------------------------------------------------------------------------------------------------------------------------------------------------------|-------|----------------------|-----------------------------------------------------------------------------------------------------------------------------------------------------------------|------|------|-----------|-------|------|------|
| Rsa1.0_00294.1.g10675.t1 | refNP_199593.2  kinesin family member 4/7/21/27 [Arabidopsis thaliana] gi 30695302 refNP_851151.1  kinesin family member 4/7/21/27 [Arabidopsis thaliana] gi 27260890 gb AAN86114.1  kinesin-like protein [Arabidopsis thaliana] gi 27260892 gb AAN86115.1  kinesin-like protein [Arabidopsis thaliana] gi 332008192 gb AED95575.1  kinesin family member 4/7/21/27 [Arabidopsis thaliana] gi 332008193 gb AED95576.1  kinesin family member 4/7/21/27 [Arabidopsis thaliana] | 1034 | 1035 | 0         | 100.1 | 91.8 | 96.1 | kinesin family member 4/7/21/27                                                                                                                                                                                                                                                                      | gbpln | Arabidopsis thaliana | AT5G47820.2   Symbols: FRA1   P-loop containing nucleoside triphosphate hydrolases superfamily protein   chr5:19368505-19372229 FORWARD LENGTH=1035             | 1034 | 1035 | 0         | 100.1 | 91.8 | 96.1 |
| Rsa1.0_00294.1.g10676.t1 | gb EOA23614.1  hypothetical protein CARUB_v10016814mg [Capsella rubella]                                                                                                                                                                                                                                                                                                                                                                                                      | 621  | 650  | 0         | 104.7 | 73.6 | 80.7 | hypothetical protein CARUB_v10016814mg                                                                                                                                                                                                                                                               | gbpln | Capsella rubella     | AT3G32940.1   Symbols:   RNA-binding KH domain-containing protein   chr3:13491089-13493630 REVERSE LENGTH=607                                                   | 621  | 607  | 0         | 97.7  | 72.5 | 79.2 |
| Rsa1.0_00294.1.g10677.t2 | refNP_197514.2  SOUL heme-binding protein [Arabidopsis thaliana] gi 17473811 gb AAL38336.1  unknown protein [Arabidopsis thaliana] gi 23197728 gb AAN15391.1  unknown protein [Arabidopsis thaliana] gi 332005416 gb AED92799.1  SOUL heme-binding protein [Arabidopsis thaliana]                                                                                                                                                                                             | 509  | 378  | 1.00E-179 | 74.3  | 62.1 | 66.6 | SOUL heme-binding protein                                                                                                                                                                                                                                                                            | gbpln | Arabidopsis thaliana | AT5G20140.1   Symbols:   SOUL heme-binding family protein   chr5:6799047-6800892 REVERSE LENGTH=378                                                             | 509  | 378  | 0         | 74.3  | 62.1 | 66.6 |
| Rsa1.0_00294.1.g10678.t1 | sp Q9LHK4.1 AB8B_ARATH RecName: Full=Putative ABC transporter B family member 8; Short=ABC transporter ABCB.8; Short=AtABCB8; AltName: Full=P-glycoprotein 8; AltName: Full=Putative multidrug resistance protein 22 gi 9294508 dbj BAB02613.1  P-glycoprotein; multi-drug resistance related; ABC transporter-like protein [Arabidopsis thaliana]                                                                                                                            | 1243 | 1241 | 0         | 99.8  | 84.4 | 92.6 | RecName: Full=Putative ABC transporter B family member 8; Short=ABC transporter ABCB.8; Short=AtABCB8; AltName: Full=P-glycoprotein 8; AltName: Full=Putative multidrug resistance protein 22 gi 9294508 dbj BAB02613.1  P-glycoprotein; multi-drug resistance related; ABC transporter-like protein | gbpln | Arabidopsis thaliana | AT3G28345.1   Symbols:   ABC transporter family protein   chr3:10593921-10598775 REVERSE LENGTH=1240                                                            | 1243 | 1240 | 0         | 99.8  | 49.7 | 71.2 |
| Rsa1.0_00294.1.g10679.t1 | ref XP_002877232.1  ATPDR10/PDR10 [Arabidopsis lyrata subsp. lyrata] gi 297323070 gb EFH53491.1  ATPDR10/PDR10 [Arabidopsis lyrata subsp. lyrata]                                                                                                                                                                                                                                                                                                                             | 287  | 1387 | 1.00E-125 | 483.3 | 78.7 | 86.4 | ATPDR10/PDR10                                                                                                                                                                                                                                                                                        | gbpln | Arabidopsis lyrata   | AT3G30842.1   Symbols: PDR10, ATPDR10   pleiotropic drug resistance 10   chr3:12593959-12600432 REVERSE LENGTH=1406                                             | 287  | 1406 | 1.00E-120 | 489.9 | 75.3 | 85.4 |
| Rsa1.0_00294.1.g10680.t1 | gb AAG50806.1 AC079281.8 unknown protein [Arabidopsis thaliana]                                                                                                                                                                                                                                                                                                                                                                                                               | 1677 | 1213 | 0         | 72.3  | 31.7 | 44.2 | unknown protein                                                                                                                                                                                                                                                                                      | gbpln | Arabidopsis thaliana | AT1G43760.1   Symbols:   DNAse I-like superfamily protein   chr1:16528880-16531065 REVERSE LENGTH=626                                                           | 1677 | 626  | 1.00E-82  | 37.3  | 10.0 | 15.0 |
| Rsa1.0_00294.1.g10681.t1 | sp Q7PC85.1 AB38G_ARATH RecName: Full=ABC transporter G family member 38; Short=ABC transporter ABCG.38; Short=AtABCG38; AltName: Full=Probable pleiotropic drug resistance protein 10 gi 28144356 tpg DAA00878.1  TPA_exp: PDR10 ABC transporter [Arabidopsis thaliana]                                                                                                                                                                                                      | 1101 | 1418 | 0         | 128.8 | 83.9 | 91.5 | RecName: Full=ABC transporter G family member 38; Short=ABC transporter ABCG.38; Short=AtABCG38; AltName: Full=Probable pleiotropic drug resistance protein 10 gi 28144356 tpg DAA00878.1  TPA_exp: PDR10 ABC transporter                                                                            | gbpln | Arabidopsis thaliana | AT3G30842.1   Symbols: PDR10, ATPDR10   pleiotropic drug resistance 10   chr3:12593959-12600432 REVERSE LENGTH=1406                                             | 1101 | 1406 | 0         | 127.7 | 80.5 | 88.6 |
| Rsa1.0_00294.1.g10682.t1 | ref XP_002875560.1  predicted protein [Arabidopsis lyrata subsp. lyrata] gi 297321398 gb EFH51819.1  predicted protein [Arabidopsis lyrata subsp. lyrata]                                                                                                                                                                                                                                                                                                                     | 893  | 495  | 0         | 55.4  | 50.6 | 52.7 | predicted protein                                                                                                                                                                                                                                                                                    | gbpln | Arabidopsis lyrata   | AT3G30841.1   Symbols:   Cofactor-independent phosphoglycerate mutase   chr3:12591595-12593401 FORWARD LENGTH=495                                               | 893  | 495  | 0         | 55.4  | 50.1 | 52.5 |
| Rsa1.0_00294.1.g10683.t1 | gb ACA63477.1  proline dehydrogenase [Brassica napus]                                                                                                                                                                                                                                                                                                                                                                                                                         | 498  | 498  | 0         | 100.0 | 96.8 | 98.8 | proline dehydrogenase                                                                                                                                                                                                                                                                                | gbpln | Brassica napus       | AT3G30775.1   Symbols: ERD5, PRODH, AT-POX, ATPOX, ATPDH, PRO1   Methylenetetrahydrofolate reductase family protein   chr3:12448880-12451126 REVERSE LENGTH=499 | 498  | 499  | 0         | 100.2 | 90.4 | 95.6 |
| Rsa1.0_00294.1.g10684.t3 | gb AAC95354.1  receptor-like protein kinase [Arabidopsis thaliana]                                                                                                                                                                                                                                                                                                                                                                                                            | 373  | 684  | 9.00E-32  | 183.4 | 19.6 | 23.1 | receptor-like protein kinase                                                                                                                                                                                                                                                                         | gbpln | Arabidopsis thaliana | AT4G23250.1   Symbols: EMB1290, DUF26-21, RKC1, CRK17   kinases:protein kinases   chr4:12162004-12167026 REVERSE LENGTH=1035                                    | 373  | 1035 | 6.00E-34  | 277.5 | 19.0 | 22.3 |
| Rsa1.0_00295.1.g10685.t1 | gb EOA15180.1  hypothetical protein CARUB_v10028566mg [Capsella rubella]                                                                                                                                                                                                                                                                                                                                                                                                      | 354  | 348  | 1.00E-163 | 98.3  | 81.1 | 89.0 | hypothetical protein CARUB_v10028566mg                                                                                                                                                                                                                                                               | gbpln | Capsella rubella     | AT5G59520.1   Symbols: ZIP2   ZRT/IRT-like protein 2   chr5:23991447-23992762 REVERSE LENGTH=353                                                                | 354  | 353  | 1.00E-164 | 99.7  | 84.7 | 92.4 |

|                          |                                                                                                                                                                                                                                                                                                                                                                                                                                               |      |      |           |       |      |      |                                                                                |       |                      |                                                                                                                                                                                                                                                                                                                                                                                                                                                                     |      |      |           |       |      |      |
|--------------------------|-----------------------------------------------------------------------------------------------------------------------------------------------------------------------------------------------------------------------------------------------------------------------------------------------------------------------------------------------------------------------------------------------------------------------------------------------|------|------|-----------|-------|------|------|--------------------------------------------------------------------------------|-------|----------------------|---------------------------------------------------------------------------------------------------------------------------------------------------------------------------------------------------------------------------------------------------------------------------------------------------------------------------------------------------------------------------------------------------------------------------------------------------------------------|------|------|-----------|-------|------|------|
| Rsa1.0_00295.1.g10686.t1 | gb AAD22286.1  putative non-LTR retroelement reverse transcriptase [Arabidopsis thaliana]                                                                                                                                                                                                                                                                                                                                                     | 139  | 1311 | 3.00E-11  | 943.2 | 32.4 | 48.9 | putative non-LTR retroelement reverse transcriptase                            | gbpln | Arabidopsis thaliana | #                                                                                                                                                                                                                                                                                                                                                                                                                                                                   | #    | #    | #         | #     | #    |      |
| Rsa1.0_00295.1.g10687.t1 | ref XP_002866333.1  hypothetical protein ARALYDRAFT_496082 [Arabidopsis lyrata subsp. lyrata] gi 297312168 gb EFH42592.1  hypothetical protein ARALYDRAFT_496082 [Arabidopsis lyrata subsp. lyrata]                                                                                                                                                                                                                                           | 263  | 266  | 1.00E-125 | 101.1 | 84.4 | 91.6 | hypothetical protein ARALYDRAFT_496082                                         | gbpln | Arabidopsis lyrata   | AT5G59490.1   Symbols:   Haloacid dehalogenase-like hydrolase (HAD) superfamily protein   chr5:23982922-23984419 REVERSE LENGTH=266                                                                                                                                                                                                                                                                                                                                 | 263  | 266  | 1.00E-120 | 101.1 | 84.4 | 91.6 |
| Rsa1.0_00295.1.g10688.t1 | ref NP_200755.1  mannose-P-dolichol utilization defect 1 protein-like protein [Arabidopsis thaliana] gi 12644539 sp Q9LTI3.1 MPU11_ARATH RecName: Full=Mannose-P-dolichol utilization defect 1 protein homolog 1 gi 8885552 dbj BAA97482.1  unnamed protein product [Arabidopsis thaliana] gi 332009810 gb AED97193.1  mannose-P-dolichol utilization defect 1 protein-like protein [Arabidopsis thaliana]                                    | 243  | 239  | 1.00E-103 | 98.4  | 76.5 | 87.2 | mannose-P-dolichol utilization defect 1 protein-like protein                   | gbpln | Arabidopsis thaliana | AT5G59470.1   Symbols:   Mannose-P-dolichol utilization defect 1 protein   chr5:23978611-23979414 FORWARD LENGTH=239                                                                                                                                                                                                                                                                                                                                                | 243  | 239  | 1.00E-106 | 98.4  | 76.5 | 87.2 |
| Rsa1.0_00295.1.g10689.t1 | gb EOA14099.1  hypothetical protein CARUB_v10027239mg [Capsella rubella]                                                                                                                                                                                                                                                                                                                                                                      | 161  | 173  | 8.00E-48  | 107.5 | 73.3 | 82.0 | hypothetical protein CARUB_v10027239mg                                         | gbpln | Capsella rubella     | AT5G59460.1   Symbols:   scarecrow-like transcription factor 11 (SCL11)   chr5:23976968-23978291 REVERSE LENGTH=172                                                                                                                                                                                                                                                                                                                                                 | 161  | 172  | 9.00E-41  | 106.8 | 70.2 | 78.9 |
| Rsa1.0_00295.1.g10690.t1 | ref XP_002864630.1  hypothetical protein ARALYDRAFT_919168 [Arabidopsis lyrata subsp. lyrata] gi 297310465 gb EFH40889.1  hypothetical protein ARALYDRAFT_919168 [Arabidopsis lyrata subsp. lyrata]                                                                                                                                                                                                                                           | 229  | 233  | 3.00E-71  | 101.7 | 67.7 | 78.2 | hypothetical protein ARALYDRAFT_919168                                         | gbpln | Arabidopsis lyrata   | AT5G59380.1   Symbols:   MBD6, ATMDB6   methyl-CPG-binding domain 6   chr5:23952321-23953485 FORWARD LENGTH=225                                                                                                                                                                                                                                                                                                                                                     | 229  | 225  | 3.00E-67  | 98.3  | 62.0 | 73.8 |
| Rsa1.0_00295.1.g10691.t1 | gb EOA15091.1  hypothetical protein CARUB_v10028459mg [Capsella rubella]                                                                                                                                                                                                                                                                                                                                                                      | 377  | 377  | 0         | 100.0 | 98.7 | 99.5 | hypothetical protein CARUB_v10028459mg                                         | gbpln | Capsella rubella     | AT3G46520.1   Symbols:   ACT12   actin-12   chr3:17128567-17129981 FORWARD LENGTH=377                                                                                                                                                                                                                                                                                                                                                                               | 377  | 377  | 0         | 100.0 | 98.7 | 99.5 |
| Rsa1.0_00295.1.g10692.t1 | #                                                                                                                                                                                                                                                                                                                                                                                                                                             | #    | #    | #         | #     | #    | #    | -                                                                              | ----  | ----                 | #                                                                                                                                                                                                                                                                                                                                                                                                                                                                   | #    | #    | #         | #     | #    |      |
| Rsa1.0_00295.1.g10693.t1 | ref NP_200743.1  uncharacterized protein [Arabidopsis thaliana] gi 8885541 dbj BAA97471.1  unnamed protein product [Arabidopsis thaliana] gi 28973705 gb AAO64169.1  unknown protein [Arabidopsis thaliana] gi 29824225 gb AAP04073.1  unknown protein [Arabidopsis thaliana] gi 110737229 dbj BAF00562.1  hypothetical protein [Arabidopsis thaliana] gi 332009791 gb AED97174.1  uncharacterized protein AT5G59350 [Arabidopsis thaliana]   | 277  | 287  | 4.00E-93  | 103.6 | 77.3 | 82.7 | uncharacterized protein                                                        | gbpln | Arabidopsis thaliana | AT5G59350.1   Symbols:   unknown protein; FUNCTIONS IN: molecular function unknown; INVOLVED IN: biological process unknown; LOCATED IN: endomembrane system; EXPRESSED IN: 23 plant structures; EXPRESSED DURING: 13 growth stages; Has 1807 Blast hits to 1807 proteins in 277 species: Archae - 0; Bacteria - 0; Metazoa - 736; Fungi - 347; Plants - 385; Viruses - 0; Other Eukaryotes - 339 (source: NCBI BLINK).   chr5:23941132-23941995 FORWARD LENGTH=287 | 277  | 287  | 1.00E-95  | 103.6 | 77.3 | 82.7 |
| Rsa1.0_00295.1.g10694.t1 | #                                                                                                                                                                                                                                                                                                                                                                                                                                             | #    | #    | #         | #     | #    | #    | -                                                                              | ----  | ----                 | #                                                                                                                                                                                                                                                                                                                                                                                                                                                                   | #    | #    | #         | #     | #    |      |
| Rsa1.0_00295.1.g10695.t1 | #                                                                                                                                                                                                                                                                                                                                                                                                                                             | #    | #    | #         | #     | #    | #    | -                                                                              | ----  | ----                 | #                                                                                                                                                                                                                                                                                                                                                                                                                                                                   | #    | #    | #         | #     | #    |      |
| Rsa1.0_00295.1.g10696.t1 | gb AAC79110.1  putative polyprotein of LTR transposon [Arabidopsis thaliana] gi 7269781 emb CAB77781.1  putative polyprotein of LTR transposon [Arabidopsis thaliana]                                                                                                                                                                                                                                                                         | 507  | 1456 | 1.00E-110 | 287.2 | 37.1 | 43.0 | putative polyprotein of LTR transposon                                         | gbpln | Arabidopsis thaliana | AT4G23160.1   Symbols:   CRK8   cysteine-rich RLK (RECEPTOR-like protein kinase) 8   chr4:12129485-12134086 FORWARD LENGTH=1262                                                                                                                                                                                                                                                                                                                                     | 507  | 1262 | 4.00E-47  | 248.9 | 20.1 | 28.4 |
| Rsa1.0_00295.1.g10697.t1 | pir  T00833 RNA-directed DNA polymerase homolog T13L16.7 - Arabidopsis thaliana (fragment)                                                                                                                                                                                                                                                                                                                                                    | 2022 | 1365 | 0         | 67.5  | 28.7 | 39.3 | RNA-directed DNA polymerase homolog T13L16.7 - Arabidopsis thaliana (fragment) | ----  | ----                 | AT5G59340.1   Symbols:   WOX2   WUSCHEL related homeobox 2   chr5:23933408-23934627 REVERSE LENGTH=260                                                                                                                                                                                                                                                                                                                                                              | 2022 | 260  | 1.00E-106 | 12.9  | 9.4  | 10.5 |
| Rsa1.0_00295.1.g10698.t1 | ref NP_568902.2  ubiquitin carrier protein 7 [Arabidopsis thaliana] gi 28973769 gb AAO64200.1  putative E2, ubiquitin-conjugating enzyme UBC7 [Arabidopsis thaliana] gi 332009785 gb AED97168.1  ubiquitin carrier protein 7 [Arabidopsis thaliana] ref XP_002866324.1  UDP-glucuronic acid decarboxylase [Arabidopsis lyrata subsp. lyrata] gi 297312159 gb EFH42583.1  UDP-glucuronic acid decarboxylase [Arabidopsis lyrata subsp. lyrata] | 194  | 203  | 8.00E-85  | 104.6 | 76.3 | 77.3 | ubiquitin carrier protein 7                                                    | gbpln | Arabidopsis thaliana | AT5G59300.1   Symbols:   UBC7, ATUBC7   ubiquitin carrier protein 7   chr5:23919868-23921304 REVERSE LENGTH=203                                                                                                                                                                                                                                                                                                                                                     | 194  | 203  | 3.00E-87  | 104.6 | 76.3 | 77.3 |
| Rsa1.0_00295.1.g10699.t1 | ref XP_002866324.1  UDP-glucuronic acid decarboxylase [Arabidopsis lyrata subsp. lyrata] gi 297312159 gb EFH42583.1  UDP-glucuronic acid decarboxylase [Arabidopsis lyrata subsp. lyrata]                                                                                                                                                                                                                                                     | 343  | 342  | 0         | 99.7  | 96.2 | 98.3 | UDP-glucuronic acid decarboxylase                                              | gbpln | Arabidopsis lyrata   | AT5G59290.2   Symbols:   UXS3, ATUXS3   UDP-glucuronic acid decarboxylase 3   chr5:23915814-23917998 REVERSE LENGTH=357                                                                                                                                                                                                                                                                                                                                             | 343  | 357  | 0         | 104.1 | 95.6 | 98.0 |

|                          |                                                                                                                                                                                                                                                                             |     |      |           |        |      |      |                                                                                                                 |       |                         |                                                                                                                                                                                                                                                                 |     |     |           |       |      |      |
|--------------------------|-----------------------------------------------------------------------------------------------------------------------------------------------------------------------------------------------------------------------------------------------------------------------------|-----|------|-----------|--------|------|------|-----------------------------------------------------------------------------------------------------------------|-------|-------------------------|-----------------------------------------------------------------------------------------------------------------------------------------------------------------------------------------------------------------------------------------------------------------|-----|-----|-----------|-------|------|------|
| Rsa1.0_00295.1.g10700.t1 | refXP_002864606.1   hypothetical protein ARALYDRAFT_358128 [Arabidopsis lyrata subsp. lyrata] gi 297310441 gb EFH40865.1                                                                                                                                                    | 200 | 251  | 8.00E-16  | 125.5  | 21.0 | 31.0 | hypothetical protein ARALYDRAFT_358128                                                                          | gbpln | Arabidopsis lyrata      | AT1G35890.1   Symbols:   NAC (No Apical Meristem) domain transcriptional regulator superfamily protein   chr1:13341300-13341953 FORWARD LENGTH=171                                                                                                              | 200 | 171 | 1.00E-10  | 85.5  | 12.0 | 16.5 |
| Rsa1.0_00295.1.g10701.t1 | refXP_002888042.1   predicted protein [Arabidopsis lyrata subsp. lyrata] gi 297333883 gb EFH64301.1   predicted protein [Arabidopsis lyrata subsp. lyrata]                                                                                                                  | 360 | 378  | 1.00E-90  | 105.0  | 55.0 | 68.1 | predicted protein                                                                                               | gbpln | Arabidopsis lyrata      | AT3G16740.1   Symbols:   F-box and associated interaction domains-containing protein   chr3:5699476-5700651 FORWARD LENGTH=391                                                                                                                                  | 360 | 391 | 1.00E-69  | 108.6 | 46.1 | 64.4 |
| Rsa1.0_00295.1.g10702.t7 | refXP_002866314.1   DNA-directed RNA polymerase II [Arabidopsis lyrata subsp. lyrata] gi 297312149 gb EFH42573.1   DNA-directed RNA polymerase II [Arabidopsis lyrata subsp. lyrata] gi 482549900 gb EOA14094.1   hypothetical protein CARUB_v10027231mg [Capsella rubella] | 465 | 176  | 3.00E-61  | 37.8   | 25.8 | 26.9 | DNA-directed RNA polymerase II                                                                                  | gbpln | Arabidopsis lyrata      | AT5G59180.1   Symbols: NRPB7   DNA-directed RNA polymerase II   chr5:23883499-23884976 FORWARD LENGTH=176                                                                                                                                                       | 465 | 176 | 2.00E-62  | 37.8  | 25.2 | 26.7 |
| Rsa1.0_00295.1.g10703.t1 | #                                                                                                                                                                                                                                                                           | #   | #    | #         | #      | #    | #    | -                                                                                                               | ----  | ----                    | #                                                                                                                                                                                                                                                               | #   | #   | #         | #     | #    | #    |
| Rsa1.0_00295.1.g10704.t1 | sp Q9FIF0.3 LRK22_ARATH RecName: Full=Putative L-type lectin-domain containing receptor kinase II.2; Short=LecRK-II.2; Flags: Precursor                                                                                                                                     | 700 | 694  | 0         | 99.1   | 75.0 | 84.7 | RecName: Full=Putative L-type lectin-domain containing receptor kinase II.2; Short=LecRK-II.2; Flags: Precursor | ----  | ----                    | AT5G59260.1   Symbols:   Concanavalin A-like lectin protein kinase family protein   chr5:2390791-2390925 REVERSE LENGTH=674                                                                                                                                     | 700 | 674 | 0         | 96.3  | 72.7 | 81.4 |
| Rsa1.0_00296.1.g10705.t2 | #                                                                                                                                                                                                                                                                           | #   | #    | #         | #      | #    | #    | -                                                                                                               | ----  | ----                    | #                                                                                                                                                                                                                                                               | #   | #   | #         | #     | #    | #    |
| Rsa1.0_00296.1.g10706.t1 | #                                                                                                                                                                                                                                                                           | #   | #    | #         | #      | #    | #    | -                                                                                                               | ----  | ----                    | #                                                                                                                                                                                                                                                               | #   | #   | #         | #     | #    | #    |
| Rsa1.0_00296.1.g10707.t1 | gb ABD65112.1   hypothetical protein 31.t00014 [Brassica oleracea]                                                                                                                                                                                                          | 144 | 122  | 6.00E-37  | 84.7   | 56.9 | 68.1 | hypothetical protein 31.t00014                                                                                  | gbpln | Brassica oleracea       | #                                                                                                                                                                                                                                                               | #   | #   | #         | #     | #    | #    |
| Rsa1.0_00296.1.g10708.t3 | gb EOA26404.1   hypothetical protein CARUB_v10023766mg [Capsella rubella]                                                                                                                                                                                                   | 340 | 291  | 1.00E-103 | 85.6   | 75.3 | 79.4 | hypothetical protein CARUB_v10023766mg                                                                          | gbpln | Capsella rubella        | AT2G37340.1   Symbols: RSZ33, ATRSZ33, RSZ233, AT-RS2Z33   arginine/serine-rich zinc knuckle-containing protein 33   chr2:15670372-15672331 REVERSE LENGTH=290                                                                                                  | 340 | 290 | 1.00E-104 | 85.3  | 75.6 | 78.8 |
| Rsa1.0_00296.1.g10709.t4 | gb EOA27940.1   hypothetical protein CARUB_v10024110mg [Capsella rubella]                                                                                                                                                                                                   | 171 | 194  | 2.00E-42  | 113.5  | 72.5 | 80.1 | hypothetical protein CARUB_v10024110mg                                                                          | gbpln | Capsella rubella        | AT2G37300.1   Symbols:   unknown protein; Has 93 Blast hits to 62 proteins in 29 species: Archae - 0; Bacteria - 6; Metazoa - 13; Fungi - 19; Plants - 25; Viruses - 0; Other Eukaryotes - 30 (source: NCBI BLink).   chr2:15662845-15663547 REVERSE LENGTH=169 | 171 | 169 | 7.00E-38  | 98.8  | 69.6 | 76.6 |
| Rsa1.0_00296.1.g10710.t1 | gb ACH99805.1   WRKY44 transcription factor [Brassica napus]                                                                                                                                                                                                                | 420 | 421  | 0         | 100.2  | 89.0 | 93.8 | WRKY44 transcription factor                                                                                     | gbpln | Brassica napus          | AT2G37260.1   Symbols: TTG2, ATWRKY44, WRKY44, DSL1   WRKY family transcription factor family protein   chr2:15645277-15646792 FORWARD LENGTH=429                                                                                                               | 420 | 429 | 0         | 102.1 | 80.7 | 88.3 |
| Rsa1.0_00296.1.g10711.t1 | gb AAF19700.1   AC008047.7 F2K11.25 [Arabidopsis thaliana]                                                                                                                                                                                                                  | 357 | 471  | 1.00E-121 | 131.9  | 66.1 | 75.1 | F2K11.25                                                                                                        | gbpln | Arabidopsis thaliana    | AT1G62620.1   Symbols:   Flavin-binding monooxygenase family protein   chr1:23182678-23184864 FORWARD LENGTH=450                                                                                                                                                | 357 | 450 | 1.00E-110 | 126.1 | 51.5 | 58.3 |
| Rsa1.0_00296.1.g10712.t1 | gb AAC3226.1   putative non-LTR retroelement reverse transcriptase [Arabidopsis thaliana]                                                                                                                                                                                   | 152 | 1529 | 6.00E-29  | 1005.9 | 42.1 | 59.2 | putative non-LTR retroelement reverse transcriptase                                                             | gbpln | Arabidopsis thaliana    | AT5G18880.1   Symbols:   RNA-directed DNA polymerase (reverse transcriptase)-related family protein   chr5:6300535-6301422 REVERSE LENGTH=295                                                                                                                   | 152 | 295 | 2.00E-18  | 194.1 | 33.6 | 48.7 |
| Rsa1.0_00296.1.g10713.t1 | refXP_003563399.1   PREDICTED: LOW QUALITY PROTEIN: polyubiquitin-C-like [Brachypodium distachyon]                                                                                                                                                                          | 440 | 535  | 2.00E-74  | 121.6  | 39.5 | 51.4 | PREDICTED: LOW QUALITY PROTEIN: polyubiquitin-C-like                                                            | gbpln | Brachypodium distachyon | AT4G05320.4   Symbols: UBQ10   polyubiquitin 10   chr4:2718559-2719932 FORWARD LENGTH=457                                                                                                                                                                       | 440 | 457 | 2.00E-75  | 103.9 | 39.5 | 51.4 |
| Rsa1.0_00296.1.g10714.t1 | refXP_002879658.1   ADK/ATPADK1 [Arabidopsis lyrata subsp. lyrata] gi 297325497 gb EFH45591.7.1   ADK/ATPADK1 [Arabidopsis lyrata subsp. lyrata]                                                                                                                            | 282 | 284  | 1.00E-150 | 100.7  | 93.3 | 96.8 | ADK/ATPADK1                                                                                                     | gbpln | Arabidopsis lyrata      | AT2G37250.1   Symbols: ADK, ATPADK1   adenosine kinase   chr2:15641991-15643318 FORWARD LENGTH=284                                                                                                                                                              | 282 | 284 | 1.00E-151 | 100.7 | 92.6 | 96.8 |
| Rsa1.0_00296.1.g10715.t1 | refXP_002868566.1   hypothetical protein ARALYDRAFT_493781 [Arabidopsis lyrata subsp. lyrata] gi 297314402 gb EFH44825.1   hypothetical protein ARALYDRAFT_493781 [Arabidopsis lyrata subsp. lyrata]                                                                        | 669 | 668  | 0         | 99.9   | 98.1 | 99.1 | hypothetical protein ARALYDRAFT_493781                                                                          | gbpln | Arabidopsis lyrata      | AT5G42020.1   Symbols: BIP, BIP2   Heat shock protein 70 (Hsp 70) family protein   chr5:16807697-16810480 REVERSE LENGTH=668                                                                                                                                    | 669 | 668 | 0         | 99.9  | 97.5 | 99.1 |
| Rsa1.0_00296.1.g10716.t1 | gb EOA29094.1   hypothetical protein CARUB_v10025361mg [Capsella rubella]                                                                                                                                                                                                   | 752 | 757  | 0         | 100.7  | 87.2 | 93.0 | hypothetical protein CARUB_v10025361mg                                                                          | gbpln | Capsella rubella        | AT2G37230.1   Symbols:   Tetratricopeptide repeat (TPR)-like superfamily protein   chr2:15637177-15639450 REVERSE LENGTH=757                                                                                                                                    | 752 | 757 | 0         | 100.7 | 87.1 | 92.8 |

|                          |                                                                                                                                                                                                                                                  |     |     |           |       |       |       |                                        |       |                      |                                                                                                                                                                                                                                                                                                                                                                                  |     |     |           |       |      |      |
|--------------------------|--------------------------------------------------------------------------------------------------------------------------------------------------------------------------------------------------------------------------------------------------|-----|-----|-----------|-------|-------|-------|----------------------------------------|-------|----------------------|----------------------------------------------------------------------------------------------------------------------------------------------------------------------------------------------------------------------------------------------------------------------------------------------------------------------------------------------------------------------------------|-----|-----|-----------|-------|------|------|
| Rsa1.0_00296.1.g10717.t1 | refXP_002881497.1  hypothetical protein ARALYDRAFT_482714 [Arabidopsis lyrata subsp. lyrata] gi 297327336 gb EFH57756.1                                                                                                                          | 287 | 289 | 1.00E-114 | 100.7 | 80.1  | 85.4  | hypothetical protein ARALYDRAFT_482714 | gbpln | Arabidopsis lyrata   | AT2G37220.1   Symbols:   RNA-binding (RRM/RBD/RNP motifs) family protein   chr2:15634980-15636331 REVERSE LENGTH=289                                                                                                                                                                                                                                                             | 287 | 289 | 1.00E-109 | 100.7 | 78.0 | 85.0 |
| Rsa1.0_00296.1.g10718.t1 | refXP_002881496.1  hypothetical protein ARALYDRAFT_482713 [Arabidopsis lyrata subsp. lyrata] gi 297327335 gb EFH57755.1                                                                                                                          | 208 | 215 | 1.00E-111 | 103.4 | 93.8  | 96.6  | hypothetical protein ARALYDRAFT_482713 | gbpln | Arabidopsis lyrata   | AT2G37210.1   Symbols:   lysine decarboxylase family protein   chr2:15624253-15626834 REVERSE LENGTH=215                                                                                                                                                                                                                                                                         | 208 | 215 | 1.00E-114 | 103.4 | 93.8 | 96.6 |
| Rsa1.0_00296.1.g10719.t1 | refNP_850279.1  uncharacterized protein [Arabidopsis thaliana] gi 62867605 gb AA17406.1  At2g37195 [Arabidopsis thaliana] gi 66841340 gb AA57307.1  At2g37195 [Arabidopsis thaliana] gi 110743680 db BAE99677.1                                  | 143 | 133 | 7.00E-56  | 93.0  | 83.9  | 87.4  | uncharacterized protein                | gbpln | Arabidopsis thaliana | AT2G37195.1   Symbols:   unknown protein; FUNCTIONS IN: molecular_function unknown; INVOLVED IN: biological_process unknown; LOCATED IN: endomembrane system; Has 23 Blast hits to 23 proteins in 10 species: Archae - 0; Bacteria - 0; Metazoa - 0; Fungi - 0; Plants - 23; Viruses - 0; Other Eukaryotes - 0 (source: NCBI BLINK).   chr2:15620370-15621464 FORWARD LENGTH=133 | 143 | 133 | 2.00E-58  | 93.0  | 83.9 | 87.4 |
| Rsa1.0_00296.1.g10720.t1 | gb EOA19281.1  hypothetical protein CARUB_v10001944mg [Capsella rubella]                                                                                                                                                                         | 234 | 215 | 3.00E-59  | 91.9  | 55.1  | 65.0  | hypothetical protein CARUB_v10001944mg | gbpln | Capsella rubella     | AT4G03570.1   Symbols:   Cystatin/monellin superfamily protein   chr4:1590413-1594105 REVERSE LENGTH=347                                                                                                                                                                                                                                                                         | 234 | 347 | 7.00E-39  | 148.3 | 32.5 | 38.0 |
| Rsa1.0_00296.1.g10721.t1 | gb EOA28926.1  hypothetical protein CARUB_v10025173mg [Capsella rubella]                                                                                                                                                                         | 166 | 166 | 3.00E-87  | 100.0 | 97.6  | 99.4  | hypothetical protein CARUB_v10025173mg | gbpln | Capsella rubella     | AT3G53430.1   Symbols:   Ribosomal protein L11 family protein   chr3:19809895-19810395 REVERSE LENGTH=166                                                                                                                                                                                                                                                                        | 166 | 166 | 6.00E-89  | 100.0 | 96.4 | 98.8 |
| Rsa1.0_00296.1.g10722.t1 | dbj BAA92261.1  Plasma membrane aquaporin 2c [Raphanus sativus]                                                                                                                                                                                  | 283 | 283 | 1.00E-160 | 100.0 | 100.0 | 100.0 | Plasma membrane aquaporin 2c           | gbpln | Raphanus sativus     | AT2G37170.1   Symbols:   PIP2B, PIP2.2   plasma membrane intrinsic protein 2   chr2:15613624-15614791 REVERSE LENGTH=285                                                                                                                                                                                                                                                         | 283 | 285 | 1.00E-156 | 100.7 | 95.4 | 97.5 |
| Rsa1.0_00296.1.g10723.t1 | gb EOA26868.1  hypothetical protein CARUB_v10022961mg [Capsella rubella] gi 482562679 gb EOA26869.1                                                                                                                                              | 532 | 536 | 0         | 100.8 | 74.2  | 82.3  | hypothetical protein CARUB_v10022961mg | gbpln | Capsella rubella     | AT2G37150.2   Symbols:   RING/U-box superfamily protein   chr2:15603748-15605988 REVERSE LENGTH=546                                                                                                                                                                                                                                                                              | 532 | 546 | 0         | 102.6 | 76.1 | 83.6 |
| Rsa1.0_00297.1.g10724.t1 | #                                                                                                                                                                                                                                                | #   | #   | #         | #     | #     | #     | -                                      | ----  | ----                 | #                                                                                                                                                                                                                                                                                                                                                                                | #   | #   | #         | #     | #    | #    |
| Rsa1.0_00297.1.g10725.t1 | gb EOA32755.1  hypothetical protein CARUB_v10016060mg [Capsella rubella]                                                                                                                                                                         | 469 | 394 | 2.00E-73  | 84.0  | 40.9  | 49.7  | hypothetical protein CARUB_v10016060mg | gbpln | Capsella rubella     | AT3G20030.1   Symbols:   F-box and associated interaction domains-containing protein   chr3:6990254-6991462 FORWARD LENGTH=402                                                                                                                                                                                                                                                   | 469 | 402 | 3.00E-74  | 85.7  | 39.2 | 49.9 |
| Rsa1.0_00297.1.g10726.t1 | gb ABD64968.1  hypothetical protein 25.t00005 [Brassica oleracea]                                                                                                                                                                                | 164 | 299 | 1.00E-16  | 182.3 | 39.0  | 51.8  | hypothetical protein 25.t00005         | gbpln | Brassica oleracea    | AT5G47590.1   Symbols:   Heat shock protein HSP20/alpha crystallin family   chr5:19297945-19299099 REVERSE LENGTH=264                                                                                                                                                                                                                                                            | 164 | 264 | 2.00E-17  | 161.0 | 34.8 | 53.0 |
| Rsa1.0_00297.1.g10727.t1 | refNP_001031995.1  defensin-like protein 115 [Arabidopsis thaliana] gi 122209222 sp Q2V321.1 DF115.ARAT H.RecName: Full-Defensin-like protein 115; Flags: Precursor gi 332007401 gb AED94784.1  defensin-like protein 115 [Arabidopsis thaliana] | 143 | 81  | 1.00E-10  | 56.6  | 24.5  | 30.1  | defensin-like protein 115              | gbpln | Arabidopsis thaliana | AT5G42232.1   Symbols:   Defensin-like (DFL) family protein   chr5:16884962-16885309 FORWARD LENGTH=81                                                                                                                                                                                                                                                                           | 143 | 81  | 4.00E-13  | 56.6  | 24.5 | 30.1 |
| Rsa1.0_00297.1.g10728.t6 | gb EOA17867.1  hypothetical protein CARUB_v10006272mg [Capsella rubella]                                                                                                                                                                         | 484 | 511 | 0         | 105.6 | 77.3  | 85.3  | hypothetical protein CARUB_v10006272mg | gbpln | Capsella rubella     | AT4G22860.1   Symbols:   Cell cycle regulated microtubule associated protein   chr4:11997735-12001281 FORWARD LENGTH=509                                                                                                                                                                                                                                                         | 484 | 509 | 0         | 105.2 | 76.0 | 84.3 |
| Rsa1.0_00297.1.g10729.t1 | gb EOA17219.1  hypothetical protein CARUB_v10005494mg [Capsella rubella]                                                                                                                                                                         | 265 | 268 | 1.00E-118 | 101.1 | 81.5  | 88.7  | hypothetical protein CARUB_v10005494mg | gbpln | Capsella rubella     | AT4G22920.1   Symbols:   ATNYE1, NYE1   non-yellowing 1   chr4:12016776-12017969 REVERSE LENGTH=268                                                                                                                                                                                                                                                                              | 265 | 268 | 1.00E-117 | 101.1 | 78.5 | 86.4 |
| Rsa1.0_00297.1.g10730.t1 | gb EOA17219.1  hypothetical protein CARUB_v10005494mg [Capsella rubella]                                                                                                                                                                         | 263 | 268 | 1.00E-129 | 101.9 | 86.3  | 93.2  | hypothetical protein CARUB_v10005494mg | gbpln | Capsella rubella     | AT4G22920.1   Symbols:   ATNYE1, NYE1   non-yellowing 1   chr4:12016776-12017969 REVERSE LENGTH=268                                                                                                                                                                                                                                                                              | 263 | 268 | 1.00E-128 | 101.9 | 84.4 | 92.4 |
| Rsa1.0_00297.1.g10731.t1 | emb CAA09731.1  receptor-like protein kinase, RLK3 [Arabidopsis thaliana]                                                                                                                                                                        | 635 | 667 | 0         | 105.0 | 69.3  | 81.3  | receptor-like protein kinase, RLK3     | gbpln | Arabidopsis thaliana | AT4G23190.1   Symbols:   CRK11, AT-RLK3   cysteine-rich RLK (RECEPTOR-like protein kinase) 11   chr4:12141197-12143710 REVERSE LENGTH=667                                                                                                                                                                                                                                        | 635 | 667 | 0         | 105.0 | 69.1 | 80.6 |
| Rsa1.0_00297.1.g10732.t1 | dbj BAJ33736.1  unnamed protein product [Thellungiella halophila]                                                                                                                                                                                | 154 | 403 | 1.00E-51  | 261.7 | 66.2  | 76.6  | unnamed protein product                | ----  | ----                 | AT4G23190.1   Symbols:   CRK11, AT-RLK3   cysteine-rich RLK (RECEPTOR-like protein kinase) 11   chr4:12141197-12143710 REVERSE LENGTH=667                                                                                                                                                                                                                                        | 154 | 667 | 5.00E-53  | 433.1 | 63.6 | 76.6 |

|                          |                                                                                                                                                                                                                                                                                                                                                                                                                                                                                                                                                                                                            |     |     |           |       |      |      |                                                              |       |                      |                                                                                                                                                                                                                                                                                                                                                                                                                                                                                                                                                                             |     |     |          |       |      |      |
|--------------------------|------------------------------------------------------------------------------------------------------------------------------------------------------------------------------------------------------------------------------------------------------------------------------------------------------------------------------------------------------------------------------------------------------------------------------------------------------------------------------------------------------------------------------------------------------------------------------------------------------------|-----|-----|-----------|-------|------|------|--------------------------------------------------------------|-------|----------------------|-----------------------------------------------------------------------------------------------------------------------------------------------------------------------------------------------------------------------------------------------------------------------------------------------------------------------------------------------------------------------------------------------------------------------------------------------------------------------------------------------------------------------------------------------------------------------------|-----|-----|----------|-------|------|------|
| Rsa1.0_00297.1.g10733.t1 | refNP_194050.2  cysteine-rich receptor-like protein kinase 11 [Arabidopsis thaliana]<br>gi 152013437 sp Q9ZP16.2 CRK11_ARATH RecName: Full=Cysteine-rich receptor-like protein kinase 11; Short=Cysteine-rich RLK11; AltName: Full=Receptor-like protein kinase 3; Flags: Precursor<br>gi 332659320 gb AEE84720.1  cysteine-rich receptor-like protein kinase 11 [Arabidopsis thaliana]                                                                                                                                                                                                                    | 667 | 667 | 0         | 100.0 | 69.6 | 78.1 | cysteine-rich receptor-like protein kinase 11                | gbpln | Arabidopsis thaliana | AT4G23190.1   Symbols: CRK11, AT-RLK3   cysteine-rich RLK (RECEPTOR-like protein kinase) 11   chr4:12141197-12143710 REVERSE LENGTH=667                                                                                                                                                                                                                                                                                                                                                                                                                                     | 667 | 667 | 0        | 100.0 | 69.6 | 78.1 |
| Rsa1.0_00297.1.g10734.t1 | emb CAA09731.1  receptor-like protein kinase, RLK3 [Arabidopsis thaliana]                                                                                                                                                                                                                                                                                                                                                                                                                                                                                                                                  | 677 | 667 | 0         | 98.5  | 71.0 | 81.2 | receptor-like protein kinase, RLK3                           | gbpln | Arabidopsis thaliana | AT4G23190.1   Symbols: CRK11, AT-RLK3   cysteine-rich RLK (RECEPTOR-like protein kinase) 11   chr4:12141197-12143710 REVERSE LENGTH=667                                                                                                                                                                                                                                                                                                                                                                                                                                     | 677 | 667 | 0        | 98.5  | 70.8 | 80.6 |
| Rsa1.0_00297.1.g10735.t1 | refNP_194026.1  agamous-like MADS-box protein AGL19 [Arabidopsis thaliana]<br>gi 12229640 sp O82743.1 AGL19_ARATH RecName: Full=Agamous-like MADS-box protein AGL19<br>gi 11545543 gb AAG37901.1 AF312664.1 MADS-box protein AGL19 [Arabidopsis thaliana] gi 3292820 emb CAA19810.1  putative MADS Box / AGL protein [Arabidopsis thaliana]<br>gi 7269142 emb CAB79250.1  putative MADS Box / AGL protein [Arabidopsis thaliana] gi 23296476 gb AAN13066.1  putative MADS box AGL protein [Arabidopsis thaliana]<br>gi 332659284 gb AEE84684.1  agamous-like MADS-box protein AGL19 [Arabidopsis thaliana] | 221 | 219 | 4.00E-91  | 99.1  | 81.0 | 86.9 | agamous-like MADS-box protein AGL19                          | gbpln | Arabidopsis thaliana | AT4G22950.1   Symbols: AGL19, GL19   AGAMOUS-like 19   chr4:12023946-12027421 REVERSE LENGTH=219                                                                                                                                                                                                                                                                                                                                                                                                                                                                            | 221 | 219 | 1.00E-93 | 99.1  | 81.0 | 86.9 |
| Rsa1.0_00297.1.g10736.t1 | refNP_196651.1  serine/threonine-protein phosphatase 7 inactive-like protein [Arabidopsis thaliana]<br>gi 75173891 sp Q9LEV0.1 PPP7J_ARATH RecName: Full=Serine/threonine-protein phosphatase 7 inactive homolog<br>gi 8979724 emb CAB98845.1  serine/threonine protein phosphatase-like protein [Arabidopsis thaliana]<br>gi 332004224 gb AED91607.1  serine/threonine-protein phosphatase 7 inactive-like protein [Arabidopsis thaliana]                                                                                                                                                                 | 95  | 600 | 2.00E-34  | 631.6 | 73.7 | 81.1 | serine/threonine-protein phosphatase 7 inactive-like protein | gbpln | Arabidopsis thaliana | AT5G10900.1   Symbols:   Calceinurim-like metallo-phosphoesterase superfamily protein   chr5:3436413-3439221 REVERSE LENGTH=600                                                                                                                                                                                                                                                                                                                                                                                                                                             | 95  | 600 | 4.00E-37 | 631.6 | 73.7 | 81.1 |
| Rsa1.0_00297.1.g10737.t1 | refNP_194029.1  uncharacterized protein [Arabidopsis thaliana]<br>gi 3292823 emb CAA19813.1  putative protein [Arabidopsis thaliana]<br>gi 7269145 emb CAB79253.1  putative protein [Arabidopsis thaliana]<br>gi 52354393 gb AAU44517.1  hypothetical protein AT4G22980 [Arabidopsis thaliana]<br>gi 332659288 gb AEE84688.1  uncharacterized protein AT4G22980 [Arabidopsis thaliana]                                                                                                                                                                                                                     | 121 | 559 | 1.00E-43  | 462.0 | 78.5 | 83.5 | uncharacterized protein                                      | gbpln | Arabidopsis thaliana | AT4G22980.1   Symbols:   FUNCTIONS IN: molecular_function unknown; INVOLVED IN: biological_process unknown; LOCATED IN: chloroplast; EXPRESSED IN: 13 plant structures; EXPRESSED DURING: 9 growth stages; BEST Arabidopsis thaliana protein match is: Pyridoxal phosphate (PLP)-dependent transferases superfamily protein (TAIR:AT5G51920.1); Has 520 Blast hits to 468 proteins in 130 species: Archae - 5; Bacteria - 23; Metazoa - 99; Fungi - 131; Plants - 231; Viruses - 0; Other Eukaryotes - 31 (source: NCBI BLINK).   chr4:12043974-12045653 REVERSE LENGTH=559 | 121 | 559 | 3.00E-46 | 462.0 | 78.5 | 83.5 |
| Rsa1.0_00297.1.g10738.t1 | gb EOA16250.1  hypothetical protein CARUB_v10004396mg, partial [Capsella rubella]                                                                                                                                                                                                                                                                                                                                                                                                                                                                                                                          | 565 | 612 | 0         | 108.3 | 76.6 | 85.8 | hypothetical protein CARUB_v10004396mg, partial              | gbpln | Capsella rubella     | AT4G22980.1   Symbols:   FUNCTIONS IN: molecular_function unknown; INVOLVED IN: biological_process unknown; LOCATED IN: chloroplast; EXPRESSED IN: 13 plant structures; EXPRESSED DURING: 9 growth stages; BEST Arabidopsis thaliana protein match is: Pyridoxal phosphate (PLP)-dependent transferases superfamily protein (TAIR:AT5G51920.1); Has 520 Blast hits to 468 proteins in 130 species: Archae - 5; Bacteria - 23; Metazoa - 99; Fungi - 131; Plants - 231; Viruses - 0; Other Eukaryotes - 31 (source: NCBI BLINK).   chr4:12043974-12045653 REVERSE LENGTH=559 | 565 | 559 | 0        | 98.9  | 76.6 | 85.3 |
| Rsa1.0_00298.1.g10739.t1 | gb AAC23763.1  hypothetical protein [Arabidopsis thaliana]                                                                                                                                                                                                                                                                                                                                                                                                                                                                                                                                                 | 389 | 705 | 1.00E-40  | 181.2 | 23.9 | 30.1 | hypothetical protein                                         | gbpln | Arabidopsis thaliana | AT2G06420.1   Symbols:   Domain of unknown function (DUF1955)   chr2:2539083-2539985 FORWARD LENGTH=249                                                                                                                                                                                                                                                                                                                                                                                                                                                                     | 389 | 249 | 4.00E-20 | 64.0  | 16.7 | 21.3 |
| Rsa1.0_00298.1.g10740.t1 | dbj BAB01350.1  Mutator-like transposase [Arabidopsis thaliana]                                                                                                                                                                                                                                                                                                                                                                                                                                                                                                                                            | 738 | 811 | 1.00E-152 | 109.9 | 38.3 | 52.2 | Mutator-like transposase                                     | gbpln | Arabidopsis thaliana | AT1G64260.1   Symbols:   MuDR family transposase   chr1:23847756-23849915 FORWARD LENGTH=719                                                                                                                                                                                                                                                                                                                                                                                                                                                                                | 738 | 719 | 8.00E-21 | 97.4  | 16.4 | 29.5 |

|                          |                                                                                                                                                                                                                                                                                                                                                                                                                                                                                                                                                                                                                                                                                                                                                                                                                                                                                                                                                                                                 |      |      |           |       |      |      |                                        |       |                      |                                                                                                                                  |      |      |           |       |      |      |
|--------------------------|-------------------------------------------------------------------------------------------------------------------------------------------------------------------------------------------------------------------------------------------------------------------------------------------------------------------------------------------------------------------------------------------------------------------------------------------------------------------------------------------------------------------------------------------------------------------------------------------------------------------------------------------------------------------------------------------------------------------------------------------------------------------------------------------------------------------------------------------------------------------------------------------------------------------------------------------------------------------------------------------------|------|------|-----------|-------|------|------|----------------------------------------|-------|----------------------|----------------------------------------------------------------------------------------------------------------------------------|------|------|-----------|-------|------|------|
| Rsa1.0_00298.1.g10741.t1 | dbj BAB01349.1  En/Spm-like transposon protein-like [Arabidopsis thaliana]                                                                                                                                                                                                                                                                                                                                                                                                                                                                                                                                                                                                                                                                                                                                                                                                                                                                                                                      | 725  | 714  | 9.00E-73  | 98.5  | 30.2 | 41.8 | En/Spm-like transposon protein-like    | gbpln | Arabidopsis thaliana | AT2G06420.1   Symbols:   Domain of unknown function (DUF1985)   chr:2.2539083-2539985 FORWARD LENGTH=249                         | 725  | 249  | 7.00E-31  | 34.3  | 10.6 | 14.8 |
| Rsa1.0_00298.1.g10742.t5 | ref XP_002892977.1  nucleotidyltransferase family protein [Arabidopsis lyrata subsp. lyrata] gi 297338819 gb EFH69236.1  nucleotidyltransferase family protein [Arabidopsis lyrata subsp. lyrata]                                                                                                                                                                                                                                                                                                                                                                                                                                                                                                                                                                                                                                                                                                                                                                                               | 708  | 716  | 0         | 101.1 | 81.5 | 86.9 | nucleotidyltransferase family protein  | gbpln | Arabidopsis lyrata   | AT1G17980.1   Symbols: PAPS1   poly(A) polymerase 1   chr1:6187742-6191418 REVERSE LENGTH=713                                    | 708  | 713  | 0         | 100.7 | 79.4 | 85.0 |
| Rsa1.0_00298.1.g10743.t1 | gb EOA36865.1  hypothetical protein CARUB_v10008857mg [Capsella rubella]                                                                                                                                                                                                                                                                                                                                                                                                                                                                                                                                                                                                                                                                                                                                                                                                                                                                                                                        | 418  | 521  | 1.00E-154 | 124.6 | 63.4 | 76.1 | hypothetical protein CARUB_v10008857mg | gbpln | Capsella rubella     | AT5G26830.1   Symbols:   Threonyl-tRNA synthetase   chr5:9437351-9441568 FORWARD LENGTH=709                                      | 418  | 709  | 1.00E-148 | 169.6 | 59.1 | 73.2 |
| Rsa1.0_00298.1.g10744.t1 | ref XP_002890254.1  hypothetical protein ARALYDRAFT_889207 [Arabidopsis lyrata subsp. lyrata] gi 297336096 gb EFH66513.1  hypothetical protein ARALYDRAFT_889207 [Arabidopsis lyrata subsp. lyrata]                                                                                                                                                                                                                                                                                                                                                                                                                                                                                                                                                                                                                                                                                                                                                                                             | 247  | 248  | 1.00E-117 | 100.4 | 84.2 | 91.1 | hypothetical protein ARALYDRAFT_889207 | gbpln | Arabidopsis lyrata   | AT1G17950.1   Symbols: ATMYB52, BW52, MYB52   myb domain protein 52   chr1:6177764-6179063 FORWARD LENGTH=249                    | 247  | 249  | 1.00E-118 | 100.8 | 83.8 | 90.7 |
| Rsa1.0_00298.1.g10745.t1 | #                                                                                                                                                                                                                                                                                                                                                                                                                                                                                                                                                                                                                                                                                                                                                                                                                                                                                                                                                                                               | #    | #    | #         | #     | #    | #    | -                                      | ----  | ----                 | #                                                                                                                                | #    | #    | #         | #     | #    | #    |
| Rsa1.0_00298.1.g10746.t1 | #                                                                                                                                                                                                                                                                                                                                                                                                                                                                                                                                                                                                                                                                                                                                                                                                                                                                                                                                                                                               | #    | #    | #         | #     | #    | #    | -                                      | ----  | ----                 | #                                                                                                                                | #    | #    | #         | #     | #    | #    |
| Rsa1.0_00298.1.g10747.t1 | ref XP_002892968.1  hypothetical protein ARALYDRAFT_889192 [Arabidopsis lyrata subsp. lyrata] gi 297338810 gb EFH69227.1  hypothetical protein ARALYDRAFT_889192 [Arabidopsis lyrata subsp. lyrata] ref NP_173223.1  putative aquaporin TIP3-2 [Arabidopsis thaliana] gi 32363213 sp O22588.1 TIP32_ARATH RecName: Full=Probable aquaporin TIP3-2; AltName: Full=Beta-tonoplast intrinsic protein; Short=Beta-TIP; AltName: Full=Tonoplast intrinsic protein 3-2; Short=AtTIP3.2 gi 9665059 gb AAF9726.1 AC034106.4 Identical to beta-tonoplast intrinsic protein (beta-TIP) from Arabidopsis thaliana gb AF026275 and contains a MIP (major intrinsic protein) PF 00230 domain. ESTs gb R64952. gb A1999191 come from this gene [Arabidopsis thaliana] gi 2605714 gb AAB84183.1  beta-tonoplast intrinsic protein [Arabidopsis thaliana] gi 110737967 dbj BAF00920.1  hypothetical protein [Arabidopsis thaliana] gi 332191518 gb AEE29639.1  putative aquaporin TIP3-2 [Arabidopsis thaliana] | 773  | 797  | 0         | 103.1 | 79.3 | 87.6 | hypothetical protein ARALYDRAFT_889192 | gbpln | Arabidopsis lyrata   | AT1G17820.1   Symbols:   Putative integral membrane protein conserved region (DUF2404)   chr1:6131751-6135115 REVERSE LENGTH=803 | 773  | 803  | 0         | 103.9 | 78.1 | 87.1 |
| Rsa1.0_00298.1.g10748.t1 | ref NP_173223.1  putative aquaporin TIP3-2 [Arabidopsis thaliana] gi 32363213 sp O22588.1 TIP32_ARATH RecName: Full=Probable aquaporin TIP3-2; AltName: Full=Beta-tonoplast intrinsic protein; Short=Beta-TIP; AltName: Full=Tonoplast intrinsic protein 3-2; Short=AtTIP3.2 gi 9665059 gb AAF9726.1 AC034106.4 Identical to beta-tonoplast intrinsic protein (beta-TIP) from Arabidopsis thaliana gb AF026275 and contains a MIP (major intrinsic protein) PF 00230 domain. ESTs gb R64952. gb A1999191 come from this gene [Arabidopsis thaliana] gi 2605714 gb AAB84183.1  beta-tonoplast intrinsic protein [Arabidopsis thaliana] gi 110737967 dbj BAF00920.1  hypothetical protein [Arabidopsis thaliana] gi 332191518 gb AEE29639.1  putative aquaporin TIP3-2 [Arabidopsis thaliana]                                                                                                                                                                                                     | 225  | 267  | 1.00E-104 | 118.7 | 90.2 | 95.6 | putative aquaporin TIP3-2              | gbpln | Arabidopsis thaliana | AT1G17810.1   Symbols: BETA-TIP   beta-tonoplast intrinsic protein   chr1:6130209-6131442 FORWARD LENGTH=267                     | 225  | 267  | 1.00E-106 | 118.7 | 90.2 | 95.6 |
| Rsa1.0_00298.1.g10749.t1 | gb AAF1864.1 AC006228_12 F5J5.16 [Arabidopsis thaliana]                                                                                                                                                                                                                                                                                                                                                                                                                                                                                                                                                                                                                                                                                                                                                                                                                                                                                                                                         | 428  | 1024 | 7.00E-73  | 239.3 | 32.0 | 42.5 | F5J5.16                                | gbpln | Arabidopsis thaliana | #                                                                                                                                | #    | #    | #         | #     | #    | #    |
| Rsa1.0_00298.1.g10750.t2 | ref XP_002892965.1  ATB beta [Arabidopsis lyrata subsp. lyrata] gi 297338807 gb EFH69224.1  ATB beta [Arabidopsis lyrata subsp. lyrata]                                                                                                                                                                                                                                                                                                                                                                                                                                                                                                                                                                                                                                                                                                                                                                                                                                                         | 197  | 506  | 1.00E-105 | 256.9 | 94.4 | 95.9 | ATB beta                               | gbpln | Arabidopsis lyrata   | AT1G17720.1   Symbols: ATB BETA   Protein phosphatase 2A, regulatory subunit PR55   chr1:6093949-6098065 REVERSE LENGTH=501      | 197  | 501  | 1.00E-107 | 254.3 | 94.4 | 95.9 |
| Rsa1.0_00298.1.g10751.t1 | gb AAD15532.1  putative retroelement pol polyprotein [Arabidopsis thaliana]                                                                                                                                                                                                                                                                                                                                                                                                                                                                                                                                                                                                                                                                                                                                                                                                                                                                                                                     | 215  | 1274 | 7.00E-42  | 592.6 | 40.5 | 53.5 | putative retroelement pol polyprotein  | gbpln | Arabidopsis thaliana | AT5G45570.1   Symbols:   Ulp1 protease family protein   chr5:18472301-18475574 FORWARD LENGTH=921                                | 215  | 921  | 4.00E-25  | 428.4 | 26.5 | 40.0 |
| Rsa1.0_00298.1.g10752.t1 | gb ACP30556.1  disease resistance protein [Brassica rapa subsp. pekinensis]                                                                                                                                                                                                                                                                                                                                                                                                                                                                                                                                                                                                                                                                                                                                                                                                                                                                                                                     | 519  | 522  | 0         | 100.6 | 79.4 | 86.5 | disease resistance protein             | gbpln | Brassica rapa        | AT1G72870.1   Symbols:   Disease resistance protein (TIR-NBS class)   chr1:27421086-27422999 FORWARD LENGTH=512                  | 519  | 512  | 9.00E-59  | 98.7  | 34.9 | 50.1 |
| Rsa1.0_00298.1.g10753.t3 | gb ACP30589.1  disease resistance protein [Brassica rapa subsp. pekinensis]                                                                                                                                                                                                                                                                                                                                                                                                                                                                                                                                                                                                                                                                                                                                                                                                                                                                                                                     | 1080 | 1104 | 0         | 102.2 | 85.2 | 88.5 | disease resistance protein             | gbpln | Brassica rapa        | AT5G48770.1   Symbols:   Disease resistance protein (TIR-NBS-LRR class) family   chr5:19773277-19777242 REVERSE LENGTH=1190      | 1080 | 1190 | 0         | 110.2 | 45.6 | 60.3 |
| Rsa1.0_00298.1.g10754.t2 | ref XP_002890235.1  hypothetical protein ARALYDRAFT_889165 [Arabidopsis lyrata subsp. lyrata] gi 297336077 gb EFH66494.1  hypothetical protein ARALYDRAFT_889165 [Arabidopsis lyrata subsp. lyrata]                                                                                                                                                                                                                                                                                                                                                                                                                                                                                                                                                                                                                                                                                                                                                                                             | 1495 | 1520 | 0         | 101.7 | 88.0 | 93.0 | hypothetical protein ARALYDRAFT_889165 | gbpln | Arabidopsis lyrata   | AT1G17580.1   Symbols: MYA1, ATMYA1, XI-1   myosin 1   chr1:6039453-6049309 FORWARD LENGTH=1520                                  | 1495 | 1520 | 0         | 101.7 | 87.7 | 92.7 |
| Rsa1.0_00298.1.g10755.t1 | gb EOA32454.1  hypothetical protein CARUB_v10015730mg [Capsella rubella]                                                                                                                                                                                                                                                                                                                                                                                                                                                                                                                                                                                                                                                                                                                                                                                                                                                                                                                        | 480  | 543  | 3.00E-75  | 113.1 | 36.5 | 56.0 | hypothetical protein CARUB_v10015730mg | gbpln | Capsella rubella     | AT1G52950.1   Symbols:   Nucleic acid-binding, OB-fold-like protein   chr1:19725483-19728007 FORWARD LENGTH=566                  | 480  | 566  | 2.00E-75  | 117.9 | 37.1 | 61.9 |

|                          |                                                                                                                                                                                                                                                                                                                               |      |      |           |       |      |      |                                                                             |       |                      |                                                                                                                                                                                                                                                             |      |     |           |       |      |      |
|--------------------------|-------------------------------------------------------------------------------------------------------------------------------------------------------------------------------------------------------------------------------------------------------------------------------------------------------------------------------|------|------|-----------|-------|------|------|-----------------------------------------------------------------------------|-------|----------------------|-------------------------------------------------------------------------------------------------------------------------------------------------------------------------------------------------------------------------------------------------------------|------|-----|-----------|-------|------|------|
| Rsa1.0_00298.1.g10756.t1 | gb AAG50806.1 AC079281.8 unknown protein [Arabidopsis thaliana]                                                                                                                                                                                                                                                               | 1535 | 1213 | 1.00E-175 | 79.0  | 24.8 | 36.7 | unknown protein                                                             | gbpln | Arabidopsis thaliana | AT1G43760.1   Symbols:   DNase I-like superfamily protein   chr1:16528880-16531065 REVERSE LENGTH=626                                                                                                                                                       | 1535 | 626 | 8.00E-49  | 40.8  | 7.1  | 11.9 |
| Rsa1.0_00298.1.g10757.t1 | ref NP_200559.1  uncharacterized protein [Arabidopsis thaliana] gi 9758312 dbj BAB08786.1  unnamed protein product [Arabidopsis thaliana] gi 91805711 gb ABE65584.1  hypothetical protein At5g57510 [Arabidopsis thaliana] gi 332009526 gb AED96909.1  uncharacterized protein AT5G57510 [Arabidopsis thaliana]               | 131  | 130  | 3.00E-51  | 99.2  | 81.7 | 88.5 | uncharacterized protein                                                     | gbpln | Arabidopsis thaliana | AT5G57510.1   Symbols:   unknown protein; Has 27 Blast hits to 27 proteins in 9 species: Archae - 0; Bacteria - 0; Metazoa - 0; Fungi - 0; Plants - 27; Viruses - 0; Other Eukaryotes - 0 (source: NCBI BLink).   chr5:23289164-23289556 REVERSE LENGTH=130 | 131  | 130 | 7.00E-54  | 99.2  | 81.7 | 88.5 |
| Rsa1.0_00298.1.g10758.t1 | ref NP_173197.2  Protein kinase protein with adenine nucleotide alpha hydrolases-like domain [Arabidopsis thaliana] gi 51969566 dbj BAD43475.1  putative protein kinase [Arabidopsis thaliana] gi 332191482 gb AEE29603.1  Protein kinase protein with adenine nucleotide alpha hydrolases-like domain [Arabidopsis thaliana] | 652  | 728  | 0         | 111.7 | 82.7 | 89.3 | Protein kinase protein with adenine nucleotide alpha hydrolases-like domain | gbpln | Arabidopsis thaliana | AT1G17540.1   Symbols:   Protein kinase protein with adenine nucleotide alpha hydrolases-like domain   chr1:6029551-6032641 REVERSE LENGTH=728                                                                                                              | 652  | 728 | 0         | 111.7 | 82.7 | 89.3 |
| Rsa1.0_00298.1.g10759.t1 | #                                                                                                                                                                                                                                                                                                                             | #    | #    | #         | #     | #    | #    | -                                                                           | ----  | ----                 | #                                                                                                                                                                                                                                                           | #    | #   | #         | #     | #    |      |
| Rsa1.0_00298.1.g10760.t1 | gb AAF99763.1 AC003981.13 F22O13.21 [Arabidopsis thaliana] gi 9293930 dbj BAB01833.1  Mutator-like transposase [Arabidopsis thaliana] gi 10177478 dbj BAB10869.1  mutator-like transposase [Arabidopsis thaliana]                                                                                                             | 743  | 915  | 1.00E-134 | 123.1 | 32.7 | 44.5 | F22O13.21                                                                   | gbpln | Arabidopsis thaliana | AT1G64260.1   Symbols:   MuDR family transposase   chr1:23847756-23849915 FORWARD LENGTH=719                                                                                                                                                                | 743  | 719 | 2.00E-34  | 96.8  | 17.0 | 29.7 |
| Rsa1.0_00298.1.g10761.t1 | gb EOA29684.1  hypothetical protein CARUB_v10016007mg [Capsella rubella]                                                                                                                                                                                                                                                      | 128  | 134  | 6.00E-15  | 104.7 | 32.0 | 46.1 | hypothetical protein CARUB_v10016007mg                                      | gbpln | Capsella rubella     | AT2G07505.1   Symbols:   zinc ion binding   chr2:3125671-3126173 FORWARD LENGTH=143                                                                                                                                                                         | 128  | 143 | 8.00E-14  | 111.7 | 26.6 | 31.3 |
| Rsa1.0_00298.1.g10762.t1 | gb ABD64941.1  Ulp1 protease family protein [Brassica oleracea]                                                                                                                                                                                                                                                               | 738  | 871  | 1.00E-169 | 118.0 | 51.2 | 63.8 | Ulp1 protease family protein                                                | gbpln | Brassica oleracea    | AT2G07240.1   Symbols:   cysteine-type peptidases;cysteine-type peptidases   chr2:3007102-3011701 REVERSE LENGTH=874                                                                                                                                        | 738  | 874 | 1.00E-23  | 118.4 | 11.1 | 17.1 |
| Rsa1.0_00298.1.g10763.t1 | gb ACN58564.1  (E)-beta-caryophyllene synthase [Arabidopsis lyrata subsp. petraea]                                                                                                                                                                                                                                            | 441  | 545  | 1.00E-153 | 123.6 | 58.3 | 63.5 | (E)-beta-caryophyllene synthase                                             | gbpln | Arabidopsis lyrata   | AT5G23960.1   Symbols:   ATTPS21, TPS21   terpene synthase 21   chr5:8092969-8095128 FORWARD LENGTH=547                                                                                                                                                     | 441  | 547 | 1.00E-148 | 124.0 | 56.0 | 63.5 |
| Rsa1.0_00298.1.g10764.t1 | #                                                                                                                                                                                                                                                                                                                             | #    | #    | #         | #     | #    | #    | -                                                                           | ----  | ----                 | #                                                                                                                                                                                                                                                           | #    | #   | #         | #     | #    |      |
| Rsa1.0_00298.1.g10765.t1 | ref XP_002892947.1  hypothetical protein ARALYDRAFT_889143 [Arabidopsis lyrata subsp. lyrata] gi 297338789 gb EFH69206.1  hypothetical protein ARALYDRAFT_889143 [Arabidopsis lyrata subsp. lyrata]                                                                                                                           | 446  | 419  | 0         | 93.9  | 83.6 | 86.1 | hypothetical protein ARALYDRAFT_889143                                      | gbpln | Arabidopsis lyrata   | AT1G17370.1   Symbols:   UBP1B   oligouridylate binding protein 1B   chr1:5951842-5954825 REVERSE LENGTH=419                                                                                                                                                | 446  | 419 | 0         | 93.9  | 83.0 | 85.7 |
| Rsa1.0_00298.1.g10766.t1 | dbj BAF01585.1  hypothetical protein [Arabidopsis thaliana]                                                                                                                                                                                                                                                                   | 192  | 565  | 6.00E-39  | 294.3 | 39.6 | 49.0 | hypothetical protein                                                        | gbpln | Arabidopsis thaliana | AT1G17340.1   Symbols:   Phosphoinositide phosphatase family protein   chr1:5934129-5938391 FORWARD LENGTH=785                                                                                                                                              | 192  | 785 | 2.00E-41  | 408.9 | 39.6 | 49.0 |
| Rsa1.0_00298.1.g10767.t1 | #                                                                                                                                                                                                                                                                                                                             | #    | #    | #         | #     | #    | #    | -                                                                           | ----  | ----                 | #                                                                                                                                                                                                                                                           | #    | #   | #         | #     | #    |      |
| Rsa1.0_00298.1.g10768.t1 | gb ABD65057.1  hypothetical protein 27.t00123 [Brassica oleracea]                                                                                                                                                                                                                                                             | 1053 | 190  | 1.00E-32  | 18.0  | 8.0  | 8.9  | hypothetical protein 27.t00123                                              | gbpln | Brassica oleracea    | #                                                                                                                                                                                                                                                           | #    | #   | #         | #     | #    |      |
| Rsa1.0_00298.1.g10769.t1 | gb ABD64958.1  ethylene responsive element binding factor -related [Brassica oleracea]                                                                                                                                                                                                                                        | 806  | 954  | 2.00E-56  | 118.4 | 18.6 | 25.6 | ethylene responsive element binding factor -related                         | gbpln | Brassica oleracea    | #                                                                                                                                                                                                                                                           | #    | #   | #         | #     | #    |      |
| Rsa1.0_00299.1.g10770.t1 | ref XP_002889130.1  hypothetical protein ARALYDRAFT_895606 [Arabidopsis lyrata subsp. lyrata] gi 297334971 gb EFH65389.1  hypothetical protein ARALYDRAFT_895606 [Arabidopsis lyrata subsp. lyrata]                                                                                                                           | 471  | 511  | 0         | 108.5 | 94.3 | 97.7 | hypothetical protein ARALYDRAFT_895606                                      | gbpln | Arabidopsis lyrata   | AT1G77210.2   Symbols:   STP14   sugar transporter 14   chr1:29009036-29010980 REVERSE LENGTH=504                                                                                                                                                           | 471  | 504 | 0         | 107.0 | 93.6 | 97.0 |
| Rsa1.0_00299.1.g10771.t1 | ref XP_002887672.1  hypothetical protein ARALYDRAFT_895607 [Arabidopsis lyrata subsp. lyrata] gi 297333513 gb EFH63931.1  hypothetical protein ARALYDRAFT_895607 [Arabidopsis lyrata subsp. lyrata]                                                                                                                           | 500  | 484  | 0         | 96.8  | 87.2 | 92.4 | hypothetical protein ARALYDRAFT_895607                                      | gbpln | Arabidopsis lyrata   | AT1G77220.1   Symbols:   Protein of unknown function (DUF300)   chr1:29013232-29015530 FORWARD LENGTH=484                                                                                                                                                   | 500  | 484 | 0         | 96.8  | 87.8 | 92.0 |

|                           |                                                                                                                                                                                                                                                                                                                                                                                                              |      |      |           |       |      |      |                                                                      |       |                      |                                                                                                                                                                                                                                                                                                                                                     |      |      |           |       |      |      |
|---------------------------|--------------------------------------------------------------------------------------------------------------------------------------------------------------------------------------------------------------------------------------------------------------------------------------------------------------------------------------------------------------------------------------------------------------|------|------|-----------|-------|------|------|----------------------------------------------------------------------|-------|----------------------|-----------------------------------------------------------------------------------------------------------------------------------------------------------------------------------------------------------------------------------------------------------------------------------------------------------------------------------------------------|------|------|-----------|-------|------|------|
| Rsa1.0_00299.1.g10772.t1  | emb CAA64328.1  amp-binding protein [Brassica napus]                                                                                                                                                                                                                                                                                                                                                         | 545  | 552  | 0         | 101.3 | 88.8 | 95.0 | amp-binding protein                                                  | gbpln | Brassica napus       | AT1G77240.1   Symbols:   AMP-dependent synthetase and ligase family protein   chr1:29017958-29019595 REVERSE LENGTH=545                                                                                                                                                                                                                             | 545  | 545  | 0         | 100.0 | 84.6 | 91.9 |
| Rsa1.0_00299.1.g10773.t1  | gb EOA35031.1  hypothetical protein CARUB_v10020138mg [Capsella rubella]                                                                                                                                                                                                                                                                                                                                     | 537  | 525  | 1.00E-174 | 97.8  | 63.5 | 72.1 | hypothetical protein CARUB_v10020138mg                               | gbpln | Capsella rubella     | AT1G77250.1   Symbols:   RING/FYVE/PHD-type zinc finger family protein   chr1:29020444-29022938 REVERSE LENGTH=522                                                                                                                                                                                                                                  | 537  | 522  | 1.00E-163 | 97.2  | 61.5 | 70.2 |
| Rsa1.0_00299.1.g10774.t1  | ref NP_565153.1  putative methyltransferase PMT10 [Arabidopsis thaliana]<br>gi 75250280 sp O94KE1.1 PMTA_ARATH RecName: Full=Probable methyltransferase PMT10<br>gi 14194107 gb AAK56248.1 AF367259.1 At1g77260/T14N5.19 [Arabidopsis thaliana]<br>gi 20334726 gb AAM16224.1 At1g77260/T14N5.19 [Arabidopsis thaliana]<br>gi 332197834 gb AEE35955.1 putative methyltransferase PMT10 [Arabidopsis thaliana] | 672  | 655  | 0         | 97.5  | 84.7 | 99.3 | putative methyltransferase PMT10                                     | gbpln | Arabidopsis thaliana | AT1G77260.1   Symbols:   S-adenosyl-L-methionine-dependent methyltransferases superfamily protein   chr1:29023961-29026699 REVERSE LENGTH=655                                                                                                                                                                                                       | 672  | 655  | 0         | 97.5  | 84.7 | 89.3 |
| Rsa1.0_00299.1.g10775.t4  | #                                                                                                                                                                                                                                                                                                                                                                                                            | #    | #    | #         | #     | #    | #    | -                                                                    | ----  | ----                 | #                                                                                                                                                                                                                                                                                                                                                   | #    | #    | #         | #     | #    | #    |
| Rsa1.0_00299.1.g10776.t1  | ref NP_177852.2  adenine nucleotide alpha hydrolases-domain containing protein kinase [Arabidopsis thaliana]<br>gi 332197836 gb AEE35957.1 adenine nucleotide alpha hydrolases-domain containing protein kinase [Arabidopsis thaliana]                                                                                                                                                                       | 688  | 794  | 0         | 115.4 | 81.5 | 88.8 | adenine nucleotide alpha hydrolases-domain containing protein kinase | gbpln | Arabidopsis thaliana | AT1G77280.1   Symbols:   Protein kinase protein with adenine nucleotide alpha hydrolases-like domain   chr1:29031468-29035882 REVERSE LENGTH=794                                                                                                                                                                                                    | 688  | 794  | 0         | 115.4 | 81.5 | 88.8 |
| Rsa1.0_00299.1.g10777.t1  | gb EOA33259.1  hypothetical protein CARUB_v10022136mg [Capsella rubella]                                                                                                                                                                                                                                                                                                                                     | 266  | 266  | 2.33E-156 | 100.0 | 94.7 | 98.9 | hypothetical protein CARUB_v10022136mg                               | gbpln | Capsella rubella     | AT1G77290.2   Symbols:   Glutathione S-transferase family protein   chr1:29038917-29039815 FORWARD LENGTH=266                                                                                                                                                                                                                                       | 266  | 266  | 2.33E-156 | 100.0 | 92.9 | 98.1 |
| Rsa1.0_00299.1.g10778.t14 | ref NP_177854.6  histone-lysine N-methyltransferase SETD2 [Arabidopsis thaliana]<br>gi 157734196 gb ABV68921.1 SDG8 [Arabidopsis thaliana]<br>gi 332197839 gb AEE35960.1 histone-lysine N-methyltransferase SETD2 [Arabidopsis thaliana]                                                                                                                                                                     | 1783 | 1805 | 0         | 101.2 | 69.7 | 78.4 | histone-lysine N-methyltransferase SETD2                             | gbpln | Arabidopsis thaliana | AT1G77300.1   Symbols: EFS, SDG8, CCR1, ASH2, LAZ2   histone methyltransferases(H3-K4 specific)/histone methyltransferases(H3-K36 specific)   chr1:29040160-29046810 REVERSE LENGTH=1805                                                                                                                                                            | 1783 | 1805 | 0         | 101.2 | 69.7 | 78.4 |
| Rsa1.0_00299.1.g10779.t1  | ref NP_177855.4  uncharacterized protein [Arabidopsis thaliana]<br>gi 332197841 gb AEE35962.1 uncharacterized protein AT1G77310 [Arabidopsis thaliana]                                                                                                                                                                                                                                                       | 668  | 717  | 0         | 107.3 | 66.2 | 77.7 | uncharacterized protein                                              | gbpln | Arabidopsis thaliana | AT1G77310.1   Symbols:   BEST Arabidopsis thaliana protein match is: wound-responsive family protein (TAIRAT1G21610.1); Has 493 Blast hits to 482 proteins in 163 species: Archae - 0; Bacteria - 100; Metazoa - 172; Fungi - 66; Plants - 65; Viruses - 7; Other Eukaryotes - 83 (source: NCBI BLink).   chr1:29051671-29056179 FORWARD LENGTH=717 | 668  | 717  | 0         | 107.3 | 66.2 | 77.7 |
| Rsa1.0_00299.1.g10780.t1  | ref XP_002887677.1  MEI1 protein [Arabidopsis lyrata subsp. lyrata]<br>gi 297333518 gb EFH63936.1 MEI1 protein [Arabidopsis lyrata subsp. lyrata]                                                                                                                                                                                                                                                            | 1002 | 970  | 0         | 96.8  | 76.9 | 83.3 | MEI1 protein                                                         | gbpln | Arabidopsis lyrata   | AT1G77320.1   Symbols: MEI1   transcription coactivators   chr1:29056740-29062710 FORWARD LENGTH=972                                                                                                                                                                                                                                                | 1002 | 972  | 0         | 97.0  | 76.3 | 82.6 |
| Rsa1.0_00299.1.g10781.t1  | gb EOA40087.1  hypothetical protein CARUB_v10008781mg [Capsella rubella]                                                                                                                                                                                                                                                                                                                                     | 325  | 544  | 6.00E-70  | 167.4 | 42.5 | 52.6 | hypothetical protein CARUB_v10008781mg                               | gbpln | Capsella rubella     | AT1G21660.1   Symbols:   Chaperone DnaJ-domain superfamily protein   chr1:7605924-7608835 FORWARD LENGTH=523                                                                                                                                                                                                                                        | 325  | 523  | 3.00E-71  | 160.9 | 41.5 | 52.6 |
| Rsa1.0_00299.1.g10782.t1  | gb AAM62803.1  amino acid carrier, putative [Arabidopsis thaliana]                                                                                                                                                                                                                                                                                                                                           | 477  | 476  | 0         | 99.8  | 92.0 | 95.6 | amino acid carrier, putative                                         | gbpln | Arabidopsis thaliana | AT1G77380.1   Symbols: AAP3, ATAAP3   amino acid permease 3   chr1:29075201-29077252 REVERSE LENGTH=476                                                                                                                                                                                                                                             | 477  | 476  | 0         | 99.8  | 91.8 | 95.4 |
| Rsa1.0_00300.1.g10783.t1  | sp Q9LJF9.3 FDL44_ARATH RecName: Full=F-box/FBD/LRR-repeat protein At3g26920                                                                                                                                                                                                                                                                                                                                 | 446  | 434  | 1.00E-118 | 97.3  | 54.0 | 70.6 | RecName: Full=F-box/FBD/LRR-repeat protein At3g26920                 | ----  | ----                 | AT3G26930.1   Symbols:   Protein with RNI-like/FBD-like domains   chr3:9925931-9927351 FORWARD LENGTH=409                                                                                                                                                                                                                                           | 446  | 409  | 7.00E-97  | 91.7  | 48.7 | 60.1 |
| Rsa1.0_00300.1.g10784.t1  | sp Q9LJF9.3 FDL44_ARATH RecName: Full=F-box/FBD/LRR-repeat protein At3g26920                                                                                                                                                                                                                                                                                                                                 | 163  | 434  | 2.00E-41  | 266.3 | 58.9 | 75.5 | RecName: Full=F-box/FBD/LRR-repeat protein At3g26920                 | ----  | ----                 | AT3G26922.1   Symbols:   F-box/RNI-like superfamily protein   chr3:9922858-9923891 FORWARD LENGTH=306                                                                                                                                                                                                                                               | 163  | 306  | 3.00E-39  | 187.7 | 54.0 | 69.3 |
| Rsa1.0_00300.1.g10785.t1  | gb EOA24039.1  hypothetical protein CARUB_v10017257mg [Capsella rubella]                                                                                                                                                                                                                                                                                                                                     | 446  | 443  | 0         | 99.3  | 89.9 | 95.7 | hypothetical protein CARUB_v10017257mg                               | gbpln | Capsella rubella     | AT3G26935.1   Symbols:   DHHC-type zinc finger family protein   chr3:9933001-9935218 REVERSE LENGTH=443                                                                                                                                                                                                                                             | 446  | 443  | 0         | 99.3  | 89.7 | 94.8 |
| Rsa1.0_00300.1.g10786.t1  | ref XP_002877007.1  hypothetical protein ARALYDRAFT_484482 [Arabidopsis lyrata subsp. lyrata]<br>gi 297322845 gb EFH53266.1 hypothetical protein ARALYDRAFT_484482 [Arabidopsis lyrata subsp. lyrata]                                                                                                                                                                                                        | 441  | 432  | 1.00E-119 | 98.0  | 57.1 | 68.3 | hypothetical protein ARALYDRAFT_484482                               | gbpln | Arabidopsis lyrata   | AT3G26940.1   Symbols: CDG1   Protein kinase superfamily protein   chr3:9936707-9938936 REVERSE LENGTH=432                                                                                                                                                                                                                                          | 441  | 432  | 1.00E-118 | 98.0  | 56.7 | 68.9 |



|                          |                                                                                                                                                                                                       |      |      |           |       |      |      |                                                     |       |                      |                                                                                                                                                                                                                                                                                                                                                                                                                                                                                                                                                                                |      |      |           |       |      |      |
|--------------------------|-------------------------------------------------------------------------------------------------------------------------------------------------------------------------------------------------------|------|------|-----------|-------|------|------|-----------------------------------------------------|-------|----------------------|--------------------------------------------------------------------------------------------------------------------------------------------------------------------------------------------------------------------------------------------------------------------------------------------------------------------------------------------------------------------------------------------------------------------------------------------------------------------------------------------------------------------------------------------------------------------------------|------|------|-----------|-------|------|------|
| Rsa1.0_00300.1.g10787.t1 | gb EOA23750.1  hypothetical protein CARUB_v10016962mg [Capsella rubella]                                                                                                                              | 545  | 551  | 0         | 101.1 | 85.3 | 92.3 | hypothetical protein CARUB_v10016962mg              | gbpln | Capsella rubella     | AT3G26950.1   Symbols:   unknown protein; Has 27 Blast hits to 27 proteins in 8 species: Archae - 0; Bacteria - 0; Metazoa - 0; Fungi - 0; Plants - 27; Viruses - 0; Other Eukaryotes - 0 (source: NCBI BLink).   chr3:9941202-9943411 REVERSE LENGTH=548                                                                                                                                                                                                                                                                                                                      | 545  | 548  | 0         | 100.6 | 84.8 | 91.6 |
| Rsa1.0_00300.1.g10788.t2 | gb EOA23822.1  hypothetical protein CARUB_v10017036mg [Capsella rubella]                                                                                                                              | 538  | 513  | 0         | 95.4  | 77.7 | 85.3 | hypothetical protein CARUB_v10017036mg              | gbpln | Capsella rubella     | AT3G26990.1   Symbols:   ENTH/VHS family protein   chr3:9946426-9951575 REVERSE LENGTH=513                                                                                                                                                                                                                                                                                                                                                                                                                                                                                     | 538  | 513  | 0         | 95.4  | 79.2 | 85.7 |
| Rsa1.0_00300.1.g10789.t1 | ref XP_002875350.1  ubiquitin family protein [Arabidopsis lyrata subsp. lyrata]   gi 297321189 gb EFH51609.1  ubiquitin family protein [Arabidopsis lyrata subsp. lyrata]                             | 109  | 120  | 3.00E-48  | 110.1 | 85.3 | 88.1 | ubiquitin family protein                            | gbpln | Arabidopsis lyrata   | AT3G26980.1   Symbols: MUB4   membrane-anchored ubiquitin-fold protein 4 precursor   chr3:9946467-9947444 REVERSE LENGTH=120                                                                                                                                                                                                                                                                                                                                                                                                                                                   | 109  | 120  | 3.00E-50  | 110.1 | 85.3 | 87.2 |
| Rsa1.0_00300.1.g10790.t1 | gb EOA24831.1  hypothetical protein CARUB_v10018119mg [Capsella rubella]                                                                                                                              | 172  | 174  | 1.00E-73  | 101.2 | 80.2 | 90.7 | hypothetical protein CARUB_v10018119mg              | gbpln | Capsella rubella     | AT3G26960.1   Symbols:   Pollen Ole e 1 allergen and extensin family protein   chr3:9944859-9945459 REVERSE LENGTH=174                                                                                                                                                                                                                                                                                                                                                                                                                                                         | 172  | 174  | 5.00E-72  | 101.2 | 76.2 | 86.0 |
| Rsa1.0_00300.1.g10791.t2 | db BAJ34017.1  unnamed protein product [Thellungiella halophila]                                                                                                                                      | 366  | 389  | 0         | 106.3 | 97.8 | 98.9 | unnamed protein product                             | ----  | ----                 | AT3G27000.1   Symbols: ARP2, ATARP2, WRM   actin related protein 2   chr3:9952787-9955784 REVERSE LENGTH=389                                                                                                                                                                                                                                                                                                                                                                                                                                                                   | 366  | 389  | 0         | 106.3 | 97.5 | 98.9 |
| Rsa1.0_00300.1.g10792.t1 | gb EOA23265.1  hypothetical protein CARUB_v10017630mg [Capsella rubella]                                                                                                                              | 328  | 328  | 1.00E-115 | 100.0 | 75.3 | 82.3 | hypothetical protein CARUB_v10017630mg              | gbpln | Capsella rubella     | AT3G27010.1   Symbols: AT-TCP20, PCF1, TCP20, ATTCP20   TEOSINTE BRANCHED 1, cycloidea, PCF (TCP)-domain family protein 20   chr3:9957810-9958754 REVERSE LENGTH=314                                                                                                                                                                                                                                                                                                                                                                                                           | 328  | 314  | 1.00E-107 | 95.7  | 74.7 | 79.9 |
| Rsa1.0_00300.1.g10793.t1 | emb CAB39638.1  RNA-directed DNA polymerase-like protein [Arabidopsis thaliana]   gi 267666 emb CAB78094.1  RNA-directed DNA polymerase-like protein [Arabidopsis thaliana]                           | 1222 | 1274 | 0         | 104.3 | 43.0 | 58.2 | RNA-directed DNA polymerase-like protein            | gbpln | Arabidopsis thaliana | AT4G29090.1   Symbols:   Ribonuclease H-like superfamily protein   chr4:14333528-14332555 FORWARD LENGTH=675                                                                                                                                                                                                                                                                                                                                                                                                                                                                   | 1222 | 575  | 1.00E-54  | 47.1  | 11.5 | 17.3 |
| Rsa1.0_00300.1.g10794.t1 | ref XP_002875353.1  hypothetical protein ARALYDRAFT_347067 [Arabidopsis lyrata subsp. lyrata]   gi 297321191 gb EFH51612.1  hypothetical protein ARALYDRAFT_347067 [Arabidopsis lyrata subsp. lyrata] | 280  | 296  | 1.00E-75  | 105.7 | 60.7 | 75.4 | hypothetical protein ARALYDRAFT_347067              | gbpln | Arabidopsis lyrata   | AT3G27025.1   Symbols:   unknown protein; Has 25 Blast hits to 25 proteins in 6 species: Archae - 0; Bacteria - 0; Metazoa - 1; Fungi - 0; Plants - 24; Viruses - 0; Other Eukaryotes - 0 (source: NCBI BLink).   chr3:9969735-9971084 FORWARD LENGTH=289                                                                                                                                                                                                                                                                                                                      | 280  | 289  | 3.00E-78  | 103.2 | 59.6 | 73.2 |
| Rsa1.0_00300.1.g10795.t1 | ref XP_002533319.1  phosphatidylinositol-4-phosphate 5-kinase, putative [Ricinus communis]   gi 223526863 gb EEF29076.1  phosphatidylinositol-4-phosphate 5-kinase, putative [Ricinus communis]       | 219  | 1569 | 9.00E-25  | 716.4 | 27.9 | 35.6 | phosphatidylinositol-4-phosphate 5-kinase, putative | gbpln | Ricinus communis     | AT1G34260.1   Symbols: FAB1D   FORMS APOID AND BINUCLEATE CELLS 1A   chr1:12485967-12491799 FORWARD LENGTH=1456                                                                                                                                                                                                                                                                                                                                                                                                                                                                | 219  | 1456 | 1.00E-24  | 664.8 | 26.9 | 37.9 |
| Rsa1.0_00300.1.g10796.t1 | #                                                                                                                                                                                                     | #    | #    | #         | #     | #    | #    | -                                                   | ----  | ----                 | #                                                                                                                                                                                                                                                                                                                                                                                                                                                                                                                                                                              | #    | #    | #         | #     | #    |      |
| Rsa1.0_00300.1.g10797.t1 | ref XP_002875353.1  hypothetical protein ARALYDRAFT_347067 [Arabidopsis lyrata subsp. lyrata]   gi 297321191 gb EFH51612.1  hypothetical protein ARALYDRAFT_347067 [Arabidopsis lyrata subsp. lyrata] | 178  | 296  | 1.00E-13  | 166.3 | 23.6 | 29.8 | hypothetical protein ARALYDRAFT_347067              | gbpln | Arabidopsis lyrata   | AT3G27025.1   Symbols:   unknown protein; Has 25 Blast hits to 25 proteins in 6 species: Archae - 0; Bacteria - 0; Metazoa - 1; Fungi - 0; Plants - 24; Viruses - 0; Other Eukaryotes - 0 (source: NCBI BLink).   chr3:9969735-9971084 FORWARD LENGTH=289                                                                                                                                                                                                                                                                                                                      | 178  | 289  | 4.00E-15  | 162.4 | 23.0 | 25.3 |
| Rsa1.0_00300.1.g10798.t1 | ref XP_002877012.1  hypothetical protein ARALYDRAFT_322830 [Arabidopsis lyrata subsp. lyrata]   gi 297322850 gb EFH53271.1  hypothetical protein ARALYDRAFT_322830 [Arabidopsis lyrata subsp. lyrata] | 69   | 142  | 3.00E-27  | 205.8 | 89.9 | 95.7 | hypothetical protein ARALYDRAFT_322830              | gbpln | Arabidopsis lyrata   | AT3G27030.1   Symbols:   unknown protein; FUNCTIONS IN: molecular_function unknown; INVOLVED IN: biological_process unknown; LOCATED IN: endomembrane system; CONTAINS InterPro DOMAIN/s: Protein of unknown function DUF3339 (InterPro:IPR021775); BEST Arabidopsis thaliana protein match is: Protein of unknown function (DUF 3339) (TAIR:AT5G40970.1); Has 538 Blast hits to 271 proteins in 16 species: Archae - 0; Bacteria - 0; Metazoa - 0; Fungi - 0; Plants - 534; Viruses - 4; Other Eukaryotes - 0 (source: NCBI BLink).   chr3:9972508-9974225 REVERSE LENGTH=142 | 69   | 142  | 1.00E-29  | 205.8 | 88.4 | 95.7 |
| Rsa1.0_00300.1.g10799.t1 | gb EOA25773.1  hypothetical protein CARUB_v10019136mg [Capsella rubella]                                                                                                                              | 331  | 332  | 0         | 100.3 | 97.0 | 97.9 | hypothetical protein CARUB_v10019136mg              | gbpln | Capsella rubella     | AT3G27060.1   Symbols: TSO2, ATTSO2   Ferritin/ribonucleotide reductase-like family protein   chr3:9979971-9981057 REVERSE LENGTH=332                                                                                                                                                                                                                                                                                                                                                                                                                                          | 331  | 332  | 0         | 100.3 | 97.0 | 98.2 |

|                          |                                                                                                                                                                                                                                                                                                                                                                                                              |     |      |           |       |      |      |                                                 |       |                      |                                                                                                                                                                                                                                                                                                                                                                                                                                                                                                                                          |     |     |           |       |      |      |
|--------------------------|--------------------------------------------------------------------------------------------------------------------------------------------------------------------------------------------------------------------------------------------------------------------------------------------------------------------------------------------------------------------------------------------------------------|-----|------|-----------|-------|------|------|-------------------------------------------------|-------|----------------------|------------------------------------------------------------------------------------------------------------------------------------------------------------------------------------------------------------------------------------------------------------------------------------------------------------------------------------------------------------------------------------------------------------------------------------------------------------------------------------------------------------------------------------------|-----|-----|-----------|-------|------|------|
| Rsa1.0_00300.1.g10800.t2 | refNP_189345.1  DCD (Development and Cell Death) domain protein [Arabidopsis thaliana] gi 9279632 dbj BAB01090.1  unnamed protein product [Arabidopsis thaliana] gi 16604450 gb AAL24231.1  AT3g27090/MOJ10.18 [Arabidopsis thaliana] gi 21655279 gb AAM65351.1  AT3g27090/MOJ10.18 [Arabidopsis thaliana] gi 332643744 gb AEE7265.1  DCD (Development and Cell Death) domain protein [Arabidopsis thaliana] | 340 | 296  | 1.00E-130 | 87.1  | 73.2 | 77.4 | DCD (Development and Cell Death) domain protein | gbpln | Arabidopsis thaliana | AT3G27090.1   Symbols:   DCD (Development and Cell Death) domain protein   chr3:9990020-9991407 FORWARD LENGTH=296                                                                                                                                                                                                                                                                                                                                                                                                                       | 340 | 296 | 1.00E-133 | 87.1  | 73.2 | 77.4 |
| Rsa1.0_00300.1.g10801.t1 | refNP_189346.2  enhancer of yellow 2 transcription factor [Arabidopsis thaliana] gi 37202032 gb AAQ89631.1  AT3g27100 [Arabidopsis thaliana] gi 51969380 dbj BAD43382.1  hypothetical protein [Arabidopsis thaliana] gi 332643745 gb AEE7266.1  enhancer of yellow 2 transcription factor [Arabidopsis thaliana]                                                                                             | 102 | 115  | 3.00E-22  | 112.7 | 61.8 | 63.7 | enhancer of yellow 2 transcription factor       | gbpln | Arabidopsis thaliana | AT3G27100.1   Symbols:   FUNCTIONS IN: molecular function unknown; INVOLVED IN: biological process unknown; LOCATED IN: chloroplast envelope; EXPRESSED IN: 23 plant structures; EXPRESSED DURING: 13 growth stages; CONTAINS InterPro DOMAIN/s: Transcription factor, enhancer of yellow 2 (InterPro:IPR018783); Has 288 Blast hits to 288 proteins in 94 species: Archae - 0; Bacteria - 0; Metazoa - 197; Fungi - 20; Plants - 51; Viruses - 0; Other Eukaryotes - 20 (source: NCBI BLINK).   chr3:9994743-9995923 REVERSE LENGTH=115 | 102 | 115 | 5.00E-25  | 112.7 | 61.8 | 63.7 |
| Rsa1.0_00300.1.g10802.t1 | refXP_002875358.1  peptidase M48 family protein [Arabidopsis lyrata subsp. lyrata] gi 297321196 gb EFH51617.1  peptidase M48 family protein [Arabidopsis lyrata subsp. lyrata]                                                                                                                                                                                                                               | 331 | 344  | 1.00E-159 | 103.9 | 88.2 | 93.1 | peptidase M48 family protein                    | gbpln | Arabidopsis lyrata   | AT3G27110.2   Symbols:   Peptidase family M48 family protein   chr3:9998006-9999892 FORWARD LENGTH=344                                                                                                                                                                                                                                                                                                                                                                                                                                   | 331 | 344 | 1.00E-162 | 103.9 | 88.2 | 92.7 |
| Rsa1.0_00300.1.g10803.t1 | gb EOA25852.1  hypothetical protein CARUB_v10019230mg [Capsella rubella]                                                                                                                                                                                                                                                                                                                                     | 434 | 420  | 0         | 96.8  | 74.4 | 83.9 | hypothetical protein CARUB_v10019230mg          | gbpln | Capsella rubella     | AT3G27150.1   Symbols:   Galactose oxidase/kech repeat superfamily protein   chr3:10009692-10010960 REVERSE LENGTH=422                                                                                                                                                                                                                                                                                                                                                                                                                   | 434 | 422 | 0         | 97.2  | 74.2 | 82.0 |
| Rsa1.0_00300.1.g10804.t1 | #                                                                                                                                                                                                                                                                                                                                                                                                            | #   | #    | #         | #     | #    | -    | ----                                            | ----  | #                    | #                                                                                                                                                                                                                                                                                                                                                                                                                                                                                                                                        | #   | #   | #         | #     | #    |      |
| Rsa1.0_00301.1.g10805.t1 | refXP_002873746.1  predicted protein [Arabidopsis lyrata subsp. lyrata] gi 297319583 gb EFH50005.1  predicted protein [Arabidopsis lyrata subsp. lyrata]                                                                                                                                                                                                                                                     | 435 | 427  | 0         | 98.2  | 89.4 | 93.6 | predicted protein                               | gbpln | Arabidopsis lyrata   | AT5G15860.1   Symbols: ATPCME, PCME   prenylcysteine methyltransferase   chr5:5178676-5181263 REVERSE LENGTH=427                                                                                                                                                                                                                                                                                                                                                                                                                         | 435 | 427 | 0         | 98.2  | 89.2 | 93.1 |
| Rsa1.0_00301.1.g10806.t1 | dbj BAJ33807.1  unnamed protein product [Thellungiella halophila]                                                                                                                                                                                                                                                                                                                                            | 186 | 190  | 3.00E-80  | 102.2 | 83.9 | 90.9 | unnamed protein product                         | ----  | ----                 | AT5G15830.1   Symbols: AtbZIP3, bZIP3   basic leucine-zipper 3   chr5:5168591-5169151 FORWARD LENGTH=186                                                                                                                                                                                                                                                                                                                                                                                                                                 | 186 | 186 | 2.00E-71  | 100.0 | 82.8 | 87.6 |
| Rsa1.0_00301.1.g10807.t1 | emb CAB39638.1  RNA-directed DNA polymerase-like protein [Arabidopsis thaliana] gi 7267666 emb CAB78094.1  RNA-directed DNA polymerase-like protein [Arabidopsis thaliana]                                                                                                                                                                                                                                   | 847 | 1274 | 0         | 150.4 | 49.6 | 65.8 | RNA-directed DNA polymerase-like protein        | gbpln | Arabidopsis thaliana | AT4G29090.1   Symbols:   Ribonuclease H-like superfamily protein   chr4:14333528-14335255 FORWARD LENGTH=575                                                                                                                                                                                                                                                                                                                                                                                                                             | 847 | 575 | 6.00E-65  | 67.9  | 20.2 | 32.5 |
| Rsa1.0_00301.1.g10808.t1 | gb EOA21044.1  hypothetical protein CARUB_v10001383mg [Capsella rubella]                                                                                                                                                                                                                                                                                                                                     | 382 | 336  | 2.00E-53  | 88.0  | 46.6 | 56.5 | hypothetical protein CARUB_v10001383mg          | gbpln | Capsella rubella     | AT5G15820.1   Symbols:   RING/U-box superfamily protein   chr5:5161787-5162833 FORWARD LENGTH=348                                                                                                                                                                                                                                                                                                                                                                                                                                        | 382 | 348 | 9.00E-52  | 91.1  | 43.7 | 54.2 |
| Rsa1.0_00301.1.g10809.t1 | #                                                                                                                                                                                                                                                                                                                                                                                                            | #   | #    | #         | #     | #    | -    | ----                                            | ----  | #                    | #                                                                                                                                                                                                                                                                                                                                                                                                                                                                                                                                        | #   | #   | #         | #     | #    |      |
| Rsa1.0_00301.1.g10810.t1 | refXP_002873741.1  hypothetical protein ARALYDRAFT_488422 [Arabidopsis lyrata subsp. lyrata] gi 297319578 gb EFH50000.1  hypothetical protein ARALYDRAFT_488422 [Arabidopsis lyrata subsp. lyrata]                                                                                                                                                                                                           | 319 | 363  | 3.00E-78  | 113.8 | 55.5 | 60.8 | hypothetical protein ARALYDRAFT_488422          | gbpln | Arabidopsis lyrata   | AT5G15780.1   Symbols:   Pollen Ole e 1 allergen and extensin family protein   chr5:5144898-5146297 REVERSE LENGTH=401                                                                                                                                                                                                                                                                                                                                                                                                                   | 319 | 401 | 2.00E-78  | 125.7 | 46.7 | 49.8 |

|                          |                                                                                                                                                                                                                                                                                                                                                                                                                                                                                                                                                                                                                                                                                                                                                                                                                                                                                                                                                                                                                                                                                              |      |      |           |       |      |      |                                                       |       |                      |                                                                                                                                   |      |      |           |       |      |      |
|--------------------------|----------------------------------------------------------------------------------------------------------------------------------------------------------------------------------------------------------------------------------------------------------------------------------------------------------------------------------------------------------------------------------------------------------------------------------------------------------------------------------------------------------------------------------------------------------------------------------------------------------------------------------------------------------------------------------------------------------------------------------------------------------------------------------------------------------------------------------------------------------------------------------------------------------------------------------------------------------------------------------------------------------------------------------------------------------------------------------------------|------|------|-----------|-------|------|------|-------------------------------------------------------|-------|----------------------|-----------------------------------------------------------------------------------------------------------------------------------|------|------|-----------|-------|------|------|
| Rsa1.0_00301.1.g10811.t1 | refNP_197081.1   glucose-6-phosphate acetyltransferase 1 [Arabidopsis thaliana]<br>gi 75174187 sp Q9LFU9.1 GNA1_ARATH<br>RecName: Full=Glucosamine 6-phosphate N-acetyltransferase;<br>AltName: Full=Glucose-6-phosphate acetyltransferase 1; Short=AtGNA1;<br>AltName: Full=Phosphoglucosamine acetylase; AltName:<br>Full=Phosphoglucosamine transacetylase; AltName: Full=Protein LIGNESCENS gi 383875481 pdb 3T90 A Chain A. Crystal Structure Of Glucosamine-6-Phosphate N-Acetyltransferase From Arabidopsis Thaliana gi 9755622 emb CAC01776.1  acetyltransferase-like protein [Arabidopsis thaliana]<br>gi 332004820 gb AED92203.1  glucose-6-phosphate acetyltransferase 1 [Arabidopsis thaliana]<br>refXP_002871682.1   RNA-binding S4 domain-containing protein [Arabidopsis lyrata subsp. lyrata]<br>gi 297317519 gb EFH47941.1  RNA-binding S4 domain-containing protein [Arabidopsis lyrata subsp. lyrata]<br>refXP_002873738.1   GDSL-motif lipase 7 [Arabidopsis lyrata subsp. lyrata]<br>gi 297319575 gb EFH49997.1  GDSL-motif lipase 7 [Arabidopsis lyrata subsp. lyrata] | 159  | 149  | 2.00E-64  | 93.7  | 74.8 | 84.3 | glucose-6-phosphate acetyltransferase 1               | gbpln | Arabidopsis thaliana | AT5G15770.1   Symbols: AtGNA1, GNA1   glucose-6-phosphate acetyltransferase 1   chr:5:144093-5144542 REVERSE LENGTH=149           | 159  | 149  | 6.00E-67  | 93.7  | 74.8 | 84.3 |
| Rsa1.0_00301.1.g10812.t1 | refXP_002871682.1   RNA-binding S4 domain-containing protein [Arabidopsis lyrata subsp. lyrata]<br>gi 297317519 gb EFH47941.1  RNA-binding S4 domain-containing protein [Arabidopsis lyrata subsp. lyrata]<br>refXP_002873738.1   GDSL-motif lipase 7 [Arabidopsis lyrata subsp. lyrata]<br>gi 297319575 gb EFH49997.1  GDSL-motif lipase 7 [Arabidopsis lyrata subsp. lyrata]                                                                                                                                                                                                                                                                                                                                                                                                                                                                                                                                                                                                                                                                                                               | 183  | 182  | 9.00E-91  | 99.5  | 88.5 | 92.3 | RNA-binding S4 domain-containing protein              | gbpln | Arabidopsis lyrata   | AT5G15750.1   Symbols:   Alpha-L RNA-binding motif/Ribosomal protein S4 family protein   chr:5:5141449-5142701 FORWARD LENGTH=182 | 183  | 182  | 1.00E-91  | 99.5  | 86.3 | 91.8 |
| Rsa1.0_00301.1.g10813.t1 | refXP_002873738.1   GDSL-motif lipase 7 [Arabidopsis lyrata subsp. lyrata]<br>gi 297319575 gb EFH49997.1  GDSL-motif lipase 7 [Arabidopsis lyrata subsp. lyrata]                                                                                                                                                                                                                                                                                                                                                                                                                                                                                                                                                                                                                                                                                                                                                                                                                                                                                                                             | 367  | 364  | 1.00E-176 | 99.2  | 81.5 | 90.7 | GDSL-motif lipase 7                                   | gbpln | Arabidopsis lyrata   | AT5G15720.1   Symbols: GLIP7   GDSL-motif lipase 7   chr:5:5124684-5126155 REVERSE LENGTH=364                                     | 367  | 364  | 1.00E-176 | 99.2  | 79.0 | 87.7 |
| Rsa1.0_00301.1.g10814.t1 | refXP_002873737.1   DNA-directed RNA polymerase [Arabidopsis lyrata subsp. lyrata]<br>gi 297319574 gb EFH49996.1  DNA-directed RNA polymerase [Arabidopsis lyrata subsp. lyrata]                                                                                                                                                                                                                                                                                                                                                                                                                                                                                                                                                                                                                                                                                                                                                                                                                                                                                                             | 1021 | 1009 | 0         | 98.8  | 81.0 | 85.7 | DNA-directed RNA polymerase                           | gbpln | Arabidopsis lyrata   | AT5G15700.2   Symbols:   DNA/RNA polymerases superfamily protein   chr:5:5115572-5121609 REVERSE LENGTH=1051                      | 1021 | 1051 | 0         | 102.9 | 80.6 | 85.0 |
| Rsa1.0_00301.1.g10815.t1 | refNP_197072.3   armadillo/beta-catenin-like repeat-containing protein [Arabidopsis thaliana]<br>gi 332004808 gb AED92191.1  armadillo/beta-catenin-like repeat-containing protein [Arabidopsis thaliana]                                                                                                                                                                                                                                                                                                                                                                                                                                                                                                                                                                                                                                                                                                                                                                                                                                                                                    | 2150 | 2153 | 0         | 100.1 | 96.1 | 98.5 | armadillo/beta-catenin-like repeat-containing protein | gbpln | Arabidopsis thaliana | AT5G15680.1   Symbols:   ARM repeat superfamily protein   chr:5:5101188-5110793 REVERSE LENGTH=2153                               | 2150 | 2153 | 0         | 100.1 | 96.1 | 98.5 |
| Rsa1.0_00301.1.g10816.t1 | refNP_192896.1   F-box protein [Arabidopsis thaliana]<br>gi 75266803 sp Q9T0C7.1 FB231_ARATH<br>RecName: Full=F-box protein At4g11590 gi 4539450 emb CAB39930.1  putative protein [Arabidopsis thaliana]<br>gi 7267859 emb CAB78202.1  putative protein [Arabidopsis thaliana]<br>gi 332657628 gb AEE83028.1  F-box protein [Arabidopsis thaliana]                                                                                                                                                                                                                                                                                                                                                                                                                                                                                                                                                                                                                                                                                                                                           | 399  | 397  | 9.00E-84  | 99.5  | 48.9 | 63.7 | F-box protein                                         | gbpln | Arabidopsis thaliana | AT4G11590.1   Symbols:   F-box associated ubiquitination effector family protein   chr:4:7008603-7009796 FORWARD LENGTH=397       | 399  | 397  | 2.00E-86  | 99.5  | 48.9 | 63.7 |
| Rsa1.0_00301.1.g10817.t1 | refNP_192896.1   F-box protein [Arabidopsis thaliana]<br>gi 75266803 sp Q9T0C7.1 FB231_ARATH<br>RecName: Full=F-box protein At4g11590 gi 4539450 emb CAB39930.1  putative protein [Arabidopsis thaliana]<br>gi 7267859 emb CAB78202.1  putative protein [Arabidopsis thaliana]<br>gi 332657628 gb AEE83028.1  F-box protein [Arabidopsis thaliana]                                                                                                                                                                                                                                                                                                                                                                                                                                                                                                                                                                                                                                                                                                                                           | 415  | 397  | 1.00E-80  | 95.7  | 45.5 | 59.0 | F-box protein                                         | gbpln | Arabidopsis thaliana | AT4G11590.1   Symbols:   F-box associated ubiquitination effector family protein   chr:4:7008603-7009796 FORWARD LENGTH=397       | 415  | 397  | 3.00E-83  | 95.7  | 45.5 | 59.0 |
| Rsa1.0_00301.1.g10818.t1 | gb EOA20905.1  hypothetical protein CARUB_v10001241mg [Capsella rubella]                                                                                                                                                                                                                                                                                                                                                                                                                                                                                                                                                                                                                                                                                                                                                                                                                                                                                                                                                                                                                     | 363  | 363  | 0         | 100.0 | 97.2 | 98.3 | hypothetical protein CARUB_v10001241mg                | gbpln | Capsella rubella     | AT5G15650.1   Symbols: RGP2, ATRGP2   reversibly glycosylated polypeptide 2   chr:5:5092203-5094093 FORWARD LENGTH=360            | 363  | 360  | 0         | 99.2  | 96.7 | 98.3 |
| Rsa1.0_00301.1.g10819.t1 | refXP_002893723.1   predicted protein [Arabidopsis lyrata subsp. lyrata]<br>gi 297339565 gb EFH69982.1  predicted protein [Arabidopsis lyrata subsp. lyrata]                                                                                                                                                                                                                                                                                                                                                                                                                                                                                                                                                                                                                                                                                                                                                                                                                                                                                                                                 | 407  | 385  | 1.00E-117 | 94.6  | 56.0 | 66.8 | predicted protein                                     | gbpln | Arabidopsis lyrata   | AT1G32430.1   Symbols:   F-box and associated interaction domains-containing protein   chr1:11704932-11706325 REVERSE LENGTH=380  | 407  | 380  | 1.00E-110 | 93.4  | 51.8 | 62.9 |

|                          |                                                                                                                                                                                                                                                                                                                                                                                       |      |      |           |       |      |      |                                                   |       |                      |                                                                                                                                                               |      |      |           |       |      |      |
|--------------------------|---------------------------------------------------------------------------------------------------------------------------------------------------------------------------------------------------------------------------------------------------------------------------------------------------------------------------------------------------------------------------------------|------|------|-----------|-------|------|------|---------------------------------------------------|-------|----------------------|---------------------------------------------------------------------------------------------------------------------------------------------------------------|------|------|-----------|-------|------|------|
| Rsa1.0_00301.1.g10820.t2 | ref NP_197067.2  COBRA-like protein 4 [Arabidopsis thaliana] gi 34222647 sp Q9LFW3.2 COBL4_ARAT H RecName: Full=COBRA-like protein 4; Flags: Precursor gi 48525349 gb AAT44976.1  At5g15630 [Arabidopsis thaliana] gi 56790214 gb AAW30024.1  At5g15630 [Arabidopsis thaliana] gi 332004803 gb AED92186.1  COBRA-like protein 4 [Arabidopsis thaliana]                                | 435  | 431  | 0         | 99.1  | 88.5 | 92.9 | COBRA-like protein 4                              | gbpln | Arabidopsis thaliana | AT5G15630.1   Symbols: COBL4, IRX6   COBRA-like extracellular glycosyl-phosphatidylinositol-anchored protein family   chr5:5084842-5086545 FORWARD LENGTH=431 | 435  | 431  | 0         | 99.1  | 88.5 | 92.9 |
| Rsa1.0_00301.1.g10821.t1 | gb AAM64731.1  nitrilase associated protein-like [Arabidopsis thaliana]                                                                                                                                                                                                                                                                                                               | 109  | 127  | 1.00E-31  | 116.5 | 79.8 | 82.6 | nitrilase associated protein-like                 | gbpln | Arabidopsis thaliana | AT5G15600.1   Symbols: SP1L4   SPIRAL1-like4   chr5:5078405-5078863 FORWARD LENGTH=127                                                                        | 109  | 127  | 2.00E-34  | 116.5 | 79.8 | 82.6 |
| Rsa1.0_00301.1.g10822.t1 | #                                                                                                                                                                                                                                                                                                                                                                                     | #    | #    | #         | #     | #    | #    | -                                                 | ----  | ----                 | #                                                                                                                                                             | #    | #    | #         | #     | #    |      |
| Rsa1.0_00301.1.g10823.t1 | gb EOA19910.1  hypothetical protein CARUB_v10000160mg [Capsella rubella]                                                                                                                                                                                                                                                                                                              | 909  | 931  | 0         | 102.4 | 81.6 | 88.3 | hypothetical protein CARUB_v10000160mg            | gbpln | Capsella rubella     | AT5G15580.1   Symbols: LNG1   longifolia1   chr5:5068495-5071930 REVERSE LENGTH=927                                                                           | 909  | 927  | 0         | 102.0 | 81.2 | 88.0 |
| Rsa1.0_00301.1.g10824.t1 | ref XP_002871671.1  hypothetical protein ARALYDRAFT_909531 [Arabidopsis lyrata subsp. lyrata] gi 297317508 gb EFH47930.1  hypothetical protein ARALYDRAFT_909531 [Arabidopsis lyrata subsp. lyrata]                                                                                                                                                                                   | 376  | 380  | 1.00E-157 | 101.1 | 74.7 | 84.3 | hypothetical protein ARALYDRAFT_909531            | gbpln | Arabidopsis lyrata   | AT5G15570.1   Symbols:   Bromodomain transcription factor   chr5:5066851-5067996 FORWARD LENGTH=381                                                           | 376  | 381  | 1.00E-157 | 101.3 | 72.3 | 81.4 |
| Rsa1.0_00301.1.g10825.t1 | ref NP_197059.1  transducin/WD40 domain-containing protein [Arabidopsis thaliana] gi 9755810 emb CAC01754.1  putative protein [Arabidopsis thaliana] gi 17381110 gb AAL36367.1  unknown protein [Arabidopsis thaliana] gi 20258961 gb AAM14196.1  unknown protein [Arabidopsis thaliana] gi 332004793 gb AED92176.1  transducin/WD40 domain-containing protein [Arabidopsis thaliana] | 369  | 433  | 1.00E-157 | 117.3 | 75.3 | 81.8 | transducin/WD40 domain-containing protein         | gbpln | Arabidopsis thaliana | AT5G15550.1   Symbols:   Transducin/WD40 repeat-like superfamily protein   chr5:5059051-5062003 REVERSE LENGTH=433                                            | 369  | 433  | 1.00E-160 | 117.3 | 75.3 | 81.8 |
| Rsa1.0_00301.1.g10826.t1 | ref XP_002873731.1  sister chromatid cohesion 2 [Arabidopsis lyrata subsp. lyrata] gi 297319568 gb EFH49990.1  sister chromatid cohesion 2 [Arabidopsis lyrata subsp. lyrata]                                                                                                                                                                                                         | 1847 | 1847 | 0         | 100.0 | 86.4 | 91.6 | sister chromatid cohesion 2                       | gbpln | Arabidopsis lyrata   | AT5G15540.1   Symbols: EMB2773, ATSCC2, SCC2   PHD finger family protein   chr5:5047887-5057411 REVERSE LENGTH=1846                                           | 1847 | 1846 | 0         | 99.9  | 85.6 | 91.1 |
| Rsa1.0_00301.1.g10827.t1 | ref NP_197055.2  TPX2 (targeting protein for Xklp2) family protein [Arabidopsis thaliana] gi 332004787 gb AED92170.1  TPX2 (targeting protein for Xklp2) family protein [Arabidopsis thaliana]                                                                                                                                                                                        | 507  | 497  | 0         | 98.0  | 75.7 | 82.8 | TPX2 (targeting protein for Xklp2) family protein | gbpln | Arabidopsis thaliana | AT5G15510.1   Symbols:   TPX2 (targeting protein for Xklp2) protein family   chr5:5034120-5036614 FORWARD LENGTH=497                                          | 507  | 497  | 0         | 98.0  | 75.7 | 82.8 |
| Rsa1.0_00301.1.g10828.t1 | #                                                                                                                                                                                                                                                                                                                                                                                     | #    | #    | #         | #     | #    | #    | -                                                 | ----  | ----                 | #                                                                                                                                                             | #    | #    | #         | #     | #    |      |
| Rsa1.0_00301.1.g10829.t1 | gb EOA20540.1  hypothetical protein CARUB_v10000855mg [Capsella rubella] gi 482556349 gb EOA2054.1  hypothetical protein CARUB_v10000855mg [Capsella rubella] gi 482556350 gb EOA20542.1  hypothetical protein CARUB_v10000855mg [Capsella rubella]                                                                                                                                   | 481  | 480  | 0         | 99.8  | 97.9 | 99.2 | hypothetical protein CARUB_v10000855mg            | gbpln | Capsella rubella     | AT5G15490.1   Symbols:   UDP-glucose 6-dehydrogenase family protein   chr5:5027872-5029314 REVERSE LENGTH=480                                                 | 481  | 480  | 0         | 99.8  | 96.7 | 99.0 |
| Rsa1.0_00301.1.g10830.t1 | gb EOA19903.1  hypothetical protein CARUB_v10000151mg [Capsella rubella]                                                                                                                                                                                                                                                                                                              | 967  | 971  | 0         | 100.4 | 94.6 | 97.2 | hypothetical protein CARUB_v10000151mg            | gbpln | Capsella rubella     | AT5G15450.1   Symbols: APG6, CLPB3, CLPB-P   casein lytic proteinase B3   chr5:5014399-5018255 REVERSE LENGTH=968                                             | 967  | 968  | 0         | 100.1 | 94.3 | 97.0 |
| Rsa1.0_00301.1.g10831.t1 | ref XP_002871665.1  hypothetical protein ARALYDRAFT_488388 [Arabidopsis lyrata subsp. lyrata] gi 297317502 gb EFH47924.1  hypothetical protein ARALYDRAFT_488388 [Arabidopsis lyrata subsp. lyrata]                                                                                                                                                                                   | 428  | 478  | 1.00E-119 | 111.7 | 66.1 | 76.9 | hypothetical protein ARALYDRAFT_488388            | gbpln | Arabidopsis lyrata   | AT5G15430.1   Symbols:   Plant calmodulin-binding protein-related   chr5:5010180-5011616 FORWARD LENGTH=478                                                   | 428  | 478  | 1.00E-113 | 111.7 | 63.8 | 76.4 |

|                          |                                                                                                                                                                                                                                                                                                                                                                                                                                                                                                                                                                                                                                                                                                                                                                           |      |      |           |       |      |       |                                                 |       |                      |                                                                                                                                                             |      |      |           |       |      |      |
|--------------------------|---------------------------------------------------------------------------------------------------------------------------------------------------------------------------------------------------------------------------------------------------------------------------------------------------------------------------------------------------------------------------------------------------------------------------------------------------------------------------------------------------------------------------------------------------------------------------------------------------------------------------------------------------------------------------------------------------------------------------------------------------------------------------|------|------|-----------|-------|------|-------|-------------------------------------------------|-------|----------------------|-------------------------------------------------------------------------------------------------------------------------------------------------------------|------|------|-----------|-------|------|------|
| Rsa1.0_00301.1.g10832.t1 | ref NP_568313.2  putative ubiquitin conjugation factor E4 [Arabidopsis thaliana]<br>gi 75174048 sp Q9LF41.1 UBE4_ARATH<br>RecName: Full=Probable ubiquitin conjugation factor E4; AltName: Full=Plant U-box protein 1; AltName: Full=U-box domain-containing protein 1; AltName: Full=Ubiquitin-fusion degradation protein 2-like; Short=UB fusion protein 2-like<br>gi 9755795 emb CAC01739.1  ubiquitin-fusion degradation protein-like [Arabidopsis thaliana]<br>gi 332004773 gb AED92156.1  putative ubiquitin conjugation factor E4 [Arabidopsis thaliana]<br>ref XP_002882199.1  hypothetical protein ARALYDRAFT_477417 [Arabidopsis lyrata subsp. lyrata]<br>gi 297328039 gb EFH58458.1  hypothetical protein ARALYDRAFT_477417 [Arabidopsis lyrata subsp. lyrata] | 1042 | 1038 | 0         | 99.6  | 92.0 | 95.5  | putative ubiquitin conjugation factor E4        | gbpln | Arabidopsis thaliana | AT5G15400.1   Symbols:   U-box domain-containing protein   chr5:497764-5002907 REVERSE LENGTH=1038                                                          | 1042 | 1038 | 0         | 99.6  | 92.0 | 95.5 |
| Rsa1.0_00301.1.g10833.t1 | ref NP_197032.1  pentatricopeptide repeat-containing protein [Arabidopsis thaliana]<br>gi 75180846 sp Q9LXF4.1 PP384_ARATH<br>RecName: Full=Pentatricopeptide repeat-containing protein AT5G15280<br>gi 7671497 emb CAB89338.1  putative protein [Arabidopsis thaliana]<br>gi 332004760 gb AED92143.1  pentatricopeptide repeat-containing protein [Arabidopsis thaliana]                                                                                                                                                                                                                                                                                                                                                                                                 | 501  | 564  | 0         | 112.6 | 75.6 | 82.4  | hypothetical protein ARALYDRAFT_477417          | gbpln | Arabidopsis lyrata   | AT3G01120.1   Symbols: MTO1, CGS, ATCY51, CGS1   Pyridoxal phosphate (PLP)-dependent transferases superfamily protein   chr3:39234-41865 REVERSE LENGTH=563 | 501  | 563  | 0         | 112.4 | 74.5 | 81.4 |
| Rsa1.0_00301.1.g10834.t1 | db BAJ34432.1  unnamed protein product [Thellungiella halophila]                                                                                                                                                                                                                                                                                                                                                                                                                                                                                                                                                                                                                                                                                                          | 315  | 326  | 1.00E-142 | 103.5 | 84.4 | 88.6  | unnamed protein product                         | ----  | ----                 | AT5G15310.1   Symbols: ATMYB16, ATMIXTA, MYB16   myb domain protein 16   chr5:4974894-4976106 FORWARD LENGTH=326                                            | 315  | 326  | 1.00E-140 | 103.5 | 83.2 | 88.3 |
| Rsa1.0_00301.1.g10835.t1 | ref NP_197032.1  pentatricopeptide repeat-containing protein [Arabidopsis thaliana]<br>gi 75180846 sp Q9LXF4.1 PP384_ARATH<br>RecName: Full=Pentatricopeptide repeat-containing protein AT5G15280<br>gi 7671497 emb CAB89338.1  putative protein [Arabidopsis thaliana]<br>gi 332004760 gb AED92143.1  pentatricopeptide repeat-containing protein [Arabidopsis thaliana]                                                                                                                                                                                                                                                                                                                                                                                                 | 1234 | 1227 | 0         | 99.4  | 72.9 | 83.5  | pentatricopeptide repeat-containing protein     | gbpln | Arabidopsis thaliana | AT5G15280.1   Symbols:   Pentatricopeptide repeat (PPR) superfamily protein   chr5:4962293-4965976 FORWARD LENGTH=1227                                      | 1234 | 1227 | 0         | 99.4  | 72.9 | 83.5 |
| Rsa1.0_00301.1.g10836.t1 | gb EOA20603.1  hypothetical protein CARUB.v10000919mg, partial [Capsella rubella]                                                                                                                                                                                                                                                                                                                                                                                                                                                                                                                                                                                                                                                                                         | 426  | 460  | 0         | 108.0 | 87.8 | 93.0  | hypothetical protein CARUB.v10000919mg, partial | gbpln | Capsella rubella     | AT5G15240.1   Symbols:   Transmembrane amino acid transporter family protein   chr5:4947762-4950211 FORWARD LENGTH=423                                      | 426  | 423  | 0         | 99.3  | 85.7 | 92.5 |
| Rsa1.0_00301.1.g10837.t1 | ref NP_197027.1  gibberellin-regulated protein 4 [Arabidopsis thaliana]<br>gi 21431771 sp P46690.2 GASA4_ARATH<br>RecName: Full=Gibberellin-regulated protein 4; AltName: Full=GAST1 protein homolog 4; Flags: Precursor<br>gi 13430574 gb AAK25909.1 AF360199.1 putative GASA4 protein [Arabidopsis thaliana]<br>gi 2764941 emb CAA66909.1 GASA4 [Arabidopsis thaliana]<br>gi 7671492 emb CAB89333.1 GASA4 [Arabidopsis thaliana]<br>gi 14532849 gb AAK64106.1  putative GASA4 protein [Arabidopsis thaliana]<br>gi 16206676 gb AAL14396.1 AT5g15230/F8M21.120 [Arabidopsis thaliana]<br>gi 332004749 gb AED92132.1  gibberellin-regulated protein 4 [Arabidopsis thaliana]                                                                                              | 106  | 106  | 8.00E-46  | 100.0 | 82.1 | 88.7  | gibberellin-regulated protein 4                 | gbpln | Arabidopsis thaliana | AT5G15230.1   Symbols: GASA4   GAST1 protein homolog 4   chr5:4945017-4946025 FORWARD LENGTH=106                                                            | 106  | 106  | 1.00E-48  | 100.0 | 82.1 | 88.7 |
| Rsa1.0_00301.1.g10838.t1 | # # # # # # # # - ---- # # # # # #                                                                                                                                                                                                                                                                                                                                                                                                                                                                                                                                                                                                                                                                                                                                        |      |      |           |       |      |       |                                                 |       |                      |                                                                                                                                                             |      |      |           |       |      |      |
| Rsa1.0_00301.1.g10839.t2 | ref NP_568310.1  large subunit ribosomal protein L27 [Arabidopsis thaliana]<br>gi 15081777 gb AAK82543.1 AT5g15220/F8M21.110 [Arabidopsis thaliana]<br>gi 8958056 gb AAL79602.1 AT5g15220/F8M21.110 [Arabidopsis thaliana]<br>gi 332004748 gb AED92131.1  large subunit ribosomal protein L27 [Arabidopsis thaliana]                                                                                                                                                                                                                                                                                                                                                                                                                                                      | 135  | 154  | 1.00E-25  | 114.1 | 58.5 | 63.7  | large subunit ribosomal protein L27             | gbpln | Arabidopsis thaliana | AT5G15220.1   Symbols:   Ribosomal protein L27 family protein   chr5:4941466-4942133 REVERSE LENGTH=154                                                     | 135  | 154  | 2.00E-28  | 114.1 | 58.5 | 63.7 |
| Rsa1.0_00301.1.g10840.t1 | gb EOA21599.1  hypothetical protein CARUB.v10002009mg [Capsella rubella]                                                                                                                                                                                                                                                                                                                                                                                                                                                                                                                                                                                                                                                                                                  | 197  | 197  | 1.00E-109 | 100.0 | 98.5 | 100.0 | hypothetical protein CARUB.v10002009mg          | gbpln | Capsella rubella     | AT5G15200.1   Symbols:   Ribosomal protein S4   chr5:4935124-4936334 REVERSE LENGTH=198                                                                     | 197  | 198  | 1.00E-105 | 100.5 | 92.9 | 94.9 |

|                          |                                                                                                                                                                                                                                                                                                                                                                                                                                                                                                                                                                                                                                                                                                                                                                                                                                                                                                                                                                                                                                                                                                                                                                                                                                                                                                                                                                                                                                                                                                                                                        |     |     |           |       |      |      |                                      |       |                      |                                                                                                                                                                                                                                                                                                                                                                                                                                                                                                                                                          |     |     |           |       |      |      |
|--------------------------|--------------------------------------------------------------------------------------------------------------------------------------------------------------------------------------------------------------------------------------------------------------------------------------------------------------------------------------------------------------------------------------------------------------------------------------------------------------------------------------------------------------------------------------------------------------------------------------------------------------------------------------------------------------------------------------------------------------------------------------------------------------------------------------------------------------------------------------------------------------------------------------------------------------------------------------------------------------------------------------------------------------------------------------------------------------------------------------------------------------------------------------------------------------------------------------------------------------------------------------------------------------------------------------------------------------------------------------------------------------------------------------------------------------------------------------------------------------------------------------------------------------------------------------------------------|-----|-----|-----------|-------|------|------|--------------------------------------|-------|----------------------|----------------------------------------------------------------------------------------------------------------------------------------------------------------------------------------------------------------------------------------------------------------------------------------------------------------------------------------------------------------------------------------------------------------------------------------------------------------------------------------------------------------------------------------------------------|-----|-----|-----------|-------|------|------|
| Rsa1.0_00301.1.g10841.t1 | ref[NP_197023.2] uncharacterized protein [Arabidopsis thaliana] gi 30685234 ref[NP_850823.1] uncharacterized protein [Arabidopsis thaliana] gi 26453158 dbj BAC43655.1  unknown protein [Arabidopsis thaliana] gi 28416855 gb AA042958.1  At5g15190 [Arabidopsis thaliana] gi 332004743 gb AED92126.1  uncharacterized protein AT5G15190 [Arabidopsis thaliana] gi 332004744 gb AED92127.1  uncharacterized protein AT5G15190 [Arabidopsis thaliana] ref[NP_197022.1] peroxidase 56 [Arabidopsis thaliana] gi 26397870 sp Q9LXG3.1 PER56_ARAT H RecName: Full=Peroxidase 56; Short=Atperox P56; AltName: Full=ATP33; Flags: Precursor gi 7671487 emb CAB89328.1  prx10 peroxidase-like protein [Arabidopsis thaliana] gi 18176159 gb AAL59994.1  putative prx10 peroxidase [Arabidopsis thaliana] gi 23296746 gb AAN13160.1  putative prx10 peroxidase [Arabidopsis thaliana] gi 110736795 dbj BAF00358.1  prx10 peroxidase - like protein [Arabidopsis thaliana] gi 332004742 gb AED92125.1  peroxidase 56 [Arabidopsis thaliana] ref[NP_197020.1] protein banquo 2 [Arabidopsis thaliana] gi 297811653 ref[XP_002873710.1] bHLH family protein [Arabidopsis lyrata subsp. lyrata] gi 7671485 emb CAB89326.1  putative protein [Arabidopsis thaliana] gi 26452783 dbj BA43472.1  unknown protein [Arabidopsis thaliana] gi 28973111 gb AA063880.1  putative bHLH protein [Arabidopsis thaliana] gi 297319547 gb EFH4969.1  bHLH family protein [Arabidopsis lyrata subsp. lyrata] gi 332004740 gb AED92123.1  protein banquo 2 [Arabidopsis thaliana] | 121 | 116 | 2.00E-40  | 95.9  | 71.1 | 80.2 | uncharacterized protein              | gbpln | Arabidopsis thaliana | AT5G15190.2   Symbols:   unknown protein; FUNCTIONS IN: molecular function unknown; INVOLVED IN: biological process unknown; LOCATED IN: chloroplast; EXPRESSED IN: 17 plant structures; EXPRESSED DURING: LP.04 four leaves visible, 4 anthesis, petal differentiation and expansion stage, E expanded cotyledon stage, D bilateral stage; Has 7 Blast hits to 7 proteins in 3 species: Archae - 0; Bacteria - 0; Metazoa - 0; Fungi - 0; Plants - 7; Viruses - 0; Other Eukaryotes - 0 (source: NCBI BLink).   chr5:4933148-4933498 REVERSE LENGTH=116 | 121 | 116 | 3.00E-43  | 95.9  | 71.1 | 80.2 |
| Rsa1.0_00301.1.g10842.t1 | ref[NP_197020.1] protein banquo 2 [Arabidopsis thaliana] gi 297811653 ref[XP_002873710.1] bHLH family protein [Arabidopsis lyrata subsp. lyrata] gi 7671485 emb CAB89326.1  putative protein [Arabidopsis thaliana] gi 26452783 dbj BA43472.1  unknown protein [Arabidopsis thaliana] gi 28973111 gb AA063880.1  putative bHLH protein [Arabidopsis thaliana] gi 297319547 gb EFH4969.1  bHLH family protein [Arabidopsis lyrata subsp. lyrata] gi 332004740 gb AED92123.1  protein banquo 2 [Arabidopsis thaliana]                                                                                                                                                                                                                                                                                                                                                                                                                                                                                                                                                                                                                                                                                                                                                                                                                                                                                                                                                                                                                                    | 330 | 329 | 1.00E-159 | 99.7  | 83.0 | 89.1 | peroxidase 56                        | gbpln | Arabidopsis thaliana | AT5G15180.1   Symbols:   Peroxidase superfamily protein   chr5:4930561-4932211 FORWARD LENGTH=329                                                                                                                                                                                                                                                                                                                                                                                                                                                        | 330 | 329 | 1.00E-161 | 99.7  | 83.0 | 89.1 |
| Rsa1.0_00301.1.g10843.t1 | ref[NP_197020.1] protein banquo 2 [Arabidopsis thaliana] gi 297811653 ref[XP_002873710.1] bHLH family protein [Arabidopsis lyrata subsp. lyrata] gi 7671485 emb CAB89326.1  putative protein [Arabidopsis thaliana] gi 26452783 dbj BA43472.1  unknown protein [Arabidopsis thaliana] gi 28973111 gb AA063880.1  putative bHLH protein [Arabidopsis thaliana] gi 297319547 gb EFH4969.1  bHLH family protein [Arabidopsis lyrata subsp. lyrata] gi 332004740 gb AED92123.1  protein banquo 2 [Arabidopsis thaliana]                                                                                                                                                                                                                                                                                                                                                                                                                                                                                                                                                                                                                                                                                                                                                                                                                                                                                                                                                                                                                                    | 93  | 94  | 4.00E-33  | 101.1 | 77.4 | 81.7 | protein banquo 2                     | gbpln | Arabidopsis lyrata   | AT5G15160.1   Symbols: BNG2, BHLH134   BANQUO 2   chr5:4921487-4922553 REVERSE LENGTH=94                                                                                                                                                                                                                                                                                                                                                                                                                                                                 | 93  | 94  | 6.00E-36  | 101.1 | 77.4 | 81.7 |
| Rsa1.0_00301.1.g10844.t1 | # # # # # # # # -                                                                                                                                                                                                                                                                                                                                                                                                                                                                                                                                                                                                                                                                                                                                                                                                                                                                                                                                                                                                                                                                                                                                                                                                                                                                                                                                                                                                                                                                                                                                      |     |     |           |       |      |      |                                      | ----  | ----                 | #                                                                                                                                                                                                                                                                                                                                                                                                                                                                                                                                                        |     |     |           |       |      |      |
| Rsa1.0_00301.1.g10845.t1 | ref[NP_001154201.1] HSP20-like chaperone [Arabidopsis thaliana] gi 332656774 gb AEE82174.1  HSP20-like chaperone [Arabidopsis thaliana] ref[NP_568309.2] homeobox-leucine zipper protein HAT7 [Arabidopsis thaliana] gi 90101578 sp Q00466.4 HAT7_ARATH RecName: Full=Homeobox-leucine zipper protein HAT7; AltName: Full=HD-ZIP protein ATHB-3; AltName: Full=Homeodomain transcription factor ATHB-3; AltName: Full=Homeodomain-leucine zipper protein HAT7; Short=HD-ZIP protein 7 gi 110738603 dbj BAF01227.1  homeobox protein [Arabidopsis thaliana] gi 199589350 gb ACH90466.1  At5g15150 [Arabidopsis thaliana] gi 332004739 gb AED92122.1  homeobox-leucine zipper protein HAT7 [Arabidopsis thaliana] ref[XP_002871650.1] WRKY DNA-binding protein 72 [Arabidopsis lyrata subsp. lyrata] gi 297317487 gb EFH47909.1  WRKY DNA-binding protein 72 [Arabidopsis lyrata subsp. lyrata]                                                                                                                                                                                                                                                                                                                                                                                                                                                                                                                                                                                                                                                          | 115 | 240 | 1.00E-40  | 208.7 | 75.7 | 83.5 | HSP20-like chaperone                 | gbpln | Arabidopsis thaliana | AT4G02450.2   Symbols:   HSP20-like chaperones superfamily protein   chr4:1073987-1075765 REVERSE LENGTH=240                                                                                                                                                                                                                                                                                                                                                                                                                                             | 115 | 240 | 2.00E-43  | 208.7 | 75.7 | 83.5 |
| Rsa1.0_00301.1.g10846.t1 | ref[NP_002871650.1] WRKY DNA-binding protein 72 [Arabidopsis lyrata subsp. lyrata] gi 297317487 gb EFH47909.1  WRKY DNA-binding protein 72 [Arabidopsis lyrata subsp. lyrata]                                                                                                                                                                                                                                                                                                                                                                                                                                                                                                                                                                                                                                                                                                                                                                                                                                                                                                                                                                                                                                                                                                                                                                                                                                                                                                                                                                          | 286 | 314 | 1.00E-143 | 109.8 | 93.7 | 96.9 | homeobox-leucine zipper protein HAT7 | gbpln | Arabidopsis thaliana | AT5G15150.1   Symbols: ATHB-3, HAT7, ATHB3, HB-3   homeobox 3   chr5:4913951-4915609 REVERSE LENGTH=314                                                                                                                                                                                                                                                                                                                                                                                                                                                  | 286 | 314 | 2.33E-156 | 109.8 | 93.7 | 96.9 |
| Rsa1.0_00301.1.g10847.t1 | homeobox protein [Arabidopsis thaliana] gi 199589350 gb ACH90466.1  At5g15150 [Arabidopsis thaliana] gi 332004739 gb AED92122.1  homeobox-leucine zipper protein HAT7 [Arabidopsis thaliana] ref[XP_002871650.1] WRKY DNA-binding protein 72 [Arabidopsis lyrata subsp. lyrata] gi 297317487 gb EFH47909.1  WRKY DNA-binding protein 72 [Arabidopsis lyrata subsp. lyrata]                                                                                                                                                                                                                                                                                                                                                                                                                                                                                                                                                                                                                                                                                                                                                                                                                                                                                                                                                                                                                                                                                                                                                                             | 607 | 555 | 0         | 91.4  | 64.6 | 69.9 | WRKY DNA-binding protein 72          | gbpln | Arabidopsis lyrata   | AT5G15130.1   Symbols: WRKY72, ATWRKY72   WRKY DNA-binding protein 72   chr5:4904426-4906879 FORWARD LENGTH=548                                                                                                                                                                                                                                                                                                                                                                                                                                          | 607 | 548 | 0         | 90.3  | 64.4 | 69.4 |
| Rsa1.0_00301.1.g10848.t1 | homeobox-leucine zipper protein HAT7 [Arabidopsis thaliana] ref[XP_002871650.1] WRKY DNA-binding protein 72 [Arabidopsis lyrata subsp. lyrata] gi 297317487 gb EFH47909.1  WRKY DNA-binding protein 72 [Arabidopsis lyrata subsp. lyrata]                                                                                                                                                                                                                                                                                                                                                                                                                                                                                                                                                                                                                                                                                                                                                                                                                                                                                                                                                                                                                                                                                                                                                                                                                                                                                                              | 481 | 473 | 0         | 98.3  | 83.0 | 90.0 | unknown                              | gbpln | Arabidopsis thaliana | AT5G15110.1   Symbols:   Pectate lyase family protein   chr5:4895966-4897682 FORWARD LENGTH=472                                                                                                                                                                                                                                                                                                                                                                                                                                                          | 481 | 472 | 0         | 98.1  | 83.0 | 90.0 |
| Rsa1.0_00301.1.g10849.t1 | homeobox-leucine zipper protein HAT7 [Arabidopsis thaliana] ref[XP_002871650.1] WRKY DNA-binding protein 72 [Arabidopsis lyrata subsp. lyrata] gi 297317487 gb EFH47909.1  WRKY DNA-binding protein 72 [Arabidopsis lyrata subsp. lyrata]                                                                                                                                                                                                                                                                                                                                                                                                                                                                                                                                                                                                                                                                                                                                                                                                                                                                                                                                                                                                                                                                                                                                                                                                                                                                                                              | 276 | 276 | 1.00E-150 | 100.0 | 95.3 | 97.5 | unknown                              | gbpln | Brassica rapa        | AT5G15090.2   Symbols: VDACS3   voltage dependent anion channel 3   chr5:4889641-4891389 REVERSE LENGTH=274                                                                                                                                                                                                                                                                                                                                                                                                                                              | 276 | 274 | 1.00E-129 | 99.3  | 80.1 | 89.9 |

|                          |                                                                                                                                                                                                                                                                                                                                                                                                                                                                                                                                                                      |      |      |           |       |      |      |                                                  |       |                      |                                                                                                                                               |      |      |           |       |      |      |
|--------------------------|----------------------------------------------------------------------------------------------------------------------------------------------------------------------------------------------------------------------------------------------------------------------------------------------------------------------------------------------------------------------------------------------------------------------------------------------------------------------------------------------------------------------------------------------------------------------|------|------|-----------|-------|------|------|--------------------------------------------------|-------|----------------------|-----------------------------------------------------------------------------------------------------------------------------------------------|------|------|-----------|-------|------|------|
| Rsa1.0_00301.1.g10850.t1 | gb[EOA20679.1] hypothetical protein CARUB_v10000991mg [Capsella rubella]                                                                                                                                                                                                                                                                                                                                                                                                                                                                                             | 441  | 436  | 0         | 98.9  | 90.5 | 92.3 | hypothetical protein CARUB_v10000991mg           | gbpln | Capsella rubella     | AT5G15050.1   Symbols:   Core-2/1-branching beta-1.6-N-acetylglucosaminyltransferase family protein   chr5:4871820-4873454 REVERSE LENGTH=434 | 441  | 434  | 0         | 98.4  | 89.3 | 91.8 |
| Rsa1.0_00301.1.g10851.t1 | ref[XP_002873701.1] hypothetical protein ARALYDRAFT_488346 [Arabidopsis lyrata subsp. lyrata] gi 297319538 gb EFH49960.1  hypothetical protein ARALYDRAFT_488346 [Arabidopsis lyrata subsp. lyrata] ref[NP_197002.1] esterase/lipase/thioesterase family protein [Arabidopsis thaliana] gi 9755665 emb CAC01817.1  lysophospholipase-like protein [Arabidopsis thaliana] gi 67633802 gb AA78825.1  esterase/lipase/thioesterase family protein [Arabidopsis thaliana] gi 332004715 gb AED92098.1  esterase/lipase/thioesterase family protein [Arabidopsis thaliana] | 1352 | 1372 | 0         | 101.5 | 83.1 | 89.3 | hypothetical protein ARALYDRAFT_488346           | gbpln | Arabidopsis lyrata   | AT5G15020.2   Symbols: SNL2   SIN3-like 2   FORWARD LENGTH=1355                                                                               | 1352 | 1355 | 0         | 100.2 | 81.7 | 88.6 |
| Rsa1.0_00301.1.g10852.t2 | gi 67633802 gb AA78825.1  esterase/lipase/thioesterase family protein [Arabidopsis thaliana] gi 332004715 gb AED92098.1  esterase/lipase/thioesterase family protein [Arabidopsis thaliana]                                                                                                                                                                                                                                                                                                                                                                          | 328  | 327  | 1.00E-176 | 99.7  | 91.5 | 95.1 | esterase/lipase/thioesterase family protein      | gbpln | Arabidopsis thaliana | AT5G14980.1   Symbols:   alpha/beta-Hydrolases superfamily protein   chr5:4849600-4850583 FORWARD LENGTH=327                                  | 328  | 327  | 1.00E-179 | 99.7  | 91.5 | 95.1 |
| Rsa1.0_00301.1.g10853.t1 | gb[EOA20959.1] hypothetical protein CARUB_v10001291mg [Capsella rubella]                                                                                                                                                                                                                                                                                                                                                                                                                                                                                             | 352  | 352  | 1.00E-133 | 100.0 | 70.7 | 80.1 | hypothetical protein CARUB_v10001291mg           | gbpln | Capsella rubella     | AT5G14960.1   Symbols: DEL2, E2L1, E2FD   DP-E2F-like 2   chr5:4843966-4846373 FORWARD LENGTH=359                                             | 352  | 359  | 1.00E-130 | 102.0 | 67.6 | 77.6 |
| Rsa1.0_00301.1.g10854.t1 | gb[EOA19830.1] hypothetical protein CARUB_v10000075mg [Capsella rubella]                                                                                                                                                                                                                                                                                                                                                                                                                                                                                             | 1171 | 1171 | 0         | 100.0 | 92.0 | 95.8 | hypothetical protein CARUB_v10000075mg           | gbpln | Capsella rubella     | AT5G14950.1   Symbols: GMI1, ATGM3   golgi alpha-mannosidase II   chr5:4837484-4841792 REVERSE LENGTH=1173                                    | 1171 | 1173 | 0         | 100.2 | 90.9 | 95.1 |
| Rsa1.0_00301.1.g10855.t1 | ref[NP_196998.1] major facilitator protein [Arabidopsis thaliana] gi 75174167 sp Q9LFR1.1 PTR50_ARATH RecName: Full=Probable peptide/nitrate transporter At5g14940 gi 9755661 emb CAC01813.1  oligopeptide transporter-like protein [Arabidopsis thaliana] gi 332004711 gb AED92094.1  probable peptide/nitrate transporter [Arabidopsis thaliana]                                                                                                                                                                                                                   | 545  | 552  | 0         | 101.3 | 87.2 | 92.1 | major facilitator protein                        | gbpln | Arabidopsis thaliana | AT5G14940.1   Symbols:   Major facilitator superfamily protein   chr5:4831748-4834312 REVERSE LENGTH=552                                      | 545  | 552  | 0         | 101.3 | 87.2 | 92.1 |
| Rsa1.0_00301.1.g10856.t1 | ref[XP_002871636.1] heavy-metal-associated domain-containing protein [Arabidopsis lyrata subsp. lyrata] gi 297317473 gb EFH47895.1  heavy-metal-associated domain-containing protein [Arabidopsis lyrata subsp. lyrata]                                                                                                                                                                                                                                                                                                                                              | 181  | 178  | 4.00E-81  | 98.3  | 87.8 | 91.2 | heavy-metal-associated domain-containing protein | gbpln | Arabidopsis lyrata   | AT5G14910.1   Symbols:   Heavy metal transport/detoxification superfamily protein   chr5:4823815-4825196 FORWARD LENGTH=178                   | 181  | 178  | 6.00E-81  | 98.3  | 85.6 | 90.1 |
| Rsa1.0_00301.1.g10857.t1 | ref[NP_196993.2] NHL domain-containing protein [Arabidopsis thaliana] gi 332004703 gb AED92096.1  NHL domain-containing protein [Arabidopsis thaliana]                                                                                                                                                                                                                                                                                                                                                                                                               | 174  | 754  | 4.00E-80  | 433.3 | 79.9 | 86.8 | NHL domain-containing protein                    | gbpln | Arabidopsis thaliana | AT5G14890.1   Symbols:   NHL domain-containing protein   chr5:4818056-4821534 FORWARD LENGTH=754                                              | 174  | 754  | 2.00E-82  | 433.3 | 79.9 | 86.8 |
| Rsa1.0_00301.1.g10858.t1 | ref[NP_196992.1] Potassium transporter 8 [Arabidopsis thaliana] gi 38503205 sp Q9M7J9.2 POT8_ARATH RecName: Full=Potassium transporter 8; Short=AHAK8; Short=APOT8 gi 9755756 emb CAC01897.1  putative cation transport protein [Arabidopsis thaliana] gi 332004702 gb AED92085.1  Potassium transporter 8 [Arabidopsis thaliana]                                                                                                                                                                                                                                    | 1223 | 781  | 0         | 63.9  | 59.9 | 61.2 | Potassium transporter 8                          | gbpln | Arabidopsis thaliana | AT5G14880.1   Symbols:   Potassium transporter family protein   chr5:4814244-4817667 FORWARD LENGTH=781                                       | 1223 | 781  | 0         | 63.9  | 59.9 | 61.2 |
| Rsa1.0_00301.1.g10859.t2 | gb[EOA20341.1] hypothetical protein CARUB_v10000649mg [Capsella rubella]                                                                                                                                                                                                                                                                                                                                                                                                                                                                                             | 549  | 543  | 0         | 98.9  | 82.0 | 88.3 | hypothetical protein CARUB_v10000649mg           | gbpln | Capsella rubella     | AT5G14850.1   Symbols:   Alg9-like mannosyltransferase family   chr5:4802099-4804977 REVERSE LENGTH=548                                       | 549  | 548  | 0         | 99.8  | 82.0 | 88.2 |

|                          |                                                                                                                                                                                                                                                                                                                                                                                                                                                                                                                                                   |      |      |           |       |      |      |                                                       |       |                      |                                                                                                                                          |      |      |           |       |      |      |  |
|--------------------------|---------------------------------------------------------------------------------------------------------------------------------------------------------------------------------------------------------------------------------------------------------------------------------------------------------------------------------------------------------------------------------------------------------------------------------------------------------------------------------------------------------------------------------------------------|------|------|-----------|-------|------|------|-------------------------------------------------------|-------|----------------------|------------------------------------------------------------------------------------------------------------------------------------------|------|------|-----------|-------|------|------|--|
| Rsa1.0_00301.1.g10860.t1 | ref NP_196983.1  armadillo/beta-catenin-like repeat-containing protein [Arabidopsis thaliana] gi 9755747 emb CAC01878.1  putative protein [Arabidopsis thaliana] gi 20260676 gb AAM13237.1  putative protein [Arabidopsis thaliana] gi 21618131 gb AAM67181.1  unknown [Arabidopsis thaliana] gi 24899827 gb AAN65128.1  putative protein [Arabidopsis thaliana] gi 62320934 dbj BAD93942.1  hypothetical protein [Arabidopsis thaliana] gi 332004694 gb AED92077.1  armadillo/beta-catenin-like repeat-containing protein [Arabidopsis thaliana] | 342  | 346  | 1.00E-158 | 101.2 | 84.2 | 93.3 | armadillo/beta-catenin-like repeat-containing protein | gbpln | Arabidopsis thaliana | AT5G14790.1   Symbols:   ARM repeat superfamily protein   chr5:4784058-4785508 FORWARD LENGTH=346                                        | 342  | 346  | 1.00E-161 | 101.2 | 84.2 | 93.3 |  |
| Rsa1.0_00302.1.g10861.t1 | ref XP_002872033.1  hypothetical protein ARALYDRAFT_910314 [Arabidopsis lyrata subsp. lyrata] gi 297317870 gb EFH48292.1  hypothetical protein ARALYDRAFT_910314 [Arabidopsis lyrata subsp. lyrata]                                                                                                                                                                                                                                                                                                                                               | 311  | 281  | 1.00E-114 | 90.4  | 65.9 | 75.2 | hypothetical protein ARALYDRAFT_910314                | gbpln | Arabidopsis lyrata   | AT5G23070.1   Symbols:   Thymidine kinase   chr5:7741979-7742827 FORWARD LENGTH=282                                                      | 311  | 282  | 1.00E-112 | 90.7  | 65.9 | 74.6 |  |
| Rsa1.0_00302.1.g10862.t1 | gb EOA19907.1  hypothetical protein CARUB_v10000157mg [Capsella rubella]                                                                                                                                                                                                                                                                                                                                                                                                                                                                          | 939  | 946  | 0         | 100.7 | 84.1 | 90.0 | hypothetical protein CARUB_v10000157mg                | gbpln | Capsella rubella     | AT5G23080.1   Symbols: TGH   SWAP (Suppressor-of-White-Apricot)/surp domain-containing protein   chr5:7743226-7748889 REVERSE LENGTH=930 | 939  | 930  | 0         | 99.0  | 82.6 | 87.8 |  |
| Rsa1.0_00302.1.g10863.t1 | ref XP_002872035.1  hypothetical protein ARALYDRAFT_910318 [Arabidopsis lyrata subsp. lyrata] gi 297317872 gb EFH48294.1  hypothetical protein ARALYDRAFT_910318 [Arabidopsis lyrata subsp. lyrata]                                                                                                                                                                                                                                                                                                                                               | 262  | 278  | 1.00E-101 | 106.1 | 82.1 | 86.3 | hypothetical protein ARALYDRAFT_910318                | gbpln | Arabidopsis lyrata   | AT5G23100.1   Symbols:   Protein of unknown function, DUF617   chr5:7753557-7754390 FORWARD LENGTH=277                                   | 262  | 277  | 4.00E-99  | 105.7 | 80.2 | 84.4 |  |
| Rsa1.0_00302.1.g10864.t1 | # # # # # # # # # # # # # # # #                                                                                                                                                                                                                                                                                                                                                                                                                                                                                                                   |      |      |           |       |      |      |                                                       |       |                      |                                                                                                                                          |      |      |           |       |      |      |  |
| Rsa1.0_00302.1.g10865.t1 | ref XP_002872036.1  zinc finger family protein [Arabidopsis lyrata subsp. lyrata] gi 297317873 gb EFH48295.1  zinc finger family protein [Arabidopsis lyrata subsp. lyrata]                                                                                                                                                                                                                                                                                                                                                                       | 4704 | 4711 | 0         | 100.1 | 90.6 | 94.9 | zinc finger family protein                            | gbpln | Arabidopsis lyrata   | AT5G23110.1   Symbols:   Zinc finger, C3HC4 type (RING finger) family protein   chr5:7758307-7775509 FORWARD LENGTH=4706                 | 4704 | 4706 | 0         | 100.0 | 90.0 | 94.6 |  |
| Rsa1.0_00302.1.g10866.t1 | ref XP_002872037.1  HCF136 [Arabidopsis lyrata subsp. lyrata] gi 297317874 gb EFH48296.1  HCF136 [Arabidopsis lyrata subsp. lyrata]                                                                                                                                                                                                                                                                                                                                                                                                               | 403  | 393  | 0         | 97.5  | 91.1 | 94.5 | HCF136                                                | gbpln | Arabidopsis lyrata   | AT5G23120.1   Symbols: HCF136   photosystem II stability/assembly factor, chloroplast (HCF136)   chr5:7778154-7780463 FORWARD LENGTH=403 | 403  | 403  | 0         | 100.0 | 93.5 | 96.5 |  |
| Rsa1.0_00302.1.g10867.t1 | gb EOA20773.1  hypothetical protein CARUB_v10001102mg [Capsella rubella]                                                                                                                                                                                                                                                                                                                                                                                                                                                                          | 398  | 405  | 1.00E-135 | 101.8 | 72.4 | 81.2 | hypothetical protein CARUB_v10001102mg                | gbpln | Capsella rubella     | AT5G23130.1   Symbols:   Peptidoglycan-binding LysM domain-containing protein   chr5:7781475-7783333 FORWARD LENGTH=397                  | 398  | 397  | 1.00E-137 | 99.7  | 72.1 | 79.6 |  |
| Rsa1.0_00302.1.g10868.t2 | ref XP_002872039.1  hypothetical protein ARALYDRAFT_910322 [Arabidopsis lyrata subsp. lyrata] gi 297317876 gb EFH48298.1  hypothetical protein ARALYDRAFT_910322 [Arabidopsis lyrata subsp. lyrata]                                                                                                                                                                                                                                                                                                                                               | 282  | 237  | 1.00E-117 | 84.0  | 77.7 | 80.1 | hypothetical protein ARALYDRAFT_910322                | gbpln | Arabidopsis lyrata   | AT5G23140.1   Symbols: CLPP2, NCLPP7   nuclear-encoded CLP protease P7   chr5:7783811-7784826 FORWARD LENGTH=241                         | 282  | 241  | 1.00E-117 | 85.5  | 77.3 | 80.5 |  |
| Rsa1.0_00302.1.g10869.t1 | ref NP_178545.1  cysteine/histidine-rich C1 domain-containing protein [Arabidopsis thaliana] gi 4544429 gb AAD22338.1  unknown protein [Arabidopsis thaliana] gi 55740549 gb AAV63867.1  hypothetical protein At2g04680 [Arabidopsis thaliana] gi 33025076 gb AEC05855.1  cysteine/histidine-rich C1 domain-containing protein [Arabidopsis thaliana]                                                                                                                                                                                             | 697  | 657  | 0         | 94.3  | 58.8 | 69.2 | cysteine/histidine-rich C1 domain-containing protein  | gbpln | Arabidopsis thaliana | AT2G04680.1   Symbols:   Cysteine/Histidine-rich C1 domain family protein   chr2:1640188-1642161 FORWARD LENGTH=657                      | 697  | 657  | 0         | 94.3  | 58.8 | 69.2 |  |
| Rsa1.0_00302.1.g10870.t3 | ref XP_002872040.1  enhancer of ag-4 2 [Arabidopsis lyrata subsp. lyrata] gi 297317877 gb EFH48299.1  enhancer of ag-4 2 [Arabidopsis lyrata subsp. lyrata]                                                                                                                                                                                                                                                                                                                                                                                       | 1369 | 1398 | 0         | 102.1 | 58.3 | 62.9 | enhancer of ag-4 2                                    | gbpln | Arabidopsis lyrata   | AT5G23150.1   Symbols: HUA2   Tudor/PWWP/MBT domain-containing protein   chr5:7786173-7792080 FORWARD LENGTH=1392                        | 1369 | 1392 | 0         | 101.7 | 57.6 | 62.5 |  |
| Rsa1.0_00302.1.g10871.t1 | gb EOA21003.1  hypothetical protein CARUB_v10001338mg [Capsella rubella]                                                                                                                                                                                                                                                                                                                                                                                                                                                                          | 403  | 344  | 1.00E-132 | 85.4  | 64.0 | 72.0 | hypothetical protein CARUB_v10001338mg                | gbpln | Capsella rubella     | AT5G23170.1   Symbols:   Protein kinase superfamily protein   chr5:7798411-7799436 REVERSE LENGTH=341                                    | 403  | 341  | 1.00E-121 | 84.6  | 65.3 | 71.5 |  |
| Rsa1.0_00302.1.g10872.t1 | ref XP_002874114.1  CYP86B1 [Arabidopsis lyrata subsp. lyrata] gi 297319951 gb EFH50373.1  CYP86B1 [Arabidopsis lyrata subsp. lyrata]                                                                                                                                                                                                                                                                                                                                                                                                             | 560  | 559  | 0         | 99.8  | 92.1 | 95.2 | CYP86B1                                               | gbpln | Arabidopsis lyrata   | AT5G23190.1   Symbols: CYP86B1   cytochrome P450, family 86, subfamily B, polypeptide 1   chr5:7803478-7805659 REVERSE LENGTH=559        | 560  | 559  | 0         | 99.8  | 91.6 | 95.5 |  |



|                          |                                                                                                                                                                                                                                                                                                                                                                                                                                                                                                                                                                                                                                                                                                                                                                            |     |     |           |       |      |      |                                                      |       |                      |                                                                                                                                                                                                                                                                                                                                                                    |     |     |           |       |      |      |
|--------------------------|----------------------------------------------------------------------------------------------------------------------------------------------------------------------------------------------------------------------------------------------------------------------------------------------------------------------------------------------------------------------------------------------------------------------------------------------------------------------------------------------------------------------------------------------------------------------------------------------------------------------------------------------------------------------------------------------------------------------------------------------------------------------------|-----|-----|-----------|-------|------|------|------------------------------------------------------|-------|----------------------|--------------------------------------------------------------------------------------------------------------------------------------------------------------------------------------------------------------------------------------------------------------------------------------------------------------------------------------------------------------------|-----|-----|-----------|-------|------|------|
| Rsa1.0_00302.1.g10873.t2 | ref[XP_002872042.1] hypothetical protein ARALYDRAFT.489175 [Arabidopsis lyrata subsp. lyrata] gi 297317879 gb EFH48301.1  hypothetical protein ARALYDRAFT.489175 [Arabidopsis lyrata subsp. lyrata]                                                                                                                                                                                                                                                                                                                                                                                                                                                                                                                                                                        | 500 | 398 | 0         | 79.6  | 67.6 | 71.6 | hypothetical protein ARALYDRAFT.489175               | gbpln | Arabidopsis lyrata   | AT5G23200.1   Symbols:   unknown protein; BEST Arabidopsis thaliana protein match is: unknown protein (TAIR:AT5G08270.1); Has 30201 Blast hits to 17322 proteins in 780 species: Archaea - 12; Bacteria - 1396; Metazoa - 17388; Fungi - 3422; Plants - 5037; Viruses - 0; Other Eukaryotes - 2996 (source: NCBI BLINK).   chr5:7807319-7808988 FORWARD LENGTH=399 | 500 | 399 | 0         | 79.8  | 67.4 | 71.6 |
| Rsa1.0_00302.1.g10874.t1 | ref[NP_197715.1] DNAJ heat shock N-terminal domain-containing protein [Arabidopsis thaliana] gi 10177813 dbj BAB11179.1  unnamed protein product [Arabidopsis thaliana] gi 134031909 gb ABO45691.1  At5g23240 [Arabidopsis thaliana] gi 332005757 gb AED93140.1  DNAJ heat shock N-terminal domain-containing protein [Arabidopsis thaliana]                                                                                                                                                                                                                                                                                                                                                                                                                               | 470 | 465 | 0         | 98.9  | 83.8 | 91.1 | DNAJ heat shock N-terminal domain-containing protein | gbpln | Arabidopsis thaliana | AT5G23240.1   Symbols:   DNAJ heat shock N-terminal domain-containing protein   chr5:782657-7828534 REVERSE LENGTH=465                                                                                                                                                                                                                                             | 470 | 465 | 0         | 98.9  | 83.8 | 91.1 |
| Rsa1.0_00302.1.g10875.t1 | ref[NP_197716.1] Succinyl-CoA ligase [GDP-forming] subunit alpha-2 [Arabidopsis thaliana] gi 56754629 sp Q8LAD2.2 SUCA2_ARAT H RecName: Full=Succinyl-CoA ligase [ADP-forming] subunit alpha-2, mitochondrial; AltName: Full=Succinyl-CoA synthetase subunit alpha-2; Short=SCS-alpha-2; Flags: Precursor gi 10177814 dbj BAB11180.1  succinyl-CoA synthetase, alpha subunit [Arabidopsis thaliana] gi 20260190 gb AAM12993.1  succinyl-CoA synthetase, alpha subunit [Arabidopsis thaliana] gi 21387045 gb AAM47926.1  succinyl-CoA synthetase alpha subunit [Arabidopsis thaliana] gi 332005758 gb AED93141.1  Succinyl-CoA ligase [GDP-forming] subunit alpha-2 [Arabidopsis thaliana] gb ABY59774.1  MADS-box DNA-binding domain transcription factor [Brassica napus] | 342 | 341 | 1.00E-180 | 99.7  | 93.3 | 95.3 | Succinyl-CoA ligase                                  | gbpln | Arabidopsis thaliana | AT5G23250.1   Symbols:   Succinyl-CoA ligase, alpha subunit   chr5:7830460-7832491 FORWARD LENGTH=341                                                                                                                                                                                                                                                              | 342 | 341 | 0         | 99.7  | 93.3 | 95.3 |
| Rsa1.0_00302.1.g10876.t2 | gi 317141590 gb ADV03947.1  MADS DNA domain binding transcription factor BnaC.TT16a [Brassica napus] gi 317141607 gb ADV03949.1  MADS DNA domain binding transcription factor BolC.TT16a [Brassica oleracea]                                                                                                                                                                                                                                                                                                                                                                                                                                                                                                                                                               | 241 | 242 | 1.00E-128 | 100.4 | 96.7 | 97.5 | MADS-box DNA-binding domain transcription factor     | gbpln | Brassica napus       | AT5G23260.2   Symbols: TT16, ABS, AGL32   K-box region and MADS-box transcription factor family protein   chr5:7836442-7838340 FORWARD LENGTH=252                                                                                                                                                                                                                  | 241 | 252 | 1.00E-110 | 104.6 | 82.6 | 92.1 |
| Rsa1.0_00302.1.g10877.t1 | ref[XP_002872047.1] predicted protein [Arabidopsis lyrata subsp. lyrata] gi 297317884 gb EFH48306.1  predicted protein [Arabidopsis lyrata subsp. lyrata]                                                                                                                                                                                                                                                                                                                                                                                                                                                                                                                                                                                                                  | 527 | 517 | 0         | 98.1  | 80.1 | 88.2 | predicted protein                                    | gbpln | Arabidopsis lyrata   | AT5G23270.1   Symbols: STP11, ATSTP11   sugar transporter 11   chr5:7839132-7840874 FORWARD LENGTH=514                                                                                                                                                                                                                                                             | 527 | 514 | 0         | 97.5  | 79.1 | 87.3 |
| Rsa1.0_00302.1.g10878.t1 | gb ABB97033.1  unknown [Brassica rapa]                                                                                                                                                                                                                                                                                                                                                                                                                                                                                                                                                                                                                                                                                                                                     | 263 | 249 | 1.00E-105 | 94.7  | 86.3 | 88.6 | unknown                                              | gbpln | Brassica rapa        | AT5G23280.1   Symbols:   TCP family transcription factor   chr5:7843017-7843769 FORWARD LENGTH=250                                                                                                                                                                                                                                                                 | 263 | 250 | 2.00E-89  | 95.1  | 72.2 | 77.9 |
| Rsa1.0_00302.1.g10879.t1 | gb EOA21748.1  hypothetical protein CARUB_v10002195mg [Capsella rubella]                                                                                                                                                                                                                                                                                                                                                                                                                                                                                                                                                                                                                                                                                                   | 152 | 151 | 6.00E-71  | 99.3  | 90.8 | 95.4 | hypothetical protein CARUB_v10002195mg               | gbpln | Capsella rubella     | AT5G23290.1   Symbols: PFD5   prefoldin 5   chr5:7846144-7847428 FORWARD LENGTH=151                                                                                                                                                                                                                                                                                | 152 | 151 | 2.00E-73  | 99.3  | 90.8 | 95.4 |
| Rsa1.0_00302.1.g10880.t1 | gb EOA20609.1  hypothetical protein CARUB_v10000920mg [Capsella rubella]                                                                                                                                                                                                                                                                                                                                                                                                                                                                                                                                                                                                                                                                                                   | 471 | 460 | 0         | 97.7  | 88.7 | 90.7 | hypothetical protein CARUB_v10000920mg               | gbpln | Capsella rubella     | AT5G23300.1   Symbols: PYRD   pyrimidine d   chr5:7847792-7850243 REVERSE LENGTH=460                                                                                                                                                                                                                                                                               | 471 | 460 | 0         | 97.7  | 87.9 | 90.4 |
| Rsa1.0_00302.1.g10881.t3 | gb ABR24272.1  iron-containing superoxide dismutase [Brassica napus]                                                                                                                                                                                                                                                                                                                                                                                                                                                                                                                                                                                                                                                                                                       | 296 | 263 | 1.00E-135 | 88.9  | 82.4 | 85.1 | iron-containing superoxide dismutase                 | gbpln | Brassica napus       | AT5G23310.1   Symbols: FSD3   Fe superoxide dismutase 3   chr5:7850624-7852241 FORWARD LENGTH=263                                                                                                                                                                                                                                                                  | 296 | 263 | 1.00E-127 | 88.9  | 81.1 | 85.1 |
| Rsa1.0_00302.1.g10882.t1 | ref[XP_002872053.1] protein binding protein [Arabidopsis lyrata subsp. lyrata] gi 297317890 gb EFH48312.1  protein binding protein [Arabidopsis lyrata subsp. lyrata]                                                                                                                                                                                                                                                                                                                                                                                                                                                                                                                                                                                                      | 406 | 405 | 0         | 99.8  | 91.1 | 97.3 | protein binding protein                              | gbpln | Arabidopsis lyrata   | AT5G23340.1   Symbols:   RNI-like superfamily protein   chr5:7856314-7857983 FORWARD LENGTH=405                                                                                                                                                                                                                                                                    | 406 | 405 | 0         | 99.8  | 91.1 | 96.8 |
| Rsa1.0_00302.1.g10883.t1 | ref[XP_002874124.1] hypothetical protein ARALYDRAFT.489196 [Arabidopsis lyrata subsp. lyrata] gi 297319961 gb EFH50383.1  hypothetical protein ARALYDRAFT.489196 [Arabidopsis lyrata subsp. lyrata]                                                                                                                                                                                                                                                                                                                                                                                                                                                                                                                                                                        | 118 | 218 | 9.00E-27  | 184.7 | 56.8 | 62.7 | hypothetical protein ARALYDRAFT.489196               | gbpln | Arabidopsis lyrata   | AT5G23370.1   Symbols:   GRAM domain-containing protein / ABA-responsive protein-related   chr5:7863542-7864201 REVERSE LENGTH=219                                                                                                                                                                                                                                 | 118 | 219 | 4.00E-29  | 185.6 | 55.9 | 62.7 |

|                          |                                                                                                                                                                                                                                                                                                           |      |      |           |       |      |      |                                        |       |                      |                                                                                                                                                                                                                                                                  |      |      |           |       |      |      |
|--------------------------|-----------------------------------------------------------------------------------------------------------------------------------------------------------------------------------------------------------------------------------------------------------------------------------------------------------|------|------|-----------|-------|------|------|----------------------------------------|-------|----------------------|------------------------------------------------------------------------------------------------------------------------------------------------------------------------------------------------------------------------------------------------------------------|------|------|-----------|-------|------|------|
| Rsa1.0_00302.1.g10884.t1 | refXP_002874125.1   hypothetical protein ARALYDRAFT_910349 [Arabidopsis lyrata subsp. lyrata] gi 297319962 gb EFH50384.1                                                                                                                                                                                  | 214  | 219  | 1.00E-100 | 102.3 | 86.0 | 91.1 | hypothetical protein ARALYDRAFT_910349 | gbpln | Arabidopsis lyrata   | AT5G23370.1   Symbols:   GRAM domain-containing protein / ABA-responsive protein-related   chr5:7863542-7864201 REVERSE LENGTH=219                                                                                                                               | 214  | 219  | 1.00E-101 | 102.3 | 85.5 | 90.7 |
| Rsa1.0_00303.1.g10885.t1 | #                                                                                                                                                                                                                                                                                                         | #    | #    | #         | #     | #    | -    | ----                                   | ----  | #                    | #                                                                                                                                                                                                                                                                | #    | #    | #         | #     | #    | #    |
| Rsa1.0_00303.1.g10886.t1 | gb EOA20937.1  hypothetical protein CARUB_v10001270mg [Capsella rubella]                                                                                                                                                                                                                                  | 358  | 357  | 1.00E-148 | 99.7  | 74.3 | 84.9 | hypothetical protein CARUB_v10001270mg | gbpln | Capsella rubella     | AT5G02890.1   Symbols:   HXXXD-type acyl-transferase family protein   chr5:670207-671454 REVERSE LENGTH=353                                                                                                                                                      | 358  | 353  | 1.00E-147 | 98.6  | 73.7 | 83.0 |
| Rsa1.0_00303.1.g10887.t1 | refXP_002870997.1   ubiquitin-protein ligase 4 [Arabidopsis lyrata subsp. lyrata] gi 297316834 gb EFH47256.1                                                                                                                                                                                              | 1486 | 1509 | 0         | 101.5 | 83.2 | 90.0 | ubiquitin-protein ligase 4             | gbpln | Arabidopsis lyrata   | AT5G02880.1   Symbols: UPL4   ubiquitin-protein ligase 4   chr5:662643-668847 FORWARD LENGTH=1502                                                                                                                                                                | 1486 | 1502 | 0         | 101.1 | 81.6 | 88.7 |
| Rsa1.0_00303.1.g10888.t3 | #                                                                                                                                                                                                                                                                                                         | #    | #    | #         | #     | #    | -    | ----                                   | ----  | #                    | #                                                                                                                                                                                                                                                                | #    | #    | #         | #     | #    | #    |
| Rsa1.0_00303.1.g10889.t1 | #                                                                                                                                                                                                                                                                                                         | #    | #    | #         | #     | #    | -    | ----                                   | ----  | #                    | #                                                                                                                                                                                                                                                                | #    | #    | #         | #     | #    | #    |
| Rsa1.0_00303.1.g10890.t1 | #                                                                                                                                                                                                                                                                                                         | #    | #    | #         | #     | #    | -    | ----                                   | ----  | #                    | #                                                                                                                                                                                                                                                                | #    | #    | #         | #     | #    | #    |
| Rsa1.0_00303.1.g10891.t1 | gb ADA58342.1  pseudo-response regulator 7a [Brassica rapa]                                                                                                                                                                                                                                               | 710  | 725  | 0         | 102.1 | 83.2 | 84.6 | pseudo-response regulator 7a           | gbpln | Brassica rapa        | AT5G02810.1   Symbols: PRR7, APRR7   pseudo-response regulator 7   chr5:638283-641461 REVERSE LENGTH=727                                                                                                                                                         | 710  | 727  | 0         | 102.4 | 82.4 | 87.9 |
| Rsa1.0_00303.1.g10892.t1 | gb AAG16628.1  protein serine/threonine kinase BNK1 [Brassica napus]                                                                                                                                                                                                                                      | 376  | 376  | 0         | 100.0 | 96.0 | 98.1 | protein serine/threonine kinase BNK1   | gbpln | Brassica napus       | AT5G02800.1   Symbols:   Protein kinase superfamily protein   chr5:635545-637374 REVERSE LENGTH=378                                                                                                                                                              | 376  | 378  | 0         | 100.5 | 93.9 | 97.1 |
| Rsa1.0_00303.1.g10893.t5 | emb CAB86032.1  putative protein [Arabidopsis thaliana]                                                                                                                                                                                                                                                   | 236  | 245  | 1.00E-113 | 103.8 | 83.5 | 91.9 | putative protein                       | gbpln | Arabidopsis thaliana | AT5G02780.1   Symbols: GSTL1   glutathione transferase lambda 1   chr5:630957-632485 FORWARD LENGTH=237                                                                                                                                                          | 236  | 237  | 1.00E-115 | 100.4 | 83.5 | 91.9 |
| Rsa1.0_00303.1.g10894.t1 | ref NP_195897.1  uncharacterized protein [Arabidopsis thaliana] gi 14190431 gb AAK55686.1 AF378893.1                                                                                                                                                                                                      | 205  | 214  | 6.00E-62  | 104.4 | 75.6 | 83.9 | uncharacterized protein                | gbpln | Arabidopsis thaliana | AT5G02770.1   Symbols:   unknown protein; Has 469 Blast hits to 336 proteins in 126 species: Archae - 0; Bacteria - 54; Metazoa - 249; Fungi - 22; Plants - 47; Viruses - 0; Other Eukaryotes - 97 (source: NCBI BLINK).   chr5:628101-629168 REVERSE LENGTH=214 | 205  | 214  | 2.00E-64  | 104.4 | 75.6 | 83.9 |
| Rsa1.0_00303.1.g10895.t1 | dbj BAJ33929.1  unnamed protein product [Thellungiella halophila]                                                                                                                                                                                                                                         | 367  | 370  | 0         | 100.8 | 89.4 | 94.8 | unnamed protein product                | ----  | ----                 | AT5G02760.1   Symbols:   Protein phosphatase 2C family protein   chr5:625377-626817 FORWARD LENGTH=370                                                                                                                                                           | 367  | 370  | 0         | 100.8 | 84.5 | 92.1 |
| Rsa1.0_00303.1.g10896.t1 | ref NP_195895.2  RING/U-box domain-containing protein [Arabidopsis thaliana] gi 26451566 dbj BAC42880.1  unknown protein [Arabidopsis thaliana] gi 28973295 gb AAO63972.1  unknown protein [Arabidopsis thaliana] gi 332003130 gb AED90513.1  RING/U-box domain-containing protein [Arabidopsis thaliana] | 285  | 283  | 1.00E-116 | 99.3  | 83.2 | 88.8 | RING/U-box domain-containing protein   | gbpln | Arabidopsis thaliana | AT5G02750.1   Symbols:   RING/U-box superfamily protein   chr5:620101-620952 FORWARD LENGTH=283                                                                                                                                                                  | 285  | 283  | 1.00E-118 | 99.3  | 83.2 | 88.8 |
| Rsa1.0_00303.1.g10897.t1 | refXP_002870982.1   60S ribosomal protein L35 [Arabidopsis lyrata subsp. lyrata] gi 297316819 gb EFH47241.1                                                                                                                                                                                               | 123  | 123  | 1.00E-57  | 100.0 | 92.7 | 99.2 | 60S ribosomal protein L35              | gbpln | Arabidopsis lyrata   | AT5G02610.1   Symbols:   Ribosomal L29 family protein   chr5:587611-588547 FORWARD LENGTH=123                                                                                                                                                                    | 123  | 123  | 2.00E-59  | 100.0 | 91.9 | 98.4 |

|                          |                                                                                                                                                                                                                                                                                                                                                                                                                                                                                                                                                                                                                                                                                                                                      |     |      |           |       |      |      |                                                                |       |                      |                                                                                                                                                                                                                                                                                                                                                                                                                     |     |     |           |       |      |      |
|--------------------------|--------------------------------------------------------------------------------------------------------------------------------------------------------------------------------------------------------------------------------------------------------------------------------------------------------------------------------------------------------------------------------------------------------------------------------------------------------------------------------------------------------------------------------------------------------------------------------------------------------------------------------------------------------------------------------------------------------------------------------------|-----|------|-----------|-------|------|------|----------------------------------------------------------------|-------|----------------------|---------------------------------------------------------------------------------------------------------------------------------------------------------------------------------------------------------------------------------------------------------------------------------------------------------------------------------------------------------------------------------------------------------------------|-----|-----|-----------|-------|------|------|
| Rsa1.0_00303.1.g10898.t1 | refNP_568105.1   heavy metal transport/detoxification domain-containing protein [Arabidopsis thaliana] gi 42573253 refNP_974723.1   heavy metal transport/detoxification domain-containing protein [Arabidopsis thaliana] gi 21553967 gb AAM63048.1   unknown [Arabidopsis thaliana] gi 26449554 dbj BAC41903.1   unknown protein [Arabidopsis thaliana] gi 30725362 gb AAP37703.1   At5g02600 [Arabidopsis thaliana] gi 62320791 dbj BAD93718.1   hypothetical protein [Arabidopsis thaliana] gi 332003112 gb AED90495.1   heavy metal transport/detoxification domain-containing protein [Arabidopsis thaliana] gi 332003113 gb AED90496.1   heavy metal transport/detoxification domain-containing protein [Arabidopsis thaliana] | 265 | 319  | 4.00E-97  | 120.4 | 81.1 | 88.7 | heavy metal transport/detoxification domain-containing protein | gbpln | Arabidopsis thaliana | AT5G02600.1   Symbols: NAKR1   Heavy metal transport/detoxification superfamily protein   chr5:585713-586855 REVERSE LENGTH=319                                                                                                                                                                                                                                                                                     | 265 | 319 | 1.00E-99  | 120.4 | 81.1 | 88.7 |
| Rsa1.0_00303.1.g10899.t2 | refXP_002873062.1   hypothetical protein ARALYDRAFT_908126 [Arabidopsis lyrata subsp. lyrata] gi 297318899 gb EFH49321.1   hypothetical protein ARALYDRAFT_908126 [Arabidopsis lyrata subsp. lyrata] refNP_195876.1   histone H2A 12 [Arabidopsis thaliana] gi 75311717 sp Q9LZ46.1 H2A4_ARATH RecName: Full=Probable histone H2A.4; AltName: Full=HTA12                                                                                                                                                                                                                                                                                                                                                                             | 249 | 99   | 3.00E-13  | 39.8  | 21.7 | 24.5 | hypothetical protein ARALYDRAFT_908126                         | gbpln | Arabidopsis lyrata   | #                                                                                                                                                                                                                                                                                                                                                                                                                   | #   | #   | #         | #     | #    |      |
| Rsa1.0_00303.1.g10900.t1 | gi 7413645 emb CAB85993.1   putative protein [Arabidopsis thaliana] gi 21553646 gb AAM62739.1   histone H2A [Arabidopsis thaliana] gi 98961093 gb ABF59030.1   At5g02560 [Arabidopsis thaliana] gi 332003106 gb AED90489.1   histone H2A 12 [Arabidopsis thaliana]                                                                                                                                                                                                                                                                                                                                                                                                                                                                   | 154 | 153  | 2.00E-65  | 99.4  | 89.0 | 91.6 | histone H2A 12                                                 | gbpln | Arabidopsis thaliana | AT5G02560.1   Symbols: HTA12   histone H2A 12   chr5:575437-576456 FORWARD LENGTH=153                                                                                                                                                                                                                                                                                                                               | 154 | 153 | 6.00E-68  | 99.4  | 89.0 | 91.6 |
| Rsa1.0_00303.1.g10901.t1 | gb AAN62481.1   phosphatidylinositol 3-kinase [Brassica napus]                                                                                                                                                                                                                                                                                                                                                                                                                                                                                                                                                                                                                                                                       | 196 | 813  | 5.00E-15  | 414.8 | 20.4 | 20.9 | phosphatidylinositol 3-kinase                                  | gbpln | Brassica napus       | AT1G60490.1   Symbols: ATVPS34, VPS34, PI3K   vacuolar protein sorting 34   chr1:22285792-22290190 REVERSE LENGTH=814                                                                                                                                                                                                                                                                                               | 196 | 814 | 1.00E-15  | 415.3 | 18.4 | 20.4 |
| Rsa1.0_00303.1.g10902.t1 | refXP_002873060.1   hypothetical protein ARALYDRAFT_487033 [Arabidopsis lyrata subsp. lyrata] gi 297318897 gb EFH49319.1   hypothetical protein ARALYDRAFT_487033 [Arabidopsis lyrata subsp. lyrata]                                                                                                                                                                                                                                                                                                                                                                                                                                                                                                                                 | 74  | 76   | 2.00E-22  | 102.7 | 79.7 | 89.2 | hypothetical protein ARALYDRAFT_487033                         | gbpln | Arabidopsis lyrata   | AT5G02550.1   Symbols:   unknown protein; Has 3 Blast hits to 3 proteins in 1 species: Archae - 0; Bacteria - 0; Metazoa - 0; Fungi - 0; Plants - 3; Viruses - 0; Other Eukaryotes - 0 (source: NCBI BLink).   chr5:573247-573477 REVERSE LENGTH=76                                                                                                                                                                 | 74  | 76  | 4.00E-20  | 102.7 | 79.7 | 89.2 |
| Rsa1.0_00303.1.g10903.t1 | gb AAG51783.1 AC079679.3 reverse transcriptase, putative: 16838-20266 [Arabidopsis thaliana]                                                                                                                                                                                                                                                                                                                                                                                                                                                                                                                                                                                                                                         | 723 | 1142 | 9.00E-60  | 158.0 | 19.9 | 28.6 | reverse transcriptase, putative: 16838-20266                   | gbpln | Arabidopsis thaliana | AT4G29090.1   Symbols:   Ribonuclease H-like superfamily protein   chr4:14333528-14335255 FORWARD LENGTH=575                                                                                                                                                                                                                                                                                                        | 723 | 575 | 2.00E-29  | 79.5  | 13.8 | 24.1 |
| Rsa1.0_00303.1.g10904.t1 | #                                                                                                                                                                                                                                                                                                                                                                                                                                                                                                                                                                                                                                                                                                                                    | #   | #    | #         | #     | #    | -    | ----                                                           | ----  | #                    | #                                                                                                                                                                                                                                                                                                                                                                                                                   | #   | #   | #         | #     |      |      |
| Rsa1.0_00303.1.g10905.t1 | refXP_002870977.1   hypothetical protein ARALYDRAFT_349549 [Arabidopsis lyrata subsp. lyrata] gi 297316814 gb EFH47236.1   hypothetical protein ARALYDRAFT_349549 [Arabidopsis lyrata subsp. lyrata]                                                                                                                                                                                                                                                                                                                                                                                                                                                                                                                                 | 379 | 503  | 3.00E-94  | 132.7 | 63.3 | 76.0 | hypothetical protein ARALYDRAFT_349549                         | gbpln | Arabidopsis lyrata   | AT5G02520.1   Symbols:   CONTAINS InterPro DOMAIN/s: SANT associated (InterPro:IPR015216); BEST Arabidopsis thaliana protein match is: kinase interacting family protein (TAIRAT1G58210.1); Has 842 Blast hits to 736 proteins in 154 species: Archae - 2; Bacteria - 99; Metazoa - 236; Fungi - 52; Plants - 90; Viruses - 0; Other Eukaryotes - 363 (source: NCBI BLink).   chr5:561325-563840 FORWARD LENGTH=598 | 379 | 598 | 7.00E-58  | 157.8 | 40.4 | 48.5 |
| Rsa1.0_00303.1.g10906.t1 | refNP_195866.1   Dof zinc finger protein DOF5.1 [Arabidopsis thaliana] gi 5583994 sp Q9LZ56.1 DOF51_ARATH RecName: Full=Dof zinc finger protein DOF5.1; Short=AtDOF5.1 gi 7413635 emb CAB85983.1   putative zinc finger protein [Arabidopsis thaliana] gi 22589877 dbj BAH30569.1   hypothetical protein [Arabidopsis thaliana] gi 332003091 gb AED90474.1   Dof zinc finger protein DOF5.1 [Arabidopsis thaliana]                                                                                                                                                                                                                                                                                                                   | 407 | 399  | 1.00E-128 | 98.0  | 81.3 | 86.0 | Dof zinc finger protein DOF5.1                                 | gbpln | Arabidopsis thaliana | AT5G02460.1   Symbols:   Dof-type zinc finger DNA-binding family protein   chr5:539549-541058 REVERSE LENGTH=399                                                                                                                                                                                                                                                                                                    | 407 | 399 | 1.00E-131 | 98.0  | 81.3 | 86.0 |

|                          |                                                                                                                                                                                                     |      |      |           |       |      |      |                                                                                                                                            |       |                      |                                                                                                                                                 |      |      |           |       |      |      |
|--------------------------|-----------------------------------------------------------------------------------------------------------------------------------------------------------------------------------------------------|------|------|-----------|-------|------|------|--------------------------------------------------------------------------------------------------------------------------------------------|-------|----------------------|-------------------------------------------------------------------------------------------------------------------------------------------------|------|------|-----------|-------|------|------|
| Rsa1.0_00303.1.g10907.t1 | emb[CAB39638.1] RNA-directed DNA polymerase-like protein [Arabidopsis thaliana] gi 7267666 emb[CAB78094.1] RNA-directed DNA polymerase-like protein [Arabidopsis thaliana]                          | 534  | 1274 | 1.00E-100 | 238.6 | 39.5 | 58.2 | RNA-directed DNA polymerase-like protein                                                                                                   | gbpln | Arabidopsis thaliana | AT4G29090.1   Symbols:   Ribonuclease H-like superfamily protein   chr4:14333528-14335255 FORWARD LENGTH=575                                    | 534  | 575  | 2.00E-63  | 107.7 | 32.0 | 50.7 |
| Rsa1.0_00304.1.g10908.t1 | gb EOA38966.1  hypothetical protein CARUB_v10011390mg [Capsella rubella]                                                                                                                            | 1177 | 1373 | 0         | 116.7 | 92.9 | 96.2 | hypothetical protein CARUB_v10011390mg                                                                                                     | gbpln | Capsella rubella     | AT1G18270.2   Symbols:   ketose-bisphosphate aldolase class-II family protein   chr1:6283634-6293772 REVERSE LENGTH=1374                        | 1177 | 1374 | 0         | 116.7 | 93.1 | 96.3 |
| Rsa1.0_00304.1.g10909.t1 | gb EOA38833.1  hypothetical protein CARUB_v10011169mg [Capsella rubella]                                                                                                                            | 243  | 260  | 1.00E-49  | 107.0 | 65.8 | 77.0 | hypothetical protein CARUB_v10011169mg                                                                                                     | gbpln | Capsella rubella     | AT1G18265.1   Symbols:   Protein of unknown function, DUF593   chr1:6282338-6283180 REVERSE LENGTH=280                                          | 243  | 280  | 3.00E-50  | 115.2 | 62.1 | 72.4 |
| Rsa1.0_00304.1.g10910.t1 | ref XP_002884501.1  hypothetical protein ARALYDRAFT_477820 [Arabidopsis lyrata subsp. lyrata] gi 297330341 gb EFH60760.1  hypothetical protein ARALYDRAFT_477820 [Arabidopsis lyrata subsp. lyrata] | 101  | 445  | 9.00E-25  | 440.6 | 59.4 | 66.3 | hypothetical protein ARALYDRAFT_477820                                                                                                     | gbpln | Arabidopsis lyrata   | AT3G05320.1   Symbols:   O-fucosyltransferase family protein   chr3:1513558-1514895 REVERSE LENGTH=445                                          | 101  | 445  | 6.00E-27  | 440.6 | 58.4 | 65.3 |
| Rsa1.0_00304.1.g10911.t1 | gb EOA39835.1  hypothetical protein CARUB_v10008501mg [Capsella rubella]                                                                                                                            | 678  | 677  | 0         | 99.9  | 92.2 | 96.0 | hypothetical protein CARUB_v10008501mg                                                                                                     | gbpln | Capsella rubella     | AT1G18260.1   Symbols:   HCP-like superfamily protein   chr1:6279047-6282008 REVERSE LENGTH=678                                                 | 678  | 678  | 0         | 100.0 | 93.2 | 96.6 |
| Rsa1.0_00304.1.g10912.t1 | gb EOA36086.1  hypothetical protein CARUB_v10010474mg [Capsella rubella]                                                                                                                            | 178  | 170  | 7.00E-82  | 95.5  | 87.6 | 92.1 | hypothetical protein CARUB_v10010474mg                                                                                                     | gbpln | Capsella rubella     | AT1G18210.2   Symbols:   Calcium-binding EF-hand family protein   chr1:6268273-6268785 REVERSE LENGTH=170                                       | 178  | 170  | 1.00E-80  | 95.5  | 79.8 | 83.7 |
| Rsa1.0_00304.1.g10913.t1 | gb EOA38883.1  hypothetical protein CARUB_v10011252mg [Capsella rubella]                                                                                                                            | 656  | 670  | 0         | 102.1 | 81.6 | 89.2 | hypothetical protein CARUB_v10011252mg                                                                                                     | gbpln | Capsella rubella     | AT1G18190.1   Symbols:   GC2   golgin candidate 2   chr1:6257963-6261325 REVERSE LENGTH=668                                                     | 656  | 668  | 0         | 101.8 | 81.6 | 87.7 |
| Rsa1.0_00304.1.g10914.t1 | ref XP_002890265.1  hypothetical protein ARALYDRAFT_889231 [Arabidopsis lyrata subsp. lyrata] gi 297336107 gb EFH66524.1  hypothetical protein ARALYDRAFT_889231 [Arabidopsis lyrata subsp. lyrata] | 292  | 305  | 1.00E-154 | 104.5 | 90.8 | 94.9 | hypothetical protein ARALYDRAFT_889231                                                                                                     | gbpln | Arabidopsis lyrata   | AT1G18180.1   Symbols:   Protein of unknown function (DUF1295)   chr1:6255903-6257737 FORWARD LENGTH=305                                        | 292  | 305  | 1.00E-151 | 104.5 | 89.4 | 94.5 |
| Rsa1.0_00304.1.g10915.t3 | dbj BAB02990.1  retroelement pol polyprotein-like [Arabidopsis thaliana]                                                                                                                            | 1000 | 1250 | 0         | 125.0 | 36.5 | 44.7 | retroelement pol polyprotein-like                                                                                                          | gbpln | Arabidopsis thaliana | AT4G23160.1   Symbols:   CRK8   cysteine-rich RLK (RECEPTOR-like protein kinase) 8   chr4:12129485-12134086 FORWARD LENGTH=1262                 | 1000 | 1262 | 6.00E-82  | 126.2 | 16.7 | 24.9 |
| Rsa1.0_00304.1.g10916.t1 | ref XP_002890263.1  kinase family protein [Arabidopsis lyrata subsp. lyrata] gi 297336105 gb EFH66522.1  kinase family protein [Arabidopsis lyrata subsp. lyrata]                                   | 991  | 996  | 0         | 100.5 | 88.8 | 92.6 | kinase family protein                                                                                                                      | gbpln | Arabidopsis lyrata   | AT1G18160.1   Symbols:   Protein kinase superfamily protein   chr1:6249126-6253835 FORWARD LENGTH=992                                           | 991  | 992  | 0         | 100.1 | 87.9 | 92.1 |
| Rsa1.0_00304.1.g10917.t1 | gb EOA28172.1  hypothetical protein CARUB_v10024362mg [Capsella rubella]                                                                                                                            | 96   | 110  | 1.00E-20  | 114.6 | 52.1 | 71.9 | hypothetical protein CARUB_v10024362mg                                                                                                     | gbpln | Capsella rubella     | AT2G32765.1   Symbols:   SUM5, SUMO5, ATSUMO5   small ubiquitinrelated modifier 5   chr2:13894968-13895399 FORWARD LENGTH=108                   | 96   | 108  | 3.00E-21  | 112.5 | 49.0 | 70.8 |
| Rsa1.0_00304.1.g10918.t1 | gb EOA39977.1  hypothetical protein CARUB_v10008665mg [Capsella rubella]                                                                                                                            | 507  | 587  | 0         | 115.8 | 93.5 | 95.9 | hypothetical protein CARUB_v10008665mg                                                                                                     | gbpln | Capsella rubella     | AT1G18150.3   Symbols:   ATPK8   Protein kinase superfamily protein   chr1:6244641-6247582 REVERSE LENGTH=589                                   | 507  | 589  | 0         | 116.2 | 93.1 | 95.9 |
| Rsa1.0_00304.1.g10919.t3 | gb ACOS7702.1  epithiospecifier modifier [Brassica rapa subsp. pekinensis] gi 226444219 gb ACOS7706.1  epithiospecifier modifier [Brassica rapa subsp. pekinensis]                                  | 365  | 386  | 1.00E-157 | 105.8 | 71.8 | 83.0 | epithiospecifier modifier                                                                                                                  | gbpln | Brassica rapa        | AT3G14210.1   Symbols:   ESM1   epithiospecifier modifier 1   chr3:4729886-4731562 FORWARD LENGTH=392                                           | 365  | 392  | 1.00E-158 | 107.4 | 72.3 | 83.0 |
| Rsa1.0_00304.1.g10920.t1 | gb EOA38819.1  hypothetical protein CARUB_v10011138mg [Capsella rubella]                                                                                                                            | 107  | 173  | 5.00E-48  | 161.7 | 86.0 | 91.6 | hypothetical protein CARUB_v10011138mg                                                                                                     | gbpln | Capsella rubella     | AT1G18100.1   Symbols:   E12A11, MFT   PEBP (phosphatidylethanolamine-binding protein) family protein   chr1:6228049-6230110 REVERSE LENGTH=173 | 107  | 173  | 8.00E-51  | 161.7 | 86.0 | 91.6 |
| Rsa1.0_00304.1.g10921.t1 | sp Q39336.1 GBLP_BRANA RecName: Full=Guanine nucleotide-binding protein subunit beta-like protein gi 563335 emb CAA83924.1  guanine nucleotide regulatory protein [Brassica napus]                  | 327  | 327  | 1.00E-180 | 100.0 | 95.7 | 97.9 | RecName: Full=Guanine nucleotide-binding protein subunit beta-like protein gi 563335 emb CAA83924.1  guanine nucleotide regulatory protein | gbpln | Brassica napus       | AT1G18080.1   Symbols:   ATARCA, RACK1A AT, RACK1A   Transducin/WD40 repeat-like superfamily protein   chr1:6222325-6223901 FORWARD LENGTH=327  | 327  | 327  | 0         | 100.0 | 94.2 | 97.2 |
| Rsa1.0_00304.1.g10922.t1 | gb AAC33226.1  putative non-LTR retroelement reverse transcriptase [Arabidopsis thaliana]                                                                                                           | 548  | 1529 | 1.00E-94  | 279.0 | 36.9 | 54.4 | putative non-LTR retroelement reverse transcriptase                                                                                        | gbpln | Arabidopsis thaliana | AT3G24255.1   Symbols:   RNA-directed DNA polymerase (reverse transcriptase)-related family protein   chr3:8789471-8793208 FORWARD LENGTH=746   | 548  | 746  | 2.00E-57  | 136.1 | 27.6 | 41.8 |

|                          |                                                                                                                                                                                                                                                                                                                                                                                                                                                                                                                                                                                                                                                                                                                                                                                                                                                                                                                                                       |      |      |           |       |      |      |                                        |       |                      |                                                                                                                                                 |      |      |           |       |      |      |
|--------------------------|-------------------------------------------------------------------------------------------------------------------------------------------------------------------------------------------------------------------------------------------------------------------------------------------------------------------------------------------------------------------------------------------------------------------------------------------------------------------------------------------------------------------------------------------------------------------------------------------------------------------------------------------------------------------------------------------------------------------------------------------------------------------------------------------------------------------------------------------------------------------------------------------------------------------------------------------------------|------|------|-----------|-------|------|------|----------------------------------------|-------|----------------------|-------------------------------------------------------------------------------------------------------------------------------------------------|------|------|-----------|-------|------|------|
| Rsa1.0_00304.1.g10923.t1 | refNP_173247.1  G1 to S phase transition protein [Arabidopsis thaliana] gi 79318119 refNP_001031063.1  G1 to S phase transition protein [Arabidopsis thaliana] gi 21539549 gb AAM53327.1  putative guanine nucleotide regulatory protein [Arabidopsis thaliana] gi 31711944 gb AAP68328.1  At1g18070 [Arabidopsis thaliana] gi 332191549 gb AEE29670.1  G1 to S phase transition protein [Arabidopsis thaliana] gi 332191550 gb AEE29671.1  Translation elongation factor EF1A/initiation factor IF2gamma family protein [Arabidopsis thaliana] refXP_002892982.1  hypothetical protein ARALYDRAFT_472022 [Arabidopsis lyrata subsp. lyrata] gi 297338824 gb EFH69241.1  hypothetical protein ARALYDRAFT_472022 [Arabidopsis lyrata subsp. lyrata] refXP_002892982.1  hypothetical protein ARALYDRAFT_472022 [Arabidopsis lyrata subsp. lyrata] gi 297338824 gb EFH69241.1  hypothetical protein ARALYDRAFT_472022 [Arabidopsis lyrata subsp. lyrata] | 562  | 532  | 0         | 94.7  | 83.5 | 88.8 | G1 to S phase transition protein       | gbpln | Arabidopsis thaliana | AT1G18070.2   Symbols:   Translation elongation factor EF1A/initiation factor IF2gamma family protein   chr1:6214236-6218211 REVERSE LENGTH=532 | 562  | 532  | 0         | 94.7  | 83.5 | 88.8 |
| Rsa1.0_00304.1.g10924.t2 | refXP_002892982.1  hypothetical protein ARALYDRAFT_472022 [Arabidopsis lyrata subsp. lyrata] gi 297338824 gb EFH69241.1  hypothetical protein ARALYDRAFT_472022 [Arabidopsis lyrata subsp. lyrata] refXP_002892982.1  hypothetical protein ARALYDRAFT_472022 [Arabidopsis lyrata subsp. lyrata] gi 297338824 gb EFH69241.1  hypothetical protein ARALYDRAFT_472022 [Arabidopsis lyrata subsp. lyrata]                                                                                                                                                                                                                                                                                                                                                                                                                                                                                                                                                 | 468  | 533  | 1.00E-150 | 113.9 | 54.3 | 57.5 | hypothetical protein ARALYDRAFT_472022 | gbpln | Arabidopsis lyrata   | AT1G18070.2   Symbols:   Translation elongation factor EF1A/initiation factor IF2gamma family protein   chr1:6214236-6218211 REVERSE LENGTH=532 | 468  | 532  | 1.00E-152 | 113.7 | 53.8 | 57.5 |
| Rsa1.0_00304.1.g10925.t1 | refXP_002892982.1  hypothetical protein ARALYDRAFT_472022 [Arabidopsis lyrata subsp. lyrata] gi 297338824 gb EFH69241.1  hypothetical protein ARALYDRAFT_472022 [Arabidopsis lyrata subsp. lyrata]                                                                                                                                                                                                                                                                                                                                                                                                                                                                                                                                                                                                                                                                                                                                                    | 208  | 533  | 5.00E-37  | 256.3 | 38.5 | 40.4 | hypothetical protein ARALYDRAFT_472022 | gbpln | Arabidopsis lyrata   | AT1G18070.2   Symbols:   Translation elongation factor EF1A/initiation factor IF2gamma family protein   chr1:6214236-6218211 REVERSE LENGTH=532 | 208  | 532  | 6.00E-39  | 255.8 | 38.5 | 39.9 |
| Rsa1.0_00304.1.g10926.t1 | refXP_002890258.1  hypothetical protein ARALYDRAFT_312763 [Arabidopsis lyrata subsp. lyrata] gi 297336100 gb EFH66517.1  hypothetical protein ARALYDRAFT_312763 [Arabidopsis lyrata subsp. lyrata] refXP_002862798.1  hypothetical protein ARALYDRAFT_497292 [Arabidopsis lyrata subsp. lyrata] gi 297308526 gb EFH39056.1  hypothetical protein ARALYDRAFT_497292 [Arabidopsis lyrata subsp. lyrata] refXP_002892977.1  nucleotidyltransferase family protein [Arabidopsis lyrata subsp. lyrata] gi 297338819 gb EFH69236.1  nucleotidyltransferase family protein [Arabidopsis lyrata subsp. lyrata] refXP_002887372.1  hypothetical protein ARALYDRAFT_476271 [Arabidopsis lyrata subsp. lyrata] gi 297333213 gb EFH63631.1  hypothetical protein ARALYDRAFT_476271 [Arabidopsis lyrata subsp. lyrata]                                                                                                                                             | 363  | 341  | 1.00E-164 | 93.9  | 79.3 | 84.8 | hypothetical protein ARALYDRAFT_312763 | gbpln | Arabidopsis lyrata   | AT1G18030.1   Symbols:   Protein phosphatase 2C family protein   chr1:6204400-6206678 FORWARD LENGTH=351                                        | 363  | 351  | 1.00E-166 | 96.7  | 80.4 | 86.0 |
| Rsa1.0_00304.1.g10927.t1 | refXP_002892977.1  nucleotidyltransferase family protein [Arabidopsis lyrata subsp. lyrata] gi 297338819 gb EFH69236.1  nucleotidyltransferase family protein [Arabidopsis lyrata subsp. lyrata] refXP_002887372.1  hypothetical protein ARALYDRAFT_476271 [Arabidopsis lyrata subsp. lyrata] gi 297333213 gb EFH63631.1  hypothetical protein ARALYDRAFT_476271 [Arabidopsis lyrata subsp. lyrata]                                                                                                                                                                                                                                                                                                                                                                                                                                                                                                                                                   | 840  | 842  | 0         | 100.2 | 54.2 | 66.5 | hypothetical protein ARALYDRAFT_497292 | gbpln | Arabidopsis lyrata   | AT1G1400.1   Symbols: AtRLP12, RLP12   receptor like protein 12   chr1:26909905-26912448 FORWARD LENGTH=847                                     | 840  | 847  | 0         | 100.8 | 54.0 | 67.9 |
| Rsa1.0_00304.1.g10928.t1 | refXP_002892977.1  nucleotidyltransferase family protein [Arabidopsis lyrata subsp. lyrata] gi 297338819 gb EFH69236.1  nucleotidyltransferase family protein [Arabidopsis lyrata subsp. lyrata] refXP_002887372.1  hypothetical protein ARALYDRAFT_476271 [Arabidopsis lyrata subsp. lyrata] gi 297333213 gb EFH63631.1  hypothetical protein ARALYDRAFT_476271 [Arabidopsis lyrata subsp. lyrata]                                                                                                                                                                                                                                                                                                                                                                                                                                                                                                                                                   | 170  | 716  | 9.00E-33  | 421.2 | 54.1 | 64.1 | nucleotidyltransferase family protein  | gbpln | Arabidopsis lyrata   | AT1G17980.1   Symbols: PAPS1   poly(A) polymerase 1   chr1:6187742-6191418 REVERSE LENGTH=713                                                   | 170  | 713  | 2.00E-31  | 419.4 | 51.2 | 61.2 |
| Rsa1.0_00304.1.g10929.t1 | refXP_002892977.1  nucleotidyltransferase family protein [Arabidopsis lyrata subsp. lyrata] gi 297338819 gb EFH69236.1  nucleotidyltransferase family protein [Arabidopsis lyrata subsp. lyrata] refXP_002887372.1  hypothetical protein ARALYDRAFT_476271 [Arabidopsis lyrata subsp. lyrata] gi 297333213 gb EFH63631.1  hypothetical protein ARALYDRAFT_476271 [Arabidopsis lyrata subsp. lyrata]                                                                                                                                                                                                                                                                                                                                                                                                                                                                                                                                                   | 838  | 832  | 0         | 99.3  | 54.3 | 67.3 | hypothetical protein ARALYDRAFT_476271 | gbpln | Arabidopsis lyrata   | AT1G1400.1   Symbols: AtRLP12, RLP12   receptor like protein 12   chr1:26909905-26912448 FORWARD LENGTH=847                                     | 838  | 847  | 0         | 101.1 | 54.4 | 68.4 |
| Rsa1.0_00305.1.g10930.t1 | gb AAF18630.1 AC006228.1 F5J5.1 [Arabidopsis thaliana] refNP_187629.3  centromeric protein E [Arabidopsis thaliana] gi 332641347 gb AE74868.1  kinesin motor protein-related protein [Arabidopsis thaliana] refXP_002889329.1  hypothetical protein ARALYDRAFT_470049 [Arabidopsis lyrata subsp. lyrata] gi 297335171 gb EFH65588.1  hypothetical protein ARALYDRAFT_470049 [Arabidopsis lyrata subsp. lyrata] refXP_002892021.1  hypothetical protein ARALYDRAFT_470051 [Arabidopsis lyrata subsp. lyrata] gi 297337863 gb EFH68280.1  hypothetical protein ARALYDRAFT_470051 [Arabidopsis lyrata subsp. lyrata]                                                                                                                                                                                                                                                                                                                                     | 210  | 1463 | 3.00E-33  | 696.7 | 33.3 | 42.4 | F5J5.1                                 | gbpln | Arabidopsis thaliana | AT3G19340.1   Symbols:   Protein of unknown function (DUF3754)   chr3:6701387-6704071 REVERSE LENGTH=487                                        | 210  | 487  | 2.00E-24  | 231.9 | 23.8 | 26.7 |
| Rsa1.0_00305.1.g10931.t2 | refNP_187629.3  centromeric protein E [Arabidopsis thaliana] gi 332641347 gb AE74868.1  kinesin motor protein-related protein [Arabidopsis thaliana] refXP_002889329.1  hypothetical protein ARALYDRAFT_470049 [Arabidopsis lyrata subsp. lyrata] gi 297335171 gb EFH65588.1  hypothetical protein ARALYDRAFT_470049 [Arabidopsis lyrata subsp. lyrata] refXP_002892021.1  hypothetical protein ARALYDRAFT_470051 [Arabidopsis lyrata subsp. lyrata] gi 297337863 gb EFH68280.1  hypothetical protein ARALYDRAFT_470051 [Arabidopsis lyrata subsp. lyrata]                                                                                                                                                                                                                                                                                                                                                                                            | 1298 | 1273 | 0         | 98.1  | 56.0 | 63.3 | centromeric protein E                  | gbpln | Arabidopsis thaliana | AT3G10180.1   Symbols:   P-loop containing nucleoside triphosphate hydrolases superfamily protein   chr3:3146393-3154644 REVERSE LENGTH=1273    | 1298 | 1273 | 0         | 98.1  | 56.0 | 63.3 |
| Rsa1.0_00305.1.g10932.t1 | refXP_002889329.1  hypothetical protein ARALYDRAFT_470049 [Arabidopsis lyrata subsp. lyrata] gi 297335171 gb EFH65588.1  hypothetical protein ARALYDRAFT_470049 [Arabidopsis lyrata subsp. lyrata] refXP_002892021.1  hypothetical protein ARALYDRAFT_470051 [Arabidopsis lyrata subsp. lyrata] gi 297337863 gb EFH68280.1  hypothetical protein ARALYDRAFT_470051 [Arabidopsis lyrata subsp. lyrata]                                                                                                                                                                                                                                                                                                                                                                                                                                                                                                                                                 | 205  | 226  | 4.00E-89  | 110.2 | 78.0 | 85.9 | hypothetical protein ARALYDRAFT_470049 | gbpln | Arabidopsis lyrata   | AT1G02180.1   Symbols:   ferredoxin-related   chr1:413619-414505 REVERSE LENGTH=226                                                             | 205  | 226  | 2.00E-88  | 110.2 | 76.1 | 83.4 |
| Rsa1.0_00305.1.g10933.t1 | refXP_002892021.1  hypothetical protein ARALYDRAFT_470051 [Arabidopsis lyrata subsp. lyrata] gi 297337863 gb EFH68280.1  hypothetical protein ARALYDRAFT_470051 [Arabidopsis lyrata subsp. lyrata]                                                                                                                                                                                                                                                                                                                                                                                                                                                                                                                                                                                                                                                                                                                                                    | 72   | 90   | 6.00E-27  | 125.0 | 95.8 | 95.8 | hypothetical protein ARALYDRAFT_470051 | gbpln | Arabidopsis lyrata   | AT1G02160.1   Symbols:   Cox19 family protein (CHCH motif)   chr1:410803-411383 FORWARD LENGTH=71                                               | 72   | 71   | 1.00E-27  | 98.6  | 93.1 | 94.4 |

|                          |                                                                                                                                                                                                                                                                                                                                                                                                                                            |      |      |           |       |      |      |                                                 |       |                      |                                                                                                                                                                                                                                                         |      |      |           |       |      |      |
|--------------------------|--------------------------------------------------------------------------------------------------------------------------------------------------------------------------------------------------------------------------------------------------------------------------------------------------------------------------------------------------------------------------------------------------------------------------------------------|------|------|-----------|-------|------|------|-------------------------------------------------|-------|----------------------|---------------------------------------------------------------------------------------------------------------------------------------------------------------------------------------------------------------------------------------------------------|------|------|-----------|-------|------|------|
| Rsa1.0_00305.1.g10934.t1 | gb EOA38945.1  hypothetical protein CARUB_v10011354mg [Capsella rubella]                                                                                                                                                                                                                                                                                                                                                                   | 508  | 524  | 0         | 103.1 | 88.2 | 93.3 | hypothetical protein CARUB_v10011354mg          | gbpln | Capsella rubella     | AT1G02150.1   Symbols:   Tetratricopeptide repeat (TPR)-like superfamily protein   chr1:408779-410433 FORWARD LENGTH=524                                                                                                                                | 508  | 524  | 0         | 103.1 | 87.0 | 91.9 |
| Rsa1.0_00305.1.g10935.t1 | ref NP_001077448.1  alpha-1,6-mannosyltransferase [Arabidopsis thaliana] gi 347662308 sp A8MR93.1 ALG12_ARA TH RecName: Full=Dol-P-Man:Man(7)GlcNAc(2)-PP-Dol alpha-1,6-mannosyltransferase; AltName: Full=Alpha-1,6-mannosyltransferase ALG12; AltName: Full=Asparagine-linked glycosylation protein 12; AltName: Full=EMS-mutagenized BRI1 suppressor 4 gi 332189270 gb AEE27391.1  alpha-1,6-mannosyltransferase [Arabidopsis thaliana] | 501  | 497  | 0         | 99.2  | 88.2 | 94.2 | alpha-1,6-mannosyltransferase                   | gbpln | Arabidopsis thaliana | AT1G02145.3   Symbols: ALG12, EBS4   homolog of asparagine-linked glycosylation 12   chr1:404627-408485 FORWARD LENGTH=497                                                                                                                              | 501  | 497  | 0         | 99.2  | 88.2 | 94.2 |
| Rsa1.0_00305.1.g10936.t1 | ref XP_004133763.1  PREDICTED: protein mago nashi homolog isoform 1 [Cucumis sativus] gi 449478034 ref XP_004155202.1  PREDICTED: protein mago nashi homolog isoform 1 [Cucumis sativus]                                                                                                                                                                                                                                                   | 135  | 193  | 1.00E-65  | 143.0 | 88.9 | 91.9 | PREDICTED: protein mago nashi homolog isoform 1 | gbpln | Cucumis sativus      | AT1G02140.1   Symbols: MEE63, MAGO, HAP1   mago nashi family protein   chr1:403467-404401 REVERSE LENGTH=150                                                                                                                                            | 135  | 150  | 6.00E-66  | 111.1 | 85.9 | 91.1 |
| Rsa1.0_00305.1.g10937.t1 | gb EOA39880.1  hypothetical protein CARUB_v10008556mg [Capsella rubella]                                                                                                                                                                                                                                                                                                                                                                   | 571  | 641  | 0         | 112.3 | 79.7 | 87.4 | hypothetical protein CARUB_v10008556mg          | gbpln | Capsella rubella     | AT1G02120.1   Symbols: VAD1   GRAM domain family protein   chr1:395761-399720 FORWARD LENGTH=598                                                                                                                                                        | 571  | 598  | 0         | 104.7 | 77.8 | 86.0 |
| Rsa1.0_00305.1.g10938.t1 | ref XP_002892031.1  hypothetical protein ARALYDRAFT_470069 [Arabidopsis lyrata subsp. lyrata] gi 297337873 gb EFH68290.1  hypothetical protein ARALYDRAFT_470069 [Arabidopsis lyrata subsp. lyrata]                                                                                                                                                                                                                                        | 324  | 323  | 1.00E-104 | 99.7  | 64.5 | 69.4 | hypothetical protein ARALYDRAFT_470069          | gbpln | Arabidopsis lyrata   | AT1G02065.1   Symbols: SPL8   squamosa promoter binding protein-like 8   chr1:365625-367149 FORWARD LENGTH=333                                                                                                                                          | 324  | 333  | 1.00E-100 | 102.8 | 64.8 | 70.4 |
| Rsa1.0_00305.1.g10939.t1 | gb EOA37457.1  hypothetical protein CARUB_v10011557mg [Capsella rubella]                                                                                                                                                                                                                                                                                                                                                                   | 239  | 267  | 1.00E-80  | 111.7 | 67.8 | 79.9 | hypothetical protein CARUB_v10011557mg          | gbpln | Capsella rubella     | AT1G01990.1   Symbols:   unknown protein; Has 32 Blast hits to 32 proteins in 6 species: Archae - 0; Bacteria - 0; Metazoa - 0; Fungi - 0; Plants - 32; Viruses - 0; Other Eukaryotes - 0 (source: NCBI BLink).   chr1:343462-344199 REVERSE LENGTH=245 | 239  | 245  | 7.00E-81  | 102.5 | 68.6 | 77.8 |
| Rsa1.0_00305.1.g10940.t1 | ref XP_002892034.1  pentatricopeptide repeat-containing protein [Arabidopsis lyrata subsp. lyrata] gi 297337876 gb EFH68293.1  pentatricopeptide repeat-containing protein [Arabidopsis lyrata subsp. lyrata]                                                                                                                                                                                                                              | 404  | 409  | 1.00E-168 | 101.2 | 75.2 | 84.7 | pentatricopeptide repeat-containing protein     | gbpln | Arabidopsis lyrata   | AT1G01970.1   Symbols:   Tetratricopeptide repeat (TPR)-like superfamily protein   chr1:338538-339905 FORWARD LENGTH=409                                                                                                                                | 404  | 409  | 1.00E-170 | 101.2 | 74.5 | 84.4 |
| Rsa1.0_00305.1.g10941.t1 | # # # # # # # # # # # # # # # # # # # # # #                                                                                                                                                                                                                                                                                                                                                                                                |      |      |           |       |      |      |                                                 |       |                      |                                                                                                                                                                                                                                                         |      |      |           |       |      |      |
| Rsa1.0_00305.1.g10942.t1 | ref XP_002881817.1  phospholipase D beta 1 [Arabidopsis lyrata subsp. lyrata] gi 297327656 gb EFH58076.1  phospholipase D beta 1 [Arabidopsis lyrata subsp. lyrata]                                                                                                                                                                                                                                                                        | 1067 | 1087 | 0         | 101.9 | 87.3 | 89.7 | phospholipase D beta 1                          | gbpln | Arabidopsis lyrata   | AT2G42010.1   Symbols: PLDBETA1, PLDBETA   phospholipase D beta 1   chr2:17533018-17537990 REVERSE LENGTH=1083                                                                                                                                          | 1067 | 1083 | 0         | 101.5 | 86.1 | 89.0 |
| Rsa1.0_00305.1.g10943.t1 | ref XP_002892038.1  predicted protein [Arabidopsis lyrata subsp. lyrata] gi 297337880 gb EFH68297.1  predicted protein [Arabidopsis lyrata subsp. lyrata]                                                                                                                                                                                                                                                                                  | 757  | 774  | 0         | 102.2 | 83.9 | 89.2 | predicted protein                               | gbpln | Arabidopsis lyrata   | AT1G01900.1   Symbols: ATSBT1.1, SBT11.1   subtilase family protein   chr1:310332-313011 FORWARD LENGTH=774                                                                                                                                             | 757  | 774  | 0         | 102.2 | 84.1 | 88.8 |
| Rsa1.0_00305.1.g10944.t1 | ref NP_563638.1  uncharacterized protein [Arabidopsis thaliana] gi 8671850 gb AAF78413.1 AC009273_19 T1N6.26 [Arabidopsis thaliana] gi 16648714 gb AL25849.1  At1g01840/T1N6_19 [Arabidopsis thaliana] gi 20453347 gb AAM19912.1  At1g01840/T1N6_19 [Arabidopsis thaliana] gi 332189222 gb AEE27343.1  uncharacterized protein AT1G01840 [Arabidopsis thaliana]                                                                            | 153  | 152  | 3.00E-53  | 99.3  | 73.9 | 83.0 | uncharacterized protein                         | gbpln | Arabidopsis thaliana | AT1G01840.1   Symbols:   unknown protein; Has 23 Blast hits to 23 proteins in 9 species: Archae - 0; Bacteria - 0; Metazoa - 0; Fungi - 0; Plants - 23; Viruses - 0; Other Eukaryotes - 0 (source: NCBI BLink).   chr1:303650-304108 FORWARD LENGTH=152 | 153  | 152  | 9.00E-56  | 99.3  | 73.9 | 83.0 |
| Rsa1.0_00305.1.g10945.t1 | ref XP_002889350.1  hypothetical protein ARALYDRAFT_470092 [Arabidopsis lyrata subsp. lyrata] gi 297335192 gb EFH65609.1  hypothetical protein ARALYDRAFT_470092 [Arabidopsis lyrata subsp. lyrata]                                                                                                                                                                                                                                        | 570  | 569  | 0         | 99.8  | 87.0 | 93.3 | hypothetical protein ARALYDRAFT_470092          | gbpln | Arabidopsis lyrata   | AT1G01830.1   Symbols:   ARM repeat superfamily protein   chr1:298717-300441 REVERSE LENGTH=574                                                                                                                                                         | 570  | 574  | 0         | 100.7 | 86.3 | 93.5 |

|                          |                                                                                                                                                                                                                                                                                                                                                                                                                                                                                            |      |      |           |       |      |      |                                                                                                                                                                                                    |       |                      |                                                                                                                                                               |      |      |           |       |      |      |
|--------------------------|--------------------------------------------------------------------------------------------------------------------------------------------------------------------------------------------------------------------------------------------------------------------------------------------------------------------------------------------------------------------------------------------------------------------------------------------------------------------------------------------|------|------|-----------|-------|------|------|----------------------------------------------------------------------------------------------------------------------------------------------------------------------------------------------------|-------|----------------------|---------------------------------------------------------------------------------------------------------------------------------------------------------------|------|------|-----------|-------|------|------|
| Rsa1.0_00305.1.g10946.t1 | refNP_563635.1   Rossmann-fold NAD(P)-binding domain-containing protein [Arabidopsis thaliana] gi 13878161 gb AAK44158.1 AF370343.1 putative carbonyl reductase [Arabidopsis thaliana] gi 22136772 gb AAM91730.1  putative carbonyl reductase [Arabidopsis thaliana] gi 222423734 dbj BAH19833.1  AT1G01800 [Arabidopsis thaliana] gi 332189215 gb AEE27336.1   Rossmann-fold NAD(P)-binding domain-containing protein [Arabidopsis thaliana]                                              | 295  | 295  | 1.00E-147 | 100.0 | 86.4 | 93.9 | Rossmann-fold NAD(P)-binding domain-containing protein                                                                                                                                             | gbpln | Arabidopsis thaliana | AT1G01800.1   Symbols:   NAD(P)-binding Rossmann-fold superfamily protein   chr1:293396-294888 FORWARD LENGTH=295                                             | 295  | 295  | 1.00E-150 | 100.0 | 86.4 | 93.9 |
| Rsa1.0_00305.1.g10947.t2 | refXP_002892042.1   hypothetical protein ARALYDRAFT_311263 [Arabidopsis lyrata subsp. lyrata] gi 297337884 gb EFH68301.1   hypothetical protein ARALYDRAFT_311263 [Arabidopsis lyrata subsp. lyrata]                                                                                                                                                                                                                                                                                       | 946  | 1171 | 0         | 123.8 | 76.2 | 78.9 | hypothetical protein ARALYDRAFT_311263                                                                                                                                                             | gbpln | Arabidopsis lyrata   | AT1G01790.1   Symbols: KEA1, ATKEA1   K+ efflux antiporter 1   chr1:284781-290869 FORWARD LENGTH=1193                                                         | 946  | 1193 | 0         | 126.1 | 75.6 | 78.2 |
| Rsa1.0_00305.1.g10948.t1 | refXP_002892042.1   hypothetical protein ARALYDRAFT_311263 [Arabidopsis lyrata subsp. lyrata] gi 297337884 gb EFH68301.1   hypothetical protein ARALYDRAFT_311263 [Arabidopsis lyrata subsp. lyrata]                                                                                                                                                                                                                                                                                       | 1100 | 1171 | 0         | 106.5 | 85.5 | 90.6 | hypothetical protein ARALYDRAFT_311263                                                                                                                                                             | gbpln | Arabidopsis lyrata   | AT1G01790.1   Symbols: KEA1, ATKEA1   K+ efflux antiporter 1   chr1:284781-290869 FORWARD LENGTH=1193                                                         | 1100 | 1193 | 0         | 108.5 | 84.0 | 89.8 |
| Rsa1.0_00305.1.g10949.t1 | gb AAF78411.1 AC009273.17 Contains similarity to mRNA for transcription factor L2 from Arabidopsis thaliana gb X91398. It contains LIM domain containing proteins PF 00412. ESTs gb T13084 and gb T42925 come from this gene [Arabidopsis thaliana]                                                                                                                                                                                                                                        | 202  | 261  | 1.00E-108 | 129.2 | 94.1 | 96.5 | Contains similarity to mRNA for transcription factor L2 from Arabidopsis thaliana gb X91398. It contains LIM domain containing proteins PF 00412. ESTs gb T13084 and gb T42925 come from this gene | gbpln | Arabidopsis thaliana | AT1G01780.1   Symbols:   GATA type zinc finger transcription factor family protein   chr1:282919-284082 FORWARD LENGTH=205                                    | 202  | 205  | 1.00E-110 | 101.5 | 94.1 | 96.5 |
| Rsa1.0_00305.1.g10950.t2 | refXP_002888820.1   glycosyltransferase family 14 protein [Arabidopsis lyrata subsp. lyrata] gi 297334661 gb EFH65079.1   glycosyltransferase family 14 protein [Arabidopsis lyrata subsp. lyrata]                                                                                                                                                                                                                                                                                         | 139  | 395  | 2.00E-20  | 284.2 | 33.8 | 34.5 | glycosyltransferase family 14 protein                                                                                                                                                              | gbpln | Arabidopsis lyrata   | AT1G71070.1   Symbols:   Core-2/-1-branching beta-1,6-N-acetylglucosaminyltransferase family protein   chr1:26807440-26809152 REVERSE LENGTH=395              | 139  | 395  | 3.00E-22  | 284.2 | 33.1 | 33.8 |
| Rsa1.0_00305.1.g10951.t1 | refXP_002889353.1   predicted protein [Arabidopsis lyrata subsp. lyrata] gi 297335195 gb EFH65612.1   predicted protein [Arabidopsis lyrata subsp. lyrata]                                                                                                                                                                                                                                                                                                                                 | 392  | 399  | 1.00E-169 | 101.8 | 79.1 | 86.5 | predicted protein                                                                                                                                                                                  | gbpln | Arabidopsis lyrata   | AT1G01760.1   Symbols:   adenosine deaminases:RNA binding:RNA binding:adenosine deaminases   chr1:276412-278448 REVERSE LENGTH=420                            | 392  | 420  | 1.00E-167 | 107.1 | 77.3 | 84.9 |
| Rsa1.0_00305.1.g10952.t1 | gb EOA37536.1  hypothetical protein CARUB_v10011760mg [Capsella rubella]                                                                                                                                                                                                                                                                                                                                                                                                                   | 140  | 140  | 9.00E-73  | 100.0 | 94.3 | 96.4 | hypothetical protein CARUB_v10011760mg                                                                                                                                                             | gbpln | Capsella rubella     | AT1G01750.1   Symbols: ADF11   actin depolymerizing factor 11   chr1:275528-276126 FORWARD LENGTH=140                                                         | 140  | 140  | 1.00E-74  | 100.0 | 92.9 | 96.4 |
| Rsa1.0_00305.1.g10953.t1 | ref NP_171679.1  tetratricopeptide repeat domain-containing protein kinase [Arabidopsis thaliana] gi 334182219 ref NP_001184886.1   protein kinase protein with tetratricopeptide repeat domain-containing protein [Arabidopsis thaliana] gi 332189208 gb AEE27329.1   tetratricopeptide repeat domain-containing protein kinase [Arabidopsis thaliana] gi 332189209 gb AEE27330.1   protein kinase protein with tetratricopeptide repeat domain-containing protein [Arabidopsis thaliana] | 484  | 483  | 0         | 99.8  | 78.1 | 84.9 | tetratricopeptide repeat domain-containing protein kinase                                                                                                                                          | gbpln | Arabidopsis thaliana | AT1G01740.2   Symbols:   Protein kinase protein with tetratricopeptide repeat domain   chr1:272111-274239 REVERSE LENGTH=483                                  | 484  | 483  | 0         | 99.8  | 78.1 | 84.9 |
| Rsa1.0_00305.1.g10954.t1 | gb AAP35054.1  NAC-domain protein 18 [Brassica napus]                                                                                                                                                                                                                                                                                                                                                                                                                                      | 292  | 285  | 1.00E-148 | 97.6  | 94.2 | 95.9 | NAC-domain protein 18                                                                                                                                                                              | gbpln | Brassica napus       | AT1G01720.1   Symbols: ATAF1, ANAC002   NAC (No Apical Meristem) domain transcriptional regulator superfamily protein   chr1:268471-269514 FORWARD LENGTH=289 | 292  | 289  | 1.00E-145 | 99.0  | 87.0 | 92.5 |
| Rsa1.0_00305.1.g10955.t1 | dbj BAJ33966.1  unnamed protein product [Theilingiella halophila]                                                                                                                                                                                                                                                                                                                                                                                                                          | 192  | 431  | 1.00E-105 | 224.5 | 94.3 | 99.0 | unnamed protein product                                                                                                                                                                            | ----  | ----                 | AT1G01710.1   Symbols:   Acyl-CoA thioesterase family protein   chr1:262950-266029 FORWARD LENGTH=427                                                         | 192  | 427  | 1.00E-101 | 222.4 | 88.5 | 94.3 |

|                          |                                                                                                                                                                                                                                                                                                                                                          |      |      |           |       |      |       |                                                                                                                                                                   |       |                      |                                                                                                                                                                                                                                                                                                                                                                                                                                                       |      |      |           |       |      |      |
|--------------------------|----------------------------------------------------------------------------------------------------------------------------------------------------------------------------------------------------------------------------------------------------------------------------------------------------------------------------------------------------------|------|------|-----------|-------|------|-------|-------------------------------------------------------------------------------------------------------------------------------------------------------------------|-------|----------------------|-------------------------------------------------------------------------------------------------------------------------------------------------------------------------------------------------------------------------------------------------------------------------------------------------------------------------------------------------------------------------------------------------------------------------------------------------------|------|------|-----------|-------|------|------|
| Rsa1.0_00306.1.g10956.t2 | gb AAD21687.1  Strong similarity to gi 3600044 T12H20.12.protease homolog from Arabidopsis thaliana BAC gb AF080119 and is a member of the reverse transcriptase family PF 00078 [Arabidopsis thaliana]                                                                                                                                                  | 1309 | 1415 | 0         | 108.1 | 60.0 | 72.7  | Strong similarity to gi 3600044 T12H20.12.protease homolog from Arabidopsis thaliana BAC gb AF080119 and is a member of the reverse transcriptase family PF 00078 | gbpln | Arabidopsis thaliana | AT4G23160.1   Symbols: CRK8   cysteine-rich RLK (RECEPTOR-like protein kinase) 8   chr4:12129485-12134086 FORWARD LENGTH=1262                                                                                                                                                                                                                                                                                                                         | 1309 | 1262 | 9.00E-97  | 96.4  | 13.8 | 20.4 |
| Rsa1.0_00306.1.g10957.t1 | ref XP_002866395.1  hypothetical protein ARALYDRAFT.496228 [Arabidopsis lyrata subsp. lyrata] gi 297312230 gb EFH42654.1  hypothetical protein ARALYDRAFT.496228 [Arabidopsis lyrata subsp. lyrata]                                                                                                                                                      | 260  | 284  | 1.00E-74  | 109.2 | 70.0 | 80.0  | hypothetical protein ARALYDRAFT.496228                                                                                                                            | gbpln | Arabidopsis lyrata   | AT5G60800.1   Symbols:   Heavy metal transport/detoxification superfamily protein   chr5:244611116-24462464 REVERSE LENGTH=283                                                                                                                                                                                                                                                                                                                        | 260  | 283  | 5.00E-73  | 108.8 | 66.9 | 77.7 |
| Rsa1.0_00306.1.g10958.t1 | gb EOA19622.1  hypothetical protein CARUB_v10002949mg [Capsella rubella]                                                                                                                                                                                                                                                                                 | 214  | 333  | 2.00E-67  | 155.6 | 70.6 | 78.0  | hypothetical protein CARUB_v10002949mg                                                                                                                            | gbpln | Capsella rubella     | AT5G23000.1   Symbols: RAX1, MYB37, ATMYB37   myb domain protein 37   chr5:7696234-7697712 FORWARD LENGTH=329                                                                                                                                                                                                                                                                                                                                         | 214  | 329  | 7.00E-55  | 153.7 | 61.7 | 71.5 |
| Rsa1.0_00306.1.g10959.t1 | ref XP_002874104.1  hypothetical protein ARALYDRAFT.351315 [Arabidopsis lyrata subsp. lyrata] gi 297319941 gb EFH50363.1  hypothetical protein ARALYDRAFT.351315 [Arabidopsis lyrata subsp. lyrata]                                                                                                                                                      | 199  | 238  | 4.00E-95  | 119.6 | 86.9 | 92.5  | hypothetical protein ARALYDRAFT.351315                                                                                                                            | gbpln | Arabidopsis lyrata   | AT5G22930.1   Symbols:   Protein of unknown function (DUF1635)   chr5:7668229-7669315 REVERSE LENGTH=238                                                                                                                                                                                                                                                                                                                                              | 199  | 238  | 5.00E-95  | 119.6 | 85.9 | 92.0 |
| Rsa1.0_00306.1.g10960.t1 | gb EOA22938.1  hypothetical protein CARUB_v10003674mg [Capsella rubella]                                                                                                                                                                                                                                                                                 | 800  | 799  | 0         | 99.9  | 74.6 | 85.4  | hypothetical protein CARUB_v10003674mg                                                                                                                            | gbpln | Capsella rubella     | AT5G22910.1   Symbols: ATCHX9, CHX9   cation/H <sup>+</sup> exchanger 9   chr5:7660927-7663829 REVERSE LENGTH=800                                                                                                                                                                                                                                                                                                                                     | 800  | 800  | 0         | 100.0 | 73.8 | 85.8 |
| Rsa1.0_00306.1.g10961.t1 | gb AAG50806.1 AC079281.8 unknown protein [Arabidopsis thaliana]                                                                                                                                                                                                                                                                                          | 1562 | 1213 | 0         | 77.7  | 29.4 | 42.4  | unknown protein                                                                                                                                                   | gbpln | Arabidopsis thaliana | AT1G43760.1   Symbols:   DNase I-like superfamily protein   chr1:16528880-16531065 REVERSE LENGTH=626                                                                                                                                                                                                                                                                                                                                                 | 1562 | 626  | 5.00E-69  | 40.1  | 9.3  | 14.1 |
| Rsa1.0_00306.1.g10962.t1 | ref XP_002874102.1  zinc finger family protein [Arabidopsis lyrata subsp. lyrata] gi 297319939 gb EFH50361.1  zinc finger family protein [Arabidopsis lyrata subsp. lyrata]                                                                                                                                                                              | 375  | 368  | 1.00E-143 | 98.1  | 69.3 | 80.8  | zinc finger family protein                                                                                                                                        | gbpln | Arabidopsis lyrata   | AT5G22890.1   Symbols:   C2H2 and C2HC zinc fingers superfamily protein   chr5:7653541-7654662 REVERSE LENGTH=373                                                                                                                                                                                                                                                                                                                                     | 375  | 373  | 1.00E-145 | 99.5  | 69.9 | 80.5 |
| Rsa1.0_00306.1.g10963.t1 | ref XP_003606631.1  Histone H2B [Medicago truncatula] gi 355507686 gb AES88828.1  Histone H2B [Medicago truncatula]                                                                                                                                                                                                                                      | 143  | 147  | 2.00E-60  | 102.8 | 86.7 | 91.6  | Histone H2B                                                                                                                                                       | gbpln | Medicago truncatula  | AT3G45980.1   Symbols: H2B, HTB9   Histone superfamily protein   chr3:16897492-16897944 REVERSE LENGTH=150                                                                                                                                                                                                                                                                                                                                            | 143  | 150  | 2.00E-59  | 104.9 | 88.1 | 90.2 |
| Rsa1.0_00306.1.g10964.t1 | gb EOA21878.1  hypothetical protein CARUB_v10002354mg [Capsella rubella]                                                                                                                                                                                                                                                                                 | 69   | 88   | 1.00E-31  | 127.5 | 98.6 | 100.0 | hypothetical protein CARUB_v10002354mg                                                                                                                            | gbpln | Capsella rubella     | AT5G22875.2   Symbols:   unknown protein; FUNCTIONS IN: molecular function unknown; INVOLVED IN: biological process unknown; LOCATED IN: endomembrane system; EXPRESSED IN: 24 plant structures; EXPRESSED DURING: 15 growth stages; Has 32 Blast hits to 32 proteins in 16 species: Archaee - 0; Bacteria - 0; Metazoa - 0; Fungi - 0; Plants - 30; Viruses - 0; Other Eukaryotes - 2 (source: NCBI BLink).   chr5:7651307-7651603 FORWARD LENGTH=69 | 69   | 69   | 1.00E-32  | 100.0 | 92.8 | 98.6 |
| Rsa1.0_00306.1.g10965.t1 | ref NP_197676.2  aspartyl protease family protein [Arabidopsis thaliana] gi 110736370 dbj BAF00154.1  protease-like protein [Arabidopsis thaliana] gi 332005704 gb AED93087.1  aspartyl protease family protein [Arabidopsis thaliana]                                                                                                                   | 492  | 493  | 0         | 100.2 | 92.1 | 96.5  | aspartyl protease family protein                                                                                                                                  | gbpln | Arabidopsis thaliana | AT5G22850.1   Symbols:   Eukaryotic aspartyl protease family protein   chr5:7633717-7636298 REVERSE LENGTH=493                                                                                                                                                                                                                                                                                                                                        | 492  | 493  | 0         | 100.2 | 92.1 | 96.5 |
| Rsa1.0_00306.1.g10966.t1 | ref NP_196209.1  UDP-glucuronosyl/UDP-glucosyl transferase family protein [Arabidopsis thaliana] gi 75262507 sp Q9F196.1 U76C3_ARATH RecName: Full=UDP-glucosyltransferase 76C3 gi 10177563 dbj BAB10795.1  glucuronosyl transferase-like protein [Arabidopsis thaliana] gi 332003554 gb AED90937.1  UDP-glucosyltransferase 76C3 [Arabidopsis thaliana] | 442  | 450  | 0         | 101.8 | 77.8 | 86.9  | UDP-glucuronosyl/UDP-glucosyl transferase family protein                                                                                                          | gbpln | Arabidopsis thaliana | AT5G05900.1   Symbols:   UDP-glucosyltransferase superfamily protein   chr5:1774513-1776381 FORWARD LENGTH=450                                                                                                                                                                                                                                                                                                                                        | 442  | 450  | 0         | 101.8 | 77.8 | 86.9 |
| Rsa1.0_00306.1.g10967.t1 | gb AAM60872.1  serine protein kinase-like protein [Arabidopsis thaliana]                                                                                                                                                                                                                                                                                 | 538  | 538  | 0         | 100.0 | 85.3 | 91.6  | serine protein kinase-like protein                                                                                                                                | gbpln | Arabidopsis thaliana | AT5G22840.1   Symbols:   Protein kinase superfamily protein   chr5:7631103-7633103 REVERSE LENGTH=538                                                                                                                                                                                                                                                                                                                                                 | 538  | 538  | 0         | 100.0 | 85.1 | 91.6 |



|                           |                                                                                                                                                                                                                                                                                                                                                                                                                                                                                                                                                                                                                   |      |      |           |       |      |      |                                        |       |                      |                                                                                                                                                       |      |      |           |       |      |      |
|---------------------------|-------------------------------------------------------------------------------------------------------------------------------------------------------------------------------------------------------------------------------------------------------------------------------------------------------------------------------------------------------------------------------------------------------------------------------------------------------------------------------------------------------------------------------------------------------------------------------------------------------------------|------|------|-----------|-------|------|------|----------------------------------------|-------|----------------------|-------------------------------------------------------------------------------------------------------------------------------------------------------|------|------|-----------|-------|------|------|
| Rsa1.0_00306.1.g10968.t1  | refXP_002872021.1   hypothetical protein ARALYDRAFT_489136 [Arabidopsis lyrata subsp. lyrata] gi 297317858 gb EFH48280.1                                                                                                                                                                                                                                                                                                                                                                                                                                                                                          | 466  | 456  | 0         | 97.9  | 85.6 | 89.5 | hypothetical protein ARALYDRAFT_489136 | gbpln | Arabidopsis lyrata   | AT5G22830.1   Symbols: ATMGT10, GMN10, MGT10, MRS2-11   magnesium (Mg) transporter 10   chr5:7627676-7630633 FORWARD LENGTH=459                       | 466  | 459  | 0         | 98.5  | 85.4 | 89.1 |
| Rsa1.0_00306.1.g10969.t1  | refXP_002874089.1   hypothetical protein ARALYDRAFT_910273 [Arabidopsis lyrata subsp. lyrata] gi 297319926 gb EFH50348.1                                                                                                                                                                                                                                                                                                                                                                                                                                                                                          | 376  | 393  | 1.00E-102 | 104.5 | 56.1 | 67.8 | hypothetical protein ARALYDRAFT_910273 | gbpln | Arabidopsis lyrata   | AT5G22791.2   Symbols:   F-box family protein   chr5:7603579-7604771 REVERSE LENGTH=355                                                               | 376  | 355  | 9.00E-99  | 94.4  | 55.1 | 65.7 |
| Rsa1.0_00306.1.g10970.t1  | refXP_002874089.1   hypothetical protein ARALYDRAFT_910273 [Arabidopsis lyrata subsp. lyrata] gi 297319926 gb EFH50348.1                                                                                                                                                                                                                                                                                                                                                                                                                                                                                          | 409  | 393  | 1.00E-120 | 96.1  | 55.5 | 67.5 | hypothetical protein ARALYDRAFT_910273 | gbpln | Arabidopsis lyrata   | AT5G22791.2   Symbols:   F-box family protein   chr5:7603579-7604771 REVERSE LENGTH=355                                                               | 409  | 355  | 1.00E-109 | 86.8  | 53.3 | 63.1 |
| Rsa1.0_00306.1.g10971.t1  | refXP_002872017.1   predicted protein [Arabidopsis lyrata subsp. lyrata] gi 297317854 gb EFH48276.1   predicted protein [Arabidopsis lyrata subsp. lyrata]                                                                                                                                                                                                                                                                                                                                                                                                                                                        | 654  | 926  | 1.00E-164 | 141.6 | 43.6 | 46.9 | predicted protein                      | gbpln | Arabidopsis lyrata   | AT1G53350.1   Symbols:   Disease resistance protein (CC-NBS-LRR class) family   chr1:19903899-19907515 FORWARD LENGTH=927                             | 654  | 927  | 3.00E-85  | 141.7 | 27.5 | 36.7 |
| Rsa1.0_00306.1.g10972.t1  | gb EOA20677.1   hypothetical protein CARUB_v10000989mg [Capsella rubella]                                                                                                                                                                                                                                                                                                                                                                                                                                                                                                                                         | 425  | 436  | 0         | 102.6 | 85.9 | 91.3 | hypothetical protein CARUB_v10000989mg | gbpln | Capsella rubella     | AT5G22790.1   Symbols: RER1   reticulata-related 1   chr5:7599395-7601573 REVERSE LENGTH=433                                                          | 425  | 433  | 0         | 101.9 | 84.5 | 90.6 |
| Rsa1.0_00306.1.g10973.t16 | refXP_002874085.1   hypothetical protein ARALYDRAFT_489126 [Arabidopsis lyrata subsp. lyrata] gi 297319922 gb EFH50344.1                                                                                                                                                                                                                                                                                                                                                                                                                                                                                          | 1088 | 1016 | 0         | 93.4  | 86.8 | 90.0 | hypothetical protein ARALYDRAFT_489126 | gbpln | Arabidopsis lyrata   | AT5G22780.1   Symbols:   Adaptor protein complex AP-2, alpha subunit   chr5:7590100-7597828 REVERSE LENGTH=1013                                       | 1088 | 1013 | 0         | 93.1  | 86.5 | 89.8 |
| Rsa1.0_00306.1.g10974.t1  | refXP_002874083.1   hypothetical protein ARALYDRAFT_489123 [Arabidopsis lyrata subsp. lyrata] gi 297319920 gb EFH50342.1                                                                                                                                                                                                                                                                                                                                                                                                                                                                                          | 534  | 534  | 0         | 100.0 | 97.9 | 99.4 | hypothetical protein ARALYDRAFT_489123 | gbpln | Arabidopsis lyrata   | AT5G22740.1   Symbols: ATCSLA02, CSLA02, ATCSLA2, CSLA2   cellulose synthase-like A02   chr5:7555379-7559866 REVERSE LENGTH=534                       | 534  | 534  | 0         | 100.0 | 97.6 | 99.4 |
| Rsa1.0_00306.1.g10975.t1  | gb AAF19546.1   AC007190_14 F23N19.13 [Arabidopsis thaliana]                                                                                                                                                                                                                                                                                                                                                                                                                                                                                                                                                      | 238  | 633  | 8.00E-43  | 266.0 | 38.2 | 45.0 | F23N19.13                              | gbpln | Arabidopsis thaliana | # # # # # # #                                                                                                                                         |      |      |           |       |      |      |
| Rsa1.0_00306.1.g10976.t1  | refNP_001078614.1   F-box/FBD/LRR-repeat protein [Arabidopsis thaliana] gi 75262764 sp Q9FNJ5.1   FDL31_ARAT H RecName: Full=F-box/FBD/LRR-repeat protein At5g22660 gi 10178240 db BAB11672.1   unnamed protein product [Arabidopsis thaliana] gi 332005678 gb AED93061.1   F-box/FBD/LRR-repeat protein [Arabidopsis thaliana]                                                                                                                                                                                                                                                                                   | 429  | 450  | 1.00E-132 | 104.9 | 62.9 | 77.4 | F-box/FBD/LRR-repeat protein           | gbpln | Arabidopsis thaliana | AT5G22660.2   Symbols:   FBD, F-box, Skp2-like and Leucine Rich Repeat domains containing protein   chr5:7536328-7537853 REVERSE LENGTH=450           | 429  | 450  | 1.00E-135 | 104.9 | 62.9 | 77.4 |
| Rsa1.0_00306.1.g10977.t1  | refNP_851056.1   histone deacetylase HDT2 [Arabidopsis thaliana] gi 73919940 sp Q56WH4.2   HDT2_ARATH RecName: Full=Histone deacetylase HDT2; AltName: Full=HD-tuins protein 2; AltName: Full=Histone deacetylase 2b gi 10178239 db BAB11671.1   histone deacetylase-like protein [Arabidopsis thaliana] gi 16649047 gb AAL24375.1   histone deacetylase-like protein [Arabidopsis thaliana] gi 19310471 gb AAL84970.1   AT5g22650/MDJ2.7 [Arabidopsis thaliana] gi 21689603 gb AAM67423.1   AT5g22650/MDJ2.7 [Arabidopsis thaliana] gi 332005675 gb AED93058.1   histone deacetylase HDT2 [Arabidopsis thaliana] | 269  | 306  | 7.00E-53  | 113.8 | 56.5 | 68.4 | histone deacetylase HDT2               | gbpln | Arabidopsis thaliana | AT5G22650.1   Symbols: HD2B, HDT02, HDT2, ATHD2B, HDAA4, HD2, ATHD2   histone deacetylase 2B   chr5:7534120-7536054 FORWARD LENGTH=306                | 269  | 306  | 2.00E-55  | 113.8 | 56.5 | 68.4 |
| Rsa1.0_00306.1.g10978.t1  | refXP_002872014.1   EMB1211 [Arabidopsis lyrata subsp. lyrata] gi 297317851 gb EFH48273.1   EMB1211 [Arabidopsis lyrata subsp. lyrata]                                                                                                                                                                                                                                                                                                                                                                                                                                                                            | 910  | 867  | 0         | 95.3  | 76.3 | 83.2 | EMB1211                                | gbpln | Arabidopsis lyrata   | AT5G22640.1   Symbols: emb1211   MORN (Membrane Occupation and Recognition Nexus) repeat-containing protein   chr5:7529423-7533641 FORWARD LENGTH=871 | 910  | 871  | 0         | 95.7  | 75.6 | 83.3 |

|                          |                                                                                                                                                                                                                                                                                                                                                                                                                                                                                                                                                                                                                                                                 |     |     |           |       |      |      |                                        |       |                      |                                                                                                                                                                                                                                                                                                                                                      |     |     |           |       |      |      |
|--------------------------|-----------------------------------------------------------------------------------------------------------------------------------------------------------------------------------------------------------------------------------------------------------------------------------------------------------------------------------------------------------------------------------------------------------------------------------------------------------------------------------------------------------------------------------------------------------------------------------------------------------------------------------------------------------------|-----|-----|-----------|-------|------|------|----------------------------------------|-------|----------------------|------------------------------------------------------------------------------------------------------------------------------------------------------------------------------------------------------------------------------------------------------------------------------------------------------------------------------------------------------|-----|-----|-----------|-------|------|------|
| Rsa1.0_00306.1.g10979.t1 | refXP_002872013.1   prephenate dehydratase family protein [Arabidopsis lyrata subsp. lyrata] gi 297317850 gb EFH48272.1   prephenate dehydratase family protein [Arabidopsis lyrata subsp. lyrata]                                                                                                                                                                                                                                                                                                                                                                                                                                                              | 432 | 433 | 0         | 100.2 | 93.3 | 95.8 | prephenate dehydratase family protein  | gbpln | Arabidopsis lyrata   | AT5G22630.1   Symbols: ADT5   rogenate dehydratase 5   chr5:7524645-7525922 FORWARD LENGTH=425                                                                                                                                                                                                                                                       | 432 | 425 | 0         | 98.4  | 91.4 | 93.8 |
| Rsa1.0_00307.1.g10980.t1 | # # # # # # # # # # # # # # # #                                                                                                                                                                                                                                                                                                                                                                                                                                                                                                                                                                                                                                 |     |     |           |       |      |      |                                        | ----  | ----                 | # # # # # # # # # #                                                                                                                                                                                                                                                                                                                                  |     |     |           |       |      |      |
| Rsa1.0_00307.1.g10981.t1 | refXP_002884997.1   predicted protein [Arabidopsis lyrata subsp. lyrata] gi 297330837 gb EFH61256.1   predicted protein [Arabidopsis lyrata subsp. lyrata]                                                                                                                                                                                                                                                                                                                                                                                                                                                                                                      | 412 | 412 | 0         | 100.0 | 98.3 | 99.5 | predicted protein                      | gbpln | Arabidopsis lyrata   | AT3G13920.1   Symbols: EIF4A1, RH4, TIF4A1   eukaryotic translation initiation factor 4A1   chr3:4592635-4594128 REVERSE LENGTH=412                                                                                                                                                                                                                  | 412 | 412 | 0         | 100.0 | 97.8 | 99.8 |
| Rsa1.0_00307.1.g10982.t2 | refXP_002884998.1   DNA binding protein [Arabidopsis lyrata subsp. lyrata] gi 297330838 gb EFH61257.1   DNA binding protein [Arabidopsis lyrata subsp. lyrata]                                                                                                                                                                                                                                                                                                                                                                                                                                                                                                  | 442 | 443 | 1.00E-128 | 100.2 | 55.4 | 73.1 | DNA binding protein                    | gbpln | Arabidopsis lyrata   | AT3G13940.1   Symbols:   DNA binding;DNA-directed RNA polymerases   chr3:4600647-4602412 REVERSE LENGTH=442                                                                                                                                                                                                                                          | 442 | 442 | 1.00E-128 | 100.0 | 54.5 | 71.9 |
| Rsa1.0_00307.1.g10983.t1 | gb EOA30723.1   hypothetical protein CARUB_v10013860mg [Capsella rubella]                                                                                                                                                                                                                                                                                                                                                                                                                                                                                                                                                                                       | 386 | 403 | 1.00E-161 | 104.4 | 79.5 | 87.6 | hypothetical protein CARUB_v10013860mg | gbpln | Capsella rubella     | AT3G13960.1   Symbols: AtGRF5, GRF5   growth-regulating factor 5   chr3:4608526-4610160 FORWARD LENGTH=397                                                                                                                                                                                                                                           | 386 | 397 | 1.00E-144 | 102.8 | 78.5 | 85.5 |
| Rsa1.0_00307.1.g10984.t1 | refNP_188014.1   uncharacterized protein [Arabidopsis thaliana] gi 1194369 dbj BAB02328.1   unnamed protein product [Arabidopsis thaliana] gi 332641926 gb AEE75447.1   uncharacterized protein AT3G13980 [Arabidopsis thaliana]                                                                                                                                                                                                                                                                                                                                                                                                                                | 360 | 357 | 1.00E-101 | 99.2  | 71.1 | 80.0 | uncharacterized protein                | gbpln | Arabidopsis thaliana | AT3G13980.1   Symbols:   unknown protein; BEST Arabidopsis thaliana protein match is: unknown protein (TAIR:AT1G54200.1); Has 1485 Blast hits to 418 proteins in 98 species: Archae - 0; Bacteria - 6; Metazoa - 246; Fungi - 61; Plants - 107; Viruses - 6; Other Eukaryotes - 1059 (source: NCBI BLink).   chr3:4619189-4620262 REVERSE LENGTH=357 | 360 | 357 | 1.00E-104 | 99.2  | 71.1 | 80.0 |
| Rsa1.0_00307.1.g10985.t1 | refNP_188015.2   uncharacterized protein [Arabidopsis thaliana] gi 22022592 gb AAM83252.1   AT3g13990/MDC16.11 [Arabidopsis thaliana] gi 23308471 gb AAAN18205.1   AT3g13990/MDC16.11 [Arabidopsis thaliana] gi 332641927 gb AEE75448.1   uncharacterized protein AT3G13990 [Arabidopsis thaliana]                                                                                                                                                                                                                                                                                                                                                              | 865 | 848 | 0         | 98.0  | 71.9 | 78.7 | uncharacterized protein                | gbpln | Arabidopsis thaliana | AT3G13990.1   Symbols:   Kinase-related protein of unknown function (DUF1296)   chr3:4625708-4630383 REVERSE LENGTH=848                                                                                                                                                                                                                              | 865 | 848 | 0         | 98.0  | 71.9 | 78.7 |
| Rsa1.0_00307.1.g10986.t1 | refNP_188016.2   protein Brevis radix-like 2 [Arabidopsis thaliana] gi 42572427 refNP_974309.1   protein Brevis radix-like 2 [Arabidopsis thaliana] gi 75151461 sp Q8GYL9.1 BRXL2_ARAT H RecName: Full=Protein Brevis radix-like 2; Short=AtBRXL2 gi 26450131 dbj BAC42185.1   unknown protein [Arabidopsis thaliana] gi 115311461 gb ABI93911.1   At3g14000 [Arabidopsis thaliana] gi 332641929 gb AEE75450.1   protein Brevis radix-like 2 [Arabidopsis thaliana] gi 332641930 gb AEE75451.1   protein Brevis radix-like 2 [Arabidopsis thaliana]                                                                                                             | 363 | 374 | 1.00E-162 | 103.0 | 85.1 | 92.3 | protein Brevis radix-like 2            | gbpln | Arabidopsis thaliana | AT3G14000.2   Symbols: ATBRXL2, BRX-LIKE2   DZC (Disease resistance/zinc finger/chromosome condensation-like region) domain containing protein   chr3:4631170-4633353 REVERSE LENGTH=374                                                                                                                                                             | 363 | 374 | 1.00E-164 | 103.0 | 85.1 | 92.3 |
| Rsa1.0_00307.1.g10987.t6 | refNP_566471.1   CTC-interacting domain 4 protein [Arabidopsis thaliana] gi 145332387 refNP_001078150.1   CTC-interacting domain 4 protein [Arabidopsis thaliana] gi 145332389 refNP_001078151.1   CTC-interacting domain 4 protein [Arabidopsis thaliana] gi 15028199 gb AAK76596.1   unknown protein [Arabidopsis thaliana] gi 19310731 gb AAL85096.1   unknown protein [Arabidopsis thaliana] gi 332641931 gb AEE75452.1   CTC-interacting domain 4 protein [Arabidopsis thaliana] gi 332641932 gb AEE75453.1   CTC-interacting domain 4 protein [Arabidopsis thaliana] gi 332641933 gb AEE75454.1   CTC-interacting domain 4 protein [Arabidopsis thaliana] | 616 | 595 | 0         | 96.6  | 66.2 | 76.1 | CTC-interacting domain 4 protein       | gbpln | Arabidopsis thaliana | AT3G14010.3   Symbols: CID4   CTC-interacting domain 4   chr3:4637164-4640691 FORWARD LENGTH=595                                                                                                                                                                                                                                                     | 616 | 595 | 0         | 96.6  | 66.2 | 76.1 |
| Rsa1.0_00307.1.g10988.t1 | refXP_002882866.1   predicted protein [Arabidopsis lyrata subsp. lyrata] gi 297328706 gb EFH59125.1   predicted protein [Arabidopsis lyrata subsp. lyrata]                                                                                                                                                                                                                                                                                                                                                                                                                                                                                                      | 296 | 315 | 1.00E-101 | 106.4 | 76.7 | 81.8 | predicted protein                      | gbpln | Arabidopsis lyrata   | AT3G14020.1   Symbols: NF-YA6   nuclear factor Y, subunit A6   chr3:4642968-4644301 FORWARD LENGTH=308                                                                                                                                                                                                                                               | 296 | 308 | 4.00E-96  | 104.1 | 73.3 | 79.7 |

|                          |                                                                                                                                                                                                                                                                                                                                                                                                                                                                               |      |      |          |       |      |      |                                        |       |                      |                                                                                                                                                                                                                                                                                                                                                                                                                                                                                                    |      |      |          |       |      |      |
|--------------------------|-------------------------------------------------------------------------------------------------------------------------------------------------------------------------------------------------------------------------------------------------------------------------------------------------------------------------------------------------------------------------------------------------------------------------------------------------------------------------------|------|------|----------|-------|------|------|----------------------------------------|-------|----------------------|----------------------------------------------------------------------------------------------------------------------------------------------------------------------------------------------------------------------------------------------------------------------------------------------------------------------------------------------------------------------------------------------------------------------------------------------------------------------------------------------------|------|------|----------|-------|------|------|
| Rsa1.0_00307.1.g10989.t1 | refXP_002885007.1   hypothetical protein ARALYDRAFT_478815 [Arabidopsis lyrata subsp. lyrata] gi297330847 gb EFH61266.1   hypothetical protein ARALYDRAFT_478815 [Arabidopsis lyrata subsp. lyrata]                                                                                                                                                                                                                                                                           | 153  | 125  | 2.00E-40 | 81.7  | 55.6 | 60.8 | hypothetical protein ARALYDRAFT_478815 | gbpln | Arabidopsis lyrata   | AT3G14060.1   Symbols:   unknown protein; BEST Arabidopsis thaliana protein match is: unknown protein (TAIR:AT1G54120.1); Has 30 Blast hits to 30 proteins in 8 species: Archae - 0; Bacteria - 0; Metazoa - 0; Fungi - 0; Plants - 30; Viruses - 0; Other Eukaryotes - 0 (source: NCBI BLink).   chr3:4657174-4657551 REVERSE LENGTH=125                                                                                                                                                          | 153  | 125  | 3.00E-42 | 81.7  | 54.9 | 60.8 |
| Rsa1.0_00307.1.g10990.t1 | refNP_566473.2   Subtilase family protein [Arabidopsis thaliana] gi11994380 dbj BAB02339.1   cucumis-like serine protease; subtilisin-like protease [Arabidopsis thaliana] gi44917461 gb AAS49055.1   At3g14067 [Arabidopsis thaliana] gi45773916 gb AAS76762.1   At3g14067 [Arabidopsis thaliana] gi110738008 dbj BAF00939.1   putative subtilisin-like serine proteinase [Arabidopsis thaliana] gi332641940 gb AEE75461.1   Subtilase family protein [Arabidopsis thaliana] | 774  | 777  | 0        | 100.4 | 89.3 | 93.4 | Subtilase family protein               | gbpln | Arabidopsis thaliana | AT3G14067.1   Symbols:   Subtilase family protein   chr3:4658421-4660754 REVERSE LENGTH=777                                                                                                                                                                                                                                                                                                                                                                                                        | 774  | 777  | 0        | 100.4 | 89.3 | 93.4 |
| Rsa1.0_00307.1.g10991.t1 | refNP_566475.1   lipase class 3 family protein [Arabidopsis thaliana] gi334185334 ref NP_001189887.1   lipase class 3 family protein [Arabidopsis thaliana] gi15146181 gb AAK83574.1   AT3g14070/MAG2.2 [Arabidopsis thaliana] gi27764916 gb AAO23579.1   At3g14070/MAG2.2 [Arabidopsis thaliana] gi332641942 gb AEE75463.1   lipase class 3 family protein [Arabidopsis thaliana] gi332641943 gb AEE75464.1   lipase class 3 family protein [Arabidopsis thaliana]           | 593  | 642  | 0        | 108.3 | 86.2 | 90.4 | lipase class 3 family protein          | gbpln | Arabidopsis thaliana | AT3G14075.2   Symbols:   Mono-/di-acylglycerol lipase, N-terminal; Lipase, class 3   chr3:4663819-4666338 REVERSE LENGTH=642                                                                                                                                                                                                                                                                                                                                                                       | 593  | 642  | 0        | 108.3 | 86.2 | 90.4 |
| Rsa1.0_00307.1.g10992.t1 | dbj BAB02972.1   unnamed protein product [Arabidopsis thaliana]                                                                                                                                                                                                                                                                                                                                                                                                               | 120  | 118  | 1.00E-53 | 98.3  | 90.0 | 93.3 | unnamed protein product                | gbpln | Arabidopsis thaliana | AT3G14060.2   Symbols:   Small nuclear ribonucleoprotein family protein   chr3:4667717-4668989 FORWARD LENGTH=128                                                                                                                                                                                                                                                                                                                                                                                  | 120  | 128  | 5.00E-55 | 106.7 | 87.5 | 93.3 |
| Rsa1.0_00307.1.g10993.t1 | refXP_002882868.1   hypothetical protein ARALYDRAFT_478823 [Arabidopsis lyrata subsp. lyrata] gi297328708 gb EFH59127.1   hypothetical protein ARALYDRAFT_478823 [Arabidopsis lyrata subsp. lyrata]                                                                                                                                                                                                                                                                           | 422  | 430  | 0        | 101.9 | 93.4 | 95.0 | hypothetical protein ARALYDRAFT_478823 | gbpln | Arabidopsis lyrata   | AT3G14100.1   Symbols:   RNA-binding (RRM/RBD/RNP motifs) family protein   chr3:4673027-4675950 FORWARD LENGTH=427                                                                                                                                                                                                                                                                                                                                                                                 | 422  | 427  | 0        | 101.2 | 92.2 | 93.8 |
| Rsa1.0_00307.1.g10994.t1 | gb EOA32951.1   hypothetical protein CARUB_v10016280mg [Capsella rubella]                                                                                                                                                                                                                                                                                                                                                                                                     | 1125 | 1077 | 0        | 95.7  | 86.1 | 91.1 | hypothetical protein CARUB_v10016280mg | gbpln | Capsella rubella     | AT3G14120.2   Symbols:   FUNCTIONS IN: molecular function unknown; INVOLVED IN: transport; LOCATED IN: nuclear pore; EXPRESSED IN: 23 plant structures; EXPRESSED DURING: 13 growth stages; CONTAINS InterPro DOMAIN/s: Nuclear pore protein 84/107 (InterPro:IPR007252); Has 271 Blast hits to 268 proteins in 107 species: Archae - 0; Bacteria - 0; Metazoa - 138; Fungi - 69; Plants - 52; Viruses - 0; Other Eukaryotes - 12 (source: NCBI BLink).   chr3:4677993-4685455 FORWARD LENGTH=1077 | 1125 | 1077 | 0        | 95.7  | 85.6 | 90.5 |
| Rsa1.0_00307.1.g10995.t1 | gb EOA31941.1   hypothetical protein CARUB_v10015180mg [Capsella rubella]                                                                                                                                                                                                                                                                                                                                                                                                     | 439  | 363  | 0        | 82.7  | 72.9 | 80.0 | hypothetical protein CARUB_v10015180mg | gbpln | Capsella rubella     | AT3G14130.1   Symbols:   Aldolase-type TIM barrel family protein   chr3:4685844-4687852 REVERSE LENGTH=363                                                                                                                                                                                                                                                                                                                                                                                         | 439  | 363  | 0        | 82.7  | 72.2 | 79.5 |
| Rsa1.0_00307.1.g10996.t1 | refXP_002885018.1   predicted protein [Arabidopsis lyrata subsp. lyrata] gi297330858 gb EFH61277.1   predicted protein [Arabidopsis lyrata subsp. lyrata]                                                                                                                                                                                                                                                                                                                     | 97   | 68   | 4.00E-18 | 70.1  | 49.5 | 54.6 | predicted protein                      | gbpln | Arabidopsis lyrata   | AT1G54070.1   Symbols:   Dormancy/auxin associated family protein   chr1:20182683-20183242 FORWARD LENGTH=123                                                                                                                                                                                                                                                                                                                                                                                      | 97   | 123  | 7.00E-11 | 126.8 | 46.4 | 55.7 |
| Rsa1.0_00307.1.g10997.t1 | refXP_002882871.1   At3g14190 [Arabidopsis lyrata subsp. lyrata] gi297328711 gb EFH59130.1   At3g14190 [Arabidopsis lyrata subsp. lyrata]                                                                                                                                                                                                                                                                                                                                     | 157  | 193  | 1.00E-40 | 122.9 | 58.6 | 70.1 | At3g14190                              | gbpln | Arabidopsis lyrata   | AT3G14190.1   Symbols:   unknown protein; BEST Arabidopsis thaliana protein match is: unknown protein (TAIR:AT5G12360.1); Has 18 Blast hits to 18 proteins in 5 species: Archae - 0; Bacteria - 0; Metazoa - 0; Fungi - 0; Plants - 18; Viruses - 0; Other Eukaryotes - 0 (source: NCBI BLink).   chr3:4710807-4711790 FORWARD LENGTH=193                                                                                                                                                          | 157  | 193  | 4.00E-41 | 122.9 | 56.7 | 68.8 |

|                          |                                                                                                                                                                                                                                                                                                                                                                                                                                                                                                                                                                                                                                                                                                                                                                                  |      |      |           |       |      |      |                                                          |       |                      |                                                                                                                                                                                                                                                            |      |      |           |       |      |      |
|--------------------------|----------------------------------------------------------------------------------------------------------------------------------------------------------------------------------------------------------------------------------------------------------------------------------------------------------------------------------------------------------------------------------------------------------------------------------------------------------------------------------------------------------------------------------------------------------------------------------------------------------------------------------------------------------------------------------------------------------------------------------------------------------------------------------|------|------|-----------|-------|------|------|----------------------------------------------------------|-------|----------------------|------------------------------------------------------------------------------------------------------------------------------------------------------------------------------------------------------------------------------------------------------------|------|------|-----------|-------|------|------|
| Rsa1.0_00307.1.g10998.t1 | refNP_188036.1  chaperone DnaJ-domain containing protein [Arabidopsis thaliana] gi 9294648 dbj BAB02987.1  unnamed protein product [Arabidopsis thaliana] gi 20268707 gb AAM14057.1  unknown protein [Arabidopsis thaliana] gi 21689885 gb AAM67503.1  unknown protein [Arabidopsis thaliana] gi 110743929 dbj BAE9798.1  hypothetical protein [Arabidopsis thaliana] gi 332641964 gb AEE75485.1  chaperone DnaJ-domain containing protein [Arabidopsis thaliana]                                                                                                                                                                                                                                                                                                                | 215  | 230  | 4.00E-79  | 107.0 | 76.7 | 86.0 | chaperone DnaJ-domain containing protein                 | gbpln | Arabidopsis thaliana | AT3G14200.1   Symbols:   Chaperone DnaJ-domain superfamily protein   chr3:4712881-4714361 REVERSE LENGTH=230                                                                                                                                               | 215  | 230  | 1.00E-81  | 107.0 | 76.7 | 86.0 |
| Rsa1.0_00307.1.g10999.t1 | gb EOA32569.1  hypothetical protein CARUB_v10015859mg [Capsella rubella]                                                                                                                                                                                                                                                                                                                                                                                                                                                                                                                                                                                                                                                                                                         | 805  | 804  | 0         | 99.9  | 83.5 | 89.7 | hypothetical protein CARUB_v10015859mg                   | gbpln | Capsella rubella     | AT3G14205.1   Symbols:   Phosphoinositide phosphatase family protein   chr3:4716008-4720524 REVERSE LENGTH=808                                                                                                                                             | 805  | 808  | 0         | 100.4 | 83.2 | 89.3 |
| Rsa1.0_00307.1.g11000.t1 | #                                                                                                                                                                                                                                                                                                                                                                                                                                                                                                                                                                                                                                                                                                                                                                                | #    | #    | #         | #     | #    | #    | -                                                        | ----  | ----                 | #                                                                                                                                                                                                                                                          | #    | #    | #         | #     | #    | #    |
| Rsa1.0_00307.1.g11001.t1 | ref XP_002882874.1  phosphatidylinositol-4-phosphate 5-kinase family protein [Arabidopsis lyrata subsp. lyrata] gi 297328714 gb EFH59133.1  phosphatidylinositol-4-phosphate 5-kinase family protein [Arabidopsis lyrata subsp. lyrata] ref XP_002885030.1  hypothetical protein ARALYDRAFT.478845 [Arabidopsis lyrata subsp. lyrata] gi 297330870 gb EFH61289.1  hypothetical protein ARALYDRAFT.478845 [Arabidopsis lyrata subsp. lyrata]                                                                                                                                                                                                                                                                                                                                      | 1747 | 1789 | 0         | 102.4 | 88.5 | 92.7 | phosphatidylinositol-4-phosphate 5-kinase family protein | gbpln | Arabidopsis lyrata   | AT3G14270.1   Symbols: FAB1B   phosphatidylinositol-4-phosphate 5-kinase family protein   chr3:4754624-4761185 FORWARD LENGTH=1791                                                                                                                         | 1747 | 1791 | 0         | 102.5 | 87.5 | 92.2 |
| Rsa1.0_00307.1.g11002.t1 | hypothetical protein ARALYDRAFT.478845 [Arabidopsis lyrata subsp. lyrata]                                                                                                                                                                                                                                                                                                                                                                                                                                                                                                                                                                                                                                                                                                        | 140  | 141  | 2.00E-58  | 100.7 | 81.4 | 87.9 | hypothetical protein ARALYDRAFT.478845                   | gbpln | Arabidopsis lyrata   | AT3G14280.1   Symbols:   unknown protein; Has 51 Blast hits to 51 proteins in 13 species: Archae - 0; Bacteria - 0; Metazoa - 0; Fungi - 0; Plants - 51; Viruses - 0; Other Eukaryotes - 0 (source: NCBI BLINK).   chr3:4761654-4762286 REVERSE LENGTH=141 | 140  | 141  | 8.00E-59  | 100.7 | 79.3 | 86.4 |
| Rsa1.0_00307.1.g11003.t1 | gb EOA32869.1  hypothetical protein CARUB_v10016184mg [Capsella rubella]                                                                                                                                                                                                                                                                                                                                                                                                                                                                                                                                                                                                                                                                                                         | 484  | 576  | 1.00E-155 | 119.0 | 55.2 | 71.7 | hypothetical protein CARUB_v10016184mg                   | gbpln | Capsella rubella     | AT1G53840.1   Symbols: ATPME1, PME1   pectin methylesterase 1   chr1:20101533-20103458 FORWARD LENGTH=586                                                                                                                                                  | 484  | 586  | 1.00E-101 | 121.1 | 40.5 | 59.5 |
| Rsa1.0_00307.1.g11004.t1 | #                                                                                                                                                                                                                                                                                                                                                                                                                                                                                                                                                                                                                                                                                                                                                                                | #    | #    | #         | #     | #    | #    | -                                                        | ----  | ----                 | #                                                                                                                                                                                                                                                          | #    | #    | #         | #     | #    | #    |
| Rsa1.0_00307.1.g11005.t1 | ref NP_188048.1  pectinesterase 3 [Arabidopsis thaliana] gi 229891485 sp O49006.2 PME3_ARATH RecName: Full=Pectinesterase/pectinesterase inhibitor 3; Includes: RecName: Full=Pectinesterase inhibitor 3; AltName: Full=Pectin methylesterase inhibitor 3; Includes: RecName: Full=Pectinesterase 3; Short=PE 3; AltName: Full=Pectin methylesterase 27; Short=AtPME27; AltName: Full=Pectin methylesterase 3; Flags: Precursor gi 9279579 dbj BAB01037.1  pectinesterase [Arabidopsis thaliana] gi 14335010 gb AAK59769.1  AT3g14310/MLN21.9 [Arabidopsis thaliana] gi 15529256 gb AAK97722.1  AT3g14310/MLN21.9 [Arabidopsis thaliana] gi 23506059 gb AAN28889.1  At3g14310/MLN21.9 [Arabidopsis thaliana] gi 332641979 gb AEE75500.1  pectinesterase 3 [Arabidopsis thaliana] | 592  | 592  | 0         | 100.0 | 90.9 | 95.1 | pectinesterase 3                                         | gbpln | Arabidopsis thaliana | AT3G14310.1   Symbols: ATPME3, PME3   pectin methylesterase 3   chr3:4772214-4775095 REVERSE LENGTH=592                                                                                                                                                    | 592  | 592  | 0         | 100.0 | 90.9 | 95.1 |
| Rsa1.0_00307.1.g11006.t1 | #                                                                                                                                                                                                                                                                                                                                                                                                                                                                                                                                                                                                                                                                                                                                                                                | #    | #    | #         | #     | #    | #    | -                                                        | ----  | ----                 | #                                                                                                                                                                                                                                                          | #    | #    | #         | #     | #    | #    |
| Rsa1.0_00307.1.g11007.t1 | dbj BAB01039.1  unnamed protein product [Arabidopsis thaliana]                                                                                                                                                                                                                                                                                                                                                                                                                                                                                                                                                                                                                                                                                                                   | 662  | 717  | 0         | 108.3 | 77.9 | 86.3 | unnamed protein product                                  | gbpln | Arabidopsis thaliana | AT3G14330.1   Symbols:   Tetratricopeptide repeat (TPR)-like superfamily protein   chr3:4779688-4782451 REVERSE LENGTH=710                                                                                                                                 | 662  | 710  | 0         | 107.3 | 77.9 | 86.3 |

|                          |                                                                                                                                                                                                                                                                                                                                                                                                                                                                                                                                                                                                                                                                                                                    |      |      |           |       |      |      |                                               |       |                      |                                                                                                                                    |      |      |           |       |      |      |
|--------------------------|--------------------------------------------------------------------------------------------------------------------------------------------------------------------------------------------------------------------------------------------------------------------------------------------------------------------------------------------------------------------------------------------------------------------------------------------------------------------------------------------------------------------------------------------------------------------------------------------------------------------------------------------------------------------------------------------------------------------|------|------|-----------|-------|------|------|-----------------------------------------------|-------|----------------------|------------------------------------------------------------------------------------------------------------------------------------|------|------|-----------|-------|------|------|
| Rsa1.0_00307.1.g11008.t1 | ref[NP_188052.2] STRUBBELIG-receptor family 7 protein [Arabidopsis thaliana]<br>gi 75335505 sp Q9LLU4.1 SRF7_ARATH<br>RecName: Full=Protein STRUBBELIG-RECEPTOR FAMILY 7; AltName: Full=Leucine-rich repeat receptor kinase-like protein SRF7; Flags: Precursor gi 9279582 dbj BAB01040.1  serine/threonine protein kinase-like protein [Arabidopsis thaliana]<br>gi 41323413 gb AAR99875.1  strubbelig receptor family 7 [Arabidopsis thaliana]<br>gi 209529813 gb ACI49801.1  At3g14350 [Arabidopsis thaliana]<br>gi 224589565 gb ACN59316.1  leucine-rich repeat receptor-like protein kinase [Arabidopsis thaliana]<br>gi 332641984 gb AEE75505.1  STRUBBELIG-receptor family 7 protein [Arabidopsis thaliana] | 728  | 717  | 0         | 98.5  | 84.2 | 90.5 | STRUBBELIG-receptor family 7 protein          | gbpln | Arabidopsis thaliana | AT3G14350.1   Symbols: SRF7   STRUBBELIG-receptor family 7   chr3:4783115-4786999 REVERSE LENGTH=717                               | 728  | 717  | 0         | 98.5  | 84.2 | 90.5 |
| Rsa1.0_00307.1.g11009.t2 | dbj BAB10837.1  retroelement pol polyprotein-like [Arabidopsis thaliana]                                                                                                                                                                                                                                                                                                                                                                                                                                                                                                                                                                                                                                           | 1464 | 1462 | 0         | 99.9  | 66.2 | 77.9 | retroelement pol polyprotein-like             | gbpln | Arabidopsis thaliana | AT4G23160.1   Symbols: CRK8   cysteine-rich RLK (RECEPTOR-like protein kinase) 8   chr4:12129485-12134086 FORWARD LENGTH=1262      | 1464 | 1262 | 1.00E-133 | 86.2  | 16.0 | 23.4 |
| Rsa1.0_00307.1.g11010.t1 | gb AAF79677.1 AC022314_18 F9C16.26 [Arabidopsis thaliana]                                                                                                                                                                                                                                                                                                                                                                                                                                                                                                                                                                                                                                                          | 229  | 1902 | 2.00E-31  | 830.6 | 31.0 | 42.8 | F9C16.26                                      | gbpln | Arabidopsis thaliana | #                                                                                                                                  | #    | #    | #         | #     | #    | #    |
| Rsa1.0_00308.1.g11011.t1 | gb EOA29213.1  hypothetical protein CARUB_v10025487mg [Capsella rubella]                                                                                                                                                                                                                                                                                                                                                                                                                                                                                                                                                                                                                                           | 186  | 213  | 5.00E-32  | 114.5 | 37.1 | 37.6 | hypothetical protein CARUB_v10025487mg        | gbpln | Capsella rubella     | AT2G35990.1   Symbols:   Putative lysine decarboxylase family protein   chr2:15114070-15116647 FORWARD LENGTH=213                  | 186  | 213  | 2.00E-34  | 114.5 | 37.1 | 37.6 |
| Rsa1.0_00308.1.g11012.t1 | #                                                                                                                                                                                                                                                                                                                                                                                                                                                                                                                                                                                                                                                                                                                  | #    | #    | #         | #     | #    | #    | -                                             | ----  | ----                 | #                                                                                                                                  | #    | #    | #         | #     | #    | #    |
| Rsa1.0_00308.1.g11013.t1 | gb EOA29213.1  hypothetical protein CARUB_v10025487mg [Capsella rubella]                                                                                                                                                                                                                                                                                                                                                                                                                                                                                                                                                                                                                                           | 79   | 213  | 2.00E-31  | 269.6 | 87.3 | 87.3 | hypothetical protein CARUB_v10025487mg        | gbpln | Capsella rubella     | AT2G35990.1   Symbols:   Putative lysine decarboxylase family protein   chr2:15114070-15116647 FORWARD LENGTH=213                  | 79   | 213  | 8.00E-33  | 269.6 | 84.8 | 86.1 |
| Rsa1.0_00308.1.g11014.t1 | ref XP_002862184.1  hypothetical protein ARALYDRAFT_497554 [Arabidopsis lyrata subsp. lyrata]<br>gi 29782341.1 ref XP_002879588.1  hypothetical protein ARALYDRAFT_482571 [Arabidopsis lyrata subsp. lyrata]<br>gi 297307418 gb EFH38442.1  hypothetical protein ARALYDRAFT_497554 [Arabidopsis lyrata subsp. lyrata]<br>gi 297325427 gb EFH55847.1  hypothetical protein ARALYDRAFT_482571 [Arabidopsis lyrata subsp. lyrata]                                                                                                                                                                                                                                                                                     | 336  | 330  | 1.00E-134 | 98.2  | 72.6 | 78.3 | hypothetical protein ARALYDRAFT_497554        | gbpln | Arabidopsis lyrata   | AT2G36000.1   Symbols:   Mitochondrial transcription termination factor family protein   chr2:15117181-15118182 FORWARD LENGTH=333 | 336  | 333  | 1.00E-128 | 99.1  | 72.9 | 79.2 |
| Rsa1.0_00308.1.g11015.t1 | ref XP_002879589.1  E2F transcription factor-3 [Arabidopsis lyrata subsp. lyrata]<br>gi 297325428 gb EFH55848.1  E2F transcription factor-3 [Arabidopsis lyrata subsp. lyrata]                                                                                                                                                                                                                                                                                                                                                                                                                                                                                                                                     | 481  | 486  | 0         | 101.0 | 81.9 | 87.1 | E2F transcription factor-3                    | gbpln | Arabidopsis lyrata   | AT2G36010.1   Symbols: E2F3, ATE2FA   E2F transcription factor 3   chr2:15119688-15122893 FORWARD LENGTH=483                       | 481  | 483  | 0         | 100.4 | 80.0 | 85.2 |
| Rsa1.0_00308.1.g11016.t1 | ref XP_002881422.1  abscisic acid-responsive HVA22 family protein [Arabidopsis lyrata subsp. lyrata]<br>gi 297327261 gb EFH57681.1  abscisic acid-responsive HVA22 family protein [Arabidopsis lyrata subsp. lyrata]                                                                                                                                                                                                                                                                                                                                                                                                                                                                                               | 259  | 258  | 1.00E-124 | 99.6  | 88.0 | 93.1 | abscisic acid-responsive HVA22 family protein | gbpln | Arabidopsis lyrata   | AT2G36020.1   Symbols: HVA22J   HVA22-like protein J   chr2:15123424-15125140 REVERSE LENGTH=258                                   | 259  | 258  | 1.00E-126 | 99.6  | 87.3 | 92.7 |
| Rsa1.0_00308.1.g11017.t1 | ref XP_002862872.1  hypothetical protein ARALYDRAFT_920186 [Arabidopsis lyrata subsp. lyrata]<br>gi 297308632 gb EFH39131.1  hypothetical protein ARALYDRAFT_920186 [Arabidopsis lyrata subsp. lyrata]                                                                                                                                                                                                                                                                                                                                                                                                                                                                                                             | 186  | 184  | 7.00E-61  | 98.9  | 76.9 | 85.5 | hypothetical protein ARALYDRAFT_920186        | gbpln | Arabidopsis lyrata   | AT2G36026.1   Symbols:   Ovate family protein   chr2:15127265-15127816 FORWARD LENGTH=183                                          | 186  | 183  | 3.00E-59  | 98.4  | 75.8 | 84.4 |
| Rsa1.0_00308.1.g11018.t1 | ref XP_002881423.1  ATOFP15/OPF15 [Arabidopsis lyrata subsp. lyrata]<br>gi 297327262 gb EFH57682.1  ATOFP15/OPF15 [Arabidopsis lyrata subsp. lyrata]                                                                                                                                                                                                                                                                                                                                                                                                                                                                                                                                                               | 265  | 259  | 2.00E-89  | 97.7  | 76.6 | 84.9 | ATOFP15/OPF15                                 | gbpln | Arabidopsis lyrata   | AT2G36050.1   Symbols: ATOFP15, OPF15   ovate family protein 15   chr2:15135852-15136637 REVERSE LENGTH=261                        | 265  | 261  | 9.00E-76  | 98.5  | 73.2 | 81.9 |

|                          |                                                                                                                                                                                                                                                                                                                                                                                          |      |      |           |       |      |      |                                                  |       |                      |                                                                                                                                                |      |      |           |       |      |      |
|--------------------------|------------------------------------------------------------------------------------------------------------------------------------------------------------------------------------------------------------------------------------------------------------------------------------------------------------------------------------------------------------------------------------------|------|------|-----------|-------|------|------|--------------------------------------------------|-------|----------------------|------------------------------------------------------------------------------------------------------------------------------------------------|------|------|-----------|-------|------|------|
| Rsa1.0_00308.1.g11019.t1 | refNP_850260.1  B3 domain-containing protein [Arabidopsis thaliana] gi 75151444 sp Q8GYJ2.1 Y2608_ARATH RecName: Full=B3 domain-containing protein At2g36080; AltName: Full=Protein AUXIN RESPONSIVE FACTOR 31 gi 26450255 dbj BAC42244.1  putative RAV2-like DNA binding protein [Arabidopsis thaliana] gi 330254110 gb AEC09204.1  B3 domain-containing protein [Arabidopsis thaliana] | 221  | 244  | 2.00E-95  | 110.4 | 87.3 | 91.4 | B3 domain-containing protein                     | gbpln | Arabidopsis thaliana | AT2G36080.1   Symbols:   AP2/B3-like transcriptional factor family protein   chr2:15148612-15151411 REVERSE LENGTH=244                         | 221  | 244  | 7.00E-98  | 110.4 | 87.3 | 91.4 |
| Rsa1.0_00308.1.g11020.t1 | refXP_002879591.1  F-box family protein [Arabidopsis lyrata subsp. lyrata] gi 297325430 gb EFH55850.1  F-box family protein [Arabidopsis lyrata subsp. lyrata]                                                                                                                                                                                                                           | 316  | 313  | 1.00E-129 | 99.1  | 75.6 | 86.1 | F-box family protein                             | gbpln | Arabidopsis lyrata   | AT2G36090.1   Symbols:   F-box family protein   chr2:15158631-15159584 FORWARD LENGTH=317                                                      | 316  | 317  | 1.00E-130 | 100.3 | 75.9 | 86.1 |
| Rsa1.0_00308.1.g11021.t1 | sp P0D149.1 CASP_RAPRA RecName: Full=Casparian strip membrane protein 1                                                                                                                                                                                                                                                                                                                  | 191  | 207  | 7.00E-76  | 108.4 | 82.7 | 89.0 | RecName: Full=Casparian strip membrane protein 1 | ----  | ----                 | AT2G36100.1   Symbols:   Uncharacterised protein family (UPF0497)   chr2:15159744-15160669 REVERSE LENGTH=206                                  | 191  | 206  | 3.00E-75  | 107.9 | 77.5 | 85.3 |
| Rsa1.0_00308.1.g11022.t1 | sp P0D149.1 CASP_RAPRA RecName: Full=Casparian strip membrane protein 1                                                                                                                                                                                                                                                                                                                  | 207  | 207  | 3.00E-93  | 100.0 | 92.8 | 96.6 | RecName: Full=Casparian strip membrane protein 1 | ----  | ----                 | AT2G36100.1   Symbols:   Uncharacterised protein family (UPF0497)   chr2:15159744-15160669 REVERSE LENGTH=206                                  | 207  | 206  | 2.00E-86  | 99.5  | 81.2 | 90.3 |
| Rsa1.0_00308.1.g11023.t1 | refXP_002869958.1  hypothetical protein ARALYDRAFT_914664 [Arabidopsis lyrata subsp. lyrata] gi 297315794 gb EFH46217.1  hypothetical protein ARALYDRAFT_914664 [Arabidopsis lyrata subsp. lyrata]                                                                                                                                                                                       | 367  | 428  | 1.00E-106 | 116.6 | 62.1 | 75.2 | hypothetical protein ARALYDRAFT_914664           | gbpln | Arabidopsis lyrata   | AT4G19940.1   Symbols:   F-box and associated interaction domains-containing protein   chr4:10806195-10807430 FORWARD LENGTH=411               | 367  | 411  | 1.00E-102 | 112.0 | 56.1 | 71.4 |
| Rsa1.0_00308.1.g11024.t1 | #                                                                                                                                                                                                                                                                                                                                                                                        | #    | #    | #         | #     | #    | #    | -                                                | ----  | ----                 | #                                                                                                                                              | #    | #    | #         | #     | #    | #    |
| Rsa1.0_00308.1.g11025.t1 | refXP_002869958.1  hypothetical protein ARALYDRAFT_914664 [Arabidopsis lyrata subsp. lyrata] gi 297315794 gb EFH46217.1  hypothetical protein ARALYDRAFT_914664 [Arabidopsis lyrata subsp. lyrata]                                                                                                                                                                                       | 425  | 428  | 1.00E-119 | 100.7 | 56.9 | 70.6 | hypothetical protein ARALYDRAFT_914664           | gbpln | Arabidopsis lyrata   | AT4G19930.1   Symbols:   F-box and associated interaction domains-containing protein   chr4:10803558-10804853 FORWARD LENGTH=431               | 425  | 431  | 1.00E-106 | 101.4 | 55.3 | 66.8 |
| Rsa1.0_00308.1.g11026.t1 | gb EOA29179.1  hypothetical protein CARUB_v10025451mg [Capsella rubella]                                                                                                                                                                                                                                                                                                                 | 164  | 164  | 2.00E-89  | 100.0 | 96.3 | 98.8 | hypothetical protein CARUB_v10025451mg           | gbpln | Capsella rubella     | AT2G36130.1   Symbols:   Cyclophilin-like peptidyl-prolyl cis-trans isomerase family protein   chr2:15166863-15168259 FORWARD LENGTH=164       | 164  | 164  | 2.00E-90  | 100.0 | 94.5 | 97.6 |
| Rsa1.0_00308.1.g11027.t2 | gb AAO41731.1  cytoplasmic ribosomal protein S14 [Brassica napus]                                                                                                                                                                                                                                                                                                                        | 150  | 150  | 5.00E-80  | 100.0 | 98.7 | 99.3 | cytoplasmic ribosomal protein S14                | gbpln | Brassica napus       | AT3G11510.1   Symbols:   Ribosomal protein S11 family protein   chr3:3623757-3624866 REVERSE LENGTH=150                                        | 150  | 150  | 3.00E-75  | 100.0 | 89.3 | 92.0 |
| Rsa1.0_00308.1.g11028.t1 | refXP_002881429.1  ATCWINV4 [Arabidopsis lyrata subsp. lyrata] gi 297327288 gb EFH57688.1  ATCWINV4 [Arabidopsis lyrata subsp. lyrata]                                                                                                                                                                                                                                                   | 588  | 591  | 0         | 100.5 | 87.1 | 94.4 | ATCWINV4                                         | gbpln | Arabidopsis lyrata   | AT2G36190.1   Symbols:   AtcwINV4, cwINV4   cell wall invertase 4   chr2:15174951-15177785 REVERSE LENGTH=591                                  | 588  | 591  | 0         | 100.5 | 84.2 | 91.2 |
| Rsa1.0_00308.1.g11029.t1 | refNP_181162.2  kinesin family member 11 [Arabidopsis thaliana] gi 322510039 sp P82266.2 K125_ARATH RecName: Full=Probable 125 kDa kinesin-related protein gi 330254121 gb AEC09215.1  kinesin family member 11 [Arabidopsis thaliana]                                                                                                                                                   | 1009 | 1009 | 0         | 100.0 | 91.5 | 96.1 | kinesin family member 11                         | gbpln | Arabidopsis thaliana | AT2G36200.1   Symbols:   P-loop containing nucleoside triphosphate hydrolases superfamily protein   chr2:15180078-15185189 REVERSE LENGTH=1009 | 1009 | 1009 | 0         | 100.0 | 91.5 | 96.1 |
| Rsa1.0_00308.1.g11030.t1 | refXP_002880228.1  BTB/POZ domain-containing protein [Arabidopsis lyrata subsp. lyrata] gi 297326087 gb EFH56487.1  BTB/POZ domain-containing protein [Arabidopsis lyrata subsp. lyrata]                                                                                                                                                                                                 | 105  | 561  | 6.00E-32  | 534.3 | 65.7 | 69.5 | BTB/POZ domain-containing protein                | gbpln | Arabidopsis lyrata   | AT2G46260.1   Symbols:   BTB/POZ/Kelch-associated protein   chr2:18996111-18998463 FORWARD LENGTH=561                                          | 105  | 561  | 1.00E-34  | 534.3 | 65.7 | 69.5 |
| Rsa1.0_00309.1.g11031.t1 | gb EOA25658.1  hypothetical protein CARUB_v10019009mg, partial [Capsella rubella]                                                                                                                                                                                                                                                                                                        | 72   | 81   | 5.00E-14  | 112.5 | 58.3 | 65.3 | hypothetical protein CARUB_v10019009mg, partial  | gbpln | Capsella rubella     | AT3G25655.1   Symbols:   IDL1   inflorescence deficient in abscission (IDA)-like 1   chr3:9337709-9337969 REVERSE LENGTH=86                    | 72   | 86   | 3.00E-13  | 119.4 | 51.4 | 56.9 |
| Rsa1.0_00309.1.g11032.t1 | refXP_002875266.1  hypothetical protein ARALYDRAFT_904728 [Arabidopsis lyrata subsp. lyrata] gi 297321104 gb EFH51525.1  hypothetical protein ARALYDRAFT_904728 [Arabidopsis lyrata subsp. lyrata]                                                                                                                                                                                       | 261  | 266  | 1.00E-123 | 101.9 | 89.7 | 95.0 | hypothetical protein ARALYDRAFT_904728           | gbpln | Arabidopsis lyrata   | AT3G25640.1   Symbols:   Protein of unknown function, DUF617   chr3:9333775-9334578 FORWARD LENGTH=267                                         | 261  | 267  | 1.00E-124 | 102.3 | 88.1 | 95.4 |
| Rsa1.0_00309.1.g11033.t1 | gb EOA20114.1  hypothetical protein CARUB_v10000393mg, partial [Capsella rubella]                                                                                                                                                                                                                                                                                                        | 137  | 670  | 2.00E-42  | 489.1 | 69.3 | 78.1 | hypothetical protein CARUB_v10000393mg, partial  | gbpln | Capsella rubella     | AT5G10900.1   Symbols:   Calcineurin-like metallo-phosphoesterase superfamily protein   chr5:3436413-3439221 REVERSE LENGTH=600                | 137  | 600  | 2.00E-38  | 438.0 | 67.9 | 75.2 |

|                          |                                                                                                                                                                                                                                                                                                                                                                                                 |      |      |           |       |      |      |                                                           |       |                      |                                                                                                                                                                                                                                                                                                                                                                                                                                                                                                                         |      |     |           |       |      |      |
|--------------------------|-------------------------------------------------------------------------------------------------------------------------------------------------------------------------------------------------------------------------------------------------------------------------------------------------------------------------------------------------------------------------------------------------|------|------|-----------|-------|------|------|-----------------------------------------------------------|-------|----------------------|-------------------------------------------------------------------------------------------------------------------------------------------------------------------------------------------------------------------------------------------------------------------------------------------------------------------------------------------------------------------------------------------------------------------------------------------------------------------------------------------------------------------------|------|-----|-----------|-------|------|------|
| Rsa1.0_00309.1.g11034.t2 | #                                                                                                                                                                                                                                                                                                                                                                                               | #    | #    | #         | #     | #    | #    | #                                                         | -     | ----                 | ----                                                                                                                                                                                                                                                                                                                                                                                                                                                                                                                    | #    | #   | #         | #     | #    | #    |
| Rsa1.0_00309.1.g11035.t1 | #                                                                                                                                                                                                                                                                                                                                                                                               | #    | #    | #         | #     | #    | #    | #                                                         | -     | ----                 | ----                                                                                                                                                                                                                                                                                                                                                                                                                                                                                                                    | #    | #   | #         | #     | #    | #    |
| Rsa1.0_00309.1.g11036.t1 | refXP_002876921.1  hypothetical protein ARALYDRAFT_904727 [Arabidopsis lyrata subsp. lyrata] gi 297322759 gb EFH53180.1  hypothetical protein ARALYDRAFT_904727 [Arabidopsis lyrata subsp. lyrata]                                                                                                                                                                                              | 670  | 671  | 0         | 100.1 | 92.1 | 96.0 | hypothetical protein ARALYDRAFT_904727                    | gbpln | Arabidopsis lyrata   | AT3G25620.2   Symbols:   ABC-2 type transporter family protein   chr3:9316677-9319505 REVERSE LENGTH=672                                                                                                                                                                                                                                                                                                                                                                                                                | 670  | 672 | 0         | 100.3 | 91.9 | 95.2 |
| Rsa1.0_00309.1.g11037.t1 | gb EOA24080.1  hypothetical protein CARUB_v10017307mg [Capsella rubella]                                                                                                                                                                                                                                                                                                                        | 406  | 429  | 1.00E-133 | 105.7 | 72.7 | 78.1 | hypothetical protein CARUB_v10017307mg                    | gbpln | Capsella rubella     | AT3G25590.1   Symbols:   unknown protein; Has 149 Blast hits to 140 proteins in 44 species: Archae - 0; Bacteria - 6; Metazoa - 40; Fungi - 6; Plants - 39; Viruses - 0; Other Eukaryotes - 58 (source: NCBI BLINK).   chr3:9302271-9303542 FORWARD LENGTH=423                                                                                                                                                                                                                                                          | 406  | 423 | 1.00E-130 | 104.2 | 72.7 | 78.6 |
| Rsa1.0_00309.1.g11038.t2 | refXP_002875262.1  hypothetical protein ARALYDRAFT_484318 [Arabidopsis lyrata subsp. lyrata] gi 297321100 gb EFH51521.1  hypothetical protein ARALYDRAFT_484318 [Arabidopsis lyrata subsp. lyrata]                                                                                                                                                                                              | 368  | 389  | 0         | 105.7 | 85.3 | 92.7 | hypothetical protein ARALYDRAFT_484318                    | gbpln | Arabidopsis lyrata   | AT3G25585.4   Symbols: AAPT2, ATAAPT2   aminoalcoholphosphotransferase   chr3:9295856-9298271 FORWARD LENGTH=389                                                                                                                                                                                                                                                                                                                                                                                                        | 368  | 389 | 0         | 105.7 | 85.1 | 92.4 |
| Rsa1.0_00309.1.g11039.t1 | #                                                                                                                                                                                                                                                                                                                                                                                               | #    | #    | #         | #     | #    | #    | -                                                         | ----  | ----                 | #                                                                                                                                                                                                                                                                                                                                                                                                                                                                                                                       | #    | #   | #         | #     | #    |      |
| Rsa1.0_00309.1.g11040.t2 | gb EOA23613.1  hypothetical protein CARUB_v10016813mg [Capsella rubella]                                                                                                                                                                                                                                                                                                                        | 607  | 651  | 0         | 107.2 | 90.6 | 94.6 | hypothetical protein CARUB_v10016813mg                    | gbpln | Capsella rubella     | AT3G25560.1   Symbols: NIK2   NSP-interacting kinase 2   chr3:9279682-9282560 REVERSE LENGTH=635                                                                                                                                                                                                                                                                                                                                                                                                                        | 607  | 635 | 0         | 104.6 | 89.6 | 94.4 |
| Rsa1.0_00309.1.g11041.t1 | gb ABD65060.1  hypothetical protein 27.t00039 [Brassica oleracea]                                                                                                                                                                                                                                                                                                                               | 1468 | 1367 | 0         | 93.1  | 59.4 | 72.5 | hypothetical protein 27.t00039                            | gbpln | Brassica oleracea    | AT3G51700.1   Symbols:   PIF1 helicase   chr3:19179443-19181145 REVERSE LENGTH=344                                                                                                                                                                                                                                                                                                                                                                                                                                      | 1468 | 344 | 2.00E-88  | 23.4  | 11.4 | 14.0 |
| Rsa1.0_00310.1.g11042.t1 | refXP_002873545.1  17.6 kDa class II heat shock protein [Arabidopsis lyrata subsp. lyrata] gi 297319382 gb EFH49804.1  17.6 kDa class II heat shock protein [Arabidopsis lyrata subsp. lyrata]                                                                                                                                                                                                  | 155  | 154  | 1.00E-71  | 99.4  | 94.2 | 97.4 | 17.6 kDa class II heat shock protein                      | gbpln | Arabidopsis lyrata   | AT5G12020.1   Symbols: HSP17.6II   17.6 kDa class II heat shock protein   chr5:3882409-3882876 REVERSE LENGTH=155                                                                                                                                                                                                                                                                                                                                                                                                       | 155  | 155 | 1.00E-72  | 100.0 | 94.2 | 97.4 |
| Rsa1.0_00310.1.g11043.t1 | ref NP_191711.1  pentatricopeptide repeat-containing protein [Arabidopsis thaliana] gi 75183498 sp Q9M316.1 PP292_ARAT H RecName: Full=Pentatricopeptide repeat-containing protein At3g61520, mitochondrial; Flags: Precursor gi 6850843 emb CAB71062.1  putative protein [Arabidopsis thaliana] gi 332646696 gb AEE80217.1  pentatricopeptide repeat-containing protein [Arabidopsis thaliana] | 766  | 766  | 0         | 100.0 | 73.0 | 83.8 | pentatricopeptide repeat-containing protein               | gbpln | Arabidopsis thaliana | AT3G61520.1   Symbols:   Pentatricopeptide repeat (PPR) superfamily protein   chr3:22768974-22771274 REVERSE LENGTH=766                                                                                                                                                                                                                                                                                                                                                                                                 | 766  | 766 | 0         | 100.0 | 73.0 | 83.8 |
| Rsa1.0_00310.1.g11044.t1 | gb AFO66517.1  putative kinase [Brassica napus]                                                                                                                                                                                                                                                                                                                                                 | 456  | 1266 | 0         | 277.6 | 83.1 | 90.8 | putative kinase                                           | gbpln | Brassica napus       | AT5G12010.1   Symbols:   unknown protein; INVOLVED IN: response to salt stress; LOCATED IN: chloroplast, plasma membrane, membrane; EXPRESSED IN: 23 plant structures; EXPRESSED DURING: 13 growth stages; BEST Arabidopsis thaliana protein match is: unknown protein (TAIR:AT4G29780.1); Has 1807 Blast hits to 1807 proteins in 277 species: Archae - 0; Bacteria - 0; Metazoa - 736; Fungi - 347; Plants - 385; Viruses - 0; Other Eukaryotes - 339 (source: NCBI BLINK).   chr5:3877975-3879483 REVERSE LENGTH=502 | 456  | 502 | 0         | 110.1 | 79.6 | 87.1 |
| Rsa1.0_00310.1.g11045.t2 | refXP_002873544.1  kinase [Arabidopsis lyrata subsp. lyrata] gi 297319381 gb EFH49803.1  kinase [Arabidopsis lyrata subsp. lyrata]                                                                                                                                                                                                                                                              | 892  | 700  | 0         | 78.5  | 62.8 | 69.3 | kinase                                                    | gbpln | Arabidopsis lyrata   | AT5G12000.1   Symbols:   Protein kinase protein with adenine nucleotide alpha hydrolases-like domain   chr5:3874151-3876780 REVERSE LENGTH=701                                                                                                                                                                                                                                                                                                                                                                          | 892  | 701 | 0         | 78.6  | 61.9 | 68.5 |
| Rsa1.0_00310.1.g11046.t1 | gb AFO66519.1  putative ABC superfamily ATP binding cassette transporter [Brassica napus]                                                                                                                                                                                                                                                                                                       | 106  | 356  | 7.00E-40  | 335.8 | 77.4 | 84.0 | putative ABC superfamily ATP binding cassette transporter | gbpln | Brassica napus       | AT5G11970.1   Symbols:   Protein of unknown function (DUF3511)   chr5:3863289-3863606 REVERSE LENGTH=105                                                                                                                                                                                                                                                                                                                                                                                                                | 106  | 105 | 5.00E-41  | 99.1  | 78.3 | 84.9 |
| Rsa1.0_00310.1.g11047.t2 | gb EOA20897.1  hypothetical protein CARUB_v10001232mg, partial [Capsella rubella]                                                                                                                                                                                                                                                                                                               | 355  | 364  | 1.00E-178 | 102.5 | 92.7 | 94.9 | hypothetical protein CARUB_v10001232mg, partial           | gbpln | Capsella rubella     | AT5G11960.1   Symbols:   Protein of unknown function (DUF803)   chr5:3858852-3861462 REVERSE LENGTH=344                                                                                                                                                                                                                                                                                                                                                                                                                 | 355  | 344 | 1.00E-177 | 96.9  | 91.8 | 94.1 |
| Rsa1.0_00310.1.g11048.t1 | refXP_002871507.1  hypothetical protein ARALYDRAFT_488037 [Arabidopsis lyrata subsp. lyrata] gi 297317344 gb EFH47766.1  hypothetical protein ARALYDRAFT_488037 [Arabidopsis lyrata subsp. lyrata]                                                                                                                                                                                              | 206  | 217  | 1.00E-112 | 105.3 | 97.6 | 99.0 | hypothetical protein ARALYDRAFT_488037                    | gbpln | Arabidopsis lyrata   | AT5G11950.2   Symbols:   Putative lysine decarboxylase family protein   chr5:3855072-3856815 FORWARD LENGTH=216                                                                                                                                                                                                                                                                                                                                                                                                         | 206  | 216 | 1.00E-114 | 104.9 | 95.6 | 98.1 |

|                          |                                                                                                                                                                                                                                                                                                                          |      |      |           |       |      |      |                                                              |       |                      |                                                                                                                                                                                                                                                                                                                                                                                                                                                                                                                                              |      |      |           |       |      |      |
|--------------------------|--------------------------------------------------------------------------------------------------------------------------------------------------------------------------------------------------------------------------------------------------------------------------------------------------------------------------|------|------|-----------|-------|------|------|--------------------------------------------------------------|-------|----------------------|----------------------------------------------------------------------------------------------------------------------------------------------------------------------------------------------------------------------------------------------------------------------------------------------------------------------------------------------------------------------------------------------------------------------------------------------------------------------------------------------------------------------------------------------|------|------|-----------|-------|------|------|
| Rsa1.0_00310.1.g11049.t2 | gb ACP30564.1  disease resistance protein [Brassica rapa subsp. pekinensis]                                                                                                                                                                                                                                              | 1214 | 1084 | 0         | 89.3  | 72.1 | 78.6 | disease resistance protein                                   | gbpln | Brassica rapa        | AT5G36930.2   Symbols:   Disease resistance protein (TIR-NBS-LRR class) family   chr5:14567771-14571916 REVERSE LENGTH=1191                                                                                                                                                                                                                                                                                                                                                                                                                  | 1214 | 1191 | 0         | 98.1  | 48.3 | 62.2 |
| Rsa1.0_00310.1.g11050.t1 | ref XP_002871506.1  subtilase family protein [Arabidopsis lyrata subsp. lyrata] gi 297317343 gb EFH47765.1  subtilase family protein [Arabidopsis lyrata subsp. lyrata]                                                                                                                                                  | 762  | 762  | 0         | 100.0 | 73.5 | 86.5 | subtilase family protein                                     | gbpln | Arabidopsis lyrata   | AT5G11940.1   Symbols:   Subtilase family protein   chr5:3849283-3852417 FORWARD LENGTH=762                                                                                                                                                                                                                                                                                                                                                                                                                                                  | 762  | 762  | 0         | 100.0 | 72.8 | 86.6 |
| Rsa1.0_00310.1.g11051.t1 | ref XP_002871506.1  subtilase family protein [Arabidopsis lyrata subsp. lyrata] gi 297317343 gb EFH47765.1  subtilase family protein [Arabidopsis lyrata subsp. lyrata]                                                                                                                                                  | 760  | 762  | 0         | 100.3 | 74.2 | 86.2 | subtilase family protein                                     | gbpln | Arabidopsis lyrata   | AT5G11940.1   Symbols:   Subtilase family protein   chr5:3849283-3852417 FORWARD LENGTH=762                                                                                                                                                                                                                                                                                                                                                                                                                                                  | 760  | 762  | 0         | 100.3 | 73.4 | 85.8 |
| Rsa1.0_00310.1.g11052.t1 | gb ACP30591.1  disease resistance protein [Brassica rapa subsp. pekinensis]                                                                                                                                                                                                                                              | 427  | 1555 | 2.00E-72  | 364.2 | 33.3 | 46.8 | disease resistance protein                                   | gbpln | Brassica rapa        | AT1G10000.1   Symbols:   Ribonuclease H-like superfamily protein   chr1:3263877-3264788 REVERSE LENGTH=303                                                                                                                                                                                                                                                                                                                                                                                                                                   | 427  | 303  | 2.00E-41  | 71.0  | 25.5 | 36.1 |
| Rsa1.0_00310.1.g11053.t1 | gb AFO66501.1  putative harpin-induced 1 [Brassica napus]                                                                                                                                                                                                                                                                | 283  | 284  | 1.00E-123 | 100.4 | 89.0 | 91.9 | putative harpin-induced 1                                    | gbpln | Brassica napus       | AT5G11890.1   Symbols:   FUNCTIONS IN: molecular function unknown; LOCATED IN: plasma membrane; EXPRESSED IN: 12 plant structures; EXPRESSED DURING: 6 growth stages; BEST Arabidopsis thaliana protein match is: Late embryogenesis abundant (LEA) hydroxyproline-rich glycoprotein family (TAIR:AT1G17620.1); Has 1807 Blast hits to 1807 proteins in 277 species: Archae - 0; Bacteria - 0; Metazoa - 736; Fungi - 347; Plants - 385; Viruses - 0; Other Eukaryotes - 339 (source: NCBI BLink).   chr5:3831770-3832633 FORWARD LENGTH=287 | 283  | 287  | 1.00E-117 | 101.4 | 83.0 | 88.7 |
| Rsa1.0_00310.1.g11054.t1 | ref NP_196746.2  sterile alpha motif and leucine zipper containing kinase AZK [Arabidopsis thaliana] gi 18700075 gb AAL77650.1  AT5g11850/F14F18_20 [Arabidopsis thaliana] gi 332004344 gb AED91727.1  protein kinase superfamily protein [Arabidopsis thaliana]                                                         | 900  | 880  | 0         | 97.8  | 86.9 | 91.6 | sterile alpha motif and leucine zipper containing kinase AZK | gbpln | Arabidopsis thaliana | AT5G11850.1   Symbols:   Protein kinase superfamily protein   chr5:3816632-3821024 REVERSE LENGTH=880                                                                                                                                                                                                                                                                                                                                                                                                                                        | 900  | 880  | 0         | 97.8  | 86.9 | 91.6 |
| Rsa1.0_00310.1.g11055.t1 | ref XP_002873531.1  hypothetical protein ARALYDRAFT_489020 [Arabidopsis lyrata subsp. lyrata] gi 297319368 gb EFH48790.1  hypothetical protein ARALYDRAFT_488020 [Arabidopsis lyrata subsp. lyrata]                                                                                                                      | 166  | 174  | 5.00E-64  | 104.8 | 71.1 | 80.1 | hypothetical protein ARALYDRAFT_488020                       | gbpln | Arabidopsis lyrata   | AT5G11830.1   Symbols:   Plant self-incompatibility protein S1 family   chr5:3812520-3813044 REVERSE LENGTH=174                                                                                                                                                                                                                                                                                                                                                                                                                              | 166  | 174  | 2.00E-65  | 104.8 | 69.3 | 80.7 |
| Rsa1.0_00310.1.g11056.t1 | ref NP_196743.1  self-incompatibility S1 family protein [Arabidopsis thaliana] gi 7573396 emb CAB87700.1  putative protein [Arabidopsis thaliana] gi 332004341 gb AED91724.1  self-incompatibility S1 family protein [Arabidopsis thaliana]                                                                              | 172  | 175  | 3.00E-68  | 101.7 | 72.7 | 82.0 | self-incompatibility S1 family protein                       | gbpln | Arabidopsis thaliana | AT5G11820.1   Symbols:   Plant self-incompatibility protein S1 family   chr5:3810649-3811176 REVERSE LENGTH=175                                                                                                                                                                                                                                                                                                                                                                                                                              | 172  | 175  | 1.00E-70  | 101.7 | 72.7 | 82.0 |
| Rsa1.0_00310.1.g11057.t1 | gb EOA22292.1  hypothetical protein CARUB_v10002889mg [Capsella rubella]                                                                                                                                                                                                                                                 | 581  | 596  | 0         | 102.6 | 87.1 | 91.4 | hypothetical protein CARUB_v10002889mg                       | gbpln | Capsella rubella     | AT5G11800.1   Symbols: KEA6, ATKEA6   K+ efflux antiporter 6   chr5:3803635-3808069 REVERSE LENGTH=597                                                                                                                                                                                                                                                                                                                                                                                                                                       | 581  | 597  | 0         | 102.8 | 84.5 | 87.8 |
| Rsa1.0_00310.1.g11058.t1 | ref NP_568251.1  protein N-MYC downregulated-like 2 [Arabidopsis thaliana] gi 13605684 gb AAK32835.1 AF361823.1 AT5g11790/T22P22_180 [Arabidopsis thaliana] gi 16323346 gb AAL15386.1  AT5g11790/T22P22_180 [Arabidopsis thaliana] gi 332004338 gb AED91721.1  protein N-MYC downregulated-like 2 [Arabidopsis thaliana] | 344  | 344  | 0         | 100.0 | 95.1 | 97.1 | protein N-MYC downregulated-like 2                           | gbpln | Arabidopsis thaliana | AT5G11790.1   Symbols: NDL2   N-MYC downregulated-like 2   chr5:3799682-3802496 FORWARD LENGTH=344                                                                                                                                                                                                                                                                                                                                                                                                                                           | 344  | 344  | 0         | 100.0 | 95.1 | 97.1 |
| Rsa1.0_00311.1.g11059.t1 | ref XP_002863417.1  hypothetical protein ARALYDRAFT_916814 [Arabidopsis lyrata subsp. lyrata] gi 297309252 gb EFH39676.1  hypothetical protein ARALYDRAFT_916814 [Arabidopsis lyrata subsp. lyrata]                                                                                                                      | 778  | 791  | 0         | 101.7 | 90.6 | 95.8 | hypothetical protein ARALYDRAFT_916814                       | gbpln | Arabidopsis lyrata   | AT5G46210.1   Symbols: CUL4, ATCUL4   cullin4   chr5:18731569-18736653 REVERSE LENGTH=792                                                                                                                                                                                                                                                                                                                                                                                                                                                    | 778  | 792  | 0         | 101.8 | 90.0 | 95.0 |
| Rsa1.0_00311.1.g11060.t1 | ref XP_002865203.1  hypothetical protein ARALYDRAFT_494352 [Arabidopsis lyrata subsp. lyrata] gi 297311038 gb EFH41462.1  hypothetical protein ARALYDRAFT_494352 [Arabidopsis lyrata subsp. lyrata]                                                                                                                      | 465  | 462  | 0         | 99.4  | 85.2 | 92.9 | hypothetical protein ARALYDRAFT_494352                       | gbpln | Arabidopsis lyrata   | AT5G46220.1   Symbols:   Protein of unknown function (DUF616)   chr5:18738827-18741964 FORWARD LENGTH=462                                                                                                                                                                                                                                                                                                                                                                                                                                    | 465  | 462  | 0         | 99.4  | 83.9 | 91.6 |



|                          |                                                                                                                                                                                                                                                                                                                                                                                                                                                                                                                                                                                                                                                                                                                                                                                                                                                                                                                                                                                                                                                                                                                                                                                                              |      |      |          |       |      |      |                                                 |       |                      |                                                                                                                                |      |      |           |       |      |      |
|--------------------------|--------------------------------------------------------------------------------------------------------------------------------------------------------------------------------------------------------------------------------------------------------------------------------------------------------------------------------------------------------------------------------------------------------------------------------------------------------------------------------------------------------------------------------------------------------------------------------------------------------------------------------------------------------------------------------------------------------------------------------------------------------------------------------------------------------------------------------------------------------------------------------------------------------------------------------------------------------------------------------------------------------------------------------------------------------------------------------------------------------------------------------------------------------------------------------------------------------------|------|------|----------|-------|------|------|-------------------------------------------------|-------|----------------------|--------------------------------------------------------------------------------------------------------------------------------|------|------|-----------|-------|------|------|
| Rsa1.0_00311.1.g11061.t1 | gb EOA14036.1  hypothetical protein CARUB_v10027170mg [Capsella rubella]                                                                                                                                                                                                                                                                                                                                                                                                                                                                                                                                                                                                                                                                                                                                                                                                                                                                                                                                                                                                                                                                                                                                     | 141  | 197  | 2.00E-64 | 139.7 | 82.3 | 92.9 | hypothetical protein CARUB_v10027170mg          | gbpln | Capsella rubella     | AT5G46230.1   Symbols:   Protein of unknown function, DUF538   chr5:18742593-18743024 REVERSE LENGTH=143                       | 141  | 143  | 2.00E-63  | 101.4 | 78.7 | 88.7 |
| Rsa1.0_00311.1.g11062.t1 | gb AAD19784.1  putative retroelement pol polyprotein [Arabidopsis thaliana]                                                                                                                                                                                                                                                                                                                                                                                                                                                                                                                                                                                                                                                                                                                                                                                                                                                                                                                                                                                                                                                                                                                                  | 1400 | 1501 | 0        | 107.2 | 60.6 | 75.5 | putative retroelement pol polyprotein           | gbpln | Arabidopsis thaliana | AT4G23160.1   Symbols: CRK8   cysteine-rich RLK (RECEPTOR-like protein kinase) 8   chr4:12129485-12134086 FORWARD LENGTH=1262  | 1400 | 1262 | 1.00E-142 | 90.1  | 16.9 | 23.6 |
| Rsa1.0_00311.1.g11063.t1 | ref XP_002863413.1  hypothetical protein ARALYDRAFT_494345 [Arabidopsis lyrata subsp. lyrata] gi 297309248 gb EFH39672.1  hypothetical protein ARALYDRAFT_494345 [Arabidopsis lyrata subsp. lyrata] ref NP_199441.1  3-oxoacyl-[acyl-carrier-protein] synthase I [Arabidopsis thaliana] gi 20141399 sp P52410.2 KASC1_ARATH RecName: Full=3-oxoacyl-[acyl-carrier-protein] synthase I, chloroplastic; AltName: Full=Beta-ketoacyl-ACP synthase I; Short=KAS I; Flags: Precursor gi 10177710 dbj BAB11084.1  3-oxoacyl-[acyl-carrier-protein] synthase I precursor [Arabidopsis thaliana] gi 14335164 gb AAK59862.1  AT5g46290/MPL12.7 [Arabidopsis thaliana] gi 20334810 gb AAM16266.1  AT5g46290/MPL12.7 [Arabidopsis thaliana] gi 21593429 gb AAM65396.1  3-oxoacyl-(acyl-carrier-protein) synthase I precursor (beta-ketoacyl-ACP synthase I) (KAS I) [Arabidopsis thaliana] gi 21703101 gb AAM74493.1  AT5g46290/MPL12.7 [Arabidopsis thaliana] gi 332007980 gb AED95363.1  3-oxoacyl-[acyl-carrier-protein] synthase I [Arabidopsis thaliana] ref XP_002877500.1  predicted protein [Arabidopsis lyrata subsp. lyrata] gi 297323338 gb EFH53759.1  predicted protein [Arabidopsis lyrata subsp. lyrata] | 776  | 776  | 0        | 100.0 | 93.0 | 96.9 | hypothetical protein ARALYDRAFT_494345          | gbpln | Arabidopsis lyrata   | AT5G46280.1   Symbols: MCM3   Minichromosome maintenance (MCM2/3/5) family protein   chr5:18769902-18773606 REVERSE LENGTH=776 | 776  | 776  | 0         | 100.0 | 91.9 | 96.0 |
| Rsa1.0_00311.1.g11064.t1 | gi 14335164 gb AAK59862.1  AT5g46290/MPL12.7 [Arabidopsis thaliana] gi 20334810 gb AAM16266.1  AT5g46290/MPL12.7 [Arabidopsis thaliana] gi 21593429 gb AAM65396.1  3-oxoacyl-(acyl-carrier-protein) synthase I precursor (beta-ketoacyl-ACP synthase I) (KAS I) [Arabidopsis thaliana] gi 21703101 gb AAM74493.1  AT5g46290/MPL12.7 [Arabidopsis thaliana] gi 332007980 gb AED95363.1  3-oxoacyl-[acyl-carrier-protein] synthase I [Arabidopsis thaliana] ref XP_002877500.1  predicted protein [Arabidopsis lyrata subsp. lyrata] gi 297323338 gb EFH53759.1  predicted protein [Arabidopsis lyrata subsp. lyrata]                                                                                                                                                                                                                                                                                                                                                                                                                                                                                                                                                                                          | 493  | 473  | 0        | 95.9  | 86.4 | 86.8 | 3-oxoacyl-                                      | gbpln | Arabidopsis thaliana | AT5G46290.1   Symbols: KASI, KAS1   3-ketoacyl-acyl carrier protein synthase 1   chr5:18774439-18776629 REVERSE LENGTH=473     | 493  | 473  | 0         | 95.9  | 86.4 | 86.8 |
| Rsa1.0_00311.1.g11065.t1 | gi 297323338 gb EFH53759.1  predicted protein [Arabidopsis lyrata subsp. lyrata]                                                                                                                                                                                                                                                                                                                                                                                                                                                                                                                                                                                                                                                                                                                                                                                                                                                                                                                                                                                                                                                                                                                             | 121  | 136  | 4.00E-12 | 112.4 | 25.6 | 40.5 | predicted protein                               | gbpln | Arabidopsis lyrata   | #                                                                                                                              | #    | #    | #         | #     | #    | #    |
| Rsa1.0_00311.1.g11066.t1 | #                                                                                                                                                                                                                                                                                                                                                                                                                                                                                                                                                                                                                                                                                                                                                                                                                                                                                                                                                                                                                                                                                                                                                                                                            | #    | #    | #        | #     | #    | -    | ----                                            | ----  | ----                 | #                                                                                                                              | #    | #    | #         | #     | #    | #    |
| Rsa1.0_00311.1.g11067.t1 | #                                                                                                                                                                                                                                                                                                                                                                                                                                                                                                                                                                                                                                                                                                                                                                                                                                                                                                                                                                                                                                                                                                                                                                                                            | #    | #    | #        | #     | #    | -    | ----                                            | ----  | ----                 | #                                                                                                                              | #    | #    | #         | #     | #    | #    |
| Rsa1.0_00311.1.g11068.t1 | #                                                                                                                                                                                                                                                                                                                                                                                                                                                                                                                                                                                                                                                                                                                                                                                                                                                                                                                                                                                                                                                                                                                                                                                                            | #    | #    | #        | #     | #    | -    | ----                                            | ----  | ----                 | #                                                                                                                              | #    | #    | #         | #     | #    | #    |
| Rsa1.0_00311.1.g11069.t1 | gb EOA26027.1  hypothetical protein CARUB_v10019435mg [Capsella rubella]                                                                                                                                                                                                                                                                                                                                                                                                                                                                                                                                                                                                                                                                                                                                                                                                                                                                                                                                                                                                                                                                                                                                     | 333  | 595  | 6.00E-44 | 178.7 | 28.5 | 39.0 | hypothetical protein CARUB_v10019435mg          | gbpln | Capsella rubella     | AT1G47350.1   Symbols:   F-box associated ubiquitination effector family protein   chr1:17358447-17360722 REVERSE LENGTH=528   | 333  | 528  | 4.00E-13  | 158.6 | 11.1 | 16.8 |
| Rsa1.0_00311.1.g11070.t1 | #                                                                                                                                                                                                                                                                                                                                                                                                                                                                                                                                                                                                                                                                                                                                                                                                                                                                                                                                                                                                                                                                                                                                                                                                            | #    | #    | #        | #     | #    | -    | ----                                            | ----  | ----                 | #                                                                                                                              | #    | #    | #         | #     | #    | #    |
| Rsa1.0_00311.1.g11071.t1 | gb ACI14410.1  WRKY8-1 transcription factor [Brassica napus]                                                                                                                                                                                                                                                                                                                                                                                                                                                                                                                                                                                                                                                                                                                                                                                                                                                                                                                                                                                                                                                                                                                                                 | 576  | 321  | 3.00E-77 | 55.7  | 25.7 | 29.2 | WRKY8-1 transcription factor                    | gbpln | Brassica napus       | AT5G46350.1   Symbols: WRKY8, ATWRKY8   WRKY DNA-binding protein 8   chr5:18801403-18803901 REVERSE LENGTH=326                 | 576  | 326  | 2.00E-71  | 56.6  | 25.3 | 29.9 |
| Rsa1.0_00311.1.g11072.t1 | dbj BAB10743.1  retroelement pol polyprotein-like [Arabidopsis thaliana]                                                                                                                                                                                                                                                                                                                                                                                                                                                                                                                                                                                                                                                                                                                                                                                                                                                                                                                                                                                                                                                                                                                                     | 858  | 1109 | 0        | 129.3 | 51.6 | 67.7 | retroelement pol polyprotein-like               | gbpln | Arabidopsis thaliana | AT4G23160.1   Symbols: CRK8   cysteine-rich RLK (RECEPTOR-like protein kinase) 8   chr4:12129485-12134086 FORWARD LENGTH=1262  | 858  | 1262 | 1.00E-138 | 147.1 | 27.0 | 37.6 |
| Rsa1.0_00312.1.g11073.t1 | ref XP_002870430.1  tRNA pseudouridine synthase family protein [Arabidopsis lyrata subsp. lyrata] gi 297316266 gb EFH46689.1  tRNA pseudouridine synthase family protein [Arabidopsis lyrata subsp. lyrata] ref NP_198389.2  leucine-rich repeat protein kinase-like protein [Arabidopsis thaliana] gi 263505488 sp COLGU0.1 RLK_ARATH RecName: Full=Probable LRR receptor-like serine/threonine-protein kinase RLK; Flags: Precursor gi 224589687 gb ACNS9375.1  leucine-rich repeat receptor-like protein kinase [Arabidopsis thaliana] gi 332006579 gb AED93962.1  probable LRR receptor-like serine/threonine-protein kinase RLK [Arabidopsis thaliana]                                                                                                                                                                                                                                                                                                                                                                                                                                                                                                                                                  | 409  | 420  | 0        | 102.7 | 86.3 | 91.9 | tRNA pseudouridine synthase family protein      | gbpln | Arabidopsis lyrata   | AT5G35400.1   Symbols:   Pseudouridine synthase family protein   chr5:13599416-13602240 REVERSE LENGTH=420                     | 409  | 420  | 0         | 102.7 | 84.4 | 91.2 |
| Rsa1.0_00312.1.g11074.t1 | gi 224589687 gb ACNS9375.1  leucine-rich repeat receptor-like protein kinase [Arabidopsis thaliana] gi 332006579 gb AED93962.1  probable LRR receptor-like serine/threonine-protein kinase RLK [Arabidopsis thaliana]                                                                                                                                                                                                                                                                                                                                                                                                                                                                                                                                                                                                                                                                                                                                                                                                                                                                                                                                                                                        | 677  | 662  | 0        | 97.8  | 76.8 | 85.1 | leucine-rich repeat protein kinase-like protein | gbpln | Arabidopsis thaliana | AT5G35390.1   Symbols:   Leucine-rich repeat protein kinase family protein   chr5:13596918-13598976 FORWARD LENGTH=662         | 677  | 662  | 0         | 97.8  | 76.8 | 85.1 |

|                           |                                                                                                                                                                                                     |      |      |           |       |      |      |                                        |       |                      |                                                                                                                                                                                                                                                                                                                                                                                                                                                                                                                                 |      |      |           |       |      |      |
|---------------------------|-----------------------------------------------------------------------------------------------------------------------------------------------------------------------------------------------------|------|------|-----------|-------|------|------|----------------------------------------|-------|----------------------|---------------------------------------------------------------------------------------------------------------------------------------------------------------------------------------------------------------------------------------------------------------------------------------------------------------------------------------------------------------------------------------------------------------------------------------------------------------------------------------------------------------------------------|------|------|-----------|-------|------|------|
| Rsa1.0_00312.1.g11075.t1  | refXP_002870429.1   kinase family protein [Arabidopsis lyrata subsp. lyrata] g 297316265 gb EFH46688.1   kinase family protein [Arabidopsis lyrata subsp. lyrata]                                   | 716  | 737  | 0         | 102.9 | 79.1 | 87.7 | kinase family protein                  | gbpln | Arabidopsis lyrata   | AT5G35380.1   Symbols:   Protein kinase protein with adenine nucleotide alpha hydrolases-like domain   chr5:13593429-13596293 REVERSE LENGTH=731                                                                                                                                                                                                                                                                                                                                                                                | 716  | 731  | 0         | 102.1 | 78.1 | 87.2 |
| Rsa1.0_00312.1.g11076.t2  | dbj BAA97087.1   copia-type pol polyprotein-like [Arabidopsis thaliana]                                                                                                                             | 1212 | 1123 | 0         | 92.7  | 52.9 | 58.6 | copia-type pol polyprotein-like        | gbpln | Arabidopsis thaliana | AT4G23160.1   Symbols: CRK8   cysteine-rich RLK (RECEPTOR-like protein kinase) 8   chr4:12129485-12134086 FORWARD LENGTH=1262                                                                                                                                                                                                                                                                                                                                                                                                   | 1212 | 1262 | 2.00E-57  | 104.1 | 13.5 | 21.0 |
| Rsa1.0_00312.1.g11077.t1  | #                                                                                                                                                                                                   | #    | #    | #         | #     | #    | #    | -                                      | ----  | ----                 | #                                                                                                                                                                                                                                                                                                                                                                                                                                                                                                                               | #    | #    | #         | #     | #    |      |
| Rsa1.0_00312.1.g11078.t3  | refXP_002869784.1   hypothetical protein ARALYDRAFT_492546 [Arabidopsis lyrata subsp. lyrata] g 297315620 gb EFH46043.1   hypothetical protein ARALYDRAFT_492546 [Arabidopsis lyrata subsp. lyrata] | 500  | 662  | 1.00E-152 | 132.4 | 51.4 | 56.2 | hypothetical protein ARALYDRAFT_492546 | gbpln | Arabidopsis lyrata   | AT4G23180.1   Symbols: CRK10, RLK4   cysteine-rich RLK (RECEPTOR-like protein kinase) 10   chr4:12138171-12140780 FORWARD LENGTH=669                                                                                                                                                                                                                                                                                                                                                                                            | 500  | 669  | 1.00E-155 | 133.8 | 51.0 | 56.4 |
| Rsa1.0_00312.1.g11079.t1  | refXP_002870426.1   hypothetical protein ARALYDRAFT_915661 [Arabidopsis lyrata subsp. lyrata] g 297316262 gb EFH46685.1   hypothetical protein ARALYDRAFT_915661 [Arabidopsis lyrata subsp. lyrata] | 260  | 278  | 2.00E-93  | 106.9 | 65.8 | 76.5 | hypothetical protein ARALYDRAFT_915661 | gbpln | Arabidopsis lyrata   | AT5G35330.3   Symbols: MBD02   methyl-CPG-binding domain protein 02   chr5:13523725-13528270 REVERSE LENGTH=272                                                                                                                                                                                                                                                                                                                                                                                                                 | 260  | 272  | 3.00E-94  | 104.6 | 65.0 | 76.2 |
| Rsa1.0_00312.1.g11080.t1  | refXP_002870422.1   hypothetical protein ARALYDRAFT_915653 [Arabidopsis lyrata subsp. lyrata] g 297316258 gb EFH46681.1   hypothetical protein ARALYDRAFT_915653 [Arabidopsis lyrata subsp. lyrata] | 560  | 547  | 0         | 97.7  | 86.4 | 89.8 | hypothetical protein ARALYDRAFT_915653 | gbpln | Arabidopsis lyrata   | AT5G35200.1   Symbols:   ENTH/ANTH/VHS superfamily protein   chr5:13462463-13465581 REVERSE LENGTH=544                                                                                                                                                                                                                                                                                                                                                                                                                          | 560  | 544  | 0         | 97.1  | 85.9 | 89.8 |
| Rsa1.0_00312.1.g11081.t1  | #                                                                                                                                                                                                   | #    | #    | #         | #     | #    | #    | -                                      | ----  | ----                 | #                                                                                                                                                                                                                                                                                                                                                                                                                                                                                                                               | #    | #    | #         | #     | #    |      |
| Rsa1.0_00312.1.g11082.t20 | refXP_002868408.1   adenylate kinase family protein [Arabidopsis lyrata subsp. lyrata] g 297314244 gb EFH44667.1   adenylate kinase family protein [Arabidopsis lyrata subsp. lyrata]               | 457  | 595  | 0         | 130.2 | 91.2 | 95.6 | adenylate kinase family protein        | gbpln | Arabidopsis lyrata   | AT5G35170.1   Symbols:   adenylate kinase family protein   chr5:13419278-13423482 FORWARD LENGTH=588                                                                                                                                                                                                                                                                                                                                                                                                                            | 457  | 588  | 0         | 128.7 | 90.2 | 95.2 |
| Rsa1.0_00312.1.g11083.t1  | gb AFK13856.1   Ty3/gypsy retrotransposon protein [Beta vulgaris subsp. vulgaris]                                                                                                                   | 1579 | 1631 | 0         | 103.3 | 46.5 | 62.9 | Ty3/gypsy retrotransposon protein      | gbpln | Beta vulgaris        | ATMG00860.1   Symbols: ORF158   DNA/RNA polymerases superfamily protein   chrM:235916-236392 FORWARD LENGTH=158                                                                                                                                                                                                                                                                                                                                                                                                                 | 1579 | 158  | 2.00E-37  | 10.0  | 4.6  | 6.0  |
| Rsa1.0_00313.1.g11084.t1  | refXP_002876359.1   hypothetical protein ARALYDRAFT_348712 [Arabidopsis lyrata subsp. lyrata] g 297322197 gb EFH52618.1   hypothetical protein ARALYDRAFT_348712 [Arabidopsis lyrata subsp. lyrata] | 290  | 362  | 1.00E-122 | 124.8 | 71.0 | 83.4 | hypothetical protein ARALYDRAFT_348712 | gbpln | Arabidopsis lyrata   | AT2G40580.1   Symbols:   Protein kinase superfamily protein   chr2:16943964-16944899 FORWARD LENGTH=311                                                                                                                                                                                                                                                                                                                                                                                                                         | 290  | 311  | 1.00E-44  | 107.2 | 39.3 | 55.9 |
| Rsa1.0_00313.1.g11085.t2  | refXP_002878078.1   predicted protein [Arabidopsis lyrata subsp. lyrata] g 297323916 gb EFH54337.1   predicted protein [Arabidopsis lyrata subsp. lyrata]                                           | 524  | 602  | 0         | 114.9 | 72.7 | 84.5 | predicted protein                      | gbpln | Arabidopsis lyrata   | AT3G56320.1   Symbols:   PAP/OAS1 substrate-binding domain superfamily   chr3:20886193-20888624 REVERSE LENGTH=603                                                                                                                                                                                                                                                                                                                                                                                                              | 524  | 603  | 0         | 115.1 | 72.5 | 83.8 |
| Rsa1.0_00313.1.g11086.t1  | gb EOA28112.1   hypothetical protein CARUB_v10024308mg [Capsella rubella]                                                                                                                           | 175  | 131  | 2.00E-60  | 74.9  | 65.1 | 65.7 | hypothetical protein CARUB_v10024308mg | gbpln | Capsella rubella     | AT2G40510.1   Symbols:   Ribosomal protein S26e family protein   chr2:16918506-16919623 FORWARD LENGTH=133                                                                                                                                                                                                                                                                                                                                                                                                                      | 175  | 133  | 9.00E-63  | 76.0  | 65.1 | 65.7 |
| Rsa1.0_00313.1.g11087.t1  | refXP_002876363.1   hypothetical protein ARALYDRAFT_907078 [Arabidopsis lyrata subsp. lyrata] g 297322201 gb EFH52622.1   hypothetical protein ARALYDRAFT_907078 [Arabidopsis lyrata subsp. lyrata] | 224  | 233  | 5.00E-82  | 104.0 | 79.0 | 86.6 | hypothetical protein ARALYDRAFT_907078 | gbpln | Arabidopsis lyrata   | AT3G56360.1   Symbols:   unknown protein; FUNCTIONS IN: molecular.function unknown; INVOLVED IN: biological.process unknown; LOCATED IN: chloroplast; EXPRESSED IN: 24 plant structures; EXPRESSED DURING: 15 growth stages; BEST Arabidopsis thaliana protein match is: unknown protein (TAIR:AT5G05250.1); Has 45 Blast hits to 45 proteins in 13 species: Archae - 0; Bacteria - 0; Metazoa - 0; Fungi - 0; Plants - 45; Viruses - 0; Other Eukaryotes - 0 (source: NCBI BLINK).   chr3:20896641-20897342 FORWARD LENGTH=233 | 224  | 233  | 1.00E-81  | 104.0 | 76.8 | 86.2 |

|                          |                                                                                                                                                                                                                                                                                                                                                            |      |      |           |       |      |      |                                               |       |                      |                                                                                                                                                     |      |      |           |       |      |      |
|--------------------------|------------------------------------------------------------------------------------------------------------------------------------------------------------------------------------------------------------------------------------------------------------------------------------------------------------------------------------------------------------|------|------|-----------|-------|------|------|-----------------------------------------------|-------|----------------------|-----------------------------------------------------------------------------------------------------------------------------------------------------|------|------|-----------|-------|------|------|
| Rsa1.0_00313.1.g11088.t1 | refNP_567037.1   two-component response regulator ARR17 [Arabidopsis thaliana]<br>gi51316089 sp Q9FPR6.1 ARR17_ARAT H RecName: Full=Two-component response regulator ARR17<br>gi11870071 gb AA40613.1 AF305722.1 response regulator 17 [Arabidopsis thaliana]<br>gi332645994 gb AEE79515.1   two-component response regulator ARR17 [Arabidopsis thaliana] | 127  | 153  | 3.00E-54  | 120.5 | 89.8 | 93.7 | two-component response regulator ARR17        | gbpln | Arabidopsis thaliana | AT3G56380.1   Symbols: ARR17, RR17   response regulator 17   chr3:20905480-20906368 FORWARD LENGTH=153                                              | 127  | 153  | 6.00E-57  | 120.5 | 89.8 | 93.7 |
| Rsa1.0_00313.1.g11089.t1 | #                                                                                                                                                                                                                                                                                                                                                          | #    | #    | #         | #     | #    | #    | -                                             | ----  | ----                 | #                                                                                                                                                   | #    | #    | #         | #     | #    | #    |
| Rsa1.0_00313.1.g11090.t2 | refXP_002876365.1   predicted protein [Arabidopsis lyrata subsp. lyrata]<br>gi297322203 gb EFH52624.1   predicted protein [Arabidopsis lyrata subsp. lyrata]                                                                                                                                                                                               | 260  | 268  | 4.00E-79  | 103.1 | 64.2 | 74.6 | predicted protein                             | gbpln | Arabidopsis lyrata   | AT2G40740.1   Symbols: WRKY55, ATWRKY55   WRKY DNA-binding protein 55   chr2:16997177-16999276 FORWARD LENGTH=292                                   | 260  | 292  | 3.00E-62  | 112.3 | 55.4 | 69.2 |
| Rsa1.0_00313.1.g11091.t1 | #                                                                                                                                                                                                                                                                                                                                                          | #    | #    | #         | #     | #    | #    | -                                             | ----  | ----                 | #                                                                                                                                                   | #    | #    | #         | #     | #    | #    |
| Rsa1.0_00313.1.g11092.t1 | gb ACQ76810.1  WRKY transcription factor 70 [Brassica napus]                                                                                                                                                                                                                                                                                               | 268  | 276  | 1.00E-107 | 103.0 | 77.6 | 86.6 | WRKY transcription factor 70                  | gbpln | Brassica napus       | AT3G56400.1   Symbols: WRKY70, ATWRKY70   WRKY DNA-binding protein 70   chr3:20909082-20910409 REVERSE LENGTH=294                                   | 268  | 294  | 5.00E-93  | 109.7 | 67.2 | 78.7 |
| Rsa1.0_00313.1.g11093.t1 | #                                                                                                                                                                                                                                                                                                                                                          | #    | #    | #         | #     | #    | #    | -                                             | ----  | ----                 | #                                                                                                                                                   | #    | #    | #         | #     | #    | #    |
| Rsa1.0_00313.1.g11094.t1 | gb AAG51783.1 AC079679.3 reverse transcriptase, putative; 16838-20266 [Arabidopsis thaliana]                                                                                                                                                                                                                                                               | 447  | 1142 | 1.00E-113 | 255.5 | 48.3 | 64.4 | reverse transcriptase, putative; 16838-20266  | gbpln | Arabidopsis thaliana | AT4G20909.1   Symbols:   Ribonuclease H-like superfamily protein   chr4:1433528-14335255 FORWARD LENGTH=575                                         | 447  | 575  | 1.00E-36  | 128.6 | 28.4 | 47.9 |
| Rsa1.0_00313.1.g11095.t1 | gb EOA24904.1  hypothetical protein CARUB_v10018194mg [Capsella rubella]                                                                                                                                                                                                                                                                                   | 130  | 147  | 5.00E-67  | 113.1 | 96.9 | 99.2 | hypothetical protein CARUB_v10018194mg        | gbpln | Capsella rubella     | AT3G56490.1   Symbols: HIT3, HINT1   HIS triad family protein 3   chr3:20941532-20943129 FORWARD LENGTH=147                                         | 130  | 147  | 1.00E-69  | 113.1 | 97.7 | 98.5 |
| Rsa1.0_00313.1.g11096.t1 | refNP_191209.1   serine-rich protein-like protein [Arabidopsis thaliana]<br>gi7594528 emb CAB88053.1   putative protein [Arabidopsis thaliana]<br>gi332646007 gb AEE79528.1   serine-rich protein-like protein [Arabidopsis thaliana]                                                                                                                      | 111  | 110  | 2.00E-37  | 99.1  | 77.5 | 81.1 | serine-rich protein-like protein              | gbpln | Arabidopsis thaliana | AT3G56500.1   Symbols:   serine-rich protein-related   chr3:20943638-20943970 FORWARD LENGTH=110                                                    | 111  | 110  | 3.00E-40  | 99.1  | 77.5 | 81.1 |
| Rsa1.0_00313.1.g11097.t1 | refXP_002878090.1   hypothetical protein ARALYDRAFT_486092 [Arabidopsis lyrata subsp. lyrata]<br>gi297323928 gb EFH54349.1   hypothetical protein ARALYDRAFT_486092 [Arabidopsis lyrata subsp. lyrata]                                                                                                                                                     | 151  | 256  | 2.00E-20  | 169.5 | 32.5 | 34.4 | hypothetical protein ARALYDRAFT_486092        | gbpln | Arabidopsis lyrata   | AT3G56510.2   Symbols:   RNA-binding (RBM/RBD/RNP motifs) family protein   chr3:20944348-20946235 REVERSE LENGTH=257                                | 151  | 257  | 2.00E-21  | 170.2 | 31.1 | 33.8 |
| Rsa1.0_00313.1.g11098.t1 | refXP_002878093.1   hypothetical protein ARALYDRAFT_486095 [Arabidopsis lyrata subsp. lyrata]<br>gi297323931 gb EFH54352.1   hypothetical protein ARALYDRAFT_486095 [Arabidopsis lyrata subsp. lyrata]                                                                                                                                                     | 538  | 301  | 1.00E-53  | 55.9  | 20.4 | 24.7 | hypothetical protein ARALYDRAFT_486095        | gbpln | Arabidopsis lyrata   | AT3G56530.1   Symbols: anac064, NAC064   NAC domain containing protein 64   chr3:20948911-20950045 REVERSE LENGTH=319                               | 538  | 319  | 1.00E-50  | 59.3  | 21.9 | 26.4 |
| Rsa1.0_00313.1.g11099.t1 | #                                                                                                                                                                                                                                                                                                                                                          | #    | #    | #         | #     | #    | #    | -                                             | ----  | ----                 | AT1G75950.1   Symbols: SKP1, ASK1, ATSKP1, SKP1A, UIP1   S phase kinase-associated protein 1   chr1:28516715-28517454 FORWARD LENGTH=160            | 128  | 160  | 8.00E-13  | 125.0 | 26.6 | 28.1 |
| Rsa1.0_00313.1.g11100.t1 | #                                                                                                                                                                                                                                                                                                                                                          | #    | #    | #         | #     | #    | #    | -                                             | ----  | ----                 | #                                                                                                                                                   | #    | #    | #         | #     | #    | #    |
| Rsa1.0_00314.1.g11101.t1 | #                                                                                                                                                                                                                                                                                                                                                          | #    | #    | #         | #     | #    | #    | -                                             | ----  | ----                 | #                                                                                                                                                   | #    | #    | #         | #     | #    | #    |
| Rsa1.0_00314.1.g11102.t1 | dbj BAD11207.1  multidrug resistance-associated protein [Thlaspi caerulescens]                                                                                                                                                                                                                                                                             | 1496 | 1514 | 0         | 101.2 | 88.6 | 92.8 | multidrug resistance-associated protein       | gbpln | Thlaspi caerulescens | AT3G13080.1   Symbols: ATMTP3, MRP3, ABCG3   multidrug resistance-associated protein 3   chr3:4196019-4201250 REVERSE LENGTH=1514                   | 1496 | 1514 | 0         | 101.2 | 86.8 | 92.4 |
| Rsa1.0_00314.1.g11103.t1 | #                                                                                                                                                                                                                                                                                                                                                          | #    | #    | #         | #     | #    | #    | -                                             | ----  | ----                 | #                                                                                                                                                   | #    | #    | #         | #     | #    | #    |
| Rsa1.0_00314.1.g11104.t1 | refXP_002884940.1   CBS domain-containing protein [Arabidopsis lyrata subsp. lyrata]<br>gi297330780 gb EFH61199.1   CBS domain-containing protein [Arabidopsis lyrata subsp. lyrata]                                                                                                                                                                       | 661  | 660  | 0         | 99.8  | 88.7 | 92.6 | CBS domain-containing protein                 | gbpln | Arabidopsis lyrata   | AT3G13070.1   Symbols:   CBS domain-containing protein / transporter associated domain-containing protein   chr3:4191511-4195112 REVERSE LENGTH=661 | 661  | 661  | 0         | 100.0 | 89.6 | 92.6 |
| Rsa1.0_00314.1.g11105.t1 | refNP_566443.1   lipid-binding START domain-containing protein [Arabidopsis thaliana]<br>gi14334998 gb AAK59763.1   At3g13062 [Arabidopsis thaliana]<br>gi22137180 gb AAM91435.1   At3g13062 [Arabidopsis thaliana]<br>gi332641767 gb AEE75288.1   lipid-binding START domain-containing protein [Arabidopsis thaliana]                                    | 478  | 403  | 1.00E-177 | 84.3  | 60.0 | 64.0 | lipid-binding START domain-containing protein | gbpln | Arabidopsis thaliana | AT3G13062.1   Symbols:   Polyketide cyclase/dehydrase and lipid transport superfamily protein   chr3:4184777-4186795 FORWARD LENGTH=403             | 478  | 403  | 1.00E-180 | 84.3  | 60.0 | 64.0 |

|                          |                                                                                                                                                                                                                                                                                                                     |      |      |           |       |      |      |                                                                |       |                      |                                                                                                                                                                                                                                                                                                                                                        |      |      |           |       |      |      |
|--------------------------|---------------------------------------------------------------------------------------------------------------------------------------------------------------------------------------------------------------------------------------------------------------------------------------------------------------------|------|------|-----------|-------|------|------|----------------------------------------------------------------|-------|----------------------|--------------------------------------------------------------------------------------------------------------------------------------------------------------------------------------------------------------------------------------------------------------------------------------------------------------------------------------------------------|------|------|-----------|-------|------|------|
| Rsa1.0_00314.1.g11106.t1 | refXP_002879596.1  40S ribosomal protein S14 [Arabidopsis lyrata subsp. lyrata] gi 297325435 gb EFH55855.1  40S ribosomal protein S14 [Arabidopsis lyrata subsp. lyrata]                                                                                                                                            | 188  | 151  | 3.00E-17  | 80.3  | 25.5 | 26.6 | 40S ribosomal protein S14                                      | gbpln | Arabidopsis lyrata   | AT3G11510.1   Symbols:   Ribosomal protein S11 family protein   chr3:3623757-3624866 REVERSE LENGTH=150                                                                                                                                                                                                                                                | 188  | 150  | 1.00E-19  | 79.8  | 25.5 | 26.6 |
| Rsa1.0_00314.1.g11107.t1 | gb EOA32797.1  hypothetical protein CARUB_v10016107mg [Capsella rubella]                                                                                                                                                                                                                                            | 502  | 500  | 0         | 99.6  | 83.9 | 90.8 | hypothetical protein CARUB_v10016107mg                         | gbpln | Capsella rubella     | AT3G13050.1   Symbols:   Major facilitator superfamily protein   chr3:4176866-4178668 FORWARD LENGTH=500                                                                                                                                                                                                                                               | 502  | 500  | 0         | 99.6  | 83.7 | 90.6 |
| Rsa1.0_00314.1.g11108.t1 | gb EOA30570.1  hypothetical protein CARUB_v10013698mg [Capsella rubella]                                                                                                                                                                                                                                            | 431  | 446  | 1.00E-177 | 103.5 | 79.6 | 86.5 | hypothetical protein CARUB_v10013698mg                         | gbpln | Capsella rubella     | AT3G13040.2   Symbols:   myb-like HTH transcriptional regulator family protein   chr3:4172415-4174456 REVERSE LENGTH=449                                                                                                                                                                                                                               | 431  | 449  | 1.00E-176 | 104.2 | 79.4 | 86.3 |
| Rsa1.0_00314.1.g11109.t1 | refNP_187908.1  hAT dimerization domain-containing protein [Arabidopsis thaliana] gi 15795134 dbj BAB02512.1  transposase-like protein [Arabidopsis thaliana] gi 332641756 gb AEE75277.1  hAT dimerization domain-containing protein [Arabidopsis thaliana]                                                         | 590  | 605  | 0         | 102.5 | 60.5 | 75.9 | hAT dimerization domain-containing protein                     | gbpln | Arabidopsis thaliana | AT3G13020.1   Symbols:   hAT transposon superfamily protein   chr3:4166995-4168917 REVERSE LENGTH=605                                                                                                                                                                                                                                                  | 590  | 605  | 0         | 102.5 | 60.5 | 75.9 |
| Rsa1.0_00314.1.g11110.t1 | dbj BAJ33667.1  unnamed protein product [Thellungiella halophila]                                                                                                                                                                                                                                                   | 575  | 590  | 0         | 102.6 | 89.2 | 93.0 | unnamed protein product                                        | ----  | ----                 | AT3G13000.2   Symbols:   Protein of unknown function, DUF547   chr3:4158214-4160989 REVERSE LENGTH=582                                                                                                                                                                                                                                                 | 575  | 582  | 0         | 101.2 | 87.7 | 92.7 |
| Rsa1.0_00314.1.g11111.t1 | refXP_002882800.1  histone acetyltransferase 5 [Arabidopsis lyrata subsp. lyrata] gi 297328640 gb EFH59059.1  histone acetyltransferase 5 [Arabidopsis lyrata subsp. lyrata]                                                                                                                                        | 1649 | 1657 | 0         | 100.5 | 81.4 | 87.1 | histone acetyltransferase 5                                    | gbpln | Arabidopsis lyrata   | AT3G12980.1   Symbols: HAC5, ATHPCAT4   histone acetyltransferase of the CBP family 5   chr3:4146919-4154495 FORWARD LENGTH=1670                                                                                                                                                                                                                       | 1649 | 1670 | 0         | 101.3 | 80.8 | 87.5 |
| Rsa1.0_00314.1.g11112.t1 | refNP_001030683.2  no apical meristem-domain containing transcriptional regulator [Arabidopsis thaliana] gi 15795128 dbj BAB02506.1  NAM (no apical meristem) protein-like [Arabidopsis thaliana] gi 332641748 gb AEE75269.1  no apical meristem-domain containing transcriptional regulator [Arabidopsis thaliana] | 275  | 279  | 1.00E-125 | 101.5 | 79.6 | 86.9 | no apical meristem-domain containing transcriptional regulator | gbpln | Arabidopsis thaliana | AT3G12977.1   Symbols:   NAC (No Apical Meristem) domain transcriptional regulator superfamily protein   chr3:4143832-4145860 FORWARD LENGTH=279                                                                                                                                                                                                       | 275  | 279  | 1.00E-128 | 101.5 | 79.6 | 86.9 |
| Rsa1.0_00314.1.g11113.t1 | refXP_002884935.1  hypothetical protein ARALYDRAFT_897507 [Arabidopsis lyrata subsp. lyrata] gi 297330775 gb EFH61194.1  hypothetical protein ARALYDRAFT_897507 [Arabidopsis lyrata subsp. lyrata]                                                                                                                  | 325  | 385  | 3.00E-97  | 118.5 | 72.6 | 79.1 | hypothetical protein ARALYDRAFT_897507                         | gbpln | Arabidopsis lyrata   | AT3G12970.1   Symbols:   unknown protein; BEST Arabidopsis thaliana protein match is: unknown protein (TAIR:AT1G56020.1); Has 2408 Blast hits to 418 proteins in 91 species: Archae - 0; Bacteria - 41; Metazoa - 198; Fungi - 63; Plants - 125; Viruses - 13; Other Eukaryotes - 1968 (source: NCBI BLink).   chr3:4141329-4142474 REVERSE LENGTH=381 | 325  | 381  | 2.00E-99  | 117.2 | 74.5 | 80.0 |
| Rsa1.0_00314.1.g11114.t1 | # # # # # # # -                                                                                                                                                                                                                                                                                                     |      |      |           |       |      |      |                                                                | ----  | ----                 | #                                                                                                                                                                                                                                                                                                                                                      | #    | #    | #         | #     | #    | #    |
| Rsa1.0_00314.1.g11115.t1 | refXP_002884932.1  protein binding protein [Arabidopsis lyrata subsp. lyrata] gi 297330772 gb EFH61191.1  protein binding protein [Arabidopsis lyrata subsp. lyrata]                                                                                                                                                | 342  | 333  | 1.00E-135 | 97.4  | 74.0 | 81.9 | protein binding protein                                        | gbpln | Arabidopsis lyrata   | AT3G12920.1   Symbols:   SBP (S-ribonuclease binding protein) family protein   chr3:4122127-4123323 REVERSE LENGTH=335                                                                                                                                                                                                                                 | 342  | 335  | 1.00E-137 | 98.0  | 73.7 | 82.2 |
| Rsa1.0_00314.1.g11116.t1 | # # # # # # # -                                                                                                                                                                                                                                                                                                     |      |      |           |       |      |      |                                                                | ----  | ----                 | #                                                                                                                                                                                                                                                                                                                                                      | #    | #    | #         | #     | #    | #    |
| Rsa1.0_00314.1.g11117.t1 | refXP_002882795.1  transcription factor [Arabidopsis lyrata subsp. lyrata] gi 297328635 gb EFH59054.1  transcription factor [Arabidopsis lyrata subsp. lyrata]                                                                                                                                                      | 304  | 303  | 1.00E-142 | 99.7  | 83.6 | 89.5 | transcription factor                                           | gbpln | Arabidopsis lyrata   | AT3G12910.1   Symbols:   NAC (No Apical Meristem) domain transcriptional regulator superfamily protein   chr3:4109417-4110648 FORWARD LENGTH=303                                                                                                                                                                                                       | 304  | 303  | 1.00E-140 | 99.7  | 81.3 | 87.8 |
| Rsa1.0_00314.1.g11118.t1 | refXP_002882794.1  oxidoreductase [Arabidopsis lyrata subsp. lyrata] gi 297328634 gb EFH59053.1  oxidoreductase [Arabidopsis lyrata subsp. lyrata]                                                                                                                                                                  | 360  | 357  | 0         | 99.2  | 86.9 | 93.1 | oxidoreductase                                                 | gbpln | Arabidopsis lyrata   | AT3G12900.1   Symbols:   2-oxoglutarate (2OG) and Fe(II)-dependent oxygenase superfamily protein   chr3:4104576-4106112 FORWARD LENGTH=357                                                                                                                                                                                                             | 360  | 357  | 0         | 99.2  | 85.3 | 92.2 |
| Rsa1.0_00314.1.g11119.t1 | refXP_002882793.1  hypothetical protein ARALYDRAFT_478650 [Arabidopsis lyrata subsp. lyrata] gi 297328633 gb EFH59052.1  hypothetical protein ARALYDRAFT_478650 [Arabidopsis lyrata subsp. lyrata]                                                                                                                  | 250  | 251  | 1.00E-113 | 100.4 | 80.0 | 88.4 | hypothetical protein ARALYDRAFT_478650                         | gbpln | Arabidopsis lyrata   | AT3G12890.1   Symbols: ASML2   activator of spomin:LUC2   chr3:4099223-4100277 FORWARD LENGTH=251                                                                                                                                                                                                                                                      | 250  | 251  | 1.00E-114 | 100.4 | 78.8 | 87.2 |
| Rsa1.0_00315.1.g11120.t1 | gb EOA27345.1  hypothetical protein CARUB_v10023459mg [Capsella rubella]                                                                                                                                                                                                                                            | 284  | 372  | 1.00E-126 | 131.0 | 85.9 | 90.8 | hypothetical protein CARUB_v10023459mg                         | gbpln | Capsella rubella     | AT2G46590.2   Symbols: DAG2   Dof-type zinc finger DNA-binding family protein   chr2:19133166-19134905 FORWARD LENGTH=369                                                                                                                                                                                                                              | 284  | 369  | 1.00E-115 | 129.9 | 85.2 | 90.5 |

|                          |                                                                                                                                                                                                                                                                                                                                                                                                                                                                                                                                                                                                                                                                                           |      |      |           |       |      |      |                                                                  |       |                      |                                                                                                                                                                                                                                                                                                                                                                                                                                                                                                                                                                                                                                                                                                                                                                                                                                                                 |      |     |           |       |      |      |
|--------------------------|-------------------------------------------------------------------------------------------------------------------------------------------------------------------------------------------------------------------------------------------------------------------------------------------------------------------------------------------------------------------------------------------------------------------------------------------------------------------------------------------------------------------------------------------------------------------------------------------------------------------------------------------------------------------------------------------|------|------|-----------|-------|------|------|------------------------------------------------------------------|-------|----------------------|-----------------------------------------------------------------------------------------------------------------------------------------------------------------------------------------------------------------------------------------------------------------------------------------------------------------------------------------------------------------------------------------------------------------------------------------------------------------------------------------------------------------------------------------------------------------------------------------------------------------------------------------------------------------------------------------------------------------------------------------------------------------------------------------------------------------------------------------------------------------|------|-----|-----------|-------|------|------|
| Rsa1.0_00315.1.g11121.t4 | refNP_182185.2   P-loop containing nucleoside triphosphate hydrolase-like protein [Arabidopsis thaliana]<br>gi 330255636 gb AEC10730.1   P-loop containing nucleoside triphosphate hydrolase-like protein [Arabidopsis thaliana]                                                                                                                                                                                                                                                                                                                                                                                                                                                          | 483  | 491  | 0         | 101.7 | 86.5 | 91.7 | P-loop containing nucleoside triphosphate hydrolase-like protein | gbpln | Arabidopsis thaliana | AT2G46620.1   Symbols:   P-loop containing nucleoside triphosphate hydrolases superfamily protein   chr2:19139071-19140546 REVERSE LENGTH=491                                                                                                                                                                                                                                                                                                                                                                                                                                                                                                                                                                                                                                                                                                                   | 483  | 491 | 0         | 101.7 | 86.5 | 91.7 |
| Rsa1.0_00315.1.g11122.t1 | refNP_182186.1   uncharacterized protein [Arabidopsis thaliana]<br>gi 3831447 gb AAC69930.1   putative extensin [Arabidopsis thaliana]<br>gi 20197778 gb AAM15241.1   putative extensin [Arabidopsis thaliana]<br>gi 330255637 gb AEC10731.1   uncharacterized protein AT2G46630 [Arabidopsis thaliana]                                                                                                                                                                                                                                                                                                                                                                                   | 372  | 394  | 1.00E-101 | 105.9 | 73.1 | 79.0 | uncharacterized protein                                          | gbpln | Arabidopsis thaliana | AT2G46630.1   Symbols:   unknown protein; LOCATED IN: chloroplast; EXPRESSED IN: 22 plant structures; EXPRESSED DURING: 13 growth stages; Has 110095 Blast hits to 59224 proteins in 2216 species: Archae - 177; Bacteria - 15429; Metazoa - 38345; Fungi - 18843; Plants - 13341; Viruses - 3084; Other Eukaryotes - 20876 (source: NCBI BLink).   chr2:19145529-19146713 FORWARD LENGTH=394<br>AT2G46640.2   Symbols:   unknown protein; FUNCTIONS IN: molecular function unknown; INVOLVED IN: biological process unknown; LOCATED IN: cellular component unknown; EXPRESSED IN: 20 plant structures; EXPRESSED DURING: 11 growth stages; Has 26 Blast hits to 26 proteins in 11 species: Archae - 0; Bacteria - 0; Metazoa - 2; Fungi - 0; Plants - 23; Viruses - 0; Other Eukaryotes - 1 (source: NCBI BLink).   chr2:19148792-19150751 FORWARD LENGTH=281 | 372  | 394 | 1.00E-103 | 105.9 | 73.1 | 79.0 |
| Rsa1.0_00315.1.g11123.t1 | refNP_001078070.1   uncharacterized protein [Arabidopsis thaliana]<br>gi 330255639 gb AEC10733.1   uncharacterized protein AT2G46640 [Arabidopsis thaliana]                                                                                                                                                                                                                                                                                                                                                                                                                                                                                                                               | 268  | 281  | 2.00E-88  | 104.9 | 69.4 | 79.9 | uncharacterized protein                                          | gbpln | Arabidopsis thaliana | AT2G46650.1   Symbols: B5 #1, ATCB5-C, CB5-C   cytochrome B5 isoform C   chr2:19151807-19152394 FORWARD LENGTH=132                                                                                                                                                                                                                                                                                                                                                                                                                                                                                                                                                                                                                                                                                                                                              | 268  | 281 | 6.00E-91  | 104.9 | 69.4 | 79.9 |
| Rsa1.0_00315.1.g11124.t1 | refXP_002880257.1   B5 #1 [Arabidopsis lyrata subsp. lyrata]<br>gi 297326096 gb EFH56516.1   B5 #1 [Arabidopsis lyrata subsp. lyrata]                                                                                                                                                                                                                                                                                                                                                                                                                                                                                                                                                     | 134  | 132  | 6.00E-63  | 98.5  | 86.6 | 91.8 | B5 #1                                                            | gbpln | Arabidopsis lyrata   | AT2G46660.1   Symbols: CYP78A6   cytochrome P450, family 78, subfamily A, polypeptide 6   chr2:19153602-19155417 REVERSE LENGTH=530                                                                                                                                                                                                                                                                                                                                                                                                                                                                                                                                                                                                                                                                                                                             | 134  | 132 | 9.00E-59  | 98.5  | 86.6 | 92.5 |
| Rsa1.0_00315.1.g11125.t1 | refXP_002882080.1   CYP78A6 [Arabidopsis lyrata subsp. lyrata]<br>gi 297327919 gb EFH58339.1   CYP78A6 [Arabidopsis lyrata subsp. lyrata]                                                                                                                                                                                                                                                                                                                                                                                                                                                                                                                                                 | 449  | 530  | 0         | 118.0 | 91.1 | 95.5 | CYP78A6                                                          | gbpln | Arabidopsis lyrata   | AT5G64840.1   Symbols: GCN5, ATGCN5   general control non-repressible 5   chr5:25916956-25919693 REVERSE LENGTH=692                                                                                                                                                                                                                                                                                                                                                                                                                                                                                                                                                                                                                                                                                                                                             | 449  | 530 | 0         | 118.0 | 90.4 | 94.9 |
| Rsa1.0_00315.1.g11126.t2 | #                                                                                                                                                                                                                                                                                                                                                                                                                                                                                                                                                                                                                                                                                         | #    | #    | #         | #     | #    | #    | -                                                                | ----  | ----                 |                                                                                                                                                                                                                                                                                                                                                                                                                                                                                                                                                                                                                                                                                                                                                                                                                                                                 | 91   | 692 | 7.00E-11  | 760.4 | 35.2 | 39.6 |
| Rsa1.0_00315.1.g11127.t1 | refNP_182191.1   homeobox-leucine zipper protein ATHB-7 [Arabidopsis thaliana]<br>gi 21431751 sp P46897.2 ATHB7_ARAT H RecName: Full=Homeobox-leucine zipper protein ATHB-7; AltName: Full=HD-ZIP protein ATHB-7; AltName: Full=Homeodomain transcription factor ATHB-7   gi 3831442 gb AAC69925.1   homeodomain transcription factor (ATHB-7) [Arabidopsis thaliana]<br>gi 15027939 gb AAK76500.1   putative homeodomain transcription factor ATHB-7 [Arabidopsis thaliana]<br>gi 20259175 gb AAM14303.1   putative homeodomain transcription factor protein ATHB-7 [Arabidopsis thaliana]<br>gi 330255645 gb AEC10739.1   homeobox-leucine zipper protein ATHB-7 [Arabidopsis thaliana] | 255  | 258  | 1.00E-107 | 101.2 | 81.2 | 86.3 | homeobox-leucine zipper protein ATHB-7                           | gbpln | Arabidopsis thaliana | AT1G43760.1   Symbols: DNase I-like superfamily protein   chr1:16528880-16531065 REVERSE LENGTH=626                                                                                                                                                                                                                                                                                                                                                                                                                                                                                                                                                                                                                                                                                                                                                             | 255  | 258 | 1.00E-110 | 101.2 | 81.2 | 86.3 |
| Rsa1.0_00315.1.g11128.t1 | #                                                                                                                                                                                                                                                                                                                                                                                                                                                                                                                                                                                                                                                                                         | #    | #    | #         | #     | #    | #    | -                                                                | ----  | ----                 | #                                                                                                                                                                                                                                                                                                                                                                                                                                                                                                                                                                                                                                                                                                                                                                                                                                                               | #    | #   | #         | #     | #    | #    |
| Rsa1.0_00315.1.g11129.t1 | gb AAG50806.1 AC079281_8 unknown protein [Arabidopsis thaliana]                                                                                                                                                                                                                                                                                                                                                                                                                                                                                                                                                                                                                           | 1788 | 1213 | 0         | 67.8  | 24.0 | 35.2 | unknown protein                                                  | gbpln | Arabidopsis thaliana | AT2G46690.1   Symbols:   SAUR-like auxin-responsive protein family   chr2:19180904-19181269 FORWARD LENGTH=121                                                                                                                                                                                                                                                                                                                                                                                                                                                                                                                                                                                                                                                                                                                                                  | 1788 | 626 | 5.00E-78  | 35.0  | 8.2  | 12.8 |
| Rsa1.0_00315.1.g11130.t1 | refXP_002880259.1   auxin-responsive family protein [Arabidopsis lyrata subsp. lyrata]<br>gi 297326098 gb EFH56518.1   auxin-responsive family protein [Arabidopsis lyrata subsp. lyrata]                                                                                                                                                                                                                                                                                                                                                                                                                                                                                                 | 122  | 121  | 7.00E-58  | 99.2  | 89.3 | 92.6 | auxin-responsive family protein                                  | gbpln | Arabidopsis lyrata   | AT2G46710.1   Symbols:   Rho GTPase activating protein with PAK-box/P21-Rho-binding domain   chr2:19192105-19194656 FORWARD LENGTH=455                                                                                                                                                                                                                                                                                                                                                                                                                                                                                                                                                                                                                                                                                                                          | 122  | 121 | 2.00E-60  | 99.2  | 89.3 | 93.4 |
| Rsa1.0_00315.1.g11131.t2 | refXP_002880260.1   hypothetical protein ARALYDRAFT_483835 [Arabidopsis lyrata subsp. lyrata]<br>gi 297326099 gb EFH56519.1   hypothetical protein ARALYDRAFT_483835 [Arabidopsis lyrata subsp. lyrata]                                                                                                                                                                                                                                                                                                                                                                                                                                                                                   | 468  | 455  | 0         | 97.2  | 81.4 | 88.0 | hypothetical protein ARALYDRAFT_483835                           | gbpln | Arabidopsis lyrata   | AT2G46720.1   Symbols: HIC, KCS13   3-ketoacyl-CoA synthase 13   chr2:19198821-19200221 FORWARD LENGTH=466                                                                                                                                                                                                                                                                                                                                                                                                                                                                                                                                                                                                                                                                                                                                                      | 468  | 455 | 0         | 97.2  | 80.8 | 88.0 |
| Rsa1.0_00315.1.g11132.t1 | gb EOA28887.1 hypothetical protein CARUB_v10025132mg, partial [Capsella rubella]                                                                                                                                                                                                                                                                                                                                                                                                                                                                                                                                                                                                          | 600  | 469  | 0         | 78.2  | 68.2 | 72.5 | hypothetical protein CARUB_v10025132mg, partial                  | gbpln | Capsella rubella     |                                                                                                                                                                                                                                                                                                                                                                                                                                                                                                                                                                                                                                                                                                                                                                                                                                                                 | 600  | 466 | 0         | 77.7  | 68.0 | 72.8 |

|                          |                                                                                                                                                                                                                                                                                                                                                                                                                                                 |     |     |           |       |      |      |                                                     |       |                      |                                                                                                                                                                                                                                                                                                                               |     |     |           |       |      |      |
|--------------------------|-------------------------------------------------------------------------------------------------------------------------------------------------------------------------------------------------------------------------------------------------------------------------------------------------------------------------------------------------------------------------------------------------------------------------------------------------|-----|-----|-----------|-------|------|------|-----------------------------------------------------|-------|----------------------|-------------------------------------------------------------------------------------------------------------------------------------------------------------------------------------------------------------------------------------------------------------------------------------------------------------------------------|-----|-----|-----------|-------|------|------|
| Rsa1.0_00315.1.g11133.t1 | emb CAZ68131.1  FAD-binding domain-containing protein [Arabidopsis halleri subsp. halleri]                                                                                                                                                                                                                                                                                                                                                      | 591 | 594 | 0         | 100.5 | 85.4 | 90.7 | FAD-binding domain-containing protein               | gbpln | Arabidopsis halleri  | AT2G46740.1   Symbols:   D-arabinono-1,4-lactone oxidase family protein   chr2:19205182-19207455 REVERSE LENGTH=590                                                                                                                                                                                                           | 591 | 590 | 0         | 99.8  | 84.9 | 90.2 |
| Rsa1.0_00316.1.g11134.t1 | gb ACQ76907.1  WRKY transcription factor 42 [Brassica napus]                                                                                                                                                                                                                                                                                                                                                                                    | 519 | 519 | 0         | 100.0 | 92.5 | 96.0 | WRKY transcription factor 42                        | gbpln | Brassica napus       | AT4G04450.1   Symbols: WRKY42, AWRKY42   WRKY family transcription factor   chr4:2218379-2221113 FORWARD LENGTH=528                                                                                                                                                                                                           | 519 | 528 | 0         | 101.7 | 76.9 | 83.8 |
| Rsa1.0_00316.1.g11135.t1 | ref NP_192345.4  uncharacterized protein [Arabidopsis thaliana] gi 332656984 gb AEE82384.1  uncharacterized protein AT4G04360 [Arabidopsis thaliana] ref NP_192344.1  leucyl-tRNA synthetase [Arabidopsis thaliana] gi 4982478 gb AAD36946.1 AF069441.6 putative leucyl tRNA synthetase [Arabidopsis thaliana]                                                                                                                                  | 179 | 176 | 3.00E-81  | 98.3  | 89.4 | 91.6 | uncharacterized protein                             | gbpln | Arabidopsis thaliana | AT4G04360.1   Symbols:   Protein of unknown function (DUF1068)   chr4:2133142-2133866 REVERSE LENGTH=176                                                                                                                                                                                                                      | 179 | 176 | 1.00E-83  | 98.3  | 89.4 | 91.6 |
| Rsa1.0_00316.1.g11136.t1 | gi 727192 emb CA877903.1  putative leucyl tRNA synthetase [Arabidopsis thaliana] gi 19310531 gb AAL84999.1  AT4G04350/T19B17.7 [Arabidopsis thaliana] gi 25090241 gb AAN7260.1  At4G04350/T19B17.7 [Arabidopsis thaliana] gi 332656983 gb AEE82383.1  tRNA synthetase class I (L, M and V) family protein [Arabidopsis thaliana]                                                                                                                | 964 | 973 | 0         | 100.9 | 92.2 | 95.7 | leucyl-tRNA synthetase                              | gbpln | Arabidopsis thaliana | AT4G04350.1   Symbols: EMB2369   tRNA synthetase class I (L, M and V) family protein   chr4:2128129-2133030 FORWARD LENGTH=973                                                                                                                                                                                                | 964 | 973 | 0         | 100.9 | 92.2 | 95.7 |
| Rsa1.0_00316.1.g11137.t1 | #                                                                                                                                                                                                                                                                                                                                                                                                                                               | #   | #   | #         | #     | #    | #    | -                                                   | ----  | ----                 | AT1G32375.1   Symbols:   F-box/RNI-like/FBD-like domains-containing protein   chr1:11679230-11680679 FORWARD LENGTH=422                                                                                                                                                                                                       | 235 | 422 | 6.00E-11  | 179.6 | 12.3 | 16.6 |
| Rsa1.0_00316.1.g11138.t1 | ref NP_189112.1  uncharacterized protein [Arabidopsis thaliana] gi 9279797 dbj BAB01218.1  unnamed protein product [Arabidopsis thaliana] gi 332643415 gb AEE76936.1  uncharacterized protein AT3G24690 [Arabidopsis thaliana]                                                                                                                                                                                                                  | 156 | 158 | 1.00E-44  | 101.3 | 70.5 | 81.4 | uncharacterized protein                             | gbpln | Arabidopsis thaliana | AT3G24690.1   Symbols:   BEST Arabidopsis thaliana protein match is: glycine-rich protein (TAIR:AT1G27090.1); Has 51 Blast hits to 50 proteins in 15 species: Archae - 0; Bacteria - 2; Metazoa - 0; Fungi - 0; Plants - 47; Viruses - 0; Other Eukaryotes - 2 (source: NCBI BLINK)   chr3:9020738-9021290 FORWARD LENGTH=158 | 156 | 158 | 4.00E-47  | 101.3 | 70.5 | 81.4 |
| Rsa1.0_00316.1.g11139.t1 | gb EOA20015.1  hypothetical protein CARUB_v10000278mg [Capsella rubella]                                                                                                                                                                                                                                                                                                                                                                        | 771 | 772 | 0         | 100.1 | 89.0 | 95.3 | hypothetical protein CARUB_v10000278mg              | gbpln | Capsella rubella     | AT4G04340.1   Symbols:   ERD (early-responsive to dehydration stress) family protein   chr4:2123235-2126624 FORWARD LENGTH=772                                                                                                                                                                                                | 771 | 772 | 0         | 100.1 | 88.3 | 95.5 |
| Rsa1.0_00316.1.g11140.t1 | #                                                                                                                                                                                                                                                                                                                                                                                                                                               | #   | #   | #         | #     | #    | #    | -                                                   | ----  | ----                 | #                                                                                                                                                                                                                                                                                                                             | #   | #   | #         | #     | #    |      |
| Rsa1.0_00316.1.g11141.t6 | ref NP_192341.2  malonyl-CoA decarboxylase [Arabidopsis thaliana] gi 30794100 gb AAP40492.1  putative malonyl-CoA decarboxylase [Arabidopsis thaliana] gi 110739288 dbj BAF01557.1  malonyl-CoA decarboxylase like protein [Arabidopsis thaliana] gi 332656977 gb AEE82377.1  malonyl-CoA decarboxylase [Arabidopsis thaliana]                                                                                                                  | 601 | 518 | 0         | 86.2  | 76.9 | 80.0 | malonyl-CoA decarboxylase                           | gbpln | Arabidopsis thaliana | AT4G04320.1   Symbols:   malonyl-CoA decarboxylase family protein   chr4:2113565-2116525 FORWARD LENGTH=518                                                                                                                                                                                                                   | 601 | 518 | 0         | 86.2  | 76.9 | 80.0 |
| Rsa1.0_00316.1.g11142.t1 | #                                                                                                                                                                                                                                                                                                                                                                                                                                               | #   | #   | #         | #     | #    | #    | -                                                   | ----  | ----                 | #                                                                                                                                                                                                                                                                                                                             | #   | #   | #         | #     | #    |      |
| Rsa1.0_00316.1.g11143.t1 | ref NP_198403.1  40S ribosomal protein S3-3 [Arabidopsis thaliana] gi 75170994 sp Q9FJA6.1 RS33_ARATH RecName: Full=40S ribosomal protein S3-3 gi 9758155 dbj BAB08712.1  40S ribosomal protein S3 [Arabidopsis thaliana] gi 16604318 gb AAL24165.1  AT5g35530/MOK9_14 [Arabidopsis thaliana] gi 20466075 gb AAM19959.1  AT5g35530/MOK9_14 [Arabidopsis thaliana] gi 332006595 gb AED93978.1  40S ribosomal protein S3-3 [Arabidopsis thaliana] | 95  | 248 | 3.00E-16  | 261.1 | 44.2 | 53.7 | 40S ribosomal protein S3-3                          | gbpln | Arabidopsis thaliana | AT5G35530.1   Symbols:   Ribosomal protein S3 family protein   chr5:13710355-13712192 REVERSE LENGTH=248                                                                                                                                                                                                                      | 95  | 248 | 6.00E-19  | 261.1 | 44.2 | 53.7 |
| Rsa1.0_00316.1.g11144.t1 | ref XP_002872684.1  plant UBX domain-containing protein 4 [Arabidopsis lyrata subsp. lyrata] gi 297318521 gb EFH48943.1  plant UBX domain-containing protein 4 [Arabidopsis lyrata subsp. lyrata]                                                                                                                                                                                                                                               | 313 | 306 | 1.00E-139 | 97.8  | 87.5 | 91.7 | plant UBX domain-containing protein 4               | gbpln | Arabidopsis lyrata   | AT4G04210.1   Symbols: PUX4   plant UBX domain containing protein 4   chr4:2030391-2031670 FORWARD LENGTH=303                                                                                                                                                                                                                 | 313 | 303 | 1.00E-136 | 96.8  | 85.0 | 89.8 |
| Rsa1.0_00316.1.g11145.t1 | gb AAD32950.1  putative non-LTR retroelement reverse transcriptase [Arabidopsis thaliana]                                                                                                                                                                                                                                                                                                                                                       | 599 | 773 | 1.00E-106 | 129.0 | 34.1 | 45.7 | putative non-LTR retroelement reverse transcriptase | gbpln | Arabidopsis thaliana | AT4G29090.1   Symbols:   Ribonuclease H-like superfamily protein   chr4:14333528-14335255 FORWARD LENGTH=575                                                                                                                                                                                                                  | 599 | 575 | 2.00E-39  | 96.0  | 13.5 | 20.4 |

|                          |                                                                                                                                                                                                                                                                                                                                           |      |     |           |       |      |      |                                                                                                                                                     |       |                          |                                                                                                                                 |     |     |           |       |      |      |
|--------------------------|-------------------------------------------------------------------------------------------------------------------------------------------------------------------------------------------------------------------------------------------------------------------------------------------------------------------------------------------|------|-----|-----------|-------|------|------|-----------------------------------------------------------------------------------------------------------------------------------------------------|-------|--------------------------|---------------------------------------------------------------------------------------------------------------------------------|-----|-----|-----------|-------|------|------|
| Rsa1.0_00316.1.g11146.t1 | ref WP_000519654.1  hypothetical protein, partial [Streptococcus agalactiae]                                                                                                                                                                                                                                                              | 198  | 183 | 3.00E-16  | 92.4  | 27.3 | 36.9 | hypothetical protein, partial                                                                                                                       | gbpct | Streptococcus agalactiae | #                                                                                                                               | #   | #   | #         | #     | #    | #    |
| Rsa1.0_00316.1.g11147.t1 | gb EOA39327.1  hypothetical protein CARUB_v10012368mg [Capsella rubella]                                                                                                                                                                                                                                                                  | 207  | 203 | 1.00E-81  | 98.1  | 72.9 | 82.6 | hypothetical protein CARUB_v10012368mg                                                                                                              | gbpln | Capsella rubella         | AT1G52900.1   Symbols:   Toll-Interleukin-Resistance (TIR) domain family protein   chr1:19702211-19702916 REVERSE LENGTH=199    | 207 | 199 | 5.00E-83  | 96.1  | 73.9 | 84.5 |
| Rsa1.0_00316.1.g11148.t1 | ref XP_002874793.1  hypothetical protein ARALYDRAFT_911683 [Arabidopsis lyrata subsp. lyrata]   g 297320630 gb EFH51052.1  hypothetical protein ARALYDRAFT_911683 [Arabidopsis lyrata subsp. lyrata]                                                                                                                                      | 187  | 184 | 2.00E-72  | 98.4  | 79.7 | 87.2 | hypothetical protein ARALYDRAFT_911683                                                                                                              | gbpln | Arabidopsis lyrata       | AT1G06920.1   Symbols:   ATOFP4, OFP4   ovate family protein 4   chr1:2124854-2125801 REVERSE LENGTH=315                        | 187 | 315 | 4.00E-14  | 168.4 | 18.7 | 27.8 |
| Rsa1.0_00316.1.g11149.t1 | sp Q94FZ9.1 PAP1_BRACM RecName: Full=Plastid lipid-associated protein 1, chloroplastic; Flags: Precursor   g 14248554 gb AAK57564.1  plastid-lipid associated protein PAP1 [Brassica rapa subsp. oleifera]                                                                                                                                | 330  | 327 | 1.00E-152 | 99.1  | 89.4 | 92.1 | RecName: Full=Plastid lipid-associated protein 1, chloroplastic; Flags: Precursor   g 14248554 gb AAK57564.1  plastid-lipid associated protein PAP1 | gbpln | Brassica rapa            | AT4G04020.1   Symbols:   FIB   fibrillin   chr4:1932161-1933546 FORWARD LENGTH=318                                              | 330 | 318 | 1.00E-147 | 96.4  | 78.5 | 86.1 |
| Rsa1.0_00316.1.g11150.t1 | #                                                                                                                                                                                                                                                                                                                                         | #    | #   | #         | #     | #    | #    | -                                                                                                                                                   | ----  | ----                     | #                                                                                                                               | #   | #   | #         | #     | #    | #    |
| Rsa1.0_00316.1.g11151.t1 | ref NP_680579.2  RING/U-box domain-containing protein [Arabidopsis thaliana]   g 52354369 gb AAU44505.1  hypothetical protein AT4G03965 [Arabidopsis thaliana]   g 55740645 gb AAV63915.1  hypothetical protein At4g03965 [Arabidopsis thaliana]   g 332656962 gb AEE82362.1  RING/U-box domain-containing protein [Arabidopsis thaliana] | 205  | 209 | 7.00E-82  | 102.0 | 79.5 | 86.3 | RING/U-box domain-containing protein                                                                                                                | gbpln | Arabidopsis thaliana     | AT4G03965.1   Symbols:   RING/U-box superfamily protein   chr4:1889576-1890205 FORWARD LENGTH=209                               | 205 | 209 | 2.00E-84  | 102.0 | 79.5 | 86.3 |
| Rsa1.0_00316.1.g11152.t1 | #                                                                                                                                                                                                                                                                                                                                         | #    | #   | #         | #     | #    | #    | -                                                                                                                                                   | ----  | ----                     | #                                                                                                                               | #   | #   | #         | #     | #    | #    |
| Rsa1.0_00317.1.g11153.t2 | gb AAF67366.1  Hypothetical protein T32B20; [Arabidopsis thaliana]                                                                                                                                                                                                                                                                        | 381  | 724 | 2.00E-69  | 190.0 | 43.3 | 58.8 | Hypothetical protein T32B20.i                                                                                                                       | gbpln | Arabidopsis thaliana     | #                                                                                                                               | #   | #   | #         | #     | #    | #    |
| Rsa1.0_00317.1.g11154.t3 | db BAA85462.1  transposon-like ORF [Brassica rapa]                                                                                                                                                                                                                                                                                        | 1044 | 703 | 0         | 67.3  | 54.5 | 55.8 | transposon-like ORF                                                                                                                                 | gbpln | Brassica rapa            | #                                                                                                                               | #   | #   | #         | #     | #    | #    |
| Rsa1.0_00317.1.g11155.t1 | gb ABD65100.1  hypothetical protein 31.t00077 [Brassica oleracea]                                                                                                                                                                                                                                                                         | 426  | 391 | 6.00E-62  | 91.8  | 33.3 | 37.8 | hypothetical protein 31.t00077                                                                                                                      | gbpln | Brassica oleracea        | #                                                                                                                               | #   | #   | #         | #     | #    | #    |
| Rsa1.0_00317.1.g11156.t1 | gb EOA31081.1  hypothetical protein CARUB_v10014232mg [Capsella rubella]                                                                                                                                                                                                                                                                  | 341  | 310 | 3.00E-95  | 90.9  | 56.9 | 68.3 | hypothetical protein CARUB_v10014232mg                                                                                                              | gbpln | Capsella rubella         | AT5G48670.1   Symbols:   FEM111, AGL80   AGAMOUS-like 80   chr5:19738825-19739790 REVERSE LENGTH=321                            | 341 | 321 | 8.00E-90  | 94.1  | 52.2 | 61.3 |
| Rsa1.0_00317.1.g11157.t7 | ref XP_002893865.1  predicted protein [Arabidopsis lyrata subsp. lyrata]   g 29733970 gb EFH70124.1  predicted protein [Arabidopsis lyrata subsp. lyrata]                                                                                                                                                                                 | 716  | 654 | 0         | 91.3  | 71.6 | 78.8 | predicted protein                                                                                                                                   | gbpln | Arabidopsis lyrata       | AT4G04540.1   Symbols:   CRK39   cysteine-rich RLK (RECEPTOR-like protein kinase) 39   chr4:2259580-2262138 FORWARD LENGTH=659  | 716 | 659 | 0         | 92.0  | 69.7 | 77.7 |
| Rsa1.0_00317.1.g11158.t1 | ref XP_002873484.1  predicted protein [Arabidopsis lyrata subsp. lyrata]   g 297319321 gb EFH49743.1  predicted protein [Arabidopsis lyrata subsp. lyrata]                                                                                                                                                                                | 131  | 603 | 4.00E-18  | 460.3 | 38.9 | 46.6 | predicted protein                                                                                                                                   | gbpln | Arabidopsis lyrata       | AT5G10900.1   Symbols:   Calcineurin-like metallo-phosphoesterase superfamily protein   chr5:3436413-3439221 REVERSE LENGTH=600 | 131 | 600 | 3.00E-16  | 458.0 | 39.7 | 46.6 |
| Rsa1.0_00317.1.g11159.t1 | #                                                                                                                                                                                                                                                                                                                                         | #    | #   | #         | #     | #    | #    | -                                                                                                                                                   | ----  | ----                     | #                                                                                                                               | #   | #   | #         | #     | #    | #    |
| Rsa1.0_00317.1.g11160.t1 | emb CAB10249.1  replication control protein 1 like [Arabidopsis thaliana]   g 7268176 emb CAB78512.1  replication control protein 1 like [Arabidopsis thaliana]                                                                                                                                                                           | 505  | 771 | 0         | 152.7 | 63.2 | 67.9 | replication control protein 1 like                                                                                                                  | gbpln | Arabidopsis thaliana     | AT4G14700.1   Symbols:   ATORC1A, ORC1A   origin recognition complex 1   chr4:8422236-8424665 FORWARD LENGTH=809                | 505 | 809 | 0         | 160.2 | 63.2 | 67.9 |
| Rsa1.0_00317.1.g11161.t1 | ref XP_002870293.1  hypothetical protein ARALYDRAFT_330043 [Arabidopsis lyrata subsp. lyrata]   g 297316129 gb EFH46552.1  hypothetical protein ARALYDRAFT_330043 [Arabidopsis lyrata subsp. lyrata]                                                                                                                                      | 108  | 317 | 1.00E-54  | 293.5 | 93.5 | 95.4 | hypothetical protein ARALYDRAFT_330043                                                                                                              | gbpln | Arabidopsis lyrata       | AT4G14695.1   Symbols:   Uncharacterised protein family (UPF0041)   chr4:8419833-8420845 FORWARD LENGTH=109                     | 108 | 109 | 1.00E-55  | 100.9 | 92.6 | 95.4 |
| Rsa1.0_00317.1.g11162.t1 | ref XP_002871839.1  F-box family protein [Arabidopsis lyrata subsp. lyrata]   g 297317676 gb EFH48098.1  F-box family protein [Arabidopsis lyrata subsp. lyrata]                                                                                                                                                                          | 490  | 478 | 2.00E-86  | 97.6  | 43.9 | 54.9 | F-box family protein                                                                                                                                | gbpln | Arabidopsis lyrata       | AT5G18770.1   Symbols:   F-box/FBD-like domains containing protein   chr5:6261426-6263172 FORWARD LENGTH=481                    | 490 | 481 | 2.00E-87  | 98.2  | 41.8 | 54.1 |

|                          |                                                                                                                                                                                                                                                                                                                                                                                            |     |     |           |       |      |      |                                                    |       |                      |                                                                                                                                                                                                                                                                                                                                                                                                                                                                   |     |     |           |       |      |      |
|--------------------------|--------------------------------------------------------------------------------------------------------------------------------------------------------------------------------------------------------------------------------------------------------------------------------------------------------------------------------------------------------------------------------------------|-----|-----|-----------|-------|------|------|----------------------------------------------------|-------|----------------------|-------------------------------------------------------------------------------------------------------------------------------------------------------------------------------------------------------------------------------------------------------------------------------------------------------------------------------------------------------------------------------------------------------------------------------------------------------------------|-----|-----|-----------|-------|------|------|
| Rsa1.0_00317.1.g11163.t1 | gb EOA21838.1  hypothetical protein CARUB_v10002305mg [Capsella rubella]                                                                                                                                                                                                                                                                                                                   | 108 | 108 | 7.00E-51  | 100.0 | 88.0 | 94.4 | hypothetical protein CARUB_v10002305mg             | gbpln | Capsella rubella     | AT4G05590.1   Symbols:   CONTAINS InterPro DOMAIN/s: Uncharacterised protein family UPF0041 (InterPro:IPR005336); BEST Arabidopsis thaliana protein match is: Uncharacterised protein family (UPF0041) (TAIR:AT4G22310.1); Has 30201 Blast hits to 17322 proteins in 780 species; Archae - 12; Bacteria - 1396; Metazoa - 1738; Fungi - 3422; Plants - 5037; Viruses - 0; Other Eukaryotes - 2996 (source: NCBI BLINK).   chr4:2907176-2908297 FORWARD LENGTH=108 | 108 | 108 | 3.00E-53  | 100.0 | 87.0 | 93.5 |
| Rsa1.0_00317.1.g11164.t1 | ref XP_002872670.1  predicted protein [Arabidopsis lyrata subsp. lyrata]   gi 297318507 gb EFH48929.1  predicted protein [Arabidopsis lyrata subsp. lyrata]                                                                                                                                                                                                                                | 428 | 444 | 0         | 103.7 | 84.1 | 90.4 | predicted protein                                  | gbpln | Arabidopsis lyrata   | AT4G22290.1   Symbols:   Ubiquitin-specific protease family C19-related protein   chr4:11783199-11785730 REVERSE LENGTH=445                                                                                                                                                                                                                                                                                                                                       | 428 | 445 | 1.00E-180 | 104.0 | 75.5 | 85.3 |
| Rsa1.0_00317.1.g11165.t1 | ref XP_002872671.1  predicted protein [Arabidopsis lyrata subsp. lyrata]   gi 297318508 gb EFH48930.1  predicted protein [Arabidopsis lyrata subsp. lyrata]                                                                                                                                                                                                                                | 858 | 815 | 0         | 95.0  | 70.3 | 78.9 | predicted protein                                  | gbpln | Arabidopsis lyrata   | AT5G37150.1   Symbols:   P-loop containing nucleoside triphosphate hydrolases superfamily protein   chr5:14701330-14704562 FORWARD LENGTH=839                                                                                                                                                                                                                                                                                                                     | 858 | 839 | 0         | 97.8  | 63.2 | 75.3 |
| Rsa1.0_00317.1.g11166.t1 | ref XP_002874790.1  short-chain dehydrogenase/reductase family protein [Arabidopsis lyrata subsp. lyrata]   gi 297320627 gb EFH51049.1  short-chain dehydrogenase/reductase family protein [Arabidopsis lyrata subsp. lyrata]                                                                                                                                                              | 255 | 254 | 1.00E-135 | 99.6  | 94.1 | 96.9 | short-chain dehydrogenase/reductase family protein | gbpln | Arabidopsis lyrata   | AT4G05530.1   Symbols: IBR1, SDRA   indole-3-butyrlic acid response 1   chr4:2816462-2818074 FORWARD LENGTH=254                                                                                                                                                                                                                                                                                                                                                   | 255 | 254 | 1.00E-136 | 99.6  | 93.3 | 96.1 |
| Rsa1.0_00317.1.g11167.t1 | # # # # # # # - ---- ---- # # # # # #                                                                                                                                                                                                                                                                                                                                                      |     |     |           |       |      |      |                                                    |       |                      |                                                                                                                                                                                                                                                                                                                                                                                                                                                                   |     |     |           |       |      |      |
| Rsa1.0_00317.1.g11168.t1 | gb EOA20335.1  hypothetical protein CARUB_v10000641mg [Capsella rubella]                                                                                                                                                                                                                                                                                                                   | 546 | 545 | 0         | 99.8  | 94.3 | 96.9 | hypothetical protein CARUB_v10000641mg             | gbpln | Capsella rubella     | AT4G05520.1   Symbols: ATEHD2, EHD2   EPS15 homology domain 2   chr4:2804522-2807833 FORWARD LENGTH=546                                                                                                                                                                                                                                                                                                                                                           | 546 | 546 | 0         | 100.0 | 92.9 | 96.5 |
| Rsa1.0_00317.1.g11169.t1 | gb EOA23178.1  hypothetical protein CARUB_v10018008mg [Capsella rubella]                                                                                                                                                                                                                                                                                                                   | 57  | 214 | 4.00E-17  | 375.4 | 73.7 | 86.0 | hypothetical protein CARUB_v10018008mg             | gbpln | Capsella rubella     | AT3G19790.2   Symbols:   unknown protein; FUNCTIONS IN: molecular_function unknown; INVOLVED IN: biological_process unknown; LOCATED IN: cellular_component unknown; EXPRESSED IN: 24 plant structures; EXPRESSED DURING: 15 growth stages; Has 32 Blast hits to 26 proteins in 8 species: Archae - 0; Bacteria - 0; Metazoa - 13; Fungi - 2; Plants - 14; Viruses - 0; Other Eukaryotes - 3 (source: NCBI BLINK).   chr3:6874837-6875440 REVERSE LENGTH=167      | 57  | 167 | 1.00E-12  | 293.0 | 50.9 | 71.9 |
| Rsa1.0_00317.1.g11170.t1 | ref XP_002874792.1  predicted protein [Arabidopsis lyrata subsp. lyrata]   gi 297320629 gb EFH51051.1  predicted protein [Arabidopsis lyrata subsp. lyrata]                                                                                                                                                                                                                                | 491 | 453 | 0         | 92.3  | 73.7 | 79.8 | predicted protein                                  | gbpln | Arabidopsis lyrata   | AT4G03820.1   Symbols:   Protein of unknown function (DUF3537)   chr4:1772114-1774380 REVERSE LENGTH=437                                                                                                                                                                                                                                                                                                                                                          | 491 | 437 | 1.00E-174 | 89.0  | 60.9 | 65.0 |
| Rsa1.0_00317.1.g11171.t1 | # # # # # # # - ---- ---- # # # # # #                                                                                                                                                                                                                                                                                                                                                      |     |     |           |       |      |      |                                                    |       |                      |                                                                                                                                                                                                                                                                                                                                                                                                                                                                   |     |     |           |       |      |      |
| Rsa1.0_00317.1.g11172.t7 | gb EOA27719.1  hypothetical protein CARUB_v10023871mg [Capsella rubella]                                                                                                                                                                                                                                                                                                                   | 370 | 262 | 7.00E-46  | 70.8  | 28.6 | 34.1 | hypothetical protein CARUB_v10023871mg             | gbpln | Capsella rubella     | AT4G01560.1   Symbols: MEE49   Ribosomal RNA processing Brix domain protein   chr4:677266-679164 REVERSE LENGTH=343                                                                                                                                                                                                                                                                                                                                               | 370 | 343 | 2.00E-17  | 92.7  | 17.6 | 25.7 |
| Rsa1.0_00317.1.g11173.t1 | gb EOA25808.1  hypothetical protein CARUB_v10019176mg [Capsella rubella]                                                                                                                                                                                                                                                                                                                   | 291 | 204 | 1.00E-53  | 70.1  | 38.8 | 49.1 | hypothetical protein CARUB_v10019176mg             | gbpln | Capsella rubella     | AT4G04090.1   Symbols:   BTB/POZ domain-containing protein   chr4:1964980-1965650 FORWARD LENGTH=192                                                                                                                                                                                                                                                                                                                                                              | 291 | 192 | 4.00E-48  | 66.0  | 34.7 | 45.4 |
| Rsa1.0_00317.1.g11174.t1 | ref NP_192328.2  uncharacterized protein [Arabidopsis thaliana]   gi 42572827 ref NP_974510.1  uncharacterized protein [Arabidopsis thaliana]   gi 114050681 gb ABI49490.1  At4g04190 [Arabidopsis thaliana]   gi 332656971 gb AEE82371.1  uncharacterized protein AT4G04190 [Arabidopsis thaliana]   gi 332656972 gb AEE82372.1  uncharacterized protein AT4G04190 [Arabidopsis thaliana] | 171 | 184 | 5.00E-84  | 107.6 | 90.1 | 93.6 | uncharacterized protein                            | gbpln | Arabidopsis thaliana | AT4G04190.2   Symbols:   unknown protein; Has 35333 Blast hits to 34131 proteins in 2444 species: Archae - 798; Bacteria - 22429; Metazoa - 974; Fungi - 991; Plants - 531; Viruses - 0; Other Eukaryotes - 9610 (source: NCBI BLINK).   chr4:2024873-2026330 FORWARD LENGTH=184                                                                                                                                                                                  | 171 | 184 | 2.00E-86  | 107.6 | 90.1 | 93.6 |
| Rsa1.0_00317.1.g11175.t1 | gb ABK9601.1  unknown [Populus trichocarpa]                                                                                                                                                                                                                                                                                                                                                | 182 | 305 | 7.00E-66  | 167.6 | 73.1 | 83.0 | unknown                                            | gbpln | Populus trichocarpa  | AT4G22150.1   Symbols: PUX3   plant UBX domain-containing protein 3   chr4:11731272-11732800 REVERSE LENGTH=367                                                                                                                                                                                                                                                                                                                                                   | 182 | 367 | 8.00E-63  | 201.6 | 74.2 | 80.2 |
| Rsa1.0_00318.1.g11176.t1 | gb AAC23640.1  CER1-like protein [Arabidopsis thaliana]                                                                                                                                                                                                                                                                                                                                    | 606 | 635 | 0         | 104.8 | 82.8 | 89.8 | CER1-like protein                                  | gbpln | Arabidopsis thaliana | AT2G37700.1   Symbols:   Fatty acid hydroxylase superfamily   chr2:15810581-15814176 REVERSE LENGTH=613                                                                                                                                                                                                                                                                                                                                                           | 606 | 613 | 0         | 101.2 | 81.0 | 88.0 |



|                          |                                                                                                                                                                                                                                                                                                                                                                                                                                                                                                                                      |     |     |           |       |      |      |                                                |       |                      |                                                                                                                                                                                                                                                                                                                                               |     |     |           |       |      |      |
|--------------------------|--------------------------------------------------------------------------------------------------------------------------------------------------------------------------------------------------------------------------------------------------------------------------------------------------------------------------------------------------------------------------------------------------------------------------------------------------------------------------------------------------------------------------------------|-----|-----|-----------|-------|------|------|------------------------------------------------|-------|----------------------|-----------------------------------------------------------------------------------------------------------------------------------------------------------------------------------------------------------------------------------------------------------------------------------------------------------------------------------------------|-----|-----|-----------|-------|------|------|
| Rsa1.0_00318.1.g11177.t1 | dbj BAB01155.1  unnamed protein product [Arabidopsis thaliana] gi 49823524 gb AAT68745.1  hypothetical protein At3g17200 [Arabidopsis thaliana] gi 60547763 gb AAX23845.1  hypothetical protein At3g17200 [Arabidopsis thaliana]                                                                                                                                                                                                                                                                                                     | 136 | 310 | 2.00E-30  | 227.9 | 41.9 | 61.8 | unnamed protein product                        | gbpln | Arabidopsis thaliana | AT3G24255.1   Symbols:   RNA-directed DNA polymerase (reverse transcriptase)-related family protein   chr3:8789471-8793208 FORWARD LENGTH=746                                                                                                                                                                                                 | 136 | 746 | 3.00E-16  | 548.5 | 30.9 | 36.8 |
| Rsa1.0_00318.1.g11178.t1 | gb AAC23640.1  CER1-like protein [Arabidopsis thaliana]                                                                                                                                                                                                                                                                                                                                                                                                                                                                              | 635 | 635 | 0         | 100.0 | 79.1 | 87.7 | CER1-like protein                              | gbpln | Arabidopsis thaliana | AT2G37700.1   Symbols:   Fatty acid hydroxylase superfamily   chr2:15810581-15814176 REVERSE LENGTH=613                                                                                                                                                                                                                                       | 635 | 613 | 0         | 96.5  | 78.1 | 86.6 |
| Rsa1.0_00318.1.g11179.t1 | ref NP_181305.2  phosphoribosylaminoimidazole carboxylase [Arabidopsis thaliana] gi 28973715 gb AAO64174.1  putative phosphoribosylaminoimidazole carboxylase [Arabidopsis thaliana] gi 30793959 gb AAP40431.1  putative phosphoribosylaminoimidazole carboxylase [Arabidopsis thaliana] gi 110737176 dbj BAF00537.1  phosphoribosylaminoimidazole carboxylase like protein [Arabidopsis thaliana] gi 330254341 gb AEC09435.1  phosphoribosylaminoimidazole carboxylase, putative / AIR carboxylase, putative [Arabidopsis thaliana] | 640 | 642 | 0         | 100.3 | 88.3 | 94.2 | phosphoribosylaminoimidazole carboxylase       | gbpln | Arabidopsis thaliana | AT2G37690.1   Symbols:   phosphoribosylaminoimidazole carboxylase, putative / AIR carboxylase, putative   chr2:15806111-15810240 FORWARD LENGTH=642                                                                                                                                                                                           | 640 | 642 | 0         | 100.3 | 88.3 | 94.2 |
| Rsa1.0_00318.1.g11180.t1 | ref NP_181304.2  uncharacterized protein [Arabidopsis thaliana] gi 297827323 ref XP_002881544.1  far-red elongated hypocotyl 1 [Arabidopsis lyrata subsp. lyrata] gi 297327383 gb EFH57803.1  far-red elongated hypocotyl 1 [Arabidopsis lyrata subsp. lyrata] gi 330254340 gb AEC09434.1  uncharacterized protein AT2G37680 [Arabidopsis thaliana]                                                                                                                                                                                  | 215 | 215 | 1.00E-121 | 100.0 | 96.7 | 98.6 | uncharacterized protein                        | gbpln | Arabidopsis lyrata   | AT2G37680.1   Symbols:   CONTAINS InterPro DOMAIN/s: Vacuolar import/degradation protein Vid24 (InterPro:IPR018618); Has 318 Blast hits to 317 proteins in 131 species: Archae - 0; Bacteria - 0; Metazoa - 80; Fungi - 184; Plants - 51; Viruses - 0; Other Eukaryotes - 3 (source: NCBI BLINK).   chr2:15803500-15805515 REVERSE LENGTH=215 | 215 | 215 | 1.00E-124 | 100.0 | 96.7 | 98.6 |
| Rsa1.0_00318.1.g11181.t1 | dbj BAJ34134.1  unnamed protein product [Thellungiella halophila]                                                                                                                                                                                                                                                                                                                                                                                                                                                                    | 166 | 191 | 1.00E-66  | 115.1 | 81.3 | 88.6 | unnamed protein product                        | ----  | ----                 | AT2G37678.1   Symbols:   FHY1, PAT3, FRY1   far-red elongated hypocotyl 1   chr2:15801689-15802696 REVERSE LENGTH=202                                                                                                                                                                                                                         | 166 | 202 | 5.00E-64  | 121.7 | 80.1 | 88.6 |
| Rsa1.0_00318.1.g11182.t1 | ref XP_002881542.1  WD-40 repeat family protein [Arabidopsis lyrata subsp. lyrata] gi 297327381 gb EFH57801.1  WD-40 repeat family protein [Arabidopsis lyrata subsp. lyrata]                                                                                                                                                                                                                                                                                                                                                        | 897 | 911 | 0         | 101.6 | 84.7 | 91.9 | WD-40 repeat family protein                    | gbpln | Arabidopsis lyrata   | AT2G37670.1   Symbols:   Transducin/WD40 repeat-like superfamily protein   chr2:15797384-15800536 REVERSE LENGTH=903                                                                                                                                                                                                                          | 897 | 903 | 0         | 100.7 | 83.5 | 90.2 |
| Rsa1.0_00318.1.g11183.t2 | gb EOA27487.1  hypothetical protein CARUB.v10023624mg [Capsella rubella]                                                                                                                                                                                                                                                                                                                                                                                                                                                             | 335 | 326 | 1.00E-157 | 97.3  | 82.7 | 88.7 | hypothetical protein CARUB.v10023624mg         | gbpln | Capsella rubella     | AT2G37660.1   Symbols:   NAD(P)-binding Rossmann-fold superfamily protein   chr2:15795481-15796977 REVERSE LENGTH=325                                                                                                                                                                                                                         | 335 | 325 | 1.00E-158 | 97.0  | 83.0 | 89.9 |
| Rsa1.0_00318.1.g11184.t1 | ref XP_002874288.1  hypothetical protein ARALYDRAFT_351609 [Arabidopsis lyrata subsp. lyrata] gi 297320125 gb EFH50547.1  hypothetical protein ARALYDRAFT_351609 [Arabidopsis lyrata subsp. lyrata]                                                                                                                                                                                                                                                                                                                                  | 151 | 413 | 6.00E-53  | 273.5 | 61.6 | 70.2 | hypothetical protein ARALYDRAFT_351609         | gbpln | Arabidopsis lyrata   | AT5G25960.1   Symbols:   Protein of Unknown Function (DUF239)   chr5:9062917-9065011 REVERSE LENGTH=352                                                                                                                                                                                                                                       | 151 | 352 | 2.00E-52  | 233.1 | 58.3 | 69.5 |
| Rsa1.0_00318.1.g11185.t1 | ref XP_002881518.1  hypothetical protein ARALYDRAFT_345496 [Arabidopsis lyrata subsp. lyrata] gi 297327357 gb EFH57777.1  hypothetical protein ARALYDRAFT_345496 [Arabidopsis lyrata subsp. lyrata]                                                                                                                                                                                                                                                                                                                                  | 116 | 161 | 9.00E-34  | 138.8 | 75.0 | 83.6 | hypothetical protein ARALYDRAFT_345496         | gbpln | Arabidopsis lyrata   | AT2G37610.1   Symbols:   unknown protein; Has 21 Blast hits to 21 proteins in 5 species: Archae - 0; Bacteria - 0; Metazoa - 0; Fungi - 0; Plants - 21; Viruses - 0; Other Eukaryotes - 0 (source: NCBI BLINK).   chr2:15776869-15777673 REVERSE LENGTH=161                                                                                   | 116 | 161 | 1.00E-32  | 138.8 | 69.8 | 77.6 |
| Rsa1.0_00318.1.g11186.t1 | gb EOA28156.1  hypothetical protein CARUB.v10024358mg [Capsella rubella]                                                                                                                                                                                                                                                                                                                                                                                                                                                             | 112 | 112 | 1.00E-50  | 100.0 | 94.6 | 94.6 | hypothetical protein CARUB.v10024358mg         | gbpln | Capsella rubella     | AT3G53740.4   Symbols:   Ribosomal protein L36e family protein   chr3:19913921-19914813 REVERSE LENGTH=112                                                                                                                                                                                                                                    | 112 | 112 | 3.00E-52  | 100.0 | 92.0 | 94.6 |
| Rsa1.0_00318.1.g11187.t1 | # # # # # # # #                                                                                                                                                                                                                                                                                                                                                                                                                                                                                                                      | #   | #   | #         | #     | #    | #    | -                                              | ----  | ----                 | # # # # # # #                                                                                                                                                                                                                                                                                                                                 | #   | #   | #         | #     | #    | #    |
| Rsa1.0_00318.1.g11188.t1 | ref XP_002879686.1  Dof-type zinc finger domain-containing protein [Arabidopsis lyrata subsp. lyrata] gi 297325525 gb EFH55945.1  Dof-type zinc finger domain-containing protein [Arabidopsis lyrata subsp. lyrata]                                                                                                                                                                                                                                                                                                                  | 307 | 326 | 1.00E-118 | 106.2 | 78.5 | 85.3 | Dof-type zinc finger domain-containing protein | gbpln | Arabidopsis lyrata   | AT2G37590.1   Symbols:   ATDOF2.4, DOF2.4   DNA binding with one finger 2.4   chr2:15769292-15770497 FORWARD LENGTH=330                                                                                                                                                                                                                       | 307 | 330 | 1.00E-116 | 107.5 | 76.9 | 85.0 |
| Rsa1.0_00318.1.g11189.t1 | ref XP_004253326.1  PREDICTED: xylosyltransferase-like [Solanum lycopersicum]                                                                                                                                                                                                                                                                                                                                                                                                                                                        | 144 | 384 | 1.00E-12  | 266.7 | 26.4 | 29.2 | PREDICTED: xylosyltransferase-like             | gbpln | Solanum lycopersicum | AT2G37585.1   Symbols:   Core-2/I-branching beta-1,6-N-acetylglucosaminyltransferase family protein   chr2:15765864-15767722 FORWARD LENGTH=384                                                                                                                                                                                               | 144 | 384 | 4.00E-15  | 266.7 | 26.4 | 29.2 |

|                          |                                                                                                                                                                                                                                                                                |      |      |           |       |      |      |                                                                                          |             |                      |                                                                                                                                                                                                                                                                                                                                                   |      |      |           |       |      |      |
|--------------------------|--------------------------------------------------------------------------------------------------------------------------------------------------------------------------------------------------------------------------------------------------------------------------------|------|------|-----------|-------|------|------|------------------------------------------------------------------------------------------|-------------|----------------------|---------------------------------------------------------------------------------------------------------------------------------------------------------------------------------------------------------------------------------------------------------------------------------------------------------------------------------------------------|------|------|-----------|-------|------|------|
| Rsa1.0_00318.1.g11190.t1 | gb[EOA27799.1] hypothetical protein CARUB_v10023951mg [Capsella rubella]                                                                                                                                                                                                       | 236  | 241  | 5.00E-68  | 102.1 | 74.2 | 80.1 | hypothetical protein CARUB_v10023951mg                                                   | gbpln       | Capsella rubella     | AT2G37580.1   Symbols:   RING/U-box superfamily protein   chr2:15764745-15765452 FORWARD LENGTH=235                                                                                                                                                                                                                                               | 236  | 235  | 3.00E-60  | 99.6  | 60.6 | 66.5 |
| Rsa1.0_00318.1.g11191.t1 | tpg[DAA40122.1] TPA: histone H4.3 [Zea mays]                                                                                                                                                                                                                                   | 188  | 248  | 4.00E-50  | 131.9 | 52.1 | 52.1 | TPA: histone H4.3                                                                        | gbenv/gbpln | Zea mays             | AT5G59970.1   Symbols:   Histone superfamily protein   chr5:24146352-24146663 REVERSE LENGTH=103                                                                                                                                                                                                                                                  | 188  | 103  | 6.00E-50  | 54.8  | 52.1 | 52.1 |
| Rsa1.0_00318.1.g11192.t1 | gb[EOA27401.1] hypothetical protein CARUB_v10023534mg, partial [Capsella rubella]                                                                                                                                                                                              | 321  | 350  | 1.00E-172 | 109.0 | 90.3 | 95.0 | hypothetical protein CARUB_v10023534mg, partial                                          | gbpln       | Capsella rubella     | AT2G37540.1   Symbols:   NAD(P)-binding Rossmann-fold superfamily protein   chr2:15751695-15753820 REVERSE LENGTH=321                                                                                                                                                                                                                             | 321  | 321  | 1.00E-163 | 100.0 | 82.6 | 91.9 |
| Rsa1.0_00318.1.g11193.t1 | ref[NP_181288.4] acyl-CoA N-acyltransferase with RING/FYVE/PHD-type zinc finger domain-containing protein [Arabidopsis thaliana]   gb[330254317]gb[AE009411.1] acyl-CoA N-acyltransferase with RING/FYVE/PHD-type zinc finger domain-containing protein [Arabidopsis thaliana] | 865  | 829  | 0         | 95.8  | 77.2 | 85.0 | acyl-CoA N-acyltransferase with RING/FYVE/PHD-type zinc finger domain-containing protein | gbpln       | Arabidopsis thaliana | AT2G37520.1   Symbols:   Acyl-CoA N-acyltransferase with RING/FYVE/PHD-type zinc finger domain   chr2:15745033-15749615 REVERSE LENGTH=829                                                                                                                                                                                                        | 865  | 829  | 0         | 95.8  | 77.2 | 85.0 |
| Rsa1.0_00318.1.g11194.t1 | gb[EOA28737.1] hypothetical protein CARUB_v10024966mg [Capsella rubella]                                                                                                                                                                                                       | 599  | 468  | 0         | 78.1  | 67.6 | 71.5 | hypothetical protein CARUB_v10024966mg                                                   | gbpln       | Capsella rubella     | AT2G37500.1   Symbols:   arginine biosynthesis protein ArgJ family   chr2:15739904-15742689 REVERSE LENGTH=468                                                                                                                                                                                                                                    | 599  | 468  | 0         | 78.1  | 67.4 | 70.6 |
| Rsa1.0_00318.1.g11195.t1 | gb[EOA28737.1] hypothetical protein CARUB_v10024966mg [Capsella rubella]                                                                                                                                                                                                       | 66   | 468  | 1.00E-18  | 709.1 | 71.2 | 75.8 | hypothetical protein CARUB_v10024966mg                                                   | gbpln       | Capsella rubella     | AT2G37500.1   Symbols:   arginine biosynthesis protein ArgJ family   chr2:15739904-15742689 REVERSE LENGTH=468                                                                                                                                                                                                                                    | 66   | 468  | 9.00E-21  | 709.1 | 68.2 | 77.3 |
| Rsa1.0_00318.1.g11196.t1 | dbj[BAD95109.1] hypothetical protein [Arabidopsis thaliana]                                                                                                                                                                                                                    | 189  | 194  | 6.00E-62  | 102.6 | 77.2 | 87.3 | hypothetical protein                                                                     | gbpln       | Arabidopsis thaliana | AT2G37480.1   Symbols:   unknown protein; BEST Arabidopsis thaliana protein match is: unknown protein (TAIR:AT3G53670.2). Has 186 Blast hits to 186 proteins in 35 species: Archaea - 0; Bacteria - 2; Metazoa - 14; Fungi - 7; Plants - 154; Viruses - 0; Other Eukaryotes - 9 (source: NCBI BLink).   chr2:15738645-15739579 FORWARD LENGTH=194 | 189  | 194  | 1.00E-63  | 102.6 | 76.7 | 87.3 |
| Rsa1.0_00318.1.g11197.t1 | gb[EOA27577.1] hypothetical protein CARUB_v10023716mg [Capsella rubella]                                                                                                                                                                                                       | 298  | 302  | 1.00E-133 | 101.3 | 77.5 | 87.6 | hypothetical protein CARUB_v10023716mg                                                   | gbpln       | Capsella rubella     | AT4G02850.1   Symbols:   phenazine biosynthesis PhzC/PhzF family protein   chr4:1266535-1268569 REVERSE LENGTH=306                                                                                                                                                                                                                                | 298  | 306  | 1.00E-115 | 102.7 | 69.5 | 82.6 |
| Rsa1.0_00319.1.g11198.t2 | gb[AAD32898.1] putative retroelement pol polyprotein [Arabidopsis thaliana]                                                                                                                                                                                                    | 1326 | 1307 | 0         | 98.6  | 57.5 | 74.4 | putative retroelement pol polyprotein                                                    | gbpln       | Arabidopsis thaliana | AT4G23160.1   Symbols:   CRK8   cysteine-rich RLK (RECEPTOR-like protein kinase) 8   chr4:12129485-12134086 FORWARD LENGTH=1262                                                                                                                                                                                                                   | 1326 | 1262 | 2.00E-96  | 95.2  | 13.5 | 21.3 |
| Rsa1.0_00319.1.g11199.t2 | gb[AAK43485.1]AC084807.10 polyprotein, putative [Arabidopsis thaliana]   g[22589800]dbj[BH30336.1] hypothetical protein [Arabidopsis thaliana]                                                                                                                                 | 1427 | 1459 | 0         | 102.2 | 61.9 | 75.4 | polyprotein, putative                                                                    | gbpln       | Arabidopsis thaliana | AT4G23160.1   Symbols:   CRK8   cysteine-rich RLK (RECEPTOR-like protein kinase) 8   chr4:12129485-12134086 FORWARD LENGTH=1262                                                                                                                                                                                                                   | 1427 | 1262 | 1.00E-107 | 88.4  | 13.5 | 19.3 |
| Rsa1.0_00319.1.g11200.t1 | ref[XP_002894142.1] hypothetical protein ARALYDRAFT_337011 [Arabidopsis lyrata subsp. lyrata]   g[297339984]gb[EFH70401.1] hypothetical protein ARALYDRAFT_337011 [Arabidopsis lyrata subsp. lyrata]                                                                           | 540  | 569  | 0         | 105.4 | 74.4 | 84.1 | hypothetical protein ARALYDRAFT_337011                                                   | gbpln       | Arabidopsis lyrata   | AT1G48870.1   Symbols:   Transducin/WD40 repeat-like superfamily protein   chr1:18072325-18074457 REVERSE LENGTH=593                                                                                                                                                                                                                              | 540  | 593  | 0         | 109.8 | 74.8 | 84.1 |
| Rsa1.0_00319.1.g11201.t1 | #                                                                                                                                                                                                                                                                              | #    | #    | #         | #     | #    | -    | ----                                                                                     | ----        | ----                 | #                                                                                                                                                                                                                                                                                                                                                 | #    | #    | #         | #     | #    | #    |
| Rsa1.0_00319.1.g11202.t1 | ref[XP_004159727.1] PREDICTED: SKP1-like protein 1A-like [Cucumis sativus]                                                                                                                                                                                                     | 183  | 155  | 2.00E-51  | 84.7  | 60.1 | 72.1 | PREDICTED: SKP1-like protein 1A-like                                                     | gbpln       | Cucumis sativus      | AT4G34210.1   Symbols:   ASK11, SK11   SKP1-like 11   chr4:16379003-16379461 FORWARD LENGTH=152                                                                                                                                                                                                                                                   | 183  | 152  | 4.00E-53  | 83.1  | 57.4 | 69.4 |
| Rsa1.0_00319.1.g11203.t1 | gb[AAF79618.1]AC027665_19 F5M15.26 [Arabidopsis thaliana]                                                                                                                                                                                                                      | 2112 | 1838 | 0         | 87.0  | 32.8 | 41.6 | F5M15.26                                                                                 | gbpln       | Arabidopsis thaliana | AT1G36390.2   Symbols:   Co-chaperone GrpE family protein   chr1:13701811-13703524 REVERSE LENGTH=279                                                                                                                                                                                                                                             | 2112 | 279  | 5.00E-86  | 13.2  | 7.6  | 9.1  |
| Rsa1.0_00319.1.g11204.t1 | gb[EOA23471.1] hypothetical protein CARUB_v10016663mg [Capsella rubella]                                                                                                                                                                                                       | 966  | 911  | 2.00E-12  | 94.3  | 5.5  | 8.4  | hypothetical protein CARUB_v10016663mg                                                   | gbpln       | Capsella rubella     | AT2G15420.1   Symbols:   myosin heavy chain-related   chr2:6723948-6728183 REVERSE LENGTH=957                                                                                                                                                                                                                                                     | 966  | 957  | 7.00E-15  | 99.1  | 5.7  | 9.6  |
| Rsa1.0_00319.1.g11205.t1 | #                                                                                                                                                                                                                                                                              | #    | #    | #         | #     | #    | -    | ----                                                                                     | ----        | ----                 | #                                                                                                                                                                                                                                                                                                                                                 | #    | #    | #         | #     | #    | #    |
| Rsa1.0_00319.1.g11206.t1 | #                                                                                                                                                                                                                                                                              | #    | #    | #         | #     | #    | -    | ----                                                                                     | ----        | ----                 | #                                                                                                                                                                                                                                                                                                                                                 | #    | #    | #         | #     | #    | #    |
| Rsa1.0_00319.1.g11207.t1 | gb[EMT03939.1] SKP1-like protein 1B [Aegilops tauschii]                                                                                                                                                                                                                        | 124  | 164  | 4.00E-44  | 132.3 | 67.7 | 83.9 | SKP1-like protein 1B                                                                     | gbpln       | Aegilops tauschii    | AT1G75950.1   Symbols:   SKP1, ASK1, ATSKP1, SKP1A, UIP1   S phase kinase-associated protein 1   chr1:28516715-28517454 FORWARD LENGTH=160                                                                                                                                                                                                        | 124  | 160  | 6.00E-44  | 129.0 | 68.5 | 85.5 |
| Rsa1.0_00319.1.g11208.t1 | ref[XP_002890353.1] ATPUP14 [Arabidopsis lyrata subsp. lyrata]   g[297336195]gb[EFH66612.1] ATPUP14 [Arabidopsis lyrata subsp. lyrata]                                                                                                                                         | 380  | 393  | 4.00E-68  | 103.4 | 42.9 | 57.6 | ATPUP14                                                                                  | gbpln       | Arabidopsis lyrata   | AT1G19770.1   Symbols:   ATPUP14, PUP14   purine permease 14   chr1:6832426-6833702 FORWARD LENGTH=393                                                                                                                                                                                                                                            | 380  | 393  | 8.00E-66  | 103.4 | 43.2 | 57.1 |
| Rsa1.0_00319.1.g11209.t2 | #                                                                                                                                                                                                                                                                              | #    | #    | #         | #     | #    | -    | ----                                                                                     | ----        | ----                 | #                                                                                                                                                                                                                                                                                                                                                 | #    | #    | #         | #     | #    | #    |

|                          |                                                                                                                                                                                                                                                                                                                                                                                                                                                                                                                                                                                                                                                                                                                                                            |      |      |           |       |      |      |                                          |       |                      |                                                                                                                                                                                                                                                                                                                                              |      |      |           |       |      |      |
|--------------------------|------------------------------------------------------------------------------------------------------------------------------------------------------------------------------------------------------------------------------------------------------------------------------------------------------------------------------------------------------------------------------------------------------------------------------------------------------------------------------------------------------------------------------------------------------------------------------------------------------------------------------------------------------------------------------------------------------------------------------------------------------------|------|------|-----------|-------|------|------|------------------------------------------|-------|----------------------|----------------------------------------------------------------------------------------------------------------------------------------------------------------------------------------------------------------------------------------------------------------------------------------------------------------------------------------------|------|------|-----------|-------|------|------|
| Rsa1.0_00319.1.g11210.t1 | emb[CAB39638.1] RNA-directed DNA polymerase-like protein [Arabidopsis thaliana] gi7267666[emb[CAB78094.1] RNA-directed DNA polymerase-like protein [Arabidopsis thaliana]                                                                                                                                                                                                                                                                                                                                                                                                                                                                                                                                                                                  | 2137 | 1274 | 0         | 59.6  | 28.7 | 38.1 | RNA-directed DNA polymerase-like protein | gbpln | Arabidopsis thaliana | AT1G48790.1   Symbols: AMSH1   associated molecule with the SH3 domain of STAM 1   chr1:18043925-18047427 REVERSE LENGTH=507                                                                                                                                                                                                                 | 2137 | 507  | 0         | 23.7  | 20.2 | 21.2 |
| Rsa1.0_00319.1.g11211.t1 | ref XP_002891453.1  hypothetical protein ARALYDRAFT_474016 [Arabidopsis lyrata subsp. lyrata] gi297337295[gb EF67712.1] hypothetical protein ARALYDRAFT_474016 [Arabidopsis lyrata subsp. lyrata]                                                                                                                                                                                                                                                                                                                                                                                                                                                                                                                                                          | 255  | 252  | 1.00E-103 | 98.8  | 83.9 | 86.7 | hypothetical protein ARALYDRAFT_474016   | gbpln | Arabidopsis lyrata   | AT1G48790.1   Symbols:   unknown protein; BEST Arabidopsis thaliana protein match is: unknown protein (TAIR:AT3G18300.1). Has 89 Blast hits to 89 proteins in 11 species: Archae - 0; Bacteria - 2; Metazoa - 0; Fungi - 0; Plants - 86; Viruses - 0; Other Eukaryotes - 1 (source: NCBI BLINK).   chr1:18041989-18042744 FORWARD LENGTH=251 | 255  | 251  | 1.00E-105 | 98.4  | 82.7 | 85.5 |
| Rsa1.0_00319.1.g11212.t4 | gb ACC38383.1  putative GH3-like protein [Brassica juncea]                                                                                                                                                                                                                                                                                                                                                                                                                                                                                                                                                                                                                                                                                                 | 703  | 592  | 0         | 84.2  | 48.4 | 53.6 | putative GH3-like protein                | gbpln | Brassica juncea      | AT1G23160.1   Symbols:   Auxin-responsive GH3 family protein   chr1:8209232-8211325 FORWARD LENGTH=578                                                                                                                                                                                                                                       | 703  | 578  | 1.00E-172 | 82.2  | 41.8 | 50.6 |
| Rsa1.0_00319.1.g11213.t1 | gb ACG60669.1  copia-type polyprotein-like protein [Brassica oleracea var. albobolabra]                                                                                                                                                                                                                                                                                                                                                                                                                                                                                                                                                                                                                                                                    | 90   | 196  | 4.00E-37  | 217.8 | 81.1 | 86.7 | copia-type polyprotein-like protein      | gbpln | Brassica oleracea    | #                                                                                                                                                                                                                                                                                                                                            | #    | #    | #         | #     | #    |      |
| Rsa1.0_00319.1.g11214.t1 | #                                                                                                                                                                                                                                                                                                                                                                                                                                                                                                                                                                                                                                                                                                                                                          | #    | #    | #         | #     | #    | #    | -                                        | ----  | ----                 | #                                                                                                                                                                                                                                                                                                                                            | #    | #    | #         | #     | #    |      |
| Rsa1.0_00319.1.g11215.t1 | gb AAZ41811.1  O1P13-1 [Brassica rapa subsp. pekinensis]                                                                                                                                                                                                                                                                                                                                                                                                                                                                                                                                                                                                                                                                                                   | 982  | 1545 | 0         | 157.3 | 59.2 | 69.3 | O1P13-1                                  | gbpln | Brassica rapa        | AT4G23160.1   Symbols: CRK8   cysteine-rich RLK (RECEPTOR-like protein kinase) 8   chr4:12129485-12134086 FORWARD LENGTH=1262                                                                                                                                                                                                                | 982  | 1262 | 1.00E-93  | 128.5 | 19.7 | 29.2 |
| Rsa1.0_00319.1.g11216.t1 | ref NP_190309.1  uncharacterized protein [Arabidopsis thaliana] gi30692831[ref NP_850661.1  uncharacterized protein [Arabidopsis thaliana] gi30692834[ref NP_850662.1  uncharacterized protein [Arabidopsis thaliana] gi6706134[emb[CAB61971.2] putative protein [Arabidopsis thaliana] gi17528938[gb AAL38679.1  unknown protein [Arabidopsis thaliana] gi20465945[gb AAM20158.1  unknown protein [Arabidopsis thaliana] gi110740818[dbj BAE98506.1  hypothetical protein [Arabidopsis thaliana] gi33264473[gb AEE78258.1  uncharacterized protein AT3G47250 [Arabidopsis thaliana] gi33264473[gb AEE78259.1  uncharacterized protein AT3G47250 [Arabidopsis thaliana] gi33264473[gb AEE78260.1  uncharacterized protein AT3G47250 [Arabidopsis thaliana] | 498  | 480  | 1.00E-109 | 96.4  | 43.0 | 58.0 | uncharacterized protein                  | gbpln | Arabidopsis thaliana | AT3G47250.3   Symbols:   Plant protein of unknown function (DUF247)   chr3:17400124-17401566 REVERSE LENGTH=480                                                                                                                                                                                                                              | 498  | 480  | 1.00E-112 | 96.4  | 43.0 | 58.0 |
| Rsa1.0_00319.1.g11217.t1 | gb AAF97969.1  AC000103.19 F21J9.30 [Arabidopsis thaliana]                                                                                                                                                                                                                                                                                                                                                                                                                                                                                                                                                                                                                                                                                                 | 1112 | 1270 | 0         | 114.2 | 49.6 | 65.5 | F21J9.30                                 | gbpln | Arabidopsis thaliana | AT4G29090.1   Symbols:   Ribonuclease H-like superfamily protein   chr4:14333528-14335255 FORWARD LENGTH=575                                                                                                                                                                                                                                 | 1112 | 575  | 2.00E-83  | 51.7  | 15.5 | 25.6 |
| Rsa1.0_00319.1.g11218.t1 | #                                                                                                                                                                                                                                                                                                                                                                                                                                                                                                                                                                                                                                                                                                                                                          | #    | #    | #         | #     | #    | #    | -                                        | ----  | ----                 | #                                                                                                                                                                                                                                                                                                                                            | #    | #    | #         | #     | #    |      |
| Rsa1.0_00319.1.g11219.t1 | gb ACG60686.1  En/Spm-related transposon protein [Brassica oleracea var. albobolabra]                                                                                                                                                                                                                                                                                                                                                                                                                                                                                                                                                                                                                                                                      | 399  | 695  | 0         | 174.2 | 85.2 | 88.0 | En/Spm-related transposon protein        | gbpln | Brassica oleracea    | #                                                                                                                                                                                                                                                                                                                                            | #    | #    | #         | #     | #    |      |
| Rsa1.0_00319.1.g11220.t1 | emb CAN76528.1  hypothetical protein VITISV_017594 [Vitis vinifera]                                                                                                                                                                                                                                                                                                                                                                                                                                                                                                                                                                                                                                                                                        | 405  | 477  | 1.00E-24  | 117.8 | 25.4 | 37.8 | hypothetical protein VITISV_017594       | gbpln | Vitis vinifera       | #                                                                                                                                                                                                                                                                                                                                            | #    | #    | #         | #     | #    |      |
| Rsa1.0_00319.1.g11221.t1 | #                                                                                                                                                                                                                                                                                                                                                                                                                                                                                                                                                                                                                                                                                                                                                          | #    | #    | #         | #     | #    | #    | -                                        | ----  | ----                 | #                                                                                                                                                                                                                                                                                                                                            | #    | #    | #         | #     | #    |      |
| Rsa1.0_00319.1.g11222.t1 | #                                                                                                                                                                                                                                                                                                                                                                                                                                                                                                                                                                                                                                                                                                                                                          | #    | #    | #         | #     | #    | #    | -                                        | ----  | ----                 | #                                                                                                                                                                                                                                                                                                                                            | #    | #    | #         | #     | #    |      |
| Rsa1.0_00319.1.g11223.t1 | ref NP_188458.1  uncharacterized protein [Arabidopsis thaliana] gi11994092[dbj BAB01095.1  unnamed protein product [Arabidopsis thaliana] gi40822865[gb AAR92245.1  At3g18295 [Arabidopsis thaliana] gi45752678[gb AAS76237.1  At3g18295 [Arabidopsis thaliana] gi332642558[gb AEE76079.1  uncharacterized protein AT3G18295 [Arabidopsis thaliana]                                                                                                                                                                                                                                                                                                                                                                                                        | 166  | 216  | 3.00E-42  | 130.1 | 73.5 | 83.1 | uncharacterized protein                  | gbpln | Arabidopsis thaliana | AT3G18295.1   Symbols:   Protein of unknown function (DUF1639)   chr3:6281268-6282000 FORWARD LENGTH=216                                                                                                                                                                                                                                     | 166  | 216  | 1.00E-44  | 130.1 | 73.5 | 83.1 |

|                          |                                                                                                                                                                                                                                                                                                                                                                                                                                                                                                                                                                                                   |     |      |           |       |      |      |                                               |       |                      |                                                                                                                    |     |     |           |       |      |      |
|--------------------------|---------------------------------------------------------------------------------------------------------------------------------------------------------------------------------------------------------------------------------------------------------------------------------------------------------------------------------------------------------------------------------------------------------------------------------------------------------------------------------------------------------------------------------------------------------------------------------------------------|-----|------|-----------|-------|------|------|-----------------------------------------------|-------|----------------------|--------------------------------------------------------------------------------------------------------------------|-----|-----|-----------|-------|------|------|
| Rsa1.0_00319.1.g11224.t1 | ref NP_175301.1  Auxin-responsive GH3 family protein [Arabidopsis thaliana]<br>gi 12597807 gb AAG60118.1 AC073555_2 auxin-regulated protein, putative [Arabidopsis thaliana]<br>gi 38566604 gb AAR24192.1  At1g48690 [Arabidopsis thaliana]<br>gi 40824047 gb AAR92331.1  At1g48690 [Arabidopsis thaliana]<br>gi 332194216 gb AEE32337.1  Auxin-responsive GH3 family protein [Arabidopsis thaliana]                                                                                                                                                                                              | 124 | 190  | 5.00E-46  | 153.2 | 71.8 | 86.3 | Auxin-responsive GH3 family protein           | gbpln | Arabidopsis thaliana | AT1G48690.1   Symbols: Auxin-responsive GH3 family protein   chr1:18009105-18009878 REVERSE LENGTH=190             | 124 | 190 | 9.00E-49  | 153.2 | 71.8 | 86.3 |
| Rsa1.0_00320.1.g11225.t1 | ref XP_002883181.1  hypothetical protein ARALYDRAFT_479458 [Arabidopsis lyrata subsp. lyrata]<br>gi 297329021 gb EFH59440.1  hypothetical protein ARALYDRAFT_479458 [Arabidopsis lyrata subsp. lyrata]                                                                                                                                                                                                                                                                                                                                                                                            | 606 | 599  | 0         | 98.8  | 87.0 | 91.1 | hypothetical protein ARALYDRAFT_479458        | gbpln | Arabidopsis lyrata   | AT3G19420.1   Symbols: ATPEN2, PEN2   PTEN 2   chr3:6731824-6735354 FORWARD LENGTH=611                             | 606 | 611 | 0         | 100.8 | 88.4 | 92.7 |
| Rsa1.0_00320.1.g11226.t2 | gb AAL60578.1 AF454956.1 senescence-associated cysteine protease [Brassica oleracea]                                                                                                                                                                                                                                                                                                                                                                                                                                                                                                              | 440 | 445  | 0         | 101.1 | 76.4 | 83.0 | senescence-associated cysteine protease       | gbpln | Brassica oleracea    | AT3G19390.1   Symbols: Granulin repeat cysteine protease family protein   chr3:6723024-6724768 FORWARD LENGTH=452  | 440 | 452 | 0         | 102.7 | 72.0 | 84.1 |
| Rsa1.0_00320.1.g11227.t1 | gb AAL60578.1 AF454956.1 senescence-associated cysteine protease [Brassica oleracea]                                                                                                                                                                                                                                                                                                                                                                                                                                                                                                              | 121 | 445  | 1.00E-37  | 367.8 | 60.3 | 68.6 | senescence-associated cysteine protease       | gbpln | Brassica oleracea    | AT3G19390.1   Symbols: Granulin repeat cysteine protease family protein   chr3:6723024-6724768 FORWARD LENGTH=452  | 121 | 452 | 6.00E-38  | 373.6 | 58.7 | 79.3 |
| Rsa1.0_00320.1.g11228.t1 | #                                                                                                                                                                                                                                                                                                                                                                                                                                                                                                                                                                                                 | #   | #    | #         | #     | #    | #    | -                                             | ----  | ----                 | #                                                                                                                  | #   | #   | #         | #     | #    |      |
| Rsa1.0_00320.1.g11229.t1 | gb ABV89622.1  U-box domain-containing protein [Brassica rapa]                                                                                                                                                                                                                                                                                                                                                                                                                                                                                                                                    | 418 | 417  | 0         | 99.8  | 95.5 | 97.8 | U-box domain-containing protein               | gbpln | Brassica rapa        | AT3G19380.1   Symbols: PUB25   plant U-box 25   chr3:6714602-6715867 REVERSE LENGTH=421                            | 418 | 421 | 0         | 100.7 | 87.3 | 94.0 |
| Rsa1.0_00320.1.g11230.t1 | ref NP_566631.1  zinc finger CCCH domain-containing protein 39 [Arabidopsis thaliana]<br>gi 75274079 sp Q9LT81.1 C3H39_ARAT H RecName: Full=Zinc finger CCCH domain-containing protein 39; Short=AtC3H39<br>gi 11994458 dbj BAB02460.1  unnamed protein product [Arabidopsis thaliana]<br>gi 14335094 gb AAK59826.1  AT3g19360/MLD14.8 [Arabidopsis thaliana]<br>gi 19548069 gb AAL87398.1  AT3g19360/MLD14.8 [Arabidopsis thaliana]<br>gi 332642708 gb AEE76229.1  zinc finger CCCH domain-containing protein 39 [Arabidopsis thaliana]                                                          | 368 | 386  | 1.00E-130 | 104.9 | 70.4 | 78.0 | zinc finger CCCH domain-containing protein 39 | gbpln | Arabidopsis thaliana | AT3G19360.1   Symbols: Zinc finger (CCCH-type) family protein   chr3:6707544-6708864 FORWARD LENGTH=386            | 368 | 386 | 1.00E-133 | 104.9 | 70.4 | 78.0 |
| Rsa1.0_00320.1.g11231.t1 | ref XP_002883174.1  predicted protein [Arabidopsis lyrata subsp. lyrata]<br>gi 297329014 gb EFH59433.1  predicted protein [Arabidopsis lyrata subsp. lyrata]                                                                                                                                                                                                                                                                                                                                                                                                                                      | 122 | 113  | 3.00E-19  | 92.6  | 43.4 | 55.7 | predicted protein                             | gbpln | Arabidopsis lyrata   | AT4G34110.1   Symbols: PAB2, PABP2, ATPAB2   poly(A) binding protein 2   chr4:16336732-16339892 FORWARD LENGTH=629 | 122 | 629 | 1.00E-18  | 515.6 | 37.7 | 46.7 |
| Rsa1.0_00320.1.g11232.t1 | ref XP_002883170.1  hypothetical protein ARALYDRAFT_479444 [Arabidopsis lyrata subsp. lyrata]<br>gi 297329010 gb EFH59429.1  hypothetical protein ARALYDRAFT_479444 [Arabidopsis lyrata subsp. lyrata]                                                                                                                                                                                                                                                                                                                                                                                            | 401 | 432  | 1.00E-144 | 107.7 | 79.8 | 84.3 | hypothetical protein ARALYDRAFT_479444        | gbpln | Arabidopsis lyrata   | AT3G19290.1   Symbols: ABF4, AREB2   ABRE binding factor 4   chr3:6687956-6689784 FORWARD LENGTH=431               | 401 | 431 | 1.00E-139 | 107.5 | 81.0 | 85.0 |
| Rsa1.0_00320.1.g11233.t1 | gb AAG51783.1 AC079679_3 reverse transcriptase, putative: 16838-20266 [Arabidopsis thaliana]                                                                                                                                                                                                                                                                                                                                                                                                                                                                                                      | 125 | 1142 | 9.00E-19  | 913.6 | 44.8 | 57.6 | reverse transcriptase, putative: 16838-20266  | gbpln | Arabidopsis thaliana | #                                                                                                                  | #   | #   | #         | #     | #    |      |
| Rsa1.0_00320.1.g11234.t1 | ref NP_188557.1  LAG1 longevity assurance homolog 2 [Arabidopsis thaliana]<br>gi 62900623 sp Q9LJK3.1 LAG12_ARAT H RecName: Full=LAG1 longevity assurance homolog 2; Short=LAG1 homolog 2<br>gi 9294628 dbj BAB02967.1  unnamed protein product [Arabidopsis thaliana]<br>gi 21537198 gb AAM61539.1  longevity factor-like protein [Arabidopsis thaliana]<br>gi 26451114 dbj BAC42661.1  putative longevity factor [Arabidopsis thaliana]<br>gi 30725356 gb AAP37700.1  At3g19260 [Arabidopsis thaliana]<br>gi 332642693 gb AEE76214.1  LAG1 longevity assurance homolog 2 [Arabidopsis thaliana] | 301 | 296  | 1.00E-145 | 98.3  | 84.7 | 90.4 | LAG1 longevity assurance homolog 2            | gbpln | Arabidopsis thaliana | AT3G19260.1   Symbols: LAG1 HOMOLOG 2, LOH2   LAG1 homologue 2   chr3:6669448-6671257 REVERSE LENGTH=296           | 301 | 296 | 1.00E-148 | 98.3  | 84.7 | 90.4 |

|                          |                                                                                                                                                                                                                                                                                                                                                                                                                                                                                                                                                                                                                                                         |      |      |           |       |      |      |                                                                                |       |                      |                                                                                                                                                                                                                                                                                                                                                                                                                                                                                                                                                                         |      |      |           |       |      |      |
|--------------------------|---------------------------------------------------------------------------------------------------------------------------------------------------------------------------------------------------------------------------------------------------------------------------------------------------------------------------------------------------------------------------------------------------------------------------------------------------------------------------------------------------------------------------------------------------------------------------------------------------------------------------------------------------------|------|------|-----------|-------|------|------|--------------------------------------------------------------------------------|-------|----------------------|-------------------------------------------------------------------------------------------------------------------------------------------------------------------------------------------------------------------------------------------------------------------------------------------------------------------------------------------------------------------------------------------------------------------------------------------------------------------------------------------------------------------------------------------------------------------------|------|------|-----------|-------|------|------|
| Rsa1.0_00320.1.g11235.t1 | ref NP_191881.1  F-box/kelch-repeat protein SKIP30 [Arabidopsis thaliana] gi 7523404 emb CAB86423.1  putative protein [Arabidopsis thaliana] gi 21593314 gb AAM65263.1  unknown [Arabidopsis thaliana] gi 110738141 dbj BAF01002.1  hypothetical protein [Arabidopsis thaliana] gi 332646928 gb AEE80449.1  F-box/kelch-repeat protein SKIP30 [Arabidopsis thaliana]                                                                                                                                                                                                                                                                                    | 349  | 345  | 1.00E-164 | 98.9  | 80.8 | 90.5 | F-box/kelch-repeat protein SKIP30                                              | gbpln | Arabidopsis thaliana | AT3G63220.1   Symbols:   Galactose oxidase/kelch repeat superfamily protein   chr3:23357540-23358577 REVERSE LENGTH=345                                                                                                                                                                                                                                                                                                                                                                                                                                                 | 349  | 345  | 1.00E-167 | 98.9  | 80.8 | 90.5 |
| Rsa1.0_00320.1.g11236.t1 | dbj BAB11243.1  unnamed protein product [Arabidopsis thaliana]                                                                                                                                                                                                                                                                                                                                                                                                                                                                                                                                                                                          | 242  | 485  | 1.00E-72  | 200.4 | 56.6 | 69.0 | unnamed protein product                                                        | gbpln | Arabidopsis thaliana | AT5G51740.1   Symbols:   Peptidase family M48 family protein   chr5:21017110-21018987 FORWARD LENGTH=442                                                                                                                                                                                                                                                                                                                                                                                                                                                                | 242  | 442  | 4.00E-75  | 182.6 | 56.6 | 69.0 |
| Rsa1.0_00320.1.g11237.t1 | ref XP_002885297.1  ATIPT8 [Arabidopsis lyrata subsp. lyrata] gi 297331137 gb EFH61556.1  ATIPT8 [Arabidopsis lyrata subsp. lyrata]                                                                                                                                                                                                                                                                                                                                                                                                                                                                                                                     | 324  | 334  | 1.00E-135 | 103.1 | 73.1 | 86.1 | ATIPT8                                                                         | gbpln | Arabidopsis lyrata   | AT3G19160.1   Symbols:   ATIPT8, PGA22, IPT8   ATP/ADP isopentenyltransferases   chr3:6621993-6623236 REVERSE LENGTH=330                                                                                                                                                                                                                                                                                                                                                                                                                                                | 324  | 330  | 1.00E-133 | 101.9 | 71.0 | 84.0 |
| Rsa1.0_00320.1.g11238.t1 | gb EOA30594.1  hypothetical protein CARUB_v10013726mg [Capsella rubella]                                                                                                                                                                                                                                                                                                                                                                                                                                                                                                                                                                                | 431  | 438  | 1.00E-180 | 101.6 | 81.0 | 87.5 | hypothetical protein CARUB_v10013726mg                                         | gbpln | Capsella rubella     | AT3G19130.1   Symbols:   ATRBP47B, RBP47B   RNA-binding protein 47B   chr3:6611399-6613823 REVERSE LENGTH=435                                                                                                                                                                                                                                                                                                                                                                                                                                                           | 431  | 435  | 1.00E-180 | 100.9 | 81.0 | 88.6 |
| Rsa1.0_00320.1.g11239.t4 | ref NP_188541.1  putative calcium-dependent protein kinase [Arabidopsis thaliana] gi 75335080 sp Q9LJL9.1 CAMK2_ARAT H RecName: Full=CDPK-related kinase 2; Short=AtCRK2; AltName: Full=Calcium/calmodulin-dependent protein kinase 2 gi 16904216 gb AAL30815.1 AF435447.1 calcium/calmodulin-dependent protein kinase CaMK2 [Arabidopsis thaliana] gi 9294612 dbj BAB02951.1  calcium-dependent protein kinase [Arabidopsis thaliana] gi 16604466 gb AAL24239.1  AT3g19100/MV111.1 [Arabidopsis thaliana] gi 18958024 gb AAL79585.1  AT3g19100/MV111.1 [Arabidopsis thaliana] gi 332642673 gb AEE76194.1  CDPK-related kinase 2 [Arabidopsis thaliana] | 200  | 599  | 6.00E-76  | 299.5 | 74.5 | 81.0 | putative calcium-dependent protein kinase                                      | gbpln | Arabidopsis thaliana | AT3G19100.1   Symbols:   Protein kinase superfamily protein   chr3:6605681-6608980 FORWARD LENGTH=599                                                                                                                                                                                                                                                                                                                                                                                                                                                                   | 200  | 599  | 2.00E-78  | 299.5 | 74.5 | 81.0 |
| Rsa1.0_00320.1.g11240.t1 | #                                                                                                                                                                                                                                                                                                                                                                                                                                                                                                                                                                                                                                                       | #    | #    | #         | #     | #    | #    | -                                                                              | ----  | ----                 | #                                                                                                                                                                                                                                                                                                                                                                                                                                                                                                                                                                       | #    | #    | #         | #     | #    | #    |
| Rsa1.0_00320.1.g11241.t1 | ref NP_174552.1  transcription initiation factor TFIID subunit 1-A [Arabidopsis thaliana] gi 75157524 sp Q8LRK9.1 TAF1A_ARAT H RecName: Full=Transcription initiation factor TFIID subunit 1-A; Short=AtTAF1a; AltName: Full=TAFII250-A gi 21105767 gb AAM34782.1 AF510669.1 HAF1 [Arabidopsis thaliana] gi 332193403 gb AEE31524.1  transcription initiation factor TFIID subunit 1-A [Arabidopsis thaliana]                                                                                                                                                                                                                                           | 1759 | 1919 | 0         | 109.1 | 76.0 | 83.9 | transcription initiation factor TFIID subunit 1-A                              | gbpln | Arabidopsis thaliana | AT1G32750.1   Symbols:   HAF01, HAF1, HAC13, GTD1, TAF1   HAC13 protein (HAC13)   chr1:11846385-11856261 REVERSE LENGTH=1919                                                                                                                                                                                                                                                                                                                                                                                                                                            | 1759 | 1919 | 0         | 109.1 | 76.0 | 83.9 |
| Rsa1.0_00320.1.g11242.t1 | pir  T00833 RNA-directed DNA polymerase homolog T13L16.7 - Arabidopsis thaliana (fragment)                                                                                                                                                                                                                                                                                                                                                                                                                                                                                                                                                              | 546  | 1365 | 1.00E-111 | 250.0 | 45.2 | 60.1 | RNA-directed DNA polymerase homolog T13L16.7 - Arabidopsis thaliana (fragment) | ----  | ----                 | AT4G29090.1   Symbols:   Ribonuclease H-like superfamily protein   chr4:14333528-14335255 FORWARD LENGTH=575                                                                                                                                                                                                                                                                                                                                                                                                                                                            | 546  | 575  | 1.00E-57  | 105.3 | 28.0 | 42.9 |
| Rsa1.0_00320.1.g11243.t1 | ref XP_002885291.1  hypothetical protein ARALYDRAFT_479421 [Arabidopsis lyrata subsp. lyrata] gi 297331131 gb EFH61550.1  hypothetical protein ARALYDRAFT_479421 [Arabidopsis lyrata subsp. lyrata]                                                                                                                                                                                                                                                                                                                                                                                                                                                     | 60   | 60   | 1.00E-19  | 100.0 | 81.7 | 90.0 | hypothetical protein ARALYDRAFT_479421                                         | gbpln | Arabidopsis lyrata   | AT3G19030.1   Symbols:   unknown protein; FUNCTIONS IN: molecular function unknown; INVOLVED IN: pyridoxine biosynthetic process, homoserine biosynthetic process; LOCATED IN: endomembrane system; EXPRESSED IN: 19 plant structures; EXPRESSED DURING: 9 growth stages; BEST Arabidopsis thaliana protein match is: unknown protein (TAIRAT1G49500.1); Has 22 Blast hits to 22 proteins in 2 species: Archae - 0; Bacteria - 0; Metazoa - 0; Fungi - 0; Plants - 22; Viruses - 0; Other Eukaryotes - 0 (source: NCBI BLINK).   chr3:6564117-6564299 REVERSE LENGTH=60 | 60   | 60   | 2.00E-21  | 100.0 | 80.0 | 88.3 |
| Rsa1.0_00321.1.g11244.t1 | #                                                                                                                                                                                                                                                                                                                                                                                                                                                                                                                                                                                                                                                       | #    | #    | #         | #     | #    | #    | -                                                                              | ----  | ----                 | #                                                                                                                                                                                                                                                                                                                                                                                                                                                                                                                                                                       | #    | #    | #         | #     | #    | #    |

|                          |                                                                                                                                                                                                                                                                                                                                                                                                                                                                                                                                                                                                                                             |     |     |           |       |      |      |                                                     |       |                      |                                                                                                                                                                                                                                                            |     |     |           |       |      |      |
|--------------------------|---------------------------------------------------------------------------------------------------------------------------------------------------------------------------------------------------------------------------------------------------------------------------------------------------------------------------------------------------------------------------------------------------------------------------------------------------------------------------------------------------------------------------------------------------------------------------------------------------------------------------------------------|-----|-----|-----------|-------|------|------|-----------------------------------------------------|-------|----------------------|------------------------------------------------------------------------------------------------------------------------------------------------------------------------------------------------------------------------------------------------------------|-----|-----|-----------|-------|------|------|
| Rsa1.0_00321.1.g11245.t1 | refXP_002884196.1 catalytic/coenzyme binding protein [Arabidopsis lyrata subsp. lyrata] gi297330036 gb EFH60455.1 catalytic/coenzyme binding protein [Arabidopsis lyrata subsp. lyrata]                                                                                                                                                                                                                                                                                                                                                                                                                                                     | 402 | 402 | 0         | 100.0 | 93.5 | 97.0 | catalytic/coenzyme binding protein                  | gbpln | Arabidopsis lyrata   | AT2G20360.1   Symbols:   NAD(P)-binding Rossmann-fold superfamily protein   chr2:8786070-8789098 FORWARD LENGTH=402                                                                                                                                        | 402 | 402 | 0         | 100.0 | 93.3 | 96.5 |
| Rsa1.0_00321.1.g11246.t1 | gb EOA30119.1  hypothetical protein CARUB_v10013229mg [Capsella rubella]                                                                                                                                                                                                                                                                                                                                                                                                                                                                                                                                                                    | 603 | 621 | 0         | 103.0 | 90.0 | 94.0 | hypothetical protein CARUB_v10013229mg              | gbpln | Capsella rubella     | AT2G20370.1   Symbols: KAM1, MUR3   Exostoin family protein   chr2:8792355-8794214 FORWARD LENGTH=619                                                                                                                                                      | 603 | 619 | 0         | 102.7 | 89.7 | 94.5 |
| Rsa1.0_00321.1.g11247.t2 | refXP_002886277.1  hypothetical protein ARALYDRAFT_480866 [Arabidopsis lyrata subsp. lyrata] gi297332117 gb EFH62536.1  hypothetical protein ARALYDRAFT_480866 [Arabidopsis lyrata subsp. lyrata]                                                                                                                                                                                                                                                                                                                                                                                                                                           | 252 | 183 | 4.00E-73  | 72.6  | 61.5 | 65.9 | hypothetical protein ARALYDRAFT_480866              | gbpln | Arabidopsis lyrata   | AT2G20390.1   Symbols:   unknown protein; Has 50 Blast hits to 50 proteins in 18 species: Archae - 0; Bacteria - 2; Metazoa - 0; Fungi - 0; Plants - 48; Viruses - 0; Other Eukaryotes - 0 (source: NCBI BLINK).   chr2:8796475-8798142 REVERSE LENGTH=183 | 252 | 183 | 6.00E-74  | 72.6  | 61.1 | 65.5 |
| Rsa1.0_00321.1.g11248.t1 | ref NP_179630.2  myb-like HTH transcriptional regulator-like protein [Arabidopsis thaliana] gi28451666 dbj BAC42929.1  unknown protein [Arabidopsis thaliana] gi29824287 gb AAP04104.1  unknown protein [Arabidopsis thaliana] gi330251909 gb AEC07003.1  myb-like HTH transcriptional regulator-like protein [Arabidopsis thaliana]                                                                                                                                                                                                                                                                                                        | 364 | 397 | 8.00E-84  | 109.1 | 56.9 | 69.5 | myb-like HTH transcriptional regulator-like protein | gbpln | Arabidopsis thaliana | AT2G20400.1   Symbols:   myb-like HTH transcriptional regulator protein   chr2:8799624-8801621 FORWARD LENGTH=397                                                                                                                                          | 364 | 397 | 2.00E-86  | 109.1 | 56.9 | 69.5 |
| Rsa1.0_00321.1.g11249.t1 | #                                                                                                                                                                                                                                                                                                                                                                                                                                                                                                                                                                                                                                           | #   | #   | #         | #     | #    | #    | -                                                   | ----  | ----                 | #                                                                                                                                                                                                                                                          | #   | #   | #         | #     | #    | #    |
| Rsa1.0_00321.1.g11250.t1 | refXP_002884202.1  hypothetical protein ARALYDRAFT_480870 [Arabidopsis lyrata subsp. lyrata] gi297330042 gb EFH60461.1  hypothetical protein ARALYDRAFT_480870 [Arabidopsis lyrata subsp. lyrata]                                                                                                                                                                                                                                                                                                                                                                                                                                           | 421 | 421 | 0         | 100.0 | 96.9 | 98.3 | hypothetical protein ARALYDRAFT_480870              | gbpln | Arabidopsis lyrata   | AT2G20420.1   Symbols:   ATP citrate lyase (ACL) family protein   chr2:8805574-8807858 FORWARD LENGTH=421                                                                                                                                                  | 421 | 421 | 0         | 100.0 | 95.7 | 98.1 |
| Rsa1.0_00321.1.g11251.t4 | gb EOA40254.1  hypothetical protein CARUB_v10008975mg [Capsella rubella]                                                                                                                                                                                                                                                                                                                                                                                                                                                                                                                                                                    | 462 | 487 | 1.00E-113 | 105.4 | 56.3 | 64.3 | hypothetical protein CARUB_v10008975mg              | gbpln | Capsella rubella     | AT1G48400.1   Symbols:   F-box/RNI-like/FBD-like domains-containing protein   chr1:17882136-17883855 REVERSE LENGTH=513                                                                                                                                    | 462 | 513 | 1.00E-109 | 111.0 | 55.0 | 64.5 |
| Rsa1.0_00321.1.g11252.t1 | ref NP_179633.2  ROP-interactive CRIB motif-containing protein 6 [Arabidopsis thaliana] gi91806212 gb ABE65834.1  p21-rho-binding domain-containing protein [Arabidopsis thaliana] gi330251912 gb AEC07006.1  ROP-interactive CRIB motif-containing protein 6 [Arabidopsis thaliana] ref NP_179634.2  RabGAP/TBC domain-containing protein [Arabidopsis thaliana] gi238479300 ref NP_001154525.1  RabGAP/TBC domain-containing protein [Arabidopsis thaliana] gi330251913 gb AEC07007.1  RabGAP/TBC domain-containing protein [Arabidopsis thaliana] gi330251914 gb AEC07008.1  RabGAP/TBC domain-containing protein [Arabidopsis thaliana] | 200 | 212 | 9.00E-71  | 106.0 | 76.0 | 86.0 | ROP-interactive CRIB motif-containing protein 6     | gbpln | Arabidopsis thaliana | AT2G20430.1   Symbols: RIC6   ROP-interactive CRIB motif-containing protein 6   chr2:8808667-8809781 REVERSE LENGTH=212                                                                                                                                    | 200 | 212 | 3.00E-73  | 106.0 | 76.0 | 86.0 |
| Rsa1.0_00321.1.g11253.t1 | ref NP_179633.2  ROP-interactive CRIB motif-containing protein 6 [Arabidopsis thaliana] gi238479300 ref NP_001154525.1  RabGAP/TBC domain-containing protein [Arabidopsis thaliana] gi330251913 gb AEC07007.1  RabGAP/TBC domain-containing protein [Arabidopsis thaliana] gi330251914 gb AEC07008.1  RabGAP/TBC domain-containing protein [Arabidopsis thaliana]                                                                                                                                                                                                                                                                           | 418 | 425 | 0         | 101.7 | 90.9 | 94.3 | RabGAP/TBC domain-containing protein                | gbpln | Arabidopsis thaliana | AT2G20440.2   Symbols:   Ypt/Rab-GAP domain of gyp1p superfamily protein   chr2:8811034-8813251 REVERSE LENGTH=425                                                                                                                                         | 418 | 425 | 0         | 101.7 | 90.9 | 94.3 |
| Rsa1.0_00321.1.g11254.t1 | gb EOA32203.1  hypothetical protein CARUB_v10015460mg [Capsella rubella]                                                                                                                                                                                                                                                                                                                                                                                                                                                                                                                                                                    | 571 | 566 | 0         | 99.1  | 94.7 | 97.0 | hypothetical protein CARUB_v10015460mg              | gbpln | Capsella rubella     | AT2G20470.1   Symbols:   AGC (cAMP-dependent, cGMP-dependent and protein kinase C) kinase family protein   chr2:8826277-8829497 REVERSE LENGTH=569                                                                                                         | 571 | 569 | 0         | 99.6  | 93.5 | 96.1 |
| Rsa1.0_00321.1.g11255.t1 | refXP_002884205.1  EDA27/NOP10 [Arabidopsis lyrata subsp. lyrata] gi297330045 gb EFH60464.1  EDA27/NOP10 [Arabidopsis lyrata subsp. lyrata]                                                                                                                                                                                                                                                                                                                                                                                                                                                                                                 | 64  | 64  | 5.00E-27  | 100.0 | 92.2 | 95.3 | EDA27/NOP10                                         | gbpln | Arabidopsis lyrata   | AT2G20490.1   Symbols: NOP10, EDA27   nucleolar RNA-binding Nop10p family protein   chr2:8831897-8832723 FORWARD LENGTH=64                                                                                                                                 | 64  | 64  | 2.00E-29  | 100.0 | 90.6 | 95.3 |
| Rsa1.0_00321.1.g11256.t1 | refXP_002890726.1  hypothetical protein ARALYDRAFT_472944 [Arabidopsis lyrata subsp. lyrata] gi297336568 gb EFH66985.1  hypothetical protein ARALYDRAFT_472944 [Arabidopsis lyrata subsp. lyrata]                                                                                                                                                                                                                                                                                                                                                                                                                                           | 320 | 422 | 1.00E-144 | 131.9 | 78.1 | 87.8 | hypothetical protein ARALYDRAFT_472944              | gbpln | Arabidopsis lyrata   | AT1G27410.1   Symbols:   DNA repair metallo-beta-lactamase family protein   chr1:9517226-9518743 FORWARD LENGTH=422                                                                                                                                        | 320 | 422 | 1.00E-145 | 131.9 | 77.5 | 87.2 |

|                          |                                                                                                                                                                                                                                                                                                                                                                                                                                                                                                              |      |      |           |       |      |      |                                                          |       |                      |                                                                                                                                                                                                                                                                                                                                                                                                                                                      |      |      |           |       |      |      |
|--------------------------|--------------------------------------------------------------------------------------------------------------------------------------------------------------------------------------------------------------------------------------------------------------------------------------------------------------------------------------------------------------------------------------------------------------------------------------------------------------------------------------------------------------|------|------|-----------|-------|------|------|----------------------------------------------------------|-------|----------------------|------------------------------------------------------------------------------------------------------------------------------------------------------------------------------------------------------------------------------------------------------------------------------------------------------------------------------------------------------------------------------------------------------------------------------------------------------|------|------|-----------|-------|------|------|
| Rsa1.0_00321.1.g11257.t1 | gb[EOA31139.1] hypothetical protein CARUB_v10014301mg, partial [Capsella rubella]                                                                                                                                                                                                                                                                                                                                                                                                                            | 274  | 290  | 1.00E-122 | 105.8 | 82.1 | 89.8 | hypothetical protein CARUB_v10014301mg, partial          | gbpln | Capsella rubella     | AT2G20495.1   Symbols:   CONTAINS InterPro DOMAIN/s: Serine-threonine protein kinase 19 (InterPro:IPR018865); Has 155 Blast hits to 154 proteins in 53 species: Archae - 0; Bacteria - 0; Metazoa - 95; Fungi - 5; Plants - 34; Viruses - 0; Other Eukaryotes - 21 (source: NCBI BLINK).   chr2:8833180-8835034 FORWARD LENGTH=282                                                                                                                   | 274  | 282  | 1.00E-120 | 102.9 | 81.4 | 89.4 |
| Rsa1.0_00321.1.g11258.t1 | gb[EOA28746.1] hypothetical protein CARUB_v10024977mg [Capsella rubella]                                                                                                                                                                                                                                                                                                                                                                                                                                     | 463  | 473  | 0         | 102.2 | 77.5 | 87.7 | hypothetical protein CARUB_v10024977mg                   | gbpln | Capsella rubella     | AT2G36070.1   Symbols: ATTIM44-2, TIM44-2   translocase inner membrane subunit 44-2   chr2:15145119-15147895 REVERSE LENGTH=469                                                                                                                                                                                                                                                                                                                      | 463  | 469  | 0         | 101.3 | 76.7 | 88.6 |
| Rsa1.0_00321.1.g11259.t2 | dbj BAA85462.1  transposon-like ORF [Brassica rapa]                                                                                                                                                                                                                                                                                                                                                                                                                                                          | 625  | 703  | 3.00E-57  | 112.5 | 17.4 | 20.6 | transposon-like ORF                                      | gbpln | Brassica rapa        | #                                                                                                                                                                                                                                                                                                                                                                                                                                                    | #    | #    | #         | #     | #    |      |
| Rsa1.0_00321.1.g11260.t1 | ref XP_002891886.1  hypothetical protein ARALYDRAFT_474703 [Arabidopsis lyrata subsp. lyrata] gi 297337728 gb EFH68145.1  hypothetical protein ARALYDRAFT_474703 [Arabidopsis lyrata subsp. lyrata]                                                                                                                                                                                                                                                                                                          | 215  | 204  | 5.00E-39  | 94.9  | 43.3 | 47.4 | hypothetical protein ARALYDRAFT_474703                   | gbpln | Arabidopsis lyrata   | AT5G48920.1   Symbols: TED7   tracheary element differentiation-related 7   chr5:19835405-19836022 FORWARD LENGTH=205                                                                                                                                                                                                                                                                                                                                | 215  | 205  | 1.00E-37  | 95.3  | 41.4 | 45.1 |
| Rsa1.0_00321.1.g11261.t1 | ref XP_002894568.1  transferase family protein [Arabidopsis lyrata subsp. lyrata] gi 297340410 gb EFH70827.1  transferase family protein [Arabidopsis lyrata subsp. lyrata]                                                                                                                                                                                                                                                                                                                                  | 424  | 433  | 0         | 102.1 | 94.3 | 97.2 | transferase family protein                               | gbpln | Arabidopsis lyrata   | AT5G48930.1   Symbols: HCT   hydroxycinnamoyl-CoA shikimate/quininate hydroxycinnamoyl transferase   chr5:19836654-19838092 REVERSE LENGTH=433                                                                                                                                                                                                                                                                                                       | 424  | 433  | 0         | 102.1 | 93.9 | 97.2 |
| Rsa1.0_00321.1.g11262.t1 | #                                                                                                                                                                                                                                                                                                                                                                                                                                                                                                            | #    | #    | #         | #     | #    | -    | ----                                                     | ----  | ----                 | #                                                                                                                                                                                                                                                                                                                                                                                                                                                    | #    | #    | #         | #     | #    |      |
| Rsa1.0_00321.1.g11263.t1 | #                                                                                                                                                                                                                                                                                                                                                                                                                                                                                                            | #    | #    | #         | #     | #    | -    | ----                                                     | ----  | ----                 | #                                                                                                                                                                                                                                                                                                                                                                                                                                                    | #    | #    | #         | #     | #    |      |
| Rsa1.0_00321.1.g11264.t1 | gb AAG52949.1  gag/pol polyprotein [Arabidopsis thaliana]                                                                                                                                                                                                                                                                                                                                                                                                                                                    | 1411 | 1643 | 0         | 116.4 | 35.1 | 44.2 | gag/pol polyprotein                                      | gbpln | Arabidopsis thaliana | AT4G23160.1   Symbols: CRK8   cysteine-rich RLK (RECEPTOR-like protein kinase) 8   chr4:12129485-12134086 FORWARD LENGTH=1262                                                                                                                                                                                                                                                                                                                        | 1411 | 1262 | 2.00E-69  | 89.4  | 10.1 | 15.3 |
| Rsa1.0_00321.1.g11265.t1 | #                                                                                                                                                                                                                                                                                                                                                                                                                                                                                                            | #    | #    | #         | #     | #    | -    | ----                                                     | ----  | ----                 | #                                                                                                                                                                                                                                                                                                                                                                                                                                                    | #    | #    | #         | #     | #    |      |
| Rsa1.0_00322.1.g11266.t2 | gb[EOA19063.1] hypothetical protein CARUB_v10007728mg [Capsella rubella]                                                                                                                                                                                                                                                                                                                                                                                                                                     | 572  | 575  | 0         | 100.5 | 85.7 | 93.7 | hypothetical protein CARUB_v10007728mg                   | gbpln | Capsella rubella     | AT4G12680.1   Symbols:   unknown protein; INVOLVED IN: vegetative to reproductive phase transition of meristem; LOCATED IN: endomembrane system; BEST Arabidopsis thaliana protein match is: unknown protein (TAIR:AT5G40640.1); Has 103 Blast hits to 103 proteins in 14 species: Archae - 0; Bacteria - 0; Metazoa - 0; Fungi - 0; Plants - 103; Viruses - 0; Other Eukaryotes - 0 (source: NCBI BLINK).   chr4:7475104-7478174 FORWARD LENGTH=575 | 572  | 575  | 0         | 100.5 | 85.3 | 92.7 |
| Rsa1.0_00322.1.g11267.t1 | dbj BAJ33770.1  unnamed protein product [Thellungiella halophila]                                                                                                                                                                                                                                                                                                                                                                                                                                            | 416  | 416  | 0         | 100.0 | 94.5 | 95.9 | unnamed protein product                                  | ----  | ----                 | AT5G57630.1   Symbols: CIPK21, SnRK3.4   CBL-interacting protein kinase 21   chr5:23341092-23343143 REVERSE LENGTH=416                                                                                                                                                                                                                                                                                                                               | 416  | 416  | 0         | 100.0 | 93.0 | 96.2 |
| Rsa1.0_00322.1.g11268.t1 | ref NP_680450.1  SCP-like extracellular protein domain-containing protein [Arabidopsis thaliana] gi 9758324 dbj BAB08798.1  unnamed protein product [Arabidopsis thaliana] gi 28058747 gb AAO29948.1  Unknown protein [Arabidopsis thaliana] gi 30023648 gb AAP13357.1  At5g57625 [Arabidopsis thaliana] gi 110742530 dbj BAE99181.1  pathogenesis-related protein - like [Arabidopsis thaliana] gi 332009544 gb AED96927.1  SCP-like extracellular protein domain-containing protein [Arabidopsis thaliana] | 205  | 207  | 7.00E-96  | 101.0 | 88.8 | 93.7 | SCP-like extracellular protein domain-containing protein | gbpln | Arabidopsis thaliana | AT5G57625.1   Symbols:   CAP (Cysteine-rich secretory proteins, Antigen 5, and Pathogenesis-related 1 protein) superfamily protein   chr5:23337865-23338577 FORWARD LENGTH=207                                                                                                                                                                                                                                                                       | 205  | 207  | 2.00E-98  | 101.0 | 88.8 | 93.7 |
| Rsa1.0_00322.1.g11269.t1 | gb[EOA13676.1] hypothetical protein CARUB_v10026749mg [Capsella rubella]                                                                                                                                                                                                                                                                                                                                                                                                                                     | 333  | 335  | 1.00E-168 | 100.6 | 90.7 | 95.2 | hypothetical protein CARUB_v10026749mg                   | gbpln | Capsella rubella     | AT5G57620.1   Symbols: MYB36, AtMYB36   myb domain protein 36   chr5:23334904-23336388 FORWARD LENGTH=333                                                                                                                                                                                                                                                                                                                                            | 333  | 333  | 1.00E-166 | 100.0 | 89.8 | 91.9 |
| Rsa1.0_00322.1.g11270.t1 | gb[EOA15115.1] hypothetical protein CARUB_v10028490mg [Capsella rubella]                                                                                                                                                                                                                                                                                                                                                                                                                                     | 1057 | 1061 | 0         | 100.4 | 80.6 | 86.3 | hypothetical protein CARUB_v10028490mg                   | gbpln | Capsella rubella     | AT5G57610.1   Symbols:   Protein kinase superfamily protein with octicosapeptide/Phox/Bem1p domain   chr5:23325307-23329099 FORWARD LENGTH=1054                                                                                                                                                                                                                                                                                                      | 1057 | 1054 | 0         | 99.7  | 79.3 | 84.6 |





|                          |                                                                                                                                                                                                                                                                                                                                                                                                                                                                                       |      |      |           |       |      |      |                                                     |             |                      |                                                                                                                                                                                                                                                                                                                                                                                                                                                                                                                                                                                                                                                                                       |      |      |           |       |      |      |
|--------------------------|---------------------------------------------------------------------------------------------------------------------------------------------------------------------------------------------------------------------------------------------------------------------------------------------------------------------------------------------------------------------------------------------------------------------------------------------------------------------------------------|------|------|-----------|-------|------|------|-----------------------------------------------------|-------------|----------------------|---------------------------------------------------------------------------------------------------------------------------------------------------------------------------------------------------------------------------------------------------------------------------------------------------------------------------------------------------------------------------------------------------------------------------------------------------------------------------------------------------------------------------------------------------------------------------------------------------------------------------------------------------------------------------------------|------|------|-----------|-------|------|------|
| Rsa1.0_00322.1.g11284.t1 | refXP_002864509.1   hypothetical protein ARALYDRAFT_495827 [Arabidopsis lyrata subsp. lyrata] gi 297310344 gb EFH40768.1   hypothetical protein ARALYDRAFT_495827 [Arabidopsis lyrata subsp. lyrata]                                                                                                                                                                                                                                                                                  | 286  | 289  | 1.00E-147 | 101.0 | 90.2 | 95.8 | hypothetical protein ARALYDRAFT_495827              | gbpln       | Arabidopsis lyrata   | AT5G57280.1   Symbols:   S-adenosyl-L-methionine-dependent methyltransferases superfamily protein   chr5:23204533-23206485 FORWARD LENGTH=289                                                                                                                                                                                                                                                                                                                                                                                                                                                                                                                                         | 286  | 289  | 1.00E-144 | 101.0 | 87.1 | 94.4 |
| Rsa1.0_00322.1.g11285.t1 | #                                                                                                                                                                                                                                                                                                                                                                                                                                                                                     | #    | #    | #         | #     | #    | #    | -                                                   | ----        | ----                 | #                                                                                                                                                                                                                                                                                                                                                                                                                                                                                                                                                                                                                                                                                     | #    | #    | #         | #     | #    |      |
| Rsa1.0_00322.1.g11286.t1 | gb EOA13053.1   hypothetical protein CARUB_v10026053mg [Capsella rubella]                                                                                                                                                                                                                                                                                                                                                                                                             | 643  | 655  | 0         | 101.9 | 93.6 | 96.4 | hypothetical protein CARUB_v10026053mg              | gbpln       | Capsella rubella     | AT5G57090.1   Symbols: EIR1, WAV6, ATPIN2, PIN2, AGR, AGR1   Auxin efflux carrier family protein   chr5:23100765-23104456 FORWARD LENGTH=647<br>AT5G57080.1   Symbols:   unknown protein; FUNCTIONS IN: molecular_function unknown; INVOLVED IN: biological_process unknown; LOCATED IN: endomembrane system; EXPRESSED IN: 13 plant structures; EXPRESSED DURING: 7 growth stages; BEST Arabidopsis thaliana protein match is: unknown protein (TAIR:AT4G26055.1); Has 14 Blast hits to 14 proteins in 6 species: Archaea - 0; Bacteria - 0; Metazoa - 0; Fungi - 0; Plants - 14; Viruses - 0; Other Eukaryotes - 0 (source: NCBI BLINK).   chr5:23098959-23099368 FORWARD LENGTH=62 | 643  | 647  | 0         | 100.6 | 90.7 | 94.6 |
| Rsa1.0_00322.1.g11287.t1 | ref NP_200518.1   uncharacterized protein [Arabidopsis thaliana] gi 8843810 db BAA97358.1   unnamed protein product [Arabidopsis thaliana] gi 91807056 gb ABE66255.1   hypothetical protein At5g57080 [Arabidopsis thaliana] gi 332009461 gb AED96844.1   uncharacterized protein AT5G57080 [Arabidopsis thaliana]                                                                                                                                                                    | 62   | 62   | 5.00E-18  | 100.0 | 75.8 | 85.5 | uncharacterized protein                             | gbpln       | Arabidopsis thaliana | BEST Arabidopsis thaliana protein match is: unknown protein (TAIR:AT4G26055.1); Has 14 Blast hits to 14 proteins in 6 species: Archaea - 0; Bacteria - 0; Metazoa - 0; Fungi - 0; Plants - 14; Viruses - 0; Other Eukaryotes - 0 (source: NCBI BLINK).   chr5:23098959-23099368 FORWARD LENGTH=62                                                                                                                                                                                                                                                                                                                                                                                     | 62   | 62   | 7.00E-21  | 100.0 | 75.8 | 85.5 |
| Rsa1.0_00322.1.g11288.t1 | ref NP_001147026.1   glyoxalase/bleomycin resistance protein/dioxygenase [Zea mays] gi 195606588 gb ACG25124.1   glyoxalase/bleomycin resistance protein/dioxygenase [Zea mays]                                                                                                                                                                                                                                                                                                       | 190  | 193  | 1.00E-101 | 101.6 | 93.2 | 97.4 | glyoxalase/bleomycin resistance protein/dioxygenase | gbenv/gbpln | Zea mays             | AT5G57040.1   Symbols:   Lactoylglutathione lyase / glyoxalase I family protein   chr5:23084035-23085116 REVERSE LENGTH=197                                                                                                                                                                                                                                                                                                                                                                                                                                                                                                                                                           | 190  | 197  | 5.00E-94  | 103.7 | 86.8 | 92.1 |
| Rsa1.0_00322.1.g11289.t2 | gb EOA12919.1   hypothetical protein CARUB_v10025897mg, partial [Capsella rubella]                                                                                                                                                                                                                                                                                                                                                                                                    | 996  | 816  | 0         | 81.9  | 69.6 | 74.9 | hypothetical protein CARUB_v10025897mg, partial     | gbpln       | Capsella rubella     | AT5G57035.1   Symbols:   U-box domain-containing protein kinase family protein   chr5:23080743-23083819 FORWARD LENGTH=789                                                                                                                                                                                                                                                                                                                                                                                                                                                                                                                                                            | 996  | 789  | 0         | 79.2  | 68.9 | 74.5 |
| Rsa1.0_00323.1.g11290.t1 | gb EOA24256.1   hypothetical protein CARUB_v10017497mg [Capsella rubella]                                                                                                                                                                                                                                                                                                                                                                                                             | 199  | 364  | 5.00E-71  | 182.9 | 71.9 | 77.9 | hypothetical protein CARUB_v10017497mg              | gbpln       | Capsella rubella     | AT3G30340.1   Symbols:   nodulin MtN21 /EamA-like transporter family protein   chr3:11956626-11958969 FORWARD LENGTH=364                                                                                                                                                                                                                                                                                                                                                                                                                                                                                                                                                              | 199  | 364  | 5.00E-70  | 182.9 | 67.3 | 77.9 |
| Rsa1.0_00323.1.g11291.t2 | gb EOA25673.1   hypothetical protein CARUB_v10019025mg [Capsella rubella]                                                                                                                                                                                                                                                                                                                                                                                                             | 467  | 458  | 0         | 98.1  | 85.7 | 92.9 | hypothetical protein CARUB_v10019025mg              | gbpln       | Capsella rubella     | AT3G30390.2   Symbols:   Transmembrane amino acid transporter family protein   chr3:11977112-11978827 REVERSE LENGTH=460                                                                                                                                                                                                                                                                                                                                                                                                                                                                                                                                                              | 467  | 460  | 0         | 98.5  | 86.7 | 92.3 |
| Rsa1.0_00323.1.g11292.t1 | #                                                                                                                                                                                                                                                                                                                                                                                                                                                                                     | #    | #    | #         | #     | #    | #    | -                                                   | ----        | ----                 | #                                                                                                                                                                                                                                                                                                                                                                                                                                                                                                                                                                                                                                                                                     | #    | #    | #         | #     | #    |      |
| Rsa1.0_00323.1.g11293.t1 | gb EOA25426.1   hypothetical protein CARUB_v10018758mg [Capsella rubella]                                                                                                                                                                                                                                                                                                                                                                                                             | 153  | 147  | 5.00E-48  | 96.1  | 64.7 | 75.2 | hypothetical protein CARUB_v10018758mg              | gbpln       | Capsella rubella     | AT3G30460.1   Symbols:   RING/U-box superfamily protein   chr3:12104433-12104876 FORWARD LENGTH=147                                                                                                                                                                                                                                                                                                                                                                                                                                                                                                                                                                                   | 153  | 147  | 1.00E-49  | 96.1  | 62.1 | 74.5 |
| Rsa1.0_00323.1.g11294.t1 | gb ABV89624.1   early responsive to dehydration 5 dehydrogenase [Brassica rapa]                                                                                                                                                                                                                                                                                                                                                                                                       | 498  | 498  | 0         | 100.0 | 89.6 | 94.6 | early responsive to dehydration 5 dehydrogenase     | gbpln       | Brassica rapa        | AT3G30775.1   Symbols: ERD5, PRODH, AT-POX, ATPOX, ATPDH, PRO1   Methylenetetrahydrofolate reductase family protein   chr3:12448880-12451126 REVERSE LENGTH=499                                                                                                                                                                                                                                                                                                                                                                                                                                                                                                                       | 498  | 499  | 0         | 100.2 | 87.6 | 93.2 |
| Rsa1.0_00323.1.g11295.t1 | ref XP_002875563.1   hypothetical protein ARALYDRAFT_484754 [Arabidopsis lyrata subsp. lyrata] gi 297321401 gb EFH51822.1   hypothetical protein ARALYDRAFT_484754 [Arabidopsis lyrata subsp. lyrata]                                                                                                                                                                                                                                                                                 | 251  | 248  | 1.00E-113 | 98.8  | 85.3 | 89.6 | hypothetical protein ARALYDRAFT_484754              | gbpln       | Arabidopsis lyrata   | AT3G32930.1   Symbols:   unknown protein; FUNCTIONS IN: molecular_function unknown; INVOLVED IN: biological_process unknown; LOCATED IN: chloroplast envelope; EXPRESSED IN: 22 plant structures; EXPRESSED DURING: 13 growth stages; Has 57 Blast hits to 57 proteins in 11 species: Archaea - 0; Bacteria - 0; Metazoa - 0; Fungi - 0; Plants - 57; Viruses - 0; Other Eukaryotes - 0 (source: NCBI BLINK).   chr3:13489595-13490704 FORWARD LENGTH=249                                                                                                                                                                                                                             | 251  | 249  | 1.00E-115 | 99.2  | 85.7 | 90.4 |
| Rsa1.0_00323.1.g11296.t2 | ref NP_199593.2   kinesin family member 4/7/21/27 [Arabidopsis thaliana] gi 30685302 ref NP_851151.1   kinesin family member 4/7/21/27 [Arabidopsis thaliana] gi 27260890 gb AAN86114.1   kinesin-like protein [Arabidopsis thaliana] gi 27260892 gb AAN86115.1   kinesin-like protein [Arabidopsis thaliana] gi 332008192 gb AED95575.1   kinesin family member 4/7/21/27 [Arabidopsis thaliana] gi 332008193 gb AED95576.1   kinesin family member 4/7/21/27 [Arabidopsis thaliana] | 1075 | 1035 | 0         | 96.3  | 87.8 | 92.0 | kinesin family member 4/7/21/27                     | gbpln       | Arabidopsis thaliana | AT5G47820.2   Symbols: FRA1   P-loop containing nucleoside triphosphate hydrolases superfamily protein   chr5:19366505-19372229 FORWARD LENGTH=1035                                                                                                                                                                                                                                                                                                                                                                                                                                                                                                                                   | 1075 | 1035 | 0         | 96.3  | 87.8 | 92.0 |

|                          |                                                                                                                                                                                                           |     |     |           |       |      |       |                                                      |       |                      |                                                                                                                                                                                                                                                                                                                                                                                                                                                                                                                               |     |     |           |       |      |       |
|--------------------------|-----------------------------------------------------------------------------------------------------------------------------------------------------------------------------------------------------------|-----|-----|-----------|-------|------|-------|------------------------------------------------------|-------|----------------------|-------------------------------------------------------------------------------------------------------------------------------------------------------------------------------------------------------------------------------------------------------------------------------------------------------------------------------------------------------------------------------------------------------------------------------------------------------------------------------------------------------------------------------|-----|-----|-----------|-------|------|-------|
| Rsa1.0_00323.1.g11297.t2 | refXP_002863827.1  hypothetical protein ARALYDRAFT_917605 [Arabidopsis lyrata subsp. lyrata] gi 297309662 gb EFH40086.1                                                                                   | 276 | 296 | 1.00E-108 | 107.2 | 80.8 | 85.9  | hypothetical protein ARALYDRAFT_917605               | gbpln | Arabidopsis lyrata   | AT5G47840.1   Symbols: AMK2   adenosine monophosphate kinase   chr5:19375488-19378058 FORWARD LENGTH=283                                                                                                                                                                                                                                                                                                                                                                                                                      | 276 | 283 | 1.00E-103 | 102.5 | 76.8 | 82.2  |
| Rsa1.0_00323.1.g11298.t1 | hypothetical protein ARALYDRAFT_917605 [Arabidopsis lyrata subsp. lyrata]<br>refXP_002865570.1  hypothetical protein ARALYDRAFT_331197 [Arabidopsis lyrata subsp. lyrata] gi 297311405 gb EFH41829.1      | 757 | 753 | 0         | 99.5  | 72.4 | 80.2  | hypothetical protein ARALYDRAFT_331197               | gbpln | Arabidopsis lyrata   | AT5G47850.1   Symbols: CCR4   CRINKLY4 related 4   chr5:19378803-19381058 REVERSE LENGTH=751                                                                                                                                                                                                                                                                                                                                                                                                                                  | 757 | 751 | 0         | 99.2  | 71.9 | 79.7  |
| Rsa1.0_00323.1.g11299.t1 | gb EOA13902.1  hypothetical protein CARUB_v10027018mg [Capsella rubella]                                                                                                                                  | 211 | 242 | 3.00E-85  | 114.7 | 75.4 | 83.4  | hypothetical protein CARUB_v10027018mg               | gbpln | Capsella rubella     | AT5G47870.1   Symbols:   FUNCTIONS IN: molecular function unknown; INVOLVED IN: biological process unknown; LOCATED IN: chloroplast; EXPRESSED IN: 22 plant structures; EXPRESSED DURING: 13 growth stages; BEST Arabidopsis thaliana protein match is: cobalt ion binding (TAIR:AT1G71310.1); Has 1807 Blast hits to 1807 proteins in 277 species: Archae - 0; Bacteria - 0; Metazoa - 736; Fungi - 347; Plants - 385; Viruses - 0; Other Eukaryotes - 339 (source: NCBI BLink).   chr5:19384555-19385808 REVERSE LENGTH=199 | 211 | 199 | 5.00E-81  | 94.3  | 74.4 | 80.1  |
| Rsa1.0_00323.1.g11300.t1 | refNP_199118.1  cysteine/histidine-rich C1 domain-containing protein [Arabidopsis thaliana] gi 9757830 db BAB08267.1  CHP-rich zinc finger protein-like [Arabidopsis thaliana] gi 332007520 gb AED94903.1 | 482 | 551 | 1.00E-117 | 114.3 | 47.9 | 61.4  | cysteine/histidine-rich C1 domain-containing protein | gbpln | Arabidopsis thaliana | AT5G43040.1   Symbols:   Cysteine/Histidine-rich C1 domain family protein   chr5:17263965-17265620 REVERSE LENGTH=551                                                                                                                                                                                                                                                                                                                                                                                                         | 482 | 551 | 1.00E-119 | 114.3 | 47.9 | 61.4  |
| Rsa1.0_00323.1.g11301.t1 | gb EOA35650.1  hypothetical protein CARUB_v10020872mg [Capsella rubella]                                                                                                                                  | 469 | 240 | 1.00E-108 | 51.2  | 40.9 | 47.1  | hypothetical protein CARUB_v10020872mg               | gbpln | Capsella rubella     | AT1G65520.1   Symbols: ATEC11, EC11, ECHC, PEC11   delta(3), delta(2)-enoyl CoA isomerase 1   chr1:24361171-24361893 REVERSE LENGTH=240                                                                                                                                                                                                                                                                                                                                                                                       | 469 | 240 | 1.00E-108 | 51.2  | 40.3 | 46.5  |
| Rsa1.0_00323.1.g11302.t1 | refXP_002863829.1  hypothetical protein ARALYDRAFT_494832 [Arabidopsis lyrata subsp. lyrata] gi 297309664 gb EFH40088.1                                                                                   | 85  | 97  | 1.00E-27  | 114.1 | 69.4 | 72.9  | hypothetical protein ARALYDRAFT_494832               | gbpln | Arabidopsis lyrata   | AT5G47890.1   Symbols:   NADH-ubiquinone oxidoreductase B8 subunit, putative   chr5:19388806-19390409 FORWARD LENGTH=97                                                                                                                                                                                                                                                                                                                                                                                                       | 85  | 97  | 1.00E-29  | 114.1 | 67.1 | 71.8  |
| Rsa1.0_00323.1.g11303.t1 | gb EOA14052.1  hypothetical protein CARUB_v10027188mg [Capsella rubella]                                                                                                                                  | 182 | 191 | 4.00E-78  | 104.9 | 86.8 | 95.1  | hypothetical protein CARUB_v10027188mg               | gbpln | Capsella rubella     | AT5G47920.1   Symbols:   unknown protein; BEST Arabidopsis thaliana protein match is: unknown protein (TAIR:AT5G13880.1); Has 1807 Blast hits to 1807 proteins in 277 species: Archae - 0; Bacteria - 0; Metazoa - 736; Fungi - 347; Plants - 385; Viruses - 0; Other Eukaryotes - 339 (source: NCBI BLink).   chr5:19403458-19404021 REVERSE LENGTH=187                                                                                                                                                                      | 182 | 187 | 6.00E-77  | 102.7 | 84.1 | 94.0  |
| Rsa1.0_00323.1.g11304.t1 | gb EOA16169.1  hypothetical protein CARUB_v10004305mg [Capsella rubella]                                                                                                                                  | 140 | 670 | 1.00E-16  | 478.6 | 37.9 | 46.4  | hypothetical protein CARUB_v10004305mg               | gbpln | Capsella rubella     | AT4G29050.1   Symbols:   Concanavalin A-like lectin protein kinase family protein   chr4:14314870-14316879 REVERSE LENGTH=669                                                                                                                                                                                                                                                                                                                                                                                                 | 140 | 669 | 9.00E-18  | 477.9 | 31.4 | 38.6  |
| Rsa1.0_00323.1.g11305.t5 | gb EOA24972.1  hypothetical protein CARUB_v10018269mg, partial [Capsella rubella]                                                                                                                         | 84  | 115 | 3.00E-42  | 136.9 | 97.6 | 100.0 | hypothetical protein CARUB_v10018269mg, partial      | gbpln | Capsella rubella     | AT3G61110.1   Symbols: ARS27A, RS27A   ribosomal protein S27   chr3:22611710-22612632 FORWARD LENGTH=86                                                                                                                                                                                                                                                                                                                                                                                                                       | 84  | 86  | 8.00E-44  | 102.4 | 96.4 | 100.0 |
| Rsa1.0_00323.1.g11306.t1 | dbj BAB02625.1  unnamed protein product [Arabidopsis thaliana]                                                                                                                                            | 506 | 420 | 6.00E-84  | 83.0  | 38.5 | 50.8  | unnamed protein product                              | gbpln | Arabidopsis thaliana | AT3G28223.1   Symbols:   F-box family protein   chr3:10527669-10528921 REVERSE LENGTH=391                                                                                                                                                                                                                                                                                                                                                                                                                                     | 506 | 391 | 1.00E-68  | 77.3  | 33.2 | 45.3  |
| Rsa1.0_00323.1.g11307.t1 | dbj BAB02625.1  unnamed protein product [Arabidopsis thaliana]                                                                                                                                            | 424 | 420 | 1.00E-90  | 99.1  | 47.4 | 61.6  | unnamed protein product                              | gbpln | Arabidopsis thaliana | AT3G28223.1   Symbols:   F-box family protein   chr3:10527669-10528921 REVERSE LENGTH=391                                                                                                                                                                                                                                                                                                                                                                                                                                     | 424 | 391 | 4.00E-75  | 92.2  | 42.7 | 55.0  |
| Rsa1.0_00323.1.g11308.t1 | gb EOA13259.1  hypothetical protein CARUB_v10026289mg [Capsella rubella]                                                                                                                                  | 495 | 490 | 0         | 99.0  | 86.7 | 91.3  | hypothetical protein CARUB_v10026289mg               | gbpln | Capsella rubella     | AT5G48150.2   Symbols: PAT1   GRAS family transcription factor   chr5:19522497-19524053 REVERSE LENGTH=490                                                                                                                                                                                                                                                                                                                                                                                                                    | 495 | 490 | 0         | 99.0  | 86.7 | 91.5  |

|                          |                                                                                                                                                                                                                                                                                                                                                                                                                                                                                                                                                                                                                                                                                                                                           |     |      |           |       |      |      |                                                 |       |                      |                                                                                                                                                                                                                                                                                                                                                                                                                                                                                                   |     |     |           |       |      |      |
|--------------------------|-------------------------------------------------------------------------------------------------------------------------------------------------------------------------------------------------------------------------------------------------------------------------------------------------------------------------------------------------------------------------------------------------------------------------------------------------------------------------------------------------------------------------------------------------------------------------------------------------------------------------------------------------------------------------------------------------------------------------------------------|-----|------|-----------|-------|------|------|-------------------------------------------------|-------|----------------------|---------------------------------------------------------------------------------------------------------------------------------------------------------------------------------------------------------------------------------------------------------------------------------------------------------------------------------------------------------------------------------------------------------------------------------------------------------------------------------------------------|-----|-----|-----------|-------|------|------|
| Rsa1.0_00323.1.g11309.t1 | ref[NP_199627.1] OBERON 2 protein [Arabidopsis thaliana] gi 79330131 ref[NP_001032031.1] OBERON 2 protein [Arabidopsis thaliana] gi 75180552 sp Q9LUB7.1 OBE2_ARATH RecName: Full=Protein OBERON 2; AltName: Full=Potyvirus VPg-interacting protein 1 gi 8777406 dbj BAA96996.1  unnamed protein product [Arabidopsis thaliana] gi 222424758 dbj BAH20332.1  AT5G48160 [Arabidopsis thaliana] gi 332008243 gb AED95626.1  OBERON 2 protein [Arabidopsis thaliana] gi 332008244 gb AED95627.1  OBERON 2 protein [Arabidopsis thaliana] ref[XP_002865614.1] hypothetical protein ARALYDRAFT_494871 [Arabidopsis lyrata subsp. lyrata] gi 297311449 gb EFH41873.1  hypothetical protein ARALYDRAFT_494871 [Arabidopsis lyrata subsp. lyrata] | 584 | 574  | 0         | 98.3  | 83.7 | 89.6 | OBERON 2 protein                                | gbpln | Arabidopsis thaliana | AT5G48160.2   Symbols: OBE2   Protein of unknown function (DUF1423)   chr5:19528019-19529820 REVERSE LENGTH=574                                                                                                                                                                                                                                                                                                                                                                                   | 584 | 574 | 0         | 98.3  | 83.7 | 89.6 |
| Rsa1.0_00323.1.g11310.t1 | ref[XP_002862436.1] predicted protein [Arabidopsis lyrata subsp. lyrata] gi 297307949 gb EFH38694.1  predicted protein [Arabidopsis lyrata subsp. lyrata]                                                                                                                                                                                                                                                                                                                                                                                                                                                                                                                                                                                 | 156 | 156  | 9.00E-77  | 100.0 | 91.0 | 94.9 | hypothetical protein ARALYDRAFT_494871          | gbpln | Arabidopsis lyrata   | AT5G48170.1   Symbols: SLY2   F-box family protein   chr5:19532729-19533202 REVERSE LENGTH=157                                                                                                                                                                                                                                                                                                                                                                                                    | 156 | 157 | 3.00E-77  | 100.6 | 89.1 | 93.6 |
| Rsa1.0_00323.1.g11311.t1 | gb AAD32866.1 AC005489.4 F14N23.4 [Arabidopsis thaliana]                                                                                                                                                                                                                                                                                                                                                                                                                                                                                                                                                                                                                                                                                  | 699 | 1161 | 1.00E-110 | 166.1 | 31.6 | 46.9 | F14N23.4                                        | gbpln | Arabidopsis thaliana | AT1G43760.1   Symbols:   DNase I-like superfamily protein   chr1:16528880-16531065 REVERSE LENGTH=626                                                                                                                                                                                                                                                                                                                                                                                             | 699 | 626 | 1.00E-63  | 89.6  | 17.9 | 30.8 |
| Rsa1.0_00323.1.g11312.t1 | ref[XP_002862436.1] predicted protein [Arabidopsis lyrata subsp. lyrata] gi 297307949 gb EFH38694.1  predicted protein [Arabidopsis lyrata subsp. lyrata]                                                                                                                                                                                                                                                                                                                                                                                                                                                                                                                                                                                 | 612 | 530  | 2.00E-36  | 86.6  | 13.4 | 18.3 | predicted protein                               | gbpln | Arabidopsis lyrata   | AT5G32613.1   Symbols:   Zinc knuckle (OHC-type) family protein   chr5:12263255-12265041 FORWARD LENGTH=457                                                                                                                                                                                                                                                                                                                                                                                       | 612 | 457 | 4.00E-12  | 74.7  | 6.0  | 8.3  |
| Rsa1.0_00323.1.g11313.t1 | ref[NP_199635.2] uncharacterized protein [Arabidopsis thaliana] gi 332008257 gb AED95640.1  uncharacterized protein AT5G48240 [Arabidopsis thaliana]                                                                                                                                                                                                                                                                                                                                                                                                                                                                                                                                                                                      | 316 | 309  | 1.00E-125 | 97.8  | 75.9 | 87.7 | uncharacterized protein                         | gbpln | Arabidopsis thaliana | AT5G48240.1   Symbols:   unknown protein; FUNCTIONS IN: molecular_function unknown; INVOLVED IN: biological_process unknown; LOCATED IN: nucleolus; EXPRESSED IN: cultured cell; CONTAINS InterPro DOMAIN/s: Protein of unknown function DUF1665 (InterPro:IPRO12459); Has 402 Blast hits to 382 proteins in 162 species: Archae - 0; Bacteria - 4; Metazoa - 139; Fungi - 111; Plants - 54; Viruses - 1; Other Eukaryotes - 93 (source: NCBI BLINK).   chr5:19559301-19561153 FORWARD LENGTH=309 | 316 | 309 | 1.00E-128 | 97.8  | 75.9 | 87.7 |
| Rsa1.0_00323.1.g11314.t1 | ref[XP_002863882.1] hypothetical protein ARALYDRAFT_494878 [Arabidopsis lyrata subsp. lyrata] gi 297309717 gb EFH40141.1  hypothetical protein ARALYDRAFT_494878 [Arabidopsis lyrata subsp. lyrata]                                                                                                                                                                                                                                                                                                                                                                                                                                                                                                                                       | 99  | 310  | 4.00E-38  | 313.1 | 83.8 | 88.9 | hypothetical protein ARALYDRAFT_494878          | gbpln | Arabidopsis lyrata   | AT5G48240.1   Symbols:   unknown protein; FUNCTIONS IN: molecular_function unknown; INVOLVED IN: biological_process unknown; LOCATED IN: nucleolus; EXPRESSED IN: cultured cell; CONTAINS InterPro DOMAIN/s: Protein of unknown function DUF1665 (InterPro:IPRO12459); Has 402 Blast hits to 382 proteins in 162 species: Archae - 0; Bacteria - 4; Metazoa - 139; Fungi - 111; Plants - 54; Viruses - 1; Other Eukaryotes - 93 (source: NCBI BLINK).   chr5:19559301-19561153 FORWARD LENGTH=309 | 99  | 309 | 7.00E-40  | 312.1 | 79.8 | 86.9 |
| Rsa1.0_00323.1.g11315.t1 | ref[NP_199638.1] uncharacterized protein [Arabidopsis thaliana] gi 8777417 dbj BAA97007.1  unnamed protein product [Arabidopsis thaliana] gi 71905601 gb AAZ52778.1  hypothetical protein AT5g48270 [Arabidopsis thaliana] gi 91805693 gb ABE65575.1  hypothetical protein AT5g48270 [Arabidopsis thaliana] gi 332008261 gb AED95644.1  uncharacterized protein AT5G48270 [Arabidopsis thaliana]                                                                                                                                                                                                                                                                                                                                          | 320 | 322  | 1.00E-161 | 100.6 | 86.6 | 92.8 | uncharacterized protein                         | gbpln | Arabidopsis thaliana | AT5G48270.1   Symbols:   Plant protein of unknown function (DUF868)   chr5:19564744-19565712 REVERSE LENGTH=322                                                                                                                                                                                                                                                                                                                                                                                   | 320 | 322 | 1.00E-164 | 100.6 | 86.6 | 92.8 |
| Rsa1.0_00323.1.g11316.t1 | gb EOA20463.1  hypothetical protein CARUB_v10000776mg, partial [Capsella rubella]                                                                                                                                                                                                                                                                                                                                                                                                                                                                                                                                                                                                                                                         | 449 | 503  | 1.00E-108 | 112.0 | 55.9 | 68.6 | hypothetical protein CARUB_v10000776mg, partial | gbpln | Capsella rubella     | AT5G03780.1   Symbols: TRFL10   TRF-like 10   chr5:999266-1000947 REVERSE LENGTH=420                                                                                                                                                                                                                                                                                                                                                                                                              | 449 | 420 | 1.00E-106 | 93.5  | 52.6 | 63.5 |

|                          |                                                                                                                                                                                                                                                                                                                                                                   |     |     |           |       |      |      |                                                 |       |                      |                                                                                                                                                                                                                                                                                                                                                                                                                                                                                |     |     |           |       |      |      |
|--------------------------|-------------------------------------------------------------------------------------------------------------------------------------------------------------------------------------------------------------------------------------------------------------------------------------------------------------------------------------------------------------------|-----|-----|-----------|-------|------|------|-------------------------------------------------|-------|----------------------|--------------------------------------------------------------------------------------------------------------------------------------------------------------------------------------------------------------------------------------------------------------------------------------------------------------------------------------------------------------------------------------------------------------------------------------------------------------------------------|-----|-----|-----------|-------|------|------|
| Rsa1.0_00323.1.g11317.t2 | ref XP_002863886.1  hypothetical protein ARALYDRAFT_331241 [Arabidopsis lyrata subsp. lyrata] gi 297309721 gb EFH40145.1  hypothetical protein ARALYDRAFT_331241 [Arabidopsis lyrata subsp. lyrata]                                                                                                                                                               | 96  | 114 | 6.00E-15  | 118.8 | 43.8 | 51.0 | hypothetical protein ARALYDRAFT_331241          | gbpln | Arabidopsis lyrata   | AT5G48335.1   Symbols:   unknown protein; FUNCTIONS IN: molecular function unknown; INVOLVED IN: biological process unknown; LOCATED IN: chloroplast; BEST Arabidopsis thaliana protein match is: unknown protein (TAIR:AT3G07580.1); Has 35333 Blast hits to 34131 proteins in 2444 species: Archae - 798; Bacteria - 22429; Metazoa - 974; Fungi - 991; Plants - 531; Viruses - 0; Other Eukaryotes - 9610 (source: NCBI BLINK).   chr5:19588083-19589366 FORWARD LENGTH=114 | 96  | 114 | 2.00E-16  | 118.8 | 42.7 | 49.0 |
| Rsa1.0_00323.1.g11318.t2 | ref NP_199648.1  thioesterase family protein [Arabidopsis thaliana] gi 8978341 dbj BAA98194.1  unnamed protein product [Arabidopsis thaliana] gi 53749132 gb AAU90051.1  At5g48370 [Arabidopsis thaliana] gi 110742181 dbj BAE99018.1  hypothetical protein [Arabidopsis thaliana] gi 332008276 gb AED95659.1  thioesterase family protein [Arabidopsis thaliana] | 442 | 438 | 0         | 99.1  | 88.5 | 90.7 | thioesterase family protein                     | gbpln | Arabidopsis thaliana | AT5G48370.1   Symbols:   Thioesterase/thiol ester dehydrase-isomerase superfamily protein   chr5:19598666-19600512 REVERSE LENGTH=438                                                                                                                                                                                                                                                                                                                                          | 442 | 438 | 0         | 99.1  | 88.5 | 90.7 |
| Rsa1.0_00323.1.g11319.t1 | dbj BAC56855.1  gamma-glutamyl transferase [Raphanus sativus]                                                                                                                                                                                                                                                                                                     | 543 | 575 | 0         | 105.9 | 88.0 | 93.4 | gamma-glutamyl transferase                      | gbpln | Raphanus sativus     | AT4G39640.2   Symbols: GGT1   gamma-glutamyl transpeptidase 1   chr4:18400608-18402861 FORWARD LENGTH=572                                                                                                                                                                                                                                                                                                                                                                      | 543 | 572 | 0         | 105.3 | 83.4 | 90.8 |
| Rsa1.0_00323.1.g11320.t1 | ref XP_002863896.1  ATGLR1.3 [Arabidopsis lyrata subsp. lyrata] gi 297309731 gb EFH40155.1  ATGLR1.3 [Arabidopsis lyrata subsp. lyrata]                                                                                                                                                                                                                           | 877 | 861 | 0         | 98.2  | 69.1 | 79.6 | ATGLR1.3                                        | gbpln | Arabidopsis lyrata   | AT5G48410.1   Symbols: ATGLR1.3, GLR1.3   glutamate receptor 1.3   chr5:19620316-19623277 FORWARD LENGTH=860                                                                                                                                                                                                                                                                                                                                                                   | 877 | 860 | 0         | 98.1  | 67.3 | 79.5 |
| Rsa1.0_00323.1.g11321.t1 | ref XP_002863896.1  ATGLR1.3 [Arabidopsis lyrata subsp. lyrata] gi 297309731 gb EFH40155.1  ATGLR1.3 [Arabidopsis lyrata subsp. lyrata]                                                                                                                                                                                                                           | 880 | 861 | 0         | 97.8  | 70.3 | 79.9 | ATGLR1.3                                        | gbpln | Arabidopsis lyrata   | AT5G48410.1   Symbols: ATGLR1.3, GLR1.3   glutamate receptor 1.3   chr5:19620316-19623277 FORWARD LENGTH=860                                                                                                                                                                                                                                                                                                                                                                   | 880 | 860 | 0         | 97.7  | 69.4 | 79.9 |
| Rsa1.0_00323.1.g11322.t1 | ref NP_186837.1  uncharacterized protein [Arabidopsis thaliana] gi 6091728 gb AAF03440.1 AC010797_16 hypothetical protein [Arabidopsis thaliana] gi 6513943 gb AAF14847.1 AC011664_29 hypothetical protein [Arabidopsis thaliana] gi 332640208 gb AEE73729.1  uncharacterized protein AT3G01880 [Arabidopsis thaliana]                                            | 498 | 592 | 1.00E-124 | 118.9 | 43.4 | 49.0 | uncharacterized protein                         | gbpln | Arabidopsis thaliana | AT3G01880.1   Symbols:   Plant protein of unknown function (DUF946)   chr3:307782-309560 FORWARD LENGTH=592                                                                                                                                                                                                                                                                                                                                                                    | 498 | 592 | 1.00E-127 | 118.9 | 43.4 | 49.0 |
| Rsa1.0_00323.1.g11323.t1 | ref XP_002865634.1  hypothetical protein ARALYDRAFT_494897 [Arabidopsis lyrata subsp. lyrata] gi 297311469 gb EFH41893.1  hypothetical protein ARALYDRAFT_494897 [Arabidopsis lyrata subsp. lyrata]                                                                                                                                                               | 403 | 406 | 0         | 100.7 | 81.6 | 89.8 | hypothetical protein ARALYDRAFT_494897          | gbpln | Arabidopsis lyrata   | AT5G48430.1   Symbols:   Eukaryotic aspartyl protease family protein   chr5:19627892-19629112 REVERSE LENGTH=406                                                                                                                                                                                                                                                                                                                                                               | 403 | 406 | 0         | 100.7 | 77.2 | 87.6 |
| Rsa1.0_00323.1.g11324.t1 | gb EOA31586.1  hypothetical protein CARUB_v10014780mg [Capsella rubella]                                                                                                                                                                                                                                                                                          | 173 | 171 | 3.00E-54  | 98.8  | 59.0 | 76.3 | hypothetical protein CARUB_v10014780mg          | gbpln | Capsella rubella     | AT3G07460.1   Symbols:   Protein of unknown function, DUF538   chr3:2384837-2385617 REVERSE LENGTH=177                                                                                                                                                                                                                                                                                                                                                                         | 173 | 177 | 8.00E-54  | 102.3 | 56.6 | 72.8 |
| Rsa1.0_00323.1.g11325.t1 | dbj BAD44609.1  fimbrin 2 [Arabidopsis thaliana]                                                                                                                                                                                                                                                                                                                  | 640 | 654 | 0         | 102.2 | 93.6 | 96.7 | fimbrin 2                                       | gbpln | Arabidopsis thaliana | AT5G48460.1   Symbols:   Actin binding Calponin homology (CH) domain-containing protein   chr5:19636225-19639365 REVERSE LENGTH=654                                                                                                                                                                                                                                                                                                                                            | 640 | 654 | 0         | 102.2 | 93.6 | 96.9 |
| Rsa1.0_00323.1.g11326.t1 | ref NP_568697.1  uncharacterized protein [Arabidopsis thaliana] gi 98960899 gb ABF58933.1  At5g48470 [Arabidopsis thaliana] gi 332008291 gb AED95674.1  uncharacterized protein AT5G48470 [Arabidopsis thaliana]                                                                                                                                                  | 397 | 397 | 0         | 100.0 | 86.6 | 94.0 | uncharacterized protein                         | gbpln | Arabidopsis thaliana | AT5G48470.1   Symbols:   unknown protein; FUNCTIONS IN: molecular function unknown; INVOLVED IN: biological process unknown; LOCATED IN: chloroplast; EXPRESSED IN: 22 plant structures; EXPRESSED DURING: 13 growth stages; Has 30201 Blast hits to 17322 proteins in 780 species: Archae - 12; Bacteria - 1396; Metazoa - 1738; Fungi - 342; Plants - 5037; Viruses - 0; Other Eukaryotes - 2996 (source: NCBI BLINK).   chr5:19641810-19644127 FORWARD LENGTH=397           | 397 | 397 | 0         | 100.0 | 86.6 | 94.0 |
| Rsa1.0_00323.1.g11327.t1 | gb EOA12589.1  hypothetical protein CARUB_v10027068mg, partial [Capsella rubella]                                                                                                                                                                                                                                                                                 | 188 | 226 | 4.00E-41  | 120.2 | 58.0 | 67.0 | hypothetical protein CARUB_v10027068mg, partial | gbpln | Capsella rubella     | AT5G48480.1   Symbols:   Lactoylglutathione lyase / glyoxalase I family protein   chr5:19644814-19645658 FORWARD LENGTH=166                                                                                                                                                                                                                                                                                                                                                    | 188 | 166 | 4.00E-39  | 88.3  | 54.3 | 63.8 |
| Rsa1.0_00323.1.g11328.t1 | #                                                                                                                                                                                                                                                                                                                                                                 | #   | #   | #         | #     | #    | #    | -                                               | ----  | ----                 | #                                                                                                                                                                                                                                                                                                                                                                                                                                                                              | #   | #   | #         | #     | #    |      |

|                          |                                                                                                                                                                                                                                                                                                                                                                    |     |     |           |       |      |      |                                             |       |                      |                                                                                                                                                                                                                                                                                                                                                                    |     |     |           |       |      |      |
|--------------------------|--------------------------------------------------------------------------------------------------------------------------------------------------------------------------------------------------------------------------------------------------------------------------------------------------------------------------------------------------------------------|-----|-----|-----------|-------|------|------|---------------------------------------------|-------|----------------------|--------------------------------------------------------------------------------------------------------------------------------------------------------------------------------------------------------------------------------------------------------------------------------------------------------------------------------------------------------------------|-----|-----|-----------|-------|------|------|
| Rsa1.0_00323.1.g11329.t1 | refNP_568700.1   uncharacterized protein [Arabidopsis thaliana]<br>gi 21553505 gb AAM62598.1   unknown [Arabidopsis thaliana]<br>gi 27754391 gb AA022644.1   unknown protein [Arabidopsis thaliana]<br>gi 28393943 gb AA042379.1   unknown protein [Arabidopsis thaliana]<br>gi 332008295 gb AED95678.1   uncharacterized protein AT5G48500 [Arabidopsis thaliana] | 146 | 167 | 6.00E-49  | 114.4 | 76.0 | 82.9 | uncharacterized protein                     | gbpln | Arabidopsis thaliana | AT5G48500.1   Symbols:   unknown protein; BEST Arabidopsis thaliana protein match is: unknown protein (TAIR:AT2G10930.1); Has 30201 Blast hits to 17322 proteins in 780 species: Archae - 12; Bacteria - 1396; Metazoa - 17338; Fungi - 3422; Plants - 5037; Viruses - 0; Other Eukaryotes - 2996 (source: NCBI BLINK)   chr5:19653235-19654017 FORWARD LENGTH=167 | 146 | 167 | 2.00E-51  | 114.4 | 76.0 | 82.9 |
| Rsa1.0_00323.1.g11330.t1 | refXP_002865649.1   hypothetical protein ARALYDRAFT_494916 [Arabidopsis lyrata subsp. lyrata]<br>gi 297311484 gb EFH41908.1   hypothetical protein ARALYDRAFT_494916 [Arabidopsis lyrata subsp. lyrata]                                                                                                                                                            | 340 | 263 | 2.00E-81  | 77.4  | 47.6 | 52.4 | hypothetical protein ARALYDRAFT_494916      | gbpln | Arabidopsis lyrata   | AT5G48540.1   Symbols:   receptor-like protein kinase-related family protein   chr5:19669096-19669887 REVERSE LENGTH=263                                                                                                                                                                                                                                           | 340 | 263 | 3.00E-81  | 77.4  | 45.0 | 48.8 |
| Rsa1.0_00324.1.g11331.t1 | refXP_002878010.1   hypothetical protein ARALYDRAFT_485918 [Arabidopsis lyrata subsp. lyrata]<br>gi 297323848 gb EFH54269.1   hypothetical protein ARALYDRAFT_485918 [Arabidopsis lyrata subsp. lyrata]                                                                                                                                                            | 342 | 346 | 1.00E-127 | 101.2 | 82.2 | 89.5 | hypothetical protein ARALYDRAFT_485918      | gbpln | Arabidopsis lyrata   | AT3G54990.1   Symbols: SMZ   Integrase-type DNA-binding superfamily protein   chr3:20373718-20376522 REVERSE LENGTH=346                                                                                                                                                                                                                                            | 342 | 346 | 1.00E-127 | 101.2 | 81.3 | 89.5 |
| Rsa1.0_00324.1.g11332.t1 | refXP_002876279.1   pentatricopeptide repeat-containing protein [Arabidopsis lyrata subsp. lyrata]<br>gi 297322117 gb EFH52538.1   pentatricopeptide repeat-containing protein [Arabidopsis lyrata subsp. lyrata]                                                                                                                                                  | 855 | 850 | 0         | 99.4  | 72.2 | 83.9 | pentatricopeptide repeat-containing protein | gbpln | Arabidopsis lyrata   | AT3G54980.1   Symbols:   Pentatricopeptide repeat (PPR) superfamily protein   chr3:20370293-20372848 FORWARD LENGTH=851                                                                                                                                                                                                                                            | 855 | 851 | 0         | 99.5  | 70.2 | 83.0 |
| Rsa1.0_00324.1.g11333.t1 | refXP_002878009.1   hypothetical protein ARALYDRAFT_324027 [Arabidopsis lyrata subsp. lyrata]<br>gi 297323847 gb EFH54268.1   hypothetical protein ARALYDRAFT_324027 [Arabidopsis lyrata subsp. lyrata]                                                                                                                                                            | 385 | 359 | 1.00E-152 | 93.2  | 74.0 | 81.0 | hypothetical protein ARALYDRAFT_324027      | gbpln | Arabidopsis lyrata   | AT3G54970.1   Symbols:   D-aminoacid aminotransferase-like PLP-dependent enzymes superfamily protein   chr3:20368329-20370070 REVERSE LENGTH=353                                                                                                                                                                                                                   | 385 | 353 | 1.00E-153 | 91.7  | 73.8 | 79.7 |
| Rsa1.0_00324.1.g11334.t2 | dbj BAJ33696.1   unnamed protein product [Thellungiella halophila]                                                                                                                                                                                                                                                                                                 | 578 | 572 | 0         | 99.0  | 91.2 | 93.9 | unnamed protein product                     | ----  | ----                 | AT3G54960.1   Symbols: ATPDIL1-3, PDI1, ATPD11, PDI1-3   PDI-like 1-3   chr3:20363514-20366822 REVERSE LENGTH=579                                                                                                                                                                                                                                                  | 578 | 579 | 0         | 100.2 | 86.5 | 90.8 |
| Rsa1.0_00324.1.g11335.t1 | refXP_002878007.1   hypothetical protein ARALYDRAFT_485912 [Arabidopsis lyrata subsp. lyrata]<br>gi 297323845 gb EFH54266.1   hypothetical protein ARALYDRAFT_485912 [Arabidopsis lyrata subsp. lyrata]                                                                                                                                                            | 504 | 504 | 0         | 100.0 | 85.9 | 92.1 | hypothetical protein ARALYDRAFT_485912      | gbpln | Arabidopsis lyrata   | AT3G54950.1   Symbols: PLP7, PLA IIIA   patain-like protein 6   chr3:20359076-20360774 REVERSE LENGTH=488                                                                                                                                                                                                                                                          | 504 | 488 | 0         | 96.8  | 85.3 | 91.3 |
| Rsa1.0_00324.1.g11336.t1 | refNP_567010.5   Papain family cysteine protease [Arabidopsis thaliana]<br>gi 17979125 gb AAL49820.1   putative cysteine proteinase [Arabidopsis thaliana]<br>gi 332645795 gb AEE79316.1   Papain family cysteine protease [Arabidopsis thaliana]                                                                                                                  | 364 | 367 | 0         | 100.8 | 83.2 | 92.3 | Papain family cysteine protease             | gbpln | Arabidopsis thaliana | AT3G54940.2   Symbols:   Papain family cysteine protease   chr3:20354402-20356127 FORWARD LENGTH=367                                                                                                                                                                                                                                                               | 364 | 367 | 0         | 100.8 | 83.2 | 92.3 |
| Rsa1.0_00324.1.g11337.t1 | gb EOA23878.1   hypothetical protein CARUB_v10017093mg [Capsella rubella]<br>gi 482559688 gb EOA23879.1   hypothetical protein CARUB_v10017093mg [Capsella rubella]                                                                                                                                                                                                | 491 | 491 | 0         | 100.0 | 89.8 | 93.9 | hypothetical protein CARUB_v10017093mg      | gbpln | Capsella rubella     | AT3G54930.1   Symbols:   Protein phosphatase 2A regulatory B subunit family protein   chr3:20351084-20352659 REVERSE LENGTH=497                                                                                                                                                                                                                                    | 491 | 497 | 0         | 101.2 | 89.8 | 93.9 |
| Rsa1.0_00324.1.g11338.t1 | gb AAQ87025.1   pectate lyase-like protein [Brassica napus]                                                                                                                                                                                                                                                                                                        | 492 | 500 | 0         | 101.6 | 92.1 | 94.7 | pectate lyase-like protein                  | gbpln | Brassica napus       | AT3G54920.1   Symbols: PMR6   Pectin lyase-like superfamily protein   chr3:20345311-20348477 FORWARD LENGTH=501                                                                                                                                                                                                                                                    | 492 | 501 | 0         | 101.8 | 80.9 | 87.4 |
| Rsa1.0_00324.1.g11339.t1 | gb EOA24113.1   hypothetical protein CARUB_v10017345mg [Capsella rubella]                                                                                                                                                                                                                                                                                          | 376 | 414 | 2.00E-97  | 110.1 | 56.9 | 72.1 | hypothetical protein CARUB_v10017345mg      | gbpln | Capsella rubella     | AT4G10400.2   Symbols:   F-box/RNI-like/FBD-like domains-containing protein   chr4:6446335-6447715 REVERSE LENGTH=409                                                                                                                                                                                                                                              | 376 | 409 | 1.00E-81  | 108.8 | 51.3 | 65.2 |
| Rsa1.0_00324.1.g11340.t1 | gb EOA24113.1   hypothetical protein CARUB_v10017345mg [Capsella rubella]                                                                                                                                                                                                                                                                                          | 417 | 414 | 1.00E-138 | 99.3  | 63.5 | 78.2 | hypothetical protein CARUB_v10017345mg      | gbpln | Capsella rubella     | AT4G10400.2   Symbols:   F-box/RNI-like/FBD-like domains-containing protein   chr4:6446335-6447715 REVERSE LENGTH=409                                                                                                                                                                                                                                              | 417 | 409 | 1.00E-117 | 98.1  | 56.1 | 71.0 |
| Rsa1.0_00324.1.g11341.t1 | gb EOA25157.1   hypothetical protein CARUB_v10018468mg [Capsella rubella]                                                                                                                                                                                                                                                                                          | 718 | 731 | 0         | 101.8 | 88.7 | 94.2 | hypothetical protein CARUB_v10018468mg      | gbpln | Capsella rubella     | AT3G54800.2   Symbols:   Pleckstrin homology (PH) and lipid-binding START domains-containing protein   chr3:20286378-20288880 FORWARD LENGTH=733                                                                                                                                                                                                                   | 718 | 733 | 0         | 102.1 | 88.3 | 94.4 |

|                           |                                                                                                                                                                                                                                                                                                                                                                                                                            |      |      |           |       |      |      |                                                       |       |                      |                                                                                                                                                                                                                                                                                                                                                    |      |      |           |       |      |      |
|---------------------------|----------------------------------------------------------------------------------------------------------------------------------------------------------------------------------------------------------------------------------------------------------------------------------------------------------------------------------------------------------------------------------------------------------------------------|------|------|-----------|-------|------|------|-------------------------------------------------------|-------|----------------------|----------------------------------------------------------------------------------------------------------------------------------------------------------------------------------------------------------------------------------------------------------------------------------------------------------------------------------------------------|------|------|-----------|-------|------|------|
| Rsa1.0_00324.1.g11342.t1  | refXP_002878000.1  armadillo/beta-catenin repeat family protein [Arabidopsis lyrata subsp. lyrata] gi 297323838 gb EFH54259.1  armadillo/beta-catenin repeat family protein [Arabidopsis lyrata subsp. lyrata]                                                                                                                                                                                                             | 262  | 760  | 1.00E-89  | 290.1 | 64.5 | 67.9 | armadillo/beta-catenin repeat family protein          | gbpln | Arabidopsis lyrata   | AT3G54790.2   Symbols:   ARM repeat superfamily protein   chr3:20281830-20284255 REVERSE LENGTH=724                                                                                                                                                                                                                                                | 262  | 724  | 1.00E-91  | 276.3 | 64.1 | 67.6 |
| Rsa1.0_00324.1.g11343.t1  | gb AAM61280.1  RNA binding protein-like [Arabidopsis thaliana]                                                                                                                                                                                                                                                                                                                                                             | 303  | 261  | 1.00E-100 | 86.1  | 64.4 | 70.0 | RNA binding protein-like                              | gbpln | Arabidopsis thaliana | AT3G54770.1   Symbols:   RNA-binding (RRM/RBD/RNP motifs) family protein   chr3:20273863-20275827 REVERSE LENGTH=261                                                                                                                                                                                                                               | 303  | 261  | 1.00E-102 | 86.1  | 64.0 | 70.0 |
| Rsa1.0_00324.1.g11344.t25 | refXP_002877997.1  hypothetical protein ARALYDRAFT_485881 [Arabidopsis lyrata subsp. lyrata] gi 297323835 gb EFH54256.1  hypothetical protein ARALYDRAFT_485881 [Arabidopsis lyrata subsp. lyrata]                                                                                                                                                                                                                         | 624  | 608  | 0         | 97.4  | 77.6 | 86.1 | hypothetical protein ARALYDRAFT_485881                | gbpln | Arabidopsis lyrata   | AT3G54750.3   Symbols:   unknown protein; FUNCTIONS IN: molecular function unknown; INVOLVED IN: biological process unknown; LOCATED IN: cellular component unknown; EXPRESSED IN: 24 plant structures; EXPRESSED DURING: 15 growth stages.   chr3:20264833-20268416 REVERSE LENGTH=590                                                            | 624  | 590  | 0         | 94.6  | 74.5 | 84.5 |
| Rsa1.0_00324.1.g11345.t1  | ref NP_001078285.1  uncharacterized protein [Arabidopsis thaliana] gi 7258378 emb CAB77594.1  putative protein [Arabidopsis thaliana] gi 332645755 gb AE79276.1  uncharacterized protein AT3G54740 [Arabidopsis thaliana]                                                                                                                                                                                                  | 418  | 438  | 0         | 104.8 | 80.1 | 88.3 | uncharacterized protein                               | gbpln | Arabidopsis thaliana | AT3G54740.2   Symbols:   Protein of unknown function. DUF593   chr3:20262949-20264466 FORWARD LENGTH=438                                                                                                                                                                                                                                           | 418  | 438  | 0         | 104.8 | 80.1 | 88.3 |
| Rsa1.0_00324.1.g11346.t1  | refXP_002877996.1  hypothetical protein ARALYDRAFT_485877 [Arabidopsis lyrata subsp. lyrata] gi 297323834 gb EFH54254.1  hypothetical protein ARALYDRAFT_485877 [Arabidopsis lyrata subsp. lyrata]                                                                                                                                                                                                                         | 707  | 705  | 0         | 99.7  | 85.6 | 92.4 | hypothetical protein ARALYDRAFT_485877                | gbpln | Arabidopsis lyrata   | AT3G54720.1   Symbols: AMP1, COP2, HPT, PT, MFO1   Peptidase M28 family protein   chr3:20254852-20257815 REVERSE LENGTH=705                                                                                                                                                                                                                        | 707  | 705  | 0         | 99.7  | 85.6 | 92.1 |
| Rsa1.0_00324.1.g11347.t1  | refXP_002877995.1  inorganic phosphate transporter 1-7 /Pi cotransporter [Arabidopsis lyrata subsp. lyrata] gi 297323833 gb EFH54254.1  inorganic phosphate transporter 1-7 /Pi cotransporter [Arabidopsis lyrata subsp. lyrata]                                                                                                                                                                                           | 531  | 533  | 0         | 100.4 | 90.0 | 94.0 | inorganic phosphate transporter 1-7 /Pi cotransporter | gbpln | Arabidopsis lyrata   | AT3G54700.1   Symbols: PHT1;7   phosphate transporter 1;7   chr3:20248463-20250070 REVERSE LENGTH=535                                                                                                                                                                                                                                              | 531  | 535  | 0         | 100.8 | 89.8 | 93.8 |
| Rsa1.0_00324.1.g11348.t2  | ref NP_001190092.1  structural maintenance of chromosomes 1 [Arabidopsis thaliana] gi 332645744 gb AEE79265.1  structural maintenance of chromosomes 1 [Arabidopsis thaliana]                                                                                                                                                                                                                                              | 1271 | 1239 | 0         | 97.5  | 85.3 | 91.0 | structural maintenance of chromosomes 1               | gbpln | Arabidopsis thaliana | AT3G54670.3   Symbols: TTN8   Structural maintenance of chromosomes (SMC) family protein   chr3:20235818-20243701 FORWARD LENGTH=1239                                                                                                                                                                                                              | 1271 | 1239 | 0         | 97.5  | 85.3 | 91.0 |
| Rsa1.0_00324.1.g11349.t1  | gb AAK27157.1 AF349449.1  glutathione reductase [Brassica juncea]                                                                                                                                                                                                                                                                                                                                                          | 563  | 564  | 0         | 100.2 | 95.4 | 97.3 | glutathione reductase                                 | gbpln | Brassica juncea      | AT3G54660.1   Symbols: GR, EMB2360, ATGR2   glutathione reductase   chr3:20230356-20233100 REVERSE LENGTH=565                                                                                                                                                                                                                                      | 563  | 565  | 0         | 100.4 | 90.2 | 95.6 |
| Rsa1.0_00324.1.g11350.t1  | ref NP_567005.2  F-box/LRR-repeat protein 17 [Arabidopsis thaliana] gi 75331246 sp Q3W104.1 FBL17_ARAT H RecName: Full=F-box/LRR-repeat protein 17; AltName: Full=F-box-like protein 17 gi 18087570 gb AAL58916.1 AF462827.1 AT3g54650/T5N23.10 [Arabidopsis thaliana] gi 22655356 gb AAM98270.1  At3g54650/T5N23.10 [Arabidopsis thaliana] gi 332645740 gb AEE79261.1  F-box/LRR-repeat protein 17 [Arabidopsis thaliana] | 578  | 593  | 0         | 102.6 | 84.3 | 91.9 | F-box/LRR-repeat protein 17                           | gbpln | Arabidopsis thaliana | AT3G54650.1   Symbols: FBL17   RNI-like superfamily protein   chr3:20226004-20228882 REVERSE LENGTH=593                                                                                                                                                                                                                                            | 578  | 593  | 0         | 102.6 | 84.3 | 91.9 |
| Rsa1.0_00324.1.g11351.t1  | emb CAH56477.1  tryptophan synthase, alpha subunit (TSA1) [Isatis tinctoria] gi 52673242 emb CAH56478.1  tryptophan synthase, alpha subunit (TSA1) [Isatis tinctoria]                                                                                                                                                                                                                                                      | 311  | 311  | 1.00E-157 | 100.0 | 92.9 | 96.8 | tryptophan synthase, alpha subunit (TSA1)             | gbpln | Isatis tinctoria     | AT3G54640.1   Symbols: TSA1, TRP3   tryptophan synthase alpha chain   chr3:20223331-20225303 REVERSE LENGTH=312                                                                                                                                                                                                                                    | 311  | 312  | 1.00E-156 | 100.3 | 91.3 | 96.8 |
| Rsa1.0_00324.1.g11352.t1  | refXP_002877991.1  kinetochore protein [Arabidopsis lyrata subsp. lyrata] gi 297323829 gb EFH54250.1  kinetochore protein [Arabidopsis lyrata subsp. lyrata]                                                                                                                                                                                                                                                               | 568  | 567  | 0         | 99.8  | 68.3 | 81.3 | kinetochore protein                                   | gbpln | Arabidopsis lyrata   | AT3G54630.1   Symbols:   CONTAINS InterPro DOMAIN/s: Kinetochore protein Ndc80 (InterPro:IPRO05550); Has 24780 Blast hits to 15608 proteins in 1321 species: Archaea - 545; Bacteria - 2969; Metazoa - 12597; Fungi - 2181; Plants - 1581; Viruses - 39; Other Eukaryotes - 4868 (source: NCBI BLINK).   chr3:20221195-20222901 REVERSE LENGTH=568 | 568  | 568  | 0         | 100.0 | 66.9 | 80.5 |

|                          |                                                                                                                                                                                                                                                                                                                                                                                                                                                                                                                                                                                                                                                                                             |     |      |           |       |      |      |                                                     |       |                            |                                                                                                                                                        |     |     |           |        |      |      |
|--------------------------|---------------------------------------------------------------------------------------------------------------------------------------------------------------------------------------------------------------------------------------------------------------------------------------------------------------------------------------------------------------------------------------------------------------------------------------------------------------------------------------------------------------------------------------------------------------------------------------------------------------------------------------------------------------------------------------------|-----|------|-----------|-------|------|------|-----------------------------------------------------|-------|----------------------------|--------------------------------------------------------------------------------------------------------------------------------------------------------|-----|-----|-----------|--------|------|------|
| Rsa1.0_00324.1.g11353.t1 | dbj BAJ34147.1  unnamed protein product [Theilingella halophila]                                                                                                                                                                                                                                                                                                                                                                                                                                                                                                                                                                                                                            | 374 | 402  | 1.00E-129 | 107.5 | 80.2 | 85.3 | unnamed protein product                             | ----  | ----                       | AT3G54620.1   Symbols: ATBZIP25, BZO2H4, BZIP25   basic leucine zipper 25   chr3:20218085-20220341 REVERSE LENGTH=403                                  | 374 | 403 | 1.00E-115 | 107.8  | 73.8 | 79.9 |
| Rsa1.0_00324.1.g11354.t1 | #                                                                                                                                                                                                                                                                                                                                                                                                                                                                                                                                                                                                                                                                                           | #   | #    | #         | #     | #    | #    | -                                                   | ----  | ----                       | AT3G54610.1   Symbols: HAT1, GCN5, HAG1, HAC3, HAG01, BGT   histone acetyltransferase of the GNAT family 1   chr3:20213593-20217375 FORWARD LENGTH=568 | 53  | 568 | 1.00E-10  | 1071.7 | 49.1 | 52.8 |
| Rsa1.0_00324.1.g11355.t1 | ref XP_002974570.1  hypothetical protein SELMODRAFT_442529 [Selaginella moellendorffii] gi 300157465 gb EFJ24090.1  hypothetical protein SELMODRAFT_442529 [Selaginella moellendorffii]                                                                                                                                                                                                                                                                                                                                                                                                                                                                                                     | 828 | 516  | 4.00E-39  | 62.3  | 31.4 | 38.3 | hypothetical protein SELMODRAFT_442529              | gbpln | Selaginella moellendorffii | AT3G54590.1   Symbols: ATHRGP1, HRGP1   hydroxyproline-rich glycoprotein   chr3:20206223-20208472 FORWARD LENGTH=699                                   | 828 | 699 | 1.00E-17  | 84.4   | 6.5  | 7.6  |
| Rsa1.0_00324.1.g11356.t1 | gb AAD29058.1  putative non-LTR retroelement reverse transcriptase [Arabidopsis thaliana]                                                                                                                                                                                                                                                                                                                                                                                                                                                                                                                                                                                                   | 324 | 1229 | 2.00E-67  | 379.3 | 37.7 | 52.5 | putative non-LTR retroelement reverse transcriptase | gbpln | Arabidopsis thaliana       | AT4G29090.1   Symbols:   Ribonuclease H-like superfamily protein   chr4:14333528-14332555 FORWARD LENGTH=575                                           | 324 | 575 | 2.00E-37  | 177.5  | 31.5 | 45.4 |
| Rsa1.0_00324.1.g11357.t1 | ref XP_002974570.1  hypothetical protein SELMODRAFT_442529 [Selaginella moellendorffii] gi 300157465 gb EFJ24090.1  hypothetical protein SELMODRAFT_442529 [Selaginella moellendorffii]                                                                                                                                                                                                                                                                                                                                                                                                                                                                                                     | 757 | 516  | 2.00E-38  | 68.2  | 35.4 | 40.0 | hypothetical protein SELMODRAFT_442529              | gbpln | Selaginella moellendorffii | AT3G54590.1   Symbols: ATHRGP1, HRGP1   hydroxyproline-rich glycoprotein   chr3:20206223-20208472 FORWARD LENGTH=699                                   | 757 | 699 | 8.00E-17  | 92.3   | 6.9  | 7.8  |
| Rsa1.0_00324.1.g11358.t1 | ref NP_001141633.1  uncharacterized protein LOC100273753 [Zea mays] gi 242065684 ref XP_002454131.1  hypothetical protein SORBIDRAFT_04g025140 [Sorghum bicolor] gi 194705342 gb ACF86755.1  unknown [Zea mays] gi 195605334 gb ACG24497.1  histone H2A variant 1 [Zea mays] gi 195605602 gb ACG24631.1  histone H2A variant 1 [Zea mays] gi 195624562 gb ACG34111.1  histone H2A variant 1 [Zea mays] gi 241933962 gb EES07107.1  hypothetical protein SORBIDRAFT_04g025140 [Sorghum bicolor] gi 414864935 tpg DAA43492.1  TPA: histone H2A [Zea mays] ref XP_002876258.1  ATGCN4 [Arabidopsis lyrata subsp. lyrata] gi 297322096 gb EFH52517.1  ATGCN4 [Arabidopsis lyrata subsp. lyrata] | 137 | 138  | 5.00E-62  | 100.7 | 87.6 | 94.2 | uncharacterized protein LOC100273753                | gbpln | Sorghum bicolor            | AT3G54560.1   Symbols: HTA11   histone H2A 11   chr3:20196532-20197466 FORWARD LENGTH=136                                                              | 137 | 136 | 2.00E-63  | 99.3   | 94.9 | 97.1 |
| Rsa1.0_00324.1.g11359.t1 | ref XP_002862436.1  predicted protein [Arabidopsis lyrata subsp. lyrata] gi 297307949 gb EFH38694.1  predicted protein [Arabidopsis lyrata subsp. lyrata]                                                                                                                                                                                                                                                                                                                                                                                                                                                                                                                                   | 718 | 723  | 0         | 100.7 | 89.6 | 95.5 | ATGCN4                                              | gbpln | Arabidopsis lyrata         | AT3G54540.1   Symbols: ATGCN4, GCN4   general control non-repressible 4   chr3:20190393-20192564 FORWARD LENGTH=723                                    | 718 | 723 | 0         | 100.7  | 89.6 | 94.8 |
| Rsa1.0_00325.1.g11360.t1 | ref XP_002862436.1  predicted protein [Arabidopsis lyrata subsp. lyrata] gi 297307949 gb EFH38694.1  predicted protein [Arabidopsis lyrata subsp. lyrata]                                                                                                                                                                                                                                                                                                                                                                                                                                                                                                                                   | 441 | 530  | 1.00E-42  | 120.2 | 21.5 | 27.4 | predicted protein                                   | gbpln | Arabidopsis lyrata         | AT5G32613.1   Symbols:   Zinc knuckle (CCHC-type) family protein   chr5:12263255-12265041 FORWARD LENGTH=457                                           | 441 | 457 | 8.00E-11  | 103.6  | 11.8 | 17.5 |
| Rsa1.0_00325.1.g11361.t1 | ref XP_002892738.1  zinc finger family protein [Arabidopsis lyrata subsp. lyrata] gi 297338580 gb EFH68997.1  zinc finger family protein [Arabidopsis lyrata subsp. lyrata]                                                                                                                                                                                                                                                                                                                                                                                                                                                                                                                 | 345 | 344  | 0         | 99.7  | 92.5 | 95.9 | hypothetical protein ARALYDRAFT_888685              | gbpln | Arabidopsis lyrata         | AT1G13260.1   Symbols: RAV1, EDF4   related to ADB3/VP1   chr1:4542386-4543420 FORWARD LENGTH=344                                                      | 345 | 344 | 0         | 99.7   | 90.7 | 94.8 |
| Rsa1.0_00325.1.g11362.t1 | ref XP_002892738.1  zinc finger family protein [Arabidopsis lyrata subsp. lyrata] gi 297338580 gb EFH68997.1  zinc finger family protein [Arabidopsis lyrata subsp. lyrata]                                                                                                                                                                                                                                                                                                                                                                                                                                                                                                                 | 308 | 303  | 1.00E-140 | 98.4  | 83.1 | 90.9 | zinc finger family protein                          | gbpln | Arabidopsis lyrata         | AT1G13290.1   Symbols: DOT5, WIP6   C2H2-like zinc finger protein   chr1:4550366-4551527 REVERSE LENGTH=302                                            | 308 | 302 | 1.00E-142 | 98.1   | 83.8 | 90.3 |
| Rsa1.0_00325.1.g11363.t1 | gb EOA36651.1  hypothetical protein CARUB_v10011925mg [Capsella rubella]                                                                                                                                                                                                                                                                                                                                                                                                                                                                                                                                                                                                                    | 312 | 344  | 1.00E-131 | 110.3 | 82.4 | 85.6 | hypothetical protein CARUB_v10011925mg              | gbpln | Capsella rubella           | AT1G13300.1   Symbols: HRS1   myb-like transcription factor family protein   chr1:4556977-4558591 FORWARD LENGTH=344                                   | 312 | 344 | 1.00E-129 | 110.3  | 82.4 | 85.9 |
| Rsa1.0_00325.1.g11364.t2 | gb EOA39103.1  hypothetical protein CARUB_v10011847mg [Capsella rubella]                                                                                                                                                                                                                                                                                                                                                                                                                                                                                                                                                                                                                    | 240 | 226  | 1.00E-115 | 94.2  | 87.5 | 91.3 | hypothetical protein CARUB_v10011847mg              | gbpln | Capsella rubella           | AT1G13330.1   Symbols: AHP2   Arabidopsis Hop2 homolog   chr1:4568008-4569410 FORWARD LENGTH=226                                                       | 240 | 226 | 1.00E-113 | 94.2   | 83.8 | 90.8 |
| Rsa1.0_00325.1.g11365.t1 | ref XP_002892743.1  hypothetical protein ARALYDRAFT_471490 [Arabidopsis lyrata subsp. lyrata] gi 297338585 gb EFH69002.1  hypothetical protein ARALYDRAFT_471490 [Arabidopsis lyrata subsp. lyrata]                                                                                                                                                                                                                                                                                                                                                                                                                                                                                         | 420 | 410  | 1.00E-161 | 97.6  | 74.8 | 84.0 | hypothetical protein ARALYDRAFT_471490              | gbpln | Arabidopsis lyrata         | AT1G13340.1   Symbols:   Regulator of Vps4 activity in the MVB pathway protein   chr1:4568622-4571043 REVERSE LENGTH=409                               | 420 | 409 | 1.00E-157 | 97.4   | 72.1 | 83.3 |

|                           |                                                                                                                                                                                                                                                                                                                                                                                                                                                                                                                                                                                                                                                                                                                                                                                                                                                                                                                                                                                                                                                                   |     |      |           |        |      |      |                                                       |       |                      |                                                                                                                                                                                                                                                                                                                                               |     |      |           |       |      |      |
|---------------------------|-------------------------------------------------------------------------------------------------------------------------------------------------------------------------------------------------------------------------------------------------------------------------------------------------------------------------------------------------------------------------------------------------------------------------------------------------------------------------------------------------------------------------------------------------------------------------------------------------------------------------------------------------------------------------------------------------------------------------------------------------------------------------------------------------------------------------------------------------------------------------------------------------------------------------------------------------------------------------------------------------------------------------------------------------------------------|-----|------|-----------|--------|------|------|-------------------------------------------------------|-------|----------------------|-----------------------------------------------------------------------------------------------------------------------------------------------------------------------------------------------------------------------------------------------------------------------------------------------------------------------------------------------|-----|------|-----------|-------|------|------|
| Rsa1.0_00325.1.g11366.t1  | refNP_683304.1   uncharacterized protein [Arabidopsis thaliana] gi 9958057 gb AAG09546.1 AC011810.5 Unknown Protein [Arabidopsis thaliana] gi 27754364 gb AA022631.1   unknown protein [Arabidopsis thaliana] gi 28393909 gb AA042362.1   unknown protein [Arabidopsis thaliana] gi 332190884 gb AEE29005.1   uncharacterized protein AT1G13360 [Arabidopsis thaliana] ref XP_002892745.1   hypothetical protein ARALYDRAFT_471492 [Arabidopsis lyrata subsp. lyrata] gi 297338587 gb EFH69004.1   hypothetical protein ARALYDRAFT_471492 [Arabidopsis lyrata subsp. lyrata]                                                                                                                                                                                                                                                                                                                                                                                                                                                                                      | 176 | 194  | 7.00E-64  | 110.2  | 79.5 | 86.9 | uncharacterized protein                               | gbpln | Arabidopsis thaliana | AT1G13360.1   Symbols:   unknown protein; BEST Arabidopsis thaliana protein match is: unknown protein (TAIR:AT3G25870.1); Has 69 Blast hits to 69 proteins in 16 species: Archae - 0; Bacteria - 0; Metazoa - 6; Fungi - 0; Plants - 63; Viruses - 0; Other Eukaryotes - 0 (source: NCBI BLink).   chr1:4577229-4577813 REVERSE LENGTH=194    | 176 | 194  | 3.00E-66  | 110.2 | 79.5 | 86.9 |
| Rsa1.0_00325.1.g11367.t1  | ref XP_002892745.1   hypothetical protein ARALYDRAFT_471492 [Arabidopsis lyrata subsp. lyrata] gi 297338587 gb EFH69004.1   hypothetical protein ARALYDRAFT_471492 [Arabidopsis lyrata subsp. lyrata]                                                                                                                                                                                                                                                                                                                                                                                                                                                                                                                                                                                                                                                                                                                                                                                                                                                             | 188 | 188  | 4.00E-88  | 100.0  | 89.9 | 94.7 | hypothetical protein ARALYDRAFT_471492                | gbpln | Arabidopsis lyrata   | AT1G13380.1   Symbols:   Protein of unknown function (DUF1218)   chr1:4589218-4590362 REVERSE LENGTH=188                                                                                                                                                                                                                                      | 188 | 188  | 6.00E-89  | 100.0 | 89.4 | 94.1 |
| Rsa1.0_00325.1.g11368.t1  | gb EOA38616.1   hypothetical protein CARUB_v10010468mg [Capsella rubella]                                                                                                                                                                                                                                                                                                                                                                                                                                                                                                                                                                                                                                                                                                                                                                                                                                                                                                                                                                                         | 161 | 171  | 4.00E-42  | 106.2  | 65.8 | 73.9 | hypothetical protein CARUB_v10010468mg                | gbpln | Capsella rubella     | AT1G13390.2   Symbols:   unknown protein; BEST Arabidopsis thaliana protein match is: unknown protein (TAIR:AT1G68490.1); Has 114 Blast hits to 114 proteins in 18 species: Archae - 0; Bacteria - 0; Metazoa - 0; Fungi - 0; Plants - 114; Viruses - 0; Other Eukaryotes - 0 (source: NCBI BLink).   chr1:4592829-4593549 REVERSE LENGTH=176 | 161 | 176  | 3.00E-42  | 109.3 | 65.2 | 72.7 |
| Rsa1.0_00325.1.g11369.t1  | gb EOA37285.1   hypothetical protein CARUB_v10010898mg [Capsella rubella]                                                                                                                                                                                                                                                                                                                                                                                                                                                                                                                                                                                                                                                                                                                                                                                                                                                                                                                                                                                         | 167 | 245  | 4.00E-40  | 146.7  | 54.5 | 59.3 | hypothetical protein CARUB_v10010898mg                | gbpln | Capsella rubella     | AT1G13400.1   Symbols: NUB, JGL   C2H2 and C2HC zinc fingers superfamily protein   chr1:4597784-4598911 FORWARD LENGTH=207                                                                                                                                                                                                                    | 167 | 207  | 3.00E-40  | 124.0 | 59.9 | 64.7 |
| Rsa1.0_00325.1.g11370.t10 | ref NP_172644.1   arogenate dehydratase 1 [Arabidopsis thaliana] gi 75265511 sp Q9SA96.1 AROD1.ARAT H RecName: Full=Arogenate dehydratase/prephenate dehydratase 1, chloroplastic; Short=AtADT1; Short=AtPDT1; Flags: Precursor gi 4835776 gb AAD30242.1 AC007296.3 Similar to gi 2392772 T32N15.11 putative chloroplast prephenate dehydratase from Arabidopsis thaliana BAC gb AC002534 and is a member of the PF 00800 Prephenate dehydratase family. ESTs gb T21562 and gb T21062 come from this gene [Arabidopsis thaliana] gi 89340486 gb ABD67752.1   arogenate dehydratase isoform 3 [Arabidopsis thaliana] gi 332190665 gb AEE28786.1   arogenate dehydratase 1 [Arabidopsis thaliana] ref XP_002889895.1   hypothetical protein ARALYDRAFT_471318 [Arabidopsis lyrata subsp. lyrata] gi 297335737 gb EFH66154.1   hypothetical protein ARALYDRAFT_471318 [Arabidopsis lyrata subsp. lyrata] ref XP_002892655.1   predicted protein [Arabidopsis lyrata subsp. lyrata] gi 297338497 gb EFH68914.1   predicted protein [Arabidopsis lyrata subsp. lyrata] | 892 | 392  | 0         | 43.9   | 36.7 | 39.0 | arogenate dehydratase 1                               | gbpln | Arabidopsis thaliana | AT1G11790.1   Symbols: ADT1   arogenate dehydratase 1   chr1:3981476-3984962 FORWARD LENGTH=392                                                                                                                                                                                                                                               | 892 | 392  | 0         | 43.9  | 36.7 | 39.0 |
| Rsa1.0_00325.1.g11371.t1  | ref XP_002889895.1   hypothetical protein ARALYDRAFT_471318 [Arabidopsis lyrata subsp. lyrata] gi 297335737 gb EFH66154.1   hypothetical protein ARALYDRAFT_471318 [Arabidopsis lyrata subsp. lyrata] ref XP_002892655.1   predicted protein [Arabidopsis lyrata subsp. lyrata] gi 297338497 gb EFH68914.1   predicted protein [Arabidopsis lyrata subsp. lyrata]                                                                                                                                                                                                                                                                                                                                                                                                                                                                                                                                                                                                                                                                                                 | 532 | 536  | 0         | 100.8  | 83.3 | 90.6 | hypothetical protein ARALYDRAFT_471318                | gbpln | Arabidopsis lyrata   | AT1G11770.1   Symbols:   FAD-binding Berberine family protein   chr1:3975679-3977289 FORWARD LENGTH=536                                                                                                                                                                                                                                       | 532 | 536  | 0         | 100.8 | 82.9 | 91.2 |
| Rsa1.0_00325.1.g11372.t1  | ref XP_002892655.1   predicted protein [Arabidopsis lyrata subsp. lyrata] gi 297338497 gb EFH68914.1   predicted protein [Arabidopsis lyrata subsp. lyrata]                                                                                                                                                                                                                                                                                                                                                                                                                                                                                                                                                                                                                                                                                                                                                                                                                                                                                                       | 238 | 414  | 5.00E-94  | 173.9  | 74.8 | 84.5 | predicted protein                                     | gbpln | Arabidopsis lyrata   | AT1G11755.1   Symbols: LEW1   Undecaprenyl pyrophosphate synthetase family protein   chr1:3969987-3971488 REVERSE LENGTH=254                                                                                                                                                                                                                  | 238 | 254  | 3.00E-95  | 106.7 | 73.1 | 85.3 |
| Rsa1.0_00325.1.g11373.t1  | gb EOA37537.1   hypothetical protein CARUB_v10011779mg [Capsella rubella]                                                                                                                                                                                                                                                                                                                                                                                                                                                                                                                                                                                                                                                                                                                                                                                                                                                                                                                                                                                         | 567 | 595  | 0         | 104.9  | 75.0 | 83.4 | hypothetical protein CARUB_v10011779mg                | gbpln | Capsella rubella     | AT1G11740.1   Symbols:   ankyrin repeat family protein   chr1:3966824 REVERSE LENGTH=644                                                                                                                                                                                                                                                      | 567 | 644  | 0         | 113.6 | 73.4 | 81.8 |
| Rsa1.0_00325.1.g11374.t1  | gb AAB87099.1   putative retroelement pol polyprotein [Arabidopsis thaliana]                                                                                                                                                                                                                                                                                                                                                                                                                                                                                                                                                                                                                                                                                                                                                                                                                                                                                                                                                                                      | 882 | 1496 | 0         | 169.6  | 58.8 | 74.7 | putative retroelement pol polyprotein                 | gbpln | Arabidopsis thaliana | AT4G23160.1   Symbols: CRK8   cysteine-rich RLK (RECEPTOR-like protein kinase) 8   chr4:12129485-12134086 FORWARD LENGTH=1262                                                                                                                                                                                                                 | 882 | 1262 | 1.00E-138 | 143.1 | 26.4 | 37.6 |
| Rsa1.0_00326.1.g11375.t1  | gb EOA39854.1   hypothetical protein CARUB_v10008528mg [Capsella rubella]                                                                                                                                                                                                                                                                                                                                                                                                                                                                                                                                                                                                                                                                                                                                                                                                                                                                                                                                                                                         | 119 | 659  | 1.00E-11  | 553.8  | 37.8 | 41.2 | hypothetical protein CARUB_v10008528mg                | gbpln | Capsella rubella     | AT1G4890.1   Symbols: QWRF2   Family of unknown function (DUF566)   chr1:18470282-18473463 FORWARD LENGTH=659                                                                                                                                                                                                                                 | 119 | 659  | 7.00E-13  | 553.8 | 36.1 | 39.5 |
| Rsa1.0_00326.1.g11376.t1  | gb ABD65150.1   hypothetical protein 40.t00029 [Brassica oleracea]                                                                                                                                                                                                                                                                                                                                                                                                                                                                                                                                                                                                                                                                                                                                                                                                                                                                                                                                                                                                | 298 | 311  | 1.00E-109 | 104.4  | 75.8 | 82.6 | hypothetical protein 40.t00029                        | gbpln | Brassica oleracea    | AT4G17680.1   Symbols:   SBP (S-ribonuclease binding protein) family protein   chr4:9842903-9844095 REVERSE LENGTH=314                                                                                                                                                                                                                        | 298 | 314  | 8.00E-94  | 105.4 | 65.1 | 75.2 |
| Rsa1.0_00326.1.g11377.t1  | gb AAF18538.1 AC006551.24 Very similar to retrotransposon reverse transcriptase [Arabidopsis thaliana]                                                                                                                                                                                                                                                                                                                                                                                                                                                                                                                                                                                                                                                                                                                                                                                                                                                                                                                                                            | 88  | 1231 | 1.00E-15  | 1398.9 | 51.1 | 62.5 | Very similar to retrotransposon reverse transcriptase | gbpln | Arabidopsis thaliana | #                                                                                                                                                                                                                                                                                                                                             | #   | #    | #         | #     | #    | #    |



|                          |                                                                                                                                                                                                                                                                                                                                                                                                                                                                                                                                                                                                                                                                                                                                                                              |      |      |           |       |      |      |                                                                       |       |                      |                                                                                                                                    |      |      |           |       |      |      |
|--------------------------|------------------------------------------------------------------------------------------------------------------------------------------------------------------------------------------------------------------------------------------------------------------------------------------------------------------------------------------------------------------------------------------------------------------------------------------------------------------------------------------------------------------------------------------------------------------------------------------------------------------------------------------------------------------------------------------------------------------------------------------------------------------------------|------|------|-----------|-------|------|------|-----------------------------------------------------------------------|-------|----------------------|------------------------------------------------------------------------------------------------------------------------------------|------|------|-----------|-------|------|------|
| Rsa1.0_00326.1.g11378.t1 | gb ABD65149.1  hypothetical protein 40.t00027 [Brassica oleracea]                                                                                                                                                                                                                                                                                                                                                                                                                                                                                                                                                                                                                                                                                                            | 157  | 168  | 3.00E-57  | 107.0 | 81.5 | 89.2 | hypothetical protein 40.t00027                                        | gbpln | Brassica oleracea    | AT4G17670.1   Symbols:   Protein of unknown function (DUF581)   chr4:9833948-9834663 REVERSE LENGTH=159                            | 157  | 159  | 3.00E-46  | 101.3 | 72.0 | 80.9 |
| Rsa1.0_00326.1.g11379.t1 | gb EOA17294.1  hypothetical protein CARUB_v10005567mg [Capsella rubella]                                                                                                                                                                                                                                                                                                                                                                                                                                                                                                                                                                                                                                                                                                     | 253  | 253  | 1.00E-117 | 100.0 | 84.2 | 89.7 | hypothetical protein CARUB_v10005567mg                                | gbpln | Capsella rubella     | AT4G17650.1   Symbols:   Polyketide cyclase / dehydrase and lipid transport protein   chr4:9827749-9829443 FORWARD LENGTH=256      | 253  | 256  | 1.00E-106 | 101.2 | 81.8 | 88.5 |
| Rsa1.0_00326.1.g11380.t1 | ref NP_193499.1  casein kinase 2 subunit beta [Arabidopsis thaliana]<br>gi 729882 sp P40229.1 CSK2C_ARATH<br>RefName: Full=Casein kinase II subunit beta; Short=CK II beta<br>gi 467975 gb AA53234.1  casein kinase II beta subunit CKB2 [Arabidopsis thaliana] gi 2245122 emb CAB10544.1  casein kinase II beta chain CKB2 [Arabidopsis thaliana]<br>gi 7268516 emb CAB78767.1  casein kinase II beta chain CKB2 [Arabidopsis thaliana] gi 21554030 gb AAM6311.1  casein kinase II beta chain CKB2 [Arabidopsis thaliana]<br>gi 26453134 dbj BAC43643.1  putative casein kinase II beta chain CKB2 [Arabidopsis thaliana]<br>gi 28950839 gb AAO63343.1  At4g17640 [Arabidopsis thaliana]<br>gi 332658527 gb AEE83927.1  casein kinase 2 subunit beta [Arabidopsis thaliana] | 284  | 282  | 1.00E-140 | 99.3  | 84.9 | 90.1 | casein kinase 2 subunit beta                                          | gbpln | Arabidopsis thaliana | AT4G17640.1   Symbols: CKB2   casein kinase II beta chain 2   chr4:9825438-9828988 FORWARD LENGTH=282                              | 284  | 282  | 1.00E-143 | 99.3  | 84.9 | 90.1 |
| Rsa1.0_00326.1.g11381.t1 | gb EOA16382.1  hypothetical protein CARUB_v10004533mg [Capsella rubella]                                                                                                                                                                                                                                                                                                                                                                                                                                                                                                                                                                                                                                                                                                     | 539  | 543  | 0         | 100.7 | 81.1 | 86.6 | hypothetical protein CARUB_v10004533mg                                | gbpln | Capsella rubella     | AT4G17620.2   Symbols:   glycine-rich protein   chr4:9822005-9824859 FORWARD LENGTH=544                                            | 539  | 544  | 0         | 100.9 | 76.8 | 84.4 |
| Rsa1.0_00326.1.g11382.t1 | ref XP_002870095.1  hypothetical protein ARALYDRAFT_914947 [Arabidopsis lyrata subsp. lyrata] gi 297315931 gb EFH46354.1  hypothetical protein ARALYDRAFT_914947 [Arabidopsis lyrata subsp. lyrata]<br>ref XP_002868048.1  tRNA/rRNA methyltransferase family protein [Arabidopsis lyrata subsp. lyrata] gi 297313884 gb EFH44307.1  tRNA/rRNA methyltransferase family protein [Arabidopsis lyrata subsp. lyrata]                                                                                                                                                                                                                                                                                                                                                           | 460  | 213  | 1.00E-115 | 46.3  | 44.3 | 44.8 | hypothetical protein ARALYDRAFT_914947                                | gbpln | Arabidopsis lyrata   | AT4G17615.1   Symbols: CBL1, ATCBL1, SCABP5   calcineurin B-like protein 1   chr4:9817142-9818995 FORWARD LENGTH=213               | 460  | 213  | 1.00E-117 | 46.3  | 43.9 | 44.8 |
| Rsa1.0_00326.1.g11383.t3 | ref XP_002868048.1  tRNA/rRNA methyltransferase family protein [Arabidopsis lyrata subsp. lyrata] gi 297313884 gb EFH44307.1  tRNA/rRNA methyltransferase family protein [Arabidopsis lyrata subsp. lyrata]                                                                                                                                                                                                                                                                                                                                                                                                                                                                                                                                                                  | 1820 | 1852 | 0         | 101.8 | 86.7 | 92.6 | tRNA/rRNA methyltransferase family protein                            | gbpln | Arabidopsis lyrata   | AT4G17610.1   Symbols:   tRNA/rRNA methyltransferase (SpoU) family protein   chr4:9805652-9814910 REVERSE LENGTH=1850              | 1820 | 1850 | 0         | 101.6 | 87.0 | 92.7 |
| Rsa1.0_00326.1.g11384.t1 | ref NP_178730.2  armadillo/beta-catenin-like repeat-containing protein [Arabidopsis thaliana] gi 330250943 gb AEC06037.1  armadillo/beta-catenin-like repeat-containing protein [Arabidopsis thaliana]                                                                                                                                                                                                                                                                                                                                                                                                                                                                                                                                                                       | 835  | 820  | 0         | 98.2  | 79.2 | 84.9 | armadillo/beta-catenin-like repeat-containing protein                 | gbpln | Arabidopsis thaliana | AT2G07170.1   Symbols:   ARM repeat superfamily protein   chr2:2975565-2978692 FORWARD LENGTH=820                                  | 835  | 820  | 0         | 98.2  | 79.2 | 84.9 |
| Rsa1.0_00326.1.g11385.t1 | gb AAM63191.1  putative cell wall-plasma membrane disconnecting CLCT protein (AIR1A) [Arabidopsis thaliana]                                                                                                                                                                                                                                                                                                                                                                                                                                                                                                                                                                                                                                                                  | 200  | 111  | 4.00E-20  | 55.5  | 26.5 | 37.0 | putative cell wall-plasma membrane disconnecting CLCT protein (AIR1A) | gbpln | Arabidopsis thaliana | AT4G12550.1   Symbols: AIR1   Auxin-Induced in Root cultures 1   chr4:7439176-7439511 FORWARD LENGTH=111                           | 200  | 111  | 3.00E-22  | 55.5  | 26.0 | 37.0 |
| Rsa1.0_00326.1.g11386.t1 | dbj BAJ34326.1  unnamed protein product [Thellungiella halophila]                                                                                                                                                                                                                                                                                                                                                                                                                                                                                                                                                                                                                                                                                                            | 503  | 516  | 0         | 102.6 | 84.5 | 90.3 | unnamed protein product                                               | ----  | ----                 | AT4G17570.3   Symbols: GATA26   GATA transcription factor 26   chr4:9784329-9786974 REVERSE LENGTH=514                             | 503  | 514  | 0         | 102.2 | 83.1 | 89.7 |
| Rsa1.0_00326.1.g11387.t1 | ref NP_193490.1  putative F-box protein [Arabidopsis thaliana] gi 122214541 sp Q3EA00.1 FB235_ARATH<br>RefName: Full=Putative F-box protein At4g17565<br>gi 332658511 gb AEE83911.1  putative F-box protein [Arabidopsis thaliana]<br>ref XP_002868054.1  predicted protein [Arabidopsis lyrata subsp. lyrata] gi 297313890 gb EFH44313.1  predicted protein [Arabidopsis lyrata subsp. lyrata]                                                                                                                                                                                                                                                                                                                                                                              | 372  | 378  | 1.00E-101 | 101.6 | 53.8 | 68.3 | putative F-box protein                                                | gbpln | Arabidopsis thaliana | AT4G17565.1   Symbols:   F-box family protein with a domain of unknown function (DUF295)   chr4:9782508-9783644 REVERSE LENGTH=378 | 372  | 378  | 1.00E-103 | 101.6 | 53.8 | 68.3 |
| Rsa1.0_00326.1.g11388.t1 | ref XP_002868054.1  predicted protein [Arabidopsis lyrata subsp. lyrata] gi 297313890 gb EFH44313.1  predicted protein [Arabidopsis lyrata subsp. lyrata]                                                                                                                                                                                                                                                                                                                                                                                                                                                                                                                                                                                                                    | 145  | 335  | 5.00E-29  | 231.0 | 46.2 | 46.9 | predicted protein                                                     | gbpln | Arabidopsis lyrata   | AT4G17550.1   Symbols:   Major facilitator superfamily protein   chr4:9777938-9779738 REVERSE LENGTH=544                           | 145  | 544  | 2.00E-31  | 375.2 | 46.2 | 46.9 |

|                          |                                                                                                                                                                                                                                                                                                                                                                                                                                                                                                                                                                                 |      |      |           |       |      |      |                                                      |       |                      |                                                                                                                                                                                                                                                                                   |      |      |           |       |      |      |
|--------------------------|---------------------------------------------------------------------------------------------------------------------------------------------------------------------------------------------------------------------------------------------------------------------------------------------------------------------------------------------------------------------------------------------------------------------------------------------------------------------------------------------------------------------------------------------------------------------------------|------|------|-----------|-------|------|------|------------------------------------------------------|-------|----------------------|-----------------------------------------------------------------------------------------------------------------------------------------------------------------------------------------------------------------------------------------------------------------------------------|------|------|-----------|-------|------|------|
| Rsa1.0_00326.1.g11389.t1 | refNP_193487.2  uncharacterized protein [Arabidopsis thaliana] gi20260466 gb AAM13131.1  unknown protein [Arabidopsis thaliana] gi28059310 gb AA030046.1  unknown protein [Arabidopsis thaliana] gi332658508 gb AEE83908.1  uncharacterized protein AT4G17540 [Arabidopsis thaliana]                                                                                                                                                                                                                                                                                            | 255  | 294  | 2.00E-92  | 115.3 | 76.5 | 83.1 | uncharacterized protein                              | gbpln | Arabidopsis thaliana | AT4G17540.1   Symbols:   unknown protein; Has 30201 Blast hits to 17322 proteins in 780 species: Archae - 12; Bacteria - 1396; Metazoa - 17338; Fungi - 3422; Plants - 5037; Viruses - 0; Other Eukaryotes - 2996 (source: NCBI BLINK);   chr4:9775982-9777765 FORWARD LENGTH=294 | 255  | 294  | 6.00E-95  | 115.3 | 76.5 | 83.1 |
| Rsa1.0_00326.1.g11390.t1 | gb ABD65068.1  GTP-binding protein, putative [Brassica oleracea]                                                                                                                                                                                                                                                                                                                                                                                                                                                                                                                | 202  | 202  | 1.00E-115 | 100.0 | 99.0 | 99.5 | GTP-binding protein, putative                        | gbpln | Brassica oleracea    | AT4G17530.1   Symbols: RAB1C, ATRAB1C, ATRABD2C   RAB GTPase homolog 1C   chr4:9773721-9775424 REVERSE LENGTH=202                                                                                                                                                                 | 202  | 202  | 1.00E-115 | 100.0 | 98.0 | 98.5 |
| Rsa1.0_00326.1.g11391.t1 | gb ABD65067.1  nuclear RNA binding protein, putative [Brassica oleracea]                                                                                                                                                                                                                                                                                                                                                                                                                                                                                                        | 345  | 367  | 1.00E-129 | 106.4 | 79.7 | 84.6 | nuclear RNA binding protein, putative                | gbpln | Brassica oleracea    | AT4G17520.1   Symbols:   Hyaluronan / mRNA binding family   chr4:9771496-9773313 FORWARD LENGTH=360                                                                                                                                                                               | 345  | 360  | 1.00E-112 | 104.3 | 70.1 | 79.4 |
| Rsa1.0_00326.1.g11392.t1 | gb EOA15862.1  hypothetical protein CARUB_v10007723mg [Capsella rubella]                                                                                                                                                                                                                                                                                                                                                                                                                                                                                                        | 232  | 234  | 1.00E-122 | 100.9 | 90.9 | 95.7 | hypothetical protein CARUB_v10007723mg               | gbpln | Capsella rubella     | AT4G17510.1   Symbols: UCH3   ubiquitin C-terminal hydrolase 3   chr4:9767114-9768648 REVERSE LENGTH=234                                                                                                                                                                          | 232  | 234  | 1.00E-124 | 100.9 | 89.2 | 97.0 |
| Rsa1.0_00326.1.g11393.t1 | refNP_567530.4  ethylene-responsive transcription factor 1A [Arabidopsis thaliana] gi21264420 sp O80337.2 EF100_ARATH RecName: Full=Ethylene-responsive transcription factor 1A; Short=ATERF1A; AltName: Full=Ethylene-responsive element-binding factor 1A; Short=EREBP-1A gi116648795 gb AAL25588.1  AT4g17500/di4785w [Arabidopsis thaliana] gi17064914 gb AAL32611.1  Unknown protein [Arabidopsis thaliana] gi27311945 gb AAO00938.1  Unknown protein [Arabidopsis thaliana] gi332658503 gb AEE83903.1  ethylene-responsive transcription factor 1A [Arabidopsis thaliana] | 206  | 268  | 1.00E-84  | 130.1 | 83.5 | 89.3 | ethylene-responsive transcription factor 1A          | gbpln | Arabidopsis thaliana | AT4G17500.1   Symbols: ATERF-1, ERF-1   ethylene responsive element binding factor 1   chr4:9759405-9760211 FORWARD LENGTH=268                                                                                                                                                    | 206  | 268  | 4.00E-87  | 130.1 | 83.5 | 89.3 |
| Rsa1.0_00326.1.g11394.t1 | refXP_002884514.1  hypothetical protein ARALYDRAFT_317406 [Arabidopsis lyrata subsp. lyrata] gi297330354 gb EFH6773.1  hypothetical protein ARALYDRAFT_317406 [Arabidopsis lyrata subsp. lyrata]                                                                                                                                                                                                                                                                                                                                                                                | 168  | 896  | 4.00E-30  | 533.3 | 51.8 | 60.1 | hypothetical protein ARALYDRAFT_317406               | gbpln | Arabidopsis lyrata   | AT3G05470.1   Symbols:   Actin-binding FH2 (formin homology 2) family protein   chr3:1579667-1582547 REVERSE LENGTH=884                                                                                                                                                           | 168  | 884  | 3.00E-31  | 526.2 | 51.2 | 59.5 |
| Rsa1.0_00326.1.g11395.t1 | gb ABD65051.1  ethylene responsive element binding factor, putative [Brassica oleracea]                                                                                                                                                                                                                                                                                                                                                                                                                                                                                         | 294  | 290  | 1.00E-103 | 98.6  | 76.2 | 83.0 | ethylene responsive element binding factor, putative | gbpln | Brassica oleracea    | AT4G17490.1   Symbols: ATERF6, ERF-6-6, ERF6   ethylene responsive element binding factor 6   chr4:9752973-9753821 REVERSE LENGTH=282                                                                                                                                             | 294  | 282  | 1.00E-100 | 95.9  | 70.1 | 79.6 |
| Rsa1.0_00326.1.g11396.t2 | gb ABD65098.1  palmitoyl protein thioesterase family protein [Brassica oleracea]                                                                                                                                                                                                                                                                                                                                                                                                                                                                                                | 298  | 300  | 1.00E-158 | 100.7 | 91.3 | 94.6 | palmitoyl protein thioesterase family protein        | gbpln | Brassica oleracea    | AT4G17480.1   Symbols:   alpha/beta-Hydrolases superfamily protein   chr4:9745313-9746847 REVERSE LENGTH=304                                                                                                                                                                      | 298  | 304  | 1.00E-130 | 102.0 | 73.5 | 84.9 |
| Rsa1.0_00326.1.g11397.t2 | gb ABD65097.1  homeobox-leucine zipper protein hat1, putative [Brassica oleracea]                                                                                                                                                                                                                                                                                                                                                                                                                                                                                               | 272  | 273  | 1.00E-149 | 100.4 | 96.0 | 97.4 | homeobox-leucine zipper protein hat1, putative       | gbpln | Brassica oleracea    | AT4G17460.1   Symbols: HAT1   Homeobox-leucine zipper protein 4 (HB-4) / HD-ZIP protein   chr4:9739862-9740983 FORWARD LENGTH=282                                                                                                                                                 | 272  | 282  | 1.00E-140 | 103.7 | 93.0 | 96.0 |
| Rsa1.0_00326.1.g11398.t1 | #                                                                                                                                                                                                                                                                                                                                                                                                                                                                                                                                                                               | #    | #    | #         | #     | #    | #    | -                                                    | ----  | ----                 | #                                                                                                                                                                                                                                                                                 | #    | #    | #         | #     | #    |      |
| Rsa1.0_00326.1.g11399.t1 | gb AAB87099.1  putative retroelement pol polyprotein [Arabidopsis thaliana]                                                                                                                                                                                                                                                                                                                                                                                                                                                                                                     | 1478 | 1496 | 0         | 101.2 | 57.2 | 72.5 | putative retroelement pol polyprotein                | gbpln | Arabidopsis thaliana | AT4G23160.1   Symbols: CRK8   cysteine-rich RLK (RECEPTOR-like protein kinase) 8   chr4:12129485-12134086 FORWARD LENGTH=1262                                                                                                                                                     | 1478 | 1262 | 1.00E-140 | 85.4  | 15.8 | 22.5 |
| Rsa1.0_00326.1.g11400.t1 | refXP_002881770.1  hypothetical protein ARALYDRAFT_903451 [Arabidopsis lyrata subsp. lyrata] gi297327609 gb EFH58029.1  hypothetical protein ARALYDRAFT_903451 [Arabidopsis lyrata subsp. lyrata]                                                                                                                                                                                                                                                                                                                                                                               | 191  | 491  | 2.00E-87  | 257.1 | 82.2 | 82.7 | hypothetical protein ARALYDRAFT_903451               | gbpln | Arabidopsis lyrata   | AT2G41370.1   Symbols: BOP2   Ankyrin repeat family protein / BTB/POZ domain-containing protein   chr2:17238019-17240203 REVERSE LENGTH=491                                                                                                                                       | 191  | 491  | 1.00E-88  | 257.1 | 80.6 | 82.7 |
| Rsa1.0_00326.1.g11401.t1 | emb CAB39638.1  RNA-directed DNA polymerase-like protein [Arabidopsis thaliana] gi7267666 emb CAB78094.1  RNA-directed DNA polymerase-like protein [Arabidopsis thaliana]                                                                                                                                                                                                                                                                                                                                                                                                       | 1559 | 1274 | 0         | 81.7  | 44.7 | 57.7 | RNA-directed DNA polymerase-like protein             | gbpln | Arabidopsis thaliana | AT4G29090.1   Symbols:   Ribonuclease H-like superfamily protein   chr4:14333528-14335255 FORWARD LENGTH=575                                                                                                                                                                      | 1559 | 575  | 1.00E-72  | 36.9  | 11.9 | 18.2 |
| Rsa1.0_00327.1.g11402.t3 | dbj BAA37167.1  cytochrome P450 [Arabidopsis thaliana]                                                                                                                                                                                                                                                                                                                                                                                                                                                                                                                          | 824  | 524  | 1.00E-111 | 63.6  | 25.8 | 27.1 | cytochrome P450                                      | gbpln | Arabidopsis thaliana | AT4G36380.1   Symbols: ROT3   Cytochrome P450 superfamily protein   chr4:17187973-17192202 REVERSE LENGTH=524                                                                                                                                                                     | 824  | 524  | 1.00E-108 | 63.6  | 25.7 | 26.9 |
| Rsa1.0_00327.1.g11403.t1 | #                                                                                                                                                                                                                                                                                                                                                                                                                                                                                                                                                                               | #    | #    | #         | #     | #    | #    | -                                                    | ----  | ----                 | #                                                                                                                                                                                                                                                                                 | #    | #    | #         | #     | #    |      |

|                          |                                                                                                                                                                                                                                                                                                                                                                                                                                                                                                                 |     |     |           |       |      |      |                                                                  |       |                      |                                                                                                                                                                                                                                                                                                                                                                                                                                                                                                                                  |     |     |           |       |      |      |
|--------------------------|-----------------------------------------------------------------------------------------------------------------------------------------------------------------------------------------------------------------------------------------------------------------------------------------------------------------------------------------------------------------------------------------------------------------------------------------------------------------------------------------------------------------|-----|-----|-----------|-------|------|------|------------------------------------------------------------------|-------|----------------------|----------------------------------------------------------------------------------------------------------------------------------------------------------------------------------------------------------------------------------------------------------------------------------------------------------------------------------------------------------------------------------------------------------------------------------------------------------------------------------------------------------------------------------|-----|-----|-----------|-------|------|------|
| Rsa1.0_00327.1.g11404.t1 | gb ABD65099.1  hypothetical protein 31.t00074 [Brassica oleracea]                                                                                                                                                                                                                                                                                                                                                                                                                                               | 230 | 258 | 1.00E-72  | 112.2 | 62.6 | 73.5 | hypothetical protein 31.t00074                                   | gbpln | Brassica oleracea    | AT3G47680.1   Symbols:   DNA binding   chr3:17577483-17578391 REVERSE LENGTH=302                                                                                                                                                                                                                                                                                                                                                                                                                                                 | 230 | 302 | 9.00E-42  | 131.3 | 47.4 | 65.2 |
|                          | ref NP_568004.1  putative ubiquitin-conjugating enzyme E2 17 [Arabidopsis thaliana]<br>gi 75318090 sp O23239.1 UBC17_ARATH RecName: Full=Probable ubiquitin-conjugating enzyme E2 17; AltName: Full=Ubiquitin carrier protein 17<br>gi 2464941 emb CAB16814.1  ubiquitin-conjugating enzyme [Arabidopsis thaliana] gi 2801446 gb AAC39326.1  ubiquitin-conjugating enzyme 17 [Arabidopsis thaliana]                                                                                                             |     |     |           |       |      |      |                                                                  |       |                      |                                                                                                                                                                                                                                                                                                                                                                                                                                                                                                                                  |     |     |           |       |      |      |
| Rsa1.0_00327.1.g11405.t4 | gi 7270589 emb CAB80307.1  ubiquitin-conjugating enzyme [Arabidopsis thaliana] gi 21593655 gb AAM65622.1  E2, ubiquitin-conjugating enzyme 17 (UBC17) [Arabidopsis thaliana] gi 66354444 gb AAY44857.1  ubiquitinating enzyme [Arabidopsis thaliana] gi 332661253 gb AEE86653.1  putative ubiquitin-conjugating enzyme E2 17 [Arabidopsis thaliana] gi 482553365 gb EOA17558.1  hypothetical protein CARUB.v10005917mg [Capsella rubella]                                                                       | 161 | 161 | 4.00E-80  | 100.0 | 92.5 | 96.9 | putative ubiquitin-conjugating enzyme E2 17                      | gbpln | Arabidopsis thaliana | AT4G36410.1   Symbols: UBC17   ubiquitin-conjugating enzyme 17   chr4:17201969-17202890 FORWARD LENGTH=161                                                                                                                                                                                                                                                                                                                                                                                                                       | 161 | 161 | 2.00E-82  | 100.0 | 92.5 | 96.9 |
| Rsa1.0_00327.1.g11406.t1 | gb EOA17517.1  hypothetical protein CARUB.v10005850mg [Capsella rubella]                                                                                                                                                                                                                                                                                                                                                                                                                                        | 175 | 180 | 1.00E-68  | 102.9 | 80.6 | 89.1 | hypothetical protein CARUB.v10005850mg                           | gbpln | Capsella rubella     | AT4G36420.1   Symbols:   Ribosomal protein L12 family protein   chr4:17203718-17204257 REVERSE LENGTH=179                                                                                                                                                                                                                                                                                                                                                                                                                        | 175 | 179 | 4.00E-59  | 102.3 | 76.6 | 86.3 |
| Rsa1.0_00327.1.g11407.t1 | emb CCJ34843.1  horseradish peroxidase isoenzyme HRP.08562.1 [Armoracia rusticana]                                                                                                                                                                                                                                                                                                                                                                                                                              | 331 | 331 | 1.00E-168 | 100.0 | 90.0 | 94.9 | horseradish peroxidase isoenzyme HRP.08562.1                     | gbpln | Armoracia rusticana  | AT4G36430.1   Symbols:   Peroxidase superfamily protein   chr4:17204648-17205917 REVERSE LENGTH=331                                                                                                                                                                                                                                                                                                                                                                                                                              | 331 | 331 | 1.00E-169 | 100.0 | 89.4 | 94.0 |
| Rsa1.0_00327.1.g11408.t1 | gb ACH61906.1  serine palmitoyltransferase long chain base subunit [Brassica rapa subsp. chinensis] gi 197311352 gb ACH61907.1  serine palmitoyltransferase long chain base subunit [Brassica rapa subsp. chinensis]                                                                                                                                                                                                                                                                                            | 480 | 482 | 0         | 100.4 | 97.3 | 98.8 | serine palmitoyltransferase long chain base subunit              | gbpln | Brassica rapa        | AT4G36480.2   Symbols: ATLCB1, LCB1, EMB2779, FBR11   long-chain base1   chr4:17218598-17221124 FORWARD LENGTH=482                                                                                                                                                                                                                                                                                                                                                                                                               | 480 | 482 | 0         | 100.4 | 91.5 | 95.4 |
| Rsa1.0_00327.1.g11409.t1 | ref NP_195365.1  S-adenosyl-L-methionine-dependent methyltransferase-like protein [Arabidopsis thaliana] gi 4006915 emb CAB16845.1  hypothetical protein [Arabidopsis thaliana] gi 7270595 emb CAB80313.1  hypothetical protein [Arabidopsis thaliana] gi 48427662 gb AAT42380.1  At4g36470 [Arabidopsis thaliana] gi 110741629 dbj BAE98762.1  hypothetical protein [Arabidopsis thaliana] gi 332661259 gb AEE86659.1  S-adenosyl-L-methionine-dependent methyltransferase-like protein [Arabidopsis thaliana] | 341 | 371 | 1.00E-150 | 108.8 | 80.6 | 85.9 | S-adenosyl-L-methionine-dependent methyltransferase-like protein | gbpln | Arabidopsis thaliana | AT4G36470.1   Symbols:   S-adenosyl-L-methionine-dependent methyltransferases superfamily protein   chr4:17215128-17216475 REVERSE LENGTH=371                                                                                                                                                                                                                                                                                                                                                                                    | 341 | 371 | 1.00E-153 | 108.8 | 80.6 | 85.9 |
| Rsa1.0_00327.1.g11410.t1 | ref NP_195368.1  uncharacterized protein [Arabidopsis thaliana] gi 2464932 emb CAB16811.1  putative protein [Arabidopsis thaliana] gi 7270598 emb CAB80316.1  putative protein [Arabidopsis thaliana] gi 28393196 gb AAO42028.1  unknown protein [Arabidopsis thaliana] gi 28287518 gb AAO50603.1  unknown protein [Arabidopsis thaliana] gi 332661263 gb AEE86663.1  uncharacterized protein AT4G36500 [Arabidopsis thaliana]                                                                                  | 122 | 122 | 4.00E-54  | 100.0 | 93.4 | 95.1 | uncharacterized protein                                          | gbpln | Arabidopsis thaliana | AT4G36500.1   Symbols:   unknown protein; FUNCTIONS IN: molecular function unknown; INVOLVED IN: biological process unknown; LOCATED IN: mitochondrion; EXPRESSED IN: 22 plant structures; EXPRESSED DURING: 13 growth stages; BEST Arabidopsis thaliana protein match is: unknown protein (TAIR:AT2G18210.1); Has 50 Blast hits to 50 proteins in 7 species: Archae - 0; Bacteria - 0; Metazoa - 0; Fungi - 0; Plants - 50; Viruses - 0; Other Eukaryotes - 0 (source: NCBI BLINK).   chr4:17226139-17226507 REVERSE LENGTH=122 | 122 | 122 | 7.00E-57  | 100.0 | 93.4 | 95.1 |
| Rsa1.0_00327.1.g11411.t1 | ref NP_849508.1  transcription factor BEE 2 [Arabidopsis thaliana] gi 332661270 gb AEE86670.1  transcription factor BEE 2 [Arabidopsis thaliana]                                                                                                                                                                                                                                                                                                                                                                | 270 | 302 | 1.00E-121 | 111.9 | 84.8 | 91.1 | transcription factor BEE 2                                       | gbpln | Arabidopsis thaliana | AT4G36540.2   Symbols: BEE2   BR enhanced expression 2   chr4:17243699-17244965 FORWARD LENGTH=302                                                                                                                                                                                                                                                                                                                                                                                                                               | 270 | 302 | 1.00E-124 | 111.9 | 84.8 | 91.1 |

|                          |                                                                                                                                                                                                                                                                                         |      |      |           |       |      |      |                                                 |       |                      |                                                                                                                                                                                                                                                                                                                                                                           |      |      |           |       |      |      |
|--------------------------|-----------------------------------------------------------------------------------------------------------------------------------------------------------------------------------------------------------------------------------------------------------------------------------------|------|------|-----------|-------|------|------|-------------------------------------------------|-------|----------------------|---------------------------------------------------------------------------------------------------------------------------------------------------------------------------------------------------------------------------------------------------------------------------------------------------------------------------------------------------------------------------|------|------|-----------|-------|------|------|
| Rsa1.0_00327.1.g11412.t1 | refXP_002867008.1   U-box domain-containing protein 5 [Arabidopsis lyrata subsp. lyrata]<br>gi 297312844 gb EFH43267.1   U-box domain-containing protein 5 [Arabidopsis lyrata subsp. lyrata]<br>gb EOA15655.1   hypothetical protein CARUB_v10006084mg, partial [Capsella rubella]     | 521  | 751  | 4.00E-76  | 144.1 | 31.3 | 36.7 | U-box domain-containing protein 5               | gbpln | Arabidopsis lyrata   | AT4G36550.1   Symbols:   ARM repeat superfamily protein   chr4:17245400-17247926 REVERSE LENGTH=718                                                                                                                                                                                                                                                                       | 521  | 718  | 6.00E-73  | 137.8 | 29.8 | 34.5 |
| Rsa1.0_00327.1.g11413.t1 | gb EOA15655.1   hypothetical protein CARUB_v10006084mg, partial [Capsella rubella]                                                                                                                                                                                                      | 75   | 105  | 2.00E-31  | 140.0 | 86.7 | 90.7 | hypothetical protein CARUB_v10006084mg, partial | gbpln | Capsella rubella     | AT1G75250.1   Symbols: ATRL6, RSM3, RL6   RAD-like 6   chr1:28245073-28245453 REVERSE LENGTH=126                                                                                                                                                                                                                                                                          | 75   | 126  | 3.00E-25  | 168.0 | 58.7 | 81.3 |
| Rsa1.0_00327.1.g11414.t1 | gb EOA18974.1   hypothetical protein CARUB_v10007612mg [Capsella rubella]                                                                                                                                                                                                               | 221  | 212  | 5.00E-84  | 95.9  | 81.4 | 88.2 | hypothetical protein CARUB_v10007612mg          | gbpln | Capsella rubella     | AT4G36620.1   Symbols: GATA19   GATA transcription factor 19   chr4:17268906-17269662 REVERSE LENGTH=211                                                                                                                                                                                                                                                                  | 221  | 211  | 3.00E-83  | 95.5  | 81.9 | 86.0 |
| Rsa1.0_00327.1.g11415.t5 | refXP_002886383.1   hypothetical protein ARALYDRAFT_474974 [Arabidopsis lyrata subsp. lyrata]<br>gi 297332224 gb EFH62642.1   hypothetical protein ARALYDRAFT_474974 [Arabidopsis lyrata subsp. lyrata]                                                                                 | 992  | 1049 | 0         | 105.7 | 84.0 | 90.7 | hypothetical protein ARALYDRAFT_474974          | gbpln | Arabidopsis lyrata   | AT1G63810.1   Symbols:   CONTAINS InterPro DOMAIN/s: Nrap protein (InterPro:IPR005554); Has 396 Blast hits to 382 proteins in 182 species: Archae - 3; Bacteria - 2; Metazoa - 142; Fungi - 146; Plants - 43; Viruses - 0; Other Eukaryotes - 60 (source: NCBI BLINK).   chr1:23669690-23675542 REVERSE LENGTH=1053                                                       | 992  | 1053 | 0         | 106.1 | 82.8 | 89.6 |
| Rsa1.0_00327.1.g11416.t1 | gb EOA15961.1   hypothetical protein CARUB_v10004058mg [Capsella rubella]                                                                                                                                                                                                               | 1001 | 1000 | 0         | 99.9  | 92.2 | 96.6 | hypothetical protein CARUB_v10004058mg          | gbpln | Capsella rubella     | AT4G36630.1   Symbols: EMB2754   Vacuolar sorting protein 39   chr4:17272088-17276524 REVERSE LENGTH=1000                                                                                                                                                                                                                                                                 | 1001 | 1000 | 0         | 99.9  | 91.4 | 96.5 |
| Rsa1.0_00327.1.g11417.t1 | gb EOA18681.1   hypothetical protein CARUB_v10007257mg [Capsella rubella]                                                                                                                                                                                                               | 284  | 293  | 1.00E-136 | 103.2 | 81.3 | 89.4 | hypothetical protein CARUB_v10007257mg          | gbpln | Capsella rubella     | AT4G36640.1   Symbols:   Sec14p-like phosphatidylinositol transfer family protein   chr4:17277187-17278447 REVERSE LENGTH=294                                                                                                                                                                                                                                             | 284  | 294  | 1.00E-132 | 103.5 | 77.5 | 88.0 |
| Rsa1.0_00327.1.g11418.t1 | #                                                                                                                                                                                                                                                                                       | #    | #    | #         | #     | #    | #    | -                                               | ----  | ----                 | #                                                                                                                                                                                                                                                                                                                                                                         | #    | #    | #         | #     | #    | #    |
| Rsa1.0_00327.1.g11419.t1 | gb EOA16387.1   hypothetical protein CARUB_v10004541mg, partial [Capsella rubella]                                                                                                                                                                                                      | 511  | 540  | 0         | 105.7 | 87.1 | 91.4 | hypothetical protein CARUB_v10004541mg, partial | gbpln | Capsella rubella     | AT4G36650.1   Symbols: ATPBRP, PBRP   plant-specific TFIIIB-related protein   chr4:17283283-17285527 REVERSE LENGTH=503                                                                                                                                                                                                                                                   | 511  | 503  | 0         | 98.4  | 86.7 | 91.2 |
| Rsa1.0_00327.1.g11420.t1 | ref NP_195384.5  uncharacterized protein [Arabidopsis thaliana]<br>gi 45752648 gb AAS76222.1   At4g36660 [Arabidopsis thaliana]<br>gi 4573768 gb AAS76688.1   At4g36660 [Arabidopsis thaliana]<br>gi 332661284 gb AEE86684.1   uncharacterized protein AT4G36660 [Arabidopsis thaliana] | 187  | 179  | 5.00E-60  | 95.7  | 67.9 | 71.7 | uncharacterized protein                         | gbpln | Arabidopsis thaliana | AT4G36660.1   Symbols:   Protein of unknown function (DUF195)   chr4:17285953-17287281 REVERSE LENGTH=179                                                                                                                                                                                                                                                                 | 187  | 179  | 2.00E-62  | 95.7  | 67.9 | 71.7 |
| Rsa1.0_00327.1.g11421.t1 | gb EOA18172.1   hypothetical protein CARUB_v10006648mg [Capsella rubella]                                                                                                                                                                                                               | 506  | 493  | 0         | 97.4  | 92.1 | 95.7 | hypothetical protein CARUB_v10006648mg          | gbpln | Capsella rubella     | AT4G36670.1   Symbols:   Major facilitator superfamily protein   chr4:17287680-17289483 REVERSE LENGTH=493                                                                                                                                                                                                                                                                | 506  | 493  | 0         | 97.4  | 91.3 | 95.3 |
| Rsa1.0_00327.1.g11422.t1 | ref XP_002871167.1  exonuclease family protein [Arabidopsis lyrata subsp. lyrata]<br>gi 297317004 gb EFH47426.1   exonuclease family protein [Arabidopsis lyrata subsp. lyrata]                                                                                                         | 267  | 464  | 1.00E-37  | 173.8 | 43.1 | 58.4 | exonuclease family protein                      | gbpln | Arabidopsis lyrata   | AT5G05540.1   Symbols: SDN2   small RNA degrading nuclease 2   chr5:1636419-1638759 FORWARD LENGTH=466                                                                                                                                                                                                                                                                    | 267  | 466  | 3.00E-39  | 174.5 | 37.8 | 50.9 |
| Rsa1.0_00327.1.g11423.t1 | ref XP_002889482.1  hypothetical protein ARALYDRAFT_333714 [Arabidopsis lyrata subsp. lyrata]<br>gi 297335324 gb EFH65741.1   hypothetical protein ARALYDRAFT_333714 [Arabidopsis lyrata subsp. lyrata]                                                                                 | 147  | 671  | 8.00E-77  | 456.5 | 87.8 | 95.2 | hypothetical protein ARALYDRAFT_333714          | gbpln | Arabidopsis lyrata   | AT1G03910.2   Symbols:   EXPRESSED IN: 24 plant structures; EXPRESSED DURING: 13 growth stages; CONTAINS InterPro DOMAIN/s: Cactin protein, cactus-binding domain, C-terminal (InterPro:IPR019134), Cactin, central region (InterPro:IPR018816); BEST Arabidopsis thaliana protein match is: unknown protein (TAIR:AT2G36815.2).   chr1:996432-1000231 FORWARD LENGTH=716 | 147  | 716  | 4.00E-79  | 487.1 | 87.8 | 95.2 |
| Rsa1.0_00327.1.g11424.t1 | gb EOA35181.1   hypothetical protein CARUB_v10020326mg [Capsella rubella]                                                                                                                                                                                                               | 156  | 430  | 5.00E-67  | 275.6 | 76.3 | 83.3 | hypothetical protein CARUB_v10020326mg          | gbpln | Capsella rubella     | AT1G77840.1   Symbols:   Translation initiation factor IF2/IF5   chr1:29269087-29270400 FORWARD LENGTH=437                                                                                                                                                                                                                                                                | 156  | 437  | 7.00E-68  | 280.1 | 75.0 | 82.1 |
| Rsa1.0_00327.1.g11425.t1 | ref NP_195388.2  cupin family protein [Arabidopsis thaliana]<br>gi 332661291 gb AEE86691.1   cupin family protein [Arabidopsis thaliana]                                                                                                                                                | 327  | 522  | 1.00E-122 | 159.6 | 69.7 | 78.9 | cupin family protein                            | gbpln | Arabidopsis thaliana | AT4G38700.1   Symbols:   RmC-like cupins superfamily protein   chr4:17298443-17300337 REVERSE LENGTH=522                                                                                                                                                                                                                                                                  | 327  | 522  | 1.00E-124 | 159.6 | 69.7 | 78.9 |
| Rsa1.0_00328.1.g11426.t1 | gb AAC63372.1   lipid transfer protein [Brassica oleracea]                                                                                                                                                                                                                              | 118  | 118  | 4.00E-53  | 100.0 | 90.7 | 96.6 | lipid transfer protein                          | gbpln | Brassica oleracea    | AT2G38540.1   Symbols: LP1, LTP1, ATLTP1   lipid transfer protein 1   chr2:16130418-16130893 FORWARD LENGTH=118                                                                                                                                                                                                                                                           | 118  | 118  | 2.00E-45  | 100.0 | 72.9 | 88.1 |
| Rsa1.0_00328.1.g11427.t1 | #                                                                                                                                                                                                                                                                                       | #    | #    | #         | #     | #    | #    | -                                               | ----  | ----                 | #                                                                                                                                                                                                                                                                                                                                                                         | #    | #    | #         | #     | #    | #    |
| Rsa1.0_00328.1.g11428.t1 | ref XP_002881569.1  hypothetical protein ARALYDRAFT_482825 [Arabidopsis lyrata subsp. lyrata]<br>gi 297327408 gb EFH57828.1   hypothetical protein ARALYDRAFT_482825 [Arabidopsis lyrata subsp. lyrata]                                                                                 | 466  | 463  | 0         | 99.4  | 88.2 | 92.9 | hypothetical protein ARALYDRAFT_482825          | gbpln | Arabidopsis lyrata   | AT2G38170.1   Symbols: CAX1, ATCAX1, RC14   cation exchanger 1   chr2:15989429-15993178 REVERSE LENGTH=463                                                                                                                                                                                                                                                                | 466  | 463  | 0         | 99.4  | 87.1 | 92.7 |

|                          |                                                                                                                                                                                                                                                                                                                                                                                                                                                                                                                                                                                                                                                                                                                                      |     |      |           |       |      |      |                                                       |       |                      |                                                                                                                                                                                                                                                                                                                                                      |     |     |           |       |      |      |
|--------------------------|--------------------------------------------------------------------------------------------------------------------------------------------------------------------------------------------------------------------------------------------------------------------------------------------------------------------------------------------------------------------------------------------------------------------------------------------------------------------------------------------------------------------------------------------------------------------------------------------------------------------------------------------------------------------------------------------------------------------------------------|-----|------|-----------|-------|------|------|-------------------------------------------------------|-------|----------------------|------------------------------------------------------------------------------------------------------------------------------------------------------------------------------------------------------------------------------------------------------------------------------------------------------------------------------------------------------|-----|-----|-----------|-------|------|------|
| Rsa1.0_00328.1.g11429.t1 | ref[XP_002881567.1] predicted protein [Arabidopsis lyrata subsp. lyrata] gi 297327406 gb EFH57826.1  predicted protein [Arabidopsis lyrata subsp. lyrata]                                                                                                                                                                                                                                                                                                                                                                                                                                                                                                                                                                            | 687 | 750  | 1.00E-168 | 109.2 | 41.5 | 46.0 | predicted protein                                     | gbpln | Arabidopsis lyrata   | AT2G38150.1   Symbols:   alpha 1,4-glycosyltransferase family protein   chr2:15981700-15982917 REVERSE LENGTH=405                                                                                                                                                                                                                                    | 687 | 405 | 1.00E-168 | 59.0  | 40.9 | 46.1 |
| Rsa1.0_00328.1.g11430.t1 | gb ACZ67478.1  auxin resistant 1 protein [Brassica rapa subsp. oleifera]                                                                                                                                                                                                                                                                                                                                                                                                                                                                                                                                                                                                                                                             | 488 | 493  | 0         | 101.0 | 96.3 | 98.8 | auxin resistant 1 protein                             | gbpln | Brassica rapa        | AT2G38120.1   Symbols: AUX1, WAV5, PIR1, MAP1   Transmembrane amino acid transporter family protein   chr2:15973493-15976792 FORWARD LENGTH=485                                                                                                                                                                                                      | 488 | 485 | 0         | 99.4  | 94.3 | 96.3 |
| Rsa1.0_00328.1.g11431.t1 | gb AAQ51783.1 AC079679.3 reverse transcriptase, putative; 16838-20266 [Arabidopsis thaliana]                                                                                                                                                                                                                                                                                                                                                                                                                                                                                                                                                                                                                                         | 193 | 1142 | 9.00E-48  | 591.7 | 54.9 | 63.7 | reverse transcriptase, putative; 16838-20266          | gbpln | Arabidopsis thaliana | AT2G22440.1   Symbols:   BEST Arabidopsis thaliana protein match is: Ribonuclease H-like superfamily protein (TAIR:AT4G29090.1); Has 208 Blast hits to 191 proteins in 10 species: Archae - 0; Bacteria - 0; Metazoa - 0; Fungi - 0; Plants - 208; Viruses - 0; Other Eukaryotes - 0 (source: NCBI BLINK).   chr2:9528910-9529917 FORWARD LENGTH=256 | 193 | 256 | 1.00E-17  | 132.6 | 28.5 | 39.9 |
| Rsa1.0_00328.1.g11432.t1 | gb AGC91763.1  glycerol-3-phosphate acyltransferase 6 [Brassica napus]                                                                                                                                                                                                                                                                                                                                                                                                                                                                                                                                                                                                                                                               | 501 | 501  | 0         | 100.0 | 96.4 | 99.0 | glycerol-3-phosphate acyltransferase 6                | gbpln | Brassica napus       | AT2G38110.1   Symbols:   ATPAT6, GPAT6   glycerol-3-phosphate acyltransferase 6   chr2:15952816-15955364 REVERSE LENGTH=501                                                                                                                                                                                                                          | 501 | 501 | 0         | 100.0 | 92.6 | 96.8 |
| Rsa1.0_00328.1.g11433.t2 | #                                                                                                                                                                                                                                                                                                                                                                                                                                                                                                                                                                                                                                                                                                                                    | #   | #    | #         | #     | #    | #    | -                                                     | ----  | ----                 | #                                                                                                                                                                                                                                                                                                                                                    | #   | #   | #         | #     | #    |      |
| Rsa1.0_00328.1.g11434.t1 | gb EOA27596.1  hypothetical protein CARUB_v10023736mg [Capsella rubella]                                                                                                                                                                                                                                                                                                                                                                                                                                                                                                                                                                                                                                                             | 298 | 299  | 1.00E-159 | 100.3 | 90.9 | 94.3 | hypothetical protein CARUB_v10023736mg                | gbpln | Capsella rubella     | AT2G38090.1   Symbols:   Duplicated homeodomain-like superfamily protein   chr2:15945278-15946775 FORWARD LENGTH=298                                                                                                                                                                                                                                 | 298 | 298 | 1.00E-156 | 100.0 | 93.0 | 95.6 |
| Rsa1.0_00328.1.g11435.t1 | ref NP_565881.1  laccase-4 [Arabidopsis thaliana] gi 75318640 sp O80434.2 _LAC4_ARATH RecName: Full=Laccase-4; AltName: Full=Benzenediol:oxygen oxidoreductase 4; AltName: Full=Diphenol oxidase 4; AltName: Full=Protein IRREGULAR XYLEM 12; AltName: Full=Urishiol oxidase 4; Flags: Precursor gi 1540603 gb AAK96573.1  AtZg38080/T8P21 [Arabidopsis thaliana] gi 17380634 gb AAL36080.1  AtZg38080/T8P21 [Arabidopsis thaliana] gi 17473886 gb AAL38363.1  putative diphenol oxidase [Arabidopsis thaliana] gi 20196985 gb AAC27158.2  putative diphenol oxidase [Arabidopsis thaliana] gi 21387103 gb AAM47955.1  putative diphenol oxidase [Arabidopsis thaliana] gi 330254393 gb AEC09487.1  laccase-4 [Arabidopsis thaliana] | 559 | 558  | 0         | 99.8  | 94.1 | 97.1 | laccase-4                                             | gbpln | Arabidopsis thaliana | AT2G38080.1   Symbols:   IRX12, LAC4, ATLMCO4, LMC04   Laccase/Diphenol oxidase family protein   chr2:15934540-15937352 FORWARD LENGTH=558                                                                                                                                                                                                           | 559 | 558 | 0         | 99.8  | 94.1 | 97.1 |
| Rsa1.0_00328.1.g11436.t1 | gb EOA26744.1  hypothetical protein CARUB_v10022830mg [Capsella rubella]                                                                                                                                                                                                                                                                                                                                                                                                                                                                                                                                                                                                                                                             | 611 | 618  | 0         | 101.1 | 67.6 | 74.6 | hypothetical protein CARUB_v10022830mg                | gbpln | Capsella rubella     | AT2G38070.1   Symbols:   Protein of unknown function (DUF740)   chr2:15928737-15930596 FORWARD LENGTH=619                                                                                                                                                                                                                                            | 611 | 619 | 1.00E-169 | 101.3 | 66.8 | 74.5 |
| Rsa1.0_00328.1.g11437.t1 | ref XP_002881562.1  hypothetical protein ARALYDRAFT_482813 [Arabidopsis lyrata subsp. lyrata] gi 297327401 gb EFH57821.1  hypothetical protein ARALYDRAFT_482813 [Arabidopsis lyrata subsp. lyrata]                                                                                                                                                                                                                                                                                                                                                                                                                                                                                                                                  | 577 | 517  | 0         | 89.6  | 77.1 | 81.1 | hypothetical protein ARALYDRAFT_482813                | gbpln | Arabidopsis lyrata   | AT2G38060.1   Symbols:   PHT4.2   phosphate transporter 4.2   chr2:15922727-15925623 REVERSE LENGTH=512                                                                                                                                                                                                                                              | 577 | 512 | 0         | 88.7  | 76.6 | 80.8 |
| Rsa1.0_00328.1.g11438.t1 | #                                                                                                                                                                                                                                                                                                                                                                                                                                                                                                                                                                                                                                                                                                                                    | #   | #    | #         | #     | #    | #    | -                                                     | ----  | ----                 | #                                                                                                                                                                                                                                                                                                                                                    | #   | #   | #         | #     | #    |      |
| Rsa1.0_00328.1.g11439.t1 | ref XP_002881561.1  predicted protein [Arabidopsis lyrata subsp. lyrata] gi 297327400 gb EFH57820.1  predicted protein [Arabidopsis lyrata subsp. lyrata]                                                                                                                                                                                                                                                                                                                                                                                                                                                                                                                                                                            | 260 | 261  | 1.00E-125 | 100.4 | 83.1 | 91.5 | predicted protein                                     | gbpln | Arabidopsis lyrata   | AT2G38050.1   Symbols:   DET2, DWF6, ATDET2   3-oxo-5-alpha-steroid 4-dehydrogenase family protein   chr2:15921303-15922176 REVERSE LENGTH=262                                                                                                                                                                                                       | 260 | 262 | 1.00E-123 | 100.8 | 80.4 | 90.0 |
| Rsa1.0_00328.1.g11440.t2 | gb EOA26982.1  hypothetical protein CARUB_v10025234mg [Capsella rubella]                                                                                                                                                                                                                                                                                                                                                                                                                                                                                                                                                                                                                                                             | 253 | 756  | 1.00E-129 | 298.8 | 93.7 | 96.8 | hypothetical protein CARUB_v10025234mg                | gbpln | Capsella rubella     | AT2G38010.1   Symbols:   Neutral/alkaline non-lysosomal ceramidase   chr2:15906862-15909867 FORWARD LENGTH=757                                                                                                                                                                                                                                       | 253 | 757 | 1.00E-127 | 299.2 | 90.1 | 94.9 |
| Rsa1.0_00328.1.g11441.t1 | ref XP_002879721.1  ribosome biogenesis regulatory protein family protein [Arabidopsis lyrata subsp. lyrata] gi 297325560 gb EFH55980.1  ribosome biogenesis regulatory protein family protein [Arabidopsis lyrata subsp. lyrata]                                                                                                                                                                                                                                                                                                                                                                                                                                                                                                    | 319 | 324  | 1.00E-156 | 101.6 | 86.8 | 92.2 | ribosome biogenesis regulatory protein family protein | gbpln | Arabidopsis lyrata   | AT2G37990.1   Symbols:   ribosome biogenesis regulatory protein (RRS1) family protein   chr2:15900713-15903028 FORWARD LENGTH=318                                                                                                                                                                                                                    | 319 | 318 | 1.00E-156 | 99.7  | 85.6 | 91.5 |
| Rsa1.0_00329.1.g11442.t1 | ref XP_002273725.1  PREDICTED: uncharacterized protein LOC100248761 [Vitis vinifera] gi 298205155 emb CB117214.3  unnamed protein product [Vitis vinifera]                                                                                                                                                                                                                                                                                                                                                                                                                                                                                                                                                                           | 259 | 413  | 1.00E-105 | 159.5 | 73.7 | 79.9 | PREDICTED: uncharacterized protein LOC100248761       | gbpln | Vitis vinifera       | AT1G04850.1   Symbols:   ubiquitin-associated (UBA)/TS-N domain-containing protein   chr1:1365311-1368706 REVERSE LENGTH=413                                                                                                                                                                                                                         | 259 | 413 | 1.00E-105 | 159.5 | 83.0 | 86.9 |

|                          |                                                                                                                                                                                                                                                                                                                                                                                                                                                                                                                                                                                                                                                                                |     |     |           |       |      |      |                                                                           |       |                      |                                                                                                                                                                                                                                                            |     |     |           |       |      |      |
|--------------------------|--------------------------------------------------------------------------------------------------------------------------------------------------------------------------------------------------------------------------------------------------------------------------------------------------------------------------------------------------------------------------------------------------------------------------------------------------------------------------------------------------------------------------------------------------------------------------------------------------------------------------------------------------------------------------------|-----|-----|-----------|-------|------|------|---------------------------------------------------------------------------|-------|----------------------|------------------------------------------------------------------------------------------------------------------------------------------------------------------------------------------------------------------------------------------------------------|-----|-----|-----------|-------|------|------|
| Rsa1.0_00329.1.g11443.t1 | ref[NP_171980.1] high mobility group-box and ARID domain-binding domain-containing protein [Arabidopsis thaliana] gi 75192516 sp Q9MAT6.1 HMG15_ARAT H RecName: Full=High mobility group B protein 15; AltName: Full=Nucleosome/chromatin assembly factor group D 15 gi 7211978 gb AAF40449.1 AC004809.7 Contains similarity to the high mobility group family PF00505 [Arabidopsis thaliana] gi 56236040 gb AAV84476.1 At1g04880 [Arabidopsis thaliana] gi 56790208 gb AAW30021.1 At1g04880 [Arabidopsis thaliana] gi 225897878 dbj BAH30271.1 hypothetical protein [Arabidopsis thaliana] gi 332189634 gb AEE27755.1 high mobility group B protein 15 [Arabidopsis thaliana] | 453 | 448 | 1.00E-167 | 98.9  | 72.6 | 82.3 | high mobility group-box and ARID domain-binding domain-containing protein | gbpln | Arabidopsis thaliana | AT1G04880.1   Symbols:   HMG (high mobility group) box protein with ARID/BRIGHT DNA-binding domain   chr1:1376106-1378264 REVERSE LENGTH=448                                                                                                               | 453 | 448 | 1.00E-170 | 98.9  | 72.6 | 82.3 |
| Rsa1.0_00329.1.g11444.t1 | ref[NP_177131.1] wall-associated receptor kinase-like 9 [Arabidopsis thaliana] gi 75333576 sp Q9C9L5.1 WAKLH_ARAT H RecName: Full=Wall-associated receptor kinase-like 9; Flags: Precursor gi 12325200 gb AAG52551.1 AC013289_18_putative protein kinase; 39563-42199 [Arabidopsis thaliana] gi 332196847 gb AEE34968.1 wall-associated receptor kinase-like 9 [Arabidopsis thaliana]                                                                                                                                                                                                                                                                                          | 710 | 792 | 0         | 111.5 | 56.3 | 71.0 | wall-associated receptor kinase-like 9                                    | gbpln | Arabidopsis thaliana | AT1G69730.1   Symbols:   Wall-associated kinase family protein   chr1:26228703-26231339 REVERSE LENGTH=792                                                                                                                                                 | 710 | 792 | 0         | 111.5 | 56.3 | 71.0 |
| Rsa1.0_00329.1.g11445.t2 | gb[EOA29941.1] hypothetical protein CARUB_v10013039mg [Capsella rubella]                                                                                                                                                                                                                                                                                                                                                                                                                                                                                                                                                                                                       | 418 | 755 | 1.00E-114 | 180.6 | 59.8 | 73.9 | hypothetical protein CARUB_v10013039mg                                    | gbpln | Capsella rubella     | AT4G31110.1   Symbols:   Wall-associated kinase family protein   chr4:15127257-15129880 FORWARD LENGTH=793                                                                                                                                                 | 418 | 793 | 1.00E-111 | 189.7 | 57.4 | 71.8 |
| Rsa1.0_00329.1.g11446.t1 | gb[EOA38824.1] hypothetical protein CARUB_v10011153mg [Capsella rubella]                                                                                                                                                                                                                                                                                                                                                                                                                                                                                                                                                                                                       | 400 | 636 | 1.00E-158 | 159.0 | 73.0 | 81.5 | hypothetical protein CARUB_v10011153mg                                    | gbpln | Capsella rubella     | AT1G04945.3   Symbols:   HIT-type Zinc finger family protein   chr1:1399588-1402651 FORWARD LENGTH=644                                                                                                                                                     | 400 | 644 | 1.00E-156 | 161.0 | 72.8 | 80.8 |
| Rsa1.0_00329.1.g11447.t1 | gb[ABV89666.1] zinc finger an1-like family protein [Brassica rapa]                                                                                                                                                                                                                                                                                                                                                                                                                                                                                                                                                                                                             | 138 | 168 | 1.00E-52  | 121.7 | 74.6 | 78.3 | zinc finger an1-like family protein                                       | gbpln | Brassica rapa        | AT1G51200.4   Symbols:   A20/AN1-like zinc finger family protein   chr1:18985690-18986211 FORWARD LENGTH=173                                                                                                                                               | 138 | 173 | 1.00E-44  | 125.4 | 68.8 | 73.2 |
| Rsa1.0_00329.1.g11448.t1 | ref[XP_002872936.1] hypothetical protein ARALYDRAFT_490506 [Arabidopsis lyrata subsp. lyrata] gi 297318773 gb EFH49195.1 hypothetical protein ARALYDRAFT_490506 [Arabidopsis lyrata subsp. lyrata]                                                                                                                                                                                                                                                                                                                                                                                                                                                                             | 334 | 361 | 1.00E-114 | 108.1 | 68.0 | 78.1 | hypothetical protein ARALYDRAFT_490506                                    | gbpln | Arabidopsis lyrata   | AT4G00620.1   Symbols:   Amino acid dehydrogenase family protein   chr4:259265-260788 REVERSE LENGTH=360                                                                                                                                                   | 334 | 360 | 1.00E-116 | 107.8 | 67.4 | 77.2 |
| Rsa1.0_00329.1.g11449.t1 | gb[EOA40075.1] hypothetical protein CARUB_v10008770mg [Capsella rubella]                                                                                                                                                                                                                                                                                                                                                                                                                                                                                                                                                                                                       | 552 | 547 | 0         | 99.1  | 82.4 | 88.2 | hypothetical protein CARUB_v10008770mg                                    | gbpln | Capsella rubella     | AT1G04950.3   Symbols: TAFII59, TAF6, ATTA6   TATA BOX ASSOCIATED FACTOR II 59   chr1:1403606-1407184 REVERSE LENGTH=549                                                                                                                                   | 552 | 549 | 0         | 99.5  | 82.8 | 87.5 |
| Rsa1.0_00329.1.g11450.t1 | ref[XP_002892257.1] predicted protein [Arabidopsis lyrata subsp. lyrata] gi 297338099 gb EFH68516.1 predicted protein [Arabidopsis lyrata subsp. lyrata]                                                                                                                                                                                                                                                                                                                                                                                                                                                                                                                       | 193 | 193 | 4.00E-83  | 100.0 | 84.5 | 91.2 | predicted protein                                                         | gbpln | Arabidopsis lyrata   | AT1G04985.1   Symbols:   unknown protein; Has 37 Blast hits to 37 proteins in 11 species: Archae - 0; Bacteria - 0; Metazoa - 0; Fungi - 0; Plants - 37; Viruses - 0; Other Eukaryotes - 0 (source: NCBI BLink).   chr1:1416563-1418291 REVERSE LENGTH=193 | 193 | 193 | 3.00E-85  | 100.0 | 85.0 | 91.2 |
| Rsa1.0_00329.1.g11451.t1 | ref[NP_563726.1] clathrin coat assembly protein AP180 [Arabidopsis thaliana] gi 46396061 sp Q9ZVN6.1 AP180_ARAT H RecName: Full=Clathrin coat assembly protein AP180; Short=At-AP180; AltName: Full=Clathrin coat-associated protein AP180 gi 4056423 gb AAC97997.1  Similar to clathrin assembly protein gb X68878 (AP180) from Rattus norvegicus. EST gb W43552 comes from this gene [Arabidopsis thaliana] gi 26450013 dbj BAC42127.1 putative clathrin protein [Arabidopsis thaliana] gi 28827746 gb AAO50717.1 putative clathrin [Arabidopsis thaliana] gi 332189659 gb AEE27780.1 clathrin coat assembly protein AP180 [Arabidopsis thaliana]                            | 907 | 653 | 0         | 72.0  | 52.0 | 56.9 | clathrin coat assembly protein AP180                                      | gbpln | Arabidopsis thaliana | AT1G05020.1   Symbols:   ENTH/ANTH/VHS superfamily protein   chr1:1435384-1437345 REVERSE LENGTH=653                                                                                                                                                       | 907 | 653 | 0         | 72.0  | 52.0 | 56.9 |

|                          |                                                                                                                                                                                                                                                                                                                                                                        |     |     |           |       |      |      |                                                        |       |                      |                                                                                                                          |     |     |           |       |      |      |
|--------------------------|------------------------------------------------------------------------------------------------------------------------------------------------------------------------------------------------------------------------------------------------------------------------------------------------------------------------------------------------------------------------|-----|-----|-----------|-------|------|------|--------------------------------------------------------|-------|----------------------|--------------------------------------------------------------------------------------------------------------------------|-----|-----|-----------|-------|------|------|
| Rsa1.0_00329.1.g11452.t1 | refXP_002892263.1   ATGTF2H2/GTF2H2 [Arabidopsis lyrata subsp. lyrata] gi297338105 gb EFH68522.1   ATGTF2H2/GTF2H2 [Arabidopsis lyrata subsp. lyrata]                                                                                                                                                                                                                  | 423 | 421 | 0         | 99.5  | 92.9 | 96.2 | ATGTF2H2/GTF2H2                                        | gbpln | Arabidopsis lyrata   | AT1G05055.1   Symbols: ATGTF2H2, GTF2H2   general transcription factor II H2   chr1:1448913-1450852 REVERSE LENGTH=421   | 423 | 421 | 0         | 99.5  | 92.4 | 96.2 |
| Rsa1.0_00329.1.g11453.t1 | #                                                                                                                                                                                                                                                                                                                                                                      | #   | #   | #         | #     | #    | -    | ----                                                   | ----  | ----                 | #                                                                                                                        | #   | #   | #         | #     | #    | #    |
| Rsa1.0_00329.1.g11454.t1 | #                                                                                                                                                                                                                                                                                                                                                                      | #   | #   | #         | #     | #    | -    | ----                                                   | ----  | ----                 | #                                                                                                                        | #   | #   | #         | #     | #    | #    |
| Rsa1.0_00329.1.g11455.t1 | #                                                                                                                                                                                                                                                                                                                                                                      | #   | #   | #         | #     | #    | -    | ----                                                   | ----  | ----                 | #                                                                                                                        | #   | #   | #         | #     | #    | #    |
| Rsa1.0_00329.1.g11456.t1 | emb[CAB45838.1] hypothetical protein [Arabidopsis thaliana] gi7268868 emb[CAB79072.1]   hypothetical protein [Arabidopsis thaliana]                                                                                                                                                                                                                                    | 678 | 758 | 0         | 111.8 | 73.7 | 83.8 | hypothetical protein                                   | gbpln | Arabidopsis thaliana | AT4G20720.1   Symbols:   dentin sialophosphoprotein-related   chr4:11105409-11107841 FORWARD LENGTH=729                  | 678 | 729 | 0         | 107.5 | 73.7 | 83.8 |
| Rsa1.0_00329.1.g11457.t6 | #                                                                                                                                                                                                                                                                                                                                                                      | #   | #   | #         | #     | #    | -    | ----                                                   | ----  | ----                 | #                                                                                                                        | #   | #   | #         | #     | #    | #    |
| Rsa1.0_00329.1.g11458.t1 | gb[EOA37664.1] hypothetical protein CARUB_v10012243mg [Capsella rubella]                                                                                                                                                                                                                                                                                               | 826 | 808 | 0         | 97.8  | 85.7 | 91.6 | hypothetical protein CARUB_v10012243mg                 | gbpln | Capsella rubella     | AT1G05150.1   Symbols:   Calcium-binding tetrapeptide family protein   chr1:1484280-1486706 REVERSE LENGTH=808           | 826 | 808 | 0         | 97.8  | 84.9 | 91.2 |
| Rsa1.0_00329.1.g11459.t1 | gb[ABV89645.1] auxin resistant 1 [Brassica rapa]                                                                                                                                                                                                                                                                                                                       | 521 | 522 | 0         | 100.2 | 90.8 | 95.8 | auxin resistant 1                                      | gbpln | Brassica rapa        | AT1G05180.1   Symbols: AXR1   NAD(P)-binding Rossmann-fold superfamily protein   chr1:1498357-1501775 REVERSE LENGTH=540 | 521 | 540 | 0         | 103.6 | 89.4 | 94.6 |
| Rsa1.0_00329.1.g11460.t1 | refXP_002889539.1   hypothetical protein ARALYDRAFT_470516 [Arabidopsis lyrata subsp. lyrata] gi297335381 gb EFH65798.1   hypothetical protein ARALYDRAFT_470516 [Arabidopsis lyrata subsp. lyrata]                                                                                                                                                                    | 165 | 168 | 1.00E-66  | 101.8 | 78.8 | 83.6 | hypothetical protein ARALYDRAFT_470516                 | gbpln | Arabidopsis lyrata   | AT1G05210.1   Symbols:   Transmembrane protein 97, predicted   chr1:1510469-1511485 FORWARD LENGTH=168                   | 165 | 168 | 6.00E-67  | 101.8 | 77.0 | 82.4 |
| Rsa1.0_00329.1.g11461.t1 | gb[EOA39455.1] hypothetical protein CARUB_v10012652mg [Capsella rubella]                                                                                                                                                                                                                                                                                               | 340 | 320 | 1.00E-140 | 94.1  | 72.6 | 82.9 | hypothetical protein CARUB_v10012652mg                 | gbpln | Capsella rubella     | AT1G05250.1   Symbols:   Peroxidase superfamily protein   chr1:1525924-1527169 REVERSE LENGTH=325                        | 340 | 325 | 1.00E-130 | 95.6  | 64.1 | 76.8 |
| Rsa1.0_00329.1.g11462.t1 | gb[EOA39455.1] hypothetical protein CARUB_v10012652mg [Capsella rubella]                                                                                                                                                                                                                                                                                               | 332 | 320 | 2.33E-156 | 96.4  | 76.5 | 86.4 | hypothetical protein CARUB_v10012652mg                 | gbpln | Capsella rubella     | AT1G05250.1   Symbols:   Peroxidase superfamily protein   chr1:1525924-1527169 REVERSE LENGTH=325                        | 332 | 325 | 1.00E-133 | 97.9  | 66.9 | 77.7 |
| Rsa1.0_00329.1.g11463.t1 | gb[EOA37749.1] hypothetical protein CARUB_v10012564mg [Capsella rubella]                                                                                                                                                                                                                                                                                               | 363 | 375 | 1.00E-162 | 103.3 | 79.6 | 89.5 | hypothetical protein CARUB_v10012564mg                 | gbpln | Capsella rubella     | AT1G05270.1   Symbols:   TraB family protein   chr1:1531806-1534305 REVERSE LENGTH=371                                   | 363 | 371 | 1.00E-158 | 102.2 | 78.8 | 88.2 |
| Rsa1.0_00329.1.g11464.t1 | refXP_002892278.1   hypothetical protein ARALYDRAFT_887710 [Arabidopsis lyrata subsp. lyrata] gi297338120 gb EFH68537.1   hypothetical protein ARALYDRAFT_887710 [Arabidopsis lyrata subsp. lyrata]                                                                                                                                                                    | 430 | 462 | 0         | 107.4 | 82.6 | 91.4 | hypothetical protein ARALYDRAFT_887710                 | gbpln | Arabidopsis lyrata   | AT1G05280.1   Symbols:   Protein of unknown function (DUF604)   chr1:1535444-1537414 REVERSE LENGTH=461                  | 430 | 461 | 0         | 107.2 | 81.4 | 90.0 |
| Rsa1.0_00329.1.g11465.t1 | ref[NP_172038.4] Type I inositol-1,4,5-trisphosphate 5-phosphatase CVP2 [Arabidopsis thaliana] gi259016256 sp Q9LR47.2 IP5P3_ARAT H RecName: Full=Type I inositol 1,4,5-trisphosphate 5-phosphatase CVP2; AltName: Full=Protein COTYLEDON VASCULAR PATTERN 2 gi332189723 gb AEE27844.1   Type I inositol-1,4,5-trisphosphate 5-phosphatase CVP2 [Arabidopsis thaliana] | 608 | 617 | 0         | 101.5 | 96.1 | 97.7 | Type I inositol-1,4,5-trisphosphate 5-phosphatase CVP2 | gbpln | Arabidopsis thaliana | AT1G05470.1   Symbols: CVP2   DNase I-like superfamily protein   chr1:1608558-1611291 REVERSE LENGTH=617                 | 608 | 617 | 0         | 101.5 | 96.1 | 97.7 |
| Rsa1.0_00329.1.g11466.t1 | #                                                                                                                                                                                                                                                                                                                                                                      | #   | #   | #         | #     | #    | -    | ----                                                   | ----  | ----                 | #                                                                                                                        | #   | #   | #         | #     | #    | #    |
| Rsa1.0_00329.1.g11467.t1 | ref[NP_563741.1] sec23/sec24-like transport protein [Arabidopsis thaliana] gi25090173 gb AAN7246.1   At1g05520/T25N20_16 [Arabidopsis thaliana] gi332189727 gb AEE27848.1   sec23/sec24-like transport protein [Arabidopsis thaliana]                                                                                                                                  | 770 | 783 | 0         | 101.7 | 91.6 | 95.6 | sec23/sec24-like transport protein                     | gbpln | Arabidopsis thaliana | AT1G05520.1   Symbols:   Sec23/Sec24 protein transport family protein   chr1:1631126-1635703 REVERSE LENGTH=783          | 770 | 783 | 0         | 101.7 | 91.6 | 95.6 |
| Rsa1.0_00329.1.g11468.t1 | ref[NP_001184912.1] uncharacterized protein [Arabidopsis thaliana] gi332189732 gb AEE27853.1   uncharacterized protein AT1G05550 [Arabidopsis thaliana]                                                                                                                                                                                                                | 351 | 385 | 1.00E-120 | 109.7 | 64.7 | 74.4 | uncharacterized protein                                | gbpln | Arabidopsis thaliana | AT1G05550.3   Symbols:   Protein of unknown function (DUF295)   chr1:1641229-1643748 REVERSE LENGTH=385                  | 351 | 385 | 1.00E-123 | 109.7 | 64.7 | 74.4 |
| Rsa1.0_00329.1.g11469.t1 | refXP_002889553.1   hypothetical protein ARALYDRAFT_470554 [Arabidopsis lyrata subsp. lyrata] gi297335395 gb EFH65812.1   hypothetical protein ARALYDRAFT_470554 [Arabidopsis lyrata subsp. lyrata]                                                                                                                                                                    | 438 | 367 | 1.00E-143 | 83.8  | 58.9 | 66.2 | hypothetical protein ARALYDRAFT_470554                 | gbpln | Arabidopsis lyrata   | AT1G05540.1   Symbols:   Protein of unknown function (DUF295)   chr1:1639348-1640707 FORWARD LENGTH=367                  | 438 | 367 | 2.33E-156 | 83.8  | 57.8 | 66.0 |

|                          |                                                                                                                                                                                                                                                                                                                                                                                                                                                                                                                                                                                                                                                                                                                                                                                                                                                                                                   |      |      |           |       |      |                                                      |                                                                |                      |                                                                                                                                              |                                                                                                                                          |      |     |           |       |      |      |
|--------------------------|---------------------------------------------------------------------------------------------------------------------------------------------------------------------------------------------------------------------------------------------------------------------------------------------------------------------------------------------------------------------------------------------------------------------------------------------------------------------------------------------------------------------------------------------------------------------------------------------------------------------------------------------------------------------------------------------------------------------------------------------------------------------------------------------------------------------------------------------------------------------------------------------------|------|------|-----------|-------|------|------------------------------------------------------|----------------------------------------------------------------|----------------------|----------------------------------------------------------------------------------------------------------------------------------------------|------------------------------------------------------------------------------------------------------------------------------------------|------|-----|-----------|-------|------|------|
| Rsa1.0_00329.1.g11470.t1 | ref[XP_002889557.1] inosine-uridine preferring nucleoside hydrolase family protein [Arabidopsis lyrata subsp. lyrata] gi 297335939 gb EFH65816.1 inosine-uridine preferring nucleoside hydrolase family protein [Arabidopsis lyrata subsp. lyrata]<br>ref[NP_001030976.1] Type I inositol-1,4,5-trisphosphate 5-phosphatase 13 [Arabidopsis thaliana]<br>gi 75337868 sp Q9SYK4.1 IP5PD_ARAT H RecName: Full=Type I inositol 1,4,5-trisphosphate 5-phosphatase 13; Short=At5PTase13<br>gi 4836913 gb AAD30615.1 AC007153.7 Putative inositol 1,4,5-trisphosphate 5-phosphatase [Arabidopsis thaliana]<br>gi 56405850 gb AAV87315.1 inositol polyphosphate 5-phosphatase [Arabidopsis thaliana]<br>gi 56405858 gb AAV87319.1 inositol polyphosphate 5-phosphatase [Arabidopsis thaliana]<br>gi 332189748 gb AEE27869.1  Type I inositol-1,4,5-trisphosphate 5-phosphatase 13 [Arabidopsis thaliana] | 322  | 322  | 1.00E-169 | 100.0 | 89.8 | 94.7                                                 | inosine-uridine preferring nucleoside hydrolase family protein | gbpln                | Arabidopsis lyrata                                                                                                                           | AT1G05620.1   Symbols: URH2   uridine-ribohydrolase 2   chr1:1679286-1681527 FORWARD LENGTH=322                                          | 322  | 322 | 1.00E-171 | 100.0 | 90.1 | 94.1 |
| Rsa1.0_00329.1.g11471.t2 | gi 4836913 gb AAD30615.1 AC007153.7 Putative inositol 1,4,5-trisphosphate 5-phosphatase [Arabidopsis thaliana]<br>gi 56405850 gb AAV87315.1 inositol polyphosphate 5-phosphatase [Arabidopsis thaliana]<br>gi 56405858 gb AAV87319.1 inositol polyphosphate 5-phosphatase [Arabidopsis thaliana]<br>gi 332189748 gb AEE27869.1  Type I inositol-1,4,5-trisphosphate 5-phosphatase 13 [Arabidopsis thaliana]                                                                                                                                                                                                                                                                                                                                                                                                                                                                                       | 1151 | 1136 | 0         | 98.7  | 85.9 | Type I inositol-1,4,5-trisphosphate 5-phosphatase 13 | gbpln                                                          | Arabidopsis thaliana | AT1G05630.2   Symbols: AT5PTASE13, 5PTASE13   Endonuclease/exonuclease/phosphatase family protein   chr1:1682483-1687153 FORWARD LENGTH=1136 | 1151                                                                                                                                     | 1136 | 0   | 98.7      | 85.9  | 92.3 |      |
| Rsa1.0_00329.1.g11472.t2 | gb EOA39331.1  hypothetical protein CARUB_v10012375mg [Capsella rubella]                                                                                                                                                                                                                                                                                                                                                                                                                                                                                                                                                                                                                                                                                                                                                                                                                          | 138  | 395  | 4.00E-61  | 286.2 | 81.9 | 89.1                                                 | hypothetical protein CARUB_v10012375mg                         | gbpln                | Capsella rubella                                                                                                                             | AT1G05650.1   Symbols:   Pectin lyase-like superfamily protein   chr1:1690264-1692126 REVERSE LENGTH=394                                 | 138  | 394 | 9.00E-61  | 285.5 | 76.8 | 88.4 |
| Rsa1.0_00329.1.g11473.t1 | ref[NP_172059.1] Uridine diphosphate glycosyltransferase 74E2 [Arabidopsis thaliana]<br>gi 75314101 sp Q9SYK9.1 U74E2_ARAT H RecName: Full=UDP-glycosyltransferase 74E2<br>gi 4836925 gb AAD30627.1 AC007153.1 9 Similar to indole-3-acetate beta-glucosyltransferase [Arabidopsis thaliana]<br>gi 63003804 gb AAV25431.1 At1g05680 [Arabidopsis thaliana]<br>At1g05680 [Arabidopsis thaliana]<br>At1g05680 [Arabidopsis thaliana]<br>gi 332189755 gb AEE27876.1  Uridine diphosphate glycosyltransferase 74E2 [Arabidopsis thaliana]                                                                                                                                                                                                                                                                                                                                                             | 453  | 453  | 0         | 100.0 | 88.7 | Uridine diphosphate glycosyltransferase 74E2         | gbpln                                                          | Arabidopsis thaliana | AT1G05680.1   Symbols: UGT74E2   Uridine diphosphate glycosyltransferase 74E2   chr1:1703196-1704639 REVERSE LENGTH=453                      | 453                                                                                                                                      | 453  | 0   | 100.0     | 88.7  | 95.8 |      |
| Rsa1.0_00329.1.g11474.t1 | ref[XP_002889559.1] hypothetical protein ARALYDRAFT_887760 [Arabidopsis lyrata subsp. lyrata]<br>gi 297335401 gb EFH65818.1  hypothetical protein ARALYDRAFT_887760 [Arabidopsis lyrata subsp. lyrata]                                                                                                                                                                                                                                                                                                                                                                                                                                                                                                                                                                                                                                                                                            | 363  | 404  | 1.00E-138 | 111.3 | 71.6 | 81.5                                                 | hypothetical protein ARALYDRAFT_887760                         | gbpln                | Arabidopsis lyrata                                                                                                                           | AT1G05690.1   Symbols: BT3   BTB and TAZ domain protein 3   chr1:1707809-1709132 FORWARD LENGTH=364                                      | 363  | 364 | 1.00E-131 | 100.3 | 67.5 | 77.1 |
| Rsa1.0_00329.1.g11475.t1 | gb EOA38787.1  hypothetical protein CARUB_v10011047mg [Capsella rubella]                                                                                                                                                                                                                                                                                                                                                                                                                                                                                                                                                                                                                                                                                                                                                                                                                          | 206  | 854  | 6.00E-96  | 414.6 | 83.0 | 90.8                                                 | hypothetical protein CARUB_v10011047mg                         | gbpln                | Capsella rubella                                                                                                                             | AT1G05700.1   Symbols:   Leucine-rich repeat transmembrane protein kinase protein   chr1:1709796-1713245 FORWARD LENGTH=852              | 206  | 852 | 1.00E-97  | 413.6 | 83.0 | 90.3 |
| Rsa1.0_00329.1.g11476.t2 | ref[NP_172061.2] Leucine-rich repeat transmembrane protein kinase protein [Arabidopsis thaliana]<br>gi 263430136 sp COLGD6.1 Y1570_ARAT H RecName: Full=Probable LRR receptor-like serine/threonine-protein kinase At1g05700; Flags: Precursor<br>gi 224589374 gb ACN59221.1  leucine-rich repeat receptor-like protein kinase [Arabidopsis thaliana]<br>gi 332189757 gb AEE27878.1  Leucine-rich repeat transmembrane protein kinase protein [Arabidopsis thaliana]                                                                                                                                                                                                                                                                                                                                                                                                                              | 1442 | 852  | 0         | 59.1  | 32.1 | 35.8                                                 | Leucine-rich repeat transmembrane protein kinase protein       | gbpln                | Arabidopsis thaliana                                                                                                                         | AT1G05700.1   Symbols:   Leucine-rich repeat transmembrane protein kinase protein   chr1:1709796-1713245 FORWARD LENGTH=852              | 1442 | 852 | 0         | 59.1  | 32.1 | 35.8 |
| Rsa1.0_00329.1.g11477.t1 | dbj BAJ34140.1  unnamed protein product [Thellungiella halophila]                                                                                                                                                                                                                                                                                                                                                                                                                                                                                                                                                                                                                                                                                                                                                                                                                                 | 148  | 149  | 4.00E-73  | 100.7 | 91.2 | 93.2                                                 | unnamed protein product                                        | ----                 | ----                                                                                                                                         | AT1G05710.5   Symbols:   basic helix-loop-helix (bHLH) DNA-binding superfamily protein   chr1:1716198-1717023 FORWARD LENGTH=149         | 148  | 149 | 4.00E-74  | 100.7 | 90.5 | 92.6 |
| Rsa1.0_00329.1.g11478.t1 | dbj BAF81524.1  putative 15kDa selenoprotein [Brassica rapa]                                                                                                                                                                                                                                                                                                                                                                                                                                                                                                                                                                                                                                                                                                                                                                                                                                      | 161  | 167  | 1.00E-85  | 103.7 | 95.7 | 99.4                                                 | putative 15kDa selenoprotein                                   | gbpln                | Brassica rapa                                                                                                                                | AT1G05720.1   Symbols:   selenoprotein family protein   chr1:1717677-1718849 REVERSE LENGTH=163                                          | 161  | 163 | 3.00E-77  | 101.2 | 83.9 | 93.2 |
| Rsa1.0_00329.1.g11479.t1 | gb AEP33756.1  chloroplast biogenesis 19, partial [Raphanus sativus]                                                                                                                                                                                                                                                                                                                                                                                                                                                                                                                                                                                                                                                                                                                                                                                                                              | 501  | 476  | 0         | 95.0  | 91.8 | 92.2                                                 | chloroplast biogenesis 19, partial                             | gbpln                | Raphanus sativus                                                                                                                             | AT1G05750.1   Symbols: PDE247, CLB19   Tetratricopeptide repeat (TPR)-like superfamily protein   chr1:1721523-1723025 FORWARD LENGTH=500 | 501  | 500 | 0         | 99.8  | 84.4 | 89.8 |



|                          |                                                                                                                                                                                                                                                                                                                                                                                                                                                                                                                                                                                                                                                                                                                                                                                                                                                                                                                                                                                                                                                                                                                                                                                                                                                                                                                                                                                         |      |      |           |       |      |      |                                          |       |                      |                                                                                                                                                                                                                                                          |      |     |          |       |      |      |
|--------------------------|-----------------------------------------------------------------------------------------------------------------------------------------------------------------------------------------------------------------------------------------------------------------------------------------------------------------------------------------------------------------------------------------------------------------------------------------------------------------------------------------------------------------------------------------------------------------------------------------------------------------------------------------------------------------------------------------------------------------------------------------------------------------------------------------------------------------------------------------------------------------------------------------------------------------------------------------------------------------------------------------------------------------------------------------------------------------------------------------------------------------------------------------------------------------------------------------------------------------------------------------------------------------------------------------------------------------------------------------------------------------------------------------|------|------|-----------|-------|------|------|------------------------------------------|-------|----------------------|----------------------------------------------------------------------------------------------------------------------------------------------------------------------------------------------------------------------------------------------------------|------|-----|----------|-------|------|------|
| Rsa1.0_00329.1.g11480.t1 | refXP_002889565.1   hypothetical protein ARALYDRAFT_311660 [Arabidopsis lyrata subsp. lyrata] gi 297335407 gb EFH65824.1   hypothetical protein ARALYDRAFT_311660 [Arabidopsis lyrata subsp. lyrata]                                                                                                                                                                                                                                                                                                                                                                                                                                                                                                                                                                                                                                                                                                                                                                                                                                                                                                                                                                                                                                                                                                                                                                                    | 758  | 959  | 0         | 126.5 | 81.9 | 86.4 | hypothetical protein ARALYDRAFT_311660   | gbpln | Arabidopsis lyrata   | AT1G05790.1   Symbols:   lipase class 3 family protein   chr1:173039-1737365 FORWARD LENGTH=687                                                                                                                                                          | 758  | 687 | 0        | 90.6  | 77.8 | 82.8 |
| Rsa1.0_00329.1.g11481.t1 | refXP_002889569.1   hypothetical protein ARALYDRAFT_887775 [Arabidopsis lyrata subsp. lyrata] gi 297335411 gb EFH65828.1   hypothetical protein ARALYDRAFT_887775 [Arabidopsis lyrata subsp. lyrata] ref NP_172076.1   chitinase-like protein 1 [Arabidopsis thaliana] gi 75191903 sp Q9MA41.1 CTL1_ARATH RecName: Full=Chitinase-like protein 1; Short=AtCTL1; AltName: Full=Protein ANION ALTERED ROOT MORPHOLOGY; AltName: Full=Protein ECTOPIC DEPOSITION OF LIGNIN IN PITH 1; AltName: Full=Protein ECTOPIC ROOT HAIR 2; AltName: Full=Protein POM-POM1; AltName: Full=Protein SENSITIVE TO HOT TEMPERATURES 2; Flags: Precursor gi 6850314 gb AAAF29391.1 AC009999.1 Contains similarity to a basic endochitinase from Arabidopsis thaliana gb AB023448. and contains a Chitinases class I PF00182 domain. ESTs gb A1095747. gb AA728545. gb Z26222. gb Z25683. gb T88386. gb T14122. gb T04241. gb N38122. come from this gene [Arabidopsis thaliana] gi 12083324 gb AAG48821.1 AF332458.1 putative class I chitinase [Arabidopsis thaliana] gi 17226329 gb AAL37736.1 AF422178.1 chitinase-like protein 1 [Arabidopsis thaliana] gi 17226331 gb AAL37737.1 AF422179.1 chitinase-like protein 1 [Arabidopsis thaliana] gi 14334488 gb AAK59442.1  putative class I chitinase [Arabidopsis thaliana] gi 21280935 gb AAM44973.1  putative class I chitinase [Arabidopsis thaliana] | 540  | 536  | 0         | 99.3  | 83.5 | 91.7 | hypothetical protein ARALYDRAFT_887775   | gbpln | Arabidopsis lyrata   | AT1G05820.1   Symbols: SPPL5, ATSPPL5   SIGNAL PEPTIDE PEPTIDASE-LIKE 5   chr1:1749776-1753767 FORWARD LENGTH=536                                                                                                                                        | 540  | 536 | 0        | 99.3  | 83.0 | 91.7 |
| Rsa1.0_00329.1.g11482.t1 | gi 12083324 gb AAG48821.1 AF332458.1 putative class I chitinase [Arabidopsis thaliana] gi 17226329 gb AAL37736.1 AF422178.1 chitinase-like protein 1 [Arabidopsis thaliana] gi 17226331 gb AAL37737.1 AF422179.1 chitinase-like protein 1 [Arabidopsis thaliana] gi 14334488 gb AAK59442.1  putative class I chitinase [Arabidopsis thaliana] gi 21280935 gb AAM44973.1  putative class I chitinase [Arabidopsis thaliana]                                                                                                                                                                                                                                                                                                                                                                                                                                                                                                                                                                                                                                                                                                                                                                                                                                                                                                                                                              | 321  | 321  | 1.00E-180 | 100.0 | 91.9 | 96.3 | chitinase-like protein 1                 | gbpln | Arabidopsis thaliana | AT1G05850.1   Symbols: POM1, ERH2, ELP1, CTL1, ELP, HOT2, ATCTL1   Chitinase family protein   chr1:1766833-1768117 REVERSE LENGTH=321                                                                                                                    | 321  | 321 | 0        | 100.0 | 91.9 | 96.3 |
| Rsa1.0_00329.1.g11483.t1 | refXP_002889573.1   hypothetical protein ARALYDRAFT_470601 [Arabidopsis lyrata subsp. lyrata] gi 297335415 gb EFH65832.1   hypothetical protein ARALYDRAFT_470601 [Arabidopsis lyrata subsp. lyrata]                                                                                                                                                                                                                                                                                                                                                                                                                                                                                                                                                                                                                                                                                                                                                                                                                                                                                                                                                                                                                                                                                                                                                                                    | 878  | 557  | 0         | 63.4  | 51.4 | 55.8 | hypothetical protein ARALYDRAFT_470601   | gbpln | Arabidopsis lyrata   | AT2G31510.1   Symbols: ARI7, ATARI7   IBR domain-containing protein   chr2:13416991-13421170 REVERSE LENGTH=562                                                                                                                                          | 878  | 562 | 0        | 64.0  | 50.0 | 55.9 |
| Rsa1.0_00329.1.g11484.t1 | gb EOA36797.1   hypothetical protein CARUB_v10008206mg [Capsella rubella]                                                                                                                                                                                                                                                                                                                                                                                                                                                                                                                                                                                                                                                                                                                                                                                                                                                                                                                                                                                                                                                                                                                                                                                                                                                                                                               | 945  | 980  | 0         | 103.7 | 85.0 | 91.0 | hypothetical protein CARUB_v10008206mg   | gbpln | Capsella rubella     | AT1G05960.1   Symbols:   ARM repeat superfamily protein   chr1:1808478-1815060 REVERSE LENGTH=982                                                                                                                                                        | 945  | 982 | 0        | 103.9 | 84.7 | 90.6 |
| Rsa1.0_00329.1.g11485.t1 | refXP_002889579.1   hypothetical protein ARALYDRAFT_887792 [Arabidopsis lyrata subsp. lyrata] gi 297335421 gb EFH65838.1   hypothetical protein ARALYDRAFT_887792 [Arabidopsis lyrata subsp. lyrata]                                                                                                                                                                                                                                                                                                                                                                                                                                                                                                                                                                                                                                                                                                                                                                                                                                                                                                                                                                                                                                                                                                                                                                                    | 151  | 150  | 4.00E-68  | 99.3  | 92.1 | 96.0 | hypothetical protein ARALYDRAFT_887792   | gbpln | Arabidopsis lyrata   | AT1G05990.1   Symbols: RHS1   EF hand calcium-binding protein family   chr1:1818588-1819040 FORWARD LENGTH=150                                                                                                                                           | 151  | 150 | 1.00E-70 | 99.3  | 92.1 | 96.7 |
| Rsa1.0_00329.1.g11486.t1 | refXP_002889580.1   predicted protein [Arabidopsis lyrata subsp. lyrata] gi 297335422 gb EFH65839.1   predicted protein [Arabidopsis lyrata subsp. lyrata]                                                                                                                                                                                                                                                                                                                                                                                                                                                                                                                                                                                                                                                                                                                                                                                                                                                                                                                                                                                                                                                                                                                                                                                                                              | 83   | 79   | 1.00E-24  | 95.2  | 71.1 | 79.5 | predicted protein                        | gbpln | Arabidopsis lyrata   | AT1G06010.1   Symbols:   unknown protein; Has 25 Blast hits to 25 proteins in 9 species: Archae - 0; Bacteria - 0; Metazoa - 0; Fungi - 0; Plants - 25; Viruses - 0; Other Eukaryotes - 0 (source: NCBI BLink).   chr1:1823347-1823670 FORWARD LENGTH=78 | 83   | 78  | 5.00E-25 | 94.0  | 68.7 | 75.9 |
| Rsa1.0_00329.1.g11487.t1 | emb CAB39638.1   RNA-directed DNA polymerase-like protein [Arabidopsis thaliana] gi 267666 emb CAB78094.1   RNA-directed DNA polymerase-like protein [Arabidopsis thaliana]                                                                                                                                                                                                                                                                                                                                                                                                                                                                                                                                                                                                                                                                                                                                                                                                                                                                                                                                                                                                                                                                                                                                                                                                             | 1965 | 1274 | 0         | 64.8  | 33.2 | 43.7 | RNA-directed DNA polymerase-like protein | gbpln | Arabidopsis thaliana | AT4G2090.1   Symbols:   Ribonuclease H-like superfamily protein   chr4:14333528-14335255 FORWARD LENGTH=575                                                                                                                                              | 1965 | 575 | 2.00E-73 | 29.3  | 9.2  | 14.4 |
| Rsa1.0_00330.1.g11488.t1 | gb EOA23477.1   hypothetical protein CARUB_v10016666mg [Capsella rubella]                                                                                                                                                                                                                                                                                                                                                                                                                                                                                                                                                                                                                                                                                                                                                                                                                                                                                                                                                                                                                                                                                                                                                                                                                                                                                                               | 919  | 902  | 0         | 98.2  | 79.3 | 88.5 | hypothetical protein CARUB_v10016666mg   | gbpln | Capsella rubella     | AT3G45140.1   Symbols: LOX2, ATLOX2   lipoxygenase 2   chr3:16525437-16529233 FORWARD LENGTH=896                                                                                                                                                         | 919  | 896 | 0        | 97.5  | 77.0 | 86.7 |

|                           |                                                                                                                                                                                                                                                                                                                                                                                                                                                                                                                                                                                                                                                                                                                                                                                                                                                                                                                                                                                                                                                                                                                                                                               |      |      |           |       |      |      |                                                |       |                         |                                                                                                                                                                                  |      |      |           |       |      |      |
|---------------------------|-------------------------------------------------------------------------------------------------------------------------------------------------------------------------------------------------------------------------------------------------------------------------------------------------------------------------------------------------------------------------------------------------------------------------------------------------------------------------------------------------------------------------------------------------------------------------------------------------------------------------------------------------------------------------------------------------------------------------------------------------------------------------------------------------------------------------------------------------------------------------------------------------------------------------------------------------------------------------------------------------------------------------------------------------------------------------------------------------------------------------------------------------------------------------------|------|------|-----------|-------|------|------|------------------------------------------------|-------|-------------------------|----------------------------------------------------------------------------------------------------------------------------------------------------------------------------------|------|------|-----------|-------|------|------|
| Rsa1.0_00330.1.g11489.t1  | ref XP_002878518.1  EMB2221<br>[Arabidopsis lyrata subsp. lyrata]<br>gi 297324356 gb EFH54777.1  EMB2221<br>[Arabidopsis lyrata subsp. lyrata]                                                                                                                                                                                                                                                                                                                                                                                                                                                                                                                                                                                                                                                                                                                                                                                                                                                                                                                                                                                                                                | 1105 | 1104 | 0         | 99.9  | 86.8 | 92.2 | EMB2221                                        | gbpln | Arabidopsis<br>lyrata   | AT3G63460.1   Symbols:   transducin family<br>protein / WD-40 repeat family protein  <br>chr3:23431009-23437241 REVERSE<br>LENGTH=1104                                           | 1105 | 1104 | 0         | 99.9  | 86.5 | 92.1 |
| Rsa1.0_00330.1.g11490.t1  | gb AFB74213.1  chloroplast<br>MPBQ/MSBO methyltransferase<br>[Brassica napus]                                                                                                                                                                                                                                                                                                                                                                                                                                                                                                                                                                                                                                                                                                                                                                                                                                                                                                                                                                                                                                                                                                 | 341  | 337  | 1.00E-169 | 98.8  | 91.8 | 93.5 | chloroplast<br>MPBQ/MSBO<br>methyltransferase  | gbpln | Brassica<br>napus       | AT3G63410.1   Symbols: APG1, VTE3, IEP37,<br>E37   S-adenosyl-L-methionine-dependent<br>methyltransferases superfamily protein  <br>chr3:23415816-23417002 REVERSE<br>LENGTH=338 | 341  | 338  | 1.00E-167 | 99.1  | 90.0 | 93.0 |
| Rsa1.0_00330.1.g11491.t1  | gb EOA25999.1  hypothetical protein<br>CARUB_v10019395mg [Capsella rubella]                                                                                                                                                                                                                                                                                                                                                                                                                                                                                                                                                                                                                                                                                                                                                                                                                                                                                                                                                                                                                                                                                                   | 488  | 535  | 1.00E-45  | 109.6 | 20.1 | 23.2 | hypothetical protein<br>CARUB_v10019395mg      | gbpln | Capsella<br>rubella     | AT3G63130.2   Symbols: RANGAP1   RAN<br>GTPase activating protein 1  <br>chr3:23325108-23326715 FORWARD<br>LENGTH=535                                                            | 488  | 535  | 5.00E-46  | 109.6 | 19.1 | 21.9 |
| Rsa1.0_00330.1.g11492.t1  | gb AAM65910.1  unknown [Arabidopsis<br>thaliana]                                                                                                                                                                                                                                                                                                                                                                                                                                                                                                                                                                                                                                                                                                                                                                                                                                                                                                                                                                                                                                                                                                                              | 404  | 404  | 0         | 100.0 | 84.2 | 92.1 | unknown                                        | gbpln | Arabidopsis<br>thaliana | AT3G63090.1   Symbols:   Ubiquitin<br>carboxyl-terminal hydrolase family protein  <br>chr3:23313617-23314831 FORWARD<br>LENGTH=404                                               | 404  | 404  | 0         | 100.0 | 83.9 | 92.1 |
| Rsa1.0_00330.1.g11493.t1  | ref XP_002876707.1  hypothetical<br>protein ARALYDRAFT_907889<br>[Arabidopsis lyrata subsp. lyrata]<br>gi 297322545 gb EFH52966.1 <br>hypothetical protein<br>ARALYDRAFT_907889 [Arabidopsis<br>lyrata subsp. lyrata]                                                                                                                                                                                                                                                                                                                                                                                                                                                                                                                                                                                                                                                                                                                                                                                                                                                                                                                                                         | 45   | 70   | 8.00E-12  | 155.6 | 82.2 | 91.1 | hypothetical protein<br>ARALYDRAFT_907889      | gbpln | Arabidopsis<br>lyrata   | AT3G63088.1   Symbols: RTFL14, DVL14  <br>ROTUNDIFOLIA like 14   chr3:23313053-<br>23313199 FORWARD LENGTH=48                                                                    | 45   | 48   | 9.00E-14  | 106.7 | 80.0 | 91.1 |
| Rsa1.0_00330.1.g11494.t1  | db BAJ34328.1  unnamed protein<br>product [Thellungiella halophila]                                                                                                                                                                                                                                                                                                                                                                                                                                                                                                                                                                                                                                                                                                                                                                                                                                                                                                                                                                                                                                                                                                           | 161  | 175  | 9.00E-84  | 108.7 | 91.3 | 96.9 | unnamed protein<br>product                     | ----  | ----                    | AT3G63080.1   Symbols: ATGPX5, MEE42,<br>GPX5   glutathione peroxidase 5  <br>chr3:23310161-23311200 FORWARD<br>LENGTH=173                                                       | 161  | 173  | 5.00E-80  | 107.5 | 85.1 | 90.7 |
| Rsa1.0_00330.1.g11495.t10 | ref NP_191866.3  Tudor/PWWP/MBT<br>domain-containing protein [Arabidopsis<br>thaliana]<br>gi 403399430 sp F4ZM8.1 HUAL2_ARAT<br>H RecName: Full=HUA2-like protein 2<br>gi 332646910 gb AEE80431.1 <br>Tudor/PWWP/MBT domain-containing<br>protein [Arabidopsis thaliana]                                                                                                                                                                                                                                                                                                                                                                                                                                                                                                                                                                                                                                                                                                                                                                                                                                                                                                      | 1399 | 1347 | 0         | 96.3  | 71.4 | 78.7 | Tudor/PWWP/MBT<br>domain-containing<br>protein | gbpln | Arabidopsis<br>thaliana | AT3G63070.1   Symbols:  <br>Tudor/PWWP/MBT domain-containing<br>protein   chr3:23302667-23309575<br>FORWARD LENGTH=1347                                                          | 1399 | 1347 | 0         | 96.3  | 71.4 | 78.7 |
| Rsa1.0_00330.1.g11496.t1  | #                                                                                                                                                                                                                                                                                                                                                                                                                                                                                                                                                                                                                                                                                                                                                                                                                                                                                                                                                                                                                                                                                                                                                                             | #    | #    | #         | #     | #    | #    | -                                              | ----  | ----                    | #                                                                                                                                                                                | #    | #    | #         | #     | #    | #    |
| Rsa1.0_00330.1.g11497.t1  | gb ADT78692.1  gibberellin receptor 1B<br>[Brassica napus]                                                                                                                                                                                                                                                                                                                                                                                                                                                                                                                                                                                                                                                                                                                                                                                                                                                                                                                                                                                                                                                                                                                    | 361  | 358  | 0         | 99.2  | 90.3 | 95.6 | gibberellin receptor 1B                        | gbpln | Brassica<br>napus       | AT3G63010.1   Symbols: ATGID1B, GID1B  <br>alpha/beta-Hydrolases superfamily protein  <br>chr3:23289717-23290998 FORWARD<br>LENGTH=358                                           | 361  | 358  | 0         | 99.2  | 88.9 | 93.4 |
| Rsa1.0_00330.1.g11498.t1  | gb AAZ66952.1  117M18.33 [Brassica<br>rapa]                                                                                                                                                                                                                                                                                                                                                                                                                                                                                                                                                                                                                                                                                                                                                                                                                                                                                                                                                                                                                                                                                                                                   | 494  | 681  | 1.00E-134 | 137.9 | 54.0 | 66.8 | 117M18.33                                      | gbpln | Brassica<br>rapa        | AT3G63000.1   Symbols: NPL41   NPL4-like<br>protein 1   chr3:23283336-23285357<br>FORWARD LENGTH=413                                                                             | 494  | 413  | 1.00E-13  | 83.6  | 7.5  | 9.9  |
| Rsa1.0_00330.1.g11499.t1  | #                                                                                                                                                                                                                                                                                                                                                                                                                                                                                                                                                                                                                                                                                                                                                                                                                                                                                                                                                                                                                                                                                                                                                                             | #    | #    | #         | #     | #    | #    | -                                              | ----  | ----                    | #                                                                                                                                                                                | #    | #    | #         | #     | #    | #    |
| Rsa1.0_00330.1.g11500.t1  | ref NP_567135.1  protein INHIBITOR<br>INHIBITOR RESPONSE 1 [Arabidopsis<br>thaliana]<br>gi 68053009 sp Q570C0.2 TIR1_ARATH<br>RecName: Full=Protein TRANSPORT<br>INHIBITOR RESPONSE 1; AltName:<br>Full=Weak ethylene-insensitive protein<br>1 gi 146387658 pdb 2P1M B Chain B,<br>Tir1-ask1 Complex Structure<br>gi 146387660 pdb 2P1N B Chain B,<br>Mechanism Of Auxin Perception By The<br>Tir1 Ubiquitin Ligase<br>gi 146387663 pdb 2P1N E Chain E,<br>Mechanism Of Auxin Perception By The<br>Tir1 Ubiquitin Ligase<br>gi 146387666 pdb 2P1O B Chain B,<br>Mechanism Of Auxin Perception By The<br>Tir1 Ubiquitin Ligase<br>gi 146387669 pdb 2P1P B Chain B,<br>Mechanism Of Auxin Perception By The<br>Tir1 Ubiquitin Ligase<br>gi 146387671 pdb 2P1Q B Chain B,<br>Mechanism Of Auxin Perception By The<br>Tir1 Ubiquitin Ligase<br>gi 185177934 pdb 3C6N B Chain B,<br>Small Molecule Agonists And<br>Antagonists Of F-Box Protein-<br>Substrate Interactions In Auxin<br>Perception And Signaling<br>gi 185177936 pdb 3C6O B Chain B,<br>Small Molecule Agonists And<br>Antagonists Of F-Box Protein-<br>Substrate Interactions In Auxin<br>Perception And Signaling | 598  | 594  | 0         | 99.3  | 90.3 | 95.3 | protein TRANSPORT<br>INHIBITOR RESPONSE<br>1   | gbpln | Arabidopsis<br>thaliana | AT3G62980.1   Symbols: TIR1   F-box/RNI-<br>like superfamily protein   chr3:23273479-<br>23276181 REVERSE LENGTH=594                                                             | 598  | 594  | 0         | 99.3  | 90.3 | 95.3 |
| Rsa1.0_00330.1.g11501.t1  | #                                                                                                                                                                                                                                                                                                                                                                                                                                                                                                                                                                                                                                                                                                                                                                                                                                                                                                                                                                                                                                                                                                                                                                             | #    | #    | #         | #     | #    | #    | -                                              | ----  | ----                    | #                                                                                                                                                                                | #    | #    | #         | #     | #    | #    |

|                          |                                                                                                                                                                                         |      |      |           |       |      |      |                                                                                |       |                      |                                                                                                                                                                                                                                                                                                                                                                                                                                                           |      |      |           |       |      |      |
|--------------------------|-----------------------------------------------------------------------------------------------------------------------------------------------------------------------------------------|------|------|-----------|-------|------|------|--------------------------------------------------------------------------------|-------|----------------------|-----------------------------------------------------------------------------------------------------------------------------------------------------------------------------------------------------------------------------------------------------------------------------------------------------------------------------------------------------------------------------------------------------------------------------------------------------------|------|------|-----------|-------|------|------|
| Rsa1.0_00330.1.g11502.t1 | #                                                                                                                                                                                       | #    | #    | #         | #     | #    | #    | -                                                                              | ----  | ----                 | #                                                                                                                                                                                                                                                                                                                                                                                                                                                         | #    | #    | #         | #     | #    |      |
|                          | ref NP_179509.1  senescence-induced receptor-like serine/threonine-protein kinase [Arabidopsis thaliana]                                                                                |      |      |           |       |      |      |                                                                                |       |                      |                                                                                                                                                                                                                                                                                                                                                                                                                                                           |      |      |           |       |      |      |
|                          | gi 30173224 sp O64483.1 SIRK_ARATH RecName: Full=Senescence-induced receptor-like serine/threonine-protein kinase; AltName: Full=FLG22-induced receptor-like kinase 1; Flags: Precursor |      |      |           |       |      |      |                                                                                |       |                      |                                                                                                                                                                                                                                                                                                                                                                                                                                                           |      |      |           |       |      |      |
|                          | gi 19569557 gb AAL92103.1 AF486619.1 senescence-induced receptor-like serine/threonine kinase [Arabidopsis thaliana]                                                                    | 95   | 876  | 2.00E-19  | 922.1 | 51.6 | 61.1 | senescence-induced receptor-like serine/threonine-protein kinase               | gbpln | Arabidopsis thaliana | AT2G19190.1   Symbols: FRK1   FLG22-induced receptor-like kinase 1   chr2:8326067-8329893 REVERSE LENGTH=876                                                                                                                                                                                                                                                                                                                                              | 95   | 876  | 3.00E-22  | 922.1 | 51.6 | 61.1 |
| Rsa1.0_00331.1.g11504.t1 | #                                                                                                                                                                                       | #    | #    | #         | #     | #    | #    | -                                                                              | ----  | ----                 | #                                                                                                                                                                                                                                                                                                                                                                                                                                                         | #    | #    | #         | #     | #    |      |
|                          | emb CAA66376.1  light repressible receptor protein kinase [Arabidopsis thaliana]                                                                                                        | 862  | 876  | 0         | 101.6 | 70.8 | 81.9 | light repressible receptor protein kinase                                      | gbpln | Arabidopsis thaliana | AT4G29990.1   Symbols:   Leucine-rich repeat transmembrane protein kinase protein   chr4:14665802-14669438 REVERSE LENGTH=876                                                                                                                                                                                                                                                                                                                             | 862  | 876  | 0         | 101.6 | 70.6 | 81.9 |
|                          | pir T00833 RNA-directed DNA polymerase homolog T13L16.7 - Arabidopsis thaliana (fragment)                                                                                               | 1050 | 1365 | 0         | 130.0 | 46.0 | 62.7 | RNA-directed DNA polymerase homolog T13L16.7 - Arabidopsis thaliana (fragment) | ----  | ----                 | AT4G29090.1   Symbols:   Ribonuclease H-like superfamily protein   chr4:14333528-14335255 FORWARD LENGTH=575                                                                                                                                                                                                                                                                                                                                              | 1050 | 575  | 5.00E-88  | 54.8  | 17.1 | 28.3 |
|                          | gb AAD49767.1 AC007932.15 ESTs gb N97074, gb T13943 and gb R89965 come from this gene [Arabidopsis thaliana]                                                                            | 355  | 360  | 1.00E-125 | 101.4 | 78.0 | 85.1 | ESTs gb N97074, gb T13943 and gb R89965 come from this gene                    | gbpln | Arabidopsis thaliana | AT1G48300.1   Symbols:   unknown protein; FUNCTIONS IN: molecular function unknown; INVOLVED IN: biological process unknown; LOCATED IN: endomembrane system; EXPRESSED IN: 24 plant structures; EXPRESSED DURING: 15 growth stages; Has 96 Blast hits to 87 proteins in 37 species: Archae - 0; Bacteria - 2; Metazoa - 12; Fungi - 2; Plants - 65; Viruses - 0; Other Eukaryotes - 15 (source: NCBI BLINK).   chr1:17847391-17848338 FORWARD LENGTH=285 | 355  | 285  | 1.00E-103 | 80.3  | 60.3 | 64.5 |
|                          | dbj BAA97290.1  non-LTR retroelement reverse transcriptase-like [Arabidopsis thaliana]                                                                                                  | 821  | 1072 | 1.00E-138 | 130.6 | 34.6 | 50.5 | non-LTR retroelement reverse transcriptase-like                                | gbpln | Arabidopsis thaliana | AT3G24255.1   Symbols:   RNA-directed DNA polymerase (reverse transcriptase)-related family protein   chr3:8789471-8793208 FORWARD LENGTH=746                                                                                                                                                                                                                                                                                                             | 821  | 746  | 3.00E-63  | 90.9  | 16.3 | 24.1 |
|                          | gb AAG51783.1 AC079679.3 reverse transcriptase, putative; 16838-20266 [Arabidopsis thaliana]                                                                                            | 1040 | 1142 | 1.00E-156 | 109.8 | 27.3 | 35.2 | reverse transcriptase, putative; 16838-20266                                   | gbpln | Arabidopsis thaliana | AT4G29090.1   Symbols:   Ribonuclease H-like superfamily protein   chr4:14333528-14335255 FORWARD LENGTH=575                                                                                                                                                                                                                                                                                                                                              | 1040 | 575  | 8.00E-33  | 55.3  | 6.8  | 10.4 |
|                          | gb EOA33218.1  hypothetical protein CARUB_v10020320mg [Capsella rubella]                                                                                                                | 109  | 432  | 7.00E-23  | 396.3 | 47.7 | 54.1 | hypothetical protein CARUB_v10020320mg                                         | gbpln | Capsella rubella     | AT1G20610.1   Symbols: CYGB2.3   Cyclin B2.3   chr1:7135073-7137273 REVERSE LENGTH=429                                                                                                                                                                                                                                                                                                                                                                    | 109  | 429  | 6.00E-24  | 393.6 | 44.0 | 55.0 |
|                          | ref NP_179068.1  pathogenesis-related protein 1 [Arabidopsis thaliana]                                                                                                                  |      |      |           |       |      |      |                                                                                |       |                      |                                                                                                                                                                                                                                                                                                                                                                                                                                                           |      |      |           |       |      |      |
|                          | gi 417527 sp P33154.1 PR1_ARATH RecName: Full=Pathogenesis-related protein 1; Short=PR-1; Flags: Precursor                                                                              |      |      |           |       |      |      |                                                                                |       |                      |                                                                                                                                                                                                                                                                                                                                                                                                                                                           |      |      |           |       |      |      |
|                          | gi 166861 gb AA32863.1  PR-1-like protein [Arabidopsis thaliana]                                                                                                                        |      |      |           |       |      |      |                                                                                |       |                      |                                                                                                                                                                                                                                                                                                                                                                                                                                                           |      |      |           |       |      |      |
|                          | gi 3810599 gb AAC69381.1  pathogenesis-related PR-1-like protein [Arabidopsis thaliana]                                                                                                 |      |      |           |       |      |      |                                                                                |       |                      |                                                                                                                                                                                                                                                                                                                                                                                                                                                           |      |      |           |       |      |      |
|                          | gi 17381134 gb AAL36379.1  putative pathogenesis-related PR-1 protein [Arabidopsis thaliana]                                                                                            | 160  | 161  | 1.00E-57  | 100.6 | 68.8 | 76.3 | pathogenesis-related protein 1                                                 | gbpln | Arabidopsis thaliana | AT2G14610.1   Symbols: PR1, PR 1, ATPR1   pathogenesis-related gene 1   chr2:6241944-6242429 REVERSE LENGTH=161                                                                                                                                                                                                                                                                                                                                           | 160  | 161  | 4.00E-60  | 100.6 | 68.8 | 76.3 |
|                          | gi 21436247 gb AAM51262.1  putative pathogenesis-related PR-1 protein [Arabidopsis thaliana]                                                                                            |      |      |           |       |      |      |                                                                                |       |                      |                                                                                                                                                                                                                                                                                                                                                                                                                                                           |      |      |           |       |      |      |
|                          | gi 91805427 gb ABE65442.1  pathogenesis-like protein 1 [Arabidopsis thaliana]                                                                                                           |      |      |           |       |      |      |                                                                                |       |                      |                                                                                                                                                                                                                                                                                                                                                                                                                                                           |      |      |           |       |      |      |
|                          | gi 330251220 gb AEC06314.1  pathogenesis-related protein 1 [Arabidopsis thaliana]                                                                                                       |      |      |           |       |      |      |                                                                                |       |                      |                                                                                                                                                                                                                                                                                                                                                                                                                                                           |      |      |           |       |      |      |
|                          | gb ABH07409.1  putative pol polyprotein [Brassica oleracea var. botrytis]                                                                                                               | 1206 | 1239 | 0         | 102.7 | 64.5 | 77.0 | putative pol polyprotein                                                       | gbpln | Brassica oleracea    | AT4G23160.1   Symbols: CRK8   cysteine-rich RLK (RECEPTOR-like protein kinase) 8   chr4:12129485-12134086 FORWARD LENGTH=1262                                                                                                                                                                                                                                                                                                                             | 1206 | 1262 | 1.00E-91  | 104.6 | 15.3 | 23.7 |

|                          |                                                                                                                                                                                                                                                                                                       |      |      |           |        |      |      |                                              |       |                      |                                                                                                                                                                                                                                                                                                                                                                                                                                                                 |      |      |           |       |      |      |
|--------------------------|-------------------------------------------------------------------------------------------------------------------------------------------------------------------------------------------------------------------------------------------------------------------------------------------------------|------|------|-----------|--------|------|------|----------------------------------------------|-------|----------------------|-----------------------------------------------------------------------------------------------------------------------------------------------------------------------------------------------------------------------------------------------------------------------------------------------------------------------------------------------------------------------------------------------------------------------------------------------------------------|------|------|-----------|-------|------|------|
| Rsa1.0_00331.1.g11513.t1 | emb[CAA18194.1] putative protein [Arabidopsis thaliana] gi 7270001 emb[CAB79817.1] putative protein [Arabidopsis thaliana]                                                                                                                                                                            | 134  | 2895 | 2.00E-17  | 2160.4 | 32.8 | 36.6 | putative protein                             | gbpln | Arabidopsis thaliana | AT4G30996.1   Symbols:   Protein of unknown function (DUF1068)   chr4:15101464-15102461 FORWARD LENGTH=172                                                                                                                                                                                                                                                                                                                                                      | 134  | 172  | 2.00E-19  | 128.4 | 32.8 | 36.6 |
| Rsa1.0_00331.1.g11514.t1 | gb AAF79514.1 AC023673.2 F21D18.2 [Arabidopsis thaliana]                                                                                                                                                                                                                                              | 480  | 454  | 0         | 94.6   | 70.4 | 79.0 | F21D18.2                                     | gbpln | Arabidopsis thaliana | AT1G48260.1   Symbols: CIPK17, SnRK3.21   CBL-interacting protein kinase 17   chr1:17814226-17817226 REVERSE LENGTH=432                                                                                                                                                                                                                                                                                                                                         | 480  | 432  | 1.00E-161 | 90.0  | 57.1 | 63.8 |
| Rsa1.0_00331.1.g11515.t1 | #                                                                                                                                                                                                                                                                                                     | #    | #    | #         | #      | #    | -    | ----                                         | ----  | ----                 | #                                                                                                                                                                                                                                                                                                                                                                                                                                                               | #    | #    | #         | #     | #    |      |
| Rsa1.0_00331.1.g11516.t2 | gb AAD49774.2 AC007932.22 F11A17.20 [Arabidopsis thaliana]                                                                                                                                                                                                                                            | 285  | 285  | 4.00E-39  | 100.0  | 38.2 | 44.9 | F11A17.20                                    | gbpln | Arabidopsis thaliana | AT1G48240.1   Symbols: ATNPSN12, NPSN12   novel plant snare 12   chr1:17809223-17811656 REVERSE LENGTH=265                                                                                                                                                                                                                                                                                                                                                      | 285  | 265  | 8.00E-41  | 93.0  | 36.5 | 42.8 |
| Rsa1.0_00331.1.g11517.t1 | ref NP_175257.1  nodulin MtN21 /EamA-like transporter protein [Arabidopsis thaliana] gi 325530209 sp Q9LNH5.2 PT148_ARA TH RecName: Full=Probable sugar phosphate/phosphate translocator At1g48230 gi 332194146 gb AEE32267.1  probable sugar phosphate/phosphate translocator [Arabidopsis thaliana] | 369  | 367  | 0         | 99.5   | 94.3 | 97.3 | nodulin MtN21 /EamA-like transporter protein | gbpln | Arabidopsis thaliana | AT1G48230.1   Symbols:   nodulin MtN21 /EamA-like transporter family protein   chr1:17806223-17808604 FORWARD LENGTH=367                                                                                                                                                                                                                                                                                                                                        | 369  | 367  | 0         | 99.5  | 94.3 | 97.3 |
| Rsa1.0_00331.1.g11518.t1 | emb[CAB78061.1] putative protein [Arabidopsis thaliana]                                                                                                                                                                                                                                               | 324  | 960  | 7.00E-40  | 296.3  | 23.1 | 30.2 | putative protein                             | gbpln | Arabidopsis thaliana | #                                                                                                                                                                                                                                                                                                                                                                                                                                                               | #    | #    | #         | #     | #    |      |
| Rsa1.0_00331.1.g11519.t1 | #                                                                                                                                                                                                                                                                                                     | #    | #    | #         | #      | #    | -    | ----                                         | ----  | ----                 | #                                                                                                                                                                                                                                                                                                                                                                                                                                                               | #    | #    | #         | #     | #    |      |
| Rsa1.0_00331.1.g11520.t1 | #                                                                                                                                                                                                                                                                                                     | #    | #    | #         | #      | #    | -    | ----                                         | ----  | ----                 | #                                                                                                                                                                                                                                                                                                                                                                                                                                                               | #    | #    | #         | #     | #    |      |
| Rsa1.0_00331.1.g11521.t1 | #                                                                                                                                                                                                                                                                                                     | #    | #    | #         | #      | #    | -    | ----                                         | ----  | ----                 | #                                                                                                                                                                                                                                                                                                                                                                                                                                                               | #    | #    | #         | #     | #    |      |
| Rsa1.0_00331.1.g11522.t2 | #                                                                                                                                                                                                                                                                                                     | #    | #    | #         | #      | #    | -    | ----                                         | ----  | ----                 | #                                                                                                                                                                                                                                                                                                                                                                                                                                                               | #    | #    | #         | #     | #    |      |
| Rsa1.0_00331.1.g11523.t1 | #                                                                                                                                                                                                                                                                                                     | #    | #    | #         | #      | #    | -    | ----                                         | ----  | ----                 | #                                                                                                                                                                                                                                                                                                                                                                                                                                                               | #    | #    | #         | #     | #    |      |
| Rsa1.0_00331.1.g11524.t1 | #                                                                                                                                                                                                                                                                                                     | #    | #    | #         | #      | #    | -    | ----                                         | ----  | ----                 | #                                                                                                                                                                                                                                                                                                                                                                                                                                                               | #    | #    | #         | #     | #    |      |
| Rsa1.0_00331.1.g11525.t1 | #                                                                                                                                                                                                                                                                                                     | #    | #    | #         | #      | #    | -    | ----                                         | ----  | ----                 | #                                                                                                                                                                                                                                                                                                                                                                                                                                                               | #    | #    | #         | #     | #    |      |
| Rsa1.0_00331.1.g11526.t1 | gb EMJ22065.1  hypothetical protein PRUPE_ppa018704mg [Prunus persica]                                                                                                                                                                                                                                | 155  | 494  | 7.00E-23  | 318.7  | 33.5 | 36.8 | hypothetical protein PRUPE_ppa018704mg       | gbpln | Prunus persica       | AT5G60120.1   Symbols: TOE2   target of early activation tagged (EAT) 2   chr5:24208153-24211067 FORWARD LENGTH=485                                                                                                                                                                                                                                                                                                                                             | 155  | 485  | 2.00E-23  | 312.9 | 40.0 | 46.5 |
| Rsa1.0_00331.1.g11527.t4 | emb CAN67863.1  hypothetical protein VITISV_020704 [Vitis vinifera]                                                                                                                                                                                                                                   | 969  | 803  | 1.00E-120 | 82.9   | 29.7 | 41.6 | hypothetical protein VITISV_020704           | gbpln | Vitis vinifera       | AT5G33406.1   Symbols:   hAT dimerisation domain-containing protein / transposase-related   chr5:12676126-12678403 REVERSE LENGTH=509                                                                                                                                                                                                                                                                                                                           | 969  | 509  | 1.00E-73  | 52.5  | 13.2 | 15.4 |
| Rsa1.0_00332.1.g11528.t1 | gb AAK43485.1 AC084807_10 polyprotein, putative [Arabidopsis thaliana] gi 225898008 dbj BAH30336.1  hypothetical protein [Arabidopsis thaliana]                                                                                                                                                       | 1418 | 1459 | 0         | 102.9  | 58.6 | 74.4 | polyprotein, putative                        | gbpln | Arabidopsis thaliana | AT4G23160.1   Symbols: CRK8   cysteine-rich RLK (RECEPTOR-like protein kinase) 8   chr4:12129485-12134086 FORWARD LENGTH=1262                                                                                                                                                                                                                                                                                                                                   | 1418 | 1262 | 1.00E-110 | 89.0  | 14.6 | 21.1 |
| Rsa1.0_00332.1.g11529.t1 | ref NP_191858.2  uncharacterized protein [Arabidopsis thaliana] gi 117168187 gb ABK32176.1  At3g62990 [Arabidopsis thaliana] gi 332646900 gb AEE80421.1  uncharacterized protein AT3G62990 [Arabidopsis thaliana]                                                                                     | 131  | 134  | 4.00E-20  | 102.3  | 55.7 | 69.5 | uncharacterized protein                      | gbpln | Arabidopsis thaliana | AT3G62990.1   Symbols:   unknown protein; FUNCTIONS IN: molecular_function unknown; INVOLVED IN: biological_process unknown; LOCATED IN: endomembrane system; BEST Arabidopsis thaliana protein match is: unknown protein (TAIR:AT2G47950.1); Has 22 Blast hits to 22 proteins in 5 species: Archae - 0; Bacteria - 0; Metazoa - 0; Fungi - 0; Plants - 22; Viruses - 0; Other Eukaryotes - 0 (source: NCBI BLink).   chr3:23282803-23283207 FORWARD LENGTH=134 | 131  | 134  | 8.00E-23  | 102.3 | 55.7 | 69.5 |

|                          |                                                                                                                                                                                                                                                                                                                                                                                                                                                                                                                                                                                                                                                                                                                                                                                                                                                                                                                                                                                                                                                                                                                                                                       |     |     |           |       |      |      |                                                             |                      |                                                                                                              |                                                                                                                        |     |     |           |       |      |      |
|--------------------------|-----------------------------------------------------------------------------------------------------------------------------------------------------------------------------------------------------------------------------------------------------------------------------------------------------------------------------------------------------------------------------------------------------------------------------------------------------------------------------------------------------------------------------------------------------------------------------------------------------------------------------------------------------------------------------------------------------------------------------------------------------------------------------------------------------------------------------------------------------------------------------------------------------------------------------------------------------------------------------------------------------------------------------------------------------------------------------------------------------------------------------------------------------------------------|-----|-----|-----------|-------|------|------|-------------------------------------------------------------|----------------------|--------------------------------------------------------------------------------------------------------------|------------------------------------------------------------------------------------------------------------------------|-----|-----|-----------|-------|------|------|
|                          | <p>ref NP_567135.1  protein 1 HANSPOK1 INHIBITOR RESPONSE 1 [Arabidopsis thaliana]<br/> gi 68053009 sp Q570C0.2 TIR1_ARATH<br/> RecName: Full=Protein TRANSPORT INHIBITOR RESPONSE 1; AltName: Full=Weak ethylene-insensitive protein 1 gi 146387658 pdb 2P1M B Chain B.<br/> Tir1-ask1 Complex Structure<br/> gi 146387660 pdb 2P1N B Chain B.<br/> Mechanism Of Auxin Perception By The Tir1 Ubiquitin Ligase<br/> gi 146387663 pdb 2P1N E Chain E.<br/> Mechanism Of Auxin Perception By The Tir1 Ubiquitin Ligase<br/> gi 146387686 pdb 2P1O B Chain B.<br/> Mechanism Of Auxin Perception By The Tir1 Ubiquitin Ligase<br/> gi 146387669 pdb 2P1P B Chain B.<br/> Mechanism Of Auxin Perception By The Tir1 Ubiquitin Ligase<br/> gi 146387671 pdb 2P1Q B Chain B.<br/> Mechanism Of Auxin Perception By The Tir1 Ubiquitin Ligase<br/> gi 185177934 pdb 3C6N B Chain B.<br/> Small Molecule Agonists And Antagonists Of F-Box Protein-Substrate Interactions In Auxin Perception And Signaling<br/> gi 185177936 pdb 3C6O B Chain B.<br/> Small Molecule Agonists And Antagonists Of F-Box Protein-Substrate Interactions In Auxin Perception And Signaling</p> | 570 | 594 | 0         | 104.2 | 92.3 | 95.3 | protein TRANSPORT INHIBITOR RESPONSE gbpln 1                | Arabidopsis thaliana | AT3G62980.1   Symbols: TIR1   F-box/RNI-like superfamily protein   chr3:23273479-23276181 REVERSE LENGTH=594 | 570                                                                                                                    | 594 | 0   | 104.2     | 92.3  | 95.3 |      |
| Rsa1.0_00332.1.g11530.t1 |                                                                                                                                                                                                                                                                                                                                                                                                                                                                                                                                                                                                                                                                                                                                                                                                                                                                                                                                                                                                                                                                                                                                                                       |     |     |           |       |      |      |                                                             |                      |                                                                                                              |                                                                                                                        |     |     |           |       |      |      |
|                          | <p>ref NP_191856.4  ring finger and CHY zinc finger domain-containing protein 1 [Arabidopsis thaliana]<br/> gi 332646897 gb AE80418.1  ring finger and CHY zinc finger domain-containing protein 1 [Arabidopsis thaliana]</p>                                                                                                                                                                                                                                                                                                                                                                                                                                                                                                                                                                                                                                                                                                                                                                                                                                                                                                                                         | 265 | 287 | 1.00E-100 | 108.3 | 69.8 | 77.0 | ring finger and CHY zinc finger domain-containing protein 1 | gbpln                | Arabidopsis thaliana                                                                                         | AT3G62970.1   Symbols: zinc finger (C3HC4-type RING finger) family protein   chr3:23270636-23272698 FORWARD LENGTH=287 | 265 | 287 | 1.00E-103 | 108.3 | 69.8 | 77.0 |
| Rsa1.0_00332.1.g11531.t1 |                                                                                                                                                                                                                                                                                                                                                                                                                                                                                                                                                                                                                                                                                                                                                                                                                                                                                                                                                                                                                                                                                                                                                                       |     |     |           |       |      |      |                                                             |                      |                                                                                                              |                                                                                                                        |     |     |           |       |      |      |
|                          | <p>ref NP_191855.1  glutaredoxin-C14 [Arabidopsis thaliana]<br/> gi 75181054 sp Q9LYC5.1 GRC14_ARATH<br/> RecName: Full=Glutaredoxin-C14; Short=AtGrxC14; AltName: Full=Protein ROXY 8 gi 7573425 emb CAB8774.1  glutaredoxin-like protein [Arabidopsis thaliana]<br/> gi 88900350 gb ABD57487.1  At3g62960 [Arabidopsis thaliana]<br/> gi 226348194 gb ACO50413.1  glutaredoxin [Arabidopsis thaliana]<br/> gi 332646896 gb AEE80417.1  glutaredoxin-C14 [Arabidopsis thaliana]<br/> gi 482560809 gb EOA25000.1  hypothetical protein CARUB_v10018297mg [Capsella rubella]</p>                                                                                                                                                                                                                                                                                                                                                                                                                                                                                                                                                                                       | 102 | 102 | 5.00E-52  | 100.0 | 97.1 | 99.0 | glutaredoxin-C14                                            | gbpln                | Arabidopsis thaliana                                                                                         | AT3G62960.1   Symbols: Thioredoxin superfamily protein   chr3:23268780-23269088 FORWARD LENGTH=102                     | 102 | 102 | 9.00E-55  | 100.0 | 97.1 | 99.0 |
| Rsa1.0_00332.1.g11533.t1 |                                                                                                                                                                                                                                                                                                                                                                                                                                                                                                                                                                                                                                                                                                                                                                                                                                                                                                                                                                                                                                                                                                                                                                       |     |     |           |       |      |      |                                                             |                      |                                                                                                              |                                                                                                                        |     |     |           |       |      |      |
|                          | <p>ref NP_191854.1  glutaredoxin-C11 [Arabidopsis thaliana]<br/> gi 297817626 ref XP_002876696.1  glutaredoxin family protein [Arabidopsis lyrata subsp. lyrata]<br/> gi 75264377 sp Q9LYC6.1 GRC11_ARATH<br/> RecName: Full=Glutaredoxin-C11; Short=AtGrxC11; AltName: Full=Protein ROXY 4 gi 7573424 emb CAB87740.1  glutaredoxin-like protein [Arabidopsis thaliana]<br/> gi 50253460 gb AAT71932.1  At3g62950 [Arabidopsis thaliana]<br/> gi 51972084 gb AAU15146.1  At3g62950 [Arabidopsis thaliana]<br/> gi 226348186 gb ACO50409.1  glutaredoxin [Arabidopsis thaliana]<br/> gi 297322534 gb EPH52955.1  glutaredoxin family protein [Arabidopsis lyrata subsp. lyrata]<br/> gi 332646895 gb AEE80416.1  glutaredoxin-C11 [Arabidopsis thaliana]</p>                                                                                                                                                                                                                                                                                                                                                                                                           | 103 | 103 | 3.00E-52  | 100.0 | 98.1 | 98.1 | glutaredoxin-C11                                            | gbpln                | Arabidopsis lyrata                                                                                           | AT3G62950.1   Symbols: Thioredoxin superfamily protein   chr3:23266303-23266614 FORWARD LENGTH=103                     | 103 | 103 | 5.00E-55  | 100.0 | 98.1 | 98.1 |
| Rsa1.0_00332.1.g11534.t1 |                                                                                                                                                                                                                                                                                                                                                                                                                                                                                                                                                                                                                                                                                                                                                                                                                                                                                                                                                                                                                                                                                                                                                                       |     |     |           |       |      |      |                                                             |                      |                                                                                                              |                                                                                                                        |     |     |           |       |      |      |
|                          | <p>gb EOA23266.1  hypothetical protein CARUB_v10017631mg [Capsella rubella]</p>                                                                                                                                                                                                                                                                                                                                                                                                                                                                                                                                                                                                                                                                                                                                                                                                                                                                                                                                                                                                                                                                                       | 333 | 327 | 1.00E-147 | 98.2  | 85.3 | 91.3 | hypothetical protein CARUB_v10017631mg                      | gbpln                | Capsella rubella                                                                                             | AT3G62940.3   Symbols: Cysteine proteinases superfamily protein   chr3:23263106-23264245 REVERSE LENGTH=332            | 333 | 332 | 1.00E-143 | 99.7  | 84.4 | 90.7 |

|                           |                                                                                                                                                                                                                                                                                                                                                                                                                                                                                                                                                                                                                                                                                                                                                                                                         |      |      |           |       |      |       |                                                                           |       |                      |                                                                                                                                                                                                                                                              |      |      |           |       |      |      |
|---------------------------|---------------------------------------------------------------------------------------------------------------------------------------------------------------------------------------------------------------------------------------------------------------------------------------------------------------------------------------------------------------------------------------------------------------------------------------------------------------------------------------------------------------------------------------------------------------------------------------------------------------------------------------------------------------------------------------------------------------------------------------------------------------------------------------------------------|------|------|-----------|-------|------|-------|---------------------------------------------------------------------------|-------|----------------------|--------------------------------------------------------------------------------------------------------------------------------------------------------------------------------------------------------------------------------------------------------------|------|------|-----------|-------|------|------|
| Rsa1.0_00332.1.g11535.t1  | gb[EOA23343.1] hypothetical protein CARUB_v10019414mg [Capsella rubella]                                                                                                                                                                                                                                                                                                                                                                                                                                                                                                                                                                                                                                                                                                                                | 80   | 102  | 7.00E-38  | 127.5 | 96.3 | 100.0 | hypothetical protein CARUB_v10019414mg                                    | gbpln | Capsella rubella     | AT3G62930.1   Symbols:   Thioredoxin superfamily protein   chr3:23261538-23261846 REVERSE LENGTH=102                                                                                                                                                         | 80   | 102  | 1.00E-39  | 127.5 | 92.5 | 97.5 |
| Rsa1.0_00332.1.g11536.t1  | ref[NP_191851.1] uncharacterized protein [Arabidopsis thaliana] gi 7573421 emb CAB87737.1  putative protein [Arabidopsis thaliana] gi 332646890 gb AEE80411.1  uncharacterized protein AT3G62920 [Arabidopsis thaliana]                                                                                                                                                                                                                                                                                                                                                                                                                                                                                                                                                                                 | 80   | 80   | 2.00E-32  | 100.0 | 82.5 | 93.8  | uncharacterized protein                                                   | gbpln | Arabidopsis thaliana | AT3G62920.1   Symbols:   unknown protein; Has 25 Blast hits to 25 proteins in 11 species: Archaea = 0; Bacteria = 0; Metazoa = 0; Fungi = 0; Plants = 25; Viruses = 0; Other Eukaryotes = 0 (source: NCBI BLINK).   chr3:23260717-23261171 FORWARD LENGTH=80 | 80   | 80   | 3.00E-35  | 100.0 | 82.5 | 93.8 |
| Rsa1.0_00332.1.g11537.t1  | gb[EOA24095.1] hypothetical protein CARUB_v10017325mg [Capsella rubella]                                                                                                                                                                                                                                                                                                                                                                                                                                                                                                                                                                                                                                                                                                                                | 418  | 422  | 0         | 101.0 | 90.7 | 95.9  | hypothetical protein CARUB_v10017325mg                                    | gbpln | Capsella rubella     | AT3G62910.1   Symbols: APG3   Peptide chain release factor 1   chr3:23257661-23260386 REVERSE LENGTH=422                                                                                                                                                     | 418  | 422  | 0         | 101.0 | 89.7 | 95.0 |
| Rsa1.0_00332.1.g11538.t10 | ref[XP_002878485.1] zinc ion binding protein [Arabidopsis lyrata subsp. lyrata] gi 297324323 gb EFH54744.1  zinc ion binding protein [Arabidopsis lyrata subsp. lyrata]                                                                                                                                                                                                                                                                                                                                                                                                                                                                                                                                                                                                                                 | 1460 | 1387 | 0         | 95.0  | 70.4 | 77.7  | zinc ion binding protein                                                  | gbpln | Arabidopsis lyrata   | AT3G62900.1   Symbols:   CW-type Zinc Finger   chr3:23248868-23254810 REVERSE LENGTH=1465                                                                                                                                                                    | 1460 | 1465 | 0         | 100.3 | 70.0 | 77.7 |
| Rsa1.0_00332.1.g11539.t1  | gb[EOA27436.1] hypothetical protein CARUB_v10023573mg [Capsella rubella]                                                                                                                                                                                                                                                                                                                                                                                                                                                                                                                                                                                                                                                                                                                                | 256  | 338  | 1.00E-140 | 132.0 | 96.5 | 97.7  | hypothetical protein CARUB_v10023573mg                                    | gbpln | Capsella rubella     | AT3G62870.1   Symbols:   Ribosomal protein L7Ae/L30e/S12e/Gadd45 family protein   chr3:23242862-23244273 REVERSE LENGTH=256                                                                                                                                  | 256  | 256  | 1.00E-140 | 100.0 | 94.5 | 97.3 |
| Rsa1.0_00332.1.g11540.t2  | ref[XP_002878482.1] predicted protein [Arabidopsis lyrata subsp. lyrata] gi 297324320 gb EFH54741.1  predicted protein [Arabidopsis lyrata subsp. lyrata] ref[NP_191842.1] UDP-glucuronic acid decarboxylase [Arabidopsis thaliana] gi 186511349 ref[NP_001118893.1] UDP-glucuronic acid decarboxylase [Arabidopsis thaliana] gi 75335709 sp Q9LZ12.1 UXS2_ARATH RecName: Full=UDP-glucuronic acid decarboxylase 2; AltName: Full=UDP-XYL synthase 2; AltName: Full=UDP-glucuronate decarboxylase 2; Short=UGD; Short=UXS-2; AltName: Full=dTDP-glucose 4-6-dehydratase homolog D18                                                                                                                                                                                                                     | 470  | 348  | 1.00E-148 | 74.0  | 58.3 | 61.7  | predicted protein                                                         | gbpln | Arabidopsis lyrata   | AT3G62860.1   Symbols:   alpha/beta-Hydrolases superfamily protein   chr3:23239577-23242143 REVERSE LENGTH=348                                                                                                                                               | 470  | 348  | 1.00E-150 | 74.0  | 58.1 | 61.3 |
| Rsa1.0_00332.1.g11541.t1  | gi 7362763 emb CAB83133.1  dTDP-glucose 4-6-dehydratase homolog D18 [Arabidopsis thaliana] gi 23305953 gb AAN2836.1  At3g2830/F26K9.260 [Arabidopsis thaliana] gi 332646877 gb AEE80398.1  UDP-glucuronic acid decarboxylase [Arabidopsis thaliana] gi 332646878 gb AEE80399.1  UDP-glucuronic acid decarboxylase [Arabidopsis thaliana] ref[NP_191841.1] plant invertase/pectin methylesterase inhibitor domain-containing protein [Arabidopsis thaliana] gi 7362762 emb CAB83132.1  putative protein [Arabidopsis thaliana] gi 21592426 gb AAM64377.1  putative pectinesterase [Arabidopsis thaliana] gi 51969488 dbj BAD43436.1  unknown protein [Arabidopsis thaliana] gi 332646876 gb AEE80397.1  plant invertase/pectin methylesterase inhibitor domain-containing protein [Arabidopsis thaliana] | 436  | 445  | 0         | 102.1 | 95.2 | 96.6  | UDP-glucuronic acid decarboxylase                                         | gbpln | Arabidopsis thaliana | AT3G62830.2   Symbols: UXS2, ATUXS2   NAD(P)-binding Rossmann-fold superfamily protein   chr3:23232539-23235353 FORWARD LENGTH=445                                                                                                                           | 436  | 445  | 0         | 102.1 | 95.2 | 96.6 |
| Rsa1.0_00332.1.g11542.t1  | ref[NP_001154686.1] double-stranded-RNA-binding protein 4 [Arabidopsis thaliana] gi 197267565 dbj BAG69145.1  dsRNA-binding protein [Arabidopsis thaliana] gi 332646874 gb AEE80395.1  double-stranded-RNA-binding protein 4 [Arabidopsis thaliana] ref[XP_002878478.1] hypothetical protein ARALYDRAFT_486781 [Arabidopsis lyrata subsp. lyrata] gi 297324316 gb EFH54737.1  hypothetical protein ARALYDRAFT_486781 [Arabidopsis lyrata subsp. lyrata]                                                                                                                                                                                                                                                                                                                                                 | 189  | 194  | 6.00E-82  | 102.6 | 80.4 | 91.5  | plant invertase/pectin methylesterase inhibitor domain-containing protein | gbpln | Arabidopsis thaliana | AT3G62820.1   Symbols:   Plant invertase/pectin methylesterase inhibitor superfamily protein   chr3:23229782-23230366 FORWARD LENGTH=194                                                                                                                     | 189  | 194  | 2.00E-84  | 102.6 | 80.4 | 91.5 |
| Rsa1.0_00332.1.g11543.t1  | ref[NP_001154686.1] double-stranded-RNA-binding protein 4 [Arabidopsis thaliana] gi 197267565 dbj BAG69145.1  dsRNA-binding protein [Arabidopsis thaliana] gi 332646874 gb AEE80395.1  double-stranded-RNA-binding protein 4 [Arabidopsis thaliana]                                                                                                                                                                                                                                                                                                                                                                                                                                                                                                                                                     | 305  | 329  | 1.00E-103 | 107.9 | 65.6 | 80.0  | double-stranded-RNA-binding protein 4                                     | gbpln | Arabidopsis thaliana | AT3G62800.3   Symbols:   double-stranded-RNA-binding protein 4   chr3:23225749-23227163 REVERSE LENGTH=329                                                                                                                                                   | 305  | 329  | 1.00E-105 | 107.9 | 65.6 | 80.0 |
| Rsa1.0_00332.1.g11544.t1  | ref[XP_002878478.1] hypothetical protein ARALYDRAFT_486781 [Arabidopsis lyrata subsp. lyrata] gi 297324316 gb EFH54737.1  hypothetical protein ARALYDRAFT_486781 [Arabidopsis lyrata subsp. lyrata]                                                                                                                                                                                                                                                                                                                                                                                                                                                                                                                                                                                                     | 83   | 83   | 2.00E-40  | 100.0 | 95.2 | 97.6  | hypothetical protein ARALYDRAFT_486781                                    | gbpln | Arabidopsis lyrata   | AT3G62790.1   Symbols:   NADH-ubiquinone oxidoreductase-related   chr3:23223321-23224221 REVERSE LENGTH=83                                                                                                                                                   | 83   | 83   | 6.00E-43  | 100.0 | 95.2 | 97.6 |

|                           |                                                                                                                                                                                                                                                                                                                                                                                                                                         |      |      |           |       |      |      |                                                                                                                                                       |       |                      |                                                                                                                                                                                                                                                                                                                                                                                                                                                                                                                                                                                                                                     |      |     |           |       |      |      |
|---------------------------|-----------------------------------------------------------------------------------------------------------------------------------------------------------------------------------------------------------------------------------------------------------------------------------------------------------------------------------------------------------------------------------------------------------------------------------------|------|------|-----------|-------|------|------|-------------------------------------------------------------------------------------------------------------------------------------------------------|-------|----------------------|-------------------------------------------------------------------------------------------------------------------------------------------------------------------------------------------------------------------------------------------------------------------------------------------------------------------------------------------------------------------------------------------------------------------------------------------------------------------------------------------------------------------------------------------------------------------------------------------------------------------------------------|------|-----|-----------|-------|------|------|
| Rsa1.0_00332.1.g11545.t1  | ref[NP_567132.4] transducin/WD40 domain-containing protein [Arabidopsis thaliana]<br>gi 75331631 sp Q93VB2.1 AT18A_ARAT_H<br>RecName: Full=Autophagy-related protein 18a; Short=AtATG18a<br>gi 14517420 gb AAK62600.1 AT3g62770/F26K9.200 [Arabidopsis thaliana]<br>gi 16323362 gb AAL15394.1 AT3g62770/F26K9.200 [Arabidopsis thaliana]<br>gi 332646868 gb AEE80389.1 transducin/WD40 domain-containing protein [Arabidopsis thaliana] | 152  | 425  | 8.00E-40  | 279.6 | 59.2 | 64.5 | transducin/WD40 domain-containing protein                                                                                                             | gbpln | Arabidopsis thaliana | AT3G62770.1   Symbols: AtATG18a   Transducin/WD40 repeat-like superfamily protein   chr:3:23218858-23221110 REVERSE LENGTH=425                                                                                                                                                                                                                                                                                                                                                                                                                                                                                                      | 152  | 425 | 3.00E-42  | 279.6 | 59.2 | 64.5 |
| Rsa1.0_00332.1.g11546.t1  | dbj BAJ34035.1  unnamed protein product [Theillungiella halophila]                                                                                                                                                                                                                                                                                                                                                                      | 539  | 506  | 0         | 93.9  | 72.7 | 81.6 | unnamed protein product                                                                                                                               | ----  | ----                 | AT4G27830.1   Symbols: BGLU10   beta glucosidase 10   chr4:13861794-13864489 REVERSE LENGTH=508                                                                                                                                                                                                                                                                                                                                                                                                                                                                                                                                     | 539  | 508 | 0         | 94.2  | 71.8 | 80.9 |
| Rsa1.0_00332.1.g11547.t1  | emb CAB39638.1  RNA-directed DNA polymerase-like protein [Arabidopsis thaliana]<br>gi 7267666 emb CAB78094.1 RNA-directed DNA polymerase-like protein [Arabidopsis thaliana]                                                                                                                                                                                                                                                            | 353  | 1274 | 7.00E-45  | 360.9 | 34.8 | 51.3 | RNA-directed DNA polymerase-like protein                                                                                                              | gbpln | Arabidopsis thaliana | AT1G10000.1   Symbols:   Ribonuclease H-like superfamily protein   chr1:3263877-3264788 REVERSE LENGTH=303                                                                                                                                                                                                                                                                                                                                                                                                                                                                                                                          | 353  | 303 | 1.00E-41  | 85.8  | 28.6 | 43.1 |
| Rsa1.0_00332.1.g11548.t1  | ref XP_002878474.1  hypothetical protein ARALYDRAFT_907848 [Arabidopsis lyrata subsp. lyrata]<br>gi 297324312 gb EFH54733.1 hypothetical protein ARALYDRAFT_907848 [Arabidopsis lyrata subsp. lyrata]                                                                                                                                                                                                                                   | 321  | 315  | 1.00E-157 | 98.1  | 86.0 | 90.7 | hypothetical protein ARALYDRAFT_907848                                                                                                                | gbpln | Arabidopsis lyrata   | AT3G62730.1   Symbols:   unknown protein; FUNCTIONS IN: molecular function unknown; INVOLVED IN: biological process unknown; LOCATED IN: endomembrane system; EXPRESSED IN: 13 plant structures; EXPRESSED DURING: LP.04 four leaves visible, 4 anthesis, LP.02 two leaves visible, petal differentiation and expansion stage; BEST Arabidopsis thaliana protein match is: unknown protein (TAIRAT1G47980.1); Has 172 Blast hits to 172 proteins in 41 species: Archae - 0; Bacteria - 73; Metazoa - 0; Fungi - 0; Plants - 99; Viruses - 0; Other Eukaryotes - 0 (source: NCBI BLink).   chr3:23208003-23209436 REVERSE LENGTH=317 | 321  | 317 | 1.00E-159 | 98.8  | 85.4 | 89.4 |
| Rsa1.0_00333.1.g11549.t1  | #                                                                                                                                                                                                                                                                                                                                                                                                                                       | #    | #    | #         | #     | #    | #    | -                                                                                                                                                     | ----  | ----                 | #                                                                                                                                                                                                                                                                                                                                                                                                                                                                                                                                                                                                                                   | #    | #   | #         | #     | #    |      |
| Rsa1.0_00333.1.g11550.t1  | gb ABD65624.1  hypothetical protein 23.t00036 [Brassica oleracea]                                                                                                                                                                                                                                                                                                                                                                       | 903  | 842  | 1.00E-141 | 93.2  | 40.3 | 56.9 | hypothetical protein 23.t00036                                                                                                                        | gbpln | Brassica oleracea    | AT1G31150.1   Symbols:   Domain of unknown function (DUF1985)   chr1:11120097-11122412 FORWARD LENGTH=673                                                                                                                                                                                                                                                                                                                                                                                                                                                                                                                           | 903  | 673 | 6.00E-39  | 74.5  | 16.2 | 24.1 |
| Rsa1.0_00333.1.g11551.t24 | gb AAF80658.1 AC012190_14 Similar to At2g29230 Mutator-like transposase gi 3980409 from Arabidopsis thaliana gb AC004561. It is a member of Transposase mutator family PF 00872 [Arabidopsis thaliana]                                                                                                                                                                                                                                  | 1260 | 904  | 1.00E-143 | 71.7  | 19.2 | 28.5 | Similar to At2g29230 Mutator-like transposase gi 3980409 from Arabidopsis thaliana gb AC004561. It is a member of Transposase mutator family PF 00872 | gbpln | Arabidopsis thaliana | AT1G26680.1   Symbols:   transcriptional factor B3 family protein   chr1:9219552-9223193 FORWARD LENGTH=920                                                                                                                                                                                                                                                                                                                                                                                                                                                                                                                         | 1260 | 920 | 3.00E-39  | 73.0  | 7.6  | 11.4 |
| Rsa1.0_00333.1.g11552.t1  | ref NP_680296.1  uncharacterized protein [Arabidopsis thaliana]<br>gi 332006517 gb AED93900.1 uncharacterized protein AT5G33393 [Arabidopsis thaliana]                                                                                                                                                                                                                                                                                  | 102  | 435  | 7.00E-13  | 426.5 | 30.4 | 42.2 | uncharacterized protein                                                                                                                               | gbpln | Arabidopsis thaliana | AT5G33393.1   Symbols:   unknown protein; LOCATED IN: chloroplast; Has 30201 Blast hits to 17322 proteins in 780 species: Archae - 12; Bacteria - 1396; Metazoa - 17338; Fungi - 3422; Plants - 5037; Viruses - 0; Other Eukaryotes - 2996 (source: NCBI BLink).   chr5:12656430-12658588 REVERSE LENGTH=435                                                                                                                                                                                                                                                                                                                        | 102  | 435 | 1.00E-15  | 426.5 | 30.4 | 42.2 |
| Rsa1.0_00333.1.g11553.t1  | #                                                                                                                                                                                                                                                                                                                                                                                                                                       | #    | #    | #         | #     | #    | #    | -                                                                                                                                                     | ----  | ----                 | #                                                                                                                                                                                                                                                                                                                                                                                                                                                                                                                                                                                                                                   | #    | #   | #         | #     | #    |      |
| Rsa1.0_00333.1.g11554.t1  | dbj BAC42083.1  unknown protein [Arabidopsis thaliana]                                                                                                                                                                                                                                                                                                                                                                                  | 384  | 398  | 2.33E-156 | 103.6 | 81.3 | 86.2 | unknown protein                                                                                                                                       | gbpln | Arabidopsis thaliana | AT2G36400.1   Symbols: AtGRF3, GRF3   growth-regulating factor 3   chr2:15270300-15272617 REVERSE LENGTH=398                                                                                                                                                                                                                                                                                                                                                                                                                                                                                                                        | 384  | 398 | 1.00E-143 | 103.6 | 80.5 | 85.7 |
| Rsa1.0_00333.1.g11555.t1  | gb EOA26559.1  hypothetical protein CARUB_v10022617mg, partial [Capsella rubella]                                                                                                                                                                                                                                                                                                                                                       | 924  | 870  | 0         | 94.2  | 81.3 | 85.3 | hypothetical protein CARUB_v10022617mg, partial                                                                                                       | gbpln | Capsella rubella     | AT2G36390.1   Symbols: SBE2.1, BE3   starch branching enzyme 2.1   chr2:15264283-15269940 FORWARD LENGTH=858                                                                                                                                                                                                                                                                                                                                                                                                                                                                                                                        | 924  | 858 | 0         | 92.9  | 80.2 | 84.4 |

|                          |                                                                                                                                                                                                                                                                                                                                                                                                                                                                                                                                                                                                                                |     |     |           |       |      |      |                                                                       |       |                      |                                                                                                                                                 |     |     |           |       |      |      |
|--------------------------|--------------------------------------------------------------------------------------------------------------------------------------------------------------------------------------------------------------------------------------------------------------------------------------------------------------------------------------------------------------------------------------------------------------------------------------------------------------------------------------------------------------------------------------------------------------------------------------------------------------------------------|-----|-----|-----------|-------|------|------|-----------------------------------------------------------------------|-------|----------------------|-------------------------------------------------------------------------------------------------------------------------------------------------|-----|-----|-----------|-------|------|------|
| Rsa1.0_00333.1.g11557.t2 | refNP_850263.1  galactose oxidase/kelch repeat-containing protein [Arabidopsis thaliana]<br>gi 79324451 refNP_001031493.1  galactose oxidase/kelch repeat-containing protein [Arabidopsis thaliana]<br>gi 20260248 gb AAM13022.1  unknown protein [Arabidopsis thaliana]<br>gi 22136502 gb AAM91329.1  unknown protein [Arabidopsis thaliana]<br>gi 222423480 dbj BAH19710.1  AT2G36360 [Arabidopsis thaliana]<br>gi 330254146 gb AEC09240.1  galactose oxidase/kelch repeat-containing protein [Arabidopsis thaliana]<br>gi 330254147 gb AEC09241.1  galactose oxidase/kelch repeat-containing protein [Arabidopsis thaliana] | 497 | 496 | 0         | 99.8  | 91.1 | 96.0 | galactose oxidase/kelch repeat-containing protein                     | gbpln | Arabidopsis thaliana | AT2G36360.2   Symbols:   Galactose oxidase/kelch repeat superfamily protein   chr2:15243461-15247523 REVERSE LENGTH=496                         | 497 | 496 | 0         | 99.8  | 91.1 | 96.0 |
| Rsa1.0_00333.1.g11558.t1 | refXP_002879605.1  hypothetical protein ARALYDRAFT_482608 [Arabidopsis lyrata subsp. lyrata]<br>gi 297325444 gb EFH55864.1  hypothetical protein ARALYDRAFT_482608 [Arabidopsis lyrata subsp. lyrata]                                                                                                                                                                                                                                                                                                                                                                                                                          | 915 | 949 | 0         | 103.7 | 84.3 | 90.6 | hypothetical protein ARALYDRAFT_482608                                | gbpln | Arabidopsis lyrata   | AT2G36350.1   Symbols:   Protein kinase superfamily protein   chr2:15238903-15241864 FORWARD LENGTH=949                                         | 915 | 949 | 0         | 103.7 | 84.3 | 90.3 |
| Rsa1.0_00333.1.g11559.t1 | gb EOA27631.1  hypothetical protein CARUB_v10023779mg [Capsella rubella]                                                                                                                                                                                                                                                                                                                                                                                                                                                                                                                                                       | 305 | 287 | 1.00E-112 | 94.1  | 73.8 | 82.0 | hypothetical protein CARUB_v10023779mg                                | gbpln | Capsella rubella     | AT2G36330.1   Symbols:   Uncharacterised protein family (UPF0497)   chr2:15233620-15235298 FORWARD LENGTH=283                                   | 305 | 283 | 1.00E-113 | 92.8  | 76.1 | 83.3 |
| Rsa1.0_00333.1.g11560.t1 | refNP_565844.1  zinc finger A20 and AN1 domain-containing stress-associated protein 4 [Arabidopsis thaliana]<br>gi 73921295 sp Q9SJM6.1 SAP4_ARATH RecName: Full=Zinc finger A20 and AN1 domain-containing stress-associated protein 4; Short=AtSAP4<br>gi 4510345 gb AAD21434.1  expressed protein [Arabidopsis thaliana]<br>gi 21592464 gb AAM64415.1  zinc finger-like protein [Arabidopsis thaliana]<br>gi 114050557 gb AB49428.1  At2g36320 [Arabidopsis thaliana]<br>gi 330254138 gb AEC09232.1  zinc finger A20 and AN1 domain-containing stress-associated protein 4 [Arabidopsis thaliana]                            | 161 | 161 | 9.00E-63  | 100.0 | 77.6 | 82.6 | zinc finger A20 and AN1 domain-containing stress-associated protein 4 | gbpln | Arabidopsis thaliana | AT2G36320.1   Symbols:   A20/AN1-like zinc finger family protein   chr2:15229388-15229873 FORWARD LENGTH=161                                    | 161 | 161 | 3.00E-65  | 100.0 | 77.6 | 82.6 |
| Rsa1.0_00333.1.g11561.t1 | gb EOA27437.1  hypothetical protein CARUB_v10023574mg [Capsella rubella]                                                                                                                                                                                                                                                                                                                                                                                                                                                                                                                                                       | 339 | 338 | 1.00E-177 | 99.7  | 89.7 | 94.4 | hypothetical protein CARUB_v10023574mg                                | gbpln | Capsella rubella     | AT2G36310.1   Symbols: URH1   uridine-ribohydrolase 1   chr2:15224692-15226633 REVERSE LENGTH=336                                               | 339 | 336 | 1.00E-177 | 99.1  | 89.4 | 93.2 |
| Rsa1.0_00333.1.g11561.t2 | gb EOA25012.1  hypothetical protein CARUB_v10018310mg, partial [Capsella rubella]                                                                                                                                                                                                                                                                                                                                                                                                                                                                                                                                              | 71  | 95  | 1.00E-19  | 133.8 | 73.2 | 90.1 | hypothetical protein CARUB_v10018310mg, partial                       | gbpln | Capsella rubella     | AT3G52770.1   Symbols: ZPR3   protein binding   chr3:19557891-19558094 REVERSE LENGTH=67                                                        | 71  | 67  | 3.00E-17  | 94.4  | 56.3 | 67.6 |
| Rsa1.0_00333.1.g11562.t1 | refXP_002881437.1  hypothetical protein ARALYDRAFT_482602 [Arabidopsis lyrata subsp. lyrata]<br>gi 297327276 gb EFH57696.1  hypothetical protein ARALYDRAFT_482602 [Arabidopsis lyrata subsp. lyrata]                                                                                                                                                                                                                                                                                                                                                                                                                          | 256 | 255 | 1.00E-122 | 99.6  | 91.4 | 94.9 | hypothetical protein ARALYDRAFT_482602                                | gbpln | Arabidopsis lyrata   | AT2G36300.1   Symbols:   Integral membrane Yip1 family protein   chr2:15213362-15214129 REVERSE LENGTH=255                                      | 256 | 255 | 1.00E-122 | 99.6  | 90.2 | 93.8 |
| Rsa1.0_00333.1.g11563.t1 | refXP_002881436.1  hydrolase, alpha/beta fold family protein [Arabidopsis lyrata subsp. lyrata]<br>gi 297327275 gb EFH57695.1  hydrolase, alpha/beta fold family protein [Arabidopsis lyrata subsp. lyrata]                                                                                                                                                                                                                                                                                                                                                                                                                    | 394 | 363 | 0         | 92.1  | 77.9 | 83.2 | hydrolase, alpha/beta fold family protein                             | gbpln | Arabidopsis lyrata   | AT2G36290.1   Symbols:   alpha/beta-Hydrolases superfamily protein   chr2:15208867-15210768 REVERSE LENGTH=364                                  | 394 | 364 | 0         | 92.4  | 77.7 | 83.5 |
| Rsa1.0_00333.1.g11564.t1 | gb AFZ45968.1  ABA insensitive 5-like protein [Brassica oleracea var. capitata]                                                                                                                                                                                                                                                                                                                                                                                                                                                                                                                                                | 438 | 425 | 1.00E-178 | 97.0  | 87.9 | 91.6 | ABA insensitive 5-like protein                                        | gbpln | Brassica oleracea    | AT2G36270.1   Symbols: ABI5, GIA1   Basic-leucine zipper (bZIP) transcription factor family protein   chr2:15204980-15206571 REVERSE LENGTH=442 | 438 | 442 | 1.00E-158 | 100.9 | 81.1 | 87.0 |
| Rsa1.0_00333.1.g11565.t1 | # # # # # # # # - ----                                                                                                                                                                                                                                                                                                                                                                                                                                                                                                                                                                                                         |     |     |           |       |      |      |                                                                       |       |                      | # # # # # # # #                                                                                                                                 |     |     |           |       |      |      |
| Rsa1.0_00333.1.g11566.t1 | refXP_002879598.1  hypothetical protein ARALYDRAFT_902735 [Arabidopsis lyrata subsp. lyrata]<br>gi 297325437 gb EFH55857.1  hypothetical protein ARALYDRAFT_902735 [Arabidopsis lyrata subsp. lyrata]                                                                                                                                                                                                                                                                                                                                                                                                                          | 527 | 497 | 1.00E-121 | 94.3  | 41.9 | 48.8 | hypothetical protein ARALYDRAFT_902735                                | gbpln | Arabidopsis lyrata   | AT2G36240.1   Symbols:   pentatricopeptide (PPR) repeat-containing protein   chr2:15195663-15197156 FORWARD LENGTH=497                          | 527 | 497 | 1.00E-123 | 94.3  | 40.2 | 45.5 |
| Rsa1.0_00333.1.g11567.t1 | dbj BAD72794.1  BBMII isomerase [Arabidopsis thaliana]                                                                                                                                                                                                                                                                                                                                                                                                                                                                                                                                                                         | 311 | 304 | 1.00E-148 | 97.7  | 85.5 | 91.0 | BBMII isomerase                                                       | gbpln | Arabidopsis thaliana | AT2G36230.1   Symbols: APG10, HSN3   Aldolase-type TIM barrel family protein   chr2:15193878-15195509 REVERSE LENGTH=304                        | 311 | 304 | 1.00E-150 | 97.7  | 85.2 | 90.7 |



|                          |                                                                                                                                                                                                                                                                                  |      |      |           |       |      |      |                                                 |       |                      |                                                                                                                                                                                                                                                                                                                                              |      |      |           |       |      |      |
|--------------------------|----------------------------------------------------------------------------------------------------------------------------------------------------------------------------------------------------------------------------------------------------------------------------------|------|------|-----------|-------|------|------|-------------------------------------------------|-------|----------------------|----------------------------------------------------------------------------------------------------------------------------------------------------------------------------------------------------------------------------------------------------------------------------------------------------------------------------------------------|------|------|-----------|-------|------|------|
| Rsa1.0_00333.1.g11568.t1 | ref[XP_002879597.1] hypothetical protein ARALYDRAFT_482594 [Arabidopsis lyrata subsp. lyrata] gi297325436 gb EFH55856.1] hypothetical protein ARALYDRAFT_482594 [Arabidopsis lyrata subsp. lyrata]                                                                               | 225  | 263  | 6.00E-68  | 116.9 | 72.9 | 79.1 | hypothetical protein ARALYDRAFT_482594          | gbpln | Arabidopsis lyrata   | AT2G36220.1   Symbols:   unknown protein; BEST Arabidopsis thaliana protein match is: unknown protein (TAIR:AT3G52710.1). Has 74 Blast hits to 74 proteins in 10 species: Archae - 0; Bacteria - 0; Metazoa - 0; Fungi - 0; Plants - 74; Viruses - 0; Other Eukaryotes - 0 (source: NCBI BLink).   chr2:15192556-15193347 FORWARD LENGTH=263 | 225  | 263  | 5.00E-68  | 116.9 | 71.6 | 77.3 |
| Rsa1.0_00333.1.g11569.t1 | gb EOA16761.1] hypothetical protein CARUB_v10004974mg [Capsella rubella]                                                                                                                                                                                                         | 185  | 398  | 2.00E-62  | 215.1 | 70.8 | 76.2 | hypothetical protein CARUB_v10004974mg          | gbpln | Capsella rubella     | AT5G40610.1   Symbols:   NAD-dependent glycerol-3-phosphate dehydrogenase family protein   chr5:16265071-16267258 REVERSE LENGTH=400                                                                                                                                                                                                         | 185  | 400  | 3.00E-63  | 216.2 | 70.3 | 75.1 |
| Rsa1.0_00334.1.g11570.t1 | #                                                                                                                                                                                                                                                                                | #    | #    | #         | #     | #    | #    | -                                               | ----  | ----                 | #                                                                                                                                                                                                                                                                                                                                            | #    | #    | #         | #     | #    |      |
| Rsa1.0_00334.1.g11571.t1 | #                                                                                                                                                                                                                                                                                | #    | #    | #         | #     | #    | #    | -                                               | ----  | ----                 | #                                                                                                                                                                                                                                                                                                                                            | #    | #    | #         | #     | #    |      |
| Rsa1.0_00334.1.g11572.t2 | dbj BAB08464.1] ADP-ribosylation factor-like protein [Arabidopsis thaliana]                                                                                                                                                                                                      | 148  | 165  | 9.00E-45  | 111.5 | 58.8 | 64.9 | ADP-ribosylation factor-like protein            | gbpln | Arabidopsis thaliana | AT3G49870.1   Symbols: ATARLA1C, ARLA1C   ADP-ribosylation factor-like A1C   chr3:18492674-18494021 REVERSE LENGTH=184                                                                                                                                                                                                                       | 148  | 184  | 4.00E-47  | 124.3 | 59.5 | 64.2 |
| Rsa1.0_00334.1.g11573.t1 | gb AAF97281.1]AC010164.3 Hypothetical protein [Arabidopsis thaliana] gi 12324507 gb AA652212.1]AC022288_11 putative gag-pol polyprotein; 76173-77576 [Arabidopsis thaliana]                                                                                                      | 189  | 467  | 5.00E-69  | 247.1 | 68.3 | 83.1 | Hypothetical protein                            | gbpln | Arabidopsis thaliana | #                                                                                                                                                                                                                                                                                                                                            | #    | #    | #         | #     | #    |      |
| Rsa1.0_00334.1.g11574.t1 | #                                                                                                                                                                                                                                                                                | #    | #    | #         | #     | #    | #    | -                                               | ----  | ----                 | #                                                                                                                                                                                                                                                                                                                                            | #    | #    | #         | #     | #    |      |
| Rsa1.0_00334.1.g11575.t1 | gb ABD65062.1] hypothetical protein 27.t00126 [Brassica oleracea]                                                                                                                                                                                                                | 480  | 578  | 4.00E-74  | 120.4 | 34.8 | 47.3 | hypothetical protein 27.t00126                  | gbpln | Brassica oleracea    | AT4G32200.1   Symbols: ASY2   DNA-binding HORMA family protein   chr4:15548840-15554962 FORWARD LENGTH=1399                                                                                                                                                                                                                                  | 480  | 1399 | 9.00E-13  | 291.5 | 7.1  | 11.3 |
| Rsa1.0_00334.1.g11576.t1 | gb ABW81018.1] gag-pol polymerase [Arabidopsis lyrata subsp. lyrata]                                                                                                                                                                                                             | 178  | 672  | 3.00E-27  | 377.5 | 29.2 | 42.1 | gag-pol polymerase                              | gbpln | Arabidopsis lyrata   | #                                                                                                                                                                                                                                                                                                                                            | #    | #    | #         | #     | #    |      |
| Rsa1.0_00334.1.g11577.t1 | gb AAF79254.1]AC023279.3 F12K21.6 [Arabidopsis thaliana]                                                                                                                                                                                                                         | 508  | 755  | 9.00E-42  | 148.6 | 21.3 | 31.9 | F12K21.6                                        | gbpln | Arabidopsis thaliana | #                                                                                                                                                                                                                                                                                                                                            | #    | #    | #         | #     | #    |      |
| Rsa1.0_00334.1.g11578.t1 | pir [E84492 probable retroelement pol polyprotein [imported] - Arabidopsis thaliana]                                                                                                                                                                                             | 554  | 531  | 1.00E-109 | 95.8  | 37.0 | 45.1 | probable retroelement pol polyprotein           | ----  | ----                 | #                                                                                                                                                                                                                                                                                                                                            | #    | #    | #         | #     | #    |      |
| Rsa1.0_00334.1.g11579.t1 | gb ABH07409.1] putative pol polyprotein [Brassica oleracea var. botrytis]                                                                                                                                                                                                        | 1430 | 1239 | 0         | 86.6  | 25.7 | 32.4 | putative pol polyprotein                        | gbpln | Brassica oleracea    | AT4G23160.1   Symbols: CRK8   cysteine-rich RLK (RECEPTOR-like protein kinase) 8   chr4:12129485-12134086 FORWARD LENGTH=1262                                                                                                                                                                                                                | 1430 | 1262 | 2.00E-58  | 88.3  | 10.1 | 15.9 |
| Rsa1.0_00334.1.g11580.t1 | gb EOA33021.1] hypothetical protein CARUB_v10016352mg, partial [Capsella rubella]                                                                                                                                                                                                | 955  | 886  | 5.00E-87  | 92.8  | 19.5 | 28.6 | hypothetical protein CARUB_v10016352mg, partial | gbpln | Capsella rubella     | AT1G64260.1   Symbols:   MuDR family transposase   chr1:23847756-23849915 FORWARD LENGTH=719                                                                                                                                                                                                                                                 | 955  | 719  | 2.00E-13  | 75.3  | 12.4 | 23.1 |
| Rsa1.0_00334.1.g11581.t1 | gb AAG51783.1]AC079679.3 reverse transcriptase, putative; 16838-20266 [Arabidopsis thaliana]                                                                                                                                                                                     | 158  | 1142 | 1.00E-12  | 722.8 | 22.2 | 32.3 | reverse transcriptase, putative; 16838-20266    | gbpln | Arabidopsis thaliana | #                                                                                                                                                                                                                                                                                                                                            | #    | #    | #         | #     | #    |      |
| Rsa1.0_00334.1.g11582.t2 | gb EMJ02968.1] hypothetical protein PRUPE_ppa000155mg [Prunus persica]                                                                                                                                                                                                           | 190  | 1600 | 1.00E-26  | 842.1 | 43.7 | 62.1 | hypothetical protein PRUPE_ppa000155mg          | gbpln | Prunus persica       | AT1G34260.1   Symbols: FAB1D   FORMS APOID AND BINUCLEATE CELLS 1A   chr1:12485967-12491799 FORWARD LENGTH=1456                                                                                                                                                                                                                              | 190  | 1456 | 2.00E-27  | 766.3 | 41.6 | 61.6 |
| Rsa1.0_00334.1.g11583.t1 | gb AAG10817.1]AC011808.5 Putative retroelement polyprotein [Arabidopsis thaliana]                                                                                                                                                                                                | 1384 | 1413 | 0         | 102.1 | 65.2 | 78.9 | Putative retroelement polyprotein               | gbpln | Arabidopsis thaliana | AT4G23160.1   Symbols: CRK8   cysteine-rich RLK (RECEPTOR-like protein kinase) 8   chr4:12129485-12134086 FORWARD LENGTH=1262                                                                                                                                                                                                                | 1384 | 1262 | 0         | 91.2  | 22.7 | 28.3 |
| Rsa1.0_00334.1.g11584.t1 | gb AAF79618.1]AC027665_19 F5M15.26 [Arabidopsis thaliana]                                                                                                                                                                                                                        | 1362 | 1838 | 0         | 134.9 | 54.0 | 67.2 | F5M15.26                                        | gbpln | Arabidopsis thaliana | #                                                                                                                                                                                                                                                                                                                                            | #    | #    | #         | #     | #    |      |
| Rsa1.0_00334.1.g11585.t1 | gb AAQ82842.1] At4g20730 [Arabidopsis thaliana] gi 51970840 dbj BAD44112.1] putative protein [Arabidopsis thaliana]                                                                                                                                                              | 913  | 800  | 2.00E-13  | 87.6  | 6.2  | 9.5  | At4g20730                                       | gbpln | Arabidopsis thaliana | AT4G32200.1   Symbols: ASY2   DNA-binding HORMA family protein   chr4:15548840-15554962 FORWARD LENGTH=1399                                                                                                                                                                                                                                  | 913  | 1399 | 3.00E-15  | 153.2 | 6.1  | 9.6  |
| Rsa1.0_00334.1.g11586.t1 | emb CAN74228.1] hypothetical protein VITISV_000583 [Vitis vinifera]                                                                                                                                                                                                              | 378  | 909  | 1.00E-95  | 240.5 | 45.8 | 52.4 | hypothetical protein VITISV_000583              | gbpln | Vitis vinifera       | #                                                                                                                                                                                                                                                                                                                                            | #    | #    | #         | #     | #    |      |
| Rsa1.0_00334.1.g11587.t1 | ref NP_175361.3] F-box protein [Arabidopsis thaliana] gi 75267565 sp Q9XIA2.1]Fb49_ARATH RecName: Full=F-box protein At1g49360 gi 5430772 gb AAD43172.1]AC007504_27 Hypothetical Protein [Arabidopsis thaliana] gi 332194301 gb AEE32422.1] F-box protein [Arabidopsis thaliana] | 553  | 481  | 1.00E-147 | 87.0  | 51.4 | 62.4 | F-box protein                                   | gbpln | Arabidopsis thaliana | AT1G49360.1   Symbols:   F-box family protein   chr1:18267338-18269423 REVERSE LENGTH=481                                                                                                                                                                                                                                                    | 553  | 481  | 1.00E-149 | 87.0  | 51.4 | 62.4 |
| Rsa1.0_00334.1.g11588.t1 | #                                                                                                                                                                                                                                                                                | #    | #    | #         | #     | #    | #    | -                                               | ----  | ----                 | #                                                                                                                                                                                                                                                                                                                                            | #    | #    | #         | #     | #    |      |
| Rsa1.0_00335.1.g11589.t1 | dbj BAA97290.1] non-LTR retroelement reverse transcriptase-like [Arabidopsis thaliana]                                                                                                                                                                                           | 970  | 1072 | 0         | 110.5 | 55.3 | 70.3 | non-LTR retroelement reverse transcriptase-like | gbpln | Arabidopsis thaliana | AT1G60720.1   Symbols:   RNA-directed DNA polymerase (reverse transcriptase)-related family protein   chr1:22357072-22357941 FORWARD LENGTH=289                                                                                                                                                                                              | 970  | 289  | 2.00E-70  | 29.8  | 13.5 | 18.6 |

|                          |                                                                                                                                                                                                                                                                                                                                                                                                                                                                                                                                                                                                                                                                                                                                                                                |     |     |           |       |      |      |                                                 |       |                      |                                                                                                                                                                                                                                                                                                                                                                   |     |     |           |       |      |      |
|--------------------------|--------------------------------------------------------------------------------------------------------------------------------------------------------------------------------------------------------------------------------------------------------------------------------------------------------------------------------------------------------------------------------------------------------------------------------------------------------------------------------------------------------------------------------------------------------------------------------------------------------------------------------------------------------------------------------------------------------------------------------------------------------------------------------|-----|-----|-----------|-------|------|------|-------------------------------------------------|-------|----------------------|-------------------------------------------------------------------------------------------------------------------------------------------------------------------------------------------------------------------------------------------------------------------------------------------------------------------------------------------------------------------|-----|-----|-----------|-------|------|------|
| Rsa1.0_00335.1.g11590.t1 | ref[NP_196021.2] F-box protein [Arabidopsis thaliana] gi 75104736 sp Q5EAF6.1 FB336_ARAT H RecName: Full=Probable F-box protein At5g04010; AltName: Full=Non-specific F-box protein gi 58743286 gb AAW81721.1  At5g04010 [Arabidopsis thaliana] gi 332003301 gb AED90684.1  probable F-box protein [Arabidopsis thaliana]                                                                                                                                                                                                                                                                                                                                                                                                                                                      | 398 | 287 | 2.00E-54  | 72.1  | 34.2 | 43.0 | F-box protein                                   | gbpln | Arabidopsis thaliana | AT5G04010.1   Symbols:   F-box family protein   chr5:1080205-1081068 REVERSE LENGTH=287                                                                                                                                                                                                                                                                           | 398 | 287 | 6.00E-57  | 72.1  | 34.2 | 43.0 |
| Rsa1.0_00335.1.g11591.t1 | gb AAG50886.1 AC025294.24 hypothetical protein [Arabidopsis thaliana]                                                                                                                                                                                                                                                                                                                                                                                                                                                                                                                                                                                                                                                                                                          | 200 | 629 | 4.00E-26  | 314.5 | 33.0 | 46.0 | hypothetical protein                            | gbpln | Arabidopsis thaliana | AT5G18880.1   Symbols:   RNA-directed DNA polymerase (reverse transcriptase)-related family protein   chr5:6300535-6301422 REVERSE LENGTH=295                                                                                                                                                                                                                     | 200 | 295 | 6.00E-26  | 147.5 | 28.0 | 41.0 |
| Rsa1.0_00335.1.g11592.t1 | # # # # # # # # - ----                                                                                                                                                                                                                                                                                                                                                                                                                                                                                                                                                                                                                                                                                                                                                         |     |     |           |       |      |      |                                                 |       |                      | # # # # # # # #                                                                                                                                                                                                                                                                                                                                                   |     |     |           |       |      |      |
| Rsa1.0_00335.1.g11593.t1 | ref[XP_002871067.1] hypothetical protein ARALYDRAFT_487179 [Arabidopsis lyrata subsp. lyrata] gi 297316904 gb EFH47326.1  hypothetical protein ARALYDRAFT_487179 [Arabidopsis lyrata subsp. lyrata]                                                                                                                                                                                                                                                                                                                                                                                                                                                                                                                                                                            | 293 | 292 | 6.00E-92  | 99.7  | 71.7 | 79.5 | hypothetical protein ARALYDRAFT_487179          | gbpln | Arabidopsis lyrata   | AT5G03990.1   Symbols:   unknown protein; BEST Arabidopsis thaliana protein match is: unknown protein (TAIR:AT3G51940.1); Has 30201 Blast hits to 17322 proteins in 780 species: Archae - 12; Bacteria - 1396; Metazoa - 17338; Fungi - 3422; Plants - 5037; Viruses - 0; Other Eukaryotes - 2996 (source: NCBI BLINK).   chr5:1075957-1077358 FORWARD LENGTH=302 | 293 | 302 | 3.00E-89  | 103.1 | 73.0 | 80.2 |
| Rsa1.0_00335.1.g11594.t1 | gb EOA19691.1  hypothetical protein CARUB_v10003448mg, partial [Capsella rubella]                                                                                                                                                                                                                                                                                                                                                                                                                                                                                                                                                                                                                                                                                              | 322 | 306 | 1.00E-66  | 95.0  | 51.6 | 56.5 | hypothetical protein CARUB_v10003448mg, partial | gbpln | Capsella rubella     | AT5G03990.1   Symbols:   SGNH hydrolase-type esterase superfamily protein   chr5:1074205-1075289 REVERSE LENGTH=323                                                                                                                                                                                                                                               | 322 | 323 | 1.00E-67  | 100.3 | 52.8 | 59.0 |
| Rsa1.0_00335.1.g11595.t3 | ref[NP_199973.1] microtubule associated protein MAP65-3 [Arabidopsis thaliana] gi 75262486 sp Q9FHM4.1 MA653_ARAT H RecName: Full=65-kDa microtubule-associated protein 3; Short=AMAP65-3; AltName: Full=Protein PLEIADE gi 9758202 db BAB08676.1  unnamed protein product [Arabidopsis thaliana] gi 332008719 gb AED96102.1  microtubule associated protein MAP65-3 [Arabidopsis thaliana]                                                                                                                                                                                                                                                                                                                                                                                    | 497 | 707 | 1.00E-174 | 142.3 | 63.0 | 67.6 | microtubule associated protein MAP65-3          | gbpln | Arabidopsis thaliana | AT5G51600.1   Symbols: PLE, ATMAP65-3, MAP65-3   Microtubule associated protein (MAP65/AE1) family protein   chr5:20961061-20964080 REVERSE LENGTH=707                                                                                                                                                                                                            | 497 | 707 | 1.00E-177 | 142.3 | 63.0 | 67.6 |
| Rsa1.0_00335.1.g11596.t1 | emb CAB85517.1  putative protein [Arabidopsis thaliana]                                                                                                                                                                                                                                                                                                                                                                                                                                                                                                                                                                                                                                                                                                                        | 405 | 426 | 1.00E-170 | 105.2 | 69.1 | 84.2 | putative protein                                | gbpln | Arabidopsis thaliana | AT5G03970.1   Symbols:   F-box associated ubiquitination effector family protein   chr5:1071721-1072977 REVERSE LENGTH=418                                                                                                                                                                                                                                        | 405 | 418 | 1.00E-172 | 103.2 | 69.1 | 84.2 |
| Rsa1.0_00335.1.g11597.t1 | ref[NP_176732.2] LETM1-like protein [Arabidopsis thaliana] gi 332196272 gb AEE34393.1  LETM1-like protein [Arabidopsis thaliana]                                                                                                                                                                                                                                                                                                                                                                                                                                                                                                                                                                                                                                               | 243 | 736 | 1.00E-20  | 302.9 | 18.9 | 19.8 | LETM1-like protein                              | gbpln | Arabidopsis thaliana | AT1G65540.1   Symbols:   LETM1-like protein   chr1:24362382-24366011 REVERSE LENGTH=736                                                                                                                                                                                                                                                                           | 243 | 736 | 3.00E-23  | 302.9 | 18.9 | 19.8 |
| Rsa1.0_00335.1.g11598.t1 | ref[NP_196016.1] IQ-domain 12 protein [Arabidopsis thaliana] gi 7406406 emb CAB85516.1  putative protein [Arabidopsis thaliana] gi 332003293 gb AED90676.1  IQ-domain 12 protein [Arabidopsis thaliana]                                                                                                                                                                                                                                                                                                                                                                                                                                                                                                                                                                        | 404 | 403 | 1.00E-150 | 99.8  | 77.7 | 86.1 | IQ-domain 12 protein                            | gbpln | Arabidopsis thaliana | AT5G03960.1   Symbols: IQD12   IQ-domain 12   chr5:1068333-1069683 REVERSE LENGTH=403                                                                                                                                                                                                                                                                             | 404 | 403 | 1.00E-152 | 99.8  | 77.7 | 86.1 |
| Rsa1.0_00335.1.g11599.t1 | ref[NP_196014.1] signal recognition particle subunit [Arabidopsis thaliana] gi 586038 sp P37107.1 SR54C_ARATH RecName: Full=Signal recognition particle 54 kDa protein, chloroplastic; Short=54 chloroplast protein; Short=54CP; Short=SRP54; Short=cpSRP54; AltName: Full=FFC; Flags: Precursor gi 396701 emb CAA79981.1  54CP [Arabidopsis thaliana] gi 7406404 emb CAB85514.1  signal recognition particle 54CP protein precursor [Arabidopsis thaliana] gi 15293131 gb AAK93676.1  putative signal recognition particle 54CP protein precursor [Arabidopsis thaliana] gi 24030445 gb AAN41376.1  putative signal recognition particle 54CP protein precursor [Arabidopsis thaliana] gi 332003291 gb AED90674.1  signal recognition particle subunit [Arabidopsis thaliana] | 583 | 564 | 0         | 96.7  | 89.2 | 92.3 | signal recognition particle subunit             | gbpln | Arabidopsis thaliana | AT5G03940.1   Symbols: FFC, 54CP, CPSRP54, SRP54CP   chloroplast signal recognition particle 54 kDa subunit   chr5:1060265-1063257 REVERSE LENGTH=564                                                                                                                                                                                                             | 583 | 564 | 0         | 96.7  | 89.2 | 92.3 |

|                          |                                                                                                                                                                                                                                                                                                                        |      |      |           |       |       |       |                                                 |       |                      |                                                                                                                                                                                                                                                                                                                                                                                                                                                                                                                                                                       |      |     |           |       |       |       |
|--------------------------|------------------------------------------------------------------------------------------------------------------------------------------------------------------------------------------------------------------------------------------------------------------------------------------------------------------------|------|------|-----------|-------|-------|-------|-------------------------------------------------|-------|----------------------|-----------------------------------------------------------------------------------------------------------------------------------------------------------------------------------------------------------------------------------------------------------------------------------------------------------------------------------------------------------------------------------------------------------------------------------------------------------------------------------------------------------------------------------------------------------------------|------|-----|-----------|-------|-------|-------|
| Rsa1.0_00335.1.g11600.t1 | refXP_002873123.1   hypothetical protein ARALYDRAFT_487170 [Arabidopsis lyrata subsp. lyrata] gi 297318960 gb EFH49382.1   hypothetical protein ARALYDRAFT_487170 [Arabidopsis lyrata subsp. lyrata]                                                                                                                   | 626  | 635  | 0         | 101.4 | 82.4  | 89.0  | hypothetical protein ARALYDRAFT_487170          | gbpln | Arabidopsis lyrata   | AT5G03910.1   Symbols: ATATH12, ATH12   ABC2 homolog 12   chr5:1054313-1057105 REVERSE LENGTH=634                                                                                                                                                                                                                                                                                                                                                                                                                                                                     | 626  | 634 | 0         | 101.3 | 82.3  | 88.7  |
| Rsa1.0_00335.1.g11601.t1 | gb EOA22053.1   hypothetical protein CARUB_v10002593mg [Capsella rubella]                                                                                                                                                                                                                                              | 163  | 158  | 6.00E-68  | 96.9  | 84.0  | 90.2  | hypothetical protein CARUB_v10002593mg          | gbpln | Capsella rubella     | AT5G03905.1   Symbols:   Iron-sulphur cluster biosynthesis family protein   chr5:1052728-1054041 FORWARD LENGTH=158<br>AT5G03890.1   Symbols:   unknown protein; INVOLVED IN: N-terminal protein myristoylation; LOCATED IN: cellular.component unknown; BEST Arabidopsis thaliana protein match is: unknown protein (TAIR:AT3G10120.1); Has 1807 Blast hits to 1807 proteins in 277 species: Archae - 0; Bacteria - 0; Metazoa - 736; Fungi - 347; Plants - 385; Viruses - 0; Other Eukaryotes - 339 (source: NCBI BLINK).   chr5:1047150-1047689 FORWARD LENGTH=179 | 163  | 158 | 2.00E-62  | 96.9  | 74.2  | 82.8  |
| Rsa1.0_00335.1.g11602.t1 | refNP_196009.1   uncharacterized protein [Arabidopsis thaliana] gi 7406399 emb CAB85509.1   putative protein [Arabidopsis thaliana] gi 9758018 dbj BAB08615.1   unnamed protein product [Arabidopsis thaliana] gi 332003284 gb AED90667.1   uncharacterized protein AT5G03890 [Arabidopsis thaliana]                   | 173  | 179  | 2.00E-58  | 103.5 | 78.0  | 84.4  | uncharacterized protein                         | gbpln | Arabidopsis thaliana | AT5G03880.1   Symbols:   Thioredoxin family protein   chr5:1038674-1041453 REVERSE LENGTH=339                                                                                                                                                                                                                                                                                                                                                                                                                                                                         | 173  | 179 | 1.00E-60  | 103.5 | 78.0  | 84.4  |
| Rsa1.0_00335.1.g11603.t2 | refXP_002873122.1   hypothetical protein ARALYDRAFT_487166 [Arabidopsis lyrata subsp. lyrata] gi 297318959 gb EFH49381.1   hypothetical protein ARALYDRAFT_487166 [Arabidopsis lyrata subsp. lyrata]                                                                                                                   | 346  | 336  | 1.00E-158 | 97.1  | 82.9  | 87.9  | hypothetical protein ARALYDRAFT_487166          | gbpln | Arabidopsis lyrata   | AT5G03850.1   Symbols:   Nucleic acid-binding, OB-fold-like protein   chr5:1028542-1028736 REVERSE LENGTH=64                                                                                                                                                                                                                                                                                                                                                                                                                                                          | 346  | 339 | 1.00E-153 | 98.0  | 81.5  | 85.8  |
| Rsa1.0_00335.1.g11604.t1 | # # # # # # # # - ----                                                                                                                                                                                                                                                                                                 |      |      |           |       |       |       |                                                 |       |                      |                                                                                                                                                                                                                                                                                                                                                                                                                                                                                                                                                                       |      |     |           |       |       |       |
| Rsa1.0_00335.1.g11605.t1 | gb EOA31777.1   hypothetical protein CARUB_v10014999mg, partial [Capsella rubella]                                                                                                                                                                                                                                     | 64   | 92   | 1.00E-28  | 143.8 | 100.0 | 100.0 | hypothetical protein CARUB_v10014999mg, partial | gbpln | Capsella rubella     | AT1G43760.1   Symbols:   DNase I-like superfamily protein   chr1:16528880-16531065 REVERSE LENGTH=626                                                                                                                                                                                                                                                                                                                                                                                                                                                                 | 64   | 64  | 7.00E-31  | 100.0 | 100.0 | 100.0 |
| Rsa1.0_00335.1.g11606.t1 | gb AAG50806.1   AC079281.8 unknown protein [Arabidopsis thaliana]                                                                                                                                                                                                                                                      | 1719 | 1213 | 0         | 70.6  | 35.4  | 46.8  | unknown protein                                 | gbpln | Arabidopsis thaliana | AT5G03840.1   Symbols: TFL1, TFL-1   PEBP (phosphatidylethanolamine-binding protein) family protein   chr5:1024760-1025796 REVERSE LENGTH=177                                                                                                                                                                                                                                                                                                                                                                                                                         | 1719 | 626 | 2.00E-69  | 36.4  | 7.9   | 13.1  |
| Rsa1.0_00335.1.g11607.t1 | dbj BAA33415.1   BNTFL1-1 [Brassica napus]                                                                                                                                                                                                                                                                             | 178  | 178  | 2.00E-93  | 100.0 | 94.9  | 96.6  | BNTFL1-1                                        | gbpln | Brassica napus       | AT5G03795.1   Symbols:   Exostosin family protein   chr5:1007554-1010373 REVERSE LENGTH=518                                                                                                                                                                                                                                                                                                                                                                                                                                                                           | 178  | 177 | 2.00E-85  | 99.4  | 85.4  | 92.7  |
| Rsa1.0_00335.1.g11608.t1 | refNP_001031828.1   putative glycosyltransferase [Arabidopsis thaliana] gi 292630778 sp Q9FFN2.2 GLYT3_ARA TH RecName: Full=Probable glycosyltransferase At5g03795 gi 332003272 gb AED90655.1   putative glycosyltransferase [Arabidopsis thaliana]                                                                    | 537  | 518  | 0         | 96.5  | 81.6  | 86.6  | putative glycosyltransferase                    | gbpln | Arabidopsis thaliana | AT5G03790.1   Symbols: ATHB51, LMI1, HB51   homeobox 51   chr5:1004985-1006373 FORWARD LENGTH=235                                                                                                                                                                                                                                                                                                                                                                                                                                                                     | 537  | 518 | 0         | 96.5  | 81.6  | 86.6  |
| Rsa1.0_00335.1.g11609.t1 | refXP_002871059.1   predicted protein [Arabidopsis lyrata subsp. lyrata] gi 297316896 gb EFH47318.1   predicted protein [Arabidopsis lyrata subsp. lyrata]                                                                                                                                                             | 219  | 215  | 3.00E-73  | 98.2  | 66.7  | 79.5  | predicted protein                               | gbpln | Arabidopsis lyrata   | AT5G03790.1   Symbols: ATHB51, LMI1, HB51   homeobox 51   chr5:1004985-1006373 FORWARD LENGTH=235                                                                                                                                                                                                                                                                                                                                                                                                                                                                     | 219  | 235 | 3.00E-73  | 107.3 | 63.9  | 79.5  |
| Rsa1.0_00335.1.g11610.t2 | refNP_195999.2   homeobox 51 [Arabidopsis thaliana] gi 374095369 sp Q9LZR0.2 ATB51_ARA TH RecName: Full=Putative homeobox-leucine zipper protein ATHB-51; AltName: Full=HD-ZIP protein ATHB-51; AltName: Full=Homeodomain transcription factor ATHB-51 gi 332003271 gb AED90654.1   homeobox 51 [Arabidopsis thaliana] | 230  | 235  | 1.00E-106 | 102.2 | 81.7  | 89.6  | homeobox 51                                     | gbpln | Arabidopsis thaliana | AT5G03770.1   Symbols: KDTA   KDO transferase A   chr5:995191-997622 FORWARD LENGTH=447                                                                                                                                                                                                                                                                                                                                                                                                                                                                               | 230  | 235 | 1.00E-108 | 102.2 | 81.7  | 89.6  |
| Rsa1.0_00335.1.g11611.t1 | refXP_002871057.1   hypothetical protein ARALYDRAFT_325028 [Arabidopsis lyrata subsp. lyrata] gi 297316894 gb EFH47316.1   hypothetical protein ARALYDRAFT_325028 [Arabidopsis lyrata subsp. lyrata]                                                                                                                   | 464  | 439  | 0         | 94.6  | 81.9  | 89.2  | hypothetical protein ARALYDRAFT_325028          | gbpln | Arabidopsis lyrata   | AT5G36228.1   Symbols:   nucleic acid binding/zinc ion binding   chr5:14271691-14272776 FORWARD LENGTH=361                                                                                                                                                                                                                                                                                                                                                                                                                                                            | 464  | 447 | 0         | 96.3  | 81.7  | 88.8  |
| Rsa1.0_00335.1.g11612.t1 | emb CAB39637.1   putative protein [Arabidopsis thaliana] gi 7267665 emb CAB78093.1   putative protein [Arabidopsis thaliana] gi 91805577 gb ABE65517.1   hypothetical protein At4g09700 [Arabidopsis thaliana]                                                                                                         | 752  | 371  | 2.00E-71  | 49.3  | 19.4  | 28.1  | putative protein                                | gbpln | Arabidopsis thaliana |                                                                                                                                                                                                                                                                                                                                                                                                                                                                                                                                                                       | 752  | 361 | 3.00E-22  | 48.0  | 8.4   | 13.0  |

|                          |                                                                                                                                                                                                                                                                                                                                                                                                                                                                                                                                                                                                                                                                                                                                                                                                                                                                                                                                                                                                                                                                                                                                                                                                                                                                                                                                                                                                                                                  |     |     |           |       |      |      |                                             |       |                      |                                                                                                                                                                                                                                                                                                                                          |     |     |           |       |      |      |
|--------------------------|--------------------------------------------------------------------------------------------------------------------------------------------------------------------------------------------------------------------------------------------------------------------------------------------------------------------------------------------------------------------------------------------------------------------------------------------------------------------------------------------------------------------------------------------------------------------------------------------------------------------------------------------------------------------------------------------------------------------------------------------------------------------------------------------------------------------------------------------------------------------------------------------------------------------------------------------------------------------------------------------------------------------------------------------------------------------------------------------------------------------------------------------------------------------------------------------------------------------------------------------------------------------------------------------------------------------------------------------------------------------------------------------------------------------------------------------------|-----|-----|-----------|-------|------|------|---------------------------------------------|-------|----------------------|------------------------------------------------------------------------------------------------------------------------------------------------------------------------------------------------------------------------------------------------------------------------------------------------------------------------------------------|-----|-----|-----------|-------|------|------|
| Rsa1.0_00336.1.g11613.t5 | refNP_563650.1 transcription factor HFR1 [Arabidopsis thaliana]<br>gi 20532238 sp Q9FE22.1 HFR1_ARATH<br>RecName: Full=Transcription factor HFR1; AltName: Full=Basic helix-loop-helix protein 26; Short=AtbHLH26; Short=bHLH 26; AltName: Full=Protein LONG HYPOCOTYL IN FAR-RED 1; AltName: Full=Protein REDUCED PHYTOCHROME SIGNALING; AltName: Full=Reduced sensitivity to far-red light; AltName: Full=Transcription factor EN 68; AltName: Full=bHLH transcription factor bHLH026<br>gi 11870115 gb AAG40617.1 AF324245.1 bHLH-like protein HFR1 [Arabidopsis thaliana]<br>gi 12025106 gb AAG45733.1 AF288287.1 reduced phytochrome signaling 1 [Arabidopsis thaliana]<br>gi 13133644 gb AAK15282.1 AF323182.1 basic helix-loop-helix FBI1 protein [Arabidopsis thaliana]<br>gi 332189297 gb AEE27418.1  transcription factor HFR1 [Arabidopsis thaliana]<br>refNP_192078.1 protoporphyrinogen oxidase [Arabidopsis thaliana]<br>gi 2495184 sp P55826.1 PPOC_ARATH<br>RecName: Full=Protoporphyrinogen oxidase, chloroplastic; Short=PPO; Flags: Precursor<br>gi 1877018 dbj BAA11820.1  protoporphyrinogen oxidase [Arabidopsis thaliana]<br>gi 7268212 emb CAB77739.1  protoporphyrinogen oxidase [Arabidopsis thaliana]<br>gi 5655071.1 gb AAV97809.1  At4g01690 [Arabidopsis thaliana]<br>gi 58331767 gb AAW70381.1  At4g01690 [Arabidopsis thaliana]<br>gi 332656665 gb AEE82065.1  protoporphyrinogen oxidase [Arabidopsis thaliana] | 257 | 292 | 3.00E-55  | 113.6 | 45.5 | 53.3 | transcription factor HFR1                   | gbpln | Arabidopsis thaliana | AT1G02340.1   Symbols: HFR1, RSF1, FBI1, REP1   basic helix-loop-helix (bHLH) DNA-binding superfamily protein   chr1:465933-467685 REVERSE LENGTH=292                                                                                                                                                                                    | 257 | 292 | 8.00E-58  | 113.6 | 45.5 | 53.3 |
| Rsa1.0_00336.1.g11614.t1 | refXP_002892103.1 expressed protein [Arabidopsis lyrata subsp. lyrata]<br>gi 297337945 gb EFH68362.1  expressed protein [Arabidopsis lyrata subsp. lyrata]                                                                                                                                                                                                                                                                                                                                                                                                                                                                                                                                                                                                                                                                                                                                                                                                                                                                                                                                                                                                                                                                                                                                                                                                                                                                                       | 539 | 537 | 0         | 99.6  | 87.0 | 92.6 | protoporphyrinogen oxidase                  | gbpln | Arabidopsis thaliana | AT4G01690.1   Symbols: PPOX, HEMG1, PPO1   Flavin containing amine oxidoreductase family   chr4:729929-732309 FORWARD LENGTH=537                                                                                                                                                                                                         | 539 | 537 | 0         | 99.6  | 87.0 | 92.6 |
| Rsa1.0_00336.1.g11615.t1 | refXP_002892103.1 expressed protein [Arabidopsis lyrata subsp. lyrata]<br>gi 297337945 gb EFH68362.1  expressed protein [Arabidopsis lyrata subsp. lyrata]                                                                                                                                                                                                                                                                                                                                                                                                                                                                                                                                                                                                                                                                                                                                                                                                                                                                                                                                                                                                                                                                                                                                                                                                                                                                                       | 70  | 69  | 4.00E-11  | 98.6  | 72.9 | 80.0 | expressed protein                           | gbpln | Arabidopsis lyrata   | #                                                                                                                                                                                                                                                                                                                                        | #   | #   | #         | #     | #    |      |
| Rsa1.0_00336.1.g11616.t1 | dbj BAJ33936.1  unnamed protein product [Theellungiella halophila]                                                                                                                                                                                                                                                                                                                                                                                                                                                                                                                                                                                                                                                                                                                                                                                                                                                                                                                                                                                                                                                                                                                                                                                                                                                                                                                                                                               | 271 | 271 | 1.00E-137 | 100.0 | 85.6 | 88.2 | unnamed protein product                     | ----  | ----                 | AT1G02360.1   Symbols:   Chitinase family protein   chr1:472138-473116 REVERSE LENGTH=272                                                                                                                                                                                                                                                | 271 | 272 | 1.00E-137 | 100.4 | 84.5 | 90.8 |
| Rsa1.0_00336.1.g11617.t1 | refXP_002889397.1 pentatricopeptide repeat-containing protein [Arabidopsis lyrata subsp. lyrata]<br>gi 297335239 gb EFH65656.1  pentatricopeptide repeat-containing protein [Arabidopsis lyrata subsp. lyrata]                                                                                                                                                                                                                                                                                                                                                                                                                                                                                                                                                                                                                                                                                                                                                                                                                                                                                                                                                                                                                                                                                                                                                                                                                                   | 513 | 524 | 0         | 102.1 | 81.9 | 91.6 | pentatricopeptide repeat-containing protein | gbpln | Arabidopsis lyrata   | AT1G02370.1   Symbols:   Tetratricopeptide repeat (TPR)-like superfamily protein   chr1:474516-476383 FORWARD LENGTH=537                                                                                                                                                                                                                 | 513 | 537 | 0         | 104.7 | 82.1 | 90.8 |
| Rsa1.0_00336.1.g11618.t1 | refNP_171740.3 uncharacterized protein [Arabidopsis thaliana]<br>gi 9857534 gb AAG00889.1 AC064879.7 Hypothetical protein [Arabidopsis thaliana]<br>gi 332189301 gb AEE27422.1  uncharacterized protein AT1G02380 [Arabidopsis thaliana]                                                                                                                                                                                                                                                                                                                                                                                                                                                                                                                                                                                                                                                                                                                                                                                                                                                                                                                                                                                                                                                                                                                                                                                                         | 226 | 231 | 3.00E-75  | 102.2 | 68.6 | 80.1 | uncharacterized protein                     | gbpln | Arabidopsis thaliana | AT1G02380.1   Symbols:   unknown protein; BEST Arabidopsis thaliana protein match is: unknown protein (TAIR:AT4G01960.1); Has 66 Blast hits to 66 proteins in 11 species: Archae - 0; Bacteria - 0; Metazoa - 0; Fungi - 0; Plants - 66; Viruses - 0; Other Eukaryotes - 0 (source: NCBI BLink).   chr1:477814-478850 FORWARD LENGTH=231 | 226 | 231 | 9.00E-78  | 102.2 | 68.6 | 80.1 |
| Rsa1.0_00336.1.g11619.t1 | dbj BAJ33901.1  unnamed protein product [Theellungiella halophila]                                                                                                                                                                                                                                                                                                                                                                                                                                                                                                                                                                                                                                                                                                                                                                                                                                                                                                                                                                                                                                                                                                                                                                                                                                                                                                                                                                               | 527 | 529 | 0         | 100.4 | 87.1 | 92.6 | unnamed protein product                     | ----  | ----                 | AT1G02390.1   Symbols: ATPAT2, GPAT2   glycerol-3-phosphate acyltransferase 2   chr1:480921-483163 FORWARD LENGTH=530                                                                                                                                                                                                                    | 527 | 530 | 0         | 100.6 | 82.4 | 89.8 |

|                          |                                                                                                                                                                                                                                                                                                                                                                                                                                                                                                                                                                                                                                                                 |     |      |           |       |      |      |                                                 |       |                      |                                                                                                                             |     |     |           |       |      |      |
|--------------------------|-----------------------------------------------------------------------------------------------------------------------------------------------------------------------------------------------------------------------------------------------------------------------------------------------------------------------------------------------------------------------------------------------------------------------------------------------------------------------------------------------------------------------------------------------------------------------------------------------------------------------------------------------------------------|-----|------|-----------|-------|------|------|-------------------------------------------------|-------|----------------------|-----------------------------------------------------------------------------------------------------------------------------|-----|-----|-----------|-------|------|------|
| Rsa1.0_00336.1.g11620.t1 | refNP_171742.1  gibberellin 2-oxidase 6 [Arabidopsis thaliana] gi 9857536 gb AAG00891.1 AC064879.9 Unknown protein [Arabidopsis thaliana] gi 48427658 gb AAT42378.1  At1g02400 [Arabidopsis thaliana] gi 57792118 gb AAW56770.1  gibberellin 2-oxidase [Arabidopsis thaliana] gi 110737568 dbj BAF00726.1  hypothetical protein [Arabidopsis thaliana] gi 332189304 gb AEE27425.1  gibberellin 2-oxidase 6 [Arabidopsis thaliana]                                                                                                                                                                                                                               | 329 | 329  | 1.00E-176 | 100.0 | 90.3 | 94.5 | gibberellin 2-oxidase 6                         | gbpln | Arabidopsis thaliana | AT1G02400.1   Symbols: ATGA2OX4, ATGA2OX6, DTA1, GA2OX6   gibberellin 2-oxidase 6   chr1:486964-489391 FORWARD LENGTH=329   | 329 | 329 | 1.00E-178 | 100.0 | 90.3 | 94.5 |
| Rsa1.0_00336.1.g11621.t1 | refXP_002889401.1  cytochrome c oxidase assembly protein CtaG [Arabidopsis lyrata subsp. lyrata] gi 297335243 gb EFH65660.1  cytochrome c oxidase assembly protein CtaG [Arabidopsis lyrata subsp. lyrata] refNP_563653.2  protein NIM1-interacting 1 [Arabidopsis thaliana] gi 75309253 sp Q9FNZ5.1 NIM1_ARATH RecName: Full=Protein NIM1-INTERACTING 1; Short=Protein NIMIN-1 gi 12057154 emb CAC19844.1  NIMIN-1 protein [Arabidopsis thaliana] gi 26453292 dbj BAC43719.1  unknown protein [Arabidopsis thaliana] gi 28372816 gb AAO39890.1  At1g02450 [Arabidopsis thaliana] gi 332189310 gb AEE27431.1  protein NIM1-INTERACTING 1 [Arabidopsis thaliana] | 272 | 287  | 1.00E-123 | 105.5 | 85.3 | 88.6 | cytochrome c oxidase assembly protein CtaG      | gbpln | Arabidopsis lyrata   | AT1G02410.1   Symbols:   cytochrome c oxidase assembly protein CtaG / Cox11 family   chr1:491300-492762 FORWARD LENGTH=287  | 272 | 287 | 1.00E-123 | 105.5 | 83.1 | 86.4 |
| Rsa1.0_00336.1.g11622.t1 | gb EOA36864.1  hypothetical protein CARUB_v10008847mg, partial [Capsella rubella] refXP_002892124.1  hypothetical protein ARALYDRAFT_887420 [Arabidopsis lyrata subsp. lyrata] gi 297337966 gb EFH68383.1  hypothetical protein ARALYDRAFT_887420 [Arabidopsis lyrata subsp. lyrata] emb CAB39638.1  RNA-directed DNA polymerase-like protein [Arabidopsis thaliana] gi 7267666 emb CAB78094.1  RNA-directed DNA polymerase-like protein [Arabidopsis thaliana]                                                                                                                                                                                                 | 266 | 142  | 1.00E-30  | 53.4  | 32.0 | 37.2 | protein NIM1-interacting 1                      | gbpln | Arabidopsis thaliana | AT1G02450.1   Symbols: NIMIN1, NIMIN-1   NIM1-interacting 1   chr1:498052-498480 REVERSE LENGTH=142                         | 266 | 142 | 3.00E-33  | 53.4  | 32.0 | 37.2 |
| Rsa1.0_00336.1.g11623.t1 | refXP_002892124.1  hypothetical protein ARALYDRAFT_887420 [Arabidopsis lyrata subsp. lyrata] gi 297337966 gb EFH68383.1  hypothetical protein ARALYDRAFT_887420 [Arabidopsis lyrata subsp. lyrata]                                                                                                                                                                                                                                                                                                                                                                                                                                                              | 491 | 523  | 0         | 106.5 | 90.2 | 94.9 | hypothetical protein CARUB_v10008847mg, partial | gbpln | Capsella rubella     | AT1G02460.1   Symbols:   Pectin lyase-like superfamily protein   chr1:504897-507099 REVERSE LENGTH=491                      | 491 | 491 | 0         | 100.0 | 88.6 | 94.1 |
| Rsa1.0_00336.1.g11624.t1 | emb CAB39638.1  RNA-directed DNA polymerase-like protein [Arabidopsis thaliana] gi 7267666 emb CAB78094.1  RNA-directed DNA polymerase-like protein [Arabidopsis thaliana]                                                                                                                                                                                                                                                                                                                                                                                                                                                                                      | 309 | 422  | 1.00E-143 | 136.6 | 81.9 | 87.4 | hypothetical protein ARALYDRAFT_887420          | gbpln | Arabidopsis lyrata   | AT1G02790.1   Symbols: PGA4   polygalacturonase 4   chr1:610681-612225 REVERSE LENGTH=422                                   | 309 | 422 | 1.00E-144 | 136.6 | 81.6 | 86.7 |
| Rsa1.0_00336.1.g11625.t2 | refNP_563662.1  pectinesterase 7 [Arabidopsis thaliana] gi 75313808 sp Q9SRX4.1 PME7_ARATH RecName: Full=Probable pectinesterase/pectinesterase inhibitor 7; Includes: RecName: Full=Pectinesterase inhibitor 7; AltName: Full=Pectin methylsterase inhibitor 7; Includes: RecName: Full=Pectinesterase 7; Short=PE 7; AltName: Full=Pectin methylsterase 1; Short=AtPME1; AltName: Full=Pectin methylsterase 7; Flags: Precursor gi 6056422 gb AAF02886.1 AC009525.20 Similar to pectinesterases [Arabidopsis thaliana] gi 133778888 gb ABO38784.1  At1g02810 [Arabidopsis thaliana] gi 332189351 gb AEE27472.1  pectinesterase 7 [Arabidopsis thaliana]       | 330 | 1274 | 4.00E-35  | 386.1 | 32.4 | 45.5 | RNA-directed DNA polymerase-like protein        | gbpln | Arabidopsis thaliana | AT1G10000.1   Symbols:   Ribonuclease H-like superfamily protein   chr1:3263877-3264788 REVERSE LENGTH=303                  | 330 | 303 | 7.00E-23  | 91.8  | 19.1 | 30.3 |
| Rsa1.0_00336.1.g11626.t1 | refXP_002892126.1  late embryogenesis abundant 3 family protein [Arabidopsis lyrata subsp. lyrata] gi 297337968 gb EFH68385.1  late embryogenesis abundant 3 family protein [Arabidopsis lyrata subsp. lyrata]                                                                                                                                                                                                                                                                                                                                                                                                                                                  | 698 | 579  | 0         | 83.0  | 75.5 | 78.1 | pectinesterase 7                                | gbpln | Arabidopsis thaliana | AT1G02810.1   Symbols:   Plant invertase/pectin methylsterase inhibitor superfamily   chr1:618284-620333 FORWARD LENGTH=579 | 698 | 579 | 0         | 83.0  | 75.5 | 78.1 |
| Rsa1.0_00336.1.g11627.t1 | dbj BAJ34418.1  unnamed protein product [Theilungella halophila]                                                                                                                                                                                                                                                                                                                                                                                                                                                                                                                                                                                                | 98  | 97   | 1.00E-36  | 99.0  | 79.6 | 86.7 | late embryogenesis abundant 3 family protein    | gbpln | Arabidopsis lyrata   | AT1G02820.1   Symbols:   Late embryogenesis abundant 3 (LEA3) family protein   chr1:623933-624304 REVERSE LENGTH=91         | 98  | 91  | 4.00E-32  | 92.9  | 68.4 | 75.5 |
| Rsa1.0_00336.1.g11628.t1 | refXP_002892126.1  late embryogenesis abundant 3 family protein [Arabidopsis lyrata subsp. lyrata] gi 297337968 gb EFH68385.1  late embryogenesis abundant 3 family protein [Arabidopsis lyrata subsp. lyrata]                                                                                                                                                                                                                                                                                                                                                                                                                                                  | 125 | 124  | 1.00E-42  | 99.2  | 80.8 | 88.0 | unnamed protein product                         | ----  | ----                 | AT3G05560.3   Symbols:   Ribosomal L22e protein family   chr3:1614641-1615204 FORWARD LENGTH=124                            | 125 | 124 | 5.00E-45  | 99.2  | 80.0 | 88.0 |
| Rsa1.0_00336.1.g11629.t1 | #                                                                                                                                                                                                                                                                                                                                                                                                                                                                                                                                                                                                                                                               | #   | #    | #         | #     | #    | #    | -                                               | ----  | ----                 | #                                                                                                                           | #   | #   | #         | #     | #    |      |

|                          |                                                                                                                                                                                                                                                                                                                                                 |      |      |           |       |      |      |                                                    |       |                      |                                                                                                                                                                                                                                                                                                                                                                                                                                                                                          |      |      |           |       |      |      |
|--------------------------|-------------------------------------------------------------------------------------------------------------------------------------------------------------------------------------------------------------------------------------------------------------------------------------------------------------------------------------------------|------|------|-----------|-------|------|------|----------------------------------------------------|-------|----------------------|------------------------------------------------------------------------------------------------------------------------------------------------------------------------------------------------------------------------------------------------------------------------------------------------------------------------------------------------------------------------------------------------------------------------------------------------------------------------------------------|------|------|-----------|-------|------|------|
| Rsa1.0_00336.1.g11630.t1 | refNP_849578.5   beta glucosidase 11 [Arabidopsis thaliana] gi 332189361 gb AE27482.1   beta glucosidase 11 [Arabidopsis thaliana]                                                                                                                                                                                                              | 506  | 497  | 0         | 98.2  | 81.0 | 89.5 | beta glucosidase 11                                | gbpln | Arabidopsis thaliana | AT1G02850.2   Symbols: BGLU11   beta glucosidase 11   chr1:630569-633085 FORWARD LENGTH=497                                                                                                                                                                                                                                                                                                                                                                                              | 506  | 497  | 0         | 98.2  | 81.0 | 89.5 |
| Rsa1.0_00336.1.g11631.t1 | refXP_002899424.1   hypothetical protein ARALYDRAFT_470251 [Arabidopsis lyrata subsp. lyrata] gi 297335266 gb EFH65683.1   hypothetical protein ARALYDRAFT_470251 [Arabidopsis lyrata subsp. lyrata]                                                                                                                                            | 327  | 334  | 1.00E-158 | 102.1 | 86.5 | 92.4 | hypothetical protein ARALYDRAFT_470251             | gbpln | Arabidopsis lyrata   | AT1G02860.1   Symbols: NLA, BAH1   SPX (SYG1/Pho81/XPR1) domain-containing protein   chr1:635474-637083 FORWARD LENGTH=335                                                                                                                                                                                                                                                                                                                                                               | 327  | 335  | 1.00E-158 | 102.4 | 85.6 | 91.7 |
| Rsa1.0_00336.1.g11632.t1 | refNP_563668.1   uncharacterized protein [Arabidopsis thaliana] gi 20260268 gb AAM13032.1   unknown protein [Arabidopsis thaliana] gi 21593889 gb AAM65856.1   unknown [Arabidopsis thaliana] gi 30102920 gb AAP21378.1   At1g02870 [Arabidopsis thaliana] gi 332189366 gb AE27487.1   uncharacterized protein AT1G02870 [Arabidopsis thaliana] | 195  | 193  | 1.00E-102 | 99.0  | 93.3 | 96.4 | uncharacterized protein                            | gbpln | Arabidopsis thaliana | AT1G02870.1   Symbols:   FUNCTIONS IN: molecular_function unknown; INVOLVED IN: biological_process unknown; EXPRESSED IN: 23 plant structures; EXPRESSED DURING: 13 growth stages; CONTAINS InterPro DOMAIN/s: Ribosome biogenesis protein Nop16 (InterPro:IPR019002); Has 104 Blast hits to 104 proteins in 57 species: Archae - 0; Bacteria - 0; Metazoa - 0; Fungi - 63; Plants - 35; Viruses - 0; Other Eukaryotes - 6 (source: NCBI BLINK).   chr1:637401-638603 REVERSE LENGTH=193 | 195  | 193  | 1.00E-104 | 99.0  | 93.3 | 96.4 |
| Rsa1.0_00336.1.g11633.t1 | refXP_002892131.1   predicted protein [Arabidopsis lyrata subsp. lyrata] gi 297337973 gb EFH68390.1   predicted protein [Arabidopsis lyrata subsp. lyrata]                                                                                                                                                                                      | 227  | 228  | 3.00E-67  | 100.4 | 84.6 | 89.4 | predicted protein                                  | gbpln | Arabidopsis lyrata   | AT4G02450.2   Symbols:   HSP20-like chaperones superfamily protein   chr4:1073987-1075765 REVERSE LENGTH=240                                                                                                                                                                                                                                                                                                                                                                             | 227  | 240  | 5.00E-53  | 105.7 | 41.0 | 46.3 |
| Rsa1.0_00336.1.g11634.t1 | refXP_002892132.1   hypothetical protein ARALYDRAFT_470256 [Arabidopsis lyrata subsp. lyrata] gi 297337974 gb EFH68391.1   hypothetical protein ARALYDRAFT_470256 [Arabidopsis lyrata subsp. lyrata]                                                                                                                                            | 266  | 266  | 1.00E-127 | 100.0 | 83.1 | 88.7 | hypothetical protein ARALYDRAFT_470256             | gbpln | Arabidopsis lyrata   | AT1G02880.3   Symbols: TPK1   thiamin pyrophosphokinase1   chr1:643063-644485 REVERSE LENGTH=267                                                                                                                                                                                                                                                                                                                                                                                         | 266  | 267  | 1.00E-129 | 100.4 | 83.1 | 88.0 |
| Rsa1.0_00336.1.g11635.t1 | refNP_171788.3   AAA-type ATPase-like protein [Arabidopsis thaliana] gi 332189371 gb AE27492.1   AAA-type ATPase-like protein [Arabidopsis thaliana]                                                                                                                                                                                            | 1263 | 1246 | 0         | 98.7  | 80.9 | 88.8 | AAA-type ATPase-like protein                       | gbpln | Arabidopsis thaliana | AT1G02890.1   Symbols:   AAA-type ATPase family protein   chr1:645372-651797 REVERSE LENGTH=1246                                                                                                                                                                                                                                                                                                                                                                                         | 1263 | 1246 | 0         | 98.7  | 80.9 | 88.8 |
| Rsa1.0_00336.1.g11636.t1 | gb EOA37640.1   hypothetical protein CARUB_v10012118mg [Capsella rubella]                                                                                                                                                                                                                                                                       | 122  | 123  | 2.00E-49  | 100.8 | 82.8 | 91.8 | hypothetical protein CARUB_v10012118mg             | gbpln | Capsella rubella     | AT1G02900.1   Symbols: RALFL1, RALF1, ATRALF1   rapid alkalization factor 1   chr1:653976-654338 REVERSE LENGTH=120                                                                                                                                                                                                                                                                                                                                                                      | 122  | 120  | 3.00E-51  | 98.4  | 80.3 | 86.1 |
| Rsa1.0_00336.1.g11637.t1 | dbj BAJ34627.1   unnamed protein product [Thelelungella halophila]                                                                                                                                                                                                                                                                              | 182  | 209  | 4.00E-87  | 114.8 | 89.6 | 93.4 | unnamed protein product                            | ----  | ----                 | AT1G02930.2   Symbols: GSTF6   glutathione S-transferase 6   chr1:661363-662191 REVERSE LENGTH=208                                                                                                                                                                                                                                                                                                                                                                                       | 182  | 208  | 1.00E-81  | 114.3 | 83.0 | 90.1 |
| Rsa1.0_00336.1.g11638.t6 | gb AAD54276.1   AF172097.1 telomerase reverse transcriptase catalytic subunit [Arabidopsis thaliana]                                                                                                                                                                                                                                            | 1100 | 1123 | 0         | 102.1 | 72.0 | 81.1 | telomerase reverse transcriptase catalytic subunit | gbpln | Arabidopsis thaliana | AT5G16850.1   Symbols: ATERT, TERT   telomerase reverse transcriptase   chr5:5538323-5543444 REVERSE LENGTH=1123                                                                                                                                                                                                                                                                                                                                                                         | 1100 | 1123 | 0         | 102.1 | 72.0 | 81.0 |
| Rsa1.0_00336.1.g11639.t1 | refXP_002892138.1   hypothetical protein ARALYDRAFT_333621 [Arabidopsis lyrata subsp. lyrata] gi 297337980 gb EFH68397.1   hypothetical protein ARALYDRAFT_333621 [Arabidopsis lyrata subsp. lyrata]                                                                                                                                            | 248  | 248  | 4.00E-98  | 100.0 | 69.4 | 79.8 | hypothetical protein ARALYDRAFT_333621             | gbpln | Arabidopsis lyrata   | AT1G02940.1   Symbols: ATGSTF5, GSTF5   glutathione S-transferase (class phi) 5   chr1:663079-664128 REVERSE LENGTH=256                                                                                                                                                                                                                                                                                                                                                                  | 248  | 256  | 2.00E-96  | 103.2 | 66.5 | 77.0 |
| Rsa1.0_00336.1.g11640.t1 | gb AAF02872.1   AC009525.6 Similar to glutathione S-transferases [Arabidopsis thaliana]                                                                                                                                                                                                                                                         | 256  | 281  | 1.00E-116 | 109.8 | 77.3 | 85.2 | Similar to glutathione S-transferases              | gbpln | Arabidopsis thaliana | AT1G02940.1   Symbols: ATGSTF5, GSTF5   glutathione S-transferase (class phi) 5   chr1:663079-664128 REVERSE LENGTH=256                                                                                                                                                                                                                                                                                                                                                                  | 256  | 256  | 1.00E-119 | 100.0 | 77.3 | 85.2 |
| Rsa1.0_00336.1.g11641.t1 | gb EOA38451.1   hypothetical protein CARUB_v10010097mg [Capsella rubella]                                                                                                                                                                                                                                                                       | 243  | 251  | 1.00E-118 | 103.3 | 83.5 | 90.5 | hypothetical protein CARUB_v10010097mg             | gbpln | Capsella rubella     | AT1G02950.3   Symbols: ATGSTF4, GST31, GSTF4   glutathione S-transferase F4   chr1:665308-666420 REVERSE LENGTH=243                                                                                                                                                                                                                                                                                                                                                                      | 243  | 243  | 1.00E-118 | 100.0 | 81.9 | 89.3 |
| Rsa1.0_00336.1.g11642.t1 | gb EOA22672.1   hypothetical protein CARUB_v10003375mg [Capsella rubella]                                                                                                                                                                                                                                                                       | 732  | 738  | 0         | 100.8 | 66.8 | 80.1 | hypothetical protein CARUB_v10003375mg             | gbpln | Capsella rubella     | AT4G02570.4   Symbols: CUL1   cullin 1   chr4:1129315-1133435 FORWARD LENGTH=738                                                                                                                                                                                                                                                                                                                                                                                                         | 732  | 738  | 0         | 100.8 | 66.3 | 79.5 |
| Rsa1.0_00336.1.g11643.t1 | refXP_002892141.1   predicted protein [Arabidopsis lyrata subsp. lyrata] gi 297337983 gb EFH68400.1   predicted protein [Arabidopsis lyrata subsp. lyrata]                                                                                                                                                                                      | 1438 | 1287 | 0         | 89.5  | 36.4 | 41.0 | predicted protein                                  | gbpln | Arabidopsis lyrata   | AT1G02990.3   Symbols:   FUNCTIONS IN: molecular_function unknown; INVOLVED IN: biological_process unknown; LOCATED IN: cellular_component unknown; BEST Arabidopsis thaliana protein match is: CW-type Zinc Finger (TAIRAT3G62900.1).   chr1:681724-686996 REVERSE LENGTH=1278                                                                                                                                                                                                          | 1438 | 1278 | 0         | 88.9  | 35.7 | 40.5 |

|                          |                                                                                                                                                                                                                                                                                                                                                                                                                                                                                                           |      |      |           |       |      |      |                                            |       |                      |                                                                                                                                           |      |      |           |       |      |      |
|--------------------------|-----------------------------------------------------------------------------------------------------------------------------------------------------------------------------------------------------------------------------------------------------------------------------------------------------------------------------------------------------------------------------------------------------------------------------------------------------------------------------------------------------------|------|------|-----------|-------|------|------|--------------------------------------------|-------|----------------------|-------------------------------------------------------------------------------------------------------------------------------------------|------|------|-----------|-------|------|------|
| Rsa1.0_00336.1.g11644.t1 | ref NP_171800.1  Phototropic-responsive NPH3 family protein [Arabidopsis thaliana]<br>gi 75200292 sp Q9SA69.1 Y1301_ARATH<br>RecName: Full=BTB/POZ domain-containing protein At1g03010<br>gi 4587577 gb AAD25808.1 AC006550_16<br>F1003.17 [Arabidopsis thaliana]<br>gi 332189393 gb AEE27514.1 <br>Phototropic-responsive NPH3 family protein [Arabidopsis thaliana]                                                                                                                                     | 633  | 634  | 0         | 100.2 | 90.0 | 94.8 | Phototropic-responsive NPH3 family protein | gbpln | Arabidopsis thaliana | AT1G03010.1   Symbols:   Phototropic-responsive NPH3 family protein   chr1:693480-696188 FORWARD LENGTH=634                               | 633  | 634  | 0         | 100.2 | 90.0 | 94.8 |
| Rsa1.0_00336.1.g11645.t1 | gb EOA36418.1  hypothetical protein CARUB_v10010921mg [Capsella rubella]                                                                                                                                                                                                                                                                                                                                                                                                                                  | 102  | 102  | 2.00E-50  | 100.0 | 95.1 | 98.0 | hypothetical protein CARUB_v10010921mg     | gbpln | Capsella rubella     | AT1G03020.1   Symbols:   Thioredoxin superfamily protein   chr1:698207-698515 REVERSE LENGTH=102                                          | 102  | 102  | 5.00E-52  | 100.0 | 93.1 | 97.1 |
| Rsa1.0_00336.1.g11646.t1 | gb EOA38355.1  hypothetical protein CARUB_v10009873mg [Capsella rubella]                                                                                                                                                                                                                                                                                                                                                                                                                                  | 231  | 300  | 1.00E-124 | 129.9 | 93.1 | 97.0 | hypothetical protein CARUB_v10009873mg     | gbpln | Capsella rubella     | AT1G03030.1   Symbols:   P-loop containing nucleoside triphosphate hydrolases superfamily protein   chr1:701621-703568 FORWARD LENGTH=301 | 231  | 301  | 1.00E-118 | 130.3 | 92.6 | 97.4 |
| Rsa1.0_00336.1.g11647.t1 | dbj BAJ34239.1  unnamed protein product [Theillungiella halophila]                                                                                                                                                                                                                                                                                                                                                                                                                                        | 308  | 308  | 1.00E-134 | 100.0 | 87.3 | 90.6 | unnamed protein product                    | ----  | ----                 | AT1G03040.1   Symbols:   basic helix-loop-helix (bHLH) DNA-binding superfamily protein   chr1:704279-706457 REVERSE LENGTH=302            | 308  | 302  | 1.00E-129 | 98.1  | 85.4 | 89.6 |
| Rsa1.0_00336.1.g11648.t1 | ref NP_171804.1  putative clathrin assembly protein [Arabidopsis thaliana]<br>gi 46396022 sp Q9SA65.1 CAP4_ARATH<br>RecName: Full=Putative clathrin assembly protein At1g03050<br>gi 4587573 gb AAD25804.1 AC006550_12<br>Similar to clathrin assembly protein gb AF041374 (CALM) from Rattus norvegicus [Arabidopsis thaliana]<br>gi 91805731 gb ABE65594.1  clathrin assembly protein-like [Arabidopsis thaliana] gi 332189399 gb AEE27520.1  putative clathrin assembly protein [Arabidopsis thaliana] | 594  | 599  | 0         | 100.8 | 88.4 | 93.3 | putative clathrin assembly protein         | gbpln | Arabidopsis thaliana | AT1G03050.1   Symbols:   ENTH/ANTH/VHS superfamily protein   chr1:707726-709860 FORWARD LENGTH=599                                        | 594  | 599  | 0         | 100.8 | 88.4 | 93.3 |
| Rsa1.0_00336.1.g11649.t2 | ref XP_002892146.1  hypothetical protein ARALYDRAFT_311407 [Arabidopsis lyrata subsp. lyrata]<br>gi 297337988 gb EFH68405.1 <br>hypothetical protein ARALYDRAFT_311407 [Arabidopsis lyrata subsp. lyrata]                                                                                                                                                                                                                                                                                                 | 3663 | 3606 | 0         | 98.4  | 90.8 | 94.0 | hypothetical protein ARALYDRAFT_311407     | gbpln | Arabidopsis lyrata   | AT1G03060.1   Symbols: SPI   Beige/BEACH domain :WD domain, G-beta repeat protein   chr1:712971-726891 REVERSE LENGTH=3601                | 3663 | 3601 | 0         | 98.3  | 90.3 | 93.8 |
| Rsa1.0_00336.1.g11650.t1 | ref XP_002889434.1  glutamate binding protein [Arabidopsis lyrata subsp. lyrata] gi 297335276 gb EFH65693.1  glutamate binding protein [Arabidopsis lyrata subsp. lyrata]                                                                                                                                                                                                                                                                                                                                 | 245  | 246  | 1.00E-129 | 100.4 | 94.3 | 98.4 | glutamate binding protein                  | gbpln | Arabidopsis lyrata   | AT1G03070.2   Symbols:   Bax inhibitor-1 family protein   chr1:730148-731379 FORWARD LENGTH=247                                           | 245  | 247  | 1.00E-130 | 100.8 | 93.5 | 98.0 |
| Rsa1.0_00336.1.g11651.t1 | ref XP_002892147.1  kinase interacting family protein [Arabidopsis lyrata subsp. lyrata] gi 297337989 gb EFH68406.1  kinase interacting family protein [Arabidopsis lyrata subsp. lyrata]                                                                                                                                                                                                                                                                                                                 | 2601 | 1736 | 0         | 66.7  | 34.1 | 37.9 | kinase interacting family protein          | gbpln | Arabidopsis lyrata   | AT1G03080.1   Symbols:   kinase interacting (KIP1-like) family protein   chr1:731794-737332 REVERSE LENGTH=1733                           | 2601 | 1733 | 0         | 66.6  | 34.0 | 38.1 |
| Rsa1.0_00336.1.g11652.t1 | #                                                                                                                                                                                                                                                                                                                                                                                                                                                                                                         | #    | #    | #         | #     | #    | -    | ----                                       | ----  | ----                 | #                                                                                                                                         | #    | #    | #         | #     | #    | #    |
| Rsa1.0_00336.1.g11653.t1 | #                                                                                                                                                                                                                                                                                                                                                                                                                                                                                                         | #    | #    | #         | #     | #    | -    | ----                                       | ----  | ----                 | #                                                                                                                                         | #    | #    | #         | #     | #    | #    |
| Rsa1.0_00336.1.g11654.t1 | ref XP_002889437.1  transducin family protein [Arabidopsis lyrata subsp. lyrata] gi 297335279 gb EFH65696.1  transducin family protein [Arabidopsis lyrata subsp. lyrata]                                                                                                                                                                                                                                                                                                                                 | 268  | 426  | 8.00E-96  | 159.0 | 71.3 | 77.6 | transducin family protein                  | gbpln | Arabidopsis lyrata   | AT1G03110.1   Symbols: TRM82, AtTRM82   Transducin/WD40 repeat-like superfamily protein   chr1:749359-751796 FORWARD LENGTH=427           | 268  | 427  | 4.00E-98  | 159.3 | 70.1 | 77.6 |
| Rsa1.0_00336.1.g11655.t1 | ref NP_171811.1  responsive to abscisic acid 28 [Arabidopsis thaliana]<br>gi 4587565 gb AAD25796.1 AC006550_4<br>Similar to rab28 protein gb X59138 from Zea mays. EST gb AA042774 comes from this gene [Arabidopsis thaliana]<br>gi 332189412 gb AEE27533.1  responsive to abscisic acid 28 [Arabidopsis thaliana]                                                                                                                                                                                       | 169  | 182  | 2.00E-62  | 107.7 | 82.2 | 87.6 | responsive to abscisic acid 28             | gbpln | Arabidopsis thaliana | AT1G03120.1   Symbols: ATRAB28, RAB28   responsive to abscisic acid 28   chr1:752271-753140 FORWARD LENGTH=182                            | 169  | 182  | 7.00E-65  | 107.7 | 82.2 | 87.6 |
| Rsa1.0_00336.1.g11656.t1 | ref XP_002888154.1  hypothetical protein ARALYDRAFT_893536 [Arabidopsis lyrata subsp. lyrata]<br>gi 297333995 gb EFH64413.1 <br>hypothetical protein ARALYDRAFT_893536 [Arabidopsis lyrata subsp. lyrata]                                                                                                                                                                                                                                                                                                 | 421  | 404  | 1.00E-54  | 96.0  | 37.3 | 54.2 | hypothetical protein ARALYDRAFT_893536     | gbpln | Arabidopsis lyrata   | AT1G50870.1   Symbols:   F-box and associated interaction domains-containing protein   chr1:18855147-18856337 FORWARD LENGTH=396          | 421  | 396  | 2.00E-46  | 94.1  | 32.3 | 44.9 |

|                          |                                                                                                                                                                                                                                                                                                                                                                                                                                                                                                                                                                                                                                                                                                                                                                                         |     |     |           |       |       |       |                                        |       |                      |                                                                                                                                                                                                                                                                                                                                                                                                                                                   |     |     |           |       |       |       |
|--------------------------|-----------------------------------------------------------------------------------------------------------------------------------------------------------------------------------------------------------------------------------------------------------------------------------------------------------------------------------------------------------------------------------------------------------------------------------------------------------------------------------------------------------------------------------------------------------------------------------------------------------------------------------------------------------------------------------------------------------------------------------------------------------------------------------------|-----|-----|-----------|-------|-------|-------|----------------------------------------|-------|----------------------|---------------------------------------------------------------------------------------------------------------------------------------------------------------------------------------------------------------------------------------------------------------------------------------------------------------------------------------------------------------------------------------------------------------------------------------------------|-----|-----|-----------|-------|-------|-------|
| Rsa1.0_00336.1.g11657.t1 | ref[NP_563677.1] peptide alpha-N-acetyltransferase [Arabidopsis thaliana] gi 2978431.1 ref[XP_002889439.1] hypothetical protein ARALYDRAFT_887467 [Arabidopsis lyrata subsp. lyrata] gi 21536510 gb AAM60842.1  unknown [Arabidopsis thaliana] gi 297335281 gb EFH65698.1  hypothetical protein ARALYDRAFT_887467 [Arabidopsis lyrata subsp. lyrata] gi 332189415 gb AEE27536.1  peptide alpha-N-acetyltransferase [Arabidopsis thaliana] gi 482572073 gb EOA36260.1  hypothetical protein CARUB_v10010452mg [Capsella rubella]                                                                                                                                                                                                                                                         | 174 | 174 | 1.00E-98  | 100.0 | 99.4  | 100.0 | peptide alpha-N-acetyltransferase      | gbpln | Arabidopsis lyrata   | AT1G03150.1   Symbols:   Acyl-CoA N-acyltransferases (NAT) superfamily protein   chr1:756461-758441 FORWARD LENGTH=174                                                                                                                                                                                                                                                                                                                            | 174 | 174 | 1.00E-101 | 100.0 | 99.4  | 100.0 |
| Rsa1.0_00336.1.g11658.t1 | gb EOA37699.1  hypothetical protein CARUB_v10012407mg [Capsella rubella]                                                                                                                                                                                                                                                                                                                                                                                                                                                                                                                                                                                                                                                                                                                | 227 | 276 | 6.00E-85  | 121.6 | 79.7  | 86.3  | hypothetical protein CARUB_v10012407mg | gbpln | Capsella rubella     | AT1G03170.1   Symbols:   Protein of unknown function (DUF3049)   chr1:769805-770527 FORWARD LENGTH=240                                                                                                                                                                                                                                                                                                                                            | 227 | 240 | 1.00E-83  | 105.7 | 74.0  | 82.8  |
| Rsa1.0_00336.1.g11659.t1 | # # # # # # # -                                                                                                                                                                                                                                                                                                                                                                                                                                                                                                                                                                                                                                                                                                                                                                         |     |     |           |       |       |       |                                        | ----  | ----                 | #                                                                                                                                                                                                                                                                                                                                                                                                                                                 | #   | #   | #         | #     | #     | #     |
| Rsa1.0_00336.1.g11660.t1 | ref[XP_002889474.1] protein binding protein [Arabidopsis lyrata subsp. lyrata] gi 297335316 gb EFH65733.1  protein binding protein [Arabidopsis lyrata subsp. lyrata]                                                                                                                                                                                                                                                                                                                                                                                                                                                                                                                                                                                                                   | 353 | 464 | 1.00E-85  | 131.4 | 59.5  | 68.6  | protein binding protein                | gbpln | Arabidopsis lyrata   | AT1G03770.2   Symbols: RING1B   RING 1B   chr1:944727-947431 FORWARD LENGTH=468                                                                                                                                                                                                                                                                                                                                                                   | 353 | 468 | 1.00E-83  | 132.6 | 58.4  | 68.6  |
| Rsa1.0_00336.1.g11661.t1 | ref[XP_002892179.1] hypothetical protein ARALYDRAFT_470351 [Arabidopsis lyrata subsp. lyrata] gi 297338021 gb EFH68438.1  hypothetical protein ARALYDRAFT_470351 [Arabidopsis lyrata subsp. lyrata]                                                                                                                                                                                                                                                                                                                                                                                                                                                                                                                                                                                     | 790 | 771 | 0         | 97.6  | 82.2  | 87.6  | hypothetical protein ARALYDRAFT_470351 | gbpln | Arabidopsis lyrata   | AT1G03780.2   Symbols: TPX2   targeting protein for XKLP2   chr1:947785-951696 REVERSE LENGTH=758                                                                                                                                                                                                                                                                                                                                                 | 790 | 758 | 0         | 95.9  | 79.5  | 85.6  |
| Rsa1.0_00337.1.g11662.t1 | ref[NP_564379.2] NEDD8-like protein RUB1 [Arabidopsis thaliana] gi 302393813 slp Q9SHE7.3 RUB1_ARAT H RecName: Full=Ubiquitin-NEDD8-like protein RUB1; Contains: RecName: Full=Ubiquitin; Contains: RecName: Full=NEDD8-like protein RUB1; AltName: Full=Ubiquitin-related protein 1; Short=AtRUB1; Flags: Precursor gi 6692129 gb AAF24594.1 AC007654_10 T19E23.13 [Arabidopsis thaliana] gi 28973676 gb AAO64156.1  putative ubiquitin (AtRUB1) [Arabidopsis thaliana] gi 29824269 gb AAP04095.1  putative ubiquitin (AtRUB1) [Arabidopsis thaliana] gi 110737109 dbj BAF00506.1  putative ubiquitin [Arabidopsis thaliana] gi 312283039 dbj BAJ34385.1  unnamed protein product [Thellungiella halophila] gi 332193223 gb AEE31344.1  NEDD8-like protein RUB1 [Arabidopsis thaliana] | 156 | 156 | 2.00E-82  | 100.0 | 100.0 | 100.0 | NEDD8-like protein RUB1                | gbpln | Arabidopsis thaliana | AT1G31340.1   Symbols: RUB1, NEDD8, ATRUB1   related to ubiquitin 1   chr1:11218076-11219417 REVERSE LENGTH=156                                                                                                                                                                                                                                                                                                                                   | 156 | 156 | 6.00E-85  | 100.0 | 100.0 | 100.0 |
| Rsa1.0_00337.1.g11663.t1 | ref[NP_564378.1] uncharacterized protein [Arabidopsis thaliana] gi 21536718 gb AAM61050.1  unknown [Arabidopsis thaliana] gi 94807644 gb ABF47119.1  At1g31335 [Arabidopsis thaliana] gi 332193222 gb AEE31343.1  uncharacterized protein AT1G31335 [Arabidopsis thaliana]                                                                                                                                                                                                                                                                                                                                                                                                                                                                                                              | 72  | 70  | 2.00E-20  | 97.2  | 81.9  | 86.1  | uncharacterized protein                | gbpln | Arabidopsis thaliana | AT1G31335.1   Symbols:   unknown protein; FUNCTIONS IN: molecular_function unknown; INVOLVED IN: biological_process unknown; LOCATED IN: plasma membrane; EXPRESSED IN: 20 plant structures; EXPRESSED DURING: 13 growth stages; Has 34 Blast hits to 34 proteins in 8 species: Archae - 0; Bacteria - 0; Metazoa - 0; Fungi - 0; Plants - 34; Viruses - 0; Other Eukaryotes - 0 (source: NCBI BLINK).   chr1:11217117-11217329 REVERSE LENGTH=70 | 72  | 70  | 3.00E-23  | 97.2  | 81.9  | 86.1  |
| Rsa1.0_00337.1.g11664.t1 | emb CAB52747.1  photosystem I subunit III precursor [Arabidopsis thaliana] gi 2159358 gb AAM65555.1  photosystem I subunit III precursor, putative [Arabidopsis thaliana]                                                                                                                                                                                                                                                                                                                                                                                                                                                                                                                                                                                                               | 218 | 221 | 1.00E-112 | 101.4 | 92.7  | 96.3  | photosystem I subunit III precursor    | gbpln | Arabidopsis thaliana | AT1G31330.1   Symbols: PSAF   photosystem I subunit F   chr1:11215011-11215939 REVERSE LENGTH=221                                                                                                                                                                                                                                                                                                                                                 | 218 | 221 | 1.00E-114 | 101.4 | 92.2  | 95.9  |
| Rsa1.0_00337.1.g11665.t1 | ref[XP_002893847.1] LOB domain protein 4 [Arabidopsis lyrata subsp. lyrata] gi 297339689 gb EFH70106.1  LOB domain protein 4 [Arabidopsis lyrata subsp. lyrata]                                                                                                                                                                                                                                                                                                                                                                                                                                                                                                                                                                                                                         | 172 | 172 | 2.00E-95  | 100.0 | 98.3  | 99.4  | LOB domain protein 4                   | gbpln | Arabidopsis lyrata   | AT1G31320.1   Symbols: LBD4   LOB domain-containing protein 4   chr1:11213107-11214032 FORWARD LENGTH=172                                                                                                                                                                                                                                                                                                                                         | 172 | 172 | 3.00E-83  | 100.0 | 97.7  | 98.8  |



|                           |                                                                                                                                                                                                    |      |      |           |       |      |      |                                         |       |                      |                                                                                                                                                                                                                                                                                                                                                                                      |      |      |           |       |      |      |
|---------------------------|----------------------------------------------------------------------------------------------------------------------------------------------------------------------------------------------------|------|------|-----------|-------|------|------|-----------------------------------------|-------|----------------------|--------------------------------------------------------------------------------------------------------------------------------------------------------------------------------------------------------------------------------------------------------------------------------------------------------------------------------------------------------------------------------------|------|------|-----------|-------|------|------|
| Rsa1.0_00337.1.g11666.t4  | ref[XP_002863741.1] hypothetical protein ARALYDRAFT_917455 [Arabidopsis lyrata subsp. lyrata] g[297309576]gb[EFH40000.1]                                                                           | 791  | 390  | 4.00E-40  | 49.3  | 11.8 | 15.3 | hypothetical protein ARALYDRAFT_917455  | gbpln | Arabidopsis lyrata   | AT5G18880.1   Symbols:   RNA-directed DNA polymerase (reverse transcriptase)-related family protein   chr5:6300535-6301422 REVERSE LENGTH=295                                                                                                                                                                                                                                        | 791  | 295  | 5.00E-36  | 37.3  | 11.5 | 18.1 |
| Rsa1.0_00337.1.g11667.t2  | gb AAC95170.1  copia-like retroelement pol polyprotein [Arabidopsis thaliana]                                                                                                                      | 705  | 916  | 4.00E-33  | 129.9 | 17.6 | 26.0 | copia-like retroelement pol polyprotein | gbpln | Arabidopsis thaliana | #                                                                                                                                                                                                                                                                                                                                                                                    | #    | #    | #         | #     | #    | #    |
| Rsa1.0_00337.1.g11668.t1  | emb[CAB75764.1] putative protein [Arabidopsis thaliana]                                                                                                                                            | 210  | 262  | 2.00E-25  | 124.8 | 31.0 | 36.2 | putative protein                        | gbpln | Arabidopsis thaliana | #                                                                                                                                                                                                                                                                                                                                                                                    | #    | #    | #         | #     | #    | #    |
| Rsa1.0_00337.1.g11669.t1  | #                                                                                                                                                                                                  | #    | #    | #         | #     | #    | -    | ----                                    | ----  | #                    | #                                                                                                                                                                                                                                                                                                                                                                                    | #    | #    | #         | #     | #    | #    |
| Rsa1.0_00337.1.g11670.t1  | #                                                                                                                                                                                                  | #    | #    | #         | #     | #    | -    | ----                                    | ----  | #                    | #                                                                                                                                                                                                                                                                                                                                                                                    | #    | #    | #         | #     | #    | #    |
| Rsa1.0_00337.1.g11671.t1  | dbj BA085462.1  transposon-like ORF [Brassica rapa]                                                                                                                                                | 596  | 703  | 4.00E-51  | 118.0 | 19.0 | 23.2 | transposon-like ORF                     | gbpln | Brassica rapa        | #                                                                                                                                                                                                                                                                                                                                                                                    | #    | #    | #         | #     | #    | #    |
| Rsa1.0_00337.1.g11672.t1  | #                                                                                                                                                                                                  | #    | #    | #         | #     | #    | -    | ----                                    | ----  | #                    | #                                                                                                                                                                                                                                                                                                                                                                                    | #    | #    | #         | #     | #    | #    |
| Rsa1.0_00337.1.g11673.t1  | gb AAD20646.1  putative TNP2-like transposon protein [Arabidopsis thaliana]                                                                                                                        | 113  | 1040 | 2.00E-19  | 920.4 | 43.4 | 49.6 | putative TNP2-like transposon protein   | gbpln | Arabidopsis thaliana | #                                                                                                                                                                                                                                                                                                                                                                                    | #    | #    | #         | #     | #    | #    |
| Rsa1.0_00337.1.g11674.t1  | #                                                                                                                                                                                                  | #    | #    | #         | #     | #    | -    | ----                                    | ----  | #                    | #                                                                                                                                                                                                                                                                                                                                                                                    | #    | #    | #         | #     | #    | #    |
| Rsa1.0_00337.1.g11675.t2  | #                                                                                                                                                                                                  | #    | #    | #         | #     | #    | -    | ----                                    | ----  | #                    | #                                                                                                                                                                                                                                                                                                                                                                                    | #    | #    | #         | #     | #    | #    |
| Rsa1.0_00337.1.g11676.t1  | #                                                                                                                                                                                                  | #    | #    | #         | #     | #    | -    | ----                                    | ----  | #                    | #                                                                                                                                                                                                                                                                                                                                                                                    | #    | #    | #         | #     | #    | #    |
| Rsa1.0_00337.1.g11677.t1  | gb EOA38400.1  hypothetical protein CARUB_v10009967mg [Capsella rubella]                                                                                                                           | 278  | 278  | 1.00E-156 | 100.0 | 96.0 | 99.3 | hypothetical protein CARUB_v10009967mg  | gbpln | Capsella rubella     | AT1G31300.2   Symbols:   TRAM, LAG1 and CLN8 (TLC) lipid-sensing domain containing protein   chr1:1194308-1195955 FORWARD LENGTH=278                                                                                                                                                                                                                                                 | 278  | 278  | 1.00E-158 | 100.0 | 95.7 | 99.3 |
| Rsa1.0_00338.1.g11678.t10 | dbj BAA97354.1  disease resistance protein-like [Arabidopsis thaliana]                                                                                                                             | 643  | 1152 | 0         | 179.2 | 56.9 | 74.0 | disease resistance protein-like         | gbpln | Arabidopsis thaliana | AT5G40060.1   Symbols:   Disease resistance protein (NBS-LRR class) family   chr5:16035246-16038730 FORWARD LENGTH=968                                                                                                                                                                                                                                                               | 643  | 968  | 1.00E-145 | 150.5 | 40.0 | 51.6 |
| Rsa1.0_00338.1.g11679.t1  | gb ACP30601.1  disease resistance protein [Brassica rapa subsp. pekinensis]                                                                                                                        | 1196 | 1207 | 0         | 100.9 | 63.9 | 74.2 | disease resistance protein              | gbpln | Brassica rapa        | AT5G46270.1   Symbols:   Disease resistance protein (TIR-NBS-LRR class) family   chr5:18764833-18769090 REVERSE LENGTH=1139                                                                                                                                                                                                                                                          | 1196 | 1139 | 0         | 95.2  | 52.9 | 66.7 |
| Rsa1.0_00338.1.g11680.t1  | gb AAD19784.1  putative retroelement pol polyprotein [Arabidopsis thaliana]                                                                                                                        | 1440 | 1501 | 0         | 104.2 | 58.1 | 73.8 | putative retroelement pol polyprotein   | gbpln | Arabidopsis thaliana | AT4G23160.1   Symbols: CRK8   cysteine-rich RLK (RECEPTOR-like protein kinase) 8   chr4:12129485-12134086 FORWARD LENGTH=1262                                                                                                                                                                                                                                                        | 1440 | 1262 | 1.00E-131 | 87.6  | 15.6 | 21.7 |
| Rsa1.0_00338.1.g11681.t1  | ref[XP_002865156.1] predicted protein [Arabidopsis lyrata subsp. lyrata] g[297310991]gb[EFH41415.1] predicted protein [Arabidopsis lyrata subsp. lyrata]                                           | 219  | 287  | 1.00E-45  | 131.1 | 56.2 | 65.8 | predicted protein                       | gbpln | Arabidopsis lyrata   | AT5G46850.3   Symbols:   FUNCTIONS IN: molecular_function unknown; INVOLVED IN: GPI anchor biosynthetic process; LOCATED IN: endomembrane system, endoplasmic reticulum membrane; EXPRESSED IN: 22 plant structures; EXPRESSED DURING: 13 growth stages; CONTAINS InterPro DOMAIN/s: PIG-X/PBN1 (InterPro:IPRO13233).   chr5:19010852-19012010 FORWARD LENGTH=299                    | 219  | 299  | 4.00E-48  | 136.5 | 52.5 | 59.8 |
| Rsa1.0_00338.1.g11682.t1  | ref[XP_002863386.1] hypothetical protein ARALYDRAFT_494291 [Arabidopsis lyrata subsp. lyrata] g[297309221]gb[EFH39645.1] hypothetical protein ARALYDRAFT_494291 [Arabidopsis lyrata subsp. lyrata] | 271  | 268  | 1.00E-131 | 98.9  | 87.1 | 90.0 | hypothetical protein ARALYDRAFT_494291  | gbpln | Arabidopsis lyrata   | AT5G46860.1   Symbols: VAM3, ATVAM3, SYP22, ATYP22, SGR3   Syntaxin/t-SNARE family protein   chr5:19012342-19013795 REVERSE LENGTH=268                                                                                                                                                                                                                                               | 271  | 268  | 1.00E-133 | 98.9  | 86.3 | 90.0 |
| Rsa1.0_00338.1.g11683.t2  | gb AAF19546.1 AC007190_14 F23N19.13 [Arabidopsis thaliana]                                                                                                                                         | 110  | 633  | 2.00E-17  | 575.5 | 38.2 | 58.2 | F23N19.13                               | gbpln | Arabidopsis thaliana | #                                                                                                                                                                                                                                                                                                                                                                                    | #    | #    | #         | #     | #    | #    |
| Rsa1.0_00338.1.g11684.t1  | gb AAD25557.1 AC005850_14 Hypothetical protein [Arabidopsis thaliana]                                                                                                                              | 244  | 404  | 3.00E-80  | 165.6 | 61.5 | 74.6 | Hypothetical protein                    | gbpln | Arabidopsis thaliana | AT1G43722.1   Symbols:   unknown protein; BEST Arabidopsis thaliana protein match is: unknown protein (TAIR:AT5G28730.1); Has 924 Blast hits to 912 proteins in 109 species: Archae - 0; Bacteria - 0; Metazoa - 222; Fungi - 31; Plants - 661; Viruses - 0; Other Eukaryotes - 10 (source: NCBI BLINK).   chr1:16496403-16497377 FORWARD LENGTH=324                                 | 244  | 324  | 3.00E-42  | 132.8 | 34.0 | 50.0 |
| Rsa1.0_00338.1.g11685.t1  | #                                                                                                                                                                                                  | #    | #    | #         | #     | #    | -    | ----                                    | ----  | ----                 | AT1G50080.1   Symbols:   BEST Arabidopsis thaliana protein match is: RNA-directed DNA polymerase (reverse transcriptase)-related family protein (TAIR:AT1G60720.1); Has 42 Blast hits to 42 proteins in 4 species: Archae - 0; Bacteria - 0; Metazoa - 0; Fungi - 0; Plants - 42; Viruses - 0; Other Eukaryotes - 0 (source: NCBI BLINK).   chr1:18554001-18554276 REVERSE LENGTH=91 | 113  | 91   | 1.00E-12  | 80.5  | 24.8 | 38.9 |

|                           |                                                                                                                                                                                                                                                                                                                                                                                                                                                                              |      |      |           |       |      |      |                                                                              |       |                      |                                                                                                                                              |      |      |           |        |      |      |
|---------------------------|------------------------------------------------------------------------------------------------------------------------------------------------------------------------------------------------------------------------------------------------------------------------------------------------------------------------------------------------------------------------------------------------------------------------------------------------------------------------------|------|------|-----------|-------|------|------|------------------------------------------------------------------------------|-------|----------------------|----------------------------------------------------------------------------------------------------------------------------------------------|------|------|-----------|--------|------|------|
| Rsa1.0_00338.1.g11686.t13 | gb AAK49635.1 AF372919.1<br>AT5g46920/MQD22.6 [Arabidopsis thaliana] gi 27764956 gb AAO23599.1 <br>AT5g46920/MQD22.6 [Arabidopsis thaliana]                                                                                                                                                                                                                                                                                                                                  | 51   | 282  | 5.00E-17  | 552.9 | 82.4 | 88.2 | AT5g46920/MQD22.6                                                            | gbpln | Arabidopsis thaliana | AT5G46920.1   Symbols:   Intron maturase, type II family protein   chr5:19053668-19055875 FORWARD LENGTH=735                                 | 51   | 735  | 1.00E-19  | 1441.2 | 82.4 | 88.2 |
| Rsa1.0_00338.1.g11687.t1  | gb EOA14879.1  hypothetical protein<br>CARUB_v10028205mg [Capsella rubella]                                                                                                                                                                                                                                                                                                                                                                                                  | 170  | 179  | 3.00E-60  | 105.3 | 68.8 | 79.4 | hypothetical protein<br>CARUB_v10028205mg                                    | gbpln | Capsella rubella     | AT5G46970.1   Symbols:   Plant invertase/pectin methyltransferase inhibitor superfamily protein   chr5:19063918-19064412 REVERSE LENGTH=164  | 170  | 164  | 5.00E-54  | 96.5   | 60.0 | 69.4 |
| Rsa1.0_00338.1.g11688.t1  | gb ABD64968.1  hypothetical protein<br>25.t00005 [Brassica oleracea]                                                                                                                                                                                                                                                                                                                                                                                                         | 223  | 299  | 3.00E-57  | 134.1 | 52.0 | 61.9 | hypothetical protein<br>25.t00005                                            | gbpln | Brassica oleracea    | AT5G47590.1   Symbols:   Heat shock protein HSP20/alpha crystallin family   chr5:19297945-19299099 REVERSE LENGTH=264                        | 223  | 264  | 1.00E-49  | 118.4  | 46.6 | 59.6 |
| Rsa1.0_00338.1.g11689.t1  | gb AAP37968.1  seed specific protein<br>Bn15D12A [Brassica napus]                                                                                                                                                                                                                                                                                                                                                                                                            | 175  | 157  | 1.00E-74  | 89.7  | 79.4 | 82.9 | seed specific protein<br>Bn15D12A                                            | gbpln | Brassica napus       | AT5G46960.1   Symbols:   Plant invertase/pectin methyltransferase inhibitor superfamily protein   chr5:19062220-19062744 REVERSE LENGTH=174  | 175  | 174  | 2.00E-58  | 99.4   | 64.6 | 74.9 |
| Rsa1.0_00338.1.g11690.t1  | gb EOA16073.1  hypothetical protein<br>CARUB_v10004206mg [Capsella rubella]                                                                                                                                                                                                                                                                                                                                                                                                  | 647  | 763  | 0         | 117.9 | 55.0 | 67.7 | hypothetical protein<br>CARUB_v10004206mg                                    | gbpln | Capsella rubella     | AT3G51690.1   Symbols:   PIF1 helicase   chr3:19176731-19178107 REVERSE LENGTH=331                                                           | 647  | 331  | 9.00E-56  | 51.2   | 17.6 | 26.4 |
| Rsa1.0_00338.1.g11691.t1  | #                                                                                                                                                                                                                                                                                                                                                                                                                                                                            | #    | #    | #         | #     | #    | #    | -                                                                            | ----  | ----                 | #                                                                                                                                            | #    | #    | #         | #      | #    | #    |
| Rsa1.0_00338.1.g11692.t1  | ref NP_199510.1  plant invertase/pectin methyltransferase inhibitor domain-containing protein [Arabidopsis thaliana] gi 9759441 dbj BAB10238.1  unnamed protein product [Arabidopsis thaliana] gi 332008072 gb AED95455.1  plant invertase/pectin methyltransferase inhibitor domain-containing protein [Arabidopsis thaliana]                                                                                                                                               | 179  | 187  | 6.00E-48  | 104.5 | 58.1 | 71.5 | plant invertase/pectin methyltransferase inhibitor domain-containing protein | gbpln | Arabidopsis thaliana | AT5G46990.1   Symbols:   Plant invertase/pectin methyltransferase inhibitor superfamily protein   chr5:19067692-19068255 REVERSE LENGTH=187  | 179  | 187  | 2.00E-50  | 104.5  | 58.1 | 71.5 |
| Rsa1.0_00339.1.g11693.t1  | gb EOA39511.1  hypothetical protein<br>CARUB_v10008128mg [Capsella rubella] gi 482575325 gb EOA39512.1 <br>hypothetical protein<br>CARUB_v10008128mg [Capsella rubella] gi 482575326 gb EOA39513.1 <br>hypothetical protein<br>CARUB_v10008128mg [Capsella rubella]                                                                                                                                                                                                          | 414  | 1171 | 1.00E-118 | 282.9 | 56.8 | 65.2 | hypothetical protein<br>CARUB_v10008128mg                                    | gbpln | Capsella rubella     | AT1G20920.1   Symbols:   P-loop containing nucleoside triphosphate hydrolases superfamily protein   chr1:7285342-7288842 FORWARD LENGTH=1166 | 414  | 1166 | 1.00E-119 | 281.6  | 56.0 | 63.5 |
| Rsa1.0_00339.1.g11694.t1  | #                                                                                                                                                                                                                                                                                                                                                                                                                                                                            | #    | #    | #         | #     | #    | #    | -                                                                            | ----  | ----                 | #                                                                                                                                            | #    | #    | #         | #      | #    | #    |
| Rsa1.0_00339.1.g11695.t1  | #                                                                                                                                                                                                                                                                                                                                                                                                                                                                            | #    | #    | #         | #     | #    | #    | -                                                                            | ----  | ----                 | #                                                                                                                                            | #    | #    | #         | #      | #    | #    |
| Rsa1.0_00339.1.g11696.t1  | dbj BAC42280.1  putative 60S ribosomal protein [Arabidopsis thaliana]                                                                                                                                                                                                                                                                                                                                                                                                        | 406  | 407  | 0         | 100.2 | 91.1 | 95.1 | putative 60S ribosomal protein                                               | gbpln | Arabidopsis thaliana | AT3G09630.1   Symbols:   Ribosomal protein L4/L1 family   chr3:2953813-2955444 FORWARD LENGTH=406                                            | 406  | 406  | 0         | 100.0  | 93.8 | 97.0 |
| Rsa1.0_00339.1.g11697.t1  | ref NP_187576.1  pentatricopeptide repeat-containing protein [Arabidopsis thaliana] gi 75204290 sp Q9SF38.1 PP222_ARAT H RecName: Full=Pentatricopeptide repeat-containing protein At3g09650, chloroplastic; AltName: Full=Protein HIGH CHLOROPHYLL FLUORESCENCE 152; Flags: Precursor gi 6682243 gb AAF23295.1 AC016661.20<br>hypothetical protein [Arabidopsis thaliana] gi 332641272 gb AEE74793.1 <br>pentatricopeptide repeat-containing protein [Arabidopsis thaliana] | 778  | 778  | 0         | 100.0 | 86.6 | 91.1 | pentatricopeptide repeat-containing protein                                  | gbpln | Arabidopsis thaliana | AT3G09650.1   Symbols: HCF152, CRM3   Tetratricopeptide repeat (TPR)-like superfamily protein   chr3:2958704-2961040 FORWARD LENGTH=778      | 778  | 778  | 0         | 100.0  | 86.6 | 91.1 |
| Rsa1.0_00339.1.g11698.t2  | gb AGC54635.1  minichromosome maintenance 8 [Arabidopsis thaliana]                                                                                                                                                                                                                                                                                                                                                                                                           | 813  | 801  | 0         | 98.5  | 86.1 | 90.7 | minichromosome maintenance 8                                                 | gbpln | Arabidopsis thaliana | AT3G09660.1   Symbols: MCM8   minichromosome maintenance 8   chr3:2961314-2966166 REVERSE LENGTH=777                                         | 813  | 777  | 0         | 95.6   | 81.3 | 85.6 |
| Rsa1.0_00339.1.g11699.t1  | ref NP_565338.1  RNA helicase, ATP-dependent, SK12/DOB1 protein [Arabidopsis thaliana] gi 20197305 gb AAC67203.2  expressed protein [Arabidopsis thaliana] gi 28973761 gb AAO64196.1  putative DEAD/DEAH box RNA helicase (HUA ENHANCER2) [Arabidopsis thaliana] gi 330250934 gb AEC06028.1  RNA helicase, ATP-dependent, SK12/DOB1 protein [Arabidopsis thaliana]                                                                                                           | 1043 | 995  | 0         | 95.4  | 86.3 | 90.1 | RNA helicase, ATP-dependent, SK12/DOB1 protein                               | gbpln | Arabidopsis thaliana | AT2G06990.1   Symbols: HEN2   RNA helicase, ATP-dependent, SK12/DOB1 protein   chr2:2895135-2900909 FORWARD LENGTH=995                       | 1043 | 995  | 0         | 95.4   | 86.3 | 90.1 |
| Rsa1.0_00339.1.g11700.t7  | emb CAO82944.1  putative pre-mRNA-splicing factor cwc-22 [Oryza sativa Indica Group]                                                                                                                                                                                                                                                                                                                                                                                         | 209  | 736  | 6.00E-73  | 352.2 | 61.7 | 73.2 | putative pre-mRNA-splicing factor cwc-22                                     | gbpln | Oryza sativa         | AT1G80930.1   Symbols:   MIF4G domain-containing protein / MA3 domain-containing protein   chr1:30405774-30409499 REVERSE LENGTH=900         | 209  | 900  | 7.00E-74  | 430.6  | 59.3 | 73.2 |

|                           |                                                                                                                                                                                                                                                                                                                                                                                                                                                                                                                                                        |     |      |           |        |      |      |                                                   |       |                      |                                                                                                                                                                                     |     |      |           |        |      |      |
|---------------------------|--------------------------------------------------------------------------------------------------------------------------------------------------------------------------------------------------------------------------------------------------------------------------------------------------------------------------------------------------------------------------------------------------------------------------------------------------------------------------------------------------------------------------------------------------------|-----|------|-----------|--------|------|------|---------------------------------------------------|-------|----------------------|-------------------------------------------------------------------------------------------------------------------------------------------------------------------------------------|-----|------|-----------|--------|------|------|
| Rsa1.0_00339.1.g11701.t1  | ref[XP_002865608.1] binding protein [Arabidopsis lyrata subsp. lyrata] gi 297311443 gb EFH41867.1  binding protein [Arabidopsis lyrata subsp. lyrata]                                                                                                                                                                                                                                                                                                                                                                                                  | 111 | 1127 | 6.00E-11  | 1015.3 | 32.4 | 35.1 | binding protein                                   | gbpln | Arabidopsis lyrata   | AT5G48120.1   Symbols:   ARM repeat superfamily protein   chr5:19508210-19514774 REVERSE LENGTH=1134                                                                                | 111 | 1134 | 1.00E-12  | 1021.6 | 30.6 | 34.2 |
| Rsa1.0_00339.1.g11702.t1  | gb EOA30702.1  hypothetical protein CARUB_v10013839mg [Capsella rubella]                                                                                                                                                                                                                                                                                                                                                                                                                                                                               | 395 | 408  | 0         | 103.3  | 84.8 | 92.7 | hypothetical protein CARUB_v10013839mg            | gbpln | Capsella rubella     | AT3G19760.1   Symbols: EIF4A-III   eukaryotic initiation factor 4A-III   chr3:6863790-6866242 FORWARD LENGTH=408                                                                    | 395 | 408  | 0         | 103.3  | 84.1 | 92.4 |
| Rsa1.0_00339.1.g11703.t17 | gb EOA29622.1  hypothetical protein CARUB_v10014335mg [Capsella rubella]                                                                                                                                                                                                                                                                                                                                                                                                                                                                               | 611 | 282  | 9.00E-66  | 46.2   | 21.8 | 22.9 | hypothetical protein CARUB_v10014335mg            | gbpln | Capsella rubella     | AT3G53500.2   Symbols: RSZ32, RSZ232, At-RSZ2   RNA-binding (RRM/RBD/RNP motifs) family protein with retrovirus zinc finger-like domain   chr3:19834557-19836507 REVERSE LENGTH=284 | 611 | 284  | 1.00E-62  | 46.5   | 20.5 | 22.7 |
| Rsa1.0_00339.1.g11704.t1  | gb EAY82747.1  hypothetical protein Osl_37956 [Oryza sativa Indica Group]                                                                                                                                                                                                                                                                                                                                                                                                                                                                              | 212 | 556  | 5.00E-83  | 262.3  | 67.9 | 81.6 | hypothetical protein Osl_37956                    | gbpln | Oryza sativa         | AT1G80930.1   Symbols:   MIF4G domain-containing protein / MA3 domain-containing protein   chr1:30405774-30409499 REVERSE LENGTH=900                                                | 212 | 900  | 9.00E-84  | 424.5  | 66.5 | 82.1 |
| Rsa1.0_00339.1.g11705.t1  | gb EOA31812.1  hypothetical protein CARUB_v10015035mg [Capsella rubella]                                                                                                                                                                                                                                                                                                                                                                                                                                                                               | 126 | 73   | 6.00E-15  | 57.9   | 50.0 | 50.8 | hypothetical protein CARUB_v10015035mg            | gbpln | Capsella rubella     | AT2G37120.1   Symbols:   S1FA-like DNA-binding protein   chr2:15594250-15594815 REVERSE LENGTH=76                                                                                   | 126 | 76   | 4.00E-13  | 60.3   | 39.7 | 46.8 |
| Rsa1.0_00339.1.g11706.t1  | gb EOA29627.1  hypothetical protein CARUB_v10014405mg [Capsella rubella]                                                                                                                                                                                                                                                                                                                                                                                                                                                                               | 265 | 265  | 1.00E-144 | 100.0  | 95.1 | 98.9 | hypothetical protein CARUB_v10014405mg            | gbpln | Capsella rubella     | AT3G09740.1   Symbols: SYP71, ATSYP71   syntaxin of plants 71   chr3:2989615-2991354 FORWARD LENGTH=266                                                                             | 265 | 266  | 1.00E-144 | 100.4  | 95.1 | 98.5 |
| Rsa1.0_00339.1.g11707.t1  | ref[NP_566355.1] RING/U-box domain-containing protein [Arabidopsis thaliana] gi 1580927 gb AAL06891.1  At3g09760/F8A24.19 [Arabidopsis thaliana] gi 21360565 gb AAM47479.1  At3g09760/F8A24.19 [Arabidopsis thaliana] gi 66865928 gb AAY57598.1  RING finger family protein [Arabidopsis thaliana] gi 332641288 gb AEE74809.1  RING/U-box domain-containing protein [Arabidopsis thaliana]                                                                                                                                                             | 474 | 491  | 0         | 103.6  | 77.0 | 84.2 | RING/U-box domain-containing protein              | gbpln | Arabidopsis thaliana | AT3G09760.1   Symbols:   RING/U-box superfamily protein   chr3:2992975-2995451 REVERSE LENGTH=491                                                                                   | 474 | 491  | 0         | 103.6  | 77.0 | 84.2 |
| Rsa1.0_00339.1.g11708.t1  | gb EOA30448.1  hypothetical protein CARUB_v10013573mg [Capsella rubella]                                                                                                                                                                                                                                                                                                                                                                                                                                                                               | 455 | 483  | 1.00E-171 | 106.2  | 74.1 | 80.9 | hypothetical protein CARUB_v10013573mg            | gbpln | Capsella rubella     | AT3G09760.1   Symbols:   RING/U-box superfamily protein   chr3:2992975-2995451 REVERSE LENGTH=491                                                                                   | 455 | 491  | 1.00E-166 | 107.9  | 71.9 | 80.9 |
| Rsa1.0_00339.1.g11709.t1  | gb EOA30784.1  hypothetical protein CARUB_v10013928mg [Capsella rubella]                                                                                                                                                                                                                                                                                                                                                                                                                                                                               | 389 | 384  | 1.00E-144 | 98.7   | 67.6 | 73.3 | hypothetical protein CARUB_v10013928mg            | gbpln | Capsella rubella     | AT3G09770.1   Symbols:   RING/U-box superfamily protein   chr3:2996402-2997835 REVERSE LENGTH=388                                                                                   | 389 | 388  | 1.00E-123 | 99.7   | 68.6 | 73.0 |
| Rsa1.0_00339.1.g11710.t1  | ref[NP_187589.1] serine/threonine-protein kinase-like protein CCR1 [Arabidopsis thaliana] gi 75313027 sp Q9S7D9.1 ACCR1_ARAT H RecName: Full=Serine/threonine-protein kinase-like protein CCR1; AltName: Full=Protein CRINKLY 4 RELATED 1; Short=ATCRR1; Flags: Precursor gi 6681340 gb AAF23257.1 AC015985_15 putative protein kinase [Arabidopsis thaliana] gi 6682254 gb AAF23306.1 AC016661_31 putative protein kinase [Arabidopsis thaliana] gi 332641291 gb AEE74812.1  serine/threonine-protein kinase-like protein CCR1 [Arabidopsis thaliana] | 774 | 775  | 0         | 100.1  | 83.2 | 90.2 | serine/threonine-protein kinase-like protein CCR1 | gbpln | Arabidopsis thaliana | AT3G09780.1   Symbols: CCR1, ATCRR1   CRINKLY4 related 1   chr3:3000838-3003165 REVERSE LENGTH=775                                                                                  | 774 | 775  | 0         | 100.1  | 83.2 | 90.2 |
| Rsa1.0_00339.1.g11711.t1  | dbj BAA92778.1  nonclathrin coat protein zeta 1-COP [Brassica rapa]                                                                                                                                                                                                                                                                                                                                                                                                                                                                                    | 184 | 184  | 1.00E-98  | 100.0  | 96.2 | 98.4 | nonclathrin coat protein zeta 1-COP               | gbpln | Brassica rapa        | AT3G09800.1   Symbols:   SNARE-like superfamily protein   chr3:3006731-3007916 REVERSE LENGTH=179                                                                                   | 184 | 179  | 6.00E-96  | 97.3   | 91.8 | 94.6 |
| Rsa1.0_00339.1.g11712.t1  | gb EOA30648.1  hypothetical protein CARUB_v10013785mg [Capsella rubella]                                                                                                                                                                                                                                                                                                                                                                                                                                                                               | 365 | 423  | 0         | 115.9  | 94.2 | 96.4 | hypothetical protein CARUB_v10013785mg            | gbpln | Capsella rubella     | AT3G09810.1   Symbols: IDH-VI   isocitrate dehydrogenase VI   chr3:3008753-3011070 FORWARD LENGTH=374                                                                               | 365 | 374  | 0         | 102.5  | 91.5 | 94.2 |
| Rsa1.0_00339.1.g11713.t1  | #                                                                                                                                                                                                                                                                                                                                                                                                                                                                                                                                                      | #   | #    | #         | #      | #    | -    | ----                                              | ----  | ----                 | #                                                                                                                                                                                   | #   | #    | #         | #      | #    |      |
| Rsa1.0_00339.1.g11714.t1  | #                                                                                                                                                                                                                                                                                                                                                                                                                                                                                                                                                      | #   | #    | #         | #      | #    | -    | ----                                              | ----  | ----                 | #                                                                                                                                                                                   | #   | #    | #         | #      | #    |      |
| Rsa1.0_00339.1.g11715.t1  | gb EOA32117.1  hypothetical protein CARUB_v10015367mg [Capsella rubella]                                                                                                                                                                                                                                                                                                                                                                                                                                                                               | 334 | 371  | 1.00E-134 | 111.1  | 73.1 | 85.3 | hypothetical protein CARUB_v10015367mg            | gbpln | Capsella rubella     | AT1G68960.1   Symbols:   Protein of unknown function (DUF295)   chr1:25929943-25931143 FORWARD LENGTH=376                                                                           | 334 | 376  | 1.00E-101 | 112.6  | 58.4 | 71.6 |
| Rsa1.0_00339.1.g11716.t1  | #                                                                                                                                                                                                                                                                                                                                                                                                                                                                                                                                                      | #   | #    | #         | #      | #    | -    | ----                                              | ----  | ----                 | #                                                                                                                                                                                   | #   | #    | #         | #      | #    |      |
| Rsa1.0_00339.1.g11717.t1  | gb EOA30630.1  hypothetical protein CARUB_v10013766mg [Capsella rubella]                                                                                                                                                                                                                                                                                                                                                                                                                                                                               | 424 | 426  | 0         | 100.5  | 91.7 | 95.0 | hypothetical protein CARUB_v10013766mg            | gbpln | Capsella rubella     | AT3G09830.2   Symbols:   Protein kinase superfamily protein   chr3:3017199-3018696 FORWARD LENGTH=418                                                                               | 424 | 418  | 0         | 98.6   | 89.4 | 94.8 |

|                          |                                                                                                                                                                                                                                                                                                                                                                                                                                                                                                                                                                                                                                                                                                                                                                                                                                                                                                                                                                                                                                                                                                                                                                                                                                                                                                                                                                                                                                                                                                                                                                                                                                                                                                                                                                                                                                                                                                             |     |     |           |       |      |      |                                        |       |                      |                                                                                                                     |     |     |           |       |      |      |
|--------------------------|-------------------------------------------------------------------------------------------------------------------------------------------------------------------------------------------------------------------------------------------------------------------------------------------------------------------------------------------------------------------------------------------------------------------------------------------------------------------------------------------------------------------------------------------------------------------------------------------------------------------------------------------------------------------------------------------------------------------------------------------------------------------------------------------------------------------------------------------------------------------------------------------------------------------------------------------------------------------------------------------------------------------------------------------------------------------------------------------------------------------------------------------------------------------------------------------------------------------------------------------------------------------------------------------------------------------------------------------------------------------------------------------------------------------------------------------------------------------------------------------------------------------------------------------------------------------------------------------------------------------------------------------------------------------------------------------------------------------------------------------------------------------------------------------------------------------------------------------------------------------------------------------------------------|-----|-----|-----------|-------|------|------|----------------------------------------|-------|----------------------|---------------------------------------------------------------------------------------------------------------------|-----|-----|-----------|-------|------|------|
| Rsa1.0_00339.1.g11718.t1 | ref[NP_187595.1] cell division control protein 48-A [Arabidopsis thaliana] gi 1705677 sp P54609.1 CD48A_ARATH RecName: Full=Cell division control protein 48 homolog A; Short=AtCDC48a gi 6681343 gb AAF23260.1 AC015985_18 putative transitional endoplasmic reticulum ATPase [Arabidopsis thaliana] gi 1019904 gb AAC49120.1  cell division cycle protein [Arabidopsis thaliana] gi 17473551 gb AL38252.1  putative transitional endoplasmic reticulum ATPase [Arabidopsis thaliana] gi 20453130 gb AAM19807.1  AT3g09840/F8A24.11 [Arabidopsis thaliana] gi 110735114 gb ABG89127.1  CDC48a [synthetic construct] gi 222424942 dbj BAH20422.1  AT3G09840 [Arabidopsis thaliana] gi 332641299 gb AEE74820.1  cell division control protein 48-A [Arabidopsis thaliana] ref[NP_566359.1] D111/G-patch domain-containing protein [Arabidopsis thaliana] gi 6681334 gb AAF23251.1 AC015985_9 hypothetical protein [Arabidopsis thaliana] gi 15982781 gb AAL09738.1  AT3g09850/F8A24.10 [Arabidopsis thaliana] gi 23308485 gb AAN18212.1  AT3g09850/F8A24.10 [Arabidopsis thaliana] gi 332641300 gb AEE74821.1  D111/G-patch domain-containing protein [Arabidopsis thaliana] ref[NP_187601.1] RAB GTPase-like protein E1E [Arabidopsis thaliana] gi 75204351 sp Q9SF91.1 RAE1E_ARATH RecName: Full=Ras-related protein RABE1e; Short=AtRABE1e; AltName: Full=Ras-related protein Rab8E; Short=AtRab8E gi 6681329 gb AAF23246.1 AC015985_4 putative Ras-like GTP-binding protein [Arabidopsis thaliana] gi 21536596 gb AAM60928.1  putative Ras-like GTP-binding protein [Arabidopsis thaliana] gi 90568022 gb ABD94081.1  At3g09900 [Arabidopsis thaliana] gi 110738463 dbj BAF01157.1  putative Ras-like GTP-binding protein [Arabidopsis thaliana] gi 332641307 gb AEE74828.1  RAB GTPase-like protein E1E [Arabidopsis thaliana] gb EOA31469.1  hypothetical protein CARUB_v10014655mg [Capsella rubella] | 809 | 809 | 0         | 100.0 | 98.9 | 99.5 | cell division control protein 48-A     | gbpln | Arabidopsis thaliana | AT3G09840.1   Symbols: CDC48, ATCDC48, CDC48A   cell division cycle 48   chr3:3019494-3022832 FORWARD LENGTH=809    | 809 | 809 | 0         | 100.0 | 98.9 | 99.5 |
| Rsa1.0_00339.1.g11719.t1 | ref[NP_566359.1] D111/G-patch domain-containing protein [Arabidopsis thaliana] gi 6681334 gb AAF23251.1 AC015985_9 hypothetical protein [Arabidopsis thaliana] gi 15982781 gb AAL09738.1  AT3g09850/F8A24.10 [Arabidopsis thaliana] gi 23308485 gb AAN18212.1  AT3g09850/F8A24.10 [Arabidopsis thaliana] gi 332641300 gb AEE74821.1  D111/G-patch domain-containing protein [Arabidopsis thaliana] ref[NP_187601.1] RAB GTPase-like protein E1E [Arabidopsis thaliana] gi 75204351 sp Q9SF91.1 RAE1E_ARATH RecName: Full=Ras-related protein RABE1e; Short=AtRABE1e; AltName: Full=Ras-related protein Rab8E; Short=AtRab8E gi 6681329 gb AAF23246.1 AC015985_4 putative Ras-like GTP-binding protein [Arabidopsis thaliana] gi 21536596 gb AAM60928.1  putative Ras-like GTP-binding protein [Arabidopsis thaliana] gi 90568022 gb ABD94081.1  At3g09900 [Arabidopsis thaliana] gi 110738463 dbj BAF01157.1  putative Ras-like GTP-binding protein [Arabidopsis thaliana] gi 332641307 gb AEE74828.1  RAB GTPase-like protein E1E [Arabidopsis thaliana]                                                                                                                                                                                                                                                                                                                                                                                                                                                                                                                                                                                                                                                                                                                                                                                                                                                   | 754 | 781 | 0         | 103.6 | 72.9 | 82.9 | D111/G-patch domain-containing protein | gbpln | Arabidopsis thaliana | AT3G09850.1   Symbols:   D111/G-patch domain-containing protein   chr3:3023397-3025742 REVERSE LENGTH=781           | 754 | 781 | 0         | 103.6 | 72.9 | 82.9 |
| Rsa1.0_00339.1.g11720.t1 | ref[NP_187601.1] RAB GTPase-like protein E1E [Arabidopsis thaliana] gi 75204351 sp Q9SF91.1 RAE1E_ARATH RecName: Full=Ras-related protein RABE1e; Short=AtRABE1e; AltName: Full=Ras-related protein Rab8E; Short=AtRab8E gi 6681329 gb AAF23246.1 AC015985_4 putative Ras-like GTP-binding protein [Arabidopsis thaliana] gi 21536596 gb AAM60928.1  putative Ras-like GTP-binding protein [Arabidopsis thaliana] gi 90568022 gb ABD94081.1  At3g09900 [Arabidopsis thaliana] gi 110738463 dbj BAF01157.1  putative Ras-like GTP-binding protein [Arabidopsis thaliana] gi 332641307 gb AEE74828.1  RAB GTPase-like protein E1E [Arabidopsis thaliana]                                                                                                                                                                                                                                                                                                                                                                                                                                                                                                                                                                                                                                                                                                                                                                                                                                                                                                                                                                                                                                                                                                                                                                                                                                                      | 218 | 218 | 1.00E-114 | 100.0 | 96.8 | 98.6 | RAB GTPase-like protein E1E            | gbpln | Arabidopsis thaliana | AT3G09900.1   Symbols: ATRABE1E, ATRAB8E, RABE1e   RAB GTPase homolog E1E   chr3:3034687-3036379 FORWARD LENGTH=218 | 218 | 218 | 1.00E-116 | 100.0 | 96.8 | 98.6 |
| Rsa1.0_00339.1.g11721.t1 | gb EOA31469.1  hypothetical protein CARUB_v10014655mg [Capsella rubella]                                                                                                                                                                                                                                                                                                                                                                                                                                                                                                                                                                                                                                                                                                                                                                                                                                                                                                                                                                                                                                                                                                                                                                                                                                                                                                                                                                                                                                                                                                                                                                                                                                                                                                                                                                                                                                    | 204 | 205 | 9.00E-99  | 100.5 | 92.2 | 96.1 | hypothetical protein CARUB_v10014655mg | gbpln | Capsella rubella     | AT3G09910.3   Symbols: RABC2b   RAB GTPase homolog C2b   chr3:3036864-3038121 REVERSE LENGTH=205                    | 204 | 205 | 1.00E-101 | 100.5 | 91.7 | 95.6 |

|                          |                                                                                                                                                                                                                                                                                                                                                                                                                                                                                                                                                                                                                                                                                                                                                                                                                                                                                                                                                                                                                                                                                                                                                                                                            |     |     |           |       |      |      |                                                       |       |                      |                                                                                                                                                                                                                                                                                                                                              |     |     |           |       |      |      |
|--------------------------|------------------------------------------------------------------------------------------------------------------------------------------------------------------------------------------------------------------------------------------------------------------------------------------------------------------------------------------------------------------------------------------------------------------------------------------------------------------------------------------------------------------------------------------------------------------------------------------------------------------------------------------------------------------------------------------------------------------------------------------------------------------------------------------------------------------------------------------------------------------------------------------------------------------------------------------------------------------------------------------------------------------------------------------------------------------------------------------------------------------------------------------------------------------------------------------------------------|-----|-----|-----------|-------|------|------|-------------------------------------------------------|-------|----------------------|----------------------------------------------------------------------------------------------------------------------------------------------------------------------------------------------------------------------------------------------------------------------------------------------------------------------------------------------|-----|-----|-----------|-------|------|------|
| Rsa1.0_00339.1.g11722.t1 | ref NP_187603.1  phosphatidylinositol-4-phosphate 5-kinase 9 [Arabidopsis thaliana]<br>gi 79313173 ref NP_001030666.1  phosphatidylinositol-4-phosphate 5-kinase 9 [Arabidopsis thaliana]<br>gi 334185202 ref NP_001189852.1  phosphatidylinositol-4-phosphate 5-kinase 9 [Arabidopsis thaliana]<br>gi 78099094 sp Q8L850.2 PIP5K9_ARATH<br>RefName: Full=Phosphatidylinositol 4-phosphate 5-kinase 9; Short=AtPIP5K9; AltName: Full=1-phosphatidylinositol 4-phosphate kinase 9; AltName: Full=Diphosphoinositide kinase 9; AltName: Full=PtdIns(4)P-5-kinase 9<br>gi 6681327 gb AAZ23244.1 AC015985.2 putative phosphatidylinositol-4-phosphate 5-kinase [Arabidopsis thaliana]<br>gi 51490699 emb CAH18644.1  putative phosphatidylinositol-4-phosphate 5-kinase [Arabidopsis thaliana]<br>gi 110739473 dbj BAF01646.1  putative phosphatidylinositol-4-phosphate 5-kinase [Arabidopsis thaliana]<br>gi 332641311 gb AEE74832.1  phosphatidylinositol-4-phosphate 5-kinase 9 [Arabidopsis thaliana]<br>gi 332641312 gb AEE74833.1  phosphatidylinositol-4-phosphate 5-kinase 9 [Arabidopsis thaliana]<br>gi 332641313 gb AEE74834.1  phosphatidylinositol-4-phosphate 5-kinase 9 [Arabidopsis thaliana] | 814 | 815 | 0         | 100.1 | 89.9 | 93.6 | phosphatidylinositol-4-phosphate 5-kinase 9           | gbpln | Arabidopsis thaliana | AT3G09920.3   Symbols: PIP5K9   phosphatidylinositol monophosphate 5 kinase   chr3:3040426-3043676 REVERSE LENGTH=815                                                                                                                                                                                                                        | 814 | 815 | 0         | 100.1 | 89.9 | 93.6 |
| Rsa1.0_00339.1.g11723.t1 | #                                                                                                                                                                                                                                                                                                                                                                                                                                                                                                                                                                                                                                                                                                                                                                                                                                                                                                                                                                                                                                                                                                                                                                                                          | #   | #   | #         | #     | #    | #    | -                                                     | ----  | ----                 | #                                                                                                                                                                                                                                                                                                                                            | #   | #   | #         | #     | #    |      |
| Rsa1.0_00339.1.g11724.t1 | gb EOA32307.1  hypothetical protein CARUB_v10015569mg [Capsella rubella]                                                                                                                                                                                                                                                                                                                                                                                                                                                                                                                                                                                                                                                                                                                                                                                                                                                                                                                                                                                                                                                                                                                                   | 171 | 171 | 5.00E-80  | 100.0 | 83.0 | 91.2 | hypothetical protein CARUB_v10015569mg                | gbpln | Capsella rubella     | AT3G09925.1   Symbols:   Pollen Ole e 1 allergen and extensin family protein   chr3:3051866-3052784 REVERSE LENGTH=171                                                                                                                                                                                                                       | 171 | 171 | 3.00E-76  | 100.0 | 77.8 | 87.7 |
| Rsa1.0_00339.1.g11725.t1 | ref XP_002882645.1  GDSL-motif lipase/hydrolase family protein [Arabidopsis lyrata subsp. lyrata]<br>gi 297328485 gb EFH58904.1  GDSL-motif lipase/hydrolase family protein [Arabidopsis lyrata subsp. lyrata]                                                                                                                                                                                                                                                                                                                                                                                                                                                                                                                                                                                                                                                                                                                                                                                                                                                                                                                                                                                             | 354 | 354 | 1.00E-156 | 100.0 | 77.1 | 86.7 | GDSL-motif lipase/hydrolase family protein            | gbpln | Arabidopsis lyrata   | AT3G09930.1   Symbols:   GDSL-like Lipase/Acylhydrolase superfamily protein   chr3:3053356-3055203 FORWARD LENGTH=354                                                                                                                                                                                                                        | 354 | 354 | 1.00E-154 | 100.0 | 71.2 | 81.4 |
| Rsa1.0_00339.1.g11726.t1 | ref XP_002884767.1  hypothetical protein ARALYDRAFT_897165 [Arabidopsis lyrata subsp. lyrata]<br>gi 297330607 gb EFH61026.1  hypothetical protein ARALYDRAFT_897165 [Arabidopsis lyrata subsp. lyrata]                                                                                                                                                                                                                                                                                                                                                                                                                                                                                                                                                                                                                                                                                                                                                                                                                                                                                                                                                                                                     | 93  | 93  | 2.00E-33  | 100.0 | 77.4 | 84.9 | hypothetical protein ARALYDRAFT_897165                | gbpln | Arabidopsis lyrata   | AT3G09950.1   Symbols:   unknown protein; BEST Arabidopsis thaliana protein match is: unknown protein (TAIR:AT5G41761.1); Has 128 Blast hits to 128 proteins in 12 species: Archae - 0; Bacteria - 0; Metazoa - 0; Fungi - 0; Plants - 128; Viruses - 0; Other Eukaryotes - 0 (source: NCBI BLink).   chr3:3060354-3060632 REVERSE LENGTH=92 | 93  | 92  | 2.00E-35  | 98.9  | 72.0 | 82.8 |
| Rsa1.0_00339.1.g11727.t1 | ref NP_566363.1  calcineurin-like metallo-phosphoesterase-like protein [Arabidopsis thaliana]<br>gi 21553642 gb AAM62735.1  unknown [Arabidopsis thaliana]<br>gi 332641320 gb AEE74841.1  calcineurin-like metallo-phosphoesterase-like protein [Arabidopsis thaliana]                                                                                                                                                                                                                                                                                                                                                                                                                                                                                                                                                                                                                                                                                                                                                                                                                                                                                                                                     | 314 | 311 | 1.00E-142 | 99.0  | 78.0 | 87.3 | calcineurin-like metallo-phosphoesterase-like protein | gbpln | Arabidopsis thaliana | AT3G09960.1   Symbols:   Calcineurin-like metallo-phosphoesterase superfamily protein   chr3:3061990-3063455 FORWARD LENGTH=311                                                                                                                                                                                                              | 314 | 311 | 1.00E-144 | 99.0  | 78.0 | 87.3 |
| Rsa1.0_00339.1.g11728.t1 | gb EOA31074.1  hypothetical protein CARUB_v10014233mg [Capsella rubella]                                                                                                                                                                                                                                                                                                                                                                                                                                                                                                                                                                                                                                                                                                                                                                                                                                                                                                                                                                                                                                                                                                                                   | 309 | 309 | 1.00E-165 | 100.0 | 90.0 | 96.4 | hypothetical protein CARUB_v10014233mg                | gbpln | Capsella rubella     | AT3G09970.1   Symbols:   Calcineurin-like metallo-phosphoesterase superfamily protein   chr3:3063813-3065337 FORWARD LENGTH=309                                                                                                                                                                                                              | 309 | 309 | 1.00E-167 | 100.0 | 89.6 | 95.8 |
| Rsa1.0_00339.1.g11729.t2 | ref XP_002882648.1  hypothetical protein ARALYDRAFT_478325 [Arabidopsis lyrata subsp. lyrata]<br>gi 297328488 gb EFH58907.1  hypothetical protein ARALYDRAFT_478325 [Arabidopsis lyrata subsp. lyrata]                                                                                                                                                                                                                                                                                                                                                                                                                                                                                                                                                                                                                                                                                                                                                                                                                                                                                                                                                                                                     | 178 | 178 | 4.00E-82  | 100.0 | 96.1 | 97.2 | hypothetical protein ARALYDRAFT_478325                | gbpln | Arabidopsis lyrata   | AT3G09980.1   Symbols:   Family of unknown function (DUF682)   chr3:3069358-3071145 FORWARD LENGTH=178                                                                                                                                                                                                                                       | 178 | 178 | 3.00E-84  | 100.0 | 95.5 | 97.2 |

|                          |                                                                                                                                                                                                                                                                                                                                                                                                                                                                                                                                                                                                                                                                                                                                                                                                                                                                                                                                            |     |     |           |       |      |      |                                        |       |                      |                                                                                                                                                                                                                                                                                                                                                                                                                                                                                               |     |     |           |       |      |      |
|--------------------------|--------------------------------------------------------------------------------------------------------------------------------------------------------------------------------------------------------------------------------------------------------------------------------------------------------------------------------------------------------------------------------------------------------------------------------------------------------------------------------------------------------------------------------------------------------------------------------------------------------------------------------------------------------------------------------------------------------------------------------------------------------------------------------------------------------------------------------------------------------------------------------------------------------------------------------------------|-----|-----|-----------|-------|------|------|----------------------------------------|-------|----------------------|-----------------------------------------------------------------------------------------------------------------------------------------------------------------------------------------------------------------------------------------------------------------------------------------------------------------------------------------------------------------------------------------------------------------------------------------------------------------------------------------------|-----|-----|-----------|-------|------|------|
| Rsa1.0_00339.1.g11730.t1 | ref NP_566365.1  uncharacterized protein [Arabidopsis thaliana] gi 6143874 gb AAF0421.1 AC010927.14 unknown protein [Arabidopsis thaliana] gi 15081660 gb AAK82485.1  AT3g10020/T22K18.16 [Arabidopsis thaliana] gi 15529276 gb AAK97732.1  AT3g10020/T22K18.16 [Arabidopsis thaliana] gi 15809812 gb AAL06834.1  AT3g10020/T22K18.16 [Arabidopsis thaliana] gi 20147181 gb AAM10307.1  AT3g10020/T22K18.16 [Arabidopsis thaliana] gi 21594522 gb AAM66017.1  unknown [Arabidopsis thaliana] gi 332641328 gb AEE74849.1  uncharacterized protein AT3G10020 [Arabidopsis thaliana] ref NP_566366.1  aspartate/glutamate/uridylylate kinase-like protein [Arabidopsis thaliana] gi 14030681 gb AAK53015.1 AF375431.1 AT3g10030/T22K18.15 [Arabidopsis thaliana] gi 21464551 gb AAM52230.1  AT3g10030/T22K18.15 [Arabidopsis thaliana] gi 332641330 gb AEE74851.1  aspartate/glutamate/uridylylate kinase-like protein [Arabidopsis thaliana] | 153 | 149 | 1.00E-64  | 97.4  | 81.7 | 88.9 | uncharacterized protein                | gbpln | Arabidopsis thaliana | AT3G10020.1   Symbols:   unknown protein; FUNCTIONS IN: molecular_function unknown; INVOLVED IN: response to oxidative stress, anaerobic respiration; LOCATED IN: cellular_component unknown; EXPRESSED IN: 23 plant structures; EXPRESSED DURING: 13 growth stages; Has 47 Blast hits to 47 proteins in 12 species: Archae - 0; Bacteria - 0; Metazoa - 1; Fungi - 0; Plants - 46; Viruses - 0; Other Eukaryotes - 0 (source: NCBI BLINK).   chr3:3091225-3091674 REVERSE LENGTH=149         | 153 | 149 | 4.00E-67  | 97.4  | 81.7 | 88.9 |
| Rsa1.0_00339.1.g11731.t1 | gb EQA32794.1  hypothetical protein CARUB_v10016104mg [Capsella rubella]                                                                                                                                                                                                                                                                                                                                                                                                                                                                                                                                                                                                                                                                                                                                                                                                                                                                   | 443 | 435 | 1.00E-157 | 98.2  | 72.2 | 81.9 | hypothetical protein CARUB_v10016104mg | gbpln | Capsella rubella     | AT3G10040.1   Symbols:   sequence-specific DNA binding transcription factors   chr3:3096580-3097875 REVERSE LENGTH=431                                                                                                                                                                                                                                                                                                                                                                        | 443 | 431 | 1.00E-154 | 97.3  | 71.6 | 81.0 |
| Rsa1.0_00340.1.g11733.t1 | gb AAM65223.1  unknown [Arabidopsis thaliana]                                                                                                                                                                                                                                                                                                                                                                                                                                                                                                                                                                                                                                                                                                                                                                                                                                                                                              | 342 | 342 | 1.00E-135 | 100.0 | 79.8 | 84.2 | unknown                                | gbpln | Arabidopsis thaliana | AT4G24060.1   Symbols:   Dof-type zinc finger DNA-binding family protein   chr4:12503970-12505417 FORWARD LENGTH=342                                                                                                                                                                                                                                                                                                                                                                          | 342 | 342 | 1.00E-132 | 100.0 | 78.7 | 83.6 |
| Rsa1.0_00340.1.g11734.t8 | gb EOA37750.1  hypothetical protein CARUB_v10012565mg [Capsella rubella]                                                                                                                                                                                                                                                                                                                                                                                                                                                                                                                                                                                                                                                                                                                                                                                                                                                                   | 203 | 679 | 7.00E-17  | 334.5 | 22.7 | 32.0 | hypothetical protein CARUB_v10012565mg | gbpln | Capsella rubella     | #                                                                                                                                                                                                                                                                                                                                                                                                                                                                                             | #   | #   | #         | #     | #    | #    |
| Rsa1.0_00340.1.g11735.t1 | ref XP_002869744.1  ATTRE1 [Arabidopsis lyrata subsp. lyrata] gi 297315580 gb EFH46003.1  ATTRE1 [Arabidopsis lyrata subsp. lyrata]                                                                                                                                                                                                                                                                                                                                                                                                                                                                                                                                                                                                                                                                                                                                                                                                        | 560 | 628 | 0         | 112.1 | 82.9 | 88.9 | ATTRE1                                 | gbpln | Arabidopsis lyrata   | AT4G24040.1   Symbols: ATTRE1, TRE1   trehalase 1   chr4:12488242-12491060 FORWARD LENGTH=626                                                                                                                                                                                                                                                                                                                                                                                                 | 560 | 626 | 0         | 111.8 | 81.4 | 88.4 |
| Rsa1.0_00340.1.g11736.t1 | ref NP_001119037.1  uncharacterized protein [Arabidopsis thaliana] gi 110737703 dbj BAF00790.1  hypothetical protein [Arabidopsis thaliana] gi 332659443 gb AEE84843.1  uncharacterized protein AT4G24026 [Arabidopsis thaliana]                                                                                                                                                                                                                                                                                                                                                                                                                                                                                                                                                                                                                                                                                                           | 84  | 78  | 6.00E-20  | 92.9  | 71.4 | 82.1 | uncharacterized protein                | gbpln | Arabidopsis thaliana | AT4G24026.1   Symbols:   unknown protein; FUNCTIONS IN: molecular_function unknown; INVOLVED IN: biological_process unknown; LOCATED IN: cellular_component unknown; BEST Arabidopsis thaliana protein match is: unknown protein (TAIR:AT4G10810.1); Has 30201 Blast hits to 17322 proteins in 780 species: Archae - 12; Bacteria - 1396; Metazoa - 17338; Fungi - 3422; Plants - 5037; Viruses - 0; Other Eukaryotes - 2996 (source: NCBI BLINK).   chr4:12486415-12488651 FORWARD LENGTH=78 | 84  | 78  | 9.00E-23  | 92.9  | 71.4 | 82.1 |
| Rsa1.0_00340.1.g11737.t1 | gb EOA15435.1  hypothetical protein CARUB_v10004076mg [Capsella rubella]                                                                                                                                                                                                                                                                                                                                                                                                                                                                                                                                                                                                                                                                                                                                                                                                                                                                   | 906 | 959 | 0         | 105.8 | 86.2 | 90.1 | hypothetical protein CARUB_v10004076mg | gbpln | Capsella rubella     | AT4G24020.1   Symbols: NLP7   NIN like protein 7   chr4:12479904-12483822 FORWARD LENGTH=959                                                                                                                                                                                                                                                                                                                                                                                                  | 906 | 959 | 0         | 105.8 | 84.3 | 89.5 |
| Rsa1.0_00340.1.g11738.t1 | #                                                                                                                                                                                                                                                                                                                                                                                                                                                                                                                                                                                                                                                                                                                                                                                                                                                                                                                                          | #   | #   | #         | #     | #    | #    | -                                      | ----  | ----                 | #                                                                                                                                                                                                                                                                                                                                                                                                                                                                                             | #   | #   | #         | #     | #    | #    |
| Rsa1.0_00340.1.g11739.t1 | gb ABN79278.1  WRKY53 transcription factor [Noccaea caerulescens]                                                                                                                                                                                                                                                                                                                                                                                                                                                                                                                                                                                                                                                                                                                                                                                                                                                                          | 325 | 324 | 1.00E-127 | 99.7  | 73.2 | 83.4 | WRKY53 transcription factor            | gbpln | Noccaea caerulescens | AT4G23810.1   Symbols: WRKY53, ATWRKY53   WRKY family transcription factor   chr4:12392666-12393739 REVERSE LENGTH=324                                                                                                                                                                                                                                                                                                                                                                        | 325 | 324 | 1.00E-122 | 99.7  | 71.1 | 83.1 |
| Rsa1.0_00340.1.g11740.t1 | ref XP_002869763.1  hypothetical protein ARALYDRAFT_492489 [Arabidopsis lyrata subsp. lyrata] gi 297315599 gb EFH46022.1  hypothetical protein ARALYDRAFT_492489 [Arabidopsis lyrata subsp. lyrata]                                                                                                                                                                                                                                                                                                                                                                                                                                                                                                                                                                                                                                                                                                                                        | 432 | 430 | 0         | 99.5  | 85.4 | 93.1 | hypothetical protein ARALYDRAFT_492489 | gbpln | Arabidopsis lyrata   | AT4G23790.1   Symbols: TBL24   TRICHOME BIREFRINGENCE-LIKE 24   chr4:12387870-12389659 FORWARD LENGTH=430                                                                                                                                                                                                                                                                                                                                                                                     | 432 | 430 | 0         | 99.5  | 83.8 | 91.9 |
| Rsa1.0_00340.1.g11741.t1 | #                                                                                                                                                                                                                                                                                                                                                                                                                                                                                                                                                                                                                                                                                                                                                                                                                                                                                                                                          | #   | #   | #         | #     | #    | #    | -                                      | ----  | ----                 | AT4G23770.1   Symbols:   unknown protein; BEST Arabidopsis thaliana protein match is: unknown protein (TAIR:AT4G23780.1); Has 17 Blast hits to 17 proteins in 6 species: Archae - 0; Bacteria - 2; Metazoa - 0; Fungi - 0; Plants - 13; Viruses - 0; Other Eukaryotes - 2 (source: NCBI BLINK).   chr4:12383514-12384050 REVERSE LENGTH=138                                                                                                                                                   | 145 | 138 | 6.00E-12  | 95.2  | 30.3 | 45.5 |

|                          |                                                                                                                                                                                                                                                                                                                                                                                                                                                                                                                                                                                                                                                                                                                            |      |      |           |       |      |      |                                        |       |                      |                                                                                                                                           |      |      |           |       |      |      |
|--------------------------|----------------------------------------------------------------------------------------------------------------------------------------------------------------------------------------------------------------------------------------------------------------------------------------------------------------------------------------------------------------------------------------------------------------------------------------------------------------------------------------------------------------------------------------------------------------------------------------------------------------------------------------------------------------------------------------------------------------------------|------|------|-----------|-------|------|------|----------------------------------------|-------|----------------------|-------------------------------------------------------------------------------------------------------------------------------------------|------|------|-----------|-------|------|------|
| Rsa1.0_00340.1.g11742.t1 | gb AAM61511.1  unknown [Arabidopsis thaliana]                                                                                                                                                                                                                                                                                                                                                                                                                                                                                                                                                                                                                                                                              | 73   | 70   | 2.00E-24  | 95.9  | 78.1 | 84.9 | unknown                                | gbpln | Arabidopsis thaliana | AT4G23760.1   Symbols:   Cox19-like CHCH family protein   chr4:12381845-12382850 FORWARD LENGTH=116                                       | 73   | 116  | 9.00E-27  | 158.9 | 78.1 | 84.9 |
| Rsa1.0_00340.1.g11743.t1 | ref XP_002891107.1  F12K21.17 [Arabidopsis lyrata subsp. lyrata]   gi 297336949 gb EFH67366.1  F12K21.17 [Arabidopsis lyrata subsp. lyrata]                                                                                                                                                                                                                                                                                                                                                                                                                                                                                                                                                                                | 331  | 333  | 6.00E-81  | 100.6 | 50.2 | 64.4 | F12K21.17                              | gbpln | Arabidopsis lyrata   | AT1G34520.1   Symbols:   MBOAT (membrane bound O-acyl transferase) family protein   chr1:12623477-12624487 FORWARD LENGTH=336             | 331  | 336  | 8.00E-83  | 101.5 | 49.2 | 63.4 |
| Rsa1.0_00340.1.g11744.t1 | ref XP_002869765.1  hypothetical protein ARALYDRAFT_492491 [Arabidopsis lyrata subsp. lyrata]   gi 297315601 gb EFH46024.1  hypothetical protein ARALYDRAFT_492491 [Arabidopsis lyrata subsp. lyrata]                                                                                                                                                                                                                                                                                                                                                                                                                                                                                                                      | 310  | 340  | 1.00E-103 | 109.7 | 69.0 | 81.3 | hypothetical protein ARALYDRAFT_492491 | gbpln | Arabidopsis lyrata   | AT4G23750.2   Symbols: CRF2, TMO3   cytokinin response factor 2   chr4:12376751-12377782 FORWARD LENGTH=343                               | 310  | 343  | 1.00E-105 | 110.6 | 69.4 | 81.0 |
| Rsa1.0_00340.1.g11745.t1 | gb EOA16215.1  hypothetical protein CARUB_v10004355mg [Capsella rubella]                                                                                                                                                                                                                                                                                                                                                                                                                                                                                                                                                                                                                                                   | 614  | 635  | 0         | 103.4 | 80.3 | 89.1 | hypothetical protein CARUB_v10004355mg | gbpln | Capsella rubella     | AT4G23740.1   Symbols:   Leucine-rich repeat protein kinase family protein   chr4:12367063-12369159 FORWARD LENGTH=638                    | 614  | 638  | 0         | 103.9 | 80.8 | 88.3 |
| Rsa1.0_00340.1.g11746.t1 | ref XP_002869767.1  aldose 1-epimerase family protein [Arabidopsis lyrata subsp. lyrata]   gi 297315603 gb EFH46026.1  aldose 1-epimerase family protein [Arabidopsis lyrata subsp. lyrata]                                                                                                                                                                                                                                                                                                                                                                                                                                                                                                                                | 305  | 306  | 1.00E-159 | 100.3 | 90.5 | 95.4 | aldose 1-epimerase family protein      | gbpln | Arabidopsis lyrata   | AT4G23730.1   Symbols:   Galactose mutarotase-like superfamily protein   chr4:12362955-12364792 FORWARD LENGTH=306                        | 305  | 306  | 1.00E-160 | 100.3 | 88.9 | 95.1 |
| Rsa1.0_00340.1.g11747.t1 | gb ACP30568.1  disease resistance protein [Brassica rapa subsp. pekinensis]                                                                                                                                                                                                                                                                                                                                                                                                                                                                                                                                                                                                                                                | 1013 | 1030 | 0         | 101.7 | 87.0 | 92.2 | disease resistance protein             | gbpln | Brassica rapa        | AT1G65850.1   Symbols:   Disease resistance protein (TIR-NBS-LRR class) family   chr1:24494734-24498485 FORWARD LENGTH=1036               | 1013 | 1036 | 0         | 102.3 | 46.8 | 64.5 |
| Rsa1.0_00340.1.g11748.t1 | ref NP_194103.2  uncharacterized protein [Arabidopsis thaliana]   gi 55740651 gb AAV63918.1  hypothetical protein At4g23720 [Arabidopsis thaliana]   gi 332659398 gb AEE84798.1  uncharacterized protein AT4G23720 [Arabidopsis thaliana]                                                                                                                                                                                                                                                                                                                                                                                                                                                                                  | 319  | 313  | 1.00E-139 | 98.1  | 77.1 | 86.8 | uncharacterized protein                | gbpln | Arabidopsis thaliana | AT4G23720.1   Symbols:   Protein of unknown function (DUF191)   chr4:12358707-12359648 FORWARD LENGTH=313                                 | 319  | 313  | 1.00E-142 | 98.1  | 77.1 | 86.8 |
| Rsa1.0_00340.1.g11749.t1 | ref NP_194102.1  V-type proton ATPase subunit G2 [Arabidopsis thaliana]   gi 12643367 sp O82629.2 VATG2_ARAT H RecName: Full=V-type proton ATPase subunit G2; Short=V-ATPase subunit G2; AltName: Full=Vacuolar H(+)-ATPase subunit G isoform 2; AltName: Full=Vacuolar proton pump subunit G2   gi 4454040 emb CAA23037.1  V-ATPase subunit G (vag2 gene) [Arabidopsis thaliana]   gi 7269220 emb CAB81289.1  V-ATPase subunit G (vag2 gene) [Arabidopsis thaliana]   gi 27808518 gb AAO24539.1  At4g23710 [Arabidopsis thaliana]   gi 110743678 db BAE99676.1  vacuolar-type H+-ATPase (V-ATPase) subunit G2 [Arabidopsis thaliana]   gi 332659397 gb AEE84797.1  V-type proton ATPase subunit G2 [Arabidopsis thaliana] | 231  | 106  | 8.00E-42  | 45.9  | 39.0 | 41.1 | V-type proton ATPase subunit G2        | gbpln | Arabidopsis thaliana | AT4G23710.1   Symbols: VHA-G2, VAG2, VATG2   vacuolar ATP synthase subunit G2   chr4:12350577-12351354 FORWARD LENGTH=106                 | 231  | 106  | 3.00E-44  | 45.9  | 39.0 | 41.1 |
| Rsa1.0_00340.1.g11750.t1 | gb ACC91238.1  putative cation/hydrogen exchanger [Arabidopsis halleri]                                                                                                                                                                                                                                                                                                                                                                                                                                                                                                                                                                                                                                                    | 825  | 821  | 0         | 99.5  | 86.5 | 92.5 | putative cation/hydrogen exchanger     | gbpln | Arabidopsis halleri  | AT4G23700.1   Symbols: ATCHX17, CHX17   cation/H+ exchanger 17   chr4:12342534-12345616 REVERSE LENGTH=820                                | 825  | 820  | 0         | 99.4  | 87.5 | 93.6 |
| Rsa1.0_00340.1.g11751.t1 | gb ABV89607.1  disease resistance response protein [Brassica rapa]                                                                                                                                                                                                                                                                                                                                                                                                                                                                                                                                                                                                                                                         | 187  | 187  | 5.00E-94  | 100.0 | 95.2 | 98.9 | disease resistance response protein    | gbpln | Brassica rapa        | AT4G23690.1   Symbols:   Disease resistance-responsive (dirigent-like protein) family protein   chr4:12339152-12339715 REVERSE LENGTH=187 | 187  | 187  | 2.00E-94  | 100.0 | 93.6 | 97.3 |
| Rsa1.0_00340.1.g11752.t1 | ref XP_002876975.1  hypothetical protein ARALYDRAFT_484409 [Arabidopsis lyrata subsp. lyrata]   gi 297322813 gb EFH53234.1  hypothetical protein ARALYDRAFT_484409 [Arabidopsis lyrata subsp. lyrata]                                                                                                                                                                                                                                                                                                                                                                                                                                                                                                                      | 151  | 152  | 9.00E-68  | 100.7 | 80.8 | 91.4 | hypothetical protein ARALYDRAFT_484409 | gbpln | Arabidopsis lyrata   | AT3G26450.1   Symbols:   Polyketide cyclase/dehydrase and lipid transport superfamily protein   chr3:9681593-9683299 REVERSE LENGTH=152   | 151  | 152  | 1.00E-68  | 100.7 | 77.5 | 92.1 |
| Rsa1.0_00340.1.g11753.t1 | #                                                                                                                                                                                                                                                                                                                                                                                                                                                                                                                                                                                                                                                                                                                          | #    | #    | #         | #     | #    | #    | -                                      | ----  | ----                 | #                                                                                                                                         | #    | #    | #         | #     | #    | #    |

|                          |                                                                                                                                                                                                                                                                                                          |     |     |           |       |      |      |                                                                                                                                                       |       |                      |                                                                                                                                                                                                                                                                                                                                                                              |     |      |           |       |      |      |
|--------------------------|----------------------------------------------------------------------------------------------------------------------------------------------------------------------------------------------------------------------------------------------------------------------------------------------------------|-----|-----|-----------|-------|------|------|-------------------------------------------------------------------------------------------------------------------------------------------------------|-------|----------------------|------------------------------------------------------------------------------------------------------------------------------------------------------------------------------------------------------------------------------------------------------------------------------------------------------------------------------------------------------------------------------|-----|------|-----------|-------|------|------|
| Rsa1.0_00340.1.g11754.t1 | refXP_002867694.1   hypothetical protein ARALYDRAFT_492500 [Arabidopsis lyrata subsp. lyrata] gi 297313530 gb EFH43953.1   hypothetical protein ARALYDRAFT_492500 [Arabidopsis lyrata subsp. lyrata]                                                                                                     | 151 | 151 | 1.00E-65  | 100.0 | 78.1 | 88.7 | hypothetical protein ARALYDRAFT_492500                                                                                                                | gbpln | Arabidopsis lyrata   | AT4G23680.1   Symbols:   Polyketide cyclase/dehydrase and lipid transport superfamily protein   chr4:12336416-12337417 REVERSE LENGTH=151                                                                                                                                                                                                                                    | 151 | 151  | 2.00E-67  | 100.0 | 76.2 | 88.1 |
| Rsa1.0_00340.1.g11755.t1 | gb EOA16649.1   hypothetical protein CARUB_v10004831mg.partial [Capsella rubella]                                                                                                                                                                                                                        | 319 | 439 | 1.00E-149 | 137.6 | 86.8 | 91.5 | hypothetical protein CARUB_v10004831mg.partial                                                                                                        | gbpln | Capsella rubella     | AT4G23660.2   Symbols: AtPPT1, PPT1   polyprenyltransferase 1   chr4:12328086-12331359 REVERSE LENGTH=407                                                                                                                                                                                                                                                                    | 319 | 407  | 1.00E-147 | 127.6 | 87.5 | 91.8 |
| Rsa1.0_00340.1.g11756.t1 | gb ACC91261.1   putative calcium-dependent protein kinase [Capsella rubella] gi 482552225 gb EOA16418.1   hypothetical protein CARUB_v10004572mg [Capsella rubella]                                                                                                                                      | 532 | 529 | 0         | 99.4  | 91.4 | 95.3 | putative calcium-dependent protein kinase                                                                                                             | gbpln | Capsella rubella     | AT4G23650.1   Symbols: CDPK6, CPK3   calcium-dependent protein kinase 6   chr4:12324967-12327415 REVERSE LENGTH=529                                                                                                                                                                                                                                                          | 532 | 529  | 0         | 99.4  | 90.8 | 94.9 |
| Rsa1.0_00340.1.g11757.t1 | dbj BAJ33905.1   unnamed protein product [Theillungiella halophila]                                                                                                                                                                                                                                      | 182 | 275 | 1.00E-95  | 151.1 | 94.0 | 98.9 | unnamed protein product                                                                                                                               | ----  | ----                 | AT4G23630.1   Symbols: BTI1, RTNLB1   VIRB2-interacting protein 1   chr4:12318070-12319574 FORWARD LENGTH=275                                                                                                                                                                                                                                                                | 182 | 275  | 2.00E-97  | 151.1 | 94.5 | 98.9 |
| Rsa1.0_00340.1.g11758.t4 | gb EOA18433.1   hypothetical protein CARUB_v10006976mg [Capsella rubella]                                                                                                                                                                                                                                | 428 | 410 | 0         | 95.8  | 73.4 | 81.5 | hypothetical protein CARUB_v10006976mg                                                                                                                | gbpln | Capsella rubella     | AT4G23380.1   Symbols:   Protein of Unknown Function (DUF239)   chr4:12214667-12216333 REVERSE LENGTH=400                                                                                                                                                                                                                                                                    | 428 | 400  | 1.00E-180 | 93.5  | 71.0 | 80.4 |
| Rsa1.0_00340.1.g11759.t1 | ref NP_199058.1   putative F-box protein [Arabidopsis thaliana] gi 75170830 sp Q9FIH4.1 FB280_ARATH RecName: Full=Putative F-box protein At5g42430 gi 9759479 dbj BAB10484.1   unnamed protein product [Arabidopsis thaliana] gi 332007427 gb AED94810.1   putative F-box protein [Arabidopsis thaliana] | 406 | 395 | 2.00E-74  | 97.3  | 47.8 | 58.4 | putative F-box protein                                                                                                                                | gbpln | Arabidopsis thaliana | AT5G42430.1   Symbols:   F-box and associated interaction domains-containing protein   chr7:16971312-16972499 REVERSE LENGTH=395                                                                                                                                                                                                                                             | 406 | 395  | 6.00E-77  | 97.3  | 47.8 | 58.4 |
| Rsa1.0_00340.1.g11760.t2 | ref XP_002874691.1   hypothetical protein ARALYDRAFT_489971 [Arabidopsis lyrata subsp. lyrata] gi 297320528 gb EFH50950.1   hypothetical protein ARALYDRAFT_489971 [Arabidopsis lyrata subsp. lyrata]                                                                                                    | 935 | 982 | 0         | 105.0 | 64.1 | 75.4 | hypothetical protein ARALYDRAFT_489971                                                                                                                | gbpln | Arabidopsis lyrata   | AT4G11420.1   Symbols: EIF3A, ATEIF3A-1, EIF3A-1, ATTF3A1, TIF3A1   eukaryotic translation initiation factor 3A   chr4:6947834-6952053 REVERSE LENGTH=987                                                                                                                                                                                                                    | 935 | 987  | 0         | 105.6 | 59.6 | 69.1 |
| Rsa1.0_00340.1.g11761.t1 | ref NP_001190810.1   uncharacterized protein [Arabidopsis thaliana] gi 332659340 gb AEE84740.1   uncharacterized protein AT4G23330 [Arabidopsis thaliana]                                                                                                                                                | 144 | 147 | 2.00E-60  | 102.1 | 83.3 | 90.3 | uncharacterized protein                                                                                                                               | gbpln | Arabidopsis thaliana | AT4G23330.2   Symbols:   unknown protein; FUNCTIONS IN: molecular_function unknown; INVOLVED IN: biological_process unknown; LOCATED IN: cellular_component unknown; EXPRESSED IN: 17 plant structures; EXPRESSED DURING: 9 growth stages; CONTAINS InterPro DOMAIN/s: Protein of unknown function DUF2365 (InterPro:IPRO19314).   chr4:12192136-12193383 FORWARD LENGTH=147 | 144 | 147  | 6.00E-63  | 102.1 | 83.3 | 90.3 |
| Rsa1.0_00340.1.g11762.t1 | gb AAC95354.1   receptor-like protein kinase [Arabidopsis thaliana]                                                                                                                                                                                                                                      | 645 | 684 | 0         | 106.0 | 76.1 | 85.6 | receptor-like protein kinase                                                                                                                          | gbpln | Arabidopsis thaliana | AT4G23250.1   Symbols: EMB1290, DUF26-21, RKC1, CRK17   kinases:protein kinases   chr4:12162004-12167026 REVERSE LENGTH=1035                                                                                                                                                                                                                                                 | 645 | 1035 | 0         | 160.5 | 75.5 | 85.0 |
| Rsa1.0_00340.1.g11763.t1 | sp Q8L710.2 CRK17_ARATH RecName: Full=Cysteine-rich receptor-like protein kinase 17; Short=Cysteine-rich RLK17; AltName: Full=Protein EMBRYO DEFECTIVE 1290; Flags: Precursor                                                                                                                            | 642 | 686 | 0         | 106.9 | 76.2 | 86.1 | RecName: Full=Cysteine-rich receptor-like protein kinase 17; Short=Cysteine-rich RLK17; AltName: Full=Protein EMBRYO DEFECTIVE 1290; Flags: Precursor | ----  | ----                 | AT4G23250.1   Symbols: EMB1290, DUF26-21, RKC1, CRK17   kinases:protein kinases   chr4:12162004-12167026 REVERSE LENGTH=1035                                                                                                                                                                                                                                                 | 642 | 1035 | 0         | 161.2 | 75.4 | 85.4 |
| Rsa1.0_00340.1.g11764.t1 | emb CAA09731.1   receptor-like protein kinase, RLK3 [Arabidopsis thaliana]                                                                                                                                                                                                                               | 660 | 667 | 0         | 101.1 | 60.0 | 71.8 | receptor-like protein kinase, RLK3                                                                                                                    | gbpln | Arabidopsis thaliana | AT4G23190.1   Symbols: CRK11, AT-RLK3   cysteine-rich RLK (RECEPTOR-like protein kinase) 11   chr4:12141197-12143710 REVERSE LENGTH=667                                                                                                                                                                                                                                      | 660 | 667  | 0         | 101.1 | 60.0 | 71.5 |
| Rsa1.0_00340.1.g11765.t1 | gb EOA16195.1   hypothetical protein CARUB_v10004335mg [Capsella rubella]                                                                                                                                                                                                                                | 674 | 649 | 0         | 96.3  | 70.6 | 80.4 | hypothetical protein CARUB_v10004335mg                                                                                                                | gbpln | Capsella rubella     | AT4G23160.1   Symbols: CRK8   cysteine-rich RLK (RECEPTOR-like protein kinase) 8   chr4:12129485-12134086 FORWARD LENGTH=1262                                                                                                                                                                                                                                                | 674 | 1262 | 0         | 187.2 | 68.7 | 78.8 |
| Rsa1.0_00340.1.g11766.t1 | ref XP_002869784.1   hypothetical protein ARALYDRAFT_492546 [Arabidopsis lyrata subsp. lyrata] gi 297315620 gb EFH40043.1   hypothetical protein ARALYDRAFT_492546 [Arabidopsis lyrata subsp. lyrata]                                                                                                    | 658 | 662 | 0         | 100.6 | 80.7 | 87.8 | hypothetical protein ARALYDRAFT_492546                                                                                                                | gbpln | Arabidopsis lyrata   | AT4G23180.1   Symbols: CRK10, RLK4   cysteine-rich RLK (RECEPTOR-like protein kinase) 10   chr4:12138171-12140780 FORWARD LENGTH=669                                                                                                                                                                                                                                         | 658 | 669  | 0         | 101.7 | 75.4 | 84.0 |



|                          |                                                                                                                                                                                                                                                                                                                                                                                                                                                                                                                                                           |     |     |           |       |      |      |                                                |       |                      |                                                                                                                                                                                                                                                                       |     |     |           |       |      |      |
|--------------------------|-----------------------------------------------------------------------------------------------------------------------------------------------------------------------------------------------------------------------------------------------------------------------------------------------------------------------------------------------------------------------------------------------------------------------------------------------------------------------------------------------------------------------------------------------------------|-----|-----|-----------|-------|------|------|------------------------------------------------|-------|----------------------|-----------------------------------------------------------------------------------------------------------------------------------------------------------------------------------------------------------------------------------------------------------------------|-----|-----|-----------|-------|------|------|
| Rsa1.0_00340.1.g11767.t1 | ref[XP_002869787.1] predicted protein [Arabidopsis lyrata subsp. lyrata] gi 297315623 gb EFH46046.1  predicted protein [Arabidopsis lyrata subsp. lyrata]                                                                                                                                                                                                                                                                                                                                                                                                 | 155 | 695 | 2.00E-61  | 448.4 | 71.0 | 83.2 | predicted protein                              | gbpln | Arabidopsis lyrata   | AT4G23140.1   Symbols: CRK6   cysteine-rich RLK (RECEPTOR-like protein kinase) 6   chr4:12121397-12124037 FORWARD LENGTH=674                                                                                                                                          | 155 | 674 | 2.00E-61  | 434.8 | 69.0 | 79.4 |
| Rsa1.0_00341.1.g11768.t1 | ref[XP_002869614.1] F-box family protein [Arabidopsis lyrata subsp. lyrata] gi 297315450 gb EFH45873.1  F-box family protein [Arabidopsis lyrata subsp. lyrata]                                                                                                                                                                                                                                                                                                                                                                                           | 124 | 418 | 1.00E-38  | 337.1 | 69.4 | 77.4 | F-box family protein                           | gbpln | Arabidopsis lyrata   | AT4G26340.1   Symbols:   F-box/RNI-like/FBD-like domains-containing protein   chr4:13324130-13325559 FORWARD LENGTH=419                                                                                                                                               | 124 | 419 | 1.00E-39  | 337.9 | 65.3 | 77.4 |
| Rsa1.0_00341.1.g11769.t1 | ref[NP_567745.1] antitermination NusB domain-containing protein [Arabidopsis thaliana] gi 15450968 gb AAK96755.1  putative protein [Arabidopsis thaliana] gi 30984514 gb AAP42720.1  At4g26370 [Arabidopsis thaliana] gi 332659789 gb AEE85189.1  antitermination NusB domain-containing protein [Arabidopsis thaliana]                                                                                                                                                                                                                                   | 288 | 301 | 1.00E-122 | 104.5 | 84.7 | 91.3 | antitermination NusB domain-containing protein | gbpln | Arabidopsis thaliana | AT4G26370.1   Symbols:   antitermination NusB domain-containing protein   chr4:13334099-13336153 REVERSE LENGTH=301                                                                                                                                                   | 288 | 301 | 1.00E-124 | 104.5 | 84.7 | 91.3 |
| Rsa1.0_00341.1.g11770.t1 | ref[NP_194370.2] RING/U-box domain-containing protein [Arabidopsis thaliana] gi 30687206 ref[NP_849554.1] RING/U-box domain-containing protein [Arabidopsis thaliana] gi 20466682 gb AAM20658.1  putative protein [Arabidopsis thaliana] gi 23198194 gb AAN15624.1  putative protein [Arabidopsis thaliana] gi 222424453 dbj BAH20182.1  AT4G26400 [Arabidopsis thaliana] gi 332659793 gb AEE85193.1  RING/U-box domain-containing protein [Arabidopsis thaliana] gi 332659794 gb AEE85194.1  RING/U-box domain-containing protein [Arabidopsis thaliana] | 337 | 356 | 1.00E-105 | 105.6 | 66.5 | 75.1 | RING/U-box domain-containing protein           | gbpln | Arabidopsis thaliana | AT4G26400.1   Symbols:   RING/U-box superfamily protein   chr4:13344953-13346023 REVERSE LENGTH=356                                                                                                                                                                   | 337 | 356 | 1.00E-107 | 105.6 | 66.5 | 75.1 |
| Rsa1.0_00341.1.g11771.t1 | ref[XP_002869612.1] hypothetical protein ARALYDRAFT_913923 [Arabidopsis lyrata subsp. lyrata] gi 297315448 gb EFH45871.1  hypothetical protein ARALYDRAFT_913923 [Arabidopsis lyrata subsp. lyrata]                                                                                                                                                                                                                                                                                                                                                       | 299 | 263 | 1.00E-123 | 88.0  | 77.6 | 82.3 | hypothetical protein ARALYDRAFT_913923         | gbpln | Arabidopsis lyrata   | AT4G26410.1   Symbols:   Uncharacterised conserved protein UCPO22280   chr4:13346760-13348791 FORWARD LENGTH=263                                                                                                                                                      | 299 | 263 | 1.00E-117 | 88.0  | 75.9 | 81.3 |
| Rsa1.0_00341.1.g11772.t1 | ref[XP_002867565.1] predicted protein [Arabidopsis lyrata subsp. lyrata] gi 297313401 gb EFH43824.1  predicted protein [Arabidopsis lyrata subsp. lyrata]                                                                                                                                                                                                                                                                                                                                                                                                 | 257 | 647 | 1.00E-102 | 251.8 | 83.3 | 90.3 | predicted protein                              | gbpln | Arabidopsis lyrata   | #                                                                                                                                                                                                                                                                     | #   | #   | #         | #     | #    | #    |
| Rsa1.0_00341.1.g11773.t1 | ref[NP_567746.1] COP9 signalosome complex subunit 6b [Arabidopsis thaliana] gi 55976549 sp Q8W1P0.2 CSN6B_ARAT H RecName: Full=COP9 signalosome complex subunit 6b; Short=AtCSN6b; Short=Signalosome subunit 6b gi 18056667 gb AAL58107.1 AF395064.1 CSN complex subunit 6B [Arabidopsis thaliana] gi 21593149 gb AAM65098.1  transcription factor-like [Arabidopsis thaliana] gi 26983852 gb AAN86178.1  unknown protein [Arabidopsis thaliana] gi 332659798 gb AEE85198.1  COP9 signalosome complex subunit 6b [Arabidopsis thaliana]                   | 324 | 317 | 1.00E-158 | 97.8  | 84.0 | 88.6 | COP9 signalosome complex subunit 6b            | gbpln | Arabidopsis thaliana | AT4G26430.1   Symbols: CSN6B   COP9 signalosome subunit 6B   chr4:13355229-13357326 FORWARD LENGTH=317                                                                                                                                                                | 324 | 317 | 1.00E-160 | 97.8  | 84.0 | 88.6 |
| Rsa1.0_00341.1.g11774.t1 | ref[XP_002867564.1] microspore-specific promoter 3 [Arabidopsis lyrata subsp. lyrata] gi 297313400 gb EFH43823.1  microspore-specific promoter 3 [Arabidopsis lyrata subsp. lyrata]                                                                                                                                                                                                                                                                                                                                                                       | 528 | 568 | 0         | 107.6 | 71.2 | 79.7 | microspore-specific promoter 3                 | gbpln | Arabidopsis lyrata   | AT4G26440.1   Symbols: WRKY34, ATWRKY34, MSP3   WRKY DNA-binding protein 34   chr4:13357586-13358550 REVERSE LENGTH=568                                                                                                                                               | 528 | 568 | 0         | 107.6 | 70.5 | 78.6 |
| Rsa1.0_00341.1.g11775.t1 | gb EOA16125.1  hypothetical protein CARUB_v10004258mg [Capsella rubella] gi 482551933 gb EOA16126.1  hypothetical protein CARUB_v10004258mg [Capsella rubella]                                                                                                                                                                                                                                                                                                                                                                                            | 697 | 706 | 0         | 101.3 | 74.9 | 83.1 | hypothetical protein CARUB_v10004258mg         | gbpln | Capsella rubella     | AT4G26450.1   Symbols:   unknown protein; Has 614 Blast hits to 492 proteins in 137 species: Archae - 0; Bacteria - 94; Metazoa - 255; Fungi - 78; Plants - 69; Viruses - 0; Other Eukaryotes - 120 (source: NCBI BLINK).   chr4:13362556-13364920 FORWARD LENGTH=708 | 697 | 708 | 0         | 101.6 | 74.7 | 82.5 |

|                          |                                                                                                                                                                                                                                                                                                                                                                                                                                                                                                                                                                                                                                                                                                                                                                                                                                                                                                                                                                                                                                                                                                                                                                                                                                                                                                                                                                                                                                                                                                                                                                                                                                                                                                                                                                                       |     |     |           |       |      |      |                                                          |       |                      |                                                                                                                                                                                                                                                                          |     |     |           |       |      |      |
|--------------------------|---------------------------------------------------------------------------------------------------------------------------------------------------------------------------------------------------------------------------------------------------------------------------------------------------------------------------------------------------------------------------------------------------------------------------------------------------------------------------------------------------------------------------------------------------------------------------------------------------------------------------------------------------------------------------------------------------------------------------------------------------------------------------------------------------------------------------------------------------------------------------------------------------------------------------------------------------------------------------------------------------------------------------------------------------------------------------------------------------------------------------------------------------------------------------------------------------------------------------------------------------------------------------------------------------------------------------------------------------------------------------------------------------------------------------------------------------------------------------------------------------------------------------------------------------------------------------------------------------------------------------------------------------------------------------------------------------------------------------------------------------------------------------------------|-----|-----|-----------|-------|------|------|----------------------------------------------------------|-------|----------------------|--------------------------------------------------------------------------------------------------------------------------------------------------------------------------------------------------------------------------------------------------------------------------|-----|-----|-----------|-------|------|------|
| Rsa1.0_00341.1.g11776.t1 | ref[NP_001119062.1] GPI-anchored protein LORELEI [Arabidopsis thaliana] gi 259495194 sp B3GS44.1 LRE_ARATH RecName: Full=GPI-anchored protein LORELEI; Flags: Precursor gi 189038616 gb ACD75469.1  GPI-anchored protein LORELEI [Arabidopsis thaliana] gi 332659802 gb AEE85202.1  GPI-anchored protein LORELEI [Arabidopsis thaliana] ref[NP_194377.2] putative calcium-binding protein CML21 [Arabidopsis thaliana] gi 75320017 sp Q52K82.1 CML21_ARATH RecName: Full=Probable calcium-binding protein CML21; AltName: Full=Calmmodulin-like protein 21 gi 62867639 gb AAAY17423.1  At4g26470 [Arabidopsis thaliana] gi 332659804 gb AEE85204.1  putative calcium-binding protein CML21 [Arabidopsis thaliana]                                                                                                                                                                                                                                                                                                                                                                                                                                                                                                                                                                                                                                                                                                                                                                                                                                                                                                                                                                                                                                                                     | 156 | 165 | 2.00E-42  | 105.8 | 52.6 | 65.4 | GPI-anchored protein LORELEI                             | gbpln | Arabidopsis thaliana | AT4G26466.1   Symbols: LRE   lorelei   chr4:13367645-13368629 REVERSE LENGTH=165                                                                                                                                                                                         | 156 | 165 | 5.00E-45  | 105.8 | 52.6 | 65.4 |
| Rsa1.0_00341.1.g11777.t1 | gb[E0A17078.1] hypothetical protein CARUB_v10005327mg [Capsella rubella] ref[NP_201502.1] putative ethylene-responsive transcription factor ERF121 [Arabidopsis thaliana] gi 75262435 sp Q9FGC9.1 EF121_ARATH RecName: Full=Putative ethylene-responsive transcription factor ERF121 gi 9758546 dbj BAB08940.1  AP2 domain transcription factor-like [Arabidopsis thaliana] gi 332010907 gb AED98290.1  putative ethylene-responsive transcription factor ERF121 [Arabidopsis thaliana] ref[NP_179625.1] ethylene-responsive transcription factor ERF120 [Arabidopsis thaliana] gi 75265983 sp Q9SK67.1 EF120_ARATH RecName: Full=Ethylene-responsive transcription factor ERF120 gi 4512700 gb AAD21753.1  putative AP2 domain transcription factor [Arabidopsis thaliana] gi 48479354 gb AAT44948.1  putative AP2/EREBP transcription factor [Arabidopsis thaliana] gi 88900422 gb ABD57523.1  At2g20350 [Arabidopsis thaliana] gi 330251902 gb AEC06996.1  ethylene-responsive transcription factor ERF120 [Arabidopsis thaliana] ref[NP_179625.1] ethylene-responsive transcription factor ERF120 [Arabidopsis thaliana] gi 75265983 sp Q9SK67.1 EF120_ARATH RecName: Full=Ethylene-responsive transcription factor ERF120 gi 4512700 gb AAD21753.1  putative AP2 domain transcription factor [Arabidopsis thaliana] gi 48479354 gb AAT44948.1  putative AP2/EREBP transcription factor [Arabidopsis thaliana] gi 88900422 gb ABD57523.1  At2g20350 [Arabidopsis thaliana] gi 330251902 gb AEC06996.1  ethylene-responsive transcription factor ERF120 [Arabidopsis thaliana] ref[XP_002867540.1] hypothetical protein ARALYDRAFT_354113 [Arabidopsis lyrata subsp. lyrata] gi 297313376 gb EFH43799.1  hypothetical protein ARALYDRAFT_354113 [Arabidopsis lyrata subsp. lyrata] | 231 | 231 | 1.00E-106 | 100.0 | 83.1 | 87.4 | putative calcium-binding protein CML21                   | gbpln | Arabidopsis thaliana | AT4G26470.1   Symbols:   Calcium-binding EF-hand family protein   chr4:13371377-13372343 FORWARD LENGTH=231                                                                                                                                                              | 231 | 231 | 1.00E-109 | 100.0 | 83.1 | 87.4 |
| Rsa1.0_00341.1.g11778.t1 | gb[E0A17078.1] hypothetical protein CARUB_v10005327mg [Capsella rubella] ref[NP_201502.1] putative ethylene-responsive transcription factor ERF121 [Arabidopsis thaliana] gi 75262435 sp Q9FGC9.1 EF121_ARATH RecName: Full=Putative ethylene-responsive transcription factor ERF121 gi 9758546 dbj BAB08940.1  AP2 domain transcription factor-like [Arabidopsis thaliana] gi 332010907 gb AED98290.1  putative ethylene-responsive transcription factor ERF121 [Arabidopsis thaliana] ref[NP_179625.1] ethylene-responsive transcription factor ERF120 [Arabidopsis thaliana] gi 75265983 sp Q9SK67.1 EF120_ARATH RecName: Full=Ethylene-responsive transcription factor ERF120 gi 4512700 gb AAD21753.1  putative AP2 domain transcription factor [Arabidopsis thaliana] gi 48479354 gb AAT44948.1  putative AP2/EREBP transcription factor [Arabidopsis thaliana] gi 88900422 gb ABD57523.1  At2g20350 [Arabidopsis thaliana] gi 330251902 gb AEC06996.1  ethylene-responsive transcription factor ERF120 [Arabidopsis thaliana] ref[NP_179625.1] ethylene-responsive transcription factor ERF120 [Arabidopsis thaliana] gi 75265983 sp Q9SK67.1 EF120_ARATH RecName: Full=Ethylene-responsive transcription factor ERF120 gi 4512700 gb AAD21753.1  putative AP2 domain transcription factor [Arabidopsis thaliana] gi 48479354 gb AAT44948.1  putative AP2/EREBP transcription factor [Arabidopsis thaliana] gi 88900422 gb ABD57523.1  At2g20350 [Arabidopsis thaliana] gi 330251902 gb AEC06996.1  ethylene-responsive transcription factor ERF120 [Arabidopsis thaliana] ref[XP_002867540.1] hypothetical protein ARALYDRAFT_354113 [Arabidopsis lyrata subsp. lyrata] gi 297313376 gb EFH43799.1  hypothetical protein ARALYDRAFT_354113 [Arabidopsis lyrata subsp. lyrata] | 310 | 306 | 1.00E-148 | 98.7  | 91.0 | 94.5 | hypothetical protein CARUB_v10005327mg                   | gbpln | Capsella rubella     | AT4G26480.1   Symbols:   RNA-binding KH domain-containing protein   chr4:13372885-13375793 REVERSE LENGTH=308                                                                                                                                                            | 310 | 308 | 1.00E-150 | 99.4  | 91.0 | 94.2 |
| Rsa1.0_00341.1.g11779.t1 | ref[NP_201502.1] putative ethylene-responsive transcription factor ERF121 [Arabidopsis thaliana] gi 75262435 sp Q9FGC9.1 EF121_ARATH RecName: Full=Putative ethylene-responsive transcription factor ERF121 gi 9758546 dbj BAB08940.1  AP2 domain transcription factor-like [Arabidopsis thaliana] gi 332010907 gb AED98290.1  putative ethylene-responsive transcription factor ERF121 [Arabidopsis thaliana] ref[NP_179625.1] ethylene-responsive transcription factor ERF120 [Arabidopsis thaliana] gi 75265983 sp Q9SK67.1 EF120_ARATH RecName: Full=Ethylene-responsive transcription factor ERF120 gi 4512700 gb AAD21753.1  putative AP2 domain transcription factor [Arabidopsis thaliana] gi 48479354 gb AAT44948.1  putative AP2/EREBP transcription factor [Arabidopsis thaliana] gi 88900422 gb ABD57523.1  At2g20350 [Arabidopsis thaliana] gi 330251902 gb AEC06996.1  ethylene-responsive transcription factor ERF120 [Arabidopsis thaliana] ref[NP_179625.1] ethylene-responsive transcription factor ERF120 [Arabidopsis thaliana] gi 75265983 sp Q9SK67.1 EF120_ARATH RecName: Full=Ethylene-responsive transcription factor ERF120 gi 4512700 gb AAD21753.1  putative AP2 domain transcription factor [Arabidopsis thaliana] gi 48479354 gb AAT44948.1  putative AP2/EREBP transcription factor [Arabidopsis thaliana] gi 88900422 gb ABD57523.1  At2g20350 [Arabidopsis thaliana] gi 330251902 gb AEC06996.1  ethylene-responsive transcription factor ERF120 [Arabidopsis thaliana] ref[XP_002867540.1] hypothetical protein ARALYDRAFT_354113 [Arabidopsis lyrata subsp. lyrata] gi 297313376 gb EFH43799.1  hypothetical protein ARALYDRAFT_354113 [Arabidopsis lyrata subsp. lyrata]                                                                          | 147 | 162 | 1.00E-47  | 110.2 | 67.3 | 78.9 | putative ethylene-responsive transcription factor ERF121 | gbpln | Arabidopsis thaliana | AT5G67010.1   Symbols:   Integrase-type DNA-binding superfamily protein   chr5:26749058-26749616 REVERSE LENGTH=162                                                                                                                                                      | 147 | 162 | 3.00E-50  | 110.2 | 67.3 | 78.9 |
| Rsa1.0_00341.1.g11780.t1 | ref[NP_201502.1] putative ethylene-responsive transcription factor ERF121 [Arabidopsis thaliana] gi 75262435 sp Q9FGC9.1 EF121_ARATH RecName: Full=Putative ethylene-responsive transcription factor ERF121 gi 9758546 dbj BAB08940.1  AP2 domain transcription factor-like [Arabidopsis thaliana] gi 332010907 gb AED98290.1  putative ethylene-responsive transcription factor ERF121 [Arabidopsis thaliana] ref[NP_179625.1] ethylene-responsive transcription factor ERF120 [Arabidopsis thaliana] gi 75265983 sp Q9SK67.1 EF120_ARATH RecName: Full=Ethylene-responsive transcription factor ERF120 gi 4512700 gb AAD21753.1  putative AP2 domain transcription factor [Arabidopsis thaliana] gi 48479354 gb AAT44948.1  putative AP2/EREBP transcription factor [Arabidopsis thaliana] gi 88900422 gb ABD57523.1  At2g20350 [Arabidopsis thaliana] gi 330251902 gb AEC06996.1  ethylene-responsive transcription factor ERF120 [Arabidopsis thaliana] ref[NP_179625.1] ethylene-responsive transcription factor ERF120 [Arabidopsis thaliana] gi 75265983 sp Q9SK67.1 EF120_ARATH RecName: Full=Ethylene-responsive transcription factor ERF120 gi 4512700 gb AAD21753.1  putative AP2 domain transcription factor [Arabidopsis thaliana] gi 48479354 gb AAT44948.1  putative AP2/EREBP transcription factor [Arabidopsis thaliana] gi 88900422 gb ABD57523.1  At2g20350 [Arabidopsis thaliana] gi 330251902 gb AEC06996.1  ethylene-responsive transcription factor ERF120 [Arabidopsis thaliana] ref[XP_002867540.1] hypothetical protein ARALYDRAFT_354113 [Arabidopsis lyrata subsp. lyrata] gi 297313376 gb EFH43799.1  hypothetical protein ARALYDRAFT_354113 [Arabidopsis lyrata subsp. lyrata]                                                                          | 144 | 158 | 6.00E-44  | 109.7 | 68.1 | 82.6 | ethylene-responsive transcription factor ERF120          | gbpln | Arabidopsis thaliana | AT2G20350.1   Symbols:   Integrase-type DNA-binding superfamily protein   chr2:8784769-8785396 FORWARD LENGTH=158                                                                                                                                                        | 144 | 158 | 2.00E-46  | 109.7 | 68.1 | 82.6 |
| Rsa1.0_00341.1.g11781.t1 | ref[NP_201502.1] putative ethylene-responsive transcription factor ERF121 [Arabidopsis thaliana] gi 75262435 sp Q9FGC9.1 EF121_ARATH RecName: Full=Putative ethylene-responsive transcription factor ERF121 gi 9758546 dbj BAB08940.1  AP2 domain transcription factor-like [Arabidopsis thaliana] gi 332010907 gb AED98290.1  putative ethylene-responsive transcription factor ERF121 [Arabidopsis thaliana] ref[NP_179625.1] ethylene-responsive transcription factor ERF120 [Arabidopsis thaliana] gi 75265983 sp Q9SK67.1 EF120_ARATH RecName: Full=Ethylene-responsive transcription factor ERF120 gi 4512700 gb AAD21753.1  putative AP2 domain transcription factor [Arabidopsis thaliana] gi 48479354 gb AAT44948.1  putative AP2/EREBP transcription factor [Arabidopsis thaliana] gi 88900422 gb ABD57523.1  At2g20350 [Arabidopsis thaliana] gi 330251902 gb AEC06996.1  ethylene-responsive transcription factor ERF120 [Arabidopsis thaliana] ref[NP_179625.1] ethylene-responsive transcription factor ERF120 [Arabidopsis thaliana] gi 75265983 sp Q9SK67.1 EF120_ARATH RecName: Full=Ethylene-responsive transcription factor ERF120 gi 4512700 gb AAD21753.1  putative AP2 domain transcription factor [Arabidopsis thaliana] gi 48479354 gb AAT44948.1  putative AP2/EREBP transcription factor [Arabidopsis thaliana] gi 88900422 gb ABD57523.1  At2g20350 [Arabidopsis thaliana] gi 330251902 gb AEC06996.1  ethylene-responsive transcription factor ERF120 [Arabidopsis thaliana] ref[XP_002867540.1] hypothetical protein ARALYDRAFT_354113 [Arabidopsis lyrata subsp. lyrata] gi 297313376 gb EFH43799.1  hypothetical protein ARALYDRAFT_354113 [Arabidopsis lyrata subsp. lyrata]                                                                          | 169 | 158 | 7.00E-47  | 93.5  | 65.1 | 74.0 | ethylene-responsive transcription factor ERF120          | gbpln | Arabidopsis thaliana | AT2G20350.1   Symbols:   Integrase-type DNA-binding superfamily protein   chr2:8784769-8785396 FORWARD LENGTH=158                                                                                                                                                        | 169 | 158 | 3.00E-49  | 93.5  | 65.1 | 74.0 |
| Rsa1.0_00341.1.g11782.t4 | ref[XP_002867540.1] hypothetical protein ARALYDRAFT_354113 [Arabidopsis lyrata subsp. lyrata] gi 297313376 gb EFH43799.1  hypothetical protein ARALYDRAFT_354113 [Arabidopsis lyrata subsp. lyrata]                                                                                                                                                                                                                                                                                                                                                                                                                                                                                                                                                                                                                                                                                                                                                                                                                                                                                                                                                                                                                                                                                                                                                                                                                                                                                                                                                                                                                                                                                                                                                                                   | 415 | 320 | 7.00E-72  | 77.1  | 33.0 | 40.0 | hypothetical protein ARALYDRAFT_354113                   | gbpln | Arabidopsis lyrata   | AT4G26820.1   Symbols:   unknown protein; Has 1807 Blast hits to 1807 proteins in 277 species: Archae - 0; Bacteria - 0; Metazoa - 736; Fungi - 347; Plants - 385; Viruses - 0; Other Eukaryotes - 339 (source: NCBI BLINK).   chr4:13493453-13494181 REVERSE LENGTH=242 | 415 | 242 | 1.00E-71  | 58.3  | 32.5 | 39.5 |

|                           |                                                                                                                                                                                                                                                                                                                                                                                                                                                                                                                                                                                                                                                                                                                                                                                                  |     |     |           |       |      |      |                                             |       |                      |                                                                                                                                                                                                                                                                                                                                                                      |     |     |           |       |      |      |
|---------------------------|--------------------------------------------------------------------------------------------------------------------------------------------------------------------------------------------------------------------------------------------------------------------------------------------------------------------------------------------------------------------------------------------------------------------------------------------------------------------------------------------------------------------------------------------------------------------------------------------------------------------------------------------------------------------------------------------------------------------------------------------------------------------------------------------------|-----|-----|-----------|-------|------|------|---------------------------------------------|-------|----------------------|----------------------------------------------------------------------------------------------------------------------------------------------------------------------------------------------------------------------------------------------------------------------------------------------------------------------------------------------------------------------|-----|-----|-----------|-------|------|------|
| Rsa1.0_00341.1.g11783.t1  | refXP_002867539.1   hydrolase, hydrolyzing O-glycosyl compounds [Arabidopsis lyrata subsp. lyrata] gi 297313375 gb EFH43798.1   hydrolase, hydrolyzing O-glycosyl compounds [Arabidopsis lyrata subsp. lyrata]                                                                                                                                                                                                                                                                                                                                                                                                                                                                                                                                                                                   | 453 | 456 | 0         | 100.7 | 82.8 | 89.4 | hydrolase, hydrolyzing O-glycosyl compounds | gbpln | Arabidopsis lyrata   | AT4G26830.1   Symbols:   O-Glycosyl hydrolases family 17 protein   chr4:13494726-13496487 REVERSE LENGTH=455                                                                                                                                                                                                                                                         | 453 | 455 | 0         | 100.4 | 81.7 | 88.7 |
| Rsa1.0_00341.1.g11784.t1  | emb CAA67923.1   ubiquitin-like protein [Arabidopsis thaliana]                                                                                                                                                                                                                                                                                                                                                                                                                                                                                                                                                                                                                                                                                                                                   | 69  | 104 | 1.00E-17  | 150.7 | 65.2 | 68.1 | ubiquitin-like protein                      | gbpln | Arabidopsis thaliana | AT5G55160.2   Symbols: SUM2, SUMO 2, SUMO2, ATSUMO2   small ubiquitin-like modifier 2   chr5:22383747-22384772 REVERSE LENGTH=116                                                                                                                                                                                                                                    | 69  | 116 | 2.00E-19  | 168.1 | 62.3 | 66.7 |
| Rsa1.0_00341.1.g11785.t1  | dbj BAJ34159.1   unnamed protein product [Thellungiella halophila]                                                                                                                                                                                                                                                                                                                                                                                                                                                                                                                                                                                                                                                                                                                               | 437 | 444 | 0         | 101.6 | 89.9 | 95.0 | unnamed protein product                     | ----  | ----                 | AT4G26850.1   Symbols: VTC2   mannose-1-phosphate guanylyltransferase (GDP):GDP-galactose:mannose-1-phosphate guanylyltransferases:GDP-galactose:glucose-1-phosphate guanylyltransferases:GDP-galactose:myoinositol-1-phosphate guanylyltransferases:glucose-1-phosphate guanylyltransferase   chr4:13499262-13501145 REVERSE LENGTH=442                             | 437 | 442 | 0         | 101.1 | 86.0 | 93.6 |
| Rsa1.0_00341.1.g11786.t10 | refXP_002867534.1   galactosyltransferase family protein [Arabidopsis lyrata subsp. lyrata] gi 297313370 gb EFH43793.1   galactosyltransferase family protein [Arabidopsis lyrata subsp. lyrata] ref NP_194425.1   uncharacterized protein [Arabidopsis thaliana] gi 334186948 ref NP_001190851.1   uncharacterized protein [Arabidopsis thaliana] gi 4455218 emb CAB36541.1   putative protein [Arabidopsis thaliana] gi 7269548 emb CAB79550.1   putative protein [Arabidopsis thaliana] gi 45752618 gb AAS76207.1   At4g26950 [Arabidopsis thaliana] gi 46359801 gb AAS88764.1   At4g26950 [Arabidopsis thaliana] gi 332659874 gb AEE85274.1   uncharacterized protein AT4G26950 [Arabidopsis thaliana] gi 332659875 gb AEE85275.1   uncharacterized protein AT4G26950 [Arabidopsis thaliana] | 434 | 407 | 0         | 93.8  | 84.6 | 88.2 | galactosyltransferase family protein        | gbpln | Arabidopsis lyrata   | AT4G26940.1   Symbols:   Galactosyltransferase family protein   chr4:13529911-13532387 REVERSE LENGTH=407                                                                                                                                                                                                                                                            | 434 | 407 | 0         | 93.8  | 84.1 | 88.0 |
| Rsa1.0_00341.1.g11787.t1  | refXP_002867534.1   galactosyltransferase family protein [Arabidopsis lyrata subsp. lyrata] gi 297313370 gb EFH43793.1   galactosyltransferase family protein [Arabidopsis lyrata subsp. lyrata] ref NP_194425.1   uncharacterized protein [Arabidopsis thaliana] gi 334186948 ref NP_001190851.1   uncharacterized protein [Arabidopsis thaliana] gi 4455218 emb CAB36541.1   putative protein [Arabidopsis thaliana] gi 7269548 emb CAB79550.1   putative protein [Arabidopsis thaliana] gi 45752618 gb AAS76207.1   At4g26950 [Arabidopsis thaliana] gi 46359801 gb AAS88764.1   At4g26950 [Arabidopsis thaliana] gi 332659874 gb AEE85274.1   uncharacterized protein AT4G26950 [Arabidopsis thaliana] gi 332659875 gb AEE85275.1   uncharacterized protein AT4G26950 [Arabidopsis thaliana] | 152 | 144 | 3.00E-47  | 94.7  | 70.4 | 78.3 | uncharacterized protein                     | gbpln | Arabidopsis thaliana | AT4G26950.2   Symbols:   Protein of unknown function, DUF584   chr4:13533643-13534077 REVERSE LENGTH=144                                                                                                                                                                                                                                                             | 152 | 144 | 8.00E-50  | 94.7  | 70.4 | 78.3 |
| Rsa1.0_00341.1.g11788.t1  | refXP_002869584.1   hypothetical protein ARALYDRAFT_492099 [Arabidopsis lyrata subsp. lyrata] gi 297315420 gb EFH45843.1   hypothetical protein ARALYDRAFT_492099 [Arabidopsis lyrata subsp. lyrata]                                                                                                                                                                                                                                                                                                                                                                                                                                                                                                                                                                                             | 994 | 995 | 0         | 100.1 | 85.7 | 92.3 | hypothetical protein ARALYDRAFT_492099      | gbpln | Arabidopsis lyrata   | AT4G26970.1   Symbols: ACO2   aconitase 2   chr4:13543077-13548427 FORWARD LENGTH=995                                                                                                                                                                                                                                                                                | 994 | 995 | 0         | 100.1 | 84.0 | 89.4 |
| Rsa1.0_00341.1.g11789.t1  | refXP_002867531.1   hypothetical protein ARALYDRAFT_492098 [Arabidopsis lyrata subsp. lyrata] gi 297313367 gb EFH43790.1   hypothetical protein ARALYDRAFT_492098 [Arabidopsis lyrata subsp. lyrata]                                                                                                                                                                                                                                                                                                                                                                                                                                                                                                                                                                                             | 365 | 342 | 1.00E-144 | 93.7  | 75.3 | 83.3 | hypothetical protein ARALYDRAFT_492098      | gbpln | Arabidopsis lyrata   | AT4G26980.1   Symbols:   RNI-like superfamily protein   chr4:13548813-13550644 REVERSE LENGTH=343                                                                                                                                                                                                                                                                    | 365 | 343 | 1.00E-141 | 94.0  | 74.5 | 83.0 |
| Rsa1.0_00341.1.g11790.t1  | ref NP_194429.3   uncharacterized protein [Arabidopsis thaliana] gi 19715628 gb AAL91635.1   AT4g26990/F10M23_330 [Arabidopsis thaliana] gi 23506167 gb AAN31095.1   At4g26990/F10M23_330 [Arabidopsis thaliana] gi 332659881 gb AEE85281.1   uncharacterized protein AT4G26990 [Arabidopsis thaliana]                                                                                                                                                                                                                                                                                                                                                                                                                                                                                           | 496 | 474 | 1.00E-167 | 95.6  | 66.7 | 78.4 | uncharacterized protein                     | gbpln | Arabidopsis thaliana | AT4G26990.1   Symbols:   unknown protein; BEST Arabidopsis thaliana protein match is: unknown protein (TAIR:AT5G54920.1); Has 30201 Blast hits to 17322 proteins in 780 species: Archaea - 12; Bacteria - 1396; Metazoa - 17338; Fungi - 3422; Plants - 5037; Viruses - 0; Other Eukaryotes - 2996 (source: NCBI BLINK).   chr4:13551150-13554253 REVERSE LENGTH=474 | 496 | 474 | 1.00E-170 | 95.6  | 66.7 | 78.4 |
| Rsa1.0_00341.1.g11791.t1  | gb EOA16728.1   hypothetical protein CARUB_v10004931mg [Capsella rubella]                                                                                                                                                                                                                                                                                                                                                                                                                                                                                                                                                                                                                                                                                                                        | 413 | 413 | 1.00E-162 | 100.0 | 78.0 | 84.0 | hypothetical protein CARUB_v10004931mg      | gbpln | Capsella rubella     | AT4G27000.1   Symbols: ATRBP45C   RNA-binding (RRM/RBD/RNP motifs) family protein   chr4:13554983-13557763 REVERSE LENGTH=415                                                                                                                                                                                                                                        | 413 | 415 | 1.00E-162 | 100.5 | 77.5 | 82.8 |
| Rsa1.0_00341.1.g11792.t1  | refXP_002880468.1   hypothetical protein ARALYDRAFT_481151 [Arabidopsis lyrata subsp. lyrata] gi 297326307 gb EFH56727.1   hypothetical protein ARALYDRAFT_481151 [Arabidopsis lyrata subsp. lyrata]                                                                                                                                                                                                                                                                                                                                                                                                                                                                                                                                                                                             | 264 | 277 | 1.00E-114 | 104.9 | 75.4 | 84.5 | hypothetical protein ARALYDRAFT_481151      | gbpln | Arabidopsis lyrata   | AT2G22890.1   Symbols:   Kua-ubiquitin conjugating enzyme hybrid localisation domain   chr2:9742500-9743339 REVERSE LENGTH=279                                                                                                                                                                                                                                       | 264 | 279 | 1.00E-116 | 105.7 | 74.2 | 85.2 |

|                          |                                                                                                                                                                                                                                                                                                                                                                                                                                                                                                                                                                                                                                                                                                                                                                                                                                                                                                                                                                                                                                                                                                                                                                                                               |      |      |           |       |      |       |                                                   |       |                      |                                                                                                                                                                                                                                                                                                                                  |      |     |           |       |      |       |
|--------------------------|---------------------------------------------------------------------------------------------------------------------------------------------------------------------------------------------------------------------------------------------------------------------------------------------------------------------------------------------------------------------------------------------------------------------------------------------------------------------------------------------------------------------------------------------------------------------------------------------------------------------------------------------------------------------------------------------------------------------------------------------------------------------------------------------------------------------------------------------------------------------------------------------------------------------------------------------------------------------------------------------------------------------------------------------------------------------------------------------------------------------------------------------------------------------------------------------------------------|------|------|-----------|-------|------|-------|---------------------------------------------------|-------|----------------------|----------------------------------------------------------------------------------------------------------------------------------------------------------------------------------------------------------------------------------------------------------------------------------------------------------------------------------|------|-----|-----------|-------|------|-------|
| Rsa1.0_00341.1.g11793.t1 | gb EOA17310.1  hypothetical protein CARUB_v10005583mg [Capsella rubella]                                                                                                                                                                                                                                                                                                                                                                                                                                                                                                                                                                                                                                                                                                                                                                                                                                                                                                                                                                                                                                                                                                                                      | 250  | 250  | 1.00E-137 | 100.0 | 94.8 | 97.2  | hypothetical protein CARUB_v10005583mg            | gbpln | Capsella rubella     | AT4G27040.4   Symbols: VPS22   EAP30/Vps36 family protein   chr4:13573061-13574576 REVERSE LENGTH=250                                                                                                                                                                                                                            | 250  | 250 | 1.00E-139 | 100.0 | 94.4 | 97.2  |
| Rsa1.0_00341.1.g11794.t3 | ref NP_194437.1  tryptophan synthase beta chain [Arabidopsis thaliana]<br>gi 1174779 sp P25269.2 TRBP2_ARATH RecName: Full=Tryptophan synthase beta chain 2, chloroplastic; Flags: Precursor gi 166894 gb AA32879.1  tryptophan synthase beta-subunit [Arabidopsis thaliana]<br>gi 4490703 emb CAB38837.1  tryptophan synthase beta-subunit (TSB2) [Arabidopsis thaliana]<br>gi 7269560 emb CAB79562.1  tryptophan synthase beta-subunit (TSB2) [Arabidopsis thaliana]<br>gi 21536585 gb AAM60917.1  tryptophan synthase beta-subunit TSB2 [Arabidopsis thaliana]<br>gi 27808592 gb AAO24576.1  At4g27070 [Arabidopsis thaliana]<br>gi 110736231 dbj BAF00086.1  tryptophan synthase beta-subunit [Arabidopsis thaliana]<br>gi 332659896 gb AEE85296.1  tryptophan synthase beta chain [Arabidopsis thaliana]                                                                                                                                                                                                                                                                                                                                                                                                 | 473  | 475  | 0         | 100.4 | 93.7 | 96.6  | tryptophan synthase beta chain                    | gbpln | Arabidopsis thaliana | AT4G27070.1   Symbols: TSB2   tryptophan synthase beta-subunit 2   chr4:13586564-13588619 FORWARD LENGTH=475                                                                                                                                                                                                                     | 473  | 475 | 0         | 100.4 | 93.7 | 96.6  |
| Rsa1.0_00341.1.g11795.t1 | gb EOA17860.1  hypothetical protein CARUB_v10006265mg [Capsella rubella]                                                                                                                                                                                                                                                                                                                                                                                                                                                                                                                                                                                                                                                                                                                                                                                                                                                                                                                                                                                                                                                                                                                                      | 506  | 298  | 1.00E-123 | 58.9  | 53.4 | 55.9  | hypothetical protein CARUB_v10006265mg            | gbpln | Capsella rubella     | AT4G27120.2   Symbols:   CONTAINS InterPro DOMAIN/s: DDRGK domain (InterPro:IPR019153). Has 14775 Blast hits to 8764 proteins in 778 species: Archae - 29; Bacteria - 1878; Metazoa - 5164; Fungi - 1447; Plants - 582; Viruses - 164; Other Eukaryotes - 5511 (source: NCBI BLINK).   chr4:13602210-13604227 REVERSE LENGTH=298 | 506  | 298 | 1.00E-113 | 58.9  | 51.8 | 53.8  |
| Rsa1.0_00341.1.g11796.t1 | ref NP_200287.1  Translation initiation factor SUI1 family protein [Arabidopsis thaliana]<br>gi 186532111 ref NP_00119436.1  Translation initiation factor SUI1 family protein [Arabidopsis thaliana]<br>gi 334188393 ref NP_001190540.1  Translation initiation factor SUI1 family protein [Arabidopsis thaliana]<br>gi 297792937 ref XP_002864353.1  hypothetical protein ARALYDRAFT_495556 [Arabidopsis lyrata subsp. lyrata]<br>gi 9758256 dbj BAB08755.1  protein translation factor Sui1 homolog [Arabidopsis thaliana]<br>gi 29028784 gb AAO64771.1  At5g54760 [Arabidopsis thaliana]<br>gi 297310188 gb EFH40612.1  hypothetical protein ARALYDRAFT_495556 [Arabidopsis lyrata subsp. lyrata]<br>gi 332009153 gb AED96536.1  Translation initiation factor SUI1 family protein [Arabidopsis thaliana]<br>gi 332009154 gb AED96537.1  Translation initiation factor SUI1 family protein [Arabidopsis thaliana]<br>gi 332009155 gb AED96538.1  Translation initiation factor SUI1 family protein [Arabidopsis thaliana]<br>ref XP_002869576.1  2S seed storage protein 3 [Arabidopsis lyrata subsp. lyrata]<br>gi 297315412 gb EFH45835.1  2S seed storage protein 3 [Arabidopsis lyrata subsp. lyrata] | 113  | 113  | 4.00E-59  | 100.0 | 98.2 | 100.0 | Translation initiation factor SUI1 family protein | gbpln | Arabidopsis lyrata   | AT5G54760.3   Symbols:   Translation initiation factor SUI1 family protein   chr5:22244732-22245517 FORWARD LENGTH=113                                                                                                                                                                                                           | 113  | 113 | 7.00E-62  | 100.0 | 98.2 | 100.0 |
| Rsa1.0_00341.1.g11797.t1 | ref XP_002869576.1  2S seed storage protein 3 [Arabidopsis lyrata subsp. lyrata]<br>gi 297315412 gb EFH45835.1  2S seed storage protein 3 [Arabidopsis lyrata subsp. lyrata]                                                                                                                                                                                                                                                                                                                                                                                                                                                                                                                                                                                                                                                                                                                                                                                                                                                                                                                                                                                                                                  | 153  | 158  | 2.00E-52  | 103.3 | 69.3 | 81.0  | 2S seed storage protein 3                         | gbpln | Arabidopsis lyrata   | AT4G27160.1   Symbols: AT2S3, SES3   seed storage albumin 3   chr4:13611836-13612330 FORWARD LENGTH=164                                                                                                                                                                                                                          | 153  | 164 | 2.00E-54  | 107.2 | 68.6 | 82.4  |
| Rsa1.0_00341.1.g11798.t2 | gb ACP30565.1  disease resistance protein [Brassica rapa subsp. pekinensis]                                                                                                                                                                                                                                                                                                                                                                                                                                                                                                                                                                                                                                                                                                                                                                                                                                                                                                                                                                                                                                                                                                                                   | 1130 | 1009 | 0         | 89.3  | 74.6 | 79.6  | disease resistance protein                        | gbpln | Brassica rapa        | AT4G27190.1   Symbols:   NB-ARC domain-containing disease resistance protein   chr4:13620977-13623934 REVERSE LENGTH=985                                                                                                                                                                                                         | 1130 | 985 | 0         | 87.2  | 48.0 | 59.1  |

|                          |                                                                                                                                                                                                                                                                                                                                                                                                                                                                                                                      |     |     |           |       |      |      |                                                                            |       |                      |                                                                                                                                                 |     |     |           |       |      |      |  |
|--------------------------|----------------------------------------------------------------------------------------------------------------------------------------------------------------------------------------------------------------------------------------------------------------------------------------------------------------------------------------------------------------------------------------------------------------------------------------------------------------------------------------------------------------------|-----|-----|-----------|-------|------|------|----------------------------------------------------------------------------|-------|----------------------|-------------------------------------------------------------------------------------------------------------------------------------------------|-----|-----|-----------|-------|------|------|--|
| Rsa1.0_00341.1.g11799.t1 | refNP_194455.2   Rossmann-fold NAD(P)-binding domain-containing protein [Arabidopsis thaliana] gi 23296465 gb AANI3064.1   unknown protein [Arabidopsis thaliana] gi 332659916 gb AEE85316.1   Rossmann-fold NAD(P)-binding domain-containing protein [Arabidopsis thaliana]                                                                                                                                                                                                                                         | 408 | 354 | 1.00E-169 | 86.8  | 70.8 | 77.2 | Rossmann-fold NAD(P)-binding domain-containing protein                     | gbpln | Arabidopsis thaliana | AT4G27250.1   Symbols:   NAD(P)-binding Rossmann-fold superfamily protein   chr4:13642803-13644425 REVERSE LENGTH=354                           | 408 | 354 | 1.00E-171 | 86.8  | 70.8 | 77.2 |  |
| Rsa1.0_00341.1.g11800.t1 | gb ABD65629.1  hypothetical protein 23.t00046 [Brassica oleracea]                                                                                                                                                                                                                                                                                                                                                                                                                                                    | 156 | 147 | 2.00E-30  | 94.2  | 41.7 | 62.2 | hypothetical protein 23.t00046                                             | gbpln | Brassica oleracea    | AT3G24255.1   Symbols:   RNA-directed DNA polymerase (reverse transcriptase)-related family protein   chr3:8789471-8793208 FORWARD LENGTH=746   | 156 | 746 | 1.00E-15  | 478.2 | 26.3 | 36.5 |  |
| Rsa1.0_00341.1.g11801.t1 | gb EOA16217.1  hypothetical protein CARUB_v10004357mg, partial [Capsella rubella]                                                                                                                                                                                                                                                                                                                                                                                                                                    | 623 | 634 | 0         | 101.8 | 94.7 | 96.6 | hypothetical protein CARUB_v10004357mg, partial                            | gbpln | Capsella rubella     | AT4G27260.1   Symbols: GH3.5, WES1   Auxin-responsive GH3 family protein   chr4:13653704-13655892 FORWARD LENGTH=612                            | 623 | 612 | 0         | 98.2  | 94.4 | 96.6 |  |
| Rsa1.0_00341.1.g11802.t1 | # # # # # # # #                                                                                                                                                                                                                                                                                                                                                                                                                                                                                                      |     |     |           |       |      |      | -                                                                          | ----  | ----                 | # # # # # # # #                                                                                                                                 |     |     |           |       |      |      |  |
| Rsa1.0_00341.1.g11803.t1 | gb EOA18934.1  hypothetical protein CARUB_v10007565mg [Capsella rubella]                                                                                                                                                                                                                                                                                                                                                                                                                                             | 555 | 638 | 0         | 115.0 | 62.0 | 69.0 | hypothetical protein CARUB_v10007565mg                                     | gbpln | Capsella rubella     | AT4G27420.1   Symbols:   ABC-2 type transporter family protein   chr4:13712434-13714797 REVERSE LENGTH=638                                      | 555 | 638 | 0         | 115.0 | 60.9 | 68.1 |  |
| Rsa1.0_00341.1.g11804.t1 | # # # # # # # #                                                                                                                                                                                                                                                                                                                                                                                                                                                                                                      |     |     |           |       |      |      | -                                                                          | ----  | ----                 | # # # # # # # #                                                                                                                                 |     |     |           |       |      |      |  |
| Rsa1.0_00341.1.g11805.t1 | refNP_567774.1   uncharacterized protein [Arabidopsis thaliana] gi 17981657 gb AAL51112.1 AF458340.1 At4g27438/At4g27438 [Arabidopsis thaliana] gi 15809978 gb AAJ06916.1  At4g27438 [Arabidopsis thaliana] gi 332659941 gb AEE85341.1   uncharacterized protein AT4G27435 [Arabidopsis thaliana]                                                                                                                                                                                                                    | 204 | 173 | 8.00E-82  | 84.8  | 71.6 | 73.5 | uncharacterized protein                                                    | gbpln | Arabidopsis thaliana | AT4G27435.1   Symbols:   Protein of unknown function (DUF1218)   chr4:13723903-13724872 FORWARD LENGTH=173                                      | 204 | 173 | 3.00E-84  | 84.8  | 71.6 | 73.5 |  |
| Rsa1.0_00341.1.g11806.t1 | refXP_002869561.1   zinc finger family protein [Arabidopsis lyrata subsp. lyrata] gi 297315397 gb EFH45820.1   zinc finger family protein [Arabidopsis lyrata subsp. lyrata]                                                                                                                                                                                                                                                                                                                                         | 245 | 243 | 6.00E-85  | 99.2  | 72.2 | 77.6 | zinc finger family protein                                                 | gbpln | Arabidopsis lyrata   | AT4G27470.1   Symbols: ATRMA3, RMA3   RING membrane-anchored 3   chr4:13735576-13736307 FORWARD LENGTH=243                                      | 245 | 243 | 3.00E-84  | 99.2  | 69.8 | 75.1 |  |
| Rsa1.0_00341.1.g11807.t1 | refNP_194478.3   Core-2/I-branching beta-1,6-N-acetylglucosaminyltransferase family protein [Arabidopsis thaliana] gi 186514118 ref NP_001119069.1   Core-2/I-branching beta-1,6-N-acetylglucosaminyltransferase family protein [Arabidopsis thaliana] gi 332659947 gb AEE85347.1   Core-2/I-branching beta-1,6-N-acetylglucosaminyltransferase family protein [Arabidopsis thaliana] gi 332659948 gb AEE85348.1   Core-2/I-branching beta-1,6-N-acetylglucosaminyltransferase family protein [Arabidopsis thaliana] | 426 | 421 | 0         | 98.8  | 85.2 | 91.1 | Core-2/I-branching beta-1,6-N-acetylglucosaminyltransferase family protein | gbpln | Arabidopsis thaliana | AT4G27480.2   Symbols:   Core-2/I-branching beta-1,6-N-acetylglucosaminyltransferase family protein   chr4:13736835-13738317 REVERSE LENGTH=421 | 426 | 421 | 0         | 98.8  | 85.2 | 91.1 |  |
| Rsa1.0_00341.1.g11808.t1 | gb EOA17279.1  hypothetical protein CARUB_v10005549mg [Capsella rubella]                                                                                                                                                                                                                                                                                                                                                                                                                                             | 177 | 256 | 1.00E-60  | 144.6 | 74.0 | 81.9 | hypothetical protein CARUB_v10005549mg                                     | gbpln | Capsella rubella     | AT4G27490.1   Symbols:   3'-5'-exoribonuclease family protein   chr4:13739961-13741647 FORWARD LENGTH=256                                       | 177 | 256 | 2.00E-61  | 144.6 | 72.9 | 80.8 |  |
| Rsa1.0_00341.1.g11809.t1 | refNP_194480.2   proton pump interactor 1 [Arabidopsis thaliana] gi 75097739 sp Q23144.2 PPI1_ARATH RecName: Full=Proton pump-interactor 1 gi 13992437 emb CAA05145.2   proton pump interactor [Arabidopsis thaliana] gi 15215674 gb AAK91382.1   AT4g27500/F27G19_100 [Arabidopsis thaliana] gi 23505987 gb AAN28853.1   At4g27500/F27G19_100 [Arabidopsis thaliana] gi 332659950 gb AEE85350.1   proton pump interactor 1 [Arabidopsis thaliana]                                                                   | 609 | 612 | 0         | 100.5 | 79.0 | 85.6 | proton pump interactor 1                                                   | gbpln | Arabidopsis thaliana | AT4G27500.1   Symbols: PPI1   proton pump interactor 1   chr4:13743614-13745900 FORWARD LENGTH=612                                              | 609 | 612 | 0         | 100.5 | 79.0 | 85.6 |  |

|                          |                                                                                                                                                                                                                                                                                                                                                                                                                                                                                                                                                                                                                                                                                                                                |      |      |           |       |      |      |                                                       |       |                      |                                                                                                                                                                                                                                                                                                                                                                                                                                                                                                                                                                                                               |      |      |           |       |      |      |
|--------------------------|--------------------------------------------------------------------------------------------------------------------------------------------------------------------------------------------------------------------------------------------------------------------------------------------------------------------------------------------------------------------------------------------------------------------------------------------------------------------------------------------------------------------------------------------------------------------------------------------------------------------------------------------------------------------------------------------------------------------------------|------|------|-----------|-------|------|------|-------------------------------------------------------|-------|----------------------|---------------------------------------------------------------------------------------------------------------------------------------------------------------------------------------------------------------------------------------------------------------------------------------------------------------------------------------------------------------------------------------------------------------------------------------------------------------------------------------------------------------------------------------------------------------------------------------------------------------|------|------|-----------|-------|------|------|
| Rsa1.0_00341.1.g11810.t1 | ref NP_194482.1  early nodulin-like protein 2 [Arabidopsis thaliana]<br>gi 34395735 sp G9T076.1 ENL2_ARATH<br>RecName: Full=Early nodulin-like protein 2; AltName: Full=Phytocyanin-like protein; Flags: Precursor<br>gi 11762218 gb AAG40387.1 AF325035.1<br>AT4g27520 [Arabidopsis thaliana]<br>gi 4469003 emb CAB38264.1  putative protein [Arabidopsis thaliana]<br>gi 7269606 emb CAB81402.1  putative protein [Arabidopsis thaliana]<br>gi 23397249 gb AAN31906.1  unknown protein [Arabidopsis thaliana]<br>gi 24417234 gb AAN60227.1  unknown [Arabidopsis thaliana]<br>gi 56381997 gb AAV85717.1  At4g27520 [Arabidopsis thaliana]<br>gi 332659953 gb AEE85353.1  early nodulin-like protein 2 [Arabidopsis thaliana] | 526  | 349  | 2.00E-82  | 66.3  | 35.9 | 39.9 | early nodulin-like protein 2                          | gbpln | Arabidopsis thaliana | AT4G27520.1   Symbols: ENODL2, AENODL2   early nodulin-like protein 2   chr4:13750668-13751819 REVERSE<br>LENGTH=349                                                                                                                                                                                                                                                                                                                                                                                                                                                                                          | 526  | 349  | 4.00E-85  | 66.3  | 35.9 | 39.9 |
| Rsa1.0_00341.1.g11811.t1 | gb EOA16047.1  hypothetical protein CARUB_v10004177mg [Capsella rubella]                                                                                                                                                                                                                                                                                                                                                                                                                                                                                                                                                                                                                                                       | 818  | 786  | 0         | 96.1  | 82.4 | 89.2 | hypothetical protein CARUB_v10004177mg                | gbpln | Capsella rubella     | AT4G27550.1   Symbols: ATTPS4, TPS4   trehalose-6-phosphatase synthase S4   chr4:13755689-13759740 FORWARD<br>LENGTH=795<br>AT4G27580.1   Symbols:   unknown protein; FUNCTIONS IN: molecular_function unknown; INVOLVED IN: biological_process unknown; LOCATED IN: mitochondrion, cell wall; EXPRESSED IN: 9 plant structures; EXPRESSED DURING: 6 growth stages; Has 30201 Blast hits to 17322 proteins in 780 species: Archae - 12; Bacteria - 1396; Metazoa - 17338; Fungi - 3422; Plants - 5037; Viruses - 0; Other Eukaryotes - 2996 (source: NCBI BLINK).   chr4:13765832-13766306 REVERSE LENGTH=104 | 818  | 795  | 0         | 97.2  | 82.3 | 89.0 |
| Rsa1.0_00341.1.g11812.t1 | emb CAB38270.1  putative protein [Arabidopsis thaliana]<br>gi 7269612 emb CAB81408.1  putative protein [Arabidopsis thaliana]                                                                                                                                                                                                                                                                                                                                                                                                                                                                                                                                                                                                  | 101  | 515  | 2.00E-30  | 509.9 | 80.2 | 84.2 | putative protein                                      | gbpln | Arabidopsis thaliana | AT5G38440.1   Symbols:   Plant self-incompatibility protein S1 family   chr5:15390223-15390624 FORWARD<br>LENGTH=133                                                                                                                                                                                                                                                                                                                                                                                                                                                                                          | 101  | 104  | 5.00E-32  | 103.0 | 80.2 | 84.2 |
| Rsa1.0_00341.1.g11813.t1 | ref NP_198660.1  self-incompatibility S1 family protein [Arabidopsis thaliana]<br>gi 9758922 db BAB09356.1  unnamed protein product [Arabidopsis thaliana]<br>gi 332006934 gb AED94317.1  self-incompatibility S1 family protein [Arabidopsis thaliana]                                                                                                                                                                                                                                                                                                                                                                                                                                                                        | 94   | 133  | 3.00E-22  | 141.5 | 69.1 | 76.6 | self-incompatibility S1 family protein                | gbpln | Arabidopsis thaliana | AT5G38440.1   Symbols:   Plant self-incompatibility protein S1 family   chr5:15390223-15390624 FORWARD<br>LENGTH=133                                                                                                                                                                                                                                                                                                                                                                                                                                                                                          | 94   | 133  | 4.00E-25  | 141.5 | 69.1 | 76.6 |
| Rsa1.0_00341.1.g11814.t1 | ref NP_567780.1  pfkB-like carbohydrate kinase family protein [Arabidopsis thaliana]<br>gi 15450507 gb AAK96546.1  AT4g27600/T29A15.90 [Arabidopsis thaliana]<br>gi 16974333 gb AAL31151.1  AT4g27600/T29A15.90 [Arabidopsis thaliana]<br>gi 332659964 gb AEE85364.1  pfkB-like carbohydrate kinase family protein [Arabidopsis thaliana]                                                                                                                                                                                                                                                                                                                                                                                      | 450  | 471  | 0         | 104.7 | 85.6 | 90.9 | pfkB-like carbohydrate kinase family protein          | gbpln | Arabidopsis thaliana | AT4G27600.1   Symbols: NARA5   pfkB-like carbohydrate kinase family protein   chr4:13782753-13785005 REVERSE<br>LENGTH=471                                                                                                                                                                                                                                                                                                                                                                                                                                                                                    | 450  | 471  | 0         | 104.7 | 85.6 | 90.9 |
| Rsa1.0_00341.1.g11815.t1 | ref XP_002867492.1  hypothetical protein ARALYDRAFT_492028 [Arabidopsis lyrata subsp. lyrata]<br>gi 297313328 gb IEFH43751.1  hypothetical protein ARALYDRAFT_492028 [Arabidopsis lyrata subsp. lyrata]                                                                                                                                                                                                                                                                                                                                                                                                                                                                                                                        | 334  | 337  | 1.00E-150 | 100.9 | 80.5 | 89.5 | hypothetical protein ARALYDRAFT_492028                | gbpln | Arabidopsis lyrata   | AT4G27610.3   Symbols:   unknown protein; FUNCTIONS IN: molecular_function unknown; INVOLVED IN: biological_process unknown; LOCATED IN: cellular_component unknown; BEST Arabidopsis thaliana protein match is: unknown protein (TAIR:AT4G27620.2). Has 1304 Blast hits to 1173 proteins in 200 species: Archae - 14; Bacteria - 115; Metazoa - 628; Fungi - 104; Plants - 95; Viruses - 8; Other Eukaryotes - 340 (source: NCBI BLINK).   chr4:13785648-13787332 REVERSE LENGTH=334                                                                                                                         | 334  | 334  | 1.00E-150 | 100.0 | 80.2 | 88.9 |
| Rsa1.0_00341.1.g11816.t1 | ref NP_194494.2  armadillo/beta-catenin-like repeat-containing protein [Arabidopsis thaliana]<br>gi 17065302 gb AAL32805.1  putative protein [Arabidopsis thaliana]<br>gi 38564254 gb AAR23706.1  At4g27640 [Arabidopsis thaliana]<br>gi 332659973 gb AEE85373.1  armadillo/beta-catenin-like repeat-containing protein [Arabidopsis thaliana]                                                                                                                                                                                                                                                                                                                                                                                 | 1049 | 1048 | 0         | 99.9  | 90.8 | 95.2 | armadillo/beta-catenin-like repeat-containing protein | gbpln | Arabidopsis thaliana | AT4G27640.1   Symbols:   ARM repeat superfamily protein   chr4:13798013-13802976 REVERSE LENGTH=1048                                                                                                                                                                                                                                                                                                                                                                                                                                                                                                          | 1049 | 1048 | 0         | 99.9  | 90.8 | 95.2 |
| Rsa1.0_00341.1.g11817.t1 | gb EOA16827.1  hypothetical protein CARUB_v10005050mg [Capsella rubella]                                                                                                                                                                                                                                                                                                                                                                                                                                                                                                                                                                                                                                                       | 378  | 378  | 0         | 100.0 | 95.0 | 98.1 | hypothetical protein CARUB_v10005050mg                | gbpln | Capsella rubella     | AT4G27650.1   Symbols: PEL1   Eukaryotic release factor 1 (eRF1) family protein   chr4:13803459-13807556 REVERSE<br>LENGTH=378                                                                                                                                                                                                                                                                                                                                                                                                                                                                                | 378  | 378  | 0         | 100.0 | 92.9 | 97.6 |

|                          |                                                                                                                                                                                                     |     |     |          |       |      |      |                                        |       |                      |                                                                                                                                                                                                                                                                                                                                                                                                                                                                                                                                                              |     |     |          |       |      |      |
|--------------------------|-----------------------------------------------------------------------------------------------------------------------------------------------------------------------------------------------------|-----|-----|----------|-------|------|------|----------------------------------------|-------|----------------------|--------------------------------------------------------------------------------------------------------------------------------------------------------------------------------------------------------------------------------------------------------------------------------------------------------------------------------------------------------------------------------------------------------------------------------------------------------------------------------------------------------------------------------------------------------------|-----|-----|----------|-------|------|------|
| Rsa1.0_00341.1.g11818.t1 | ref[XP_002869552.1] hypothetical protein ARALYDRAFT_492020 [Arabidopsis lyrata subsp. lyrata] gi 297315388 gb EFH45811.1  hypothetical protein ARALYDRAFT_492020 [Arabidopsis lyrata subsp. lyrata] | 68  | 62  | 5.00E-20 | 91.2  | 77.9 | 85.3 | hypothetical protein ARALYDRAFT_492020 | gbpln | Arabidopsis lyrata   | AT4G27657.1   Symbols:   unknown protein; FUNCTIONS IN: molecular_function unknown; INVOLVED IN: biological_process unknown; LOCATED IN: endomembrane system; EXPRESSED IN: 15 plant structures; EXPRESSED DURING: 9 growth stages; BEST Arabidopsis thaliana protein match is: unknown protein (TAIR:AT5G54145.1); Has 30201 Blast hits to 17322 proteins in 780 species: Archae - 12; Bacteria - 1396; Metazoa - 17338; Fungi - 3422; Plants - 5037; Viruses - 0; Other Eukaryotes - 2996 (source: NCBI BLink).   chr4:13813124-13813312 FORWARD LENGTH=62 | 68  | 62  | 1.00E-22 | 91.2  | 76.5 | 85.3 |
| Rsa1.0_00341.1.g11819.t1 | gb AAM66967.1  unknown [Arabidopsis thaliana]                                                                                                                                                       | 62  | 62  | 9.00E-20 | 100.0 | 75.8 | 87.1 | unknown                                | gbpln | Arabidopsis thaliana | AT4G27657.1   Symbols:   unknown protein; FUNCTIONS IN: molecular_function unknown; INVOLVED IN: biological_process unknown; LOCATED IN: endomembrane system; EXPRESSED IN: 15 plant structures; EXPRESSED DURING: 9 growth stages; BEST Arabidopsis thaliana protein match is: unknown protein (TAIR:AT5G54145.1); Has 30201 Blast hits to 17322 proteins in 780 species: Archae - 12; Bacteria - 1396; Metazoa - 17338; Fungi - 3422; Plants - 5037; Viruses - 0; Other Eukaryotes - 2996 (source: NCBI BLink).   chr4:13813124-13813312 FORWARD LENGTH=62 | 62  | 62  | 5.00E-20 | 100.0 | 71.0 | 83.9 |
| Rsa1.0_00341.1.g11820.t1 | ref[XP_002869553.1] hypothetical protein ARALYDRAFT_913767 [Arabidopsis lyrata subsp. lyrata] gi 297315389 gb EFH45812.1  hypothetical protein ARALYDRAFT_913767 [Arabidopsis lyrata subsp. lyrata] | 62  | 62  | 1.00E-24 | 100.0 | 87.1 | 95.2 | hypothetical protein ARALYDRAFT_913767 | gbpln | Arabidopsis lyrata   | AT4G27657.1   Symbols:   unknown protein; FUNCTIONS IN: molecular_function unknown; INVOLVED IN: biological_process unknown; LOCATED IN: endomembrane system; EXPRESSED IN: 15 plant structures; EXPRESSED DURING: 9 growth stages; BEST Arabidopsis thaliana protein match is: unknown protein (TAIR:AT5G54145.1); Has 30201 Blast hits to 17322 proteins in 780 species: Archae - 12; Bacteria - 1396; Metazoa - 17338; Fungi - 3422; Plants - 5037; Viruses - 0; Other Eukaryotes - 2996 (source: NCBI BLink).   chr4:13813124-13813312 FORWARD LENGTH=62 | 62  | 62  | 4.00E-25 | 100.0 | 83.9 | 91.9 |
| Rsa1.0_00341.1.g11821.t1 | gb AAM66967.1  unknown [Arabidopsis thaliana]                                                                                                                                                       | 62  | 62  | 3.00E-21 | 100.0 | 82.3 | 91.9 | unknown                                | gbpln | Arabidopsis thaliana | AT4G27657.1   Symbols:   unknown protein; FUNCTIONS IN: molecular_function unknown; INVOLVED IN: biological_process unknown; LOCATED IN: endomembrane system; EXPRESSED IN: 15 plant structures; EXPRESSED DURING: 9 growth stages; BEST Arabidopsis thaliana protein match is: unknown protein (TAIR:AT5G54145.1); Has 30201 Blast hits to 17322 proteins in 780 species: Archae - 12; Bacteria - 1396; Metazoa - 17338; Fungi - 3422; Plants - 5037; Viruses - 0; Other Eukaryotes - 2996 (source: NCBI BLink).   chr4:13813124-13813312 FORWARD LENGTH=62 | 62  | 62  | 6.00E-24 | 100.0 | 83.9 | 91.9 |
| Rsa1.0_00341.1.g11822.t1 | ref[XP_002867486.1] hypothetical protein ARALYDRAFT_492019 [Arabidopsis lyrata subsp. lyrata] gi 297313322 gb EFH43745.1  hypothetical protein ARALYDRAFT_492019 [Arabidopsis lyrata subsp. lyrata] | 174 | 176 | 4.00E-55 | 101.1 | 69.0 | 77.0 | hypothetical protein ARALYDRAFT_492019 | gbpln | Arabidopsis lyrata   | AT4G27660.1   Symbols:   unknown protein; BEST Arabidopsis thaliana protein match is: unknown protein (TAIR:AT5G54150.1); Has 115 Blast hits to 109 proteins in 25 species: Archae - 0; Bacteria - 0; Metazoa - 10; Fungi - 0; Plants - 100; Viruses - 0; Other Eukaryotes - 5 (source: NCBI BLink).   chr4:13817249-13818027 REVERSE LENGTH=182                                                                                                                                                                                                             | 174 | 182 | 3.00E-56 | 104.6 | 58.6 | 63.8 |

|                           |                                                                                                                                                                                                                                                                                                                                                                                                                                                                                                                                                                                                                                                                                                                                                                                                                                                                                                            |     |      |           |       |      |      |                                                                                    |       |                      |                                                                                                                                                                               |     |     |           |       |      |      |
|---------------------------|------------------------------------------------------------------------------------------------------------------------------------------------------------------------------------------------------------------------------------------------------------------------------------------------------------------------------------------------------------------------------------------------------------------------------------------------------------------------------------------------------------------------------------------------------------------------------------------------------------------------------------------------------------------------------------------------------------------------------------------------------------------------------------------------------------------------------------------------------------------------------------------------------------|-----|------|-----------|-------|------|------|------------------------------------------------------------------------------------|-------|----------------------|-------------------------------------------------------------------------------------------------------------------------------------------------------------------------------|-----|-----|-----------|-------|------|------|
| Rsa1.0_00341.1.g11823.t1  | ref NP_194498.1  26S proteasome regulatory particle chain RPT6-like protein [Arabidopsis thaliana] gi 4469019 emb CAB38280.1  putative protein [Arabidopsis thaliana] gi 7269622 emb CAB81418.1  putative protein [Arabidopsis thaliana] gi 20260328 gb AAM13062.1  putative protein [Arabidopsis thaliana] gi 21553404 gb AAM62497.1  26S proteasome regulatory particle chain RPT6-like protein [Arabidopsis thaliana] gi 23197836 gb AAN15445.1  putative protein [Arabidopsis thaliana] gi 110740771 dbj BAE98483.1  hypothetical protein [Arabidopsis thaliana] gi 332659980 gb AEE85380.1  P-loop containing nucleoside triphosphate hydrolases superfamily protein [Arabidopsis thaliana]                                                                                                                                                                                                           | 389 | 398  | 0         | 102.3 | 91.3 | 95.6 | 26S proteasome regulatory particle chain RPT6-like protein                         | gbpln | Arabidopsis thaliana | AT4G27680.1   Symbols:   P-loop containing nucleoside triphosphate hydrolases superfamily protein   chr4:13821263-13823083 FORWARD LENGTH=398                                 | 389 | 398 | 0         | 102.3 | 91.3 | 95.6 |
| Rsa1.0_00341.1.g11824.t1  | gb EOA16839.1  hypothetical protein CARUB_v10005060mg [Capsella rubella]                                                                                                                                                                                                                                                                                                                                                                                                                                                                                                                                                                                                                                                                                                                                                                                                                                   | 366 | 376  | 1.00E-179 | 102.7 | 88.3 | 93.4 | hypothetical protein CARUB_v10005060mg                                             | gbpln | Capsella rubella     | AT4G27760.1   Symbols: FEY, FEY3   NAD(P)-binding Rossmann-fold superfamily protein   chr4:13844151-13846563 FORWARD LENGTH=376                                               | 366 | 376 | 1.00E-179 | 102.7 | 87.2 | 93.2 |
| Rsa1.0_00341.1.g11825.t1  | ref NP_194507.1  acyl-CoA binding protein 2 [Arabidopsis thaliana] gi 75313883 sp Q9STP8.1 ACBP2_ARAT_H RecName: Full=Acyl-CoA-binding domain-containing protein 2; Short=Acyl-CoA binding protein 2 gi 12039032 gb AAG46056.1 AF178947.1 acyl-CoA binding protein ACBP2 [Arabidopsis thaliana] gi 13661742 gb AAK38078.1 AF320561.1 putative membrane-bound acyl-CoA binding protein isoform 2 [Arabidopsis thaliana] gi 4972109 emb CAB43966.1  putative acyl-CoA binding protein [Arabidopsis thaliana] gi 7269631 emb CAB81427.1  putative acyl-CoA binding protein [Arabidopsis thaliana] gi 19699102 gb AAL90917.1  AT4g27780/T2E11_20 [Arabidopsis thaliana] gi 21594802 gb AAM66045.1  putative acyl-CoA binding protein [Arabidopsis thaliana] gi 21689607 gb AAM67425.1  AT4g27780/T2E11_20 [Arabidopsis thaliana] gi 332659991 gb AEE85391.1  acyl-CoA binding protein 2 [Arabidopsis thaliana] | 254 | 354  | 5.00E-98  | 139.4 | 80.7 | 87.0 | acyl-CoA binding protein 2                                                         | gbpln | Arabidopsis thaliana | AT4G27780.1   Symbols: ACBP2   acyl-CoA binding protein 2   chr4:13847774-13849629 FORWARD LENGTH=354                                                                         | 254 | 354 | 1.00E-100 | 139.4 | 80.7 | 87.0 |
| Rsa1.0_00342.1.g11826.t2  | ref XP_002877847.1  starch-excess 4 [Arabidopsis lyrata subsp. lyrata] gi 297323685 gb EFH54106.1  starch-excess 4 [Arabidopsis lyrata subsp. lyrata]                                                                                                                                                                                                                                                                                                                                                                                                                                                                                                                                                                                                                                                                                                                                                      | 214 | 377  | 1.00E-114 | 176.2 | 91.6 | 95.3 | starch-excess 4                                                                    | gbpln | Arabidopsis lyrata   | AT3G52180.1   Symbols: ATPPKIS1, DSP4, SEX4, ATSEX4   dual specificity protein phosphatase (DsPTP1) family protein   chr3:19349884-19353459 REVERSE LENGTH=379                | 214 | 379 | 1.00E-116 | 177.1 | 92.1 | 95.3 |
| Rsa1.0_00342.1.g11827.t17 | gb EOA24621.1  hypothetical protein CARUB_v10017892mg [Capsella rubella]                                                                                                                                                                                                                                                                                                                                                                                                                                                                                                                                                                                                                                                                                                                                                                                                                                   | 113 | 254  | 3.00E-38  | 224.8 | 85.0 | 88.5 | hypothetical protein CARUB_v10017892mg                                             | gbpln | Capsella rubella     | AT3G52150.2   Symbols:   RNA-binding (RRM/RBD/RNP motifs) family protein   chr3:19342074-19343090 FORWARD LENGTH=253                                                          | 113 | 253 | 4.00E-40  | 223.9 | 82.3 | 88.5 |
| Rsa1.0_00342.1.g11828.t1  | ref NP_190781.1  bifunctional inhibitor/lipid-transfer protein/seed storage 2S albumin-like protein [Arabidopsis thaliana] gi 4678942 emb CAB41333.1  5B protein like protein [Arabidopsis thaliana] gi 44917507 gb AAS49078.1  At3g52130 [Arabidopsis thaliana] gi 62320556 dbj BAD95162.1  5B protein like protein [Arabidopsis thaliana] gi 33264537 gb AEE78898.1  bifunctional inhibitor/lipid-transfer protein/seed storage 2S albumin-like protein [Arabidopsis thaliana]                                                                                                                                                                                                                                                                                                                                                                                                                           | 150 | 125  | 9.00E-47  | 83.3  | 72.0 | 73.3 | bifunctional inhibitor/lipid-transfer protein/seed storage 2S albumin-like protein | gbpln | Arabidopsis thaliana | AT3G52130.1   Symbols:   Bifunctional inhibitor/lipid-transfer protein/seed storage 2S albumin superfamily protein   chr3:19332081-19332458 REVERSE LENGTH=125                | 150 | 125 | 3.00E-49  | 83.3  | 72.0 | 73.3 |
| Rsa1.0_00342.1.g11829.t1  | ref XP_002876126.1  hypothetical protein ARALYDRAFT_323761 [Arabidopsis lyrata subsp. lyrata] gi 297321964 gb EFH52385.1  hypothetical protein ARALYDRAFT_323761 [Arabidopsis lyrata subsp. lyrata]                                                                                                                                                                                                                                                                                                                                                                                                                                                                                                                                                                                                                                                                                                        | 488 | 1114 | 0         | 228.3 | 76.0 | 80.7 | hypothetical protein ARALYDRAFT_323761                                             | gbpln | Arabidopsis lyrata   | AT3G52120.1   Symbols:   SWAP (Suppressor-of-White-Apico)/surp domain-containing protein / D111/G-patch domain-containing protein   chr3:19329243-19331738 FORWARD LENGTH=443 | 488 | 443 | 0         | 90.8  | 75.6 | 80.3 |



|                           |                                                                                                                                                                                                                                                                                                                                                                                                                                                                                                                       |     |     |           |        |      |      |                                              |       |                      |                                                                                                                                                                                                                                                                                                                                                                                                       |     |     |           |       |      |      |
|---------------------------|-----------------------------------------------------------------------------------------------------------------------------------------------------------------------------------------------------------------------------------------------------------------------------------------------------------------------------------------------------------------------------------------------------------------------------------------------------------------------------------------------------------------------|-----|-----|-----------|--------|------|------|----------------------------------------------|-------|----------------------|-------------------------------------------------------------------------------------------------------------------------------------------------------------------------------------------------------------------------------------------------------------------------------------------------------------------------------------------------------------------------------------------------------|-----|-----|-----------|-------|------|------|
| Rsa1.0_00342.1.g11830.t1  | gb EOA24248.1  hypothetical protein CARUB_v10017489mg [Capsella rubella]                                                                                                                                                                                                                                                                                                                                                                                                                                              | 354 | 364 | 1.00E-139 | 102.8  | 76.6 | 84.7 | hypothetical protein CARUB_v10017489mg       | gbpln | Capsella rubella     | AT3G52110.1   Symbols:   unknown protein; Has 191 Blast hits to 174 proteins in 54 species: Archae - 0; Bacteria - 7; Metazoa - 45; Fungi - 7; Plants - 40; Viruses - 0; Other Eukaryotes - 92 (source: NCBI BLink).   chr3:19323925-19325632 REVERSE LENGTH=362                                                                                                                                      | 354 | 362 | 1.00E-139 | 102.3 | 75.1 | 84.5 |
| Rsa1.0_00342.1.g11831.t1  | emb CAB41330.1  putative protein [Arabidopsis thaliana]                                                                                                                                                                                                                                                                                                                                                                                                                                                               | 69  | 763 | 7.00E-26  | 1105.8 | 81.2 | 84.1 | putative protein                             | gbpln | Arabidopsis thaliana | AT3G52105.1   Symbols:   unknown protein; FUNCTIONS IN: molecular_function unknown; INVOLVED IN: biological_process unknown; LOCATED IN: endomembrane system; Has 35333 Blast hits to 34131 proteins in 2444 species: Archae - 798; Bacteria - 22429; Metazoa - 974; Fungi - 991; Plants - 531; Viruses - 0; Other Eukaryotes - 9610 (source: NCBI BLink).   chr3:19323394-19323606 FORWARD LENGTH=70 | 69  | 70  | 1.00E-25  | 101.4 | 78.3 | 81.2 |
| Rsa1.0_00342.1.g11832.t4  | ref NP_190778.2  RING/FYVE/PHD zinc finger-containing protein [Arabidopsis thaliana] gi 332645370 gb AEE78891.1  RING/FYVE/PHD zinc finger-containing protein [Arabidopsis thaliana]                                                                                                                                                                                                                                                                                                                                  | 655 | 696 | 0         | 106.3  | 79.4 | 86.3 | RING/FYVE/PHD zinc finger-containing protein | gbpln | Arabidopsis thaliana | AT3G52100.1   Symbols:   RING/FYVE/PHD-type zinc finger family protein   chr3:19319343-19322773 FORWARD LENGTH=696                                                                                                                                                                                                                                                                                    | 655 | 696 | 0         | 106.3 | 79.4 | 86.3 |
| Rsa1.0_00342.1.g11833.t8  | ref XP_002885456.1  hypothetical protein ARALYDRAFT_898613 [Arabidopsis lyrata subsp. lyrata] gi 297331296 gb EFH61715.1  hypothetical protein ARALYDRAFT_898613 [Arabidopsis lyrata subsp. lyrata]                                                                                                                                                                                                                                                                                                                   | 976 | 365 | 0         | 37.4   | 31.5 | 33.6 | hypothetical protein ARALYDRAFT_898613       | gbpln | Arabidopsis lyrata   | AT3G21640.1   Symbols: TWD1, UCU2, FKBP42, ATKFBP42   FKBP-type peptidyl- prolyl cis-trans isomerase family protein   chr3:7619025-7621097 REVERSE LENGTH=365                                                                                                                                                                                                                                         | 976 | 365 | 0         | 37.4  | 31.0 | 33.4 |
| Rsa1.0_00342.1.g11834.t17 | ref XP_002876121.1  hypothetical protein ARALYDRAFT_485561 [Arabidopsis lyrata subsp. lyrata] gi 297321959 gb EFH52380.1  hypothetical protein ARALYDRAFT_485561 [Arabidopsis lyrata subsp. lyrata]                                                                                                                                                                                                                                                                                                                   | 389 | 454 | 1.00E-157 | 116.7  | 76.3 | 84.3 | hypothetical protein ARALYDRAFT_485561       | gbpln | Arabidopsis lyrata   | AT3G52050.1   Symbols:   5'-3' exonuclease family protein   chr3:19305228-19309398 FORWARD LENGTH=425                                                                                                                                                                                                                                                                                                 | 389 | 425 | 1.00E-158 | 109.3 | 73.3 | 79.9 |
| Rsa1.0_00342.1.g11835.t1  | gb EOA25020.1  hypothetical protein CARUB_v10018318mg [Capsella rubella]                                                                                                                                                                                                                                                                                                                                                                                                                                              | 91  | 90  | 3.00E-38  | 98.9   | 83.5 | 92.3 | hypothetical protein CARUB_v10018318mg       | gbpln | Capsella rubella     | AT3G52040.1   Symbols:   unknown protein; Has 37 Blast hits to 37 proteins in 15 species: Archae - 0; Bacteria - 0; Metazoa - 0; Fungi - 0; Plants - 37; Viruses - 0; Other Eukaryotes - 0 (source: NCBI BLink).   chr3:19304368-19304802 REVERSE LENGTH=90                                                                                                                                           | 91  | 90  | 9.00E-40  | 98.9  | 81.3 | 90.1 |
| Rsa1.0_00342.1.g11836.t1  | ref XP_002885549.1  hypothetical protein ARALYDRAFT_342455 [Arabidopsis lyrata subsp. lyrata] gi 297331389 gb EFH61808.1  hypothetical protein ARALYDRAFT_342455 [Arabidopsis lyrata subsp. lyrata]                                                                                                                                                                                                                                                                                                                   | 416 | 494 | 1.00E-90  | 118.8  | 49.8 | 66.1 | hypothetical protein ARALYDRAFT_342455       | gbpln | Arabidopsis lyrata   | AT3G52320.1   Symbols:   F-box and associated interaction domains-containing protein   chr3:19403020-19404192 REVERSE LENGTH=390                                                                                                                                                                                                                                                                      | 416 | 390 | 2.00E-76  | 93.8  | 38.7 | 51.0 |
| Rsa1.0_00342.1.g11837.t1  | gb EOA24272.1  hypothetical protein CARUB_v10017513mg [Capsella rubella]                                                                                                                                                                                                                                                                                                                                                                                                                                              | 326 | 358 | 1.00E-151 | 109.8  | 89.3 | 95.4 | hypothetical protein CARUB_v10017513mg       | gbpln | Capsella rubella     | AT3G51990.1   Symbols:   Protein kinase superfamily protein   chr3:19287899-19289077 FORWARD LENGTH=362                                                                                                                                                                                                                                                                                               | 326 | 362 | 1.00E-151 | 111.0 | 88.0 | 94.5 |
| Rsa1.0_00342.1.g11838.t1  | ref XP_002877838.1  binding protein [Arabidopsis lyrata subsp. lyrata] gi 297323676 gb EFH54097.1  binding protein [Arabidopsis lyrata subsp. lyrata]                                                                                                                                                                                                                                                                                                                                                                 | 382 | 382 | 0         | 100.0  | 85.1 | 91.6 | binding protein                              | gbpln | Arabidopsis lyrata   | AT3G51980.1   Symbols:   ARM repeat superfamily protein   chr3:19285811-19287502 REVERSE LENGTH=382                                                                                                                                                                                                                                                                                                   | 382 | 382 | 0         | 100.0 | 84.0 | 92.1 |
| Rsa1.0_00342.1.g11839.t1  | ref NP_190765.1  acyl-CoA sterol acyl transferase 1 [Arabidopsis thaliana] gi 75209995 ss Q9SV07.1 ASAT1_ARAT H ResName: Full=Acyl-CoA-sterol O-acetyltransferase 1; AltName: Full=Sterol O-acetyltransferase 1 gi 4678926 emb CAB41317.1  hypothetical protein [Arabidopsis thaliana] gi 34365695 gb AAQ65159.1  AT3g51970 [Arabidopsis thaliana] gi 51968422 dbj BAD42903.1  wax synthase-like protein [Arabidopsis thaliana] gi 332645349 gb AEE78870.1  acyl-CoA sterol acyl transferase 1 [Arabidopsis thaliana] | 71  | 345 | 8.00E-14  | 485.9  | 53.5 | 59.2 | acyl-CoA sterol acyl transferase 1           | gbpln | Arabidopsis thaliana | AT3G51970.1   Symbols: ATASAT1, ASAT1, ATASAT1   acyl-CoA sterol acyl transferase 1   chr3:19284420-19285457 FORWARD LENGTH=345                                                                                                                                                                                                                                                                       | 71  | 345 | 1.00E-16  | 485.9 | 53.5 | 59.2 |
| Rsa1.0_00342.1.g11840.t1  | gb EOA24836.1  hypothetical protein CARUB_v10018125mg [Capsella rubella]                                                                                                                                                                                                                                                                                                                                                                                                                                              | 101 | 171 | 4.00E-14  | 169.3  | 54.5 | 62.4 | hypothetical protein CARUB_v10018125mg       | gbpln | Capsella rubella     | AT3G51960.1   Symbols: ATBZIP24, BZIP24   basic leucine zipper 24   chr3:19282828-19284064 REVERSE LENGTH=227                                                                                                                                                                                                                                                                                         | 101 | 227 | 6.00E-15  | 224.8 | 53.5 | 64.4 |

|                          |                                                                                                                                                                                                                                                                                                                                                                         |     |      |           |       |      |      |                                                         |       |                      |                                                                                                                                                                                                                                                                                                                                                     |     |     |           |       |      |      |
|--------------------------|-------------------------------------------------------------------------------------------------------------------------------------------------------------------------------------------------------------------------------------------------------------------------------------------------------------------------------------------------------------------------|-----|------|-----------|-------|------|------|---------------------------------------------------------|-------|----------------------|-----------------------------------------------------------------------------------------------------------------------------------------------------------------------------------------------------------------------------------------------------------------------------------------------------------------------------------------------------|-----|-----|-----------|-------|------|------|
| Rsa1.0_00342.1.g11841.t2 | ref XP_002877836.1  hypothetical protein ARALYDRAFT_485553 [Arabidopsis lyrata subsp. lyrata] gi 297323674 gb EFH54095.1                                                                                                                                                                                                                                                | 535 | 539  | 0         | 100.7 | 87.9 | 92.0 | hypothetical protein ARALYDRAFT_485553                  | gbpln | Arabidopsis lyrata   | AT3G51950.2   Symbols:   Zinc finger (CCH-type) family protein / RNA recognition motif (RRM)-containing protein   chr3:19278244-19280407 REVERSE LENGTH=540                                                                                                                                                                                         | 535 | 540 | 0         | 100.9 | 87.7 | 92.0 |
| Rsa1.0_00342.1.g11842.t1 | dbj BAB08714.1  non-LTR retroelement reverse transcriptase-like protein [Arabidopsis thaliana]                                                                                                                                                                                                                                                                          | 384 | 1197 | 1.00E-39  | 311.7 | 26.3 | 41.9 | non-LTR retroelement reverse transcriptase-like protein | gbpln | Arabidopsis thaliana | AT4G29090.1   Symbols:   Ribonuclease H-like superfamily protein   chr4:14333528-14335255 FORWARD LENGTH=575                                                                                                                                                                                                                                        | 384 | 575 | 1.00E-19  | 149.7 | 21.9 | 35.7 |
| Rsa1.0_00342.1.g11843.t1 | ref XP_002877834.1  oxidoreductase/transition metal ion binding protein [Arabidopsis lyrata subsp. lyrata] gi 297323672 gb EFH54093.1                                                                                                                                                                                                                                   | 407 | 473  | 1.00E-124 | 116.2 | 65.6 | 78.1 | oxidoreductase/transition metal ion binding protein     | gbpln | Arabidopsis lyrata   | AT3G51940.1   Symbols:   unknown protein; BEST Arabidopsis thaliana protein match is: unknown protein (TAIR:AT5G03990.1); Has 215 Blast hits to 164 proteins in 38 species: Archae - 0; Bacteria - 35; Metazoa - 16; Fungi - 18; Plants - 121; Viruses - 0; Other Eukaryotes - 25 (source: NCBI BLINK).   chr3:19273708-19275157 REVERSE LENGTH=453 | 407 | 453 | 1.00E-119 | 111.3 | 64.9 | 76.7 |
| Rsa1.0_00342.1.g11844.t1 | ref NP_190761.1  transducin/WD40 domain-containing protein [Arabidopsis thaliana] gi 4678922 emb CAB41313.1 putative protein [Arabidopsis thaliana] gi 30725344 gb AAP37694.1   At3g51930 [Arabidopsis thaliana] gi 110736561 dbj BAF00246.1                                                                                                                            | 427 | 415  | 0         | 97.2  | 85.5 | 90.2 | transducin/WD40 domain-containing protein               | gbpln | Arabidopsis thaliana | AT3G51930.1   Symbols:   Transducin/WD40 repeat-like superfamily protein   chr3:19271672-19272919 FORWARD LENGTH=415                                                                                                                                                                                                                                | 427 | 415 | 0         | 97.2  | 85.5 | 90.2 |
| Rsa1.0_00342.1.g11845.t1 | #                                                                                                                                                                                                                                                                                                                                                                       | #   | #    | #         | #     | #    | #    | -                                                       | ----  | ----                 | #                                                                                                                                                                                                                                                                                                                                                   | #   | #   | #         | #     | #    |      |
| Rsa1.0_00342.1.g11846.t1 | #                                                                                                                                                                                                                                                                                                                                                                       | #   | #    | #         | #     | #    | #    | -                                                       | ----  | ----                 | #                                                                                                                                                                                                                                                                                                                                                   | #   | #   | #         | #     | #    |      |
| Rsa1.0_00343.1.g11847.t1 | ref NP_177927.1  pollen Ole e 1 allergen and extensin family protein [Arabidopsis thaliana] gi 145327725 ref NP_001077838.1  pollen Ole e 1 allergen and extensin family protein [Arabidopsis thaliana] gi 21592341 gb AAM64292.1  allergen, putative [Arabidopsis thaliana] gi 28416615 gb AAC042838.1    At1g78040 [Arabidopsis thaliana] gi 110743227 dbj BAE99504.1 | 166 | 171  | 1.00E-72  | 103.0 | 78.9 | 89.8 | pollen Ole e 1 allergen and extensin family protein     | gbpln | Arabidopsis thaliana | AT1G78040.2   Symbols:   Pollen Ole e 1 allergen and extensin family protein   chr1:29345593-29346840 FORWARD LENGTH=171                                                                                                                                                                                                                            | 166 | 171 | 4.00E-75  | 103.0 | 78.9 | 89.8 |
| Rsa1.0_00343.1.g11848.t1 | phosphoglycerate mutase 1 like protein [Arabidopsis thaliana] gi 332197939 gb AEE36060.1  pollen Ole e 1 allergen and extensin family protein [Arabidopsis thaliana] gi 332197940 gb AEE36061.1  pollen Ole e 1 allergen and extensin family protein [Arabidopsis thaliana]                                                                                             | 327 | 677  | 1.00E-154 | 207.0 | 82.6 | 89.3 | F28K19.26                                               | gbpln | Arabidopsis thaliana | AT1G78050.1   Symbols:   PGM   phosphoglycerate/bisphosphoglycerate mutase   chr1:29348095-29349592 FORWARD LENGTH=332                                                                                                                                                                                                                              | 327 | 332 | 1.00E-156 | 101.5 | 82.6 | 89.3 |
| Rsa1.0_00343.1.g11849.t1 | gb AAF17689.1 AC009243.16 F28K19.26 [Arabidopsis thaliana]                                                                                                                                                                                                                                                                                                              | 279 | 356  | 3.00E-90  | 127.6 | 77.4 | 84.2 | unnamed protein product                                 | ----  | ----                 | AT1G78080.1   Symbols:   RAP2.4   related to AP2.4   chr1:29364790-29365794 FORWARD LENGTH=334                                                                                                                                                                                                                                                      | 279 | 334 | 2.00E-88  | 119.7 | 74.6 | 83.2 |
| Rsa1.0_00343.1.g11850.t1 | dbj BAJ34031.1  unnamed protein product [Thellungiella halophila]                                                                                                                                                                                                                                                                                                       | 393 | 1142 | 1.00E-117 | 290.6 | 50.1 | 65.6 | reverse transcriptase, putative; 16838-20266            | gbpln | Arabidopsis thaliana | AT4G29090.1   Symbols:   Ribonuclease H-like superfamily protein   chr4:14333528-14335255 FORWARD LENGTH=575                                                                                                                                                                                                                                        | 393 | 575 | 5.00E-50  | 146.3 | 26.2 | 42.2 |
| Rsa1.0_00343.1.g11851.t1 | gb AAG51783.1 AC079679.3 reverse transcriptase, putative; 16838-20266 [Arabidopsis thaliana]                                                                                                                                                                                                                                                                            | 368 | 376  | 0         | 102.2 | 87.0 | 93.2 | hypothetical protein CARUB_v10020479mg                  | gbpln | Capsella rubella     | AT1G78090.1   Symbols:   ATTPPB, TPPB   trehalose-6-phosphate phosphatase   chr1:29373955-29376295 FORWARD LENGTH=374                                                                                                                                                                                                                               | 368 | 374 | 0         | 101.6 | 85.9 | 92.7 |
| Rsa1.0_00343.1.g11852.t1 | #                                                                                                                                                                                                                                                                                                                                                                       | #   | #    | #         | #     | #    | #    | -                                                       | ----  | ----                 | #                                                                                                                                                                                                                                                                                                                                                   | #   | #   | #         | #     | #    |      |
| Rsa1.0_00343.1.g11853.t1 | #                                                                                                                                                                                                                                                                                                                                                                       | #   | #    | #         | #     | #    | #    | -                                                       | ----  | ----                 | #                                                                                                                                                                                                                                                                                                                                                   | #   | #   | #         | #     | #    |      |

|                          |                                                                                                                                                                                                                                                                                                                                                                                                                         |      |      |           |       |      |      |                                                |       |                      |                                                                                                                                                                                                                                                                                                                                                                                                                                                                                                                                                                                                                                                                      |      |     |           |       |      |      |
|--------------------------|-------------------------------------------------------------------------------------------------------------------------------------------------------------------------------------------------------------------------------------------------------------------------------------------------------------------------------------------------------------------------------------------------------------------------|------|------|-----------|-------|------|------|------------------------------------------------|-------|----------------------|----------------------------------------------------------------------------------------------------------------------------------------------------------------------------------------------------------------------------------------------------------------------------------------------------------------------------------------------------------------------------------------------------------------------------------------------------------------------------------------------------------------------------------------------------------------------------------------------------------------------------------------------------------------------|------|-----|-----------|-------|------|------|
| Rsa1.0_00343.1.g11854.t1 | refNP_565169.1  F-box protein [Arabidopsis thaliana] gi175262248 sp Q9C9S2.1 FB91_ARATH RecName: Full=F-box protein At1g78100 gi12324249 gb AAG52096.1 AC012680_7 unknown protein; 22671-23675 [Arabidopsis thaliana] gi15450976 gb AAK96759.1  Unknown protein [Arabidopsis thaliana] gi20148731 gb AAM10256.1  unknown protein [Arabidopsis thaliana] gi332197946 gb AEE36067.1  F-box protein [Arabidopsis thaliana] | 201  | 334  | 2.00E-23  | 166.2 | 32.8 | 36.8 | F-box protein                                  | gbpln | Arabidopsis thaliana | AT1G78100.1   Symbols:   F-box family protein   chr1:29387907-29388911 FORWARD LENGTH=334                                                                                                                                                                                                                                                                                                                                                                                                                                                                                                                                                                            | 201  | 334 | 5.00E-26  | 166.2 | 32.8 | 36.8 |
| Rsa1.0_00343.1.g11855.t1 | gb AAG51754.1 AC068667_33 reverse transcriptase, putative; 100033-105622 [Arabidopsis thaliana]                                                                                                                                                                                                                                                                                                                         | 1742 | 1557 | 0         | 89.4  | 42.1 | 57.7 | reverse transcriptase, putative; 100033-105622 | gbpln | Arabidopsis thaliana | AT4G29090.1   Symbols:   Ribonuclease H-like superfamily protein   chr4:14333528-14335255 FORWARD LENGTH=575<br>AT1G78110.1   Symbols:   unknown protein; FUNCTIONS IN: molecular function unknown; INVOLVED IN: biological process unknown; LOCATED IN: plasma membrane; EXPRESSED IN: 17 plant structures; EXPRESSED DURING: 7 growth stages; BEST Arabidopsis thaliana protein match is: unknown protein (TAIR:AT1G22230.1); Has 5452 Blast hits to 3541 proteins in 289 species: Archae - 4; Bacteria - 165; Metazoa - 1756; Fungi - 532; Plants - 205; Viruses - 141; Other Eukaryotes - 2649 (source: NCBI BLink).   chr1:29391879-29392907 FORWARD LENGTH=342 | 1742 | 575 | 9.00E-75  | 33.0  | 9.8  | 15.0 |
| Rsa1.0_00343.1.g11856.t1 | refXP_002887722.1  hypothetical protein ARALYDRAFT_476978 [Arabidopsis lyrata subsp. lyrata] gi297333563 gb EFH63981.1  hypothetical protein ARALYDRAFT_476978 [Arabidopsis lyrata subsp. lyrata]                                                                                                                                                                                                                       | 310  | 344  | 1.00E-112 | 111.0 | 73.9 | 83.9 | hypothetical protein ARALYDRAFT_476978         | gbpln | Arabidopsis lyrata   | BEST Arabidopsis thaliana protein match is: unknown protein (TAIR:AT1G22230.1); Has 5452 Blast hits to 3541 proteins in 289 species: Archae - 4; Bacteria - 165; Metazoa - 1756; Fungi - 532; Plants - 205; Viruses - 141; Other Eukaryotes - 2649 (source: NCBI BLink).   chr1:29391879-29392907 FORWARD LENGTH=342                                                                                                                                                                                                                                                                                                                                                 | 310  | 342 | 1.00E-111 | 110.3 | 73.5 | 84.5 |
| Rsa1.0_00343.1.g11857.t1 | #                                                                                                                                                                                                                                                                                                                                                                                                                       | #    | #    | #         | #     | #    | #    | -                                              | ----  | ----                 | #                                                                                                                                                                                                                                                                                                                                                                                                                                                                                                                                                                                                                                                                    | #    | #   | #         | #     | #    |      |
| Rsa1.0_00343.1.g11858.t1 | refNP_177937.1  putative transporter [Arabidopsis thaliana] gi12324255 gb AAG52102.1 AC012680_13 putative transporter; 34935-36578 [Arabidopsis thaliana] gi28416565 gb AAO42813.1  At1g78130 [Arabidopsis thaliana] gi110742895 dbj BAE99345.1  transporter like protein [Arabidopsis thaliana] gi332197949 gb AEE36070.1  putative transporter [Arabidopsis thaliana]                                                 | 468  | 490  | 0         | 104.7 | 92.1 | 96.6 | putative transporter                           | gbpln | Arabidopsis thaliana | AT1G78130.1   Symbols: UNE2   Major facilitator superfamily protein   chr1:29400171-29401814 FORWARD LENGTH=490                                                                                                                                                                                                                                                                                                                                                                                                                                                                                                                                                      | 468  | 490 | 0         | 104.7 | 92.1 | 96.6 |
| Rsa1.0_00343.1.g11859.t1 | refXP_002889176.1  predicted protein [Arabidopsis lyrata subsp. lyrata] gi297335017 gb EFH65435.1  predicted protein [Arabidopsis lyrata subsp. lyrata]                                                                                                                                                                                                                                                                 | 350  | 352  | 1.00E-157 | 100.6 | 83.7 | 89.1 | predicted protein                              | gbpln | Arabidopsis lyrata   | AT1G78140.1   Symbols:   S-adenosyl-L-methionine-dependent methyltransferases superfamily protein   chr1:29401937-29403878 REVERSE LENGTH=355                                                                                                                                                                                                                                                                                                                                                                                                                                                                                                                        | 350  | 355 | 1.00E-159 | 101.4 | 83.7 | 90.0 |
| Rsa1.0_00343.1.g11860.t1 | dbj BAJ34542.1  unnamed protein product [Thellungiella halophila]                                                                                                                                                                                                                                                                                                                                                       | 283  | 280  | 1.00E-137 | 98.9  | 88.7 | 92.2 | unnamed protein product                        | ----  | ----                 | AT1G78150.2   Symbols:   unknown protein; BEST Arabidopsis thaliana protein match is: unknown protein (TAIR:AT1G35780.1); Has 35333 Blast hits to 34131 proteins in 2444 species: Archae - 798; Bacteria - 22429; Metazoa - 974; Fungi - 991; Plants - 531; Viruses - 0; Other Eukaryotes - 9610 (source: NCBI BLink).   chr1:29404996-29406341 FORWARD LENGTH=274                                                                                                                                                                                                                                                                                                   | 283  | 274 | 1.00E-122 | 96.8  | 82.7 | 90.1 |
| Rsa1.0_00343.1.g11861.t1 | gb EOA34555.1  hypothetical protein CARUB_v10022107mg [Capsella rubella]                                                                                                                                                                                                                                                                                                                                                | 546  | 665  | 0         | 121.8 | 80.6 | 85.7 | hypothetical protein CARUB_v10022107mg         | gbpln | Capsella rubella     | AT1G78160.1   Symbols: APUM7, PUM7   pumilio 7   chr1:29407900-29410184 FORWARD LENGTH=650                                                                                                                                                                                                                                                                                                                                                                                                                                                                                                                                                                           | 546  | 650 | 0         | 119.0 | 78.4 | 84.6 |
| Rsa1.0_00343.1.g11862.t1 | #                                                                                                                                                                                                                                                                                                                                                                                                                       | #    | #    | #         | #     | #    | #    | -                                              | ----  | ----                 | #                                                                                                                                                                                                                                                                                                                                                                                                                                                                                                                                                                                                                                                                    | #    | #   | #         | #     | #    |      |
| Rsa1.0_00343.1.g11863.t1 | gb EOA35716.1  hypothetical protein CARUB_v10020942mg [Capsella rubella]                                                                                                                                                                                                                                                                                                                                                | 199  | 214  | 7.00E-60  | 107.5 | 68.8 | 76.9 | hypothetical protein CARUB_v10020942mg         | gbpln | Capsella rubella     | AT1G78170.1   Symbols:   unknown protein; BEST Arabidopsis thaliana protein match is: unknown protein (TAIR:AT1G22250.1); Has 66 Blast hits to 66 proteins in 11 species: Archae - 0; Bacteria - 0; Metazoa - 0; Fungi - 0; Plants - 66; Viruses - 0; Other Eukaryotes - 0 (source: NCBI BLink).   chr1:29414160-29414941 FORWARD LENGTH=221                                                                                                                                                                                                                                                                                                                         | 199  | 221 | 8.00E-62  | 111.1 | 68.3 | 76.4 |
| Rsa1.0_00343.1.g11864.t1 | gb ABV89659.1  dehydration-responsive protein-related [Brassica rapa]                                                                                                                                                                                                                                                                                                                                                   | 661  | 662  | 0         | 100.2 | 93.3 | 96.8 | dehydration-responsive protein-related         | gbpln | Brassica rapa        | AT1G78240.2   Symbols: TSD2, QUA2   S-adenosyl-L-methionine-dependent methyltransferases superfamily protein   chr1:29433173-29435815 REVERSE LENGTH=684                                                                                                                                                                                                                                                                                                                                                                                                                                                                                                             | 661  | 684 | 0         | 103.5 | 85.0 | 92.6 |

|                          |                                                                                                                                                                                                                                                                                                                                                                                                                                                                                                                                                                                                                                                                             |      |      |           |       |      |      |                                                              |       |                      |                                                                                                                                                        |      |      |           |       |      |      |
|--------------------------|-----------------------------------------------------------------------------------------------------------------------------------------------------------------------------------------------------------------------------------------------------------------------------------------------------------------------------------------------------------------------------------------------------------------------------------------------------------------------------------------------------------------------------------------------------------------------------------------------------------------------------------------------------------------------------|------|------|-----------|-------|------|------|--------------------------------------------------------------|-------|----------------------|--------------------------------------------------------------------------------------------------------------------------------------------------------|------|------|-----------|-------|------|------|
| Rsa1.0_00344.1.g11865.t1 | ref NP_567072.1  Mitogen activated protein kinase kinase kinase-like protein [Arabidopsis thaliana]   gi 30694847 ref NP_850718.1  Mitogen activated protein kinase kinase kinase-like protein [Arabidopsis thaliana]   gi 15146176 gb AAK83572.1   AT3g58640/F14P22_230 [Arabidopsis thaliana]   gi 22655030 gb AAM98106.1   AT3g58640/F14P22_230 [Arabidopsis thaliana]   gi 110741986 dbj BAE98932.1   hypothetical protein [Arabidopsis thaliana]   gi 332646288 gb AEE79809.1   Mitogen activated protein kinase kinase-like protein [Arabidopsis thaliana]   gi 332646289 gb AEE79810.1   Mitogen activated protein kinase kinase-like protein [Arabidopsis thaliana] | 746  | 809  | 0         | 108.4 | 92.0 | 95.4 | Mitogen activated protein kinase kinase-like protein         | gbpln | Arabidopsis thaliana | AT3G58640.2   Symbols:   Mitogen activated protein kinase kinase kinase-related   chr3:21687153-21692675 REVERSE LENGTH=809                            | 746  | 809  | 0         | 108.4 | 92.0 | 95.4 |
| Rsa1.0_00344.1.g11866.t1 | emb CAB68201.1  putative protein [Arabidopsis thaliana]                                                                                                                                                                                                                                                                                                                                                                                                                                                                                                                                                                                                                     | 293  | 311  | 1.00E-112 | 106.1 | 77.5 | 84.6 | putative protein                                             | gbpln | Arabidopsis thaliana | AT3G58630.1   Symbols:   sequence-specific DNA binding transcription factors   chr3:21683928-21685771 REVERSE LENGTH=321                               | 293  | 321  | 1.00E-114 | 109.6 | 76.5 | 83.6 |
| Rsa1.0_00344.1.g11867.t1 | ref XP_002878116.1  hypothetical protein ARALYDRAFT_907139 [Arabidopsis lyrata subsp. lyrata]   gi 297323954 gb EFH54375.1   hypothetical protein ARALYDRAFT_907139 [Arabidopsis lyrata subsp. lyrata]                                                                                                                                                                                                                                                                                                                                                                                                                                                                      | 123  | 343  | 4.00E-27  | 278.9 | 50.4 | 65.0 | hypothetical protein ARALYDRAFT_907139                       | gbpln | Arabidopsis lyrata   | AT3G56890.1   Symbols:   F-box associated ubiquitination effector family protein   chr3:21062990-21063717 REVERSE LENGTH=219                           | 123  | 219  | 8.00E-29  | 178.0 | 48.0 | 58.5 |
| Rsa1.0_00344.1.g11868.t1 | gb ABD65101.1  hypothetical protein 31.t00082 [Brassica oleracea]                                                                                                                                                                                                                                                                                                                                                                                                                                                                                                                                                                                                           | 248  | 226  | 1.00E-39  | 91.1  | 39.9 | 54.8 | hypothetical protein 31.t00082                               | gbpln | Brassica oleracea    | AT1G52950.1   Symbols:   Nucleic acid-binding, OB-fold-like protein   chr1:19725483-19728007 FORWARD LENGTH=566                                        | 248  | 566  | 3.00E-22  | 228.2 | 25.8 | 48.4 |
| Rsa1.0_00344.1.g11869.t1 | gb ABD65118.1  hypothetical protein 31.t00031 [Brassica oleracea]                                                                                                                                                                                                                                                                                                                                                                                                                                                                                                                                                                                                           | 520  | 467  | 1.00E-143 | 89.8  | 49.4 | 60.0 | hypothetical protein 31.t00031                               | gbpln | Brassica oleracea    | AT1G52950.1   Symbols:   Nucleic acid-binding, OB-fold-like protein   chr1:19725483-19728007 FORWARD LENGTH=566                                        | 520  | 566  | 1.00E-85  | 108.8 | 34.2 | 55.0 |
| Rsa1.0_00344.1.g11870.t1 | dbj BAJ34494.1  unnamed protein product [Thellungiella halophila]                                                                                                                                                                                                                                                                                                                                                                                                                                                                                                                                                                                                           | 428  | 445  | 0         | 104.0 | 85.5 | 90.0 | unnamed protein product                                      | ----  | ----                 | AT4G34000.2   Symbols: ABF3, DPBF5   abscisic acid responsive elements-binding factor 3   chr4:16296008-16297971 FORWARD LENGTH=454                    | 428  | 454  | 1.00E-175 | 106.1 | 80.1 | 86.2 |
| Rsa1.0_00344.1.g11871.t1 | ref NP_195128.2  class I glutamine amidotransferase domain-containing protein [Arabidopsis thaliana]   gi 75161395 sp Q8VY09.1 DJ1C_ARATH RecName: Full=Protein DJ-1 homolog C; Short=AtDJ1C; Flags: Precursor   gi 18377664 gb AAL66992.1  unknown protein [Arabidopsis thaliana]   gi 20465753 gb AAM20345.1  unknown protein [Arabidopsis thaliana]   gi 332660910 gb AEE86310.1  class I glutamine amidotransferase domain-containing protein [Arabidopsis thaliana]                                                                                                                                                                                                    | 464  | 472  | 0         | 101.7 | 80.6 | 89.2 | class I glutamine amidotransferase domain-containing protein | gbpln | Arabidopsis thaliana | AT4G34020.1   Symbols:   Class I glutamine amidotransferase-like superfamily protein   chr4:16298553-16300897 REVERSE LENGTH=472                       | 464  | 472  | 0         | 101.7 | 80.6 | 89.2 |
| Rsa1.0_00344.1.g11872.t1 | gb ABE41833.1  caffeoyl-CoA 3-O-methyltransferase [Brassica rapa subsp. pekinensis]                                                                                                                                                                                                                                                                                                                                                                                                                                                                                                                                                                                         | 258  | 258  | 1.00E-140 | 100.0 | 97.7 | 98.8 | caffeoyl-CoA 3-O-methyltransferase                           | gbpln | Brassica rapa        | AT4G34050.1   Symbols: CCoAOMT1   S-adenosyl-L-methionine-dependent methyltransferases superfamily protein   chr4:16310844-16311973 FORWARD LENGTH=259 | 258  | 259  | 1.00E-141 | 100.4 | 93.0 | 94.6 |
| Rsa1.0_00344.1.g11873.t2 | ref XP_002869176.1  protein binding protein [Arabidopsis lyrata subsp. lyrata]   gi 297315012 gb EFH45435.1  protein binding protein [Arabidopsis lyrata subsp. lyrata]                                                                                                                                                                                                                                                                                                                                                                                                                                                                                                     | 1086 | 1108 | 0         | 102.0 | 91.8 | 95.2 | protein binding protein                                      | gbpln | Arabidopsis lyrata   | AT4G34100.2   Symbols:   RING/U-box superfamily protein   chr4:16330590-16334864 FORWARD LENGTH=1107                                                   | 1086 | 1107 | 0         | 101.9 | 91.1 | 94.8 |
| Rsa1.0_00344.1.g11874.t1 | gb EOA17339.1  hypothetical protein CARUB_v10005622mg [Capsella rubella]                                                                                                                                                                                                                                                                                                                                                                                                                                                                                                                                                                                                    | 113  | 239  | 3.00E-40  | 211.5 | 77.0 | 82.3 | hypothetical protein CARUB_v10005622mg                       | gbpln | Capsella rubella     | AT4G34120.1   Symbols: LEJ1, CDCP1   Cystathionine beta-synthase (CBS) family protein   chr4:16341194-16342893 FORWARD LENGTH=238                      | 113  | 238  | 8.00E-43  | 210.6 | 76.1 | 83.2 |
| Rsa1.0_00344.1.g11875.t1 | ref XP_002867135.1  predicted protein [Arabidopsis lyrata subsp. lyrata]   gi 297312971 gb EFH43394.1  predicted protein [Arabidopsis lyrata subsp. lyrata]                                                                                                                                                                                                                                                                                                                                                                                                                                                                                                                 | 484  | 482  | 0         | 99.6  | 80.0 | 88.8 | predicted protein                                            | gbpln | Arabidopsis lyrata   | AT4G34131.1   Symbols: UGT73B3   UDP-glucosyl transferase 73B3   chr4:16343268-16344713 REVERSE LENGTH=481                                             | 484  | 481  | 0         | 99.4  | 79.5 | 87.8 |
| Rsa1.0_00344.1.g11876.t1 | ref XP_002867135.1  predicted protein [Arabidopsis lyrata subsp. lyrata]   gi 297312971 gb EFH43394.1  predicted protein [Arabidopsis lyrata subsp. lyrata]                                                                                                                                                                                                                                                                                                                                                                                                                                                                                                                 | 483  | 482  | 0         | 99.8  | 82.2 | 89.9 | predicted protein                                            | gbpln | Arabidopsis lyrata   | AT4G34131.1   Symbols: UGT73B3   UDP-glucosyl transferase 73B3   chr4:16343268-16344713 REVERSE LENGTH=481                                             | 483  | 481  | 0         | 99.6  | 80.5 | 88.4 |

|                          |                                                                                                                                                                                                                                                                                                                                                                                                                                                                                                                                                                                 |     |     |           |       |      |      |                                        |       |                      |                                                                                                                                                                                                                                                                                                                                                                                                                    |     |     |           |       |      |      |
|--------------------------|---------------------------------------------------------------------------------------------------------------------------------------------------------------------------------------------------------------------------------------------------------------------------------------------------------------------------------------------------------------------------------------------------------------------------------------------------------------------------------------------------------------------------------------------------------------------------------|-----|-----|-----------|-------|------|------|----------------------------------------|-------|----------------------|--------------------------------------------------------------------------------------------------------------------------------------------------------------------------------------------------------------------------------------------------------------------------------------------------------------------------------------------------------------------------------------------------------------------|-----|-----|-----------|-------|------|------|
| Rsa1.0_00344.1.g11877.t1 | ref[XP_002867133.1] UDP-glucosyl transferase 73B1 [Arabidopsis lyrata subsp. lyrata]<br>gi 297312969 gb EFH43392.1  UDP-glucosyl transferase 73B1 [Arabidopsis lyrata subsp. lyrata]                                                                                                                                                                                                                                                                                                                                                                                            | 491 | 488 | 0         | 99.4  | 80.2 | 90.8 | UDP-glucosyl transferase 73B1          | gbpln | Arabidopsis lyrata   | AT4G34138.1   Symbols: UGT73B1   UDP-glucosyl transferase 73B1   chr4:16348267-16349858 REVERSE LENGTH=488                                                                                                                                                                                                                                                                                                         | 491 | 488 | 0         | 99.4  | 79.8 | 90.6 |
| Rsa1.0_00344.1.g11878.t1 | ref[XP_002869171.1] hypothetical protein ARALYDRAFT_912986 [Arabidopsis lyrata subsp. lyrata]<br>gi 297315007 gb EFH45430.1  hypothetical protein ARALYDRAFT_912986 [Arabidopsis lyrata subsp. lyrata]                                                                                                                                                                                                                                                                                                                                                                          | 250 | 248 | 2.00E-86  | 99.2  | 66.0 | 70.4 | hypothetical protein ARALYDRAFT_912986 | gbpln | Arabidopsis lyrata   | AT4G34150.1   Symbols:   Calcium-dependent lipid-binding (CaLB domain) family protein   chr4:16355035-16356955 FORWARD LENGTH=247                                                                                                                                                                                                                                                                                  | 250 | 247 | 1.00E-85  | 98.8  | 63.2 | 68.8 |
| Rsa1.0_00344.1.g11879.t1 | ref[NP_195142.1] cyclin-D3-1 [Arabidopsis thaliana]<br>gi 59802919 sp P42753.3 CCD31_ARATH<br>RecName: Full=Cyclin-D3-1; AltName: Full=Cyclin-delta-3; Short=Cyclin-d3; AltName: Full=G1/S-specific cyclin-D3-1; Short=CycD3;1<br>gi 2911046 emb CAA17556.1  cyclin delta-3 [Arabidopsis thaliana]<br>gi 7270365 emb CAB80133.1  cyclin delta-3 [Arabidopsis thaliana]<br>gi 62320771 dbj BAD95437.1  cyclin delta-3 [Arabidopsis thaliana]<br>gi 332660935 gb AEE86335.1  cyclin-D3-1 [Arabidopsis thaliana]                                                                   | 369 | 376 | 1.00E-161 | 101.9 | 82.4 | 90.5 | cyclin-D3-1                            | gbpln | Arabidopsis thaliana | AT4G34160.1   Symbols: CYCD3;1, CYCD3   CYCLIN D3;1   chr4:16357903-16359304 FORWARD LENGTH=376                                                                                                                                                                                                                                                                                                                    | 369 | 376 | 1.00E-164 | 101.9 | 82.4 | 90.5 |
| Rsa1.0_00344.1.g11880.t1 | gb EOA32480.1  hypothetical protein CARUB_v10015759mg [Capsella rubella]                                                                                                                                                                                                                                                                                                                                                                                                                                                                                                        | 332 | 350 | 5.00E-90  | 105.4 | 54.8 | 75.6 | hypothetical protein CARUB_v10015759mg | gbpln | Capsella rubella     | AT2G17305.1   Symbols:   CONTAINS InterPro DOMAIN/s: FBD (InterPro:IPR013596), FBD-like (InterPro:IPR006566); BEST Arabidopsis thaliana protein match is: F-box family protein (TAIR:AT3G62230.1); Has 81 Blast hits to 54 proteins in 5 species: Archae - 0; Bacteria - 0; Metazoa - 0; Fungi - 0; Plants - 81; Viruses - 0; Other Eukaryotes - 0 (source: NCBI BLINK);   chr2:7527676-7528853 FORWARD LENGTH=271 | 332 | 271 | 3.00E-86  | 81.6  | 47.3 | 59.3 |
| Rsa1.0_00344.1.g11881.t4 | gb EOA16621.1  hypothetical protein CARUB_v10004791mg [Capsella rubella]                                                                                                                                                                                                                                                                                                                                                                                                                                                                                                        | 502 | 452 | 0         | 90.0  | 81.9 | 84.7 | hypothetical protein CARUB_v10004791mg | gbpln | Capsella rubella     | AT3G42050.1   Symbols:   vacuolar ATP synthase subunit H family protein   chr3:14228846-14232228 REVERSE LENGTH=441                                                                                                                                                                                                                                                                                                | 502 | 441 | 0         | 87.8  | 79.7 | 83.1 |
| Rsa1.0_00344.1.g11882.t1 | gb ABV98639.1  stress enhanced protein 1 [Brassica rapa]                                                                                                                                                                                                                                                                                                                                                                                                                                                                                                                        | 153 | 146 | 3.00E-60  | 95.4  | 87.6 | 91.5 | stress enhanced protein 1              | gbpln | Brassica rapa        | AT4G34190.1   Symbols: SEP1   stress enhanced protein 1   chr4:16372606-16373511 REVERSE LENGTH=146                                                                                                                                                                                                                                                                                                                | 153 | 146 | 4.00E-59  | 95.4  | 81.7 | 86.3 |
| Rsa1.0_00344.1.g11883.t1 | ref[XP_002867129.1] hypothetical protein ARALYDRAFT_491252 [Arabidopsis lyrata subsp. lyrata]<br>gi 297312965 gb EFH43388.1  hypothetical protein ARALYDRAFT_491252 [Arabidopsis lyrata subsp. lyrata]                                                                                                                                                                                                                                                                                                                                                                          | 598 | 603 | 0         | 100.8 | 92.5 | 95.5 | hypothetical protein ARALYDRAFT_491252 | gbpln | Arabidopsis lyrata   | AT4G34200.1   Symbols: EDA9   D-3-phosphoglycerate dehydrogenase   chr4:16374041-16376561 REVERSE LENGTH=603                                                                                                                                                                                                                                                                                                       | 598 | 603 | 0         | 100.8 | 92.0 | 95.0 |
| Rsa1.0_00344.1.g11884.t1 | gb AAM65927.1  unknown [Arabidopsis thaliana]                                                                                                                                                                                                                                                                                                                                                                                                                                                                                                                                   | 260 | 260 | 1.00E-129 | 100.0 | 88.8 | 92.3 | unknown                                | gbpln | Arabidopsis thaliana | AT4G34215.2   Symbols:   Domain of unknown function (DUF303)   chr4:16380203-16381192 REVERSE LENGTH=260                                                                                                                                                                                                                                                                                                           | 260 | 260 | 1.00E-130 | 100.0 | 88.1 | 91.5 |
| Rsa1.0_00344.1.g11885.t1 | ref[NP_567961.1] receptor protein kinase-like protein [Arabidopsis thaliana]<br>gi 75165202 sp Q94C77.1 RPKL_ARATH<br>RecName: Full=Receptor protein kinase-like protein At4g34220; Flags: Precursor gi 14334872 gb AAK59614.1  putative receptor protein kinase [Arabidopsis thaliana]<br>gi 21281267 gb AAM44951.1  putative receptor protein kinase [Arabidopsis thaliana]<br>gi 224589647 gb ACN59356.1  leucine-rich repeat receptor-like protein kinase [Arabidopsis thaliana]<br>gi 332660943 gb AEE86343.1  receptor protein kinase-like protein [Arabidopsis thaliana] | 758 | 757 | 0         | 99.9  | 83.8 | 89.4 | receptor protein kinase-like protein   | gbpln | Arabidopsis thaliana | AT4G34220.1   Symbols:   Leucine-rich repeat protein kinase family protein   chr4:16381653-16384054 REVERSE LENGTH=757                                                                                                                                                                                                                                                                                             | 758 | 757 | 0         | 99.9  | 83.8 | 89.4 |
| Rsa1.0_00344.1.g11886.t1 | gb EOA24678.1  hypothetical protein CARUB_v10017951mg [Capsella rubella]                                                                                                                                                                                                                                                                                                                                                                                                                                                                                                        | 241 | 239 | 1.00E-108 | 99.2  | 81.3 | 93.4 | hypothetical protein CARUB_v10017951mg | gbpln | Capsella rubella     | AT3G57230.1   Symbols: AGL16   AGAMOUS-like 16   chr3:21177710-21180671 FORWARD LENGTH=240                                                                                                                                                                                                                                                                                                                         | 241 | 240 | 1.00E-109 | 99.6  | 80.5 | 92.1 |

|                          |                                                                                                                                                                                                                                                                                                                                                                                                                                                                                                                                                                                                                                                                                                                                                                                                                                                                                                                                                                                                             |      |      |           |       |      |      |                                                                                 |       |                      |                                                                                                                                                                                                                                                                                                                                                                                                                                                            |      |      |           |       |      |      |
|--------------------------|-------------------------------------------------------------------------------------------------------------------------------------------------------------------------------------------------------------------------------------------------------------------------------------------------------------------------------------------------------------------------------------------------------------------------------------------------------------------------------------------------------------------------------------------------------------------------------------------------------------------------------------------------------------------------------------------------------------------------------------------------------------------------------------------------------------------------------------------------------------------------------------------------------------------------------------------------------------------------------------------------------------|------|------|-----------|-------|------|------|---------------------------------------------------------------------------------|-------|----------------------|------------------------------------------------------------------------------------------------------------------------------------------------------------------------------------------------------------------------------------------------------------------------------------------------------------------------------------------------------------------------------------------------------------------------------------------------------------|------|------|-----------|-------|------|------|
| Rsa1.0_00344.1.g11887.t1 | ref[NP_195149.1] cinnamyl alcohol dehydrogenase 5 [Arabidopsis thaliana] gi 13626131 sp O49482.1 CADH5_ARAT H RecName: Full=Cinnamyl alcohol dehydrogenase 5; Short=AtCAD5; AltName: Full=Cinnamyl alcohol dehydrogenase D gi 134104089 pdb 2CF5 A Chain A, Crystal Structures Of The Arabidopsis Cinnamyl Alcohol Dehydrogenases, Atcad5 gi 134104090 pdb 2CF6 A Chain A, Crystal Structures Of The Arabidopsis Cinnamyl Alcohol Dehydrogenases Atcad5 gi 2911039 emb CAA17549.1  cinnamyl alcohol dehydrogenase-like protein [Arabidopsis thaliana] gi 7270373 emb CAB80140.1  cinnamyl alcohol dehydrogenase-like protein [Arabidopsis thaliana] gi 14334456 gb AAK59426.1  putative cinnamyl alcohol dehydrogenase [Arabidopsis thaliana] gi 21280925 gb AAM44967.1  putative cinnamyl alcohol dehydrogenase [Arabidopsis thaliana] gi 31880043 gb AAP59435.1  cinnamyl alcohol dehydrogenase [Arabidopsis thaliana] gi 33266094 gb AEE86344.1  cinnamyl alcohol dehydrogenase 5 [Arabidopsis thaliana] | 357  | 357  | 1.00E-174 | 100.0 | 94.1 | 98.6 | cinnamyl alcohol dehydrogenase 5                                                | gbpln | Arabidopsis thaliana | AT4G34230.1   Symbols: CAD5, ATCAD5, CAD-5   cinnamyl alcohol dehydrogenase 5   chr4:16386898-16388666 REVERSE LENGTH=357                                                                                                                                                                                                                                                                                                                                  | 357  | 357  | 1.00E-176 | 100.0 | 94.1 | 98.6 |
| Rsa1.0_00344.1.g11888.t1 | gb ABC41273.1  putative aldehyde dehydrogenase [Brassica rapa]                                                                                                                                                                                                                                                                                                                                                                                                                                                                                                                                                                                                                                                                                                                                                                                                                                                                                                                                              | 551  | 555  | 0         | 100.7 | 93.1 | 96.6 | putative aldehyde dehydrogenase                                                 | gbpln | Brassica rapa        | AT4G34240.1   Symbols: ALDH3I1, ALDH3   aldehyde dehydrogenase 3I1   chr4:16389801-16392633 FORWARD LENGTH=550                                                                                                                                                                                                                                                                                                                                             | 551  | 550  | 0         | 99.8  | 85.1 | 92.2 |
| Rsa1.0_00344.1.g11889.t2 | ref[XP_002869162.1] hypothetical protein ARALYDRAFT_491244 [Arabidopsis lyrata subsp. lyrata] gi 297314998 gb EFH45421.1  hypothetical protein ARALYDRAFT_491244 [Arabidopsis lyrata subsp. lyrata] ref[XP_002867898.1] VQ motif-containing protein [Arabidopsis lyrata subsp. lyrata] gi 297313734 gb EFH44157.1  VQ motif-containing protein [Arabidopsis lyrata subsp. lyrata]                                                                                                                                                                                                                                                                                                                                                                                                                                                                                                                                                                                                                           | 476  | 493  | 0         | 103.6 | 82.4 | 91.0 | hypothetical protein ARALYDRAFT_491244                                          | gbpln | Arabidopsis lyrata   | AT4G34250.1   Symbols: KCS16   3-ketoacyl-CoA synthase 16   chr4:16394749-16396230 FORWARD LENGTH=493                                                                                                                                                                                                                                                                                                                                                      | 476  | 493  | 0         | 103.6 | 81.3 | 90.5 |
| Rsa1.0_00345.1.g11890.t1 | ref[XP_002867898.1] VQ motif-containing protein [Arabidopsis lyrata subsp. lyrata] gi 297313734 gb EFH44157.1  VQ motif-containing protein [Arabidopsis lyrata subsp. lyrata]                                                                                                                                                                                                                                                                                                                                                                                                                                                                                                                                                                                                                                                                                                                                                                                                                               | 211  | 209  | 3.00E-70  | 99.1  | 72.0 | 79.1 | VQ motif-containing protein                                                     | gbpln | Arabidopsis lyrata   | AT4G20000.1   Symbols:   VQ motif-containing protein   chr4:10838367-10838993 FORWARD LENGTH=208                                                                                                                                                                                                                                                                                                                                                           | 211  | 208  | 6.00E-63  | 98.6  | 67.3 | 76.3 |
| Rsa1.0_00345.1.g11891.t1 | gb AAG03119.1 AC004133_13 F5A9.24 [Arabidopsis thaliana]                                                                                                                                                                                                                                                                                                                                                                                                                                                                                                                                                                                                                                                                                                                                                                                                                                                                                                                                                    | 1226 | 1254 | 0         | 102.3 | 34.6 | 42.3 | F5A9.24                                                                         | gbpln | Arabidopsis thaliana | AT1G43760.1   Symbols:   DNase I-like superfamily protein   chr1:16528880-16531065 REVERSE LENGTH=626                                                                                                                                                                                                                                                                                                                                                      | 1226 | 626  | 2.00E-31  | 51.1  | 9.2  | 14.4 |
| Rsa1.0_00345.1.g11892.t1 | #                                                                                                                                                                                                                                                                                                                                                                                                                                                                                                                                                                                                                                                                                                                                                                                                                                                                                                                                                                                                           | #    | #    | #         | #     | #    | -    | -                                                                               | ----  | ----                 | #                                                                                                                                                                                                                                                                                                                                                                                                                                                          | #    | #    | #         | #     | #    |      |
| Rsa1.0_00345.1.g11893.t1 | gb EOA17660.1  hypothetical protein CARUB_v10006027mg [Capsella rubella]                                                                                                                                                                                                                                                                                                                                                                                                                                                                                                                                                                                                                                                                                                                                                                                                                                                                                                                                    | 115  | 125  | 5.00E-41  | 108.7 | 76.5 | 80.9 | hypothetical protein CARUB_v10006027mg                                          | gbpln | Capsella rubella     | AT4G19980.1   Symbols:   unknown protein; FUNCTIONS IN: molecular_function unknown; INVOLVED IN: biological_process unknown; LOCATED IN: chloroplast; EXPRESSED IN: root, pedicel; EXPRESSED DURING: 4 anthesis; Has 30201 Blast hits to 17322 proteins in 780 species: Archae - 12; Bacteria - 1396; Metazoa - 17338; Fungi - 3422; Plants - 5037; Viruses - 0; Other Eukaryotes - 2996 (source: NCBI ELink).   chr4:10828153-10828536 REVERSE LENGTH=127 | 115  | 127  | 3.00E-39  | 110.4 | 73.0 | 80.9 |
| Rsa1.0_00345.1.g11894.t1 | gb EOA16028.1  hypothetical protein CARUB_v10004157mg [Capsella rubella]                                                                                                                                                                                                                                                                                                                                                                                                                                                                                                                                                                                                                                                                                                                                                                                                                                                                                                                                    | 800  | 812  | 0         | 101.5 | 90.5 | 94.4 | hypothetical protein CARUB_v10004157mg                                          | gbpln | Capsella rubella     | AT4G19960.2   Symbols: KUP9   K+ uptake permease 9   chr4:10813807-10816997 FORWARD LENGTH=807                                                                                                                                                                                                                                                                                                                                                             | 800  | 807  | 0         | 100.9 | 90.6 | 94.6 |
| Rsa1.0_00345.1.g11895.t2 | #                                                                                                                                                                                                                                                                                                                                                                                                                                                                                                                                                                                                                                                                                                                                                                                                                                                                                                                                                                                                           | #    | #    | #         | #     | #    | -    | -                                                                               | ----  | ----                 | #                                                                                                                                                                                                                                                                                                                                                                                                                                                          | #    | #    | #         | #     | #    |      |
| Rsa1.0_00345.1.g11896.t1 | gb AAB61111.1  Strong similarity to Zea mays retrotransposon Hopscotch polyprotein (gb U12626) [Arabidopsis thaliana]                                                                                                                                                                                                                                                                                                                                                                                                                                                                                                                                                                                                                                                                                                                                                                                                                                                                                       | 1364 | 1315 | 0         | 96.4  | 44.1 | 52.6 | Strong similarity to Zea mays retrotransposon Hopscotch polyprotein (gb U12626) | gbpln | Arabidopsis thaliana | AT4G23160.1   Symbols: CRK8   cysteine-rich RLK (RECEPTOR-like protein kinase) 8   chr4:12129485-12134086 FORWARD LENGTH=1262                                                                                                                                                                                                                                                                                                                              | 1364 | 1262 | 0         | 92.5  | 29.8 | 34.9 |
| Rsa1.0_00345.1.g11897.t1 | ref[XP_002869958.1] hypothetical protein ARALYDRAFT_914664 [Arabidopsis lyrata subsp. lyrata] gi 297315794 gb EFH46217.1  hypothetical protein ARALYDRAFT_914664 [Arabidopsis lyrata subsp. lyrata]                                                                                                                                                                                                                                                                                                                                                                                                                                                                                                                                                                                                                                                                                                                                                                                                         | 410  | 428  | 1.00E-125 | 104.4 | 58.0 | 73.2 | hypothetical protein ARALYDRAFT_914664                                          | gbpln | Arabidopsis lyrata   | AT4G19930.1   Symbols:   F-box and associated interaction domains-containing protein   chr4:10803558-10804853 FORWARD LENGTH=431                                                                                                                                                                                                                                                                                                                           | 410  | 431  | 1.00E-121 | 105.1 | 58.5 | 72.2 |
| Rsa1.0_00345.1.g11898.t1 | #                                                                                                                                                                                                                                                                                                                                                                                                                                                                                                                                                                                                                                                                                                                                                                                                                                                                                                                                                                                                           | #    | #    | #         | #     | #    | -    | -                                                                               | ----  | ----                 | #                                                                                                                                                                                                                                                                                                                                                                                                                                                          | #    | #    | #         | #     | #    |      |

|                          |                                                                                                                                                                                                                                                                                                                                                                                                                        |      |      |           |       |      |      |                                                      |       |                      |                                                                                                                                        |      |     |           |       |      |      |
|--------------------------|------------------------------------------------------------------------------------------------------------------------------------------------------------------------------------------------------------------------------------------------------------------------------------------------------------------------------------------------------------------------------------------------------------------------|------|------|-----------|-------|------|------|------------------------------------------------------|-------|----------------------|----------------------------------------------------------------------------------------------------------------------------------------|------|-----|-----------|-------|------|------|
| Rsa1.0_00345.1.g11899.t2 | ref NP_192163.1  cysteine/histidine-rich C1 domain-containing protein [Arabidopsis thaliana] gi 3892060 gb AAC78273.1  hypothetical protein [Arabidopsis thaliana] gi 7269014 emb CAB80747.1  putative protein [Arabidopsis thaliana] gi 110737893 dbj BAF00884.1  hypothetical protein [Arabidopsis thaliana] gi 332656785 gb AEE82185.1  cysteine/histidine-rich C1 domain-containing protein [Arabidopsis thaliana] | 633  | 822  | 0         | 129.9 | 57.2 | 70.1 | cysteine/histidine-rich C1 domain-containing protein | gbpln | Arabidopsis thaliana | AT4G02540.1   Symbols:   Cysteine/Histidine-rich C1 domain family protein   chr4:1117202-1119670 FORWARD LENGTH=822                    | 633  | 822 | 0         | 129.9 | 57.2 | 70.1 |
| Rsa1.0_00345.1.g11900.t1 | ref NP_193726.1  F-box/kelch-repeat protein [Arabidopsis thaliana] gi 75219621 sp O49420.1 FBK86_ARATH RecName: Full=F-box/kelch-repeat protein At4g19930 gi 2827647 emb CAA16601.1  putative protein [Arabidopsis thaliana] gi 7268787 emb CAB78993.1  putative protein [Arabidopsis thaliana] gi 332658848 gb AEE84248.1  F-box/kelch-repeat protein [Arabidopsis thaliana]                                          | 167  | 431  | 2.00E-30  | 258.1 | 42.5 | 54.5 | F-box/kelch-repeat protein                           | gbpln | Arabidopsis thaliana | AT4G19930.1   Symbols:   F-box and associated interaction domains-containing protein   chr4:10803558-10804853 FORWARD LENGTH=431       | 167  | 431 | 6.00E-33  | 258.1 | 42.5 | 54.5 |
| Rsa1.0_00345.1.g11901.t8 | ref XP_002867916.1  kelch repeat-containing F-box family protein [Arabidopsis lyrata subsp. lyrata] gi 297313752 gb EFH44175.1  kelch repeat-containing F-box family protein [Arabidopsis lyrata subsp. lyrata]                                                                                                                                                                                                        | 396  | 397  | 1.00E-100 | 100.3 | 54.3 | 68.4 | kelch repeat-containing F-box family protein         | gbpln | Arabidopsis lyrata   | AT4G19870.2   Symbols:   Galactose oxidase/kelch repeat superfamily protein   chr4:10783054-10784256 REVERSE LENGTH=400                | 396  | 400 | 1.00E-102 | 101.0 | 54.8 | 67.4 |
| Rsa1.0_00345.1.g11902.t1 | ref XP_002867916.1  kelch repeat-containing F-box family protein [Arabidopsis lyrata subsp. lyrata] gi 297313752 gb EFH44175.1  kelch repeat-containing F-box family protein [Arabidopsis lyrata subsp. lyrata]                                                                                                                                                                                                        | 387  | 397  | 1.00E-101 | 102.6 | 55.8 | 68.7 | kelch repeat-containing F-box family protein         | gbpln | Arabidopsis lyrata   | AT4G19870.2   Symbols:   Galactose oxidase/kelch repeat superfamily protein   chr4:10783054-10784256 REVERSE LENGTH=400                | 387  | 400 | 3.00E-97  | 103.4 | 52.2 | 65.6 |
| Rsa1.0_00345.1.g11903.t9 | emb CAB39638.1  RNA-directed DNA polymerase-like protein [Arabidopsis thaliana] gi 7267666 emb CAB78094.1  RNA-directed DNA polymerase-like protein [Arabidopsis thaliana]                                                                                                                                                                                                                                             | 3871 | 1274 | 0         | 32.9  | 13.6 | 17.9 | RNA-directed DNA polymerase-like protein             | gbpln | Arabidopsis thaliana | AT4G19840.1   Symbols:   ATPP2-A1, ATPP2A-1, PP2-A1   phloem protein 2-A1   chr4:10774336-10775701 FORWARD LENGTH=246                  | 3871 | 246 | 6.00E-80  | 6.4   | 3.8  | 4.4  |
| Rsa1.0_00345.1.g11904.t1 | gb EOA15606.1  hypothetical protein CARUB_v10005678mg [Capsella rubella]                                                                                                                                                                                                                                                                                                                                               | 216  | 225  | 3.00E-95  | 104.2 | 85.6 | 89.8 | hypothetical protein CARUB_v10005678mg               | gbpln | Capsella rubella     | AT4G19830.1   Symbols:   FKBP-like peptidyl-prolyl cis-trans isomerase family protein   chr4:10772579-10773933 REVERSE LENGTH=229      | 216  | 229 | 7.00E-90  | 106.0 | 84.3 | 91.7 |
| Rsa1.0_00345.1.g11905.t3 | gb EOA16822.1  hypothetical protein CARUB_v10005044mg [Capsella rubella]                                                                                                                                                                                                                                                                                                                                               | 326  | 380  | 1.00E-157 | 116.6 | 83.4 | 90.8 | hypothetical protein CARUB_v10005044mg               | gbpln | Capsella rubella     | AT4G19810.1   Symbols:   Glycosyl hydrolase family protein with chitinase insertion domain   chr4:10764151-10765753 REVERSE LENGTH=379 | 326  | 379 | 1.00E-157 | 116.3 | 83.4 | 89.6 |
| Rsa1.0_00346.1.g11906.t1 | ref XP_002881592.1  hypothetical protein ARALYDRAFT_903069 [Arabidopsis lyrata subsp. lyrata] gi 297327431 gb EFH57851.1  hypothetical protein ARALYDRAFT_903069 [Arabidopsis lyrata subsp. lyrata]                                                                                                                                                                                                                    | 302  | 411  | 1.00E-79  | 136.1 | 58.9 | 71.2 | hypothetical protein ARALYDRAFT_903069               | gbpln | Arabidopsis lyrata   | AT2G38590.1   Symbols:   F-box and associated interaction domains-containing protein   chr2:16142897-16144171 FORWARD LENGTH=424       | 302  | 424 | 6.00E-68  | 140.4 | 54.3 | 69.5 |
| Rsa1.0_00346.1.g11907.t1 | ref XP_002881592.1  hypothetical protein ARALYDRAFT_903069 [Arabidopsis lyrata subsp. lyrata] gi 297327431 gb EFH57851.1  hypothetical protein ARALYDRAFT_903069 [Arabidopsis lyrata subsp. lyrata]                                                                                                                                                                                                                    | 964  | 411  | 5.00E-91  | 42.6  | 19.3 | 25.0 | hypothetical protein ARALYDRAFT_903069               | gbpln | Arabidopsis lyrata   | AT2G38590.1   Symbols:   F-box and associated interaction domains-containing protein   chr2:16142897-16144171 FORWARD LENGTH=424       | 964  | 424 | 7.00E-84  | 44.0  | 18.8 | 24.7 |
| Rsa1.0_00346.1.g11908.t1 | #                                                                                                                                                                                                                                                                                                                                                                                                                      | #    | #    | #         | #     | #    | #    | -                                                    | ----  | ----                 | #                                                                                                                                      | #    | #   | #         | #     | #    | #    |
| Rsa1.0_00346.1.g11909.t1 | gb EOA37442.1  hypothetical protein CARUB_v10011523mg [Capsella rubella]                                                                                                                                                                                                                                                                                                                                               | 363  | 388  | 1.00E-171 | 106.9 | 78.8 | 88.2 | hypothetical protein CARUB_v10011523mg               | gbpln | Capsella rubella     | AT1G23320.1   Symbols:   TAR1   tryptophan aminotransferase related 1   chr1:8273423-8275350 REVERSE LENGTH=388                        | 363  | 388 | 1.00E-172 | 106.9 | 79.3 | 87.6 |
| Rsa1.0_00346.1.g11910.t1 | gb ACG60684.1  maize transposon MuDR-like protein [Brassica oleracea var. alboglabra]                                                                                                                                                                                                                                                                                                                                  | 198  | 622  | 6.00E-59  | 314.1 | 57.1 | 73.2 | maize transposon MuDR-like protein                   | gbpln | Brassica oleracea    | #                                                                                                                                      | #    | #   | #         | #     | #    | #    |
| Rsa1.0_00346.1.g11911.t1 | ref XP_002881592.1  hypothetical protein ARALYDRAFT_903069 [Arabidopsis lyrata subsp. lyrata] gi 297327431 gb EFH57851.1  hypothetical protein ARALYDRAFT_903069 [Arabidopsis lyrata subsp. lyrata]                                                                                                                                                                                                                    | 315  | 411  | 6.00E-82  | 130.5 | 54.6 | 69.5 | hypothetical protein ARALYDRAFT_903069               | gbpln | Arabidopsis lyrata   | AT3G25090.1   Symbols:   F-box associated ubiquitination effector family protein   chr3:9140039-9141094 REVERSE LENGTH=325             | 315  | 325 | 6.00E-80  | 103.2 | 52.4 | 65.4 |
| Rsa1.0_00346.1.g11912.t1 | #                                                                                                                                                                                                                                                                                                                                                                                                                      | #    | #    | #         | #     | #    | #    | -                                                    | ----  | ----                 | #                                                                                                                                      | #    | #   | #         | #     | #    | #    |

|                          |                                                                                                                                                                |     |     |           |       |      |      |                                        |       |                      |                                                                                                                                           |     |     |           |       |      |      |
|--------------------------|----------------------------------------------------------------------------------------------------------------------------------------------------------------|-----|-----|-----------|-------|------|------|----------------------------------------|-------|----------------------|-------------------------------------------------------------------------------------------------------------------------------------------|-----|-----|-----------|-------|------|------|
| Rsa1.0_00346.1.g11913.t1 | refXP_002881592.1  hypothetical protein ARALYDRAFT_903069 [Arabidopsis lyrata subsp. lyrata] gi 297327431 gb EFH57851.1                                        | 451 | 411 | 5.00E-83  | 91.1  | 40.8 | 53.0 | hypothetical protein ARALYDRAFT_903069 | gbpln | Arabidopsis lyrata   | AT2G38590.1   Symbols:   F-box and associated interaction domains-containing protein   chr2:16142897-16144171 FORWARD LENGTH=424          | 451 | 424 | 1.00E-77  | 94.0  | 39.2 | 52.1 |
| Rsa1.0_00346.1.g11914.t1 | refXP_002881592.1  hypothetical protein ARALYDRAFT_903069 [Arabidopsis lyrata subsp. lyrata] gi 297327431 gb EFH57851.1                                        | 404 | 411 | 1.00E-106 | 101.7 | 53.5 | 68.3 | hypothetical protein ARALYDRAFT_903069 | gbpln | Arabidopsis lyrata   | AT4G33290.1   Symbols:   F-box and associated interaction domains-containing protein   chr4:16049573-16050865 FORWARD LENGTH=430          | 404 | 430 | 1.00E-106 | 106.4 | 53.2 | 64.9 |
| Rsa1.0_00346.1.g11915.t1 | refXP_002870633.1  hypothetical protein ARALYDRAFT_916057 [Arabidopsis lyrata subsp. lyrata] gi 297316469 gb EFH46892.1                                        | 233 | 351 | 6.00E-41  | 150.6 | 49.4 | 61.4 | hypothetical protein ARALYDRAFT_916057 | gbpln | Arabidopsis lyrata   | AT4G33290.1   Symbols:   F-box and associated interaction domains-containing protein   chr4:16049573-16050865 FORWARD LENGTH=430          | 233 | 430 | 8.00E-37  | 184.5 | 48.5 | 63.9 |
| Rsa1.0_00346.1.g11916.t1 | refXP_002881592.1  hypothetical protein ARALYDRAFT_903069 [Arabidopsis lyrata subsp. lyrata] gi 297327431 gb EFH57851.1                                        | 429 | 411 | 1.00E-108 | 95.8  | 50.3 | 67.6 | hypothetical protein ARALYDRAFT_903069 | gbpln | Arabidopsis lyrata   | AT4G33290.1   Symbols:   F-box and associated interaction domains-containing protein   chr4:16049573-16050865 FORWARD LENGTH=430          | 429 | 430 | 1.00E-108 | 100.2 | 51.3 | 66.4 |
| Rsa1.0_00346.1.g11917.t1 | refXP_002883382.1  predicted protein [Arabidopsis lyrata subsp. lyrata] gi 297329222 gb EFH59641.1  predicted protein [Arabidopsis lyrata subsp. lyrata]       | 428 | 403 | 3.00E-90  | 94.2  | 47.7 | 58.9 | predicted protein                      | gbpln | Arabidopsis lyrata   | AT4G33290.1   Symbols:   F-box and associated interaction domains-containing protein   chr4:16049573-16050865 FORWARD LENGTH=430          | 428 | 430 | 7.00E-86  | 100.5 | 45.8 | 57.9 |
| Rsa1.0_00346.1.g11918.t1 | gb AFU75878.1  lipase [Brassica napus]                                                                                                                         | 473 | 468 | 0         | 98.9  | 94.7 | 96.8 | lipase                                 | gbpln | Brassica napus       | AT1G23330.1   Symbols:   alpha/beta-Hydrolases superfamily protein   chr1:8279874-8281891 REVERSE LENGTH=471                              | 473 | 471 | 0         | 99.6  | 89.9 | 94.9 |
| Rsa1.0_00346.1.g11919.t1 | gb EOA37605.1  hypothetical protein CARUB_v10011971mg [Capsella rubella]                                                                                       | 176 | 166 | 5.00E-50  | 94.3  | 57.4 | 64.8 | hypothetical protein CARUB_v10011971mg | gbpln | Capsella rubella     | AT1G23350.1   Symbols:   Plant invertase/pectin methyltransferase inhibitor superfamily protein   chr1:8293696-8294175 REVERSE LENGTH=159 | 176 | 159 | 4.00E-52  | 90.3  | 57.4 | 65.3 |
| Rsa1.0_00346.1.g11920.t1 | refXP_002893283.1  hypothetical protein ARALYDRAFT_472599 [Arabidopsis lyrata subsp. lyrata] gi 297339125 gb EFH69542.1                                        | 138 | 329 | 2.00E-63  | 238.4 | 89.9 | 94.2 | hypothetical protein ARALYDRAFT_472599 | gbpln | Arabidopsis lyrata   | AT1G23380.1   Symbols:   KNAT6, KNAT6L, KNAT6S   KNOTTED1-like homeobox gene 6   chr1:8297499-8302492 REVERSE LENGTH=327                  | 138 | 327 | 7.00E-66  | 237.0 | 87.7 | 93.5 |
| Rsa1.0_00346.1.g11921.t3 | ref NP_173752.3  homeobox protein knotted-1-like 6 [Arabidopsis thaliana] gi 332192259 gb AEE30380.1  homeobox protein knotted-1-like 6 [Arabidopsis thaliana] | 161 | 329 | 2.00E-49  | 204.3 | 62.1 | 64.6 | homeobox protein knotted-1-like 6      | gbpln | Arabidopsis thaliana | AT1G23380.2   Symbols:   KNAT6, KNAT6L, KNAT6S   KNOTTED1-like homeobox gene 6   chr1:8297499-8302492 REVERSE LENGTH=329                  | 161 | 329 | 8.00E-52  | 204.3 | 62.1 | 64.6 |
| Rsa1.0_00346.1.g11922.t1 | #                                                                                                                                                              | #   | #   | #         | #     | #    | #    | -                                      | ----  | ----                 | #                                                                                                                                         | #   | #   | #         | #     | #    | #    |



|                          |                                                                                                                                                                                                                                                                                                                                                                                                                                                                                                                                                                                                                                                                                                                                                                                                                                                                                                                                                                                                                                                                                                                                                                                      |     |     |           |       |      |      |                                        |       |                      |                                                                                                                                                              |     |     |           |       |      |      |
|--------------------------|--------------------------------------------------------------------------------------------------------------------------------------------------------------------------------------------------------------------------------------------------------------------------------------------------------------------------------------------------------------------------------------------------------------------------------------------------------------------------------------------------------------------------------------------------------------------------------------------------------------------------------------------------------------------------------------------------------------------------------------------------------------------------------------------------------------------------------------------------------------------------------------------------------------------------------------------------------------------------------------------------------------------------------------------------------------------------------------------------------------------------------------------------------------------------------------|-----|-----|-----------|-------|------|------|----------------------------------------|-------|----------------------|--------------------------------------------------------------------------------------------------------------------------------------------------------------|-----|-----|-----------|-------|------|------|
|                          | ref NP_064193.1  Kelch repeat-containing F-box protein [Arabidopsis thaliana]<br>gi 75173823 sp Q9LDE3.1 FBK9_ARATH<br>RecName: Full=F-box/kelch-repeat protein At1g23390<br>gi 8778589 gb AAF79597.1 AC007945_17<br>F28C11.3 [Arabidopsis thaliana]<br>gi 9295700 gb AAF87006.1 AC005292_15<br>F26F24.26 [Arabidopsis thaliana]<br>gi 21539423 gb AAM53264.1  putative knotted-like homeobox protein [Arabidopsis thaliana]<br>gi 23197636 gb AAN15345.1  putative knotted-like homeobox protein [Arabidopsis thaliana]<br>gi 237873580 emb CAX36488.1  F-box/Kelch repeat-containing F-box family protein [Arabidopsis thaliana]<br>gi 237873584 emb CAX36490.1  F-box/Kelch repeat-containing F-box family protein [Arabidopsis thaliana]<br>gi 237873588 emb CAX36492.1  F-box/Kelch repeat-containing F-box family protein [Arabidopsis thaliana]<br>gi 237873596 emb CAX36496.1  F-box/Kelch repeat-containing F-box family protein [Arabidopsis thaliana]<br>gi 237873598 emb CAX36497.1  F-box/Kelch repeat-containing F-box family protein [Arabidopsis thaliana]<br>gi 237873604 emb CAX36500.1  F-box/Kelch repeat-containing F-box family protein [Arabidopsis thaliana] | 411 | 394 | 1.00E-160 | 95.9  | 70.6 | 76.9 | Kelch repeat-containing F-box protein  | gbpln | Arabidopsis thaliana | AT1G23390.1   Symbols:   Kelch repeat-containing F-box family protein   chr1:8309449-8310633 REVERSE LENGTH=394                                              | 411 | 394 | 1.00E-163 | 95.9  | 70.6 | 76.9 |
| Rsa1.0_00346.1.g11923.t1 |                                                                                                                                                                                                                                                                                                                                                                                                                                                                                                                                                                                                                                                                                                                                                                                                                                                                                                                                                                                                                                                                                                                                                                                      |     |     |           |       |      |      |                                        |       |                      |                                                                                                                                                              |     |     |           |       |      |      |
| Rsa1.0_00347.1.g11924.t2 | gb EOA29689.1  hypothetical protein CARUB_v1001621 mg [Capsella rubella]                                                                                                                                                                                                                                                                                                                                                                                                                                                                                                                                                                                                                                                                                                                                                                                                                                                                                                                                                                                                                                                                                                             | 116 | 248 | 2.00E-38  | 213.8 | 71.6 | 87.1 | hypothetical protein CARUB_v1001621 mg | gbpln | Capsella rubella     | AT1G19260.1   Symbols:   TTF-type zinc finger protein with HAT dimerisation domain   chr1:6657260-6659569 REVERSE LENGTH=769                                 | 116 | 769 | 5.00E-36  | 662.9 | 65.5 | 81.9 |
| Rsa1.0_00347.1.g11925.t1 | db BAJ34292.1  unnamed protein product [Thellungiella halophila]                                                                                                                                                                                                                                                                                                                                                                                                                                                                                                                                                                                                                                                                                                                                                                                                                                                                                                                                                                                                                                                                                                                     | 461 | 461 | 0         | 100.0 | 93.1 | 95.9 | unnamed protein product                | ----  | ----                 | AT3G51860.1   Symbols: CAX3, ATHOX1, CAX1-LIKE, ATCAX3   cation exchanger 3   chr3:19239458-19242519 FORWARD LENGTH=459                                      | 461 | 459 | 0         | 99.6  | 88.5 | 93.7 |
| Rsa1.0_00347.1.g11926.t1 | db BAJ34524.1  unnamed protein product [Thellungiella halophila]                                                                                                                                                                                                                                                                                                                                                                                                                                                                                                                                                                                                                                                                                                                                                                                                                                                                                                                                                                                                                                                                                                                     | 657 | 658 | 0         | 100.2 | 92.2 | 96.0 | unnamed protein product                | ----  | ----                 | AT3G51895.1   Symbols: SULTR3.1, AST12   sulfate transporter 3:1   chr3:19251503-19255677 REVERSE LENGTH=658                                                 | 657 | 658 | 0         | 100.2 | 90.4 | 95.3 |
| Rsa1.0_00347.1.g11927.t1 | ref NP_192687.1  RNase H domain-containing protein [Arabidopsis thaliana]<br>gi 7267644 emb CAB78072.1  putative proteins [Arabidopsis thaliana]<br>gi 332657356 gb AEE82756.1  RNase H domain-containing protein [Arabidopsis thaliana]                                                                                                                                                                                                                                                                                                                                                                                                                                                                                                                                                                                                                                                                                                                                                                                                                                                                                                                                             | 140 | 170 | 3.00E-19  | 121.4 | 40.0 | 57.1 | RNase H domain-containing protein      | gbpln | Arabidopsis thaliana | AT4G09490.1   Symbols:   Polynucleotidyl transferase, ribonuclease H-like superfamily protein   chr4:6015583-6016575 REVERSE LENGTH=170                      | 140 | 170 | 9.00E-22  | 121.4 | 40.0 | 57.1 |
| Rsa1.0_00347.1.g11928.t1 | # # # # # # # # -                                                                                                                                                                                                                                                                                                                                                                                                                                                                                                                                                                                                                                                                                                                                                                                                                                                                                                                                                                                                                                                                                                                                                                    |     |     |           |       |      |      |                                        | ----  | ----                 | #                                                                                                                                                            | #   | #   | #         | #     | #    | #    |
| Rsa1.0_00347.1.g11929.t1 | ref XP_002876110.1  AT-HSFA7A [Arabidopsis lyrata subsp. lyrata]<br>gi 297321948 gb EFH52369.1  AT-HSFA7A [Arabidopsis lyrata subsp. lyrata]                                                                                                                                                                                                                                                                                                                                                                                                                                                                                                                                                                                                                                                                                                                                                                                                                                                                                                                                                                                                                                         | 268 | 277 | 1.00E-115 | 103.4 | 83.2 | 90.7 | AT-HSFA7A                              | gbpln | Arabidopsis lyrata   | AT3G51910.1   Symbols: AT-HSFA7A, HSFA7A   heat shock transcription factor A7A   chr3:19265294-19266619 FORWARD LENGTH=272                                   | 268 | 272 | 1.00E-115 | 101.5 | 80.2 | 88.4 |
| Rsa1.0_00347.1.g11930.t1 | ref XP_002876110.1  AT-HSFA7A [Arabidopsis lyrata subsp. lyrata]<br>gi 297321948 gb EFH52369.1  AT-HSFA7A [Arabidopsis lyrata subsp. lyrata]                                                                                                                                                                                                                                                                                                                                                                                                                                                                                                                                                                                                                                                                                                                                                                                                                                                                                                                                                                                                                                         | 360 | 277 | 1.00E-105 | 76.9  | 57.5 | 64.2 | AT-HSFA7A                              | gbpln | Arabidopsis lyrata   | AT3G51910.1   Symbols: AT-HSFA7A, HSFA7A   heat shock transcription factor A7A   chr3:19265294-19266619 FORWARD LENGTH=272                                   | 360 | 272 | 1.00E-106 | 75.6  | 55.6 | 62.2 |
| Rsa1.0_00347.1.g11931.t1 | gb EOA25516.1  hypothetical protein CARUB_v10018860mg [Capsella rubella]                                                                                                                                                                                                                                                                                                                                                                                                                                                                                                                                                                                                                                                                                                                                                                                                                                                                                                                                                                                                                                                                                                             | 939 | 538 | 0         | 57.3  | 38.6 | 40.8 | hypothetical protein CARUB_v10018860mg | gbpln | Capsella rubella     | AT3G51950.2   Symbols:   Zinc finger (GCCN-type) family protein / RNA recognition motif (RRM)-containing protein   chr3:19278244-19280407 REVERSE LENGTH=540 | 939 | 540 | 0         | 57.5  | 38.8 | 40.9 |
| Rsa1.0_00347.1.g11932.t1 | ref NP_190768.1  carboxypeptidase D [Arabidopsis thaliana]<br>gi 75337703 sp Q9SV04.1 SCP36_ARATH<br>RecName: Full=Serine carboxypeptidase-like 36; Flags: Precursor gi 4678929 emb CAB41320.1  serine-type carboxypeptidase like protein [Arabidopsis thaliana]<br>gi 67633688 gb AA78768.1  serine carboxypeptidase S10 family protein [Arabidopsis thaliana]<br>gi 332645352 gb AEE78873.1  serine carboxypeptidase-like 36 [Arabidopsis thaliana]                                                                                                                                                                                                                                                                                                                                                                                                                                                                                                                                                                                                                                                                                                                                | 465 | 482 | 1.00E-161 | 103.7 | 61.1 | 75.9 | carboxypeptidase D                     | gbpln | Arabidopsis thaliana | AT3G52000.1   Symbols: scp136   serine carboxypeptidase-like 36   chr3:19293071-19294702 FORWARD LENGTH=482                                                  | 465 | 482 | 1.00E-163 | 103.7 | 61.1 | 75.9 |

|                          |                                                                                                                                                                                                                                                                                                                                                                                                                                                                                   |     |     |           |        |      |      |                                                                                    |       |                      |                                                                                                                                                                                                                                                                                                                                                                                                       |     |     |           |       |      |      |
|--------------------------|-----------------------------------------------------------------------------------------------------------------------------------------------------------------------------------------------------------------------------------------------------------------------------------------------------------------------------------------------------------------------------------------------------------------------------------------------------------------------------------|-----|-----|-----------|--------|------|------|------------------------------------------------------------------------------------|-------|----------------------|-------------------------------------------------------------------------------------------------------------------------------------------------------------------------------------------------------------------------------------------------------------------------------------------------------------------------------------------------------------------------------------------------------|-----|-----|-----------|-------|------|------|
| Rsa1.0_00347.1.g11933.t1 | gb EOA25727.1  hypothetical protein CARUB_v10019088mg [Capsella rubella]                                                                                                                                                                                                                                                                                                                                                                                                          | 418 | 431 | 0         | 103.1  | 85.9 | 92.1 | hypothetical protein CARUB_v10019088mg                                             | gbpln | Capsella rubella     | AT3G52030.2   Symbols:   F-box family protein with WD40/YVTN repeat domain   chr3:19301872-19304227 FORWARD LENGTH=433                                                                                                                                                                                                                                                                                | 418 | 433 | 0         | 103.6 | 86.1 | 92.1 |
| Rsa1.0_00347.1.g11934.t7 | ref NP_190773.2  5'-3' exonuclease-like protein [Arabidopsis thaliana] gi 145362483 ref NP_974414.2  5'-3' exonuclease-like protein [Arabidopsis thaliana] gi 109946597 gb ABG48477.1  At3g52050 [Arabidopsis thaliana] gi 332645356 gb AE78879.1  5'-3' exonuclease-like protein [Arabidopsis thaliana] gi 332645359 gb AEE78880.1  5'-3' exonuclease-like protein [Arabidopsis thaliana]                                                                                        | 420 | 425 | 1.00E-158 | 101.2  | 72.6 | 78.8 | 5'-3' exonuclease-like protein                                                     | gbpln | Arabidopsis thaliana | AT3G52050.1   Symbols:   5'-3' exonuclease family protein   chr3:19305228-19309398 FORWARD LENGTH=425                                                                                                                                                                                                                                                                                                 | 420 | 425 | 1.00E-161 | 101.2 | 72.6 | 78.8 |
| Rsa1.0_00347.1.g11935.t1 | ref XP_002885456.1  hypothetical protein ARALYDRAFT_898613 [Arabidopsis lyrata subsp. lyrata] gi 297331296 gb EFH61715.1  hypothetical protein ARALYDRAFT_898613 [Arabidopsis lyrata subsp. lyrata]                                                                                                                                                                                                                                                                               | 365 | 365 | 1.00E-177 | 100.0  | 84.9 | 90.4 | hypothetical protein ARALYDRAFT_898613                                             | gbpln | Arabidopsis lyrata   | AT3G21640.1   Symbols:   TWD1, UCU2, FKBP42, ATFKBP42   FKBP-type peptidyl-prolyl cis-trans isomerase family protein   chr3:7619025-7621097 REVERSE LENGTH=365                                                                                                                                                                                                                                        | 365 | 365 | 1.00E-178 | 100.0 | 84.9 | 91.2 |
| Rsa1.0_00347.1.g11936.t2 | ref XP_002876124.1  PHD finger family protein [Arabidopsis lyrata subsp. lyrata] gi 297321962 gb EFH52383.1  PHD finger family protein [Arabidopsis lyrata subsp. lyrata]                                                                                                                                                                                                                                                                                                         | 624 | 678 | 0         | 108.7  | 77.4 | 84.8 | PHD finger family protein                                                          | gbpln | Arabidopsis lyrata   | AT3G52100.1   Symbols:   RING/FYVE/PHD-type zinc finger family protein   chr3:19319343-19322773 FORWARD LENGTH=696                                                                                                                                                                                                                                                                                    | 624 | 696 | 0         | 111.5 | 76.9 | 85.4 |
| Rsa1.0_00347.1.g11937.t1 | emb CAB41330.1  putative protein [Arabidopsis thaliana]                                                                                                                                                                                                                                                                                                                                                                                                                           | 74  | 763 | 1.00E-29  | 1031.1 | 79.7 | 85.1 | putative protein                                                                   | gbpln | Arabidopsis thaliana | AT3G52105.1   Symbols:   unknown protein; FUNCTIONS IN: molecular_function unknown; INVOLVED IN: biological_process unknown; LOCATED IN: endomembrane system; Has 35333 Blast hits to 34131 proteins in 2444 species: Archae - 798; Bacteria - 22429; Metazoa - 974; Fungi - 991; Plants - 531; Viruses - 0; Other Eukaryotes - 9610 (source: NCBI BLINK).   chr3:19323394-19323606 FORWARD LENGTH=70 | 74  | 70  | 1.00E-28  | 94.6  | 79.7 | 85.1 |
| Rsa1.0_00347.1.g11938.t1 | ref NP_190781.1  bifunctional inhibitor/lipid-transfer protein/seed storage 2S albumin-like protein [Arabidopsis thaliana] gi 4678942 emb CAB41333.1  5B protein like protein [Arabidopsis thaliana] gi 44917507 gb AAS49078.1  At3g52130 [Arabidopsis thaliana] gi 62320556 dbj BAD95162.1  5B protein like protein [Arabidopsis thaliana] gi 332645377 gb AEE78898.1  bifunctional inhibitor/lipid-transfer protein/seed storage 2S albumin-like protein [Arabidopsis thaliana] | 125 | 125 | 7.00E-45  | 100.0  | 85.6 | 89.6 | bifunctional inhibitor/lipid-transfer protein/seed storage 2S albumin-like protein | gbpln | Arabidopsis thaliana | AT3G52130.1   Symbols:   Bifunctional inhibitor/lipid-transfer protein/seed storage 2S albumin superfamily protein   chr3:19332081-19332458 REVERSE LENGTH=125                                                                                                                                                                                                                                        | 125 | 125 | 1.00E-47  | 100.0 | 85.6 | 89.6 |
| Rsa1.0_00347.1.g11939.t1 | ref XP_002876128.1  hypothetical protein ARALYDRAFT_348313 [Arabidopsis lyrata subsp. lyrata] gi 297321966 gb EFH52387.1  hypothetical protein ARALYDRAFT_348313 [Arabidopsis lyrata subsp. lyrata]                                                                                                                                                                                                                                                                               | 218 | 467 | 1.00E-98  | 214.2  | 82.1 | 91.3 | hypothetical protein ARALYDRAFT_348313                                             | gbpln | Arabidopsis lyrata   | AT3G52155.1   Symbols:   Phosphoglycerate mutase family protein   chr3:19343740-19344722 FORWARD LENGTH=218                                                                                                                                                                                                                                                                                           | 218 | 218 | 7.00E-99  | 100.0 | 81.2 | 91.3 |
| Rsa1.0_00347.1.g11940.t1 | ref XP_002877845.1  beta-ketoacyl-CoA synthase family protein [Arabidopsis lyrata subsp. lyrata] gi 297323683 gb EFH54104.1  beta-ketoacyl-CoA synthase family protein [Arabidopsis lyrata subsp. lyrata]                                                                                                                                                                                                                                                                         | 448 | 452 | 0         | 100.9  | 87.1 | 93.3 | beta-ketoacyl-CoA synthase family protein                                          | gbpln | Arabidopsis lyrata   | AT3G52160.1   Symbols:   KCS15   3-ketoacyl-CoA synthase 15   chr3:19345069-19346591 REVERSE LENGTH=451                                                                                                                                                                                                                                                                                               | 448 | 451 | 0         | 100.7 | 86.8 | 93.3 |
| Rsa1.0_00347.1.g11941.t4 | ref NP_974416.1  RNA pseudourine synthase 5 [Arabidopsis thaliana] gi 229891781 sp Q5M721.2 PUS5_ARAT H RecName: Full=RNA pseudourine synthase 5; AltName: Full=RNA pseudouridylate synthase 5; AltName: Full=RNA-uridine isomerase 5 gi 332645400 gb AEE78921.1  RNA pseudourine synthase 5 [Arabidopsis thaliana]                                                                                                                                                               | 682 | 369 | 1.00E-158 | 54.1   | 41.1 | 45.3 | RNA pseudourine synthase 5                                                         | gbpln | Arabidopsis thaliana | AT3G52260.2   Symbols:   Pseudouridine synthase family protein   chr3:19383452-19386440 REVERSE LENGTH=369                                                                                                                                                                                                                                                                                            | 682 | 369 | 1.00E-160 | 54.1  | 41.1 | 45.3 |
| Rsa1.0_00347.1.g11942.t1 | gb EOA25462.1  hypothetical protein CARUB_v10018800mg [Capsella rubella]                                                                                                                                                                                                                                                                                                                                                                                                          | 269 | 258 | 2.00E-67  | 95.9   | 56.1 | 62.5 | hypothetical protein CARUB_v10018800mg                                             | gbpln | Capsella rubella     | AT3G52270.1   Symbols:   Transcription initiation factor IIF, beta subunit   chr3:19387180-19388902 REVERSE LENGTH=269                                                                                                                                                                                                                                                                                | 269 | 269 | 1.00E-63  | 100.0 | 53.5 | 61.7 |

|                          |                                                                                                                                                                                                                                                                                                                                                                                                                                                              |     |     |           |       |      |      |                                                          |       |                      |                                                                                                                                           |     |     |           |       |      |      |
|--------------------------|--------------------------------------------------------------------------------------------------------------------------------------------------------------------------------------------------------------------------------------------------------------------------------------------------------------------------------------------------------------------------------------------------------------------------------------------------------------|-----|-----|-----------|-------|------|------|----------------------------------------------------------|-------|----------------------|-------------------------------------------------------------------------------------------------------------------------------------------|-----|-----|-----------|-------|------|------|
| Rsa1.0_00347.1.g11943.t1 | gb[EOA18887.1] hypothetical protein CARUB_v10007517mg.partial [Capsella rubella]                                                                                                                                                                                                                                                                                                                                                                             | 336 | 533 | 1.00E-150 | 158.6 | 76.5 | 88.7 | hypothetical protein CARUB_v10007517mg.partial           | gbpln | Capsella rubella     | AT4G38160.2   Symbols: pde191   Mitochondrial transcription termination factor family protein   chr4:17902412-17903784 FORWARD LENGTH=363 | 336 | 363 | 1.00E-152 | 108.0 | 76.2 | 88.1 |
| Rsa1.0_00347.1.g11944.t2 | gb[EOA25462.1] hypothetical protein CARUB_v10018800mg [Capsella rubella]                                                                                                                                                                                                                                                                                                                                                                                     | 110 | 258 | 4.00E-15  | 234.5 | 48.2 | 57.3 | hypothetical protein CARUB_v10018800mg                   | gbpln | Capsella rubella     | #                                                                                                                                         | #   | #   | #         | #     | #    |      |
| Rsa1.0_00347.1.g11945.t1 | ref[XP_002877853.1] hypothetical protein ARALYDRAFT_485593 [Arabidopsis lyrata subsp. lyrata] gi 297323691 gb EFH54112.1  hypothetical protein ARALYDRAFT_485593 [Arabidopsis lyrata subsp. lyrata]                                                                                                                                                                                                                                                          | 364 | 371 | 1.00E-145 | 101.9 | 78.8 | 85.4 | hypothetical protein ARALYDRAFT_485593                   | gbpln | Arabidopsis lyrata   | AT3G52280.1   Symbols: GTE6   general transcription factor group E6   chr3:19389103-19391289 REVERSE LENGTH=369                           | 364 | 369 | 1.00E-142 | 101.4 | 78.6 | 84.9 |
| Rsa1.0_00347.1.g11946.t1 | gb[EOA24848.1] hypothetical protein CARUB_v10018138mg [Capsella rubella]                                                                                                                                                                                                                                                                                                                                                                                     | 213 | 168 | 2.00E-83  | 78.9  | 76.1 | 77.9 | hypothetical protein CARUB_v10018138mg                   | gbpln | Capsella rubella     | AT3G52300.1   Symbols: ATPQ   ATP synthase D chain, mitochondrial   chr3:19396689-19398119 FORWARD LENGTH=168                             | 213 | 168 | 9.00E-84  | 78.9  | 74.6 | 77.0 |
| Rsa1.0_00347.1.g11947.t1 | ref[XP_002876141.1] RNA-binding protein cp33 [Arabidopsis lyrata subsp. lyrata] gi 297321979 gb EFH52400.1  RNA-binding protein cp33 [Arabidopsis lyrata subsp. lyrata]                                                                                                                                                                                                                                                                                      | 323 | 330 | 1.00E-130 | 102.2 | 77.1 | 81.1 | RNA-binding protein cp33                                 | gbpln | Arabidopsis lyrata   | AT3G52380.1   Symbols: CP33, PDE322   chloroplast RNA-binding protein 33   chr3:19421619-19422855 FORWARD LENGTH=329                      | 323 | 329 | 1.00E-131 | 101.9 | 79.9 | 86.7 |
| Rsa1.0_00348.1.g11948.t1 | ref[XP_002879225.1] zinc finger family protein [Arabidopsis lyrata subsp. lyrata] gi 297325064 gb EFH55484.1  zinc finger family protein [Arabidopsis lyrata subsp. lyrata]                                                                                                                                                                                                                                                                                  | 181 | 373 | 5.00E-48  | 206.1 | 57.5 | 61.9 | zinc finger family protein                               | gbpln | Arabidopsis lyrata   | AT2G29660.1   Symbols:   zinc finger (C2H2 type) family protein   chr2:12679346-12680467 FORWARD LENGTH=373                               | 181 | 373 | 1.00E-42  | 206.1 | 54.7 | 58.6 |
| Rsa1.0_00348.1.g11949.t1 | gb ABD65118.1  hypothetical protein 31.t00031 [Brassica oleracea] ref[NP_565685.1] tetratricopeptide repeat-containing protein [Arabidopsis thaliana]                                                                                                                                                                                                                                                                                                        | 85  | 467 | 2.00E-12  | 549.4 | 38.8 | 43.5 | hypothetical protein 31.t00031                           | gbpln | Brassica oleracea    | #                                                                                                                                         | #   | #   | #         | #     | #    |      |
| Rsa1.0_00348.1.g11950.t1 | gi 14030739 gb AAK53044.1 AF375460.1 At2g29670/T27A16.23 [Arabidopsis thaliana] gi 18377765 gb AAL67032.1  unknown protein [Arabidopsis thaliana] gi 20197389 gb AAC35237.2  expressed protein [Arabidopsis thaliana] gi 20465643 gb AAM20290.1  unknown protein [Arabidopsis thaliana] gi 23308477 gb AAN18208.1  At2g29670/T27A16.23 [Arabidopsis thaliana] gi 330253196 gb AEC08290.1  tetratricopeptide repeat-containing protein [Arabidopsis thaliana] | 479 | 536 | 1.00E-178 | 111.9 | 77.9 | 86.2 | tetratricopeptide repeat-containing protein              | gbpln | Arabidopsis thaliana | AT2G29670.1   Symbols:   Tetratricopeptide repeat (TPR)-like superfamily protein   chr2:12682309-12684745 REVERSE LENGTH=536              | 479 | 536 | 1.00E-180 | 111.9 | 77.9 | 86.2 |
| Rsa1.0_00348.1.g11951.t3 | ref[XP_002879226.1] predicted protein [Arabidopsis lyrata subsp. lyrata] gi 297325065 gb EFH55485.1  predicted protein [Arabidopsis lyrata subsp. lyrata]                                                                                                                                                                                                                                                                                                    | 634 | 493 | 0         | 77.8  | 64.5 | 68.3 | predicted protein                                        | gbpln | Arabidopsis lyrata   | AT2G29680.2   Symbols: CDC6, ATCDC6   cell division control 6   chr2:12689586-12692854 FORWARD LENGTH=508                                 | 634 | 508 | 0         | 80.1  | 64.8 | 69.2 |
| Rsa1.0_00348.1.g11952.t1 | #                                                                                                                                                                                                                                                                                                                                                                                                                                                            | #   | #   | #         | #     | #    | #    | -                                                        | ----  | ----                 | #                                                                                                                                         | #   | #   | #         | #     | #    |      |
| Rsa1.0_00348.1.g11953.t1 | ref[XP_002879231.1] UDP-glucuronosyl/UDP-glucosyl transferase family protein [Arabidopsis lyrata subsp. lyrata] gi 297325070 gb EFH55490.1  UDP-glucuronosyl/UDP-glucosyl transferase family protein [Arabidopsis lyrata subsp. lyrata]                                                                                                                                                                                                                      | 466 | 475 | 0         | 101.9 | 80.5 | 90.3 | UDP-glucuronosyl/UDP-glucosyl transferase family protein | gbpln | Arabidopsis lyrata   | AT2G29730.1   Symbols: UGT71D1   UDP-glucosyl transferase 71D1   chr2:12703652-12705055 FORWARD LENGTH=467                                | 466 | 467 | 0         | 100.2 | 79.4 | 89.5 |
| Rsa1.0_00348.1.g11954.t1 | ref[XP_002879232.1] UDP-glucuronosyl/UDP-glucosyl transferase family protein [Arabidopsis lyrata subsp. lyrata] gi 297325071 gb EFH55491.1  UDP-glucuronosyl/UDP-glucosyl transferase family protein [Arabidopsis lyrata subsp. lyrata]                                                                                                                                                                                                                      | 480 | 474 | 0         | 98.8  | 72.3 | 83.5 | UDP-glucuronosyl/UDP-glucosyl transferase family protein | gbpln | Arabidopsis lyrata   | AT2G29740.1   Symbols: UGT71C2   UDP-glucosyl transferase 71C2   chr2:12706747-12708171 FORWARD LENGTH=474                                | 480 | 474 | 0         | 98.8  | 71.7 | 83.1 |

|                          |                                                                                                                                                                                                                                                                                                                                                                                                                                                                                                                                                    |     |      |           |       |      |      |                                        |       |                      |                                                                                                                                                                 |     |      |           |       |      |      |
|--------------------------|----------------------------------------------------------------------------------------------------------------------------------------------------------------------------------------------------------------------------------------------------------------------------------------------------------------------------------------------------------------------------------------------------------------------------------------------------------------------------------------------------------------------------------------------------|-----|------|-----------|-------|------|------|----------------------------------------|-------|----------------------|-----------------------------------------------------------------------------------------------------------------------------------------------------------------|-----|------|-----------|-------|------|------|
|                          | refNP_180535.1   UDP-glucosyl transferase 71C2 [Arabidopsis thaliana] gi 75279075 sp O82382.1 U71C2_ARATH RecName: Full=UDP-glycosyltransferase 71C2 gi 3582341 gb AAC35238.1  putative flavonol 3-O-glucosyltransferase [Arabidopsis thaliana] gi 28393510 gb AA042176.1  putative flavonol 3-O-glucosyltransferase [Arabidopsis thaliana] gi 28973169 gb AA063909.1  putative flavonol 3-O-glucosyltransferase [Arabidopsis thaliana] gi 330253205 gb AEC08299.1  UDP-glucosyl transferase 71C2 [Arabidopsis thaliana]                           | 424 | 474  | 1.00E-161 | 111.8 | 69.3 | 81.4 | UDP-glucosyl transferase 71C2          | gbpln | Arabidopsis thaliana | AT2G29740.1   Symbols: UGT71C2   UDP-glucosyl transferase 71C2   chr2:12706747-12708171 FORWARD LENGTH=474                                                      | 424 | 474  | 1.00E-164 | 111.8 | 69.3 | 81.4 |
| Rsa1.0_00348.1.g11955.t1 | refNP_195670.1   putative F-box/kelch-repeat protein [Arabidopsis thaliana] gi 75210846 sp Q9S98.1 FK103_ARATH RecName: Full=Putative F-box/kelch-repeat protein At4g39600 gi 5042176 emb CAB44695.1  putative protein [Arabidopsis thaliana] gi 7270944 emb CAB80623.1  putative protein [Arabidopsis thaliana] gi 332661692 gb AEB7092.1  putative F-box/kelch-repeat protein [Arabidopsis thaliana]                                                                                                                                             | 386 | 367  | 2.00E-88  | 95.1  | 47.7 | 64.2 | putative F-box/kelch-repeat protein    | gbpln | Arabidopsis thaliana | AT4G39600.1   Symbols: Galactose oxidase/kelch repeat superfamily protein   chr4:18389436-18390539 REVERSE LENGTH=367                                           | 386 | 367  | 6.00E-91  | 95.1  | 47.7 | 64.2 |
| Rsa1.0_00348.1.g11957.t1 | gb EOA26647.1  hypothetical protein CARUB_v10022711mg [Capsella rubella]                                                                                                                                                                                                                                                                                                                                                                                                                                                                           | 741 | 739  | 0         | 99.7  | 90.8 | 95.5 | hypothetical protein CARUB_v10022711mg | gbpln | Capsella rubella     | AT2G29760.1   Symbols: OTP81   Tetratricopeptide repeat (TPR)-like superfamily protein   chr2:12712684-12715100 FORWARD LENGTH=738                              | 741 | 738  | 0         | 99.6  | 90.0 | 95.1 |
| Rsa1.0_00348.1.g11958.t1 | refNP_029567.1   villin-1 [Arabidopsis thaliana] gi 147744599 sp O81643.2 VIL11_ARATH RecName: Full=Villin-1 gi 20198093 gb AAD23629.2  putative villin [Arabidopsis thaliana] gi 33025322.1 gb AEC08315.1  villin-1 [Arabidopsis thaliana]                                                                                                                                                                                                                                                                                                        | 914 | 909  | 0         | 99.5  | 81.2 | 89.6 | villin-1                               | gbpln | Arabidopsis thaliana | AT2G29890.1   Symbols: VLN1, ATVLN1   villin-like 1   chr2:12744597-12749474 FORWARD LENGTH=909                                                                 | 914 | 909  | 0         | 99.5  | 81.2 | 89.6 |
| Rsa1.0_00348.1.g11959.t1 | refXP_002879239.1   presenilin family protein [Arabidopsis lyrata subsp. lyrata] gi 297325078 gb EFH55498.1  presenilin family protein [Arabidopsis lyrata subsp. lyrata]                                                                                                                                                                                                                                                                                                                                                                          | 396 | 399  | 1.00E-170 | 100.8 | 82.8 | 89.6 | presenilin family protein              | gbpln | Arabidopsis lyrata   | AT2G29900.1   Symbols: PS2   Presenilin-2   chr2:12749837-12751030 FORWARD LENGTH=397                                                                           | 396 | 397  | 1.00E-164 | 100.3 | 82.6 | 88.6 |
| Rsa1.0_00348.1.g11960.t1 | refNP_180554.2   F-box/LRR-repeat protein [Arabidopsis thaliana] gi 42570979 ref NP_973563.1  F-box/LRR-repeat protein [Arabidopsis thaliana] gi 75272176 sp O84RK6.1 FBL36_ARATH RecName: Full=F-box/LRR-repeat protein At2g29930 gi 29649041 gb AA086840.1  hypothetical protein [Arabidopsis thaliana] gi 55740577 gb AAV63881.1  hypothetical protein At2g29930 [Arabidopsis thaliana] gi 330253229 gb AEC08323.1  F-box/LRR-repeat protein [Arabidopsis thaliana] gi 330253230 gb AEC08324.1  F-box/LRR-repeat protein [Arabidopsis thaliana] | 518 | 459  | 1.00E-139 | 88.6  | 54.8 | 65.8 | F-box/LRR-repeat protein               | gbpln | Arabidopsis thaliana | AT2G29930.3   Symbols: F-box/RNI-like superfamily protein   chr2:12756457-12758087 REVERSE LENGTH=459                                                           | 518 | 459  | 1.00E-141 | 88.6  | 54.8 | 65.8 |
| Rsa1.0_00348.1.g11961.t1 | refXP_002881077.1   cyclophilin [Arabidopsis lyrata subsp. lyrata] gi 297326916 gb EFH57336.1  cyclophilin [Arabidopsis lyrata subsp. lyrata]                                                                                                                                                                                                                                                                                                                                                                                                      | 201 | 201  | 1.00E-105 | 100.0 | 93.0 | 96.0 | cyclophilin                            | gbpln | Arabidopsis lyrata   | AT2G29960.1   Symbols: CYP5, ATCYP5, CYP19-4   cyclophilin 5   chr2:12769183-12770528 REVERSE LENGTH=201                                                        | 201 | 201  | 1.00E-106 | 100.0 | 92.0 | 95.5 |
| Rsa1.0_00348.1.g11962.t1 | gb EOA26514.1  hypothetical protein CARUB_v10022567mg [Capsella rubella]                                                                                                                                                                                                                                                                                                                                                                                                                                                                           | 950 | 1000 | 0         | 105.3 | 79.2 | 87.5 | hypothetical protein CARUB_v10022567mg | gbpln | Capsella rubella     | AT2G29970.1   Symbols: Double Clp-N motif-containing P-loop nucleoside triphosphate hydrolases superfamily protein   chr2:12776601-12779784 FORWARD LENGTH=1002 | 950 | 1002 | 0         | 105.5 | 77.7 | 85.5 |
| Rsa1.0_00348.1.g11963.t1 | gb ADJ58019.1  fatty acid desaturase 3-N1 [Brassica juncea]                                                                                                                                                                                                                                                                                                                                                                                                                                                                                        | 352 | 383  | 0         | 108.8 | 98.3 | 99.7 | fatty acid desaturase 3-N1             | gbpln | Brassica juncea      | AT2G29980.1   Symbols: FAD3   fatty acid desaturase 3   chr2:12781787-12784946 REVERSE LENGTH=386                                                               | 352 | 386  | 0         | 109.7 | 94.0 | 96.3 |
| Rsa1.0_00348.1.g11964.t1 | #                                                                                                                                                                                                                                                                                                                                                                                                                                                                                                                                                  | #   | #    | #         | #     | #    | -    | ----                                   | ----  | #                    | #                                                                                                                                                               | #   | #    | #         | #     | #    |      |
| Rsa1.0_00348.1.g11965.t1 | #                                                                                                                                                                                                                                                                                                                                                                                                                                                                                                                                                  | #   | #    | #         | #     | #    | -    | ----                                   | ----  | #                    | #                                                                                                                                                               | #   | #    | #         | #     | #    |      |
| Rsa1.0_00349.1.g11966.t1 | #                                                                                                                                                                                                                                                                                                                                                                                                                                                                                                                                                  | #   | #    | #         | #     | #    | -    | ----                                   | ----  | #                    | #                                                                                                                                                               | #   | #    | #         | #     | #    |      |
| Rsa1.0_00349.1.g11967.t1 | #                                                                                                                                                                                                                                                                                                                                                                                                                                                                                                                                                  | #   | #    | #         | #     | #    | -    | ----                                   | ----  | #                    | #                                                                                                                                                               | #   | #    | #         | #     | #    |      |

|                          |                                                                                                                                                                                                                                                                                                                                                                                                                                                                          |      |      |           |       |      |      |                                                      |       |                      |                                                                                                                                 |      |      |           |       |      |      |
|--------------------------|--------------------------------------------------------------------------------------------------------------------------------------------------------------------------------------------------------------------------------------------------------------------------------------------------------------------------------------------------------------------------------------------------------------------------------------------------------------------------|------|------|-----------|-------|------|------|------------------------------------------------------|-------|----------------------|---------------------------------------------------------------------------------------------------------------------------------|------|------|-----------|-------|------|------|
| Rsa1.0_00349.1.g11968.t1 | gb AAB68964.1  trypsin inhibitor propeptide [Brassica oleracea]                                                                                                                                                                                                                                                                                                                                                                                                          | 208  | 214  | 1.00E-70  | 102.9 | 69.2 | 76.0 | trypsin inhibitor propeptide                         | gbpln | Brassica oleracea    | AT1G73260.1   Symbols: ATKTI1, KTI1   kunitz trypsin inhibitor 1   chr1:27547410-27548057 REVERSE LENGTH=215                    | 208  | 215  | 2.00E-53  | 103.4 | 56.3 | 67.3 |
| Rsa1.0_00349.1.g11969.t1 | #                                                                                                                                                                                                                                                                                                                                                                                                                                                                        | #    | #    | #         | #     | #    | #    | -                                                    | ----  | ----                 | #                                                                                                                               | #    | #    | #         | #     | #    |      |
| Rsa1.0_00349.1.g11970.t1 | ref XP_002878905.1  predicted protein [Arabidopsis lyrata subsp. lyrata] gi 297324744 gb EFH55164.1  predicted protein [Arabidopsis lyrata subsp. lyrata]                                                                                                                                                                                                                                                                                                                | 181  | 480  | 2.00E-34  | 265.2 | 41.4 | 61.3 | predicted protein                                    | gbpln | Arabidopsis lyrata   | #                                                                                                                               | #    | #    | #         | #     | #    |      |
| Rsa1.0_00349.1.g11971.t1 | ref XP_002872320.1  hypothetical protein ARALYDRAFT_351828 [Arabidopsis lyrata subsp. lyrata] gi 297318157 gb EFH48579.1  hypothetical protein ARALYDRAFT_351828 [Arabidopsis lyrata subsp. lyrata]                                                                                                                                                                                                                                                                      | 303  | 186  | 3.00E-21  | 61.4  | 16.2 | 25.1 | hypothetical protein ARALYDRAFT_351828               | gbpln | Arabidopsis lyrata   | AT1G14800.1   Symbols:   Nucleic acid-binding, OB-fold-like protein   chr1:5099572-5102558 FORWARD LENGTH=384                   | 303  | 384  | 3.00E-16  | 126.7 | 17.2 | 22.8 |
| Rsa1.0_00349.1.g11972.t1 | ref NP_850959.1  stomatal cytokinesis defective / SCD1 protein (SCD1) [Arabidopsis thaliana] gi 19743728 gb AL92456.1  stomatal cytokinesis defective [Arabidopsis thaliana] gi 332194264 gb AEE32385.1  stomatal cytokinesis defective / SCD1 protein (SCD1) [Arabidopsis thaliana]                                                                                                                                                                                     | 1187 | 1187 | 0         | 100.0 | 92.7 | 96.5 | stomatal cytokinesis defective / SCD1 protein (SCD1) | gbpln | Arabidopsis thaliana | AT1G49040.1   Symbols: SCD1   stomatal cytokinesis defective / SCD1 protein (SCD1)   chr1:18139419-18148826 REVERSE LENGTH=1187 | 1187 | 1187 | 0         | 100.0 | 92.7 | 96.5 |
| Rsa1.0_00349.1.g11973.t1 | gb AAG52313.1 AC021666.2 Mutator-like transposase; 53847-56139 [Arabidopsis thaliana]                                                                                                                                                                                                                                                                                                                                                                                    | 73   | 583  | 6.00E-15  | 798.6 | 67.1 | 79.5 | Mutator-like transposase; 53847-56139                | gbpln | Arabidopsis thaliana | #                                                                                                                               | #    | #    | #         | #     | #    |      |
| Rsa1.0_00349.1.g11974.t1 | ref NP_175332.1  PLAC8 family protein [Arabidopsis thaliana] gi 75186719 sp Q9M9A5.1 PCR6_ARATH RecName: Full=Protein PLANT CADMIUM RESISTANCE 6; Short=AtPCR6 gi 7770345 gb AAF69715.1 AC016041_20 F27J15.18 [Arabidopsis thaliana] gi 38603922 gb AR24706.1  At1g49030 [Arabidopsis thaliana] gi 44681424 gb AAS47652.1  At1g49030 [Arabidopsis thaliana] gi 332194262 gb AEE32383.1  PLAC8 family protein [Arabidopsis thaliana]                                      | 223  | 224  | 1.00E-102 | 100.4 | 82.5 | 88.3 | PLAC8 family protein                                 | gbpln | Arabidopsis thaliana | AT1G49030.1   Symbols:   PLAC8 family protein   chr1:18136794-18137846 FORWARD LENGTH=224                                       | 223  | 224  | 1.00E-105 | 100.4 | 82.5 | 88.3 |
| Rsa1.0_00349.1.g11975.t1 | ref NP_175332.1  PLAC8 family protein [Arabidopsis thaliana] gi 75186719 sp Q9M9A5.1 PCR6_ARATH RecName: Full=Protein PLANT CADMIUM RESISTANCE 6; Short=AtPCR6 gi 7770345 gb AAF69715.1 AC016041_20 F27J15.18 [Arabidopsis thaliana] gi 38603922 gb AR24706.1  At1g49030 [Arabidopsis thaliana] gi 44681424 gb AAS47652.1  At1g49030 [Arabidopsis thaliana] gi 332194262 gb AEE32383.1  PLAC8 family protein [Arabidopsis thaliana]                                      | 166  | 224  | 3.00E-77  | 134.9 | 81.3 | 85.5 | PLAC8 family protein                                 | gbpln | Arabidopsis thaliana | AT1G49030.1   Symbols:   PLAC8 family protein   chr1:18136794-18137846 FORWARD LENGTH=224                                       | 166  | 224  | 1.00E-79  | 134.9 | 81.3 | 85.5 |
| Rsa1.0_00349.1.g11976.t1 | ref NP_564537.1  myb/SANT-like DNA-binding domain-containing protein [Arabidopsis thaliana] gi 7770343 gb AAF69713.1 AC016041_18 F27J15.20 [Arabidopsis thaliana] gi 21555865 gb AM63950.1  unknown [Arabidopsis thaliana] gi 41618992 gb AAS09998.1  MYB transcription factor [Arabidopsis thaliana] gi 89274145 gb ABD65593.1  At1g49010 [Arabidopsis thaliana] gi 332194260 gb AEE32381.1  myb/SANT-like DNA-binding domain-containing protein [Arabidopsis thaliana] | 296  | 314  | 1.00E-123 | 106.1 | 84.8 | 90.5 | myb/SANT-like DNA-binding domain-containing protein  | gbpln | Arabidopsis thaliana | AT1G49010.1   Symbols:   Duplicated homeodomain-like superfamily protein   chr1:18132714-18133778 FORWARD LENGTH=314            | 296  | 314  | 1.00E-126 | 106.1 | 84.8 | 90.5 |
| Rsa1.0_00349.1.g11977.t1 | gb AAG51783.1 AC079679_3 reverse transcriptase, putative; 16838-20266 [Arabidopsis thaliana]                                                                                                                                                                                                                                                                                                                                                                             | 1596 | 1142 | 0         | 71.6  | 38.8 | 48.7 | reverse transcriptase, putative; 16838-20266         | gbpln | Arabidopsis thaliana | AT4G2090.1   Symbols:   Ribonuclease H-like superfamily protein   chr4:14333528-14335255 FORWARD LENGTH=575                     | 1596 | 575  | 1.00E-67  | 36.0  | 9.7  | 14.5 |
| Rsa1.0_00349.1.g11978.t1 | gb AAD20658.1  putative retroelement pol polyprotein [Arabidopsis thaliana]                                                                                                                                                                                                                                                                                                                                                                                              | 491  | 1611 | 9.00E-33  | 328.1 | 18.5 | 33.0 | putative retroelement pol polyprotein                | gbpln | Arabidopsis thaliana | #                                                                                                                               | #    | #    | #         | #     | #    |      |

|                          |                                                                                                                                                                                                                                                                                                                                                                                                                                                                   |      |      |           |       |      |      |                                                     |       |                      |                                                                                                                                                                                                                                                                                                                                                                                                                                                                                 |      |      |           |       |      |      |
|--------------------------|-------------------------------------------------------------------------------------------------------------------------------------------------------------------------------------------------------------------------------------------------------------------------------------------------------------------------------------------------------------------------------------------------------------------------------------------------------------------|------|------|-----------|-------|------|------|-----------------------------------------------------|-------|----------------------|---------------------------------------------------------------------------------------------------------------------------------------------------------------------------------------------------------------------------------------------------------------------------------------------------------------------------------------------------------------------------------------------------------------------------------------------------------------------------------|------|------|-----------|-------|------|------|
| Rsa1.0_00349.1.g11979.t1 | ref NP_175330.1  uncharacterized protein [Arabidopsis thaliana]<br>gi 7770334 gb AAF69704.1 AC016041.9 F27J15.21 [Arabidopsis thaliana]<br>gi 4547654 gb AAS5939.1  At1g49000 [Arabidopsis thaliana]<br>gi 46359837 gb AAS98782.1  At1g49000 [Arabidopsis thaliana]<br>gi 332194258 gb AEE32379.1  uncharacterized protein AT1G49000 [Arabidopsis thaliana]                                                                                                       | 144  | 156  | 2.00E-30  | 108.3 | 61.1 | 67.4 | uncharacterized protein                             | gbpln | Arabidopsis thaliana | AT1G49000.1   Symbols:   unknown protein; FUNCTIONS IN: molecular_function unknown; INVOLVED IN: biological_process unknown; LOCATED IN: chloroplast; EXPRESSED IN: stem; BEST Arabidopsis thaliana protein match is: unknown protein (TAIR:AT3G18560.1); Has 105 Blast hits to 105 proteins in 13 species: Archae - 0; Bacteria - 0; Metazoa - 0; Fungi - 0; Plants - 105; Viruses - 0; Other Eukaryotes - 0 (source: NCBI BLink).   chr1:18123559-18124029 REVERSE LENGTH=156 | 144  | 156  | 5.00E-33  | 108.3 | 61.1 | 67.4 |
| Rsa1.0_00349.1.g11980.t1 | ref XP_002891470.1  hypothetical protein ARALYDRAFT_474043 [Arabidopsis lyrata subsp. lyrata]<br>gi 297337312 gb EFH67729.1  hypothetical protein ARALYDRAFT_474043 [Arabidopsis lyrata subsp. lyrata]                                                                                                                                                                                                                                                            | 161  | 168  | 2.00E-60  | 104.3 | 77.6 | 85.1 | hypothetical protein ARALYDRAFT_474043              | gbpln | Arabidopsis lyrata   | AT1G48990.1   Symbols:   Oleosin family protein   chr1:18121470-18121979 FORWARD LENGTH=169                                                                                                                                                                                                                                                                                                                                                                                     | 161  | 169  | 3.00E-57  | 105.0 | 79.5 | 86.3 |
| Rsa1.0_00349.1.g11981.t1 | ref XP_002891469.1  hypothetical protein ARALYDRAFT_314327 [Arabidopsis lyrata subsp. lyrata]<br>gi 297337311 gb EFH67728.1  hypothetical protein ARALYDRAFT_314327 [Arabidopsis lyrata subsp. lyrata]                                                                                                                                                                                                                                                            | 306  | 335  | 1.00E-132 | 109.5 | 74.8 | 86.3 | hypothetical protein ARALYDRAFT_314327              | gbpln | Arabidopsis lyrata   | AT1G48980.1   Symbols:   2-oxoglutarate (2OG) and Fe(II)-dependent oxygenase superfamily protein   chr1:18118715-18120511 FORWARD LENGTH=331                                                                                                                                                                                                                                                                                                                                    | 306  | 331  | 1.00E-134 | 108.2 | 74.8 | 85.9 |
| Rsa1.0_00349.1.g11982.t1 | ref NP_181704.1  uncharacterized protein [Arabidopsis thaliana]<br>gi 2335105 gb AAC02775.1  hypothetical protein [Arabidopsis thaliana]<br>gi 26450207 dbj BAO42222.1  unknown protein [Arabidopsis thaliana]<br>gi 30793799 gb AAP40352.1  unknown protein [Arabidopsis thaliana]<br>gi 330254932 gb AEC10026.1  uncharacterized protein AT2G41730 [Arabidopsis thaliana]                                                                                       | 130  | 119  | 2.00E-45  | 91.5  | 69.2 | 78.5 | uncharacterized protein                             | gbpln | Arabidopsis thaliana | AT2G41730.1   Symbols:   unknown protein; BEST Arabidopsis thaliana protein match is: unknown protein (TAIR:AT5G24640.1); Has 25 Blast hits to 25 proteins in 5 species: Archae - 0; Bacteria - 0; Metazoa - 0; Fungi - 0; Plants - 25; Viruses - 0; Other Eukaryotes - 0 (source: NCBI BLink).   chr2:17409488-17409847 FORWARD LENGTH=119                                                                                                                                     | 130  | 119  | 5.00E-48  | 91.5  | 69.2 | 78.5 |
| Rsa1.0_00349.1.g11983.t2 | ref XP_002871839.1  F-box family protein [Arabidopsis lyrata subsp. lyrata]<br>gi 297317676 gb EFH48098.1  F-box family protein [Arabidopsis lyrata subsp. lyrata]                                                                                                                                                                                                                                                                                                | 292  | 478  | 3.00E-46  | 163.7 | 35.6 | 43.2 | F-box family protein                                | gbpln | Arabidopsis lyrata   | AT5G18770.1   Symbols:   F-box/FBD-like domains containing protein   chr5:6261426-6263172 FORWARD LENGTH=481                                                                                                                                                                                                                                                                                                                                                                    | 292  | 481  | 1.00E-43  | 164.7 | 33.2 | 41.4 |
| Rsa1.0_00350.1.g11984.t1 | ref NP_568597.1  Transmembrane amino acid transporter family protein [Arabidopsis thaliana]<br>gi 75245603 sp Q8L4X4.1 GAT2_ARATH RecName: Full=Probable GABA transporter 2<br>gi 20466438 gb AAM20536.1  amino acid permease-like protein [Arabidopsis thaliana]<br>gi 22136372 gb AAM91264.1  amino acid permease-like protein [Arabidopsis thaliana]<br>gi 332007347 gb AED94730.1  Transmembrane amino acid transporter family protein [Arabidopsis thaliana] | 452  | 452  | 0         | 100.0 | 94.0 | 97.8 | Transmembrane amino acid transporter family protein | gbpln | Arabidopsis thaliana | AT5G41800.1   Symbols:   Transmembrane amino acid transporter family protein   chr5:16733842-16735888 FORWARD LENGTH=452                                                                                                                                                                                                                                                                                                                                                        | 452  | 452  | 0         | 100.0 | 94.0 | 97.8 |
| Rsa1.0_00350.1.g11985.t1 | ref XP_002868681.1  hypothetical protein ARALYDRAFT_916271 [Arabidopsis lyrata subsp. lyrata]<br>gi 297314517 gb EFH44940.1  hypothetical protein ARALYDRAFT_916271 [Arabidopsis lyrata subsp. lyrata]                                                                                                                                                                                                                                                            | 1181 | 1168 | 0         | 98.9  | 88.3 | 91.7 | hypothetical protein ARALYDRAFT_916271              | gbpln | Arabidopsis lyrata   | AT4G10320.1   Symbols:   tRNA synthetase class I (L, M and V) family protein   chr4:6397526-6404509 REVERSE LENGTH=1190                                                                                                                                                                                                                                                                                                                                                         | 1181 | 1190 | 0         | 100.8 | 85.6 | 91.4 |
| Rsa1.0_00350.1.g11986.t1 | gb EOA16625.1  hypothetical protein CARUB_v10004795mg [Capsella rubella]                                                                                                                                                                                                                                                                                                                                                                                          | 456  | 450  | 0         | 98.7  | 83.8 | 91.0 | hypothetical protein CARUB_v10004795mg              | gbpln | Capsella rubella     | AT5G41880.1   Symbols: POLA3, POLA4   DNA primases;DNA primases   chr5:16761071-16764074 FORWARD LENGTH=451                                                                                                                                                                                                                                                                                                                                                                     | 456  | 451  | 0         | 98.9  | 84.2 | 90.6 |
| Rsa1.0_00350.1.g11987.t4 | gb AAC97237.1  putative TNP2-like transposon protein [Arabidopsis thaliana]                                                                                                                                                                                                                                                                                                                                                                                       | 926  | 889  | 0         | 96.0  | 68.4 | 77.8 | putative TNP2-like transposon protein               | gbpln | Arabidopsis thaliana | #                                                                                                                                                                                                                                                                                                                                                                                                                                                                               | #    | #    | #         | #     | #    |      |
| Rsa1.0_00350.1.g11988.t1 | ref NP_199005.1  hydrolase, alpha/beta fold family protein [Arabidopsis thaliana]<br>gi 10177374 dbj BAB10665.1  unnamed protein product [Arabidopsis thaliana]<br>gi 26449651 dbj BAC41950.1  unknown protein [Arabidopsis thaliana]<br>gi 28951051 gb AAO63449.1  At5g41900 [Arabidopsis thaliana]<br>gi 332007358 gb AED94741.1  hydrolase, alpha/beta fold family protein [Arabidopsis thaliana]                                                              | 445  | 471  | 0         | 105.8 | 83.8 | 91.7 | hydrolase, alpha/beta fold family protein           | gbpln | Arabidopsis thaliana | AT5G41900.1   Symbols:   alpha/beta-Hydrolases superfamily protein   chr5:16769032-16771567 FORWARD LENGTH=471                                                                                                                                                                                                                                                                                                                                                                  | 445  | 471  | 0         | 105.8 | 83.8 | 91.7 |

|                          |                                                                                                                                                                                                                                                                                                                                                                      |     |     |           |       |      |      |                                                              |       |                      |                                                                                                                                                                                                                                                                                                                                                                                                                                           |     |     |           |       |      |      |
|--------------------------|----------------------------------------------------------------------------------------------------------------------------------------------------------------------------------------------------------------------------------------------------------------------------------------------------------------------------------------------------------------------|-----|-----|-----------|-------|------|------|--------------------------------------------------------------|-------|----------------------|-------------------------------------------------------------------------------------------------------------------------------------------------------------------------------------------------------------------------------------------------------------------------------------------------------------------------------------------------------------------------------------------------------------------------------------------|-----|-----|-----------|-------|------|------|
| Rsa1.0_00350.1.g11989.t1 | refXP_002863741.1  hypothetical protein ARALYDRAFT_917455 [Arabidopsis lyrata subsp. lyrata] gi 297309576 gb EFH40000.1                                                                                                                                                                                                                                              | 516 | 390 | 6.00E-41  | 75.6  | 16.7 | 21.1 | hypothetical protein ARALYDRAFT_917455                       | gbpln | Arabidopsis lyrata   | AT5G18880.1   Symbols:   RNA-directed DNA polymerase (reverse transcriptase)-related family protein   chr5:6300535-6301422 REVERSE LENGTH=295                                                                                                                                                                                                                                                                                             | 516 | 295 | 2.00E-37  | 57.2  | 17.8 | 29.7 |
| Rsa1.0_00350.1.g11990.t1 | dbj BAJ34468.1  unnamed protein product [Theellungiella halophila]                                                                                                                                                                                                                                                                                                   | 401 | 413 | 0         | 103.0 | 83.8 | 90.3 | unnamed protein product                                      | ----  | ----                 | AT5G41920.1   Symbols:   GRAS family transcription factor   chr5:1677982-16781199 FORWARD LENGTH=405                                                                                                                                                                                                                                                                                                                                      | 401 | 405 | 1.00E-178 | 101.0 | 79.1 | 87.3 |
| Rsa1.0_00350.1.g11991.t1 | gb EOA16268.1  hypothetical protein CARUB_v10004413mg, partial [Capsella rubella]                                                                                                                                                                                                                                                                                    | 591 | 603 | 0         | 102.0 | 79.4 | 84.4 | hypothetical protein CARUB_v10004413mg, partial              | gbpln | Capsella rubella     | AT5G41940.1   Symbols:   Ypt/Rab-GAP domain of gyp1p superfamily protein   chr5:16782039-16785451 FORWARD LENGTH=549                                                                                                                                                                                                                                                                                                                      | 591 | 549 | 0         | 92.9  | 78.0 | 82.9 |
| Rsa1.0_00350.1.g11992.t9 | refNP_199013.1  uncharacterized protein [Arabidopsis thaliana] gi 9757943 dbj BAB08431.1  unnamed protein product [Arabidopsis thaliana] gi 28416671 gb AAO42866.1  At5g41980 [Arabidopsis thaliana] gi 110743283 dbj BAE99532.1                                                                                                                                     | 374 | 374 | 1.00E-157 | 100.0 | 76.7 | 81.3 | uncharacterized protein                                      | gbpln | Arabidopsis thaliana | AT5G41980.1   Symbols:   CONTAINS InterPro DOMAIN/s: Putative harbinger transposase-derived nuclease (InterPro:IPR006912); BEST Arabidopsis thaliana protein match is: unknown protein (TAIR:AT1G43722.1); Has 1807 Blast hits to 1807 proteins in 277 species: Archae = 0; Bacteria = 0; Metazoa = 736; Fungi = 347; Plants = 385; Viruses = 0; Other Eukaryotes = 339 (source: NCBI BLINK).   chr5:16793765-16794889 FORWARD LENGTH=374 | 374 | 374 | 1.00E-160 | 100.0 | 76.7 | 81.3 |
| Rsa1.0_00350.1.g11993.t1 | refXP_002868565.1  hypothetical protein ARALYDRAFT_493780 [Arabidopsis lyrata subsp. lyrata] gi 297314401 gb EFH44824.1                                                                                                                                                                                                                                              | 276 | 279 | 1.00E-125 | 101.1 | 83.7 | 89.9 | hypothetical protein ARALYDRAFT_493780                       | gbpln | Arabidopsis lyrata   | AT5G42030.1   Symbols:   ABIL4   ABL interactor-like protein 4   chr5:16811518-16813087 REVERSE LENGTH=279                                                                                                                                                                                                                                                                                                                                | 276 | 279 | 1.00E-126 | 101.1 | 83.3 | 88.8 |
| Rsa1.0_00350.1.g11994.t1 | #                                                                                                                                                                                                                                                                                                                                                                    | #   | #   | #         | #     | #    | #    | -                                                            | ----  | ----                 | #                                                                                                                                                                                                                                                                                                                                                                                                                                         | #   | #   | #         | #     | #    | #    |
| Rsa1.0_00350.1.g11995.t1 | gb EOA16900.1  hypothetical protein CARUB_v10005124mg [Capsella rubella]                                                                                                                                                                                                                                                                                             | 339 | 357 | 1.00E-129 | 105.3 | 76.1 | 82.9 | hypothetical protein CARUB_v10005124mg                       | gbpln | Capsella rubella     | AT5G42050.1   Symbols:   DCD (Development and Cell Death) domain protein   chr5:16815630-16816932 FORWARD LENGTH=349                                                                                                                                                                                                                                                                                                                      | 339 | 349 | 1.00E-123 | 102.9 | 72.6 | 80.2 |
| Rsa1.0_00350.1.g11996.t3 | refNP_851120.1  dynamin-related protein 1A [Arabidopsis thaliana] gi 27735181 sp P42697.3 DRP1A_ARAT H RecName: Full=Dynamin-related protein 1A; AltName: Full=Dynamin-like protein 1; AltName: Full=Dynamin-like protein A gi 807577 gb AAA84446.1                                                                                                                  | 749 | 610 | 0         | 81.4  | 79.0 | 80.6 | dynamin-related protein 1A                                   | gbpln | Arabidopsis thaliana | AT5G42080.1   Symbols:   ADL1, ADL1A, AG68, DRP1A, RSW9, DL1   dynamin-like protein   chr5:16820661-16824536 REVERSE LENGTH=610                                                                                                                                                                                                                                                                                                           | 749 | 610 | 0         | 81.4  | 79.0 | 80.6 |
| Rsa1.0_00350.1.g11997.t1 | refNP_199026.4  uncharacterized protein [Arabidopsis thaliana] gi 26453100 dbj BAC43626.1  unknown protein [Arabidopsis thaliana] gi 332007386 gb AED94769.1                                                                                                                                                                                                         | 63  | 62  | 6.00E-17  | 98.4  | 79.4 | 84.1 | uncharacterized protein                                      | gbpln | Arabidopsis thaliana | AT5G42110.1   Symbols:   unknown protein; FUNCTIONS IN: molecular_function unknown; LOCATED IN: biological_process unknown; EXPRESSED IN: 11 plant structures; EXPRESSED DURING: 6 growth stages; Has 36 Blast hits to 36 proteins in 8 species: Archae = 0; Bacteria = 0; Metazoa = 0; Fungi = 0; Plants = 36; Viruses = 0; Other Eukaryotes = 0 (source: NCBI BLINK).   chr5:16831951-16832226 REVERSE LENGTH=62                        | 63  | 62  | 9.00E-20  | 98.4  | 79.4 | 84.1 |
| Rsa1.0_00350.1.g11998.t1 | refNP_187840.7  FKBP-like peptidyl-prolyl cis-trans isomerase family protein [Arabidopsis thaliana] gi 380876925 sp F4J9Q6.1 FKB43_ARAT H RecName: Full=Peptidyl-prolyl cis-trans isomerase FKBP43; Short=PPase FKBP43; AltName: Full=FK506-binding protein 43; Short=AtFKBP43; AltName: Full=Immunophilin FKBP43; AltName: Full=Rotamase gi 332641663 gb AEE75184.1 | 460 | 499 | 1.00E-150 | 108.5 | 70.0 | 84.1 | FKBP-like peptidyl-prolyl cis-trans isomerase family protein | gbpln | Arabidopsis thaliana | AT3G12340.1   Symbols:   FKBP-like peptidyl-prolyl cis-trans isomerase family protein   chr3:3925720-3929346 REVERSE LENGTH=499                                                                                                                                                                                                                                                                                                           | 460 | 499 | 1.00E-152 | 108.5 | 70.0 | 84.1 |

|                          |                                                                                                                                                                                                                                                                                                                                                                                                                                                                                                                 |     |     |           |       |      |      |                                                 |       |                      |                                                                                                                                     |     |     |           |       |      |      |
|--------------------------|-----------------------------------------------------------------------------------------------------------------------------------------------------------------------------------------------------------------------------------------------------------------------------------------------------------------------------------------------------------------------------------------------------------------------------------------------------------------------------------------------------------------|-----|-----|-----------|-------|------|------|-------------------------------------------------|-------|----------------------|-------------------------------------------------------------------------------------------------------------------------------------|-----|-----|-----------|-------|------|------|
| Rsa1.0_00350.1.g11999.t1 | refXP_002870534.1   hypothetical protein ARALYDRAFT_493723 [Arabidopsis lyrata subsp. lyrata] gi 297316370 gb EFH46793.1   hypothetical protein ARALYDRAFT_493723 [Arabidopsis lyrata subsp. lyrata]                                                                                                                                                                                                                                                                                                            | 250 | 225 | 3.00E-77  | 90.0  | 70.4 | 77.2 | hypothetical protein ARALYDRAFT_493723          | gbpln | Arabidopsis lyrata   | AT5G37475.1   Symbols: Translation initiation factor eIF3 subunit   chr5:14866328-14867749 REVERSE LENGTH=225                       | 250 | 225 | 1.00E-79  | 90.0  | 69.6 | 77.6 |
| Rsa1.0_00350.1.g12000.t1 | gb EOA32182.1   hypothetical protein CARUB_v10015438mg [Capsella rubella]                                                                                                                                                                                                                                                                                                                                                                                                                                       | 310 | 378 | 4.00E-62  | 121.9 | 45.2 | 63.5 | hypothetical protein CARUB_v10015438mg          | gbpln | Capsella rubella     | AT1G11510.1   Symbols: DNA-binding storekeeper protein-related transcriptional regulator   chr1:3871778-3872836 REVERSE LENGTH=352  | 310 | 352 | 5.00E-57  | 113.5 | 49.0 | 67.7 |
| Rsa1.0_00351.1.g12001.t1 | gb AAM19711.1   AF499724.1 aluminum-induced protein-like protein [Eutrema halophilum]                                                                                                                                                                                                                                                                                                                                                                                                                           | 281 | 251 | 1.00E-123 | 89.3  | 79.0 | 85.1 | aluminum-induced protein-like protein           | gbpln | Eutrema halophilum   | AT5G43830.1   Symbols: Aluminum induced protein with YGL and LRDR motifs   chr5:17622593-17624239 REVERSE LENGTH=251                | 281 | 251 | 1.00E-118 | 89.3  | 74.0 | 81.5 |
| Rsa1.0_00351.1.g12002.t1 | gb ADL70520.1   indole-3-acetic acid inducible 4 [Arabidopsis thaliana]                                                                                                                                                                                                                                                                                                                                                                                                                                         | 191 | 186 | 3.00E-91  | 97.4  | 88.5 | 91.1 | indole-3-acetic acid inducible 4                | gbpln | Arabidopsis thaliana | AT5G43700.1   Symbols: ATAX2-1, IAA4   AUX/IAA transcriptional regulator family protein   chr5:17550465-17551206 FORWARD LENGTH=186 | 191 | 186 | 4.00E-92  | 97.4  | 86.9 | 90.6 |
| Rsa1.0_00351.1.g12003.t1 | gb EOA14581.1   hypothetical protein CARUB_v10027822mg [Capsella rubella]                                                                                                                                                                                                                                                                                                                                                                                                                                       | 415 | 524 | 0         | 126.3 | 93.5 | 97.1 | hypothetical protein CARUB_v10027822mg          | gbpln | Capsella rubella     | AT5G43360.1   Symbols: PHT3, ATP4, PHT1.3   phosphate transporter 1.3   chr5:17409524-17411214 FORWARD LENGTH=521                   | 415 | 521 | 0         | 125.5 | 93.5 | 95.9 |
| Rsa1.0_00351.1.g12004.t1 | gb EOA14581.1   hypothetical protein CARUB_v10027822mg [Capsella rubella]                                                                                                                                                                                                                                                                                                                                                                                                                                       | 370 | 524 | 0         | 141.6 | 91.4 | 96.2 | hypothetical protein CARUB_v10027822mg          | gbpln | Capsella rubella     | AT5G43360.1   Symbols: PHT3, ATP4, PHT1.3   phosphate transporter 1.3   chr5:17409524-17411214 FORWARD LENGTH=521                   | 370 | 521 | 0         | 140.8 | 90.3 | 94.9 |
| Rsa1.0_00351.1.g12005.t1 | ref NP_199148.1   putative inorganic phosphate transporter 1-6 [Arabidopsis thaliana] gi 75316009 sp Q9ZWT3.1 PHT16_ARATH RecName: Full=Probable inorganic phosphate transporter 1-6; Short=AtPht1.6; AltName: Full=H(+)/Pi cotransporter gi 3869190 dbj BAA34390.1   inorganic phosphate transporter [Arabidopsis thaliana] gi 8843887 dbj BAA97413.1   inorganic phosphate transporter [Arabidopsis thaliana] gi 332007564 gb AED9497.1   putative inorganic phosphate transporter 1-6 [Arabidopsis thaliana] | 510 | 516 | 0         | 101.2 | 82.9 | 92.0 | putative inorganic phosphate transporter 1-6    | gbpln | Arabidopsis thaliana | AT5G43340.1   Symbols: PHT6, PHT1.6   phosphate transporter 1.6   chr5:17393598-17395148 REVERSE LENGTH=516                         | 510 | 516 | 0         | 101.2 | 82.9 | 92.0 |
| Rsa1.0_00351.1.g12006.t2 | dbj BAJ34213.1   unnamed protein product [Theillungiella halophila]                                                                                                                                                                                                                                                                                                                                                                                                                                             | 367 | 332 | 0         | 90.5  | 88.6 | 90.2 | unnamed protein product                         | ----  | ----                 | AT1G04410.1   Symbols: Lactate/malate dehydrogenase family protein   chr1:1189418-1191267 REVERSE LENGTH=332                        | 367 | 332 | 0         | 90.5  | 87.2 | 89.6 |
| Rsa1.0_00351.1.g12007.t1 | #                                                                                                                                                                                                                                                                                                                                                                                                                                                                                                               | #   | #   | #         | #     | #    | #    | -                                               | ----  | ----                 | #                                                                                                                                   | #   | #   | #         | #     | #    | #    |
| Rsa1.0_00351.1.g12008.t1 | ref XP_002863664.1   hypothetical protein ARALYDRAFT_494671 [Arabidopsis lyrata subsp. lyrata] gi 297309499 gb EFH39923.1   hypothetical protein ARALYDRAFT_494671 [Arabidopsis lyrata subsp. lyrata] ref XP_002863667.1   glycerophosphodiester phosphodiesterase [Arabidopsis lyrata subsp. lyrata] gi 297309502 gb EFH39926.1   glycerophosphodiester phosphodiesterase [Arabidopsis lyrata subsp. lyrata]                                                                                                   | 482 | 480 | 0         | 99.6  | 95.0 | 97.7 | hypothetical protein ARALYDRAFT_494671          | gbpln | Arabidopsis lyrata   | AT5G43320.1   Symbols: ckl8   casein kinase I-like 8   chr5:17386043-17388941 REVERSE LENGTH=480                                    | 482 | 480 | 0         | 99.6  | 95.2 | 97.5 |
| Rsa1.0_00351.1.g12009.t1 | ref XP_002863667.1   glycerophosphodiester phosphodiesterase [Arabidopsis lyrata subsp. lyrata] gi 297309502 gb EFH39926.1   glycerophosphodiester phosphodiesterase [Arabidopsis lyrata subsp. lyrata]                                                                                                                                                                                                                                                                                                         | 368 | 372 | 1.00E-174 | 101.1 | 80.7 | 88.9 | glycerophosphodiester phosphodiesterase         | gbpln | Arabidopsis lyrata   | AT5G43300.1   Symbols: PLC-like phosphodiesterases superfamily protein   chr5:17376946-17379070 REVERSE LENGTH=370                  | 368 | 370 | 1.00E-173 | 100.5 | 78.0 | 85.6 |
| Rsa1.0_00351.1.g12010.t1 | #                                                                                                                                                                                                                                                                                                                                                                                                                                                                                                               | #   | #   | #         | #     | #    | #    | -                                               | ----  | ----                 | #                                                                                                                                   | #   | #   | #         | #     | #    | #    |
| Rsa1.0_00351.1.g12011.t1 | ref XP_002962895.1   WRKY DNA-binding protein 49 [Arabidopsis lyrata subsp. lyrata] gi 297308683 gb EFH39154.1   WRKY DNA-binding protein 49 [Arabidopsis lyrata subsp. lyrata]                                                                                                                                                                                                                                                                                                                                 | 329 | 272 | 9.00E-96  | 82.7  | 55.0 | 65.0 | WRKY DNA-binding protein 49                     | gbpln | Arabidopsis lyrata   | AT5G43290.1   Symbols: WRKY49, ATWRKY49   WRKY DNA-binding protein 49   chr5:17371987-17373083 REVERSE LENGTH=274                   | 329 | 274 | 3.00E-95  | 83.3  | 55.0 | 64.7 |
| Rsa1.0_00351.1.g12012.t1 | gb EOA13745.1   hypothetical protein CARUB_v10026833mg, partial [Capsella rubella]                                                                                                                                                                                                                                                                                                                                                                                                                              | 277 | 307 | 1.00E-138 | 110.8 | 89.9 | 94.6 | hypothetical protein CARUB_v10026833mg, partial | gbpln | Capsella rubella     | AT5G43280.1   Symbols: ATDCI1, DCI1   delta(3,5)delta(2,4)-dienoyl-CoA isomerase 1   chr5:17367947-17369113 FORWARD LENGTH=278      | 277 | 278 | 1.00E-136 | 100.4 | 86.3 | 92.4 |
| Rsa1.0_00351.1.g12013.t1 | dbj BAJ34267.1   unnamed protein product [Theillungiella halophila]                                                                                                                                                                                                                                                                                                                                                                                                                                             | 356 | 422 | 1.00E-152 | 118.5 | 81.2 | 88.8 | unnamed protein product                         | ----  | ----                 | AT5G43270.1   Symbols: SPL2   squamosa promoter binding protein-like 2   chr5:17360527-17362143 REVERSE LENGTH=419                  | 356 | 419 | 1.00E-149 | 117.7 | 80.9 | 88.5 |



|                          |                                                                                                                                                                                                                                                                                                                                                                                                                                                                                                                                                                                                                                                                                                                                                                                  |      |      |           |       |      |      |                                                                                      |       |                      |                                                                                                                                                                                                                                                                                                                                                                     |      |      |           |       |      |      |
|--------------------------|----------------------------------------------------------------------------------------------------------------------------------------------------------------------------------------------------------------------------------------------------------------------------------------------------------------------------------------------------------------------------------------------------------------------------------------------------------------------------------------------------------------------------------------------------------------------------------------------------------------------------------------------------------------------------------------------------------------------------------------------------------------------------------|------|------|-----------|-------|------|------|--------------------------------------------------------------------------------------|-------|----------------------|---------------------------------------------------------------------------------------------------------------------------------------------------------------------------------------------------------------------------------------------------------------------------------------------------------------------------------------------------------------------|------|------|-----------|-------|------|------|
| Rsa1.0_00351.1.g12014.t1 | gb EOA14275.1  hypothetical protein CARUB_v10027437mg [Capsella rubella]                                                                                                                                                                                                                                                                                                                                                                                                                                                                                                                                                                                                                                                                                                         | 98   | 98   | 4.00E-42  | 100.0 | 83.7 | 94.9 | hypothetical protein CARUB_v10027437mg                                               | gbpln | Capsella rubella     | AT5G43260.1   Symbols:   chaperone protein dnaJ-related   chr5:17357693-17357986 REVERSE LENGTH=97                                                                                                                                                                                                                                                                  | 98   | 97   | 7.00E-43  | 99.0  | 82.7 | 93.9 |
| Rsa1.0_00351.1.g12015.t1 | ref NP_199137.2  uncharacterized protein [Arabidopsis thaliana] gi 332007543 gb AED94926.1  uncharacterized protein AT5G43230 [Arabidopsis thaliana]                                                                                                                                                                                                                                                                                                                                                                                                                                                                                                                                                                                                                             | 843  | 848  | 0         | 100.6 | 87.8 | 93.1 | uncharacterized protein                                                              | gbpln | Arabidopsis thaliana | AT5G43230.1   Symbols:   unknown protein; BEST Arabidopsis thaliana protein match is: unknown protein (TAIR:AT3G01810.3); Has 30201 Blast hits to 17322 proteins in 780 species: Archae - 12; Bacteria - 1396; Metazoa - 17338; Fungi - 3422; Plants - 5037; Viruses - 0; Other Eukaryotes - 2996 (source: NCBI BLINK).   chr5:17349125-17352747 FORWARD LENGTH=848 | 843  | 848  | 0         | 100.6 | 87.8 | 93.1 |
| Rsa1.0_00351.1.g12016.t1 | ref NP_568622.1  F-box/kelch-repeat protein [Arabidopsis thaliana] gi 75170673 sp Q9FHS6.1 FK119_ARAT H RecName: Full=F-box/kelch-repeat protein At5g43190 gi 10177381 dbj BAB10582.1  unnamed protein product [Arabidopsis thaliana] gi 27765056 gb AA023649.1  At5g43190 [Arabidopsis thaliana] gi 110743394 dbj BAE99583.1  hypothetical protein [Arabidopsis thaliana] gi 332007539 gb AED94922.1  F-box/kelch-repeat protein [Arabidopsis thaliana] ref NP_199125.2  pumilio 14 [Arabidopsis thaliana] gi 75339252 sp Q4PSD1.1 PUM14_ARAT H RecName: Full=Pumilio homolog 14; Short=APUM-14; Short=AtPUM14 gi 67633854 gb AA78851.1  pumilio/Puf RNA-binding domain-containing protein [Arabidopsis thaliana] gi 332007528 gb AED94911.1  pumilio 14 [Arabidopsis thaliana] | 402  | 403  | 1.00E-174 | 100.2 | 85.3 | 92.3 | F-box/kelch-repeat protein                                                           | gbpln | Arabidopsis thaliana | AT5G43190.1   Symbols:   Galactose oxidase/kelch repeat superfamily protein   chr5:17340300-17341511 REVERSE LENGTH=403                                                                                                                                                                                                                                             | 402  | 403  | 1.00E-176 | 100.2 | 85.3 | 92.3 |
| Rsa1.0_00351.1.g12017.t1 | ref NP_199125.2  pumilio 14 [Arabidopsis thaliana] gi 75339252 sp Q4PSD1.1 PUM14_ARAT H RecName: Full=Pumilio homolog 14; Short=APUM-14; Short=AtPUM14 gi 67633854 gb AA78851.1  pumilio/Puf RNA-binding domain-containing protein [Arabidopsis thaliana] gi 332007528 gb AED94911.1  pumilio 14 [Arabidopsis thaliana]                                                                                                                                                                                                                                                                                                                                                                                                                                                          | 462  | 518  | 8.00E-92  | 112.1 | 45.0 | 60.8 | pumilio 14                                                                           | gbpln | Arabidopsis thaliana | AT5G43110.1   Symbols: APUM14, PUM14   pumilio 14   chr5:17309842-17311937 FORWARD LENGTH=518                                                                                                                                                                                                                                                                       | 462  | 518  | 2.00E-94  | 112.1 | 45.0 | 60.8 |
| Rsa1.0_00351.1.g12018.t1 | #                                                                                                                                                                                                                                                                                                                                                                                                                                                                                                                                                                                                                                                                                                                                                                                | #    | #    | #         | #     | #    | #    | -                                                                                    | ----  | ----                 | AT5G43066.1   Symbols:   unknown protein; LOCATED IN: endomembrane system; Has 30201 Blast hits to 17322 proteins in 780 species: Archae - 12; Bacteria - 1396; Metazoa - 17338; Fungi - 3422; Plants - 5037; Viruses - 0; Other Eukaryotes - 2996 (source: NCBI BLINK).   chr5:17284583-17284807 FORWARD LENGTH=74                                                 | 146  | 74   | 5.00E-12  | 50.7  | 24.7 | 29.5 |
| Rsa1.0_00351.1.g12019.t1 | #                                                                                                                                                                                                                                                                                                                                                                                                                                                                                                                                                                                                                                                                                                                                                                                | #    | #    | #         | #     | #    | #    | -                                                                                    | ----  | ----                 | #                                                                                                                                                                                                                                                                                                                                                                   | #    | #    | #         | #     | #    |      |
| Rsa1.0_00351.1.g12020.t1 | gb AAL60579.1 AF454957.1 senescence-associated cysteine protease [Brassica oleracea]                                                                                                                                                                                                                                                                                                                                                                                                                                                                                                                                                                                                                                                                                             | 461  | 460  | 0         | 99.8  | 93.3 | 95.4 | senescence-associated cysteine protease                                              | gbpln | Brassica oleracea    | AT5G43060.1   Symbols:   Granulin repeat cysteine protease family protein   chr5:17269784-17272117 REVERSE LENGTH=463                                                                                                                                                                                                                                               | 461  | 463  | 0         | 100.4 | 87.0 | 91.8 |
| Rsa1.0_00351.1.g12021.t1 | gb EOA15078.1  hypothetical protein CARUB_v10028445mg [Capsella rubella]                                                                                                                                                                                                                                                                                                                                                                                                                                                                                                                                                                                                                                                                                                         | 156  | 157  | 7.00E-65  | 100.6 | 83.3 | 89.7 | hypothetical protein CARUB_v10028445mg                                               | gbpln | Capsella rubella     | AT5G43050.1   Symbols: NPO6   Protein of unknown function (DUF565)   chr5:17268404-17268880 FORWARD LENGTH=158                                                                                                                                                                                                                                                      | 156  | 158  | 1.00E-66  | 101.3 | 83.3 | 90.4 |
| Rsa1.0_00351.1.g12022.t1 | emb CAN83990.1  hypothetical protein VITISV_018454 [Vitis vinifera]                                                                                                                                                                                                                                                                                                                                                                                                                                                                                                                                                                                                                                                                                                              | 1394 | 1243 | 0         | 89.2  | 38.1 | 51.7 | hypothetical protein VITISV_018454                                                   | gbpln | Vitis vinifera       | AT4G23160.1   Symbols: CRK8   cysteine-rich RLK (RECEPTOR-like protein kinase) 8   chr4:12129485-12134086 FORWARD LENGTH=1262                                                                                                                                                                                                                                       | 1394 | 1262 | 1.00E-171 | 90.5  | 20.9 | 28.2 |
| Rsa1.0_00351.1.g12023.t1 | gb ABR14728.1  ubiquitin conjugating enzyme [Gossypium hirsutum]                                                                                                                                                                                                                                                                                                                                                                                                                                                                                                                                                                                                                                                                                                                 | 148  | 161  | 9.00E-72  | 108.8 | 87.8 | 94.6 | ubiquitin conjugating enzyme                                                         | gbpln | Gossypium hirsutum   | AT5G42990.1   Symbols: UBC18   ubiquitin-conjugating enzyme 18   chr5:17244206-17245904 REVERSE LENGTH=161                                                                                                                                                                                                                                                          | 148  | 161  | 8.00E-74  | 108.8 | 95.3 | 98.0 |
| Rsa1.0_00351.1.g12024.t1 | sp O64432.1 TRXH_BRARA RecName: Full=Thioredoxin H-type; Short=Trx-H gi 3062793 dbj BAA25681.1  Thioredoxin [Brassica rapa]                                                                                                                                                                                                                                                                                                                                                                                                                                                                                                                                                                                                                                                      | 123  | 123  | 4.00E-56  | 100.0 | 88.6 | 95.1 | RecName: Full=Thioredoxin H-type; Short=Trx-H gi 3062793 dbj BAA25681.1  Thioredoxin | gbpln | Brassica rapa        | AT5G42980.1   Symbols: ATTRX3, ATH3, ATTRX3, TRX3, TRX3   thioredoxin 3   chr5:17242772-17243718 FORWARD LENGTH=118                                                                                                                                                                                                                                                 | 123  | 118  | 1.00E-45  | 95.9  | 68.3 | 79.7 |
| Rsa1.0_00351.1.g12025.t1 | gb EOA12455.1  hypothetical protein CARUB_v10025736mg [Capsella rubella]                                                                                                                                                                                                                                                                                                                                                                                                                                                                                                                                                                                                                                                                                                         | 1706 | 1716 | 0         | 100.6 | 75.1 | 83.8 | hypothetical protein CARUB_v10025736mg                                               | gbpln | Capsella rubella     | AT5G42950.1   Symbols:   GYF domain-containing protein   chr5:17224436-17231044 FORWARD LENGTH=1714                                                                                                                                                                                                                                                                 | 1706 | 1714 | 0         | 100.5 | 75.4 | 84.2 |
| Rsa1.0_00351.1.g12026.t1 | ref XP_002863715.1  zinc finger family protein [Arabidopsis lyrata subsp. lyrata] gi 297309550 gb EFH39974.1  zinc finger family protein [Arabidopsis lyrata subsp. lyrata] ref NP_199107.5  lipase class 3-like protein [Arabidopsis thaliana] gi 332007506 gb AED94889.1  lipase class 3-like protein [Arabidopsis thaliana]                                                                                                                                                                                                                                                                                                                                                                                                                                                   | 423  | 682  | 1.00E-121 | 161.2 | 58.9 | 64.8 | zinc finger family protein                                                           | gbpln | Arabidopsis lyrata   | AT5G42940.1   Symbols:   RING/U-box superfamily protein   chr5:17216649-17219171 REVERSE LENGTH=691                                                                                                                                                                                                                                                                 | 423  | 691  | 1.00E-114 | 163.4 | 56.0 | 62.6 |
| Rsa1.0_00351.1.g12027.t1 | ref NP_199107.5  lipase class 3-like protein [Arabidopsis thaliana] gi 332007506 gb AED94889.1  lipase class 3-like protein [Arabidopsis thaliana]                                                                                                                                                                                                                                                                                                                                                                                                                                                                                                                                                                                                                               | 468  | 467  | 0         | 99.8  | 80.6 | 90.4 | lipase class 3-like protein                                                          | gbpln | Arabidopsis thaliana | AT5G42930.1   Symbols:   alpha/beta-Hydrolases superfamily protein   chr5:17210738-17214152 REVERSE LENGTH=467                                                                                                                                                                                                                                                      | 468  | 467  | 0         | 99.8  | 80.6 | 90.4 |

|                          |                                                                                                                                                                                                                                                                                                                                                                                                                                                                                                                                                                                                                                                                                                                                                                                            |     |     |           |       |       |       |                                                       |             |                      |                                                                                                                                                                                                                                                                          |     |     |           |       |       |       |
|--------------------------|--------------------------------------------------------------------------------------------------------------------------------------------------------------------------------------------------------------------------------------------------------------------------------------------------------------------------------------------------------------------------------------------------------------------------------------------------------------------------------------------------------------------------------------------------------------------------------------------------------------------------------------------------------------------------------------------------------------------------------------------------------------------------------------------|-----|-----|-----------|-------|-------|-------|-------------------------------------------------------|-------------|----------------------|--------------------------------------------------------------------------------------------------------------------------------------------------------------------------------------------------------------------------------------------------------------------------|-----|-----|-----------|-------|-------|-------|
| Rsa1.0_00351.1.g12028.t1 | gb EOA13922.1  hypothetical protein CARUB_v10027042mg [Capsella rubella]                                                                                                                                                                                                                                                                                                                                                                                                                                                                                                                                                                                                                                                                                                                   | 132 | 224 | 2.00E-32  | 169.7 | 71.2  | 80.3  | hypothetical protein CARUB_v10027042mg                | gbpln       | Capsella rubella     | AT5G42900.2   Symbols:   cold regulated gene 27   chr5:17198366-17199712 REVERSE LENGTH=246                                                                                                                                                                              | 132 | 246 | 1.00E-31  | 186.4 | 69.7  | 80.3  |
| Rsa1.0_00351.1.g12029.t1 | gb EOA14063.1  hypothetical protein CARUB_v10027199mg [Capsella rubella]                                                                                                                                                                                                                                                                                                                                                                                                                                                                                                                                                                                                                                                                                                                   | 186 | 186 | 1.00E-102 | 100.0 | 98.4  | 99.5  | hypothetical protein CARUB_v10027199mg                | gbpln       | Capsella rubella     | AT5G54750.1   Symbols:   Transport protein particle (TRAPP) component   chr5:22242080-22243477 FORWARD LENGTH=186                                                                                                                                                        | 186 | 186 | 1.00E-104 | 100.0 | 97.3  | 99.5  |
| Rsa1.0_00351.1.g12030.t1 | gb EOA14581.1  hypothetical protein CARUB_v10027822mg [Capsella rubella]                                                                                                                                                                                                                                                                                                                                                                                                                                                                                                                                                                                                                                                                                                                   | 556 | 524 | 0         | 94.2  | 78.1  | 83.6  | hypothetical protein CARUB_v10027822mg                | gbpln       | Capsella rubella     | AT5G43360.1   Symbols: PHT3, ATP4, PHT1.3   phosphate transporter 1.3   chr5:17409524-17411214 FORWARD LENGTH=521                                                                                                                                                        | 556 | 521 | 0         | 93.7  | 78.2  | 82.7  |
| Rsa1.0_00351.1.g12031.t1 | gb ABX46557.1  polygalacturonase inhibitor protein 11 [Brassica napus]                                                                                                                                                                                                                                                                                                                                                                                                                                                                                                                                                                                                                                                                                                                     | 332 | 342 | 1.00E-157 | 103.0 | 84.0  | 86.1  | polygalacturonase inhibitor protein 11                | gbpln       | Brassica napus       | AT5G06860.1   Symbols: PGIP1, ATPGIP1   polygalacturonase inhibiting protein 1   chr5:2132373-2133434 FORWARD LENGTH=330                                                                                                                                                 | 332 | 330 | 1.00E-119 | 99.4  | 63.6  | 74.4  |
| Rsa1.0_00351.1.g12032.t1 | ref NP_174709.1  putative long-chain-alcohol O-fatty-acyltransferase 9 [Arabidopsis thaliana] gi 75339336 sp Q4PT07.1 WAXS9_ARATH RecName: Full=Probable long-chain-alcohol O-fatty-acyltransferase 9; AltName: Full=Wax synthase 9 gi 67633422 gb AAAY78636.1  membrane bound O-acyl transferase family protein [Arabidopsis thaliana] gi 332193599 gb AEE31720.1  putative long-chain-alcohol O-fatty-acyltransferase 9 [Arabidopsis thaliana]                                                                                                                                                                                                                                                                                                                                           | 338 | 341 | 1.00E-144 | 100.9 | 78.1  | 86.4  | putative long-chain-alcohol O-fatty-acyltransferase 9 | gbpln       | Arabidopsis thaliana | AT1G34500.1   Symbols:   MBOAT (membrane bound O-acyl transferase) family protein   chr1:12611638-12612663 FORWARD LENGTH=341                                                                                                                                            | 338 | 341 | 2.33E-156 | 100.9 | 78.1  | 86.4  |
| Rsa1.0_00351.1.g12033.t1 | ref XP_002865494.1  hypothetical protein ARALYDRAFT_494763 [Arabidopsis lyrata subsp. lyrata] gi 297311329 gb EFH41753.1  hypothetical protein ARALYDRAFT_494763 [Arabidopsis lyrata subsp. lyrata]                                                                                                                                                                                                                                                                                                                                                                                                                                                                                                                                                                                        | 822 | 806 | 0         | 98.1  | 69.2  | 78.8  | hypothetical protein ARALYDRAFT_494763                | gbpln       | Arabidopsis lyrata   | AT5G42710.1   Symbols:   unknown protein; Has 1807 Blast hits to 1807 proteins in 277 species: Archae - 0; Bacteria - 0; Metazoa - 736; Fungi - 347; Plants - 385; Viruses - 0; Other Eukaryotes - 339 (source: NCBI BLINK).   chr5:17125578-17128696 FORWARD LENGTH=807 | 822 | 807 | 0         | 98.2  | 66.9  | 78.0  |
| Rsa1.0_00351.1.g12034.t1 | tpg DAA55311.1  TPA: histone H3.2 [Zea mays]                                                                                                                                                                                                                                                                                                                                                                                                                                                                                                                                                                                                                                                                                                                                               | 136 | 245 | 1.00E-72  | 180.1 | 100.0 | 100.0 | TPA: histone H3.2                                     | gbenv/gbpln | Zea mays             | AT5G65360.1   Symbols:   Histone superfamily protein   chr5:26120099-26120509 REVERSE LENGTH=136                                                                                                                                                                         | 136 | 136 | 5.00E-74  | 100.0 | 100.0 | 100.0 |
| Rsa1.0_00351.1.g12035.t1 | ref NP_175180.1  RNA-binding protein 47C [Arabidopsis thaliana] gi 75337807 sp Q9SX79.1 RB47C_ARATH RecName: Full=Polyadenylate-binding protein RBP47C; Short=Poly(A)-binding protein RBP47C; AltName: Full=RNA-binding protein 47C; Short=AtRBP47C gi 5668812 gb AAD46038.1 AC007519_23 Contains: 3 PF00076 RNA recognition motif domains. ESTs gi R30092, gb R30093, gb AA394338, gb N65719 and gb AA597577 come from this gene [Arabidopsis thaliana] gi 12744993 gb AAK06876.1 AF344325.1 putative DNA binding protein [Arabidopsis thaliana] gi 14334552 gb AAK59684.1  putative DNA binding protein [Arabidopsis thaliana] gi 17065624 gb AAL33806.1  putative DNA binding protein [Arabidopsis thaliana] gi 332194053 gb AEE32174.1  RNA-binding protein 47C [Arabidopsis thaliana] | 427 | 432 | 1.00E-162 | 101.2 | 68.1  | 79.2  | RNA-binding protein 47C                               | gbpln       | Arabidopsis thaliana | AT1G47490.1   Symbols: ATRBP47C, RBP47C   RNA-binding protein 47C   chr1:17424801-17427182 FORWARD LENGTH=432                                                                                                                                                            | 427 | 432 | 1.00E-165 | 101.2 | 68.1  | 79.2  |
| Rsa1.0_00351.1.g12036.t2 | ref XP_002863751.1  hypothetical protein ARALYDRAFT_331132 [Arabidopsis lyrata subsp. lyrata] gi 297309586 gb EFH40010.1  hypothetical protein ARALYDRAFT_331132 [Arabidopsis lyrata subsp. lyrata]                                                                                                                                                                                                                                                                                                                                                                                                                                                                                                                                                                                        | 517 | 541 | 0         | 104.6 | 75.6  | 82.6  | hypothetical protein ARALYDRAFT_331132                | gbpln       | Arabidopsis lyrata   | AT5G42690.2   Symbols:   Protein of unknown function, DUF547   chr5:17116630-17119492 REVERSE LENGTH=540                                                                                                                                                                 | 517 | 540 | 0         | 104.4 | 75.8  | 82.6  |
| Rsa1.0_00351.1.g12037.t1 | ref XP_002865496.1  hypothetical protein ARALYDRAFT_494768 [Arabidopsis lyrata subsp. lyrata] gi 297311331 gb EFH41755.1  hypothetical protein ARALYDRAFT_494768 [Arabidopsis lyrata subsp. lyrata]                                                                                                                                                                                                                                                                                                                                                                                                                                                                                                                                                                                        | 238 | 238 | 1.00E-127 | 100.0 | 91.6  | 97.5  | hypothetical protein ARALYDRAFT_494768                | gbpln       | Arabidopsis lyrata   | AT5G42680.2   Symbols:   Protein of unknown function, DUF617   chr5:17114640-17115356 FORWARD LENGTH=238                                                                                                                                                                 | 238 | 238 | 1.00E-122 | 100.0 | 91.2  | 97.5  |
| Rsa1.0_00351.1.g12038.t1 | #                                                                                                                                                                                                                                                                                                                                                                                                                                                                                                                                                                                                                                                                                                                                                                                          | #   | #   | #         | #     | #     | -     | ---                                                   | ---         | #                    | #                                                                                                                                                                                                                                                                        | #   | #   | #         | #     | #     |       |
| Rsa1.0_00351.1.g12039.t1 | gb EOA26064.1  hypothetical protein CARUB_v10019482mg [Capsella rubella]                                                                                                                                                                                                                                                                                                                                                                                                                                                                                                                                                                                                                                                                                                                   | 126 | 624 | 1.00E-17  | 495.2 | 34.1  | 36.5  | hypothetical protein CARUB_v10019482mg                | gbpln       | Capsella rubella     | AT3G60190.1   Symbols: ADL4, ADLP2, EDR3, DRP1E, ADL1E, DL1E   DYNAMIN-like 1E   chr3:22244367-22247651 REVERSE LENGTH=624                                                                                                                                               | 126 | 624 | 5.00E-20  | 495.2 | 34.1  | 35.7  |

|                          |                                                                                                                                                                                                                                                                                                                                                                     |     |      |           |       |      |      |                                                      |       |                      |                                                                                                                                                                                                                                                                                                                                                                                                                        |     |      |           |       |      |      |
|--------------------------|---------------------------------------------------------------------------------------------------------------------------------------------------------------------------------------------------------------------------------------------------------------------------------------------------------------------------------------------------------------------|-----|------|-----------|-------|------|------|------------------------------------------------------|-------|----------------------|------------------------------------------------------------------------------------------------------------------------------------------------------------------------------------------------------------------------------------------------------------------------------------------------------------------------------------------------------------------------------------------------------------------------|-----|------|-----------|-------|------|------|
| Rsa1.0_00352.1.g12040.t1 | gb ABW74585.1  pol polyprotein [Boechera divaricarpa]                                                                                                                                                                                                                                                                                                               | 217 | 551  | 4.00E-34  | 253.9 | 47.9 | 64.1 | pol polyprotein                                      | gbpln | Boechera divaricarpa | #                                                                                                                                                                                                                                                                                                                                                                                                                      | #   | #    | #         | #     | #    |      |
| Rsa1.0_00352.1.g12041.t1 | #                                                                                                                                                                                                                                                                                                                                                                   | #   | #    | #         | #     | #    | -    | -                                                    | ----  | ----                 | #                                                                                                                                                                                                                                                                                                                                                                                                                      | #   | #    | #         | #     | #    |      |
| Rsa1.0_00352.1.g12042.t1 | gb EOA32056.1  hypothetical protein CARUB_v10015301mg [Capsella rubella]                                                                                                                                                                                                                                                                                            | 263 | 263  | 1.00E-118 | 100.0 | 83.3 | 91.3 | hypothetical protein CARUB_v10015301mg               | gbpln | Capsella rubella     | AT2G17080.1   Symbols:   Arabidopsis protein of unknown function (DUF241)   chr2:7433326-7434117 REVERSE LENGTH=263                                                                                                                                                                                                                                                                                                    | 263 | 263  | 1.00E-110 | 100.0 | 79.1 | 89.0 |
| Rsa1.0_00352.1.g12043.t1 | ref XP_002884040.1  peptidoglycan-binding LysM domain-containing protein [Arabidopsis lyrata subsp. lyrata]   gi 297329880 gb EFH60299.1  peptidoglycan-binding LysM domain-containing protein [Arabidopsis lyrata subsp. lyrata]                                                                                                                                   | 364 | 356  | 1.00E-147 | 97.8  | 73.4 | 82.4 | peptidoglycan-binding LysM domain-containing protein | gbpln | Arabidopsis lyrata   | AT2G17120.1   Symbols: LYM2   lysm domain GPI-anchored protein 2 precursor   chr2:7459156-7460649 FORWARD LENGTH=350                                                                                                                                                                                                                                                                                                   | 364 | 350  | 1.00E-134 | 96.2  | 69.0 | 78.8 |
| Rsa1.0_00352.1.g12044.t1 | gb EOA30387.1  hypothetical protein CARUB_v10013507mg [Capsella rubella]                                                                                                                                                                                                                                                                                            | 738 | 502  | 0         | 68.0  | 57.2 | 60.6 | hypothetical protein CARUB_v10013507mg               | gbpln | Capsella rubella     | AT2G13100.1   Symbols:   Major facilitator superfamily protein   chr2:5390206-5391764 FORWARD LENGTH=493                                                                                                                                                                                                                                                                                                               | 738 | 493  | 0         | 66.8  | 56.8 | 60.3 |
| Rsa1.0_00352.1.g12045.t1 | gb AAO61648.1  NAD-dependent isocitrate dehydrogenase gamma subunit [Brassica napus]   gi 28974506 gb AAO61649.1  NAD-dependent isocitrate dehydrogenase gamma subunit [Brassica napus]   gi 28974508 gb AAO61650.1  NAD-dependent isocitrate dehydrogenase gamma subunit [Brassica napus]                                                                          | 380 | 368  | 0         | 96.8  | 95.0 | 95.3 | NAD-dependent isocitrate dehydrogenase gamma subunit | gbpln | Brassica napus       | AT2G17130.1   Symbols: IDH2, IDH-II   isocitrate dehydrogenase subunit 2   chr2:7461062-7462466 REVERSE LENGTH=367                                                                                                                                                                                                                                                                                                     | 380 | 367  | 0         | 96.6  | 91.8 | 92.9 |
| Rsa1.0_00352.1.g12046.t1 | ref XP_002884041.1  binding protein [Arabidopsis lyrata subsp. lyrata]   gi 297329881 gb EFH60300.1  binding protein [Arabidopsis lyrata subsp. lyrata]                                                                                                                                                                                                             | 877 | 874  | 0         | 99.7  | 89.7 | 94.6 | binding protein                                      | gbpln | Arabidopsis lyrata   | AT2G17140.1   Symbols:   Pentatricopeptide repeat (PPR) superfamily protein   chr2:7462820-7465740 FORWARD LENGTH=874                                                                                                                                                                                                                                                                                                  | 877 | 874  | 0         | 99.7  | 89.4 | 94.4 |
| Rsa1.0_00352.1.g12047.t1 | ref XP_002886100.1  predicted protein [Arabidopsis lyrata subsp. lyrata]   gi 297331940 gb EFH62359.1  predicted protein [Arabidopsis lyrata subsp. lyrata]                                                                                                                                                                                                         | 913 | 914  | 0         | 100.1 | 80.0 | 85.7 | predicted protein                                    | gbpln | Arabidopsis lyrata   | AT2G17150.1   Symbols:   Plant regulator RWP-RK family protein   chr2:7467049-7470533 REVERSE LENGTH=909                                                                                                                                                                                                                                                                                                               | 913 | 909  | 0         | 99.6  | 79.1 | 84.7 |
| Rsa1.0_00352.1.g12048.t1 | emb CAC37623.1  copia-like polyprotein [Arabidopsis thaliana]                                                                                                                                                                                                                                                                                                       | 561 | 1466 | 0         | 261.3 | 57.9 | 67.0 | copia-like polyprotein                               | gbpln | Arabidopsis thaliana | AT5G48050.1   Symbols:   CONTAINS InterPro DOMAIN/s: Retrotransposon gag protein (InterPro:IPR005162); BEST Arabidopsis thaliana protein match is: unknown protein (TAIR:AT1G34070.1); Has 1807 Blast hits to 1807 proteins in 277 species: Archaea - 0; Bacteria - 0; Metazoa - 736; Fungi - 347; Plants - 385; Viruses - 0; Other Eukaryotes - 339 (source: NCBI BLINK).   chr5:19472661-19473770 REVERSE LENGTH=369 | 561 | 369  | 8.00E-18  | 65.8  | 13.9 | 21.9 |
| Rsa1.0_00352.1.g12049.t1 | gb AAD24567.1 AF120335.1 putative transposase [Arabidopsis thaliana]                                                                                                                                                                                                                                                                                                | 428 | 577  | 2.00E-80  | 134.8 | 36.4 | 47.4 | putative transposase                                 | gbpln | Arabidopsis thaliana | AT3G42170.1   Symbols:   BED zinc finger hAT family dimerisation domain   chr3:14321838-14323928 FORWARD LENGTH=696                                                                                                                                                                                                                                                                                                    | 428 | 696  | 1.00E-18  | 162.6 | 15.2 | 29.4 |
| Rsa1.0_00352.1.g12050.t1 | gb EOA32781.1  hypothetical protein CARUB_v10016090mg [Capsella rubella]                                                                                                                                                                                                                                                                                            | 257 | 276  | 5.00E-52  | 107.4 | 56.0 | 67.7 | hypothetical protein CARUB_v10016090mg               | gbpln | Capsella rubella     | AT2G17180.1   Symbols:   C2H2-like zinc finger protein   chr2:7476835-7477647 REVERSE LENGTH=270                                                                                                                                                                                                                                                                                                                       | 257 | 270  | 1.00E-52  | 105.1 | 53.3 | 62.6 |
| Rsa1.0_00352.1.g12051.t2 | ref NP_179311.1  ubiquitin-like protein [Arabidopsis thaliana]   gi 4584343 gb AAD25138.1  putative ubiquitin-like protein [Arabidopsis thaliana]   gi 23296306 gb AA13037.1  putative ubiquitin protein [Arabidopsis thaliana]   gi 110735104 gb AG89122.1  Dsk2a [synthetic construct]   gi 330251503 gb AEC06597.1  UBL/UBA protein DSK2b [Arabidopsis thaliana] | 569 | 551  | 0         | 96.8  | 82.2 | 88.2 | ubiquitin-like protein                               | gbpln | Arabidopsis thaliana | AT2G17200.1   Symbols: DSK2   ubiquitin family protein   chr2:7482133-7485090 REVERSE LENGTH=551                                                                                                                                                                                                                                                                                                                       | 569 | 551  | 0         | 96.8  | 82.2 | 88.2 |
| Rsa1.0_00352.1.g12052.t1 | gb ABH07409.1  putative pol polyprotein [Brassica oleracea var. botrytis]                                                                                                                                                                                                                                                                                           | 863 | 1239 | 1.00E-115 | 143.6 | 29.1 | 36.0 | putative pol polyprotein                             | gbpln | Brassica oleracea    | AT4G23160.1   Symbols: CRK8   cysteine-rich RLK (RECEPTOR-like protein kinase) 8   chr4:12129485-12134086 FORWARD LENGTH=1262                                                                                                                                                                                                                                                                                          | 863 | 1262 | 5.00E-25  | 146.2 | 9.0  | 14.5 |
| Rsa1.0_00352.1.g12053.t2 | gb EOA26181.1  hypothetical protein CARUB_v10019619mg [Capsella rubella]                                                                                                                                                                                                                                                                                            | 363 | 435  | 1.00E-117 | 119.8 | 61.7 | 76.0 | hypothetical protein CARUB_v10019619mg               | gbpln | Capsella rubella     | AT2G28580.1   Symbols:   Plant protein of unknown function (DUF247)   chr2:12244885-12248270 FORWARD LENGTH=536                                                                                                                                                                                                                                                                                                        | 363 | 536  | 4.00E-96  | 147.7 | 53.2 | 71.3 |
| Rsa1.0_00352.1.g12054.t1 | #                                                                                                                                                                                                                                                                                                                                                                   | #   | #    | #         | #     | #    | -    | -                                                    | ----  | ----                 | #                                                                                                                                                                                                                                                                                                                                                                                                                      | #   | #    | #         | #     | #    |      |
| Rsa1.0_00353.1.g12055.t6 | gb EOA39474.1  hypothetical protein CARUB_v10008071mg [Capsella rubella]                                                                                                                                                                                                                                                                                            | 219 | 1950 | 2.00E-93  | 890.4 | 73.5 | 87.2 | hypothetical protein CARUB_v10008071mg               | gbpln | Capsella rubella     | AT1G56130.1   Symbols:   Leucine-rich repeat transmembrane protein kinase   chr1:20994931-21000887 REVERSE LENGTH=1032                                                                                                                                                                                                                                                                                                 | 219 | 1032 | 6.00E-89  | 471.2 | 71.2 | 81.7 |

|                          |                                                                                                                                                                                                                                                        |     |     |           |       |      |      |                                                  |       |                      |                                                                                                                                              |     |     |           |       |      |      |
|--------------------------|--------------------------------------------------------------------------------------------------------------------------------------------------------------------------------------------------------------------------------------------------------|-----|-----|-----------|-------|------|------|--------------------------------------------------|-------|----------------------|----------------------------------------------------------------------------------------------------------------------------------------------|-----|-----|-----------|-------|------|------|
| Rsa1.0_00353.1.g12058.t1 | gb EOA34482.1  hypothetical protein CARUB_v10022023mg [Capsella rubella]                                                                                                                                                                               | 280 | 286 | 1.00E-111 | 102.1 | 79.6 | 88.2 | hypothetical protein CARUB_v10022023mg           | gbpln | Capsella rubella     | AT1G68120.1   Symbols: BPC3, ATBPC3   basic pentacysteine 3   chr1:25526296-25527108 REVERSE LENGTH=270                                      | 280 | 270 | 1.00E-109 | 96.4  | 76.1 | 85.4 |
| Rsa1.0_00353.1.g12057.t1 | ref XP_002888638.1  hypothetical protein ARALYDRAFT_894560 [Arabidopsis lyrata subsp. lyrata]   g 297334479 gb EFH64897.1  hypothetical protein ARALYDRAFT_894560 [Arabidopsis lyrata subsp. lyrata]                                                   | 368 | 373 | 1.00E-156 | 101.4 | 77.7 | 96.4 | hypothetical protein ARALYDRAFT_894560           | gbpln | Arabidopsis lyrata   | AT1G68110.1   Symbols:   ENTH/ANTH/VHS superfamily protein   chr1:25524901-25526040 FORWARD LENGTH=379                                       | 368 | 379 | 1.00E-156 | 103.0 | 74.7 | 86.7 |
| Rsa1.0_00353.1.g12058.t1 | gb EOA33325.1  hypothetical protein CARUB_v10022100mg [Capsella rubella]                                                                                                                                                                               | 316 | 316 | 1.00E-171 | 100.0 | 91.1 | 96.5 | hypothetical protein CARUB_v10022100mg           | gbpln | Capsella rubella     | AT1G68090.1   Symbols: ANNAT5, ANN5   annexin 5   chr1:25519442-25520774 REVERSE LENGTH=316                                                  | 316 | 316 | 1.00E-173 | 100.0 | 89.9 | 96.2 |
| Rsa1.0_00353.1.g12059.t1 | gb EOA33379.1  hypothetical protein CARUB_v10020306mg, partial [Capsella rubella]                                                                                                                                                                      | 133 | 442 | 5.00E-33  | 332.3 | 48.1 | 52.6 | hypothetical protein CARUB_v10020306mg, partial  | gbpln | Capsella rubella     | AT1G68080.1   Symbols:   2-oxoglutarate (2OG) and Fe(II)-dependent oxygenase superfamily protein   chr1:25517530-25519240 FORWARD LENGTH=389 | 133 | 389 | 2.00E-32  | 292.5 | 44.4 | 49.6 |
| Rsa1.0_00353.1.g12060.t1 | ref XP_002887158.1  hypothetical protein ARALYDRAFT_475916 [Arabidopsis lyrata subsp. lyrata]   g 297332999 gb EFH63417.1  hypothetical protein ARALYDRAFT_475916 [Arabidopsis lyrata subsp. lyrata]                                                   | 335 | 344 | 1.00E-164 | 102.7 | 83.6 | 90.4 | hypothetical protein ARALYDRAFT_475916           | gbpln | Arabidopsis lyrata   | AT1G68070.1   Symbols:   Zinc finger, C3HC4 type (RING finger) family protein   chr1:25515412-25516767 REVERSE LENGTH=343                    | 335 | 343 | 1.00E-166 | 102.4 | 83.0 | 90.4 |
| Rsa1.0_00353.1.g12061.t1 | gb AAG51872.1 AC079678_2 disease resistance protein, putative; 6346-10057 [Arabidopsis thaliana]                                                                                                                                                       | 928 | 951 | 0         | 102.5 | 66.4 | 79.3 | disease resistance protein, putative; 6346-10057 | gbpln | Arabidopsis thaliana | AT1G74180.1   Symbols: AtRLP14, RLP14   receptor like protein 14   chr1:27897197-27900908 REVERSE LENGTH=976                                 | 928 | 976 | 0         | 105.2 | 66.5 | 79.2 |
| Rsa1.0_00353.1.g12062.t1 | gb EOA35382.1  hypothetical protein CARUB_v10020579mg [Capsella rubella]                                                                                                                                                                               | 208 | 346 | 1.00E-32  | 166.3 | 35.6 | 39.4 | hypothetical protein CARUB_v10020579mg           | gbpln | Capsella rubella     | AT1G68070.1   Symbols:   Zinc finger, C3HC4 type (RING finger) family protein   chr1:25515412-25516767 REVERSE LENGTH=343                    | 208 | 343 | 5.00E-33  | 164.9 | 33.7 | 37.5 |
| Rsa1.0_00353.1.g12063.t1 | ref XP_002869005.1  hypothetical protein ARALYDRAFT_353131 [Arabidopsis lyrata subsp. lyrata]   g 297314841 gb EFH45264.1  hypothetical protein ARALYDRAFT_353131 [Arabidopsis lyrata subsp. lyrata]                                                   | 73  | 281 | 3.00E-18  | 384.9 | 72.6 | 82.2 | hypothetical protein ARALYDRAFT_353131           | gbpln | Arabidopsis lyrata   | #                                                                                                                                            | #   | #   | #         | #     | #    | #    |
| Rsa1.0_00353.1.g12064.t2 | gb AAM77369.1 AF521301_1 phosphatidylinositol synthase [Brassica napus]                                                                                                                                                                                | 228 | 227 | 1.00E-127 | 99.6  | 97.8 | 98.7 | phosphatidylinositol synthase                    | gbpln | Brassica napus       | AT1G68000.1   Symbols: ATPIS1, ATPIS, PIS1   phosphatidylinositol synthase 1   chr1:25491346-25492930 FORWARD LENGTH=227                     | 228 | 227 | 1.00E-125 | 99.6  | 93.9 | 97.4 |
| Rsa1.0_00353.1.g12065.t1 | ref NP_191779.1  Putative endonuclease or glycosyl hydrolase [Arabidopsis thaliana]   g 6899830 emb CAB71880.1  putative protein [Arabidopsis thaliana]   g 33264680 gb AEE80322.1  Putative endonuclease or glycosyl hydrolase [Arabidopsis thaliana] | 200 | 673 | 1.00E-21  | 336.5 | 36.5 | 50.0 | Putative endonuclease or glycosyl hydrolase      | gbpln | Arabidopsis thaliana | AT3G62200.1   Symbols:   Putative endonuclease or glycosyl hydrolase   chr3:23023437-23025671 REVERSE LENGTH=673                             | 200 | 673 | 4.00E-24  | 336.5 | 36.5 | 50.0 |
| Rsa1.0_00353.1.g12066.t1 | ref XP_002888647.1  hypothetical protein ARALYDRAFT_475925 [Arabidopsis lyrata subsp. lyrata]   g 297334448 gb EFH64906.1  hypothetical protein ARALYDRAFT_475925 [Arabidopsis lyrata subsp. lyrata]                                                   | 246 | 232 | 1.00E-106 | 94.3  | 79.3 | 87.0 | hypothetical protein ARALYDRAFT_475925           | gbpln | Arabidopsis lyrata   | AT1G67980.1   Symbols: CCOAMT   coffeoyl-CoA 3-O-methyltransferase   chr1:25487724-25488934 FORWARD LENGTH=232                               | 246 | 232 | 1.00E-107 | 94.3  | 78.0 | 87.0 |
| Rsa1.0_00353.1.g12067.t1 | ref XP_002888647.1  hypothetical protein ARALYDRAFT_475925 [Arabidopsis lyrata subsp. lyrata]   g 297334448 gb EFH64906.1  hypothetical protein ARALYDRAFT_475925 [Arabidopsis lyrata subsp. lyrata]                                                   | 232 | 232 | 1.00E-122 | 100.0 | 92.7 | 96.6 | hypothetical protein ARALYDRAFT_475925           | gbpln | Arabidopsis lyrata   | AT1G67980.1   Symbols: CCOAMT   coffeoyl-CoA 3-O-methyltransferase   chr1:25487724-25488934 FORWARD LENGTH=232                               | 232 | 232 | 1.00E-123 | 100.0 | 90.5 | 96.6 |
| Rsa1.0_00353.1.g12068.t1 | ref XP_00287161.1  predicted protein [Arabidopsis lyrata subsp. lyrata]   g 297333002 gb EFH63420.1  predicted protein [Arabidopsis lyrata subsp. lyrata]                                                                                              | 373 | 374 | 1.00E-149 | 100.3 | 75.1 | 84.5 | predicted protein                                | gbpln | Arabidopsis lyrata   | AT1G67970.1   Symbols: AT-HSFA8, HSFA8   heat shock transcription factor A8   chr1:25484844-25486313 REVERSE LENGTH=374                      | 373 | 374 | 1.00E-150 | 100.3 | 77.2 | 86.3 |

|                          |                                                                                                                                                                                                                                                                                                                                                                                                                                                                                     |     |      |           |       |      |      |                                                 |       |                      |                                                                                                                                                                                                                                                                                                                                                                                                                                                                                                                                                                                              |     |     |           |       |      |      |
|--------------------------|-------------------------------------------------------------------------------------------------------------------------------------------------------------------------------------------------------------------------------------------------------------------------------------------------------------------------------------------------------------------------------------------------------------------------------------------------------------------------------------|-----|------|-----------|-------|------|------|-------------------------------------------------|-------|----------------------|----------------------------------------------------------------------------------------------------------------------------------------------------------------------------------------------------------------------------------------------------------------------------------------------------------------------------------------------------------------------------------------------------------------------------------------------------------------------------------------------------------------------------------------------------------------------------------------------|-----|-----|-----------|-------|------|------|
| Rsa1.0_00353.1.g12069.t1 | refNP_173222.1  early nodulin-like protein 22 [Arabidopsis thaliana] gi 9665058 gb AAF97260.1 AC034106.3 Contains similarity to blue copper-binding protein III from Arabidopsis thaliana gb U65650 and contains a Plastocyanin-like PF 02298 domain [Arabidopsis thaliana] gi 50897198 gb AT85738.1  At1g17800 [Arabidopsis thaliana] gi 51972100 gb AAU15154.1  At1g17800 [Arabidopsis thaliana] gi 332191517 gb AEE29638.1  early nodulin-like protein 22 [Arabidopsis thaliana] | 138 | 140  | 3.00E-52  | 101.4 | 70.3 | 83.3 | early nodulin-like protein 22                   | gbpln | Arabidopsis thaliana | AT1G17800.1   Symbols: ENODL22, AENODL22   early nodulin-like protein 22   chr1:6128829-6129391 FORWARD LENGTH=140                                                                                                                                                                                                                                                                                                                                                                                                                                                                           | 138 | 140 | 7.00E-55  | 101.4 | 70.3 | 83.3 |
| Rsa1.0_00353.1.g12070.t1 | dbj BAJ34019.1  unnamed protein product [The lungella halophila]                                                                                                                                                                                                                                                                                                                                                                                                                    | 67  | 66   | 1.00E-22  | 98.5  | 82.1 | 85.1 | unnamed protein product                         | ----  | ----                 | AT1G67920.1   Symbols:   unknown protein; BEST Arabidopsis thaliana protein match is: unknown protein (TAIR:AT1G24600.1); Has 22 Blast hits to 22 proteins in 5 species: Archae - 0; Bacteria - 0; Metazoa - 0; Fungi - 0; Plants - 22; Viruses - 0; Other Eukaryotes - 0 (source: NCBI BLink).   chr1:25473731-25473934 FORWARD LENGTH=67                                                                                                                                                                                                                                                   | 67  | 67  | 7.00E-24  | 100.0 | 82.1 | 88.1 |
| Rsa1.0_00353.1.g12071.t1 | refXP_002888631.1  hypothetical protein ARALYDRAFT_894547 [Arabidopsis lyrata subsp. lyrata] gi 297334472 gb EFH64890.1  hypothetical protein ARALYDRAFT_894547 [Arabidopsis lyrata subsp. lyrata] emb CAB39638.1  RNA-directed DNA polymerase-like protein [Arabidopsis thaliana] gi 7267666 emb CAB78094.1  RNA-directed DNA polymerase-like protein [Arabidopsis thaliana]                                                                                                       | 209 | 184  | 3.00E-44  | 88.0  | 51.7 | 58.9 | hypothetical protein ARALYDRAFT_894547          | gbpln | Arabidopsis lyrata   | AT1G67870.1   Symbols:   glycine-rich protein   chr1:25449593-25450943 REVERSE LENGTH=279                                                                                                                                                                                                                                                                                                                                                                                                                                                                                                    | 209 | 279 | 4.00E-29  | 133.5 | 38.8 | 48.8 |
| Rsa1.0_00354.1.g12072.t1 | emb CAB39638.1  RNA-directed DNA polymerase-like protein [Arabidopsis thaliana] gi 7267666 emb CAB78094.1  RNA-directed DNA polymerase-like protein [Arabidopsis thaliana]                                                                                                                                                                                                                                                                                                          | 606 | 1274 | 1.00E-142 | 210.2 | 43.1 | 61.1 | RNA-directed DNA polymerase-like protein        | gbpln | Arabidopsis thaliana | AT4G29090.1   Symbols:   Ribonuclease H-like superfamily protein   chr4:1433528-14335255 FORWARD LENGTH=575                                                                                                                                                                                                                                                                                                                                                                                                                                                                                  | 606 | 575 | 4.00E-68  | 94.9  | 27.6 | 43.6 |
| Rsa1.0_00354.1.g12073.t1 | refXP_002879865.1  hypothetical protein ARALYDRAFT_483086 [Arabidopsis lyrata subsp. lyrata] gi 297325704 gb EFH56124.1  hypothetical protein ARALYDRAFT_483086 [Arabidopsis lyrata subsp. lyrata]                                                                                                                                                                                                                                                                                  | 401 | 425  | 0         | 106.0 | 90.8 | 94.8 | hypothetical protein ARALYDRAFT_483086          | gbpln | Arabidopsis lyrata   | AT2G40320.1   Symbols: TBL33   TRICHOME BIREFRINGENCE-LIKE 33   chr2:16840330-16842139 FORWARD LENGTH=425                                                                                                                                                                                                                                                                                                                                                                                                                                                                                    | 401 | 425 | 0         | 106.0 | 88.8 | 91.5 |
| Rsa1.0_00354.1.g12074.t1 | gb EOA23244.1  hypothetical protein CARUB_v10017153mg [Capsella rubella]                                                                                                                                                                                                                                                                                                                                                                                                            | 477 | 473  | 1.00E-125 | 99.2  | 53.7 | 68.3 | hypothetical protein CARUB_v10017153mg          | gbpln | Capsella rubella     | AT3G59000.1   Symbols:   F-box/RNI-like superfamily protein   chr3:21799757-21801536 FORWARD LENGTH=491<br>AT2G40316.1   Symbols:   FUNCTIONS IN: molecular function unknown; LOCATED IN: endomembrane system; EXPRESSED IN: 22 plant structures; EXPRESSED DURING: 13 growth stages; CONTAINS InterPro DOMAIN/s: Autophagy-related protein 27 (InterPro:IPRO18939); Has 138 Blast hits to 138 proteins in 57 species: Archae - 0; Bacteria - 0; Metazoa - 32; Fungi - 62; Plants - 33; Viruses - 0; Other Eukaryotes - 11 (source: NCBI BLink).   chr2:16836355-16838688 FORWARD LENGTH=276 | 477 | 491 | 1.00E-119 | 102.9 | 52.8 | 67.1 |
| Rsa1.0_00354.1.g12075.t1 | refXP_002879864.1  hypothetical protein ARALYDRAFT_903321 [Arabidopsis lyrata subsp. lyrata] gi 297325703 gb EFH56123.1  hypothetical protein ARALYDRAFT_903321 [Arabidopsis lyrata subsp. lyrata]                                                                                                                                                                                                                                                                                  | 317 | 276  | 1.00E-115 | 87.1  | 65.6 | 71.0 | hypothetical protein ARALYDRAFT_903321          | gbpln | Arabidopsis lyrata   | AT2G40290.1   Symbols:   Eukaryotic translation initiation factor 2 subunit 1   chr2:16829030-16830889 REVERSE LENGTH=344<br>AT5G58530.1   Symbols:   Glutaredoxin family protein   chr5:23660428-23661249 FORWARD LENGTH=273                                                                                                                                                                                                                                                                                                                                                                | 317 | 276 | 1.00E-114 | 87.1  | 62.8 | 70.3 |
| Rsa1.0_00354.1.g12076.t1 | #                                                                                                                                                                                                                                                                                                                                                                                                                                                                                   | #   | #    | #         | #     | #    | #    | -                                               | ----  | ----                 | #                                                                                                                                                                                                                                                                                                                                                                                                                                                                                                                                                                                            | #   | #   | #         | #     | #    | #    |
| Rsa1.0_00354.1.g12077.t1 | gb EOA28841.1  hypothetical protein CARUB_v10025080mg [Capsella rubella]                                                                                                                                                                                                                                                                                                                                                                                                            | 342 | 344  | 1.00E-168 | 100.6 | 90.9 | 96.8 | hypothetical protein CARUB_v10025080mg          | gbpln | Capsella rubella     | AT2G40290.1   Symbols:   Eukaryotic translation initiation factor 2 subunit 1   chr2:16829030-16830889 REVERSE LENGTH=344                                                                                                                                                                                                                                                                                                                                                                                                                                                                    | 342 | 344 | 1.00E-169 | 100.6 | 89.8 | 96.2 |
| Rsa1.0_00354.1.g12078.t1 | gb EOA28978.1  hypothetical protein CARUB_v10025230mg, partial [Capsella rubella]                                                                                                                                                                                                                                                                                                                                                                                                   | 225 | 258  | 4.00E-68  | 114.7 | 64.9 | 76.4 | hypothetical protein CARUB_v10025230mg, partial | gbpln | Capsella rubella     | AT5G58530.1   Symbols:   Glutaredoxin family protein   chr5:23660428-23661249 FORWARD LENGTH=273                                                                                                                                                                                                                                                                                                                                                                                                                                                                                             | 225 | 273 | 5.00E-43  | 121.3 | 37.8 | 49.8 |
| Rsa1.0_00354.1.g12079.t1 | #                                                                                                                                                                                                                                                                                                                                                                                                                                                                                   | #   | #    | #         | #     | #    | #    | -                                               | ----  | ----                 | #                                                                                                                                                                                                                                                                                                                                                                                                                                                                                                                                                                                            | #   | #   | #         | #     | #    | #    |
| Rsa1.0_00354.1.g12080.t2 | refXP_002881704.1  hypothetical protein ARALYDRAFT_321718 [Arabidopsis lyrata subsp. lyrata] gi 297325743 gb EFH57963.1  hypothetical protein ARALYDRAFT_321718 [Arabidopsis lyrata subsp. lyrata]                                                                                                                                                                                                                                                                                  | 408 | 411  | 1.00E-168 | 100.7 | 82.4 | 87.5 | hypothetical protein ARALYDRAFT_321718          | gbpln | Arabidopsis lyrata   | AT2G40260.1   Symbols:   Homeodomain-like superfamily protein   chr2:16816818-16818473 REVERSE LENGTH=410                                                                                                                                                                                                                                                                                                                                                                                                                                                                                    | 408 | 410 | 1.00E-165 | 100.5 | 80.1 | 86.5 |
| Rsa1.0_00354.1.g12081.t1 | refXP_002879857.1  GDSL-motif lipase/hydrolase family protein [Arabidopsis lyrata subsp. lyrata] gi 297325696 gb EFH56116.1  GDSL-motif lipase/hydrolase family protein [Arabidopsis lyrata subsp. lyrata]                                                                                                                                                                                                                                                                          | 359 | 361  | 1.00E-167 | 100.6 | 78.0 | 86.1 | GDSL-motif lipase/hydrolase family protein      | gbpln | Arabidopsis lyrata   | AT2G40250.1   Symbols:   SGNH hydrolase-type esterase superfamily protein   chr2:16813330-16815251 FORWARD LENGTH=361                                                                                                                                                                                                                                                                                                                                                                                                                                                                        | 359 | 361 | 1.00E-169 | 100.6 | 79.1 | 88.9 |

| Rsa1.0_00354.1.g12082.t1 | #                                                                                                                                                                                                                                                                                          | #   | #    | #         | #     | #    | #    | #                                                                                                | -     | ----                 | -----                                                                                                                                                            | #   | #   | #         | #     | #    | #    |
|--------------------------|--------------------------------------------------------------------------------------------------------------------------------------------------------------------------------------------------------------------------------------------------------------------------------------------|-----|------|-----------|-------|------|------|--------------------------------------------------------------------------------------------------|-------|----------------------|------------------------------------------------------------------------------------------------------------------------------------------------------------------|-----|-----|-----------|-------|------|------|
| Rsa1.0_00354.1.g12082.t1 | ref NP_181552.1  HXXXD-type acyl-transferase-like protein [Arabidopsis thaliana]                                                                                                                                                                                                           |     |      |           |       |      |      |                                                                                                  |       |                      |                                                                                                                                                                  |     |     |           |       |      |      |
| Rsa1.0_00354.1.g12083.t1 | gi 4507997 gb AAD25938.1 AF085279.11 hypothetical protein [Arabidopsis thaliana] gi 21536614 gb AAM60946.1  putative anthranilate N-hydroxycinnamoyl/benzoyltransferase [Arabidopsis thaliana] gi 330254705 gb AEC09799.1  HXXXD-type acyl-transferase-like protein [Arabidopsis thaliana] | 430 | 433  | 0         | 100.7 | 89.1 | 94.7 | HXXXD-type acyl-transferase-like protein                                                         | gbpln | Arabidopsis thaliana | AT2G40230.1   Symbols:   HXXXD-type acyl-transferase family protein   chr2:16803285-16804586 REVERSE LENGTH=433                                                  | 430 | 433 | 0         | 100.7 | 89.1 | 94.7 |
| Rsa1.0_00354.1.g12084.t1 | gb ABK28529.1  unknown [Arabidopsis thaliana]                                                                                                                                                                                                                                              | 328 | 329  | 1.00E-94  | 100.3 | 70.1 | 81.1 | unknown                                                                                          | gbpln | Arabidopsis thaliana | AT2G40220.1   Symbols: ABI4, SUN6, SIS5, IS3, GIN6, SAN5, ATAB14   Integrase-type DNA-binding superfamily protein   chr2:16796599-16797585 REVERSE LENGTH=328    | 328 | 328 | 5.00E-97  | 100.0 | 70.1 | 81.1 |
| Rsa1.0_00354.1.g12085.t1 | gb EOA27018.1  hypothetical protein CARUB_v10023116mg, partial [Capsella rubella]                                                                                                                                                                                                          | 462 | 478  | 0         | 103.5 | 89.0 | 93.9 | hypothetical protein CARUB_v10023116mg, partial                                                  | gbpln | Capsella rubella     | AT2G40190.1   Symbols: LEW3   UDP-Glycosyltransferase superfamily protein   chr2:16785232-16787257 FORWARD LENGTH=463                                            | 462 | 463 | 0         | 100.2 | 87.7 | 93.3 |
| Rsa1.0_00354.1.g12086.t1 | ref XP_002879887.1  hypothetical protein ARALYDRAFT_903365 [Arabidopsis lyrata subsp. lyrata] gi 297325726 gb EFH56146.1  hypothetical protein ARALYDRAFT_903365 [Arabidopsis lyrata subsp. lyrata]                                                                                        | 476 | 1359 | 1.00E-123 | 285.5 | 52.7 | 68.5 | hypothetical protein ARALYDRAFT_903365                                                           | gbpln | Arabidopsis lyrata   | AT3G18150.1   Symbols:   RNI-like superfamily protein   chr3:6217929-6219500 FORWARD LENGTH=456                                                                  | 476 | 456 | 1.00E-115 | 95.8  | 49.6 | 64.3 |
| Rsa1.0_00354.1.g12087.t1 | ref XP_002880609.1  hypothetical protein ARALYDRAFT_901029 [Arabidopsis lyrata subsp. lyrata] gi 297326448 gb EFH56868.1  hypothetical protein ARALYDRAFT_901029 [Arabidopsis lyrata subsp. lyrata]                                                                                        | 485 | 464  | 1.00E-125 | 95.7  | 53.6 | 68.9 | hypothetical protein ARALYDRAFT_901029                                                           | gbpln | Arabidopsis lyrata   | AT3G18150.1   Symbols:   RNI-like superfamily protein   chr3:6217929-6219500 FORWARD LENGTH=456                                                                  | 485 | 456 | 1.00E-116 | 94.0  | 48.9 | 63.1 |
| Rsa1.0_00354.1.g12088.t1 | ref XP_002880609.1  hypothetical protein ARALYDRAFT_901029 [Arabidopsis lyrata subsp. lyrata] gi 297326448 gb EFH56868.1  hypothetical protein ARALYDRAFT_901029 [Arabidopsis lyrata subsp. lyrata]                                                                                        | 471 | 464  | 1.00E-119 | 98.5  | 51.8 | 66.2 | hypothetical protein ARALYDRAFT_901029                                                           | gbpln | Arabidopsis lyrata   | AT3G18150.1   Symbols:   RNI-like superfamily protein   chr3:6217929-6219500 FORWARD LENGTH=456                                                                  | 471 | 456 | 1.00E-118 | 96.8  | 52.0 | 66.7 |
| Rsa1.0_00354.1.g12089.t1 | ref XP_002879851.1  predicted protein [Arabidopsis lyrata subsp. lyrata] gi 297325690 gb EFH56110.1  predicted protein [Arabidopsis lyrata subsp. lyrata]                                                                                                                                  | 365 | 392  | 1.00E-174 | 107.4 | 84.1 | 88.5 | predicted protein                                                                                | gbpln | Arabidopsis lyrata   | AT2G40180.1   Symbols: ATHPP2C5, PP2C5   phosphatase 2C5   chr2:16782522-16784014 FORWARD LENGTH=390                                                             | 365 | 390 | 1.00E-170 | 106.8 | 83.6 | 88.2 |
| Rsa1.0_00354.1.g12090.t1 | sp P11573.1 SEEP_RAPSA RecName: Full=Late seed maturation protein P8B6 gi 21122 emb CAA33479.1  unnamed protein product [Raphanus sativus] gi 169692 gb AAA33868.1  late maturation protein [Raphanus sativus]                                                                             | 83  | 83   | 6.00E-38  | 100.0 | 98.8 | 98.8 | RecName: Full=Late seed maturation protein P8B6 gi 21122 emb CAA33479.1  unnamed protein product | gbpln | Raphanus sativus     | AT2G40170.1   Symbols: ATEM6, GEAA6, EM6   Stress induced protein   chr2:16779792-16780167 REVERSE LENGTH=92                                                     | 83  | 92  | 6.00E-31  | 110.8 | 89.2 | 90.4 |
| Rsa1.0_00354.1.g12091.t1 | dbj BAJ34526.1  unnamed protein product [Thellungiella halophila]                                                                                                                                                                                                                          | 566 | 600  | 0         | 106.0 | 86.6 | 92.6 | unnamed protein product                                                                          | ----  | ----                 | AT2G40140.2   Symbols: CZF1, ZFAR1, SZF2, ATSZF2   zinc finger (CCH-type) family protein   chr2:16772537-16774330 FORWARD LENGTH=597                             | 566 | 597 | 0         | 105.5 | 84.6 | 92.8 |
| Rsa1.0_00354.1.g12092.t1 | ref NP_973646.1  heat shock-related protein [Arabidopsis thaliana] gi 330254692 gb AEC09786.1  heat shock-related protein [Arabidopsis thaliana]                                                                                                                                           | 806 | 910  | 0         | 112.9 | 78.7 | 87.6 | heat shock-related protein                                                                       | gbpln | Arabidopsis thaliana | AT2G40130.2   Symbols:   Double Clp-N motif-containing P-loop nucleoside triphosphate hydrolases superfamily protein   chr2:16766030-16769074 FORWARD LENGTH=910 | 806 | 910 | 0         | 112.9 | 78.7 | 87.6 |
| Rsa1.0_00354.1.g12093.t1 | gb EOA28716.1  hypothetical protein CARUB_v10024944mg [Capsella rubella]                                                                                                                                                                                                                   | 482 | 483  | 0         | 100.2 | 88.0 | 91.9 | hypothetical protein CARUB_v10024944mg                                                           | gbpln | Capsella rubella     | AT2G39980.1   Symbols:   HXXXD-type acyl-transferase family protein   chr2:16688437-16689885 REVERSE LENGTH=482                                                  | 482 | 482 | 0         | 100.0 | 86.9 | 91.7 |
| Rsa1.0_00354.1.g12094.t1 | gb EOA27439.1  hypothetical protein CARUB_v10023576mg [Capsella rubella]                                                                                                                                                                                                                   | 336 | 338  | 1.00E-162 | 100.6 | 89.0 | 93.2 | hypothetical protein CARUB_v10023576mg                                                           | gbpln | Capsella rubella     | AT2G39970.1   Symbols:   Mitochondrial substrate carrier family protein   chr2:16684026-16686392 REVERSE LENGTH=331                                              | 336 | 331 | 1.00E-164 | 98.5  | 87.2 | 91.7 |

|                          |                                                                                                                                                                                                                                                                                                                                                                                                                                                                                                                                                                                                                                                                                                                                                                                                             |     |     |           |       |      |      |                                        |       |                      |                                                                                                                                                                                                                                                                                                                                             |     |     |           |       |      |      |
|--------------------------|-------------------------------------------------------------------------------------------------------------------------------------------------------------------------------------------------------------------------------------------------------------------------------------------------------------------------------------------------------------------------------------------------------------------------------------------------------------------------------------------------------------------------------------------------------------------------------------------------------------------------------------------------------------------------------------------------------------------------------------------------------------------------------------------------------------|-----|-----|-----------|-------|------|------|----------------------------------------|-------|----------------------|---------------------------------------------------------------------------------------------------------------------------------------------------------------------------------------------------------------------------------------------------------------------------------------------------------------------------------------------|-----|-----|-----------|-------|------|------|
| Rsa1.0_00354.1.g12095.t3 | refNP_181525.2   signal peptidase complex subunit 2 [Arabidopsis thaliana]<br>gi 20140011 sp P58684.1 SPCS2_ARATH<br>RecName: Full=Probable signal peptidase complex subunit 2; AltName: Full=Microsomal signal peptidase 25 kDa subunit; Short=SPase 25 kDa subunit<br>gi 17528956 gb AAL38688.1  unknown protein [Arabidopsis thaliana]<br>gi 20465965 gb AAM20168.1  unknown protein [Arabidopsis thaliana]<br>gi 330254662 gb AEC09756.1  signal peptidase complex subunit 2 [Arabidopsis thaliana]<br>refNP_181524.1   uncharacterized protein [Arabidopsis thaliana]<br>gi 2088648 gb AAB95280.1  hypothetical protein [Arabidopsis thaliana]<br>gi 209529767 gb ACI49778.1  At2g39950 [Arabidopsis thaliana]<br>gi 330254660 gb AEC09754.1  uncharacterized protein AT2G39950 [Arabidopsis thaliana] | 454 | 192 | 1.00E-70  | 42.3  | 30.8 | 32.6 | signal peptidase complex subunit 2     | gbpln | Arabidopsis thaliana | AT2G39960.1   Symbols:   Microsomal signal peptidase 25 kDa subunit (SPC25)   chr2:16681666-16683491 REVERSE LENGTH=192                                                                                                                                                                                                                     | 454 | 192 | 3.00E-73  | 42.3  | 30.8 | 32.6 |
| Rsa1.0_00354.1.g12096.t2 | gb EOA26779.1  hypothetical protein CARUB_v10022866mg [Capsella rubella]                                                                                                                                                                                                                                                                                                                                                                                                                                                                                                                                                                                                                                                                                                                                    | 475 | 636 | 0         | 133.9 | 79.2 | 87.2 | uncharacterized protein                | gbpln | Arabidopsis thaliana | AT2G39950.1   Symbols:   unknown protein; Has 978 Blast hits to 254 proteins in 81 species: Archae - 0; Bacteria - 8; Metazoa - 109; Fungi - 53; Plants - 41; Viruses - 0; Other Eukaryotes - 767 (source: NCBI BLink).   chr2:16676758-16680204 REVERSE LENGTH=636                                                                         | 475 | 636 | 0         | 133.9 | 79.2 | 87.2 |
| Rsa1.0_00354.1.g12097.t1 | refNP_181522.1   isoamylase 1 [Arabidopsis thaliana]<br>gi 75096955 sp O04196.1 ISOA1_ARATH<br>RecName: Full=Isoamylase 1, chloroplastic; Short=AtISA1; Flags: Precursor<br>gi 2088646 gb AAB95278.1  putative isoamylase [Arabidopsis thaliana]<br>gi 23306386 gb AAN17420.1  putative isoamylase [Arabidopsis thaliana]<br>gi 34098817 gb AAQ56791.1  At2g39930 [Arabidopsis thaliana]<br>gi 330254658 gb AEC09752.1  isoamylase 1 [Arabidopsis thaliana]                                                                                                                                                                                                                                                                                                                                                 | 603 | 594 | 0         | 98.5  | 90.2 | 94.2 | hypothetical protein CARUB_v10022866mg | gbpln | Capsella rubella     | AT2G39940.1   Symbols: COI1   RNI-like superfamily protein   chr2:16672848-16675486 REVERSE LENGTH=592                                                                                                                                                                                                                                      | 603 | 592 | 0         | 98.2  | 89.9 | 93.9 |
| Rsa1.0_00354.1.g12098.t2 | refNP_001189716.1   acid phosphatase class IIIB protein [Arabidopsis thaliana]<br>gi 330254656 gb AEC09750.1  acid phosphatase class IIIB protein [Arabidopsis thaliana]                                                                                                                                                                                                                                                                                                                                                                                                                                                                                                                                                                                                                                    | 811 | 783 | 0         | 96.5  | 87.3 | 92.0 | isoamylase 1                           | gbpln | Arabidopsis thaliana | AT2G39930.1   Symbols: ISA1, ATISA1   isoamylase 1   chr2:16666078-16672183 FORWARD LENGTH=783                                                                                                                                                                                                                                              | 811 | 783 | 0         | 96.5  | 87.3 | 92.0 |
| Rsa1.0_00354.1.g12099.t1 | refXP_002879830.1   hypothetical protein ARALYDRAFT_483024 [Arabidopsis lyrata subsp. lyrata]<br>gi 297325669 gb EFH56089.1  hypothetical protein ARALYDRAFT_483024 [Arabidopsis lyrata subsp. lyrata]                                                                                                                                                                                                                                                                                                                                                                                                                                                                                                                                                                                                      | 282 | 282 | 1.00E-121 | 100.0 | 77.3 | 86.5 | acid phosphatase class IIIB protein    | gbpln | Arabidopsis thaliana | AT2G39920.2   Symbols:   HAD superfamily, subfamily IIIB acid phosphatase   chr2:16663201-16664305 REVERSE LENGTH=282                                                                                                                                                                                                                       | 282 | 282 | 1.00E-124 | 100.0 | 77.3 | 86.5 |
| Rsa1.0_00354.1.g12100.t2 | refXP_002879830.1   hypothetical protein ARALYDRAFT_483024 [Arabidopsis lyrata subsp. lyrata]<br>gi 297325669 gb EFH56089.1  hypothetical protein ARALYDRAFT_483024 [Arabidopsis lyrata subsp. lyrata]                                                                                                                                                                                                                                                                                                                                                                                                                                                                                                                                                                                                      | 685 | 442 | 0         | 64.5  | 55.3 | 59.6 | hypothetical protein ARALYDRAFT_483024 | gbpln | Arabidopsis lyrata   | AT2G39890.2   Symbols: PROT1, ATPROT1   proline transporter 1   chr2:16656022-16658202 FORWARD LENGTH=442                                                                                                                                                                                                                                   | 685 | 442 | 0         | 64.5  | 54.7 | 59.6 |
| Rsa1.0_00354.1.g12101.t1 | refXP_002881682.1   predicted protein [Arabidopsis lyrata subsp. lyrata]<br>gi 297327521 gb EFH57941.1  predicted protein [Arabidopsis lyrata subsp. lyrata]                                                                                                                                                                                                                                                                                                                                                                                                                                                                                                                                                                                                                                                | 475 | 442 | 0         | 93.1  | 83.6 | 88.4 | hypothetical protein ARALYDRAFT_483024 | gbpln | Arabidopsis lyrata   | AT2G39890.2   Symbols: PROT1, ATPROT1   proline transporter 1   chr2:16656022-16658202 FORWARD LENGTH=442                                                                                                                                                                                                                                   | 475 | 442 | 0         | 93.1  | 83.4 | 88.2 |
| Rsa1.0_00354.1.g12102.t1 | refXP_002879829.1   hypothetical protein ARALYDRAFT_483023 [Arabidopsis lyrata subsp. lyrata]<br>gi 297325668 gb EFH56089.1  hypothetical protein ARALYDRAFT_483023 [Arabidopsis lyrata subsp. lyrata]                                                                                                                                                                                                                                                                                                                                                                                                                                                                                                                                                                                                      | 416 | 382 | 1.00E-118 | 91.8  | 58.4 | 70.9 | predicted protein                      | gbpln | Arabidopsis lyrata   | AT2G39880.1   Symbols: MYB25, AtMYB25   myb domain protein 25   chr2:16647945-16649479 REVERSE LENGTH=367                                                                                                                                                                                                                                   | 416 | 367 | 1.00E-110 | 88.2  | 54.3 | 64.7 |
| Rsa1.0_00354.1.g12103.t1 | refXP_002879829.1   hypothetical protein ARALYDRAFT_483023 [Arabidopsis lyrata subsp. lyrata]<br>gi 297325668 gb EFH56089.1  hypothetical protein ARALYDRAFT_483023 [Arabidopsis lyrata subsp. lyrata]                                                                                                                                                                                                                                                                                                                                                                                                                                                                                                                                                                                                      | 333 | 342 | 1.00E-105 | 102.7 | 74.2 | 83.5 | hypothetical protein ARALYDRAFT_483023 | gbpln | Arabidopsis lyrata   | AT2G39870.1   Symbols:   unknown protein; BEST Arabidopsis thaliana protein match is: unknown protein (TAIRAT3G55690.1); Has 73 Blast hits to 71 proteins in 14 species: Archae - 0; Bacteria - 0; Metazoa - 2; Fungi - 2; Plants - 69; Viruses - 0; Other Eukaryotes - 0 (source: NCBI BLink).   chr2:16643697-16644950 FORWARD LENGTH=330 | 333 | 330 | 1.00E-100 | 99.1  | 71.8 | 79.6 |
| Rsa1.0_00354.1.g12104.t1 | #                                                                                                                                                                                                                                                                                                                                                                                                                                                                                                                                                                                                                                                                                                                                                                                                           | #   | #   | #         | #     | #    | #    | -                                      | ----  | ----                 | #                                                                                                                                                                                                                                                                                                                                           | #   | #   | #         | #     | #    |      |

|                          |                                                                                                                                                                                                                                                                                                                                                                              |      |      |           |       |      |      |                                                              |       |                      |                                                                                                                                                                                                                                                                                                                                                                                                                                                                                |      |      |           |       |      |      |
|--------------------------|------------------------------------------------------------------------------------------------------------------------------------------------------------------------------------------------------------------------------------------------------------------------------------------------------------------------------------------------------------------------------|------|------|-----------|-------|------|------|--------------------------------------------------------------|-------|----------------------|--------------------------------------------------------------------------------------------------------------------------------------------------------------------------------------------------------------------------------------------------------------------------------------------------------------------------------------------------------------------------------------------------------------------------------------------------------------------------------|------|------|-----------|-------|------|------|
| Rsa1.0_00354.1.g12105.t2 | ref NP_973642.1  uncharacterized protein [Arabidopsis thaliana] gi 28207122 gb AAO37201.1  hypothetical protein [Arabidopsis thaliana] gi 330254647 gb AEC09741.1  uncharacterized protein AT2G39855 [Arabidopsis thaliana]                                                                                                                                                  | 159  | 142  | 5.00E-43  | 89.3  | 59.1 | 65.4 | uncharacterized protein                                      | gbpln | Arabidopsis thaliana | AT2G39855.2   Symbols:   unknown protein; FUNCTIONS IN: molecular_function unknown; INVOLVED IN: biological_process unknown; LOCATED IN: chloroplast; BEST Arabidopsis thaliana protein match is: unknown protein (TAIR:AT3G55646.1); Has 35333 Blast hits to 34131 proteins in 2444 species: Archae - 798; Bacteria - 22429; Metazoa - 974; Fungi - 991; Plants - 531; Viruses - 0; Other Eukaryotes - 9610 (source: NCBI ELink).   chr2:16637845-16638852 FORWARD LENGTH=142 | 159  | 142  | 2.00E-45  | 89.3  | 59.1 | 65.4 |
| Rsa1.0_00354.1.g12106.t1 | ref XP_002879825.1  hypothetical protein ARALYDRAFT_483018 [Arabidopsis lyrata subsp. lyrata] gi 297325664 gb EFH56084.1  hypothetical protein ARALYDRAFT_483018 [Arabidopsis lyrata subsp. lyrata]                                                                                                                                                                          | 322  | 319  | 0         | 99.1  | 95.3 | 98.1 | hypothetical protein ARALYDRAFT_483018                       | gbpln | Arabidopsis lyrata   | AT2G39840.1   Symbols: TOPP4   type one serine/threonine protein phosphatase 4   chr2:16627430-16628789 FORWARD LENGTH=321                                                                                                                                                                                                                                                                                                                                                     | 322  | 321  | 0         | 99.7  | 93.5 | 95.3 |
| Rsa1.0_00355.1.g12107.t1 | dbj BAG50513.1  ascorbic acid oxidase [Brassica rapa subsp. chinensis]                                                                                                                                                                                                                                                                                                       | 571  | 577  | 0         | 101.1 | 87.4 | 93.3 | ascorbic acid oxidase                                        | gbpln | Brassica rapa        | AT5G21105.1   Symbols:   Plant L-ascorbate oxidase   chr5:7172727-7177409 FORWARD LENGTH=588                                                                                                                                                                                                                                                                                                                                                                                   | 571  | 588  | 0         | 103.0 | 83.9 | 91.1 |
| Rsa1.0_00355.1.g12108.t1 | gb EOA37492.1  hypothetical protein CARUB_v10011646mg [Capsella rubella]                                                                                                                                                                                                                                                                                                     | 421  | 506  | 1.00E-154 | 120.2 | 75.1 | 79.6 | hypothetical protein CARUB_v10011646mg                       | gbpln | Capsella rubella     | AT1G21380.1   Symbols:   Target of Myb protein 1   chr1:7485806-7488032 REVERSE LENGTH=506                                                                                                                                                                                                                                                                                                                                                                                     | 421  | 506  | 1.00E-154 | 120.2 | 74.6 | 79.1 |
| Rsa1.0_00355.1.g12109.t1 | gb ACP30598.1  disease resistance protein [Brassica rapa subsp. pekinensis]                                                                                                                                                                                                                                                                                                  | 1546 | 2301 | 0         | 148.8 | 61.6 | 74.9 | disease resistance protein                                   | gbpln | Brassica rapa        | AT4G23160.1   Symbols: CRK8   cysteine-rich RLK (RECEPTOR-like protein kinase) 8   chr4:12129495-12134086 FORWARD LENGTH=1262                                                                                                                                                                                                                                                                                                                                                  | 1546 | 1262 | 1.00E-110 | 81.6  | 12.7 | 19.7 |
| Rsa1.0_00355.1.g12110.t1 | gb EOA20396.1  hypothetical protein CARUB_v10000708mg [Capsella rubella]                                                                                                                                                                                                                                                                                                     | 510  | 524  | 1.00E-173 | 102.7 | 65.9 | 77.5 | hypothetical protein CARUB_v10000708mg                       | gbpln | Capsella rubella     | AT5G21120.1   Symbols: EIL2   ETHYLENE-INSENSITIVE3-like 2   chr5:7182629-7184185 FORWARD LENGTH=518                                                                                                                                                                                                                                                                                                                                                                           | 510  | 518  | 1.00E-165 | 101.6 | 64.1 | 73.5 |
| Rsa1.0_00355.1.g12111.t1 | #                                                                                                                                                                                                                                                                                                                                                                            | #    | #    | #         | #     | #    | #    | -                                                            | ----  | ----                 | #                                                                                                                                                                                                                                                                                                                                                                                                                                                                              | #    | #    | #         | #     | #    |      |
| Rsa1.0_00355.1.g12112.t1 | ref NP_197612.1  late embryogenesis abundant hydroxyproline-rich glycoprotein [Arabidopsis thaliana] gi 29294053 gb AAO73890.1  hypothetical protein [Arabidopsis thaliana] gi 52354467 gb AAU44554.1  hypothetical protein AT5G21130 [Arabidopsis thaliana] gi 332005555 gb AED92938.1  late embryogenesis abundant hydroxyproline-rich glycoprotein [Arabidopsis thaliana] | 297  | 281  | 1.00E-83  | 94.6  | 56.6 | 70.4 | late embryogenesis abundant hydroxyproline-rich glycoprotein | gbpln | Arabidopsis thaliana | AT5G21130.1   Symbols:   Late embryogenesis abundant (LEA) hydroxyproline-rich glycoprotein family   chr5:7185989-718813 FORWARD LENGTH=281                                                                                                                                                                                                                                                                                                                                    | 297  | 281  | 3.00E-86  | 94.6  | 56.6 | 70.4 |
| Rsa1.0_00355.1.g12113.t1 | #                                                                                                                                                                                                                                                                                                                                                                            | #    | #    | #         | #     | #    | #    | -                                                            | ----  | ----                 | #                                                                                                                                                                                                                                                                                                                                                                                                                                                                              | #    | #    | #         | #     | #    |      |
| Rsa1.0_00355.1.g12114.t1 | gb EOA21152.1  hypothetical protein CARUB_v10001499mg [Capsella rubella]                                                                                                                                                                                                                                                                                                     | 316  | 315  | 1.00E-156 | 99.7  | 84.2 | 90.5 | hypothetical protein CARUB_v10001499mg                       | gbpln | Capsella rubella     | AT5G21140.1   Symbols: emb1379   embryo defective 1379   chr5:7187416-7189521 REVERSE LENGTH=312                                                                                                                                                                                                                                                                                                                                                                               | 316  | 312  | 1.00E-149 | 98.7  | 83.2 | 88.3 |
| Rsa1.0_00355.1.g12115.t1 | gb EOA19916.1  hypothetical protein CARUB_v10000166mg [Capsella rubella]                                                                                                                                                                                                                                                                                                     | 907  | 922  | 0         | 101.7 | 80.5 | 87.9 | hypothetical protein CARUB_v10000166mg                       | gbpln | Capsella rubella     | AT5G21150.1   Symbols: AGO9   Argonaute family protein   chr5:7193472-7198113 FORWARD LENGTH=896                                                                                                                                                                                                                                                                                                                                                                               | 907  | 896  | 0         | 98.8  | 80.4 | 88.9 |
| Rsa1.0_00355.1.g12116.t1 | ref XP_002890258.1  hypothetical protein ARALYDRAFT_312763 [Arabidopsis lyrata subsp. lyrata] gi 297336100 gb EFH66517.1  hypothetical protein ARALYDRAFT_312763 [Arabidopsis lyrata subsp. lyrata]                                                                                                                                                                          | 320  | 341  | 1.00E-37  | 106.6 | 24.4 | 25.3 | hypothetical protein ARALYDRAFT_312763                       | gbpln | Arabidopsis lyrata   | AT1G18030.1   Symbols:   Protein phosphatase 2C family protein   chr1:6204400-6206678 FORWARD LENGTH=351                                                                                                                                                                                                                                                                                                                                                                       | 320  | 351  | 2.00E-39  | 109.7 | 24.1 | 25.0 |
| Rsa1.0_00355.1.g12117.t1 | gb ABD65606.1  hypothetical protein Z3:t00002 [Brassica oleracea]                                                                                                                                                                                                                                                                                                            | 108  | 433  | 5.00E-12  | 400.9 | 34.3 | 43.5 | hypothetical protein Z3:t00002                               | gbpln | Brassica oleracea    | #                                                                                                                                                                                                                                                                                                                                                                                                                                                                              | #    | #    | #         | #     | #    |      |
| Rsa1.0_00355.1.g12118.t1 | ref XP_002874032.1  La domain-containing protein [Arabidopsis lyrata subsp. lyrata] gi 297319869 gb EFH50291.1  La domain-containing protein [Arabidopsis lyrata subsp. lyrata]                                                                                                                                                                                              | 818  | 838  | 0         | 102.4 | 79.1 | 86.3 | La domain-containing protein                                 | gbpln | Arabidopsis lyrata   | AT5G21160.1   Symbols:   LA RNA-binding protein   chr5:7199191-7203879 REVERSE LENGTH=826                                                                                                                                                                                                                                                                                                                                                                                      | 818  | 826  | 0         | 101.0 | 78.1 | 86.1 |
| Rsa1.0_00355.1.g12119.t1 | gb EOA21286.1  hypothetical protein CARUB_v10001638mg [Capsella rubella]                                                                                                                                                                                                                                                                                                     | 88   | 285  | 5.00E-13  | 323.9 | 50.0 | 56.8 | hypothetical protein CARUB_v10001638mg                       | gbpln | Capsella rubella     | #                                                                                                                                                                                                                                                                                                                                                                                                                                                                              | #    | #    | #         | #     | #    |      |
| Rsa1.0_00355.1.g12120.t1 | ref XP_002871972.1  AMP-activated protein kinase [Arabidopsis lyrata subsp. lyrata] gi 297317809 gb EFH48231.1  AMP-activated protein kinase [Arabidopsis lyrata subsp. lyrata]                                                                                                                                                                                              | 223  | 319  | 1.00E-111 | 143.0 | 86.1 | 91.0 | AMP-activated protein kinase                                 | gbpln | Arabidopsis lyrata   | AT5G21170.1   Symbols: AKINBETA1   5'-AMP-activated protein kinase beta-2 subunit protein   chr5:7205718-7208239 FORWARD LENGTH=283                                                                                                                                                                                                                                                                                                                                            | 223  | 283  | 1.00E-112 | 126.9 | 86.1 | 91.0 |



|                          |                                                                                                                                                                                                                                                                                                                                                                                                                                                                                                                                                                                                                                                                                                                                                                  |     |      |           |        |       |       |                                                    |       |                      |                                                                                                                                   |     |     |           |       |      |       |
|--------------------------|------------------------------------------------------------------------------------------------------------------------------------------------------------------------------------------------------------------------------------------------------------------------------------------------------------------------------------------------------------------------------------------------------------------------------------------------------------------------------------------------------------------------------------------------------------------------------------------------------------------------------------------------------------------------------------------------------------------------------------------------------------------|-----|------|-----------|--------|-------|-------|----------------------------------------------------|-------|----------------------|-----------------------------------------------------------------------------------------------------------------------------------|-----|-----|-----------|-------|------|-------|
| Rsa1.0_00355.1.g12121.t1 | refXP_002871678.1   F-box family protein [Arabidopsis lyrata subsp. lyrata] gi 297317515 gb EFH47937.1   F-box family protein [Arabidopsis lyrata subsp. lyrata]                                                                                                                                                                                                                                                                                                                                                                                                                                                                                                                                                                                                 | 470 | 430  | 5.00E-44  | 91.5   | 28.7  | 37.0  | F-box family protein                               | gbpln | Arabidopsis lyrata   | AT5G15660.1   Symbols:   F-box and associated interaction domains-containing protein   chr5:5095652-5097041 FORWARD LENGTH=438    | 470 | 438 | 1.00E-43  | 93.2  | 30.2 | 41.1  |
| Rsa1.0_00355.1.g12122.t1 | gb EOA23804.1   hypothetical protein CARUB_v10017017mg_partial [Capsella rubella]                                                                                                                                                                                                                                                                                                                                                                                                                                                                                                                                                                                                                                                                                | 566 | 521  | 7.00E-71  | 92.0   | 26.0  | 36.0  | hypothetical protein CARUB_v10017017mg_partial     | gbpln | Capsella rubella     | AT2G17920.1   Symbols:   nucleic acid binding-zinc ion binding   chr2:7782808-7783731 FORWARD LENGTH=307                          | 566 | 307 | 2.00E-22  | 54.2  | 10.1 | 16.1  |
| Rsa1.0_00355.1.g12123.t1 | refXP_004251248.1   PREDICTED: calmodulin-like isoform 1 [Solanium lycopersicum]                                                                                                                                                                                                                                                                                                                                                                                                                                                                                                                                                                                                                                                                                 | 149 | 180  | 4.00E-80  | 120.8  | 100.0 | 100.0 | PREDICTED: calmodulin-like isoform 1               | gbpln | Solanum lycopersicum | AT2G27030.3   Symbols: CAM5   calmodulin 5   chr2:11532069-11534176 FORWARD LENGTH=181                                            | 149 | 181 | 6.00E-82  | 121.5 | 98.7 | 100.0 |
| Rsa1.0_00355.1.g12124.t1 | ref NP_850861.2   CBL-interacting serine/threonine-protein kinase 26 [Arabidopsis thaliana] gi 189082529 sp Q84VQ3.2 CIPKQ_ARATH RecName: Full=CBL-interacting serine/threonine-protein kinase 26; AltName: Full=SNF1-related kinase 3.26; AltName: Full=SOS2-like protein kinase PKS26 gi 332005565 gb AED92948.1   CBL-interacting serine/threonine-protein kinase 26 [Arabidopsis thaliana]                                                                                                                                                                                                                                                                                                                                                                   | 447 | 439  | 0         | 98.2   | 84.1  | 90.4  | CBL-interacting serine/threonine-protein kinase 26 | gbpln | Arabidopsis thaliana | AT5G21326.1   Symbols:   Ca2+regulated serine-threonine protein kinase family protein   chr5:7218081-7221743 FORWARD LENGTH=439   | 447 | 439 | 0         | 98.2  | 84.1 | 90.4  |
| Rsa1.0_00356.1.g12125.t1 | gb AAL37170.1 AF319169.1 CBL-interacting protein kinase [Brassica napus]                                                                                                                                                                                                                                                                                                                                                                                                                                                                                                                                                                                                                                                                                         | 440 | 441  | 0         | 100.2  | 97.0  | 98.6  | CBL-interacting protein kinase                     | gbpln | Brassica napus       | AT4G30960.1   Symbols: CIPK6, SIP3, SNRK3.14, ATCIPK6   SOS3-interacting protein 3   chr4:15067400-15068725 FORWARD LENGTH=441    | 440 | 441 | 0         | 100.2 | 94.1 | 96.1  |
| Rsa1.0_00356.1.g12126.t1 | #                                                                                                                                                                                                                                                                                                                                                                                                                                                                                                                                                                                                                                                                                                                                                                | #   | #    | #         | #      | #     | #     | -                                                  | ----  | ----                 | #                                                                                                                                 | #   | #   | #         | #     | #    | #     |
| Rsa1.0_00356.1.g12127.t1 | #                                                                                                                                                                                                                                                                                                                                                                                                                                                                                                                                                                                                                                                                                                                                                                | #   | #    | #         | #      | #     | #     | -                                                  | ----  | ----                 | #                                                                                                                                 | #   | #   | #         | #     | #    | #     |
| Rsa1.0_00356.1.g12128.t1 | emb CAA18195.1   putative protein [Arabidopsis thaliana] gi 7270000 emb CAB79816.1   putative protein [Arabidopsis thaliana]                                                                                                                                                                                                                                                                                                                                                                                                                                                                                                                                                                                                                                     | 327 | 367  | 1.00E-130 | 112.2  | 74.6  | 78.6  | putative protein                                   | gbpln | Arabidopsis thaliana | AT4G30980.1   Symbols: LRL2   LJRHL1-like 2   chr4:15079489-15081606 REVERSE LENGTH=310                                           | 327 | 310 | 1.00E-133 | 94.8  | 74.6 | 78.6  |
| Rsa1.0_00356.1.g12129.t2 | gb AAM65252.1   unknown [Arabidopsis thaliana]                                                                                                                                                                                                                                                                                                                                                                                                                                                                                                                                                                                                                                                                                                                   | 278 | 285  | 1.00E-116 | 102.5  | 73.4  | 84.2  | unknown                                            | gbpln | Arabidopsis thaliana | AT4G30993.2   Symbols:   Calceinurim-like metallo-phosphoesterase superfamily protein   chr4:15098201-15099935 FORWARD LENGTH=285 | 278 | 285 | 1.00E-118 | 102.5 | 73.0 | 83.8  |
| Rsa1.0_00356.1.g12130.t1 | emb CAA18194.1   putative protein [Arabidopsis thaliana] gi 7270001 emb CAB79817.1   putative protein [Arabidopsis thaliana]                                                                                                                                                                                                                                                                                                                                                                                                                                                                                                                                                                                                                                     | 172 | 2895 | 1.00E-82  | 1683.1 | 92.4  | 97.7  | putative protein                                   | gbpln | Arabidopsis thaliana | AT2G24290.1   Symbols:   Protein of unknown function (DUF1068)   chr2:10338779-10339859 FORWARD LENGTH=173                        | 172 | 173 | 9.00E-85  | 100.6 | 85.5 | 94.2  |
| Rsa1.0_00356.1.g12131.t1 | ref NP_194829.2   Calmodulin-binding protein [Arabidopsis thaliana] gi 332660443 gb AEE85843.1   Calmodulin-binding protein [Arabidopsis thaliana]                                                                                                                                                                                                                                                                                                                                                                                                                                                                                                                                                                                                               | 553 | 562  | 0         | 101.6  | 83.2  | 90.1  | Calmodulin-binding protein                         | gbpln | Arabidopsis thaliana | AT4G31000.1   Symbols:   Calmodulin-binding protein   chr4:15103402-15105799 FORWARD LENGTH=562                                   | 553 | 562 | 0         | 101.6 | 83.2 | 90.1  |
| Rsa1.0_00356.1.g12132.t1 | ref XP_002867317.1   hypothetical protein ARALYDRAFT_328615 [Arabidopsis lyrata subsp. lyrata] gi 297313153 gb EFH43576.1   hypothetical protein ARALYDRAFT_328615 [Arabidopsis lyrata subsp. lyrata]                                                                                                                                                                                                                                                                                                                                                                                                                                                                                                                                                            | 294 | 294  | 1.00E-164 | 100.0  | 93.5  | 98.0  | hypothetical protein ARALYDRAFT_328615             | gbpln | Arabidopsis lyrata   | AT4G31020.1   Symbols:   alpha/beta-Hydrolases superfamily protein   chr4:15108832-15110079 REVERSE LENGTH=294                    | 294 | 294 | 1.00E-166 | 100.0 | 93.2 | 98.0  |
| Rsa1.0_00356.1.g12133.t1 | ref NP_567865.1   CemA-like proton extrusion protein-like protein [Arabidopsis thaliana] gi 19347877 gb AAL85996.1   unknown protein [Arabidopsis thaliana] gi 29824339 gb AAP04130.1   unknown protein [Arabidopsis thaliana] gi 51968984 dbj BAD43184.1   unknown protein [Arabidopsis thaliana] gi 51969232 dbj BAD43308.1   unknown protein [Arabidopsis thaliana] gi 51971222 dbj BAD44303.1   unknown protein [Arabidopsis thaliana] gi 51971232 dbj BAD44303.1   unknown protein [Arabidopsis thaliana] gi 51971856 dbj BAD44592.1   unknown protein [Arabidopsis thaliana] gi 110741205 dbj BAF02153.1   hypothetical protein [Arabidopsis thaliana] gi 332660450 gb AEE85850.1   CemA-like proton extrusion protein-like protein [Arabidopsis thaliana] | 441 | 438  | 0         | 99.3   | 88.2  | 92.5  | CemA-like proton extrusion protein-like protein    | gbpln | Arabidopsis thaliana | AT4G31040.1   Symbols:   CemA-like proton extrusion protein-related   chr4:15111811-15113881 REVERSE LENGTH=438                   | 441 | 438 | 0         | 99.3  | 88.2 | 92.5  |

|                           |                                                                                                                                                                                                                                                                                                                                                                                                                                                                                                                                                                                      |     |      |           |       |      |      |                                                     |       |                      |                                                                                                                                                                                                                                                                                                               |     |      |           |       |      |      |
|---------------------------|--------------------------------------------------------------------------------------------------------------------------------------------------------------------------------------------------------------------------------------------------------------------------------------------------------------------------------------------------------------------------------------------------------------------------------------------------------------------------------------------------------------------------------------------------------------------------------------|-----|------|-----------|-------|------|------|-----------------------------------------------------|-------|----------------------|---------------------------------------------------------------------------------------------------------------------------------------------------------------------------------------------------------------------------------------------------------------------------------------------------------------|-----|------|-----------|-------|------|------|
| Rsa1.0_00356.1.g12134.t1  | refNP_567866.1  Plastidial lipoyltransferase 2 [Arabidopsis thaliana]<br>gi 75164691 sp Q948J9.1 LIP2P_ARATH<br>RecName: Full=Plastidial lipoyltransferase 2; AltName: Full=Lipoate-protein ligase 2p; AltName: Full=Lipoyl-[acyl-carrier-protein]-protein-N- lipoyltransferase 2p<br>gi 15887052 dbj BAE69449.1  lipoyltransferase [Arabidopsis thaliana]<br>gi 62320326 dbj BAD94675.1  putative protein [Arabidopsis thaliana]<br>gi 90186250 gb ABD91501.1  At4g31050 [Arabidopsis thaliana]<br>gi 33266045 gb AEE85851.1  Plastidial lipoyltransferase 2 [Arabidopsis thaliana] | 519 | 278  | 1.00E-133 | 53.6  | 44.5 | 48.4 | Plastidial lipoyltransferase 2                      | gbpln | Arabidopsis thaliana | AT4G31050.1   Symbols:   Biotin/lipoate A/B protein ligase family   chr4:15114345-15115443 FORWARD LENGTH=278                                                                                                                                                                                                 | 519 | 278  | 1.00E-136 | 53.6  | 44.5 | 48.4 |
| Rsa1.0_00356.1.g12135.t1  | gb EOA15750.1  hypothetical protein CARUB_v10006795mg [Capsella rubella]                                                                                                                                                                                                                                                                                                                                                                                                                                                                                                             | 699 | 806  | 0         | 115.3 | 68.1 | 79.7 | hypothetical protein CARUB_v10006795mg              | gbpln | Capsella rubella     | AT4G31110.1   Symbols:   Wall-associated kinase family protein   chr4:15127257-15129880 FORWARD LENGTH=793                                                                                                                                                                                                    | 699 | 793  | 0         | 113.4 | 67.8 | 78.8 |
| Rsa1.0_00356.1.g12136.t1  | gb EOA15750.1  hypothetical protein CARUB_v10006795mg [Capsella rubella]                                                                                                                                                                                                                                                                                                                                                                                                                                                                                                             | 882 | 806  | 0         | 91.4  | 61.7 | 68.9 | hypothetical protein CARUB_v10006795mg              | gbpln | Capsella rubella     | AT4G31100.1   Symbols:   wall-associated kinase, putative   chr4:15123862-15126426 FORWARD LENGTH=786                                                                                                                                                                                                         | 882 | 786  | 0         | 89.1  | 60.1 | 68.0 |
| Rsa1.0_00356.1.g12137.t4  | gb EOA18616.1  hypothetical protein CARUB_v10007189mg [Capsella rubella]                                                                                                                                                                                                                                                                                                                                                                                                                                                                                                             | 636 | 642  | 0         | 100.9 | 90.9 | 94.0 | hypothetical protein CARUB_v10007189mg              | gbpln | Capsella rubella     | AT4G31120.1   Symbols: SKB1, ATPRMT5   SHK1 binding protein 1   chr4:15132185-15136568 REVERSE LENGTH=642                                                                                                                                                                                                     | 636 | 642  | 0         | 100.9 | 89.5 | 93.4 |
| Rsa1.0_00356.1.g12138.t1  | # # # # # # # # # #                                                                                                                                                                                                                                                                                                                                                                                                                                                                                                                                                                  | #   | #    | #         | #     | #    | #    | -                                                   | ----  | ----                 | #                                                                                                                                                                                                                                                                                                             | #   | #    | #         | #     | #    | #    |
| Rsa1.0_00356.1.g12139.t1  | refNP_567632.1  Subtilase family protein [Arabidopsis thaliana]<br>gi 445527 emb CAB36807.1  serine protease-like protein [Arabidopsis thaliana]<br>gi 7268960 emb CAB81270.1  serine protease-like protein [Arabidopsis thaliana]<br>gi 332659063 gb AEE84483.1  Subtilase family protein [Arabidopsis thaliana]                                                                                                                                                                                                                                                                    | 703 | 772  | 0         | 109.8 | 75.8 | 84.4 | Subtilase family protein                            | gbpln | Arabidopsis thaliana | AT4G21630.1   Symbols:   Subtilase family protein   chr4:11492248-11495500 REVERSE LENGTH=772                                                                                                                                                                                                                 | 703 | 772  | 0         | 109.8 | 75.8 | 84.4 |
| Rsa1.0_00356.1.g12140.t2  | refXP_002867835.1  hypothetical protein ARALYDRAFT_914502 [Arabidopsis lyrata subsp. lyrata]<br>gi 297313671 gb EFH44094.1  hypothetical protein ARALYDRAFT_914502 [Arabidopsis lyrata subsp. lyrata]                                                                                                                                                                                                                                                                                                                                                                                | 516 | 584  | 0         | 113.2 | 77.5 | 82.6 | hypothetical protein ARALYDRAFT_914502              | gbpln | Arabidopsis lyrata   | AT4G21660.2   Symbols:   proline-rich spliceosome-associated (PSP) family protein   chr4:11506259-11509772 REVERSE LENGTH=598                                                                                                                                                                                 | 516 | 598  | 0         | 115.9 | 76.0 | 83.3 |
| Rsa1.0_00356.1.g12141.t1  | refXP_002869597.1  pentatricopeptide repeat-containing protein [Arabidopsis lyrata subsp. lyrata]<br>gi 297315433 gb EFH45856.1  pentatricopeptide repeat-containing protein [Arabidopsis lyrata subsp. lyrata]                                                                                                                                                                                                                                                                                                                                                                      | 185 | 538  | 3.00E-11  | 290.8 | 18.4 | 19.5 | pentatricopeptide repeat-containing protein         | gbpln | Arabidopsis lyrata   | AT4G26680.2   Symbols:   Tetratricopeptide repeat (TPR)-like superfamily protein   chr4:13454853-13456418 FORWARD LENGTH=521                                                                                                                                                                                  | 185 | 521  | 2.00E-13  | 281.6 | 17.8 | 20.0 |
| Rsa1.0_00356.1.g12142.t1  | gb EOA21337.1  hypothetical protein CARUB_v10001699mg [Capsella rubella]                                                                                                                                                                                                                                                                                                                                                                                                                                                                                                             | 283 | 272  | 4.00E-14  | 96.1  | 23.7 | 37.8 | hypothetical protein CARUB_v10001699mg              | gbpln | Capsella rubella     | #                                                                                                                                                                                                                                                                                                             | #   | #    | #         | #     | #    | #    |
| Rsa1.0_00356.1.g12143.t1  | refNP_194085.4  NUC173 domain-containing protein [Arabidopsis thaliana]<br>gi 332659373 gb AEE84773.1  NUC173 domain-containing protein [Arabidopsis thaliana]                                                                                                                                                                                                                                                                                                                                                                                                                       | 896 | 1131 | 0         | 126.2 | 57.6 | 62.2 | NUC173 domain-containing protein                    | gbpln | Arabidopsis thaliana | AT4G23540.1   Symbols:   ARM repeat superfamily protein   chr4:12280547-12286420 REVERSE LENGTH=1131                                                                                                                                                                                                          | 896 | 1131 | 0         | 126.2 | 57.6 | 62.2 |
| Rsa1.0_00356.1.g12144.t1  | refXP_002869776.1  hypothetical protein ARALYDRAFT_914244 [Arabidopsis lyrata subsp. lyrata]<br>gi 297315612 gb EFH46035.1  hypothetical protein ARALYDRAFT_914244 [Arabidopsis lyrata subsp. lyrata]                                                                                                                                                                                                                                                                                                                                                                                | 282 | 400  | 1.00E-121 | 141.8 | 84.8 | 92.2 | hypothetical protein ARALYDRAFT_914244              | gbpln | Arabidopsis lyrata   | AT4G23530.1   Symbols:   Protein of unknown function (DUF793)   chr4:12279171-12280361 FORWARD LENGTH=396                                                                                                                                                                                                     | 282 | 396  | 1.00E-118 | 140.4 | 83.7 | 91.5 |
| Rsa1.0_00357.1.g12145.t1  | # # # # # # # # # #                                                                                                                                                                                                                                                                                                                                                                                                                                                                                                                                                                  | #   | #    | #         | #     | #    | #    | -                                                   | ----  | ----                 | #                                                                                                                                                                                                                                                                                                             | #   | #    | #         | #     | #    | #    |
| Rsa1.0_00357.1.g12146.t1  | gb EOA40409.1  hypothetical protein CARUB_v10009135mg [Capsella rubella]                                                                                                                                                                                                                                                                                                                                                                                                                                                                                                             | 431 | 445  | 0         | 103.2 | 81.9 | 91.6 | hypothetical protein CARUB_v10009135mg              | gbpln | Capsella rubella     | AT1G31660.1   Symbols:   CONTAINS InterPro DOMAIN/s: Bystin (InterPro:IPR007955); Has 475 Blast hits to 467 proteins in 210 species: Archae - 0; Bacteria - 9; Metazoa - 155; Fungi - 139; Plants - 55; Viruses - 0; Other Eukaryotes - 117 (source: NCBI BLINK).   chr1:11331176-11333440 REVERSE LENGTH=444 | 431 | 444  | 0         | 103.0 | 82.6 | 91.2 |
| Rsa1.0_00357.1.g12147.t14 | gb AAC67331.1  putative non-LTR retroelement reverse transcriptase [Arabidopsis thaliana]                                                                                                                                                                                                                                                                                                                                                                                                                                                                                            | 602 | 1449 | 3.00E-40  | 240.7 | 19.3 | 27.6 | putative non-LTR retroelement reverse transcriptase | gbpln | Arabidopsis thaliana | AT3G24255.1   Symbols:   RNA-directed DNA polymerase (reverse transcriptase)-related family protein   chr3:8789471-8793208 FORWARD LENGTH=746                                                                                                                                                                 | 602 | 746  | 8.00E-24  | 123.9 | 8.1  | 10.1 |

|                          |                                                                                                                                                                                                                                                                                          |      |      |           |       |      |      |                                                                                                                                                                                                                                                  |       |                      |                                                                                                                                                      |      |      |           |       |      |      |
|--------------------------|------------------------------------------------------------------------------------------------------------------------------------------------------------------------------------------------------------------------------------------------------------------------------------------|------|------|-----------|-------|------|------|--------------------------------------------------------------------------------------------------------------------------------------------------------------------------------------------------------------------------------------------------|-------|----------------------|------------------------------------------------------------------------------------------------------------------------------------------------------|------|------|-----------|-------|------|------|
| Rsa1.0_00357.1.g12148.t1 | gb AAF18630.1 AC006228.1 F5J5.1 [Arabidopsis thaliana]                                                                                                                                                                                                                                   | 165  | 1463 | 1.00E-19  | 886.7 | 32.7 | 41.2 | F5J5.1                                                                                                                                                                                                                                           | gbpln | Arabidopsis thaliana | #                                                                                                                                                    | #    | #    | #         | #     | #    |      |
| Rsa1.0_00357.1.g12149.t1 | #                                                                                                                                                                                                                                                                                        | #    | #    | #         | #     | #    | -    | -                                                                                                                                                                                                                                                | ----  | ----                 | #                                                                                                                                                    | #    | #    | #         | #     | #    |      |
| Rsa1.0_00357.1.g12150.t1 | #                                                                                                                                                                                                                                                                                        | #    | #    | #         | #     | #    | -    | -                                                                                                                                                                                                                                                | ----  | ----                 | #                                                                                                                                                    | #    | #    | #         | #     | #    |      |
| Rsa1.0_00357.1.g12151.t1 | #                                                                                                                                                                                                                                                                                        | #    | #    | #         | #     | #    | -    | -                                                                                                                                                                                                                                                | ----  | ----                 | #                                                                                                                                                    | #    | #    | #         | #     | #    |      |
| Rsa1.0_00357.1.g12152.t1 | gb AAG52321.1 AC021666_10 hypothetical protein; 77302-71408 [Arabidopsis thaliana]                                                                                                                                                                                                       | 392  | 523  | 4.00E-16  | 133.4 | 14.8 | 18.4 | hypothetical protein; 77302-71408                                                                                                                                                                                                                | gbpln | Arabidopsis thaliana | #                                                                                                                                                    | #    | #    | #         | #     | #    |      |
| Rsa1.0_00357.1.g12153.t1 | gb EOA36555.1  hypothetical protein CARUB_v10011695mg [Capsella rubella]                                                                                                                                                                                                                 | 411  | 411  | 1.00E-175 | 100.0 | 73.5 | 83.2 | hypothetical protein CARUB_v10011695mg                                                                                                                                                                                                           | gbpln | Capsella rubella     | AT1G31790.1   Symbols:   Tetratricopeptide repeat (TPR)-like superfamily protein   chr1:11394744-11395973 REVERSE LENGTH=409                         | 411  | 409  | 1.00E-175 | 99.5  | 75.2 | 83.5 |
| Rsa1.0_00357.1.g12154.t1 | gb AAK62792.1 AC027036_13 kinesin motor protein (kin2), putative [Arabidopsis thaliana]                                                                                                                                                                                                  | 299  | 807  | 2.00E-49  | 269.9 | 37.5 | 41.5 | kinesin motor protein (kin2), putative                                                                                                                                                                                                           | gbpln | Arabidopsis thaliana | AT1G59540.1   Symbols: ZCF125   P-loop containing nucleoside triphosphate hydrolases superfamily protein   chr1:21874083-21879382 FORWARD LENGTH=823 | 299  | 823  | 4.00E-52  | 275.3 | 37.5 | 41.5 |
| Rsa1.0_00357.1.g12155.t1 | #                                                                                                                                                                                                                                                                                        | #    | #    | #         | #     | #    | -    | -                                                                                                                                                                                                                                                | ----  | ----                 | #                                                                                                                                                    | #    | #    | #         | #     | #    |      |
| Rsa1.0_00357.1.g12156.t1 | #                                                                                                                                                                                                                                                                                        | #    | #    | #         | #     | #    | -    | -                                                                                                                                                                                                                                                | ----  | ----                 | #                                                                                                                                                    | #    | #    | #         | #     | #    |      |
| Rsa1.0_00357.1.g12157.t1 | #                                                                                                                                                                                                                                                                                        | #    | #    | #         | #     | #    | -    | -                                                                                                                                                                                                                                                | ----  | ----                 | #                                                                                                                                                    | #    | #    | #         | #     | #    |      |
| Rsa1.0_00358.1.g12158.t1 | ref XP_002880160.1  hypothetical protein ARALYDRAFT_483647 [Arabidopsis lyrata subsp. lyrata] gi 297325999 gb EFH56419.1  hypothetical protein ARALYDRAFT_483647 [Arabidopsis lyrata subsp. lyrata]                                                                                      | 101  | 239  | 7.00E-35  | 236.6 | 90.1 | 96.0 | hypothetical protein ARALYDRAFT_483647                                                                                                                                                                                                           | gbpln | Arabidopsis lyrata   | AT2G45140.1   Symbols: PVA12   plant VAP homolog 12   chr2:18611029-18612971 FORWARD LENGTH=239                                                      | 101  | 239  | 2.00E-36  | 236.6 | 87.1 | 96.0 |
| Rsa1.0_00358.1.g12159.t1 | gb AAK43485.1 AC084807_10 polyprotein, putative [Arabidopsis thaliana] gi 225898008 db BAH30336.1  hypothetical protein [Arabidopsis thaliana]                                                                                                                                           | 1389 | 1459 | 0         | 105.0 | 59.8 | 75.7 | polyprotein, putative                                                                                                                                                                                                                            | gbpln | Arabidopsis thaliana | AT4G23160.1   Symbols: CRK8   cysteine-rich RLK (RECEPTOR-like protein kinase) 8   chr4:12129485-12134086 FORWARD LENGTH=1262                        | 1389 | 1262 | 1.00E-118 | 90.9  | 15.4 | 22.5 |
| Rsa1.0_00358.1.g12160.t1 | gb AFI44621.1  putative male sterile protein [Brassica rapa subsp. pekinensis] gi 387913740 gb AFK10493.1  YABBY1 [Brassica rapa var. parachinensis]                                                                                                                                     | 233  | 233  | 1.00E-133 | 100.0 | 98.3 | 99.1 | putative male sterile protein                                                                                                                                                                                                                    | gbpln | Brassica rapa        | AT2G45190.1   Symbols: AFO, FIL, YAB1   Plant-specific transcription factor YABBY family protein   chr2:18628450-18630552 REVERSE LENGTH=229         | 233  | 229  | 1.00E-109 | 98.3  | 83.3 | 87.1 |
| Rsa1.0_00358.1.g12161.t1 | ref XP_002882001.1  hypothetical protein ARALYDRAFT_903960 [Arabidopsis lyrata subsp. lyrata] gi 297327840 gb EFH58260.1  hypothetical protein ARALYDRAFT_903960 [Arabidopsis lyrata subsp. lyrata]                                                                                      | 236  | 239  | 1.00E-123 | 101.3 | 94.5 | 97.9 | hypothetical protein ARALYDRAFT_903960                                                                                                                                                                                                           | gbpln | Arabidopsis lyrata   | AT2G45200.1   Symbols: GOS12, ATGOS12   golgi snare 12   chr2:18637689-18639640 REVERSE LENGTH=239                                                   | 236  | 239  | 1.00E-125 | 101.3 | 94.1 | 97.9 |
| Rsa1.0_00358.1.g12162.t1 | ref XP_002882002.1  predicted protein [Arabidopsis lyrata subsp. lyrata] gi 297327841 gb EFH58261.1  predicted protein [Arabidopsis lyrata subsp. lyrata]                                                                                                                                | 448  | 511  | 0         | 114.1 | 88.4 | 93.5 | predicted protein                                                                                                                                                                                                                                | gbpln | Arabidopsis lyrata   | AT2G45220.1   Symbols:   Plant invertase/pectin methyltransferase inhibitor superfamily   chr2:18644281-18646394 REVERSE LENGTH=511                  | 448  | 511  | 0         | 114.1 | 87.5 | 92.9 |
| Rsa1.0_00358.1.g12163.t1 | gb AAC02678.1  lactate dehydrogenase [Arabidopsis thaliana]                                                                                                                                                                                                                              | 128  | 353  | 2.00E-33  | 275.8 | 54.7 | 56.3 | lactate dehydrogenase                                                                                                                                                                                                                            | gbpln | Arabidopsis thaliana | AT4G17260.1   Symbols:   Lactate/malate dehydrogenase family protein   chr4:9674057-9675309 FORWARD LENGTH=353                                       | 128  | 353  | 4.00E-36  | 275.8 | 54.7 | 56.3 |
| Rsa1.0_00358.1.g12164.t1 | sp P17688.1 ARCA_BRANA RecName: Full=3-phosphoshikimate 1-carboxyvinyltransferase, chloroplastic; AltName: Full=5-enolpyruvylshikimate-3-phosphate synthase; Short=EPSP synthase; Flags: Precursor gi 17815 emb CAA35839.1  5-enolpyruvylshikimate-3-phosphate synthase [Brassica napus] | 521  | 516  | 0         | 99.0  | 94.0 | 95.6 | RecName: Full=3-phosphoshikimate 1-carboxyvinyltransferase, chloroplastic; AltName: Full=5-enolpyruvylshikimate-3-phosphate synthase; Short=EPSP synthase; Flags: Precursor gi 17815 emb CAA35839.1  5-enolpyruvylshikimate-3-phosphate synthase | gbpln | Brassica napus       | AT2G45300.1   Symbols:   RNA 3'-terminal phosphate cyclase/enolpyruvate transferase, alpha/beta   chr2:1867518-18679868 FORWARD LENGTH=520           | 521  | 520  | 0         | 99.8  | 91.4 | 93.7 |
| Rsa1.0_00358.1.g12165.t1 | ref XP_002875045.1  ATRPS13A [Arabidopsis lyrata subsp. lyrata] gi 297320882 gb EFH51304.1  ATRPS13A [Arabidopsis lyrata subsp. lyrata]                                                                                                                                                  | 118  | 151  | 1.00E-50  | 128.0 | 83.1 | 88.1 | ATRPS13A                                                                                                                                                                                                                                         | gbpln | Arabidopsis lyrata   | AT4G00100.1   Symbols: ATRPS13A, RPS13, PFL2, RPS13A   ribosomal protein S13A   chr4:37172-38123 FORWARD LENGTH=151                                  | 118  | 151  | 2.00E-53  | 128.0 | 83.1 | 88.1 |
| Rsa1.0_00358.1.g12166.t1 | #                                                                                                                                                                                                                                                                                        | #    | #    | #         | #     | #    | -    | -                                                                                                                                                                                                                                                | ----  | ----                 | #                                                                                                                                                    | #    | #    | #         | #     | #    |      |
| Rsa1.0_00358.1.g12167.t1 | gb AFJ66169.1  hypothetical protein 11M19.13 [Arabidopsis halleri]                                                                                                                                                                                                                       | 610  | 1273 | 1.00E-144 | 208.7 | 42.6 | 51.8 | hypothetical protein 11M19.13                                                                                                                                                                                                                    | gbpln | Arabidopsis halleri  | AT4G23160.1   Symbols: CRK8   cysteine-rich RLK (RECEPTOR-like protein kinase) 8   chr4:12129485-12134086 FORWARD LENGTH=1262                        | 610  | 1262 | 2.00E-21  | 206.9 | 8.5  | 13.4 |

|                          |                                                                                                                                                                                                      |     |     |           |       |      |      |                                                                       |             |                    |                                                                                                                                                                                                                                                                                                                                               |     |     |           |       |      |      |
|--------------------------|------------------------------------------------------------------------------------------------------------------------------------------------------------------------------------------------------|-----|-----|-----------|-------|------|------|-----------------------------------------------------------------------|-------------|--------------------|-----------------------------------------------------------------------------------------------------------------------------------------------------------------------------------------------------------------------------------------------------------------------------------------------------------------------------------------------|-----|-----|-----------|-------|------|------|
| Rsa1.0_00358.1.g12168.t1 | gb[EOA26345.1] hypothetical protein CARUB_v10022725mg [Capsella rubella]                                                                                                                             | 695 | 723 | 0         | 104.0 | 87.2 | 91.5 | hypothetical protein CARUB_v10022725mg                                | gbpln       | Capsella rubella   | AT2G45340.1   Symbols:   Leucine-rich repeat protein kinase family protein   chr2:18691739-18694466 FORWARD LENGTH=691                                                                                                                                                                                                                        | 695 | 691 | 0         | 99.4  | 87.1 | 90.8 |
| Rsa1.0_00358.1.g12169.t1 | gb[EOA27861.1] hypothetical protein CARUB_v10024019mg [Capsella rubella]                                                                                                                             | 223 | 221 | 1.00E-110 | 99.1  | 86.1 | 93.3 | hypothetical protein CARUB_v10024019mg                                | gbpln       | Capsella rubella   | AT2G45360.1   Symbols:   Protein of unknown function (DUF1442)   chr2:18692619-18699360 FORWARD LENGTH=215                                                                                                                                                                                                                                    | 223 | 215 | 1.00E-97  | 96.4  | 85.2 | 89.2 |
| Rsa1.0_00358.1.g12170.t1 | ref[XP_002882011.1] dihydroflavonol 4-reductase family [Arabidopsis lyrata subsp. lyrata]   g[297327850]gb[EFH58270.1] dihydroflavonol 4-reductase family [Arabidopsis lyrata subsp. lyrata]         | 360 | 360 | 0         | 100.0 | 90.3 | 93.3 | dihydroflavonol 4-reductase family                                    | gbpln       | Arabidopsis lyrata | AT2G45400.1   Symbols: BEN1   NAD(P)-binding Rossmann-fold superfamily protein   chr2:18703960-18706235 REVERSE LENGTH=364                                                                                                                                                                                                                    | 360 | 364 | 1.00E-177 | 101.1 | 85.8 | 89.7 |
| Rsa1.0_00358.1.g12171.t1 | #                                                                                                                                                                                                    | #   | #   | #         | #     | #    | #    | -                                                                     | ----        | ----               | #                                                                                                                                                                                                                                                                                                                                             | #   | #   | #         | #     | #    |      |
| Rsa1.0_00358.1.g12172.t1 | ref[XP_003521945.1] PREDICTED: LOW QUALITY PROTEIN: LOB domain-containing protein 31-like [Glycine max]                                                                                              | 104 | 217 | 8.00E-27  | 208.7 | 52.9 | 61.5 | PREDICTED: LOW QUALITY PROTEIN: LOB domain-containing protein 31-like | gbenv/gbpln | Glycine max        | AT2G45410.1   Symbols: LBD19   LOB domain-containing protein 19   chr2:18712449-18713108 REVERSE LENGTH=191                                                                                                                                                                                                                                   | 104 | 191 | 5.00E-26  | 183.7 | 49.0 | 52.9 |
| Rsa1.0_00358.1.g12173.t1 | #                                                                                                                                                                                                    | #   | #   | #         | #     | #    | #    | -                                                                     | ----        | ----               | #                                                                                                                                                                                                                                                                                                                                             | #   | #   | #         | #     | #    |      |
| Rsa1.0_00358.1.g12174.t1 | #                                                                                                                                                                                                    | #   | #   | #         | #     | #    | #    | -                                                                     | ----        | ----               | #                                                                                                                                                                                                                                                                                                                                             | #   | #   | #         | #     | #    |      |
| Rsa1.0_00358.1.g12175.t1 | ref[XP_002880178.1] hypothetical protein ARALYDRAFT_483677 [Arabidopsis lyrata subsp. lyrata]   g[297326017]gb[EFH56437.1] hypothetical protein ARALYDRAFT_483677 [Arabidopsis lyrata subsp. lyrata] | 253 | 260 | 1.00E-99  | 102.8 | 85.0 | 88.5 | hypothetical protein ARALYDRAFT_483677                                | gbpln       | Arabidopsis lyrata | AT2G45420.1   Symbols: LBD18   LOB domain-containing protein 18   chr2:18718601-18720445 FORWARD LENGTH=262                                                                                                                                                                                                                                   | 253 | 262 | 1.00E-95  | 103.6 | 83.0 | 87.0 |
| Rsa1.0_00358.1.g12176.t1 | gb[EOA29249.1] hypothetical protein CARUB_v10025523mg [Capsella rubella]                                                                                                                             | 311 | 316 | 1.00E-127 | 101.6 | 92.9 | 95.2 | hypothetical protein CARUB_v10025523mg                                | gbpln       | Capsella rubella   | AT2G45430.1   Symbols: AHL22   AT-hook motif nuclear-localized protein 22   chr2:18727848-18728801 FORWARD LENGTH=317                                                                                                                                                                                                                         | 311 | 317 | 1.00E-128 | 101.9 | 93.9 | 95.8 |
| Rsa1.0_00359.1.g12177.t1 | gb[EOA29987.1] hypothetical protein CARUB_v10013092mg [Capsella rubella]                                                                                                                             | 680 | 701 | 0         | 103.1 | 87.5 | 91.9 | hypothetical protein CARUB_v10013092mg                                | gbpln       | Capsella rubella   | AT3G19830.2   Symbols: NTMC2TYPE5.2, NTMC2T5.2   Calcium-dependent lipid-binding (CaLB domain) family protein   chr3:6886338-6889974 REVERSE LENGTH=693                                                                                                                                                                                       | 680 | 693 | 0         | 101.9 | 85.6 | 90.4 |
| Rsa1.0_00359.1.g12178.t1 | ref[XP_002883208.1] hypothetical protein ARALYDRAFT_898376 [Arabidopsis lyrata subsp. lyrata]   g[297329048]gb[EFH59467.1] hypothetical protein ARALYDRAFT_898376 [Arabidopsis lyrata subsp. lyrata] | 762 | 835 | 0         | 109.6 | 79.7 | 86.1 | hypothetical protein ARALYDRAFT_898376                                | gbpln       | Arabidopsis lyrata | AT3G19840.1   Symbols: ATPRP40C, PRP40C   pre-mRNA-processing protein 40C   chr3:6891228-6897227 FORWARD LENGTH=835                                                                                                                                                                                                                           | 762 | 835 | 0         | 109.6 | 77.2 | 84.6 |
| Rsa1.0_00359.1.g12179.t1 | gb[EOA13622.1] hypothetical protein CARUB_v10026692mg [Capsella rubella]                                                                                                                             | 460 | 350 | 0         | 76.1  | 68.9 | 71.1 | hypothetical protein CARUB_v10026692mg                                | gbpln       | Capsella rubella   | AT5G50960.1   Symbols: NBP35, ATNBP35   nucleotide binding protein 35   chr5:20734267-20735824 FORWARD LENGTH=350                                                                                                                                                                                                                             | 460 | 350 | 0         | 76.1  | 67.4 | 71.1 |
| Rsa1.0_00359.1.g12180.t1 | ref[XP_002885337.1] hypothetical protein ARALYDRAFT_898378 [Arabidopsis lyrata subsp. lyrata]   g[297331177]gb[EFH61596.1] hypothetical protein ARALYDRAFT_898378 [Arabidopsis lyrata subsp. lyrata] | 383 | 392 | 1.00E-107 | 102.3 | 56.9 | 72.6 | hypothetical protein ARALYDRAFT_898378                                | gbpln       | Arabidopsis lyrata | AT3G20030.1   Symbols:   F-box and associated interaction domains-containing protein   chr3:6990254-6991462 FORWARD LENGTH=402                                                                                                                                                                                                                | 383 | 402 | 1.00E-108 | 105.0 | 59.5 | 70.0 |
| Rsa1.0_00359.1.g12181.t1 | #                                                                                                                                                                                                    | #   | #   | #         | #     | #    | #    | -                                                                     | ----        | ----               | #                                                                                                                                                                                                                                                                                                                                             | #   | #   | #         | #     | #    |      |
| Rsa1.0_00359.1.g12182.t1 | #                                                                                                                                                                                                    | #   | #   | #         | #     | #    | #    | -                                                                     | ----        | ----               | #                                                                                                                                                                                                                                                                                                                                             | #   | #   | #         | #     | #    |      |
| Rsa1.0_00359.1.g12183.t1 | gb[EOA30982.1] hypothetical protein CARUB_v10014137mg [Capsella rubella]                                                                                                                             | 314 | 335 | 1.00E-126 | 106.7 | 79.0 | 87.3 | hypothetical protein CARUB_v10014137mg                                | gbpln       | Capsella rubella   | AT3G19910.1   Symbols:   RING/U-box superfamily protein   chr3:6926497-6929324 FORWARD LENGTH=340                                                                                                                                                                                                                                             | 314 | 340 | 1.00E-127 | 108.3 | 79.3 | 87.9 |
| Rsa1.0_00359.1.g12184.t1 | gb[EOA30543.1] hypothetical protein CARUB_v10013663mg [Capsella rubella]                                                                                                                             | 438 | 458 | 0         | 104.6 | 86.8 | 92.5 | hypothetical protein CARUB_v10013663mg                                | gbpln       | Capsella rubella   | AT3G19920.1   Symbols:   unknown protein; BEST Arabidopsis thaliana protein match is: unknown protein (TAIR:AT5G64230.1); Has 217 Blast hits to 217 proteins in 16 species: Archae - 0; Bacteria - 2; Metazoa - 0; Fungi - 0; Plants - 215; Viruses - 0; Other Eukaryotes - 0 (source: NCBI BLink).   chr3:6929840-6931771 REVERSE LENGTH=416 | 438 | 416 | 0         | 95.0  | 83.3 | 88.1 |
| Rsa1.0_00359.1.g12185.t1 | gb[EOA30349.1] hypothetical protein CARUB_v10013472mg [Capsella rubella]                                                                                                                             | 514 | 514 | 0         | 100.0 | 95.1 | 98.2 | hypothetical protein CARUB_v10013472mg                                | gbpln       | Capsella rubella   | AT3G19930.1   Symbols: STP4, ATSTP4   sugar transporter 4   chr3:6935048-6936841 FORWARD LENGTH=514                                                                                                                                                                                                                                           | 514 | 514 | 0         | 100.0 | 94.9 | 98.2 |
| Rsa1.0_00359.1.g12186.t1 | ref[XP_002883213.1] zinc finger family protein [Arabidopsis lyrata subsp. lyrata]   g[297329053]gb[EFH59472.1] zinc finger family protein [Arabidopsis lyrata subsp. lyrata]                         | 276 | 330 | 4.00E-84  | 119.6 | 71.7 | 80.8 | zinc finger family protein                                            | gbpln       | Arabidopsis lyrata | AT3G19950.1   Symbols:   RING/U-box superfamily protein   chr3:6942853-6943839 FORWARD LENGTH=328                                                                                                                                                                                                                                             | 276 | 328 | 1.00E-82  | 118.8 | 68.5 | 78.3 |

|                           |                                                                                                                                                                                                                                                                                                                                                                                                                                                                                                                                                                                                                                                                                                                            |      |      |           |       |      |      |                                                               |       |                      |                                                                                                                                                                                                                                                                                                                                                                                                                             |      |      |           |       |      |      |
|---------------------------|----------------------------------------------------------------------------------------------------------------------------------------------------------------------------------------------------------------------------------------------------------------------------------------------------------------------------------------------------------------------------------------------------------------------------------------------------------------------------------------------------------------------------------------------------------------------------------------------------------------------------------------------------------------------------------------------------------------------------|------|------|-----------|-------|------|------|---------------------------------------------------------------|-------|----------------------|-----------------------------------------------------------------------------------------------------------------------------------------------------------------------------------------------------------------------------------------------------------------------------------------------------------------------------------------------------------------------------------------------------------------------------|------|------|-----------|-------|------|------|
| Rsa1.0_00359.1.g12187.t13 | ref XP_002883217.1  hypothetical protein ARALYDRAFT_479514 [Arabidopsis lyrata subsp. lyrata] gi 297329057 gb EFH5476.1                                                                                                                                                                                                                                                                                                                                                                                                                                                                                                                                                                                                    | 1246 | 1166 | 0         | 93.6  | 86.2 | 89.1 | hypothetical protein ARALYDRAFT_479514                        | gbpln | Arabidopsis lyrata   | AT3G19960.1   Symbols: ATM1   myosin 1   chr3:6949787-6956736 FORWARD LENGTH=1166                                                                                                                                                                                                                                                                                                                                           | 1246 | 1166 | 0         | 93.6  | 86.0 | 89.2 |
| Rsa1.0_00359.1.g12188.t1  | gb EOA32491.1  hypothetical protein CARUB_v10015771mg [Capsella rubella]                                                                                                                                                                                                                                                                                                                                                                                                                                                                                                                                                                                                                                                   | 440  | 441  | 0         | 100.2 | 88.9 | 94.1 | hypothetical protein CARUB_v10015771mg                        | gbpln | Capsella rubella     | AT3G19970.1   Symbols:   alpha/beta-Hydrolases superfamily protein   chr3:6959844-6961367 FORWARD LENGTH=434                                                                                                                                                                                                                                                                                                                | 440  | 434  | 0         | 98.6  | 86.1 | 92.5 |
| Rsa1.0_00359.1.g12189.t1  | #                                                                                                                                                                                                                                                                                                                                                                                                                                                                                                                                                                                                                                                                                                                          | #    | #    | #         | #     | #    | #    | -                                                             | ----  | ----                 | #                                                                                                                                                                                                                                                                                                                                                                                                                           | #    | #    | #         | #     | #    |      |
| Rsa1.0_00359.1.g12190.t1  | ref NP_188632.1  phytochrome-associated serine/threonine protein phosphatase 3 [Arabidopsis thaliana] gi 75311171 sp G9LHE7.1 FYPP3_ARAT H RecName: Full=Phytochrome-associated serine/threonine-protein phosphatase 3; Short=ATFYPP3; AltName: Full=Protein EMBRYO DEFECTIVE 2736 gi 14582206 gb AAK69404.1 AF275664.1 serine/threonine protein phosphatase [Arabidopsis thaliana] gi 11994773 dbj BAB03163.1  phosphoprotein phosphatase [Arabidopsis thaliana] gi 17381249 gb AAL36043.1  AT3g19980/MZE19.3 [Arabidopsis thaliana] gi 20453383 gb AAM19930.1  AT3g19980/MZE19.3 [Arabidopsis thaliana] gi 332642794 gb AEE76315.1  phytochrome-associated serine/threonine protein phosphatase 3 [Arabidopsis thaliana] | 303  | 303  | 1.00E-177 | 100.0 | 97.7 | 99.7 | phytochrome-associated serine/threonine protein phosphatase 3 | gbpln | Arabidopsis thaliana | AT3G19980.1   Symbols: ATFYPP3, EMB2736, STPP, FYPP3   flower-specific, phytochrome-associated protein phosphatase 3   chr3:6962008-6964761 FORWARD LENGTH=303                                                                                                                                                                                                                                                              | 303  | 303  | 1.00E-180 | 100.0 | 97.7 | 99.7 |
| Rsa1.0_00359.1.g12191.t1  | ref NP_188633.1  uncharacterized protein [Arabidopsis thaliana] gi 63003792 gb AAAY25425.1  At3g19990 [Arabidopsis thaliana] gi 111074436 gb ABH04591.1  At3g19990 [Arabidopsis thaliana] gi 332642795 gb AEE76316.1  uncharacterized protein AT3G19990 [Arabidopsis thaliana]                                                                                                                                                                                                                                                                                                                                                                                                                                             | 395  | 425  | 0         | 107.6 | 88.4 | 93.9 | uncharacterized protein                                       | gbpln | Arabidopsis thaliana | AT3G19990.1   Symbols:   unknown protein; INVOLVED IN: biological_process unknown; LOCATED IN: chloroplast stroma, chloroplast; EXPRESSED IN: 23 plant structures; EXPRESSED DURING: 13 growth stages; Has 118 Blast hits to 118 proteins in 41 species: Archae - 0; Bacteria - 42; Metazoa - 0; Fungi - 0; Plants - 56; Viruses - 0; Other Eukaryotes - 20 (source: NCBI BLink).   chr3:6965671-6967102 FORWARD LENGTH=425 | 395  | 425  | 0         | 107.6 | 88.4 | 93.9 |
| Rsa1.0_00359.1.g12192.t1  | gb EOA31005.1  hypothetical protein CARUB_v10014148mg [Capsella rubella]                                                                                                                                                                                                                                                                                                                                                                                                                                                                                                                                                                                                                                                   | 309  | 308  | 1.00E-157 | 99.7  | 85.4 | 91.6 | hypothetical protein CARUB_v10014148mg                        | gbpln | Capsella rubella     | AT3G20000.1   Symbols: TOM40   translocase of the outer mitochondrial membrane 40   chr3:6967685-6970247 FORWARD LENGTH=309                                                                                                                                                                                                                                                                                                 | 309  | 309  | 1.00E-159 | 100.0 | 84.5 | 90.6 |
| Rsa1.0_00360.1.g12193.t1  | ref XP_002892997.1  hypothetical protein ARALYDRAFT_472054 [Arabidopsis lyrata subsp. lyrata] gi 297338839 gb EFH69256.1  hypothetical protein ARALYDRAFT_472054 [Arabidopsis lyrata subsp. lyrata]                                                                                                                                                                                                                                                                                                                                                                                                                                                                                                                        | 306  | 301  | 1.00E-143 | 98.4  | 86.3 | 91.2 | hypothetical protein ARALYDRAFT_472054                        | gbpln | Arabidopsis lyrata   | AT1G18340.1   Symbols:   basal transcription factor complex subunit-related   chr1:6311612-6313734 REVERSE LENGTH=301                                                                                                                                                                                                                                                                                                       | 306  | 301  | 1.00E-144 | 98.4  | 85.0 | 90.8 |
| Rsa1.0_00360.1.g12194.t1  | ref NP_173273.2  ATP binding microtubule motor family protein [Arabidopsis thaliana] gi 19979627 dbj BAB88748.1  ATNACK1 kinesin-like protein [Arabidopsis thaliana] gi 332191587 gb AEE29708.1  ATP binding microtubule motor family protein [Arabidopsis thaliana]                                                                                                                                                                                                                                                                                                                                                                                                                                                       | 978  | 974  | 0         | 99.6  | 91.6 | 94.6 | ATP binding microtubule motor family protein                  | gbpln | Arabidopsis thaliana | AT1G18370.1   Symbols: HIK, ATNACK1, NACK1   ATP binding microtubule motor family protein   chr1:6319732-6323820 REVERSE LENGTH=974                                                                                                                                                                                                                                                                                         | 978  | 974  | 0         | 99.6  | 91.6 | 94.6 |
| Rsa1.0_00360.1.g12195.t1  | ref XP_002890272.1  F15H18.11 [Arabidopsis lyrata subsp. lyrata] gi 297336114 gb EFH66531.1  F15H18.11 [Arabidopsis lyrata subsp. lyrata]                                                                                                                                                                                                                                                                                                                                                                                                                                                                                                                                                                                  | 884  | 1143 | 0         | 129.3 | 72.2 | 82.4 | F15H18.11                                                     | gbpln | Arabidopsis lyrata   | AT1G18390.2   Symbols:   Protein kinase superfamily protein   chr1:6327463-6329935 FORWARD LENGTH=654                                                                                                                                                                                                                                                                                                                       | 884  | 654  | 0         | 74.0  | 58.1 | 63.6 |
| Rsa1.0_00360.1.g12196.t1  | gb AAW81732.1  putative bZIPtranscription factor protein [Brassica oleracea]                                                                                                                                                                                                                                                                                                                                                                                                                                                                                                                                                                                                                                               | 247  | 263  | 1.00E-106 | 106.5 | 86.2 | 91.1 | putative bZIPtranscription factor protein                     | gbpln | Brassica oleracea    | AT1G18400.1   Symbols: BEE1   BR enhanced expression 1   chr1:6331464-6333576 FORWARD LENGTH=260                                                                                                                                                                                                                                                                                                                            | 247  | 260  | 4.00E-92  | 105.3 | 79.4 | 85.8 |
| Rsa1.0_00360.1.g12197.t2  | gb AAW81733.1  Putative Kinesin motor protein-related [Brassica oleracea]                                                                                                                                                                                                                                                                                                                                                                                                                                                                                                                                                                                                                                                  | 1224 | 1116 | 0         | 91.2  | 82.2 | 85.4 | Putative Kinesin motor protein-related                        | gbpln | Brassica oleracea    | AT1G18410.1   Symbols:   P-loop containing nucleoside triphosphate hydrolases superfamily protein   chr1:6336528-6342460 REVERSE LENGTH=1140                                                                                                                                                                                                                                                                                | 1224 | 1140 | 0         | 93.1  | 52.4 | 57.4 |

|                          |                                                                                                                                                                                                                                  |      |      |           |       |      |      |                                          |       |                      |                                                                                                                                                                                                                                                                                                                                                                                                                                                                                       |      |     |           |       |      |      |
|--------------------------|----------------------------------------------------------------------------------------------------------------------------------------------------------------------------------------------------------------------------------|------|------|-----------|-------|------|------|------------------------------------------|-------|----------------------|---------------------------------------------------------------------------------------------------------------------------------------------------------------------------------------------------------------------------------------------------------------------------------------------------------------------------------------------------------------------------------------------------------------------------------------------------------------------------------------|------|-----|-----------|-------|------|------|
| Rsa1.0_00360.1.g12198.t1 | emb[CAB39638.1] RNA-directed DNA polymerase-like protein [Arabidopsis thaliana] gi 7267666 emb[CAB78094.1] RNA-directed DNA polymerase-like protein [Arabidopsis thaliana]                                                       | 2131 | 1274 | 0         | 59.8  | 33.3 | 42.6 | RNA-directed DNA polymerase-like protein | gbpln | Arabidopsis thaliana | AT4G29090.1   Symbols:   Ribonuclease H-like superfamily protein   chr4:14333528-14335255 FORWARD LENGTH=575                                                                                                                                                                                                                                                                                                                                                                          | 2131 | 575 | 9.00E-67  | 27.0  | 8.5  | 12.8 |
| Rsa1.0_00360.1.g12199.t1 | gb AAW81734.1  Putative expressed protein [Brassica oleracea]                                                                                                                                                                    | 602  | 581  | 0         | 96.5  | 88.4 | 91.2 | Putative expressed protein               | gbpln | Brassica oleracea    | AT1G18420.1   Symbols:   Aluminium activated malate transporter family protein   chr1:6343330-6345689 FORWARD LENGTH=581                                                                                                                                                                                                                                                                                                                                                              | 602  | 581 | 0         | 96.5  | 76.7 | 83.4 |
| Rsa1.0_00360.1.g12200.t1 | gb AAF25998.1 AC013354_17 F15H18.8 [Arabidopsis thaliana]                                                                                                                                                                        | 761  | 777  | 0         | 102.1 | 78.6 | 82.9 | F15H18.8                                 | gbpln | Arabidopsis thaliana | AT1G18450.1   Symbols:   ATARP4, ARP4   actin-related protein 4   chr1:6348199-6351766 FORWARD LENGTH=441                                                                                                                                                                                                                                                                                                                                                                             | 761  | 441 | 0         | 58.0  | 54.5 | 56.2 |
| Rsa1.0_00360.1.g12201.t1 | gb AAW81737.1  Putative finger family protein [Brassica oleracea]                                                                                                                                                                | 428  | 467  | 0         | 109.1 | 94.4 | 96.3 | Putative finger family protein           | gbpln | Brassica oleracea    | AT1G18470.1   Symbols:   Transmembrane Fragile-X-F-associated protein   chr1:6356407-6360057 REVERSE LENGTH=467                                                                                                                                                                                                                                                                                                                                                                       | 428  | 467 | 0         | 109.1 | 90.9 | 95.1 |
| Rsa1.0_00360.1.g12202.t2 | gb AAF26001.1 AC013354_20 F15H18.4 [Arabidopsis thaliana]                                                                                                                                                                        | 1400 | 1702 | 0         | 121.6 | 74.5 | 83.1 | F15H18.4                                 | gbpln | Arabidopsis thaliana | AT1G18485.1   Symbols:   Pentatricopeptide repeat (PPR) superfamily protein   chr1:6363172-6366084 FORWARD LENGTH=970                                                                                                                                                                                                                                                                                                                                                                 | 1400 | 970 | 0         | 69.3  | 55.7 | 62.2 |
| Rsa1.0_00360.1.g12203.t1 | ref XP_002874902.1  hypothetical protein ARALYDRAFT_911948 [Arabidopsis lyrata subsp. lyrata] gi 297320739 gb EFH51161.1  hypothetical protein ARALYDRAFT_911948 [Arabidopsis lyrata subsp. lyrata]                              | 118  | 120  | 9.00E-40  | 101.7 | 68.6 | 83.1 | hypothetical protein ARALYDRAFT_911948   | gbpln | Arabidopsis lyrata   | AT4G02655.1   Symbols:   unknown protein; FUNCTIONS IN: molecular_function unknown; INVOLVED IN: biological_process unknown; LOCATED IN: endomembrane system; BEST Arabidopsis thaliana protein match is: unknown protein (TAIR:AT1G18486.1). Has 30201 Blast hits to 17322 proteins in 780 species: Archae - 12; Bacteria - 1396; Metazoa - 17338; Fungi - 3422; Plants - 5037; Viruses - 0; Other Eukaryotes - 2996 (source: NCBI BLINK).   chr4:1158876-1159241 FORWARD LENGTH=121 | 118  | 121 | 3.00E-41  | 102.5 | 66.1 | 82.2 |
| Rsa1.0_00360.1.g12204.t1 | gb AAW81740.1  Putative Expressed protein [Brassica oleracea]                                                                                                                                                                    | 277  | 276  | 1.00E-154 | 99.6  | 94.9 | 97.5 | Putative Expressed protein               | gbpln | Brassica oleracea    | AT1G18490.1   Symbols:   Protein of unknown function (DUF1637)   chr1:6367116-6368640 FORWARD LENGTH=282                                                                                                                                                                                                                                                                                                                                                                              | 277  | 282 | 1.00E-141 | 101.8 | 86.6 | 92.4 |
| Rsa1.0_00360.1.g12205.t1 | gb AAW81741.1  Putative 2-isopropylmalate synthase [Brassica oleracea]                                                                                                                                                           | 656  | 623  | 0         | 95.0  | 89.6 | 92.1 | Putative 2-isopropylmalate synthase      | gbpln | Brassica oleracea    | AT1G18500.1   Symbols:   MAML-4, IPMS1   methylthioalkylmalate synthase-like 4   chr1:6369347-6372861 FORWARD LENGTH=631                                                                                                                                                                                                                                                                                                                                                              | 656  | 631 | 0         | 96.2  | 84.6 | 89.8 |
| Rsa1.0_00360.1.g12206.t1 | gb AAW81742.1  Putative hypothetical protein [Brassica oleracea]                                                                                                                                                                 | 248  | 248  | 1.00E-128 | 100.0 | 88.7 | 94.0 | Putative hypothetical protein            | gbpln | Brassica oleracea    | AT1G18510.1   Symbols:   TET16   tetraspanin 16   chr1:6373295-6374090 FORWARD LENGTH=238                                                                                                                                                                                                                                                                                                                                                                                             | 248  | 238 | 1.00E-109 | 96.0  | 71.8 | 83.1 |
| Rsa1.0_00360.1.g12207.t1 | ref XP_002890283.1  hypothetical protein ARALYDRAFT_889272 [Arabidopsis lyrata subsp. lyrata] gi 297336125 gb EFH66542.1  hypothetical protein ARALYDRAFT_889272 [Arabidopsis lyrata subsp. lyrata]                              | 272  | 272  | 1.00E-145 | 100.0 | 90.8 | 96.3 | hypothetical protein ARALYDRAFT_889272   | gbpln | Arabidopsis lyrata   | AT1G18520.1   Symbols:   TET11   tetraspanin11   chr1:6375051-6376178 FORWARD LENGTH=271                                                                                                                                                                                                                                                                                                                                                                                              | 272  | 271 | 1.00E-145 | 99.6  | 90.4 | 95.6 |
| Rsa1.0_00360.1.g12208.t1 | gb EOA33232.1  hypothetical protein CARUB_v10021263mg [Capsella rubella]                                                                                                                                                         | 234  | 233  | 1.00E-106 | 99.6  | 87.6 | 94.0 | hypothetical protein CARUB_v10021263mg   | gbpln | Capsella rubella     | AT1G74050.1   Symbols:   Ribosomal protein L6 family protein   chr1:27847256-27848680 REVERSE LENGTH=233                                                                                                                                                                                                                                                                                                                                                                              | 234  | 233 | 1.00E-109 | 99.6  | 90.6 | 94.4 |
| Rsa1.0_00360.1.g12209.t1 | gb EOA39778.1  hypothetical protein CARUB_v10008434mg [Capsella rubella]                                                                                                                                                         | 739  | 724  | 0         | 98.0  | 81.7 | 88.5 | hypothetical protein CARUB_v10008434mg   | gbpln | Capsella rubella     | AT1G18550.1   Symbols:   ATP binding microtubule motor family protein   chr1:6381656-6384340 REVERSE LENGTH=725                                                                                                                                                                                                                                                                                                                                                                       | 739  | 725 | 0         | 98.1  | 81.1 | 87.3 |
| Rsa1.0_00360.1.g12210.t1 | gb ACR48188.1  MYB domain protein 51-2 [Brassica rapa subsp. pekinensis]                                                                                                                                                         | 333  | 333  | 1.00E-138 | 100.0 | 81.7 | 89.8 | MYB domain protein 51-2                  | gbpln | Brassica rapa        | AT1G18570.1   Symbols:   MYB51, AtMYB51, BW51A, BW51B, HG1   myb domain protein 51   chr1:6389765-6391026 FORWARD LENGTH=352                                                                                                                                                                                                                                                                                                                                                          | 333  | 352 | 1.00E-120 | 105.7 | 75.7 | 81.7 |
| Rsa1.0_00361.1.g12211.t1 | gb EOA36377.1  hypothetical protein CARUB_v10010783mg [Capsella rubella]                                                                                                                                                         | 99   | 82   | 4.00E-23  | 82.8  | 58.6 | 63.6 | hypothetical protein CARUB_v10010783mg   | gbpln | Capsella rubella     | AT1G30250.1   Symbols:   unknown protein; Has 5 Blast hits to 5 proteins in 2 species: Archae - 0; Bacteria - 0; Metazoa - 0; Fungi - 0; Plants - 5; Viruses - 0; Other Eukaryotes - 0 (source: NCBI BLINK).   chr1:10647253-10647501 REVERSE LENGTH=82                                                                                                                                                                                                                               | 99   | 82  | 2.00E-22  | 82.8  | 53.5 | 59.6 |
| Rsa1.0_00361.1.g12212.t1 | ref NP_001077628.1  uncharacterized protein [Arabidopsis thaliana] gi 110742078 dbj BAE98970.1  hypothetical protein [Arabidopsis thaliana] gi 332193077 gb AEE31198.1  uncharacterized protein AT1G30240 [Arabidopsis thaliana] | 811  | 827  | 0         | 102.0 | 79.2 | 86.2 | uncharacterized protein                  | gbpln | Arabidopsis thaliana | AT1G30240.2   Symbols:   unknown protein; Has 169 Blast hits to 168 proteins in 75 species: Archae - 0; Bacteria - 0; Metazoa - 49; Fungi - 68; Plants - 46; Viruses - 0; Other Eukaryotes - 6 (source: NCBI BLINK).   chr1:10641241-10645838 REVERSE LENGTH=827                                                                                                                                                                                                                      | 811  | 827 | 0         | 102.0 | 79.2 | 86.2 |

|                          |                                                                                                                                                                                                                                                                                                                                                                                                                                                                            |     |     |           |       |      |      |                                          |       |                      |                                                                                                                                                                                                                                                                                                                                                                                                                                                                                                                                                                     |     |     |           |       |      |      |
|--------------------------|----------------------------------------------------------------------------------------------------------------------------------------------------------------------------------------------------------------------------------------------------------------------------------------------------------------------------------------------------------------------------------------------------------------------------------------------------------------------------|-----|-----|-----------|-------|------|------|------------------------------------------|-------|----------------------|---------------------------------------------------------------------------------------------------------------------------------------------------------------------------------------------------------------------------------------------------------------------------------------------------------------------------------------------------------------------------------------------------------------------------------------------------------------------------------------------------------------------------------------------------------------------|-----|-----|-----------|-------|------|------|
| Rsa1.0_00361.1.g12213.t1 | gb ABK78691.1  putative elongation factor 1-beta [Brassica rapa]                                                                                                                                                                                                                                                                                                                                                                                                           | 271 | 230 | 1.00E-106 | 84.9  | 81.2 | 83.4 | putative elongation factor 1-beta        | gbpln | Brassica rapa        | AT2G18110.1   Symbols:   Translation elongation factor EF1B/ribosomal protein S6 family protein   chr2:7872636-7873713 FORWARD LENGTH=231                                                                                                                                                                                                                                                                                                                                                                                                                           | 271 | 231 | 1.00E-106 | 85.2  | 77.5 | 82.7 |
| Rsa1.0_00361.1.g12214.t1 | ref XP_002893607.1  ATINT2 [Arabidopsis lyrata subsp. lyrata]   gi 297339449 gb EFH69866.1  ATINT2 [Arabidopsis lyrata subsp. lyrata]                                                                                                                                                                                                                                                                                                                                      | 571 | 580 | 0         | 101.6 | 90.7 | 95.6 | ATINT2                                   | gbpln | Arabidopsis lyrata   | AT1G30220.1   Symbols: ATINT2, INT2   inositol transporter 2   chr1:10632957-10635439 REVERSE LENGTH=580                                                                                                                                                                                                                                                                                                                                                                                                                                                            | 571 | 580 | 0         | 101.6 | 90.4 | 95.6 |
| Rsa1.0_00361.1.g12215.t2 | dbj BAA97156.1  unnamed protein product [Arabidopsis thaliana]                                                                                                                                                                                                                                                                                                                                                                                                             | 271 | 329 | 2.00E-30  | 121.4 | 27.7 | 34.7 | unnamed protein product                  | gbpln | Arabidopsis thaliana | AT5G50930.1   Symbols:   Histone superfamily protein   chr5:20722069-20724317 FORWARD LENGTH=242                                                                                                                                                                                                                                                                                                                                                                                                                                                                    | 271 | 242 | 2.00E-29  | 89.3  | 24.4 | 28.8 |
| Rsa1.0_00361.1.g12216.t1 | dbj BAJ34242.1  unnamed protein product [Thellungiella halophila]                                                                                                                                                                                                                                                                                                                                                                                                          | 319 | 339 | 1.00E-111 | 106.3 | 83.1 | 89.3 | unnamed protein product                  | ----  | ----                 | AT1G30210.2   Symbols: TCP24   TEOSINTE BRANCHED 1, cycloidea, and PCF family 24   chr1:10628754-10629728 REVERSE LENGTH=324                                                                                                                                                                                                                                                                                                                                                                                                                                        | 319 | 324 | 1.00E-107 | 101.6 | 79.3 | 85.6 |
| Rsa1.0_00361.1.g12217.t1 | gb AAG50859.1 AC074176.8 En/Spm-like transposon protein, putative [Arabidopsis thaliana]                                                                                                                                                                                                                                                                                                                                                                                   | 148 | 413 | 1.00E-11  | 279.1 | 29.1 | 45.9 | En/Spm-like transposon protein, putative | gbpln | Arabidopsis thaliana | #                                                                                                                                                                                                                                                                                                                                                                                                                                                                                                                                                                   | #   | #   | #         | #     | #    | #    |
| Rsa1.0_00361.1.g12218.t1 | ref XP_002893604.1  hypothetical protein ARALYDRAFT.473236 [Arabidopsis lyrata subsp. lyrata]   gi 297339446 gb EFH69863.1  hypothetical protein ARALYDRAFT.473236 [Arabidopsis lyrata subsp. lyrata]                                                                                                                                                                                                                                                                      | 717 | 366 | 1.00E-151 | 51.0  | 38.5 | 43.1 | hypothetical protein ARALYDRAFT.473236   | gbpln | Arabidopsis lyrata   | AT1G30170.1   Symbols:   Protein of unknown function (DUF295)   chr1:10608068-10609529 REVERSE LENGTH=366                                                                                                                                                                                                                                                                                                                                                                                                                                                           | 717 | 366 | 2.33E-156 | 51.0  | 38.5 | 42.7 |
| Rsa1.0_00361.1.g12219.t1 | ref XP_002890853.1  predicted protein [Arabidopsis lyrata subsp. lyrata]   gi 297336695 gb EFH67112.1  predicted protein [Arabidopsis lyrata subsp. lyrata]                                                                                                                                                                                                                                                                                                                | 129 | 131 | 4.00E-49  | 101.6 | 79.8 | 89.9 | predicted protein                        | gbpln | Arabidopsis lyrata   | AT1G30135.1   Symbols: JAZ8, TIFY5A   jasmonate-zim-domain protein 8   chr1:10596516-10597095 FORWARD LENGTH=131                                                                                                                                                                                                                                                                                                                                                                                                                                                    | 129 | 131 | 1.00E-49  | 101.6 | 78.3 | 88.4 |
| Rsa1.0_00361.1.g12220.t1 | ref NP_564348.1  uncharacterized protein [Arabidopsis thaliana]   gi 42571697 ref NP_973939.1  uncharacterized protein [Arabidopsis thaliana]   gi 12321635 gb AAG50861.1 AC074176.10 unknown protein [Arabidopsis thaliana]   gi 222423586 dbj BAH19762.1  AT1G30130 [Arabidopsis thaliana]   gi 332193061 gb AEE31182.1  uncharacterized protein AT1G30130 [Arabidopsis thaliana]   gi 332193062 gb AEE31183.1  uncharacterized protein AT1G30130 [Arabidopsis thaliana] | 307 | 311 | 1.00E-153 | 101.3 | 85.3 | 93.2 | uncharacterized protein                  | gbpln | Arabidopsis thaliana | AT1G30130.2   Symbols:   unknown protein; FUNCTIONS IN: molecular_function unknown; INVOLVED IN: biological_process unknown; LOCATED IN: endomembrane system; EXPRESSED IN: 23 plant structures; EXPRESSED DURING: 13 growth stages; CONTAINS InterPro DOMAIN/s: Protein of unknown function DUF1365 (InterPro:IPR010775); Has 35333 Blast hits to 34131 proteins in 2444 species: Archae - 798; Bacteria - 22429; Metazoa - 974; Fungi - 991; Plants - 531; Viruses - 0; Other Eukaryotes - 9610 (source: NCBI BLINK).   chr1:10587666-10589222 FORWARD LENGTH=311 | 307 | 311 | 1.00E-156 | 101.3 | 85.3 | 93.2 |
| Rsa1.0_00361.1.g12221.t1 | gb EOA40587.1  hypothetical protein CARUB_v10009315mg [Capsella rubella]                                                                                                                                                                                                                                                                                                                                                                                                   | 409 | 407 | 0         | 99.5  | 93.2 | 95.4 | hypothetical protein CARUB_v10009315mg   | gbpln | Capsella rubella     | AT1G30120.1   Symbols: PDH-E1 BETA   pyruvate dehydrogenase E1 beta   chr1:10584350-10586477 REVERSE LENGTH=406                                                                                                                                                                                                                                                                                                                                                                                                                                                     | 409 | 406 | 0         | 99.3  | 92.4 | 94.4 |
| Rsa1.0_00361.1.g12222.t1 | gb EOA38468.1  hypothetical protein CARUB_v10010189mg [Capsella rubella]                                                                                                                                                                                                                                                                                                                                                                                                   | 175 | 232 | 6.00E-93  | 132.6 | 92.6 | 97.7 | hypothetical protein CARUB_v10010189mg   | gbpln | Capsella rubella     | AT1G30110.2   Symbols: NUDX25   nudix hydrolase homolog 25   chr1:10582700-10583821 FORWARD LENGTH=175                                                                                                                                                                                                                                                                                                                                                                                                                                                              | 175 | 175 | 1.00E-93  | 100.0 | 91.4 | 97.7 |
| Rsa1.0_00361.1.g12223.t1 | #                                                                                                                                                                                                                                                                                                                                                                                                                                                                          | #   | #   | #         | #     | #    | #    | -                                        | ----  | ----                 | #                                                                                                                                                                                                                                                                                                                                                                                                                                                                                                                                                                   | #   | #   | #         | #     | #    |      |
| Rsa1.0_00361.1.g12224.t1 | ref XP_002893598.1  predicted protein [Arabidopsis lyrata subsp. lyrata]   gi 297339440 gb EFH69857.1  predicted protein [Arabidopsis lyrata subsp. lyrata]                                                                                                                                                                                                                                                                                                                | 382 | 376 | 0         | 98.4  | 85.9 | 89.8 | predicted protein                        | gbpln | Arabidopsis lyrata   | AT1G30080.1   Symbols:   Glycosyl hydrolase superfamily protein   chr1:10551231-10553167 REVERSE LENGTH=408                                                                                                                                                                                                                                                                                                                                                                                                                                                         | 382 | 408 | 0         | 106.8 | 84.6 | 89.0 |
| Rsa1.0_00361.1.g12225.t1 | gb EOA37925.1  hypothetical protein CARUB_v10009392mg [Capsella rubella]                                                                                                                                                                                                                                                                                                                                                                                                   | 379 | 390 | 1.00E-144 | 102.9 | 81.3 | 86.8 | hypothetical protein CARUB_v10009392mg   | gbpln | Capsella rubella     | AT1G30050.1   Symbols:   unknown protein; BEST Arabidopsis thaliana protein match is: unknown protein (TAIR:AT5G01970.1); Has 246 Blast hits to 244 proteins in 61 species: Archae - 0; Bacteria - 8; Metazoa - 78; Fungi - 10; Plants - 117; Viruses - 0; Other Eukaryotes - 33 (source: NCBI BLINK).   chr1:10543177-10544418 FORWARD LENGTH=389                                                                                                                                                                                                                  | 379 | 389 | 1.00E-140 | 102.6 | 79.4 | 85.2 |
| Rsa1.0_00361.1.g12226.t1 | gb EOA38156.1  hypothetical protein CARUB_v10009631mg [Capsella rubella]                                                                                                                                                                                                                                                                                                                                                                                                   | 335 | 343 | 0         | 102.4 | 91.0 | 96.4 | hypothetical protein CARUB_v10009631mg   | gbpln | Capsella rubella     | AT1G30040.1   Symbols: ATGA2OX2, GA2OX2   gibberellin 2-oxidase   chr1:10537769-10539570 FORWARD LENGTH=341                                                                                                                                                                                                                                                                                                                                                                                                                                                         | 335 | 341 | 1.00E-180 | 101.8 | 89.3 | 95.2 |





|                          |                                                                                                                                                                                                                                                                                                                                                                                                                                                                                                                                                                                               |     |     |           |       |      |      |                                                         |       |                         |                                                                                                                                                                                                                                                                                                                                                                                                                                                                                                                                                                                                |     |     |           |       |      |      |
|--------------------------|-----------------------------------------------------------------------------------------------------------------------------------------------------------------------------------------------------------------------------------------------------------------------------------------------------------------------------------------------------------------------------------------------------------------------------------------------------------------------------------------------------------------------------------------------------------------------------------------------|-----|-----|-----------|-------|------|------|---------------------------------------------------------|-------|-------------------------|------------------------------------------------------------------------------------------------------------------------------------------------------------------------------------------------------------------------------------------------------------------------------------------------------------------------------------------------------------------------------------------------------------------------------------------------------------------------------------------------------------------------------------------------------------------------------------------------|-----|-----|-----------|-------|------|------|
| Rsa1.0_00362.1.g12240.t1 | ref[XP_002865745.1] AtMYB78<br>[Arabidopsis lyrata subsp. lyrata]<br>gi 297311580 gb EFH42004.1  AtMYB78<br>[Arabidopsis lyrata subsp. lyrata]                                                                                                                                                                                                                                                                                                                                                                                                                                                | 322 | 306 | 1.00E-116 | 95.0  | 70.5 | 80.1 | AtMYB78                                                 | gbpln | Arabidopsis<br>lyrata   | AT5G49620.1   Symbols: AtMYB78, MYB78  <br>myb domain protein 78   chr5:20137491-<br>20139384 REVERSE LENGTH=307                                                                                                                                                                                                                                                                                                                                                                                                                                                                               | 322 | 307 | 1.00E-114 | 95.3  | 67.7 | 79.2 |
| Rsa1.0_00362.1.g12241.t1 | #                                                                                                                                                                                                                                                                                                                                                                                                                                                                                                                                                                                             | #   | #   | #         | #     | #    | -    | ----                                                    | ----  | ----                    | #                                                                                                                                                                                                                                                                                                                                                                                                                                                                                                                                                                                              | #   | #   | #         | #     | #    | #    |
| Rsa1.0_00362.1.g12242.t1 | #                                                                                                                                                                                                                                                                                                                                                                                                                                                                                                                                                                                             | #   | #   | #         | #     | #    | -    | ----                                                    | ----  | ----                    | #                                                                                                                                                                                                                                                                                                                                                                                                                                                                                                                                                                                              | #   | #   | #         | #     | #    | #    |
| Rsa1.0_00362.1.g12243.t1 | #                                                                                                                                                                                                                                                                                                                                                                                                                                                                                                                                                                                             | #   | #   | #         | #     | #    | -    | ----                                                    | ----  | ----                    | #                                                                                                                                                                                                                                                                                                                                                                                                                                                                                                                                                                                              | #   | #   | #         | #     | #    | #    |
| Rsa1.0_00362.1.g12244.t1 | gb ACI14408.1  WRKY74-1 transcription<br>factor [Brassica napus]                                                                                                                                                                                                                                                                                                                                                                                                                                                                                                                              | 343 | 341 | 1.00E-180 | 99.4  | 92.4 | 97.1 | WRKY74-1<br>transcription factor                        | gbpln | Brassica<br>napus       | AT5G28650.1   Symbols: WRKY74,<br>ATWRKY74   WRKY DNA-binding protein 74  <br>chr5:10677790-10678945 REVERSE<br>LENGTH=330                                                                                                                                                                                                                                                                                                                                                                                                                                                                     | 343 | 330 | 1.00E-168 | 96.2  | 86.3 | 91.3 |
| Rsa1.0_00362.1.g12245.t1 | ref[NP_001154744.1] TPX2 (targeting<br>protein for Xklp2) family protein<br>[Arabidopsis thaliana]<br>gi 240256363 ref[NP_690247.4] TPX2<br>(targeting protein for Xklp2) family<br>protein [Arabidopsis thaliana]<br>gi 75149265 sp Q84ZT9.1 WVD2_ARATH<br>RecName: Full=Protein WAVE-<br>DAMPENED 2; Short=AtWVD2<br>gi 28453880 gb AAO43563.1  WAVE-<br>DAMPENED2 [Arabidopsis thaliana]<br>gi 332006439 gb AED93822.1  TPX2<br>(targeting protein for Xklp2) family<br>protein [Arabidopsis thaliana]<br>gi 332006440 gb AED93823.1  protein<br>WAVE-DAMPENED 2 [Arabidopsis<br>thaliana] | 231 | 202 | 5.00E-78  | 87.4  | 71.4 | 77.9 | TPX2 (targeting protein<br>for Xklp2) family<br>protein | gbpln | Arabidopsis<br>thaliana | AT5G28646.2   Symbols: WVD2   TPX2<br>(targeting protein for Xklp2) protein family  <br>chr5:10675192-10676151 FORWARD<br>LENGTH=202                                                                                                                                                                                                                                                                                                                                                                                                                                                           | 231 | 202 | 1.00E-80  | 87.4  | 71.4 | 77.9 |
| Rsa1.0_00362.1.g12246.t1 | ref[XP_002884455.1] nucleic acid binding<br>protein [Arabidopsis lyrata subsp.<br>lyrata] gi 297330295 gb EFH60714.1 <br>nucleic acid binding protein [Arabidopsis<br>lyrata subsp. lyrata]                                                                                                                                                                                                                                                                                                                                                                                                   | 163 | 164 | 7.00E-47  | 100.6 | 65.6 | 69.9 | nucleic acid binding<br>protein                         | gbpln | Arabidopsis<br>lyrata   | AT3G04620.1   Symbols:   Alba DNA/RNA-<br>binding protein   chr3:1255660-1256739<br>REVERSE LENGTH=164                                                                                                                                                                                                                                                                                                                                                                                                                                                                                         | 163 | 164 | 6.00E-49  | 100.6 | 65.0 | 69.9 |
| Rsa1.0_00362.1.g12247.t1 | gb EOA21560.1  hypothetical protein<br>CARUB_v10001969mg [Capsella rubella]                                                                                                                                                                                                                                                                                                                                                                                                                                                                                                                   | 204 | 208 | 6.00E-72  | 102.0 | 96.6 | 98.0 | hypothetical protein<br>CARUB_v10001969mg               | gbpln | Capsella<br>rubella     | AT5G28640.1   Symbols: AN3, GIF, GIF1,<br>ATGIF1   SSXT family protein  <br>chr5:10647831-10649620 REVERSE<br>LENGTH=210                                                                                                                                                                                                                                                                                                                                                                                                                                                                       | 204 | 210 | 1.00E-72  | 102.9 | 94.6 | 96.1 |
| Rsa1.0_00362.1.g12248.t1 | gb EOA30721.1  hypothetical protein<br>CARUB_v10013864mg [Capsella rubella]                                                                                                                                                                                                                                                                                                                                                                                                                                                                                                                   | 396 | 402 | 8.00E-93  | 101.5 | 57.1 | 67.4 | hypothetical protein<br>CARUB_v10013864mg               | gbpln | Capsella<br>rubella     | AT3G04590.2   Symbols:   AT hook motif<br>DNA-binding family protein   chr3:1239245-<br>1241603 REVERSE LENGTH=411                                                                                                                                                                                                                                                                                                                                                                                                                                                                             | 396 | 411 | 1.00E-91  | 103.8 | 55.8 | 65.7 |
| Rsa1.0_00362.1.g12249.t1 | ref[XP_002872313.1] hypothetical<br>protein ARALYDRAFT_489651<br>[Arabidopsis lyrata subsp. lyrata]<br>gi 297318150 gb EFH48572.1 <br>hypothetical protein<br>ARALYDRAFT_489651 [Arabidopsis<br>lyrata subsp. lyrata]                                                                                                                                                                                                                                                                                                                                                                         | 438 | 435 | 0         | 99.3  | 80.8 | 90.2 | hypothetical protein<br>ARALYDRAFT_489651               | gbpln | Arabidopsis<br>lyrata   | AT5G28500.1   Symbols:   unknown protein;<br>FUNCTIONS IN: molecular function unknown;<br>INVOLVED IN: biological process unknown;<br>LOCATED IN: chloroplast stroma,<br>chloroplast; EXPRESSED IN: 23 plant<br>structures; EXPRESSED DURING: 13 growth<br>stages; BEST Arabidopsis thaliana protein<br>match is: unknown protein<br>(TAIR:AT3G04550.1); Has 109 Blast hits to<br>109 proteins in 49 species: Archae - 0;<br>Bacteria - 67; Metazoa - 0; Fungi - 0; Plants<br>- 41; Viruses - 0; Other Eukaryotes - 1<br>(source: NCBI BLink).   chr5:10477810-<br>10479114 FORWARD LENGTH=434 | 438 | 434 | 0         | 99.1  | 81.1 | 88.4 |
| Rsa1.0_00362.1.g12250.t1 | #                                                                                                                                                                                                                                                                                                                                                                                                                                                                                                                                                                                             | #   | #   | #         | #     | #    | -    | ----                                                    | ----  | ----                    | #                                                                                                                                                                                                                                                                                                                                                                                                                                                                                                                                                                                              | #   | #   | #         | #     | #    | #    |
| Rsa1.0_00362.1.g12251.t1 | gb EOA21624.1  hypothetical protein<br>CARUB_v10002037mg [Capsella rubella]                                                                                                                                                                                                                                                                                                                                                                                                                                                                                                                   | 195 | 191 | 2.00E-80  | 97.9  | 90.8 | 91.8 | hypothetical protein<br>CARUB_v10002037mg               | gbpln | Capsella<br>rubella     | AT5G28490.1   Symbols: LSH1   Protein of<br>unknown function [DUF640]  <br>chr5:10454541-10455113 REVERSE<br>LENGTH=190                                                                                                                                                                                                                                                                                                                                                                                                                                                                        | 195 | 190 | 6.00E-83  | 97.4  | 89.2 | 91.8 |
| Rsa1.0_00362.1.g12252.t1 | ref[XP_002872312.1] predicted protein<br>[Arabidopsis lyrata subsp. lyrata]<br>gi 297318149 gb EFH48571.1  predicted<br>protein [Arabidopsis lyrata subsp.<br>lyrata]                                                                                                                                                                                                                                                                                                                                                                                                                         | 569 | 561 | 0         | 98.6  | 83.7 | 91.9 | predicted protein                                       | gbpln | Arabidopsis<br>lyrata   | AT5G28470.1   Symbols:   Major facilitator<br>superfamily protein   chr5:10429813-<br>10432357 FORWARD LENGTH=559                                                                                                                                                                                                                                                                                                                                                                                                                                                                              | 569 | 559 | 0         | 98.2  | 81.7 | 90.0 |
| Rsa1.0_00362.1.g12253.t1 | #                                                                                                                                                                                                                                                                                                                                                                                                                                                                                                                                                                                             | #   | #   | #         | #     | #    | -    | ----                                                    | ----  | ----                    | #                                                                                                                                                                                                                                                                                                                                                                                                                                                                                                                                                                                              | #   | #   | #         | #     | #    | #    |
| Rsa1.0_00362.1.g12254.t1 | gb AAD24567.1 AF120335.1 putative<br>transposase [Arabidopsis thaliana]                                                                                                                                                                                                                                                                                                                                                                                                                                                                                                                       | 288 | 577 | 1.00E-108 | 200.3 | 63.9 | 79.2 | putative transposase                                    | gbpln | Arabidopsis<br>thaliana | AT3G42170.1   Symbols:   BED zinc finger<br>;hAT family dimerisation domain  <br>chr3:14321838-14323928 FORWARD<br>LENGTH=696                                                                                                                                                                                                                                                                                                                                                                                                                                                                  | 288 | 696 | 2.00E-37  | 241.7 | 30.9 | 46.9 |

|                          |                                                                                                                                                                                                                                                                                                                                                                                                                                                                                    |      |     |           |       |      |      |                                                             |       |                      |                                                                                                                                                                                     |      |     |           |       |      |      |
|--------------------------|------------------------------------------------------------------------------------------------------------------------------------------------------------------------------------------------------------------------------------------------------------------------------------------------------------------------------------------------------------------------------------------------------------------------------------------------------------------------------------|------|-----|-----------|-------|------|------|-------------------------------------------------------------|-------|----------------------|-------------------------------------------------------------------------------------------------------------------------------------------------------------------------------------|------|-----|-----------|-------|------|------|
| Rsa1.0_00362.1.g12255.t1 | refNP_568506.2 putative trihelix DNA-binding protein [Arabidopsis thaliana] gi 75244603 sp Q8H181.1 GTL2_ARATH RecName: Full=Trihelix transcription factor GTL2; AltName: Full=GT2-LIKE protein 2; Short=ATGTL2; AltName: Full=Trihelix DNA-binding protein GTL2 gi 233064422 gb AA117438.1 Unknown protein [Arabidopsis thaliana] gi 30725452 gb AAP37748.1 At5g28300 [Arabidopsis thaliana] gi 332006404 gb AED93787.1 trihelix transcription factor GTL2 [Arabidopsis thaliana] | 595  | 619 | 0         | 104.0 | 77.6 | 85.5 | putative trihelix DNA-binding protein                       | gbpln | Arabidopsis thaliana | AT5G28300.1   Symbols:   Duplicated homeodomain-like superfamily protein   chr5:10292789-10295101 REVERSE LENGTH=619                                                                | 595  | 619 | 0         | 104.0 | 77.6 | 85.5 |
| Rsa1.0_00362.1.g12256.t1 | gb EOA20282.1  hypothetical protein CARUB_v10000590mg [Capsella rubella]                                                                                                                                                                                                                                                                                                                                                                                                           | 585  | 567 | 0         | 96.9  | 86.2 | 90.1 | hypothetical protein CARUB_v10000590mg                      | gbpln | Capsella rubella     | AT5G28290.1   Symbols: ATNEK3, NEK3   NIMA-related kinase 3   chr5:10278880-10281880 REVERSE LENGTH=568                                                                             | 585  | 568 | 0         | 97.1  | 85.6 | 89.9 |
| Rsa1.0_00362.1.g12257.t1 | ref XP_002872310.1  hypothetical protein ARALYDRAFT_910925 [Arabidopsis lyrata subsp. lyrata] gi 297318147 gb EFH48569.1 hypothetical protein ARALYDRAFT_910925 [Arabidopsis lyrata subsp. lyrata]                                                                                                                                                                                                                                                                                 | 641  | 609 | 0         | 95.0  | 67.4 | 78.6 | hypothetical protein ARALYDRAFT_910925                      | gbpln | Arabidopsis lyrata   | AT5G28210.1   Symbols:   mRNA capping enzyme family protein   chr5:10188586-10190463 FORWARD LENGTH=625                                                                             | 641  | 625 | 0         | 97.5  | 66.6 | 78.8 |
| Rsa1.0_00362.1.g12258.t1 | ref XP_002872306.1  hypothetical protein ARALYDRAFT_489643 [Arabidopsis lyrata subsp. lyrata] gi 297318143 gb EFH48565.1 hypothetical protein ARALYDRAFT_489643 [Arabidopsis lyrata subsp. lyrata]                                                                                                                                                                                                                                                                                 | 294  | 288 | 1.00E-152 | 98.0  | 90.8 | 95.2 | hypothetical protein ARALYDRAFT_489643                      | gbpln | Arabidopsis lyrata   | AT5G28150.1   Symbols:   Plant protein of unknown function (DUF865)   chr5:10135826-10136695 FORWARD LENGTH=289                                                                     | 294  | 289 | 1.00E-147 | 98.3  | 88.8 | 94.2 |
| Rsa1.0_00363.1.g12259.t1 | ref XP_002882629.1  myb family transcription factor [Arabidopsis lyrata subsp. lyrata] gi 297328469 gb EFH58888.1 myb family transcription factor [Arabidopsis lyrata subsp. lyrata]                                                                                                                                                                                                                                                                                               | 321  | 297 | 1.00E-137 | 92.5  | 80.1 | 85.0 | myb family transcription factor                             | gbpln | Arabidopsis lyrata   | AT3G09600.1   Symbols:   Homeodomain-like superfamily protein   chr3:2946459-2948270 FORWARD LENGTH=298                                                                             | 321  | 298 | 1.00E-136 | 92.8  | 79.4 | 84.1 |
| Rsa1.0_00363.1.g12260.t1 | gb EOA29622.1  hypothetical protein CARUB_v10014335mg [Capsella rubella]                                                                                                                                                                                                                                                                                                                                                                                                           | 263  | 282 | 2.00E-49  | 107.2 | 57.4 | 63.1 | hypothetical protein CARUB_v10014335mg                      | gbpln | Capsella rubella     | AT3G53500.2   Symbols: RSZ32, RS2Z32, At-RS2Z   RNA-binding (RRM/RBD/RNP motifs) family protein with retrovirus zinc finger-like domain   chr3:19834557-19836507 REVERSE LENGTH=284 | 263  | 284 | 2.00E-32  | 108.0 | 25.5 | 27.0 |
| Rsa1.0_00363.1.g12261.t1 | ref NP_187569.1  FAD/NAD(P)-binding oxidoreductase domain-containing protein [Arabidopsis thaliana] gi 6682237 gb AAF23289.1 AC016661.14 putative oxidoreductase [Arabidopsis thaliana] gi 17381088 gb AAL36356.1 putative oxidoreductase [Arabidopsis thaliana] gi 21436243 gb AAM51260.1 putative oxidoreductase [Arabidopsis thaliana] gi 332641263 gb AEE74784.1 FAD/NAD(P)-binding oxidoreductase domain-containing protein [Arabidopsis thaliana]                            | 478  | 477 | 0         | 99.8  | 85.8 | 92.1 | FAD/NAD(P)-binding oxidoreductase domain-containing protein | gbpln | Arabidopsis thaliana | AT3G09580.1   Symbols:   FAD/NAD(P)-binding oxidoreductase family protein   chr3:2942614-2944047 REVERSE LENGTH=477                                                                 | 478  | 477 | 0         | 99.8  | 85.8 | 92.1 |
| Rsa1.0_00363.1.g12262.t1 | gb EOA30589.1  hypothetical protein CARUB_v10013721mg [Capsella rubella]                                                                                                                                                                                                                                                                                                                                                                                                           | 442  | 440 | 0         | 99.5  | 90.5 | 94.6 | hypothetical protein CARUB_v10013721mg                      | gbpln | Capsella rubella     | AT3G09570.1   Symbols:   Lung seven transmembrane receptor family protein   chr3:2940524-2941843 FORWARD LENGTH=439                                                                 | 442  | 439 | 0         | 99.3  | 87.8 | 92.3 |
| Rsa1.0_00363.1.g12263.t1 | gb AEA07504.1  putative lipin 1 isoform B [Brassica napus]                                                                                                                                                                                                                                                                                                                                                                                                                         | 1184 | 813 | 0         | 68.7  | 58.8 | 61.7 | putative lipin 1 isoform B                                  | gbpln | Brassica napus       | AT3G09560.3   Symbols:   Lipin family protein   chr3:2934953-2938673 REVERSE LENGTH=904                                                                                             | 1184 | 904 | 0         | 76.4  | 56.7 | 60.6 |
| Rsa1.0_00363.1.g12264.t1 | gb EOA30087.1  hypothetical protein CARUB_v10013194mg [Capsella rubella]                                                                                                                                                                                                                                                                                                                                                                                                           | 626  | 636 | 0         | 101.6 | 71.7 | 83.9 | hypothetical protein CARUB_v10013194mg                      | gbpln | Capsella rubella     | AT3G09520.1   Symbols: ATEXO70H4, EXO70H4   exocyst subunit exo70 family protein H4   chr3:2923743-2925629 FORWARD LENGTH=628                                                       | 626  | 628 | 0         | 100.3 | 71.4 | 82.3 |
| Rsa1.0_00363.1.g12265.t1 | gb EOA31721.1  hypothetical protein CARUB_v10014930mg [Capsella rubella]                                                                                                                                                                                                                                                                                                                                                                                                           | 123  | 123 | 2.00E-58  | 100.0 | 94.3 | 98.4 | hypothetical protein CARUB_v10014930mg                      | gbpln | Capsella rubella     | AT3G09500.1   Symbols:   Ribosomal L29 family protein   chr3:2917047-2917895 FORWARD LENGTH=123                                                                                     | 123  | 123 | 4.00E-61  | 100.0 | 94.3 | 98.4 |
| Rsa1.0_00363.1.g12266.t1 | ref NP_850546.1  UNC93-like protein [Arabidopsis thaliana] gi 51971813 dbj BAD44571.1  unnamed protein product [Arabidopsis thaliana] gi 222423196 dbj BAH19575.1 AT3G09470 [Arabidopsis thaliana] gi 332641250 gb AEE74771.1  UNC93-like protein [Arabidopsis thaliana]                                                                                                                                                                                                           | 436  | 437 | 0         | 100.2 | 91.3 | 95.6 | UNC93-like protein                                          | gbpln | Arabidopsis thaliana | AT3G09470.2   Symbols:   Major facilitator superfamily protein   chr3:2911668-2914410 REVERSE LENGTH=437                                                                            | 436  | 437 | 0         | 100.2 | 91.3 | 95.6 |

|                          |                                                                                                                                                                                                                                                                                                                                                                                                                                                                                                                     |     |      |           |       |      |      |                                                                   |       |                      |                                                                                                                                                                                                                                                                                                                                                                                                                                     |     |     |           |       |      |      |
|--------------------------|---------------------------------------------------------------------------------------------------------------------------------------------------------------------------------------------------------------------------------------------------------------------------------------------------------------------------------------------------------------------------------------------------------------------------------------------------------------------------------------------------------------------|-----|------|-----------|-------|------|------|-------------------------------------------------------------------|-------|----------------------|-------------------------------------------------------------------------------------------------------------------------------------------------------------------------------------------------------------------------------------------------------------------------------------------------------------------------------------------------------------------------------------------------------------------------------------|-----|-----|-----------|-------|------|------|
| Rsa1.0_00363.1.g12267.t1 | ref XP_002882620.1  hypothetical protein ARALYDRAFT_341087 [Arabidopsis lyrata subsp. lyrata] gi 297328460 gb EFH58879.1                                                                                                                                                                                                                                                                                                                                                                                            | 765 | 773  | 0         | 101.0 | 80.4 | 88.4 | hypothetical protein ARALYDRAFT_341087                            | gbpln | Arabidopsis lyrata   | AT3G09450.1   Symbols:   CONTAINS InterPro DOMAIN/s: Fusaric acid resistance protein, conserved region (InterPro:IPR006726); BEST Arabidopsis thaliana protein match is: unknown protein (TAIR:AT2G28780.1); Has 503 Blast hits to 494 proteins in 215 species: Archae - 0; Bacteria - 423; Metazoa - 0; Fungi - 0; Plants - 65; Viruses - 0; Other Eukaryotes - 15 (source: NCBI BLink).   chr3:2907548-2910091 FORWARD LENGTH=775 | 765 | 775 | 0         | 101.3 | 80.0 | 87.7 |
| Rsa1.0_00363.1.g12268.t3 | ref XP_002882619.1  hypothetical protein ARALYDRAFT_478263 [Arabidopsis lyrata subsp. lyrata] gi 297328459 gb EFH58878.1                                                                                                                                                                                                                                                                                                                                                                                            | 405 | 296  | 1.00E-115 | 73.1  | 56.0 | 61.0 | hypothetical protein ARALYDRAFT_478263                            | gbpln | Arabidopsis lyrata   | AT3G09430.1   Symbols:   unknown protein; Has 17 Blast hits to 17 proteins in 7 species: Archae - 0; Bacteria - 0; Metazoa - 0; Fungi - 0; Plants - 17; Viruses - 0; Other Eukaryotes - 0 (source: NCBI BLink).   chr3:2901280-2902893 FORWARD LENGTH=301                                                                                                                                                                           | 405 | 301 | 1.00E-115 | 74.3  | 54.8 | 60.0 |
| Rsa1.0_00363.1.g12269.t1 | ref XP_002884736.1  pectinacylesterase family protein [Arabidopsis lyrata subsp. lyrata] gi 297330576 gb EFH60995.1                                                                                                                                                                                                                                                                                                                                                                                                 | 423 | 427  | 0         | 100.9 | 83.0 | 88.4 | pectinacylesterase family protein                                 | gbpln | Arabidopsis lyrata   | AT3G09410.1   Symbols:   Pectinacylesterase family protein   chr3:2898243-2900984 REVERSE LENGTH=427                                                                                                                                                                                                                                                                                                                                | 423 | 427 | 0         | 100.9 | 82.5 | 88.4 |
| Rsa1.0_00363.1.g12270.t1 | gb EOA30038.1  hypothetical protein CARUB_v10013141mg [Capsella rubella]                                                                                                                                                                                                                                                                                                                                                                                                                                            | 627 | 667  | 0         | 106.4 | 72.7 | 81.0 | hypothetical protein CARUB_v10013141mg                            | gbpln | Capsella rubella     | AT3G09400.1   Symbols: PLL3   pol-like 3   chr3:2891235-2893532 REVERSE LENGTH=650                                                                                                                                                                                                                                                                                                                                                  | 627 | 650 | 0         | 103.7 | 72.2 | 80.4 |
| Rsa1.0_00363.1.g12271.t1 | dbj BAA11391.1  metallothionein-like protein [Brassica rapa]                                                                                                                                                                                                                                                                                                                                                                                                                                                        | 82  | 80   | 1.00E-25  | 97.6  | 75.6 | 76.8 | metallothionein-like protein                                      | gbpln | Brassica rapa        | AT3G09390.1   Symbols: MT2A, ATMT-K, ATMT-1   metallothionein 2A   chr3:2889737-2890188 REVERSE LENGTH=81                                                                                                                                                                                                                                                                                                                           | 82  | 81  | 4.00E-22  | 98.8  | 63.4 | 64.6 |
| Rsa1.0_00363.1.g12272.t1 | gb EOA32896.1  hypothetical protein CARUB_v10016220mg [Capsella rubella]                                                                                                                                                                                                                                                                                                                                                                                                                                            | 89  | 150  | 1.00E-13  | 168.5 | 40.4 | 52.8 | hypothetical protein CARUB_v10016220mg                            | gbpln | Capsella rubella     | AT3G09380.1   Symbols:   Protein of unknown function (DUF59)   chr3:2885265-2886116 REVERSE LENGTH=156                                                                                                                                                                                                                                                                                                                              | 89  | 156 | 1.00E-13  | 175.3 | 38.2 | 46.1 |
| Rsa1.0_00363.1.g12273.t1 | ref NP_178208.1  pre-mRNA-splicing factor CWC22 [Arabidopsis thaliana] gi 6503305 gb AAF14681.1 AC011713.29 Contains similarity to gb U19615 LET 858 gene from Caenorhabditis elegans. ESTs gb A1995190, gb H76674 and gb R64035 come from this gene [Arabidopsis thaliana] gi 22654971 gb AAM99078.1   At1g80930/F23A5.23 [Arabidopsis thaliana] gi 28416525 gb AAO42783.1   At1g80930/F23A5.23 [Arabidopsis thaliana] gi 332198347 gb AEE36468.1   MIF4G and MA3 domain-containing protein [Arabidopsis thaliana] | 504 | 900  | 1.00E-180 | 178.6 | 61.3 | 80.4 | pre-mRNA-splicing factor CWC22                                    | gbpln | Arabidopsis thaliana | AT1G80930.1   Symbols:   MIF4G domain-containing protein / MA3 domain-containing protein   chr1:30405774-30409499 REVERSE LENGTH=900                                                                                                                                                                                                                                                                                                | 504 | 900 | 0         | 178.6 | 61.3 | 80.4 |
| Rsa1.0_00363.1.g12274.t1 | ref NP_565602.1  DNA-binding storekeeper protein-related transcriptional regulator [Arabidopsis thaliana] gi 18176116 gb AAL59986.1  unknown protein [Arabidopsis thaliana] gi 20197507 gb AAD31366.2  expressed protein [Arabidopsis thaliana] gi 20465307 gb AAM20057.1  unknown protein [Arabidopsis thaliana] gi 21536492 gb AAM60824.1  unknown [Arabidopsis thaliana] gi 330252636 gb AEC07730.1  DNA-binding storekeeper protein-related transcriptional regulator [Arabidopsis thaliana]                    | 345 | 386  | 5.00E-61  | 111.9 | 45.2 | 58.8 | DNA-binding storekeeper protein-related transcriptional regulator | gbpln | Arabidopsis thaliana | AT2G26550.1   Symbols:   DNA-binding storekeeper protein-related transcriptional regulator   chr2:10914765-10916006 FORWARD LENGTH=386                                                                                                                                                                                                                                                                                              | 345 | 386 | 1.00E-63  | 111.9 | 45.2 | 58.8 |
| Rsa1.0_00363.1.g12275.t1 | ref XP_002882616.1  hypothetical protein ARALYDRAFT_317739 [Arabidopsis lyrata subsp. lyrata] gi 297328456 gb EFH58875.1                                                                                                                                                                                                                                                                                                                                                                                            | 504 | 1245 | 0         | 247.0 | 71.8 | 77.2 | hypothetical protein ARALYDRAFT_317739                            | gbpln | Arabidopsis lyrata   | AT3G09370.1   Symbols: MYB3R-3, A1MYB3R3   myb domain protein 3-3   chr3:2879534-2882128 FORWARD LENGTH=505                                                                                                                                                                                                                                                                                                                         | 504 | 505 | 0         | 100.2 | 70.8 | 77.8 |
| Rsa1.0_00363.1.g12276.t1 | ref XP_002882614.1  armadillo/beta-catenin repeat family protein [Arabidopsis lyrata subsp. lyrata] gi 297328454 gb EFH58873.1                                                                                                                                                                                                                                                                                                                                                                                      | 368 | 365  | 0         | 99.2  | 92.1 | 96.5 | armadillo/beta-catenin repeat family protein                      | gbpln | Arabidopsis lyrata   | AT3G09350.1   Symbols: Fes1A   Fes1A   chr3:2871216-2873109 FORWARD LENGTH=363                                                                                                                                                                                                                                                                                                                                                      | 368 | 363 | 0         | 98.6  | 91.3 | 95.9 |

|                          |                                                                                                                                                                                                                                                                                                                                                                                            |     |     |           |       |      |      |                                           |       |                      |                                                                                                                                                                                                                                                                                                                                                                                                                                                 |     |     |           |       |      |      |
|--------------------------|--------------------------------------------------------------------------------------------------------------------------------------------------------------------------------------------------------------------------------------------------------------------------------------------------------------------------------------------------------------------------------------------|-----|-----|-----------|-------|------|------|-------------------------------------------|-------|----------------------|-------------------------------------------------------------------------------------------------------------------------------------------------------------------------------------------------------------------------------------------------------------------------------------------------------------------------------------------------------------------------------------------------------------------------------------------------|-----|-----|-----------|-------|------|------|
| Rsa1.0_00363.1.g12277.t1 | refXP_002884727.1   zinc finger family protein [Arabidopsis lyrata subsp. lyrata] gi 297330567 gb EFH60986.1   zinc finger family protein [Arabidopsis lyrata subsp. lyrata]                                                                                                                                                                                                               | 293 | 286 | 1.00E-148 | 97.6  | 86.3 | 91.8 | zinc finger family protein                | gbpln | Arabidopsis lyrata   | AT3G09320.1   Symbols:   DHHC-type zinc finger family protein   chr3:2862142-2864113 REVERSE LENGTH=286                                                                                                                                                                                                                                                                                                                                         | 293 | 286 | 1.00E-144 | 97.6  | 86.3 | 92.2 |
| Rsa1.0_00363.1.g12278.t1 | refXP_002882613.1   hypothetical protein ARALYDRAFT_897086 [Arabidopsis lyrata subsp. lyrata] gi 297328453 gb EFH58872.1   hypothetical protein ARALYDRAFT_897086 [Arabidopsis lyrata subsp. lyrata]                                                                                                                                                                                       | 114 | 116 | 4.00E-41  | 101.8 | 74.6 | 79.8 | hypothetical protein ARALYDRAFT_897086    | gbpln | Arabidopsis lyrata   | AT5G02120.1   Symbols: OHP   one helix protein   chr5:419144-419633 FORWARD LENGTH=110                                                                                                                                                                                                                                                                                                                                                          | 114 | 110 | 1.00E-35  | 96.5  | 62.3 | 70.2 |
| Rsa1.0_00363.1.g12279.t1 | refNP_187542.2   uncharacterized protein [Arabidopsis thaliana] gi 209572699 sp Q9SR32.2 U161_ARATH RecName: Full=UPF0161 protein At3g09310 gi 89274167 gb ABD65604.1   At3g09310 [Arabidopsis thaliana] gi 332641228 gb AEE74749.1   uncharacterized protein AT3G09310 [Arabidopsis thaliana]                                                                                             | 169 | 170 | 2.00E-63  | 100.6 | 70.4 | 76.3 | uncharacterized protein                   | gbpln | Arabidopsis thaliana | AT3G09310.1   Symbols:   unknown protein; CONTAINS InterPro DOMAIN/s: Protein of unknown function DUF37 (InterPro:IPR002696). Has 5781 Blast hits to 5781 proteins in 1903 species: Archae - 0; Bacteria - 3956; Metazoa - 2; Fungi - 0; Plants - 42; Viruses - 3; Other Eukaryotes - 1778 (source: NCBI BLINK).   chr3:2860622-2861297 REVERSE LENGTH=170                                                                                      | 169 | 170 | 8.00E-66  | 100.6 | 70.4 | 76.3 |
| Rsa1.0_00363.1.g12280.t1 | refXP_002882612.1   oxysterol-binding family protein [Arabidopsis lyrata subsp. lyrata] gi 297328452 gb EFH58871.1   oxysterol-binding family protein [Arabidopsis lyrata subsp. lyrata]                                                                                                                                                                                                   | 447 | 456 | 0         | 102.0 | 95.7 | 97.3 | oxysterol-binding family protein          | gbpln | Arabidopsis lyrata   | AT3G09300.1   Symbols: ORP3B   OSBP(oxysterol binding protein)-related protein 3B   chr3:2858068-2860462 FORWARD LENGTH=458                                                                                                                                                                                                                                                                                                                     | 447 | 458 | 0         | 102.5 | 95.7 | 97.5 |
| Rsa1.0_00363.1.g12281.t2 | dbj BAJ34410.1   unnamed protein product [Thellungiella halophila]                                                                                                                                                                                                                                                                                                                         | 78  | 524 | 4.00E-38  | 671.8 | 89.7 | 96.2 | unnamed protein product                   | ----  | ----                 | AT3G09260.1   Symbols: PYK10, PSR3.1, BGLU23_LEB   Glycosyl hydrolase superfamily protein   chr3:2840657-2843730 REVERSE LENGTH=524                                                                                                                                                                                                                                                                                                             | 78  | 524 | 1.00E-32  | 671.8 | 87.2 | 92.3 |
| Rsa1.0_00364.1.g12282.t1 | refXP_002876123.1   hypothetical protein ARALYDRAFT_485568 [Arabidopsis lyrata subsp. lyrata] gi 297321961 gb EFH52382.1   hypothetical protein ARALYDRAFT_485568 [Arabidopsis lyrata subsp. lyrata]                                                                                                                                                                                       | 802 | 801 | 0         | 99.9  | 95.0 | 97.6 | hypothetical protein ARALYDRAFT_485568    | gbpln | Arabidopsis lyrata   | AT3G52080.1   Symbols: chx28   cation/hydrogen exchanger 28   chr3:19315090-19317735 FORWARD LENGTH=801                                                                                                                                                                                                                                                                                                                                         | 802 | 801 | 0         | 99.9  | 92.4 | 96.9 |
| Rsa1.0_00364.1.g12283.t1 | refXP_002876122.1   hypothetical protein ARALYDRAFT_906567 [Arabidopsis lyrata subsp. lyrata] gi 297321960 gb EFH52381.1   hypothetical protein ARALYDRAFT_906567 [Arabidopsis lyrata subsp. lyrata]                                                                                                                                                                                       | 108 | 113 | 4.00E-40  | 104.6 | 78.7 | 89.8 | hypothetical protein ARALYDRAFT_906567    | gbpln | Arabidopsis lyrata   | AT3G52070.1   Symbols:   unknown protein; FUNCTIONS IN: molecular function unknown; INVOLVED IN: biological process unknown; LOCATED IN: chloroplast; EXPRESSED IN: 22 plant structures; EXPRESSED DURING: 13 growth stages; Has 23 Blast hits to 23 proteins in 10 species: Archae - 0; Bacteria - 0; Metazoa - 0; Fungi - 0; Plants - 23; Viruses - 0; Other Eukaryotes - 0 (source: NCBI BLINK).   chr3:19312753-19313097 FORWARD LENGTH=114 | 108 | 114 | 3.00E-42  | 105.6 | 79.6 | 88.0 |
| Rsa1.0_00364.1.g12284.t1 | refXP_002877841.1   hypothetical protein ARALYDRAFT_485566 [Arabidopsis lyrata subsp. lyrata] gi 297323679 gb EFH54100.1   hypothetical protein ARALYDRAFT_485566 [Arabidopsis lyrata subsp. lyrata]                                                                                                                                                                                       | 342 | 344 | 1.00E-151 | 100.6 | 84.5 | 91.8 | hypothetical protein ARALYDRAFT_485566    | gbpln | Arabidopsis lyrata   | AT3G52060.2   Symbols:   Core-2/1-branching beta-1,6-N-acetylglucosaminyltransferase family protein   chr3:19310987-19312027 REVERSE LENGTH=346                                                                                                                                                                                                                                                                                                 | 342 | 346 | 1.00E-151 | 101.2 | 83.3 | 90.6 |
| Rsa1.0_00364.1.g12285.t1 | gb EOA24836.1   hypothetical protein CARUB_v10018125mg [Capsella rubella]                                                                                                                                                                                                                                                                                                                  | 156 | 171 | 7.00E-65  | 109.6 | 76.9 | 82.7 | hypothetical protein CARUB_v10018125mg    | gbpln | Capsella rubella     | AT3G51960.1   Symbols: ATBZIP24, BZIP24   basic leucine zipper 24   chr3:19282828-19284064 REVERSE LENGTH=227                                                                                                                                                                                                                                                                                                                                   | 156 | 227 | 1.00E-61  | 145.5 | 71.8 | 78.8 |
| Rsa1.0_00364.1.g12286.t1 | gb EOA25516.1   hypothetical protein CARUB_v10018860mg [Capsella rubella]                                                                                                                                                                                                                                                                                                                  | 564 | 538 | 0         | 95.4  | 83.5 | 89.5 | hypothetical protein CARUB_v10018860mg    | gbpln | Capsella rubella     | AT3G51950.2   Symbols:   Zinc finger (GCCCH-type) family protein / RNA recognition motif (RRM)-containing protein   chr3:19278244-19280407 REVERSE LENGTH=540                                                                                                                                                                                                                                                                                   | 564 | 540 | 0         | 95.7  | 84.0 | 89.2 |
| Rsa1.0_00364.1.g12287.t1 | #                                                                                                                                                                                                                                                                                                                                                                                          | #   | #   | #         | #     | #    | -    | ----                                      | ----  | ----                 | #                                                                                                                                                                                                                                                                                                                                                                                                                                               | #   | #   | #         | #     | #    | #    |
| Rsa1.0_00364.1.g12288.t3 | gb AAD29774.1 AF074021.6 putative polyprotein [Arabidopsis thaliana] gi 7267218 emb CAB80825.1   putative polyprotein [Arabidopsis thaliana]                                                                                                                                                                                                                                               | 667 | 922 | 2.00E-26  | 138.2 | 10.9 | 15.4 | putative polyprotein                      | gbpln | Arabidopsis thaliana | #                                                                                                                                                                                                                                                                                                                                                                                                                                               | #   | #   | #         | #     | #    | #    |
| Rsa1.0_00364.1.g12289.t1 | refNP_190761.1   transducin/WD40 domain-containing protein [Arabidopsis thaliana] gi 4678922 emb CAB41313.1   putative protein [Arabidopsis thaliana] gi 30725344 gb AAP37694.1   At3g51930 [Arabidopsis thaliana] gi 110736561 dbj BAF00246.1   hypothetical protein [Arabidopsis thaliana] gi 332645343 gb AEE78864.1   transducin/WD40 domain-containing protein [Arabidopsis thaliana] | 424 | 415 | 0         | 97.9  | 86.6 | 92.2 | transducin/WD40 domain-containing protein | gbpln | Arabidopsis thaliana | AT3G51930.1   Symbols:   Transducin/WD40 repeat-like superfamily protein   chr3:19271672-19272919 FORWARD LENGTH=415                                                                                                                                                                                                                                                                                                                            | 424 | 415 | 0         | 97.9  | 86.6 | 92.2 |

| Rsa1.0_00364.1.g12290.t1 | #                                                                                                                                                                                                                                                                                      | #    | #    | #         | #     | #    | #    | -                                                     | ----  | ----                  | #                                                                                                                                                                                                                                                                                                                                                | #    | #    | #         | #     | #    |      |
|--------------------------|----------------------------------------------------------------------------------------------------------------------------------------------------------------------------------------------------------------------------------------------------------------------------------------|------|------|-----------|-------|------|------|-------------------------------------------------------|-------|-----------------------|--------------------------------------------------------------------------------------------------------------------------------------------------------------------------------------------------------------------------------------------------------------------------------------------------------------------------------------------------|------|------|-----------|-------|------|------|
| Rsa1.0_00364.1.g12291.t1 | gb ABH07409.1  putative pol polyprotein [Brassica oleracea var. botrytis]                                                                                                                                                                                                              | 642  | 1239 | 1.00E-171 | 193.0 | 49.5 | 57.9 | putative pol polyprotein                              | gbpln | Brassica oleracea     | AT4G23180.1   Symbols: CRK8   cysteine-rich RLK (RECEPTOR-like protein kinase) 8   chr4:12129485-12134086 FORWARD LENGTH=1262                                                                                                                                                                                                                    | 642  | 1262 | 8.00E-32  | 196.6 | 10.3 | 16.8 |
| Rsa1.0_00364.1.g12292.t1 | ref XP_002877832.1  hypothetical protein ARALYDRAFT_906546 [Arabidopsis lyrata subsp. lyrata] gi 297323670 gb EFH54091.1  hypothetical protein ARALYDRAFT_906546 [Arabidopsis lyrata subsp. lyrata]                                                                                    | 151  | 151  | 5.00E-76  | 100.0 | 94.0 | 96.0 | hypothetical protein ARALYDRAFT_906546                | gbpln | Arabidopsis lyrata    | AT3G51920.1   Symbols: CAM9, CML9, ATCML9   calmodulin 9   chr3:19268178-19269314 REVERSE LENGTH=151                                                                                                                                                                                                                                             | 151  | 151  | 2.00E-78  | 100.0 | 94.0 | 96.0 |
| Rsa1.0_00364.1.g12293.t1 | gb AAG51237.1 AC035249_12 unknown protein; 55998-51558 [Arabidopsis thaliana]                                                                                                                                                                                                          | 212  | 593  | 8.00E-32  | 279.7 | 32.5 | 45.3 | unknown protein; 55998-51558                          | gbpln | Arabidopsis thaliana  | AT1G36970.1   Symbols:   Domain of unknown function (DUF1985)   chr1:14016385-14018356 REVERSE LENGTH=439                                                                                                                                                                                                                                        | 212  | 439  | 7.00E-28  | 207.1 | 28.3 | 39.6 |
| Rsa1.0_00364.1.g12294.t1 | gb AAC02672.1  polyprotein [Arabidopsis arenosa]                                                                                                                                                                                                                                       | 612  | 1390 | 1.00E-143 | 227.1 | 42.8 | 52.9 | polyprotein                                           | gbpln | Arabidopsis arenosa   | AT3G51910.1   Symbols: AT-HSFA7A, HSFA7A   heat shock transcription factor A7A   chr3:19265294-19266619 FORWARD LENGTH=272                                                                                                                                                                                                                       | 612  | 272  | 1.00E-74  | 44.4  | 23.7 | 26.3 |
| Rsa1.0_00365.1.g12295.t1 | ref XP_002875949.1  hypothetical protein ARALYDRAFT_906172 [Arabidopsis lyrata subsp. lyrata] gi 297321787 gb EFH52208.1  hypothetical protein ARALYDRAFT_906172 [Arabidopsis lyrata subsp. lyrata]                                                                                    | 565  | 967  | 3.00E-38  | 171.2 | 29.9 | 44.1 | hypothetical protein ARALYDRAFT_906172                | gbpln | Arabidopsis lyrata    | AT5G12280.1   Symbols:   SWAP (Suppressor-of-White-APricot)/surp RNA-binding domain-containing protein   chr5:3972014-3973636 REVERSE LENGTH=419                                                                                                                                                                                                 | 565  | 419  | 5.00E-21  | 74.2  | 17.3 | 25.0 |
| Rsa1.0_00365.1.g12296.t1 | #                                                                                                                                                                                                                                                                                      | #    | #    | #         | #     | #    | #    | -                                                     | ----  | ----                  | #                                                                                                                                                                                                                                                                                                                                                | #    | #    | #         | #     | #    |      |
| Rsa1.0_00365.1.g12297.t1 | #                                                                                                                                                                                                                                                                                      | #    | #    | #         | #     | #    | #    | -                                                     | ----  | ----                  | #                                                                                                                                                                                                                                                                                                                                                | #    | #    | #         | #     | #    |      |
| Rsa1.0_00365.1.g12298.t1 | ref NP_198533.1  putative O-diphenol-O-methyl transferase [Arabidopsis thaliana] gi 332006766 gb AED94149.1  putative O-diphenol-O-methyl transferase [Arabidopsis thaliana]                                                                                                           | 269  | 334  | 2.00E-41  | 124.2 | 37.2 | 44.2 | putative O-diphenol-O-methyl transferase              | gbpln | Arabidopsis thaliana  | AT5G37170.1   Symbols:   O-methyltransferase family protein   chr5:14712811-14714303 FORWARD LENGTH=334                                                                                                                                                                                                                                          | 269  | 334  | 5.00E-44  | 124.2 | 37.2 | 44.2 |
| Rsa1.0_00365.1.g12299.t1 | gb ABB55318.1  conserved hypothetical protein [Asparagus officinalis]                                                                                                                                                                                                                  | 314  | 324  | 3.00E-65  | 103.2 | 49.4 | 61.1 | conserved hypothetical protein                        | gbpln | Asparagus officinalis | AT2G13770.1   Symbols:   CONTAINS InterPro DOMAIN/s: Putative harbinger transposase-derived nuclease (InterPro:IPR006912); Has 451 Blast hits to 352 proteins in 33 species: Archae - 0; Bacteria - 0; Metazoa - 28; Fungi - 8; Plants - 388; Viruses - 0; Other Eukaryotes - 27 (source: NCBI BLINK);   chr2:5736603-5737847 FORWARD LENGTH=343 | 314  | 343  | 2.00E-62  | 109.2 | 42.4 | 52.5 |
| Rsa1.0_00365.1.g12300.t1 | ref XP_002889151.1  nucleoside-triphosphatase/ nucleotide binding protein [Arabidopsis lyrata subsp. lyrata] gi 297334992 gb EFH65410.1  nucleoside-triphosphatase/ nucleotide binding protein [Arabidopsis lyrata subsp. lyrata]                                                      | 1168 | 1154 | 0         | 98.8  | 72.6 | 80.8 | nucleoside-triphosphatase/ nucleotide binding protein | gbpln | Arabidopsis lyrata    | AT1G77620.1   Symbols:   P-loop containing nucleoside triphosphate hydrolases superfamily protein   chr1:29167934-29172867 REVERSE LENGTH=1151                                                                                                                                                                                                   | 1168 | 1151 | 0         | 98.5  | 72.1 | 80.3 |
| Rsa1.0_00365.1.g12301.t1 | ref NP_177876.1  O-methyltransferase family protein [Arabidopsis thaliana] gi 12323395 gb AAG51676.1 AC010704_20 putative caffeic acid 3-O-methyltransferase; 41078-42528 [Arabidopsis thaliana] gi 332197867 gb AEE35988.1  O-methyltransferase family protein [Arabidopsis thaliana] | 348  | 381  | 1.00E-142 | 109.5 | 72.7 | 80.5 | O-methyltransferase family protein                    | gbpln | Arabidopsis thaliana  | AT1G77520.1   Symbols:   O-methyltransferase family protein   chr1:29130557-29132007 FORWARD LENGTH=381                                                                                                                                                                                                                                          | 348  | 381  | 1.00E-144 | 109.5 | 72.7 | 80.5 |
| Rsa1.0_00365.1.g12302.t1 | ref XP_002862810.1  nucleoside-triphosphatase/ nucleotide binding protein [Arabidopsis lyrata subsp. lyrata] gi 297308545 gb EFH39068.1  nucleoside-triphosphatase/ nucleotide binding protein [Arabidopsis lyrata subsp. lyrata]                                                      | 304  | 960  | 7.00E-52  | 315.8 | 38.5 | 43.1 | nucleoside-triphosphatase/ nucleotide binding protein | gbpln | Arabidopsis lyrata    | AT1G77620.1   Symbols:   P-loop containing nucleoside triphosphate hydrolases superfamily protein   chr1:29167934-29172867 REVERSE LENGTH=1151                                                                                                                                                                                                   | 304  | 1151 | 2.00E-44  | 378.6 | 36.5 | 40.8 |
| Rsa1.0_00365.1.g12303.t1 | ref XP_002887693.1  peptidoglycan-binding LysM domain-containing protein [Arabidopsis lyrata subsp. lyrata] gi 29733534 gb EFH63952.1  peptidoglycan-binding LysM domain-containing protein [Arabidopsis lyrata subsp. lyrata]                                                         | 426  | 425  | 0         | 99.8  | 80.3 | 87.3 | peptidoglycan-binding LysM domain-containing protein  | gbpln | Arabidopsis lyrata    | AT1G77630.1   Symbols:   Peptidoglycan-binding LysM domain-containing protein   chr1:29173726-29175387 FORWARD LENGTH=423                                                                                                                                                                                                                        | 426  | 423  | 0         | 99.3  | 78.9 | 86.2 |
| Rsa1.0_00365.1.g12304.t1 | #                                                                                                                                                                                                                                                                                      | #    | #    | #         | #     | #    | #    | -                                                     | ----  | ----                  | #                                                                                                                                                                                                                                                                                                                                                | #    | #    | #         | #     | #    |      |
| Rsa1.0_00365.1.g12305.t1 | ref XP_002883210.1  zinc finger family protein [Arabidopsis lyrata subsp. lyrata] gi 297329050 gb EFH59469.1  zinc finger family protein [Arabidopsis lyrata subsp. lyrata]                                                                                                            | 152  | 337  | 2.00E-25  | 221.7 | 40.8 | 44.1 | zinc finger family protein                            | gbpln | Arabidopsis lyrata    | AT3G19910.1   Symbols:   RING/U-box superfamily protein   chr3:6926497-6929324 FORWARD LENGTH=340                                                                                                                                                                                                                                                | 152  | 340  | 2.00E-27  | 223.7 | 40.1 | 44.1 |



|                          |                                                                                                                                                                                                                                                                                                                                                                             |     |     |           |       |      |      |                                                 |       |                      |                                                                                                                                                 |     |     |           |       |      |      |
|--------------------------|-----------------------------------------------------------------------------------------------------------------------------------------------------------------------------------------------------------------------------------------------------------------------------------------------------------------------------------------------------------------------------|-----|-----|-----------|-------|------|------|-------------------------------------------------|-------|----------------------|-------------------------------------------------------------------------------------------------------------------------------------------------|-----|-----|-----------|-------|------|------|
| Rsa1.0_00366.1.g12318.t1 | refXP_002878660.1   hypothetical protein ARALYDRAFT_481185 [Arabidopsis lyrata subsp. lyrata]   gi 297324499 gb EFH54919.1   hypothetical protein ARALYDRAFT_481185 [Arabidopsis lyrata subsp. lyrata]                                                                                                                                                                      | 82  | 79  | 4.00E-18  | 96.3  | 70.7 | 80.5 | hypothetical protein ARALYDRAFT_481185          | gbpln | Arabidopsis lyrata   | AT2G23120.1   Symbols:   Late embryogenesis abundant protein, group 6   chr2:9842102-9842353 FORWARD LENGTH=83                                  | 82  | 83  | 6.00E-16  | 101.2 | 50.0 | 61.0 |
| Rsa1.0_00366.1.g12319.t1 | refXP_002878661.1   predicted protein [Arabidopsis lyrata subsp. lyrata]   gi 297324500 gb EFH54920.1   predicted protein [Arabidopsis lyrata subsp. lyrata]                                                                                                                                                                                                                | 304 | 180 | 4.00E-20  | 59.2  | 38.2 | 43.4 | predicted protein                               | gbpln | Arabidopsis lyrata   | #                                                                                                                                               | #   | #   | #         | #     | #    | #    |
| Rsa1.0_00366.1.g12320.t1 | refXP_002890484.1   armadillo/beta-catenin repeat family protein [Arabidopsis lyrata subsp. lyrata]   gi 297326323 gb EFH56743.1   armadillo/beta-catenin repeat family protein [Arabidopsis lyrata subsp. lyrata]                                                                                                                                                          | 817 | 829 | 0         | 101.5 | 88.4 | 92.8 | armadillo/beta-catenin repeat family protein    | gbpln | Arabidopsis lyrata   | AT2G23140.1   Symbols:   RING/U-box superfamily protein with ARM repeat domain   chr2:9845696-9849105 REVERSE LENGTH=829                        | 817 | 829 | 0         | 101.5 | 88.2 | 92.8 |
| Rsa1.0_00366.1.g12321.t1 | gb EOA26902.1   hypothetical protein CARUB_v10022990mg, partial [Capsella rubella]                                                                                                                                                                                                                                                                                          | 494 | 527 | 0         | 106.7 | 75.9 | 81.4 | hypothetical protein CARUB_v10022990mg, partial | gbpln | Capsella rubella     | AT2G23150.1   Symbols:   NRAMP3, ATNRAMP3   natural resistance-associated macrophage protein 3   chr2:9856422-9858565 REVERSE LENGTH=509        | 494 | 509 | 0         | 103.0 | 68.2 | 71.3 |
| Rsa1.0_00366.1.g12322.t1 | gb EOA26747.1   hypothetical protein CARUB_v10022833mg, partial [Capsella rubella]                                                                                                                                                                                                                                                                                          | 596 | 617 | 0         | 103.5 | 91.3 | 96.0 | hypothetical protein CARUB_v10022833mg, partial | gbpln | Capsella rubella     | AT2G23170.1   Symbols:   GH3.3   Auxin-responsive GH3 family protein   chr2:9864125-9866502 REVERSE LENGTH=595                                  | 596 | 595 | 0         | 99.8  | 91.1 | 95.3 |
| Rsa1.0_00366.1.g12323.t1 | gb ABD65629.1   hypothetical protein Z3.t00046 [Brassica oleracea]                                                                                                                                                                                                                                                                                                          | 146 | 147 | 6.00E-44  | 100.7 | 54.8 | 75.3 | hypothetical protein Z3.t00046                  | gbpln | Brassica oleracea    | AT3G24255.1   Symbols:   RNA-directed DNA polymerase (reverse transcriptase)-related family protein   chr3:8789471-8793208 FORWARD LENGTH=746   | 146 | 746 | 8.00E-16  | 511.0 | 28.1 | 41.8 |
| Rsa1.0_00366.1.g12324.t1 | #                                                                                                                                                                                                                                                                                                                                                                           | #   | #   | #         | #     | #    | #    | -                                               | ----  | ----                 | #                                                                                                                                               | #   | #   | #         | #     | #    | #    |
| Rsa1.0_00366.1.g12325.t1 | gb EOA19915.1   hypothetical protein CARUB_v10000165mg [Capsella rubella]                                                                                                                                                                                                                                                                                                   | 224 | 923 | 7.00E-69  | 412.1 | 63.8 | 67.4 | hypothetical protein CARUB_v10000165mg          | gbpln | Capsella rubella     | AT4G02460.1   Symbols:   PMS1   DNA mismatch repair protein, putative   chr4:1076306-1080510 REVERSE LENGTH=923                                 | 224 | 923 | 2.00E-69  | 412.1 | 63.8 | 67.9 |
| Rsa1.0_00366.1.g12326.t1 | refXP_002878665.1   CYP96A1 [Arabidopsis lyrata subsp. lyrata]   gi 297324504 gb EFH54924.1   CYP96A1 [Arabidopsis lyrata subsp. lyrata]                                                                                                                                                                                                                                    | 708 | 514 | 0         | 72.6  | 58.9 | 64.1 | CYP96A1                                         | gbpln | Arabidopsis lyrata   | AT2G23180.1   Symbols:   CYP96A1   cytochrome P450, family 96, subfamily A, polypeptide 1   chr2:9874953-9876503 FORWARD LENGTH=516             | 708 | 516 | 0         | 72.9  | 58.5 | 63.1 |
| Rsa1.0_00366.1.g12327.t1 | refXP_002878666.1   predicted protein [Arabidopsis lyrata subsp. lyrata]   gi 297324505 gb EFH54925.1   predicted protein [Arabidopsis lyrata subsp. lyrata]                                                                                                                                                                                                                | 496 | 519 | 0         | 104.6 | 85.7 | 93.3 | predicted protein                               | gbpln | Arabidopsis lyrata   | AT2G23190.1   Symbols:   CYP81D7   cytochrome P450, family 81, subfamily D, polypeptide 7   chr2:9877058-9879007 FORWARD LENGTH=543             | 496 | 543 | 0         | 109.5 | 84.3 | 92.5 |
| Rsa1.0_00366.1.g12328.t1 | ref NP_179901.1   putative receptor-like protein kinase [Arabidopsis thaliana]   gi 75317972 sp O22187.1 Y2232_ARATH RecName: Full=Probable receptor-like protein kinase At2g23200; Flags: Precursor  gi 2642445 gb AAB87113.1   putative protein kinase [Arabidopsis thaliana]   gi 330232334 gb AEC07428.1   putative receptor-like protein kinase [Arabidopsis thaliana] | 486 | 834 | 1.00E-171 | 171.6 | 65.8 | 78.0 | putative receptor-like protein kinase           | gbpln | Arabidopsis thaliana | AT2G23200.1   Symbols:   Protein kinase superfamily protein   chr2:9879351-9881855 FORWARD LENGTH=834                                           | 486 | 834 | 1.00E-174 | 171.6 | 65.8 | 78.0 |
| Rsa1.0_00367.1.g12329.t1 | ref NP_197887.1   major facilitator protein [Arabidopsis thaliana]   gi 75104998 sp Q5PV41.1 FBT2_ARATH RecName: Full=Probable folate-biopterin transporter 2  gi 58331763 gb AAW70379.1   At5g25050 [Arabidopsis thaliana]   gi 332006011 gb AED93394.1   probable folate-biopterin transporter 2 [Arabidopsis thaliana]                                                   | 498 | 499 | 0         | 100.2 | 89.0 | 94.8 | major facilitator protein                       | gbpln | Arabidopsis thaliana | AT5G25050.1   Symbols:   Major facilitator superfamily protein   chr5:8632022-8633828 FORWARD LENGTH=499                                        | 498 | 499 | 0         | 100.2 | 89.0 | 94.8 |
| Rsa1.0_00367.1.g12330.t1 | #                                                                                                                                                                                                                                                                                                                                                                           | #   | #   | #         | #     | #    | #    | -                                               | ----  | ----                 | #                                                                                                                                               | #   | #   | #         | #     | #    | #    |
| Rsa1.0_00367.1.g12331.t1 | gb AAK68074.1 AF384970.1 somatic embryogenesis receptor-like kinase 3 [Arabidopsis thaliana]                                                                                                                                                                                                                                                                                | 275 | 615 | 1.00E-38  | 223.6 | 30.2 | 32.0 | somatic embryogenesis receptor-like kinase 3    | gbpln | Arabidopsis thaliana | AT4G33430.1   Symbols:   BAK1, RKS10, SERK3, ELG, ATSERK3, ATBAK1   BRI1-associated receptor kinase   chr4:16086654-16090288 REVERSE LENGTH=615 | 275 | 615 | 4.00E-41  | 223.6 | 30.2 | 32.0 |
| Rsa1.0_00367.1.g12332.t1 | refXP_002872140.1   CYP71B11 [Arabidopsis lyrata subsp. lyrata]   gi 297317977 gb EFH48399.1   CYP71B11 [Arabidopsis lyrata subsp. lyrata]                                                                                                                                                                                                                                  | 496 | 496 | 0         | 100.0 | 83.1 | 92.1 | CYP71B11                                        | gbpln | Arabidopsis lyrata   | AT5G25120.1   Symbols:   CYP71B11   cytochrome p450, family 71, subfamily B, polypeptide 11   chr5:8662851-8664432 FORWARD LENGTH=496           | 496 | 496 | 0         | 100.0 | 81.7 | 92.3 |
| Rsa1.0_00367.1.g12333.t1 | gb EOA19571.1   hypothetical protein CARUB_v10002639mg [Capsella rubella]                                                                                                                                                                                                                                                                                                   | 638 | 668 | 0         | 104.7 | 89.0 | 94.4 | hypothetical protein CARUB_v10002639mg          | gbpln | Capsella rubella     | AT5G25150.1   Symbols:   TAF5   TBP-associated factor 5   chr5:8677117-8682058 FORWARD LENGTH=669                                               | 638 | 669 | 0         | 104.9 | 90.0 | 95.5 |

|                          |                                                                                                                                                                                                                                                                                                                                                                                                                                                                                                                                             |      |      |           |       |      |      |                                                 |       |                      |                                                                                                                                                                                                                                                                                                                                                                                                                                                                           |      |     |           |       |      |      |
|--------------------------|---------------------------------------------------------------------------------------------------------------------------------------------------------------------------------------------------------------------------------------------------------------------------------------------------------------------------------------------------------------------------------------------------------------------------------------------------------------------------------------------------------------------------------------------|------|------|-----------|-------|------|------|-------------------------------------------------|-------|----------------------|---------------------------------------------------------------------------------------------------------------------------------------------------------------------------------------------------------------------------------------------------------------------------------------------------------------------------------------------------------------------------------------------------------------------------------------------------------------------------|------|-----|-----------|-------|------|------|
| Rsa1.0_00367.1.g12334.t1 | gb EOA21453.1  hypothetical protein CARUB_v10001837mg [Capsella rubella]                                                                                                                                                                                                                                                                                                                                                                                                                                                                    | 248  | 241  | 1.00E-94  | 97.2  | 73.4 | 79.4 | hypothetical protein CARUB_v10001837mg          | gbpln | Capsella rubella     | AT5G25160.1   Symbols: ZFP3   zinc finger protein 3   chr:5:8687524-8688231 FORWARD LENGTH=235                                                                                                                                                                                                                                                                                                                                                                            | 248  | 235 | 3.00E-91  | 94.8  | 74.6 | 79.4 |
| Rsa1.0_00367.1.g12335.t1 | ref XP_002872143.1  hypothetical protein ARALYDRAFT_910561 [Arabidopsis lyrata subsp. lyrata] gi 297317980 gb EFH48402.1  hypothetical protein ARALYDRAFT_910561 [Arabidopsis lyrata subsp. lyrata]                                                                                                                                                                                                                                                                                                                                         | 194  | 218  | 1.00E-92  | 112.4 | 85.6 | 89.2 | hypothetical protein ARALYDRAFT_910561          | gbpln | Arabidopsis lyrata   | AT5G25170.1   Symbols:   PPPDE putative thiol peptidase family protein   chr:5:8693257-8694438 FORWARD LENGTH=218                                                                                                                                                                                                                                                                                                                                                         | 194  | 218 | 3.00E-93  | 112.4 | 84.0 | 88.1 |
| Rsa1.0_00367.1.g12336.t1 | ref NP_197894.1  cytochrome P450 71B11 [Arabidopsis thaliana] gi 13878370 sp P58049.1 C71BB_ARATH RecName: Full=Cytochrome P450 71B11 gi 51971443 dbj BAD44386.1  cytochrome P450-like protein [Arabidopsis thaliana] gi 332006020 gb AED93403.1  cytochrome P450 71B11 [Arabidopsis thaliana]                                                                                                                                                                                                                                              | 469  | 496  | 0         | 105.8 | 81.0 | 91.7 | cytochrome P450 71B11                           | gbpln | Arabidopsis thaliana | AT5G25120.1   Symbols: CYP71B11   cytochrome p450, family 71, subfamily B, polypeptide 11   chr:5:8662851-8664432 FORWARD LENGTH=496                                                                                                                                                                                                                                                                                                                                      | 469  | 496 | 0         | 105.8 | 81.0 | 91.7 |
| Rsa1.0_00367.1.g12337.t1 | #                                                                                                                                                                                                                                                                                                                                                                                                                                                                                                                                           | #    | #    | #         | #     | #    | #    | -                                               | ----  | ----                 | #                                                                                                                                                                                                                                                                                                                                                                                                                                                                         | #    | #   | #         | #     | #    |      |
| Rsa1.0_00367.1.g12338.t1 | ref XP_002874244.1  hypothetical protein ARALYDRAFT_489371 [Arabidopsis lyrata subsp. lyrata] gi 297320081 gb EFH50503.1  hypothetical protein ARALYDRAFT_489371 [Arabidopsis lyrata subsp. lyrata]                                                                                                                                                                                                                                                                                                                                         | 185  | 183  | 1.00E-76  | 98.9  | 83.2 | 88.6 | hypothetical protein ARALYDRAFT_489371          | gbpln | Arabidopsis lyrata   | AT5G25190.1   Symbols:   Integrase-type DNA-binding superfamily protein   chr:5:8707007-8707655 REVERSE LENGTH=181                                                                                                                                                                                                                                                                                                                                                        | 185  | 181 | 2.00E-76  | 97.8  | 81.1 | 87.6 |
| Rsa1.0_00367.1.g12339.t1 | #                                                                                                                                                                                                                                                                                                                                                                                                                                                                                                                                           | #    | #    | #         | #     | #    | #    | -                                               | ----  | ----                 | #                                                                                                                                                                                                                                                                                                                                                                                                                                                                         | #    | #   | #         | #     | #    |      |
| Rsa1.0_00367.1.g12340.t1 | gb EOA28640.1  hypothetical protein CARUB_v10024862mg, partial [Capsella rubella]                                                                                                                                                                                                                                                                                                                                                                                                                                                           | 533  | 490  | 6.00E-95  | 91.9  | 35.6 | 55.9 | hypothetical protein CARUB_v10024862mg, partial | gbpln | Capsella rubella     | AT1G52950.1   Symbols:   Nucleic acid-binding, OB-fold-like protein   chr:1:19725483-19728007 FORWARD LENGTH=566                                                                                                                                                                                                                                                                                                                                                          | 533  | 566 | 1.00E-93  | 106.2 | 34.9 | 57.4 |
| Rsa1.0_00367.1.g12341.t1 | gb AAD15468.1  putative helicase [Arabidopsis thaliana]                                                                                                                                                                                                                                                                                                                                                                                                                                                                                     | 1606 | 1265 | 0         | 78.8  | 44.0 | 56.1 | putative helicase                               | gbpln | Arabidopsis thaliana | AT3G51700.1   Symbols:   PIF1 helicase   chr:3:19179443-19181145 REVERSE LENGTH=344                                                                                                                                                                                                                                                                                                                                                                                       | 1606 | 344 | 4.00E-69  | 21.4  | 8.7  | 12.0 |
| Rsa1.0_00367.1.g12342.t1 | #                                                                                                                                                                                                                                                                                                                                                                                                                                                                                                                                           | #    | #    | #         | #     | #    | #    | -                                               | ----  | ----                 | #                                                                                                                                                                                                                                                                                                                                                                                                                                                                         | #    | #   | #         | #     | #    |      |
| Rsa1.0_00367.1.g12343.t1 | #                                                                                                                                                                                                                                                                                                                                                                                                                                                                                                                                           | #    | #    | #         | #     | #    | #    | -                                               | ----  | ----                 | #                                                                                                                                                                                                                                                                                                                                                                                                                                                                         | #    | #   | #         | #     | #    |      |
| Rsa1.0_00367.1.g12344.t2 | gb EOA20703.1  hypothetical protein CARUB_v10001020mg [Capsella rubella]                                                                                                                                                                                                                                                                                                                                                                                                                                                                    | 484  | 427  | 0         | 88.2  | 75.0 | 77.5 | hypothetical protein CARUB_v10001020mg          | gbpln | Capsella rubella     | AT5G25220.1   Symbols: KNAT3   KNOTTED1-like homeobox gene 3   chr:5:8736208-8738115 FORWARD LENGTH=431                                                                                                                                                                                                                                                                                                                                                                   | 484  | 431 | 0         | 89.0  | 75.4 | 77.7 |
| Rsa1.0_00367.1.g12345.t1 | ref NP_197906.1  uncharacterized protein [Arabidopsis thaliana] gi 26450052 dbj BAC42146.1  unknown protein [Arabidopsis thaliana] gi 28827680 gb AAO50684.1  unknown protein [Arabidopsis thaliana] gi 332006033 gb AED93416.1  uncharacterized protein AT5G25240 [Arabidopsis thaliana]                                                                                                                                                                                                                                                   | 125  | 131  | 4.00E-44  | 104.8 | 78.4 | 86.4 | uncharacterized protein                         | gbpln | Arabidopsis thaliana | AT5G25240.1   Symbols:   unknown protein; FUNCTIONS IN: molecular_function unknown; INVOLVED IN: biological_process unknown; LOCATED IN: cellular_component unknown; EXPRESSED IN: 23 plant structures; EXPRESSED DURING: 13 growth stages; Has 1807 Blast hits to 1807 proteins in 277 species: Archae - 0; Bacteria - 0; Metazoa - 736; Fungi - 347; Plants - 385; Viruses - 0; Other Eukaryotes - 339 (source: NCBI BLink).   chr:5:8746779-8747174 REVERSE LENGTH=131 | 125  | 131 | 7.00E-47  | 104.8 | 78.4 | 86.4 |
| Rsa1.0_00367.1.g12346.t1 | ref NP_197908.1  Flotillin-like protein 2 [Arabidopsis thaliana] gi 75316159 sp Q4V3D6.1 FLOT2_ARATH RecName: Full=Flotillin-like protein 2; AltName: Full=Nodulin-like protein 2 gi 66792618 gb AAV56411.1  At5g25260 [Arabidopsis thaliana] gi 332006035 gb AED93418.1  Flotillin-like protein 2 [Arabidopsis thaliana]                                                                                                                                                                                                                   | 469  | 463  | 0         | 98.7  | 90.0 | 94.7 | Flotillin-like protein 2                        | gbpln | Arabidopsis thaliana | AT5G25260.1   Symbols:   SPFH/Band 7/PHB domain-containing membrane-associated protein family   chr:5:8752751-8754282 FORWARD LENGTH=463                                                                                                                                                                                                                                                                                                                                  | 469  | 463 | 0         | 98.7  | 90.0 | 94.7 |
| Rsa1.0_00367.1.g12347.t1 | ref NP_192927.5  S-locus lectin protein kinase-like protein [Arabidopsis thaliana] gi 75266793 sp Q9T058.1 Y4119_ARATH RecName: Full=G-type lectin S-receptor-like serine/threonine-protein kinase At4g11900; Flags: Precursor gi 5002525 emb CAB44328.1  KI domain interacting kinase 1-like protein [Arabidopsis thaliana] gi 7267891 emb CAB78233.1  KI domain interacting kinase 1-like protein [Arabidopsis thaliana] gi 332657667 gb AEE83067.1  G-type lectin S-receptor-like serine/threonine-protein kinase [Arabidopsis thaliana] | 541  | 849  | 1.00E-111 | 156.9 | 41.2 | 47.7 | S-locus lectin protein kinase-like protein      | gbpln | Arabidopsis thaliana | AT4G11900.1   Symbols:   S-locus lectin protein kinase family protein   chr:4:7150241-7153542 REVERSE LENGTH=849                                                                                                                                                                                                                                                                                                                                                          | 541  | 849 | 1.00E-113 | 156.9 | 41.2 | 47.7 |



|                          |                                                                                                                                                                                                                                                                                                                                                                                                                                                                                                                                                                                                                                                                                                                                                                               |     |      |           |       |      |      |                                                             |                      |                                                                                                                                           |                                                                                                               |     |           |          |       |      |      |
|--------------------------|-------------------------------------------------------------------------------------------------------------------------------------------------------------------------------------------------------------------------------------------------------------------------------------------------------------------------------------------------------------------------------------------------------------------------------------------------------------------------------------------------------------------------------------------------------------------------------------------------------------------------------------------------------------------------------------------------------------------------------------------------------------------------------|-----|------|-----------|-------|------|------|-------------------------------------------------------------|----------------------|-------------------------------------------------------------------------------------------------------------------------------------------|---------------------------------------------------------------------------------------------------------------|-----|-----------|----------|-------|------|------|
| Rsa1.0_00368.1.g12348.t1 | gb EOA24133.1  hypothetical protein CARUB_v10017366mg, partial [Capsella rubella]                                                                                                                                                                                                                                                                                                                                                                                                                                                                                                                                                                                                                                                                                             | 372 | 407  | 1.00E-121 | 109.4 | 76.1 | 83.6 | hypothetical protein CARUB_v10017366mg, gbpln partial       | Capsella rubella     | AT3G52910.1   Symbols: AtGRF4, GRF4   growth-regulating factor 4   chr3:19616177-19618268 REVERSE LENGTH=380                              | 372                                                                                                           | 380 | 1.00E-120 | 102.2    | 75.0  | 82.0 |      |
| Rsa1.0_00368.1.g12349.t1 | ref XP_002882246.1  hypothetical protein ARALYDRAFT_477508 [Arabidopsis lyrata subsp. lyrata]   gi 297328086 gb EFH58505.1  hypothetical protein ARALYDRAFT_477508 [Arabidopsis lyrata subsp. lyrata]   ref XP_002877892.1  hypothetical protein ARALYDRAFT_323835 [Arabidopsis lyrata subsp. lyrata]   gi 297328086 gb EFH58505.1  hypothetical protein ARALYDRAFT_323835 [Arabidopsis lyrata subsp. lyrata]                                                                                                                                                                                                                                                                                                                                                                 | 528 | 537  | 0         | 101.7 | 82.4 | 89.8 | hypothetical protein ARALYDRAFT_477508 gbpln                | Arabidopsis lyrata   | AT3G02680.1   Symbols: NBS1, ATNBS1   nijmegen breakage syndrome 1   chr3:576378-579226 FORWARD LENGTH=542                                | 528                                                                                                           | 542 | 0         | 102.7    | 83.1  | 89.8 |      |
| Rsa1.0_00368.1.g12350.t1 | ref NP_566973.2  KCBP-interacting protein kinase [Arabidopsis thaliana]   gi 30693721 ref NP_850687.1  KCBP-interacting protein kinase [Arabidopsis thaliana]   gi 75263849 sp Q9LFA2.1 KIPK ARATH RecName: Full=Serine/threonine-protein kinase KIPK; AltName: Full=KCBP-interacting protein kinase   gi 7529713 emb CAB86893.1  protein kinase-like [Arabidopsis thaliana]   gi 21703143 gb AAM7451.1  AT3G52890/F8J2_60 [Arabidopsis thaliana]   gi 25054838 gb AAN71909.1  putative protein kinase [Arabidopsis thaliana]   gi 25090422 gb AAN72297.1  AT3G52890/F8J2_60 [Arabidopsis thaliana]   gi 332645484 gb AEE79005.1  KCBP-interacting protein kinase [Arabidopsis thaliana]   gi 332645485 gb AEE79006.1  KCBP-interacting protein kinase [Arabidopsis thaliana] | 170 | 542  | 5.00E-87  | 318.8 | 92.9 | 96.5 | hypothetical protein ARALYDRAFT_323835 gbpln                | Arabidopsis lyrata   | AT3G52905.1   Symbols:   Polynucleotidyl transferase, ribonuclease H-like superfamily protein   chr3:19614142-19615471 REVERSE LENGTH=170 | 170                                                                                                           | 170 | 1.00E-88  | 100.0    | 92.9  | 96.5 |      |
| Rsa1.0_00368.1.g12351.t1 | gi 21703143 gb AAM7451.1  AT3G52890/F8J2_60 [Arabidopsis thaliana]   gi 25054838 gb AAN71909.1  putative protein kinase [Arabidopsis thaliana]   gi 25090422 gb AAN72297.1  AT3G52890/F8J2_60 [Arabidopsis thaliana]   gi 332645484 gb AEE79005.1  KCBP-interacting protein kinase [Arabidopsis thaliana]   gi 332645485 gb AEE79006.1  KCBP-interacting protein kinase [Arabidopsis thaliana]                                                                                                                                                                                                                                                                                                                                                                                | 826 | 934  | 0         | 113.1 | 84.3 | 91.8 | KCBP-interacting protein kinase gbpln                       | Arabidopsis thaliana | AT3G52890.2   Symbols: KIPK   KCBP-interacting protein kinase   chr3:19609150-19612032 FORWARD LENGTH=934                                 | 826                                                                                                           | 934 | 0         | 113.1    | 84.3  | 91.8 |      |
| Rsa1.0_00368.1.g12352.t1 | gb EOA26734.1  hypothetical protein CARUB_v10022820mg [Capsella rubella]                                                                                                                                                                                                                                                                                                                                                                                                                                                                                                                                                                                                                                                                                                      | 362 | 527  | 4.00E-34  | 145.6 | 29.3 | 35.1 | hypothetical protein CARUB_v10022820mg gbpln                | Capsella rubella     | AT4G05360.1   Symbols:   Zinc knuckle (CCHC-type) family protein   chr4:2728204-2732337 FORWARD LENGTH=735                                | 362                                                                                                           | 735 | 1.00E-36  | 203.0    | 28.2  | 36.5 |      |
| Rsa1.0_00368.1.g12353.t1 | gb AAC69114.1  putative gag-protease polyprotein [Arabidopsis thaliana]   emb CAB39638.1  RNA-directed DNA polymerase-like protein [Arabidopsis thaliana]   gi 7267666 emb CAB78094.1  RNA-directed DNA polymerase-like protein [Arabidopsis thaliana]                                                                                                                                                                                                                                                                                                                                                                                                                                                                                                                        | 524 | 627  | 1.00E-39  | 119.7 | 23.5 | 41.0 | putative gag-protease polyprotein gbpln                     | Arabidopsis thaliana | #                                                                                                                                         | #                                                                                                             | #   | #         | #        | #     | #    |      |
| Rsa1.0_00368.1.g12354.t1 | emb CAB39638.1  RNA-directed DNA polymerase-like protein [Arabidopsis thaliana]   gi 7267666 emb CAB78094.1  RNA-directed DNA polymerase-like protein [Arabidopsis thaliana]                                                                                                                                                                                                                                                                                                                                                                                                                                                                                                                                                                                                  | 568 | 1274 | 1.00E-111 | 224.3 | 39.6 | 56.9 | RNA-directed DNA polymerase-like protein gbpln              | Arabidopsis thaliana | AT4G29090.1   Symbols:   Ribonuclease H-like superfamily protein   chr4:14333528-14335255 FORWARD LENGTH=575                              | 568                                                                                                           | 575 | 4.00E-69  | 101.2    | 30.1  | 49.3 |      |
| Rsa1.0_00368.1.g12355.t2 | #                                                                                                                                                                                                                                                                                                                                                                                                                                                                                                                                                                                                                                                                                                                                                                             | #   | #    | #         | #     | #    | -    | ----                                                        | ----                 | #                                                                                                                                         | #                                                                                                             | #   | #         | #        | #     | #    |      |
| Rsa1.0_00368.1.g12356.t1 | gb AAG03119.1 AC004133_13 F5A9.24 [Arabidopsis thaliana]                                                                                                                                                                                                                                                                                                                                                                                                                                                                                                                                                                                                                                                                                                                      | 609 | 1254 | 0         | 205.9 | 55.7 | 69.8 | F5A9.24 gbpln                                               | Arabidopsis thaliana | AT1G43760.1   Symbols:   DNAse I-like superfamily protein   chr1:16528880-16531065 REVERSE LENGTH=626                                     | 609                                                                                                           | 626 | 1.00E-30  | 102.8    | 17.1  | 28.2 |      |
| Rsa1.0_00368.1.g12357.t1 | gb AAF18538.1 AC006551_24 Very similar to retrotransposon reverse transcriptase [Arabidopsis thaliana]                                                                                                                                                                                                                                                                                                                                                                                                                                                                                                                                                                                                                                                                        | 296 | 1231 | 4.00E-68  | 415.9 | 45.9 | 60.5 | Very similar to retrotransposon reverse transcriptase gbpln | Arabidopsis thaliana | AT4G29090.1   Symbols:   Ribonuclease H-like superfamily protein   chr4:14333528-14335255 FORWARD LENGTH=575                              | 296                                                                                                           | 575 | 1.00E-37  | 194.3    | 27.7  | 48.3 |      |
| Rsa1.0_00368.1.g12358.t2 | #                                                                                                                                                                                                                                                                                                                                                                                                                                                                                                                                                                                                                                                                                                                                                                             | #   | #    | #         | #     | #    | -    | ----                                                        | ----                 | #                                                                                                                                         | #                                                                                                             | #   | #         | #        | #     | #    |      |
| Rsa1.0_00368.1.g12359.t1 | gb EOA23972.1  hypothetical protein CARUB_v10017192mg [Capsella rubella]                                                                                                                                                                                                                                                                                                                                                                                                                                                                                                                                                                                                                                                                                                      | 456 | 463  | 0         | 101.5 | 86.0 | 90.4 | hypothetical protein CARUB_v10017192mg gbpln                | Capsella rubella     | AT3G52870.1   Symbols:   IQ calmodulin-binding motif family protein   chr3:19593365-19595686 REVERSE LENGTH=456                           | 456                                                                                                           | 456 | 0         | 100.0    | 84.4  | 90.4 |      |
| Rsa1.0_00368.1.g12360.t1 | #                                                                                                                                                                                                                                                                                                                                                                                                                                                                                                                                                                                                                                                                                                                                                                             | #   | #    | #         | #     | #    | -    | ----                                                        | ----                 | #                                                                                                                                         | #                                                                                                             | #   | #         | #        | #     | #    |      |
| Rsa1.0_00369.1.g12361.t1 | sp D7LTJ4.2 CSPLN_ARALL RecName: Full=CASP-like protein ARALYDRAFT_485429                                                                                                                                                                                                                                                                                                                                                                                                                                                                                                                                                                                                                                                                                                     | 154 | 154  | 1.00E-49  | 100.0 | 68.2 | 74.7 | RecName: Full=CASP-like protein ARALYDRAFT_485429           | ----                 | ----                                                                                                                                      | AT3G50810.1   Symbols:   Uncharacterised protein family (UPF0497)   chr3:18889002-18889868 REVERSE LENGTH=154 | 154 | 154       | 7.00E-52 | 100.0 | 68.2 | 75.3 |

|                          |                                                                                                                                                                                                                                                                                                                                                                                                                                                                                                                                                                                                                                                                                                               |      |      |           |       |      |      |                                        |       |                      |                                                                                                                                                                                                                                                                                                                                                              |      |      |           |       |      |      |
|--------------------------|---------------------------------------------------------------------------------------------------------------------------------------------------------------------------------------------------------------------------------------------------------------------------------------------------------------------------------------------------------------------------------------------------------------------------------------------------------------------------------------------------------------------------------------------------------------------------------------------------------------------------------------------------------------------------------------------------------------|------|------|-----------|-------|------|------|----------------------------------------|-------|----------------------|--------------------------------------------------------------------------------------------------------------------------------------------------------------------------------------------------------------------------------------------------------------------------------------------------------------------------------------------------------------|------|------|-----------|-------|------|------|
| Rsa1.0_00369.1.g12362.t1 | ref NP_190652.1  cold-regulated 413-plasma membrane 2 [Arabidopsis thaliana]<br>gi 75212080 sp O9SVL6.1 CRPM2_ARAT<br>H RefName: Full=Cold-regulated 413 plasma membrane protein 2;<br>Short=AtCOR413-PM2<br>gi 10121843 gb AAG13394.1 AF283005.1<br>cold acclimation protein WCOR413-like protein beta form [Arabidopsis thaliana]<br>gi 13430786 gb AAK26015.1 AF360305.1<br>putative cold acclimation protein [Arabidopsis thaliana]<br>gi 4835234 emb CAB42912.1  putative cold acclimation protein [Arabidopsis thaliana] gi 15810635 gb AAL07242.1  putative cold acclimation protein [Arabidopsis thaliana]<br>gi 332645194 gb AEE78715.1  cold-regulated 413-plasma membrane 2 [Arabidopsis thaliana] | 204  | 203  | 1.00E-103 | 99.5  | 90.2 | 96.1 | cold-regulated 413-plasma membrane 2   | gbpln | Arabidopsis thaliana | AT3G50830.1   Symbols: COR413-PM2, ATCOR413-PM2   cold-regulated 413-plasma membrane 2   chr3:18894109-18895355 REVERSE LENGTH=203                                                                                                                                                                                                                           | 204  | 203  | 1.00E-105 | 99.5  | 90.2 | 96.1 |
| Rsa1.0_00369.1.g12363.t1 | gb EOA24850.1  hypothetical protein CARUB_v10018140mg [Capsella rubella]                                                                                                                                                                                                                                                                                                                                                                                                                                                                                                                                                                                                                                      | 212  | 166  | 3.00E-71  | 78.3  | 63.7 | 64.6 | hypothetical protein CARUB_v10018140mg | gbpln | Capsella rubella     | AT3G50860.1   Symbols:   Clathrin adaptor complex small chain family protein   chr3:18902346-18903959 FORWARD LENGTH=166                                                                                                                                                                                                                                     | 212  | 166  | 1.00E-73  | 78.3  | 63.2 | 64.6 |
| Rsa1.0_00369.1.g12364.t1 | # # # # # # # -                                                                                                                                                                                                                                                                                                                                                                                                                                                                                                                                                                                                                                                                                               |      |      |           |       |      |      |                                        | ----  | ----                 | #                                                                                                                                                                                                                                                                                                                                                            | #    | #    | #         | #     | #    | #    |
| Rsa1.0_00369.1.g12365.t1 | ref XP_002870704.1  ATMKK3 MITOGEN-ACTIVATED kinase [Arabidopsis lyrata subsp. lyrata]<br>gi 297316540 gb EFH46963.1  ATMKK3 MITOGEN-ACTIVATED kinase [Arabidopsis lyrata subsp. lyrata]                                                                                                                                                                                                                                                                                                                                                                                                                                                                                                                      | 251  | 520  | 9.00E-52  | 207.2 | 43.4 | 49.0 | ATMKK3 MITOGEN-ACTIVATED kinase        | gbpln | Arabidopsis lyrata   | AT5G40440.1   Symbols: ATMKK3, MKK3   mitogen-activated protein kinase kinase 3   chr5:16182149-16184513 FORWARD LENGTH=520                                                                                                                                                                                                                                  | 251  | 520  | 9.00E-54  | 207.2 | 43.0 | 49.0 |
| Rsa1.0_00369.1.g12366.t1 | gb AAB87099.1  putative retroelement pol polyprotein [Arabidopsis thaliana]                                                                                                                                                                                                                                                                                                                                                                                                                                                                                                                                                                                                                                   | 1465 | 1496 | 0         | 102.1 | 59.2 | 73.0 | putative retroelement pol polyprotein  | gbpln | Arabidopsis thaliana | AT4G23160.1   Symbols: CRK8   cysteine-rich RLK (RECEPTOR-like protein kinase) 8   chr4:12129485-12134086 FORWARD LENGTH=1262                                                                                                                                                                                                                                | 1465 | 1262 | 1.00E-139 | 86.1  | 16.5 | 23.7 |
| Rsa1.0_00369.1.g12367.t1 | # # # # # # # -                                                                                                                                                                                                                                                                                                                                                                                                                                                                                                                                                                                                                                                                                               |      |      |           |       |      |      |                                        | ----  | ----                 | #                                                                                                                                                                                                                                                                                                                                                            | #    | #    | #         | #     | #    | #    |
| Rsa1.0_00369.1.g12368.t1 | # # # # # # # -                                                                                                                                                                                                                                                                                                                                                                                                                                                                                                                                                                                                                                                                                               |      |      |           |       |      |      |                                        | ----  | ----                 | #                                                                                                                                                                                                                                                                                                                                                            | #    | #    | #         | #     | #    | #    |
| Rsa1.0_00369.1.g12369.t1 | # # # # # # # -                                                                                                                                                                                                                                                                                                                                                                                                                                                                                                                                                                                                                                                                                               |      |      |           |       |      |      |                                        | ----  | ----                 | #                                                                                                                                                                                                                                                                                                                                                            | #    | #    | #         | #     | #    | #    |
| Rsa1.0_00369.1.g12370.t1 | # # # # # # # -                                                                                                                                                                                                                                                                                                                                                                                                                                                                                                                                                                                                                                                                                               |      |      |           |       |      |      |                                        | ----  | ----                 | #                                                                                                                                                                                                                                                                                                                                                            | #    | #    | #         | #     | #    | #    |
| Rsa1.0_00369.1.g12371.t1 | # # # # # # # -                                                                                                                                                                                                                                                                                                                                                                                                                                                                                                                                                                                                                                                                                               |      |      |           |       |      |      |                                        | ----  | ----                 | #                                                                                                                                                                                                                                                                                                                                                            | #    | #    | #         | #     | #    | #    |
| Rsa1.0_00369.1.g12372.t1 | gb EOA23275.1  hypothetical protein CARUB_v10017889mg [Capsella rubella]                                                                                                                                                                                                                                                                                                                                                                                                                                                                                                                                                                                                                                      | 255  | 254  | 1.00E-128 | 99.6  | 91.4 | 95.3 | hypothetical protein CARUB_v10017889mg | gbpln | Capsella rubella     | AT3G51090.1   Symbols:   Protein of unknown function (DUF1640)   chr3:18978192-18979853 REVERSE LENGTH=298                                                                                                                                                                                                                                                   | 255  | 298  | 1.00E-121 | 116.9 | 87.5 | 90.6 |
| Rsa1.0_00369.1.g12373.t1 | db BAE99915.1  hypothetical protein [Arabidopsis thaliana]                                                                                                                                                                                                                                                                                                                                                                                                                                                                                                                                                                                                                                                    | 250  | 211  | 1.00E-74  | 84.4  | 64.8 | 72.4 | hypothetical protein                   | gbpln | Arabidopsis thaliana | AT3G51100.1   Symbols:   unknown protein; Has 48 Blast hits to 48 proteins in 16 species: Archae - 0; Bacteria - 0; Metazoa - 0; Fungi - 0; Plants - 48; Viruses - 0; Other Eukaryotes - 0 (source: NCBI BLINK).   chr3:18980531-18982174 REVERSE LENGTH=211                                                                                                 | 250  | 211  | 3.00E-73  | 84.4  | 65.2 | 72.8 |
| Rsa1.0_00369.1.g12374.t8 | # # # # # # # -                                                                                                                                                                                                                                                                                                                                                                                                                                                                                                                                                                                                                                                                                               |      |      |           |       |      |      |                                        | ----  | ----                 | AT5G35730.1   Symbols:   EXS (ERD1/XPR1/SYG1) family protein   chr5:13893941-13896821 FORWARD LENGTH=457                                                                                                                                                                                                                                                     | 227  | 457  | 5.00E-12  | 201.3 | 16.3 | 17.2 |
| Rsa1.0_00369.1.g12375.t1 | ref XP_002877789.1  hypothetical protein ARALYDRAFT_906461 [Arabidopsis lyrata subsp. lyrata]<br>gi 297323627 gb EFH54048.1  hypothetical protein ARALYDRAFT_906461 [Arabidopsis lyrata subsp. lyrata]                                                                                                                                                                                                                                                                                                                                                                                                                                                                                                        | 1267 | 1292 | 0         | 102.0 | 81.5 | 87.5 | hypothetical protein ARALYDRAFT_906461 | gbpln | Arabidopsis lyrata   | AT3G51120.1   Symbols:   DNA binding; zinc ion binding; nucleic acid binding; nucleic acid binding   chr3:18966026-18991886 REVERSE LENGTH=1292                                                                                                                                                                                                              | 1267 | 1292 | 0         | 102.0 | 80.9 | 87.0 |
| Rsa1.0_00369.1.g12376.t5 | gb EOA25162.1  hypothetical protein CARUB_v10018473mg [Capsella rubella]                                                                                                                                                                                                                                                                                                                                                                                                                                                                                                                                                                                                                                      | 398  | 410  | 0         | 103.0 | 94.5 | 97.7 | hypothetical protein CARUB_v10018473mg | gbpln | Capsella rubella     | AT3G51130.1   Symbols:   unknown protein; CONTAINS InterPro DOMAIN/s; Uncharacterised protein family UPF0183 (InterPro:IPR005373); Has 269 Blast hits to 265 proteins in 123 species: Archae - 0; Bacteria - 0; Metazoa - 131; Fungi - 82; Plants - 37; Viruses - 0; Other Eukaryotes - 19 (source: NCBI BLINK).   chr3:18994219-18997180 FORWARD LENGTH=410 | 398  | 410  | 0         | 103.0 | 94.0 | 96.7 |

|                           |                                                                                                                                                                                                                                                                                                                                                                                                              |      |      |           |       |      |      |                                                    |       |                      |                                                                                                                                                                                                                                                                                                                                                                                                                                                                                                                                    |      |      |           |       |      |      |
|---------------------------|--------------------------------------------------------------------------------------------------------------------------------------------------------------------------------------------------------------------------------------------------------------------------------------------------------------------------------------------------------------------------------------------------------------|------|------|-----------|-------|------|------|----------------------------------------------------|-------|----------------------|------------------------------------------------------------------------------------------------------------------------------------------------------------------------------------------------------------------------------------------------------------------------------------------------------------------------------------------------------------------------------------------------------------------------------------------------------------------------------------------------------------------------------------|------|------|-----------|-------|------|------|
| Rsa1.0_00369.1.g12377.t1  | gb EOA36857.1  hypothetical protein CARUB_v10008903mg [Capsella rubella]                                                                                                                                                                                                                                                                                                                                     | 566  | 536  | 2.00E-84  | 94.7  | 24.7 | 32.0 | hypothetical protein CARUB_v10008903mg             | gbpln | Capsella rubella     | AT5G28823.1   Symbols:   FUNCTIONS IN: molecular_function unknown; INVOLVED IN: biological_process unknown; LOCATED IN: cellular_component unknown; EXPRESSED IN: cultured cell; BEST Arabidopsis thaliana protein match is: Zinc knuckle (CCHC-type) family protein (TAIR:AT2G07760.1); Has 30201 Blast hits to 17322 proteins in 780 species: Archae - 12; Bacteria - 1396; Metazoa - 17338; Fungi - 3422; Plants - 5037; Viruses - 0; Other Eukaryotes - 2996 (source: NCBI BLink).   chr5:10837849-10838826 REVERSE LENGTH=568 | 566  | 568  | 3.00E-46  | 100.4 | 14.0 | 17.0 |
| Rsa1.0_00369.1.g12378.t1  | ref NP_001190049.1  ATP binding microtubule motor family protein [Arabidopsis thaliana]   gi 332645236 gb AEE78757.1  ATP binding microtubule motor family protein [Arabidopsis thaliana]                                                                                                                                                                                                                    | 1087 | 1054 | 0         | 97.0  | 78.8 | 85.0 | ATP binding microtubule motor family protein       | gbpln | Arabidopsis thaliana | AT3G51150.2   Symbols:   ATP binding microtubule motor family protein   chr3:19002006-19006509 FORWARD LENGTH=1054                                                                                                                                                                                                                                                                                                                                                                                                                 | 1087 | 1054 | 0         | 97.0  | 78.8 | 85.0 |
| Rsa1.0_00369.1.g12379.t1  | gb EOA25979.1  hypothetical protein CARUB_v10019368mg [Capsella rubella]                                                                                                                                                                                                                                                                                                                                     | 365  | 374  | 0         | 102.5 | 91.2 | 95.6 | hypothetical protein CARUB_v10019368mg             | gbpln | Capsella rubella     | AT3G51160.1   Symbols: MUR1, MUR1, GMD2   NAD(P)-binding Rossmann-fold superfamily protein   chr3:19007232-19008353 REVERSE LENGTH=373                                                                                                                                                                                                                                                                                                                                                                                             | 365  | 373  | 0         | 102.2 | 91.0 | 95.1 |
| Rsa1.0_00369.1.g12380.t1  | ref XP_002869043.1  60S ribosomal protein L8 [Arabidopsis lyrata subsp. lyrata]   gi 297314879 gb EFH45302.1  60S ribosomal protein L8 [Arabidopsis lyrata subsp. lyrata]                                                                                                                                                                                                                                    | 259  | 258  | 1.00E-130 | 99.6  | 90.0 | 92.7 | 60S ribosomal protein L8                           | gbpln | Arabidopsis lyrata   | AT4G36130.1   Symbols:   Ribosomal protein L2 family   chr4:17097613-17098656 FORWARD LENGTH=258                                                                                                                                                                                                                                                                                                                                                                                                                                   | 259  | 258  | 1.00E-132 | 99.6  | 89.6 | 92.7 |
| Rsa1.0_00369.1.g12381.t1  | ref XP_002877792.1  hypothetical protein ARALYDRAFT_485473 [Arabidopsis lyrata subsp. lyrata]   gi 297323630 gb EFH54051.1  hypothetical protein ARALYDRAFT_485473 [Arabidopsis lyrata subsp. lyrata]                                                                                                                                                                                                        | 187  | 186  | 9.00E-71  | 99.5  | 79.7 | 85.6 | hypothetical protein ARALYDRAFT_485473             | gbpln | Arabidopsis lyrata   | AT3G51220.1   Symbols:   Plant protein of unknown function (DUF827)   chr3:19021943-19022612 REVERSE LENGTH=186                                                                                                                                                                                                                                                                                                                                                                                                                    | 187  | 186  | 6.00E-73  | 99.5  | 78.6 | 85.6 |
| Rsa1.0_00369.1.g12382.t1  | gb ABB91635.1  flavanone 3-hydroxylase 1 [Brassica napus]   gi 82795266 gb ABB91636.1  flavanone 3-hydroxylase 1 [Brassica napus]                                                                                                                                                                                                                                                                            | 368  | 358  | 0         | 97.3  | 89.9 | 93.8 | flavanone 3-hydroxylase 1                          | gbpln | Brassica napus       | AT3G51240.1   Symbols: F3H, TT6, F3'H   flavanone 3-hydroxylase   chr3:19025409-19026658 FORWARD LENGTH=358                                                                                                                                                                                                                                                                                                                                                                                                                        | 368  | 358  | 0         | 97.3  | 86.7 | 91.8 |
| Rsa1.0_00369.1.g12383.t1  | emb CAA73622.1  multicatalytic endopeptidase [Arabidopsis thaliana]   gi 2511592 emb CAA73623.1  multicatalytic endopeptidase [Arabidopsis thaliana]                                                                                                                                                                                                                                                         | 250  | 235  | 1.00E-130 | 94.0  | 90.0 | 93.2 | multicatalytic endopeptidase                       | gbpln | Arabidopsis thaliana | AT5G66140.1   Symbols: PAD2   proteasome alpha subunit D2   chr5:26437445-26438677 REVERSE LENGTH=250                                                                                                                                                                                                                                                                                                                                                                                                                              | 250  | 250  | 1.00E-131 | 100.0 | 95.6 | 98.8 |
| Rsa1.0_00369.1.g12384.t16 | ref NP_190696.1  tetratricopeptide repeat domain-containing protein [Arabidopsis thaliana]   gi 6562280 emb CAB62650.1  MS5-like protein [Arabidopsis thaliana]   gi 30102656 gb AAP21246.1  At3g51280 [Arabidopsis thaliana]   gi 110735963 dbj BAE99956.1  MS5 like protein [Arabidopsis thaliana]   gi 332645252 gb AEE78773.1  tetratricopeptide repeat domain-containing protein [Arabidopsis thaliana] | 420  | 430  | 0         | 102.4 | 88.8 | 92.9 | tetratricopeptide repeat domain-containing protein | gbpln | Arabidopsis thaliana | AT3G51280.1   Symbols:   Tetratricopeptide repeat (TPR)-like superfamily protein   chr3:19037229-19038781 FORWARD LENGTH=430                                                                                                                                                                                                                                                                                                                                                                                                       | 420  | 430  | 0         | 102.4 | 88.8 | 92.9 |
| Rsa1.0_00369.1.g12385.t1  | gb AFK47272.1  unknown [Lotus japonicus]                                                                                                                                                                                                                                                                                                                                                                     | 197  | 197  | 1.00E-104 | 100.0 | 90.4 | 97.5 | unknown                                            | gbpln | Lotus japonicus      | AT4G35950.1   Symbols: ARAC6, RAC2, ATROP5, ATRAC6, ROP5, RAC6   RAC-like 6   chr4:17024051-17025514 REVERSE LENGTH=197                                                                                                                                                                                                                                                                                                                                                                                                            | 197  | 197  | 1.00E-101 | 100.0 | 95.9 | 99.0 |
| Rsa1.0_00369.1.g12386.t2  | ref XP_002877797.1  aspartyl protease family protein [Arabidopsis lyrata subsp. lyrata]   gi 297323630 gb EFH54056.1  aspartyl protease family protein [Arabidopsis lyrata subsp. lyrata]                                                                                                                                                                                                                    | 551  | 530  | 0         | 96.2  | 73.3 | 81.9 | aspartyl protease family protein                   | gbpln | Arabidopsis lyrata   | AT3G51330.1   Symbols:   Eukaryotic aspartyl protease family protein   chr3:19053480-19056152 REVERSE LENGTH=529                                                                                                                                                                                                                                                                                                                                                                                                                   | 551  | 529  | 0         | 96.0  | 73.3 | 81.5 |
| Rsa1.0_00369.1.g12387.t2  | gb AAM19705.1 AF499718.1 protein phosphatase 2c-like protein [Eutrema halophilum]                                                                                                                                                                                                                                                                                                                            | 185  | 378  | 2.00E-26  | 204.3 | 34.1 | 37.3 | protein phosphatase 2c-like protein                | gbpln | Eutrema halophilum   | AT3G51370.2   Symbols:   Protein phosphatase 2C family protein   chr3:19070387-19071975 FORWARD LENGTH=294                                                                                                                                                                                                                                                                                                                                                                                                                         | 185  | 294  | 6.00E-27  | 158.9 | 32.4 | 36.2 |
| Rsa1.0_00369.1.g12388.t1  | ref NP_190706.1  protein IQ-domain 20 [Arabidopsis thaliana]   gi 6572059 emb CAB63002.1  putative protein [Arabidopsis thaliana]   gi 119360013 gb ABL66735.1  At3g51380 [Arabidopsis thaliana]   gi 332645265 gb AEE78786.1  protein IQ-domain 20 [Arabidopsis thaliana]                                                                                                                                   | 142  | 103  | 2.00E-39  | 72.5  | 62.0 | 65.5 | protein IQ-domain 20                               | gbpln | Arabidopsis thaliana | AT3G51380.1   Symbols: IQD20   IQ-domain 20   chr3:19074036-19074426 REVERSE LENGTH=103                                                                                                                                                                                                                                                                                                                                                                                                                                            | 142  | 103  | 6.00E-42  | 72.5  | 62.0 | 65.5 |

|                          |                                                                                                                                                                                                                                                                                                                                                                                                                                                                                       |     |     |           |       |      |      |                                        |       |                         |                                                                                                                                                              |     |     |           |       |      |      |
|--------------------------|---------------------------------------------------------------------------------------------------------------------------------------------------------------------------------------------------------------------------------------------------------------------------------------------------------------------------------------------------------------------------------------------------------------------------------------------------------------------------------------|-----|-----|-----------|-------|------|------|----------------------------------------|-------|-------------------------|--------------------------------------------------------------------------------------------------------------------------------------------------------------|-----|-----|-----------|-------|------|------|
| Rsa1.0_00369.1.g12389.t1 | gb EOA16039.1  hypothetical protein CARUB_v10004167mg [Capsella rubella]                                                                                                                                                                                                                                                                                                                                                                                                              | 478 | 799 | 1.00E-151 | 167.2 | 57.5 | 68.2 | hypothetical protein CARUB_v10004167mg | gbpln | Capsella rubella        | AT4G13780.1   Symbols:   methionine--tRNA ligase, putative / methionyl-tRNA synthetase, putative / MetRS, putative   chr4:7993366-7998433 REVERSE LENGTH=797 | 478 | 797 | 1.00E-150 | 166.7 | 56.1 | 66.1 |
| Rsa1.0_00370.1.g12390.t2 | gb ABW81040.1  C-4-methyl-sterase-like protein [Arabidopsis lyrata subsp. lyrata]                                                                                                                                                                                                                                                                                                                                                                                                     | 331 | 253 | 4.00E-97  | 76.4  | 55.6 | 59.2 | C-4-methyl-sterase-like protein        | gbpln | Arabidopsis lyrata      | AT2G29390.3   Symbols: ATSMO2   sterol 4-alpha-methyl-oxidase 2-2   chr2:12610758-12612149 REVERSE LENGTH=253                                                | 331 | 253 | 2.00E-99  | 76.4  | 55.3 | 58.6 |
| Rsa1.0_00370.1.g12391.t1 | ref XP_002879214.1  hypothetical protein ARALYDRAFT_344701 [Arabidopsis lyrata subsp. lyrata] gi 297325053 gb EFH55473.1  hypothetical protein ARALYDRAFT_344701 [Arabidopsis lyrata subsp. lyrata]                                                                                                                                                                                                                                                                                   | 384 | 397 | 1.00E-166 | 103.4 | 84.9 | 92.2 | hypothetical protein ARALYDRAFT_344701 | gbpln | Arabidopsis lyrata      | AT2G29410.1   Symbols: MTPB1, ATMTPB1   metal tolerance protein B1   chr2:12616810-12617937 FORWARD LENGTH=375                                               | 384 | 375 | 1.00E-159 | 97.7  | 79.4 | 86.5 |
| Rsa1.0_00370.1.g12392.t1 | gb ABW74586.1  glutathione-S-transferase [Boecheera divaricarpa]                                                                                                                                                                                                                                                                                                                                                                                                                      | 225 | 225 | 1.00E-108 | 100.0 | 84.9 | 91.6 | glutathione-S-transferase              | gbpln | Boecheera divaricarpa   | AT2G29420.1   Symbols: ATGSTU7, GST25, GSTU7   glutathione S-transferase tau 7   chr2:12618111-12618871 REVERSE LENGTH=227                                   | 225 | 227 | 1.00E-107 | 100.9 | 84.0 | 90.7 |
| Rsa1.0_00370.1.g12393.t1 | gb ABW81194.1  glutathione-S-transferase 5 [Arabidopsis cebennensis]                                                                                                                                                                                                                                                                                                                                                                                                                  | 261 | 224 | 4.00E-99  | 85.8  | 67.4 | 72.8 | glutathione-S-transferase 5            | gbpln | Arabidopsis cebennensis | AT2G29460.1   Symbols: ATGSTU4, GST22, GSTU4   glutathione S-transferase tau 4   chr2:12626689-12627600 REVERSE LENGTH=224                                   | 261 | 224 | 1.00E-100 | 85.8  | 67.0 | 72.4 |
| Rsa1.0_00370.1.g12394.t1 | ref XP_002881051.1  glutathione-s-transferase 2 [Arabidopsis lyrata subsp. lyrata] gi 158828146 gb ABW81025.1  glutathione-S-transferase 2 [Arabidopsis lyrata subsp. lyrata] gi 297326890 gb EFH57310.1  glutathione-s-transferase 2 [Arabidopsis lyrata subsp. lyrata] ref NP_180509.1  glutathione S-transferase [Arabidopsis thaliana] gi 75268092 sp Q9ZW29.1 GSTU2_ARAT H RecName: Full=Glutathione S-transferase U2; Short=AtGSTU2; AltName: Full=Glutathione S-transferase 20 | 228 | 225 | 1.00E-107 | 98.7  | 83.8 | 90.4 | glutathione-s-transferase 2            | gbpln | Arabidopsis lyrata      | AT2G29470.1   Symbols: ATGSTU3, GST21, GSTU3   glutathione S-transferase tau 3   chr2:12628666-12629490 REVERSE LENGTH=225                                   | 228 | 225 | 1.00E-109 | 98.7  | 83.3 | 89.0 |
| Rsa1.0_00370.1.g12395.t1 | gi 11096002 gb AAG30133.1 AF288184.1  glutathione S-transferase [Arabidopsis thaliana] gi 3980387 gb AAC95190.1  putative glutathione S-transferase [Arabidopsis thaliana] gi 20453170 gb AAM19826.1  At2g29480/F16P2.14 [Arabidopsis thaliana] gi 21689633 gb AAM67438.1  At2g29480/F16P2.14 [Arabidopsis thaliana] gi 330253165 gb AEC08259.1  glutathione S-transferase U2 [Arabidopsis thaliana]                                                                                  | 224 | 225 | 1.00E-112 | 100.4 | 88.4 | 93.3 | glutathione S-transferase              | gbpln | Arabidopsis thaliana    | AT2G29480.1   Symbols: ATGSTU2, GST20, GSTU2   glutathione S-transferase tau 2   chr2:12630382-12631232 REVERSE LENGTH=225                                   | 224 | 225 | 1.00E-114 | 100.4 | 88.4 | 93.3 |
| Rsa1.0_00370.1.g12396.t1 | #                                                                                                                                                                                                                                                                                                                                                                                                                                                                                     | #   | #   | #         | #     | #    | #    | -                                      | ----  | ----                    | #                                                                                                                                                            | #   | #   | #         | #     | #    |      |

|                          |                                                                                                                                                                                                                                                                                                                                                                                                                                                                                                                                                                                                                                                                                                                                                                                                                                                                                                                                                                                                                                                                                                                                                                                                                                                                                                                                                                                                                                                                                                                                   |     |     |           |       |      |      |                                               |        |                      |                                                                                                                                  |     |     |           |       |      |      |
|--------------------------|-----------------------------------------------------------------------------------------------------------------------------------------------------------------------------------------------------------------------------------------------------------------------------------------------------------------------------------------------------------------------------------------------------------------------------------------------------------------------------------------------------------------------------------------------------------------------------------------------------------------------------------------------------------------------------------------------------------------------------------------------------------------------------------------------------------------------------------------------------------------------------------------------------------------------------------------------------------------------------------------------------------------------------------------------------------------------------------------------------------------------------------------------------------------------------------------------------------------------------------------------------------------------------------------------------------------------------------------------------------------------------------------------------------------------------------------------------------------------------------------------------------------------------------|-----|-----|-----------|-------|------|------|-----------------------------------------------|--------|----------------------|----------------------------------------------------------------------------------------------------------------------------------|-----|-----|-----------|-------|------|------|
| Rsa1.0_00370.1.g12397.t1 | ref NP_180511.1  HSP20 family protein [Arabidopsis thaliana] gi 75315964 sp Q9Z31.1 HS17B_ARAT H RecName: Full=17.6 kDa class 1 heat shock protein 2; AltName: Full=17.6 kDa heat shock protein 2; Short=AtHsp17.6B gi 3980385 gb AAC95188.1  putative small heat shock protein [Arabidopsis thaliana] gi 21554599 gb AAM63628.1  putative small heat shock protein [Arabidopsis thaliana] gi 51968472 dbj BAD42928.1  putative small heat shock protein [Arabidopsis thaliana] gi 51968689 dbj BAD43036.1  putative small heat shock protein [Arabidopsis thaliana] gi 51971795 dbj BAD44562.1  putative small heat shock protein [Arabidopsis thaliana] gi 51971973 dbj BAD44651.1  putative small heat shock protein [Arabidopsis thaliana] gi 51971989 dbj BAD44659.1  putative small heat shock protein [Arabidopsis thaliana] gi 62318713 dbj BAD93726.1  putative small heat shock protein [Arabidopsis thaliana] gi 62320100 dbj BAD94277.1  putative small heat shock protein [Arabidopsis thaliana] gi 88900410 gb ABD5751.1  At2g29500 [Arabidopsis thaliana] gi 330253167 gb AEC08261.1  HSP20 family protein [Arabidopsis thaliana] ref XP_002881056.1  hypothetical protein ARALYDRAFT_901916 [Arabidopsis thaliana] gi 297326895 gb EFH57315.1  hypothetical protein ARALYDRAFT_901916 [Arabidopsis thaliana] ref NP_180518.1  zinc finger CCCH domain-containing protein 25 [Arabidopsis thaliana] gi 75339110 sp Q9Z36.1 C3H25_ARAT H RecName: Full=Zinc finger CCCH domain-containing protein 25; Short=AtC3H25 | 154 | 153 | 2.00E-65  | 99.4  | 91.6 | 94.2 | HSP20 family protein                          | gb pln | Arabidopsis thaliana | AT2G29500.1   Symbols:   HSP20-like chaperones superfamily protein   chr2:12633279-12633740 REVERSE LENGTH=153                   | 154 | 153 | 5.00E-68  | 99.4  | 91.6 | 94.2 |
| Rsa1.0_00370.1.g12398.t1 | gi 16226863 gb AAL16284.1 AF428354.1 At2g29580/F16P2.4 [Arabidopsis thaliana] gi 3980378 gb AAC95181.1  putative RNA-binding protein [Arabidopsis thaliana] gi 27363230 gb AAO11537.1  At2g29580/F16P2.4 [Arabidopsis thaliana] gi 330253181 gb AEC08275.1  zinc finger CCCH domain-containing protein 25 [Arabidopsis thaliana]                                                                                                                                                                                                                                                                                                                                                                                                                                                                                                                                                                                                                                                                                                                                                                                                                                                                                                                                                                                                                                                                                                                                                                                                  | 85  | 85  | 2.00E-40  | 100.0 | 90.6 | 96.5 | hypothetical protein ARALYDRAFT_901916        | gb pln | Arabidopsis lyrata   | AT2G29530.2   Symbols: TIM10   Tim10/DDP family zinc finger protein   chr2:12641026-12642243 REVERSE LENGTH=83                   | 85  | 83  | 1.00E-40  | 97.6  | 85.9 | 90.6 |
| Rsa1.0_00370.1.g12399.t1 | gi 16226863 gb AAL16284.1 AF428354.1 At2g29580/F16P2.4 [Arabidopsis thaliana] gi 3980378 gb AAC95181.1  putative RNA-binding protein [Arabidopsis thaliana] gi 27363230 gb AAO11537.1  At2g29580/F16P2.4 [Arabidopsis thaliana] gi 330253181 gb AEC08275.1  zinc finger CCCH domain-containing protein 25 [Arabidopsis thaliana]                                                                                                                                                                                                                                                                                                                                                                                                                                                                                                                                                                                                                                                                                                                                                                                                                                                                                                                                                                                                                                                                                                                                                                                                  | 338 | 483 | 4.00E-80  | 142.9 | 64.2 | 72.5 | zinc finger CCCH domain-containing protein 25 | gb pln | Arabidopsis thaliana | AT2G29580.1   Symbols:   CCCH-type zinc fingerfamily protein with RNA-binding domain   chr2:12652011-12654158 FORWARD LENGTH=483 | 338 | 483 | 1.00E-82  | 142.9 | 64.2 | 72.5 |
| Rsa1.0_00370.1.g12400.t1 | gb EOA26305.1  hypothetical protein CARUB_v10024771mg [Capsella rubella]                                                                                                                                                                                                                                                                                                                                                                                                                                                                                                                                                                                                                                                                                                                                                                                                                                                                                                                                                                                                                                                                                                                                                                                                                                                                                                                                                                                                                                                          | 178 | 313 | 1.00E-75  | 175.8 | 77.0 | 85.4 | hypothetical protein CARUB_v10024771mg        | gb pln | Capsella rubella     | AT2G29640.1   Symbols: JOSL   JOSEPHIN-like protein   chr2:12671206-12673300 FORWARD LENGTH=360                                  | 178 | 360 | 2.00E-75  | 202.2 | 74.7 | 83.7 |
| Rsa1.0_00370.1.g12401.t1 | dbj BAJ34219.1  unnamed protein product [Thellungiella halophila]                                                                                                                                                                                                                                                                                                                                                                                                                                                                                                                                                                                                                                                                                                                                                                                                                                                                                                                                                                                                                                                                                                                                                                                                                                                                                                                                                                                                                                                                 | 366 | 379 | 1.00E-136 | 103.6 | 77.3 | 85.5 | unnamed protein product                       | ----   | ----                 | AT2G29660.1   Symbols:   zinc finger (C2H2 type) family protein   chr2:12679346-12680467 FORWARD LENGTH=373                      | 366 | 373 | 1.00E-126 | 101.9 | 80.1 | 86.9 |
| Rsa1.0_00370.1.g12402.t1 | ref NP_565685.1  tetratricopeptide repeat-containing protein [Arabidopsis thaliana] gi 14030739 gb AAK53044.1 AF375460.1 At2g29670/T27A16.23 [Arabidopsis thaliana] gi 18377765 gb AAL67032.1  unknown protein [Arabidopsis thaliana] gi 20197389 gb AAC35237.2  expressed protein [Arabidopsis thaliana] gi 20465643 gb AAM20290.1  unknown protein [Arabidopsis thaliana] gi 23308477 gb AAN18206.1  At2g29670/T27A16.23 [Arabidopsis thaliana] gi 330253196 gb AEC08290.1  tetratricopeptide repeat-containing protein [Arabidopsis thaliana]                                                                                                                                                                                                                                                                                                                                                                                                                                                                                                                                                                                                                                                                                                                                                                                                                                                                                                                                                                                  | 514 | 536 | 0         | 104.3 | 72.6 | 83.5 | tetratricopeptide repeat-containing protein   | gb pln | Arabidopsis thaliana | AT2G29670.1   Symbols:   Tetratricopeptide repeat (TPR)-like superfamily protein   chr2:12682309-12684745 REVERSE LENGTH=536     | 514 | 536 | 0         | 104.3 | 72.6 | 83.5 |
| Rsa1.0_00370.1.g12403.t1 | #                                                                                                                                                                                                                                                                                                                                                                                                                                                                                                                                                                                                                                                                                                                                                                                                                                                                                                                                                                                                                                                                                                                                                                                                                                                                                                                                                                                                                                                                                                                                 | #   | #   | #         | #     | #    | -    | ----                                          | ----   | #                    | #                                                                                                                                | #   | #   | #         | #     | #    |      |
| Rsa1.0_00370.1.g12404.t2 | #                                                                                                                                                                                                                                                                                                                                                                                                                                                                                                                                                                                                                                                                                                                                                                                                                                                                                                                                                                                                                                                                                                                                                                                                                                                                                                                                                                                                                                                                                                                                 | #   | #   | #         | #     | #    | -    | ----                                          | ----   | #                    | #                                                                                                                                | #   | #   | #         | #     | #    |      |
| Rsa1.0_00370.1.g12405.t1 | #                                                                                                                                                                                                                                                                                                                                                                                                                                                                                                                                                                                                                                                                                                                                                                                                                                                                                                                                                                                                                                                                                                                                                                                                                                                                                                                                                                                                                                                                                                                                 | #   | #   | #         | #     | #    | -    | ----                                          | ----   | #                    | #                                                                                                                                | #   | #   | #         | #     | #    |      |

| Rsa1.0_00370.1.g12406.t1 | #                                                                                                                                                                                                                                                                                                                                                                                                                                                                                                                                                      | #    | #    | #         | #     | #    | #    | #                                               | -     | ----                 | ----                                                                                                                                                                                                                                                                                                                                                                                             | #    | #    | #         | #     | #    | #    |
|--------------------------|--------------------------------------------------------------------------------------------------------------------------------------------------------------------------------------------------------------------------------------------------------------------------------------------------------------------------------------------------------------------------------------------------------------------------------------------------------------------------------------------------------------------------------------------------------|------|------|-----------|-------|------|------|-------------------------------------------------|-------|----------------------|--------------------------------------------------------------------------------------------------------------------------------------------------------------------------------------------------------------------------------------------------------------------------------------------------------------------------------------------------------------------------------------------------|------|------|-----------|-------|------|------|
| Rsa1.0_00370.1.g12407.t1 | ref[XP_002881067.1] hypothetical protein ARALYDRAFT_901946 [Arabidopsis lyrata subsp. lyrata] gi 297326906 gb EFH57326.1                                                                                                                                                                                                                                                                                                                                                                                                                               | 114  | 117  | 2.00E-41  | 102.6 | 67.5 | 83.3 | hypothetical protein ARALYDRAFT_901946          | gbpln | Arabidopsis lyrata   | AT4G09465.1   Symbols:   Carbohydrate-binding X8 domain superfamily protein   chr4:6001411-6001761 FORWARD LENGTH=116                                                                                                                                                                                                                                                                            | 114  | 116  | 2.00E-29  | 101.8 | 48.2 | 67.5 |
| Rsa1.0_00370.1.g12408.t1 | ref[NP_973562.1] F-box/LRR-repeat protein [Arabidopsis thaliana] gi 29649061 gb AA086842.1                                                                                                                                                                                                                                                                                                                                                                                                                                                             | 228  | 339  | 1.00E-72  | 148.7 | 65.8 | 76.8 | F-box/LRR-repeat protein                        | gbpln | Arabidopsis thaliana | AT2G29930.2   Symbols:   F-box/RNI-like superfamily protein   chr2:12756457-12757727 REVERSE LENGTH=339                                                                                                                                                                                                                                                                                          | 228  | 339  | 3.00E-75  | 148.7 | 65.8 | 76.8 |
| Rsa1.0_00370.1.g12409.t1 | ref[XP_002879240.1] ATPDR3/PDR3 [Arabidopsis lyrata subsp. lyrata] gi 297325079 gb EFH55499.1                                                                                                                                                                                                                                                                                                                                                                                                                                                          | 1428 | 1428 | 0         | 100.0 | 92.4 | 96.5 | ATPDR3/PDR3                                     | gbpln | Arabidopsis lyrata   | AT2G29940.1   Symbols: PDR3, ATPDR3   pleiotropic drug resistance 3   chr2:12760139-12766455 FORWARD LENGTH=1426                                                                                                                                                                                                                                                                                 | 1428 | 1426 | 0         | 99.9  | 91.9 | 96.4 |
| Rsa1.0_00370.1.g12410.t1 | gb AFJ19037.1  fatty acid desaturase BnaC.FAD3.b [Brassica napus]                                                                                                                                                                                                                                                                                                                                                                                                                                                                                      | 380  | 380  | 0         | 100.0 | 97.6 | 99.7 | fatty acid desaturase BnaC.FAD3.b               | gbpln | Brassica napus       | AT2G29980.1   Symbols: FAD3   fatty acid desaturase 3   chr2:12781787-12784946 REVERSE LENGTH=386                                                                                                                                                                                                                                                                                                | 380  | 386  | 0         | 101.6 | 91.8 | 95.8 |
| Rsa1.0_00371.1.g12411.t1 | #                                                                                                                                                                                                                                                                                                                                                                                                                                                                                                                                                      | #    | #    | #         | #     | #    | #    | -                                               | ----  | ----                 | #                                                                                                                                                                                                                                                                                                                                                                                                | #    | #    | #         | #     | #    | #    |
| Rsa1.0_00371.1.g12412.t1 | gb EOA26942.1  hypothetical protein CARUB_v10023035mg, partial [Capsella rubella]                                                                                                                                                                                                                                                                                                                                                                                                                                                                      | 419  | 508  | 1.00E-139 | 121.2 | 67.3 | 77.6 | hypothetical protein CARUB_v10023035mg, partial | gbpln | Capsella rubella     | AT2G23530.1   Symbols:   Zinc-finger domain of monoamine-oxidase A repressor R1   chr2:10020652-10022804 REVERSE LENGTH=552                                                                                                                                                                                                                                                                      | 419  | 552  | 1.00E-138 | 131.7 | 63.0 | 70.9 |
| Rsa1.0_00371.1.g12413.t1 | gb EOA28509.1  hypothetical protein CARUB_v10024724mg [Capsella rubella]                                                                                                                                                                                                                                                                                                                                                                                                                                                                               | 876  | 890  | 0         | 101.6 | 87.8 | 91.9 | hypothetical protein CARUB_v10024724mg          | gbpln | Capsella rubella     | AT2G23520.1   Symbols:   Pyridoxal phosphate (PLP)-dependent transferases superfamily protein   chr2:10014256-10016943 REVERSE LENGTH=895                                                                                                                                                                                                                                                        | 876  | 895  | 0         | 102.2 | 87.1 | 91.4 |
| Rsa1.0_00371.1.g12414.t1 | ref[XP_002880506.1] hypothetical protein ARALYDRAFT_481217 [Arabidopsis lyrata subsp. lyrata] gi 297326345 gb EFH56765.1                                                                                                                                                                                                                                                                                                                                                                                                                               | 525  | 519  | 0         | 98.9  | 82.9 | 89.0 | hypothetical protein ARALYDRAFT_481217          | gbpln | Arabidopsis lyrata   | AT2G23470.1   Symbols: RUS4   Protein of unknown function, DUF647   chr2:9999105-10001398 REVERSE LENGTH=520                                                                                                                                                                                                                                                                                     | 525  | 520  | 0         | 99.0  | 81.7 | 88.4 |
| Rsa1.0_00371.1.g12415.t1 | gb EOA26553.1  hypothetical protein CARUB_v10022612mg [Capsella rubella]                                                                                                                                                                                                                                                                                                                                                                                                                                                                               | 859  | 883  | 0         | 102.8 | 87.0 | 92.2 | hypothetical protein CARUB_v10022612mg          | gbpln | Capsella rubella     | AT2G23460.1   Symbols: XLG1, ATXLG1   extra-large G-protein 1   chr2:9995699-9998945 FORWARD LENGTH=888                                                                                                                                                                                                                                                                                          | 859  | 888  | 0         | 103.4 | 86.7 | 92.0 |
| Rsa1.0_00371.1.g12416.t1 | ref[NP_565552.1] wall-associated receptor kinase-like 14 [Arabidopsis thaliana] gi 30682087 ref[NP_850041.1] wall-associated receptor kinase-like 14 [Arabidopsis thaliana] gi 116256124 sp Q8RY67.2 WAKLO_ARA TH RecName: Full=Wall-associated receptor kinase-like 14; Flags: Precursor gi 20197000 gb AAC23760.2 putative protein kinase [Arabidopsis thaliana] gi 330252362 gb AEC07456.1 wall-associated receptor kinase-like 14 [Arabidopsis thaliana] gi 330252363 gb AEC07457.1 wall-associated receptor kinase-like 14 [Arabidopsis thaliana] | 687  | 708  | 0         | 103.1 | 79.3 | 89.2 | wall-associated receptor kinase-like 14         | gbpln | Arabidopsis thaliana | AT2G23450.1   Symbols:   Protein kinase superfamily protein   chr2:9988926-9991244 REVERSE LENGTH=708                                                                                                                                                                                                                                                                                            | 687  | 708  | 0         | 103.1 | 79.3 | 89.2 |
| Rsa1.0_00371.1.g12417.t1 | #                                                                                                                                                                                                                                                                                                                                                                                                                                                                                                                                                      | #    | #    | #         | #     | #    | #    | -                                               | ----  | ----                 | #                                                                                                                                                                                                                                                                                                                                                                                                | #    | #    | #         | #     | #    | #    |
| Rsa1.0_00371.1.g12418.t1 | #                                                                                                                                                                                                                                                                                                                                                                                                                                                                                                                                                      | #    | #    | #         | #     | #    | #    | -                                               | ----  | ----                 | #                                                                                                                                                                                                                                                                                                                                                                                                | #    | #    | #         | #     | #    | #    |
| Rsa1.0_00371.1.g12419.t1 | emb CAB39638.1  RNA-directed DNA polymerase-like protein [Arabidopsis thaliana] gi 7267666 emb CAB78094.1  RNA-directed DNA polymerase-like protein [Arabidopsis thaliana]                                                                                                                                                                                                                                                                                                                                                                             | 1900 | 1274 | 0         | 67.1  | 32.9 | 43.7 | RNA-directed DNA polymerase-like protein        | gbpln | Arabidopsis thaliana | AT4G29090.1   Symbols:   Ribonuclease H-like superfamily protein   chr4:14333528-14335255 FORWARD LENGTH=575                                                                                                                                                                                                                                                                                     | 1900 | 575  | 2.00E-66  | 30.3  | 9.0  | 14.2 |
| Rsa1.0_00371.1.g12420.t1 | ref[XP_002878685.1] hypothetical protein ARALYDRAFT_900829 [Arabidopsis lyrata subsp. lyrata] gi 297324524 gb EFH54944.1                                                                                                                                                                                                                                                                                                                                                                                                                               | 83   | 81   | 2.00E-25  | 97.6  | 72.3 | 81.9 | hypothetical protein ARALYDRAFT_900829          | gbpln | Arabidopsis lyrata   | AT2G23440.1   Symbols:   unknown protein; FUNCTIONS IN: molecular function unknown; INVOLVED IN: biological process unknown; LOCATED IN: endomembrane system; EXPRESSED IN: root; Has 25 Blast hits to 25 proteins in 6 species: Archae - 0; Bacteria - 0; Metazoa - 0; Fungi - 0; Plants - 25; Viruses - 0; Other Eukaryotes - 0 (source: NCBI BLink).   chr2:9979482-9979730 FORWARD LENGTH=82 | 83   | 82   | 1.00E-23  | 98.8  | 67.5 | 75.9 |

|                          |                                                                                                                                                                                                                                                                                                                                                                                                                                                                                                                                                                                                                                                                                                                                                                                                                        |     |     |          |       |      |      |                                                 |       |                      |                                                                                                                        |     |     |          |       |      |      |
|--------------------------|------------------------------------------------------------------------------------------------------------------------------------------------------------------------------------------------------------------------------------------------------------------------------------------------------------------------------------------------------------------------------------------------------------------------------------------------------------------------------------------------------------------------------------------------------------------------------------------------------------------------------------------------------------------------------------------------------------------------------------------------------------------------------------------------------------------------|-----|-----|----------|-------|------|------|-------------------------------------------------|-------|----------------------|------------------------------------------------------------------------------------------------------------------------|-----|-----|----------|-------|------|------|
| Rsa1.0_00371.1.g12421.t1 | refNP_179919.1  histone-lysine N-methyltransferase CLF [Arabidopsis thaliana]<br>gi 30912630 sp P93831.2 CLF_ARATH<br>RecName: Full=Histone-lysine N-methyltransferase CLF; AltName: Full=Polycomb group protein CURLY LEAF; AltName: Full=Protein INCURVATA 1; AltName: Full=Protein SET DOMAIN GROUP 1; AltName: Full=Protein photoperiod insensitive flowering<br>gi 3242729 gb AAC23781.1  curly leaf protein (polycomb-group) [Arabidopsis thaliana]<br>gi 330252355 gb AEC07449.1  histone-lysine N-methyltransferase CLF [Arabidopsis thaliana]<br>refNP_179917.2  filament-like plant protein 7 [Arabidopsis thaliana]<br>gi 334302808 sp Q9SLN1.2 FPP7_ARATH<br>RecName: Full=Filament-like plant protein 7; Short=AtFPP7<br>gi 330252353 gb AEC07447.1  filament-like plant protein 7 [Arabidopsis thaliana] | 916 | 902 | 0        | 98.5  | 84.6 | 89.0 | histone-lysine N-methyltransferase CLF          | gbpln | Arabidopsis thaliana | AT2G23380.1   Symbols: CLF, ICU1, SDG1, SET1   SET domain-containing protein   chr2:9955570-9960117 FORWARD LENGTH=902 | 916 | 902 | 0        | 98.5  | 84.6 | 89.0 |
| Rsa1.0_00371.1.g12422.t1 | refXP_002878667.1  hypothetical protein ARALYDRAFT_481192 [Arabidopsis lyrata subsp. lyrata]<br>gi 297324506 gb EFH54926.1  hypothetical protein ARALYDRAFT_481192 [Arabidopsis lyrata subsp. lyrata]<br>refXP_002878667.1  hypothetical protein ARALYDRAFT_481192 [Arabidopsis lyrata subsp. lyrata]<br>gi 297324506 gb EFH54926.1  hypothetical protein ARALYDRAFT_481192 [Arabidopsis lyrata subsp. lyrata]                                                                                                                                                                                                                                                                                                                                                                                                         | 812 | 898 | 0        | 110.6 | 79.6 | 89.0 | filament-like plant protein 7                   | gbpln | Arabidopsis thaliana | AT2G23360.1   Symbols:   Plant protein of unknown function (DUF869)   chr2:9949420-9952727 FORWARD LENGTH=898          | 812 | 898 | 0        | 110.6 | 79.6 | 89.0 |
| Rsa1.0_00371.1.g12423.t1 | refXP_002878667.1  hypothetical protein ARALYDRAFT_481192 [Arabidopsis lyrata subsp. lyrata]<br>gi 297324506 gb EFH54926.1  hypothetical protein ARALYDRAFT_481192 [Arabidopsis lyrata subsp. lyrata]                                                                                                                                                                                                                                                                                                                                                                                                                                                                                                                                                                                                                  | 824 | 828 | 0        | 100.5 | 70.4 | 82.4 | hypothetical protein ARALYDRAFT_481192          | gbpln | Arabidopsis lyrata   | AT2G23200.1   Symbols:   Protein kinase superfamily protein   chr2:9879351-9881855 FORWARD LENGTH=834                  | 824 | 834 | 0        | 101.2 | 69.7 | 81.9 |
| Rsa1.0_00371.1.g12424.t1 | refXP_002878667.1  hypothetical protein ARALYDRAFT_481192 [Arabidopsis lyrata subsp. lyrata]<br>gi 297324506 gb EFH54926.1  hypothetical protein ARALYDRAFT_481192 [Arabidopsis lyrata subsp. lyrata]                                                                                                                                                                                                                                                                                                                                                                                                                                                                                                                                                                                                                  | 85  | 828 | 5.00E-11 | 974.1 | 50.6 | 69.4 | hypothetical protein ARALYDRAFT_481192          | gbpln | Arabidopsis lyrata   | AT2G23200.1   Symbols:   Protein kinase superfamily protein   chr2:9879351-9881855 FORWARD LENGTH=834                  | 85  | 834 | 3.00E-12 | 981.2 | 48.2 | 67.1 |
| Rsa1.0_00371.1.g12425.t1 | refXP_002878680.1  PAB4 binding protein 4 [Arabidopsis lyrata subsp. lyrata]<br>gi 297324519 gb EFH54939.1  PAB4 binding protein 4 [Arabidopsis lyrata subsp. lyrata]                                                                                                                                                                                                                                                                                                                                                                                                                                                                                                                                                                                                                                                  | 640 | 655 | 0        | 102.3 | 87.5 | 93.9 | PAB4 binding protein 4                          | gbpln | Arabidopsis lyrata   | AT2G23350.1   Symbols: PAB4, PABP4   poly(A) binding protein 4   chr2:9943209-9946041 FORWARD LENGTH=662               | 640 | 662 | 0        | 103.4 | 86.3 | 92.5 |
| Rsa1.0_00371.1.g12426.t1 | refNP_179915.1  ethylene-responsive transcription factor ERF008 [Arabidopsis thaliana]<br>gi 75219088 sp O22174.1 ERF08_ARATH<br>RecName: Full=Ethylene-responsive transcription factor ERF008<br>gi 2642430 gb AAB87098.1  putative AP2 domain transcription factor [Arabidopsis thaliana]<br>gi 26452018 dbj BAC43099.1  putative AP2 domain transcription factor [Arabidopsis thaliana]<br>gi 28372974 gb AAO39969.1  At2g23340 [Arabidopsis thaliana]<br>gi 330252350 gb AEC07444.1  ethylene-responsive transcription factor ERF008 [Arabidopsis thaliana]                                                                                                                                                                                                                                                        | 167 | 176 | 1.00E-66 | 105.4 | 82.6 | 85.6 | ethylene-responsive transcription factor ERF008 | gbpln | Arabidopsis thaliana | AT2G23340.1   Symbols: DEAR3   DREB and EAR motif protein 3   chr2:9938186-9938716 FORWARD LENGTH=176                  | 167 | 176 | 6.00E-69 | 105.4 | 82.6 | 85.6 |
| Rsa1.0_00372.1.g12427.t1 | refXP_002881852.1  hypothetical protein ARALYDRAFT_321928 [Arabidopsis lyrata subsp. lyrata]<br>gi 297327691 gb EFH58111.1  hypothetical protein ARALYDRAFT_321928 [Arabidopsis lyrata subsp. lyrata]                                                                                                                                                                                                                                                                                                                                                                                                                                                                                                                                                                                                                  | 381 | 742 | 2.00E-63 | 194.8 | 46.5 | 59.3 | hypothetical protein ARALYDRAFT_321928          | gbpln | Arabidopsis lyrata   | AT2G42480.1   Symbols:   TRAF-like family protein   chr2:17685805-17689851 REVERSE LENGTH=743                          | 381 | 743 | 1.00E-59 | 195.0 | 44.6 | 56.7 |
| Rsa1.0_00372.1.g12428.t1 | refXP_002881852.1  hypothetical protein ARALYDRAFT_321928 [Arabidopsis lyrata subsp. lyrata]<br>gi 297327691 gb EFH58111.1  hypothetical protein ARALYDRAFT_321928 [Arabidopsis lyrata subsp. lyrata]                                                                                                                                                                                                                                                                                                                                                                                                                                                                                                                                                                                                                  | 453 | 742 | 5.00E-79 | 163.8 | 42.4 | 54.7 | hypothetical protein ARALYDRAFT_321928          | gbpln | Arabidopsis lyrata   | AT2G42480.1   Symbols:   TRAF-like family protein   chr2:17685805-17689851 REVERSE LENGTH=743                          | 453 | 743 | 3.00E-72 | 164.0 | 38.6 | 49.2 |
| Rsa1.0_00372.1.g12429.t1 | refXP_002881854.1  predicted protein [Arabidopsis lyrata subsp. lyrata]<br>gi 297327693 gb EFH58113.1  predicted protein [Arabidopsis lyrata subsp. lyrata]                                                                                                                                                                                                                                                                                                                                                                                                                                                                                                                                                                                                                                                            | 541 | 595 | 4.00E-75 | 110.0 | 42.7 | 59.1 | predicted protein                               | gbpln | Arabidopsis lyrata   | AT2G42480.1   Symbols:   TRAF-like family protein   chr2:17685805-17689851 REVERSE LENGTH=743                          | 541 | 743 | 6.00E-76 | 137.3 | 35.5 | 47.9 |

|                          |                                                                                                                                                                                                                                                                                                                                                                                                                                                                                                                                                                                                                                                                                                                                                                                                                                                                                                                                                                                                                                                          |     |     |          |       |      |      |                                                               |       |                      |                                                                                                                                                                                                                                                                                                                                                                                                                                                                                                                                                                                                           |     |     |          |       |      |      |
|--------------------------|----------------------------------------------------------------------------------------------------------------------------------------------------------------------------------------------------------------------------------------------------------------------------------------------------------------------------------------------------------------------------------------------------------------------------------------------------------------------------------------------------------------------------------------------------------------------------------------------------------------------------------------------------------------------------------------------------------------------------------------------------------------------------------------------------------------------------------------------------------------------------------------------------------------------------------------------------------------------------------------------------------------------------------------------------------|-----|-----|----------|-------|------|------|---------------------------------------------------------------|-------|----------------------|-----------------------------------------------------------------------------------------------------------------------------------------------------------------------------------------------------------------------------------------------------------------------------------------------------------------------------------------------------------------------------------------------------------------------------------------------------------------------------------------------------------------------------------------------------------------------------------------------------------|-----|-----|----------|-------|------|------|
| Rsa1.0_00372.1.g12430.t1 | refNP_001078216.1   ECA1-like gametogenesis related family protein [Arabidopsis thaliana] gi 332643796 gb AE77317.1   ECA1-like gametogenesis related family protein [Arabidopsis thaliana]                                                                                                                                                                                                                                                                                                                                                                                                                                                                                                                                                                                                                                                                                                                                                                                                                                                              | 104 | 105 | 3.00E-20 | 101.0 | 51.9 | 66.3 | ECA1-like gametogenesis related family protein                | gbpln | Arabidopsis thaliana | AT3G27425.1   Symbols:   ECA1-like gametogenesis related family protein   chr3:10151058-10151375 FORWARD LENGTH=105                                                                                                                                                                                                                                                                                                                                                                                                                                                                                       | 104 | 105 | 4.00E-23 | 101.0 | 51.9 | 66.3 |
| Rsa1.0_00372.1.g12431.t1 | refNP_565974.1   serine/threonine-protein phosphatase PP2A-4 catalytic subunit [Arabidopsis thaliana] gi 297827949 ref XP_002881857.1   protein phosphatase 2A-4 [Arabidopsis lyrata subsp. lyrata] gi 1352663 ep Q07100.2 PP2A4_ARATH RecName: Full=Serine/threonine-protein phosphatase PP2A-4 catalytic subunit; AltName: Full=Protein phosphatase 2A isoform 4 gi 466441 gb AA64742.1   Ser/Thr protein phosphatase [Arabidopsis thaliana] gi 4567320 gb AAD23731.1   serine threonine protein phosphatase PP2A-3 catalytic subunit [Arabidopsis thaliana] gi 20198072 gb AAM15383.1   serine/threonine protein phosphatase PP2A-3 catalytic subunit [Arabidopsis thaliana] gi 33589738 gb AAQ22635.1   At2g42500/F14N22.23 [Arabidopsis thaliana] gi 297327696 gb EFH58116.1   protein phosphatase 2A-4 [Arabidopsis lyrata subsp. lyrata] gi 330255033 gb AEC10127.1   serine/threonine-protein phosphatase PP2A-4 catalytic subunit [Arabidopsis thaliana] gi 482563348 gb EOA27538.1   hypothetical protein CARUB_v10023677mg [Capsella rubella] | 313 | 313 | 0        | 100.0 | 98.7 | 99.7 | serine/threonine-protein phosphatase PP2A-4 catalytic subunit | gbpln | Arabidopsis lyrata   | AT2G42500.1   Symbols: PP2A-3   protein phosphatase 2A-3   chr2:17698099-17701226 REVERSE LENGTH=313                                                                                                                                                                                                                                                                                                                                                                                                                                                                                                      | 313 | 313 | 0        | 100.0 | 98.7 | 99.7 |
| Rsa1.0_00372.1.g12432.t1 | refXP_002879989.1   hypothetical protein ARALYDRAFT_483344 [Arabidopsis lyrata subsp. lyrata] gi 297325828 gb EFH56248.1   hypothetical protein ARALYDRAFT_483344 [Arabidopsis lyrata subsp. lyrata]                                                                                                                                                                                                                                                                                                                                                                                                                                                                                                                                                                                                                                                                                                                                                                                                                                                     | 381 | 607 | 2.00E-63 | 159.3 | 47.0 | 57.7 | hypothetical protein ARALYDRAFT_483344                        | gbpln | Arabidopsis lyrata   | AT2G42510.2   Symbols:   FUNCTIONS IN: molecular function unknown; INVOLVED IN: spliceosome assembly, nuclear mRNA splicing, via spliceosome; LOCATED IN: cellular_component unknown; CONTAINS InterPro DOMAIN/s: Survival motor neuron interacting protein 1 (InterPro:IPRO07022); BEST Arabidopsis thaliana protein match is: spliceosome protein-related (TAIR:AT1G54380.1); Has 297 Blast hits to 270 proteins in 80 species: Archae - 2; Bacteria - 35; Metazoa - 62; Fungi - 11; Plants - 64; Viruses - 0; Other Eukaryotes - 123 (source: NCBI BLINK).   chr2:17701686-17704618 FORWARD LENGTH=653 | 381 | 653 | 2.00E-49 | 171.4 | 34.1 | 39.1 |
| Rsa1.0_00372.1.g12433.t1 | refXP_002881861.1   hypothetical protein ARALYDRAFT_483351 [Arabidopsis lyrata subsp. lyrata] gi 297327700 gb EFH58120.1   hypothetical protein ARALYDRAFT_483351 [Arabidopsis lyrata subsp. lyrata]                                                                                                                                                                                                                                                                                                                                                                                                                                                                                                                                                                                                                                                                                                                                                                                                                                                     | 366 | 366 | 0        | 100.0 | 86.9 | 92.6 | hypothetical protein ARALYDRAFT_483351                        | gbpln | Arabidopsis lyrata   | AT2G42570.1   Symbols: TBL39   TRICHOME BIREFRINGENCE-LIKE 39   chr2:17717498-17719921 REVERSE LENGTH=367                                                                                                                                                                                                                                                                                                                                                                                                                                                                                                 | 366 | 367 | 0        | 100.3 | 86.6 | 93.2 |
| Rsa1.0_00372.1.g12434.t1 | #                                                                                                                                                                                                                                                                                                                                                                                                                                                                                                                                                                                                                                                                                                                                                                                                                                                                                                                                                                                                                                                        | #   | #   | #        | #     | #    | -    | ----                                                          | ----  | #                    | #                                                                                                                                                                                                                                                                                                                                                                                                                                                                                                                                                                                                         | #   | #   | #        | #     | #    |      |
| Rsa1.0_00372.1.g12435.t1 | refXP_002879994.1   hypothetical protein ARALYDRAFT_483352 [Arabidopsis lyrata subsp. lyrata] gi 297325833 gb EFH56253.1   hypothetical protein ARALYDRAFT_483352 [Arabidopsis lyrata subsp. lyrata] refXP_002881863.1   phosphoenolpyruvate carboxylase [Arabidopsis lyrata subsp. lyrata] gi 297327702 gb EFH58122.1   phosphoenolpyruvate carboxylase [Arabidopsis lyrata subsp. lyrata]                                                                                                                                                                                                                                                                                                                                                                                                                                                                                                                                                                                                                                                              | 675 | 688 | 0        | 101.9 | 86.2 | 92.1 | hypothetical protein ARALYDRAFT_483352                        | gbpln | Arabidopsis lyrata   | AT2G42580.1   Symbols: TTL3, VIT   tetraatricopeptide-repeat thioredoxin-like 3   chr2:17728855-17731461 FORWARD LENGTH=691                                                                                                                                                                                                                                                                                                                                                                                                                                                                               | 675 | 691 | 0        | 102.4 | 85.9 | 92.3 |
| Rsa1.0_00372.1.g12436.t1 | refXP_002881863.1   phosphoenolpyruvate carboxylase [Arabidopsis lyrata subsp. lyrata] gi 297327702 gb EFH58122.1   phosphoenolpyruvate carboxylase [Arabidopsis lyrata subsp. lyrata]                                                                                                                                                                                                                                                                                                                                                                                                                                                                                                                                                                                                                                                                                                                                                                                                                                                                   | 929 | 963 | 0        | 103.7 | 96.3 | 98.0 | phosphoenolpyruvate carboxylase                               | gbpln | Arabidopsis lyrata   | AT2G42600.1   Symbols: ATPPC2, PPC2   phosphoenolpyruvate carboxylase 2   chr2:17734541-17738679 REVERSE LENGTH=963                                                                                                                                                                                                                                                                                                                                                                                                                                                                                       | 929 | 963 | 0        | 103.7 | 96.0 | 97.8 |
| Rsa1.0_00372.1.g12437.t1 | #                                                                                                                                                                                                                                                                                                                                                                                                                                                                                                                                                                                                                                                                                                                                                                                                                                                                                                                                                                                                                                                        | #   | #   | #        | #     | #    | -    | ----                                                          | ----  | #                    | #                                                                                                                                                                                                                                                                                                                                                                                                                                                                                                                                                                                                         | #   | #   | #        | #     | #    |      |
| Rsa1.0_00372.1.g12438.t1 | gb EOA29463.1   hypothetical protein CARUB_v100241591mg [Capsella rubella] gi 482565274 gb EOA29464.1   hypothetical protein CARUB_v100241591mg [Capsella rubella]                                                                                                                                                                                                                                                                                                                                                                                                                                                                                                                                                                                                                                                                                                                                                                                                                                                                                       | 178 | 178 | 1.00E-85 | 100.0 | 88.2 | 91.0 | hypothetical protein CARUB_v100241591mg                       | gbpln | Capsella rubella     | AT2G42610.2   Symbols: LSH10   Protein of unknown function (DUF640)   chr2:17748005-17748538 FORWARD LENGTH=177                                                                                                                                                                                                                                                                                                                                                                                                                                                                                           | 178 | 177 | 9.00E-87 | 99.4  | 87.6 | 89.9 |



|                          |                                                                                                                                                                                                        |      |      |           |       |      |      |                                        |       |                      |                                                                                                                                                                                                                                                                                                                                                                                                                                                   |      |      |           |       |      |      |
|--------------------------|--------------------------------------------------------------------------------------------------------------------------------------------------------------------------------------------------------|------|------|-----------|-------|------|------|----------------------------------------|-------|----------------------|---------------------------------------------------------------------------------------------------------------------------------------------------------------------------------------------------------------------------------------------------------------------------------------------------------------------------------------------------------------------------------------------------------------------------------------------------|------|------|-----------|-------|------|------|
| Rsa1.0_00372.1.g12439.t1 | refXP_002881837.1   hypothetical protein ARALYDRAFT_903588 [Arabidopsis lyrata subsp. lyrata]   gi 297327676 gb EFH58096.1   hypothetical protein ARALYDRAFT_903588 [Arabidopsis lyrata subsp. lyrata] | 113  | 345  | 1.00E-18  | 305.3 | 54.0 | 64.6 | hypothetical protein ARALYDRAFT_903588 | gbpln | Arabidopsis lyrata   | AT2G42550.1   Symbols:   Protein kinase superfamily protein   chr2:17713196-17714230 FORWARD LENGTH=344                                                                                                                                                                                                                                                                                                                                           | 113  | 344  | 8.00E-11  | 304.4 | 23.9 | 28.3 |
| Rsa1.0_00372.1.g12440.t1 | dbj BAJ33992.1   unnamed protein product [Theilungella halophila]                                                                                                                                      | 685  | 701  | 0         | 102.3 | 88.6 | 94.0 | unnamed protein product                | ----  | ----                 | AT2G42620.1   Symbols: MAX2, ORE9, PPS   RNI-like superfamily protein   chr2:17756170-17758251 FORWARD LENGTH=693                                                                                                                                                                                                                                                                                                                                 | 685  | 693  | 0         | 101.2 | 85.8 | 92.0 |
| Rsa1.0_00372.1.g12441.t1 | refXP_002881866.1   hypothetical protein ARALYDRAFT_903639 [Arabidopsis lyrata subsp. lyrata]   gi 297327705 gb EFH58125.1   hypothetical protein ARALYDRAFT_903639 [Arabidopsis lyrata subsp. lyrata] | 239  | 241  | 1.00E-124 | 100.8 | 90.0 | 96.2 | hypothetical protein ARALYDRAFT_903639 | gbpln | Arabidopsis lyrata   | AT2G42670.1   Symbols:   Protein of unknown function (DUF1637)   chr2:17772004-17773700 REVERSE LENGTH=241                                                                                                                                                                                                                                                                                                                                        | 239  | 241  | 1.00E-126 | 100.8 | 89.1 | 95.4 |
| Rsa1.0_00372.1.g12442.t1 | refXP_002879999.1   ATMBF1A/MBF1A [Arabidopsis lyrata subsp. lyrata]   gi 297325838 gb EFH58258.1   ATMBF1A/MBF1A [Arabidopsis lyrata subsp. lyrata]                                                   | 137  | 142  | 9.00E-67  | 103.6 | 92.0 | 95.6 | ATMBF1A/MBF1A                          | gbpln | Arabidopsis lyrata   | AT3G58680.1   Symbols: MBF1B, ATMBF1B   multiprotein bridging factor 1B   chr3:21707367-21708625 FORWARD LENGTH=142                                                                                                                                                                                                                                                                                                                               | 137  | 142  | 9.00E-68  | 103.6 | 89.8 | 94.2 |
| Rsa1.0_00372.1.g12443.t1 | refXP_002881868.1   hypothetical protein ARALYDRAFT_903642 [Arabidopsis lyrata subsp. lyrata]   gi 297327707 gb EFH58127.1   hypothetical protein ARALYDRAFT_903642 [Arabidopsis lyrata subsp. lyrata] | 392  | 401  | 0         | 102.3 | 89.5 | 94.9 | hypothetical protein ARALYDRAFT_903642 | gbpln | Arabidopsis lyrata   | AT2G42690.1   Symbols:   alpha/beta-Hydrolases superfamily protein   chr2:17776356-17777682 REVERSE LENGTH=412                                                                                                                                                                                                                                                                                                                                    | 392  | 412  | 2.33E-156 | 105.1 | 65.1 | 77.6 |
| Rsa1.0_00372.1.g12444.t1 | refNP_001189734.1   uncharacterized protein [Arabidopsis thaliana]   gi 330255064 gb AEC10158.1   uncharacterized protein AT2G42700 [Arabidopsis thaliana]                                             | 252  | 867  | 1.00E-121 | 344.0 | 92.5 | 94.4 | uncharacterized protein                | gbpln | Arabidopsis thaliana | AT2G42700.2   Symbols:   FUNCTIONS IN: molecular_function unknown; INVOLVED IN: vesicle-mediated transport, vesicle docking involved in exocytosis; LOCATED IN: cellular_component unknown; EXPRESSED IN: 22 plant structures; EXPRESSED DURING: 14 growth stages; CONTAINS InterPro DOMAIN/s: Sec1-like protein (InterPro:IPR001619).   chr2:17778464-17782034 FORWARD LENGTH=867                                                                | 252  | 867  | 1.00E-124 | 344.0 | 92.5 | 94.4 |
| Rsa1.0_00373.1.g12445.t1 | gb ACP30622.1   disease resistance protein [Brassica rapa subsp. pekinensis]                                                                                                                           | 1414 | 1459 | 0         | 103.2 | 54.5 | 66.3 | disease resistance protein             | gbpln | Brassica rapa        | AT5G18350.1   Symbols:   Disease resistance protein (TIR-NBS-LRR class) family   chr5:6074069-6078569 REVERSE LENGTH=1245                                                                                                                                                                                                                                                                                                                         | 1414 | 1245 | 0         | 88.0  | 40.9 | 52.3 |
| Rsa1.0_00373.1.g12446.t1 | gb AAD19784.1   putative retroelement pol polyprotein [Arabidopsis thaliana]                                                                                                                           | 1433 | 1501 | 0         | 104.7 | 57.8 | 73.2 | putative retroelement pol polyprotein  | gbpln | Arabidopsis thaliana | AT4G23160.1   Symbols: CRK8   cysteine-rich RLK (RECEPTOR-like protein kinase) 8   chr4:12129485-12134086 FORWARD LENGTH=1262                                                                                                                                                                                                                                                                                                                     | 1433 | 1262 | 1.00E-127 | 88.1  | 16.2 | 22.8 |
| Rsa1.0_00373.1.g12447.t1 | refXP_002873884.1   predicted protein [Arabidopsis lyrata subsp. lyrata]   gi 297319721 gb EFH50143.1   predicted protein [Arabidopsis lyrata subsp. lyrata]                                           | 459  | 458  | 1.00E-169 | 99.8  | 69.1 | 80.6 | predicted protein                      | gbpln | Arabidopsis lyrata   | AT5G18320.1   Symbols:   ARM repeat superfamily protein   chr5:6064431-6066186 REVERSE LENGTH=458                                                                                                                                                                                                                                                                                                                                                 | 459  | 458  | 1.00E-167 | 99.8  | 68.0 | 80.0 |
| Rsa1.0_00373.1.g12448.t1 | gb EOA19483.1   hypothetical protein CARUB_v10002130mg [Capsella rubella]                                                                                                                              | 215  | 166  | 3.00E-56  | 77.2  | 56.7 | 65.1 | hypothetical protein CARUB_v10002130mg | gbpln | Capsella rubella     | AT5G18310.2   Symbols:   unknown protein; FUNCTIONS IN: molecular_function unknown; INVOLVED IN: biological_process unknown; LOCATED IN: plasma membrane; EXPRESSED IN: 22 plant structures; EXPRESSED DURING: 13 growth stages; Has 60 Blast hits to 60 proteins in 14 species: Archae - 0; Bacteria - 0; Metazoa - 7; Fungi - 0; Plants - 53; Viruses - 0; Other Eukaryotes - 0 (source: NCBI BLINK).   chr5:6061759-6062912 FORWARD LENGTH=167 | 215  | 167  | 3.00E-57  | 77.7  | 55.3 | 62.8 |
| Rsa1.0_00373.1.g12449.t2 | refNP_197329.4   nucleoside-triphosphatase [Arabidopsis thaliana]   gi 332005149 gb AED92532.1   nucleoside-triphosphatase [Arabidopsis thaliana]                                                      | 777  | 578  | 0         | 74.4  | 59.5 | 62.9 | nucleoside-triphosphatase              | gbpln | Arabidopsis thaliana | AT5G18280.1   Symbols: ATAPY2, APY2   apyrase 2   chr5:6050799-6054875 REVERSE LENGTH=578                                                                                                                                                                                                                                                                                                                                                         | 777  | 578  | 0         | 74.4  | 59.5 | 62.9 |
| Rsa1.0_00373.1.g12450.t1 | refXP_002873881.1   ANAC087 [Arabidopsis lyrata subsp. lyrata]   gi 297319718 gb EFH50140.1   ANAC087 [Arabidopsis lyrata subsp. lyrata]                                                               | 337  | 334  | 1.00E-172 | 99.1  | 86.9 | 92.6 | ANAC087                                | gbpln | Arabidopsis lyrata   | AT5G18270.1   Symbols: ANAC087   Arabidopsis NAC domain containing protein 87   chr5:6041241-6042743 REVERSE LENGTH=335                                                                                                                                                                                                                                                                                                                           | 337  | 335  | 1.00E-174 | 99.4  | 87.2 | 92.3 |
| Rsa1.0_00373.1.g12451.t1 | refXP_002873880.1   hypothetical protein ARALYDRAFT_909836 [Arabidopsis lyrata subsp. lyrata]   gi 297319717 gb EFH50139.1   hypothetical protein ARALYDRAFT_909836 [Arabidopsis lyrata subsp. lyrata] | 376  | 450  | 1.00E-124 | 119.7 | 66.8 | 77.4 | hypothetical protein ARALYDRAFT_909836 | gbpln | Arabidopsis lyrata   | AT5G18260.1   Symbols:   RING/U-box superfamily protein   chr5:6036226-6037295 REVERSE LENGTH=320                                                                                                                                                                                                                                                                                                                                                 | 376  | 320  | 1.00E-102 | 85.1  | 56.4 | 63.8 |

|                          |                                                                                                                                                                                                                                                                                                                                                                                                                                                                                                                                                                                                                                                                                                                                                                                                                                                                                                                                                                                                                                                                                                                                                              |     |     |           |       |      |      |                                           |       |                      |                                                                                                                                                                                                                                                                                                                                                                                                                                                                                                                                             |     |     |           |       |      |      |
|--------------------------|--------------------------------------------------------------------------------------------------------------------------------------------------------------------------------------------------------------------------------------------------------------------------------------------------------------------------------------------------------------------------------------------------------------------------------------------------------------------------------------------------------------------------------------------------------------------------------------------------------------------------------------------------------------------------------------------------------------------------------------------------------------------------------------------------------------------------------------------------------------------------------------------------------------------------------------------------------------------------------------------------------------------------------------------------------------------------------------------------------------------------------------------------------------|-----|-----|-----------|-------|------|------|-------------------------------------------|-------|----------------------|---------------------------------------------------------------------------------------------------------------------------------------------------------------------------------------------------------------------------------------------------------------------------------------------------------------------------------------------------------------------------------------------------------------------------------------------------------------------------------------------------------------------------------------------|-----|-----|-----------|-------|------|------|
| Rsa1.0_00373.1.g12452.t2 | gb EOA21781.1  hypothetical protein CARUB_v10002242mg [Capsella rubella]                                                                                                                                                                                                                                                                                                                                                                                                                                                                                                                                                                                                                                                                                                                                                                                                                                                                                                                                                                                                                                                                                     | 218 | 133 | 9.00E-68  | 61.0  | 56.9 | 59.6 | hypothetical protein CARUB_v10002242mg    | gbpln | Capsella rubella     | AT5G18250.1   Symbols:   unknown protein; FUNCTIONS IN: molecular_function unknown; INVOLVED IN: biological_process unknown; LOCATED IN: mitochondrion; EXPRESSED IN: 23 plant structures; EXPRESSED DURING: 13 growth stages; BEST Arabidopsis thaliana protein match is: unknown protein (TAIR:AT3G04040.1); Has 1807 Blast hits to 1807 proteins in 277 species: Archae - 0; Bacteria - 0; Metazoa - 736; Fungi - 347; Plants - 385; Viruses - 0; Other Eukaryotes - 339 (source: NCBI BLINK).   chr5:6033797-6035216 FORWARD LENGTH=133 | 218 | 133 | 2.00E-68  | 61.0  | 55.0 | 59.2 |
| Rsa1.0_00373.1.g12453.t1 | ref NP_197325.1  myb-related protein 1 [Arabidopsis thaliana] gi 42573403 ref NP_974798.1  myb-related protein 1 [Arabidopsis thaliana] gi 9758906 dbj BAB09482.1  transfactor-like protein [Arabidopsis thaliana] gi 332005140 gb AED92523.1  myb-related protein 1 [Arabidopsis thaliana] gi 332005141 gb AED92524.1  myb-related protein 1 [Arabidopsis thaliana]                                                                                                                                                                                                                                                                                                                                                                                                                                                                                                                                                                                                                                                                                                                                                                                         | 393 | 402 | 0         | 102.3 | 90.1 | 92.9 | myb-related protein 1                     | gbpln | Arabidopsis thaliana | AT5G18240.4   Symbols: MYR1   myb-related protein 1   chr5:6028617-6030573 REVERSE LENGTH=402                                                                                                                                                                                                                                                                                                                                                                                                                                               | 393 | 402 | 0         | 102.3 | 90.1 | 92.9 |
| Rsa1.0_00373.1.g12454.t1 | dbj BAB09481.1  unnamed protein product [Arabidopsis thaliana]                                                                                                                                                                                                                                                                                                                                                                                                                                                                                                                                                                                                                                                                                                                                                                                                                                                                                                                                                                                                                                                                                               | 848 | 889 | 0         | 104.8 | 90.6 | 94.8 | unnamed protein product                   | gbpln | Arabidopsis thaliana | AT5G18230.1   Symbols:   transcription regulator NOT2/NOT3/NOT5 family protein   chr5:6021610-6027031 REVERSE LENGTH=843                                                                                                                                                                                                                                                                                                                                                                                                                    | 848 | 843 | 0         | 99.4  | 89.6 | 93.6 |
| Rsa1.0_00373.1.g12455.t1 | ref XP_002873877.1  predicted protein [Arabidopsis lyrata subsp. lyrata] gi 297319714 gb EFH50136.1  predicted protein [Arabidopsis lyrata subsp. lyrata]                                                                                                                                                                                                                                                                                                                                                                                                                                                                                                                                                                                                                                                                                                                                                                                                                                                                                                                                                                                                    | 494 | 490 | 0         | 99.2  | 89.7 | 94.3 | predicted protein                         | gbpln | Arabidopsis lyrata   | AT5G18220.1   Symbols:   O-Glycosyl hydrolases family 17 protein   chr5:6018914-6020453 REVERSE LENGTH=488                                                                                                                                                                                                                                                                                                                                                                                                                                  | 494 | 488 | 0         | 98.8  | 89.7 | 94.1 |
| Rsa1.0_00373.1.g12456.t1 | gb EOA21381.1  hypothetical protein CARUB_v10001742mg [Capsella rubella]                                                                                                                                                                                                                                                                                                                                                                                                                                                                                                                                                                                                                                                                                                                                                                                                                                                                                                                                                                                                                                                                                     | 262 | 263 | 1.00E-128 | 100.4 | 88.5 | 93.9 | hypothetical protein CARUB_v10001742mg    | gbpln | Capsella rubella     | AT5G18210.1   Symbols:   NAD(P)-binding Rossmann-fold superfamily protein   chr5:6017865-6018919 FORWARD LENGTH=277                                                                                                                                                                                                                                                                                                                                                                                                                         | 262 | 277 | 1.00E-118 | 105.7 | 79.4 | 87.4 |
| Rsa1.0_00373.1.g12457.t1 | ref NP_197321.1  galactose-1-phosphate uridylyltransferase [Arabidopsis thaliana] gi 73919619 sp Q9FK51.1 GALT_ARATH RecName: Full=Probable galactose-1-phosphate uridylyltransferase; AltName: Full=Gal-1-P uridylyltransferase; AltName: Full=UDP-glucose--hexose-1-phosphate uridylyltransferase gi 66361361 pdb 1Z84 A Chain A, X-Ray Structure Of Galt-Like Protein From Arabidopsis Thaliana At5g18200 gi 66361362 pdb 1Z84 B Chain B, X-Ray Structure Of Galt-Like Protein From Arabidopsis Thaliana At5g18200 gi 71042524 pdb 1ZWJ A Chain A, X-Ray Structure Of Galt-Like Protein From Arabidopsis Thaliana At5g18200 gi 71042525 pdb 1ZWJ B Chain B, X-Ray Structure Of Galt-Like Protein From Arabidopsis Thaliana At5g18200 gi 150261501 pdb 2Q4H A Chain A, Ensemble Refinement Of The Crystal Structure Of Galt-Like Protein From Arabidopsis Thaliana At5g18200 gi 150261502 pdb 2Q4H B Chain B, Ensemble Refinement Of The Crystal Structure Of Galt-Like Protein From Arabidopsis Thaliana At5g18200 gi 150261511 pdb 2Q4L A Chain A, Ensemble Refinement Of The Crystal Structure Of Galt-Like Protein From Arabidopsis Thaliana At5g18200 | 340 | 351 | 1.00E-174 | 103.2 | 86.5 | 92.9 | galactose-1-phosphate uridylyltransferase | gbpln | Arabidopsis thaliana | AT5G18200.1   Symbols:   UTP:galactose-1-phosphate uridylyltransferases; ribose-5-phosphate adenylyltransferases   chr5:6015270-6016555 FORWARD LENGTH=351                                                                                                                                                                                                                                                                                                                                                                                  | 340 | 351 | 1.00E-177 | 103.2 | 86.5 | 92.9 |
| Rsa1.0_00373.1.g12458.t1 | gb EOA20087.1  hypothetical protein CARUB_v10000361mg [Capsella rubella]                                                                                                                                                                                                                                                                                                                                                                                                                                                                                                                                                                                                                                                                                                                                                                                                                                                                                                                                                                                                                                                                                     | 706 | 692 | 0         | 98.0  | 89.8 | 92.8 | hypothetical protein CARUB_v10000361mg    | gbpln | Capsella rubella     | AT5G18190.1   Symbols:   Protein kinase family protein   chr5:6010215-6013724 REVERSE LENGTH=691                                                                                                                                                                                                                                                                                                                                                                                                                                            | 706 | 691 | 0         | 97.9  | 88.0 | 91.5 |

|                           |                                                                                                                                                                                                                                                                                                                                                                                                                                                                                                                                                  |     |     |           |       |      |      |                                                                    |       |                      |                                                                                                                                                                                                                                                                                                                                                        |     |     |           |       |      |      |
|---------------------------|--------------------------------------------------------------------------------------------------------------------------------------------------------------------------------------------------------------------------------------------------------------------------------------------------------------------------------------------------------------------------------------------------------------------------------------------------------------------------------------------------------------------------------------------------|-----|-----|-----------|-------|------|------|--------------------------------------------------------------------|-------|----------------------|--------------------------------------------------------------------------------------------------------------------------------------------------------------------------------------------------------------------------------------------------------------------------------------------------------------------------------------------------------|-----|-----|-----------|-------|------|------|
| Rsa1.0_00373.1.g12459.t1  | refNP_197318.1  glutamate dehydrogenase 1 [Arabidopsis thaliana] gi 12229807 sp Q43314.1 DHE1_ARATH RecName: Full=Glutamate dehydrogenase 1; Short=GDH 1 gi 1098960 gb AAA82615.1  glutamate dehydrogenase 1 [Arabidopsis thaliana] gi 1293095 gb AAB08057.1  glutamate dehydrogenase 1 [Arabidopsis thaliana] gi 9758899 dbj BAB09475.1  glutamate dehydrogenase (EC 1.4.1.-) 1 [Arabidopsis thaliana] gi 98960991 gb ABF58979.1  At5g18170 [Arabidopsis thaliana] gi 332005132 gb AED92515.1  glutamate dehydrogenase 1 [Arabidopsis thaliana] | 411 | 411 | 0         | 100.0 | 95.6 | 98.5 | glutamate dehydrogenase 1                                          | gbpln | Arabidopsis thaliana | AT5G18170.1   Symbols: GDH1   glutamate dehydrogenase 1   chr5:6006172-6008248 FORWARD LENGTH=411                                                                                                                                                                                                                                                      | 411 | 411 | 0         | 100.0 | 95.6 | 98.5 |
| Rsa1.0_00373.1.g12460.t1  | gb EOA19719.1  hypothetical protein CARUB_v10003766mg [Capsella rubella]                                                                                                                                                                                                                                                                                                                                                                                                                                                                         | 83  | 79  | 3.00E-33  | 95.2  | 88.0 | 94.0 | hypothetical protein CARUB_v10003766mg                             | gbpln | Capsella rubella     | AT5G18150.1   Symbols:   Methyltransferase-related protein   chr5:6000014-6000331 REVERSE LENGTH=76                                                                                                                                                                                                                                                    | 83  | 76  | 9.00E-31  | 91.6  | 78.3 | 85.5 |
| Rsa1.0_00373.1.g12461.t2  | refNP_197315.1  chaperone DnaJ-domain containing protein [Arabidopsis thaliana] gi 9758896 dbj BAB09472.1  unnamed protein product [Arabidopsis thaliana] gi 20260574 gb AAM13185.1  unknown protein [Arabidopsis thaliana] gi 28059343 gb AAO30049.1  unknown protein [Arabidopsis thaliana] gi 332005129 gb AED92512.1  chaperone DnaJ-domain containing protein [Arabidopsis thaliana]                                                                                                                                                        | 319 | 333 | 1.00E-117 | 104.4 | 76.5 | 83.1 | chaperone DnaJ-domain containing protein                           | gbpln | Arabidopsis thaliana | AT5G18140.1   Symbols:   Chaperone DnaJ-domain superfamily protein   chr5:5998235-5999699 FORWARD LENGTH=333                                                                                                                                                                                                                                           | 319 | 333 | 1.00E-120 | 104.4 | 76.5 | 83.1 |
| Rsa1.0_00373.1.g12462.t1  | refXP_002871803.1  hypothetical protein ARALYDRAFT_488679 [Arabidopsis lyrata subsp. lyrata] gi 297317640 gb EFH48062.1  hypothetical protein ARALYDRAFT_488679 [Arabidopsis lyrata subsp. lyrata]                                                                                                                                                                                                                                                                                                                                               | 273 | 281 | 1.00E-102 | 102.9 | 72.9 | 82.8 | hypothetical protein ARALYDRAFT_488679                             | gbpln | Arabidopsis lyrata   | AT5G18130.1   Symbols:   unknown protein; BEST Arabidopsis thaliana protein match is: unknown protein (TAIR:AT3G03870.2); Has 1807 Blast hits to 1807 proteins in 277 species: Archae - 0; Bacteria - 0; Metazoa - 736; Fungi - 347; Plants - 385; Viruses - 0; Other Eukaryotes - 339 (source: NCBI BLINK).   chr5:5995634-5997165 FORWARD LENGTH=280 | 273 | 280 | 1.00E-105 | 102.6 | 72.5 | 81.0 |
| Rsa1.0_00373.1.g12463.t1  | gb AAM60945.1  contains similarity to protein disulfide isomerase-related protein [Arabidopsis thaliana]                                                                                                                                                                                                                                                                                                                                                                                                                                         | 299 | 289 | 1.00E-124 | 96.7  | 75.9 | 85.6 | contains similarity to protein disulfide isomerase-related protein | gbpln | Arabidopsis thaliana | AT5G18120.1   Symbols: ATAPRL7, APRL7   APR-like 7   chr5:5991385-5993696 FORWARD LENGTH=289                                                                                                                                                                                                                                                           | 299 | 289 | 1.00E-126 | 96.7  | 75.6 | 85.6 |
| Rsa1.0_00374.1.g12464.t1  | #                                                                                                                                                                                                                                                                                                                                                                                                                                                                                                                                                | #   | #   | #         | #     | #    | #    | -                                                                  | ----  | ----                 | #                                                                                                                                                                                                                                                                                                                                                      | #   | #   | #         | #     | #    |      |
| Rsa1.0_00374.1.g12465.t4  | emb CCH26503.1  calcineurin B-like 10 [Arabidopsis thaliana]                                                                                                                                                                                                                                                                                                                                                                                                                                                                                     | 246 | 256 | 1.00E-115 | 104.1 | 85.0 | 89.4 | calcineurin B-like 10                                              | gbpln | Arabidopsis thaliana | AT4G33000.2   Symbols: CBL10, SCABP8, ATCBL10   calcineurin B-like protein 10   chr4:15924821-15926398 FORWARD LENGTH=246                                                                                                                                                                                                                              | 246 | 246 | 1.00E-117 | 100.0 | 85.0 | 88.6 |
| Rsa1.0_00374.1.g12466.t1  | #                                                                                                                                                                                                                                                                                                                                                                                                                                                                                                                                                | #   | #   | #         | #     | #    | #    | -                                                                  | ----  | ----                 | #                                                                                                                                                                                                                                                                                                                                                      | #   | #   | #         | #     | #    |      |
| Rsa1.0_00374.1.g12467.t1  | #                                                                                                                                                                                                                                                                                                                                                                                                                                                                                                                                                | #   | #   | #         | #     | #    | #    | -                                                                  | ----  | ----                 | #                                                                                                                                                                                                                                                                                                                                                      | #   | #   | #         | #     | #    |      |
| Rsa1.0_00374.1.g12468.t11 | refXP_002867194.1  predicted protein [Arabidopsis lyrata subsp. lyrata] gi 297313030 gb EFH43453.1  predicted protein [Arabidopsis lyrata subsp. lyrata]                                                                                                                                                                                                                                                                                                                                                                                         | 773 | 990 | 0         | 128.1 | 75.0 | 82.9 | predicted protein                                                  | gbpln | Arabidopsis lyrata   | AT4G33210.1   Symbols: SLOMO   F-box family protein   chr4:16015971-16020697 REVERSE LENGTH=990                                                                                                                                                                                                                                                        | 773 | 990 | 0         | 128.1 | 74.8 | 82.5 |
| Rsa1.0_00374.1.g12469.t1  | gb EOA16324.1  hypothetical protein CARUB_v10004474mg, partial [Capsella rubella]                                                                                                                                                                                                                                                                                                                                                                                                                                                                | 504 | 569 | 0         | 112.9 | 88.5 | 94.6 | hypothetical protein CARUB_v10004474mg, partial                    | gbpln | Capsella rubella     | AT4G33220.1   Symbols: PME44, ATPME44   pectin methyltransferase 44   chr4:16022506-16026130 FORWARD LENGTH=525                                                                                                                                                                                                                                        | 504 | 525 | 0         | 104.2 | 88.5 | 93.8 |
| Rsa1.0_00374.1.g12470.t1  | refXP_002867191.1  hypothetical protein ARALYDRAFT_913095 [Arabidopsis lyrata subsp. lyrata] gi 297313027 gb EFH43450.1  hypothetical protein ARALYDRAFT_913095 [Arabidopsis lyrata subsp. lyrata]                                                                                                                                                                                                                                                                                                                                               | 224 | 228 | 1.00E-121 | 101.8 | 92.9 | 98.2 | hypothetical protein ARALYDRAFT_913095                             | gbpln | Arabidopsis lyrata   | AT4G33250.1   Symbols: EIF3K, TIF3K1, ATTF3K1   eukaryotic translation initiation factor 3K   chr4:16039066-16040617 REVERSE LENGTH=226                                                                                                                                                                                                                | 224 | 226 | 1.00E-121 | 100.9 | 92.0 | 96.4 |
| Rsa1.0_00374.1.g12471.t1  | emb CAA11819.1  hypothetical protein [Brassica napus]                                                                                                                                                                                                                                                                                                                                                                                                                                                                                            | 452 | 457 | 0         | 101.1 | 91.4 | 94.2 | hypothetical protein                                               | gbpln | Brassica napus       | AT4G33270.1   Symbols: CDC20.1   Transducin family protein / WD-40 repeat family protein   chr4:16044545-16046590 REVERSE LENGTH=457                                                                                                                                                                                                                   | 452 | 457 | 0         | 101.1 | 90.0 | 93.1 |
| Rsa1.0_00374.1.g12472.t1  | gb ACP30606.1  disease resistance protein [Brassica rapa subsp. pekinensis]                                                                                                                                                                                                                                                                                                                                                                                                                                                                      | 821 | 836 | 0         | 101.8 | 82.2 | 91.4 | disease resistance protein                                         | gbpln | Brassica rapa        | AT4G33300.2   Symbols: ADR1-L1   ADR1-like 1   chr4:16051162-16054005 REVERSE LENGTH=816                                                                                                                                                                                                                                                               | 821 | 816 | 0         | 99.4  | 79.0 | 88.7 |
| Rsa1.0_00374.1.g12473.t1  | gb EOA16266.1  hypothetical protein CARUB_v10004410mg [Capsella rubella]                                                                                                                                                                                                                                                                                                                                                                                                                                                                         | 453 | 604 | 0         | 133.3 | 88.7 | 92.7 | hypothetical protein CARUB_v10004410mg                             | gbpln | Capsella rubella     | AT4G33330.2   Symbols: PGSIP3, GUX2   plant glycogenin-like starch initiation protein 3   chr4:16059754-16063061 REVERSE LENGTH=626                                                                                                                                                                                                                    | 453 | 626 | 0         | 138.2 | 87.0 | 91.4 |

|                          |                                                                                                                                                                                                                                                                                                                                                                                                                                                                                                                                                                                                                                                                                                                                                                                                                                                                                                                    |      |      |           |       |      |      |                                                                                    |       |                      |                                                                                                                                                                                                                                                                  |      |     |           |       |      |      |
|--------------------------|--------------------------------------------------------------------------------------------------------------------------------------------------------------------------------------------------------------------------------------------------------------------------------------------------------------------------------------------------------------------------------------------------------------------------------------------------------------------------------------------------------------------------------------------------------------------------------------------------------------------------------------------------------------------------------------------------------------------------------------------------------------------------------------------------------------------------------------------------------------------------------------------------------------------|------|------|-----------|-------|------|------|------------------------------------------------------------------------------------|-------|----------------------|------------------------------------------------------------------------------------------------------------------------------------------------------------------------------------------------------------------------------------------------------------------|------|-----|-----------|-------|------|------|
| Rsa1.0_00374.1.g12474.t1 | refNP_179794.1   F-box/kelch-repeat protein [Arabidopsis thaliana]<br>gi75206012 sp Q9SI02.1 FBK33_ARATH RecName: Full=F-box/kelch-repeat protein At2g22030<br>gi4587593 gb AAD25821.1  hypothetical protein [Arabidopsis thaliana]<br>gi20198005 gb AAM15347.1  hypothetical protein [Arabidopsis thaliana] gi330252159 gb AEC07253.1  F-box/kelch-repeat protein [Arabidopsis thaliana]<br>refNP_179794.1   F-box/kelch-repeat protein [Arabidopsis thaliana]<br>gi75206012 sp Q9SI02.1 FBK33_ARATH RecName: Full=F-box/kelch-repeat protein At2g22030<br>gi4587593 gb AAD25821.1  hypothetical protein [Arabidopsis thaliana]<br>gi20198005 gb AAM15347.1  hypothetical protein [Arabidopsis thaliana] gi330252159 gb AEC07253.1  F-box/kelch-repeat protein [Arabidopsis thaliana]                                                                                                                             | 431  | 383  | 7.00E-86  | 88.9  | 44.3 | 55.9 | F-box/kelch-repeat protein                                                         | gbpln | Arabidopsis thaliana | AT2G22030.1   Symbols:   Galactose oxidase/kelch repeat superfamily protein   chr2:9372530-9373681 FORWARD LENGTH=383                                                                                                                                            | 431  | 383 | 2.00E-88  | 88.9  | 44.3 | 55.9 |
| Rsa1.0_00374.1.g12475.t1 | refNP_179794.1   F-box/kelch-repeat protein [Arabidopsis thaliana]<br>gi75206012 sp Q9SI02.1 FBK33_ARATH RecName: Full=F-box/kelch-repeat protein At2g22030<br>gi4587593 gb AAD25821.1  hypothetical protein [Arabidopsis thaliana]<br>gi20198005 gb AAM15347.1  hypothetical protein [Arabidopsis thaliana] gi330252159 gb AEC07253.1  F-box/kelch-repeat protein [Arabidopsis thaliana]                                                                                                                                                                                                                                                                                                                                                                                                                                                                                                                          | 447  | 383  | 2.00E-83  | 85.7  | 42.1 | 52.6 | F-box/kelch-repeat protein                                                         | gbpln | Arabidopsis thaliana | AT2G22030.1   Symbols:   Galactose oxidase/kelch repeat superfamily protein   chr2:9372530-9373681 FORWARD LENGTH=383                                                                                                                                            | 447  | 383 | 5.00E-86  | 85.7  | 42.1 | 52.6 |
| Rsa1.0_00374.1.g12476.t1 | refXP_002869217.1   hypothetical protein ARALYDRAFT_913084 [Arabidopsis lyrata subsp. lyrata]<br>gi297315053 gb EFH45476.1  hypothetical protein ARALYDRAFT_913084 [Arabidopsis lyrata subsp. lyrata]<br>refNP_195066.1   Vacuolar import/ degradation, Vid27-related protein [Arabidopsis thaliana]<br>gi4490307 emb CAB38798.1  Dem-like protein [Arabidopsis thaliana]<br>gi7270288 emb CAB80057.1  Dem-like protein [Arabidopsis thaliana]<br>gi20465423 gb AAM20135.1  putative Dem protein [Arabidopsis thaliana]<br>gi28394003 gb AAO42409.1  putative Dem protein [Arabidopsis thaliana]<br>gi332660820 gb AEE86220.1  Vacuolar import/ degradation, Vid27-related protein [Arabidopsis thaliana]<br>refXP_002869214.1   hypothetical protein ARALYDRAFT_913079 [Arabidopsis lyrata subsp. lyrata]<br>gi297315050 gb EFH45473.1  hypothetical protein ARALYDRAFT_913079 [Arabidopsis lyrata subsp. lyrata] | 451  | 328  | 1.00E-156 | 72.7  | 61.9 | 67.6 | hypothetical protein ARALYDRAFT_913084                                             | gbpln | Arabidopsis lyrata   | AT4G33380.1   Symbols:   unknown protein; Has 194 Blast hits to 189 proteins in 23 species: Archae - 0; Bacteria - 0; Metazoa - 0; Fungi - 0; Plants - 184; Viruses - 0; Other Eukaryotes - 10 (source: NCBI BLINK).   chr4:16072064-16074605 FORWARD LENGTH=328 | 451  | 328 | 1.00E-156 | 72.7  | 60.8 | 67.2 |
| Rsa1.0_00374.1.g12477.t1 | refNP_195066.1   Vacuolar import/ degradation, Vid27-related protein [Arabidopsis thaliana]<br>gi4490307 emb CAB38798.1  Dem-like protein [Arabidopsis thaliana]<br>gi7270288 emb CAB80057.1  Dem-like protein [Arabidopsis thaliana]<br>gi20465423 gb AAM20135.1  putative Dem protein [Arabidopsis thaliana]<br>gi28394003 gb AAO42409.1  putative Dem protein [Arabidopsis thaliana]<br>gi332660820 gb AEE86220.1  Vacuolar import/ degradation, Vid27-related protein [Arabidopsis thaliana]<br>refXP_002869214.1   hypothetical protein ARALYDRAFT_913079 [Arabidopsis lyrata subsp. lyrata]<br>gi297315050 gb EFH45473.1  hypothetical protein ARALYDRAFT_913079 [Arabidopsis lyrata subsp. lyrata]                                                                                                                                                                                                          | 638  | 645  | 0         | 101.1 | 86.7 | 92.9 | Vacuolar import/ degradation, Vid27-related protein                                | gbpln | Arabidopsis thaliana | AT4G33400.1   Symbols:   Vacuolar import/ degradation, Vid27-related protein   chr4:16076189-16080410 REVERSE LENGTH=645                                                                                                                                         | 638  | 645 | 0         | 101.1 | 86.7 | 92.9 |
| Rsa1.0_00374.1.g12478.t1 | refXP_002869214.1   hypothetical protein ARALYDRAFT_913079 [Arabidopsis lyrata subsp. lyrata]<br>gi297315050 gb EFH45473.1  hypothetical protein ARALYDRAFT_913079 [Arabidopsis lyrata subsp. lyrata]                                                                                                                                                                                                                                                                                                                                                                                                                                                                                                                                                                                                                                                                                                              | 304  | 325  | 1.00E-147 | 106.9 | 82.6 | 89.1 | hypothetical protein ARALYDRAFT_913079                                             | gbpln | Arabidopsis lyrata   | AT4G33420.1   Symbols:   Peroxidase superfamily protein   chr4:16084856-16086105 FORWARD LENGTH=325                                                                                                                                                              | 304  | 325 | 1.00E-149 | 106.9 | 82.6 | 89.1 |
| Rsa1.0_00374.1.g12479.t1 | gb AF067895.1  leucine-rich repeat receptor-like kinase (mitochondrion) [Brassica rapa subsp. oleifera]                                                                                                                                                                                                                                                                                                                                                                                                                                                                                                                                                                                                                                                                                                                                                                                                            | 611  | 632  | 0         | 103.4 | 95.7 | 97.5 | leucine-rich repeat receptor-like kinase (mitochondrion)                           | gbpln | Brassica rapa        | AT4G33430.1   Symbols: BAK1, RKS10, SERK3, ELG, ATSERK3, ATBAK1   BRI-associated receptor kinase   chr4:16086654-16090288 REVERSE LENGTH=615                                                                                                                     | 611  | 615 | 0         | 100.7 | 93.8 | 96.9 |
| Rsa1.0_00374.1.g12480.t1 | refXP_002867181.1   AtMYB69 [Arabidopsis lyrata subsp. lyrata]<br>gi297313017 gb EFH43440.1   AtMYB69 [Arabidopsis lyrata subsp. lyrata]                                                                                                                                                                                                                                                                                                                                                                                                                                                                                                                                                                                                                                                                                                                                                                           | 249  | 250  | 1.00E-116 | 100.4 | 81.1 | 88.8 | AtMYB69                                                                            | gbpln | Arabidopsis lyrata   | AT4G33450.1   Symbols: ATMYB69, MYB69   myb domain protein 69   chr4:16095746-16096603 REVERSE LENGTH=250                                                                                                                                                        | 249  | 250 | 1.00E-116 | 100.4 | 80.3 | 87.1 |
| Rsa1.0_00374.1.g12481.t1 | gb AAC95175.1  putative non-LTR retroelement reverse transcriptase [Arabidopsis thaliana]                                                                                                                                                                                                                                                                                                                                                                                                                                                                                                                                                                                                                                                                                                                                                                                                                          | 1656 | 1352 | 0         | 81.6  | 40.6 | 54.4 | putative non-LTR retroelement reverse transcriptase                                | gbpln | Arabidopsis thaliana | AT3G24255.1   Symbols:   RNA-directed DNA polymerase (reverse transcriptase)-related family protein   chr3:8789471-8793208 FORWARD LENGTH=746                                                                                                                    | 1656 | 746 | 1.00E-116 | 45.0  | 12.6 | 16.4 |
| Rsa1.0_00374.1.g12482.t1 | refXP_002869211.1   predicted protein [Arabidopsis lyrata subsp. lyrata]<br>gi297315047 gb EFH45470.1   predicted protein [Arabidopsis lyrata subsp. lyrata]                                                                                                                                                                                                                                                                                                                                                                                                                                                                                                                                                                                                                                                                                                                                                       | 209  | 949  | 2.00E-58  | 454.1 | 72.2 | 76.6 | predicted protein                                                                  | gbpln | Arabidopsis lyrata   | AT4G33520.2   Symbols: PAA1, HMA6   P-type ATP-ase 1   chr4:16118993-16125849 FORWARD LENGTH=949                                                                                                                                                                 | 209  | 949 | 1.00E-60  | 454.1 | 72.7 | 77.0 |
| Rsa1.0_00374.1.g12483.t1 | refNP_001078488.1   bifunctional inhibitor/lipid-transfer protein/seed storage 2S albumin-like protein [Arabidopsis thaliana]<br>gi3549657 emb CAA20568.1  putative protein [Arabidopsis thaliana]<br>gi7270303 emb CAB80072.1  putative protein [Arabidopsis thaliana]<br>gi332660845 gb AEE86245.1  bifunctional inhibitor/lipid-transfer protein/seed storage 2S albumin-like protein [Arabidopsis thaliana]                                                                                                                                                                                                                                                                                                                                                                                                                                                                                                    | 114  | 115  | 4.00E-48  | 100.9 | 82.5 | 93.9 | bifunctional inhibitor/lipid-transfer protein/seed storage 2S albumin-like protein | gbpln | Arabidopsis thaliana | AT4G33550.2   Symbols:   Bifunctional inhibitor/lipid-transfer protein/seed storage 2S albumin superfamily protein   chr4:16134538-16134964 FORWARD LENGTH=115                                                                                                   | 114  | 115 | 6.00E-51  | 100.9 | 82.5 | 93.9 |

|                           |                                                                                                                                                                                                                                                                                                                                                                                                           |     |     |           |       |      |      |                                                                                    |       |                      |                                                                                                                                                                                                                                                                                                                                                          |     |      |           |       |      |      |
|---------------------------|-----------------------------------------------------------------------------------------------------------------------------------------------------------------------------------------------------------------------------------------------------------------------------------------------------------------------------------------------------------------------------------------------------------|-----|-----|-----------|-------|------|------|------------------------------------------------------------------------------------|-------|----------------------|----------------------------------------------------------------------------------------------------------------------------------------------------------------------------------------------------------------------------------------------------------------------------------------------------------------------------------------------------------|-----|------|-----------|-------|------|------|
| Rsa1.0_00374.1.g12484.t1  | refNP_001078488.1   bifunctional inhibitor/lipid-transfer protein/seed storage 2S albumin-like protein [Arabidopsis thaliana] g 3549657 emb CAA20568.1   putative protein [Arabidopsis thaliana] g 7270303 emb CAB80072.1   putative protein [Arabidopsis thaliana] g 332660845 gb AEE86245.1   bifunctional inhibitor/lipid-transfer protein/seed storage 2S albumin-like protein [Arabidopsis thaliana] | 116 | 115 | 7.00E-51  | 99.1  | 87.1 | 92.2 | bifunctional inhibitor/lipid-transfer protein/seed storage 2S albumin-like protein | gbpln | Arabidopsis thaliana | AT4G33550.2   Symbols:   Bifunctional inhibitor/lipid-transfer protein/seed storage 2S albumin superfamily protein   chr4:16134538-16134964 FORWARD LENGTH=115                                                                                                                                                                                           | 116 | 115  | 1.00E-53  | 99.1  | 87.1 | 92.2 |
| Rsa1.0_00374.1.g12485.t1  | #                                                                                                                                                                                                                                                                                                                                                                                                         | #   | #   | #         | #     | #    | -    |                                                                                    | ----  | ----                 | #                                                                                                                                                                                                                                                                                                                                                        | #   | #    | #         | #     | #    |      |
| Rsa1.0_00374.1.g12486.t1  | refXP_002869207.1   hypothetical protein ARALYDRAFT_491329 [Arabidopsis thaliana] g 297315043 gb EFH45466.1   hypothetical protein ARALYDRAFT_491329 [Arabidopsis lyrata subsp. lyrata]                                                                                                                                                                                                                   | 95  | 95  | 1.00E-31  | 100.0 | 77.9 | 82.1 | hypothetical protein ARALYDRAFT_491329                                             | gbpln | Arabidopsis lyrata   | AT4G33560.1   Symbols:   Wound-responsive family protein   chr4:16135465-16135752 FORWARD LENGTH=95                                                                                                                                                                                                                                                      | 95  | 95   | 2.00E-25  | 100.0 | 68.4 | 74.7 |
| Rsa1.0_00374.1.g12487.t1  | refXP_002869206.1   hypothetical protein ARALYDRAFT_328381 [Arabidopsis lyrata subsp. lyrata] g 297315042 gb EFH45465.1   hypothetical protein ARALYDRAFT_328381 [Arabidopsis lyrata subsp. lyrata]                                                                                                                                                                                                       | 308 | 315 | 7.00E-92  | 102.3 | 67.9 | 78.9 | hypothetical protein ARALYDRAFT_328381                                             | gbpln | Arabidopsis lyrata   | AT4G33565.1   Symbols:   RING/U-box superfamily protein   chr4:16136821-16137924 FORWARD LENGTH=367                                                                                                                                                                                                                                                      | 308 | 367  | 2.00E-88  | 119.2 | 68.2 | 77.3 |
| Rsa1.0_00375.1.g12488.t1  | refNP_001032052.1   uncharacterized protein [Arabidopsis thaliana] g 222423776 dbj BAH19854.1   AT5G51040 [Arabidopsis thaliana] g 332008642 gb AED96025.1   uncharacterized protein AT5G51040 [Arabidopsis thaliana]                                                                                                                                                                                     | 183 | 184 | 8.00E-84  | 100.5 | 83.1 | 90.2 | uncharacterized protein                                                            | gbpln | Arabidopsis thaliana | AT5G51040.2   Symbols:   unknown protein; CONTAINS InterPro DOMAIN/s: Protein of unknown function DUF339 (InterPro:IPR005631). Has 368 Blast hits to 368 proteins in 141 species: Archae - 0; Bacteria - 216; Metazoa - 8; Fungi - 13; Plants - 40; Viruses - 0; Other Eukaryotes - 91 (source: NCBI BLINK).   chr5:20750700-20751790 FORWARD LENGTH=184 | 183 | 184  | 3.00E-86  | 100.5 | 83.1 | 90.2 |
| Rsa1.0_00375.1.g12489.t1  | gb EOA23477.1   hypothetical protein CARUB_v10016666mg [Capsella rubella]                                                                                                                                                                                                                                                                                                                                 | 780 | 902 | 0         | 115.6 | 80.8 | 89.7 | hypothetical protein CARUB_v10016666mg                                             | gbpln | Capsella rubella     | AT3G45140.1   Symbols: LOX2, ATLOX2   lipoxygenase 2   chr3:16525437-16529233 FORWARD LENGTH=896                                                                                                                                                                                                                                                         | 780 | 896  | 0         | 114.9 | 77.1 | 88.2 |
| Rsa1.0_00375.1.g12490.t1  | #                                                                                                                                                                                                                                                                                                                                                                                                         | #   | #   | #         | #     | #    | -    |                                                                                    | ----  | ----                 | #                                                                                                                                                                                                                                                                                                                                                        | #   | #    | #         | #     | #    |      |
| Rsa1.0_00375.1.g12491.t1  | #                                                                                                                                                                                                                                                                                                                                                                                                         | #   | #   | #         | #     | #    | -    |                                                                                    | ----  | ----                 | #                                                                                                                                                                                                                                                                                                                                                        | #   | #    | #         | #     | #    |      |
| Rsa1.0_00375.1.g12492.t1  | gb EMJ14584.1   hypothetical protein PRUPE_ppa026473mg [Prunus persica]                                                                                                                                                                                                                                                                                                                                   | 79  | 696 | 1.00E-14  | 881.0 | 51.9 | 70.9 | hypothetical protein PRUPE_ppa026473mg                                             | gbpln | Prunus persica       | #                                                                                                                                                                                                                                                                                                                                                        | #   | #    | #         | #     | #    |      |
| Rsa1.0_00375.1.g12493.t1  | gb AAM61036.1   contains similarity to poly(A)-binding protein II [Arabidopsis thaliana]                                                                                                                                                                                                                                                                                                                  | 228 | 227 | 6.00E-98  | 99.6  | 86.8 | 92.5 | contains similarity to poly(A)-binding protein II                                  | gbpln | Arabidopsis thaliana | AT5G51120.1   Symbols: PABN1, ATPABN1   polyadenylate-binding protein 1   chr5:20778760-20781241 FORWARD LENGTH=227                                                                                                                                                                                                                                      | 228 | 227  | 3.00E-96  | 99.6  | 82.9 | 88.2 |
| Rsa1.0_00375.1.g12494.t1  | refXP_002864098.1   hypothetical protein ARALYDRAFT_495181 [Arabidopsis lyrata subsp. lyrata] g 297309933 gb EFH40357.1   hypothetical protein ARALYDRAFT_495181 [Arabidopsis lyrata subsp. lyrata]                                                                                                                                                                                                       | 318 | 313 | 1.00E-128 | 98.4  | 72.0 | 78.3 | hypothetical protein ARALYDRAFT_495181                                             | gbpln | Arabidopsis lyrata   | AT5G51130.1   Symbols:   S-adenosyl-L-methionine-dependent methyltransferases superfamily protein   chr5:20781896-20783901 FORWARD LENGTH=318                                                                                                                                                                                                            | 318 | 318  | 1.00E-128 | 100.0 | 71.4 | 78.6 |
| Rsa1.0_00375.1.g12495.t1  | #                                                                                                                                                                                                                                                                                                                                                                                                         | #   | #   | #         | #     | #    | -    |                                                                                    | ----  | ----                 | #                                                                                                                                                                                                                                                                                                                                                        | #   | #    | #         | #     | #    |      |
| Rsa1.0_00375.1.g12496.t1  | gb ACP30595.1   disease resistance protein [Brassica rapa subsp. pekinensis]                                                                                                                                                                                                                                                                                                                              | 394 | 707 | 3.00E-88  | 179.4 | 42.6 | 45.9 | disease resistance protein                                                         | gbpln | Brassica rapa        | AT4G16890.1   Symbols: SNC1, BAL   disease resistance protein (TIR-NBS-LRR class), putative   chr4:9500506-9505455 REVERSE LENGTH=1301                                                                                                                                                                                                                   | 394 | 1301 | 5.00E-75  | 330.2 | 40.6 | 52.8 |
| Rsa1.0_00375.1.g12497.t1  | refXP_002862832.1   hypothetical protein ARALYDRAFT_359344 [Arabidopsis lyrata subsp. lyrata] g 297308575 gb EFH39090.1   hypothetical protein ARALYDRAFT_359344 [Arabidopsis lyrata subsp. lyrata]                                                                                                                                                                                                       | 255 | 260 | 1.00E-20  | 102.0 | 35.3 | 49.4 | hypothetical protein ARALYDRAFT_359344                                             | gbpln | Arabidopsis lyrata   | AT1G73490.2   Symbols:   RNA-binding (RRM/RBD/RNP motifs) family protein   chr1:27633496-27634867 REVERSE LENGTH=260                                                                                                                                                                                                                                     | 255 | 260  | 6.00E-20  | 102.0 | 21.6 | 34.1 |
| Rsa1.0_00375.1.g12498.t10 | gb AFI23584.1   embryonic flower 2_2 [Brassica oleracea var. italica] g 384597741 gb AFI23587.1   embryonic flower 2_2 [Brassica oleracea var. italica]                                                                                                                                                                                                                                                   | 665 | 630 | 0         | 94.7  | 89.9 | 91.7 | embryonic flower 2_2                                                               | gbpln | Brassica oleracea    | AT5G51230.1   Symbols: EMF2, VEF2, CYR1, ATEMF2   VEFs-Box of polycomb protein   chr5:20824153-20829344 FORWARD LENGTH=631                                                                                                                                                                                                                               | 665 | 631  | 0         | 94.9  | 80.2 | 86.8 |
| Rsa1.0_00375.1.g12499.t1  | refXP_002865848.1   hypothetical protein ARALYDRAFT_495196 [Arabidopsis lyrata subsp. lyrata] g 297311683 gb EFH42107.1   hypothetical protein ARALYDRAFT_495196 [Arabidopsis lyrata subsp. lyrata]                                                                                                                                                                                                       | 258 | 257 | 1.00E-124 | 99.6  | 85.7 | 91.9 | hypothetical protein ARALYDRAFT_495196                                             | gbpln | Arabidopsis lyrata   | AT5G51260.1   Symbols:   HAD superfamily, subfamily IIIB acid phosphatase   chr5:20832222-20833466 REVERSE LENGTH=257                                                                                                                                                                                                                                    | 258 | 257  | 1.00E-126 | 99.6  | 84.9 | 92.2 |

|                           |                                                                                                                                                                                                                                                                                                                                                                                                                                  |     |     |           |        |      |      |                                                         |       |                      |                                                                                                                                                                                                                                                                |     |     |           |        |      |      |
|---------------------------|----------------------------------------------------------------------------------------------------------------------------------------------------------------------------------------------------------------------------------------------------------------------------------------------------------------------------------------------------------------------------------------------------------------------------------|-----|-----|-----------|--------|------|------|---------------------------------------------------------|-------|----------------------|----------------------------------------------------------------------------------------------------------------------------------------------------------------------------------------------------------------------------------------------------------------|-----|-----|-----------|--------|------|------|
| Rsa1.0_00375.1.g12501.t1  | ref XP_002865850.1  kinase family protein [Arabidopsis lyrata subsp. lyrata] gi 297311685 gb EFH42109.1  kinase family protein [Arabidopsis lyrata subsp. lyrata]                                                                                                                                                                                                                                                                | 786 | 812 | 0         | 103.3  | 76.6 | 86.6 | kinase family protein                                   | gbpln | Arabidopsis lyrata   | AT5G51270.1   Symbols:   U-box domain-containing protein kinase family protein   chr:5:20835137-20838262 REVERSE LENGTH=819                                                                                                                                    | 786 | 819 | 0         | 104.2  | 73.3 | 83.0 |
| Rsa1.0_00375.1.g12501.t1  | gb EOA33952.1  hypothetical protein CARUB_v10021447mg [Capsella rubella]                                                                                                                                                                                                                                                                                                                                                         | 70  | 813 | 6.00E-16  | 1161.4 | 54.3 | 54.3 | hypothetical protein CARUB_v10021447mg                  | gbpln | Capsella rubella     | AT1G60490.1   Symbols: ATVPS34, VPS34, PI3K   vacuolar protein sorting 34   chr:1:22285792-22290190 REVERSE LENGTH=814                                                                                                                                         | 70  | 814 | 1.00E-18  | 1162.9 | 54.3 | 54.3 |
| Rsa1.0_00375.1.g12502.t1  | ref NP_199944.2  gibberellin 20-oxidase-related protein [Arabidopsis thaliana] gi 332008683 gb AED9066.1  gibberellin 20-oxidase-related protein [Arabidopsis thaliana]                                                                                                                                                                                                                                                          | 322 | 325 | 1.00E-166 | 100.9  | 89.1 | 93.8 | gibberellin 20-oxidase-related protein                  | gbpln | Arabidopsis thaliana | AT5G51310.1   Symbols:   2-oxoglutarate (2OG) and Fe(II)-dependent oxygenase superfamily protein   chr:5:20852854-20854718 REVERSE LENGTH=325                                                                                                                  | 322 | 325 | 1.00E-169 | 100.9  | 89.1 | 93.8 |
| Rsa1.0_00376.1.g12503.t1  | gb EOA32351.1  hypothetical protein CARUB_v10015618mg [Capsella rubella]                                                                                                                                                                                                                                                                                                                                                         | 334 | 404 | 1.00E-127 | 121.0  | 71.3 | 75.7 | hypothetical protein CARUB_v10015618mg                  | gbpln | Capsella rubella     | AT3G07220.1   Symbols:   SMAD/FHA domain-containing protein   chr:3:2297968-2299407 FORWARD LENGTH=320                                                                                                                                                         | 334 | 320 | 1.00E-124 | 95.8   | 71.3 | 76.6 |
| Rsa1.0_00376.1.g12504.t1  | gb EOA30273.1  hypothetical protein CARUB_v10013394mg [Capsella rubella]                                                                                                                                                                                                                                                                                                                                                         | 557 | 546 | 0         | 98.0   | 84.9 | 89.4 | hypothetical protein CARUB_v10013394mg                  | gbpln | Capsella rubella     | AT3G07210.1   Symbols:   unknown protein; Has 97 Blast hits to 85 proteins in 31 species: Archae - 0; Bacteria - 14; Metazoa - 7; Fungi - 19; Plants - 37; Viruses - 0; Other Eukaryotes - 20 (source: NCBI BLink).   chr:3:2293000-2295119 REVERSE LENGTH=547 | 557 | 547 | 0         | 98.2   | 85.8 | 90.3 |
| Rsa1.0_00376.1.g12505.t1  | ref XP_002882517.1  zinc finger family protein [Arabidopsis lyrata subsp. lyrata] gi 297328357 gb EFH58776.1  zinc finger family protein [Arabidopsis lyrata subsp. lyrata]                                                                                                                                                                                                                                                      | 388 | 181 | 1.00E-54  | 46.6   | 31.7 | 36.9 | zinc finger family protein                              | gbpln | Arabidopsis lyrata   | AT3G07200.2   Symbols:   RING/U-box superfamily protein   chr:3:2291343-2292223 FORWARD LENGTH=182                                                                                                                                                             | 388 | 182 | 4.00E-54  | 46.9   | 30.4 | 35.1 |
| Rsa1.0_00376.1.g12506.t1  | ref XP_002884631.1  hypothetical protein ARALYDRAFT_896875 [Arabidopsis lyrata subsp. lyrata] gi 297330471 gb EFH60890.1  hypothetical protein ARALYDRAFT_896875 [Arabidopsis lyrata subsp. lyrata]                                                                                                                                                                                                                              | 596 | 599 | 0         | 100.5  | 87.6 | 93.8 | hypothetical protein ARALYDRAFT_896875                  | gbpln | Arabidopsis lyrata   | AT3G07180.1   Symbols:   GPI transamidase component PIG-S-related   chr:3:2282455-2285475 REVERSE LENGTH=599                                                                                                                                                   | 596 | 599 | 0         | 100.5  | 85.7 | 92.6 |
| Rsa1.0_00376.1.g12507.t1  | ref NP_566300.1  Sterile alpha motif (SAM) domain-containing protein [Arabidopsis thaliana] gi 6642648 gb AAF20229.1 AC012395_16 unknown protein [Arabidopsis thaliana] gi 15294218 gb AAK95286.1 AF410300.1 AT3g07170/T1B9_17 [Arabidopsis thaliana] gi 22655432 gb AAM98308.1  At3g07170/T1B9_17 [Arabidopsis thaliana] gi 332640986 gb AEE74507.1  Sterile alpha motif (SAM) domain-containing protein [Arabidopsis thaliana] | 190 | 203 | 8.00E-88  | 106.8  | 87.4 | 92.1 | Sterile alpha motif (SAM) domain-containing protein     | gbpln | Arabidopsis thaliana | AT3G07170.1   Symbols:   Sterile alpha motif (SAM) domain-containing protein   chr:3:2280428-2282097 FORWARD LENGTH=203                                                                                                                                        | 190 | 203 | 3.00E-90  | 106.8  | 87.4 | 92.1 |
| Rsa1.0_00376.1.g12508.t33 | ref NP_187371.1  uncharacterized protein [Arabidopsis thaliana] gi 6642650 gb AAF20231.1 AC012395_18 hypothetical protein [Arabidopsis thaliana] gi 332640984 gb AEE74505.1  uncharacterized protein AT3G07150 [Arabidopsis thaliana]                                                                                                                                                                                            | 192 | 199 | 3.00E-69  | 103.6  | 75.0 | 83.9 | uncharacterized protein                                 | gbpln | Arabidopsis thaliana | AT3G07150.1   Symbols:   unknown protein; Has 19 Blast hits to 19 proteins in 8 species: Archae - 0; Bacteria - 0; Metazoa - 0; Fungi - 0; Plants - 19; Viruses - 0; Other Eukaryotes - 0 (source: NCBI BLink).   chr:3:2263806-2264576 REVERSE LENGTH=199     | 192 | 199 | 1.00E-71  | 103.6  | 75.0 | 83.9 |
| Rsa1.0_00376.1.g12509.t1  | ref XP_002882514.1  GPI transamidase component Gpi16 subunit family protein [Arabidopsis lyrata subsp. lyrata] gi 297328354 gb EFH58773.1  GPI transamidase component Gpi16 subunit family protein [Arabidopsis lyrata subsp. lyrata]                                                                                                                                                                                            | 639 | 647 | 0         | 101.3  | 85.3 | 90.3 | GPI transamidase component Gpi16 subunit family protein | gbpln | Arabidopsis lyrata   | AT3G07140.2   Symbols:   GPI transamidase component Gpi16 subunit family protein   chr:3:2261278-2263632 FORWARD LENGTH=643                                                                                                                                    | 639 | 643 | 0         | 100.6  | 84.0 | 89.7 |
| Rsa1.0_00376.1.g12510.t1  | gb EOA30308.1  hypothetical protein CARUB_v10013434mg [Capsella rubella]                                                                                                                                                                                                                                                                                                                                                         | 545 | 532 | 0         | 97.6   | 87.0 | 91.4 | hypothetical protein CARUB_v10013434mg                  | gbpln | Capsella rubella     | AT3G07130.1   Symbols: ATPAP15, PAP15   purple acid phosphatase 15   chr:3:2255763-2257981 REVERSE LENGTH=532                                                                                                                                                  | 545 | 532 | 0         | 97.6   | 86.1 | 90.8 |
| Rsa1.0_00376.1.g12511.t1  | gb EOA29662.1  hypothetical protein CARUB_v10015595mg [Capsella rubella]                                                                                                                                                                                                                                                                                                                                                         | 214 | 365 | 6.00E-68  | 170.6  | 70.1 | 80.4 | hypothetical protein CARUB_v10015595mg                  | gbpln | Capsella rubella     | AT3G07120.1   Symbols:   RING/U-box superfamily protein   chr:3:2254560-2255642 FORWARD LENGTH=360                                                                                                                                                             | 214 | 360 | 3.00E-69  | 168.2  | 72.0 | 81.3 |

|                          |                                                                                                                                                                                                                                                                                                                                                                                                                               |      |      |           |       |      |      |                                          |       |                      |                                                                                                                                                                        |      |      |           |       |      |      |
|--------------------------|-------------------------------------------------------------------------------------------------------------------------------------------------------------------------------------------------------------------------------------------------------------------------------------------------------------------------------------------------------------------------------------------------------------------------------|------|------|-----------|-------|------|------|------------------------------------------|-------|----------------------|------------------------------------------------------------------------------------------------------------------------------------------------------------------------|------|------|-----------|-------|------|------|
| Rsa1.0_00376.1.g12512.t1 | ref NP_187366.2  sec24-like transport protein [Arabidopsis thaliana] gi 78099801 sp Q9SFU0.2 SC24A_ARAT H RecName: Full=Protein transport protein Sec24-like At3g07100 gi 22531076 gb JAM97042.1  putative Sec24-like COPII protein [Arabidopsis thaliana] gi 2319790 gb AAN15492.1  putative Sec24-like COPII protein [Arabidopsis thaliana] gi 332640977 gb AEE74498.1  sec24-like transport protein [Arabidopsis thaliana] | 1009 | 1038 | 0         | 102.9 | 87.6 | 91.6 | sec24-like transport protein             | gbpln | Arabidopsis thaliana | AT3G07100.1   Symbols: ERMO2, SEC24A   Sec23/Sec24 protein transport family protein   chr3:2245689-2250077 REVERSE LENGTH=1038                                         | 1009 | 1038 | 0         | 102.9 | 87.6 | 91.6 |
| Rsa1.0_00376.1.g12513.t1 | ref XP_002884625.1  predicted protein [Arabidopsis lyrata subsp. lyrata] gi 297330465 gb EFH60884.1  predicted protein [Arabidopsis lyrata subsp. lyrata]                                                                                                                                                                                                                                                                     | 272  | 265  | 1.00E-126 | 97.4  | 81.3 | 86.8 | predicted protein                        | gbpln | Arabidopsis lyrata   | AT3G07090.1   Symbols:   PPPDE putative thiol peptidase family protein   chr3:2243153-2244476 REVERSE LENGTH=265                                                       | 272  | 265  | 1.00E-127 | 97.4  | 80.1 | 87.1 |
| Rsa1.0_00376.1.g12514.t1 | ref NP_187364.1  EamA-like transporter [Arabidopsis thaliana] gi 6642657 gb AAF20238.1 AC012395_25 putative integral membrane protein [Arabidopsis thaliana] gi 30794019 gb AAP40456.1  putative integral membrane protein [Arabidopsis thaliana] gi 53749190 gb AAU90080.1  At3g07080 [Arabidopsis thaliana] gi 332640975 gb AEE74496.1  EamA-like transporter [Arabidopsis thaliana]                                        | 232  | 438  | 5.00E-46  | 188.8 | 56.9 | 65.1 | EamA-like transporter                    | gbpln | Arabidopsis thaliana | AT3G07080.1   Symbols:   EamA-like transporter family   chr3:2241360-2242934 FORWARD LENGTH=438                                                                        | 232  | 438  | 1.00E-48  | 188.8 | 56.9 | 65.1 |
| Rsa1.0_00376.1.g12515.t4 | ref NP_566298.1  protein kinase domain-containing protein [Arabidopsis thaliana] gi 75337179 sp Q9SFT7.1 Y3707_ARATH RecName: Full=Serine/threonine-protein kinase At3g07070 gi 6642658 gb AAF20239.1 AC012395_26 putative protein kinase [Arabidopsis thaliana] gi 332640974 gb AEE74495.1  serine/threonine-protein kinase [Arabidopsis thaliana]                                                                           | 441  | 414  | 0         | 93.9  | 88.0 | 90.7 | protein kinase domain-containing protein | gbpln | Arabidopsis thaliana | AT3G07070.1   Symbols:   Protein kinase superfamily protein   chr3:2238455-2240074 FORWARD LENGTH=414                                                                  | 441  | 414  | 0         | 93.9  | 88.0 | 90.7 |
| Rsa1.0_00376.1.g12516.t1 | gb EOA30210.1  hypothetical protein CARUB_v10013329mg [Capsella rubella]                                                                                                                                                                                                                                                                                                                                                      | 615  | 574  | 0         | 93.3  | 77.1 | 82.1 | hypothetical protein CARUB_v10013329mg   | gbpln | Capsella rubella     | AT3G07050.1   Symbols:   GTP-binding family protein   chr3:2229602-2232279 REVERSE LENGTH=582                                                                          | 615  | 582  | 0         | 94.6  | 79.5 | 84.2 |
| Rsa1.0_00376.1.g12517.t1 | gb EOA30082.1  hypothetical protein CARUB_v10013187mg [Capsella rubella]                                                                                                                                                                                                                                                                                                                                                      | 635  | 642  | 0         | 101.1 | 89.1 | 93.7 | hypothetical protein CARUB_v10013187mg   | gbpln | Capsella rubella     | AT3G07020.2   Symbols:   UDP-Glycosyltransferase superfamily protein   chr3:2218120-2221590 REVERSE LENGTH=637                                                         | 635  | 637  | 0         | 100.3 | 89.3 | 93.5 |
| Rsa1.0_00376.1.g12518.t1 | ref XP_002882503.1  hypothetical protein ARALYDRAFT_478019 [Arabidopsis lyrata subsp. lyrata] gi 297328343 gb EFH58762.1  hypothetical protein ARALYDRAFT_478019 [Arabidopsis lyrata subsp. lyrata]                                                                                                                                                                                                                           | 750  | 782  | 0         | 104.3 | 82.3 | 89.3 | hypothetical protein ARALYDRAFT_478019   | gbpln | Arabidopsis lyrata   | AT3G06980.1   Symbols:   DEA(D/H)-box RNA helicase family protein   chr3:2201531-2204662 FORWARD LENGTH=781                                                            | 750  | 781  | 0         | 104.1 | 81.3 | 88.7 |
| Rsa1.0_00376.1.g12519.t1 | ref XP_002884617.1  hypothetical protein ARALYDRAFT_317559 [Arabidopsis lyrata subsp. lyrata] gi 297330457 gb EFH60876.1  hypothetical protein ARALYDRAFT_317559 [Arabidopsis lyrata subsp. lyrata]                                                                                                                                                                                                                           | 310  | 320  | 2.00E-27  | 103.2 | 32.6 | 44.5 | hypothetical protein ARALYDRAFT_317559   | gbpln | Arabidopsis lyrata   | AT3G06970.1   Symbols:   RNA-binding (RRM/RBD/RNP motifs) family protein   chr3:2199653-2201150 REVERSE LENGTH=317                                                     | 310  | 317  | 2.00E-27  | 102.3 | 31.9 | 44.5 |
| Rsa1.0_00376.1.g12520.t1 | gb EOA18666.1  hypothetical protein CARUB_v10007242mg [Capsella rubella]                                                                                                                                                                                                                                                                                                                                                      | 377  | 401  | 1.00E-104 | 106.4 | 56.8 | 71.1 | hypothetical protein CARUB_v10007242mg   | gbpln | Capsella rubella     | AT4G36840.1   Symbols:   Galactose oxidase/kelch repeat superfamily protein   chr4:17352166-17352882 FORWARD LENGTH=238                                                | 377  | 238  | 3.00E-98  | 63.1  | 34.0 | 41.4 |
| Rsa1.0_00377.1.g12521.t1 | gb EOA30334.1  hypothetical protein CARUB_v10013459mg [Capsella rubella]                                                                                                                                                                                                                                                                                                                                                      | 615  | 519  | 0         | 84.4  | 72.8 | 77.6 | hypothetical protein CARUB_v10013459mg   | gbpln | Capsella rubella     | AT3G15180.1   Symbols:   ARM repeat superfamily protein   chr3:5111952-5115803 FORWARD LENGTH=519                                                                      | 615  | 519  | 0         | 84.4  | 73.3 | 77.6 |
| Rsa1.0_00377.1.g12522.t1 | gb EOA29514.1  hypothetical protein CARUB_v10014276mg [Capsella rubella]                                                                                                                                                                                                                                                                                                                                                      | 308  | 300  | 1.00E-123 | 97.4  | 79.2 | 83.8 | hypothetical protein CARUB_v10014276mg   | gbpln | Capsella rubella     | AT3G15170.1   Symbols: CUC1, ANAC054, ATNAC1   NAC (No Apical Meristem) domain transcriptional regulator superfamily protein   chr3:5109912-5111435 FORWARD LENGTH=310 | 308  | 310  | 1.00E-118 | 100.6 | 79.2 | 85.1 |
| Rsa1.0_00377.1.g12523.t1 | ref XP_002885073.1  hypothetical protein ARALYDRAFT_897788 [Arabidopsis lyrata subsp. lyrata] gi 297330913 gb EFH61332.1  hypothetical protein ARALYDRAFT_897788 [Arabidopsis lyrata subsp. lyrata]                                                                                                                                                                                                                           | 280  | 248  | 1.00E-112 | 88.6  | 71.1 | 80.4 | hypothetical protein ARALYDRAFT_897788   | gbpln | Arabidopsis lyrata   | AT3G15150.1   Symbols: HPY2, MMS21, ATMM21   RING/U-box superfamily protein   chr3:5102210-5104082 REVERSE LENGTH=249                                                  | 280  | 249  | 1.00E-111 | 88.9  | 68.9 | 79.6 |

|                          |                                                                                                                                                                                                                                                                                                                                                                                                                                                |     |      |           |       |      |      |                                                 |       |                      |                                                                                                                                                                                                                                                                                                                                                                                                                                                                                                                                                         |     |     |           |       |      |      |
|--------------------------|------------------------------------------------------------------------------------------------------------------------------------------------------------------------------------------------------------------------------------------------------------------------------------------------------------------------------------------------------------------------------------------------------------------------------------------------|-----|------|-----------|-------|------|------|-------------------------------------------------|-------|----------------------|---------------------------------------------------------------------------------------------------------------------------------------------------------------------------------------------------------------------------------------------------------------------------------------------------------------------------------------------------------------------------------------------------------------------------------------------------------------------------------------------------------------------------------------------------------|-----|-----|-----------|-------|------|------|
| Rsa1.0_00377.1.g12524.t2 | refXP_002885072.1  hypothetical protein ARALYDRAFT_318289 [Arabidopsis lyrata subsp. lyrata] gi 297330912 gb EFH61331.1                                                                                                                                                                                                                                                                                                                        | 332 | 1134 | 1.00E-162 | 341.6 | 84.3 | 89.2 | hypothetical protein ARALYDRAFT_318289          | gbpln | Arabidopsis lyrata   | AT3G15140.1   Symbols:   Polynucleotidyl transferase, ribonuclease H-like superfamily protein   chr3:5099712-5101717 REVERSE LENGTH=337                                                                                                                                                                                                                                                                                                                                                                                                                 | 332 | 337 | 1.00E-164 | 101.5 | 84.6 | 89.2 |
| Rsa1.0_00377.1.g12525.t1 | hypothetical protein ARALYDRAFT_318289 [Arabidopsis lyrata subsp. lyrata] ref NP_566501.1  uncharacterized protein [Arabidopsis thaliana] gi 11994501 dbj BAB02566.1  unnamed protein product [Arabidopsis thaliana] gi 26450163 dbj BAC42200.1  unknown protein [Arabidopsis thaliana] gi 28827590 gb AAO50639.1  unknown protein [Arabidopsis thaliana] gi 332642100 gb AEE75621.1  uncharacterized protein AT3G15115 [Arabidopsis thaliana] | 318 | 339  | 1.00E-112 | 106.6 | 74.2 | 82.7 | uncharacterized protein                         | gbpln | Arabidopsis thaliana | AT3G15115.1   Symbols:   unknown protein; BEST Arabidopsis thaliana protein match is: unknown protein (TAIR:AT1G53180.1). Has 47 Blast hits to 47 proteins in 15 species: Archae - 0; Bacteria - 0; Metazoa - 13; Fungi - 0; Plants - 30; Viruses - 0; Other Eukaryotes - 4 (source: NCBI BLink).   chr3:5086219-5087352 REVERSE LENGTH=339                                                                                                                                                                                                             | 318 | 339 | 1.00E-114 | 106.6 | 74.2 | 82.7 |
| Rsa1.0_00377.1.g12526.t1 | gb EOA31218.1  hypothetical protein CARUB_v10014384mg [Capsella rubella]                                                                                                                                                                                                                                                                                                                                                                       | 289 | 271  | 1.00E-100 | 93.8  | 72.0 | 82.4 | hypothetical protein CARUB_v10014384mg          | gbpln | Capsella rubella     | AT3G15110.1   Symbols:   unknown protein; FUNCTIONS IN: molecular function unknown; INVOLVED IN: biological process unknown; LOCATED IN: chloroplast thylakoid membrane; EXPRESSED IN: 20 plant structures; EXPRESSED DURING: 13 growth stages; CONTAINS InterPro DOMAIN/s: Protein of unknown function DUF3082 (InterPro:IPRO21434); Has 77 Blast hits to 77 proteins in 38 species: Archae - 0; Bacteria - 37; Metazoa - 0; Fungi - 0; Plants - 39; Viruses - 0; Other Eukaryotes - 1 (source: NCBI BLink).   chr3:5084394-5085823 REVERSE LENGTH=266 | 289 | 266 | 2.00E-98  | 92.0  | 69.6 | 79.9 |
| Rsa1.0_00377.1.g12527.t1 | gb EOA32270.1  hypothetical protein CARUB_v10015530mg [Capsella rubella]                                                                                                                                                                                                                                                                                                                                                                       | 667 | 682  | 0         | 102.2 | 76.2 | 82.6 | hypothetical protein CARUB_v10015530mg          | gbpln | Capsella rubella     | AT3G15095.1   Symbols:   unknown protein; FUNCTIONS IN: molecular function unknown; INVOLVED IN: biological process unknown; LOCATED IN: chloroplast; EXPRESSED IN: 22 plant structures; EXPRESSED DURING: 13 growth stages; Has 9762 Blast hits to 6439 proteins in 764 species: Archae - 77; Bacteria - 1339; Metazoa - 3211; Fungi - 718; Plants - 437; Viruses - 131; Other Eukaryotes - 3849 (source: NCBI BLink).   chr3:5081896-5084050 FORWARD LENGTH=684                                                                                       | 667 | 684 | 0         | 102.5 | 72.9 | 80.1 |
| Rsa1.0_00377.1.g12528.t1 | gb EOA31192.1  hypothetical protein CARUB_v10014358mg [Capsella rubella]                                                                                                                                                                                                                                                                                                                                                                       | 225 | 277  | 1.00E-105 | 123.1 | 81.8 | 85.8 | hypothetical protein CARUB_v10014358mg          | gbpln | Capsella rubella     | AT3G15080.1   Symbols:   Polynucleotidyl transferase, ribonuclease H-like superfamily protein   chr3:5074319-5076327 FORWARD LENGTH=275                                                                                                                                                                                                                                                                                                                                                                                                                 | 225 | 275 | 1.00E-106 | 122.2 | 81.8 | 84.0 |
| Rsa1.0_00377.1.g12529.t1 | ref XP_002885067.1  zinc finger family protein [Arabidopsis lyrata subsp. lyrata] gi 297330907 gb EFH61326.1  zinc finger family protein [Arabidopsis lyrata subsp. lyrata]                                                                                                                                                                                                                                                                    | 155 | 476  | 1.00E-27  | 307.1 | 38.7 | 44.5 | zinc finger family protein                      | gbpln | Arabidopsis lyrata   | AT3G15070.2   Symbols:   RING/U-box superfamily protein   chr3:5070472-5072344 REVERSE LENGTH=486                                                                                                                                                                                                                                                                                                                                                                                                                                                       | 155 | 486 | 3.00E-28  | 313.5 | 36.8 | 43.2 |
| Rsa1.0_00377.1.g12530.t1 | gb AAM66027.1  unknown [Arabidopsis thaliana]                                                                                                                                                                                                                                                                                                                                                                                                  | 220 | 243  | 3.00E-83  | 110.5 | 85.5 | 93.2 | unknown                                         | gbpln | Arabidopsis thaliana | AT3G15040.1   Symbols:   Protein of unknown function, DUF584   chr3:5065445-5066176 REVERSE LENGTH=243                                                                                                                                                                                                                                                                                                                                                                                                                                                  | 220 | 243 | 1.00E-81  | 110.5 | 84.5 | 91.8 |
| Rsa1.0_00377.1.g12531.t1 | ref XP_002882910.1  hypothetical protein ARALYDRAFT_897773 [Arabidopsis lyrata subsp. lyrata] gi 297328750 gb EFH59169.1                                                                                                                                                                                                                                                                                                                       | 405 | 452  | 1.00E-157 | 111.6 | 80.2 | 85.4 | hypothetical protein ARALYDRAFT_897773          | gbpln | Arabidopsis lyrata   | AT3G15030.3   Symbols: TCP4   TCP family transcription factor 4   chr3:5062308-5063570 FORWARD LENGTH=420                                                                                                                                                                                                                                                                                                                                                                                                                                               | 405 | 420 | 1.00E-148 | 103.7 | 80.5 | 84.7 |
| Rsa1.0_00377.1.g12532.t1 | hypothetical protein ARALYDRAFT_897773 [Arabidopsis lyrata subsp. lyrata] ref XP_002882907.1  hypothetical protein ARALYDRAFT_478926 [Arabidopsis lyrata subsp. lyrata] gi 297328747 gb EFH59166.1                                                                                                                                                                                                                                             | 337 | 396  | 1.00E-133 | 117.5 | 81.6 | 84.3 | hypothetical protein ARALYDRAFT_478926          | gbpln | Arabidopsis lyrata   | AT3G15000.1   Symbols:   cobalt ion binding   chr3:5050321-5052121 FORWARD LENGTH=395                                                                                                                                                                                                                                                                                                                                                                                                                                                                   | 337 | 395 | 1.00E-122 | 117.2 | 78.6 | 81.6 |
| Rsa1.0_00377.1.g12533.t1 | hypothetical protein ARALYDRAFT_478926 [Arabidopsis lyrata subsp. lyrata] gb AAP96742.1  ThiJ-like protein [Brassica rapa subsp. pekinensis]                                                                                                                                                                                                                                                                                                   | 392 | 392  | 0         | 100.0 | 96.7 | 98.0 | ThiJ-like protein                               | gbpln | Brassica rapa        | AT3G14990.1   Symbols:   Class I glutamine amidotransferase-like superfamily protein   chr3:5047510-5049621 FORWARD LENGTH=392                                                                                                                                                                                                                                                                                                                                                                                                                          | 392 | 392 | 0         | 100.0 | 92.3 | 96.2 |
| Rsa1.0_00377.1.g12534.t1 | gb EOA30576.1  hypothetical protein CARUB_v10013708mg, partial [Capsella rubella]                                                                                                                                                                                                                                                                                                                                                              | 175 | 444  | 5.00E-12  | 253.7 | 24.6 | 24.6 | hypothetical protein CARUB_v10013708mg, partial | gbpln | Capsella rubella     | AT3G15000.1   Symbols:   cobalt ion binding   chr3:5050321-5052121 FORWARD LENGTH=395                                                                                                                                                                                                                                                                                                                                                                                                                                                                   | 175 | 395 | 3.00E-12  | 225.7 | 22.3 | 22.3 |
| Rsa1.0_00377.1.g12535.t1 | #                                                                                                                                                                                                                                                                                                                                                                                                                                              | #   | #    | #         | #     | #    | #    | -                                               | ----  | ----                 | #                                                                                                                                                                                                                                                                                                                                                                                                                                                                                                                                                       | #   | #   | #         | #     | #    | #    |
| Rsa1.0_00377.1.g12536.t1 | #                                                                                                                                                                                                                                                                                                                                                                                                                                              | #   | #    | #         | #     | #    | #    | -                                               | ----  | ----                 | #                                                                                                                                                                                                                                                                                                                                                                                                                                                                                                                                                       | #   | #   | #         | #     | #    | #    |



|                          |                                                                                                                                                                                                    |      |      |           |       |      |      |                                                                                                                 |       |                      |                                                                                                                                                                                                                                                                                                                                                        |      |      |           |       |      |      |
|--------------------------|----------------------------------------------------------------------------------------------------------------------------------------------------------------------------------------------------|------|------|-----------|-------|------|------|-----------------------------------------------------------------------------------------------------------------|-------|----------------------|--------------------------------------------------------------------------------------------------------------------------------------------------------------------------------------------------------------------------------------------------------------------------------------------------------------------------------------------------------|------|------|-----------|-------|------|------|
| Rsa1.0_00377.1.g12537.t1 | refNP_188116.1   Acyl-CoA N-acyltransferase with RING/FYVE/PHD-type zinc finger domain [Arabidopsis thaliana] gi 332642075 gb AJEE75596.1                                                          | 1122 | 1189 | 0         | 106.0 | 73.8 | 82.4 | Acyl-CoA N-acyltransferase with RING/FYVE/PHD-type zinc finger domain                                           | gbpln | Arabidopsis thaliana | AT3G14980.1   Symbols:   Acyl-CoA N-acyltransferase with RING/FYVE/PHD-type zinc finger protein   chr3:5039931-5044811 REVERSE LENGTH=1189                                                                                                                                                                                                             | 1122 | 1189 | 0         | 106.0 | 73.8 | 82.4 |
| Rsa1.0_00377.1.g12538.t1 | gb EOA30944.1  hypothetical protein CARUB_v1 0014091mg [Capsella rubella]                                                                                                                          | 401  | 347  | 1.00E-162 | 86.5  | 75.6 | 79.1 | hypothetical protein CARUB_v1 0014091mg                                                                         | gbpln | Capsella rubella     | AT1G53290.1   Symbols:   Galactosyltransferase family protein   chr1:19871353-19873251 FORWARD LENGTH=345                                                                                                                                                                                                                                              | 401  | 345  | 1.00E-149 | 86.0  | 67.8 | 75.3 |
| Rsa1.0_00377.1.g12539.t1 | sp F4IXE4.2 TTL2_ARATH RecName: Full=TPR repeat-containing thioredoxin TTL2; AltName: Full=Tetratricopeptide repeat thioredoxin-like 2                                                             | 740  | 730  | 0         | 98.6  | 67.8 | 77.8 | RecName: Full=TPR repeat-containing thioredoxin TTL2; AltName: Full=Tetratricopeptide repeat thioredoxin-like 2 | ----  | ----                 | AT3G14950.1   Symbols: TTL2   tetratricopeptide-repeat thioredoxin-like 2   chr3:5030216-5032892 REVERSE LENGTH=721                                                                                                                                                                                                                                    | 740  | 721  | 0         | 97.4  | 67.2 | 76.9 |
| Rsa1.0_00377.1.g12540.t1 | dbj BAJ34436.1  unnamed protein product [Theilingella halophila]                                                                                                                                   | 957  | 968  | 0         | 101.1 | 96.8 | 98.6 | unnamed protein product                                                                                         | ----  | ----                 | AT3G14940.1   Symbols: ATPPC3, PPC3   phosphoenolpyruvate carboxylase 3   chr3:5025584-5029476 FORWARD LENGTH=968                                                                                                                                                                                                                                      | 957  | 968  | 0         | 101.1 | 96.3 | 98.3 |
| Rsa1.0_00378.1.g12541.t1 | #                                                                                                                                                                                                  | #    | #    | #         | #     | #    | #    | -                                                                                                               | ----  | ----                 | #                                                                                                                                                                                                                                                                                                                                                      | #    | #    | #         | #     | #    | #    |
| Rsa1.0_00378.1.g12542.t1 | #                                                                                                                                                                                                  | #    | #    | #         | #     | #    | #    | -                                                                                                               | ----  | ----                 | #                                                                                                                                                                                                                                                                                                                                                      | #    | #    | #         | #     | #    | #    |
| Rsa1.0_00378.1.g12543.t1 | refXP_002875039.1  hypothetical protein ARALYDRAFT_490540 [Arabidopsis lyrata subsp. lyrata] gi 297320876 gb EFH51298.1  hypothetical protein ARALYDRAFT_490540 [Arabidopsis lyrata subsp. lyrata] | 224  | 788  | 1.00E-114 | 351.8 | 85.3 | 92.4 | hypothetical protein ARALYDRAFT_490540                                                                          | gbpln | Arabidopsis lyrata   | AT4G00300.1   Symbols:   fringe-related protein   chr4:126509-130126 FORWARD LENGTH=785                                                                                                                                                                                                                                                                | 224  | 785  | 1.00E-116 | 350.4 | 85.3 | 92.0 |
| Rsa1.0_00378.1.g12544.t1 | refXP_002875038.1  hypothetical protein ARALYDRAFT_912220 [Arabidopsis lyrata subsp. lyrata] gi 297320875 gb EFH51297.1  hypothetical protein ARALYDRAFT_912220 [Arabidopsis lyrata subsp. lyrata] | 718  | 720  | 0         | 100.3 | 85.1 | 92.1 | hypothetical protein ARALYDRAFT_912220                                                                          | gbpln | Arabidopsis lyrata   | AT1G01580.1   Symbols: FRO2, FRD1, ATFRO2   ferric reduction oxidase 2   chr1:209395-212810 FORWARD LENGTH=725                                                                                                                                                                                                                                         | 718  | 725  | 0         | 101.0 | 70.6 | 84.4 |
| Rsa1.0_00378.1.g12545.t2 | refXP_002875036.1  EDA8/MEE46 [Arabidopsis lyrata subsp. lyrata] gi 297320873 gb EFH51295.1  EDA8/MEE46 [Arabidopsis lyrata subsp. lyrata]                                                         | 316  | 302  | 1.00E-73  | 95.6  | 60.8 | 70.6 | EDA8/MEE46                                                                                                      | gbpln | Arabidopsis lyrata   | AT4G00310.2   Symbols: MEE46, EDA8   Putative membrane lipoprotein   chr4:133857-135235 FORWARD LENGTH=302                                                                                                                                                                                                                                             | 316  | 302  | 1.00E-71  | 95.6  | 56.3 | 69.3 |
| Rsa1.0_00378.1.g12546.t1 | refXP_002872958.1  hypothetical protein ARALYDRAFT_912217 [Arabidopsis lyrata subsp. lyrata] gi 297318795 gb EFH49217.1  hypothetical protein ARALYDRAFT_912217 [Arabidopsis lyrata subsp. lyrata] | 412  | 400  | 0         | 97.1  | 82.5 | 89.3 | hypothetical protein ARALYDRAFT_912217                                                                          | gbpln | Arabidopsis lyrata   | AT4G00330.1   Symbols: CROCK2   calmodulin-binding receptor-like cytoplasmic kinase 2   chr4:142787-144427 REVERSE LENGTH=411                                                                                                                                                                                                                          | 412  | 411  | 0         | 99.8  | 81.8 | 88.3 |
| Rsa1.0_00378.1.g12547.t1 | refXP_002875035.1  ring-H2 finger B1A [Arabidopsis lyrata subsp. lyrata] gi 297320872 gb EFH51294.1  ring-H2 finger B1A [Arabidopsis lyrata subsp. lyrata]                                         | 196  | 190  | 2.00E-59  | 96.9  | 68.4 | 75.0 | ring-H2 finger B1A                                                                                              | gbpln | Arabidopsis lyrata   | AT4G00335.3   Symbols: RHB1A   RING-H2 finger B1A   chr4:146866-147957 FORWARD LENGTH=189                                                                                                                                                                                                                                                              | 196  | 189  | 1.00E-60  | 96.4  | 67.9 | 75.5 |
| Rsa1.0_00378.1.g12548.t1 | refNP_567172.4  receptor-like protein kinase 4 [Arabidopsis thaliana] gi 332656462 gb AE81862.1  receptor-like protein kinase 4 [Arabidopsis thaliana]                                             | 827  | 818  | 0         | 98.9  | 77.4 | 84.8 | receptor-like protein kinase 4                                                                                  | gbpln | Arabidopsis thaliana | AT4G00340.1   Symbols: RLK4   receptor-like protein kinase 4   chr4:148958-151496 FORWARD LENGTH=818                                                                                                                                                                                                                                                   | 827  | 818  | 0         | 98.9  | 77.4 | 84.8 |
| Rsa1.0_00378.1.g12549.t1 | refXP_002875033.1  mate efflux family protein [Arabidopsis lyrata subsp. lyrata] gi 297320870 gb EFH51292.1  mate efflux family protein [Arabidopsis lyrata subsp. lyrata]                         | 544  | 542  | 0         | 99.6  | 89.3 | 94.9 | mate efflux family protein                                                                                      | gbpln | Arabidopsis lyrata   | AT4G00350.1   Symbols:   MATE efflux family protein   chr4:151978-153988 FORWARD LENGTH=542                                                                                                                                                                                                                                                            | 544  | 542  | 0         | 99.6  | 89.2 | 94.7 |
| Rsa1.0_00378.1.g12550.t1 | gb AAB71442.1  Similar to Arabidopsis hypothetical protein PID:e326839 (gb Z97337) [Arabidopsis thaliana]                                                                                          | 241  | 430  | 1.00E-31  | 178.4 | 29.5 | 33.2 | Similar to Arabidopsis hypothetical protein PID:e326839 (gb Z97337)                                             | gbpln | Arabidopsis thaliana | AT1G05360.1   Symbols:   BEST Arabidopsis thaliana protein match is: SNARE associated Golgi protein family (TAIR:AT4G14950.1); Has 332 Blast hits to 326 proteins in 115 species: Archae - 0; Bacteria - 11; Metazoa - 174; Fungi - 0; Plants - 74; Viruses - 0; Other Eukaryotes - 73 (source: NCBI BLINK).   chr1:1564816-1567278 FORWARD LENGTH=416 | 241  | 416  | 3.00E-34  | 172.6 | 29.5 | 33.2 |
| Rsa1.0_00378.1.g12551.t1 | refXP_002875027.1  CYP86A2 [Arabidopsis lyrata subsp. lyrata] gi 297320864 gb EFH51286.1  CYP86A2 [Arabidopsis lyrata subsp. lyrata]                                                               | 558  | 554  | 0         | 99.3  | 91.2 | 94.6 | CYP86A2                                                                                                         | gbpln | Arabidopsis lyrata   | AT4G00360.1   Symbols: CYP86A2, ATT1   cytochrome P450, family 86, subfamily A, polypeptide 2   chr4:160951-162778 FORWARD LENGTH=553                                                                                                                                                                                                                  | 558  | 553  | 0         | 99.1  | 91.4 | 94.6 |

|                          |                                                                                                                                                                                                                                                                                                                                                                                                                                                                                                                                                                                                                                                                                |      |      |           |       |      |      |                                                      |       |                      |                                                                                                                                           |      |      |           |       |      |      |
|--------------------------|--------------------------------------------------------------------------------------------------------------------------------------------------------------------------------------------------------------------------------------------------------------------------------------------------------------------------------------------------------------------------------------------------------------------------------------------------------------------------------------------------------------------------------------------------------------------------------------------------------------------------------------------------------------------------------|------|------|-----------|-------|------|------|------------------------------------------------------|-------|----------------------|-------------------------------------------------------------------------------------------------------------------------------------------|------|------|-----------|-------|------|------|
| Rsa1.0_00378.1.g12552.t1 | refNP_567175.2  putative anion transporter 2 [Arabidopsis thaliana] gi 75244391 sp Q8GX78.1 ANTR2_ARAT H RecName: Full=Probable anion transporter 2, chloroplastic; AltName: Full=Phosphate transporter PHT4.4; Flags: Precursor gi 26451814 dbj BAC43000.1  unknown protein [Arabidopsis thaliana] gi 32306495 gb AAP78931.1  At4g00370 [Arabidopsis thaliana] gi 332656470 gb AEE81870.1  putative anion transporter 2 [Arabidopsis thaliana] refXP_002872955.1  phospholipid/glycerol acyltransferase family protein [Arabidopsis lyrata subsp. lyrata] gi 297318792 gb EFH49214.1  phospholipid/glycerol acyltransferase family protein [Arabidopsis lyrata subsp. lyrata] | 531  | 541  | 0         | 101.9 | 87.2 | 90.8 | putative anion transporter 2                         | gbpln | Arabidopsis thaliana | AT4G00370.1   Symbols: ANTR2, PHT4.4   Major facilitator superfamily protein   chr4:163153-166111 REVERSE LENGTH=541                      | 531  | 541  | 0         | 101.9 | 87.2 | 90.8 |
| Rsa1.0_00378.1.g12553.t1 | refXP_002872955.1  phospholipid/glycerol acyltransferase family protein [Arabidopsis lyrata subsp. lyrata] gi 297318792 gb EFH49214.1  phospholipid/glycerol acyltransferase family protein [Arabidopsis lyrata subsp. lyrata]                                                                                                                                                                                                                                                                                                                                                                                                                                                 | 499  | 498  | 0         | 99.8  | 89.0 | 92.6 | phospholipid/glycerol acyltransferase family protein | gbpln | Arabidopsis lyrata   | AT4G00400.1   Symbols: GPAT8, AtGPAT8   glycerol-3-phosphate acyltransferase 8   chr4:174312-176734 REVERSE LENGTH=500                    | 499  | 500  | 0         | 100.2 | 90.4 | 93.0 |
| Rsa1.0_00378.1.g12554.t1 | #                                                                                                                                                                                                                                                                                                                                                                                                                                                                                                                                                                                                                                                                              | #    | #    | #         | #     | #    | #    | -                                                    | ----  | ----                 | #                                                                                                                                         | #    | #    | #         | #     | #    | #    |
| Rsa1.0_00378.1.g12555.t1 | gb ABO71659.2  trans-membrane water channel protein [Brassica juncea]                                                                                                                                                                                                                                                                                                                                                                                                                                                                                                                                                                                                          | 286  | 288  | 1.00E-161 | 100.7 | 98.3 | 99.3 | trans-membrane water channel protein                 | gbpln | Brassica juncea      | AT4G00430.1   Symbols: TMP-C, PIP1.4, PIP1E   plasma membrane intrinsic protein 1:4   chr4:186143-187531 REVERSE LENGTH=287               | 286  | 287  | 1.00E-162 | 100.3 | 97.9 | 99.3 |
| Rsa1.0_00378.1.g12556.t1 | gb AAG10809.1 AC018460.3 Similar to mutator transposase [Arabidopsis thaliana]                                                                                                                                                                                                                                                                                                                                                                                                                                                                                                                                                                                                 | 196  | 884  | 1.00E-49  | 451.0 | 46.9 | 66.8 | Similar to mutator transposase                       | gbpln | Arabidopsis thaliana | #                                                                                                                                         | #    | #    | #         | #     | #    | #    |
| Rsa1.0_00378.1.g12557.t1 | #                                                                                                                                                                                                                                                                                                                                                                                                                                                                                                                                                                                                                                                                              | #    | #    | #         | #     | #    | #    | -                                                    | ----  | ----                 | #                                                                                                                                         | #    | #    | #         | #     | #    | #    |
| Rsa1.0_00379.1.g12558.t5 | refXP_002864242.1  hypothetical protein ARALYDRAFT_918421 [Arabidopsis lyrata subsp. lyrata] gi 297310077 gb EFH40501.1  hypothetical protein ARALYDRAFT_918421 [Arabidopsis lyrata subsp. lyrata]                                                                                                                                                                                                                                                                                                                                                                                                                                                                             | 1048 | 1049 | 0         | 100.1 | 82.9 | 88.0 | hypothetical protein ARALYDRAFT_918421               | gbpln | Arabidopsis lyrata   | AT5G53430.1   Symbols: SDG29, SET29, ATX5   SET domain group 29   chr5:21677623-21683166 FORWARD LENGTH=1043                              | 1048 | 1043 | 0         | 99.5  | 82.3 | 87.9 |
| Rsa1.0_00379.1.g12559.t1 | #                                                                                                                                                                                                                                                                                                                                                                                                                                                                                                                                                                                                                                                                              | #    | #    | #         | #     | #    | #    | -                                                    | ----  | ----                 | #                                                                                                                                         | #    | #    | #         | #     | #    | #    |
| Rsa1.0_00379.1.g12560.t1 | gb EOA13856.1  hypothetical protein CARUB_v10026959mg [Capsella rubella]                                                                                                                                                                                                                                                                                                                                                                                                                                                                                                                                                                                                       | 281  | 266  | 1.00E-128 | 94.7  | 82.9 | 87.5 | hypothetical protein CARUB_v10026959mg               | gbpln | Capsella rubella     | AT5G53420.1   Symbols:   CCT motif family protein   chr5:21673683-21675469 FORWARD LENGTH=264                                             | 281  | 264  | 1.00E-129 | 94.0  | 82.9 | 86.1 |
| Rsa1.0_00379.1.g12561.t1 | #                                                                                                                                                                                                                                                                                                                                                                                                                                                                                                                                                                                                                                                                              | #    | #    | #         | #     | #    | #    | -                                                    | ----  | ----                 | #                                                                                                                                         | #    | #    | #         | #     | #    | #    |
| Rsa1.0_00379.1.g12562.t1 | #                                                                                                                                                                                                                                                                                                                                                                                                                                                                                                                                                                                                                                                                              | #    | #    | #         | #     | #    | #    | -                                                    | ----  | ----                 | #                                                                                                                                         | #    | #    | #         | #     | #    | #    |
| Rsa1.0_00379.1.g12563.t1 | #                                                                                                                                                                                                                                                                                                                                                                                                                                                                                                                                                                                                                                                                              | #    | #    | #         | #     | #    | #    | -                                                    | ----  | ----                 | #                                                                                                                                         | #    | #    | #         | #     | #    | #    |
| Rsa1.0_00379.1.g12564.t1 | #                                                                                                                                                                                                                                                                                                                                                                                                                                                                                                                                                                                                                                                                              | #    | #    | #         | #     | #    | #    | -                                                    | ----  | ----                 | #                                                                                                                                         | #    | #    | #         | #     | #    | #    |
| Rsa1.0_00379.1.g12565.t1 | #                                                                                                                                                                                                                                                                                                                                                                                                                                                                                                                                                                                                                                                                              | #    | #    | #         | #     | #    | #    | -                                                    | ----  | ----                 | #                                                                                                                                         | #    | #    | #         | #     | #    | #    |
| Rsa1.0_00379.1.g12566.t1 | #                                                                                                                                                                                                                                                                                                                                                                                                                                                                                                                                                                                                                                                                              | #    | #    | #         | #     | #    | #    | -                                                    | ----  | ----                 | #                                                                                                                                         | #    | #    | #         | #     | #    | #    |
| Rsa1.0_00379.1.g12567.t1 | gb EOA13779.1  hypothetical protein CARUB_v10026873mg [Capsella rubella]                                                                                                                                                                                                                                                                                                                                                                                                                                                                                                                                                                                                       | 285  | 299  | 1.00E-124 | 104.9 | 88.4 | 94.7 | hypothetical protein CARUB_v10026873mg               | gbpln | Capsella rubella     | AT5G53400.1   Symbols: BOB1   HSP20-like chaperones superfamily protein   chr5:21661588-21663383 FORWARD LENGTH=304                       | 285  | 304  | 1.00E-124 | 106.7 | 83.2 | 91.2 |
| Rsa1.0_00379.1.g12568.t4 | dbj BAC42871.1  unknown protein [Arabidopsis thaliana]                                                                                                                                                                                                                                                                                                                                                                                                                                                                                                                                                                                                                         | 349  | 486  | 1.00E-132 | 139.3 | 66.2 | 70.8 | unknown protein                                      | gbpln | Arabidopsis thaliana | AT5G53390.1   Symbols:   O-acyltransferase (WSD1-like) family protein   chr5:21656951-21659207 REVERSE LENGTH=486                         | 349  | 486  | 1.00E-134 | 139.3 | 66.2 | 70.8 |
| Rsa1.0_00379.1.g12569.t4 | refNP_197139.1  O-acyltransferase (WSD1-like) family protein [Arabidopsis thaliana] gi 9759117 dbj BAB09602.1  unnamed protein product [Arabidopsis thaliana] gi 28393404 gb AAO42125.1  unknown protein [Arabidopsis thaliana] gi 29824351 gb AAP04136.1  unknown protein [Arabidopsis thaliana] gi 332004899 gb AED92282.1  O-acyltransferase (WSD1-like) family protein [Arabidopsis thaliana]                                                                                                                                                                                                                                                                              | 79   | 488  | 2.00E-18  | 617.7 | 55.7 | 59.5 | O-acyltransferase (WSD1-like) family protein         | gbpln | Arabidopsis thaliana | AT5G16350.1   Symbols:   O-acyltransferase (WSD1-like) family protein   chr5:5352702-5354955 FORWARD LENGTH=488                           | 79   | 488  | 3.00E-21  | 617.7 | 55.7 | 59.5 |
| Rsa1.0_00379.1.g12570.t1 | gb AAF69169.1 AC007915.21 F27F5.21 [Arabidopsis thaliana]                                                                                                                                                                                                                                                                                                                                                                                                                                                                                                                                                                                                                      | 121  | 1023 | 7.00E-23  | 845.5 | 47.1 | 54.5 | F27F5.21                                             | gbpln | Arabidopsis thaliana | AT2G34320.1   Symbols:   Polynucleotidyl transferase, ribonuclease H-like superfamily protein   chr2:14484959-14485837 FORWARD LENGTH=292 | 121  | 292  | 9.00E-11  | 241.3 | 26.4 | 38.8 |
| Rsa1.0_00379.1.g12571.t1 | #                                                                                                                                                                                                                                                                                                                                                                                                                                                                                                                                                                                                                                                                              | #    | #    | #         | #     | #    | #    | -                                                    | ----  | ----                 | #                                                                                                                                         | #    | #    | #         | #     | #    | #    |
| Rsa1.0_00379.1.g12572.t1 | gb AAD19784.1  putative retroelement pol polyprotein [Arabidopsis thaliana]                                                                                                                                                                                                                                                                                                                                                                                                                                                                                                                                                                                                    | 1412 | 1501 | 0         | 106.3 | 61.3 | 74.8 | putative retroelement pol polyprotein                | gbpln | Arabidopsis thaliana | AT4G23160.1   Symbols: CRK8   cysteine-rich RLK (RECEPTOR-like protein kinase) 8   chr4:12129485-12134086 FORWARD LENGTH=1262             | 1412 | 1262 | 1.00E-133 | 89.4  | 16.6 | 23.5 |

|                          |                                                                                                                                                                                                                                                                                                                                                                                                                                                                                                                                                                                                                                                                                                                                                                                                                                                                                                                                                                                                                                                                                                                                                                                                                                                                                   |      |      |           |       |      |      |                                                                               |       |                      |                                                                                                                                                                                                                                                                                                                                                  |      |     |           |       |      |      |
|--------------------------|-----------------------------------------------------------------------------------------------------------------------------------------------------------------------------------------------------------------------------------------------------------------------------------------------------------------------------------------------------------------------------------------------------------------------------------------------------------------------------------------------------------------------------------------------------------------------------------------------------------------------------------------------------------------------------------------------------------------------------------------------------------------------------------------------------------------------------------------------------------------------------------------------------------------------------------------------------------------------------------------------------------------------------------------------------------------------------------------------------------------------------------------------------------------------------------------------------------------------------------------------------------------------------------|------|------|-----------|-------|------|------|-------------------------------------------------------------------------------|-------|----------------------|--------------------------------------------------------------------------------------------------------------------------------------------------------------------------------------------------------------------------------------------------------------------------------------------------------------------------------------------------|------|-----|-----------|-------|------|------|
| Rsa1.0_00379.1.g12573.t2 | gb ABD64939.1  hypothetical protein 24.t00017 [Brassica oleracea]                                                                                                                                                                                                                                                                                                                                                                                                                                                                                                                                                                                                                                                                                                                                                                                                                                                                                                                                                                                                                                                                                                                                                                                                                 | 380  | 442  | 2.00E-54  | 116.3 | 35.8 | 44.5 | hypothetical protein 24.t00017                                                | gbpln | Brassica oleracea    | AT2G13770.1   Symbols:   CONTAINS InterPro DOMAIN/s: Putative harbinger transposase-derived nuclease (InterPro:IPR006912); Has 451 Blast hits to 352 proteins in 33 species: Archae - 0; Bacteria - 0; Metazoa - 28; Fungi - 8; Plants - 388; Viruses - 0; Other Eukaryotes - 27 (source: NCBI BLink).   chr2:5736603-5737847 FORWARD LENGTH=343 | 380  | 343 | 1.00E-23  | 90.3  | 18.4 | 24.7 |
| Rsa1.0_00379.1.g12574.t1 | ref NP_200149.1  Putative pectinesterase/pectinesterase inhibitor 61 [Arabidopsis thaliana] gi 75309150 sp Q9FK05.1 PME61_ARAT H RecName: Full=Probable pectinesterase/pectinesterase inhibitor 61; Includes: RecName: Full=Pectinesterase inhibitor 61; AltName: Full=Pectin methylsterase inhibitor 61; Includes: RecName: Full=Pectinesterase 61; Short=PE 61; AltName: Full=AtPMEpcrF; AltName: Full=Pectin methylsterase 61; Short=AtPME61 gi 13507549 gb AAK28637.1 AF360340.1 putative pectinesterase [Arabidopsis thaliana] gi 9759184 dbj BAB09799.1 pectinesterase [Arabidopsis thaliana] gi 15293287 gb AAK93754.1 putative pectinesterase [Arabidopsis thaliana] gi 332008962 gb AED96345.1 Putative pectinesterase/pectinesterase inhibitor 61 [Arabidopsis thaliana] ref NP_568792.1  CLP protease regulatory subunit X [Arabidopsis thaliana] gi 9759182 dbj BAB09797.1 ATP-dependent Clp protease regulatory subunit CLPX [Arabidopsis thaliana] gi 14334860 gb AAK59608.1 putative ATP-dependent Clp protease ATP-binding subunit ClpX1 [Arabidopsis thaliana] gi 23296603 gb AA13130.1 putative ATP-dependent Clp protease ATP-binding subunit ClpX1 [Arabidopsis thaliana] gi 332008960 gb AED96343.1 CLP protease regulatory subunit X [Arabidopsis thaliana] | 746  | 587  | 0         | 78.7  | 69.0 | 73.2 | Putative pectinesterase/pectinesterase inhibitor 61                           | gbpln | Arabidopsis thaliana | AT5G53370.1   Symbols: ATPMEPCRF, PMEPCRF   pectin methylsterase PCR fragment F   chr5:21649683-21651530 REVERSE LENGTH=587                                                                                                                                                                                                                      | 746  | 587 | 0         | 78.7  | 69.0 | 73.2 |
| Rsa1.0_00379.1.g12575.t1 | ATP-dependent Clp protease regulatory subunit CLPX [Arabidopsis thaliana] gi 14334860 gb AAK59608.1 putative ATP-dependent Clp protease ATP-binding subunit ClpX1 [Arabidopsis thaliana] gi 23296603 gb AA13130.1 putative ATP-dependent Clp protease ATP-binding subunit ClpX1 [Arabidopsis thaliana] gi 332008960 gb AED96343.1 CLP protease regulatory subunit X [Arabidopsis thaliana]                                                                                                                                                                                                                                                                                                                                                                                                                                                                                                                                                                                                                                                                                                                                                                                                                                                                                        | 554  | 579  | 0         | 104.5 | 86.5 | 89.4 | CLP protease regulatory subunit X                                             | gbpln | Arabidopsis thaliana | AT5G53350.1   Symbols: CLPX   CLP protease regulatory subunit X   chr5:21644060-21647503 FORWARD LENGTH=579                                                                                                                                                                                                                                      | 554  | 579 | 0         | 104.5 | 86.5 | 89.4 |
| Rsa1.0_00380.1.g12576.t1 | gb AAG50606.1 AC079605_11 unknown protein [Arabidopsis thaliana]                                                                                                                                                                                                                                                                                                                                                                                                                                                                                                                                                                                                                                                                                                                                                                                                                                                                                                                                                                                                                                                                                                                                                                                                                  | 1074 | 1311 | 2.00E-75  | 122.1 | 16.2 | 23.8 | unknown protein                                                               | gbpln | Arabidopsis thaliana | AT1G31150.1   Symbols:   Domain of unknown function (DUF1985)   chr1:11120097-11122412 FORWARD LENGTH=673                                                                                                                                                                                                                                        | 1074 | 673 | 4.00E-53  | 62.7  | 12.8 | 18.4 |
| Rsa1.0_00380.1.g12577.t1 | ref XP_002890088.1  predicted protein [Arabidopsis lyrata subsp. lyrata] gi 297335930 gb EFH66347.1  predicted protein [Arabidopsis lyrata subsp. lyrata] ref NP_683307.2  S-adenosyl-L-methionine-dependent methyltransferase domain-containing protein [Arabidopsis thaliana] gi 5103811 gb AAD39641.1 AC007591_6 F9L1.6 [Arabidopsis thaliana] gi 332191148 gb AEE29269.1  S-adenosyl-L-methionine-dependent methyltransferase domain-containing protein [Arabidopsis thaliana]                                                                                                                                                                                                                                                                                                                                                                                                                                                                                                                                                                                                                                                                                                                                                                                                | 93   | 69   | 3.00E-32  | 74.2  | 72.0 | 73.1 | predicted protein                                                             | gbpln | Arabidopsis lyrata   | AT1G15120.1   Symbols:   Ubiquinol-cytochrome C reductase hinge protein   chr1:5203091-5203897 FORWARD LENGTH=69                                                                                                                                                                                                                                 | 93   | 69  | 5.00E-35  | 74.2  | 72.0 | 73.1 |
| Rsa1.0_00380.1.g12578.t1 | ref NP_683307.2  S-adenosyl-L-methionine-dependent methyltransferase domain-containing protein [Arabidopsis thaliana] gi 5103811 gb AAD39641.1 AC007591_6 F9L1.6 [Arabidopsis thaliana] gi 332191148 gb AEE29269.1  S-adenosyl-L-methionine-dependent methyltransferase domain-containing protein [Arabidopsis thaliana]                                                                                                                                                                                                                                                                                                                                                                                                                                                                                                                                                                                                                                                                                                                                                                                                                                                                                                                                                          | 323  | 351  | 1.00E-155 | 108.7 | 82.0 | 91.6 | S-adenosyl-L-methionine-dependent methyltransferase domain-containing protein | gbpln | Arabidopsis thaliana | AT1G15125.1   Symbols:   S-adenosyl-L-methionine-dependent methyltransferases superfamily protein   chr1:5204625-5205912 FORWARD LENGTH=351                                                                                                                                                                                                      | 323  | 351 | 1.00E-158 | 108.7 | 82.0 | 91.6 |
| Rsa1.0_00380.1.g12579.t1 | gb EOA36804.1  hypothetical protein CARUB_v10008299mg [Capsella rubella]                                                                                                                                                                                                                                                                                                                                                                                                                                                                                                                                                                                                                                                                                                                                                                                                                                                                                                                                                                                                                                                                                                                                                                                                          | 871  | 845  | 0         | 97.0  | 85.6 | 89.9 | hypothetical protein CARUB_v10008299mg                                        | gbpln | Capsella rubella     | AT1G15130.1   Symbols:   Endosomal targeting BRO1-like domain-containing protein   chr1:5206217-5209848 REVERSE LENGTH=846                                                                                                                                                                                                                       | 871  | 846 | 0         | 97.1  | 84.8 | 90.0 |
| Rsa1.0_00380.1.g12580.t1 | gb EOA38363.1  hypothetical protein CARUB_v10009891mg [Capsella rubella]                                                                                                                                                                                                                                                                                                                                                                                                                                                                                                                                                                                                                                                                                                                                                                                                                                                                                                                                                                                                                                                                                                                                                                                                          | 272  | 295  | 1.00E-133 | 108.5 | 85.7 | 92.3 | hypothetical protein CARUB_v10009891mg                                        | gbpln | Capsella rubella     | AT1G15140.1   Symbols:   FAD/NAD(P)-binding oxidoreductase   chr1:5210403-5212137 REVERSE LENGTH=295                                                                                                                                                                                                                                             | 272  | 295 | 1.00E-133 | 108.5 | 83.8 | 91.9 |
| Rsa1.0_00380.1.g12581.t1 | # # # # # # # # # #                                                                                                                                                                                                                                                                                                                                                                                                                                                                                                                                                                                                                                                                                                                                                                                                                                                                                                                                                                                                                                                                                                                                                                                                                                                               | #    | #    | #         | #     | #    | #    | -                                                                             | ----  | ----                 | #                                                                                                                                                                                                                                                                                                                                                | #    | #   | #         | #     | #    |      |
| Rsa1.0_00380.1.g12582.t2 | ref XP_002890091.1  mate efflux family protein [Arabidopsis lyrata subsp. lyrata] gi 297335933 gb EFH66350.1  mate efflux family protein [Arabidopsis lyrata subsp. lyrata]                                                                                                                                                                                                                                                                                                                                                                                                                                                                                                                                                                                                                                                                                                                                                                                                                                                                                                                                                                                                                                                                                                       | 479  | 483  | 0         | 100.8 | 85.6 | 93.7 | mate efflux family protein                                                    | gbpln | Arabidopsis lyrata   | AT1G15170.1   Symbols:   MATE efflux family protein   chr1:5220690-5222756 FORWARD LENGTH=481                                                                                                                                                                                                                                                    | 479  | 481 | 0         | 100.4 | 84.3 | 92.7 |

|                          |                                                                                                                                                                                                                                                                                                                                                                                                                                                                                                                                                                                                                                                                                                                                                                                                                                                                                |      |      |           |       |      |      |                                               |       |                      |                                                                                                                                                                                                                                                                                                                                                                                                                          |      |      |           |       |      |      |
|--------------------------|--------------------------------------------------------------------------------------------------------------------------------------------------------------------------------------------------------------------------------------------------------------------------------------------------------------------------------------------------------------------------------------------------------------------------------------------------------------------------------------------------------------------------------------------------------------------------------------------------------------------------------------------------------------------------------------------------------------------------------------------------------------------------------------------------------------------------------------------------------------------------------|------|------|-----------|-------|------|------|-----------------------------------------------|-------|----------------------|--------------------------------------------------------------------------------------------------------------------------------------------------------------------------------------------------------------------------------------------------------------------------------------------------------------------------------------------------------------------------------------------------------------------------|------|------|-----------|-------|------|------|
| Rsa1.0_00380.1.g12583.t1 | gb EOA36212.1  hypothetical protein CARUB_v10010136mg [Capsella rubella]                                                                                                                                                                                                                                                                                                                                                                                                                                                                                                                                                                                                                                                                                                                                                                                                       | 243  | 243  | 1.00E-82  | 100.0 | 71.6 | 81.1 | hypothetical protein CARUB_v10010136mg        | gbpln | Capsella rubella     | AT1G15190.1   Symbols:   Fasciclin-like arabinogalactan family protein   chr1:5227275-5228021 FORWARD LENGTH=248                                                                                                                                                                                                                                                                                                         | 243  | 248  | 3.00E-84  | 102.1 | 71.2 | 82.3 |
| Rsa1.0_00380.1.g12584.t1 | gb EOA39023.1  hypothetical protein CARUB_v10011586mg [Capsella rubella]                                                                                                                                                                                                                                                                                                                                                                                                                                                                                                                                                                                                                                                                                                                                                                                                       | 419  | 423  | 1.00E-176 | 101.0 | 80.7 | 87.4 | hypothetical protein CARUB_v10011586mg        | gbpln | Capsella rubella     | AT1G15200.1   Symbols:   protein-protein interaction regulator family protein   chr1:5228477-5231017 REVERSE LENGTH=423                                                                                                                                                                                                                                                                                                  | 419  | 423  | 1.00E-177 | 101.0 | 80.4 | 86.9 |
| Rsa1.0_00380.1.g12585.t1 | ref XP_002892853.1  ATPDR7/PDR7 [Arabidopsis lyrata subsp. lyrata] gi 297338695 gb EFH69112.1  ATPDR7/PDR7 [Arabidopsis lyrata subsp. lyrata]                                                                                                                                                                                                                                                                                                                                                                                                                                                                                                                                                                                                                                                                                                                                  | 1435 | 1445 | 0         | 100.7 | 91.2 | 96.3 | ATPDR7/PDR7                                   | gbpln | Arabidopsis lyrata   | AT1G15210.1   Symbols:   PDR7, ATPDR7   pleiotropic drug resistance 7   chr1:5231552-5236573 REVERSE LENGTH=1442                                                                                                                                                                                                                                                                                                         | 1435 | 1442 | 0         | 100.5 | 90.7 | 96.2 |
| Rsa1.0_00380.1.g12586.t1 | ref NP_849666.2  uncharacterized protein [Arabidopsis thaliana] gi 5103848 gb AAD39678.1 AC007591_43 F9L1.16 [Arabidopsis thaliana] gi 332191165 gb AAE29286.1  uncharacterized protein AT1G15215 [Arabidopsis thaliana]                                                                                                                                                                                                                                                                                                                                                                                                                                                                                                                                                                                                                                                       | 268  | 258  | 1.00E-106 | 96.3  | 73.1 | 79.9 | uncharacterized protein                       | gbpln | Arabidopsis thaliana | AT1G15215.2   Symbols:   BEST Arabidopsis thaliana protein match is: sequence-specific DNA binding transcription factors;sequence-specific DNA binding (TAIR:AT3G18380.1); Has 89 Blast hits to 86 proteins in 16 species: Archae - 0; Bacteria - 0; Metazoa - 0; Fungi - 0; Plants - 89; Viruses - 0; Other Eukaryotes - 0 (source: NCBI BLink).   chr1:5238096-5239770 FORWARD LENGTH=258                              | 268  | 258  | 1.00E-108 | 96.3  | 73.1 | 79.9 |
| Rsa1.0_00380.1.g12587.t1 | gb EOA38631.1  hypothetical protein CARUB_v10010517mg [Capsella rubella]                                                                                                                                                                                                                                                                                                                                                                                                                                                                                                                                                                                                                                                                                                                                                                                                       | 160  | 159  | 5.00E-81  | 99.4  | 91.3 | 95.0 | hypothetical protein CARUB_v10010517mg        | gbpln | Capsella rubella     | AT1G15220.2   Symbols:   ATCCMH, CCMH   cytochrome c biogenesis protein family   chr1:5240471-5241117 REVERSE LENGTH=159                                                                                                                                                                                                                                                                                                 | 160  | 159  | 5.00E-81  | 99.4  | 89.4 | 93.8 |
| Rsa1.0_00380.1.g12588.t1 | gb EOA37497.1  hypothetical protein CARUB_v10011666mg [Capsella rubella]                                                                                                                                                                                                                                                                                                                                                                                                                                                                                                                                                                                                                                                                                                                                                                                                       | 166  | 155  | 2.00E-46  | 93.4  | 70.5 | 82.5 | hypothetical protein CARUB_v10011666mg        | gbpln | Capsella rubella     | AT1G15230.1   Symbols:   unknown protein; FUNCTIONS IN: molecular_function unknown; INVOLVED IN: biological_process unknown; LOCATED IN: cellular_component unknown; EXPRESSED IN: 24 plant structures; Has 26 Blast hits to 26 proteins in 12 species: Archae - 0; Bacteria - 0; Metazoa - 0; Fungi - 0; Plants - 26; Viruses - 0; Other Eukaryotes - 0 (source: NCBI BLink).   chr1:5242729-5243196 REVERSE LENGTH=155 | 166  | 155  | 2.00E-47  | 93.4  | 66.9 | 80.7 |
| Rsa1.0_00380.1.g12589.t3 | gb EOA38912.1  hypothetical protein CARUB_v10011308mg [Capsella rubella]                                                                                                                                                                                                                                                                                                                                                                                                                                                                                                                                                                                                                                                                                                                                                                                                       | 185  | 176  | 4.00E-70  | 95.1  | 75.1 | 85.9 | hypothetical protein CARUB_v10011308mg        | gbpln | Capsella rubella     | AT1G15260.1   Symbols:   unknown protein; BEST Arabidopsis thaliana protein match is: unknown protein (TAIR:AT3G16070.1). Has 28 Blast hits to 28 proteins in 7 species: Archae - 0; Bacteria - 0; Metazoa - 0; Fungi - 0; Plants - 28; Viruses - 0; Other Eukaryotes - 0 (source: NCBI BLink).   chr1:5249834-5250370 FORWARD LENGTH=178                                                                                | 185  | 178  | 8.00E-72  | 96.2  | 74.1 | 86.5 |
| Rsa1.0_00380.1.g12590.t1 | ref NP_563969.1  translation machinery associated protein TMA7 [Arabidopsis thaliana] gi 297849952 ref XP_002892857.1  hypothetical protein ARALYDRAFT_471721 [Arabidopsis lyrata subsp. lyrata] gi 5103825 gb AAD39655.1 AC007591_20 ESTs gb AA650895. gb AA720043 and gb R29777 come from this gene [Arabidopsis thaliana] gi 12484215 gb AAG54006.1 AF336925.1 unknown protein [Arabidopsis thaliana] gi 15028107 gb AAK76677.1  unknown protein [Arabidopsis thaliana] gi 17065256 gb AAL32782.1  unknown protein [Arabidopsis thaliana] gi 20260078 gb AAM13386.1  unknown protein [Arabidopsis thaliana] gi 21592316 gb AAM64267.1  unknown [Arabidopsis thaliana] gi 29733869 gb EFH69116.1  hypothetical protein ARALYDRAFT_471721 [Arabidopsis lyrata subsp. lyrata] gi 332191176 gb AAE29297.1  translation machinery associated protein TMA7 [Arabidopsis thaliana] | 64   | 64   | 5.00E-24  | 100.0 | 95.3 | 98.4 | translation machinery associated protein TMA7 | gbpln | Arabidopsis lyrata   | AT1G15270.1   Symbols:   Translation machinery associated TMA7   chr1:5250833-5252020 REVERSE LENGTH=64                                                                                                                                                                                                                                                                                                                  | 64   | 64   | 9.00E-27  | 100.0 | 95.3 | 98.4 |
| Rsa1.0_00380.1.g12591.t1 | ref XP_002888148.1  EMB1220 [Arabidopsis lyrata subsp. lyrata] gi 297333899 gb EFH64407.1  EMB1220 [Arabidopsis lyrata subsp. lyrata]                                                                                                                                                                                                                                                                                                                                                                                                                                                                                                                                                                                                                                                                                                                                          | 486  | 480  | 0         | 98.8  | 71.6 | 82.5 | EMB1220                                       | gbpln | Arabidopsis lyrata   | AT1G60170.1   Symbols:   emb1220   pre-mRNA processing ribonucleoprotein binding region-containing protein   chr1:22193008-22195177 FORWARD LENGTH=485                                                                                                                                                                                                                                                                   | 486  | 485  | 0         | 99.8  | 70.8 | 81.9 |

|                          |                                                                                                                                                                                                                                                                                                                                                                                                                                                                                                                                                                                                                                                                                                                                                                                                       |      |      |           |       |      |      |                                                                             |       |                      |                                                                                                                                                                                                                                                                                                                                                                                                                                                                   |      |      |           |       |      |      |
|--------------------------|-------------------------------------------------------------------------------------------------------------------------------------------------------------------------------------------------------------------------------------------------------------------------------------------------------------------------------------------------------------------------------------------------------------------------------------------------------------------------------------------------------------------------------------------------------------------------------------------------------------------------------------------------------------------------------------------------------------------------------------------------------------------------------------------------------|------|------|-----------|-------|------|------|-----------------------------------------------------------------------------|-------|----------------------|-------------------------------------------------------------------------------------------------------------------------------------------------------------------------------------------------------------------------------------------------------------------------------------------------------------------------------------------------------------------------------------------------------------------------------------------------------------------|------|------|-----------|-------|------|------|
| Rsa1.0_00380.1.g12592.t1 | gb[EOA38784.1] hypothetical protein CARUB_v10011034mg [Capsella rubella]                                                                                                                                                                                                                                                                                                                                                                                                                                                                                                                                                                                                                                                                                                                              | 596  | 584  | 0         | 98.0  | 67.4 | 76.8 | hypothetical protein CARUB_v10011034mg                                      | gbpln | Capsella rubella     | AT1G15280.2   Symbols:   CASG3/Barentsz eIF4AIII binding   chr1:5252538-5256214 FORWARD LENGTH=585                                                                                                                                                                                                                                                                                                                                                                | 596  | 585  | 1.00E-178 | 98.2  | 68.0 | 76.5 |
| Rsa1.0_00380.1.g12593.t1 | ref[XP_002892858.1] binding protein [Arabidopsis lyrata subsp. lyrata] gi 297338700 gb EFH69117.1  binding protein [Arabidopsis lyrata subsp. lyrata]                                                                                                                                                                                                                                                                                                                                                                                                                                                                                                                                                                                                                                                 | 1577 | 1622 | 0         | 102.9 | 78.0 | 85.7 | binding protein                                                             | gbpln | Arabidopsis lyrata   | AT1G15290.1   Symbols:   Tetratricopeptide repeat (TPR)-like superfamily protein   chr1:5257327-5264814 REVERSE LENGTH=1608                                                                                                                                                                                                                                                                                                                                       | 1577 | 1608 | 0         | 102.0 | 77.4 | 85.0 |
| Rsa1.0_00380.1.g12594.t1 | gb AAD39658.1 AC007591_23 Similar to gi 22113 Ac transposase (ORF) from Zea mays transcript gb X05424 [Arabidopsis thaliana] gi 20260646 gb AM13221.1  similar to Ac transposase [Arabidopsis thaliana] gi 34098823 gb AAQ56794.1  At1g15300 [Arabidopsis thaliana]                                                                                                                                                                                                                                                                                                                                                                                                                                                                                                                                   | 742  | 799  | 0         | 107.7 | 64.2 | 75.9 | Similar to gi 22113 Ac transposase (ORF) from Zea mays transcript gb X05424 | gbpln | Arabidopsis thaliana | AT3G42170.1   Symbols:   BED zinc finger ;hAT family dimerisation domain   chr3:14321838-14323928 FORWARD LENGTH=696                                                                                                                                                                                                                                                                                                                                              | 742  | 696  | 1.00E-123 | 93.8  | 29.9 | 43.5 |
| Rsa1.0_00380.1.g12595.t1 | gb[EOA40222.1] hypothetical protein CARUB_v10008947mg [Capsella rubella]                                                                                                                                                                                                                                                                                                                                                                                                                                                                                                                                                                                                                                                                                                                              | 465  | 495  | 0         | 106.5 | 83.2 | 90.8 | hypothetical protein CARUB_v10008947mg                                      | gbpln | Capsella rubella     | AT1G48900.1   Symbols:   Signal recognition particle, SRP54 subunit protein   chr1:18084972-18087743 REVERSE LENGTH=495                                                                                                                                                                                                                                                                                                                                           | 465  | 495  | 0         | 106.5 | 82.8 | 90.5 |
| Rsa1.0_00380.1.g12596.t1 | ref[XP_002892860.1] F9L1.26 [Arabidopsis lyrata subsp. lyrata] gi 297338702 gb EFH69119.1  F9L1.26 [Arabidopsis lyrata subsp. lyrata]                                                                                                                                                                                                                                                                                                                                                                                                                                                                                                                                                                                                                                                                 | 377  | 317  | 1.00E-132 | 84.1  | 65.0 | 70.6 | F9L1.26                                                                     | gbpln | Arabidopsis lyrata   | AT1G15320.1   Symbols:   unknown protein; FUNCTIONS IN: molecular_function unknown; INVOLVED IN: biological_process unknown; LOCATED IN: endomembrane system; EXPRESSED IN: flower; EXPRESSED DURING: petal differentiation and expansion stage; Has 62 Blast hits to 62 proteins in 17 species: Archae - 0; Bacteria - 0; Metazoa - 0; Fungi - 0; Plants - 62; Viruses - 0; Other Eukaryotes - 0 (source: NCBI BLink).   chr1:5272468-5273699 REVERSE LENGTH=307 | 377  | 307  | 1.00E-130 | 81.4  | 62.6 | 66.6 |
| Rsa1.0_00380.1.g12597.t1 | ref[NP_172985.1] Cystathionine beta-synthase (CBS) protein [Arabidopsis thaliana] gi 75315303 sp Q9X137.1 PV42A_ARATH RecName: Full=SNF1-related protein kinase regulatory subunit gamma-like PV42a; Short=AtPV42a; AltName: Full=AKIN subunit gamma-like PV42a; AltName: Full=CBS domain-containing protein CBSCBS4 gi 5103830 gb AAD39660.1 AC007591_2 5 Similar to gb U40713 Pv42p gene from Phaseolus vulgaris and contains PF00571 CBS (cystathionine beta synthase) domain [Arabidopsis thaliana] gi 66792608 gb AAY56406.1  At1g15330 [Arabidopsis thaliana] gi 110738205 dbj BAF01033.1  hypothetical protein [Arabidopsis thaliana] gi 11074494 gb ABH04620.1  At1g15330 [Arabidopsis thaliana] gi 332191183 gb AEE29304.1  Cystathionine beta-synthase (CBS) protein [Arabidopsis thaliana] | 355  | 352  | 1.00E-178 | 99.2  | 85.6 | 93.8 | Cystathionine beta-synthase (CBS) protein                                   | gbpln | Arabidopsis thaliana | AT1G15330.1   Symbols:   Cystathionine beta-synthase (CBS) protein   chr1:5274368-5275499 FORWARD LENGTH=352                                                                                                                                                                                                                                                                                                                                                      | 355  | 352  | 0         | 99.2  | 85.6 | 93.8 |
| Rsa1.0_00380.1.g12598.t1 | ref[XP_002892861.1] hypothetical protein ARALYDRAFT_312525 [Arabidopsis lyrata subsp. lyrata] gi 297338703 gb EFH69120.1  hypothetical protein ARALYDRAFT_312525 [Arabidopsis lyrata subsp. lyrata]                                                                                                                                                                                                                                                                                                                                                                                                                                                                                                                                                                                                   | 326  | 357  | 3.00E-84  | 109.5 | 59.8 | 66.3 | hypothetical protein ARALYDRAFT_312525                                      | gbpln | Arabidopsis lyrata   | AT1G15340.1   Symbols:   MBD10   methyl-CPG-binding domain 10   chr1:5275895-5277474 REVERSE LENGTH=384                                                                                                                                                                                                                                                                                                                                                           | 326  | 384  | 2.00E-79  | 117.8 | 66.0 | 74.5 |
| Rsa1.0_00380.1.g12599.t1 | ref[NP_563972.1] uncharacterized protein [Arabidopsis thaliana] gi 30684315 ref NP_849667.1  uncharacterized protein [Arabidopsis thaliana] gi 21617951 gb AAM67001.1  unknown [Arabidopsis thaliana] gi 110742955 dbj BAE99372.1  hypothetical protein [Arabidopsis thaliana] gi 332191186 gb AEE29307.1  uncharacterized protein AT1G15350 [Arabidopsis thaliana] gi 332191187 gb AEE29308.1  uncharacterized protein AT1G15350 [Arabidopsis thaliana]                                                                                                                                                                                                                                                                                                                                              | 415  | 154  | 4.00E-62  | 37.1  | 28.7 | 32.8 | uncharacterized protein                                                     | gbpln | Arabidopsis thaliana | AT1G15350.1   Symbols:   unknown protein; BEST Arabidopsis thaliana protein match is: unknown protein (TAIR:AT3G15770.2); Has 148 Blast hits to 148 proteins in 25 species: Archae - 0; Bacteria - 0; Metazoa - 0; Fungi - 0; Plants - 141; Viruses - 0; Other Eukaryotes - 7 (source: NCBI BLink).   chr1:5278481-5279486 REVERSE LENGTH=154                                                                                                                     | 415  | 154  | 9.00E-65  | 37.1  | 28.7 | 32.8 |

|                          |                                                                                                                                                                                                                                                                                                                                                                                                                                                                                                                                                                                                                                                                                                                                                                                                                                                                |     |     |           |       |      |      |                                                 |       |                      |                                                                                                                                         |     |     |           |       |      |      |
|--------------------------|----------------------------------------------------------------------------------------------------------------------------------------------------------------------------------------------------------------------------------------------------------------------------------------------------------------------------------------------------------------------------------------------------------------------------------------------------------------------------------------------------------------------------------------------------------------------------------------------------------------------------------------------------------------------------------------------------------------------------------------------------------------------------------------------------------------------------------------------------------------|-----|-----|-----------|-------|------|------|-------------------------------------------------|-------|----------------------|-----------------------------------------------------------------------------------------------------------------------------------------|-----|-----|-----------|-------|------|------|
| Rsa1.0_00380.1.g12600.t1 | ref[NP_172988.1] ethylene-responsive transcription factor WIN1 [Arabidopsis thaliana]<br>gi 75338622 sp Q9XI33.1 WIN1_ARATH<br>RecName: Full=Ethylene-responsive transcription factor WIN1; AltName: Full=Protein SHINE 1; AltName: Full=Protein WAX INDUCER 1<br>gi 5103834 gb AAD39664.1 AC007591_29<br>Similar to gb AB008104 ethylene responsive element binding factor 2 from Arabidopsis thaliana and contains an PF 00847 AP2 domain. EST gb AA728476 comes from this gene [Arabidopsis thaliana]<br>gi 26450944 dbj BAC42579.1  putative ethylene responsive element [Arabidopsis thaliana]<br>gi 28950721 gb AAO63284.1  At1g15360 [Arabidopsis thaliana]<br>gi 38428899 gb AAR20494.1  transcription factor wax inducer 1 [Arabidopsis thaliana]<br>gi 332191189 gb AEE29310.1  ethylene-responsive transcription factor WIN1 [Arabidopsis thaliana] | 191 | 199 | 3.00E-83  | 104.2 | 89.5 | 92.1 | ethylene-responsive transcription factor WIN1   | gbpln | Arabidopsis thaliana | AT1G15360.1   Symbols: SHN1, WIN1   Integrase-type DNA-binding superfamily protein   chr1:5283609-5284506 FORWARD LENGTH=199            | 191 | 199 | 1.00E-85  | 104.2 | 89.5 | 92.1 |
| Rsa1.0_00380.1.g12601.t1 | gb EOA38653.1  hypothetical protein CARUB_v10010572mg [Capsella rubella]                                                                                                                                                                                                                                                                                                                                                                                                                                                                                                                                                                                                                                                                                                                                                                                       | 147 | 147 | 1.00E-75  | 100.0 | 94.6 | 98.0 | hypothetical protein CARUB_v10010572mg          | gbpln | Capsella rubella     | AT1G15370.1   Symbols:   SNARE-like superfamily protein   chr1:5287135-5288375 FORWARD LENGTH=147                                       | 147 | 147 | 4.00E-78  | 100.0 | 95.2 | 97.3 |
| Rsa1.0_00381.1.g12602.t1 | # # # # # # # # - ---- ---- # # # # # # #                                                                                                                                                                                                                                                                                                                                                                                                                                                                                                                                                                                                                                                                                                                                                                                                                      |     |     |           |       |      |      |                                                 |       |                      |                                                                                                                                         |     |     |           |       |      |      |
| Rsa1.0_00381.1.g12603.t1 | ref XP_002868276.1  cbl-interacting protein kinase 4 [Arabidopsis lyrata subsp. lyrata]<br>gi 297314112 gb EFH44535.1  cbl-interacting protein kinase 4 [Arabidopsis lyrata subsp. lyrata]<br>ref XP_002868276.1  cbl-interacting protein kinase 4 [Arabidopsis lyrata subsp. lyrata]<br>gi 297314112 gb EFH44535.1  cbl-interacting protein kinase 4 [Arabidopsis lyrata subsp. lyrata]                                                                                                                                                                                                                                                                                                                                                                                                                                                                       | 426 | 423 | 0         | 99.3  | 78.2 | 88.7 | cbl-interacting protein kinase 4                | gbpln | Arabidopsis lyrata   | AT4G14580.1   Symbols: CIPK4, SnRK3.3   CBL-interacting protein kinase 4   chr4:8367887-8369167 REVERSE LENGTH=426                      | 426 | 426 | 0         | 100.0 | 75.1 | 85.4 |
| Rsa1.0_00381.1.g12604.t1 | ref XP_002868276.1  cbl-interacting protein kinase 4 [Arabidopsis lyrata subsp. lyrata]<br>gi 297314112 gb EFH44535.1  cbl-interacting protein kinase 4 [Arabidopsis lyrata subsp. lyrata]                                                                                                                                                                                                                                                                                                                                                                                                                                                                                                                                                                                                                                                                     | 427 | 423 | 1.00E-166 | 99.1  | 74.2 | 84.5 | cbl-interacting protein kinase 4                | gbpln | Arabidopsis lyrata   | AT4G14580.1   Symbols: CIPK4, SnRK3.3   CBL-interacting protein kinase 4   chr4:8367887-8369167 REVERSE LENGTH=426                      | 427 | 426 | 1.00E-166 | 99.8  | 71.2 | 81.7 |
| Rsa1.0_00381.1.g12605.t1 | ref XP_002870305.1  hypothetical protein ARALYDRAFT_915409 [Arabidopsis lyrata subsp. lyrata]<br>gi 297316141 gb EFH446564.1  hypothetical protein ARALYDRAFT_915409 [Arabidopsis lyrata subsp. lyrata]                                                                                                                                                                                                                                                                                                                                                                                                                                                                                                                                                                                                                                                        | 757 | 763 | 0         | 100.8 | 80.8 | 90.6 | hypothetical protein ARALYDRAFT_915409          | gbpln | Arabidopsis lyrata   | AT4G14570.1   Symbols:   acylaminoacyl-peptidase-related   chr4:8362586-8366525 FORWARD LENGTH=764                                      | 757 | 764 | 0         | 100.9 | 80.8 | 90.1 |
| Rsa1.0_00381.1.g12606.t1 | ref XP_002868278.1  hypothetical protein ARALYDRAFT_330061 [Arabidopsis lyrata subsp. lyrata]<br>gi 297314114 gb EFH44537.1  hypothetical protein ARALYDRAFT_330061 [Arabidopsis lyrata subsp. lyrata]                                                                                                                                                                                                                                                                                                                                                                                                                                                                                                                                                                                                                                                         | 865 | 919 | 0         | 106.2 | 78.4 | 85.5 | hypothetical protein ARALYDRAFT_330061          | gbpln | Arabidopsis lyrata   | AT4G14510.1   Symbols: ATCFM3B, CFM3B   CRM family member 3B   chr4:8337390-8341057 REVERSE LENGTH=907                                  | 865 | 907 | 0         | 104.9 | 77.0 | 84.2 |
| Rsa1.0_00381.1.g12607.t9 | gb EOA16652.1  hypothetical protein CARUB_v10004845mg [Capsella rubella]                                                                                                                                                                                                                                                                                                                                                                                                                                                                                                                                                                                                                                                                                                                                                                                       | 432 | 434 | 0         | 100.5 | 88.0 | 91.4 | hypothetical protein CARUB_v10004845mg          | gbpln | Capsella rubella     | AT4G14500.1   Symbols:   Polyketide cyclase/dehydrase and lipid transport superfamily protein   chr4:8343491-8337022 FORWARD LENGTH=433 | 432 | 433 | 0         | 100.2 | 87.7 | 91.7 |
| Rsa1.0_00381.1.g12608.t2 | ref XP_002877826.1  ATG4/CHLG/G4 [Arabidopsis lyrata subsp. lyrata]<br>gi 297323664 gb EFH54085.1  ATG4/CHLG/G4 [Arabidopsis lyrata subsp. lyrata]                                                                                                                                                                                                                                                                                                                                                                                                                                                                                                                                                                                                                                                                                                             | 449 | 387 | 0         | 86.2  | 76.6 | 79.1 | ATG4/CHLG/G4                                    | gbpln | Arabidopsis lyrata   | AT3G51820.1   Symbols: ATG4, G4, CHLG   UbiA prenyltransferase family protein   chr3:19216301-19218934 REVERSE LENGTH=387               | 449 | 387 | 0         | 86.2  | 75.7 | 78.6 |
| Rsa1.0_00381.1.g12609.t1 | gb ABB55260.1  late embryogenesis-abundant protein [Brassica carinata]                                                                                                                                                                                                                                                                                                                                                                                                                                                                                                                                                                                                                                                                                                                                                                                         | 152 | 152 | 2.00E-70  | 100.0 | 92.8 | 98.7 | late embryogenesis-abundant protein             | gbpln | Brassica carinata    | AT3G51810.1   Symbols: ATEM1, GEA1, AT3, EM1   Stress induced protein   chr3:19214818-19215461 FORWARD LENGTH=152                       | 152 | 152 | 3.00E-70  | 100.0 | 89.5 | 96.1 |
| Rsa1.0_00381.1.g12610.t1 | ref NP_001190060.1  metalloproteinase M24 domain-containing protein [Arabidopsis thaliana]<br>gi 332645325 gb AEE78846.1  metalloproteinase M24 domain-containing protein [Arabidopsis thaliana]                                                                                                                                                                                                                                                                                                                                                                                                                                                                                                                                                                                                                                                               | 392 | 385 | 0         | 98.2  | 84.7 | 91.3 | metalloproteinase M24 domain-containing protein | gbpln | Arabidopsis thaliana | AT3G51800.3   Symbols: ATG2   metalloproteinase M24 family protein   chr3:19211261-19213568 REVERSE LENGTH=385                          | 392 | 385 | 0         | 98.2  | 84.7 | 91.3 |

|                          |                                                                                                                                                                                                                                                                                                                                                                                                                                                                                             |     |     |           |       |      |      |                                        |       |                      |                                                                                                                                                                                                                                                                                                                                                                                                                                                                                 |     |     |           |       |      |      |
|--------------------------|---------------------------------------------------------------------------------------------------------------------------------------------------------------------------------------------------------------------------------------------------------------------------------------------------------------------------------------------------------------------------------------------------------------------------------------------------------------------------------------------|-----|-----|-----------|-------|------|------|----------------------------------------|-------|----------------------|---------------------------------------------------------------------------------------------------------------------------------------------------------------------------------------------------------------------------------------------------------------------------------------------------------------------------------------------------------------------------------------------------------------------------------------------------------------------------------|-----|-----|-----------|-------|------|------|
| Rsa1.0_00381.1.g12611.t1 | ref[XP_002877820.1] hypothetical protein ARALYDRAFT_348272 [Arabidopsis lyrata subsp. lyrata] gi 297323658 gb EFH54079.1                                                                                                                                                                                                                                                                                                                                                                    | 196 | 113 | 2.00E-26  | 57.7  | 34.7 | 43.4 | hypothetical protein ARALYDRAFT_348272 | gbpln | Arabidopsis lyrata   | AT3G51750.3   Symbols:   unknown protein; FUNCTIONS IN: molecular_function unknown; INVOLVED IN: biological_process unknown; LOCATED IN: cellular_component unknown; EXPRESSED IN: 12 plant structures; EXPRESSED DURING: 9 growth stages.   chr3:19196706-19197307 REVERSE LENGTH=110                                                                                                                                                                                          | 196 | 110 | 2.00E-26  | 56.1  | 36.2 | 41.8 |
| Rsa1.0_00381.1.g12612.t1 | ref[XP_002876102.1] hypothetical protein ARALYDRAFT_485528 [Arabidopsis lyrata subsp. lyrata] gi 297321940 gb EFH52361.1                                                                                                                                                                                                                                                                                                                                                                    | 830 | 832 | 0         | 100.2 | 87.5 | 92.9 | hypothetical protein ARALYDRAFT_485528 | gbpln | Arabidopsis lyrata   | AT3G51740.1   Symbols: IMK2   inflorescence meristem receptor-like kinase 2   chr3:19189248-19191842 FORWARD LENGTH=836                                                                                                                                                                                                                                                                                                                                                         | 830 | 836 | 0         | 100.7 | 86.3 | 91.4 |
| Rsa1.0_00381.1.g12613.t1 | ref[XP_002876095.1] hypothetical protein ARALYDRAFT_485514 [Arabidopsis lyrata subsp. lyrata] gi 297321933 gb EFH52354.1                                                                                                                                                                                                                                                                                                                                                                    | 807 | 829 | 0         | 102.7 | 73.7 | 82.0 | hypothetical protein ARALYDRAFT_485514 | gbpln | Arabidopsis lyrata   | AT3G51620.2   Symbols:   PAP/OAS1 substrate-binding domain superfamily   chr3:19143859-19147944 FORWARD LENGTH=829                                                                                                                                                                                                                                                                                                                                                              | 807 | 829 | 0         | 102.7 | 72.1 | 81.0 |
| Rsa1.0_00381.1.g12614.t1 | ref[XP_002877814.1] hypothetical protein ARALYDRAFT_906509 [Arabidopsis lyrata subsp. lyrata] gi 297323652 gb EFH54073.1                                                                                                                                                                                                                                                                                                                                                                    | 267 | 230 | 1.00E-118 | 86.1  | 78.3 | 81.3 | hypothetical protein ARALYDRAFT_906509 | gbpln | Arabidopsis lyrata   | AT3G51610.1   Symbols:   unknown protein; FUNCTIONS IN: molecular_function unknown; INVOLVED IN: response to oxidative stress; LOCATED IN: endomembrane system; EXPRESSED IN: 25 plant structures; EXPRESSED DURING: 15 growth stages; Has 53 Blast hits to 53 proteins in 21 species: Archae - 0; Bacteria - 0; Metazoa - 0; Fungi - 0; Plants - 48; Viruses - 0; Other Eukaryotes - 5 (source: NCBI BLink).   chr3:19139715-19141986 REVERSE LENGTH=230                       | 267 | 230 | 1.00E-120 | 86.1  | 78.7 | 80.5 |
| Rsa1.0_00381.1.g12615.t1 | gb AGC11819.1  putative lipid transfer protein 5 [Eutrema halophilum]                                                                                                                                                                                                                                                                                                                                                                                                                       | 116 | 118 | 9.00E-55  | 101.7 | 92.2 | 97.4 | putative lipid transfer protein 5      | gbpln | Eutrema halophilum   | AT3G51600.1   Symbols: LTP5   lipid transfer protein 5   chr3:19138661-19139124 REVERSE LENGTH=118                                                                                                                                                                                                                                                                                                                                                                              | 116 | 118 | 5.00E-54  | 101.7 | 87.1 | 93.1 |
| Rsa1.0_00381.1.g12616.t1 | emb CAA42870.1  E2 [Brassica napus] gi 384340 prf 1905428A phospholipid transfer protein                                                                                                                                                                                                                                                                                                                                                                                                    | 185 | 119 | 2.00E-57  | 64.3  | 59.5 | 60.0 | E2                                     | gbpln | Brassica napus       | AT3G51590.1   Symbols: LTP12   lipid transfer protein 12   chr3:19135828-19136654 REVERSE LENGTH=119                                                                                                                                                                                                                                                                                                                                                                            | 185 | 119 | 5.00E-48  | 64.3  | 48.1 | 55.1 |
| Rsa1.0_00381.1.g12617.t1 | gb ABT18094.1  FERONIA receptor-like kinase [Brassica oleracea]                                                                                                                                                                                                                                                                                                                                                                                                                             | 897 | 895 | 0         | 99.8  | 91.8 | 93.6 | FERONIA receptor-like kinase           | gbpln | Brassica oleracea    | AT3G51550.1   Symbols: FER   Malectin/receptor-like protein kinase family protein   chr3:19117877-19120564 REVERSE LENGTH=895                                                                                                                                                                                                                                                                                                                                                   | 897 | 895 | 0         | 99.8  | 87.1 | 91.9 |
| Rsa1.0_00381.1.g12618.t1 | ref[NP_566952.1] diacylglycerol O-acyltransferase 2 [Arabidopsis thaliana] gi 75167729 sp Q9ASU1.1 D_GAT2_ARAT_H RecName: Full=Diacylglycerol O-acyltransferase 2 gi 13605702 gb AAK32844.1 AF361832.1 AT3g51520/F26O13.160 [Arabidopsis thaliana] gi 18700272 gb AAL77746.1 AT3g51520/F26O13.160 [Arabidopsis thaliana] gi 21593164 gb AAM65113.1  unknown [Arabidopsis thaliana] gi 332645281 gb AEE78802.1  diacylglycerol O-acyltransferase 2 [Arabidopsis thaliana]                    | 318 | 314 | 1.00E-147 | 98.7  | 78.9 | 88.4 | diacylglycerol O-acyltransferase 2     | gbpln | Arabidopsis thaliana | AT3G51520.1   Symbols:   diacylglycerol acyltransferase family   chr3:19110739-19112518 FORWARD LENGTH=314                                                                                                                                                                                                                                                                                                                                                                      | 318 | 314 | 1.00E-150 | 98.7  | 78.9 | 88.4 |
| Rsa1.0_00381.1.g12619.t1 | ref[NP_190719.1] uncharacterized protein [Arabidopsis thaliana] gi 6572072 emb CAB63015.1  putative protein [Arabidopsis thaliana] gi 15027917 gb AAK76489.1  unknown protein [Arabidopsis thaliana] gi 15450643 gb AAK96593.1 AT3g51510/F26O13.150 [Arabidopsis thaliana] gi 20259289 gb AAM14380.1  unknown protein [Arabidopsis thaliana] gi 21536487 gb AAM60819.1  unknown [Arabidopsis thaliana] gi 332645280 gb AEE78801.1  uncharacterized protein AT3G51510 [Arabidopsis thaliana] | 176 | 181 | 2.00E-67  | 102.8 | 80.7 | 87.5 | uncharacterized protein                | gbpln | Arabidopsis thaliana | AT3G51510.1   Symbols:   unknown protein; FUNCTIONS IN: molecular_function unknown; INVOLVED IN: biological_process unknown; LOCATED IN: chloroplast thylakoid membrane, chloroplast; EXPRESSED IN: 22 plant structures; EXPRESSED DURING: 13 growth stages; Has 42 Blast hits to 42 proteins in 19 species: Archae - 0; Bacteria - 0; Metazoa - 0; Fungi - 0; Plants - 40; Viruses - 0; Other Eukaryotes - 2 (source: NCBI BLink).   chr3:19109118-19109842 FORWARD LENGTH=181 | 176 | 181 | 7.00E-70  | 102.8 | 80.7 | 87.5 |

|                          |                                                                                                                                                                                                                                                                                                                                                                                                                                                                                                                                                                                                                                                                                                                                                                                                                                                |     |     |           |       |      |      |                                                   |       |                      |                                                                                                                                                                                                                                                                                                                                                                                                                                                 |     |     |          |       |      |      |
|--------------------------|------------------------------------------------------------------------------------------------------------------------------------------------------------------------------------------------------------------------------------------------------------------------------------------------------------------------------------------------------------------------------------------------------------------------------------------------------------------------------------------------------------------------------------------------------------------------------------------------------------------------------------------------------------------------------------------------------------------------------------------------------------------------------------------------------------------------------------------------|-----|-----|-----------|-------|------|------|---------------------------------------------------|-------|----------------------|-------------------------------------------------------------------------------------------------------------------------------------------------------------------------------------------------------------------------------------------------------------------------------------------------------------------------------------------------------------------------------------------------------------------------------------------------|-----|-----|----------|-------|------|------|
| Rsa1.0_00381.1.g12620.t1 | dbj BAE99300.1  hypothetical protein [Arabidopsis thaliana]                                                                                                                                                                                                                                                                                                                                                                                                                                                                                                                                                                                                                                                                                                                                                                                    | 120 | 116 | 2.00E-31  | 96.7  | 72.5 | 80.8 | hypothetical protein                              | gbpln | Arabidopsis thaliana | AT3G51500.1   Symbols:   unknown protein; FUNCTIONS IN: molecular_function unknown; INVOLVED IN: biological_process unknown; LOCATED IN: chloroplast; EXPRESSED IN: 22 plant structures; EXPRESSED DURING: 13 growth stages; Has 23 Blast hits to 23 proteins in 10 species: Archae - 0; Bacteria - 0; Metazoa - 0; Fungi - 0; Plants - 23; Viruses - 0; Other Eukaryotes - 0 (source: NCBI BLINK);   chr3:19108353-19108703 FORWARD LENGTH=116 | 120 | 116 | 5.00E-34 | 96.7  | 72.5 | 80.8 |
| Rsa1.0_00381.1.g12621.t1 | ref NP_190717.1  monosaccharide-sensing protein 3 [Arabidopsis thaliana] gi 75337067 sp Q9SD00.1 MSSP3_ARATH RecName: Full=Monosaccharide-sensing protein 3; AltName: Full=Sugar transporter MSSP3 gi 6572070 emb CAB63013.1  sugar transporter-like protein [Arabidopsis thaliana] gi 26800697 emb CAD58693.1  monosaccharide sensing protein 3 [Arabidopsis thaliana] gi 332645277 gb AEE78798.1  monosaccharide-sensing protein 3 [Arabidopsis thaliana]                                                                                                                                                                                                                                                                                                                                                                                    | 654 | 729 | 0         | 111.5 | 82.3 | 89.0 | monosaccharide-sensing protein 3                  | gbpln | Arabidopsis thaliana | AT3G51490.1   Symbols: TMT3   tonoplast monosaccharide transporter3   chr3:19105018-19107562 REVERSE LENGTH=729                                                                                                                                                                                                                                                                                                                                 | 654 | 729 | 0        | 111.5 | 82.3 | 89.0 |
| Rsa1.0_00381.1.g12622.t1 | gb EOA25689.1  hypothetical protein CARUB_v10019042mg [Capsella rubella]                                                                                                                                                                                                                                                                                                                                                                                                                                                                                                                                                                                                                                                                                                                                                                       | 348 | 362 | 1.00E-180 | 104.0 | 89.4 | 95.7 | hypothetical protein CARUB_v10019042mg            | gbpln | Capsella rubella     | AT3G51470.1   Symbols:   Protein phosphatase 2C family protein   chr3:19097924-19099244 REVERSE LENGTH=361                                                                                                                                                                                                                                                                                                                                      | 348 | 361 | 0        | 103.7 | 88.5 | 95.7 |
| Rsa1.0_00381.1.g12623.t2 | ref NP_190714.2  phosphatidylinositol-4-phosphate phosphatase RHD4 [Arabidopsis thaliana] gi 75168948 sp Q9CG55.1 SAC7_ARATH RecName: Full=Phosphoinositide phosphatase SAC7; Short=AtSAC7; AltName: Full=Protein ROOT HAIR DEFECTIVE 4; AltName: Full=Protein SUPPRESSOR OF ACTIN 1C; Short=AtSAC1c; AltName: Full=Protein SUPPRESSOR OF ACTIN 7; AltName: Full=SAC domain protein 7; AltName: Full=SAC1-like protein AtSAC1c gi 13430710 gb AAK25977.1 AF360267.1 unknown protein [Arabidopsis thaliana] gi 30840667 gb AAP41368.1 AF266459.1 SAC1-like protein AtSAC1c [Arabidopsis thaliana] gi 14532908 gb AAK64136.1  unknown protein [Arabidopsis thaliana] gi 31415731 gb AAP49840.1  SAC domain protein 7 [Arabidopsis thaliana] gi 332645274 gb AEE78795.1  phosphatidylinositol-4-phosphate phosphatase RHD4 [Arabidopsis thaliana] | 685 | 597 | 0         | 87.2  | 79.0 | 83.5 | phosphatidylinositol-4-phosphate phosphatase RHD4 | gbpln | Arabidopsis thaliana | AT3G51460.1   Symbols: RHD4   Phosphoinositide phosphatase family protein   chr3:19093007-19097142 FORWARD LENGTH=597                                                                                                                                                                                                                                                                                                                           | 685 | 597 | 0        | 87.2  | 79.0 | 83.5 |
| Rsa1.0_00381.1.g12624.t1 | #                                                                                                                                                                                                                                                                                                                                                                                                                                                                                                                                                                                                                                                                                                                                                                                                                                              | #   | #   | #         | #     | #    | #    | -                                                 | ----  | ----                 | #                                                                                                                                                                                                                                                                                                                                                                                                                                               | #   | #   | #        | #     | #    |      |
| Rsa1.0_00382.1.g12625.t1 | #                                                                                                                                                                                                                                                                                                                                                                                                                                                                                                                                                                                                                                                                                                                                                                                                                                              | #   | #   | #         | #     | #    | #    | -                                                 | ----  | ----                 | #                                                                                                                                                                                                                                                                                                                                                                                                                                               | #   | #   | #        | #     | #    |      |
| Rsa1.0_00382.1.g12626.t1 | ref NP_001031527.1  Tim17 domain-containing protein [Arabidopsis thaliana] gi 330254993 gb AEC10087.1  outer envelope pore protein 16-3 [Arabidopsis thaliana]                                                                                                                                                                                                                                                                                                                                                                                                                                                                                                                                                                                                                                                                                 | 114 | 173 | 4.00E-27  | 151.8 | 59.6 | 64.0 | Tim17 domain-containing protein                   | gbpln | Arabidopsis thaliana | AT2G42210.2   Symbols: ATOEP16-3, OEP16-3   Mitochondrial import inner membrane translocase subunit Tim17/Tim22/Tim23 family protein   chr2:17590600-17591591 FORWARD LENGTH=173                                                                                                                                                                                                                                                                | 114 | 173 | 6.00E-30 | 151.8 | 59.6 | 64.0 |
| Rsa1.0_00382.1.g12627.t1 | ref XP_002893732.1  ATMYC2 [Arabidopsis lyrata subsp. lyrata] gi 297339574 gb EFH6999.1  ATMYC2 [Arabidopsis lyrata subsp. lyrata]                                                                                                                                                                                                                                                                                                                                                                                                                                                                                                                                                                                                                                                                                                             | 276 | 625 | 1.00E-61  | 226.4 | 51.1 | 64.5 | ATMYC2                                            | gbpln | Arabidopsis lyrata   | AT1G32640.1   Symbols: ATMYC2, RD22BP1, JA11, JIN1, MYC2, ZBF1   Basic helix-loop-helix (bHLH) DNA-binding family protein   chr1:11799042-11800913 REVERSE LENGTH=623                                                                                                                                                                                                                                                                           | 276 | 623 | 1.00E-63 | 225.7 | 50.7 | 64.1 |
| Rsa1.0_00382.1.g12628.t1 | ref NP_190352.1  DNA binding protein [Arabidopsis thaliana] gi 4741185 emb CAB41851.1  hypothetical protein [Arabidopsis thaliana] gi 189303599 gb ACD85799.1  At3g47680 [Arabidopsis thaliana] gi 332644797 gb AEE78318.1  DNA binding protein [Arabidopsis thaliana]                                                                                                                                                                                                                                                                                                                                                                                                                                                                                                                                                                         | 349 | 302 | 8.00E-32  | 86.5  | 25.2 | 34.4 | DNA binding protein                               | gbpln | Arabidopsis thaliana | AT3G47680.1   Symbols:   DNA binding   chr3:17577483-17578391 REVERSE LENGTH=302                                                                                                                                                                                                                                                                                                                                                                | 349 | 302 | 2.00E-34 | 86.5  | 25.2 | 34.4 |



|                          |                                                                                                                                                                                                                                                                                                                                                                                                                                                            |      |      |           |       |      |      |                                                          |       |                      |                                                                                                                                                                                                                                                                                                                                                                                                                                                                                                                                                       |      |      |           |       |      |      |
|--------------------------|------------------------------------------------------------------------------------------------------------------------------------------------------------------------------------------------------------------------------------------------------------------------------------------------------------------------------------------------------------------------------------------------------------------------------------------------------------|------|------|-----------|-------|------|------|----------------------------------------------------------|-------|----------------------|-------------------------------------------------------------------------------------------------------------------------------------------------------------------------------------------------------------------------------------------------------------------------------------------------------------------------------------------------------------------------------------------------------------------------------------------------------------------------------------------------------------------------------------------------------|------|------|-----------|-------|------|------|
| Rsa1.0_00382.1.g12629.t1 | ref[XP_002865157.1] RNA recognition motif-containing protein [Arabidopsis lyrata subsp. lyrata]<br>gi 297310992 gb EFH41416.1  RNA recognition motif-containing protein [Arabidopsis lyrata subsp. lyrata]                                                                                                                                                                                                                                                 | 495  | 509  | 0         | 102.8 | 81.6 | 87.7 | RNA recognition motif-containing protein                 | gbpln | Arabidopsis lyrata   | AT5G46840.1   Symbols:   RNA-binding (RRM/RBD/RNP motifs) family protein   chr5:19005651-19007609 FORWARD LENGTH=501                                                                                                                                                                                                                                                                                                                                                                                                                                  | 495  | 501  | 0         | 101.2 | 78.2 | 84.6 |
| Rsa1.0_00382.1.g12630.t2 | ref[NP_001190481.1] phosphatidylinositol glycan, class X [Arabidopsis thaliana]<br>gi 332008052 gb AED95435.1  uncharacterized protein AT5G46850 [Arabidopsis thaliana]                                                                                                                                                                                                                                                                                    | 379  | 325  | 1.00E-108 | 85.8  | 55.1 | 63.9 | phosphatidylinositol glycan, class X                     | gbpln | Arabidopsis thaliana | AT5G46850.2   Symbols:   FUNCTIONS IN: molecular_function unknown; INVOLVED IN: GPI anchor biosynthetic process; LOCATED IN: endoplasmic reticulum membrane; EXPRESSED IN: 22 plant structures; CONTAINS InterPro DOMAIN/s: PIG-X/PBN1 (InterPro:IPR013233).   chr5:19010714-19012010 FORWARD LENGTH=325                                                                                                                                                                                                                                              | 379  | 325  | 1.00E-111 | 85.8  | 55.1 | 63.9 |
| Rsa1.0_00382.1.g12631.t1 | gb EOA13852.1  hypothetical protein CARUB_v10026955mg [Capsella rubella]                                                                                                                                                                                                                                                                                                                                                                                   | 270  | 268  | 1.00E-129 | 99.3  | 84.4 | 90.4 | hypothetical protein CARUB_v10026955mg                   | gbpln | Capsella rubella     | AT5G46860.1   Symbols: VAM3, ATVAM3, SYP22, AT5YP22, SGR3   Syntxin/t-SNARE family protein   chr5:19012342-19013795 REVERSE LENGTH=268                                                                                                                                                                                                                                                                                                                                                                                                                | 270  | 268  | 1.00E-130 | 99.3  | 83.7 | 88.9 |
| Rsa1.0_00382.1.g12632.t1 | ref[XP_002865155.1] predicted protein [Arabidopsis lyrata subsp. lyrata]<br>gi 297310990 gb EFH41414.1  predicted protein [Arabidopsis lyrata subsp. lyrata]                                                                                                                                                                                                                                                                                               | 318  | 303  | 1.00E-126 | 95.3  | 80.2 | 86.5 | predicted protein                                        | gbpln | Arabidopsis lyrata   | AT5G46870.1   Symbols:   RNA-binding (RRM/RBD/RNP motifs) family protein   chr5:19015486-19016990 FORWARD LENGTH=295                                                                                                                                                                                                                                                                                                                                                                                                                                  | 318  | 295  | 1.00E-127 | 92.8  | 77.7 | 83.0 |
| Rsa1.0_00382.1.g12633.t1 | dbj BAJ34553.1  unnamed protein product [Thellungiella halophila]                                                                                                                                                                                                                                                                                                                                                                                          | 360  | 389  | 0         | 108.1 | 95.8 | 97.8 | unnamed protein product                                  | ----  | ----                 | AT1G43170.8   Symbols: RP1   ribosomal protein 1   chr1:16268992-16268631 FORWARD LENGTH=389                                                                                                                                                                                                                                                                                                                                                                                                                                                          | 360  | 389  | 0         | 108.1 | 91.7 | 95.8 |
| Rsa1.0_00382.1.g12634.t4 | ref[NP_199499.3] homeobox-leucine zipper protein HDG5 [Arabidopsis thaliana]<br>gi 322510124 sp Q9FJS2.3 HDG5_ARATH RecName: Full=Homeobox-leucine zipper protein HDG5; AltName: Full=HD-ZIP protein HDG5; AltName: Full=Homeodomain GLABRA 2-like protein 5; AltName: Full=Homeodomain transcription factor HDG5; AltName: Full=Protein HOMEODOMAIN GLABROUS 5<br>gi 332008060 gb AED95443.1  homeobox-leucine zipper protein HDG5 [Arabidopsis thaliana] | 820  | 826  | 0         | 100.7 | 84.8 | 90.7 | homeobox-leucine zipper protein HDG5                     | gbpln | Arabidopsis thaliana | AT5G46890.1   Symbols: HB-7, HDG5   homeobox-7   chr5:19031540-19035388 FORWARD LENGTH=826                                                                                                                                                                                                                                                                                                                                                                                                                                                            | 820  | 826  | 0         | 100.7 | 84.8 | 90.7 |
| Rsa1.0_00382.1.g12635.t1 | ref[NP_199503.1] Intron maturase, type II family protein [Arabidopsis thaliana]<br>gi 9759434 dbj BAB10231.1  unnamed protein product [Arabidopsis thaliana]<br>gi 332008065 gb AED95448.1  Intron maturase, type II family protein [Arabidopsis thaliana]                                                                                                                                                                                                 | 731  | 735  | 0         | 100.5 | 88.5 | 93.0 | Intron maturase, type II family protein                  | gbpln | Arabidopsis thaliana | AT5G46920.1   Symbols:   Intron maturase, type II family protein   chr5:19053668-19055875 FORWARD LENGTH=735                                                                                                                                                                                                                                                                                                                                                                                                                                          | 731  | 735  | 0         | 100.5 | 88.5 | 93.0 |
| Rsa1.0_00382.1.g12636.t1 | ref[XP_002863379.1] invertase/pectin methylesterase inhibitor family protein [Arabidopsis lyrata subsp. lyrata]<br>gi 297309214 gb EFH39638.1  invertase/pectin methylesterase inhibitor family protein [Arabidopsis lyrata subsp. lyrata]                                                                                                                                                                                                                 | 173  | 179  | 7.00E-37  | 103.5 | 50.3 | 67.1 | invertase/pectin methylesterase inhibitor family protein | gbpln | Arabidopsis lyrata   | AT5G46930.1   Symbols:   Plant invertase/pectin methylesterase inhibitor superfamily protein   chr5:19056655-19057191 REVERSE LENGTH=178                                                                                                                                                                                                                                                                                                                                                                                                              | 173  | 178  | 2.00E-36  | 102.9 | 45.7 | 65.3 |
| Rsa1.0_00382.1.g12637.t1 | gb ABD64967.1  hypothetical protein 25.t00004 [Brassica oleracea]                                                                                                                                                                                                                                                                                                                                                                                          | 143  | 149  | 2.00E-43  | 104.2 | 61.5 | 76.9 | hypothetical protein 25.t00004                           | gbpln | Brassica oleracea    | AT5G47600.1   Symbols:   HSP20-like chaperones superfamily protein   chr5:19299945-19300456 REVERSE LENGTH=131                                                                                                                                                                                                                                                                                                                                                                                                                                        | 143  | 131  | 1.00E-37  | 91.6  | 47.6 | 60.1 |
| Rsa1.0_00382.1.g12638.t2 | #                                                                                                                                                                                                                                                                                                                                                                                                                                                          | #    | #    | #         | #     | #    | -    | ----                                                     | ----  | ----                 | #                                                                                                                                                                                                                                                                                                                                                                                                                                                                                                                                                     | #    | #    | #         | #     | #    |      |
| Rsa1.0_00382.1.g12639.t2 | ref[NP_199513.2] uncharacterized protein [Arabidopsis thaliana]<br>gi 332008075 gb AED95458.1  uncharacterized protein AT5G47020 [Arabidopsis thaliana]                                                                                                                                                                                                                                                                                                    | 1373 | 1421 | 0         | 103.5 | 90.8 | 94.8 | uncharacterized protein                                  | gbpln | Arabidopsis thaliana | AT5G47020.1   Symbols:   unknown protein; FUNCTIONS IN: molecular_function unknown; INVOLVED IN: biological_process unknown; LOCATED IN: endomembrane system; EXPRESSED IN: 23 plant structures; EXPRESSED DURING: 13 growth stages; BEST Arabidopsis thaliana protein match is: unknown protein (TAIR:AT5G11700.2); Has 1807 Blast hits to 1807 proteins in 277 species: Archaea - 0; Bacteria - 0; Metazoa - 736; Fungi - 347; Plants - 385; Viruses - 0; Other Eukaryotes - 339 (source: NCBI BLINK).   chr5:19082005-19089800 FORWARD LENGTH=1421 | 1373 | 1421 | 0         | 103.5 | 90.8 | 94.8 |

|                          |                                                                                                                                                                                                                |     |      |           |       |      |       |                                                       |       |                      |                                                                                                                          |     |     |           |       |      |      |
|--------------------------|----------------------------------------------------------------------------------------------------------------------------------------------------------------------------------------------------------------|-----|------|-----------|-------|------|-------|-------------------------------------------------------|-------|----------------------|--------------------------------------------------------------------------------------------------------------------------|-----|-----|-----------|-------|------|------|
| Rsa1.0_00382.1.g12640.t1 | refXP_00286835.1   pentatricopeptide repeat-containing protein [Arabidopsis lyrata subsp. lyrata]   g1297314671 gb EFH45094.1   pentatricopeptide repeat-containing protein [Arabidopsis lyrata subsp. lyrata] | 291 | 301  | 1.00E-125 | 103.4 | 80.4 | 88.3  | pentatricopeptide repeat-containing protein           | gbpln | Arabidopsis lyrata   | AT4G38150.2   Symbols:   Pentatricopeptide repeat (PPR) superfamily protein   chr4:17901211-17902119 REVERSE LENGTH=302  | 291 | 302 | 1.00E-127 | 103.8 | 80.1 | 86.9 |
| Rsa1.0_00382.1.g12641.t1 | gb ABL97963.1   hydrogen-transporting ATP synthase [Brassica rapa]                                                                                                                                             | 112 | 203  | 2.00E-57  | 181.3 | 98.2 | 100.0 | hydrogen-transporting ATP synthase                    | gbpln | Brassica rapa        | AT5G47030.1   Symbols:   ATPase, F1 complex, delta/epsilon subunit   chr5:19090384-19092034 FORWARD LENGTH=203           | 112 | 203 | 2.00E-56  | 181.3 | 92.9 | 98.2 |
| Rsa1.0_00382.1.g12642.t1 | refXP_002863374.1   hypothetical protein ARALYDRAFT_494276 [Arabidopsis lyrata subsp. lyrata]   g1297309209 gb EFH39633.1   hypothetical protein ARALYDRAFT_494276 [Arabidopsis lyrata subsp. lyrata]          | 878 | 888  | 0         | 101.1 | 96.7 | 97.8  | hypothetical protein ARALYDRAFT_494276                | gbpln | Arabidopsis lyrata   | AT5G47040.1   Symbols: LON2   lon protease 2   chr5:19093356-19098678 REVERSE LENGTH=888                                 | 878 | 888 | 0         | 101.1 | 96.5 | 97.9 |
| Rsa1.0_00382.1.g12643.t1 | refXP_002865147.1   ATP binding protein [Arabidopsis lyrata subsp. lyrata]   g1297310982 gb EFH41406.1   ATP binding protein [Arabidopsis lyrata subsp. lyrata]                                                | 302 | 303  | 1.00E-112 | 100.3 | 75.2 | 83.1  | ATP binding protein                                   | gbpln | Arabidopsis lyrata   | AT5G47050.1   Symbols:   SBP (S-ribonuclease binding protein) family protein   chr5:19106612-19107860 FORWARD LENGTH=300 | 302 | 300 | 1.00E-109 | 99.3  | 74.5 | 83.8 |
| Rsa1.0_00382.1.g12644.t1 | #                                                                                                                                                                                                              | #   | #    | #         | #     | #    | #     | -                                                     | ----  | ----                 | #                                                                                                                        | #   | #   | #         | #     | #    |      |
| Rsa1.0_00382.1.g12645.t1 | gb EOA14090.1   hypothetical protein CARUB_v10027227mg [Capsella rubella]                                                                                                                                      | 180 | 177  | 1.00E-60  | 98.3  | 82.2 | 88.3  | hypothetical protein CARUB_v10027227mg                | gbpln | Capsella rubella     | AT5G47060.1   Symbols:   Protein of unknown function (DUF581)   chr5:19116843-19117639 FORWARD LENGTH=177                | 180 | 177 | 2.00E-61  | 98.3  | 80.0 | 85.0 |
| Rsa1.0_00382.1.g12646.t1 | dbj BAJ33813.1   unnamed protein product [Theilungiella halophila]                                                                                                                                             | 407 | 412  | 0         | 101.2 | 85.3 | 92.6  | unnamed protein product                               | ----  | ----                 | AT5G47070.1   Symbols:   Protein kinase superfamily protein   chr5:19118683-19120528 REVERSE LENGTH=410                  | 407 | 410 | 0         | 100.7 | 83.8 | 92.1 |
| Rsa1.0_00382.1.g12647.t1 | gb ABD65048.1   Casein kinase II beta chain, putative [Brassica oleracea]                                                                                                                                      | 269 | 276  | 1.00E-141 | 102.6 | 92.2 | 95.2  | Casein kinase II beta chain, putative                 | gbpln | Brassica oleracea    | AT5G47080.1   Symbols: CKB1   casein kinase II beta chain 1   chr5:19124969-19126397 REVERSE LENGTH=287                  | 269 | 287 | 1.00E-137 | 106.7 | 90.7 | 94.4 |
| Rsa1.0_00382.1.g12648.t1 | refXP_002863360.1   hypothetical protein ARALYDRAFT_916691 [Arabidopsis lyrata subsp. lyrata]   g1297309195 gb EFH39619.1   hypothetical protein ARALYDRAFT_916691 [Arabidopsis lyrata subsp. lyrata]          | 260 | 264  | 1.00E-115 | 101.5 | 85.0 | 90.0  | hypothetical protein ARALYDRAFT_916691                | gbpln | Arabidopsis lyrata   | AT5G47110.1   Symbols: LIL3.2   Chlorophyll A-B binding family protein   chr5:19134218-19135238 REVERSE LENGTH=258       | 260 | 258 | 1.00E-116 | 99.2  | 83.5 | 89.6 |
| Rsa1.0_00382.1.g12649.t1 | gb AAC25101.1   putative transposase [Arabidopsis thaliana]                                                                                                                                                    | 761 | 729  | 1.00E-111 | 95.8  | 24.3 | 29.4  | putative transposase                                  | gbpln | Arabidopsis thaliana | AT3G17450.1   Symbols:   hAT dimerisation domain-containing protein   chr3:5972793-5975684 REVERSE LENGTH=877            | 761 | 877 | 2.00E-38  | 115.2 | 10.8 | 18.8 |
| Rsa1.0_00382.1.g12650.t1 | gb AAF18538.1 AC006551_24 Very similar to retrotransposon reverse transcriptase [Arabidopsis thaliana]                                                                                                         | 598 | 1231 | 1.00E-173 | 205.9 | 49.2 | 66.2  | Very similar to retrotransposon reverse transcriptase | gbpln | Arabidopsis thaliana | AT4G29090.1   Symbols:   Ribonuclease H-like superfamily protein   chr4:14333528-14335255 FORWARD LENGTH=575             | 598 | 575 | 1.00E-91  | 96.2  | 27.6 | 44.6 |
| Rsa1.0_00382.1.g12651.t1 | refXP_002865139.1   zinc finger family protein [Arabidopsis lyrata subsp. lyrata]   g1297310974 gb EFH41398.1   zinc finger family protein [Arabidopsis lyrata subsp. lyrata]                                  | 451 | 477  | 1.00E-176 | 105.8 | 78.5 | 87.1  | zinc finger family protein                            | gbpln | Arabidopsis lyrata   | AT5G47140.1   Symbols: GATA27   GATA transcription factor 27   chr5:19145108-19147303 FORWARD LENGTH=470                 | 451 | 470 | 1.00E-170 | 104.2 | 77.4 | 86.7 |
| Rsa1.0_00382.1.g12652.t1 | gb ABD65049.1   histone-lysine N-methyltransferase, putative [Brassica oleracea]                                                                                                                               | 335 | 392  | 1.00E-109 | 117.0 | 67.2 | 77.6  | histone-lysine N-methyltransferase, putative          | gbpln | Brassica oleracea    | AT5G47150.1   Symbols:   YDG/SRA domain-containing protein   chr5:19150807-19151793 FORWARD LENGTH=328                   | 335 | 328 | 7.00E-98  | 97.9  | 57.9 | 69.9 |
| Rsa1.0_00382.1.g12653.t1 | refXP_002865137.1   hypothetical protein ARALYDRAFT_494263 [Arabidopsis lyrata subsp. lyrata]   g1297310972 gb EFH41396.1   hypothetical protein ARALYDRAFT_494263 [Arabidopsis lyrata subsp. lyrata]          | 392 | 332  | 1.00E-82  | 84.7  | 45.9 | 58.9  | hypothetical protein ARALYDRAFT_494263                | gbpln | Arabidopsis lyrata   | AT5G47160.1   Symbols:   YDG/SRA domain-containing protein   chr5:19156731-19157978 FORWARD LENGTH=415                   | 392 | 415 | 3.00E-81  | 105.9 | 48.0 | 64.3 |

|                          |                                                                                                                                                                                                                                                                                                                                                                                                                                                                                                                                                                                                                                                                                                                                                                                                                                                                                                                                                                                                                                                                              |     |     |           |       |      |      |                                                           |       |                      |                                                                                                                                      |     |     |           |       |      |      |
|--------------------------|------------------------------------------------------------------------------------------------------------------------------------------------------------------------------------------------------------------------------------------------------------------------------------------------------------------------------------------------------------------------------------------------------------------------------------------------------------------------------------------------------------------------------------------------------------------------------------------------------------------------------------------------------------------------------------------------------------------------------------------------------------------------------------------------------------------------------------------------------------------------------------------------------------------------------------------------------------------------------------------------------------------------------------------------------------------------------|-----|-----|-----------|-------|------|------|-----------------------------------------------------------|-------|----------------------|--------------------------------------------------------------------------------------------------------------------------------------|-----|-----|-----------|-------|------|------|
| Rsa1.0_00382.1.g12654.t1 | ref NP_199529.1  VAMP (vesicle-associated membrane protein) family protein [Arabidopsis thaliana]<br>gi 30695123 ref NP_851144.1  VAMP (vesicle-associated membrane protein) family protein [Arabidopsis thaliana]<br>gi 75180692 sp Q9LVU1.1 VAP21_ARAT H RecName: Full=Vesicle-associated protein 2-1; AltName: Full=Plant VAP homolog 21; Short=AtPVA21; AltName: Full=VAMP-associated protein 2-1<br>gi 8809600 dbj BAA97151.1  VAMP (vesicle-associated membrane protein)-associated protein-like [Arabidopsis thaliana]<br>gi 14334974 gb AAK59664.1  putative VAMP (vesicle-associated membrane protein)-associated protein [Arabidopsis thaliana]<br>gi 17104633 gb AAL34205.1  putative VAMP-associated protein [Arabidopsis thaliana]<br>gi 21553413 gb AAM62506.1  VAMP (vesicle-associated membrane protein)-associated protein-like [Arabidopsis thaliana]<br>gi 332008097 gb AED95480.1  VAMP (vesicle-associated membrane protein) family protein [Arabidopsis thaliana]<br>gi 332008098 gb AED95481.1  vesicle-associated protein 2-1 [Arabidopsis thaliana] | 216 | 220 | 1.00E-108 | 101.9 | 90.7 | 95.4 | VAMP (vesicle-associated membrane protein) family protein | gbpln | Arabidopsis thaliana | AT5G47180.2   Symbols:   Plant VAMP (vesicle-associated membrane protein) family protein   chr5:19161384-19163265 REVERSE LENGTH=220 | 216 | 220 | 1.00E-111 | 101.9 | 90.7 | 95.4 |
| Rsa1.0_00382.1.g12655.t1 | gb AAM64533.1  contains similarity to plastid ribosomal protein L19 [Arabidopsis thaliana]                                                                                                                                                                                                                                                                                                                                                                                                                                                                                                                                                                                                                                                                                                                                                                                                                                                                                                                                                                                   | 234 | 229 | 1.00E-82  | 97.9  | 78.6 | 84.6 | contains similarity to plastid ribosomal protein L19      | gbpln | Arabidopsis thaliana | AT5G47190.1   Symbols:   Ribosomal protein L19 family protein   chr5:19164432-19166064 REVERSE LENGTH=229                            | 234 | 229 | 7.00E-85  | 97.9  | 78.2 | 84.6 |
| Rsa1.0_00382.1.g12656.t1 | # # # # # # # #                                                                                                                                                                                                                                                                                                                                                                                                                                                                                                                                                                                                                                                                                                                                                                                                                                                                                                                                                                                                                                                              | #   | #   | #         | #     | #    | -    | ----                                                      | ----  | #                    | #                                                                                                                                    | #   | #   | #         | #     | #    |      |
| Rsa1.0_00383.1.g12657.t2 | ref XP_002864736.1  small G protein family protein [Arabidopsis lyrata subsp. lyrata]<br>gi 297310571 gb EFH40995.1  small G protein family protein [Arabidopsis lyrata subsp. lyrata]                                                                                                                                                                                                                                                                                                                                                                                                                                                                                                                                                                                                                                                                                                                                                                                                                                                                                       | 726 | 376 | 0         | 51.8  | 49.6 | 50.8 | small G protein family protein                            | gbpln | Arabidopsis lyrata   | AT5G61530.1   Symbols:   small G protein family protein / RhoGAP family protein   chr5:24742630-24744586 FORWARD LENGTH=376          | 726 | 376 | 0         | 51.8  | 48.5 | 50.4 |
| Rsa1.0_00383.1.g12658.t1 | gb EOA14619.1  hypothetical protein CARUB_v10027877mg [Capsella rubella]                                                                                                                                                                                                                                                                                                                                                                                                                                                                                                                                                                                                                                                                                                                                                                                                                                                                                                                                                                                                     | 846 | 849 | 0         | 100.4 | 87.4 | 92.9 | hypothetical protein CARUB_v10027877mg                    | gbpln | Capsella rubella     | AT5G61550.1   Symbols:   U-box domain-containing protein kinase family protein   chr5:24748325-24751558 FORWARD LENGTH=845           | 846 | 845 | 0         | 99.9  | 84.0 | 91.7 |
| Rsa1.0_00383.1.g12659.t1 | ref NP_200964.2  U-box domain-containing protein 51 [Arabidopsis thaliana]<br>gi 172045896 sp Q9FKG5.2 PUB51_ARATH RecName: Full=U-box domain-containing protein 51; AltName: Full=Plant U-box protein 51; Includes: RecName: Full=E3 ubiquitin ligase; Includes: RecName: Full=Serine/threonine-protein kinase<br>gi 332010105 gb AED97488.1  U-box domain-containing protein 51 [Arabidopsis thaliana]                                                                                                                                                                                                                                                                                                                                                                                                                                                                                                                                                                                                                                                                     | 789 | 796 | 0         | 100.9 | 86.7 | 93.2 | U-box domain-containing protein 51                        | gbpln | Arabidopsis thaliana | AT5G61560.1   Symbols:   U-box domain-containing protein kinase family protein   chr5:24753476-24756506 FORWARD LENGTH=796           | 789 | 796 | 0         | 100.9 | 86.7 | 93.2 |
| Rsa1.0_00383.1.g12660.t1 | ref NP_001078779.1  protein kinase-like protein [Arabidopsis thaliana]<br>gi 63003858 gb AAZ25458.1  At5g61570 [Arabidopsis thaliana]<br>gi 332010108 gb AED97491.1  protein kinase-like protein [Arabidopsis thaliana]                                                                                                                                                                                                                                                                                                                                                                                                                                                                                                                                                                                                                                                                                                                                                                                                                                                      | 359 | 358 | 1.00E-152 | 99.7  | 79.9 | 88.9 | protein kinase-like protein                               | gbpln | Arabidopsis thaliana | AT5G61570.2   Symbols:   Protein kinase superfamily protein   chr5:24758507-24760201 FORWARD LENGTH=358                              | 359 | 358 | 1.00E-154 | 99.7  | 79.9 | 88.9 |
| Rsa1.0_00383.1.g12661.t1 | ref XP_002866443.1  hypothetical protein ARALYDRAFT_919404 [Arabidopsis lyrata subsp. lyrata]<br>gi 297312278 gb EFH42702.1  hypothetical protein ARALYDRAFT_919404 [Arabidopsis lyrata subsp. lyrata]                                                                                                                                                                                                                                                                                                                                                                                                                                                                                                                                                                                                                                                                                                                                                                                                                                                                       | 753 | 749 | 0         | 99.5  | 75.4 | 84.1 | hypothetical protein ARALYDRAFT_919404                    | gbpln | Arabidopsis lyrata   | AT3G53360.1   Symbols:   Tetratricopeptide repeat (TPR)-like superfamily protein   chr3:19784502-19786808 FORWARD LENGTH=768         | 753 | 768 | 1.00E-114 | 102.0 | 31.3 | 51.8 |

|                          |                                                                                                                                                                                                                                                                                                                                                                                                                                                                                                                                                                                                                                                                          |     |      |          |       |      |      |                                                                                                                                |       |                      |                                                                                                                                      |     |      |          |       |      |      |
|--------------------------|--------------------------------------------------------------------------------------------------------------------------------------------------------------------------------------------------------------------------------------------------------------------------------------------------------------------------------------------------------------------------------------------------------------------------------------------------------------------------------------------------------------------------------------------------------------------------------------------------------------------------------------------------------------------------|-----|------|----------|-------|------|------|--------------------------------------------------------------------------------------------------------------------------------|-------|----------------------|--------------------------------------------------------------------------------------------------------------------------------------|-----|------|----------|-------|------|------|
| Rsa1.0_00383.1.g12662.t1 | ref NP_200966.2  6-phosphofructokinase 4 [Arabidopsis thaliana] gi 75171244 sp Q9FKG3.1 K6PF4_ARATH RecName: Full=6-phosphofructokinase 4, chloroplastic; Short=Phosphofructokinase 4; AltName: Full=Phosphohexokinase 4; Flags: Precursor gi 9758473 dbj BAB09002.1  pyrophosphate-fructose-6-phosphate 1-phosphotransferase-like protein [Arabidopsis thaliana] gi 20466456 gb AAM20545.1  pyrophosphate-dependent phosphofructo-1-kinase-like protein [Arabidopsis thaliana] gi 22136390 gb AAM91273.1  pyrophosphate-dependent phosphofructo-1-kinase-like protein [Arabidopsis thaliana] gi 332010109 gb AED97492.1  6-phosphofructokinase 4 [Arabidopsis thaliana] | 113 | 530  | 4.00E-34 | 469.0 | 70.8 | 77.0 | 6-phosphofructokinase 4                                                                                                        | gbpln | Arabidopsis thaliana | AT5G61580.1   Symbols: PFK4   phosphofructokinase 4   chr5:24761150-24763827 FORWARD LENGTH=530                                      | 113 | 530  | 7.00E-37 | 469.0 | 70.8 | 77.0 |
| Rsa1.0_00383.1.g12663.t1 | ref XP_002866451.1  predicted protein [Arabidopsis lyrata subsp. lyrata] gi 297312286 gb EFH42710.1  predicted protein [Arabidopsis lyrata subsp. lyrata]                                                                                                                                                                                                                                                                                                                                                                                                                                                                                                                | 939 | 954  | 0        | 101.6 | 85.7 | 91.4 | predicted protein                                                                                                              | gbpln | Arabidopsis lyrata   | AT5G61730.1   Symbols: ATATH11, ATH11   ABC2 homolog 11   chr5:24803583-24807898 REVERSE LENGTH=940                                  | 939 | 940  | 0        | 100.1 | 83.8 | 89.9 |
| Rsa1.0_00383.1.g12664.t2 | sp Q9FLT4.2 AB10A_ARATH RecName: Full=ABC transporter A family member 10; Short=ABC transporter ABCA.10; Short=AtABCA10; AltName: Full=ABC2 homolog 14                                                                                                                                                                                                                                                                                                                                                                                                                                                                                                                   | 865 | 909  | 0        | 105.1 | 79.5 | 87.7 | RecName: Full=ABC transporter A family member 10; Short=ABC transporter ABCA.10; Short=AtABCA10; AltName: Full=ABC2 homolog 14 | ----  | ----                 | AT5G61700.1   Symbols: ATATH16, ATH16   ABC2 homolog 16   chr5:24793864-24797944 FORWARD LENGTH=888                                  | 865 | 888  | 0        | 102.7 | 75.0 | 85.4 |
| Rsa1.0_00383.1.g12665.t1 | ref XP_002866452.1  cupin family protein [Arabidopsis lyrata subsp. lyrata] gi 297312287 gb EFH42711.1  cupin family protein [Arabidopsis lyrata subsp. lyrata]                                                                                                                                                                                                                                                                                                                                                                                                                                                                                                          | 330 | 210  | 2.00E-97 | 63.6  | 53.3 | 55.8 | cupin family protein                                                                                                           | gbpln | Arabidopsis lyrata   | AT5G61750.1   Symbols:   RmlC-like cupins superfamily protein   chr5:24812804-24813436 REVERSE LENGTH=210                            | 330 | 210  | 5.00E-97 | 63.6  | 52.7 | 56.1 |
| Rsa1.0_00383.1.g12666.t1 | ref XP_002875982.1  hypothetical protein ARALYDRAFT_906265 [Arabidopsis lyrata subsp. lyrata] gi 297321820 gb EFH52241.1  hypothetical protein ARALYDRAFT_906265 [Arabidopsis lyrata subsp. lyrata]                                                                                                                                                                                                                                                                                                                                                                                                                                                                      | 989 | 1001 | 0        | 101.2 | 86.5 | 92.0 | hypothetical protein ARALYDRAFT_906265                                                                                         | gbpln | Arabidopsis lyrata   | AT3G49670.1   Symbols: BAM2   Leucine-rich receptor-like protein kinase family protein   chr3:18417741-18420836 FORWARD LENGTH=1002  | 989 | 1002 | 0        | 101.3 | 85.6 | 91.6 |
| Rsa1.0_00383.1.g12667.t1 | gb EOA26692.1  hypothetical protein CARUB_v10022776mg [Capsella rubella]                                                                                                                                                                                                                                                                                                                                                                                                                                                                                                                                                                                                 | 269 | 676  | 2.00E-18 | 251.3 | 21.6 | 27.1 | hypothetical protein CARUB_v10022776mg                                                                                         | gbpln | Capsella rubella     | AT2G42320.2   Symbols:   nucleolar protein gar2-related   chr2:17628102-17630657 FORWARD LENGTH=669                                  | 269 | 669  | 3.00E-19 | 248.7 | 20.8 | 26.4 |
| Rsa1.0_00383.1.g12668.t1 | ref NP_190539.1  1-aminocyclopropane-1-carboxylate synthase 9 [Arabidopsis thaliana] gi 50400669 sp Q9M2Y8.1 A19_ARATH RecName: Full=1-aminocyclopropane-1-carboxylate synthase 9; Short=ACC synthase 9; AltName: Full=Ethylene-overproduction protein 3; AltName: Full=S-adenosyl-L-methionine methylthioadenosine-lyase 9 gi 12083192 gb AAG48755.1 AF332391.1 1-aminocyclopropane-1-carboxylate synthase ACS9 [Arabidopsis thaliana] gi 8723415 emb CAB66908.1  1-aminocyclopropane-1-carboxylate synthase-like protein [Arabidopsis thaliana] gi 332645057 gb AEE78578.1  1-aminocyclopropane-1-carboxylate synthase 9 [Arabidopsis thaliana]                        | 470 | 470  | 0        | 100.0 | 97.4 | 99.1 | 1-aminocyclopropane-1-carboxylate synthase 9                                                                                   | gbpln | Arabidopsis thaliana | AT3G49700.1   Symbols: ETO3, ACS9, AtACS9   1-aminocyclopropane-1-carboxylate synthase 9   chr3:18434470-18436141 REVERSE LENGTH=470 | 470 | 470  | 0        | 100.0 | 97.4 | 99.1 |
| Rsa1.0_00383.1.g12669.t1 | ref XP_002875993.1  pentatricopeptide repeat-containing protein [Arabidopsis lyrata subsp. lyrata] gi 297321831 gb EFH52252.1  pentatricopeptide repeat-containing protein [Arabidopsis lyrata subsp. lyrata]                                                                                                                                                                                                                                                                                                                                                                                                                                                            | 580 | 731  | 0        | 126.0 | 80.7 | 90.0 | pentatricopeptide repeat-containing protein                                                                                    | gbpln | Arabidopsis lyrata   | AT3G49740.1   Symbols:   Tetratricopeptide repeat (TPR)-like superfamily protein   chr3:18447788-18450001 FORWARD LENGTH=737         | 580 | 737  | 0        | 127.1 | 79.7 | 88.8 |
| Rsa1.0_00383.1.g12670.t1 | ref XP_002875994.1  predicted protein [Arabidopsis lyrata subsp. lyrata] gi 297321832 gb EFH52253.1  predicted protein [Arabidopsis lyrata subsp. lyrata]                                                                                                                                                                                                                                                                                                                                                                                                                                                                                                                | 95  | 147  | 3.00E-16 | 154.7 | 51.6 | 65.3 | predicted protein                                                                                                              | gbpln | Arabidopsis lyrata   | # # # # # # #                                                                                                                        | #   | #    | #        | #     | #    | #    |

|                          |                                                                                                                                                                                                                                                                                                                                                                                                                                                                                                                                                                                                                                                                                                                                                                                                                                                                                                                                                                                                                                                                            |     |      |           |       |      |      |                                        |       |                      |                                                                                                                                                                                                                                                              |     |      |           |       |      |      |
|--------------------------|----------------------------------------------------------------------------------------------------------------------------------------------------------------------------------------------------------------------------------------------------------------------------------------------------------------------------------------------------------------------------------------------------------------------------------------------------------------------------------------------------------------------------------------------------------------------------------------------------------------------------------------------------------------------------------------------------------------------------------------------------------------------------------------------------------------------------------------------------------------------------------------------------------------------------------------------------------------------------------------------------------------------------------------------------------------------------|-----|------|-----------|-------|------|------|----------------------------------------|-------|----------------------|--------------------------------------------------------------------------------------------------------------------------------------------------------------------------------------------------------------------------------------------------------------|-----|------|-----------|-------|------|------|
| Rsa1.0_00383.1.g12671.t1 | refNP_190548.1  Carbohydrate-binding protein [Arabidopsis thaliana]<br>gi 6723424 emb CAB66917.1  putative protein [Arabidopsis thaliana]<br>gi 44681372 gb AAS47626.1  At3g49790 [Arabidopsis thaliana]<br>gi 46931272 gb AAT06440.1  At3g49790 [Arabidopsis thaliana]<br>gi 110737624 dbj BAF00753.1  hypothetical protein [Arabidopsis thaliana]<br>gi 332645069 gb AEE78590.1  Carbohydrate-binding protein [Arabidopsis thaliana]<br>ref XP_002876001.1  hypothetical protein ARALYDRAFT_485345 [Arabidopsis lyrata subsp. lyrata]<br>gi 297321839 gb EFH52260.1  hypothetical protein ARALYDRAFT_485345 [Arabidopsis lyrata subsp. lyrata]                                                                                                                                                                                                                                                                                                                                                                                                                           | 357 | 366  | 1.00E-150 | 102.5 | 81.5 | 90.5 | Carbohydrate-binding protein           | gbpln | Arabidopsis thaliana | AT3G49790.1   Symbols:   Carbohydrate-binding protein   chr3:18468296-18469396 REVERSE LENGTH=366                                                                                                                                                            | 357 | 366  | 1.00E-153 | 102.5 | 81.5 | 90.5 |
| Rsa1.0_00383.1.g12672.t1 | ref XP_002876001.1  hypothetical protein ARALYDRAFT_485345 [Arabidopsis lyrata subsp. lyrata]<br>gi 297321839 gb EFH52260.1  hypothetical protein ARALYDRAFT_485345 [Arabidopsis lyrata subsp. lyrata]                                                                                                                                                                                                                                                                                                                                                                                                                                                                                                                                                                                                                                                                                                                                                                                                                                                                     | 228 | 286  | 1.00E-55  | 125.4 | 50.0 | 59.6 | hypothetical protein ARALYDRAFT_485345 | gbpln | Arabidopsis lyrata   | AT3G49850.1   Symbols: TRB3, ATTRB3, TBP2   telomere repeat binding factor 3   chr3:18489451-18490731 FORWARD LENGTH=295                                                                                                                                     | 228 | 295  | 1.00E-55  | 129.4 | 49.1 | 59.2 |
| Rsa1.0_00383.1.g12673.t1 | gb EOA24807.1  hypothetical protein CARUB.v10018087mg [Capsella rubella]                                                                                                                                                                                                                                                                                                                                                                                                                                                                                                                                                                                                                                                                                                                                                                                                                                                                                                                                                                                                   | 184 | 184  | 1.00E-101 | 100.0 | 98.4 | 98.4 | hypothetical protein CARUB.v10018087mg | gbpln | Capsella rubella     | AT3G49870.1   Symbols: ATARLA1C, ARLA1C   ADP-ribosylation factor-like A1C   chr3:18492674-18494021 REVERSE LENGTH=184                                                                                                                                       | 184 | 184  | 1.00E-102 | 100.0 | 97.8 | 97.8 |
| Rsa1.0_00383.1.g12674.t1 | gb AAM65029.1  unknown [Arabidopsis thaliana]                                                                                                                                                                                                                                                                                                                                                                                                                                                                                                                                                                                                                                                                                                                                                                                                                                                                                                                                                                                                                              | 224 | 220  | 3.00E-84  | 98.2  | 71.4 | 81.3 | unknown                                | gbpln | Arabidopsis thaliana | AT3G49890.1   Symbols:   unknown protein; Has 27 Blast hits to 27 proteins in 13 species: Archae - 0; Bacteria - 0; Metazoa - 3; Fungi - 0; Plants - 21; Viruses - 0; Other Eukaryotes - 3 (source: NCBI BLINK).   chr3:18499296-18500501 FORWARD LENGTH=220 | 224 | 220  | 1.00E-86  | 98.2  | 71.9 | 80.8 |
| Rsa1.0_00383.1.g12675.t1 | refNP_190560.1  60S ribosomal protein L26-1 [Arabidopsis thaliana]<br>gi 297816242 ref XP_002876004.1  60S ribosomal protein L26 [Arabidopsis lyrata subsp. lyrata]<br>gi 27735242 sp P51414.2 RL261_ARATH RecName: Full=60S ribosomal protein L26-1<br>gi 13877791 gb AAK43973.1 AF370158.1 putative 60S ribosomal protein [Arabidopsis thaliana]<br>gi 6723436 emb CAB66929.1  60S RIBOSOMAL PROTEIN-like [Arabidopsis thaliana]<br>gi 16323426 gb AAL15207.1  putative 60S ribosomal protein [Arabidopsis thaliana]<br>gi 23397064 gb AAN31827.1  putative 60S ribosomal protein [Arabidopsis thaliana]<br>gi 297321842 gb EFH52263.1  60S ribosomal protein L26 [Arabidopsis lyrata subsp. lyrata]<br>gi 332645084 gb AEE78605.1  60S ribosomal protein L26-1 [Arabidopsis thaliana]<br>ref XP_002877711.1  hypothetical protein ARALYDRAFT_323570 [Arabidopsis lyrata subsp. lyrata]<br>gi 297323549 gb EFH53970.1  hypothetical protein ARALYDRAFT_323570 [Arabidopsis lyrata subsp. lyrata]<br>gb AAG50701.1 AC079604.8 hypothetical protein [Arabidopsis thaliana] | 146 | 146  | 2.00E-76  | 100.0 | 97.3 | 99.3 | 60S ribosomal protein L26-1            | gbpln | Arabidopsis lyrata   | AT3G49910.1   Symbols:   Translation protein SH3-like family protein   chr3:18504311-18504751 FORWARD LENGTH=146                                                                                                                                             | 146 | 146  | 6.00E-79  | 100.0 | 97.3 | 99.3 |
| Rsa1.0_00383.1.g12676.t1 | ref XP_002877711.1  hypothetical protein ARALYDRAFT_323570 [Arabidopsis lyrata subsp. lyrata]<br>gi 297323549 gb EFH53970.1  hypothetical protein ARALYDRAFT_323570 [Arabidopsis lyrata subsp. lyrata]<br>gb AAG50701.1 AC079604.8 hypothetical protein [Arabidopsis thaliana]                                                                                                                                                                                                                                                                                                                                                                                                                                                                                                                                                                                                                                                                                                                                                                                             | 140 | 276  | 6.00E-32  | 197.1 | 45.7 | 50.0 | hypothetical protein ARALYDRAFT_323570 | gbpln | Arabidopsis lyrata   | AT5G67500.1   Symbols: VDAC2, ATVDAC2   voltage dependent anion channel 2   chr5:26935223-26937123 FORWARD LENGTH=276                                                                                                                                        | 140 | 276  | 1.00E-32  | 197.1 | 44.3 | 47.9 |
| Rsa1.0_00383.1.g12677.t1 | ref XP_002877711.1  hypothetical protein ARALYDRAFT_323570 [Arabidopsis lyrata subsp. lyrata]<br>gi 297323549 gb EFH53970.1  hypothetical protein ARALYDRAFT_323570 [Arabidopsis lyrata subsp. lyrata]<br>gb AAM19784.1  AT5g42080/MJC20_19 [Arabidopsis thaliana]<br>gi 24111387 gb AAN46817.1  At5g42080/MJC20_19 [Arabidopsis thaliana]                                                                                                                                                                                                                                                                                                                                                                                                                                                                                                                                                                                                                                                                                                                                 | 391 | 1453 | 9.00E-71  | 371.6 | 38.9 | 42.7 | hypothetical protein                   | gbpln | Arabidopsis thaliana | AT1G58060.1   Symbols:   RNA helicase family protein   chr1:21489480-21501775 REVERSE LENGTH=1459                                                                                                                                                            | 391 | 1459 | 2.00E-73  | 373.1 | 38.9 | 42.7 |
| Rsa1.0_00383.1.g12678.t3 | ref XP_002877711.1  hypothetical protein ARALYDRAFT_323570 [Arabidopsis lyrata subsp. lyrata]<br>gi 297323549 gb EFH53970.1  hypothetical protein ARALYDRAFT_323570 [Arabidopsis lyrata subsp. lyrata]<br>gb AAM19784.1  AT5g42080/MJC20_19 [Arabidopsis thaliana]<br>gi 24111387 gb AAN46817.1  At5g42080/MJC20_19 [Arabidopsis thaliana]                                                                                                                                                                                                                                                                                                                                                                                                                                                                                                                                                                                                                                                                                                                                 | 144 | 276  | 7.00E-46  | 191.7 | 61.1 | 69.4 | hypothetical protein ARALYDRAFT_323570 | gbpln | Arabidopsis lyrata   | AT5G67500.1   Symbols: VDAC2, ATVDAC2   voltage dependent anion channel 2   chr5:26935223-26937123 FORWARD LENGTH=276                                                                                                                                        | 144 | 276  | 5.00E-46  | 191.7 | 59.0 | 68.1 |
| Rsa1.0_00383.1.g12679.t1 | gb AAM19784.1  AT5g42080/MJC20_19 [Arabidopsis thaliana]<br>gi 24111387 gb AAN46817.1  At5g42080/MJC20_19 [Arabidopsis thaliana]                                                                                                                                                                                                                                                                                                                                                                                                                                                                                                                                                                                                                                                                                                                                                                                                                                                                                                                                           | 85  | 610  | 1.00E-14  | 717.6 | 48.2 | 49.4 | AT5g42080/MJC20_19                     | gbpln | Arabidopsis thaliana | AT5G42080.3   Symbols: DL1   dynamin-like protein   chr5:16820661-16824536 REVERSE LENGTH=604                                                                                                                                                                | 85  | 604  | 2.00E-17  | 710.6 | 48.2 | 49.4 |
| Rsa1.0_00383.1.g12680.t1 | #                                                                                                                                                                                                                                                                                                                                                                                                                                                                                                                                                                                                                                                                                                                                                                                                                                                                                                                                                                                                                                                                          | #   | #    | #         | #     | #    | #    | -                                      | ----  | ----                 | #                                                                                                                                                                                                                                                            | #   | #    | #         | #     | #    | #    |

|                          |                                                                                                                                                                                                                                                                                                                                                                                                                                                                                                                                                                                                                                 |     |      |           |       |      |      |                                                     |       |                      |                                                                                                                                                                                                                                                                                                                            |     |     |           |       |      |      |
|--------------------------|---------------------------------------------------------------------------------------------------------------------------------------------------------------------------------------------------------------------------------------------------------------------------------------------------------------------------------------------------------------------------------------------------------------------------------------------------------------------------------------------------------------------------------------------------------------------------------------------------------------------------------|-----|------|-----------|-------|------|------|-----------------------------------------------------|-------|----------------------|----------------------------------------------------------------------------------------------------------------------------------------------------------------------------------------------------------------------------------------------------------------------------------------------------------------------------|-----|-----|-----------|-------|------|------|
| Rsa1.0_00383.1.g12681.t1 | gb EOA24663.1  hypothetical protein CARUB_v10017944mg [Capsella rubella]                                                                                                                                                                                                                                                                                                                                                                                                                                                                                                                                                        | 238 | 240  | 1.00E-102 | 100.8 | 81.9 | 87.8 | hypothetical protein CARUB_v10017944mg              | gbpln | Capsella rubella     | AT3G49940.1   Symbols: LBD38   LOB domain-containing protein 38   chr3:18514465-18515302 FORWARD LENGTH=247                                                                                                                                                                                                                | 238 | 247 | 4.00E-98  | 103.8 | 80.7 | 87.8 |
| Rsa1.0_00383.1.g12682.t1 | gb ABL97967.1  R2R3-MYB transcription factor [Brassica rapa]                                                                                                                                                                                                                                                                                                                                                                                                                                                                                                                                                                    | 345 | 266  | 2.00E-87  | 77.1  | 54.2 | 62.0 | R2R3-MYB transcription factor                       | gbpln | Brassica rapa        | AT3G50060.1   Symbols: MYB77   myb domain protein 77   chr3:18558146-18559051 REVERSE LENGTH=301                                                                                                                                                                                                                           | 345 | 301 | 6.00E-89  | 87.2  | 57.1 | 64.1 |
| Rsa1.0_00383.1.g12683.t1 | #                                                                                                                                                                                                                                                                                                                                                                                                                                                                                                                                                                                                                               | #   | #    | #         | #     | #    | #    | -                                                   | ----  | ----                 | #                                                                                                                                                                                                                                                                                                                          | #   | #   | #         | #     | #    | #    |
| Rsa1.0_00383.1.g12684.t1 | #                                                                                                                                                                                                                                                                                                                                                                                                                                                                                                                                                                                                                               | #   | #    | #         | #     | #    | #    | -                                                   | ----  | ----                 | #                                                                                                                                                                                                                                                                                                                          | #   | #   | #         | #     | #    | #    |
| Rsa1.0_00383.1.g12685.t1 | gb AAG09097.1 AC009323.8 Putative retroelement polyprotein [Arabidopsis thaliana]                                                                                                                                                                                                                                                                                                                                                                                                                                                                                                                                               | 432 | 1486 | 1.00E-106 | 344.0 | 47.2 | 65.3 | Putative retroelement polyprotein                   | gbpln | Arabidopsis thaliana | AT1G21280.1   Symbols:   CONTAINS InterPro DOMAIN/s: Retrotransposon gag protein (InterPro:IPR005162); Has 707 Blast hits to 705 proteins in 25 species: Archae - 0; Bacteria - 0; Metazoa - 4; Fungi - 0; Plants - 703; Viruses - 0; Other Eukaryotes - 0 (source: NCBI BLINK).   chr1:7447690-7448403 REVERSE LENGTH=237 | 432 | 237 | 2.00E-28  | 54.9  | 16.9 | 27.8 |
| Rsa1.0_00383.1.g12686.t1 | ref NP_190576.1  cyclin-D3-3 [Arabidopsis thaliana] gi 75313638 sp Q9SN11.1 CCD33_ARAT H RecName: Full=Cyclin-D3-3; AltName: Full=G1/S-specific cyclin-D3-3; Short=CycD3.3 gi 6522928 emb CAB62115.1  cyclin D3-like protein [Arabidopsis thaliana] gi 15450595 gb AAK96569.1  AT3g50070/F3A4_150 [Arabidopsis thaliana] gi 17380632 gb AAL36079.1  AT3g50070/F3A4_150 [Arabidopsis thaliana] gi 21593092 gb AAM65041.1  cyclin D3-like protein [Arabidopsis thaliana] gi 332645102 gb AEE78623.1  cyclin-D3-3 [Arabidopsis thaliana] gb AAB82639.1  putative non-LTR retroelement reverse transcriptase [Arabidopsis thaliana] | 344 | 361  | 1.00E-129 | 104.9 | 74.1 | 82.0 | cyclin-D3-3                                         | gbpln | Arabidopsis thaliana | AT3G50070.1   Symbols: CYCD3.3   CYCLIN D3.3   chr3:18565322-18566669 REVERSE LENGTH=361                                                                                                                                                                                                                                   | 344 | 361 | 1.00E-132 | 104.9 | 74.1 | 82.0 |
| Rsa1.0_00383.1.g12687.t1 | ref XP_002877728.1  hypothetical protein ARALYDRAFT_485369 [Arabidopsis lyrata subsp. lyrata] gi 297323566 gb EFH53987.1  hypothetical protein ARALYDRAFT_485369 [Arabidopsis lyrata subsp. lyrata]                                                                                                                                                                                                                                                                                                                                                                                                                             | 761 | 1374 | 0         | 180.6 | 54.0 | 72.0 | putative non-LTR retroelement reverse transcriptase | gbpln | Arabidopsis thaliana | AT4G29090.1   Symbols:   Ribonuclease H-like superfamily protein   chr4:14333528-14335255 FORWARD LENGTH=575                                                                                                                                                                                                               | 761 | 575 | 1.00E-173 | 75.6  | 37.3 | 52.8 |
| Rsa1.0_00383.1.g12688.t1 | ref XP_002877728.1  hypothetical protein ARALYDRAFT_485369 [Arabidopsis lyrata subsp. lyrata] gi 297323566 gb EFH53987.1  hypothetical protein ARALYDRAFT_485369 [Arabidopsis lyrata subsp. lyrata]                                                                                                                                                                                                                                                                                                                                                                                                                             | 610 | 633  | 0         | 103.8 | 84.4 | 89.2 | hypothetical protein ARALYDRAFT_485369              | gbpln | Arabidopsis lyrata   | AT3G50110.1   Symbols: ATPEN3, PEN3   PTEN 3   chr3:18580777-18583929 REVERSE LENGTH=632                                                                                                                                                                                                                                   | 610 | 632 | 0         | 103.6 | 83.4 | 88.7 |
| Rsa1.0_00383.1.g12689.t1 | gb EOA25901.1  hypothetical protein CARUB_v10019280mg [Capsella rubella]                                                                                                                                                                                                                                                                                                                                                                                                                                                                                                                                                        | 59  | 254  | 5.00E-19  | 430.5 | 78.0 | 83.1 | hypothetical protein CARUB_v10019280mg              | gbpln | Capsella rubella     | AT3G50410.1   Symbols: OBP1   OBF binding protein 1   chr3:18709872-18710633 FORWARD LENGTH=253                                                                                                                                                                                                                            | 59  | 253 | 9.00E-21  | 428.8 | 76.3 | 79.7 |
| Rsa1.0_00383.1.g12690.t1 | ref NP_190611.1  pentatricopeptide repeat-containing protein [Arabidopsis thaliana] gi 75202753 sp Q9SCT2.1 PP277_ARAT H RecName: Full=Pentatricopeptide repeat-containing protein At3g50420 gi 6561982 emb CAB62471.1  putative protein [Arabidopsis thaliana] gi 332645144 gb AEE78665.1  pentatricopeptide repeat-containing protein [Arabidopsis thaliana]                                                                                                                                                                                                                                                                  | 713 | 794  | 0         | 111.4 | 80.5 | 87.8 | pentatricopeptide repeat-containing protein         | gbpln | Arabidopsis thaliana | AT3G50420.1   Symbols:   Pentatricopeptide repeat (PPR) superfamily protein   chr3:18710871-18713649 REVERSE LENGTH=794                                                                                                                                                                                                    | 713 | 794 | 0         | 111.4 | 80.5 | 87.8 |
| Rsa1.0_00383.1.g12691.t1 | #                                                                                                                                                                                                                                                                                                                                                                                                                                                                                                                                                                                                                               | #   | #    | #         | #     | #    | #    | -                                                   | ----  | ----                 | #                                                                                                                                                                                                                                                                                                                          | #   | #   | #         | #     | #    | #    |
| Rsa1.0_00383.1.g12692.t1 | gb EOA24580.1  hypothetical protein CARUB_v10017842mg [Capsella rubella]                                                                                                                                                                                                                                                                                                                                                                                                                                                                                                                                                        | 262 | 266  | 1.00E-128 | 101.5 | 82.8 | 91.6 | hypothetical protein CARUB_v10017842mg              | gbpln | Capsella rubella     | AT3G50440.1   Symbols: ATMES10, MES10   methyl esterase 10   chr3:18717392-18718435 REVERSE LENGTH=288                                                                                                                                                                                                                     | 262 | 288 | 1.00E-127 | 109.9 | 80.5 | 88.9 |
| Rsa1.0_00383.1.g12693.t1 | ref NP_001190047.1  serine/threonine-protein kinase SRK2D [Arabidopsis thaliana] gi 332645152 gb AEE78673.1  serine/threonine-protein kinase SRK2D [Arabidopsis thaliana]                                                                                                                                                                                                                                                                                                                                                                                                                                                       | 80  | 369  | 6.00E-22  | 461.3 | 85.0 | 85.0 | serine/threonine-protein kinase SRK2D               | gbpln | Arabidopsis thaliana | AT3G50500.2   Symbols: SNRK2.2   SNF1-related protein kinase 2.2   chr3:18741805-18743904 REVERSE LENGTH=369                                                                                                                                                                                                               | 80  | 369 | 1.00E-24  | 461.3 | 85.0 | 85.0 |
| Rsa1.0_00383.1.g12694.t1 | #                                                                                                                                                                                                                                                                                                                                                                                                                                                                                                                                                                                                                               | #   | #    | #         | #     | #    | #    | -                                                   | ----  | ----                 | #                                                                                                                                                                                                                                                                                                                          | #   | #   | #         | #     | #    | #    |
| Rsa1.0_00383.1.g12695.t1 | ref XP_002876034.1  hypothetical protein ARALYDRAFT_485398 [Arabidopsis lyrata subsp. lyrata] gi 37359455 gb AAP45325.1  HR3 [Arabidopsis lyrata] gi 297321872 gb EFH52293.1  hypothetical protein ARALYDRAFT_485398 [Arabidopsis lyrata subsp. lyrata]                                                                                                                                                                                                                                                                                                                                                                         | 213 | 213  | 2.00E-79  | 100.0 | 71.8 | 80.8 | hypothetical protein ARALYDRAFT_485398              | gbpln | Arabidopsis lyrata   | AT3G50470.1   Symbols: HR3, MLA10   homolog of RPW8 3   chr3:18729146-18730162 FORWARD LENGTH=213                                                                                                                                                                                                                          | 213 | 213 | 4.00E-74  | 100.0 | 70.9 | 79.8 |

|                          |                                                                                                                                                                                                                                                                                                                                                                                                                                                                                       |     |     |           |       |      |      |                                                 |       |                      |                                                                                                                                           |     |     |           |       |      |      |
|--------------------------|---------------------------------------------------------------------------------------------------------------------------------------------------------------------------------------------------------------------------------------------------------------------------------------------------------------------------------------------------------------------------------------------------------------------------------------------------------------------------------------|-----|-----|-----------|-------|------|------|-------------------------------------------------|-------|----------------------|-------------------------------------------------------------------------------------------------------------------------------------------|-----|-----|-----------|-------|------|------|
| Rsa1.0_00383.1.g12696.t1 | ref NP_190616.1  RPW8-like protein 3 [Arabidopsis thaliana]<br>gi 12958164 gb AAK0268.1 AF273059_3 HR3 [Arabidopsis thaliana]<br>gi 6561987 emb CAB62476.1  hypothetical protein [Arabidopsis thaliana] gi 51969642 dbj BAD43513.1  hypothetical protein [Arabidopsis thaliana] gi 332645149 gb AEE78670.1  RPW8-like protein 3 [Arabidopsis thaliana]                                                                                                                                | 133 | 213 | 3.00E-31  | 160.2 | 60.2 | 69.2 | RPW8-like protein 3                             | gbpln | Arabidopsis thaliana | AT3G50470.1   Symbols: HR3, MLA10   homolog of RPW8 3   chr3:18729146-18730162 FORWARD LENGTH=213                                         | 133 | 213 | 6.00E-34  | 160.2 | 60.2 | 69.2 |
| Rsa1.0_00383.1.g12697.t1 | ref XP_002885880.1  hypothetical protein ARALYDRAFT_899583 [Arabidopsis lyrata subsp. lyrata] gi 297331720 gb EFH62139.1  hypothetical protein ARALYDRAFT_899583 [Arabidopsis lyrata subsp. lyrata]                                                                                                                                                                                                                                                                                   | 203 | 183 | 2.00E-17  | 90.1  | 28.6 | 46.8 | hypothetical protein ARALYDRAFT_899583          | gbpln | Arabidopsis lyrata   | AT5G33330.1   Symbols:   Polynucleotidyl transferase, ribonuclease H-like superfamily protein   chr5:12591754-12592896 REVERSE LENGTH=183 | 203 | 183 | 3.00E-18  | 90.1  | 26.1 | 38.9 |
| Rsa1.0_00384.1.g12698.t1 | gb EOA29555.1  hypothetical protein CARUB_v10015898mg [Capsella rubella]                                                                                                                                                                                                                                                                                                                                                                                                              | 181 | 163 | 3.00E-75  | 90.1  | 80.7 | 87.8 | hypothetical protein CARUB_v10015898mg          | gbpln | Capsella rubella     | AT3G11090.1   Symbols: LBD21   LOB domain-containing protein 21   chr3:3475036-3475533 FORWARD LENGTH=165                                 | 181 | 165 | 1.00E-76  | 91.2  | 82.3 | 87.8 |
| Rsa1.0_00384.1.g12699.t1 | ref NP_187718.1  outer membrane OMP85-like protein [Arabidopsis thaliana]<br>gi 6016688 gb AAF01515.1 AC009991_11 unknown protein [Arabidopsis thaliana]<br>gi 12321882 gb AAG50978.1 AC073395_20 unknown protein: 4967-6981 [Arabidopsis thaliana]<br>gi 20466221 gb AAM20428.1  unknown protein [Arabidopsis thaliana]<br>gi 25084079 gb AAN72169.1  unknown protein [Arabidopsis thaliana]<br>gi 332641478 gb AEE74999.1  outer membrane OMP85-like protein [Arabidopsis thaliana] | 494 | 520 | 0         | 105.3 | 78.5 | 87.9 | outer membrane OMP85-like protein               | gbpln | Arabidopsis thaliana | AT3G11070.1   Symbols:   Outer membrane OMP85 family protein   chr3:3467801-3469815 FORWARD LENGTH=520                                    | 494 | 520 | 0         | 105.3 | 78.5 | 87.9 |
| Rsa1.0_00384.1.g12700.t1 | ref XP_002882712.1  hypothetical protein ARALYDRAFT_317904 [Arabidopsis lyrata subsp. lyrata] gi 297328552 gb EFH58971.1  hypothetical protein ARALYDRAFT_317904 [Arabidopsis lyrata subsp. lyrata]                                                                                                                                                                                                                                                                                   | 120 | 355 | 1.00E-35  | 295.8 | 64.2 | 75.0 | hypothetical protein ARALYDRAFT_317904          | gbpln | Arabidopsis lyrata   | AT2G24645.1   Symbols:   Transcriptional factor B3 family protein   chr2:10480728-10482650 REVERSE LENGTH=490                             | 120 | 490 | 1.00E-19  | 408.3 | 45.0 | 60.0 |
| Rsa1.0_00384.1.g12701.t2 | ref XP_002882711.1  ATFER2 [Arabidopsis lyrata subsp. lyrata] gi 297328551 gb EFH58970.1  ATFER2 [Arabidopsis lyrata subsp. lyrata]                                                                                                                                                                                                                                                                                                                                                   | 254 | 250 | 1.00E-119 | 98.4  | 85.0 | 92.5 | ATFER2                                          | gbpln | Arabidopsis lyrata   | AT3G11050.1   Symbols: ATFER2, FER2   ferritin 2   chr3:3463651-3465294 FORWARD LENGTH=253                                                | 254 | 253 | 1.00E-121 | 99.6  | 85.8 | 92.9 |
| Rsa1.0_00384.1.g12702.t1 | ref NP_187714.1  protein trichome birefringence-like 32 [Arabidopsis thaliana]<br>gi 6016691 gb AAF01518.1 AC009991_14 unknown protein [Arabidopsis thaliana]<br>gi 27754560 gb AAO22727.1  unknown protein [Arabidopsis thaliana]<br>gi 28394093 gb AAO42454.1  unknown protein [Arabidopsis thaliana]<br>gi 332641474 gb AEE74995.1  protein trichome birefringence-like 32 [Arabidopsis thaliana]                                                                                  | 443 | 451 | 0         | 101.8 | 88.5 | 93.2 | protein trichome birefringence-like 32          | gbpln | Arabidopsis thaliana | AT3G11030.1   Symbols: TBL32   TRICHOME BIREFRINGENCE-LIKE 32   chr3:3457300-3459300 REVERSE LENGTH=451                                   | 443 | 451 | 0         | 101.8 | 88.5 | 93.2 |
| Rsa1.0_00384.1.g12703.t1 | gb ABV08790.1  DREB2B [Eutrema halophilum]                                                                                                                                                                                                                                                                                                                                                                                                                                            | 309 | 316 | 6.00E-96  | 102.3 | 66.3 | 78.3 | DREB2B                                          | gbpln | Eutrema halophilum   | AT3G11020.1   Symbols: DREB2B, DREB2   DRE/CRT-binding protein 2B   chr3:3456009-3457001 FORWARD LENGTH=330                               | 309 | 330 | 9.00E-83  | 106.8 | 61.8 | 73.8 |
| Rsa1.0_00384.1.g12704.t1 | gb EOA29651.1  hypothetical protein CARUB_v10015153mg [Capsella rubella]                                                                                                                                                                                                                                                                                                                                                                                                              | 466 | 478 | 1.00E-139 | 102.6 | 61.2 | 71.0 | hypothetical protein CARUB_v10015153mg          | gbpln | Capsella rubella     | AT3G11000.1   Symbols:   DCD (Development and Cell Death) domain protein   chr3:3448442-3450283 FORWARD LENGTH=488                        | 466 | 488 | 1.00E-138 | 104.7 | 60.7 | 71.9 |
| Rsa1.0_00384.1.g12705.t1 | gb EOA32919.1  hypothetical protein CARUB_v10016246mg, partial [Capsella rubella]                                                                                                                                                                                                                                                                                                                                                                                                     | 201 | 161 | 5.00E-73  | 80.1  | 67.2 | 73.1 | hypothetical protein CARUB_v10016246mg, partial | gbpln | Capsella rubella     | AT3G10985.1   Symbols: SAG20, WI12, ATW-12   senescence associated gene 20   chr3:3442776-3443108 FORWARD LENGTH=110                      | 201 | 110 | 1.00E-40  | 54.7  | 43.3 | 46.8 |
| Rsa1.0_00384.1.g12706.t1 | dbj BAJ34145.1  unnamed protein product [Thellungiella halophila]                                                                                                                                                                                                                                                                                                                                                                                                                     | 537 | 554 | 0         | 103.2 | 83.6 | 91.2 | unnamed protein product                         | ----  | ----                 | AT3G10980.1   Symbols:   PLAC8 family protein   chr3:3438810-3440501 FORWARD LENGTH=563                                                   | 537 | 563 | 0         | 104.8 | 79.3 | 86.6 |

|                          |                                                                                                                                                                                                                                                                                                                                                                                                                                                                                                                                                                                                |     |     |           |       |      |      |                                             |       |                      |                                                                                                                                                                                                                                                                                                                                                                                                                                                                  |     |     |           |       |      |      |
|--------------------------|------------------------------------------------------------------------------------------------------------------------------------------------------------------------------------------------------------------------------------------------------------------------------------------------------------------------------------------------------------------------------------------------------------------------------------------------------------------------------------------------------------------------------------------------------------------------------------------------|-----|-----|-----------|-------|------|------|---------------------------------------------|-------|----------------------|------------------------------------------------------------------------------------------------------------------------------------------------------------------------------------------------------------------------------------------------------------------------------------------------------------------------------------------------------------------------------------------------------------------------------------------------------------------|-----|-----|-----------|-------|------|------|
| Rsa1.0_00384.1.g12707.t1 | refNP_566385.1  haloacid dehalogenase-like hydrolase [Arabidopsis thaliana] gi 332641462 gb AAE74983.1  haloacid dehalogenase-like hydrolase [Arabidopsis thaliana] refNP_566384.1  adenine/guanine permease AZG1 [Arabidopsis thaliana] gi 75207346 sp Q9SRK7.1 AZG1_ARATH RecName: Full=Adenine/guanine permease AZG1; AltName: Full=AzG1-homolog protein; AltName: Full=Protein AZAGUANINE RESISTANT 1; Short=AtAZg1                                                                                                                                                                        | 368 | 365 | 0         | 99.2  | 90.8 | 93.8 | haloacid dehalogenase-like hydrolase        | gbpln | Arabidopsis thaliana | AT3G10970.1   Symbols:   Haloacid dehalogenase-like hydrolase (HAD) superfamily protein   chr3:3433276-3436077 REVERSE LENGTH=365                                                                                                                                                                                                                                                                                                                                | 368 | 365 | 0         | 99.2  | 90.8 | 93.8 |
| Rsa1.0_00384.1.g12708.t1 | gi 6016698 gb AAF01525.1 AC009991_21 hypothetical protein [Arabidopsis thaliana] gi 20260452 gb AAM13124.1  unknown protein [Arabidopsis thaliana] gi 34365735 gb AAQ65179.1  At3g10960 [Arabidopsis thaliana] gi 332641461 gb AAE74982.1  adenine/guanine permease AZG1 [Arabidopsis thaliana] refNP_566383.1  dual-specificity protein-like phosphatase 3 [Arabidopsis thaliana] gi 75266227 sp Q9SRK5.1 LSF2_ARATH RecName: Full=Phosphoglucan phosphatase LSF2, chloroplastic; AltName: Full=Phosphoglucan phosphatase like sex Four2; AltName: Full=Protein LIKE SEX4 2; Flags: Precursor | 598 | 579 | 0         | 96.8  | 88.3 | 93.0 | adenine/guanine permease AZG1               | gbpln | Arabidopsis thaliana | AT3G10960.1   Symbols: ATAZG1, AZG1   AZA-guanine resistant1   chr3:3424986-3426725 REVERSE LENGTH=579                                                                                                                                                                                                                                                                                                                                                           | 598 | 579 | 0         | 96.8  | 88.3 | 93.0 |
| Rsa1.0_00384.1.g12709.t1 | gi 6016700 gb AAF01527.1 AC009991_23 unknown protein [Arabidopsis thaliana] gi 87116654 gb ABD19691.1  At3g10940 [Arabidopsis thaliana] gi 110740568 dbj BAE98389.1  hypothetical protein [Arabidopsis thaliana] gi 332641459 gb AAE74980.1  phosphoglucan phosphatase LSF2 [Arabidopsis thaliana]                                                                                                                                                                                                                                                                                             | 278 | 282 | 1.00E-139 | 101.4 | 88.8 | 92.8 | dual-specificity protein-like phosphatase 3 | gbpln | Arabidopsis thaliana | AT3G10940.1   Symbols:   dual specificity protein phosphatase (DsPTP) family protein   chr3:3422259-3423394 REVERSE LENGTH=282                                                                                                                                                                                                                                                                                                                                   | 278 | 282 | 1.00E-142 | 101.4 | 88.8 | 92.8 |
| Rsa1.0_00384.1.g12710.t1 | gb AAF01528.1 AC009991_24 hypothetical protein [Arabidopsis thaliana] gi 21618249 gb AAM67299.1  unknown [Arabidopsis thaliana]                                                                                                                                                                                                                                                                                                                                                                                                                                                                | 102 | 97  | 6.00E-26  | 95.1  | 72.5 | 79.4 | hypothetical protein                        | gbpln | Arabidopsis thaliana | AT5G05300.1   Symbols:   unknown protein; FUNCTIONS IN: molecular_function unknown; INVOLVED IN: biological_process unknown; LOCATED IN: endomembrane system; EXPRESSED IN: 10 plant structures; EXPRESSED DURING: 8 growth stages; Has 1807 Blast hits to 1807 proteins in 277 species: Archae - 0; Bacteria - 0; Metazoa - 736; Fungi - 347; Plants - 385; Viruses - 0; Other Eukaryotes - 339 (source: NCBI BLINK).   chr5:1570102-1570410 REVERSE LENGTH=102 | 102 | 102 | 2.00E-16  | 100.0 | 51.0 | 60.8 |
| Rsa1.0_00384.1.g12711.t1 | gb ABQ81865.1  Mn superoxide dismutase [Eutrema halophilum]                                                                                                                                                                                                                                                                                                                                                                                                                                                                                                                                    | 230 | 231 | 1.00E-127 | 100.4 | 95.7 | 97.8 | Mn superoxide dismutase                     | gbpln | Eutrema halophilum   | AT3G10920.1   Symbols: MSD1, MEE33, ATMSD1   manganese superoxide dismutase 1   chr3:3418015-3419581 FORWARD LENGTH=231                                                                                                                                                                                                                                                                                                                                          | 230 | 231 | 1.00E-123 | 100.4 | 91.7 | 95.2 |
| Rsa1.0_00384.1.g12712.t1 | refNP_974275.1  reticulon-like protein B16 [Arabidopsis thaliana] gi 75151434 sp Q8GYH6.1 RTNLP_ARATH RecName: Full=Reticulon-like protein B16; Short=ATRNLB16 gi 26450318 dbj BAC42275.1  unknown protein [Arabidopsis thaliana] gi 28827594 gb AAO50641.1  unknown protein [Arabidopsis thaliana] gi 332641451 gb AAE74972.1  reticulon-like protein B16 [Arabidopsis thaliana]                                                                                                                                                                                                              | 232 | 226 | 1.00E-110 | 97.4  | 86.2 | 92.7 | reticulon-like protein B16                  | gbpln | Arabidopsis thaliana | AT3G10915.2   Symbols:   Reticulon family protein   chr3:3416101-3417497 REVERSE LENGTH=226                                                                                                                                                                                                                                                                                                                                                                      | 232 | 226 | 1.00E-112 | 97.4  | 86.2 | 92.7 |
| Rsa1.0_00384.1.g12713.t1 | refXP_002882702.1  hypothetical protein ARALYDRAFT_341221 [Arabidopsis lyrata subsp. lyrata] gi 297328542 gb EFH58961.1  hypothetical protein ARALYDRAFT_341221 [Arabidopsis lyrata subsp. lyrata]                                                                                                                                                                                                                                                                                                                                                                                             | 346 | 338 | 1.00E-75  | 97.7  | 52.6 | 62.1 | hypothetical protein ARALYDRAFT_341221      | gbpln | Arabidopsis lyrata   | AT3G10880.1   Symbols:   unknown protein; BEST Arabidopsis thaliana protein match is: unknown protein (TAIR:AT5G05180.1); Has 15699 Blast hits to 11378 proteins in 1134 species: Archae - 391; Bacteria - 2054; Metazoa - 6851; Fungi - 1354; Plants - 1096; Viruses - 119; Other Eukaryotes - 3834 (source: NCBI BLINK).   chr3:3406092-3407131 FORWARD LENGTH=319                                                                                             | 346 | 319 | 3.00E-77  | 92.2  | 53.2 | 62.4 |
| Rsa1.0_00384.1.g12714.t1 | #                                                                                                                                                                                                                                                                                                                                                                                                                                                                                                                                                                                              | #   | #   | #         | #     | #    | -    | ----                                        | ----  | ----                 | #                                                                                                                                                                                                                                                                                                                                                                                                                                                                | #   | #   | #         | #     | #    |      |



|                          |                                                                                                                                                                                                                                                                                                                               |     |     |           |       |      |      |                                                 |       |                      |                                                                                                                                                                                                                                                                                                                                                                    |     |     |           |       |      |      |
|--------------------------|-------------------------------------------------------------------------------------------------------------------------------------------------------------------------------------------------------------------------------------------------------------------------------------------------------------------------------|-----|-----|-----------|-------|------|------|-------------------------------------------------|-------|----------------------|--------------------------------------------------------------------------------------------------------------------------------------------------------------------------------------------------------------------------------------------------------------------------------------------------------------------------------------------------------------------|-----|-----|-----------|-------|------|------|
| Rsa1.0_00384.1.g12715.t6 | refXP_002884817.1   hypothetical protein ARALYDRAFT_478421 [Arabidopsis lyrata subsp. lyrata] gi 297330657 gb EFH61076.1   hypothetical protein ARALYDRAFT_478421 [Arabidopsis lyrata subsp. lyrata]                                                                                                                          | 299 | 275 | 1.00E-127 | 92.0  | 75.9 | 83.6 | hypothetical protein ARALYDRAFT_478421          | gbpln | Arabidopsis lyrata   | AT3G10870.1   Symbols: MES17, ATMES17   methyl esterase 17   chr3:3401228-3402612 REVERSE LENGTH=276                                                                                                                                                                                                                                                               | 299 | 276 | 1.00E-127 | 92.3  | 75.3 | 83.6 |
| Rsa1.0_00384.1.g12716.t2 | gb EOA31272.1   hypothetical protein CARUB_v10014444mg [Capsella rubella]                                                                                                                                                                                                                                                     | 359 | 258 | 1.00E-140 | 71.9  | 65.2 | 69.4 | hypothetical protein CARUB_v10014444mg          | gbpln | Capsella rubella     | AT3G10850.1   Symbols: GLX2-2, GLY2   Metallo-hydrolase/oxidoreductase superfamily protein   chr3:3397756-3399522 REVERSE LENGTH=258                                                                                                                                                                                                                               | 359 | 258 | 1.00E-142 | 71.9  | 65.2 | 69.4 |
| Rsa1.0_00384.1.g12717.t3 | gb EOA31449.1   hypothetical protein CARUB_v10014632mg [Capsella rubella]                                                                                                                                                                                                                                                     | 198 | 209 | 4.00E-81  | 105.6 | 79.3 | 85.9 | hypothetical protein CARUB_v10014632mg          | gbpln | Capsella rubella     | AT3G10815.1   Symbols:   RING/U-box superfamily protein   chr3:3385009-3385608 REVERSE LENGTH=199                                                                                                                                                                                                                                                                  | 198 | 199 | 5.00E-76  | 100.5 | 74.2 | 82.3 |
| Rsa1.0_00384.1.g12718.t1 | refXP_002882696.1   predicted protein [Arabidopsis lyrata subsp. lyrata] gi 297328536 gb EFH58955.1   predicted protein [Arabidopsis lyrata subsp. lyrata]                                                                                                                                                                    | 282 | 227 | 4.00E-67  | 80.5  | 43.3 | 52.8 | predicted protein                               | gbpln | Arabidopsis lyrata   | AT3G10780.1   Symbols:   emp24/gp25L/p24 family/GOLD family protein   chr3:3375161-3376334 FORWARD LENGTH=217                                                                                                                                                                                                                                                      | 282 | 217 | 3.00E-67  | 77.0  | 42.2 | 50.4 |
| Rsa1.0_00385.1.g12719.t1 | db BAJ34369.1   unnamed protein product [Theilungiella halophila]                                                                                                                                                                                                                                                             | 368 | 384 | 1.00E-144 | 104.3 | 84.2 | 89.9 | unnamed protein product                         | ----  | ----                 | AT2G31370.5   Symbols:   Basic-leucine zipper (bZIP) transcription factor family protein   chr2:13379448-13381037 FORWARD LENGTH=377                                                                                                                                                                                                                               | 368 | 377 | 1.00E-145 | 102.4 | 74.5 | 81.0 |
| Rsa1.0_00385.1.g12720.t1 | db BAJ34047.1   unnamed protein product [Theilungiella halophila]                                                                                                                                                                                                                                                             | 243 | 241 | 1.00E-119 | 99.2  | 89.3 | 92.2 | unnamed protein product                         | ----  | ----                 | AT2G31380.1   Symbols: STH   salt tolerance homologue   chr2:13382150-13383302 FORWARD LENGTH=238                                                                                                                                                                                                                                                                  | 243 | 238 | 1.00E-115 | 97.9  | 84.8 | 89.3 |
| Rsa1.0_00385.1.g12721.t1 | gb EOA27492.1   hypothetical protein CARUB_v10023630mg [Capsella rubella]                                                                                                                                                                                                                                                     | 326 | 325 | 1.00E-178 | 99.7  | 93.9 | 96.9 | hypothetical protein CARUB_v10023630mg          | gbpln | Capsella rubella     | AT2G31390.1   Symbols:   pfkB-like carbohydrate kinase family protein   chr2:1338365-13386116 REVERSE LENGTH=325                                                                                                                                                                                                                                                   | 326 | 325 | 1.00E-178 | 99.7  | 92.3 | 96.6 |
| Rsa1.0_00385.1.g12722.t1 | refXP_002881173.1   pentatricopeptide repeat-containing protein [Arabidopsis lyrata subsp. lyrata] gi 297327012 gb EFH57432.1   pentatricopeptide repeat-containing protein [Arabidopsis lyrata subsp. lyrata]                                                                                                                | 860 | 917 | 0         | 106.6 | 81.9 | 88.7 | pentatricopeptide repeat-containing protein     | gbpln | Arabidopsis lyrata   | AT2G31400.1   Symbols: GUN1   genomes uncoupled 1   chr2:13387201-13390550 REVERSE LENGTH=918                                                                                                                                                                                                                                                                      | 860 | 918 | 0         | 106.7 | 81.0 | 87.8 |
| Rsa1.0_00385.1.g12723.t1 | gb EOA27918.1   hypothetical protein CARUB_v10024091mg [Capsella rubella]                                                                                                                                                                                                                                                     | 198 | 199 | 4.00E-74  | 100.5 | 82.8 | 90.4 | hypothetical protein CARUB_v10024091mg          | gbpln | Capsella rubella     | AT2G31410.1   Symbols:   unknown protein; Has 1719 Blast hits to 1091 proteins in 184 species: Archae - 5; Bacteria - 24; Metazoa - 559; Fungi - 169; Plants - 192; Viruses - 1; Other Eukaryotes - 769 (source: NCBI BLINK).   chr2:13392220-13392819 REVERSE LENGTH=199                                                                                          | 198 | 199 | 2.00E-74  | 100.5 | 84.3 | 89.4 |
| Rsa1.0_00385.1.g12724.t1 | gb EOA28709.1   hypothetical protein CARUB_v10024937mg, partial [Capsella rubella]                                                                                                                                                                                                                                            | 202 | 308 | 3.00E-37  | 152.5 | 40.1 | 59.9 | hypothetical protein CARUB_v10024937mg, partial | gbpln | Capsella rubella     | AT2G31420.1   Symbols:   Domain of unknown function (DUF313)   chr2:13393364-13393993 REVERSE LENGTH=209                                                                                                                                                                                                                                                           | 202 | 209 | 3.00E-36  | 103.5 | 45.0 | 59.9 |
| Rsa1.0_00385.1.g12725.t1 | ref NP_180705.1   F-box protein DOR [Arabidopsis thaliana] gi 229807544 sp Q5BPS3.2 DOR ARATH RecName: Full=F-box protein DOR; AltName: Full=Protein DROUGHT TOLERANCE REPRESSOR gi 4589954 gb AAD26472.1   hypothetical protein [Arabidopsis thaliana] gi 330253458 gb AEC08552.1   F-box protein DOR [Arabidopsis thaliana] | 405 | 387 | 2.00E-96  | 95.6  | 51.9 | 63.5 | F-box protein DOR                               | gbpln | Arabidopsis thaliana | AT2G31470.1   Symbols: DOR   F-box and associated interaction domains-containing protein   chr2:13407492-13408655 REVERSE LENGTH=387                                                                                                                                                                                                                               | 405 | 387 | 5.00E-99  | 95.6  | 51.9 | 63.5 |
| Rsa1.0_00385.1.g12726.t1 | refXP_002881178.1   hypothetical protein ARALYDRAFT_482077 [Arabidopsis lyrata subsp. lyrata] gi 297327017 gb EFH57437.1   hypothetical protein ARALYDRAFT_482077 [Arabidopsis lyrata subsp. lyrata]                                                                                                                          | 453 | 472 | 1.00E-175 | 104.2 | 76.4 | 85.4 | hypothetical protein ARALYDRAFT_482077          | gbpln | Arabidopsis lyrata   | AT2G31480.1   Symbols:   unknown protein; BEST Arabidopsis thaliana protein match is: unknown protein (TAIR:AT1G05894.1). Has 35333 Blast hits to 34131 proteins in 2444 species: Archae - 798; Bacteria - 22429; Metazoa - 974; Fungi - 991; Plants - 531; Viruses - 0; Other Eukaryotes - 9610 (source: NCBI BLINK).   chr2:13409516-13410934 REVERSE LENGTH=472 | 453 | 472 | 1.00E-176 | 104.2 | 77.0 | 85.7 |

|                          |                                                                                                                                                                                                                                                                                                                                                                                                                                                                                                                                                                                                                                                                                                                                                                                                                            |     |     |           |       |      |      |                                           |       |                      |                                                                                                                                                                                                                                                             |     |     |           |       |      |      |
|--------------------------|----------------------------------------------------------------------------------------------------------------------------------------------------------------------------------------------------------------------------------------------------------------------------------------------------------------------------------------------------------------------------------------------------------------------------------------------------------------------------------------------------------------------------------------------------------------------------------------------------------------------------------------------------------------------------------------------------------------------------------------------------------------------------------------------------------------------------|-----|-----|-----------|-------|------|------|-------------------------------------------|-------|----------------------|-------------------------------------------------------------------------------------------------------------------------------------------------------------------------------------------------------------------------------------------------------------|-----|-----|-----------|-------|------|------|
| Rsa1.0_00385.1.g12727.t1 | ref NP_565726.1  uncharacterized protein [Arabidopsis thaliana]<br>gi 297822895 ref XP_002879330.1  hypothetical protein ARALYDRAFT_902184 [Arabidopsis lyrata subsp. lyrata]<br>gi 4582445 gb AAD24829.1  expressed protein [Arabidopsis thaliana]<br>gi 20198160 gb AAM15434.1  expressed protein [Arabidopsis thaliana]<br>gi 26451972 dbj BAC43077.1  unknown protein [Arabidopsis thaliana]<br>gi 28416745 gb AAO42903.1  At2g31490 [Arabidopsis thaliana]<br>gi 227204167 dbj BAH56935.1  AT2G31490 [Arabidopsis thaliana]<br>gi 297325169 gb EFH55589.1  hypothetical protein ARALYDRAFT_902184 [Arabidopsis lyrata subsp. lyrata]<br>gi 330253460 gb AEC08554.1  uncharacterized protein AT2G31490 [Arabidopsis thaliana]<br>gi 482564076 gb EOA28266.1  hypothetical protein CARUB_v10024460mg [Capsella rubella] | 152 | 71  | 7.00E-26  | 46.7  | 36.8 | 36.8 | uncharacterized protein                   | gbpln | Arabidopsis lyrata   | AT2G31490.1   Symbols:   unknown protein; Has 55 Blast hits to 55 proteins in 15 species: Archae - 0; Bacteria - 0; Metazoa - 0; Fungi - 0; Plants - 55; Viruses - 0; Other Eukaryotes - 0 (source: NCBI BLink).   chr2:13412060-13413002 FORWARD LENGTH=71 | 152 | 71  | 2.00E-28  | 46.7  | 36.8 | 36.8 |
| Rsa1.0_00385.1.g12728.t1 | gb ABK28519.1  unknown [Arabidopsis thaliana]                                                                                                                                                                                                                                                                                                                                                                                                                                                                                                                                                                                                                                                                                                                                                                              | 606 | 583 | 0         | 96.2  | 87.5 | 91.4 | unknown                                   | gbpln | Arabidopsis thaliana | AT2G31500.1   Symbols: CPK24   calcium-dependent protein kinase 24   chr2:13414016-13416324 FORWARD LENGTH=582                                                                                                                                              | 606 | 582 | 0         | 96.0  | 87.5 | 91.4 |
| Rsa1.0_00385.1.g12729.t1 | ref NP_180709.3  putative E3 ubiquitin-protein ligase ARI7 [Arabidopsis thaliana]<br>gi 75328048 sp Q84RR0.1 ARI7_ARATH RecName: Full=Probable E3 ubiquitin-protein ligase ARI7; AltName: Full=ARIADNE-like protein ARI7; AltName: Full=Protein ariadne homolog 7 gi 29125028 emb CAD52889.1  ARIADNE-like protein ARI7 [Arabidopsis thaliana]<br>gi 330253462 gb AEC08556.1  putative E3 ubiquitin-protein ligase ARI7 [Arabidopsis thaliana]                                                                                                                                                                                                                                                                                                                                                                             | 559 | 562 | 0         | 100.5 | 93.0 | 95.3 | putative E3 ubiquitin-protein ligase ARI7 | gbpln | Arabidopsis thaliana | AT2G31510.1   Symbols: ARI7, ATARI7   IBR domain-containing protein   chr2:13416991-13421170 REVERSE LENGTH=562                                                                                                                                             | 559 | 562 | 0         | 100.5 | 93.0 | 95.3 |
| Rsa1.0_00385.1.g12730.t1 | ref XP_002878768.1  carboxylic ester hydrolase [Arabidopsis lyrata subsp. lyrata] gi 297324607 gb EFH55027.1  carboxylic ester hydrolase [Arabidopsis lyrata subsp. lyrata]                                                                                                                                                                                                                                                                                                                                                                                                                                                                                                                                                                                                                                                | 386 | 359 | 1.00E-172 | 93.0  | 74.6 | 82.9 | carboxylic ester hydrolase                | gbpln | Arabidopsis lyrata   | AT2G24560.1   Symbols:   GDSL-like Lipase/Acylhydrolase family protein   chr2:10431537-10432933 FORWARD LENGTH=363                                                                                                                                          | 386 | 363 | 1.00E-170 | 94.0  | 73.1 | 82.6 |
| Rsa1.0_00385.1.g12731.t1 | ref XP_002870433.1  40S ribosomal protein S3 [Arabidopsis lyrata subsp. lyrata] gi 297316269 gb EFH46692.1  40S ribosomal protein S3 [Arabidopsis lyrata subsp. lyrata]                                                                                                                                                                                                                                                                                                                                                                                                                                                                                                                                                                                                                                                    | 250 | 248 | 1.00E-128 | 99.2  | 92.0 | 94.0 | 40S ribosomal protein S3                  | gbpln | Arabidopsis lyrata   | AT5G35530.1   Symbols:   Ribosomal protein S3 family protein   chr5:13710355-13712192 REVERSE LENGTH=248                                                                                                                                                    | 250 | 248 | 1.00E-129 | 99.2  | 90.8 | 93.2 |
| Rsa1.0_00385.1.g12732.t1 | ref NP_850169.1  uncharacterized protein [Arabidopsis thaliana]<br>gi 42571003 ref NP_973575.1  uncharacterized protein [Arabidopsis thaliana] gi 17528942 gb AAL38681.1  unknown protein [Arabidopsis thaliana]<br>gi 50897252 gb AAT85765.1  At2g31560 [Arabidopsis thaliana]<br>gi 222423288 dbj BAH19620.1  AT2G31560 [Arabidopsis thaliana]<br>gi 222423386 dbj BAH19665.1  AT2G31560 [Arabidopsis thaliana]<br>gi 330253466 gb AEC08560.1  uncharacterized protein AT2G31560 [Arabidopsis thaliana]<br>gi 330253467 gb AEC08561.1  uncharacterized protein AT2G31560 [Arabidopsis thaliana]                                                                                                                                                                                                                          | 192 | 202 | 2.00E-70  | 105.2 | 75.0 | 81.8 | uncharacterized protein                   | gbpln | Arabidopsis thaliana | AT2G31560.2   Symbols:   Protein of unknown function (DUF1685)   chr2:13436611-13437312 FORWARD LENGTH=202                                                                                                                                                  | 192 | 202 | 8.00E-73  | 105.2 | 75.0 | 81.8 |
| Rsa1.0_00385.1.g12733.t1 | ref XP_002879336.1  40S ribosomal protein S3 [Arabidopsis lyrata subsp. lyrata] gi 297325175 gb EFH55595.1  40S ribosomal protein S3 [Arabidopsis lyrata subsp. lyrata]                                                                                                                                                                                                                                                                                                                                                                                                                                                                                                                                                                                                                                                    | 250 | 250 | 1.00E-129 | 100.0 | 91.6 | 94.4 | 40S ribosomal protein S3                  | gbpln | Arabidopsis lyrata   | AT2G31610.1   Symbols:   Ribosomal protein S3 family protein   chr2:13450384-13451669 FORWARD LENGTH=250                                                                                                                                                    | 250 | 250 | 1.00E-130 | 100.0 | 91.2 | 94.0 |

|                          |                                                                                                                                                                                                                                                                                                                                                                             |      |      |          |       |      |      |                                        |       |                      |                                                                                                                                         |      |      |          |       |      |      |
|--------------------------|-----------------------------------------------------------------------------------------------------------------------------------------------------------------------------------------------------------------------------------------------------------------------------------------------------------------------------------------------------------------------------|------|------|----------|-------|------|------|----------------------------------------|-------|----------------------|-----------------------------------------------------------------------------------------------------------------------------------------|------|------|----------|-------|------|------|
| Rsa1.0_00385.1.g12734.t6 | refXP_002881186.1  hypothetical protein ARALYDRAFT_902198 [Arabidopsis lyrata subsp. lyrata] gi 297327025 gb EFH57445.1                                                                                                                                                                                                                                                     | 1072 | 1066 | 0        | 99.4  | 78.5 | 84.9 | hypothetical protein ARALYDRAFT_902198 | gbpln | Arabidopsis lyrata   | AT2G31650.1   Symbols: ATX1, SDG27   homologue of trithorax   chr2:13455448-13462181 REVERSE LENGTH=1062                                | 1072 | 1062 | 0        | 99.1  | 77.2 | 84.5 |
| Rsa1.0_00385.1.g12735.t1 | refXP_002879337.1  hypothetical protein ARALYDRAFT_482091 [Arabidopsis lyrata subsp. lyrata] gi 297325176 gb EFH55596.1                                                                                                                                                                                                                                                     | 1041 | 1044 | 0        | 100.3 | 90.4 | 94.9 | hypothetical protein ARALYDRAFT_482091 | gbpln | Arabidopsis lyrata   | AT2G31660.1   Symbols: SAD2, URM9   ARM repeat superfamily protein   chr2:13464519-13471353 FORWARD LENGTH=1040                         | 1041 | 1040 | 0        | 99.9  | 88.9 | 93.9 |
| Rsa1.0_00385.1.g12736.t1 | hypothetical protein ARALYDRAFT_902198 [Arabidopsis lyrata subsp. lyrata]                                                                                                                                                                                                                                                                                                   | #    | #    | #        | #     | #    | #    | -                                      | ----  | ----                 | #                                                                                                                                       | #    | #    | #        | #     | #    |      |
| Rsa1.0_00385.1.g12737.t1 | refXP_002879337.1  hypothetical protein ARALYDRAFT_482091 [Arabidopsis lyrata subsp. lyrata]                                                                                                                                                                                                                                                                                | #    | #    | #        | #     | #    | #    | -                                      | ----  | ----                 | AT2G31710.1   Symbols: Vacuolar ATPase assembly integral membrane protein VMA21-like domain   chr2:13482057-13482895 REVERSE LENGTH=105 | 76   | 105  | 1.00E-11 | 138.2 | 39.5 | 43.4 |
| Rsa1.0_00385.1.g12738.t1 | gb EOA29031.1  hypothetical protein CARUB_v10025285mg [Capsella rubella]                                                                                                                                                                                                                                                                                                    | 558  | 514  | 0        | 92.1  | 69.2 | 77.6 | hypothetical protein CARUB_v10025285mg | gbpln | Capsella rubella     | AT2G31865.1   Symbols: PARG2   poly(ADP-ribose) glycohydrolase 2   chr2:13546790-13549472 REVERSE LENGTH=522                            | 558  | 522  | 0        | 93.5  | 66.1 | 74.9 |
| Rsa1.0_00385.1.g12739.t1 | refXP_002879346.1  hypothetical protein ARALYDRAFT_902223 [Arabidopsis lyrata subsp. lyrata] gi 297325185 gb EFH56605.1                                                                                                                                                                                                                                                     | 407  | 378  | 2.00E-28 | 92.9  | 27.3 | 37.1 | hypothetical protein ARALYDRAFT_902223 | gbpln | Arabidopsis lyrata   | AT2G31720.1   Symbols: Domain of unknown function (DUF313)   chr2:13485034-13485975 REVERSE LENGTH=313                                  | 407  | 313  | 3.00E-26 | 76.9  | 24.6 | 34.2 |
| Rsa1.0_00385.1.g12740.t1 | refNP_565720.1  inhibitor-3 [Arabidopsis thaliana] gi 20197895 gb AAM15305.1  Expressed protein [Arabidopsis thaliana] gi 21555013 gb AAM63754.1  unknown [Arabidopsis thaliana] gi 106879151 gb ABF82605.1  At2g31305 [Arabidopsis thaliana] gi 330253431 gb AEC08525.1  inhibitor-3 [Arabidopsis thaliana]                                                                | 107  | 107  | 1.00E-33 | 100.0 | 81.3 | 87.9 | inhibitor-3                            | gbpln | Arabidopsis thaliana | AT2G31305.1   Symbols: INH3   inhibitor-3   chr2:13350909-13351232 FORWARD LENGTH=107                                                   | 107  | 107  | 2.00E-36 | 100.0 | 81.3 | 87.9 |
| Rsa1.0_00385.1.g12741.t2 | db BAJ34071.1  unnamed protein product [Thellungiella halophila]                                                                                                                                                                                                                                                                                                            | 716  | 699  | 0        | 97.6  | 78.2 | 83.4 | unnamed protein product                | ----  | ----                 | AT2G31280.1   Symbols: CPUORF7   conserved peptide upstream open reading frame 7   chr2:13339678-13343424 FORWARD LENGTH=720            | 716  | 720  | 0        | 100.6 | 77.0 | 83.5 |
| Rsa1.0_00385.1.g12742.t1 | refNP_191803.1  F-box/LRR-repeat protein [Arabidopsis thaliana] gi 75335717 sp Q9LZP6.1 FBL70.ARAT H RecName: Full=F-box/LRR-repeat protein At3g62440 gi 7340715 emb CAB82958.1  putative protein [Arabidopsis thaliana] gi 67633712 gb AAY78780.1  F-box family protein [Arabidopsis thaliana] gi 332646832 gb AEE80353.1  F-box/LRR-repeat protein [Arabidopsis thaliana] | #    | #    | #        | #     | #    | #    | -                                      | ----  | ----                 | #                                                                                                                                       | #    | #    | #        | #     | #    |      |
| Rsa1.0_00386.1.g12743.t1 | refNP_191803.1  F-box/LRR-repeat protein [Arabidopsis thaliana] gi 75335717 sp Q9LZP6.1 FBL70.ARAT H RecName: Full=F-box/LRR-repeat protein At3g62440 gi 7340715 emb CAB82958.1  putative protein [Arabidopsis thaliana] gi 67633712 gb AAY78780.1  F-box family protein [Arabidopsis thaliana] gi 332646832 gb AEE80353.1  F-box/LRR-repeat protein [Arabidopsis thaliana] | 415  | 457  | 7.00E-62 | 110.1 | 37.6 | 51.3 | F-box/LRR-repeat protein               | gbpln | Arabidopsis thaliana | AT3G62440.1   Symbols: F-box/RNI-like superfamily protein   chr3:23096104-23097726 REVERSE LENGTH=457                                   | 415  | 457  | 2.00E-64 | 110.1 | 37.6 | 51.3 |
| Rsa1.0_00386.1.g12744.t1 | refXP_002873681.1  hypothetical protein ARALYDRAFT_488304 [Arabidopsis lyrata subsp. lyrata] gi 297319518 gb EFH49940.1                                                                                                                                                                                                                                                     | 580  | 629  | 0        | 108.4 | 72.6 | 83.3 | hypothetical protein ARALYDRAFT_488304 | gbpln | Arabidopsis lyrata   | AT5G14620.1   Symbols: DRM2, DMT7   domains rearranged methyltransferase 2   chr5:4715429-4718578 REVERSE LENGTH=626                    | 580  | 626  | 0        | 107.9 | 70.0 | 80.5 |
| Rsa1.0_00386.1.g12745.t1 | refNP_001190309.1  DEAD-box ATP-dependent RNA helicase 46 [Arabidopsis thaliana] gi 114153757 sp Q9LYJ9.2 RH46.ARAT H RecName: Full=DEAD-box ATP-dependent RNA helicase 46 gi 332004672 gb AED92055.1  DEAD-box ATP-dependent RNA helicase 46 [Arabidopsis thaliana]                                                                                                        | 686  | 645  | 0        | 94.0  | 81.3 | 85.7 | DEAD-box ATP-dependent RNA helicase 46 | gbpln | Arabidopsis thaliana | AT5G14610.2   Symbols: DEAD box RNA helicase family protein   chr5:4711271-4714713 FORWARD LENGTH=645                                   | 686  | 645  | 0        | 94.0  | 81.3 | 85.7 |

|                          |                                                                                                                                                                                                                                                                                                                                                 |     |     |           |       |      |      |                                        |       |                      |                                                                                                                                                                                                                                                                                                                                                                                                                                                                                        |     |     |           |       |      |      |
|--------------------------|-------------------------------------------------------------------------------------------------------------------------------------------------------------------------------------------------------------------------------------------------------------------------------------------------------------------------------------------------|-----|-----|-----------|-------|------|------|----------------------------------------|-------|----------------------|----------------------------------------------------------------------------------------------------------------------------------------------------------------------------------------------------------------------------------------------------------------------------------------------------------------------------------------------------------------------------------------------------------------------------------------------------------------------------------------|-----|-----|-----------|-------|------|------|
| Rsa1.0_00386.1.g12746.t1 | gb EOA19719.1  hypothetical protein CARUB_v10003766mg [Capsella rubella]                                                                                                                                                                                                                                                                        | 80  | 79  | 4.00E-28  | 98.8  | 77.5 | 86.3 | hypothetical protein CARUB_v10003766mg | gbpln | Capsella rubella     | AT5G14602.1   Symbols:   FUNCTIONS IN: molecular_function unknown; INVOLVED IN: biological_process unknown; LOCATED IN: endomembrane system; BEST Arabidopsis thaliana protein match is: Methyltransferase-related protein (TAIR:AT5G18150.1); Has 30201 Blast hits to 17322 proteins in 780 species: Archaea - 12; Bacteria - 1396; Metazoa - 17338; Fungi - 3422; Plants - 5037; Viruses - 0; Other Eukaryotes - 2996 (source: NCBI BLINK).   chr5:4709436-4709678 FORWARD LENGTH=80 | 80  | 80  | 1.00E-27  | 100.0 | 72.5 | 83.8 |
| Rsa1.0_00386.1.g12747.t1 | ref XP_002873677.1  ATNRT2.7 [Arabidopsis lyrata subsp. lyrata]   gi 297319514 gb EFH49936.1  ATNRT2.7 [Arabidopsis lyrata subsp. lyrata]                                                                                                                                                                                                       | 482 | 490 | 0         | 101.7 | 83.2 | 90.2 | ATNRT2.7                               | gbpln | Arabidopsis lyrata   | AT5G14570.1   Symbols: ATNRT2.7, NRT2.7   high affinity nitrate transporter 2.7   chr5:4695331-4696890 REVERSE LENGTH=493                                                                                                                                                                                                                                                                                                                                                              | 482 | 493 | 0         | 102.3 | 84.0 | 91.3 |
| Rsa1.0_00386.1.g12748.t1 | gb EOA22128.1  hypothetical protein CARUB_v10002686mg [Capsella rubella]                                                                                                                                                                                                                                                                        | 538 | 541 | 0         | 100.6 | 75.7 | 81.8 | hypothetical protein CARUB_v10002686mg | gbpln | Capsella rubella     | AT3G01560.1   Symbols:   Protein of unknown function (DUF1421)   chr3:219884-221707 FORWARD LENGTH=511                                                                                                                                                                                                                                                                                                                                                                                 | 538 | 511 | 1.00E-121 | 95.0  | 58.7 | 66.5 |
| Rsa1.0_00386.1.g12749.t1 | gb EOA22220.1  hypothetical protein CARUB_v10002807mg [Capsella rubella]                                                                                                                                                                                                                                                                        | 332 | 334 | 0         | 100.6 | 97.0 | 97.9 | hypothetical protein CARUB_v10002807mg | gbpln | Capsella rubella     | AT5G14530.1   Symbols:   Transducin/WD40 repeat-like superfamily protein   chr5:4684782-4686865 REVERSE LENGTH=330                                                                                                                                                                                                                                                                                                                                                                     | 332 | 330 | 0         | 99.4  | 95.2 | 97.0 |
| Rsa1.0_00386.1.g12750.t1 | gb EOA20817.1  hypothetical protein CARUB_v10001154mg [Capsella rubella]                                                                                                                                                                                                                                                                        | 382 | 387 | 0         | 101.3 | 88.7 | 95.5 | hypothetical protein CARUB_v10001154mg | gbpln | Capsella rubella     | AT5G14480.1   Symbols:   beta-1,4-N-acetylglucosaminyltransferase family protein   chr5:4667984-4669693 FORWARD LENGTH=387                                                                                                                                                                                                                                                                                                                                                             | 382 | 387 | 0         | 101.3 | 89.0 | 94.8 |
| Rsa1.0_00386.1.g12751.t1 | gb EOA21250.1  hypothetical protein CARUB_v10001600mg [Capsella rubella]                                                                                                                                                                                                                                                                        | 282 | 295 | 3.00E-88  | 104.6 | 73.4 | 84.4 | hypothetical protein CARUB_v10001600mg | gbpln | Capsella rubella     | AT5G14440.2   Symbols:   Surfeit locus protein 2 (SURF2)   chr5:4656065-4657807 REVERSE LENGTH=291                                                                                                                                                                                                                                                                                                                                                                                     | 282 | 291 | 3.00E-89  | 103.2 | 67.7 | 76.6 |
| Rsa1.0_00386.1.g12752.t1 | gb EOA20582.1  hypothetical protein CARUB_v10000894mg [Capsella rubella]                                                                                                                                                                                                                                                                        | 460 | 466 | 0         | 101.3 | 87.0 | 90.9 | hypothetical protein CARUB_v10000894mg | gbpln | Capsella rubella     | AT5G14420.2   Symbols: RGLG2   RING domain ligase2   chr5:4648355-4650563 REVERSE LENGTH=468                                                                                                                                                                                                                                                                                                                                                                                           | 460 | 468 | 0         | 101.7 | 86.3 | 90.7 |
| Rsa1.0_00386.1.g12753.t1 | ref XP_002871617.1  predicted protein [Arabidopsis lyrata subsp. lyrata]   gi 297317454 gb EFH47876.1  predicted protein [Arabidopsis lyrata subsp. lyrata]                                                                                                                                                                                     | 435 | 381 | 0         | 87.6  | 79.5 | 83.7 | predicted protein                      | gbpln | Arabidopsis lyrata   | AT5G14400.1   Symbols: CYP724A1   cytochrome P450, family 724, subfamily A, polypeptide 1   chr5:4644128-4646382 FORWARD LENGTH=367                                                                                                                                                                                                                                                                                                                                                    | 435 | 367 | 0         | 84.4  | 74.9 | 79.1 |
| Rsa1.0_00386.1.g12754.t1 | #                                                                                                                                                                                                                                                                                                                                               | #   | #   | #         | #     | #    | #    | -                                      | ----  | ----                 | #                                                                                                                                                                                                                                                                                                                                                                                                                                                                                      | #   | #   | #         | #     | #    |      |
| Rsa1.0_00386.1.g12755.t1 | ref XP_002873663.1  hypothetical protein ARALYDRAFT_488279 [Arabidopsis lyrata subsp. lyrata]   gi 297319500 gb EFH49922.1  hypothetical protein ARALYDRAFT_488279 [Arabidopsis lyrata subsp. lyrata]                                                                                                                                           | 334 | 369 | 1.00E-174 | 110.5 | 91.9 | 95.8 | hypothetical protein ARALYDRAFT_488279 | gbpln | Arabidopsis lyrata   | AT5G14390.1   Symbols:   alpha/beta-Hydrolases superfamily protein   chr5:4637551-4639575 REVERSE LENGTH=369                                                                                                                                                                                                                                                                                                                                                                           | 334 | 369 | 1.00E-176 | 110.5 | 91.0 | 95.5 |
| Rsa1.0_00386.1.g12756.t1 | ref XP_002873661.1  hypothetical protein ARALYDRAFT_488277 [Arabidopsis lyrata subsp. lyrata]   gi 297319498 gb EFH49920.1  hypothetical protein ARALYDRAFT_488277 [Arabidopsis lyrata subsp. lyrata]                                                                                                                                           | 333 | 335 | 1.00E-127 | 100.6 | 78.4 | 85.6 | hypothetical protein ARALYDRAFT_488277 | gbpln | Arabidopsis lyrata   | AT5G14370.1   Symbols:   CCT motif family protein   chr5:4632147-4633651 REVERSE LENGTH=339                                                                                                                                                                                                                                                                                                                                                                                            | 333 | 339 | 1.00E-121 | 101.8 | 76.0 | 84.1 |
| Rsa1.0_00386.1.g12757.t1 | ref NP_196940.1  ubiquitin family protein [Arabidopsis thaliana]   gi 7573461 emb CAB87775.1  putative protein [Arabidopsis thaliana]   gi 45752636 gb AAS76217.1  At5g14360 [Arabidopsis thaliana]   gi 46359805 gb AAS38766.1  At5g14360 [Arabidopsis thaliana]   gi 332004639 gb AED92022.1  ubiquitin family protein [Arabidopsis thaliana] | 161 | 163 | 1.00E-72  | 101.2 | 90.7 | 95.7 | ubiquitin family protein               | gbpln | Arabidopsis thaliana | AT5G14360.1   Symbols:   Ubiquitin-like superfamily protein   chr5:4631038-4631641 FORWARD LENGTH=163                                                                                                                                                                                                                                                                                                                                                                                  | 161 | 163 | 4.00E-75  | 101.2 | 90.7 | 95.7 |
| Rsa1.0_00386.1.g12758.t1 | ref NP_001078582.1  early nodulin-like protein 21 [Arabidopsis thaliana]   gi 332004637 gb AED92020.1  early nodulin-like protein 21 [Arabidopsis thaliana]                                                                                                                                                                                     | 145 | 145 | 7.00E-63  | 100.0 | 80.7 | 86.2 | early nodulin-like protein 21          | gbpln | Arabidopsis thaliana | AT5G14345.1   Symbols: ENODL21, ATENODL21   early nodulin-like protein 21   chr5:4626175-4626722 REVERSE LENGTH=145                                                                                                                                                                                                                                                                                                                                                                    | 145 | 145 | 2.00E-65  | 100.0 | 80.7 | 86.2 |
| Rsa1.0_00386.1.g12759.t1 | ref NP_196937.1  uncharacterized protein [Arabidopsis thaliana]   gi 7573458 emb CAB87772.1  putative protein [Arabidopsis thaliana]   gi 332004635 gb AED92018.1  uncharacterized protein AT5G14330 [Arabidopsis thaliana]                                                                                                                     | 77  | 128 | 2.00E-15  | 166.2 | 76.6 | 80.5 | uncharacterized protein                | gbpln | Arabidopsis thaliana | AT5G14330.1   Symbols:   unknown protein; Has 8 Blast hits to 8 proteins in 2 species: Archaea - 0; Bacteria - 0; Metazoa - 0; Fungi - 0; Plants - 8; Viruses - 0; Other Eukaryotes - 0 (source: NCBI BLINK).   chr5:4619847-4620551 REVERSE LENGTH=128                                                                                                                                                                                                                                | 77  | 128 | 4.00E-18  | 166.2 | 76.6 | 80.5 |
| Rsa1.0_00386.1.g12760.t1 | dbj BAJ34069.1  unnamed protein product [Theillungiella halophila]                                                                                                                                                                                                                                                                              | 680 | 429 | 0         | 63.1  | 52.4 | 57.6 | unnamed protein product                | ----  | ----                 | AT5G14250.1   Symbols: COP13, CSN3, FUS11   Proteasome component (PCI) domain protein   chr5:4597970-4600561 FORWARD LENGTH=429                                                                                                                                                                                                                                                                                                                                                        | 680 | 429 | 0         | 63.1  | 49.3 | 55.4 |

|                          |                                                                                                                                                                                                                                                                                                                                                                                                                                                                                                                                                                  |      |      |           |       |      |      |                                                                    |       |                      |                                                                                                                                                                                                                                                                                  |      |      |           |       |      |      |
|--------------------------|------------------------------------------------------------------------------------------------------------------------------------------------------------------------------------------------------------------------------------------------------------------------------------------------------------------------------------------------------------------------------------------------------------------------------------------------------------------------------------------------------------------------------------------------------------------|------|------|-----------|-------|------|------|--------------------------------------------------------------------|-------|----------------------|----------------------------------------------------------------------------------------------------------------------------------------------------------------------------------------------------------------------------------------------------------------------------------|------|------|-----------|-------|------|------|
| Rsa1.0_00386.1.g12761.t1 | gb EOA19327.1  hypothetical protein CARUB_v10003397mg [Capsella rubella]                                                                                                                                                                                                                                                                                                                                                                                                                                                                                         | 408  | 408  | 0         | 100.0 | 90.7 | 94.4 | hypothetical protein CARUB_v10003397mg                             | gbpln | Capsella rubella     | AT5G14200.1   Symbols: ATIMD1, IMD1   isopropylmalate dehydrogenase 1   chr5:4576220-4578111 FORWARD LENGTH=409                                                                                                                                                                  | 408  | 409  | 0         | 100.2 | 90.9 | 94.6 |
| Rsa1.0_00386.1.g12762.t1 | # # # # # # # #                                                                                                                                                                                                                                                                                                                                                                                                                                                                                                                                                  | #    | #    | #         | #     | #    | #    | -                                                                  | ----  | ----                 | # # # # # # #                                                                                                                                                                                                                                                                    | #    | #    | #         | #     | #    | #    |
| Rsa1.0_00386.1.g12763.t2 | gb EOA21047.1  hypothetical protein CARUB_v10001386mg [Capsella rubella]                                                                                                                                                                                                                                                                                                                                                                                                                                                                                         | 400  | 335  | 1.00E-135 | 83.8  | 59.0 | 65.0 | hypothetical protein CARUB_v10001386mg                             | gbpln | Capsella rubella     | AT5G14130.1   Symbols:   Peroxidase superfamily protein   chr5:4558862-4560028 REVERSE LENGTH=330                                                                                                                                                                                | 400  | 330  | 1.00E-134 | 82.5  | 57.8 | 64.8 |
| Rsa1.0_00386.1.g12764.t1 | ref XP_002528055.1  conserved hypothetical protein [Ricinus communis]  g 223532516 gb EF34305.1  conserved hypothetical protein [Ricinus communis]                                                                                                                                                                                                                                                                                                                                                                                                               | 75   | 76   | 6.00E-25  | 101.3 | 70.7 | 86.7 | conserved hypothetical protein                                     | gbpln | Ricinus communis     | AT5G14105.1   Symbols:   unknown protein; Has 30201 Blast hits to 17322 proteins in 780 species: Archae - 12; Bacteria - 1396; Metazoa - 17338; Fungi - 3422; Plants - 5037; Viruses - 0; Other Eukaryotes - 2996 (source: NCBI BLINK).   chr5:4552169-4552901 REVERSE LENGTH=76 | 75   | 76   | 1.00E-25  | 101.3 | 86.7 | 96.0 |
| Rsa1.0_00386.1.g12765.t1 | gb EOA21767.1  hypothetical protein CARUB_v10002222mg [Capsella rubella]                                                                                                                                                                                                                                                                                                                                                                                                                                                                                         | 138  | 140  | 6.00E-65  | 101.4 | 89.1 | 95.7 | hypothetical protein CARUB_v10002222mg                             | gbpln | Capsella rubella     | AT5G14070.1   Symbols: ROXY2   Thioredoxin superfamily protein   chr5:4541915-4542337 FORWARD LENGTH=140                                                                                                                                                                         | 138  | 140  | 3.00E-67  | 101.4 | 89.9 | 94.9 |
| Rsa1.0_00387.1.g12766.t1 | ref XP_002877087.1  nodulin MtN3 family protein [Arabidopsis lyrata subsp. lyrata]  g 297322925 gb EFH53346.1  nodulin MtN3 family protein [Arabidopsis lyrata subsp. lyrata]                                                                                                                                                                                                                                                                                                                                                                                    | 209  | 252  | 3.00E-88  | 120.6 | 85.6 | 91.9 | nodulin MtN3 family protein                                        | gbpln | Arabidopsis lyrata   | AT3G28007.1   Symbols: SWEET4, ATSWET4   Nodulin MtN3 family protein   chr3:10408243-10409633 REVERSE LENGTH=251                                                                                                                                                                 | 209  | 251  | 1.00E-84  | 120.1 | 87.6 | 91.9 |
| Rsa1.0_00387.1.g12767.t1 | ref XP_002875418.1  predicted protein [Arabidopsis lyrata subsp. lyrata]  g 297321256 gb EFH51677.1  predicted protein [Arabidopsis lyrata subsp. lyrata]                                                                                                                                                                                                                                                                                                                                                                                                        | 1545 | 1463 | 0         | 94.7  | 71.3 | 79.4 | predicted protein                                                  | gbpln | Arabidopsis lyrata   | AT3G28030.1   Symbols: UVH3, UVRI   5'-3' exonuclease family protein   chr3:10424321-10431178 FORWARD LENGTH=1479                                                                                                                                                                | 1545 | 1479 | 0         | 95.7  | 70.1 | 78.1 |
| Rsa1.0_00387.1.g12768.t1 | ref NP_189443.2  probably inactive leucine-rich repeat receptor-like protein kinase [Arabidopsis thaliana]  g 75335370 sp Q9LRT1.1 Y3804_ARATH RecName: Full=Probably inactive leucine-rich repeat receptor-like protein kinase At3g28040; Flags: Precursor  g 11994124 dbj BAB01126.1  receptor protein kinase [Arabidopsis thaliana]  g 224589581 gb ACN59324.1  leucine-rich repeat receptor-like protein kinase [Arabidopsis thaliana]  g 332643873 gb AEE77394.1  probably inactive leucine-rich repeat receptor-like protein kinase [Arabidopsis thaliana] | 1014 | 1016 | 0         | 100.2 | 87.6 | 93.4 | probably inactive leucine-rich repeat receptor-like protein kinase | gbpln | Arabidopsis thaliana | AT3G28040.1   Symbols:   Leucine-rich receptor-like protein kinase family protein   chr3:10435139-10438268 FORWARD LENGTH=1016                                                                                                                                                   | 1014 | 1016 | 0         | 100.2 | 87.6 | 93.4 |
| Rsa1.0_00387.1.g12769.t1 | ref XP_002875422.1  predicted protein [Arabidopsis lyrata subsp. lyrata]  g 297321260 gb EFH51681.1  predicted protein [Arabidopsis lyrata subsp. lyrata]                                                                                                                                                                                                                                                                                                                                                                                                        | 363  | 363  | 0         | 100.0 | 92.3 | 95.6 | predicted protein                                                  | gbpln | Arabidopsis lyrata   | AT5G40210.1   Symbols:   nodulin MtN21 /EamA-like transporter family protein   chr5:16073725-16076088 REVERSE LENGTH=339                                                                                                                                                         | 363  | 339  | 1.00E-115 | 93.4  | 55.9 | 72.7 |
| Rsa1.0_00387.1.g12770.t1 | gb AAF99727.1 AC004557.6 F17L21.7 [Arabidopsis thaliana]                                                                                                                                                                                                                                                                                                                                                                                                                                                                                                         | 346  | 1534 | 2.00E-99  | 443.4 | 56.4 | 70.2 | F17L21.7                                                           | gbpln | Arabidopsis thaliana | # # # # # # #                                                                                                                                                                                                                                                                    | #    | #    | #         | #     | #    | #    |
| Rsa1.0_00387.1.g12771.t1 | gb AAF97969.1 AC000103.19 F21J9.30 [Arabidopsis thaliana]                                                                                                                                                                                                                                                                                                                                                                                                                                                                                                        | 1789 | 1270 | 0         | 71.0  | 35.6 | 47.7 | F21J9.30                                                           | gbpln | Arabidopsis thaliana | AT4G29090.1   Symbols:   Ribonuclease H-like superfamily protein   chr4:14333528-14335255 FORWARD LENGTH=575                                                                                                                                                                     | 1789 | 575  | 6.00E-94  | 32.1  | 10.1 | 17.2 |
| Rsa1.0_00387.1.g12772.t1 | gb EOA23588.1  hypothetical protein CARUB_v10016783mg [Capsella rubella]                                                                                                                                                                                                                                                                                                                                                                                                                                                                                         | 675  | 673  | 0         | 99.7  | 94.5 | 97.3 | hypothetical protein CARUB_v10016783mg                             | gbpln | Capsella rubella     | AT3G28180.1   Symbols: ATCSLC04, CSLC04, ATCSLC4, CSLC4   Cellulose-synthesis-like C4   chr3:10506110-10509067 FORWARD LENGTH=673                                                                                                                                                | 675  | 673  | 0         | 99.7  | 93.5 | 97.0 |
| Rsa1.0_00387.1.g12773.t1 | gb EOA24756.1  hypothetical protein CARUB_v10018042mg [Capsella rubella]                                                                                                                                                                                                                                                                                                                                                                                                                                                                                         | 188  | 204  | 5.00E-88  | 108.5 | 81.9 | 86.7 | hypothetical protein CARUB_v10018042mg                             | gbpln | Capsella rubella     | AT3G28210.1   Symbols: PMZ, SAP12   zinc finger (AN1-like) family protein   chr3:10520585-10521223 FORWARD LENGTH=186                                                                                                                                                            | 188  | 186  | 8.00E-86  | 98.9  | 77.7 | 84.6 |
| Rsa1.0_00387.1.g12774.t1 | ref XP_002877098.1  hypothetical protein ARALYDRAFT_905093 [Arabidopsis lyrata subsp. lyrata]  g 297322936 gb EFH53357.1  hypothetical protein ARALYDRAFT_905093 [Arabidopsis lyrata subsp. lyrata]                                                                                                                                                                                                                                                                                                                                                              | 363  | 364  | 0         | 100.3 | 88.4 | 93.7 | hypothetical protein ARALYDRAFT_905093                             | gbpln | Arabidopsis lyrata   | AT3G28340.1   Symbols: GATL10   galacturonosyltransferase-like 10   chr3:10589396-10590493 REVERSE LENGTH=365                                                                                                                                                                    | 363  | 365  | 0         | 100.6 | 87.1 | 92.3 |
| Rsa1.0_00387.1.g12775.t1 | gb EOA13153.1  hypothetical protein CARUB_v10026171mg [Capsella rubella]                                                                                                                                                                                                                                                                                                                                                                                                                                                                                         | 128  | 560  | 6.00E-46  | 437.5 | 78.9 | 83.6 | hypothetical protein CARUB_v10026171mg                             | gbpln | Capsella rubella     | AT5G62560.1   Symbols:   RING/U-box superfamily protein with ARM repeat domain   chr5:25110073-25111752 FORWARD LENGTH=559                                                                                                                                                       | 128  | 559  | 9.00E-47  | 436.7 | 79.7 | 85.2 |
| Rsa1.0_00387.1.g12776.t1 | gb EOA23410.1  hypothetical protein CARUB_v10016590mg [Capsella rubella]                                                                                                                                                                                                                                                                                                                                                                                                                                                                                         | 1244 | 1245 | 0         | 100.1 | 92.5 | 96.7 | hypothetical protein CARUB_v10016590mg                             | gbpln | Capsella rubella     | AT3G28345.1   Symbols:   ABC transporter family protein   chr3:10593921-10598775 REVERSE LENGTH=1240                                                                                                                                                                             | 1244 | 1240 | 0         | 99.7  | 91.6 | 96.7 |

|                           |                                                                                                                                                                                                                                                                                                                                                                                                                                                                       |      |      |           |       |      |      |                                                                                                                                                                                                    |       |                      |                                                                                                                                                                                                                                                                                                                                                                 |      |      |           |       |      |      |
|---------------------------|-----------------------------------------------------------------------------------------------------------------------------------------------------------------------------------------------------------------------------------------------------------------------------------------------------------------------------------------------------------------------------------------------------------------------------------------------------------------------|------|------|-----------|-------|------|------|----------------------------------------------------------------------------------------------------------------------------------------------------------------------------------------------------|-------|----------------------|-----------------------------------------------------------------------------------------------------------------------------------------------------------------------------------------------------------------------------------------------------------------------------------------------------------------------------------------------------------------|------|------|-----------|-------|------|------|
| Rsa1.0_00387.1.g12777.t2  | refXP_002875450.1  hypothetical protein ARALYDRAFT_484614 [Arabidopsis lyrata subsp. lyrata] gi 297321288 gb EFH51709.1  hypothetical protein ARALYDRAFT_484614 [Arabidopsis lyrata subsp. lyrata]                                                                                                                                                                                                                                                                    | 300  | 269  | 6.00E-98  | 89.7  | 62.7 | 68.7 | hypothetical protein ARALYDRAFT_484614                                                                                                                                                             | gbpln | Arabidopsis lyrata   | AT3G28370.1   Symbols:   unknown protein; BEST Arabidopsis thaliana protein match is: unknown protein (TAIR:AT1G51430.1); Has 6174 Blast hits to 4953 proteins in 685 species: Archae - 195; Bacteria - 792; Metazoa - 2688; Fungi - 653; Plants - 470; Viruses - 15; Other Eukaryotes - 1361 (source: NCBI BLink).   chr3:10620627-10623259 FORWARD LENGTH=292 | 300  | 292  | 1.00E-97  | 97.3  | 61.7 | 68.0 |
| Rsa1.0_00387.1.g12778.t1  | dbj BAB02858.1  multidrug resistance p-glycoprotein; ABC transporter-like protein [Arabidopsis thaliana]                                                                                                                                                                                                                                                                                                                                                              | 1268 | 1262 | 0         | 99.5  | 76.7 | 86.2 | multidrug resistance p-glycoprotein; ABC transporter-like protein                                                                                                                                  | gbpln | Arabidopsis thaliana | AT3G28390.1   Symbols: PGP18   P-glycoprotein 18   chr3:10629425-10633967 REVERSE LENGTH=1225                                                                                                                                                                                                                                                                   | 1268 | 1225 | 0         | 96.6  | 76.4 | 85.9 |
| Rsa1.0_00387.1.g12779.t1  | sp P17333.1 ZSS4_BRANA RecName: Full=Napin; AltName: Full=1.7S seed storage protein; Contains: RecName: Full=Napin small chain; Contains: RecName: Full=Napin large chain; Flags: Precursor gi 17833 emb CAA35580.1  unnamed protein product [Brassica napus] gi 468022 gb AAA81909.1  napin [Brassica napus]                                                                                                                                                         | 174  | 180  | 3.00E-78  | 103.4 | 89.7 | 94.8 | RecName: Full=Napin; AltName: Full=1.7S seed storage protein; Contains: RecName: Full=Napin small chain; Full=Napin large chain; Flags: Precursor gi 17833 emb CAA35580.1  unnamed protein product | gbpln | Brassica napus       | AT4G27170.1   Symbols: SESA4, AT2S4   seed storage albumin 4   chr4:13613637-13614137 FORWARD LENGTH=166                                                                                                                                                                                                                                                        | 174  | 166  | 2.00E-50  | 95.4  | 60.3 | 71.8 |
| Rsa1.0_00387.1.g12780.t1  | refNP_189483.1  Putative membrane lipoprotein [Arabidopsis thaliana] gi 9294578 dbj BAB02859.1  unnamed protein product [Arabidopsis thaliana] gi 38454112 gb AAR20750.1  At3g28420 [Arabidopsis thaliana] gi 332643922 gb AEE77443.1  Putative membrane lipoprotein [Arabidopsis thaliana]                                                                                                                                                                           | 388  | 216  | 8.00E-79  | 55.7  | 43.0 | 46.4 | Putative membrane lipoprotein                                                                                                                                                                      | gbpln | Arabidopsis thaliana | AT3G28420.1   Symbols:   Putative membrane lipoprotein   chr3:10654674-10655324 REVERSE LENGTH=216                                                                                                                                                                                                                                                              | 388  | 216  | 2.00E-81  | 55.7  | 43.0 | 46.4 |
| Rsa1.0_00387.1.g12781.t1  | refXP_002877106.1  predicted protein [Arabidopsis lyrata subsp. lyrata] gi 297322944 gb EFH53365.1  predicted protein [Arabidopsis lyrata subsp. lyrata]                                                                                                                                                                                                                                                                                                              | 803  | 548  | 6.00E-72  | 68.2  | 26.7 | 32.0 | predicted protein                                                                                                                                                                                  | gbpln | Arabidopsis lyrata   | AT1G19010.1   Symbols:   unknown protein; BEST Arabidopsis thaliana protein match is: unknown protein (TAIR:AT1G74860.1); Has 337 Blast hits to 320 proteins in 97 species: Archae - 0; Bacteria - 14; Metazoa - 153; Fungi - 26; Plants - 76; Viruses - 0; Other Eukaryotes - 68 (source: NCBI BLink).   chr1:6565616-6567354 FORWARD LENGTH=319               | 803  | 319  | 1.00E-24  | 39.7  | 7.1  | 9.8  |
| Rsa1.0_00387.1.g12782.t1  | refNP_189486.1  leucine-rich repeat protein kinase-like protein [Arabidopsis thaliana] gi 9294580 dbj BAB02861.1  receptor-like protein kinase-like protein [Arabidopsis thaliana] gi 26449808 dbj BAC42027.1  putative receptor kinase [Arabidopsis thaliana] gi 224589583 gb ACN59325.1  leucine-rich repeat receptor-like protein kinase [Arabidopsis thaliana] gi 332643925 gb AEE77446.1  leucine-rich repeat protein kinase-like protein [Arabidopsis thaliana] | 597  | 605  | 0         | 101.3 | 80.4 | 89.3 | leucine-rich repeat protein kinase-like protein                                                                                                                                                    | gbpln | Arabidopsis thaliana | AT3G28450.1   Symbols:   Leucine-rich repeat protein kinase family protein   chr3:10667359-10669176 FORWARD LENGTH=605                                                                                                                                                                                                                                          | 597  | 605  | 0         | 101.3 | 80.4 | 89.3 |
| Rsa1.0_00387.1.g12783.t1  | gb EOA25615.1  hypothetical protein CARUB_v10018963mg [Capsella rubella]                                                                                                                                                                                                                                                                                                                                                                                              | 81   | 81   | 1.00E-19  | 100.0 | 64.2 | 70.4 | hypothetical protein CARUB_v10018963mg                                                                                                                                                             | gbpln | Capsella rubella     | AT3G28455.1   Symbols: CLE25   CLAVATA3/ESR-RELATED 25   chr3:10670220-10670931 REVERSE LENGTH=81                                                                                                                                                                                                                                                               | 81   | 81   | 3.00E-21  | 100.0 | 63.0 | 69.1 |
| Rsa1.0_00387.1.g12784.t22 | refXP_002877109.1  hypothetical protein ARALYDRAFT_905108 [Arabidopsis lyrata subsp. lyrata] gi 297322947 gb EFH53368.1  hypothetical protein ARALYDRAFT_905108 [Arabidopsis lyrata subsp. lyrata]                                                                                                                                                                                                                                                                    | 277  | 312  | 1.00E-124 | 112.6 | 84.1 | 88.4 | hypothetical protein ARALYDRAFT_905108                                                                                                                                                             | gbpln | Arabidopsis lyrata   | AT3G28460.1   Symbols:   methyltransferases   chr3:10672673-10674297 REVERSE LENGTH=314                                                                                                                                                                                                                                                                         | 277  | 314  | 1.00E-123 | 113.4 | 83.0 | 86.6 |
| Rsa1.0_00387.1.g12785.t1  | gb EOA24401.1  hypothetical protein CARUB_v10017650mg [Capsella rubella]                                                                                                                                                                                                                                                                                                                                                                                              | 324  | 322  | 1.00E-141 | 99.4  | 86.1 | 91.0 | hypothetical protein CARUB_v10017650mg                                                                                                                                                             | gbpln | Capsella rubella     | AT3G28470.1   Symbols: ATMYB35, TDF1   Duplicated homeodomain-like superfamily protein   chr3:10674579-10675724 REVERSE LENGTH=317                                                                                                                                                                                                                              | 324  | 317  | 1.00E-137 | 97.8  | 83.6 | 88.6 |
| Rsa1.0_00387.1.g12786.t1  | refXP_002877111.1  oxidoreductase [Arabidopsis lyrata subsp. lyrata] gi 297322949 gb EFH53370.1  oxidoreductase [Arabidopsis lyrata subsp. lyrata]                                                                                                                                                                                                                                                                                                                    | 317  | 316  | 1.00E-160 | 99.7  | 84.9 | 89.3 | oxidoreductase                                                                                                                                                                                     | gbpln | Arabidopsis lyrata   | AT3G28480.1   Symbols:   Oxoglutarate/iron-dependent oxygenase   chr3:10676266-10678262 REVERSE LENGTH=316                                                                                                                                                                                                                                                      | 317  | 316  | 1.00E-161 | 99.7  | 84.5 | 89.3 |

|                          |                                                                                                                                                                                                                                                                                                                                                                                                                                                                                                                           |      |      |           |       |      |      |                                                          |             |                      |                                                                                                                                                                         |      |      |           |       |      |      |
|--------------------------|---------------------------------------------------------------------------------------------------------------------------------------------------------------------------------------------------------------------------------------------------------------------------------------------------------------------------------------------------------------------------------------------------------------------------------------------------------------------------------------------------------------------------|------|------|-----------|-------|------|------|----------------------------------------------------------|-------------|----------------------|-------------------------------------------------------------------------------------------------------------------------------------------------------------------------|------|------|-----------|-------|------|------|
| Rsa1.0_00387.1.g12787.t1 | ref NP_974372.1  basic helix-loop-helix (bHLH) DNA-binding family protein [Arabidopsis thaliana]   gi 9294226 dbj BAB02128.1  DNA-binding protein-like [Arabidopsis thaliana]   gi 88900306 gb ABD57465.1  At3g28857 [Arabidopsis thaliana]   gi 332643976 gb AEE77497.1  basic helix-loop-helix (bHLH) DNA-binding family protein [Arabidopsis thaliana]                                                                                                                                                                 | 92   | 92   | 5.00E-38  | 100.0 | 90.2 | 95.7 | basic helix-loop-helix (bHLH) DNA-binding family protein | gbpln       | Arabidopsis thaliana | AT3G28857.1   Symbols:   basic helix-loop-helix (bHLH) DNA-binding family protein   chr3:10855781-10856313 REVERSE LENGTH=92                                            | 92   | 92   | 8.00E-41  | 100.0 | 90.2 | 95.7 |
| Rsa1.0_00387.1.g12788.t1 | #                                                                                                                                                                                                                                                                                                                                                                                                                                                                                                                         | #    | #    | #         | #     | #    | -    | ----                                                     | ----        | #                    | #                                                                                                                                                                       | #    | #    | #         | #     | #    | #    |
| Rsa1.0_00387.1.g12789.t1 | #                                                                                                                                                                                                                                                                                                                                                                                                                                                                                                                         | #    | #    | #         | #     | #    | -    | ----                                                     | ----        | #                    | #                                                                                                                                                                       | #    | #    | #         | #     | #    | #    |
| Rsa1.0_00387.1.g12790.t1 | gb AAB87099.1  putative retroelement pol polyprotein [Arabidopsis thaliana]                                                                                                                                                                                                                                                                                                                                                                                                                                               | 1477 | 1496 | 0         | 101.3 | 59.5 | 73.5 | putative retroelement pol polyprotein                    | gbpln       | Arabidopsis thaliana | AT4G23160.1   Symbols: CRK8   cysteine-rich RLK (RECEPTOR-like protein kinase) 8   chr4:12129485-12134086 FORWARD LENGTH=1262                                           | 1477 | 1262 | 1.00E-143 | 85.4  | 16.8 | 23.6 |
| Rsa1.0_00387.1.g12791.t1 | ref NP_189528.1  ABC transporter B family member 19 [Arabidopsis thaliana]   gi 75335092 sp Q9LJX0.1 AB19B ARAT H RecName: Full=ABC transporter B family member 19; Short=ABC transporter ABCB.19; Short=AtABCB19; AltName: Full=Multidrug resistance protein 11; AltName: Full=P-glycoprotein 19   gi 9294227 dbj BAB02129.1  P-glycoprotein; multi-drug resistance related; ABC transporter-like protein [Arabidopsis thaliana]   gi 332643977 gb AEE77498.1  ABC transporter B family member 19 [Arabidopsis thaliana] | 1252 | 1252 | 0         | 100.0 | 97.0 | 99.0 | ABC transporter B family member 19                       | gbpln       | Arabidopsis thaliana | AT3G28860.1   Symbols: ATMDR1, ATMDR1.1, PGPI9, MDR1, MDR1, ATPGP19, ABCB19, ATABCB19   ATP binding cassette subfamily B19   chr3:10870287-10877286 REVERSE LENGTH=1252 | 1252 | 1252 | 0         | 100.0 | 97.0 | 99.0 |
| Rsa1.0_00387.1.g12792.t1 | gb EOA39186.1  hypothetical protein CARUB_v10012153mg [Capsella rubella]                                                                                                                                                                                                                                                                                                                                                                                                                                                  | 184  | 508  | 3.00E-29  | 276.1 | 42.4 | 50.5 | hypothetical protein CARUB_v10012153mg                   | gbpln       | Capsella rubella     | AT1G21060.1   Symbols:   Protein of unknown function, DUF547   chr1:7371799-7374085 FORWARD LENGTH=505                                                                  | 184  | 505  | 7.00E-28  | 274.5 | 39.1 | 48.9 |
| Rsa1.0_00387.1.g12793.t1 | #                                                                                                                                                                                                                                                                                                                                                                                                                                                                                                                         | #    | #    | #         | #     | #    | -    | ----                                                     | ----        | #                    | #                                                                                                                                                                       | #    | #    | #         | #     | #    | #    |
| Rsa1.0_00387.1.g12794.t1 | #                                                                                                                                                                                                                                                                                                                                                                                                                                                                                                                         | #    | #    | #         | #     | #    | -    | ----                                                     | ----        | #                    | #                                                                                                                                                                       | #    | #    | #         | #     | #    | #    |
| Rsa1.0_00387.1.g12795.t1 | dbj BAJ34042.1  unnamed protein product [Thellungiella halophila]                                                                                                                                                                                                                                                                                                                                                                                                                                                         | 337  | 337  | 1.00E-154 | 100.0 | 90.8 | 92.6 | unnamed protein product                                  | ----        | ----                 | AT3G28910.1   Symbols: ATMYB30, MYB30   myb domain protein 30   chr3:10911443-10912856 FORWARD LENGTH=323                                                               | 337  | 323  | 2.33E-156 | 95.8  | 86.9 | 87.8 |
| Rsa1.0_00387.1.g12796.t1 | ref NP_001147103.1  zinc finger homeodomain protein 1 [Zea mays]   gi 195607236 gb ACG25448.1  zinc finger homeodomain protein 1 [Zea mays]                                                                                                                                                                                                                                                                                                                                                                               | 100  | 100  | 5.00E-40  | 100.0 | 97.0 | 97.0 | zinc finger homeodomain protein 1                        | gbenv/gbpln | Zea mays             | AT3G28917.1   Symbols: MIF2   mini zinc finger. 2   chr3:10925014-10925316 FORWARD LENGTH=100                                                                           | 100  | 100  | 6.00E-41  | 100.0 | 94.0 | 95.0 |
| Rsa1.0_00387.1.g12797.t1 | ref NP_189534.1  homeobox protein 34 [Arabidopsis thaliana]   gi 9294358 dbj BAB02255.1  unnamed protein product [Arabidopsis thaliana]   gi 20260544 gb AAM13170.1  unknown protein [Arabidopsis thaliana]   gi 22136284 gb AAM91220.1  unknown protein [Arabidopsis thaliana]   gi 332643987 gb AEE77508.1  homeobox protein 34 [Arabidopsis thaliana]                                                                                                                                                                  | 346  | 312  | 1.00E-93  | 90.2  | 69.4 | 75.1 | homeobox protein 34                                      | gbpln       | Arabidopsis thaliana | AT3G28920.1   Symbols: ATHB34, HB34, ZHD9   homeobox protein 34   chr3:10940598-10941536 REVERSE LENGTH=312                                                             | 346  | 312  | 3.00E-96  | 90.2  | 69.4 | 75.1 |
| Rsa1.0_00387.1.g12798.t1 | ref NP_001190492.1  structural maintenance of chromosomes protein 4 [Arabidopsis thaliana]   gi 332008312 gb AED95695.1  structural maintenance of chromosomes protein 4 [Arabidopsis thaliana]                                                                                                                                                                                                                                                                                                                           | 1221 | 1244 | 0         | 101.9 | 91.3 | 95.8 | structural maintenance of chromosomes protein 4          | gbpln       | Arabidopsis thaliana | AT5G48600.2   Symbols: SMC3   structural maintenance of chromosome 3   chr5:19701908-19709091 FORWARD LENGTH=1244                                                       | 1221 | 1244 | 0         | 101.9 | 91.3 | 95.8 |
| Rsa1.0_00387.1.g12799.t1 | dbj BAJ34156.1  unnamed protein product [Thellungiella halophila]                                                                                                                                                                                                                                                                                                                                                                                                                                                         | 168  | 168  | 6.00E-83  | 100.0 | 85.7 | 93.5 | unnamed protein product                                  | ----        | ----                 | AT3G28930.1   Symbols: AIG2   AIG2-like (avirulence induced gene) family protein   chr3:10959890-10960728 REVERSE LENGTH=170                                            | 168  | 170  | 6.00E-83  | 101.2 | 83.3 | 93.5 |
| Rsa1.0_00387.1.g12800.t1 | gb EOA24839.1  hypothetical protein CARUB_v10018128mg [Capsella rubella]                                                                                                                                                                                                                                                                                                                                                                                                                                                  | 169  | 170  | 5.00E-82  | 100.6 | 82.8 | 93.5 | hypothetical protein CARUB_v10018128mg                   | gbpln       | Capsella rubella     | AT3G28940.1   Symbols:   AIG2-like (avirulence induced gene) family protein   chr3:10968324-10969311 REVERSE LENGTH=169                                                 | 169  | 169  | 1.00E-79  | 100.0 | 76.9 | 93.5 |
| Rsa1.0_00387.1.g12801.t1 | dbj BAJ34156.1  unnamed protein product [Thellungiella halophila]                                                                                                                                                                                                                                                                                                                                                                                                                                                         | 168  | 168  | 7.00E-86  | 100.0 | 90.5 | 95.2 | unnamed protein product                                  | ----        | ----                 | AT3G28940.1   Symbols:   AIG2-like (avirulence induced gene) family protein   chr3:10968324-10969311 REVERSE LENGTH=169                                                 | 168  | 169  | 1.00E-79  | 100.6 | 79.2 | 91.1 |
| Rsa1.0_00387.1.g12802.t3 | gb EOA24101.1  hypothetical protein CARUB_v10017331mg, partial [Capsella rubella]                                                                                                                                                                                                                                                                                                                                                                                                                                         | 405  | 418  | 0         | 103.2 | 90.1 | 95.3 | hypothetical protein CARUB_v10017331mg, partial          | gbpln       | Capsella rubella     | AT3G28960.1   Symbols:   Transmembrane amino acid transporter family protein   chr3:10984245-10985767 REVERSE LENGTH=405                                                | 405  | 405  | 0         | 100.0 | 88.9 | 94.8 |

|                          |                                                                                                                                                                                                                                                                                                                                                                                                                                                                                                                            |     |     |           |       |      |      |                                                 |       |                      |                                                                                                                                                                                                                                                                                    |     |     |           |       |      |      |
|--------------------------|----------------------------------------------------------------------------------------------------------------------------------------------------------------------------------------------------------------------------------------------------------------------------------------------------------------------------------------------------------------------------------------------------------------------------------------------------------------------------------------------------------------------------|-----|-----|-----------|-------|------|------|-------------------------------------------------|-------|----------------------|------------------------------------------------------------------------------------------------------------------------------------------------------------------------------------------------------------------------------------------------------------------------------------|-----|-----|-----------|-------|------|------|
| Rsa1.0_00387.1.g12803.t3 | refXP_002877147.1   hypothetical protein ARALYDRAFT_347271 [Arabidopsis lyrata subsp. lyrata] gi 297322985 gb EFH53406.1   hypothetical protein ARALYDRAFT_347271 [Arabidopsis lyrata subsp. lyrata]                                                                                                                                                                                                                                                                                                                       | 313 | 279 | 2.00E-91  | 89.1  | 54.6 | 62.0 | hypothetical protein ARALYDRAFT_347271          | gbpln | Arabidopsis lyrata   | AT3G28970.1   Symbols: AAR3   Domain of unknown function (DUF298)   chr3:10987970-10989782 REVERSE LENGTH=295                                                                                                                                                                      | 313 | 295 | 3.00E-93  | 94.2  | 55.0 | 62.3 |
| Rsa1.0_00387.1.g12804.t1 | refXP_002875484.1   calcium-binding EF hand family protein [Arabidopsis lyrata subsp. lyrata] gi 297321322 gb EFH51743.1   calcium-binding EF hand family protein [Arabidopsis lyrata subsp. lyrata]                                                                                                                                                                                                                                                                                                                       | 184 | 178 | 2.00E-57  | 96.7  | 69.6 | 77.2 | calcium-binding EF hand family protein          | gbpln | Arabidopsis lyrata   | AT5G39670.1   Symbols:   Calcium-binding EF-hand family protein   chr5:15883270-15883884 FORWARD LENGTH=204                                                                                                                                                                        | 184 | 204 | 1.00E-56  | 110.9 | 64.1 | 77.7 |
| Rsa1.0_00387.1.g12805.t1 | refXP_002875485.1   predicted protein [Arabidopsis lyrata subsp. lyrata] gi 297321323 gb EFH51744.1   predicted protein [Arabidopsis lyrata subsp. lyrata]                                                                                                                                                                                                                                                                                                                                                                 | 263 | 262 | 1.00E-135 | 99.6  | 85.9 | 96.2 | predicted protein                               | gbpln | Arabidopsis lyrata   | AT3G29010.1   Symbols:   Biotin/lipoate A/B protein ligase family   chr3:11006945-11007977 FORWARD LENGTH=262                                                                                                                                                                      | 263 | 262 | 1.00E-138 | 99.6  | 86.7 | 95.4 |
| Rsa1.0_00387.1.g12806.t2 | gb EOA25741.1   hypothetical protein CARUB_v10019103mg [Capsella rubella]                                                                                                                                                                                                                                                                                                                                                                                                                                                  | 138 | 309 | 1.00E-48  | 223.9 | 67.4 | 73.9 | hypothetical protein CARUB_v10019103mg          | gbpln | Capsella rubella     | AT3G29020.2   Symbols: MYB110   myb domain protein 110   chr3:11008233-11009419 REVERSE LENGTH=305                                                                                                                                                                                 | 138 | 305 | 1.00E-49  | 221.0 | 65.9 | 73.2 |
| Rsa1.0_00387.1.g12807.t2 | ref NP_189545.1   expansin A5 [Arabidopsis thaliana] gi 20138196 sp Q38864.1 EXPA5_ARAT H RecName: Full=Expansin-A5; Short=AEXPAS; AltName: Full=Alpha-expansin-5; Short=At-EXP5; Short=AtEx5; AltName: Full=AtH-ExpAlpha-1.4; Flags: Precursor gi 1041704 gb AAB38071.1   expansin At-EXPA5 [Arabidopsis thaliana] gi 7939553 dbj BAA95756.1   expansin-like protein [Arabidopsis thaliana] gi 106879169 gb ABF82614.1   At3g29030 [Arabidopsis thaliana] gi 332644002 gb AEE77523.1   expansin A5 [Arabidopsis thaliana] | 216 | 255 | 8.00E-99  | 118.1 | 92.1 | 95.8 | expansin A5                                     | gbpln | Arabidopsis thaliana | AT3G29030.1   Symbols: ATEXPA5, ATEXP5, ATHEXP ALPHA 1.4, EXP5, EXPA5   expansin A5   chr3:11011538-11013068 REVERSE LENGTH=255                                                                                                                                                    | 216 | 255 | 1.00E-101 | 118.1 | 92.1 | 95.8 |
| Rsa1.0_00387.1.g12808.t1 | ref NP_850646.1   uncharacterized protein [Arabidopsis thaliana] gi 26451841 dbj BAC43013.1   unknown protein [Arabidopsis thaliana] gi 28416777 gb AAO42919.1   At3g29034 [Arabidopsis thaliana] gi 332644005 gb AEE77526.1   uncharacterized protein AT3G29034 [Arabidopsis thaliana]                                                                                                                                                                                                                                    | 87  | 86  | 8.00E-32  | 98.9  | 83.9 | 93.1 | uncharacterized protein                         | gbpln | Arabidopsis thaliana | AT3G29034.1   Symbols:   unknown protein; Has 7 Blast hits to 7 proteins in 3 species: Archae - 0; Bacteria - 0; Metazoa - 0; Fungi - 0; Plants - 7; Viruses - 0; Other Eukaryotes - 0 (source: NCBI BLINK).   chr3:11030343-11030603 REVERSE LENGTH=86                            | 87  | 86  | 1.00E-34  | 98.9  | 83.9 | 93.1 |
| Rsa1.0_00387.1.g12809.t1 | refXP_002875486.1   ANAC059/ATNAC3 [Arabidopsis lyrata subsp. lyrata] gi 297321324 gb EFH51745.1   ANAC059/ATNAC3 [Arabidopsis lyrata subsp. lyrata]                                                                                                                                                                                                                                                                                                                                                                       | 316 | 322 | 1.00E-123 | 101.9 | 73.4 | 81.6 | ANAC059/ATNAC3                                  | gbpln | Arabidopsis lyrata   | AT3G29035.1   Symbols: ATNAC3, ANAC059, NAC3   NAC domain containing protein 3   chr3:11033839-11035006 FORWARD LENGTH=318                                                                                                                                                         | 316 | 318 | 1.00E-121 | 100.6 | 69.9 | 79.7 |
| Rsa1.0_00387.1.g12810.t1 | gb AAS76703.1   At3g29075 [Arabidopsis thaliana] gi 46402446 gb AAS92325.1   At3g29075 [Arabidopsis thaliana]                                                                                                                                                                                                                                                                                                                                                                                                              | 277 | 236 | 3.00E-47  | 85.2  | 48.4 | 54.2 | At3g29075                                       | gbpln | Arabidopsis thaliana | AT3G29075.1   Symbols:   glycine-rich protein   chr3:11051645-11052629 REVERSE LENGTH=294                                                                                                                                                                                          | 277 | 294 | 2.00E-49  | 106.1 | 46.6 | 51.6 |
| Rsa1.0_00387.1.g12811.t1 | refXP_002875491.1   pectinesterase family protein [Arabidopsis lyrata subsp. lyrata] gi 297321329 gb EFH51750.1   pectinesterase family protein [Arabidopsis lyrata subsp. lyrata]                                                                                                                                                                                                                                                                                                                                         | 317 | 317 | 0         | 100.0 | 94.6 | 98.4 | pectinesterase family protein                   | gbpln | Arabidopsis lyrata   | AT3G29090.1   Symbols: PME31, ATPME31   pectin methyltransferase 31   chr3:11073804-11075335 FORWARD LENGTH=317                                                                                                                                                                    | 317 | 317 | 0         | 100.0 | 94.3 | 98.4 |
| Rsa1.0_00387.1.g12812.t1 | refXP_002877157.1   hypothetical protein ARALYDRAFT_905203 [Arabidopsis lyrata subsp. lyrata] gi 297322995 gb EFH53416.1   hypothetical protein ARALYDRAFT_905203 [Arabidopsis lyrata subsp. lyrata]                                                                                                                                                                                                                                                                                                                       | 121 | 119 | 1.00E-56  | 98.3  | 89.3 | 95.0 | hypothetical protein ARALYDRAFT_905203          | gbpln | Arabidopsis lyrata   | AT3G29130.2   Symbols:   FUNCTIONS IN: molecular function unknown; INVOLVED IN: biological process unknown; LOCATED IN: cellular component unknown; CONTAINS InterPro DOMAIN/s: Domain of unknown function Kx/DL (InterPro:IPR019371).   chr3:11102546-11103847 REVERSE LENGTH=168 | 121 | 168 | 2.00E-58  | 138.8 | 87.6 | 93.4 |
| Rsa1.0_00387.1.g12813.t1 | gb EOA23756.1   hypothetical protein CARUB_v10016968mg, partial [Capsella rubella]                                                                                                                                                                                                                                                                                                                                                                                                                                         | 508 | 543 | 0         | 106.9 | 91.9 | 95.3 | hypothetical protein CARUB_v10016968mg, partial | gbpln | Capsella rubella     | AT3G29160.2   Symbols: AKIN11, KIN11   SNF1 kinase homolog 11   chr3:1128893-11131510 REVERSE LENGTH=512                                                                                                                                                                           | 508 | 512 | 0         | 100.8 | 91.3 | 94.9 |
| Rsa1.0_00387.1.g12814.t1 | gb EOA23180.1   hypothetical protein CARUB_v10018086mg, partial [Capsella rubella]                                                                                                                                                                                                                                                                                                                                                                                                                                         | 116 | 184 | 5.00E-44  | 158.6 | 88.8 | 94.0 | hypothetical protein CARUB_v10018086mg, partial | gbpln | Capsella rubella     | AT3G29170.1   Symbols:   Eukaryotic protein of unknown function (DUF872)   chr3:11136240-11137542 REVERSE LENGTH=121                                                                                                                                                               | 116 | 121 | 1.00E-42  | 104.3 | 89.7 | 94.8 |
| Rsa1.0_00387.1.g12815.t1 | gb EOA23831.1   hypothetical protein CARUB_v10017046mg [Capsella rubella]                                                                                                                                                                                                                                                                                                                                                                                                                                                  | 511 | 512 | 0         | 100.2 | 89.0 | 95.1 | hypothetical protein CARUB_v10017046mg          | gbpln | Capsella rubella     | AT3G29180.2   Symbols:   Protein of unknown function (DUF1336)   chr3:11149073-11151322 FORWARD LENGTH=513                                                                                                                                                                         | 511 | 513 | 0         | 100.4 | 90.2 | 94.7 |



|                          |                                                                                                                                                                                                                                                                                                                                                                                                                                                                                                                                                                                                                                                                                                                                                                                                                                                                                                                                                                                                                                                                    |      |     |           |       |      |      |                                             |       |                      |                                                                                                                                                                                                                                                                                                                                                             |      |     |           |       |      |      |
|--------------------------|--------------------------------------------------------------------------------------------------------------------------------------------------------------------------------------------------------------------------------------------------------------------------------------------------------------------------------------------------------------------------------------------------------------------------------------------------------------------------------------------------------------------------------------------------------------------------------------------------------------------------------------------------------------------------------------------------------------------------------------------------------------------------------------------------------------------------------------------------------------------------------------------------------------------------------------------------------------------------------------------------------------------------------------------------------------------|------|-----|-----------|-------|------|------|---------------------------------------------|-------|----------------------|-------------------------------------------------------------------------------------------------------------------------------------------------------------------------------------------------------------------------------------------------------------------------------------------------------------------------------------------------------------|------|-----|-----------|-------|------|------|
| Rsa1.0_00387.1.g12816.t1 | gb EOA24077.1  hypothetical protein CARUB_v10017314mg [Capsella rubella]                                                                                                                                                                                                                                                                                                                                                                                                                                                                                                                                                                                                                                                                                                                                                                                                                                                                                                                                                                                           | 400  | 394 | 0         | 98.5  | 86.0 | 91.5 | hypothetical protein CARUB_v10017314mg      | gbpln | Capsella rubella     | AT3G29185.1   Symbols:   Domain of unknown function (DUF3598)   chr3:11155092-11157207 REVERSE LENGTH=396                                                                                                                                                                                                                                                   | 400  | 396 | 0         | 99.0  | 84.0 | 90.0 |
| Rsa1.0_00387.1.g12817.t1 | ref NP_566846.1  chorismate mutase 1 [Arabidopsis thaliana]   gi 334302922 sp P42738.3 CM1_ARATH RecName: Full=Chorismate mutase 1, chloroplastic; Short=ATCM1; AltName: Full=CM-1; Flags: Precursor   gi 89000961 gb ABD59070.1  At3g29200 [Arabidopsis thaliana]   gi 332644031 gb AEE77552.1  chorismate mutase 1 [Arabidopsis thaliana]                                                                                                                                                                                                                                                                                                                                                                                                                                                                                                                                                                                                                                                                                                                        | 336  | 340 | 1.00E-161 | 101.2 | 88.1 | 90.5 | chorismate mutase 1                         | gbpln | Arabidopsis thaliana | AT3G29200.1   Symbols: CM1, ATCM1   chorismate mutase 1   chr3:11164582-11166258 REVERSE LENGTH=340                                                                                                                                                                                                                                                         | 336  | 340 | 1.00E-163 | 101.2 | 88.1 | 90.5 |
| Rsa1.0_00387.1.g12818.t1 | ref NP_189568.1  pentatricopeptide repeat-containing protein [Arabidopsis thaliana]   gi 75273910 sp Q9LS72.1 PP261_ARATH RecName: Full=Pentatricopeptide repeat-containing protein At3g29230   gi 9293916 dbj BAB01819.1  unnamed protein product [Arabidopsis thaliana]   gi 332644032 gb AEE77553.1  pentatricopeptide repeat-containing protein [Arabidopsis thaliana]   ref NP_566847.1  uncharacterized protein [Arabidopsis thaliana]   gi 30689543 ref NP_850648.1  uncharacterized protein [Arabidopsis thaliana]   gi 9293917 dbj BAB01820.1  unnamed protein product [Arabidopsis thaliana]   gi 19310484 gb AAL84976.1  AT3g29240/MXO21_9 [Arabidopsis thaliana]   gi 21537141 gb AAM61482.1  unknown [Arabidopsis thaliana]   gi 22654969 gb AAM98077.1  AT3g29240/MXO21_9 [Arabidopsis thaliana]   gi 28416521 gb AAO42791.1  AT3g29240/MXO21_9 [Arabidopsis thaliana]   gi 332644033 gb AEE77554.1  uncharacterized protein AT3G29240 [Arabidopsis thaliana]   gi 332644034 gb AEE77555.1  uncharacterized protein AT3G29240 [Arabidopsis thaliana] | 597  | 600 | 0         | 100.5 | 85.3 | 93.6 | pentatricopeptide repeat-containing protein | gbpln | Arabidopsis thaliana | AT3G29230.1   Symbols:   Tetratricopeptide repeat (TPR)-like superfamily protein   chr3:11186803-11190605 FORWARD LENGTH=600                                                                                                                                                                                                                                | 597  | 600 | 0         | 100.5 | 85.3 | 93.6 |
| Rsa1.0_00387.1.g12819.t1 | ref NP_189568.1  pentatricopeptide repeat-containing protein [Arabidopsis thaliana]   gi 75273910 sp Q9LS72.1 PP261_ARATH RecName: Full=Pentatricopeptide repeat-containing protein At3g29230   gi 9293916 dbj BAB01819.1  unnamed protein product [Arabidopsis thaliana]   gi 332644032 gb AEE77553.1  pentatricopeptide repeat-containing protein [Arabidopsis thaliana]   ref NP_566847.1  uncharacterized protein [Arabidopsis thaliana]   gi 30689543 ref NP_850648.1  uncharacterized protein [Arabidopsis thaliana]   gi 9293917 dbj BAB01820.1  unnamed protein product [Arabidopsis thaliana]   gi 19310484 gb AAL84976.1  AT3g29240/MXO21_9 [Arabidopsis thaliana]   gi 21537141 gb AAM61482.1  unknown [Arabidopsis thaliana]   gi 22654969 gb AAM98077.1  AT3g29240/MXO21_9 [Arabidopsis thaliana]   gi 28416521 gb AAO42791.1  AT3g29240/MXO21_9 [Arabidopsis thaliana]   gi 332644033 gb AEE77554.1  uncharacterized protein AT3G29240 [Arabidopsis thaliana]   gi 332644034 gb AEE77555.1  uncharacterized protein AT3G29240 [Arabidopsis thaliana] | 311  | 317 | 1.00E-164 | 101.9 | 92.3 | 96.1 | uncharacterized protein                     | gbpln | Arabidopsis thaliana | AT3G29240.2   Symbols:   Protein of unknown function (DUF179)   chr3:11191780-11192868 FORWARD LENGTH=317                                                                                                                                                                                                                                                   | 311  | 317 | 1.00E-167 | 101.9 | 92.3 | 96.1 |
| Rsa1.0_00387.1.g12820.t1 | gb EOA24175.1  hypothetical protein CARUB_v10017408mg [Capsella rubella]                                                                                                                                                                                                                                                                                                                                                                                                                                                                                                                                                                                                                                                                                                                                                                                                                                                                                                                                                                                           | 387  | 393 | 1.00E-178 | 101.6 | 86.8 | 93.3 | hypothetical protein CARUB_v10017408mg      | gbpln | Capsella rubella     | AT3G29770.1   Symbols: ATMES11, MES11   methyl esterase 11   chr3:11648471-11650565 FORWARD LENGTH=390                                                                                                                                                                                                                                                      | 387  | 390 | 1.00E-168 | 100.8 | 86.0 | 92.2 |
| Rsa1.0_00387.1.g12821.t1 | ref XP_002875545.1  hypothetical protein ARALYDRAFT_905307 [Arabidopsis lyrata subsp. lyrata]   gi 297321383 gb EFH51804.1  hypothetical protein ARALYDRAFT_905307 [Arabidopsis lyrata subsp. lyrata]   ref XP_002875546.1  hypothetical protein ARALYDRAFT_484733 [Arabidopsis lyrata subsp. lyrata]   gi 297321384 gb EFH51805.1  hypothetical protein ARALYDRAFT_484733 [Arabidopsis lyrata subsp. lyrata]   ref XP_002875526.1  hypothetical protein ARALYDRAFT_323026 [Arabidopsis lyrata subsp. lyrata]   gi 297321364 gb EFH51785.1  hypothetical protein ARALYDRAFT_323026 [Arabidopsis lyrata subsp. lyrata]                                                                                                                                                                                                                                                                                                                                                                                                                                              | 101  | 116 | 4.00E-25  | 114.9 | 62.4 | 74.3 | hypothetical protein ARALYDRAFT_905307      | gbpln | Arabidopsis lyrata   | AT3G29780.1   Symbols: RALFL27   ralfl-like 27   chr3:11671741-11672094 FORWARD LENGTH=117                                                                                                                                                                                                                                                                  | 101  | 117 | 1.00E-18  | 115.8 | 55.4 | 64.4 |
| Rsa1.0_00387.1.g12822.t1 | ref XP_002875546.1  hypothetical protein ARALYDRAFT_484733 [Arabidopsis lyrata subsp. lyrata]   gi 297321384 gb EFH51805.1  hypothetical protein ARALYDRAFT_484733 [Arabidopsis lyrata subsp. lyrata]   ref XP_002875526.1  hypothetical protein ARALYDRAFT_323026 [Arabidopsis lyrata subsp. lyrata]   gi 297321364 gb EFH51785.1  hypothetical protein ARALYDRAFT_323026 [Arabidopsis lyrata subsp. lyrata]                                                                                                                                                                                                                                                                                                                                                                                                                                                                                                                                                                                                                                                      | 437  | 439 | 0         | 100.5 | 87.6 | 93.1 | hypothetical protein ARALYDRAFT_484733      | gbpln | Arabidopsis lyrata   | AT3G29810.1   Symbols: COBL2   COBRA-like protein 2 precursor   chr3:11728212-11730158 FORWARD LENGTH=441                                                                                                                                                                                                                                                   | 437  | 441 | 0         | 100.9 | 86.3 | 93.1 |
| Rsa1.0_00387.1.g12823.t1 | ref XP_002875526.1  hypothetical protein ARALYDRAFT_323026 [Arabidopsis lyrata subsp. lyrata]   gi 297321364 gb EFH51785.1  hypothetical protein ARALYDRAFT_323026 [Arabidopsis lyrata subsp. lyrata]                                                                                                                                                                                                                                                                                                                                                                                                                                                                                                                                                                                                                                                                                                                                                                                                                                                              | 87   | 87  | 5.00E-42  | 100.0 | 94.3 | 97.7 | hypothetical protein ARALYDRAFT_323026      | gbpln | Arabidopsis lyrata   | AT3G29970.1   Symbols:   B12D protein   chr3:11745299-11746481 FORWARD LENGTH=87                                                                                                                                                                                                                                                                            | 87   | 87  | 3.00E-44  | 100.0 | 93.1 | 96.6 |
| Rsa1.0_00387.1.g12824.t2 | ref XP_002877204.1  hypothetical protein ARALYDRAFT_323027 [Arabidopsis lyrata subsp. lyrata]   gi 297323042 gb EFH53463.1  hypothetical protein ARALYDRAFT_323027 [Arabidopsis lyrata subsp. lyrata]                                                                                                                                                                                                                                                                                                                                                                                                                                                                                                                                                                                                                                                                                                                                                                                                                                                              | 1081 | 977 | 0         | 90.4  | 51.2 | 61.6 | hypothetical protein ARALYDRAFT_323027      | gbpln | Arabidopsis lyrata   | AT2G10440.1   Symbols:   unknown protein; BEST Arabidopsis thaliana protein match is: unknown protein (TAIR:AT1G15780.1); Has 8319 Blast hits to 5104 proteins in 317 species: Archae - 0; Bacteria - 283; Metazoa - 1706; Fungi - 535; Plants - 320; Viruses - 18; Other Eukaryotes - 5455 (source: NCBI BLINK).   chr2:4013752-4018046 REVERSE LENGTH=935 | 1081 | 935 | 1.00E-174 | 86.5  | 39.1 | 47.9 |
| Rsa1.0_00387.1.g12825.t1 | #                                                                                                                                                                                                                                                                                                                                                                                                                                                                                                                                                                                                                                                                                                                                                                                                                                                                                                                                                                                                                                                                  | #    | #   | #         | #     | #    | #    | -                                           | ----  | ----                 | #                                                                                                                                                                                                                                                                                                                                                           | #    | #   | #         | #     | #    |      |
| Rsa1.0_00387.1.g12826.t1 | #                                                                                                                                                                                                                                                                                                                                                                                                                                                                                                                                                                                                                                                                                                                                                                                                                                                                                                                                                                                                                                                                  | #    | #   | #         | #     | #    | #    | -                                           | ----  | ----                 | #                                                                                                                                                                                                                                                                                                                                                           | #    | #   | #         | #     | #    |      |

|                          |                                                                                                                                                                                                                                                                                                                                                                                                                                                                                                                                                                                                                                                                                                                                                                                                     |     |     |           |       |      |      |                                        |       |                      |                                                                                                                                                                                                                                                                                                                                                                     |     |     |           |       |      |      |
|--------------------------|-----------------------------------------------------------------------------------------------------------------------------------------------------------------------------------------------------------------------------------------------------------------------------------------------------------------------------------------------------------------------------------------------------------------------------------------------------------------------------------------------------------------------------------------------------------------------------------------------------------------------------------------------------------------------------------------------------------------------------------------------------------------------------------------------------|-----|-----|-----------|-------|------|------|----------------------------------------|-------|----------------------|---------------------------------------------------------------------------------------------------------------------------------------------------------------------------------------------------------------------------------------------------------------------------------------------------------------------------------------------------------------------|-----|-----|-----------|-------|------|------|
| Rsa1.0_00388.1.g12827.t1 | gb EOA14349.1  hypothetical protein CARUB_v10027529mg [Capsella rubella]                                                                                                                                                                                                                                                                                                                                                                                                                                                                                                                                                                                                                                                                                                                            | 165 | 222 | 4.00E-49  | 134.5 | 66.1 | 86.1 | hypothetical protein CARUB_v10027529mg | gbpln | Capsella rubella     | AT5G51860.2   Symbols:   K-box region and MADS-box transcription factor family protein   chr5:21081844-21084126 REVERSE LENGTH=202                                                                                                                                                                                                                                  | 165 | 202 | 4.00E-30  | 122.4 | 47.9 | 58.8 |
| Rsa1.0_00388.1.g12828.t1 | ref NP_194273.2  uncharacterized protein [Arabidopsis thaliana] gi 332659656 gb AE85056.1  uncharacterized protein AT4G25430 [Arabidopsis thaliana]                                                                                                                                                                                                                                                                                                                                                                                                                                                                                                                                                                                                                                                 | 446 | 459 | 2.00E-96  | 102.9 | 57.0 | 69.5 | uncharacterized protein                | gbpln | Arabidopsis thaliana | AT4G25430.1   Symbols:   unknown protein; BEST Arabidopsis thaliana protein match is: unknown protein (TAIR:AT5G51850.1). Has 30201 Blast hits to 17322 proteins in 780 species: Archae - 12; Bacteria - 1396; Metazoa - 17338; Fungi - 3422; Plants - 5037; Viruses - 0; Other Eukaryotes - 2996 (source: NCBI BLINK).   chr4:12998571-13000211 FORWARD LENGTH=459 | 446 | 459 | 6.00E-99  | 102.9 | 57.0 | 69.5 |
| Rsa1.0_00388.1.g12829.t1 | #                                                                                                                                                                                                                                                                                                                                                                                                                                                                                                                                                                                                                                                                                                                                                                                                   | #   | #   | #         | #     | #    | #    | -                                      | ----  | ----                 | #                                                                                                                                                                                                                                                                                                                                                                   | #   | #   | #         | #     | #    |      |
| Rsa1.0_00388.1.g12830.t1 | ref XP_002869672.1  basix helix-loop-helix family protein [Arabidopsis lyrata subsp. lyrata] gi 297315508 gb EFH45931.1  basix helix-loop-helix family protein [Arabidopsis lyrata subsp. lyrata]                                                                                                                                                                                                                                                                                                                                                                                                                                                                                                                                                                                                   | 219 | 222 | 2.00E-81  | 101.4 | 76.3 | 87.2 | basix helix-loop-helix family protein  | gbpln | Arabidopsis lyrata   | AT4G25410.1   Symbols:   basix helix-loop-helix (bHLH) DNA-binding superfamily protein   chr4:12985772-12987149 FORWARD LENGTH=230                                                                                                                                                                                                                                  | 219 | 230 | 7.00E-82  | 105.0 | 73.5 | 84.9 |
| Rsa1.0_00388.1.g12831.t1 | #                                                                                                                                                                                                                                                                                                                                                                                                                                                                                                                                                                                                                                                                                                                                                                                                   | #   | #   | #         | #     | #    | #    | -                                      | ----  | ----                 | #                                                                                                                                                                                                                                                                                                                                                                   | #   | #   | #         | #     | #    |      |
| Rsa1.0_00388.1.g12832.t1 | ref NP_194265.2  phosphate transporter PHO1-4 [Arabidopsis thaliana] gi 75127840 sp Q6R8G6.1 PHO14_ARAT H RecName: Full=Phosphate transporter PHO1 homolog 4; AltName: Full=Protein PHO1 homolog 4; Short=AtPHO1;H4 gi 41079263 gb AAR99486.1  PHO1-like protein [Arabidopsis thaliana] gi 332659645 gb AEE85045.1  phosphate transporter PHO1-4 [Arabidopsis thaliana]                                                                                                                                                                                                                                                                                                                                                                                                                             | 727 | 745 | 0         | 102.5 | 82.4 | 89.7 | phosphate transporter PHO1-4           | gbpln | Arabidopsis thaliana | AT4G25350.1   Symbols: SHB1   EXS (ERD1/XPR1/SYG1) family protein   chr4:12963382-12966448 REVERSE LENGTH=745                                                                                                                                                                                                                                                       | 727 | 745 | 0         | 102.5 | 82.4 | 89.7 |
| Rsa1.0_00388.1.g12833.t1 | ref XP_002869680.1  oxidoreductase [Arabidopsis lyrata subsp. lyrata] gi 297315516 gb EFH45939.1  oxidoreductase [Arabidopsis lyrata subsp. lyrata]                                                                                                                                                                                                                                                                                                                                                                                                                                                                                                                                                                                                                                                 | 358 | 356 | 1.00E-172 | 99.4  | 79.3 | 91.1 | oxidoreductase                         | gbpln | Arabidopsis lyrata   | AT4G25300.1   Symbols:   2-oxoglutarate (2OG) and Fe(II)-dependent oxygenase superfamily protein   chr4:12945263-12946642 FORWARD LENGTH=356                                                                                                                                                                                                                        | 358 | 356 | 1.00E-171 | 99.4  | 77.7 | 89.9 |
| Rsa1.0_00388.1.g12834.t2 | ref NP_194253.2  E3 ubiquitin protein ligase RIN2 [Arabidopsis thaliana] gi 30686808 ref NP_849552.1  E3 ubiquitin protein ligase RIN2 [Arabidopsis thaliana] gi 75304438 sp Q8VYC8.1 RIN2_ARATH RecName: Full=E3 ubiquitin protein ligase RIN2; AltName: Full=AMF receptor-like protein 1A; AltName: Full=RP11-interacting protein 2 gi 18176187 gb AAL60000.1  unknown protein [Arabidopsis thaliana] gi 332659628 gb AEE85028.1  E3 ubiquitin protein ligase RIN2 [Arabidopsis thaliana] gi 332659629 gb AEE85029.1  E3 ubiquitin protein ligase RIN2 [Arabidopsis thaliana] sp P29110.1 OLEO3_BRANA RecName: Full=Oleolin Bn-III; Short=BnIII gi 17839 emb CAA43941.1  oleosin BN-III [Brassica napus] gi 196122088 gb ACG69519.1  oleosin S3-7 [Brassica napus] gi 742387 prf 2009397A oleosin | 986 | 578 | 0         | 58.6  | 54.9 | 56.3 | E3 ubiquitin protein ligase RIN2       | gbpln | Arabidopsis thaliana | AT4G25230.2   Symbols: RIN2   RPM1 interacting protein 2   chr4:12924446-12928671 FORWARD LENGTH=578                                                                                                                                                                                                                                                                | 986 | 578 | 0         | 58.6  | 54.9 | 56.3 |
| Rsa1.0_00388.1.g12835.t1 | ref NP_001190831.1  acyl carrier protein 4 [Arabidopsis thaliana] gi 332659597 gb AEE84997.1  acyl carrier protein 4 [Arabidopsis thaliana]                                                                                                                                                                                                                                                                                                                                                                                                                                                                                                                                                                                                                                                         | 42  | 149 | 4.00E-12  | 354.8 | 85.7 | 92.9 | acyl carrier protein 4                 | gbpln | Arabidopsis thaliana | AT4G25050.2   Symbols: ACP4   acyl carrier protein 4   chr4:12870178-12871024 FORWARD LENGTH=149                                                                                                                                                                                                                                                                    | 42  | 149 | 7.00E-15  | 354.8 | 85.7 | 92.9 |
| Rsa1.0_00388.1.g12837.t1 | ref NP_194234.1  uncharacterized protein [Arabidopsis thaliana] gi 75181563 sp Q9MOL3.1 CSPLR_ARATH RecName: Full=CASP-like protein At4g25040 gi 7269354 emb CAB79413.1  putative protein [Arabidopsis thaliana] gi 332659595 gb AEE84995.1  CASP-like protein [Arabidopsis thaliana]                                                                                                                                                                                                                                                                                                                                                                                                                                                                                                               | 168 | 170 | 2.00E-65  | 101.2 | 79.2 | 87.5 | uncharacterized protein                | gbpln | Arabidopsis thaliana | AT4G25040.1   Symbols:   Uncharacterised protein family (UPF0497)   chr4:12868320-12869319 FORWARD LENGTH=170                                                                                                                                                                                                                                                       | 168 | 170 | 8.00E-68  | 101.2 | 79.2 | 87.5 |
| Rsa1.0_00388.1.g12838.t1 | ref XP_002867630.1  nodulin MtN3 family protein [Arabidopsis lyrata subsp. lyrata] gi 297313466 gb EFH43889.1  nodulin MtN3 family protein [Arabidopsis lyrata subsp. lyrata]                                                                                                                                                                                                                                                                                                                                                                                                                                                                                                                                                                                                                       | 272 | 280 | 1.00E-137 | 102.9 | 90.1 | 95.6 | nodulin MtN3 family protein            | gbpln | Arabidopsis lyrata   | AT4G25010.1   Symbols: SWEET14, AtSWEET14   Nodulin MtN3 family protein   chr4:12854630-12856351 REVERSE LENGTH=281                                                                                                                                                                                                                                                 | 272 | 281 | 1.00E-137 | 103.3 | 89.0 | 93.8 |



|                          |                                                                                                                                                                                                                                                                                                                                                                               |      |      |           |       |      |      |                                                  |       |                      |                                                                                                                                                                                                                                                                                                                                                                                                                                                                              |      |      |           |       |      |      |
|--------------------------|-------------------------------------------------------------------------------------------------------------------------------------------------------------------------------------------------------------------------------------------------------------------------------------------------------------------------------------------------------------------------------|------|------|-----------|-------|------|------|--------------------------------------------------|-------|----------------------|------------------------------------------------------------------------------------------------------------------------------------------------------------------------------------------------------------------------------------------------------------------------------------------------------------------------------------------------------------------------------------------------------------------------------------------------------------------------------|------|------|-----------|-------|------|------|
| Rsa1.0_00389.1.g12852.t1 | refXP_002884365.1   esterase/lipase/thioesterase family protein [Arabidopsis lyrata subsp. lyrata] gi 297330205 gb EFH60624.1   esterase/lipase/thioesterase family protein [Arabidopsis lyrata subsp. lyrata]                                                                                                                                                                | 306  | 333  | 1.00E-143 | 108.8 | 85.3 | 90.5 | esterase/lipase/thioesterase family protein      | gbpln | Arabidopsis lyrata   | AT3G03240.1   Symbols:   alpha/beta-Hydrolases superfamily protein   chr3:746781-748291 REVERSE LENGTH=333                                                                                                                                                                                                                                                                                                                                                                   | 306  | 333  | 1.00E-143 | 108.8 | 83.3 | 90.2 |
| Rsa1.0_00389.1.g12853.t1 | gb EOA30501.1   hypothetical protein CARUB_v10013624mg [Capsella rubella]                                                                                                                                                                                                                                                                                                     | 469  | 469  | 0         | 100.0 | 95.7 | 98.5 | hypothetical protein CARUB_v10013624mg           | gbpln | Capsella rubella     | AT3G03250.1   Symbols: UGP, UGP1, AUGP1   UDP-GLUCOSE PYROPHOSPHORYLASE 1   chr3:749761-754014 REVERSE LENGTH=469                                                                                                                                                                                                                                                                                                                                                            | 469  | 469  | 0         | 100.0 | 94.9 | 98.1 |
| Rsa1.0_00389.1.g12854.t1 | gb EOA32484.1   hypothetical protein CARUB_v10015764mg [Capsella rubella]                                                                                                                                                                                                                                                                                                     | 696  | 687  | 0         | 98.7  | 60.8 | 75.0 | hypothetical protein CARUB_v10015764mg           | gbpln | Capsella rubella     | AT3G03260.1   Symbols: HDG8   homeodomain GLABROUS 8   chr3:755356-759234 REVERSE LENGTH=699                                                                                                                                                                                                                                                                                                                                                                                 | 696  | 699  | 0         | 100.4 | 59.6 | 73.6 |
| Rsa1.0_00389.1.g12855.t1 | gb ABV89642.1   universal stress protein family protein [Brassica rapa]                                                                                                                                                                                                                                                                                                       | 135  | 159  | 9.00E-66  | 117.8 | 97.0 | 99.3 | universal stress protein family protein          | gbpln | Brassica rapa        | AT3G03270.2   Symbols:   Adenine nucleotide alpha hydrolases-like superfamily protein   chr3:762136-763075 REVERSE LENGTH=159                                                                                                                                                                                                                                                                                                                                                | 135  | 159  | 4.00E-64  | 117.8 | 92.6 | 95.6 |
| Rsa1.0_00389.1.g12856.t1 | #                                                                                                                                                                                                                                                                                                                                                                             | #    | #    | #         | #     | #    | #    | -                                                | ----  | ----                 | #                                                                                                                                                                                                                                                                                                                                                                                                                                                                            | #    | #    | #         | #     | #    | #    |
| Rsa1.0_00389.1.g12857.t1 | refXP_002882281.1   hypothetical protein ARALYDRAFT_896322 [Arabidopsis lyrata subsp. lyrata] gi 297328121 gb EFH58540.1   hypothetical protein ARALYDRAFT_896322 [Arabidopsis lyrata subsp. lyrata]                                                                                                                                                                          | 173  | 166  | 3.00E-69  | 96.0  | 77.5 | 86.1 | hypothetical protein ARALYDRAFT_896322           | gbpln | Arabidopsis lyrata   | AT3G03280.1   Symbols:   unknown protein; FUNCTIONS IN: molecular function unknown; INVOLVED IN: N-terminal protein myristoylation; LOCATED IN: cellular_component unknown; BEST Arabidopsis thaliana protein match is: unknown protein (TAIRAT5G17350.1). Has 137 Blast hits to 137 proteins in 11 species: Archae - 0; Bacteria - 0; Metazoa - 0; Fungi - 0; Plants - 137; Viruses - 0; Other Eukaryotes - 0 (source: NCBI BLINK).   chr3:765559-766059 FORWARD LENGTH=166 | 173  | 166  | 8.00E-71  | 96.0  | 75.1 | 86.1 |
| Rsa1.0_00389.1.g12858.t1 | refXP_002882282.1   predicted protein [Arabidopsis lyrata subsp. lyrata] gi 297328122 gb EFH58541.1   predicted protein [Arabidopsis lyrata subsp. lyrata]                                                                                                                                                                                                                    | 477  | 494  | 1.00E-165 | 103.6 | 62.7 | 76.1 | predicted protein                                | gbpln | Arabidopsis lyrata   | #                                                                                                                                                                                                                                                                                                                                                                                                                                                                            | #    | #    | #         | #     | #    | #    |
| Rsa1.0_00389.1.g12859.t1 | ref NP_186979.1   Adenine nucleotide alpha hydrolases-like protein [Arabidopsis thaliana] gi 671441.1 gb AAF26099.1 AC012328.2   hypothetical protein [Arabidopsis thaliana] gi 6763361.8 gb AAV78733.1   universal stress protein family protein [Arabidopsis thaliana] gi 332640402 gb AEE73923.1   Adenine nucleotide alpha hydrolases-like protein [Arabidopsis thaliana] | 288  | 274  | 1.00E-112 | 95.1  | 80.2 | 84.7 | Adenine nucleotide alpha hydrolases-like protein | gbpln | Arabidopsis thaliana | AT3G03290.1   Symbols:   Adenine nucleotide alpha hydrolases-like superfamily protein   chr3:766745-767742 FORWARD LENGTH=274                                                                                                                                                                                                                                                                                                                                                | 288  | 274  | 1.00E-114 | 95.1  | 80.2 | 84.7 |
| Rsa1.0_00389.1.g12860.t4 | gb ACE60552.1   dicer-like protein 2 [Brassica rapa]                                                                                                                                                                                                                                                                                                                          | 1416 | 1392 | 0         | 98.3  | 89.8 | 93.7 | dicer-like protein 2                             | gbpln | Brassica rapa        | AT3G03300.3   Symbols: DCL2   dicer-like 2   chr3:768020-774833 REVERSE LENGTH=1388                                                                                                                                                                                                                                                                                                                                                                                          | 1416 | 1388 | 0         | 98.0  | 79.5 | 87.3 |
| Rsa1.0_00389.1.g12861.t1 | refXP_002884369.1   hypothetical protein ARALYDRAFT_317213 [Arabidopsis lyrata subsp. lyrata] gi 297330209 gb EFH60628.1   hypothetical protein ARALYDRAFT_317213 [Arabidopsis lyrata subsp. lyrata]                                                                                                                                                                          | 750  | 2033 | 0         | 271.1 | 79.3 | 88.5 | hypothetical protein ARALYDRAFT_317213           | gbpln | Arabidopsis lyrata   | AT3G03305.1   Symbols:   Calcineurin-like metallo-phosphoesterase superfamily protein   chr3:775504-778271 REVERSE LENGTH=743                                                                                                                                                                                                                                                                                                                                                | 750  | 743  | 0         | 99.1  | 81.9 | 90.1 |
| Rsa1.0_00389.1.g12862.t1 | gb EOA30564.1   hypothetical protein CARUB_v10013690mg [Capsella rubella]                                                                                                                                                                                                                                                                                                     | 450  | 448  | 0         | 99.6  | 88.0 | 93.8 | hypothetical protein CARUB_v10013690mg           | gbpln | Capsella rubella     | AT3G03310.1   Symbols: ATLCAT3, LCAT3   leithincholesterol acyltransferase 3   chr3:778767-781488 REVERSE LENGTH=447                                                                                                                                                                                                                                                                                                                                                         | 450  | 447  | 0         | 99.3  | 89.8 | 95.3 |
| Rsa1.0_00389.1.g12863.t5 | refXP_002882284.1   hypothetical protein ARALYDRAFT_477581 [Arabidopsis lyrata subsp. lyrata] gi 297328124 gb EFH58543.1   hypothetical protein ARALYDRAFT_477581 [Arabidopsis lyrata subsp. lyrata]                                                                                                                                                                          | 314  | 240  | 1.00E-101 | 76.4  | 60.5 | 63.4 | hypothetical protein ARALYDRAFT_477581           | gbpln | Arabidopsis lyrata   | AT3G03320.1   Symbols:   RNA-binding ASCH domain protein   chr3:781872-783289 FORWARD LENGTH=244                                                                                                                                                                                                                                                                                                                                                                             | 314  | 244  | 1.00E-100 | 77.7  | 58.9 | 63.7 |
| Rsa1.0_00389.1.g12864.t2 | #                                                                                                                                                                                                                                                                                                                                                                             | #    | #    | #         | #     | #    | #    | -                                                | ----  | ----                 | #                                                                                                                                                                                                                                                                                                                                                                                                                                                                            | #    | #    | #         | #     | #    | #    |
| Rsa1.0_00389.1.g12865.t1 | #                                                                                                                                                                                                                                                                                                                                                                             | #    | #    | #         | #     | #    | #    | -                                                | ----  | ----                 | #                                                                                                                                                                                                                                                                                                                                                                                                                                                                            | #    | #    | #         | #     | #    | #    |
| Rsa1.0_00389.1.g12866.t3 | refXP_002882284.1   hypothetical protein ARALYDRAFT_477581 [Arabidopsis lyrata subsp. lyrata] gi 297328124 gb EFH58543.1   hypothetical protein ARALYDRAFT_477581 [Arabidopsis lyrata subsp. lyrata]                                                                                                                                                                          | 245  | 240  | 2.00E-91  | 98.0  | 75.1 | 79.6 | hypothetical protein ARALYDRAFT_477581           | gbpln | Arabidopsis lyrata   | AT3G03320.1   Symbols:   RNA-binding ASCH domain protein   chr3:781872-783289 FORWARD LENGTH=244                                                                                                                                                                                                                                                                                                                                                                             | 245  | 244  | 5.00E-90  | 99.6  | 72.7 | 80.0 |

|                          |                                                                                                                                                                                                                                                                                                                    |      |      |           |       |      |      |                                                                                                                                                                                                |       |                      |                                                                                                                                                                                                                                                                                                                                                                                                                                                              |      |     |           |       |      |      |
|--------------------------|--------------------------------------------------------------------------------------------------------------------------------------------------------------------------------------------------------------------------------------------------------------------------------------------------------------------|------|------|-----------|-------|------|------|------------------------------------------------------------------------------------------------------------------------------------------------------------------------------------------------|-------|----------------------|--------------------------------------------------------------------------------------------------------------------------------------------------------------------------------------------------------------------------------------------------------------------------------------------------------------------------------------------------------------------------------------------------------------------------------------------------------------|------|-----|-----------|-------|------|------|
| Rsa1.0_00389.1.g12867.t1 | refXP_002884371.1   short-chain dehydrogenase/reductase family protein [Arabidopsis lyrata subsp. lyrata] gi 297330211 gb EFH60630.1   short-chain dehydrogenase/reductase family protein [Arabidopsis lyrata subsp. lyrata]                                                                                       | 410  | 327  | 1.00E-135 | 79.8  | 59.5 | 64.4 | short-chain dehydrogenase/reductase family protein                                                                                                                                             | gbpln | Arabidopsis lyrata   | AT3G03330.1   Symbols:   NAD(P)-binding Rossmann-fold superfamily protein   chr3:783572-786148 REVERSE LENGTH=328                                                                                                                                                                                                                                                                                                                                            | 410  | 328 | 1.00E-134 | 80.0  | 59.5 | 64.4 |
| Rsa1.0_00389.1.g12868.t1 | refXP_002884371.1   short-chain dehydrogenase/reductase family protein [Arabidopsis lyrata subsp. lyrata] gi 297330211 gb EFH60630.1   short-chain dehydrogenase/reductase family protein [Arabidopsis lyrata subsp. lyrata]                                                                                       | 399  | 327  | 1.00E-125 | 82.0  | 58.4 | 62.9 | short-chain dehydrogenase/reductase family protein                                                                                                                                             | gbpln | Arabidopsis lyrata   | AT3G03330.1   Symbols:   NAD(P)-binding Rossmann-fold superfamily protein   chr3:783572-786148 REVERSE LENGTH=328                                                                                                                                                                                                                                                                                                                                            | 399  | 328 | 1.00E-123 | 82.2  | 58.4 | 62.7 |
| Rsa1.0_00389.1.g12869.t1 | refXP_002884371.1   short-chain dehydrogenase/reductase family protein [Arabidopsis lyrata subsp. lyrata] gi 297330211 gb EFH60630.1   short-chain dehydrogenase/reductase family protein [Arabidopsis lyrata subsp. lyrata]                                                                                       | 328  | 327  | 1.00E-172 | 99.7  | 91.8 | 94.5 | short-chain dehydrogenase/reductase family protein                                                                                                                                             | gbpln | Arabidopsis lyrata   | AT3G03330.1   Symbols:   NAD(P)-binding Rossmann-fold superfamily protein   chr3:783572-786148 REVERSE LENGTH=328                                                                                                                                                                                                                                                                                                                                            | 328  | 328 | 1.00E-170 | 100.0 | 91.8 | 94.5 |
| Rsa1.0_00390.1.g12870.t1 | refXP_002862843.1   predicted protein [Arabidopsis lyrata subsp. lyrata] gi 297308590 gb EFH39101.1   predicted protein [Arabidopsis lyrata subsp. lyrata]                                                                                                                                                         | 379  | 550  | 1.00E-13  | 145.1 | 15.6 | 28.5 | predicted protein                                                                                                                                                                              | gbpln | Arabidopsis lyrata   | #                                                                                                                                                                                                                                                                                                                                                                                                                                                            | #    | #   | #         | #     | #    | #    |
| Rsa1.0_00390.1.g12871.t1 | refXP_002865450.1   hypothetical protein ARALYDRAFT_917371 [Arabidopsis lyrata subsp. lyrata] gi 297311285 gb EFH41709.1   hypothetical protein ARALYDRAFT_917371 [Arabidopsis lyrata subsp. lyrata]                                                                                                               | 92   | 91   | 5.00E-36  | 98.9  | 80.4 | 87.0 | hypothetical protein ARALYDRAFT_917371                                                                                                                                                         | gbpln | Arabidopsis lyrata   | AT5G43150.1   Symbols:   unknown protein; FUNCTIONS IN: molecular function unknown; INVOLVED IN: biological process unknown; LOCATED IN: mitochondrion; EXPRESSED IN: 22 plant structures; EXPRESSED DURING: 13 growth stages; Has 1807 Blast hits to 1807 proteins in 277 species: Archae - 0; Bacteria - 0; Metazoa - 736; Fungi - 347; Plants - 385; Viruses - 0; Other Eukaryotes - 339 (source: NCBI BLINK).   chr5:17325076-17325689 FORWARD LENGTH=91 | 92   | 91  | 1.00E-36  | 98.9  | 78.3 | 85.9 |
| Rsa1.0_00390.1.g12872.t1 | refXP_002865451.1   hypothetical protein ARALYDRAFT_917372 [Arabidopsis lyrata subsp. lyrata] gi 297311286 gb EFH41710.1   hypothetical protein ARALYDRAFT_917372 [Arabidopsis lyrata subsp. lyrata]                                                                                                               | 250  | 253  | 1.00E-118 | 101.2 | 86.4 | 90.8 | hypothetical protein ARALYDRAFT_917372                                                                                                                                                         | gbpln | Arabidopsis lyrata   | AT5G43140.1   Symbols:   Peroxisomal membrane 22 kDa (Mpv17/PMP22) family protein   chr5:17321570-17323224 FORWARD LENGTH=254                                                                                                                                                                                                                                                                                                                                | 250  | 254 | 1.00E-120 | 101.6 | 85.2 | 91.6 |
| Rsa1.0_00390.1.g12873.t1 | #                                                                                                                                                                                                                                                                                                                  | #    | #    | #         | #     | #    | #    | -                                                                                                                                                                                              | ----  | ----                 | #                                                                                                                                                                                                                                                                                                                                                                                                                                                            | #    | #   | #         | #     | #    | #    |
| Rsa1.0_00390.1.g12874.t1 | gb EOA11936.1   hypothetical protein CARUB_v10016547mg, partial [Capsella rubella]                                                                                                                                                                                                                                 | 116  | 149  | 1.00E-23  | 128.4 | 41.4 | 62.9 | hypothetical protein CARUB_v10016547mg, partial                                                                                                                                                | gbpln | Capsella rubella     | AT2G34320.1   Symbols:   Polynucleotidyl transferase, ribonuclease H-like superfamily protein   chr2:14484959-14485837 FORWARD LENGTH=292                                                                                                                                                                                                                                                                                                                    | 116  | 292 | 5.00E-11  | 251.7 | 29.3 | 48.3 |
| Rsa1.0_00390.1.g12875.t1 | gb EOA39894.1   hypothetical protein CARUB_v10008573mg [Capsella rubella]                                                                                                                                                                                                                                          | 1022 | 630  | 3.00E-77  | 61.6  | 16.3 | 23.0 | hypothetical protein CARUB_v10008573mg                                                                                                                                                         | gbpln | Capsella rubella     | AT1G31150.1   Symbols:   Domain of unknown function (DUF1985)   chr1:1120097-11122412 FORWARD LENGTH=673                                                                                                                                                                                                                                                                                                                                                     | 1022 | 673 | 5.00E-56  | 65.9  | 14.3 | 22.3 |
| Rsa1.0_00390.1.g12876.t2 | gb AAF78267.1 AC020576.11 Contains weak similarity to 25.7 kDa protein from Cicer arietinum gb AJ276422 and contains a transposase mutator PF 00872 domain. ESTs gb T13756, gb AA712647, gb AA585980 come from this gene [Arabidopsis thaliana]                                                                    | 956  | 1206 | 1.00E-171 | 126.2 | 33.5 | 45.6 | Contains weak similarity to 25.7 kDa protein from Cicer arietinum gb AJ276422 and contains a transposase mutator PF 00872 domain. ESTs gb T13756, gb AA712647, gb AA585980 come from this gene | gbpln | Arabidopsis thaliana | AT1G64260.1   Symbols:   MuDR family transposase   chr1:23847756-23849915 FORWARD LENGTH=719                                                                                                                                                                                                                                                                                                                                                                 | 956  | 719 | 7.00E-35  | 75.2  | 14.0 | 23.4 |
| Rsa1.0_00390.1.g12877.t1 | ref NP_199127.3  TBP-associated factor 4 [Arabidopsis thaliana] gi 38490053 gb AAR21620.1   TATA-binding protein associated factor 4b [Arabidopsis thaliana] gi 110738778 dbj BAF01312.1   hypothetical protein [Arabidopsis thaliana] gi 332007530 gb AED84913.1   TBP-associated factor 4 [Arabidopsis thaliana] | 783  | 823  | 0         | 105.1 | 86.8 | 91.7 | TBP-associated factor 4                                                                                                                                                                        | gbpln | Arabidopsis thaliana | AT5G43130.1   Symbols: TAF4, TAF4B   TBP-associated factor 4   chr5:17315608-17321144 REVERSE LENGTH=823                                                                                                                                                                                                                                                                                                                                                     | 783  | 823 | 0         | 105.1 | 86.8 | 91.7 |
| Rsa1.0_00390.1.g12878.t1 | gb AAG51046.1 AC069473.8 gypsy/Ty-3 retroelement, polyprotein; 69905-74404 [Arabidopsis thaliana] gi 10998138 dbj BAE03109.1   retroelement pol polyprotein [Arabidopsis thaliana]                                                                                                                                 | 1518 | 1499 | 0         | 98.7  | 64.8 | 77.8 | gypsy/Ty-3 retroelement polyprotein; 69905-74404                                                                                                                                               | gbpln | Arabidopsis thaliana | ATMG00860.1   Symbols: ORF158   DNA/RNA polymerases superfamily protein   chrM:235916-236392 FORWARD LENGTH=158                                                                                                                                                                                                                                                                                                                                              | 1518 | 158 | 2.00E-29  | 10.4  | 4.2  | 5.3  |

|                          |                                                                                                                                                                                                                                                                                                                                                                                                                     |      |      |           |       |      |      |                                                                                                  |       |                      |                                                                                                                                                                                                                                                                                                                                                                                                                                                                                                                            |      |     |           |       |      |      |
|--------------------------|---------------------------------------------------------------------------------------------------------------------------------------------------------------------------------------------------------------------------------------------------------------------------------------------------------------------------------------------------------------------------------------------------------------------|------|------|-----------|-------|------|------|--------------------------------------------------------------------------------------------------|-------|----------------------|----------------------------------------------------------------------------------------------------------------------------------------------------------------------------------------------------------------------------------------------------------------------------------------------------------------------------------------------------------------------------------------------------------------------------------------------------------------------------------------------------------------------------|------|-----|-----------|-------|------|------|
| Rsa1.0_00390.1.g12879.t4 | gb AAC26674.1  putative non-LTR retroelement reverse transcriptase [Arabidopsis thaliana]                                                                                                                                                                                                                                                                                                                           | 1722 | 970  | 0         | 56.3  | 28.5 | 36.4 | putative non-LTR retroelement reverse transcriptase                                              | gbpln | Arabidopsis thaliana | AT2G01050.1   Symbols:   zinc ion binding nucleic acid binding   chr2:68337-69884 REVERSE LENGTH=515                                                                                                                                                                                                                                                                                                                                                                                                                       | 1722 | 515 | 1.00E-132 | 29.9  | 14.5 | 18.6 |
| Rsa1.0_00390.1.g12880.t1 | ref NP_171890.1  HXXXD-type acyl-transferase family protein [Arabidopsis thaliana]<br>gi 75217119 sp Q9ZWB4.1 3AT1_ARATH RecName: Full=Coumaroyl-CoA:anthocyanidin 3-O-glucoside-6"-O-coumaroyltransferase 1<br>gi 4204295 gb AAD10676.1  Hypothetical protein [Arabidopsis thaliana]<br>gi 332189515 gb AEE27636.1  coumaroyl-CoA:anthocyanidin 3-O-glucoside-6"-O-coumaroyltransferase 1 [Arabidopsis thaliana]   | 467  | 469  | 0         | 100.4 | 81.2 | 88.4 | HXXXD-type acyl-transferase family protein                                                       | gbpln | Arabidopsis thaliana | AT1G03940.1   Symbols:   HXXXD-type acyl-transferase family protein   chr1:1009542-1010951 REVERSE LENGTH=469                                                                                                                                                                                                                                                                                                                                                                                                              | 467  | 469 | 0         | 100.4 | 81.2 | 88.4 |
| Rsa1.0_00390.1.g12881.t1 | #                                                                                                                                                                                                                                                                                                                                                                                                                   | #    | #    | #         | #     | #    | #    | -                                                                                                | ----  | ----                 | #                                                                                                                                                                                                                                                                                                                                                                                                                                                                                                                          | #    | #   | #         | #     | #    | #    |
| Rsa1.0_00390.1.g12882.t1 | gb AAF19226.1 AC007505.2 Highly similar to Ta1-3 polypeptide [Arabidopsis thaliana]                                                                                                                                                                                                                                                                                                                                 | 545  | 1356 | 1.00E-115 | 248.8 | 37.6 | 48.8 | Highly similar to Ta1-3 polypeptide                                                              | gbpln | Arabidopsis thaliana | AT1G03905.1   Symbols:   P-loop containing nucleoside triphosphate hydrolases superfamily protein   chr1:993476-995594 FORWARD LENGTH=290                                                                                                                                                                                                                                                                                                                                                                                  | 545  | 290 | 4.00E-81  | 53.2  | 28.6 | 30.8 |
| Rsa1.0_00390.1.g12883.t1 | #                                                                                                                                                                                                                                                                                                                                                                                                                   | #    | #    | #         | #     | #    | #    | -                                                                                                | ----  | ----                 | #                                                                                                                                                                                                                                                                                                                                                                                                                                                                                                                          | #    | #   | #         | #     | #    | #    |
| Rsa1.0_00390.1.g12884.t3 | gb AAG51783.1 AC079679.3 reverse transcriptase, putative; 16838-20266 [Arabidopsis thaliana]                                                                                                                                                                                                                                                                                                                        | 866  | 1142 | 1.00E-79  | 131.9 | 18.7 | 28.6 | reverse transcriptase, putative; 16838-20266                                                     | gbpln | Arabidopsis thaliana | AT4G29090.1   Symbols:   Ribonuclease H-like superfamily protein   chr4:14333528-14335255 FORWARD LENGTH=575<br>AT4G05095.1   Symbols:   BEST Arabidopsis thaliana protein match is: RNA-directed DNA polymerase (reverse transcriptase)-related family protein (TAIR:AT4G04650.1); Has 30201 Blast hits to 17322 proteins in 780 species: Archae - 12; Bacteria - 1396; Metazoa - 1738; Fungi - 3422; Plants - 5037; Viruses - 0; Other Eukaryotes - 2996 (source: NCBI BLINK).   chr4:2613798-2614214 REVERSE LENGTH=138 | 866  | 575 | 3.00E-39  | 66.4  | 12.7 | 21.9 |
| Rsa1.0_00390.1.g12885.t1 | ref XP_002877500.1  predicted protein [Arabidopsis lyrata subsp. lyrata]<br>gi 297323338 gb EFH53759.1  predicted protein [Arabidopsis lyrata subsp. lyrata]                                                                                                                                                                                                                                                        | 135  | 136  | 2.00E-28  | 100.7 | 42.2 | 63.0 | predicted protein                                                                                | gbpln | Arabidopsis lyrata   | AT4G05095.1   Symbols:   BEST Arabidopsis thaliana protein match is: RNA-directed DNA polymerase (reverse transcriptase)-related family protein (TAIR:AT4G04650.1); Has 30201 Blast hits to 17322 proteins in 780 species: Archae - 12; Bacteria - 1396; Metazoa - 1738; Fungi - 3422; Plants - 5037; Viruses - 0; Other Eukaryotes - 2996 (source: NCBI BLINK).   chr4:2613798-2614214 REVERSE LENGTH=138                                                                                                                 | 135  | 138 | 1.00E-13  | 102.2 | 33.3 | 49.6 |
| Rsa1.0_00390.1.g12886.t1 | dbj BAA97087.1  copia-type pol polyprotein-like [Arabidopsis thaliana]<br>ref NP_565402.1  pentatricopeptide repeat-containing protein [Arabidopsis thaliana]<br>gi 13877877 gb AAK44016.1 AF370201.1 unknown protein [Arabidopsis thaliana]<br>gi 21280879 gb AAM44931.1  unknown protein [Arabidopsis thaliana]<br>gi 330251481 gb AEC06575.1  pentatricopeptide repeat-containing protein [Arabidopsis thaliana] | 116  | 1123 | 2.00E-31  | 968.1 | 55.2 | 63.8 | copia-type pol polyprotein-like                                                                  | gbpln | Arabidopsis thaliana | #                                                                                                                                                                                                                                                                                                                                                                                                                                                                                                                          | #    | #   | #         | #     | #    | #    |
| Rsa1.0_00391.1.g12887.t1 | ref NP_565401.1  F-box protein SKIP23 [Arabidopsis thaliana]<br>gi 122215148 sp Q3EBZ2.1 SKI23_ARATH RecName: Full=F-box protein SKIP23; AltName: Full=SKP1-interacting partner 23<br>gi 119935952 gb ABM06043.1  At2g17030 [Arabidopsis thaliana]<br>gi 330251480 gb AEC06574.1  F-box protein SKIP23 [Arabidopsis thaliana]                                                                                       | 445  | 407  | 0         | 91.5  | 74.8 | 82.5 | F-box protein SKIP23                                                                             | gbpln | Arabidopsis thaliana | AT2G17033.1   Symbols:   pentatricopeptide (PPR) repeat-containing protein   chr2:7401205-7403207 FORWARD LENGTH=504                                                                                                                                                                                                                                                                                                                                                                                                       | 514  | 504 | 0         | 98.1  | 72.4 | 79.8 |
| Rsa1.0_00391.1.g12888.t2 | ref NP_565401.1  F-box protein SKIP23 [Arabidopsis thaliana]<br>gi 122215148 sp Q3EBZ2.1 SKI23_ARATH RecName: Full=F-box protein SKIP23; AltName: Full=SKP1-interacting partner 23<br>gi 119935952 gb ABM06043.1  At2g17030 [Arabidopsis thaliana]<br>gi 330251480 gb AEC06574.1  F-box protein SKIP23 [Arabidopsis thaliana]                                                                                       | 445  | 407  | 0         | 91.5  | 74.8 | 82.5 | F-box protein SKIP23                                                                             | gbpln | Arabidopsis thaliana | AT2G17030.1   Symbols:   F-box family protein with a domain of unknown function (DUF295)   chr2:7399108-7400650 FORWARD LENGTH=407                                                                                                                                                                                                                                                                                                                                                                                         | 445  | 407 | 0         | 91.5  | 74.8 | 82.5 |
| Rsa1.0_00391.1.g12889.t1 | sp F4IME2.2 MSL8_ARATH RecName: Full=Mechanosensitive ion channel protein 8; AltName: Full=Mechanosensitive channel of small conductance-like 8; AltName: Full=MscS-Like protein 8                                                                                                                                                                                                                                  | 859  | 908  | 0         | 105.7 | 81.1 | 88.6 | Full=Mechanosensitive ion channel of small conductance-like 8; AltName: Full=MscS-Like protein 8 | ----  | ----                 | AT2G17000.1   Symbols:   Mechanosensitive ion channel family protein   chr2:7388893-7392105 REVERSE LENGTH=849                                                                                                                                                                                                                                                                                                                                                                                                             | 859  | 849 | 0         | 98.8  | 60.8 | 74.6 |
| Rsa1.0_00391.1.g12890.t1 | ref XP_002886089.1  mechanosensitive ion channel domain-containing protein [Arabidopsis lyrata subsp. lyrata]<br>gi 297331929 gb EFH62348.1  mechanosensitive ion channel domain-containing protein [Arabidopsis lyrata subsp. lyrata]                                                                                                                                                                              | 856  | 851  | 0         | 99.4  | 84.6 | 90.9 | mechanosensitive ion channel domain-containing protein                                           | gbpln | Arabidopsis lyrata   | AT2G17000.1   Symbols:   Mechanosensitive ion channel family protein   chr2:7388893-7392105 REVERSE LENGTH=849                                                                                                                                                                                                                                                                                                                                                                                                             | 856  | 849 | 0         | 99.2  | 83.6 | 90.2 |
| Rsa1.0_00391.1.g12891.t1 | ref NP_179291.2  major facilitator protein [Arabidopsis thaliana]<br>gi 79322376 ref NP_001031360.1  major facilitator protein [Arabidopsis thaliana]<br>gi 330251475 gb AEC06569.1  major facilitator protein [Arabidopsis thaliana]<br>gi 330251476 gb AEC06570.1  major facilitator protein [Arabidopsis thaliana]                                                                                               | 266  | 456  | 1.00E-119 | 171.4 | 85.0 | 91.4 | major facilitator protein                                                                        | gbpln | Arabidopsis thaliana | AT2G16990.2   Symbols:   Major facilitator superfamily protein   chr2:7383194-7387783 FORWARD LENGTH=456                                                                                                                                                                                                                                                                                                                                                                                                                   | 266  | 456 | 1.00E-122 | 171.4 | 85.0 | 91.4 |

|                           |                                                                                                                                                                                                                                                                                                                                                                                                                                                                              |      |      |           |       |      |      |                                                 |       |                      |                                                                                                                                           |      |      |           |       |      |      |
|---------------------------|------------------------------------------------------------------------------------------------------------------------------------------------------------------------------------------------------------------------------------------------------------------------------------------------------------------------------------------------------------------------------------------------------------------------------------------------------------------------------|------|------|-----------|-------|------|------|-------------------------------------------------|-------|----------------------|-------------------------------------------------------------------------------------------------------------------------------------------|------|------|-----------|-------|------|------|
| Rsa1.0_00391.1.g12892.t1  | gb EOA30555.1  hypothetical protein CARUB_v10013679mg [Capsella rubella]                                                                                                                                                                                                                                                                                                                                                                                                     | 87   | 455  | 1.00E-34  | 523.0 | 83.9 | 89.7 | hypothetical protein CARUB_v10013679mg          | gbpln | Capsella rubella     | AT2G16990.2   Symbols: Major facilitator superfamily protein   chr2:7383194-7387783 FORWARD LENGTH=456                                    | 87   | 456  | 9.00E-37  | 524.1 | 83.9 | 88.5 |
| Rsa1.0_00391.1.g12893.t1  | ref NP_188314.1  pentatricopeptide repeat-containing protein [Arabidopsis thaliana]<br>gi 75274022 sp Q9LSQ2.1 PP239_ARAT H RecName: Full=Putative pentatricopeptide repeat-containing protein At3g16890, mitochondrial; AltName: Full=Protein PENTATRICOPEPTIDE REPEAT 40; Flags: Precursor<br>gi 7670019 dbj BAA94973.1  salt-inducible protein-like [Arabidopsis thaliana] gi 332642359 gb AEE75880.1  pentatricopeptide repeat-containing protein [Arabidopsis thaliana] | 644  | 659  | 0         | 102.3 | 74.8 | 84.0 | hypothetical protein repeat-containing protein  | gbpln | Arabidopsis thaliana | AT3G16890.1   Symbols: PPR40   pentatricopeptide (PPR) domain protein 40   chr3:5768401-5770380 REVERSE LENGTH=659                        | 644  | 659  | 0         | 102.3 | 74.8 | 84.0 |
| Rsa1.0_00391.1.g12894.t1  | gb EOA31984.1  hypothetical protein CARUB_v10015224mg [Capsella rubella]                                                                                                                                                                                                                                                                                                                                                                                                     | 896  | 891  | 0         | 99.4  | 90.1 | 93.3 | hypothetical protein CARUB_v10015224mg          | gbpln | Capsella rubella     | AT2G16950.2   Symbols: TRN1, ATTRN1   transportin 1   chr2:7353939-7360637 FORWARD LENGTH=891                                             | 896  | 891  | 0         | 99.4  | 89.2 | 92.5 |
| Rsa1.0_00391.1.g12895.t1  | gb EOA29763.1  hypothetical protein CARUB_v10012853mg [Capsella rubella]                                                                                                                                                                                                                                                                                                                                                                                                     | 1103 | 1127 | 0         | 102.2 | 79.5 | 88.3 | hypothetical protein CARUB_v10012853mg          | gbpln | Capsella rubella     | AT2G16920.1   Symbols: UBC23, PFU2   ubiquitin-conjugating enzyme 23   chr2:7334559-7338827 REVERSE LENGTH=1102                           | 1103 | 1102 | 0         | 99.9  | 79.2 | 87.0 |
| Rsa1.0_00391.1.g12896.t1  | emb CAD54298.1  bHLH transcription factor [Brassica napus]                                                                                                                                                                                                                                                                                                                                                                                                                   | 560  | 564  | 0         | 100.7 | 93.2 | 95.7 | bHLH transcription factor                       | gbpln | Brassica napus       | AT2G16910.1   Symbols: AMS   basic helix-loop-helix (bHLH) DNA-binding superfamily protein   chr2:7331721-7334077 FORWARD LENGTH=571      | 560  | 571  | 0         | 102.0 | 85.5 | 90.9 |
| Rsa1.0_00391.1.g12897.t1  | ref XP_002884020.1  hypothetical protein ARALYDRAFT_480568 [Arabidopsis lyrata subsp. lyrata] gi 297329860 gb EFH60279.1  hypothetical protein ARALYDRAFT_480568 [Arabidopsis lyrata subsp. lyrata]                                                                                                                                                                                                                                                                          | 475  | 479  | 0         | 100.8 | 83.2 | 91.8 | hypothetical protein ARALYDRAFT_480568          | gbpln | Arabidopsis lyrata   | AT2G16890.2   Symbols: UDP-Glycosyltransferase superfamily protein   chr2:7316938-7319022 FORWARD LENGTH=478                              | 475  | 478  | 0         | 100.6 | 80.6 | 90.1 |
| Rsa1.0_00391.1.g12898.t1  | gb AAB88009.1  heat shock cognate protein HSC70 [Brassica napus]                                                                                                                                                                                                                                                                                                                                                                                                             | 587  | 645  | 0         | 109.9 | 95.4 | 98.1 | heat shock cognate protein HSC70                | gbpln | Brassica napus       | AT5G02500.1   Symbols: HSC70-1, HSP70-1, AT-HSC70-1, HSC70   heat shock cognate protein 70-1   chr5:554055-556334 REVERSE LENGTH=651      | 587  | 651  | 0         | 110.9 | 95.4 | 98.1 |
| Rsa1.0_00391.1.g12899.t1  | gb EOA16600.1  hypothetical protein CARUB_v10004773mg, partial [Capsella rubella]                                                                                                                                                                                                                                                                                                                                                                                            | 66   | 458  | 5.00E-18  | 693.9 | 74.2 | 81.8 | hypothetical protein CARUB_v10004773mg, partial | gbpln | Capsella rubella     | AT4G3050.1   Symbols: MSI3, NFC3   Transducin family protein / WD-40 repeat family protein   chr4:16682752-16684751 REVERSE LENGTH=424    | 66   | 424  | 1.00E-20  | 642.4 | 74.2 | 81.8 |
| Rsa1.0_00391.1.g12900.t1  | gb EOA31263.1  hypothetical protein CARUB_v10014436mg [Capsella rubella] gi 482567075 gb EOA31264.1  hypothetical protein CARUB_v10014436mg [Capsella rubella]                                                                                                                                                                                                                                                                                                               | 249  | 258  | 1.00E-106 | 103.6 | 82.3 | 89.6 | hypothetical protein CARUB_v10014436mg          | gbpln | Capsella rubella     | AT2G16770.1   Symbols: bZIP23   Basic-leucine zipper (bZIP) transcription factor family protein   chr2:7279859-7280817 FORWARD LENGTH=249 | 249  | 249  | 1.00E-106 | 100.0 | 80.7 | 86.3 |
| Rsa1.0_00391.1.g12901.t22 | emb CAB39638.1  RNA-directed DNA polymerase-like protein [Arabidopsis thaliana] gi 7267666 emb CAB78094.1  RNA-directed DNA polymerase-like protein [Arabidopsis thaliana]                                                                                                                                                                                                                                                                                                   | 929  | 1274 | 0         | 137.1 | 46.1 | 60.4 | RNA-directed DNA polymerase-like protein        | gbpln | Arabidopsis thaliana | AT4G29090.1   Symbols: Ribonuclease H-like superfamily protein   chr4:14333528-14335255 FORWARD LENGTH=575                                | 929  | 575  | 1.00E-64  | 61.9  | 18.5 | 29.4 |
| Rsa1.0_00391.1.g12902.t1  | ref XP_002886073.1  beta-galactosidase 13 [Arabidopsis lyrata subsp. lyrata] gi 297331913 gb EFH62332.1  beta-galactosidase 13 [Arabidopsis lyrata subsp. lyrata]                                                                                                                                                                                                                                                                                                            | 844  | 848  | 0         | 100.5 | 88.6 | 94.1 | beta-galactosidase 13                           | gbpln | Arabidopsis lyrata   | AT2G16730.1   Symbols: BGAL13   glycosyl hydrolase family 35 protein   chr2:7261986-7266105 REVERSE LENGTH=848                            | 844  | 848  | 0         | 100.5 | 87.8 | 94.2 |
| Rsa1.0_00391.1.g12903.t4  | ref XP_002886070.1  hypothetical protein ARALYDRAFT_899989 [Arabidopsis lyrata subsp. lyrata] gi 297331910 gb EFH62329.1  hypothetical protein ARALYDRAFT_899989 [Arabidopsis lyrata subsp. lyrata]                                                                                                                                                                                                                                                                          | 338  | 292  | 1.00E-140 | 86.4  | 80.5 | 83.4 | hypothetical protein ARALYDRAFT_899989          | gbpln | Arabidopsis lyrata   | AT4G35000.1   Symbols: APX3   ascorbate peroxidase 3   chr4:16665007-16667541 REVERSE LENGTH=287                                          | 338  | 287  | 1.00E-126 | 84.9  | 72.2 | 77.2 |
| Rsa1.0_00392.1.g12904.t1  | dbj BAC42653.1  putative glycine-rich protein [Arabidopsis thaliana] gi 28416867 gb AAO42964.1  At4g29030 [Arabidopsis thaliana]                                                                                                                                                                                                                                                                                                                                             | 109  | 115  | 3.00E-13  | 105.5 | 36.7 | 40.4 | putative glycine-rich protein                   | gbpln | Arabidopsis thaliana | # # # # # # #                                                                                                                             | #    | #    | #         | #     | #    | #    |

|                          |                                                                                                                                                                                                                                                                                                                                                                                                                                                                                                                                            |     |     |           |       |      |      |                                        |       |                      |                                                                                                                                                                                                                                                                                                                                                                                                                                                                                                                                    |     |     |           |       |      |      |
|--------------------------|--------------------------------------------------------------------------------------------------------------------------------------------------------------------------------------------------------------------------------------------------------------------------------------------------------------------------------------------------------------------------------------------------------------------------------------------------------------------------------------------------------------------------------------------|-----|-----|-----------|-------|------|------|----------------------------------------|-------|----------------------|------------------------------------------------------------------------------------------------------------------------------------------------------------------------------------------------------------------------------------------------------------------------------------------------------------------------------------------------------------------------------------------------------------------------------------------------------------------------------------------------------------------------------------|-----|-----|-----------|-------|------|------|
| Rsa1.0_00392.1.g12905.t1 | ref[NP_194631.1] glycine-rich protein [Arabidopsis thaliana] gi 4972048 emb CAB43916.1  glycine-rich protein like [Arabidopsis thaliana] gi 7269800 emb CAB79660.1  glycine-rich protein like [Arabidopsis thaliana] gi 15292933 gb AAK93577.1  putative glycine-rich protein [Arabidopsis thaliana] gi 20465685 gb AAM20311.1  putative glycine-rich protein 5 [Arabidopsis thaliana] gi 21592872 gb AAM64822.1  glycine-rich protein like [Arabidopsis thaliana] gi 332660173 gb AEE85573.1  glycine-rich protein [Arabidopsis thaliana] | 145 | 158 | 2.00E-15  | 109.0 | 26.2 | 28.3 | glycine-rich protein                   | gbpln | Arabidopsis thaliana | AT4G29020.2   Symbols:   glycine-rich protein   chr4:14305032-14305508 FORWARD LENGTH=113                                                                                                                                                                                                                                                                                                                                                                                                                                          | 145 | 113 | 6.00E-18  | 77.9  | 26.2 | 28.3 |
| Rsa1.0_00392.1.g12906.t1 | #                                                                                                                                                                                                                                                                                                                                                                                                                                                                                                                                          | #   | #   | #         | #     | #    | #    | -                                      | ----  | ----                 | #                                                                                                                                                                                                                                                                                                                                                                                                                                                                                                                                  | #   | #   | #         | #     | #    |      |
| Rsa1.0_00392.1.g12907.t2 | ref[XP_002867428.1] hypothetical protein ARALYDRAFT_491857 [Arabidopsis lyrata subsp. lyrata] gi 297313264 gb EFH43687.1  hypothetical protein ARALYDRAFT_491857 [Arabidopsis lyrata subsp. lyrata]                                                                                                                                                                                                                                                                                                                                        | 728 | 721 | 0         | 99.0  | 88.0 | 94.0 | hypothetical protein ARALYDRAFT_491857 | gbpln | Arabidopsis lyrata   | AT4G29010.1   Symbols: AIM1   Enoyl-CoA hydratase/isomerase family   chr4:14297312-14302016 REVERSE LENGTH=721                                                                                                                                                                                                                                                                                                                                                                                                                     | 728 | 721 | 0         | 99.0  | 87.5 | 93.7 |
| Rsa1.0_00392.1.g12908.t1 | ref[XP_002869459.1] hypothetical protein ARALYDRAFT_491858 [Arabidopsis lyrata subsp. lyrata] gi 297315295 gb EFH45718.1  hypothetical protein ARALYDRAFT_491858 [Arabidopsis lyrata subsp. lyrata]                                                                                                                                                                                                                                                                                                                                        | 496 | 601 | 0         | 121.2 | 73.0 | 80.8 | hypothetical protein ARALYDRAFT_491858 | gbpln | Arabidopsis lyrata   | AT4G29000.1   Symbols:   Tesmin/TSO1-like CXG domain-containing protein   chr4:14293957-14296602 FORWARD LENGTH=603                                                                                                                                                                                                                                                                                                                                                                                                                | 496 | 603 | 0         | 121.6 | 75.2 | 82.5 |
| Rsa1.0_00392.1.g12909.t1 | ref[XP_002867435.1] ring-H2 finger protein AT4J precursor [Arabidopsis lyrata subsp. lyrata] gi 297313271 gb EFH43694.1  ring-H2 finger protein AT4J precursor [Arabidopsis lyrata subsp. lyrata]                                                                                                                                                                                                                                                                                                                                          | 486 | 435 | 1.00E-171 | 89.5  | 69.3 | 75.3 | ring-H2 finger protein AT4J precursor  | gbpln | Arabidopsis lyrata   | AT4G28890.1   Symbols:   RING/U-box superfamily protein   chr4:14256437-14257735 REVERSE LENGTH=432                                                                                                                                                                                                                                                                                                                                                                                                                                | 486 | 432 | 1.00E-170 | 88.9  | 67.1 | 72.6 |
| Rsa1.0_00392.1.g12910.t1 | ref[XP_002867438.1] hypothetical protein ARALYDRAFT_491882 [Arabidopsis lyrata subsp. lyrata] gi 297313274 gb EFH43697.1  hypothetical protein ARALYDRAFT_491882 [Arabidopsis lyrata subsp. lyrata]                                                                                                                                                                                                                                                                                                                                        | 143 | 143 | 1.00E-48  | 100.0 | 81.8 | 91.6 | hypothetical protein ARALYDRAFT_491882 | gbpln | Arabidopsis lyrata   | AT2G20260.1   Symbols: PSAE-2   photosystem I subunit E-2   chr2:8736780-8737644 FORWARD LENGTH=145                                                                                                                                                                                                                                                                                                                                                                                                                                | 143 | 145 | 2.00E-42  | 101.4 | 71.3 | 81.1 |
| Rsa1.0_00392.1.g12911.t1 | gb EOA15635.1  hypothetical protein CARUB_v10005878mg [Capsella rubella]                                                                                                                                                                                                                                                                                                                                                                                                                                                                   | 94  | 173 | 4.00E-13  | 184.0 | 41.5 | 47.9 | hypothetical protein CARUB_v10005878mg | gbpln | Capsella rubella     | AT4G28730.1   Symbols:   Glutaredoxin family protein   chr4:14199174-14200712 FORWARD LENGTH=174                                                                                                                                                                                                                                                                                                                                                                                                                                   | 94  | 174 | 5.00E-15  | 185.1 | 38.3 | 48.9 |
| Rsa1.0_00392.1.g12912.t1 | gb EOA18198.1  hypothetical protein CARUB_v10006681mg [Capsella rubella]                                                                                                                                                                                                                                                                                                                                                                                                                                                                   | 425 | 426 | 0         | 100.2 | 90.6 | 94.8 | hypothetical protein CARUB_v10006681mg | gbpln | Capsella rubella     | AT4G28720.1   Symbols: YUC8   Flavin-binding monooxygenase family protein   chr4:14192688-14193968 FORWARD LENGTH=426                                                                                                                                                                                                                                                                                                                                                                                                              | 425 | 426 | 0         | 100.2 | 89.9 | 95.1 |
| Rsa1.0_00392.1.g12913.t1 | #                                                                                                                                                                                                                                                                                                                                                                                                                                                                                                                                          | #   | #   | #         | #     | #    | #    | -                                      | ----  | ----                 | #                                                                                                                                                                                                                                                                                                                                                                                                                                                                                                                                  | #   | #   | #         | #     | #    |      |
| Rsa1.0_00392.1.g12914.t1 | dbj BAJ34056.1  unnamed protein product [Thellungiella halophila]                                                                                                                                                                                                                                                                                                                                                                                                                                                                          | 408 | 415 | 1.00E-177 | 101.7 | 85.5 | 90.0 | unnamed protein product                | ----  | ----                 | AT4G28610.1   Symbols: PHR1, AtPHR1   phosphate starvation response 1   chr4:14133164-14134951 REVERSE LENGTH=409                                                                                                                                                                                                                                                                                                                                                                                                                  | 408 | 409 | 1.00E-173 | 100.2 | 79.7 | 87.7 |
| Rsa1.0_00392.1.g12915.t1 | ref[XP_002869490.1] hypothetical protein ARALYDRAFT_328837 [Arabidopsis lyrata subsp. lyrata] gi 297315326 gb EFH45749.1  hypothetical protein ARALYDRAFT_328837 [Arabidopsis lyrata subsp. lyrata]                                                                                                                                                                                                                                                                                                                                        | 658 | 739 | 0         | 112.3 | 82.2 | 90.1 | hypothetical protein ARALYDRAFT_328837 | gbpln | Arabidopsis lyrata   | AT4G28600.1   Symbols: NPGR2   no pollen germination related 2   chr4:14130046-14132599 FORWARD LENGTH=739                                                                                                                                                                                                                                                                                                                                                                                                                         | 658 | 739 | 0         | 112.3 | 81.8 | 90.0 |
| Rsa1.0_00392.1.g12916.t1 | ref[NP_194588.2] uncharacterized protein [Arabidopsis thaliana] gi 332660110 gb AEE85510.1  uncharacterized protein AT4G28590 [Arabidopsis thaliana]                                                                                                                                                                                                                                                                                                                                                                                       | 326 | 331 | 1.00E-138 | 101.5 | 81.0 | 86.8 | uncharacterized protein                | gbpln | Arabidopsis thaliana | AT4G28590.1   Symbols:   FUNCTIONS IN: molecular_function unknown; INVOLVED IN: biological_process unknown; LOCATED IN: chloroplast; EXPRESSED IN: 21 plant structures; EXPRESSED DURING: 10 growth stages; BEST Arabidopsis thaliana protein match is: Thioredoxin superfamily protein (TAIR:AT2G31840.1); Has 114 Blast hits to 112 proteins in 39 species: Archae - 2; Bacteria - 0; Metazoa - 17; Fungi - 6; Plants - 67; Viruses - 0; Other Eukaryotes - 22 (source: NCBI BLINK).   chr4:14125367-14126828 REVERSE LENGTH=331 | 326 | 331 | 1.00E-141 | 101.5 | 81.0 | 86.8 |



|                          |                                                                                                                                                                                                                                                                                                                                                                                                |      |      |           |       |      |      |                                                       |       |                      |                                                                                                                                                  |      |      |           |       |      |      |
|--------------------------|------------------------------------------------------------------------------------------------------------------------------------------------------------------------------------------------------------------------------------------------------------------------------------------------------------------------------------------------------------------------------------------------|------|------|-----------|-------|------|------|-------------------------------------------------------|-------|----------------------|--------------------------------------------------------------------------------------------------------------------------------------------------|------|------|-----------|-------|------|------|
| Rsa1.0_00392.1.g12917.t1 | refNP_194584.3  RabGAP/TBC domain-containing protein [Arabidopsis thaliana] gi 119935837 gb ABM06008.1  At4g28550 [Arabidopsis thaliana] gi 332660104 gb AEE85504.1  RabGAP/TBC domain-containing protein [Arabidopsis thaliana]                                                                                                                                                               | 421  | 424  | 0         | 100.7 | 91.4 | 96.0 | RabGAP/TBC domain-containing protein                  | gbpln | Arabidopsis thaliana | AT4G28550.1   Symbols:   Ypt/Rab-GAP domain of gyp1p superfamily protein   chr4:14111204-14113468 FORWARD LENGTH=424                             | 421  | 424  | 0         | 100.7 | 91.4 | 96.0 |
| Rsa1.0_00392.1.g12918.t1 | refNP_567812.1  casein kinase I-like 6 [Arabidopsis thaliana] gi 20466498 gb AAM20566.1  protein kinase ADK1-like protein [Arabidopsis thaliana] gi 23198156 gb AAN15605.1  protein kinase ADK1-like protein [Arabidopsis thaliana] gi 62996982 gb AAY24535.1  casein kinase 1-like protein 6 [Arabidopsis thaliana] gi 332660103 gb AEE85503.1  casein kinase I-like 6 [Arabidopsis thaliana] | 487  | 479  | 0         | 98.4  | 88.9 | 93.0 | casein kinase I-like 6                                | gbpln | Arabidopsis thaliana | AT4G28540.1   Symbols: CKL6, PPK1   casein kinase I-like 6   chr4:14107284-14110511 FORWARD LENGTH=479                                           | 487  | 479  | 0         | 98.4  | 88.9 | 93.0 |
| Rsa1.0_00392.1.g12919.t1 | refNP_188381.1  putative F-box/kelch-repeat protein [Arabidopsis thaliana] gi 75274267 sp Q9LUP4.1 FBK60.ARAT H RecName: Full=Putative F-box/kelch-repeat protein At3g17540 gi 9294141 db BAB02043.1  unnamed protein product [Arabidopsis thaliana] gi 332642445 gb AEE75966.1  putative F-box/kelch-repeat protein [Arabidopsis thaliana]                                                    | 379  | 396  | 3.00E-96  | 104.5 | 52.8 | 69.7 | putative F-box/kelch-repeat protein                   | gbpln | Arabidopsis thaliana | AT3G17540.1   Symbols:   F-box and associated interaction domains-containing protein   chr3:6002783-6003973 FORWARD LENGTH=396                   | 379  | 396  | 7.00E-99  | 104.5 | 52.8 | 69.7 |
| Rsa1.0_00393.1.g12920.t1 | refNP_187361.1  putative GTP-binding protein [Arabidopsis thaliana] gi 6729012 gb AAF27009.1 AC016827.20 putative GTPase [Arabidopsis thaliana] gi 332640972 gb AE74493.1  putative GTP-binding protein [Arabidopsis thaliana] gi 414420744 gb AFW99797.1  nucleostemin-like 1 protein [Arabidopsis thaliana]                                                                                  | 722  | 582  | 2.00E-39  | 80.6  | 12.7 | 14.4 | putative GTP-binding protein                          | gbpln | Arabidopsis thaliana | AT3G07050.1   Symbols:   GTP-binding family protein   chr3:2229602-2232279 REVERSE LENGTH=582                                                    | 722  | 582  | 4.00E-42  | 80.6  | 12.7 | 14.4 |
| Rsa1.0_00393.1.g12921.t1 | refNP_198906.2  Nucleotide-diphospho-sugar transferase family protein [Arabidopsis thaliana] gi 332007231 gb AED94614.1  Nucleotide-diphospho-sugar transferase family protein [Arabidopsis thaliana]                                                                                                                                                                                          | 303  | 322  | 1.00E-123 | 106.3 | 76.2 | 86.5 | Nucleotide-diphospho-sugar transferase family protein | gbpln | Arabidopsis thaliana | AT5G40900.1   Symbols:   Nucleotide-diphospho-sugar transferase family protein   chr5:16391847-16393375 FORWARD LENGTH=322                       | 303  | 322  | 1.00E-125 | 106.3 | 76.2 | 86.5 |
| Rsa1.0_00393.1.g12922.t2 | refXP_002875828.1  predicted protein [Arabidopsis lyrata subsp. lyrata] gi 297321666 gb EFH52087.1  predicted protein [Arabidopsis lyrata subsp. lyrata]                                                                                                                                                                                                                                       | 291  | 486  | 5.00E-54  | 167.0 | 36.1 | 48.8 | predicted protein                                     | gbpln | Arabidopsis lyrata   | AT5G36228.1   Symbols:   nucleic acid binding/zinc ion binding   chr5:14271691-14272776 FORWARD LENGTH=361                                       | 291  | 361  | 3.00E-21  | 124.1 | 19.9 | 30.2 |
| Rsa1.0_00393.1.g12923.t1 | gb AAF18630.1 AC006228.1 F5J5.1 [Arabidopsis thaliana]                                                                                                                                                                                                                                                                                                                                         | 1371 | 1463 | 0         | 106.7 | 46.4 | 61.3 | F5J5.1                                                | gbpln | Arabidopsis thaliana | AT4G23160.1   Symbols: CRK8   cysteine-rich RLK (RECEPTOR-like protein kinase) 8   chr4:12129485-12134086 FORWARD LENGTH=1262                    | 1371 | 1262 | 3.00E-54  | 92.0  | 8.7  | 13.0 |
| Rsa1.0_00393.1.g12924.t1 | gb AAF18631.1 AC006228.2 F5J5.2 [Arabidopsis thaliana]                                                                                                                                                                                                                                                                                                                                         | 411  | 463  | 3.00E-34  | 112.7 | 23.6 | 38.9 | F5J5.2                                                | gbpln | Arabidopsis thaliana | # # # # # # #                                                                                                                                    |      |      |           |       |      |      |
| Rsa1.0_00393.1.g12925.t1 | gb ADD09860.1  chloride channel A [Eutrema halophilum]                                                                                                                                                                                                                                                                                                                                         | 770  | 776  | 0         | 100.8 | 96.8 | 98.6 | chloride channel A                                    | gbpln | Eutrema halophilum   | AT5G40890.1   Symbols: ATCLC-A, CLC-A, CLCA, ATCLCA   chloride channel A   chr5:16381645-16384999 REVERSE LENGTH=775                             | 770  | 775  | 0         | 100.6 | 94.9 | 96.8 |
| Rsa1.0_00393.1.g12926.t1 | gb AAF79253.1 AC023279.2 F12K21.4 [Arabidopsis thaliana]                                                                                                                                                                                                                                                                                                                                       | 591  | 857  | 1.00E-108 | 145.0 | 40.6 | 58.0 | F12K21.4                                              | gbpln | Arabidopsis thaliana | AT1G49920.1   Symbols:   MuDR family transposase   chr1:18481798-18484233 REVERSE LENGTH=785                                                     | 591  | 785  | 7.00E-14  | 132.8 | 10.8 | 19.0 |
| Rsa1.0_00393.1.g12927.t1 | refXP_002868626.1  hypothetical protein ARALYDRAFT_493894 [Arabidopsis lyrata subsp. lyrata] gi 297314462 gb EFH44885.1  hypothetical protein ARALYDRAFT_493894 [Arabidopsis lyrata subsp. lyrata]                                                                                                                                                                                             | 706  | 805  | 1.00E-149 | 114.0 | 42.2 | 51.3 | hypothetical protein ARALYDRAFT_493894                | gbpln | Arabidopsis lyrata   | AT5G40840.1   Symbols: SYN2, AtRAD21.1   Rad21/Rec8-like family protein   chr5:16359611-16363722 REVERSE LENGTH=809                              | 706  | 809  | 1.00E-149 | 114.6 | 41.9 | 50.7 |
| Rsa1.0_00393.1.g12928.t1 | gb EOA17181.1  hypothetical protein CARUB_v10005452mg [Capsella rubella]                                                                                                                                                                                                                                                                                                                       | 266  | 277  | 7.00E-50  | 104.1 | 45.1 | 59.0 | hypothetical protein CARUB_v10005452mg                | gbpln | Capsella rubella     | AT2G36340.1   Symbols:   DNA-binding storekeeper protein-related transcriptional regulator   chr2:15235858-15237489 FORWARD LENGTH=414           | 266  | 414  | 3.00E-24  | 155.6 | 21.1 | 27.4 |
| Rsa1.0_00393.1.g12929.t3 | gb ABD65056.1  hypothetical protein 27.t00122 [Brassica oleracea]                                                                                                                                                                                                                                                                                                                              | 474  | 239  | 5.00E-23  | 50.4  | 15.0 | 21.7 | hypothetical protein 27.t00122                        | gbpln | Brassica oleracea    | ATMG00310.1   Symbols: ORF154   RNA-directed DNA polymerase (reverse transcriptase)-related family protein   chrM:90883-91347 REVERSE LENGTH=154 | 474  | 154  | 2.00E-15  | 32.5  | 10.8 | 13.9 |

|                          |                                                                                                                                                                                                                                                                                                                                                                                                                                                                                                           |      |      |           |        |      |      |                                                          |       |                      |                                                                                                                                              |      |      |           |        |      |      |
|--------------------------|-----------------------------------------------------------------------------------------------------------------------------------------------------------------------------------------------------------------------------------------------------------------------------------------------------------------------------------------------------------------------------------------------------------------------------------------------------------------------------------------------------------|------|------|-----------|--------|------|------|----------------------------------------------------------|-------|----------------------|----------------------------------------------------------------------------------------------------------------------------------------------|------|------|-----------|--------|------|------|
| Rsa1.0_00393.1.g12930.t1 | refNP_198894.2  Lysine histidine transporter 1 [Arabidopsis thaliana] gi 33200721 gb AE94594.1  Lysine histidine transporter 1 [Arabidopsis thaliana]                                                                                                                                                                                                                                                                                                                                                     | 443  | 445  | 0         | 100.5  | 94.6 | 98.2 | Lysine histidine transporter 1                           | gbpln | Arabidopsis thaliana | AT5G40780.2   Symbols:   lysine histidine transporter 1   chr5:16323823-16327082 FORWARD LENGTH=445                                          | 443  | 445  | 0         | 100.5  | 94.6 | 98.2 |
| Rsa1.0_00394.1.g12931.t1 | refXP_002884781.1  hypothetical protein ARALYDRAFT_478343 [Arabidopsis lyrata subsp. lyrata] gi 297328062 gb EFH61040.1  hypothetical protein ARALYDRAFT_478343 [Arabidopsis lyrata subsp. lyrata]                                                                                                                                                                                                                                                                                                        | 121  | 1377 | 3.00E-63  | 1138.0 | 95.9 | 99.2 | hypothetical protein ARALYDRAFT_478343                   | gbpln | Arabidopsis lyrata   | AT3G10180.1   Symbols:   P-loop containing nucleoside triphosphate hydrolases superfamily protein   chr3:3146393-3154644 REVERSE LENGTH=1273 | 121  | 1273 | 2.00E-65  | 1052.1 | 95.0 | 98.3 |
| Rsa1.0_00394.1.g12932.t1 | gb AAD32898.1  putative retroelement pol polyprotein [Arabidopsis thaliana]                                                                                                                                                                                                                                                                                                                                                                                                                               | 1525 | 1307 | 0         | 85.7   | 55.0 | 67.4 | putative retroelement pol polyprotein                    | gbpln | Arabidopsis thaliana | AT4G23160.1   Symbols: CRK8   cysteine-rich RLK (RECEPTOR-like protein kinase) 8   chr4:12129485-12134086 FORWARD LENGTH=1262                | 1525 | 1262 | 1.00E-103 | 82.8   | 12.9 | 20.3 |
| Rsa1.0_00394.1.g12933.t1 | refXP_002882586.1  hypothetical protein ARALYDRAFT_478142 [Arabidopsis lyrata subsp. lyrata] gi 297328406 gb EFH58825.1  hypothetical protein ARALYDRAFT_478142 [Arabidopsis lyrata subsp. lyrata]                                                                                                                                                                                                                                                                                                        | 373  | 374  | 0         | 100.3  | 91.7 | 95.7 | hypothetical protein ARALYDRAFT_478142                   | gbpln | Arabidopsis lyrata   | AT3G08010.1   Symbols: ATAB2   RNA binding   chr3:2558046-2557426 FORWARD LENGTH=374                                                         | 373  | 374  | 0         | 100.3  | 90.6 | 95.2 |
| Rsa1.0_00394.1.g12934.t1 | emb CAB54520.1  MAP3K epsilon 1 protein kinase [Brassica napus]                                                                                                                                                                                                                                                                                                                                                                                                                                           | 1143 | 1299 | 0         | 113.6  | 88.8 | 90.1 | MAP3K epsilon 1 protein kinase                           | gbpln | Brassica napus       | AT3G13530.1   Symbols: MAPKKK7, MAP3KE1   mitogen-activated protein kinase kinase 7   chr3:4411934-4419320 REVERSE LENGTH=1368               | 1143 | 1368 | 0         | 119.7  | 81.5 | 85.9 |
| Rsa1.0_00394.1.g12935.t1 | refNP_187454.2  Polygalacturonase QRT2 [Arabidopsis thaliana] gi 226736750 sp Q95FB7.2 QRT2_ARAT H RecName: Full=Polygalacturonase QRT2; Short=AtQRT2; Short=PG QRT2; AltName: Full=Pectinase QRT2; AltName: Full=Protein QUARTET 2; Flags: Precursor gi 332641105 gb AEE74626.1  Polygalacturonase QRT2 [Arabidopsis thaliana]                                                                                                                                                                           | 441  | 439  | 0         | 99.5   | 78.5 | 87.5 | Polygalacturonase QRT2                                   | gbpln | Arabidopsis thaliana | AT3G07970.1   Symbols: QRT2   Pectin lyase-like superfamily protein   chr3:2541006-2543370 FORWARD LENGTH=439                                | 441  | 439  | 0         | 99.5   | 78.5 | 87.5 |
| Rsa1.0_00394.1.g12936.t1 | refXP_002882563.1  phosphatidylinositol-4-phosphate 5-kinase family protein [Arabidopsis lyrata subsp. lyrata] gi 297328403 gb EFH58922.1  phosphatidylinositol-4-phosphate 5-kinase family protein [Arabidopsis lyrata subsp. lyrata]                                                                                                                                                                                                                                                                    | 743  | 715  | 0         | 96.2   | 91.8 | 94.2 | phosphatidylinositol-4-phosphate 5-kinase family protein | gbpln | Arabidopsis lyrata   | AT3G07960.1   Symbols:   Phosphatidylinositol-4-phosphate 5-kinase family protein   chr3:2535274-2538090 FORWARD LENGTH=715                  | 743  | 715  | 0         | 96.2   | 90.4 | 93.7 |
| Rsa1.0_00394.1.g12937.t1 | refXP_002882559.1  hypothetical protein ARALYDRAFT_478135 [Arabidopsis lyrata subsp. lyrata] gi 297328399 gb EFH58818.1  hypothetical protein ARALYDRAFT_478135 [Arabidopsis lyrata subsp. lyrata]                                                                                                                                                                                                                                                                                                        | 398  | 383  | 0         | 96.2   | 84.4 | 88.9 | hypothetical protein ARALYDRAFT_478135                   | gbpln | Arabidopsis lyrata   | AT3G07940.1   Symbols:   Calcium-dependent ARF-type GTPase activating protein family   chr3:2529542-2531368 FORWARD LENGTH=385               | 398  | 385  | 0         | 96.7   | 83.7 | 89.2 |
| Rsa1.0_00394.1.g12938.t1 | #                                                                                                                                                                                                                                                                                                                                                                                                                                                                                                         | #    | #    | #         | #      | #    | #    | -                                                        | ----  | ----                 | #                                                                                                                                            | #    | #    | #         | #      | #    |      |
| Rsa1.0_00394.1.g12939.t1 | #                                                                                                                                                                                                                                                                                                                                                                                                                                                                                                         | #    | #    | #         | #      | #    | #    | -                                                        | ----  | ----                 | #                                                                                                                                            | #    | #    | #         | #      | #    |      |
| Rsa1.0_00394.1.g12940.t1 | refNP_566323.1  RabGAP/TBC domain-containing protein [Arabidopsis thaliana] gi 145332002 refNP_001078123.1  RabGAP/TBC domain-containing protein [Arabidopsis thaliana] gi 98960973 gb ABF58970.1  At3g07890 [Arabidopsis thaliana] gi 110737642 dbj BAF00761.1  putative GTPase activator protein [Arabidopsis thaliana] gi 332641094 gb AEE74615.1  RabGAP/TBC domain-containing protein [Arabidopsis thaliana] gi 332641095 gb AEE74616.1  RabGAP/TBC domain-containing protein [Arabidopsis thaliana] | 401  | 400  | 0         | 99.8   | 95.0 | 98.0 | RabGAP/TBC domain-containing protein                     | gbpln | Arabidopsis thaliana | AT3G07890.2   Symbols:   Ypt/Rab-GAP domain of gyp1p superfamily protein   chr3:2516639-2518784 REVERSE LENGTH=400                           | 401  | 400  | 0         | 99.8   | 95.0 | 98.0 |
| Rsa1.0_00394.1.g12941.t1 | gb EOA31341.1  hypothetical protein CARUB_v10014515mg [Capsella rubella]                                                                                                                                                                                                                                                                                                                                                                                                                                  | 241  | 238  | 1.00E-117 | 98.8   | 87.6 | 92.5 | hypothetical protein CARUB_v10014515mg                   | gbpln | Capsella rubella     | AT3G07880.1   Symbols: SCN1   Immunoglobulin E-set superfamily protein   chr3:2514175-2515544 FORWARD LENGTH=240                             | 241  | 240  | 1.00E-114 | 99.6   | 85.9 | 90.0 |
| Rsa1.0_00394.1.g12942.t1 | refXP_002882554.1  F-box family protein [Arabidopsis lyrata subsp. lyrata] gi 297328394 gb EFH58813.1  F-box family protein [Arabidopsis lyrata subsp. lyrata]                                                                                                                                                                                                                                                                                                                                            | 410  | 415  | 0         | 101.2  | 90.5 | 94.9 | F-box family protein                                     | gbpln | Arabidopsis lyrata   | AT3G07870.1   Symbols:   F-box and associated interaction domains-containing protein   chr3:2510871-2512124 FORWARD LENGTH=417               | 410  | 417  | 0         | 101.7  | 89.5 | 94.4 |

|                          |                                                                                                                                                                                                                                                                                                                                                                                                                                                                                                                                                                                                                                                                                                                                                             |     |     |           |       |      |      |                                          |       |                      |                                                                                                                        |     |     |           |       |      |      |
|--------------------------|-------------------------------------------------------------------------------------------------------------------------------------------------------------------------------------------------------------------------------------------------------------------------------------------------------------------------------------------------------------------------------------------------------------------------------------------------------------------------------------------------------------------------------------------------------------------------------------------------------------------------------------------------------------------------------------------------------------------------------------------------------------|-----|-----|-----------|-------|------|------|------------------------------------------|-------|----------------------|------------------------------------------------------------------------------------------------------------------------|-----|-----|-----------|-------|------|------|
| Rsa1.0_00394.1.g12943.t1 | gb[EOA31581.1] hypothetical protein CARUB_v10014777mg [Capsella rubella] gi 482567393 gb EOA31582.1  hypothetical protein CARUB_v10014777mg [Capsella rubella]                                                                                                                                                                                                                                                                                                                                                                                                                                                                                                                                                                                              | 170 | 172 | 9.00E-81  | 101.2 | 87.6 | 93.5 | hypothetical protein CARUB_v10014777mg   | gbpln | Capsella rubella     | AT3G07860.1   Symbols:   Ubiquitin-like superfamily protein   chr3:2507895-2508656 FORWARD LENGTH=165                  | 170 | 165 | 3.00E-78  | 97.1  | 87.1 | 91.8 |
| Rsa1.0_00394.1.g12944.t1 | ref XP_002884670.1  exopolylacturonase [Arabidopsis lyrata subsp. lyrata] gi 297330510 gb EFH60929.1  exopolylacturonase [Arabidopsis lyrata subsp. lyrata]                                                                                                                                                                                                                                                                                                                                                                                                                                                                                                                                                                                                 | 431 | 449 | 1.00E-166 | 104.2 | 70.1 | 81.9 | exopolylacturonase                       | gbpln | Arabidopsis lyrata   | AT3G14040.1   Symbols:   Pectin lyase-like superfamily protein   chr3:4648607-4650226 REVERSE LENGTH=445               | 431 | 445 | 1.00E-159 | 103.2 | 69.6 | 81.2 |
| Rsa1.0_00394.1.g12945.t1 | ref XP_002869665.1  ShTK domain-containing protein [Arabidopsis lyrata subsp. lyrata] gi 297315501 gb EFH45924.1  ShTK domain-containing protein [Arabidopsis lyrata subsp. lyrata]                                                                                                                                                                                                                                                                                                                                                                                                                                                                                                                                                                         | 168 | 290 | 8.00E-44  | 172.6 | 57.7 | 66.1 | ShTK domain-containing protein           | gbpln | Arabidopsis lyrata   | AT4G25600.1   Symbols:   Oxoglutarate/iron-dependent oxygenase   chr4:13060712-13062359 FORWARD LENGTH=291             | 168 | 291 | 9.00E-46  | 173.2 | 55.4 | 63.1 |
| Rsa1.0_00394.1.g12946.t1 | gb ABN13878.1  polygalacturonase [Brassica rapa subsp. oleifera]                                                                                                                                                                                                                                                                                                                                                                                                                                                                                                                                                                                                                                                                                            | 395 | 395 | 0         | 100.0 | 93.9 | 98.2 | polygalacturonase                        | gbpln | Brassica rapa        | AT3G07820.1   Symbols:   Pectin lyase-like superfamily protein   chr3:2496597-2498028 REVERSE LENGTH=391               | 395 | 391 | 0         | 99.0  | 85.1 | 92.7 |
| Rsa1.0_00394.1.g12947.t1 | ref NP_566321.1  RNA recognition motif-containing protein [Arabidopsis thaliana] gi 16930093 gb AAL32012.1 AF436830.1 AT3g07810/F17A17_15 [Arabidopsis thaliana] gi 23297627 gb AAN12995.1  putative RNA-binding protein [Arabidopsis thaliana] gi 332641085 gb AEE74606.1  RNA recognition motif-containing protein [Arabidopsis thaliana]                                                                                                                                                                                                                                                                                                                                                                                                                 | 496 | 494 | 0         | 99.6  | 83.9 | 88.7 | RNA recognition motif-containing protein | gbpln | Arabidopsis thaliana | AT3G07810.1   Symbols:   RNA-binding (RRM/RBD/RNP motifs) family protein   chr3:2492875-2495052 FORWARD LENGTH=494     | 496 | 494 | 0         | 99.6  | 83.9 | 88.7 |
| Rsa1.0_00394.1.g12948.t1 | gb[EOA31343.1] hypothetical protein CARUB_v10014517mg [Capsella rubella]                                                                                                                                                                                                                                                                                                                                                                                                                                                                                                                                                                                                                                                                                    | 158 | 238 | 4.00E-71  | 150.6 | 79.7 | 83.5 | hypothetical protein CARUB_v10014517mg   | gbpln | Capsella rubella     | AT3G07800.1   Symbols:   Thymidine kinase   chr3:2489944-2490935 REVERSE LENGTH=238                                    | 158 | 238 | 1.00E-71  | 150.6 | 78.5 | 81.6 |
| Rsa1.0_00394.1.g12949.t1 | gb AAF13094.1 AC009176.21 unknown protein [Arabidopsis thaliana] gi 6648188 gb AAF21186.1 AC013483.10 unknown protein [Arabidopsis thaliana]                                                                                                                                                                                                                                                                                                                                                                                                                                                                                                                                                                                                                | 126 | 196 | 3.00E-62  | 155.6 | 91.3 | 96.0 | unknown protein                          | gbpln | Arabidopsis thaliana | AT3G07760.2   Symbols:   Sterile alpha motif (SAM) domain-containing protein   chr3:2476723-2477947 FORWARD LENGTH=125 | 126 | 125 | 6.00E-64  | 99.2  | 91.3 | 96.0 |
| Rsa1.0_00394.1.g12950.t1 | ref XP_002882543.1  hypothetical protein ARALYDRAFT_478100 [Arabidopsis lyrata subsp. lyrata] gi 297328383 gb EFH58802.1  hypothetical protein ARALYDRAFT_478100 [Arabidopsis lyrata subsp. lyrata] ref NP_187422.1  zinc finger protein CONSTANS-LIKE 9 [Arabidopsis thaliana] gi 42572309 ref NP_974250.1  zinc finger protein CONSTANS-LIKE 9 [Arabidopsis thaliana] gi 79313159 ref NP_001030659.1  zinc finger protein CONSTANS-LIKE 9 [Arabidopsis thaliana] gi 186509893 ref NP_001118599.1  zinc finger protein CONSTANS-LIKE 9 [Arabidopsis thaliana] gi 17433084 sp Q9SSE5.1 COL9_ARATH RecName: Full=Zinc finger protein CONSTANS-LIKE 9 gi 6466948 gb AAF13083.1 AC009176.10 unknown protein [Arabidopsis thaliana] gi 119360037 gb ABI.66747.1 | 208 | 208 | 1.00E-117 | 100.0 | 97.6 | 99.5 | hypothetical protein ARALYDRAFT_478100   | gbpln | Arabidopsis lyrata   | AT3G07680.1   Symbols:   emp24/gp25L/p24 family/GOLD family protein   chr3:2455627-2456652 FORWARD LENGTH=208          | 208 | 208 | 1.00E-119 | 100.0 | 97.1 | 98.6 |
| Rsa1.0_00394.1.g12951.t1 | At3g07650 [Arabidopsis thaliana] gi 222423327 db BAH19639.1  AT3G07650 [Arabidopsis thaliana] gi 332641059 gb AEE74580.1  zinc finger protein CONSTANS-LIKE 9 [Arabidopsis thaliana] gi 332641060 gb AEE74581.1  zinc finger protein CONSTANS-LIKE 9 [Arabidopsis thaliana] gi 332641061 gb AEE74582.1  zinc finger protein CONSTANS-LIKE 9 [Arabidopsis thaliana] gi 332641062 gb AEE74583.1  zinc finger protein CONSTANS-LIKE 9 [Arabidopsis thaliana]                                                                                                                                                                                                                                                                                                   | 358 | 372 | 1.00E-167 | 103.9 | 84.6 | 90.2 | zinc finger protein CONSTANS-LIKE 9      | gbpln | Arabidopsis thaliana | AT3G07650.4   Symbols:   COL9   CONSTANS-like 9   chr3:2442494-2443901 FORWARD LENGTH=372                              | 358 | 372 | 1.00E-169 | 103.9 | 84.6 | 90.2 |

|                          |                                                                                                                                                                                                                                                                                                                                                                                                                                                                         |     |     |           |       |      |      |                                                               |       |                      |                                                                                                                                                                                                                                                                                                                                                                                                                                                                                                                                                        |     |     |           |       |      |      |
|--------------------------|-------------------------------------------------------------------------------------------------------------------------------------------------------------------------------------------------------------------------------------------------------------------------------------------------------------------------------------------------------------------------------------------------------------------------------------------------------------------------|-----|-----|-----------|-------|------|------|---------------------------------------------------------------|-------|----------------------|--------------------------------------------------------------------------------------------------------------------------------------------------------------------------------------------------------------------------------------------------------------------------------------------------------------------------------------------------------------------------------------------------------------------------------------------------------------------------------------------------------------------------------------------------------|-----|-----|-----------|-------|------|------|
| Rsa1.0_00394.1.g12952.t1 | ref[XP_002882540.1] hypothetical protein ARALYDRAFT_478093 [Arabidopsis lyrata subsp. lyrata] gi 297328380 gb EFH58799.1                                                                                                                                                                                                                                                                                                                                                | 237 | 241 | 1.00E-106 | 101.7 | 81.0 | 90.3 | hypothetical protein ARALYDRAFT_478093                        | gbpln | Arabidopsis lyrata   | AT3G07640.1   Symbols:   unknown protein; Has 27 Blast hits to 27 proteins in 10 species: Archae - 0; Bacteria - 0; Metazoa - 0; Fungi - 0; Plants - 27; Viruses - 0; Other Eukaryotes - 0 (source: NCBI BLink).   chr3:2438171-2439661 FORWARD LENGTH=241                                                                                                                                                                                                                                                                                             | 237 | 241 | 1.00E-106 | 101.7 | 78.9 | 89.5 |
| Rsa1.0_00394.1.g12953.t1 | gb AAM61395.1  putative P-protein: chorismate mutase, prephenate dehydratase [Arabidopsis thaliana]                                                                                                                                                                                                                                                                                                                                                                     | 367 | 381 | 1.00E-174 | 103.8 | 86.6 | 93.2 | putative P-protein: chorismate mutase, prephenate dehydratase | gbpln | Arabidopsis thaliana | AT3G07630.2   Symbols: ADT2   arogenate dehydratase 2   chr3:2435457-2437530 FORWARD LENGTH=381                                                                                                                                                                                                                                                                                                                                                                                                                                                        | 367 | 381 | 1.00E-176 | 103.8 | 86.4 | 92.9 |
| Rsa1.0_00394.1.g12954.t1 | gb AAD09508.1  ATPF4, partial [Arabidopsis thaliana]                                                                                                                                                                                                                                                                                                                                                                                                                    | 139 | 179 | 5.00E-47  | 128.8 | 73.4 | 81.3 | ATPF4, partial                                                | gbpln | Arabidopsis thaliana | AT3G07600.1   Symbols:   Heavy metal transport/detoxification superfamily protein   chr3:2424300-2424954 REVERSE LENGTH=157                                                                                                                                                                                                                                                                                                                                                                                                                            | 139 | 157 | 1.00E-48  | 112.9 | 72.7 | 80.6 |
| Rsa1.0_00394.1.g12955.t1 | ref[XP_002882536.1] hypothetical protein ARALYDRAFT_478080 [Arabidopsis lyrata subsp. lyrata] gi 297328376 gb EFH58795.1                                                                                                                                                                                                                                                                                                                                                | 254 | 251 | 1.00E-124 | 98.8  | 85.8 | 91.7 | hypothetical protein ARALYDRAFT_478080                        | gbpln | Arabidopsis lyrata   | AT3G07565.1   Symbols:   Protein of unknown function (DUF3755)   chr3:2413823-2415872 FORWARD LENGTH=258                                                                                                                                                                                                                                                                                                                                                                                                                                               | 254 | 258 | 1.00E-126 | 101.6 | 88.2 | 93.7 |
| Rsa1.0_00394.1.g12956.t1 | gb EOA31112.1  hypothetical protein CARUB_v10014265mg [Capsella rubella]                                                                                                                                                                                                                                                                                                                                                                                                | 315 | 302 | 8.00E-96  | 95.9  | 76.2 | 78.7 | hypothetical protein CARUB_v10014265mg                        | gbpln | Capsella rubella     | AT3G07560.1   Symbols: APM2, PEX13   peroxin 13   chr3:2411616-2413310 REVERSE LENGTH=304                                                                                                                                                                                                                                                                                                                                                                                                                                                              | 315 | 304 | 3.00E-65  | 96.5  | 37.8 | 38.4 |
| Rsa1.0_00394.1.g12957.t1 | gb EOA29856.1  hypothetical protein CARUB_v10012950mg, partial [Capsella rubella]                                                                                                                                                                                                                                                                                                                                                                                       | 288 | 883 | 5.00E-92  | 306.6 | 66.3 | 80.6 | hypothetical protein CARUB_v10012950mg, partial               | gbpln | Capsella rubella     | AT3G07540.1   Symbols:   Actin-binding FH2 (formin homology 2) family protein   chr3:2404763-2407464 REVERSE LENGTH=841                                                                                                                                                                                                                                                                                                                                                                                                                                | 288 | 841 | 4.00E-93  | 292.0 | 65.3 | 78.5 |
| Rsa1.0_00394.1.g12958.t1 | ref[NP_566310.1] uncharacterized protein [Arabidopsis thaliana] gi 145331996 ref[NP_001078120.1] uncharacterized protein [Arabidopsis thaliana] gi 13877549 gb AAK43852.1 AF370475.1 Unknown protein [Arabidopsis thaliana] gi 20148735 gb AAM10258.1  unknown protein [Arabidopsis thaliana] gi 332641030 gb AEE74551.1  uncharacterized protein AT3G07510 [Arabidopsis thaliana] gi 332641031 gb AEE74552.1  uncharacterized protein AT3G07510 [Arabidopsis thaliana] | 305 | 189 | 1.00E-61  | 62.0  | 44.3 | 46.2 | uncharacterized protein                                       | gbpln | Arabidopsis thaliana | AT3G07510.2   Symbols:   unknown protein; FUNCTIONS IN: molecular_function unknown; INVOLVED IN: biological_process unknown; LOCATED IN: cellular_component unknown; EXPRESSED IN: 22 plant structures; EXPRESSED DURING: 13 growth stages; BEST Arabidopsis thaliana protein match is: unknown protein (TAIR:AT2G01580.1); Has 133 Blast hits to 133 proteins in 14 species: Archae - 0; Bacteria - 4; Metazoa - 0; Fungi - 0; Plants - 129; Viruses - 0; Other Eukaryotes - 0 (source: NCBI BLink).   chr3:2393895-2394464 REVERSE LENGTH=189        | 305 | 189 | 3.00E-64  | 62.0  | 44.3 | 46.2 |
| Rsa1.0_00395.1.g12959.t1 | gb AEX07593.1  cyclin-dependent kinase B2_2, partial [Brassica juncea]                                                                                                                                                                                                                                                                                                                                                                                                  | 314 | 307 | 1.00E-176 | 97.8  | 95.9 | 95.9 | cyclin-dependent kinase B2_2, partial                         | gbpln | Brassica juncea      | AT1G20930.1   Symbols: CDKB2.2   cyclin-dependent kinase B2.2   chr1:7292752-7294664 REVERSE LENGTH=315                                                                                                                                                                                                                                                                                                                                                                                                                                                | 314 | 315 | 1.00E-176 | 100.3 | 94.3 | 96.5 |
| Rsa1.0_00395.1.g12960.t1 | #                                                                                                                                                                                                                                                                                                                                                                                                                                                                       | #   | #   | #         | #     | #    | #    | -                                                             | ----  | ----                 | #                                                                                                                                                                                                                                                                                                                                                                                                                                                                                                                                                      | #   | #   | #         | #     | #    |      |
| Rsa1.0_00395.1.g12961.t2 | #                                                                                                                                                                                                                                                                                                                                                                                                                                                                       | #   | #   | #         | #     | #    | #    | -                                                             | ----  | ----                 | #                                                                                                                                                                                                                                                                                                                                                                                                                                                                                                                                                      | #   | #   | #         | #     | #    |      |
| Rsa1.0_00395.1.g12962.t1 | ref[NP_173523.1] DC1 domain-containing protein [Arabidopsis thaliana] gi 332191930 gb AEE30051.1  DC1 domain-containing protein [Arabidopsis thaliana]                                                                                                                                                                                                                                                                                                                  | 176 | 319 | 3.00E-62  | 181.3 | 85.2 | 92.0 | DC1 domain-containing protein                                 | gbpln | Arabidopsis thaliana | AT1G20990.1   Symbols:   Cysteine/Histidine-rich C1 domain family protein   chr1:7330524-7331946 REVERSE LENGTH=319                                                                                                                                                                                                                                                                                                                                                                                                                                    | 176 | 319 | 1.00E-64  | 181.3 | 85.2 | 92.0 |
| Rsa1.0_00395.1.g12963.t1 | ref[XP_002893147.1] predicted protein [Arabidopsis lyrata subsp. lyrata] gi 297338989 gb EFH69406.1  predicted protein [Arabidopsis lyrata subsp. lyrata]                                                                                                                                                                                                                                                                                                               | 161 | 322 | 2.00E-58  | 200.0 | 71.4 | 78.3 | predicted protein                                             | gbpln | Arabidopsis lyrata   | AT1G20990.1   Symbols:   Cysteine/Histidine-rich C1 domain family protein   chr1:7330524-7331946 REVERSE LENGTH=319                                                                                                                                                                                                                                                                                                                                                                                                                                    | 161 | 319 | 2.00E-59  | 198.1 | 68.3 | 78.3 |
| Rsa1.0_00395.1.g12964.t1 | gb EOA36953.1  hypothetical protein CARUB_v10009886mg [Capsella rubella]                                                                                                                                                                                                                                                                                                                                                                                                | 199 | 296 | 7.00E-79  | 148.7 | 82.9 | 89.4 | hypothetical protein CARUB_v10009886mg                        | gbpln | Capsella rubella     | AT1G21010.1   Symbols:   unknown protein; FUNCTIONS IN: molecular_function unknown; INVOLVED IN: N-terminal protein myristoylation; LOCATED IN: cellular_component unknown; EXPRESSED IN: 24 plant structures; EXPRESSED DURING: 14 growth stages; BEST Arabidopsis thaliana protein match is: unknown protein (TAIR:AT1G76600.1); Has 206 Blast hits to 206 proteins in 13 species: Archae - 0; Bacteria - 0; Metazoa - 0; Fungi - 0; Plants - 206; Viruses - 0; Other Eukaryotes - 0 (source: NCBI BLink).   chr1:7346239-7346871 FORWARD LENGTH=210 | 199 | 210 | 6.00E-79  | 105.5 | 82.9 | 88.9 |
| Rsa1.0_00395.1.g12965.t1 | #                                                                                                                                                                                                                                                                                                                                                                                                                                                                       | #   | #   | #         | #     | #    | #    | -                                                             | ----  | ----                 | #                                                                                                                                                                                                                                                                                                                                                                                                                                                                                                                                                      | #   | #   | #         | #     | #    |      |

|                          |                                                                                                                                                                                                                                                                                                                                                                                                                                                                                                                                                                                                                                                      |     |      |           |        |      |      |                                                 |       |                      |                                                                                                                                                                                                                                                                                                                                                                                                                                                                     |     |     |           |       |      |      |
|--------------------------|------------------------------------------------------------------------------------------------------------------------------------------------------------------------------------------------------------------------------------------------------------------------------------------------------------------------------------------------------------------------------------------------------------------------------------------------------------------------------------------------------------------------------------------------------------------------------------------------------------------------------------------------------|-----|------|-----------|--------|------|------|-------------------------------------------------|-------|----------------------|---------------------------------------------------------------------------------------------------------------------------------------------------------------------------------------------------------------------------------------------------------------------------------------------------------------------------------------------------------------------------------------------------------------------------------------------------------------------|-----|-----|-----------|-------|------|------|
| Rsa1.0_00395.1.g12966.t1 | refNP_177787.1  uncharacterized protein [Arabidopsis thaliana] gi 12323988 gb AAG51959.1 AC015450_20 hypothetical protein: 87351-88031 [Arabidopsis thaliana] gi 55740535 gb AAV63860.1  hypothetical protein At1g76610 [Arabidopsis thaliana] gi 332197743 gb AEE35864.1  uncharacterized protein AT1G76610 [Arabidopsis thaliana]                                                                                                                                                                                                                                                                                                                  | 201 | 226  | 1.00E-50  | 112.4  | 61.2 | 75.1 | uncharacterized protein                         | gbpln | Arabidopsis thaliana | AT1G76610.1   Symbols:   Protein of unknown function, DUF617   chr1:28751049-287511729 FORWARD LENGTH=226                                                                                                                                                                                                                                                                                                                                                           | 201 | 226 | 4.00E-53  | 112.4 | 61.2 | 75.1 |
| Rsa1.0_00395.1.g12967.t1 | gb ABW74585.1  pol polyprotein [Boechera divaricarpa]                                                                                                                                                                                                                                                                                                                                                                                                                                                                                                                                                                                                | 367 | 551  | 3.00E-82  | 150.1  | 46.6 | 57.8 | pol polyprotein                                 | gbpln | Boechera divaricarpa | #                                                                                                                                                                                                                                                                                                                                                                                                                                                                   | #   | #   | #         | #     | #    |      |
| Rsa1.0_00395.1.g12968.t1 | gb AFJ66169.1  hypothetical protein 11M19.13 [Arabidopsis halleri]                                                                                                                                                                                                                                                                                                                                                                                                                                                                                                                                                                                   | 98  | 1273 | 7.00E-19  | 1299.0 | 42.9 | 62.2 | hypothetical protein 11M19.13                   | gbpln | Arabidopsis halleri  | #                                                                                                                                                                                                                                                                                                                                                                                                                                                                   | #   | #   | #         | #     | #    |      |
| Rsa1.0_00395.1.g12969.t1 | #                                                                                                                                                                                                                                                                                                                                                                                                                                                                                                                                                                                                                                                    | #   | #    | #         | #      | #    | #    | -                                               | ----  | ----                 | #                                                                                                                                                                                                                                                                                                                                                                                                                                                                   | #   | #   | #         | #     | #    |      |
| Rsa1.0_00395.1.g12970.t1 | refNP_564135.1  cupredoxin-like protein [Arabidopsis thaliana] gi 111074298 gb ABH04522.1  At1g21090 [Arabidopsis thaliana] gi 332191942 gb AEE30063.1  cupredoxin-like protein [Arabidopsis thaliana]                                                                                                                                                                                                                                                                                                                                                                                                                                               | 244 | 242  | 1.00E-110 | 99.2   | 82.4 | 89.8 | cupredoxin-like protein                         | gbpln | Arabidopsis thaliana | AT1G21090.1   Symbols:   Cupredoxin superfamily protein   chr1:7384854-7386199 FORWARD LENGTH=242                                                                                                                                                                                                                                                                                                                                                                   | 244 | 242 | 1.00E-113 | 99.2  | 82.4 | 89.8 |
| Rsa1.0_00395.1.g12971.t1 | refNP_173534.1  O-methyltransferase-like protein [Arabidopsis thaliana] gi 888699 gb AAF80651.1 AC012190.7 Contains similarity to O-Methyltransferase 1 from Arabidopsis thaliana gb U70424. It is a member of O-methyltransferase family. ESTs gb AI994826, gb N65066 and gb N38589 come from this gene [Arabidopsis thaliana] gi 12744975 gb AAK06867.1 AF344316.1 putative O-methyltransferase [Arabidopsis thaliana] gi 15982844 gb AAL09769.1  At1g21100/T2211.7 [Arabidopsis thaliana] gi 23506107 gb AAN28913.1  At1g21100/T2211.7 [Arabidopsis thaliana] gi 332191943 gb AEE30064.1  O-methyltransferase-like protein [Arabidopsis thaliana] | 376 | 373  | 0         | 99.2   | 89.4 | 94.1 | O-methyltransferase-like protein                | gbpln | Arabidopsis thaliana | AT1G21100.1   Symbols:   O-methyltransferase family protein   chr1:7386991-7388318 REVERSE LENGTH=373                                                                                                                                                                                                                                                                                                                                                               | 376 | 373 | 0         | 99.2  | 89.4 | 94.1 |
| Rsa1.0_00395.1.g12972.t1 | gb EOA23804.1  hypothetical protein CARUB_v10017017mg, partial [Capsella rubella]                                                                                                                                                                                                                                                                                                                                                                                                                                                                                                                                                                    | 687 | 521  | 4.00E-44  | 75.8   | 16.0 | 22.4 | hypothetical protein CARUB_v10017017mg, partial | gbpln | Capsella rubella     | AT3G31430.1   Symbols:   unknown protein; FUNCTIONS IN: molecular_function unknown; INVOLVED IN: biological_process unknown; LOCATED IN: endomembrane system; BEST Arabidopsis thaliana protein match is: unknown protein (TAIR:AT5G18636.1); Has 295 Blast hits to 291 proteins in 12 species: Archae - 0; Bacteria - 0; Metazoa - 0; Fungi - 0; Plants - 295; Viruses - 0; Other Eukaryotes - 0 (source: NCBI BLink).   chr3:12795861-12796871 REVERSE LENGTH=336 | 687 | 336 | 2.00E-15  | 48.9  | 7.1  | 11.9 |
| Rsa1.0_00395.1.g12973.t1 | gb AAG51783.1 AC079679.3 reverse transcriptase, putative: 16838-20266 [Arabidopsis thaliana]                                                                                                                                                                                                                                                                                                                                                                                                                                                                                                                                                         | 787 | 1142 | 0         | 145.1  | 45.7 | 57.7 | reverse transcriptase, putative: 16838-20266    | gbpln | Arabidopsis thaliana | AT1G43760.1   Symbols:   DNase I-like superfamily protein   chr1:16528880-16531065 REVERSE LENGTH=626                                                                                                                                                                                                                                                                                                                                                               | 787 | 626 | 5.00E-40  | 79.5  | 16.0 | 25.2 |
| Rsa1.0_00395.1.g12974.t1 | #                                                                                                                                                                                                                                                                                                                                                                                                                                                                                                                                                                                                                                                    | #   | #    | #         | #      | #    | #    | -                                               | ----  | ----                 | #                                                                                                                                                                                                                                                                                                                                                                                                                                                                   | #   | #   | #         | #     | #    |      |
| Rsa1.0_00395.1.g12975.t1 | gb EOA36591.1  hypothetical protein CARUB_v10011787mg [Capsella rubella]                                                                                                                                                                                                                                                                                                                                                                                                                                                                                                                                                                             | 756 | 732  | 0         | 96.8   | 73.0 | 83.1 | hypothetical protein CARUB_v10011787mg          | gbpln | Capsella rubella     | AT1G21210.1   Symbols: WAK4   wall associated kinase 4   chr1:7424653-7427041 FORWARD LENGTH=738                                                                                                                                                                                                                                                                                                                                                                    | 756 | 738 | 0         | 97.6  | 70.2 | 81.1 |
| Rsa1.0_00395.1.g12976.t1 | gb EOA39743.1  hypothetical protein CARUB_v10008400mg [Capsella rubella]                                                                                                                                                                                                                                                                                                                                                                                                                                                                                                                                                                             | 628 | 740  | 0         | 117.8  | 73.6 | 81.1 | hypothetical protein CARUB_v10008400mg          | gbpln | Capsella rubella     | AT1G21270.1   Symbols: WAK2   wall-associated kinase 2   chr1:7444997-7447345 FORWARD LENGTH=732                                                                                                                                                                                                                                                                                                                                                                    | 628 | 732 | 0         | 116.6 | 68.5 | 77.1 |

|                          |                                                                                                                                                                                                                                                                                                                                                                                                                                                                                                                                                                                                                                                                                                                                                          |     |      |           |       |      |      |                                                       |       |                         |                                                                                                                                                                                                                                                                                                                                                                      |     |      |           |       |      |       |
|--------------------------|----------------------------------------------------------------------------------------------------------------------------------------------------------------------------------------------------------------------------------------------------------------------------------------------------------------------------------------------------------------------------------------------------------------------------------------------------------------------------------------------------------------------------------------------------------------------------------------------------------------------------------------------------------------------------------------------------------------------------------------------------------|-----|------|-----------|-------|------|------|-------------------------------------------------------|-------|-------------------------|----------------------------------------------------------------------------------------------------------------------------------------------------------------------------------------------------------------------------------------------------------------------------------------------------------------------------------------------------------------------|-----|------|-----------|-------|------|-------|
| Rsa1.0_00395.1.g12977.t1 | refNP_173553.1  extensin 3<br>[Arabidopsis thaliana]<br>gi 334302912 sp Q9FS16.3 EXTN3_ARA<br>TH RecName: Full=Extensin-3;<br>Short=AtExt3; Short=AtExt5; Flags:<br>Precursor<br>gi 8920638 gb AAF81360.1 AC036104.9<br>Contains similarity to Extensin (atExt1)<br>from Arabidopsis thaliana gb U43627                                                                                                                                                                                                                                                                                                                                                                                                                                                  | 352 | 431  | 5.00E-81  | 122.4 | 98.0 | 98.0 | extensin 3                                            | gbpln | Arabidopsis<br>thaliana | AT1G21310.1   Symbols: ATEXT3, RSH,<br>EXT3   extensin 3   chr1:7453693-7454988<br>REVERSE LENGTH=431                                                                                                                                                                                                                                                                | 352 | 431  | 1.00E-83  | 122.4 | 98.0 | 98.0  |
| Rsa1.0_00396.1.g12978.t1 | refNP_189147.1  fatA acyl-ACP<br>thioesterase [Arabidopsis thaliana]<br>gi 75275267 sp Q42561.1 FATA1_ARAT<br>H RecName: Full=Oleoyl-acyl carrier<br>protein thioesterase 1, chloroplastic;<br>AltName: Full=18:0-acyl-carrier protein<br>thioesterase; Short=18:0-ACP<br>thioesterase; AltName: Full=Acyl-[acyl-<br>carrier-protein] hydrolase; Flags:<br>Precursor gi 804946 emb CAA85389.1 <br>acyl-(acyl carrier protein) thioesterase<br>[Arabidopsis thaliana]<br>gi 8294167 dbj BAB02069.1  acyl carrier<br>protein thioesterase [Arabidopsis<br>thaliana] gi 51970352 dbj BAD43868.1 <br>acyl-(acyl carrier protein) thioesterase<br>[Arabidopsis thaliana]<br>gi 332643459 gb AEE76980.1  fatA acyl-<br>ACP thioesterase [Arabidopsis thaliana] | 151 | 362  | 1.00E-16  | 239.7 | 27.2 | 29.1 | fatA acyl-ACP<br>thioesterase                         | gbpln | Arabidopsis<br>thaliana | AT3G25110.1   Symbols: AtFaTA, FaTA  <br>fatA acyl-ACP thioesterase   chr3:9146589-<br>9148273 REVERSE LENGTH=362                                                                                                                                                                                                                                                    | 151 | 362  | 4.00E-19  | 239.7 | 27.2 | 29.1  |
| Rsa1.0_00396.1.g12979.t1 | gb AAM66136.1  polyneuridine aldehyde<br>esterase, putative [Arabidopsis thaliana]                                                                                                                                                                                                                                                                                                                                                                                                                                                                                                                                                                                                                                                                       | 347 | 347  | 0         | 100.0 | 93.9 | 96.5 | polyneuridine aldehyde<br>esterase, putative          | gbpln | Arabidopsis<br>thaliana | AT1G33990.1   Symbols: ATMES14, MES14  <br>methyl esterase 14   chr1:12355909-<br>12357894 FORWARD LENGTH=348                                                                                                                                                                                                                                                        | 347 | 348  | 0         | 100.3 | 92.8 | 95.4  |
| Rsa1.0_00396.1.g12980.t1 | dbj BAJ33748.1  unnamed protein<br>product [Thellungiella halophila]                                                                                                                                                                                                                                                                                                                                                                                                                                                                                                                                                                                                                                                                                     | 172 | 177  | 8.00E-69  | 102.9 | 87.8 | 94.2 | unnamed protein<br>product                            | ----  | ----                    | AT1G34000.1   Symbols: OHP2   one-helix<br>protein 2   chr1:12358151-12358902<br>REVERSE LENGTH=172                                                                                                                                                                                                                                                                  | 172 | 172  | 9.00E-71  | 100.0 | 88.4 | 92.4  |
| Rsa1.0_00396.1.g12981.t1 | refXP_002893799.1  hypothetical<br>protein ARALYDRAFT_313917<br>[Arabidopsis lyrata subsp. lyrata]<br>gi 297339641 gb EFH70058.1 <br>hypothetical protein<br>ARALYDRAFT_313917 [Arabidopsis<br>lyrata subsp. lyrata]                                                                                                                                                                                                                                                                                                                                                                                                                                                                                                                                     | 214 | 187  | 5.00E-70  | 87.4  | 64.0 | 71.5 | hypothetical protein<br>ARALYDRAFT_313917             | gbpln | Arabidopsis<br>lyrata   | AT1G34010.1   Symbols:   unknown protein;<br>BEST Arabidopsis thaliana protein match is:<br>unknown protein (TAIR:AT1G22790.2); Has<br>74 Blast hits to 74 proteins in 12 species:<br>Archae - 0; Bacteria - 0; Metazoa - 0; Fungi<br>- 0; Plants - 74; Viruses - 0; Other<br>Eukaryotes - 0 (source: NCBI BLink).  <br>chr1:12359821-12360838 REVERSE<br>LENGTH=182 | 214 | 182  | 1.00E-69  | 85.0  | 65.0 | 72.0  |
| Rsa1.0_00396.1.g12982.t1 | emb CAN82943.1  hypothetical protein<br>VITISV_001812 [Vitis vinifera]                                                                                                                                                                                                                                                                                                                                                                                                                                                                                                                                                                                                                                                                                   | 405 | 817  | 1.00E-127 | 201.7 | 58.8 | 70.9 | hypothetical protein<br>VITISV_001812                 | gbpln | Vitis vinifera          | AT4G23160.1   Symbols: CRK8   cysteine-<br>rich RLK (RECEPTOR-like protein kinase) 8  <br>chr4:12129485-12134086 FORWARD<br>LENGTH=1262                                                                                                                                                                                                                              | 405 | 1262 | 1.00E-24  | 311.6 | 23.5 | 34.8  |
| Rsa1.0_00396.1.g12983.t1 | emb CAN60947.1  hypothetical protein<br>VITISV_015758 [Vitis vinifera]                                                                                                                                                                                                                                                                                                                                                                                                                                                                                                                                                                                                                                                                                   | 200 | 1306 | 1.00E-28  | 653.0 | 31.5 | 34.5 | hypothetical protein<br>VITISV_015758                 | gbpln | Vitis vinifera          | #                                                                                                                                                                                                                                                                                                                                                                    | #   | #    | #         | #     | #    | #     |
| Rsa1.0_00396.1.g12984.t1 | refXP_002891071.1  hypothetical<br>protein ARALYDRAFT_473556<br>[Arabidopsis lyrata subsp. lyrata]<br>gi 297336913 gb EFH67330.1 <br>hypothetical protein<br>ARALYDRAFT_473556 [Arabidopsis<br>lyrata subsp. lyrata]                                                                                                                                                                                                                                                                                                                                                                                                                                                                                                                                     | 337 | 335  | 1.00E-179 | 99.4  | 90.2 | 92.9 | hypothetical protein<br>ARALYDRAFT_473556             | gbpln | Arabidopsis<br>lyrata   | AT1G34020.1   Symbols:   Nucleotide-sugar<br>transporter family protein   chr1:12367359-<br>12368965 FORWARD LENGTH=335                                                                                                                                                                                                                                              | 337 | 335  | 0         | 99.4  | 89.9 | 92.9  |
| Rsa1.0_00396.1.g12985.t1 | gb EOA21645.1  hypothetical protein<br>CARUB_v10002063mg, partial [Capsella<br>rubella]                                                                                                                                                                                                                                                                                                                                                                                                                                                                                                                                                                                                                                                                  | 152 | 183  | 7.00E-83  | 120.4 | 98.0 | 99.3 | hypothetical protein<br>CARUB_v10002063mg,<br>partial | gbpln | Capsella<br>rubella     | AT4G09800.1   Symbols: RPS18C   S18<br>ribosomal protein   chr4:6173818-6174963<br>FORWARD LENGTH=152                                                                                                                                                                                                                                                                | 152 | 152  | 2.00E-85  | 100.0 | 98.7 | 100.0 |
| Rsa1.0_00396.1.g12986.t1 | emb CAN79264.1  hypothetical protein<br>VITISV_034881 [Vitis vinifera]                                                                                                                                                                                                                                                                                                                                                                                                                                                                                                                                                                                                                                                                                   | 138 | 1360 | 5.00E-55  | 985.5 | 71.0 | 85.5 | hypothetical protein<br>VITISV_034881                 | gbpln | Vitis vinifera          | AT4G23160.1   Symbols: CRK8   cysteine-<br>rich RLK (RECEPTOR-like protein kinase) 8  <br>chr4:12129485-12134086 FORWARD<br>LENGTH=1262                                                                                                                                                                                                                              | 138 | 1262 | 2.00E-14  | 914.5 | 29.0 | 40.6  |
| Rsa1.0_00396.1.g12987.t1 | #                                                                                                                                                                                                                                                                                                                                                                                                                                                                                                                                                                                                                                                                                                                                                        | #   | #    | #         | #     | #    | -    | ----                                                  | ----  | ----                    | #                                                                                                                                                                                                                                                                                                                                                                    | #   | #    | #         | #     | #    | #     |
| Rsa1.0_00396.1.g12988.t1 | #                                                                                                                                                                                                                                                                                                                                                                                                                                                                                                                                                                                                                                                                                                                                                        | #   | #    | #         | #     | #    | -    | ----                                                  | ----  | ----                    | #                                                                                                                                                                                                                                                                                                                                                                    | #   | #    | #         | #     | #    | #     |
| Rsa1.0_00396.1.g12989.t2 | gb EOA21997.1  hypothetical protein<br>CARUB_v10002508mg, partial [Capsella<br>rubella]                                                                                                                                                                                                                                                                                                                                                                                                                                                                                                                                                                                                                                                                  | 474 | 448  | 2.00E-99  | 94.5  | 47.0 | 60.1 | hypothetical protein<br>CARUB_v10002508mg,<br>partial | gbpln | Capsella<br>rubella     | AT4G02760.3   Symbols:   RNI-like<br>superfamily protein   chr4:1224336-1227857<br>REVERSE LENGTH=551                                                                                                                                                                                                                                                                | 474 | 551  | 1.00E-102 | 116.2 | 47.5 | 61.0  |
| Rsa1.0_00396.1.g12990.t1 | #                                                                                                                                                                                                                                                                                                                                                                                                                                                                                                                                                                                                                                                                                                                                                        | #   | #    | #         | #     | #    | -    | ----                                                  | ----  | ----                    | #                                                                                                                                                                                                                                                                                                                                                                    | #   | #    | #         | #     | #    | #     |

|                          |                                                                                                                                                                                                                                                                                                                                                                                                                                                                                                                                                                                                                                                                                      |      |      |           |        |      |      |                                                      |       |                      |                                                                                                                                                                                                                                                                                                                                                                                                                                                                                    |      |      |           |       |      |      |
|--------------------------|--------------------------------------------------------------------------------------------------------------------------------------------------------------------------------------------------------------------------------------------------------------------------------------------------------------------------------------------------------------------------------------------------------------------------------------------------------------------------------------------------------------------------------------------------------------------------------------------------------------------------------------------------------------------------------------|------|------|-----------|--------|------|------|------------------------------------------------------|-------|----------------------|------------------------------------------------------------------------------------------------------------------------------------------------------------------------------------------------------------------------------------------------------------------------------------------------------------------------------------------------------------------------------------------------------------------------------------------------------------------------------------|------|------|-----------|-------|------|------|
| Rsa1.0_00396.1.g12991.t1 | gb AAC02672.1  polyprotein [Arabidopsis arenosa]                                                                                                                                                                                                                                                                                                                                                                                                                                                                                                                                                                                                                                     | 136  | 1390 | 2.00E-38  | 1022.1 | 57.4 | 75.0 | polyprotein                                          | gbpln | Arabidopsis arenosa  | #                                                                                                                                                                                                                                                                                                                                                                                                                                                                                  | #    | #    | #         | #     | #    |      |
| Rsa1.0_00396.1.g12992.t1 | ref NP_177373.1  trypsin inhibitor (Kunitz) domain-containing protein [Arabidopsis thaliana]<br>gi 12323668 gb AAG51801.1 AC067754.17 drought induced protein, putative; 79797-80444 [Arabidopsis thaliana]<br>gi 21536624 gb AM60956.1  drought induced protein, putative [Arabidopsis thaliana]<br>gi 94442485 gb ABF19030.1 At1g72290 [Arabidopsis thaliana]<br>gi 332197178 gb AEE35299.1  trypsin inhibitor (Kunitz) domain-containing protein [Arabidopsis thaliana]<br>ref XP_002888867.1  hypothetical protein ARALYDRAFT.476358 [Arabidopsis lyrata subsp. lyrata]<br>gi 297334708 gb EFH65126.1  hypothetical protein ARALYDRAFT.476358 [Arabidopsis lyrata subsp. lyrata] | 178  | 215  | 1.00E-45  | 120.8  | 55.6 | 64.0 | trypsin inhibitor (Kunitz) domain-containing protein | gbpln | Arabidopsis thaliana | AT1G72290.1   Symbols:   Kunitz family trypsin and protease inhibitor protein   chr1:27215852-27216499 FORWARD LENGTH=215                                                                                                                                                                                                                                                                                                                                                          | 178  | 215  | 5.00E-48  | 120.8 | 55.6 | 64.0 |
| Rsa1.0_00396.1.g12993.t1 | ref XP_002888867.1  hypothetical protein ARALYDRAFT.476358 [Arabidopsis lyrata subsp. lyrata]<br>gi 297334708 gb EFH65126.1  hypothetical protein ARALYDRAFT.476358 [Arabidopsis lyrata subsp. lyrata]                                                                                                                                                                                                                                                                                                                                                                                                                                                                               | 1084 | 1096 | 0         | 101.1  | 80.0 | 88.6 | hypothetical protein ARALYDRAFT.476358               | gbpln | Arabidopsis lyrata   | AT1G72300.1   Symbols:   Leucine-rich receptor-like protein kinase family protein   chr1:27217679-27220966 REVERSE LENGTH=1095                                                                                                                                                                                                                                                                                                                                                     | 1084 | 1095 | 0         | 101.0 | 79.2 | 88.7 |
| Rsa1.0_00396.1.g12994.t1 | #                                                                                                                                                                                                                                                                                                                                                                                                                                                                                                                                                                                                                                                                                    | #    | #    | #         | #      | #    | -    | ----                                                 | ----  | #                    | #                                                                                                                                                                                                                                                                                                                                                                                                                                                                                  | #    | #    | #         | #     | #    |      |
| Rsa1.0_00396.1.g12995.t1 | #                                                                                                                                                                                                                                                                                                                                                                                                                                                                                                                                                                                                                                                                                    | #    | #    | #         | #      | #    | -    | ----                                                 | ----  | #                    | #                                                                                                                                                                                                                                                                                                                                                                                                                                                                                  | #    | #    | #         | #     | #    |      |
| Rsa1.0_00396.1.g12996.t1 | gb AAC33226.1  putative non-LTR retroelement reverse transcriptase [Arabidopsis thaliana]<br>ref XP_002887428.1  hypothetical protein ARALYDRAFT.476359 [Arabidopsis lyrata subsp. lyrata]<br>gi 297333269 gb EFH63687.1  hypothetical protein ARALYDRAFT.476359 [Arabidopsis lyrata subsp. lyrata]                                                                                                                                                                                                                                                                                                                                                                                  | 1495 | 1529 | 0         | 102.3  | 43.1 | 61.7 | putative non-LTR retroelement reverse transcriptase  | gbpln | Arabidopsis thaliana | AT3G24255.1   Symbols:   RNA-directed DNA polymerase (reverse transcriptase)-related family protein   chr3:8789471-8793208 FORWARD LENGTH=746                                                                                                                                                                                                                                                                                                                                      | 1495 | 746  | 9.00E-93  | 49.9  | 12.2 | 15.3 |
| Rsa1.0_00396.1.g12997.t1 | ref XP_002887428.1  hypothetical protein ARALYDRAFT.476359 [Arabidopsis lyrata subsp. lyrata]<br>gi 297333269 gb EFH63687.1  hypothetical protein ARALYDRAFT.476359 [Arabidopsis lyrata subsp. lyrata]                                                                                                                                                                                                                                                                                                                                                                                                                                                                               | 303  | 324  | 1.00E-116 | 106.9  | 80.9 | 88.1 | hypothetical protein ARALYDRAFT.476359               | gbpln | Arabidopsis lyrata   | AT1G72310.1   Symbols:   ATL3   RING/U-box superfamily protein   chr1:27226405-27227379 FORWARD LENGTH=324                                                                                                                                                                                                                                                                                                                                                                         | 303  | 324  | 1.00E-116 | 106.9 | 76.6 | 83.5 |
| Rsa1.0_00396.1.g12998.t1 | ref XP_002887429.1  predicted protein [Arabidopsis lyrata subsp. lyrata]<br>gi 297333270 gb EFH63688.1  predicted protein [Arabidopsis lyrata subsp. lyrata]                                                                                                                                                                                                                                                                                                                                                                                                                                                                                                                         | 76   | 101  | 3.00E-15  | 132.9  | 76.3 | 80.3 | predicted protein                                    | gbpln | Arabidopsis lyrata   | AT1G17285.1   Symbols:   unknown protein; FUNCTIONS IN: molecular_function unknown; INVOLVED IN: biological_process unknown; LOCATED IN: endomembrane system; BEST Arabidopsis thaliana protein match is: unknown protein (TAIR:AT1G17300.1). Has 35333 Blast hits to 34131 proteins in 2444 species: Archae - 798; Bacteria - 22429; Metazoa - 974; Fungi - 991; Plants - 531; Viruses - 0; Other Eukaryotes - 9610 (source: NCBI BLINK)   chr1:5920895-5921287 FORWARD LENGTH=95 | 76   | 95   | 2.00E-14  | 125.0 | 52.6 | 65.8 |
| Rsa1.0_00397.1.g12999.t1 | ref NP_188337.1  uncharacterized protein [Arabidopsis thaliana]<br>gi 42572461 ref NP_974326.1  uncharacterized protein [Arabidopsis thaliana]<br>gi 18087521 gb AAL58895.1 AF462799.1 AT3g17120/K14A17_24 [Arabidopsis thaliana]<br>gi 7670036 db BA94990.1  unnamed protein product [Arabidopsis thaliana]<br>gi 332642385 gb AEE75906.1  uncharacterized protein AT3G17120 [Arabidopsis thaliana]<br>gi 332642386 gb AEE75907.1  uncharacterized protein AT3G17120 [Arabidopsis thaliana]                                                                                                                                                                                         | 200  | 219  | 1.00E-76  | 109.5  | 84.5 | 88.5 | uncharacterized protein                              | gbpln | Arabidopsis thaliana | AT3G17120.2   Symbols:   unknown protein; BEST Arabidopsis thaliana protein match is: unknown protein (TAIR:AT1G02380.1). Has 35333 Blast hits to 34131 proteins in 2444 species: Archae - 798; Bacteria - 22429; Metazoa - 974; Fungi - 991; Plants - 531; Viruses - 0; Other Eukaryotes - 9610 (source: NCBI BLINK)   chr3:5842410-5843246 FORWARD LENGTH=219                                                                                                                    | 200  | 219  | 4.00E-79  | 109.5 | 84.5 | 88.5 |
| Rsa1.0_00397.1.g13000.t1 | gb EOA31631.1  hypothetical protein CARUB_v10014831mg [Capsella rubella]                                                                                                                                                                                                                                                                                                                                                                                                                                                                                                                                                                                                             | 174  | 153  | 2.00E-22  | 87.9   | 45.4 | 58.6 | hypothetical protein CARUB_v10014831mg               | gbpln | Capsella rubella     | AT3G16660.1   Symbols:   Pollen Ole e 1 allergen and extensin family protein   chr3:5676904-5677788 FORWARD LENGTH=180                                                                                                                                                                                                                                                                                                                                                             | 174  | 180  | 2.00E-24  | 103.4 | 48.9 | 65.5 |
| Rsa1.0_00397.1.g13001.t1 | gb AAD19784.1  putative retroelement pol polyprotein [Arabidopsis thaliana]                                                                                                                                                                                                                                                                                                                                                                                                                                                                                                                                                                                                          | 509  | 1501 | 1.00E-133 | 294.9  | 43.4 | 53.2 | putative retroelement pol polyprotein                | gbpln | Arabidopsis thaliana | AT4G23160.1   Symbols:   CRK8   cysteine-rich RLK (RECEPTOR-like protein kinase) 8   chr4:12129485-12134086 FORWARD LENGTH=1262                                                                                                                                                                                                                                                                                                                                                    | 509  | 1262 | 8.00E-80  | 247.9 | 25.3 | 39.1 |
| Rsa1.0_00397.1.g13002.t1 | db BAJ34012.1  unnamed protein product [Thellungiella halophila]                                                                                                                                                                                                                                                                                                                                                                                                                                                                                                                                                                                                                     | 207  | 227  | 2.00E-62  | 109.7  | 74.9 | 83.6 | unnamed protein product                              | ----  | ----                 | AT3G17100.2   Symbols:   sequence-specific DNA binding transcription factors   chr3:5831552-5832244 FORWARD LENGTH=230                                                                                                                                                                                                                                                                                                                                                             | 207  | 230  | 2.00E-61  | 111.1 | 71.5 | 80.7 |
| Rsa1.0_00397.1.g13003.t1 | gb AAM61747.1  protein phosphatase-2c, putative [Arabidopsis thaliana]                                                                                                                                                                                                                                                                                                                                                                                                                                                                                                                                                                                                               | 380  | 384  | 0         | 101.1  | 90.5 | 95.3 | protein phosphatase-2c, putative                     | gbpln | Arabidopsis thaliana | AT3G17090.1   Symbols:   Protein phosphatase 2C family protein   chr3:5826984-5829327 FORWARD LENGTH=384                                                                                                                                                                                                                                                                                                                                                                           | 380  | 384  | 0         | 101.1 | 89.7 | 94.5 |

|                          |                                                                                                                                                                                                    |     |     |           |       |      |      |                                                                                     |       |                      |                                                                                                                                                               |     |     |           |       |      |      |
|--------------------------|----------------------------------------------------------------------------------------------------------------------------------------------------------------------------------------------------|-----|-----|-----------|-------|------|------|-------------------------------------------------------------------------------------|-------|----------------------|---------------------------------------------------------------------------------------------------------------------------------------------------------------|-----|-----|-----------|-------|------|------|
| Rsa1.0_00397.1.g13004.t2 | ref[XP_002885186.1] pectinesterase family protein [Arabidopsis lyrata subsp. lyrata] gi297331028[gb EFH61445.1] pectinesterase family protein [Arabidopsis lyrata subsp. lyrata]                   | 151 | 344 | 1.00E-67  | 227.8 | 89.4 | 93.4 | pectinesterase family protein                                                       | gbpln | Arabidopsis lyrata   | AT3G17060.1   Symbols:   Pectin lyase-like superfamily protein   chr3:5816953-5818458 REVERSE LENGTH=344                                                      | 151 | 344 | 5.00E-69  | 227.8 | 88.7 | 92.7 |
| Rsa1.0_00397.1.g13005.t1 | #                                                                                                                                                                                                  | #   | #   | #         | #     | #    | #    | -                                                                                   | ----  | ----                 | #                                                                                                                                                             | #   | #   | #         | #     | #    |      |
| Rsa1.0_00397.1.g13006.t1 | ref[NP_188328.5] nucleic acid-binding-like protein [Arabidopsis thaliana] gi332642375[gb AE75896.1] nucleic acid-binding-like protein [Arabidopsis thaliana]                                       | 665 | 668 | 0         | 100.5 | 84.7 | 91.9 | nucleic acid-binding-like protein                                                   | gbpln | Arabidopsis thaliana | AT3G17030.1   Symbols:   Nucleic acid-binding proteins superfamily   chr3:5804509-5808462 REVERSE LENGTH=668                                                  | 665 | 668 | 0         | 100.5 | 84.7 | 91.9 |
| Rsa1.0_00397.1.g13007.t1 | gb[ABL97971.1] unknown [Brassica rapa]                                                                                                                                                             | 163 | 163 | 1.00E-88  | 100.0 | 96.9 | 98.2 | unknown                                                                             | gbpln | Brassica rapa        | AT3G17020.1   Symbols:   Adenine nucleotide alpha hydrolases-like superfamily protein   chr3:5802728-5804063 REVERSE LENGTH=163                               | 163 | 163 | 3.00E-82  | 100.0 | 86.5 | 94.5 |
| Rsa1.0_00397.1.g13008.t1 | dbj[BAB09171.1] serine/threonine-protein kinase Mak (male germ cell-associated kinase)-like protein [Arabidopsis thaliana]                                                                         | 251 | 530 | 1.00E-44  | 211.2 | 36.3 | 39.0 | serine/threonine-protein kinase Mak (male germ cell-associated kinase)-like protein | gbpln | Arabidopsis thaliana | AT5G45430.1   Symbols:   Protein kinase superfamily protein   chr5:18409200-18411711 FORWARD LENGTH=499                                                       | 251 | 499 | 6.00E-47  | 198.8 | 36.3 | 39.0 |
| Rsa1.0_00397.1.g13009.t1 | #                                                                                                                                                                                                  | #   | #   | #         | #     | #    | #    | -                                                                                   | ----  | ----                 | AT3G49560.1   Symbols:   Mitochondrial import inner membrane translocase subunit Tim17/Tim22/Tim23 family protein   chr3:18370644-18371821 FORWARD LENGTH=261 | 144 | 261 | 1.00E-12  | 181.3 | 36.1 | 53.5 |
| Rsa1.0_00397.1.g13010.t1 | gb[EOA18266.1] hypothetical protein CARUB_v10006759mg [Capsella rubella]                                                                                                                           | 137 | 128 | 2.00E-12  | 93.4  | 31.4 | 45.3 | hypothetical protein CARUB_v10006759mg                                              | gbpln | Capsella rubella     | AT1G14800.1   Symbols:   Nucleic acid-binding, OB-fold-like protein   chr1:5099572-5102558 FORWARD LENGTH=384                                                 | 137 | 384 | 9.00E-14  | 280.3 | 30.7 | 46.0 |
| Rsa1.0_00397.1.g13011.t1 | ref[XP_002883037.1] ubiquitin-conjugating enzyme 31 [Arabidopsis lyrata subsp. lyrata] gi297328877[gb EFH59296.1] ubiquitin-conjugating enzyme 31 [Arabidopsis lyrata subsp. lyrata]               | 301 | 308 | 1.00E-152 | 102.3 | 87.0 | 92.0 | ubiquitin-conjugating enzyme 31                                                     | gbpln | Arabidopsis lyrata   | AT3G17000.1   Symbols:   UBC32   ubiquitin-conjugating enzyme 32   chr3:5797296-5799467 FORWARD LENGTH=309                                                    | 301 | 309 | 1.00E-151 | 102.7 | 85.4 | 89.4 |
| Rsa1.0_00397.1.g13012.t1 | gb[EOA32502.1] hypothetical protein CARUB_v10015783mg [Capsella rubella]                                                                                                                           | 366 | 398 | 1.00E-125 | 108.7 | 65.6 | 78.1 | hypothetical protein CARUB_v10015783mg                                              | gbpln | Capsella rubella     | AT3G16740.1   Symbols:   F-box and associated interaction domains-containing protein   chr3:5699476-5700651 FORWARD LENGTH=391                                | 366 | 391 | 1.00E-113 | 106.8 | 60.7 | 75.4 |
| Rsa1.0_00397.1.g13013.t1 | ref[XP_002885181.1] hypothetical protein ARALYDRAFT_318461 [Arabidopsis lyrata subsp. lyrata] gi297331021[gb EFH61440.1] hypothetical protein ARALYDRAFT_318461 [Arabidopsis lyrata subsp. lyrata] | 146 | 143 | 6.00E-50  | 97.9  | 64.4 | 73.3 | hypothetical protein ARALYDRAFT_318461                                              | gbpln | Arabidopsis lyrata   | AT3G16970.1   Symbols:   Plant self-incompatibility protein S1 family   chr3:5793668-5794090 REVERSE LENGTH=140                                               | 146 | 140 | 4.00E-51  | 95.9  | 63.0 | 73.3 |
| Rsa1.0_00397.1.g13014.t1 | gb[EOA31883.1] hypothetical protein CARUB_v10015111mg [Capsella rubella]                                                                                                                           | 186 | 186 | 5.00E-94  | 100.0 | 89.2 | 95.7 | hypothetical protein CARUB_v10015111mg                                              | gbpln | Capsella rubella     | AT3G16900.1   Symbols:   Protein of unknown function (DUF567)   chr3:5772106-5772849 FORWARD LENGTH=185                                                       | 186 | 185 | 5.00E-91  | 99.5  | 84.4 | 93.5 |
| Rsa1.0_00397.1.g13015.t3 | gb[EOA30062.1] hypothetical protein CARUB_v10013169mg [Capsella rubella]                                                                                                                           | 419 | 654 | 1.00E-105 | 156.1 | 50.4 | 58.2 | hypothetical protein CARUB_v10013169mg                                              | gbpln | Capsella rubella     | AT3G16890.1   Symbols:   PPR40   pentatricopeptide (PPR) domain protein 40   chr3:5768401-5770380 REVERSE LENGTH=659                                          | 419 | 659 | 1.00E-107 | 157.3 | 51.6 | 58.7 |
| Rsa1.0_00397.1.g13016.t1 | ref[XP_002885174.1] hypothetical protein ARALYDRAFT_479155 [Arabidopsis lyrata subsp. lyrata] gi297331014[gb EFH61433.1] hypothetical protein ARALYDRAFT_479155 [Arabidopsis lyrata subsp. lyrata] | 131 | 175 | 3.00E-16  | 133.6 | 54.2 | 65.6 | hypothetical protein ARALYDRAFT_479155                                              | gbpln | Arabidopsis lyrata   | AT3G16870.1   Symbols:   GATA17   GATA transcription factor 17   chr3:5763752-5764576 REVERSE LENGTH=190                                                      | 131 | 190 | 3.00E-12  | 145.0 | 56.5 | 68.7 |
| Rsa1.0_00398.1.g13017.t1 | #                                                                                                                                                                                                  | #   | #   | #         | #     | #    | #    | -                                                                                   | ----  | ----                 | #                                                                                                                                                             | #   | #   | #         | #     | #    |      |
| Rsa1.0_00398.1.g13018.t1 | #                                                                                                                                                                                                  | #   | #   | #         | #     | #    | #    | -                                                                                   | ----  | ----                 | #                                                                                                                                                             | #   | #   | #         | #     | #    |      |
| Rsa1.0_00398.1.g13019.t1 | ref[XP_002889113.1] hypothetical protein ARALYDRAFT_316612 [Arabidopsis lyrata subsp. lyrata] gi297334954[gb EFH65372.1] hypothetical protein ARALYDRAFT_316612 [Arabidopsis lyrata subsp. lyrata] | 240 | 195 | 8.00E-14  | 81.3  | 23.3 | 29.6 | hypothetical protein ARALYDRAFT_316612                                              | gbpln | Arabidopsis lyrata   | AT1G76965.1   Symbols:   Encodes a Protease inhibitor/seed storage/LTP family protein   chr1:28921729-2892292 REVERSE LENGTH=187                              | 240 | 187 | 1.00E-15  | 77.9  | 20.0 | 25.8 |
| Rsa1.0_00398.1.g13020.t2 | gb[EOA34253.1] hypothetical protein CARUB_v10021765mg [Capsella rubella]                                                                                                                           | 496 | 471 | 0         | 95.0  | 75.0 | 81.0 | hypothetical protein CARUB_v10021765mg                                              | gbpln | Capsella rubella     | AT1G76970.1   Symbols:   Target of Myb protein 1   chr1:28922841-28924854 REVERSE LENGTH=446                                                                  | 496 | 446 | 1.00E-171 | 89.9  | 68.3 | 76.4 |



|                          |                                                                                                                                                                                                                                                                                                                                                                                                                                                                                                                                                                                                                                                                                                                                                                                                                                                                                                                                                                                                                                            |     |      |           |       |      |      |                                                                   |        |                      |                                                                                                                                                                                                                                                                                                                                   |     |     |           |       |      |      |
|--------------------------|--------------------------------------------------------------------------------------------------------------------------------------------------------------------------------------------------------------------------------------------------------------------------------------------------------------------------------------------------------------------------------------------------------------------------------------------------------------------------------------------------------------------------------------------------------------------------------------------------------------------------------------------------------------------------------------------------------------------------------------------------------------------------------------------------------------------------------------------------------------------------------------------------------------------------------------------------------------------------------------------------------------------------------------------|-----|------|-----------|-------|------|------|-------------------------------------------------------------------|--------|----------------------|-----------------------------------------------------------------------------------------------------------------------------------------------------------------------------------------------------------------------------------------------------------------------------------------------------------------------------------|-----|-----|-----------|-------|------|------|
| Rsa1.0_00398.1.g13021.t1 | ref XP_002862501.1  hypothetical protein ARALYDRAFT_497423 [Arabidopsis lyrata subsp. lyrata] gi 297842467 ref XP_002889115.1  hypothetical protein ARALYDRAFT_476857 [Arabidopsis lyrata subsp. lyrata] gi 297309058 gb EFH38759.1  hypothetical protein ARALYDRAFT_497423 [Arabidopsis lyrata subsp. lyrata] gi 297334956 gb EFH65374.1  hypothetical protein ARALYDRAFT_476857 [Arabidopsis lyrata subsp. lyrata]                                                                                                                                                                                                                                                                                                                                                                                                                                                                                                                                                                                                                       | 219 | 246  | 3.00E-71  | 112.3 | 68.5 | 74.9 | hypothetical protein ARALYDRAFT_497423                            | gblpln | Arabidopsis lyrata   | AT1G76980.1   Symbols:   BEST Arabidopsis thaliana protein match is: embryo defective 2170 (TAIR:AT1G21390.1); Has 65 Blast hits to 65 proteins in 23 species: Archae = 0; Bacteria = 8; Metazoa = 1; Fungi = 8; Plants = 40; Viruses = 3; Other Eukaryotes = 5 (source: NCBI BLINK).   chr1:28926466-28927242 REVERSE LENGTH=258 | 219 | 258 | 5.00E-65  | 117.8 | 66.7 | 73.5 |
| Rsa1.0_00398.1.g13022.t1 | #                                                                                                                                                                                                                                                                                                                                                                                                                                                                                                                                                                                                                                                                                                                                                                                                                                                                                                                                                                                                                                          | #   | #    | #         | #     | #    | -    | ----                                                              | ----   | #                    | #                                                                                                                                                                                                                                                                                                                                 | #   | #   | #         | #     | #    |      |
| Rsa1.0_00398.1.g13023.t1 | dbj BAB09379.1  non-LTR retroelement reverse transcriptase-like protein [Arabidopsis thaliana]                                                                                                                                                                                                                                                                                                                                                                                                                                                                                                                                                                                                                                                                                                                                                                                                                                                                                                                                             | 942 | 1223 | 1.00E-171 | 129.8 | 36.8 | 53.9 | non-LTR retroelement reverse transcriptase-like protein           | gblpln | Arabidopsis thaliana | AT3G24255.1   Symbols:   RNA-directed DNA polymerase (reverse transcriptase)-related family protein   chr3:8789471-8793208 FORWARD LENGTH=746                                                                                                                                                                                     | 942 | 746 | 3.00E-55  | 79.2  | 14.9 | 22.1 |
| Rsa1.0_00398.1.g13024.t1 | ret NP_566146.1  AC1 domain-containing protein 3 [Arabidopsis thaliana] gi 30699222 ref NP_849896.1  ACT domain-containing protein 3 [Arabidopsis thaliana] gi 30699224 ref NP_849897.1  ACT domain-containing protein 3 [Arabidopsis thaliana] gi 79321337 ref NP_001031289.1  ACT domain-containing protein 3 [Arabidopsis thaliana] gi 186495930 ref NP_001117608.1  ACT domain-containing protein 3 [Arabidopsis thaliana] gi 13430820 gb AAK26032.1 AF360322.1 unknown protein [Arabidopsis thaliana] gi 2829923 gb AAC00631.1  Similar to unidyl transferases [Arabidopsis thaliana] gi 21280959 gb AAM44939.1  unknown protein [Arabidopsis thaliana] gi 22138096 gb AAM93428.1  ACR3 [Arabidopsis thaliana] gi 222424164 dbj BAH20041.1  AT1G76990 [Arabidopsis thaliana] gi 332197796 gb AEE35917.1  ACT domain-containing protein 3 [Arabidopsis thaliana] gi 332197797 gb AEE35918.1  ACT domain-containing protein 3 [Arabidopsis thaliana] gi 332197798 gb AEE35919.1  ACT domain-containing protein 3 [Arabidopsis thaliana] | 449 | 453  | 0         | 100.9 | 92.7 | 96.7 | ACT domain-containing protein 3                                   | gblpln | Arabidopsis thaliana | AT1G76990.5   Symbols:   ACR3   ACT domain repeat 3   chr1:28933387-28935179 FORWARD LENGTH=453                                                                                                                                                                                                                                   | 449 | 453 | 0         | 100.9 | 92.7 | 96.7 |
| Rsa1.0_00398.1.g13025.t1 | dbj BAJ33955.1  unnamed protein product [Theilungella halophila]                                                                                                                                                                                                                                                                                                                                                                                                                                                                                                                                                                                                                                                                                                                                                                                                                                                                                                                                                                           | 358 | 367  | 0         | 102.5 | 92.5 | 96.6 | unnamed protein product                                           | ----   | ----                 | AT1G77000.2   Symbols:   SKP2B   RNI-like superfamily protein   chr1:28940888-28942401 FORWARD LENGTH=360                                                                                                                                                                                                                         | 358 | 360 | 0         | 100.6 | 88.3 | 94.4 |
| Rsa1.0_00398.1.g13026.t1 | ref NP_177828.2  DNAJ heat shock N-terminal domain-containing protein [Arabidopsis thaliana] gi 332197805 gb AEE35926.1  DNAJ heat shock N-terminal domain-containing protein [Arabidopsis thaliana]                                                                                                                                                                                                                                                                                                                                                                                                                                                                                                                                                                                                                                                                                                                                                                                                                                       | 356 | 379  | 0         | 106.5 | 93.3 | 96.3 | DNAJ heat shock N-terminal domain-containing protein              | gblpln | Arabidopsis thaliana | AT1G77020.1   Symbols:   DNAJ heat shock N-terminal domain-containing protein   chr1:28945056-28946867 REVERSE LENGTH=379                                                                                                                                                                                                         | 356 | 379 | 0         | 106.5 | 93.3 | 96.3 |
| Rsa1.0_00398.1.g13027.t1 | gb AAL61930.1  putative carboxyphosphoenolpyruvate mutase [Arabidopsis thaliana] gi 21386949 gb AAM47878.1  putative carboxyphosphoenolpyruvate mutase [Arabidopsis thaliana]                                                                                                                                                                                                                                                                                                                                                                                                                                                                                                                                                                                                                                                                                                                                                                                                                                                              | 344 | 337  | 0         | 98.0  | 90.4 | 93.9 | putative carboxyphosphoenolpyruvate mutase                        | gblpln | Arabidopsis thaliana | AT1G77060.1   Symbols:   Phosphoenolpyruvate carboxylase family protein   chr1:28951804-28953449 REVERSE LENGTH=339                                                                                                                                                                                                               | 344 | 339 | 0         | 98.5  | 90.4 | 93.9 |
| Rsa1.0_00398.1.g13028.t1 | ref XP_002889122.1  thylakoid lumenal 29.8 kDa protein [Arabidopsis lyrata subsp. lyrata] gi 297334963 gb EFH65381.1  thylakoid lumenal 29.8 kDa protein [Arabidopsis lyrata subsp. lyrata]                                                                                                                                                                                                                                                                                                                                                                                                                                                                                                                                                                                                                                                                                                                                                                                                                                                | 248 | 256  | 1.00E-111 | 103.2 | 83.9 | 89.9 | thylakoid lumenal 29.8 kDa protein                                | gblpln | Arabidopsis lyrata   | AT1G77090.1   Symbols:   Mog1/PsbP/DUF1795-like photosystem II reaction center PsbP family protein   chr1:28960576-28961875 REVERSE LENGTH=260                                                                                                                                                                                    | 248 | 260 | 1.00E-112 | 104.8 | 84.3 | 91.5 |
| Rsa1.0_00398.1.g13029.t1 | sp O49293.2 PER13_ARATH RecName: Full= Peroxidase 13; Short=Atperox P13; Flags: Precursor                                                                                                                                                                                                                                                                                                                                                                                                                                                                                                                                                                                                                                                                                                                                                                                                                                                                                                                                                  | 319 | 319  | 1.00E-152 | 100.0 | 80.6 | 90.0 | RecName: Full= Peroxidase 13; Short=Atperox P13; Flags: Precursor | ----   | ----                 | AT1G77100.1   Symbols:   Peroxidase superfamily protein   chr1:28965772-28967066 REVERSE LENGTH=336                                                                                                                                                                                                                               | 319 | 336 | 1.00E-154 | 105.3 | 80.6 | 90.0 |

|                          |                                                                                                                                                                                                                                                                                                                                                                                                                                                                                                                                                                                                                                                                                                                                                                                                                           |     |     |           |       |      |      |                                        |       |                      |                                                                                                                                                                                                                                                                                                                                                          |     |     |           |       |      |      |
|--------------------------|---------------------------------------------------------------------------------------------------------------------------------------------------------------------------------------------------------------------------------------------------------------------------------------------------------------------------------------------------------------------------------------------------------------------------------------------------------------------------------------------------------------------------------------------------------------------------------------------------------------------------------------------------------------------------------------------------------------------------------------------------------------------------------------------------------------------------|-----|-----|-----------|-------|------|------|----------------------------------------|-------|----------------------|----------------------------------------------------------------------------------------------------------------------------------------------------------------------------------------------------------------------------------------------------------------------------------------------------------------------------------------------------------|-----|-----|-----------|-------|------|------|
| Rsa1.0_00398.1.g13030.t1 | gb EOA34971.1  hypothetical protein CARUB_v10020056mg [Capsella rubella]                                                                                                                                                                                                                                                                                                                                                                                                                                                                                                                                                                                                                                                                                                                                                  | 549 | 570 | 0         | 103.8 | 89.6 | 94.2 | hypothetical protein CARUB_v10020056mg | gbpln | Capsella rubella     | AT1G77110.1   Symbols: PIN6   Auxin efflux carrier family protein   chr1:28970855-28974408 FORWARD LENGTH=570                                                                                                                                                                                                                                            | 549 | 570 | 0         | 103.8 | 87.6 | 92.9 |
| Rsa1.0_00398.1.g13031.t1 | gb AEC13713.1  alcohol dehydrogenase 1 [Brassica rapa]                                                                                                                                                                                                                                                                                                                                                                                                                                                                                                                                                                                                                                                                                                                                                                    | 379 | 379 | 0         | 100.0 | 97.4 | 99.5 | alcohol dehydrogenase 1                | gbpln | Brassica rapa        | AT1G77120.1   Symbols: ADH1, ADH, ATADH, ATADH1   alcohol dehydrogenase 1   chr1:28975509-28977216 FORWARD LENGTH=379                                                                                                                                                                                                                                    | 379 | 379 | 0         | 100.0 | 94.7 | 98.4 |
| Rsa1.0_00398.1.g13032.t1 | ref XP_002887161.1  predicted protein [Arabidopsis lyrata subsp. lyrata] gi 297333002 gb EFH63420.1  predicted protein [Arabidopsis lyrata subsp. lyrata]                                                                                                                                                                                                                                                                                                                                                                                                                                                                                                                                                                                                                                                                 | 388 | 374 | 1.00E-153 | 96.4  | 76.3 | 83.8 | predicted protein                      | gbpln | Arabidopsis lyrata   | AT1G67970.1   Symbols: AT-HSFA8, HSFA8   heat shock transcription factor A8   chr1:25484844-25486313 REVERSE LENGTH=374                                                                                                                                                                                                                                  | 388 | 374 | 1.00E-154 | 96.4  | 76.5 | 82.7 |
| Rsa1.0_00398.1.g13033.t1 | ref NP_176961.1  ABC transporter I family member 17 [Arabidopsis thaliana] gi 75333593 sp Q9G9W0.1 AB171_ARAT_H RecName: Full=ABC transporter I family member 17; Short=ABC transporter ABC17; Short=AtABC17; AltName: Full=MRP-related protein 1; AltName: Full=Non-intrinsic ABC protein 3 gi 12324076 gb AAG52004.1 AC012563.14 putative ABC transporter; 66585-65723 [Arabidopsis thaliana] gi 21554406 gb AAM63511.1  putative ABC transporter [Arabidopsis thaliana] gi 26450485 dbj BAC42356.1  putative ABC transporter [Arabidopsis thaliana] gi 28827588 gb AAO50638.1  putative ABC transporter protein [Arabidopsis thaliana] gi 298286464 dbj BAJ09459.1  sensitive to aluminum rhizotoxicity 1 [Arabidopsis thaliana] gi 332196603 gb AEE34724.1  ABC transporter I family member 17 [Arabidopsis thaliana] | 264 | 263 | 1.00E-130 | 99.6  | 87.9 | 95.1 | ABC transporter I family member 17     | gbpln | Arabidopsis thaliana | AT1G67940.1   Symbols: ATNAP3, AtSTAR1, NAP3   non-intrinsic ABC protein 3   chr1:25477805-25478667 FORWARD LENGTH=263                                                                                                                                                                                                                                   | 264 | 263 | 1.00E-132 | 99.6  | 87.9 | 95.1 |
| Rsa1.0_00398.1.g13034.t6 | gb EOA35564.1  hypothetical protein CARUB_v10020770mg [Capsella rubella]                                                                                                                                                                                                                                                                                                                                                                                                                                                                                                                                                                                                                                                                                                                                                  | 288 | 278 | 1.00E-128 | 96.5  | 81.6 | 88.5 | hypothetical protein CARUB_v10020770mg | gbpln | Capsella rubella     | AT1G67950.3   Symbols:   RNA-binding (RRM/RBD/RNP motifs) family protein   chr1:25478884-25480420 REVERSE LENGTH=279                                                                                                                                                                                                                                     | 288 | 279 | 1.00E-130 | 96.9  | 80.6 | 87.8 |
| Rsa1.0_00398.1.g13035.t1 | ref XP_002888635.1  hypothetical protein ARALYDRAFT_475901 [Arabidopsis lyrata subsp. lyrata] gi 297334476 gb EFH64894.1  hypothetical protein ARALYDRAFT_475901 [Arabidopsis lyrata subsp. lyrata] ref NP_564914.1  uncharacterized protein [Arabidopsis thaliana] gi 12324082 gb AAG52010.1 AC012563.20 unknown protein; 70659-70456 [Arabidopsis thaliana] gi 21537331 gb AAM61672.1  unknown [Arabidopsis thaliana] gi 89111818 gb ABD60681.1  At1g67920 [Arabidopsis thaliana] gi 332196601 gb AEE34722.1  uncharacterized protein AT1G67920 [Arabidopsis thaliana]                                                                                                                                                                                                                                                  | 827 | 832 | 0         | 100.6 | 90.2 | 95.2 | hypothetical protein ARALYDRAFT_475901 | gbpln | Arabidopsis lyrata   | AT1G67930.1   Symbols:   Golgi transport complex protein-related   chr1:25474218-25477332 REVERSE LENGTH=832                                                                                                                                                                                                                                             | 827 | 832 | 0         | 100.6 | 87.2 | 92.5 |
| Rsa1.0_00398.1.g13036.t1 | gi 21537331 gb AAM61672.1  unknown [Arabidopsis thaliana] gi 89111818 gb ABD60681.1  At1g67920 [Arabidopsis thaliana] gi 332196601 gb AEE34722.1  uncharacterized protein AT1G67920 [Arabidopsis thaliana]                                                                                                                                                                                                                                                                                                                                                                                                                                                                                                                                                                                                                | 80  | 67  | 1.00E-18  | 83.8  | 67.5 | 70.0 | uncharacterized protein                | gbpln | Arabidopsis thaliana | AT1G67920.1   Symbols:   unknown protein; BEST Arabidopsis thaliana protein match is: unknown protein (TAIR:AT1G24600.1); Has 22 Blast hits to 22 proteins in 5 species: Archae - 0; Bacteria - 0; Metazoa - 0; Fungi - 0; Plants - 22; Viruses - 0; Other Eukaryotes - 0 (source: NCBI BLINK).   chr1:25473731-25473934 FORWARD LENGTH=67               | 80  | 67  | 2.00E-21  | 83.8  | 67.5 | 70.0 |
| Rsa1.0_00398.1.g13037.t1 | gb EOA35521.1  hypothetical protein CARUB_v10020730mg [Capsella rubella]                                                                                                                                                                                                                                                                                                                                                                                                                                                                                                                                                                                                                                                                                                                                                  | 235 | 295 | 2.00E-55  | 125.5 | 63.0 | 74.9 | hypothetical protein CARUB_v10020730mg | gbpln | Capsella rubella     | AT1G67870.1   Symbols:   glycine-rich protein   chr1:25449593-25450943 REVERSE LENGTH=279                                                                                                                                                                                                                                                                | 235 | 279 | 4.00E-37  | 118.7 | 51.9 | 63.0 |
| Rsa1.0_00399.1.g13038.t1 | ref NP_198361.1  uncharacterized protein [Arabidopsis thaliana] gi 10176810 dbj BAB10018.1  unnamed protein product [Arabidopsis thaliana] gi 332006549 gb AED93932.1  uncharacterized protein AT5G35110 [Arabidopsis thaliana]                                                                                                                                                                                                                                                                                                                                                                                                                                                                                                                                                                                           | 114 | 112 | 2.00E-23  | 98.2  | 65.8 | 75.4 | uncharacterized protein                | gbpln | Arabidopsis thaliana | AT5G35110.1   Symbols:   unknown protein; BEST Arabidopsis thaliana protein match is: unknown protein (TAIR:AT2G46490.1); Has 1807 Blast hits to 1807 proteins in 277 species: Archae - 0; Bacteria - 0; Metazoa - 736; Fungi - 347; Plants - 385; Viruses - 0; Other Eukaryotes - 339 (source: NCBI BLINK).   chr5:13363937-13364275 REVERSE LENGTH=112 | 114 | 112 | 3.00E-26  | 98.2  | 65.8 | 75.4 |
| Rsa1.0_00399.1.g13039.t1 | gb EOA17182.1  hypothetical protein CARUB_v10005453mg [Capsella rubella]                                                                                                                                                                                                                                                                                                                                                                                                                                                                                                                                                                                                                                                                                                                                                  | 287 | 277 | 1.00E-123 | 96.5  | 81.9 | 86.8 | hypothetical protein CARUB_v10005453mg | gbpln | Capsella rubella     | AT5G35100.1   Symbols:   Cyclophilin-like peptidyl-prolyl cis-trans isomerase family protein   chr5:13360459-13361377 REVERSE LENGTH=281                                                                                                                                                                                                                 | 287 | 281 | 1.00E-124 | 97.9  | 82.9 | 89.2 |

|                          |                                                                                                                                                                                                                                                                                                                                           |     |     |           |       |      |      |                                                                   |       |                      |                                                                                                                                                                                                                                                                          |     |     |           |       |      |      |
|--------------------------|-------------------------------------------------------------------------------------------------------------------------------------------------------------------------------------------------------------------------------------------------------------------------------------------------------------------------------------------|-----|-----|-----------|-------|------|------|-------------------------------------------------------------------|-------|----------------------|--------------------------------------------------------------------------------------------------------------------------------------------------------------------------------------------------------------------------------------------------------------------------|-----|-----|-----------|-------|------|------|
| Rsa1.0_00399.1.g13040.t1 | ref[XP_002868405.1] hypothetical protein ARALYDRAFT_493584 [Arabidopsis lyrata subsp. lyrata] gi 297314241 gb EFH44664.1                                                                                                                                                                                                                  | 144 | 161 | 5.00E-43  | 111.8 | 70.8 | 79.9 | hypothetical protein ARALYDRAFT_493584                            | gbpln | Arabidopsis lyrata   | AT5G35090.1   Symbols:   unknown protein; Has 1807 Blast hits to 1807 proteins in 277 species: Archae - 0; Bacteria - 0; Metazoa - 736; Fungi - 347; Plants - 385; Viruses - 0; Other Eukaryotes - 339 (source: NCBI BLink).   chr5:13358536-13359015 FORWARD LENGTH=159 | 144 | 159 | 2.00E-44  | 110.4 | 68.8 | 79.2 |
| Rsa1.0_00399.1.g13041.t1 | ref[XP_002870409.1] glycosyl hydrolase family 79 N-terminal domain-containing protein [Arabidopsis lyrata subsp. lyrata] gi 297316245 gb EFH46668.1                                                                                                                                                                                       | 536 | 536 | 0         | 100.0 | 80.0 | 87.1 | glycosyl hydrolase family 79 N-terminal domain-containing protein | gbpln | Arabidopsis lyrata   | AT5G34940.2   Symbols: AtGUS3, GUS3   glucuronidase 3   chr5:13235912-13238718 REVERSE LENGTH=536                                                                                                                                                                        | 536 | 536 | 0         | 100.0 | 77.1 | 84.7 |
| Rsa1.0_00399.1.g13042.t1 | ref[XP_002870409.1] glycosyl hydrolase family 79 N-terminal domain-containing protein [Arabidopsis lyrata subsp. lyrata] gi 297316245 gb EFH46668.1                                                                                                                                                                                       | 532 | 536 | 0         | 100.8 | 84.2 | 91.9 | glycosyl hydrolase family 79 N-terminal domain-containing protein | gbpln | Arabidopsis lyrata   | AT5G34940.2   Symbols: AtGUS3, GUS3   glucuronidase 3   chr5:13235912-13238718 REVERSE LENGTH=536                                                                                                                                                                        | 532 | 536 | 0         | 100.8 | 82.1 | 90.2 |
| Rsa1.0_00399.1.g13043.t1 | ref[NP_198334.1] purple acid phosphatase 26 [Arabidopsis thaliana] gi 75249765 sp Q949Y3.1 PPA26_ARAT H RecName: Full=Bifunctional purple acid phosphatase 26; Includes: RecName: Full=Acid phosphatase; Includes: RecName: Full=Peroxidase; Flags: Precursor                                                                             | 474 | 475 | 0         | 100.2 | 89.0 | 94.9 | purple acid phosphatase 26                                        | gbpln | Arabidopsis thaliana | AT5G34850.1   Symbols: ATPAP26, PAP26   purple acid phosphatase 26   chr5:13108475-13111217 REVERSE LENGTH=475                                                                                                                                                           | 474 | 475 | 0         | 100.2 | 89.0 | 94.9 |
| Rsa1.0_00399.1.g13044.t1 | gi 15292757 gb AAK92747.1  putative acid phosphatase [Arabidopsis thaliana]                                                                                                                                                                                                                                                               | #   | #   | #         | #     | #    | -    | ----                                                              | ----  | #                    | #                                                                                                                                                                                                                                                                        | #   | #   | #         | #     | #    |      |
| Rsa1.0_00399.1.g13045.t1 | gi 20259673 gb AAM14354.1  putative acid phosphatase [Arabidopsis thaliana]                                                                                                                                                                                                                                                               | #   | #   | #         | #     | #    | -    | ----                                                              | ----  | #                    | #                                                                                                                                                                                                                                                                        | #   | #   | #         | #     | #    |      |
| Rsa1.0_00399.1.g13046.t1 | gi 332006529 gb AED93912.1  purple acid phosphatase 26 [Arabidopsis thaliana]                                                                                                                                                                                                                                                             | 909 | 933 | 0         | 102.6 | 85.8 | 92.6 | hypothetical protein CARUB_v10004088mg                            | gbpln | Capsella rubella     | AT1G49920.1   Symbols:   MuDR family transposase   chr1:18481798-18484233 REVERSE LENGTH=785                                                                                                                                                                             | 909 | 785 | 1.00E-28  | 86.4  | 13.9 | 25.7 |
| Rsa1.0_00399.1.g13047.t1 | ref[NP_198313.2] putative chloride channel-like protein CLC-g [Arabidopsis thaliana] gi 363548399 sp P60300.2 CLCG_ARAT H RecName: Full=Putative chloride channel-like protein CLC-g; AltName: Full=CBS domain-containing protein CBSCLC6 gi 332006508 gb AED93891.1  putative chloride channel-like protein CLC-g [Arabidopsis thaliana] | 764 | 765 | 0         | 100.1 | 91.0 | 95.8 | putative chloride channel-like protein CLC-g                      | gbpln | Arabidopsis thaliana | AT5G33280.1   Symbols:   Voltage-gated chloride channel family protein   chr5:12549280-12552305 FORWARD LENGTH=765                                                                                                                                                       | 764 | 765 | 0         | 100.1 | 91.0 | 95.8 |
| Rsa1.0_00399.1.g13048.t1 | ref[NP_198314.2] xylogalacturonan beta-1,3-xylosyltransferase [Arabidopsis thaliana] gi 292630939 sp Q94AA9.2 XGD1_ARAT H RecName: Full=Xylogalacturonan beta-1,3-xylosyltransferase; AltName: Full=Protein XYLOGALACTURONAN DEFICIENT 1 gi 332006509 gb AED93892.1  xylogalacturonan beta-1,3-xylosyltransferase [Arabidopsis thaliana]  | 448 | 500 | 0         | 111.6 | 85.9 | 91.5 | xylogalacturonan beta-1,3-xylosyltransferase                      | gbpln | Arabidopsis thaliana | AT5G33290.1   Symbols: XGD1   xylogalacturonan deficient   chr5:12558439-12561840 FORWARD LENGTH=500                                                                                                                                                                     | 448 | 500 | 0         | 111.6 | 85.9 | 91.5 |
| Rsa1.0_00399.1.g13049.t3 | ref[XP_002868397.1] hypothetical protein ARALYDRAFT_915622 [Arabidopsis lyrata subsp. lyrata] gi 297314233 gb EFH446656.1                                                                                                                                                                                                                 | 468 | 444 | 1.00E-161 | 94.9  | 70.9 | 79.1 | hypothetical protein ARALYDRAFT_915622                            | gbpln | Arabidopsis lyrata   | AT5G33300.1   Symbols:   chromosome-associated kinesin-related   chr5:12562649-12565675 REVERSE LENGTH=439                                                                                                                                                               | 468 | 439 | 1.00E-163 | 93.8  | 71.8 | 79.3 |
| Rsa1.0_00399.1.g13050.t1 | gi EOA16196.1  hypothetical protein CARUB_v10004336mg, partial [Capsella rubella]                                                                                                                                                                                                                                                         | 600 | 648 | 0         | 108.0 | 84.2 | 90.8 | hypothetical protein CARUB_v10004336mg, partial                   | gbpln | Capsella rubella     | AT5G32470.1   Symbols:   Haem oxygenase-like, multi-helical   chr5:12085328-12088569 REVERSE LENGTH=617                                                                                                                                                                  | 600 | 617 | 0         | 102.8 | 86.7 | 93.3 |
| Rsa1.0_00399.1.g13051.t1 | #                                                                                                                                                                                                                                                                                                                                         | #   | #   | #         | #     | #    | -    | ----                                                              | ----  | #                    | #                                                                                                                                                                                                                                                                        | #   | #   | #         | #     | #    |      |
| Rsa1.0_00399.1.g13052.t1 | #                                                                                                                                                                                                                                                                                                                                         | #   | #   | #         | #     | #    | -    | ----                                                              | ----  | #                    | #                                                                                                                                                                                                                                                                        | #   | #   | #         | #     | #    |      |

|                          |                                                                                                                                                                                                                                                                                                                                                                                                                                                                                                                                                                                                                                                                                                                                                                                          |     |      |           |       |      |      |                                          |       |                      |                                                                                                                       |     |      |           |       |      |      |
|--------------------------|------------------------------------------------------------------------------------------------------------------------------------------------------------------------------------------------------------------------------------------------------------------------------------------------------------------------------------------------------------------------------------------------------------------------------------------------------------------------------------------------------------------------------------------------------------------------------------------------------------------------------------------------------------------------------------------------------------------------------------------------------------------------------------------|-----|------|-----------|-------|------|------|------------------------------------------|-------|----------------------|-----------------------------------------------------------------------------------------------------------------------|-----|------|-----------|-------|------|------|
| Rsa1.0_00399.1.g13053.t1 | ref[NP_197291.2] protein DA1-related 4 [Arabidopsis thaliana] gi 302595926 sp Q9FKN7.2 DAR4.ARAT H RecName: Full=Protein DA1-related 4 gi 332005099 gb AED92482.1  protein DA1-related 4 [Arabidopsis thaliana]                                                                                                                                                                                                                                                                                                                                                                                                                                                                                                                                                                          | 377 | 1613 | 1.00E-116 | 427.9 | 61.5 | 74.0 | protein DA1-related 4                    | gbpln | Arabidopsis thaliana | AT5G17890.1   Symbols: CHS3, DAR4   DA1-related protein 4   chr5:5917015-5923160 FORWARD LENGTH=1613                  | 377 | 1613 | 1.00E-119 | 427.9 | 61.5 | 74.0 |
| Rsa1.0_00399.1.g13054.t1 | ref[XP_002870515.1] transporter [Arabidopsis lyrata subsp. lyrata] gi 297316351 gb EFH46774.1  transporter [Arabidopsis lyrata subsp. lyrata]                                                                                                                                                                                                                                                                                                                                                                                                                                                                                                                                                                                                                                            | 605 | 593  | 0         | 98.0  | 91.7 | 95.5 | transporter                              | gbpln | Arabidopsis lyrata   | AT5G37310.1   Symbols:   Endomembrane protein 70 protein family   chr5:14772836-14776093 REVERSE LENGTH=593           | 605 | 593  | 0         | 98.0  | 91.4 | 95.4 |
| Rsa1.0_00399.1.g13055.t1 | ref[XP_002870516.1] zinc finger (ZPR1-type) family protein [Arabidopsis lyrata subsp. lyrata] gi 297316352 gb EFH46775.1  zinc finger (ZPR1-type) family protein [Arabidopsis lyrata subsp. lyrata] ref[NP_198554.1] chaperone DnaJ-domain containing protein [Arabidopsis thaliana] gi 30693076 ref[NP_851102.1] chaperone DnaJ-domain containing protein [Arabidopsis thaliana] gi 145334655 ref[NP_001078673.1] chaperone DnaJ-domain containing protein [Arabidopsis thaliana] gi 186527150 ref[NP_001119323.1] chaperone DnaJ-domain containing protein [Arabidopsis thaliana] gi 186527153 ref[NP_001119324.1] chaperone DnaJ-domain containing protein [Arabidopsis thaliana] gi 9758724 dbj BAB09110.1  unnamed protein product [Arabidopsis thaliana] gi 15450367 gb AAK96477.1 | 484 | 493  | 0         | 101.9 | 87.6 | 92.4 | zinc finger (ZPR1-type) family protein   | gbpln | Arabidopsis lyrata   | AT5G37340.3   Symbols:   ZPR1 zinc-finger domain protein   chr5:14787488-14792373 REVERSE LENGTH=493                  | 484 | 493  | 0         | 101.9 | 88.0 | 92.8 |
| Rsa1.0_00399.1.g13056.t1 | AT5g37380/MNJ8_170 [Arabidopsis thaliana] gi 27363370 gb AAO11604.1  At5g37380/MNJ8_170 [Arabidopsis thaliana] gi 332006794 gb AED94177.1  chaperone DnaJ-domain containing protein [Arabidopsis thaliana] gi 332006795 gb AED94178.1  chaperone DnaJ-domain containing protein [Arabidopsis thaliana] gi 332006796 gb AED94179.1  chaperone DnaJ-domain containing protein [Arabidopsis thaliana] gi 332006797 gb AED94180.1  chaperone DnaJ-domain containing protein [Arabidopsis thaliana] gi 332006798 gb AED94181.1  chaperone DnaJ-domain containing protein ref[XP_002874348.1] hypothetical protein ARALYDRAFT_489554 [Arabidopsis lyrata subsp. lyrata] gi 297320185 gb EFH50607.1                                                                                             | 392 | 431  | 1.00E-143 | 109.9 | 68.9 | 82.4 | chaperone DnaJ-domain containing protein | gbpln | Arabidopsis thaliana | AT5G37380.5   Symbols:   Chaperone DnaJ-domain superfamily protein   chr5:14817035-14818330 REVERSE LENGTH=431        | 392 | 431  | 1.00E-145 | 109.9 | 68.9 | 82.4 |
| Rsa1.0_00399.1.g13057.t1 | hypothetical protein ARALYDRAFT_489554 [Arabidopsis lyrata subsp. lyrata] ref[NP_193135.2] Exostosin family protein [Arabidopsis thaliana] gi 29824391 gb AAP04155.1  unknown protein [Arabidopsis thaliana] gi 332657957 gb AEE83357.1  Exostosin family protein [Arabidopsis thaliana]                                                                                                                                                                                                                                                                                                                                                                                                                                                                                                 | 282 | 457  | 8.00E-46  | 162.1 | 39.4 | 48.9 | hypothetical protein ARALYDRAFT_489554   | gbpln | Arabidopsis lyrata   | AT1G13780.1   Symbols:   F-box/RNI-like/FBD-like domains-containing protein   chr1:4724681-4726314 FORWARD LENGTH=456 | 282 | 456  | 1.00E-47  | 161.7 | 39.0 | 48.9 |
| Rsa1.0_00399.1.g13058.t1 | ref[NP_193135.2] Exostosin family protein [Arabidopsis thaliana] gi 29824391 gb AAP04155.1  unknown protein [Arabidopsis thaliana] gi 332657957 gb AEE83357.1  Exostosin family protein [Arabidopsis thaliana]                                                                                                                                                                                                                                                                                                                                                                                                                                                                                                                                                                           | 520 | 521  | 0         | 100.2 | 81.9 | 89.6 | Exostosin family protein                 | gbpln | Arabidopsis thaliana | AT4G13990.1   Symbols:   Exostosin family protein   chr4:8084395-8085960 FORWARD LENGTH=521                           | 520 | 521  | 0         | 100.2 | 81.9 | 89.6 |
| Rsa1.0_00399.1.g13059.t2 | #                                                                                                                                                                                                                                                                                                                                                                                                                                                                                                                                                                                                                                                                                                                                                                                        | #   | #    | #         | #     | #    | #    | -                                        | ----  | ----                 | #                                                                                                                     | #   | #    | #         | #     | #    |      |
| Rsa1.0_00400.1.g13060.t1 | #                                                                                                                                                                                                                                                                                                                                                                                                                                                                                                                                                                                                                                                                                                                                                                                        | #   | #    | #         | #     | #    | #    | -                                        | ----  | ----                 | #                                                                                                                     | #   | #    | #         | #     | #    |      |

|                          |                                                                                                                                                                                                                                                                                                                                                                                                                                                                                                                                                                                                                                                                                                                                                                        |     |     |           |       |      |      |                                        |       |                      |                                                                                                                                                                                                                                                                                                                                                                                                                                                         |     |     |          |       |      |      |
|--------------------------|------------------------------------------------------------------------------------------------------------------------------------------------------------------------------------------------------------------------------------------------------------------------------------------------------------------------------------------------------------------------------------------------------------------------------------------------------------------------------------------------------------------------------------------------------------------------------------------------------------------------------------------------------------------------------------------------------------------------------------------------------------------------|-----|-----|-----------|-------|------|------|----------------------------------------|-------|----------------------|---------------------------------------------------------------------------------------------------------------------------------------------------------------------------------------------------------------------------------------------------------------------------------------------------------------------------------------------------------------------------------------------------------------------------------------------------------|-----|-----|----------|-------|------|------|
| Rsa1.0_00400.1.g13061.t1 | refNP_197207.1  Flavonoid 3-O-glucosyltransferase [Arabidopsis thaliana]<br>gi 75311137 sp Q9LFJ8.1 U78D2_ARAT<br>H RecName: Full=UDP-glucosyltransferase 78D2; AltName: Full=Anthocyanin 3-O-glucosyltransferase; AltName: Full=Flavonol 3-O-glucosyltransferase.; AltName: Full=UDP-glucose:flavonoid 3-O-glucosyltransferase<br>gi 9755706 emb CAC01718.1  UDP-glucose:flavonoid 3-O-glucosyltransferase-like protein [Arabidopsis thaliana]<br>gi 18252199 gb AAL61932.1  UDP-glucose:flavonoid 3-O-glucosyltransferase-like protein [Arabidopsis thaliana]<br>gi 22136122 gb AM91139.1  UDP-glucose:flavonoid 3-O-glucosyltransferase-like protein [Arabidopsis thaliana]<br>gi 332004994 gb AED92377.1  Flavonoid 3-O-glucosyltransferase [Arabidopsis thaliana] | 459 | 460 | 0         | 100.2 | 73.2 | 84.5 | Flavonoid 3-O-glucosyltransferase      | gbpln | Arabidopsis thaliana | AT5G17050.1   Symbols: UGT78D2   UDP-glucosyl transferase 78D2   chr5:5607828-5609392 REVERSE LENGTH=460                                                                                                                                                                                                                                                                                                                                                | 459 | 460 | 0        | 100.2 | 73.2 | 84.5 |
| Rsa1.0_00400.1.g13062.t1 | gb EOA18272.1  hypothetical protein CARUB_v10006771mg [Capsella rubella]                                                                                                                                                                                                                                                                                                                                                                                                                                                                                                                                                                                                                                                                                               | 571 | 447 | 2.00E-35  | 78.3  | 17.2 | 27.5 | hypothetical protein CARUB_v10006771mg | gbpln | Capsella rubella     | AT2G07190.1   Symbols:   Domain of unknown function (DUF1985)   chr2:2987367-2988945 FORWARD LENGTH=452                                                                                                                                                                                                                                                                                                                                                 | 571 | 452 | 7.00E-32 | 79.2  | 16.5 | 24.7 |
| Rsa1.0_00400.1.g13063.t1 | emb CAB80843.1  hypothetical protein [Arabidopsis thaliana]                                                                                                                                                                                                                                                                                                                                                                                                                                                                                                                                                                                                                                                                                                            | 149 | 381 | 3.00E-20  | 255.7 | 31.5 | 44.3 | hypothetical protein                   | gbpln | Arabidopsis thaliana | AT5G15690.1   Symbols:   zinc ion binding   chr5:5113823-5114402 REVERSE LENGTH=169                                                                                                                                                                                                                                                                                                                                                                     | 149 | 169 | 1.00E-22 | 113.4 | 32.2 | 45.6 |
| Rsa1.0_00400.1.g13064.t1 | emb CAB51200.1  putative protein [Arabidopsis thaliana]                                                                                                                                                                                                                                                                                                                                                                                                                                                                                                                                                                                                                                                                                                                | 705 | 739 | 1.00E-117 | 104.8 | 35.3 | 56.6 | putative protein                       | gbpln | Arabidopsis thaliana | AT1G49920.1   Symbols:   MuDR family transposase   chr1:18481798-18484233 REVERSE LENGTH=785                                                                                                                                                                                                                                                                                                                                                            | 705 | 785 | 1.00E-28 | 111.3 | 17.9 | 32.3 |
| Rsa1.0_00400.1.g13065.t1 | gb EOA22387.1  hypothetical protein CARUB_v10003022mg [Capsella rubella]                                                                                                                                                                                                                                                                                                                                                                                                                                                                                                                                                                                                                                                                                               | 211 | 259 | 2.00E-38  | 122.7 | 40.8 | 42.2 | hypothetical protein CARUB_v10003022mg | gbpln | Capsella rubella     | AT5G17070.1   Symbols:   CONTAINS InterPro DOMAIN/s: Protein phosphatase 4 core regulatory subunit R2 (InterPro:IPR015267); Has 30201 Blast hits to 17322 proteins in 780 species: Archae - 12; Bacteria - 1396; Metazoa - 17338; Fungi - 3422; Plants - 5037; Viruses - 0; Other Eukaryotes - 2996 (source: NCBI BLINK).   chr5:5613514-5616088 REVERSE LENGTH=277                                                                                     | 211 | 277 | 1.00E-39 | 131.3 | 40.8 | 44.1 |
| Rsa1.0_00400.1.g13066.t1 | gb AAC14510.1  En/Spm-like transposon protein [Arabidopsis thaliana]                                                                                                                                                                                                                                                                                                                                                                                                                                                                                                                                                                                                                                                                                                   | 142 | 292 | 4.00E-36  | 205.6 | 52.8 | 57.7 | En/Spm-like transposon protein         | gbpln | Arabidopsis thaliana | AT4G10890.1   Symbols:   unknown protein; CONTAINS InterPro DOMAIN/s: Protein of unknown function DUF2439 (InterPro:IPR018839); BEST Arabidopsis thaliana protein match is: unknown protein (TAIR:AT1G43722.1); Has 30201 Blast hits to 17322 proteins in 780 species: Archae - 12; Bacteria - 1396; Metazoa - 17338; Fungi - 3422; Plants - 5037; Viruses - 0; Other Eukaryotes - 2996 (source: NCBI BLINK).   chr4:6688833-6692937 FORWARD LENGTH=527 | 142 | 527 | 9.00E-20 | 371.1 | 31.0 | 38.0 |
| Rsa1.0_00400.1.g13067.t1 | emb CAA22150.1  hypothetical protein [Arabidopsis thaliana]<br>gi 7269091 emb CAB79200.1  hypothetical protein [Arabidopsis thaliana]                                                                                                                                                                                                                                                                                                                                                                                                                                                                                                                                                                                                                                  | 459 | 457 | 3.00E-28  | 99.6  | 15.3 | 20.0 | hypothetical protein                   | gbpln | Arabidopsis thaliana | #                                                                                                                                                                                                                                                                                                                                                                                                                                                       | #   | #   | #        | #     | #    | #    |
| Rsa1.0_00400.1.g13068.t1 | gb AAC23763.1  hypothetical protein [Arabidopsis thaliana]                                                                                                                                                                                                                                                                                                                                                                                                                                                                                                                                                                                                                                                                                                             | 606 | 705 | 2.00E-82  | 116.3 | 28.4 | 37.6 | hypothetical protein                   | gbpln | Arabidopsis thaliana | AT2G06420.1   Symbols:   Domain of unknown function (DUF1985)   chr2:2539083-2539985 FORWARD LENGTH=249                                                                                                                                                                                                                                                                                                                                                 | 606 | 249 | 4.00E-46 | 41.1  | 16.3 | 21.8 |
| Rsa1.0_00400.1.g13069.t1 | gb AAC23765.1  Mutator-like transposase [Arabidopsis thaliana]                                                                                                                                                                                                                                                                                                                                                                                                                                                                                                                                                                                                                                                                                                         | 432 | 784 | 6.00E-53  | 181.5 | 22.5 | 32.2 | Mutator-like transposase               | gbpln | Arabidopsis thaliana | #                                                                                                                                                                                                                                                                                                                                                                                                                                                       | #   | #   | #        | #     | #    | #    |
| Rsa1.0_00400.1.g13070.t1 | gb EOA22387.1  hypothetical protein CARUB_v10003022mg [Capsella rubella]                                                                                                                                                                                                                                                                                                                                                                                                                                                                                                                                                                                                                                                                                               | 56  | 259 | 5.00E-13  | 462.5 | 75.0 | 80.4 | hypothetical protein CARUB_v10003022mg | gbpln | Capsella rubella     | #                                                                                                                                                                                                                                                                                                                                                                                                                                                       | #   | #   | #        | #     | #    | #    |
| Rsa1.0_00400.1.g13071.t2 | #                                                                                                                                                                                                                                                                                                                                                                                                                                                                                                                                                                                                                                                                                                                                                                      | #   | #   | #         | #     | #    | -    | ----                                   | ----  | ----                 | #                                                                                                                                                                                                                                                                                                                                                                                                                                                       | #   | #   | #        | #     | #    | #    |

|                          |                                                                                                                                                                                                                                                                                                                                                                                                                                                                                                                                                                                                                                    |      |      |           |       |      |      |                                        |       |                      |                                                                                                                                                                                                                                                                                                                                                                |      |      |           |       |      |      |
|--------------------------|------------------------------------------------------------------------------------------------------------------------------------------------------------------------------------------------------------------------------------------------------------------------------------------------------------------------------------------------------------------------------------------------------------------------------------------------------------------------------------------------------------------------------------------------------------------------------------------------------------------------------------|------|------|-----------|-------|------|------|----------------------------------------|-------|----------------------|----------------------------------------------------------------------------------------------------------------------------------------------------------------------------------------------------------------------------------------------------------------------------------------------------------------------------------------------------------------|------|------|-----------|-------|------|------|
| Rsa1.0_00400.1.g13072.t1 | ref[XP_002865515.1] hypothetical protein ARALYDRAFT_917509 [Arabidopsis lyrata subsp. lyrata] gi 297311350 gb EFH41774.1  hypothetical protein ARALYDRAFT_917509 [Arabidopsis lyrata subsp. lyrata]                                                                                                                                                                                                                                                                                                                                                                                                                                | 376  | 380  | 0         | 101.1 | 86.4 | 92.3 | hypothetical protein ARALYDRAFT_917509 | gbpln | Arabidopsis lyrata   | AT5G42470.1   Symbols:   CONTAINS InterPro DOMAIN/s: Brain/reproductive organ-expressed protein (InterPro:IPR010358). Has 35333 Blast hits to 34131 proteins in 2444 species: Archae - 798; Bacteria - 22429; Metazoa - 974; Fungi - 991; Plants - 531; Viruses - 0; Other Eukaryotes - 9610 (source: NCBI BLink).   chr5:16982365-16984738 FORWARD LENGTH=382 | 376  | 382  | 0         | 101.6 | 84.8 | 92.0 |
| Rsa1.0_00400.1.g13073.t1 | #                                                                                                                                                                                                                                                                                                                                                                                                                                                                                                                                                                                                                                  | #    | #    | #         | #     | #    | -    | ----                                   | ----  | #                    | #                                                                                                                                                                                                                                                                                                                                                              | #    | #    | #         | #     | #    |      |
| Rsa1.0_00400.1.g13074.t1 | #                                                                                                                                                                                                                                                                                                                                                                                                                                                                                                                                                                                                                                  | #    | #    | #         | #     | #    | -    | ----                                   | ----  | #                    | #                                                                                                                                                                                                                                                                                                                                                              | #    | #    | #         | #     | #    |      |
| Rsa1.0_00400.1.g13075.t1 | #                                                                                                                                                                                                                                                                                                                                                                                                                                                                                                                                                                                                                                  | #    | #    | #         | #     | #    | -    | ----                                   | ----  | #                    | #                                                                                                                                                                                                                                                                                                                                                              | #    | #    | #         | #     | #    |      |
| Rsa1.0_00400.1.g13076.t1 | #                                                                                                                                                                                                                                                                                                                                                                                                                                                                                                                                                                                                                                  | #    | #    | #         | #     | #    | -    | ----                                   | ----  | #                    | #                                                                                                                                                                                                                                                                                                                                                              | #    | #    | #         | #     | #    |      |
| Rsa1.0_00400.1.g13077.t1 | #                                                                                                                                                                                                                                                                                                                                                                                                                                                                                                                                                                                                                                  | #    | #    | #         | #     | #    | -    | ----                                   | ----  | #                    | #                                                                                                                                                                                                                                                                                                                                                              | #    | #    | #         | #     | #    |      |
| Rsa1.0_00401.1.g13078.t1 | gb EOA28996.1  hypothetical protein CARUB_v10025249mg [Capsella rubella]                                                                                                                                                                                                                                                                                                                                                                                                                                                                                                                                                           | 317  | 314  | 1.00E-154 | 99.1  | 84.2 | 91.8 | hypothetical protein CARUB_v10025249mg | gbpln | Capsella rubella     | AT2G22500.1   Symbols: UCP5, ATPUMP5, DIC1   uncoupling protein 5   chr2:9563531-9564472 REVERSE LENGTH=313                                                                                                                                                                                                                                                    | 317  | 313  | 1.00E-154 | 98.7  | 84.5 | 94.0 |
| Rsa1.0_00401.1.g13079.t1 | ref[XP_002880446.1] CYCD2.1 [Arabidopsis lyrata subsp. lyrata] gi 297326285 gb EFH56705.1  CYCD2.1 [Arabidopsis lyrata subsp. lyrata] ref[NP_565538.1] GLABRA2 expression modulator [Arabidopsis thaliana] gi 75160436 sp Q8S8F8.1 GEM_ARATH RecName: Full=GLABRA2 expression modulator gi 20197888 gb AAM15301.1  Expressed protein [Arabidopsis thaliana] gi 145076288 gb ABP35534.1  GL2 expression modulator [Arabidopsis thaliana] gi 330252217 gb AEC07311.1  GLABRA2 expression modulator [Arabidopsis thaliana]                                                                                                            | 349  | 358  | 1.00E-139 | 102.6 | 76.2 | 85.1 | CYCD2.1                                | gbpln | Arabidopsis lyrata   | AT2G22490.1   Symbols: CYCD2.1, ATCYD2.1   Cyclin D2.1   chr2:9554157-955873 REVERSE LENGTH=361                                                                                                                                                                                                                                                                | 349  | 361  | 1.00E-135 | 103.4 | 75.4 | 86.0 |
| Rsa1.0_00401.1.g13080.t1 | ref[NP_565537.1] arabinogalactan protein 2 [Arabidopsis thaliana] gi 75206344 sp Q9SJY7.1 AGP2_ARATH RecName: Full=Classical arabinogalactan protein 2; Flags: Precursor gi 4544458 gb AAD22366.1  expressed protein [Arabidopsis thaliana] gi 17065300 gb AAL32804.1  Unknown protein [Arabidopsis thaliana] gi 20260016 gb AAM13355.1  unknown protein [Arabidopsis thaliana] gi 330252215 gb AEC07309.1  arabinogalactan protein 2 [Arabidopsis thaliana]                                                                                                                                                                       | 283  | 299  | 1.00E-126 | 105.7 | 83.4 | 89.0 | GLABRA2 expression modulator           | gbpln | Arabidopsis thaliana | AT2G22475.1   Symbols: GEM   GRAM domain family protein   chr2:9541523-9544778 FORWARD LENGTH=299                                                                                                                                                                                                                                                              | 283  | 299  | 1.00E-129 | 105.7 | 83.4 | 89.0 |
| Rsa1.0_00401.1.g13081.t1 | ref[XP_002880444.1] hypothetical protein ARALYDRAFT_481106 [Arabidopsis lyrata subsp. lyrata] gi 297326283 gb EFH56703.1  hypothetical protein ARALYDRAFT_481106 [Arabidopsis lyrata subsp. lyrata] ref[XP_002893409.1] hypothetical protein ARALYDRAFT_890118 [Arabidopsis lyrata subsp. lyrata] gi 297339251 gb EFH69668.1  hypothetical protein ARALYDRAFT_890118 [Arabidopsis lyrata subsp. lyrata] ref[NP_179819.1] uncharacterized protein [Arabidopsis thaliana] gi 4567195 gb AAD23611.1  hypothetical protein [Arabidopsis thaliana] gi 330252199 gb AEC07293.1  uncharacterized protein AT2G22320 [Arabidopsis thaliana] | 132  | 131  | 2.00E-22  | 99.2  | 74.2 | 84.1 | arabinogalactan protein 2              | gbpln | Arabidopsis thaliana | AT2G22470.1   Symbols: AGP2, ATAGP2   arabinogalactan protein 2   chr2:9538400-9538795 REVERSE LENGTH=131                                                                                                                                                                                                                                                      | 132  | 131  | 4.00E-25  | 99.2  | 74.2 | 84.1 |
| Rsa1.0_00401.1.g13082.t1 | ref[XP_002880444.1] hypothetical protein ARALYDRAFT_481106 [Arabidopsis lyrata subsp. lyrata] gi 297326283 gb EFH56703.1  hypothetical protein ARALYDRAFT_481106 [Arabidopsis lyrata subsp. lyrata] ref[XP_002893409.1] hypothetical protein ARALYDRAFT_890118 [Arabidopsis lyrata subsp. lyrata] gi 297339251 gb EFH69668.1  hypothetical protein ARALYDRAFT_890118 [Arabidopsis lyrata subsp. lyrata] ref[NP_179819.1] uncharacterized protein [Arabidopsis thaliana] gi 4567195 gb AAD23611.1  hypothetical protein [Arabidopsis thaliana] gi 330252199 gb AEC07293.1  uncharacterized protein AT2G22320 [Arabidopsis thaliana] | 245  | 245  | 1.00E-112 | 100.0 | 86.5 | 93.5 | hypothetical protein ARALYDRAFT_481106 | gbpln | Arabidopsis lyrata   | AT2G22460.1   Symbols:   Protein of unknown function, DUF617   chr2:9533354-9534091 REVERSE LENGTH=245                                                                                                                                                                                                                                                         | 245  | 245  | 1.00E-106 | 100.0 | 85.7 | 92.2 |
| Rsa1.0_00401.1.g13083.t1 | ref[XP_002893409.1] hypothetical protein ARALYDRAFT_890118 [Arabidopsis lyrata subsp. lyrata] gi 297339251 gb EFH69668.1  hypothetical protein ARALYDRAFT_890118 [Arabidopsis lyrata subsp. lyrata] ref[NP_179819.1] uncharacterized protein [Arabidopsis thaliana] gi 4567195 gb AAD23611.1  hypothetical protein [Arabidopsis thaliana] gi 330252199 gb AEC07293.1  uncharacterized protein AT2G22320 [Arabidopsis thaliana]                                                                                                                                                                                                     | 71   | 191  | 4.00E-12  | 269.0 | 53.5 | 64.8 | hypothetical protein ARALYDRAFT_890118 | gbpln | Arabidopsis lyrata   | AT1G14800.1   Symbols:   Nucleic acid-binding, OB-fold-like protein   chr1:5099572-5102558 FORWARD LENGTH=384                                                                                                                                                                                                                                                  | 71   | 384  | 7.00E-14  | 540.8 | 45.1 | 53.5 |
| Rsa1.0_00401.1.g13084.t1 | ref[NP_179819.1] uncharacterized protein [Arabidopsis thaliana] gi 4567195 gb AAD23611.1  hypothetical protein [Arabidopsis thaliana] gi 330252199 gb AEC07293.1  uncharacterized protein AT2G22320 [Arabidopsis thaliana]                                                                                                                                                                                                                                                                                                                                                                                                         | 113  | 111  | 2.00E-28  | 98.2  | 66.4 | 77.9 | uncharacterized protein                | gbpln | Arabidopsis thaliana | AT2G22320.1   Symbols:   unknown protein; Has 7 Blast hits to 7 proteins in 4 species: Archae - 0; Bacteria - 0; Metazoa - 0; Fungi - 0; Plants - 7; Viruses - 0; Other Eukaryotes - 0 (source: NCBI BLink).   chr2:9480105-9480440 FORWARD LENGTH=111                                                                                                         | 113  | 111  | 3.00E-31  | 98.2  | 66.4 | 77.9 |
| Rsa1.0_00401.1.g13085.t1 | #                                                                                                                                                                                                                                                                                                                                                                                                                                                                                                                                                                                                                                  | #    | #    | #         | #     | #    | -    | ----                                   | ----  | #                    | #                                                                                                                                                                                                                                                                                                                                                              | #    | #    | #         | #     | #    |      |
| Rsa1.0_00401.1.g13086.t1 | gb EOA28523.1  hypothetical protein CARUB_v10024738mg [Capsella rubella]                                                                                                                                                                                                                                                                                                                                                                                                                                                                                                                                                           | 1031 | 1032 | 0         | 100.1 | 86.4 | 92.6 | hypothetical protein CARUB_v10024738mg | gbpln | Capsella rubella     | AT2G22300.2   Symbols: CAMTA3, SR1   signal responsive 1   chr2:9471599-9476472 FORWARD LENGTH=1032                                                                                                                                                                                                                                                            | 1031 | 1032 | 0         | 100.1 | 87.0 | 92.5 |

|                          |                                                                                                                                                                                                                                                                                                                                                                                                                                                                                                                                                                                                                                                                                                                                                                                                                                                                                                                                                                                                                                                                                                                                                                                                                                    |      |      |           |       |      |      |                                                                                                         |       |                      |                                                                                                                                                                                                                                                                                                                                                  |      |      |           |       |      |      |
|--------------------------|------------------------------------------------------------------------------------------------------------------------------------------------------------------------------------------------------------------------------------------------------------------------------------------------------------------------------------------------------------------------------------------------------------------------------------------------------------------------------------------------------------------------------------------------------------------------------------------------------------------------------------------------------------------------------------------------------------------------------------------------------------------------------------------------------------------------------------------------------------------------------------------------------------------------------------------------------------------------------------------------------------------------------------------------------------------------------------------------------------------------------------------------------------------------------------------------------------------------------------|------|------|-----------|-------|------|------|---------------------------------------------------------------------------------------------------------|-------|----------------------|--------------------------------------------------------------------------------------------------------------------------------------------------------------------------------------------------------------------------------------------------------------------------------------------------------------------------------------------------|------|------|-----------|-------|------|------|
| Rsa1.0_00401.1.g13087.t1 | gb[EOA27602.1] hypothetical protein CARUB_v10023742mg [Capsella rubella]                                                                                                                                                                                                                                                                                                                                                                                                                                                                                                                                                                                                                                                                                                                                                                                                                                                                                                                                                                                                                                                                                                                                                           | 268  | 298  | 7.00E-92  | 111.2 | 72.0 | 80.2 | hypothetical protein CARUB_v10023742mg                                                                  | gbpln | Capsella rubella     | AT2G22270.1   Symbols:   unknown protein; BEST Arabidopsis thaliana protein match is: unknown protein (TAIR:AT4G39860.2). Has 247 Blast hits to 231 proteins in 42 species: Archae - 0; Bacteria - 17; Metazoa - 14; Fungi - 5; Plants - 145; Viruses - 0; Other Eukaryotes - 66 (source: NCBI BLINK).   chr2:9463765-9465282 FORWARD LENGTH=328 | 268  | 328  | 2.00E-89  | 122.4 | 72.8 | 81.7 |
| Rsa1.0_00401.1.g13088.t1 | #                                                                                                                                                                                                                                                                                                                                                                                                                                                                                                                                                                                                                                                                                                                                                                                                                                                                                                                                                                                                                                                                                                                                                                                                                                  | #    | #    | #         | #     | #    | #    | -                                                                                                       | ----  | ----                 | #                                                                                                                                                                                                                                                                                                                                                | #    | #    | #         | #     | #    |      |
| Rsa1.0_00401.1.g13089.t4 | gb[EOA18064.1] hypothetical protein CARUB_v10006510mg, partial [Capsella rubella]                                                                                                                                                                                                                                                                                                                                                                                                                                                                                                                                                                                                                                                                                                                                                                                                                                                                                                                                                                                                                                                                                                                                                  | 256  | 555  | 7.00E-22  | 216.8 | 24.2 | 37.1 | hypothetical protein CARUB_v10006510mg, partial                                                         | gbpln | Capsella rubella     | AT1G52950.1   Symbols:   Nucleic acid-binding, OB-fold-like protein   chr1:19725483-19728007 FORWARD LENGTH=566                                                                                                                                                                                                                                  | 256  | 566  | 5.00E-18  | 221.1 | 21.9 | 35.2 |
| Rsa1.0_00401.1.g13090.t1 | ref[NP_196021.2] F-box protein [Arabidopsis thaliana] gi 75104736 sp G5EAF6.1 FB336_ARATH RecName: Full=Probable F-box protein At5g04010; AltName: Full=Non-specific F-box protein [Arabidopsis thaliana] gi 58743280 gb AAW81721.1  At5g04010 [Arabidopsis thaliana] gi 332003301 gb AED90684.1  probable F-box protein [Arabidopsis thaliana] ref[NP_565529.1] aspartate aminotransferase [Arabidopsis thaliana] gi 79322722 ref[NP_001031394.1] aspartate aminotransferase [Arabidopsis thaliana] gi 75206088 sp Q9SIE1.2 PAT_ARATH RecName: Full=Bifunctional aspartate aminotransferase and glutamate/aspartate-prephenate aminotransferase; Short=ATAAT; Short=AtPPA-AT; AltName: Full=Protein MATERNAL EFFECT EMBRYO ARREST 17; Flags: Precursor gi 17381280 gb AAL36058.1  At2g22250/T26C19.9 [Arabidopsis thaliana] gi 20198151 gb AAD23617.2  putative aspartate aminotransferase [Arabidopsis thaliana] gi 21700793 gb AAM70520.1  At2g22250/T26C19.9 [Arabidopsis thaliana] gi 305855255 gb ADM67558.1  prephenate aminotransferase [Arabidopsis thaliana] gi 330252190 gb AEC07284.1  aspartate aminotransferase [Arabidopsis thaliana] gi 330252191 gb AEC07285.1  aspartate aminotransferase [Arabidopsis thaliana] | 286  | 287  | 1.00E-72  | 100.3 | 51.7 | 70.3 | F-box protein                                                                                           | gbpln | Arabidopsis thaliana | AT5G04010.1   Symbols:   F-box family protein   chr5:1080205-1081068 REVERSE LENGTH=287                                                                                                                                                                                                                                                          | 286  | 287  | 3.00E-75  | 100.3 | 51.7 | 70.3 |
| Rsa1.0_00401.1.g13091.t1 | ref[NP_196021.2] F-box protein [Arabidopsis thaliana] gi 75104736 sp G5EAF6.1 FB336_ARATH RecName: Full=Probable F-box protein At5g04010; AltName: Full=Non-specific F-box protein [Arabidopsis thaliana] gi 58743280 gb AAW81721.1  At5g04010 [Arabidopsis thaliana] gi 332003301 gb AED90684.1  probable F-box protein [Arabidopsis thaliana] ref[NP_565529.1] aspartate aminotransferase [Arabidopsis thaliana] gi 79322722 ref[NP_001031394.1] aspartate aminotransferase [Arabidopsis thaliana] gi 75206088 sp Q9SIE1.2 PAT_ARATH RecName: Full=Bifunctional aspartate aminotransferase and glutamate/aspartate-prephenate aminotransferase; Short=ATAAT; Short=AtPPA-AT; AltName: Full=Protein MATERNAL EFFECT EMBRYO ARREST 17; Flags: Precursor gi 17381280 gb AAL36058.1  At2g22250/T26C19.9 [Arabidopsis thaliana] gi 20198151 gb AAD23617.2  putative aspartate aminotransferase [Arabidopsis thaliana] gi 21700793 gb AAM70520.1  At2g22250/T26C19.9 [Arabidopsis thaliana] gi 305855255 gb ADM67558.1  prephenate aminotransferase [Arabidopsis thaliana] gi 330252190 gb AEC07284.1  aspartate aminotransferase [Arabidopsis thaliana] gi 330252191 gb AEC07285.1  aspartate aminotransferase [Arabidopsis thaliana] | 475  | 475  | 0         | 100.0 | 90.3 | 95.6 | aspartate aminotransferase                                                                              | gbpln | Arabidopsis thaliana | AT2G22250.3   Symbols:   ATAAT, AAT, MEE1   aspartate aminotransferase   chr2:9458011-9460297 REVERSE LENGTH=475                                                                                                                                                                                                                                 | 475  | 475  | 0         | 100.0 | 90.3 | 95.6 |
| Rsa1.0_00401.1.g13092.t1 | dbj[BAB02902.1] disease resistance protein-like [Arabidopsis thaliana]                                                                                                                                                                                                                                                                                                                                                                                                                                                                                                                                                                                                                                                                                                                                                                                                                                                                                                                                                                                                                                                                                                                                                             | 885  | 883  | 0         | 99.8  | 67.1 | 76.4 | disease resistance protein-like                                                                         | gbpln | Arabidopsis thaliana | AT3G24982.1   Symbols:   ATRLP40, RLP40   receptor like protein 40   chr3:9106157-9108937 REVERSE LENGTH=915                                                                                                                                                                                                                                     | 885  | 915  | 0         | 103.4 | 67.1 | 76.4 |
| Rsa1.0_00401.1.g13093.t1 | gb[AAF40460.1]AC004809_18 Strong similarity to the synaptobrevin homolog F25118.14 gi 2924792 from A. thaliana on BAC gb AC002334 [Arabidopsis thaliana]                                                                                                                                                                                                                                                                                                                                                                                                                                                                                                                                                                                                                                                                                                                                                                                                                                                                                                                                                                                                                                                                           | 213  | 229  | 1.00E-32  | 107.5 | 32.4 | 35.2 | Strong similarity to the synaptobrevin homolog F25118.14 gi 2924792 from A. thaliana on BAC gb AC002334 | gbpln | Arabidopsis thaliana | AT2G32670.1   Symbols:   ATVAMP725, VAMP725   vesicle-associated membrane protein 725   chr2:13857941-13859346 FORWARD LENGTH=285                                                                                                                                                                                                                | 213  | 285  | 1.00E-34  | 133.8 | 31.9 | 34.7 |
| Rsa1.0_00401.1.g13094.t1 | gb[AA04914.1] putative leucine-rich repeat disease resistance protein [Arabidopsis thaliana] ref[NP_180867.1] receptor like protein 28 [Arabidopsis thaliana] gi 2924783 gb AAC04912.1  putative leucine-rich repeat disease resistance protein [Arabidopsis thaliana] gi 330253689 gb AEC08783.1  receptor like protein 28 [Arabidopsis thaliana] gb AAK43485.1 AC084807_10 polyprotein, putative [Arabidopsis thaliana] gi 225898008 dbj BAH30336.1  hypothetical protein [Arabidopsis thaliana]                                                                                                                                                                                                                                                                                                                                                                                                                                                                                                                                                                                                                                                                                                                                 | 191  | 800  | 7.00E-78  | 418.8 | 75.9 | 87.4 | putative leucine-rich repeat disease resistance protein                                                 | gbpln | Arabidopsis thaliana | AT2G33060.1   Symbols:   AtRLP27, RLP27   receptor like protein 27   chr2:14025661-14028087 FORWARD LENGTH=808                                                                                                                                                                                                                                   | 191  | 808  | 3.00E-80  | 423.0 | 75.9 | 87.4 |
| Rsa1.0_00401.1.g13095.t1 | gb[AA04914.1] putative leucine-rich repeat disease resistance protein [Arabidopsis thaliana] ref[NP_180867.1] receptor like protein 28 [Arabidopsis thaliana] gi 2924783 gb AAC04912.1  putative leucine-rich repeat disease resistance protein [Arabidopsis thaliana] gi 330253689 gb AEC08783.1  receptor like protein 28 [Arabidopsis thaliana] gb AAK43485.1 AC084807_10 polyprotein, putative [Arabidopsis thaliana] gi 225898008 dbj BAH30336.1  hypothetical protein [Arabidopsis thaliana]                                                                                                                                                                                                                                                                                                                                                                                                                                                                                                                                                                                                                                                                                                                                 | 423  | 740  | 1.00E-124 | 174.9 | 60.3 | 72.1 | receptor like protein 28                                                                                | gbpln | Arabidopsis thaliana | AT2G33080.1   Symbols:   AtRLP28, RLP28   receptor like protein 28   chr2:14032015-14034237 FORWARD LENGTH=740                                                                                                                                                                                                                                   | 423  | 740  | 1.00E-126 | 174.9 | 60.3 | 72.1 |
| Rsa1.0_00401.1.g13096.t1 | gb[AAK43485.1]AC084807_10 polyprotein, putative [Arabidopsis thaliana] gi 225898008 dbj BAH30336.1  hypothetical protein [Arabidopsis thaliana]                                                                                                                                                                                                                                                                                                                                                                                                                                                                                                                                                                                                                                                                                                                                                                                                                                                                                                                                                                                                                                                                                    | 1455 | 1459 | 0         | 100.3 | 57.2 | 72.8 | polyprotein, putative                                                                                   | gbpln | Arabidopsis thaliana | AT4G23160.1   Symbols:   CRK8   cysteine-rich RLK (RECEPTOR-like protein kinase) 8   chr4:12129485-12134086 FORWARD LENGTH=1262                                                                                                                                                                                                                  | 1455 | 1262 | 1.00E-113 | 86.7  | 13.6 | 19.6 |
| Rsa1.0_00401.1.g13097.t1 | gb[EOA39215.1] hypothetical protein CARUB_v10012187mg [Capsella rubella]                                                                                                                                                                                                                                                                                                                                                                                                                                                                                                                                                                                                                                                                                                                                                                                                                                                                                                                                                                                                                                                                                                                                                           | 253  | 220  | 1.00E-64  | 87.0  | 47.0 | 52.2 | hypothetical protein CARUB_v10012187mg                                                                  | gbpln | Capsella rubella     | AT1G04760.1   Symbols:   ATVAMP726, VAMP726   vesicle-associated membrane protein 726   chr1:1334760-1336070 FORWARD LENGTH=220                                                                                                                                                                                                                  | 253  | 220  | 3.00E-59  | 87.0  | 46.6 | 51.8 |

|                          |                                                                                                                                                                                                                                                                                                                                                                                                                                                                                                                                                                                                                                                                                                                                                                              |     |      |           |       |      |      |                                                                                                                                                                                                                                   |                      |                                                                                                                                                                                                                                                                                                                                                                                                                         |     |     |           |       |      |      |
|--------------------------|------------------------------------------------------------------------------------------------------------------------------------------------------------------------------------------------------------------------------------------------------------------------------------------------------------------------------------------------------------------------------------------------------------------------------------------------------------------------------------------------------------------------------------------------------------------------------------------------------------------------------------------------------------------------------------------------------------------------------------------------------------------------------|-----|------|-----------|-------|------|------|-----------------------------------------------------------------------------------------------------------------------------------------------------------------------------------------------------------------------------------|----------------------|-------------------------------------------------------------------------------------------------------------------------------------------------------------------------------------------------------------------------------------------------------------------------------------------------------------------------------------------------------------------------------------------------------------------------|-----|-----|-----------|-------|------|------|
| Rsa1.0_00401.1.g13098.t1 | refNP_180861.1  receptor like protein 24 [Arabidopsis thaliana]<br>gi 2924789 gb AAC04918.1  putative leucine-rich repeat disease resistance protein [Arabidopsis thaliana]<br>gi 20196994 gb AAM14862.1  putative leucine-rich repeat disease resistance protein [Arabidopsis thaliana]<br>gi 33025368 gb AEC08775.1  receptor like protein 24 [Arabidopsis thaliana]                                                                                                                                                                                                                                                                                                                                                                                                       | 338 | 864  | 1.00E-125 | 255.6 | 70.4 | 80.2 | receptor like protein 24 gbpln                                                                                                                                                                                                    | Arabidopsis thaliana | AT2G33020.1   Symbols: AtRLP24, RLP24   receptor like protein 24   chr2:14013874-14016516 REVERSE LENGTH=864                                                                                                                                                                                                                                                                                                            | 338 | 864 | 1.00E-128 | 255.6 | 70.4 | 80.2 |
| Rsa1.0_00401.1.g13099.t1 | gb EOA30595.1  hypothetical protein CARUB_v10013726mg [Capsella rubella]                                                                                                                                                                                                                                                                                                                                                                                                                                                                                                                                                                                                                                                                                                     | 206 | 439  | 1.00E-52  | 213.1 | 54.4 | 61.2 | hypothetical protein CARUB_v10013726mg gbpln                                                                                                                                                                                      | Capsella rubella     | AT3G19130.1   Symbols: ATRBP47B, RBP47B   RNA-binding protein 47B   chr3:6611398-6613823 REVERSE LENGTH=435                                                                                                                                                                                                                                                                                                             | 206 | 435 | 2.00E-53  | 211.2 | 50.5 | 56.3 |
| Rsa1.0_00401.1.g13100.t1 | sp Q9STU0.1 INO1.WHEAT RecName: Full=Inositol-3-phosphate synthase; Short=MIP synthase; AltName: Full=Myo-inositol 1-phosphate synthase; Short=IPS; Short=MI-1-P synthase<br>gi 4589062 gb AAD26330.1 AF120146.1 myo-inositol 1-phosphate synthase [Triticum aestivum]<br>gi 4589064 gb AAD26331.1 AF120147.1 myo-inositol 1-phosphate synthase [Triticum aestivum]<br>gi 4589066 gb AAD26332.1 AF120148.1 myo-inositol 1-phosphate synthase [Triticum aestivum]                                                                                                                                                                                                                                                                                                             | 510 | 510  | 0         | 100.0 | 97.3 | 98.6 | RecName: Full=Inositol-3-phosphate synthase; Short=MIP synthase; AltName: Full=Myo-inositol 1-phosphate synthase; Short=IPS; Short=MI-1-P synthase<br>gi 4589062 gb AAD26330.1 AF120146.1 myo-inositol 1-phosphate synthase gbpln | Triticum aestivum    | AT2G22240.1   Symbols: ATMIPS2, MIPS2, ATIPS2   myo-inositol-1-phosphate synthase 2   chr2:9451901-9453938 REVERSE LENGTH=510                                                                                                                                                                                                                                                                                           | 510 | 510 | 0         | 100.0 | 95.9 | 99.0 |
| Rsa1.0_00401.1.g13101.t1 | refXP_002878603.1  hypothetical protein ARALYDRAFT_481086 [Arabidopsis lyrata subsp. lyrata]<br>gi 297324442 gb EFH54862.1  hypothetical protein ARALYDRAFT_481086 [Arabidopsis lyrata subsp. lyrata]                                                                                                                                                                                                                                                                                                                                                                                                                                                                                                                                                                        | 83  | 224  | 5.00E-32  | 269.9 | 83.1 | 92.8 | hypothetical protein ARALYDRAFT_481086 gbpln                                                                                                                                                                                      | Arabidopsis lyrata   | AT2G22230.1   Symbols:   Thioesterase superfamily protein   chr2:9450042-9451427 FORWARD LENGTH=220                                                                                                                                                                                                                                                                                                                     | 83  | 220 | 1.00E-34  | 265.1 | 83.1 | 92.8 |
| Rsa1.0_00402.1.g13102.t1 | gb AAM15154.1  unknown protein [Arabidopsis thaliana]<br>gi 20198162 gb AAM15435.1  unknown protein [Arabidopsis thaliana]                                                                                                                                                                                                                                                                                                                                                                                                                                                                                                                                                                                                                                                   | 288 | 1308 | 2.00E-47  | 454.2 | 36.8 | 45.8 | unknown protein gbpln                                                                                                                                                                                                             | Arabidopsis thaliana | # # # # # #                                                                                                                                                                                                                                                                                                                                                                                                             | #   | #   | #         | #     | #    | #    |
| Rsa1.0_00402.1.g13103.t1 | ref NP_198138.2  uncharacterized protein [Arabidopsis thaliana]<br>gi 238481400 ref NP_001154743.1  uncharacterized protein [Arabidopsis thaliana]<br>gi 332006354 gb AED93737.1  uncharacterized protein AT5G27860 [Arabidopsis thaliana]<br>gi 332006355 gb AED93738.1  uncharacterized protein AT5G27860 [Arabidopsis thaliana]                                                                                                                                                                                                                                                                                                                                                                                                                                           | 178 | 177  | 1.00E-33  | 99.4  | 49.4 | 53.4 | uncharacterized protein gbpln                                                                                                                                                                                                     | Arabidopsis thaliana | AT5G27860.2   Symbols:   unknown protein; FUNCTIONS IN: molecular function unknown; INVOLVED IN: biological process unknown; LOCATED IN: chloroplast; EXPRESSED IN: pollen tube; Has 23049 Blast hits to 11981 proteins in 648 species: Archae - 2; Bacteria - 589; Metazoa - 13464; Fungi - 1977; Plants - 1635; Viruses - 89; Other Eukaryotes - 5293 (source: NCBI BLink).   chr5:9875068-9876442 REVERSE LENGTH=177 | 178 | 177 | 5.00E-36  | 99.4  | 49.4 | 53.4 |
| Rsa1.0_00402.1.g13104.t1 | dbj BAC42193.1  putative FUSCA protein FUS6 [Arabidopsis thaliana]                                                                                                                                                                                                                                                                                                                                                                                                                                                                                                                                                                                                                                                                                                           | 176 | 441  | 1.00E-23  | 250.6 | 31.3 | 37.5 | putative FUSCA protein FUS6 gbpln                                                                                                                                                                                                 | Arabidopsis thaliana | AT3G61140.1   Symbols: FUS6, ATFUS6, CSN1, COP1, EMB78, ATSK31, SK31   26S proteasome, regulatory subunit Rpn7; Proteasome component (PCI) domain   chr3:22626335-22628895 FORWARD LENGTH=441                                                                                                                                                                                                                           | 176 | 441 | 4.00E-26  | 250.6 | 31.3 | 37.5 |
| Rsa1.0_00402.1.g13105.t1 | ref NP_567410.1  nucleoside-triphosphate pyrophosphatase [Arabidopsis thaliana]<br>gi 75301199 sp Q8L968.1 ITPA_ARATH RecName: Full=Inosine triphosphate pyrophosphatase; Short=ITPase; Short=Inosine triphosphatase; AltName: Full=Non-canonical purine NTP pyrophosphatase; AltName: Full=Non-standard purine NTP pyrophosphatase; AltName: Full=Nucleoside-triphosphate diphosphatase; AltName: Full=Nucleoside-triphosphate pyrophosphatase; Short=NTase<br>gi 21617884 gb AAM66934.1  putative HAM1 protein [Arabidopsis thaliana]<br>gi 62319786 dbj BAD93787.1  hypothetical protein [Arabidopsis thaliana]<br>gi 90962982 gb ABE02415.1  At4g13720 [Arabidopsis thaliana]<br>gi 332657917 gb AEE83317.1  Inosine triphosphate pyrophosphatase [Arabidopsis thaliana] | 205 | 206  | 1.00E-107 | 100.5 | 92.2 | 93.7 | nucleoside-triphosphate pyrophosphatase gbpln                                                                                                                                                                                     | Arabidopsis thaliana | AT4G13720.1   Symbols:   Inosine triphosphate pyrophosphatase family protein   chr4:7967166-7968894 REVERSE LENGTH=206                                                                                                                                                                                                                                                                                                  | 205 | 206 | 1.00E-109 | 100.5 | 92.2 | 93.7 |



|                           |                                                                                                                                                                                                                                                                                                                                                                                                                                                                                            |      |      |           |       |      |      |                                                   |       |                      |                                                                                                                                                                                                                                                             |      |      |           |       |      |      |
|---------------------------|--------------------------------------------------------------------------------------------------------------------------------------------------------------------------------------------------------------------------------------------------------------------------------------------------------------------------------------------------------------------------------------------------------------------------------------------------------------------------------------------|------|------|-----------|-------|------|------|---------------------------------------------------|-------|----------------------|-------------------------------------------------------------------------------------------------------------------------------------------------------------------------------------------------------------------------------------------------------------|------|------|-----------|-------|------|------|
| Rsa1.0_00402.1.g13106.t1  | refXP_002870357.1 pectate lyase family protein [Arabidopsis lyrata subsp. lyrata] gi 297316193 gb EFH46616.1 pectate lyase family protein [Arabidopsis lyrata subsp. lyrata]                                                                                                                                                                                                                                                                                                               | 451  | 484  | 0         | 107.3 | 89.8 | 93.1 | pectate lyase family protein                      | gbpln | Arabidopsis lyrata   | AT4G13710.2   Symbols:   Pectin lyase-like superfamily protein   chr4:7962550-7966012 FORWARD LENGTH=451                                                                                                                                                    | 451  | 451  | 0         | 100.0 | 89.6 | 92.7 |
| Rsa1.0_00402.1.g13107.t1  | emb CAB91581.1 putative protein [Arabidopsis thaliana]                                                                                                                                                                                                                                                                                                                                                                                                                                     | 224  | 1752 | 2.00E-66  | 782.1 | 51.8 | 68.3 | putative protein                                  | gbpln | Arabidopsis thaliana | #                                                                                                                                                                                                                                                           | #    | #    | #         | #     | #    | #    |
| Rsa1.0_00402.1.g13108.t1  | #                                                                                                                                                                                                                                                                                                                                                                                                                                                                                          | #    | #    | #         | #     | #    | #    | -                                                 | ----  | ----                 | #                                                                                                                                                                                                                                                           | #    | #    | #         | #     | #    | #    |
| Rsa1.0_00402.1.g13109.t1  | refXP_002868345.1 pentatricopeptide repeat-containing protein [Arabidopsis lyrata subsp. lyrata] gi 297314181 gb EFH44604.1 pentatricopeptide repeat-containing protein [Arabidopsis lyrata subsp. lyrata]                                                                                                                                                                                                                                                                                 | 1058 | 1047 | 0         | 99.0  | 86.5 | 92.2 | pentatricopeptide repeat-containing protein       | gbpln | Arabidopsis lyrata   | AT4G13650.1   Symbols:   Pentatricopeptide repeat (PPR) superfamily protein   chr4:7939611-7942898 REVERSE LENGTH=1064                                                                                                                                      | 1058 | 1064 | 0         | 100.6 | 86.1 | 91.7 |
| Rsa1.0_00402.1.g13110.t1  | gb EOA16725.1 hypothetical protein CARUB_v10004928mg [Capsella rubella]                                                                                                                                                                                                                                                                                                                                                                                                                    | 382  | 414  | 1.00E-152 | 108.4 | 75.9 | 86.6 | hypothetical protein CARUB_v10004928mg            | gbpln | Capsella rubella     | AT4G13670.1   Symbols: PTAC5   plastid transcriptionally active 5   chr4:7948644-7950779 FORWARD LENGTH=387                                                                                                                                                 | 382  | 387  | 1.00E-154 | 101.3 | 74.9 | 85.6 |
| Rsa1.0_00402.1.g13111.t1  | refXP_002870359.1 hypothetical protein ARALYDRAFT_355445 [Arabidopsis lyrata subsp. lyrata] gi 297316195 gb EFH46618.1 hypothetical protein ARALYDRAFT_355445 [Arabidopsis lyrata subsp. lyrata]                                                                                                                                                                                                                                                                                           | 254  | 254  | 6.00E-83  | 100.0 | 68.1 | 79.5 | hypothetical protein ARALYDRAFT_355445            | gbpln | Arabidopsis lyrata   | AT4G13690.1   Symbols:   unknown protein; Has 37 Blast hits to 37 proteins in 16 species: Archaea - 0; Bacteria - 2; Metazoa - 2; Fungi - 0; Plants - 27; Viruses - 0; Other Eukaryotes - 6 (source: NCBI BLINK).   chr4:7953662-7955380 REVERSE LENGTH=249 | 254  | 249  | 3.00E-81  | 98.0  | 63.8 | 75.2 |
| Rsa1.0_00402.1.g13112.t1  | #                                                                                                                                                                                                                                                                                                                                                                                                                                                                                          | #    | #    | #         | #     | #    | #    | -                                                 | ----  | ----                 | #                                                                                                                                                                                                                                                           | #    | #    | #         | #     | #    | #    |
| Rsa1.0_00402.1.g13113.t1  | #                                                                                                                                                                                                                                                                                                                                                                                                                                                                                          | #    | #    | #         | #     | #    | #    | -                                                 | ----  | ----                 | #                                                                                                                                                                                                                                                           | #    | #    | #         | #     | #    | #    |
| Rsa1.0_00402.1.g13114.t1  | ref NP_193099.2 uncharacterized protein [Arabidopsis thaliana] gi 334186497 ref NP_001190719.1 uncharacterized protein [Arabidopsis thaliana] gi 332657905 gb AEE83305.1 uncharacterized protein AT4G13630 [Arabidopsis thaliana] gi 332657906 gb AEE83306.1 uncharacterized protein AT4G13630 [Arabidopsis thaliana]                                                                                                                                                                      | 490  | 569  | 1.00E-157 | 116.1 | 71.4 | 81.0 | uncharacterized protein                           | gbpln | Arabidopsis thaliana | AT4G13630.2   Symbols:   Protein of unknown function, DUF593   chr4:7934093-7936029 REVERSE LENGTH=569                                                                                                                                                      | 490  | 569  | 1.00E-159 | 116.1 | 71.4 | 81.0 |
| Rsa1.0_00402.1.g13115.t1  | ref NP_193098.1 ethylene-responsive transcription factor ERF062 [Arabidopsis thaliana] gi 75337746 sp Q9SVQ0.1 ERF62_ARAT H RecName: Full=Ethylene-responsive transcription factor ERF062 gi 5748494 emb CAB36826.2 putative protein [Arabidopsis thaliana] gi 7268066 emb CAB78404.1 putative protein [Arabidopsis thaliana] gi 11935810 gb ABM05999.1 At4g13620 [Arabidopsis thaliana] gi 332657904 gb AEE83304.1 ethylene-responsive transcription factor ERF062 [Arabidopsis thaliana] | 345  | 388  | 1.00E-149 | 112.5 | 81.7 | 89.0 | ethylene-responsive transcription factor ERF062   | gbpln | Arabidopsis thaliana | AT4G13620.1   Symbols:   Integrase-type DNA-binding superfamily protein   chr4:7932138-7933304 FORWARD LENGTH=388                                                                                                                                           | 345  | 388  | 1.00E-152 | 112.5 | 81.7 | 89.0 |
| Rsa1.0_00402.1.g13116.t1  | #                                                                                                                                                                                                                                                                                                                                                                                                                                                                                          | #    | #    | #         | #     | #    | #    | -                                                 | ----  | ----                 | #                                                                                                                                                                                                                                                           | #    | #    | #         | #     | #    | #    |
| Rsa1.0_00402.1.g13117.t10 | dbj BAB10503.1 retroelement pol polyprotein-like [Arabidopsis thaliana]                                                                                                                                                                                                                                                                                                                                                                                                                    | 1300 | 1475 | 0         | 113.5 | 60.8 | 75.8 | retroelement pol polyprotein-like                 | gbpln | Arabidopsis thaliana | AT4G23160.1   Symbols: CRK8   cysteine-rich RLK (RECEPTOR-like protein kinase) 8   chr4:12129485-12134086 FORWARD LENGTH=1262                                                                                                                               | 1300 | 1262 | 1.00E-158 | 97.1  | 21.8 | 28.6 |
| Rsa1.0_00402.1.g13118.t1  | ref NP_193096.5 carbohydrate-binding X8 domain-containing protein [Arabidopsis thaliana] gi 332657901 gb AEE83301.1 carbohydrate-binding X8 domain-containing protein [Arabidopsis thaliana]                                                                                                                                                                                                                                                                                               | 189  | 231  | 5.00E-75  | 122.2 | 82.5 | 88.4 | carbohydrate-binding X8 domain-containing protein | gbpln | Arabidopsis thaliana | AT4G13600.1   Symbols:   Carbohydrate-binding X8 domain superfamily protein   chr4:7911179-7912892 REVERSE LENGTH=231                                                                                                                                       | 189  | 231  | 2.00E-77  | 122.2 | 82.5 | 88.4 |
| Rsa1.0_00402.1.g13119.t1  | gb EOA28640.1 hypothetical protein CARUB_v10024862mg, partial [Capsella rubella]                                                                                                                                                                                                                                                                                                                                                                                                           | 448  | 490  | 5.00E-75  | 109.4 | 36.6 | 57.6 | hypothetical protein CARUB_v10024862mg, partial   | gbpln | Capsella rubella     | AT1G52950.1   Symbols:   Nucleic acid-binding, OB-fold-like protein   chr1:19725483-19728007 FORWARD LENGTH=566                                                                                                                                             | 448  | 566  | 3.00E-71  | 126.3 | 33.9 | 58.0 |
| Rsa1.0_00402.1.g13120.t1  | ref NP_197911.1 F-box protein [Arabidopsis thaliana] gi 75339263 sp Q4PSE7.1 FB262_ARAT H RecName: Full=F-box protein At5g25290 gi 67633822 gb AA778835.1 F-box family protein [Arabidopsis thaliana] gi 332006040 gb AED93423.1 F-box protein [Arabidopsis thaliana]                                                                                                                                                                                                                      | 409  | 397  | 1.00E-112 | 97.1  | 57.0 | 68.9 | F-box protein                                     | gbpln | Arabidopsis thaliana | AT5G25290.1   Symbols:   F-box family protein with a domain of unknown function (DUF295)   chr5:8778592-8779785 FORWARD LENGTH=397                                                                                                                          | 409  | 397  | 1.00E-114 | 97.1  | 57.0 | 68.9 |

|                          |                                                                                                                                                                                               |      |      |          |       |      |      |                                                                                |       |                      |                                                                                                                                                                                                                                                                                                                                                                                                              |      |      |           |       |      |      |
|--------------------------|-----------------------------------------------------------------------------------------------------------------------------------------------------------------------------------------------|------|------|----------|-------|------|------|--------------------------------------------------------------------------------|-------|----------------------|--------------------------------------------------------------------------------------------------------------------------------------------------------------------------------------------------------------------------------------------------------------------------------------------------------------------------------------------------------------------------------------------------------------|------|------|-----------|-------|------|------|
| Rsa1.0_00402.1.g13121.t1 | gb EOA30761.1  hypothetical protein CARUB_v10013903mg [Capsella rubella]                                                                                                                      | 364  | 392  | 4.00E-58 | 107.7 | 46.2 | 63.7 | hypothetical protein CARUB_v10013903mg                                         | gbpln | Capsella rubella     | AT1G61730.1   Symbols:   DNA-binding storekeeper protein-related transcriptional regulator   chr1:22793447-22794577 REVERSE LENGTH=376                                                                                                                                                                                                                                                                       | 364  | 376  | 1.00E-58  | 103.3 | 38.2 | 47.5 |
| Rsa1.0_00402.1.g13122.t1 | emb CAB77996.1  putative protein [Arabidopsis thaliana] gi 7321060 emb CAB82107.1  putative protein [Arabidopsis thaliana]                                                                    | 578  | 715  | 3.00E-85 | 123.7 | 29.1 | 40.8 | putative protein                                                               | gbpln | Arabidopsis thaliana | AT2G06420.1   Symbols:   Domain of unknown function (DUF1985)   chr2:2539083-2539985 FORWARD LENGTH=249                                                                                                                                                                                                                                                                                                      | 578  | 249  | 4.00E-57  | 43.1  | 18.5 | 24.2 |
| Rsa1.0_00402.1.g13123.t1 | gb ABL97981.1  unknown [Brassica rapa]                                                                                                                                                        | 109  | 109  | 2.00E-51 | 100.0 | 95.4 | 95.4 | unknown                                                                        | gbpln | Brassica rapa        | AT4G13560.1   Symbols: UNE15   Late embryogenesis abundant protein (LEA) family protein   chr4:7879764-7880311 REVERSE LENGTH=109                                                                                                                                                                                                                                                                            | 109  | 109  | 1.00E-43  | 100.0 | 79.8 | 82.6 |
| Rsa1.0_00402.1.g13124.t1 | #                                                                                                                                                                                             | #    | #    | #        | #     | #    | #    | -                                                                              | ----  | ----                 | #                                                                                                                                                                                                                                                                                                                                                                                                            | #    | #    | #         | #     | #    |      |
| Rsa1.0_00402.1.g13125.t1 | gb EOA15979.1  hypothetical protein CARUB_v10004094mg [Capsella rubella]                                                                                                                      | 847  | 915  | 0        | 108.0 | 77.0 | 85.4 | hypothetical protein CARUB_v10004094mg                                         | gbpln | Capsella rubella     | AT4G13550.1   Symbols:   triglyceride lipase; triglyceride lipases   chr4:7871251-7876160 REVERSE LENGTH=715                                                                                                                                                                                                                                                                                                 | 847  | 715  | 0         | 84.4  | 62.3 | 69.2 |
| Rsa1.0_00402.1.g13126.t1 | gb EOA17915.1  hypothetical protein CARUB_v10006324mg [Capsella rubella]                                                                                                                      | 204  | 210  | 2.00E-77 | 102.9 | 76.5 | 84.8 | hypothetical protein CARUB_v10006324mg                                         | gbpln | Capsella rubella     | AT4G13540.1   Symbols:   unknown protein; INVOLVED IN: N-terminal protein myristoylation; BEST Arabidopsis thaliana protein match is: unknown protein (TAIR:AT3G23930.1); Has 4658 Blast hits to 3455 proteins in 431 species: Archae - 39; Bacteria - 387; Metazoa - 1842; Fungi - 436; Plants - 133; Viruses - 38; Other Eukaryotes - 1783 (source: NCBI BLink).   chr4:7869896-7870604 FORWARD LENGTH=210 | 204  | 210  | 2.00E-73  | 102.9 | 77.0 | 84.3 |
| Rsa1.0_00402.1.g13127.t1 | gb EOA16151.1  hypothetical protein CARUB_v10004289mg [Capsella rubella]                                                                                                                      | 617  | 677  | 0        | 109.7 | 72.6 | 80.6 | hypothetical protein CARUB_v10004289mg                                         | gbpln | Capsella rubella     | AT4G23190.1   Symbols: CRK11, AT-RLK3   cysteine-rich RLK (RECEPTOR-like protein kinase) 11   chr4:12141197-12143710 REVERSE LENGTH=667                                                                                                                                                                                                                                                                      | 617  | 667  | 0         | 108.1 | 54.0 | 66.6 |
| Rsa1.0_00402.1.g13128.t1 | dbj BAJ33699.1  unnamed protein product [Thellungiella halophila]                                                                                                                             | 476  | 504  | 0        | 105.9 | 95.0 | 97.7 | unnamed protein product                                                        | ----  | ----                 | AT4G13250.1   Symbols: NYC1   NAD(P)-binding Rossmann-fold superfamily protein   chr4:7684417-7686691 REVERSE LENGTH=496                                                                                                                                                                                                                                                                                     | 476  | 496  | 0         | 104.2 | 92.0 | 95.0 |
| Rsa1.0_00402.1.g13129.t3 | gb AAD32898.1  putative retroelement pol polyprotein [Arabidopsis thaliana]                                                                                                                   | 1250 | 1307 | 0        | 104.6 | 57.2 | 72.5 | putative retroelement pol polyprotein                                          | gbpln | Arabidopsis thaliana | AT4G23160.1   Symbols: CRK8   cysteine-rich RLK (RECEPTOR-like protein kinase) 8   chr4:12129485-12134086 FORWARD LENGTH=1262                                                                                                                                                                                                                                                                                | 1250 | 1262 | 6.00E-99  | 101.0 | 14.6 | 24.1 |
| Rsa1.0_00402.1.g13130.t1 | gb AAG09097.1 AC009323.8 Putative retroelement polyprotein [Arabidopsis thaliana]                                                                                                             | 287  | 1486 | 1.00E-56 | 517.8 | 40.1 | 46.7 | Putative retroelement polyprotein                                              | gbpln | Arabidopsis thaliana | AT4G23160.1   Symbols: CRK8   cysteine-rich RLK (RECEPTOR-like protein kinase) 8   chr4:12129485-12134086 FORWARD LENGTH=1262                                                                                                                                                                                                                                                                                | 287  | 1262 | 3.00E-31  | 439.7 | 28.9 | 40.8 |
| Rsa1.0_00402.1.g13131.t1 | gb AAD36942.1 AF069441.2 hypothetical protein [Arabidopsis thaliana] gi 7267196 emb CAB77907.1  hypothetical protein [Arabidopsis thaliana]                                                   | 212  | 963  | 9.00E-31 | 454.2 | 36.3 | 50.5 | hypothetical protein                                                           | gbpln | Arabidopsis thaliana | AT2G07240.1   Symbols:   cysteine-type peptidases; cysteine-type peptidases   chr2:3007102-3011701 REVERSE LENGTH=874                                                                                                                                                                                                                                                                                        | 212  | 874  | 5.00E-29  | 412.3 | 31.1 | 47.6 |
| Rsa1.0_00402.1.g13132.t1 | gb AAF69169.1 AC007915.21 F27F5.21 [Arabidopsis thaliana]                                                                                                                                     | 331  | 1023 | 4.00E-34 | 309.1 | 27.8 | 39.0 | F27F5.21                                                                       | gbpln | Arabidopsis thaliana | #                                                                                                                                                                                                                                                                                                                                                                                                            | #    | #    | #         | #     | #    |      |
| Rsa1.0_00402.1.g13133.t1 | gb AAC28189.1  contains similarity to Arabidopsis thaliana retrotransposon Athila (GB:X81801) [Arabidopsis thaliana]                                                                          | 410  | 940  | 2.00E-64 | 229.3 | 33.2 | 47.6 | contains similarity to Arabidopsis thaliana retrotransposon Athila (GB:X81801) | gbpln | Arabidopsis thaliana | #                                                                                                                                                                                                                                                                                                                                                                                                            | #    | #    | #         | #     | #    |      |
| Rsa1.0_00402.1.g13134.t4 | gb AAD17349.1  similar to Antirrhinum majus (garden snapdragon) TNP2 protein (GB:X57297) [Arabidopsis thaliana] gi 7267145 emb CAB80813.1  putative transposon protein [Arabidopsis thaliana] | 453  | 817  | 1.00E-51 | 180.4 | 33.3 | 45.9 | similar to Antirrhinum majus (garden snapdragon) TNP2 protein (GB:X57297)      | gbpln | Arabidopsis thaliana | #                                                                                                                                                                                                                                                                                                                                                                                                            | #    | #    | #         | #     | #    |      |
| Rsa1.0_00402.1.g13135.t8 | gb AAC33226.1  putative non-LTR retroelement reverse transcriptase [Arabidopsis thaliana]                                                                                                     | 1459 | 1529 | 0        | 104.8 | 44.6 | 62.1 | putative non-LTR retroelement reverse transcriptase                            | gbpln | Arabidopsis thaliana | AT3G24255.1   Symbols:   RNA-directed DNA polymerase (reverse transcriptase)-related family protein   chr3:8789471-8793208 FORWARD LENGTH=746                                                                                                                                                                                                                                                                | 1459 | 746  | 1.00E-107 | 51.1  | 13.8 | 17.8 |

|                          |                                                                                                                                                                                                                                                                                                                                                                                                                                                                                                                                                             |     |     |           |       |      |      |                                                        |       |                      |                                                                                                                                                                                                                                                                                                                                                                                        |     |     |           |       |      |      |
|--------------------------|-------------------------------------------------------------------------------------------------------------------------------------------------------------------------------------------------------------------------------------------------------------------------------------------------------------------------------------------------------------------------------------------------------------------------------------------------------------------------------------------------------------------------------------------------------------|-----|-----|-----------|-------|------|------|--------------------------------------------------------|-------|----------------------|----------------------------------------------------------------------------------------------------------------------------------------------------------------------------------------------------------------------------------------------------------------------------------------------------------------------------------------------------------------------------------------|-----|-----|-----------|-------|------|------|
| Rsa1.0_00403.1.g13136.t1 | refNP_195457.1  cytochrome P450, family 81, subfamily F, polypeptide 4 [Arabidopsis thaliana] gi 4468807 emb CAB38208.1  cytochrome P450 monooxygenase-like protein [Arabidopsis thaliana] gi 7270723 emb CAB80406.1  cytochrome P450 monooxygenase-like protein [Arabidopsis thaliana] gi 21536532 gb AAM60864.1  cytochrome P450 monooxygenase-like protein [Arabidopsis thaliana] gi 116325950 gb ABJ98576.1  At4g37410 [Arabidopsis thaliana] gi 332661390 gb AEE86790.1  cytochrome P450, family 81, subfamily F, polypeptide 4 [Arabidopsis thaliana] | 501 | 501 | 0         | 100.0 | 78.8 | 90.2 | cytochrome P450, family 81, subfamily F, polypeptide 4 | gbpln | Arabidopsis thaliana | AT4G37410.1   Symbols: CYP81F4   cytochrome P450, family 81, subfamily F, polypeptide 4   chr4:17590848-17592780 FORWARD LENGTH=501                                                                                                                                                                                                                                                    | 501 | 501 | 0         | 100.0 | 78.8 | 90.2 |
| Rsa1.0_00403.1.g13137.t2 | #                                                                                                                                                                                                                                                                                                                                                                                                                                                                                                                                                           | #   | #   | #         | #     | #    | -    | ----                                                   | ----  | ----                 | #                                                                                                                                                                                                                                                                                                                                                                                      | #   | #   | #         | #     | #    |      |
| Rsa1.0_00403.1.g13138.t2 | refXP_002868986.1  hypothetical protein ARALYDRAFT_490875 [Arabidopsis lyrata subsp. lyrata] gi 297314822 gb EFH45245.1  hypothetical protein ARALYDRAFT_490875 [Arabidopsis lyrata subsp. lyrata]                                                                                                                                                                                                                                                                                                                                                          | 540 | 447 | 1.00E-148 | 82.8  | 54.1 | 65.0 | hypothetical protein ARALYDRAFT_490875                 | gbpln | Arabidopsis lyrata   | AT4G37440.1   Symbols:   unknown protein; BEST Arabidopsis thaliana protein match is: unknown protein (TAIR:AT3G50040.1); Has 220 Blast hits to 205 proteins in 55 species: Archae - 0; Bacteria - 15; Metazoa - 50; Fungi - 11; Plants - 76; Viruses - 3; Other Eukaryotes - 65 (source: NCBI BLINK).   chr4:17601647-17603846 FORWARD LENGTH=471                                     | 540 | 471 | 1.00E-145 | 87.2  | 54.6 | 64.6 |
| Rsa1.0_00403.1.g13139.t1 | gb ABD64939.1  hypothetical protein 24.t00017 [Brassica oleracea]                                                                                                                                                                                                                                                                                                                                                                                                                                                                                           | 103 | 442 | 9.00E-31  | 429.1 | 62.1 | 70.9 | hypothetical protein 24.t00017                         | gbpln | Brassica oleracea    | #                                                                                                                                                                                                                                                                                                                                                                                      | #   | #   | #         | #     | #    |      |
| Rsa1.0_00403.1.g13140.t1 | gb ABD65634.1  hypothetical protein 23.t00051 [Brassica oleracea]                                                                                                                                                                                                                                                                                                                                                                                                                                                                                           | 165 | 133 | 2.00E-30  | 80.6  | 38.8 | 46.7 | hypothetical protein 23.t00051                         | gbpln | Brassica oleracea    | #                                                                                                                                                                                                                                                                                                                                                                                      | #   | #   | #         | #     | #    |      |
| Rsa1.0_00403.1.g13141.t1 | gb EOA18971.1  hypothetical protein CARUB_v10007609mg [Capsella rubella]                                                                                                                                                                                                                                                                                                                                                                                                                                                                                    | 497 | 496 | 0         | 99.8  | 85.9 | 92.6 | hypothetical protein CARUB_v10007609mg                 | gbpln | Capsella rubella     | AT4G37400.1   Symbols: CYP81F3   cytochrome P450, family 81, subfamily F, polypeptide 3   chr4:17584096-17586197 FORWARD LENGTH=501                                                                                                                                                                                                                                                    | 497 | 501 | 0         | 100.8 | 85.7 | 92.8 |
| Rsa1.0_00403.1.g13142.t1 | gb EOA17212.1  hypothetical protein CARUB_v10005485mg [Capsella rubella]                                                                                                                                                                                                                                                                                                                                                                                                                                                                                    | 271 | 271 | 1.00E-148 | 100.0 | 93.4 | 97.0 | hypothetical protein CARUB_v10005485mg                 | gbpln | Capsella rubella     | AT4G37470.1   Symbols:   alpha/beta-Hydrolases superfamily protein   chr4:17617045-17618363 REVERSE LENGTH=270                                                                                                                                                                                                                                                                         | 271 | 270 | 1.00E-149 | 99.6  | 92.3 | 97.8 |
| Rsa1.0_00403.1.g13143.t2 | refNP_195464.2  chaperone DnaJ-domain-containing protein [Arabidopsis thaliana] gi 332661399 gb AEE86799.1  chaperone DnaJ-domain-containing protein [Arabidopsis thaliana]                                                                                                                                                                                                                                                                                                                                                                                 | 530 | 531 | 0         | 100.2 | 83.0 | 88.1 | chaperone DnaJ-domain-containing protein               | gbpln | Arabidopsis thaliana | AT4G37480.1   Symbols:   Chaperone DnaJ-domain superfamily protein   chr4:17619261-17621596 FORWARD LENGTH=531                                                                                                                                                                                                                                                                         | 530 | 531 | 0         | 100.2 | 83.0 | 88.1 |
| Rsa1.0_00403.1.g13144.t1 | gb EOA16747.1  hypothetical protein CARUB_v10004955mg [Capsella rubella]                                                                                                                                                                                                                                                                                                                                                                                                                                                                                    | 403 | 404 | 0         | 100.2 | 90.1 | 96.0 | hypothetical protein CARUB_v10004955mg                 | gbpln | Capsella rubella     | AT4G37580.1   Symbols: HLS1, COP3, UNS2   Acyl-CoA N-acyltransferases (NAT) superfamily protein   chr4:17658932-17660564 FORWARD LENGTH=403                                                                                                                                                                                                                                            | 403 | 403 | 0         | 100.0 | 91.1 | 96.3 |
| Rsa1.0_00403.1.g13145.t1 | dbj BAF02155.1  hypothetical protein [Arabidopsis thaliana]                                                                                                                                                                                                                                                                                                                                                                                                                                                                                                 | 574 | 580 | 0         | 101.0 | 86.8 | 93.7 | hypothetical protein                                   | gbpln | Arabidopsis thaliana | AT4G37590.1   Symbols: NPY5   Phototropic-responsive NPH3 family protein   chr4:17663080-17665299 REVERSE LENGTH=580                                                                                                                                                                                                                                                                   | 574 | 580 | 0         | 101.0 | 86.8 | 93.7 |
| Rsa1.0_00403.1.g13146.t1 | gb EOA17745.1  hypothetical protein CARUB_v10006133mg [Capsella rubella]                                                                                                                                                                                                                                                                                                                                                                                                                                                                                    | 96  | 88  | 2.00E-22  | 91.7  | 62.5 | 74.0 | hypothetical protein CARUB_v10006133mg                 | gbpln | Capsella rubella     | AT4G37608.1   Symbols:   unknown protein; FUNCTIONS IN: molecular_function unknown; INVOLVED IN: biological_process unknown; LOCATED IN: cellular_component unknown; Has 22 Blast hits to 22 proteins in 10 species: Archae - 0; Bacteria - 0; Metazoa - 0; Fungi - 0; Plants - 22; Viruses - 0; Other Eukaryotes - 0 (source: NCBI BLINK).   chr4:17669825-17670429 FORWARD LENGTH=87 | 96  | 87  | 2.00E-22  | 90.6  | 58.3 | 68.8 |

|                          |                                                                                                                                                                                                                                                                                                                                                                                                                                                                                                                                                                                                                                                                                                                                                    |     |      |           |       |      |      |                                        |       |                      |                                                                                                                 |     |      |           |       |      |      |
|--------------------------|----------------------------------------------------------------------------------------------------------------------------------------------------------------------------------------------------------------------------------------------------------------------------------------------------------------------------------------------------------------------------------------------------------------------------------------------------------------------------------------------------------------------------------------------------------------------------------------------------------------------------------------------------------------------------------------------------------------------------------------------------|-----|------|-----------|-------|------|------|----------------------------------------|-------|----------------------|-----------------------------------------------------------------------------------------------------------------|-----|------|-----------|-------|------|------|
| Rsa1.0_00403.1.g13147.t1 | refNP_195479.1   Ca <sup>2+</sup> -transporting ATPase [Arabidopsis thaliana] gi 12229639 sp O81108.1 ACA2_ARATH RecName: Full=Calcium-transporting ATPase 2, plasma membrane-type; AltName: Full=Ca(2+)-ATPase isoform 2 gi 3335060 gb AAC26997.1  plasma membrane-type calcium ATPase [Arabidopsis thaliana] gi 4468989 emb CAB38303.1  plasma membrane-type calcium ATPase (ACA2) [Arabidopsis thaliana] gi 7270746 emb CAB80429.1  plasma membrane-type calcium ATPase (ACA2) [Arabidopsis thaliana] gi 17064816 gb AAL32562.1  plasma membrane-type calcium ATPase (ACA2) [Arabidopsis thaliana] gi 37201998 gb AAQ89614.1  At4g37640 [Arabidopsis thaliana] gi 332661419 gb AEE86819.1  calcium-transporting ATPase 2 [Arabidopsis thaliana] | 155 | 1014 | 6.00E-77  | 654.2 | 89.0 | 94.2 | Ca <sup>2+</sup> -transporting ATPase  | gbpln | Arabidopsis thaliana | AT4G37640.1   Symbols: ACA2   calcium ATPase 2   chr4:17683225-17686808 REVERSE LENGTH=1014                     | 155 | 1014 | 2.00E-79  | 654.2 | 89.0 | 94.2 |
| Rsa1.0_00403.1.g13148.t1 | gb EOA16409.1  hypothetical protein CARUB_v10004568mg [Capsella rubella]                                                                                                                                                                                                                                                                                                                                                                                                                                                                                                                                                                                                                                                                           | 264 | 531  | 1.00E-104 | 201.1 | 86.4 | 90.2 | hypothetical protein CARUB_v10004568mg | gbpln | Capsella rubella     | AT4G37650.1   Symbols: SHR, SGR7   GRAS family transcription factor   chr4:17691871-17693466 FORWARD LENGTH=531 | 264 | 531  | 1.00E-106 | 201.1 | 87.5 | 91.3 |
| Rsa1.0_00404.1.g13149.t2 | ref XP_002892447.1  aspartyl protease family protein [Arabidopsis lyrata subsp. lyrata] gi 297338289 gb EFH88706.1  aspartyl protease family protein [Arabidopsis lyrata subsp. lyrata]                                                                                                                                                                                                                                                                                                                                                                                                                                                                                                                                                            | 365 | 493  | 1.00E-142 | 135.1 | 69.6 | 72.3 | aspartyl protease family protein       | gbpln | Arabidopsis lyrata   | AT1G08210.1   Symbols:   Eukaryotic aspartyl protease family protein   chr1:2577119-2580581 REVERSE LENGTH=492  | 365 | 492  | 1.00E-144 | 134.8 | 69.6 | 72.3 |
| Rsa1.0_00404.1.g13150.t1 | refNP_175926.1   TBP-associated factor 7 [Arabidopsis thaliana] gi 12323163 gb AAG51559.1 AC027034_5 Serine/arginine-rich protein, putative: 48931-50251 [Arabidopsis thaliana] gi 38638688 gb AAR25638.1  At1g55300 [Arabidopsis thaliana] gi 39545922 gb AAR28024.1  TAF7 [Arabidopsis thaliana] gi 50253539 gb ATT171971.1  At1g55300 [Arabidopsis thaliana] gi 222423319 db BAH19635.1  AT1G55300 [Arabidopsis thaliana] gi 332195099 gb AEE33220.1  TBP-associated factor 7 [Arabidopsis thaliana]                                                                                                                                                                                                                                            | 85  | 203  | 2.00E-11  | 238.8 | 51.8 | 56.5 | TBP-associated factor 7                | gbpln | Arabidopsis thaliana | AT1G55300.1   Symbols: TAF7   TBP-associated factor 7   chr1:20628170-20629490 REVERSE LENGTH=203               | 85  | 203  | 3.00E-14  | 238.8 | 51.8 | 56.5 |
| Rsa1.0_00404.1.g13151.t1 | refNP_563809.1   arogenate dehydratase 6 [Arabidopsis thaliana] gi 75204832 sp Q9SGD6.1 AROD6_ARATH RecName: Full=Arogenate dehydratase/prephenate dehydratase 6, chloroplastic; Short=AtADT6; Short=AtPDT6; Flags: Precursor gi 6579207 gb AAF18250.1 AC011438_12 T23G18.10 [Arabidopsis thaliana] gi 15810503 gb AAL07139.1  unknown protein [Arabidopsis thaliana] gi 20259555 gb AAM14120.1  unknown protein [Arabidopsis thaliana] gi 89340490 gb ABD67754.1  arogenate dehydratase isoform 5 [Arabidopsis thaliana] gi 332190144 gb AEE28265.1  arogenate dehydratase 6 [Arabidopsis thaliana]                                                                                                                                               | 339 | 413  | 1.00E-167 | 121.8 | 88.5 | 92.3 | arogenate dehydratase 6                | gbpln | Arabidopsis thaliana | AT1G08250.1   Symbols: ADT6   arogenate dehydratase 6   chr1:2588994-2590235 REVERSE LENGTH=413                 | 339 | 413  | 1.00E-169 | 121.8 | 88.5 | 92.3 |
| Rsa1.0_00404.1.g13152.t1 | gb AAF18253.1 AC011438_15 T23G18.7 [Arabidopsis thaliana]                                                                                                                                                                                                                                                                                                                                                                                                                                                                                                                                                                                                                                                                                          | 58  | 566  | 8.00E-20  | 975.9 | 86.2 | 89.7 | T23G18.7                               | gbpln | Arabidopsis thaliana | AT1G08210.1   Symbols:   Eukaryotic aspartyl protease family protein   chr1:2577119-2580581 REVERSE LENGTH=492  | 58  | 492  | 4.00E-15  | 848.3 | 58.6 | 58.6 |
| Rsa1.0_00404.1.g13153.t1 | refNP_563807.1   UDP-apiose/xylose synthase [Arabidopsis thaliana] gi 6579211 gb AAF18254.1 AC011438_16 T23G18.6 [Arabidopsis thaliana] gi 24899785 gb AAN65107.1  similar to dihydroflavonol reductase [Arabidopsis thaliana] gi 332190139 gb AEE28260.1  UDP-apiose/xylose synthase [Arabidopsis thaliana]                                                                                                                                                                                                                                                                                                                                                                                                                                       | 389 | 389  | 0         | 100.0 | 97.2 | 98.7 | UDP-apiose/xylose synthase             | gbpln | Arabidopsis thaliana | AT1G08200.1   Symbols: AXS2   UDP-D-apsiose/UDP-D-xylose synthase 2   chr1:2574259-2576609 REVERSE LENGTH=389   | 389 | 389  | 0         | 100.0 | 97.2 | 98.7 |
| Rsa1.0_00404.1.g13154.t1 | #                                                                                                                                                                                                                                                                                                                                                                                                                                                                                                                                                                                                                                                                                                                                                  | #   | #    | #         | #     | #    | #    | -                                      | ----  | ----                 | #                                                                                                               | #   | #    | #         | #     | #    |      |

|                          |                                                                                                                                                                                                     |      |      |          |       |      |      |                                        |       |                      |                                                                                                                                                                                                                                                            |      |      |          |       |      |      |
|--------------------------|-----------------------------------------------------------------------------------------------------------------------------------------------------------------------------------------------------|------|------|----------|-------|------|------|----------------------------------------|-------|----------------------|------------------------------------------------------------------------------------------------------------------------------------------------------------------------------------------------------------------------------------------------------------|------|------|----------|-------|------|------|
| Rsa1.0_00404.1.g13155.t1 | gb[EOA37085.1] hypothetical protein CARUB_v10010243mg [Capsella rubella]                                                                                                                            | 207  | 222  | 1.00E-89 | 107.2 | 88.9 | 95.2 | hypothetical protein CARUB_v10010243mg | gbpln | Capsella rubella     | AT1G08160.1   Symbols:   Late embryogenesis abundant (LEA) hydroxyproline-rich glycoprotein family   chr1:2559672-2560337 REVERSE LENGTH=221                                                                                                               | 207  | 221  | 4.00E-90 | 106.8 | 86.0 | 92.8 |
| Rsa1.0_00404.1.g13156.t1 | gb[EOA37645.1] hypothetical protein CARUB_v10012128mg [Capsella rubella]                                                                                                                            | 809  | 810  | 0        | 100.1 | 75.8 | 88.3 | hypothetical protein CARUB_v10012128mg | gbpln | Capsella rubella     | AT1G08150.1   Symbols: ATCHX5, CHX5   Cation/hydrogen exchanger family protein   chr1:2556343-2559074 REVERSE LENGTH=815                                                                                                                                   | 809  | 815  | 0        | 100.7 | 73.8 | 86.4 |
| Rsa1.0_00404.1.g13157.t7 | gb[EOA39250.1] hypothetical protein CARUB_v10012247mg [Capsella rubella]                                                                                                                            | 952  | 818  | 0        | 85.9  | 63.1 | 72.9 | hypothetical protein CARUB_v10012247mg | gbpln | Capsella rubella     | AT1G08140.1   Symbols: ATCHX6A, CHX6A   cation/H <sup>+</sup> exchanger 6A   chr1:2552206-2559074 REVERSE LENGTH=818                                                                                                                                       | 952  | 818  | 0        | 85.9  | 59.3 | 71.1 |
| Rsa1.0_00404.1.g13158.t1 | #                                                                                                                                                                                                   | #    | #    | #        | #     | #    | #    | -                                      | ----  | ----                 | AT5G46740.1   Symbols: UBP21   ubiquitin-specific protease 21   chr5:18965410-18968492 REVERSE LENGTH=732                                                                                                                                                  | 113  | 732  | 3.00E-12 | 647.8 | 28.3 | 34.5 |
| Rsa1.0_00404.1.g13159.t1 | gb[EOA37659.1] hypothetical protein CARUB_v10012226mg [Capsella rubella]                                                                                                                            | 794  | 793  | 0        | 99.9  | 72.9 | 85.6 | hypothetical protein CARUB_v10012226mg | gbpln | Capsella rubella     | AT1G08135.1   Symbols: ATCHX6B, CHX6B   cation/H <sup>+</sup> exchanger 6B   chr1:2548819-2551473 REVERSE LENGTH=796                                                                                                                                       | 794  | 796  | 0        | 100.3 | 71.0 | 84.5 |
| Rsa1.0_00404.1.g13160.t1 | gb[AAG50652.1]AC073433.4 transposase, putative [Arabidopsis thaliana]                                                                                                                               | 208  | 659  | 5.00E-23 | 316.8 | 27.9 | 35.1 | transposase, putative                  | gbpln | Arabidopsis thaliana | #                                                                                                                                                                                                                                                          | #    | #    | #        | #     | #    | #    |
| Rsa1.0_00404.1.g13161.t1 | #                                                                                                                                                                                                   | #    | #    | #        | #     | #    | #    | -                                      | ----  | ----                 | #                                                                                                                                                                                                                                                          | #    | #    | #        | #     | #    | #    |
| Rsa1.0_00404.1.g13162.t4 | dbj[BAB09501.1] unnamed protein product [Arabidopsis thaliana]                                                                                                                                      | 190  | 312  | 7.00E-18 | 164.2 | 27.9 | 41.6 | unnamed protein product                | gbpln | Arabidopsis thaliana | #                                                                                                                                                                                                                                                          | #    | #    | #        | #     | #    | #    |
| Rsa1.0_00404.1.g13163.t1 | gb[AFK65609.1] high-affinity nitrate transporter [Brassica rapa subsp. chinensis]                                                                                                                   | 502  | 530  | 0        | 105.6 | 88.0 | 92.8 | high-affinity nitrate transporter      | gbpln | Brassica rapa        | AT1G08090.1   Symbols: ATNRT2:1, NRT2, NRT2:1AT, ACH1, LIN1, ATNRT2.1, NRT2.1, NRT2:1   nitrate transporter 2:1   chr1:2524139-2525920 FORWARD LENGTH=530                                                                                                  | 502  | 530  | 0        | 105.6 | 86.9 | 91.8 |
| Rsa1.0_00404.1.g13164.t1 | gb[AFK65609.1] high-affinity nitrate transporter [Brassica rapa subsp. chinensis]                                                                                                                   | 529  | 530  | 0        | 100.2 | 97.4 | 98.1 | high-affinity nitrate transporter      | gbpln | Brassica rapa        | AT1G08090.1   Symbols: ATNRT2:1, NRT2, NRT2:1AT, ACH1, LIN1, ATNRT2.1, NRT2.1, NRT2:1   nitrate transporter 2:1   chr1:2524139-2525920 FORWARD LENGTH=530                                                                                                  | 529  | 530  | 0        | 100.2 | 94.3 | 97.5 |
| Rsa1.0_00404.1.g13165.t3 | gb[AAF73380.1] MOM [Arabidopsis thaliana]                                                                                                                                                           | 1932 | 2001 | 0        | 103.6 | 46.4 | 54.5 | MOM                                    | gbpln | Arabidopsis thaliana | AT1G08060.2   Symbols: MOM, MOM1   ATP-dependent helicase family protein   chr1:2501981-2510488 REVERSE LENGTH=2001                                                                                                                                        | 1932 | 2001 | 0        | 103.6 | 46.3 | 54.3 |
| Rsa1.0_00404.1.g13166.t1 | gb[EOA36949.1] hypothetical protein CARUB_v10009871mg [Capsella rubella] gi[482572763]gb[EOA36950.1] hypothetical protein CARUB_v10009871mg [Capsella rubella]                                      | 271  | 300  | 1.00E-95 | 110.7 | 72.0 | 80.1 | hypothetical protein CARUB_v10009871mg | gbpln | Capsella rubella     | AT1G08010.2   Symbols: GATA11   GATA transcription factor 11   chr1:2486202-2487402 REVERSE LENGTH=303                                                                                                                                                     | 271  | 303  | 1.00E-95 | 111.8 | 70.5 | 80.1 |
| Rsa1.0_00404.1.g13167.t1 | ref[XP_002889676.1] hypothetical protein ARALYDRAFT_470850 [Arabidopsis lyrata subsp. lyrata] gi[297335518]gb[EFH65935.1] hypothetical protein ARALYDRAFT_470850 [Arabidopsis lyrata subsp. lyrata] | 217  | 144  | 1.00E-31 | 66.4  | 47.0 | 50.2 | hypothetical protein ARALYDRAFT_470850 | gbpln | Arabidopsis lyrata   | AT1G07985.1   Symbols:   Expressed protein   chr1:2475508-2475942 FORWARD LENGTH=144                                                                                                                                                                       | 217  | 144  | 1.00E-32 | 66.4  | 46.5 | 49.3 |
| Rsa1.0_00404.1.g13168.t1 | #                                                                                                                                                                                                   | #    | #    | #        | #     | #    | #    | -                                      | ----  | ----                 | #                                                                                                                                                                                                                                                          | #    | #    | #        | #     | #    | #    |
| Rsa1.0_00404.1.g13169.t1 | dbj[BAF00898.1] hypothetical protein [Arabidopsis thaliana] gi[110738408]dbj[BAF01130.1] hypothetical protein [Arabidopsis thaliana]                                                                | 183  | 206  | 1.00E-56 | 112.6 | 73.2 | 79.8 | hypothetical protein                   | gbpln | Arabidopsis thaliana | AT1G07980.1   Symbols: NF-YC10   nuclear factor Y, subunit C10   chr1:2473523-2474910 REVERSE LENGTH=206                                                                                                                                                   | 183  | 206  | 1.00E-53 | 112.6 | 52.5 | 55.2 |
| Rsa1.0_00405.1.g13170.t1 | #                                                                                                                                                                                                   | #    | #    | #        | #     | #    | #    | -                                      | ----  | ----                 | #                                                                                                                                                                                                                                                          | #    | #    | #        | #     | #    | #    |
| Rsa1.0_00405.1.g13171.t1 | gb[EOA23251.1] hypothetical protein CARUB_v10017299mg [Capsella rubella]                                                                                                                            | 426  | 431  | 2.00E-29 | 101.2 | 19.7 | 32.4 | hypothetical protein CARUB_v10017299mg | gbpln | Capsella rubella     | #                                                                                                                                                                                                                                                          | #    | #    | #        | #     | #    | #    |
| Rsa1.0_00405.1.g13172.t1 | gb[AAG52949.1] gag/pol polyprotein [Arabidopsis thaliana]                                                                                                                                           | 1484 | 1643 | 0        | 110.7 | 47.6 | 62.5 | gag/pol polyprotein                    | gbpln | Arabidopsis thaliana | AT4G23160.1   Symbols: CRK8   cysteine-rich RLK (RECEPTOR-like protein kinase) 8   chr4:12129485-12134086 FORWARD LENGTH=1262                                                                                                                              | 1484 | 1262 | 2.00E-79 | 85.0  | 11.4 | 17.0 |
| Rsa1.0_00405.1.g13173.t3 | gb[EOA20465.1] hypothetical protein CARUB_v10000778mg [Capsella rubella]                                                                                                                            | 100  | 503  | 1.00E-32 | 503.0 | 75.0 | 81.0 | hypothetical protein CARUB_v10000778mg | gbpln | Capsella rubella     | AT5G11780.1   Symbols:   unknown protein; Has 37 Blast hits to 37 proteins in 12 species: Archae - 0; Bacteria - 0; Metazoa - 0; Fungi - 3; Plants - 34; Viruses - 0; Other Eukaryotes - 0 (source: NCBI BLink).   chr5:3793928-3795983 FORWARD LENGTH=504 | 100  | 504  | 8.00E-30 | 504.0 | 71.0 | 77.0 |
| Rsa1.0_00405.1.g13174.t1 | #                                                                                                                                                                                                   | #    | #    | #        | #     | #    | #    | -                                      | ----  | ----                 | #                                                                                                                                                                                                                                                          | #    | #    | #        | #     | #    | #    |
| Rsa1.0_00405.1.g13175.t1 | gb[EOA35189.1] hypothetical protein CARUB_v10020338mg [Capsella rubella]                                                                                                                            | 424  | 425  | 0        | 100.2 | 87.3 | 92.7 | hypothetical protein CARUB_v10020338mg | gbpln | Capsella rubella     | AT1G61600.1   Symbols:   Protein of unknown function (DUF1262)   chr1:22729816-22731182 FORWARD LENGTH=421                                                                                                                                                 | 424  | 421  | 0        | 99.3  | 86.8 | 92.0 |

|                          |                                                                                                                                                                                                                                                                                                                                                               |      |      |           |       |      |      |                                                                   |       |                      |                                                                                                                                                                                                                                                                                                                                                      |      |      |           |       |      |      |
|--------------------------|---------------------------------------------------------------------------------------------------------------------------------------------------------------------------------------------------------------------------------------------------------------------------------------------------------------------------------------------------------------|------|------|-----------|-------|------|------|-------------------------------------------------------------------|-------|----------------------|------------------------------------------------------------------------------------------------------------------------------------------------------------------------------------------------------------------------------------------------------------------------------------------------------------------------------------------------------|------|------|-----------|-------|------|------|
| Rsa1.0_00405.1.g13176.t2 | gb ABD65633.1  hypothetical protein 23.t00050 [Brassica oleracea]<br>ref NP_176355.1  S-locus lectin protein kinase-like protein [Arabidopsis thaliana]<br>gi 75213389 sp O9SY89.1 Y1661_ARATH<br>RecName: Full=Putative G-type lectin S-receptor-like serine/threonine-protein kinase At1g61610; Flags: Precursor                                            | 240  | 260  | 4.00E-14  | 108.3 | 17.1 | 22.9 | hypothetical protein 23.t00050                                    | gbpln | Brassica oleracea    | #                                                                                                                                                                                                                                                                                                                                                    | #    | #    | #         | #     | #    |      |
| Rsa1.0_00405.1.g13177.t1 | gi 4585876 gb AAD25549.1 AC005850_6 Putative serine/threonine kinase [Arabidopsis thaliana]<br>gi 332195741 gb AEE33862.1  putative G-type lectin S-receptor-like serine/threonine-protein kinase [Arabidopsis thaliana]                                                                                                                                      | 843  | 842  | 0         | 99.9  | 79.6 | 88.4 | S-locus lectin protein kinase-like protein                        | gbpln | Arabidopsis thaliana | AT1G61610.1   Symbols:   S-locus lectin protein kinase family protein   chr1:22733472-22736509 FORWARD LENGTH=842                                                                                                                                                                                                                                    | 843  | 842  | 0         | 99.9  | 79.6 | 88.4 |
| Rsa1.0_00405.1.g13178.t1 | dbj BAF00918.1  putative reverse transcriptase [Arabidopsis thaliana]                                                                                                                                                                                                                                                                                         | 1055 | 910  | 0         | 86.3  | 32.2 | 42.7 | putative reverse transcriptase                                    | gbpln | Arabidopsis thaliana | AT1G43760.1   Symbols:   DNase I-like superfamily protein   chr1:16528880-16531065 REVERSE LENGTH=626                                                                                                                                                                                                                                                | 1055 | 626  | 6.00E-82  | 59.3  | 13.4 | 19.4 |
| Rsa1.0_00405.1.g13179.t1 | gb AAG51783.1 AC079679.3 reverse transcriptase, putative; 16838-20266 [Arabidopsis thaliana]                                                                                                                                                                                                                                                                  | 187  | 1142 | 9.00E-20  | 610.7 | 37.4 | 55.1 | reverse transcriptase, putative; 16838-20266                      | gbpln | Arabidopsis thaliana | AT2G22440.1   Symbols:   BEST Arabidopsis thaliana protein match is: Ribonuclease H-like superfamily protein (TAIR:AT4G29090.1); Has 208 Blast hits to 191 proteins in 10 species: Archae - 0; Bacteria - 0; Metazoa - 0; Fungi - 0; Plants - 208; Viruses - 0; Other Eukaryotes - 0 (source: NCBI BLink).   chr2:9528910-9529917 FORWARD LENGTH=256 | 187  | 256  | 4.00E-11  | 136.9 | 21.9 | 31.6 |
| Rsa1.0_00405.1.g13180.t1 | ref XP_002888079.1  protein binding protein [Arabidopsis lyrata subsp. lyrata] gi 297333920 gb EFH64338.1  protein binding protein [Arabidopsis lyrata subsp. lyrata]                                                                                                                                                                                         | 629  | 310  | 9.00E-30  | 49.3  | 9.5  | 10.5 | protein binding protein                                           | gbpln | Arabidopsis lyrata   | AT1G61620.1   Symbols:   phosphoinositide binding   chr1:22737653-22739209 FORWARD LENGTH=310                                                                                                                                                                                                                                                        | 629  | 310  | 3.00E-32  | 49.3  | 9.4  | 10.5 |
| Rsa1.0_00405.1.g13181.t1 | #                                                                                                                                                                                                                                                                                                                                                             | #    | #    | #         | #     | #    | -    | ---                                                               | ---   | ---                  | #                                                                                                                                                                                                                                                                                                                                                    | #    | #    | #         | #     | #    |      |
| Rsa1.0_00405.1.g13182.t1 | gb AAM63037.1  unknown [Arabidopsis thaliana]                                                                                                                                                                                                                                                                                                                 | 157  | 157  | 1.00E-74  | 100.0 | 92.4 | 96.2 | unknown                                                           | gbpln | Arabidopsis thaliana | AT1G61667.1   Symbols:   Protein of unknown function, DUF538   chr1:22767674-22768269 FORWARD LENGTH=156                                                                                                                                                                                                                                             | 157  | 156  | 1.00E-76  | 99.4  | 86.6 | 89.8 |
| Rsa1.0_00405.1.g13183.t1 | emb CAB43904.1  putative protein [Arabidopsis thaliana]<br>gi 7269745 emb CAB81478.1  putative protein [Arabidopsis thaliana]                                                                                                                                                                                                                                 | 317  | 1415 | 5.00E-71  | 446.4 | 43.5 | 53.9 | putative protein                                                  | gbpln | Arabidopsis thaliana | ATMG00810.1   Symbols: ORF240B   DNA/RNA polymerases superfamily protein   chrM:2277209-228431 REVERSE LENGTH=240                                                                                                                                                                                                                                    | 317  | 240  | 4.00E-32  | 75.7  | 22.1 | 27.8 |
| Rsa1.0_00405.1.g13184.t3 | gb AAG52949.1  gag/pol polyprotein [Arabidopsis thaliana]                                                                                                                                                                                                                                                                                                     | 2029 | 1643 | 0         | 81.0  | 39.5 | 52.6 | gag/pol polyprotein                                               | gbpln | Arabidopsis thaliana | AT4G23160.1   Symbols: CRK8   cysteine-rich RLK (RECEPTOR-like protein kinase) 8   chr4:12129485-12134086 FORWARD LENGTH=1262                                                                                                                                                                                                                        | 2029 | 1262 | 2.00E-96  | 62.2  | 9.2  | 14.1 |
| Rsa1.0_00405.1.g13185.t1 | gb ACY30424.1  A.BANb [Brassica napus]                                                                                                                                                                                                                                                                                                                        | 316  | 342  | 1.00E-149 | 108.2 | 85.8 | 89.2 | A.BANb                                                            | gbpln | Brassica napus       | AT1G61720.1   Symbols: BAN   NAD(P)-binding Rossmann-fold superfamily protein   chr1:22791326-22792757 REVERSE LENGTH=340                                                                                                                                                                                                                            | 316  | 340  | 1.00E-133 | 107.6 | 74.4 | 84.8 |
| Rsa1.0_00405.1.g13186.t1 | ref NP_564784.1  DNA-binding storekeeper protein-related transcriptional regulator [Arabidopsis thaliana] gi 4508074 gb AAD21418.1  Unknown protein [Arabidopsis thaliana] gi 222424594 dbj BAH20252.1  AT1G61730 [Arabidopsis thaliana] gi 332195759 gb AEE33880.1  DNA-binding storekeeper protein-related transcriptional regulator [Arabidopsis thaliana] | 219  | 376  | 1.00E-18  | 171.7 | 21.5 | 25.1 | DNA-binding storekeeper protein-related transcriptional regulator | gbpln | Arabidopsis thaliana | AT1G61730.1   Symbols:   DNA-binding storekeeper protein-related transcriptional regulator   chr1:22793447-22794577 REVERSE LENGTH=376                                                                                                                                                                                                               | 219  | 376  | 4.00E-21  | 171.7 | 21.5 | 25.1 |
| Rsa1.0_00405.1.g13187.t1 | gb ABB97041.1  unknown [Brassica rapa]                                                                                                                                                                                                                                                                                                                        | 346  | 346  | 1.00E-173 | 100.0 | 85.5 | 88.7 | unknown                                                           | gbpln | Brassica rapa        | AT1G61790.1   Symbols:   Oligosaccharyltransferase complex/magnesium transporter family protein   chr1:22814390-22815430 FORWARD LENGTH=346                                                                                                                                                                                                          | 346  | 346  | 1.00E-170 | 100.0 | 86.1 | 93.1 |
| Rsa1.0_00405.1.g13188.t1 | gb AAC33226.1  putative non-LTR retroelement reverse transcriptase [Arabidopsis thaliana]                                                                                                                                                                                                                                                                     | 1602 | 1529 | 0         | 95.4  | 39.2 | 54.9 | putative non-LTR retroelement reverse transcriptase               | gbpln | Arabidopsis thaliana | AT3G24255.1   Symbols:   RNA-directed DNA polymerase (reverse transcriptase)-related family protein   chr3:8789471-8793208 FORWARD LENGTH=746                                                                                                                                                                                                        | 1602 | 746  | 5.00E-81  | 46.6  | 10.2 | 14.2 |
| Rsa1.0_00405.1.g13189.t1 | ref XP_003635668.1  PREDICTED: uncharacterized protein LOC100854178, partial [Vitis vinifera]                                                                                                                                                                                                                                                                 | 380  | 478  | 4.00E-46  | 125.8 | 32.9 | 45.0 | PREDICTED: uncharacterized protein LOC100854178, partial          | gbpln | Vitis vinifera       | #                                                                                                                                                                                                                                                                                                                                                    | #    | #    | #         | #     | #    |      |

|                          |                                                                                                                                                                                                                                                                                                                                                                                                                                  |     |      |           |       |      |      |                                                 |       |                      |                                                                                                                         |     |     |           |       |      |      |
|--------------------------|----------------------------------------------------------------------------------------------------------------------------------------------------------------------------------------------------------------------------------------------------------------------------------------------------------------------------------------------------------------------------------------------------------------------------------|-----|------|-----------|-------|------|------|-------------------------------------------------|-------|----------------------|-------------------------------------------------------------------------------------------------------------------------|-----|-----|-----------|-------|------|------|
| Rsa1.0_00405.1.g13190.t1 | refXP_002886504.1  hypothetical protein ARALYDRAFT_475144 [Arabidopsis lyrata subsp. lyrata] gi 297332345 gb EFH62763.1  hypothetical protein ARALYDRAFT_475144 [Arabidopsis lyrata subsp. lyrata]                                                                                                                                                                                                                               | 392 | 388  | 0         | 99.0  | 91.1 | 93.9 | hypothetical protein ARALYDRAFT_475144          | gbpln | Arabidopsis lyrata   | AT1G61860.1   Symbols:   Protein kinase superfamily protein   chr1:22863079-22864619 REVERSE LENGTH=389                 | 392 | 389 | 0         | 99.2  | 90.1 | 92.9 |
| Rsa1.0_00405.1.g13191.t1 | gb EOA35229.1  hypothetical protein CARUB_v10020389mg [Capsella rubella]                                                                                                                                                                                                                                                                                                                                                         | 68  | 408  | 9.00E-24  | 600.0 | 79.4 | 89.7 | hypothetical protein CARUB_v10020389mg          | gbpln | Capsella rubella     | AT1G61870.1   Symbols: PPR336   pentatricopeptide repeat 336   chr1:22865326-22866552 REVERSE LENGTH=408                | 68  | 408 | 1.00E-20  | 600.0 | 77.9 | 91.2 |
| Rsa1.0_00405.1.g13192.t1 | gb AAF18641.1 AC006228_12 F5J5.16 [Arabidopsis thaliana]                                                                                                                                                                                                                                                                                                                                                                         | 872 | 1024 | 1.00E-54  | 117.4 | 13.8 | 17.7 | F5J5.16                                         | gbpln | Arabidopsis thaliana | #                                                                                                                       | #   | #   | #         | #     | #    | #    |
| Rsa1.0_00405.1.g13193.t1 | #                                                                                                                                                                                                                                                                                                                                                                                                                                | #   | #    | #         | #     | #    | #    | -                                               | ----  | ----                 | #                                                                                                                       | #   | #   | #         | #     | #    | #    |
| Rsa1.0_00406.1.g13194.t1 | gb AAF67372.1  Hypothetical protein T15F17.d [Arabidopsis thaliana]                                                                                                                                                                                                                                                                                                                                                              | 775 | 677  | 3.00E-13  | 87.4  | 5.5  | 7.7  | Hypothetical protein T15F17.d                   | gbpln | Arabidopsis thaliana | #                                                                                                                       | #   | #   | #         | #     | #    | #    |
| Rsa1.0_00406.1.g13195.t2 | ref NP_178819.1  Zinc knuckle (CCHC-type) family protein [Arabidopsis thaliana] gi 3327395 gb AAC26677.1  putative Ta11-like non-LTR retroelement protein [Arabidopsis thaliana] gi 33025103 gb AEC06131.1  Zinc knuckle (CCHC-type) family protein [Arabidopsis thaliana]                                                                                                                                                       | 294 | 530  | 1.00E-12  | 180.3 | 11.9 | 14.6 | Zinc knuckle (CCHC-type) family protein         | gbpln | Arabidopsis thaliana | AT2G07760.1   Symbols:   Zinc knuckle (CCHC-type) family protein   chr2:3584420-3586278 REVERSE LENGTH=530              | 294 | 530 | 4.00E-15  | 180.3 | 11.9 | 14.6 |
| Rsa1.0_00406.1.g13196.t1 | gb EOA11934.1  hypothetical protein CARUB_v10016549mg, partial [Capsella rubella]                                                                                                                                                                                                                                                                                                                                                | 894 | 499  | 2.00E-15  | 55.8  | 5.9  | 8.5  | hypothetical protein CARUB_v10016549mg, partial | gbpln | Capsella rubella     | AT2G15420.1   Symbols:   myosin heavy chain-related   chr2:6723948-6728183 REVERSE LENGTH=957                           | 894 | 957 | 8.00E-17  | 107.0 | 5.9  | 9.5  |
| Rsa1.0_00406.1.g13197.t1 | gb AAF79618.1 AC027665_19 F5M15.26 [Arabidopsis thaliana]                                                                                                                                                                                                                                                                                                                                                                        | 617 | 1838 | 0         | 297.9 | 57.1 | 74.2 | F5M15.26                                        | gbpln | Arabidopsis thaliana | #                                                                                                                       | #   | #   | #         | #     | #    | #    |
| Rsa1.0_00406.1.g13198.t1 | gb AAF79618.1 AC027665_19 F5M15.26 [Arabidopsis thaliana]                                                                                                                                                                                                                                                                                                                                                                        | 735 | 1838 | 3.00E-36  | 250.1 | 16.7 | 25.7 | F5M15.26                                        | gbpln | Arabidopsis thaliana | #                                                                                                                       | #   | #   | #         | #     | #    | #    |
| Rsa1.0_00406.1.g13199.t1 | refXP_002893700.1  hypothetical protein ARALYDRAFT_473393 [Arabidopsis lyrata subsp. lyrata] gi 297339542 gb EFH69959.1  hypothetical protein ARALYDRAFT_473393 [Arabidopsis lyrata subsp. lyrata]                                                                                                                                                                                                                               | 377 | 317  | 1.00E-161 | 84.1  | 72.9 | 76.1 | hypothetical protein ARALYDRAFT_473393          | gbpln | Arabidopsis lyrata   | AT1G32100.1   Symbols: ATPRR1, PRR1   pinorensinol reductase 1   chr1:11546472-11547953 REVERSE LENGTH=317              | 377 | 317 | 1.00E-163 | 84.1  | 72.9 | 75.9 |
| Rsa1.0_00406.1.g13200.t2 | #                                                                                                                                                                                                                                                                                                                                                                                                                                | #   | #    | #         | #     | #    | #    | -                                               | ----  | ----                 | #                                                                                                                       | #   | #   | #         | #     | #    | #    |
| Rsa1.0_00406.1.g13201.t1 | #                                                                                                                                                                                                                                                                                                                                                                                                                                | #   | #    | #         | #     | #    | #    | -                                               | ----  | ----                 | #                                                                                                                       | #   | #   | #         | #     | #    | #    |
| Rsa1.0_00406.1.g13202.t1 | refXP_002893700.1  hypothetical protein ARALYDRAFT_473393 [Arabidopsis lyrata subsp. lyrata] gi 297339542 gb EFH69959.1  hypothetical protein ARALYDRAFT_473393 [Arabidopsis lyrata subsp. lyrata]                                                                                                                                                                                                                               | 317 | 317  | 1.00E-168 | 100.0 | 89.0 | 94.6 | hypothetical protein ARALYDRAFT_473393          | gbpln | Arabidopsis lyrata   | AT1G32100.1   Symbols: ATPRR1, PRR1   pinorensinol reductase 1   chr1:11546472-11547953 REVERSE LENGTH=317              | 317 | 317 | 1.00E-170 | 100.0 | 89.3 | 94.3 |
| Rsa1.0_00406.1.g13203.t1 | #                                                                                                                                                                                                                                                                                                                                                                                                                                | #   | #    | #         | #     | #    | #    | -                                               | ----  | ----                 | #                                                                                                                       | #   | #   | #         | #     | #    | #    |
| Rsa1.0_00406.1.g13204.t1 | emb CAB39638.1  RNA-directed DNA polymerase-like protein [Arabidopsis thaliana] gi 2767666 emb CAB78094.1  RNA-directed DNA polymerase-like protein [Arabidopsis thaliana]                                                                                                                                                                                                                                                       | 553 | 1274 | 1.00E-139 | 230.4 | 47.2 | 65.1 | RNA-directed DNA polymerase-like protein        | gbpln | Arabidopsis thaliana | AT4G29090.1   Symbols:   Ribonuclease H-like superfamily protein   chr4:14333528-14335255 FORWARD LENGTH=575            | 553 | 575 | 3.00E-77  | 104.0 | 33.6 | 51.4 |
| Rsa1.0_00406.1.g13205.t1 | emb CAB86926.1  putative protein [Arabidopsis thaliana]                                                                                                                                                                                                                                                                                                                                                                          | 443 | 977  | 1.00E-151 | 220.5 | 63.2 | 77.0 | putative protein                                | gbpln | Arabidopsis thaliana | AT3G58980.1   Symbols:   F-box family protein   chr3:21794445-21797006 REVERSE LENGTH=594                               | 443 | 594 | 1.00E-153 | 134.1 | 63.2 | 77.0 |
| Rsa1.0_00406.1.g13206.t1 | ref NP_564389.1  uncharacterized protein [Arabidopsis thaliana] gi 10801369 gb AAG23441.1 AC084165_7 unknown protein [Arabidopsis thaliana] gi 14335034 gb AAK59781.1  At1g32160/F3C3_6 [Arabidopsis thaliana] gi 21593480 gb AAM65447.1  unknown [Arabidopsis thaliana] gi 27363354 gb AAO11596.1  At1g32160/F3C3_6 [Arabidopsis thaliana] gi 332193321 gb AEE31442.1  uncharacterized protein AT1G32160 [Arabidopsis thaliana] | 396 | 406  | 0         | 102.5 | 86.1 | 92.9 | uncharacterized protein                         | gbpln | Arabidopsis thaliana | AT1G32160.1   Symbols:   Protein of unknown function (DUF760)   chr1:11568701-11570241 FORWARD LENGTH=406               | 396 | 406 | 0         | 102.5 | 86.1 | 92.9 |
| Rsa1.0_00407.1.g13207.t1 | gb EOA14519.1  hypothetical protein CARUB_v10027748mg [Capsella rubella]                                                                                                                                                                                                                                                                                                                                                         | 382 | 368  | 4.00E-87  | 96.3  | 48.4 | 63.1 | hypothetical protein CARUB_v10027748mg          | gbpln | Capsella rubella     | AT4G38940.1   Symbols:   Galactose oxidase/kelch repeat superfamily protein   chr4:18152848-18153960 FORWARD LENGTH=370 | 382 | 370 | 2.00E-78  | 96.9  | 42.9 | 61.5 |

|                          |                                                                                                                                                                                                                                                                                                                                       |     |     |           |       |      |      |                                                    |       |                      |                                                                                                                                                                                                                                                                                                                                                                                                                                                                                                                                                                   |     |     |           |       |      |      |
|--------------------------|---------------------------------------------------------------------------------------------------------------------------------------------------------------------------------------------------------------------------------------------------------------------------------------------------------------------------------------|-----|-----|-----------|-------|------|------|----------------------------------------------------|-------|----------------------|-------------------------------------------------------------------------------------------------------------------------------------------------------------------------------------------------------------------------------------------------------------------------------------------------------------------------------------------------------------------------------------------------------------------------------------------------------------------------------------------------------------------------------------------------------------------|-----|-----|-----------|-------|------|------|
| Rsa1.0_00407.1.g13208.t1 | ref[XP_002879295.1] hypothetical protein ARALYDRAFT_482020 [Arabidopsis lyrata subsp. lyrata] gi 297325134 gb EFH55554.1                                                                                                                                                                                                              | 431 | 430 | 0         | 99.8  | 89.3 | 93.5 | hypothetical protein ARALYDRAFT_482020             | gbpln | Arabidopsis lyrata   | AT2G30970.2   Symbols: ASP1   aspartate aminotransferase 1   chr2:13179012-13181686 FORWARD LENGTH=430                                                                                                                                                                                                                                                                                                                                                                                                                                                            | 431 | 430 | 0         | 99.8  | 88.6 | 93.3 |
| Rsa1.0_00407.1.g13209.t2 | ref[XP_002881139.1] predicted protein [Arabidopsis lyrata subsp. lyrata] gi 297326978 gb EFH57398.1  predicted protein [Arabidopsis lyrata subsp. lyrata]                                                                                                                                                                             | 179 | 232 | 1.00E-53  | 129.6 | 73.7 | 76.5 | predicted protein                                  | gbpln | Arabidopsis lyrata   | AT2G30933.2   Symbols:   Carbohydrate-binding X8 domain superfamily protein   chr2:13165235-13166517 REVERSE LENGTH=159                                                                                                                                                                                                                                                                                                                                                                                                                                           | 179 | 159 | 8.00E-55  | 88.8  | 72.6 | 76.0 |
| Rsa1.0_00407.1.g13210.t1 | gb EOA28009.1  hypothetical protein CARUB_v10024186mg [Capsella rubella]                                                                                                                                                                                                                                                              | 161 | 170 | 1.00E-36  | 105.6 | 60.9 | 72.0 | hypothetical protein CARUB_v10024186mg             | gbpln | Capsella rubella     | AT2G30930.1   Symbols:   unknown protein; FUNCTIONS IN: molecular.function unknown; INVOLVED IN: biological.process unknown; LOCATED IN: chloroplast, plasma membrane, membrane; EXPRESSED IN: 24 plant structures; EXPRESSED DURING: 14 growth stages; BEST Arabidopsis thaliana protein match is: unknown protein (TAIR:AT1G06540.1); Has 194 Blast hits to 176 proteins in 78 species: Archae - 0; Bacteria - 101; Metazoa - 15; Fungi - 25; Plants - 12; Viruses - 4; Other Eukaryotes - 37 (source: NCBI BLink).   chr2:13162458-13163156 FORWARD LENGTH=164 | 161 | 164 | 5.00E-37  | 101.9 | 58.4 | 69.6 |
| Rsa1.0_00407.1.g13211.t1 | gb EOA28009.1  hypothetical protein CARUB_v10024186mg [Capsella rubella]                                                                                                                                                                                                                                                              | 173 | 170 | 1.00E-59  | 98.3  | 72.3 | 83.2 | hypothetical protein CARUB_v10024186mg             | gbpln | Capsella rubella     | AT2G30930.1   Symbols:   unknown protein; FUNCTIONS IN: molecular.function unknown; INVOLVED IN: biological.process unknown; LOCATED IN: chloroplast, plasma membrane, membrane; EXPRESSED IN: 24 plant structures; EXPRESSED DURING: 14 growth stages; BEST Arabidopsis thaliana protein match is: unknown protein (TAIR:AT1G06540.1); Has 194 Blast hits to 176 proteins in 78 species: Archae - 0; Bacteria - 101; Metazoa - 15; Fungi - 25; Plants - 12; Viruses - 4; Other Eukaryotes - 37 (source: NCBI BLink).   chr2:13162458-13163156 FORWARD LENGTH=164 | 173 | 164 | 9.00E-59  | 94.8  | 69.4 | 79.8 |
| Rsa1.0_00407.1.g13212.t1 | ref[XP_002881138.1] ATCOQ3 [Arabidopsis lyrata subsp. lyrata] gi 297326977 gb EFH57397.1  ATCOQ3 [Arabidopsis lyrata subsp. lyrata]                                                                                                                                                                                                   | 312 | 323 | 1.00E-149 | 103.5 | 84.0 | 93.3 | ATCOQ3                                             | gbpln | Arabidopsis lyrata   | AT2G30920.1   Symbols: ATCOQ3, EMB3002, COQ3   coenzyme Q 3   chr2:13157409-13159824 REVERSE LENGTH=322                                                                                                                                                                                                                                                                                                                                                                                                                                                           | 312 | 322 | 1.00E-147 | 103.2 | 81.7 | 92.3 |
| Rsa1.0_00407.1.g13213.t1 | ref[XP_002873095.1] predicted protein [Arabidopsis lyrata subsp. lyrata] gi 297318932 gb EFH49354.1  predicted protein [Arabidopsis lyrata subsp. lyrata]                                                                                                                                                                             | 284 | 227 | 4.00E-19  | 79.9  | 22.9 | 34.9 | predicted protein                                  | gbpln | Arabidopsis lyrata   | AT5G03480.1   Symbols:   RNA-binding (RRM/RBD/RNP motifs) family protein   chr5:869208-870855 REVERSE LENGTH=321                                                                                                                                                                                                                                                                                                                                                                                                                                                  | 284 | 321 | 5.00E-19  | 113.0 | 22.9 | 35.9 |
| Rsa1.0_00407.1.g13214.t1 | ref[NP_001031338.1] glycine-rich protein 3 [Arabidopsis thaliana] gi 330250855 gb AEC05949.1  glycine-rich protein 3 [Arabidopsis thaliana]                                                                                                                                                                                           | 115 | 111 | 3.00E-20  | 96.5  | 65.2 | 69.6 | glycine-rich protein 3                             | gbpln | Arabidopsis thaliana | AT2G05520.5   Symbols: GRP-3, ATGRP-3   glycine-rich protein 3   chr2:2026217-2026882 FORWARD LENGTH=111                                                                                                                                                                                                                                                                                                                                                                                                                                                          | 115 | 111 | 5.00E-23  | 96.5  | 65.2 | 69.6 |
| Rsa1.0_00407.1.g13215.t1 | ref[NP_850155.1] Pleckstrin homology (PH) domain-containing protein [Arabidopsis thaliana] gi 17979459 gb AL50066.1  At2g30880/F7F1.9 [Arabidopsis thaliana] gi 23506099 gb AAN28904.1  At2g30880/F7F1.9 [Arabidopsis thaliana] gi 330253357 gb AEC08451.1  Pleckstrin homology (PH) domain-containing protein [Arabidopsis thaliana] | 514 | 504 | 0         | 98.1  | 87.4 | 93.4 | Pleckstrin homology (PH) domain-containing protein | gbpln | Arabidopsis thaliana | AT2G30880.1   Symbols:   Pleckstrin homology (PH) domain-containing protein   chr2:13142926-13145718 REVERSE LENGTH=504                                                                                                                                                                                                                                                                                                                                                                                                                                           | 514 | 504 | 0         | 98.1  | 87.4 | 93.4 |



|                          |                                                                                                                                                                                                                                                                                                                                                                                                                                                                                                                                                                                                                                                                                                                                                      |      |      |           |       |      |      |                                                                  |       |                      |                                                                                                                                                                                                                                                                                                                                                                    |      |      |           |       |      |      |
|--------------------------|------------------------------------------------------------------------------------------------------------------------------------------------------------------------------------------------------------------------------------------------------------------------------------------------------------------------------------------------------------------------------------------------------------------------------------------------------------------------------------------------------------------------------------------------------------------------------------------------------------------------------------------------------------------------------------------------------------------------------------------------------|------|------|-----------|-------|------|------|------------------------------------------------------------------|-------|----------------------|--------------------------------------------------------------------------------------------------------------------------------------------------------------------------------------------------------------------------------------------------------------------------------------------------------------------------------------------------------------------|------|------|-----------|-------|------|------|
| Rsa1.0_00407.1.g13216.t1 | refNP_180643.1  glutathione S-transferase [Arabidopsis thaliana] gi 297822799 ref XP_002879282.1  hypothetical protein ARALYDRAFT_482003 [Arabidopsis lyrata subsp. lyrata] gi 75318706 sp O80852.1 GSTF9_ARAT H RecName: Full=Glutathione S-transferase F9; Short=AtGSTF9; AltName: Full=AtGSTF7; AltName: Full=GST class=phi member 9 gi 13926310 gb AAK49621.1 AF372905.1 At2g30860/F7F1.7 [Arabidopsis thaliana] gi 3201613 gb AAC20720.1  glutathione S-transferase [Arabidopsis thaliana] gi 27363352 gb AAO11595.1  At2g30860/F7F1.7 [Arabidopsis thaliana] gi 29732512 gb EFH55541.1  hypothetical protein ARALYDRAFT_482003 [Arabidopsis lyrata subsp. lyrata] gi 330253354 gb AEC08448.1  glutathione S-transferase [Arabidopsis thaliana] | 215  | 215  | 1.00E-118 | 100.0 | 97.2 | 98.1 | glutathione S-transferase                                        | gbpln | Arabidopsis lyrata   | AT2G30860.1   Symbols: ATGSTF9, GLUTTR, ATGSTF7, GSTF9   glutathione S-transferase PHI 9   chr2:13139132-13140057 FORWARD LENGTH=215                                                                                                                                                                                                                               | 215  | 215  | 1.00E-120 | 100.0 | 97.2 | 98.1 |
| Rsa1.0_00407.1.g13217.t1 | gb EOA27250.1  hypothetical protein CARUB_v10023369mg, partial [Capsella rubella]                                                                                                                                                                                                                                                                                                                                                                                                                                                                                                                                                                                                                                                                    | 361  | 396  | 0         | 109.7 | 85.0 | 90.6 | hypothetical protein CARUB_v10023369mg, partial                  | gbpln | Capsella rubella     | AT2G30840.1   Symbols:   2-oxoglutarate (2OG) and Fe(II)-dependent oxygenase superfamily protein   chr2:13135581-13136833 REVERSE LENGTH=362                                                                                                                                                                                                                       | 361  | 362  | 1.00E-175 | 100.3 | 81.4 | 88.9 |
| Rsa1.0_00407.1.g13218.t1 | ref NP_180641.1  2-oxoglutarate (2OG) and Fe(II)-dependent oxygenase-like protein [Arabidopsis thaliana] gi 3201632 gb AAC20718.1  putative dioxygenase [Arabidopsis thaliana] gi 330253352 gb AEC08446.1  2-oxoglutarate (2OG) and Fe(II)-dependent oxygenase-like protein [Arabidopsis thaliana]                                                                                                                                                                                                                                                                                                                                                                                                                                                   | 353  | 358  | 1.00E-176 | 101.4 | 86.1 | 92.9 | 2-oxoglutarate (2OG) and Fe(II)-dependent oxygenase-like protein | gbpln | Arabidopsis thaliana | AT2G30830.1   Symbols:   2-oxoglutarate (2OG) and Fe(II)-dependent oxygenase superfamily protein   chr2:13132707-13134284 REVERSE LENGTH=358                                                                                                                                                                                                                       | 353  | 358  | 1.00E-179 | 101.4 | 86.1 | 92.9 |
| Rsa1.0_00407.1.g13219.t3 | ref XP_002879280.1  hypothetical protein ARALYDRAFT_481999 [Arabidopsis lyrata subsp. lyrata] gi 297325119 gb EFH55539.1  hypothetical protein ARALYDRAFT_481999 [Arabidopsis lyrata subsp. lyrata]                                                                                                                                                                                                                                                                                                                                                                                                                                                                                                                                                  | 426  | 437  | 1.00E-124 | 102.6 | 63.4 | 73.9 | hypothetical protein ARALYDRAFT_481999                           | gbpln | Arabidopsis lyrata   | AT2G30820.2   Symbols:   unknown protein; BEST Arabidopsis thaliana protein match is: unknown protein (TAIR:AT1G06660.1). Has 35333 Blast hits to 34131 proteins in 2444 species: Archae - 798; Bacteria - 22429; Metazoa - 974; Fungi - 991; Plants - 531; Viruses - 0; Other Eukaryotes - 9610 (source: NCBI BLINK).   chr2:13129800-13132391 FORWARD LENGTH=421 | 426  | 421  | 1.00E-116 | 98.8  | 60.3 | 70.0 |
| Rsa1.0_00407.1.g13220.t1 | ref XP_002881133.1  hypothetical protein ARALYDRAFT_902078 [Arabidopsis lyrata subsp. lyrata] gi 297326972 gb EFH57392.1  hypothetical protein ARALYDRAFT_902078 [Arabidopsis lyrata subsp. lyrata]                                                                                                                                                                                                                                                                                                                                                                                                                                                                                                                                                  | 1312 | 1299 | 0         | 99.0  | 87.1 | 92.7 | hypothetical protein ARALYDRAFT_902078                           | gbpln | Arabidopsis lyrata   | AT2G30800.1   Symbols: HVT1, ATVT-1   helicase in vascular tissue and tapetum   chr2:13120585-13126635 REVERSE LENGTH=1299                                                                                                                                                                                                                                         | 1312 | 1299 | 0         | 99.0  | 86.7 | 92.4 |
| Rsa1.0_00407.1.g13221.t1 | ref XP_002879279.1  pentatricopeptide repeat-containing protein [Arabidopsis lyrata subsp. lyrata] gi 297325118 gb EFH55538.1  pentatricopeptide repeat-containing protein [Arabidopsis lyrata subsp. lyrata]                                                                                                                                                                                                                                                                                                                                                                                                                                                                                                                                        | 471  | 452  | 0         | 96.0  | 78.8 | 87.0 | pentatricopeptide repeat-containing protein                      | gbpln | Arabidopsis lyrata   | AT2G30780.1   Symbols:   Tetratricopeptide repeat (TPR)-like superfamily protein   chr2:13116547-13118059 FORWARD LENGTH=452                                                                                                                                                                                                                                       | 471  | 452  | 0         | 96.0  | 78.6 | 87.0 |
| Rsa1.0_00407.1.g13222.t2 | emb CAB40035.1  retrotransposon like protein [Arabidopsis thaliana] gi 7267767 emb CAB81170.1  retrotransposon like protein [Arabidopsis thaliana]                                                                                                                                                                                                                                                                                                                                                                                                                                                                                                                                                                                                   | 303  | 1515 | 2.00E-13  | 500.0 | 20.8 | 27.4 | retrotransposon like protein                                     | gbpln | Arabidopsis thaliana | #                                                                                                                                                                                                                                                                                                                                                                  | #    | #    | #         | #     | #    | #    |
| Rsa1.0_00407.1.g13223.t1 | gb EOA27372.1  hypothetical protein CARUB_v10023490mg [Capsella rubella] gi 482563183 gb EOA27373.1  hypothetical protein CARUB_v10023490mg [Capsella rubella]                                                                                                                                                                                                                                                                                                                                                                                                                                                                                                                                                                                       | 909  | 364  | 1.00E-167 | 40.0  | 33.6 | 34.8 | hypothetical protein CARUB_v10023490mg                           | gbpln | Capsella rubella     | AT2G30740.1   Symbols:   Protein kinase superfamily protein   chr2:13096399-13098285 FORWARD LENGTH=366                                                                                                                                                                                                                                                            | 909  | 366  | 1.00E-169 | 40.3  | 33.4 | 34.5 |
| Rsa1.0_00407.1.g13224.t1 | #                                                                                                                                                                                                                                                                                                                                                                                                                                                                                                                                                                                                                                                                                                                                                    | #    | #    | #         | #     | #    | #    | -                                                                | ----  | ----                 | #                                                                                                                                                                                                                                                                                                                                                                  | #    | #    | #         | #     | #    | #    |

|                          |                                                                                                                                                                                                                                                                                                                                                                                                                                                                                                                                                                                                                                                                                                                                                                                                                                                                                                                                                                                                                                                                                                                                                                                                                                                                                                                                                                                                                                                                                                |      |      |           |       |      |      |                                                 |       |                      |                                                                                                                                               |      |     |           |       |      |      |
|--------------------------|------------------------------------------------------------------------------------------------------------------------------------------------------------------------------------------------------------------------------------------------------------------------------------------------------------------------------------------------------------------------------------------------------------------------------------------------------------------------------------------------------------------------------------------------------------------------------------------------------------------------------------------------------------------------------------------------------------------------------------------------------------------------------------------------------------------------------------------------------------------------------------------------------------------------------------------------------------------------------------------------------------------------------------------------------------------------------------------------------------------------------------------------------------------------------------------------------------------------------------------------------------------------------------------------------------------------------------------------------------------------------------------------------------------------------------------------------------------------------------------------|------|------|-----------|-------|------|------|-------------------------------------------------|-------|----------------------|-----------------------------------------------------------------------------------------------------------------------------------------------|------|-----|-----------|-------|------|------|
| Rsa1.0_00407.1.g13225.t1 | refNP_180621.1  nucleoside/nucleotide kinase-like protein [Arabidopsis thaliana] gi 2880041 gb AAC02735.1  unknown protein [Arabidopsis thaliana] gi 20198326 gb AAM15524.1  unknown protein [Arabidopsis thaliana] gi 55740579 gb AAV63882.1  hypothetical protein At2g30630 [Arabidopsis thaliana] gi 330253328 gb AEC08422.1  nucleoside/nucleotide kinase-like protein [Arabidopsis thaliana] refNP_180620.1  histone H1.2 [Arabidopsis thaliana] gi 121907 sp P26569.1 H12_ARATH RecName: Full=Histone H1.2 gi 13430598 gb AAK25921.1 AF360211_1 putative histone H1 protein [Arabidopsis thaliana] gi 16320 emb CAA44316.1  Histone H1-2 [Arabidopsis thaliana] gi 14532870 gb AAK64117.1  putative histone H1 protein [Arabidopsis thaliana] gi 20198329 gb AAM15525.1  histone H1 [Arabidopsis thaliana] gi 21553923 gb AAM63006.1  histone H1 [Arabidopsis thaliana] gi 330253325 gb AEC08419.1  histone H1.2 [Arabidopsis thaliana] refXP_002879271.1  BTB/POZ domain-containing protein [Arabidopsis lyrata subsp. lyrata] gi 297325110 gb EFH55530.1  BTB/POZ domain-containing protein [Arabidopsis lyrata subsp. lyrata] refXP_002879270.1  WRKY DNA-binding protein 21 [Arabidopsis lyrata subsp. lyrata] gi 297325109 gb EFH55529.1  WRKY DNA-binding protein 21 [Arabidopsis lyrata subsp. lyrata] refXP_002879269.1  zinc finger family protein [Arabidopsis lyrata subsp. lyrata] gi 297325108 gb EFH55528.1  zinc finger family protein [Arabidopsis lyrata subsp. lyrata] | 530  | 531  | 0         | 100.2 | 92.6 | 95.5 | nucleoside/nucleotide kinase-like protein       | gbpln | Arabidopsis thaliana | AT2G30630.1   Symbols:   P-loop containing nucleoside triphosphate hydrolases superfamily protein   chr2:13046883-13049106 REVERSE LENGTH=531 | 530  | 531 | 0         | 100.2 | 92.6 | 95.5 |
| Rsa1.0_00407.1.g13226.t1 | refXP_002879271.1  BTB/POZ domain-containing protein [Arabidopsis lyrata subsp. lyrata] gi 297325110 gb EFH55530.1  BTB/POZ domain-containing protein [Arabidopsis lyrata subsp. lyrata] refXP_002879270.1  WRKY DNA-binding protein 21 [Arabidopsis lyrata subsp. lyrata] gi 297325109 gb EFH55529.1  WRKY DNA-binding protein 21 [Arabidopsis lyrata subsp. lyrata] refXP_002879269.1  zinc finger family protein [Arabidopsis lyrata subsp. lyrata] gi 297325108 gb EFH55528.1  zinc finger family protein [Arabidopsis lyrata subsp. lyrata]                                                                                                                                                                                                                                                                                                                                                                                                                                                                                                                                                                                                                                                                                                                                                                                                                                                                                                                                               | 265  | 273  | 1.00E-53  | 103.0 | 68.7 | 75.5 | histone H1.2                                    | gbpln | Arabidopsis thaliana | AT2G30620.1   Symbols:   winged-helix DNA-binding transcription factor family protein   chr2:13045360-13046267 FORWARD LENGTH=273             | 265  | 273 | 3.00E-56  | 103.0 | 68.7 | 75.5 |
| Rsa1.0_00407.1.g13227.t1 | refXP_002879271.1  BTB/POZ domain-containing protein [Arabidopsis lyrata subsp. lyrata] gi 297325110 gb EFH55530.1  BTB/POZ domain-containing protein [Arabidopsis lyrata subsp. lyrata] refXP_002879270.1  WRKY DNA-binding protein 21 [Arabidopsis lyrata subsp. lyrata] gi 297325109 gb EFH55529.1  WRKY DNA-binding protein 21 [Arabidopsis lyrata subsp. lyrata] refXP_002879269.1  zinc finger family protein [Arabidopsis lyrata subsp. lyrata] gi 297325108 gb EFH55528.1  zinc finger family protein [Arabidopsis lyrata subsp. lyrata]                                                                                                                                                                                                                                                                                                                                                                                                                                                                                                                                                                                                                                                                                                                                                                                                                                                                                                                                               | 815  | 809  | 0         | 99.3  | 88.3 | 92.3 | BTB/POZ domain-containing protein               | gbpln | Arabidopsis lyrata   | AT2G30600.4   Symbols:   BTB/POZ domain-containing protein   chr2:13037410-13041475 FORWARD LENGTH=809                                        | 815  | 809 | 0         | 99.3  | 86.6 | 91.5 |
| Rsa1.0_00407.1.g13228.t1 | refXP_002879271.1  BTB/POZ domain-containing protein [Arabidopsis lyrata subsp. lyrata] gi 297325110 gb EFH55530.1  BTB/POZ domain-containing protein [Arabidopsis lyrata subsp. lyrata] refXP_002879270.1  WRKY DNA-binding protein 21 [Arabidopsis lyrata subsp. lyrata] gi 297325109 gb EFH55529.1  WRKY DNA-binding protein 21 [Arabidopsis lyrata subsp. lyrata] refXP_002879269.1  zinc finger family protein [Arabidopsis lyrata subsp. lyrata] gi 297325108 gb EFH55528.1  zinc finger family protein [Arabidopsis lyrata subsp. lyrata]                                                                                                                                                                                                                                                                                                                                                                                                                                                                                                                                                                                                                                                                                                                                                                                                                                                                                                                                               | 343  | 370  | 1.00E-133 | 107.9 | 84.3 | 89.8 | WRKY DNA-binding protein 21                     | gbpln | Arabidopsis lyrata   | AT2G30590.1   Symbols:   WRKY21   WRKY DNA-binding protein 21   chr2:13033891-13035303 FORWARD LENGTH=380                                     | 343  | 380 | 1.00E-133 | 110.8 | 82.2 | 88.0 |
| Rsa1.0_00407.1.g13229.t1 | refXP_002879271.1  BTB/POZ domain-containing protein [Arabidopsis lyrata subsp. lyrata] gi 297325110 gb EFH55530.1  BTB/POZ domain-containing protein [Arabidopsis lyrata subsp. lyrata] refXP_002879270.1  WRKY DNA-binding protein 21 [Arabidopsis lyrata subsp. lyrata] gi 297325109 gb EFH55529.1  WRKY DNA-binding protein 21 [Arabidopsis lyrata subsp. lyrata] refXP_002879269.1  zinc finger family protein [Arabidopsis lyrata subsp. lyrata] gi 297325108 gb EFH55528.1  zinc finger family protein [Arabidopsis lyrata subsp. lyrata]                                                                                                                                                                                                                                                                                                                                                                                                                                                                                                                                                                                                                                                                                                                                                                                                                                                                                                                                               | 290  | 420  | 1.00E-116 | 144.8 | 81.7 | 86.6 | zinc finger family protein                      | gbpln | Arabidopsis lyrata   | AT2G30580.1   Symbols:   DRIP2   DREB2A-interacting protein 2   chr2:13026444-13030363 FORWARD LENGTH=420                                     | 290  | 420 | 1.00E-117 | 144.8 | 82.1 | 85.9 |
| Rsa1.0_00407.1.g13230.t4 | gb ACP30598.1  disease resistance protein [Brassica rapa subsp. pekinensis] refXP_002879268.1  predicted protein [Arabidopsis lyrata subsp. lyrata] gi 297325107 gb EFH55527.1  predicted protein [Arabidopsis lyrata subsp. lyrata]                                                                                                                                                                                                                                                                                                                                                                                                                                                                                                                                                                                                                                                                                                                                                                                                                                                                                                                                                                                                                                                                                                                                                                                                                                                           | 2193 | 2301 | 0         | 104.9 | 39.8 | 48.6 | disease resistance protein                      | gbpln | Brassica rapa        | AT2G30575.1   Symbols:   GAUT5, LGT5   los glycosyltransferase 5   chr2:13020564-13023906 REVERSE LENGTH=610                                  | 2193 | 610 | 0         | 27.8  | 21.2 | 24.2 |
| Rsa1.0_00407.1.g13231.t1 | refXP_002879268.1  predicted protein [Arabidopsis lyrata subsp. lyrata] gi 297325107 gb EFH55527.1  predicted protein [Arabidopsis lyrata subsp. lyrata]                                                                                                                                                                                                                                                                                                                                                                                                                                                                                                                                                                                                                                                                                                                                                                                                                                                                                                                                                                                                                                                                                                                                                                                                                                                                                                                                       | 89   | 89   | 2.00E-13  | 100.0 | 40.4 | 41.6 | predicted protein                               | gbpln | Arabidopsis lyrata   | AT2G30560.1   Symbols:   glycine-rich protein   chr2:13017347-13018857 FORWARD LENGTH=171                                                     | 89   | 171 | 1.00E-10  | 192.1 | 31.5 | 31.5 |
| Rsa1.0_00407.1.g13232.t1 | gb EOA26886.1  hypothetical protein CARUB_v10022980mg [Capsella rubella]                                                                                                                                                                                                                                                                                                                                                                                                                                                                                                                                                                                                                                                                                                                                                                                                                                                                                                                                                                                                                                                                                                                                                                                                                                                                                                                                                                                                                       | 526  | 530  | 0         | 100.8 | 85.0 | 91.3 | hypothetical protein CARUB_v10022980mg          | gbpln | Capsella rubella     | AT2G30550.2   Symbols:   alpha/beta-Hydrolases superfamily protein   chr2:13014884-13017005 FORWARD LENGTH=529                                | 526  | 529 | 0         | 100.6 | 84.2 | 90.7 |
| Rsa1.0_00408.1.g13233.t1 | emb CAB39638.1  RNA-directed DNA polymerase-like protein [Arabidopsis thaliana] gi 7267666 emb CAB78094.1  RNA-directed DNA polymerase-like protein [Arabidopsis thaliana]                                                                                                                                                                                                                                                                                                                                                                                                                                                                                                                                                                                                                                                                                                                                                                                                                                                                                                                                                                                                                                                                                                                                                                                                                                                                                                                     | 1879 | 1274 | 0         | 67.8  | 32.4 | 44.3 | RNA-directed DNA polymerase-like protein        | gbpln | Arabidopsis thaliana | AT4G29090.1   Symbols:   Ribonuclease H-like superfamily protein   chr4:14333528-14335255 FORWARD LENGTH=575                                  | 1879 | 575 | 5.00E-64  | 30.6  | 8.9  | 14.3 |
| Rsa1.0_00408.1.g13234.t1 | # # # # # # # # - ----                                                                                                                                                                                                                                                                                                                                                                                                                                                                                                                                                                                                                                                                                                                                                                                                                                                                                                                                                                                                                                                                                                                                                                                                                                                                                                                                                                                                                                                                         |      |      |           |       |      |      |                                                 |       |                      | # # # # # # #                                                                                                                                 |      |     |           |       |      |      |
| Rsa1.0_00408.1.g13235.t1 | gb EOA23861.1  hypothetical protein CARUB_v10017078mg, partial [Capsella rubella] refXP_002875529.1  MYB121 [Arabidopsis lyrata subsp. lyrata] gi 297321367 gb EFH51788.1  MYB121 [Arabidopsis lyrata subsp. lyrata]                                                                                                                                                                                                                                                                                                                                                                                                                                                                                                                                                                                                                                                                                                                                                                                                                                                                                                                                                                                                                                                                                                                                                                                                                                                                           | 465  | 496  | 0         | 106.7 | 90.5 | 95.7 | hypothetical protein CARUB_v10017078mg, partial | gbpln | Capsella rubella     | AT3G30180.1   Symbols:   CYP85A2, BR6OX2   brassinosteroid-6-oxidase 2   chr3:11810867-11813509 FORWARD LENGTH=465                            | 465  | 465 | 0         | 100.0 | 89.0 | 95.3 |
| Rsa1.0_00408.1.g13236.t1 | refXP_002875529.1  MYB121 [Arabidopsis lyrata subsp. lyrata] gi 297321367 gb EFH51788.1  MYB121 [Arabidopsis lyrata subsp. lyrata]                                                                                                                                                                                                                                                                                                                                                                                                                                                                                                                                                                                                                                                                                                                                                                                                                                                                                                                                                                                                                                                                                                                                                                                                                                                                                                                                                             | 263  | 271  | 1.00E-109 | 103.0 | 79.5 | 86.3 | MYB121                                          | gbpln | Arabidopsis lyrata   | AT3G30210.1   Symbols:   ATMYP121, MYB121   myb domain protein 121   chr3:11838567-11840313 FORWARD LENGTH=276                                | 263  | 276 | 1.00E-108 | 104.9 | 76.4 | 86.3 |
| Rsa1.0_00408.1.g13237.t1 | gb EOA12330.1  hypothetical protein CARUB_v10007925mg, partial [Capsella rubella]                                                                                                                                                                                                                                                                                                                                                                                                                                                                                                                                                                                                                                                                                                                                                                                                                                                                                                                                                                                                                                                                                                                                                                                                                                                                                                                                                                                                              | 312  | 539  | 5.00E-47  | 172.8 | 28.8 | 36.9 | hypothetical protein CARUB_v10007925mg, partial | gbpln | Capsella rubella     | AT3G42170.1   Symbols:   BED zinc finger :hAT family dimerisation domain   chr3:14321838-14323928 FORWARD LENGTH=696                          | 312  | 696 | 5.00E-15  | 223.1 | 14.7 | 25.0 |

|                          |                                                                                                                                                                                                                           |     |     |           |       |      |      |                                                 |             |                      |                                                                                                                                                                                                                                                                                                                                                                                                                                                                                                                                                                                                                                             |     |     |           |       |      |      |
|--------------------------|---------------------------------------------------------------------------------------------------------------------------------------------------------------------------------------------------------------------------|-----|-----|-----------|-------|------|------|-------------------------------------------------|-------------|----------------------|---------------------------------------------------------------------------------------------------------------------------------------------------------------------------------------------------------------------------------------------------------------------------------------------------------------------------------------------------------------------------------------------------------------------------------------------------------------------------------------------------------------------------------------------------------------------------------------------------------------------------------------------|-----|-----|-----------|-------|------|------|
| Rsa1.0_00408.1.g13238.t1 | gb AAF70842.1 AC003113.9 F24O1.21 [Arabidopsis thaliana]                                                                                                                                                                  | 231 | 361 | 6.00E-77  | 156.3 | 63.2 | 76.6 | F24O1.21                                        | gbpln       | Arabidopsis thaliana | AT5G48050.1   Symbols:   CONTAINS InterPro DOMAIN/s: Retrotransposon gag protein (InterPro:IPR005162); BEST Arabidopsis thaliana protein match is: unknown protein (TAIR:AT1G34070.1); Has 1807 Blast hits to 1807 proteins in 277 species: Archae - 0; Bacteria - 0; Metazoa - 736; Fungi - 347; Plants - 385; Viruses - 0; Other Eukaryotes - 339 (source: NCBI BLINK).   chr5:19472661-19473770 REVERSE LENGTH=369                                                                                                                                                                                                                       | 231 | 369 | 5.00E-14  | 159.7 | 19.9 | 34.6 |
| Rsa1.0_00408.1.g13239.t3 | ref NP_189645.2  protein agamous-like 79 [Arabidopsis thaliana]<br>gi 32402440 gb AAN52802.1  MADS-box protein AGL79 [Arabidopsis thaliana]<br>gi 332644107 gb AEE77628.1  protein agamous-like 79 [Arabidopsis thaliana] | 187 | 249 | 7.00E-62  | 133.2 | 76.5 | 85.0 | protein agamous-like 79                         | gbpln       | Arabidopsis thaliana | AT3G30260.1   Symbols: AGL79   AGAMOUS-like 79   chr3:11909119-11912880 FORWARD LENGTH=249                                                                                                                                                                                                                                                                                                                                                                                                                                                                                                                                                  | 187 | 249 | 3.00E-64  | 133.2 | 76.5 | 85.0 |
| Rsa1.0_00408.1.g13240.t1 | ref XP_003531882.1  PREDICTED: uncharacterized protein LOC100788724 [Glycine max]                                                                                                                                         | 876 | 787 | 0         | 89.8  | 61.5 | 72.3 | PREDICTED: uncharacterized protein LOC100788724 | gbenv/gbpln | Glycine max          | AT5G38880.1   Symbols:   unknown protein; Has 474 Blast hits to 433 proteins in 138 species: Archae - 6; Bacteria - 80; Metazoa - 195; Fungi - 44; Plants - 59; Viruses - 0; Other Eukaryotes - 90 (source: NCBI BLINK).   chr5:15563621-15568804 REVERSE LENGTH=796                                                                                                                                                                                                                                                                                                                                                                        | 876 | 796 | 0         | 90.9  | 55.9 | 62.8 |
| Rsa1.0_00408.1.g13241.t1 | ref XP_002877209.1  hypothetical protein ARALYDRAFT_484728 [Arabidopsis lyrata subsp. lyrata]<br>gi 297323047 gb EFH53468.1  hypothetical protein ARALYDRAFT_484728 [Arabidopsis lyrata subsp. lyrata]                    | 681 | 677 | 0         | 99.4  | 91.6 | 94.7 | hypothetical protein ARALYDRAFT_484728          | gbpln       | Arabidopsis lyrata   | AT3G30300.1   Symbols:   O-fucosyltransferase family protein   chr3:11921390-11924254 REVERSE LENGTH=677                                                                                                                                                                                                                                                                                                                                                                                                                                                                                                                                    | 681 | 677 | 0         | 99.4  | 91.3 | 94.7 |
| Rsa1.0_00408.1.g13242.t2 | gb EOA24256.1  hypothetical protein CARUB_v10017497mg [Capsella rubella]                                                                                                                                                  | 359 | 364 | 1.00E-167 | 101.4 | 82.7 | 89.1 | hypothetical protein CARUB_v10017497mg          | gbpln       | Capsella rubella     | AT3G30340.1   Symbols:   nodulin MtN21 /EamA-like transporter family protein   chr3:11956626-11958969 FORWARD LENGTH=364                                                                                                                                                                                                                                                                                                                                                                                                                                                                                                                    | 359 | 364 | 1.00E-169 | 101.4 | 81.6 | 89.7 |
| Rsa1.0_00408.1.g13243.t1 | db BAB02236.1  unnamed protein product [Arabidopsis thaliana]                                                                                                                                                             | 152 | 180 | 8.00E-37  | 118.4 | 50.7 | 59.9 | unnamed protein product                         | gbpln       | Arabidopsis thaliana | AT3G30350.2   Symbols: RGF4   Encodes a root meristem growth factor (RGF). Belongs to a family of functionally redundant homologous peptides that are secreted, tyrosine-sulfated, and expressed mainly in the stem cell area and the innermost layer of central columella cells. RGFs are required for maintenance of the root stem cell niche and transit amplifying cell proliferation. Members of this family include: At5g60810 (RGF1), At1g13620 (RGF2), At2g04025 (RGF3), At3g30350 (RGF4), At5g51451 (RGF5), At4g16515 (RGF6), At3g02240 (RGF7), At2g03830 (RGF8) and At5g64770 (RGF9).   chr3:11960552-11961764 REVERSE LENGTH=182 | 152 | 182 | 5.00E-33  | 119.7 | 44.1 | 53.3 |
| Rsa1.0_00408.1.g13244.t1 | gb EOA26153.1  hypothetical protein CARUB_v10019591mg [Capsella rubella]                                                                                                                                                  | 384 | 377 | 0         | 98.2  | 89.8 | 93.2 | hypothetical protein CARUB_v10019591mg          | gbpln       | Capsella rubella     | AT3G30380.2   Symbols:   alpha/beta-Hydrolases superfamily protein   chr3:11974424-11976571 FORWARD LENGTH=377                                                                                                                                                                                                                                                                                                                                                                                                                                                                                                                              | 384 | 377 | 0         | 98.2  | 89.1 | 93.0 |
| Rsa1.0_00408.1.g13245.t1 | gb EOA25673.1  hypothetical protein CARUB_v10019025mg [Capsella rubella]                                                                                                                                                  | 453 | 458 | 0         | 101.1 | 91.4 | 96.2 | hypothetical protein CARUB_v10019025mg          | gbpln       | Capsella rubella     | AT3G30390.2   Symbols:   Transmembrane amino acid transporter family protein   chr3:11977112-11978827 REVERSE LENGTH=460                                                                                                                                                                                                                                                                                                                                                                                                                                                                                                                    | 453 | 460 | 0         | 101.5 | 90.1 | 95.4 |
| Rsa1.0_00408.1.g13246.t1 | ref XP_002875553.1  zinc finger family protein [Arabidopsis lyrata subsp. lyrata]<br>gi 297321391 gb EFH51812.1  zinc finger family protein [Arabidopsis lyrata subsp. lyrata]                                            | 194 | 146 | 9.00E-52  | 75.3  | 53.6 | 58.8 | zinc finger family protein                      | gbpln       | Arabidopsis lyrata   | AT3G30460.1   Symbols:   RING/U-box superfamily protein   chr3:12104433-12104876 FORWARD LENGTH=147                                                                                                                                                                                                                                                                                                                                                                                                                                                                                                                                         | 194 | 147 | 2.00E-52  | 75.8  | 53.1 | 57.7 |
| Rsa1.0_00408.1.g13247.t1 | gb ABE65398.1  hypothetical protein At1g43570 [Arabidopsis thaliana]                                                                                                                                                      | 413 | 348 | 1.00E-77  | 84.3  | 34.6 | 45.3 | hypothetical protein At1g43570                  | gbpln       | Arabidopsis thaliana | AT3G24255.1   Symbols:   RNA-directed DNA polymerase (reverse transcriptase)-related family protein   chr3:8789471-8793208 FORWARD LENGTH=746                                                                                                                                                                                                                                                                                                                                                                                                                                                                                               | 413 | 746 | 1.00E-63  | 180.6 | 30.0 | 38.3 |
| Rsa1.0_00408.1.g13248.t1 | ref XP_002875554.1  bZIP transcription factor family protein [Arabidopsis lyrata subsp. lyrata]<br>gi 297321392 gb EFH51813.1  bZIP transcription factor family protein [Arabidopsis lyrata subsp. lyrata]                | 172 | 172 | 1.00E-82  | 100.0 | 90.1 | 92.4 | bZIP transcription factor family protein        | gbpln       | Arabidopsis lyrata   | AT3G30530.1   Symbols: ATBZIP42, bZIP42   basic leucine-zipper 42   chr3:12139512-12140033 FORWARD LENGTH=173                                                                                                                                                                                                                                                                                                                                                                                                                                                                                                                               | 172 | 173 | 4.00E-84  | 100.6 | 90.1 | 93.6 |

|                          |                                                                                                                                                                                                                                                                                                                                                                                                                                                                                                                                                             |      |      |           |       |      |      |                                             |       |                      |                                                                                                                                                                                                                                                                                                                                                                                                                                                                                                                                |      |      |           |       |      |      |
|--------------------------|-------------------------------------------------------------------------------------------------------------------------------------------------------------------------------------------------------------------------------------------------------------------------------------------------------------------------------------------------------------------------------------------------------------------------------------------------------------------------------------------------------------------------------------------------------------|------|------|-----------|-------|------|------|---------------------------------------------|-------|----------------------|--------------------------------------------------------------------------------------------------------------------------------------------------------------------------------------------------------------------------------------------------------------------------------------------------------------------------------------------------------------------------------------------------------------------------------------------------------------------------------------------------------------------------------|------|------|-----------|-------|------|------|
| Rsa1.0_00408.1.g13249.t1 | gb EOA12358.1  hypothetical protein CARUB_v10016510mg [Capsella rubella]                                                                                                                                                                                                                                                                                                                                                                                                                                                                                    | 132  | 134  | 7.00E-46  | 101.5 | 81.8 | 84.1 | hypothetical protein CARUB_v10016510mg      | gbpln | Capsella rubella     | AT3G30580.1   Symbols:   unknown protein; BEST Arabidopsis thaliana protein match is: unknown protein (TAIR:AT5G38790.1); Has 75 Blast hits to 75 proteins in 16 species: Archae - 2; Bacteria - 0; Metazoa - 0; Fungi - 2; Plants - 63; Viruses - 0; Other Eukaryotes - 8 (source: NCBI BLink).   chr3:12167767-12168153 REVERSE LENGTH=128                                                                                                                                                                                   | 132  | 128  | 1.00E-40  | 97.0  | 82.6 | 86.4 |
| Rsa1.0_00408.1.g13250.t1 | ref NP_850650.1  glutamine dumper 6 [Arabidopsis thaliana]<br>gi 122214817 sp Q3EAV6.1 GDU6_ARAT H RecName: Full=Protein GLUTAMINE DUMPER 6<br>gi 332644133 gb AEE77654.1  glutamine dumper 6 [Arabidopsis thaliana]                                                                                                                                                                                                                                                                                                                                        | 112  | 111  | 2.00E-22  | 99.1  | 66.1 | 81.3 | glutamine dumper 6                          | gbpln | Arabidopsis thaliana | AT3G30725.1   Symbols: AtGDU6, GDU6   glutamine dumper 6   chr3:12352509-12352844 FORWARD LENGTH=111                                                                                                                                                                                                                                                                                                                                                                                                                           | 112  | 111  | 4.00E-25  | 99.1  | 66.1 | 81.3 |
| Rsa1.0_00408.1.g13251.t1 | #                                                                                                                                                                                                                                                                                                                                                                                                                                                                                                                                                           | #    | #    | #         | #     | #    | #    | -                                           | ----  | ----                 | #                                                                                                                                                                                                                                                                                                                                                                                                                                                                                                                              | #    | #    | #         | #     | #    |      |
| Rsa1.0_00409.1.g13252.t1 | gb EOA29639.1  hypothetical protein CARUB_v10014964mg [Capsella rubella]                                                                                                                                                                                                                                                                                                                                                                                                                                                                                    | 113  | 113  | 2.00E-38  | 100.0 | 74.3 | 88.5 | hypothetical protein CARUB_v10014964mg      | gbpln | Capsella rubella     | AT3G08770.1   Symbols: LTP6   lipid transfer protein 6   chr3:2664349-2664784 REVERSE LENGTH=113                                                                                                                                                                                                                                                                                                                                                                                                                               | 113  | 113  | 1.00E-38  | 100.0 | 71.7 | 81.4 |
| Rsa1.0_00409.1.g13253.t1 | ref XP_002884696.1  hypothetical protein ARALYDRAFT_478180 [Arabidopsis lyrata subsp. lyrata]<br>gi 297330536 gb EFH60955.1  hypothetical protein ARALYDRAFT_478180 [Arabidopsis lyrata subsp. lyrata]                                                                                                                                                                                                                                                                                                                                                      | 380  | 312  | 1.00E-129 | 82.1  | 63.7 | 70.8 | hypothetical protein ARALYDRAFT_478180      | gbpln | Arabidopsis lyrata   | AT3G08780.2   Symbols:   unknown protein; FUNCTIONS IN: molecular function unknown; INVOLVED IN: biological process unknown; LOCATED IN: cellular component unknown; EXPRESSED IN: male gametophyte, cultured cell; EXPRESSED DURING: L mature pollen stage, M germinated pollen stage; Has 35333 Blast hits to 34131 proteins in 2444 species: Archae - 798; Bacteria - 22429; Metazoa - 974; Fungi - 991; Plants - 531; Viruses - 0; Other Eukaryotes - 9610 (source: NCBI BLink).   chr3:2666514-2667452 REVERSE LENGTH=312 | 380  | 312  | 1.00E-130 | 82.1  | 63.4 | 70.8 |
| Rsa1.0_00409.1.g13254.t1 | ref NP_187491.1  ENTH/VHS/GAT family protein [Arabidopsis thaliana]<br>gi 12322744 gb AAG51368.1 AC012562_29 hypothetical protein; 78804-81924 [Arabidopsis thaliana]<br>gi 332641159 gb AEE74680.1  ENTH/VHS/GAT family protein [Arabidopsis thaliana]                                                                                                                                                                                                                                                                                                     | 151  | 607  | 2.00E-28  | 402.0 | 59.6 | 66.2 | ENTH/VHS/GAT family protein                 | gbpln | Arabidopsis thaliana | AT3G08790.1   Symbols:   ENTH/VHS/GAT family protein   chr3:2671148-2671001 FORWARD LENGTH=607                                                                                                                                                                                                                                                                                                                                                                                                                                 | 151  | 607  | 5.00E-31  | 402.0 | 59.6 | 66.2 |
| Rsa1.0_00409.1.g13255.t1 | ref XP_002882584.1  binding protein [Arabidopsis lyrata subsp. lyrata]<br>gi 297328424 gb EFH58843.1  binding protein [Arabidopsis lyrata subsp. lyrata]                                                                                                                                                                                                                                                                                                                                                                                                    | 932  | 932  | 0         | 100.0 | 81.2 | 88.3 | binding protein                             | gbpln | Arabidopsis lyrata   | AT3G08800.1   Symbols:   ARM repeat superfamily protein   chr3:2671148-2674910 FORWARD LENGTH=936                                                                                                                                                                                                                                                                                                                                                                                                                              | 932  | 936  | 0         | 100.4 | 80.2 | 88.1 |
| Rsa1.0_00409.1.g13256.t1 | ref XP_002884698.1  pentatricopeptide repeat-containing protein [Arabidopsis lyrata subsp. lyrata]<br>gi 297330539 gb EFH60957.1  pentatricopeptide repeat-containing protein [Arabidopsis lyrata subsp. lyrata]                                                                                                                                                                                                                                                                                                                                            | 691  | 685  | 0         | 99.1  | 82.2 | 90.3 | pentatricopeptide repeat-containing protein | gbpln | Arabidopsis lyrata   | AT3G08820.1   Symbols:   Pentatricopeptide repeat (PPR) superfamily protein   chr3:2677122-2679179 REVERSE LENGTH=685                                                                                                                                                                                                                                                                                                                                                                                                          | 691  | 685  | 0         | 99.1  | 81.6 | 89.9 |
| Rsa1.0_00409.1.g13257.t1 | ref XP_002885026.1  protein binding protein [Arabidopsis lyrata subsp. lyrata]<br>gi 297330866 gb EFH61285.1  protein binding protein [Arabidopsis lyrata subsp. lyrata]                                                                                                                                                                                                                                                                                                                                                                                    | 328  | 303  | 1.00E-109 | 92.4  | 59.8 | 70.1 | protein binding protein                     | gbpln | Arabidopsis lyrata   | AT3G14250.1   Symbols:   RING/U-box superfamily protein   chr3:4745963-4746958 REVERSE LENGTH=303                                                                                                                                                                                                                                                                                                                                                                                                                              | 328  | 303  | 1.00E-104 | 92.4  | 57.3 | 68.9 |
| Rsa1.0_00409.1.g13258.t1 | ref NP_566335.1  regulatory associated protein of mTOR [Arabidopsis thaliana]<br>gi 75331762 sp Q33YQ1.1 RTOR1_ARAT H RecName: Full=Regulatory-associated protein of TOR 1; AltName: Full=Protein RAPTOR 1; AltName: Full=Protein RAPTOR 1B; Short=AtRaptor1b<br>gi 16648937 gb AAL24320.1  Unknown protein [Arabidopsis thaliana]<br>gi 31711792 gb AAP68252.1  At3g08850 [Arabidopsis thaliana]<br>gi 56266687 gb AAV84960.1  raptor1B [Arabidopsis thaliana]<br>gi 332641166 gb AEE74687.1  regulatory associated protein of mTOR [Arabidopsis thaliana] | 1335 | 1344 | 0         | 100.7 | 91.2 | 94.7 | regulatory associated protein of mTOR       | gbpln | Arabidopsis thaliana | AT3G08850.1   Symbols: RAPTOR1B, ATRAPTOR1B, RAPTOR1   HEAT repeat WD domain, G-beta repeat protein protein   chr3:2686978-2694911 REVERSE LENGTH=1344                                                                                                                                                                                                                                                                                                                                                                         | 1335 | 1344 | 0         | 100.7 | 91.2 | 94.7 |

|                          |                                                                                                                                                                                                                                                                                                                                                                                                                                                                                                                                                                                                                                                                                                                                                                                                    |      |      |           |       |      |       |                                                       |       |                      |                                                                                                                     |      |      |           |       |      |       |
|--------------------------|----------------------------------------------------------------------------------------------------------------------------------------------------------------------------------------------------------------------------------------------------------------------------------------------------------------------------------------------------------------------------------------------------------------------------------------------------------------------------------------------------------------------------------------------------------------------------------------------------------------------------------------------------------------------------------------------------------------------------------------------------------------------------------------------------|------|------|-----------|-------|------|-------|-------------------------------------------------------|-------|----------------------|---------------------------------------------------------------------------------------------------------------------|------|------|-----------|-------|------|-------|
| Rsa1.0_00409.1.g13259.t1 | refNP_566336.1  uncharacterized protein [Arabidopsis thaliana] gi 30680674 refNP_850544.1  uncharacterized protein [Arabidopsis thaliana] gi 6403495 gb AAF07835.1 AC010871.1  unknown protein [Arabidopsis thaliana] gi 21554089 gb AAM63170.1  unknown [Arabidopsis thaliana] gi 98960915 gb ABF58941.1  At3g08890 [Arabidopsis thaliana] gi 110743674 dbj BAE99674.1  hypothetical protein [Arabidopsis thaliana] gi 332641170 gb AEE74691.1  uncharacterized protein AT3G08890 [Arabidopsis thaliana] gi 332641171 gb AEE74692.1  uncharacterized protein AT3G08890 [Arabidopsis thaliana] ref XP_002884703.1  hypothetical protein ARALYDRAFT_317692 [Arabidopsis lyrata subsp. lyrata] gi 297330543 gb EFH60962.1  hypothetical protein ARALYDRAFT_317692 [Arabidopsis lyrata subsp. lyrata] | 121  | 170  | 2.00E-63  | 140.5 | 95.9 | 100.0 | uncharacterized protein                               | gbpln | Arabidopsis thaliana | AT3G08890.2   Symbols:   Protein of unknown function, DUF538   chr3:2706701-2707775 FORWARD LENGTH=170              | 121  | 170  | 3.00E-66  | 140.5 | 95.9 | 100.0 |
| Rsa1.0_00409.1.g13261.t1 | ref NP_187503.1  DnaJ domain-containing protein [Arabidopsis thaliana] gi 6403504 gb AAF07844.1 AC010871_20 putative heat shock protein [Arabidopsis thaliana] gi 208879540 gb ACI31315.1  At3g08910 [Arabidopsis thaliana] gi 332641173 gb AEE74694.1  DnaJ domain-containing protein [Arabidopsis thaliana]                                                                                                                                                                                                                                                                                                                                                                                                                                                                                      | 368  | 374  | 0         | 101.6 | 91.0 | 95.1  | hypothetical protein ARALYDRAFT_317692                | gbpln | Arabidopsis lyrata   | AT3G08900.1   Symbols: RGP3, RGP   reversibly glycosylated polypeptide 3   chr3:2708347-2709714 REVERSE LENGTH=362  | 368  | 362  | 0         | 98.4  | 88.9 | 92.1  |
| Rsa1.0_00409.1.g13261.t1 | ref NP_187506.1  chlorophyll a-b binding protein CP29.2 [Arabidopsis thaliana] gi 38503262 sp Q9XF88.1 CB4B_ARATH RecName: Full=Chlorophyll a-b binding protein CP29.2, chloroplastic; AltName: Full=LHCB4.2; AltName: Full=LHCII protein 4.2; Flags: Precursor gi 4741954 gb AAD28774.1 AF134127.1 Lhcb4.2 protein [Arabidopsis thaliana] gi 6403491 gb AAF07831.1 AC010871_7 putative chlorophyll a/b-binding protein [Arabidopsis thaliana] gi 17473745 gb AAL38316.1  putative chlorophyll a/b-binding protein [Arabidopsis thaliana] gi 20148559 gb AAM10170.1  putative chlorophyll a/b-binding protein [Arabidopsis thaliana] gi 332641177 gb AEE74698.1  chlorophyll a-b binding protein CP29.2 [Arabidopsis thaliana]                                                                     | 91   | 323  | 2.00E-23  | 354.9 | 67.0 | 76.9  | DnaJ domain-containing protein                        | gbpln | Arabidopsis thaliana | AT3G08910.1   Symbols:   DNAJ heat shock family protein   chr3:2710402-2711811 REVERSE LENGTH=323                   | 91   | 323  | 3.00E-26  | 354.9 | 67.0 | 76.9  |
| Rsa1.0_00409.1.g13262.t1 | ref NP_001154598.1  armadillo/beta-catenin-like repeat-containing protein [Arabidopsis thaliana] gi 332641179 gb AE74700.1  armadillo/beta-catenin-like repeat-containing protein [Arabidopsis thaliana]                                                                                                                                                                                                                                                                                                                                                                                                                                                                                                                                                                                           | 288  | 287  | 1.00E-151 | 99.7  | 95.1 | 97.6  | chlorophyll a-b binding protein CP29.2                | gbpln | Arabidopsis thaliana | AT3G08940.2   Symbols: LHCB4.2   light harvesting complex photosystem II   chr3:2711717-2718665 FORWARD LENGTH=287  | 288  | 287  | 1.00E-153 | 99.7  | 95.1 | 97.6  |
| Rsa1.0_00409.1.g13263.t1 | ref XP_002882593.1  electron transport SCO1/SenC family protein [Arabidopsis lyrata subsp. lyrata] gi 297328433 gb EFH58852.1  electron transport SCO1/SenC family protein [Arabidopsis lyrata subsp. lyrata] ref XP_002884706.1  hypothetical protein ARALYDRAFT_317700 [Arabidopsis lyrata subsp. lyrata] gi 297330546 gb EFH60965.1  hypothetical protein ARALYDRAFT_317700 [Arabidopsis lyrata subsp. lyrata]                                                                                                                                                                                                                                                                                                                                                                                  | 872  | 873  | 0         | 100.1 | 87.5 | 93.2  | armadillo/beta-catenin-like repeat-containing protein | gbpln | Arabidopsis thaliana | AT3G08947.1   Symbols:   ARM repeat superfamily protein   chr3:2724007-2726722 FORWARD LENGTH=873                   | 872  | 873  | 0         | 100.1 | 87.5 | 93.2  |
| Rsa1.0_00409.1.g13264.t2 | ref NP_001154598.1  armadillo/beta-catenin-like repeat-containing protein [Arabidopsis thaliana] gi 332641179 gb AE74700.1  armadillo/beta-catenin-like repeat-containing protein [Arabidopsis thaliana]                                                                                                                                                                                                                                                                                                                                                                                                                                                                                                                                                                                           | 358  | 334  | 1.00E-160 | 93.3  | 82.1 | 86.9  | electron transport SCO1/SenC family protein           | gbpln | Arabidopsis lyrata   | AT3G08950.1   Symbols: HCC1   electron transport SCO1/SenC family protein   chr3:2727285-2729289 FORWARD LENGTH=334 | 358  | 334  | 1.00E-161 | 93.3  | 82.1 | 86.0  |
| Rsa1.0_00409.1.g13265.t1 | ref XP_002882593.1  electron transport SCO1/SenC family protein [Arabidopsis lyrata subsp. lyrata] gi 297328433 gb EFH58852.1  electron transport SCO1/SenC family protein [Arabidopsis lyrata subsp. lyrata] ref XP_002884706.1  hypothetical protein ARALYDRAFT_317700 [Arabidopsis lyrata subsp. lyrata] gi 297330546 gb EFH60965.1  hypothetical protein ARALYDRAFT_317700 [Arabidopsis lyrata subsp. lyrata]                                                                                                                                                                                                                                                                                                                                                                                  | 1002 | 1010 | 0         | 100.8 | 92.0 | 96.1  | hypothetical protein ARALYDRAFT_317700                | gbpln | Arabidopsis lyrata   | AT3G08960.1   Symbols:   ARM repeat superfamily protein   chr3:2730405-2736762 REVERSE LENGTH=1010                  | 1002 | 1010 | 0         | 100.8 | 91.4 | 95.5  |

|                          |                                                                                                                                                                                                                                                                                                                                                                     |     |     |           |       |      |      |                                                             |       |                      |                                                                                                                                                                                                                                                                                                                                                                                                                                                                                    |     |     |           |       |      |      |
|--------------------------|---------------------------------------------------------------------------------------------------------------------------------------------------------------------------------------------------------------------------------------------------------------------------------------------------------------------------------------------------------------------|-----|-----|-----------|-------|------|------|-------------------------------------------------------------|-------|----------------------|------------------------------------------------------------------------------------------------------------------------------------------------------------------------------------------------------------------------------------------------------------------------------------------------------------------------------------------------------------------------------------------------------------------------------------------------------------------------------------|-----|-----|-----------|-------|------|------|
| Rsa1.0_00409.1.g13266.t1 | ref[XP_002882594.1] DNAJ heat shock N-terminal domain-containing protein [Arabidopsis lyrata subsp. lyrata] gi 297328434 gb EFH58853.1  DNAJ heat shock N-terminal domain-containing protein [Arabidopsis lyrata subsp. lyrata]                                                                                                                                     | 588 | 575 | 0         | 97.8  | 83.2 | 87.9 | DNAJ heat shock N-terminal domain-containing protein        | gbpln | Arabidopsis lyrata   | AT3G08970.1   Symbols: ATERDJ3A, TMS1   DNAJ heat shock N-terminal domain-containing protein   chr3:2737589-2740265 FORWARD LENGTH=572                                                                                                                                                                                                                                                                                                                                             | 588 | 572 | 0         | 97.3  | 81.5 | 87.1 |
| Rsa1.0_00409.1.g13267.t1 | ref[XP_002882596.1] yippee family protein [Arabidopsis lyrata subsp. lyrata] gi 297328439 gb EFH58855.1  yippee family protein [Arabidopsis lyrata subsp. lyrata]                                                                                                                                                                                                   | 127 | 127 | 5.00E-61  | 100.0 | 87.4 | 93.7 | yippee family protein                                       | gbpln | Arabidopsis lyrata   | AT3G08990.2   Symbols:   Yippee family putative zinc-binding protein   chr3:2743590-2744709 FORWARD LENGTH=128                                                                                                                                                                                                                                                                                                                                                                     | 127 | 128 | 2.00E-61  | 100.8 | 83.5 | 93.7 |
| Rsa1.0_00409.1.g13268.t1 | gb EOA31912.1  hypothetical protein CARUB_v10015141mg [Capsella rubella]                                                                                                                                                                                                                                                                                            | 653 | 523 | 0         | 80.1  | 66.3 | 70.8 | hypothetical protein CARUB_v10015141mg                      | gbpln | Capsella rubella     | AT3G09000.1   Symbols:   proline-rich family protein   chr3:2746014-2748326 FORWARD LENGTH=541                                                                                                                                                                                                                                                                                                                                                                                     | 653 | 541 | 0         | 82.8  | 66.9 | 72.0 |
| Rsa1.0_00409.1.g13269.t1 | ref[XP_002882599.1] hypothetical protein ARALYDRAFT_478210 [Arabidopsis lyrata subsp. lyrata] gi 297328439 gb EFH58858.1  hypothetical protein ARALYDRAFT_478210 [Arabidopsis lyrata subsp. lyrata]                                                                                                                                                                 | 406 | 412 | 0         | 101.5 | 84.0 | 92.9 | hypothetical protein ARALYDRAFT_478210                      | gbpln | Arabidopsis lyrata   | AT3G09020.1   Symbols:   alpha 1,4-glycosyltransferase family protein   chr3:2753307-2754542 FORWARD LENGTH=411                                                                                                                                                                                                                                                                                                                                                                    | 406 | 411 | 0         | 101.2 | 81.8 | 90.9 |
| Rsa1.0_00409.1.g13270.t1 | ref[XP_002882600.1] potassium channel tetramerization domain-containing protein [Arabidopsis lyrata subsp. lyrata] gi 297328440 gb EFH58859.1  potassium channel tetramerization domain-containing protein [Arabidopsis lyrata subsp. lyrata]                                                                                                                       | 385 | 454 | 1.00E-165 | 117.9 | 74.5 | 79.2 | potassium channel tetramerization domain-containing protein | gbpln | Arabidopsis lyrata   | AT3G09030.1   Symbols:   BTB/POZ domain-containing protein   chr3:2754841-2756223 FORWARD LENGTH=460                                                                                                                                                                                                                                                                                                                                                                               | 385 | 460 | 1.00E-168 | 119.5 | 74.5 | 79.7 |
| Rsa1.0_00409.1.g13271.t1 | gb EOA31664.1  hypothetical protein CARUB_v10014868mg [Capsella rubella]                                                                                                                                                                                                                                                                                            | 137 | 142 | 1.00E-37  | 103.6 | 73.0 | 83.2 | hypothetical protein CARUB_v10014868mg                      | gbpln | Capsella rubella     | AT3G09032.1   Symbols:   unknown protein; BEST Arabidopsis thaliana protein match is: unknown protein (TAIR:AT5G01225.1); Has 35333 Blast hits to 34131 proteins in 2444 species: Archae - 798; Bacteria - 22429; Metazoa - 974; Fungi - 991; Plants - 531; Viruses - 0; Other Eukaryotes - 9610 (source: NCBI BLINK);   chr3:2757605-2758045 REVERSE LENGTH=146                                                                                                                   | 137 | 146 | 5.00E-39  | 106.6 | 62.8 | 75.2 |
| Rsa1.0_00409.1.g13272.t1 | ref[NP_001154599.1] putative lectin [Arabidopsis thaliana] gi 332641214 gb AEE74735.1  putative lectin [Arabidopsis thaliana]                                                                                                                                                                                                                                       | 354 | 345 | 1.00E-132 | 97.5  | 70.1 | 79.4 | putative lectin                                             | gbpln | Arabidopsis thaliana | AT3G09190.1   Symbols:   Concanavalin A-like lectin family protein   chr3:2821650-2822687 REVERSE LENGTH=345                                                                                                                                                                                                                                                                                                                                                                       | 354 | 345 | 1.00E-135 | 97.5  | 70.1 | 79.4 |
| Rsa1.0_00409.1.g13273.t1 | ref[XP_002882608.1] hypothetical protein ARALYDRAFT_897068 [Arabidopsis lyrata subsp. lyrata] gi 297328448 gb EFH58867.1  hypothetical protein ARALYDRAFT_897068 [Arabidopsis lyrata subsp. lyrata]                                                                                                                                                                 | 397 | 402 | 0         | 101.3 | 89.9 | 95.0 | hypothetical protein ARALYDRAFT_897068                      | gbpln | Arabidopsis lyrata   | AT3G09180.1   Symbols:   CONTAINS InterPro DOMAIN/s: Mediator complex subunit Med27 (InterPro:IPR021627); Has 112 Blast hits to 112 proteins in 38 species: Archae - 0; Bacteria - 0; Metazoa - 79; Fungi - 0; Plants - 23; Viruses - 0; Other Eukaryotes - 10 (source: NCBI BLINK);   chr3:2819278-2821096 FORWARD LENGTH=402                                                                                                                                                     | 397 | 402 | 0         | 101.3 | 89.7 | 95.2 |
| Rsa1.0_00409.1.g13274.t1 | ref[NP_187517.1] uncharacterized protein [Arabidopsis thaliana] gi 5923670 gb AAD56321.1 AC009326.8 unknown protein [Arabidopsis thaliana] gi 44681474 gb AAS47677.1  At3g09050 [Arabidopsis thaliana] gi 62320254 dbj BAD94528.1  hypothetical protein [Arabidopsis thaliana] gi 332641193 gb AEE74714.1  uncharacterized protein AT3G09050 [Arabidopsis thaliana] | 258 | 258 | 1.00E-119 | 100.0 | 88.8 | 93.8 | uncharacterized protein                                     | gbpln | Arabidopsis thaliana | AT3G09050.1   Symbols:   unknown protein; FUNCTIONS IN: molecular_function unknown; INVOLVED IN: biological_process unknown; LOCATED IN: chloroplast thylakoid membrane, chloroplast; EXPRESSED IN: 21 plant structures; EXPRESSED DURING: 13 growth stages; Has 120 Blast hits to 120 proteins in 47 species: Archae - 4; Bacteria - 10; Metazoa - 33; Fungi - 2; Plants - 44; Viruses - 0; Other Eukaryotes - 27 (source: NCBI BLINK);   chr3:2764860-2765907 FORWARD LENGTH=258 | 258 | 258 | 1.00E-122 | 100.0 | 88.8 | 93.8 |
| Rsa1.0_00409.1.g13275.t1 | gb EOA29845.1  hypothetical protein CARUB_v10012938mg [Capsella rubella]                                                                                                                                                                                                                                                                                            | 941 | 896 | 0         | 95.2  | 83.0 | 87.0 | hypothetical protein CARUB_v10012938mg                      | gbpln | Capsella rubella     | AT3G09090.1   Symbols: DEX1   defective in exine formation protein (DEX1)   chr3:2782912-2787552 REVERSE LENGTH=896                                                                                                                                                                                                                                                                                                                                                                | 941 | 896 | 0         | 95.2  | 83.3 | 87.2 |
| Rsa1.0_00409.1.g13276.t1 | ref[XP_002884713.1] mRNA capping enzyme family protein [Arabidopsis lyrata subsp. lyrata] gi 297330553 gb EFH60972.1  mRNA capping enzyme family protein [Arabidopsis lyrata subsp. lyrata]                                                                                                                                                                         | 200 | 668 | 4.00E-99  | 334.0 | 90.5 | 95.5 | mRNA capping enzyme family protein                          | gbpln | Arabidopsis lyrata   | AT3G09100.2   Symbols:   mRNA capping enzyme family protein   chr3:2788435-2792913 REVERSE LENGTH=672                                                                                                                                                                                                                                                                                                                                                                              | 200 | 672 | 1.00E-101 | 336.0 | 90.0 | 95.5 |
| Rsa1.0_00409.1.g13277.t1 | ref[XP_002884714.1] predicted protein [Arabidopsis lyrata subsp. lyrata] gi 297330554 gb EFH60973.1  predicted protein [Arabidopsis lyrata subsp. lyrata]                                                                                                                                                                                                           | 474 | 492 | 1.00E-109 | 103.8 | 50.0 | 66.5 | predicted protein                                           | gbpln | Arabidopsis lyrata   | AT5G01150.1   Symbols:   Protein of unknown function (DUF874)   chr5:51988-53649 FORWARD LENGTH=501                                                                                                                                                                                                                                                                                                                                                                                | 474 | 501 | 9.00E-93  | 105.7 | 44.7 | 61.6 |

|                          |                                                                                                                                                                                                                                                                                                                                                                                                                             |     |     |           |       |      |      |                                                            |       |                      |                                                                                                                                                                                                                                                                                                                                                                                                                                         |     |     |           |       |      |      |
|--------------------------|-----------------------------------------------------------------------------------------------------------------------------------------------------------------------------------------------------------------------------------------------------------------------------------------------------------------------------------------------------------------------------------------------------------------------------|-----|-----|-----------|-------|------|------|------------------------------------------------------------|-------|----------------------|-----------------------------------------------------------------------------------------------------------------------------------------------------------------------------------------------------------------------------------------------------------------------------------------------------------------------------------------------------------------------------------------------------------------------------------------|-----|-----|-----------|-------|------|------|
| Rsa1.0_00409.1.g13278.t1 | ref[XP_002882607.1] hypothetical protein ARALYDRAFT.478229 [Arabidopsis lyrata subsp. lyrata] gi 297328447 gb EFH58866.1                                                                                                                                                                                                                                                                                                    | 340 | 329 | 2.00E-58  | 96.8  | 34.1 | 37.1 | hypothetical protein ARALYDRAFT.478229                     | gbpln | Arabidopsis lyrata   | AT3G09150.1   Symbols: HY2, GUN3, ATHY2   phytochromobilin:ferredoxin oxidoreductase, chloroplast / phytochromobilin synthase (HY2)   chr3:2803665-2805333 FORWARD LENGTH=327                                                                                                                                                                                                                                                           | 340 | 327 | 8.00E-60  | 96.2  | 31.5 | 33.5 |
| Rsa1.0_00409.1.g13279.t1 | gb AAD56334.1 AC009326.21 putative lectin [Arabidopsis thaliana]                                                                                                                                                                                                                                                                                                                                                            | 246 | 313 | 6.00E-88  | 127.2 | 65.0 | 80.1 | putative lectin                                            | gbpln | Arabidopsis thaliana | AT3G09190.1   Symbols:   Concanavalin A-like lectin family protein   chr3:2821650-2822687 REVERSE LENGTH=345                                                                                                                                                                                                                                                                                                                            | 246 | 345 | 8.00E-90  | 140.2 | 64.6 | 80.1 |
| Rsa1.0_00410.1.g13280.t1 | gb EOA16607.1  hypothetical protein CARUB_v10004780mg [Capsella rubella]                                                                                                                                                                                                                                                                                                                                                    | 449 | 454 | 0         | 101.1 | 80.6 | 88.4 | hypothetical protein CARUB_v10004780mg                     | gbpln | Capsella rubella     | AT4G29700.1   Symbols:   Alkaline-phosphatase-like family protein   chr4:14543739-14545124 REVERSE LENGTH=461                                                                                                                                                                                                                                                                                                                           | 449 | 461 | 0         | 102.7 | 79.3 | 87.8 |
| Rsa1.0_00410.1.g13281.t1 | #                                                                                                                                                                                                                                                                                                                                                                                                                           | #   | #   | #         | #     | #    | -    | ----                                                       | ----  | #                    | #                                                                                                                                                                                                                                                                                                                                                                                                                                       | #   | #   | #         | #     | #    |      |
| Rsa1.0_00410.1.g13282.t1 | #                                                                                                                                                                                                                                                                                                                                                                                                                           | #   | #   | #         | #     | #    | -    | ----                                                       | ----  | #                    | #                                                                                                                                                                                                                                                                                                                                                                                                                                       | #   | #   | #         | #     | #    |      |
| Rsa1.0_00410.1.g13283.t1 | #                                                                                                                                                                                                                                                                                                                                                                                                                           | #   | #   | #         | #     | #    | -    | ----                                                       | ----  | #                    | #                                                                                                                                                                                                                                                                                                                                                                                                                                       | #   | #   | #         | #     | #    |      |
| Rsa1.0_00410.1.g13284.t1 | ref[NP_194697.1] alkaline-phosphatase-like protein [Arabidopsis thaliana] gi 5123562 emb CAB45328.1  nucleotide pyrophosphatase-like protein [Arabidopsis thaliana] gi 7269867 emb CAB79726.1  nucleotide pyrophosphatase-like protein [Arabidopsis thaliana] gi 225898829 dbj BAH30545.1  hypothetical protein [Arabidopsis thaliana] gi 332660261 gb AEE85661.1  alkaline-phosphatase-like protein [Arabidopsis thaliana] | 443 | 496 | 0         | 112.0 | 78.6 | 85.8 | alkaline-phosphatase-like protein                          | gbpln | Arabidopsis thaliana | AT4G29680.1   Symbols:   Alkaline-phosphatase-like family protein   chr4:14538067-14539557 REVERSE LENGTH=496                                                                                                                                                                                                                                                                                                                           | 443 | 496 | 0         | 112.0 | 78.6 | 85.8 |
| Rsa1.0_00410.1.g13285.t1 | ref[XP_002867402.1] hypothetical protein ARALYDRAFT.491802 [Arabidopsis lyrata subsp. lyrata] gi 297313238 gb EFH43661.1                                                                                                                                                                                                                                                                                                    | 501 | 493 | 0         | 98.4  | 76.8 | 86.8 | hypothetical protein ARALYDRAFT.491802                     | gbpln | Arabidopsis lyrata   | AT4G29560.1   Symbols:   CONTAINS InterPro DOMAIN/s: Fanconi Anaemia group E protein, C-terminal (InterPro:IPR021025); Has 41 Blast hits to 41 proteins in 17 species: Archae - 0; Bacteria - 0; Metazoa - 10; Fungi - 0; Plants - 27; Viruses - 0; Other Eukaryotes - 4 (source: NCBI BLink).   chr4:14504421-14505999 REVERSE LENGTH=493                                                                                              | 501 | 493 | 0         | 98.4  | 76.2 | 85.2 |
| Rsa1.0_00410.1.g13286.t1 | ref[XP_002869427.1] acyl--UDP-N-acetylglucosamine O-acetyltransferase [Arabidopsis lyrata subsp. lyrata] gi 297315263 gb EFH45686.1  acyl--UDP-N-acetylglucosamine O-acetyltransferase [Arabidopsis lyrata subsp. lyrata]                                                                                                                                                                                                   | 335 | 336 | 1.00E-165 | 100.3 | 88.4 | 92.2 | acyl--UDP-N-acetylglucosamine O-acetyltransferase          | gbpln | Arabidopsis lyrata   | AT4G29540.2   Symbols:   bacterial transferase hexapeptide repeat-containing protein   chr4:14497775-14499765 FORWARD LENGTH=336                                                                                                                                                                                                                                                                                                        | 335 | 336 | 1.00E-165 | 100.3 | 86.3 | 91.0 |
| Rsa1.0_00410.1.g13287.t1 | gb EOA17071.1  hypothetical protein CARUB_v10005319mg [Capsella rubella]                                                                                                                                                                                                                                                                                                                                                    | 354 | 307 | 1.00E-114 | 86.7  | 65.8 | 72.3 | hypothetical protein CARUB_v10005319mg                     | gbpln | Capsella rubella     | AT4G29520.1   Symbols:   LOCATED IN: endoplasmic reticulum, plasma membrane; EXPRESSED IN: 23 plant structures; EXPRESSED DURING: 14 growth stages; CONTAINS InterPro DOMAIN/s: Saposin B (InterPro:IPR008139); Has 137 Blast hits to 137 proteins in 50 species: Archae - 2; Bacteria - 0; Metazoa - 41; Fungi - 10; Plants - 36; Viruses - 0; Other Eukaryotes - 48 (source: NCBI BLink).   chr4:14494056-14495657 REVERSE LENGTH=306 | 354 | 306 | 1.00E-112 | 86.4  | 62.1 | 66.9 |
| Rsa1.0_00410.1.g13288.t1 | ref[NP_174578.1] F-box and associated interaction domain-containing protein [Arabidopsis thaliana] gi 3784051 sp Q9MAP1.2 FB33_ARATH RecName: Full=Putative F-box protein At1g33020 gi 332193429 gb AEE31550.1  F-box and associated interaction domain-containing protein [Arabidopsis thaliana]                                                                                                                           | 380 | 548 | 4.00E-68  | 144.2 | 43.9 | 56.1 | F-box and associated interaction domain-containing protein | gbpln | Arabidopsis thaliana | AT1G33020.1   Symbols:   F-box and associated interaction domains-containing protein   chr1:11962746-11964832 FORWARD LENGTH=548                                                                                                                                                                                                                                                                                                        | 380 | 548 | 1.00E-70  | 144.2 | 43.9 | 56.1 |

|                          |                                                                                                                                                                                                                                                                                                                                                                                                                                                                                                                                                                                                                                                                                                                                                                                        |     |     |           |       |      |      |                                                                     |       |                      |                                                                                                                                    |     |     |           |       |      |      |
|--------------------------|----------------------------------------------------------------------------------------------------------------------------------------------------------------------------------------------------------------------------------------------------------------------------------------------------------------------------------------------------------------------------------------------------------------------------------------------------------------------------------------------------------------------------------------------------------------------------------------------------------------------------------------------------------------------------------------------------------------------------------------------------------------------------------------|-----|-----|-----------|-------|------|------|---------------------------------------------------------------------|-------|----------------------|------------------------------------------------------------------------------------------------------------------------------------|-----|-----|-----------|-------|------|------|
| Rsa1.0_00410.1.g13289.t1 | refNP_194675.1  Phospholipase A2 family protein [Arabidopsis thaliana] gi 75264514 sp Q9MOD7.1 PLA2C_ARAT H RecName: Full=Phospholipase A2-gamma; AltName: Full=Secretory phospholipase A2-gamma; Short=AtsPLA2-gamma; Flags: Precursor gi 7269845 emb CAB79704.1  phospholipase A2-like protein [Arabidopsis thaliana] gi 26006457 gb AAN63044.1  phospholipase A2 gamma [Arabidopsis thaliana] gi 332660234 gb AEE85634.1  phospholipase A2-gamma [Arabidopsis thaliana]                                                                                                                                                                                                                                                                                                             | 186 | 187 | 4.00E-80  | 100.5 | 75.8 | 87.1 | Phospholipase A2 family protein                                     | gbpln | Arabidopsis thaliana | AT4G29460.1   Symbols:   Phospholipase A2 family protein   chr4:14483066-14483930 REVERSE LENGTH=187                               | 186 | 187 | 2.00E-82  | 100.5 | 75.8 | 87.1 |
| Rsa1.0_00410.1.g13290.t1 | refXP_002867410.1  60S ribosomal protein L28 [Arabidopsis lyrata subsp. lyrata] gi 297313246 gb EFH43669.1  60S ribosomal protein L28 [Arabidopsis lyrata subsp. lyrata]                                                                                                                                                                                                                                                                                                                                                                                                                                                                                                                                                                                                               | 143 | 143 | 4.00E-72  | 100.0 | 93.0 | 96.5 | 60S ribosomal protein L28                                           | gbpln | Arabidopsis lyrata   | AT4G29410.2   Symbols:   Ribosomal L28e protein family   chr4:14468439-14469964 REVERSE LENGTH=143                                 | 143 | 143 | 1.00E-72  | 100.0 | 90.9 | 95.1 |
| Rsa1.0_00410.1.g13291.t1 | gb EOA18586.1  hypothetical protein CARUB_v10007158mg [Capsella rubella]                                                                                                                                                                                                                                                                                                                                                                                                                                                                                                                                                                                                                                                                                                               | 596 | 538 | 0         | 90.3  | 76.3 | 81.0 | hypothetical protein CARUB_v10007158mg                              | gbpln | Capsella rubella     | AT4G29360.1   Symbols:   O-Glycosyl hydrolases family 17 protein   chr4:14451562-14453687 REVERSE LENGTH=534                       | 596 | 534 | 0         | 89.6  | 77.2 | 81.4 |
| Rsa1.0_00410.1.g13292.t1 | sp Q9FUB8.1 PROF_BRANA RecName: Full=Profilin gi 1229030 gb AAG33237.1 AF315326_1 profilin [Brassica napus]                                                                                                                                                                                                                                                                                                                                                                                                                                                                                                                                                                                                                                                                            | 134 | 134 | 3.00E-72  | 100.0 | 97.8 | 99.3 | RecName: Full=Profilin gi 1229030 gb AAG33237.1 AF315326_1 profilin | gbpln | Brassica napus       | AT4G29340.1   Symbols: PRF4   profilin 4   chr4:14447718-14448467 FORWARD LENGTH=134                                               | 134 | 134 | 3.00E-72  | 100.0 | 93.3 | 98.5 |
| Rsa1.0_00410.1.g13293.t1 | # # # # # # # # # #                                                                                                                                                                                                                                                                                                                                                                                                                                                                                                                                                                                                                                                                                                                                                                    | #   | #   | #         | #     | #    | #    | -                                                                   | ----  | ----                 | #                                                                                                                                  | #   | #   | #         | #     | #    | #    |
| Rsa1.0_00410.1.g13294.t1 | refXP_002867418.1  predicted protein [Arabidopsis lyrata subsp. lyrata] gi 297313254 gb EFH43677.1  predicted protein [Arabidopsis lyrata subsp. lyrata]                                                                                                                                                                                                                                                                                                                                                                                                                                                                                                                                                                                                                               | 260 | 256 | 1.00E-103 | 98.5  | 70.8 | 80.8 | predicted protein                                                   | gbpln | Arabidopsis lyrata   | AT4G29270.1   Symbols:   HAD superfamily, subfamily IIIB acid phosphatase   chr4:14423797-14424848 REVERSE LENGTH=256              | 260 | 256 | 1.00E-101 | 98.5  | 67.7 | 78.5 |
| Rsa1.0_00410.1.g13295.t1 | db BAJ33902.1  unnamed protein product [Thellungiella halophila]                                                                                                                                                                                                                                                                                                                                                                                                                                                                                                                                                                                                                                                                                                                       | 351 | 365 | 1.00E-162 | 104.0 | 82.3 | 89.2 | unnamed protein product                                             | ----  | ----                 | AT4G29190.1   Symbols:   Zinc finger C-x8-C-x5-C-x3-H type family protein   chr4:14392233-14393303 REVERSE LENGTH=356              | 351 | 356 | 1.00E-150 | 101.4 | 78.3 | 84.0 |
| Rsa1.0_00410.1.g13296.t1 | refXP_002869450.1  hypothetical protein ARALYDRAFT_913597 [Arabidopsis lyrata subsp. lyrata] gi 297315286 gb EFH45709.1  hypothetical protein ARALYDRAFT_913597 [Arabidopsis lyrata subsp. lyrata]                                                                                                                                                                                                                                                                                                                                                                                                                                                                                                                                                                                     | 526 | 533 | 0         | 101.3 | 85.6 | 92.8 | hypothetical protein ARALYDRAFT_913597                              | gbpln | Arabidopsis lyrata   | AT4G29140.1   Symbols:   MATE efflux family protein   chr4:14369148-14370746 FORWARD LENGTH=532                                    | 526 | 532 | 0         | 101.1 | 84.8 | 91.8 |
| Rsa1.0_00410.1.g13297.t5 | refXP_002869950.1  hypothetical protein ARALYDRAFT_914645 [Arabidopsis lyrata subsp. lyrata] gi 297315786 gb EFH46209.1  hypothetical protein ARALYDRAFT_914645 [Arabidopsis lyrata subsp. lyrata]                                                                                                                                                                                                                                                                                                                                                                                                                                                                                                                                                                                     | 290 | 529 | 3.00E-36  | 182.4 | 31.4 | 37.6 | hypothetical protein ARALYDRAFT_914645                              | gbpln | Arabidopsis lyrata   | AT4G20070.1   Symbols: ATAAH, AAH   allantoate amidohydrolase   chr4:10861548-10864529 FORWARD LENGTH=525                          | 290 | 525 | 3.00E-38  | 181.0 | 31.0 | 37.2 |
| Rsa1.0_00410.1.g13298.t1 | # # # # # # # # # #                                                                                                                                                                                                                                                                                                                                                                                                                                                                                                                                                                                                                                                                                                                                                                    | #   | #   | #         | #     | #    | #    | -                                                                   | ----  | ----                 | #                                                                                                                                  | #   | #   | #         | #     | #    | #    |
| Rsa1.0_00410.1.g13299.t1 | refNP_194639.1  transcription factor bHLH68 [Arabidopsis thaliana] gi 75159400 sp Q8S3D1.2 BH068_ARAT H RecName: Full=Transcription factor bHLH68; AltName: Full=Basic helix-loop-helix protein 68; Short=AtbHLH68; Short=bHLH 68; AltName: Full=Transcription factor EN 60; AltName: Full=bHLH transcription factor bHLH068 gi 22711852 gb AAM10966.2 AF488634.1 putative bHLH transcription factor [Arabidopsis thaliana] gi 4972056 emb CAB43924.1  putative protein [Arabidopsis thaliana] gi 7269808 emb CAB79668.1  putative protein [Arabidopsis thaliana] gi 19698939 gb AAL91205.1  putative protein [Arabidopsis thaliana] gi 23197826 gb AAN15440.1  putative protein [Arabidopsis thaliana] gi 332660186 gb AEE85586.1  transcription factor bHLH68 [Arabidopsis thaliana] | 408 | 407 | 1.00E-173 | 99.8  | 85.5 | 90.2 | transcription factor bHLH68                                         | gbpln | Arabidopsis thaliana | AT4G29100.1   Symbols:   basic helix-loop-helix (bHLH) DNA-binding superfamily protein   chr4:14341140-14344575 FORWARD LENGTH=407 | 408 | 407 | 1.00E-175 | 99.8  | 85.5 | 90.2 |
| Rsa1.0_00411.1.g13300.t1 | gb EOA12485.1  hypothetical protein CARUB_v10026032mg [Capsella rubella]                                                                                                                                                                                                                                                                                                                                                                                                                                                                                                                                                                                                                                                                                                               | 670 | 668 | 0         | 99.7  | 66.9 | 75.4 | hypothetical protein CARUB_v10026032mg                              | gbpln | Capsella rubella     | AT5G62190.1   Symbols: PRH75   DEAD box RNA helicase (PRH75)   chr5:24980542-24983879 REVERSE LENGTH=671                           | 670 | 671 | 0         | 100.1 | 66.4 | 75.1 |



|                          |                                                                                                                                                                                                                                                                                                                                                                                                                                                                                                                                                                                                                                                                                                                                                                                                                                                                                                         |     |     |           |       |      |      |                                        |       |                      |                                                                                                                                                                                                                                                                                                                                                                                                                                                  |     |     |           |       |      |      |
|--------------------------|---------------------------------------------------------------------------------------------------------------------------------------------------------------------------------------------------------------------------------------------------------------------------------------------------------------------------------------------------------------------------------------------------------------------------------------------------------------------------------------------------------------------------------------------------------------------------------------------------------------------------------------------------------------------------------------------------------------------------------------------------------------------------------------------------------------------------------------------------------------------------------------------------------|-----|-----|-----------|-------|------|------|----------------------------------------|-------|----------------------|--------------------------------------------------------------------------------------------------------------------------------------------------------------------------------------------------------------------------------------------------------------------------------------------------------------------------------------------------------------------------------------------------------------------------------------------------|-----|-----|-----------|-------|------|------|
| Rsa1.0_00411.1.g13301.t1 | gb[EOA39029.1] hypothetical protein CARUB_v10011599mg [Capsella rubella]                                                                                                                                                                                                                                                                                                                                                                                                                                                                                                                                                                                                                                                                                                                                                                                                                                | 289 | 329 | 5.00E-89  | 113.8 | 60.2 | 73.7 | hypothetical protein CARUB_v10011599mg | gbpln | Capsella rubella     | AT5G62180.1   Symbols: AtCXE20, CXE20   carboxyesterase 20   chr5:24978866-24979849 REVERSE LENGTH=327                                                                                                                                                                                                                                                                                                                                           | 289 | 327 | 2.00E-84  | 113.1 | 56.1 | 71.3 |
| Rsa1.0_00411.1.g13302.t1 | gb[EOA39029.1] hypothetical protein CARUB_v10011599mg [Capsella rubella]                                                                                                                                                                                                                                                                                                                                                                                                                                                                                                                                                                                                                                                                                                                                                                                                                                | 249 | 329 | 3.00E-94  | 132.1 | 71.9 | 83.9 | hypothetical protein CARUB_v10011599mg | gbpln | Capsella rubella     | AT5G62180.1   Symbols: AtCXE20, CXE20   carboxyesterase 20   chr5:24978866-24979849 REVERSE LENGTH=327                                                                                                                                                                                                                                                                                                                                           | 249 | 327 | 6.00E-91  | 131.3 | 67.1 | 81.9 |
| Rsa1.0_00411.1.g13303.t1 | gb[EOA39029.1] hypothetical protein CARUB_v10011599mg [Capsella rubella]                                                                                                                                                                                                                                                                                                                                                                                                                                                                                                                                                                                                                                                                                                                                                                                                                                | 327 | 329 | 1.00E-137 | 100.6 | 73.4 | 83.8 | hypothetical protein CARUB_v10011599mg | gbpln | Capsella rubella     | AT5G62180.1   Symbols: AtCXE20, CXE20   carboxyesterase 20   chr5:24978866-24979849 REVERSE LENGTH=327                                                                                                                                                                                                                                                                                                                                           | 327 | 327 | 1.00E-132 | 100.0 | 69.4 | 83.5 |
| Rsa1.0_00411.1.g13304.t1 | gb[EOA39029.1] hypothetical protein CARUB_v10011599mg [Capsella rubella]                                                                                                                                                                                                                                                                                                                                                                                                                                                                                                                                                                                                                                                                                                                                                                                                                                | 342 | 329 | 1.00E-120 | 96.2  | 64.3 | 76.3 | hypothetical protein CARUB_v10011599mg | gbpln | Capsella rubella     | AT5G62180.1   Symbols: AtCXE20, CXE20   carboxyesterase 20   chr5:24978866-24979849 REVERSE LENGTH=327                                                                                                                                                                                                                                                                                                                                           | 342 | 327 | 1.00E-116 | 95.6  | 59.6 | 76.0 |
| Rsa1.0_00411.1.g13305.t1 | ref[NP_568952.1] protein agamous-like 42 [Arabidopsis thaliana]<br>gi 30697641 ref[NP_851247.1] protein agamous-like 42 [Arabidopsis thaliana]<br>gi 79331885 ref[NP_001032123.1] protein agamous-like 42 [Arabidopsis thaliana]<br>gi 10176935 dbj BAB10179.1  MADS box protein-like [Arabidopsis thaliana]<br>gi 15809905 gb AAL06880.1  AtZg45660/F17K2.19 [Arabidopsis thaliana] gi 17528944 gb AAL38682.1  unknown protein [Arabidopsis thaliana] gi 17978861 gb AAL47402.1  AtZg45660/F17K2.19 [Arabidopsis thaliana] gi 20465947 gb AAM20159.1  unknown protein [Arabidopsis thaliana] gi 32402390 gb AAN52777.1  MADS-box protein AGL42 [Arabidopsis thaliana] gi 332010189 gb AED97572.1  protein agamous-like 42 [Arabidopsis thaliana] gi 332010190 gb AED97573.1  protein agamous-like 42 [Arabidopsis thaliana] gi 332010191 gb AED97574.1  protein agamous-like 42 [Arabidopsis thaliana] | 209 | 210 | 1.00E-100 | 100.5 | 85.6 | 94.7 | protein agamous-like 42                | gbpln | Arabidopsis thaliana | AT5G62165.3   Symbols: AGL42   AGAMOUS-like 42   chr5:24965075-24968437 FORWARD LENGTH=210                                                                                                                                                                                                                                                                                                                                                       | 209 | 210 | 1.00E-102 | 100.5 | 85.6 | 94.7 |
| Rsa1.0_00411.1.g13306.t1 | #                                                                                                                                                                                                                                                                                                                                                                                                                                                                                                                                                                                                                                                                                                                                                                                                                                                                                                       | #   | #   | #         | #     | #    | -    | ----                                   | ----  | ----                 | #                                                                                                                                                                                                                                                                                                                                                                                                                                                | #   | #   | #         | #     | #    |      |
| Rsa1.0_00411.1.g13307.t1 | #                                                                                                                                                                                                                                                                                                                                                                                                                                                                                                                                                                                                                                                                                                                                                                                                                                                                                                       | #   | #   | #         | #     | #    | -    | ----                                   | ----  | ----                 | #                                                                                                                                                                                                                                                                                                                                                                                                                                                | #   | #   | #         | #     | #    |      |
| Rsa1.0_00411.1.g13308.t1 | #                                                                                                                                                                                                                                                                                                                                                                                                                                                                                                                                                                                                                                                                                                                                                                                                                                                                                                       | #   | #   | #         | #     | #    | -    | ----                                   | ----  | ----                 | #                                                                                                                                                                                                                                                                                                                                                                                                                                                | #   | #   | #         | #     | #    |      |
| Rsa1.0_00411.1.g13309.t1 | ref[XP_002864774.1] predicted protein [Arabidopsis lyrata subsp. lyrata] gi 297310609 gb EFH41033.1  predicted protein [Arabidopsis lyrata subsp. lyrata]                                                                                                                                                                                                                                                                                                                                                                                                                                                                                                                                                                                                                                                                                                                                               | 409 | 356 | 1.00E-161 | 87.0  | 70.2 | 75.1 | predicted protein                      | gbpln | Arabidopsis lyrata   | AT5G62160.1   Symbols: AtZIP12, ZIP12   zinc transporter 12 precursor   chr5:24960107-24961263 FORWARD LENGTH=355                                                                                                                                                                                                                                                                                                                                | 409 | 355 | 1.00E-155 | 86.8  | 68.9 | 74.6 |
| Rsa1.0_00411.1.g13310.t1 | ref[XP_002866474.1] hypothetical protein ARALYDRAFT_496390 [Arabidopsis lyrata subsp. lyrata] gi 297312309 gb EFH42733.1  hypothetical protein ARALYDRAFT_496390 [Arabidopsis lyrata subsp. lyrata]                                                                                                                                                                                                                                                                                                                                                                                                                                                                                                                                                                                                                                                                                                     | 241 | 238 | 1.00E-104 | 98.8  | 79.3 | 87.6 | hypothetical protein ARALYDRAFT_496390 | gbpln | Arabidopsis lyrata   | AT5G62140.1   Symbols:   unknown protein; FUNCTIONS IN: molecular_function unknown; INVOLVED IN: biological_process unknown; LOCATED IN: chloroplast; EXPRESSED IN: 19 plant structures; EXPRESSED DURING: 13 growth stages; Has 60 Blast hits to 60 proteins in 24 species: Archae - 0; Bacteria - 14; Metazoa - 0; Fungi - 0; Plants - 45; Viruses - 0; Other Eukaryotes - 1 (source: NCBI BLINK).   chr5:24954563-24955376 REVERSE LENGTH=241 | 241 | 241 | 1.00E-106 | 100.0 | 79.3 | 88.4 |
| Rsa1.0_00411.1.g13311.t1 | ref[NP_568951.1] Per1-like family protein [Arabidopsis thaliana] gi 15294204 gb AAK95279.1 AF410293.1 AT5g62130/mtg10.150 [Arabidopsis thaliana] gi 20147283 gb AAM10355.1  AT5g62130/mtg10.150 [Arabidopsis thaliana] gi 332010184 gb AED97567.1  Per1-like family protein [Arabidopsis thaliana]                                                                                                                                                                                                                                                                                                                                                                                                                                                                                                                                                                                                      | 346 | 343 | 1.00E-174 | 99.1  | 84.1 | 92.8 | Per1-like family protein               | gbpln | Arabidopsis thaliana | AT5G62130.1   Symbols:   Per1-like family protein   chr5:24950685-24952918 REVERSE LENGTH=343                                                                                                                                                                                                                                                                                                                                                    | 346 | 343 | 1.00E-177 | 99.1  | 84.1 | 92.8 |
| Rsa1.0_00411.1.g13312.t1 | ref[XP_002866471.1] hypothetical protein ARALYDRAFT_332444 [Arabidopsis lyrata subsp. lyrata] gi 297312306 gb EFH42730.1  hypothetical protein ARALYDRAFT_332444 [Arabidopsis lyrata subsp. lyrata]                                                                                                                                                                                                                                                                                                                                                                                                                                                                                                                                                                                                                                                                                                     | 611 | 639 | 1.00E-54  | 104.6 | 33.2 | 43.9 | hypothetical protein ARALYDRAFT_332444 | gbpln | Arabidopsis lyrata   | AT5G07210.1   Symbols: ARR21, RR21   response regulator 21   chr5:2252237-2256018 FORWARD LENGTH=621                                                                                                                                                                                                                                                                                                                                             | 611 | 621 | 2.00E-22  | 101.6 | 16.9 | 24.1 |

|                           |                                                                                                                                                                                                                                                                                                                                                                                                                                                                                                                                                                                                                                                                                                                                              |      |      |           |       |      |      |                                                 |       |                      |                                                                                                                                                                                                                                                                                                                                                                  |      |      |           |       |      |      |
|---------------------------|----------------------------------------------------------------------------------------------------------------------------------------------------------------------------------------------------------------------------------------------------------------------------------------------------------------------------------------------------------------------------------------------------------------------------------------------------------------------------------------------------------------------------------------------------------------------------------------------------------------------------------------------------------------------------------------------------------------------------------------------|------|------|-----------|-------|------|------|-------------------------------------------------|-------|----------------------|------------------------------------------------------------------------------------------------------------------------------------------------------------------------------------------------------------------------------------------------------------------------------------------------------------------------------------------------------------------|------|------|-----------|-------|------|------|
| Rsa1.0_00411.1.g13313.t1  | ref NP_568950.2  BCL-2-associated athanogene 2 [Arabidopsis thaliana] gi 378548292 sp QOWPX7.1 BAG2_ARAT H RecName: Full=BAG family molecular chaperone regulator 2; AltName: Full=Bcl-2-associated athanogene 2 gi 110737767 dbj BAF00822.1  hypothetical protein [Arabidopsis thaliana] gi 332010180 gb AED97563.1  BCL-2-associated athanogene 2 [Arabidopsis thaliana]                                                                                                                                                                                                                                                                                                                                                                   | 297  | 285  | 1.00E-117 | 96.0  | 71.7 | 82.2 | BCL-2-associated athanogene 2                   | gbpln | Arabidopsis thaliana | AT5G62100.2   Symbols: ATBAG2, BAG2   BCL-2-associated athanogene 2   chr5:24940477-24941775 FORWARD LENGTH=285                                                                                                                                                                                                                                                  | 297  | 285  | 1.00E-120 | 96.0  | 71.7 | 82.2 |
| Rsa1.0_00411.1.g13314.t1  | ref XP_002866470.1  hypothetical protein ARALYDRAFT_919461 [Arabidopsis lyrata subsp. lyrata] gi 297312305 gb EFH42729.1  hypothetical protein ARALYDRAFT_919461 [Arabidopsis lyrata subsp. lyrata]                                                                                                                                                                                                                                                                                                                                                                                                                                                                                                                                          | 773  | 815  | 0         | 105.4 | 56.3 | 59.6 | hypothetical protein ARALYDRAFT_919461          | gbpln | Arabidopsis lyrata   | AT5G62090.2   Symbols: SLK2   SEUSS-like 2   chr5:24935221-24938540 REVERSE LENGTH=816                                                                                                                                                                                                                                                                           | 773  | 816  | 0         | 105.6 | 56.8 | 59.5 |
| Rsa1.0_00411.1.g13315.t3  | gb EOA13663.1  hypothetical protein CARUB_v10026734mg, partial [Capsella rubella]                                                                                                                                                                                                                                                                                                                                                                                                                                                                                                                                                                                                                                                            | 325  | 339  | 3.00E-87  | 104.3 | 56.3 | 63.1 | hypothetical protein CARUB_v10026734mg, partial | gbpln | Capsella rubella     | AT5G62020.1   Symbols: AT-HSFB2A, HSFB2A   heat shock transcription factor B2A   chr5:24916212-24917194 FORWARD LENGTH=299                                                                                                                                                                                                                                       | 325  | 299  | 2.00E-88  | 92.0  | 56.9 | 63.1 |
| Rsa1.0_00411.1.g13316.t10 | gb EOA12910.1  hypothetical protein CARUB_v10025886mg [Capsella rubella]                                                                                                                                                                                                                                                                                                                                                                                                                                                                                                                                                                                                                                                                     | 819  | 831  | 0         | 101.5 | 93.3 | 95.6 | hypothetical protein CARUB_v10025886mg          | gbpln | Capsella rubella     | AT5G61980.1   Symbols: AGD1   ARF-GAP domain 1   chr5:24894472-24899178 FORWARD LENGTH=828                                                                                                                                                                                                                                                                       | 819  | 828  | 0         | 101.1 | 92.3 | 95.0 |
| Rsa1.0_00412.1.g13317.t1  | ref NP_197666.1  glucomannan 4-beta-mannosyltransferase 2 [Arabidopsis thaliana] gi 75171864 sp Q9FN17.1 CSLA2_ARATH RecName: Full=Glucomannan 4-beta-mannosyltransferase 2; AltName: Full=Cellulose synthase-like protein A2; Short=AtCslA2; AltName: Full=Glucomannan synthase; AltName: Full=Mannan synthase 2 gi 10178248 dbj BAB11680.1  glucosyltransferase-like protein [Arabidopsis thaliana] gi 16648764 gb AAL25573.1  AT5g22740/MDJ22_16 [Arabidopsis thaliana] gi 16648965 gb AAL24334.1  glucosyltransferase-like protein [Arabidopsis thaliana] gi 20259890 gb AAM13292.1  glucosyltransferase-like protein [Arabidopsis thaliana] gi 332005686 gb AED93069.1  glucomannan 4-beta-mannosyltransferase 2 [Arabidopsis thaliana] | 264  | 534  | 1.00E-148 | 202.3 | 96.2 | 98.5 | glucomannan 4-beta-mannosyltransferase 2        | gbpln | Arabidopsis thaliana | AT5G22740.1   Symbols: ATCSLA02, CSLA02, ATCSLA2, CSLA2   cellulose synthase-like A02   chr5:7555379-7559866 REVERSE LENGTH=534                                                                                                                                                                                                                                  | 264  | 534  | 1.00E-151 | 202.3 | 96.2 | 98.5 |
| Rsa1.0_00412.1.g13318.t1  | ref NP_197667.1  DNA/RNA helicase protein RAD5 [Arabidopsis thaliana] gi 60390961 sp Q9FN16.1 SM3L2_ARATH RecName: Full=Putative SWI/SNF-related matrix-associated actin-dependent regulator of chromatin subfamily A member 3-like 2; Short=SMARCA3-like protein 2 gi 10178249 dbj BAB11681.1  DNA repair protein RAD5 protein [Arabidopsis thaliana] gi 110737306 dbj BAF00599.1  hypothetical protein [Arabidopsis thaliana] gi 332005687 gb AED93070.1  DNA/RNA helicase protein RAD5 [Arabidopsis thaliana]                                                                                                                                                                                                                             | 1021 | 1029 | 0         | 100.8 | 86.9 | 91.5 | DNA/RNA helicase protein RAD5                   | gbpln | Arabidopsis thaliana | AT5G22750.1   Symbols: RAD5   DNA/RNA helicase protein   chr5:7565374-7570871 REVERSE LENGTH=1029                                                                                                                                                                                                                                                                | 1021 | 1029 | 0         | 100.8 | 86.9 | 91.5 |
| Rsa1.0_00412.1.g13319.t1  | gb EOA22590.1  hypothetical protein CARUB_v10003253mg [Capsella rubella]                                                                                                                                                                                                                                                                                                                                                                                                                                                                                                                                                                                                                                                                     | 1533 | 1591 | 0         | 103.8 | 79.4 | 87.7 | hypothetical protein CARUB_v10003253mg          | gbpln | Capsella rubella     | AT5G22760.1   Symbols:   PHD finger family protein   chr5:7571635-7577662 FORWARD LENGTH=1566                                                                                                                                                                                                                                                                    | 1533 | 1566 | 0         | 102.2 | 79.1 | 87.1 |
| Rsa1.0_00412.1.g13320.t1  | ref XP_002882729.1  hypothetical protein ARALYDRAFT_478477 [Arabidopsis lyrata subsp. lyrata] gi 297328569 gb EFH58988.1  hypothetical protein ARALYDRAFT_478477 [Arabidopsis lyrata subsp. lyrata]                                                                                                                                                                                                                                                                                                                                                                                                                                                                                                                                          | 149  | 154  | 2.00E-43  | 103.4 | 62.4 | 77.9 | hypothetical protein ARALYDRAFT_478477          | gbpln | Arabidopsis lyrata   | AT3G11405.1   Symbols:   unknown protein; BEST Arabidopsis thaliana protein match is: unknown protein (TAIR:AT3G55570.1). Has 35333 Blast hits to 34131 proteins in 2444 species: Archae - 798; Bacteria - 22429; Metazoa - 974; Fungi - 991; Plants - 531; Viruses - 0; Other Eukaryotes - 9610 (source: NCBI BLINK).   chr3:3580895-3581359 FORWARD LENGTH=154 | 149  | 154  | 2.00E-40  | 103.4 | 60.4 | 77.2 |
| Rsa1.0_00412.1.g13321.t1  | gb EOA20677.1  hypothetical protein CARUB_v10000989mg [Capsella rubella]                                                                                                                                                                                                                                                                                                                                                                                                                                                                                                                                                                                                                                                                     | 925  | 436  | 1.00E-165 | 47.1  | 34.7 | 37.3 | hypothetical protein CARUB_v10000989mg          | gbpln | Capsella rubella     | AT5G22790.1   Symbols: RER1   reticulata-related 1   chr5:7599395-7601573 REVERSE LENGTH=433                                                                                                                                                                                                                                                                     | 925  | 433  | 1.00E-165 | 46.8  | 34.5 | 37.3 |

|                          |                                                                                                                                                                                                                                                                                                                                                                                                                                                                                                           |      |      |           |       |      |      |                                                             |       |                      |                                                                                                                                                                                                                                                                                                                                                                                                                                                                              |      |     |           |       |      |      |
|--------------------------|-----------------------------------------------------------------------------------------------------------------------------------------------------------------------------------------------------------------------------------------------------------------------------------------------------------------------------------------------------------------------------------------------------------------------------------------------------------------------------------------------------------|------|------|-----------|-------|------|------|-------------------------------------------------------------|-------|----------------------|------------------------------------------------------------------------------------------------------------------------------------------------------------------------------------------------------------------------------------------------------------------------------------------------------------------------------------------------------------------------------------------------------------------------------------------------------------------------------|------|-----|-----------|-------|------|------|
| Rsa1.0_00412.1.g13322.t1 | dbj BAB08714.1  non-LTR retroelement reverse transcriptase-like protein [Arabidopsis thaliana]                                                                                                                                                                                                                                                                                                                                                                                                            | 176  | 1197 | 9.00E-17  | 680.1 | 29.5 | 46.0 | non-LTR retroelement reverse transcriptase-like protein     | gbpln | Arabidopsis thaliana | AT4G09490.1   Symbols:   Polynucleotidyl transferase, ribonuclease H-like superfamily protein   chr4:6015583-6016575 REVERSE LENGTH=170                                                                                                                                                                                                                                                                                                                                      | 176  | 170 | 5.00E-13  | 96.6  | 20.5 | 32.4 |
| Rsa1.0_00412.1.g13323.t1 | ref XP_003606631.1  Histone H2B [Medicago truncatula] gi 355507686 gb AES89828.1  Histone H2B [Medicago truncatula]                                                                                                                                                                                                                                                                                                                                                                                       | 141  | 147  | 6.00E-62  | 104.3 | 92.2 | 95.0 | Histone H2B                                                 | gbpln | Medicago truncatula  | AT3G45980.1   Symbols: H2B, HTB9   Histone superfamily protein   chr3:16897492-16897944 REVERSE LENGTH=150                                                                                                                                                                                                                                                                                                                                                                   | 141  | 150 | 6.00E-61  | 106.4 | 92.9 | 94.3 |
| Rsa1.0_00412.1.g13324.t1 | emb CAB39638.1  RNA-directed DNA polymerase-like protein [Arabidopsis thaliana] gi 7267666 emb CAB78094.1  RNA-directed DNA polymerase-like protein [Arabidopsis thaliana]                                                                                                                                                                                                                                                                                                                                | 2271 | 1274 | 0         | 56.1  | 30.4 | 39.3 | RNA-directed DNA polymerase-like protein                    | gbpln | Arabidopsis thaliana | AT5G22910.1   Symbols: ATCHX9, CHX9   cation/H <sup>+</sup> exchanger 9   chr5:7660927-7663829 REVERSE LENGTH=800                                                                                                                                                                                                                                                                                                                                                            | 2271 | 800 | 0         | 35.2  | 14.0 | 15.9 |
| Rsa1.0_00412.1.g13325.t1 | ref NP_197683.1  ring finger and CHY zinc finger domain-containing protein 1 [Arabidopsis thaliana] gi 10177239 dbj BAB10613.1  PGPD14 protein [Arabidopsis thaliana] gi 15450521 gb AAK96553.1  AT5g22920/MRN17.15 [Arabidopsis thaliana] gi 27363264 gb AAO11551.1  AT5g22920/MRN17.15 [Arabidopsis thaliana] gi 66865966 gb AA57617.1  RING finger family protein [Arabidopsis thaliana] gi 33200571 gb AED93097.1  ring finger and CHY zinc finger domain-containing protein 1 [Arabidopsis thaliana] | 292  | 291  | 1.00E-156 | 99.7  | 90.4 | 96.2 | ring finger and CHY zinc finger domain-containing protein 1 | gbpln | Arabidopsis thaliana | AT5G22920.1   Symbols:   CHY-type/CTCHY-type/RING-type zinc finger protein   chr5:7665143-7667031 FORWARD LENGTH=291                                                                                                                                                                                                                                                                                                                                                         | 292  | 291 | 1.00E-159 | 99.7  | 90.4 | 96.2 |
| Rsa1.0_00412.1.g13326.t1 | ref XP_002874104.1  hypothetical protein ARALYDRAFT_351315 [Arabidopsis lyrata subsp. lyrata] gi 297319941 gb EFH50363.1  hypothetical protein ARALYDRAFT_351315 [Arabidopsis lyrata subsp. lyrata]                                                                                                                                                                                                                                                                                                       | 239  | 238  | 1.00E-110 | 99.6  | 82.8 | 90.4 | hypothetical protein ARALYDRAFT_351315                      | gbpln | Arabidopsis lyrata   | AT5G22930.1   Symbols:   Protein of unknown function (DUF1635)   chr5:7668229-7669315 REVERSE LENGTH=238                                                                                                                                                                                                                                                                                                                                                                     | 239  | 238 | 1.00E-111 | 99.6  | 81.2 | 89.1 |
| Rsa1.0_00412.1.g13327.t1 | ref XP_002872025.1  exostosin family protein [Arabidopsis lyrata subsp. lyrata] gi 297317862 gb EFH48284.1  exostosin family protein [Arabidopsis lyrata subsp. lyrata]                                                                                                                                                                                                                                                                                                                                   | 461  | 465  | 0         | 100.9 | 82.9 | 88.1 | exostosin family protein                                    | gbpln | Arabidopsis lyrata   | AT5G22940.1   Symbols: F8H   FRA8 homolog   chr5:7677197-767892 FORWARD LENGTH=469                                                                                                                                                                                                                                                                                                                                                                                           | 461  | 469 | 0         | 101.7 | 81.1 | 87.6 |
| Rsa1.0_00412.1.g13328.t1 | ref XP_002872026.1  SNF7 family protein [Arabidopsis lyrata subsp. lyrata] gi 297317863 gb EFH48285.1  SNF7 family protein [Arabidopsis lyrata subsp. lyrata]                                                                                                                                                                                                                                                                                                                                             | 229  | 229  | 1.00E-113 | 100.0 | 96.1 | 99.1 | SNF7 family protein                                         | gbpln | Arabidopsis lyrata   | AT5G22950.1   Symbols: VPS24.1   SNF7 family protein   chr5:7681380-7682720 FORWARD LENGTH=229                                                                                                                                                                                                                                                                                                                                                                               | 229  | 229 | 1.00E-114 | 100.0 | 95.6 | 98.7 |
| Rsa1.0_00412.1.g13329.t1 | ref XP_002872027.1  hypothetical protein ARALYDRAFT_489152 [Arabidopsis lyrata subsp. lyrata] gi 297317864 gb EFH48286.1  hypothetical protein ARALYDRAFT_489152 [Arabidopsis lyrata subsp. lyrata]                                                                                                                                                                                                                                                                                                       | 419  | 508  | 1.00E-170 | 121.2 | 67.8 | 79.0 | hypothetical protein ARALYDRAFT_489152                      | gbpln | Arabidopsis lyrata   | AT5G22980.1   Symbols: scp47   serine carboxypeptidase-like 47   chr5:7688084-7690481 FORWARD LENGTH=505                                                                                                                                                                                                                                                                                                                                                                     | 419  | 505 | 1.00E-169 | 120.5 | 68.0 | 79.0 |
| Rsa1.0_00412.1.g13330.t1 | ref NP_200808.1  uncharacterized protein [Arabidopsis thaliana] gi 9757921 dbj BAB08368.1  unnamed protein product [Arabidopsis thaliana] gi 61742769 gb AAX55205.1  hypothetical protein At5g60000 [Arabidopsis thaliana] gi 332009882 gb AED97265.1  uncharacterized protein AT5G60000 [Arabidopsis thaliana]                                                                                                                                                                                           | 169  | 149  | 2.00E-29  | 88.2  | 45.6 | 59.8 | uncharacterized protein                                     | gbpln | Arabidopsis thaliana | AT5G60000.1   Symbols:   unknown protein; FUNCTIONS IN: molecular_function unknown; INVOLVED IN: biological_process unknown; LOCATED IN: endomembrane system; BEST Arabidopsis thaliana protein match is: unknown protein (TAIR:AT5G22970.1); Has 1807 Blast hits to 1807 proteins in 277 species: Archae - 0; Bacteria - 0; Metazoa - 736; Fungi - 347; Plants - 385; Viruses - 0; Other Eukaryotes - 339 (source: NCBI BLINK).   chr5:24159331-24159780 REVERSE LENGTH=149 | 169  | 149 | 8.00E-32  | 88.2  | 45.6 | 59.8 |
| Rsa1.0_00412.1.g13331.t1 | ref NP_200808.1  uncharacterized protein [Arabidopsis thaliana] gi 9757921 dbj BAB08368.1  unnamed protein product [Arabidopsis thaliana] gi 61742769 gb AAX55205.1  hypothetical protein At5g60000 [Arabidopsis thaliana] gi 332009882 gb AED97265.1  uncharacterized protein AT5G60000 [Arabidopsis thaliana]                                                                                                                                                                                           | 155  | 149  | 5.00E-29  | 96.1  | 47.1 | 63.9 | uncharacterized protein                                     | gbpln | Arabidopsis thaliana | AT5G60000.1   Symbols:   unknown protein; FUNCTIONS IN: molecular_function unknown; INVOLVED IN: biological_process unknown; LOCATED IN: endomembrane system; BEST Arabidopsis thaliana protein match is: unknown protein (TAIR:AT5G22970.1); Has 1807 Blast hits to 1807 proteins in 277 species: Archae - 0; Bacteria - 0; Metazoa - 736; Fungi - 347; Plants - 385; Viruses - 0; Other Eukaryotes - 339 (source: NCBI BLINK).   chr5:24159331-24159780 REVERSE LENGTH=149 | 155  | 149 | 2.00E-31  | 96.1  | 47.1 | 63.9 |

|                          |                                                                                                                                                                                                                                                                                                                                                                                                                                                                                                                                                                                                                                                                                                                                                                                                     |     |     |           |       |      |      |                                                     |       |                      |                                                                                                                                                    |     |     |           |       |      |      |
|--------------------------|-----------------------------------------------------------------------------------------------------------------------------------------------------------------------------------------------------------------------------------------------------------------------------------------------------------------------------------------------------------------------------------------------------------------------------------------------------------------------------------------------------------------------------------------------------------------------------------------------------------------------------------------------------------------------------------------------------------------------------------------------------------------------------------------------------|-----|-----|-----------|-------|------|------|-----------------------------------------------------|-------|----------------------|----------------------------------------------------------------------------------------------------------------------------------------------------|-----|-----|-----------|-------|------|------|
| Rsa1.0_00412.1.g13332.t1 | gb EOA13802.1  hypothetical protein CARUB_v10026897mg [Capsella rubella]                                                                                                                                                                                                                                                                                                                                                                                                                                                                                                                                                                                                                                                                                                                            | 276 | 290 | 2.00E-60  | 105.1 | 59.8 | 72.8 | hypothetical protein CARUB_v10026897mg              | gbpln | Capsella rubella     | AT5G60800.1   Symbols:   Heavy metal transport/detoxification superfamily protein   chr5:24461116-24462464 REVERSE LENGTH=283                      | 276 | 283 | 7.00E-59  | 102.5 | 58.7 | 70.3 |
| Rsa1.0_00413.1.g13333.t1 | gb EOA22581.1  hypothetical protein CARUB_v10003247mg [Capsella rubella]                                                                                                                                                                                                                                                                                                                                                                                                                                                                                                                                                                                                                                                                                                                            | 260 | 445 | 1.00E-147 | 171.2 | 96.9 | 97.3 | hypothetical protein CARUB_v10003247mg              | gbpln | Capsella rubella     | AT5G09550.1   Symbols:   GDP dissociation inhibitor family protein / Rab GTPase activator family protein   chr5:2963850-2966465 FORWARD LENGTH=445 | 260 | 445 | 1.00E-149 | 171.2 | 96.5 | 97.7 |
| Rsa1.0_00413.1.g13334.t1 | dbj BAJ34398.1  unnamed protein product [Theellungiella halophila]                                                                                                                                                                                                                                                                                                                                                                                                                                                                                                                                                                                                                                                                                                                                  | 682 | 683 | 0         | 100.1 | 95.0 | 97.7 | unnamed protein product                             | ----  | ----                 | AT5G09590.1   Symbols: MTHSC70-2, HSC70-5   mitochondrial HSC70 2   chr5:2975721-2978508 FORWARD LENGTH=682                                        | 682 | 682 | 0         | 100.0 | 93.3 | 97.1 |
| Rsa1.0_00413.1.g13335.t1 | ref XP_002873412.1  hypothetical protein ARALYDRAFT_908914 [Arabidopsis lyrata subsp. lyrata] gi 297319249 gb EFH49671.1  hypothetical protein ARALYDRAFT_908914 [Arabidopsis lyrata subsp. lyrata]                                                                                                                                                                                                                                                                                                                                                                                                                                                                                                                                                                                                 | 383 | 384 | 1.00E-108 | 100.3 | 53.5 | 71.0 | hypothetical protein ARALYDRAFT_908914              | gbpln | Arabidopsis lyrata   | AT5G09630.1   Symbols:   LisH/CRA/RING-U-box domains-containing protein   chr5:2986016-2987176 REVERSE LENGTH=386                                  | 383 | 386 | 1.00E-109 | 100.8 | 53.5 | 70.0 |
| Rsa1.0_00413.1.g13336.t1 | ref XP_002873413.1  inorganic pyrophosphatase family protein [Arabidopsis lyrata subsp. lyrata] gi 297319250 gb EFH49672.1  inorganic pyrophosphatase family protein [Arabidopsis lyrata subsp. lyrata]                                                                                                                                                                                                                                                                                                                                                                                                                                                                                                                                                                                             | 297 | 299 | 1.00E-154 | 100.7 | 91.9 | 97.6 | inorganic pyrophosphatase family protein            | gbpln | Arabidopsis lyrata   | AT5G09650.1   Symbols: AtPPa6, PPa6   pyrophosphorylase 6   chr5:2991331-2993117 REVERSE LENGTH=300                                                | 297 | 300 | 1.00E-155 | 101.0 | 91.9 | 97.0 |
| Rsa1.0_00413.1.g13337.t1 | ref NP_001031010.1  uncharacterized protein [Arabidopsis thaliana] gi 3249106 gb AAC24089.1  T12M4.16 [Arabidopsis thaliana] gi 98961961 gb ABF59310.1  unknown protein [Arabidopsis thaliana] gi 332190283 gb AEE28404.1  uncharacterized protein AT1G09157 [Arabidopsis thaliana]                                                                                                                                                                                                                                                                                                                                                                                                                                                                                                                 | 242 | 243 | 1.00E-104 | 100.4 | 88.0 | 93.4 | uncharacterized protein                             | gbpln | Arabidopsis thaliana | AT1G09157.1   Symbols:   Protein of unknown function (DUF679)   chr1:2951665-2952396 REVERSE LENGTH=243                                            | 242 | 243 | 1.00E-107 | 100.4 | 88.0 | 93.4 |
| Rsa1.0_00413.1.g13338.t1 | gb AGK89951.1  Hpp1 protein [Eutrema halophilum]                                                                                                                                                                                                                                                                                                                                                                                                                                                                                                                                                                                                                                                                                                                                                    | 83  | 300 | 2.00E-22  | 361.4 | 74.7 | 79.5 | Hpp1 protein                                        | gbpln | Eutrema halophilum   | AT5G09650.1   Symbols: AtPPa6, PPa6   pyrophosphorylase 6   chr5:2991331-2993117 REVERSE LENGTH=300                                                | 83  | 300 | 3.00E-24  | 361.4 | 72.3 | 77.1 |
| Rsa1.0_00413.1.g13339.t1 | ref NP_196538.1  Putative pectinesterase/pectinesterase inhibitor 51 [Arabidopsis thaliana] gi 75180831 sp Q9LXD9.1 PME51_ARAT H RecName: Full=Probable pectinesterase/pectinesterase inhibitor 51; Includes: RecName: Full=Pectinesterase inhibitor 51; AltName: Full=Pectin methylsterase inhibitor 51; Includes: RecName: Full=Pectinesterase 51; Short=PE 51; AltName: Full=Pectin methylsterase 51; Short=AtPME51; Flags: Precursor gi 7671413 emb CAB88354.1  pectin methylsterase-like protein [Arabidopsis thaliana] gi 17979183 gb AAL49830.1  putative pectin methylsterase [Arabidopsis thaliana] gi 29824167 gb AAP04044.1  putative pectin methylsterase [Arabidopsis thaliana] gi 332004060 gb AED91443.1  Putative pectinesterase/pectinesterase inhibitor 51 [Arabidopsis thaliana] | 549 | 551 | 0         | 100.4 | 82.1 | 88.3 | Putative pectinesterase/pectinesterase inhibitor 51 | gbpln | Arabidopsis thaliana | AT5G09760.1   Symbols:   Plant invertase/pectin methylsterase inhibitor superfamily   chr5:3032446-3034364 FORWARD LENGTH=551                      | 549 | 551 | 0         | 100.4 | 82.1 | 88.3 |

|                          |                                                                                                                                                                                                                                                                                                                                                                                                                                                                                                                                                                                                                                                                                                                                                                                                                                                                                                                                                                                                                         |      |      |           |       |      |       |                                                        |       |                      |                                                                                                                                    |      |      |           |       |      |      |
|--------------------------|-------------------------------------------------------------------------------------------------------------------------------------------------------------------------------------------------------------------------------------------------------------------------------------------------------------------------------------------------------------------------------------------------------------------------------------------------------------------------------------------------------------------------------------------------------------------------------------------------------------------------------------------------------------------------------------------------------------------------------------------------------------------------------------------------------------------------------------------------------------------------------------------------------------------------------------------------------------------------------------------------------------------------|------|------|-----------|-------|------|-------|--------------------------------------------------------|-------|----------------------|------------------------------------------------------------------------------------------------------------------------------------|------|------|-----------|-------|------|------|
| Rsa1.0_00413.1.g13340.t1 | refNP_196538.1  Putative pectinesterase/pectinesterase inhibitor 51 [Arabidopsis thaliana] gi 75180831 sp Q9LXD9.1 PME51_ARAT H RecName: Full=Probable pectinesterase/pectinesterase inhibitor 51; Includes: RecName: Full=Pectinesterase inhibitor 51; AltName: Full=Pectin methyltransferase inhibitor 51; Includes: RecName: Full=Pectinesterase 51; Short=PE 51; AltName: Full=Pectin methyltransferase 51; Short=AtPME51; Flags: Precursor gi 7671413 emb CAB89354.1  pectin methyltransferase-like protein [Arabidopsis thaliana] gi 17979183 gb AAL49830.1  putative pectin methyltransferase [Arabidopsis thaliana] gi 29824167 gb AAP04044.1  putative pectin methyltransferase [Arabidopsis thaliana] gi 332004060 gb AED91443.1  Putative pectinesterase/pectinesterase inhibitor 51 [Arabidopsis thaliana] ref XP_002873421.1  ribosomal protein L17 family protein [Arabidopsis lyrata subsp. lyrata] gi 297319258 gb EFH49680.1  ribosomal protein L17 family protein [Arabidopsis lyrata subsp. lyrata.] | 546  | 551  | 0         | 100.9 | 78.4 | 86.6  | Putative pectinesterase/pectinesterase inhibitor 51    | gbpln | Arabidopsis thaliana | AT5G09760.1   Symbols:   Plant invertase/pectin methyltransferase inhibitor superfamily   chr5:3032446-3034364 FORWARD LENGTH=551  | 546  | 551  | 0         | 100.9 | 78.4 | 86.6 |
| Rsa1.0_00413.1.g13341.t1 | ref XP_002873421.1  ribosomal protein L17 family protein [Arabidopsis lyrata subsp. lyrata] gi 297319258 gb EFH49680.1  ribosomal protein L17 family protein [Arabidopsis lyrata subsp. lyrata.]                                                                                                                                                                                                                                                                                                                                                                                                                                                                                                                                                                                                                                                                                                                                                                                                                        | 160  | 160  | 2.00E-79  | 100.0 | 89.4 | 95.0  | ribosomal protein L17 family protein                   | gbpln | Arabidopsis lyrata   | AT5G09770.1   Symbols:   Ribosomal protein L17 family protein   chr5:3035267-3036518 REVERSE LENGTH=160                            | 160  | 160  | 1.00E-81  | 100.0 | 90.0 | 95.0 |
| Rsa1.0_00413.1.g13342.t1 | gb EOA20292.1  hypothetical protein CARUB_v10000600mg [Capsella rubella]                                                                                                                                                                                                                                                                                                                                                                                                                                                                                                                                                                                                                                                                                                                                                                                                                                                                                                                                                | 122  | 561  | 8.00E-20  | 459.8 | 39.3 | 41.0  | hypothetical protein CARUB_v10000600mg                 | gbpln | Capsella rubella     | AT5G24470.1   Symbols:   APRR5, PRR5   pseudo-response regulator 5   chr5:8356204-8358873 REVERSE LENGTH=667                       | 122  | 667  | 2.00E-22  | 546.7 | 39.3 | 41.0 |
| Rsa1.0_00413.1.g13343.t1 | ref XP_002871385.1  hypothetical protein ARALYDRAFT_908929 [Arabidopsis lyrata subsp. lyrata] gi 297317222 gb EFH47644.1  hypothetical protein ARALYDRAFT_908929 [Arabidopsis lyrata subsp. lyrata.]                                                                                                                                                                                                                                                                                                                                                                                                                                                                                                                                                                                                                                                                                                                                                                                                                    | 105  | 103  | 4.00E-29  | 98.1  | 74.3 | 83.8  | hypothetical protein ARALYDRAFT_908929                 | gbpln | Arabidopsis lyrata   | AT5G09805.1   Symbols:   IDL3   inflorescence deficient in abscission (IDA)-like 3   chr5:3047218-3047517 FORWARD LENGTH=99        | 105  | 99   | 3.00E-30  | 94.3  | 69.5 | 78.1 |
| Rsa1.0_00413.1.g13344.t1 | gb AEN25580.1  actin 7 [Brassica rapa subsp. pekinensis]                                                                                                                                                                                                                                                                                                                                                                                                                                                                                                                                                                                                                                                                                                                                                                                                                                                                                                                                                                | 377  | 377  | 0         | 100.0 | 99.7 | 100.0 | actin 7                                                | gbpln | Brassica rapa        | AT5G09810.1   Symbols:   ACT7   actin 7   chr5:3052809-3054220 FORWARD LENGTH=377                                                  | 377  | 377  | 0         | 100.0 | 99.2 | 99.7 |
| Rsa1.0_00413.1.g13345.t1 | ref NP_001031862.1  putative plastid-lipid-associated protein 7 [Arabidopsis thaliana] gi 75102996 sp Q5M755.1 PAP7_ARATH RecName: Full=Probable plastid-lipid-associated protein 7, chloroplastic; AltName: Full=Fibrillin-7; Flags: Precursor gi 56461766 gb AAV91339.1 At5g09820 [Arabidopsis thaliana] gi 11073731 c dbj BAF00604.1  hypothetical protein [Arabidopsis thaliana] gi 332004069 gb AED91452.1  putative plastid-lipid-associated protein 7 [Arabidopsis thaliana]                                                                                                                                                                                                                                                                                                                                                                                                                                                                                                                                     | 271  | 273  | 1.00E-124 | 100.7 | 86.7 | 91.9  | putative plastid-lipid-associated protein 7            | gbpln | Arabidopsis thaliana | AT5G09820.2   Symbols:   Plastid-lipid associated protein PAP / fibrillin family protein   chr5:3056090-3057380 REVERSE LENGTH=273 | 271  | 273  | 1.00E-126 | 100.7 | 86.7 | 91.9 |
| Rsa1.0_00413.1.g13346.t1 | ref NP_568218.1  Transcription elongation factor (TFIIS) family protein [Arabidopsis thaliana] gi 395406779 sp F4KFC7.1 MD26C_ARATH RecName: Full=Probable mediator of RNA polymerase II transcription subunit 26c gi 332004072 gb AED91455.1  Transcription elongation factor (TFIIS) family protein [Arabidopsis thaliana]                                                                                                                                                                                                                                                                                                                                                                                                                                                                                                                                                                                                                                                                                            | 348  | 353  | 1.00E-158 | 101.4 | 84.5 | 90.5  | Transcription elongation factor (TFIIS) family protein | gbpln | Arabidopsis thaliana | AT5G09850.1   Symbols:   Transcription elongation factor (TFIIS) family protein   chr5:3063488-3065221 REVERSE LENGTH=353          | 348  | 353  | 1.00E-160 | 101.4 | 84.5 | 90.5 |
| Rsa1.0_00413.1.g13347.t1 | ref NP_196549.1  cellulose synthase A catalytic subunit 5 [UDP-forming] [Arabidopsis thaliana] gi 73917713 sp Q8L778.2 CESA5_ARATH RecName: Full=Cellulose synthase A catalytic subunit 5 [UDP-forming]; Short=AtCesA5 gi 9758965 dbj BAB09408.1  cellulose synthase catalytic subunit [Arabidopsis thaliana] gi 332004075 gb AED91458.1  cellulose synthase A catalytic subunit 5 [UDP-forming] [Arabidopsis thaliana]                                                                                                                                                                                                                                                                                                                                                                                                                                                                                                                                                                                                 | 1069 | 1069 | 0         | 100.0 | 92.7 | 95.4  | cellulose synthase A catalytic subunit 5               | gbpln | Arabidopsis thaliana | AT5G09870.1   Symbols:   CESA5   cellulose synthase 5   chr5:3073356-3077974 FORWARD LENGTH=1069                                   | 1069 | 1069 | 0         | 100.0 | 92.7 | 95.4 |

|                          |                                                                                                                                                                                                                                                                                                                                                                                                                                                                                                                                                                            |     |      |           |       |      |      |                                                                            |       |                      |                                                                                                                                                                                                                                                                                                                                                                                                                                                                                                                                                        |     |      |           |       |      |      |
|--------------------------|----------------------------------------------------------------------------------------------------------------------------------------------------------------------------------------------------------------------------------------------------------------------------------------------------------------------------------------------------------------------------------------------------------------------------------------------------------------------------------------------------------------------------------------------------------------------------|-----|------|-----------|-------|------|------|----------------------------------------------------------------------------|-------|----------------------|--------------------------------------------------------------------------------------------------------------------------------------------------------------------------------------------------------------------------------------------------------------------------------------------------------------------------------------------------------------------------------------------------------------------------------------------------------------------------------------------------------------------------------------------------------|-----|------|-----------|-------|------|------|
| Rsa1.0_00413.1.g13348.t1 | ref[XP_002871390.1] hypothetical protein ARALYDRAFT_908937 [Arabidopsis lyrata subsp. lyrata] gi 297317227 gb EFH47649.1] hypothetical protein ARALYDRAFT_908937 [Arabidopsis lyrata subsp. lyrata]                                                                                                                                                                                                                                                                                                                                                                        | 83  | 103  | 9.00E-13  | 124.1 | 66.3 | 75.9 | hypothetical protein ARALYDRAFT_908937                                     | gbpln | Arabidopsis lyrata   | AT5G09876.1   Symbols:   unknown protein; FUNCTIONS IN: molecular_function unknown; INVOLVED IN: biological_process unknown; LOCATED IN: cellular_component unknown; Has 5 Blast hits to 5 proteins in 2 species: Archae - 0; Bacteria - 0; Metazoa - 0; Fungi - 0; Plants - 5; Viruses - 0; Other Eukaryotes - 0 (source: NCBI BLINK).   chr5:3079987-3080304 FORWARD LENGTH=105                                                                                                                                                                      | 83  | 105  | 2.00E-15  | 126.5 | 61.4 | 74.7 |
| Rsa1.0_00413.1.g13349.t1 | gb EOA19397.1  hypothetical protein CARUB_v10000967mg [Capsella rubella]                                                                                                                                                                                                                                                                                                                                                                                                                                                                                                   | 538 | 442  | 0         | 82.2  | 78.8 | 80.3 | hypothetical protein CARUB_v10000967mg                                     | gbpln | Capsella rubella     | AT5G09900.1   Symbols: EMB2107, RPN5A, MSA   26S proteasome regulatory subunit, putative (RPN5)   chr5:3089462-3092434 REVERSE LENGTH=442                                                                                                                                                                                                                                                                                                                                                                                                              | 538 | 442  | 0         | 82.2  | 77.5 | 80.5 |
| Rsa1.0_00413.1.g13350.t1 | ref[NP_196554.1] DNA-directed RNA polymerase II subunit D [Arabidopsis thaliana] gi 2760362 gb AAB95261.1] 15.9 kDa subunit of RNA polymerase II [Arabidopsis thaliana] gi 9758970 dbj BAB09413.1] 15.9 kDa subunit of RNA polymerase II [Arabidopsis thaliana] gi 21554212 gb AAM63291.1] 15.9 kDa subunit of RNA polymerase II [Arabidopsis thaliana] gi 98960869 gb ABF58918.1] At5g09920 [Arabidopsis thaliana] gi 222423668 dbj BAH19801.1] AT5G09920 [Arabidopsis thaliana] gi 332004084 gb AED91467.1] RNA polymerase II, Rpb4, core protein [Arabidopsis thaliana] | 90  | 138  | 1.00E-12  | 153.3 | 38.9 | 41.1 | DNA-directed RNA polymerase II subunit D                                   | gbpln | Arabidopsis thaliana | AT5G09920.1   Symbols: RPB15.9, ATRPB15.9, RPB15.9.9, NRPB4   RNA polymerase II, Rpb4, core protein   chr5:3096276-3097370 FORWARD LENGTH=138                                                                                                                                                                                                                                                                                                                                                                                                          | 90  | 138  | 2.00E-15  | 153.3 | 38.9 | 41.1 |
| Rsa1.0_00413.1.g13351.t1 | gb AAZ66921.1] 117M18.2 [Brassica rapa]                                                                                                                                                                                                                                                                                                                                                                                                                                                                                                                                    | 193 | 329  | 9.00E-86  | 170.5 | 81.3 | 88.6 | 117M18.2                                                                   | gbpln | Brassica rapa        | AT5G09940.1   Symbols:   Protein of unknown function (DUF1635)   chr5:3101192-3101833 FORWARD LENGTH=213                                                                                                                                                                                                                                                                                                                                                                                                                                               | 193 | 213  | 5.00E-40  | 110.4 | 54.9 | 67.9 |
| Rsa1.0_00413.1.g13352.t1 | gb AAZ66922.1] 117M18.3 [Brassica rapa]                                                                                                                                                                                                                                                                                                                                                                                                                                                                                                                                    | 82  | 87   | 1.00E-18  | 106.1 | 80.5 | 82.9 | 117M18.3                                                                   | gbpln | Brassica rapa        | AT5G09980.1   Symbols: PROPEP4   elicitor peptide 4 precursor   chr5:3122790-3123728 FORWARD LENGTH=81                                                                                                                                                                                                                                                                                                                                                                                                                                                 | 82  | 81   | 4.00E-11  | 98.8  | 62.2 | 72.0 |
| Rsa1.0_00413.1.g13353.t1 | gb AAZ66923.1] 117M18.4 [Brassica rapa]                                                                                                                                                                                                                                                                                                                                                                                                                                                                                                                                    | 407 | 424  | 0         | 104.2 | 86.7 | 89.7 | 117M18.4                                                                   | gbpln | Brassica rapa        | AT5G10010.1   Symbols:   unknown protein; FUNCTIONS IN: molecular_function unknown; INVOLVED IN: biological_process unknown; LOCATED IN: nucleolus; EXPRESSED IN: 25 plant structures; EXPRESSED DURING: 15 growth stages; BEST Arabidopsis thaliana protein match is: unknown protein (TAIR:AT5G64910.1); Has 33260 Blast hits to 16857 proteins in 1270 species: Archae - 88; Bacteria - 3040; Metazoa - 11915; Fungi - 3137; Plants - 1371; Viruses - 424; Other Eukaryotes - 13285 (source: NCBI BLINK).   chr5:3128098-3131452 FORWARD LENGTH=434 | 407 | 434  | 2.33E-156 | 106.6 | 72.7 | 81.8 |
| Rsa1.0_00413.1.g13354.t1 | gb AAZ66924.1] 117M18.5 [Brassica rapa]                                                                                                                                                                                                                                                                                                                                                                                                                                                                                                                                    | 947 | 1037 | 0         | 109.5 | 78.9 | 82.9 | 117M18.5                                                                   | gbpln | Brassica rapa        | AT5G10020.2   Symbols:   Leucine-rich receptor-like protein kinase family protein   chr5:3133514-3136949 FORWARD LENGTH=1000                                                                                                                                                                                                                                                                                                                                                                                                                           | 947 | 1000 | 0         | 105.6 | 79.3 | 85.7 |
| Rsa1.0_00413.1.g13355.t2 | gb AAZ66925.1] 117M18.6 [Brassica rapa]                                                                                                                                                                                                                                                                                                                                                                                                                                                                                                                                    | 296 | 280  | 1.00E-154 | 94.6  | 91.2 | 93.2 | 117M18.6                                                                   | gbpln | Brassica rapa        | AT5G10050.1   Symbols:   NAD(P)-binding Rossmann-fold superfamily protein   chr5:3144254-3145643 FORWARD LENGTH=279                                                                                                                                                                                                                                                                                                                                                                                                                                    | 296 | 279  | 1.00E-151 | 94.3  | 87.8 | 91.6 |
| Rsa1.0_00413.1.g13356.t1 | gb AAZ66926.1] 117M18.7 [Brassica rapa]                                                                                                                                                                                                                                                                                                                                                                                                                                                                                                                                    | 474 | 468  | 0         | 98.7  | 91.1 | 93.9 | 117M18.7                                                                   | gbpln | Brassica rapa        | AT5G10060.1   Symbols:   ENTH/VHS family protein   chr5:3145994-3148049 REVERSE LENGTH=469                                                                                                                                                                                                                                                                                                                                                                                                                                                             | 474 | 469  | 0         | 98.9  | 84.4 | 90.3 |
| Rsa1.0_00413.1.g13357.t1 | gb AAZ66927.1] 117M18.8 [Brassica rapa]                                                                                                                                                                                                                                                                                                                                                                                                                                                                                                                                    | 589 | 582  | 0         | 98.8  | 89.1 | 93.5 | 117M18.8                                                                   | gbpln | Brassica rapa        | AT5G10090.1   Symbols: TPR13   Tetratricopeptide repeat (TPR)-like superfamily protein   chr5:3153722-3155745 REVERSE LENGTH=594                                                                                                                                                                                                                                                                                                                                                                                                                       | 589 | 594  | 0         | 100.8 | 78.3 | 84.9 |
| Rsa1.0_00413.1.g13358.t1 | ref[NP_178356.1] RNA-directed DNA polymerase (reverse transcriptase)-related family protein [Arabidopsis thaliana] gi 3184287 gb AAC18934.1] putative non-LTR retroelement reverse transcriptase [Arabidopsis thaliana] gi 330250497 gb AEC05591.1] RNA-directed DNA polymerase (reverse transcriptase)-related family protein [Arabidopsis thaliana]                                                                                                                                                                                                                      | 129 | 211  | 6.00E-23  | 163.6 | 36.4 | 47.3 | RNA-directed DNA polymerase (reverse transcriptase)-related family protein | gbpln | Arabidopsis thaliana | AT2G02520.1   Symbols:   RNA-directed DNA polymerase (reverse transcriptase)-related family protein   chr2:676771-678145 REVERSE LENGTH=211                                                                                                                                                                                                                                                                                                                                                                                                            | 129 | 211  | 1.00E-25  | 163.6 | 36.4 | 47.3 |

|                          |                                                                                                                                                                                                                                                                 |      |      |           |       |      |      |                                                                                   |       |                      |                                                                                                                                                                                                                                                                                                                                                                                                                                                                                                                                                      |      |      |           |       |      |      |
|--------------------------|-----------------------------------------------------------------------------------------------------------------------------------------------------------------------------------------------------------------------------------------------------------------|------|------|-----------|-------|------|------|-----------------------------------------------------------------------------------|-------|----------------------|------------------------------------------------------------------------------------------------------------------------------------------------------------------------------------------------------------------------------------------------------------------------------------------------------------------------------------------------------------------------------------------------------------------------------------------------------------------------------------------------------------------------------------------------------|------|------|-----------|-------|------|------|
| Rsa1.0_00414.1.g13359.t1 | gb EOA15138.1  hypothetical protein CARUB_v10028513mg [Capsella rubella]                                                                                                                                                                                        | 128  | 129  | 5.00E-48  | 100.8 | 78.1 | 88.3 | hypothetical protein CARUB_v10028513mg                                            | gbpln | Capsella rubella     | AT5G46890.1   Symbols:   Bifunctional inhibitor/lipid-transfer protein/seed storage 2S albumin superfamily protein   chr5:19036437-19036820 REVERSE LENGTH=127                                                                                                                                                                                                                                                                                                                                                                                       | 128  | 127  | 2.00E-43  | 99.2  | 77.3 | 88.3 |
| Rsa1.0_00414.1.g13360.t1 | ref NP_199502.2  transcription factor jumonji and C5HC2 type zinc finger domain-containing protein [Arabidopsis thaliana]   g 332008063 gb AED95446.1  transcription factor jumonji and C5HC2 type zinc finger domain-containing protein [Arabidopsis thaliana] | 764  | 787  | 0         | 103.0 | 85.1 | 91.2 | transcription factor jumonji and C5HC2 type zinc finger domain-containing protein | gbpln | Arabidopsis thaliana | AT5G46910.1   Symbols:   Transcription factor jumonji (jmi) family protein / zinc finger (C5HC2 type) family protein   chr5:19046888-19050880 FORWARD LENGTH=787                                                                                                                                                                                                                                                                                                                                                                                     | 764  | 787  | 0         | 103.0 | 85.1 | 91.2 |
| Rsa1.0_00414.1.g13361.t1 | gb EOA14414.1  hypothetical protein CARUB_v10027615mg [Capsella rubella]                                                                                                                                                                                        | 181  | 177  | 8.00E-33  | 97.8  | 45.3 | 61.3 | hypothetical protein CARUB_v10027615mg                                            | gbpln | Capsella rubella     | AT5G46930.1   Symbols:   Plant invertase/pectin methyltransferase inhibitor superfamily protein   chr5:19056855-19057191 REVERSE LENGTH=178                                                                                                                                                                                                                                                                                                                                                                                                          | 181  | 178  | 1.00E-32  | 98.3  | 43.6 | 59.7 |
| Rsa1.0_00414.1.g13362.t1 | gb ACT35474.1  peroxidase 65 [Brassica rapa]                                                                                                                                                                                                                    | 326  | 330  | 1.00E-178 | 101.2 | 94.2 | 97.2 | peroxidase 65                                                                     | gbpln | Brassica rapa        | AT5G47000.1   Symbols:   Peroxidase superfamily protein   chr5:19069171-19070175 REVERSE LENGTH=334                                                                                                                                                                                                                                                                                                                                                                                                                                                  | 326  | 334  | 1.00E-177 | 102.5 | 91.4 | 94.5 |
| Rsa1.0_00414.1.g13363.t1 | db BAG69285.1  cathepsin B-like cysteine protease [Raphanus sativus]                                                                                                                                                                                            | 98   | 343  | 6.00E-14  | 350.0 | 38.8 | 40.8 | cathepsin B-like cysteine protease                                                | gbpln | Raphanus sativus     | AT4G01610.1   Symbols:   Cysteine proteinases superfamily protein   chr4:694857-696937 FORWARD LENGTH=359                                                                                                                                                                                                                                                                                                                                                                                                                                            | 98   | 359  | 9.00E-15  | 366.3 | 34.7 | 38.8 |
| Rsa1.0_00414.1.g13364.t1 | ref NP_199513.2  uncharacterized protein [Arabidopsis thaliana]   g 332008075 gb AED95458.1  uncharacterized protein AT5G47020 [Arabidopsis thaliana]                                                                                                           | 1393 | 1421 | 0         | 102.0 | 87.2 | 92.7 | uncharacterized protein                                                           | gbpln | Arabidopsis thaliana | AT5G47020.1   Symbols:   unknown protein; FUNCTIONS IN: molecular_function unknown; INVOLVED IN: biological_process unknown; LOCATED IN: endomembrane system; EXPRESSED IN: 23 plant structures; EXPRESSED DURING: 13 growth stages; BEST Arabidopsis thaliana protein match is: unknown protein (TAIR:AT5G11700.2); Has 1807 Blast hits to 1807 proteins in 277 species: Archae - 0; Bacteria - 0; Metazoa - 736; Fungi - 347; Plants - 385; Viruses - 0; Other Eukaryotes - 339 (source: NCBI BLINK).   chr5:19082005-19089800 FORWARD LENGTH=1421 | 1393 | 1421 | 0         | 102.0 | 87.2 | 92.7 |
| Rsa1.0_00414.1.g13365.t1 | gb ABL97963.1  hydrogen-transporting ATP synthase [Brassica rapa]                                                                                                                                                                                               | 154  | 203  | 1.00E-41  | 131.8 | 64.9 | 76.6 | hydrogen-transporting ATP synthase                                                | gbpln | Brassica rapa        | AT5G47030.1   Symbols:   ATPase, F1 complex, delta/epsilon subunit   chr5:19090384-19092034 FORWARD LENGTH=203                                                                                                                                                                                                                                                                                                                                                                                                                                       | 154  | 203  | 2.00E-39  | 131.8 | 51.3 | 55.8 |
| Rsa1.0_00414.1.g13366.t1 | gb ABL97963.1  hydrogen-transporting ATP synthase [Brassica rapa]                                                                                                                                                                                               | 112  | 203  | 9.00E-57  | 181.3 | 97.3 | 99.1 | hydrogen-transporting ATP synthase                                                | gbpln | Brassica rapa        | AT5G47030.1   Symbols:   ATPase, F1 complex, delta/epsilon subunit   chr5:19090384-19092034 FORWARD LENGTH=203                                                                                                                                                                                                                                                                                                                                                                                                                                       | 112  | 203  | 4.00E-56  | 181.3 | 92.0 | 97.3 |
| Rsa1.0_00414.1.g13367.t1 | ref XP_002865147.1  ATP binding protein [Arabidopsis lyrata subsp. lyrata]   g 297310982 gb EFH41406.1  ATP binding protein [Arabidopsis lyrata subsp. lyrata]                                                                                                  | 307  | 303  | 1.00E-110 | 98.7  | 74.6 | 81.8 | ATP binding protein                                                               | gbpln | Arabidopsis lyrata   | AT5G47050.1   Symbols:   SBP (S-ribonuclease binding protein) family protein   chr5:19106612-19107860 FORWARD LENGTH=300                                                                                                                                                                                                                                                                                                                                                                                                                             | 307  | 300  | 1.00E-107 | 97.7  | 74.3 | 81.1 |
| Rsa1.0_00414.1.g13368.t1 | #                                                                                                                                                                                                                                                               | #    | #    | #         | #     | #    | #    | -                                                                                 | ----  | ----                 | #                                                                                                                                                                                                                                                                                                                                                                                                                                                                                                                                                    | #    | #    | #         | #     | #    |      |
| Rsa1.0_00414.1.g13369.t1 | gb EOA14090.1  hypothetical protein CARUB_v10027227mg [Capsella rubella]                                                                                                                                                                                        | 175  | 177  | 1.00E-54  | 101.1 | 78.3 | 86.3 | hypothetical protein CARUB_v10027227mg                                            | gbpln | Capsella rubella     | AT5G47060.1   Symbols:   Protein of unknown function (DUF581)   chr5:19116843-19117639 FORWARD LENGTH=177                                                                                                                                                                                                                                                                                                                                                                                                                                            | 175  | 177  | 1.00E-52  | 101.1 | 76.6 | 84.6 |
| Rsa1.0_00414.1.g13370.t1 | db BAJ33813.1  unnamed protein product [Theilungiella halophila]                                                                                                                                                                                                | 410  | 412  | 0         | 100.5 | 86.6 | 92.2 | unnamed protein product                                                           | ----  | ----                 | AT5G47070.1   Symbols:   Protein kinase superfamily protein   chr5:19118683-19120528 REVERSE LENGTH=410                                                                                                                                                                                                                                                                                                                                                                                                                                              | 410  | 410  | 0         | 100.0 | 82.7 | 89.8 |
| Rsa1.0_00414.1.g13371.t1 | #                                                                                                                                                                                                                                                               | #    | #    | #         | #     | #    | #    | -                                                                                 | ----  | ----                 | #                                                                                                                                                                                                                                                                                                                                                                                                                                                                                                                                                    | #    | #    | #         | #     | #    |      |
| Rsa1.0_00414.1.g13372.t1 | gb ABD64921.1  calcineurin B-like protein, putative [Brassica oleracea]                                                                                                                                                                                         | 213  | 213  | 1.00E-119 | 100.0 | 99.1 | 99.1 | calcineurin B-like protein, putative                                              | gbpln | Brassica oleracea    | AT5G47100.1   Symbols:   CBL9, ATCBL9   calcineurin B-like protein 9   chr5:19129896-19131727 REVERSE LENGTH=213                                                                                                                                                                                                                                                                                                                                                                                                                                     | 213  | 213  | 1.00E-118 | 100.0 | 96.2 | 98.1 |
| Rsa1.0_00414.1.g13373.t1 | gb ABD64937.1  hypothetical protein 24.t00015 [Brassica oleracea]                                                                                                                                                                                               | 401  | 1327 | 0         | 330.9 | 93.0 | 95.5 | hypothetical protein 24.t00015                                                    | gbpln | Brassica oleracea    | AT5G47480.1   Symbols:   RGPR-related   chr5:19257420-19263132 FORWARD LENGTH=1350                                                                                                                                                                                                                                                                                                                                                                                                                                                                   | 401  | 1350 | 0         | 336.7 | 80.3 | 86.0 |
| Rsa1.0_00414.1.g13374.t1 | gb ABD64975.1  Ras family GTP-binding protein [Brassica oleracea]                                                                                                                                                                                               | 206  | 221  | 7.00E-43  | 107.3 | 40.8 | 41.3 | Ras family GTP-binding protein                                                    | gbpln | Brassica oleracea    | AT5G47520.1   Symbols:   ATRABA5a, RABA5a   RAB GTPase homolog A5A   chr5:19277596-19278366 REVERSE LENGTH=221                                                                                                                                                                                                                                                                                                                                                                                                                                       | 206  | 221  | 2.00E-44  | 107.3 | 40.3 | 41.3 |
| Rsa1.0_00414.1.g13375.t1 | gb ABD64933.1  hypothetical protein 24.t00011 [Brassica oleracea]                                                                                                                                                                                               | 235  | 241  | 1.00E-103 | 102.6 | 82.6 | 88.1 | hypothetical protein 24.t00011                                                    | gbpln | Brassica oleracea    | AT5G47530.1   Symbols:   Auxin-responsive family protein   chr5:19281471-19282870 FORWARD LENGTH=395                                                                                                                                                                                                                                                                                                                                                                                                                                                 | 235  | 395  | 2.00E-85  | 168.1 | 64.7 | 71.9 |
| Rsa1.0_00414.1.g13376.t1 | ref XP_002863336.1  ATSDAT [Arabidopsis lyrata subsp. lyrata]   g 297309171 gb EFH39595.1  ATSDAT [Arabidopsis lyrata subsp. lyrata]                                                                                                                            | 1082 | 540  | 0         | 49.9  | 44.3 | 46.9 | ATSDAT                                                                            | gbpln | Arabidopsis lyrata   | AT5G47560.1   Symbols:   ATTTDT, ATSDAT, TDT   tonoplast dicarboxylate transporter   chr5:19287895-19290347 REVERSE LENGTH=540                                                                                                                                                                                                                                                                                                                                                                                                                       | 1082 | 540  | 0         | 49.9  | 43.7 | 46.8 |

|                          |                                                                                                                                                                                                                                                                                                                                                                                                                                                        |     |     |           |       |      |      |                                            |             |                      |                                                                                                                                                                                                                                                                                                                                                                                                                                                                                                                                                                                                                                                                                                            |     |     |           |       |      |      |
|--------------------------|--------------------------------------------------------------------------------------------------------------------------------------------------------------------------------------------------------------------------------------------------------------------------------------------------------------------------------------------------------------------------------------------------------------------------------------------------------|-----|-----|-----------|-------|------|------|--------------------------------------------|-------------|----------------------|------------------------------------------------------------------------------------------------------------------------------------------------------------------------------------------------------------------------------------------------------------------------------------------------------------------------------------------------------------------------------------------------------------------------------------------------------------------------------------------------------------------------------------------------------------------------------------------------------------------------------------------------------------------------------------------------------------|-----|-----|-----------|-------|------|------|
| Rsa1.0_00414.1.g13377.t1 | gb[EOA14220.1] hypothetical protein CARUB_v10027375mg [Capsella rubella]                                                                                                                                                                                                                                                                                                                                                                               | 122 | 125 | 1.00E-58  | 102.5 | 95.1 | 96.7 | hypothetical protein CARUB_v10027375mg     | gbpln       | Capsella rubella     | AT5G47570.1   Symbols:   unknown protein; Has 30201 Blast hits to 17322 proteins in 780 species: Archae - 12; Bacteria - 1396; Metazoa - 17338; Fungi - 3422; Plants - 5037; Viruses - 0; Other Eukaryotes - 2996 (source: NCBI BLINK).   chr5:19292869-19294666 REVERSE LENGTH=125                                                                                                                                                                                                                                                                                                                                                                                                                        | 122 | 125 | 1.00E-53  | 102.5 | 94.3 | 95.1 |
| Rsa1.0_00414.1.g13378.t1 | gb[AAM63044.1] RNA-binding protein-like [Arabidopsis thaliana]                                                                                                                                                                                                                                                                                                                                                                                         | 439 | 431 | 0         | 98.2  | 82.2 | 89.5 | RNA-binding protein-like                   | gbpln       | Arabidopsis thaliana | AT5G47620.2   Symbols:   RNA-binding (RRM/RBD/RNP motifs) family protein   chr5:19302548-19304278 REVERSE LENGTH=431                                                                                                                                                                                                                                                                                                                                                                                                                                                                                                                                                                                       | 439 | 431 | 0         | 98.2  | 82.9 | 90.4 |
| Rsa1.0_00414.1.g13379.t1 | gb[EOA14124.1] hypothetical protein CARUB_v10027269mg [Capsella rubella]                                                                                                                                                                                                                                                                                                                                                                               | 164 | 162 | 3.00E-63  | 98.8  | 72.6 | 82.9 | hypothetical protein CARUB_v10027269mg     | gbpln       | Capsella rubella     | AT5G47635.1   Symbols:   Pollen Ole e 1 allergen and extensin family protein   chr5:19307291-19307849 REVERSE LENGTH=164                                                                                                                                                                                                                                                                                                                                                                                                                                                                                                                                                                                   | 164 | 164 | 6.00E-64  | 100.0 | 75.0 | 82.3 |
| Rsa1.0_00414.1.g13380.t1 | gb[ABD64993.1] transcription factor Hap3b, putative [Brassica oleracea]                                                                                                                                                                                                                                                                                                                                                                                | 197 | 185 | 2.00E-67  | 93.9  | 64.0 | 65.0 | transcription factor Hap3b, putative       | gbpln       | Brassica oleracea    | AT5G47640.1   Symbols: NF-YB2   nuclear factor Y, subunit B2   chr5:19309414-19309986 FORWARD LENGTH=190                                                                                                                                                                                                                                                                                                                                                                                                                                                                                                                                                                                                   | 197 | 190 | 7.00E-68  | 96.4  | 68.0 | 68.0 |
| Rsa1.0_00414.1.g13381.t1 | ref[NP_568687.1] nudix hydrolase 2 [Arabidopsis thaliana] gi[68565924]sp[Q94B74.1]NUDT2_ARATH RecName: Full=Nudix hydrolase 2; Short=AtNUDT2; AltName: Full=ADP-ribose pyrophosphatase; AltName: Full=NADH pyrophosphatase gi[14596037]gb[AAK68746.1] Mut T domain protein-like [Arabidopsis thaliana] gi[1797872]gb[AAL47357.1] Mut T domain protein-like [Arabidopsis thaliana] gi[332008163]gb[AED95546.1] nudix hydrolase 2 [Arabidopsis thaliana] | 336 | 278 | 1.00E-138 | 82.7  | 70.2 | 76.2 | nudix hydrolase 2                          | gbpln       | Arabidopsis thaliana | AT5G47650.1   Symbols: ATNUDT2, ATNUDX2, NUDT2   nudix hydrolase homolog 2   chr5:19310391-19312084 REVERSE LENGTH=278                                                                                                                                                                                                                                                                                                                                                                                                                                                                                                                                                                                     | 336 | 278 | 1.00E-141 | 82.7  | 70.2 | 76.2 |
| Rsa1.0_00414.1.g13382.t1 | ref[NP_001078727.1] nuclear transcription factor Y subunit B-6 [Arabidopsis thaliana] gi[9758795]gb[BAB09093.1] unnamed protein product [Arabidopsis thaliana] gi[332008166]gb[AED95549.1] nuclear transcription factor Y subunit B-6 [Arabidopsis thaliana]                                                                                                                                                                                           | 196 | 205 | 1.00E-81  | 104.6 | 84.2 | 89.8 | nuclear transcription factor Y subunit B-6 | gbpln       | Arabidopsis thaliana | AT5G47670.2   Symbols: NF-YB6, L1L   nuclear factor Y, subunit B6   chr5:19315358-19315975 FORWARD LENGTH=205                                                                                                                                                                                                                                                                                                                                                                                                                                                                                                                                                                                              | 196 | 205 | 5.00E-84  | 104.6 | 84.2 | 89.8 |
| Rsa1.0_00414.1.g13383.t1 | gb[EOA15250.1] hypothetical protein CARUB_v10028649mg [Capsella rubella]                                                                                                                                                                                                                                                                                                                                                                               | 405 | 347 | 1.00E-125 | 85.7  | 68.9 | 75.6 | hypothetical protein CARUB_v10028649mg     | gbpln       | Capsella rubella     | AT5G47680.1   Symbols: TRM10, AtTRM   FUNCTIONS IN: molecular.function unknown; INVOLVED IN: biological.process unknown; LOCATED IN: cellular.component unknown; EXPRESSED IN: 23 plant structures; EXPRESSED DURING: 13 growth stages; CONTAINS InterPro DOMAIN/s: tRNA (guanine-N1-)-methyltransferase (InterPro:IPR016009), tRNA (guanine-N(1)-)-methyltransferase, metazoa (InterPro:IPR016653), tRNA (guanine-N1-)-methyltransferase, eukaryotic (InterPro:IPR007356); Has 1807 Blast hits to 1807 proteins in 277 species: Archae - 0; Bacteria - 0; Metazoa - 736; Fungi - 347; Plants - 385; Viruses - 0; Other Eukaryotes - 339 (source: NCBI BLINK).   chr5:19316329-19317467 REVERSE LENGTH=344 | 405 | 344 | 1.00E-100 | 84.9  | 42.5 | 46.4 |
| Rsa1.0_00415.1.g13384.t1 | ref[NP_001238519.1] uncharacterized protein LOC100499953 [Glycine max] gi[255627951]gb[ACU14320.1] unknown [Glycine max]                                                                                                                                                                                                                                                                                                                               | 186 | 139 | 6.00E-70  | 74.7  | 66.1 | 72.0 | uncharacterized protein LOC100499953       | gbenv/gbpln | Glycine max          | AT3G46010.2   Symbols: ADF1, atadf, ATADF1   actin depolymerizing factor 1   chr3:16909679-16910678 REVERSE LENGTH=150                                                                                                                                                                                                                                                                                                                                                                                                                                                                                                                                                                                     | 186 | 150 | 2.00E-71  | 80.6  | 65.6 | 74.2 |
| Rsa1.0_00415.1.g13385.t1 | gb[EOA14190.1] hypothetical protein CARUB_v10027342mg [Capsella rubella]                                                                                                                                                                                                                                                                                                                                                                               | 132 | 139 | 4.00E-70  | 105.3 | 97.0 | 99.2 | hypothetical protein CARUB_v10027342mg     | gbpln       | Capsella rubella     | AT3G46010.2   Symbols: ADF1, atadf, ATADF1   actin depolymerizing factor 1   chr3:16909679-16910678 REVERSE LENGTH=150                                                                                                                                                                                                                                                                                                                                                                                                                                                                                                                                                                                     | 132 | 150 | 4.00E-72  | 113.6 | 95.5 | 98.5 |



|                          |                                                                                                                                                                                                                                                                                                                                                                                                                                                                                                                                                                                                                                                                                                                                                                                                                                                                                                                          |      |      |          |       |      |      |                                        |       |                      |                                                                                                                                                                                                                                                                                                                                                         |      |      |          |       |      |      |
|--------------------------|--------------------------------------------------------------------------------------------------------------------------------------------------------------------------------------------------------------------------------------------------------------------------------------------------------------------------------------------------------------------------------------------------------------------------------------------------------------------------------------------------------------------------------------------------------------------------------------------------------------------------------------------------------------------------------------------------------------------------------------------------------------------------------------------------------------------------------------------------------------------------------------------------------------------------|------|------|----------|-------|------|------|----------------------------------------|-------|----------------------|---------------------------------------------------------------------------------------------------------------------------------------------------------------------------------------------------------------------------------------------------------------------------------------------------------------------------------------------------------|------|------|----------|-------|------|------|
| Rsa1.0_00415.1.g13386.t1 | ref NP_190184.1  histone H2B [Arabidopsis thaliana] gi 297819124 ref XP_002877445.1  hypothetical protein ARALYDRAFT_484977 [Arabidopsis lyrata subsp. lyrata] gi 75097936 sp O23629.3 H2B6 ARATH RecName: Full=Histone H2B.6; AltName: Full=H2BA; AltName: Full=HTB9 gi 2407802 emb CAA73156.1  histone H2B [Arabidopsis thaliana] gi 7339499 emb CAB82822.1  histone H2B [Arabidopsis thaliana] gi 21592825 gb AAM64775.1  histone H2B [Arabidopsis thaliana] gi 30102580 gb AAP21208.1  At3g45980 [Arabidopsis thaliana] gi 110743640 dbj BAE99657.1  histone H2B [Arabidopsis thaliana] gi 297323283 gb EFH53704.1  hypothetical protein ARALYDRAFT_484977 [Arabidopsis lyrata subsp. lyrata] gi 332644576 gb AEE78097.1  histone H2B [Arabidopsis thaliana] ref NP_001154789.1  ribonuclease P subunit Rpp30 [Arabidopsis thaliana] gi 332009879 gb AED97282.1  ribonuclease P subunit Rpp30 [Arabidopsis thaliana] | 146  | 150  | 2.00E-65 | 102.7 | 96.6 | 98.6 | histone H2B                            | gbpln | Arabidopsis lyrata   | AT3G45980.1   Symbols: H2B, HTB9   Histone superfamily protein   chr3:16897492-16897944 REVERSE LENGTH=150                                                                                                                                                                                                                                              | 146  | 150  | 5.00E-68 | 102.7 | 96.6 | 98.6 |
| Rsa1.0_00415.1.g13387.t1 | ref NP_001154789.1  ribonuclease P subunit Rpp30 [Arabidopsis thaliana] gi 332009879 gb AED97282.1  ribonuclease P subunit Rpp30 [Arabidopsis thaliana]                                                                                                                                                                                                                                                                                                                                                                                                                                                                                                                                                                                                                                                                                                                                                                  | 663  | 705  | 0        | 106.3 | 70.3 | 80.1 | ribonuclease P subunit Rpp30           | gbpln | Arabidopsis thaliana | AT5G59980.2   Symbols:   Polymerase/histidinol phosphatase-like   chr5:24147207-24149783 FORWARD LENGTH=705                                                                                                                                                                                                                                             | 663  | 705  | 0        | 106.3 | 70.3 | 80.1 |
| Rsa1.0_00415.1.g13388.t1 | ref XP_002866360.1  hypothetical protein ARALYDRAFT_919236 [Arabidopsis lyrata subsp. lyrata] gi 297312195 gb EFH42619.1  hypothetical protein ARALYDRAFT_919236 [Arabidopsis lyrata subsp. lyrata]                                                                                                                                                                                                                                                                                                                                                                                                                                                                                                                                                                                                                                                                                                                      | 239  | 241  | 7.00E-96 | 100.8 | 82.0 | 87.9 | hypothetical protein ARALYDRAFT_919236 | gbpln | Arabidopsis lyrata   | AT5G59990.1   Symbols:   CCT motif family protein   chr5:24151206-24153084 REVERSE LENGTH=241                                                                                                                                                                                                                                                           | 239  | 241  | 3.00E-92 | 100.8 | 82.8 | 88.7 |
| Rsa1.0_00415.1.g13389.t1 | #                                                                                                                                                                                                                                                                                                                                                                                                                                                                                                                                                                                                                                                                                                                                                                                                                                                                                                                        | #    | #    | #        | #     | #    | -    | ----                                   | ----  | #                    | #                                                                                                                                                                                                                                                                                                                                                       | #    | #    | #        | #     | #    |      |
| Rsa1.0_00415.1.g13390.t1 | #                                                                                                                                                                                                                                                                                                                                                                                                                                                                                                                                                                                                                                                                                                                                                                                                                                                                                                                        | #    | #    | #        | #     | #    | #    | -                                      | ----  | ----                 | #                                                                                                                                                                                                                                                                                                                                                       | #    | #    | #        | #     | #    |      |
| Rsa1.0_00415.1.g13391.t1 | dbj BAB21595.1  Tat binding protein like protein [Brassica rapa]                                                                                                                                                                                                                                                                                                                                                                                                                                                                                                                                                                                                                                                                                                                                                                                                                                                         | 239  | 424  | 2.00E-21 | 177.4 | 29.3 | 31.8 | Tat binding protein like protein       | gbpln | Brassica rapa        | AT3G05530.1   Symbols: RPT5A, ATS6A.2   regulatory particle triple-A ATPase 5A   chr3:1603540-1605993 FORWARD LENGTH=424                                                                                                                                                                                                                                | 239  | 424  | 7.00E-24 | 177.4 | 29.3 | 31.8 |
| Rsa1.0_00415.1.g13392.t5 | gb EOA14805.1  hypothetical protein CARUB_v10028111mg [Capsella rubella]                                                                                                                                                                                                                                                                                                                                                                                                                                                                                                                                                                                                                                                                                                                                                                                                                                                 | 859  | 885  | 0        | 103.0 | 87.4 | 92.7 | hypothetical protein CARUB_v10028111mg | gbpln | Capsella rubella     | AT5G60010.1   Symbols:   ferric reductase-like transmembrane component family protein   chr5:24160456-24164755 FORWARD LENGTH=886                                                                                                                                                                                                                       | 859  | 886  | 0        | 103.1 | 87.0 | 93.0 |
| Rsa1.0_00415.1.g13393.t1 | ref NP_200810.1  laccase 17 [Arabidopsis thaliana] gi 75333948 sp O9FJD5.1 LAC17 ARAT H RecName: Full=Laccase-17; AltName: Full=Benzenediol:oxygen oxidoreductase 17; AltName: Full=Diphenol oxidase 17; AltName: Full=Urishiol oxidase 17; Flags: Precursor gi 9757923 dbj BAB08370.1  laccase (diphenol oxidase) [Arabidopsis thaliana] gi 51536488 gb AAU05482.1  At5g60020 [Arabidopsis thaliana] gi 53850499 gb AAU95426.1  At5g60020 [Arabidopsis thaliana] gi 332009884 gb AED97267.1  laccase 17 [Arabidopsis thaliana]                                                                                                                                                                                                                                                                                                                                                                                          | 572  | 577  | 0        | 100.9 | 92.3 | 96.0 | laccase 17                             | gbpln | Arabidopsis thaliana | AT5G60020.1   Symbols: LAC17, ATLAC17   laccase 17   chr5:24168072-24170223 FORWARD LENGTH=577                                                                                                                                                                                                                                                          | 572  | 577  | 0        | 100.9 | 92.3 | 96.0 |
| Rsa1.0_00415.1.g13394.t1 | ref NP_200811.1  uncharacterized protein [Arabidopsis thaliana] gi 8777342 dbj BAA96932.1  unnamed protein product [Arabidopsis thaliana] gi 332009885 gb AED97268.1  uncharacterized protein AT5G60030 [Arabidopsis thaliana]                                                                                                                                                                                                                                                                                                                                                                                                                                                                                                                                                                                                                                                                                           | 206  | 292  | 1.00E-24 | 141.7 | 39.3 | 46.6 | uncharacterized protein                | gbpln | Arabidopsis thaliana | AT5G60030.1   Symbols:   unknown protein; BEST Arabidopsis thaliana protein match is: unknown protein (TAIRAT1G75335.1); Has 1807 Blast hits to 1807 proteins in 277 species: Archae - 0; Bacteria - 0; Metazoa - 736; Fungi - 347; Plants - 385; Viruses - 0; Other Eukaryotes - 339 (source: NCBI BLink).   chr5:24172082-24172960 REVERSE LENGTH=292 | 206  | 292  | 5.00E-27 | 141.7 | 39.3 | 46.6 |
| Rsa1.0_00415.1.g13395.t1 | gb EOA12363.1  hypothetical protein CARUB_v10025743mg [Capsella rubella]                                                                                                                                                                                                                                                                                                                                                                                                                                                                                                                                                                                                                                                                                                                                                                                                                                                 | 1376 | 1376 | 0        | 100.0 | 86.3 | 92.6 | hypothetical protein CARUB_v10025743mg | gbpln | Capsella rubella     | AT5G60040.1   Symbols: NRPC1   nuclear RNA polymerase C1   chr5:24173590-24183269 FORWARD LENGTH=1376                                                                                                                                                                                                                                                   | 1376 | 1376 | 0        | 100.0 | 86.1 | 91.5 |
| Rsa1.0_00415.1.g13396.t1 | gb EOA14531.1  hypothetical protein CARUB_v10027763mg [Capsella rubella]                                                                                                                                                                                                                                                                                                                                                                                                                                                                                                                                                                                                                                                                                                                                                                                                                                                 | 501  | 500  | 0        | 99.8  | 89.4 | 94.0 | hypothetical protein CARUB_v10027763mg | gbpln | Capsella rubella     | AT5G60050.1   Symbols:   BTB/POZ domain-containing protein   chr5:24183680-24185264 REVERSE LENGTH=499                                                                                                                                                                                                                                                  | 501  | 499  | 0        | 99.6  | 87.8 | 93.0 |
| Rsa1.0_00416.1.g13397.t1 | #                                                                                                                                                                                                                                                                                                                                                                                                                                                                                                                                                                                                                                                                                                                                                                                                                                                                                                                        | #    | #    | #        | #     | #    | #    | -                                      | ----  | ----                 | AT3G10360.1   Symbols: APUM4, PUM4   pumilio 4   chr3:3211276-3215144 REVERSE LENGTH=1003                                                                                                                                                                                                                                                               | 157  | 1003 | 2.00E-12 | 638.9 | 19.1 | 19.7 |

|                           |                                                                                                                                                                                                                                                                                                                                                                                                                                                                                                                                                                                                                                                                                                                                                                                                                                                                                                                                                                                                                                                                                                                                                                                                                                                                          |     |      |           |       |      |      |                                                 |       |                      |                                                                                                                                                                     |     |     |           |       |      |      |  |
|---------------------------|--------------------------------------------------------------------------------------------------------------------------------------------------------------------------------------------------------------------------------------------------------------------------------------------------------------------------------------------------------------------------------------------------------------------------------------------------------------------------------------------------------------------------------------------------------------------------------------------------------------------------------------------------------------------------------------------------------------------------------------------------------------------------------------------------------------------------------------------------------------------------------------------------------------------------------------------------------------------------------------------------------------------------------------------------------------------------------------------------------------------------------------------------------------------------------------------------------------------------------------------------------------------------|-----|------|-----------|-------|------|------|-------------------------------------------------|-------|----------------------|---------------------------------------------------------------------------------------------------------------------------------------------------------------------|-----|-----|-----------|-------|------|------|--|
| Rsa1.0_00416.1.g13398.t1  | refXP_002882663.1  anion-transporting ATPase family protein [Arabidopsis lyrata subsp. lyrata] gi 297328503 gb EFH58922.1  anion-transporting ATPase family protein [Arabidopsis lyrata subsp. lyrata]                                                                                                                                                                                                                                                                                                                                                                                                                                                                                                                                                                                                                                                                                                                                                                                                                                                                                                                                                                                                                                                                   | 331 | 410  | 1.00E-178 | 123.9 | 96.4 | 99.1 | anion-transporting ATPase family protein        | gbpln | Arabidopsis lyrata   | AT3G10350.1   Symbols:   P-loop containing nucleoside triphosphate hydrolases superfamily protein   chr3:3208310-3210678 FORWARD LENGTH=411                         | 331 | 411 | 1.00E-180 | 124.2 | 95.8 | 98.5 |  |
| Rsa1.0_00416.1.g13399.t1  | # # # # # # # # # # # # # # # #                                                                                                                                                                                                                                                                                                                                                                                                                                                                                                                                                                                                                                                                                                                                                                                                                                                                                                                                                                                                                                                                                                                                                                                                                                          |     |      |           |       |      |      |                                                 |       |                      |                                                                                                                                                                     |     |     |           |       |      |      |  |
| Rsa1.0_00416.1.g13400.t1  | ref NP_187645.1  phenylalanine ammonia-lyase 4 [Arabidopsis thaliana] gi 14195018 sp Q9SS45.1 PAL4_ARATH RecName: Full=Phenylalanine ammonia-lyase 4 gi 6056192 gb AAF02809.1 AC009400.5 putative phenylalanine ammonia-lyase [Arabidopsis thaliana] gi 20466382 gb AAM20508.1  putative phenylalanine ammonia-lyase [Arabidopsis thaliana] gi 23198088 gb AAN15571.1  putative phenylalanine ammonia-lyase [Arabidopsis thaliana] gi 32140425 gb AAP59440.1  phenylalanine ammonia lyase [Arabidopsis thaliana] gi 332641372 gb AEE74893.1  phenylalanine ammonia-lyase 4 [Arabidopsis thaliana]                                                                                                                                                                                                                                                                                                                                                                                                                                                                                                                                                                                                                                                                        | 702 | 707  | 0         | 100.7 | 91.0 | 94.4 | phenylalanine ammonia-lyase 4                   | gbpln | Arabidopsis thaliana | AT3G10340.1   Symbols: PAL4   phenylalanine ammonia-lyase 4   chr3:3204260-3207809 FORWARD LENGTH=707                                                               | 702 | 707 | 0         | 100.7 | 91.0 | 94.4 |  |
| Rsa1.0_00416.1.g13401.t1  | gb EOA29558.1  hypothetical protein CARUB_v10015940mg [Capsella rubella]                                                                                                                                                                                                                                                                                                                                                                                                                                                                                                                                                                                                                                                                                                                                                                                                                                                                                                                                                                                                                                                                                                                                                                                                 | 488 | 492  | 0         | 100.8 | 80.3 | 88.3 | hypothetical protein CARUB_v10015940mg          | gbpln | Capsella rubella     | AT3G10320.1   Symbols:   Glycosyltransferase family 61 protein   chr3:3195441-3197111 REVERSE LENGTH=494                                                            | 488 | 494 | 0         | 101.2 | 80.1 | 87.5 |  |
| Rsa1.0_00416.1.g13402.t1  | gb EOA29791.1  hypothetical protein CARUB_v10012886mg, partial [Capsella rubella]                                                                                                                                                                                                                                                                                                                                                                                                                                                                                                                                                                                                                                                                                                                                                                                                                                                                                                                                                                                                                                                                                                                                                                                        | 980 | 1011 | 0         | 103.2 | 83.9 | 90.2 | hypothetical protein CARUB_v10012886mg, partial | gbpln | Capsella rubella     | AT3G10310.1   Symbols:   P-loop nucleoside triphosphate hydrolases superfamily protein with CH (Calponin Homology) domain   chr3:3190208-3195005 FORWARD LENGTH=922 | 980 | 922 | 0         | 94.1  | 80.7 | 86.6 |  |
| Rsa1.0_00416.1.g13403.t18 | gb EOA30978.1  hypothetical protein CARUB_v10014124mg, partial [Capsella rubella]                                                                                                                                                                                                                                                                                                                                                                                                                                                                                                                                                                                                                                                                                                                                                                                                                                                                                                                                                                                                                                                                                                                                                                                        | 326 | 337  | 1.00E-171 | 103.4 | 92.6 | 97.2 | hypothetical protein CARUB_v10014124mg, partial | gbpln | Capsella rubella     | AT3G10290.1   Symbols:   Nucleotide-sugar transporter family protein   chr3:3183511-3185324 REVERSE LENGTH=355                                                      | 326 | 355 | 1.00E-173 | 108.9 | 92.6 | 97.5 |  |
| Rsa1.0_00416.1.g13404.t1  | ref NP_566371.1  reticulon-like protein B8 [Arabidopsis thaliana] gi 30681222 ref NP_850551.1  reticulon-like protein B8 [Arabidopsis thaliana] gi 75207442 sp Q9SS37.1 RTNLH_ARATH RecName: Full=Reticulon-like protein B8; Short=AtRTNLB8 gi 6056199 gb AAF02816.1 AC009400.12 unknown protein [Arabidopsis thaliana] gi 15027947 gb AAK76504.1  unknown protein [Arabidopsis thaliana] gi 20259183 gb AAM14307.1  unknown protein [Arabidopsis thaliana] gi 21553569 gb AAM62662.1  unknown [Arabidopsis thaliana] gi 332641358 gb AEE74879.1  reticulon-like protein B8 [Arabidopsis thaliana] gi 332641359 gb AEE74880.1  reticulon-like protein B8 [Arabidopsis thaliana] ref NP_566370.1  uncharacterized protein [Arabidopsis thaliana] gi 42572351 ref NP_974271.1  uncharacterized protein [Arabidopsis thaliana] gi 15809982 gb AAL06918.1  AT3g10250/F14P13_15 [Arabidopsis thaliana] gi 18958054 gb AAL79600.1  AT3g10250/F14P13_15 [Arabidopsis thaliana] gi 21536630 gb AAM60962.1  unknown [Arabidopsis thaliana] gi 22242363 ctb BAH19734.1  AT3G10250 [Arabidopsis thaliana] gi 332641356 gb AEE74877.1  uncharacterized protein AT3G10250 [Arabidopsis thaliana] gi 332641357 gb AEE74878.1  uncharacterized protein AT3G10250 [Arabidopsis thaliana] | 239 | 247  | 1.00E-119 | 103.3 | 85.4 | 95.0 | reticulon-like protein B8                       | gbpln | Arabidopsis thaliana | AT3G10260.2   Symbols:   Reticulon family protein   chr3:3171413-3172508 REVERSE LENGTH=247                                                                         | 239 | 247 | 1.00E-122 | 103.3 | 85.4 | 95.0 |  |
| Rsa1.0_00416.1.g13405.t1  | gb EOA31328.1  hypothetical protein CARUB_v10014499mg [Capsella rubella]                                                                                                                                                                                                                                                                                                                                                                                                                                                                                                                                                                                                                                                                                                                                                                                                                                                                                                                                                                                                                                                                                                                                                                                                 | 339 | 324  | 1.00E-158 | 95.6  | 85.3 | 90.6 | uncharacterized protein                         | gbpln | Arabidopsis thaliana | AT3G10250.2   Symbols:   Plant protein 1589 of unknown function   chr3:3168371-3170418 REVERSE LENGTH=324                                                           | 339 | 324 | 1.00E-160 | 95.6  | 85.3 | 90.6 |  |
| Rsa1.0_00416.1.g13406.t1  | gb ADT89710.1  chloroplast lycopene beta-cyclase [Brassica napus]                                                                                                                                                                                                                                                                                                                                                                                                                                                                                                                                                                                                                                                                                                                                                                                                                                                                                                                                                                                                                                                                                                                                                                                                        | 494 | 493  | 0         | 99.8  | 95.5 | 97.2 | chloroplast lycopene beta-cyclase               | gbpln | Brassica napus       | AT3G10230.1   Symbols: LYC   lycopene cyclase   chr3:3164340-3165845 REVERSE LENGTH=501                                                                             | 494 | 501 | 0         | 101.4 | 91.9 | 96.4 |  |
| Rsa1.0_00416.1.g13407.t1  | gb EOA31328.1  hypothetical protein CARUB_v10014499mg [Capsella rubella]                                                                                                                                                                                                                                                                                                                                                                                                                                                                                                                                                                                                                                                                                                                                                                                                                                                                                                                                                                                                                                                                                                                                                                                                 | 294 | 243  | 1.00E-124 | 82.7  | 71.4 | 76.9 | hypothetical protein CARUB_v10014499mg          | gbpln | Capsella rubella     | AT3G10220.1   Symbols:   tubulin folding cofactor B   chr3:3161977-3164037 FORWARD LENGTH=243                                                                       | 294 | 243 | 1.00E-125 | 82.7  | 70.4 | 76.2 |  |



|                          |                                                                                                                                                                                                                                                                                                                                                                                                                                                                                                                                                                                                                                                                                                                                                                                                                                                                                                                                                                                     |      |      |           |       |      |      |                                        |       |                      |                                                                                                                                                                         |      |      |           |       |      |      |
|--------------------------|-------------------------------------------------------------------------------------------------------------------------------------------------------------------------------------------------------------------------------------------------------------------------------------------------------------------------------------------------------------------------------------------------------------------------------------------------------------------------------------------------------------------------------------------------------------------------------------------------------------------------------------------------------------------------------------------------------------------------------------------------------------------------------------------------------------------------------------------------------------------------------------------------------------------------------------------------------------------------------------|------|------|-----------|-------|------|------|----------------------------------------|-------|----------------------|-------------------------------------------------------------------------------------------------------------------------------------------------------------------------|------|------|-----------|-------|------|------|
| Rsa1.0_00416.1.g13417.t1 | gb EOA31367.1  hypothetical protein CARUB_v10014538mg [Capsella rubella]                                                                                                                                                                                                                                                                                                                                                                                                                                                                                                                                                                                                                                                                                                                                                                                                                                                                                                            | 231  | 232  | 1.00E-114 | 100.4 | 90.9 | 95.7 | hypothetical protein CARUB_v10014538mg | gbpln | Capsella rubella     | AT3G10060.1   Symbols:   FKBP-like peptidyl-prolyl cis-trans isomerase family protein   chr3:3102291-3103801 FORWARD LENGTH=230                                         | 231  | 230  | 1.00E-116 | 99.6  | 89.6 | 94.4 |
| Rsa1.0_00416.1.g13418.t1 | ref XP_002884774.1  L-O-methylthreonine resistant 1 [Arabidopsis lyrata subsp. lyrata] gi 297330614 gb EFH61033.1  L-O-methylthreonine resistant 1 [Arabidopsis lyrata subsp. lyrata] ref NP_567241.1  xyloglucan 6-xylosyltransferase [Arabidopsis thaliana] gi 46576207 sp Q22775.1 GT2_ARATH RecName: Full=Putative glycosyltransferase 2; Short=AtGT2 gi 3193287 gb AAC19271.1  T14P8.23 [Arabidopsis thaliana] gi 9716844 emb CAC01674.1  putative golgi glycosyltransferase [Arabidopsis thaliana] gi 16209669 gb AAL14393.1  AT4g02500/T10P1.20 [Arabidopsis thaliana] gi 22655160 gb AAM98170.1  putative glycosyltransferase [Arabidopsis thaliana] gi 30387559 gb AAP31945.1  At4g02500 [Arabidopsis thaliana] gi 332656781 gb AEE82181.1  putative glycosyltransferase 2 [Arabidopsis thaliana]                                                                                                                                                                          | 607  | 591  | 0         | 97.4  | 82.5 | 89.3 | L-O-methylthreonine resistant 1        | gbpln | Arabidopsis lyrata   | AT3G10050.1   Symbols: OMR1   L-O-methylthreonine resistant 1   chr3:3099164-3101741 REVERSE LENGTH=592                                                                 | 607  | 592  | 0         | 97.5  | 81.1 | 89.1 |
| Rsa1.0_00417.1.g13419.t2 | gi 9716844 emb CAC01674.1  putative golgi glycosyltransferase [Arabidopsis thaliana] gi 16209669 gb AAL14393.1  AT4g02500/T10P1.20 [Arabidopsis thaliana] gi 22655160 gb AAM98170.1  putative glycosyltransferase [Arabidopsis thaliana] gi 30387559 gb AAP31945.1  At4g02500 [Arabidopsis thaliana] gi 332656781 gb AEE82181.1  putative glycosyltransferase 2 [Arabidopsis thaliana] ref NP_567242.2  translocase of chloroplast 159 [Arabidopsis thaliana] gi 75100143 sp O81283.1 TC159_ARATH RecName: Full=Translocase of chloroplast 159, chloroplastic; Short=AtToc159; AltName: Full=159 kDa chloroplast outer envelope protein; AltName: Full=Plastid protein import 2; AltName: Full=Translocase of chloroplast 160, chloroplastic; Short=AtToc160; AltName: Full=Translocase of chloroplast 86, chloroplastic; Short=AtToc86 gi 3193301 gb AAC19285.1  T14P8.24 [Arabidopsis thaliana] gi 332656782 gb AEE82182.1  translocase of chloroplast 159 [Arabidopsis thaliana] | 167  | 461  | 1.00E-19  | 276.0 | 33.5 | 34.1 | xyloglucan 6-xylosyltransferase        | gbpln | Arabidopsis thaliana | AT4G02500.1   Symbols: ATXT2, XXT2, XT2   UDP-xylosyltransferase 2   chr4:1101638-1103345 FORWARD LENGTH=461                                                            | 167  | 461  | 5.00E-22  | 276.0 | 33.5 | 34.1 |
| Rsa1.0_00417.1.g13420.t1 | gi 3193301 gb AAC19285.1  T14P8.24 [Arabidopsis thaliana] gi 332656782 gb AEE82182.1  translocase of chloroplast 159 [Arabidopsis thaliana]                                                                                                                                                                                                                                                                                                                                                                                                                                                                                                                                                                                                                                                                                                                                                                                                                                         | 1561 | 1503 | 0         | 96.3  | 56.2 | 58.7 | translocase of chloroplast 159         | gbpln | Arabidopsis thaliana | AT4G02510.1   Symbols: TOC159, TOC86, PPI2, TOC160, ATTOC159   translocon at the outer envelope membrane of chloroplasts 159   chr4:1104766-1109360 FORWARD LENGTH=1503 | 1561 | 1503 | 0         | 96.3  | 56.2 | 58.7 |
| Rsa1.0_00417.1.g13421.t1 | gb AFP86475.1  glutathione-S-transferase, partial [Brassica rapa subsp. chinensis]                                                                                                                                                                                                                                                                                                                                                                                                                                                                                                                                                                                                                                                                                                                                                                                                                                                                                                  | 213  | 213  | 1.00E-117 | 100.0 | 95.8 | 98.6 | glutathione-S-transferase, partial     | gbpln | Brassica rapa        | AT2G02930.1   Symbols: ATGSTF3, GST16, GSTF3   glutathione S-transferase F3   chr2:851348-852106 REVERSE LENGTH=212                                                     | 213  | 212  | 1.00E-111 | 99.5  | 89.2 | 95.3 |
| Rsa1.0_00417.1.g13422.t1 | gb AAP58393.1  glutathione S-transferase 3 [Brassica juncea]                                                                                                                                                                                                                                                                                                                                                                                                                                                                                                                                                                                                                                                                                                                                                                                                                                                                                                                        | 213  | 213  | 1.00E-117 | 100.0 | 97.7 | 98.6 | glutathione S-transferase 3            | gbpln | Brassica juncea      | AT2G02930.1   Symbols: ATGSTF3, GST16, GSTF3   glutathione S-transferase F3   chr2:851348-852106 REVERSE LENGTH=212                                                     | 213  | 212  | 1.00E-111 | 99.5  | 90.6 | 95.3 |
| Rsa1.0_00417.1.g13423.t2 | #                                                                                                                                                                                                                                                                                                                                                                                                                                                                                                                                                                                                                                                                                                                                                                                                                                                                                                                                                                                   | #    | #    | #         | #     | #    | -    | -                                      | ----  | ----                 | #                                                                                                                                                                       | #    | #    | #         | #     | #    |      |
| Rsa1.0_00417.1.g13424.t1 | gb EOA24064.1  hypothetical protein CARUB_v10017284mg [Capsella rubella]                                                                                                                                                                                                                                                                                                                                                                                                                                                                                                                                                                                                                                                                                                                                                                                                                                                                                                            | 240  | 435  | 3.00E-25  | 181.3 | 27.1 | 33.8 | hypothetical protein CARUB_v10017284mg | gbpln | Capsella rubella     | AT3G46650.1   Symbols:   UDP-Glycosyltransferase superfamily protein   chr3:17185561-17187812 REVERSE LENGTH=435                                                        | 240  | 435  | 2.00E-25  | 181.3 | 25.0 | 32.5 |
| Rsa1.0_00417.1.g13425.t1 | #                                                                                                                                                                                                                                                                                                                                                                                                                                                                                                                                                                                                                                                                                                                                                                                                                                                                                                                                                                                   | #    | #    | #         | #     | #    | -    | -                                      | ----  | ----                 | #                                                                                                                                                                       | #    | #    | #         | #     | #    |      |
| Rsa1.0_00417.1.g13426.t2 | gb AAC67205.1  putative retroelement pol polyprotein [Arabidopsis thaliana]                                                                                                                                                                                                                                                                                                                                                                                                                                                                                                                                                                                                                                                                                                                                                                                                                                                                                                         | 716  | 1413 | 2.00E-26  | 197.3 | 12.6 | 19.1 | putative retroelement pol polyprotein  | gbpln | Arabidopsis thaliana | AT4G23160.1   Symbols: CRK8   cysteine-rich RLK (RECEPTOR-like protein kinase) 8   chr4:12129485-12134086 FORWARD LENGTH=1262                                           | 716  | 1262 | 2.00E-12  | 176.3 | 6.6  | 11.2 |
| Rsa1.0_00417.1.g13427.t1 | gb AAF97297.1 AC010164_19 Hypothetical protein [Arabidopsis thaliana] ref XP_002874894.1  hypothetical protein ARALYDRAFT_911920 [Arabidopsis lyrata subsp. lyrata] gi 297320731 gb EFH51153.1  hypothetical protein ARALYDRAFT_911920 [Arabidopsis lyrata subsp. lyrata]                                                                                                                                                                                                                                                                                                                                                                                                                                                                                                                                                                                                                                                                                                           | 300  | 308  | 6.00E-45  | 102.7 | 35.0 | 46.0 | Hypothetical protein                   | gbpln | Arabidopsis thaliana | #                                                                                                                                                                       | #    | #    | #         | #     | #    |      |
| Rsa1.0_00417.1.g13428.t1 | ref XP_002874894.1  hypothetical protein ARALYDRAFT_911920 [Arabidopsis lyrata subsp. lyrata] gi 297320731 gb EFH51153.1  hypothetical protein ARALYDRAFT_911920 [Arabidopsis lyrata subsp. lyrata]                                                                                                                                                                                                                                                                                                                                                                                                                                                                                                                                                                                                                                                                                                                                                                                 | 250  | 260  | 6.00E-88  | 104.0 | 69.2 | 80.4 | hypothetical protein ARALYDRAFT_911920 | gbpln | Arabidopsis lyrata   | AT4G02810.1   Symbols:   Protein of unknown function (DUF3049)   chr4:1256253-1257068 FORWARD LENGTH=271                                                                | 250  | 271  | 6.00E-74  | 108.4 | 65.6 | 76.8 |

|                          |                                                                                                                                                                                                                                                                                                                                                                                                                                                                                                                                             |     |     |           |       |      |      |                                                        |       |                      |                                                                                                                                                                                                                                                                                                                                                                                                                                                                      |     |     |           |       |      |      |
|--------------------------|---------------------------------------------------------------------------------------------------------------------------------------------------------------------------------------------------------------------------------------------------------------------------------------------------------------------------------------------------------------------------------------------------------------------------------------------------------------------------------------------------------------------------------------------|-----|-----|-----------|-------|------|------|--------------------------------------------------------|-------|----------------------|----------------------------------------------------------------------------------------------------------------------------------------------------------------------------------------------------------------------------------------------------------------------------------------------------------------------------------------------------------------------------------------------------------------------------------------------------------------------|-----|-----|-----------|-------|------|------|
| Rsa1.0_00417.1.g13429.t1 | refNP_192192.1  uncharacterized protein [Arabidopsis thaliana]   g14263528 gb AAD15354.1  predicted protein of unknown function [Arabidopsis thaliana]   g17269768 emb CAB7768.1  predicted protein of unknown function [Arabidopsis thaliana]   g1332656834 gb AEE82234.1  uncharacterized protein AT4G02830 [Arabidopsis thaliana]   ref XP_002874881.1  hypothetical protein ARALYDRAFT_490253 [Arabidopsis lyrata subsp. lyrata]   g1297320718 gb EFH51140.1  hypothetical protein ARALYDRAFT_490253 [Arabidopsis lyrata subsp. lyrata] | 124 | 184 | 4.00E-35  | 148.4 | 68.5 | 76.6 | uncharacterized protein                                | gbpln | Arabidopsis thaliana | AT4G02830.1   Symbols:   unknown protein; Has 74 Blast hits to 74 proteins in 13 species: Archae - 0; Bacteria - 0; Metazoa - 0; Fungi - 0; Plants - 74; Viruses - 0; Other Eukaryotes - 0 (source: NCBI BLink).   chr4:1262447-1263932 FORWARD LENGTH=184                                                                                                                                                                                                           | 124 | 184 | 7.00E-38  | 148.4 | 68.5 | 76.6 |
| Rsa1.0_00417.1.g13430.t1 | ref XP_002874881.1  hypothetical protein ARALYDRAFT_490253 [Arabidopsis lyrata subsp. lyrata]   g1297320718 gb EFH51140.1  hypothetical protein ARALYDRAFT_490253 [Arabidopsis lyrata subsp. lyrata]                                                                                                                                                                                                                                                                                                                                        | 424 | 423 | 0         | 99.8  | 79.7 | 83.3 | hypothetical protein ARALYDRAFT_490253                 | gbpln | Arabidopsis lyrata   | AT4G03100.1   Symbols:   Rho GTPase activating protein with PAK-box/P21-Rho-binding domain   chr4:1374361-1375913 FORWARD LENGTH=430                                                                                                                                                                                                                                                                                                                                 | 424 | 430 | 0         | 101.4 | 83.3 | 88.0 |
| Rsa1.0_00417.1.g13431.t1 | gb EOA20635.1  hypothetical protein CARUB_v10000954mg [Capsella rubella]                                                                                                                                                                                                                                                                                                                                                                                                                                                                    | 427 | 446 | 0         | 104.4 | 83.1 | 88.3 | hypothetical protein CARUB_v10000954mg                 | gbpln | Capsella rubella     | AT4G03110.1   Symbols: AtRBP-DR1, RBP-DR1   RNA-binding protein-defense related 1   chr4:1376612-1379275 REVERSE LENGTH=441                                                                                                                                                                                                                                                                                                                                          | 427 | 441 | 0         | 103.3 | 82.2 | 87.6 |
| Rsa1.0_00417.1.g13432.t1 | refNP_680566.5  Mitochondrial substrate carrier family protein [Arabidopsis thaliana]   g1332656874 gb AE82274.1  Mitochondrial substrate carrier family protein [Arabidopsis thaliana]   ref XP_002874880.1  hypothetical protein ARALYDRAFT_911890 [Arabidopsis lyrata subsp. lyrata]   g1297320717 gb EFH51139.1  hypothetical protein ARALYDRAFT_911890 [Arabidopsis lyrata subsp. lyrata]                                                                                                                                              | 333 | 314 | 1.00E-157 | 94.3  | 83.8 | 88.3 | Mitochondrial substrate carrier family protein         | gbpln | Arabidopsis thaliana | AT4G03115.1   Symbols:   Mitochondrial substrate carrier family protein   chr4:1383366-1385485 REVERSE LENGTH=314                                                                                                                                                                                                                                                                                                                                                    | 333 | 314 | 1.00E-159 | 94.3  | 83.8 | 88.3 |
| Rsa1.0_00417.1.g13433.t1 | ref XP_002874880.1  hypothetical protein ARALYDRAFT_911890 [Arabidopsis lyrata subsp. lyrata]   g1297320717 gb EFH51139.1  hypothetical protein ARALYDRAFT_911890 [Arabidopsis lyrata subsp. lyrata]                                                                                                                                                                                                                                                                                                                                        | 188 | 194 | 2.00E-59  | 103.2 | 87.2 | 89.9 | hypothetical protein ARALYDRAFT_911890                 | gbpln | Arabidopsis lyrata   | AT4G03120.1   Symbols:   C2H2 and C2HC zinc fingers superfamily protein   chr4:1385747-1387331 FORWARD LENGTH=207                                                                                                                                                                                                                                                                                                                                                    | 188 | 207 | 1.00E-58  | 110.1 | 87.8 | 89.9 |
| Rsa1.0_00417.1.g13434.t1 | ref XP_002872794.1  hypothetical protein ARALYDRAFT_490249 [Arabidopsis lyrata subsp. lyrata]   g1297318631 gb EFH49053.1  hypothetical protein ARALYDRAFT_490249 [Arabidopsis lyrata subsp. lyrata]                                                                                                                                                                                                                                                                                                                                        | 717 | 762 | 0         | 106.3 | 70.3 | 79.8 | hypothetical protein ARALYDRAFT_490249                 | gbpln | Arabidopsis lyrata   | AT4G03130.1   Symbols:   BRCT domain-containing DNA repair protein   chr4:1387781-1390646 REVERSE LENGTH=766                                                                                                                                                                                                                                                                                                                                                         | 717 | 766 | 0         | 106.8 | 68.5 | 78.8 |
| Rsa1.0_00417.1.g13435.t1 | ref NP_567251.2  Rossmann-fold NAD(P)-binding domain-containing protein [Arabidopsis thaliana]   g1332656878 gb AEE82278.1  Rossmann-fold NAD(P)-binding domain-containing protein [Arabidopsis thaliana]                                                                                                                                                                                                                                                                                                                                   | 271 | 343 | 1.00E-143 | 126.6 | 91.1 | 94.5 | Rossmann-fold NAD(P)-binding domain-containing protein | gbpln | Arabidopsis thaliana | AT4G03140.1   Symbols:   NAD(P)-binding Rossmann-fold superfamily protein   chr4:1392191-1393662 FORWARD LENGTH=343                                                                                                                                                                                                                                                                                                                                                  | 271 | 343 | 1.00E-145 | 126.6 | 91.1 | 94.5 |
| Rsa1.0_00417.1.g13436.t1 | ref XP_002872793.1  hypothetical protein ARALYDRAFT_911887 [Arabidopsis lyrata subsp. lyrata]   g1297318630 gb EFH49052.1  hypothetical protein ARALYDRAFT_911887 [Arabidopsis lyrata subsp. lyrata]                                                                                                                                                                                                                                                                                                                                        | 174 | 174 | 1.00E-67  | 100.0 | 77.6 | 83.3 | hypothetical protein ARALYDRAFT_911887                 | gbpln | Arabidopsis lyrata   | AT4G03150.1   Symbols:   unknown protein; FUNCTIONS IN: molecular_function unknown; INVOLVED IN: biological_process unknown; LOCATED IN: chloroplast; EXPRESSED IN: 20 plant structures; EXPRESSED DURING: 13 growth stages; Has 30201 Blast hits to 17322 proteins in 780 species: Archae - 12; Bacteria - 1396; Metazoa - 17338; Fungi - 3422; Plants - 5037; Viruses - 0; Other Eukaryotes - 2996 (source: NCBI BLink).   chr4:1393731-1394529 REVERSE LENGTH=185 | 174 | 185 | 3.00E-67  | 106.3 | 75.9 | 83.3 |
| Rsa1.0_00417.1.g13437.t1 | dbj BAJ333601.1  unnamed protein product [Theillungiella halophila]                                                                                                                                                                                                                                                                                                                                                                                                                                                                         | 585 | 585 | 0         | 100.0 | 88.9 | 93.8 | unnamed protein product                                | ----  | ----                 | AT4G03190.1   Symbols: GRH1, ATGRH1, AFB1   GRR1-like protein 1   chr4:1405108-1407057 REVERSE LENGTH=585                                                                                                                                                                                                                                                                                                                                                            | 585 | 585 | 0         | 100.0 | 84.4 | 92.0 |
| Rsa1.0_00417.1.g13438.t1 | #                                                                                                                                                                                                                                                                                                                                                                                                                                                                                                                                           | #   | #   | #         | #     | #    | -    | -                                                      | ----  | ----                 | #                                                                                                                                                                                                                                                                                                                                                                                                                                                                    | #   | #   | #         | #     | #    |      |
| Rsa1.0_00417.1.g13439.t1 | gb EOA19687.1  hypothetical protein CARUB_v10003357mg [Capsella rubella]                                                                                                                                                                                                                                                                                                                                                                                                                                                                    | 811 | 816 | 0         | 100.6 | 90.8 | 94.9 | hypothetical protein CARUB_v10003357mg                 | gbpln | Capsella rubella     | AT4G03200.1   Symbols:   catalytics   chr4:1408296-1412566 FORWARD LENGTH=818                                                                                                                                                                                                                                                                                                                                                                                        | 811 | 818 | 0         | 100.9 | 90.9 | 94.9 |
| Rsa1.0_00417.1.g13440.t1 | gb AAV92081.1  xyloglucan endotransglucosylase/hydrolase [Brassica rapa subsp. oleifera]                                                                                                                                                                                                                                                                                                                                                                                                                                                    | 291 | 281 | 1.00E-163 | 96.6  | 93.1 | 96.2 | xyloglucan endotransglucosylase/hydrolase              | gbpln | Brassica rapa        | AT4G03210.1   Symbols: XTH9   xyloglucan endotransglucosylase/hydrolase 9   chr4:1416019-1417197 FORWARD LENGTH=290                                                                                                                                                                                                                                                                                                                                                  | 291 | 290 | 1.00E-162 | 99.7  | 91.4 | 96.2 |
| Rsa1.0_00417.1.g13441.t1 | gb EOA21150.1  hypothetical protein CARUB_v10001497mg [Capsella rubella]                                                                                                                                                                                                                                                                                                                                                                                                                                                                    | 316 | 315 | 2.00E-95  | 99.7  | 57.9 | 67.1 | hypothetical protein CARUB_v10001497mg                 | gbpln | Capsella rubella     | AT4G05460.1   Symbols:   RNI-like superfamily protein   chr4:2761106-2762400 REVERSE LENGTH=302                                                                                                                                                                                                                                                                                                                                                                      | 316 | 302 | 1.00E-85  | 95.6  | 57.0 | 66.1 |

|                          |                                                                                                                                                                                                                                                                                                                |      |      |           |       |      |      |                                                                                                                                                             |       |                      |                                                                                                                    |      |      |           |       |      |      |
|--------------------------|----------------------------------------------------------------------------------------------------------------------------------------------------------------------------------------------------------------------------------------------------------------------------------------------------------------|------|------|-----------|-------|------|------|-------------------------------------------------------------------------------------------------------------------------------------------------------------|-------|----------------------|--------------------------------------------------------------------------------------------------------------------|------|------|-----------|-------|------|------|
| Rsa1.0_00417.1.g13442.t1 | refXP_002874843.1   hypothetical protein ARALYDRAFT_911810 [Arabidopsis lyrata subsp. lyrata] gi 297320680 gb EFH51102.1                                                                                                                                                                                       | 198  | 610  | 3.00E-59  | 308.1 | 63.6 | 74.2 | hypothetical protein ARALYDRAFT_911810                                                                                                                      | gbpln | Arabidopsis lyrata   | AT4G05460.1   Symbols:   RNI-like superfamily protein   chr4:2761106-2762400 REVERSE LENGTH=302                    | 198  | 302  | 1.00E-47  | 152.5 | 54.0 | 68.2 |
| Rsa1.0_00417.1.g13443.t1 | hypothetical protein ARALYDRAFT_911810 [Arabidopsis lyrata subsp. lyrata] refXP_002874843.1   hypothetical protein ARALYDRAFT_911810 [Arabidopsis lyrata subsp. lyrata] gi 297320680 gb EFH51102.1                                                                                                             | 290  | 610  | 2.00E-83  | 210.3 | 58.6 | 68.6 | hypothetical protein ARALYDRAFT_911810                                                                                                                      | gbpln | Arabidopsis lyrata   | AT4G05460.1   Symbols:   RNI-like superfamily protein   chr4:2761106-2762400 REVERSE LENGTH=302                    | 290  | 302  | 2.00E-83  | 104.1 | 59.7 | 71.4 |
| Rsa1.0_00417.1.g13444.t1 | sp Q9ZR08.3 Y4230_ARATH RecName: Full=G-type lectin S-receptor-like serine/threonine-protein kinase At4g03230; Flags: Precursor gi 4262151 gb AAD14451.1   putative receptor kinase [Arabidopsis thaliana] gi 7270193 emb CAB77808.1   putative receptor kinase [Arabidopsis thaliana]                         | 217  | 852  | 4.00E-22  | 392.6 | 29.5 | 31.8 | RecName: Full=G-type lectin S-receptor-like serine/threonine-protein kinase At4g03230; Flags: Precursor gi 4262151 gb AAD14451.1   putative receptor kinase | gbpln | Arabidopsis thaliana | AT4G03230.1   Symbols:   S-locus lectin protein kinase family protein   chr4:1419278-1422828 REVERSE LENGTH=1010   | 217  | 1010 | 2.00E-24  | 465.4 | 29.5 | 31.8 |
| Rsa1.0_00417.1.g13445.t1 | refXP_002894406.1   predicted protein [Arabidopsis lyrata subsp. lyrata] gi 297340248 gb EFH70665.1   predicted protein [Arabidopsis lyrata subsp. lyrata]                                                                                                                                                     | 153  | 160  | 2.00E-15  | 104.6 | 37.3 | 57.5 | predicted protein                                                                                                                                           | gbpln | Arabidopsis lyrata   | #                                                                                                                  | #    | #    | #         | #     | #    | #    |
| Rsa1.0_00417.1.g13446.t1 | #                                                                                                                                                                                                                                                                                                              | #    | #    | #         | #     | #    | #    | -                                                                                                                                                           | ----  | ----                 | #                                                                                                                  | #    | #    | #         | #     | #    | #    |
| Rsa1.0_00417.1.g13447.t1 | gb EOA21150.1  hypothetical protein CARUB_v10001497mg [Capsella rubella]                                                                                                                                                                                                                                       | 303  | 315  | 1.00E-92  | 104.0 | 59.7 | 70.3 | hypothetical protein CARUB_v10001497mg                                                                                                                      | gbpln | Capsella rubella     | AT4G05460.1   Symbols:   RNI-like superfamily protein   chr4:2761106-2762400 REVERSE LENGTH=302                    | 303  | 302  | 5.00E-87  | 99.7  | 57.4 | 68.6 |
| Rsa1.0_00417.1.g13448.t1 | refNP_192232.5   S-locus lectin protein kinase-like protein [Arabidopsis thaliana] gi 332656895 gb AEE82295.1   G-type lectin S-receptor-like serine/threonine-protein kinase [Arabidopsis thaliana]                                                                                                           | 1157 | 1010 | 0         | 87.3  | 73.8 | 79.8 | S-locus lectin protein kinase-like protein                                                                                                                  | gbpln | Arabidopsis thaliana | AT4G03230.1   Symbols:   S-locus lectin protein kinase family protein   chr4:1419278-1422828 REVERSE LENGTH=1010   | 1157 | 1010 | 0         | 87.3  | 73.8 | 79.8 |
| Rsa1.0_00417.1.g13449.t1 | refNP_192234.2   homeobox-leucine zipper family protein [Arabidopsis thaliana] gi 332656897 gb AEE82297.1   homeobox-leucine zipper family protein [Arabidopsis thaliana]                                                                                                                                      | 475  | 507  | 1.00E-179 | 106.7 | 73.5 | 82.9 | homeobox-leucine zipper family protein                                                                                                                      | gbpln | Arabidopsis thaliana | AT4G03250.1   Symbols:   Homeodomain-like superfamily protein   chr4:1425050-1427744 FORWARD LENGTH=507            | 475  | 507  | 0         | 106.7 | 73.5 | 82.9 |
| Rsa1.0_00417.1.g13450.t1 | refXP_002874872.1   leucine-rich repeat family protein [Arabidopsis lyrata subsp. lyrata] gi 297320709 gb EFH51131.1   leucine-rich repeat family protein [Arabidopsis lyrata subsp. lyrata]                                                                                                                   | 637  | 680  | 0         | 106.8 | 79.0 | 86.0 | leucine-rich repeat family protein                                                                                                                          | gbpln | Arabidopsis lyrata   | AT4G03260.2   Symbols:   Outer arm dynein light chain 1 protein   chr4:1429092-1431431 FORWARD LENGTH=677          | 637  | 677  | 0         | 106.3 | 77.9 | 85.9 |
| Rsa1.0_00417.1.g13451.t1 | refXP_002872788.1   CYCD6.1 [Arabidopsis lyrata subsp. lyrata] gi 297318625 gb EFH49047.1   CYCD6.1 [Arabidopsis lyrata subsp. lyrata]                                                                                                                                                                         | 303  | 300  | 1.00E-130 | 99.0  | 80.2 | 88.1 | CYCD6.1                                                                                                                                                     | gbpln | Arabidopsis lyrata   | AT4G03270.1   Symbols: CYCD6.1   Cyclin D6.1   chr4:1432375-1433691 REVERSE LENGTH=302                             | 303  | 302  | 1.00E-130 | 99.7  | 80.5 | 86.8 |
| Rsa1.0_00417.1.g13452.t1 | #                                                                                                                                                                                                                                                                                                              | #    | #    | #         | #     | #    | #    | -                                                                                                                                                           | ----  | ----                 | #                                                                                                                  | #    | #    | #         | #     | #    | #    |
| Rsa1.0_00417.1.g13453.t1 | refXP_002874864.1   hypothetical protein ARALYDRAFT_911855 [Arabidopsis lyrata subsp. lyrata] gi 297320701 gb EFH51123.1   hypothetical protein ARALYDRAFT_911855 [Arabidopsis lyrata subsp. lyrata]                                                                                                           | 307  | 314  | 1.00E-140 | 102.3 | 87.6 | 90.6 | hypothetical protein ARALYDRAFT_911855                                                                                                                      | gbpln | Arabidopsis lyrata   | AT4G03420.1   Symbols:   Protein of unknown function (DUF789)   chr4:1512226-1513594 FORWARD LENGTH=310            | 307  | 310  | 1.00E-139 | 101.0 | 86.3 | 89.3 |
| Rsa1.0_00417.1.g13454.t1 | #                                                                                                                                                                                                                                                                                                              | #    | #    | #         | #     | #    | #    | -                                                                                                                                                           | ----  | ----                 | #                                                                                                                  | #    | #    | #         | #     | #    | #    |
| Rsa1.0_00417.1.g13455.t1 | gb EOA12837.1  hypothetical protein CARUB_v10025803mg [Capsella rubella]                                                                                                                                                                                                                                       | 1014 | 1021 | 0         | 100.7 | 89.6 | 94.9 | hypothetical protein CARUB_v10025803mg                                                                                                                      | gbpln | Capsella rubella     | AT4G03430.1   Symbols: STA1, EMB2770   pre-mRNA splicing factor-related   chr4:1517411-1520500 REVERSE LENGTH=1029 | 1014 | 1029 | 0         | 101.5 | 89.5 | 94.8 |
| Rsa1.0_00417.1.g13456.t1 | refNP_192259.1   ankyrin repeat-containing protein [Arabidopsis thaliana] gi 4206204 gb AAD11592.1   hypothetical protein [Arabidopsis thaliana] gi 7270673 emb CAB77835.1   hypothetical protein [Arabidopsis thaliana] gi 332656929 gb AEE82329.1   ankyrin repeat-containing protein [Arabidopsis thaliana] | 303  | 652  | 1.00E-110 | 215.2 | 67.7 | 78.5 | ankyrin repeat-containing protein                                                                                                                           | gbpln | Arabidopsis thaliana | AT4G03500.1   Symbols:   Ankyrin repeat family protein   chr4:1553453-1556571 FORWARD LENGTH=652                   | 303  | 652  | 1.00E-112 | 215.2 | 67.7 | 78.5 |
| Rsa1.0_00417.1.g13457.t3 | refNP_192258.5   Ankyrin repeat family protein [Arabidopsis thaliana] gi 332656927 gb AEE82327.1   Ankyrin repeat family protein [Arabidopsis thaliana]                                                                                                                                                        | 958  | 662  | 0         | 69.1  | 46.2 | 51.8 | Ankyrin repeat family protein                                                                                                                               | gbpln | Arabidopsis thaliana | AT4G03490.1   Symbols:   Ankyrin repeat family protein   chr4:1549345-1552784 REVERSE LENGTH=662                   | 958  | 662  | 0         | 69.1  | 46.2 | 51.8 |

|                          |                                                                                                                                                                                                                                                                                                                                                                                                                                                                                                                                                                                                                                                                                                                                                                                   |     |     |           |       |      |      |                                        |       |                      |                                                                                                                                         |     |     |           |       |      |      |
|--------------------------|-----------------------------------------------------------------------------------------------------------------------------------------------------------------------------------------------------------------------------------------------------------------------------------------------------------------------------------------------------------------------------------------------------------------------------------------------------------------------------------------------------------------------------------------------------------------------------------------------------------------------------------------------------------------------------------------------------------------------------------------------------------------------------------|-----|-----|-----------|-------|------|------|----------------------------------------|-------|----------------------|-----------------------------------------------------------------------------------------------------------------------------------------|-----|-----|-----------|-------|------|------|
| Rsa1.0_00417.1.g13458.t1 | refNP_192260.1  E3 ubiquitin-protein ligase RMA1 [Arabidopsis thaliana] gi 42572819 refNP_974506.1  E3 ubiquitin-protein ligase RMA1 [Arabidopsis thaliana] gi 75318457 sp O64425.1 RMA1_ARATH RecName: Full=E3 ubiquitin-protein ligase RMA1; AltName: Full=Protein RING membrane-anchor 1 gi 3164222 dbj BAA28598.1  RMA1 [Arabidopsis thaliana] gi 4206205 gb AAD11593.1  RMA1 RING zinc finger protein [Arabidopsis thaliana] gi 28392896 gb AAO41884.1  putative E3 ubiquitin ligase, RMA1 [Arabidopsis thaliana] gi 28827754 gb AAO50721.1  putative E3 ubiquitin ligase, RMA1 [Arabidopsis thaliana] gi 33265693 gb AEE82331.1  E3 ubiquitin-protein ligase RMA1 [Arabidopsis thaliana] gi 33265693 gb AEE82332.1  E3 ubiquitin-protein ligase RMA1 [Arabidopsis thaliana] | 240 | 249 | 5.00E-97  | 103.8 | 77.1 | 87.1 | E3 ubiquitin-protein ligase RMA1       | gbpln | Arabidopsis thaliana | AT4G03510.2   Symbols: RMA1, ATRMA1   RING membrane-anchor 1   chr4:1557905-1558654 REVERSE LENGTH=249                                  | 240 | 249 | 2.00E-99  | 103.8 | 77.1 | 87.1 |
| Rsa1.0_00417.1.g13459.t1 | #                                                                                                                                                                                                                                                                                                                                                                                                                                                                                                                                                                                                                                                                                                                                                                                 | #   | #   | #         | #     | #    | #    | -                                      | ----  | ----                 | #                                                                                                                                       | #   | #   | #         | #     | #    |      |
| Rsa1.0_00418.1.g13460.t1 | refNP_565495.1  synaptotagmin A [Arabidopsis thaliana] gi 75313542 sp Q9SKR2.2 SYT1_ARATH RecName: Full=Synaptotagmin-1; AltName: Full=NTMC2T1.1; AltName: Full=Synaptotagmin A gi 15027959 gb AAK76510.1  unknown protein [Arabidopsis thaliana] gi 20197686 gb AAM15203.1  expressed protein [Arabidopsis thaliana] gi 20197724 gb AAD29817.2  expressed protein [Arabidopsis thaliana] gi 21593508 gb AAM65475.1  unknown [Arabidopsis thaliana] gi 28393915 gb AAO42365.1  unknown protein [Arabidopsis thaliana] gi 31071599 dbj BAC76812.1  synaptotagmin A [Arabidopsis thaliana] gi 39918793 emb CAE85115.1  synaptotagmin [Arabidopsis thaliana] gi 330252015 gb AEC07109.1  svnaototamin A [Arabidopsis thaliana]                                                       | 541 | 541 | 0         | 100.0 | 91.7 | 96.3 | synaptotagmin A                        | gbpln | Arabidopsis thaliana | AT2G20990.1   Symbols: SYTA, NTMC2TYPE1.1, ATSYTA, NTMC2T1.1, SYT1   synaptotagmin A   chr2:9014827-9017829 FORWARD LENGTH=541          | 541 | 541 | 0         | 100.0 | 91.7 | 96.3 |
| Rsa1.0_00418.1.g13461.t1 | gb EOA27008.1  hypothetical protein CARUB_v10023108mg [Capsella rubella]                                                                                                                                                                                                                                                                                                                                                                                                                                                                                                                                                                                                                                                                                                          | 287 | 483 | 1.00E-155 | 168.3 | 96.2 | 97.9 | hypothetical protein CARUB_v10023108mg | gbpln | Capsella rubella     | AT2G21050.1   Symbols: LAX2   like AUXIN RESISTANT 2   chr2:9034289-9036439 FORWARD LENGTH=483                                          | 287 | 483 | 1.00E-157 | 168.3 | 96.9 | 98.3 |
| Rsa1.0_00418.1.g13462.t1 | refNP_179702.1  glycine-rich protein 2B [Arabidopsis thaliana] gi 17366505 sp Q38896.1 CSP4_ARATH RecName: Full=Cold shock domain-containing protein 4; Short=AtCSP4; AltName: Full=Glycine-rich protein 2b; Short=AtGRP2b gi 1063684 gb AAA91165.1  AtGRP2b [Arabidopsis thaliana] gi 4803937 gb AAD29810.1  glycine-rich protein (AtGRP2) [Arabidopsis thaliana] gi 16323178 gb AAL15323.1  At2g21060/F26H11.18 [Arabidopsis thaliana] gi 60543359 gb AAX22277.1  At2g21060 [Arabidopsis thaliana] gi 330252023 gb AEC07117.1  glycine-rich protein 2B [Arabidopsis thaliana]                                                                                                                                                                                                   | 184 | 201 | 5.00E-20  | 109.2 | 54.3 | 56.5 | glycine-rich protein 2B                | gbpln | Arabidopsis thaliana | AT2G21060.1   Symbols: ATGRP2B, ATCSP4, GRP2B   glycine-rich protein 2B   chr2:9036983-9037588 REVERSE LENGTH=201                       | 184 | 201 | 2.00E-22  | 109.2 | 54.3 | 56.5 |
| Rsa1.0_00418.1.g13463.t1 | gb EOA29035.1  hypothetical protein CARUB_v10025289mg [Capsella rubella]                                                                                                                                                                                                                                                                                                                                                                                                                                                                                                                                                                                                                                                                                                          | 559 | 597 | 0         | 106.8 | 82.8 | 91.8 | hypothetical protein CARUB_v10025289mg | gbpln | Capsella rubella     | AT2G21090.1   Symbols:   Pentatricopeptide repeat (PPR-like) superfamily protein   chr2:9045695-9047488 REVERSE LENGTH=597              | 559 | 597 | 0         | 106.8 | 80.1 | 90.9 |
| Rsa1.0_00418.1.g13464.t1 | gb EOA27954.1  hypothetical protein CARUB_v10024124mg [Capsella rubella]                                                                                                                                                                                                                                                                                                                                                                                                                                                                                                                                                                                                                                                                                                          | 188 | 189 | 9.00E-97  | 100.5 | 89.4 | 96.3 | hypothetical protein CARUB_v10024124mg | gbpln | Capsella rubella     | AT2G21100.1   Symbols:   Disease resistance-responsive (dirigent-like protein) family protein   chr2:9048687-9049336 REVERSE LENGTH=187 | 188 | 187 | 3.00E-97  | 99.5  | 86.7 | 95.2 |
| Rsa1.0_00418.1.g13465.t1 | gb EOA28830.1  hypothetical protein CARUB_v10025069mg [Capsella rubella]                                                                                                                                                                                                                                                                                                                                                                                                                                                                                                                                                                                                                                                                                                          | 188 | 184 | 7.00E-82  | 97.9  | 79.8 | 88.3 | hypothetical protein CARUB_v10025069mg | gbpln | Capsella rubella     | AT2G21110.1   Symbols:   Disease resistance-responsive (dirigent-like protein) family protein   chr2:9050290-9050850 REVERSE LENGTH=186 | 188 | 186 | 4.00E-84  | 98.9  | 79.3 | 88.3 |

|                          |                                                                                                                                                                                                                                                                                            |     |     |           |       |      |      |                                        |       |                      |                                                                                                                                                                                                                                                                                                                                               |     |     |           |       |      |      |
|--------------------------|--------------------------------------------------------------------------------------------------------------------------------------------------------------------------------------------------------------------------------------------------------------------------------------------|-----|-----|-----------|-------|------|------|----------------------------------------|-------|----------------------|-----------------------------------------------------------------------------------------------------------------------------------------------------------------------------------------------------------------------------------------------------------------------------------------------------------------------------------------------|-----|-----|-----------|-------|------|------|
| Rsa1.0_00418.1.g13466.t1 | refNP_179708.2   uncharacterized protein [Arabidopsis thaliana]   gi26452186 dbj BAC43181.1   unknown protein [Arabidopsis thaliana]   gi109946593 gb ABG48475.1   At2g21120 [Arabidopsis thaliana]   gi330252031 gb AEC07125.1   uncharacterized protein AT2G21120 [Arabidopsis thaliana] | 339 | 328 | 1.00E-179 | 96.8  | 92.3 | 95.6 | uncharacterized protein                | gbpln | Arabidopsis thaliana | AT2G21120.1   Symbols:   Protein of unknown function (DUF803)   chr2:9052103-9054266 REVERSE LENGTH=328                                                                                                                                                                                                                                       | 339 | 328 | 0         | 96.8  | 92.3 | 95.6 |
| Rsa1.0_00418.1.g13467.t1 | gb EOA29108.1   hypothetical protein CARUB_v10025375mg [Capsella rubella]                                                                                                                                                                                                                  | 361 | 337 | 1.00E-160 | 93.4  | 87.5 | 90.3 | hypothetical protein CARUB_v10025375mg | gbpln | Capsella rubella     | AT2G21150.1   Symbols: XCT   XAP5 family protein   chr2:9065397-9067921 FORWARD LENGTH=337                                                                                                                                                                                                                                                    | 361 | 337 | 1.00E-162 | 93.4  | 87.3 | 90.6 |
| Rsa1.0_00418.1.g13468.t1 | gb EOA27737.1   hypothetical protein CARUB_v10023890mg [Capsella rubella]                                                                                                                                                                                                                  | 257 | 258 | 1.00E-110 | 100.4 | 84.4 | 89.1 | hypothetical protein CARUB_v10023890mg | gbpln | Capsella rubella     | AT2G21160.1   Symbols:   Translocon-associated protein (TRAP), alpha subunit   chr2:9068428-9070207 FORWARD LENGTH=258                                                                                                                                                                                                                        | 257 | 258 | 1.00E-107 | 100.4 | 81.3 | 87.2 |
| Rsa1.0_00418.1.g13469.t1 | gb EOA27531.1   hypothetical protein CARUB_v10023671mg [Capsella rubella]                                                                                                                                                                                                                  | 315 | 315 | 1.00E-149 | 100.0 | 88.6 | 91.7 | hypothetical protein CARUB_v10023671mg | gbpln | Capsella rubella     | AT2G21170.1   Symbols: TIM, PDTPI   triosephosphate isomerase   chr2:9071047-9073106 REVERSE LENGTH=315                                                                                                                                                                                                                                       | 315 | 315 | 1.00E-150 | 100.0 | 89.2 | 91.7 |
| Rsa1.0_00418.1.g13470.t1 | ref XP_002880362.1   hypothetical protein ARALYDRAFT_900527 [Arabidopsis lyrata subsp. lyrata]   gi297326201 gb EFH56621.1   hypothetical protein ARALYDRAFT_900527 [Arabidopsis lyrata subsp. lyrata]                                                                                     | 132 | 130 | 1.00E-44  | 98.5  | 84.8 | 90.2 | hypothetical protein ARALYDRAFT_900527 | gbpln | Arabidopsis lyrata   | AT2G21180.1   Symbols:   unknown protein; BEST Arabidopsis thaliana protein match is: unknown protein (TAIR:AT5G19875.1); Has 124 Blast hits to 124 proteins in 12 species: Archae - 0; Bacteria - 0; Metazoa - 0; Fungi - 0; Plants - 124; Viruses - 0; Other Eukaryotes - 0 (source: NCBI BLink).   chr2:9074956-9075351 REVERSE LENGTH=131 | 132 | 131 | 2.00E-39  | 99.2  | 81.1 | 87.1 |
| Rsa1.0_00418.1.g13471.t1 | #                                                                                                                                                                                                                                                                                          | #   | #   | #         | #     | #    | #    | -                                      | ----  | ----                 | #                                                                                                                                                                                                                                                                                                                                             | #   | #   | #         | #     | #    | #    |
| Rsa1.0_00418.1.g13472.t1 | gb EOA17208.1   hypothetical protein CARUB_v10005480mg [Capsella rubella]                                                                                                                                                                                                                  | 272 | 273 | 1.00E-139 | 100.4 | 88.6 | 94.1 | hypothetical protein CARUB_v10005480mg | gbpln | Capsella rubella     | AT4G38790.1   Symbols:   ER lumen protein retaining receptor family protein   chr4:18111426-18112977 FORWARD LENGTH=273                                                                                                                                                                                                                       | 272 | 273 | 1.00E-141 | 100.4 | 87.9 | 93.4 |
| Rsa1.0_00418.1.g13473.t1 | gb EOA28190.1   hypothetical protein CARUB_v10024381mg [Capsella rubella]                                                                                                                                                                                                                  | 91  | 104 | 9.00E-46  | 114.3 | 96.7 | 96.7 | hypothetical protein CARUB_v10024381mg | gbpln | Capsella rubella     | AT2G21220.1   Symbols:   SAUR-like auxin-responsive protein family   chr2:9089380-9089694 FORWARD LENGTH=104                                                                                                                                                                                                                                  | 91  | 104 | 2.00E-47  | 114.3 | 95.6 | 95.6 |
| Rsa1.0_00418.1.g13474.t1 | #                                                                                                                                                                                                                                                                                          | #   | #   | #         | #     | #    | #    | -                                      | ----  | ----                 | #                                                                                                                                                                                                                                                                                                                                             | #   | #   | #         | #     | #    | #    |
| Rsa1.0_00418.1.g13475.t1 | ref XP_002880366.1   hypothetical protein ARALYDRAFT_480978 [Arabidopsis lyrata subsp. lyrata]   gi297326205 gb EFH56625.1   hypothetical protein ARALYDRAFT_480978 [Arabidopsis lyrata subsp. lyrata]                                                                                     | 801 | 518 | 2.00E-90  | 64.7  | 29.6 | 33.6 | hypothetical protein ARALYDRAFT_480978 | gbpln | Arabidopsis lyrata   | AT2G21230.1   Symbols:   Basic-leucine zipper (bZIP) transcription factor family protein   chr2:9093920-9096059 REVERSE LENGTH=519                                                                                                                                                                                                            | 801 | 519 | 1.00E-85  | 64.8  | 28.5 | 32.2 |
| Rsa1.0_00418.1.g13476.t2 | ref XP_002880370.1   hypothetical protein ARALYDRAFT_480985 [Arabidopsis lyrata subsp. lyrata]   gi297326209 gb EFH56629.1   hypothetical protein ARALYDRAFT_480985 [Arabidopsis lyrata subsp. lyrata]                                                                                     | 295 | 309 | 1.00E-141 | 104.7 | 82.4 | 86.1 | hypothetical protein ARALYDRAFT_480985 | gbpln | Arabidopsis lyrata   | AT2G21250.1   Symbols:   NAD(P)-linked oxidoreductase superfamily protein   chr2:9103408-9105116 REVERSE LENGTH=309                                                                                                                                                                                                                           | 295 | 309 | 1.00E-142 | 104.7 | 81.4 | 85.8 |
| Rsa1.0_00418.1.g13477.t2 | ref XP_002878541.1   hypothetical protein ARALYDRAFT_480987 [Arabidopsis lyrata subsp. lyrata]   gi297324403 gb EFH54800.1   hypothetical protein ARALYDRAFT_480987 [Arabidopsis lyrata subsp. lyrata]                                                                                     | 131 | 319 | 4.00E-72  | 243.5 | 96.9 | 99.2 | hypothetical protein ARALYDRAFT_480987 | gbpln | Arabidopsis lyrata   | AT2G21270.2   Symbols: UFD1   ubiquitin fusion degradation 1   chr2:9108126-9110012 FORWARD LENGTH=319                                                                                                                                                                                                                                        | 131 | 319 | 1.00E-74  | 243.5 | 96.9 | 99.2 |
| Rsa1.0_00418.1.g13478.t1 | ref XP_002878564.1   hypothetical protein ARALYDRAFT_481032 [Arabidopsis lyrata subsp. lyrata]   gi297324403 gb EFH54823.1   hypothetical protein ARALYDRAFT_481032 [Arabidopsis lyrata subsp. lyrata]                                                                                     | 100 | 96  | 2.00E-41  | 96.0  | 80.0 | 90.0 | hypothetical protein ARALYDRAFT_481032 | gbpln | Arabidopsis lyrata   | AT2G21650.1   Symbols: MEE3, ATRL2, RSM1   Homeodomain-like superfamily protein   chr2:9259654-9260419 FORWARD LENGTH=101                                                                                                                                                                                                                     | 100 | 101 | 1.00E-40  | 101.0 | 86.0 | 94.0 |
| Rsa1.0_00418.1.g13479.t1 | gb AFL91694.1   glycine-rich RNA binding protein [Raphanus sativus var. raphanistroides]                                                                                                                                                                                                   | 169 | 153 | 5.00E-44  | 90.5  | 50.3 | 50.9 | glycine-rich RNA binding protein       | gbpln | Raphanus sativus     | AT2G21660.2   Symbols: ATGRP7, CCR2   cold, circadian rhythm, and rna binding 2   chr2:9265477-9266316 REVERSE LENGTH=159                                                                                                                                                                                                                     | 169 | 159 | 2.00E-42  | 94.1  | 46.2 | 49.1 |
| Rsa1.0_00418.1.g13480.t1 | ref NP_173379.1   Kelch repeat-containing protein [Arabidopsis thaliana]   gi125991225 sp POC2F7.1 Y1947.ARAT.H   RecName: Full=Kelch repeat-containing protein At1g19470   gi332191734 gb AEE29855.1   Kelch repeat-containing protein [Arabidopsis thaliana]                             | 347 | 412 | 8.00E-56  | 118.7 | 43.5 | 63.4 | Kelch repeat-containing protein        | gbpln | Arabidopsis thaliana | AT1G19470.1   Symbols:   Galactose oxidase/kelch repeat superfamily protein   chr1:6741296-6742534 FORWARD LENGTH=412                                                                                                                                                                                                                         | 347 | 412 | 2.00E-58  | 118.7 | 43.5 | 63.4 |



|                           |                                                                                                                                                                                                                         |      |      |           |       |      |      |                                                                                                                                                                        |       |                      |                                                                                                                                              |      |      |           |       |      |      |
|---------------------------|-------------------------------------------------------------------------------------------------------------------------------------------------------------------------------------------------------------------------|------|------|-----------|-------|------|------|------------------------------------------------------------------------------------------------------------------------------------------------------------------------|-------|----------------------|----------------------------------------------------------------------------------------------------------------------------------------------|------|------|-----------|-------|------|------|
| Rsa1.0_00418.1.g13481.t1  | gb AAF79430.1 AC025808.12<br>F18O14.24 [Arabidopsis thaliana]                                                                                                                                                           | 397  | 840  | 5.00E-75  | 211.6 | 43.3 | 62.5 | F18O14.24                                                                                                                                                              | gbpln | Arabidopsis thaliana | AT1G19470.1   Symbols:   Galactose oxidase/kelch repeat superfamily protein   chr1:6741296-6742534 FORWARD LENGTH=412                        | 397  | 412  | 1.00E-77  | 103.8 | 43.3 | 62.5 |
| Rsa1.0_00418.1.g13482.t1  | sp P49311.1 GRP2_SINAL RecName: Full=Glycine-rich RNA-binding protein GRP2A gi 496237 gb AA59213.1  homology with RNA-binding proteins in meristematic tissue [Sinapis alba]                                            | 239  | 169  | 2.00E-22  | 70.7  | 20.9 | 27.6 | RecName: Full=Glycine-rich RNA-binding protein GRP2A gi 496237 gb AA59213.1  homology with RNA-binding proteins in meristematic tissue                                 | gbpln | Sinapis alba         | AT2G21660.2   Symbols: ATGRP7, CCR2   cold, circadian rhythm, and ma binding 2   chr2:9265477-9266316 REVERSE LENGTH=159                     | 239  | 159  | 3.00E-23  | 66.5  | 20.1 | 26.4 |
| Rsa1.0_00418.1.g13483.t1  | ref XP_002878567.1  EMB2219 [Arabidopsis lyrata subsp. lyrata] gi 297324406 gb EFH54826.1  EMB2219 [Arabidopsis lyrata subsp. lyrata]                                                                                   | 364  | 613  | 1.00E-143 | 168.4 | 76.1 | 81.6 | EMB2219                                                                                                                                                                | gbpln | Arabidopsis lyrata   | AT2G21710.1   Symbols: EMB2219   Mitochondrial transcription termination factor family protein   chr2:9270886-9273307 FORWARD LENGTH=641     | 364  | 641  | 1.00E-140 | 176.1 | 74.2 | 81.3 |
| Rsa1.0_00419.1.g13484.t1  | gb EMJ11389.1  hypothetical protein PRUPE_ppa017790mg [Prunus persica]                                                                                                                                                  | 1468 | 1485 | 0         | 101.2 | 45.2 | 61.1 | hypothetical protein PRUPE_ppa017790mg                                                                                                                                 | gbpln | Prunus persica       | ATMG00860.1   Symbols: ORF158   DNA/RNA polymerase superfamily protein   chrM:235916-236392 FORWARD LENGTH=158                               | 1468 | 158  | 2.00E-29  | 10.8  | 3.8  | 5.7  |
| Rsa1.0_00419.1.g13485.t1  | gb EOA40353.1  hypothetical protein CARUB_v10009081mg [Capsella rubella]                                                                                                                                                | 185  | 461  | 3.00E-93  | 249.2 | 91.4 | 94.6 | hypothetical protein CARUB_v10009081mg                                                                                                                                 | gbpln | Capsella rubella     | AT1G12860.1   Symbols: SCRM2, ICE2   basic helix-loop-helix (bHLH) DNA-binding superfamily protein   chr1:4384758-4386392 FORWARD LENGTH=450 | 185  | 450  | 2.00E-95  | 243.2 | 91.4 | 95.1 |
| Rsa1.0_00419.1.g13486.t1  | gb AAF78493.1 AC012187_13 Contains similarity to AP2/EREBP-like transcription factor from Arabidopsis thaliana gb AF216581 and contains Bacterial mutT protein PF 00293 and AP2 PF 00847 domains [Arabidopsis thaliana] | 166  | 411  | 2.00E-73  | 247.6 | 83.1 | 90.4 | Contains similarity to AP2/EREBP-like transcription factor from Arabidopsis thaliana gb AF216581 and contains Bacterial mutT protein PF 00293 and AP2 PF 00847 domains | gbpln | Arabidopsis thaliana | AT1G12880.1   Symbols: atnudt12, NUDT12   nudix hydrolase homolog 12   chr1:4390036-4391046 FORWARD LENGTH=203                               | 166  | 203  | 8.00E-75  | 122.3 | 83.1 | 90.4 |
| Rsa1.0_00419.1.g13487.t1  | ref XP_002889975.1  hypothetical protein ARALYDRAFT_471441 [Arabidopsis lyrata subsp. lyrata] gi 297335817 gb EFH66234.1  hypothetical protein ARALYDRAFT_471441 [Arabidopsis lyrata subsp. lyrata]                     | 206  | 203  | 4.00E-93  | 98.5  | 83.5 | 90.8 | hypothetical protein ARALYDRAFT_471441                                                                                                                                 | gbpln | Arabidopsis lyrata   | AT1G12880.1   Symbols: atnudt12, NUDT12   nudix hydrolase homolog 12   chr1:4390036-4391046 FORWARD LENGTH=203                               | 206  | 203  | 1.00E-93  | 98.5  | 81.1 | 89.8 |
| Rsa1.0_00419.1.g13488.t1  | dbj BAJ10475.1  glyceraldehyde-3-phosphate dehydrogenase [Brassica rapa subsp. chinensis]                                                                                                                               | 399  | 399  | 0         | 100.0 | 98.2 | 98.5 | glyceraldehyde-3-phosphate dehydrogenase                                                                                                                               | gbpln | Brassica rapa        | AT1G12900.1   Symbols: GAPA-2   glyceraldehyde 3-phosphate dehydrogenase A subunit 2   chr1:4392634-4394283 REVERSE LENGTH=399               | 399  | 399  | 0         | 100.0 | 97.2 | 99.2 |
| Rsa1.0_00419.1.g13489.t1  | #                                                                                                                                                                                                                       | #    | #    | #         | #     | #    | #    | -                                                                                                                                                                      | ----  | ----                 | #                                                                                                                                            | #    | #    | #         | #     | #    | #    |
| Rsa1.0_00419.1.g13490.t13 | ref XP_002892722.1  hypothetical protein ARALYDRAFT_471447 [Arabidopsis lyrata subsp. lyrata] gi 297338564 gb EFH68981.1  hypothetical protein ARALYDRAFT_471447 [Arabidopsis lyrata subsp. lyrata]                     | 310  | 1007 | 2.00E-62  | 324.8 | 50.6 | 53.9 | hypothetical protein ARALYDRAFT_471447                                                                                                                                 | gbpln | Arabidopsis lyrata   | AT1G12930.1   Symbols:   ARM repeat superfamily protein   chr1:4398588-4405495 REVERSE LENGTH=1005                                           | 310  | 1005 | 3.00E-64  | 324.2 | 50.0 | 53.9 |
| Rsa1.0_00419.1.g13491.t1  | gb EOA37327.1  hypothetical protein CARUB_v10011023mg [Capsella rubella]                                                                                                                                                | 303  | 331  | 1.00E-83  | 109.2 | 64.7 | 71.3 | hypothetical protein CARUB_v10011023mg                                                                                                                                 | gbpln | Capsella rubella     | AT1G12980.1   Symbols: ESR1, DRN   Integrase-type DNA-binding superfamily protein   chr1:4429791-4430777 FORWARD LENGTH=328                  | 303  | 328  | 3.00E-76  | 108.3 | 61.7 | 71.9 |
| Rsa1.0_00419.1.g13492.t1  | ref NP_172759.2  beta-1,4-mannosyl-glycoprotein [Arabidopsis thaliana] gi 332190836 gb AEE28957.1  beta-1,4-N-acetylglucosaminyltransferase family protein [Arabidopsis thaliana]                                       | 392  | 392  | 0         | 100.0 | 92.9 | 96.9 | beta-1,4-mannosyl-glycoprotein                                                                                                                                         | gbpln | Arabidopsis thaliana | AT1G12990.1   Symbols:   beta-1,4-N-acetylglucosaminyltransferase family protein   chr1:4433973-4435552 FORWARD LENGTH=392                   | 392  | 392  | 0         | 100.0 | 92.9 | 96.9 |
| Rsa1.0_00419.1.g13493.t1  | gb EOA36479.1  hypothetical protein CARUB_v10011103mg [Capsella rubella]                                                                                                                                                | 419  | 401  | 0         | 95.7  | 84.7 | 91.4 | hypothetical protein CARUB_v10011103mg                                                                                                                                 | gbpln | Capsella rubella     | AT1G13000.2   Symbols:   Protein of unknown function (DUF707)   chr1:4436402-4438693 REVERSE LENGTH=401                                      | 419  | 401  | 0         | 95.7  | 85.0 | 91.2 |
| Rsa1.0_00419.1.g13494.t1  | gb EOA36832.1  hypothetical protein CARUB_v10008617mg [Capsella rubella]                                                                                                                                                | 606  | 608  | 0         | 100.3 | 75.9 | 84.0 | hypothetical protein CARUB_v10008617mg                                                                                                                                 | gbpln | Capsella rubella     | AT1G13030.1   Symbols:   sphere organelles protein-related   chr1:4444284-4447278 REVERSE LENGTH=608                                         | 606  | 608  | 0         | 100.3 | 74.9 | 82.0 |
| Rsa1.0_00419.1.g13495.t1  | ref XP_002889980.1  pentatricopeptide repeat-containing protein [Arabidopsis lyrata subsp. lyrata] gi 297335822 gb EFH66239.1  pentatricopeptide repeat-containing protein [Arabidopsis lyrata subsp. lyrata]           | 507  | 517  | 0         | 102.0 | 89.0 | 95.1 | pentatricopeptide repeat-containing protein                                                                                                                            | gbpln | Arabidopsis lyrata   | AT1G13040.1   Symbols:   Pentatricopeptide repeat (PPR-like) superfamily protein   chr1:4447647-4448200 FORWARD LENGTH=517                   | 507  | 517  | 0         | 102.0 | 89.0 | 95.1 |

|                          |                                                                                                                                                                                                                                                                                                                                                                                                                                                                                                                                                                                                                                                                                                                                                                                                                                                                                                                                                                                                                                                                                                                                                                                                                                                                                                                                                                                                                                                                                                                                                                                                                                                                                                                                                                                                                                                                                                                                                                                                                                                                                                               |     |     |           |       |      |      |                                        |       |                      |                                                                                                                                                                                                                                                                                                                                                   |     |     |           |       |      |      |
|--------------------------|---------------------------------------------------------------------------------------------------------------------------------------------------------------------------------------------------------------------------------------------------------------------------------------------------------------------------------------------------------------------------------------------------------------------------------------------------------------------------------------------------------------------------------------------------------------------------------------------------------------------------------------------------------------------------------------------------------------------------------------------------------------------------------------------------------------------------------------------------------------------------------------------------------------------------------------------------------------------------------------------------------------------------------------------------------------------------------------------------------------------------------------------------------------------------------------------------------------------------------------------------------------------------------------------------------------------------------------------------------------------------------------------------------------------------------------------------------------------------------------------------------------------------------------------------------------------------------------------------------------------------------------------------------------------------------------------------------------------------------------------------------------------------------------------------------------------------------------------------------------------------------------------------------------------------------------------------------------------------------------------------------------------------------------------------------------------------------------------------------------|-----|-----|-----------|-------|------|------|----------------------------------------|-------|----------------------|---------------------------------------------------------------------------------------------------------------------------------------------------------------------------------------------------------------------------------------------------------------------------------------------------------------------------------------------------|-----|-----|-----------|-------|------|------|
| Rsa1.0_00419.1.g13496.t1 | gb EOA36472.1  hypothetical protein CARUB_v10011087mg [Capsella rubella]                                                                                                                                                                                                                                                                                                                                                                                                                                                                                                                                                                                                                                                                                                                                                                                                                                                                                                                                                                                                                                                                                                                                                                                                                                                                                                                                                                                                                                                                                                                                                                                                                                                                                                                                                                                                                                                                                                                                                                                                                                      | 320 | 317 | 1.00E-131 | 99.1  | 78.1 | 86.3 | hypothetical protein CARUB_v10011087mg | gbpln | Capsella rubella     | AT1G13050.1   Symbols:   unknown protein; BEST Arabidopsis thaliana protein match is: unknown protein (TAIR:AT3G26350.1). Has 538 Blast hits to 510 proteins in 88 species: Archae - 0; Bacteria - 23; Metazoa - 81; Fungi - 36; Plants - 361; Viruses - 8; Other Eukaryotes - 29 (source: NCBI BLINK).   chr1:4450568-4451521 FORWARD LENGTH=317 | 320 | 317 | 1.00E-127 | 99.1  | 81.3 | 86.9 |
| Rsa1.0_00419.1.g13497.t1 | ref NP_189265.1  proteasome subunit beta type-5-B [Arabidopsis thaliana] gi 75273433 sp Q9LIP2.1 PSB5B_ARATH RecName: Full=Proteasome subunit beta type-5-B; AltName: Full=20S proteasome beta subunit E-2; AltName: Full=Proteasome epsilon-2 chain; Flags: Precursor gi 16612308 gb AAL27514.1 AF439846.1 AT3g26340/F20C19.6 [Arabidopsis thaliana] gi 9294292 dbj BAB02194.1  proteasome epsilon chain precursor [Arabidopsis thaliana] gi 21553804 gb AAM62897.1  26S proteasome beta subunit, putative [Arabidopsis thaliana] gi 21928101 gb AAM78079.1  AT3g26340/F20C19.6 [Arabidopsis thaliana] gi 332643626 gb AEE77147.1  proteasome subunit beta type-5-B [Arabidopsis thaliana] ref NP_172770.1  cytochrome P450 71B7 [Arabidopsis thaliana] gi 5915830 sp Q96514.1 C71B7_ARATH RecName: Full=Cytochrome P450 71B7 gi 4850394 gb AAD31064.1 AC007357.13 Identical to gb X97864 cytochrome P450 from Arabidopsis thaliana and is a member of the PF 00067 Cytochrome P450 family. ESTs gb T44875. gb T04814. gb R6511.1. gb T44310 and gb T04541 come from this gene [Arabidopsis thaliana] gi 18087623 gb AAL58941.1 AF462855.1 At1g13110/F3F19.13 [Arabidopsis thaliana] gi 1523796 emb CAA66458.1  cytochrome P450 [Arabidopsis thaliana] gi 29028730 gb AAO64744.1  At1g13110/F3F19.13 [Arabidopsis thaliana] gi 332190850 gb AEE28971.1  cytochrome P450 71B7 [Arabidopsis thaliana] ref NP_172770.1  cytochrome P450 71B7 [Arabidopsis thaliana] gi 5915830 sp Q96514.1 C71B7_ARATH RecName: Full=Cytochrome P450 71B7 gi 4850394 gb AAD31064.1 AC007357.13 Identical to gb X97864 cytochrome P450 from Arabidopsis thaliana and is a member of the PF 00067 Cytochrome P450 family. ESTs gb T44875. gb T04814. gb R6511.1. gb T44310 and gb T04541 come from this gene [Arabidopsis thaliana] gi 18087623 gb AAL58941.1 AF462855.1 At1g13110/F3F19.13 [Arabidopsis thaliana] gi 1523796 emb CAA66458.1  cytochrome P450 [Arabidopsis thaliana] gi 29028730 gb AAO64744.1  At1g13110/F3F19.13 [Arabidopsis thaliana] gi 332190850 gb AEE28971.1  cytochrome P450 71B7 [Arabidopsis thaliana] | 281 | 273 | 1.00E-143 | 97.2  | 89.7 | 92.2 | proteasome subunit beta type-5-B       | gbpln | Arabidopsis thaliana | AT3G26340.1   Symbols:   N-terminal nucleophile aminohydrolases (Ntn hydrolases) superfamily protein   chr3:9650600-9652572 REVERSE LENGTH=273                                                                                                                                                                                                    | 281 | 273 | 2.33E-156 | 97.2  | 89.7 | 92.2 |
| Rsa1.0_00419.1.g13498.t1 | ref NP_172770.1  cytochrome P450 71B7 [Arabidopsis thaliana] gi 5915830 sp Q96514.1 C71B7_ARATH RecName: Full=Cytochrome P450 71B7 gi 4850394 gb AAD31064.1 AC007357.13 Identical to gb X97864 cytochrome P450 from Arabidopsis thaliana and is a member of the PF 00067 Cytochrome P450 family. ESTs gb T44875. gb T04814. gb R6511.1. gb T44310 and gb T04541 come from this gene [Arabidopsis thaliana] gi 18087623 gb AAL58941.1 AF462855.1 At1g13110/F3F19.13 [Arabidopsis thaliana] gi 1523796 emb CAA66458.1  cytochrome P450 [Arabidopsis thaliana] gi 29028730 gb AAO64744.1  At1g13110/F3F19.13 [Arabidopsis thaliana] gi 332190850 gb AEE28971.1  cytochrome P450 71B7 [Arabidopsis thaliana] ref NP_172770.1  cytochrome P450 71B7 [Arabidopsis thaliana] gi 5915830 sp Q96514.1 C71B7_ARATH RecName: Full=Cytochrome P450 71B7 gi 4850394 gb AAD31064.1 AC007357.13 Identical to gb X97864 cytochrome P450 from Arabidopsis thaliana and is a member of the PF 00067 Cytochrome P450 family. ESTs gb T44875. gb T04814. gb R6511.1. gb T44310 and gb T04541 come from this gene [Arabidopsis thaliana] gi 18087623 gb AAL58941.1 AF462855.1 At1g13110/F3F19.13 [Arabidopsis thaliana] gi 1523796 emb CAA66458.1  cytochrome P450 [Arabidopsis thaliana] gi 29028730 gb AAO64744.1  At1g13110/F3F19.13 [Arabidopsis thaliana] gi 332190850 gb AEE28971.1  cytochrome P450 71B7 [Arabidopsis thaliana]                                                                                                                                                                                                                                                                                                                                                                                                                                                                                                                                                                                                                                                                                             | 501 | 504 | 0         | 100.6 | 77.0 | 90.2 | cytochrome P450 71B7                   | gbpln | Arabidopsis thaliana | AT1G13110.1   Symbols: CYP71B7   cytochrome P450, family 71 subfamily B, polypeptide 7   chr1:4467272-4468857 FORWARD LENGTH=504                                                                                                                                                                                                                  | 501 | 504 | 0         | 100.6 | 77.0 | 90.2 |
| Rsa1.0_00419.1.g13499.t1 | ref XP_002889989.1  glycosyl hydrolase family 5 protein [Arabidopsis lyrata subsp. lyrata] gi 29733583 gb EFH66248.1  glycosyl hydrolase family 5 protein [Arabidopsis lyrata subsp. lyrata]                                                                                                                                                                                                                                                                                                                                                                                                                                                                                                                                                                                                                                                                                                                                                                                                                                                                                                                                                                                                                                                                                                                                                                                                                                                                                                                                                                                                                                                                                                                                                                                                                                                                                                                                                                                                                                                                                                                  | 550 | 552 | 0         | 100.4 | 82.7 | 88.9 | glycosyl hydrolase family 5 protein    | gbpln | Arabidopsis lyrata   | AT1G13130.1   Symbols:   Cellulase (glycosyl hydrolase family 5) protein   chr1:4474726-4477820 FORWARD LENGTH=552                                                                                                                                                                                                                                | 550 | 552 | 0         | 100.4 | 82.5 | 88.5 |
| Rsa1.0_00419.1.g13499.t1 | ref NP_172770.1  cytochrome P450 71B7 [Arabidopsis thaliana] gi 5915830 sp Q96514.1 C71B7_ARATH RecName: Full=Cytochrome P450 71B7 gi 4850394 gb AAD31064.1 AC007357.13 Identical to gb X97864 cytochrome P450 from Arabidopsis thaliana and is a member of the PF 00067 Cytochrome P450 family. ESTs gb T44875. gb T04814. gb R6511.1. gb T44310 and gb T04541 come from this gene [Arabidopsis thaliana] gi 18087623 gb AAL58941.1 AF462855.1 At1g13110/F3F19.13 [Arabidopsis thaliana] gi 1523796 emb CAA66458.1  cytochrome P450 [Arabidopsis thaliana] gi 29028730 gb AAO64744.1  At1g13110/F3F19.13 [Arabidopsis thaliana] gi 332190850 gb AEE28971.1  cytochrome P450 71B7 [Arabidopsis thaliana]                                                                                                                                                                                                                                                                                                                                                                                                                                                                                                                                                                                                                                                                                                                                                                                                                                                                                                                                                                                                                                                                                                                                                                                                                                                                                                                                                                                                      | 507 | 504 | 0         | 99.4  | 80.1 | 90.9 | cytochrome P450 71B7                   | gbpln | Arabidopsis thaliana | AT1G13110.1   Symbols: CYP71B7   cytochrome P450, family 71 subfamily B, polypeptide 7   chr1:4467272-4468857 FORWARD LENGTH=504                                                                                                                                                                                                                  | 507 | 504 | 0         | 99.4  | 80.1 | 90.9 |

|                          |                                                                                                                                                                                                                                                                                                                                                                                                                                                                                                                                                                                                                                                                                                                                                                                                              |     |     |           |       |      |      |                                                              |                      |                                                                                                                                              |     |     |           |       |      |      |
|--------------------------|--------------------------------------------------------------------------------------------------------------------------------------------------------------------------------------------------------------------------------------------------------------------------------------------------------------------------------------------------------------------------------------------------------------------------------------------------------------------------------------------------------------------------------------------------------------------------------------------------------------------------------------------------------------------------------------------------------------------------------------------------------------------------------------------------------------|-----|-----|-----------|-------|------|------|--------------------------------------------------------------|----------------------|----------------------------------------------------------------------------------------------------------------------------------------------|-----|-----|-----------|-------|------|------|
| Rsa1.0_00419.1.g13501.t1 | refNP_172773.4  cytochrome P450, family 86, subfamily C, polypeptide 3 [Arabidopsis thaliana]<br>gi 63147398 gb AA34172.1  At1g13140 [Arabidopsis thaliana]<br>gi 332190853 gb AEE28974.1  cytochrome P450, family 86, subfamily C, polypeptide 3 [Arabidopsis thaliana]<br>refNP_172776.1  oxysterol binding protein-related protein 1D [Arabidopsis thaliana]<br>gi 75200684 sp Q9SAF0.1 ORP1D, ARAT H RecName: Full=Oxysterol-binding protein-related protein 1D; AltName: Full=OSBP-related protein 1D                                                                                                                                                                                                                                                                                                   | 526 | 534 | 0         | 101.5 | 87.5 | 93.3 | cytochrome P450, family 86, subfamily C, gbpln polypeptide 3 | Arabidopsis thaliana | AT1G13140.1   Symbols: CYP86C3   cytochrome P450, family 86, subfamily C, polypeptide 3   chr1:4478667-4480271 REVERSE LENGTH=534            | 526 | 534 | 0         | 101.5 | 87.5 | 93.3 |
| Rsa1.0_00419.1.g13502.t1 | gi 4850400 gb AAD31070.1 AC007357.19 Similar to gb M86917 oxysterol-binding protein from Homo sapiens [Arabidopsis thaliana]<br>gi 18087546 gb AAL58905.1 AF462814.1 At1g13170/F3F19.19 [Arabidopsis thaliana] gi 332190857 gb AEE28978.1  oxysterol binding protein-related protein 1D [Arabidopsis thaliana]                                                                                                                                                                                                                                                                                                                                                                                                                                                                                               | 797 | 816 | 0         | 102.4 | 91.3 | 94.1 | oxysterol binding protein-related protein 1D                 | Arabidopsis thaliana | AT1G13170.1   Symbols: ORP1D   OSBP(oxysterol binding protein)-related protein 1D   chr1:4488826-4492278 REVERSE LENGTH=816                  | 797 | 816 | 0         | 102.4 | 91.3 | 94.1 |
| Rsa1.0_00419.1.g13503.t1 | #                                                                                                                                                                                                                                                                                                                                                                                                                                                                                                                                                                                                                                                                                                                                                                                                            | #   | #   | #         | #     | #    | #    | -                                                            | ----                 | ----                                                                                                                                         | #   | #   | #         | #     | #    | #    |
| Rsa1.0_00419.1.g13504.t1 | refNP_172777.1  actin-related protein 3 [Arabidopsis thaliana]<br>gi 75313139 sp Q9SAF1.1 ARP3, ARATH RecName: Full=Actin-related protein 3; AltName: Full=Protein DISTORTED TRICHOMES 1<br>gi 4850401 gb AAD31071.1 AC007357.20 Strong similarity to gb U29610 Actin-like protein (Arp3) from Acanthamoeba castellanii and is a member of the PF 00022 Actin family [Arabidopsis thaliana]<br>gi 21427461 gb AAM53243.1 AF507911.1 actin-related protein 3 [Arabidopsis thaliana] gi 20260500 gb AAM13148.1  similar to actin-like protein [Arabidopsis thaliana] gi 21489929 tpg DAA00033.1  TPA, exp: actin-related protein 3; AtARP3 [Arabidopsis thaliana]<br>gi 30387525 gb AAP31928.1  At1g13180 [Arabidopsis thaliana]<br>gi 332190859 gb AEE28980.1  actin-related protein 3 [Arabidopsis thaliana] | 428 | 427 | 0         | 99.8  | 94.4 | 97.7 | actin-related protein 3 gbpln                                | Arabidopsis thaliana | AT1G13180.1   Symbols: DIS1, ARP3, ATARP3   Actin-like ATPase superfamily protein   chr1:4495394-4498204 FORWARD LENGTH=427                  | 428 | 427 | 0         | 99.8  | 94.4 | 97.7 |
| Rsa1.0_00419.1.g13505.t1 | refNP_180115.1  putative 2-oxoacid dependent dioxygenase [Arabidopsis thaliana]<br>gi 75313535 sp Q9SKK4.1 GSL, ARATH RecName: Full=Probable 2-oxoacid dependent dioxygenase<br>gi 4432856 gb AAD20704.1  putative dioxygenase [Arabidopsis thaliana]<br>gi 15292707 gb AAK92722.1  putative dioxygenase [Arabidopsis thaliana]<br>gi 21280917 gb AAM45103.1  putative dioxygenase [Arabidopsis thaliana]<br>gi 330252609 gb AEC07703.1  putative 2-oxoacid dependent dioxygenase [Arabidopsis thaliana]                                                                                                                                                                                                                                                                                                     | 299 | 359 | 1.00E-116 | 120.1 | 65.9 | 78.3 | putative 2-oxoacid dependent dioxygenase gbpln               | Arabidopsis thaliana | AT2G25450.1   Symbols:   2-oxoglutarate (2OG) and Fe(II)-dependent oxygenase superfamily protein   chr2:10830286-10831563 REVERSE LENGTH=359 | 299 | 359 | 1.00E-118 | 120.1 | 65.9 | 78.3 |
| Rsa1.0_00420.1.g13506.t1 | #                                                                                                                                                                                                                                                                                                                                                                                                                                                                                                                                                                                                                                                                                                                                                                                                            | #   | #   | #         | #     | #    | #    | -                                                            | ----                 | ----                                                                                                                                         | #   | #   | #         | #     | #    | #    |
| Rsa1.0_00420.1.g13507.t1 | refXP_002882437.1  hypothetical protein ARALYDRAFT_340760 [Arabidopsis lyrata subsp. lyrata]<br>gi 297328277 gb EFH58696.1  hypothetical protein ARALYDRAFT_340760 [Arabidopsis lyrata subsp. lyrata]                                                                                                                                                                                                                                                                                                                                                                                                                                                                                                                                                                                                        | 329 | 350 | 1.00E-155 | 106.4 | 86.0 | 93.0 | hypothetical protein ARALYDRAFT_340760 gbpln                 | Arabidopsis lyrata   | AT3G05830.1   Symbols:   Encodes alpha-helical IF (intermediate filament)-like protein.   chr3:1736796-1738665 FORWARD LENGTH=336            | 329 | 336 | 1.00E-151 | 102.1 | 85.4 | 91.2 |
| Rsa1.0_00420.1.g13508.t1 | gb EOA32504.1  hypothetical protein CARUB_v10015785mg [Capsella rubella]                                                                                                                                                                                                                                                                                                                                                                                                                                                                                                                                                                                                                                                                                                                                     | 410 | 409 | 0         | 99.8  | 96.6 | 98.0 | hypothetical protein CARUB_v10015785mg gbpln                 | Capsella rubella     | AT3G05840.1   Symbols: ATSK12   Protein kinase superfamily protein   chr3:1740793-1742927 FORWARD LENGTH=409                                 | 410 | 409 | 0         | 99.8  | 96.6 | 97.8 |
| Rsa1.0_00420.1.g13509.t1 | gb AAF26087.1 AC012393.13 unknown protein [Arabidopsis thaliana]<br>gi 30793999 gb AAP40449.1  unknown protein [Arabidopsis thaliana]                                                                                                                                                                                                                                                                                                                                                                                                                                                                                                                                                                                                                                                                        | 788 | 777 | 0         | 98.6  | 87.1 | 92.3 | unknown protein gbpln                                        | Arabidopsis thaliana | AT1G64260.1   Symbols:   MuDR family transposase   chr1:23847756-23849915 FORWARD LENGTH=719                                                 | 788 | 719 | 8.00E-35  | 91.2  | 21.2 | 39.5 |
| Rsa1.0_00420.1.g13510.t1 | #                                                                                                                                                                                                                                                                                                                                                                                                                                                                                                                                                                                                                                                                                                                                                                                                            | #   | #   | #         | #     | #    | #    | -                                                            | ----                 | ----                                                                                                                                         | #   | #   | #         | #     | #    | #    |

|                          |                                                                                                                                                                                                                                                                                                                                                                                                                                                                                                |      |      |          |        |      |      |                                        |       |                      |                                                                                                                                                                                                                                                                                                                                                                                                                                                                                              |      |     |          |       |      |      |
|--------------------------|------------------------------------------------------------------------------------------------------------------------------------------------------------------------------------------------------------------------------------------------------------------------------------------------------------------------------------------------------------------------------------------------------------------------------------------------------------------------------------------------|------|------|----------|--------|------|------|----------------------------------------|-------|----------------------|----------------------------------------------------------------------------------------------------------------------------------------------------------------------------------------------------------------------------------------------------------------------------------------------------------------------------------------------------------------------------------------------------------------------------------------------------------------------------------------------|------|-----|----------|-------|------|------|
| Rsa1.0_00420.1.g13511.t1 | ref[NP_001118584.1] uncharacterized protein [Arabidopsis thaliana] gi 98962065 gb ABF59362.1  unknown protein [Arabidopsis thaliana] gi 332640784 gb AE74305.1  uncharacterized protein AT3G05858 [Arabidopsis thaliana]                                                                                                                                                                                                                                                                       | 80   | 90   | 2.00E-30 | 112.5  | 83.8 | 87.5 | uncharacterized protein                | gbpln | Arabidopsis thaliana | AT3G05858.1   Symbols:   unknown protein; FUNCTIONS IN: molecular_function unknown; INVOLVED IN: biological_process unknown; LOCATED IN: cellular_component unknown; BEST Arabidopsis thaliana protein match is: unknown protein (TAIR:AT5G26620.1); Has 30201 Blast hits to 17322 proteins in 780 species: Archaea = 12; Bacteria = 1396; Metazoa = 17338; Fungi = 3422; Plants = 5037; Viruses = 0; Other Eukaryotes = 2996 (source: NCBI BLINK).   chr3:1749464-1749736 FORWARD LENGTH=90 | 80   | 90  | 3.00E-33 | 112.5 | 83.8 | 87.5 |
| Rsa1.0_00420.1.g13512.t1 | ref[NP_187237.2] MADS-box domain-containing protein [Arabidopsis thaliana] gi 332640785 gb AE74306.1  MADS-box domain-containing protein [Arabidopsis thaliana]                                                                                                                                                                                                                                                                                                                                | 300  | 260  | 7.00E-71 | 86.7   | 50.7 | 64.0 | MADS-box domain-containing protein     | gbpln | Arabidopsis thaliana | AT3G05860.1   Symbols:   MADS-box transcription factor family protein   chr3:1751406-1752355 REVERSE LENGTH=260                                                                                                                                                                                                                                                                                                                                                                              | 300  | 260 | 2.00E-73 | 86.7  | 50.7 | 64.0 |
| Rsa1.0_00420.1.g13513.t1 | gb EOA31081.1  hypothetical protein CARUB_v10014232mg [Capsella rubella]                                                                                                                                                                                                                                                                                                                                                                                                                       | 326  | 310  | 2.00E-51 | 95.1   | 42.3 | 53.7 | hypothetical protein CARUB_v10014232mg | gbpln | Capsella rubella     | AT5G48670.1   Symbols: FEM111, AGL80   AGAMOUS-like 80   chr5:19738825-19739790 REVERSE LENGTH=321                                                                                                                                                                                                                                                                                                                                                                                           | 326  | 321 | 2.00E-52 | 98.5  | 40.8 | 53.4 |
| Rsa1.0_00420.1.g13514.t1 | gb AFC41201.1  PM-YC3.6-Lti6b [Binary expression vector PM-YC3.6-LTi6b]                                                                                                                                                                                                                                                                                                                                                                                                                        | 54   | 726  | 2.00E-20 | 1344.4 | 77.8 | 94.4 | PM-YC3.6-Lti6b                         | ----  | ----                 | AT3G05880.1   Symbols: RC12A   Low temperature and salt responsive protein family   chr3:1756195-1756494 REVERSE LENGTH=54                                                                                                                                                                                                                                                                                                                                                                   | 54   | 54  | 3.00E-21 | 100.0 | 85.2 | 98.1 |
| Rsa1.0_00420.1.g13515.t1 | ref[NP_187241.2] neurofilament protein-related protein [Arabidopsis thaliana] gi 332640792 gb AE74313.1  neurofilament protein-related protein [Arabidopsis thaliana]                                                                                                                                                                                                                                                                                                                          | 542  | 673  | 3.00E-48 | 124.2  | 37.3 | 47.2 | neurofilament protein-related protein  | gbpln | Arabidopsis thaliana | AT3G05900.1   Symbols:   neurofilament protein-related   chr3:1761408-1763854 REVERSE LENGTH=673                                                                                                                                                                                                                                                                                                                                                                                             | 542  | 673 | 8.00E-51 | 124.2 | 37.3 | 47.2 |
| Rsa1.0_00420.1.g13516.t1 | ref[NP_566263.1] Pectin lyase-like protein [Arabidopsis thaliana] gi 6671966 gb AAF23225.1 AC013454_12 putative pectinacetyltransferase [Arabidopsis thaliana] gi 18226325 gb AAL16135.1 AF428303_1 AT3g05910/F2010.3 [Arabidopsis thaliana] gi 15292827 gb AAK92782.1  putative pectinacetyltransferase [Arabidopsis thaliana] gi 20465793 gb AAM20385.1  putative pectinacetyltransferase [Arabidopsis thaliana] gi 332640793 gb AE74314.1  Pectin lyase-like protein [Arabidopsis thaliana] | 414  | 415  | 0        | 100.2  | 92.8 | 96.6 | Pectin lyase-like protein              | gbpln | Arabidopsis thaliana | AT3G05910.1   Symbols:   Pectinacetyltransferase family protein   chr3:1764509-1767240 REVERSE LENGTH=415                                                                                                                                                                                                                                                                                                                                                                                    | 414  | 415 | 0        | 100.2 | 92.8 | 96.6 |
| Rsa1.0_00420.1.g13517.t1 | gb AAM61454.1  unknown [Arabidopsis thaliana]                                                                                                                                                                                                                                                                                                                                                                                                                                                  | 145  | 126  | 2.00E-37 | 86.9   | 73.8 | 78.6 | unknown                                | gbpln | Arabidopsis thaliana | AT3G05920.1   Symbols:   Heavy metal transport/detoxification superfamily protein   chr3:1768991-1768522 REVERSE LENGTH=126                                                                                                                                                                                                                                                                                                                                                                  | 145  | 126 | 5.00E-40 | 86.9  | 74.5 | 79.3 |
| Rsa1.0_00420.1.g13518.t1 | gb AAG50806.1 AC079291.8 unknown protein [Arabidopsis thaliana]                                                                                                                                                                                                                                                                                                                                                                                                                                | 1651 | 1213 | 0        | 73.5   | 26.3 | 38.9 | unknown protein                        | gbpln | Arabidopsis thaliana | AT5G18880.1   Symbols:   RNA-directed DNA polymerase (reverse transcriptase)-related family protein   chr5:6300535-6301422 REVERSE LENGTH=295                                                                                                                                                                                                                                                                                                                                                | 1651 | 295 | 2.00E-83 | 17.9  | 9.5  | 12.6 |
| Rsa1.0_00420.1.g13519.t1 | ref[XP_002882441.1] hypothetical protein ARALYDRAFT_896692 [Arabidopsis lyrata subsp. lyrata] gi 297328281 gb EFH58700.1  hypothetical protein ARALYDRAFT_896692 [Arabidopsis lyrata subsp. lyrata]                                                                                                                                                                                                                                                                                            | 218  | 219  | 4.00E-95 | 100.5  | 79.8 | 87.2 | hypothetical protein ARALYDRAFT_896692 | gbpln | Arabidopsis lyrata   | AT3G05930.1   Symbols: GLP8   germin-like protein 8   chr3:1770377-1771183 FORWARD LENGTH=219                                                                                                                                                                                                                                                                                                                                                                                                | 218  | 219 | 4.00E-96 | 100.5 | 78.9 | 87.2 |
| Rsa1.0_00420.1.g13520.t2 | ref[XP_002884544.1] hypothetical protein ARALYDRAFT_896695 [Arabidopsis lyrata subsp. lyrata] gi 297330384 gb EFH60803.1  hypothetical protein ARALYDRAFT_896695 [Arabidopsis lyrata subsp. lyrata]                                                                                                                                                                                                                                                                                            | 109  | 101  | 7.00E-25 | 92.7   | 78.0 | 82.6 | hypothetical protein ARALYDRAFT_896695 | gbpln | Arabidopsis lyrata   | AT5G26731.1   Symbols:   unknown protein; Has 30201 Blast hits to 17322 proteins in 780 species: Archaea = 12; Bacteria = 1396; Metazoa = 17338; Fungi = 3422; Plants = 5037; Viruses = 0; Other Eukaryotes = 2996 (source: NCBI BLINK).   chr5:9295676-9295975 FORWARD LENGTH=99                                                                                                                                                                                                            | 109  | 99  | 2.00E-12 | 90.8  | 37.6 | 45.0 |
| Rsa1.0_00420.1.g13521.t1 | ref[XP_002884547.1] hypothetical protein ARALYDRAFT_317457 [Arabidopsis lyrata subsp. lyrata] gi 297330387 gb EFH60806.1  hypothetical protein ARALYDRAFT_317457 [Arabidopsis lyrata subsp. lyrata]                                                                                                                                                                                                                                                                                            | 504  | 507  | 0        | 100.6  | 94.6 | 97.4 | hypothetical protein ARALYDRAFT_317457 | gbpln | Arabidopsis lyrata   | AT3G05960.1   Symbols: ATSTP6, STP6   sugar transporter 6   chr3:1783587-1785334 REVERSE LENGTH=507                                                                                                                                                                                                                                                                                                                                                                                          | 504  | 507 | 0        | 100.6 | 94.2 | 97.4 |
| Rsa1.0_00420.1.g13522.t1 | ref[XP_002884548.1] long-chain acyl-CoA synthetase [Arabidopsis lyrata subsp. lyrata] gi 297330388 gb EFH60807.1  long-chain acyl-CoA synthetase [Arabidopsis lyrata subsp. lyrata]                                                                                                                                                                                                                                                                                                            | 620  | 695  | 0        | 112.1  | 83.9 | 89.4 | long-chain acyl-CoA synthetase         | gbpln | Arabidopsis lyrata   | AT3G05970.1   Symbols: LACS6, ATLACS6   long-chain acyl-CoA synthetase 6   chr3:1786510-1791746 REVERSE LENGTH=701                                                                                                                                                                                                                                                                                                                                                                           | 620  | 701 | 0        | 113.1 | 83.5 | 89.5 |

|                           |                                                                                                                                                                                                                                                                                                                                                                                                                                                                              |     |     |           |       |      |      |                                                    |       |                      |                                                                                                                                                                                                                                                                                                                                                 |     |     |           |       |      |      |
|---------------------------|------------------------------------------------------------------------------------------------------------------------------------------------------------------------------------------------------------------------------------------------------------------------------------------------------------------------------------------------------------------------------------------------------------------------------------------------------------------------------|-----|-----|-----------|-------|------|------|----------------------------------------------------|-------|----------------------|-------------------------------------------------------------------------------------------------------------------------------------------------------------------------------------------------------------------------------------------------------------------------------------------------------------------------------------------------|-----|-----|-----------|-------|------|------|
| Rsa1.0_00420.1.g13523.t1  | refXP_002884549.1   hypothetical protein ARALYDRAFT_896701 [Arabidopsis lyrata subsp. lyrata] gi 297330389 gb EFH60808.1                                                                                                                                                                                                                                                                                                                                                     | 122 | 189 | 2.00E-51  | 154.9 | 78.7 | 89.3 | hypothetical protein ARALYDRAFT_896701             | gbpln | Arabidopsis lyrata   | AT3G05975.1   Symbols:   Late embryogenesis abundant (LEA) hydroxyproline-rich glycoprotein family   chr3:1792145-1792714 REVERSE LENGTH=189                                                                                                                                                                                                    | 122 | 189 | 7.00E-51  | 154.9 | 76.2 | 86.1 |
| Rsa1.0_00420.1.g13524.t1  | refXP_002882443.1   hypothetical protein ARALYDRAFT_896702 [Arabidopsis lyrata subsp. lyrata] gi 297328283 gb EFH58702.1                                                                                                                                                                                                                                                                                                                                                     | 238 | 248 | 1.00E-85  | 104.2 | 89.9 | 93.7 | hypothetical protein ARALYDRAFT_896702             | gbpln | Arabidopsis lyrata   | AT3G05980.1   Symbols:   unknown protein; BEST Arabidopsis thaliana protein match is: unknown protein (TAIR:AT5G19340.1); Has 202 Blast hits to 202 proteins in 28 species: Archae - 0; Bacteria - 0; Metazoa - 39; Fungi - 4; Plants - 148; Viruses - 0; Other Eukaryotes - 11 (source: NCBI BLINK).   chr3:1795514-1796251 FORWARD LENGTH=245 | 238 | 245 | 2.00E-81  | 102.9 | 85.3 | 90.8 |
| Rsa1.0_00420.1.g13525.t1  | ref NP_187250.1  leucine-rich repeat-containing protein [Arabidopsis thaliana] gi 6671958 gb AAF23217.1 AC013454.4 hypothetical protein [Arabidopsis thaliana] gi 30102730 gb AAP21283.1 At3g05990 [Arabidopsis thaliana] gi 110743247 dbj BAE99514.1                                                                                                                                                                                                                        | 525 | 517 | 0         | 98.5  | 77.1 | 86.1 | leucine-rich repeat-containing protein             | gbpln | Arabidopsis thaliana | AT3G05990.1   Symbols:   Leucine-rich repeat (LRR) family protein   chr3:1797116-1799732 REVERSE LENGTH=517                                                                                                                                                                                                                                     | 525 | 517 | 0         | 98.5  | 77.1 | 86.1 |
| Rsa1.0_00421.1.g13526.t1  | ref NP_198140.1  C2H2 and C2HC zinc finger-containing protein [Arabidopsis thaliana] gi 332006357 gb AED93740.1   C2H2 and C2HC zinc finger-containing protein [Arabidopsis thaliana]                                                                                                                                                                                                                                                                                        | 275 | 278 | 4.00E-88  | 101.1 | 64.7 | 74.2 | C2H2 and C2HC zinc finger-containing protein       | gbpln | Arabidopsis thaliana | AT5G27880.1   Symbols:   C2H2 and C2HC zinc fingers superfamily protein   chr5:9885909-9886744 FORWARD LENGTH=278                                                                                                                                                                                                                               | 275 | 278 | 1.00E-90  | 101.1 | 64.7 | 74.2 |
| Rsa1.0_00421.1.g13527.t1  | gb AAQ81585.1  putative tubulin alpha-2/alpha-4 chain [Brassica napus]                                                                                                                                                                                                                                                                                                                                                                                                       | 474 | 450 | 0         | 94.9  | 92.4 | 93.2 | putative tubulin alpha-2/alpha-4 chain             | gbpln | Brassica napus       | AT4G14960.2   Symbols: TUA6   Tubulin/FtsZ family protein   chr4:8548769-8550319 REVERSE LENGTH=450                                                                                                                                                                                                                                             | 474 | 450 | 0         | 94.9  | 90.1 | 90.7 |
| Rsa1.0_00421.1.g13528.t1  | ref NP_187210.1  60S ribosomal protein L18-2 [Arabidopsis thaliana] gi 21431838 sp P42791.2 RL182_ARATH RecName: Full=60S ribosomal protein L18-2 gi 6714451 gb AAF26138.1 AC011620.14 putative 60S ribosomal protein L18 [Arabidopsis thaliana] gi 14335090 gb AAK59824.1   AT3g05590/F18C1.14 [Arabidopsis thaliana] gi 16974509 gb AAL31164.1   AT3g05590/F18C1.14 [Arabidopsis thaliana] gi 332640742 gb AEE74263.1   60S ribosomal protein L18-2 [Arabidopsis thaliana] | 187 | 187 | 4.00E-96  | 100.0 | 94.7 | 96.8 | 60S ribosomal protein L18-2                        | gbpln | Arabidopsis thaliana | AT3G05590.1   Symbols: RPL18   ribosomal protein L18   chr3:1621511-1622775 FORWARD LENGTH=187                                                                                                                                                                                                                                                  | 187 | 187 | 1.00E-98  | 100.0 | 94.7 | 96.8 |
| Rsa1.0_00421.1.g13529.t1  | ref NP_568501.3  serine/threonine-protein phosphatase PP1 isozyme 8 [Arabidopsis thaliana] gi 38503411 sp O82734.3 PP18_ARATH RecName: Full=Serine/threonine-protein phosphatase PP1 isozyme 8 gi 332006352 gb AED93735.1   serine/threonine-protein phosphatase PP1 isozyme 8 [Arabidopsis thaliana]                                                                                                                                                                        | 360 | 324 | 1.00E-170 | 90.0  | 81.1 | 84.4 | serine/threonine-protein phosphatase PP1 isozyme 8 | gbpln | Arabidopsis thaliana | AT5G27840.2   Symbols: TOPP8   Calineurin-like metallo-phosphoesterase superfamily protein   chr5:9863465-9864828 REVERSE LENGTH=324                                                                                                                                                                                                            | 360 | 324 | 1.00E-173 | 90.0  | 81.1 | 84.4 |
| Rsa1.0_00421.1.g13530.t1  | gb EOA19497.1  hypothetical protein CARUB_v10002200mg, partial [Capsella rubella]                                                                                                                                                                                                                                                                                                                                                                                            | 114 | 149 | 1.00E-57  | 130.7 | 93.9 | 98.2 | hypothetical protein CARUB_v10002200mg, partial    | gbpln | Capsella rubella     | AT5G27820.1   Symbols:   Ribosomal L18p/L5e family protein   chr5:9860584-9860928 FORWARD LENGTH=114                                                                                                                                                                                                                                            | 114 | 114 | 2.00E-59  | 100.0 | 93.9 | 97.4 |
| Rsa1.0_00421.1.g13531.t1  | ref XP_002882425.1  60S ribosomal protein L22-2 [Arabidopsis lyrata subsp. lyrata] gi 297328265 gb EFH56684.1   60S ribosomal protein L22-2 [Arabidopsis lyrata subsp. lyrata]                                                                                                                                                                                                                                                                                               | 83  | 124 | 9.00E-20  | 149.4 | 69.9 | 75.9 | 60S ribosomal protein L22-2                        | gbpln | Arabidopsis lyrata   | AT3G05560.3   Symbols:   Ribosomal L22e protein family   chr3:1614641-1615204 FORWARD LENGTH=124                                                                                                                                                                                                                                                | 83  | 124 | 3.00E-22  | 149.4 | 68.7 | 75.9 |
| Rsa1.0_00421.1.g13532.t10 | ref XP_002874347.1  hypoxia-responsive family protein [Arabidopsis lyrata subsp. lyrata] gi 297320184 gb EFH50606.1   hypoxia-responsive family protein [Arabidopsis lyrata subsp. lyrata]                                                                                                                                                                                                                                                                                   | 96  | 96  | 2.00E-37  | 100.0 | 94.8 | 96.9 | hypoxia-responsive family protein                  | gbpln | Arabidopsis lyrata   | AT5G27760.1   Symbols:   Hypoxia-responsive family protein   chr5:98303396-9831559 FORWARD LENGTH=96                                                                                                                                                                                                                                            | 96  | 96  | 1.00E-38  | 100.0 | 92.7 | 94.8 |
| Rsa1.0_00421.1.g13533.t1  | gb EOA21887.1  hypothetical protein CARUB_v10002364mg [Capsella rubella]                                                                                                                                                                                                                                                                                                                                                                                                     | 82  | 82  | 2.00E-39  | 100.0 | 91.5 | 97.6 | hypothetical protein CARUB_v10002364mg             | gbpln | Capsella rubella     | AT5G27700.1   Symbols:   Ribosomal protein S21e   chr5:9807541-9808048 REVERSE LENGTH=82                                                                                                                                                                                                                                                        | 82  | 82  | 5.00E-42  | 100.0 | 91.5 | 97.6 |

|                          |                                                                                                                                                                                                                                                                                                                                                                                                                                                                                                                                                                                                                                                                 |      |     |           |       |      |      |                                                 |       |                      |                                                                                                                                           |      |     |           |       |      |      |
|--------------------------|-----------------------------------------------------------------------------------------------------------------------------------------------------------------------------------------------------------------------------------------------------------------------------------------------------------------------------------------------------------------------------------------------------------------------------------------------------------------------------------------------------------------------------------------------------------------------------------------------------------------------------------------------------------------|------|-----|-----------|-------|------|------|-------------------------------------------------|-------|----------------------|-------------------------------------------------------------------------------------------------------------------------------------------|------|-----|-----------|-------|------|------|
| Rsa1.0_00421.1.g13534.t1 | ref[XP_002874359.1] hypothetical protein ARALYDRAFT_489559 [Arabidopsis lyrata subsp. lyrata] gi 297320196 gb EFH50618.1                                                                                                                                                                                                                                                                                                                                                                                                                                                                                                                                        | 364  | 345 | 1.00E-101 | 94.8  | 70.6 | 78.3 | hypothetical protein ARALYDRAFT_489559          | gbpln | Arabidopsis lyrata   | AT5G27690.1   Symbols: Heavy metal transport/detoxification superfamily protein   chr5:9803796-9805036 FORWARD LENGTH=352                 | 364  | 352 | 1.00E-103 | 96.7  | 72.3 | 80.2 |
| Rsa1.0_00421.1.g13535.t1 | hypothetical protein ARALYDRAFT_489559 [Arabidopsis lyrata subsp. lyrata] ref[NP_198119.1] histone H2A 7 [Arabidopsis thaliana] gi 75306451 sp Q94F49.1 H2A5 ARATH RecName: Full=Probable histone H2A.5; AltName: Full=HTA7                                                                                                                                                                                                                                                                                                                                                                                                                                     | 158  | 150 | 5.00E-65  | 94.9  | 82.3 | 87.3 | histone H2A 7                                   | gbpln | Arabidopsis thaliana | AT5G27670.1   Symbols: HTA7   histone H2A 7   chr5:9792807-9793365 REVERSE LENGTH=150                                                     | 158  | 150 | 2.00E-67  | 94.9  | 82.3 | 87.3 |
| Rsa1.0_00421.1.g13536.t1 | gi 14326516 gb AAK60303.1 AF385711.1 AT5g27670/F15A18_130 [Arabidopsis thaliana] gi 18700220 gb AAL77720.1  AT5g27670/F15A18_130 [Arabidopsis thaliana] gi 332006330 gb AED93713.1  histone H2A 7 [Arabidopsis thaliana]                                                                                                                                                                                                                                                                                                                                                                                                                                        | 674  | 668 | 0         | 99.1  | 81.6 | 89.2 | hypothetical protein CARUB_v10002793mg          | gbpln | Capsella rubella     | AT5G27630.1   Symbols: ACBP5   acyl-CoA binding protein 5   chr5:9776101-9780780 FORWARD LENGTH=648                                       | 674  | 648 | 0         | 96.1  | 80.4 | 88.0 |
| Rsa1.0_00421.1.g13537.t6 | gb EOA22209.1  hypothetical protein CARUB_v10002793mg [Capsella rubella] ref[NP_198113.2] protein ALWAYS EARLY 1 [Arabidopsis thaliana] gi 296439606 sp Q6A331.2 ALY1 ARATH RecName: Full=Protein ALWAYS EARLY 1; Short=ATALY1 gi 225898943 gb BAH30602.1                                                                                                                                                                                                                                                                                                                                                                                                       | 1244 | 971 | 0         | 78.1  | 48.1 | 56.8 | protein ALWAYS EARLY 1                          | gbpln | Arabidopsis thaliana | AT5G27610.1   Symbols: ATALY1, ALY1   DIRP_Myb-like DNA-binding domain   chr5:9764852-9769706 FORWARD LENGTH=971                          | 1244 | 971 | 0         | 78.1  | 48.1 | 56.8 |
| Rsa1.0_00421.1.g13538.t1 | hypothetical protein [Arabidopsis thaliana] gi 332006323 gb AED93706.1  protein ALWAYS EARLY 1 [Arabidopsis thaliana]                                                                                                                                                                                                                                                                                                                                                                                                                                                                                                                                           | 778  | 793 | 0         | 101.9 | 84.8 | 91.1 | hypothetical protein CARUB_v10000259mg          | gbpln | Capsella rubella     | AT5G27550.1   Symbols: P-loop containing nucleoside triphosphate hydrolases superfamily protein   chr5:9727634-9731323 REVERSE LENGTH=765 | 778  | 765 | 0         | 98.3  | 84.1 | 90.5 |
| Rsa1.0_00421.1.g13539.t1 | gb EOA20124.1  hypothetical protein CARUB_v10000404mg, partial [Capsella rubella]                                                                                                                                                                                                                                                                                                                                                                                                                                                                                                                                                                               | 644  | 664 | 0         | 103.1 | 91.1 | 96.0 | hypothetical protein CARUB_v10000404mg, partial | gbpln | Capsella rubella     | AT5G27540.2   Symbols: MIRO1   MIRO-related GTP-ase 1   chr5:9722816-9727112 FORWARD LENGTH=648                                           | 644  | 648 | 0         | 100.6 | 90.8 | 96.1 |
| Rsa1.0_00421.1.g13540.t1 | ref[NP_198099.1] seryl-tRNA synthetase [Arabidopsis thaliana] gi 2501056 sp Q39230.1 SYS ARATH RecName: Full=Serine-tRNA ligase; AltName: Full=Seryl-tRNA synthetase; Short=SerRS; AltName: Full=Seryl-tRNA(Ser/Sec) synthetase gi 13507571 gb AAK28648.1 AF360352.1 putative seryl-tRNA synthetase [Arabidopsis thaliana] gi 1359497 emb CAA94388.1  seryl-tRNA Synthetase [Arabidopsis thaliana] gi 15293241 gb AAK93731.1  putative seryl-tRNA synthetase [Arabidopsis thaliana] gi 332006309 gb AED93692.1  seryl-tRNA synthetase [Arabidopsis thaliana]                                                                                                    | 451  | 451 | 0         | 100.0 | 92.0 | 95.8 | seryl-tRNA synthetase                           | gbpln | Arabidopsis thaliana | AT5G27470.1   Symbols: seryl-tRNA synthetase / serine-tRNA ligase   chr5:9695087-9697154 FORWARD LENGTH=451                               | 451  | 451 | 0         | 100.0 | 92.0 | 95.8 |
| Rsa1.0_00421.1.g13541.t1 | ref[XP_002874371.1] hypothetical protein ARALYDRAFT_489582 [Arabidopsis lyrata subsp. lyrata] gi 297320208 gb EFH50630.1                                                                                                                                                                                                                                                                                                                                                                                                                                                                                                                                        | 386  | 378 | 0         | 97.9  | 84.2 | 91.5 | hypothetical protein ARALYDRAFT_489582          | gbpln | Arabidopsis lyrata   | AT5G27450.3   Symbols: MK   mevalonate kinase   chr5:9691051-9692975 FORWARD LENGTH=378                                                   | 386  | 378 | 0         | 97.9  | 84.2 | 91.2 |
| Rsa1.0_00421.1.g13542.t1 | hypothetical protein ARALYDRAFT_489582 [Arabidopsis lyrata subsp. lyrata] ref[NP_198095.1] Signal peptidase complex subunit 3B [Arabidopsis thaliana] gi 75270222 sp Q53YF3.1 SPC3B_ARATH RecName: Full=Signal peptidase complex subunit 3B; AltName: Full=Microsomal signal peptidase 22 kDa subunit; Short=SPC22; Short=SPase 22 kDa subunit gi 3044218 gb AAC13316.1  signal peptidase [Arabidopsis thaliana] gi 28393474 gb AAO42158.1  putative signal peptidase [Arabidopsis thaliana] gi 28973603 gb AAO64126.1  putative signal peptidase [Arabidopsis thaliana] gi 332006303 gb AED93686.1  Signal peptidase complex subunit 3B [Arabidopsis thaliana] | 90   | 167 | 3.00E-44  | 185.6 | 93.3 | 96.7 | Signal peptidase complex subunit 3B             | gbpln | Arabidopsis thaliana | AT5G27430.1   Symbols: Signal peptidase subunit   chr5:9687470-9689185 FORWARD LENGTH=167                                                 | 90   | 167 | 5.00E-47  | 185.6 | 93.3 | 96.7 |

|                          |                                                                                                                                                                                                                                                                                                                                                                                                                                                                                                                                     |     |     |           |       |      |      |                                          |       |                      |                                                                                                                                                  |     |     |           |       |      |      |
|--------------------------|-------------------------------------------------------------------------------------------------------------------------------------------------------------------------------------------------------------------------------------------------------------------------------------------------------------------------------------------------------------------------------------------------------------------------------------------------------------------------------------------------------------------------------------|-----|-----|-----------|-------|------|------|------------------------------------------|-------|----------------------|--------------------------------------------------------------------------------------------------------------------------------------------------|-----|-----|-----------|-------|------|------|
| Rsa1.0_00422.1.g13543.t1 | ref[XP_002878123.1] OBP3-responsive gene 3 [Arabidopsis lyrata subsp. lyrata] gi 297323961 gb EFH54382.1  OBP3-responsive gene 3 [Arabidopsis lyrata subsp. lyrata]<br>ref[NP_191256.1] transcription factor ORG2 [Arabidopsis thaliana] gi 75311784 sp Q9M1K1.1 ORG2_ARATH RecName: Full=Transcription factor ORG2; AltName: Full=Basic helix-loop-helix protein 38; Short=AtbHLH38; Short=bHLH 38; AltName: Full=OBP3-responsive gene 2; AltName: Full=Transcription factor EN 8; AltName: Full=bHLH transcription factor bHLH038 | 85  | 258 | 2.00E-29  | 303.5 | 78.8 | 88.2 | OBP3-responsive gene 3                   | gbpln | Arabidopsis lyrata   | AT3G56980.1   Symbols: BHLH039, ORG3   basic helix-loop-helix (bHLH) DNA-binding superfamily protein   chr3:21086612-21087494 REVERSE LENGTH=258 | 85  | 258 | 6.00E-32  | 303.5 | 80.0 | 88.2 |
| Rsa1.0_00422.1.g13544.t1 | gi 20127034 gb AAM10940.1 AF488576.1 putative bHLH transcription factor [Arabidopsis thaliana] gi 6911867 emb CAB72167.1  putative protein [Arabidopsis thaliana] gi 62320432 dbj BAD94899.1  putative bHLH transcription factor [Arabidopsis thaliana] gi 111074306 gb ABH04526.1  At3g56970 [Arabidopsis thaliana] gi 332646073 gb AEE79594.1  transcription factor ORG2 [Arabidopsis thaliana]                                                                                                                                   | 183 | 253 | 4.00E-60  | 138.3 | 63.9 | 72.1 | transcription factor ORG2                | gbpln | Arabidopsis thaliana | AT3G56970.1   Symbols: BHLH038, ORG2   basic helix-loop-helix (bHLH) DNA-binding superfamily protein   chr3:21084204-21085094 REVERSE LENGTH=253 | 183 | 253 | 1.00E-62  | 138.3 | 63.9 | 72.1 |
| Rsa1.0_00422.1.g13545.t1 | gb EOA23522.1  hypothetical protein CARUB_v10016715mg [Capsella rubella]                                                                                                                                                                                                                                                                                                                                                                                                                                                            | 773 | 778 | 0         | 100.6 | 92.2 | 97.0 | hypothetical protein CARUB_v10016715mg   | gbpln | Capsella rubella     | AT3G56960.1   Symbols: PIP5K4   phosphatidylinositol monophosphate 5 kinase 4   chr3:21080957-21083885 FORWARD LENGTH=779                        | 773 | 779 | 0         | 100.8 | 91.7 | 96.2 |
| Rsa1.0_00422.1.g13546.t1 | ref[XP_002878121.1] SIP2_1 [Arabidopsis lyrata subsp. lyrata] gi 297323959 gb EFH54380.1  SIP2_1 [Arabidopsis lyrata subsp. lyrata]                                                                                                                                                                                                                                                                                                                                                                                                 | 101 | 237 | 1.00E-40  | 234.7 | 82.2 | 89.1 | SIP2_1                                   | gbpln | Arabidopsis lyrata   | AT3G56950.1   Symbols: SIP2.1, SIP2   small and basic intrinsic protein 2.1   chr3:21078586-21079644 REVERSE LENGTH=237                          | 101 | 237 | 6.00E-42  | 234.7 | 79.2 | 88.1 |
| Rsa1.0_00422.1.g13547.t1 | ref[NP_001190113.1] putative aquaporin SIP2-1 [Arabidopsis thaliana] gi 332646071 gb AEE79592.1  putative aquaporin SIP2-1 [Arabidopsis thaliana]                                                                                                                                                                                                                                                                                                                                                                                   | 98  | 260 | 4.00E-47  | 265.3 | 88.8 | 98.0 | putative aquaporin SIP2-1                | gbpln | Arabidopsis thaliana | AT3G56950.2   Symbols: SIP2.1   small and basic intrinsic protein 2.1   chr3:21078411-21079644 REVERSE LENGTH=260                                | 98  | 260 | 7.00E-50  | 265.3 | 88.8 | 98.0 |
| Rsa1.0_00422.1.g13548.t1 | gb EOA24121.1  hypothetical protein CARUB_v10017355mg [Capsella rubella]                                                                                                                                                                                                                                                                                                                                                                                                                                                            | 57  | 409 | 6.00E-15  | 717.5 | 73.7 | 75.4 | hypothetical protein CARUB_v10017355mg   | gbpln | Capsella rubella     | AT3G56940.1   Symbols: CRD1, CHL27, ACSF   dicarboxylate diiron protein, putative (CrD1)   chr3:21076594-21078269 FORWARD LENGTH=409             | 57  | 409 | 9.00E-16  | 717.5 | 66.7 | 71.9 |
| Rsa1.0_00422.1.g13549.t1 | gb EOA24894.1  hypothetical protein CARUB_v10018185mg [Capsella rubella]                                                                                                                                                                                                                                                                                                                                                                                                                                                            | 139 | 151 | 2.00E-23  | 108.6 | 80.6 | 88.5 | hypothetical protein CARUB_v10018185mg   | gbpln | Capsella rubella     | AT3G56910.1   Symbols: PSRP5   plastid-specific 50S ribosomal protein 5   chr3:21069558-21070257 REVERSE LENGTH=148                              | 139 | 148 | 5.00E-25  | 106.5 | 78.4 | 84.2 |
| Rsa1.0_00422.1.g13550.t1 | ref[XP_002876384.1] VQ motif-containing protein [Arabidopsis lyrata subsp. lyrata] gi 29732222 gb EFH52643.1  VQ motif-containing protein [Arabidopsis lyrata subsp. lyrata]                                                                                                                                                                                                                                                                                                                                                        | 233 | 242 | 2.00E-75  | 103.9 | 75.1 | 83.7 | VQ motif-containing protein              | gbpln | Arabidopsis lyrata   | AT3G56880.1   Symbols:   VQ motif-containing protein   chr3:21060044-21060781 FORWARD LENGTH=245                                                 | 233 | 245 | 6.00E-77  | 105.2 | 73.4 | 81.5 |
| Rsa1.0_00422.1.g13551.t1 | dbj BAD95408.1  hypothetical protein [Arabidopsis thaliana]                                                                                                                                                                                                                                                                                                                                                                                                                                                                         | 237 | 478 | 4.00E-68  | 201.7 | 47.3 | 70.5 | hypothetical protein                     | gbpln | Arabidopsis thaliana | AT3G24255.1   Symbols:   RNA-directed DNA polymerase (reverse transcriptase)-related family protein   chr3:8789471-8793208 FORWARD LENGTH=746    | 237 | 746 | 1.00E-55  | 314.8 | 40.9 | 58.6 |
| Rsa1.0_00422.1.g13552.t1 | dbj BAJ33737.1  unnamed protein product [Theilungiella halophila]                                                                                                                                                                                                                                                                                                                                                                                                                                                                   | 433 | 479 | 1.00E-142 | 110.6 | 63.0 | 68.8 | unnamed protein product                  | ----  | ----                 | AT3G56860.5   Symbols: UBA2A   UBP1-associated protein 2A   chr3:21050708-21052144 REVERSE LENGTH=478                                            | 433 | 478 | 1.00E-138 | 110.4 | 60.0 | 66.3 |
| Rsa1.0_00422.1.g13553.t1 | ref[XP_002878113.1] aba-responsive element binding protein 3 [Arabidopsis lyrata subsp. lyrata] gi 297323951 gb EFH54372.1  aba-responsive element binding protein 3 [Arabidopsis lyrata subsp. lyrata]                                                                                                                                                                                                                                                                                                                             | 284 | 299 | 1.00E-107 | 105.3 | 81.7 | 85.2 | aba-responsive element binding protein 3 | gbpln | Arabidopsis lyrata   | AT3G56850.1   Symbols: AREB3, DPBF3   ABA-responsive element binding protein 3   chr3:21046554-21047894 REVERSE LENGTH=297                       | 284 | 297 | 1.00E-109 | 104.6 | 79.2 | 83.1 |
| Rsa1.0_00422.1.g13554.t2 | #                                                                                                                                                                                                                                                                                                                                                                                                                                                                                                                                   | #   | #   | #         | #     | #    | #    | -                                        | ----  | ----                 | #                                                                                                                                                | #   | #   | #         | #     | #    | #    |
| Rsa1.0_00422.1.g13555.t1 | #                                                                                                                                                                                                                                                                                                                                                                                                                                                                                                                                   | #   | #   | #         | #     | #    | #    | -                                        | ----  | ----                 | #                                                                                                                                                | #   | #   | #         | #     | #    | #    |

|                          |                                                                                                                                                                                                                                                                                                                                                                                                                  |     |      |           |       |       |       |                                           |       |                      |                                                                                                                                                                                                                                                                                                                                                                                                                                                |     |      |           |       |       |       |
|--------------------------|------------------------------------------------------------------------------------------------------------------------------------------------------------------------------------------------------------------------------------------------------------------------------------------------------------------------------------------------------------------------------------------------------------------|-----|------|-----------|-------|-------|-------|-------------------------------------------|-------|----------------------|------------------------------------------------------------------------------------------------------------------------------------------------------------------------------------------------------------------------------------------------------------------------------------------------------------------------------------------------------------------------------------------------------------------------------------------------|-----|------|-----------|-------|-------|-------|
| Rsa1.0_00422.1.g13556.t1 | gb[EOA24368.1] hypothetical protein CARUB_v10017605mg [Capsella rubella]                                                                                                                                                                                                                                                                                                                                         | 326 | 333  | 1.00E-127 | 102.1 | 77.3  | 86.5  | hypothetical protein CARUB_v10017605mg    | gbpln | Capsella rubella     | AT3G56810.1   Symbols:   unknown protein; FUNCTIONS IN: molecular_function unknown; INVOLVED IN: biological_process unknown; LOCATED IN: chloroplast; EXPRESSED IN: 22 plant structures; EXPRESSED DURING: 13 growth stages; Has 14 Blast hits to 14 proteins in 7 species: Archae - 0; Bacteria - 0; Metazoa - 0; Fungi - 0; Plants - 14; Viruses - 0; Other Eukaryotes - 0 (source: NCBI BLINK);   chr3:21036927-21038927 REVERSE LENGTH=332 | 326 | 332  | 1.00E-129 | 101.8 | 75.5  | 85.3  |
| Rsa1.0_00422.1.g13557.t1 | gb[EOA27855.1] hypothetical protein CARUB_v10024013mg [Capsella rubella]                                                                                                                                                                                                                                                                                                                                         | 149 | 224  | 2.00E-80  | 150.3 | 100.0 | 100.0 | hypothetical protein CARUB_v10024013mg    | gbpln | Capsella rubella     | AT2G27030.3   Symbols: CAM5   calmodulin 5   chr2:11532069-11534176 FORWARD LENGTH=181                                                                                                                                                                                                                                                                                                                                                         | 149 | 181  | 9.00E-83  | 121.5 | 100.0 | 100.0 |
| Rsa1.0_00422.1.g13558.t1 | ref[XP_002878108.1] basic helix-loop-helix family protein [Arabidopsis lyrata subsp. lyrata]<br>gi 297323946 gb EFH54367.1  basic helix-loop-helix family protein [Arabidopsis lyrata subsp. lyrata]                                                                                                                                                                                                             | 231 | 232  | 1.00E-85  | 100.4 | 73.6  | 87.0  | basic helix-loop-helix family protein     | gbpln | Arabidopsis lyrata   | AT3G56770.1   Symbols:   basic helix-loop-helix (bHLH) DNA-binding superfamily protein   chr3:21029202-21030618 REVERSE LENGTH=230                                                                                                                                                                                                                                                                                                             | 231 | 230  | 9.00E-82  | 99.6  | 71.9  | 84.8  |
| Rsa1.0_00422.1.g13559.t1 | #                                                                                                                                                                                                                                                                                                                                                                                                                | #   | #    | #         | #     | #     | #     | -                                         | ----  | ----                 | #                                                                                                                                                                                                                                                                                                                                                                                                                                              | #   | #    | #         | #     | #     |       |
| Rsa1.0_00422.1.g13560.t1 | ref[NP_191235.1] protein kinase-domain containing protein [Arabidopsis thaliana]<br>gi 75334901 sp Q9LET1.1 CAMK7_ARAT H RecName: Full=CDPK-related kinase 7; Short=AtCRK7; AltName: Full=Calcium/calmodulin-dependent protein kinase CRK7<br>gi 9662995 emb CAC00739.1  calcium-dependent protein kinase-like [Arabidopsis thaliana]<br>gi 33264604 gb AEE79562.1  CDPK-related kinase 7 [Arabidopsis thaliana] | 574 | 577  | 0         | 100.5 | 89.4  | 93.4  | protein kinase-domain containing protein  | gbpln | Arabidopsis thaliana | AT3G56760.1   Symbols:   Protein kinase superfamily protein   chr3:21020661-21023756 REVERSE LENGTH=577                                                                                                                                                                                                                                                                                                                                        | 574 | 577  | 0         | 100.5 | 89.4  | 93.4  |
| Rsa1.0_00422.1.g13561.t1 | ref[XP_002878104.1] hypothetical protein ARALYDRAFT_486111 [Arabidopsis lyrata subsp. lyrata]<br>gi 297323942 gb EFH54363.1  hypothetical protein ARALYDRAFT_486111 [Arabidopsis lyrata subsp. lyrata]                                                                                                                                                                                                           | 155 | 155  | 2.00E-41  | 100.0 | 62.6  | 71.0  | hypothetical protein ARALYDRAFT_486111    | gbpln | Arabidopsis lyrata   | AT3G56710.1   Symbols: SIB1   sigma factor binding protein 1   chr3:21007053-21007508 REVERSE LENGTH=151                                                                                                                                                                                                                                                                                                                                       | 155 | 151  | 9.00E-44  | 97.4  | 60.0  | 67.1  |
| Rsa1.0_00422.1.g13562.t1 | ref[XP_002878104.1] hypothetical protein ARALYDRAFT_486111 [Arabidopsis lyrata subsp. lyrata]<br>gi 297323942 gb EFH54363.1  hypothetical protein ARALYDRAFT_486111 [Arabidopsis lyrata subsp. lyrata]                                                                                                                                                                                                           | 151 | 155  | 2.00E-46  | 102.6 | 68.2  | 74.8  | hypothetical protein ARALYDRAFT_486111    | gbpln | Arabidopsis lyrata   | AT3G56710.1   Symbols: SIB1   sigma factor binding protein 1   chr3:21007053-21007508 REVERSE LENGTH=151                                                                                                                                                                                                                                                                                                                                       | 151 | 151  | 2.00E-47  | 100.0 | 64.9  | 74.2  |
| Rsa1.0_00422.1.g13563.t1 | ref[XP_002878101.1] CIP111 [Arabidopsis lyrata subsp. lyrata]<br>gi 297323939 gb EFH54360.1  CIP111 [Arabidopsis lyrata subsp. lyrata]                                                                                                                                                                                                                                                                           | 245 | 1025 | 6.00E-89  | 418.4 | 72.2  | 81.2  | CIP111                                    | gbpln | Arabidopsis lyrata   | AT3G56690.1   Symbols: CIP111   Cam interacting protein 111   chr3:20993869-20998531 REVERSE LENGTH=1022                                                                                                                                                                                                                                                                                                                                       | 245 | 1022 | 7.00E-91  | 417.1 | 71.4  | 81.6  |
| Rsa1.0_00422.1.g13564.t1 | ref[XP_002876378.1] hypothetical protein ARALYDRAFT_486108 [Arabidopsis lyrata subsp. lyrata]<br>gi 29732221 gb EFH52637.1  hypothetical protein ARALYDRAFT_486108 [Arabidopsis lyrata subsp. lyrata]                                                                                                                                                                                                            | 350 | 354  | 1.00E-133 | 101.1 | 73.4  | 82.0  | hypothetical protein ARALYDRAFT_486108    | gbpln | Arabidopsis lyrata   | AT3G56680.1   Symbols:   Single-stranded nucleic acid binding R3H protein   chr3:20991537-20993446 FORWARD LENGTH=353                                                                                                                                                                                                                                                                                                                          | 350 | 353  | 1.00E-135 | 100.9 | 72.3  | 80.6  |
| Rsa1.0_00423.1.g13565.t1 | ref[NP_187901.1] trypsin-like protein [Arabidopsis thaliana]<br>gi 15795124 dbj BAB02502.1  unnamed protein product [Arabidopsis thaliana]<br>gi 45773814 gb AAS76711.1  At3g12950 [Arabidopsis thaliana]<br>gi 52627109 gb AAU84681.1  At3g12950 [Arabidopsis thaliana]<br>gi 332641744 gb AEE75265.1  trypsin-like protein [Arabidopsis thaliana]                                                              | 529 | 558  | 0         | 105.5 | 94.3  | 96.6  | trypsin-like protein                      | gbpln | Arabidopsis thaliana | AT3G12950.1   Symbols:   Trypsin family protein   chr3:4132798-4134818 REVERSE LENGTH=558                                                                                                                                                                                                                                                                                                                                                      | 529 | 558  | 0         | 105.5 | 94.3  | 96.6  |
| Rsa1.0_00423.1.g13566.t1 | ref[NP_566440.1] SAUR-like auxin-responsive family protein [Arabidopsis thaliana]<br>gi 15795125 dbj BAB02503.1  unnamed protein product [Arabidopsis thaliana]<br>gi 89111858 gb ABD60701.1  At3g12955 [Arabidopsis thaliana]<br>gi 332641745 gb AEE75266.1  SAUR-like auxin-responsive family protein [Arabidopsis thaliana]                                                                                   | 140 | 139  | 7.00E-69  | 99.3  | 90.7  | 96.4  | SAUR-like auxin-responsive family protein | gbpln | Arabidopsis thaliana | AT3G12955.1   Symbols:   SAUR-like auxin-responsive protein family   chr3:4135659-4136078 REVERSE LENGTH=139                                                                                                                                                                                                                                                                                                                                   | 140 | 139  | 2.00E-71  | 99.3  | 90.7  | 96.4  |



|                          |                                                                                                                                                                                                                                                                                                                                                                 |      |      |           |       |      |      |                                                |       |                      |                                                                                                                                                                                                                                                           |      |      |           |       |      |      |
|--------------------------|-----------------------------------------------------------------------------------------------------------------------------------------------------------------------------------------------------------------------------------------------------------------------------------------------------------------------------------------------------------------|------|------|-----------|-------|------|------|------------------------------------------------|-------|----------------------|-----------------------------------------------------------------------------------------------------------------------------------------------------------------------------------------------------------------------------------------------------------|------|------|-----------|-------|------|------|
| Rsa1.0_00423.1.g13567.t1 | refNP_187902.1   uncharacterized protein [Arabidopsis thaliana]   gi15795126 dbj BAB02504.1   unnamed protein product [Arabidopsis thaliana]   gi48596999 gb AAT46040.1   At3g12960 [Arabidopsis thaliana]   gi52627125 gb AAU84689.1   At3g12960 [Arabidopsis thaliana]   gi332641746 gb AEE75267.1   uncharacterized protein AT3G12960 [Arabidopsis thaliana] | 89   | 86   | 1.00E-29  | 96.6  | 77.5 | 87.6 | uncharacterized protein                        | gbpln | Arabidopsis thaliana | AT3G12960.1   Symbols:   unknown protein; Has 44 Blast hits to 44 proteins in 14 species: Archae - 0; Bacteria - 0; Metazoa - 0; Fungi - 0; Plants - 44; Viruses - 0; Other Eukaryotes - 0 (source: NCBI BLINK).   chr3:4136546-4136806 FORWARD LENGTH=86 | 89   | 86   | 2.00E-32  | 96.6  | 77.5 | 87.6 |
| Rsa1.0_00423.1.g13568.t1 | #                                                                                                                                                                                                                                                                                                                                                               | #    | #    | #         | #     | #    | -    | ----                                           | ----  | #                    | #                                                                                                                                                                                                                                                         | #    | #    | #         | #     | #    |      |
| Rsa1.0_00423.1.g13569.t1 | refXP_002882800.1   histone acetyltransferase 5 [Arabidopsis lyrata subsp. lyrata]   gi297328640 gb EFH59059.1   histone acetyltransferase 5 [Arabidopsis lyrata subsp. lyrata]                                                                                                                                                                                 | 1646 | 1657 | 0         | 100.7 | 79.8 | 86.8 | histone acetyltransferase 5                    | gbpln | Arabidopsis lyrata   | AT3G12980.1   Symbols: HAC5, ATHPCAT4   histone acetyltransferase of the CBP family 5   chr3:4146919-4154495 FORWARD LENGTH=1670                                                                                                                          | 1646 | 1670 | 0         | 101.5 | 79.5 | 87.2 |
| Rsa1.0_00423.1.g13570.t1 | #                                                                                                                                                                                                                                                                                                                                                               | #    | #    | #         | #     | #    | -    | ----                                           | ----  | #                    | #                                                                                                                                                                                                                                                         | #    | #    | #         | #     | #    |      |
| Rsa1.0_00423.1.g13571.t1 | refNP_187908.1   hAT dimerization domain-containing protein [Arabidopsis thaliana]   gi15795134 dbj BAB02512.1   transposase-like protein [Arabidopsis thaliana]   gi332641756 gb AEE75277.1   hAT dimerization domain-containing protein [Arabidopsis thaliana]                                                                                                | 529  | 605  | 1.00E-174 | 114.4 | 63.5 | 77.5 | hAT dimerization domain-containing protein     | gbpln | Arabidopsis thaliana | AT3G13020.1   Symbols:   hAT transposon superfamily protein   chr3:4166995-4168917 REVERSE LENGTH=605                                                                                                                                                     | 529  | 605  | 1.00E-176 | 114.4 | 63.5 | 77.5 |
| Rsa1.0_00423.1.g13572.t1 | refNP_181350.2   lactosylceramide 4-alpha-galactosyltransferase [Arabidopsis thaliana]   gi330254401 gb AEC09495.1   alpha 1,4-glycosyltransferase family protein [Arabidopsis thaliana]                                                                                                                                                                        | 402  | 405  | 0         | 100.7 | 79.9 | 88.6 | lactosylceramide 4-alpha-galactosyltransferase | gbpln | Arabidopsis thaliana | AT2G38150.1   Symbols:   alpha 1,4-glycosyltransferase family protein   chr2:15981700-15982917 REVERSE LENGTH=405                                                                                                                                         | 402  | 405  | 0         | 100.7 | 79.9 | 88.6 |
| Rsa1.0_00423.1.g13573.t1 | refNP_187908.1   hAT dimerization domain-containing protein [Arabidopsis thaliana]   gi15795134 dbj BAB02512.1   transposase-like protein [Arabidopsis thaliana]   gi332641756 gb AEE75277.1   hAT dimerization domain-containing protein [Arabidopsis thaliana]                                                                                                | 623  | 605  | 0         | 97.1  | 60.2 | 75.3 | hAT dimerization domain-containing protein     | gbpln | Arabidopsis thaliana | AT3G13020.1   Symbols:   hAT transposon superfamily protein   chr3:4166995-4168917 REVERSE LENGTH=605                                                                                                                                                     | 623  | 605  | 0         | 97.1  | 60.2 | 75.3 |
| Rsa1.0_00423.1.g13574.t1 | dbj BAB02514.1   transfactor-like protein [Arabidopsis thaliana]                                                                                                                                                                                                                                                                                                | 446  | 554  | 0         | 124.2 | 78.7 | 85.9 | transfactor-like protein                       | gbpln | Arabidopsis thaliana | AT3G13040.2   Symbols:   myb-like HTH transcriptional regulator family protein   chr3:4172415-4174456 REVERSE LENGTH=449                                                                                                                                  | 446  | 449  | 0         | 100.7 | 79.6 | 86.3 |
| Rsa1.0_00423.1.g13575.t1 | gb EOA32797.1   hypothetical protein CARUB_v10016107mg [Capsella rubella]                                                                                                                                                                                                                                                                                       | 504  | 500  | 0         | 99.2  | 82.7 | 90.1 | hypothetical protein CARUB_v10016107mg         | gbpln | Capsella rubella     | AT3G13050.1   Symbols:   Major facilitator superfamily protein   chr3:4176866-4178868 FORWARD LENGTH=500                                                                                                                                                  | 504  | 500  | 0         | 99.2  | 81.0 | 88.5 |
| Rsa1.0_00423.1.g13576.t1 | refXP_002882804.1   hypothetical protein ARALYDRAFT.478675 [Arabidopsis lyrata subsp. lyrata]   gi297328644 gb EFH59063.1   hypothetical protein ARALYDRAFT.478675 [Arabidopsis lyrata subsp. lyrata]                                                                                                                                                           | 620  | 635  | 0         | 102.4 | 87.6 | 91.8 | hypothetical protein ARALYDRAFT.478675         | gbpln | Arabidopsis lyrata   | AT3G13060.2   Symbols: ECT5   evolutionarily conserved C-terminal region 5   chr3:4180625-4183632 FORWARD LENGTH=634                                                                                                                                      | 620  | 634  | 0         | 102.3 | 87.4 | 91.9 |
| Rsa1.0_00423.1.g13577.t8 | refNP_850574.1   lipid-binding START domain-containing protein [Arabidopsis thaliana]   gi332641765 gb AEE75286.1   lipid-binding START domain-containing protein [Arabidopsis thaliana]                                                                                                                                                                        | 109  | 411  | 3.00E-29  | 377.1 | 69.7 | 77.1 | lipid-binding START domain-containing protein  | gbpln | Arabidopsis thaliana | AT3G13062.3   Symbols:   Polyketide cyclase/dehydrase and lipid transport superfamily protein   chr3:4184777-4186795 FORWARD LENGTH=411                                                                                                                   | 109  | 411  | 5.00E-32  | 377.1 | 69.7 | 77.1 |
| Rsa1.0_00423.1.g13578.t1 | dbj BAD11207.1   multidrug resistance-associated protein [Thlaspi caerulescens]                                                                                                                                                                                                                                                                                 | 1486 | 1514 | 0         | 101.9 | 86.1 | 92.3 | multidrug resistance-associated protein        | gbpln | Thlaspi caerulescens | AT3G13080.1   Symbols: ATMRP3, MRP3, ABCO3   multidrug resistance-associated protein 3   chr3:4196019-4201250 REVERSE LENGTH=1514                                                                                                                         | 1486 | 1514 | 0         | 101.9 | 84.3 | 91.9 |
| Rsa1.0_00423.1.g13579.t1 | refXP_002884942.1   predicted protein [Arabidopsis lyrata subsp. lyrata]   gi297330782 gb EFH61201.1   predicted protein [Arabidopsis lyrata subsp. lyrata]                                                                                                                                                                                                     | 1459 | 1463 | 0         | 100.3 | 84.3 | 92.0 | predicted protein                              | gbpln | Arabidopsis lyrata   | AT3G13090.1   Symbols: ATMRP8, ABCC6, MRP8   multidrug resistance-associated protein 8   chr3:4203013-4208171 REVERSE LENGTH=1466                                                                                                                         | 1459 | 1466 | 0         | 100.5 | 83.3 | 92.1 |
| Rsa1.0_00423.1.g13580.t1 | gb AAL14776.1   ATP-binding cassette transporter MRP6 [Arabidopsis thaliana]                                                                                                                                                                                                                                                                                    | 1574 | 1466 | 0         | 93.1  | 77.4 | 84.5 | ATP-binding cassette transporter MRP6          | gbpln | Arabidopsis thaliana | AT3G13090.1   Symbols: ATMRP8, ABCC6, MRP8   multidrug resistance-associated protein 8   chr3:4203013-4208171 REVERSE LENGTH=1466                                                                                                                         | 1574 | 1466 | 0         | 93.1  | 77.4 | 84.6 |
| Rsa1.0_00423.1.g13581.t1 | gb ABL97980.1   30S ribosomal protein S10-like [Brassica rapa]                                                                                                                                                                                                                                                                                                  | 192  | 193  | 4.00E-83  | 100.5 | 88.0 | 91.7 | 30S ribosomal protein S10-like                 | gbpln | Brassica rapa        | AT3G13120.2   Symbols:   Ribosomal protein S10p/S20e family protein   chr3:4220310-4221526 REVERSE LENGTH=191                                                                                                                                             | 192  | 191  | 3.00E-74  | 99.5  | 81.3 | 84.9 |

|                          |                                                                                                                                                                                                                                                                                                                                                                                                                                                                                                                                                                                                                                                                                                                                                                                                         |     |     |           |       |      |      |                                                 |       |                      |                                                                                                                              |     |     |           |       |      |      |
|--------------------------|---------------------------------------------------------------------------------------------------------------------------------------------------------------------------------------------------------------------------------------------------------------------------------------------------------------------------------------------------------------------------------------------------------------------------------------------------------------------------------------------------------------------------------------------------------------------------------------------------------------------------------------------------------------------------------------------------------------------------------------------------------------------------------------------------------|-----|-----|-----------|-------|------|------|-------------------------------------------------|-------|----------------------|------------------------------------------------------------------------------------------------------------------------------|-----|-----|-----------|-------|------|------|
| Rsa1.0_00423.1.g13582.t1 | ref[NP_187921.1] hydroxyproline-rich glycoprotein family protein [Arabidopsis thaliana] gi 10172601 dbj BAB01405.1  unnamed protein product [Arabidopsis thaliana] gi 67633630 gb AA78739.1  hydroxyproline-rich glycoprotein family protein [Arabidopsis thaliana] gi 332641780 gb AEE75301.1  hydroxyproline-rich glycoprotein family protein [Arabidopsis thaliana] ref[NP_187922.1] pentatricopeptide repeat-containing protein [Arabidopsis thaliana] gi 75311241 sp Q9LK58.1 PP225_ARATH RecName: Full=Pentatricopeptide repeat-containing protein At3g13150 gi 10172602 dbj BAB01406.1  unnamed protein product [Arabidopsis thaliana] gi 66792658 gb AA56431.1  At3g13150 [Arabidopsis thaliana] gi 332641781 gb AEE75302.1  pentatricopeptide repeat-containing protein [Arabidopsis thaliana] | 188 | 183 | 1.00E-25  | 97.3  | 42.0 | 55.3 | hydroxyproline-rich glycoprotein family protein | gbpln | Arabidopsis thaliana | AT3G13140.1   Symbols:   hydroxyproline-rich glycoprotein family protein   chr3:4226654-4227377 REVERSE LENGTH=183           | 188 | 183 | 4.00E-28  | 97.3  | 42.0 | 55.3 |
| Rsa1.0_00423.1.g13583.t1 | ref[NP_187922.1] pentatricopeptide repeat-containing protein [Arabidopsis thaliana] gi 75311241 sp Q9LK58.1 PP225_ARATH RecName: Full=Pentatricopeptide repeat-containing protein At3g13150 gi 10172602 dbj BAB01406.1  unnamed protein product [Arabidopsis thaliana] gi 66792658 gb AA56431.1  At3g13150 [Arabidopsis thaliana] gi 332641781 gb AEE75302.1  pentatricopeptide repeat-containing protein [Arabidopsis thaliana]                                                                                                                                                                                                                                                                                                                                                                        | 426 | 551 | 0         | 129.3 | 77.2 | 87.8 | pentatricopeptide repeat-containing protein     | gbpln | Arabidopsis thaliana | AT3G13150.1   Symbols:   Tetratricopeptide repeat (TPR)-like superfamily protein   chr3:4227975-4229630 REVERSE LENGTH=551   | 426 | 551 | 0         | 129.3 | 77.2 | 87.8 |
| Rsa1.0_00423.1.g13584.t1 | gb EOA31905.1  hypothetical protein CARUB_v10015134mg [Capsella rubella]                                                                                                                                                                                                                                                                                                                                                                                                                                                                                                                                                                                                                                                                                                                                | 391 | 394 | 0         | 100.8 | 82.6 | 92.1 | hypothetical protein CARUB_v10015134mg          | gbpln | Capsella rubella     | AT3G13160.1   Symbols:   Tetratricopeptide repeat (TPR)-like superfamily protein   chr3:4229994-4231178 REVERSE LENGTH=394   | 391 | 394 | 0         | 100.8 | 81.3 | 90.3 |
| Rsa1.0_00423.1.g13585.t1 | ref[XP_002884949.1] predicted protein [Arabidopsis lyrata subsp. lyrata] gi 297330789 gb EFH61208.1  predicted protein [Arabidopsis lyrata subsp. lyrata] ref[NP_191330.1] protein kinase family protein [Arabidopsis thaliana] gi 4678276 emb CAB41184.1  putative protein [Arabidopsis thaliana] gi 21537362 gb AAM61703.1  protein kinase-like protein [Arabidopsis thaliana] gi 51968400 dbj BAD42892.1  protein kinase - like protein [Arabidopsis thaliana] gi 51969234 dbj BAD43309.1  protein kinase - like protein [Arabidopsis thaliana] gi 51969278 dbj BAD43331.1  protein kinase - like protein [Arabidopsis thaliana] gi 332646167 gb AEE79688.1  protein kinase family protein [Arabidopsis thaliana]                                                                                    | 377 | 362 | 0         | 96.0  | 83.3 | 87.8 | predicted protein                               | gbpln | Arabidopsis lyrata   | AT3G13170.1   Symbols:   ATSP011-1   Spo11/DNA topoisomerase VI, subunit A protein   chr3:4231560-4234192 REVERSE LENGTH=362 | 377 | 362 | 0         | 96.0  | 82.5 | 87.8 |
| Rsa1.0_00424.1.g13586.t1 | ref[NP_191330.1] protein kinase family protein [Arabidopsis thaliana] gi 4678276 emb CAB41184.1  putative protein [Arabidopsis thaliana] gi 21537362 gb AAM61703.1  protein kinase-like protein [Arabidopsis thaliana] gi 51968400 dbj BAD42892.1  protein kinase - like protein [Arabidopsis thaliana] gi 51969234 dbj BAD43309.1  protein kinase - like protein [Arabidopsis thaliana] gi 51969278 dbj BAD43331.1  protein kinase - like protein [Arabidopsis thaliana] gi 332646167 gb AEE79688.1  protein kinase family protein [Arabidopsis thaliana]                                                                                                                                                                                                                                              | 316 | 351 | 7.00E-83  | 111.1 | 55.1 | 71.5 | protein kinase family protein                   | gbpln | Arabidopsis thaliana | AT3G57710.1   Symbols:   Protein kinase superfamily protein   chr3:21386233-21387288 REVERSE LENGTH=351                      | 316 | 351 | 2.00E-85  | 111.1 | 55.1 | 71.5 |
| Rsa1.0_00424.1.g13587.t1 | ref[NP_191330.1] protein kinase family protein [Arabidopsis thaliana] gi 4678276 emb CAB41184.1  putative protein [Arabidopsis thaliana] gi 21537362 gb AAM61703.1  protein kinase-like protein [Arabidopsis thaliana] gi 51968400 dbj BAD42892.1  protein kinase - like protein [Arabidopsis thaliana] gi 51969234 dbj BAD43309.1  protein kinase - like protein [Arabidopsis thaliana] gi 51969278 dbj BAD43331.1  protein kinase - like protein [Arabidopsis thaliana] gi 332646167 gb AEE79688.1  protein kinase family protein [Arabidopsis thaliana]                                                                                                                                                                                                                                              | 204 | 351 | 1.00E-45  | 172.1 | 54.9 | 73.5 | protein kinase family protein                   | gbpln | Arabidopsis thaliana | AT3G57710.1   Symbols:   Protein kinase superfamily protein   chr3:21386233-21387288 REVERSE LENGTH=351                      | 204 | 351 | 4.00E-48  | 172.1 | 54.9 | 73.5 |
| Rsa1.0_00424.1.g13588.t1 | gb EOA25819.1  hypothetical protein CARUB_v10019188mg [Capsella rubella]                                                                                                                                                                                                                                                                                                                                                                                                                                                                                                                                                                                                                                                                                                                                | 355 | 349 | 6.00E-94  | 98.3  | 51.0 | 64.2 | hypothetical protein CARUB_v10019188mg          | gbpln | Capsella rubella     | AT3G57710.1   Symbols:   Protein kinase superfamily protein   chr3:21386233-21387288 REVERSE LENGTH=351                      | 355 | 351 | 9.00E-95  | 98.9  | 50.4 | 65.6 |
| Rsa1.0_00424.1.g13589.t1 | ref[NP_191329.1] putative protein kinase [Arabidopsis thaliana] gi 4678277 emb CAB41185.1  protein kinase-like protein [Arabidopsis thaliana] gi 332646168 gb AEE79689.1  putative protein kinase [Arabidopsis thaliana]                                                                                                                                                                                                                                                                                                                                                                                                                                                                                                                                                                                | 341 | 340 | 1.00E-157 | 99.7  | 80.9 | 90.9 | putative protein kinase                         | gbpln | Arabidopsis thaliana | AT3G57700.1   Symbols:   Protein kinase superfamily protein   chr3:21384917-21385939 FORWARD LENGTH=340                      | 341 | 340 | 1.00E-160 | 99.7  | 80.9 | 90.9 |

|                          |                                                                                                                                                                                                                                                                                                                                                                                                                                                                                                                                                                                                                                                        |      |      |           |       |      |      |                                                       |       |                      |                                                                                                                                                                                                                                                                                                                                                             |      |      |           |       |      |      |
|--------------------------|--------------------------------------------------------------------------------------------------------------------------------------------------------------------------------------------------------------------------------------------------------------------------------------------------------------------------------------------------------------------------------------------------------------------------------------------------------------------------------------------------------------------------------------------------------------------------------------------------------------------------------------------------------|------|------|-----------|-------|------|------|-------------------------------------------------------|-------|----------------------|-------------------------------------------------------------------------------------------------------------------------------------------------------------------------------------------------------------------------------------------------------------------------------------------------------------------------------------------------------------|------|------|-----------|-------|------|------|
| Rsa1.0_00424.1.g13590.t1 | gb EOA28140.1  hypothetical protein CARUB_v10024329mg [Capsella rubella]                                                                                                                                                                                                                                                                                                                                                                                                                                                                                                                                                                               | 61   | 123  | 3.00E-17  | 201.6 | 80.3 | 93.4 | hypothetical protein CARUB_v10024329mg                | gbpln | Capsella rubella     | AT2G41905.1   Symbols:   BEST Arabidopsis thaliana protein match is: arabinogalactan protein 23 (TAIR:AT3G57690.1); Has 35333 Blast hits to 34131 proteins in 2444 species: Archae - 798; Bacteria - 22429; Metazoa - 974; Fungi - 991; Plants - 531; Viruses - 0; Other Eukaryotes - 9610 (source: NCBI BLink).   chr2:17495766-17495951 FORWARD LENGTH=61 | 61   | 61   | 1.00E-19  | 100.0 | 83.6 | 93.4 |
| Rsa1.0_00424.1.g13591.t1 | #                                                                                                                                                                                                                                                                                                                                                                                                                                                                                                                                                                                                                                                      | #    | #    | #         | #     | #    | #    | -                                                     | ----  | ----                 | #                                                                                                                                                                                                                                                                                                                                                           | #    | #    | #         | #     | #    |      |
| Rsa1.0_00424.1.g13592.t1 | gb AAG50806.1 AC079281_8 unknown protein [Arabidopsis thaliana]                                                                                                                                                                                                                                                                                                                                                                                                                                                                                                                                                                                        | 1336 | 1213 | 0         | 90.8  | 40.3 | 49.7 | unknown protein                                       | gbpln | Arabidopsis thaliana | AT3G57670.1   Symbols: NTT, WIP2   C2H2-type zinc finger family protein   chr3:21370936-21373121 FORWARD LENGTH=383                                                                                                                                                                                                                                         | 1336 | 383  | 1.00E-155 | 28.7  | 23.6 | 24.5 |
| Rsa1.0_00424.1.g13593.t1 | gb ADC97478.1  lysophosphatidic acid acyltransferase [Brassica napus] gi 289472613 gb ADC97480.1  lysophosphatidic acid acyltransferase [Brassica napus]                                                                                                                                                                                                                                                                                                                                                                                                                                                                                               | 403  | 390  | 0         | 96.8  | 81.4 | 85.9 | lysophosphatidic acid acyltransferase                 | gbpln | Brassica napus       | AT3G57650.1   Symbols: LPAT2   lysophosphatidyl acyltransferase 2   chr3:21349751-21352839 FORWARD LENGTH=389                                                                                                                                                                                                                                               | 403  | 389  | 0         | 96.5  | 80.4 | 84.6 |
| Rsa1.0_00424.1.g13594.t2 | ref NP_191320.1  adenylosuccinate synthetase [Arabidopsis thaliana] gi 2500026 sp Q96529.1 PURA_ARATH RecName: Full=Adenylosuccinate synthetase, chloroplastic; Short=AMPSase; Short=AdSS; AltName: Full=IMP--aspartate ligase; Flags: Precursor gi 1616657 gb AAB16828.1  adenylosuccinate synthetase [Arabidopsis thaliana] gi 4678286 emb CAB41194.1  adenylosuccinate synthetase [Arabidopsis thaliana] gi 15451052 gb AAK96797.1  adenylosuccinate synthetase [Arabidopsis thaliana] gi 20148265 gb AAM10023.1  adenylosuccinate synthetase [Arabidopsis thaliana] gi 332646157 gb AEE79678.1  adenylosuccinate synthetase [Arabidopsis thaliana] | 550  | 490  | 0         | 89.1  | 82.2 | 85.5 | adenylosuccinate synthetase                           | gbpln | Arabidopsis thaliana | AT3G57610.1   Symbols: ADSS   adenylosuccinate synthase   chr3:21334519-21336603 REVERSE LENGTH=490                                                                                                                                                                                                                                                         | 550  | 490  | 0         | 89.1  | 82.2 | 85.5 |
| Rsa1.0_00424.1.g13595.t1 | gb EOA24542.1  hypothetical protein CARUB_v10017800mg [Capsella rubella]                                                                                                                                                                                                                                                                                                                                                                                                                                                                                                                                                                               | 249  | 278  | 1.00E-101 | 111.6 | 77.1 | 86.3 | hypothetical protein CARUB_v10017800mg                | gbpln | Capsella rubella     | AT3G57600.1   Symbols:   Integrase-type DNA-binding superfamily protein   chr3:21332841-21333674 FORWARD LENGTH=277                                                                                                                                                                                                                                         | 249  | 277  | 1.00E-101 | 111.2 | 75.5 | 85.9 |
| Rsa1.0_00424.1.g13596.t1 | ref XP_002876425.1  binding protein [Arabidopsis lyrata subsp. lyrata] gi 297322263 gb EFH52684.1  binding protein [Arabidopsis lyrata subsp. lyrata]                                                                                                                                                                                                                                                                                                                                                                                                                                                                                                  | 145  | 1082 | 2.00E-24  | 746.2 | 45.5 | 58.6 | binding protein                                       | gbpln | Arabidopsis lyrata   | AT3G57570.2   Symbols:   ARM repeat superfamily protein   chr3:21312598-21320105 FORWARD LENGTH=1096                                                                                                                                                                                                                                                        | 145  | 1096 | 1.00E-26  | 755.9 | 45.5 | 57.9 |
| Rsa1.0_00424.1.g13597.t1 | ref XP_002878162.1  aspartate/ glutamate/ uridylate kinase family protein [Arabidopsis lyrata subsp. lyrata] gi 297324000 gb EFH54421.1  aspartate/ glutamate/ uridylate kinase family protein [Arabidopsis lyrata subsp. lyrata]                                                                                                                                                                                                                                                                                                                                                                                                                      | 339  | 346  | 1.00E-167 | 102.1 | 92.9 | 95.3 | aspartate/ glutamate/ uridylate kinase family protein | gbpln | Arabidopsis lyrata   | AT3G57560.1   Symbols: NAGK   N-acetyl-L-glutamate kinase   chr3:21311164-21312207 REVERSE LENGTH=347                                                                                                                                                                                                                                                       | 339  | 347  | 1.00E-166 | 102.4 | 91.4 | 94.7 |
| Rsa1.0_00424.1.g13598.t1 | gb EOA24182.1  hypothetical protein CARUB_v10017419mg [Capsella rubella]                                                                                                                                                                                                                                                                                                                                                                                                                                                                                                                                                                               | 378  | 389  | 0         | 102.9 | 91.3 | 96.0 | hypothetical protein CARUB_v10017419mg                | gbpln | Capsella rubella     | AT3G57550.1   Symbols: AGK2, GK-2   guanylate kinase   chr3:21307269-21309193 FORWARD LENGTH=389                                                                                                                                                                                                                                                            | 378  | 389  | 0         | 102.9 | 89.9 | 95.8 |
| Rsa1.0_00424.1.g13599.t1 | gb AAD32898.1  putative retroelement pol polyprotein [Arabidopsis thaliana]                                                                                                                                                                                                                                                                                                                                                                                                                                                                                                                                                                            | 1256 | 1307 | 0         | 104.1 | 60.3 | 72.5 | putative retroelement pol polyprotein                 | gbpln | Arabidopsis thaliana | AT4G23160.1   Symbols: CRK8   cysteine-rich RLK (RECEPTOR-like protein kinase) 8   chr4:12129485-12134086 FORWARD LENGTH=1262                                                                                                                                                                                                                               | 1256 | 1262 | 8.00E-70  | 100.5 | 12.6 | 19.8 |
| Rsa1.0_00424.1.g13600.t1 | #                                                                                                                                                                                                                                                                                                                                                                                                                                                                                                                                                                                                                                                      | #    | #    | #         | #     | #    | #    | -                                                     | ----  | ----                 | #                                                                                                                                                                                                                                                                                                                                                           | #    | #    | #         | #     | #    |      |
| Rsa1.0_00425.1.g13601.t1 | ref XP_002892072.1  hypothetical protein ARALYDRAFT_470143 [Arabidopsis lyrata subsp. lyrata] gi 297337914 gb EFH68331.1  hypothetical protein ARALYDRAFT_470143 [Arabidopsis lyrata subsp. lyrata]                                                                                                                                                                                                                                                                                                                                                                                                                                                    | 239  | 241  | 3.00E-93  | 100.8 | 73.6 | 81.6 | hypothetical protein ARALYDRAFT_470143                | gbpln | Arabidopsis lyrata   | AT1G01310.1   Symbols:   CAP (Cysteine-rich secretory proteins, Antigen 5, and Pathogenesis-related 1 protein) superfamily protein   chr1:120221-120946 FORWARD LENGTH=241                                                                                                                                                                                  | 239  | 241  | 2.00E-92  | 100.8 | 70.7 | 80.3 |
| Rsa1.0_00425.1.g13602.t3 | ref NP_001184884.1  tetratricopeptide repeat-containing protein [Arabidopsis thaliana] gi 332189151 gb AEE27272.1  tetratricopeptide repeat-containing protein [Arabidopsis thaliana]                                                                                                                                                                                                                                                                                                                                                                                                                                                                  | 1780 | 1787 | 0         | 100.4 | 88.6 | 93.3 | tetratricopeptide repeat-containing protein           | gbpln | Arabidopsis thaliana | AT1G01320.2   Symbols:   Tetratricopeptide repeat (TPR)-like superfamily protein   chr1:121582-130099 REVERSE LENGTH=1787                                                                                                                                                                                                                                   | 1780 | 1787 | 0         | 100.4 | 88.6 | 93.3 |

|                          |                                                                                                                                                                                                                                                                                                                                                                                            |     |     |           |       |      |      |                                                          |       |                      |                                                                                                                                                                                                                                                                                                                                                                                                                                                                                             |     |     |           |       |      |      |
|--------------------------|--------------------------------------------------------------------------------------------------------------------------------------------------------------------------------------------------------------------------------------------------------------------------------------------------------------------------------------------------------------------------------------------|-----|-----|-----------|-------|------|------|----------------------------------------------------------|-------|----------------------|---------------------------------------------------------------------------------------------------------------------------------------------------------------------------------------------------------------------------------------------------------------------------------------------------------------------------------------------------------------------------------------------------------------------------------------------------------------------------------------------|-----|-----|-----------|-------|------|------|
| Rsa1.0_00425.1.g13603.t2 | gb EOA38162.1  hypothetical protein CARUB_v10009639mg [Capsella rubella]                                                                                                                                                                                                                                                                                                                   | 403 | 342 | 1.00E-167 | 84.9  | 74.9 | 79.2 | hypothetical protein CARUB_v10009639mg                   | gbpln | Capsella rubella     | AT1G01350.1   Symbols:   Zinc finger (CCH-type/C3HC4-type RING finger) family protein   chr1:136732-137970 FORWARD LENGTH=343                                                                                                                                                                                                                                                                                                                                                               | 403 | 343 | 1.00E-161 | 85.1  | 74.2 | 78.9 |
| Rsa1.0_00425.1.g13604.t1 | dbj BAF63139.1  hypothetical protein [Arabidopsis suecica]                                                                                                                                                                                                                                                                                                                                 | 198 | 189 | 2.00E-93  | 95.5  | 82.8 | 87.4 | hypothetical protein                                     | gbpln | Arabidopsis suecica  | AT1G01360.1   Symbols: RCAR1, PYL9   regulatory component of ABA receptor 1   chr1:142138-142914 FORWARD LENGTH=187                                                                                                                                                                                                                                                                                                                                                                         | 198 | 187 | 3.00E-95  | 94.4  | 82.3 | 87.9 |
| Rsa1.0_00425.1.g13605.t1 | #                                                                                                                                                                                                                                                                                                                                                                                          | #   | #   | #         | #     | #    | -    | -                                                        | ----  | ----                 | #                                                                                                                                                                                                                                                                                                                                                                                                                                                                                           | #   | #   | #         | #     | #    |      |
| Rsa1.0_00425.1.g13606.t1 | dbj BAA97156.1  unnamed protein product [Arabidopsis thaliana]<br>ref XP_002889367.1  hypothetical protein ARALYDRAFT_887310 [Arabidopsis lyrata subsp. lyrata]<br>gi 297335209 gb EFH65626.1  hypothetical protein ARALYDRAFT_887310 [Arabidopsis lyrata subsp. lyrata]                                                                                                                   | 107 | 329 | 2.00E-17  | 307.5 | 41.1 | 57.0 | unnamed protein product                                  | gbpln | Arabidopsis thaliana | #                                                                                                                                                                                                                                                                                                                                                                                                                                                                                           | #   | #   | #         | #     | #    |      |
| Rsa1.0_00425.1.g13607.t1 | ref XP_002889366.1  predicted protein [Arabidopsis lyrata subsp. lyrata]<br>gi 297335208 gb EFH65625.1  predicted protein [Arabidopsis lyrata subsp. lyrata]                                                                                                                                                                                                                               | 292 | 970 | 1.00E-108 | 332.2 | 71.9 | 78.1 | predicted protein                                        | gbpln | Arabidopsis lyrata   | AT1G01440.1   Symbols:   Protein of unknown function (DUF3133)   chr1:159935-162219 REVERSE LENGTH=664                                                                                                                                                                                                                                                                                                                                                                                      | 292 | 267 | 1.00E-105 | 91.4  | 70.9 | 79.1 |
| Rsa1.0_00425.1.g13609.t2 | ref XP_002892064.1  phosphatidylinositol-4-phosphate 5-kinase family protein [Arabidopsis lyrata subsp. lyrata]<br>gi 297337906 gb EFH68323.1  phosphatidylinositol-4-phosphate 5-kinase family protein [Arabidopsis lyrata subsp. lyrata]                                                                                                                                                 | 419 | 426 | 0         | 101.7 | 89.5 | 95.0 | phosphatidylinositol-4-phosphate 5-kinase family protein | gbpln | Arabidopsis lyrata   | AT1G01453.1   Symbols:   unknown protein; FUNCTIONS IN: molecular_function unknown; INVOLVED IN: biological_process unknown; LOCATED IN: cellular_component unknown; BEST Arabidopsis thaliana protein match is: unknown protein (TAIR:AT4G01110.1); Has 30201 Blast hits to 17322 proteins in 780 species: Archaea - 12; Bacteria - 1396; Metazoa - 17338; Fungi - 3422; Plants - 5037; Viruses - 0; Other Eukaryotes - 2996 (source: NCBI BLINK).   chr1:166853-167798 REVERSE LENGTH=267 | 419 | 427 | 0         | 101.9 | 90.2 | 94.7 |
| Rsa1.0_00425.1.g13610.t1 | ref XP_002892062.1  1-amino-cyclopropane-1-carboxylate synthase 2 [Arabidopsis lyrata subsp. lyrata]<br>gi 297337904 gb EFH68321.1  1-amino-cyclopropane-1-carboxylate synthase 2 [Arabidopsis lyrata subsp. lyrata]                                                                                                                                                                       | 499 | 496 | 0         | 99.4  | 86.6 | 92.2 | 1-amino-cyclopropane-1-carboxylate synthase 2            | gbpln | Arabidopsis lyrata   | AT1G01460.1   Symbols: ATPIP11, PIPK11   Phosphatidylinositol-4-phosphate 5-kinase, core   chr1:169115-171154 FORWARD LENGTH=427                                                                                                                                                                                                                                                                                                                                                            | 499 | 496 | 0         | 99.4  | 85.2 | 91.6 |
| Rsa1.0_00425.1.g13611.t1 | ref XP_002889363.1  hypothetical protein ARALYDRAFT_887301 [Arabidopsis lyrata subsp. lyrata]<br>gi 297335205 gb EFH65622.1  hypothetical protein ARALYDRAFT_887301 [Arabidopsis lyrata subsp. lyrata]                                                                                                                                                                                     | 177 | 177 | 2.00E-53  | 100.0 | 97.2 | 98.3 | hypothetical protein ARALYDRAFT_887301                   | gbpln | Arabidopsis lyrata   | AT1G01480.1   Symbols: ACS2, AT-ACC2   1-amino-cyclopropane-1-carboxylate synthase 2   chr1:175862-178051 FORWARD LENGTH=496                                                                                                                                                                                                                                                                                                                                                                | 177 | 177 | 1.00E-55  | 100.0 | 95.5 | 97.7 |
| Rsa1.0_00425.1.g13612.t1 | gb EOA25182.1  hypothetical protein CARUB_v10018494mg [Capsella rubella]                                                                                                                                                                                                                                                                                                                   | 259 | 282 | 3.00E-31  | 108.9 | 34.4 | 52.9 | hypothetical protein CARUB_v10018494mg                   | gbpln | Capsella rubella     | AT1G01490.2   Symbols:   Heavy metal transport/detoxification superfamily protein   chr1:180401-182066 REVERSE LENGTH=177                                                                                                                                                                                                                                                                                                                                                                   | 259 | 303 | 5.00E-32  | 117.0 | 33.2 | 49.0 |
| Rsa1.0_00425.1.g13613.t2 | ref NP_563629.1  Rossmann-fold NAD(P)-binding domain-containing protein [Arabidopsis thaliana]<br>gi 75274951 sp O23702.1 CTBP_ARATH<br>RecName: Full=C-terminal binding protein AN; Short=CtBP; AltName: Full=Protein ANGUSTIFOLIA<br>gi 2505877 emb CAA73306.1  dehydrogenase [Arabidopsis thaliana]<br>gi 332189177 gb AEE27298.1  C-terminal binding protein AN [Arabidopsis thaliana] | 630 | 636 | 0         | 101.0 | 91.3 | 96.0 | Rossmann-fold NAD(P)-binding domain-containing protein   | gbpln | Arabidopsis thaliana | AT1G01000.1   Symbols:   Ribonuclease H-like superfamily protein   chr1:3263877-3264788 REVERSE LENGTH=303                                                                                                                                                                                                                                                                                                                                                                                  | 630 | 636 | 0         | 101.0 | 91.3 | 96.0 |
| Rsa1.0_00425.1.g13614.t1 | gb EOA39056.1  hypothetical protein CARUB_v10011679mg [Capsella rubella]                                                                                                                                                                                                                                                                                                                   | 275 | 273 | 1.00E-113 | 99.3  | 77.1 | 85.1 | hypothetical protein CARUB_v10011679mg                   | gbpln | Capsella rubella     | AT1G01510.1   Symbols: AN   NAD(P)-binding Rossmann-fold superfamily protein   chr1:187235-189836 FORWARD LENGTH=636                                                                                                                                                                                                                                                                                                                                                                        | 275 | 287 | 1.00E-110 | 104.4 | 75.6 | 84.7 |
| Rsa1.0_00425.1.g13615.t1 | ref XP_002892058.1  kinase family protein [Arabidopsis lyrata subsp. lyrata]<br>gi 297337900 gb EFH68317.1  kinase family protein [Arabidopsis lyrata subsp. lyrata]                                                                                                                                                                                                                       | 458 | 472 | 0         | 103.1 | 94.5 | 97.2 | kinase family protein                                    | gbpln | Arabidopsis lyrata   | AT1G01520.1   Symbols:   Homeodomain-like superfamily protein   chr1:190596-192139 FORWARD LENGTH=287                                                                                                                                                                                                                                                                                                                                                                                       | 458 | 472 | 0         | 103.1 | 94.3 | 96.9 |

|                          |                                                                                                                                                                                                                                                                                                                                                                                                                                                                                                                                                                                                                      |     |     |           |       |      |       |                                                                |       |                      |                                                                                                                                 |     |     |           |       |      |      |  |  |
|--------------------------|----------------------------------------------------------------------------------------------------------------------------------------------------------------------------------------------------------------------------------------------------------------------------------------------------------------------------------------------------------------------------------------------------------------------------------------------------------------------------------------------------------------------------------------------------------------------------------------------------------------------|-----|-----|-----------|-------|------|-------|----------------------------------------------------------------|-------|----------------------|---------------------------------------------------------------------------------------------------------------------------------|-----|-----|-----------|-------|------|------|--|--|
|                          | refNP_563630.1  protein BPS1<br>[Arabidopsis thaliana]<br>gi 79316260 refNP_001030929.1  protein BPS1 [Arabidopsis thaliana]<br>gi 75174796 sp Q9LMM6.1 BPS1_ARATH<br>RecName: Full=Protein BPS1,<br>chloroplastic; AltName: Full=Protein BYPASS 1; Flags: Precursor<br>gi 8920591 gb AAF81313.1 AC061957.9<br>Contains similarity to an unknown protein T3F17.27 gi 3702339 from Arabidopsis thaliana BAC T3F17<br>gb AC005397. ESTs gb T43647,<br>gb H36161. gb T22185. gb Z37624.<br>gb AI100650 come from this gene                                                                                              |     |     |           |       |      |       |                                                                |       |                      |                                                                                                                                 |     |     |           |       |      |      |  |  |
| Rsa1.0_00425.1.g13616.t1 | [Arabidopsis thaliana]<br>gi 13194834 gb AAK15579.1 AF349532.1<br>unknown protein [Arabidopsis thaliana]<br>gi 16648871 gb AAL24287.1  Unknown<br>protein [Arabidopsis thaliana]<br>gi 17380900 gb AAL36262.1  unknown<br>protein [Arabidopsis thaliana]<br>gi 20259587 gb AAM14136.1  unknown<br>protein [Arabidopsis thaliana]<br>gi 23197666 gb AANI5360.1  Unknown<br>protein [Arabidopsis thaliana]<br>gi 24417250 gb AAN60235.1  unknown<br>[Arabidopsis thaliana]<br>gi 332189182 gb AEE27303.1  protein<br>BPS1 [Arabidopsis thaliana]<br>gi 332189183 gb AEE27304.1  protein<br>BPS1 [Arabidopsis thaliana] | 350 | 349 | 1.00E-178 | 99.7  | 88.3 | 94.6  | protein BPS1                                                   | gbpln | Arabidopsis thaliana | AT1G01550.2   Symbols: BPS1   Protein of unknown function (DUF793)   chr1:200526-201575 FORWARD LENGTH=349                      | 350 | 349 | 0         | 99.7  | 88.3 | 94.6 |  |  |
| Rsa1.0_00425.1.g13617.t1 | gb EOA36874.1  hypothetical protein<br>CARUB_v10008901mg [Capsella rubella]                                                                                                                                                                                                                                                                                                                                                                                                                                                                                                                                          | 517 | 507 | 0         | 98.1  | 78.5 | 86.8  | hypothetical protein<br>CARUB_v10008901mg                      | gbpln | Capsella rubella     | AT1G01570.1   Symbols:   Protein of unknown function (DUF604)   chr1:205176-207435 FORWARD LENGTH=478                           | 517 | 478 | 0         | 92.5  | 72.7 | 81.6 |  |  |
| Rsa1.0_00425.1.g13618.t1 | gb EOA39785.1  hypothetical protein<br>CARUB_v10008441mg [Capsella rubella]                                                                                                                                                                                                                                                                                                                                                                                                                                                                                                                                          | 702 | 723 | 0         | 103.0 | 83.5 | 91.3  | hypothetical protein<br>CARUB_v10008441mg                      | gbpln | Capsella rubella     | AT1G01580.1   Symbols: FRO2, FRD1, ATFRO2   ferric reduction oxidase 2   chr1:209395-212810 FORWARD LENGTH=725                  | 702 | 725 | 0         | 103.3 | 81.5 | 90.5 |  |  |
| Rsa1.0_00425.1.g13619.t1 | ref XP_002892051.1  CYP86A4<br>[Arabidopsis lyrata subsp. lyrata]<br>gi 297337893 gb EFH68310.1  CYP86A4<br>[Arabidopsis lyrata subsp. lyrata]<br>gb AFH02722.1  sn-glycerol-3-<br>phosphate acyltransferase 4 isoform C2<br>[Brassica napus]<br>gi 383289235 gb AFH02725.1  sn-<br>glycerol-3-phosphate acyltransferase 4<br>isoform C2 [Brassica napus]                                                                                                                                                                                                                                                            | 551 | 554 | 0         | 100.5 | 91.1 | 95.8  | CYP86A4                                                        | gbpln | Arabidopsis lyrata   | AT1G01600.1   Symbols: CYP86A4   cytochrome P450, family 86, subfamily A, polypeptide 4   chr1:219200-220994 FORWARD LENGTH=554 | 551 | 554 | 0         | 100.5 | 90.4 | 95.5 |  |  |
| Rsa1.0_00425.1.g13620.t1 | ref XP_003604065.1  DEAD-box ATP-<br>dependent RNA helicase [Medicago<br>truncatula]<br>gi 355493113 gb AES74316.1  DEAD-<br>box ATP-dependent RNA helicase<br>[Medicago truncatula]                                                                                                                                                                                                                                                                                                                                                                                                                                 | 503 | 503 | 0         | 100.0 | 98.4 | 99.4  | sn-glycerol-3-<br>phosphate<br>acyltransferase 4<br>isoform C2 | gbpln | Brassica napus       | AT1G01610.1   Symbols: ATPAT4, GPAT4   glycerol-3-phosphate acyltransferase 4   chr1:221950-224255 REVERSE LENGTH=503           | 503 | 503 | 0         | 100.0 | 95.0 | 98.0 |  |  |
| Rsa1.0_00425.1.g13621.t1 | ref XP_003604065.1  DEAD-box ATP-<br>dependent RNA helicase [Medicago<br>truncatula]<br>gi 355493113 gb AES74316.1  DEAD-<br>box ATP-dependent RNA helicase<br>[Medicago truncatula]                                                                                                                                                                                                                                                                                                                                                                                                                                 | 213 | 568 | 1.00E-13  | 266.7 | 23.9 | 30.0  | DEAD-box ATP-<br>dependent RNA<br>helicase                     | gbpln | Medicago truncatula  | AT3G06980.1   Symbols:   DEA(D/H)-box RNA helicase family protein   chr3:2201531-2204662 FORWARD LENGTH=781                     | 213 | 781 | 2.00E-15  | 366.7 | 16.4 | 16.9 |  |  |
| Rsa1.0_00425.1.g13622.t1 | db BAJ34288.1  unnamed protein<br>product [Theillungiella halophila]                                                                                                                                                                                                                                                                                                                                                                                                                                                                                                                                                 | 286 | 286 | 1.00E-162 | 100.0 | 97.9 | 100.0 | unnamed protein<br>product                                     | ----  | ----                 | AT4G00430.1   Symbols: TMP-C, PIP1,4, PIP1E   plasma membrane intrinsic protein 1:4   chr4:186143-187531 REVERSE LENGTH=287     | 286 | 287 | 1.00E-162 | 100.3 | 97.9 | 99.7 |  |  |
| Rsa1.0_00425.1.g13623.t1 | ref XP_002892050.1  hypothetical<br>protein ARALYDRAFT_470113<br>[Arabidopsis lyrata subsp. lyrata]<br>gi 297337892 gb EFH68309.1 <br>hypothetical protein<br>ARALYDRAFT_470113 [Arabidopsis<br>lyrata subsp. lyrata]                                                                                                                                                                                                                                                                                                                                                                                                | 258 | 256 | 1.00E-131 | 99.2  | 86.8 | 92.2  | hypothetical protein<br>ARALYDRAFT_470113                      | gbpln | Arabidopsis lyrata   | AT1G01630.1   Symbols:   Sec14p-like phosphatidylinositol transfer family protein   chr1:229206-230675 FORWARD LENGTH=255       | 258 | 255 | 1.00E-132 | 98.8  | 85.3 | 91.5 |  |  |

|                          |                                                                                                                                                                                                                                                                                                                                                                                                                                                                                                                                                                                                                           |      |      |           |       |      |      |                                                                                                                |       |                      |                                                                                                                                    |      |     |           |       |      |      |
|--------------------------|---------------------------------------------------------------------------------------------------------------------------------------------------------------------------------------------------------------------------------------------------------------------------------------------------------------------------------------------------------------------------------------------------------------------------------------------------------------------------------------------------------------------------------------------------------------------------------------------------------------------------|------|------|-----------|-------|------|------|----------------------------------------------------------------------------------------------------------------|-------|----------------------|------------------------------------------------------------------------------------------------------------------------------------|------|-----|-----------|-------|------|------|
| Rsa1.0_00425.1.g13624.t1 | refNP_171670.1  BTB/POZ domain-containing protein [Arabidopsis thaliana] gi 30678163 refNP_049574.1  BTB/POZ domain-containing protein [Arabidopsis thaliana] gi 75311457 sp Q9LQ95.1 Y1164_ARATH RecName: Full=BTB/POZ domain-containing protein At:g01640 gi 8671833 gb AAF78396.1 AC009273_2 Contains similarity to the speckle-type POZ protein from Homo sapiens gb AJ000644. It contains a BTB/POZ domain PF 00651 [Arabidopsis thaliana] gi 332189194 gb AEE27315.1  BTB/POZ domain-containing protein [Arabidopsis thaliana] gi 332189195 gb AEE27316.1  BTB/POZ domain-containing protein [Arabidopsis thaliana] | 216  | 207  | 4.00E-89  | 95.8  | 75.5 | 81.5 | BTB/POZ domain-containing protein                                                                              | gbpln | Arabidopsis thaliana | AT1G01640.2   Symbols:   BTB/POZ domain-containing protein   chr1:231164-231915 REVERSE LENGTH=207                                 | 216  | 207 | 1.00E-91  | 95.8  | 75.5 | 81.5 |
| Rsa1.0_00425.1.g13625.t2 | refNP_171671.2  signal peptide peptidase-like 4 [Arabidopsis thaliana] gi 403377882 sp Q0WMJ8.1 SIPL4_ARATH RecName: Full=Signal peptide peptidase-like 4; Short=AtSPPL4; Flags: Precursor gi 110739487 gb BAF01653.1  hypothetical protein [Arabidopsis thaliana] gi 332189196 gb AEE27317.1  signal peptide peptidase-like 4 [Arabidopsis thaliana]                                                                                                                                                                                                                                                                     | 538  | 540  | 0         | 100.4 | 89.8 | 93.3 | signal peptide peptidase-like 4                                                                                | gbpln | Arabidopsis thaliana | AT1G01650.1   Symbols: SPPL4, ATSPPL4   SIGNAL PEPTIDE PEPTIDASE-LIKE 4   chr1:233188-237647 REVERSE LENGTH=540                    | 538  | 540 | 0         | 100.4 | 89.8 | 93.3 |
| Rsa1.0_00425.1.g13626.t1 | gb AAF78397.1 AC009273_3 Contains similarity to a putative protein T2J13.100 gi 6522560 from Arabidopsis thaliana BAC T2J13 gb AL132967 [Arabidopsis thaliana]                                                                                                                                                                                                                                                                                                                                                                                                                                                            | 569  | 952  | 0         | 167.3 | 92.4 | 97.2 | Contains similarity to a putative protein T2J13.100 gi 6522560 from Arabidopsis thaliana BAC T2J13 gb AL132967 | gbpln | Arabidopsis thaliana | AT1G01660.1   Symbols:   RING/U-box superfamily protein   chr1:240057-242608 REVERSE LENGTH=568                                    | 569  | 568 | 0         | 99.8  | 92.1 | 96.8 |
| Rsa1.0_00425.1.g13627.t1 | gb EOA40469.1  hypothetical protein CARUB_v10009194mg [Capsella rubella]                                                                                                                                                                                                                                                                                                                                                                                                                                                                                                                                                  | 434  | 431  | 1.00E-150 | 99.3  | 68.4 | 78.6 | hypothetical protein CARUB_v10009194mg                                                                         | gbpln | Capsella rubella     | AT1G01670.1   Symbols:   RING/U-box superfamily protein   chr1:242943-245163 REVERSE LENGTH=365                                    | 434  | 365 | 1.00E-139 | 84.1  | 62.0 | 69.4 |
| Rsa1.0_00425.1.g13628.t1 | ref XP_002889356.1  predicted protein [Arabidopsis lyrata subsp. lyrata] gi 297335198 gb EFH65615.1  predicted protein [Arabidopsis lyrata subsp. lyrata]                                                                                                                                                                                                                                                                                                                                                                                                                                                                 | 309  | 309  | 1.00E-107 | 100.0 | 67.0 | 78.6 | predicted protein                                                                                              | gbpln | Arabidopsis lyrata   | AT1G01680.1   Symbols: ATPUB54, PUB54   plant U-box 54   chr1:246411-248329 REVERSE LENGTH=308                                     | 309  | 308 | 1.00E-108 | 99.7  | 65.7 | 77.3 |
| Rsa1.0_00425.1.g13629.t2 | dbj BAJ33966.1  unnamed protein product [Theellungiella halophila]                                                                                                                                                                                                                                                                                                                                                                                                                                                                                                                                                        | 276  | 431  | 1.00E-126 | 156.2 | 79.3 | 82.6 | unnamed protein product                                                                                        | ----  | ----                 | AT1G01710.1   Symbols:   Acyl-CoA thioesterase family protein   chr1:262950-266029 FORWARD LENGTH=427                              | 276  | 427 | 1.00E-122 | 154.7 | 74.6 | 80.4 |
| Rsa1.0_00426.1.g13630.t1 | gb AAM82604.1 AF525305_2 putative AP endonuclease/reverse transcriptase [Brassica napus]                                                                                                                                                                                                                                                                                                                                                                                                                                                                                                                                  | 1743 | 1214 | 0         | 69.7  | 39.0 | 49.4 | putative AP endonuclease/reverse transcriptase                                                                 | gbpln | Brassica napus       | AT1G43760.1   Symbols:   DNase I-like superfamily protein   chr1:16528880-16531065 REVERSE LENGTH=626                              | 1743 | 626 | 8.00E-84  | 35.9  | 9.5  | 14.5 |
| Rsa1.0_00426.1.g13631.t1 | gb EOA15756.1  hypothetical protein CARUB_v10006834mg [Capsella rubella]                                                                                                                                                                                                                                                                                                                                                                                                                                                                                                                                                  | 315  | 332  | 1.00E-133 | 105.4 | 81.0 | 89.2 | hypothetical protein CARUB_v10006834mg                                                                         | gbpln | Capsella rubella     | AT4G37850.1   Symbols:   basic helix-loop-helix (bHLH) DNA-binding superfamily protein   chr4:17796362-17797647 REVERSE LENGTH=328 | 315  | 328 | 1.00E-131 | 104.1 | 74.9 | 84.1 |
| Rsa1.0_00426.1.g13632.t1 | ref XP_002866928.1  hypothetical protein ARALYDRAFT_353053 [Arabidopsis lyrata subsp. lyrata] gi 297312764 gb EFH43187.1  hypothetical protein ARALYDRAFT_353053 [Arabidopsis lyrata subsp. lyrata]                                                                                                                                                                                                                                                                                                                                                                                                                       | 379  | 344  | 2.00E-77  | 90.8  | 50.4 | 63.9 | hypothetical protein ARALYDRAFT_353053                                                                         | gbpln | Arabidopsis lyrata   | AT4G37860.1   Symbols:   SPT2 chromatin protein   chr4:17800589-17801907 REVERSE LENGTH=354                                        | 379  | 354 | 3.00E-77  | 93.4  | 47.2 | 61.7 |

|                          |                                                                                                                                                                                                                                                                                                                                                                                                                                                                                                                                                                                                                                                                                                                                                                                                                                             |     |      |           |       |      |      |                                                 |       |                      |                                                                                                                                                                                                                                                                                                                                                                                                                                                                                                                    |     |     |           |       |      |      |
|--------------------------|---------------------------------------------------------------------------------------------------------------------------------------------------------------------------------------------------------------------------------------------------------------------------------------------------------------------------------------------------------------------------------------------------------------------------------------------------------------------------------------------------------------------------------------------------------------------------------------------------------------------------------------------------------------------------------------------------------------------------------------------------------------------------------------------------------------------------------------------|-----|------|-----------|-------|------|------|-------------------------------------------------|-------|----------------------|--------------------------------------------------------------------------------------------------------------------------------------------------------------------------------------------------------------------------------------------------------------------------------------------------------------------------------------------------------------------------------------------------------------------------------------------------------------------------------------------------------------------|-----|-----|-----------|-------|------|------|
| Rsa1.0_00426.1.g13633.t1 | refNP_195500.1  phosphoenolpyruvate carboxykinase [ATP] [Arabidopsis thaliana]<br>gi 12230482 sp Q9T074.1 PEPCK_ARAT H RecName: Full=Phosphoenolpyruvate carboxykinase [ATP]; Short=PEP carboxykinase; Short=PEPCK; AltName: Full=Phosphoenolpyruvate carboxylase<br>gi 13937137 gb AAK50062.1 AF372922.1 AT4g37870.T2819.150 [Arabidopsis thaliana] gi 4490732 emb CAB38935.1  phosphoenolpyruvate carboxykinase (ATP)-like protein [Arabidopsis thaliana] gi 7270770 emb CAB80452.1  phosphoenolpyruvate carboxykinase (ATP)-like protein [Arabidopsis thaliana] gi 18700252 gb AAL7736.1  AT4g37870.T2819.150 [Arabidopsis thaliana] gi 110740763 dbj BAE98480.1  phosphoenolpyruvate carboxykinase (ATP)-like protein [Arabidopsis thaliana] gi 332661447 gb AEE86847.1  phosphoenolpyruvate carboxykinase [ATP] [Arabidopsis thaliana] | 666 | 671  | 0         | 100.8 | 96.8 | 98.2 | phosphoenolpyruvate carboxykinase               | gbpln | Arabidopsis thaliana | AT4G37870.1   Symbols: PCK1, PEPCK   phosphoenolpyruvate carboxykinase 1   chr4:17802974-17806332 REVERSE LENGTH=671                                                                                                                                                                                                                                                                                                                                                                                               | 666 | 671 | 0         | 100.8 | 96.8 | 98.2 |
| Rsa1.0_00426.1.g13634.t1 | refXP_002866923.1  hypothetical protein ARALYDRAFT_327981 [Arabidopsis lyrata subsp. lyrata] gi 297312759 gb EFH43182.1  hypothetical protein ARALYDRAFT_327981 [Arabidopsis lyrata subsp. lyrata]                                                                                                                                                                                                                                                                                                                                                                                                                                                                                                                                                                                                                                          | 432 | 643  | 0         | 148.8 | 87.5 | 93.1 | hypothetical protein ARALYDRAFT_327981          | gbpln | Arabidopsis lyrata   | AT4G37920.1   Symbols:   unknown protein; FUNCTIONS IN: molecular.function unknown; INVOLVED IN: biological.process unknown; LOCATED IN: chloroplast thylakoid membrane, chloroplast, chloroplast envelope: BEST Arabidopsis thaliana protein match is: unknown protein (TAIR:AT1G36320.1); Has 123 Blast hits to 120 proteins in 40 species: Archae - 2; Bacteria - 11; Metazoa - 8; Fungi - 0; Plants - 85; Viruses - 0; Other Eukaryotes - 17 (source: NCBI BLINK).   chr4:17828538-17830317 REVERSE LENGTH=427 | 432 | 427 | 0         | 98.8  | 87.0 | 92.1 |
| Rsa1.0_00426.1.g13635.t1 | gb EOA16298.1  hypothetical protein CARUB_v10004441mg, partial [Capsella rubella]                                                                                                                                                                                                                                                                                                                                                                                                                                                                                                                                                                                                                                                                                                                                                           | 517 | 583  | 0         | 112.8 | 97.3 | 99.4 | hypothetical protein CARUB_v10004441mg, partial | gbpln | Capsella rubella     | AT4G37930.1   Symbols: SHM1, STM, SHMT1   serine transhydroxymethyltransferase 1   chr4:17831891-17834742 REVERSE LENGTH=517                                                                                                                                                                                                                                                                                                                                                                                       | 517 | 517 | 0         | 100.0 | 97.5 | 99.2 |
| Rsa1.0_00426.1.g13636.t1 | gb ACP30591.1  disease resistance protein [Brassica rapa subsp. pekinensis]                                                                                                                                                                                                                                                                                                                                                                                                                                                                                                                                                                                                                                                                                                                                                                 | 254 | 1555 | 3.00E-48  | 612.2 | 40.6 | 56.7 | disease resistance protein                      | gbpln | Brassica rapa        | AT1G10000.1   Symbols:   Ribonuclease H-like superfamily protein   chr1:3263877-3264788 REVERSE LENGTH=303                                                                                                                                                                                                                                                                                                                                                                                                         | 254 | 303 | 3.00E-24  | 119.3 | 29.1 | 45.3 |
| Rsa1.0_00426.1.g13637.t1 | refXP_002868956.1  hypothetical protein ARALYDRAFT_490819 [Arabidopsis lyrata subsp. lyrata] gi 297314782 gb EFH45215.1  hypothetical protein ARALYDRAFT_490819 [Arabidopsis lyrata subsp. lyrata]                                                                                                                                                                                                                                                                                                                                                                                                                                                                                                                                                                                                                                          | 362 | 363  | 0         | 100.3 | 89.0 | 94.8 | hypothetical protein ARALYDRAFT_490819          | gbpln | Arabidopsis lyrata   | AT4G37970.1   Symbols: ATCAD6, CAD6   cinnamyl alcohol dehydrogenase 6   chr4:17849672-17852145 FORWARD LENGTH=363                                                                                                                                                                                                                                                                                                                                                                                                 | 362 | 363 | 0         | 100.3 | 88.1 | 94.8 |
| Rsa1.0_00426.1.g13638.t1 | #                                                                                                                                                                                                                                                                                                                                                                                                                                                                                                                                                                                                                                                                                                                                                                                                                                           | #   | #    | #         | #     | #    | #    | -                                               | ----  | ----                 | #                                                                                                                                                                                                                                                                                                                                                                                                                                                                                                                  | #   | #   | #         | #     | #    |      |
| Rsa1.0_00426.1.g13639.t1 | dbj BAJ33843.1  unnamed protein product [Thellungiella halophila]                                                                                                                                                                                                                                                                                                                                                                                                                                                                                                                                                                                                                                                                                                                                                                           | 363 | 358  | 1.00E-173 | 98.6  | 86.8 | 92.8 | unnamed protein product                         | ----  | ----                 | AT4G37980.1   Symbols: ELI3-1, ELI3, ATCAD7, CAD7   elicitor-activated gene 3-1   chr4:17852670-17854302 FORWARD LENGTH=357                                                                                                                                                                                                                                                                                                                                                                                        | 363 | 357 | 1.00E-169 | 98.3  | 82.4 | 90.1 |
| Rsa1.0_00426.1.g13640.t1 | refXP_002868951.1  tRNA/rRNA methyltransferase family protein [Arabidopsis lyrata subsp. lyrata] gi 297314787 gb EFH45210.1  tRNA/rRNA methyltransferase family protein [Arabidopsis lyrata subsp. lyrata]                                                                                                                                                                                                                                                                                                                                                                                                                                                                                                                                                                                                                                  | 587 | 355  | 1.00E-159 | 60.5  | 48.6 | 54.0 | tRNA/rRNA methyltransferase family protein      | gbpln | Arabidopsis lyrata   | AT4G38020.1   Symbols:   tRNA/rRNA methyltransferase (SpoU) family protein   chr4:17861568-17863010 FORWARD LENGTH=352                                                                                                                                                                                                                                                                                                                                                                                             | 587 | 352 | 1.00E-159 | 60.0  | 47.5 | 52.5 |
| Rsa1.0_00426.1.g13641.t1 | gb EOA16170.1  hypothetical protein CARUB_v10004306mg [Capsella rubella]                                                                                                                                                                                                                                                                                                                                                                                                                                                                                                                                                                                                                                                                                                                                                                    | 656 | 668  | 0         | 101.8 | 80.5 | 88.7 | hypothetical protein CARUB_v10004306mg          | gbpln | Capsella rubella     | AT4G38030.1   Symbols:   Rhamnogalacturonate lyase family protein   chr4:17863206-17866730 REVERSE LENGTH=667                                                                                                                                                                                                                                                                                                                                                                                                      | 656 | 667 | 0         | 101.7 | 80.5 | 87.3 |
| Rsa1.0_00426.1.g13642.t1 | gb EOA16680.1  hypothetical protein CARUB_v10004872mg [Capsella rubella]                                                                                                                                                                                                                                                                                                                                                                                                                                                                                                                                                                                                                                                                                                                                                                    | 410 | 426  | 0         | 103.9 | 91.7 | 96.8 | hypothetical protein CARUB_v10004872mg          | gbpln | Capsella rubella     | AT4G38040.1   Symbols:   Exostosin family protein   chr4:17867501-17869131 FORWARD LENGTH=425                                                                                                                                                                                                                                                                                                                                                                                                                      | 410 | 425 | 0         | 103.7 | 90.7 | 96.8 |
| Rsa1.0_00426.1.g13643.t1 | gb EOA16123.1  hypothetical protein CARUB_v10004255mg [Capsella rubella]                                                                                                                                                                                                                                                                                                                                                                                                                                                                                                                                                                                                                                                                                                                                                                    | 714 | 710  | 0         | 99.4  | 81.8 | 88.1 | hypothetical protein CARUB_v10004255mg          | gbpln | Capsella rubella     | AT4G38050.1   Symbols:   Xanthine/uracil permease family protein   chr4:17869529-17872461 REVERSE LENGTH=709                                                                                                                                                                                                                                                                                                                                                                                                       | 714 | 709 | 0         | 99.3  | 79.8 | 86.8 |

|                          |                                                                                                                                                                                                                                                                                                                                                                                                                                                                     |      |      |           |       |      |      |                                        |       |                      |                                                                                                                                                                                                                                                                                                                                              |      |      |           |       |      |      |
|--------------------------|---------------------------------------------------------------------------------------------------------------------------------------------------------------------------------------------------------------------------------------------------------------------------------------------------------------------------------------------------------------------------------------------------------------------------------------------------------------------|------|------|-----------|-------|------|------|----------------------------------------|-------|----------------------|----------------------------------------------------------------------------------------------------------------------------------------------------------------------------------------------------------------------------------------------------------------------------------------------------------------------------------------------|------|------|-----------|-------|------|------|
| Rsa1.0_00426.1.g13644.t1 | ref[XP_002866917.1] hypothetical protein ARALYDRAFT_490808 [Arabidopsis lyrata subsp. lyrata] gi 297312753 gb EFH43176.1  hypothetical protein ARALYDRAFT_490808 [Arabidopsis lyrata subsp. lyrata]                                                                                                                                                                                                                                                                 | 124  | 126  | 8.00E-31  | 101.6 | 66.1 | 75.0 | hypothetical protein ARALYDRAFT_490808 | gbpln | Arabidopsis lyrata   | AT4G38060.1   Symbols:   unknown protein; BEST Arabidopsis thaliana protein match is: unknown protein (TAIR:AT5G65480.1). Has 63 Blast hits to 63 proteins in 13 species: Archae - 0; Bacteria - 0; Metazoa - 0; Fungi - 0; Plants - 63; Viruses - 0; Other Eukaryotes - 0 (source: NCBI BLink).   chr4:17874002-17874379 REVERSE LENGTH=125 | 124  | 125  | 3.00E-32  | 100.8 | 66.1 | 76.6 |
| Rsa1.0_00426.1.g13645.t1 | gb EOA18943.1  hypothetical protein CARUB_v10007575mg [Capsella rubella]                                                                                                                                                                                                                                                                                                                                                                                            | 143  | 138  | 1.00E-28  | 96.5  | 73.4 | 81.8 | hypothetical protein CARUB_v10007575mg | gbpln | Capsella rubella     | AT4G40090.1   Symbols: AGP3   arabinogalactan protein 3   chr4:18581085-18581504 REVERSE LENGTH=139                                                                                                                                                                                                                                          | 143  | 139  | 3.00E-28  | 97.2  | 74.8 | 83.2 |
| Rsa1.0_00426.1.g13646.t1 | ref NP_195718.1  putative clathrin assembly protein [Arabidopsis thaliana] gi 46395895 sp Q8L936.2 CAP16 ARAT H RecName: Full=Putative clathrin assembly protein At4g40080 gi 5918311 emb CAB56391.1  putative protein [Arabidopsis thaliana] gi 7271063 emb CAB80671.1  putative protein [Arabidopsis thaliana] gi 119360027 gb ABL66742.1  At4g40080 [Arabidopsis thaliana] gi 332661765 gb AEE87165.1  putative clathrin assembly protein [Arabidopsis thaliana] | 365  | 365  | 1.00E-177 | 100.0 | 83.3 | 90.1 | putative clathrin assembly protein     | gbpln | Arabidopsis thaliana | AT4G40080.1   Symbols:   ENTH/ANTH/VHS superfamily protein   chr4:18579371-18580542 FORWARD LENGTH=365                                                                                                                                                                                                                                       | 365  | 365  | 1.00E-180 | 100.0 | 83.3 | 90.1 |
| Rsa1.0_00427.1.g13647.t1 | gb ABH07409.1  putative pol polyprotein [Brassica oleracea var. botrytis]                                                                                                                                                                                                                                                                                                                                                                                           | 1371 | 1239 | 0         | 90.4  | 59.7 | 73.0 | putative pol polyprotein               | gbpln | Brassica oleracea    | AT4G23160.1   Symbols: CRK8   cysteine-rich RLK (RECEPTOR-like protein kinase) 8   chr4:12129485-12134086 FORWARD LENGTH=1262                                                                                                                                                                                                                | 1371 | 1262 | 4.00E-97  | 92.0  | 13.9 | 21.4 |
| Rsa1.0_00427.1.g13648.t1 | gb EOA27737.1  hypothetical protein CARUB_v10023890mg [Capsella rubella]                                                                                                                                                                                                                                                                                                                                                                                            | 258  | 258  | 1.00E-100 | 100.0 | 79.1 | 85.7 | hypothetical protein CARUB_v10023890mg | gbpln | Capsella rubella     | AT2G21160.1   Symbols:   Translocon-associated protein (TRAP), alpha subunit   chr2:9068428-9070207 FORWARD LENGTH=258                                                                                                                                                                                                                       | 258  | 258  | 4.00E-99  | 100.0 | 76.0 | 85.3 |
| Rsa1.0_00427.1.g13649.t2 | gb EOA27531.1  hypothetical protein CARUB_v10023671mg [Capsella rubella]                                                                                                                                                                                                                                                                                                                                                                                            | 320  | 315  | 1.00E-150 | 98.4  | 88.1 | 91.3 | hypothetical protein CARUB_v10023671mg | gbpln | Capsella rubella     | AT2G21170.1   Symbols: TIM, PDTPI   triosephosphate isomerase   chr2:9071047-9073106 REVERSE LENGTH=315                                                                                                                                                                                                                                      | 320  | 315  | 1.00E-150 | 98.4  | 88.8 | 90.6 |
| Rsa1.0_00427.1.g13650.t1 | ref XP_002878538.1  predicted protein [Arabidopsis lyrata subsp. lyrata] gi 297324377 gb EFH54797.1  predicted protein [Arabidopsis lyrata subsp. lyrata]                                                                                                                                                                                                                                                                                                           | 101  | 93   | 2.00E-36  | 92.1  | 72.3 | 74.3 | predicted protein                      | gbpln | Arabidopsis lyrata   | AT2G21195.1   Symbols:   unknown protein; Has 28 Blast hits to 28 proteins in 11 species: Archae - 0; Bacteria - 0; Metazoa - 0; Fungi - 0; Plants - 28; Viruses - 0; Other Eukaryotes - 0 (source: NCBI BLink).   chr2:9083191-9083687 FORWARD LENGTH=93                                                                                    | 101  | 93   | 7.00E-39  | 92.1  | 71.3 | 74.3 |
| Rsa1.0_00427.1.g13651.t1 | #                                                                                                                                                                                                                                                                                                                                                                                                                                                                   | #    | #    | #         | #     | #    | #    | -                                      | ----  | ----                 | #                                                                                                                                                                                                                                                                                                                                            | #    | #    | #         | #     | #    | #    |
| Rsa1.0_00427.1.g13652.t1 | #                                                                                                                                                                                                                                                                                                                                                                                                                                                                   | #    | #    | #         | #     | #    | #    | -                                      | ----  | ----                 | #                                                                                                                                                                                                                                                                                                                                            | #    | #    | #         | #     | #    | #    |
| Rsa1.0_00427.1.g13653.t1 | gb EOA26967.1  hypothetical protein CARUB_v10023063mg [Capsella rubella] gi 482562778 gb EOA26968.1  hypothetical protein CARUB_v10023063mg [Capsella rubella]                                                                                                                                                                                                                                                                                                      | 472  | 500  | 1.00E-165 | 105.9 | 75.2 | 81.4 | hypothetical protein CARUB_v10023063mg | gbpln | Capsella rubella     | AT2G21230.1   Symbols:   Basic-leucine zipper (bZIP) transcription factor family protein   chr2:9093920-9096059 REVERSE LENGTH=519                                                                                                                                                                                                           | 472  | 519  | 1.00E-162 | 110.0 | 75.8 | 81.1 |
| Rsa1.0_00427.1.g13654.t1 | gb AAL87314.1  unknown protein [Arabidopsis thaliana]                                                                                                                                                                                                                                                                                                                                                                                                               | 405  | 547  | 1.00E-26  | 135.1 | 24.0 | 33.3 | unknown protein                        | gbpln | Arabidopsis thaliana | AT4G38900.3   Symbols:   Basic-leucine zipper (bZIP) transcription factor family protein   chr4:18139564-18141520 REVERSE LENGTH=547                                                                                                                                                                                                         | 405  | 547  | 3.00E-29  | 135.1 | 24.0 | 33.3 |
| Rsa1.0_00427.1.g13655.t1 | ref XP_002890369.1  ATBPC4/BBR/BPC4/BPC4 [Arabidopsis lyrata subsp. lyrata] gi 297326209 gb EFH56628.1  ATBPC4/BBR/BPC4/BPC4 [Arabidopsis lyrata subsp. lyrata]                                                                                                                                                                                                                                                                                                     | 443  | 296  | 1.00E-127 | 66.8  | 52.6 | 55.8 | ATBPC4/BBR/BPC4/BPC4                   | gbpln | Arabidopsis lyrata   | AT2G21240.2   Symbols: BPC4, BBR, ATBPC4   basic pentacysteine 4   chr2:9101515-9102489 REVERSE LENGTH=296                                                                                                                                                                                                                                   | 443  | 296  | 1.00E-125 | 66.8  | 49.9 | 53.7 |
| Rsa1.0_00427.1.g13656.t1 | gb EOA29062.1  hypothetical protein CARUB_v10025318mg [Capsella rubella]                                                                                                                                                                                                                                                                                                                                                                                            | 335  | 320  | 1.00E-161 | 95.5  | 86.3 | 89.6 | hypothetical protein CARUB_v10025318mg | gbpln | Capsella rubella     | AT2G21270.3   Symbols: UFD1   ubiquitin fusion degradation 1   chr2:9107841-9110012 FORWARD LENGTH=340                                                                                                                                                                                                                                       | 335  | 340  | 1.00E-160 | 101.5 | 86.0 | 88.4 |
| Rsa1.0_00427.1.g13657.t1 | ref XP_002880372.1  hypothetical protein ARALYDRAFT_900542 [Arabidopsis lyrata subsp. lyrata] gi 297326211 gb EFH56631.1  hypothetical protein ARALYDRAFT_900542 [Arabidopsis lyrata subsp. lyrata]                                                                                                                                                                                                                                                                 | 350  | 350  | 1.00E-179 | 100.0 | 86.0 | 91.1 | hypothetical protein ARALYDRAFT_900542 | gbpln | Arabidopsis lyrata   | AT2G21280.1   Symbols: GC1, ATSULA, SULA   NAD(P)-binding Rossmann-fold superfamily protein   chr2:9110502-9112679 REVERSE LENGTH=347                                                                                                                                                                                                        | 350  | 347  | 0         | 99.1  | 90.9 | 95.1 |



|                          |                                                                                                                                                                                                                                                                                                                                                                    |     |     |           |       |      |      |                                                              |       |                      |                                                                                                                                                                                                                                                                                                                                                                                                                                                |     |     |           |        |      |      |
|--------------------------|--------------------------------------------------------------------------------------------------------------------------------------------------------------------------------------------------------------------------------------------------------------------------------------------------------------------------------------------------------------------|-----|-----|-----------|-------|------|------|--------------------------------------------------------------|-------|----------------------|------------------------------------------------------------------------------------------------------------------------------------------------------------------------------------------------------------------------------------------------------------------------------------------------------------------------------------------------------------------------------------------------------------------------------------------------|-----|-----|-----------|--------|------|------|
| Rsa1.0_00427.1.g13658.t1 | refXP_002513001.1  30S ribosomal protein S31, mitochondrial precursor, putative [Ricinus communis] gi 223548012 gb EEF49504.1  30S ribosomal protein S31, mitochondrial precursor, putative [Ricinus communis]                                                                                                                                                     | 86  | 87  | 1.00E-27  | 101.2 | 75.6 | 87.2 | 30S ribosomal protein S31, mitochondrial precursor, putative | gbpln | Ricinus communis     | AT2G21290.1   Symbols:   unknown protein; FUNCTIONS IN: molecular_function unknown; INVOLVED IN: biological_process unknown; LOCATED IN: mitochondrion; EXPRESSED IN: 22 plant structures; EXPRESSED DURING: 13 growth stages; Has 63 Blast hits to 63 proteins in 12 species: Archae - 0; Bacteria - 0; Metazoa - 0; Fungi - 0; Plants - 63; Viruses - 0; Other Eukaryotes - 0 (source: NCBI BLINK).   chr2:9112888-9113184 FORWARD LENGTH=96 | 86  | 98  | 1.00E-29  | 114.0  | 84.9 | 88.4 |
| Rsa1.0_00427.1.g13659.t1 | refXP_002880373.1  kinesin motor family protein [Arabidopsis lyrata subsp. lyrata] gi 297326212 gb EFH56632.1  kinesin motor family protein [Arabidopsis lyrata subsp. lyrata]                                                                                                                                                                                     | 840 | 862 | 0         | 102.6 | 89.0 | 93.5 | kinesin motor family protein                                 | gbpln | Arabidopsis lyrata   | AT2G21300.2   Symbols:   ATP binding microtubule motor family protein   chr2:9114396-9118292 REVERSE LENGTH=862                                                                                                                                                                                                                                                                                                                                | 840 | 862 | 0         | 102.6  | 88.8 | 93.1 |
| Rsa1.0_00427.1.g13660.t1 | dbj BAJ33780.1  unnamed protein product [Thellungiella halophila]                                                                                                                                                                                                                                                                                                  | 394 | 399 | 0         | 101.3 | 95.7 | 97.7 | unnamed protein product                                      | ----  | ----                 | AT2G21330.1   Symbols: FBA1   fructose-bisphosphate aldolase 1   chr2:9128416-9130152 REVERSE LENGTH=399                                                                                                                                                                                                                                                                                                                                       | 394 | 399 | 0         | 101.3  | 93.7 | 96.7 |
| Rsa1.0_00427.1.g13661.t1 | refNP_179731.4  RNA-binding CRS1 / YhbY (CRM) domain protein [Arabidopsis thaliana] gi 330252071 gb AEC07165.1  RNA-binding CRS1 / YhbY (CRM) domain protein [Arabidopsis thaliana]                                                                                                                                                                                | 229 | 222 | 4.00E-55  | 96.9  | 58.1 | 68.1 | RNA-binding CRS1 / YhbY (CRM) domain protein                 | gbpln | Arabidopsis thaliana | AT2G21350.1   Symbols:   RNA-binding CRS1 / YhbY (CRM) domain protein   chr2:9136451-9137267 REVERSE LENGTH=222                                                                                                                                                                                                                                                                                                                                | 229 | 222 | 1.00E-57  | 96.9   | 58.1 | 68.1 |
| Rsa1.0_00427.1.g13662.t1 | refNP_179735.1  SHI-related sequence protein [Arabidopsis thaliana] gi 4567272 gb AAD23685.1  hypothetical protein [Arabidopsis thaliana] gi 330252080 gb AEC07174.1  SHI-related sequence protein [Arabidopsis thaliana]                                                                                                                                          | 237 | 174 | 1.00E-65  | 73.4  | 55.7 | 62.4 | SHI-related sequence protein                                 | gbpln | Arabidopsis thaliana | AT2G21400.1   Symbols: SRS3   SHI-related sequence3   chr2:9158390-9159541 FORWARD LENGTH=174                                                                                                                                                                                                                                                                                                                                                  | 237 | 174 | 3.00E-68  | 73.4   | 55.7 | 62.4 |
| Rsa1.0_00427.1.g13663.t1 | refNP_179742.2  SUMO-activating enzyme subunit 2 [Arabidopsis thaliana] gi 26450535 dbj BAC42380.1  putative ubiquitin activating enzyme [Arabidopsis thaliana] gi 208879522 gb ACI31306.1  At2g21470 [Arabidopsis thaliana] gi 330252087 gb AEC07181.1  SUMO-activating enzyme subunit 2 [Arabidopsis thaliana]                                                   | 634 | 625 | 0         | 98.6  | 89.7 | 93.4 | SUMO-activating enzyme subunit 2                             | gbpln | Arabidopsis thaliana | AT2G21470.1   Symbols: SAE2, ATSAE2, EMB2764   SUMO-activating enzyme 2   chr2:9198752-9202136 FORWARD LENGTH=625                                                                                                                                                                                                                                                                                                                              | 634 | 625 | 0         | 98.6   | 89.7 | 93.4 |
| Rsa1.0_00427.1.g13664.t1 | refNP_179743.1  Malectin/receptor-like protein kinase [Arabidopsis thaliana] gi 75337322 sp Q9SJT0.1 Y2214_ARATH RecName: Full=Probable receptor-like protein kinase At2g21480; Flags: Precursor gi 4567279 gb AAD23692.1  putative protein kinase [Arabidopsis thaliana] gi 330252090 gb AEC07184.1  Malectin/receptor-like protein kinase [Arabidopsis thaliana] | 851 | 871 | 0         | 102.4 | 85.1 | 90.5 | Malectin/receptor-like protein kinase                        | gbpln | Arabidopsis thaliana | AT2G21480.1   Symbols:   Malectin/receptor-like protein kinase family protein   chr2:9202753-9205368 REVERSE LENGTH=871                                                                                                                                                                                                                                                                                                                        | 851 | 871 | 0         | 102.4  | 85.1 | 90.5 |
| Rsa1.0_00427.1.g13665.t1 | gb EOA29328.1  hypothetical protein CARUB_v10025610mg [Capsella rubella]                                                                                                                                                                                                                                                                                           | 336 | 635 | 1.00E-169 | 189.0 | 86.3 | 91.1 | hypothetical protein CARUB_v10025610mg                       | gbpln | Capsella rubella     | AT2G21520.2   Symbols:   Sec14p-like phosphatidylinositol transfer family protein   chr2:9215956-9218953 FORWARD LENGTH=637                                                                                                                                                                                                                                                                                                                    | 336 | 637 | 1.00E-171 | 189.6  | 85.1 | 91.4 |
| Rsa1.0_00427.1.g13666.t1 | refNP_001189571.1  SEC14-like 3 protein [Arabidopsis thaliana] gi 330252100 gb AEC07194.1  SEC14-like 3 protein [Arabidopsis thaliana]                                                                                                                                                                                                                             | 544 | 542 | 0         | 99.6  | 87.3 | 93.8 | SEC14-like 3 protein                                         | gbpln | Arabidopsis thaliana | AT2G21540.3   Symbols: SFH3   SEC14-like 3   chr2:9220831-9223737 REVERSE LENGTH=542                                                                                                                                                                                                                                                                                                                                                           | 544 | 542 | 0         | 99.6   | 87.3 | 93.8 |
| Rsa1.0_00427.1.g13667.t1 | refXP_002880390.1  hypothetical protein ARALYDRAFT.481023 [Arabidopsis lyrata subsp. lyrata] gi 297326229 gb EFH56649.1  hypothetical protein ARALYDRAFT.481023 [Arabidopsis lyrata subsp. lyrata]                                                                                                                                                                 | 218 | 265 | 6.00E-86  | 121.6 | 80.3 | 86.7 | hypothetical protein ARALYDRAFT.481023                       | gbpln | Arabidopsis lyrata   | AT2G21560.1   Symbols:   unknown protein; BEST Arabidopsis thaliana protein match is: unknown protein (TAIR:AT4G39190.1). Has 3685 Blast hits to 2305 proteins in 270 species: Archae - 0; Bacteria - 156; Metazoa - 1145; Fungi - 322; Plants - 177; Viruses - 6; Other Eukaryotes - 1879 (source: NCBI BLINK).   chr2:9230473-9231297 REVERSE LENGTH=274                                                                                     | 218 | 274 | 7.00E-84  | 125.7  | 77.1 | 84.9 |
| Rsa1.0_00427.1.g13668.t1 | gb EOA37750.1  hypothetical protein CARUB_v10012565mg [Capsella rubella]                                                                                                                                                                                                                                                                                           | 221 | 679 | 2.00E-32  | 307.2 | 35.3 | 50.2 | hypothetical protein CARUB_v10012565mg                       | gbpln | Capsella rubella     | AT1G18560.1   Symbols:   BED zinc finger hAT family dimerisation domain   chr1:6385614-6388005 FORWARD LENGTH=690                                                                                                                                                                                                                                                                                                                              | 221 | 690 | 3.00E-14  | 312.2  | 19.0 | 29.4 |
| Rsa1.0_00427.1.g13669.t1 | #                                                                                                                                                                                                                                                                                                                                                                  | #   | #   | #         | #     | #    | -    | -                                                            | ----  | ----                 | AT5G59790.1   Symbols:   Domain of unknown function (DUF966)   chr5:24090950-24092804 FORWARD LENGTH=423                                                                                                                                                                                                                                                                                                                                       | 40  | 423 | 4.00E-12  | 1057.5 | 80.0 | 80.0 |
| Rsa1.0_00427.1.g13670.t1 | #                                                                                                                                                                                                                                                                                                                                                                  | #   | #   | #         | #     | #    | -    | -                                                            | ----  | ----                 | #                                                                                                                                                                                                                                                                                                                                                                                                                                              | #   | #   | #         | #      | #    |      |

|                          |                                                                                                                                                                                                                                                                                                                                                                                                                                                                                                                                                                                                                                                                                     |      |      |           |       |      |       |                                                     |       |                      |                                                                                                                                               |      |      |           |       |      |       |
|--------------------------|-------------------------------------------------------------------------------------------------------------------------------------------------------------------------------------------------------------------------------------------------------------------------------------------------------------------------------------------------------------------------------------------------------------------------------------------------------------------------------------------------------------------------------------------------------------------------------------------------------------------------------------------------------------------------------------|------|------|-----------|-------|------|-------|-----------------------------------------------------|-------|----------------------|-----------------------------------------------------------------------------------------------------------------------------------------------|------|------|-----------|-------|------|-------|
| Rsa1.0_00427.1.g13671.t1 | ref NP_195631.1  40S ribosomal protein S25-4 [Arabidopsis thaliana] gi 30580493 sp Q9T029.1 RS254_ARATH RecName: Full=40S ribosomal protein S25-4 gi 4914432 emb CAB43635.1 ribosomal protein S25 [Arabidopsis thaliana] gi 7270903 emb CAB80583.1 ribosomal protein S25 [Arabidopsis thaliana] gi 14335026 gb AAK59777.1 AT4g39200/T22F8.100 [Arabidopsis thaliana] gi 16323232 gb AAL15350.1 AT4g39200/T22F8.100 [Arabidopsis thaliana] gi 21553704 gb AAM62797.1 ribosomal protein S25 [Arabidopsis thaliana] gi 332661636 gb AEE87036.1 40S ribosomal protein S25-4 [Arabidopsis thaliana] gi 482553510 gb EOA17703.1 hypothetical protein CARUB_v10006075mg [Capsella rubella] | 108  | 108  | 3.00E-55  | 100.0 | 99.1 | 100.0 | 40S ribosomal protein S25-4                         | gbpln | Arabidopsis thaliana | AT4G39200.1   Symbols:   Ribosomal protein S25 family protein   chr4:18257464-18258464 FORWARD LENGTH=108                                     | 108  | 108  | 5.00E-58  | 100.0 | 99.1 | 100.0 |
| Rsa1.0_00427.1.g13672.t1 | gb EOA26914.1  hypothetical protein CARUB_v10023004mg [Capsella rubella]                                                                                                                                                                                                                                                                                                                                                                                                                                                                                                                                                                                                            | 659  | 523  | 0         | 79.4  | 72.4 | 75.4  | hypothetical protein CARUB_v10023004mg              | gbpln | Capsella rubella     | AT2G21590.2   Symbols: APL4   Glucose-1-phosphate adenyltransferase family protein   chr2:9239362-9242150 FORWARD LENGTH=523                  | 659  | 523  | 0         | 79.4  | 71.3 | 74.4  |
| Rsa1.0_00427.1.g13673.t1 | ref NP_179755.1  pectinesterase 11 [Arabidopsis thaliana] gi 75206124 sp Q9SIJ9.1 PME11_ARATH RecName: Full=Putative pectinesterase 11; Short=PE 11; AltName: Full=Pectin methyltransferase 11; Short=ATPME11 gi 4567229 gb AAD23644.1  putative pectinesterase [Arabidopsis thaliana] gi 330252108 gb AECO7202.1  pectinesterase 11 [Arabidopsis thaliana]                                                                                                                                                                                                                                                                                                                         | 316  | 352  | 1.00E-155 | 111.4 | 80.7 | 88.9  | pectinesterase 11                                   | gbpln | Arabidopsis thaliana | AT2G21610.1   Symbols: PE11, ATPE11   pectinesterase 11   chr2:9245161-9247025 REVERSE LENGTH=352                                             | 316  | 352  | 1.00E-157 | 111.4 | 80.7 | 88.9  |
| Rsa1.0_00427.1.g13674.t1 | gb EOA33402.1  hypothetical protein CARUB_v10020424mg [Capsella rubella]                                                                                                                                                                                                                                                                                                                                                                                                                                                                                                                                                                                                            | 462  | 394  | 0         | 85.3  | 71.4 | 76.2  | hypothetical protein CARUB_v10020424mg              | gbpln | Capsella rubella     | AT1G80360.1   Symbols:   Pyridoxal phosphate (PLP)-dependent transferases superfamily protein   chr1:30208736-30210643 REVERSE LENGTH=394     | 462  | 394  | 0         | 85.3  | 70.6 | 75.5  |
| Rsa1.0_00427.1.g13675.t2 | ref XP_002870488.1  AMP binding protein [Arabidopsis lyrata subsp. lyrata] gi 297316324 gb EFH46747.1  AMP binding protein [Arabidopsis lyrata subsp. lyrata]                                                                                                                                                                                                                                                                                                                                                                                                                                                                                                                       | 747  | 743  | 0         | 99.5  | 92.6 | 95.6  | AMP binding protein                                 | gbpln | Arabidopsis lyrata   | AT5G36880.2   Symbols: ACS   acetyl-CoA synthetase   chr5:14534961-14540296 REVERSE LENGTH=743                                                | 747  | 743  | 0         | 99.5  | 91.8 | 95.2  |
| Rsa1.0_00427.1.g13676.t1 | # # # # # # # # -                                                                                                                                                                                                                                                                                                                                                                                                                                                                                                                                                                                                                                                                   |      |      |           |       |      |       |                                                     | ----  | ----                 | #                                                                                                                                             | #    | #    | #         | #     | #    | #     |
| Rsa1.0_00428.1.g13677.t1 | emb CAN68931.1  hypothetical protein VITISV_006966 [Vitis vinifera]                                                                                                                                                                                                                                                                                                                                                                                                                                                                                                                                                                                                                 | 914  | 1021 | 0         | 111.7 | 64.8 | 78.9  | hypothetical protein VITISV_006966                  | gbpln | Vitis vinifera       | AT5G53890.1   Symbols: PSKR2, AtPSKR2   phytylsfokine-alpha receptor 2   chr5:21877235-21880345 FORWARD LENGTH=1036                           | 914  | 1036 | 0         | 113.3 | 55.8 | 61.3  |
| Rsa1.0_00428.1.g13678.t2 | ref NP_200201.3  Serine/threonine-protein kinase-like protein [Arabidopsis thaliana] gi 10177252 db BAB10720.1  unnamed protein product [Arabidopsis thaliana] gi 33209043 gb AED96426.1  Serine/threonine-protein kinase-like protein [Arabidopsis thaliana]                                                                                                                                                                                                                                                                                                                                                                                                                       | 376  | 377  | 0         | 100.3 | 92.0 | 94.9  | Serine/threonine-protein kinase-like protein        | gbpln | Arabidopsis thaliana | AT5G53900.2   Symbols:   Serine/threonine-protein kinase WNK (With No Lysine)-related   chr5:21881375-21883133 REVERSE LENGTH=377             | 376  | 377  | 0         | 100.3 | 92.0 | 94.9  |
| Rsa1.0_00428.1.g13679.t1 | gb AAC95175.1  putative non-LTR retroelement reverse transcriptase [Arabidopsis thaliana]                                                                                                                                                                                                                                                                                                                                                                                                                                                                                                                                                                                           | 1664 | 1352 | 1.00E-173 | 81.3  | 20.6 | 29.9  | putative non-LTR retroelement reverse transcriptase | gbpln | Arabidopsis thaliana | AT3G24255.1   Symbols:   RNA-directed DNA polymerase (reverse transcriptase)-related family protein   chr3:8789471-8793208 FORWARD LENGTH=746 | 1664 | 746  | 9.00E-41  | 44.8  | 6.0  | 9.3   |
| Rsa1.0_00428.1.g13680.t1 | gb EOA17344.1  hypothetical protein CARUB_v10005627mg [Capsella rubella]                                                                                                                                                                                                                                                                                                                                                                                                                                                                                                                                                                                                            | 216  | 238  | 1.00E-63  | 110.2 | 60.6 | 75.0  | hypothetical protein CARUB_v10005627mg              | gbpln | Capsella rubella     | AT4G27540.1   Symbols: PRA1.H   prenylated RAB acceptor 1.H   chr4:13753449-13754660 REVERSE LENGTH=241                                       | 216  | 241  | 2.00E-63  | 111.6 | 57.9 | 75.0  |
| Rsa1.0_00428.1.g13681.t1 | ref XP_002864292.1  hypothetical protein ARALYDRAFT_495472 [Arabidopsis lyrata subsp. lyrata] gi 297310127 gb EFH40551.1  hypothetical protein ARALYDRAFT_495472 [Arabidopsis lyrata subsp. lyrata]                                                                                                                                                                                                                                                                                                                                                                                                                                                                                 | 349  | 368  | 1.00E-161 | 105.4 | 87.7 | 92.0  | hypothetical protein ARALYDRAFT_495472              | gbpln | Arabidopsis lyrata   | AT5G53920.1   Symbols:   ribosomal protein L11 methyltransferase-related   chr5:21892124-21894087 FORWARD LENGTH=371                          | 349  | 371  | 1.00E-157 | 106.3 | 88.3 | 92.6  |

|                          |                                                                                                                                                                                                                                                                                                                                                                                                                                                                                                                                     |      |      |           |       |      |      |                                                 |       |                      |                                                                                                                                                                                                                                                                                             |      |      |           |       |      |      |
|--------------------------|-------------------------------------------------------------------------------------------------------------------------------------------------------------------------------------------------------------------------------------------------------------------------------------------------------------------------------------------------------------------------------------------------------------------------------------------------------------------------------------------------------------------------------------|------|------|-----------|-------|------|------|-------------------------------------------------|-------|----------------------|---------------------------------------------------------------------------------------------------------------------------------------------------------------------------------------------------------------------------------------------------------------------------------------------|------|------|-----------|-------|------|------|
| Rsa1.0_00428.1.g13682.t1 | refNP_200204.1  uncharacterized protein [Arabidopsis thaliana] gi 10177255 dbj BAB10723.1  unnamed protein product [Arabidopsis thaliana] gi 26453018 dbj BAC43585.1  unknown protein [Arabidopsis thaliana] gi 28973163 gb AAO63906.1  unknown protein [Arabidopsis thaliana] gi 332009047 gb AED96430.1  uncharacterized protein AT5G53930 [Arabidopsis thaliana]                                                                                                                                                                 | 495  | 529  | 2.00E-99  | 106.9 | 48.5 | 56.2 | uncharacterized protein                         | gbpln | Arabidopsis thaliana | AT5G53930.1   Symbols:   unknown protein; LOCATED IN: chloroplast; Has 1807 Blast hits to 1807 proteins in 277 species: Archae - 0; Bacteria - 385; Viruses - 0; Fungi - 347; Plants - 0; Metazoa - 736; Eukaryotes - 339 (source: NCBI BLINK).   chr5:21894387-21896283 REVERSE LENGTH=529 | 495  | 529  | 1.00E-102 | 106.9 | 48.5 | 56.2 |
| Rsa1.0_00428.1.g13683.t1 | gb EOA14167.1  hypothetical protein CARUB_v10027317mg, partial [Capsella rubella]                                                                                                                                                                                                                                                                                                                                                                                                                                                   | 125  | 148  | 5.00E-59  | 118.4 | 91.2 | 95.2 | hypothetical protein CARUB_v10027317mg, partial | gbpln | Capsella rubella     | AT5G53940.1   Symbols:   Yippee family putative zinc-binding protein   chr5:21897164-21898589 REVERSE LENGTH=129                                                                                                                                                                            | 125  | 129  | 2.00E-61  | 103.2 | 90.4 | 95.2 |
| Rsa1.0_00428.1.g13684.t1 | refXP_002866009.1  cup-shaped cotyledon2 [Arabidopsis lyrata subsp. lyrata] gi 297311844 gb EFH42268.1  predicted protein [Arabidopsis lyrata subsp. lyrata]                                                                                                                                                                                                                                                                                                                                                                        | 367  | 369  | 1.00E-168 | 100.5 | 86.4 | 92.9 | cup-shaped cotyledon2                           | gbpln | Arabidopsis lyrata   | AT5G53950.1   Symbols: CUC2, ANAC098, ATCUC2   NAC (No Apical Meristem) domain transcriptional regulator superfamily protein   chr5:21901966-21903795 REVERSE LENGTH=375                                                                                                                    | 367  | 375  | 1.00E-170 | 102.2 | 86.4 | 92.6 |
| Rsa1.0_00428.1.g13685.t1 | refNP_200208.1  tyrosine aminotransferase [Arabidopsis thaliana] gi 75171781 sp Q9FN30.1 TAT2_ARATH RecName: Full=Probable aminotransferase TAT2; AltName: Full=Tyrosine aminotransferase 2 gi 10177259 dbj BAB10727.1  tyrosine aminotransferase [Arabidopsis thaliana] gi 25054842 gb AAN71911.1  putative tyrosine aminotransferase [Arabidopsis thaliana] gi 332009051 gb AED96434.1  tyrosine aminotransferase [Arabidopsis thaliana]                                                                                          | 417  | 414  | 0         | 99.3  | 93.3 | 95.4 | tyrosine aminotransferase                       | gbpln | Arabidopsis thaliana | AT5G53970.1   Symbols:   Tyrosine transaminase family protein   chr5:21910676-21912594 FORWARD LENGTH=414                                                                                                                                                                                   | 417  | 414  | 0         | 99.3  | 93.3 | 95.4 |
| Rsa1.0_00428.1.g13686.t1 | refNP_850699.1  uracil phosphoribosyltransferase [Arabidopsis thaliana] gi 332645635 gb AEE79156.1  uracil phosphoribosyltransferase [Arabidopsis thaliana]                                                                                                                                                                                                                                                                                                                                                                         | 261  | 231  | 3.00E-12  | 88.5  | 14.9 | 17.2 | uracil phosphoribosyltransferase                | gbpln | Arabidopsis thaliana | AT3G53900.1   Symbols: UPP, PYRR   uracil phosphoribosyltransferase   chr3:19956914-19958699 REVERSE LENGTH=231                                                                                                                                                                             | 261  | 231  | 7.00E-15  | 88.5  | 14.9 | 17.2 |
| Rsa1.0_00428.1.g13687.t1 | refXP_002864296.1  ATHB52 [Arabidopsis lyrata subsp. lyrata] gi 297310131 gb EFH40555.1  ATHB52 [Arabidopsis lyrata subsp. lyrata]                                                                                                                                                                                                                                                                                                                                                                                                  | 154  | 156  | 2.00E-72  | 101.3 | 87.7 | 95.5 | ATHB52                                          | gbpln | Arabidopsis lyrata   | AT5G53980.1   Symbols: ATHB52, HB52   homeobox protein 52   chr5:21914087-21914557 FORWARD LENGTH=156                                                                                                                                                                                       | 154  | 156  | 8.00E-73  | 101.3 | 86.4 | 93.5 |
| Rsa1.0_00428.1.g13688.t1 | refXP_002888294.1  glycosyltransferase family protein [Arabidopsis lyrata subsp. lyrata] gi 297334135 gb EFH64553.1  glycosyltransferase family protein [Arabidopsis lyrata subsp. lyrata]                                                                                                                                                                                                                                                                                                                                          | 442  | 447  | 0         | 101.1 | 83.7 | 91.9 | glycosyltransferase family protein              | gbpln | Arabidopsis lyrata   | AT1G64910.1   Symbols:   UDP-Glycosyltransferase superfamily protein   chr1:24115324-24116667 REVERSE LENGTH=447                                                                                                                                                                            | 442  | 447  | 0         | 101.1 | 81.7 | 92.1 |
| Rsa1.0_00428.1.g13689.t1 | refNP_200210.1  UDP-glycosyltransferase-like protein [Arabidopsis thaliana] gi 75171780 sp Q9FN28.1 U79B9_ARATH RecName: Full=UDP-glycosyltransferase 79B9 gi 10177261 dbj BAB10729.1  flavonol 3-O-glucosyltransferase-like protein [Arabidopsis thaliana] gi 17529306 gb AAL38880.1  putative flavonol 3-O-glucosyltransferase [Arabidopsis thaliana] gi 20465447 gb AAM20183.1  putative flavonol 3-O-glucosyltransferase [Arabidopsis thaliana] gi 332009053 gb AED96436.1  UDP-glycosyltransferase 79B9 [Arabidopsis thaliana] | 447  | 447  | 0         | 100.0 | 81.2 | 90.8 | UDP-glycosyltransferase-like protein            | gbpln | Arabidopsis thaliana | AT5G53990.1   Symbols:   UDP-Glycosyltransferase superfamily protein   chr5:21915707-21917050 REVERSE LENGTH=447                                                                                                                                                                            | 447  | 447  | 0         | 100.0 | 81.2 | 90.8 |
| Rsa1.0_00428.1.g13690.t1 | refXP_002870717.1  nodulin MtN3 family protein [Arabidopsis lyrata subsp. lyrata] gi 297316553 gb EFH46976.1  nodulin MtN3 family protein [Arabidopsis lyrata subsp. lyrata]                                                                                                                                                                                                                                                                                                                                                        | 228  | 240  | 2.00E-27  | 105.3 | 36.4 | 57.5 | nodulin MtN3 family protein                     | gbpln | Arabidopsis lyrata   | AT5G40260.1   Symbols: SWEET8, ASWEET8   Nodulin MtN3 family protein   chr5:16089842-16091527 FORWARD LENGTH=239                                                                                                                                                                            | 228  | 239  | 6.00E-29  | 104.8 | 36.8 | 54.8 |
| Rsa1.0_00429.1.g13691.t1 | emb CAN69340.1  hypothetical protein VITISV_032634 [Vitis vinifera]                                                                                                                                                                                                                                                                                                                                                                                                                                                                 | 1123 | 1298 | 0         | 115.6 | 62.7 | 75.7 | hypothetical protein VITISV_032634              | gbpln | Vitis vinifera       | AT4G23160.1   Symbols: CRK8   cysteine-rich RLK (RECEPTOR-like protein kinase) 8   chr4:12129485-12134086 FORWARD LENGTH=1262                                                                                                                                                               | 1123 | 1262 | 4.00E-67  | 112.4 | 13.6 | 19.9 |
| Rsa1.0_00429.1.g13692.t1 | #                                                                                                                                                                                                                                                                                                                                                                                                                                                                                                                                   | #    | #    | #         | #     | #    | #    | -                                               | ---   | ---                  | #                                                                                                                                                                                                                                                                                           | #    | #    | #         | #     | #    |      |
| Rsa1.0_00429.1.g13693.t1 | gb EOA36147.1  hypothetical protein CARUB_v10009836mg [Capsella rubella]                                                                                                                                                                                                                                                                                                                                                                                                                                                            | 328  | 307  | 8.00E-82  | 93.6  | 63.4 | 72.6 | hypothetical protein CARUB_v10009836mg          | gbpln | Capsella rubella     | AT1G49950.1   Symbols: TRB1, ATTRB1   telomere repeat binding factor 1   chr1:18494439-18496713 REVERSE LENGTH=300                                                                                                                                                                          | 328  | 300  | 3.00E-81  | 91.5  | 63.1 | 70.7 |

|                           |                                                                                                                                                                                                                                                                                                                                                                                                                                                                                                                                                                                                                                                      |      |      |          |       |      |       |                                                     |       |                      |                                                                                                                                                               |      |      |          |       |      |       |
|---------------------------|------------------------------------------------------------------------------------------------------------------------------------------------------------------------------------------------------------------------------------------------------------------------------------------------------------------------------------------------------------------------------------------------------------------------------------------------------------------------------------------------------------------------------------------------------------------------------------------------------------------------------------------------------|------|------|----------|-------|------|-------|-----------------------------------------------------|-------|----------------------|---------------------------------------------------------------------------------------------------------------------------------------------------------------|------|------|----------|-------|------|-------|
| Rsa1.0_00429.1.g13694.t1  | refXP_002894225.1   hypothetical protein ARALYDRAFT_891918 [Arabidopsis lyrata subsp. lyrata] gi 297340067 gb EFH70484.1                                                                                                                                                                                                                                                                                                                                                                                                                                                                                                                             | 390  | 387  | 0        | 99.2  | 94.4 | 96.7  | hypothetical protein ARALYDRAFT_891918              | gbpln | Arabidopsis lyrata   | AT1G49970.1   Symbols: CLPR1, NCLPP5, SVR2   CLP protease proteolytic subunit 1   chr1:18501936-18504462 REVERSE LENGTH=387                                   | 390  | 387  | 0        | 99.2  | 93.3 | 96.2  |
| Rsa1.0_00429.1.g13695.t1  | refXP_002891550.1   hypothetical protein ARALYDRAFT_474131 [Arabidopsis lyrata subsp. lyrata] gi 297337392 gb EFH67809.1                                                                                                                                                                                                                                                                                                                                                                                                                                                                                                                             | 386  | 422  | 1.00E-75 | 109.3 | 46.1 | 58.3  | hypothetical protein ARALYDRAFT_474131              | gbpln | Arabidopsis lyrata   | AT1G49990.1   Symbols:   F-box family protein   chr1:18513696-18514988 FORWARD LENGTH=430                                                                     | 386  | 430  | 5.00E-72 | 111.4 | 44.0 | 57.0  |
| Rsa1.0_00429.1.g13696.t1  | #                                                                                                                                                                                                                                                                                                                                                                                                                                                                                                                                                                                                                                                    | #    | #    | #        | #     | #    | -     | ----                                                | ----  | #                    | #                                                                                                                                                             | #    | #    | #        | #     | #    |       |
| Rsa1.0_00429.1.g13697.t1  | ret NP_171974.1   tubulin alpha-2/alpha-4 chain [Arabidopsis thaliana] gi 15222856 ref NP_175423.1   tubulin alpha-2/alpha-4 chain [Arabidopsis thaliana] gi 297791421 ref XP_002863595.1   tubulin alpha-2/alpha-4 chain [Arabidopsis lyrata subsp. lyrata] gi 297847340 ref XP_002891551.1   tubulin alpha-2/alpha-4 chain [Arabidopsis lyrata subsp. lyrata] gi 408387609 sp B9DGT7.2 TBA2_ARAT H RecName: Full=Tubulin alpha-2 chain gi 408407917 sp Q0WV25.2 TBA4_ARAT H RecName: Full=Tubulin alpha-4 chain gi 7211983 gb AAF40454.1 AC004809_12                                                                                               | 450  | 450  | 0        | 100.0 | 99.8 | 100.0 | tubulin alpha-2/alpha-4 chain                       | gbpln | Arabidopsis lyrata   | AT1G50010.1   Symbols: TUA2   tubulin alpha-2 chain   chr1:18517737-18519729 FORWARD LENGTH=450                                                               | 450  | 450  | 0        | 100.0 | 99.8 | 100.0 |
| Rsa1.0_00429.1.g13698.t19 | Identical to the alpha-4 tubulin (TUA4) gene from A. thaliana gi M84697. ESTs gb T46564. gb T04381. gb T76028. gb T21602. gb H37154 gb H37663 and gb T21719 come from this gene [Arabidopsis thaliana] gi 8569104 gb AAF76449.1 AC015445_16 Identical to Tubulin Alpha-6 Chain from Arabidopsis thaliana gi 267070 and contains a Tubulin PF 00091 domain. ESTs gb N37387. gb N37805. gb R90497. gb T44684. gb H36144. gb N38686. gb A1994844. gb R90689. gb T04725. gb H36928. gb N96479. gb H36922. gb R90670. gb Z17980. gb T4428. gb H36248. gb N65408. gb T46222 come from this gene [Arabidopsis thaliana] ...:15004701..15005118   AEF10929.1 | 2519 | 2479 | 0        | 98.4  | 94.9 | 96.4  | target of rapamycin                                 | gbpln | Eutrema halophilum   | AT1G50030.1   Symbols: TOR   target of rapamycin   chr1:18522626-18539619 REVERSE LENGTH=2481                                                                 | 2519 | 2481 | 0        | 98.5  | 93.8 | 96.0  |
| Rsa1.0_00429.1.g13699.t4  | gb EOA38839.1   hypothetical protein CARUB_v10011180mg [Capsella rubella]                                                                                                                                                                                                                                                                                                                                                                                                                                                                                                                                                                            | 856  | 1003 | 0        | 117.2 | 88.2 | 94.2  | hypothetical protein CARUB_v10011180mg              | gbpln | Capsella rubella     | AT1G50200.1   Symbols: ALATS, ACD   Alanyl-tRNA synthetase   chr1:18591429-18598311 REVERSE LENGTH=1003                                                       | 856  | 1003 | 0        | 117.2 | 87.7 | 94.0  |
| Rsa1.0_00429.1.g13700.t1  | refXP_002891565.1   monosaccharide transporter [Arabidopsis lyrata subsp. lyrata] gi 297337407 gb EFH67824.1   monosaccharide transporter [Arabidopsis lyrata subsp. lyrata]                                                                                                                                                                                                                                                                                                                                                                                                                                                                         | 516  | 517  | 0        | 100.2 | 92.2 | 96.1  | monosaccharide transporter                          | gbpln | Arabidopsis lyrata   | AT1G50310.1   Symbols: ATSTP9, STP9   sugar transporter 9   chr5:18635984-18638110 FORWARD LENGTH=517                                                         | 516  | 517  | 0        | 100.2 | 91.5 | 96.1  |
| Rsa1.0_00429.1.g13701.t1  | #                                                                                                                                                                                                                                                                                                                                                                                                                                                                                                                                                                                                                                                    | #    | #    | #        | #     | #    | -     | ----                                                | ----  | #                    | #                                                                                                                                                             | #    | #    | #        | #     | #    |       |
| Rsa1.0_00429.1.g13702.t1  | refXP_002891568.1   hypothetical protein ARALYDRAFT_474163 [Arabidopsis lyrata subsp. lyrata] gi 297337410 gb EFH67827.1                                                                                                                                                                                                                                                                                                                                                                                                                                                                                                                             | 1143 | 1153 | 0        | 100.9 | 86.4 | 92.3  | hypothetical protein ARALYDRAFT_474163              | gbpln | Arabidopsis lyrata   | AT1G50360.1   Symbols: VIIIA, ATVIIIA   P-loop containing nucleoside triphosphate hydrolases superfamily protein   chr1:18650688-18657106 FORWARD LENGTH=1153 | 1143 | 1153 | 0        | 100.9 | 85.8 | 92.0  |
| Rsa1.0_00429.1.g13703.t1  | gb AAC33226.1   putative non-LTR retroelement reverse transcriptase [Arabidopsis thaliana]                                                                                                                                                                                                                                                                                                                                                                                                                                                                                                                                                           | 1625 | 1529 | 0        | 94.1  | 28.4 | 45.0  | putative non-LTR retroelement reverse transcriptase | gbpln | Arabidopsis thaliana | AT5G18880.1   Symbols:   RNA-directed DNA polymerase (reverse transcriptase)-related family protein   chr5:6300535-6301422 REVERSE LENGTH=295                 | 1625 | 295  | 1.00E-39 | 18.2  | 5.7  | 9.1   |
| Rsa1.0_00429.1.g13704.t1  | #                                                                                                                                                                                                                                                                                                                                                                                                                                                                                                                                                                                                                                                    | #    | #    | #        | #     | #    | -     | ----                                                | ----  | #                    | #                                                                                                                                                             | #    | #    | #        | #     | #    |       |
| Rsa1.0_00430.1.g13705.t19 | refXP_002879161.1   VHA-A1 [Arabidopsis lyrata subsp. lyrata] gi 297325000 gb EFH55420.1   VHA-A1 [Arabidopsis lyrata subsp. lyrata]                                                                                                                                                                                                                                                                                                                                                                                                                                                                                                                 | 773  | 822  | 0        | 106.3 | 89.8 | 93.0  | VHA-A1                                              | gbpln | Arabidopsis lyrata   | AT2G28520.1   Symbols: VHA-A1   vacuolar proton ATPase A1   chr2:12210026-12215532 FORWARD LENGTH=817                                                         | 773  | 817  | 0        | 105.7 | 87.8 | 91.5  |
| Rsa1.0_00430.1.g13706.t1  | #                                                                                                                                                                                                                                                                                                                                                                                                                                                                                                                                                                                                                                                    | #    | #    | #        | #     | #    | -     | ----                                                | ----  | #                    | #                                                                                                                                                             | #    | #    | #        | #     | #    |       |

|                          |                                                                                                                                                                                                                                                                                                                        |      |      |           |       |      |      |                                                                                                                                   |       |                      |                                                                                                                                                    |     |     |           |       |      |      |
|--------------------------|------------------------------------------------------------------------------------------------------------------------------------------------------------------------------------------------------------------------------------------------------------------------------------------------------------------------|------|------|-----------|-------|------|------|-----------------------------------------------------------------------------------------------------------------------------------|-------|----------------------|----------------------------------------------------------------------------------------------------------------------------------------------------|-----|-----|-----------|-------|------|------|
| Rsa1.0_00430.1.g13707.t1 | gb[EOA27347.1] hypothetical protein CARUB_v10023462mg [Capsella rubella]                                                                                                                                                                                                                                               | 372  | 371  | 1.00E-160 | 99.7  | 82.5 | 90.1 | hypothetical protein CARUB_v10023462mg                                                                                            | gbpln | Capsella rubella     | AT2G28480.1   Symbols:   RNA-binding CRS1 / YhbY (CRM) domain protein   chr2:12176642-12178031 REVERSE LENGTH=372                                  | 372 | 372 | 1.00E-151 | 100.0 | 76.6 | 81.2 |
| Rsa1.0_00430.1.g13708.t1 | dbj[BAD20774.2] beta-galactosidase [Raphanus sativus]                                                                                                                                                                                                                                                                  | 844  | 851  | 0         | 100.8 | 90.9 | 95.4 | beta-galactosidase                                                                                                                | gbpln | Raphanus sativus     | AT2G28470.1   Symbols:   BGAL8   beta-galactosidase 8   chr2:12169047-12173164 REVERSE LENGTH=852                                                  | 844 | 852 | 0         | 100.9 | 88.5 | 94.2 |
| Rsa1.0_00430.1.g13709.t1 | gb[AAB36545.1] ubiquitin-like protein [Phaseolus vulgaris]                                                                                                                                                                                                                                                             | 229  | 407  | 1.00E-126 | 177.7 | 99.6 | 99.6 | ubiquitin-like protein                                                                                                            | gbpln | Phaseolus vulgaris   | AT4G05320.4   Symbols:   UBQ10   polyubiquitin 10   chr4:2718559-2719932 FORWARD LENGTH=457                                                        | 229 | 457 | 1.00E-128 | 199.6 | 99.6 | 99.6 |
| Rsa1.0_00430.1.g13710.t1 | #                                                                                                                                                                                                                                                                                                                      | #    | #    | #         | #     | #    | -    | -                                                                                                                                 | ----  | ----                 | #                                                                                                                                                  | #   | #   | #         | #     | #    | #    |
| Rsa1.0_00430.1.g13711.t1 | ref[XP_002879099.1] sand family protein [Arabidopsis lyrata subsp. lyrata] gi 297324938 gb EFH55358.1  sand family protein [Arabidopsis lyrata subsp. lyrata]                                                                                                                                                          | 610  | 618  | 0         | 101.3 | 85.1 | 88.7 | sand family protein                                                                                                               | gbpln | Arabidopsis lyrata   | AT2G28390.1   Symbols:   SAND family protein   chr2:12139836-12143375 REVERSE LENGTH=607                                                           | 610 | 607 | 0         | 99.5  | 84.1 | 88.4 |
| Rsa1.0_00430.1.g13712.t2 | gb[AAF79618.1]AC027665_19 F5M15.26 [Arabidopsis thaliana]                                                                                                                                                                                                                                                              | 1852 | 1838 | 0         | 99.2  | 33.3 | 42.8 | F5M15.26                                                                                                                          | gbpln | Arabidopsis thaliana | #                                                                                                                                                  | #   | #   | #         | #     | #    | #    |
| Rsa1.0_00430.1.g13713.t1 | #                                                                                                                                                                                                                                                                                                                      | #    | #    | #         | #     | #    | -    | -                                                                                                                                 | ----  | ----                 | #                                                                                                                                                  | #   | #   | #         | #     | #    | #    |
| Rsa1.0_00430.1.g13714.t1 | gb[AAD17351.1] contains similarity to retrovirus-related polyproteins and to CCHC zinc finger protein (Pfam: PF00098, Score=16.3, E=0.051, E= 1) [Arabidopsis thaliana] gi 7267432 emb CAB77944.1  putative polyprotein [Arabidopsis thaliana]                                                                         | 536  | 1138 | 7.00E-92  | 212.3 | 30.8 | 37.3 | contains similarity to retrovirus-related polyproteins and to CCHC zinc finger protein (Pfam: PF00098, Score=16.3, E=0.051, E= 1) | gbpln | Arabidopsis thaliana | #                                                                                                                                                  | #   | #   | #         | #     | #    | #    |
| Rsa1.0_00430.1.g13715.t1 | #                                                                                                                                                                                                                                                                                                                      | #    | #    | #         | #     | #    | -    | -                                                                                                                                 | ----  | ----                 | #                                                                                                                                                  | #   | #   | #         | #     | #    | #    |
| Rsa1.0_00430.1.g13716.t1 | ref[NP_565665.1] SAUR-like auxin-responsive protein [Arabidopsis thaliana] gi 20197467 gb AAM15087.1  Expressed protein [Arabidopsis thaliana] gi 91806281 gb ABE65868.1  auxin-responsive family protein [Arabidopsis thaliana] gi 330252983 gb AEC08077.1  SAUR-like auxin-responsive protein [Arabidopsis thaliana] | 124  | 124  | 5.00E-60  | 100.0 | 90.3 | 92.7 | SAUR-like auxin-responsive protein                                                                                                | gbpln | Arabidopsis thaliana | AT2G28085.1   Symbols:   SAUR-like auxin-responsive protein family   chr2:11968182-11968556 REVERSE LENGTH=124                                     | 124 | 124 | 9.00E-63  | 100.0 | 90.3 | 92.7 |
| Rsa1.0_00430.1.g13717.t1 | gb[AAC13582.1] similar to maize transposon MuDR (GB:M76978) [Arabidopsis thaliana] gi 8843876 dbj BAA97402.1  mutator-like transposase [Arabidopsis thaliana]                                                                                                                                                          | 130  | 806  | 3.00E-17  | 620.0 | 32.3 | 43.8 | similar to maize transposon MuDR (GB:M76978)                                                                                      | gbpln | Arabidopsis thaliana | #                                                                                                                                                  | #   | #   | #         | #     | #    | #    |
| Rsa1.0_00430.1.g13718.t1 | #                                                                                                                                                                                                                                                                                                                      | #    | #    | #         | #     | #    | -    | -                                                                                                                                 | ----  | ----                 | #                                                                                                                                                  | #   | #   | #         | #     | #    | #    |
| Rsa1.0_00431.1.g13719.t1 | ref[XP_002894585.1] rubredoxin family protein [Arabidopsis lyrata subsp. lyrata] gi 297340427 gb EFH70844.1  rubredoxin family protein [Arabidopsis lyrata subsp. lyrata]                                                                                                                                              | 182  | 195  | 2.00E-63  | 107.1 | 81.3 | 87.4 | rubredoxin family protein                                                                                                         | gbpln | Arabidopsis lyrata   | AT1G54500.1   Symbols:   Rubredoxin-like superfamily protein   chr1:20357084-20357671 REVERSE LENGTH=195                                           | 182 | 195 | 1.00E-65  | 107.1 | 81.9 | 86.3 |
| Rsa1.0_00431.1.g13720.t1 | #                                                                                                                                                                                                                                                                                                                      | #    | #    | #         | #     | #    | -    | -                                                                                                                                 | ----  | ----                 | #                                                                                                                                                  | #   | #   | #         | #     | #    | #    |
| Rsa1.0_00431.1.g13721.t1 | gb[AAP96742.1] ThiJ-like protein [Brassica rapa subsp. pekinensis]                                                                                                                                                                                                                                                     | 572  | 392  | 0         | 68.5  | 61.0 | 64.2 | ThiJ-like protein                                                                                                                 | gbpln | Brassica rapa        | AT3G14990.1   Symbols:   Class I glutamine amidotransferase-like superfamily protein   chr3:5047510-5049621 FORWARD LENGTH=392                     | 572 | 392 | 0         | 68.5  | 61.5 | 64.7 |
| Rsa1.0_00431.1.g13722.t1 | gb[EOA23804.1] hypothetical protein CARUB_v10017017mg, partial [Capsella rubella]                                                                                                                                                                                                                                      | 673  | 521  | 8.00E-32  | 77.4  | 10.8 | 15.8 | hypothetical protein CARUB_v10017017mg, partial                                                                                   | gbpln | Capsella rubella     | AT3G42140.1   Symbols:   zinc ion binding/nucleic acid binding   chr3:14302060-14303018 REVERSE LENGTH=273                                         | 673 | 273 | 1.00E-11  | 40.6  | 4.9  | 7.9  |
| Rsa1.0_00431.1.g13723.t2 | gb[AAD17398.1] putative non-LTR retroelement reverse transcriptase [Arabidopsis thaliana]                                                                                                                                                                                                                              | 799  | 1225 | 1.00E-63  | 153.3 | 15.0 | 21.0 | putative non-LTR retroelement reverse transcriptase                                                                               | gbpln | Arabidopsis thaliana | ATMG00310.1   Symbols:   ORF154   RNA-directed DNA polymerase (reverse transcriptase)-related family protein   chrM:90883-91347 REVERSE LENGTH=154 | 799 | 154 | 3.00E-20  | 19.3  | 5.8  | 8.4  |
| Rsa1.0_00431.1.g13724.t1 | gb[AAL87314.1] unknown protein [Arabidopsis thaliana]                                                                                                                                                                                                                                                                  | 139  | 547  | 8.00E-53  | 393.5 | 82.7 | 89.9 | unknown protein                                                                                                                   | gbpln | Arabidopsis thaliana | AT4G38900.3   Symbols:   Basic-leucine zipper (bZIP) transcription factor family protein   chr4:18139564-18141520 REVERSE LENGTH=547               | 139 | 547 | 2.00E-55  | 393.5 | 82.7 | 89.9 |
| Rsa1.0_00431.1.g13725.t1 | emb[CAB77974.1] putative athila-like protein [Arabidopsis thaliana]                                                                                                                                                                                                                                                    | 148  | 587  | 1.00E-11  | 396.6 | 24.3 | 32.4 | putative athila-like protein                                                                                                      | gbpln | Arabidopsis thaliana | #                                                                                                                                                  | #   | #   | #         | #     | #    | #    |
| Rsa1.0_00431.1.g13726.t1 | gb[AAF18641.1]AC006228_12 F5J5.16 [Arabidopsis thaliana]                                                                                                                                                                                                                                                               | 210  | 1024 | 9.00E-27  | 487.6 | 29.0 | 37.1 | F5J5.16                                                                                                                           | gbpln | Arabidopsis thaliana | #                                                                                                                                                  | #   | #   | #         | #     | #    | #    |
| Rsa1.0_00431.1.g13727.t1 | #                                                                                                                                                                                                                                                                                                                      | #    | #    | #         | #     | #    | -    | -                                                                                                                                 | ----  | ----                 | #                                                                                                                                                  | #   | #   | #         | #     | #    | #    |
| Rsa1.0_00431.1.g13728.t1 | #                                                                                                                                                                                                                                                                                                                      | #    | #    | #         | #     | #    | -    | -                                                                                                                                 | ----  | ----                 | #                                                                                                                                                  | #   | #   | #         | #     | #    | #    |
| Rsa1.0_00431.1.g13729.t1 | gb[AAF79618.1]AC027665_19 F5M15.26 [Arabidopsis thaliana]                                                                                                                                                                                                                                                              | 969  | 1838 | 1.00E-171 | 189.7 | 32.0 | 39.8 | F5M15.26                                                                                                                          | gbpln | Arabidopsis thaliana | #                                                                                                                                                  | #   | #   | #         | #     | #    | #    |
| Rsa1.0_00431.1.g13730.t1 | gb[EOA18727.1] hypothetical protein CARUB_v10007306mg [Capsella rubella]                                                                                                                                                                                                                                               | 263  | 284  | 1.00E-119 | 108.0 | 89.0 | 94.7 | hypothetical protein CARUB_v10007306mg                                                                                            | gbpln | Capsella rubella     | AT4G14465.1   Symbols:   AHL20   AT-hook motif nuclear-localized protein 20   chr4:8320972-8321817 FORWARD LENGTH=281                              | 263 | 281 | 1.00E-120 | 106.8 | 90.5 | 95.1 |

|                           |                                                                                                                                                                                                                                       |      |      |           |       |      |      |                                                                                |       |                      |      |      |     |          |       |      |      |
|---------------------------|---------------------------------------------------------------------------------------------------------------------------------------------------------------------------------------------------------------------------------------|------|------|-----------|-------|------|------|--------------------------------------------------------------------------------|-------|----------------------|------|------|-----|----------|-------|------|------|
| Rsa1.0_00431.1.g13731.t1  | #                                                                                                                                                                                                                                     | #    | #    | #         | #     | #    | #    | #                                                                              | -     | ----                 | ---- | #    | #   | #        | #     | #    | #    |
| Rsa1.0_00431.1.g13732.t1  | #                                                                                                                                                                                                                                     | #    | #    | #         | #     | #    | #    | #                                                                              | -     | ----                 | ---- | #    | #   | #        | #     | #    | #    |
| Rsa1.0_00431.1.g13733.t1  | gb AAF97298.1 AC007843.1<br>Hypothetical protein [Arabidopsis thaliana]                                                                                                                                                               | 235  | 362  | 4.00E-56  | 154.0 | 52.3 | 66.0 | Hypothetical protein                                                           | gbpln | Arabidopsis thaliana | #    | #    | #   | #        | #     | #    | #    |
| Rsa1.0_00431.1.g13734.t1  | gb AAG51783.1 AC079679.3 reverse transcriptase, putative; 16838-20266 [Arabidopsis thaliana]                                                                                                                                          | 185  | 1142 | 2.00E-40  | 617.3 | 42.2 | 53.0 | reverse transcriptase, putative; 16838-20266                                   | gbpln | Arabidopsis thaliana | #    | #    | #   | #        | #     | #    | #    |
| Rsa1.0_00431.1.g13735.t1  | gb EOA18445.1  hypothetical protein CARUB_v10006988mg [Capsella rubella]                                                                                                                                                              | 546  | 683  | 1.00E-142 | 125.1 | 51.1 | 67.6 | hypothetical protein CARUB_v10006988mg                                         | gbpln | Capsella rubella     | #    | 546  | 696 | 3.00E-19 | 127.5 | 20.7 | 37.4 |
| Rsa1.0_00431.1.g13736.t1  | #                                                                                                                                                                                                                                     | #    | #    | #         | #     | #    | #    | -                                                                              | ----  | ----                 | #    | #    | #   | #        | #     | #    | #    |
| Rsa1.0_00431.1.g13737.t1  | ref XP_002870312.1  hypothetical protein ARALYDRAFT_915420 [Arabidopsis lyrata subsp. lyrata]   gi 297316148 gb EFH46571.1  hypothetical protein ARALYDRAFT_915420 [Arabidopsis lyrata subsp. lyrata]                                 | 106  | 105  | 9.00E-29  | 99.1  | 63.2 | 75.5 | hypothetical protein ARALYDRAFT_915420                                         | gbpln | Arabidopsis lyrata   | #    | 106  | 125 | 1.00E-30 | 117.9 | 66.0 | 73.6 |
| Rsa1.0_00432.1.g13738.t1  | #                                                                                                                                                                                                                                     | #    | #    | #         | #     | #    | #    | -                                                                              | ----  | ----                 | #    | #    | #   | #        | #     | #    | #    |
| Rsa1.0_00432.1.g13739.t1  | #                                                                                                                                                                                                                                     | #    | #    | #         | #     | #    | #    | -                                                                              | ----  | ----                 | #    | #    | #   | #        | #     | #    | #    |
| Rsa1.0_00432.1.g13740.t1  | #                                                                                                                                                                                                                                     | #    | #    | #         | #     | #    | #    | -                                                                              | ----  | ----                 | #    | #    | #   | #        | #     | #    | #    |
| Rsa1.0_00432.1.g13741.t1  | #                                                                                                                                                                                                                                     | #    | #    | #         | #     | #    | #    | -                                                                              | ----  | ----                 | #    | #    | #   | #        | #     | #    | #    |
| Rsa1.0_00432.1.g13742.t2  | #                                                                                                                                                                                                                                     | #    | #    | #         | #     | #    | #    | -                                                                              | ----  | ----                 | #    | #    | #   | #        | #     | #    | #    |
| Rsa1.0_00432.1.g13743.t6  | gb AAD30632.1 AC006085.5<br>Hypothetical protein [Arabidopsis thaliana]                                                                                                                                                               | 1010 | 1295 | 1.00E-97  | 128.2 | 24.5 | 34.8 | Hypothetical protein                                                           | gbpln | Arabidopsis thaliana | #    | #    | #   | #        | #     | #    | #    |
| Rsa1.0_00432.1.g13744.t1  | #                                                                                                                                                                                                                                     | #    | #    | #         | #     | #    | #    | -                                                                              | ----  | ----                 | #    | #    | #   | #        | #     | #    | #    |
| Rsa1.0_00432.1.g13745.t1  | db BAB88750.1  gag protein [Silene latifolia]                                                                                                                                                                                         | 313  | 196  | 5.00E-20  | 62.6  | 14.7 | 25.2 | gag protein                                                                    | gbpln | Silene latifolia     | #    | #    | #   | #        | #     | #    | #    |
| Rsa1.0_00432.1.g13746.t1  | ref XP_002885617.1  hypothetical protein ARALYDRAFT_898967 [Arabidopsis lyrata subsp. lyrata]   gi 297331457 gb EFH61876.1  hypothetical protein ARALYDRAFT_898967 [Arabidopsis lyrata subsp. lyrata]                                 | 502  | 488  | 8.00E-27  | 97.2  | 21.9 | 38.2 | hypothetical protein ARALYDRAFT_898967                                         | gbpln | Arabidopsis lyrata   | #    | #    | #   | #        | #     | #    | #    |
| Rsa1.0_00432.1.g13747.t1  | db BAB10790.1  retroelement pol polyprotein-like [Arabidopsis thaliana]                                                                                                                                                               | 2016 | 1864 | 0         | 92.5  | 17.2 | 20.4 | retroelement pol polyprotein-like                                              | gbpln | Arabidopsis thaliana | #    | 2016 | 119 | 1.00E-17 | 5.9   | 2.0  | 2.2  |
| Rsa1.0_00432.1.g13748.t15 | gb AAC28189.1  contains similarity to Arabidopsis thaliana retrotransposon Athila (GB:X81801) [Arabidopsis thaliana]                                                                                                                  | 220  | 940  | 3.00E-30  | 427.3 | 31.8 | 40.9 | contains similarity to Arabidopsis thaliana retrotransposon Athila (GB:X81801) | gbpln | Arabidopsis thaliana | #    | #    | #   | #        | #     | #    | #    |
| Rsa1.0_00432.1.g13749.t1  | #                                                                                                                                                                                                                                     | #    | #    | #         | #     | #    | #    | -                                                                              | ----  | ----                 | #    | #    | #   | #        | #     | #    | #    |
| Rsa1.0_00432.1.g13750.t1  | gb AAF79348.1 AC007887.7 F15O4.13 [Arabidopsis thaliana]                                                                                                                                                                              | 1313 | 1887 | 0         | 143.7 | 54.6 | 67.8 | F15O4.13                                                                       | gbpln | Arabidopsis thaliana | #    | 1313 | 158 | 3.00E-22 | 12.0  | 3.9  | 5.6  |
| Rsa1.0_00432.1.g13751.t15 | gb AAM15254.1  putative retroelement pol polyprotein [Arabidopsis thaliana]                                                                                                                                                           | 275  | 930  | 2.00E-41  | 338.2 | 34.9 | 50.2 | putative retroelement pol polyprotein                                          | gbpln | Arabidopsis thaliana | #    | #    | #   | #        | #     | #    | #    |
| Rsa1.0_00432.1.g13752.t6  | #                                                                                                                                                                                                                                     | #    | #    | #         | #     | #    | #    | -                                                                              | ----  | ----                 | #    | #    | #   | #        | #     | #    | #    |
| Rsa1.0_00432.1.g13753.t12 | gb ABD65035.1  hypothetical protein 26.t00052 [Brassica oleracea]                                                                                                                                                                     | 799  | 695  | 1.00E-164 | 87.0  | 43.7 | 54.4 | hypothetical protein 26.t00052                                                 | gbpln | Brassica oleracea    | #    | #    | #   | #        | #     | #    | #    |
| Rsa1.0_00433.1.g13754.t1  | gb EOA34242.1  hypothetical protein CARUB_v10021762mg [Capsella rubella]                                                                                                                                                              | 162  | 163  | 4.00E-64  | 100.6 | 72.8 | 88.3 | hypothetical protein CARUB_v10021762mg                                         | gbpln | Capsella rubella     | #    | 162  | 163 | 2.00E-66 | 100.6 | 73.5 | 86.4 |
| Rsa1.0_00433.1.g13755.t1  | gb EOA39123.1  hypothetical protein CARUB_v10011935mg [Capsella rubella]                                                                                                                                                              | 170  | 560  | 3.00E-60  | 329.4 | 67.1 | 72.4 | hypothetical protein CARUB_v10011935mg                                         | gbpln | Capsella rubella     | #    | 170  | 564 | 2.00E-62 | 331.8 | 67.1 | 72.9 |
| Rsa1.0_00433.1.g13756.t1  | ref XP_002890519.1  proton-dependent oligopeptide transport family protein [Arabidopsis lyrata subsp. lyrata]   gi 297336361 gb EFH66778.1  proton-dependent oligopeptide transport family protein [Arabidopsis lyrata subsp. lyrata] | 561  | 561  | 0         | 100.0 | 90.4 | 94.5 | proton-dependent oligopeptide transport family protein                         | gbpln | Arabidopsis lyrata   | #    | 561  | 557 | 0        | 99.3  | 88.6 | 93.6 |

|                          |                                                                                                                                                                                                                                                                                                                                                                                                              |     |     |           |       |      |      |                                        |       |                      |                                                                                                                                                                                                                                                             |     |     |           |       |      |      |
|--------------------------|--------------------------------------------------------------------------------------------------------------------------------------------------------------------------------------------------------------------------------------------------------------------------------------------------------------------------------------------------------------------------------------------------------------|-----|-----|-----------|-------|------|------|----------------------------------------|-------|----------------------|-------------------------------------------------------------------------------------------------------------------------------------------------------------------------------------------------------------------------------------------------------------|-----|-----|-----------|-------|------|------|
| Rsa1.0_00433.1.g13757.t1 | ref[XP_002893236.1] hypothetical protein ARALYDRAFT_472493 [Arabidopsis lyrata subsp. lyrata] gi 297339078 gb EFH69495.1                                                                                                                                                                                                                                                                                     | 732 | 676 | 0         | 92.3  | 75.3 | 80.9 | hypothetical protein ARALYDRAFT_472493 | gbpln | Arabidopsis lyrata   | AT1G22530.1   Symbols: PATL2   PATELLIN 2   chr1:7955773-7958326 REVERSE LENGTH=683                                                                                                                                                                         | 732 | 683 | 0         | 93.3  | 72.5 | 79.1 |
| Rsa1.0_00433.1.g13758.t1 | gb[EOA36747.1] hypothetical protein CARUB_v10012585mg [Capsella rubella]                                                                                                                                                                                                                                                                                                                                     | 375 | 382 | 1.00E-166 | 101.9 | 78.7 | 85.6 | hypothetical protein CARUB_v10012585mg | gbpln | Capsella rubella     | AT1G22500.1   Symbols:   RING/U-box superfamily protein   chr1:7949581-7950726 FORWARD LENGTH=381                                                                                                                                                           | 375 | 381 | 1.00E-164 | 101.6 | 77.6 | 85.1 |
| Rsa1.0_00433.1.g13759.t1 | ref[NP_200608.3] reticulon-like protein B21 [Arabidopsis thaliana] gi 332278149 sp G56X72.2 RTNLS_ARA TH RecName: Full=Reticulon-like protein B21; Short=ATRNLB21 gi 332009600 gb AED96983.1  reticulon-like protein B21 [Arabidopsis thaliana]                                                                                                                                                              | 124 | 487 | 1.00E-25  | 392.7 | 49.2 | 52.4 | reticulon-like protein B21             | gbpln | Arabidopsis thaliana | AT5G58000.1   Symbols:   Reticulon family protein   chr5:23477416-23479496 FORWARD LENGTH=487                                                                                                                                                               | 124 | 487 | 2.00E-28  | 392.7 | 49.2 | 52.4 |
| Rsa1.0_00433.1.g13760.t1 | #                                                                                                                                                                                                                                                                                                                                                                                                            | #   | #   | #         | #     | #    | #    | -                                      | ----  | ----                 | #                                                                                                                                                                                                                                                           | #   | #   | #         | #     | #    |      |
| Rsa1.0_00433.1.g13761.t1 | ref[NP_564171.1] transcription factor bHLH94 [Arabidopsis thaliana] gi 218563531 sp Q9SK91.2 BH094_ARAT H RecName: Full=Transcription factor bHLH94; AltName: Full=Basic helix-loop-helix protein 94; Short=AtbHLH94; Short=bHLH 94; AltName: Full=Transcription factor EN 16; AltName: Full=bHLH transcription factor bHLH94 gi 332192126 gb AEE30247.1  transcription factor bHLH94 [Arabidopsis thaliana] | 295 | 304 | 1.00E-116 | 103.1 | 79.0 | 87.1 | transcription factor bHLH94            | gbpln | Arabidopsis thaliana | AT1G22490.1   Symbols:   basic helix-loop-helix (bHLH) DNA-binding superfamily protein   chr1:7938448-7940489 REVERSE LENGTH=304                                                                                                                            | 295 | 304 | 1.00E-118 | 103.1 | 79.0 | 87.1 |
| Rsa1.0_00433.1.g13762.t1 | #                                                                                                                                                                                                                                                                                                                                                                                                            | #   | #   | #         | #     | #    | #    | -                                      | ----  | ----                 | #                                                                                                                                                                                                                                                           | #   | #   | #         | #     | #    |      |
| Rsa1.0_00433.1.g13763.t1 | gb[EOA37135.1] hypothetical protein CARUB_v10010418mg [Capsella rubella]                                                                                                                                                                                                                                                                                                                                     | 172 | 180 | 2.00E-52  | 104.7 | 73.3 | 80.2 | hypothetical protein CARUB_v10010418mg | gbpln | Capsella rubella     | AT1G22480.1   Symbols:   Cupredoxin superfamily protein   chr1:7934232-7935054 REVERSE LENGTH=174                                                                                                                                                           | 172 | 174 | 9.00E-54  | 101.2 | 72.1 | 79.1 |
| Rsa1.0_00433.1.g13764.t1 | ref[XP_002893230.1] hypothetical protein ARALYDRAFT_472486 [Arabidopsis lyrata subsp. lyrata] gi 297339072 gb EFH69489.1  hypothetical protein ARALYDRAFT_472486 [Arabidopsis lyrata subsp. lyrata]                                                                                                                                                                                                          | 564 | 566 | 0         | 100.4 | 84.9 | 90.2 | hypothetical protein ARALYDRAFT_472486 | gbpln | Arabidopsis lyrata   | AT1G22460.1   Symbols:   O-fucosyltransferase family protein   chr1:7927530-7930351 REVERSE LENGTH=565                                                                                                                                                      | 564 | 565 | 0         | 100.2 | 84.9 | 90.4 |
| Rsa1.0_00433.1.g13765.t1 | ref[XP_002890515.1] hypothetical protein ARALYDRAFT_889753 [Arabidopsis lyrata subsp. lyrata] gi 297336357 gb EFH66774.1  hypothetical protein ARALYDRAFT_889753 [Arabidopsis lyrata subsp. lyrata]                                                                                                                                                                                                          | 150 | 192 | 1.00E-58  | 128.0 | 88.7 | 93.3 | hypothetical protein ARALYDRAFT_889753 | gbpln | Arabidopsis lyrata   | AT1G22450.1   Symbols: COX6B, ATCOX6B2   cytochrome C oxidase 6B   chr1:7925447-7926918 FORWARD LENGTH=191                                                                                                                                                  | 150 | 191 | 5.00E-60  | 127.3 | 89.3 | 94.7 |
| Rsa1.0_00433.1.g13766.t1 | ref[XP_002890513.1] hypothetical protein ARALYDRAFT_472482 [Arabidopsis lyrata subsp. lyrata] gi 297336355 gb EFH66772.1  hypothetical protein ARALYDRAFT_472482 [Arabidopsis lyrata subsp. lyrata]                                                                                                                                                                                                          | 389 | 388 | 0         | 99.7  | 86.9 | 94.9 | hypothetical protein ARALYDRAFT_472482 | gbpln | Arabidopsis lyrata   | AT1G22430.2   Symbols:   GroES-like zinc-binding dehydrogenase family protein   chr1:7919235-7921594 FORWARD LENGTH=388                                                                                                                                     | 389 | 388 | 0         | 99.7  | 86.1 | 94.6 |
| Rsa1.0_00433.1.g13767.t1 | ref[XP_002890510.1] hypothetical protein ARALYDRAFT_472481 [Arabidopsis lyrata subsp. lyrata] gi 297336352 gb EFH66769.1  hypothetical protein ARALYDRAFT_472481 [Arabidopsis lyrata subsp. lyrata]                                                                                                                                                                                                          | 518 | 527 | 0         | 101.7 | 93.8 | 96.5 | hypothetical protein ARALYDRAFT_472481 | gbpln | Arabidopsis lyrata   | AT1G22410.1   Symbols:   Class-II DAHP synthetase family protein   chr1:7912120-7914742 FORWARD LENGTH=527                                                                                                                                                  | 518 | 527 | 0         | 101.7 | 93.6 | 96.7 |
| Rsa1.0_00433.1.g13768.t1 | gb[EOA40264.1] hypothetical protein CARUB_v10008992mg [Capsella rubella]                                                                                                                                                                                                                                                                                                                                     | 491 | 484 | 0         | 98.6  | 74.1 | 85.3 | hypothetical protein CARUB_v10008992mg | gbpln | Capsella rubella     | AT1G22360.1   Symbols: AtUGT85A2, UGT85A2   UDP-glucosyl transferase 85A2   chr1:7895068-7897527 REVERSE LENGTH=481                                                                                                                                         | 491 | 481 | 0         | 98.0  | 73.3 | 84.7 |
| Rsa1.0_00434.1.g13769.t1 | ref[XP_002897617.1] hypothetical protein ARALYDRAFT_316513 [Arabidopsis lyrata subsp. lyrata] gi 297333458 gb EFH63876.1  hypothetical protein ARALYDRAFT_316513 [Arabidopsis lyrata subsp. lyrata]                                                                                                                                                                                                          | 165 | 163 | 8.00E-42  | 98.8  | 55.2 | 69.1 | hypothetical protein ARALYDRAFT_316513 | gbpln | Arabidopsis lyrata   | AT1G75970.1   Symbols:   unknown protein; Has 10 Blast hits to 10 proteins in 5 species: Archae - 0; Bacteria - 0; Metazoa - 0; Fungi - 0; Plants - 10; Viruses - 0; Other Eukaryotes - 0 (source: NCBI BLINK).   chr1:28486532-28487114 FORWARD LENGTH=165 | 165 | 165 | 2.00E-43  | 100.0 | 50.3 | 66.1 |

|                          |                                                                                                                                                                                                                                                                                                                                                                                |     |     |           |       |       |       |                                                                                                                                                                              |       |                      |                                                                                                                                                                                                                                                 |     |     |           |       |      |      |
|--------------------------|--------------------------------------------------------------------------------------------------------------------------------------------------------------------------------------------------------------------------------------------------------------------------------------------------------------------------------------------------------------------------------|-----|-----|-----------|-------|-------|-------|------------------------------------------------------------------------------------------------------------------------------------------------------------------------------|-------|----------------------|-------------------------------------------------------------------------------------------------------------------------------------------------------------------------------------------------------------------------------------------------|-----|-----|-----------|-------|------|------|
| Rsa1.0_00434.1.g13770.t1 | refXP_002889047.1 hypothetical protein ARALYDRAFT_895460 [Arabidopsis lyrata subsp. lyrata] gi 297334888 gb EFH65306.1 hypothetical protein ARALYDRAFT_895460 [Arabidopsis lyrata subsp. lyrata]                                                                                                                                                                               | 795 | 791 | 0         | 99.5  | 93.8  | 96.4  | hypothetical protein ARALYDRAFT_895460                                                                                                                                       | gbpln | Arabidopsis lyrata   | AT1G75850.1   Symbols: VPS35B   VPS35 homolog B   chr1:28478053-28483874 REVERSE LENGTH=790                                                                                                                                                     | 795 | 790 | 0         | 99.4  | 93.5 | 96.2 |
| Rsa1.0_00434.1.g13771.t1 | gb EOA38545.1 hypothetical protein CARUB_v10010350mg [Capsella rubella]                                                                                                                                                                                                                                                                                                        | 196 | 196 | 1.00E-110 | 100.0 | 99.0  | 99.0  | hypothetical protein CARUB_v10010350mg                                                                                                                                       | gbpln | Capsella rubella     | AT1G20090.1   Symbols: ARAC4, ROP2, ATROP2, ATRAC4   RHO-related protein from plants 2   chr1:6967223-6968603 FORWARD LENGTH=195                                                                                                                | 196 | 195 | 1.00E-111 | 99.5  | 98.0 | 98.0 |
| Rsa1.0_00434.1.g13772.t1 | #                                                                                                                                                                                                                                                                                                                                                                              | #   | #   | #         | #     | #     | #     | -                                                                                                                                                                            | ----  | ----                 | #                                                                                                                                                                                                                                               | #   | #   | #         | #     | #    | #    |
| Rsa1.0_00434.1.g13773.t1 | sp P69241.1 DEF1_RAPSA RecName: Full=Defensin-like protein 1; AltName: Full=Cysteine-rich antifungal protein 1; Short=AFP1; Flags: Precursor gi 609322 gb AA69541.1 antifungal protein 1 preprotein [Raphanus sativus] gi 15529964 gb ABJ09663.1 antifungal rafp1 [Raphanus sativus]                                                                                           | 80  | 80  | 2.00E-39  | 100.0 | 100.0 | 100.0 | RecName: Full=Defensin-like protein 1; AltName: Full=Cysteine-rich antifungal protein 1; Short=AFP1; Flags: Precursor gi 609322 gb AA69541.1 antifungal protein 1 preprotein | gbpln | Raphanus sativus     | AT5G44420.1   Symbols: PDF1.2, PDF1.2A, LCR77   plant defensin 1.2   chr5:17907216-17907550 REVERSE LENGTH=80                                                                                                                                   | 80  | 80  | 6.00E-38  | 100.0 | 88.8 | 95.0 |
| Rsa1.0_00434.1.g13774.t1 | gb AAY27736.1 putative plant defensin PDF1.1 [Arabidopsis halleri] gi 410066989 emb CCN97877.1 defensin [Arabidopsis halleri subsp. halleri]                                                                                                                                                                                                                                   | 80  | 80  | 4.00E-29  | 100.0 | 75.0  | 83.8  | putative plant defensin PDF1.1                                                                                                                                               | gbpln | Arabidopsis halleri  | AT5G44420.1   Symbols: PDF1.2, PDF1.2A, LCR77   plant defensin 1.2   chr5:17907216-17907550 REVERSE LENGTH=80                                                                                                                                   | 80  | 80  | 3.00E-30  | 100.0 | 71.3 | 81.3 |
| Rsa1.0_00434.1.g13775.t1 | gb ABV89616.1 pathogenesis-related thaumatin family protein [Brassica rapa] gi 157849670 gb ABV89618.1 pathogenesis-related thaumatin family protein [Brassica rapa]                                                                                                                                                                                                           | 492 | 321 | 1.00E-165 | 65.2  | 60.6  | 62.0  | pathogenesis-related thaumatin family protein                                                                                                                                | gbpln | Brassica rapa        | AT1G75800.1   Symbols:   Pathogenesis-related thaumatin superfamily protein   chr1:28458889-28460447 FORWARD LENGTH=330                                                                                                                         | 492 | 330 | 1.00E-159 | 67.1  | 56.3 | 59.8 |
| Rsa1.0_00434.1.g13776.t1 | refXP_002889045.1 hypothetical protein ARALYDRAFT_476726 [Arabidopsis lyrata subsp. lyrata] gi 297334886 gb EFH65304.1 hypothetical protein ARALYDRAFT_476726 [Arabidopsis lyrata subsp. lyrata]                                                                                                                                                                               | 554 | 545 | 0         | 98.4  | 78.3  | 87.2  | hypothetical protein ARALYDRAFT_476726                                                                                                                                       | gbpln | Arabidopsis lyrata   | AT1G75790.1   Symbols: sks18   SKU5 similar 18   chr1:28454980-28457388 REVERSE LENGTH=545                                                                                                                                                      | 554 | 545 | 0         | 98.4  | 76.4 | 85.4 |
| Rsa1.0_00434.1.g13777.t1 | #                                                                                                                                                                                                                                                                                                                                                                              | #   | #   | #         | #     | #     | #     | -                                                                                                                                                                            | ----  | ----                 | #                                                                                                                                                                                                                                               | #   | #   | #         | #     | #    | #    |
| Rsa1.0_00434.1.g13778.t1 | gb ACV70139.1 gast1-like protein [Jatropha curcas]                                                                                                                                                                                                                                                                                                                             | 109 | 103 | 1.00E-18  | 94.5  | 46.8  | 57.8  | gast1-like protein                                                                                                                                                           | gbpln | Jatropha curcas      | AT1G75750.1   Symbols: GASA1   GAST1 protein homolog 1   chr1:28441813-28442284 REVERSE LENGTH=98                                                                                                                                               | 109 | 98  | 9.00E-19  | 89.9  | 54.1 | 57.8 |
| Rsa1.0_00434.1.g13779.t1 | #                                                                                                                                                                                                                                                                                                                                                                              | #   | #   | #         | #     | #     | #     | -                                                                                                                                                                            | ----  | ----                 | #                                                                                                                                                                                                                                               | #   | #   | #         | #     | #    | #    |
| Rsa1.0_00434.1.g13780.t1 | ref NP_177702.2 uncharacterized protein [Arabidopsis thaliana] gi 33418393 ref NP_001185406.1 uncharacterized protein [Arabidopsis thaliana] gi 133778892 gb ABO38786.1 At1g75730 [Arabidopsis thaliana] gi 33219763 gb AEE35752.1 uncharacterized protein AT1G75730 [Arabidopsis thaliana] gi 33219763 gb AEE35752.1 uncharacterized protein AT1G75730 [Arabidopsis thaliana] | 568 | 589 | 1.00E-165 | 103.7 | 66.4  | 77.3  | uncharacterized protein                                                                                                                                                      | gbpln | Arabidopsis thaliana | AT1G75730.2   Symbols:   unknown protein; FUNCTIONS IN: molecular_function unknown; INVOLVED IN: biological_process unknown; EXPRESSED IN: 22 plant structures; EXPRESSED DURING: 12 growth stages.   chr1:28435991-28438983 REVERSE LENGTH=589 | 568 | 589 | 1.00E-168 | 103.7 | 66.4 | 77.3 |
| Rsa1.0_00434.1.g13781.t1 | gb EOA33227.1 hypothetical protein CARUB_v10020976mg [Capsella rubella]                                                                                                                                                                                                                                                                                                        | 187 | 198 | 1.00E-55  | 105.9 | 72.2  | 80.2  | hypothetical protein CARUB_v10020976mg                                                                                                                                       | gbpln | Capsella rubella     | AT1G75720.2   Symbols:   Plant protein of unknown function (DUF827)   chr1:28434648-28435321 REVERSE LENGTH=193                                                                                                                                 | 187 | 193 | 1.00E-55  | 103.2 | 71.1 | 80.7 |
| Rsa1.0_00434.1.g13782.t1 | ref XP_002887608.1 zinc finger family protein [Arabidopsis lyrata subsp. lyrata] gi 297333449 gb EFH63867.1 zinc finger family protein [Arabidopsis lyrata subsp. lyrata]                                                                                                                                                                                                      | 443 | 461 | 0         | 104.1 | 86.7  | 89.8  | zinc finger family protein                                                                                                                                                   | gbpln | Arabidopsis lyrata   | AT1G75710.1   Symbols:   C2H2-like zinc finger protein   chr1:28428806-28431128 FORWARD LENGTH=462                                                                                                                                              | 443 | 462 | 0         | 104.3 | 85.8 | 90.1 |
| Rsa1.0_00434.1.g13783.t2 | gb EOA35847.1 hypothetical protein CARUB_v10021088mg [Capsella rubella]                                                                                                                                                                                                                                                                                                        | 153 | 155 | 2.00E-71  | 101.3 | 87.6  | 93.5  | hypothetical protein CARUB_v10021088mg                                                                                                                                       | gbpln | Capsella rubella     | AT1G75690.1   Symbols:   DnaJ/Hsp40 cysteine-rich domain superfamily protein   chr1:28422273-28423170 REVERSE LENGTH=154                                                                                                                        | 153 | 154 | 2.00E-72  | 100.7 | 88.9 | 92.8 |



|                          |                                                                                                                                                                                                                                                                                                                                                                                                                                                                                                                                                                  |      |      |           |       |      |      |                                                              |       |                      |                                                                                                                                                                                                                                                                                                                                                                                                                                                                                                                                                  |      |      |           |       |      |      |
|--------------------------|------------------------------------------------------------------------------------------------------------------------------------------------------------------------------------------------------------------------------------------------------------------------------------------------------------------------------------------------------------------------------------------------------------------------------------------------------------------------------------------------------------------------------------------------------------------|------|------|-----------|-------|------|------|--------------------------------------------------------------|-------|----------------------|--------------------------------------------------------------------------------------------------------------------------------------------------------------------------------------------------------------------------------------------------------------------------------------------------------------------------------------------------------------------------------------------------------------------------------------------------------------------------------------------------------------------------------------------------|------|------|-----------|-------|------|------|
| Rsa1.0_00434.1.g13784.t1 | ref XP_002510517.1  conserved hypothetical protein [Ricinus communis]  g 223551218 gb EEF52704.1  conserved hypothetical protein [Ricinus communis]                                                                                                                                                                                                                                                                                                                                                                                                              | 297  | 311  | 5.00E-78  | 104.7 | 52.9 | 66.7 | conserved hypothetical protein                               | gbpln | Ricinus communis     | AT5G05800.2   Symbols:   unknown protein; FUNCTIONS IN: molecular_function unknown; INVOLVED IN: biological_process unknown; LOCATED IN: cellular_component unknown; EXPRESSED IN: 24 plant structures; EXPRESSED DURING: 15 growth stages; BEST Arabidopsis thaliana protein match is: unknown protein (TAIR:AT3G11290.1); Has 881 Blast hits to 512 proteins in 30 species: Archae - 0; Bacteria - 2; Metazoa - 0; Fungi - 38; Plants - 833; Viruses - 0; Other Eukaryotes - 8 (source: NCBI BLink).   chr5:1743234-1744751 REVERSE LENGTH=449 | 297  | 449  | 4.00E-17  | 151.2 | 26.6 | 41.8 |
| Rsa1.0_00434.1.g13785.t1 | gb AAM63477.1  endo-beta-1,4-glucanase, putative [Arabidopsis thaliana]                                                                                                                                                                                                                                                                                                                                                                                                                                                                                          | 524  | 525  | 0         | 100.2 | 88.0 | 94.1 | endo-beta-1,4-glucanase, putative                            | gbpln | Arabidopsis thaliana | AT1G75680.1   Symbols: AtGH9B7, GH9B7   glycosyl hydrolase 9B7   chr1:28417215-28419231 REVERSE LENGTH=525                                                                                                                                                                                                                                                                                                                                                                                                                                       | 524  | 525  | 0         | 100.2 | 86.6 | 93.1 |
| Rsa1.0_00434.1.g13786.t1 | ref XP_002868503.1  hypothetical protein ARALYDRAFT_493700 [Arabidopsis lyrata subsp. lyrata]  g 297314339 gb EFH44762.1  hypothetical protein ARALYDRAFT_493700 [Arabidopsis lyrata subsp. lyrata]                                                                                                                                                                                                                                                                                                                                                              | 235  | 632  | 9.00E-48  | 268.9 | 42.1 | 48.5 | hypothetical protein ARALYDRAFT_493700                       | gbpln | Arabidopsis lyrata   | AT5G37010.1   Symbols:   unknown protein; FUNCTIONS IN: molecular_function unknown; INVOLVED IN: N-terminal protein myristoylation; EXPRESSED IN: 22 plant structures; EXPRESSED DURING: 13 growth stages; BEST Arabidopsis thaliana protein match is: unknown protein (TAIR:AT1G65710.1); Has 6746 Blast hits to 5259 proteins in 486 species: Archae - 7; Bacteria - 485; Metazoa - 3508; Fungi - 577; Plants - 378; Viruses - 50; Other Eukaryotes - 1741 (source: NCBI BLink).   chr5:14620853-14622879 REVERSE LENGTH=637                   | 235  | 637  | 1.00E-49  | 271.1 | 43.0 | 48.9 |
| Rsa1.0_00434.1.g13787.t1 | ref XP_002889036.1  hypothetical protein ARALYDRAFT_316494 [Arabidopsis lyrata subsp. lyrata]  g 297334877 gb EFH65295.1  hypothetical protein ARALYDRAFT_316494 [Arabidopsis lyrata subsp. lyrata]                                                                                                                                                                                                                                                                                                                                                              | 201  | 196  | 2.00E-77  | 97.5  | 72.1 | 80.1 | hypothetical protein ARALYDRAFT_316494                       | gbpln | Arabidopsis lyrata   | AT1G75670.2   Symbols:   DNA-directed RNA polymerases   chr1:28415378-28416505 REVERSE LENGTH=196                                                                                                                                                                                                                                                                                                                                                                                                                                                | 201  | 196  | 3.00E-77  | 97.5  | 69.7 | 79.1 |
| Rsa1.0_00434.1.g13788.t1 | gb EOA33199.1  hypothetical protein CARUB_v10019710mg [Capsella rubella]                                                                                                                                                                                                                                                                                                                                                                                                                                                                                         | 1051 | 1024 | 0         | 97.4  | 84.4 | 89.2 | hypothetical protein CARUB_v10019710mg                       | gbpln | Capsella rubella     | AT1G75660.1   Symbols: XRN3, AtXRN3   5'-3' exoribonuclease 3   chr1:28408289-28414825 FORWARD LENGTH=1020                                                                                                                                                                                                                                                                                                                                                                                                                                       | 1051 | 1020 | 0         | 97.1  | 83.3 | 88.6 |
| Rsa1.0_00434.1.g13789.t1 | gb EOA33194.1  hypothetical protein CARUB_v10021300mg [Capsella rubella]                                                                                                                                                                                                                                                                                                                                                                                                                                                                                         | 217  | 547  | 2.00E-90  | 252.1 | 75.1 | 85.7 | hypothetical protein CARUB_v10021300mg                       | gbpln | Capsella rubella     | AT1G75620.1   Symbols:   glyoxal oxidase-related protein   chr1:28394951-28396594 REVERSE LENGTH=547                                                                                                                                                                                                                                                                                                                                                                                                                                             | 217  | 547  | 9.00E-89  | 252.1 | 73.3 | 81.6 |
| Rsa1.0_00435.1.g13790.t1 | #                                                                                                                                                                                                                                                                                                                                                                                                                                                                                                                                                                | #    | #    | #         | #     | #    | #    | -                                                            | ----  | ----                 | #                                                                                                                                                                                                                                                                                                                                                                                                                                                                                                                                                | #    | #    | #         | #     | #    |      |
| Rsa1.0_00435.1.g13791.t1 | db BAJ34187.1  unnamed protein product [Thellungiella halophila]                                                                                                                                                                                                                                                                                                                                                                                                                                                                                                 | 313  | 316  | 1.00E-141 | 101.0 | 88.5 | 93.0 | unnamed protein product                                      | ----  | ----                 | AT4G01460.1   Symbols:   basic helix-loop-helix (bHLH) DNA-binding superfamily protein   chr4:621334-622697 FORWARD LENGTH=315                                                                                                                                                                                                                                                                                                                                                                                                                   | 313  | 315  | 1.00E-130 | 100.6 | 81.2 | 89.1 |
| Rsa1.0_00435.1.g13792.t1 | gb AAF18643.1 AC006228_14 F5J5.14 [Arabidopsis thaliana]                                                                                                                                                                                                                                                                                                                                                                                                                                                                                                         | 548  | 743  | 7.00E-79  | 135.6 | 31.9 | 44.5 | F5J5.14                                                      | gbpln | Arabidopsis thaliana | #                                                                                                                                                                                                                                                                                                                                                                                                                                                                                                                                                | #    | #    | #         | #     | #    |      |
| Rsa1.0_00435.1.g13793.t1 | ref XP_002874982.1  nodulin MtN21 family protein [Arabidopsis lyrata subsp. lyrata]  g 297320819 gb EFH51241.1  nodulin MtN21 family protein [Arabidopsis lyrata subsp. lyrata]                                                                                                                                                                                                                                                                                                                                                                                  | 363  | 363  | 0         | 100.0 | 88.4 | 93.7 | nodulin MtN21 family protein                                 | gbpln | Arabidopsis lyrata   | AT4G01440.1   Symbols:   nodulin MtN21 /EamA-like transporter family protein   chr4:596531-598512 FORWARD LENGTH=365                                                                                                                                                                                                                                                                                                                                                                                                                             | 363  | 365  | 0         | 100.6 | 88.7 | 93.9 |
| Rsa1.0_00435.1.g13794.t1 | #                                                                                                                                                                                                                                                                                                                                                                                                                                                                                                                                                                | #    | #    | #         | #     | #    | #    | -                                                            | ----  | ----                 | #                                                                                                                                                                                                                                                                                                                                                                                                                                                                                                                                                | #    | #    | #         | #     | #    |      |
| Rsa1.0_00435.1.g13795.t1 | ref NP_192050.1  late embryogenesis abundant hydroxyproline-rich glycoprotein [Arabidopsis thaliana]  g 7267638 emb CAB80950.1  putative hypersensitive response protein [Arabidopsis thaliana]  g 2155824 gb AAM63942.1  putative hypersensitive response protein [Arabidopsis thaliana]  g 26451865 db BAC43025.1  putative hypersensitive response protein [Arabidopsis thaliana]  g 30017263 gb AAP12865.1  At4g01410 [Arabidopsis thaliana]  g 332656622 gb AEE82022.1  late embryogenesis abundant hydroxyproline-rich glycoprotein [Arabidopsis thaliana] | 230  | 227  | 2.00E-98  | 98.7  | 87.8 | 93.0 | late embryogenesis abundant hydroxyproline-rich glycoprotein | gbpln | Arabidopsis thaliana | AT4G01410.1   Symbols:   Late embryogenesis abundant (LEA) hydroxyproline-rich glycoprotein family   chr4:578308-578991 FORWARD LENGTH=227                                                                                                                                                                                                                                                                                                                                                                                                       | 230  | 227  | 1.00E-101 | 98.7  | 87.8 | 93.0 |
| Rsa1.0_00435.1.g13796.t1 | gb ABD65000.1  hypothetical protein 26.t00020 [Brassica oleracea]                                                                                                                                                                                                                                                                                                                                                                                                                                                                                                | 372  | 302  | 2.00E-83  | 81.2  | 46.0 | 56.5 | hypothetical protein 26.t00020                               | gbpln | Brassica oleracea    | AT3G47680.1   Symbols:   DNA binding   chr3:17577483-17578391 REVERSE LENGTH=302                                                                                                                                                                                                                                                                                                                                                                                                                                                                 | 372  | 302  | 3.00E-55  | 81.2  | 37.1 | 50.5 |

|                          |                                                                                                                                                                                                                                                                                                                                                                                                                                                                                                                                                                                                                                                                                                                                                                                                                                                                                                                                                                                                                                                                                                                                                                                                                                                                                                                                                       |      |      |           |       |      |      |                                                         |       |                      |                                                                                                                                                                                                                                                                                                                                                  |      |      |           |       |      |      |
|--------------------------|-------------------------------------------------------------------------------------------------------------------------------------------------------------------------------------------------------------------------------------------------------------------------------------------------------------------------------------------------------------------------------------------------------------------------------------------------------------------------------------------------------------------------------------------------------------------------------------------------------------------------------------------------------------------------------------------------------------------------------------------------------------------------------------------------------------------------------------------------------------------------------------------------------------------------------------------------------------------------------------------------------------------------------------------------------------------------------------------------------------------------------------------------------------------------------------------------------------------------------------------------------------------------------------------------------------------------------------------------------|------|------|-----------|-------|------|------|---------------------------------------------------------|-------|----------------------|--------------------------------------------------------------------------------------------------------------------------------------------------------------------------------------------------------------------------------------------------------------------------------------------------------------------------------------------------|------|------|-----------|-------|------|------|
| Rsa1.0_00435.1.g13797.t1 | gb ABD64939.1  hypothetical protein 24.t00017 [Brassica oleracea]                                                                                                                                                                                                                                                                                                                                                                                                                                                                                                                                                                                                                                                                                                                                                                                                                                                                                                                                                                                                                                                                                                                                                                                                                                                                                     | 405  | 442  | 1.00E-176 | 109.1 | 77.3 | 87.2 | hypothetical protein 24.t00017                          | gbpln | Brassica oleracea    | AT2G13770.1   Symbols:   CONTAINS InterPro DOMAIN/s: Putative harbinger transposase-derived nuclease (InterPro:IPR006912); Has 451 Blast hits to 352 proteins in 33 species: Archae - 0; Bacteria - 0; Metazoa - 28; Fungi - 8; Plants - 388; Viruses - 0; Other Eukaryotes - 27 (source: NCBI BLink).   chr2:5736603-5737847 FORWARD LENGTH=343 | 405  | 343  | 8.00E-52  | 84.7  | 30.6 | 40.2 |
| Rsa1.0_00435.1.g13798.t1 | #                                                                                                                                                                                                                                                                                                                                                                                                                                                                                                                                                                                                                                                                                                                                                                                                                                                                                                                                                                                                                                                                                                                                                                                                                                                                                                                                                     | #    | #    | #         | #     | #    | #    | -                                                       | ----  | ----                 | #                                                                                                                                                                                                                                                                                                                                                | #    | #    | #         | #     | #    |      |
| Rsa1.0_00435.1.g13799.t1 | ref XP_002875014.1  hypothetical protein ARALYDRAFT_490488 [Arabidopsis lyrata subsp. lyrata] gi 297320851 gb EFH51273.1  hypothetical protein ARALYDRAFT_490488 [Arabidopsis lyrata subsp. lyrata]                                                                                                                                                                                                                                                                                                                                                                                                                                                                                                                                                                                                                                                                                                                                                                                                                                                                                                                                                                                                                                                                                                                                                   | 287  | 298  | 1.00E-108 | 103.8 | 67.9 | 77.7 | hypothetical protein ARALYDRAFT_490488                  | gbpln | Arabidopsis lyrata   | AT4G00780.1   Symbols:   TRAF-like family protein   chr4:334779-336120 FORWARD LENGTH=299                                                                                                                                                                                                                                                        | 287  | 299  | 1.00E-108 | 104.2 | 67.6 | 76.7 |
| Rsa1.0_00435.1.g13800.t1 | ref NP_567189.6  transducin family protein / WD-40 repeat family protein [Arabidopsis thaliana] gi 332656536 gb AE81936.1  transducin family protein / WD-40 repeat family protein [Arabidopsis thaliana]                                                                                                                                                                                                                                                                                                                                                                                                                                                                                                                                                                                                                                                                                                                                                                                                                                                                                                                                                                                                                                                                                                                                             | 1892 | 1913 | 0         | 101.1 | 82.4 | 88.3 | transducin family protein / WD-40 repeat family protein | gbpln | Arabidopsis thaliana | AT4G00800.1   Symbols:   transducin family protein / WD-40 repeat family protein   chr4:337114-345581 REVERSE LENGTH=1913                                                                                                                                                                                                                        | 1892 | 1913 | 0         | 101.1 | 82.4 | 88.3 |
| Rsa1.0_00435.1.g13801.t1 | ref NP_567190.1  60S acidic ribosomal protein P1-2 [Arabidopsis thaliana] gi 30678744 ref NP_849278.1  60S acidic ribosomal protein P1-2 [Arabidopsis thaliana] gi 41019478 sp O23095.2 RLA12.ARATH RecName: Full=60S acidic ribosomal protein P1-2 gi 13605597 gb AAK32792.1 AF361624_1 AT4g00810/A.TM018A10.9 [Arabidopsis thaliana] gi 15777871 gb AAL05896.1  AT4g00810/A.TM018A10.9 [Arabidopsis thaliana] gi 21554797 gb AAM63694.1  acidic ribosomal protein p1 [Arabidopsis thaliana] gi 222423235 dbj BAH19594.1  AT4G00810 [Arabidopsis thaliana] gi 332656537 gb AEE81937.1  60S acidic ribosomal protein P1-2 [Arabidopsis thaliana] gi 332656538 gb AEE81938.1  60S acidic ribosomal protein P1-2 [Arabidopsis thaliana] ref NP_567192.1  RNA recognition motif-containing protein [Arabidopsis thaliana] gi 79324963 ref NP_001031566.1  RNA recognition motif-containing protein [Arabidopsis thaliana] gi 13605916 gb AAK32943.1 AF367357_1 AT4g00830/A.TM018A10.14 [Arabidopsis thaliana] gi 21360555 gb AAM47474.1  AT4g00830/A.TM018A10.14 [Arabidopsis thaliana] gi 110743368 dbj BAE99571.1  hypothetical protein [Arabidopsis thaliana] gi 332656540 gb AEE81940.1  RNA recognition motif-containing protein [Arabidopsis thaliana] gi 332656541 gb AEE81941.1  RNA recognition motif-containing protein [Arabidopsis thaliana] | 113  | 113  | 5.00E-55  | 100.0 | 99.1 | 99.1 | 60S acidic ribosomal protein P1-2                       | gbpln | Arabidopsis thaliana | AT4G00810.2   Symbols:   60S acidic ribosomal protein family   chr4:346179-346957 REVERSE LENGTH=113                                                                                                                                                                                                                                             | 113  | 113  | 8.00E-58  | 100.0 | 99.1 | 99.1 |
| Rsa1.0_00435.1.g13802.t1 | ref NP_567192.1  RNA recognition motif-containing protein [Arabidopsis thaliana] gi 79324963 ref NP_001031566.1  RNA recognition motif-containing protein [Arabidopsis thaliana] gi 13605916 gb AAK32943.1 AF367357_1 AT4g00830/A.TM018A10.14 [Arabidopsis thaliana] gi 21360555 gb AAM47474.1  AT4g00830/A.TM018A10.14 [Arabidopsis thaliana] gi 110743368 dbj BAE99571.1  hypothetical protein [Arabidopsis thaliana] gi 332656540 gb AEE81940.1  RNA recognition motif-containing protein [Arabidopsis thaliana] gi 332656541 gb AEE81941.1  RNA recognition motif-containing protein [Arabidopsis thaliana]                                                                                                                                                                                                                                                                                                                                                                                                                                                                                                                                                                                                                                                                                                                                       | 510  | 495  | 0         | 97.1  | 87.1 | 91.8 | RNA recognition motif-containing protein                | gbpln | Arabidopsis thaliana | AT4G00830.2   Symbols:   RNA-binding (RRM/RBD/RNP motifs) family protein   chr4:352782-354965 FORWARD LENGTH=495                                                                                                                                                                                                                                 | 510  | 495  | 0         | 97.1  | 87.1 | 91.8 |

|                          |                                                                                                                                                                                                                                                                                                                                                                                                                                                                                                                                                                                                                                                                                                           |     |     |           |       |      |      |                                               |       |                      |                                                                                                                              |     |     |           |       |      |      |
|--------------------------|-----------------------------------------------------------------------------------------------------------------------------------------------------------------------------------------------------------------------------------------------------------------------------------------------------------------------------------------------------------------------------------------------------------------------------------------------------------------------------------------------------------------------------------------------------------------------------------------------------------------------------------------------------------------------------------------------------------|-----|-----|-----------|-------|------|------|-----------------------------------------------|-------|----------------------|------------------------------------------------------------------------------------------------------------------------------|-----|-----|-----------|-------|------|------|
| Rsa1.0_00435.1.g13803.t1 | ref[NP_567193.2] putative S-acyltransferase [Arabidopsis thaliana] gi 75222970 sp Q5M757.1 ZDH15_ARAT H RecName: Full=Probable S-acyltransferase At4g00840; AltName: Full=Probable palmitoyltransferase At4g00840; AltName: Full=Zinc finger DHHC domain-containing protein At4g00840 gi 56461762 gb AAV91337.1  At4g00840 [Arabidopsis thaliana] gi 57222210 gb AAW39012.1  At4g00840 [Arabidopsis thaliana] gi 110738461 dbj BAF01156.1  hypothetical protein [Arabidopsis thaliana] gi 332656544 gb AEE81944.1  putative S-acyltransferase [Arabidopsis thaliana]                                                                                                                                      | 287 | 291 | 1.00E-141 | 101.4 | 89.5 | 94.8 | putative S-acyltransferase                    | gbpln | Arabidopsis thaliana | AT4G00840.1   Symbols:   DHHC-type zinc finger family protein   chr4:355483-357105 REVERSE LENGTH=291                        | 287 | 291 | 1.00E-144 | 101.4 | 89.5 | 94.8 |
| Rsa1.0_00435.1.g13804.t1 | ref[XP_002871206.1] EMB2735 [Arabidopsis lyrata subsp. lyrata] gi 297317043 gb EFH47465.1  EMB2735 [Arabidopsis lyrata subsp. lyrata] ref[NP_192535.1] DNA-directed RNA polymerase, subunit M [Arabidopsis thaliana] gi 4309697 gb AAD15481.1  putative DNA-directed RNA polymerase subunit [Arabidopsis thaliana] gi 7267434 emb CAB77946.1  putative DNA-directed RNA polymerase subunit [Arabidopsis thaliana] gi 18253033 gb AAL62443.1  putative DNA-directed RNA polymerase subunit [Arabidopsis thaliana] gi 23198220 gb AAN15637.1  putative DNA-directed RNA polymerase subunit [Arabidopsis thaliana] gi 332657185 gb AEE82585.1  DNA-directed RNA polymerase, subunit M [Arabidopsis thaliana] | 166 | 162 | 5.00E-38  | 97.6  | 50.0 | 54.8 | EMB2735                                       | gbpln | Arabidopsis lyrata   | AT5G06240.1   Symbols: emb2735   embryo defective 2735   chr5:1888380-1889512 FORWARD LENGTH=162                             | 166 | 162 | 4.00E-39  | 97.6  | 48.2 | 53.6 |
| Rsa1.0_00435.1.g13805.t1 | ref[NP_567196.1] SAUR-like auxin-responsive protein [Arabidopsis thaliana] gi 2252854 gb AAB62852.1  similar to auxin-induced protein [Arabidopsis thaliana] gi 7267427 emb CAB80897.1  AT4g00880 [Arabidopsis thaliana] gi 17380988 gb AAL36306.1  unknown protein [Arabidopsis thaliana] gi 20466031 gb AAM20350.1  unknown protein [Arabidopsis thaliana] gi 332656549 gb AEE81949.1  SAUR-like auxin-responsive protein [Arabidopsis thaliana]                                                                                                                                                                                                                                                        | 103 | 106 | 1.00E-45  | 102.9 | 87.4 | 94.2 | DNA-directed RNA polymerase, subunit M        | gbpln | Arabidopsis thaliana | AT4G07950.1   Symbols:   DNA-directed RNA polymerase, subunit M, archaeal   chr4:4798910-4799510 FORWARD LENGTH=106          | 103 | 106 | 2.00E-48  | 102.9 | 87.4 | 94.2 |
| Rsa1.0_00435.1.g13806.t1 | ref[NP_567204.3] cysteine-rich receptor-like protein kinase 41 [Arabidopsis thaliana] gi 152013451 sp O23081.2 CRK41_ARAT H RecName: Full=Cysteine-rich receptor-like protein kinase 41; Short=Cysteine-rich RLK41; Flags: Precursor gi 332656562 gb AEE81962.1  cysteine-rich receptor-like protein kinase 41 [Arabidopsis thaliana]                                                                                                                                                                                                                                                                                                                                                                     | 133 | 122 | 2.00E-49  | 91.7  | 82.0 | 88.7 | SAUR-like auxin-responsive protein            | gbpln | Arabidopsis thaliana | AT4G00880.1   Symbols:   SAUR-like auxin-responsive protein family   chr4:366692-367060 REVERSE LENGTH=122                   | 133 | 122 | 5.00E-52  | 91.7  | 82.0 | 88.7 |
| Rsa1.0_00435.1.g13807.t1 | ref[NP_567205.2] zinc knuckle (CCHC-type) family protein [Arabidopsis thaliana] gi 26451026 dbj BAC42619.1  unknown protein [Arabidopsis thaliana] gi 29028884 gb AAO64821.1  At4g00980 [Arabidopsis thaliana] gi 332656563 gb AEE81963.1  zinc knuckle (CCHC-type) family protein [Arabidopsis thaliana]                                                                                                                                                                                                                                                                                                                                                                                                 | 250 | 665 | 1.00E-117 | 266.0 | 84.4 | 91.6 | cysteine-rich receptor-like protein kinase 41 | gbpln | Arabidopsis thaliana | AT4G00970.1   Symbols: CRK41   cysteine-rich RLK (RECEPTOR-like protein kinase) 41   chr4:418437-421694 FORWARD LENGTH=665   | 250 | 665 | 1.00E-120 | 266.0 | 84.4 | 91.6 |
| Rsa1.0_00435.1.g13808.t1 | ref[EOA19940.1] hypothetical protein CARUB_v10000192mg [Capsella rubella]                                                                                                                                                                                                                                                                                                                                                                                                                                                                                                                                                                                                                                 | 508 | 488 | 0         | 96.1  | 68.1 | 75.2 | zinc knuckle (CCHC-type) family protein       | gbpln | Arabidopsis thaliana | AT4G00980.1   Symbols:   zinc knuckle (CCHC-type) family protein   chr4:422732-424580 REVERSE LENGTH=488                     | 508 | 488 | 0         | 96.1  | 68.1 | 75.2 |
| Rsa1.0_00435.1.g13809.t1 | ref[EOA19940.1] hypothetical protein CARUB_v10000192mg [Capsella rubella]                                                                                                                                                                                                                                                                                                                                                                                                                                                                                                                                                                                                                                 | 888 | 876 | 0         | 98.6  | 62.0 | 71.5 | hypothetical protein CARUB_v10000192mg        | gbpln | Capsella rubella     | AT4G00990.1   Symbols:   Transcription factor jumoni (jmc) domain-containing protein   chr4:427035-431535 FORWARD LENGTH=840 | 888 | 840 | 0         | 94.6  | 47.9 | 56.4 |
| Rsa1.0_00435.1.g13810.t2 | ref[EOA19940.1] hypothetical protein CARUB_v10000192mg [Capsella rubella]                                                                                                                                                                                                                                                                                                                                                                                                                                                                                                                                                                                                                                 | 894 | 876 | 0         | 98.0  | 63.2 | 72.6 | hypothetical protein CARUB_v10000192mg        | gbpln | Capsella rubella     | AT4G00990.1   Symbols:   Transcription factor jumoni (jmc) domain-containing protein   chr4:427035-431535 FORWARD LENGTH=840 | 894 | 840 | 0         | 94.0  | 61.7 | 72.6 |
| Rsa1.0_00435.1.g13811.t1 | #                                                                                                                                                                                                                                                                                                                                                                                                                                                                                                                                                                                                                                                                                                         | #   | #   | #         | #     | #    | #    | -                                             | ----  | ----                 | #                                                                                                                            | #   | #   | #         | #     | #    |      |

|                           |                                                                                                                                                                                                                                           |      |      |           |       |      |      |                                                         |       |                      |                                                                                                                                 |      |      |           |       |      |      |
|---------------------------|-------------------------------------------------------------------------------------------------------------------------------------------------------------------------------------------------------------------------------------------|------|------|-----------|-------|------|------|---------------------------------------------------------|-------|----------------------|---------------------------------------------------------------------------------------------------------------------------------|------|------|-----------|-------|------|------|
| Rsa1.0_00435.1.g13812.t1  | ref[XP_002874992.1] zinc finger family protein [Arabidopsis lyrata subsp. lyrata] gi 297320829 gb EFH51251.1  zinc finger family protein [Arabidopsis lyrata subsp. lyrata]                                                               | 523  | 502  | 0         | 96.0  | 71.7 | 81.1 | zinc finger family protein                              | gbpln | Arabidopsis lyrata   | AT4G01270.1   Symbols:   RING/U-box superfamily protein   chr4:532351-534891 FORWARD LENGTH=506                                 | 523  | 506  | 0         | 96.7  | 70.6 | 79.9 |
| Rsa1.0_00435.1.g13813.t1  | gb EOA29347.1  hypothetical protein CARUB_v10025632mg [Capsella rubella]                                                                                                                                                                  | 368  | 366  | 1.00E-97  | 99.5  | 51.1 | 62.5 | hypothetical protein CARUB_v10025632mg                  | gbpln | Capsella rubella     | AT2G44700.1   Symbols:   Galactose oxidase/kelch repeat superfamily protein   chr2:18431015-18432121 FORWARD LENGTH=368         | 368  | 368  | 7.00E-93  | 100.0 | 50.5 | 63.9 |
| Rsa1.0_00436.1.g13814.t1  | emb CAA55893.1  putative imbibition protein [Brassica oleracea]                                                                                                                                                                           | 766  | 765  | 0         | 99.9  | 95.8 | 97.5 | putative imbibition protein                             | gbpln | Brassica oleracea    | AT3G57520.1   Symbols: AtSIP2, SIP2   seed imbibition 2   chr3:21288982-21292694 REVERSE LENGTH=773                             | 766  | 773  | 0         | 100.9 | 92.2 | 96.6 |
| Rsa1.0_00436.1.g13815.t1  | gb AAZ30035.1  putative calcium-dependent protein kinase [Isatis tinctoria] gi 94958384 gb ABF47341.1  calcium-dependent protein kinase [Isatis tinctoria] gi 95020533 gb ABF50790.1  calcium-dependent protein kinase [Isatis tinctoria] | 424  | 537  | 0         | 126.7 | 95.3 | 97.9 | putative calcium-dependent protein kinase               | gbpln | Isatis tinctoria     | AT3G57530.1   Symbols: CPK32, ATPCK32, CDPK32   calcium-dependent protein kinase 32   chr3:21296898-21299351 REVERSE LENGTH=538 | 424  | 538  | 0         | 126.9 | 94.8 | 97.4 |
| Rsa1.0_00436.1.g13816.t1  | ref[XP_002875407.1] hypothetical protein ARALYDRAFT_484576 [Arabidopsis lyrata subsp. lyrata] gi 297321245 gb EFH51666.1  hypothetical protein ARALYDRAFT_484576 [Arabidopsis lyrata subsp. lyrata]                                       | 1139 | 661  | 6.00E-39  | 58.0  | 9.7  | 13.6 | hypothetical protein ARALYDRAFT_484576                  | gbpln | Arabidopsis lyrata   | AT3G27860.1   Symbols:   Tudor/PWPF/MBT superfamily protein   chr3:10326128-10328086 FORWARD LENGTH=652                         | 1139 | 652  | 3.00E-36  | 57.2  | 10.6 | 14.2 |
| Rsa1.0_00436.1.g13817.t1  | ref[XP_002878161.1] hypothetical protein ARALYDRAFT_486202 [Arabidopsis lyrata subsp. lyrata] gi 297323999 gb EFH54420.1  hypothetical protein ARALYDRAFT_486202 [Arabidopsis lyrata subsp. lyrata]                                       | 299  | 296  | 1.00E-124 | 99.0  | 81.9 | 88.3 | hypothetical protein ARALYDRAFT_486202                  | gbpln | Arabidopsis lyrata   | AT3G57540.1   Symbols:   Remorin family protein   chr3:21301623-21302924 REVERSE LENGTH=296                                     | 299  | 296  | 1.00E-126 | 99.0  | 79.6 | 86.3 |
| Rsa1.0_00436.1.g13818.t1  | gb EOA24182.1  hypothetical protein CARUB_v10017419mg [Capsella rubella]                                                                                                                                                                  | 413  | 389  | 0         | 94.2  | 87.2 | 91.3 | hypothetical protein CARUB_v10017419mg                  | gbpln | Capsella rubella     | AT3G57550.1   Symbols: AGK2, GK-2   guanylate kinase   chr3:21307269-21309193 FORWARD LENGTH=389                                | 413  | 389  | 0         | 94.2  | 86.4 | 91.0 |
| Rsa1.0_00436.1.g13819.t17 | gb EOA25774.1  hypothetical protein CARUB_v10019137mg [Capsella rubella]                                                                                                                                                                  | 996  | 347  | 4.00E-78  | 34.8  | 16.1 | 16.5 | hypothetical protein CARUB_v10019137mg                  | gbpln | Capsella rubella     | AT3G57560.1   Symbols: NAGK   N-acetyl-L-glutamate kinase   chr3:21311164-21312207 REVERSE LENGTH=347                           | 996  | 347  | 7.00E-80  | 34.8  | 15.9 | 16.5 |
| Rsa1.0_00436.1.g13820.t19 | dbj BAB01845.1  non-LTR retroelement reverse transcriptase-like protein [Arabidopsis thaliana]                                                                                                                                            | 1304 | 893  | 7.00E-83  | 68.5  | 17.3 | 25.8 | non-LTR retroelement reverse transcriptase-like protein | gbpln | Arabidopsis thaliana | AT1G43760.1   Symbols:   DNase I-like superfamily protein   chr1:16528880-16531065 REVERSE LENGTH=626                           | 1304 | 626  | 6.00E-44  | 48.0  | 10.0 | 16.7 |
| Rsa1.0_00436.1.g13821.t1  | emb CAB10321.1  UFD1 like protein [Arabidopsis thaliana] gi 7268289 emb CAB78584.1  UFD1 like protein [Arabidopsis thaliana]                                                                                                              | 156  | 778  | 5.00E-14  | 498.7 | 25.6 | 32.7 | UFD1 like protein                                       | gbpln | Arabidopsis thaliana | AT4G15420.1   Symbols:   Ubiquitin fusion degradation UFD1 family protein   chr4:8823822-8825949 FORWARD LENGTH=561             | 156  | 561  | 2.00E-16  | 359.6 | 26.9 | 36.5 |
| Rsa1.0_00436.1.g13822.t25 | ref NP_191316.5  armadillo/beta-catenin-like repeat-containing protein [Arabidopsis thaliana] gi 332646152 gb AEE79673.1  armadillo/beta-catenin-like repeat-containing protein [Arabidopsis thaliana]                                    | 1108 | 1092 | 0         | 98.6  | 81.4 | 87.3 | armadillo/beta-catenin-like repeat-containing protein   | gbpln | Arabidopsis thaliana | AT3G57570.1   Symbols:   ARM repeat superfamily protein   chr3:21312598-21320105 FORWARD LENGTH=1092                            | 1108 | 1092 | 0         | 98.6  | 81.4 | 87.3 |
| Rsa1.0_00436.1.g13823.t1  | ref[XP_002876426.1] hypothetical protein ARALYDRAFT_486209 [Arabidopsis lyrata subsp. lyrata] gi 297322264 gb EFH52685.1  hypothetical protein ARALYDRAFT_486209 [Arabidopsis lyrata subsp. lyrata]                                       | 275  | 277  | 1.00E-106 | 100.7 | 72.7 | 83.6 | hypothetical protein ARALYDRAFT_486209                  | gbpln | Arabidopsis lyrata   | AT3G57600.1   Symbols:   Integrase-type DNA-binding superfamily protein   chr3:21332841-21333674 FORWARD LENGTH=277             | 275  | 277  | 1.00E-107 | 100.7 | 71.6 | 83.6 |

|                          |                                                                                                                                                                                                                                                                                                                                                                                                                                                                                                                                                                                                                                                        |     |     |           |       |      |      |                                           |       |                      |                                                                                                                                                                                                                                                                                                                                             |     |     |           |       |      |      |
|--------------------------|--------------------------------------------------------------------------------------------------------------------------------------------------------------------------------------------------------------------------------------------------------------------------------------------------------------------------------------------------------------------------------------------------------------------------------------------------------------------------------------------------------------------------------------------------------------------------------------------------------------------------------------------------------|-----|-----|-----------|-------|------|------|-------------------------------------------|-------|----------------------|---------------------------------------------------------------------------------------------------------------------------------------------------------------------------------------------------------------------------------------------------------------------------------------------------------------------------------------------|-----|-----|-----------|-------|------|------|
| Rsa1.0_00436.1.g13824.t1 | ref NP_191320.1  adenylosuccinate synthetase [Arabidopsis thaliana] gi 2500026 sp Q96529.1 PURA_ARATH RecName: Full=Adenylosuccinate synthetase, chloroplastic; Short=AMPSase; Short=AdSS; AltName: Full=IMP--aspartate ligase; Flags: Precursor gi 1616657 gb AAB16828.1  adenylosuccinate synthetase [Arabidopsis thaliana] gi 4678286 emb CA841194.1  adenylosuccinate synthetase [Arabidopsis thaliana] gi 15451052 gb AAK96797.1  adenylosuccinate synthetase [Arabidopsis thaliana] gi 20148265 gb AAM10023.1  adenylosuccinate synthetase [Arabidopsis thaliana] gi 332646157 gb AEE79678.1  adenylosuccinate synthetase [Arabidopsis thaliana] | 491 | 490 | 0         | 99.8  | 89.6 | 93.9 | adenylosuccinate synthetase               | gbpln | Arabidopsis thaliana | AT3G57610.1   Symbols: ADSS   adenylosuccinate synthase   chr3:21334519-21336603 REVERSE LENGTH=490                                                                                                                                                                                                                                         | 491 | 490 | 0         | 99.8  | 89.6 | 93.9 |
| Rsa1.0_00436.1.g13825.t1 | ref XP_002878165.1  exostosin family protein [Arabidopsis lyrata subsp. lyrata] gi 297324000 gb EFH54424.1  exostosin family protein [Arabidopsis lyrata subsp. lyrata]                                                                                                                                                                                                                                                                                                                                                                                                                                                                                | 503 | 792 | 0         | 157.5 | 76.1 | 82.1 | exostosin family protein                  | gbpln | Arabidopsis lyrata   | AT3G57630.1   Symbols:   exostosin family protein   chr3:21339543-21343080 REVERSE LENGTH=793                                                                                                                                                                                                                                               | 503 | 793 | 0         | 157.7 | 74.6 | 81.3 |
| Rsa1.0_00437.1.g13826.t2 | gb EOA39644.1  hypothetical protein CARUB_v10008281mg [Capsella rubella] gi 482575458 gb EOA39645.1  hypothetical protein CARUB_v10008281mg [Capsella rubella]                                                                                                                                                                                                                                                                                                                                                                                                                                                                                         | 923 | 867 | 0         | 93.9  | 84.5 | 88.4 | hypothetical protein CARUB_v10008281mg    | gbpln | Capsella rubella     | AT1G23870.1   Symbols: ATTPS9, TPS9   trehalose-phosphatase/synthase 9   chr1:8432695-8435506 FORWARD LENGTH=867                                                                                                                                                                                                                            | 923 | 867 | 0         | 93.9  | 83.7 | 87.8 |
| Rsa1.0_00437.1.g13827.t1 | ref XP_002890597.1  hypothetical protein ARALYDRAFT_889925 [Arabidopsis lyrata subsp. lyrata] gi 297336439 gb EFH66856.1  hypothetical protein ARALYDRAFT_889925 [Arabidopsis lyrata subsp. lyrata]                                                                                                                                                                                                                                                                                                                                                                                                                                                    | 319 | 378 | 1.00E-161 | 118.5 | 90.6 | 94.0 | hypothetical protein ARALYDRAFT_889925    | gbpln | Arabidopsis lyrata   | AT1G23820.1   Symbols: SPDS1   spermidine synthase 1   chr1:8420278-8422724 FORWARD LENGTH=378                                                                                                                                                                                                                                              | 319 | 378 | 1.00E-163 | 118.5 | 90.3 | 93.4 |
| Rsa1.0_00437.1.g13828.t1 | gb AAG51228.1 AC035249_3 Tam3-like transposon protein; 93317-95488 [Arabidopsis thaliana] gi 12323055 gb AAG51515.1 AC068324_3 hAT-element transposase, putative [Arabidopsis thaliana]                                                                                                                                                                                                                                                                                                                                                                                                                                                                | 731 | 723 | 0         | 98.9  | 57.7 | 73.1 | Tam3-like transposon protein; 93317-95488 | gbpln | Arabidopsis thaliana | AT3G42170.1   Symbols:   BED zinc finger hAT family dimerisation domain   chr3:14321839-14323928 FORWARD LENGTH=696                                                                                                                                                                                                                         | 731 | 696 | 2.00E-52  | 95.2  | 24.1 | 45.1 |
| Rsa1.0_00437.1.g13829.t1 | ref XP_002893307.1  hypothetical protein ARALYDRAFT_472641 [Arabidopsis lyrata subsp. lyrata] gi 297339149 gb EFH69566.1  hypothetical protein ARALYDRAFT_472641 [Arabidopsis lyrata subsp. lyrata]                                                                                                                                                                                                                                                                                                                                                                                                                                                    | 533 | 534 | 0         | 100.2 | 90.4 | 95.3 | hypothetical protein ARALYDRAFT_472641    | gbpln | Arabidopsis lyrata   | AT1G23800.1   Symbols: ALDH2B7, ALDH2B   aldehyde dehydrogenase 2B7   chr1:8412238-8414804 REVERSE LENGTH=534                                                                                                                                                                                                                               | 533 | 534 | 0         | 100.2 | 91.0 | 95.5 |
| Rsa1.0_00437.1.g13830.t1 | gb EOA40104.1  hypothetical protein CARUB_v10008797mg [Capsella rubella]                                                                                                                                                                                                                                                                                                                                                                                                                                                                                                                                                                               | 538 | 538 | 0         | 100.0 | 84.6 | 90.5 | hypothetical protein CARUB_v10008797mg    | gbpln | Capsella rubella     | AT1G23790.1   Symbols:   Plant protein of unknown function (DUF936)   chr1:8410099-8411917 FORWARD LENGTH=518                                                                                                                                                                                                                               | 538 | 518 | 0         | 96.3  | 81.6 | 87.2 |
| Rsa1.0_00437.1.g13831.t1 | gb EOA37583.1  hypothetical protein CARUB_v10011933mg [Capsella rubella]                                                                                                                                                                                                                                                                                                                                                                                                                                                                                                                                                                               | 293 | 481 | 5.00E-57  | 164.2 | 52.2 | 62.8 | hypothetical protein CARUB_v10011933mg    | gbpln | Capsella rubella     | AT1G23770.1   Symbols:   F-box family protein   chr1:8405214-8406266 REVERSE LENGTH=350                                                                                                                                                                                                                                                     | 293 | 350 | 1.00E-48  | 119.5 | 44.0 | 50.5 |
| Rsa1.0_00437.1.g13832.t1 | # # # # # # # # -                                                                                                                                                                                                                                                                                                                                                                                                                                                                                                                                                                                                                                      | #   | #   | #         | #     | #    | #    | -                                         | ----  | ----                 | AT1G70430.1   Symbols:   Protein kinase superfamily protein   chr1:26545589-26548756 FORWARD LENGTH=594                                                                                                                                                                                                                                     | 143 | 594 | 9.00E-11  | 415.4 | 26.6 | 40.6 |
| Rsa1.0_00437.1.g13833.t1 | gb EOA34992.1  hypothetical protein CARUB_v10020084mg [Capsella rubella]                                                                                                                                                                                                                                                                                                                                                                                                                                                                                                                                                                               | 141 | 556 | 2.00E-11  | 394.3 | 35.5 | 53.9 | hypothetical protein CARUB_v10020084mg    | gbpln | Capsella rubella     | AT1G70430.1   Symbols:   Protein kinase superfamily protein   chr1:26545589-26548756 FORWARD LENGTH=594                                                                                                                                                                                                                                     | 141 | 594 | 1.00E-12  | 421.3 | 31.9 | 42.6 |
| Rsa1.0_00437.1.g13834.t1 | gb AAD14492.1  Hypothetical protein [Arabidopsis thaliana]                                                                                                                                                                                                                                                                                                                                                                                                                                                                                                                                                                                             | 155 | 240 | 7.00E-27  | 154.8 | 43.9 | 51.0 | Hypothetical protein                      | gbpln | Arabidopsis thaliana | AT3G32050.1   Symbols:   unknown protein; BEST Arabidopsis thaliana protein match is: unknown protein (TAIR:AT3G14780.1); Has 22 Blast hits to 22 proteins in 2 species: Archae - 0; Bacteria - 0; Metazoa - 0; Fungi - 0; Plants - 22; Viruses - 0; Other Eukaryotes - 0 (source: NCBI BLINK).   chr3:13067626-13068582 REVERSE LENGTH=175 | 155 | 175 | 2.00E-11  | 112.9 | 18.1 | 21.9 |

|                          |                                                                                                                                                                                                                                                                                                                                                                                                                                         |      |      |           |       |      |       |                                                 |       |                      |                                                                                                                                                                                                                                                                                                                                            |      |      |           |       |      |      |
|--------------------------|-----------------------------------------------------------------------------------------------------------------------------------------------------------------------------------------------------------------------------------------------------------------------------------------------------------------------------------------------------------------------------------------------------------------------------------------|------|------|-----------|-------|------|-------|-------------------------------------------------|-------|----------------------|--------------------------------------------------------------------------------------------------------------------------------------------------------------------------------------------------------------------------------------------------------------------------------------------------------------------------------------------|------|------|-----------|-------|------|------|
| Rsa1.0_00437.1.g13835.t1 | refNP_173771.1  uncharacterized protein [Arabidopsis thaliana] gi4056441 gb AAC98014.1  Similar to OBP32pep protein gb U37698 from Arabidopsis thaliana [Arabidopsis thaliana] gi45476571 gb AAS65951.1  At1g23580 [Arabidopsis thaliana] gi46402436 gb AAS92320.1  At1g23580 [Arabidopsis thaliana] gi332192286 gb AEE30407.1  uncharacterized protein AT1G23580 [Arabidopsis thaliana]                                                | 288  | 285  | 2.00E-84  | 99.0  | 57.6 | 72.9  | uncharacterized protein                         | gbpln | Arabidopsis thaliana | AT1G23580.1   Symbols:   Domain of unknown function DUF220   chr1:8357491-8356706 REVERSE LENGTH=285                                                                                                                                                                                                                                       | 288  | 285  | 4.00E-87  | 99.0  | 57.6 | 72.9 |
| Rsa1.0_00437.1.g13836.t2 | refNP_173771.1  uncharacterized protein [Arabidopsis thaliana] gi4056441 gb AAC98014.1  Similar to OBP32pep protein gb U37698 from Arabidopsis thaliana [Arabidopsis thaliana] gi45476571 gb AAS65951.1  At1g23580 [Arabidopsis thaliana] gi46402436 gb AAS92320.1  At1g23580 [Arabidopsis thaliana] gi332192286 gb AEE30407.1  uncharacterized protein AT1G23580 [Arabidopsis thaliana]                                                | 278  | 285  | 4.00E-81  | 102.5 | 55.0 | 72.7  | uncharacterized protein                         | gbpln | Arabidopsis thaliana | AT1G23580.1   Symbols:   Domain of unknown function DUF220   chr1:8357491-8356706 REVERSE LENGTH=285                                                                                                                                                                                                                                       | 278  | 285  | 1.00E-83  | 102.5 | 55.0 | 72.7 |
| Rsa1.0_00437.1.g13837.t1 | refNP_173767.1  uncharacterized protein [Arabidopsis thaliana] gi8778581 gb AAF79589.1 AC007945.9 F28C11.16 [Arabidopsis thaliana] gi4056436 gb AAC98009.1  EST gb AA650912 comes from this gene [Arabidopsis thaliana] gi34365603 gb AA065113.1  At1g23530 [Arabidopsis thaliana] gi51969024 db BAD43204.1  unknown protein [Arabidopsis thaliana] gi332192279 gb AEE30400.1  uncharacterized protein AT1G23530 [Arabidopsis thaliana] | 172  | 189  | 1.00E-63  | 109.9 | 80.8 | 87.2  | uncharacterized protein                         | gbpln | Arabidopsis thaliana | AT1G23530.1   Symbols:   unknown protein; BEST Arabidopsis thaliana protein match is: unknown protein (TAIR:AT1G07040.1); Has 38 Blast hits to 38 proteins in 12 species: Archae - 0; Bacteria - 0; Metazoa - 0; Fungi - 0; Plants - 37; Viruses - 0; Other Eukaryotes - 1 (source: NCBI BLink).   chr1:8345861-8346430 FORWARD LENGTH=189 | 172  | 189  | 4.00E-66  | 109.9 | 80.8 | 87.2 |
| Rsa1.0_00437.1.g13838.t1 | refNP_173766.1  uncharacterized protein [Arabidopsis thaliana] gi8778585 gb AAF79593.1 AC007945.13 F28C11.15 [Arabidopsis thaliana] gi4056435 gb AAC98008.1  Similar to OBP32pep protein gb U37698 from Arabidopsis thaliana [Arabidopsis thaliana] gi332192277 gb AEE30398.1  uncharacterized protein AT1G23520 [Arabidopsis thaliana]                                                                                                 | 256  | 263  | 5.00E-67  | 102.7 | 55.9 | 71.9  | uncharacterized protein                         | gbpln | Arabidopsis thaliana | AT1G23520.1   Symbols:   Domain of unknown function (DUF220)   chr1:8343571-8344675 REVERSE LENGTH=263                                                                                                                                                                                                                                     | 256  | 263  | 1.00E-69  | 102.7 | 55.9 | 71.9 |
| Rsa1.0_00437.1.g13839.t1 | gb ACD37536.1  putative ADP-ribosylation factor [Brassica napus]                                                                                                                                                                                                                                                                                                                                                                        | 181  | 181  | 1.00E-102 | 100.0 | 99.4 | 100.0 | putative ADP-ribosylation factor                | gbpln | Brassica napus       | AT3G62290.3   Symbols: ARFA1E   ADP-ribosylation factor A1E   chr3:23052287-23053545 FORWARD LENGTH=181                                                                                                                                                                                                                                    | 181  | 181  | 1.00E-104 | 100.0 | 99.4 | 99.4 |
| Rsa1.0_00437.1.g13840.t1 | gb EOA38890.1  hypothetical protein CARUB_v10011268mg [Capsella rubella]                                                                                                                                                                                                                                                                                                                                                                | 470  | 1077 | 0         | 229.1 | 83.2 | 89.4  | hypothetical protein CARUB_v10011268mg          | gbpln | Capsella rubella     | AT1G23460.1   Symbols:   Pectin lyase-like superfamily protein   chr1:8327382-8329622 FORWARD LENGTH=460                                                                                                                                                                                                                                   | 470  | 460  | 0         | 97.9  | 84.3 | 88.9 |
| Rsa1.0_00437.1.g13841.t1 | gb AAC98003.1  This gene may be continued from BAC T23E23 [Arabidopsis thaliana]                                                                                                                                                                                                                                                                                                                                                        | 72   | 278  | 5.00E-15  | 386.1 | 65.3 | 69.4  | This gene may be continued from BAC T23E23      | gbpln | Arabidopsis thaliana | AT1G23450.1   Symbols:   Tetratricopeptide repeat (TPR)-like superfamily protein   chr1:8324698-8326697 FORWARD LENGTH=666                                                                                                                                                                                                                 | 72   | 666  | 1.00E-17  | 925.0 | 65.3 | 69.4 |
| Rsa1.0_00437.1.g13842.t1 | refXP_002890583.1  predicted protein [Arabidopsis lyrata subsp. lyrata] gi297336425 gb EFH66842.1  predicted protein [Arabidopsis lyrata subsp. lyrata]                                                                                                                                                                                                                                                                                 | 218  | 217  | 1.00E-109 | 99.5  | 87.2 | 95.0  | predicted protein                               | gbpln | Arabidopsis lyrata   | AT1G23440.1   Symbols:   Peptidase C15, pyroglutamyl peptidase 1-like   chr1:8321940-8324019 FORWARD LENGTH=217                                                                                                                                                                                                                            | 218  | 217  | 1.00E-111 | 99.5  | 87.2 | 94.0 |
| Rsa1.0_00438.1.g13843.t3 | gb EOA31608.1  hypothetical protein CARUB_v10014805mg, partial [Capsella rubella]                                                                                                                                                                                                                                                                                                                                                       | 204  | 161  | 6.00E-58  | 78.9  | 59.3 | 59.8  | hypothetical protein CARUB_v10014805mg, partial | gbpln | Capsella rubella     | AT3G04400.1   Symbols: emb2171   Ribosomal protein L14p/L23e family protein   chr3:1167339-1168308 FORWARD LENGTH=140                                                                                                                                                                                                                      | 204  | 140  | 5.00E-60  | 68.6  | 59.3 | 59.8 |
| Rsa1.0_00438.1.g13844.t1 | gb EOA39245.1  hypothetical protein CARUB_v10012233mg [Capsella rubella]                                                                                                                                                                                                                                                                                                                                                                | 1029 | 1032 | 0         | 100.3 | 91.5 | 94.6  | hypothetical protein CARUB_v10012233mg          | gbpln | Capsella rubella     | AT1G04470.1   Symbols:   Protein of unknown function (DUF810)   chr1:1211177-1214591 REVERSE LENGTH=1035                                                                                                                                                                                                                                   | 1029 | 1035 | 0         | 100.6 | 89.3 | 93.1 |
| Rsa1.0_00438.1.g13845.t1 | refXP_002899506.1  hypothetical protein ARALYDRAFT.470423 [Arabidopsis lyrata subsp. lyrata] gi297335348 gb EFH65765.1  hypothetical protein ARALYDRAFT.470423 [Arabidopsis lyrata subsp. lyrata]                                                                                                                                                                                                                                       | 164  | 154  | 2.00E-33  | 93.9  | 51.2 | 61.6  | hypothetical protein ARALYDRAFT.470423          | gbpln | Arabidopsis lyrata   | AT1G04445.1   Symbols:   C2H2-like zinc finger protein   chr1:1207344-1207862 FORWARD LENGTH=172                                                                                                                                                                                                                                           | 164  | 172  | 2.00E-28  | 104.9 | 51.8 | 62.8 |
| Rsa1.0_00438.1.g13846.t1 | gb EOA36675.1  hypothetical protein CARUB_v10012017mg [Capsella rubella]                                                                                                                                                                                                                                                                                                                                                                | 461  | 468  | 0         | 101.5 | 88.3 | 93.9  | hypothetical protein CARUB_v10012017mg          | gbpln | Capsella rubella     | AT1G04440.1   Symbols: CKL13   casein kinase like 13   chr1:1202815-1205664 FORWARD LENGTH=468                                                                                                                                                                                                                                             | 461  | 468  | 0         | 101.5 | 87.4 | 93.7 |
| Rsa1.0_00438.1.g13847.t1 | #                                                                                                                                                                                                                                                                                                                                                                                                                                       | #    | #    | #         | #     | #    | #     | -                                               | ----  | ----                 | #                                                                                                                                                                                                                                                                                                                                          | #    | #    | #         | #     | #    | #    |

| Rsa1.0_00438.1.g13848.t1 | #                                                                                                                                                                                                                                                                                                                                                                                                                 | #    | #    | #         | #     | #    | #    | #                                               | -     | ----                 | ----                                                                                                                                                                                                                                                                                                                                           | #    | #    | #         | #     | #    | #    |
|--------------------------|-------------------------------------------------------------------------------------------------------------------------------------------------------------------------------------------------------------------------------------------------------------------------------------------------------------------------------------------------------------------------------------------------------------------|------|------|-----------|-------|------|------|-------------------------------------------------|-------|----------------------|------------------------------------------------------------------------------------------------------------------------------------------------------------------------------------------------------------------------------------------------------------------------------------------------------------------------------------------------|------|------|-----------|-------|------|------|
| Rsa1.0_00438.1.g13849.t1 | gb EOA38791.1  hypothetical protein CARUB_v10011057mg [Capsella rubella]                                                                                                                                                                                                                                                                                                                                          | 133  | 130  | 3.00E-47  | 97.7  | 87.2 | 89.5 | hypothetical protein CARUB_v10011057mg          | gbpln | Capsella rubella     | AT1G04370.1   Symbols: ATERF14, ERF14   Ethylene-responsive element binding factor 14   chr1:1175177-1175578 FORWARD LENGTH=133                                                                                                                                                                                                                | 133  | 133  | 3.00E-47  | 100.0 | 81.2 | 85.7 |
| Rsa1.0_00438.1.g13850.t1 | dbj BAB10876.1  polyprotein [Arabidopsis thaliana]                                                                                                                                                                                                                                                                                                                                                                | 213  | 1429 | 6.00E-50  | 670.9 | 45.1 | 50.2 | polyprotein                                     | gbpln | Arabidopsis thaliana | AT4G23160.1   Symbols: CRK8   cysteine-rich RLK (RECEPTOR-like protein kinase) 8   chr4:12129485-12134086 FORWARD LENGTH=1262                                                                                                                                                                                                                  | 213  | 1262 | 2.00E-15  | 592.5 | 19.7 | 30.5 |
| Rsa1.0_00438.1.g13851.t1 | gb AAD32898.1  putative retroelement pol polyprotein [Arabidopsis thaliana]                                                                                                                                                                                                                                                                                                                                       | 1714 | 1307 | 0         | 76.3  | 45.8 | 58.2 | putative retroelement pol polyprotein           | gbpln | Arabidopsis thaliana | AT4G23160.1   Symbols: CRK8   cysteine-rich RLK (RECEPTOR-like protein kinase) 8   chr4:12129485-12134086 FORWARD LENGTH=1262                                                                                                                                                                                                                  | 1714 | 1262 | 1.00E-103 | 73.6  | 11.7 | 18.3 |
| Rsa1.0_00438.1.g13852.t2 | ref XP_002876745.1  hypothetical protein ARALYDRAFT_904327 [Arabidopsis lyrata subsp. lyrata] gi 297322583 gb EFH53004.1  hypothetical protein ARALYDRAFT_904327 [Arabidopsis lyrata subsp. lyrata]                                                                                                                                                                                                               | 499  | 589  | 1.00E-51  | 118.0 | 29.3 | 43.3 | hypothetical protein ARALYDRAFT_904327          | gbpln | Arabidopsis lyrata   | AT1G01355.1   Symbols:   Putative endonuclease or glycosyl hydrolase   chr1:138513-139568 FORWARD LENGTH=228                                                                                                                                                                                                                                   | 499  | 228  | 3.00E-42  | 45.7  | 19.8 | 25.9 |
| Rsa1.0_00438.1.g13853.t1 | gb EOA23062.1  hypothetical protein CARUB_v10003832mg [Capsella rubella]                                                                                                                                                                                                                                                                                                                                          | 218  | 588  | 5.00E-37  | 269.7 | 40.8 | 43.6 | hypothetical protein CARUB_v10003832mg          | gbpln | Capsella rubella     | AT5G11670.1   Symbols: ATNADP-ME2, NADP-ME2   NADP-malic enzyme 2   chr5:3754456-3758040 FORWARD LENGTH=588                                                                                                                                                                                                                                    | 218  | 588  | 2.00E-39  | 269.7 | 40.8 | 43.6 |
| Rsa1.0_00438.1.g13854.t1 | #                                                                                                                                                                                                                                                                                                                                                                                                                 | #    | #    | #         | #     | #    | #    | -                                               | ----  | ----                 | AT3G60940.1   Symbols:   Putative endonuclease or glycosyl hydrolase   chr3:22521615-22523029 REVERSE LENGTH=257                                                                                                                                                                                                                               | 164  | 257  | 8.00E-13  | 156.7 | 22.0 | 40.2 |
| Rsa1.0_00438.1.g13855.t1 | gb EOA39428.1  hypothetical protein CARUB_v10012550mg [Capsella rubella]                                                                                                                                                                                                                                                                                                                                          | 534  | 538  | 0         | 100.7 | 86.1 | 91.4 | hypothetical protein CARUB_v10012550mg          | gbpln | Capsella rubella     | AT1G04280.1   Symbols:   P-loop containing nucleoside triphosphate hydrolases superfamily protein   chr1:1143643-1146541 REVERSE LENGTH=534                                                                                                                                                                                                    | 534  | 534  | 0         | 100.0 | 83.0 | 17.8 |
| Rsa1.0_00438.1.g13856.t1 | gb EOA36082.1  hypothetical protein CARUB_v10010394mg, partial [Capsella rubella]                                                                                                                                                                                                                                                                                                                                 | 153  | 186  | 3.00E-80  | 121.6 | 98.0 | 99.3 | hypothetical protein CARUB_v10010394mg, partial | gbpln | Capsella rubella     | AT1G04270.1   Symbols: RPS15   cytosolic ribosomal protein S15   chr1:1141852-1142960 REVERSE LENGTH=152                                                                                                                                                                                                                                       | 153  | 152  | 3.00E-75  | 99.3  | 98.7 | 98.7 |
| Rsa1.0_00438.1.g13857.t1 | gb EOA36534.1  hypothetical protein CARUB_v10011583mg [Capsella rubella]                                                                                                                                                                                                                                                                                                                                          | 139  | 182  | 2.00E-32  | 130.9 | 60.4 | 76.3 | hypothetical protein CARUB_v10011583mg          | gbpln | Capsella rubella     | AT1G04260.1   Symbols: MPI7, MPIP7, PRA1.D   CAMV movement protein interacting protein 7   chr1:1140749-1141297 REVERSE LENGTH=182                                                                                                                                                                                                             | 139  | 182  | 8.00E-34  | 130.9 | 58.3 | 75.5 |
| Rsa1.0_00438.1.g13858.t1 | gb AAG51783.1 AC079679.3 reverse transcriptase, putative; 16838-20266 [Arabidopsis thaliana]                                                                                                                                                                                                                                                                                                                      | 726  | 1142 | 1.00E-112 | 157.3 | 27.1 | 34.4 | reverse transcriptase, putative; 16838-20266    | gbpln | Arabidopsis thaliana | AT5G18880.1   Symbols:   RNA-directed DNA polymerase (reverse transcriptase)-related family protein   chr5:6300535-6301422 REVERSE LENGTH=295                                                                                                                                                                                                  | 726  | 295  | 1.00E-65  | 40.6  | 16.7 | 23.4 |
| Rsa1.0_00439.1.g13859.t1 | #                                                                                                                                                                                                                                                                                                                                                                                                                 | #    | #    | #         | #     | #    | #    | -                                               | ----  | ----                 | #                                                                                                                                                                                                                                                                                                                                              | #    | #    | #         | #     | #    | #    |
| Rsa1.0_00439.1.g13860.t1 | gb AAG51754.1 AC069667.33 reverse transcriptase, putative; 100033-105622 [Arabidopsis thaliana]                                                                                                                                                                                                                                                                                                                   | 1634 | 1557 | 0         | 95.3  | 37.6 | 52.0 | reverse transcriptase, putative; 100033-105622  | gbpln | Arabidopsis thaliana | AT4G29090.1   Symbols:   Ribonuclease H-like superfamily protein   chr4:14333528-14335255 FORWARD LENGTH=575                                                                                                                                                                                                                                   | 1634 | 575  | 7.00E-78  | 35.2  | 9.3  | 14.4 |
| Rsa1.0_00439.1.g13861.t1 | ref NP_179390.1  uncharacterized protein [Arabidopsis thaliana] gi 4406819 gb AAD20127.1  unknown protein [Arabidopsis thaliana] gi 50198801 gb AAT70434.1  At2g17990 [Arabidopsis thaliana] gi 56121929 gb AAV74245.1  At2g17990 [Arabidopsis thaliana] gi 330251619 gb AEC06712.1  uncharacterized protein AT2G17990 [Arabidopsis thaliana] ref NP_001189547.1  TBP-associated factor 14 [Arabidopsis thaliana] | 302  | 338  | 1.00E-128 | 111.9 | 85.1 | 93.0 | uncharacterized protein                         | gbpln | Arabidopsis thaliana | AT2G17990.1   Symbols:   BEST Arabidopsis thaliana protein match is: kinectin-related (TAIR:AT5G66250.3); Has 7578 Blast hits to 6129 proteins in 763 species; Archae - 220; Bacteria - 1045; Metazoa - 3605; Fungi - 575; Plants - 442; Viruses - 38; Other Eukaryotes - 1653 (source: NCBI BLINK).   chr2:7827480-7828596 FORWARD LENGTH=338 | 302  | 338  | 1.00E-131 | 111.9 | 85.1 | 93.0 |
| Rsa1.0_00439.1.g13862.t1 | ref NP_001189547.1  TBP-associated factor 14 [Arabidopsis thaliana] gi 330251620 gb AEC06714.1  TBP-associated factor 14 [Arabidopsis thaliana]                                                                                                                                                                                                                                                                   | 258  | 268  | 1.00E-103 | 103.9 | 73.3 | 85.3 | TBP-associated factor 14                        | gbpln | Arabidopsis thaliana | AT2G18000.2   Symbols: TAF14   TBP-associated factor 14   chr2:7829035-7830580 FORWARD LENGTH=268                                                                                                                                                                                                                                              | 258  | 268  | 1.00E-106 | 103.9 | 73.3 | 85.3 |
| Rsa1.0_00439.1.g13863.t2 | dbj BAA97087.1  copia-type pol polyprotein-like [Arabidopsis thaliana]                                                                                                                                                                                                                                                                                                                                            | 846  | 1123 | 0         | 132.7 | 43.7 | 49.8 | copia-type pol polyprotein-like                 | gbpln | Arabidopsis thaliana | AT4G23160.1   Symbols: CRK8   cysteine-rich RLK (RECEPTOR-like protein kinase) 8   chr4:12129485-12134086 FORWARD LENGTH=1262                                                                                                                                                                                                                  | 846  | 1262 | 2.00E-59  | 149.2 | 17.1 | 26.1 |
| Rsa1.0_00439.1.g13864.t1 | ref NP_179392.1  SAUR-like auxin-responsive protein [Arabidopsis thaliana] gi 4406817 gb AAD20125.1  putative auxin-regulated protein [Arabidopsis thaliana] gi 330251621 gb AEC06715.1  SAUR-like auxin-responsive protein [Arabidopsis thaliana]                                                                                                                                                                | 107  | 112  | 2.00E-47  | 104.7 | 85.0 | 92.5 | SAUR-like auxin-responsive protein              | gbpln | Arabidopsis thaliana | AT2G18010.1   Symbols:   SAUR-like auxin-responsive protein family   chr2:7833902-7834240 FORWARD LENGTH=112                                                                                                                                                                                                                                   | 107  | 112  | 4.00E-50  | 104.7 | 85.0 | 92.5 |

|                          |                                                                                                                                                                                                     |      |      |           |       |      |      |                                                                                |       |                      |                                                                                                                                                                                                                                                                                                                                                                                                                                                                     |      |      |           |       |      |      |
|--------------------------|-----------------------------------------------------------------------------------------------------------------------------------------------------------------------------------------------------|------|------|-----------|-------|------|------|--------------------------------------------------------------------------------|-------|----------------------|---------------------------------------------------------------------------------------------------------------------------------------------------------------------------------------------------------------------------------------------------------------------------------------------------------------------------------------------------------------------------------------------------------------------------------------------------------------------|------|------|-----------|-------|------|------|
| Rsa1.0_00439.1.g13865.t1 | ref XP_002869043.1  60S ribosomal protein L8 [Arabidopsis lyrata subsp. lyrata] gi 297314879 gb EFH45302.1  60S ribosomal protein L8 [Arabidopsis lyrata subsp. lyrata]                             | 258  | 258  | 1.00E-143 | 100.0 | 96.1 | 98.8 | 60S ribosomal protein L8                                                       | gbpln | Arabidopsis lyrata   | AT4G36130.1   Symbols:   Ribosomal protein L2 family   chr4:17097613-17098656 FORWARD LENGTH=258                                                                                                                                                                                                                                                                                                                                                                    | 258  | 258  | 1.00E-144 | 100.0 | 95.3 | 98.8 |
| Rsa1.0_00439.1.g13866.t1 | dbj BAJ34365.1  unnamed protein product [Thellungiella halophila]                                                                                                                                   | 129  | 119  | 9.00E-60  | 92.2  | 90.7 | 92.2 | unnamed protein product                                                        | ----  | ----                 | AT2G18040.1   Symbols: PIN1AT   peptidylprolyl cis/trans isomerase, NIMA-interacting 1   chr2:7842346-7843537 FORWARD LENGTH=119                                                                                                                                                                                                                                                                                                                                    | 129  | 119  | 1.00E-60  | 92.2  | 88.4 | 91.5 |
| Rsa1.0_00439.1.g13867.t1 | gb EOA17220.1  hypothetical protein CARUB_v10005495mg [Capsella rubella]                                                                                                                            | 264  | 268  | 1.00E-116 | 101.5 | 83.0 | 89.8 | hypothetical protein CARUB_v10005495mg                                         | gbpln | Capsella rubella     | AT5G32450.1   Symbols:   RNA binding (RRM/RBD/RNP motifs) family protein   chr5:12079707-12081317 FORWARD LENGTH=267                                                                                                                                                                                                                                                                                                                                                | 264  | 267  | 1.00E-116 | 101.1 | 81.4 | 89.8 |
| Rsa1.0_00439.1.g13868.t1 | ref XP_002886145.1  predicted protein [Arabidopsis lyrata subsp. lyrata] gi 297331985 gb EFH62404.1  predicted protein [Arabidopsis lyrata subsp. lyrata]                                           | 361  | 365  | 1.00E-168 | 101.1 | 79.5 | 87.8 | predicted protein                                                              | gbpln | Arabidopsis lyrata   | AT2G18060.1   Symbols: VND1, ANAC037   vascular related NAC-domain protein 1   chr2:7848399-7850303 REVERSE LENGTH=365                                                                                                                                                                                                                                                                                                                                              | 361  | 365  | 1.00E-169 | 101.1 | 78.9 | 87.5 |
| Rsa1.0_00439.1.g13869.t1 | emb CAN66432.1  hypothetical protein VITISV_027451 [Vitis vinifera]                                                                                                                                 | 568  | 576  | 4.00E-72  | 101.4 | 35.2 | 51.8 | hypothetical protein VITISV_027451                                             | gbpln | Vitis vinifera       | AT4G23160.1   Symbols: CRK8   cysteine-rich RLK (RECEPTOR-like protein kinase) 8   chr4:12129485-12134086 FORWARD LENGTH=1262                                                                                                                                                                                                                                                                                                                                       | 568  | 1262 | 3.00E-21  | 222.2 | 8.1  | 13.7 |
| Rsa1.0_00439.1.g13870.t1 | #                                                                                                                                                                                                   | #    | #    | #         | #     | #    | #    | -                                                                              | ----  | ----                 | #                                                                                                                                                                                                                                                                                                                                                                                                                                                                   | #    | #    | #         | #     | #    | #    |
| Rsa1.0_00439.1.g13871.t1 | gb AAF99785.1 AC012463.2 T2E6.4 [Arabidopsis thaliana]                                                                                                                                              | 435  | 740  | 1.00E-125 | 170.1 | 50.8 | 66.7 | T2E6.4                                                                         | gbpln | Arabidopsis thaliana | AT3G24255.1   Symbols:   RNA-directed DNA polymerase (reverse transcriptase)-related family protein   chr3:8789471-8793208 FORWARD LENGTH=746                                                                                                                                                                                                                                                                                                                       | 435  | 746  | 2.00E-97  | 171.5 | 37.5 | 48.7 |
| Rsa1.0_00439.1.g13872.t3 | #                                                                                                                                                                                                   | #    | #    | #         | #     | #    | #    | -                                                                              | ----  | ----                 | #                                                                                                                                                                                                                                                                                                                                                                                                                                                                   | #    | #    | #         | #     | #    | #    |
| Rsa1.0_00439.1.g13873.t3 | #                                                                                                                                                                                                   | #    | #    | #         | #     | #    | #    | -                                                                              | ----  | ----                 | #                                                                                                                                                                                                                                                                                                                                                                                                                                                                   | #    | #    | #         | #     | #    | #    |
| Rsa1.0_00439.1.g13874.t1 | gb EOA29875.1  hypothetical protein CARUB_v10012971mg [Capsella rubella]                                                                                                                            | 738  | 840  | 0         | 113.8 | 79.9 | 87.7 | hypothetical protein CARUB_v10012971mg                                         | gbpln | Capsella rubella     | AT2G18090.1   Symbols:   PHD finger family protein / SWIB complex BAF60b domain-containing protein / GYF domain-containing protein   chr2:7864501-7867317 FORWARD LENGTH=824                                                                                                                                                                                                                                                                                        | 738  | 824  | 0         | 111.7 | 79.4 | 86.4 |
| Rsa1.0_00439.1.g13875.t1 | ref XP_002886148.1  hypothetical protein ARALYDRAFT_319764 [Arabidopsis lyrata subsp. lyrata] gi 297331988 gb EFH62407.1  hypothetical protein ARALYDRAFT_319764 [Arabidopsis lyrata subsp. lyrata] | 221  | 208  | 1.00E-86  | 94.1  | 72.9 | 81.0 | hypothetical protein ARALYDRAFT_319764                                         | gbpln | Arabidopsis lyrata   | AT2G18120.1   Symbols: SRS4   SH1-related sequence 4   chr2:7876722-7877681 REVERSE LENGTH=222                                                                                                                                                                                                                                                                                                                                                                      | 221  | 222  | 3.00E-87  | 100.5 | 74.7 | 84.6 |
| Rsa1.0_00439.1.g13876.t1 | pir [T00833 RNA-directed DNA polymerase homolog T13L16.7 - Arabidopsis thaliana (fragment)]                                                                                                         | 984  | 1365 | 0         | 138.7 | 45.5 | 62.9 | RNA-directed DNA polymerase homolog T13L16.7 - Arabidopsis thaliana (fragment) | ----  | ----                 | AT4G29090.1   Symbols:   Ribonuclease H-like superfamily protein   chr4:14333528-14335255 FORWARD LENGTH=575                                                                                                                                                                                                                                                                                                                                                        | 984  | 575  | 1.00E-80  | 58.4  | 18.1 | 28.6 |
| Rsa1.0_00439.1.g13877.t1 | gb ABK28184.1  unknown [Arabidopsis thaliana]                                                                                                                                                       | 451  | 488  | 1.00E-36  | 108.2 | 22.2 | 37.3 | unknown                                                                        | gbpln | Arabidopsis thaliana | AT3G47920.1   Symbols:   unknown protein; FUNCTIONS IN: molecular.function unknown; INVOLVED IN: biological.process unknown; LOCATED IN: endomembrane system; BEST Arabidopsis thaliana protein match is: unknown protein (TAIR:AT2G41590.1); Has 154 Blast hits to 152 proteins in 10 species: Archae - 0; Bacteria - 0; Metazoa - 0; Fungi - 0; Plants - 154; Viruses - 0; Other Eukaryotes - 0 (source: NCBI BLink).   chr3:17682952-17683854 FORWARD LENGTH=300 | 451  | 300  | 4.00E-15  | 66.5  | 10.0 | 18.2 |
| Rsa1.0_00439.1.g13878.t1 | #                                                                                                                                                                                                   | #    | #    | #         | #     | #    | #    | -                                                                              | ----  | ----                 | #                                                                                                                                                                                                                                                                                                                                                                                                                                                                   | #    | #    | #         | #     | #    | #    |
| Rsa1.0_00440.1.g13879.t1 | gb EOA39250.1  hypothetical protein CARUB_v10012247mg [Capsella rubella]                                                                                                                            | 815  | 818  | 0         | 100.4 | 72.5 | 85.3 | hypothetical protein CARUB_v10012247mg                                         | gbpln | Capsella rubella     | AT1G08140.1   Symbols: ATCHX6A, CHX6A   cation/H <sup>+</sup> exchanger 6A   chr1:2552206-2559074 REVERSE LENGTH=818                                                                                                                                                                                                                                                                                                                                                | 815  | 818  | 0         | 100.4 | 70.7 | 83.6 |
| Rsa1.0_00440.1.g13880.t1 | gb EOA37659.1  hypothetical protein CARUB_v10012226mg [Capsella rubella]                                                                                                                            | 796  | 793  | 0         | 99.6  | 72.2 | 84.2 | hypothetical protein CARUB_v10012226mg                                         | gbpln | Capsella rubella     | AT1G08135.1   Symbols: ATCHX6B, CHX6B   cation/H <sup>+</sup> exchanger 6B   chr1:2548819-2551473 REVERSE LENGTH=796                                                                                                                                                                                                                                                                                                                                                | 796  | 796  | 0         | 100.0 | 71.4 | 84.4 |
| Rsa1.0_00440.1.g13881.t1 | emb CAB39638.1  RNA-directed DNA polymerase-like protein [Arabidopsis thaliana] gi 7267666 emb CAB78094.1  RNA-directed DNA polymerase-like protein [Arabidopsis thaliana]                          | 1960 | 1274 | 0         | 65.0  | 31.2 | 43.3 | RNA-directed DNA polymerase-like protein                                       | gbpln | Arabidopsis thaliana | AT4G29090.1   Symbols:   Ribonuclease H-like superfamily protein   chr4:14333528-14335255 FORWARD LENGTH=575                                                                                                                                                                                                                                                                                                                                                        | 1960 | 575  | 8.00E-74  | 29.3  | 9.3  | 14.8 |
| Rsa1.0_00440.1.g13882.t2 | ref XP_002892438.1  ATLIG1 [Arabidopsis lyrata subsp. lyrata] gi 297338280 gb EFH68697.1  ATLIG1 [Arabidopsis lyrata subsp. lyrata]                                                                 | 1101 | 793  | 0         | 72.0  | 60.7 | 63.6 | ATLIG1                                                                         | gbpln | Arabidopsis lyrata   | AT1G08130.1   Symbols: ATLIG1, LIG1   DNA ligase 1   chr1:2542913-2547815 REVERSE LENGTH=790                                                                                                                                                                                                                                                                                                                                                                        | 1101 | 790  | 0         | 71.8  | 59.9 | 63.1 |



|                          |                                                                                                                                                                                                                                                                                                                                  |      |      |           |       |      |      |                                             |       |                      |                                                                                                                                                           |      |      |           |       |      |      |
|--------------------------|----------------------------------------------------------------------------------------------------------------------------------------------------------------------------------------------------------------------------------------------------------------------------------------------------------------------------------|------|------|-----------|-------|------|------|---------------------------------------------|-------|----------------------|-----------------------------------------------------------------------------------------------------------------------------------------------------------|------|------|-----------|-------|------|------|
| Rsa1.0_00440.1.g13883.t1 | ref[XP_002889680.1] calmodulin binding protein [Arabidopsis lyrata subsp. lyrata] gi 297335522 gb EFH65939.1  calmodulin binding protein [Arabidopsis lyrata subsp. lyrata.]                                                                                                                                                     | 232  | 235  | 1.00E-120 | 101.3 | 90.1 | 94.0 | calmodulin binding protein                  | gbpln | Arabidopsis lyrata   | AT1G08110.4   Symbols:   lactoylglutathione lyase family protein / glyoxalase I family protein   chr1:2535463-2537630 FORWARD LENGTH=235                  | 232  | 235  | 1.00E-108 | 101.3 | 84.5 | 88.8 |
| Rsa1.0_00440.1.g13884.t1 | gb AFK65609.1  high-affinity nitrate transporter [Brassica rapa subsp. chinensis]                                                                                                                                                                                                                                                | 530  | 530  | 0         | 100.0 | 97.4 | 98.9 | high-affinity nitrate transporter           | gbpln | Brassica rapa        | AT1G08090.1   Symbols: ATNRT2.1, NRT2, NRT2:1AT, ACH1, LIN1, ATNRT2.1, NRT2.1, NRT2:1   nitrate transporter 2:1   chr1:2524139-2525920 FORWARD LENGTH=530 | 530  | 530  | 0         | 100.0 | 94.0 | 97.2 |
| Rsa1.0_00440.1.g13885.t1 | gb AFK65609.1  high-affinity nitrate transporter [Brassica rapa subsp. chinensis]                                                                                                                                                                                                                                                | 530  | 530  | 0         | 100.0 | 97.2 | 98.9 | high-affinity nitrate transporter           | gbpln | Brassica rapa        | AT1G08090.1   Symbols: ATNRT2.1, NRT2, NRT2:1AT, ACH1, LIN1, ATNRT2.1, NRT2.1, NRT2:1   nitrate transporter 2:1   chr1:2524139-2525920 FORWARD LENGTH=530 | 530  | 530  | 0         | 100.0 | 95.3 | 97.9 |
| Rsa1.0_00440.1.g13886.t1 | gb EOA36129.1  hypothetical protein CARUB_v10012300mg [Capsella rubella]                                                                                                                                                                                                                                                         | 273  | 276  | 1.00E-133 | 101.1 | 82.8 | 91.9 | hypothetical protein CARUB_v10012300mg      | gbpln | Capsella rubella     | AT1G08080.1   Symbols: ATACA7, ACA7   alpha carbonic anhydrase 7   chr1:2517022-2518546 REVERSE LENGTH=275                                                | 273  | 275  | 1.00E-131 | 100.7 | 82.8 | 92.7 |
| Rsa1.0_00440.1.g13887.t1 | gb AEP33770.1  organelle transcript processing 82, partial [Raphanus sativus]                                                                                                                                                                                                                                                    | 750  | 675  | 0         | 90.0  | 87.9 | 89.2 | organelle transcript processing 82, partial | gbpln | Raphanus sativus     | AT1G08070.1   Symbols: OTP82   Tetratricopeptide repeat (TPR)-like superfamily protein   chr1:2514374-2516599 REVERSE LENGTH=741                          | 750  | 741  | 0         | 98.8  | 81.5 | 89.3 |
| Rsa1.0_00440.1.g13888.t1 | ref NP_172285.2  carbonic anhydrase [Arabidopsis thaliana] gi 332190117 gb AEE28238.1  alpha carbonic anhydrase 5 [Arabidopsis thaliana]                                                                                                                                                                                         | 274  | 277  | 1.00E-126 | 101.1 | 77.4 | 85.8 | carbonic anhydrase                          | gbpln | Arabidopsis thaliana | AT1G08065.1   Symbols: ATACA5, ACA5   alpha carbonic anhydrase 5   chr1:2511788-2513341 REVERSE LENGTH=277                                                | 274  | 277  | 1.00E-128 | 101.1 | 77.4 | 85.8 |
| Rsa1.0_00440.1.g13889.t1 | gb AAF79839.1 AC026875_19 T6D22.14 [Arabidopsis thaliana]                                                                                                                                                                                                                                                                        | 2260 | 2254 | 0         | 99.7  | 50.4 | 58.8 | T6D22.14                                    | gbpln | Arabidopsis thaliana | AT1G08060.2   Symbols: MOM, MOM1   ATP-dependent helicase family protein   chr1:2501981-2510488 REVERSE LENGTH=2001                                       | 2260 | 2001 | 0         | 88.5  | 49.4 | 58.4 |
| Rsa1.0_00440.1.g13890.t1 | ref NP_172283.1  C3HC4-type RING finger-containing protein [Arabidopsis thaliana] gi 8778841 gb AAF79840.1 AC026875_20 T6D22.13 [Arabidopsis thaliana] gi 332190114 gb AEE28235.1  C3HC4-type RING finger-containing protein [Arabidopsis thaliana]                                                                              | 625  | 641  | 0         | 102.6 | 71.0 | 80.2 | C3HC4-type RING finger-containing protein   | gbpln | Arabidopsis thaliana | AT1G08050.1   Symbols:   Zinc finger (C3HC4-type RING finger) family protein   chr1:2499088-2501311 REVERSE LENGTH=641                                    | 625  | 641  | 0         | 102.6 | 71.0 | 80.2 |
| Rsa1.0_00440.1.g13891.t1 | ref XP_002892430.1  hypothetical protein ARALYDRAFT_888027 [Arabidopsis lyrata subsp. lyrata] gi 297338272 gb EFH68689.1  hypothetical protein ARALYDRAFT_888027 [Arabidopsis lyrata subsp. lyrata]                                                                                                                              | 398  | 382  | 0         | 96.0  | 87.7 | 91.5 | hypothetical protein ARALYDRAFT_888027      | gbpln | Arabidopsis lyrata   | AT1G08040.2   Symbols:   Protein of unknown function (DUF707)   chr1:2495507-2497973 REVERSE LENGTH=382                                                   | 398  | 382  | 0         | 96.0  | 87.7 | 91.7 |
| Rsa1.0_00440.1.g13892.t1 | ref NP_172283.1  C3HC4-type RING finger-containing protein [Arabidopsis thaliana] gi 8778841 gb AAF79840.1 AC026875_20 T6D22.13 [Arabidopsis thaliana] gi 332190114 gb AEE28235.1  C3HC4-type RING finger-containing protein [Arabidopsis thaliana]                                                                              | 758  | 641  | 0         | 84.6  | 55.0 | 64.8 | C3HC4-type RING finger-containing protein   | gbpln | Arabidopsis thaliana | AT1G08050.1   Symbols:   Zinc finger (C3HC4-type RING finger) family protein   chr1:2499088-2501311 REVERSE LENGTH=641                                    | 758  | 641  | 0         | 84.6  | 55.0 | 64.8 |
| Rsa1.0_00440.1.g13893.t1 | gb EOA22612.1  hypothetical protein CARUB_v10003280mg [Capsella rubella]                                                                                                                                                                                                                                                         | 1246 | 762  | 0         | 61.2  | 48.6 | 53.5 | hypothetical protein CARUB_v10003280mg      | gbpln | Capsella rubella     | AT5G04500.1   Symbols:   glycosyltransferase family protein 47   chr5:1283604-1286155 FORWARD LENGTH=765                                                  | 1246 | 765  | 0         | 61.4  | 47.9 | 53.0 |
| Rsa1.0_00441.1.g13894.t1 | ref NP_194075.1  TIR-NBS class of disease resistance protein [Arabidopsis thaliana] gi 3451069 emb CAA20465.1  hypothetical protein [Arabidopsis thaliana] gi 2769192 emb CAB79299.1  hypothetical protein [Arabidopsis thaliana] gi 332659357 gb AEE84757.1  TIR-NBS class of disease resistance protein [Arabidopsis thaliana] | 900  | 964  | 0         | 107.1 | 82.6 | 89.7 | TIR-NBS class of disease resistance protein | gbpln | Arabidopsis thaliana | AT4G23440.1   Symbols:   Disease resistance protein (TIR-NBS class)   chr4:1223765-12240659 FORWARD LENGTH=964                                            | 900  | 964  | 0         | 107.1 | 82.6 | 89.7 |
| Rsa1.0_00441.1.g13895.t1 | gb EOA15733.1  hypothetical protein CARUB_v10006703mg [Capsella rubella]                                                                                                                                                                                                                                                         | 162  | 155  | 8.00E-45  | 95.7  | 67.3 | 77.8 | hypothetical protein CARUB_v10006703mg      | gbpln | Capsella rubella     | AT4G23450.3   Symbols: AIRP1, AtAIRP1   RING/U-box superfamily protein   chr4:12241113-12242190 REVERSE LENGTH=208                                        | 162  | 208  | 1.00E-44  | 128.4 | 59.9 | 72.8 |
| Rsa1.0_00441.1.g13896.t1 | dbj BAB02625.1  unnamed protein product [Arabidopsis thaliana]                                                                                                                                                                                                                                                                   | 412  | 420  | 4.00E-82  | 101.9 | 47.1 | 60.7 | unnamed protein product                     | gbpln | Arabidopsis thaliana | AT3G28330.1   Symbols:   F-box family protein-related   chr3:10586566-10587712 REVERSE LENGTH=349                                                         | 412  | 349  | 5.00E-66  | 84.7  | 37.9 | 49.3 |

|                          |                                                                                                                                                                                                                                                                                                                                                                                                                                                                              |      |      |           |       |      |      |                                        |       |                      |                                                                                                                               |      |      |           |       |      |      |
|--------------------------|------------------------------------------------------------------------------------------------------------------------------------------------------------------------------------------------------------------------------------------------------------------------------------------------------------------------------------------------------------------------------------------------------------------------------------------------------------------------------|------|------|-----------|-------|------|------|----------------------------------------|-------|----------------------|-------------------------------------------------------------------------------------------------------------------------------|------|------|-----------|-------|------|------|
| Rsa1.0_00441.1.g13897.t1 | refNP_194077.1  beta-adaptin-like protein C [Arabidopsis thaliana]<br>gi306531056 sp O81742.2 APBLC_ARA TH RecName: Full=Beta-adaptin-like protein C; Short=At-bC-Ad; Short=At-betaC-Ad; AltName: Full=AP complex subunit beta-C; AltName: Full=Adaptor protein complex AP subunit beta-C; AltName: Full=Beta-adaptin C; AltName: Full=Clathrin assembly protein complex beta large chain C<br>gi332659361 gb AEE84761.1  beta-adaptin-like protein C [Arabidopsis thaliana] | 880  | 893  | 0         | 101.5 | 94.7 | 97.3 | beta-adaptin-like protein C            | gbpln | Arabidopsis thaliana | AT4G23460.1   Symbols:   Adaptin family protein   chr4:12243899-12248898 REVERSE LENGTH=893                                   | 880  | 893  | 0         | 101.5 | 94.7 | 97.3 |
| Rsa1.0_00441.1.g13898.t1 | gb EOA17284.1  hypothetical protein CARUB_v10005554mg [Capsella rubella]                                                                                                                                                                                                                                                                                                                                                                                                     | 240  | 255  | 1.00E-118 | 106.3 | 87.1 | 90.8 | hypothetical protein CARUB_v10005554mg | gbpln | Capsella rubella     | AT4G23470.1   Symbols:   PLAC8 family protein   chr4:12249289-12251079 FORWARD LENGTH=255                                     | 240  | 255  | 1.00E-114 | 106.3 | 82.5 | 88.3 |
| Rsa1.0_00441.1.g13899.t1 | gb ACC91275.1  fringe-related protein [Capsella rubella]<br>gi482552213 gb EOA16406.1  hypothetical protein CARUB_v10004561mg [Capsella rubella]                                                                                                                                                                                                                                                                                                                             | 494  | 534  | 0         | 108.1 | 85.2 | 89.9 | fringe-related protein                 | gbpln | Capsella rubella     | AT4G23490.1   Symbols:   Protein of unknown function (DUF604)   chr4:12251580-12253973 REVERSE LENGTH=526                     | 494  | 526  | 0         | 106.5 | 84.2 | 89.1 |
| Rsa1.0_00441.1.g13900.t1 | ref XP_002869777.1  glycoside hydrolase family 28 protein [Arabidopsis lyrata subsp. lyrata]<br>gi297315613 gb EFH46036.1  glycoside hydrolase family 28 protein [Arabidopsis lyrata subsp. lyrata]                                                                                                                                                                                                                                                                          | 493  | 494  | 0         | 100.2 | 93.9 | 96.6 | glycoside hydrolase family 28 protein  | gbpln | Arabidopsis lyrata   | AT4G23500.1   Symbols:   Pectin lyase-like superfamily protein   chr4:12264640-12267074 FORWARD LENGTH=495                    | 493  | 495  | 0         | 100.4 | 93.5 | 96.6 |
| Rsa1.0_00441.1.g13901.t1 | ref XP_002867703.1  predicted protein [Arabidopsis lyrata subsp. lyrata]<br>gi297313539 gb EFH43962.1  predicted protein [Arabidopsis lyrata subsp. lyrata]                                                                                                                                                                                                                                                                                                                  | 371  | 879  | 3.00E-32  | 236.9 | 18.1 | 20.8 | predicted protein                      | gbpln | Arabidopsis lyrata   | AT4G23515.1   Symbols:   Toll-Interleukin-Resistance (TIR) domain family protein   chr4:12271382-12272842 REVERSE LENGTH=331  | 371  | 331  | 3.00E-33  | 89.2  | 19.7 | 24.8 |
| Rsa1.0_00441.1.g13902.t1 | ref XP_002867703.1  predicted protein [Arabidopsis lyrata subsp. lyrata]<br>gi297313539 gb EFH43962.1  predicted protein [Arabidopsis lyrata subsp. lyrata]                                                                                                                                                                                                                                                                                                                  | 476  | 879  | 2.00E-39  | 184.7 | 23.1 | 30.0 | predicted protein                      | gbpln | Arabidopsis lyrata   | AT4G23515.1   Symbols:   Toll-Interleukin-Resistance (TIR) domain family protein   chr4:12271382-12272842 REVERSE LENGTH=331  | 476  | 331  | 9.00E-38  | 69.5  | 20.6 | 26.9 |
| Rsa1.0_00441.1.g13903.t1 | #                                                                                                                                                                                                                                                                                                                                                                                                                                                                            | #    | #    | #         | #     | #    | #    | -                                      | ----  | ----                 | #                                                                                                                             | #    | #    | #         | #     | #    | #    |
| Rsa1.0_00441.1.g13904.t1 | gb AAK51235.1 AF287471.1 polyprotein [Arabidopsis thaliana]                                                                                                                                                                                                                                                                                                                                                                                                                  | 1377 | 1453 | 0         | 105.5 | 68.6 | 80.1 | polyprotein                            | gbpln | Arabidopsis thaliana | AT4G23160.1   Symbols: CRK8   cysteine-rich RLK (RECEPTOR-like protein kinase) 8   chr4:12129485-12134086 FORWARD LENGTH=1262 | 1377 | 1262 | 1.00E-103 | 91.6  | 14.2 | 21.6 |
| Rsa1.0_00441.1.g13905.t1 | gb EOA18423.1  hypothetical protein CARUB_v10006966mg [Capsella rubella]                                                                                                                                                                                                                                                                                                                                                                                                     | 156  | 312  | 2.00E-33  | 200.0 | 44.9 | 56.4 | hypothetical protein CARUB_v10006966mg | gbpln | Capsella rubella     | AT4G23515.1   Symbols:   Toll-Interleukin-Resistance (TIR) domain family protein   chr4:12271382-12272842 REVERSE LENGTH=331  | 156  | 331  | 2.00E-32  | 212.2 | 42.3 | 52.6 |
| Rsa1.0_00441.1.g13906.t1 | ref XP_002869776.1  hypothetical protein ARALYDRAFT_914244 [Arabidopsis lyrata subsp. lyrata]<br>gi297315612 gb EFH46035.1  hypothetical protein ARALYDRAFT_914244 [Arabidopsis lyrata subsp. lyrata]                                                                                                                                                                                                                                                                        | 373  | 400  | 1.00E-133 | 107.2 | 76.7 | 85.0 | hypothetical protein ARALYDRAFT_914244 | gbpln | Arabidopsis lyrata   | AT4G23530.1   Symbols:   Protein of unknown function (DUF793)   chr4:12279171-12280361 FORWARD LENGTH=396                     | 373  | 396  | 1.00E-132 | 106.2 | 76.1 | 85.0 |
| Rsa1.0_00441.1.g13907.t1 | #                                                                                                                                                                                                                                                                                                                                                                                                                                                                            | #    | #    | #         | #     | #    | #    | -                                      | ----  | ----                 | #                                                                                                                             | #    | #    | #         | #     | #    | #    |
| Rsa1.0_00441.1.g13908.t1 | gb EOA16931.1  hypothetical protein CARUB_v10005155mg [Capsella rubella]                                                                                                                                                                                                                                                                                                                                                                                                     | 299  | 351  | 1.00E-143 | 117.4 | 87.3 | 93.0 | hypothetical protein CARUB_v10005155mg | gbpln | Capsella rubella     | AT4G23550.1   Symbols: WRKY29, ATWRKY29   WRKY family transcription factor 1   chr4:12291831-12293088 FORWARD LENGTH=304      | 299  | 304  | 1.00E-142 | 101.7 | 83.9 | 91.0 |
| Rsa1.0_00441.1.g13909.t1 | ref XP_002874585.1  glycosyl hydrolase family 9 protein [Arabidopsis lyrata subsp. lyrata]<br>gi297320422 gb EFH50844.1  glycosyl hydrolase family 9 protein [Arabidopsis lyrata subsp. lyrata]                                                                                                                                                                                                                                                                              | 480  | 483  | 0         | 100.6 | 83.3 | 89.6 | glycosyl hydrolase family 9 protein    | gbpln | Arabidopsis lyrata   | AT4G23560.1   Symbols: AtGH9B15, GH9B15   glycosyl hydrolase 9B15   chr4:12293633-12295788 REVERSE LENGTH=479                 | 480  | 479  | 0         | 99.8  | 82.3 | 89.4 |
| Rsa1.0_00441.1.g13910.t1 | gb ACC91268.1  phosphatase-related protein [Capsella rubella]<br>gi482552711 gb EOA16904.1  hypothetical protein CARUB_v10005128mg [Capsella rubella]                                                                                                                                                                                                                                                                                                                        | 344  | 356  | 1.00E-171 | 103.5 | 87.5 | 95.6 | phosphatase-related protein            | gbpln | Capsella rubella     | AT4G23570.2   Symbols: SGT1A   phosphatase-related   chr4:12300015-12302493 FORWARD LENGTH=350                                | 344  | 350  | 1.00E-163 | 101.7 | 87.2 | 93.6 |
| Rsa1.0_00441.1.g13911.t1 | #                                                                                                                                                                                                                                                                                                                                                                                                                                                                            | #    | #    | #         | #     | #    | #    | -                                      | ----  | ----                 | #                                                                                                                             | #    | #    | #         | #     | #    | #    |

|                          |                                                                                                                                                                                                                                                                                                                                                                                                                                                                                                                                                                                                                                                                   |      |      |           |        |      |      |                                                     |       |                      |                                                                                                                                                  |      |      |          |       |      |      |
|--------------------------|-------------------------------------------------------------------------------------------------------------------------------------------------------------------------------------------------------------------------------------------------------------------------------------------------------------------------------------------------------------------------------------------------------------------------------------------------------------------------------------------------------------------------------------------------------------------------------------------------------------------------------------------------------------------|------|------|-----------|--------|------|------|-----------------------------------------------------|-------|----------------------|--------------------------------------------------------------------------------------------------------------------------------------------------|------|------|----------|-------|------|------|
| Rsa1.0_00441.1.g13912.t1 | refNP_194090.2  tyrosine transaminase-like protein [Arabidopsis thaliana]<br>gi 75161515 sp Q8VYP2.1 TAT4_ARATH<br>RecName: Full=Probable aminotransferase TAT4; AltName: Full=Tyrosine aminotransferase 4<br>gi 17979319 gb AAL49885.1  putative tyrosine transaminase [Arabidopsis thaliana] gi 21689827 gb AAM67557.1  putative tyrosine transaminase [Arabidopsis thaliana]<br>gi 332659380 gb AEE84780.1  probable aminotransferase TAT4 [Arabidopsis thaliana]<br>refXP_002892335.1  agenet domain-containing protein [Arabidopsis lyrata subsp. lyrata]<br>gi 297338177 gb EFH68594.1  agenet domain-containing protein [Arabidopsis lyrata subsp. lyrata] | 418  | 424  | 0         | 101.4  | 74.6 | 85.2 | tyrosine transaminase-like protein                  | gbpln | Arabidopsis thaliana | AT4G23590.1   Symbols: Tyrosine transaminase family protein   chr4:12307195-12309445 FORWARD LENGTH=424                                          | 418  | 424  | 0        | 101.4 | 74.6 | 85.2 |
| Rsa1.0_00442.1.g13913.t1 | refXP_002892335.1  agenet domain-containing protein [Arabidopsis lyrata subsp. lyrata]<br>gi 297338177 gb EFH68594.1  agenet domain-containing protein [Arabidopsis lyrata subsp. lyrata]                                                                                                                                                                                                                                                                                                                                                                                                                                                                         | 147  | 139  | 8.00E-34  | 94.6   | 49.0 | 57.1 | agenet domain-containing protein                    | gbpln | Arabidopsis lyrata   | AT1G06340.1   Symbols: Plant Tudor-like protein   chr1:1933583-1933987 REVERSE LENGTH=134                                                        | 147  | 134  | 7.00E-28 | 91.2  | 39.5 | 51.0 |
| Rsa1.0_00442.1.g13914.t1 | refXP_002892334.1  copper-binding family protein [Arabidopsis lyrata subsp. lyrata] gi 297338176 gb EFH68593.1  copper-binding family protein [Arabidopsis lyrata subsp. lyrata]<br>refNP_171719.2  metacaspase 1 [Arabidopsis thaliana]<br>gi 75232683 sp Q7XJE6.1 MCA1_ARATH<br>RecName: Full=Metacaspase-1; Short=AtMC1; AltName: Full=Metacaspase 1b; Short=AtMCP1b; AltName: Full=Protein LSD ONE LIKE 3<br>gi 32482812 gb AAP84706.1  metacaspase 1 [Arabidopsis thaliana]<br>gi 37788545 gb AAP44514.1  metacaspase 1 [Arabidopsis thaliana]<br>gi 332189275 gb AEE27396.1  metacaspase 1 [Arabidopsis thaliana]                                           | 132  | 145  | 4.00E-59  | 109.8  | 84.8 | 89.4 | copper-binding family protein                       | gbpln | Arabidopsis lyrata   | AT1G06330.1   Symbols: Heavy metal transport/detoxification superfamily protein   chr1:1931671-1932266 REVERSE LENGTH=159                        | 132  | 159  | 3.00E-61 | 120.5 | 84.1 | 87.9 |
| Rsa1.0_00442.1.g13915.t1 | refNP_171719.2  metacaspase 1 [Arabidopsis thaliana]<br>gi 75232683 sp Q7XJE6.1 MCA1_ARATH<br>RecName: Full=Metacaspase-1; Short=AtMC1; AltName: Full=Metacaspase 1b; Short=AtMCP1b; AltName: Full=Protein LSD ONE LIKE 3<br>gi 32482812 gb AAP84706.1  metacaspase 1 [Arabidopsis thaliana]<br>gi 37788545 gb AAP44514.1  metacaspase 1 [Arabidopsis thaliana]<br>gi 332189275 gb AEE27396.1  metacaspase 1 [Arabidopsis thaliana]                                                                                                                                                                                                                               | 366  | 367  | 1.00E-180 | 100.3  | 90.4 | 93.7 | metacaspase 1                                       | gbpln | Arabidopsis thaliana | AT1G02170.1   Symbols: LOL3, ATMCPB1, MCP1B, ATMC1, MC1   metacaspase 1   chr1:411883-413426 FORWARD LENGTH=367                                  | 366  | 367  | 0        | 100.3 | 90.4 | 93.7 |
| Rsa1.0_00442.1.g13916.t1 | refXP_002892332.1  hypothetical protein ARALYDRAFT_887830 [Arabidopsis lyrata subsp. lyrata]<br>gi 297338174 gb EFH68591.1  hypothetical protein ARALYDRAFT_887830 [Arabidopsis lyrata subsp. lyrata]                                                                                                                                                                                                                                                                                                                                                                                                                                                             | 204  | 205  | 5.00E-86  | 100.5  | 77.9 | 83.8 | hypothetical protein ARALYDRAFT_887830              | gbpln | Arabidopsis lyrata   | AT1G06280.1   Symbols: LBD2   LOB domain-containing protein 2   chr1:1920327-1920947 REVERSE LENGTH=206                                          | 204  | 206  | 4.00E-84 | 101.0 | 78.4 | 83.8 |
| Rsa1.0_00442.1.g13917.t1 | refXP_002889594.1  DNA-binding bromodomain-containing protein [Arabidopsis lyrata subsp. lyrata]<br>gi 297335436 gb EFH65853.1  DNA-binding bromodomain-containing protein [Arabidopsis lyrata subsp. lyrata]                                                                                                                                                                                                                                                                                                                                                                                                                                                     | 808  | 767  | 0         | 94.9   | 69.1 | 74.3 | DNA-binding bromodomain-containing protein          | gbpln | Arabidopsis lyrata   | AT1G06230.3   Symbols: GTE4   global transcription factor group E4   chr1:1907626-1910183 FORWARD LENGTH=766                                     | 808  | 766  | 0        | 94.8  | 68.4 | 74.0 |
| Rsa1.0_00442.1.g13918.t1 | #                                                                                                                                                                                                                                                                                                                                                                                                                                                                                                                                                                                                                                                                 | #    | #    | #         | #      | #    | #    | -                                                   | ----  | ----                 | #                                                                                                                                                | #    | #    | #        | #     | #    |      |
| Rsa1.0_00442.1.g13919.t1 | refXP_002889592.1  hypothetical protein ARALYDRAFT_470642 [Arabidopsis lyrata subsp. lyrata]<br>gi 297335434 gb EFH65851.1  hypothetical protein ARALYDRAFT_470642 [Arabidopsis lyrata subsp. lyrata]                                                                                                                                                                                                                                                                                                                                                                                                                                                             | 990  | 987  | 0         | 99.7   | 94.7 | 97.7 | hypothetical protein ARALYDRAFT_470642              | gbpln | Arabidopsis lyrata   | AT1G06220.1   Symbols: MEE5, CLO, GFA1   Ribosomal protein S5/Elongation factor G/III/V family protein   chr1:1900524-1904583 FORWARD LENGTH=987 | 990  | 987  | 0        | 99.7  | 94.6 | 97.7 |
| Rsa1.0_00442.1.g13920.t1 | refXP_002889588.1  hypothetical protein ARALYDRAFT_470633 [Arabidopsis lyrata subsp. lyrata]<br>gi 297335430 gb EFH65847.1  hypothetical protein ARALYDRAFT_470633 [Arabidopsis lyrata subsp. lyrata]                                                                                                                                                                                                                                                                                                                                                                                                                                                             | 227  | 237  | 1.00E-70  | 104.4  | 72.7 | 75.8 | hypothetical protein ARALYDRAFT_470633              | gbpln | Arabidopsis lyrata   | AT1G06160.1   Symbols: ORA59   octadecanoid-responsive Arabidopsis AP2/ERF 59   chr1:1883046-1883780 FORWARD LENGTH=244                          | 227  | 244  | 7.00E-67 | 107.5 | 77.5 | 84.6 |
| Rsa1.0_00442.1.g13921.t1 | gb AAC32226.1  putative non-LTR retroelement reverse transcriptase [Arabidopsis thaliana]                                                                                                                                                                                                                                                                                                                                                                                                                                                                                                                                                                         | 100  | 1529 | 6.00E-13  | 1529.0 | 31.0 | 56.0 | putative non-LTR retroelement reverse transcriptase | gbpln | Arabidopsis thaliana | #                                                                                                                                                | #    | #    | #        | #     | #    |      |
| Rsa1.0_00442.1.g13922.t3 | gb AAG51783.1 AC079679.3 reverse transcriptase, putative; 16838-20266 [Arabidopsis thaliana]                                                                                                                                                                                                                                                                                                                                                                                                                                                                                                                                                                      | 1993 | 1142 | 0         | 57.3   | 22.4 | 28.9 | reverse transcriptase, putative; 16838-20266        | gbpln | Arabidopsis thaliana | AT1G43760.1   Symbols: DNase I-like superfamily protein   chr1:1652880-16531065 REVERSE LENGTH=626                                               | 1993 | 626  | 4.00E-37 | 31.4  | 5.4  | 9.2  |
| Rsa1.0_00442.1.g13923.t1 | refXP_002892322.1  hypothetical protein ARALYDRAFT_311694 [Arabidopsis lyrata subsp. lyrata]<br>gi 297338164 gb EFH68581.1  hypothetical protein ARALYDRAFT_311694 [Arabidopsis lyrata subsp. lyrata]                                                                                                                                                                                                                                                                                                                                                                                                                                                             | 569  | 1329 | 0         | 233.6  | 81.2 | 89.1 | hypothetical protein ARALYDRAFT_311694              | gbpln | Arabidopsis lyrata   | AT1G06150.1   Symbols: EMB1444   basic helix-loop-helix (bHLH) DNA-binding superfamily protein   chr1:1867129-1873194 REVERSE LENGTH=1322        | 569  | 1322 | 0        | 232.3 | 80.1 | 88.4 |

|                          |                                                                                                                                                                                                                                                                                                                                                                                                                                                                                                                                                                                                                                                                                                                                                                                                                               |      |     |           |       |      |      |                                                                                                                                                                                                                                                           |       |                      |                                                                                                                                                                                                                                                                                                                                                                                                                                                                                      |     |     |           |       |      |      |
|--------------------------|-------------------------------------------------------------------------------------------------------------------------------------------------------------------------------------------------------------------------------------------------------------------------------------------------------------------------------------------------------------------------------------------------------------------------------------------------------------------------------------------------------------------------------------------------------------------------------------------------------------------------------------------------------------------------------------------------------------------------------------------------------------------------------------------------------------------------------|------|-----|-----------|-------|------|------|-----------------------------------------------------------------------------------------------------------------------------------------------------------------------------------------------------------------------------------------------------------|-------|----------------------|--------------------------------------------------------------------------------------------------------------------------------------------------------------------------------------------------------------------------------------------------------------------------------------------------------------------------------------------------------------------------------------------------------------------------------------------------------------------------------------|-----|-----|-----------|-------|------|------|
| Rsa1.0_00442.1.g13924.t1 | refXP_002892321.1  hypothetical protein ARALYDRAFT_311691 [Arabidopsis lyrata subsp. lyrata] gi 297338163 gb EFH68580.1  hypothetical protein ARALYDRAFT_311691 [Arabidopsis lyrata subsp. lyrata]                                                                                                                                                                                                                                                                                                                                                                                                                                                                                                                                                                                                                            | 70   | 485 | 9.00E-15  | 692.9 | 70.0 | 77.1 | hypothetical protein ARALYDRAFT_311691                                                                                                                                                                                                                    | gbpln | Arabidopsis lyrata   | AT1G06137.1   Symbols:   unknown protein; FUNCTIONS IN: molecular_function unknown; INVOLVED IN: biological_process unknown; LOCATED IN: endomembrane system; BEST Arabidopsis thaliana protein match is: unknown protein (TAIR:AT1G06135.1); Has 30201 Blast hits to 17322 proteins in 780 species: Archae - 12; Bacteria - 1396; Metazoa - 17338; Fungi - 3422; Plants - 5037; Viruses - 0; Other Eukaryotes - 2996 (source: NCBI BLINK).   chr1:1863544-1863750 REVERSE LENGTH=68 | 70  | 68  | 3.00E-15  | 97.1  | 67.1 | 72.9 |
| Rsa1.0_00442.1.g13925.t1 | gb AAF80136.1 AC024174_18 Contains similarity to glyoxalase II isozyme from Arabidopsis thaliana gb J90927 and is a member of the Metallo-beta-lactamase sepefamily PF 00753. ESTs gb AV519053, gb AV535897, gb AV535667, gb AV556046, gb BE039169, gb AV525509 come from this gene [Arabidopsis thaliana]                                                                                                                                                                                                                                                                                                                                                                                                                                                                                                                    | 139  | 512 | 2.00E-47  | 368.3 | 65.5 | 70.5 | Contains similarity to glyoxalase II isozyme from Arabidopsis thaliana gb J90927 and is a member of the Metallo-beta-lactamase sepefamily PF 00753. ESTs gb AV519053, gb AV535897, gb AV535667, gb AV556046, gb BE039169, gb AV525509 come from this gene | gbpln | Arabidopsis thaliana | AT1G06130.2   Symbols: GLX2-4   glyoxalase 2-4   chr1:1858034-1860640 REVERSE LENGTH=330                                                                                                                                                                                                                                                                                                                                                                                             | 139 | 330 | 4.00E-49  | 237.4 | 65.5 | 70.5 |
| Rsa1.0_00442.1.g13926.t1 | refXP_002879320.1  hypothetical protein ARALYDRAFT_902163 [Arabidopsis lyrata subsp. lyrata] gi 297325159 gb EFH55579.1  hypothetical protein ARALYDRAFT_902163 [Arabidopsis lyrata subsp. lyrata]                                                                                                                                                                                                                                                                                                                                                                                                                                                                                                                                                                                                                            | 70   | 69  | 1.00E-15  | 98.6  | 60.0 | 72.9 | hypothetical protein ARALYDRAFT_902163                                                                                                                                                                                                                    | gbpln | Arabidopsis lyrata   | AT1G06137.1   Symbols:   unknown protein; FUNCTIONS IN: molecular_function unknown; INVOLVED IN: biological_process unknown; LOCATED IN: endomembrane system; BEST Arabidopsis thaliana protein match is: unknown protein (TAIR:AT1G06135.1); Has 30201 Blast hits to 17322 proteins in 780 species: Archae - 12; Bacteria - 1396; Metazoa - 17338; Fungi - 3422; Plants - 5037; Viruses - 0; Other Eukaryotes - 2996 (source: NCBI BLINK).   chr1:1863544-1863750 REVERSE LENGTH=68 | 70  | 68  | 1.00E-15  | 97.1  | 70.0 | 75.7 |
| Rsa1.0_00442.1.g13927.t1 | refNP_563760.1  putative hydroxyacylglutathione hydrolase 2, chloroplast [Arabidopsis thaliana] gi 75246000 sp Q8LDW8.1 GLC2D_ARAT H RecName: Full=Probable hydroxyacylglutathione hydrolase 2, chloroplast; AltName: Full=Glyoxalase 2-4; AltName: Full=Glyoxalase II; Short=Glx II; Flags: Precursor gi 21553879 gb AAM62972.1  glyoxalase II isozyme, putative [Arabidopsis thaliana] gi 110742461 dbj BAE99149.1  glyoxalase II isozyme like protein [Arabidopsis thaliana] gi 332189821 gb AEE27942.1  putative hydroxyacylglutathione hydrolase 2, chloroplast [Arabidopsis thaliana] refNP_172099.1  delta-9 desaturase-like 1 protein [Arabidopsis thaliana] gi 62510518 sp Q9LND9.1 ADSL1_ARAT H RecName: Full=Delta-9 desaturase-like 1 protein gi 8810471 gb AAF80132.1 AC024174_14 Contains similarity to delta 9 | 289  | 331 | 1.00E-152 | 114.5 | 87.9 | 94.5 | putative hydroxyacylglutathione hydrolase 2, chloroplast                                                                                                                                                                                                  | gbpln | Arabidopsis thaliana | AT1G06130.1   Symbols: GLX2-4   glyoxalase 2-4   chr1:1858034-1860640 REVERSE LENGTH=331                                                                                                                                                                                                                                                                                                                                                                                             | 289 | 331 | 1.00E-155 | 114.5 | 87.9 | 94.5 |
| Rsa1.0_00442.1.g13928.t1 | desaturase mRNA from Arabidopsis thaliana gb D88536 and contains a fatty acid desaturase PF 01069 domain. ESTs gb AV546954, gb AI993202, gb AV554343, gb T46147 come from this gene [Arabidopsis thaliana] gi 332189817 gb AEE27938.1  delta-9 desaturase-like 1 protein [Arabidopsis thaliana]                                                                                                                                                                                                                                                                                                                                                                                                                                                                                                                               | 300  | 299 | 1.00E-157 | 99.7  | 89.0 | 93.7 | delta-9 desaturase-like 1 protein                                                                                                                                                                                                                         | gbpln | Arabidopsis thaliana | AT1G06090.1   Symbols:   Fatty acid desaturase family protein   chr1:1847921-1849500 FORWARD LENGTH=299                                                                                                                                                                                                                                                                                                                                                                              | 300 | 299 | 1.00E-160 | 99.7  | 89.0 | 93.7 |
| Rsa1.0_00442.1.g13929.t1 | refXP_002889584.1  hypothetical protein ARALYDRAFT_887802 [Arabidopsis lyrata subsp. lyrata] gi 297335426 gb EFH65843.1  hypothetical protein ARALYDRAFT_887802 [Arabidopsis lyrata subsp. lyrata]                                                                                                                                                                                                                                                                                                                                                                                                                                                                                                                                                                                                                            | 303  | 305 | 1.00E-169 | 100.7 | 93.4 | 97.4 | hypothetical protein ARALYDRAFT_887802                                                                                                                                                                                                                    | gbpln | Arabidopsis lyrata   | AT1G06080.1   Symbols: ADS1   delta 9 desaturase 1   chr1:1843661-1846093 FORWARD LENGTH=305                                                                                                                                                                                                                                                                                                                                                                                         | 303 | 305 | 1.00E-170 | 100.7 | 92.4 | 97.0 |
| Rsa1.0_00443.1.g13930.t1 | emb CAN84035.1  hypothetical protein VITISV_016995 [Vitis vinifera]                                                                                                                                                                                                                                                                                                                                                                                                                                                                                                                                                                                                                                                                                                                                                           | 1318 | 965 | 0         | 73.2  | 31.3 | 41.7 | hypothetical protein VITISV_016995                                                                                                                                                                                                                        | gbpln | Vitis vinifera #     | # # # # # #                                                                                                                                                                                                                                                                                                                                                                                                                                                                          | #   | #   | #         | #     | #    |      |

|                          |                                                                                                                                                                                                      |      |      |           |        |      |      |                                                                                |             |                        |                                                                                                                                               |      |      |           |       |      |      |
|--------------------------|------------------------------------------------------------------------------------------------------------------------------------------------------------------------------------------------------|------|------|-----------|--------|------|------|--------------------------------------------------------------------------------|-------------|------------------------|-----------------------------------------------------------------------------------------------------------------------------------------------|------|------|-----------|-------|------|------|
| Rsa1.0_00443.1.g13931.t1 | #                                                                                                                                                                                                    | #    | #    | #         | #      | #    | #    | #                                                                              | -           | ----                   | ----                                                                                                                                          | #    | #    | #         | #     | #    | #    |
| Rsa1.0_00443.1.g13932.t1 | #                                                                                                                                                                                                    | #    | #    | #         | #      | #    | #    | #                                                                              | -           | ----                   | ----                                                                                                                                          | #    | #    | #         | #     | #    | #    |
| Rsa1.0_00443.1.g13933.t1 | #                                                                                                                                                                                                    | #    | #    | #         | #      | #    | #    | #                                                                              | -           | ----                   | ----                                                                                                                                          | #    | #    | #         | #     | #    | #    |
| Rsa1.0_00443.1.g13934.t1 | #                                                                                                                                                                                                    | #    | #    | #         | #      | #    | #    | #                                                                              | -           | ----                   | ----                                                                                                                                          | #    | #    | #         | #     | #    | #    |
| Rsa1.0_00443.1.g13935.t2 | gb AAF79618.1 AC027665_19 F5M15.26 [Arabidopsis thaliana]                                                                                                                                            | 1753 | 1838 | 0         | 104.8  | 37.5 | 47.2 | F5M15.26                                                                       | gbpln       | Arabidopsis thaliana   | #                                                                                                                                             | #    | #    | #         | #     | #    | #    |
| Rsa1.0_00443.1.g13936.t1 | ref XP_003631962.1  PREDICTED: uncharacterized protein LOC100855226 [Vitis vinifera]                                                                                                                 | 1101 | 1011 | 5.00E-99  | 91.8   | 17.3 | 22.2 | PREDICTED: uncharacterized protein LOC100855226                                | gbpln       | Vitis vinifera         | AT4G23160.1   Symbols: CRK8   cysteine-rich RLK (RECEPTOR-like protein kinase) 8   chr4:12129485-12134086 FORWARD LENGTH=1262                 | 1101 | 1262 | 1.00E-43  | 114.6 | 7.5  | 10.6 |
| Rsa1.0_00443.1.g13937.t1 | #                                                                                                                                                                                                    | #    | #    | #         | #      | #    | #    | #                                                                              | -           | ----                   | ----                                                                                                                                          | #    | #    | #         | #     | #    | #    |
| Rsa1.0_00443.1.g13938.t1 | #                                                                                                                                                                                                    | #    | #    | #         | #      | #    | #    | #                                                                              | -           | ----                   | ----                                                                                                                                          | #    | #    | #         | #     | #    | #    |
| Rsa1.0_00443.1.g13939.t1 | #                                                                                                                                                                                                    | #    | #    | #         | #      | #    | #    | #                                                                              | -           | ----                   | ----                                                                                                                                          | #    | #    | #         | #     | #    | #    |
| Rsa1.0_00443.1.g13940.t1 | #                                                                                                                                                                                                    | #    | #    | #         | #      | #    | #    | #                                                                              | -           | ----                   | ----                                                                                                                                          | #    | #    | #         | #     | #    | #    |
| Rsa1.0_00443.1.g13941.t5 | gb AAD20658.1  putative retroelement pol polyprotein [Arabidopsis thaliana]                                                                                                                          | 815  | 1611 | 3.00E-30  | 197.7  | 9.7  | 13.9 | putative retroelement pol polyprotein                                          | gbpln       | Arabidopsis thaliana   | #                                                                                                                                             | #    | #    | #         | #     | #    | #    |
| Rsa1.0_00443.1.g13942.t1 | db BAB02259.1  retroelement pol polyprotein-like [Arabidopsis thaliana]                                                                                                                              | 422  | 777  | 2.00E-21  | 184.1  | 12.8 | 18.7 | retroelement pol polyprotein-like                                              | gbpln       | Arabidopsis thaliana   | #                                                                                                                                             | #    | #    | #         | #     | #    | #    |
| Rsa1.0_00443.1.g13943.t1 | #                                                                                                                                                                                                    | #    | #    | #         | #      | #    | #    | #                                                                              | -           | ----                   | ----                                                                                                                                          | #    | #    | #         | #     | #    | #    |
| Rsa1.0_00444.1.g13944.t2 | ref XP_001537841.1  predicted protein [Ajellomyces capsulatus NAM1]   g 150415449 gb EDN10802.1  predicted protein [Ajellomyces capsulatus NAM1]                                                     | 864  | 801  | 6.00E-17  | 92.7   | 12.0 | 17.9 | predicted protein                                                              | gbenv/gbpln | Ajellomyces capsulatus | #                                                                                                                                             | #    | #    | #         | #     | #    | #    |
| Rsa1.0_00444.1.g13945.t1 | #                                                                                                                                                                                                    | #    | #    | #         | #      | #    | #    | #                                                                              | -           | ----                   | ----                                                                                                                                          | #    | #    | #         | #     | #    | #    |
| Rsa1.0_00444.1.g13946.t1 | gb ABW81018.1  gag-pol polymerase [Arabidopsis lyrata subsp. lyrata]                                                                                                                                 | 460  | 672  | 1.00E-58  | 146.1  | 32.4 | 51.5 | gag-pol polymerase                                                             | gbpln       | Arabidopsis lyrata     | #                                                                                                                                             | #    | #    | #         | #     | #    | #    |
| Rsa1.0_00444.1.g13947.t1 | gb ABD65091.1  hypothetical protein 31.t00049 [Brassica oleracea]                                                                                                                                    | 299  | 530  | 1.00E-47  | 177.3  | 40.1 | 55.5 | hypothetical protein 31.t00049                                                 | gbpln       | Brassica oleracea      | #                                                                                                                                             | #    | #    | #         | #     | #    | #    |
| Rsa1.0_00444.1.g13948.t1 | #                                                                                                                                                                                                    | #    | #    | #         | #      | #    | #    | #                                                                              | -           | ----                   | ----                                                                                                                                          | #    | #    | #         | #     | #    | #    |
| Rsa1.0_00444.1.g13949.t2 | gb AAG51228.1 AC035249_3 Tam3-like transposon protein; 93317-95488 [Arabidopsis thaliana]   g 12323055 gb AAG51515.1 AC068324_3 hAT-element transposase, putative [Arabidopsis thaliana]             | 646  | 723  | 0         | 111.9  | 51.7 | 68.4 | Tam3-like transposon protein; 93317-95488                                      | gbpln       | Arabidopsis thaliana   | AT3G42170.1   Symbols:   BED zinc finger hAT family dimerisation domain   chr3:14321838-14323928 FORWARD LENGTH=696                           | 646  | 696  | 3.00E-41  | 107.7 | 20.6 | 39.5 |
| Rsa1.0_00444.1.g13950.t1 | gb ABD65057.1  hypothetical protein 27.t00123 [Brassica oleracea]                                                                                                                                    | 596  | 190  | 9.00E-18  | 31.9   | 11.1 | 12.8 | hypothetical protein 27.t00123                                                 | gbpln       | Brassica oleracea      | #                                                                                                                                             | #    | #    | #         | #     | #    | #    |
| Rsa1.0_00444.1.g13951.t1 | gb AAC33226.1  putative non-LTR retroelement reverse transcriptase [Arabidopsis thaliana]                                                                                                            | 763  | 1529 | 0         | 200.4  | 48.6 | 62.1 | putative non-LTR retroelement reverse transcriptase                            | gbpln       | Arabidopsis thaliana   | AT3G24255.1   Symbols:   RNA-directed DNA polymerase (reverse transcriptase)-related family protein   chr3:8789471-8793208 FORWARD LENGTH=746 | 763  | 746  | 2.00E-62  | 97.8  | 15.7 | 19.9 |
| Rsa1.0_00444.1.g13952.t2 | gb AAC28189.1  contains similarity to Arabidopsis thaliana retrotransposon Athila (GB:X81801) [Arabidopsis thaliana]                                                                                 | 1582 | 940  | 1.00E-65  | 59.4   | 10.1 | 14.4 | contains similarity to Arabidopsis thaliana retrotransposon Athila (GB:X81801) | gbpln       | Arabidopsis thaliana   | #                                                                                                                                             | #    | #    | #         | #     | #    | #    |
| Rsa1.0_00444.1.g13953.t1 | gb EMJ12193.1  hypothetical protein PRUPE_ppa021032mg [Prunus persica]                                                                                                                               | 517  | 781  | 6.00E-41  | 151.1  | 24.4 | 40.0 | hypothetical protein PRUPE_ppa021032mg                                         | gbpln       | Prunus persica         | AT3G09510.1   Symbols:   Ribonuclease H-like superfamily protein   chr3:2921804-2923258 FORWARD LENGTH=484                                    | 517  | 484  | 4.00E-16  | 93.6  | 7.4  | 12.2 |
| Rsa1.0_00444.1.g13954.t1 | #                                                                                                                                                                                                    | #    | #    | #         | #      | #    | #    | #                                                                              | -           | ----                   | ----                                                                                                                                          | #    | #    | #         | #     | #    | #    |
| Rsa1.0_00444.1.g13955.t1 | gb AAF79348.1 AC007887_7 F15O4.13 [Arabidopsis thaliana]                                                                                                                                             | 147  | 1887 | 1.00E-18  | 1283.7 | 38.1 | 52.4 | F15O4.13                                                                       | gbpln       | Arabidopsis thaliana   | #                                                                                                                                             | #    | #    | #         | #     | #    | #    |
| Rsa1.0_00444.1.g13956.t1 | #                                                                                                                                                                                                    | #    | #    | #         | #      | #    | #    | #                                                                              | -           | ----                   | ----                                                                                                                                          | #    | #    | #         | #     | #    | #    |
| Rsa1.0_00444.1.g13957.t2 | #                                                                                                                                                                                                    | #    | #    | #         | #      | #    | #    | #                                                                              | -           | ----                   | ----                                                                                                                                          | #    | #    | #         | #     | #    | #    |
| Rsa1.0_00444.1.g13958.t1 | ref XP_002865504.1  hypothetical protein ARALYDRAFT_917484 [Arabidopsis lyrata subsp. lyrata]   g 297311339 gb EFH41763.1  hypothetical protein ARALYDRAFT_917484 [Arabidopsis lyrata subsp. lyrata] | 282  | 293  | 1.00E-121 | 103.9  | 78.0 | 85.8 | hypothetical protein ARALYDRAFT_917484                                         | gbpln       | Arabidopsis lyrata     | AT5G42610.1   Symbols:   Protein of unknown function (DUF607)   chr5:17062507-17063934 FORWARD LENGTH=293                                     | 282  | 293  | 1.00E-123 | 103.9 | 78.0 | 85.1 |
| Rsa1.0_00444.1.g13959.t1 | gb AAL59842.1  cysteine protease inhibitor CPI-1 [Brassica oleracea]                                                                                                                                 | 104  | 207  | 1.00E-15  | 199.0  | 47.1 | 50.0 | cysteine protease inhibitor CPI-1                                              | gbpln       | Brassica oleracea      | AT3G12490.2   Symbols:   ATCY5B, ATCY56, CY5B   cystatin B   chr3:3960523-3961876 REVERSE LENGTH=234                                          | 104  | 234  | 5.00E-16  | 225.0 | 43.3 | 48.1 |
| Rsa1.0_00444.1.g13960.t1 | gb AAF18641.1 AC006228_12 F5J5.16 [Arabidopsis thaliana]                                                                                                                                             | 348  | 1024 | 2.00E-36  | 294.3  | 21.8 | 29.3 | F5J5.16                                                                        | gbpln       | Arabidopsis thaliana   | #                                                                                                                                             | #    | #    | #         | #     | #    | #    |
| Rsa1.0_00444.1.g13961.t1 | gb AAD19762.1  putative Athila retroelement ORF1 protein [Arabidopsis thaliana]                                                                                                                      | 254  | 616  | 1.00E-15  | 242.5  | 24.4 | 32.3 | putative Athila retroelement ORF1 protein                                      | gbpln       | Arabidopsis thaliana   | #                                                                                                                                             | #    | #    | #         | #     | #    | #    |
| Rsa1.0_00445.1.g13962.t1 | gb AAC67331.1  putative non-LTR retroelement reverse transcriptase [Arabidopsis thaliana]                                                                                                            | 1259 | 1449 | 0         | 115.1  | 35.9 | 53.0 | putative non-LTR retroelement reverse transcriptase                            | gbpln       | Arabidopsis thaliana   | AT3G24255.1   Symbols:   RNA-directed DNA polymerase (reverse transcriptase)-related family protein   chr3:8789471-8793208 FORWARD LENGTH=746 | 1259 | 746  | 2.00E-78  | 59.3  | 11.8 | 16.0 |

|                          |                                                                                                                                                                                                                                                                                                                                                                                                                                              |      |      |           |       |      |      |                                                                                |       |                      |                                                                                                                                               |      |     |           |       |      |      |
|--------------------------|----------------------------------------------------------------------------------------------------------------------------------------------------------------------------------------------------------------------------------------------------------------------------------------------------------------------------------------------------------------------------------------------------------------------------------------------|------|------|-----------|-------|------|------|--------------------------------------------------------------------------------|-------|----------------------|-----------------------------------------------------------------------------------------------------------------------------------------------|------|-----|-----------|-------|------|------|
| Rsa1.0_00445.1.g13963.t1 | gb EOA25808.1  hypothetical protein CARUB_v10019176mg [Capsella rubella]                                                                                                                                                                                                                                                                                                                                                                     | 147  | 204  | 9.00E-43  | 138.8 | 57.8 | 72.1 | hypothetical protein CARUB_v10019176mg                                         | gbpln | Capsella rubella     | AT4G04090.1   Symbols:   BTB/POZ domain-containing protein   chr4:1964980-1965650 FORWARD LENGTH=192                                          | 147  | 192 | 2.00E-41  | 130.6 | 57.8 | 71.4 |
| Rsa1.0_00445.1.g13964.t4 | #                                                                                                                                                                                                                                                                                                                                                                                                                                            | #    | #    | #         | #     | #    | #    | -                                                                              | ----  | ----                 | #                                                                                                                                             | #    | #   | #         | #     | #    | #    |
| Rsa1.0_00445.1.g13965.t1 | gb AAG51783.1 AC079679_3 reverse transcriptase, putative; 16838-20266 [Arabidopsis thaliana]                                                                                                                                                                                                                                                                                                                                                 | 729  | 1142 | 0         | 156.7 | 52.3 | 63.9 | reverse transcriptase, putative; 16838-20266                                   | gbpln | Arabidopsis thaliana | AT4G29090.1   Symbols:   Ribonuclease H-like superfamily protein   chr4:14333528-14335255 FORWARD LENGTH=575                                  | 729  | 575 | 4.00E-27  | 78.9  | 9.6  | 16.7 |
| Rsa1.0_00445.1.g13966.t1 | gb EOA22943.1  hypothetical protein CARUB_v10003680mg, partial [Capsella rubella]                                                                                                                                                                                                                                                                                                                                                            | 555  | 669  | 1.00E-136 | 120.5 | 49.0 | 65.6 | hypothetical protein CARUB_v10003680mg, partial                                | gbpln | Capsella rubella     | AT3G42170.1   Symbols:   BED zinc finger :hAT family dimerisation domain   chr3:14321838-14323928 FORWARD LENGTH=696                          | 555  | 696 | 1.00E-31  | 125.4 | 24.9 | 42.0 |
| Rsa1.0_00445.1.g13967.t1 | ref XP_004292625.1  PREDICTED: uncharacterized protein LOC101299743 [Fragaria vesca subsp. vesca]                                                                                                                                                                                                                                                                                                                                            | 479  | 746  | 1.00E-141 | 155.7 | 54.3 | 69.9 | PREDICTED: uncharacterized protein LOC101299743                                | gbpln | Fragaria vesca       | AT5G31412.1   Symbols:   hAT transposon superfamily protein   chr5:11541463-11543768 REVERSE LENGTH=433                                       | 479  | 433 | 8.00E-83  | 90.4  | 37.8 | 50.1 |
| Rsa1.0_00445.1.g13968.t1 | #                                                                                                                                                                                                                                                                                                                                                                                                                                            | #    | #    | #         | #     | #    | #    | -                                                                              | ----  | ----                 | #                                                                                                                                             | #    | #   | #         | #     | #    | #    |
| Rsa1.0_00445.1.g13969.t1 | gb AAC19278.1  T14P8.10 [Arabidopsis thaliana] gi 7269009 emb CAB80742.1  AT4g02490 [Arabidopsis thaliana]                                                                                                                                                                                                                                                                                                                                   | 209  | 657  | 1.00E-64  | 314.4 | 54.5 | 68.9 | T14P8.10                                                                       | gbpln | Arabidopsis thaliana | AT5G16486.1   Symbols:   RNA-directed DNA polymerase (reverse transcriptase)-related family protein   chr5:5383597-5384226 REVERSE LENGTH=209 | 209  | 209 | 9.00E-61  | 100.0 | 52.2 | 67.9 |
| Rsa1.0_00445.1.g13970.t1 | ref NP_176277.1  AP-1 complex subunit mu [Arabidopsis thaliana] gi 2462748 gb AAB71967.1  putative Clathrin Coat Assembly protein [Arabidopsis thaliana] gi 20466372 gb AAM20503.1  clathrin adaptor medium chain protein MU1B, putative [Arabidopsis thaliana] gi 25084014 gb AAN72155.1  clathrin adaptor medium chain protein MU1B, putative [Arabidopsis thaliana] gi 332195610 gb AEE33731.1  protein HAPLESS 13 [Arabidopsis thaliana] | 300  | 428  | 1.00E-167 | 142.7 | 93.7 | 97.0 | AP-1 complex subunit mu                                                        | gbpln | Arabidopsis thaliana | AT1G60780.1   Symbols: HAP13   Clathrin adaptor complexes medium subunit family protein   chr1:22369289-22371885 REVERSE LENGTH=428           | 300  | 428 | 1.00E-170 | 142.7 | 93.7 | 97.0 |
| Rsa1.0_00445.1.g13971.t1 | gb AAG51046.1 AC069473_8 gypsy/Ty-3 retroelement polyprotein; 69905-74404 [Arabidopsis thaliana] gi 10998138 dbj BAB03109.1  retroelement pol polyprotein [Arabidopsis thaliana]                                                                                                                                                                                                                                                             | 1421 | 1499 | 0         | 105.5 | 55.0 | 66.3 | gypsy/Ty-3 retroelement polyprotein; 69905-74404                               | gbpln | Arabidopsis thaliana | ATMG00860.1   Symbols: ORF158   DNA/RNA polymerases superfamily protein   chrM:2359116-236392 FORWARD LENGTH=158                              | 1421 | 158 | 1.00E-31  | 1.1   | 4.5  | 6.2  |
| Rsa1.0_00445.1.g13972.t1 | gb ABD65091.1  hypothetical protein 31.t00049 [Brassica oleracea]                                                                                                                                                                                                                                                                                                                                                                            | 320  | 530  | 2.00E-71  | 165.6 | 47.8 | 64.1 | hypothetical protein 31.t00049                                                 | gbpln | Brassica oleracea    | #                                                                                                                                             | #    | #   | #         | #     | #    | #    |
| Rsa1.0_00445.1.g13973.t1 | gb ABW81018.1  gag-pol polymerase [Arabidopsis lyrata subsp. lyrata]                                                                                                                                                                                                                                                                                                                                                                         | 762  | 672  | 3.00E-96  | 88.2  | 27.4 | 42.1 | gag-pol polymerase                                                             | gbpln | Arabidopsis lyrata   | #                                                                                                                                             | #    | #   | #         | #     | #    | #    |
| Rsa1.0_00445.1.g13974.t1 | gb AAC28189.1  contains similarity to Arabidopsis thaliana retrotransposon Athila (GB:X81801) [Arabidopsis thaliana]                                                                                                                                                                                                                                                                                                                         | 1866 | 940  | 5.00E-94  | 50.4  | 12.5 | 19.3 | contains similarity to Arabidopsis thaliana retrotransposon Athila (GB:X81801) | gbpln | Arabidopsis thaliana | AT5G45570.1   Symbols:   Ulp1 protease family protein   chr5:18472301-18475574 FORWARD LENGTH=921                                             | 1866 | 921 | 5.00E-16  | 49.4  | 2.3  | 3.6  |
| Rsa1.0_00445.1.g13975.t1 | #                                                                                                                                                                                                                                                                                                                                                                                                                                            | #    | #    | #         | #     | #    | #    | -                                                                              | ----  | ----                 | #                                                                                                                                             | #    | #   | #         | #     | #    | #    |
| Rsa1.0_00445.1.g13976.t1 | dbj BAA97086.1  unnamed protein product [Arabidopsis thaliana]                                                                                                                                                                                                                                                                                                                                                                               | 78   | 341  | 3.00E-12  | 437.2 | 44.9 | 65.4 | unnamed protein product                                                        | gbpln | Arabidopsis thaliana | #                                                                                                                                             | #    | #   | #         | #     | #    | #    |
| Rsa1.0_00446.1.g13977.t2 | ref NP_199384.2  AAA-type ATPase family protein [Arabidopsis thaliana] gi 332007905 gb AED95288.1  AAA-type ATPase family protein [Arabidopsis thaliana]                                                                                                                                                                                                                                                                                     | 583  | 966  | 0         | 165.7 | 63.5 | 71.7 | AAA-type ATPase family protein                                                 | gbpln | Arabidopsis thaliana | AT5G45720.1   Symbols:   AAA-type ATPase family protein   chr5:18543338-18546629 REVERSE LENGTH=966                                           | 583  | 966 | 0         | 165.7 | 63.5 | 71.7 |
| Rsa1.0_00446.1.g13978.t1 | #                                                                                                                                                                                                                                                                                                                                                                                                                                            | #    | #    | #         | #     | #    | #    | -                                                                              | ----  | ----                 | #                                                                                                                                             | #    | #   | #         | #     | #    | #    |
| Rsa1.0_00446.1.g13979.t1 | #                                                                                                                                                                                                                                                                                                                                                                                                                                            | #    | #    | #         | #     | #    | #    | -                                                                              | ----  | ----                 | #                                                                                                                                             | #    | #   | #         | #     | #    | #    |
| Rsa1.0_00446.1.g13980.t5 | gb AAF18538.1 AC006551_24 Very similar to retrotransposon reverse transcriptase [Arabidopsis thaliana]                                                                                                                                                                                                                                                                                                                                       | 795  | 1231 | 0         | 154.8 | 46.5 | 61.6 | Very similar to retrotransposon reverse transcriptase                          | gbpln | Arabidopsis thaliana | AT4G29090.1   Symbols:   Ribonuclease H-like superfamily protein   chr4:14333528-14335255 FORWARD LENGTH=575                                  | 795  | 575 | 3.00E-77  | 72.3  | 20.1 | 32.1 |
| Rsa1.0_00446.1.g13981.t1 | #                                                                                                                                                                                                                                                                                                                                                                                                                                            | #    | #    | #         | #     | #    | #    | -                                                                              | ----  | ----                 | #                                                                                                                                             | #    | #   | #         | #     | #    | #    |
| Rsa1.0_00446.1.g13982.t1 | emb CAB77974.1  putative athila-like protein [Arabidopsis thaliana]                                                                                                                                                                                                                                                                                                                                                                          | 580  | 587  | 2.00E-16  | 101.2 | 8.6  | 13.8 | putative athila-like protein                                                   | gbpln | Arabidopsis thaliana | #                                                                                                                                             | #    | #   | #         | #     | #    | #    |
| Rsa1.0_00446.1.g13983.t1 | ref NP_567562.1  pollen Ole e 1 allergen and extensin family protein [Arabidopsis thaliana] gi 44681468 gb AAS47674.1  At4g18596 [Arabidopsis thaliana] gi 82320348 dbj BAD94719.1  pollen-specific protein - like [Arabidopsis thaliana] gi 332658666 gb AEE84066.1  pollen Ole e 1 allergen and extensin family protein [Arabidopsis thaliana]                                                                                             | 174  | 172  | 6.00E-84  | 98.9  | 89.1 | 93.1 | pollen Ole e 1 allergen and extensin family protein                            | gbpln | Arabidopsis thaliana | AT4G18596.1   Symbols:   Pollen Ole e 1 allergen and extensin family protein   chr4:10239114-10239728 FORWARD LENGTH=172                      | 174  | 172 | 3.00E-86  | 98.9  | 89.1 | 93.1 |
| Rsa1.0_00446.1.g13984.t1 | #                                                                                                                                                                                                                                                                                                                                                                                                                                            | #    | #    | #         | #     | #    | #    | -                                                                              | ----  | ----                 | #                                                                                                                                             | #    | #   | #         | #     | #    | #    |
| Rsa1.0_00446.1.g13985.t4 | gb AAC33226.1  putative non-LTR retroelement reverse transcriptase [Arabidopsis thaliana]                                                                                                                                                                                                                                                                                                                                                    | 400  | 1529 | 2.00E-46  | 382.3 | 27.8 | 38.8 | putative non-LTR retroelement reverse transcriptase                            | gbpln | Arabidopsis thaliana | AT3G24255.1   Symbols:   RNA-directed DNA polymerase (reverse transcriptase)-related family protein   chr3:8789471-8793208 FORWARD LENGTH=746 | 400  | 746 | 7.00E-30  | 186.5 | 23.0 | 31.0 |

|                          |                                                                                                                                                                                                                                                       |      |      |           |       |      |      |                                                                                                                                                                                           |       |                      |                                                                                                                                                                                                                                                                                                                                                                                                 |      |      |           |       |      |      |
|--------------------------|-------------------------------------------------------------------------------------------------------------------------------------------------------------------------------------------------------------------------------------------------------|------|------|-----------|-------|------|------|-------------------------------------------------------------------------------------------------------------------------------------------------------------------------------------------|-------|----------------------|-------------------------------------------------------------------------------------------------------------------------------------------------------------------------------------------------------------------------------------------------------------------------------------------------------------------------------------------------------------------------------------------------|------|------|-----------|-------|------|------|
| Rsa1.0_00446.1.g13986.t1 | gb AAD53012.1 AF089849.1<br>senescence-specific cysteine protease [Brassica napus]                                                                                                                                                                    | 402  | 344  | 1.00E-159 | 85.6  | 69.9 | 72.9 | senescence-specific cysteine protease                                                                                                                                                     | gbpln | Brassica napus       | AT5G45890.1   Symbols: SAG12   senescence-associated gene 12   chr5:18613300-18614759 FORWARD LENGTH=346                                                                                                                                                                                                                                                                                        | 402  | 346  | 1.00E-140 | 86.1  | 58.5 | 65.9 |
| Rsa1.0_00446.1.g13987.t1 | ref XP_002863434.1  hypothetical protein ARALYDRAFT_494379 [Arabidopsis lyrata subsp. lyrata] gi 297309269 gb EFH39693.1  hypothetical protein ARALYDRAFT_494379 [Arabidopsis lyrata subsp. lyrata]                                                   | 164  | 164  | 2.00E-55  | 100.0 | 93.3 | 97.6 | hypothetical protein ARALYDRAFT_494379                                                                                                                                                    | gbpln | Arabidopsis lyrata   | AT5G46020.1   Symbols:   CONTAINS InterPro DOMAIN/s: Casein kinase substrate_phosphoprotein PP28 (InterPro:IPR019380). Has 30201 Blast hits to 17322 proteins in 780 species: Archae - 12; Bacteria - 1396; Metazoa - 17338; Fungi - 3422; Plants - 5037; Viruses - 0; Other Eukaryotes - 2996 (source: NCBI BLink).   chr5:18663075-18664629 REVERSE LENGTH=164                                | 164  | 164  | 5.00E-57  | 100.0 | 93.3 | 97.6 |
| Rsa1.0_00446.1.g13988.t1 | gb EOA14228.1  hypothetical protein CARUB_v10027385mg [Capsella rubella]                                                                                                                                                                              | 127  | 120  | 1.00E-42  | 94.5  | 79.5 | 85.0 | hypothetical protein CARUB_v10027385mg                                                                                                                                                    | gbpln | Capsella rubella     | AT5G46030.1   Symbols:   unknown protein; CONTAINS InterPro DOMAIN/s: Protein of unknown function DUF701, zinc-binding putative (InterPro:IPR007808); Has 30201 Blast hits to 17322 proteins in 780 species: Archae - 12; Bacteria - 1396; Metazoa - 17338; Fungi - 3422; Plants - 5037; Viruses - 0; Other Eukaryotes - 2996 (source: NCBI BLink).   chr5:18670531-18671138 FORWARD LENGTH=120 | 127  | 120  | 6.00E-40  | 94.5  | 78.0 | 84.3 |
| Rsa1.0_00446.1.g13989.t1 | ref NP_199419.2  Guanylate-binding protein [Arabidopsis thaliana] gi 332007951 gb AED95334.1  Guanylate-binding protein [Arabidopsis thaliana]                                                                                                        | 1081 | 1082 | 0         | 100.1 | 88.5 | 93.5 | Guanylate-binding protein                                                                                                                                                                 | gbpln | Arabidopsis thaliana | AT5G46070.1   Symbols:   Guanylate-binding family protein   chr5:18683468-18688397 FORWARD LENGTH=1082                                                                                                                                                                                                                                                                                          | 1081 | 1082 | 0         | 100.1 | 88.5 | 93.5 |
| Rsa1.0_00446.1.g13990.t1 | ref NP_199420.1  protein kinase family protein [Arabidopsis thaliana] gi 9757728 dbj BAB08253.1  serine/threonine protein kinase-like protein [Arabidopsis thaliana] gi 332007952 gb AED95335.1  protein kinase family protein [Arabidopsis thaliana] | 333  | 332  | 1.00E-147 | 99.7  | 82.6 | 89.8 | protein kinase family protein                                                                                                                                                             | gbpln | Arabidopsis thaliana | AT5G46080.1   Symbols:   Protein kinase superfamily protein   chr5:18689723-18690721 REVERSE LENGTH=332                                                                                                                                                                                                                                                                                         | 333  | 332  | 1.00E-150 | 99.7  | 82.6 | 89.8 |
| Rsa1.0_00446.1.g13991.t1 | gb EOA14650.1  hypothetical protein CARUB_v10027911mg [Capsella rubella]                                                                                                                                                                              | 222  | 224  | 1.00E-104 | 100.9 | 82.9 | 90.5 | hypothetical protein CARUB_v10027911mg                                                                                                                                                    | gbpln | Capsella rubella     | AT5G46090.1   Symbols:   Protein of unknown function (DUF679)   chr5:18693485-18694129 FORWARD LENGTH=214                                                                                                                                                                                                                                                                                       | 222  | 214  | 8.00E-92  | 96.4  | 73.0 | 82.4 |
| Rsa1.0_00446.1.g13992.t1 | gb EOA14650.1  hypothetical protein CARUB_v10027911mg [Capsella rubella]                                                                                                                                                                              | 210  | 224  | 1.00E-90  | 106.7 | 77.1 | 84.8 | hypothetical protein CARUB_v10027911mg                                                                                                                                                    | gbpln | Capsella rubella     | AT5G46090.1   Symbols:   Protein of unknown function (DUF679)   chr5:18693485-18694129 FORWARD LENGTH=214                                                                                                                                                                                                                                                                                       | 210  | 214  | 7.00E-91  | 101.9 | 74.3 | 85.2 |
| Rsa1.0_00446.1.g13993.t1 | ref XP_002863429.1  pentatricopeptide repeat-containing protein [Arabidopsis lyrata subsp. lyrata] gi 297309264 gb EFH39688.1  pentatricopeptide repeat-containing protein [Arabidopsis lyrata subsp. lyrata]                                         | 473  | 472  | 0         | 99.8  | 90.7 | 96.2 | pentatricopeptide repeat-containing protein                                                                                                                                               | gbpln | Arabidopsis lyrata   | AT5G46100.1   Symbols:   Pentatricopeptide repeat (PPR) superfamily protein   chr5:18694316-18695734 REVERSE LENGTH=472                                                                                                                                                                                                                                                                         | 473  | 472  | 0         | 99.8  | 89.6 | 96.2 |
| Rsa1.0_00446.1.g13994.t1 | sp P52177.1 TPT1_BRAOB RecName: Full=Triose phosphate/phosphate translocator, chloroplastic; Short=cTPT; Flags: Precursor gi 143709 gb AAA84890.1  chloroplast phosphate/triose-phosphate translocator precursor [Brassica oleracea var. botrytis]    | 430  | 407  | 0         | 94.7  | 90.5 | 91.9 | RecName: Full=Triose phosphate/phosphate translocator, chloroplastic; Short=cTPT; Flags: Precursor gi 143709 gb AAA84890.1  chloroplast phosphate/triose-phosphate translocator precursor | gbpln | Brassica oleracea    | AT5G46110.4   Symbols: APE2, TPT   Glucose-6-phosphate/phosphate translocator-related   chr5:18697606-18700223 FORWARD LENGTH=415                                                                                                                                                                                                                                                               | 430  | 415  | 0         | 96.5  | 86.0 | 90.7 |
| Rsa1.0_00446.1.g13995.t1 | ref XP_002863425.1  expressed protein [Arabidopsis lyrata subsp. lyrata] gi 297309260 gb EFH39684.1  expressed protein [Arabidopsis lyrata subsp. lyrata]                                                                                             | 79   | 79   | 4.00E-31  | 100.0 | 83.5 | 87.3 | expressed protein                                                                                                                                                                         | gbpln | Arabidopsis lyrata   | #                                                                                                                                                                                                                                                                                                                                                                                               | #    | #    | #         | #     | #    | #    |

|                          |                                                                                                                                                                                                                                                                                                                                                                                                                                                                                                                                                                                                                                                                                                                                                                                               |     |     |           |       |      |      |                                        |       |                      |                                                                                                                                                                                                            |     |     |           |       |      |      |
|--------------------------|-----------------------------------------------------------------------------------------------------------------------------------------------------------------------------------------------------------------------------------------------------------------------------------------------------------------------------------------------------------------------------------------------------------------------------------------------------------------------------------------------------------------------------------------------------------------------------------------------------------------------------------------------------------------------------------------------------------------------------------------------------------------------------------------------|-----|-----|-----------|-------|------|------|----------------------------------------|-------|----------------------|------------------------------------------------------------------------------------------------------------------------------------------------------------------------------------------------------------|-----|-----|-----------|-------|------|------|
| Rsa1.0_00446.1.g13996.t1 | ref[NP_196114.1] nicotianamine synthase 1 [Arabidopsis thaliana] gi 27151631 sp Q9FF79.1 NAS1_ARATH RecName: Full=Nicotianamine synthase 1; AltName: Full=S-adenosyl-L-methionine:S-adenosyl-L-methionine:S-adenosyl-L-methionine 3-amino-3-carboxypropyltransferase 1; Short=ATNAS1 gi 10178034 dbj BAB11517.1  nicotianamine synthase [Arabidopsis thaliana] gi 18252859 gb AAL62356.1  nicotianamine synthase [Arabidopsis thaliana] gi 23198368 gb AAN15711.1  nicotianamine synthase [Arabidopsis thaliana] gi 332003425 gb AED90808.1  nicotianamine synthase 1 [Arabidopsis thaliana]                                                                                                                                                                                                  | 280 | 320 | 1.00E-106 | 114.3 | 69.3 | 93.6 | nicotianamine synthase 1               | gbpln | Arabidopsis thaliana | AT5G04950.1   Symbols: NAS1, ATNAS1   nicotianamine synthase 1   chr5:1457876-1458838 REVERSE LENGTH=320                                                                                                   | 280 | 320 | 1.00E-109 | 114.3 | 69.3 | 93.6 |
| Rsa1.0_00447.1.g13997.t4 | ref[NP_567013.1] tonneau 1b (TON1b) [Arabidopsis thaliana] gi 75262840 sp Q9FQ24.1 TON1B_ARATH RecName: Full=Protein TONNEAU 1b gi 11494365 gb AAG35780.1 AF280058.2 tonneau 1b [Arabidopsis thaliana] gi 18700182 gb AAL77702.1  AT3G55000/F28P10.20 [Arabidopsis thaliana] gi 332645805 gb AEE79326.1  tonneau 1b (TON1b) [Arabidopsis thaliana]                                                                                                                                                                                                                                                                                                                                                                                                                                            | 391 | 257 | 1.00E-96  | 65.7  | 48.1 | 52.2 | tonneau 1b (TON1b)                     | gbpln | Arabidopsis thaliana | AT3G55005.1   Symbols: TON1B   tonneau 1b (TON1b)   chr3:20384131-20386193 FORWARD LENGTH=257                                                                                                              | 391 | 257 | 3.00E-99  | 65.7  | 48.1 | 52.2 |
| Rsa1.0_00447.1.g13998.t1 | gb EOA25829.1  hypothetical protein CARUB_v10019201mg [Capsella rubella]                                                                                                                                                                                                                                                                                                                                                                                                                                                                                                                                                                                                                                                                                                                      | 384 | 383 | 0         | 99.7  | 86.5 | 93.2 | hypothetical protein CARUB_v10019201mg | gbpln | Capsella rubella     | AT3G55010.2   Symbols: ATPURM, PUR5   phosphoribosylformylglycinamide cycloligase, chloroplast / phosphoribosylaminoimidazole synthetase / AIR synthase (PUR5)   chr3:20386818-20388549 FORWARD LENGTH=389 | 384 | 389 | 1.00E-179 | 101.3 | 86.2 | 92.7 |
| Rsa1.0_00447.1.g13999.t1 | ref[XP_002878011.1] hypothetical protein ARALYDRAFT_324032 [Arabidopsis lyrata subsp. lyrata] gi 297323849 gb EFH54270.1  hypothetical protein ARALYDRAFT_324032 [Arabidopsis lyrata subsp. lyrata]                                                                                                                                                                                                                                                                                                                                                                                                                                                                                                                                                                                           | 812 | 825 | 0         | 101.6 | 87.4 | 92.2 | hypothetical protein ARALYDRAFT_324032 | gbpln | Arabidopsis lyrata   | AT3G55020.1   Symbols:   Ypt/Rab-GAP domain of gyp1p superfamily protein   chr3:20389278-20394713 REVERSE LENGTH=777                                                                                       | 812 | 777 | 0         | 95.7  | 80.7 | 85.3 |
| Rsa1.0_00447.1.g14000.t1 | gb EOA25129.1  hypothetical protein CARUB_v10018438mg [Capsella rubella]                                                                                                                                                                                                                                                                                                                                                                                                                                                                                                                                                                                                                                                                                                                      | 210 | 235 | 1.00E-102 | 111.9 | 93.3 | 96.7 | hypothetical protein CARUB_v10018438mg | gbpln | Capsella rubella     | AT3G55030.1   Symbols: PGPS2   phosphatidylglycerolphosphate synthase 2   chr3:20396860-20399224 FORWARD LENGTH=233                                                                                        | 210 | 233 | 1.00E-104 | 111.0 | 92.9 | 96.2 |
| Rsa1.0_00447.1.g14001.t1 | ref[XP_002878012.1] hypothetical protein ARALYDRAFT_906920 [Arabidopsis lyrata subsp. lyrata] gi 297323850 gb EFH54271.1  hypothetical protein ARALYDRAFT_906920 [Arabidopsis lyrata subsp. lyrata]                                                                                                                                                                                                                                                                                                                                                                                                                                                                                                                                                                                           | 296 | 294 | 1.00E-133 | 99.3  | 78.4 | 87.5 | hypothetical protein ARALYDRAFT_906920 | gbpln | Arabidopsis lyrata   | AT3G55040.1   Symbols: GSTL2   glutathione transferase lambda 2   chr3:20398718-20400305 REVERSE LENGTH=292                                                                                                | 296 | 292 | 1.00E-124 | 98.6  | 77.4 | 86.1 |
| Rsa1.0_00447.1.g14002.t1 | ref[NP_191065.2] putative protein phosphatase 2C 48 [Arabidopsis thaliana] gi 42572685 ref[NP_974438.1] putative protein phosphatase 2C 48 [Arabidopsis thaliana] gi 75249980 sp Q9ACL8.1 P2C48_ARATH RecName: Full=Probable protein phosphatase 2C 48; Short=AtPP2C48; AltName: Full=Protein phosphatase 2C 6 gi 15020818 emb CAC44619.1  Ser/Thr protein phosphatase 2C [Arabidopsis thaliana] gi 48525333 gb AAT44968.1  At3g55050 [Arabidopsis thaliana] gi 61656143 gb AAX49374.1  At3g55050 [Arabidopsis thaliana] gi 110738459 dbj BAF01155.1  protein phosphatase 2C like protein [Arabidopsis thaliana] gi 33264581.1 gb AEE79332.1  putative protein phosphatase 2C 48 [Arabidopsis thaliana] gi 332645812 gb AEE79333.1  putative protein phosphatase 2C 48 [Arabidopsis thaliana] | 390 | 384 | 0         | 98.5  | 87.7 | 94.6 | putative protein phosphatase 2C 48     | gbpln | Arabidopsis thaliana | AT3G55050.2   Symbols:   Protein phosphatase 2C family protein   chr3:20400669-20401922 REVERSE LENGTH=384                                                                                                 | 390 | 384 | 0         | 98.5  | 87.7 | 94.6 |



|                          |                                                                                                                                                                                                                                                                                                    |     |     |           |       |      |      |                                                                                                                    |       |                      |                                                                                                                                    |     |     |           |       |      |      |
|--------------------------|----------------------------------------------------------------------------------------------------------------------------------------------------------------------------------------------------------------------------------------------------------------------------------------------------|-----|-----|-----------|-------|------|------|--------------------------------------------------------------------------------------------------------------------|-------|----------------------|------------------------------------------------------------------------------------------------------------------------------------|-----|-----|-----------|-------|------|------|
| Rsa1.0_00447.1.g14003.t1 | refXP_002876284.1   hypothetical protein ARALYDRAFT_485927 [Arabidopsis lyrata subsp. lyrata] gi297322122 gb EFH52543.1   hypothetical protein ARALYDRAFT_485927 [Arabidopsis lyrata subsp. lyrata]                                                                                                | 413 | 418 | 0         | 101.2 | 86.4 | 92.3 | hypothetical protein ARALYDRAFT_485927                                                                             | gbpln | Arabidopsis lyrata   | AT3G55070.1   Symbols:   LisH/CRA/RING-U-box domains-containing protein   chr3:20408377-20410887 FORWARD LENGTH=418                | 413 | 418 | 0         | 101.2 | 84.7 | 90.8 |
| Rsa1.0_00447.1.g14004.t1 | refXP_002878015.1   SET domain-containing protein [Arabidopsis lyrata subsp. lyrata] gi297323853 gb EFH54274.1   SET domain-containing protein [Arabidopsis lyrata subsp. lyrata]                                                                                                                  | 473 | 473 | 0         | 100.0 | 79.1 | 87.5 | SET domain-containing protein                                                                                      | gbpln | Arabidopsis lyrata   | AT3G55080.1   Symbols:   SET domain-containing protein   chr3:20411476-20415830 REVERSE LENGTH=463                                 | 473 | 463 | 0         | 97.9  | 76.3 | 84.8 |
| Rsa1.0_00447.1.g14005.t1 | gb ABB97036.1   ABC transporter-like protein [Brassica rapa]                                                                                                                                                                                                                                       | 709 | 708 | 0         | 99.9  | 94.5 | 97.3 | ABC transporter-like protein                                                                                       | gbpln | Brassica rapa        | AT3G55110.1   Symbols:   ABC-2 type transporter family protein   chr3:20424766-20426892 REVERSE LENGTH=708                         | 709 | 708 | 0         | 99.9  | 83.6 | 91.8 |
| Rsa1.0_00447.1.g14006.t1 | sp O22651.1 CFI_RAPSA RecName: Full=Chalcone--flavonone isomerase; Short=Chalcone isomerase gi2642604 gb AAB87071.1   chalcone isomerase [Raphanus sativus]                                                                                                                                        | 247 | 247 | 1.00E-133 | 100.0 | 97.6 | 98.4 | RecName: Full=Chalcone--flavonone isomerase; Short=Chalcone isomerase gi2642604 gb AAB87071.1   chalcone isomerase | gbpln | Raphanus sativus     | AT3G55120.1   Symbols: TT5, A11, CFI   Chalcone--flavonone isomerase family protein   chr3:20430248-20431415 REVERSE LENGTH=246    | 247 | 246 | 1.00E-110 | 99.6  | 81.8 | 89.1 |
| Rsa1.0_00447.1.g14007.t1 | refXP_002886490.1   hypothetical protein ARALYDRAFT_315177 [Arabidopsis lyrata subsp. lyrata] gi297332331 gb EFH62749.1   hypothetical protein ARALYDRAFT_315177 [Arabidopsis lyrata subsp. lyrata]                                                                                                | 178 | 812 | 1.00E-33  | 456.2 | 45.5 | 54.5 | hypothetical protein ARALYDRAFT_315177                                                                             | gbpln | Arabidopsis lyrata   | AT1G62120.1   Symbols:   Mitochondrial transcription termination factor family protein   chr1:22960326-22961639 REVERSE LENGTH=437 | 178 | 437 | 1.00E-33  | 245.5 | 44.9 | 52.2 |
| Rsa1.0_00447.1.g14008.t1 | ref NP_191075.2  exocyst complex component 7 [Arabidopsis thaliana] gi18377618 gb AAL66959.1   unknown protein [Arabidopsis thaliana] gi20465379 gb AAM20093.1   unknown protein [Arabidopsis thaliana] gi332645825 gb AEE79346.1   exocyst subunit exo70 family protein H1 [Arabidopsis thaliana] | 635 | 636 | 0         | 100.2 | 84.7 | 92.3 | exocyst complex component 7                                                                                        | gbpln | Arabidopsis thaliana | AT3G55150.1   Symbols: ATEXO70H1, EXO70H1   exocyst subunit exo70 family protein H1   chr3:20440655-20442565 REVERSE LENGTH=636    | 635 | 636 | 0         | 100.2 | 84.7 | 92.3 |
| Rsa1.0_00447.1.g14009.t1 | #                                                                                                                                                                                                                                                                                                  | #   | #   | #         | #     | #    | -    | ----                                                                                                               | ----  | ----                 | #                                                                                                                                  | #   | #   | #         | #     | #    |      |
| Rsa1.0_00447.1.g14010.t1 | ref NP_191078.1  esterase/lipase/thioesterase family protein [Arabidopsis thaliana] gi17019651 emb CAB75752.1   lipase-like protein [Arabidopsis thaliana] gi332645829 gb AEE79350.1   esterase/lipase/thioesterase family protein [Arabidopsis thaliana]                                          | 304 | 312 | 1.00E-158 | 102.6 | 86.8 | 92.8 | esterase/lipase/thioesterase family protein                                                                        | gbpln | Arabidopsis thaliana | AT3G55180.1   Symbols:   alpha/beta-Hydrolases superfamily protein   chr3:20454903-20456682 FORWARD LENGTH=312                     | 304 | 312 | 1.00E-160 | 102.6 | 86.8 | 92.8 |
| Rsa1.0_00448.1.g14011.t1 | dbj BAJ33859.1   unnamed protein product [Thellungiella halophila]                                                                                                                                                                                                                                 | 334 | 343 | 1.00E-147 | 102.7 | 85.6 | 92.2 | unnamed protein product                                                                                            | ----  | ----                 | AT3G52400.1   Symbols: SYP122, ATSYP122   syntaxin of plants 122   chr3:19425835-19427032 REVERSE LENGTH=341                       | 334 | 341 | 1.00E-136 | 102.1 | 79.6 | 90.4 |
| Rsa1.0_00448.1.g14012.t1 | gb EOA24991.1   hypothetical protein CARUB_v10018288mg, partial [Capsella rubella]                                                                                                                                                                                                                 | 66  | 106 | 2.00E-19  | 160.6 | 77.3 | 83.3 | hypothetical protein CARUB_v10018288mg, partial                                                                    | gbpln | Capsella rubella     | AT3G52420.1   Symbols: OEP7, ATOEP7   outer envelope membrane protein 7   chr3:19429775-19429969 FORWARD LENGTH=64                 | 66  | 64  | 6.00E-21  | 97.0  | 71.2 | 74.2 |
| Rsa1.0_00448.1.g14013.t1 | gb ABR46042.1   phytoalexin deficient 4 [Arabidopsis thaliana]                                                                                                                                                                                                                                     | 547 | 541 | 0         | 98.9  | 65.1 | 76.8 | phytoalexin deficient 4                                                                                            | gbpln | Arabidopsis thaliana | AT3G52430.1   Symbols: PAD4, ATPAD4   alpha/beta-Hydrolases superfamily protein   chr3:19431566-19434292 FORWARD LENGTH=541        | 547 | 541 | 0         | 98.9  | 64.5 | 75.9 |
| Rsa1.0_00448.1.g14014.t1 | dbj BAH30484.1   hypothetical protein [Arabidopsis thaliana]                                                                                                                                                                                                                                       | 236 | 266 | 1.00E-111 | 112.7 | 85.6 | 91.1 | hypothetical protein                                                                                               | gbpln | Arabidopsis thaliana | AT3G52440.1   Symbols:   Dof-type zinc finger DNA-binding family protein   chr3:19435447-19436190 FORWARD LENGTH=247               | 236 | 247 | 1.00E-113 | 104.7 | 85.6 | 91.1 |
| Rsa1.0_00448.1.g14015.t1 | dbj BAJ34414.1   unnamed protein product [Thellungiella halophila]                                                                                                                                                                                                                                 | 423 | 435 | 0         | 102.8 | 92.7 | 94.8 | unnamed protein product                                                                                            | ----  | ----                 | AT3G52450.1   Symbols: PUB22   plant U-box 22   chr3:19440943-19442250 REVERSE LENGTH=435                                          | 423 | 435 | 0         | 102.8 | 89.6 | 93.4 |
| Rsa1.0_00448.1.g14016.t2 | #                                                                                                                                                                                                                                                                                                  | #   | #   | #         | #     | #    | -    | ----                                                                                                               | ----  | ----                 | #                                                                                                                                  | #   | #   | #         | #     | #    |      |
| Rsa1.0_00448.1.g14017.t1 | #                                                                                                                                                                                                                                                                                                  | #   | #   | #         | #     | #    | -    | ----                                                                                                               | ----  | ----                 | #                                                                                                                                  | #   | #   | #         | #     | #    |      |
| Rsa1.0_00448.1.g14018.t1 | refXP_002876145.1   hypothetical protein ARALYDRAFT_906612 [Arabidopsis lyrata subsp. lyrata] gi297321983 gb EFH52404.1   hypothetical protein ARALYDRAFT_906612 [Arabidopsis lyrata subsp. lyrata]                                                                                                | 302 | 295 | 1.00E-110 | 97.7  | 72.2 | 79.1 | hypothetical protein ARALYDRAFT_906612                                                                             | gbpln | Arabidopsis lyrata   | AT3G52460.1   Symbols:   hydroxyproline-rich glycoprotein family protein   chr3:19446970-19447872 FORWARD LENGTH=300               | 302 | 300 | 1.00E-107 | 99.3  | 74.5 | 83.1 |

|                          |                                                                                                                                                                                                                                                                                           |      |      |           |       |      |      |                                                          |       |                      |                                                                                                                                                                  |      |      |           |       |      |      |
|--------------------------|-------------------------------------------------------------------------------------------------------------------------------------------------------------------------------------------------------------------------------------------------------------------------------------------|------|------|-----------|-------|------|------|----------------------------------------------------------|-------|----------------------|------------------------------------------------------------------------------------------------------------------------------------------------------------------|------|------|-----------|-------|------|------|
| Rsa1.0_00448.1.g14019.t1 | gb[EOA33837.1] hypothetical protein CARUB_v10021318mg_partial [Capsella rubella]                                                                                                                                                                                                          | 110  | 290  | 2.00E-23  | 263.6 | 49.1 | 61.8 | hypothetical protein CARUB_v10021318mg_partial           | gbpln | Capsella rubella     | AT4G04650.1   Symbols:   RNA-directed DNA polymerase (reverse transcriptase)-related family protein   chr4:2353989-2355213 REVERSE LENGTH=332                    | 110  | 332  | 1.00E-23  | 301.8 | 44.5 | 58.2 |
| Rsa1.0_00448.1.g14020.t1 | dbj BAJ34290.1  unnamed protein product [Thellungiella halophila]                                                                                                                                                                                                                         | 208  | 208  | 1.00E-114 | 100.0 | 95.2 | 98.6 | unnamed protein product                                  | ----  | ----                 | AT3G52470.1   Symbols:   Late embryogenesis abundant (LEA) hydroxyproline-rich glycoprotein family   chr3:19450750-19451376 FORWARD LENGTH=208                   | 208  | 208  | 1.00E-109 | 100.0 | 88.9 | 94.7 |
| Rsa1.0_00448.1.g14021.t1 | ref NP_190817.1  heat shock protein-like protein [Arabidopsis thaliana] gi 4886278 emb CA543425.1  putative protein [Arabidopsis thaliana] gi 44917467 gb AAS49058.1  At3g52490 [Arabidopsis thaliana] gi 332645430 gb AEE78951.1  heat shock protein-like protein [Arabidopsis thaliana] | 786  | 815  | 0         | 103.7 | 83.2 | 90.3 | heat shock protein-like protein                          | gbpln | Arabidopsis thaliana | AT3G52490.1   Symbols:   Double Clp-N motif-containing P-loop nucleoside triphosphate hydrolases superfamily protein   chr3:19455850-19458721 REVERSE LENGTH=815 | 786  | 815  | 0         | 103.7 | 83.2 | 90.3 |
| Rsa1.0_00448.1.g14022.t1 | ref NP_192687.1  RNase H domain-containing protein [Arabidopsis thaliana] gi 7267844 emb CA578072.1  putative proteins [Arabidopsis thaliana] gi 332657356 gb AEE82756.1  RNase H domain-containing protein [Arabidopsis thaliana]                                                        | 94   | 170  | 2.00E-11  | 180.9 | 39.4 | 57.4 | RNase H domain-containing protein                        | gbpln | Arabidopsis thaliana | AT4G09490.1   Symbols:   Polynucleotidyl transferase, ribonuclease H-like superfamily protein   chr4:6015583-6016575 REVERSE LENGTH=170                          | 94   | 170  | 3.00E-14  | 180.9 | 39.4 | 57.4 |
| Rsa1.0_00448.1.g14023.t1 | ref XP_002877867.1  aspartyl protease family protein [Arabidopsis lyrata subsp. lyrata] gi 297323705 gb EFH54126.1  aspartyl protease family protein [Arabidopsis lyrata subsp. lyrata]                                                                                                   | 471  | 469  | 0         | 99.6  | 79.2 | 88.1 | aspartyl protease family protein                         | gbpln | Arabidopsis lyrata   | AT3G52500.1   Symbols:   Eukaryotic aspartyl protease family protein   chr3:19465644-19467053 REVERSE LENGTH=469                                                 | 471  | 469  | 0         | 99.6  | 78.1 | 88.1 |
| Rsa1.0_00448.1.g14024.t1 | #                                                                                                                                                                                                                                                                                         | #    | #    | #         | #     | #    | -    | ----                                                     | ----  | ----                 | #                                                                                                                                                                | #    | #    | #         | #     | #    | #    |
| Rsa1.0_00448.1.g14025.t1 | #                                                                                                                                                                                                                                                                                         | #    | #    | #         | #     | #    | -    | ----                                                     | ----  | ----                 | #                                                                                                                                                                | #    | #    | #         | #     | #    | #    |
| Rsa1.0_00448.1.g14026.t1 | ref XP_002870253.1  hypothetical protein ARALYDRAFT_355259 [Arabidopsis lyrata subsp. lyrata] gi 297316089 gb EFH46512.1  hypothetical protein ARALYDRAFT_355259 [Arabidopsis lyrata subsp. lyrata]                                                                                       | 1377 | 1390 | 0         | 100.9 | 82.4 | 92.4 | hypothetical protein ARALYDRAFT_355259                   | gbpln | Arabidopsis lyrata   | AT4G15236.1   Symbols:   ABC-2 and Plant PDR ABC-type transporter family protein   chr4:8696683-8702727 FORWARD LENGTH=1388                                      | 1377 | 1388 | 0         | 100.8 | 81.7 | 91.0 |
| Rsa1.0_00448.1.g14027.t2 | ref XP_002870253.1  hypothetical protein ARALYDRAFT_355259 [Arabidopsis lyrata subsp. lyrata] gi 297316089 gb EFH46512.1  hypothetical protein ARALYDRAFT_355259 [Arabidopsis lyrata subsp. lyrata]                                                                                       | 1240 | 1390 | 0         | 112.1 | 80.4 | 89.9 | hypothetical protein ARALYDRAFT_355259                   | gbpln | Arabidopsis lyrata   | AT4G15236.1   Symbols:   ABC-2 and Plant PDR ABC-type transporter family protein   chr4:8696683-8702727 FORWARD LENGTH=1388                                      | 1240 | 1388 | 0         | 111.9 | 79.5 | 88.7 |
| Rsa1.0_00448.1.g14028.t1 | ref XP_002868218.1  hypothetical protein ARALYDRAFT_493365 [Arabidopsis lyrata subsp. lyrata] gi 297314054 gb EFH44477.1  hypothetical protein ARALYDRAFT_493365 [Arabidopsis lyrata subsp. lyrata]                                                                                       | 450  | 488  | 1.00E-155 | 108.4 | 56.9 | 60.4 | hypothetical protein ARALYDRAFT_493365                   | gbpln | Arabidopsis lyrata   | AT4G15240.1   Symbols:   Protein of unknown function (DUF604)   chr4:8703518-8705378 REVERSE LENGTH=488                                                          | 450  | 488  | 1.00E-155 | 108.4 | 56.2 | 60.0 |
| Rsa1.0_00448.1.g14029.t1 | ref XP_002870248.1  UDP-glucuronosyl/UDP-glucosyl transferase family protein [Arabidopsis lyrata subsp. lyrata] gi 297316084 gb EFH46507.1  UDP-glucuronosyl/UDP-glucosyl transferase family protein [Arabidopsis lyrata subsp. lyrata]                                                   | 471  | 466  | 0         | 98.9  | 69.4 | 83.7 | UDP-glucuronosyl/UDP-glucosyl transferase family protein | gbpln | Arabidopsis lyrata   | AT4G15280.1   Symbols:   UGT71B5   UDP-glucosyl transferase 71B5   chr4:8719182-8720618 FORWARD LENGTH=478                                                       | 471  | 478  | 0         | 101.5 | 69.4 | 83.7 |
| Rsa1.0_00449.1.g14030.t1 | gb[EOA17853.1] hypothetical protein CARUB_v10006257mg [Capsella rubella]                                                                                                                                                                                                                  | 503  | 518  | 0         | 103.0 | 92.8 | 94.8 | hypothetical protein CARUB_v10006257mg                   | gbpln | Capsella rubella     | AT4G35230.1   Symbols:   BSK1   BR-signaling kinase 1   chr4:16755325-16758041 REVERSE LENGTH=512                                                                | 503  | 512  | 0         | 101.8 | 92.4 | 95.0 |
| Rsa1.0_00449.1.g14031.t1 | gb[EOA18585.1] hypothetical protein CARUB_v10007157mg [Capsella rubella]                                                                                                                                                                                                                  | 251  | 251  | 1.00E-116 | 100.0 | 84.5 | 94.8 | hypothetical protein CARUB_v10007157mg                   | gbpln | Capsella rubella     | AT4G35210.1   Symbols:   Arabidopsis protein of unknown function (DUF241)   chr4:16751428-16752180 FORWARD LENGTH=250                                            | 251  | 250  | 1.00E-117 | 99.6  | 83.7 | 94.0 |
| Rsa1.0_00449.1.g14032.t1 | gb[EOA18908.1] hypothetical protein CARUB_v10007538mg [Capsella rubella]                                                                                                                                                                                                                  | 254  | 253  | 1.00E-109 | 99.6  | 81.1 | 90.6 | hypothetical protein CARUB_v10007538mg                   | gbpln | Capsella rubella     | AT4G35200.1   Symbols:   Arabidopsis protein of unknown function (DUF241)   chr4:16749142-16749903 REVERSE LENGTH=253                                            | 254  | 253  | 1.00E-109 | 99.6  | 79.5 | 89.4 |
| Rsa1.0_00449.1.g14033.t1 | gb[EOA18585.1] hypothetical protein CARUB_v10007157mg [Capsella rubella]                                                                                                                                                                                                                  | 232  | 251  | 6.00E-98  | 108.2 | 78.4 | 91.4 | hypothetical protein CARUB_v10007157mg                   | gbpln | Capsella rubella     | AT4G35210.1   Symbols:   Arabidopsis protein of unknown function (DUF241)   chr4:16751428-16752180 FORWARD LENGTH=250                                            | 232  | 250  | 1.00E-100 | 107.8 | 78.0 | 91.8 |

|                          |                                                                                                                                                                                                                                                                                                                                                                                                       |      |      |           |       |      |       |                                                                                                                                                                                                                                         |       |                      |                                                                                                                                          |      |      |           |       |      |      |
|--------------------------|-------------------------------------------------------------------------------------------------------------------------------------------------------------------------------------------------------------------------------------------------------------------------------------------------------------------------------------------------------------------------------------------------------|------|------|-----------|-------|------|-------|-----------------------------------------------------------------------------------------------------------------------------------------------------------------------------------------------------------------------------------------|-------|----------------------|------------------------------------------------------------------------------------------------------------------------------------------|------|------|-----------|-------|------|------|
| Rsa1.0_00449.1.g14034.t1 | refNP_567977.2  LYS/HIS transporter 7 [Arabidopsis thaliana] gi 334302829 sp Q84WE9.2 LHLL7_ARA TH RecName: Full=Lysine histidine transporter-like 7 gi 332661077 gb AAE86477.1  LYS/HIS transporter 7 [Arabidopsis thaliana]                                                                                                                                                                         | 597  | 478  | 0         | 80.1  | 57.1 | 65.5  | LYS/HIS transporter 7                                                                                                                                                                                                                   | gbpln | Arabidopsis thaliana | AT4G35180.1   Symbols: LHT7   LYS/HIS transporter 7   chr4:16738517-16740385 REVERSE LENGTH=478                                          | 597  | 478  | 0         | 80.1  | 57.1 | 65.5 |
| Rsa1.0_00449.1.g14035.t2 | sp P14874.1 LVB2_BRANA RecName: Full=Acetolactate synthase 2, chloroplastic; AltName: Full=ALS II; AltName: Full=Acetohydroxy-acid synthase II; AltName: Full=Acetolactate synthase II; Flags: Precursor gi 17774 emb CAA77614.1  acetohydroxyacid synthase II [Brassica napus] gi 17778 emb CAA34680.1  unnamed protein product [Brassica napus]                                                     | 338  | 637  | 8.00E-97  | 188.5 | 55.3 | 60.4  | RecName: Full=Acetolactate synthase 2, chloroplastic; AltName: Full=ALS II; AltName: Full=Acetohydroxy-acid synthase II; AltName: Full=Acetolactate synthase II; Flags: Precursor gi 17774 emb CAA77614.1  acetohydroxyacid synthase II | gbpln | Brassica napus       | AT3G48560.1   Symbols: CSR1, ALS, AHAS, TZP5, IMR1   chlorsulfuron/imidazolinone resistant 1   chr3:18001530-18003542 REVERSE LENGTH=670 | 338  | 670  | 1.00E-87  | 198.2 | 49.7 | 55.0 |
| Rsa1.0_00449.1.g14036.t2 | refXP_002869102.1  hypothetical protein ARALYDRAFT_912862 [Arabidopsis lyrata subsp. lyrata] gi 297314938 gb EFH43361.1  hypothetical protein ARALYDRAFT_912862 [Arabidopsis lyrata subsp. lyrata] refXP_002867087.1  O-methyltransferase family 2 protein [Arabidopsis lyrata subsp. lyrata] gi 297312923 gb EFH43346.1  O-methyltransferase family 2 protein [Arabidopsis lyrata subsp. lyrata]     | 236  | 225  | 1.00E-120 | 95.3  | 87.7 | 92.4  | hypothetical protein ARALYDRAFT_912862                                                                                                                                                                                                  | gbpln | Arabidopsis lyrata   | AT4G35190.1   Symbols:   Putative lysine decarboxylase family protein   chr4:16746724-16748090 FORWARD LENGTH=228                        | 236  | 228  | 1.00E-116 | 96.6  | 87.3 | 92.4 |
| Rsa1.0_00449.1.g14037.t1 | refXP_002867087.1  O-methyltransferase family 2 protein [Arabidopsis lyrata subsp. lyrata] gi 297312923 gb EFH43346.1  O-methyltransferase family 2 protein [Arabidopsis lyrata subsp. lyrata]                                                                                                                                                                                                        | 368  | 368  | 0         | 100.0 | 86.4 | 91.0  | O-methyltransferase family 2 protein                                                                                                                                                                                                    | gbpln | Arabidopsis lyrata   | AT4G35160.1   Symbols:   O-methyltransferase family protein   chr4:16730989-16732808 REVERSE LENGTH=382                                  | 368  | 382  | 0         | 103.8 | 86.4 | 92.1 |
| Rsa1.0_00449.1.g14038.t1 | #                                                                                                                                                                                                                                                                                                                                                                                                     | #    | #    | #         | #     | #    | #     | -                                                                                                                                                                                                                                       | ----  | ----                 | #                                                                                                                                        | #    | #    | #         | #     | #    |      |
| Rsa1.0_00449.1.g14039.t1 | refXP_002867091.1  hypothetical protein ARALYDRAFT_353319 [Arabidopsis lyrata subsp. lyrata] gi 297312927 gb EFH43350.1  hypothetical protein ARALYDRAFT_353319 [Arabidopsis lyrata subsp. lyrata]                                                                                                                                                                                                    | 368  | 386  | 1.00E-151 | 104.9 | 78.0 | 86.1  | hypothetical protein ARALYDRAFT_353319                                                                                                                                                                                                  | gbpln | Arabidopsis lyrata   | AT4G35110.2   Symbols:   Arabidopsis phospholipase-like protein (PEARLI 4) family   chr4:16712660-16713987 REVERSE LENGTH=386            | 368  | 386  | 1.00E-151 | 104.9 | 78.3 | 85.3 |
| Rsa1.0_00449.1.g14040.t1 | gb AAG30607.1 AF314656.1 aquaporin [Brassica oleracea]                                                                                                                                                                                                                                                                                                                                                | 281  | 281  | 1.00E-159 | 100.0 | 97.9 | 100.0 | aquaporin                                                                                                                                                                                                                               | gbpln | Brassica oleracea    | AT4G35100.2   Symbols: PIP3   plasma membrane intrinsic protein 3   chr4:16708672-16709958 FORWARD LENGTH=280                            | 281  | 280  | 1.00E-155 | 99.6  | 95.0 | 97.5 |
| Rsa1.0_00449.1.g14041.t1 | #                                                                                                                                                                                                                                                                                                                                                                                                     | #    | #    | #         | #     | #    | #     | -                                                                                                                                                                                                                                       | ----  | ----                 | #                                                                                                                                        | #    | #    | #         | #     | #    |      |
| Rsa1.0_00449.1.g14042.t1 | gb AAD17935.1  catalase [Brassica juncea]                                                                                                                                                                                                                                                                                                                                                             | 492  | 492  | 0         | 100.0 | 99.6 | 100.0 | catalase                                                                                                                                                                                                                                | gbpln | Brassica juncea      | AT4G35090.1   Symbols: CAT2   catalase 2   chr4:16700937-16703215 REVERSE LENGTH=492                                                     | 492  | 492  | 0         | 100.0 | 97.8 | 99.8 |
| Rsa1.0_00449.1.g14043.t1 | refXP_002869109.1  hypothetical protein ARALYDRAFT_912877 [Arabidopsis lyrata subsp. lyrata] gi 297314945 gb EFH45368.1  hypothetical protein ARALYDRAFT_912877 [Arabidopsis lyrata subsp. lyrata] refXP_002869110.1  hypothetical protein ARALYDRAFT_491149 [Arabidopsis lyrata subsp. lyrata] gi 297314946 gb EFH45369.1  hypothetical protein ARALYDRAFT_491149 [Arabidopsis lyrata subsp. lyrata] | 359  | 365  | 1.00E-149 | 101.7 | 85.8 | 91.6  | hypothetical protein ARALYDRAFT_912877                                                                                                                                                                                                  | gbpln | Arabidopsis lyrata   | AT4G35080.1   Symbols:   high-affinity nickel-transport family protein   chr4:16698384-16700012 FORWARD LENGTH=365                       | 359  | 365  | 1.00E-145 | 101.7 | 83.6 | 89.7 |
| Rsa1.0_00449.1.g14044.t1 | refXP_002869110.1  hypothetical protein ARALYDRAFT_491149 [Arabidopsis lyrata subsp. lyrata] gi 297314946 gb EFH45369.1  hypothetical protein ARALYDRAFT_491149 [Arabidopsis lyrata subsp. lyrata]                                                                                                                                                                                                    | 252  | 265  | 2.00E-97  | 105.2 | 79.0 | 86.1  | hypothetical protein ARALYDRAFT_491149                                                                                                                                                                                                  | gbpln | Arabidopsis lyrata   | AT4G35070.1   Symbols:   SBP (S-ribonuclease binding protein) family protein   chr4:16694488-16695387 FORWARD LENGTH=265                 | 252  | 265  | 2.00E-99  | 105.2 | 75.8 | 86.5 |
| Rsa1.0_00450.1.g14045.t1 | gb AAF18538.1 AC006551_24 Very similar to retrotransposon reverse transcriptase [Arabidopsis thaliana]                                                                                                                                                                                                                                                                                                | 201  | 1231 | 1.00E-21  | 612.4 | 24.9 | 35.8  | Very similar to retrotransposon reverse transcriptase                                                                                                                                                                                   | gbpln | Arabidopsis thaliana | #                                                                                                                                        | #    | #    | #         | #     | #    |      |
| Rsa1.0_00450.1.g14046.t1 | #                                                                                                                                                                                                                                                                                                                                                                                                     | #    | #    | #         | #     | #    | #     | -                                                                                                                                                                                                                                       | ----  | ----                 | #                                                                                                                                        | #    | #    | #         | #     | #    |      |
| Rsa1.0_00450.1.g14047.t1 | #                                                                                                                                                                                                                                                                                                                                                                                                     | #    | #    | #         | #     | #    | #     | -                                                                                                                                                                                                                                       | ----  | ----                 | #                                                                                                                                        | #    | #    | #         | #     | #    |      |
| Rsa1.0_00450.1.g14048.t1 | #                                                                                                                                                                                                                                                                                                                                                                                                     | #    | #    | #         | #     | #    | #     | -                                                                                                                                                                                                                                       | ----  | ----                 | #                                                                                                                                        | #    | #    | #         | #     | #    |      |
| Rsa1.0_00450.1.g14049.t1 | #                                                                                                                                                                                                                                                                                                                                                                                                     | #    | #    | #         | #     | #    | #     | -                                                                                                                                                                                                                                       | ----  | ----                 | #                                                                                                                                        | #    | #    | #         | #     | #    |      |
| Rsa1.0_00450.1.g14050.t1 | #                                                                                                                                                                                                                                                                                                                                                                                                     | #    | #    | #         | #     | #    | #     | -                                                                                                                                                                                                                                       | ----  | ----                 | #                                                                                                                                        | #    | #    | #         | #     | #    |      |
| Rsa1.0_00450.1.g14051.t1 | gb AFJ94635.1  P1B-ATPase 4 [Brassica juncea]                                                                                                                                                                                                                                                                                                                                                         | 1237 | 1272 | 0         | 102.8 | 89.6 | 91.8  | P1B-ATPase 4                                                                                                                                                                                                                            | gbpln | Brassica juncea      | AT2G19110.1   Symbols: HMA4, ATHMA4   heavy metal atpase 4   chr2:8279478-8286255 FORWARD LENGTH=1172                                    | 1237 | 1172 | 0         | 94.7  | 68.8 | 74.9 |

|                          |                                                                                                                                                                                                                                                                                                                                                                                                                                                                                                                                                                                   |      |      |           |       |      |      |                                              |       |                      |                                                                                                                                                                                                                                                                                                                                                   |      |     |           |       |      |      |
|--------------------------|-----------------------------------------------------------------------------------------------------------------------------------------------------------------------------------------------------------------------------------------------------------------------------------------------------------------------------------------------------------------------------------------------------------------------------------------------------------------------------------------------------------------------------------------------------------------------------------|------|------|-----------|-------|------|------|----------------------------------------------|-------|----------------------|---------------------------------------------------------------------------------------------------------------------------------------------------------------------------------------------------------------------------------------------------------------------------------------------------------------------------------------------------|------|-----|-----------|-------|------|------|
| Rsa1.0_00450.1.g14052.t1 | gb ACC68157.1  unknown [Arabidopsis halleri subsp. halleri]                                                                                                                                                                                                                                                                                                                                                                                                                                                                                                                       | 378  | 393  | 0         | 104.0 | 81.2 | 90.5 | unknown                                      | gbpln | Arabidopsis halleri  | AT2G19160.1   Symbols:   Core-2/1-branching beta-1.6-N-acetylglucosaminyltransferase family protein   chr2:8310921-8313595 FORWARD LENGTH=394                                                                                                                                                                                                     | 378  | 394 | 0         | 104.2 | 81.5 | 90.5 |
| Rsa1.0_00450.1.g14053.t2 | gb ACC68158.1  putative subtilase family protein [Arabidopsis halleri subsp. halleri]                                                                                                                                                                                                                                                                                                                                                                                                                                                                                             | 797  | 815  | 0         | 102.3 | 94.9 | 97.5 | putative subtilase family protein            | gbpln | Arabidopsis halleri  | AT2G19170.1   Symbols: SLP3   subtilisin-like serine protease 3   chr2:8314154-8317620 REVERSE LENGTH=815                                                                                                                                                                                                                                         | 797  | 815 | 0         | 102.3 | 94.5 | 97.2 |
| Rsa1.0_00450.1.g14054.t1 | gb AAG52949.1  gag/pol polyprotein [Arabidopsis thaliana]<br>ref NP_565448.1  uncharacterized protein [Arabidopsis thaliana]<br>gi 3176718 gb AAD12033.1  expressed protein [Arabidopsis thaliana]<br>gi 21593481 gb AAM65448.1  unknown [Arabidopsis thaliana]                                                                                                                                                                                                                                                                                                                   | 747  | 1643 | 1.00E-131 | 219.9 | 41.8 | 62.8 | gag/pol polyprotein                          | gbpln | Arabidopsis thaliana | #                                                                                                                                                                                                                                                                                                                                                 | #    | #   | #         | #     | #    | #    |
| Rsa1.0_00450.1.g14055.t2 | gi 21805656 gb AAM76745.1  hypothetical protein [Arabidopsis thaliana] gi 61742592 gb AAX55117.1  hypothetical protein At2g19180 [Arabidopsis thaliana]<br>gi 330251761 gb AEC06855.1  uncharacterized protein AT2G19180 [Arabidopsis thaliana]                                                                                                                                                                                                                                                                                                                                   | 211  | 179  | 2.00E-36  | 84.8  | 40.8 | 48.8 | uncharacterized protein                      | gbpln | Arabidopsis thaliana | AT2G19180.1   Symbols:   unknown protein; BEST Arabidopsis thaliana protein match is: unknown protein (TAIR:AT1G16840.1); Has 64 Blast hits to 64 proteins in 12 species: Archae - 0; Bacteria - 0; Metazoa - 0; Fungi - 0; Plants - 64; Viruses - 0; Other Eukaryotes - 0 (source: NCBI BLink).   chr2:8324742-8325575 FORWARD LENGTH=179        | 211  | 179 | 5.00E-39  | 84.8  | 40.8 | 48.8 |
| Rsa1.0_00450.1.g14056.t1 | gb ABK28562.1  unknown [Arabidopsis thaliana]                                                                                                                                                                                                                                                                                                                                                                                                                                                                                                                                     | 318  | 381  | 5.00E-81  | 119.8 | 53.5 | 65.4 | unknown                                      | gbpln | Arabidopsis thaliana | AT3G18720.1   Symbols:   F-box family protein   chr3:6444433-6445751 REVERSE LENGTH=380                                                                                                                                                                                                                                                           | 318  | 380 | 1.00E-83  | 119.5 | 53.5 | 65.4 |
| Rsa1.0_00450.1.g14057.t1 | #                                                                                                                                                                                                                                                                                                                                                                                                                                                                                                                                                                                 | #    | #    | #         | #     | #    | #    | -                                            | ----  | ----                 | #                                                                                                                                                                                                                                                                                                                                                 | #    | #   | #         | #     | #    | #    |
| Rsa1.0_00450.1.g14058.t1 | #                                                                                                                                                                                                                                                                                                                                                                                                                                                                                                                                                                                 | #    | #    | #         | #     | #    | #    | -                                            | ----  | ----                 | #                                                                                                                                                                                                                                                                                                                                                 | #    | #   | #         | #     | #    | #    |
| Rsa1.0_00450.1.g14059.t1 | ref NP_179516.2  RING/FYVE/PHD zinc finger-containing protein [Arabidopsis thaliana] gi 330251767 gb AEC06861.1  RING/FYVE/PHD zinc finger-containing protein [Arabidopsis thaliana]                                                                                                                                                                                                                                                                                                                                                                                              | 633  | 631  | 0         | 99.7  | 67.1 | 76.9 | RING/FYVE/PHD zinc finger-containing protein | gbpln | Arabidopsis thaliana | AT2G19260.1   Symbols:   RING/FYVE/PHD zinc finger superfamily protein   chr2:8357331-8359931 FORWARD LENGTH=631                                                                                                                                                                                                                                  | 633  | 631 | 0         | 99.7  | 67.1 | 76.9 |
| Rsa1.0_00450.1.g14060.t1 | ref XP_002883998.1  hypothetical protein ARALYDRAFT_319616 [Arabidopsis lyrata subsp. lyrata] gi 297329838 gb EFH60257.1  hypothetical protein ARALYDRAFT_319616 [Arabidopsis lyrata subsp. lyrata]                                                                                                                                                                                                                                                                                                                                                                               | 370  | 360  | 1.00E-110 | 97.3  | 72.2 | 78.6 | hypothetical protein ARALYDRAFT_319616       | gbpln | Arabidopsis lyrata   | AT2G19270.1   Symbols:   CONTAINS InterPro DOMAIN's: Mitotic checkpoint protein PRCC, C-terminal (InterPro:IPR018800); Has 930 Blast hits to 533 proteins in 146 species: Archae - 0; Bacteria - 18; Metazoa - 327; Fungi - 143; Plants - 61; Viruses - 0; Other Eukaryotes - 381 (source: NCBI BLink).   chr2:8360349-8361907 REVERSE LENGTH=359 | 370  | 359 | 1.00E-105 | 97.0  | 69.2 | 77.3 |
| Rsa1.0_00450.1.g14061.t3 | ref NP_179518.1  pentatricopeptide repeat-containing protein [Arabidopsis thaliana] gi 334184304 ref NP_001189552.1  pentatricopeptide repeat-containing protein [Arabidopsis thaliana] gi 218546774 sp Q6NKKW7.2 PP164.ARA TH RecName: Full=Pentatricopeptide repeat-containing protein At2g19280 gi 3135258 gb AAC16458.1  putative salt-inducible protein [Arabidopsis thaliana] gi 330251769 gb AEC06863.1  pentatricopeptide repeat-containing protein [Arabidopsis thaliana] gi 330251770 gb AEC06864.1  pentatricopeptide repeat-containing protein [Arabidopsis thaliana] | 1393 | 693  | 0         | 49.7  | 38.3 | 42.7 | pentatricopeptide repeat-containing protein  | gbpln | Arabidopsis thaliana | AT2G19280.2   Symbols:   Pentatricopeptide repeat (PPR) superfamily protein   chr2:8362672-8364753 FORWARD LENGTH=693                                                                                                                                                                                                                             | 1393 | 693 | 0         | 49.7  | 38.3 | 42.7 |
| Rsa1.0_00451.1.g14062.t1 | dbj BAB01972.1  copia-like retrotransposable element [Arabidopsis thaliana]                                                                                                                                                                                                                                                                                                                                                                                                                                                                                                       | 214  | 1499 | 1.00E-75  | 700.5 | 65.4 | 73.4 | copia-like retrotransposable element         | gbpln | Arabidopsis thaliana | AT3G21000.1   Symbols:   Gag-Pol-related retrotransposon family protein   chr3:7363921-7365138 FORWARD LENGTH=405                                                                                                                                                                                                                                 | 214  | 405 | 5.00E-12  | 189.3 | 22.9 | 43.5 |
| Rsa1.0_00451.1.g14063.t1 | gb EOA15533.1  hypothetical protein CARUB_v10004950mg [Capsella rubella]                                                                                                                                                                                                                                                                                                                                                                                                                                                                                                          | 409  | 406  | 0         | 99.3  | 80.4 | 86.6 | hypothetical protein CARUB_v10004950mg       | gbpln | Capsella rubella     | AT4G24630.1   Symbols:   DHHC-type zinc finger family protein   chr4:12714919-12717111 FORWARD LENGTH=407                                                                                                                                                                                                                                         | 409  | 407 | 0         | 99.5  | 79.2 | 87.0 |
| Rsa1.0_00451.1.g14064.t1 | ref XP_002869710.1  hypothetical protein ARALYDRAFT_492383 [Arabidopsis lyrata subsp. lyrata] gi 297315546 gb EFH45969.1  hypothetical protein ARALYDRAFT_492383 [Arabidopsis lyrata subsp. lyrata]                                                                                                                                                                                                                                                                                                                                                                               | 230  | 241  | 1.00E-81  | 104.8 | 74.8 | 83.0 | hypothetical protein ARALYDRAFT_492383       | gbpln | Arabidopsis lyrata   | AT4G24590.1   Symbols:   unknown protein; BEST Arabidopsis thaliana protein match is: unknown protein (TAIR:AT5G49710.3); Has 105 Blast hits to 105 proteins in 26 species: Archae - 0; Bacteria - 0; Metazoa - 8; Fungi - 3; Plants - 85; Viruses - 0; Other Eukaryotes - 9 (source: NCBI BLink).   chr4:1269651-12698036 FORWARD LENGTH=241     | 230  | 241 | 4.00E-84  | 104.8 | 73.5 | 81.3 |

|                          |                                                                                                                                                                                                                                                                                                                                                                                                                                                                                                                                                                                                                                                                                                                                                                                                                                                                                                                                                                                                                                                                                                                                                                                                                                                                                                                                                                                                                                                                                                                                                                                                                                     |      |      |           |       |      |      |                                                       |       |                      |                                                                                                                                                                                                                                                                                                                                                                                                                                                                                                                                                                                                                                     |      |     |           |       |      |      |
|--------------------------|-------------------------------------------------------------------------------------------------------------------------------------------------------------------------------------------------------------------------------------------------------------------------------------------------------------------------------------------------------------------------------------------------------------------------------------------------------------------------------------------------------------------------------------------------------------------------------------------------------------------------------------------------------------------------------------------------------------------------------------------------------------------------------------------------------------------------------------------------------------------------------------------------------------------------------------------------------------------------------------------------------------------------------------------------------------------------------------------------------------------------------------------------------------------------------------------------------------------------------------------------------------------------------------------------------------------------------------------------------------------------------------------------------------------------------------------------------------------------------------------------------------------------------------------------------------------------------------------------------------------------------------|------|------|-----------|-------|------|------|-------------------------------------------------------|-------|----------------------|-------------------------------------------------------------------------------------------------------------------------------------------------------------------------------------------------------------------------------------------------------------------------------------------------------------------------------------------------------------------------------------------------------------------------------------------------------------------------------------------------------------------------------------------------------------------------------------------------------------------------------------|------|-----|-----------|-------|------|------|
| Rsa1.0_00451.1.g14065.t1 | ref NP_194189.6  Rho GTPase activation protein (RhoGAP) with PH domain [Arabidopsis thaliana] gi 332659528 gb AE84928.1  Rho GTPase activation protein (RhoGAP) with PH domain [Arabidopsis thaliana]                                                                                                                                                                                                                                                                                                                                                                                                                                                                                                                                                                                                                                                                                                                                                                                                                                                                                                                                                                                                                                                                                                                                                                                                                                                                                                                                                                                                                               | 897  | 933  | 0         | 104.0 | 76.5 | 83.9 | Rho GTPase activation protein (RhoGAP) with PH domain | gbpln | Arabidopsis thaliana | AT4G24580.1   Symbols: REN1   Rho GTPase activation protein (RhoGAP) with PH domain   chr4:12687879-12694248 REVERSE LENGTH=933                                                                                                                                                                                                                                                                                                                                                                                                                                                                                                     | 897  | 933 | 0         | 104.0 | 76.5 | 83.9 |
| Rsa1.0_00451.1.g14066.t2 | gb EOA16624.1  hypothetical protein CARUB_v10004794mg [Capsella rubella]                                                                                                                                                                                                                                                                                                                                                                                                                                                                                                                                                                                                                                                                                                                                                                                                                                                                                                                                                                                                                                                                                                                                                                                                                                                                                                                                                                                                                                                                                                                                                            | 426  | 451  | 0         | 105.9 | 96.0 | 98.8 | hypothetical protein CARUB_v10004794mg                | gbpln | Capsella rubella     | AT4G24550.2   Symbols:   Clathrin adaptor complexes medium subunit family protein   chr4:12675873-12678903 FORWARD LENGTH=451                                                                                                                                                                                                                                                                                                                                                                                                                                                                                                       | 426  | 451 | 0         | 105.9 | 95.5 | 98.6 |
| Rsa1.0_00451.1.g14067.t1 | ref NP_563794.1  thioredoxin-like 4 [Arabidopsis thaliana] gi 75168930 sp Q9C5C5.1 TRL4_ARATH RecName: Full=Thioredoxin-like 4, chloroplastic; AltName: Full=Lilium-type thioredoxin 3; Flags: Precursor gi 13507559 gb AAK28642.1 AF360345.1 unknown protein [Arabidopsis thaliana] gi 15293297 gb AAK93759.1  unknown protein [Arabidopsis thaliana] gi 110739213 dbj BAF01521.1  hypothetical protein [Arabidopsis thaliana] gi 332190043 gb AEE28164.1  thioredoxin-like 4 [Arabidopsis thaliana] ref NP_194179.1  transcription initiation factor IIA subunit 2 [Arabidopsis thaliana] gi 30686529 ref NP_849434.1  transcription initiation factor IIA subunit 2 [Arabidopsis thaliana] gi 297803670 ref XP_002869719.1  transcription initiation factor IIA gamma chain [Arabidopsis lyrata subsp. lyrata] gi 20141796 sp Q39236.2 T2AG_ARATH RecName: Full=Transcription initiation factor IIA subunit 2; AltName: Full=General transcription factor IIA subunit 2; AltName: Full=Transcription initiation factor IIA gamma chain; Short=TFIIA-gamma gi 2826882 emb CAA11524.1  transcription factor IIA small subunit [Arabidopsis thaliana] gi 5051786 emb CAB45079.1  transcription factor IIA small subunit [Arabidopsis thaliana] gi 7269294 emb CAB79354.1  transcription factor IIA small subunit [Arabidopsis thaliana] gi 18176271 gb AAL60014.1  putative transcription factor IIA small subunit [Arabidopsis thaliana] gi 20465319 gb AAM20063.1  putative transcription factor IIA small subunit [Arabidopsis thaliana] gi 2153865 gb AAM62958.1  transcription factor IIA small subunit [Arabidopsis thaliana] | 121  | 204  | 7.00E-34  | 168.6 | 65.3 | 75.2 | thioredoxin-like 4                                    | gbpln | Arabidopsis thaliana | AT1G07700.1   Symbols:   Thioredoxin superfamily protein   chr1:2380214-2381127 FORWARD LENGTH=204                                                                                                                                                                                                                                                                                                                                                                                                                                                                                                                                  | 121  | 204 | 1.00E-36  | 168.6 | 65.3 | 75.2 |
| Rsa1.0_00451.1.g14068.t1 | gi 2826882 emb CAA11524.1  transcription factor IIA small subunit [Arabidopsis thaliana] gi 5051786 emb CAB45079.1  transcription factor IIA small subunit [Arabidopsis thaliana] gi 7269294 emb CAB79354.1  transcription factor IIA small subunit [Arabidopsis thaliana] gi 18176271 gb AAL60014.1  putative transcription factor IIA small subunit [Arabidopsis thaliana] gi 20465319 gb AAM20063.1  putative transcription factor IIA small subunit [Arabidopsis thaliana] gi 2153865 gb AAM62958.1  transcription factor IIA small subunit [Arabidopsis thaliana]                                                                                                                                                                                                                                                                                                                                                                                                                                                                                                                                                                                                                                                                                                                                                                                                                                                                                                                                                                                                                                                              | 106  | 106  | 5.00E-55  | 100.0 | 99.1 | 99.1 | transcription initiation factor IIA subunit 2         | gbpln | Arabidopsis lyrata   | AT4G24440.2   Symbols:   transcription initiation factor IIA gamma chain / TFIIA-gamma (TFIIA-S)   chr4:12633460-12634553 FORWARD LENGTH=106                                                                                                                                                                                                                                                                                                                                                                                                                                                                                        | 106  | 106 | 7.00E-58  | 100.0 | 99.1 | 99.1 |
| Rsa1.0_00451.1.g14069.t1 | gb AAF97969.1 AC000103.19 F21J9.30 [Arabidopsis thaliana]                                                                                                                                                                                                                                                                                                                                                                                                                                                                                                                                                                                                                                                                                                                                                                                                                                                                                                                                                                                                                                                                                                                                                                                                                                                                                                                                                                                                                                                                                                                                                                           | 1759 | 1270 | 0         | 72.2  | 35.0 | 46.3 | F21J9.30                                              | gbpln | Arabidopsis thaliana | AT4G29090.1   Symbols:   Ribonuclease H-like superfamily protein   chr4:14333528-14335255 FORWARD LENGTH=575                                                                                                                                                                                                                                                                                                                                                                                                                                                                                                                        | 1759 | 575 | 1.00E-94  | 32.7  | 10.7 | 17.2 |
| Rsa1.0_00451.1.g14070.t1 | dbj BAJ33821.1  unnamed protein product [Thellungiella halophila]                                                                                                                                                                                                                                                                                                                                                                                                                                                                                                                                                                                                                                                                                                                                                                                                                                                                                                                                                                                                                                                                                                                                                                                                                                                                                                                                                                                                                                                                                                                                                                   | 235  | 233  | 1.00E-112 | 99.1  | 83.8 | 93.2 | unnamed protein product                               | ----  | ----                 | AT4G24380.1   Symbols:   INVOLVED IN: 10-formyltetrahydrofolate biosynthetic process, folic acid and derivative biosynthetic process; EXPRESSED IN: 24 plant structures; EXPRESSED DURING: 15 growth stages; CONTAINS InterPro DOMAIN/s: Serine hydrolase (InterPro:IPR005645); BEST Arabidopsis thaliana protein match is: alpha/beta-Hydrolases superfamily protein (TAIR:AT5G65400.1); Has 30201 Blast hits to 17322 proteins in 780 species: Archae - 12; Bacteria - 1396; Metazoa - 17338; Fungi - 3422; Plants - 5037; Viruses - 0; Other Eukaryotes - 2996 (source: NCBI BLINK).   chr4:12612554-12613586 FORWARD LENGTH=234 | 235  | 234 | 1.00E-113 | 99.6  | 81.7 | 91.1 |

|                          |                                                                                                                                                                                                                                                                                                                                                                                                                                                                                                                                                      |      |      |           |       |      |      |                                                                            |       |                      |                                                                                                                                                              |      |      |           |       |      |      |
|--------------------------|------------------------------------------------------------------------------------------------------------------------------------------------------------------------------------------------------------------------------------------------------------------------------------------------------------------------------------------------------------------------------------------------------------------------------------------------------------------------------------------------------------------------------------------------------|------|------|-----------|-------|------|------|----------------------------------------------------------------------------|-------|----------------------|--------------------------------------------------------------------------------------------------------------------------------------------------------------|------|------|-----------|-------|------|------|
| Rsa1.0_00451.1.g14071.t1 | refXP_002869724.1   hypothetical protein ARALYDRAFT_492419 [Arabidopsis lyrata subsp. lyrata] gi 297315560 gb EFH45983.1   hypothetical protein ARALYDRAFT_492419 [Arabidopsis lyrata subsp. lyrata]                                                                                                                                                                                                                                                                                                                                                 | 220  | 213  | 1.00E-100 | 96.8  | 83.6 | 87.7 | hypothetical protein ARALYDRAFT_492419                                     | gbpln | Arabidopsis lyrata   | AT4G24310.1   Symbols:   Protein of unknown function (DUF679)   chr4:12600900-12601541 FORWARD LENGTH=213                                                    | 220  | 213  | 7.00E-96  | 96.8  | 82.3 | 87.7 |
| Rsa1.0_00451.1.g14072.t1 | gb EOA16263.1   hypothetical protein CARUB_v10004407mg [Capsella rubella]                                                                                                                                                                                                                                                                                                                                                                                                                                                                            | 609  | 606  | 0         | 99.5  | 91.3 | 95.2 | hypothetical protein CARUB_v10004407mg                                     | gbpln | Capsella rubella     | AT4G24290.2   Symbols:   MAC/Perforin domain-containing protein   chr4:12594856-12597815 FORWARD LENGTH=606                                                  | 609  | 606  | 0         | 99.5  | 91.0 | 94.7 |
| Rsa1.0_00451.1.g14073.t1 | refXP_002869727.1   cpHsc70-1 [Arabidopsis lyrata subsp. lyrata] gi 297315563 gb EFH45986.1   cpHsc70-1 [Arabidopsis lyrata subsp. lyrata]                                                                                                                                                                                                                                                                                                                                                                                                           | 181  | 718  | 1.00E-53  | 396.7 | 65.7 | 70.7 | cpHsc70-1                                                                  | gbpln | Arabidopsis lyrata   | AT4G24280.1   Symbols: cpHsc70-1   chloroplast heat shock protein 70-1   chr4:12590094-12593437 FORWARD LENGTH=718                                           | 181  | 718  | 4.00E-56  | 396.7 | 65.7 | 70.7 |
| Rsa1.0_00451.1.g14074.t1 | refXP_002863119.1   predicted protein [Arabidopsis lyrata subsp. lyrata] gi 297308943 gb EFH39378.1   predicted protein [Arabidopsis lyrata subsp. lyrata]                                                                                                                                                                                                                                                                                                                                                                                           | 1936 | 1121 | 0         | 57.9  | 29.4 | 37.1 | predicted protein                                                          | gbpln | Arabidopsis lyrata   | AT5G11250.1   Symbols:   Disease resistance protein (TIR-NBS-LRR class)   chr5:3587978-3591960 REVERSE LENGTH=1189                                           | 1936 | 1189 | 0         | 61.4  | 26.6 | 33.6 |
| Rsa1.0_00451.1.g14075.t1 | refNP_199802.1   heat shock protein 70-2 [Arabidopsis thaliana] gi 75311568 sp Q9LTX9.1   HSP7G_ARAT H RecName: Full=Heat shock 70 kDa protein 7, chloroplastic; AltName: Full=Chloroplast heat shock protein 70-2; Short=cpHsc70-2; AltName: Full=Heat shock protein 70-2; Short=AtHsp70-2; Flags: Precursor gi 8777422 dbj BAA97012.1   heat shock protein 70 [Arabidopsis thaliana] gi 24030296 gb AAN41319.1   putative heat shock protein 70 [Arabidopsis thaliana] gi 332008487 gb AED95870.1   heat shock protein 70-2 [Arabidopsis thaliana] | 240  | 718  | 1.00E-112 | 299.2 | 90.8 | 94.2 | heat shock protein 70-2                                                    | gbpln | Arabidopsis thaliana | AT5G49910.1   Symbols: CPHSC70-2EAT SHOCK PROTEIN 70-2, HSC70-7, cpHsc70-2   chloroplast heat shock protein 70-2   chr5:20303470-20306295 FORWARD LENGTH=718 | 240  | 718  | 1.00E-114 | 299.2 | 90.8 | 94.2 |
| Rsa1.0_00451.1.g14076.t3 | refXP_002867042.1   hypothetical protein ARALYDRAFT_912762 [Arabidopsis lyrata subsp. lyrata] gi 297312878 gb EFH43301.1   hypothetical protein ARALYDRAFT_912762 [Arabidopsis lyrata subsp. lyrata]                                                                                                                                                                                                                                                                                                                                                 | 411  | 302  | 1.00E-138 | 73.5  | 65.2 | 67.9 | hypothetical protein ARALYDRAFT_912762                                     | gbpln | Arabidopsis lyrata   | AT4G36010.2   Symbols:   Pathogenesis-related thaumatin superfamily protein   chr4:17039472-17040976 REVERSE LENGTH=301                                      | 411  | 301  | 1.00E-138 | 73.2  | 63.3 | 66.4 |
| Rsa1.0_00451.1.g14077.t1 | refXP_002869051.1   predicted protein [Arabidopsis lyrata subsp. lyrata] gi 297314887 gb EFH45310.1   predicted protein [Arabidopsis lyrata subsp. lyrata]                                                                                                                                                                                                                                                                                                                                                                                           | 275  | 282  | 1.00E-105 | 102.5 | 78.9 | 84.4 | predicted protein                                                          | gbpln | Arabidopsis lyrata   | AT4G35900.1   Symbols: FD, FD-1, atbzip14   Basic-leucine zipper (bZIP) transcription factor family protein   chr4:17004746-17005952 FORWARD LENGTH=285      | 275  | 285  | 1.00E-103 | 103.6 | 76.4 | 82.9 |
| Rsa1.0_00451.1.g14078.t1 | refNP_001031892.1   RNA-directed DNA polymerase (reverse transcriptase)-related family protein [Arabidopsis thaliana] gi 98962153 gb ABF59406.1   unknown protein [Arabidopsis thaliana] gi 332004916 gb AED92299.1   RNA-directed DNA polymerase (reverse transcriptase)-related family protein [Arabidopsis thaliana]                                                                                                                                                                                                                              | 200  | 209  | 2.00E-20  | 104.5 | 28.5 | 41.5 | RNA-directed DNA polymerase (reverse transcriptase)-related family protein | gbpln | Arabidopsis thaliana | AT5G16486.1   Symbols:   RNA-directed DNA polymerase (reverse transcriptase)-related family protein   chr5:5383597-5384226 REVERSE LENGTH=209                | 200  | 209  | 7.00E-23  | 104.5 | 28.5 | 41.5 |
| Rsa1.0_00451.1.g14079.t1 | refXP_002869052.1   La domain-containing protein [Arabidopsis lyrata subsp. lyrata] gi 297314888 gb EFH45311.1   La domain-containing protein [Arabidopsis lyrata subsp. lyrata]                                                                                                                                                                                                                                                                                                                                                                     | 497  | 526  | 1.00E-117 | 105.8 | 51.3 | 57.3 | La domain-containing protein                                               | gbpln | Arabidopsis lyrata   | AT4G35890.1   Symbols:   winged-helix DNA-binding transcription factor family protein   chr4:16997433-17000410 FORWARD LENGTH=523                            | 497  | 523  | 1.00E-116 | 105.2 | 49.3 | 55.9 |
| Rsa1.0_00451.1.g14080.t1 | refNP_195312.1   early-responsive to dehydration stress protein (ERD4) [Arabidopsis thaliana] gi 3805853 emb CAA21473.1   putative protein [Arabidopsis thaliana] gi 7270539 emb CAB81496.1   putative protein [Arabidopsis thaliana] gi 19699093 gb AAL90913.1   AT4g35870/F4B14.140 [Arabidopsis thaliana] gi 332661183 gb AEE86583.1   early-responsive to dehydration stress protein (ERD4) [Arabidopsis thaliana]                                                                                                                               | 810  | 817  | 0         | 100.9 | 92.2 | 97.0 | early-responsive to dehydration stress protein (ERD4)                      | gbpln | Arabidopsis thaliana | AT4G35870.1   Symbols:   early-responsive to dehydration stress protein (ERD4)   chr4:16990332-16992785 FORWARD LENGTH=817                                   | 810  | 817  | 0         | 100.9 | 92.2 | 97.0 |
| Rsa1.0_00451.1.g14081.t1 | gb EOA17424.1   hypothetical protein CARUB_v10005728mg [Capsella rubella]                                                                                                                                                                                                                                                                                                                                                                                                                                                                            | 163  | 211  | 1.00E-69  | 129.4 | 89.0 | 92.0 | hypothetical protein CARUB_v10005728mg                                     | gbpln | Capsella rubella     | AT4G35860.1   Symbols: ATRABB1B, ATGB2, ATRAB2C, GB2   GTP-binding 2   chr4:16987118-16988839 REVERSE LENGTH=211                                             | 163  | 211  | 2.00E-70  | 129.4 | 86.5 | 91.4 |

|                          |                                                                                                                                                                                                                                                                                                                                                                                                                                                                                                                                                                                                                                                                                                                          |     |     |           |       |      |      |                                                      |       |                         |                                                                                                                                                        |     |     |           |       |      |      |
|--------------------------|--------------------------------------------------------------------------------------------------------------------------------------------------------------------------------------------------------------------------------------------------------------------------------------------------------------------------------------------------------------------------------------------------------------------------------------------------------------------------------------------------------------------------------------------------------------------------------------------------------------------------------------------------------------------------------------------------------------------------|-----|-----|-----------|-------|------|------|------------------------------------------------------|-------|-------------------------|--------------------------------------------------------------------------------------------------------------------------------------------------------|-----|-----|-----------|-------|------|------|
| Rsa1.0_00451.1.g14082.t1 | ref NP_195308.1  aconitate hydratase 1 [Arabidopsis thaliana]<br>gi 13124706 sp Q42560.2 ACO1_ARATH<br>RecName: Full=Aconitate hydratase 1;<br>Short=Aconitase 1; AltName:<br>Full=Citrate hydro-lyase 1<br>gi 3805849 emb CAA21469.1 <br>cytoplasmatic aconitate hydratase<br>(citrate hydro-lyase)(aconitase)(EC<br>4.2.1.3) [Arabidopsis thaliana]<br>gi 7270535 emb CAB81492.1 <br>cytoplasmatic aconitate hydratase<br>(citrate hydro-lyase)(aconitase)(EC<br>4.2.1.3) [Arabidopsis thaliana]<br>gi 17065392 gb AAL32850.1  Unknown<br>protein [Arabidopsis thaliana]<br>gi 332661176 gb AEE86576.1  aconitate<br>hydratase 1 [Arabidopsis thaliana]                                                                | 898 | 898 | 0         | 100.0 | 97.9 | 99.4 | aconitate hydratase 1                                | gbpln | Arabidopsis<br>thaliana | AT4G35830.1   Symbols: ACO1   aconitase 1<br>  chr4:16973007-16977949 REVERSE<br>LENGTH=898                                                            | 898 | 898 | 0         | 100.0 | 97.9 | 99.4 |
| Rsa1.0_00451.1.g14083.t1 | ref XP_002869059.1  oxidoreductase<br>[Arabidopsis lyrata subsp. lyrata]<br>gi 297314895 gb EFH45318.1 <br>oxidoreductase [Arabidopsis lyrata<br>subsp. lyrata]<br>ref NP_173161.1  glutathione S-<br>transferase TAU 25 [Arabidopsis<br>thaliana]<br>gi 75337230 sp Q9SHH7.1 GSTUP_ARAT<br>H RecName: Full=Glutathione S-<br>transferase U25. Short=AtGSTU25;<br>AltName: Full=GST class-tau member<br>25                                                                                                                                                                                                                                                                                                               | 332 | 290 | 1.00E-141 | 87.3  | 73.2 | 81.0 | oxidoreductase                                       | gbpln | Arabidopsis<br>lyrata   | AT4G35810.1   Symbols:   2-oxoglutarate<br>(2OG) and Fe(II)-dependent oxygenase<br>superfamily protein   chr4:16968921-<br>16970358 FORWARD LENGTH=290 | 332 | 290 | 1.00E-131 | 87.3  | 70.5 | 79.5 |
| Rsa1.0_00451.1.g14084.t1 | gi 5734750 gb AAD50015.1 AC007651_1<br>0 Putative glutathione transferase<br>[Arabidopsis thaliana]<br>gi 26452821 dbj BAC43490.1  putative<br>glutathione transferase [Arabidopsis<br>thaliana] gi 28973477 gb AAO64063.1 <br>putative glutathione transferase<br>[Arabidopsis thaliana]<br>gi 332191434 gb AEE29555.1 <br>glutathione S-transferase TAU 25<br>[Arabidopsis thaliana]<br>ref XP_002869067.1  hypothetical<br>protein ARALYDRAFT_491077<br>[Arabidopsis lyrata subsp. lyrata]<br>gi 297314903 gb EFH45326.1 <br>hypothetical protein<br>ARALYDRAFT_491077 [Arabidopsis<br>lyrata subsp. lyrata]                                                                                                          | 182 | 221 | 3.00E-71  | 121.4 | 75.8 | 88.5 | glutathione S-<br>transferase TAU 25                 | gbpln | Arabidopsis<br>thaliana | AT1G17180.1   Symbols: ATGSTU25,<br>GSTU25   glutathione S-transferase TAU 25<br>  chr1:5872208-5872958 FORWARD<br>LENGTH=221                          | 182 | 221 | 1.00E-73  | 121.4 | 75.8 | 88.5 |
| Rsa1.0_00451.1.g14085.t1 | ref XP_002869067.1  hypothetical<br>protein ARALYDRAFT_491077<br>[Arabidopsis lyrata subsp. lyrata]<br>gi 297314903 gb EFH45326.1 <br>hypothetical protein<br>ARALYDRAFT_491077 [Arabidopsis<br>lyrata subsp. lyrata]                                                                                                                                                                                                                                                                                                                                                                                                                                                                                                    | 206 | 280 | 3.00E-72  | 135.9 | 71.4 | 80.1 | hypothetical protein<br>ARALYDRAFT_491077            | gbpln | Arabidopsis<br>lyrata   | AT4G35690.1   Symbols:   Arabidopsis<br>protein of unknown function (DUF241)  <br>chr4:16921886-16922740 FORWARD<br>LENGTH=284                         | 206 | 284 | 3.00E-67  | 137.9 | 68.9 | 77.2 |
| Rsa1.0_00451.1.g14086.t1 | gb EOA17852.1  hypothetical protein<br>CARUB_v10006256mg [Capsella rubella]                                                                                                                                                                                                                                                                                                                                                                                                                                                                                                                                                                                                                                              | 368 | 368 | 0         | 100.0 | 94.0 | 97.3 | hypothetical protein<br>CARUB_v10006256mg            | gbpln | Capsella<br>rubella     | AT4G35650.1   Symbols: IDH-III   isocitrate<br>dehydrogenase III   chr4:16908584-16909973<br>FORWARD LENGTH=368                                        | 368 | 368 | 0         | 100.0 | 93.2 | 97.3 |
| Rsa1.0_00451.1.g14087.t1 | ref XP_002869075.1  phosphoserine<br>aminotransferase [Arabidopsis lyrata<br>subsp. lyrata]<br>gi 29731491.1 gb EFH45334.1 <br>phosphoserine aminotransferase<br>[Arabidopsis lyrata subsp. lyrata]<br>ref NP_195285.3  putative<br>serine/threonine-protein kinase Cx32<br>[Arabidopsis thaliana]<br>gi 49066036 sp P27450.2 CX32_ARATH<br>RecName: Full=Probable<br>serine/threonine-protein kinase Cx32,<br>chloroplastic; Flags: Precursor<br>gi 17529234 gb AAL38844.1  putative<br>protein kinase [Arabidopsis thaliana]<br>gi 20465931 gb AAM20151.1  putative<br>protein kinase [Arabidopsis thaliana]<br>gi 332661138 gb AEE86538.1  putative<br>serine/threonine-protein kinase Cx32<br>[Arabidopsis thaliana] | 433 | 431 | 0         | 99.5  | 88.5 | 93.5 | phosphoserine<br>aminotransferase                    | gbpln | Arabidopsis<br>lyrata   | AT4G35630.1   Symbols: PSAT  <br>phosphoserine aminotransferase  <br>chr4:16904205-16905497 FORWARD<br>LENGTH=430                                      | 433 | 430 | 0         | 99.3  | 87.3 | 92.8 |
| Rsa1.0_00451.1.g14088.t1 | ref NP_195285.3  putative<br>serine/threonine-protein kinase Cx32<br>[Arabidopsis thaliana]<br>gi 49066036 sp P27450.2 CX32_ARATH<br>RecName: Full=Probable<br>serine/threonine-protein kinase Cx32,<br>chloroplastic; Flags: Precursor<br>gi 17529234 gb AAL38844.1  putative<br>protein kinase [Arabidopsis thaliana]<br>gi 20465931 gb AAM20151.1  putative<br>protein kinase [Arabidopsis thaliana]<br>gi 332661138 gb AEE86538.1  putative<br>serine/threonine-protein kinase Cx32<br>[Arabidopsis thaliana]                                                                                                                                                                                                        | 367 | 419 | 1.00E-143 | 114.2 | 69.8 | 82.0 | putative<br>serine/threonine-<br>protein kinase Cx32 | gbpln | Arabidopsis<br>thaliana | AT4G35600.1   Symbols: CONNEXIN 32  <br>Protein kinase superfamily protein  <br>chr4:16896448-16899714 FORWARD<br>LENGTH=419                           | 367 | 419 | 1.00E-145 | 114.2 | 69.8 | 82.0 |
| Rsa1.0_00451.1.g14089.t1 | gb EOA36857.1  hypothetical protein<br>CARUB_v10008803mg [Capsella rubella]                                                                                                                                                                                                                                                                                                                                                                                                                                                                                                                                                                                                                                              | 645 | 536 | 5.00E-91  | 83.1  | 25.1 | 33.6 | hypothetical protein<br>CARUB_v10008803mg            | gbpln | Capsella<br>rubella     | AT2G07760.1   Symbols:   Zinc knuckle<br>(OHC-type) family protein   chr2:3584420-<br>3586278 REVERSE LENGTH=530                                       | 645 | 530 | 3.00E-52  | 82.2  | 15.0 | 20.2 |

|                          |                                                                                                                                                                                                                                                                                                                                                                                                                                                                           |     |     |           |       |      |      |                                               |       |                      |                                                                                                                                               |     |     |           |       |      |      |
|--------------------------|---------------------------------------------------------------------------------------------------------------------------------------------------------------------------------------------------------------------------------------------------------------------------------------------------------------------------------------------------------------------------------------------------------------------------------------------------------------------------|-----|-----|-----------|-------|------|------|-----------------------------------------------|-------|----------------------|-----------------------------------------------------------------------------------------------------------------------------------------------|-----|-----|-----------|-------|------|------|
| Rsa1.0_00451.1.g14090.t1 | refNP_195285.3  putative serine/threonine-protein kinase Cx32 [Arabidopsis thaliana] gi 49066036 sp P27450.2 CX32_ARATH RecName: Full=Probable serine/threonine-protein kinase Cx32, chloroplastic; Flags: Precursor gi 17529234 gb AAL38844.1  putative protein kinase [Arabidopsis thaliana] gi 20465931 gb AAM20151.1  putative protein kinase [Arabidopsis thaliana] gi 332661138 gb AEE86538.1  putative serine/threonine-protein kinase Cx32 [Arabidopsis thaliana] | 423 | 419 | 0         | 99.1  | 79.4 | 87.5 | putative serine/threonine-protein kinase Cx32 | gbpln | Arabidopsis thaliana | AT4G35600.1   Symbols: CONNEXIN 32   Protein kinase superfamily protein   chr4:16896448-16898714 FORWARD LENGTH=419                           | 423 | 419 | 0         | 99.1  | 79.4 | 87.5 |
| Rsa1.0_00451.1.g14091.t1 | #                                                                                                                                                                                                                                                                                                                                                                                                                                                                         | #   | #   | #         | #     | #    | -    | ----                                          | ----  | #                    | #                                                                                                                                             | #   | #   | #         | #     | #    |      |
| Rsa1.0_00451.1.g14092.t1 | #                                                                                                                                                                                                                                                                                                                                                                                                                                                                         | #   | #   | #         | #     | #    | -    | ----                                          | ----  | #                    | #                                                                                                                                             | #   | #   | #         | #     | #    |      |
| Rsa1.0_00451.1.g14093.t2 | gb EOA16985.1  hypothetical protein CARUB_v10005217mg [Capsella rubella]                                                                                                                                                                                                                                                                                                                                                                                                  | 249 | 332 | 1.00E-101 | 133.3 | 82.3 | 89.6 | hypothetical protein CARUB_v10005217mg        | gbpln | Capsella rubella     | AT4G35550.1   Symbols: HB-4, WOX13, ATWOX13   WUSCHEL related homeobox 13   chr4:16875814-16877167 REVERSE LENGTH=268                         | 249 | 268 | 1.00E-100 | 107.6 | 82.7 | 90.0 |
| Rsa1.0_00451.1.g14094.t1 | ref XP_002867072.1  ring-H2 finger A3B [Arabidopsis lyrata subsp. lyrata] gi 297312908 gb EFH43331.1  ring-H2 finger A3B [Arabidopsis lyrata subsp. lyrata]                                                                                                                                                                                                                                                                                                               | 197 | 200 | 8.00E-86  | 101.5 | 82.7 | 90.9 | ring-H2 finger A3B                            | gbpln | Arabidopsis lyrata   | AT4G35480.1   Symbols: RHA3B   RING-H2 finger A3B   chr4:16852233-16852835 REVERSE LENGTH=200                                                 | 197 | 200 | 3.00E-87  | 101.5 | 82.2 | 89.8 |
| Rsa1.0_00451.1.g14095.t2 | ref XP_002869086.1  NADPH-dependent thioredoxin reductase 1 [Arabidopsis lyrata subsp. lyrata] gi 297314922 gb EFH45345.1  NADPH-dependent thioredoxin reductase 1 [Arabidopsis lyrata subsp. lyrata]                                                                                                                                                                                                                                                                     | 311 | 375 | 1.00E-162 | 120.6 | 93.2 | 96.8 | NADPH-dependent thioredoxin reductase 1       | gbpln | Arabidopsis lyrata   | AT4G35460.1   Symbols: ATNTRB, NTRB, NTR1   NADPH-dependent thioredoxin reductase B   chr4:16842218-16843740 FORWARD LENGTH=375               | 311 | 375 | 1.00E-163 | 120.6 | 92.6 | 96.5 |
| Rsa1.0_00451.1.g14096.t1 | dbj BAJ33771.1  unnamed protein product [Thellungiella halophila]                                                                                                                                                                                                                                                                                                                                                                                                         | 355 | 342 | 1.00E-163 | 96.3  | 86.5 | 90.7 | unnamed protein product                       | ----  | ----                 | AT4G35450.1   Symbols: AKR2, AFT, AKR2A   ankyrin repeat-containing protein 2   chr4:16839862-16841759 FORWARD LENGTH=342                     | 355 | 342 | 1.00E-161 | 96.3  | 83.9 | 89.6 |
| Rsa1.0_00451.1.g14097.t1 | dbj BAJ34269.1  unnamed protein product [Thellungiella halophila]                                                                                                                                                                                                                                                                                                                                                                                                         | 444 | 472 | 1.00E-164 | 106.3 | 75.2 | 84.2 | unnamed protein product                       | ----  | ----                 | AT1G14580.2   Symbols:   C2H2-like zinc finger protein   chr1:4990070-4992442 FORWARD LENGTH=467                                              | 444 | 467 | 1.00E-153 | 105.2 | 68.9 | 80.0 |
| Rsa1.0_00451.1.g14098.t1 | gb AAC19278.1  T14P8.10 [Arabidopsis thaliana] gi 7269009 emb CAB80742.1  AT4g02490 [Arabidopsis thaliana]                                                                                                                                                                                                                                                                                                                                                                | 422 | 657 | 1.00E-105 | 155.7 | 42.4 | 56.9 | T14P8.10                                      | gbpln | Arabidopsis thaliana | AT4G04650.1   Symbols:   RNA-directed DNA polymerase (reverse transcriptase)-related family protein   chr4:2353989-2355213 REVERSE LENGTH=332 | 422 | 332 | 3.00E-79  | 78.7  | 31.5 | 44.8 |
| Rsa1.0_00451.1.g14099.t1 | ref NP_195268.2  dihydroflavonol 4-reductase-like 1 [Arabidopsis thaliana] gi 75276293 sp Q500U8.1 TKPR1_ARATH RecName: Full=Tetraketide alpha-pyrone reductase 1; AltName: Full=Protein DIHYDROFLAVONOL 4-REDUCTASE-LIKE 1 gi 63147414 gb AAY34180.1  At4g35420 [Arabidopsis thaliana] gi 105830365 gb ABF74722.1  At4g35420 [Arabidopsis thaliana] gi 332661109 gb AEE86509.1  dihydroflavonol 4-reductase-like 1 [Arabidopsis thaliana]                                | 317 | 326 | 1.00E-170 | 102.8 | 92.4 | 96.2 | dihydroflavonol 4-reductase-like 1            | gbpln | Arabidopsis thaliana | AT4G35420.1   Symbols: DRL1   dihydroflavonol 4-reductase-like 1   chr4:16834091-16835611 REVERSE LENGTH=326                                  | 317 | 326 | 1.00E-173 | 102.8 | 92.4 | 96.2 |
| Rsa1.0_00451.1.g14100.t2 | gb EOA19090.1  hypothetical protein CARUB_v10007758mg [Capsella rubella]                                                                                                                                                                                                                                                                                                                                                                                                  | 387 | 352 | 0         | 91.0  | 86.8 | 89.9 | hypothetical protein CARUB_v10007758mg        | gbpln | Capsella rubella     | AT4G35335.1   Symbols:   Nucleotide-sugar transporter family protein   chr4:16807286-16810015 FORWARD LENGTH=352                              | 387 | 352 | 0         | 91.0  | 86.8 | 89.7 |
| Rsa1.0_00451.1.g14101.t1 | gb ACC91264.1  50S ribosomal protein [Capsella rubella] gi 482553078 gb EOA17271.1  hypothetical protein CARUB_v10005544mg [Capsella rubella]                                                                                                                                                                                                                                                                                                                             | 272 | 257 | 1.00E-132 | 94.5  | 86.8 | 91.2 | 50S ribosomal protein                         | gbpln | Capsella rubella     | AT4G23620.1   Symbols:   Ribosomal protein L25/Gln-tRNA synthetase, anti-codon-binding domain   chr4:12315016-12316659 REVERSE LENGTH=264     | 272 | 264 | 1.00E-131 | 97.1  | 84.9 | 90.4 |
| Rsa1.0_00451.1.g14102.t1 | dbj BAJ33905.1  unnamed protein product [Thellungiella halophila]                                                                                                                                                                                                                                                                                                                                                                                                         | 275 | 275 | 1.00E-127 | 100.0 | 89.8 | 94.9 | unnamed protein product                       | ----  | ----                 | AT4G23630.1   Symbols: BTI1, RTNLB1   VIRB2-interacting protein 1   chr4:12318070-12319574 FORWARD LENGTH=275                                 | 275 | 275 | 1.00E-124 | 100.0 | 89.5 | 94.5 |
| Rsa1.0_00451.1.g14103.t1 | ref XP_002867696.1  ATPPT1 [Arabidopsis lyrata subsp. lyrata] gi 297313532 gb EFH43955.1  ATPPT1 [Arabidopsis lyrata subsp. lyrata]                                                                                                                                                                                                                                                                                                                                       | 383 | 405 | 1.00E-167 | 105.7 | 85.6 | 90.1 | ATPPT1                                        | gbpln | Arabidopsis lyrata   | AT4G23660.2   Symbols: AtPPT1, PPT1   polyprenyltransferase 1   chr4:12328086-12331359 REVERSE LENGTH=407                                     | 383 | 407 | 1.00E-168 | 106.3 | 83.0 | 89.0 |
| Rsa1.0_00451.1.g14104.t1 | #                                                                                                                                                                                                                                                                                                                                                                                                                                                                         | #   | #   | #         | #     | #    | -    | ----                                          | ----  | #                    | #                                                                                                                                             | #   | #   | #         | #     | #    |      |



|                           |                                                                                                                                                                                                                                                                                                                   |      |      |          |       |      |      |                                                     |       |                      |                                                                                                                                                                                                                                                             |      |      |          |       |      |      |
|---------------------------|-------------------------------------------------------------------------------------------------------------------------------------------------------------------------------------------------------------------------------------------------------------------------------------------------------------------|------|------|----------|-------|------|------|-----------------------------------------------------|-------|----------------------|-------------------------------------------------------------------------------------------------------------------------------------------------------------------------------------------------------------------------------------------------------------|------|------|----------|-------|------|------|
| Rsa1.0_00451.1.g14105.t1  | ref XP_002875076.1  hypothetical protein ARALYDRAFT_904347 [Arabidopsis lyrata subsp. lyrata] gi 297320914 gb EFH51335.1                                                                                                                                                                                          | 151  | 151  | 4.00E-72 | 100.0 | 84.1 | 89.4 | hypothetical protein ARALYDRAFT_904347              | gbpln | Arabidopsis lyrata   | AT2G01520.1   Symbols: MLP328   MLP-like protein 328   chr2:235992-236881 FORWARD LENGTH=151                                                                                                                                                                | 151  | 151  | 3.00E-74 | 100.0 | 84.1 | 88.7 |
| Rsa1.0_00451.1.g14106.t1  | hypothetical protein ARALYDRAFT_904347 [Arabidopsis lyrata subsp. lyrata] gb ACC91257.1  disease resistance-responsive family protein [Capsella rubella] gi 482553287 gb EOA17480.1  hypothetical protein CARUB_v10005816mg [Capsella rubella]                                                                    | 186  | 187  | 1.00E-91 | 100.5 | 93.0 | 96.8 | disease resistance-responsive family protein        | gbpln | Capsella rubella     | AT4G23690.1   Symbols:   Disease resistance-responsive (dirigent-like protein) family protein   chr4:12339152-12339715 REVERSE LENGTH=187                                                                                                                   | 186  | 187  | 2.00E-92 | 100.5 | 91.4 | 96.2 |
| Rsa1.0_00452.1.g14107.t1  | ref XP_002878881.1  ATP-dependent protease La domain-containing protein [Arabidopsis lyrata subsp. lyrata] gi 297324720 gb EFH55140.1  ATP-dependent protease La domain-containing protein [Arabidopsis lyrata subsp. lyrata]                                                                                     | 577  | 542  | 0        | 93.9  | 74.9 | 80.1 | ATP-dependent protease La domain-containing protein | gbpln | Arabidopsis lyrata   | AT2G25740.1   Symbols:   ATP-dependent protease La (LON) domain protein   chr2:10980175-10983632 FORWARD LENGTH=547                                                                                                                                         | 577  | 547  | 0        | 94.8  | 74.5 | 79.9 |
| Rsa1.0_00452.1.g14108.t1  | gb EOA28640.1  hypothetical protein CARUB_v10024862mg, partial [Capsella rubella]                                                                                                                                                                                                                                 | 475  | 490  | 5.00E-62 | 103.2 | 34.9 | 52.4 | hypothetical protein CARUB_v10024862mg, partial     | gbpln | Capsella rubella     | AT1G52950.1   Symbols:   Nucleic acid-binding, OB-fold-like protein   chr1:19725483-19728007 FORWARD LENGTH=566                                                                                                                                             | 475  | 566  | 5.00E-63 | 119.2 | 33.7 | 53.7 |
| Rsa1.0_00452.1.g14109.t2  | dbj BAB02793.1  helicase-like protein [Arabidopsis thaliana]                                                                                                                                                                                                                                                      | 1193 | 1428 | 0        | 119.7 | 36.0 | 46.4 | helicase-like protein                               | gbpln | Arabidopsis thaliana | AT3G51690.1   Symbols:   PIF1 helicase   chr3:19176731-19178107 REVERSE LENGTH=331                                                                                                                                                                          | 1193 | 331  | 4.00E-42 | 27.7  | 6.6  | 9.4  |
| Rsa1.0_00452.1.g14110.t1  | ref NP_187198.1  formin-like protein 11 [Arabidopsis thaliana] gi 75191978 sp Q9MA60.1 FH11_ARATH RecName: Full=Formin-like protein 11; Short=AtFH11; Flags: Precursor gi 7596775 gb AAF64546.1  unknown protein [Arabidopsis thaliana] gi 332640723 gb AEE74244.1  formin-like protein 11 [Arabidopsis thaliana] | 180  | 884  | 4.00E-15 | 491.1 | 26.7 | 30.6 | formin-like protein 11                              | gbpln | Arabidopsis thaliana | AT3G05470.1   Symbols:   Actin-binding FH2 (formin homology 2) family protein   chr3:1579667-1582547 REVERSE LENGTH=884                                                                                                                                     | 180  | 884  | 2.00E-17 | 491.1 | 26.7 | 30.6 |
| Rsa1.0_00452.1.g14111.t3  | dbj BAB03186.1  En/Spm transposon protein-like [Arabidopsis thaliana]                                                                                                                                                                                                                                             | 609  | 1516 | 3.00E-35 | 248.9 | 16.1 | 23.0 | En/Spm transposon protein-like                      | gbpln | Arabidopsis thaliana | #                                                                                                                                                                                                                                                           | #    | #    | #        | #     | #    | #    |
| Rsa1.0_00452.1.g14112.t2  | gb EOA18445.1  hypothetical protein CARUB_v10006988mg [Capsella rubella]                                                                                                                                                                                                                                          | 592  | 683  | 3.00E-47 | 115.4 | 26.0 | 37.3 | hypothetical protein CARUB_v10006988mg              | gbpln | Capsella rubella     | #                                                                                                                                                                                                                                                           | #    | #    | #        | #     | #    | #    |
| Rsa1.0_00452.1.g14113.t1  | ref NP_199370.1  Ulp1 protease family protein [Arabidopsis thaliana] gi 10177930 dbj BAB11195.1  unnamed protein product [Arabidopsis thaliana] gi 332007886 gb AED95269.1  Ulp1 protease family protein [Arabidopsis thaliana]                                                                                   | 649  | 921  | 1.00E-96 | 141.9 | 31.0 | 45.1 | Ulp1 protease family protein                        | gbpln | Arabidopsis thaliana | AT5G45570.1   Symbols:   Ulp1 protease family protein   chr5:18472301-18475574 FORWARD LENGTH=921                                                                                                                                                           | 649  | 921  | 3.00E-99 | 141.9 | 31.0 | 45.1 |
| Rsa1.0_00452.1.g14114.t1  | #                                                                                                                                                                                                                                                                                                                 | #    | #    | #        | #     | #    | -    | ----                                                | ----  | #                    | #                                                                                                                                                                                                                                                           | #    | #    | #        | #     | #    | #    |
| Rsa1.0_00452.1.g14115.t1  | ref XP_002880703.1  hypothetical protein ARALYDRAFT_901230 [Arabidopsis lyrata subsp. lyrata] gi 297326542 gb EFH56962.1  hypothetical protein ARALYDRAFT_901230 [Arabidopsis lyrata subsp. lyrata]                                                                                                               | 121  | 117  | 7.00E-43 | 96.7  | 84.3 | 87.6 | hypothetical protein ARALYDRAFT_901230              | gbpln | Arabidopsis lyrata   | AT2G25735.1   Symbols:   unknown protein; Has 31 Blast hits to 31 proteins in 9 species: Archae - 0; Bacteria - 0; Metazoa - 0; Fungi - 0; Plants - 31; Viruses - 0; Other Eukaryotes - 0 (source: NCBI BLINK).   chr2:10975345-10975704 REVERSE LENGTH=119 | 121  | 119  | 1.00E-41 | 98.3  | 80.2 | 84.3 |
| Rsa1.0_00452.1.g14116.t6  | #                                                                                                                                                                                                                                                                                                                 | #    | #    | #        | #     | #    | -    | ----                                                | ----  | #                    | #                                                                                                                                                                                                                                                           | #    | #    | #        | #     | #    | #    |
| Rsa1.0_00452.1.g14117.t14 | ref NP_001189602.1  uncharacterized protein [Arabidopsis thaliana] gi 330252650 gb AEC07744.1  uncharacterized protein AT2G25730 [Arabidopsis thaliana]                                                                                                                                                           | 2545 | 2487 | 0        | 97.7  | 86.0 | 90.7 | uncharacterized protein                             | gbpln | Arabidopsis thaliana | AT2G25730.2   Symbols:   unknown protein; LOCATED IN: cellular_component unknown; EXPRESSED IN: 23 plant structures; EXPRESSED DURING: 14 growth stages.   chr2:10956751-10972729 REVERSE LENGTH=2487                                                       | 2545 | 2487 | 0        | 97.7  | 86.0 | 90.7 |

|                          |                                                                                                                                                                                                                                                                                                                                                                                                                                                                                                                                                                                                                                                                                                                                                                                                                                                                                                                                                                                                                             |     |     |           |       |      |      |                                        |       |                    |                                                                                                                                               |     |     |           |       |      |      |
|--------------------------|-----------------------------------------------------------------------------------------------------------------------------------------------------------------------------------------------------------------------------------------------------------------------------------------------------------------------------------------------------------------------------------------------------------------------------------------------------------------------------------------------------------------------------------------------------------------------------------------------------------------------------------------------------------------------------------------------------------------------------------------------------------------------------------------------------------------------------------------------------------------------------------------------------------------------------------------------------------------------------------------------------------------------------|-----|-----|-----------|-------|------|------|----------------------------------------|-------|--------------------|-----------------------------------------------------------------------------------------------------------------------------------------------|-----|-----|-----------|-------|------|------|
| Rsa1.0_00453.1.g14118.t1 | <p>ref NP_563952.1  NADH dehydrogenase (ubiquinone) [Arabidopsis thaliana] gi 297849852 ref XP_002892807.1  hypothetical protein ARALYDRAFT_471620 [Arabidopsis lyrata subsp. lyrata] gi 75191411 sp O9M9R9.1 NDB3B_ARAT H RecName: Full=NADH dehydrogenase [ubiquinone] 1 beta subcomplex subunit 3-B gi 7262687 gb AAF43945.1 AC012188_22 Contains similarity to an unknown protein from Arabidopsis thaliana gb AC0004136.2. ESTs gb Z47683, gb Z47682, gb AA597850, gb Z29736, gb Z29735, gb AA042623 come from this gene [Arabidopsis thaliana] gi 12063314 gb AG48816.1 AF332453_1 unknown protein [Arabidopsis thaliana] gi 21592891 gb AAM64640.1  unknown [Arabidopsis thaliana] gi 30725334 gb AAP37689.1  At1g14450 [Arabidopsis thaliana] gi 110736426 dbj BAF00181.1  hypothetical protein [Arabidopsis thaliana] gi 297338649 gb EFH69066.1  hypothetical protein ARALYDRAFT_471620 [Arabidopsis lyrata subsp. lyrata] gi 332191044 gb AEE29165.1  NADH dehydrogenase (ubiquinone) [Arabidopsis thaliana]</p> | 74  | 73  | 3.00E-32  | 98.6  | 91.9 | 97.3 | NADH dehydrogenase (ubiquinone)        | gbpln | Arabidopsis lyrata | AT1G14450.1   Symbols:   NADH dehydrogenase (ubiquinone)s   chr1:4947337-4947558 REVERSE LENGTH=73                                            | 74  | 73  | 5.00E-35  | 98.6  | 91.9 | 97.3 |
| Rsa1.0_00453.1.g14119.t1 | <p>gb ABW81051.1  tn7 reverse transcriptase [Arabidopsis lyrata subsp. lyrata]</p>                                                                                                                                                                                                                                                                                                                                                                                                                                                                                                                                                                                                                                                                                                                                                                                                                                                                                                                                          | 179 | 441 | 6.00E-36  | 246.4 | 37.4 | 50.8 | tn7 reverse transcriptase              | gbpln | Arabidopsis lyrata | AT3G24255.1   Symbols:   RNA-directed DNA polymerase (reverse transcriptase)-related family protein   chr3:8789471-8793208 FORWARD LENGTH=746 | 179 | 746 | 2.00E-25  | 416.8 | 31.3 | 38.5 |
| Rsa1.0_00453.1.g14120.t1 | <p>ref XP_002892806.1  ATHB31 [Arabidopsis lyrata subsp. lyrata] gi 297338648 gb EFH69065.1  ATHB31 [Arabidopsis lyrata subsp. lyrata]</p>                                                                                                                                                                                                                                                                                                                                                                                                                                                                                                                                                                                                                                                                                                                                                                                                                                                                                  | 304 | 311 | 1.00E-134 | 102.3 | 82.6 | 87.8 | ATHB31                                 | gbpln | Arabidopsis lyrata | AT1G14440.2   Symbols: AthB31, HB31, ZHD4   homeobox protein 31   chr1:4939076-4940014 REVERSE LENGTH=312                                     | 304 | 312 | 1.00E-133 | 102.6 | 82.2 | 87.5 |
| Rsa1.0_00453.1.g14121.t1 | <p>ref XP_002890054.1  hypothetical protein ARALYDRAFT_888820 [Arabidopsis lyrata subsp. lyrata] gi 297335896 gb EFH66313.1  hypothetical protein ARALYDRAFT_888820 [Arabidopsis lyrata subsp. lyrata]</p>                                                                                                                                                                                                                                                                                                                                                                                                                                                                                                                                                                                                                                                                                                                                                                                                                  | 560 | 564 | 0         | 100.7 | 90.9 | 96.3 | hypothetical protein ARALYDRAFT_888820 | gbpln | Arabidopsis lyrata | AT1G14430.1   Symbols:   glyoxal oxidase-related protein   chr1:4934359-4936053 FORWARD LENGTH=564                                            | 560 | 564 | 0         | 100.7 | 89.1 | 95.5 |
| Rsa1.0_00453.1.g14122.t1 | <p>ref XP_002892805.1  hypothetical protein ARALYDRAFT_471616 [Arabidopsis lyrata subsp. lyrata] gi 297338647 gb EFH69064.1  hypothetical protein ARALYDRAFT_471616 [Arabidopsis lyrata subsp. lyrata]</p>                                                                                                                                                                                                                                                                                                                                                                                                                                                                                                                                                                                                                                                                                                                                                                                                                  | 458 | 459 | 0         | 100.2 | 82.3 | 91.3 | hypothetical protein ARALYDRAFT_471616 | gbpln | Arabidopsis lyrata | AT1G14420.1   Symbols: AT59   Pectate lyase family protein   chr1:4931844-4933405 REVERSE LENGTH=459                                          | 458 | 459 | 0         | 100.2 | 81.7 | 90.0 |

|                          |                                                                                                                                                                                                                                                                                                                                                                                                                                                                                                                                                                                                                                                                                                                                                                                                                                                                                                                                                                                                                                                                                                                                                                                                                   |     |     |           |       |      |      |                                         |       |                      |                                                                                                                                |     |     |           |       |      |      |
|--------------------------|-------------------------------------------------------------------------------------------------------------------------------------------------------------------------------------------------------------------------------------------------------------------------------------------------------------------------------------------------------------------------------------------------------------------------------------------------------------------------------------------------------------------------------------------------------------------------------------------------------------------------------------------------------------------------------------------------------------------------------------------------------------------------------------------------------------------------------------------------------------------------------------------------------------------------------------------------------------------------------------------------------------------------------------------------------------------------------------------------------------------------------------------------------------------------------------------------------------------|-----|-----|-----------|-------|------|------|-----------------------------------------|-------|----------------------|--------------------------------------------------------------------------------------------------------------------------------|-----|-----|-----------|-------|------|------|
| Rsa1.0_00453.1.g14123.t2 | <p>ref NP_563951.1  ubiquitin-conjugating enzyme E2 1 [Arabidopsis thaliana]<br/> gi 42571469 ref NP_973825.1  ubiquitin-conjugating enzyme E2 1 [Arabidopsis thaliana]<br/> gi 297849844 ref XP_002892803.1  hypothetical protein ARALYDRAFT_471614 [Arabidopsis lyrata subsp. lyrata]<br/> gi 136636 sp P25865.1 UBC1_ARATH<br/> RecName: Full=Ubiquitin-conjugating enzyme E2 1; AltName: Full=Ubiquitin carrier protein 1; AltName: Full=Ubiquitin-conjugating enzyme E2-17 kDa 1; AltName: Full=Ubiquitin-protein ligase 1<br/> gi 157834522 pdb 2AAK A Chain A. Ubiquitin Conjugating Enzyme From Arabidopsis Thaliana<br/> gi 7262682 gb AAF43940.1 AC012188_17<br/> Strong similarity to a Ubiquitin-conjugating Enzyme (E2-17 KD 1) from Arabidopsis thaliana gi 136636 and contains a Ubiquitin-conjugating Enzyme PF 00179 domain. ESTs gb AA728508, gb H36735, gb A1100736 come from this gene [Arabidopsis thaliana]<br/> gi 12083310 gb AAG48814.1 AF332451_1 putative E2, ubiquitin-conjugating enzyme 1 [Arabidopsis thaliana]<br/> gi 166924 gb AAA32903.1 ubiquitin carrier protein [Arabidopsis thaliana]<br/> gi 431260 gb AAA32897.1 ubiquitin conjugating enzyme [Arabidopsis thaliana]</p> | 158 | 152 | 6.00E-82  | 96.2  | 94.9 | 96.2 | ubiquitin-conjugating enzyme E2 1       | gbpln | Arabidopsis lyrata   | AT1G14400.2   Symbols: UBC1, ATUBC1   ubiquitin carrier protein 1   chr1:4927294-4928136 REVERSE LENGTH=152                    | 158 | 152 | 2.00E-84  | 96.2  | 94.9 | 96.2 |
| Rsa1.0_00453.1.g14124.t1 | <p>gb EOA39444.1  hypothetical protein CARUB_v10012614mg [Capsella rubella]</p>                                                                                                                                                                                                                                                                                                                                                                                                                                                                                                                                                                                                                                                                                                                                                                                                                                                                                                                                                                                                                                                                                                                                   | 732 | 750 | 0         | 102.5 | 86.6 | 90.7 | hypothetical protein CARUB_v10012614mg  | gbpln | Capsella rubella     | AT1G14390.1   Symbols:   Leucine-rich repeat protein kinase family protein   chr1:4924277-4926794 FORWARD LENGTH=747           | 732 | 747 | 0         | 102.0 | 86.2 | 91.0 |
| Rsa1.0_00453.1.g14125.t2 | <p>ref XP_002892802.1  predicted protein [Arabidopsis lyrata subsp. lyrata]<br/> gi 297338644 gb EFH69061.1  predicted protein [Arabidopsis lyrata subsp. lyrata]<br/> ref XP_002890052.1  hypothetical protein ARALYDRAFT_471608 [Arabidopsis lyrata subsp. lyrata]<br/> gi 297335894 gb EFH66311.1 </p>                                                                                                                                                                                                                                                                                                                                                                                                                                                                                                                                                                                                                                                                                                                                                                                                                                                                                                         | 628 | 661 | 0         | 105.3 | 66.6 | 77.2 | predicted protein                       | gbpln | Arabidopsis lyrata   | AT1G14380.3   Symbols: IQD28   IQ-domain 28   chr1:4918279-4920761 REVERSE LENGTH=664                                          | 628 | 664 | 0         | 105.7 | 64.8 | 75.8 |
| Rsa1.0_00453.1.g14126.t1 | <p>hypothetical protein ARALYDRAFT_471608 [Arabidopsis lyrata subsp. lyrata]<br/> ref XP_002890052.1  hypothetical protein ARALYDRAFT_471608 [Arabidopsis lyrata subsp. lyrata]<br/> gi 297335894 gb EFH66311.1 </p>                                                                                                                                                                                                                                                                                                                                                                                                                                                                                                                                                                                                                                                                                                                                                                                                                                                                                                                                                                                              | 426 | 426 | 0         | 100.0 | 84.3 | 92.0 | hypothetical protein ARALYDRAFT_471608  | gbpln | Arabidopsis lyrata   | AT1G14370.1   Symbols: APK2A, PBL2   protein kinase 2A   chr1:4915859-4917959 FORWARD LENGTH=426                               | 426 | 426 | 0         | 100.0 | 84.3 | 91.3 |
| Rsa1.0_00453.1.g14127.t1 | <p>ref XP_002890052.1  hypothetical protein ARALYDRAFT_471608 [Arabidopsis lyrata subsp. lyrata]<br/> gi 297335894 gb EFH66311.1  hypothetical protein ARALYDRAFT_471608 [Arabidopsis lyrata subsp. lyrata]</p>                                                                                                                                                                                                                                                                                                                                                                                                                                                                                                                                                                                                                                                                                                                                                                                                                                                                                                                                                                                                   | 366 | 426 | 1.00E-145 | 116.4 | 73.2 | 86.1 | hypothetical protein ARALYDRAFT_471608  | gbpln | Arabidopsis lyrata   | AT1G14370.1   Symbols: APK2A, PBL2   protein kinase 2A   chr1:4915859-4917959 FORWARD LENGTH=426                               | 366 | 426 | 2.33E-156 | 116.4 | 72.1 | 85.0 |
| Rsa1.0_00453.1.g14128.t1 | <p>ref XP_002892801.1  UDP-galactose transporter 3 [Arabidopsis lyrata subsp. lyrata]<br/> gi 297338643 gb EFH69060.1  UDP-galactose transporter 3 [Arabidopsis lyrata subsp. lyrata]<br/> ref NP_563948.1  FOUR LIPS transcription factor R2R3-MYB [Arabidopsis thaliana]<br/> gi 145323890 ref NP_001077534.1  FOUR LIPS transcription factor R2R3-MYB [Arabidopsis thaliana]<br/> gi 15375305 gb AAK54745.2 AF371982_1 putative transcription factor MYB124 [Arabidopsis thaliana]</p>                                                                                                                                                                                                                                                                                                                                                                                                                                                                                                                                                                                                                                                                                                                         | 331 | 331 | 0         | 100.0 | 98.5 | 99.7 | UDP-galactose transporter 3             | gbpln | Arabidopsis lyrata   | AT1G14360.1   Symbols: ATUTR3, UTR3   UDP-galactose transporter 3   chr1:4911362-4913029 REVERSE LENGTH=331                    | 331 | 331 | 0         | 100.0 | 97.6 | 99.4 |
| Rsa1.0_00453.1.g14129.t1 | <p>gi 109946607 gb ABG48482.1  At g14350 [Arabidopsis thaliana]<br/> gi 332191029 gb AEE29150.1  FOUR LIPS transcription factor R2R3-MYB [Arabidopsis thaliana]<br/> gi 332191030 gb AEE29151.1  FOUR LIPS transcription factor R2R3-MYB [Arabidopsis thaliana]</p>                                                                                                                                                                                                                                                                                                                                                                                                                                                                                                                                                                                                                                                                                                                                                                                                                                                                                                                                               | 437 | 436 | 0         | 99.8  | 87.4 | 92.7 | FOUR LIPS transcription factor R2R3-MYB | gbpln | Arabidopsis thaliana | AT1G14350.2   Symbols: FLP, MYB124   Duplicated homeodomain-like superfamily protein   chr1:4908427-4910647 FORWARD LENGTH=436 | 437 | 436 | 0         | 99.8  | 87.4 | 92.7 |

|                          |                                                                                                                                                                                                                                                                                                                                                                                                                                                                                                                                                                                                                                                                                                                                                                                                                                                                                                                                                                                                                                                                                                                                                                                                                                                                                                                                                       |     |     |           |       |      |      |                                                                                                                                                                    |       |                      |                                                                                                                                    |     |     |           |       |      |      |
|--------------------------|-------------------------------------------------------------------------------------------------------------------------------------------------------------------------------------------------------------------------------------------------------------------------------------------------------------------------------------------------------------------------------------------------------------------------------------------------------------------------------------------------------------------------------------------------------------------------------------------------------------------------------------------------------------------------------------------------------------------------------------------------------------------------------------------------------------------------------------------------------------------------------------------------------------------------------------------------------------------------------------------------------------------------------------------------------------------------------------------------------------------------------------------------------------------------------------------------------------------------------------------------------------------------------------------------------------------------------------------------------|-----|-----|-----------|-------|------|------|--------------------------------------------------------------------------------------------------------------------------------------------------------------------|-------|----------------------|------------------------------------------------------------------------------------------------------------------------------------|-----|-----|-----------|-------|------|------|
| Rsa1.0_00453.1.g14130.t1 | gb AAF43934.1 AC012188.11 Contains similarity to Vip1 protein from Schizosaccharomyces pombe gb Y13635.1 and contains a RNA recognition motif PF 00076. EST gb A1996906 comes from this gene [Arabidopsis thaliana]                                                                                                                                                                                                                                                                                                                                                                                                                                                                                                                                                                                                                                                                                                                                                                                                                                                                                                                                                                                                                                                                                                                                   | 197 | 431 | 1.00E-92  | 218.8 | 88.3 | 94.9 | Contains similarity to Vip1 protein from Schizosaccharomyces pombe gb Y13635.1 and contains a RNA recognition motif PF 00076. EST gb A1996906 comes from this gene | gbpln | Arabidopsis thaliana | AT1G14345.1   Symbols:   NAD(P)-linked oxidoreductase superfamily protein   chr1:4899176-4899766 FORWARD LENGTH=196                | 197 | 196 | 1.00E-93  | 99.5  | 88.3 | 94.4 |
| Rsa1.0_00453.1.g14131.t1 | ref XP_002892800.1  kelch repeat-containing F-box family protein [Arabidopsis lyrata subsp. lyrata] gi 297338642 gb EFH69059.1  kelch repeat-containing F-box family protein [Arabidopsis lyrata subsp. lyrata] ref NP_563945.2  60S ribosomal protein L10-1 [Arabidopsis thaliana] gi 297844336 ref XP_002890049.1  hypothetical protein ARALYDRAFT_888807 [Arabidopsis lyrata subsp. lyrata] gi 75305724 sp Q93VT9.1 RL101_ARATH RecName: Full=60S ribosomal protein L10-1 gi 7262674 gb AAF43932.1 AC012188.9 Strong similarity, practically identical, to a 60S Ribosomal Protein L10 (Wilm's Tumor Suppressor Protein Homolog) from Arabidopsis thaliana gi 1172806. and contains a Ribosomal L10 PF 00826 domain. ESTs gb Z18472. gb T76209. gb N65098. gb T43013. gb T46279. gb AA394948. gb AA7131166. gb T44895. gb AA042691 come from this gene [Arabidopsis thaliana] gi 16226263 gb AAL16118.1 AF428286_1 At1g14320/F14L17.28 [Arabidopsis thaliana] gi 16226713 gb AAL16239.1 AF428470_1 At1g14320/F14L17.28 [Arabidopsis thaliana] gi 15028019 gb AAK76540.1  putative tumor suppressor protein [Arabidopsis thaliana] gi 21281241 gb AAM45037.1  putative tumor suppressor protein [Arabidopsis thaliana] gi 23397080 gb AAN31825.1  putative tumor suppressor [Arabidopsis thaliana] gi 297335891 gb EFH66308.1  hypothetical protein | 428 | 436 | 0         | 101.9 | 84.8 | 91.4 | kelch repeat-containing F-box family protein                                                                                                                       | gbpln | Arabidopsis lyrata   | AT1G14330.1   Symbols:   Galactose oxidase/kelch repeat superfamily protein   chr1:4890375-4891700 REVERSE LENGTH=441              | 428 | 441 | 0         | 103.0 | 85.3 | 91.4 |
| Rsa1.0_00453.1.g14132.t1 | gi 16226263 gb AAL16118.1 AF428286_1 At1g14320/F14L17.28 [Arabidopsis thaliana] gi 16226713 gb AAL16239.1 AF428470_1 At1g14320/F14L17.28 [Arabidopsis thaliana] gi 15028019 gb AAK76540.1  putative tumor suppressor protein [Arabidopsis thaliana] gi 21281241 gb AAM45037.1  putative tumor suppressor protein [Arabidopsis thaliana] gi 23397080 gb AAN31825.1  putative tumor suppressor [Arabidopsis thaliana] gi 297335891 gb EFH66308.1  hypothetical protein                                                                                                                                                                                                                                                                                                                                                                                                                                                                                                                                                                                                                                                                                                                                                                                                                                                                                  | 220 | 220 | 1.00E-124 | 100.0 | 99.1 | 99.1 | 60S ribosomal protein L10-1                                                                                                                                        | gbpln | Arabidopsis lyrata   | AT1G14320.1   Symbols: SAC52, RPL10, RPL10A   Ribosomal protein L16p/L10e family protein   chr1:4888270-4889408 FORWARD LENGTH=220 | 220 | 220 | 1.00E-127 | 100.0 | 99.1 | 99.1 |
| Rsa1.0_00453.1.g14133.t1 | ref XP_002892799.1  binding protein [Arabidopsis lyrata subsp. lyrata] gi 297338641 gb EFH69058.1  binding protein [Arabidopsis lyrata subsp. lyrata]                                                                                                                                                                                                                                                                                                                                                                                                                                                                                                                                                                                                                                                                                                                                                                                                                                                                                                                                                                                                                                                                                                                                                                                                 | 340 | 339 | 0         | 99.7  | 93.8 | 96.8 | binding protein                                                                                                                                                    | gbpln | Arabidopsis lyrata   | AT1G14300.1   Symbols:   ARM repeat superfamily protein   chr1:4882654-4884686 REVERSE LENGTH=339                                  | 340 | 339 | 0         | 99.7  | 92.1 | 96.2 |
| Rsa1.0_00453.1.g14134.t1 | ref XP_002892798.1  hypothetical protein ARALYDRAFT_888804 [Arabidopsis lyrata subsp. lyrata] gi 297338640 gb EFH69057.1  hypothetical protein ARALYDRAFT_888804 [Arabidopsis lyrata subsp. lyrata]                                                                                                                                                                                                                                                                                                                                                                                                                                                                                                                                                                                                                                                                                                                                                                                                                                                                                                                                                                                                                                                                                                                                                   | 283 | 259 | 1.00E-140 | 91.5  | 86.2 | 90.1 | hypothetical protein ARALYDRAFT_888804                                                                                                                             | gbpln | Arabidopsis lyrata   | AT1G14290.1   Symbols: SBH2   sphingoid base hydroxylase 2   chr1:4880307-4881784 REVERSE LENGTH=259                               | 283 | 259 | 1.00E-142 | 91.5  | 86.2 | 90.1 |
| Rsa1.0_00453.1.g14135.t1 | ref XP_002890047.1  hypothetical protein ARALYDRAFT_888803 [Arabidopsis lyrata subsp. lyrata] gi 297335889 gb EFH66306.1  hypothetical protein ARALYDRAFT_888803 [Arabidopsis lyrata subsp. lyrata]                                                                                                                                                                                                                                                                                                                                                                                                                                                                                                                                                                                                                                                                                                                                                                                                                                                                                                                                                                                                                                                                                                                                                   | 441 | 446 | 1.00E-169 | 101.1 | 77.3 | 87.1 | hypothetical protein ARALYDRAFT_888803                                                                                                                             | gbpln | Arabidopsis lyrata   | AT1G14280.1   Symbols: PKS2   phytochrome kinase substrate 2   chr1:4877657-4878985 FORWARD LENGTH=442                             | 441 | 442 | 1.00E-165 | 100.2 | 78.0 | 87.3 |
| Rsa1.0_00453.1.g14136.t1 | ref XP_002892797.1  hypothetical protein ARALYDRAFT_471595 [Arabidopsis lyrata subsp. lyrata] gi 297338639 gb EFH69056.1  hypothetical protein ARALYDRAFT_471595 [Arabidopsis lyrata subsp. lyrata]                                                                                                                                                                                                                                                                                                                                                                                                                                                                                                                                                                                                                                                                                                                                                                                                                                                                                                                                                                                                                                                                                                                                                   | 340 | 338 | 1.00E-161 | 99.4  | 85.6 | 91.5 | hypothetical protein ARALYDRAFT_471595                                                                                                                             | gbpln | Arabidopsis lyrata   | AT1G14270.1   Symbols:   CAAX amino terminal protease family protein   chr1:4875099-4877195 REVERSE LENGTH=353                     | 340 | 353 | 1.00E-157 | 103.8 | 85.9 | 91.5 |
| Rsa1.0_00453.1.g14137.t1 | gb EOA39225.1  hypothetical protein CARUB_v10012202mg [Capsella rubella]                                                                                                                                                                                                                                                                                                                                                                                                                                                                                                                                                                                                                                                                                                                                                                                                                                                                                                                                                                                                                                                                                                                                                                                                                                                                              | 179 | 261 | 9.00E-38  | 145.8 | 52.5 | 57.5 | hypothetical protein CARUB_v10012202mg                                                                                                                             | gbpln | Capsella rubella     | AT1G14260.2   Symbols:   RING/FYVE/PHD zinc finger superfamily protein   chr1:4873200-4874430 FORWARD LENGTH=265                   | 179 | 265 | 7.00E-31  | 148.0 | 53.6 | 57.5 |

|                          |                                                                                                                                                                                                                                                                                                                                                                                                                               |      |      |           |       |      |      |                                           |       |                      |                                                                                                                                                         |      |      |           |       |      |      |
|--------------------------|-------------------------------------------------------------------------------------------------------------------------------------------------------------------------------------------------------------------------------------------------------------------------------------------------------------------------------------------------------------------------------------------------------------------------------|------|------|-----------|-------|------|------|-------------------------------------------|-------|----------------------|---------------------------------------------------------------------------------------------------------------------------------------------------------|------|------|-----------|-------|------|------|
| Rsa1.0_00454.1.g14138.t1 | gb ABD64975.1  Ras family GTP-binding protein [Brassica oleracea]                                                                                                                                                                                                                                                                                                                                                             | 179  | 221  | 5.00E-33  | 123.5 | 38.5 | 41.9 | Ras family GTP-binding protein            | gbpln | Brassica oleracea    | AT5G47520.1   Symbols: AtRABA5a, RABA5a   RAB GTPase homolog ASA   chr5:19277596-19278366 REVERSE LENGTH=221                                            | 179  | 221  | 1.00E-34  | 123.5 | 37.4 | 41.3 |
| Rsa1.0_00454.1.g14139.t2 | gb AAx77014.1  MLO1 [Brassica rapa]                                                                                                                                                                                                                                                                                                                                                                                           | 576  | 574  | 0         | 99.7  | 96.0 | 97.9 | MLO1                                      | gbpln | Brassica rapa        | AT1G11310.1   Symbols: MLO2, ATMLO2, PMR2   Seven transmembrane MLO family protein   chr1:3800899-3803870 REVERSE LENGTH=573                            | 576  | 573  | 0         | 99.5  | 88.2 | 93.1 |
| Rsa1.0_00454.1.g14140.t1 | gb AAB87099.1  putative retroelement pol polyprotein [Arabidopsis thaliana]                                                                                                                                                                                                                                                                                                                                                   | 1502 | 1496 | 0         | 99.6  | 58.9 | 73.0 | putative retroelement pol polyprotein     | gbpln | Arabidopsis thaliana | AT4G23160.1   Symbols: CRK8   cysteine-rich RLK (RECEPTOR-like protein kinase) 8   chr4:12129485-12134086 FORWARD LENGTH=1262                           | 1502 | 1262 | 1.00E-141 | 84.0  | 15.6 | 22.2 |
| Rsa1.0_00454.1.g14141.t1 | gb EOA37991.1  hypothetical protein CARUB_v10009460mg [Capsella rubella]                                                                                                                                                                                                                                                                                                                                                      | 379  | 377  | 1.00E-122 | 99.5  | 58.6 | 71.5 | hypothetical protein CARUB_v10009460mg    | gbpln | Capsella rubella     | AT1G11270.2   Symbols:   F-box and associated interaction domains-containing protein   chr1:3785715-3786653 REVERSE LENGTH=312                          | 379  | 312  | 1.00E-93  | 82.3  | 48.0 | 59.1 |
| Rsa1.0_00454.1.g14142.t1 | ref XP_002890588.1  predicted protein [Arabidopsis lyrata subsp. lyrata]   gi 297338430 gb EFH68647.1  predicted protein [Arabidopsis lyrata subsp. lyrata]                                                                                                                                                                                                                                                                   | 221  | 317  | 3.00E-29  | 143.4 | 30.3 | 34.4 | predicted protein                         | gbpln | Arabidopsis lyrata   | AT1G23550.1   Symbols: SRO2   similar to RCD one 2   chr1:8350912-8352232 FORWARD LENGTH=323                                                            | 221  | 323  | 3.00E-30  | 146.2 | 29.9 | 33.5 |
| Rsa1.0_00454.1.g14143.t1 | gb EOA37991.1  hypothetical protein CARUB_v10009460mg [Capsella rubella]                                                                                                                                                                                                                                                                                                                                                      | 369  | 377  | 1.00E-125 | 102.2 | 64.0 | 76.4 | hypothetical protein CARUB_v10009460mg    | gbpln | Capsella rubella     | AT1G11270.2   Symbols:   F-box and associated interaction domains-containing protein   chr1:3785715-3786653 REVERSE LENGTH=312                          | 369  | 312  | 3.00E-95  | 84.6  | 48.8 | 57.7 |
| Rsa1.0_00454.1.g14144.t1 | ref XP_002892604.1  TIF3H1 [Arabidopsis lyrata subsp. lyrata]   gi 297338446 gb EFH68863.1  TIF3H1 [Arabidopsis lyrata subsp. lyrata]                                                                                                                                                                                                                                                                                         | 460  | 337  | 0         | 73.3  | 70.9 | 72.0 | TIF3H1                                    | gbpln | Arabidopsis lyrata   | AT1G10840.1   Symbols: TIF3H1   translation initiation factor 3 subunit H1   chr1:3607885-3610299 REVERSE LENGTH=337                                    | 460  | 337  | 0         | 73.3  | 70.7 | 72.0 |
| Rsa1.0_00454.1.g14145.t1 | ref NP_973807.1  uncharacterized protein [Arabidopsis thaliana]   gi 332190529 gb AEE28650.1  uncharacterized protein AT1G10820 [Arabidopsis thaliana]                                                                                                                                                                                                                                                                        | 244  | 258  | 1.00E-106 | 105.7 | 81.1 | 89.3 | uncharacterized protein                   | gbpln | Arabidopsis thaliana | AT1G10820.2   Symbols:   Protein of unknown function (DUF3755)   chr1:3601437-3604650 REVERSE LENGTH=258                                                | 244  | 258  | 1.00E-108 | 105.7 | 81.1 | 89.3 |
| Rsa1.0_00454.1.g14146.t1 | ref NP_172551.1  NAD(P)-linked oxidoreductase-like protein [Arabidopsis thaliana]   gi 75268154 sp Q9C5B9.1 AKR1_ARATH RecName: Full=Probable aldo-keto reductase 1   gi 13448928 gb AAK27238.1 AF361098.1 putative auxin-induced protein [Arabidopsis thaliana]   gi 332190527 gb AEE28648.1  probable aldo-keto reductase 1 [Arabidopsis thaliana]                                                                          | 337  | 344  | 1.00E-173 | 102.1 | 88.4 | 93.5 | NAD(P)-linked oxidoreductase-like protein | gbpln | Arabidopsis thaliana | AT1G10810.1   Symbols:   NAD(P)-linked oxidoreductase superfamily protein   chr1:3599369-3600757 FORWARD LENGTH=344                                     | 337  | 344  | 1.00E-176 | 102.1 | 88.4 | 93.5 |
| Rsa1.0_00454.1.g14147.t1 | ref NP_172548.2  F-box/RNI-like protein [Arabidopsis thaliana]   gi 75265517 sp Q9SAC4.1 FB2_ARATH RecName: Full=F-box protein At1g10780   gi 4874270 gb AAD31335.1 AC007354.8 T16B5.8 [Arabidopsis thaliana]   gi 50253496 gb AAT71950.1  At1g10780 [Arabidopsis thaliana]   gi 53850513 gb AAU95433.1  At1g10780 [Arabidopsis thaliana]   gi 332190524 gb AEE28645.1  F-box/RNI-like protein [Arabidopsis thaliana]         | 418  | 418  | 0         | 100.0 | 82.8 | 91.1 | F-box/RNI-like protein                    | gbpln | Arabidopsis thaliana | AT1G10780.1   Symbols:   F-box/RNI-like superfamily protein   chr1:3592875-3594310 REVERSE LENGTH=418                                                   | 418  | 418  | 0         | 100.0 | 82.8 | 91.1 |
| Rsa1.0_00454.1.g14148.t1 | gb AAZ20131.1  pectin methyltransferase inhibitor [Brassica oleracea var. botrytis]                                                                                                                                                                                                                                                                                                                                           | 167  | 168  | 3.00E-82  | 100.6 | 94.0 | 98.8 | pectin methyltransferase inhibitor        | gbpln | Brassica oleracea    | AT1G10770.1   Symbols:   Plant invertase/pectin methyltransferase inhibitor superfamily protein   chr1:3591859-3592362 REVERSE LENGTH=167               | 167  | 167  | 4.00E-69  | 100.0 | 75.4 | 88.6 |
| Rsa1.0_00454.1.g14149.t1 | ref NP_563877.1  alpha-glucan water dikinase 1 [Arabidopsis thaliana]   gi 57012990 sp Q9SAC6.2 GWD1_ARATH RecName: Full=Alpha-glucan water dikinase 1, chloroplastic; AltName: Full=Protein starch excess 1; AltName: Full=Protein starch-related R1; Flags: Precursor   gi 12044358 gb AAG47821.1 AF312027.1 SEX1 [Arabidopsis thaliana]   gi 332190522 gb AEE28643.1  alpha-glucan water dikinase 1 [Arabidopsis thaliana] | 1399 | 1399 | 0         | 100.0 | 89.0 | 94.6 | alpha-glucan water dikinase 1             | gbpln | Arabidopsis thaliana | AT1G10760.1   Symbols: SEX1, SOP1, SOP, GWD1, GWD   Pyruvate phosphate dikinase, PEP/pyruvate binding domain   chr1:3581210-3590043 REVERSE LENGTH=1399 | 1399 | 1399 | 0         | 100.0 | 89.0 | 94.6 |

|                           |                                                                                                                                                                                                                                                                                                                                                                                                                                                                                                                                                                                                                                                                                                                                                                                                                                                                                                                                                                                                       |      |      |           |       |      |      |                                                                                                                                                                                                |       |                      |                                                                                                                                     |      |     |           |       |      |      |
|---------------------------|-------------------------------------------------------------------------------------------------------------------------------------------------------------------------------------------------------------------------------------------------------------------------------------------------------------------------------------------------------------------------------------------------------------------------------------------------------------------------------------------------------------------------------------------------------------------------------------------------------------------------------------------------------------------------------------------------------------------------------------------------------------------------------------------------------------------------------------------------------------------------------------------------------------------------------------------------------------------------------------------------------|------|------|-----------|-------|------|------|------------------------------------------------------------------------------------------------------------------------------------------------------------------------------------------------|-------|----------------------|-------------------------------------------------------------------------------------------------------------------------------------|------|-----|-----------|-------|------|------|
| Rsa1.0_00454.1.g14150.t1  | ref[XP_002892596.1] hypothetical protein ARALYDRAFT_888367 [Arabidopsis lyrata subsp. lyrata] gi 297338438 gb EFH68855.1                                                                                                                                                                                                                                                                                                                                                                                                                                                                                                                                                                                                                                                                                                                                                                                                                                                                              | 471  | 468  | 0         | 99.4  | 88.1 | 91.3 | hypothetical protein ARALYDRAFT_888367                                                                                                                                                         | gbpln | Arabidopsis lyrata   | AT1G10750.1   Symbols:   Protein of Unknown Function (DUF239)   chr1:3574986-3578310 REVERSE LENGTH=467                             | 471  | 467 | 0         | 99.2  | 87.9 | 91.3 |
| Rsa1.0_00454.1.g14151.t1  | ref[NP_172544.1] alpha/beta-hydrolase domain-containing protein [Arabidopsis thaliana] gi 334182439 ref NP_001184955.1  alpha/beta-hydrolase domain-containing protein [Arabidopsis thaliana] gi 334182441 ref NP_001184956.1  alpha/beta-hydrolase domain-containing protein [Arabidopsis thaliana] gi 4874274 gb AAD31339.1 AC007354.12 Similar to gb X02844 lipase precursor from Staphylococcus hyicus. ESTs gb AI239406 and gb T76725 come from this gene [Arabidopsis thaliana] gi 13448930 gb AAK27239.1 AF361099.1 putative lipase [Arabidopsis thaliana] gi 21539509 gb AAM53307.1  putative lipase [Arabidopsis thaliana] gi 30387585 gb AAP31958.1  At1g10740 [Arabidopsis thaliana] gi 332190515 gb AEE28636.1  alpha/beta-hydrolase domain-containing protein [Arabidopsis thaliana] gi 332190517 gb AEE28638.1  alpha/beta-hydrolase domain-containing protein [Arabidopsis thaliana] gi 332190518 gb AEE28639.1  alpha/beta-hydrolase domain-containing protein [Arabidopsis thaliana] | 467  | 473  | 0         | 101.3 | 89.1 | 94.4 | alpha/beta-hydrolase domain-containing protein                                                                                                                                                 | gbpln | Arabidopsis thaliana | AT1G10740.4   Symbols:   alpha/beta-Hydrolases superfamily protein   chr1:3568343-3570466 REVERSE LENGTH=473                        | 467  | 473 | 0         | 101.3 | 89.1 | 94.4 |
| Rsa1.0_00454.1.g14152.t1  | ref[XP_002889832.1] clathrin adaptor complexes medium subunit family protein [Arabidopsis lyrata subsp. lyrata] gi 297335674 gb EFH66091.1  clathrin adaptor complexes medium subunit family protein [Arabidopsis lyrata subsp. lyrata]                                                                                                                                                                                                                                                                                                                                                                                                                                                                                                                                                                                                                                                                                                                                                               | 428  | 428  | 0         | 100.0 | 99.1 | 99.5 | clathrin adaptor complexes medium subunit family protein                                                                                                                                       | gbpln | Arabidopsis lyrata   | AT1G60780.1   Symbols: HAP13   Clathrin adaptor complexes medium subunit family protein   chr1:22369289-22371885 REVERSE LENGTH=428 | 428  | 428 | 0         | 100.0 | 97.2 | 99.5 |
| Rsa1.0_00454.1.g14153.t1  | gb AAF17660.1 AC009398.9 F20B24.15 [Arabidopsis thaliana]                                                                                                                                                                                                                                                                                                                                                                                                                                                                                                                                                                                                                                                                                                                                                                                                                                                                                                                                             | 466  | 452  | 1.00E-152 | 97.0  | 73.0 | 78.1 | F20B24.15                                                                                                                                                                                      | gbpln | Arabidopsis thaliana | AT1G10720.1   Symbols:   BSD domain-containing protein   chr1:3562964-3564446 FORWARD LENGTH=429                                    | 466  | 429 | 1.00E-150 | 92.1  | 73.2 | 78.1 |
| Rsa1.0_00454.1.g14154.t1  | ref[XP_002889827.1] predicted protein [Arabidopsis lyrata subsp. lyrata] gi 297335669 gb EFH66086.1  predicted protein [Arabidopsis lyrata subsp. lyrata]                                                                                                                                                                                                                                                                                                                                                                                                                                                                                                                                                                                                                                                                                                                                                                                                                                             | 356  | 412  | 1.00E-103 | 115.7 | 59.3 | 67.1 | predicted protein                                                                                                                                                                              | gbpln | Arabidopsis lyrata   | AT1G10710.2   Symbols: PHS1   poor homologous synapsis 1   chr1:3558423-3560407 FORWARD LENGTH=349                                  | 356  | 349 | 1.00E-102 | 98.0  | 58.4 | 67.7 |
| Rsa1.0_00454.1.g14155.t1  | #                                                                                                                                                                                                                                                                                                                                                                                                                                                                                                                                                                                                                                                                                                                                                                                                                                                                                                                                                                                                     | #    | #    | #         | #     | #    | #    | -                                                                                                                                                                                              | ----  | ----                 | #                                                                                                                                   | #    | #   | #         | #     | #    |      |
| Rsa1.0_00454.1.g14156.t12 | gb AAF78272.1 AC020576_16 Contains similarity to a putative protein T32A11_100 gi 7413627 from Arabidopsis thaliana BAC T32A11 gb AL138653 [Arabidopsis thaliana]                                                                                                                                                                                                                                                                                                                                                                                                                                                                                                                                                                                                                                                                                                                                                                                                                                     | 1099 | 1075 | 1.00E-68  | 97.8  | 18.8 | 26.8 | Contains similarity to a putative protein T32A11_100 gi 7413627 from Arabidopsis thaliana BAC T32A11 gb AL138653                                                                               | gbpln | Arabidopsis thaliana | AT1G31150.1   Symbols:   Domain of unknown function (DUF1985)   chr1:1120097-11122412 FORWARD LENGTH=673                            | 1099 | 673 | 5.00E-49  | 61.2  | 11.0 | 16.7 |
| Rsa1.0_00454.1.g14157.t1  | gb AAF78267.1 AC020576_11 Contains weak similarity to 25.7 kDa protein from Cicer arietinum gb AJ276422 and contains a transposase mutator PF[00872 domain. ESTs gb T13756, gb AA712647, gb AA585980 come from this gene [Arabidopsis thaliana]                                                                                                                                                                                                                                                                                                                                                                                                                                                                                                                                                                                                                                                                                                                                                       | 1025 | 1206 | 0         | 117.7 | 35.0 | 46.2 | Contains weak similarity to 25.7 kDa protein from Cicer arietinum gb AJ276422 and contains a transposase mutator PF[00872 domain. ESTs gb T13756, gb AA712647, gb AA585980 come from this gene | gbpln | Arabidopsis thaliana | AT1G64260.1   Symbols:   MuDR family transposase   chr1:23847756-23849915 FORWARD LENGTH=719                                        | 1025 | 719 | 1.00E-31  | 70.1  | 12.9 | 22.0 |
| Rsa1.0_00454.1.g14158.t1  | #                                                                                                                                                                                                                                                                                                                                                                                                                                                                                                                                                                                                                                                                                                                                                                                                                                                                                                                                                                                                     | #    | #    | #         | #     | #    | #    | -                                                                                                                                                                                              | ----  | ----                 | #                                                                                                                                   | #    | #   | #         | #     | #    |      |

|                          |                                                                                                                                                                                                                                                                                                                                                                                                                                                                                         |     |      |           |       |      |      |                                                                                                                       |       |                      |                                                                                                                                             |     |      |           |       |      |      |
|--------------------------|-----------------------------------------------------------------------------------------------------------------------------------------------------------------------------------------------------------------------------------------------------------------------------------------------------------------------------------------------------------------------------------------------------------------------------------------------------------------------------------------|-----|------|-----------|-------|------|------|-----------------------------------------------------------------------------------------------------------------------|-------|----------------------|---------------------------------------------------------------------------------------------------------------------------------------------|-----|------|-----------|-------|------|------|
| Rsa1.0_00454.1.g14159.t1 | refNP_199321.1  protein PHLOEM protein 2-LIKE A6 [Arabidopsis thaliana]<br>gi 75170595 sp Q9FHE8.1 P2A06 ARAT H RecName: Full=Protein PHLOEM PROTEIN 2-LIKE A6; Short=AtPP2-A6<br>gi 9758981 dbj BAB09491.1  unnamed protein product [Arabidopsis thaliana]<br>gi 332007815 gb AED95198.1  protein PHLOEM protein 2-LIKE A6 [Arabidopsis thaliana]                                                                                                                                      | 358 | 392  | 7.00E-90  | 109.5 | 52.2 | 66.5 | protein PHLOEM protein 2-LIKE A6                                                                                      | gbpln | Arabidopsis thaliana | AT5G45080.1   Symbols: AtPP2-A6, PP2-A6   phloem protein 2-A6   chr5:18191575-18193207 REVERSE LENGTH=392                                   | 358 | 392  | 2.00E-92  | 109.5 | 52.2 | 66.5 |
| Rsa1.0_00455.1.g14160.t2 | gb EOA36037.1  hypothetical protein CARUB.v10008116mg [Capsella rubella]                                                                                                                                                                                                                                                                                                                                                                                                                | 779 | 1204 | 0         | 154.6 | 85.6 | 89.2 | hypothetical protein CARUB.v10008116mg                                                                                | gbpln | Capsella rubella     | AT1G13210.1   Symbols: ACA.1   autoinhibited Ca2+/ATPase II   chr1:4509252-4513774 REVERSE LENGTH=1203                                      | 779 | 1203 | 0         | 154.4 | 84.7 | 88.6 |
| Rsa1.0_00455.1.g14161.t1 | #                                                                                                                                                                                                                                                                                                                                                                                                                                                                                       | #   | #    | #         | #     | #    | #    | -                                                                                                                     | ----  | ----                 | #                                                                                                                                           | #   | #    | #         | #     | #    | #    |
| Rsa1.0_00455.1.g14162.t1 | sp P04796.2 G3PC.SINAL RecName: Full=Glyceraldehyde-3-phosphate dehydrogenase, cytosolic<br>gi 21143 emb CAA27844.1  unnamed protein product [Sinapis alba]                                                                                                                                                                                                                                                                                                                             | 133 | 338  | 3.00E-62  | 254.1 | 85.7 | 88.0 | RecName: Full=Glyceraldehyde-3-phosphate dehydrogenase, cytosolic<br>gi 21143 emb CAA27844.1  unnamed protein product | gbpln | Sinapis alba         | AT3G04120.1   Symbols: GAPC, GAPC-1, GAPC1   glyceraldehyde-3-phosphate dehydrogenase C subunit 1   chr3:1081077-1083131 FORWARD LENGTH=338 | 133 | 338  | 4.00E-63  | 254.1 | 82.0 | 87.2 |
| Rsa1.0_00455.1.g14163.t2 | gb ABV89646.1  DNA binding protein GT-1 [Brassica rapa]                                                                                                                                                                                                                                                                                                                                                                                                                                 | 425 | 399  | 0         | 93.9  | 84.2 | 88.0 | DNA binding protein GT-1                                                                                              | gbpln | Brassica rapa        | AT1G13450.1   Symbols: GT-1   Homeodomain-like superfamily protein   chr1:4612999-4615115 REVERSE LENGTH=406                                | 425 | 406  | 0         | 95.5  | 81.6 | 88.0 |
| Rsa1.0_00455.1.g14164.t1 | refNP_172804.2  uncharacterized protein [Arabidopsis thaliana]<br>gi 332190902 gb AEE29023.1  uncharacterized protein AT1G13470 [Arabidopsis thaliana]                                                                                                                                                                                                                                                                                                                                  | 384 | 379  | 1.00E-154 | 98.7  | 71.6 | 83.1 | uncharacterized protein                                                                                               | gbpln | Arabidopsis thaliana | AT1G13470.1   Symbols:   Protein of unknown function (DUF1262)   chr1:4620322-4621542 REVERSE LENGTH=379                                    | 384 | 379  | 1.00E-157 | 98.7  | 71.6 | 83.1 |
| Rsa1.0_00455.1.g14165.t1 | gb ABD65164.1  hypothetical protein 40.t00049 [Brassica oleracea]                                                                                                                                                                                                                                                                                                                                                                                                                       | 436 | 297  | 7.00E-55  | 68.1  | 23.2 | 24.1 | hypothetical protein 40.t00049                                                                                        | gbpln | Brassica oleracea    | AT4G17760.2   Symbols:   damaged DNA binding:exodeoxyribonuclease IIIs   chr4:9871921-9873257 FORWARD LENGTH=250                            | 436 | 250  | 2.00E-54  | 57.3  | 22.0 | 22.9 |
| Rsa1.0_00455.1.g14166.t1 | refNP_187210.1  60S ribosomal protein L18-2 [Arabidopsis thaliana]<br>gi 21431838 sp P42791.2 RL182_ARATH RecName: Full=60S ribosomal protein L18-2<br>gi 6714451 gb AAF26138.1 AC011620.14 putative 60S ribosomal protein L18 [Arabidopsis thaliana]<br>gi 14335090 gb AAK59824.1  AT3g05590/F18C1.14 [Arabidopsis thaliana]<br>gi 16974509 gb AAL31164.1  AT3g05590/F18C1.14 [Arabidopsis thaliana]<br>gi 332640742 gb AEE74263.1  60S ribosomal protein L18-2 [Arabidopsis thaliana] | 178 | 187  | 8.00E-46  | 105.1 | 53.4 | 56.2 | 60S ribosomal protein L18-2                                                                                           | gbpln | Arabidopsis thaliana | AT3G05590.1   Symbols: RPL18   ribosomal protein L18   chr3:1621511-1622775 FORWARD LENGTH=187                                              | 178 | 187  | 3.00E-48  | 105.1 | 53.4 | 56.2 |
| Rsa1.0_00455.1.g14167.t1 | #                                                                                                                                                                                                                                                                                                                                                                                                                                                                                       | #   | #    | #         | #     | #    | #    | -                                                                                                                     | ----  | ----                 | #                                                                                                                                           | #   | #    | #         | #     | #    | #    |
| Rsa1.0_00455.1.g14168.t1 | refNP_172804.2  uncharacterized protein [Arabidopsis thaliana]<br>gi 332190902 gb AEE29023.1  uncharacterized protein AT1G13470 [Arabidopsis thaliana]                                                                                                                                                                                                                                                                                                                                  | 379 | 379  | 1.00E-160 | 100.0 | 75.7 | 85.8 | uncharacterized protein                                                                                               | gbpln | Arabidopsis thaliana | AT1G13470.1   Symbols:   Protein of unknown function (DUF1262)   chr1:4620322-4621542 REVERSE LENGTH=379                                    | 379 | 379  | 1.00E-162 | 100.0 | 75.7 | 85.8 |
| Rsa1.0_00455.1.g14169.t1 | refXP_002892756.1  hypothetical protein ARALYDRAFT_312360 [Arabidopsis lyrata subsp. lyrata]<br>gi 297338598 gb EFH69015.1  hypothetical protein ARALYDRAFT_312360 [Arabidopsis lyrata subsp. lyrata]                                                                                                                                                                                                                                                                                   | 380 | 772  | 1.00E-153 | 203.2 | 72.9 | 83.7 | hypothetical protein ARALYDRAFT_312360                                                                                | gbpln | Arabidopsis lyrata   | AT1G13520.1   Symbols:   Protein of unknown function (DUF1262)   chr1:4631857-4633223 REVERSE LENGTH=387                                    | 380 | 387  | 1.00E-152 | 101.8 | 73.9 | 82.6 |
| Rsa1.0_00455.1.g14170.t1 | refNP_172812.2  uncharacterized protein [Arabidopsis thaliana]<br>gi 91805779 gb ABE5618.1  unknown [Arabidopsis thaliana]<br>gi 332190911 gb AEE29032.1  uncharacterized protein AT1G13550 [Arabidopsis thaliana]                                                                                                                                                                                                                                                                      | 389 | 388  | 0         | 99.7  | 85.3 | 91.0 | uncharacterized protein                                                                                               | gbpln | Arabidopsis thaliana | AT1G13550.1   Symbols:   Protein of unknown function (DUF1262)   chr1:4637072-4638315 REVERSE LENGTH=388                                    | 389 | 388  | 0         | 99.7  | 85.3 | 91.0 |
| Rsa1.0_00455.1.g14171.t1 | #                                                                                                                                                                                                                                                                                                                                                                                                                                                                                       | #   | #    | #         | #     | #    | #    | -                                                                                                                     | ----  | ----                 | #                                                                                                                                           | #   | #    | #         | #     | #    | #    |
| Rsa1.0_00455.1.g14172.t1 | gb AAL46934.3 AF446089.1 aminoalcoholphosphotransferase [Brassica rapa subsp. pekinensis]                                                                                                                                                                                                                                                                                                                                                                                               | 269 | 392  | 1.00E-127 | 145.7 | 84.8 | 87.4 | aminoalcoholphosphotransferase                                                                                        | gbpln | Brassica rapa        | AT1G13560.2   Symbols: AAPT1, ATAAPT1   aminoalcoholphosphotransferase 1   chr1:4638834-4641563 REVERSE LENGTH=346                          | 269 | 346  | 1.00E-125 | 128.6 | 80.7 | 85.1 |

|                          |                                                                                                                                                                                                                                                                                                                                                                                                                                                                                                                                                                                                                                                                                                                                                         |     |     |          |       |      |      |                                                   |       |                      |                                                                                                                          |     |     |          |       |      |      |
|--------------------------|---------------------------------------------------------------------------------------------------------------------------------------------------------------------------------------------------------------------------------------------------------------------------------------------------------------------------------------------------------------------------------------------------------------------------------------------------------------------------------------------------------------------------------------------------------------------------------------------------------------------------------------------------------------------------------------------------------------------------------------------------------|-----|-----|----------|-------|------|------|---------------------------------------------------|-------|----------------------|--------------------------------------------------------------------------------------------------------------------------|-----|-----|----------|-------|------|------|
| Rsa1.0_00455.1.g14173.t1 | ref[XP_002892760.1] hypothetical protein ARALYDRAFT.471517 [Arabidopsis lyrata subsp. lyrata] gi 297338602 gb EFH69019.1                                                                                                                                                                                                                                                                                                                                                                                                                                                                                                                                                                                                                                | 188 | 308 | 1.00E-91 | 163.8 | 85.6 | 89.4 | hypothetical protein ARALYDRAFT.471517            | gbpln | Arabidopsis lyrata   | AT1G13580.1   Symbols: LAG13   LAG1 longevity assurance homolog 3   chr1:4645380-4646765 REVERSE LENGTH=239              | 188 | 239 | 1.00E-93 | 127.1 | 85.1 | 89.9 |
| Rsa1.0_00455.1.g14174.t1 | hypothetical protein ARALYDRAFT.471517 [Arabidopsis lyrata subsp. lyrata] ref[NP_172816.2] phytosulfokine-beta [Arabidopsis thaliana] gi 41019236 sp Q9LMY9.3 PSK1_ARATH RecName: Full=Phytosulfokines 1; Short=AtPSK1; Contains: RecName: Full=Phytosulfokine-alpha; Short=PSK-alpha; Short=Phytosulfokine-a; Contains: RecName: Full=Phytosulfokine-beta; Short=PSK-beta; Short=Phytosulfokine-b; Flags: Precursor gi 23466369 tpg DAA00275.1  TPA_exp: putative phytosulfokine peptide precursor [Arabidopsis thaliana] gi 27529964 dbj BAB72176.2  phytosulfokine precursor 1 [Arabidopsis thaliana] gi 51970324 dbj BAD43854.1  hypothetical protein [Arabidopsis thaliana] gi 332190919 gb AEE29039.1  phytosulfokine-beta [Arabidopsis thaliana] | 90  | 87  | 7.00E-31 | 96.7  | 76.7 | 84.4 | phytosulfokine-beta                               | gbpln | Arabidopsis thaliana | AT1G13590.1   Symbols: ATPSK1, PSK1   phytosulfokine 1 precursor   chr1:4647979-4648612 FORWARD LENGTH=87                | 90  | 87  | 1.00E-33 | 96.7  | 76.7 | 84.4 |
| Rsa1.0_00455.1.g14175.t1 | ref[NP_172817.2] basic leucine-zipper 58 [Arabidopsis thaliana] gi 8920564 gb AAF81286.1 AC027656.3 Contains similarity to bZIP DNA-binding protein HBF-1 - soybean from Glycine max gb Y10685. It contains a bZIP transcription factor PF 00170. EST gb N37717 comes from this gene [Arabidopsis thaliana] gi 9802757 gb AAF99826.1 AC027134.8 Hypothetical protein [Arabidopsis thaliana] gi 12083268 gb AAG48793.1 AF332430.1 putative bZIP transcription factor [Arabidopsis thaliana] gi 225897922 dbj BAH30293.1  hypothetical protein [Arabidopsis thaliana] gi 332190919 gb AEE29040.1  basic leucine-zipper 58 [Arabidopsis thaliana]                                                                                                          | 195 | 196 | 3.00E-82 | 100.5 | 84.6 | 90.8 | basic leucine-zipper 58                           | gbpln | Arabidopsis thaliana | AT1G13600.1   Symbols: AtbZIP58, bZIP58   basic leucine-zipper 58   chr1:4650787-4651377 REVERSE LENGTH=196              | 195 | 196 | 1.00E-84 | 100.5 | 84.6 | 90.8 |
| Rsa1.0_00455.1.g14176.t1 | #                                                                                                                                                                                                                                                                                                                                                                                                                                                                                                                                                                                                                                                                                                                                                       | #   | #   | #        | #     | #    | -    | ----                                              | ----  | #                    | #                                                                                                                        | #   | #   | #        | #     | #    | #    |
| Rsa1.0_00455.1.g14177.t1 | #                                                                                                                                                                                                                                                                                                                                                                                                                                                                                                                                                                                                                                                                                                                                                       | #   | #   | #        | #     | #    | -    | ----                                              | ----  | #                    | #                                                                                                                        | #   | #   | #        | #     | #    | #    |
| Rsa1.0_00455.1.g14178.t1 | #                                                                                                                                                                                                                                                                                                                                                                                                                                                                                                                                                                                                                                                                                                                                                       | #   | #   | #        | #     | #    | -    | ----                                              | ----  | #                    | #                                                                                                                        | #   | #   | #        | #     | #    | #    |
| Rsa1.0_00456.1.g14179.t1 | gb ACA61613.1  hypothetical protein AP2_E11.1 [Arabidopsis lyrata subsp. petraea]                                                                                                                                                                                                                                                                                                                                                                                                                                                                                                                                                                                                                                                                       | 138 | 471 | 9.00E-17 | 341.3 | 35.5 | 47.1 | hypothetical protein AP2_E11.1                    | gbpln | Arabidopsis lyrata   | #                                                                                                                        | #   | #   | #        | #     | #    | #    |
| Rsa1.0_00456.1.g14180.t2 | gb EOA27002.1  hypothetical protein CARUB_v10023097mg [Capsella rubella] gi 482562813 gb EOA27003.1  hypothetical protein CARUB_v10023097mg [Capsella rubella]                                                                                                                                                                                                                                                                                                                                                                                                                                                                                                                                                                                          | 465 | 486 | 0        | 104.5 | 82.6 | 87.7 | hypothetical protein CARUB_v10023097mg            | gbpln | Capsella rubella     | AT2G37440.1   Symbols:   DNase I-like superfamily protein   chr2:15719230-15721885 FORWARD LENGTH=479                    | 465 | 479 | 0        | 103.0 | 82.6 | 87.7 |
| Rsa1.0_00456.1.g14181.t1 | ref[NP_181282.1] nodulin MtN21 /EamA-like transporter-like protein [Arabidopsis thaliana] gi 75216840 sp Q9ZUS1.1 WTR13_ARATH RecName: Full=WAT1-related protein At2g37460 gi 4056506 gb AAC98072.1  nodulin-like protein [Arabidopsis thaliana] gi 14334858 gb AAK59607.1  putative nodulin protein [Arabidopsis thaliana] gi 14994253 gb AAK73261.1  nodulin-like protein [Arabidopsis thaliana] gi 17104641 gb AAL34209.1  putative nodulin protein [Arabidopsis thaliana] gi 330254309 gb AEC09403.1  WAT1-related protein [Arabidopsis thaliana]                                                                                                                                                                                                   | 362 | 380 | 0        | 105.0 | 89.2 | 94.2 | nodulin MtN21 /EamA-like transporter-like protein | gbpln | Arabidopsis thaliana | AT2G37460.1   Symbols:   nodulin MtN21 /EamA-like transporter family protein   chr2:15726667-15729010 REVERSE LENGTH=380 | 362 | 380 | 0        | 105.0 | 89.2 | 94.2 |



|                          |                                                                                                                                                                                                                               |     |      |           |       |       |       |                                                                        |             |                      |                                                                                                                                                                                                                                                                                                                                                                     |     |      |           |       |       |       |
|--------------------------|-------------------------------------------------------------------------------------------------------------------------------------------------------------------------------------------------------------------------------|-----|------|-----------|-------|-------|-------|------------------------------------------------------------------------|-------------|----------------------|---------------------------------------------------------------------------------------------------------------------------------------------------------------------------------------------------------------------------------------------------------------------------------------------------------------------------------------------------------------------|-----|------|-----------|-------|-------|-------|
| Rsa1.0_00456.1.g14182.t1 | ref[NP_973623.1] uncharacterized protein [Arabidopsis thaliana] gi 110741336 dbj BAF02218.1  hypothetical protein [Arabidopsis thaliana] gi 330254313 gb AEC09407.1  uncharacterized protein AT2G37480 [Arabidopsis thaliana] | 185 | 193  | 1.00E-64  | 104.3 | 72.4  | 84.3  | uncharacterized protein                                                | gbpln       | Arabidopsis thaliana | AT2G37480.2   Symbols:   unknown protein; BEST Arabidopsis thaliana protein match is: unknown protein (TAIR:AT3G53670.2); Has 35333 Blast hits to 34131 proteins in 2444 species: Archaea - 798; Bacteria - 22429; Metazoa - 974; Fungi - 991; Plants - 531; Viruses - 0; Other Eukaryotes - 9610 (source: NCBI BLink).   chr2:15738645-15739579 FORWARD LENGTH=193 | 185 | 193  | 4.00E-67  | 104.3 | 72.4  | 84.3  |
| Rsa1.0_00456.1.g14183.t1 | ref[NP_181289.2] uncharacterized protein [Arabidopsis thaliana] gi 330254318 gb AEC09412.1  uncharacterized protein AT2G37530 [Arabidopsis thaliana]                                                                          | 125 | 122  | 2.00E-49  | 97.6  | 79.2  | 89.6  | uncharacterized protein                                                | gbpln       | Arabidopsis thaliana | AT2G37530.1   Symbols:   unknown protein; BEST Arabidopsis thaliana protein match is: unknown protein (TAIR:AT1G07795.1); Has 39 Blast hits to 39 proteins in 11 species: Archaea - 0; Bacteria - 0; Metazoa - 0; Fungi - 0; Plants - 39; Viruses - 0; Other Eukaryotes - 0 (source: NCBI BLink).   chr2:15751060-15751428 FORWARD LENGTH=122                       | 125 | 122  | 3.00E-52  | 97.6  | 79.2  | 89.6  |
| Rsa1.0_00456.1.g14184.t2 | ref[XP_003542460.1] PREDICTED: ADP-ribosylation factor GTPase-activating protein AGD7-like [Glycine max]                                                                                                                      | 441 | 481  | 1.00E-120 | 109.1 | 59.2  | 72.3  | PREDICTED: ADP-ribosylation factor GTPase-activating protein AGD7-like | gbenv/gbpln | Glycine max          | AT2G37550.2   Symbols: ASP1, AGD7   ARF-GAP domain 7   chr2:15755544-15757456 REVERSE LENGTH=456                                                                                                                                                                                                                                                                    | 441 | 456  | 6.00E-86  | 103.4 | 44.7  | 46.0  |
| Rsa1.0_00456.1.g14185.t1 | tpg[DAA40122.1] TPA: histone H4.3 [Zea mays]                                                                                                                                                                                  | 103 | 248  | 3.00E-52  | 240.8 | 100.0 | 100.0 | TPA: histone H4.3                                                      | gbenv/gbpln | Zea mays             | AT5G59970.1   Symbols:   Histone superfamily protein   chr5:24146352-24146663 REVERSE LENGTH=103                                                                                                                                                                                                                                                                    | 103 | 103  | 2.00E-52  | 100.0 | 100.0 | 100.0 |
| Rsa1.0_00456.1.g14186.t1 | emb[CAB46045.1] retrotransposon like protein [Arabidopsis thaliana] gi 7263441 emb CAB80961.1  retrotransposon like protein [Arabidopsis thaliana]                                                                            | 462 | 687  | 9.00E-22  | 148.7 | 10.6  | 15.6  | retrotransposon like protein                                           | gbpln       | Arabidopsis thaliana | AT5G20300.2   Symbols:   Avirulence induced gene (AIG1) family protein   chr5:6853544-6856332 REVERSE LENGTH=793                                                                                                                                                                                                                                                    | 462 | 793  | 2.00E-17  | 171.6 | 16.0  | 22.1  |
| Rsa1.0_00456.1.g14187.t1 | dbj BAB10503.1  retroelement pol polyprotein-like [Arabidopsis thaliana]                                                                                                                                                      | 792 | 1475 | 0         | 186.2 | 66.8  | 81.6  | retroelement pol polyprotein-like                                      | gbpln       | Arabidopsis thaliana | AT4G23180.1   Symbols: CRK8   cysteine-rich RLK (RECEPTOR-like protein kinase) 8   chr4:12129485-12134086 FORWARD LENGTH=1262                                                                                                                                                                                                                                       | 792 | 1262 | 0         | 159.3 | 40.4  | 52.9  |
| Rsa1.0_00456.1.g14188.t1 | #                                                                                                                                                                                                                             | #   | #    | #         | #     | #     | -     | -                                                                      | ----        | ----                 | #                                                                                                                                                                                                                                                                                                                                                                   | #   | #    | #         | #     | #     |       |
| Rsa1.0_00456.1.g14189.t1 | emb[CAB72476.1] putative protein [Arabidopsis thaliana]                                                                                                                                                                       | 469 | 661  | 8.00E-91  | 140.9 | 47.8  | 65.5  | putative protein                                                       | gbpln       | Arabidopsis thaliana | AT3G42170.1   Symbols:   BED zinc finger hAT family dimerisation domain   chr3:14321838-14323928 FORWARD LENGTH=696                                                                                                                                                                                                                                                 | 469 | 696  | 2.00E-13  | 148.4 | 11.3  | 18.1  |
| Rsa1.0_00456.1.g14190.t1 | #                                                                                                                                                                                                                             | #   | #    | #         | #     | #     | -     | -                                                                      | ----        | ----                 | #                                                                                                                                                                                                                                                                                                                                                                   | #   | #    | #         | #     | #     |       |
| Rsa1.0_00456.1.g14191.t1 | gb[EOA27799.1] hypothetical protein CARUB_v10023951mg [Capsella rubella]                                                                                                                                                      | 213 | 241  | 1.00E-57  | 113.1 | 72.3  | 79.3  | hypothetical protein CARUB_v10023951mg                                 | gbpln       | Capsella rubella     | AT2G37580.1   Symbols:   RING/U-box superfamily protein   chr2:15764745-15765452 FORWARD LENGTH=235                                                                                                                                                                                                                                                                 | 213 | 235  | 2.00E-51  | 110.3 | 65.7  | 74.6  |
| Rsa1.0_00456.1.g14192.t1 | #                                                                                                                                                                                                                             | #   | #    | #         | #     | #     | -     | -                                                                      | ----        | ----                 | #                                                                                                                                                                                                                                                                                                                                                                   | #   | #    | #         | #     | #     |       |
| Rsa1.0_00456.1.g14193.t1 | ref[XP_002879686.1] Dof-type zinc finger domain-containing protein [Arabidopsis lyrata subsp. lyrata] gi 297325525 gb EFH55945.1  Dof-type zinc finger domain-containing protein [Arabidopsis lyrata subsp. lyrata]           | 301 | 326  | 1.00E-120 | 108.3 | 83.7  | 87.0  | Dof-type zinc finger domain-containing protein                         | gbpln       | Arabidopsis lyrata   | AT2G37590.1   Symbols: ATDOF2.4, DOF2.4   DNA binding with one finger 2.4   chr2:15769292-15770497 FORWARD LENGTH=330                                                                                                                                                                                                                                               | 301 | 330  | 1.00E-114 | 109.6 | 82.4  | 85.4  |
| Rsa1.0_00456.1.g14194.t1 | gb[EOA28156.1] hypothetical protein CARUB_v10024358mg [Capsella rubella]                                                                                                                                                      | 136 | 112  | 7.00E-51  | 82.4  | 77.2  | 77.2  | hypothetical protein CARUB_v10024358mg                                 | gbpln       | Capsella rubella     | AT3G53740.4   Symbols:   Ribosomal protein L36e family protein   chr3:19913921-19914813 REVERSE LENGTH=112                                                                                                                                                                                                                                                          | 136 | 112  | 9.00E-53  | 82.4  | 75.7  | 77.9  |
| Rsa1.0_00456.1.g14195.t1 | gb ABK28208.1  unknown [Arabidopsis thaliana]                                                                                                                                                                                 | 122 | 122  | 6.00E-26  | 100.0 | 58.2  | 66.4  | unknown                                                                | gbpln       | Arabidopsis thaliana | AT2G37610.1   Symbols:   unknown protein; Has 21 Blast hits to 21 proteins in 5 species: Archaea - 0; Bacteria - 0; Metazoa - 0; Fungi - 0; Plants - 21; Viruses - 0; Other Eukaryotes - 0 (source: NCBI BLink).   chr2:15776869-15777673 REVERSE LENGTH=161                                                                                                        | 122 | 161  | 1.00E-28  | 132.0 | 58.2  | 66.4  |



|                          |                                                                                                                                                                        |     |     |           |       |      |      |                                                 |       |                      |                                                                                                                                                                                                                                                                                                                                                                                                                                                                                                                                                                                                                                                                          |     |     |           |       |      |      |
|--------------------------|------------------------------------------------------------------------------------------------------------------------------------------------------------------------|-----|-----|-----------|-------|------|------|-------------------------------------------------|-------|----------------------|--------------------------------------------------------------------------------------------------------------------------------------------------------------------------------------------------------------------------------------------------------------------------------------------------------------------------------------------------------------------------------------------------------------------------------------------------------------------------------------------------------------------------------------------------------------------------------------------------------------------------------------------------------------------------|-----|-----|-----------|-------|------|------|
| Rsa1.0_00457.1.g14205.t1 | refXP_002889406.1  hypothetical protein ARALYDRAFT_887394 [Arabidopsis lyrata subsp. lyrata] gi 297335248 gb EFH65665.1                                                | 299 | 298 | 1.00E-168 | 99.7  | 96.3 | 98.0 | hypothetical protein ARALYDRAFT_887394          | gbpln | Arabidopsis lyrata   | AT1G02560.1   Symbols: CLPP5, NCLPP5, NCLPP1   nuclear encoded CLP protease 5   chr1:538000-539805 FORWARD LENGTH=298                                                                                                                                                                                                                                                                                                                                                                                                                                                                                                                                                    | 299 | 298 | 1.00E-169 | 99.7  | 95.7 | 97.3 |
| Rsa1.0_00457.1.g14206.t1 | gb EOA38398.1  hypothetical protein CARUB_v10009964mg [Capsella rubella]                                                                                               | 270 | 279 | 1.00E-104 | 103.3 | 78.9 | 87.0 | hypothetical protein CARUB_v10009964mg          | gbpln | Capsella rubella     | AT1G02570.1   Symbols:   unknown protein; BEST Arabidopsis thaliana protein match is: unknown protein (TAIR:AT1G02575.1); Has 108 Blast hits to 55 proteins in 6 species: Archae - 0; Bacteria - 0; Metazoa - 0; Fungi - 0; Plants - 108; Viruses - 0; Other Eukaryotes - 0 (source: NCBI BLink).   chr1:541380-542216 FORWARD LENGTH=278                                                                                                                                                                                                                                                                                                                                | 270 | 278 | 1.00E-105 | 103.0 | 80.4 | 86.7 |
| Rsa1.0_00457.1.g14207.t6 | refXP_002889408.1  hypothetical protein ARALYDRAFT_470218 [Arabidopsis lyrata subsp. lyrata] gi 297335250 gb EFH65667.1                                                | 659 | 672 | 0         | 102.0 | 55.4 | 70.0 | hypothetical protein ARALYDRAFT_470218          | gbpln | Arabidopsis lyrata   | AT1G02580.1   Symbols: MEA, EMB173, FIS1, SDG5   SET domain-containing protein   chr1:544796-548994 FORWARD LENGTH=689                                                                                                                                                                                                                                                                                                                                                                                                                                                                                                                                                   | 659 | 689 | 0         | 104.6 | 54.6 | 70.3 |
| Rsa1.0_00457.1.g14208.t1 | gb EOA22812.1  hypothetical protein CARUB_v10003530mg [Capsella rubella]                                                                                               | 406 | 288 | 7.00E-90  | 70.9  | 42.9 | 51.0 | hypothetical protein CARUB_v10003530mg          | gbpln | Capsella rubella     | AT1G45063.2   Symbols:   copper ion binding; electron carriers   chr1:17034068-17034886 REVERSE LENGTH=272                                                                                                                                                                                                                                                                                                                                                                                                                                                                                                                                                               | 406 | 272 | 7.00E-82  | 67.0  | 39.4 | 47.3 |
| Rsa1.0_00457.1.g14209.t1 | refXP_002892113.1  predicted protein [Arabidopsis lyrata subsp. lyrata] gi 297337955 gb EFH68372.1  predicted protein [Arabidopsis lyrata subsp. lyrata]               | 217 | 220 | 4.00E-87  | 101.4 | 80.6 | 87.6 | predicted protein                               | gbpln | Arabidopsis lyrata   | AT1G02610.1   Symbols:   RING/FYVE/PHD zinc finger superfamily protein   chr1:553181-555854 REVERSE LENGTH=221                                                                                                                                                                                                                                                                                                                                                                                                                                                                                                                                                           | 217 | 221 | 1.00E-86  | 101.8 | 77.9 | 85.3 |
| Rsa1.0_00457.1.g14210.t1 | refXP_002892115.1  hypothetical protein ARALYDRAFT_470221 [Arabidopsis lyrata subsp. lyrata] gi 297337957 gb EFH68374.1                                                | 102 | 389 | 5.00E-24  | 381.4 | 73.5 | 78.4 | hypothetical protein ARALYDRAFT_470221          | gbpln | Arabidopsis lyrata   | AT1G02630.1   Symbols:   Nucleoside transporter family protein   chr1:561007-562382 REVERSE LENGTH=389                                                                                                                                                                                                                                                                                                                                                                                                                                                                                                                                                                   | 102 | 389 | 1.00E-26  | 381.4 | 71.6 | 79.4 |
| Rsa1.0_00457.1.g14211.t1 | ref NP_563659.1  beta-glucosidase [Arabidopsis thaliana] gi 75250279 sp O94KD8.1 BXL2_ARATH ResName: Full=Probable beta-D-xylosidase 2; Short=AtBXL2; Flags: Precursor | 767 | 768 | 0         | 100.1 | 92.0 | 95.3 | beta-glucosidase                                | gbpln | Arabidopsis thaliana | AT1G02640.1   Symbols: BXL2, ATBXL2   beta-xylosidase 2   chr1:564293-567580 FORWARD LENGTH=768                                                                                                                                                                                                                                                                                                                                                                                                                                                                                                                                                                          | 767 | 768 | 0         | 100.1 | 92.0 | 95.3 |
| Rsa1.0_00457.1.g14212.t1 | ref NP_563659.1  beta-glucosidase [Arabidopsis thaliana] gi 75250279 sp O94KD8.1 BXL2_ARATH ResName: Full=Probable beta-D-xylosidase 2; Short=AtBXL2; Flags: Precursor | 127 | 167 | 8.00E-54  | 131.5 | 88.2 | 91.3 | hypothetical protein CARUB_v10010486mg, partial | gbpln | Capsella rubella     | AT1G02680.1   Symbols: TAF13   TBP-associated factor 13   chr1:581084-581919 FORWARD LENGTH=126                                                                                                                                                                                                                                                                                                                                                                                                                                                                                                                                                                          | 127 | 126 | 3.00E-55  | 99.2  | 85.0 | 89.0 |
| Rsa1.0_00457.1.g14213.t1 | gb EOA38580.1  hypothetical protein CARUB_v10010400mg [Capsella rubella]                                                                                               | 187 | 183 | 1.00E-82  | 97.9  | 83.4 | 91.4 | hypothetical protein CARUB_v10010400mg          | gbpln | Capsella rubella     | AT5G38700.1   Symbols:   unknown protein; FUNCTIONS IN: molecular function unknown; INVOLVED IN: biological process unknown; LOCATED IN: mitochondrion; EXPRESSED IN: 10 plant structures; EXPRESSED DURING: LP.04 four leaves visible, LP.10 ten leaves visible, petal differentiation and expansion stage, LP.08 eight leaves visible, LP.12 twelve leaves visible; BEST Arabidopsis thaliana protein match is: unknown protein (TAIR:AT4G02170.1); Has 64 Blast hits to 64 proteins in 13 species: Archae - 0; Bacteria - 0; Metazoa - 0; Fungi - 0; Plants - 64; Viruses - 0; Other Eukaryotes - 0 (source: NCBI BLink).   chr5:15489690-15490238 FORWARD LENGTH=182 | 187 | 182 | 4.00E-82  | 97.3  | 79.1 | 86.6 |
| Rsa1.0_00457.1.g14214.t1 | refXP_002874719.1  hypothetical protein ARALYDRAFT_911537 [Arabidopsis lyrata subsp. lyrata] gi 297320556 gb EFH50978.1                                                | 374 | 456 | 2.00E-90  | 121.9 | 51.1 | 61.2 | hypothetical protein ARALYDRAFT_911537          | gbpln | Arabidopsis lyrata   | AT4G36840.1   Symbols:   Galactose oxidase/kelch repeat superfamily protein   chr4:17352166-17352882 FORWARD LENGTH=238                                                                                                                                                                                                                                                                                                                                                                                                                                                                                                                                                  | 374 | 238 | 5.00E-32  | 63.6  | 27.8 | 37.2 |

|                          |                                                                                                                                                                                                                                                                                                                                                                                                             |      |      |           |       |      |      |                                        |       |                      |                                                                                                                                                                                                                                                                                                                                                                                                                                                         |      |      |           |       |      |      |
|--------------------------|-------------------------------------------------------------------------------------------------------------------------------------------------------------------------------------------------------------------------------------------------------------------------------------------------------------------------------------------------------------------------------------------------------------|------|------|-----------|-------|------|------|----------------------------------------|-------|----------------------|---------------------------------------------------------------------------------------------------------------------------------------------------------------------------------------------------------------------------------------------------------------------------------------------------------------------------------------------------------------------------------------------------------------------------------------------------------|------|------|-----------|-------|------|------|
| Rsa1.0_00457.1.g14215.t1 | gb EOA38865.1  hypothetical protein CARUB_v10011230mg [Capsella rubella]                                                                                                                                                                                                                                                                                                                                    | 207  | 221  | 2.00E-52  | 106.8 | 72.0 | 82.1 | hypothetical protein CARUB_v10011230mg | gbpln | Capsella rubella     | AT5G61710.1   Symbols:   unknown protein; BEST Arabidopsis thaliana protein match is: unknown protein (TAIR:AT4G02160.1); Has 1807 Blast hits to 1807 proteins in 277 species: Archae - 0; Bacteria - 0; Metazoa - 736; Fungi - 347; Plants - 385; Viruses - 0; Other Eukaryotes - 339 (source: NCBI BLink).   chr5:24800045-24800512 FORWARD LENGTH=155                                                                                                | 207  | 155  | 2.00E-47  | 74.9  | 56.5 | 61.4 |
| Rsa1.0_00457.1.g14216.t1 | ref XP_002889414.1  predicted protein [Arabidopsis lyrata subsp. lyrata] gi 297335256 gb EFH65673.1  predicted protein [Arabidopsis lyrata subsp. lyrata]                                                                                                                                                                                                                                                   | 197  | 217  | 2.00E-66  | 110.2 | 70.1 | 76.1 | predicted protein                      | gbpln | Arabidopsis lyrata   | AT2G36110.1   Symbols:   Polynucleotidyl transferase, ribonuclease H-like superfamily protein   chr2:15161877-15162596 FORWARD LENGTH=239                                                                                                                                                                                                                                                                                                               | 197  | 239  | 4.00E-11  | 121.3 | 27.4 | 44.2 |
| Rsa1.0_00457.1.g14217.t1 | ref NP_171769.1  importin alpha isoform 6 [Arabidopsis thaliana] gi 9972381 gb AAG10631.1 AC022521_9 Putative importin alpha subunit [Arabidopsis thaliana] gi 17979135 gb AAL49825.1  putative importin alpha protein [Arabidopsis thaliana] gi 20465347 gb AAM20077.1  putative importin alpha protein [Arabidopsis thaliana] gi 332189337 gb AEE27458.1  importin alpha isoform 6 [Arabidopsis thaliana] | 527  | 538  | 0         | 102.1 | 75.7 | 85.0 | importin alpha isoform 6               | gbpln | Arabidopsis thaliana | AT1G02690.1   Symbols:   IMPA-6   importin alpha isoform 6   chr1:584397-587036 FORWARD LENGTH=538                                                                                                                                                                                                                                                                                                                                                      | 527  | 538  | 0         | 102.1 | 75.7 | 85.0 |
| Rsa1.0_00457.1.g14218.t1 | ref NP_563661.1  uncharacterized protein [Arabidopsis thaliana] gi 9972373 gb AAG10623.1 AC022521_1 Unknown protein [Arabidopsis thaliana] gi 15810579 gb AAL07177.1  unknown protein [Arabidopsis thaliana] gi 20259577 gb AAM14131.1  unknown protein [Arabidopsis thaliana] gi 332189339 gb AEE27460.1  uncharacterized protein AT1G02700 [Arabidopsis thaliana]                                         | 226  | 247  | 1.00E-108 | 109.3 | 87.2 | 94.7 | uncharacterized protein                | gbpln | Arabidopsis thaliana | AT1G02700.1   Symbols:   unknown protein; FUNCTIONS IN: molecular_function unknown; INVOLVED IN: biological_process unknown; LOCATED IN: mitochondrion; BEST Arabidopsis thaliana protein match is: unknown protein (TAIR:AT4G02140.1); Has 49 Blast hits to 49 proteins in 21 species: Archae - 0; Bacteria - 0; Metazoa - 10; Fungi - 6; Plants - 29; Viruses - 0; Other Eukaryotes - 4 (source: NCBI BLink).   chr1:588367-589232 FORWARD LENGTH=247 | 226  | 247  | 1.00E-111 | 109.3 | 87.2 | 94.7 |
| Rsa1.0_00457.1.g14219.t1 | ref XP_002892121.1  hypothetical protein ARALYDRAFT_887416 [Arabidopsis lyrata subsp. lyrata] gi 297337963 gb EFH68380.1  hypothetical protein ARALYDRAFT_887416 [Arabidopsis lyrata subsp. lyrata]                                                                                                                                                                                                         | 1181 | 1184 | 0         | 100.3 | 93.2 | 96.4 | hypothetical protein ARALYDRAFT_887416 | gbpln | Arabidopsis lyrata   | AT1G02730.1   Symbols:   ATCSLD5, CSLD5, SOS6   cellulose synthase-like D5   chr1:594697-598473 REVERSE LENGTH=1181                                                                                                                                                                                                                                                                                                                                     | 1181 | 1181 | 0         | 100.0 | 92.9 | 95.9 |
| Rsa1.0_00457.1.g14220.t1 | dbj BAJ33794.1  unnamed protein product [Thellungiella halophila] gi 312281899 dbj BAJ33815.1  unnamed protein product [Thellungiella halophila]                                                                                                                                                                                                                                                            | 189  | 220  | 9.00E-52  | 116.4 | 70.4 | 80.4 | unnamed protein product                | ----  | ----                 | AT1G02750.2   Symbols:   Drought-responsive family protein   chr1:602673-604134 FORWARD LENGTH=205                                                                                                                                                                                                                                                                                                                                                      | 189  | 205  | 1.00E-50  | 108.5 | 65.1 | 75.1 |
| Rsa1.0_00457.1.g14221.t1 | gb EOA31438.1  hypothetical protein CARUB_v10014622mg [Capsella rubella]                                                                                                                                                                                                                                                                                                                                    | 216  | 210  | 4.00E-96  | 97.2  | 84.3 | 88.0 | hypothetical protein CARUB_v10014622mg | gbpln | Capsella rubella     | AT3G16780.1   Symbols:   Ribosomal protein L19e family protein   chr3:5708982-5710249 FORWARD LENGTH=209                                                                                                                                                                                                                                                                                                                                                | 216  | 209  | 4.00E-97  | 96.8  | 82.9 | 87.0 |
| Rsa1.0_00457.1.g14222.t1 | dbj BAB09923.1  copia-like retrotransposable element [Arabidopsis thaliana]                                                                                                                                                                                                                                                                                                                                 | 1418 | 1342 | 0         | 94.6  | 50.2 | 66.7 | copia-like retrotransposable element   | gbpln | Arabidopsis thaliana | AT4G23160.1   Symbols:   CRK8   cysteine-rich RLK (RECEPTOR-like protein kinase) 8   chr4:12129485-12134086 FORWARD LENGTH=1262                                                                                                                                                                                                                                                                                                                         | 1418 | 1262 | 2.00E-87  | 89.0  | 13.8 | 20.9 |
| Rsa1.0_00457.1.g14223.t1 | gb EOA38368.1  hypothetical protein CARUB_v10009900mg [Capsella rubella]                                                                                                                                                                                                                                                                                                                                    | 300  | 292  | 1.00E-127 | 97.3  | 75.3 | 85.7 | hypothetical protein CARUB_v10009900mg | gbpln | Capsella rubella     | AT1G03210.1   Symbols:   Phenazine biosynthesis PhzC/PhzF protein   chr1:782948-784240 FORWARD LENGTH=286                                                                                                                                                                                                                                                                                                                                               | 300  | 286  | 1.00E-128 | 95.3  | 75.7 | 85.0 |
| Rsa1.0_00457.1.g14224.t1 | ref NP_001184897.1  uncharacterized protein [Arabidopsis thaliana] gi 332189429 gb AEE27550.1  uncharacterized protein AT1G03250 [Arabidopsis thaliana]                                                                                                                                                                                                                                                     | 257  | 251  | 1.00E-121 | 97.7  | 86.0 | 91.1 | uncharacterized protein                | gbpln | Arabidopsis thaliana | AT1G03250.2   Symbols:   unknown protein; FUNCTIONS IN: molecular_function unknown; INVOLVED IN: biological_process unknown; LOCATED IN: cellular_component unknown; EXPRESSED IN: 24 plant structures; EXPRESSED DURING: 15 growth stages.   chr1:793576-795159 REVERSE LENGTH=251                                                                                                                                                                     | 257  | 251  | 1.00E-124 | 97.7  | 86.0 | 91.1 |
| Rsa1.0_00457.1.g14225.t1 | gb EOA40220.1  hypothetical protein CARUB_v10008943mg [Capsella rubella]                                                                                                                                                                                                                                                                                                                                    | 502  | 496  | 0         | 98.8  | 87.3 | 91.8 | hypothetical protein CARUB_v10008943mg | gbpln | Capsella rubella     | AT1G03270.1   Symbols:   CBS domain-containing protein with a domain of unknown function (DUF21)   chr1:799191-802436 FORWARD LENGTH=499                                                                                                                                                                                                                                                                                                                | 502  | 499  | 0         | 99.4  | 87.6 | 90.6 |

|                          |                                                                                                                                                                                                                                                                                                                                                                                                                                                          |     |     |           |       |       |       |                                                    |       |                      |                                                                                                                                                                                                                                                                                                                                                                     |     |     |           |       |      |      |
|--------------------------|----------------------------------------------------------------------------------------------------------------------------------------------------------------------------------------------------------------------------------------------------------------------------------------------------------------------------------------------------------------------------------------------------------------------------------------------------------|-----|-----|-----------|-------|-------|-------|----------------------------------------------------|-------|----------------------|---------------------------------------------------------------------------------------------------------------------------------------------------------------------------------------------------------------------------------------------------------------------------------------------------------------------------------------------------------------------|-----|-----|-----------|-------|------|------|
| Rsa1.0_00457.1.g14226.t2 | ref[XP_002889451.1] hypothetical protein ARALYDRAFT_470307 [Arabidopsis lyrata subsp. lyrata] gi 297335293 gb EFH65710.1                                                                                                                                                                                                                                                                                                                                 | 577 | 573 | 1.00E-157 | 99.3  | 61.9  | 71.6  | hypothetical protein ARALYDRAFT_470307             | gbpln | Arabidopsis lyrata   | AT1G03290.2   Symbols:   unknown protein; FUNCTIONS IN: molecular_function unknown; INVOLVED IN: biological_process unknown; LOCATED IN: cellular_component unknown; EXPRESSED IN: 22 plant structures; EXPRESSED DURING: 13 growth stages; BEST Arabidopsis thaliana protein match is: unknown protein (TAIR:AT4G02880.2).   chr1:807970-810680 FORWARD LENGTH=571 | 577 | 571 | 1.00E-157 | 99.0  | 60.0 | 71.4 |
| Rsa1.0_00457.1.g14227.t1 | # # # # # # # # - ---- ---- # # # # # #                                                                                                                                                                                                                                                                                                                                                                                                                  |     |     |           |       |       |       |                                                    |       |                      |                                                                                                                                                                                                                                                                                                                                                                     |     |     |           |       |      |      |
| Rsa1.0_00457.1.g14228.t1 | ref[XP_002889452.1] ATISA2/BE2/DBE1/ISA2 [Arabidopsis lyrata subsp. lyrata] gi 297335294 gb EFH65711.1  ATISA2/BE2/DBE1/ISA2 [Arabidopsis lyrata subsp. lyrata]                                                                                                                                                                                                                                                                                          | 885 | 872 | 0         | 98.5  | 81.6  | 88.7  | ATISA2/BE2/DBE1/ISA2                               | gbpln | Arabidopsis lyrata   | AT1G03310.1   Symbols: ATISA2, ISA2, DBE1, BE2   debranching enzyme 1   chr1:813975-816623 FORWARD LENGTH=882                                                                                                                                                                                                                                                       | 885 | 882 | 0         | 99.7  | 82.5 | 90.1 |
| Rsa1.0_00457.1.g14229.t1 | gb EOA39128.1  hypothetical protein CARUB_v10012047mg [Capsella rubella]                                                                                                                                                                                                                                                                                                                                                                                 | 221 | 207 | 3.00E-16  | 93.7  | 41.6  | 52.9  | hypothetical protein CARUB_v10012047mg             | gbpln | Capsella rubella     | # # # # # #                                                                                                                                                                                                                                                                                                                                                         |     |     |           |       |      |      |
| Rsa1.0_00457.1.g14230.t1 | ref[XP_002875353.1] hypothetical protein ARALYDRAFT_347067 [Arabidopsis lyrata subsp. lyrata] gi 297321191 gb EFH51612.1  hypothetical protein ARALYDRAFT_347067 [Arabidopsis lyrata subsp. lyrata]                                                                                                                                                                                                                                                      | 284 | 296 | 1.00E-70  | 104.2 | 59.5  | 73.2  | hypothetical protein ARALYDRAFT_347067             | gbpln | Arabidopsis lyrata   | AT3G27025.1   Symbols:   unknown protein; Has 25 Blast hits to 25 proteins in 6 species: Archae - 0; Bacteria - 0; Metazoa - 1; Fungi - 0; Plants - 24; Viruses - 0; Other Eukaryotes - 0 (source: NCBI BLink).   chr3:9969735-9971084 FORWARD LENGTH=289                                                                                                           | 284 | 289 | 2.00E-66  | 101.8 | 56.0 | 70.1 |
| Rsa1.0_00457.1.g14231.t1 | gb EOA38703.1  hypothetical protein CARUB_v10010754mg [Capsella rubella]                                                                                                                                                                                                                                                                                                                                                                                 | 93  | 93  | 3.00E-47  | 100.0 | 100.0 | 100.0 | hypothetical protein CARUB_v10010754mg             | gbpln | Capsella rubella     | AT1G03330.1   Symbols:   Small nuclear ribonucleoprotein family protein   chr1:818161-819297 REVERSE LENGTH=93                                                                                                                                                                                                                                                      | 93  | 93  | 4.00E-49  | 100.0 | 98.9 | 98.9 |
| Rsa1.0_00457.1.g14232.t1 | ref[NP_171833.1] uncharacterized protein [Arabidopsis thaliana] gi 3850570 gb AAC7210.1  F15K9.6 [Arabidopsis thaliana] gi 332189440 gb AEE27561.1  uncharacterized protein AT1G03340 [Arabidopsis thaliana]                                                                                                                                                                                                                                             | 360 | 385 | 1.00E-100 | 106.9 | 64.7  | 77.2  | uncharacterized protein                            | gbpln | Arabidopsis thaliana | AT1G03340.1   Symbols:   unknown protein; BEST Arabidopsis thaliana protein match is: unknown protein (TAIR:AT4G02920.1); Has 44 Blast hits to 41 proteins in 13 species: Archae - 0; Bacteria - 1; Metazoa - 0; Fungi - 0; Plants - 43; Viruses - 0; Other Eukaryotes - 0 (source: NCBI BLink).   chr1:819712-821227 FORWARD LENGTH=385                            | 360 | 385 | 1.00E-103 | 106.9 | 64.7 | 77.2 |
| Rsa1.0_00457.1.g14233.t1 | gb EOA40387.1  hypothetical protein CARUB_v10009113mg [Capsella rubella]                                                                                                                                                                                                                                                                                                                                                                                 | 456 | 451 | 1.00E-162 | 98.9  | 71.9  | 81.1  | hypothetical protein CARUB_v10009113mg             | gbpln | Capsella rubella     | AT1G03350.1   Symbols:   BSD domain-containing protein   chr1:822834-824246 REVERSE LENGTH=470                                                                                                                                                                                                                                                                      | 456 | 470 | 1.00E-161 | 103.1 | 71.3 | 81.1 |
| Rsa1.0_00457.1.g14234.t1 | ref[NP_171835.1] exosome complex component RRP4 [Arabidopsis thaliana] gi 3850568 gb AAC72108.1  Similar to hypothetical protein SPAC2F7.14c gi 1052797 from Schizosaccharomyces pombe cosmid gb Z50142 [Arabidopsis thaliana] gi 34365689 gb AAQ65156.1  At1g03360 [Arabidopsis thaliana] gi 51970606 dbj BAD43995.1  hypothetical protein [Arabidopsis thaliana] gi 332189442 gb AEE27563.1  ribosomal RNA processing protein 4 [Arabidopsis thaliana] | 320 | 322 | 1.00E-169 | 100.6 | 89.7  | 96.6  | exosome complex component RRP4                     | gbpln | Arabidopsis thaliana | AT1G03360.1   Symbols: ATRRP4, RRP4   ribosomal RNA processing 4   chr1:824653-826179 FORWARD LENGTH=322                                                                                                                                                                                                                                                            | 320 | 322 | 1.00E-172 | 100.6 | 89.7 | 96.6 |
| Rsa1.0_00457.1.g14235.t1 | ref[XP_002889457.1] hypothetical protein ARALYDRAFT_333664 [Arabidopsis lyrata subsp. lyrata] gi 297335299 gb EFH65716.1  hypothetical protein ARALYDRAFT_333664 [Arabidopsis lyrata subsp. lyrata]                                                                                                                                                                                                                                                      | 961 | 958 | 0         | 99.7  | 85.4  | 90.9  | hypothetical protein ARALYDRAFT_333664             | gbpln | Arabidopsis lyrata   | AT1G03380.1   Symbols: ATATG18G, ATG18G   homolog of yeast autophagy 18 (ATG18) G   chr1:836155-840362 FORWARD LENGTH=959                                                                                                                                                                                                                                           | 961 | 959 | 0         | 99.8  | 84.6 | 90.8 |
| Rsa1.0_00457.1.g14236.t1 | ref[XP_002892159.1] transferase family protein [Arabidopsis lyrata subsp. lyrata] gi 297338001 gb EFH68418.1  transferase family protein [Arabidopsis lyrata subsp. lyrata]                                                                                                                                                                                                                                                                              | 462 | 462 | 0         | 100.0 | 88.5  | 93.9  | transferase family protein                         | gbpln | Arabidopsis lyrata   | AT1G03390.1   Symbols:   HXXXD-type acyl-transferase family protein   chr1:841033-842418 REVERSE LENGTH=461                                                                                                                                                                                                                                                         | 462 | 461 | 0         | 99.8  | 87.2 | 93.3 |
| Rsa1.0_00457.1.g14237.t1 | ref[NP_171840.2] putative 1-aminocyclopropane-1-carboxylate oxidase [Arabidopsis thaliana] gi 332310331 sp Q43383.2 ACCH5_ARA TH RecName: Full=1-aminocyclopropane-1-carboxylate oxidase homolog 5 gi 332189448 gb AEE27569.1  1-aminocyclopropane-1-carboxylate oxidase homolog 5 [Arabidopsis thaliana]                                                                                                                                                | 372 | 398 | 1.00E-134 | 107.0 | 59.4  | 74.7  | putative 1-aminocyclopropane-1-carboxylate oxidase | gbpln | Arabidopsis thaliana | AT1G03410.1   Symbols: 2A6   2-oxoglutarate (2OG) and Fe(II)-dependent oxygenase superfamily protein   chr1:844782-846574 REVERSE LENGTH=398                                                                                                                                                                                                                        | 372 | 398 | 1.00E-136 | 107.0 | 59.4 | 74.7 |

|                          |                                                                                                                                                                                                       |      |      |           |        |      |      |                                                                                                                                                       |       |                      |                                                                                                                                                  |      |      |           |        |      |      |
|--------------------------|-------------------------------------------------------------------------------------------------------------------------------------------------------------------------------------------------------|------|------|-----------|--------|------|------|-------------------------------------------------------------------------------------------------------------------------------------------------------|-------|----------------------|--------------------------------------------------------------------------------------------------------------------------------------------------|------|------|-----------|--------|------|------|
| Rsa1.0_00458.1.g14238.t2 | gb AAZ41811.1  01P13-1 [Brassica rapa subsp. pekinensis]                                                                                                                                              | 549  | 1545 | 1.00E-117 | 281.4  | 47.2 | 55.7 | 01P13-1                                                                                                                                               | gbpln | Brassica rapa        | AT4G23160.1   Symbols: CRK8   cysteine-rich RLK (RECEPTOR-like protein kinase) 8   chr4:12129485-12134086 FORWARD LENGTH=1262                    | 549  | 1262 | 6.00E-12  | 229.9  | 7.5  | 11.8 |
| Rsa1.0_00458.1.g14239.t1 | dbj BAJ33719.1  unnamed protein product [Theilungiella halophila]                                                                                                                                     | 360  | 392  | 2.33E-156 | 108.9  | 85.0 | 90.8 | unnamed protein product                                                                                                                               | ----  | ----                 | AT5G44190.1   Symbols: GLK2, ATGLK2, GPR12   GOLDEN2-like 2   chr5:17798435-17800647 FORWARD LENGTH=386                                          | 360  | 386  | 1.00E-139 | 107.2  | 79.7 | 86.9 |
| Rsa1.0_00458.1.g14240.t1 | ref XP_002866574.1  IBR domain-containing protein [Arabidopsis lyrata subsp. lyrata]   gi 297312409 gb EFH42833.1  IBR domain-containing protein [Arabidopsis lyrata subsp. lyrata]                   | 593  | 518  | 1.00E-34  | 87.4   | 17.7 | 23.6 | IBR domain-containing protein                                                                                                                         | gbpln | Arabidopsis lyrata   | AT5G63750.1   Symbols: ATARI13, ARI13   RING/U-box superfamily protein   chr5:25513038-25514729 REVERSE LENGTH=536                               | 593  | 536  | 1.00E-36  | 90.4   | 17.9 | 22.9 |
| Rsa1.0_00458.1.g14241.t1 | gb AEW23125.1  phytochelatin synthase [Amaranthus tricolor]                                                                                                                                           | 428  | 485  | 0         | 113.3  | 90.0 | 94.9 | phytochelatin synthase                                                                                                                                | gbpln | Amaranthus tricolor  | AT5G44070.1   Symbols: CAD1, ARA8, ATPCS1, PCS1   phytochelatin synthase 1 (PCS1)   chr5:17734876-17737672 FORWARD LENGTH=485                    | 428  | 485  | 0         | 113.3  | 88.8 | 94.4 |
| Rsa1.0_00458.1.g14242.t1 | #                                                                                                                                                                                                     | #    | #    | #         | #      | #    | #    | -                                                                                                                                                     | ----  | ----                 | #                                                                                                                                                | #    | #    | #         | #      | #    | #    |
| Rsa1.0_00458.1.g14243.t1 | ref XP_002865388.1  hypothetical protein ARALYDRAFT_917224 [Arabidopsis lyrata subsp. lyrata]   gi 297311223 gb EFH41647.1  hypothetical protein ARALYDRAFT_917224 [Arabidopsis lyrata subsp. lyrata] | 256  | 272  | 1.00E-132 | 106.3  | 89.1 | 94.9 | hypothetical protein ARALYDRAFT_917224                                                                                                                | gbpln | Arabidopsis lyrata   | AT5G44020.1   Symbols:   HAD superfamily, subfamily IIIB acid phosphatase   chr5:17712433-17714046 FORWARD LENGTH=272                            | 256  | 272  | 1.00E-132 | 106.3  | 87.9 | 94.5 |
| Rsa1.0_00458.1.g14244.t1 | gb AAD32898.1  putative retroelement pol polyprotein [Arabidopsis thaliana]                                                                                                                           | 1321 | 1307 | 0         | 98.9   | 57.1 | 71.5 | putative retroelement pol polyprotein                                                                                                                 | gbpln | Arabidopsis thaliana | AT4G23160.1   Symbols: CRK8   cysteine-rich RLK (RECEPTOR-like protein kinase) 8   chr4:12129485-12134086 FORWARD LENGTH=1262                    | 1321 | 1262 | 2.00E-83  | 95.5   | 13.2 | 20.5 |
| Rsa1.0_00458.1.g14245.t1 | gb AAG51783.1 AC079679.3 reverse transcriptase, putative; 16838-20266 [Arabidopsis thaliana]                                                                                                          | 1020 | 1142 | 0         | 112.0  | 44.2 | 59.7 | reverse transcriptase, putative; 16838-20266                                                                                                          | gbpln | Arabidopsis thaliana | AT4G29090.1   Symbols:   Ribonuclease H-like superfamily protein   chr4:14333528-14335255 FORWARD LENGTH=575                                     | 1020 | 575  | 1.00E-80  | 56.4   | 17.2 | 28.0 |
| Rsa1.0_00458.1.g14246.t1 | pir  S65812 RNA-directed DNA polymerase (EC 2.7.7.49) (clone DW15) - Arabidopsis thaliana retrotransposon Ta11-1   gi 976278 gb AAA75254.1  reverse transcriptase [Arabidopsis thaliana]              | 114  | 1333 | 2.00E-11  | 1169.3 | 32.5 | 50.9 | RNA-directed DNA polymerase (EC 2.7.7.49) (clone DW15) - Arabidopsis thaliana retrotransposon Ta11-1   gi 976278 gb AAA75254.1  reverse transcriptase | gbpln | Arabidopsis thaliana | #                                                                                                                                                | #    | #    | #         | #      | #    | #    |
| Rsa1.0_00458.1.g14247.t1 | ref XP_002865389.1  SET domain protein SUVR2 [Arabidopsis lyrata subsp. lyrata]   gi 297311224 gb EFH41648.1  SET domain protein SUVR2 [Arabidopsis lyrata subsp. lyrata]                             | 631  | 712  | 0         | 112.8  | 71.8 | 82.7 | SET domain protein SUVR2                                                                                                                              | gbpln | Arabidopsis lyrata   | AT5G43990.5   Symbols: SUVR2   SET-domain containing protein lysine methyltransferase family protein   chr5:17698523-17701733 FORWARD LENGTH=697 | 631  | 697  | 0         | 110.5  | 70.2 | 81.9 |
| Rsa1.0_00458.1.g14248.t1 | gb AAD17398.1  putative non-LTR retroelement reverse transcriptase [Arabidopsis thaliana]                                                                                                             | 602  | 1225 | 1.00E-127 | 203.5  | 40.2 | 56.5 | putative non-LTR retroelement reverse transcriptase                                                                                                   | gbpln | Arabidopsis thaliana | AT4G29090.1   Symbols:   Ribonuclease H-like superfamily protein   chr4:14333528-14335255 FORWARD LENGTH=575                                     | 602  | 575  | 2.00E-81  | 95.5   | 29.6 | 45.7 |
| Rsa1.0_00458.1.g14249.t1 | gb EOA14888.1  hypothetical protein CARUB_v10028217mg [Capsella rubella]                                                                                                                              | 99   | 99   | 5.00E-40  | 100.0  | 85.9 | 93.9 | hypothetical protein CARUB_v10028217mg                                                                                                                | gbpln | Capsella rubella     | AT5G43970.1   Symbols: TOM22-V, TOM9-2, ATTOM22-V   translocase of outer membrane 22-V   chr5:17692888-17693187 FORWARD LENGTH=99                | 99   | 99   | 1.00E-42  | 100.0  | 87.9 | 92.9 |
| Rsa1.0_00458.1.g14250.t1 | gb EOA14513.1  hypothetical protein CARUB_v10027740mg [Capsella rubella]                                                                                                                              | 571  | 565  | 0         | 98.9   | 82.1 | 89.5 | hypothetical protein CARUB_v10027740mg                                                                                                                | gbpln | Capsella rubella     | AT5G43950.1   Symbols:   Plant protein of unknown function (DUF946)   chr5:17686707-17688623 REVERSE LENGTH=566                                  | 571  | 566  | 0         | 99.1   | 79.5 | 90.0 |
| Rsa1.0_00459.1.g14251.t1 | gb EOA39562.1  hypothetical protein CARUB_v10008180mg [Capsella rubella]                                                                                                                              | 58   | 1021 | 4.00E-11  | 1760.3 | 77.6 | 87.9 | hypothetical protein CARUB_v10008180mg                                                                                                                | gbpln | Capsella rubella     | AT1G31280.1   Symbols: AGO2   Argonaute family protein   chr1:11181777-11185112 FORWARD LENGTH=1014                                              | 58   | 1014 | 1.00E-12  | 1748.3 | 74.1 | 86.2 |
| Rsa1.0_00459.1.g14252.t1 | gb AAG51783.1 AC079679.3 reverse transcriptase, putative; 16838-20266 [Arabidopsis thaliana]                                                                                                          | 198  | 1142 | 1.00E-30  | 576.8  | 41.9 | 59.1 | reverse transcriptase, putative; 16838-20266                                                                                                          | gbpln | Arabidopsis thaliana | #                                                                                                                                                | #    | #    | #         | #      | #    | #    |
| Rsa1.0_00459.1.g14253.t1 | gb EOA38400.1  hypothetical protein CARUB_v10009967mg [Capsella rubella]                                                                                                                              | 278  | 278  | 1.00E-155 | 100.0  | 95.3 | 98.9 | hypothetical protein CARUB_v10009967mg                                                                                                                | gbpln | Capsella rubella     | AT1G31300.2   Symbols:   TRAM, LAG1 and CLN8 (TLG) lipid-sensing domain containing protein   chr1:11194308-11195955 FORWARD LENGTH=278           | 278  | 278  | 1.00E-157 | 100.0  | 95.0 | 98.9 |
| Rsa1.0_00459.1.g14254.t1 | gb EOA39311.1  hypothetical protein CARUB_v10012336mg [Capsella rubella]                                                                                                                              | 387  | 403  | 1.00E-125 | 104.1  | 72.4 | 80.4 | hypothetical protein CARUB_v10012336mg                                                                                                                | gbpln | Capsella rubella     | AT1G31310.1   Symbols:   hydroxyproline-rich glycoprotein family protein   chr1:11198565-11200025 REVERSE LENGTH=383                             | 387  | 383  | 1.00E-124 | 99.0   | 73.1 | 79.6 |
| Rsa1.0_00459.1.g14255.t1 | #                                                                                                                                                                                                     | #    | #    | #         | #      | #    | #    | -                                                                                                                                                     | ----  | ----                 | #                                                                                                                                                | #    | #    | #         | #      | #    | #    |
| Rsa1.0_00459.1.g14256.t1 | emb CAB52747.1  photosystem I subunit III precursor [Arabidopsis thaliana]   gi 21593588 gb AAM65555.1  photosystem I subunit III precursor, putative [Arabidopsis thaliana]                          | 221  | 221  | 1.00E-117 | 100.0  | 92.8 | 96.8 | photosystem I subunit III precursor                                                                                                                   | gbpln | Arabidopsis thaliana | AT1G31330.1   Symbols: PSAF   photosystem I subunit F   chr1:11215011-11215939 REVERSE LENGTH=221                                                | 221  | 221  | 1.00E-119 | 100.0  | 92.3 | 96.4 |

|                          |                                                                                                                                                                                                                                                                                                                                                                                                                                                                                                                                                                                                                                                                                                                                                                                       |     |     |           |       |      |      |                                        |       |                      |                                                                                                                                                                                                                                                                                                                                                                                                                                                   |     |     |           |       |      |      |
|--------------------------|---------------------------------------------------------------------------------------------------------------------------------------------------------------------------------------------------------------------------------------------------------------------------------------------------------------------------------------------------------------------------------------------------------------------------------------------------------------------------------------------------------------------------------------------------------------------------------------------------------------------------------------------------------------------------------------------------------------------------------------------------------------------------------------|-----|-----|-----------|-------|------|------|----------------------------------------|-------|----------------------|---------------------------------------------------------------------------------------------------------------------------------------------------------------------------------------------------------------------------------------------------------------------------------------------------------------------------------------------------------------------------------------------------------------------------------------------------|-----|-----|-----------|-------|------|------|
| Rsa1.0_00459.1.g14257.t1 | gb[EOA37259.1] hypothetical protein CARUB_v10010814mg [Capsella rubella]                                                                                                                                                                                                                                                                                                                                                                                                                                                                                                                                                                                                                                                                                                              | 72  | 70  | 5.00E-21  | 97.2  | 83.3 | 84.7 | hypothetical protein CARUB_v10010814mg | gbpln | Capsella rubella     | AT1G31335.1   Symbols:   unknown protein; FUNCTIONS IN: molecular_function unknown; INVOLVED IN: biological_process unknown; LOCATED IN: plasma membrane; EXPRESSED IN: 20 plant structures; EXPRESSED DURING: 13 growth stages; Has 34 Blast hits to 34 proteins in 8 species: Archae - 0; Bacteria - 0; Metazoa - 0; Fungi - 0; Plants - 34; Viruses - 0; Other Eukaryotes - 0 (source: NCBI BLink).   chr1:11217117-11217329 REVERSE LENGTH=70 | 72  | 70  | 2.00E-23  | 97.2  | 84.7 | 86.1 |
| Rsa1.0_00459.1.g14258.t1 | ref[NP_564379.2] NEDD8-like protein RUB1 [Arabidopsis thaliana] gi 302393813 sp Q9SHE7.3 RUB1_ARAT H RecName: Full=Ubiquitin-NEDD8-like protein RUB1; Contains: RecName: Full=Ubiquitin; Contains: RecName: Full=NEDD8-like protein RUB1; AltName: Full=Ubiquitin-related protein 1; Short=AtRUB1; Flags: Precursor gi 6692129 gb AAF24594.1 AC007654_10 T19E23.13 [Arabidopsis thaliana] gi 28973676 gb AAO64156.1  putative ubiquitin (ARUB1) [Arabidopsis thaliana] gi 28924269 gb AAP04095.1  putative ubiquitin (AtRUB1) [Arabidopsis thaliana] gi 110737109 dbj BAF00506.1  putative ubiquitin [Arabidopsis thaliana] gi 312283039 dbj BAJ34385.1  unnamed protein product [Thellungiella halophila] gi 332193223 gb AEE31344.1  NEDD8-like protein RUB1 [Arabidopsis thaliana] | 172 | 156 | 1.00E-77  | 90.7  | 90.1 | 90.7 | NEDD8-like protein RUB1                | gbpln | Arabidopsis thaliana | AT1G31340.1   Symbols: RUB1, NEDD8, ATRUB1   related to ubiquitin 1   chr1:11218076-11219417 REVERSE LENGTH=156                                                                                                                                                                                                                                                                                                                                   | 172 | 156 | 4.00E-80  | 90.7  | 90.1 | 90.7 |
| Rsa1.0_00459.1.g14259.t1 | #                                                                                                                                                                                                                                                                                                                                                                                                                                                                                                                                                                                                                                                                                                                                                                                     | #   | #   | #         | #     | #    | -    | ----                                   | ----  | #                    | #                                                                                                                                                                                                                                                                                                                                                                                                                                                 | #   | #   | #         | #     | #    |      |
| Rsa1.0_00459.1.g14260.t1 | ref[XP_002891150.1] F-box family protein [Arabidopsis lyrata subsp. lyrata] gi 297336992 gb EFH67409.1  F-box family protein [Arabidopsis lyrata subsp. lyrata]                                                                                                                                                                                                                                                                                                                                                                                                                                                                                                                                                                                                                       | 384 | 385 | 1.00E-163 | 100.3 | 76.8 | 87.8 | F-box family protein                   | gbpln | Arabidopsis lyrata   | AT1G31350.1   Symbols: KUF1   KAR-UP F-box 1   chr1:11221519-11222706 REVERSE LENGTH=395                                                                                                                                                                                                                                                                                                                                                          | 384 | 395 | 1.00E-159 | 102.9 | 76.3 | 87.5 |
| Rsa1.0_00459.1.g14261.t1 | #                                                                                                                                                                                                                                                                                                                                                                                                                                                                                                                                                                                                                                                                                                                                                                                     | #   | #   | #         | #     | #    | -    | ----                                   | ----  | #                    | #                                                                                                                                                                                                                                                                                                                                                                                                                                                 | #   | #   | #         | #     | #    |      |
| Rsa1.0_00460.1.g14262.t1 | ref[XP_002867362.1] hypothetical protein ARALYDRAFT_491730 [Arabidopsis lyrata subsp. lyrata] gi 297313198 gb EFH43621.1  hypothetical protein ARALYDRAFT_491730 [Arabidopsis lyrata subsp. lyrata] ref[NP_194751.1] small nuclear ribonucleoprotein F [Arabidopsis thaliana] gi 297798954 ref[XP_002867361.1] hypothetical protein ARALYDRAFT_913456 [Arabidopsis lyrata subsp. lyrata] gi 297836060 ref[XP_002885912.1] hypothetical protein ARALYDRAFT_899645 [Arabidopsis lyrata subsp. lyrata] gi 10720264 sp Q9SUM2.1 RUXF_ARAT H RecName: Full=Probable small nuclear ribonucleoprotein F; Short=snRNP-F; AltName: Full=Sm protein F; Short=Sm-F; Short=SmF                                                                                                                    | 358 | 718 | 1.00E-144 | 200.6 | 76.5 | 83.8 | hypothetical protein ARALYDRAFT_491730 | gbpln | Arabidopsis lyrata   | AT4G30200.3   Symbols: VEL1, VIL2   vernalization5/VIN3-like   chr4:14786852-14790070 REVERSE LENGTH=702                                                                                                                                                                                                                                                                                                                                          | 358 | 702 | 1.00E-144 | 196.1 | 75.7 | 83.2 |
| Rsa1.0_00460.1.g14263.t1 | gi 5730132 emb CAB52466.1  snRNP Sm protein F-like [Arabidopsis thaliana] gi 7269922 emb CAB81015.1  snRNP Sm protein F-like [Arabidopsis thaliana] gi 21593208 gb AAM65157.1  snRNP Sm protein F-like [Arabidopsis thaliana] gi 30102544 gb AAP21190.1  At4g30220 [Arabidopsis thaliana] gi 110743810 dbj BAE99740.1  snRNP Sm protein F-like [Arabidopsis thaliana] gi 297313197 gb EFH43620.1  hypothetical protein ARALYDRAFT_913456 [Arabidopsis lyrata subsp. lyrata] gi 297331752 gb EFH62171.1  hypothetical protein ARALYDRAFT_899645 [Arabidopsis lyrata subsp. lyrata]                                                                                                                                                                                                     | 88  | 88  | 2.00E-42  | 100.0 | 97.7 | 98.9 | small nuclear ribonucleoprotein F      | gbpln | Arabidopsis lyrata   | AT4G30220.1   Symbols: RUXF   small nuclear ribonucleoprotein F   chr4:14803100-14804259 REVERSE LENGTH=88                                                                                                                                                                                                                                                                                                                                        | 88  | 88  | 3.00E-45  | 100.0 | 97.7 | 98.9 |
| Rsa1.0_00460.1.g14264.t1 | #                                                                                                                                                                                                                                                                                                                                                                                                                                                                                                                                                                                                                                                                                                                                                                                     | #   | #   | #         | #     | #    | -    | ----                                   | ----  | #                    | #                                                                                                                                                                                                                                                                                                                                                                                                                                                 | #   | #   | #         | #     | #    |      |

|                          |                                                                                                                                                                                                                                                                                                                                                                                                                                                                                                                                                                                                         |     |     |           |       |      |      |                                                      |       |                      |                                                                                                                                                                                                                                                             |     |     |           |       |      |      |
|--------------------------|---------------------------------------------------------------------------------------------------------------------------------------------------------------------------------------------------------------------------------------------------------------------------------------------------------------------------------------------------------------------------------------------------------------------------------------------------------------------------------------------------------------------------------------------------------------------------------------------------------|-----|-----|-----------|-------|------|------|------------------------------------------------------|-------|----------------------|-------------------------------------------------------------------------------------------------------------------------------------------------------------------------------------------------------------------------------------------------------------|-----|-----|-----------|-------|------|------|
| Rsa1.0_00460.1.g14265.t1 | gb[EOA17247.1] hypothetical protein CARUB_v10005521mg [Capsella rubella]                                                                                                                                                                                                                                                                                                                                                                                                                                                                                                                                | 260 | 263 | 2.00E-82  | 101.2 | 68.1 | 80.8 | hypothetical protein CARUB_v10005521mg               | gbpln | Capsella rubella     | AT4G30230.1   Symbols:   unknown protein; Has 42 Blast hits to 42 proteins in 5 species: Archae - 0; Bacteria - 0; Metazoa - 0; Fungi - 0; Plants - 42; Viruses - 0; Other Eukaryotes - 0 (source: NCBI BLink).   chr4:14806376-14807158 FORWARD LENGTH=260 | 260 | 260 | 9.00E-83  | 100.0 | 69.2 | 80.0 |
| Rsa1.0_00460.1.g14266.t1 | ref[XP_002867359.1] integral membrane Yip1 family protein [Arabidopsis lyrata subsp. lyrata] gi 297313195 gb EFH43618.1  integral membrane Yip1 family protein [Arabidopsis lyrata subsp. lyrata]                                                                                                                                                                                                                                                                                                                                                                                                       | 190 | 283 | 3.00E-28  | 148.9 | 33.7 | 35.3 | integral membrane Yip1 family protein                | gbpln | Arabidopsis lyrata   | AT4G30260.1   Symbols:   Integral membrane Yip1 family protein   chr4:14816890-14818722 REVERSE LENGTH=280                                                                                                                                                  | 190 | 280 | 2.00E-30  | 147.4 | 33.2 | 35.3 |
| Rsa1.0_00460.1.g14267.t1 | ref[XP_002867358.1] meristem-5 [Arabidopsis lyrata subsp. lyrata] gi 297313194 gb EFH43617.1  meristem-5 [Arabidopsis lyrata subsp. lyrata]                                                                                                                                                                                                                                                                                                                                                                                                                                                             | 279 | 269 | 1.00E-147 | 96.4  | 90.7 | 93.5 | meristem-5                                           | gbpln | Arabidopsis lyrata   | AT4G30270.1   Symbols: MERI5B, MERI-5, XTH24, SEN4   xyloglucan endotransglucosylase/hydrolase 24   chr4:14819445-14820448 REVERSE LENGTH=269                                                                                                               | 279 | 269 | 1.00E-147 | 96.4  | 88.5 | 92.8 |
| Rsa1.0_00460.1.g14268.t1 | ref[XP_002867357.1] ATXTH18/XTH18 [Arabidopsis lyrata subsp. lyrata] gi 297313193 gb EFH43616.1  ATXTH18/XTH18 [Arabidopsis lyrata subsp. lyrata]                                                                                                                                                                                                                                                                                                                                                                                                                                                       | 282 | 282 | 1.00E-145 | 100.0 | 89.7 | 94.7 | ATXTH18/XTH18                                        | gbpln | Arabidopsis lyrata   | AT4G30280.1   Symbols: ATXTH18, XTH18   xyloglucan endotransglucosylase/hydrolase 18   chr4:14825958-14826998 REVERSE LENGTH=282                                                                                                                            | 282 | 282 | 1.00E-147 | 100.0 | 89.4 | 94.3 |
| Rsa1.0_00460.1.g14269.t1 | ref[NP_199618.1] xyloglucan endotransglucosylase/hydrolase protein 20 [Arabidopsis thaliana] gi 38605469 sp Q9F131.1 XTH20_ARATH RecName: Full=Xyloglucan endotransglucosylase/hydrolase protein 20; Short=At-XTH20; Short=XTH-20; Flags: Precursor gi 10177758 dbj BAB11071.1  xyloglucan endo-1,4-beta-D-glucanase [Arabidopsis thaliana] gi 45825157 gb AAS77486.1  At5g48070 [Arabidopsis thaliana] gi 62320256 dbj BAD94531.1  xyloglucan endo-1,4-beta-D-glucanase [Arabidopsis thaliana] gi 332008233 gb AED95616.1  xyloglucan endotransglucosylase/hydrolase protein 20 [Arabidopsis thaliana] | 283 | 282 | 1.00E-142 | 99.6  | 84.8 | 90.8 | xyloglucan endotransglucosylase/hydrolase protein 20 | gbpln | Arabidopsis thaliana | AT5G48070.1   Symbols: ATXTH20, XTH20   xyloglucan endotransglucosylase/hydrolase 20   chr5:19482158-19483231 FORWARD LENGTH=282                                                                                                                            | 283 | 282 | 1.00E-144 | 99.6  | 84.8 | 90.8 |
| Rsa1.0_00460.1.g14270.t1 | ref[NP_194760.2] FGGY family of carbohydrate kinase [Arabidopsis thaliana] gi 332660351 gb AEE85751.1  FGGY family of carbohydrate kinase [Arabidopsis thaliana]                                                                                                                                                                                                                                                                                                                                                                                                                                        | 573 | 579 | 0         | 101.0 | 92.5 | 97.0 | FGGY family of carbohydrate kinase                   | gbpln | Arabidopsis thaliana | AT4G30310.2   Symbols:   FGGY family of carbohydrate kinase   chr4:14831913-14835092 FORWARD LENGTH=579                                                                                                                                                     | 573 | 579 | 0         | 101.0 | 92.5 | 97.0 |
| Rsa1.0_00460.1.g14271.t1 | #                                                                                                                                                                                                                                                                                                                                                                                                                                                                                                                                                                                                       | #   | #   | #         | #     | #    | #    | -                                                    | ----  | ----                 | #                                                                                                                                                                                                                                                           | #   | #   | #         | #     | #    |      |
| Rsa1.0_00460.1.g14272.t1 | gb[EOA18929.1] hypothetical protein CARUB_v10007576mg [Capsella rubella]                                                                                                                                                                                                                                                                                                                                                                                                                                                                                                                                | 167 | 164 | 1.00E-74  | 98.2  | 82.6 | 88.0 | hypothetical protein CARUB_v10007576mg               | gbpln | Capsella rubella     | AT4G30320.1   Symbols:   CAP (Cysteine-rich secretory proteins, Antigen 5, and Pathogenesis-related 1 protein) superfamily protein   chr4:14835833-14836318 FORWARD LENGTH=161                                                                              | 167 | 161 | 3.00E-75  | 96.4  | 79.6 | 85.0 |
| Rsa1.0_00460.1.g14273.t1 | ref[NP_194764.1] heat shock-related protein [Arabidopsis thaliana] gi 7269935 emb CAB81023.1  putative protein [Arabidopsis thaliana] gi 332660355 gb AEE85755.1  heat shock-related protein [Arabidopsis thaliana]                                                                                                                                                                                                                                                                                                                                                                                     | 857 | 924 | 0         | 107.8 | 82.6 | 89.4 | heat shock-related protein                           | gbpln | Arabidopsis thaliana | AT4G30350.1   Symbols:   Double Clip-N motif-containing P-loop nucleoside triphosphate hydrolases superfamily protein   chr4:14848031-14850973 FORWARD LENGTH=924                                                                                           | 857 | 924 | 0         | 107.8 | 82.6 | 89.4 |
| Rsa1.0_00460.1.g14274.t1 | gb[EOA19101.1] hypothetical protein CARUB_v10007769mg [Capsella rubella]                                                                                                                                                                                                                                                                                                                                                                                                                                                                                                                                | 663 | 724 | 0         | 109.2 | 86.0 | 93.5 | hypothetical protein CARUB_v10007769mg               | gbpln | Capsella rubella     | AT4G30360.1   Symbols: ATCNGC17, CNGC17   cyclic nucleotide-gated channel 17   chr4:14855060-14857779 REVERSE LENGTH=720                                                                                                                                    | 663 | 720 | 0         | 108.6 | 86.0 | 92.5 |
| Rsa1.0_00460.1.g14275.t1 | ref[XP_002867351.1] hypothetical protein ARALYDRAFT_491714 [Arabidopsis lyrata subsp. lyrata] gi 297313187 gb EFH43610.1  hypothetical protein ARALYDRAFT_491714 [Arabidopsis lyrata subsp. lyrata]                                                                                                                                                                                                                                                                                                                                                                                                     | 96  | 95  | 2.00E-35  | 99.0  | 80.2 | 90.6 | hypothetical protein ARALYDRAFT_491714               | gbpln | Arabidopsis lyrata   | AT4G30390.1   Symbols:   unknown protein; Has 22 Blast hits to 22 proteins in 11 species: Archae - 0; Bacteria - 0; Metazoa - 0; Fungi - 0; Plants - 22; Viruses - 0; Other Eukaryotes - 0 (source: NCBI BLink).   chr4:14862224-14862906 REVERSE LENGTH=95 | 96  | 95  | 9.00E-38  | 99.0  | 77.1 | 88.5 |
| Rsa1.0_00460.1.g14276.t1 | ref[NP_567846.1] RING-H2 finger protein ATL13 [Arabidopsis thaliana] gi 68565248 sp Q940Q4.2 ATL13_ARATH RecName: Full=RING-H2 finger protein ATL13 gi 332660360 gb AEE85760.1  RING-H2 finger protein ATL13 [Arabidopsis thaliana]                                                                                                                                                                                                                                                                                                                                                                     | 447 | 472 | 1.00E-177 | 105.6 | 85.2 | 89.5 | RING-H2 finger protein ATL13                         | gbpln | Arabidopsis thaliana | AT4G30400.1   Symbols:   RING/U-box superfamily protein   chr4:14867068-14868486 FORWARD LENGTH=472                                                                                                                                                         | 447 | 472 | 1.00E-179 | 105.6 | 85.2 | 89.5 |



|                          |                                                                                                                                                                                                                                                                                                                                                                                                                     |     |     |           |       |      |      |                                                     |       |                      |                                                                                                                                               |     |      |           |       |      |      |
|--------------------------|---------------------------------------------------------------------------------------------------------------------------------------------------------------------------------------------------------------------------------------------------------------------------------------------------------------------------------------------------------------------------------------------------------------------|-----|-----|-----------|-------|------|------|-----------------------------------------------------|-------|----------------------|-----------------------------------------------------------------------------------------------------------------------------------------------|-----|------|-----------|-------|------|------|
| Rsa1.0_00460.1.g14277.t1 | ref NP_194771.1  nodulin MtN21 /EamA-like transporter family protein [Arabidopsis thaliana] gi 75181441 sp Q9M0B8.1 WTR37_ARAT H RecName: Full=WAT1-related protein At4g30420 gi 7269943 emb CAB79760.1  nodulin-like protein [Arabidopsis thaliana] gi 332660363 gb AEE85763.1  nodulin MtN21 /EamA-like transporter family protein [Arabidopsis thaliana]                                                         | 368 | 373 | 1.00E-150 | 101.4 | 70.7 | 83.7 | nodulin MtN21 /EamA-like transporter family protein | gbpln | Arabidopsis thaliana | AT4G30420.1   Symbols:   nodulin MtN21 /EamA-like transporter family protein   chr4:14877069-14878914 FORWARD LENGTH=373                      | 368 | 373  | 1.00E-153 | 101.4 | 70.7 | 83.7 |
| Rsa1.0_00460.1.g14278.t1 | gb EOA35038.1  hypothetical protein CARUB_v10020144mg, partial [Capsella rubella]                                                                                                                                                                                                                                                                                                                                   | 676 | 521 | 1.00E-170 | 77.1  | 49.9 | 55.9 | hypothetical protein CARUB_v10020144mg, partial     | gbpln | Capsella rubella     | AT1G66980.1   Symbols: SNC4   suppressor of npr1-1 constitutive 4   chr1:24997491-25001961 REVERSE LENGTH=1118                                | 676 | 1118 | 1.00E-137 | 165.4 | 35.5 | 40.7 |
| Rsa1.0_00460.1.g14279.t1 | ref NP_567849.1  putative F-box/LRR-repeat protein 19 [Arabidopsis thaliana] gi 75335738 sp Q9M096.1 FBL19_ARAT H RecName: Full=Putative F-box/LRR-repeat protein 19 gi 7269965 emb CAB79782.1  putative protein [Arabidopsis thaliana] gi 332660389 gb AEE85789.1  putative F-box/LRR-repeat protein 19 [Arabidopsis thaliana]                                                                                     | 278 | 301 | 1.00E-87  | 108.3 | 58.3 | 73.4 | putative F-box/LRR-repeat protein 19                | gbpln | Arabidopsis thaliana | AT4G30640.1   Symbols:   RNi-like superfamily protein   chr4:14952670-14953682 FORWARD LENGTH=301                                             | 278 | 301  | 3.00E-90  | 108.3 | 58.3 | 73.4 |
| Rsa1.0_00460.1.g14280.t1 | ref XP_002869365.1  hypothetical protein ARALYDRAFT_913409 [Arabidopsis lyrata subsp. lyrata] gi 297315201 gb EFH45624.1  hypothetical protein ARALYDRAFT_913409 [Arabidopsis lyrata subsp. lyrata]                                                                                                                                                                                                                 | 75  | 74  | 2.00E-29  | 98.7  | 86.7 | 94.7 | hypothetical protein ARALYDRAFT_913409              | gbpln | Arabidopsis lyrata   | AT4G30660.2   Symbols:   Low temperature and salt responsive protein family   chr4:14955470-14955944 FORWARD LENGTH=74                        | 75  | 74   | 5.00E-31  | 98.7  | 82.7 | 92.0 |
| Rsa1.0_00460.1.g14281.t1 | ref NP_567850.1  Putative membrane lipoprotein [Arabidopsis thaliana] gi 21536573 gb AAM60905.1  unknown [Arabidopsis thaliana] gi 26449845 dbj BAC42045.1  unknown protein [Arabidopsis thaliana] gi 51970566 dbj BAD43975.1  putative protein [Arabidopsis thaliana] gi 89111838 gb ABD60691.1  At4g30670 [Arabidopsis thaliana] gi 332660394 gb AEE85794.1  Putative membrane lipoprotein [Arabidopsis thaliana] | 104 | 102 | 3.00E-15  | 98.1  | 69.2 | 78.8 | Putative membrane lipoprotein                       | gbpln | Arabidopsis thaliana | AT4G30670.1   Symbols:   Putative membrane lipoprotein   chr4:14957597-14957905 REVERSE LENGTH=102                                            | 104 | 102  | 4.00E-18  | 98.1  | 69.2 | 78.8 |
| Rsa1.0_00460.1.g14282.t1 | gb EOA16004.1  hypothetical protein CARUB_v10004122mg [Capsella rubella]                                                                                                                                                                                                                                                                                                                                            | 169 | 841 | 6.00E-71  | 497.6 | 80.5 | 88.8 | hypothetical protein CARUB_v10004122mg              | gbpln | Capsella rubella     | AT4G30680.1   Symbols:   Initiation factor eIF-4 gamma, MA3   chr4:14958687-14960012 REVERSE LENGTH=263                                       | 169 | 263  | 5.00E-71  | 155.6 | 76.9 | 87.0 |
| Rsa1.0_00460.1.g14283.t1 | ref XP_002867334.1  hypothetical protein ARALYDRAFT_353746 [Arabidopsis lyrata subsp. lyrata] gi 297313170 gb EFH43593.1  hypothetical protein ARALYDRAFT_353746 [Arabidopsis lyrata subsp. lyrata]                                                                                                                                                                                                                 | 748 | 745 | 0         | 99.6  | 80.6 | 87.2 | hypothetical protein ARALYDRAFT_353746              | gbpln | Arabidopsis lyrata   | AT2G24050.1   Symbols: eFiso4G2   MIF4G domain-containing protein / MA3 domain-containing protein   chr2:10225500-10228456 REVERSE LENGTH=747 | 748 | 747  | 0         | 99.9  | 69.5 | 80.6 |
| Rsa1.0_00460.1.g14284.t1 | ref NP_567851.1  translation initiation factor IF-3 [Arabidopsis thaliana] gi 14596121 gb AAK68788.1  putative protein [Arabidopsis thaliana] gi 18377498 gb AAL66915.1  putative protein [Arabidopsis thaliana] gi 332660396 gb AEE85796.1  translation initiation factor IF-3 [Arabidopsis thaliana]                                                                                                              | 284 | 281 | 1.00E-118 | 98.9  | 87.3 | 91.2 | translation initiation factor IF-3                  | gbpln | Arabidopsis thaliana | AT4G30690.1   Symbols:   Translation initiation factor 3 protein   chr4:14960742-14962328 FORWARD LENGTH=281                                  | 284 | 281  | 1.00E-121 | 98.9  | 87.3 | 91.2 |
| Rsa1.0_00460.1.g14285.t1 | gb EOA18812.1  hypothetical protein CARUB_v10007425mg [Capsella rubella]                                                                                                                                                                                                                                                                                                                                            | 633 | 644 | 0         | 101.7 | 82.0 | 88.3 | hypothetical protein CARUB_v10007425mg              | gbpln | Capsella rubella     | AT4G30710.1   Symbols: QWRF8   Family of unknown function (DUF566)   chr4:14965538-14967881 REVERSE LENGTH=644                                | 633 | 644  | 0         | 101.7 | 85.2 | 90.2 |
| Rsa1.0_00461.1.g14287.t1 | gb ABA42147.1  aintegumenta 2 [Brassica napus]                                                                                                                                                                                                                                                                                                                                                                      | 546 | 562 | 0         | 102.9 | 88.6 | 94.0 | aintegumenta 2                                      | gbpln | Brassica napus       | AT4G37750.1   Symbols: ANT, DRG, CKC, CKC1   Integrase-type DNA-binding superfamily protein   chr4:17739782-17742189 FORWARD LENGTH=555       | 546 | 555  | 0         | 101.6 | 86.6 | 91.9 |
| Rsa1.0_00461.1.g14288.t1 | ref XP_002868966.1  hypothetical protein ARALYDRAFT_490840 [Arabidopsis lyrata subsp. lyrata] gi 297314802 gb EFH45225.1  hypothetical protein ARALYDRAFT_490840 [Arabidopsis lyrata subsp. lyrata]                                                                                                                                                                                                                 | 517 | 521 | 0         | 100.8 | 91.9 | 95.6 | hypothetical protein ARALYDRAFT_490840              | gbpln | Arabidopsis lyrata   | AT4G37760.1   Symbols: SQE3   squalene epoxidase 3   chr4:17744085-17746426 FORWARD LENGTH=525                                                | 517 | 525  | 0         | 101.5 | 90.9 | 94.6 |
|                          | #                                                                                                                                                                                                                                                                                                                                                                                                                   | #   | #   | #         | #     | #    | #    | -                                                   | ----  | ----                 | #                                                                                                                                             | #   | #    | #         | #     | #    | #    |

|                          |                                                                                                                                                                                                                                                                                                                                                                                                       |     |     |           |       |      |      |                                               |       |                      |                                                                                                                                                                                                                                                                                                                                                                                                                                                                                                       |     |     |           |       |      |      |
|--------------------------|-------------------------------------------------------------------------------------------------------------------------------------------------------------------------------------------------------------------------------------------------------------------------------------------------------------------------------------------------------------------------------------------------------|-----|-----|-----------|-------|------|------|-----------------------------------------------|-------|----------------------|-------------------------------------------------------------------------------------------------------------------------------------------------------------------------------------------------------------------------------------------------------------------------------------------------------------------------------------------------------------------------------------------------------------------------------------------------------------------------------------------------------|-----|-----|-----------|-------|------|------|
| Rsa1.0_00461.1.g14289.t1 | ref[XP_002868965.1] 1-amino-cyclopropane-1-carboxylate synthase 8 [Arabidopsis lyrata subsp. lyrata] gi 297314801 gb EFH45224.1  1-amino-cyclopropane-1-carboxylate synthase 8 [Arabidopsis lyrata subsp. lyrata]                                                                                                                                                                                     | 469 | 469 | 0         | 100.0 | 93.0 | 96.6 | 1-amino-cyclopropane-1-carboxylate synthase 8 | gbpln | Arabidopsis lyrata   | AT4G37770.1   Symbols: ACS8   1-amino-cyclopropane-1-carboxylate synthase 8   chr4:17758221-17759325 FORWARD LENGTH=469                                                                                                                                                                                                                                                                                                                                                                               | 469 | 469 | 0         | 100.0 | 91.9 | 95.9 |
| Rsa1.0_00461.1.g14290.t1 | ref[NP_195492.2] myb domain protein 87 [Arabidopsis thaliana] gi 332661437 gb AE86837.1  myb domain protein 87 [Arabidopsis thaliana]                                                                                                                                                                                                                                                                 | 310 | 305 | 1.00E-121 | 98.4  | 72.9 | 83.9 | myb domain protein 87                         | gbpln | Arabidopsis thaliana | AT4G37780.1   Symbols: MYB87, ATMYB87   myb domain protein 87   chr4:17758404-17759526 REVERSE LENGTH=305                                                                                                                                                                                                                                                                                                                                                                                             | 310 | 305 | 1.00E-124 | 98.4  | 72.9 | 83.9 |
| Rsa1.0_00461.1.g14291.t1 | #                                                                                                                                                                                                                                                                                                                                                                                                     | #   | #   | #         | #     | #    | -    |                                               | ----  | ----                 | #                                                                                                                                                                                                                                                                                                                                                                                                                                                                                                     | #   | #   | #         | #     | #    |      |
| Rsa1.0_00461.1.g14292.t1 | ref[XP_002868963.1] homeobox-leucine zipper protein 22 [Arabidopsis lyrata subsp. lyrata] gi 297314799 gb EFH45222.1  homeobox-leucine zipper protein 22 [Arabidopsis lyrata subsp. lyrata]                                                                                                                                                                                                           | 282 | 283 | 1.00E-124 | 100.4 | 90.1 | 92.9 | homeobox-leucine zipper protein 22            | gbpln | Arabidopsis lyrata   | AT4G37790.1   Symbols: HAT22   Homeobox-leucine zipper protein family   chr4:17769241-17769272 FORWARD LENGTH=278                                                                                                                                                                                                                                                                                                                                                                                     | 282 | 278 | 1.00E-126 | 98.6  | 88.7 | 91.5 |
| Rsa1.0_00461.1.g14293.t1 | #                                                                                                                                                                                                                                                                                                                                                                                                     | #   | #   | #         | #     | #    | -    |                                               | ----  | ----                 | #                                                                                                                                                                                                                                                                                                                                                                                                                                                                                                     | #   | #   | #         | #     | #    |      |
| Rsa1.0_00461.1.g14294.t1 | dbj BAD22536.1  gamma-glutamyl transferase [Raphanus sativus]                                                                                                                                                                                                                                                                                                                                         | 90  | 635 | 5.00E-20  | 705.6 | 53.3 | 63.3 | gamma-glutamyl transferase                    | gbpln | Raphanus sativus     | AT4G29210.1   Symbols: GGT3, GGT4   gamma-glutamyl transpeptidase 4   chr4:14400990-14403319 FORWARD LENGTH=637                                                                                                                                                                                                                                                                                                                                                                                       | 90  | 637 | 6.00E-16  | 707.8 | 48.9 | 57.8 |
| Rsa1.0_00461.1.g14295.t1 | gb EOA17720.1  hypothetical protein CARUB_v10006101mg [Capsella rubella]                                                                                                                                                                                                                                                                                                                              | 102 | 102 | 2.00E-44  | 100.0 | 85.3 | 90.2 | hypothetical protein CARUB_v10006101mg        | gbpln | Capsella rubella     | AT4G37830.1   Symbols:   cytochrome c oxidase-related   chr4:17787672-17788762 REVERSE LENGTH=102                                                                                                                                                                                                                                                                                                                                                                                                     | 102 | 102 | 2.00E-44  | 100.0 | 80.4 | 86.3 |
| Rsa1.0_00461.1.g14296.t1 | ref[NP_194638.1] Ribonuclease H-like protein [Arabidopsis thaliana] gi 4972055 emb CAB43923.1  putative protein [Arabidopsis thaliana] gi 7269807 emb CAB79667.1  putative protein [Arabidopsis thaliana] gi 67633766 gb AA78807.1  putative reverse transcriptase/RNA-dependent DNA polymerase [Arabidopsis thaliana] gi 332660185 gb AEE85585.1  Ribonuclease H-like protein [Arabidopsis thaliana] | 136 | 575 | 6.00E-23  | 422.8 | 39.7 | 59.6 | Ribonuclease H-like protein                   | gbpln | Arabidopsis thaliana | AT4G29090.1   Symbols:   Ribonuclease H-like superfamily protein   chr4:14333528-14335255 FORWARD LENGTH=575                                                                                                                                                                                                                                                                                                                                                                                          | 136 | 575 | 2.00E-25  | 422.8 | 39.7 | 59.6 |
| Rsa1.0_00461.1.g14297.t1 | ref[NP_195497.1] hexokinase [Arabidopsis thaliana] gi 11386888 sp Q9T07.1.1 HXKL2_ARAT H RecName: Full=Probable hexokinase-like 2 protein gi 4490729 emb CAB38932.1  hexokinase-like protein [Arabidopsis thaliana] gi 7270767 emb CAB80449.1  hexokinase-like protein [Arabidopsis thaliana] gi 332661444 gb AEE86844.1  hexokinase-like 3 [Arabidopsis thaliana]                                    | 490 | 493 | 0         | 100.6 | 82.7 | 88.4 | hexokinase                                    | gbpln | Arabidopsis thaliana | AT4G37840.1   Symbols: HKL3   hexokinase-like 3   chr4:17790147-17792198 REVERSE LENGTH=493                                                                                                                                                                                                                                                                                                                                                                                                           | 490 | 493 | 0         | 100.6 | 82.7 | 88.4 |
| Rsa1.0_00462.1.g14298.t1 | gb EOA38356.1  hypothetical protein CARUB_v10009876mg [Capsella rubella]                                                                                                                                                                                                                                                                                                                              | 296 | 299 | 1.00E-152 | 101.0 | 90.5 | 94.6 | hypothetical protein CARUB_v10009876mg        | gbpln | Capsella rubella     | AT1G33800.1   Symbols:   Protein of unknown function (DUF579)   chr1:12261480-12262456 FORWARD LENGTH=297                                                                                                                                                                                                                                                                                                                                                                                             | 296 | 297 | 1.00E-147 | 100.3 | 88.2 | 93.2 |
| Rsa1.0_00462.1.g14299.t5 | gb AAD14459.1  hypothetical protein [Arabidopsis thaliana] gi 7270201 emb CAB77816.1  hypothetical protein [Arabidopsis thaliana]                                                                                                                                                                                                                                                                     | 312 | 562 | 2.00E-43  | 180.1 | 33.3 | 44.6 | hypothetical protein                          | gbpln | Arabidopsis thaliana | #                                                                                                                                                                                                                                                                                                                                                                                                                                                                                                     | #   | #   | #         | #     | #    |      |
| Rsa1.0_00462.1.g14300.t2 | gb ABD65089.1  zinc knuckle containing protein [Brassica oleracea]                                                                                                                                                                                                                                                                                                                                    | 198 | 333 | 4.00E-15  | 168.2 | 20.7 | 23.7 | zinc knuckle containing protein               | gbpln | Brassica oleracea    | #                                                                                                                                                                                                                                                                                                                                                                                                                                                                                                     | #   | #   | #         | #     | #    |      |
| Rsa1.0_00462.1.g14301.t1 | gb ABD65089.1  zinc knuckle containing protein [Brassica oleracea]                                                                                                                                                                                                                                                                                                                                    | 301 | 333 | 4.00E-33  | 110.6 | 30.6 | 31.9 | zinc knuckle containing protein               | gbpln | Brassica oleracea    | #                                                                                                                                                                                                                                                                                                                                                                                                                                                                                                     | #   | #   | #         | #     | #    |      |
| Rsa1.0_00462.1.g14302.t1 | #                                                                                                                                                                                                                                                                                                                                                                                                     | #   | #   | #         | #     | #    | -    |                                               | ----  | ----                 | #                                                                                                                                                                                                                                                                                                                                                                                                                                                                                                     | #   | #   | #         | #     | #    |      |
| Rsa1.0_00462.1.g14303.t1 | ref[XP_002891064.1] hypothetical protein ARALYDRAFT_336448 [Arabidopsis lyrata subsp. lyrata] gi 297336906 gb EFH67323.1  hypothetical protein ARALYDRAFT_336448 [Arabidopsis lyrata subsp. lyrata]                                                                                                                                                                                                   | 136 | 139 | 5.00E-63  | 102.2 | 93.4 | 96.3 | hypothetical protein ARALYDRAFT_336448        | gbpln | Arabidopsis lyrata   | AT1G33810.1   Symbols:   unknown protein; FUNCTIONS IN: molecular function unknown; INVOLVED IN: biological process unknown; LOCATED IN: chloroplast thylakoid membrane, chloroplast, chloroplast envelope; EXPRESSED IN: 22 plant structures; EXPRESSED DURING: 13 growth stages; Has 39 Blast hits to 39 proteins in 18 species: Archae - 0; Bacteria - 0; Metazoa - 0; Fungi - 0; Plants - 39; Viruses - 0; Other Eukaryotes - 0 (source: NCBI BLINK).   chr1:12265084-12266655 FORWARD LENGTH=138 | 136 | 138 | 2.00E-65  | 101.5 | 92.6 | 97.1 |

|                          |                                                                                                                                                                                                                                                                                                                                                                                                                                                             |      |      |           |       |      |      |                                                     |       |                      |                                                                                                                                               |      |      |           |       |      |      |
|--------------------------|-------------------------------------------------------------------------------------------------------------------------------------------------------------------------------------------------------------------------------------------------------------------------------------------------------------------------------------------------------------------------------------------------------------------------------------------------------------|------|------|-----------|-------|------|------|-----------------------------------------------------|-------|----------------------|-----------------------------------------------------------------------------------------------------------------------------------------------|------|------|-----------|-------|------|------|
| Rsa1.0_00462.1.g14304.t3 | dbj BAJ34639.1  unnamed protein product [Theilingella halophila]                                                                                                                                                                                                                                                                                                                                                                                            | 338  | 343  | 1.00E-172 | 101.5 | 92.0 | 96.7 | unnamed protein product                             | ----  | ----                 | AT1G33970.5   Symbols:   P-loop containing nucleoside triphosphate hydrolases superfamily protein   chr1:12349614-12350960 REVERSE LENGTH=342 | 338  | 342  | 1.00E-155 | 101.2 | 82.5 | 92.0 |
| Rsa1.0_00462.1.g14305.t1 | gb ACP30609.1  disease resistance protein [Brassica rapa subsp. pekinensis]                                                                                                                                                                                                                                                                                                                                                                                 | 1514 | 2726 | 0         | 180.1 | 51.5 | 68.6 | disease resistance protein                          | gbpln | Brassica rapa        | ATMG00860.1   Symbols: ORF158   DNA/RNA polymerases superfamily protein   chrM:235916-236392 FORWARD LENGTH=158                               | 1514 | 158  | 4.00E-34  | 10.4  | 4.4  | 5.8  |
| Rsa1.0_00462.1.g14306.t5 | ref XP_002891069.1  ATUPF3/UPF3 [Arabidopsis lyrata subsp. lyrata]   gi 29733691.1  gb EFH67328.1  ATUPF3/UPF3 [Arabidopsis lyrata subsp. lyrata]                                                                                                                                                                                                                                                                                                           | 532  | 486  | 0         | 91.4  | 67.7 | 75.0 | ATUPF3/UPF3                                         | gbpln | Arabidopsis lyrata   | AT1G33980.1   Symbols: ATUPF3, UPF3   Smg-4/UPF3 family protein   chr1:12351719-12354401 FORWARD LENGTH=482                                   | 532  | 482  | 0         | 90.6  | 66.9 | 74.8 |
| Rsa1.0_00462.1.g14307.t1 | #                                                                                                                                                                                                                                                                                                                                                                                                                                                           | #    | #    | #         | #     | #    | #    | -                                                   | ----  | ----                 | #                                                                                                                                             | #    | #    | #         | #     | #    | #    |
| Rsa1.0_00463.1.g14308.t1 | gb EOA15630.1  hypothetical protein CARUB_v10005867mg [Capsella rubella]                                                                                                                                                                                                                                                                                                                                                                                    | 175  | 176  | 2.00E-64  | 100.6 | 82.3 | 87.4 | hypothetical protein CARUB_v10005867mg              | gbpln | Capsella rubella     | AT4G16750.1   Symbols:   Integrase-type DNA-binding superfamily protein   chr4:9421121-9421660 REVERSE LENGTH=179                             | 175  | 179  | 9.00E-65  | 102.3 | 80.0 | 86.9 |
| Rsa1.0_00463.1.g14309.t1 | #                                                                                                                                                                                                                                                                                                                                                                                                                                                           | #    | #    | #         | #     | #    | #    | -                                                   | ----  | ----                 | #                                                                                                                                             | #    | #    | #         | #     | #    | #    |
| Rsa1.0_00463.1.g14310.t1 | ref XP_002890956.1  GHMP kinase family protein [Arabidopsis lyrata subsp. lyrata]   gi 297336799.1  gb EFH67215.1  GHMP kinase family protein [Arabidopsis lyrata subsp. lyrata]                                                                                                                                                                                                                                                                            | 494  | 505  | 0         | 102.2 | 87.9 | 91.5 | GHMP kinase family protein                          | gbpln | Arabidopsis lyrata   | AT1G31910.1   Symbols:   GHMP kinase family protein   chr1:11459050-11461649 FORWARD LENGTH=505                                               | 494  | 505  | 0         | 102.2 | 87.7 | 91.7 |
| Rsa1.0_00463.1.g14311.t1 | #                                                                                                                                                                                                                                                                                                                                                                                                                                                           | #    | #    | #         | #     | #    | #    | -                                                   | ----  | ----                 | #                                                                                                                                             | #    | #    | #         | #     | #    | #    |
| Rsa1.0_00463.1.g14312.t3 | ref NP_198442.2  AMP-dependent synthetase and ligase family protein [Arabidopsis thaliana]   gi 378548266.1  sp F4K1G2.1  AEE19_ARAT H RecName: Full=Putative acyl-activating enzyme 19   gi 332006646.1  gb AED94029.1  putative acyl-activating enzyme 19 [Arabidopsis thaliana]                                                                                                                                                                          | 989  | 1040 | 0         | 105.2 | 80.6 | 86.9 | AMP-dependent synthetase and ligase family protein  | gbpln | Arabidopsis thaliana | AT5G35930.1   Symbols:   AMP-dependent synthetase and ligase family protein   chr5:14067197-14074404 REVERSE LENGTH=1040                      | 989  | 1040 | 0         | 105.2 | 80.6 | 86.9 |
| Rsa1.0_00463.1.g14313.t1 | ref XP_002870449.1  glucose-6-phosphate dehydrogenase 1 [Arabidopsis lyrata subsp. lyrata]   gi 297316285.1  gb EFH46708.1  glucose-6-phosphate dehydrogenase 1 [Arabidopsis lyrata subsp. lyrata]                                                                                                                                                                                                                                                          | 576  | 578  | 0         | 100.3 | 91.3 | 95.0 | glucose-6-phosphate dehydrogenase 1                 | gbpln | Arabidopsis lyrata   | AT5G35790.1   Symbols: G6PD1   glucose-6-phosphate dehydrogenase 1   chr5:13956879-13959686 REVERSE LENGTH=576                                | 576  | 576  | 0         | 100.0 | 90.5 | 94.3 |
| Rsa1.0_00463.1.g14314.t7 | gb ABD65073.1  hypothetical protein 27.t00059 [Brassica oleracea]                                                                                                                                                                                                                                                                                                                                                                                           | 175  | 341  | 6.00E-22  | 194.9 | 40.0 | 54.3 | hypothetical protein 27.t00059                      | gbpln | Brassica oleracea    | #                                                                                                                                             | #    | #    | #         | #     | #    | #    |
| Rsa1.0_00463.1.g14315.t2 | ref NP_198420.1  fimbrin-like protein 2 [Arabidopsis thaliana]   gi 59797968.1  sp Q9FK0.1  FIMB2_ARATH RecName: Full=Fimbrin-like protein 2   gi 9758643.1  dbj BAB09267.1  fimbrin [Arabidopsis thaliana]   gi 15027847.1  gb AAK76454.1  putative fimbrin protein [Arabidopsis thaliana]   gi 23296651.1  gb AANI13139.1  putative fimbrin protein [Arabidopsis thaliana]   gi 332006624.1  gb AED94007.1  fimbrin-like protein 2 [Arabidopsis thaliana] | 199  | 687  | 2.00E-88  | 345.2 | 84.9 | 89.4 | fimbrin-like protein 2                              | gbpln | Arabidopsis thaliana | AT5G35700.1   Symbols: FIM2, FIM5   fimbrin-like protein 2   chr5:13872833-13876432 REVERSE LENGTH=687                                        | 199  | 687  | 6.00E-91  | 345.2 | 84.9 | 89.4 |
| Rsa1.0_00463.1.g14316.t1 | ref XP_002868430.1  hypothetical protein ARALYDRAFT_493625 [Arabidopsis lyrata subsp. lyrata]   gi 297314266.1  gb EFH44689.1  hypothetical protein ARALYDRAFT_493625 [Arabidopsis lyrata subsp. lyrata]                                                                                                                                                                                                                                                    | 416  | 445  | 1.00E-163 | 107.0 | 77.4 | 87.5 | hypothetical protein ARALYDRAFT_493625              | gbpln | Arabidopsis lyrata   | AT5G35670.1   Symbols: iqd33   IQ-domain 33   chr5:13856170-13857910 FORWARD LENGTH=442                                                       | 416  | 442  | 1.00E-155 | 106.3 | 75.2 | 85.6 |
| Rsa1.0_00463.1.g14317.t1 | gb AAB87099.1  putative retroelement pol polyprotein [Arabidopsis thaliana]                                                                                                                                                                                                                                                                                                                                                                                 | 1435 | 1496 | 0         | 104.3 | 58.6 | 72.1 | putative retroelement pol polyprotein               | gbpln | Arabidopsis thaliana | AT4G23160.1   Symbols: CRK8   cysteine-rich RLK (RECEPTOR-like protein kinase) 8   chr4:12129485-12134086 FORWARD LENGTH=1262                 | 1435 | 1262 | 1.00E-136 | 87.9  | 18.0 | 25.9 |
| Rsa1.0_00463.1.g14318.t1 | #                                                                                                                                                                                                                                                                                                                                                                                                                                                           | #    | #    | #         | #     | #    | #    | -                                                   | ----  | ----                 | AT5G35660.1   Symbols:   Glycine-rich protein family   chr5:13852609-13853717 REVERSE LENGTH=343                                              | 266  | 343  | 1.00E-12  | 128.9 | 16.9 | 20.3 |
| Rsa1.0_00463.1.g14319.t1 | #                                                                                                                                                                                                                                                                                                                                                                                                                                                           | #    | #    | #         | #     | #    | #    | -                                                   | ----  | ----                 | #                                                                                                                                             | #    | #    | #         | #     | #    | #    |
| Rsa1.0_00463.1.g14320.t5 | gb AAD17398.1  putative non-LTR retroelement reverse transcriptase [Arabidopsis thaliana]                                                                                                                                                                                                                                                                                                                                                                   | 559  | 1225 | 1.00E-101 | 219.1 | 34.2 | 49.9 | putative non-LTR retroelement reverse transcriptase | gbpln | Arabidopsis thaliana | AT4G29090.1   Symbols:   Ribonuclease H-like superfamily protein   chr4:14333528-14335255 FORWARD LENGTH=575                                  | 559  | 575  | 7.00E-33  | 102.9 | 18.1 | 30.1 |
| Rsa1.0_00463.1.g14321.t1 | #                                                                                                                                                                                                                                                                                                                                                                                                                                                           | #    | #    | #         | #     | #    | #    | -                                                   | ----  | ----                 | #                                                                                                                                             | #    | #    | #         | #     | #    | #    |
| Rsa1.0_00463.1.g14322.t1 | gb AAD17398.1  putative non-LTR retroelement reverse transcriptase [Arabidopsis thaliana]                                                                                                                                                                                                                                                                                                                                                                   | 605  | 1225 | 1.00E-15  | 202.5 | 10.7 | 15.4 | putative non-LTR retroelement reverse transcriptase | gbpln | Arabidopsis thaliana | #                                                                                                                                             | #    | #    | #         | #     | #    | #    |

| Rsa                      | Accession                 | Gene Name                                                                                                                       | Gene Description                                                                                           | 465 | 428  | 0         | 92.0  | 90.1 | 91.4 | RecName                                                                                                                | gbpln | Species              | Gene ID                                                                                                                                             | 465 | 430 | 0         | 92.5  | 84.7 | 89.7 |
|--------------------------|---------------------------|---------------------------------------------------------------------------------------------------------------------------------|------------------------------------------------------------------------------------------------------------|-----|------|-----------|-------|------|------|------------------------------------------------------------------------------------------------------------------------|-------|----------------------|-----------------------------------------------------------------------------------------------------------------------------------------------------|-----|-----|-----------|-------|------|------|
| Rsa1.0_00463.1.g14323.t1 | sp Q42624.1 GLNAC_BRANA   | RecName: Full=Glutamine synthetase, chloroplastic; AltName: Full=GS2; AltName: Full=Glutamate--ammonia ligase; Flags: Precursor | gi 296223 emb CAA51280.1  glutamate--ammonia ligase precursor [Brassica napus]                             | 465 | 428  | 0         | 92.0  | 90.1 | 91.4 | Full=Glutamine synthetase, chloroplastic; AltName: Full=GS2; AltName: Full=Glutamate--ammonia ligase; Flags: Precursor | gbpln | Brassica napus       | AT5G35630.3   Symbols: GS2, GLN2. ATGSL1   glutamine synthetase 2   chr5:13831220-13833239 FORWARD LENGTH=430                                       | 465 | 430 | 0         | 92.5  | 84.7 | 89.7 |
| Rsa1.0_00463.1.g14324.t1 | gb AAF79675.1 AC022314_16 | F9C16.30 [Arabidopsis thaliana]                                                                                                 |                                                                                                            | 180 | 1001 | 7.00E-69  | 556.1 | 69.4 | 79.4 | F9C16.30                                                                                                               | gbpln | Arabidopsis thaliana | #                                                                                                                                                   | #   | #   | #         | #     | #    | #    |
| Rsa1.0_00463.1.g14325.t1 | gb ADK94611.1             | translation initiation factor eIF(iso)4E.c [Brassica rapa]                                                                      |                                                                                                            | 180 | 200  | 3.00E-88  | 111.1 | 90.0 | 92.2 | translation initiation factor eIF(iso)4E.c                                                                             | gbpln | Brassica rapa        | AT5G35620.2   Symbols: LSP1, EIF(ISO)4E, LSP, EIF4E2, eFiso4E   Eukaryotic initiation factor 4E protein   chr5:13825570-13826331 REVERSE LENGTH=167 | 180 | 167 | 3.00E-74  | 92.8  | 76.7 | 84.4 |
| Rsa1.0_00463.1.g14326.t6 | #                         | #                                                                                                                               | #                                                                                                          | #   | #    | #         | #     | #    | -    | ----                                                                                                                   | ----  | ----                 | #                                                                                                                                                   | #   | #   | #         | #     | #    | #    |
| Rsa1.0_00463.1.g14327.t1 | gb ABI13034.1             | transparent testa 2 family isoform 1 [Brassica napus]                                                                           | gi 112142579 gb ABI13038.1  transparent testa 2 family isoform 1 [Brassica napus]                          | 258 | 260  | 1.00E-132 | 100.8 | 89.5 | 93.8 | transparent testa 2 family isoform 1                                                                                   | gbpln | Brassica napus       | AT5G35550.1   Symbols: TT2, ATMYB123, MYB123, ATTT2   Duplicated homeodomain-like superfamily protein   chr5:13726807-13727729 FORWARD LENGTH=258   | 258 | 258 | 1.00E-98  | 100.0 | 73.6 | 82.6 |
| Rsa1.0_00464.1.g14328.t1 | gb EOA17264.1             | hypothetical protein CARUB_v10005538mg [Capsella rubella]                                                                       |                                                                                                            | 256 | 258  | 1.00E-101 | 100.8 | 79.7 | 87.1 | hypothetical protein CARUB_v10005538mg                                                                                 | gbpln | Capsella rubella     | AT4G35040.1   Symbols: bZIP19   Basic-leucine zipper (bZIP) transcription factor family protein   chr4:16680821-16681805 FORWARD LENGTH=261         | 256 | 261 | 1.00E-100 | 102.0 | 76.2 | 84.8 |
| Rsa1.0_00464.1.g14329.t1 | ref NP_001190918.1        | protein kinase-like protein [Arabidopsis thaliana]                                                                              | gi 332661053 gb AE86453.1  protein kinase-like protein [Arabidopsis thaliana]                              | 489 | 448  | 0         | 91.6  | 77.1 | 83.6 | protein kinase-like protein                                                                                            | gbpln | Arabidopsis thaliana | AT4G35030.3   Symbols:   Protein kinase superfamily protein   chr4:16676234-16677962 FORWARD LENGTH=448                                             | 489 | 448 | 0         | 91.6  | 77.1 | 83.6 |
| Rsa1.0_00464.1.g14330.t2 | ref NP_19b228.1           | Rac-like GTP-binding protein ARAC3 [Arabidopsis thaliana]                                                                       | gi 334187165 ref NP_001190916.1  Rac-like GTP-binding protein ARAC3 [Arabidopsis thaliana]                 | 212 | 198  | 1.00E-78  | 93.4  | 81.6 | 82.1 | Rac-like GTP-binding protein ARAC3                                                                                     | gbpln | Arabidopsis lyrata   | AT4G35020.3   Symbols: RAC3   RAC-like 3   chr4:16673176-16674540 FORWARD LENGTH=198                                                                | 212 | 198 | 3.00E-81  | 93.4  | 81.6 | 82.1 |
| Rsa1.0_00464.1.g14331.t1 | ref NP_001190917.1        | Rac-like GTP-binding protein ARAC3 [Arabidopsis thaliana]                                                                       | gi 297802458 ref XP_002869113.1  hypothetical protein ARALYDRAFT_491155 [Arabidopsis lyrata subsp. lyrata] | 845 | 845  | 0         | 100.0 | 89.7 | 94.8 | beta-galactosidase 11                                                                                                  | gbpln | Arabidopsis thaliana | AT4G35010.1   Symbols: BGAL11   beta-galactosidase 11   chr4:16668075-16671974 REVERSE LENGTH=845                                                   | 845 | 845 | 0         | 100.0 | 89.7 | 94.8 |
| Rsa1.0_00464.1.g14332.t1 | ref XP_002867097.1        | AtMYB32 [Arabidopsis lyrata subsp. lyrata]                                                                                      | gi 297312933 gb EFH43356.1  AtMYB32 [Arabidopsis lyrata subsp. lyrata]                                     | 285 | 278  | 1.00E-117 | 97.5  | 79.6 | 84.9 | AtMYB32                                                                                                                | gbpln | Arabidopsis lyrata   | AT4G34990.1   Symbols: AtMYB32, MYB32   myb domain protein 32   chr4:16661370-16662289 REVERSE LENGTH=274                                           | 285 | 274 | 1.00E-117 | 96.1  | 78.9 | 84.6 |

|                          |                                                                                                                                                                                                                                                                                                                                                                                                                                                                                                                                                                                                                                                                                 |      |      |           |       |      |      |                                                                     |       |                      |                                                                                                                                               |      |      |           |       |      |      |
|--------------------------|---------------------------------------------------------------------------------------------------------------------------------------------------------------------------------------------------------------------------------------------------------------------------------------------------------------------------------------------------------------------------------------------------------------------------------------------------------------------------------------------------------------------------------------------------------------------------------------------------------------------------------------------------------------------------------|------|------|-----------|-------|------|------|---------------------------------------------------------------------|-------|----------------------|-----------------------------------------------------------------------------------------------------------------------------------------------|------|------|-----------|-------|------|------|
| Rsa1.0_00464.1.g14333.t1 | ref[XP_002327946.1] predicted protein [Populus trichocarpa] gi 118487306 gb ABK95481.1  unknown [Populus trichocarpa] gi 222837355 gb EEE75734.1  predicted protein [Populus trichocarpa]                                                                                                                                                                                                                                                                                                                                                                                                                                                                                       | 89   | 363  | 3.00E-34  | 407.9 | 80.9 | 85.4 | predicted protein                                                   | gbpln | Populus trichocarpa  | AT1G48210.2   Symbols:   Protein kinase superfamily protein   chr1:17799551-17801798 FORWARD LENGTH=363                                       | 89   | 363  | 2.00E-32  | 407.9 | 73.0 | 82.0 |
| Rsa1.0_00464.1.g14334.t3 | ref[XP_002869114.1] actin binding protein [Arabidopsis lyrata subsp. lyrata] gi 297314950 gb EFH45373.1  actin binding protein [Arabidopsis lyrata subsp. lyrata]                                                                                                                                                                                                                                                                                                                                                                                                                                                                                                               | 142  | 141  | 9.00E-71  | 99.3  | 89.4 | 96.5 | actin binding protein                                               | gbpln | Arabidopsis lyrata   | AT4G34970.1   Symbols: ADF9   actin depolymerizing factor 9   chr4:16653784-16654593 FORWARD LENGTH=141                                       | 142  | 141  | 5.00E-73  | 99.3  | 88.7 | 96.5 |
| Rsa1.0_00464.1.g14335.t1 | ref[NP_195222.1] Cyclophilin-like peptidyl-prolyl cis-trans isomerase family protein [Arabidopsis thaliana] gi 2924507 emb CAA17761.1  cyclophilin-like protein [Arabidopsis thaliana] gi 7270447 emb CAB80213.1  cyclophilin-like protein [Arabidopsis thaliana] gi 26450419 dbj BAC42324.1  putative cyclophilin like protein ROC14 [Arabidopsis thaliana] gi 28827322 gb AAO50505.1  putative cyclophilin [Arabidopsis thaliana] gi 45680864 gb AAS75301.1  single domain cyclophilin type peptidyl-prolyl cis-trans isomerase [Arabidopsis thaliana] gi 332661041 gb AEE86441.1  Cyclophilin-like peptidyl-prolyl cis-trans isomerase family protein [Arabidopsis thaliana] | 224  | 224  | 1.00E-113 | 100.0 | 95.1 | 98.7 | Cyclophilin-like peptidyl-prolyl cis-trans isomerase family protein | gbpln | Arabidopsis thaliana | AT4G34960.1   Symbols:   Cyclophilin-like peptidyl-prolyl cis-trans isomerase family protein   chr4:16648865-16650646 FORWARD LENGTH=224      | 224  | 224  | 1.00E-116 | 100.0 | 95.1 | 98.7 |
| Rsa1.0_00464.1.g14336.t1 | ref[XP_002867099.1] nodulin family protein [Arabidopsis lyrata subsp. lyrata] gi 297312935 gb EFH43358.1  nodulin family protein [Arabidopsis lyrata subsp. lyrata]                                                                                                                                                                                                                                                                                                                                                                                                                                                                                                             | 585  | 567  | 0         | 96.9  | 70.8 | 77.1 | nodulin family protein                                              | gbpln | Arabidopsis lyrata   | AT4G34950.1   Symbols:   Major facilitator superfamily protein   chr4:16642544-16644759 REVERSE LENGTH=567                                    | 585  | 567  | 0         | 96.9  | 70.4 | 76.8 |
| Rsa1.0_00464.1.g14337.t1 | gb EOA19138.1  hypothetical protein CARUB_v10007809mg [Capsella rubella]                                                                                                                                                                                                                                                                                                                                                                                                                                                                                                                                                                                                        | 659  | 668  | 0         | 101.4 | 93.5 | 97.1 | hypothetical protein CARUB_v10007809mg                              | gbpln | Capsella rubella     | AT4G34940.1   Symbols: ARO1   armadillo repeat only 1   chr4:16639760-16641754 FORWARD LENGTH=664                                             | 659  | 664  | 0         | 100.8 | 93.5 | 96.8 |
| Rsa1.0_00464.1.g14338.t1 | gb EOA16221.1  hypothetical protein CARUB_v10004361mg [Capsella rubella]                                                                                                                                                                                                                                                                                                                                                                                                                                                                                                                                                                                                        | 626  | 633  | 0         | 101.1 | 84.5 | 90.7 | hypothetical protein CARUB_v10004361mg                              | gbpln | Capsella rubella     | AT4G34910.1   Symbols:   P-loop containing nucleoside triphosphate hydrolases superfamily protein   chr4:16631661-16634834 FORWARD LENGTH=626 | 626  | 626  | 0         | 100.0 | 83.1 | 89.3 |
| Rsa1.0_00464.1.g14339.t1 | ref[XP_002869119.1] ATXDH1 [Arabidopsis lyrata subsp. lyrata] gi 297314955 gb EFH45378.1  ATXDH1 [Arabidopsis lyrata subsp. lyrata]                                                                                                                                                                                                                                                                                                                                                                                                                                                                                                                                             | 1358 | 1361 | 0         | 100.2 | 92.4 | 96.8 | ATXDH1                                                              | gbpln | Arabidopsis lyrata   | AT4G34890.1   Symbols: ATXDH1, XDH1   xanthine dehydrogenase 1   chr4:16618736-16624983 REVERSE LENGTH=1361                                   | 1358 | 1361 | 0         | 100.2 | 92.3 | 96.8 |
| Rsa1.0_00464.1.g14340.t1 | gb EOA16479.1  hypothetical protein CARUB_v10004638mg [Capsella rubella]                                                                                                                                                                                                                                                                                                                                                                                                                                                                                                                                                                                                        | 470  | 500  | 0         | 106.4 | 73.8 | 82.1 | hypothetical protein CARUB_v10004638mg                              | gbpln | Capsella rubella     | AT4G34880.1   Symbols:   Amidase family protein   chr4:16615549-16617424 FORWARD LENGTH=466                                                   | 470  | 466  | 1.00E-161 | 99.1  | 64.3 | 74.3 |
| Rsa1.0_00464.1.g14341.t1 | gb EOA18997.1  hypothetical protein CARUB_v10007642mg [Capsella rubella]                                                                                                                                                                                                                                                                                                                                                                                                                                                                                                                                                                                                        | 172  | 172  | 2.00E-84  | 100.0 | 85.5 | 93.6 | hypothetical protein CARUB_v10007642mg                              | gbpln | Capsella rubella     | AT4G34870.1   Symbols: ROC5, ATCYP1   rotamase cyclophilin 5   chr4:16614451-16614969 FORWARD LENGTH=172                                      | 172  | 172  | 5.00E-84  | 100.0 | 83.1 | 92.4 |
| Rsa1.0_00464.1.g14342.t1 | gb EOA16316.1  hypothetical protein CARUB_v10004468mg [Capsella rubella]                                                                                                                                                                                                                                                                                                                                                                                                                                                                                                                                                                                                        | 570  | 571  | 0         | 100.2 | 94.9 | 98.4 | hypothetical protein CARUB_v10004468mg                              | gbpln | Capsella rubella     | AT4G34860.2   Symbols:   Plant neutral invertase family protein   chr4:16609955-16612019 REVERSE LENGTH=571                                   | 570  | 571  | 0         | 100.2 | 95.3 | 97.5 |
| Rsa1.0_00464.1.g14343.t1 | gb ADF43047.1  chalcone synthase 6 protein [Brassica rapa subsp. rapa]                                                                                                                                                                                                                                                                                                                                                                                                                                                                                                                                                                                                          | 235  | 392  | 1.00E-67  | 166.8 | 52.8 | 54.0 | chalcone synthase 6 protein                                         | gbpln | Brassica rapa        | AT4G34850.1   Symbols: LAP5   Chalcone and stilbene synthase family protein   chr4:16608349-16609720 FORWARD LENGTH=392                       | 235  | 392  | 1.00E-69  | 166.8 | 51.9 | 54.5 |
| Rsa1.0_00464.1.g14344.t1 | gb EOA19012.1  hypothetical protein CARUB_v10007663mg [Capsella rubella]                                                                                                                                                                                                                                                                                                                                                                                                                                                                                                                                                                                                        | 1106 | 1122 | 0         | 101.4 | 82.4 | 88.7 | hypothetical protein CARUB_v10007663mg                              | gbpln | Capsella rubella     | AT4G34830.1   Symbols: MRL1   Pentatricopeptide repeat (PPR) superfamily protein   chr4:16599976-16605994 REVERSE LENGTH=1089                 | 1106 | 1089 | 0         | 98.5  | 81.7 | 89.0 |
| Rsa1.0_00464.1.g14345.t1 | ref[NP_195207.1] SAUR-like auxin-responsive protein [Arabidopsis thaliana] gi 5123699 emb CAB45442.1  putative protein [Arabidopsis thaliana] gi 7270432 emb CAB80198.1  putative protein [Arabidopsis thaliana] gi 332661025 gb AEE86425.1  SAUR-like auxin-responsive protein [Arabidopsis thaliana]                                                                                                                                                                                                                                                                                                                                                                          | 107  | 105  | 5.00E-46  | 98.1  | 89.7 | 95.3 | SAUR-like auxin-responsive protein                                  | gbpln | Arabidopsis thaliana | AT4G34810.1   Symbols:   SAUR-like auxin-responsive protein family   chr4:16599104-16599421 FORWARD LENGTH=105                                | 107  | 105  | 8.00E-49  | 98.1  | 89.7 | 95.3 |
| Rsa1.0_00464.1.g14346.t1 | ref[XP_002869125.1] auxin-responsive family protein [Arabidopsis lyrata subsp. lyrata] gi 297314961 gb EFH45384.1  auxin-responsive family protein [Arabidopsis lyrata subsp. lyrata]                                                                                                                                                                                                                                                                                                                                                                                                                                                                                           | 94   | 94   | 1.00E-46  | 100.0 | 97.9 | 97.9 | auxin-responsive family protein                                     | gbpln | Arabidopsis lyrata   | AT4G34800.1   Symbols:   SAUR-like auxin-responsive protein family   chr4:16596860-16597144 FORWARD LENGTH=94                                 | 94   | 94   | 7.00E-49  | 100.0 | 96.8 | 97.9 |

|                           |                                                                                                                                                                                                                                                                                                                                                                 |      |      |           |       |      |      |                                                                  |       |                      |                                                                                                                                             |      |      |           |       |      |      |
|---------------------------|-----------------------------------------------------------------------------------------------------------------------------------------------------------------------------------------------------------------------------------------------------------------------------------------------------------------------------------------------------------------|------|------|-----------|-------|------|------|------------------------------------------------------------------|-------|----------------------|---------------------------------------------------------------------------------------------------------------------------------------------|------|------|-----------|-------|------|------|
| Rsa1.0_00464.1.g14347.t1  | refXP_002869126.1  auxin-responsive family protein [Arabidopsis lyrata subsp. lyrata] gi 297314962 gb EFH45385.1  auxin-responsive family protein [Arabidopsis lyrata subsp. lyrata] emb CAB39638.1  RNA-directed DNA polymerase-like protein [Arabidopsis thaliana] gi 7267666 emb CAB78094.1  RNA-directed DNA polymerase-like protein [Arabidopsis thaliana] | 105  | 106  | 1.00E-42  | 101.0 | 86.7 | 92.4 | auxin-responsive family protein                                  | gbpln | Arabidopsis lyrata   | AT4G34790.1   Symbols:   SAUR-like auxin-responsive protein family   chr4:16594539-16594865 FORWARD LENGTH=108                              | 105  | 108  | 1.00E-44  | 102.9 | 84.8 | 91.4 |
| Rsa1.0_00465.1.g14348.t1  | refNP_196049.1  kow domain-containing transcription factor 1 [Arabidopsis thaliana] gi 332003341 gb AED90724.1  kow domain-containing transcription factor 1 [Arabidopsis thaliana]                                                                                                                                                                             | 1927 | 1274 | 0         | 66.1  | 34.8 | 45.8 | RNA-directed DNA polymerase-like protein                         | gbpln | Arabidopsis thaliana | AT4G29090.1   Symbols:   Ribonuclease H-like superfamily protein   chr4:14333528-14335255 FORWARD LENGTH=575                                | 1927 | 575  | 1.00E-78  | 29.8  | 9.6  | 15.1 |
| Rsa1.0_00465.1.g14349.t1  | refNP_196051.2  pectate lyase family protein [Arabidopsis thaliana] gi 332003342 gb AED90725.1  pectate lyase family protein [Arabidopsis thaliana]                                                                                                                                                                                                             | 1594 | 1493 | 0         | 93.7  | 64.2 | 72.3 | hypothetical protein ARALYDRAFT_487213                           | gbpln | Arabidopsis thaliana | AT5G04290.1   Symbols: KTF1, SPT5L   kow domain-containing transcription factor 1   chr5:1196069-1202653 FORWARD LENGTH=1493                | 1594 | 1493 | 0         | 93.7  | 64.2 | 72.3 |
| Rsa1.0_00465.1.g14350.t1  | refXP_002871086.1  hypothetical protein ARALYDRAFT_487213 [Arabidopsis lyrata subsp. lyrata] gi 297316923 gb EFH47345.1  hypothetical protein ARALYDRAFT_487213 [Arabidopsis lyrata subsp. lyrata]                                                                                                                                                              | 504  | 518  | 0         | 102.8 | 87.3 | 92.3 | pectate lyase family protein                                     | gbpln | Arabidopsis thaliana | AT5G04310.1   Symbols:   Pectin lyase-like superfamily protein   chr5:1203356-1207352 REVERSE LENGTH=518                                    | 504  | 518  | 0         | 102.8 | 87.3 | 92.3 |
| Rsa1.0_00465.1.g14351.t13 | refNP_196053.2  ferulate-5-hydroxylase [Arabidopsis thaliana] gi 332003345 gb AED90728.1  cytochrome P450 8A44 [Arabidopsis thaliana]                                                                                                                                                                                                                           | 745  | 413  | 2.00E-85  | 55.4  | 25.4 | 29.7 | hypothetical protein ARALYDRAFT_487213                           | gbpln | Arabidopsis lyrata   | AT5G04320.2   Symbols:   Shugoshin C terminus   chr5:1209613-1212376 FORWARD LENGTH=470                                                     | 745  | 470  | 3.00E-87  | 63.1  | 28.1 | 34.0 |
| Rsa1.0_00465.1.g14352.t1  | #                                                                                                                                                                                                                                                                                                                                                               | #    | #    | #         | #     | #    | #    | -                                                                | ----  | ----                 | #                                                                                                                                           | #    | #    | #         | #     | #    | #    |
| Rsa1.0_00465.1.g14353.t1  | gb ABI74691.1  C2H2 zinc finger protein [Brassica carinata]                                                                                                                                                                                                                                                                                                     | 513  | 512  | 0         | 99.8  | 86.0 | 92.2 | ferulate-5-hydroxylase                                           | gbpln | Arabidopsis thaliana | AT5G04330.1   Symbols:   Cytochrome P450 superfamily protein   chr5:1212695-1214310 REVERSE LENGTH=512                                      | 513  | 512  | 0         | 99.8  | 86.0 | 92.2 |
| Rsa1.0_00465.1.g14354.t1  | refNP_196055.1  self-incompatibility S1 family protein [Arabidopsis thaliana] gi 332003348 gb AED90731.1  self-incompatibility S1 family protein [Arabidopsis thaliana]                                                                                                                                                                                         | 242  | 239  | 5.00E-96  | 98.8  | 87.2 | 90.1 | C2H2 zinc finger protein                                         | gbpln | Brassica carinata    | AT5G04340.1   Symbols: C2H2, CZF2, ZAT6   zinc finger of Arabidopsis thaliana 6   chr5:1216321-1217037 REVERSE LENGTH=238                   | 242  | 238  | 6.00E-83  | 98.3  | 80.6 | 86.4 |
| Rsa1.0_00465.1.g14355.t1  | gb EOA22765.1  hypothetical protein CARUB_v10003478mg [Capsella rubella]                                                                                                                                                                                                                                                                                        | 124  | 146  | 7.00E-38  | 117.7 | 64.5 | 80.6 | self-incompatibility S1 family protein                           | gbpln | Arabidopsis thaliana | AT5G04350.1   Symbols:   Plant self-incompatibility protein S1 family   chr5:1220829-1221269 FORWARD LENGTH=146                             | 124  | 146  | 1.00E-40  | 117.7 | 64.5 | 80.6 |
| Rsa1.0_00465.1.g14356.t1  | refXP_002871089.1  hypothetical protein ARALYDRAFT_487216 [Arabidopsis lyrata subsp. lyrata] gi 297316926 gb EFH47348.1  hypothetical protein ARALYDRAFT_487216 [Arabidopsis lyrata subsp. lyrata]                                                                                                                                                              | 111  | 144  | 4.00E-21  | 129.7 | 47.7 | 64.0 | hypothetical protein CARUB_v10003478mg                           | gbpln | Capsella rubella     | AT5G04350.1   Symbols:   Plant self-incompatibility protein S1 family   chr5:1220829-1221269 FORWARD LENGTH=146                             | 111  | 146  | 3.00E-23  | 131.5 | 48.6 | 68.5 |
| Rsa1.0_00465.1.g14357.t1  | #                                                                                                                                                                                                                                                                                                                                                               | #    | #    | #         | #     | #    | #    | -                                                                | ----  | ----                 | #                                                                                                                                           | #    | #    | #         | #     | #    | #    |
| Rsa1.0_00465.1.g14358.t1  | refNP_196058.1  S-adenosyl-L-methionine-dependent methyltransferase-like protein [Arabidopsis thaliana] gi 332003352 gb AED90735.1  S-adenosyl-L-methionine-dependent methyltransferase-like protein [Arabidopsis thaliana]                                                                                                                                     | 1030 | 964  | 0         | 93.6  | 80.4 | 86.0 | hypothetical protein ARALYDRAFT_487216                           | gbpln | Arabidopsis lyrata   | AT5G04360.1   Symbols: ATPU1, ATLDA, PUI1, LDA   limit dextrinase   chr5:1221566-1228399 FORWARD LENGTH=965                                 | 1030 | 965  | 0         | 93.7  | 80.0 | 85.3 |
| Rsa1.0_00465.1.g14359.t1  | refNP_196058.1  S-adenosyl-L-methionine-dependent methyltransferase-like protein [Arabidopsis thaliana] gi 332003352 gb AED90735.1  S-adenosyl-L-methionine-dependent methyltransferase-like protein [Arabidopsis thaliana]                                                                                                                                     | 389  | 385  | 1.00E-168 | 99.0  | 75.3 | 83.5 | S-adenosyl-L-methionine-dependent methyltransferase-like protein | gbpln | Arabidopsis thaliana | AT5G04380.1   Symbols:   S-adenosyl-L-methionine-dependent methyltransferases superfamily protein   chr5:1234883-1236317 FORWARD LENGTH=385 | 389  | 385  | 1.00E-170 | 99.0  | 75.3 | 83.5 |
| Rsa1.0_00465.1.g14360.t1  | refNP_196058.1  S-adenosyl-L-methionine-dependent methyltransferase-like protein [Arabidopsis thaliana] gi 332003352 gb AED90735.1  S-adenosyl-L-methionine-dependent methyltransferase-like protein [Arabidopsis thaliana]                                                                                                                                     | 319  | 385  | 2.33E-156 | 120.7 | 79.0 | 88.1 | S-adenosyl-L-methionine-dependent methyltransferase-like protein | gbpln | Arabidopsis thaliana | AT5G04380.1   Symbols:   S-adenosyl-L-methionine-dependent methyltransferases superfamily protein   chr5:1234883-1236317 FORWARD LENGTH=385 | 319  | 385  | 1.00E-149 | 120.7 | 79.0 | 88.1 |
| Rsa1.0_00466.1.g14361.t1  | gb EOA16761.1  hypothetical protein CARUB_v10004974mg [Capsella rubella]                                                                                                                                                                                                                                                                                        | 89   | 398  | 5.00E-32  | 447.2 | 75.3 | 77.5 | hypothetical protein CARUB_v10004974mg                           | gbpln | Capsella rubella     | AT5G40610.1   Symbols:   NAD-dependent glycerol-3-phosphate dehydrogenase family protein   chr5:16265071-16267258 REVERSE LENGTH=400        | 89   | 400  | 5.00E-34  | 449.4 | 74.2 | 76.4 |

|                           |                                                                                                                                                                                                                                                                                                                                                                                                                                                                                                                  |     |     |           |       |      |      |                                             |       |                      |                                                                                                                                                                                                                                                                                                                                                                                                                                                                    |     |     |           |       |      |      |
|---------------------------|------------------------------------------------------------------------------------------------------------------------------------------------------------------------------------------------------------------------------------------------------------------------------------------------------------------------------------------------------------------------------------------------------------------------------------------------------------------------------------------------------------------|-----|-----|-----------|-------|------|------|---------------------------------------------|-------|----------------------|--------------------------------------------------------------------------------------------------------------------------------------------------------------------------------------------------------------------------------------------------------------------------------------------------------------------------------------------------------------------------------------------------------------------------------------------------------------------|-----|-----|-----------|-------|------|------|
| Rsa1.0_00466.1.g14362.t1  | refXP_002882916.1   cup-shaped cotyledon1 [Arabidopsis lyrata subsp. lyrata] gi 297328756 gb EFH59175.1   cup-shaped cotyledon1 [Arabidopsis lyrata subsp. lyrata]                                                                                                                                                                                                                                                                                                                                               | 315 | 310 | 1.00E-124 | 98.4  | 82.2 | 87.0 | cup-shaped cotyledon1                       | gbpln | Arabidopsis lyrata   | AT3G15170.1   Symbols: CUC1, ANAC054, ATNAC1   NAC (No Apical Meristem) domain transcriptional regulator superfamily protein   chr:3:5109912-5111435 FORWARD LENGTH=310                                                                                                                                                                                                                                                                                            | 315 | 310 | 1.00E-119 | 98.4  | 80.3 | 85.7 |
| Rsa1.0_00466.1.g14363.t10 | ref NP_188134.2  uncharacterized protein [Arabidopsis thaliana] gi 23297454 gb AA12973.1  unknown protein [Arabidopsis thaliana] gi 332642105 gb AE75626.1  uncharacterized protein AT3G15160 [Arabidopsis thaliana]                                                                                                                                                                                                                                                                                             | 386 | 562 | 1.00E-46  | 145.6 | 30.1 | 32.9 | uncharacterized protein                     | gbpln | Arabidopsis thaliana | AT3G15160.1   Symbols:   unknown protein; Has 266 Blast hits to 264 proteins in 44 species: Archae - 0; Bacteria - 0; Metazoa - 58; Fungi - 0; Plants - 199; Viruses - 0; Other Eukaryotes - 9 (source: NCBI BLink).   chr:3:5104582-5108279 FORWARD LENGTH=562                                                                                                                                                                                                    | 386 | 562 | 2.00E-49  | 145.6 | 30.1 | 32.9 |
| Rsa1.0_00466.1.g14364.t1  | refXP_002885069.1   hypothetical protein ARALYDRAFT_478943 [Arabidopsis lyrata subsp. lyrata] gi 297330909 gb EFH61328.1  hypothetical protein ARALYDRAFT_478943 [Arabidopsis lyrata subsp. lyrata]                                                                                                                                                                                                                                                                                                              | 393 | 334 | 1.00E-113 | 85.0  | 61.8 | 66.4 | hypothetical protein ARALYDRAFT_478943      | gbpln | Arabidopsis lyrata   | AT3G15115.1   Symbols:   unknown protein; BEST Arabidopsis thaliana protein match is: unknown protein (TAIR:AT1G53180.1). Has 47 Blast hits to 47 proteins in 15 species: Archae - 0; Bacteria - 0; Metazoa - 13; Fungi - 0; Plants - 30; Viruses - 0; Other Eukaryotes - 4 (source: NCBI BLink).   chr:3:5086219-5087352 REVERSE LENGTH=339                                                                                                                       | 393 | 339 | 1.00E-114 | 86.3  | 59.0 | 64.9 |
| Rsa1.0_00466.1.g14365.t1  | gb EOA32270.1  hypothetical protein CARUB_v10015530mg [Capsella rubella]                                                                                                                                                                                                                                                                                                                                                                                                                                         | 531 | 682 | 1.00E-179 | 128.4 | 74.6 | 81.5 | hypothetical protein CARUB_v10015530mg      | gbpln | Capsella rubella     | AT3G15095.1   Symbols:   unknown protein; FUNCTIONS IN: molecular_function unknown; INVOLVED IN: biological_process unknown; LOCATED IN: chloroplast; EXPRESSED IN: 22 plant structures; EXPRESSED DURING: 13 growth stages; Has 9762 Blast hits to 6439 proteins in 764 species: Archae - 77; Bacteria - 1339; Metazoa - 3211; Fungi - 718; Plants - 437; Viruses - 131; Other Eukaryotes - 3849 (source: NCBI BLink).   chr:3:5081996-5084050 FORWARD LENGTH=684 | 531 | 684 | 1.00E-152 | 128.8 | 68.9 | 77.8 |
| Rsa1.0_00466.1.g14366.t1  | #                                                                                                                                                                                                                                                                                                                                                                                                                                                                                                                | #   | #   | #         | #     | #    | #    | -                                           | ---   | ---                  | #                                                                                                                                                                                                                                                                                                                                                                                                                                                                  | #   | #   | #         | #     | #    |      |
| Rsa1.0_00466.1.g14367.t1  | gb EOA30402.1  hypothetical protein CARUB_v10013526mg [Capsella rubella]                                                                                                                                                                                                                                                                                                                                                                                                                                         | 140 | 497 | 9.00E-20  | 355.0 | 51.4 | 59.3 | hypothetical protein CARUB_v10013526mg      | gbpln | Capsella rubella     | AT3G15070.2   Symbols:   RING/U-box superfamily protein   chr:3:5070472-5072344 REVERSE LENGTH=486                                                                                                                                                                                                                                                                                                                                                                 | 140 | 486 | 1.00E-20  | 347.1 | 41.4 | 47.1 |
| Rsa1.0_00466.1.g14368.t1  | ref NP_188124.1  RAB GTPase-like protein A1G [Arabidopsis thaliana] gi 75273740 sp Q9LK99.1 RAA1G_ARAT H RecName: Full=Ras-related protein RABA1g; Short=AtRABA1g gi 8777489 dbj BAA97069.1  GTP-binding protein-like [Arabidopsis thaliana] gi 26452472 dbj BAC43321.1  putative ras-related GTP-binding protein [Arabidopsis thaliana] gi 28973321 gb AAO63985.1  putative Ras family GTP-binding protein [Arabidopsis thaliana] gi 332642090 gb AE75611.1  RAB GTPase-like protein A1G [Arabidopsis thaliana] | 61  | 217 | 1.00E-16  | 355.7 | 78.7 | 90.2 | RAB GTPase-like protein A1G                 | gbpln | Arabidopsis thaliana | AT3G15060.1   Symbols: AtRABA1g, RABA1g   RAB GTPase homolog A1G   chr:3:5069239-5070025 FORWARD LENGTH=217                                                                                                                                                                                                                                                                                                                                                        | 61  | 217 | 2.00E-19  | 355.7 | 78.7 | 90.2 |
| Rsa1.0_00466.1.g14369.t1  | ref NP_179179.1  Plastocyanin-like domain-containing protein [Arabidopsis thaliana] gi 5306254 gb AAD41987.1  hypothetical protein [Arabidopsis thaliana] gi 20145855 emb CAD29618.1  auxin response factor 30 [Arabidopsis thaliana] gi 330251342 gb AEC06436.1  Plastocyanin-like domain-containing protein [Arabidopsis thaliana]                                                                                                                                                                             | 307 | 301 | 2.00E-25  | 98.0  | 18.9 | 25.7 | Plastocyanin-like domain-containing protein | gbpln | Arabidopsis thaliana | AT2G15770.1   Symbols:   Cupredoxin superfamily protein   chr:2:6871257-6872245 REVERSE LENGTH=301                                                                                                                                                                                                                                                                                                                                                                 | 307 | 301 | 4.00E-28  | 98.0  | 18.9 | 25.7 |
| Rsa1.0_00466.1.g14370.t1  | gb EOA31422.1  hypothetical protein CARUB_v10014602mg [Capsella rubella]                                                                                                                                                                                                                                                                                                                                                                                                                                         | 221 | 217 | 1.00E-112 | 98.2  | 90.0 | 95.0 | hypothetical protein CARUB_v10014602mg      | gbpln | Capsella rubella     | AT3G15060.1   Symbols: AtRABA1g, RABA1g   RAB GTPase homolog A1G   chr:3:5069239-5070025 FORWARD LENGTH=217                                                                                                                                                                                                                                                                                                                                                        | 221 | 217 | 1.00E-114 | 98.2  | 89.6 | 95.0 |
| Rsa1.0_00466.1.g14371.t2  | ref XP_002885066.1  IQ-domain 10 [Arabidopsis lyrata subsp. lyrata] gi 297330906 gb EFH61325.1  IQ-domain 10 [Arabidopsis lyrata subsp. lyrata]                                                                                                                                                                                                                                                                                                                                                                  | 265 | 259 | 1.00E-121 | 97.7  | 81.9 | 88.7 | IQ-domain 10                                | gbpln | Arabidopsis lyrata   | AT3G15050.1   Symbols: IQD10   IQ-domain 10   chr:3:5066879-5067892 REVERSE LENGTH=259                                                                                                                                                                                                                                                                                                                                                                             | 265 | 259 | 1.00E-122 | 97.7  | 81.1 | 88.3 |
| Rsa1.0_00466.1.g14372.t1  | gb EOA31321.1  hypothetical protein CARUB_v10014502mg [Capsella rubella] gi 482567133 gb EOA31322.1  hypothetical protein CARUB_v10014502mg [Capsella rubella]                                                                                                                                                                                                                                                                                                                                                   | 234 | 242 | 7.00E-77  | 103.4 | 81.6 | 88.0 | hypothetical protein CARUB_v10014502mg      | gbpln | Capsella rubella     | AT3G15040.1   Symbols:   Protein of unknown function, DUF584   chr:3:5065445-5066176 REVERSE LENGTH=243                                                                                                                                                                                                                                                                                                                                                            | 234 | 243 | 5.00E-72  | 103.8 | 77.4 | 84.6 |
| Rsa1.0_00466.1.g14373.t1  | gb EOA30715.1  hypothetical protein CARUB_v10013851mg [Capsella rubella]                                                                                                                                                                                                                                                                                                                                                                                                                                         | 362 | 406 | 1.00E-127 | 112.2 | 77.9 | 84.5 | hypothetical protein CARUB_v10013851mg      | gbpln | Capsella rubella     | AT3G15030.3   Symbols: TCP4   TCP family transcription factor 4   chr:3:5062308-5063570 FORWARD LENGTH=420                                                                                                                                                                                                                                                                                                                                                         | 362 | 420 | 1.00E-122 | 116.0 | 76.2 | 82.6 |

|                          |                                                                                                                                                                                                                                                                                                                                                                                                                                                            |      |      |           |       |      |      |                                                                                                                 |             |                      |                                                                                                                                        |      |      |           |       |      |      |
|--------------------------|------------------------------------------------------------------------------------------------------------------------------------------------------------------------------------------------------------------------------------------------------------------------------------------------------------------------------------------------------------------------------------------------------------------------------------------------------------|------|------|-----------|-------|------|------|-----------------------------------------------------------------------------------------------------------------|-------------|----------------------|----------------------------------------------------------------------------------------------------------------------------------------|------|------|-----------|-------|------|------|
| Rsa1.0_00466.1.g14374.t2 | ref XP_002869260.1  nucleic acid binding protein [Arabidopsis lyrata subsp. lyrata] gi 297315096 gb EFH45519.1  nucleic acid binding protein [Arabidopsis lyrata subsp. lyrata]                                                                                                                                                                                                                                                                            | 172  | 1550 | 4.00E-29  | 901.2 | 41.3 | 45.3 | nucleic acid binding protein                                                                                    | gbpln       | Arabidopsis lyrata   | AT4G32620.2   Symbols:   Enhancer of polycomb-like transcription factor protein   chr4:15731968-15737222 FORWARD LENGTH=1540           | 172  | 1540 | 7.00E-31  | 895.3 | 40.1 | 45.9 |
| Rsa1.0_00466.1.g14375.t1 | ref XP_003518855.1  PREDICTED: uncharacterized protein LOC100803580 [Glycine max]                                                                                                                                                                                                                                                                                                                                                                          | 312  | 177  | 6.00E-21  | 56.7  | 17.0 | 24.4 | PREDICTED: uncharacterized protein LOC100803580                                                                 | gbenv/gbpln | Glycine max          | AT2G15780.1   Symbols:   Cupredoxin superfamily protein   chr2:6873666-6874701 REVERSE LENGTH=257                                      | 312  | 257  | 1.00E-21  | 82.4  | 15.7 | 23.1 |
| Rsa1.0_00466.1.g14376.t1 | ref XP_002882907.1  hypothetical protein ARALYDRAFT_478926 [Arabidopsis lyrata subsp. lyrata] gi 297328747 gb EFH59166.1  hypothetical protein ARALYDRAFT_478926 [Arabidopsis lyrata subsp. lyrata]                                                                                                                                                                                                                                                        | 375  | 396  | 1.00E-119 | 105.6 | 72.0 | 76.3 | hypothetical protein ARALYDRAFT_478926                                                                          | gbpln       | Arabidopsis lyrata   | AT3G15000.1   Symbols:   cobalt ion binding   chr3:5050321-5052121 FORWARD LENGTH=395                                                  | 375  | 395  | 1.00E-109 | 105.3 | 68.5 | 72.8 |
| Rsa1.0_00466.1.g14377.t2 | sp F4IXE4.2 TTL2_ARATH RecName: Full=TPR repeat-containing thioredoxin TTL2; AltName: Full=Tetratricopeptide repeat thioredoxin-like 2                                                                                                                                                                                                                                                                                                                     | 785  | 730  | 0         | 93.0  | 60.4 | 70.3 | RecName: Full=TPR repeat-containing thioredoxin TTL2; AltName: Full=Tetratricopeptide repeat thioredoxin-like 2 | ----        | ----                 | AT3G14950.1   Symbols: TTL2   tetratricopeptide-repeat thioredoxin-like 2   chr3:5030216-5032892 REVERSE LENGTH=721                    | 785  | 721  | 0         | 91.8  | 59.6 | 69.4 |
| Rsa1.0_00466.1.g14378.t1 | gb EOA29805.1  hypothetical protein CARUB_v10012899mg [Capsella rubella]                                                                                                                                                                                                                                                                                                                                                                                   | 196  | 968  | 2.00E-74  | 493.9 | 77.0 | 81.1 | hypothetical protein CARUB_v10012899mg                                                                          | gbpln       | Capsella rubella     | AT3G14940.1   Symbols: ATPPC3, PPC3   phosphoenolpyruvate carboxylase 3   chr3:5025584-5029476 FORWARD LENGTH=968                      | 196  | 968  | 9.00E-77  | 493.9 | 77.0 | 80.6 |
| Rsa1.0_00466.1.g14379.t1 | ref NP_188110.1  Peptide-N4-(N-acetyl-beta-glucosaminy)lasparagine amidase A protein [Arabidopsis thaliana] gi 8777475 db BAA97055.1  unnamed protein product [Arabidopsis thaliana] gi 332642067 gb AEE75588.1  Peptide-N4-(N-acetyl-beta-glucosaminy)lasparagine amidase A protein [Arabidopsis thaliana]                                                                                                                                                | 604  | 609  | 0         | 100.8 | 80.0 | 87.4 | Peptide-N4-(N-acetyl-beta-glucosaminy)lasparagine amidase A protein                                             | gbpln       | Arabidopsis thaliana | AT3G14920.1   Symbols:   Peptide-N4-(N-acetyl-beta-glucosaminy)lasparagine amidase A protein   chr3:5018275-5020104 FORWARD LENGTH=609 | 604  | 609  | 0         | 100.8 | 80.0 | 87.4 |
| Rsa1.0_00466.1.g14380.t1 | ref XP_004244285.1  PREDICTED: uncharacterized protein LOC101246450 [Solanum lycopersicum]                                                                                                                                                                                                                                                                                                                                                                 | 86   | 479  | 9.00E-11  | 557.0 | 33.7 | 44.2 | PREDICTED: uncharacterized protein LOC101246450                                                                 | gbpln       | Solanum lycopersicum | AT3G14860.2   Symbols:   NHL domain-containing protein   chr3:498591-5000894 REVERSE LENGTH=493                                        | 86   | 493  | 8.00E-13  | 573.3 | 34.9 | 38.4 |
| Rsa1.0_00466.1.g14381.t1 | ref XP_002882897.1  hypothetical protein ARALYDRAFT_478900 [Arabidopsis lyrata subsp. lyrata] gi 297328737 gb EFH59156.1  hypothetical protein ARALYDRAFT_478900 [Arabidopsis lyrata subsp. lyrata]                                                                                                                                                                                                                                                        | 351  | 350  | 1.00E-178 | 99.7  | 87.5 | 92.3 | hypothetical protein ARALYDRAFT_478900                                                                          | gbpln       | Arabidopsis lyrata   | AT3G14850.2   Symbols: TBL41   TRICHOME BIREFRINGENCE-LIKE 41   chr3:4995615-4997611 FORWARD LENGTH=356                                | 351  | 356  | 1.00E-171 | 101.4 | 84.0 | 91.7 |
| Rsa1.0_00466.1.g14382.t1 | ref NP_188102.5  Leucine-rich repeat transmembrane protein kinase [Arabidopsis thaliana] gi 313471762 sp C0LGN2.1 Y3148_ARATH RecName: Full=Probable leucine-rich repeat receptor-like serine/threonine-protein kinase At3g14840; Flags: Precursor gi 224589567 gb ACN59317.1  leucine-rich repeat receptor-like protein kinase [Arabidopsis thaliana] gi 332642053 gb AEE75574.1  Leucine-rich repeat transmembrane protein kinase [Arabidopsis thaliana] | 1021 | 1020 | 0         | 99.9  | 77.5 | 87.3 | Leucine-rich repeat transmembrane protein kinase                                                                | gbpln       | Arabidopsis thaliana | AT3G14840.2   Symbols:   Leucine-rich repeat transmembrane protein kinase   chr3:4988271-4993891 FORWARD LENGTH=1020                   | 1021 | 1020 | 0         | 99.9  | 77.5 | 87.3 |
| Rsa1.0_00466.1.g14383.t1 | ref XP_002882894.1  GDSL-motif lipase/hydrolase family protein [Arabidopsis lyrata subsp. lyrata] gi 297328734 gb EFH59153.1  GDSL-motif lipase/hydrolase family protein [Arabidopsis lyrata subsp. lyrata]                                                                                                                                                                                                                                                | 311  | 311  | 1.00E-150 | 100.0 | 81.4 | 90.4 | GDSL-motif lipase/hydrolase family protein                                                                      | gbpln       | Arabidopsis lyrata   | AT3G14820.1   Symbols:   GDSL-like Lipase/Acylhydrolase superfamily protein   chr3:4978728-4980241 FORWARD LENGTH=351                  | 311  | 351  | 1.00E-151 | 112.9 | 79.1 | 90.7 |
| Rsa1.0_00466.1.g14384.t1 | gb EOA30039.1  hypothetical protein CARUB_v10013145mg [Capsella rubella] gi 482565851 gb EOA30040.1  hypothetical protein CARUB_v10013145mg [Capsella rubella]                                                                                                                                                                                                                                                                                             | 673  | 667  | 0         | 99.1  | 87.1 | 92.0 | hypothetical protein CARUB_v10013145mg                                                                          | gbpln       | Capsella rubella     | AT3G42170.1   Symbols:   BED zinc finger hAT family dimerisation domain   chr3:14321839-14323928 FORWARD LENGTH=696                    | 673  | 696  | 1.00E-107 | 103.4 | 33.0 | 51.4 |
| Rsa1.0_00467.1.g14385.t1 | #                                                                                                                                                                                                                                                                                                                                                                                                                                                          | #    | #    | #         | #     | #    | -    | -                                                                                                               | ----        | ----                 | #                                                                                                                                      | #    | #    | #         | #     | #    | #    |
| Rsa1.0_00467.1.g14386.t3 | gb AAL66955.1  putative UV-damaged DNA binding factor [Arabidopsis thaliana]                                                                                                                                                                                                                                                                                                                                                                               | 385  | 270  | 3.00E-89  | 70.1  | 46.0 | 48.6 | putative UV-damaged DNA binding factor                                                                          | gbpln       | Arabidopsis thaliana | AT4G05420.2   Symbols: DDB1A   damaged DNA binding protein 1A   chr4:2746288-2752663 FORWARD LENGTH=1067                               | 385  | 1067 | 9.00E-91  | 277.1 | 46.0 | 48.6 |
| Rsa1.0_00467.1.g14387.t5 | gb AAC33226.1  putative non-LTR retroelement reverse transcriptase [Arabidopsis thaliana]                                                                                                                                                                                                                                                                                                                                                                  | 698  | 1529 | 1.00E-122 | 219.1 | 38.5 | 54.7 | putative non-LTR retroelement reverse transcriptase                                                             | gbpln       | Arabidopsis thaliana | AT1G43760.1   Symbols:   DNase I-like retroelement protein   chr1:16528880-16531065 REVERSE LENGTH=626                                 | 698  | 626  | 1.00E-43  | 89.7  | 18.1 | 27.9 |



|                          |                                                                                                                                                                                                                                                                                                                                                                                                                                                                                                                                 |     |     |           |       |      |      |                                                                            |       |                      |                                                                                                                                               |     |     |           |       |      |      |
|--------------------------|---------------------------------------------------------------------------------------------------------------------------------------------------------------------------------------------------------------------------------------------------------------------------------------------------------------------------------------------------------------------------------------------------------------------------------------------------------------------------------------------------------------------------------|-----|-----|-----------|-------|------|------|----------------------------------------------------------------------------|-------|----------------------|-----------------------------------------------------------------------------------------------------------------------------------------------|-----|-----|-----------|-------|------|------|
| Rsa1.0_00467.1.g14388.t1 | gb AAV92081.1  xyloglucan endotransglycosylase/hydrolase [Brassica rapa subsp. oleifera]                                                                                                                                                                                                                                                                                                                                                                                                                                        | 290 | 281 | 1.00E-163 | 96.9  | 93.8 | 96.2 | xyloglucan endotransglycosylase/hydrolase                                  | gbpln | Brassica rapa        | AT4G03210.1   Symbols: XTH9   xyloglucan endotransglucosylase/hydrolase 9   chr4:1416019-1417197 FORWARD LENGTH=290                           | 290 | 290 | 1.00E-160 | 100.0 | 90.3 | 96.6 |
| Rsa1.0_00467.1.g14389.t1 | ref NP_192233.2  frataxin [Arabidopsis thaliana] gi 83302740 sp Q9Z07.2 FRDA_ARATH RecName: Full=Frataxin, mitochondrial; Short=Fxn; Flags: Precursor gi 48958525 gb AAT47815.1  At4g03240 [Arabidopsis thaliana] gi 51860727 gb AAU11485.1  mitochondrial frataxin-like [Arabidopsis thaliana] gi 51971039 dbj BAD44211.1  putative frataxin-like protein [Arabidopsis thaliana] gi 51971859 dbj BAD44594.1  putative frataxin-like protein [Arabidopsis thaliana] gi 332656896 gb AEE82296.1  frataxin [Arabidopsis thaliana] | 187 | 187 | 1.00E-70  | 100.0 | 80.7 | 87.2 | frataxin                                                                   | gbpln | Arabidopsis thaliana | AT4G03240.1   Symbols: ATFH, FH   frataxin homolog   chr4:1423685-1424758 REVERSE LENGTH=187                                                  | 187 | 187 | 4.00E-73  | 100.0 | 80.7 | 87.2 |
| Rsa1.0_00467.1.g14390.t1 | ref XP_002874872.1  leucine-rich repeat family protein [Arabidopsis lyrata subsp. lyrata] gi 297320709 gb EFH51131.1  leucine-rich repeat family protein [Arabidopsis lyrata subsp. lyrata]                                                                                                                                                                                                                                                                                                                                     | 619 | 680 | 0         | 109.9 | 81.7 | 89.7 | leucine-rich repeat family protein                                         | gbpln | Arabidopsis lyrata   | AT4G03260.2   Symbols:   Outer arm dynein light chain 1 protein   chr4:1429092-1431431 FORWARD LENGTH=677                                     | 619 | 677 | 0         | 109.4 | 81.1 | 88.7 |
| Rsa1.0_00467.1.g14391.t3 | dbj BAJ34429.1  unnamed protein product [Thellungiella halophila]                                                                                                                                                                                                                                                                                                                                                                                                                                                               | 213 | 271 | 1.00E-28  | 127.2 | 31.5 | 32.4 | unnamed protein product                                                    | ----  | ----                 | AT1G74840.1   Symbols:   Homeodomain-like superfamily protein   chr1:28116201-28117317 REVERSE LENGTH=265                                     | 213 | 265 | 4.00E-25  | 124.4 | 27.7 | 31.0 |
| Rsa1.0_00467.1.g14392.t1 | ref NP_850841.1  AAA-type ATPase family protein [Arabidopsis thaliana] gi 9759053 dbj BAB09575.1  AAA-type ATPase-like protein [Arabidopsis thaliana] gi 332005081 gb AED92464.1  AAA-type ATPase family protein [Arabidopsis thaliana]                                                                                                                                                                                                                                                                                         | 182 | 505 | 2.00E-29  | 277.5 | 40.1 | 56.6 | AAA-type ATPase family protein                                             | gbpln | Arabidopsis thaliana | AT5G17760.1   Symbols:   P-loop containing nucleoside triphosphate hydrolases superfamily protein   chr5:5860591-5862301 REVERSE LENGTH=505   | 182 | 505 | 8.00E-32  | 277.5 | 40.1 | 56.6 |
| Rsa1.0_00467.1.g14393.t1 | dbj BAJ34370.1  unnamed protein product [Thellungiella halophila]                                                                                                                                                                                                                                                                                                                                                                                                                                                               | 233 | 229 | 1.00E-115 | 98.3  | 91.8 | 95.3 | unnamed protein product                                                    | ----  | ----                 | AT4G03280.1   Symbols: PETC, PGR1   photosynthetic electron transfer C   chr4:1440314-1441717 FORWARD LENGTH=229                              | 233 | 229 | 1.00E-109 | 98.3  | 89.3 | 95.3 |
| Rsa1.0_00467.1.g14394.t1 | gb EOA19331.1  hypothetical protein CARUB_v10003659mg [Capsella rubella]                                                                                                                                                                                                                                                                                                                                                                                                                                                        | 150 | 154 | 1.00E-71  | 102.7 | 91.3 | 96.0 | hypothetical protein CARUB_v10003659mg                                     | gbpln | Capsella rubella     | AT4G03290.1   Symbols:   EF hand calcium-binding protein family   chr4:1442813-1443277 FORWARD LENGTH=154                                     | 150 | 154 | 9.00E-67  | 102.7 | 90.7 | 95.3 |
| Rsa1.0_00467.1.g14395.t1 | #                                                                                                                                                                                                                                                                                                                                                                                                                                                                                                                               | #   | #   | #         | #     | #    | #    | -                                                                          | ----  | ----                 | #                                                                                                                                             | #   | #   | #         | #     | #    | #    |
| Rsa1.0_00467.1.g14396.t7 | ref NP_192243.1  Core-2/1-branching beta-1,6-N-acetylglucosaminyltransferase family protein [Arabidopsis thaliana] gi 4262162 gb AAD14462.1  putative glycosylation enzyme [Arabidopsis thaliana] gi 7270204 emb CAB77819.1  putative glycosylation enzyme [Arabidopsis thaliana] gi 110741957 dbj BAE98919.1  putative glycosylation enzyme [Arabidopsis thaliana] gi 332656908 gb AEE82308.1  Core-2/1-branching beta-1,6-N-acetylglucosaminyltransferase family protein [Arabidopsis thaliana]                               | 810 | 448 | 0         | 55.3  | 46.8 | 49.1 | Core-2/1-branching beta-1,6-N-acetylglucosaminyltransferase family protein | gbpln | Arabidopsis thaliana | AT4G03340.1   Symbols:   Core-2/1-branching beta-1,6-N-acetylglucosaminyltransferase family protein   chr4:1467865-1469465 REVERSE LENGTH=448 | 810 | 448 | 0         | 55.3  | 46.8 | 49.1 |
| Rsa1.0_00467.1.g14397.t2 | #                                                                                                                                                                                                                                                                                                                                                                                                                                                                                                                               | #   | #   | #         | #     | #    | #    | -                                                                          | ----  | ----                 | #                                                                                                                                             | #   | #   | #         | #     | #    | #    |
| Rsa1.0_00467.1.g14398.t1 | ref NP_188381.1  putative F-box/kelch-repeat protein [Arabidopsis thaliana] gi 75274267 sp Q9LUP4.1 FBK60_ARATH RecName: Full=Putative F-box/kelch-repeat protein At3g17540 gi 9294141 dbj BAB02043.1  unnamed protein product [Arabidopsis thaliana] gi 332642445 gb AEE75966.1  putative F-box/kelch-repeat protein [Arabidopsis thaliana]                                                                                                                                                                                    | 375 | 396 | 1.00E-103 | 105.6 | 56.0 | 70.9 | putative F-box/kelch-repeat protein                                        | gbpln | Arabidopsis thaliana | AT3G17540.1   Symbols:   F-box and associated interaction domains-containing protein   chr3:6002783-6003973 FORWARD LENGTH=396                | 375 | 396 | 1.00E-106 | 105.6 | 56.0 | 70.9 |
| Rsa1.0_00467.1.g14399.t1 | #                                                                                                                                                                                                                                                                                                                                                                                                                                                                                                                               | #   | #   | #         | #     | #    | #    | -                                                                          | ----  | ----                 | #                                                                                                                                             | #   | #   | #         | #     | #    | #    |
| Rsa1.0_00467.1.g14400.t2 | gb ADM21174.1  SRF3 [Arabidopsis thaliana]                                                                                                                                                                                                                                                                                                                                                                                                                                                                                      | 802 | 776 | 0         | 96.8  | 76.9 | 84.2 | SRF3                                                                       | gbpln | Arabidopsis thaliana | AT4G03390.1   Symbols: SRF3   STRUBBELG-receptor family 3   chr4:1490912-1494553 REVERSE LENGTH=776                                           | 802 | 776 | 0         | 96.8  | 76.9 | 83.9 |

|                          |                                                                                                                                                                                                                                                                                                                                                                                                                                                                                                                             |      |      |           |       |      |      |                                                                               |       |                      |                                                                                                                                                            |      |      |           |       |      |      |
|--------------------------|-----------------------------------------------------------------------------------------------------------------------------------------------------------------------------------------------------------------------------------------------------------------------------------------------------------------------------------------------------------------------------------------------------------------------------------------------------------------------------------------------------------------------------|------|------|-----------|-------|------|------|-------------------------------------------------------------------------------|-------|----------------------|------------------------------------------------------------------------------------------------------------------------------------------------------------|------|------|-----------|-------|------|------|
| Rsa1.0_00467.1.g14401.t1 | refXP_002874865.1  hypothetical protein ARALYDRAFT_490222 [Arabidopsis lyrata subsp. lyrata] gi 297320702 gb EFH51124.1                                                                                                                                                                                                                                                                                                                                                                                                     | 316  | 341  | 1.00E-150 | 107.9 | 81.3 | 89.6 | hypothetical protein ARALYDRAFT_490222                                        | gbpln | Arabidopsis lyrata   | AT4G03410.2   Symbols:   Peroxisomal membrane 22 kDa (Mpv17/PMP22) family protein   chr4:1501907-1503503 FORWARD LENGTH=361                                | 316  | 361  | 1.00E-152 | 114.2 | 81.6 | 88.3 |
| Rsa1.0_00467.1.g14402.t1 | gb EOA21158.1  hypothetical protein CARUB_v10001504mg [Capsella rubella]                                                                                                                                                                                                                                                                                                                                                                                                                                                    | 313  | 314  | 1.00E-164 | 100.3 | 93.9 | 97.8 | hypothetical protein CARUB_v10001504mg                                        | gbpln | Capsella rubella     | AT4G03420.1   Symbols:   Protein of unknown function (DUF789)   chr4:1512226-1513594 FORWARD LENGTH=310                                                    | 313  | 310  | 1.00E-163 | 99.0  | 93.0 | 96.2 |
| Rsa1.0_00467.1.g14403.t1 | gb AAF18538.1 AC006551_24 Very similar to retrotransposon reverse transcriptase [Arabidopsis thaliana]                                                                                                                                                                                                                                                                                                                                                                                                                      | 220  | 1231 | 7.00E-47  | 559.5 | 43.6 | 60.5 | Very similar to retrotransposon reverse transcriptase                         | gbpln | Arabidopsis thaliana | AT2G34320.1   Symbols:   Polynucleotidyl transferase, ribonuclease H-like superfamily protein   chr2:14484959-14485837 FORWARD LENGTH=292                  | 220  | 292  | 9.00E-20  | 132.7 | 26.4 | 43.6 |
| Rsa1.0_00467.1.g14404.t1 | gb EOA12837.1  hypothetical protein CARUB_v10025803mg [Capsella rubella]                                                                                                                                                                                                                                                                                                                                                                                                                                                    | 388  | 1021 | 0         | 263.1 | 80.4 | 89.4 | hypothetical protein CARUB_v10025803mg                                        | gbpln | Capsella rubella     | AT4G03430.1   Symbols: STA1, EMB2770   pre-mRNA splicing factor-related   chr4:1517411-1520500 REVERSE LENGTH=1029                                         | 388  | 1029 | 0         | 265.2 | 79.4 | 89.4 |
| Rsa1.0_00468.1.g14405.t1 | gb EOA30546.1  hypothetical protein CARUB_v10013666mg [Capsella rubella]                                                                                                                                                                                                                                                                                                                                                                                                                                                    | 455  | 457  | 0         | 100.4 | 91.9 | 95.4 | hypothetical protein CARUB_v10013666mg                                        | gbpln | Capsella rubella     | AT3G22990.1   Symbols: LFR   ARM repeat superfamily protein   chr3:8164015-8166145 FORWARD LENGTH=460                                                      | 455  | 460  | 0         | 101.1 | 92.1 | 96.0 |
| Rsa1.0_00468.1.g14406.t1 | gb EOA29789.1  hypothetical protein CARUB_v10012884mg [Capsella rubella]                                                                                                                                                                                                                                                                                                                                                                                                                                                    | 1011 | 1015 | 0         | 100.4 | 91.7 | 96.9 | hypothetical protein CARUB_v10012884mg                                        | gbpln | Capsella rubella     | AT3G22980.1   Symbols:   Ribosomal protein S5/Elongation factor G/III/V family protein   chr3:8160269-8163316 REVERSE LENGTH=1015                          | 1011 | 1015 | 0         | 100.4 | 92.0 | 96.5 |
| Rsa1.0_00468.1.g14407.t1 | refNP_190938.1  pentatricopeptide repeat-containing protein [Arabidopsis thaliana] gi 75174107 sp Q9LFF1.1 PP281_ARATH RecName: Full=Pentatricopeptide repeat-containing protein At3g53700, chloroplastic; AltName: Full=Protein MATERNAL EFFECT EMBRYO ARREST 40; Flags: Precursor gi 6729521 emb CAB67677.1  putative protein [Arabidopsis thaliana] gi 15982931 gb AAL09812.1  AT3g53700/F4P12.400 [Arabidopsis thaliana] gi 332645608 gb AEE79129.1  pentatricopeptide repeat-containing protein [Arabidopsis thaliana] | 167  | 754  | 7.00E-40  | 451.5 | 53.3 | 58.7 | pentatricopeptide repeat-containing protein                                   | gbpln | Arabidopsis thaliana | AT3G53700.1   Symbols: MEE40   Pentatricopeptide repeat (PPR) superfamily protein   chr3:19900303-19902567 FORWARD LENGTH=754                              | 167  | 754  | 3.00E-42  | 451.5 | 53.3 | 58.7 |
| Rsa1.0_00468.1.g14408.t1 | refXP_002879135.1  nucleic acid binding protein [Arabidopsis lyrata subsp. lyrata] gi 297324974 gb EFH55394.1  nucleic acid binding protein [Arabidopsis lyrata subsp. lyrata]                                                                                                                                                                                                                                                                                                                                              | 175  | 223  | 4.00E-26  | 127.4 | 41.7 | 44.6 | nucleic acid binding protein                                                  | gbpln | Arabidopsis lyrata   | AT2G27790.2   Symbols:   RNA-binding (RRM/RBD/RNP motifs) family protein   chr2:11847335-11849285 REVERSE LENGTH=240                                       | 175  | 240  | 2.00E-24  | 137.1 | 38.3 | 42.9 |
| Rsa1.0_00468.1.g14409.t1 | gb EOA32294.1  hypothetical protein CARUB_v10015556mg [Capsella rubella]                                                                                                                                                                                                                                                                                                                                                                                                                                                    | 252  | 182  | 2.00E-13  | 72.2  | 20.2 | 29.8 | hypothetical protein CARUB_v10015556mg                                        | gbpln | Capsella rubella     | AT3G22961.1   Symbols:   Paired amphipathic helix (PAH2) superfamily protein   chr3:8142138-8142809 FORWARD LENGTH=223                                     | 252  | 223  | 2.00E-12  | 88.5  | 25.4 | 34.5 |
| Rsa1.0_00468.1.g14410.t1 | dbj BAA97099.1  retroelement pol polyprotein-like [Arabidopsis thaliana] refNP_001118679.1  uncharacterized protein [Arabidopsis thaliana]                                                                                                                                                                                                                                                                                                                                                                                  | 139  | 1098 | 1.00E-28  | 789.9 | 44.6 | 54.0 | retroelement pol polyprotein-like                                             | gbpln | Arabidopsis thaliana | #                                                                                                                                                          | #    | #    | #         | #     | #    |      |
| Rsa1.0_00468.1.g14411.t1 | gi 11994728 dbj BAB03044.1  unnamed protein product [Arabidopsis thaliana] gi 332643177 gb AEE76698.1  uncharacterized protein AT3G22961 [Arabidopsis thaliana]                                                                                                                                                                                                                                                                                                                                                             | 338  | 223  | 7.00E-33  | 66.0  | 29.0 | 39.1 | uncharacterized protein                                                       | gbpln | Arabidopsis thaliana | AT3G22961.1   Symbols:   Paired amphipathic helix (PAH2) superfamily protein   chr3:8142138-8142809 FORWARD LENGTH=223                                     | 338  | 223  | 2.00E-35  | 66.0  | 29.0 | 39.1 |
| Rsa1.0_00468.1.g14412.t1 | refXP_002279593.1  PREDICTED: putative calcium-transporting ATPase 13, plasma membrane-type-like [Vitis vinifera]                                                                                                                                                                                                                                                                                                                                                                                                           | 111  | 1011 | 9.00E-47  | 910.8 | 75.7 | 88.3 | PREDICTED: putative calcium-transporting ATPase 13, plasma membrane-type-like | gbpln | Vitis vinifera       | AT3G22910.1   Symbols:   ATPase E1-E2 type family protein / haloacid dehalogenase-like hydrolase family protein   chr3:8116335-8119388 REVERSE LENGTH=1017 | 111  | 1017 | 1.00E-46  | 916.2 | 86.5 | 93.7 |
| Rsa1.0_00468.1.g14413.t1 | gb ABY9052.1  chloroplast ATP sulfurylase 1 precursor [Brassica oleracea]                                                                                                                                                                                                                                                                                                                                                                                                                                                   | 466  | 459  | 0         | 98.5  | 95.9 | 97.4 | chloroplast ATP sulfurylase 1 precursor                                       | gbpln | Brassica oleracea    | AT3G22890.1   Symbols: APS1   ATP sulfurylase 1   chr3:8112837-8114734 FORWARD LENGTH=463                                                                  | 466  | 463  | 0         | 99.4  | 91.4 | 95.3 |
| Rsa1.0_00468.1.g14414.t1 | refXP_002885060.1  hypothetical protein ARALYDRAFT_478918 [Arabidopsis lyrata subsp. lyrata] gi 297330900 gb EFH61319.1  hypothetical protein ARALYDRAFT_478918 [Arabidopsis lyrata subsp. lyrata]                                                                                                                                                                                                                                                                                                                          | 238  | 715  | 4.00E-19  | 300.4 | 22.7 | 26.1 | hypothetical protein ARALYDRAFT_478918                                        | gbpln | Arabidopsis lyrata   | AT3G14950.1   Symbols: TTL2   tetratricopeptide-repeat thioredoxin-like 2   chr3:5030216-5032892 REVERSE LENGTH=721                                        | 238  | 721  | 6.00E-20  | 302.9 | 21.4 | 25.2 |
| Rsa1.0_00468.1.g14415.t1 | emb CAB39638.1  RNA-directed DNA polymerase-like protein [Arabidopsis thaliana] gi 7267666 emb CAB78094.1  RNA-directed DNA polymerase-like protein [Arabidopsis thaliana]                                                                                                                                                                                                                                                                                                                                                  | 288  | 1274 | 1.00E-66  | 442.4 | 49.7 | 62.2 | RNA-directed DNA polymerase-like protein                                      | gbpln | Arabidopsis thaliana | AT1G10000.1   Symbols:   Ribonuclease H-like superfamily protein   chr1:3263877-3264788 REVERSE LENGTH=303                                                 | 288  | 303  | 9.00E-45  | 105.2 | 40.3 | 55.2 |

| Rsa1.0_00468.1.g14416.t1 | #                                                                                                                                                                                                                                                                                                                                                                                                                                                                                                                                                                                                                                                                                                                                                                                                                                                                                                            | #   | #   | #         | #     | #    | #    | -                                                       | ----  | ----                 | #                                                                                                                                                     | #   | #   | #         | #     | #    |      |
|--------------------------|--------------------------------------------------------------------------------------------------------------------------------------------------------------------------------------------------------------------------------------------------------------------------------------------------------------------------------------------------------------------------------------------------------------------------------------------------------------------------------------------------------------------------------------------------------------------------------------------------------------------------------------------------------------------------------------------------------------------------------------------------------------------------------------------------------------------------------------------------------------------------------------------------------------|-----|-----|-----------|-------|------|------|---------------------------------------------------------|-------|----------------------|-------------------------------------------------------------------------------------------------------------------------------------------------------|-----|-----|-----------|-------|------|------|
| Rsa1.0_00468.1.g14417.t1 | ref NP_001185158.1  F-box associated ubiquitination effector family protein [Arabidopsis thaliana]  gi 33219401.1 gb AEE32132.1  F-box associated ubiquitination effector family protein [Arabidopsis thaliana]  ref NP_188924.3  emp24/gp25L/p24 family/GOLD domain-containing protein [Arabidopsis thaliana]  gi 175273406.1 sp Q9LIL4.1 P24B3 ARATH RecName: Full=Transmembrane emp24 domain-containing protein p24beta3; AltName: Full=p24 family protein beta2; Short=p24beta2; AltName: Full=p24 family protein beta3; Short=p24beta3; Flags: Precursor  gi 11994713 dbj BAB03029.1  coated vesicle membrane protein-like [Arabidopsis thaliana]  gi 17979492 gb AAL50082.1  AT3g22845/MW123.22 [Arabidopsis thaliana]  gi 20147305 gb AAM10366.1  AT3g22845/MW123.22 [Arabidopsis thaliana]  gi 332643162 gb AEE76683.1  emp24/gp25L/p24 family/GOLD domain-containing protein [Arabidopsis thaliana] | 198 | 220 | 2.00E-23  | 111.1 | 33.3 | 46.0 | F-box associated ubiquitination effector family protein | gbpln | Arabidopsis thaliana | AT1G46912.2   Symbols:   F-box associated ubiquitination effector family protein   chr1:17272521-17273629 FORWARD LENGTH=220                          | 198 | 220 | 6.00E-26  | 111.1 | 33.3 | 46.0 |
| Rsa1.0_00468.1.g14418.t1 | gi 11994713 dbj BAB03029.1  coated vesicle membrane protein-like [Arabidopsis thaliana]  gi 17979492 gb AAL50082.1  AT3g22845/MW123.22 [Arabidopsis thaliana]  gi 20147305 gb AAM10366.1  AT3g22845/MW123.22 [Arabidopsis thaliana]  gi 332643162 gb AEE76683.1  emp24/gp25L/p24 family/GOLD domain-containing protein [Arabidopsis thaliana]                                                                                                                                                                                                                                                                                                                                                                                                                                                                                                                                                                | 219 | 214 | 1.00E-117 | 97.7  | 93.6 | 96.3 | emp24/gp25L/p24 family/GOLD domain-containing protein   | gbpln | Arabidopsis thaliana | AT3G22845.1   Symbols:   emp24/gp25L/p24 family/GOLD family protein   chr3:8087373-8088550 FORWARD LENGTH=214                                         | 219 | 214 | 1.00E-119 | 97.7  | 93.6 | 96.3 |
| Rsa1.0_00469.1.g14419.t1 | gb EOA27506.1  hypothetical protein CARUB_v10023644mg [Capsella rubella]                                                                                                                                                                                                                                                                                                                                                                                                                                                                                                                                                                                                                                                                                                                                                                                                                                     | 307 | 322 | 1.00E-119 | 104.9 | 75.9 | 83.4 | hypothetical protein CARUB_v10023644mg                  | gbpln | Capsella rubella     | AT2G42380.2   Symbols: ATBZIP34, BZIP34   Basic-leucine zipper (bZIP) transcription factor family protein   chr2:17647205-17648660 REVERSE LENGTH=321 | 307 | 321 | 1.00E-116 | 104.6 | 74.9 | 82.7 |
| Rsa1.0_00469.1.g14420.t1 | #                                                                                                                                                                                                                                                                                                                                                                                                                                                                                                                                                                                                                                                                                                                                                                                                                                                                                                            | #   | #   | #         | #     | #    | #    | -                                                       | ----  | ----                 | #                                                                                                                                                     | #   | #   | #         | #     | #    |      |
| Rsa1.0_00469.1.g14421.t1 | gb EOA27998.1  hypothetical protein CARUB_v10024176mg [Capsella rubella]                                                                                                                                                                                                                                                                                                                                                                                                                                                                                                                                                                                                                                                                                                                                                                                                                                     | 181 | 173 | 8.00E-58  | 95.6  | 66.3 | 77.9 | hypothetical protein CARUB_v10024176mg                  | gbpln | Capsella rubella     | AT3G58100.1   Symbols: PDCB5   plasmodesmata callose-binding protein 5   chr3:21515397-21516329 REVERSE LENGTH=180                                    | 181 | 180 | 4.00E-45  | 99.4  | 51.9 | 62.4 |
| Rsa1.0_00469.1.g14422.t1 | ref XP_002879982.1  zinc finger family protein [Arabidopsis lyrata subsp. lyrata]  gi 297325821 gb EFH56241.1  zinc finger family protein [Arabidopsis lyrata subsp. lyrata]                                                                                                                                                                                                                                                                                                                                                                                                                                                                                                                                                                                                                                                                                                                                 | 237 | 236 | 2.00E-96  | 99.6  | 75.5 | 82.7 | zinc finger family protein                              | gbpln | Arabidopsis lyrata   | AT2G42360.1   Symbols:   RING/U-box superfamily protein   chr2:17640907-17641617 FORWARD LENGTH=236                                                   | 237 | 236 | 1.00E-97  | 99.6  | 75.5 | 83.1 |
| Rsa1.0_00469.1.g14423.t1 | ref XP_002879981.1  zinc finger family protein [Arabidopsis lyrata subsp. lyrata]  gi 297325820 gb EFH56240.1  zinc finger family protein [Arabidopsis lyrata subsp. lyrata]                                                                                                                                                                                                                                                                                                                                                                                                                                                                                                                                                                                                                                                                                                                                 | 216 | 217 | 7.00E-87  | 100.5 | 75.0 | 85.2 | zinc finger family protein                              | gbpln | Arabidopsis lyrata   | AT2G42350.1   Symbols:   RING/U-box superfamily protein   chr2:17639245-17639898 FORWARD LENGTH=217                                                   | 216 | 217 | 3.00E-79  | 100.5 | 73.6 | 83.8 |
| Rsa1.0_00469.1.g14424.t1 | ref XP_002881837.1  hypothetical protein ARALYDRAFT_903588 [Arabidopsis lyrata subsp. lyrata]  gi 297327676 gb EFH58096.1  hypothetical protein ARALYDRAFT_903588 [Arabidopsis lyrata subsp. lyrata]                                                                                                                                                                                                                                                                                                                                                                                                                                                                                                                                                                                                                                                                                                         | 356 | 345 | 1.00E-140 | 96.9  | 72.2 | 81.7 | hypothetical protein ARALYDRAFT_903588                  | gbpln | Arabidopsis lyrata   | AT2G42550.1   Symbols:   Protein kinase superfamily protein   chr2:17713196-17714230 FORWARD LENGTH=344                                               | 356 | 344 | 1.00E-100 | 96.6  | 55.9 | 68.8 |
| Rsa1.0_00469.1.g14425.t1 | gb EOA35866.1  hypothetical protein CARUB_v10021107mg [Capsella rubella]                                                                                                                                                                                                                                                                                                                                                                                                                                                                                                                                                                                                                                                                                                                                                                                                                                     | 147 | 148 | 2.00E-61  | 100.7 | 78.9 | 83.0 | hypothetical protein CARUB_v10021107mg                  | gbpln | Capsella rubella     | AT1G75350.1   Symbols: emb2184   Ribosomal protein L31   chr1:28272163-28272687 FORWARD LENGTH=144                                                    | 147 | 144 | 4.00E-61  | 98.0  | 74.1 | 82.3 |
| Rsa1.0_00469.1.g14426.t1 | ref XP_002879979.1  hypothetical protein ARALYDRAFT_483324 [Arabidopsis lyrata subsp. lyrata]  gi 297325818 gb EFH56238.1  hypothetical protein ARALYDRAFT_483324 [Arabidopsis lyrata subsp. lyrata]                                                                                                                                                                                                                                                                                                                                                                                                                                                                                                                                                                                                                                                                                                         | 601 | 662 | 0         | 110.1 | 80.2 | 88.4 | hypothetical protein ARALYDRAFT_483324                  | gbpln | Arabidopsis lyrata   | AT2G42320.2   Symbols:   nucleolar protein gar2-related   chr2:17628102-17630657 FORWARD LENGTH=669                                                   | 601 | 669 | 0         | 111.3 | 80.2 | 88.7 |

|                          |                                                                                                                                                                                                                                                                                                                                                                                                                                                                                                                                                                                                                                                                                                                                                                                                                                                                                                                                                                                                                                                                                                                       |     |     |           |       |      |      |                                                 |       |                      |                                                                                                                                                                                                                                                                                                                                                                    |     |     |           |       |      |      |
|--------------------------|-----------------------------------------------------------------------------------------------------------------------------------------------------------------------------------------------------------------------------------------------------------------------------------------------------------------------------------------------------------------------------------------------------------------------------------------------------------------------------------------------------------------------------------------------------------------------------------------------------------------------------------------------------------------------------------------------------------------------------------------------------------------------------------------------------------------------------------------------------------------------------------------------------------------------------------------------------------------------------------------------------------------------------------------------------------------------------------------------------------------------|-----|-----|-----------|-------|------|------|-------------------------------------------------|-------|----------------------|--------------------------------------------------------------------------------------------------------------------------------------------------------------------------------------------------------------------------------------------------------------------------------------------------------------------------------------------------------------------|-----|-----|-----------|-------|------|------|
| Rsa1.0_00469.1.g14427.t1 | refNP_181760.1  uncharacterized protein [Arabidopsis thaliana] gi 29782419 ref XP_002879978.1  hypothetical protein ARALYDRAFT_903579 [Arabidopsis lyrata subsp. lyrata] gi 4567303 gb AAD23714.1  unknown protein [Arabidopsis thaliana] gi 18176258 gb AAL60012.1  unknown protein [Arabidopsis thaliana] gi 20465315 gb AAM20061.1  unknown protein [Arabidopsis thaliana] gi 297325817 gb EFH56237.1  hypothetical protein ARALYDRAFT_903579 [Arabidopsis lyrata subsp. lyrata] gi 330255010 gb AEC10104.1  uncharacterized protein AT2G42310 [Arabidopsis thaliana] ref XP_002881830.1  basic helix-loop-helix family protein [Arabidopsis lyrata subsp. lyrata] gi 297327669 gb EFH58089.1  basic helix-loop-helix family protein [Arabidopsis lyrata subsp. lyrata] ref NP_181755.1  uv-b-insensitive 4 [Arabidopsis thaliana] gi 2673916 gb AAB88650.1  hypothetical protein [Arabidopsis thaliana] gi 28950705 gb AAO63276.1  At2g42260 [Arabidopsis thaliana] gi 110735686 db BAE99823.1  hypothetical protein [Arabidopsis thaliana] gi 330255003 gb AEC10097.1  uv-b-insensitive 4 [Arabidopsis thaliana] | 117 | 114 | 8.00E-54  | 97.4  | 91.5 | 93.2 | uncharacterized protein                         | gbpln | Arabidopsis lyrata   | AT2G42310.1   Symbols:   unknown protein; BEST Arabidopsis thaliana protein match is: unknown protein (TAIR:AT3G57785.1); Has 115 Blast hits to 115 proteins in 48 species: Archae - 0; Bacteria - 0; Metazoa - 4; Fungi - 44; Plants - 67; Viruses - 0; Other Eukaryotes - 0 (source: NCBI BLink).   chr2:17625251-17625595 FORWARD LENGTH=114                    | 117 | 114 | 1.00E-56  | 97.4  | 91.5 | 93.2 |
| Rsa1.0_00469.1.g14428.t3 | ref NP_181755.1  uv-b-insensitive 4 [Arabidopsis thaliana] gi 2673916 gb AAB88650.1  hypothetical protein [Arabidopsis thaliana] gi 28950705 gb AAO63276.1  At2g42260 [Arabidopsis thaliana] gi 110735686 db BAE99823.1  hypothetical protein [Arabidopsis thaliana] gi 330255003 gb AEC10097.1  uv-b-insensitive 4 [Arabidopsis thaliana]                                                                                                                                                                                                                                                                                                                                                                                                                                                                                                                                                                                                                                                                                                                                                                            | 326 | 359 | 1.00E-121 | 110.1 | 81.3 | 85.9 | basic helix-loop-helix family protein           | gbpln | Arabidopsis lyrata   | AT2G42280.1   Symbols:   basic helix-loop-helix (bHLH) DNA-binding superfamily protein   chr2:17611428-17613163 REVERSE LENGTH=359                                                                                                                                                                                                                                 | 326 | 359 | 1.00E-122 | 110.1 | 80.4 | 85.6 |
| Rsa1.0_00469.1.g14429.t1 | ref NP_181755.1  uv-b-insensitive 4 [Arabidopsis thaliana] gi 2673916 gb AAB88650.1  hypothetical protein [Arabidopsis thaliana] gi 28950705 gb AAO63276.1  At2g42260 [Arabidopsis thaliana] gi 110735686 db BAE99823.1  hypothetical protein [Arabidopsis thaliana] gi 330255003 gb AEC10097.1  uv-b-insensitive 4 [Arabidopsis thaliana]                                                                                                                                                                                                                                                                                                                                                                                                                                                                                                                                                                                                                                                                                                                                                                            | 235 | 259 | 5.00E-88  | 110.2 | 81.3 | 89.4 | uv-b-insensitive 4                              | gbpln | Arabidopsis thaliana | AT2G42260.1   Symbols: UVI4, PYM   uv-b-insensitive 4   chr2:17602240-17603283 REVERSE LENGTH=259                                                                                                                                                                                                                                                                  | 235 | 259 | 1.00E-90  | 110.2 | 81.3 | 89.4 |
| Rsa1.0_00469.1.g14430.t1 | ref NP_973669.1  C-CAP/cofactor C-like domain-containing protein [Arabidopsis thaliana] gi 51536484 gb AAU05480.1  At2g42230 [Arabidopsis thaliana] gi 53850497 gb AAU95425.1  At2g42230 [Arabidopsis thaliana] gi 110740775 db BAE98485.1  hypothetical protein [Arabidopsis thaliana] gi 330254997 gb AEC10091.1  C-CAP/cofactor C-like domain-containing protein [Arabidopsis thaliana]                                                                                                                                                                                                                                                                                                                                                                                                                                                                                                                                                                                                                                                                                                                            | 638 | 568 | 0         | 89.0  | 74.9 | 80.6 | C-CAP/cofactor C-like domain-containing protein | gbpln | Arabidopsis thaliana | AT2G42230.2   Symbols:   C-CAP/cofactor C-like domain-containing protein   chr2:17593705-17596563 REVERSE LENGTH=568                                                                                                                                                                                                                                               | 638 | 568 | 0         | 89.0  | 74.9 | 80.6 |
| Rsa1.0_00469.1.g14431.t1 | ref NP_001031527.1  Tim17 domain-containing protein [Arabidopsis thaliana] gi 330254993 gb AEC10087.1  outer envelope pore protein 16-3 [Arabidopsis thaliana]                                                                                                                                                                                                                                                                                                                                                                                                                                                                                                                                                                                                                                                                                                                                                                                                                                                                                                                                                        | 160 | 173 | 8.00E-80  | 108.1 | 91.9 | 97.5 | Tim17 domain-containing protein                 | gbpln | Arabidopsis thaliana | AT2G42210.2   Symbols: ATOEP16-3, OEP16-3   Mitochondrial import inner membrane translocase subunit Tim17/Tim22/Tim23 family protein   chr2:17590600-17591591 FORWARD LENGTH=173                                                                                                                                                                                   | 160 | 173 | 3.00E-82  | 108.1 | 91.9 | 97.5 |
| Rsa1.0_00469.1.g14432.t1 | db BAJ34624.1  unnamed protein product [Thellungiella halophila]                                                                                                                                                                                                                                                                                                                                                                                                                                                                                                                                                                                                                                                                                                                                                                                                                                                                                                                                                                                                                                                      | 368 | 372 | 1.00E-168 | 101.1 | 88.0 | 93.2 | unnamed protein product                         | ----  | ----                 | AT2G42200.1   Symbols: SPL9, AtSPL9   squamosa promoter binding protein-like 9   chr2:17587601-17589451 FORWARD LENGTH=375                                                                                                                                                                                                                                         | 368 | 375 | 1.00E-159 | 101.9 | 87.5 | 92.1 |
| Rsa1.0_00469.1.g14433.t1 | gb EOA28102.1  hypothetical protein CARUB_v10024288mg [Capsella rubella] gi 482563913 gb EOA28103.1  hypothetical protein CARUB_v10024288mg [Capsella rubella]                                                                                                                                                                                                                                                                                                                                                                                                                                                                                                                                                                                                                                                                                                                                                                                                                                                                                                                                                        | 141 | 138 | 4.00E-39  | 97.9  | 74.5 | 85.8 | hypothetical protein CARUB_v10024288mg          | gbpln | Capsella rubella     | AT2G42190.1   Symbols:   unknown protein; BEST Arabidopsis thaliana protein match is: unknown protein (TAIR:AT3G57930.2); Has 1381 Blast hits to 1230 proteins in 175 species: Archae - 3; Bacteria - 25; Metazoa - 672; Fungi - 135; Plants - 127; Viruses - 30; Other Eukaryotes - 389 (source: NCBI BLink).   chr2:17583625-17584050 FORWARD LENGTH=141         | 141 | 141 | 4.00E-38  | 100.0 | 75.9 | 86.5 |
| Rsa1.0_00469.1.g14434.t1 | ref XP_002881826.1  hypothetical protein ARALYDRAFT_483306 [Arabidopsis lyrata subsp. lyrata] gi 297327665 gb EFH58085.1  hypothetical protein ARALYDRAFT_483306 [Arabidopsis lyrata subsp. lyrata]                                                                                                                                                                                                                                                                                                                                                                                                                                                                                                                                                                                                                                                                                                                                                                                                                                                                                                                   | 159 | 161 | 2.00E-55  | 101.3 | 74.8 | 84.9 | hypothetical protein ARALYDRAFT_483306          | gbpln | Arabidopsis lyrata   | AT2G42180.1   Symbols:   unknown protein; BEST Arabidopsis thaliana protein match is: unknown protein (TAIR:AT3G57950.1); Has 35333 Blast hits to 34131 proteins in 2444 species: Archae - 798; Bacteria - 22429; Metazoa - 974; Fungi - 991; Plants - 531; Viruses - 0; Other Eukaryotes - 9610 (source: NCBI BLink).   chr2:17581133-17581633 REVERSE LENGTH=166 | 159 | 166 | 5.00E-54  | 104.4 | 72.3 | 83.0 |

|                          |                                                                                                                                                                                                                                                                                                                                                                                                                                                                                                                                                                                                                                                                                                                                                                                                                                                                                                                                                                                                                                                    |     |     |           |       |      |      |                                              |       |                      |                                                                                                                                                                                                                                                                                                      |     |     |           |       |      |      |
|--------------------------|----------------------------------------------------------------------------------------------------------------------------------------------------------------------------------------------------------------------------------------------------------------------------------------------------------------------------------------------------------------------------------------------------------------------------------------------------------------------------------------------------------------------------------------------------------------------------------------------------------------------------------------------------------------------------------------------------------------------------------------------------------------------------------------------------------------------------------------------------------------------------------------------------------------------------------------------------------------------------------------------------------------------------------------------------|-----|-----|-----------|-------|------|------|----------------------------------------------|-------|----------------------|------------------------------------------------------------------------------------------------------------------------------------------------------------------------------------------------------------------------------------------------------------------------------------------------------|-----|-----|-----------|-------|------|------|
| Rsa1.0_00469.1.g14435.t1 | ref[NP_973667.2] putative plastid-lipid-associated protein 13 [Arabidopsis thaliana]<br>gi 147719766 sp Q8S9M1.2 PAP13_ARATH RecName: Full=Probable plastid-lipid-associated protein 13, chloroplastic; AltName: Full=Fibrillin-13; Short=AtPGL30; Flags: Precursor<br>gi 20196973 gb AAB88638.2  unknown protein [Arabidopsis thaliana]<br>gi 330254981 gb AEC10075.1  putative plastid-lipid-associated protein 13 [Arabidopsis thaliana]                                                                                                                                                                                                                                                                                                                                                                                                                                                                                                                                                                                                        | 306 | 299 | 1.00E-133 | 97.7  | 81.0 | 88.9 | putative plastid-lipid-associated protein 13 | gbpln | Arabidopsis thaliana | AT2G42130.4   Symbols:   Plastid-lipid associated protein PAP / fibrillin family protein   chr2:17566242-17567916 FORWARD LENGTH=299                                                                                                                                                                 | 306 | 299 | 1.00E-136 | 97.7  | 81.0 | 88.9 |
| Rsa1.0_00469.1.g14436.t1 | gb EOA27133.1  hypothetical protein CARUB_v10023232mg [Capsella rubella]                                                                                                                                                                                                                                                                                                                                                                                                                                                                                                                                                                                                                                                                                                                                                                                                                                                                                                                                                                           | 83  | 439 | 6.00E-28  | 528.9 | 92.8 | 95.2 | hypothetical protein CARUB_v10023232mg       | gbpln | Capsella rubella     | AT2G42120.1   Symbols: POLD2   DNA polymerase delta small subunit   chr2:17563282-17565965 REVERSE LENGTH=441                                                                                                                                                                                        | 83  | 441 | 5.00E-29  | 531.3 | 90.4 | 92.8 |
| Rsa1.0_00469.1.g14437.t1 | ref[NP_181741.1] uncharacterized protein [Arabidopsis thaliana]<br>gi 2673903 gb AAB88637.1  hypothetical protein [Arabidopsis thaliana]<br>gi 20198320 gb AAM15521.1  hypothetical protein [Arabidopsis thaliana]<br>gi 149944371 gb ABR46228.1  At2g42110 [Arabidopsis thaliana]<br>gi 330254977 gb AEC10071.1  uncharacterized protein AT2G42110 [Arabidopsis thaliana]<br>ref[NP_565965.1] nudix hydrolase 23 [Arabidopsis thaliana]<br>gi 68565870 sp P93740.2 NUD23_ARATH RecName: Full=Nudix hydrolase 23, chloroplastic; Short=AtNUDT23; AltName: Full=ADP-ribose pyrophosphatase; AltName: Full=FAD diphosphatase; Flags: Precursor<br>gi 20198322 gb AAB63537.2  expressed protein [Arabidopsis thaliana]<br>gi 62320524 dbj BAD95098.1  hypothetical protein [Arabidopsis thaliana]<br>gi 107738412 gb ABF83693.1  AT2g42070 [Arabidopsis thaliana]<br>gi 330254973 gb AEC10067.1  nudix hydrolase 23 [Arabidopsis thaliana]                                                                                                            | 87  | 137 | 1.00E-22  | 157.5 | 73.6 | 83.9 | uncharacterized protein                      | gbpln | Arabidopsis thaliana | AT2G42110.1   Symbols:   unknown protein; Has 27 Blast hits to 27 proteins in 11 species: Archae - 0; Bacteria - 0; Metazoa - 0; Fungi - 0; Plants - 25; Viruses - 0; Other Eukaryotes - 2 (source: NCBI BLINK).   chr2:17562234-17562732 REVERSE LENGTH=137                                         | 87  | 137 | 2.00E-25  | 157.5 | 73.6 | 83.9 |
| Rsa1.0_00469.1.g14438.t1 | ref[NP_565965.1] nudix hydrolase 23 [Arabidopsis thaliana]<br>gi 68565870 sp P93740.2 NUD23_ARATH RecName: Full=Nudix hydrolase 23, chloroplastic; Short=AtNUDT23; AltName: Full=ADP-ribose pyrophosphatase; AltName: Full=FAD diphosphatase; Flags: Precursor<br>gi 20198322 gb AAB63537.2  expressed protein [Arabidopsis thaliana]<br>gi 62320524 dbj BAD95098.1  hypothetical protein [Arabidopsis thaliana]<br>gi 107738412 gb ABF83693.1  AT2g42070 [Arabidopsis thaliana]<br>gi 330254973 gb AEC10067.1  nudix hydrolase 23 [Arabidopsis thaliana]                                                                                                                                                                                                                                                                                                                                                                                                                                                                                          | 562 | 280 | 1.00E-136 | 49.8  | 44.1 | 45.2 | nudix hydrolase 23                           | gbpln | Arabidopsis thaliana | AT2G42070.1   Symbols: ATNUDT23, ATNUDX23, NUDX23   nudix hydrolase homolog 23   chr2:17549669-17551066 REVERSE LENGTH=280                                                                                                                                                                           | 562 | 280 | 1.00E-139 | 49.8  | 44.1 | 45.2 |
| Rsa1.0_00469.1.g14439.t1 | gb EOA27725.1  hypothetical protein CARUB_v10023878mg [Capsella rubella]                                                                                                                                                                                                                                                                                                                                                                                                                                                                                                                                                                                                                                                                                                                                                                                                                                                                                                                                                                           | 275 | 260 | 1.00E-83  | 94.5  | 70.5 | 76.4 | hypothetical protein CARUB_v10023878mg       | gbpln | Capsella rubella     | AT2G42040.1   Symbols:   CONTAINS InterPro DOMAIN/s: WRC (InterPro:IPR014977); Has 219 Blast hits to 219 proteins in 19 species: Archae - 0; Bacteria - 0; Metazoa - 3; Fungi - 0; Plants - 215; Viruses - 0; Other Eukaryotes - 1 (source: NCBI BLINK).   chr2:17543282-17545063 FORWARD LENGTH=269 | 275 | 269 | 7.00E-80  | 97.8  | 73.1 | 78.9 |
| Rsa1.0_00469.1.g14440.t1 | ref[XP_002881818.1] zinc finger family protein [Arabidopsis lyrata subsp. lyrata]<br>gi 297327657 gb EFH58077.1  zinc finger family protein [Arabidopsis lyrata subsp. lyrata]<br>ref[NP_181728.1] putative protein kinase [Arabidopsis thaliana]<br>gi 75319137 sp P93749.1 Y2197_ARATH RecName: Full=Probable protein kinase At2g41970 gi 1871186 gb AAB63546.1  putative protein kinase [Arabidopsis thaliana]<br>gi 38603828 gb AAR24659.1  AT2g41970 [Arabidopsis thaliana]<br>gi 51968610 dbj BAD42997.1  putative protein kinase [Arabidopsis thaliana]<br>gi 51968682 dbj BAD43033.1  putative protein kinase [Arabidopsis thaliana]<br>gi 51971150 dbj BAD44267.1  putative protein kinase [Arabidopsis thaliana]<br>gi 51971369 dbj BAD44349.1  putative protein kinase [Arabidopsis thaliana]<br>gi 51971789 dbj BAD44559.1  putative protein kinase [Arabidopsis thaliana]<br>gi 62318717 dbj BAD93732.1  putative protein kinase [Arabidopsis thaliana]<br>gi 330254963 gb AEC10057.1  putative protein kinase [Arabidopsis thaliana] | 425 | 413 | 1.00E-141 | 97.2  | 69.4 | 77.9 | zinc finger family protein                   | gbpln | Arabidopsis lyrata   | AT2G42030.1   Symbols:   RING/U-box superfamily protein   chr2:17539069-17540346 REVERSE LENGTH=425                                                                                                                                                                                                  | 425 | 425 | 1.00E-132 | 100.0 | 64.2 | 74.1 |
| Rsa1.0_00469.1.g14441.t1 | ref[NP_181728.1] putative protein kinase [Arabidopsis thaliana]<br>gi 75319137 sp P93749.1 Y2197_ARATH RecName: Full=Probable protein kinase At2g41970 gi 1871186 gb AAB63546.1  putative protein kinase [Arabidopsis thaliana]<br>gi 38603828 gb AAR24659.1  AT2g41970 [Arabidopsis thaliana]<br>gi 51968610 dbj BAD42997.1  putative protein kinase [Arabidopsis thaliana]<br>gi 51968682 dbj BAD43033.1  putative protein kinase [Arabidopsis thaliana]<br>gi 51971150 dbj BAD44267.1  putative protein kinase [Arabidopsis thaliana]<br>gi 51971369 dbj BAD44349.1  putative protein kinase [Arabidopsis thaliana]<br>gi 51971789 dbj BAD44559.1  putative protein kinase [Arabidopsis thaliana]<br>gi 62318717 dbj BAD93732.1  putative protein kinase [Arabidopsis thaliana]<br>gi 330254963 gb AEC10057.1  putative protein kinase [Arabidopsis thaliana]                                                                                                                                                                                   | 366 | 365 | 0         | 99.7  | 94.3 | 97.8 | putative protein kinase                      | gbpln | Arabidopsis thaliana | AT2G41970.1   Symbols:   Protein kinase superfamily protein   chr2:17520517-17522304 REVERSE LENGTH=365                                                                                                                                                                                              | 366 | 365 | 0         | 99.7  | 94.3 | 97.8 |
| Rsa1.0_00470.1.g14442.t4 | #                                                                                                                                                                                                                                                                                                                                                                                                                                                                                                                                                                                                                                                                                                                                                                                                                                                                                                                                                                                                                                                  | #   | #   | #         | #     | #    | -    | ---                                          | ---   | #                    | #                                                                                                                                                                                                                                                                                                    | #   | #   | #         | #     | #    |      |

|                          |                                                                                                                                                                                                                                                                                                                |      |      |           |       |      |      |                                                     |       |                      |                                                                                                                                               |      |     |           |       |      |      |
|--------------------------|----------------------------------------------------------------------------------------------------------------------------------------------------------------------------------------------------------------------------------------------------------------------------------------------------------------|------|------|-----------|-------|------|------|-----------------------------------------------------|-------|----------------------|-----------------------------------------------------------------------------------------------------------------------------------------------|------|-----|-----------|-------|------|------|
| Rsa1.0_00470.1.g14443.t2 | gb EOA38463.1  hypothetical protein CARUB_v10010159mg.partial [Capsella rubella]                                                                                                                                                                                                                               | 169  | 238  | 4.00E-38  | 140.8 | 59.2 | 71.6 | hypothetical protein CARUB_v10010159mg.partial      | gbpln | Capsella rubella     | AT1G09580.1   Symbols:   emp24/gp25L/p24 family/GOLD family protein   chr1:3104657-3106092 FORWARD LENGTH=217                                 | 169  | 217 | 2.00E-39  | 128.4 | 58.6 | 70.4 |
| Rsa1.0_00470.1.g14444.t8 | gb AAC33226.1  putative non-LTR retroelement reverse transcriptase [Arabidopsis thaliana]                                                                                                                                                                                                                      | 1683 | 1529 | 0         | 90.8  | 40.5 | 54.8 | putative non-LTR retroelement reverse transcriptase | gbpln | Arabidopsis thaliana | AT3G24255.1   Symbols:   RNA-directed DNA polymerase (reverse transcriptase)-related family protein   chr3:8789471-8793208 FORWARD LENGTH=746 | 1683 | 746 | 5.00E-95  | 44.3  | 10.6 | 14.0 |
| Rsa1.0_00470.1.g14445.t1 | gb EOA35819.1  hypothetical protein CARUB_v10021057mg [Capsella rubella] gi 482571634 gb EOA35822.1  hypothetical protein CARUB_v10021062mg [Capsella rubella]                                                                                                                                                 | 79   | 164  | 8.00E-30  | 207.6 | 81.0 | 84.8 | hypothetical protein CARUB_v10021057mg              | gbpln | Capsella rubella     | AT1G09690.1   Symbols:   Translation protein SH3-like family protein   chr1:3136407-3137430 REVERSE LENGTH=164                                | 79   | 164 | 2.00E-32  | 207.6 | 81.0 | 83.5 |
| Rsa1.0_00470.1.g14446.t1 | ref XP_002872611.1  hypothetical protein ARALYDRAFT_911524 [Arabidopsis lyrata subsp. lyrata] gi 297318448 gb EFH48870.1  hypothetical protein ARALYDRAFT_911524 [Arabidopsis lyrata subsp. lyrata]                                                                                                            | 237  | 405  | 2.00E-86  | 170.9 | 66.2 | 80.2 | hypothetical protein ARALYDRAFT_911524              | gbpln | Arabidopsis lyrata   | AT4G15050.1   Symbols:   Protein of Unknown Function (DUF239)   chr4:8588548-8590345 REVERSE LENGTH=396                                       | 237  | 396 | 6.00E-24  | 167.1 | 32.9 | 48.5 |
| Rsa1.0_00470.1.g14447.t1 | ref XP_002889760.1  60S ribosomal protein L21 [Arabidopsis lyrata subsp. lyrata] gi 297335602 gb EFH66019.1  60S ribosomal protein L21 [Arabidopsis lyrata subsp. lyrata]                                                                                                                                      | 164  | 164  | 6.00E-88  | 100.0 | 97.0 | 98.8 | 60S ribosomal protein L21                           | gbpln | Arabidopsis lyrata   | AT1G09690.1   Symbols:   Translation protein SH3-like family protein   chr1:3136407-3137430 REVERSE LENGTH=164                                | 164  | 164 | 6.00E-90  | 100.0 | 96.3 | 98.2 |
| Rsa1.0_00470.1.g14448.t1 | emb CAA48890.1  U2 small nuclear ribonucleoprotein A' [Arabidopsis thaliana]                                                                                                                                                                                                                                   | 237  | 249  | 1.00E-110 | 105.1 | 88.6 | 93.7 | U2 small nuclear ribonucleoprotein A'               | gbpln | Arabidopsis thaliana | AT1G09760.1   Symbols: U2A'   U2 small nuclear ribonucleoprotein A   chr1:3159476-3161603 REVERSE LENGTH=249                                  | 237  | 249 | 1.00E-113 | 105.1 | 88.6 | 93.7 |
| Rsa1.0_00470.1.g14449.t1 | ref XP_002869101.1  predicted protein [Arabidopsis lyrata subsp. lyrata] gi 297314937 gb EFH45360.1  predicted protein [Arabidopsis lyrata subsp. lyrata]                                                                                                                                                      | 141  | 248  | 3.00E-17  | 175.9 | 38.3 | 52.5 | predicted protein                                   | gbpln | Arabidopsis lyrata   | #                                                                                                                                             | #    | #   | #         | #     | #    | #    |
| Rsa1.0_00470.1.g14450.t1 | dbj BAD44444.1  unnamed protein product [Arabidopsis thaliana] gi 51971573 dbj BAD44451.1  unnamed protein product [Arabidopsis thaliana] ref XP_002889774.1  histidine acid phosphatase family protein [Arabidopsis lyrata subsp. lyrata]                                                                     | 319  | 368  | 1.00E-147 | 115.4 | 83.4 | 87.1 | unnamed protein product                             | gbpln | Arabidopsis thaliana | AT1G09800.1   Symbols:   Pseudouridine synthase family protein   chr1:3171721-3180336 REVERSE LENGTH=372                                      | 319  | 372 | 1.00E-149 | 116.6 | 83.4 | 87.1 |
| Rsa1.0_00470.1.g14451.t1 | gi 297335616 gb EFH66033.1  histidine acid phosphatase family protein [Arabidopsis lyrata subsp. lyrata] ref NP_563857.1  TRAF-type zinc finger-related protein [Arabidopsis thaliana] gi 22531082 gb AAM97045.1  expressed protein [Arabidopsis thaliana]                                                     | 479  | 487  | 0         | 101.7 | 89.8 | 95.8 | histidine acid phosphatase family protein           | gbpln | Arabidopsis lyrata   | AT1G09870.1   Symbols:   histidine acid phosphatase family protein   chr1:3205817-3208444 FORWARD LENGTH=487                                  | 479  | 487 | 0         | 101.7 | 89.6 | 95.4 |
| Rsa1.0_00470.1.g14452.t1 | gi 23197978 gb AAN15516.1  expressed protein [Arabidopsis thaliana] gi 332190393 gb AEE28514.1  TRAF-type zinc finger-related protein [Arabidopsis thaliana]                                                                                                                                                   | 113  | 192  | 4.00E-22  | 169.9 | 42.5 | 46.9 | TRAF-type zinc finger-related protein               | gbpln | Arabidopsis thaliana | AT1G09920.1   Symbols:   TRAF-type zinc finger-related   chr1:3224863-3226860 REVERSE LENGTH=192                                              | 113  | 192 | 7.00E-25  | 169.9 | 42.5 | 46.9 |
| Rsa1.0_00470.1.g14453.t1 | gb EOA40255.1  hypothetical protein CARUB_v10008976mg [Capsella rubella]                                                                                                                                                                                                                                       | 94   | 487  | 3.00E-27  | 518.1 | 69.1 | 73.4 | hypothetical protein CARUB_v10008976mg              | gbpln | Capsella rubella     | AT1G09870.1   Symbols:   histidine acid phosphatase family protein   chr1:3205817-3208444 FORWARD LENGTH=487                                  | 94   | 487 | 1.00E-29  | 518.1 | 76.6 | 85.1 |
| Rsa1.0_00470.1.g14454.t1 | ref NP_563857.1  TRAF-type zinc finger-related protein [Arabidopsis thaliana] gi 22531082 gb AAM97045.1  expressed protein [Arabidopsis thaliana] gi 23197978 gb AAN15516.1  expressed protein [Arabidopsis thaliana] gi 332190393 gb AEE28514.1  TRAF-type zinc finger-related protein [Arabidopsis thaliana] | 192  | 192  | 2.00E-86  | 100.0 | 79.7 | 89.1 | TRAF-type zinc finger-related protein               | gbpln | Arabidopsis thaliana | AT1G09920.1   Symbols:   TRAF-type zinc finger-related   chr1:3224863-3226860 REVERSE LENGTH=192                                              | 192  | 192 | 7.00E-89  | 100.0 | 79.7 | 89.1 |
| Rsa1.0_00470.1.g14455.t1 | ref XP_002892535.1  ATOPT2 [Arabidopsis lyrata subsp. lyrata] gi 29733837 gb EFH68794.1  ATOPT2 [Arabidopsis lyrata subsp. lyrata] ref NP_194164.1  uncharacterized protein [Arabidopsis thaliana] gi 5051775 emb CAB45068.1  putative protein [Arabidopsis thaliana]                                          | 733  | 734  | 0         | 100.1 | 92.9 | 96.9 | ATOPT2                                              | gbpln | Arabidopsis lyrata   | AT1G09930.1   Symbols: ATOPT2, OPT2   oligopeptide transporter 2   chr1:3227490-3230043 REVERSE LENGTH=734                                    | 733  | 734 | 0         | 100.1 | 92.6 | 96.9 |
| Rsa1.0_00470.1.g14456.t1 | gi 7289283 emb CAB78343.1  putative protein [Arabidopsis thaliana] gi 58652054 gb AAW80852.1  At4g24330 [Arabidopsis thaliana] gi 332659490 gb AEE84890.1  uncharacterized protein AT4G24330 [Arabidopsis thaliana]                                                                                            | 319  | 478  | 3.00E-97  | 149.8 | 54.9 | 58.6 | uncharacterized protein                             | gbpln | Arabidopsis thaliana | AT4G24330.1   Symbols:   Protein of unknown function (DUF1682)   chr4:12603848-12606229 REVERSE LENGTH=748                                    | 319  | 478 | 1.00E-100 | 149.8 | 54.9 | 58.6 |

|                          |                                                                                                                                                                                                     |      |      |           |       |       |       |                                                                                                                                                     |       |                      |                                                                                                                                                                                                                                                                                                                                                                       |      |     |           |       |      |      |
|--------------------------|-----------------------------------------------------------------------------------------------------------------------------------------------------------------------------------------------------|------|------|-----------|-------|-------|-------|-----------------------------------------------------------------------------------------------------------------------------------------------------|-------|----------------------|-----------------------------------------------------------------------------------------------------------------------------------------------------------------------------------------------------------------------------------------------------------------------------------------------------------------------------------------------------------------------|------|-----|-----------|-------|------|------|
| Rsa1.0_00470.1.g14457.t1 | gb EOA15579.1  hypothetical protein CARUB_v10005317mg [Capsella rubella]                                                                                                                            | 126  | 307  | 2.00E-13  | 243.7 | 38.1  | 44.4  | hypothetical protein CARUB_v10005317mg                                                                                                              | gbpln | Capsella rubella     | AT4G22320.2   Symbols:   unknown protein; FUNCTIONS IN: molecular_function unknown; INVOLVED IN: biological_process unknown; EXPRESSED IN: 24 plant structures; EXPRESSED DURING: 14 growth stages; BEST Arabidopsis thaliana protein match is: unknown protein (TAIR:AT5G55210.1).   chr4:11793129-11794596 REVERSE LENGTH=237                                       | 126  | 237 | 1.00E-13  | 188.1 | 34.9 | 38.9 |
| Rsa1.0_00470.1.g14458.t1 | ref NP_683294.2  phosphoglycerate mutase-like protein [Arabidopsis thaliana] gi 332190397 gb AEE28518.1  phosphoglycerate mutase-like protein [Arabidopsis thaliana]                                | 216  | 231  | 1.00E-110 | 106.9 | 91.7  | 95.8  | phosphoglycerate mutase-like protein                                                                                                                | gbpln | Arabidopsis thaliana | AT1G09935.1   Symbols:   Phosphoglycerate mutase family protein   chr1:3234060-3235530 REVERSE LENGTH=231                                                                                                                                                                                                                                                             | 216  | 231 | 1.00E-113 | 106.9 | 91.7 | 95.8 |
| Rsa1.0_00470.1.g14459.t1 | pir  S65812 RNA-directed DNA polymerase (EC 2.7.7.49) (clone DW15) - Arabidopsis thaliana retrotransposon Ta11-1 gi 976278 gb AAA75254.1  reverse transcriptase [Arabidopsis thaliana]              | 1003 | 1333 | 0         | 132.9 | 35.8  | 46.7  | RNA-directed DNA polymerase (EC 2.7.7.49) (clone DW15) - Arabidopsis thaliana retrotransposon Ta11-1 gi 976278 gb AAA75254.1  reverse transcriptase | gbpln | Arabidopsis thaliana | AT4G29090.1   Symbols:   Ribonuclease H-like superfamily protein   chr4:14333528-14335255 FORWARD LENGTH=575                                                                                                                                                                                                                                                          | 1003 | 575 | 8.00E-46  | 57.3  | 10.2 | 16.3 |
| Rsa1.0_00470.1.g14460.t1 | dbj BAB01217.1  Ta11 non-LTR retroelement protein-like [Arabidopsis thaliana] gi 67633664 gb AA78756.1  putative zinc finger protein [Arabidopsis thaliana]                                         | 507  | 487  | 2.00E-94  | 96.1  | 41.2  | 59.0  | Ta11 non-LTR retroelement protein-like                                                                                                              | gbpln | Arabidopsis thaliana | AT5G36228.1   Symbols:   nucleic acid binding/zinc ion binding   chr5:14271691-14272776 FORWARD LENGTH=361                                                                                                                                                                                                                                                            | 507  | 361 | 4.00E-24  | 71.2  | 10.8 | 21.1 |
| Rsa1.0_00470.1.g14461.t1 | ref XP_002892538.1  glutamyl-tRNA reductase [Arabidopsis lyrata subsp. lyrata] gi 297338380 gb EFH68797.1  glutamyl-tRNA reductase [Arabidopsis lyrata subsp. lyrata]                               | 526  | 526  | 0         | 100.0 | 81.6  | 89.9  | glutamyl-tRNA reductase                                                                                                                             | gbpln | Arabidopsis lyrata   | AT1G09940.1   Symbols:   HEMA2   Glutamyl-tRNA reductase family protein   chr1:3237224-3239262 REVERSE LENGTH=530                                                                                                                                                                                                                                                     | 526  | 530 | 0         | 100.8 | 82.5 | 91.1 |
| Rsa1.0_00471.1.g14462.t1 | ref XP_002876613.1  beta-substituted ala synthase 3_1 [Arabidopsis lyrata subsp. lyrata] gi 297322424 gb EFH52872.1  beta-substituted ala synthase 3_1 [Arabidopsis lyrata subsp. lyrata]           | 352  | 368  | 1.00E-169 | 104.5 | 86.1  | 93.5  | beta-substituted ala synthase 3_1                                                                                                                   | gbpln | Arabidopsis lyrata   | AT3G61440.1   Symbols:   ATCYSC1, ARATH:BSA531, CYSC1   cysteine synthase C1   chr3:2273585-22737792 FORWARD LENGTH=368                                                                                                                                                                                                                                               | 352  | 368 | 1.00E-172 | 104.5 | 86.1 | 93.5 |
| Rsa1.0_00471.1.g14463.t1 | dbj BAA32777.1  plasma membrane aquaporin (PAQ1) [Raphanus sativus]                                                                                                                                 | 286  | 286  | 1.00E-164 | 100.0 | 100.0 | 100.0 | plasma membrane aquaporin (PAQ1)                                                                                                                    | gbpln | Raphanus sativus     | AT3G61430.2   Symbols:   PIP1A, ATPIP1, PIP1, PIP1.1   plasma membrane intrinsic protein 1A   chr3:22733657-22735113 FORWARD LENGTH=286                                                                                                                                                                                                                               | 286  | 286 | 1.00E-164 | 100.0 | 98.3 | 99.7 |
| Rsa1.0_00471.1.g14464.t1 | ref XP_002878380.1  hypothetical protein ARALYDRAFT_486615 [Arabidopsis lyrata subsp. lyrata] gi 297324218 gb EFH54639.1  hypothetical protein ARALYDRAFT_486615 [Arabidopsis lyrata subsp. lyrata] | 345  | 346  | 1.00E-162 | 100.3 | 86.7  | 91.6  | hypothetical protein ARALYDRAFT_486615                                                                                                              | gbpln | Arabidopsis lyrata   | AT3G61415.1   Symbols:   ASK21, SK21   SKP1-like 21   chr3:22722962-22725577 REVERSE LENGTH=351                                                                                                                                                                                                                                                                       | 345  | 351 | 1.00E-164 | 101.7 | 85.8 | 91.9 |
| Rsa1.0_00471.1.g14465.t1 | ref XP_002876611.1  hypothetical protein ARALYDRAFT_486614 [Arabidopsis lyrata subsp. lyrata] gi 297322449 gb EFH52870.1  hypothetical protein ARALYDRAFT_486614 [Arabidopsis lyrata subsp. lyrata] | 301  | 295  | 1.00E-113 | 98.0  | 74.8  | 83.4  | hypothetical protein ARALYDRAFT_486614                                                                                                              | gbpln | Arabidopsis lyrata   | AT3G61410.1   Symbols:   BEST Arabidopsis thaliana protein match is: U-box domain-containing protein kinase family protein (TAIR:AT2G45910.1); Has 232 Blast hits to 229 proteins in 13 species: Archae - 0; Bacteria - 0; Metazoa - 13; Fungi - 0; Plants - 218; Viruses - 0; Other Eukaryotes - 1 (source: NCBI BLINK).   chr3:22721112-22722452 FORWARD LENGTH=294 | 301  | 294 | 1.00E-116 | 97.7  | 73.8 | 82.7 |
| Rsa1.0_00471.1.g14466.t1 | gb EOA24031.1  hypothetical protein CARUB_v10017247mg [Capsella rubella]                                                                                                                            | 434  | 447  | 1.00E-165 | 103.0 | 68.7  | 80.2  | hypothetical protein CARUB_v10017247mg                                                                                                              | gbpln | Capsella rubella     | AT3G61390.2   Symbols:   RING/U-box superfamily protein   chr3:22716418-22718270 FORWARD LENGTH=435                                                                                                                                                                                                                                                                   | 434  | 435 | 1.00E-160 | 100.2 | 67.7 | 77.9 |
| Rsa1.0_00471.1.g14467.t1 | ref XP_002878378.1  hypothetical protein ARALYDRAFT_486612 [Arabidopsis lyrata subsp. lyrata] gi 297324216 gb EFH54637.1  hypothetical protein ARALYDRAFT_486612 [Arabidopsis lyrata subsp. lyrata] | 678  | 714  | 0         | 105.3 | 74.0  | 84.5  | hypothetical protein ARALYDRAFT_486612                                                                                                              | gbpln | Arabidopsis lyrata   | AT3G61380.1   Symbols:   Phosphatidylinositol N-acetylglucosaminyltransferase subunit P-related   chr3:22708769-22711279 REVERSE LENGTH=718                                                                                                                                                                                                                           | 678  | 718 | 0         | 105.9 | 73.0 | 83.9 |
| Rsa1.0_00471.1.g14468.t2 | ref XP_002876607.1  hypothetical protein ARALYDRAFT_486610 [Arabidopsis lyrata subsp. lyrata] gi 297322445 gb EFH52866.1  hypothetical protein ARALYDRAFT_486610 [Arabidopsis lyrata subsp. lyrata] | 128  | 127  | 1.00E-47  | 99.2  | 78.1  | 85.2  | hypothetical protein ARALYDRAFT_486610                                                                                                              | gbpln | Arabidopsis lyrata   | AT3G61370.1   Symbols:   Protein of unknown function (DUF3245)   chr3:22707796-22708380 FORWARD LENGTH=127                                                                                                                                                                                                                                                            | 128  | 127 | 4.00E-42  | 99.2  | 75.0 | 82.8 |
| Rsa1.0_00471.1.g14469.t1 | gb EOA23307.1  hypothetical protein CARUB_v10019081mg [Capsella rubella]                                                                                                                            | 488  | 495  | 0         | 101.4 | 82.6  | 91.2  | hypothetical protein CARUB_v10019081mg                                                                                                              | gbpln | Capsella rubella     | AT3G61360.1   Symbols:   Tetratricopeptide repeat (TPR)-like superfamily protein   chr3:22704630-22706126 REVERSE LENGTH=498                                                                                                                                                                                                                                          | 488  | 498 | 0         | 102.0 | 83.2 | 91.4 |

|                           |                                                                                                                                                                                                                                                                                                                                                                                                                                                                                                                                                                                              |      |     |           |       |      |      |                                                                                             |       |                      |                                                                                                                                                                                                                                                                                                                                                 |      |     |           |       |      |      |
|---------------------------|----------------------------------------------------------------------------------------------------------------------------------------------------------------------------------------------------------------------------------------------------------------------------------------------------------------------------------------------------------------------------------------------------------------------------------------------------------------------------------------------------------------------------------------------------------------------------------------------|------|-----|-----------|-------|------|------|---------------------------------------------------------------------------------------------|-------|----------------------|-------------------------------------------------------------------------------------------------------------------------------------------------------------------------------------------------------------------------------------------------------------------------------------------------------------------------------------------------|------|-----|-----------|-------|------|------|
| Rsa1.0_00471.1.g14470.t1  | ref NP_191691.2  Bestrophin-like protein [Arabidopsis thaliana] gi 20141056 sp Q9M2D2.2 YU88_ARATH RecName: Full=UPF0187 protein At3g61320. chloroplastic; Flags: Precursor gi 16604549 gb AAL24280.1  AT3g61320/T20K12_220 [Arabidopsis thaliana] gi 23296291 gb AAN12915.1  At3g61320/T20K12_220 [Arabidopsis thaliana] gi 33264666 gb AEE80187.1  Bestrophin-like protein [Arabidopsis thaliana]                                                                                                                                                                                          | 360  | 410 | 1.00E-171 | 113.9 | 85.6 | 90.6 | Bestrophin-like protein                                                                     | gbpln | Arabidopsis thaliana | AT3G61320.1   Symbols:   Bestrophin-like protein   chr3:22694002-22695474 FORWARD LENGTH=410                                                                                                                                                                                                                                                    | 360  | 410 | 1.00E-173 | 113.9 | 85.6 | 90.6 |
| Rsa1.0_00471.1.g14471.t1  | gb EOA24312.1  hypothetical protein CARUB_v10017532mg [Capsella rubella]                                                                                                                                                                                                                                                                                                                                                                                                                                                                                                                     | 346  | 350 | 1.00E-137 | 101.2 | 80.9 | 87.3 | hypothetical protein CARUB_v10017532mg                                                      | gbpln | Capsella rubella     | AT3G61310.1   Symbols:   AT hook motif DNA-binding family protein   chr3:22690799-22692445 REVERSE LENGTH=354                                                                                                                                                                                                                                   | 346  | 354 | 1.00E-125 | 102.3 | 80.1 | 88.4 |
| Rsa1.0_00471.1.g14472.t1  | ref NP_191689.1  C2 calcium/lipid-binding and phosphoribosyltransferase C-terminal domain-containing protein [Arabidopsis thaliana] gi 6850897 emb CAB71060.1  anthranilate phosphoribosyltransferase-like protein [Arabidopsis thaliana] gi 28392941 gb AAO41906.1  putative anthranilate phosphoribosyltransferase [Arabidopsis thaliana] gi 28973565 gb AAO64107.1  putative anthranilate phosphoribosyltransferase [Arabidopsis thaliana] gi 332646664 gb AEE80185.1  C2 calcium/lipid-binding and phosphoribosyltransferase C-terminal domain-containing protein [Arabidopsis thaliana] | 1010 | 972 | 0         | 96.2  | 77.2 | 86.4 | C2 calcium/lipid-binding and phosphoribosyltransferase C-terminal domain-containing protein | gbpln | Arabidopsis thaliana | AT3G61300.1   Symbols:   C2 calcium/lipid-binding plant phosphoribosyltransferase family protein   chr3:22690580 FORWARD LENGTH=972                                                                                                                                                                                                             | 1010 | 972 | 0         | 96.2  | 77.2 | 86.4 |
| Rsa1.0_00471.1.g14473.t1  | gb EOA23775.1  hypothetical protein CARUB_v10016988mg [Capsella rubella]                                                                                                                                                                                                                                                                                                                                                                                                                                                                                                                     | 499  | 535 | 0         | 107.2 | 81.0 | 88.8 | hypothetical protein CARUB_v10016988mg                                                      | gbpln | Capsella rubella     | AT3G61280.1   Symbols:   Arabidopsis thaliana protein of unknown function (DUF821)   chr3:22681145-22683589 FORWARD LENGTH=536                                                                                                                                                                                                                  | 499  | 536 | 0         | 107.4 | 81.6 | 89.8 |
| Rsa1.0_00471.1.g14474.t1  | ref NP_191687.2  uncharacterized protein [Arabidopsis thaliana] gi 55978809 gb AAV68866.1  hypothetical protein AT3G61280 [Arabidopsis thaliana] gi 61742723 gb AAX55182.1  hypothetical protein AT3g61280 [Arabidopsis thaliana] gi 110739424 dbj BAF01622.1  hypothetical protein [Arabidopsis thaliana] gi 33264666 gb AEE80182.1  uncharacterized protein AT3G61280 [Arabidopsis thaliana]                                                                                                                                                                                               | 524  | 536 | 0         | 102.3 | 84.5 | 91.8 | uncharacterized protein                                                                     | gbpln | Arabidopsis thaliana | AT3G61280.1   Symbols:   Arabidopsis thaliana protein of unknown function (DUF821)   chr3:22681145-22683589 FORWARD LENGTH=536                                                                                                                                                                                                                  | 524  | 536 | 0         | 102.3 | 84.5 | 91.8 |
| Rsa1.0_00471.1.g14475.t1  | ref XP_002876559.1  hypothetical protein ARALYDRAFT_349109 [Arabidopsis lyrata subsp. lyrata] gi 297322397 gb EPH52818.1  hypothetical protein ARALYDRAFT_349109 [Arabidopsis lyrata subsp. lyrata]                                                                                                                                                                                                                                                                                                                                                                                          | 134  | 443 | 1.00E-19  | 330.6 | 49.3 | 61.9 | hypothetical protein ARALYDRAFT_349109                                                      | gbpln | Arabidopsis lyrata   | AT2G44930.1   Symbols:   Plant protein of unknown function (DUF247)   chr2:18529700-18531671 REVERSE LENGTH=515                                                                                                                                                                                                                                 | 134  | 515 | 1.00E-19  | 384.3 | 47.8 | 60.4 |
| Rsa1.0_00471.1.g14476.t4  | gb ABD64939.1  hypothetical protein 24.t00017 [Brassica oleracea]                                                                                                                                                                                                                                                                                                                                                                                                                                                                                                                            | 401  | 442 | 1.00E-174 | 110.2 | 77.1 | 86.3 | hypothetical protein 24.t00017                                                              | gbpln | Brassica oleracea    | AT2G13770.1   Symbols:   CONTAINS InterPro DOMAIN/s: Putative harbinger transposase-derived nuclease (InterPro:IPR006912); Has 451 Blast hits to 352 proteins in 33 species: Archae - 0; Bacteria - 0; Metazoa - 28; Fungi - 8; Plants - 388; Viruses - 0; Other Eukaryotes - 27 (source: NCBI BLINK)   chr2:5736603-5737847 FORWARD LENGTH=343 | 401  | 343 | 3.00E-52  | 85.5  | 32.4 | 43.9 |
| Rsa1.0_00471.1.g14477.t15 | gb ABD65000.1  hypothetical protein 26.t00020 [Brassica oleracea]                                                                                                                                                                                                                                                                                                                                                                                                                                                                                                                            | 297  | 302 | 2.00E-84  | 101.7 | 56.2 | 71.0 | hypothetical protein 26.t00020                                                              | gbpln | Brassica oleracea    | AT3G47680.1   Symbols:   DNA binding   chr3:17577493-17578391 REVERSE LENGTH=302                                                                                                                                                                                                                                                                | 297  | 302 | 4.00E-59  | 101.7 | 45.5 | 62.0 |
| Rsa1.0_00471.1.g14478.t1  | gb EOA24748.1  hypothetical protein CARUB_v10018025mg [Capsella rubella]                                                                                                                                                                                                                                                                                                                                                                                                                                                                                                                     | 191  | 208 | 4.00E-67  | 108.9 | 75.9 | 85.9 | hypothetical protein CARUB_v10018025mg                                                      | gbpln | Capsella rubella     | AT3G61260.1   Symbols:   Remorin family protein   chr3:22675403-22676701 REVERSE LENGTH=212                                                                                                                                                                                                                                                     | 191  | 212 | 1.00E-66  | 111.0 | 74.3 | 83.8 |



|                          |                                                                                                                                                                                                                                                                                                                                                                                                                                                                                                                                                           |     |     |           |       |      |      |                                                                            |       |                      |                                                                                                                                               |     |     |           |       |      |      |
|--------------------------|-----------------------------------------------------------------------------------------------------------------------------------------------------------------------------------------------------------------------------------------------------------------------------------------------------------------------------------------------------------------------------------------------------------------------------------------------------------------------------------------------------------------------------------------------------------|-----|-----|-----------|-------|------|------|----------------------------------------------------------------------------|-------|----------------------|-----------------------------------------------------------------------------------------------------------------------------------------------|-----|-----|-----------|-------|------|------|
| Rsa1.0_00471.1.g14479.t1 | ref NP_191684.1  myb domain protein 17 [Arabidopsis thaliana] gi 6850892 emb CAB71055.1  putative transcription factor (MYB17) [Arabidopsis thaliana] gi 41619302 gb AA510071.1  MYB transcription factor [Arabidopsis thaliana] gi 19385153 gb ACF28390.1  At3g51250 [Arabidopsis thaliana] gi 332646658 gb AEE80179.1  myb domain protein 17 [Arabidopsis thaliana]                                                                                                                                                                                     | 291 | 299 | 1.00E-136 | 102.7 | 83.5 | 89.3 | myb domain protein 17                                                      | gbpln | Arabidopsis thaliana | AT3G61250.1   Symbols: AtMYB17, MYB17   myb domain protein 17   chr3:22671306-22672551 FORWARD LENGTH=299                                     | 291 | 299 | 1.00E-138 | 102.7 | 83.5 | 89.3 |
| Rsa1.0_00471.1.g14480.t1 | ref XP_002876600.1  hypothetical protein ARALYDRAFT_486601 [Arabidopsis lyrata subsp. lyrata] gi 297322438 gb EFH52859.1  hypothetical protein ARALYDRAFT_486601 [Arabidopsis lyrata subsp. lyrata]                                                                                                                                                                                                                                                                                                                                                       | 143 | 494 | 7.00E-44  | 345.5 | 62.2 | 62.9 | hypothetical protein ARALYDRAFT_486601                                     | gbpln | Arabidopsis lyrata   | AT3G61240.2   Symbols:   DEA(D/H)-box RNA helicase family protein   chr3:22668590-22669154 FORWARD LENGTH=498                                 | 143 | 498 | 2.00E-46  | 348.3 | 62.2 | 62.9 |
| Rsa1.0_00471.1.g14481.t1 | ref XP_002878372.1  LIM domain-containing protein [Arabidopsis lyrata subsp. lyrata] gi 297324210 gb EFH54631.1  LIM domain-containing protein [Arabidopsis lyrata subsp. lyrata]                                                                                                                                                                                                                                                                                                                                                                         | 214 | 214 | 1.00E-104 | 100.0 | 88.3 | 92.5 | LIM domain-containing protein                                              | gbpln | Arabidopsis lyrata   | AT3G61230.1   Symbols:   GATA type zinc finger transcription factor family protein   chr3:22664601-22665503 REVERSE LENGTH=213                | 214 | 213 | 1.00E-104 | 99.5  | 85.5 | 91.1 |
| Rsa1.0_00471.1.g14482.t1 | ref NP_191681.1  (+)-neomenthol dehydrogenase [Arabidopsis thaliana] gi 75311801 sp Q9M2E2.1 SDR1_ARATH RecName: Full=(+)-neomenthol dehydrogenase; AltName: Full=Menthone:neomenthol reductase; AltName: Full=Short-chain dehydrogenase/reductase 1: Short=AtSDR1 gi 6850899 emb CAB71052.1  putative protein [Arabidopsis thaliana] gi 15028055 gb AAK76558.1  unknown protein [Arabidopsis thaliana] gi 20259057 gb AAMI4244.1  unknown protein [Arabidopsis thaliana] gi 332646653 gb AEE80174.1  (+)-neomenthol dehydrogenase [Arabidopsis thaliana] | 296 | 296 | 1.00E-144 | 100.0 | 81.1 | 89.9 | (+)-neomenthol dehydrogenase                                               | gbpln | Arabidopsis thaliana | AT3G61220.1   Symbols:   NAD(P)-binding Rossmann-fold superfamily protein   chr3:22663025-22664316 FORWARD LENGTH=296                         | 296 | 296 | 1.00E-147 | 100.0 | 81.1 | 89.9 |
| Rsa1.0_00471.1.g14483.t1 | ref NP_191680.1  S-adenosylmethionine-dependent methyltransferase domain-containing protein [Arabidopsis thaliana] gi 6850888 emb CAB71051.1  putative protein [Arabidopsis thaliana] gi 26452065 dbj BAC43122.1  unknown protein [Arabidopsis thaliana] gi 332646652 gb AEE80173.1  S-adenosylmethionine-dependent methyltransferase domain-containing protein [Arabidopsis thaliana]                                                                                                                                                                    | 261 | 261 | 1.00E-126 | 100.0 | 81.6 | 90.0 | S-adenosylmethionine-dependent methyltransferase domain-containing protein | gbpln | Arabidopsis thaliana | AT3G61210.1   Symbols:   S-adenosyl-L-methionine-dependent methyltransferases superfamily protein   chr3:22658881-22659815 REVERSE LENGTH=261 | 261 | 261 | 1.00E-129 | 100.0 | 81.6 | 90.0 |
| Rsa1.0_00472.1.g14484.t1 | dbj BAJ33985.1  unnamed protein product [Theilungella halophila]                                                                                                                                                                                                                                                                                                                                                                                                                                                                                          | 454 | 478 | 0         | 105.3 | 91.2 | 95.8 | unnamed protein product                                                    | ----  | ----                 | AT2G38400.1   Symbols: AGT3   alanine:glyoxylate aminotransferase 3   chr2:16083779-16085974 FORWARD LENGTH=477                               | 454 | 477 | 0         | 105.1 | 89.6 | 94.9 |
| Rsa1.0_00472.1.g14485.t1 | ref NP_181375.1  VHS and GAT domain-containing protein [Arabidopsis thaliana] gi 3395431 gb AAC28763.1  unknown protein [Arabidopsis thaliana] gi 209529799 gb ACI49794.1  At2g38410 [Arabidopsis thaliana] gi 330254440 gb AEC09534.1  VHS and GAT domain-containing protein [Arabidopsis thaliana]                                                                                                                                                                                                                                                      | 700 | 671 | 0         | 95.9  | 56.1 | 59.1 | VHS and GAT domain-containing protein                                      | gbpln | Arabidopsis thaliana | AT2G38410.1   Symbols:   ENTH/VHS/GAT family protein   chr2:16086912-16090047 REVERSE LENGTH=671                                              | 700 | 671 | 0         | 95.9  | 56.1 | 59.1 |
| Rsa1.0_00472.1.g14486.t1 | ref NP_181376.3  pentatricopeptide repeat-containing protein [Arabidopsis thaliana] gi 218546769 sp Q8L6Y7.2 PP193_ARATH RecName: Full=Pentatricopeptide repeat-containing protein At2g38420, mitochondrial; Flags: Precursor gi 3395430 gb AAC28762.1  hypothetical protein [Arabidopsis thaliana] gi 330254441 gb AEC09535.1  pentatricopeptide repeat-containing protein [Arabidopsis thaliana]                                                                                                                                                        | 454 | 453 | 0         | 99.8  | 77.3 | 88.5 | pentatricopeptide repeat-containing protein                                | gbpln | Arabidopsis thaliana | AT2G38420.1   Symbols:   Pentatricopeptide repeat (PPR) superfamily protein   chr2:16091093-16092454 FORWARD LENGTH=453                       | 454 | 453 | 0         | 99.8  | 77.3 | 88.5 |

|                          |                                                                                                                                                                                                                                                                                                                                                                                                                             |      |      |           |       |      |      |                                                             |       |                      |                                                                                                                                                                                                                                                                                                                                                                   |      |      |           |       |      |      |
|--------------------------|-----------------------------------------------------------------------------------------------------------------------------------------------------------------------------------------------------------------------------------------------------------------------------------------------------------------------------------------------------------------------------------------------------------------------------|------|------|-----------|-------|------|------|-------------------------------------------------------------|-------|----------------------|-------------------------------------------------------------------------------------------------------------------------------------------------------------------------------------------------------------------------------------------------------------------------------------------------------------------------------------------------------------------|------|------|-----------|-------|------|------|
| Rsa1.0_00472.1.g14487.t2 | refXP_002881597.1   hypothetical protein ARALYDRAFT_345626 [Arabidopsis lyrata subsp. lyrata] gi 297327436 gb EFH57856.1   hypothetical protein ARALYDRAFT_345626 [Arabidopsis lyrata subsp. lyrata]                                                                                                                                                                                                                        | 332  | 366  | 1.00E-78  | 110.2 | 52.7 | 66.3 | hypothetical protein ARALYDRAFT_345626                      | gbpln | Arabidopsis lyrata   | AT2G38430.1   Symbols:   unknown protein; BEST Arabidopsis thaliana protein match is: unknown protein (TAIR:AT3G5430.1); Has 35333 Blast hits to 34131 proteins in 2444 species: Archae - 798; Bacteria - 22429; Metazoa - 974; Fungi - 991; Plants - 531; Viruses - 0; Other Eukaryotes - 9610 (source: NCBI BLINK).   chr2:16092950-16094810 REVERSE LENGTH=393 | 332  | 393  | 4.00E-74  | 118.4 | 46.1 | 59.9 |
| Rsa1.0_00472.1.g14488.t1 | refXP_002881597.1   hypothetical protein ARALYDRAFT_345626 [Arabidopsis lyrata subsp. lyrata] gi 297327436 gb EFH57856.1   hypothetical protein ARALYDRAFT_345626 [Arabidopsis lyrata subsp. lyrata]                                                                                                                                                                                                                        | 124  | 366  | 3.00E-37  | 295.2 | 67.7 | 80.6 | hypothetical protein ARALYDRAFT_345626                      | gbpln | Arabidopsis lyrata   | AT2G38430.1   Symbols:   unknown protein; BEST Arabidopsis thaliana protein match is: unknown protein (TAIR:AT3G5430.1); Has 35333 Blast hits to 34131 proteins in 2444 species: Archae - 798; Bacteria - 22429; Metazoa - 974; Fungi - 991; Plants - 531; Viruses - 0; Other Eukaryotes - 9610 (source: NCBI BLINK).   chr2:16092950-16094810 REVERSE LENGTH=393 | 124  | 393  | 2.00E-36  | 316.9 | 60.5 | 73.4 |
| Rsa1.0_00472.1.g14489.t2 | ref NP_568490.3  lon protease 1 [Arabidopsis thaliana] gi 27735209 sp P93655.2 LONM1_ARAT H RecName: Full=Lon protease homolog 1, mitochondrial; Flags: Precursor gi 20259500 gb AAM13870.1  putative Lon protease homolog 2 precursor [Arabidopsis thaliana] gi 21436459 gb AAM51430.1  putative Lon protease homolog 2 precursor [Arabidopsis thaliana] gi 332006234 gb AED93617.1  lon protease 1 [Arabidopsis thaliana] | 353  | 940  | 3.00E-53  | 266.3 | 28.9 | 31.7 | lon protease 1                                              | gbpln | Arabidopsis thaliana | AT5G26860.1   Symbols: LON_ARA_ARA, LON1   lon protease 1   chr5:9451183-9456631 FORWARD LENGTH=940                                                                                                                                                                                                                                                               | 353  | 940  | 8.00E-56  | 266.3 | 28.9 | 31.7 |
| Rsa1.0_00472.1.g14490.t1 | #                                                                                                                                                                                                                                                                                                                                                                                                                           | #    | #    | #         | #     | #    | #    | -                                                           | ----  | ----                 | #                                                                                                                                                                                                                                                                                                                                                                 | #    | #    | #         | #     | #    |      |
| Rsa1.0_00472.1.g14491.t1 | dbj BAB08714.1  non-LTR retroelement reverse transcriptase-like protein [Arabidopsis thaliana]                                                                                                                                                                                                                                                                                                                              | 399  | 1197 | 4.00E-69  | 300.0 | 38.6 | 56.4 | non-LTR retroelement reverse transcriptase-like protein     | gbpln | Arabidopsis thaliana | AT1G10000.1   Symbols:   Ribonuclease H-like superfamily protein   chr1:3263877-3264788 REVERSE LENGTH=303                                                                                                                                                                                                                                                        | 399  | 303  | 2.00E-46  | 75.9  | 29.6 | 38.8 |
| Rsa1.0_00472.1.g14492.t2 | ref NP_568470.1  uncharacterized protein [Arabidopsis thaliana] gi 15529244 gb AAK97716.1  AT5g25410/F18G18.150 [Arabidopsis thaliana] gi 16974397 gb AAL31124.1  AT5g25410/F18G18.150 [Arabidopsis thaliana] gi 332006054 gb AED93437.1  uncharacterized protein AT5G25410 [Arabidopsis thaliana]                                                                                                                          | 344  | 369  | 1.00E-122 | 107.3 | 62.5 | 75.3 | uncharacterized protein                                     | gbpln | Arabidopsis thaliana | AT5G25410.1   Symbols:   Protein of Unknown Function (DUF239)   chr5:8831692-8833437 FORWARD LENGTH=369                                                                                                                                                                                                                                                           | 344  | 369  | 1.00E-125 | 107.3 | 62.5 | 75.3 |
| Rsa1.0_00472.1.g14493.t1 | #                                                                                                                                                                                                                                                                                                                                                                                                                           | #    | #    | #         | #     | #    | #    | -                                                           | ----  | ----                 | #                                                                                                                                                                                                                                                                                                                                                                 | #    | #    | #         | #     | #    |      |
| Rsa1.0_00472.1.g14494.t1 | gb AAF19226.1 AC007505.2 Highly similar to Ta1-3 polyprotein [Arabidopsis thaliana]                                                                                                                                                                                                                                                                                                                                         | 1382 | 1356 | 0         | 98.1  | 50.1 | 67.9 | Highly similar to Ta1-3 polyprotein                         | gbpln | Arabidopsis thaliana | AT4G23160.1   Symbols: CRK8   cysteine-rich RLK (RECEPTOR-like protein kinase) 8   chr4:12129485-12134086 FORWARD LENGTH=1262                                                                                                                                                                                                                                     | 1382 | 1262 | 5.00E-78  | 91.3  | 11.9 | 19.2 |
| Rsa1.0_00472.1.g14495.t1 | ref NP_181385.1  MATE efflux family protein [Arabidopsis thaliana] gi 3786021 gb AAC67367.1  hypothetical protein [Arabidopsis thaliana] gi 67633596 gb AAAY78722.1  MATE efflux protein-related [Arabidopsis thaliana] gi 330254451 gb AEC09545.1  MATE efflux family protein [Arabidopsis thaliana]                                                                                                                       | 452  | 486  | 0         | 107.5 | 90.9 | 97.1 | MATE efflux family protein                                  | gbpln | Arabidopsis thaliana | AT2G38510.1   Symbols:   MATE efflux family protein   chr2:16123985-16125445 FORWARD LENGTH=486                                                                                                                                                                                                                                                                   | 452  | 486  | 0         | 107.5 | 90.9 | 97.1 |
| Rsa1.0_00472.1.g14496.t1 | gb ABM69132.1  lipid transfer protein precursor [Brassica rapa subsp. pekinensis]                                                                                                                                                                                                                                                                                                                                           | 118  | 118  | 3.00E-52  | 100.0 | 89.8 | 94.9 | lipid transfer protein precursor                            | gbpln | Brassica rapa        | AT2G38540.1   Symbols: LP1, LTP1, ATLTP1   lipid transfer protein 1   chr2:16130418-16130893 FORWARD LENGTH=118                                                                                                                                                                                                                                                   | 118  | 118  | 2.00E-44  | 100.0 | 75.4 | 87.3 |
| Rsa1.0_00472.1.g14497.t3 | gb AAA84891.1  non-green plastid inner envelope membrane protein precursor [Brassica oleracea var. botrytis]                                                                                                                                                                                                                                                                                                                | 373  | 336  | 1.00E-162 | 90.1  | 81.5 | 83.4 | non-green plastid inner envelope membrane protein precursor | gbpln | Brassica oleracea    | AT2G38550.1   Symbols:   Transmembrane proteins 14C   chr2:16132178-16134229 FORWARD LENGTH=335                                                                                                                                                                                                                                                                   | 373  | 335  | 1.00E-125 | 89.8  | 64.6 | 73.5 |
| Rsa1.0_00472.1.g14498.t1 | gb EOA23646.1  hypothetical protein CARUB_v10016844mg [Capsella rubella]                                                                                                                                                                                                                                                                                                                                                    | 654  | 626  | 0         | 95.7  | 76.8 | 85.5 | hypothetical protein CARUB_v10016844mg                      | gbpln | Capsella rubella     | AT3G52850.1   Symbols: VSR1, BP-80, ATELP, BP80, BP80B, ATELP1, ATVSR1, GFS1, VSR1.1, BP80-1;1   vacuolar sorting receptor homolog 1   chr3:19587999-19591690 FORWARD LENGTH=623                                                                                                                                                                                  | 654  | 623  | 0         | 95.3  | 77.2 | 86.1 |
| Rsa1.0_00472.1.g14499.t1 | dbj BAJ34462.1  unnamed protein product [Theillungiella halophila]                                                                                                                                                                                                                                                                                                                                                          | 334  | 381  | 1.00E-154 | 114.1 | 84.7 | 93.7 | unnamed protein product                                     | ----  | ----                 | AT2G38560.1   Symbols: TFIIS   transcript elongation factor IIS   chr2:16134802-16136319 FORWARD LENGTH=378                                                                                                                                                                                                                                                       | 334  | 378  | 1.00E-145 | 113.2 | 81.7 | 90.7 |
| Rsa1.0_00472.1.g14500.t1 | ref XP_002879756.1  acid phosphatase class B family protein [Arabidopsis lyrata subsp. lyrata] gi 297325595 gb EFH56015.1  acid phosphatase class B family protein [Arabidopsis lyrata subsp. lyrata]                                                                                                                                                                                                                       | 251  | 251  | 1.00E-126 | 100.0 | 83.3 | 92.8 | acid phosphatase class B family protein                     | gbpln | Arabidopsis lyrata   | AT2G38600.1   Symbols:   HAD superfamily, subfamily IIIB acid phosphatase   chr2:16145907-16146857 FORWARD LENGTH=251                                                                                                                                                                                                                                             | 251  | 251  | 1.00E-127 | 100.0 | 82.9 | 92.0 |

|                          |                                                                                                                                                                                                                                                                                                                                                                                                                                                                                                                                                                                                                                                                                                                                                                                                                                                                                                                                                                                                                                                                                                                                                                                                                                                                                                                                                                                                                                                                                                                                                                                                                                                                                                                                                                                                                                                                                                                                                                                                                                                                                                                                                                                                                                 |     |     |           |       |      |      |                                             |       |                      |                                                                                                                                                                  |     |     |           |       |      |      |
|--------------------------|---------------------------------------------------------------------------------------------------------------------------------------------------------------------------------------------------------------------------------------------------------------------------------------------------------------------------------------------------------------------------------------------------------------------------------------------------------------------------------------------------------------------------------------------------------------------------------------------------------------------------------------------------------------------------------------------------------------------------------------------------------------------------------------------------------------------------------------------------------------------------------------------------------------------------------------------------------------------------------------------------------------------------------------------------------------------------------------------------------------------------------------------------------------------------------------------------------------------------------------------------------------------------------------------------------------------------------------------------------------------------------------------------------------------------------------------------------------------------------------------------------------------------------------------------------------------------------------------------------------------------------------------------------------------------------------------------------------------------------------------------------------------------------------------------------------------------------------------------------------------------------------------------------------------------------------------------------------------------------------------------------------------------------------------------------------------------------------------------------------------------------------------------------------------------------------------------------------------------------|-----|-----|-----------|-------|------|------|---------------------------------------------|-------|----------------------|------------------------------------------------------------------------------------------------------------------------------------------------------------------|-----|-----|-----------|-------|------|------|
| Rsa1.0_00472.1.g14501.t1 | refNP_181395.1  RNA-binding KH domain-containing protein [Arabidopsis thaliana] gi 30687577 refNP_850296.1  RNA-binding KH domain-containing protein [Arabidopsis thaliana] gi 297827443 refXP_002881604.1  KH domain-containing protein [Arabidopsis lyrata subsp. lyrata] gi 75268069 sp Q9ZV13.1 QKIL3_ARATH RecName: Full=KH domain-containing protein At2g38610; AltName: Full=Quaking-like protein 3 gi 378601 gb AAC67357.1  putative RNA-binding protein [Arabidopsis thaliana] gi 14596033 gb AAK68744.1  putative RNA-binding protein [Arabidopsis thaliana] gi 17473661 gb AAL38288.1  putative RNA-binding protein [Arabidopsis thaliana] gi 17978787 gb AAL47387.1  putative RNA-binding protein [Arabidopsis thaliana] gi 23197752 gb AAN15403.1  putative RNA-binding protein [Arabidopsis thaliana] gi 297327443 gb EFH57863.1  KH domain-containing protein [Arabidopsis lyrata subsp. lyrata] gi 330254461 gb AEC09555.1  RNA-binding KH domain-containing protein [Arabidopsis thaliana] gi 330254462 gb AEC09556.1  RNA-binding KH domain-containing protein [Arabidopsis thaliana] refXP_002879774.1  hypothetical protein ARALYDRAFT_482913 [Arabidopsis lyrata subsp. lyrata] gi 297325613 gb EFH56033.1  hypothetical protein ARALYDRAFT_482913 [Arabidopsis lyrata subsp. lyrata] refXP_002879774.1  hypothetical protein ARALYDRAFT_482913 [Arabidopsis lyrata subsp. lyrata] gi 297325613 gb EFH56033.1  hypothetical protein ARALYDRAFT_482913 [Arabidopsis lyrata subsp. lyrata] refXP_002879775.1  transcription factor jumonji family protein [Arabidopsis lyrata subsp. lyrata] gi 297325614 gb EFH56034.1  transcription factor jumonji family protein [Arabidopsis lyrata subsp. lyrata] refNP_181430.2  endoplasmic oxidoreductin-2 [Arabidopsis thaliana] gi 50400445 sp Q7X914.1 ERO2_ARATH RecName: Full=Endoplasmic oxidoreductin-2; Flags: Precursor gi 32329466 emb CAD83855.1  endoplasmic reticulum oxidoreductin [Arabidopsis thaliana] gi 63003842 gb AAZ25450.1  At2g38960 [Arabidopsis thaliana] gi 71143092 gb AAZ23937.1  At2g38960 [Arabidopsis thaliana] gi 330254524 gb AEC09618.1  endoplasmic oxidoreductin-2 [Arabidopsis thaliana] # # # # # # # # - ---- # # # # # # # | 304 | 286 | 1.00E-155 | 94.1  | 92.8 | 93.8 | RNA-binding KH domain-containing protein    | gbpln | Arabidopsis lyrata   | AT2G38610.2   Symbols:   RNA-binding KH domain-containing protein   chr2:16147552-16149638 REVERSE LENGTH=286                                                    | 304 | 286 | 1.00E-157 | 94.1  | 92.8 | 93.8 |
| Rsa1.0_00472.1.g14502.t1 | refXP_002879774.1  hypothetical protein ARALYDRAFT_482913 [Arabidopsis lyrata subsp. lyrata] gi 297325613 gb EFH56033.1  hypothetical protein ARALYDRAFT_482913 [Arabidopsis lyrata subsp. lyrata] refXP_002879774.1  hypothetical protein ARALYDRAFT_482913 [Arabidopsis lyrata subsp. lyrata] gi 297325613 gb EFH56033.1  hypothetical protein ARALYDRAFT_482913 [Arabidopsis lyrata subsp. lyrata] refXP_002879775.1  transcription factor jumonji family protein [Arabidopsis lyrata subsp. lyrata] gi 297325614 gb EFH56034.1  transcription factor jumonji family protein [Arabidopsis lyrata subsp. lyrata] refNP_181430.2  endoplasmic oxidoreductin-2 [Arabidopsis thaliana] gi 50400445 sp Q7X914.1 ERO2_ARATH RecName: Full=Endoplasmic oxidoreductin-2; Flags: Precursor gi 32329466 emb CAD83855.1  endoplasmic reticulum oxidoreductin [Arabidopsis thaliana] gi 63003842 gb AAZ25450.1  At2g38960 [Arabidopsis thaliana] gi 71143092 gb AAZ23937.1  At2g38960 [Arabidopsis thaliana] gi 330254524 gb AEC09618.1  endoplasmic oxidoreductin-2 [Arabidopsis thaliana] # # # # # # # # - ---- # # # # # # #                                                                                                                                                                                                                                                                                                                                                                                                                                                                                                                                                                                                                                                                                                                                                                                                                                                                                                                                                                                                                                                                                                         | 535 | 534 | 0         | 99.8  | 94.8 | 97.8 | hypothetical protein ARALYDRAFT_482913      | gbpln | Arabidopsis lyrata   | AT2G38940.1   Symbols: ATPT2, PHT1.4   phosphate transporter 1;4   chr2:16258500-16260104 FORWARD LENGTH=534                                                     | 535 | 534 | 0         | 99.8  | 93.6 | 96.8 |
| Rsa1.0_00472.1.g14503.t1 | refXP_002879774.1  hypothetical protein ARALYDRAFT_482913 [Arabidopsis lyrata subsp. lyrata] gi 297325613 gb EFH56033.1  hypothetical protein ARALYDRAFT_482913 [Arabidopsis lyrata subsp. lyrata] refXP_002879775.1  transcription factor jumonji family protein [Arabidopsis lyrata subsp. lyrata] gi 297325614 gb EFH56034.1  transcription factor jumonji family protein [Arabidopsis lyrata subsp. lyrata] refNP_181430.2  endoplasmic oxidoreductin-2 [Arabidopsis thaliana] gi 50400445 sp Q7X914.1 ERO2_ARATH RecName: Full=Endoplasmic oxidoreductin-2; Flags: Precursor gi 32329466 emb CAD83855.1  endoplasmic reticulum oxidoreductin [Arabidopsis thaliana] gi 63003842 gb AAZ25450.1  At2g38960 [Arabidopsis thaliana] gi 71143092 gb AAZ23937.1  At2g38960 [Arabidopsis thaliana] gi 330254524 gb AEC09618.1  endoplasmic oxidoreductin-2 [Arabidopsis thaliana] # # # # # # # # - ---- # # # # # # #                                                                                                                                                                                                                                                                                                                                                                                                                                                                                                                                                                                                                                                                                                                                                                                                                                                                                                                                                                                                                                                                                                                                                                                                                                                                                                            | 533 | 534 | 0         | 100.2 | 91.4 | 96.8 | hypothetical protein ARALYDRAFT_482913      | gbpln | Arabidopsis lyrata   | AT2G38940.1   Symbols: ATPT2, PHT1.4   phosphate transporter 1;4   chr2:16258500-16260104 FORWARD LENGTH=534                                                     | 533 | 534 | 0         | 100.2 | 91.7 | 96.6 |
| Rsa1.0_00472.1.g14504.t1 | refXP_002879775.1  transcription factor jumonji family protein [Arabidopsis lyrata subsp. lyrata] gi 297325614 gb EFH56034.1  transcription factor jumonji family protein [Arabidopsis lyrata subsp. lyrata] refNP_181430.2  endoplasmic oxidoreductin-2 [Arabidopsis thaliana] gi 50400445 sp Q7X914.1 ERO2_ARATH RecName: Full=Endoplasmic oxidoreductin-2; Flags: Precursor gi 32329466 emb CAD83855.1  endoplasmic reticulum oxidoreductin [Arabidopsis thaliana] gi 63003842 gb AAZ25450.1  At2g38960 [Arabidopsis thaliana] gi 71143092 gb AAZ23937.1  At2g38960 [Arabidopsis thaliana] gi 330254524 gb AEC09618.1  endoplasmic oxidoreductin-2 [Arabidopsis thaliana] # # # # # # # # - ---- # # # # # # #                                                                                                                                                                                                                                                                                                                                                                                                                                                                                                                                                                                                                                                                                                                                                                                                                                                                                                                                                                                                                                                                                                                                                                                                                                                                                                                                                                                                                                                                                                               | 713 | 710 | 0         | 99.6  | 67.7 | 79.8 | transcription factor jumonji family protein | gbpln | Arabidopsis lyrata   | AT2G38950.1   Symbols:   Transcription factor jumonji (jmj) family protein / zinc finger (C5HC2 type) family protein   chr2:16261599-16265044 FORWARD LENGTH=708 | 713 | 708 | 0         | 99.3  | 65.9 | 78.0 |
| Rsa1.0_00472.1.g14505.t1 | refNP_181430.2  endoplasmic oxidoreductin-2 [Arabidopsis thaliana] gi 50400445 sp Q7X914.1 ERO2_ARATH RecName: Full=Endoplasmic oxidoreductin-2; Flags: Precursor gi 32329466 emb CAD83855.1  endoplasmic reticulum oxidoreductin [Arabidopsis thaliana] gi 63003842 gb AAZ25450.1  At2g38960 [Arabidopsis thaliana] gi 71143092 gb AAZ23937.1  At2g38960 [Arabidopsis thaliana] gi 330254524 gb AEC09618.1  endoplasmic oxidoreductin-2 [Arabidopsis thaliana] # # # # # # # # - ---- # # # # # # #                                                                                                                                                                                                                                                                                                                                                                                                                                                                                                                                                                                                                                                                                                                                                                                                                                                                                                                                                                                                                                                                                                                                                                                                                                                                                                                                                                                                                                                                                                                                                                                                                                                                                                                            | 455 | 472 | 0         | 103.7 | 85.9 | 91.6 | endoplasmic oxidoreductin-2                 | gbpln | Arabidopsis thaliana | AT2G38960.1   Symbols: AERO2, ERO2   endoplasmic reticulum oxidoreductins 2   chr2:16265455-16267883 FORWARD LENGTH=472                                          | 455 | 472 | 0         | 103.7 | 85.9 | 91.6 |
| Rsa1.0_00472.1.g14506.t1 | # # # # # # # # - ---- # # # # # # #                                                                                                                                                                                                                                                                                                                                                                                                                                                                                                                                                                                                                                                                                                                                                                                                                                                                                                                                                                                                                                                                                                                                                                                                                                                                                                                                                                                                                                                                                                                                                                                                                                                                                                                                                                                                                                                                                                                                                                                                                                                                                                                                                                                            |     |     |           |       |      |      |                                             |       |                      |                                                                                                                                                                  |     |     |           |       |      |      |
| Rsa1.0_00472.1.g14507.t1 | gb AAL77698.1  At2g38970/T7F6.14 [Arabidopsis thaliana]                                                                                                                                                                                                                                                                                                                                                                                                                                                                                                                                                                                                                                                                                                                                                                                                                                                                                                                                                                                                                                                                                                                                                                                                                                                                                                                                                                                                                                                                                                                                                                                                                                                                                                                                                                                                                                                                                                                                                                                                                                                                                                                                                                         | 72  | 692 | 7.00E-28  | 961.1 | 83.3 | 90.3 | At2g38970/T7F6.14                           | gbpln | Arabidopsis thaliana | AT2G38970.1   Symbols:   Zinc finger (C3HC4-type RING finger) family protein   chr2:16274135-16276651 FORWARD LENGTH=692                                         | 72  | 692 | 1.00E-30  | 961.1 | 83.3 | 90.3 |
| Rsa1.0_00472.1.g14508.t1 | gb AAC79610.1  putative retroelement poi polyprotein [Arabidopsis thaliana]                                                                                                                                                                                                                                                                                                                                                                                                                                                                                                                                                                                                                                                                                                                                                                                                                                                                                                                                                                                                                                                                                                                                                                                                                                                                                                                                                                                                                                                                                                                                                                                                                                                                                                                                                                                                                                                                                                                                                                                                                                                                                                                                                     | 600 | 689 | 0         | 114.8 | 88.0 | 92.7 | putative retroelement poi polyprotein       | gbpln | Arabidopsis thaliana | AT2G38970.1   Symbols:   Zinc finger (C3HC4-type RING finger) family protein   chr2:16274135-16276651 FORWARD LENGTH=692                                         | 600 | 689 | 0         | 115.3 | 88.0 | 92.7 |

|                           |                                                                                                                                                                                                                                                                                                         |      |      |           |       |      |      |                                                   |       |                      |                                                                                                                          |      |      |           |       |      |      |
|---------------------------|---------------------------------------------------------------------------------------------------------------------------------------------------------------------------------------------------------------------------------------------------------------------------------------------------------|------|------|-----------|-------|------|------|---------------------------------------------------|-------|----------------------|--------------------------------------------------------------------------------------------------------------------------|------|------|-----------|-------|------|------|
| Rsa1.0_00472.1.g14509.t2  | refXP_002879777.1   hypothetical protein ARALYDRAFT_321593 [Arabidopsis lyrata subsp. lyrata] gi 297325616 gb EFH56036.1   hypothetical protein ARALYDRAFT_321593 [Arabidopsis lyrata subsp. lyrata]                                                                                                    | 443  | 474  | 0         | 107.0 | 72.2 | 85.3 | hypothetical protein ARALYDRAFT_321593            | gbpln | Arabidopsis lyrata   | AT2G38995.2   Symbols:   O-acyltransferase (WSD1-like) family protein   chr2:16282139-16284700 FORWARD LENGTH=487        | 443  | 487  | 0         | 109.9 | 74.0 | 86.0 |
| Rsa1.0_00472.1.g14510.t9  | refXP_002881629.1   hypothetical protein ARALYDRAFT_903150 [Arabidopsis lyrata subsp. lyrata] gi 297327468 gb EFH57888.1   hypothetical protein ARALYDRAFT_903150 [Arabidopsis lyrata subsp. lyrata]                                                                                                    | 339  | 344  | 1.00E-161 | 101.5 | 84.4 | 89.7 | hypothetical protein ARALYDRAFT_903150            | gbpln | Arabidopsis lyrata   | AT2G39080.1   Symbols:   NAD(P)-binding Rossmann-fold superfamily protein   chr2:16309981-16312475 REVERSE LENGTH=351    | 339  | 351  | 1.00E-158 | 103.5 | 82.0 | 88.5 |
| Rsa1.0_00472.1.g14511.t2  | refXP_002862908.1   hypothetical protein ARALYDRAFT_921086 [Arabidopsis lyrata subsp. lyrata] gi 297308678 gb EFH439167.1   hypothetical protein ARALYDRAFT_921086 [Arabidopsis lyrata subsp. lyrata]                                                                                                   | 431  | 434  | 0         | 100.7 | 89.6 | 94.7 | hypothetical protein ARALYDRAFT_921086            | gbpln | Arabidopsis lyrata   | AT2G39110.1   Symbols:   Protein kinase superfamily protein   chr2:16319770-16321568 FORWARD LENGTH=435                  | 431  | 435  | 0         | 100.9 | 89.6 | 94.9 |
| Rsa1.0_00472.1.g14512.t2  | refNP_850312.1   transmembrane amino acid transporter-like protein [Arabidopsis thaliana] gi 330254544 gb AE09638.1   transmembrane amino acid transporter-like protein [Arabidopsis thaliana]                                                                                                          | 559  | 550  | 0         | 98.4  | 89.8 | 93.6 | transmembrane amino acid transporter-like protein | gbpln | Arabidopsis thaliana | AT2G39130.1   Symbols:   Transmembrane amino acid transporter family protein   chr2:16323171-16326744 REVERSE LENGTH=550 | 559  | 550  | 0         | 98.4  | 89.8 | 93.6 |
| Rsa1.0_00472.1.g14513.t1  | gb EOA27086.1   hypothetical protein CARUB_v10023183mg, partial [Capsella rubella]                                                                                                                                                                                                                      | 468  | 456  | 1.00E-174 | 97.4  | 69.7 | 75.2 | hypothetical protein CARUB_v10023183mg, partial   | gbpln | Capsella rubella     | AT2G39140.1   Symbols: SVR1   pseudouridine synthase family protein   chr2:16330238-16333153 FORWARD LENGTH=410          | 468  | 410  | 1.00E-167 | 87.6  | 66.2 | 71.4 |
| Rsa1.0_00472.1.g14514.t1  | ref NP_181454.1   major facilitator protein [Arabidopsis thaliana] gi 16930479 gb AAL31925.1 AF419593.1 At2g39210/T16824.15 [Arabidopsis thaliana] gi 3402684 gb AAC28987.1   nodulin-like protein [Arabidopsis thaliana] gi 330254552 gb AEC09646.1   major facilitator protein [Arabidopsis thaliana] | 584  | 601  | 0         | 102.9 | 84.1 | 90.9 | major facilitator protein                         | gbpln | Arabidopsis thaliana | AT2G39210.1   Symbols:   Major facilitator superfamily protein   chr2:16366287-16368231 REVERSE LENGTH=601               | 584  | 601  | 0         | 102.9 | 84.1 | 90.9 |
| Rsa1.0_00472.1.g14515.t1  | gb EOA26975.1   hypothetical protein CARUB_v10023072mg [Capsella rubella] gi 482562786 gb EOA26976.1   hypothetical protein CARUB_v10023072mg [Capsella rubella]                                                                                                                                        | 489  | 497  | 0         | 101.6 | 85.3 | 89.8 | hypothetical protein CARUB_v10023072mg            | gbpln | Capsella rubella     | AT2G39220.1   Symbols: PLP6, PLA IIB   PATATIN-like protein 6   chr2:16375055-16376663 REVERSE LENGTH=499                | 489  | 499  | 0         | 102.0 | 84.9 | 90.0 |
| Rsa1.0_00473.1.g14516.t1  | #                                                                                                                                                                                                                                                                                                       | #    | #    | #         | #     | #    | -    | ----                                              | ----  | ----                 | #                                                                                                                        | #    | #    | #         | #     | #    | #    |
| Rsa1.0_00473.1.g14517.t15 | refXP_002867740.1   hypothetical protein ARALYDRAFT_492569 [Arabidopsis lyrata subsp. lyrata] gi 297313576 gb EFH43999.1   hypothetical protein ARALYDRAFT_492569 [Arabidopsis lyrata subsp. lyrata]                                                                                                    | 2220 | 2186 | 0         | 98.5  | 77.8 | 86.4 | hypothetical protein ARALYDRAFT_492569            | gbpln | Arabidopsis lyrata   | AT4G22970.1   Symbols: RSW4, AESP, ESP   homolog of seprase   chr4:12033703-12043572 REVERSE LENGTH=2180                 | 2220 | 2180 | 0         | 98.2  | 77.0 | 85.5 |
| Rsa1.0_00473.1.g14518.t1  | gb EOA20085.1   hypothetical protein CARUB_v10000359mg [Capsella rubella]                                                                                                                                                                                                                               | 554  | 693  | 1.00E-115 | 125.1 | 48.9 | 64.4 | hypothetical protein CARUB_v10000359mg            | gbpln | Capsella rubella     | AT4G11860.1   Symbols:   Protein of unknown function (DUF544)   chr4:7134237-7138361 REVERSE LENGTH=682                  | 554  | 682  | 1.00E-116 | 123.1 | 50.2 | 66.8 |
| Rsa1.0_00473.1.g14519.t1  | refXP_002887270.1   hypothetical protein ARALYDRAFT_894796 [Arabidopsis lyrata subsp. lyrata] gi 297333111 gb EFH63529.1   hypothetical protein ARALYDRAFT_894796 [Arabidopsis lyrata subsp. lyrata]                                                                                                    | 123  | 177  | 2.00E-22  | 143.9 | 47.2 | 55.3 | hypothetical protein ARALYDRAFT_894796            | gbpln | Arabidopsis lyrata   | AT1G70040.1   Symbols:   Protein of unknown function (DUF1163)   chr1:26381233-26381908 FORWARD LENGTH=193               | 123  | 193  | 6.00E-22  | 156.9 | 43.9 | 53.7 |

|                           |                                                                                                                                                                                                                                                                                                                                                                                                                                                                                                                                                                                                                               |     |     |           |       |      |      |                                                 |       |                      |                                                                                                                                         |     |     |           |       |      |      |
|---------------------------|-------------------------------------------------------------------------------------------------------------------------------------------------------------------------------------------------------------------------------------------------------------------------------------------------------------------------------------------------------------------------------------------------------------------------------------------------------------------------------------------------------------------------------------------------------------------------------------------------------------------------------|-----|-----|-----------|-------|------|------|-------------------------------------------------|-------|----------------------|-----------------------------------------------------------------------------------------------------------------------------------------|-----|-----|-----------|-------|------|------|
| Rsa1.0_00473.1.g14520.t1  | ref NP_194026.1  agamous-like MADS-box protein AGL19 [Arabidopsis thaliana]<br>gi 12229640 sp O82743.1 AGL19_ARATH<br>RecName: Full=Agamous-like MADS-box protein AGL19<br>gi 11545543 gb AAG37901.1 AF312664.1<br>MADS-box protein AGL19 [Arabidopsis thaliana]<br>gi 3292820 emb CAA19810.1 <br>putative MADS Box / AGL protein [Arabidopsis thaliana]<br>gi 7269142 emb CAB79250.1  putative MADS Box / AGL protein [Arabidopsis thaliana]<br>gi 23296476 gb AAN13066.1 <br>putative MADS box AGL protein [Arabidopsis thaliana]<br>gi 332659284 gb AEE84684.1  agamous-like MADS-box protein AGL19 [Arabidopsis thaliana] | 221 | 219 | 1.00E-100 | 99.1  | 86.9 | 91.9 | agamous-like MADS-box protein AGL19             | gbpln | Arabidopsis thaliana | AT4G22950.1   Symbols: AGL19, GL19   AGAMOUS-like 19   chr4:12023946-12027421 REVERSE LENGTH=219                                        | 221 | 219 | 1.00E-102 | 99.1  | 86.9 | 91.9 |
| Rsa1.0_00473.1.g14521.t1  | gb EOA19053.1  hypothetical protein CARUB_v10007714mg [Capsella rubella]                                                                                                                                                                                                                                                                                                                                                                                                                                                                                                                                                      | 564 | 573 | 0         | 101.6 | 71.3 | 79.3 | hypothetical protein CARUB_v10007714mg          | gbpln | Capsella rubella     | AT4G22940.1   Symbols:   Protein kinase superfamily protein   chr4:12021763-12023467 REVERSE LENGTH=458                                 | 564 | 458 | 0         | 81.2  | 60.5 | 66.0 |
| Rsa1.0_00473.1.g14522.t18 | gb EOA16740.1  hypothetical protein CARUB_v10004941mg, partial [Capsella rubella]                                                                                                                                                                                                                                                                                                                                                                                                                                                                                                                                             | 485 | 409 | 0         | 84.3  | 71.1 | 73.8 | hypothetical protein CARUB_v10004941mg, partial | gbpln | Capsella rubella     | AT4G22930.1   Symbols: PYR4, DHOASE   pyrimidin 4   chr4:12019315-12021200 FORWARD LENGTH=377                                           | 485 | 377 | 0         | 77.7  | 69.7 | 73.2 |
| Rsa1.0_00473.1.g14523.t1  | emb CAA09731.1  receptor-like protein kinase, RLK3 [Arabidopsis thaliana]                                                                                                                                                                                                                                                                                                                                                                                                                                                                                                                                                     | 682 | 667 | 0         | 97.8  | 76.0 | 84.0 | receptor-like protein kinase, RLK3              | gbpln | Arabidopsis thaliana | AT4G23190.1   Symbols: CRK11, AT-RLK3   cysteine-rich RLK (RECEPTOR-like protein kinase) 11   chr4:12141197-12143710 REVERSE LENGTH=667 | 682 | 667 | 0         | 97.8  | 76.2 | 84.0 |
| Rsa1.0_00473.1.g14524.t1  | emb CAA09731.1  receptor-like protein kinase, RLK3 [Arabidopsis thaliana]                                                                                                                                                                                                                                                                                                                                                                                                                                                                                                                                                     | 650 | 667 | 0         | 102.6 | 70.2 | 79.2 | receptor-like protein kinase, RLK3              | gbpln | Arabidopsis thaliana | AT4G23190.1   Symbols: CRK11, AT-RLK3   cysteine-rich RLK (RECEPTOR-like protein kinase) 11   chr4:12141197-12143710 REVERSE LENGTH=667 | 650 | 667 | 0         | 102.6 | 69.5 | 78.3 |
| Rsa1.0_00473.1.g14525.t1  | gb EOA16337.1  hypothetical protein CARUB_v10004487mg [Capsella rubella]                                                                                                                                                                                                                                                                                                                                                                                                                                                                                                                                                      | 653 | 560 | 0         | 85.8  | 68.1 | 76.6 | hypothetical protein CARUB_v10004487mg          | gbpln | Capsella rubella     | AT4G23190.1   Symbols: CRK11, AT-RLK3   cysteine-rich RLK (RECEPTOR-like protein kinase) 11   chr4:12141197-12143710 REVERSE LENGTH=667 | 653 | 667 | 1.00E-166 | 102.1 | 47.2 | 64.9 |
| Rsa1.0_00473.1.g14526.t1  | gb EOA17219.1  hypothetical protein CARUB_v10005494mg [Capsella rubella]                                                                                                                                                                                                                                                                                                                                                                                                                                                                                                                                                      | 271 | 268 | 1.00E-133 | 98.9  | 85.6 | 94.1 | hypothetical protein CARUB_v10005494mg          | gbpln | Capsella rubella     | AT4G22920.1   Symbols: ATNYE1, NYE1   non-yellowing 1   chr4:12016776-12017969 REVERSE LENGTH=268                                       | 271 | 268 | 1.00E-130 | 98.9  | 84.5 | 92.6 |
| Rsa1.0_00473.1.g14527.t1  | ref XP_002869798.1  WD-40 repeat family protein [Arabidopsis lyrata subsp. lyrata]<br>gi 297315634 gb EFH46057.1 <br>WD-40 repeat family protein [Arabidopsis lyrata subsp. lyrata]                                                                                                                                                                                                                                                                                                                                                                                                                                           | 478 | 476 | 0         | 99.6  | 92.1 | 94.6 | WD-40 repeat family protein                     | gbpln | Arabidopsis lyrata   | AT4G22910.1   Symbols: FZR2, CCS52A1   FIZZY-related 2   chr4:12012743-12015663 FORWARD LENGTH=483                                      | 478 | 483 | 0         | 101.0 | 92.7 | 95.0 |
| Rsa1.0_00473.1.g14528.t1  | gb EOA16965.1  hypothetical protein CARUB_v10005193mg [Capsella rubella]                                                                                                                                                                                                                                                                                                                                                                                                                                                                                                                                                      | 118 | 339 | 1.00E-29  | 287.3 | 60.2 | 72.0 | hypothetical protein CARUB_v10005193mg          | gbpln | Capsella rubella     | AT4G22900.1   Symbols:   Protein of unknown function (DUF1191)   chr4:12010221-12011252 FORWARD LENGTH=343                              | 118 | 343 | 7.00E-30  | 290.7 | 61.9 | 71.2 |
| Rsa1.0_00473.1.g14529.t1  | ref XP_002869800.1  hypothetical protein ARALYDRAFT_492575 [Arabidopsis lyrata subsp. lyrata]<br>gi 297315636 gb EFH46059.1 <br>hypothetical protein ARALYDRAFT_492575 [Arabidopsis lyrata subsp. lyrata]                                                                                                                                                                                                                                                                                                                                                                                                                     | 317 | 320 | 1.00E-161 | 100.9 | 88.3 | 95.0 | hypothetical protein ARALYDRAFT_492575          | gbpln | Arabidopsis lyrata   | AT4G22890.2   Symbols: PGR5-LIKE A   PGR5-LIKE A   chr4:12007157-12009175 FORWARD LENGTH=324                                            | 317 | 324 | 1.00E-162 | 102.2 | 88.0 | 95.3 |
| Rsa1.0_00473.1.g14530.t1  | gb ABY89681.1  anthocyanidin synthase 1 protein [Brassica rapa subsp. oleifera]<br>gi 166798273 gb ABY89682.1 <br>anthocyanidin synthase 2 protein [Brassica rapa subsp. oleifera]<br>gi 288551983 gb ADC53481.1 <br>anthocyanidin synthase [Brassica rapa var. purpuraria]                                                                                                                                                                                                                                                                                                                                                   | 363 | 358 | 0         | 98.6  | 93.7 | 97.0 | anthocyanidin synthase 1 protein                | gbpln | Brassica rapa        | AT4G22880.2   Symbols: LDOX, TDS4, TT18, ANS   leucoanthocyanidin dioxygenase   chr4:12004905-12006059 REVERSE LENGTH=356               | 363 | 356 | 0         | 98.1  | 88.7 | 94.2 |
| Rsa1.0_00473.1.g14531.t1  | gb EOA17107.1  hypothetical protein CARUB_v10005366mg [Capsella rubella]                                                                                                                                                                                                                                                                                                                                                                                                                                                                                                                                                      | 301 | 298 | 1.00E-132 | 99.0  | 79.4 | 87.7 | hypothetical protein CARUB_v10005366mg          | gbpln | Capsella rubella     | AT4G22850.1   Symbols:   SNARE associated Golgi protein family   chr4:11994194-11995941 FORWARD LENGTH=296                              | 301 | 296 | 1.00E-126 | 98.3  | 78.4 | 87.0 |

|                          |                                                                                                                                                                                                                                                                                                                                                                                                                                                                                                                                                                                                                                                                                                                                                                                         |     |     |           |       |      |      |                                                                |       |                      |                                                                                                                                                                                                                                                                                                                                                                                                                                                                                                                                              |     |     |           |       |      |      |
|--------------------------|-----------------------------------------------------------------------------------------------------------------------------------------------------------------------------------------------------------------------------------------------------------------------------------------------------------------------------------------------------------------------------------------------------------------------------------------------------------------------------------------------------------------------------------------------------------------------------------------------------------------------------------------------------------------------------------------------------------------------------------------------------------------------------------------|-----|-----|-----------|-------|------|------|----------------------------------------------------------------|-------|----------------------|----------------------------------------------------------------------------------------------------------------------------------------------------------------------------------------------------------------------------------------------------------------------------------------------------------------------------------------------------------------------------------------------------------------------------------------------------------------------------------------------------------------------------------------------|-----|-----|-----------|-------|------|------|
| Rsa1.0_00473.1.g14532.t1 | ref[XP_002867747.1] hypothetical protein ARALYDRAFT_914324 [Arabidopsis lyrata subsp. lyrata] gi 297313593 gb EFH44006.1] hypothetical protein ARALYDRAFT_914324 [Arabidopsis lyrata subsp. lyrata]                                                                                                                                                                                                                                                                                                                                                                                                                                                                                                                                                                                     | 191 | 190 | 9.00E-82  | 99.5  | 78.5 | 87.4 | hypothetical protein ARALYDRAFT_914324                         | gbpln | Arabidopsis lyrata   | AT4G22830.1   Symbols:   unknown protein; FUNCTIONS IN: molecular_function unknown; INVOLVED IN: biological_process unknown; LOCATED IN: chloroplast; EXPRESSED IN: 20 plant structures; EXPRESSED DURING: 13 growth stages; CONTAINS InterPro DOMAIN/s: Protein of unknown function DUF2499 (InterPro:IPRO19634); Has 319 Blast hits to 317 proteins in 103 species: Archae - 0; Bacteria - 147; Metazoa - 0; Fungi - 0; Plants - 64; Viruses - 0; Other Eukaryotes - 108 (source: NCBI BLINK).   chr4:11990296-11991325 REVERSE LENGTH=193 | 191 | 193 | 5.00E-79  | 101.0 | 76.4 | 86.9 |
| Rsa1.0_00473.1.g14533.t1 | ref[XP_002867758.1] hypothetical protein ARALYDRAFT_914352 [Arabidopsis lyrata subsp. lyrata] gi 297313594 gb EFH44017.1] hypothetical protein ARALYDRAFT_914352 [Arabidopsis lyrata subsp. lyrata]                                                                                                                                                                                                                                                                                                                                                                                                                                                                                                                                                                                     | 276 | 272 | 1.00E-128 | 98.6  | 87.0 | 92.0 | hypothetical protein ARALYDRAFT_914352                         | gbpln | Arabidopsis lyrata   | AT4G22600.1   Symbols:   unknown protein; Has 26 Blast hits to 26 proteins in 8 species: Archae - 0; Bacteria - 0; Metazoa - 0; Fungi - 0; Plants - 26; Viruses - 0; Other Eukaryotes - 0 (source: NCBI BLINK).   chr4:11900211-11901032 REVERSE LENGTH=273                                                                                                                                                                                                                                                                                  | 276 | 273 | 1.00E-129 | 98.9  | 85.9 | 91.7 |
| Rsa1.0_00473.1.g14534.t1 | ref[NP_193990.1] haloacid dehalogenase-like hydrolase domain-containing protein [Arabidopsis thaliana] gi 75209575 sp Q9SUW0.1 TPPG ARAT H RecName: Full=Probable trehalose-phosphate phosphatase G; Short=AtTPPG; AltName: Full=Trehalose 6-phosphate phosphatase; AltName: Full=Trehalose-6-phosphate phosphatase 6 gi 3892714 emb CAA22164.1] trehalose-6-phosphate phosphatase-like protein [Arabidopsis thaliana] gi 7269105 emb CAB79214.1] trehalose-6-phosphate phosphatase-like protein [Arabidopsis thaliana] gi 62321206 dbj BAD94370.1] trehalose-6-phosphate phosphatase - like protein [Arabidopsis thaliana] gi 222422885 dbj BAH19429.1] AT4G22590 [Arabidopsis thaliana] gi 332659227 gb AEE84627.1] probable trehalose-phosphate phosphatase G [Arabidopsis thaliana] | 371 | 377 | 0         | 101.6 | 89.2 | 95.4 | haloacid dehalogenase-like hydrolase domain-containing protein | gbpln | Arabidopsis thaliana | AT4G22590.1   Symbols: TPPG   Haloacid dehalogenase-like hydrolase (HAD) superfamily protein   chr4:11893707-11895371 REVERSE LENGTH=377                                                                                                                                                                                                                                                                                                                                                                                                     | 371 | 377 | 0         | 101.6 | 89.2 | 95.4 |
| Rsa1.0_00473.1.g14535.t1 | ref[XP_002867760.1] exostosin family protein [Arabidopsis lyrata subsp. lyrata] gi 297313596 gb EFH44019.1] exostosin family protein [Arabidopsis lyrata subsp. lyrata]                                                                                                                                                                                                                                                                                                                                                                                                                                                                                                                                                                                                                 | 440 | 435 | 0         | 98.9  | 90.7 | 93.4 | exostosin family protein                                       | gbpln | Arabidopsis lyrata   | AT4G22580.1   Symbols:   Exostosin family protein   chr4:11889382-11890689 REVERSE LENGTH=435                                                                                                                                                                                                                                                                                                                                                                                                                                                | 440 | 435 | 0         | 98.9  | 90.0 | 92.5 |
| Rsa1.0_00473.1.g14536.t1 | sp[Q3ECR3.3]FB305.ARATH RecName: Full=Putative F-box protein At1g53360                                                                                                                                                                                                                                                                                                                                                                                                                                                                                                                                                                                                                                                                                                                  | 395 | 384 | 3.00E-77  | 97.2  | 44.6 | 59.7 | RecName: Full=Putative F-box protein At1g53360                 | ----  | ----                 | AT1G53360.1   Symbols:   F-box associated ubiquitination effector family protein   chr1:19907517-19908548 FORWARD LENGTH=343                                                                                                                                                                                                                                                                                                                                                                                                                 | 395 | 343 | 4.00E-77  | 86.8  | 43.0 | 57.2 |
| Rsa1.0_00473.1.g14537.t1 | #                                                                                                                                                                                                                                                                                                                                                                                                                                                                                                                                                                                                                                                                                                                                                                                       | #   | #   | #         | #     | #    | #    | -                                                              | ----  | ----                 | AT4G12590.1   Symbols:   Protein of unknown function DUF106, transmembrane   chr4:7451291-7452976 REVERSE LENGTH=246                                                                                                                                                                                                                                                                                                                                                                                                                         | 119 | 246 | 4.00E-12  | 206.7 | 38.7 | 46.2 |
| Rsa1.0_00473.1.g14538.t2 | ref[NP_193986.1] Phosphatidic acid phosphatase (PAP2) family protein [Arabidopsis thaliana] gi 3892710 emb CAA22160.1] putative protein [Arabidopsis thaliana] gi 7269101 emb CAB79210.1] putative protein [Arabidopsis thaliana] gi 28973659 gb AA064149.1] unknown protein [Arabidopsis thaliana] gi 29824231 gb AAP04076.1] unknown protein [Arabidopsis thaliana] gi 110737243 dbj BAF00569.1] hypothetical protein [Arabidopsis thaliana] gi 332659223 gb AEE84623.1] Phosphatidic acid phosphatase (PAP2) family protein [Arabidopsis thaliana]                                                                                                                                                                                                                                   | 246 | 213 | 1.00E-76  | 86.6  | 68.3 | 74.0 | Phosphatidic acid phosphatase (PAP2) family protein            | gbpln | Arabidopsis thaliana | AT4G22550.1   Symbols:   Phosphatidic acid phosphatase (PAP2) family protein   chr4:11878255-11878896 REVERSE LENGTH=213                                                                                                                                                                                                                                                                                                                                                                                                                     | 246 | 213 | 3.00E-79  | 86.6  | 68.3 | 74.0 |
| Rsa1.0_00474.1.g14539.t1 | gb[EOA27104.1] hypothetical protein CARUB_v10023202mg [Capsella rubella]                                                                                                                                                                                                                                                                                                                                                                                                                                                                                                                                                                                                                                                                                                                | 142 | 449 | 2.00E-54  | 316.2 | 70.4 | 78.2 | hypothetical protein CARUB_v10023202mg                         | gbpln | Capsella rubella     | AT2G43820.1   Symbols: GT, UGT74F2, ATSAGT1, SGT1, SAGT1   UDP-glucosyltransferase 74F2   chr2:18152279-18153715 FORWARD LENGTH=449                                                                                                                                                                                                                                                                                                                                                                                                          | 142 | 449 | 1.00E-52  | 316.2 | 66.2 | 75.4 |

|                          |                                                                                                                                                                                                                                                                                                                                                                                                                                                                                                                                                                                                                                                                                                                                                                                                              |      |      |           |       |      |      |                                                     |       |                      |                                                                                                                                               |      |      |           |       |      |      |
|--------------------------|--------------------------------------------------------------------------------------------------------------------------------------------------------------------------------------------------------------------------------------------------------------------------------------------------------------------------------------------------------------------------------------------------------------------------------------------------------------------------------------------------------------------------------------------------------------------------------------------------------------------------------------------------------------------------------------------------------------------------------------------------------------------------------------------------------------|------|------|-----------|-------|------|------|-----------------------------------------------------|-------|----------------------|-----------------------------------------------------------------------------------------------------------------------------------------------|------|------|-----------|-------|------|------|
| Rsa1.0_00474.1.g14540.t1 | refNP_181908.1  formin-like protein 2 [Arabidopsis thaliana] gi75097595 sp Q22824.1 FH2_ARATH RecName: Full=Formin-like protein 2; Short=AtFH2; Short=AtFORMIN-2; Flags: Precursor gi2281090 gb AAB64026.1  unknown protein [Arabidopsis thaliana] gi330255234 gb AEC10328.1  formin-like protein 2 [Arabidopsis thaliana] gb AAC63844.1  putative non-LTR retroelement reverse transcriptase [Arabidopsis thaliana]                                                                                                                                                                                                                                                                                                                                                                                         | 867  | 894  | 0         | 103.1 | 73.9 | 81.5 | formin-like protein 2                               | gbpln | Arabidopsis thaliana | AT2G43800.1   Symbols:   Actin-binding FH2 (formin homology 2) family protein   chr2:18145721-18148721 FORWARD LENGTH=894                     | 867  | 894  | 0         | 103.1 | 73.9 | 81.5 |
| Rsa1.0_00474.1.g14541.t1 | gb AAC63844.1  putative non-LTR retroelement reverse transcriptase [Arabidopsis thaliana]                                                                                                                                                                                                                                                                                                                                                                                                                                                                                                                                                                                                                                                                                                                    | 1751 | 1231 | 0         | 70.3  | 38.0 | 48.4 | putative non-LTR retroelement reverse transcriptase | gbpln | Arabidopsis thaliana | AT2G01050.1   Symbols:   zinc ion binding/nucleic acid binding   chr2:68337-69884 REVERSE LENGTH=515                                          | 1751 | 515  | 1.00E-117 | 29.4  | 12.7 | 16.2 |
| Rsa1.0_00474.1.g14542.t2 | #                                                                                                                                                                                                                                                                                                                                                                                                                                                                                                                                                                                                                                                                                                                                                                                                            | #    | #    | #         | #     | #    | #    | -                                                   | ----  | ----                 | #                                                                                                                                             | #    | #    | #         | #     | #    |      |
| Rsa1.0_00474.1.g14543.t1 | gb ADM89008.1  MPK6 protein [Brassica napus]                                                                                                                                                                                                                                                                                                                                                                                                                                                                                                                                                                                                                                                                                                                                                                 | 391  | 394  | 0         | 100.8 | 95.7 | 98.2 | MPK6 protein                                        | gbpln | Brassica napus       | AT2G43790.1   Symbols: ATMPK6, MPK6, MAPK6, ATMMPK6   MAP kinase 6   chr2:18138477-18140693 FORWARD LENGTH=395                                | 391  | 395  | 0         | 101.0 | 95.4 | 97.7 |
| Rsa1.0_00474.1.g14544.t4 | refXP_002881928.1  hypothetical protein ARALYDRAFT_346189 [Arabidopsis lyrata subsp. lyrata] gi297327767 gb EFH58187.1  hypothetical protein ARALYDRAFT_346189 [Arabidopsis lyrata subsp. lyrata]                                                                                                                                                                                                                                                                                                                                                                                                                                                                                                                                                                                                            | 219  | 179  | 8.00E-35  | 81.7  | 40.2 | 50.2 | hypothetical protein ARALYDRAFT_346189              | gbpln | Arabidopsis lyrata   | AT2G43730.1   Symbols:   Mannose-binding lectin superfamily protein   chr2:18124821-18125669 REVERSE LENGTH=224                               | 219  | 224  | 2.00E-26  | 102.3 | 28.8 | 38.4 |
| Rsa1.0_00474.1.g14545.t1 | refXP_002881925.1  hypothetical protein ARALYDRAFT_903775 [Arabidopsis lyrata subsp. lyrata] gi29732764 gb EFH58184.1  hypothetical protein ARALYDRAFT_903775 [Arabidopsis lyrata subsp. lyrata]                                                                                                                                                                                                                                                                                                                                                                                                                                                                                                                                                                                                             | 166  | 170  | 7.00E-50  | 102.4 | 69.3 | 78.3 | hypothetical protein ARALYDRAFT_903775              | gbpln | Arabidopsis lyrata   | AT2G43730.1   Symbols:   Mannose-binding lectin superfamily protein   chr2:18124821-18125669 REVERSE LENGTH=224                               | 166  | 224  | 3.00E-25  | 134.9 | 44.6 | 56.6 |
| Rsa1.0_00474.1.g14546.t1 | #                                                                                                                                                                                                                                                                                                                                                                                                                                                                                                                                                                                                                                                                                                                                                                                                            | #    | #    | #         | #     | #    | #    | -                                                   | ----  | ----                 | #                                                                                                                                             | #    | #    | #         | #     | #    |      |
| Rsa1.0_00474.1.g14547.t5 | gb EOA30377.1  hypothetical protein CARUB_v10013516mg [Capsella rubella]                                                                                                                                                                                                                                                                                                                                                                                                                                                                                                                                                                                                                                                                                                                                     | 448  | 499  | 0         | 111.4 | 74.6 | 83.7 | hypothetical protein CARUB_v10013516mg              | gbpln | Capsella rubella     | AT3G62750.1   Symbols: BGLU8   beta glucosidase 8   chr3:23214375-23216900 FORWARD LENGTH=497                                                 | 448  | 497  | 1.00E-161 | 110.9 | 62.5 | 76.6 |
| Rsa1.0_00474.1.g14548.t1 | #                                                                                                                                                                                                                                                                                                                                                                                                                                                                                                                                                                                                                                                                                                                                                                                                            | #    | #    | #         | #     | #    | #    | -                                                   | ----  | ----                 | #                                                                                                                                             | #    | #    | #         | #     | #    |      |
| Rsa1.0_00474.1.g14549.t1 | gb AAD19773.1  putative retroelement pol polyprotein [Arabidopsis thaliana]                                                                                                                                                                                                                                                                                                                                                                                                                                                                                                                                                                                                                                                                                                                                  | 1272 | 1335 | 0         | 105.0 | 54.3 | 68.7 | putative retroelement pol polyprotein               | gbpln | Arabidopsis thaliana | AT4G23160.1   Symbols: CRK8   cysteine-rich RLK (RECEPTOR-like protein kinase) 8   chr4:12129485-12134086 FORWARD LENGTH=1262                 | 1272 | 1262 | 7.00E-53  | 99.2  | 11.9 | 18.6 |
| Rsa1.0_00474.1.g14550.t1 | gb AAC19278.1  T14P8.10 [Arabidopsis thaliana] gi7269009 emb CAB80742.1  AT4g02490 [Arabidopsis thaliana]                                                                                                                                                                                                                                                                                                                                                                                                                                                                                                                                                                                                                                                                                                    | 786  | 657  | 0         | 83.6  | 50.6 | 64.1 | T14P8.10                                            | gbpln | Arabidopsis thaliana | AT4G04650.1   Symbols:   RNA-directed DNA polymerase (reverse transcriptase)-related family protein   chr4:2353989-2355213 REVERSE LENGTH=332 | 786  | 332  | 3.00E-85  | 42.2  | 18.3 | 24.9 |
| Rsa1.0_00474.1.g14551.t1 | gb AAD32866.1 AC005489_4 F14N23.4 [Arabidopsis thaliana]                                                                                                                                                                                                                                                                                                                                                                                                                                                                                                                                                                                                                                                                                                                                                     | 571  | 1161 | 6.00E-92  | 203.3 | 32.6 | 45.2 | F14N23.4                                            | gbpln | Arabidopsis thaliana | AT1G43760.1   Symbols:   DNase I-like superfamily protein   chr1:16528880-16531065 REVERSE LENGTH=626                                         | 571  | 626  | 4.00E-75  | 109.6 | 25.7 | 38.4 |
| Rsa1.0_00474.1.g14552.t1 | gb EOA30377.1  hypothetical protein CARUB_v10013516mg [Capsella rubella]                                                                                                                                                                                                                                                                                                                                                                                                                                                                                                                                                                                                                                                                                                                                     | 339  | 499  | 1.00E-103 | 147.2 | 52.5 | 59.3 | hypothetical protein CARUB_v10013516mg              | gbpln | Capsella rubella     | AT3G62750.1   Symbols: BGLU8   beta glucosidase 8   chr3:23214375-23216900 FORWARD LENGTH=497                                                 | 339  | 497  | 7.00E-75  | 146.6 | 41.0 | 52.2 |
| Rsa1.0_00475.1.g14553.t2 | refNP_199242.1  protein kinase-like protein [Arabidopsis thaliana] gi793298689 refNP_001032009.1  protein kinase-like protein [Arabidopsis thaliana] gi793298882 refNP_001032010.1  protein kinase-like protein [Arabidopsis thaliana] gi145334725 refNP_001078708.1  protein kinase-like protein [Arabidopsis thaliana] gi10176884 dbj BAB10114.1  cyclin-dependent protein kinase-like protein [Arabidopsis thaliana] gi222424232 dbj BAH20074.1  AT5G44290 [Arabidopsis thaliana] gi332007704 gb AED95087.1  protein kinase-like protein [Arabidopsis thaliana] gi332007705 gb AED95088.1  protein kinase-like protein [Arabidopsis thaliana] gi332007706 gb AED95089.1  protein kinase-like protein [Arabidopsis thaliana] gi332007707 gb AED95090.1  protein kinase-like protein [Arabidopsis thaliana] | 621  | 644  | 0         | 103.7 | 85.8 | 91.3 | protein kinase-like protein                         | gbpln | Arabidopsis thaliana | AT5G44290.4   Symbols:   Protein kinase superfamily protein   chr5:17840750-17843190 REVERSE LENGTH=644                                       | 621  | 644  | 0         | 103.7 | 85.8 | 91.3 |

|                          |                                                                                                                                                                                                                                                                                                                                                                                                                                                               |     |      |           |        |      |      |                                                     |       |                      |                                                                                                                                                                                                                                                                                                                                                      |     |     |           |       |      |      |
|--------------------------|---------------------------------------------------------------------------------------------------------------------------------------------------------------------------------------------------------------------------------------------------------------------------------------------------------------------------------------------------------------------------------------------------------------------------------------------------------------|-----|------|-----------|--------|------|------|-----------------------------------------------------|-------|----------------------|------------------------------------------------------------------------------------------------------------------------------------------------------------------------------------------------------------------------------------------------------------------------------------------------------------------------------------------------------|-----|-----|-----------|-------|------|------|
| Rsa1.0_00475.1.g14554.t1 | refNP_179144.1  myosin heavy chain-related protein [Arabidopsis thaliana] gi4544371 gb AAD2282.1  hypothetical protein [Arabidopsis thaliana] gi330251305 gb AEC06399.1  myosin heavy chain-related protein [Arabidopsis thaliana]                                                                                                                                                                                                                            | 293 | 957  | 1.00E-16  | 326.6  | 13.3 | 19.8 | myosin heavy chain-related protein                  | gbpln | Arabidopsis thaliana | AT2G15420.1   Symbols:   myosin heavy chain-related   chr2:6723948-6728183 REVERSE LENGTH=957                                                                                                                                                                                                                                                        | 293 | 957 | 3.00E-19  | 326.6 | 13.3 | 19.8 |
| Rsa1.0_00475.1.g14555.t1 | refXP_002885378.1  tetraacyldisaccharide 4'-kinase family protein [Arabidopsis lyrata subsp. lyrata] gi297331218 gb EFH61637.1  tetraacyldisaccharide 4'-kinase family protein [Arabidopsis lyrata subsp. lyrata]                                                                                                                                                                                                                                             | 393 | 395  | 1.00E-180 | 100.5  | 79.4 | 86.5 | tetraacyldisaccharide 4'-kinase family protein      | gbpln | Arabidopsis lyrata   | AT3G20480.1   Symbols:   tetraacyldisaccharide 4'-kinase family protein   chr3:7151497-7153369 REVERSE LENGTH=395                                                                                                                                                                                                                                    | 393 | 395 | 1.00E-179 | 100.5 | 77.4 | 86.8 |
| Rsa1.0_00475.1.g14556.t1 | #                                                                                                                                                                                                                                                                                                                                                                                                                                                             | #   | #    | #         | #      | #    | #    | -                                                   | ----  | ----                 | #                                                                                                                                                                                                                                                                                                                                                    | #   | #   | #         | #     | #    | #    |
| Rsa1.0_00475.1.g14557.t1 | #                                                                                                                                                                                                                                                                                                                                                                                                                                                             | #   | #    | #         | #      | #    | #    | -                                                   | ----  | ----                 | #                                                                                                                                                                                                                                                                                                                                                    | #   | #   | #         | #     | #    | #    |
| Rsa1.0_00475.1.g14558.t1 | gb AAD32866.1 AC005489.4 F14N23.4 [Arabidopsis thaliana]                                                                                                                                                                                                                                                                                                                                                                                                      | 822 | 1161 | 2.00E-88  | 141.2  | 31.0 | 48.2 | F14N23.4                                            | gbpln | Arabidopsis thaliana | AT1G43760.1   Symbols:   DNase I-like superfamily protein   chr1:16528880-16531065 REVERSE LENGTH=626                                                                                                                                                                                                                                                | 822 | 626 | 2.00E-35  | 76.2  | 11.4 | 18.6 |
| Rsa1.0_00475.1.g14559.t1 | gb EOA14899.1  hypothetical protein CARUB_v10028228mg, partial [Capsella rubella]                                                                                                                                                                                                                                                                                                                                                                             | 56  | 370  | 7.00E-12  | 660.7  | 64.3 | 71.4 | hypothetical protein CARUB_v10028228mg, partial     | gbpln | Capsella rubella     | #                                                                                                                                                                                                                                                                                                                                                    | #   | #   | #         | #     | #    | #    |
| Rsa1.0_00475.1.g14560.t1 | ref XP_002863598.1  dormancy/auxin associated family protein [Arabidopsis lyrata subsp. lyrata] gi297309433 gb EFH39857.1  dormancy/auxin associated family protein [Arabidopsis lyrata subsp. lyrata]                                                                                                                                                                                                                                                        | 120 | 114  | 1.00E-42  | 95.0   | 75.8 | 79.2 | dormancy/auxin associated family protein            | gbpln | Arabidopsis lyrata   | AT5G44300.1   Symbols:   Dormancy/auxin associated family protein   chr5:17845371-17846179 REVERSE LENGTH=114                                                                                                                                                                                                                                        | 120 | 114 | 1.00E-44  | 95.0  | 75.0 | 78.3 |
| Rsa1.0_00475.1.g14561.t1 | gb AAS49101.1  At5g44310 [Arabidopsis thaliana] gi51970006 dbj BAD43695.1  late embryogenesis abundant protein-like [Arabidopsis thaliana] gi51971018 dbj BAD44201.1  late embryogenesis abundant protein-like [Arabidopsis thaliana]                                                                                                                                                                                                                         | 248 | 342  | 5.00E-85  | 137.9  | 78.6 | 88.3 | At5g44310                                           | gbpln | Arabidopsis thaliana | AT5G44310.1   Symbols:   Late embryogenesis abundant protein (LEA) family protein   chr5:17847998-17848885 REVERSE LENGTH=295                                                                                                                                                                                                                        | 248 | 295 | 9.00E-85  | 119.0 | 76.2 | 85.5 |
| Rsa1.0_00475.1.g14562.t1 | ref NP_563864.1  S-phase kinase-associated protein 1 [Arabidopsis thaliana] gi4914325 gb AAD32873.1 AC005489.11 F14N23.11 [Arabidopsis thaliana] gi27754385 gb AAO22641.1  putative E3 ubiquitin ligase SCF complex subunit SKP1/ASK1 (At18) [Arabidopsis thaliana] gi28394095 gb AAO42455.1  putative E3 ubiquitin ligase SCF complex subunit SKP1/ASK1 (At18) [Arabidopsis thaliana] gi332190436 gb AEE28557.1  SKP1-like protein 18 [Arabidopsis thaliana] | 174 | 183  | 2.00E-46  | 105.2  | 61.5 | 71.8 | S-phase kinase-associated protein 1                 | gbpln | Arabidopsis thaliana | AT1G10230.1   Symbols: ASK18, SK18   SKP1-like 18   chr1:3355600-3356151 FORWARD LENGTH=183                                                                                                                                                                                                                                                          | 174 | 183 | 9.00E-49  | 105.2 | 61.5 | 71.8 |
| Rsa1.0_00475.1.g14563.t1 | ref XP_002863588.1  tubulin beta-4 chain [Arabidopsis lyrata subsp. lyrata] gi297309423 gb EFH39847.1  tubulin beta-4 chain [Arabidopsis lyrata subsp. lyrata] gi482550217 gb EOA14411.1  hypothetical protein CARUB_v10027611mg [Capsella rubella]                                                                                                                                                                                                           | 452 | 444  | 0         | 98.2   | 94.5 | 94.7 | tubulin beta-4 chain                                | gbpln | Arabidopsis lyrata   | AT5G44340.1   Symbols: TUB4   tubulin beta chain 4   chr5:17859442-17860994 REVERSE LENGTH=444                                                                                                                                                                                                                                                       | 452 | 444 | 0         | 98.2  | 94.5 | 94.7 |
| Rsa1.0_00475.1.g14564.t1 | #                                                                                                                                                                                                                                                                                                                                                                                                                                                             | #   | #    | #         | #      | #    | #    | -                                                   | ----  | ----                 | #                                                                                                                                                                                                                                                                                                                                                    | #   | #   | #         | #     | #    | #    |
| Rsa1.0_00475.1.g14565.t1 | ref XP_002865368.1  hypothetical protein ARALYDRAFT.494551 [Arabidopsis lyrata subsp. lyrata] gi297311203 gb EFH41627.1  hypothetical protein ARALYDRAFT.494551 [Arabidopsis lyrata subsp. lyrata]                                                                                                                                                                                                                                                            | 342 | 333  | 6.00E-85  | 97.4   | 60.8 | 70.8 | hypothetical protein ARALYDRAFT.494551              | gbpln | Arabidopsis lyrata   | AT5G44350.1   Symbols:   ethylene-responsive nuclear protein-related   chr5:17864628-17865632 FORWARD LENGTH=334                                                                                                                                                                                                                                     | 342 | 334 | 8.00E-76  | 97.7  | 57.0 | 69.6 |
| Rsa1.0_00475.1.g14566.t1 | gb AAD21778.1  putative non-LTR retroelement reverse transcriptase [Arabidopsis thaliana]                                                                                                                                                                                                                                                                                                                                                                     | 150 | 1715 | 4.00E-12  | 1143.3 | 23.3 | 37.3 | putative non-LTR retroelement reverse transcriptase | gbpln | Arabidopsis thaliana | AT2G22440.1   Symbols:   BEST Arabidopsis thaliana protein match is: Ribonuclease H-like superfamily protein (TAIR:AT4G29090.1); Has 208 Blast hits to 191 proteins in 10 species: Archae - 0; Bacteria - 0; Metazoa - 0; Fungi - 0; Plants - 208; Viruses - 0; Other Eukaryotes - 0 (source: NCBI BLINK).   chr2:9528910-9529917 FORWARD LENGTH=256 | 150 | 256 | 3.00E-11  | 170.7 | 20.7 | 32.7 |
| Rsa1.0_00475.1.g14567.t1 | gb EOA32467.1  hypothetical protein CARUB_v10015744mg [Capsella rubella]                                                                                                                                                                                                                                                                                                                                                                                      | 80  | 633  | 3.00E-13  | 791.3  | 50.0 | 57.5 | hypothetical protein CARUB_v10015744mg              | gbpln | Capsella rubella     | AT3G01085.1   Symbols:   Protein kinase superfamily protein   chr3:28060-30556 FORWARD LENGTH=629                                                                                                                                                                                                                                                    | 80  | 629 | 2.00E-15  | 786.3 | 52.5 | 60.0 |



|                          |                                                                                                                                                                                                                                                                                                                                                                                               |     |     |           |       |      |       |                                                                                                                                                                                                                                                                                    |       |                      |                                                                                                                                         |     |     |           |       |      |      |
|--------------------------|-----------------------------------------------------------------------------------------------------------------------------------------------------------------------------------------------------------------------------------------------------------------------------------------------------------------------------------------------------------------------------------------------|-----|-----|-----------|-------|------|-------|------------------------------------------------------------------------------------------------------------------------------------------------------------------------------------------------------------------------------------------------------------------------------------|-------|----------------------|-----------------------------------------------------------------------------------------------------------------------------------------|-----|-----|-----------|-------|------|------|
| Rsa1.0_00475.1.g14568.t1 | refXP_002863581.1   FAD-binding domain-containing protein [Arabidopsis lyrata subsp. lyrata] gi 297309416 gb EFH39840.1   FAD-binding domain-containing protein [Arabidopsis lyrata subsp. lyrata]                                                                                                                                                                                            | 481 | 540 | 0         | 112.3 | 75.9 | 87.1  | FAD-binding domain-containing protein                                                                                                                                                                                                                                              | gbpln | Arabidopsis lyrata   | AT5G44400.1   Symbols:   FAD-binding Berberine family protein   chr5:17886365-17888071 REVERSE LENGTH=537                               | 481 | 537 | 0         | 111.6 | 76.1 | 86.7 |
| Rsa1.0_00475.1.g14569.t1 | #                                                                                                                                                                                                                                                                                                                                                                                             | #   | #   | #         | #     | #    | -     | ----                                                                                                                                                                                                                                                                               | ----  | #                    | #                                                                                                                                       | #   | #   | #         | #     | #    | #    |
| Rsa1.0_00475.1.g14570.t1 | #                                                                                                                                                                                                                                                                                                                                                                                             | #   | #   | #         | #     | #    | -     | ----                                                                                                                                                                                                                                                                               | ----  | #                    | #                                                                                                                                       | #   | #   | #         | #     | #    | #    |
| Rsa1.0_00475.1.g14571.t1 | refNP_199253.1   FAD-binding and BBE domain-containing protein [Arabidopsis thaliana] gi 10176895 dbj BAB10125.1   berberine bridge enzyme [Arabidopsis thaliana] gi 18176302 gb AAL60019.1   putative berberine bridge enzyme [Arabidopsis thaliana] gi 332007722 gb AED95105.1   FAD-binding and BBE domain-containing protein [Arabidopsis thaliana]                                       | 509 | 537 | 0         | 105.5 | 79.6 | 89.8  | FAD-binding and BBE domain-containing protein                                                                                                                                                                                                                                      | gbpln | Arabidopsis thaliana | AT5G44400.1   Symbols:   FAD-binding Berberine family protein   chr5:17886365-17888071 REVERSE LENGTH=537                               | 509 | 537 | 0         | 105.5 | 79.6 | 89.8 |
| Rsa1.0_00476.1.g14572.t1 | #                                                                                                                                                                                                                                                                                                                                                                                             | #   | #   | #         | #     | #    | -     | ----                                                                                                                                                                                                                                                                               | ----  | #                    | #                                                                                                                                       | #   | #   | #         | #     | #    | #    |
| Rsa1.0_00476.1.g14573.t1 | sp Q02498.1 CRU1_RAPSA RecName: Full=Cruciferin PGCURSE5; AltName: Full=11S globulin; AltName: Full=12S storage protein; Contains: RecName: Full=Cruciferin PGCURSE5 alpha chain; Contains: RecName: Full=Cruciferin PGCURSE5 beta chain; Flags: Precursor gi 21118 emb CAA42478.1   cruciferin precursor [Raphanus sativus]                                                                  | 491 | 479 | 0         | 97.6  | 96.7 | 97.1  | RecName: Full=Cruciferin PGCURSE5; AltName: Full=11S globulin; AltName: Full=12S storage protein; Contains: RecName: Full=Cruciferin PGCURSE5 alpha chain; Contains: RecName: Full=Cruciferin PGCURSE5 beta chain; Flags: Precursor gi 21118 emb CAA42478.1   cruciferin precursor | gbpln | Raphanus sativus     | AT5G44120.3   Symbols: CRA1, ATCRA1, CRU1   RmlC-like cupins superfamily protein   chr5:17756460-17758246 REVERSE LENGTH=472            | 491 | 472 | 1.00E-153 | 96.1  | 55.8 | 71.5 |
| Rsa1.0_00476.1.g14574.t1 | gb AAK07610.1 AF319771_2 prohibitin 1-like protein [Brassica napus]                                                                                                                                                                                                                                                                                                                           | 290 | 290 | 1.00E-166 | 100.0 | 99.3 | 100.0 | prohibitin 1-like protein                                                                                                                                                                                                                                                          | gbpln | Brassica napus       | AT4G28510.1   Symbols: ATPHB1, PHB1   prohibitin 1   chr4:14084970-14086372 REVERSE LENGTH=288                                          | 290 | 288 | 1.00E-145 | 99.3  | 93.1 | 97.2 |
| Rsa1.0_00476.1.g14575.t1 | refNP_194579.1   NAC domain containing protein 73 [Arabidopsis thaliana] gi 2842493 emb CAA16890.1   predicted protein [Arabidopsis thaliana] gi 7269704 emb CAB79652.1   predicted protein [Arabidopsis thaliana] gi 67633762 gb AAAY78805.1   no apical meristem family protein [Arabidopsis thaliana] gi 332660095 gb AEE85495.1   NAC domain containing protein 73 [Arabidopsis thaliana] | 306 | 305 | 2.33E-156 | 99.7  | 87.3 | 91.5  | NAC domain containing protein 73                                                                                                                                                                                                                                                   | gbpln | Arabidopsis thaliana | AT4G28500.1   Symbols: ANAC073, SND2, NAC073   NAC domain containing protein 73   chr4:14083014-14084266 FORWARD LENGTH=305             | 306 | 305 | 1.00E-148 | 99.7  | 87.3 | 91.5 |
| Rsa1.0_00476.1.g14576.t1 | refXP_002869498.1   hypothetical protein ARALYDRAFT_491919 [Arabidopsis lyrata subsp. lyrata] gi 297315334 gb EFH45757.1   hypothetical protein ARALYDRAFT_491919 [Arabidopsis lyrata subsp. lyrata]                                                                                                                                                                                          | 979 | 996 | 0         | 101.7 | 82.6 | 89.7  | hypothetical protein ARALYDRAFT_491919                                                                                                                                                                                                                                             | gbpln | Arabidopsis lyrata   | AT4G28490.1   Symbols: RLK5, HAE   Leucine-rich receptor-like protein kinase family protein   chr4:14077894-14080965 FORWARD LENGTH=999 | 979 | 999 | 0         | 102.0 | 81.8 | 89.4 |
| Rsa1.0_00476.1.g14577.t1 | refXP_002867447.1   predicted protein [Arabidopsis lyrata subsp. lyrata] gi 297313283 gb EFH43706.1   predicted protein [Arabidopsis lyrata subsp. lyrata]                                                                                                                                                                                                                                    | 200 | 200 | 1.00E-92  | 100.0 | 81.0 | 89.5  | predicted protein                                                                                                                                                                                                                                                                  | gbpln | Arabidopsis lyrata   | AT5G46090.1   Symbols:   Protein of unknown function [DUF679]   chr5:18693485-18694129 FORWARD LENGTH=214                               | 200 | 214 | 5.00E-51  | 107.0 | 49.5 | 68.0 |
| Rsa1.0_00476.1.g14578.t1 | refXP_002869499.1   DNAJ heat shock family protein [Arabidopsis lyrata subsp. lyrata] gi 297315335 gb EFH45758.1   DNAJ heat shock family protein [Arabidopsis lyrata subsp. lyrata]                                                                                                                                                                                                          | 363 | 344 | 1.00E-160 | 94.8  | 86.0 | 89.0  | DNAJ heat shock family protein                                                                                                                                                                                                                                                     | gbpln | Arabidopsis lyrata   | AT4G28480.1   Symbols:   DNAJ heat shock family protein   chr4:14073310-14075091 FORWARD LENGTH=348                                     | 363 | 348 | 1.00E-160 | 95.9  | 84.8 | 87.9 |
| Rsa1.0_00476.1.g14579.t1 | refXP_002867448.1   26S proteasome subunit RPN1b [Arabidopsis lyrata subsp. lyrata] gi 297313284 gb EFH43707.1   26S proteasome subunit RPN1b [Arabidopsis lyrata subsp. lyrata]                                                                                                                                                                                                              | 894 | 891 | 0         | 99.7  | 91.5 | 95.6  | 26S proteasome subunit RPN1b                                                                                                                                                                                                                                                       | gbpln | Arabidopsis lyrata   | AT4G28470.1   Symbols: RPN1B, ATRPN1B   26S proteasome regulatory subunit S2 1B   chr4:14067082-14072357 REVERSE LENGTH=891             | 894 | 891 | 0         | 99.7  | 90.7 | 95.6 |

|                          |                                                                                                                                                                                                                                                                                                                                                                                                                                            |     |      |           |        |      |      |                                                                                    |       |                      |                                                                                                                                                                                                                                                                                                                                                                                                                                                                                                                                                                                              |     |     |           |       |      |      |
|--------------------------|--------------------------------------------------------------------------------------------------------------------------------------------------------------------------------------------------------------------------------------------------------------------------------------------------------------------------------------------------------------------------------------------------------------------------------------------|-----|------|-----------|--------|------|------|------------------------------------------------------------------------------------|-------|----------------------|----------------------------------------------------------------------------------------------------------------------------------------------------------------------------------------------------------------------------------------------------------------------------------------------------------------------------------------------------------------------------------------------------------------------------------------------------------------------------------------------------------------------------------------------------------------------------------------------|-----|-----|-----------|-------|------|------|
| Rsa1.0_00476.1.g14580.t1 | gb ABK28261.1  unknown [Arabidopsis thaliana]                                                                                                                                                                                                                                                                                                                                                                                              | 73  | 73   | 2.00E-24  | 100.0  | 82.2 | 87.7 | unknown                                                                            | gbpln | Arabidopsis thaliana | AT4G28460.1   Symbols:   unknown protein; FUNCTIONS IN: molecular_function unknown; INVOLVED IN: biological_process unknown; LOCATED IN: endomembrane system; EXPRESSED IN: 10 plant structures; EXPRESSED DURING: LP.04 four leaves visible, 4 anthesis, petal differentiation and expansion stage; Has 8 Blast hits to 8 proteins in 3 species: Archae - 0; Bacteria - 0; Metazoa - 0; Fungi - 0; Plants - 8; Viruses - 0; Other Eukaryotes - 0 (source: NCBI BLink).   chr4:14066083-14066301 FORWARD LENGTH=72                                                                           | 73  | 72  | 3.00E-27  | 98.6  | 82.2 | 87.7 |
| Rsa1.0_00476.1.g14581.t1 | gb EOA17584.1  hypothetical protein CARUB_v10005945mg [Capsella rubella]                                                                                                                                                                                                                                                                                                                                                                   | 145 | 152  | 2.00E-68  | 104.8  | 86.2 | 90.3 | hypothetical protein CARUB_v10005945mg                                             | gbpln | Capsella rubella     | AT4G28440.1   Symbols:   Nucleic acid-binding, OB-fold-like protein   chr4:14060054-14060970 FORWARD LENGTH=153                                                                                                                                                                                                                                                                                                                                                                                                                                                                              | 145 | 153 | 1.00E-68  | 105.5 | 84.1 | 87.6 |
| Rsa1.0_00476.1.g14582.t1 | ref XP_002869503.1  hypothetical protein ARALYDRAFT_491927 [Arabidopsis lyrata subsp. lyrata] gi 297315339 gb EFH45762.1  hypothetical protein ARALYDRAFT_491927 [Arabidopsis lyrata subsp. lyrata]                                                                                                                                                                                                                                        | 461 | 463  | 1.00E-162 | 100.4  | 77.0 | 86.1 | hypothetical protein ARALYDRAFT_491927                                             | gbpln | Arabidopsis lyrata   | AT4G28430.1   Symbols:   Reticulon family protein   chr4:14057846-14059772 FORWARD LENGTH=457                                                                                                                                                                                                                                                                                                                                                                                                                                                                                                | 461 | 457 | 1.00E-161 | 99.1  | 73.5 | 83.9 |
| Rsa1.0_00476.1.g14583.t1 | ref XP_002869504.1  transaminase [Arabidopsis lyrata subsp. lyrata] gi 297315340 gb EFH45763.1  transaminase [Arabidopsis lyrata subsp. lyrata]                                                                                                                                                                                                                                                                                            | 448 | 449  | 0         | 100.2  | 83.3 | 92.9 | transaminase                                                                       | gbpln | Arabidopsis lyrata   | AT4G28420.2   Symbols:   Tyrosine transaminase family protein   chr4:14055687-14057409 FORWARD LENGTH=449                                                                                                                                                                                                                                                                                                                                                                                                                                                                                    | 448 | 449 | 0         | 100.2 | 83.0 | 92.9 |
| Rsa1.0_00476.1.g14584.t1 | ref XP_002869504.1  transaminase [Arabidopsis lyrata subsp. lyrata] gi 297315340 gb EFH45763.1  transaminase [Arabidopsis lyrata subsp. lyrata]                                                                                                                                                                                                                                                                                            | 431 | 449  | 0         | 104.2  | 80.5 | 89.1 | transaminase                                                                       | gbpln | Arabidopsis lyrata   | AT4G28420.2   Symbols:   Tyrosine transaminase family protein   chr4:14055687-14057409 FORWARD LENGTH=449                                                                                                                                                                                                                                                                                                                                                                                                                                                                                    | 431 | 449 | 0         | 104.2 | 80.3 | 89.1 |
| Rsa1.0_00476.1.g14585.t1 | ref NP_683422.3  bifunctional inhibitor/lipid-transfer protein/seed storage 2S albumin-like protein [Arabidopsis thaliana] gi 332194683 gb AE32804.1  bifunctional inhibitor/lipid-transfer protein/seed storage 2S albumin-like protein [Arabidopsis thaliana]                                                                                                                                                                            | 123 | 116  | 2.00E-47  | 94.3   | 71.5 | 82.9 | bifunctional inhibitor/lipid-transfer protein/seed storage 2S albumin-like protein | gbpln | Arabidopsis thaliana | AT1G52415.1   Symbols:   Bifunctional inhibitor/lipid-transfer protein/seed storage 2S albumin superfamily protein   chr1:19526166-19526686 FORWARD LENGTH=116                                                                                                                                                                                                                                                                                                                                                                                                                               | 123 | 116 | 3.00E-50  | 94.3  | 71.5 | 82.9 |
| Rsa1.0_00476.1.g14586.t1 | ref NP_567808.1  putative protein phosphatase 2C 58 [Arabidopsis thaliana] gi 75163673 sp Q93YW5.1 P2C58_ARAT H RecName: Full=Probable protein phosphatase 2C 58; Short=AtPP2C58 gi 16604585 gb AAL24149.1  putative protein phosphatase 2C [Arabidopsis thaliana] gi 20258991 gb AAM14211.1  putative protein phosphatase 2C [Arabidopsis thaliana] gi 332660081 gb AEE85481.1  putative protein phosphatase 2C 58 [Arabidopsis thaliana] | 316 | 283  | 1.00E-141 | 89.6   | 78.2 | 82.9 | putative protein phosphatase 2C 58                                                 | gbpln | Arabidopsis thaliana | AT4G28400.1   Symbols:   Protein phosphatase 2C family protein   chr4:14048499-14050118 FORWARD LENGTH=283                                                                                                                                                                                                                                                                                                                                                                                                                                                                                   | 316 | 283 | 1.00E-144 | 89.6  | 78.2 | 82.9 |
| Rsa1.0_00476.1.g14587.t1 | gb AAG09097.1 AC009323.8 Putative retroelement polyprotein [Arabidopsis thaliana]                                                                                                                                                                                                                                                                                                                                                          | 117 | 1486 | 2.00E-34  | 1270.1 | 55.6 | 73.5 | Putative retroelement polyprotein                                                  | gbpln | Arabidopsis thaliana | # # # # # # #                                                                                                                                                                                                                                                                                                                                                                                                                                                                                                                                                                                | #   | #   | #         | #     | #    | #    |
| Rsa1.0_00476.1.g14588.t1 | ref XP_002867465.1  AtMYB41 [Arabidopsis lyrata subsp. lyrata] gi 297313301 gb EFH43724.1  AtMYB41 [Arabidopsis lyrata subsp. lyrata]                                                                                                                                                                                                                                                                                                      | 289 | 283  | 1.00E-123 | 97.9   | 82.0 | 87.2 | AtMYB41                                                                            | gbpln | Arabidopsis lyrata   | AT4G28110.1   Symbols:   AtMYB41, MYB41   myb domain protein 41   chr4:13968166-13969384 REVERSE LENGTH=282                                                                                                                                                                                                                                                                                                                                                                                                                                                                                  | 289 | 282 | 1.00E-119 | 97.6  | 82.0 | 87.5 |
| Rsa1.0_00476.1.g14589.t1 | ref XP_002867466.1  hypothetical protein ARALYDRAFT_491965 [Arabidopsis lyrata subsp. lyrata] gi 297313302 gb EFH43725.1  hypothetical protein ARALYDRAFT_491965 [Arabidopsis lyrata subsp. lyrata]                                                                                                                                                                                                                                        | 264 | 304  | 1.00E-120 | 115.2  | 83.0 | 87.9 | hypothetical protein ARALYDRAFT_491965                                             | gbpln | Arabidopsis lyrata   | AT4G28100.1   Symbols:   unknown protein; FUNCTIONS IN: molecular_function unknown; INVOLVED IN: biological_process unknown; LOCATED IN: anchored to plasma membrane, anchored to membrane; EXPRESSED IN: 23 plant structures; EXPRESSED DURING: 14 growth stages; BEST Arabidopsis thaliana protein match is: unknown protein (TAIR:AT3G18050.1). Has 30201 Blast hits to 17322 proteins in 780 species: Archae - 12; Bacteria - 1396; Metazoa - 17338; Fungi - 3422; Plants - 5037; Viruses - 0; Other Eukaryotes - 2996 (source: NCBI BLink).   chr4:13965300-13966697 REVERSE LENGTH=304 | 264 | 304 | 1.00E-121 | 115.2 | 82.6 | 88.6 |

|                          |                                                                                                                                                                                                                                                                                                                                                                                                                                                                                                   |     |     |           |       |       |       |                                             |       |                      |                                                                                                                                                                                                                                                                                   |     |     |           |       |      |       |
|--------------------------|---------------------------------------------------------------------------------------------------------------------------------------------------------------------------------------------------------------------------------------------------------------------------------------------------------------------------------------------------------------------------------------------------------------------------------------------------------------------------------------------------|-----|-----|-----------|-------|-------|-------|---------------------------------------------|-------|----------------------|-----------------------------------------------------------------------------------------------------------------------------------------------------------------------------------------------------------------------------------------------------------------------------------|-----|-----|-----------|-------|------|-------|
| Rsa1.0_00476.1.g14590.t1 | gb AAF37283.1 AF225704.1 RSH3 [Arabidopsis thaliana]                                                                                                                                                                                                                                                                                                                                                                                                                                              | 186 | 712 | 1.00E-11  | 382.8 | 18.8  | 20.4  | RSH3                                        | gbpln | Arabidopsis thaliana | AT1G54130.1   Symbols: RSH3, AT-RSH3, ATRSH3   RELA/SPOT homolog 3   chr1:20211177-20213761 FORWARD LENGTH=715                                                                                                                                                                    | 186 | 715 | 4.00E-14  | 384.4 | 18.8 | 20.4  |
| Rsa1.0_00476.1.g14591.t1 | ref NP_974629.1  Low temperature and salt responsive protein [Arabidopsis thaliana]   gi 297799168 ref XP_002867468.1  hypothetical protein ARALYDRAFT_328884 [Arabidopsis lyrata subsp. lyrata]   gi 297313304 gb EFH43727.1  hypothetical protein ARALYDRAFT_328884 [Arabidopsis lyrata subsp. lyrata]   gi 332660039 gb AEE85439.1  Low temperature and salt responsive protein [Arabidopsis thaliana]   gi 482553953 gb EOA18146.1  hypothetical protein CARUB_v10006610mg [Capsella rubella] | 77  | 77  | 1.00E-35  | 100.0 | 96.1  | 100.0 | Low temperature and salt responsive protein | gbpln | Arabidopsis lyrata   | AT4G28088.1   Symbols:   Low temperature and salt responsive protein family   chr4:13961244-13961560 REVERSE LENGTH=77                                                                                                                                                            | 77  | 77  | 2.00E-38  | 100.0 | 96.1 | 100.0 |
| Rsa1.0_00476.1.g14592.t1 | ref XP_002869520.1  hypothetical protein ARALYDRAFT_491969 [Arabidopsis lyrata subsp. lyrata]   gi 297315356 gb EFH45779.1  hypothetical protein ARALYDRAFT_491969 [Arabidopsis lyrata subsp. lyrata]                                                                                                                                                                                                                                                                                             | 80  | 82  | 2.00E-20  | 102.5 | 63.8  | 71.3  | hypothetical protein ARALYDRAFT_491969      | gbpln | Arabidopsis lyrata   | AT4G28085.2   Symbols:   unknown protein; Has 35333 Blast hits to 34131 proteins in 2444 species: Archae - 798; Bacteria - 22429; Metazoa - 974; Fungi - 991; Plants - 531; Viruses - 0; Other Eukaryotes - 9610 (source: NCBI BLINK).   chr4:13960054-13960308 FORWARD LENGTH=84 | 80  | 84  | 2.00E-21  | 105.0 | 61.3 | 70.0  |
| Rsa1.0_00476.1.g14593.t1 | ref XP_002869520.1  hypothetical protein ARALYDRAFT_491969 [Arabidopsis lyrata subsp. lyrata]   gi 297315356 gb EFH45779.1  hypothetical protein ARALYDRAFT_491969 [Arabidopsis lyrata subsp. lyrata]                                                                                                                                                                                                                                                                                             | 82  | 82  | 3.00E-20  | 100.0 | 62.2  | 74.4  | hypothetical protein ARALYDRAFT_491969      | gbpln | Arabidopsis lyrata   | AT4G28085.2   Symbols:   unknown protein; Has 35333 Blast hits to 34131 proteins in 2444 species: Archae - 798; Bacteria - 22429; Metazoa - 974; Fungi - 991; Plants - 531; Viruses - 0; Other Eukaryotes - 9610 (source: NCBI BLINK).   chr4:13960054-13960308 FORWARD LENGTH=84 | 82  | 84  | 1.00E-22  | 102.4 | 61.0 | 73.2  |
| Rsa1.0_00476.1.g14594.t2 | ref NP_001031737.1  AFG1-like protein [Arabidopsis thaliana]   gi 53850477 gb AAU95415.1  At4g28070 [Arabidopsis thaliana]   gi 56790192 gb AAW30013.1  At4g28070 [Arabidopsis thaliana]   gi 332660035 gb AEE85435.1  AFG1-like protein [Arabidopsis thaliana]                                                                                                                                                                                                                                   | 502 | 473 | 0         | 94.2  | 83.5  | 86.5  | AFG1-like protein                           | gbpln | Arabidopsis thaliana | AT4G28070.2   Symbols:   AFG1-like ATPase family protein   chr4:13946009-13948462 FORWARD LENGTH=473                                                                                                                                                                              | 502 | 473 | 0         | 94.2  | 83.5 | 86.5  |
| Rsa1.0_00476.1.g14595.t1 | gb EOA17644.1  hypothetical protein CARUB_v10006010mg [Capsella rubella]                                                                                                                                                                                                                                                                                                                                                                                                                          | 78  | 133 | 2.00E-40  | 170.5 | 100.0 | 100.0 | hypothetical protein CARUB_v10006010mg      | gbpln | Capsella rubella     | AT4G28060.1   Symbols:   Cytochrome c oxidase, subunit Vlb family protein   chr4:13944018-13945602 REVERSE LENGTH=78                                                                                                                                                              | 78  | 78  | 1.00E-41  | 100.0 | 98.7 | 100.0 |
| Rsa1.0_00476.1.g14596.t1 | ref XP_002869522.1  nodulin MtN21 family protein [Arabidopsis lyrata subsp. lyrata]   gi 297315358 gb EFH45781.1  nodulin MtN21 family protein [Arabidopsis lyrata subsp. lyrata]                                                                                                                                                                                                                                                                                                                 | 573 | 359 | 1.00E-178 | 62.7  | 53.4  | 58.3  | nodulin MtN21 family protein                | gbpln | Arabidopsis lyrata   | AT4G28040.5   Symbols:   nodulin MtN21 /EamA-like transporter family protein   chr4:13940891-13942201 FORWARD LENGTH=359                                                                                                                                                          | 573 | 359 | 1.00E-179 | 62.7  | 53.2 | 57.9  |
| Rsa1.0_00476.1.g14597.t1 | ref NP_001190856.1  uncharacterized protein [Arabidopsis thaliana]   gi 332660023 gb AEE85423.1  uncharacterized protein AT4G28025 [Arabidopsis thaliana]                                                                                                                                                                                                                                                                                                                                         | 131 | 148 | 2.00E-49  | 113.0 | 79.4  | 83.2  | uncharacterized protein                     | gbpln | Arabidopsis thaliana | AT4G28025.2   Symbols:   unknown protein.   chr4:13935836-13937367 REVERSE LENGTH=148                                                                                                                                                                                             | 131 | 148 | 4.00E-52  | 113.0 | 79.4 | 83.2  |
| Rsa1.0_00476.1.g14598.t1 | ref NP_194529.4  AAA-type ATPase family protein [Arabidopsis thaliana]   gi 332660018 gb AEE85418.1  AAA-type ATPase family protein [Arabidopsis thaliana]                                                                                                                                                                                                                                                                                                                                        | 811 | 830 | 0         | 102.3 | 92.7  | 96.4  | AAA-type ATPase family protein              | gbpln | Arabidopsis thaliana | AT4G28000.1   Symbols:   P-loop containing nucleoside triphosphate hydrolases superfamily protein   chr4:13925456-13929280 FORWARD LENGTH=830                                                                                                                                     | 811 | 830 | 0         | 102.3 | 92.7 | 96.4  |
| Rsa1.0_00476.1.g14599.t1 | ref NP_567792.1  SLAC1 homologue 2 [Arabidopsis thaliana]   gi 13605877 gb AAK32924.1 AF367337.1 AT4g27970/T13J8.80 [Arabidopsis thaliana]   gi 25090193 gb AAN7249.1  At4g27970/T13J8.80 [Arabidopsis thaliana]   gi 332660015 gb AEE85415.1  SLAC1 homologue 2 [Arabidopsis thaliana]                                                                                                                                                                                                           | 513 | 519 | 0         | 101.2 | 83.6  | 91.6  | SLAC1 homologue 2                           | gbpln | Arabidopsis thaliana | AT4G27970.1   Symbols: SLAH2   SLAC1 homologue 2   chr4:13918290-13920122 REVERSE LENGTH=519                                                                                                                                                                                      | 513 | 519 | 0         | 101.2 | 83.6 | 91.6  |
| Rsa1.0_00476.1.g14600.t1 | dbj BAH57245.1  AT4G27860 [Arabidopsis thaliana]                                                                                                                                                                                                                                                                                                                                                                                                                                                  | 448 | 352 | 2.00E-32  | 78.6  | 19.2  | 26.1  | AT4G27860                                   | gbpln | Arabidopsis thaliana | AT4G27860.1   Symbols:   vacuolar iron transporter (VIT) family protein   chr4:13873808-13876240 FORWARD LENGTH=611                                                                                                                                                               | 448 | 611 | 5.00E-35  | 136.4 | 18.5 | 25.4  |

|                          |                                                                                                                                                                                                                                                                                                                                                                                                                                                                                                                                                                                                                                                                                                                                                                                                                                                                                                            |     |      |           |       |      |      |                                          |       |                      |                                                                                                                                                                                                                                                                                                                                                                                                                                   |     |     |           |       |      |      |
|--------------------------|------------------------------------------------------------------------------------------------------------------------------------------------------------------------------------------------------------------------------------------------------------------------------------------------------------------------------------------------------------------------------------------------------------------------------------------------------------------------------------------------------------------------------------------------------------------------------------------------------------------------------------------------------------------------------------------------------------------------------------------------------------------------------------------------------------------------------------------------------------------------------------------------------------|-----|------|-----------|-------|------|------|------------------------------------------|-------|----------------------|-----------------------------------------------------------------------------------------------------------------------------------------------------------------------------------------------------------------------------------------------------------------------------------------------------------------------------------------------------------------------------------------------------------------------------------|-----|-----|-----------|-------|------|------|
| Rsa1.0_00476.1.g14601.t1 | emb[CAB39638.1] RNA-directed DNA polymerase-like protein [Arabidopsis thaliana] gi 7267666 emb[CAB78094.1] RNA-directed DNA polymerase-like protein [Arabidopsis thaliana]                                                                                                                                                                                                                                                                                                                                                                                                                                                                                                                                                                                                                                                                                                                                 | 651 | 1274 | 0         | 195.7 | 55.0 | 71.6 | RNA-directed DNA polymerase-like protein | gbpln | Arabidopsis thaliana | AT4G29090.1   Symbols:   Ribonuclease H-like superfamily protein   chr4:14333528-14335255 FORWARD LENGTH=575                                                                                                                                                                                                                                                                                                                      | 651 | 575 | 8.00E-58  | 88.3  | 20.6 | 31.3 |
| Rsa1.0_00476.1.g14602.t1 | #                                                                                                                                                                                                                                                                                                                                                                                                                                                                                                                                                                                                                                                                                                                                                                                                                                                                                                          | #   | #    | #         | #     | #    | #    | -                                        | ----  | ----                 | #                                                                                                                                                                                                                                                                                                                                                                                                                                 | #   | #   | #         | #     | #    |      |
| Rsa1.0_00476.1.g14603.t1 | ref XP_002867481.1  hypothetical protein ARALYDRAFT_492001 [Arabidopsis lyrata subsp. lyrata] gi 29731333.7 gb EFH43740.1  hypothetical protein ARALYDRAFT_492001 [Arabidopsis lyrata subsp. lyrata]                                                                                                                                                                                                                                                                                                                                                                                                                                                                                                                                                                                                                                                                                                       | 109 | 195  | 3.00E-35  | 178.9 | 68.8 | 71.6 | hypothetical protein ARALYDRAFT_492001   | gbpln | Arabidopsis lyrata   | AT4G27810.1   Symbols:   unknown protein; CONTAINS InterPro DOMAIN/s: Protein of unknown function DUF688 (InterPro:IPR007789); BEST Arabidopsis thaliana protein match is: unknown protein (TAIR:AT5G53030.1); Has 73 Blast hits to 66 proteins in 11 species: Archae - 0; Bacteria - 0; Metazoa - 0; Fungi - 0; Plants - 73; Viruses - 0; Other Eukaryotes - 0 (source: NCBI BLINK).   chr4:13854641-13855671 REVERSE LENGTH=196 | 109 | 196 | 3.00E-32  | 179.8 | 67.9 | 71.6 |
| Rsa1.0_00476.1.g14604.t1 | gb EOA18032.1  hypothetical protein CARUB_v10006475mg [Capsella rubella]                                                                                                                                                                                                                                                                                                                                                                                                                                                                                                                                                                                                                                                                                                                                                                                                                                   | 346 | 346  | 1.00E-174 | 100.0 | 86.7 | 93.1 | hypothetical protein CARUB_v10006475mg   | gbpln | Capsella rubella     | AT4G27790.1   Symbols:   Calcium-binding EF hand family protein   chr4:13850066-13851488 FORWARD LENGTH=345                                                                                                                                                                                                                                                                                                                       | 346 | 345 | 1.00E-176 | 99.7  | 86.7 | 92.2 |
| Rsa1.0_00476.1.g14605.t1 | ref NP_194507.1  acyl-CoA binding protein 2 [Arabidopsis thaliana] gi 75313883 sp Q9STP8.1 ACBP2_ARAT_H RecName: Full=Acyl-CoA-binding domain-containing protein 2; Short=Acyl-CoA binding protein 2 gi 12039032 gb AAG46056.1 AF178947.1 acyl-CoA binding protein ACBP2 [Arabidopsis thaliana] gi 13661742 gb AAK38078.1 AF320561.1 putative membrane-bound acyl-CoA binding protein isoform 2 [Arabidopsis thaliana] gi 4972109 emb[CAB43966.1] putative acyl-CoA binding protein [Arabidopsis thaliana] gi 7269631 emb[CAB81427.1] putative acyl-CoA binding protein [Arabidopsis thaliana] gi 19699102 gb AAL90917.1 AT4g27780/T27E11.20 [Arabidopsis thaliana] gi 21594802 gb AAM66045.1  putative acyl-CoA binding protein [Arabidopsis thaliana] gi 21689607 gb AAM67425.1 AT4g27780/T27E11.20 [Arabidopsis thaliana] gi 332659991 gb AEE85391.1  acyl-CoA binding protein 2 [Arabidopsis thaliana] | 358 | 354  | 1.00E-168 | 98.9  | 86.0 | 91.3 | acyl-CoA binding protein 2               | gbpln | Arabidopsis thaliana | AT4G27780.1   Symbols: ACBP2   acyl-CoA binding protein 2   chr4:13847774-13849629 FORWARD LENGTH=354                                                                                                                                                                                                                                                                                                                             | 358 | 354 | 1.00E-170 | 98.9  | 86.0 | 91.3 |
| Rsa1.0_00476.1.g14606.t1 | ref XP_002869542.1  forever young oxidoreductase [Arabidopsis lyrata subsp. lyrata] gi 297315378 gb EFH45801.1  forever young oxidoreductase [Arabidopsis lyrata subsp. lyrata]                                                                                                                                                                                                                                                                                                                                                                                                                                                                                                                                                                                                                                                                                                                            | 374 | 374  | 0         | 100.0 | 91.4 | 97.1 | forever young oxidoreductase             | gbpln | Arabidopsis lyrata   | AT4G27760.1   Symbols: FEY, FEY3   NAD(P)-binding Rossmann-fold superfamily protein   chr4:13844151-13846563 FORWARD LENGTH=376                                                                                                                                                                                                                                                                                                   | 374 | 376 | 0         | 100.5 | 90.9 | 97.3 |
| Rsa1.0_00476.1.g14607.t1 | ref NP_194505.2  impaired sucrose induction 1 protein [Arabidopsis thaliana] gi 28393094 gb AAO41981.1  unknown protein [Arabidopsis thaliana] gi 28827484 gb AAO50586.1  unknown protein [Arabidopsis thaliana] gi 55956219 emb CAG26905.1  impaired sucrose induction 1 [Arabidopsis thaliana] gi 332659989 gb AEE85389.1  impaired sucrose induction 1 protein [Arabidopsis thaliana]                                                                                                                                                                                                                                                                                                                                                                                                                                                                                                                   | 305 | 305  | 1.00E-167 | 100.0 | 94.8 | 98.0 | impaired sucrose induction 1 protein     | gbpln | Arabidopsis thaliana | AT4G27750.1   Symbols: ISI   binding   chr4:13841708-13843501 FORWARD LENGTH=305                                                                                                                                                                                                                                                                                                                                                  | 305 | 305 | 1.00E-170 | 100.0 | 94.8 | 98.0 |
| Rsa1.0_00476.1.g14608.t1 | ref XP_002869544.1  hypothetical protein ARALYDRAFT_328916 [Arabidopsis lyrata subsp. lyrata] gi 297315380 gb EFH45803.1  hypothetical protein ARALYDRAFT_328916 [Arabidopsis lyrata subsp. lyrata]                                                                                                                                                                                                                                                                                                                                                                                                                                                                                                                                                                                                                                                                                                        | 107 | 148  | 2.00E-55  | 138.3 | 96.3 | 98.1 | hypothetical protein ARALYDRAFT_328916   | gbpln | Arabidopsis lyrata   | AT4G27745.1   Symbols:   Yippee family putative zinc-binding protein   chr4:13840530-13841279 FORWARD LENGTH=106                                                                                                                                                                                                                                                                                                                  | 107 | 106 | 5.00E-57  | 99.1  | 94.4 | 98.1 |
| Rsa1.0_00476.1.g14609.t1 | ref NP_194504.2  yippee-like protein [Arabidopsis thaliana] gi 122209321 sp Q2V3E2.1 YIPL5_ARAT_H RecName: Full=Protein yippee-like At4g27740 gi 110738581 dbj BAF01216.1  hypothetical protein [Arabidopsis thaliana] gi 332659987 gb AEE85387.1  yippee-like protein [Arabidopsis thaliana]                                                                                                                                                                                                                                                                                                                                                                                                                                                                                                                                                                                                              | 105 | 105  | 3.00E-49  | 100.0 | 89.5 | 92.4 | yippee-like protein                      | gbpln | Arabidopsis thaliana | AT4G27740.1   Symbols:   Yippee family putative zinc-binding protein   chr4:13839148-13839616 FORWARD LENGTH=105                                                                                                                                                                                                                                                                                                                  | 105 | 105 | 4.00E-52  | 100.0 | 89.5 | 92.4 |

|                          |                                                                                                                                                                                                                                                                                                                                                                                                                                                                                                                                                                             |     |     |           |       |      |      |                                           |       |                         |                                                                                                                                                                                                                                                                                                                                                                          |     |     |           |       |      |      |
|--------------------------|-----------------------------------------------------------------------------------------------------------------------------------------------------------------------------------------------------------------------------------------------------------------------------------------------------------------------------------------------------------------------------------------------------------------------------------------------------------------------------------------------------------------------------------------------------------------------------|-----|-----|-----------|-------|------|------|-------------------------------------------|-------|-------------------------|--------------------------------------------------------------------------------------------------------------------------------------------------------------------------------------------------------------------------------------------------------------------------------------------------------------------------------------------------------------------------|-----|-----|-----------|-------|------|------|
| Rsa1.0_00476.1.g14610.t1 | ref XP_002867483.1  ATOPT6<br>[Arabidopsis lyrata subsp. lyrata]<br>gi 297313319 gb EFH43742.1  ATOPT6<br>[Arabidopsis lyrata subsp. lyrata]                                                                                                                                                                                                                                                                                                                                                                                                                                | 735 | 735 | 0         | 100.0 | 95.8 | 97.8 | ATOPT6                                    | gbpln | Arabidopsis<br>lyrata   | AT4G27730.1   Symbols: ATOPT6, OPT6  <br>oligopeptide transporter 1   chr4:13834024-<br>13836468 REVERSE LENGTH=736                                                                                                                                                                                                                                                      | 735 | 736 | 0         | 100.1 | 95.5 | 97.8 |
| Rsa1.0_00476.1.g14611.t1 | ref NP_567786.1  major facilitator<br>protein [Arabidopsis thaliana]<br>gi 13272473 gb AAK17175.1 AF325107.1<br>putative protein [Arabidopsis thaliana]<br>gi 16930439 gb AAL31905.1 AF419573.1<br>AT4g27720/T29A15.210 [Arabidopsis<br>thaliana] gi 15912261 gb AAL08264.1 <br>AT4g27720/T29A15.210 [Arabidopsis<br>thaliana] gi 21536852 gb AAM61184.1 <br>putative transporter [Arabidopsis<br>thaliana] gi 27764934 gb AAO23588.1 <br>AT4g27720/T29A15.210 [Arabidopsis<br>thaliana] gi 332659985 gb AEE85385.1 <br>major facilitator protein [Arabidopsis<br>thaliana] | 460 | 460 | 0         | 100.0 | 92.6 | 97.2 | major facilitator protein                 | gbpln | Arabidopsis<br>thaliana | AT4G27720.1   Symbols:   Major facilitator<br>superfamily protein   chr4:13831203-<br>13833521 FORWARD LENGTH=460                                                                                                                                                                                                                                                        | 460 | 460 | 0         | 100.0 | 92.6 | 97.2 |
| Rsa1.0_00476.1.g14612.t1 | ref XP_002869545.1  hypothetical<br>protein ARALYDRAFT_913755<br>[Arabidopsis lyrata subsp. lyrata]<br>gi 297315381 gb EFH45804.1 <br>hypothetical protein<br>ARALYDRAFT_913755 [Arabidopsis<br>lyrata subsp. lyrata]                                                                                                                                                                                                                                                                                                                                                       | 460 | 460 | 0         | 100.0 | 94.1 | 98.0 | hypothetical protein<br>ARALYDRAFT_913755 | gbpln | Arabidopsis<br>lyrata   | AT4G27720.1   Symbols:   Major facilitator<br>superfamily protein   chr4:13831203-<br>13833521 FORWARD LENGTH=460                                                                                                                                                                                                                                                        | 460 | 460 | 0         | 100.0 | 93.9 | 97.8 |
| Rsa1.0_00476.1.g14613.t1 | gb EOA17385.1  hypothetical protein<br>CARUB_v10005676mg [Capsella rubella]                                                                                                                                                                                                                                                                                                                                                                                                                                                                                                 | 230 | 226 | 1.00E-111 | 98.3  | 87.4 | 90.9 | hypothetical protein<br>CARUB_v10005676mg | gbpln | Capsella<br>rubella     | AT4G27700.1   Symbols:   Rhodanese/Cell<br>cycle control phosphatase superfamily<br>protein   chr4:13826541-13827673 REVERSE<br>LENGTH=224                                                                                                                                                                                                                               | 230 | 224 | 1.00E-111 | 97.4  | 86.5 | 90.4 |
| Rsa1.0_00476.1.g14614.t1 | ref XP_002869547.1  hypothetical<br>protein ARALYDRAFT_913758<br>[Arabidopsis lyrata subsp. lyrata]<br>gi 297315383 gb EFH45806.1 <br>hypothetical protein<br>ARALYDRAFT_913758 [Arabidopsis<br>lyrata subsp. lyrata]                                                                                                                                                                                                                                                                                                                                                       | 304 | 303 | 1.00E-170 | 99.7  | 95.4 | 98.0 | hypothetical protein<br>ARALYDRAFT_913758 | gbpln | Arabidopsis<br>lyrata   | AT4G27690.1   Symbols: VPS26B   vacuolar<br>protein sorting 26B   chr4:13824019-<br>13826235 FORWARD LENGTH=303                                                                                                                                                                                                                                                          | 304 | 303 | 1.00E-172 | 99.7  | 95.1 | 97.7 |
| Rsa1.0_00476.1.g14615.t1 | gb EOA15537.1  hypothetical protein<br>CARUB_v10004969mg [Capsella rubella]                                                                                                                                                                                                                                                                                                                                                                                                                                                                                                 | 383 | 398 | 0         | 103.9 | 91.1 | 93.7 | hypothetical protein<br>CARUB_v10004969mg | gbpln | Capsella<br>rubella     | AT4G27680.1   Symbols:   P-loop containing<br>nucleoside triphosphate hydrolases<br>superfamily protein   chr4:13821263-<br>13823083 FORWARD LENGTH=398                                                                                                                                                                                                                  | 383 | 398 | 0         | 103.9 | 90.6 | 94.8 |
| Rsa1.0_00476.1.g14616.t1 | ref XP_002867485.1  chloroplast small<br>heat shock protein [Arabidopsis lyrata<br>subsp. lyrata]<br>gi 297313321 gb EFH43744.1 <br>chloroplast small heat shock protein<br>[Arabidopsis lyrata subsp. lyrata]                                                                                                                                                                                                                                                                                                                                                              | 229 | 226 | 6.00E-99  | 98.7  | 83.4 | 90.0 | chloroplast small heat<br>shock protein   | gbpln | Arabidopsis<br>lyrata   | AT4G27670.1   Symbols: HSP21   heat shock<br>protein 21   chr4:13819048-13819895<br>REVERSE LENGTH=227                                                                                                                                                                                                                                                                   | 229 | 227 | 3.00E-94  | 99.1  | 82.1 | 87.8 |
| Rsa1.0_00476.1.g14617.t1 | ref XP_002869549.1  hypothetical<br>protein ARALYDRAFT_354029<br>[Arabidopsis lyrata subsp. lyrata]<br>gi 297315385 gb EFH45808.1 <br>hypothetical protein<br>ARALYDRAFT_354029 [Arabidopsis<br>lyrata subsp. lyrata]                                                                                                                                                                                                                                                                                                                                                       | 345 | 369 | 0         | 107.0 | 91.3 | 94.5 | hypothetical protein<br>ARALYDRAFT_354029 | gbpln | Arabidopsis<br>lyrata   | AT5G54160.1   Symbols: ATOMT1, OMT1  <br>O-methyltransferase 1   chr5:21982075-<br>21984167 FORWARD LENGTH=363                                                                                                                                                                                                                                                           | 345 | 363 | 1.00E-148 | 105.2 | 71.3 | 83.8 |
| Rsa1.0_00476.1.g14618.t1 | ref XP_002869540.1  hypothetical<br>protein ARALYDRAFT_913747<br>[Arabidopsis lyrata subsp. lyrata]<br>gi 297315376 gb EFH45799.1 <br>hypothetical protein<br>ARALYDRAFT_913747 [Arabidopsis<br>lyrata subsp. lyrata]                                                                                                                                                                                                                                                                                                                                                       | 367 | 367 | 0         | 100.0 | 91.0 | 95.6 | hypothetical protein<br>ARALYDRAFT_913747 | gbpln | Arabidopsis<br>lyrata   | AT5G54160.1   Symbols: ATOMT1, OMT1  <br>O-methyltransferase 1   chr5:21982075-<br>21984167 FORWARD LENGTH=363                                                                                                                                                                                                                                                           | 367 | 363 | 1.00E-167 | 98.9  | 73.6 | 88.3 |
| Rsa1.0_00476.1.g14619.t1 | ref XP_002867486.1  hypothetical<br>protein ARALYDRAFT_492019<br>[Arabidopsis lyrata subsp. lyrata]<br>gi 297313322 gb EFH43745.1 <br>hypothetical protein<br>ARALYDRAFT_492019 [Arabidopsis<br>lyrata subsp. lyrata]                                                                                                                                                                                                                                                                                                                                                       | 174 | 176 | 5.00E-53  | 101.1 | 62.1 | 71.8 | hypothetical protein<br>ARALYDRAFT_492019 | gbpln | Arabidopsis<br>lyrata   | AT4G27660.1   Symbols:   unknown protein:<br>BEST Arabidopsis thaliana protein match is:<br>unknown protein (TAIR:AT5G54150.1). Has<br>115 Blast hits to 109 proteins in 25 species:<br>Archae - 0; Bacteria - 0; Metazoa - 10;<br>Fungi - 0; Plants - 100; Viruses - 0; Other<br>Eukaryotes - 5 (source: NCBI BLINK).  <br>chr4:13817249-13818027 REVERSE<br>LENGTH=182 | 174 | 182 | 3.00E-55  | 104.6 | 54.0 | 62.1 |

|                          |                                                                                                                                                                                                                                                                          |     |     |           |       |      |      |                                         |       |                      |                                                                                                                                                                                                                                                                                                                                                                                                                                                                                                                                                              |     |     |           |       |      |      |
|--------------------------|--------------------------------------------------------------------------------------------------------------------------------------------------------------------------------------------------------------------------------------------------------------------------|-----|-----|-----------|-------|------|------|-----------------------------------------|-------|----------------------|--------------------------------------------------------------------------------------------------------------------------------------------------------------------------------------------------------------------------------------------------------------------------------------------------------------------------------------------------------------------------------------------------------------------------------------------------------------------------------------------------------------------------------------------------------------|-----|-----|-----------|-------|------|------|
| Rsa1.0_00476.1.g14620.t1 | ref NP_567784.1  uncharacterized protein [Arabidopsis thaliana] gi 21537308 gb AA61649.1  unknown [Arabidopsis thaliana] gi 109134199 gb ABG25097.1  At4g27657 [Arabidopsis thaliana] gi 33265997 gb AE85377.1  uncharacterized protein AT4G27657 [Arabidopsis thaliana] | 63  | 62  | 2.00E-11  | 98.4  | 66.7 | 76.2 | uncharacterized protein                 | gbpln | Arabidopsis thaliana | AT4G27657.1   Symbols:   unknown protein; FUNCTIONS IN: molecular.function unknown; INVOLVED IN: biological.process unknown; LOCATED IN: endomembrane system; EXPRESSED IN: 15 plant structures; EXPRESSED DURING: 9 growth stages; BEST Arabidopsis thaliana protein match is: unknown protein (TAIR:AT5G54145.1); Has 30201 Blast hits to 17322 proteins in 780 species: Archae - 12; Bacteria - 1396; Metazoa - 17338; Fungi - 3422; Plants - 5037; Viruses - 0; Other Eukaryotes - 2996 (source: NCBI BLink).   chr4:13813124-13813312 FORWARD LENGTH=62 | 63  | 62  | 4.00E-14  | 98.4  | 66.7 | 76.2 |
| Rsa1.0_00476.1.g14621.t2 | #                                                                                                                                                                                                                                                                        | #   | #   | #         | #     | #    | #    | -                                       | ----  | ----                 | #                                                                                                                                                                                                                                                                                                                                                                                                                                                                                                                                                            | #   | #   | #         | #     | #    |      |
| Rsa1.0_00476.1.g14622.t1 | ref NP_567784.1  uncharacterized protein [Arabidopsis thaliana] gi 21537308 gb AA61649.1  unknown [Arabidopsis thaliana] gi 109134199 gb ABG25097.1  At4g27657 [Arabidopsis thaliana] gi 33265997 gb AE85377.1  uncharacterized protein AT4G27657 [Arabidopsis thaliana] | 62  | 62  | 2.00E-21  | 100.0 | 83.9 | 91.9 | uncharacterized protein                 | gbpln | Arabidopsis thaliana | AT4G27657.1   Symbols:   unknown protein; FUNCTIONS IN: molecular.function unknown; INVOLVED IN: biological.process unknown; LOCATED IN: endomembrane system; EXPRESSED IN: 15 plant structures; EXPRESSED DURING: 9 growth stages; BEST Arabidopsis thaliana protein match is: unknown protein (TAIR:AT5G54145.1); Has 30201 Blast hits to 17322 proteins in 780 species: Archae - 12; Bacteria - 1396; Metazoa - 17338; Fungi - 3422; Plants - 5037; Viruses - 0; Other Eukaryotes - 2996 (source: NCBI BLink).   chr4:13813124-13813312 FORWARD LENGTH=62 | 62  | 62  | 4.00E-24  | 100.0 | 83.9 | 91.9 |
| Rsa1.0_00476.1.g14623.t1 | ref XP_002869553.1  hypothetical protein ARALYDRAFT_913767 [Arabidopsis lyrata subsp. lyrata] gi 297315389 gb EFH45812.1  hypothetical protein ARALYDRAFT_913767 [Arabidopsis lyrata subsp. lyrata]                                                                      | 62  | 62  | 2.00E-23  | 100.0 | 80.6 | 93.5 | hypothetical protein ARALYDRAFT_913767  | gbpln | Arabidopsis lyrata   | AT4G27657.1   Symbols:   unknown protein; FUNCTIONS IN: molecular.function unknown; INVOLVED IN: biological.process unknown; LOCATED IN: endomembrane system; EXPRESSED IN: 15 plant structures; EXPRESSED DURING: 9 growth stages; BEST Arabidopsis thaliana protein match is: unknown protein (TAIR:AT5G54145.1); Has 30201 Blast hits to 17322 proteins in 780 species: Archae - 12; Bacteria - 1396; Metazoa - 17338; Fungi - 3422; Plants - 5037; Viruses - 0; Other Eukaryotes - 2996 (source: NCBI BLink).   chr4:13813124-13813312 FORWARD LENGTH=62 | 62  | 62  | 5.00E-25  | 100.0 | 83.9 | 90.3 |
| Rsa1.0_00476.1.g14624.t1 | #                                                                                                                                                                                                                                                                        | #   | #   | #         | #     | #    | #    | -                                       | ----  | ----                 | #                                                                                                                                                                                                                                                                                                                                                                                                                                                                                                                                                            | #   | #   | #         | #     | #    |      |
| Rsa1.0_00476.1.g14625.t1 | ref XP_002867488.1  hypothetical protein ARALYDRAFT_492022 [Arabidopsis lyrata subsp. lyrata] gi 297313324 gb EFH43747.1  hypothetical protein ARALYDRAFT_492022 [Arabidopsis lyrata subsp. lyrata]                                                                      | 223 | 378 | 1.00E-115 | 169.5 | 91.0 | 93.3 | hypothetical protein ARALYDRAFT_492022  | gbpln | Arabidopsis lyrata   | AT4G27650.1   Symbols: PEL1   Eukaryotic release factor 1 (eRF1) family protein   chr4:13803459-13807556 REVERSE LENGTH=378                                                                                                                                                                                                                                                                                                                                                                                                                                  | 223 | 378 | 1.00E-118 | 169.5 | 90.6 | 93.3 |
| Rsa1.0_00477.1.g14626.t1 | gb ABD64930.1  hypothetical protein 24.t00076 [Brassica oleracea]                                                                                                                                                                                                        | 523 | 407 | 3.00E-13  | 77.8  | 15.5 | 21.8 | hypothetical protein 24.t00076          | gbpln | Brassica oleracea    | #                                                                                                                                                                                                                                                                                                                                                                                                                                                                                                                                                            | #   | #   | #         | #     | #    |      |
| Rsa1.0_00477.1.g14627.t1 | gb EOA28212.1  hypothetical protein CARUB_v10024401mg [Capsella rubella]                                                                                                                                                                                                 | 98  | 97  | 1.00E-22  | 99.0  | 70.4 | 78.6 | hypothetical protein CARUB_v10024401mg  | gbpln | Capsella rubella     | AT2G27775.1   Symbols:   FUNCTIONS IN: molecular.function unknown; INVOLVED IN: biological.process unknown; LOCATED IN: chloroplast; EXPRESSED IN: 22 plant structures; EXPRESSED DURING: 13 growth stages; BEST Arabidopsis thaliana protein match is: Tetratricopeptide repeat (TPR)-like superfamily protein (TAIR:AT2G27800.1); Has 21 Blast hits to 21 proteins in 5 species: Archae - 0; Bacteria - 0; Metazoa - 0; Fungi - 0; Plants - 21; Viruses - 0; Other Eukaryotes - 0 (source: NCBI BLink).   chr2:11842618-11843254 REVERSE LENGTH=100        | 98  | 100 | 3.00E-22  | 102.0 | 66.3 | 76.5 |
| Rsa1.0_00477.1.g14628.t2 | ref XP_002880968.1  xanthine/uracil permease family protein [Arabidopsis lyrata subsp. lyrata] gi 297326807 gb EFH57227.1  xanthine/uracil permease family protein [Arabidopsis lyrata subsp. lyrata]                                                                    | 666 | 715 | 0         | 107.4 | 89.0 | 92.5 | xanthine/uracil permease family protein | gbpln | Arabidopsis lyrata   | AT2G27810.1   Symbols: ATNAT12, NAT12   nucleobase-ascorbate transporter 12   chr2:11852338-11855988 FORWARD LENGTH=709                                                                                                                                                                                                                                                                                                                                                                                                                                      | 666 | 709 | 0         | 106.5 | 87.7 | 92.0 |
| Rsa1.0_00477.1.g14629.t1 | ref XP_002880966.1  hypothetical protein ARALYDRAFT_481721 [Arabidopsis lyrata subsp. lyrata] gi 297326805 gb EFH57225.1  hypothetical protein ARALYDRAFT_481721 [Arabidopsis lyrata subsp. lyrata]                                                                      | 424 | 406 | 0         | 95.8  | 86.1 | 90.1 | hypothetical protein ARALYDRAFT_481721  | gbpln | Arabidopsis lyrata   | AT2G27820.1   Symbols: PD1, ADT3   prephenate dehydratase 1   chr2:11856808-11858082 FORWARD LENGTH=424                                                                                                                                                                                                                                                                                                                                                                                                                                                      | 424 | 424 | 0         | 100.0 | 84.2 | 88.0 |

|                          |                                                                                                                                                                                                                                                                                                                                                                                                                                                                                                                                                                                                                                                                                   |      |      |          |       |      |      |                                               |       |                      |                                                                                                                                                                                                                                                                                                                                                                                                                                           |      |      |          |       |      |      |
|--------------------------|-----------------------------------------------------------------------------------------------------------------------------------------------------------------------------------------------------------------------------------------------------------------------------------------------------------------------------------------------------------------------------------------------------------------------------------------------------------------------------------------------------------------------------------------------------------------------------------------------------------------------------------------------------------------------------------|------|------|----------|-------|------|------|-----------------------------------------------|-------|----------------------|-------------------------------------------------------------------------------------------------------------------------------------------------------------------------------------------------------------------------------------------------------------------------------------------------------------------------------------------------------------------------------------------------------------------------------------------|------|------|----------|-------|------|------|
| Rsa1.0_00477.1.g14630.t1 | ref NP_565661.2  histone deacetylase HDT4 [Arabidopsis thaliana] gi 73919944 sp Q9M4T3.1 HDT4_ARATH RecName: Full=Histone deacetylase HDT4; AltName: Full=HD-tuins protein 4; AltName: Full=Histone deacetylase 2d gi 7804965 gb AAAF70198.1 AF255713.1 putative histone deacetylase HD2d [Arabidopsis thaliana] gi 29824372 gb AAP04146.1  unknown protein [Arabidopsis thaliana] gi 30793819 gb AAP40362.1  unknown protein [Arabidopsis thaliana] gi 110739095 dbj BAF01464.1  putative histone deacetylase HD2d [Arabidopsis thaliana] gi 330252958 gb AEC08052.1  histone deacetylase HDT4 [Arabidopsis thaliana]                                                            | 204  | 203  | 8.00E-27 | 99.5  | 39.7 | 56.4 | histone deacetylase HDT4                      | gbpln | Arabidopsis thaliana | AT2G27840.1   Symbols: HDT4, HDA13, HDT04   histone deacetylase-related / HD-related   chr2:11862085-11863707 FORWARD LENGTH=203                                                                                                                                                                                                                                                                                                          | 204  | 203  | 3.00E-29 | 99.5  | 39.7 | 56.4 |
| Rsa1.0_00477.1.g14631.t1 | ref XP_002879132.1  UDP-D-apiose/UDP-D-xylose synthase 1 [Arabidopsis lyrata subsp. lyrata] gi 297324971 gb EFH55391.1  UDP-D-apiose/UDP-D-xylose synthase 1 [Arabidopsis lyrata subsp. lyrata]                                                                                                                                                                                                                                                                                                                                                                                                                                                                                   | 389  | 389  | 0        | 100.0 | 96.9 | 98.7 | UDP-D-apiose/UDP-D-xylose synthase 1          | gbpln | Arabidopsis lyrata   | AT2G27860.1   Symbols: AXS1   UDP-D-apiose/UDP-D-xylose synthase 1   chr2:11864684-11866843 REVERSE LENGTH=389                                                                                                                                                                                                                                                                                                                            | 389  | 389  | 0        | 100.0 | 96.7 | 98.5 |
| Rsa1.0_00477.1.g14632.t1 | #                                                                                                                                                                                                                                                                                                                                                                                                                                                                                                                                                                                                                                                                                 | #    | #    | #        | #     | #    | #    | -                                             | ----  | ----                 | #                                                                                                                                                                                                                                                                                                                                                                                                                                         | #    | #    | #        | #     | #    |      |
| Rsa1.0_00477.1.g14633.t9 | gb EMJ06153.1  hypothetical protein PRUPE_ppa000504mg [Prunus persica]                                                                                                                                                                                                                                                                                                                                                                                                                                                                                                                                                                                                            | 1187 | 1124 | 0        | 94.7  | 61.0 | 72.5 | hypothetical protein PRUPE_ppa000504mg        | gbpln | Prunus persica       | AT2G27900.2   Symbols:   CONTAINS InterPro DOMAIN/s: Protein of unknown function DUF2451, C-terminal (InterPro:IPR019514), Vacuolar protein sorting-associated protein 54 (InterPro:IPR019515); Has 35333 Blast hits to 34131 proteins in 2444 species: Archae - 798; Bacteria - 22429; Metazoa - 974; Fungi - 991; Plants - 531; Viruses - 0; Other Eukaryotes - 9610 (source: NCBI BLINK).   chr2:11877654-11885238 FORWARD LENGTH=1124 | 1187 | 1124 | 0        | 94.7  | 50.0 | 53.2 |
| Rsa1.0_00477.1.g14634.t1 | ref NP_565663.1  serine carboxypeptidase-like 51 [Arabidopsis thaliana] gi 125987784 sp Q67Y83.2 SCP51_ARATH RecName: Full=Serine carboxypeptidase-like 51; Flags: Precursor gi 15724218 gb AAL06502.1 AF412049.1 At2g27920/T1E2.16 [Arabidopsis thaliana] gi 20197951 gb AAD21510.2  putative carboxypeptidase [Arabidopsis thaliana] gi 27764970 gb AAO23606.1  At2g27920/T1E2.16 [Arabidopsis thaliana] gi 330252965 gb AEC08059.1  serine carboxypeptidase-like 51 [Arabidopsis thaliana]                                                                                                                                                                                     | 458  | 461  | 0        | 100.7 | 84.1 | 92.8 | serine carboxypeptidase-like 51               | gbpln | Arabidopsis thaliana | AT2G27920.1   Symbols: SCPL51   serine carboxypeptidase-like 51   chr2:11885777-11889043 REVERSE LENGTH=461                                                                                                                                                                                                                                                                                                                               | 458  | 461  | 0        | 100.7 | 84.1 | 92.8 |
| Rsa1.0_00477.1.g14635.t1 | ref NP_180360.4  PLATZ transcription factor family protein [Arabidopsis thaliana] gi 330252967 gb AEC08061.1  PLATZ transcription factor family protein [Arabidopsis thaliana]                                                                                                                                                                                                                                                                                                                                                                                                                                                                                                    | 224  | 189  | 3.00E-71 | 84.4  | 55.4 | 58.9 | PLATZ transcription factor family protein     | gbpln | Arabidopsis thaliana | AT2G27930.1   Symbols:   PLATZ transcription factor family protein   chr2:11892369-11893488 FORWARD LENGTH=189                                                                                                                                                                                                                                                                                                                            | 224  | 189  | 9.00E-74 | 84.4  | 55.4 | 58.9 |
| Rsa1.0_00477.1.g14636.t1 | ref NP_180364.1  cyclin-dependent kinases regulatory subunit 2 [Arabidopsis thaliana] gi 297822483 ref XP_002879124.1  cdk-subunit 2 [Arabidopsis lyrata subsp. lyrata] gi 75206284 sp Q9SJJ5.1 CKS2_ARATH RecName: Full=Cyclin-dependent kinases regulatory subunit 2 gi 4510419 gb AAD21505.1  putative cyclin-dependent kinase regulatory subunit [Arabidopsis thaliana] gi 38566522 gb AAR24151.1  At2g27970 [Arabidopsis thaliana] gi 40823612 gb AAR92293.1  At2g27970 [Arabidopsis thaliana] gi 297324963 gb EFH55383.1  cdk-subunit 2 [Arabidopsis lyrata subsp. lyrata] gi 330252971 gb AEC08065.1  cyclin-dependent kinases regulatory subunit 2 [Arabidopsis thaliana] | 84   | 83   | 1.00E-34 | 98.8  | 84.5 | 88.1 | cyclin-dependent kinases regulatory subunit 2 | gbpln | Arabidopsis lyrata   | AT2G27970.1   Symbols: CKS2   CDK-subunit 2   chr2:11912460-11913112 REVERSE LENGTH=83                                                                                                                                                                                                                                                                                                                                                    | 84   | 83   | 2.00E-37 | 98.8  | 84.5 | 88.1 |

|                          |                                                                                                                                                                                                                                                                                                                                                                                                       |      |      |           |       |      |      |                                                                                                                                                                                                                                                                  |             |                      |                                                                                                                                             |      |      |           |       |      |      |
|--------------------------|-------------------------------------------------------------------------------------------------------------------------------------------------------------------------------------------------------------------------------------------------------------------------------------------------------------------------------------------------------------------------------------------------------|------|------|-----------|-------|------|------|------------------------------------------------------------------------------------------------------------------------------------------------------------------------------------------------------------------------------------------------------------------|-------------|----------------------|---------------------------------------------------------------------------------------------------------------------------------------------|------|------|-----------|-------|------|------|
| Rsa1.0_00477.1.g14637.t1 | ref NP_180365.6  acyl-CoA N-acyltransferase with RING/FYVE/PHD-type zinc finger domain-containing protein [Arabidopsis thaliana] gi 330252972 gb AE08066.1  acyl-CoA N-acyltransferase with RING/FYVE/PHD-type zinc finger domain-containing protein [Arabidopsis thaliana]                                                                                                                           | 1104 | 1072 | 0         | 97.1  | 64.7 | 74.4 | acyl-CoA N-acyltransferase with RING/FYVE/PHD-type zinc finger domain-containing protein                                                                                                                                                                         | gbpln       | Arabidopsis thaliana | AT2G27980.1   Symbols:   Acyl-CoA N-acyltransferase with RING/FYVE/PHD-type zinc finger domain   chr2:11913950-11919741 REVERSE LENGTH=1072 | 1104 | 1072 | 0         | 97.1  | 64.7 | 74.4 |
| Rsa1.0_00477.1.g14638.t2 | gb EOA39500.1  hypothetical protein CARUB_v10008106mg [Capsella rubella]                                                                                                                                                                                                                                                                                                                              | 1258 | 1260 | 0         | 100.2 | 90.5 | 95.9 | hypothetical protein CARUB_v10008106mg                                                                                                                                                                                                                           | gbpln       | Capsella rubella     | AT1G42470.1   Symbols:   Patched family protein   chr1:15926987-15935128 FORWARD LENGTH=1272                                                | 1258 | 1272 | 0         | 101.1 | 83.5 | 87.8 |
| Rsa1.0_00477.1.g14639.t1 | sp P21239.2 RUB1_BRANA RecName: Full=RubisCO large subunit-binding protein subunit alpha, chloroplastic; AltName: Full=60 kDa chaperonin subunit alpha; AltName: Full=CPN-60 alpha; Flags: Precursor gi 289365 gb AAA32979.1  60-kDa chaperonin-60 alpha-polypeptide precursor, partial [Brassica napus]                                                                                              | 185  | 546  | 3.00E-65  | 295.1 | 69.2 | 70.3 | RecName: Full=RubisCO large subunit-binding protein subunit alpha, chloroplastic; AltName: Full=60 kDa chaperonin subunit alpha; AltName: Full=CPN-60 alpha; Flags: Precursor gi 289365 gb AAA32979.1  60-kDa chaperonin-60 alpha-polypeptide precursor, partial | gbpln       | Brassica napus       | AT2G28000.1   Symbols: CPN60A, CH-CPN60A, SLP   chaperonin-60alpha   chr2:11926603-11929184 FORWARD LENGTH=586                              | 185  | 586  | 2.00E-56  | 316.8 | 58.9 | 62.2 |
| Rsa1.0_00477.1.g14640.t1 | gb EOA28199.1  hypothetical protein CARUB_v10024391mg [Capsella rubella]                                                                                                                                                                                                                                                                                                                              | 118  | 99   | 3.00E-18  | 83.9  | 38.1 | 44.9 | hypothetical protein CARUB_v10024391mg                                                                                                                                                                                                                           | gbpln       | Capsella rubella     | #                                                                                                                                           | #    | #    | #         | #     | #    | #    |
| Rsa1.0_00478.1.g14641.t1 | #                                                                                                                                                                                                                                                                                                                                                                                                     | #    | #    | #         | #     | #    | #    | -                                                                                                                                                                                                                                                                | ----        | ----                 | #                                                                                                                                           | #    | #    | #         | #     | #    | #    |
| Rsa1.0_00478.1.g14642.t1 | ref NP_683599.1  ABC transporter B family member 22 [Arabidopsis thaliana] gi 33264392 gb AE77442.1  ABC transporter B family member 22 [Arabidopsis thaliana]                                                                                                                                                                                                                                        | 1186 | 1221 | 0         | 103.0 | 80.8 | 90.1 | ABC transporter B family member 22                                                                                                                                                                                                                               | gbpln       | Arabidopsis thaliana | AT3G28415.1   Symbols:   ABC transporter family protein   chr3:10647123-10651540 REVERSE LENGTH=1221                                        | 1186 | 1221 | 0         | 103.0 | 80.8 | 90.1 |
| Rsa1.0_00478.1.g14643.t1 | gb AAD19784.1  putative retroelement pol polyprotein [Arabidopsis thaliana]                                                                                                                                                                                                                                                                                                                           | 416  | 1501 | 1.00E-123 | 360.8 | 49.3 | 62.3 | putative retroelement pol polyprotein                                                                                                                                                                                                                            | gbpln       | Arabidopsis thaliana | AT4G23160.1   Symbols: CRK8   cysteine-rich RLK (RECEPTOR-like protein kinase) 8   chr4:12129485-12134086 FORWARD LENGTH=1262               | 416  | 1262 | 5.00E-72  | 303.4 | 31.7 | 47.4 |
| Rsa1.0_00478.1.g14644.t1 | dbj BAB02858.1  multidrug resistance p-glycoprotein; ABC transporter-like protein [Arabidopsis thaliana]                                                                                                                                                                                                                                                                                              | 1233 | 1262 | 0         | 102.4 | 81.4 | 90.6 | multidrug resistance p-glycoprotein; ABC transporter-like protein                                                                                                                                                                                                | gbpln       | Arabidopsis thaliana | AT3G28415.1   Symbols:   ABC transporter family protein   chr3:10647123-10651540 REVERSE LENGTH=1221                                        | 1233 | 1221 | 0         | 99.0  | 80.8 | 89.9 |
| Rsa1.0_00478.1.g14645.t1 | gb EOA14179.1  hypothetical protein CARUB_v10027329mg [Capsella rubella]                                                                                                                                                                                                                                                                                                                              | 144  | 144  | 6.00E-65  | 100.0 | 93.8 | 97.2 | hypothetical protein CARUB_v10027329mg                                                                                                                                                                                                                           | gbpln       | Capsella rubella     | AT5G51940.1   Symbols: NRPB6A, NRPD6A, NRPE6A   RNA polymerase Rpb6   chr5:21104679-21105796 FORWARD LENGTH=144                             | 144  | 144  | 7.00E-67  | 100.0 | 93.8 | 96.5 |
| Rsa1.0_00478.1.g14646.t1 | ref XP_002877098.1  hypothetical protein ARALYDRAFT_905093 [Arabidopsis lyrata subsp. lyrata] gi 297322936 gb EFH53357.1  hypothetical protein ARALYDRAFT_905093 [Arabidopsis lyrata subsp. lyrata]                                                                                                                                                                                                   | 353  | 364  | 0         | 103.1 | 89.8 | 94.3 | hypothetical protein ARALYDRAFT_905093                                                                                                                                                                                                                           | gbpln       | Arabidopsis lyrata   | AT3G28340.1   Symbols: GATL10   galacturonosyltransferase-like 10   chr3:10589396-10590493 REVERSE LENGTH=365                               | 353  | 365  | 0         | 103.4 | 89.5 | 94.6 |
| Rsa1.0_00478.1.g14647.t1 | dbj BAJ34116.1  unnamed protein product [Theellungiella halophila]                                                                                                                                                                                                                                                                                                                                    | 323  | 323  | 1.00E-162 | 100.0 | 88.2 | 93.8 | unnamed protein product                                                                                                                                                                                                                                          | ----        | ----                 | AT3G28200.1   Symbols:   Peroxidase superfamily protein   chr3:10518082-10519032 FORWARD LENGTH=316                                         | 323  | 316  | 1.00E-160 | 97.8  | 81.4 | 88.5 |
| Rsa1.0_00478.1.g14648.t1 | gb EOA23588.1  hypothetical protein CARUB_v10016783mg [Capsella rubella]                                                                                                                                                                                                                                                                                                                              | 631  | 673  | 0         | 106.7 | 94.3 | 97.6 | hypothetical protein CARUB_v10016783mg                                                                                                                                                                                                                           | gbpln       | Capsella rubella     | AT3G28180.1   Symbols: ATCSLC04, CSLC04, ATCSLC4   Cellulose-synthase-like C4   chr3:10506110-10509067 FORWARD LENGTH=673                   | 631  | 673  | 0         | 106.7 | 93.2 | 97.3 |
| Rsa1.0_00478.1.g14649.t1 | ref NP_566831.1  EamA domain-containing protein [Arabidopsis thaliana] gi 75166353 sp Q94JU2.1 WTR18_ARAT H RecName: Full=WAT1-related protein At3g28050 gi 13937165 gb AAK50076.1 AF372936.1 AT3g28050/MMG15.6 [Arabidopsis thaliana] gi 22137010 gb AAM91350.1  At3g28050/MMG15.6 [Arabidopsis thaliana] gi 332643874 gb AEE77395.1  nodulin MtN21-like transporter UMAMIT41 [Arabidopsis thaliana] | 368  | 367  | 0         | 99.7  | 91.3 | 95.9 | EamA domain-containing protein                                                                                                                                                                                                                                   | gbpln       | Arabidopsis thaliana | AT3G28050.1   Symbols:   nodulin MtN21 /EamA-like transporter family protein   chr3:10442984-10445216 FORWARD LENGTH=367                    | 368  | 367  | 0         | 99.7  | 91.3 | 95.9 |
| Rsa1.0_00478.1.g14650.t1 | gb AFW72878.1  hypothetical protein ZEAMMB73_112131 [Zea mays]                                                                                                                                                                                                                                                                                                                                        | 276  | 282  | 5.00E-17  | 102.2 | 22.1 | 24.3 | hypothetical protein ZEAMMB73_112131                                                                                                                                                                                                                             | gbpln/gbpln | Zea mays             | AT5G46630.1   Symbols:   Clathrin adaptor complex medium subunit family protein   chr5:18920580-18923252 FORWARD LENGTH=438                 | 276  | 438  | 2.00E-19  | 158.7 | 22.1 | 24.6 |





|                          |                                                                                                                                                                                                        |     |      |           |       |      |      |                                                                                                               |       |                      |                                                                                                                                                 |     |     |           |       |      |      |
|--------------------------|--------------------------------------------------------------------------------------------------------------------------------------------------------------------------------------------------------|-----|------|-----------|-------|------|------|---------------------------------------------------------------------------------------------------------------|-------|----------------------|-------------------------------------------------------------------------------------------------------------------------------------------------|-----|-----|-----------|-------|------|------|
| Rsa1.0_00479.1.g14661.t1 | gb EOA27449.1  hypothetical protein CARUB_v10023586mg [Capsella rubella]                                                                                                                               | 102 | 335  | 8.00E-14  | 328.4 | 61.8 | 64.7 | hypothetical protein CARUB_v10023586mg                                                                        | gbpln | Capsella rubella     | AT2G35680.1   Symbols:   Phosphotyrosine protein phosphatases superfamily protein   chr2:14997004-14998590 REVERSE LENGTH=337                   | 102 | 337 | 2.00E-12  | 330.4 | 39.2 | 42.2 |
| Rsa1.0_00479.1.g14662.t1 | gb AAW28084.1  transcription factor DREBIII-1 [Brassica napus]                                                                                                                                         | 205 | 204  | 5.00E-84  | 99.5  | 88.8 | 92.7 | transcription factor DREBIII-1                                                                                | gbpln | Brassica napus       | AT2G35700.1   Symbols: ATERF38, ERF38   ERF family protein 38   chr2:15005205-15005789 FORWARD LENGTH=194                                       | 205 | 194 | 4.00E-70  | 94.6  | 70.7 | 77.6 |
| Rsa1.0_00479.1.g14663.t1 | gb EOA26908.1  hypothetical protein CARUB_v10022998mg [Capsella rubella]                                                                                                                               | 494 | 524  | 0         | 106.1 | 92.7 | 95.3 | hypothetical protein CARUB_v10022998mg                                                                        | gbpln | Capsella rubella     | AT2G35710.1   Symbols:   Nucleotide-diphospho-sugar transferases superfamily protein   chr2:15010925-15014070 REVERSE LENGTH=497                | 494 | 497 | 0         | 100.6 | 91.3 | 94.3 |
| Rsa1.0_00479.1.g14664.t1 | #                                                                                                                                                                                                      | #   | #    | #         | #     | #    | #    | -                                                                                                             | ----  | ----                 | #                                                                                                                                               | #   | #   | #         | #     | #    | #    |
| Rsa1.0_00479.1.g14665.t1 | gb EOA26688.1  hypothetical protein CARUB_v10022772mg [Capsella rubella]                                                                                                                               | 661 | 679  | 0         | 102.7 | 85.9 | 91.4 | hypothetical protein CARUB_v10022772mg                                                                        | gbpln | Capsella rubella     | AT2G35940.3   Symbols: BLH1   BEL1-like homeodomain 1   chr2:15089171-15091699 REVERSE LENGTH=680                                               | 661 | 680 | 0         | 102.9 | 85.5 | 90.9 |
| Rsa1.0_00480.1.g14666.t1 | #                                                                                                                                                                                                      | #   | #    | #         | #     | #    | #    | -                                                                                                             | ----  | ----                 | #                                                                                                                                               | #   | #   | #         | #     | #    | #    |
| Rsa1.0_00480.1.g14667.t1 | gb AAK38472.1  putative oleosin [Brassica oleracea]<br>gi 38196017 gb AAR13697.1  pollen coat oleosin-glycine rich protein [Brassica oleracea]                                                         | 295 | 353  | 4.00E-82  | 119.7 | 76.3 | 79.7 | putative oleosin                                                                                              | gbpln | Brassica oleracea    | AT5G07540.1   Symbols: GRP16, ATGRP16, ATGRP-6   glycine-rich protein 16   chr5:2386212-2387206 REVERSE LENGTH=244                              | 295 | 244 | 2.00E-29  | 82.7  | 26.4 | 31.2 |
| Rsa1.0_00480.1.g14668.t1 | sp Q42626.1 OLNB3_BRANA RecName: Full=Oleosin-B3; Contains: RecName: Full=Pollen coat protein B3<br>gi 904228 gb AAA70400.1  STA 41-2 [Brassica napus]                                                 | 375 | 424  | 2.00E-82  | 113.1 | 67.5 | 71.2 | RecName: Full=Oleosin-B3; Contains: RecName: Full=Pollen coat protein B3<br>gi 904228 gb AAA70400.1  STA 41-2 | gbpln | Brassica napus       | AT5G07530.2   Symbols: GRP17, ATGRP17, ATGRP-7   glycine rich protein 17   chr5:2382829-2384495 REVERSE LENGTH=512                              | 375 | 512 | 1.00E-23  | 136.5 | 12.5 | 16.5 |
| Rsa1.0_00480.1.g14669.t1 | ref XP_002863741.1  hypothetical protein ARALYDRAFT_917455 [Arabidopsis lyrata subsp. lyrata]<br>gi 297309576 gb EFH40000.1  hypothetical protein ARALYDRAFT_917455 [Arabidopsis lyrata subsp. lyrata] | 251 | 390  | 2.00E-39  | 155.4 | 32.7 | 42.6 | hypothetical protein ARALYDRAFT_917455                                                                        | gbpln | Arabidopsis lyrata   | AT1G60720.1   Symbols:   RNA-directed DNA polymerase (reverse transcriptase)-related family protein   chr1:22357072-22357941 FORWARD LENGTH=289 | 251 | 289 | 5.00E-29  | 115.1 | 30.3 | 47.8 |
| Rsa1.0_00480.1.g14670.t1 | gb AAK38474.1  putative oleosin [Brassica oleracea]<br>gi 38196015 gb AAR13695.1  pollen coat oleosin-glycine rich protein [Brassica oleracea]                                                         | 192 | 186  | 2.00E-50  | 96.9  | 72.4 | 76.6 | putative oleosin                                                                                              | gbpln | Brassica oleracea    | AT5G07530.2   Symbols: GRP17, ATGRP17, ATGRP-7   glycine rich protein 17   chr5:2382829-2384495 REVERSE LENGTH=512                              | 192 | 512 | 2.00E-25  | 266.7 | 30.2 | 37.0 |
| Rsa1.0_00480.1.g14671.t1 | emb CAB39638.1  RNA-directed DNA polymerase-like protein [Arabidopsis thaliana]<br>gi 7267666 emb CAB78094.1  RNA-directed DNA polymerase-like protein [Arabidopsis thaliana]                          | 770 | 1274 | 0         | 165.5 | 50.6 | 67.0 | RNA-directed DNA polymerase-like protein                                                                      | gbpln | Arabidopsis thaliana | AT4G29090.1   Symbols:   Ribonuclease H-like superfamily protein   chr4:14333528-14335255 FORWARD LENGTH=575                                    | 770 | 575 | 4.00E-76  | 74.7  | 23.1 | 37.0 |
| Rsa1.0_00480.1.g14672.t1 | gb AAK38475.1  putative oleosin [Brassica oleracea]<br>gi 38196014 gb AAR13694.1  pollen coat oleosin-glycine rich protein [Brassica oleracea]                                                         | 179 | 171  | 1.00E-45  | 95.5  | 72.1 | 76.5 | putative oleosin                                                                                              | gbpln | Brassica oleracea    | AT5G07520.1   Symbols: GRP18, ATGRP18, ATGRP-8   glycine-rich protein 18   chr5:2380208-2381230 REVERSE LENGTH=228                              | 179 | 228 | 8.00E-26  | 127.4 | 44.7 | 55.3 |
| Rsa1.0_00480.1.g14673.t1 | gb AAR13693.1  zinc finger transcription factor [Brassica oleracea]                                                                                                                                    | 246 | 246  | 1.00E-140 | 100.0 | 96.3 | 98.4 | zinc finger transcription factor                                                                              | gbpln | Brassica oleracea    | AT5G07500.1   Symbols: PEI1   Zinc finger C-x8-C-x5-C-x3-H type family protein   chr5:2372716-2373453 FORWARD LENGTH=245                        | 246 | 245 | 1.00E-124 | 99.6  | 85.0 | 91.1 |
| Rsa1.0_00480.1.g14674.t1 | gb AAR13691.1  Cu2+ plastocyanin-like protein [Brassica oleracea]                                                                                                                                      | 196 | 195  | 5.00E-90  | 99.5  | 84.7 | 90.3 | Cu2+ plastocyanin-like protein                                                                                | gbpln | Brassica oleracea    | AT5G07475.1   Symbols:   Cupredoxin superfamily protein   chr5:2364827-2365536 REVERSE LENGTH=192                                               | 196 | 192 | 2.00E-79  | 98.0  | 73.5 | 81.1 |
| Rsa1.0_00480.1.g14675.t1 | emb CAB39638.1  RNA-directed DNA polymerase-like protein [Arabidopsis thaliana]<br>gi 7267666 emb CAB78094.1  RNA-directed DNA polymerase-like protein [Arabidopsis thaliana]                          | 660 | 1274 | 1.00E-145 | 193.0 | 42.6 | 58.6 | RNA-directed DNA polymerase-like protein                                                                      | gbpln | Arabidopsis thaliana | AT4G29090.1   Symbols:   Ribonuclease H-like superfamily protein   chr4:14333528-14335255 FORWARD LENGTH=575                                    | 660 | 575 | 2.00E-63  | 87.1  | 24.2 | 40.3 |
| Rsa1.0_00480.1.g14676.t1 | gb AAR13690.1  peptide methionine sulfoxide reductase [Brassica oleracea]                                                                                                                              | 202 | 202  | 1.00E-110 | 100.0 | 93.6 | 96.5 | peptide methionine sulfoxide reductase                                                                        | gbpln | Brassica oleracea    | AT5G07470.1   Symbols: PMSR3, ATMSRA3   peptidomethionine sulfoxide reductase 3   chr5:2362760-2364286 REVERSE LENGTH=202                       | 202 | 202 | 1.00E-104 | 100.0 | 86.6 | 91.1 |
| Rsa1.0_00480.1.g14677.t1 | gb AAR13689.1  peptide methionine sulfoxide reductase [Brassica oleracea]                                                                                                                              | 204 | 204  | 1.00E-113 | 100.0 | 95.6 | 97.1 | peptide methionine sulfoxide reductase                                                                        | gbpln | Brassica oleracea    | AT5G07460.1   Symbols: PMSR2, ATMSRA2   peptidomethionine sulfoxide reductase 2   chr5:2360844-2361885 REVERSE LENGTH=218                       | 204 | 218 | 1.00E-102 | 106.9 | 84.8 | 89.7 |
| Rsa1.0_00480.1.g14678.t1 | ref XP_002873308.1  CYCP4_3 [Arabidopsis lyrata subsp. lyrata]<br>gi 297319145 gb EFH49567.1  CYCP4_3 [Arabidopsis lyrata subsp. lyrata]                                                               | 216 | 220  | 1.00E-102 | 101.9 | 83.3 | 90.7 | CYCP4_3                                                                                                       | gbpln | Arabidopsis lyrata   | AT5G07450.1   Symbols: CYCP4.3   cyclin p4.3   chr5:2358418-2359253 REVERSE LENGTH=216                                                          | 216 | 216 | 1.00E-101 | 100.0 | 81.0 | 89.8 |

|                          |                                                                                                                                                                                                                                                                                                                                                                                                                                                                                                                                                                                                                                                                                                                                                                            |     |     |           |       |      |      |                                        |       |                      |                                                                                                                                                                                                                                                                                                                                                                                                                                                                     |     |     |           |       |      |      |
|--------------------------|----------------------------------------------------------------------------------------------------------------------------------------------------------------------------------------------------------------------------------------------------------------------------------------------------------------------------------------------------------------------------------------------------------------------------------------------------------------------------------------------------------------------------------------------------------------------------------------------------------------------------------------------------------------------------------------------------------------------------------------------------------------------------|-----|-----|-----------|-------|------|------|----------------------------------------|-------|----------------------|---------------------------------------------------------------------------------------------------------------------------------------------------------------------------------------------------------------------------------------------------------------------------------------------------------------------------------------------------------------------------------------------------------------------------------------------------------------------|-----|-----|-----------|-------|------|------|
| Rsa1.0_00480.1.g14679.t1 | refNP_196361.1  glutamate dehydrogenase 2 [Arabidopsis thaliana] gi 186521018 refNP_001119183.1  glutamate dehydrogenase 2 [Arabidopsis thaliana] gi 297806777 refXP_002871272.1  hypothetical protein ARALYDRAFT_487575 [Arabidopsis lyrata subsp. lyrata] gi 12229806 sp Q38946.1 DHE2_ARATH RecName: Full=Glutamate dehydrogenase 2; Short=GDH 2 gi 1336084 gb AAB01222.1  glutamate dehydrogenase 2 [Arabidopsis thaliana] gi 7576182 emb CAB87933.1  glutamate dehydrogenase 2 [Arabidopsis thaliana] gi 297317109 gb EFH47531.1  hypothetical protein ARALYDRAFT_487575 [Arabidopsis lyrata subsp. lyrata] gi 332003774 gb AED91157.1  glutamate dehydrogenase 2 [Arabidopsis thaliana] gi 332003775 gb AED91158.1  glutamate dehydrogenase 2 [Arabidopsis thaliana] | 411 | 411 | 0         | 100.0 | 97.1 | 99.5 | glutamate dehydrogenase 2              | gbpln | Arabidopsis lyrata   | AT5G07440.2   Symbols: GDH2   glutamate dehydrogenase 2   chr5:2356153-2358012 FORWARD LENGTH=411                                                                                                                                                                                                                                                                                                                                                                   | 411 | 411 | 0         | 100.0 | 97.1 | 99.5 |
| Rsa1.0_00480.1.g14680.t1 | gb EOA19726.1  hypothetical protein CARUB_v10003776mg [Capsella rubella]                                                                                                                                                                                                                                                                                                                                                                                                                                                                                                                                                                                                                                                                                                   | 354 | 362 | 1.00E-180 | 102.3 | 83.1 | 91.8 | hypothetical protein CARUB_v10003776mg | gbpln | Capsella rubella     | AT5G07420.1   Symbols:   Pectin lyase-like superfamily protein   chr5:2349547-2351366 FORWARD LENGTH=361                                                                                                                                                                                                                                                                                                                                                            | 354 | 361 | 1.00E-177 | 102.0 | 80.5 | 89.3 |
| Rsa1.0_00480.1.g14681.t1 | gb EOA22708.1  hypothetical protein CARUB_v10003415mg [Capsella rubella]                                                                                                                                                                                                                                                                                                                                                                                                                                                                                                                                                                                                                                                                                                   | 247 | 361 | 1.00E-127 | 146.2 | 86.2 | 91.5 | hypothetical protein CARUB_v10003415mg | gbpln | Capsella rubella     | AT1G69940.1   Symbols: ATPPME1, PPME1   Pectin lyase-like superfamily protein   chr1:26343549-26344971 REVERSE LENGTH=361                                                                                                                                                                                                                                                                                                                                           | 247 | 361 | 1.00E-128 | 146.2 | 86.2 | 91.1 |
| Rsa1.0_00480.1.g14682.t1 | gb AAC39475.1  respiratory burst oxidase protein A [Arabidopsis thaliana]                                                                                                                                                                                                                                                                                                                                                                                                                                                                                                                                                                                                                                                                                                  | 906 | 902 | 0         | 99.6  | 81.9 | 88.7 | respiratory burst oxidase protein A    | gbpln | Arabidopsis thaliana | AT5G07390.1   Symbols: ATRBOHA, RBOHA   respiratory burst oxidase homolog A   chr5:2336063-2339728 REVERSE LENGTH=902                                                                                                                                                                                                                                                                                                                                               | 906 | 902 | 0         | 99.6  | 82.0 | 88.7 |
| Rsa1.0_00480.1.g14683.t3 | refNP_001031848.1  uncharacterized protein [Arabidopsis thaliana] gi 79508236 refNP_196355.2  uncharacterized protein [Arabidopsis thaliana] gi 55978831 gb AAV68877.1  hypothetical protein AT5G07380 [Arabidopsis thaliana] gi 55978833 gb AAV68878.1  hypothetical protein AT5G07380 [Arabidopsis thaliana] gi 61742743 gb AAV35192.1  hypothetical protein AT5G07380 [Arabidopsis thaliana] gi 332003765 gb AED91148.1  uncharacterized protein AT5G07380 [Arabidopsis thaliana] gi 332003766 gb AED91149.1  uncharacterized protein AT5G07380 [Arabidopsis thaliana]                                                                                                                                                                                                  | 637 | 641 | 0         | 100.6 | 76.3 | 85.1 | uncharacterized protein                | gbpln | Arabidopsis thaliana | AT5G07380.2   Symbols:   unknown protein; Has 84 Blast hits to 81 proteins in 31 species: Archae - 0; Bacteria - 0; Metazoa - 42; Fungi - 0; Plants - 41; Viruses - 0; Other Eukaryotes - 1 (source: NCBI BLINK).   chr5:2332527-2335736 FORWARD LENGTH=641                                                                                                                                                                                                         | 637 | 641 | 0         | 100.6 | 76.3 | 85.1 |
| Rsa1.0_00480.1.g14684.t1 | gb AAM64773.1  putative inositol hexaphosphate kinase [Arabidopsis thaliana]                                                                                                                                                                                                                                                                                                                                                                                                                                                                                                                                                                                                                                                                                               | 284 | 286 | 1.00E-143 | 100.7 | 86.3 | 91.9 | putative inositol hexaphosphate kinase | gbpln | Arabidopsis thaliana | AT5G07370.4   Symbols: IPK2a, ATIPK2A   inositol polyphosphate kinase 2 alpha   chr5:2331251-2332111 FORWARD LENGTH=286                                                                                                                                                                                                                                                                                                                                             | 284 | 286 | 2.33E-156 | 100.7 | 85.9 | 91.9 |
| Rsa1.0_00480.1.g14685.t7 | refXP_002873306.1  amidase family protein [Arabidopsis lyrata subsp. lyrata] gi 297319114 gb EFH49565.1  amidase family protein [Arabidopsis lyrata subsp. lyrata]                                                                                                                                                                                                                                                                                                                                                                                                                                                                                                                                                                                                         | 723 | 622 | 0         | 86.0  | 73.6 | 77.3 | amidase family protein                 | gbpln | Arabidopsis lyrata   | AT5G07360.1   Symbols:   Amidase family protein   chr5:2326925-2330011 REVERSE LENGTH=659                                                                                                                                                                                                                                                                                                                                                                           | 723 | 659 | 0         | 91.1  | 74.0 | 77.3 |
| Rsa1.0_00480.1.g14686.t1 | refNP_196350.1  uncharacterized protein [Arabidopsis thaliana] gi 7576171 emb CAB87922.1  putative protein [Arabidopsis thaliana] gi 26452141 dbj BAC43159.1  unknown protein [Arabidopsis thaliana] gi 34098921 gb AAQ56843.1  At5g07330 [Arabidopsis thaliana] gi 332003754 gb AED91137.1  uncharacterized protein AT5G07330 [Arabidopsis thaliana]                                                                                                                                                                                                                                                                                                                                                                                                                      | 167 | 165 | 6.00E-71  | 98.8  | 83.2 | 89.2 | uncharacterized protein                | gbpln | Arabidopsis thaliana | AT5G07330.1   Symbols:   unknown protein; FUNCTIONS IN: molecular_function unknown; INVOLVED IN: biological_process unknown; LOCATED IN: mitochondrion; BEST Arabidopsis thaliana protein match is: unknown protein (TAIRAT1G63060.1). Has 1807 Blast hits to 1807 proteins in 277 species: Archae - 0; Bacteria - 0; Metazoa - 736; Fungi - 347; Plants - 385; Viruses - 0; Other Eukaryotes - 339 (source: NCBI BLINK).   chr5:2316064-2316641 FORWARD LENGTH=165 | 167 | 165 | 2.00E-73  | 98.8  | 83.2 | 89.2 |
| Rsa1.0_00480.1.g14687.t1 | gb EOA20534.1  hypothetical protein CARUB_v10000847mg [Capsella rubella]                                                                                                                                                                                                                                                                                                                                                                                                                                                                                                                                                                                                                                                                                                   | 475 | 481 | 0         | 101.3 | 93.9 | 96.0 | hypothetical protein CARUB_v10000847mg | gbpln | Capsella rubella     | AT5G07320.1   Symbols:   Mitochondrial substrate carrier family protein   chr5:2310248-2312082 FORWARD LENGTH=479                                                                                                                                                                                                                                                                                                                                                   | 475 | 479 | 0         | 100.8 | 92.0 | 95.4 |
| Rsa1.0_00481.1.g14688.t1 | #                                                                                                                                                                                                                                                                                                                                                                                                                                                                                                                                                                                                                                                                                                                                                                          | #   | #   | #         | #     | #    | #    | -                                      | ----  | ----                 | #                                                                                                                                                                                                                                                                                                                                                                                                                                                                   | #   | #   | #         | #     | #    | #    |

|                          |                                                                                                                                                                                                                                                                                                                                                                                                                                                                                                                                                                                                                                                                |     |     |           |       |      |      |                                        |       |                      |                                                                                                                                                                                                                                                                                                                                                                           |     |     |           |       |      |      |
|--------------------------|----------------------------------------------------------------------------------------------------------------------------------------------------------------------------------------------------------------------------------------------------------------------------------------------------------------------------------------------------------------------------------------------------------------------------------------------------------------------------------------------------------------------------------------------------------------------------------------------------------------------------------------------------------------|-----|-----|-----------|-------|------|------|----------------------------------------|-------|----------------------|---------------------------------------------------------------------------------------------------------------------------------------------------------------------------------------------------------------------------------------------------------------------------------------------------------------------------------------------------------------------------|-----|-----|-----------|-------|------|------|
| Rsa1.0_00481.1.g14689.t2 | refXP_002865011.1  hypothetical protein ARALYDRAFT_496871 [Arabidopsis lyrata subsp. lyrata] gi 297310846 gb EFH41270.1  hypothetical protein ARALYDRAFT_496871 [Arabidopsis lyrata subsp. lyrata]                                                                                                                                                                                                                                                                                                                                                                                                                                                             | 300 | 403 | 5.00E-68  | 134.3 | 40.3 | 43.3 | hypothetical protein ARALYDRAFT_496871 | gbpln | Arabidopsis lyrata   | AT5G67290.1   Symbols: FAD-dependent oxidoreductase family protein   chr5:26848419-26849755 REVERSE LENGTH=406                                                                                                                                                                                                                                                            | 300 | 406 | 8.00E-70  | 135.3 | 40.3 | 43.0 |
| Rsa1.0_00481.1.g14690.t1 | refXP_002866710.1  AtMYB44/AtMYB1 [Arabidopsis lyrata subsp. lyrata] gi 297312545 gb EFH42969.1  AtMYB44/AtMYB1 [Arabidopsis lyrata subsp. lyrata]                                                                                                                                                                                                                                                                                                                                                                                                                                                                                                             | 298 | 305 | 1.00E-141 | 102.3 | 86.9 | 89.3 | AtMYB44/AtMYB1                         | gbpln | Arabidopsis lyrata   | AT5G67300.1   Symbols: ATMYB1, ATMYB44, MYB1, MYB44   myb domain protein r1   chr5:26854109-26855026 FORWARD LENGTH=305                                                                                                                                                                                                                                                   | 298 | 305 | 1.00E-138 | 102.3 | 87.2 | 89.6 |
| Rsa1.0_00481.1.g14691.t1 | # # # # # # # # # - ---- ---- # # # # # # #                                                                                                                                                                                                                                                                                                                                                                                                                                                                                                                                                                                                                    |     |     |           |       |      |      |                                        |       |                      |                                                                                                                                                                                                                                                                                                                                                                           |     |     |           |       |      |      |
| Rsa1.0_00481.1.g14692.t1 | refNP_569048.1  subtilisin-like protease [Arabidopsis thaliana] gi 75099392 sp O65351.1 SUBL_ARATH RecName: Full=Cucumisin-like serine protease; AltName: Full=Cucumisin-like serine protease; Flags: Precursor gi 13430746 gb AAK25995.1 AF360285.1 putative subtilisin serine protease ARA12 [Arabidopsis thaliana] gi 3176874 gb AAC18851.1  cucumisin-like serine protease [Arabidopsis thaliana] gi 9758435 dbj BAB09021.1  cucumisin-like serine protease [Arabidopsis thaliana] gi 23296832 gb AAN13181.1  putative subtilisin serine protease ARA12 [Arabidopsis thaliana] gi 332010949 gb AED98332.1  subtilisin-like protease [Arabidopsis thaliana] | 754 | 757 | 0         | 100.4 | 87.4 | 92.7 | subtilisin-like protease               | gbpln | Arabidopsis thaliana | AT5G67360.1   Symbols: ARA12   Subtilase family protein   chr5:26872192-26874465 REVERSE LENGTH=757                                                                                                                                                                                                                                                                       | 754 | 757 | 0         | 100.4 | 87.4 | 92.7 |
| Rsa1.0_00481.1.g14693.t1 | refXP_002865007.1  hypothetical protein ARALYDRAFT_496863 [Arabidopsis lyrata subsp. lyrata] gi 297310842 gb EFH41266.1  hypothetical protein ARALYDRAFT_496863 [Arabidopsis lyrata subsp. lyrata]                                                                                                                                                                                                                                                                                                                                                                                                                                                             | 322 | 326 | 1.00E-152 | 101.2 | 88.5 | 95.0 | hypothetical protein ARALYDRAFT_496863 | gbpln | Arabidopsis lyrata   | AT5G67370.1   Symbols: Protein of unknown function (DUF1230)   chr5:26877667-26879465 REVERSE LENGTH=327                                                                                                                                                                                                                                                                  | 322 | 327 | 1.00E-154 | 101.6 | 87.9 | 95.3 |
| Rsa1.0_00481.1.g14694.t1 | gb EOA15160.1  hypothetical protein CARUB_v10028548mg [Capsella rubella]                                                                                                                                                                                                                                                                                                                                                                                                                                                                                                                                                                                       | 411 | 411 | 0         | 100.0 | 83.0 | 87.8 | hypothetical protein CARUB_v10028548mg | gbpln | Capsella rubella     | AT5G67380.1   Symbols: CKA1, ATCKA1   casein kinase alpha 1   chr5:26881156-26883383 REVERSE LENGTH=409                                                                                                                                                                                                                                                                   | 411 | 409 | 0         | 99.5  | 82.0 | 85.6 |
| Rsa1.0_00481.1.g14695.t1 | dbj BAJ34215.1  unnamed protein product [Thellungiella halophila]                                                                                                                                                                                                                                                                                                                                                                                                                                                                                                                                                                                              | 600 | 603 | 0         | 100.5 | 90.5 | 94.2 | unnamed protein product                | ----  | ----                 | AT5G67385.1   Symbols: Phototropic-responsive NPH3 family protein   chr5:26884754-26887083 FORWARD LENGTH=604                                                                                                                                                                                                                                                             | 600 | 604 | 0         | 100.7 | 90.2 | 94.0 |
| Rsa1.0_00481.1.g14696.t1 | refXP_002865005.1  hypothetical protein ARALYDRAFT_358820 [Arabidopsis lyrata subsp. lyrata] gi 297310840 gb EFH41264.1  hypothetical protein ARALYDRAFT_358820 [Arabidopsis lyrata subsp. lyrata]                                                                                                                                                                                                                                                                                                                                                                                                                                                             | 175 | 174 | 1.00E-55  | 99.4  | 82.3 | 90.3 | hypothetical protein ARALYDRAFT_358820 | gbpln | Arabidopsis lyrata   | AT5G67390.2   Symbols: unknown protein; BEST Arabidopsis thaliana protein match is: Plant protein of unknown function (DUF863) (TAIRAT1G69360.1); Has 186 Blast hits to 186 proteins in 18 species: Archaea - 0; Bacteria - 0; Metazoa - 0; Fungi - 0; Plants - 170; Viruses - 0; Other Eukaryotes - 16 (source: NCBI BLINK);   chr5:26887883-26888512 REVERSE LENGTH=176 | 175 | 176 | 1.00E-57  | 100.6 | 80.6 | 90.3 |
| Rsa1.0_00481.1.g14697.t1 | refXP_002876006.1  LOB domain protein 38 [Arabidopsis lyrata subsp. lyrata] gi 297321844 gb EFH52265.1  LOB domain protein 38 [Arabidopsis lyrata subsp. lyrata]                                                                                                                                                                                                                                                                                                                                                                                                                                                                                               | 239 | 236 | 3.00E-94  | 98.7  | 78.7 | 84.9 | LOB domain protein 38                  | gbpln | Arabidopsis lyrata   | AT5G67420.1   Symbols: LBD37, ASL39   LOB domain-containing protein 37   chr5:26904576-26905415 REVERSE LENGTH=250                                                                                                                                                                                                                                                        | 239 | 250 | 6.00E-96  | 104.6 | 83.7 | 90.4 |
| Rsa1.0_00481.1.g14698.t1 | gb AAD25622.1 AC005287_24 Hypothetical protein [Arabidopsis thaliana]                                                                                                                                                                                                                                                                                                                                                                                                                                                                                                                                                                                          | 264 | 224 | 7.00E-17  | 84.8  | 20.8 | 34.1 | Hypothetical protein                   | gbpln | Arabidopsis thaliana | AT1G14800.1   Symbols: Nucleic acid-binding, OB-fold-like protein   chr1:5099572-5102558 FORWARD LENGTH=384                                                                                                                                                                                                                                                               | 264 | 384 | 1.00E-15  | 145.5 | 17.4 | 29.2 |
| Rsa1.0_00481.1.g14699.t1 | gb AAB53260.1  zinc-finger protein-1 [Brassica rapa subsp. oleifera]                                                                                                                                                                                                                                                                                                                                                                                                                                                                                                                                                                                           | 239 | 235 | 4.00E-95  | 98.3  | 84.9 | 88.7 | zinc-finger protein-1                  | gbpln | Brassica rapa        | AT5G67450.1   Symbols: AZF1, ZF1   zinc-finger protein 1   chr5:26919142-26919879 REVERSE LENGTH=245                                                                                                                                                                                                                                                                      | 239 | 245 | 2.00E-83  | 102.5 | 76.2 | 82.8 |
| Rsa1.0_00481.1.g14700.t1 | refXP_002865000.1  glycosyl hydrolase family protein 17 [Arabidopsis lyrata subsp. lyrata] gi 297310835 gb EFH41259.1  glycosyl hydrolase family protein 17 [Arabidopsis lyrata subsp. lyrata]                                                                                                                                                                                                                                                                                                                                                                                                                                                                 | 415 | 382 | 1.00E-163 | 92.0  | 75.2 | 80.7 | glycosyl hydrolase family protein 17   | gbpln | Arabidopsis lyrata   | AT5G67460.1   Symbols: O-Glycosyl hydrolases family 17 protein   chr5:26921984-26923274 REVERSE LENGTH=380                                                                                                                                                                                                                                                                | 415 | 380 | 1.00E-160 | 91.6  | 72.5 | 78.6 |
| Rsa1.0_00481.1.g14701.t1 | gb EOA12871.1  hypothetical protein CARUB_v10025843mg [Capsella rubella]                                                                                                                                                                                                                                                                                                                                                                                                                                                                                                                                                                                       | 950 | 922 | 0         | 97.1  | 73.7 | 78.6 | hypothetical protein CARUB_v10025843mg | gbpln | Capsella rubella     | AT5G67470.1   Symbols: ATFH6, FH6   formin homolog 6   chr5:26926835-26930212 FORWARD LENGTH=899                                                                                                                                                                                                                                                                          | 950 | 899 | 0         | 94.6  | 71.9 | 76.8 |

|                          |                                                                                                                                                                                                                                                                                                                       |      |      |           |       |      |      |                                                |       |                      |                                                                                                                                                                                                                                                                                                                                                                                                                                                                                                                         |      |      |           |       |      |      |
|--------------------------|-----------------------------------------------------------------------------------------------------------------------------------------------------------------------------------------------------------------------------------------------------------------------------------------------------------------------|------|------|-----------|-------|------|------|------------------------------------------------|-------|----------------------|-------------------------------------------------------------------------------------------------------------------------------------------------------------------------------------------------------------------------------------------------------------------------------------------------------------------------------------------------------------------------------------------------------------------------------------------------------------------------------------------------------------------------|------|------|-----------|-------|------|------|
| Rsa1.0_00481.1.g14702.t1 | gb EOA17180.1  hypothetical protein CARUB_v10005451mg [Capsella rubella]                                                                                                                                                                                                                                              | 293  | 278  | 3.00E-73  | 94.9  | 50.2 | 65.2 | hypothetical protein CARUB_v10005451mg         | gbpln | Capsella rubella     | AT4G17700.1   Symbols:   unknown protein; BEST Arabidopsis thaliana protein match is: unknown protein (TAIR:AT4G17990.1); Has 30201 Blast hits to 17322 proteins in 780 species; Archae - 12; Bacteria - 1396; Metazoa - 17338; Fungi - 3422; Plants - 5037; Viruses - 0; Other Eukaryotes - 2996 (source: NCBI BLINK).   chr4:9854322-9855227 FORWARD LENGTH=164                                                                                                                                                       | 293  | 164  | 1.00E-42  | 56.0  | 29.0 | 36.5 |
| Rsa1.0_00481.1.g14703.t1 | ref NP_201556.2  uncharacterized protein [Arabidopsis thaliana] gi 91807109 gb ABE66281.1  unknown [Arabidopsis thaliana] gi 332010976 gb AED98359.1  uncharacterized protein AT5G67550 [Arabidopsis thaliana]                                                                                                        | 575  | 509  | 0         | 88.5  | 59.5 | 67.0 | uncharacterized protein                        | gbpln | Arabidopsis thaliana | AT5G67550.1   Symbols:   unknown protein; FUNCTIONS IN: molecular_function unknown; INVOLVED IN: biological_process unknown; LOCATED IN: endomembrane system; EXPRESSED IN: flower; EXPRESSED DURING: 4 anthesis; BEST Arabidopsis thaliana protein match is: unknown protein (TAIR:AT1G71110.1); Has 161 Blast hits to 154 proteins in 16 species; Archae - 0; Bacteria - 0; Metazoa - 0; Fungi - 0; Plants - 161; Viruses - 0; Other Eukaryotes - 0 (source: NCBI BLINK).   chr5:26946908-26949112 REVERSE LENGTH=509 | 575  | 509  | 0         | 88.5  | 59.5 | 67.0 |
| Rsa1.0_00482.1.g14704.t1 | ref NP_974731.1  8-amino-7-oxononanoate synthase [Arabidopsis thaliana] gi 67847131 gb AAAY82238.1  7-keto-8-amino pelargonic acid synthase [Arabidopsis thaliana] gi 332003382 gb AED90765.1  8-amino-7-oxononanoate synthase [Arabidopsis thaliana]                                                                 | 472  | 476  | 0         | 100.8 | 89.4 | 94.9 | 8-amino-7-oxononanoate synthase                | gbpln | Arabidopsis thaliana | AT5G04620.2   Symbols: ATBIOF, BIOF   biotin F   chr5:1327292-1329934 FORWARD LENGTH=476                                                                                                                                                                                                                                                                                                                                                                                                                                | 472  | 476  | 0         | 100.8 | 89.4 | 94.9 |
| Rsa1.0_00482.1.g14705.t1 | ref XP_002873158.1  hypothetical protein ARALYDRAFT_487242 [Arabidopsis lyrata subsp. lyrata] gi 297318995 gb EFH49417.1  hypothetical protein ARALYDRAFT_487242 [Arabidopsis lyrata subsp. lyrata]                                                                                                                   | 417  | 435  | 1.00E-166 | 104.3 | 75.5 | 84.9 | hypothetical protein ARALYDRAFT_487242         | gbpln | Arabidopsis lyrata   | AT5G04610.1   Symbols:   S-adenosyl-L-methionine-dependent methyltransferases superfamily protein   chr5:1325612-1326916 REVERSE LENGTH=434                                                                                                                                                                                                                                                                                                                                                                             | 417  | 434  | 1.00E-164 | 104.1 | 74.1 | 83.9 |
| Rsa1.0_00482.1.g14706.t1 | gb EOA21520.1  hypothetical protein CARUB_v10001924mg [Capsella rubella]                                                                                                                                                                                                                                              | 244  | 220  | 1.00E-103 | 90.2  | 82.4 | 87.3 | hypothetical protein CARUB_v10001924mg         | gbpln | Capsella rubella     | AT5G04600.1   Symbols:   RNA-binding (RRM/RBD/RNP motifs) family protein   chr5:1323700-1325486 FORWARD LENGTH=222                                                                                                                                                                                                                                                                                                                                                                                                      | 244  | 222  | 3.00E-99  | 91.0  | 71.3 | 79.9 |
| Rsa1.0_00482.1.g14707.t1 | ref XP_002871103.1  hypothetical protein ARALYDRAFT_908346 [Arabidopsis lyrata subsp. lyrata] gi 297316940 gb EFH47362.1  hypothetical protein ARALYDRAFT_908346 [Arabidopsis lyrata subsp. lyrata]                                                                                                                   | 645  | 642  | 0         | 99.5  | 95.0 | 96.9 | hypothetical protein ARALYDRAFT_908346         | gbpln | Arabidopsis lyrata   | AT5G04590.1   Symbols: SIR   sulfite reductase   chr5:1319404-1322298 FORWARD LENGTH=642                                                                                                                                                                                                                                                                                                                                                                                                                                | 645  | 642  | 0         | 99.5  | 94.7 | 96.6 |
| Rsa1.0_00482.1.g14708.t1 | ref NP_196074.2  Myotubularin-like phosphatases II-like protein [Arabidopsis thaliana] gi 332003375 gb AED90758.1  Myotubularin-like phosphatases II-like protein [Arabidopsis thaliana]                                                                                                                              | 840  | 833  | 0         | 99.2  | 76.9 | 85.1 | Myotubularin-like phosphatases II-like protein | gbpln | Arabidopsis thaliana | AT5G04540.1   Symbols:   Myotubularin-like phosphatases II superfamily   chr5:1296826-1302299 REVERSE LENGTH=833                                                                                                                                                                                                                                                                                                                                                                                                        | 840  | 833  | 0         | 99.2  | 76.9 | 85.1 |
| Rsa1.0_00482.1.g14709.t1 | ref XP_002873154.1  beta-ketoacyl-CoA synthase family protein [Arabidopsis lyrata subsp. lyrata] gi 297318991 gb EFH49413.1  beta-ketoacyl-CoA synthase family protein [Arabidopsis lyrata subsp. lyrata]                                                                                                             | 463  | 464  | 0         | 100.2 | 87.5 | 92.4 | beta-ketoacyl-CoA synthase family protein      | gbpln | Arabidopsis lyrata   | AT5G04530.1   Symbols: KCS19   3-ketoacyl-CoA synthase 19   chr5:1292222-1293616 REVERSE LENGTH=464                                                                                                                                                                                                                                                                                                                                                                                                                     | 463  | 464  | 0         | 100.2 | 86.8 | 92.2 |
| Rsa1.0_00482.1.g14710.t1 | gb EOA20487.1  hypothetical protein CARUB_v10000799mg [Capsella rubella]                                                                                                                                                                                                                                              | 485  | 495  | 0         | 102.1 | 94.4 | 96.7 | hypothetical protein CARUB_v10000799mg         | gbpln | Capsella rubella     | AT5G04510.1   Symbols: PDK1, ATPDK1   3'-phosphoinositide-dependent protein kinase 1   chr5:1287235-1289681 FORWARD LENGTH=491                                                                                                                                                                                                                                                                                                                                                                                          | 485  | 491  | 0         | 101.2 | 93.6 | 96.7 |
| Rsa1.0_00482.1.g14711.t1 | gb AFB74217.1  phyto kinase [Brassica napus]                                                                                                                                                                                                                                                                          | 299  | 307  | 1.00E-140 | 102.7 | 83.6 | 91.6 | phyto kinase                                   | gbpln | Brassica napus       | AT5G04490.1   Symbols: VTE5   vitamin E pathway gene 5   chr5:1279867-1281587 FORWARD LENGTH=304                                                                                                                                                                                                                                                                                                                                                                                                                        | 299  | 304  | 1.00E-133 | 101.7 | 79.3 | 88.3 |
| Rsa1.0_00482.1.g14712.t1 | ref NP_568137.1  UDP-glycosyltransferase family protein [Arabidopsis thaliana] gi 15450503 gb AAK96544.1  AT5g04480/T32M21.80 [Arabidopsis thaliana] gi 24111433 gb AAAN46867.1  AT5g04480/T32M21.80 [Arabidopsis thaliana] gi 332003367 gb AED90750.1  UDP-glycosyltransferase family protein [Arabidopsis thaliana] | 1035 | 1050 | 0         | 101.4 | 89.5 | 95.2 | UDP-glycosyltransferase family protein         | gbpln | Arabidopsis thaliana | AT5G04480.1   Symbols:   UDP-Glycosyltransferase superfamily protein   chr5:1271886-1277793 REVERSE LENGTH=1050                                                                                                                                                                                                                                                                                                                                                                                                         | 1035 | 1050 | 0         | 101.4 | 89.5 | 95.2 |

|                          |                                                                                                                                                                                                                                                                                                                                                                                                                                                                                                                           |     |     |           |       |      |      |                                                                  |       |                      |                                                                                                                                             |     |     |           |       |      |      |
|--------------------------|---------------------------------------------------------------------------------------------------------------------------------------------------------------------------------------------------------------------------------------------------------------------------------------------------------------------------------------------------------------------------------------------------------------------------------------------------------------------------------------------------------------------------|-----|-----|-----------|-------|------|------|------------------------------------------------------------------|-------|----------------------|---------------------------------------------------------------------------------------------------------------------------------------------|-----|-----|-----------|-------|------|------|
| Rsa1.0_00482.1.g14713.t1 | refNP_196067.1  cyclin-dependent protein kinase inhibitor [Arabidopsis thaliana]<br>gi 75181205 sp Q9LZ78.1 SIM_ARATH<br>RecName: Full=Cyclin-dependent protein kinase inhibitor SIM; AltName: Full=Protein SIAMESE<br>gi 7406451 emb CA885553.1  putative protein [Arabidopsis thaliana]<br>gi 21537413 gb AAM61754.1  unknown [Arabidopsis thaliana]<br>gi 32815859 gb AAP88332.1  At5g04470 [Arabidopsis thaliana]<br>gi 332003366 gb AED90749.1  cyclin-dependent protein kinase inhibitor SIM [Arabidopsis thaliana] | 134 | 127 | 2.00E-29  | 94.8  | 71.6 | 77.6 | cyclin-dependent protein kinase inhibitor                        | gbpln | Arabidopsis thaliana | AT5G04470.1   Symbols: SIM   cyclin-dependent protein kinase inhibitors   chr5:1266893-1267276 REVERSE LENGTH=127                           | 134 | 127 | 4.00E-32  | 94.8  | 71.6 | 77.6 |
| Rsa1.0_00482.1.g14714.t1 | refXP_002871095.1  protein binding protein [Arabidopsis lyrata subsp. lyrata] gi 297316932 gb EFH47354.1  protein binding protein [Arabidopsis lyrata subsp. lyrata]                                                                                                                                                                                                                                                                                                                                                      | 786 | 860 | 0         | 109.4 | 80.5 | 87.4 | protein binding protein                                          | gbpln | Arabidopsis lyrata   | AT5G04460.3   Symbols:   RING/U-box superfamily protein   chr5:1260009-1263695 FORWARD LENGTH=863                                           | 786 | 863 | 0         | 109.8 | 80.5 | 87.8 |
| Rsa1.0_00482.1.g14715.t1 | refXP_002871094.1  hypothetical protein ARALYDRAFT_487226 [Arabidopsis lyrata subsp. lyrata] gi 297316931 gb EFH47353.1  hypothetical protein ARALYDRAFT_487226 [Arabidopsis lyrata subsp. lyrata]                                                                                                                                                                                                                                                                                                                        | 253 | 252 | 1.00E-124 | 99.6  | 91.7 | 95.3 | hypothetical protein ARALYDRAFT_487226                           | gbpln | Arabidopsis lyrata   | AT5G04440.1   Symbols:   Protein of unknown function (DUF1997)   chr5:1254957-1256624 FORWARD LENGTH=255                                    | 253 | 255 | 1.00E-121 | 100.8 | 89.7 | 94.1 |
| Rsa1.0_00482.1.g14716.t1 | refNP_850764.1  binding to TOMV RNA 1L (long form) protein [Arabidopsis thaliana] gi 332003360 gb AED90743.1  binding to TOMV RNA 1L (long form) protein [Arabidopsis thaliana]                                                                                                                                                                                                                                                                                                                                           | 339 | 334 | 1.00E-176 | 98.5  | 90.9 | 94.1 | binding to TOMV RNA 1L (long form) protein                       | gbpln | Arabidopsis thaliana | AT5G04430.2   Symbols: BTR1, BTR1L   binding to TOMV RNA 1L (long form)   chr5:1250802-1253523 REVERSE LENGTH=334                           | 339 | 334 | 1.00E-179 | 98.5  | 90.9 | 94.1 |
| Rsa1.0_00482.1.g14717.t1 | refXP_002871092.1  hypothetical protein ARALYDRAFT_908325 [Arabidopsis lyrata subsp. lyrata] gi 297316929 gb EFH47351.1  hypothetical protein ARALYDRAFT_908325 [Arabidopsis lyrata subsp. lyrata]                                                                                                                                                                                                                                                                                                                        | 568 | 568 | 0         | 100.0 | 83.6 | 90.0 | hypothetical protein ARALYDRAFT_908325                           | gbpln | Arabidopsis lyrata   | AT5G04410.1   Symbols: NAC2, anac078   NAC domain containing protein 2   chr5:1243980-1246416 FORWARD LENGTH=567                            | 568 | 567 | 0         | 99.8  | 81.9 | 88.7 |
| Rsa1.0_00482.1.g14718.t1 | refNP_196059.1  C2H2-type zinc finger protein [Arabidopsis thaliana] gi 28392998 gb AAO41934.1  putative zinc finger transcription factor [Arabidopsis thaliana] gi 28827440 gb AAO50564.1  putative zinc finger transcription factor [Arabidopsis thaliana] gi 332003354 gb AED90737.1  C2H2-type zinc finger protein [Arabidopsis thaliana]                                                                                                                                                                             | 349 | 362 | 1.00E-147 | 103.7 | 80.2 | 86.8 | C2H2-type zinc finger protein                                    | gbpln | Arabidopsis thaliana | AT5G04390.1   Symbols:   C2H2-type zinc finger family protein   chr5:1239166-1240254 FORWARD LENGTH=362                                     | 349 | 362 | 1.00E-149 | 103.7 | 80.2 | 86.8 |
| Rsa1.0_00482.1.g14719.t1 | refNP_196058.1  S-adenosyl-L-methionine-dependent methyltransferase-like protein [Arabidopsis thaliana] gi 332003352 gb AED90735.1  S-adenosyl-L-methionine-dependent methyltransferase-like protein [Arabidopsis thaliana]                                                                                                                                                                                                                                                                                               | 393 | 385 | 1.00E-174 | 98.0  | 76.3 | 84.2 | S-adenosyl-L-methionine-dependent methyltransferase-like protein | gbpln | Arabidopsis thaliana | AT5G04380.1   Symbols:   S-adenosyl-L-methionine-dependent methyltransferases superfamily protein   chr5:1234883-1236317 FORWARD LENGTH=385 | 393 | 385 | 1.00E-177 | 98.0  | 76.3 | 84.2 |
| Rsa1.0_00483.1.g14720.t2 | refXP_002871957.1  hypothetical protein ARALYDRAFT_488986 [Arabidopsis lyrata subsp. lyrata] gi 297317794 gb EFH48216.1  hypothetical protein ARALYDRAFT_488986 [Arabidopsis lyrata subsp. lyrata]                                                                                                                                                                                                                                                                                                                        | 205 | 165 | 5.00E-77  | 80.5  | 69.8 | 72.7 | hypothetical protein ARALYDRAFT_488986                           | gbpln | Arabidopsis lyrata   | AT5G20810.1   Symbols:   SAUR-like auxin-responsive protein family   chr5:7044791-7045555 FORWARD LENGTH=165                                | 205 | 165 | 5.00E-77  | 80.5  | 67.8 | 71.7 |
| Rsa1.0_00483.1.g14721.t1 | refNP_197582.1  SAUR-like auxin-responsive protein family [Arabidopsis thaliana] gi 89111850 gb ABD60697.1  At5g20820 [Arabidopsis thaliana] gi 332005510 gb AED92893.1  SAUR-like auxin-responsive protein family [Arabidopsis thaliana]                                                                                                                                                                                                                                                                                 | 127 | 127 | 9.00E-61  | 100.0 | 89.0 | 93.7 | SAUR-like auxin-responsive protein family                        | gbpln | Arabidopsis thaliana | AT5G20820.1   Symbols:   SAUR-like auxin-responsive protein family   chr5:70446911-7047294 REVERSE LENGTH=127                               | 127 | 127 | 2.00E-63  | 100.0 | 89.0 | 93.7 |
| Rsa1.0_00483.1.g14722.t1 | refXP_002874016.1  hypothetical protein ARALYDRAFT_910122 [Arabidopsis lyrata subsp. lyrata] gi 297319853 gb EFH50275.1  hypothetical protein ARALYDRAFT_910122 [Arabidopsis lyrata subsp. lyrata]                                                                                                                                                                                                                                                                                                                        | 805 | 808 | 0         | 100.4 | 94.0 | 97.1 | hypothetical protein ARALYDRAFT_910122                           | gbpln | Arabidopsis lyrata   | AT5G20830.2   Symbols: SUS1, ASUS1, atsus1   sucrose synthase 1   chr5:7050599-7054032 REVERSE LENGTH=808                                   | 805 | 808 | 0         | 100.4 | 93.4 | 97.1 |
| Rsa1.0_00483.1.g14723.t1 | #                                                                                                                                                                                                                                                                                                                                                                                                                                                                                                                         | #   | #   | #         | #     | #    | #    | -                                                                | ----  | ----                 | #                                                                                                                                           | #   | #   | #         | #     | #    |      |

|                          |                                                                                                                                                                                                                                      |     |     |           |       |      |      |                                                 |             |                      |                                                                                                                                                                                                                                                                                                                                                                                                             |     |     |           |       |      |      |
|--------------------------|--------------------------------------------------------------------------------------------------------------------------------------------------------------------------------------------------------------------------------------|-----|-----|-----------|-------|------|------|-------------------------------------------------|-------------|----------------------|-------------------------------------------------------------------------------------------------------------------------------------------------------------------------------------------------------------------------------------------------------------------------------------------------------------------------------------------------------------------------------------------------------------|-----|-----|-----------|-------|------|------|
| Rsa1.0_00483.1.g14724.t1 | gb EOA22650.1  hypothetical protein CARUB_v10003342mg [Capsella rubella]                                                                                                                                                             | 837 | 828 | 0         | 98.9  | 84.3 | 91.0 | hypothetical protein CARUB_v10003342mg          | gbpln       | Capsella rubella     | AT5G20840.1   Symbols:   Phosphoinositide phosphatase family protein   chr5:7061638-7068572 REVERSE LENGTH=831                                                                                                                                                                                                                                                                                              | 837 | 831 | 0         | 99.3  | 83.8 | 89.7 |
| Rsa1.0_00483.1.g14725.t1 | gb ACQ44224.1  unknown [Arabis alpina]                                                                                                                                                                                               | 145 | 291 | 2.00E-33  | 200.7 | 50.3 | 66.2 | unknown                                         | gbpln       | Arabis alpina #      | # # # # # #                                                                                                                                                                                                                                                                                                                                                                                                 |     |     |           |       |      |      |
| Rsa1.0_00483.1.g14726.t1 | gb EOA21011.1  hypothetical protein CARUB_v10001345mg [Capsella rubella]                                                                                                                                                             | 388 | 342 | 0         | 88.1  | 85.6 | 87.1 | hypothetical protein CARUB_v10001345mg          | gbpln       | Capsella rubella     | AT5G20850.1   Symbols: ATRAD51, RAD51   RAS associated with diabetes protein 51   chr5:7070758-7072860 REVERSE LENGTH=342                                                                                                                                                                                                                                                                                   | 388 | 342 | 0         | 88.1  | 85.3 | 86.9 |
| Rsa1.0_00483.1.g14727.t1 | ref NP_001146854.1  RING zinc finger protein-like [Zea mays] gi 195604260 gb ACG23960.1  RING zinc finger protein-like [Zea mays]                                                                                                    | 172 | 173 | 6.00E-82  | 100.6 | 95.3 | 96.5 | RING zinc finger protein-like                   | gbenv/gbpln | Zea mays             | AT5G20885.1   Symbols:   RING/U-box superfamily protein   chr5:7084133-7084663 REVERSE LENGTH=176                                                                                                                                                                                                                                                                                                           | 172 | 176 | 3.00E-80  | 102.3 | 87.2 | 94.8 |
| Rsa1.0_00483.1.g14728.t1 | gb EOA20386.1  hypothetical protein CARUB_v10000699mg [Capsella rubella]                                                                                                                                                             | 527 | 527 | 0         | 100.0 | 96.2 | 98.9 | hypothetical protein CARUB_v10000699mg          | gbpln       | Capsella rubella     | AT5G20890.1   Symbols:   TCP-1/cpn60 chaperonin family protein   chr5:7087020-7089906 REVERSE LENGTH=527                                                                                                                                                                                                                                                                                                    | 527 | 527 | 0         | 100.0 | 95.8 | 98.7 |
| Rsa1.0_00483.1.g14729.t1 | db BAJ34102.1  unnamed protein product [Thellungiella halophila]                                                                                                                                                                     | 199 | 214 | 6.00E-75  | 107.5 | 79.4 | 83.4 | unnamed protein product                         | ----        | ----                 | AT5G20900.1   Symbols: JAZ12, TIFY3B   jasmonate-zim-domain protein 12   chr5:7090883-7092201 FORWARD LENGTH=187                                                                                                                                                                                                                                                                                            | 199 | 187 | 1.00E-66  | 94.0  | 66.8 | 75.9 |
| Rsa1.0_00483.1.g14730.t1 | gb EOA21161.1  hypothetical protein CARUB_v10001508mg, partial [Capsella rubella]                                                                                                                                                    | 275 | 314 | 1.00E-126 | 114.2 | 86.9 | 91.6 | hypothetical protein CARUB_v10001508mg, partial | gbpln       | Capsella rubella     | AT5G20920.2   Symbols: EIF2 BETA   eukaryotic translation initiation factor 2 beta subunit   chr5:7094994-7096661 REVERSE LENGTH=267                                                                                                                                                                                                                                                                        | 275 | 267 | 1.00E-126 | 97.1  | 85.1 | 90.2 |
| Rsa1.0_00483.1.g14731.t1 | gb EOA25553.1  hypothetical protein CARUB_v10018898mg [Capsella rubella]                                                                                                                                                             | 329 | 316 | 1.00E-108 | 96.0  | 65.3 | 75.7 | hypothetical protein CARUB_v10018898mg          | gbpln       | Capsella rubella     | AT5G25290.1   Symbols:   F-box family protein with a domain of unknown function (DUF295)   chr5:8778592-8779785 FORWARD LENGTH=397                                                                                                                                                                                                                                                                          | 329 | 397 | 4.00E-65  | 120.7 | 45.3 | 64.1 |
| Rsa1.0_00483.1.g14732.t4 | ref XP_002889622.1  hypothetical protein ARALYDRAFT_470709 [Arabidopsis lyrata subsp. lyrata] gi 297335464 gb EFH65881.1  hypothetical protein ARALYDRAFT_470709 [Arabidopsis lyrata subsp. lyrata]                                  | 153 | 365 | 9.00E-32  | 238.6 | 47.7 | 51.0 | hypothetical protein ARALYDRAFT_470709          | gbpln       | Arabidopsis lyrata   | AT1G06870.1   Symbols:   Peptidase S24/S26A/S26B/S26C family protein   chr1:2108832-2110642 FORWARD LENGTH=367                                                                                                                                                                                                                                                                                              | 153 | 367 | 4.00E-33  | 239.9 | 46.4 | 50.3 |
| Rsa1.0_00483.1.g14733.t1 | gb ABK28572.1  unknown [Arabidopsis thaliana]                                                                                                                                                                                        | 410 | 415 | 1.00E-102 | 101.2 | 52.2 | 67.3 | unknown                                         | gbpln       | Arabidopsis thaliana | AT3G26010.1   Symbols:   Galactose oxidase/kelch repeat superfamily protein   chr3:9511901-9513145 FORWARD LENGTH=414                                                                                                                                                                                                                                                                                       | 410 | 414 | 1.00E-105 | 101.0 | 52.2 | 67.3 |
| Rsa1.0_00483.1.g14734.t1 | ref NP_176872.1  uncharacterized protein [Arabidopsis thaliana] gi 9755450 gb AAF98211.1 AC007152.7 Hypothetical protein [Arabidopsis thaliana] gi 332196462 gb AEE34583.1  uncharacterized protein AT1G67020 [Arabidopsis thaliana] | 851 | 659 | 3.00E-12  | 77.4  | 6.1  | 8.8  | uncharacterized protein                         | gbpln       | Arabidopsis thaliana | AT1G67020.1   Symbols:   unknown protein; FUNCTIONS IN: molecular_function unknown; INVOLVED IN: biological_process unknown; LOCATED IN: cellular_component unknown; EXPRESSED IN: leaf; Has 72 Blast hits to 72 proteins in 9 species: Archaee - 0; Bacteria - 0; Metazoa - 0; Fungi - 0; Plants - 72; Viruses - 0; Other Eukaryotes - 0 (source: NCBI BLINK).   chr1:25011008-25012987 REVERSE LENGTH=659 | 851 | 659 | 6.00E-15  | 77.4  | 6.1  | 8.8  |
| Rsa1.0_00483.1.g14735.t2 | gb EOA20091.1  hypothetical protein CARUB_v10000368mg [Capsella rubella]                                                                                                                                                             | 693 | 688 | 0         | 99.3  | 84.1 | 89.8 | hypothetical protein CARUB_v10000368mg          | gbpln       | Capsella rubella     | AT5G20930.1   Symbols: TSL   Protein kinase superfamily protein   chr5:7098213-7102970 FORWARD LENGTH=688                                                                                                                                                                                                                                                                                                   | 693 | 688 | 0         | 99.3  | 84.4 | 89.5 |
| Rsa1.0_00483.1.g14736.t2 | gb EOA19371.1  hypothetical protein CARUB_v10000466mg [Capsella rubella]                                                                                                                                                             | 630 | 624 | 0         | 99.0  | 89.4 | 93.5 | hypothetical protein CARUB_v10000466mg          | gbpln       | Capsella rubella     | AT5G20950.2   Symbols:   Glycosyl hydrolase family protein   chr5:7107609-7110775 REVERSE LENGTH=624                                                                                                                                                                                                                                                                                                        | 630 | 624 | 0         | 99.0  | 89.5 | 93.7 |
| Rsa1.0_00484.1.g14737.t1 | gb EOA40302.1  hypothetical protein CARUB_v10009029mg [Capsella rubella]                                                                                                                                                             | 491 | 475 | 3.00E-41  | 96.7  | 32.8 | 44.0 | hypothetical protein CARUB_v10009029mg          | gbpln       | Capsella rubella     | AT3G18035.1   Symbols: HON4   winged-helix DNA-binding transcription factor family protein   chr3:6169384-6171558 REVERSE LENGTH=480                                                                                                                                                                                                                                                                        | 491 | 480 | 2.00E-39  | 97.8  | 34.2 | 44.2 |
| Rsa1.0_00484.1.g14738.t1 | gb EOA40302.1  hypothetical protein CARUB_v10009029mg [Capsella rubella]                                                                                                                                                             | 512 | 475 | 4.00E-47  | 92.8  | 31.4 | 43.2 | hypothetical protein CARUB_v10009029mg          | gbpln       | Capsella rubella     | AT3G18035.1   Symbols: HON4   winged-helix DNA-binding transcription factor family protein   chr3:6169384-6171558 REVERSE LENGTH=480                                                                                                                                                                                                                                                                        | 512 | 480 | 1.00E-43  | 93.8  | 37.9 | 48.6 |

|                          |                                                                                                                                                                                                                                                                                                                                                                                                                                                                                                                                                                                                                                                                                                                                                                                                                                        |     |     |           |       |      |      |                                                               |       |                         |                                                                                                                                                                            |     |     |           |       |      |      |
|--------------------------|----------------------------------------------------------------------------------------------------------------------------------------------------------------------------------------------------------------------------------------------------------------------------------------------------------------------------------------------------------------------------------------------------------------------------------------------------------------------------------------------------------------------------------------------------------------------------------------------------------------------------------------------------------------------------------------------------------------------------------------------------------------------------------------------------------------------------------------|-----|-----|-----------|-------|------|------|---------------------------------------------------------------|-------|-------------------------|----------------------------------------------------------------------------------------------------------------------------------------------------------------------------|-----|-----|-----------|-------|------|------|
| Rsa1.0_00484.1.g14739.t1 | refNP_188430.1<br>phosphopantothienylcysteine<br>decarboxylase [Arabidopsis thaliana]<br>gi 13124313 sp Q9SWE5.1 HAL3A_ARAT<br>H RecName:<br>Full=Phosphopantothienylcysteine<br>decarboxylase; Short=PPCDC; AltName:<br>Full=Halotolerance protein Hal3a;<br>Short=AtCoaC; Short=AtHal3a<br>gi 10835869 pdb 1E20A Chain A, The<br>Fmn Binding Protein Athal3<br>gi 5802225 gb AAD51616.1 AF166262.1<br>HAL3A protein [Arabidopsis thaliana]<br>gi 11994209 dbj BAB01331.1  HAL3A<br>protein [Arabidopsis thaliana]<br>gi 48310154 gb AAAT41764.1  At3g18030<br>[Arabidopsis thaliana]<br>gi 52218792 gb AAU29466.1  At3g18030<br>[Arabidopsis thaliana]<br>gi 110737049 dbj BAF00478.1  HAL3A<br>protein [Arabidopsis thaliana]<br>gi 332642515 gb AEE76036.1 <br>phosphopantothienylcysteine<br>decarboxylase [Arabidopsis thaliana] | 210 | 209 | 1.00E-114 | 99.5  | 94.3 | 98.1 | phosphopantothienylcysteine<br>decarboxylase                  | gbpln | Arabidopsis<br>thaliana | AT3G18030.1   Symbols: ATHAL3A, HAL3A,<br>HAL3, ATHAL3   HAL3-like protein A  <br>chr3:6167883-6168629 REVERSE<br>LENGTH=209                                               | 210 | 209 | 1.00E-116 | 99.5  | 94.3 | 98.1 |
| Rsa1.0_00484.1.g14740.t1 | gb EOA32381.1  hypothetical protein<br>CARUB_v10015648mg [Capsella rubella]                                                                                                                                                                                                                                                                                                                                                                                                                                                                                                                                                                                                                                                                                                                                                            | 688 | 687 | 0         | 99.9  | 79.8 | 89.1 | hypothetical protein<br>CARUB_v10015648mg                     | gbpln | Capsella<br>rubella     | AT3G18020.1   Symbols:   Pentatricopeptide<br>repeat (PPR) superfamily protein  <br>chr3:6165449-6167515 FORWARD<br>LENGTH=688                                             | 688 | 688 | 0         | 100.0 | 79.5 | 88.2 |
| Rsa1.0_00484.1.g14741.t1 | ref XP_002862807.1  WOX1 protein<br>[Arabidopsis lyrata subsp. lyrata]<br>gi 29730854.1 gb EFH39065.1  WOX1<br>protein [Arabidopsis lyrata subsp.<br>lyrata]                                                                                                                                                                                                                                                                                                                                                                                                                                                                                                                                                                                                                                                                           | 346 | 348 | 1.00E-145 | 100.6 | 77.7 | 84.1 | WOX1 protein                                                  | gbpln | Arabidopsis<br>lyrata   | AT3G18010.1   Symbols: WOX1   WUSCHEL<br>related homeobox 1   chr3:6161155-6163183<br>REVERSE LENGTH=350                                                                   | 346 | 350 | 1.00E-143 | 101.2 | 76.9 | 83.8 |
| Rsa1.0_00484.1.g14742.t1 | gb AAP83582.1  phosphoethanolamine<br>N-methyltransferase [Brassica napus]                                                                                                                                                                                                                                                                                                                                                                                                                                                                                                                                                                                                                                                                                                                                                             | 492 | 491 | 0         | 99.8  | 97.6 | 99.0 | phosphoethanolamine<br>N-methyltransferase                    | gbpln | Brassica<br>napus       | AT3G18000.1   Symbols: NMT1, XPL1,<br>PEAMT   S-adenosyl-L-methionine-<br>dependent methyltransferases superfamily<br>protein   chr3:6154578-6157331 FORWARD<br>LENGTH=491 | 492 | 491 | 0         | 99.8  | 93.3 | 97.6 |
| Rsa1.0_00484.1.g14743.t1 | gb EOA31949.1  hypothetical protein<br>CARUB_v10015190mg [Capsella rubella]                                                                                                                                                                                                                                                                                                                                                                                                                                                                                                                                                                                                                                                                                                                                                            | 177 | 177 | 1.00E-90  | 100.0 | 91.5 | 96.0 | hypothetical protein<br>CARUB_v10015190mg                     | gbpln | Capsella<br>rubella     | AT3G17980.1   Symbols:   Calcium-<br>dependent lipid-binding (CaLB domain) family<br>protein   chr3:6152417-6153115 FORWARD<br>LENGTH=177                                  | 177 | 177 | 9.00E-93  | 100.0 | 92.1 | 96.6 |
| Rsa1.0_00484.1.g14744.t5 | refNP_188424.2  translocon at the<br>outer membrane of chloroplasts 64-III<br>[Arabidopsis thaliana]<br>gi 75335547 sp O9LVH5.1 OE64C_ARAT<br>H RecName: Full=Outer envelope<br>protein 64, chloroplastic; AltName:<br>Full=Translocon at the outer membrane<br>of chloroplasts 64-III<br>gi 9294499 dbj BAB02718.1  unnamed<br>protein product [Arabidopsis thaliana]<br>gi 332642509 gb AEE76030.1  translocon<br>at the outer membrane of chloroplasts<br>64-III [Arabidopsis thaliana]                                                                                                                                                                                                                                                                                                                                             | 612 | 589 | 0         | 96.2  | 83.7 | 89.2 | translocon at the outer<br>membrane of<br>chloroplasts 64-III | gbpln | Arabidopsis<br>thaliana | AT3G17970.1   Symbols: atToc64-III,<br>TOC64-III   translocon at the outer<br>membrane of chloroplasts 64-III  <br>chr3:6148030-6151794 FORWARD<br>LENGTH=589              | 612 | 589 | 0         | 96.2  | 83.7 | 89.2 |
| Rsa1.0_00484.1.g14745.t1 | ref XP_002885235.1  aldose 1-<br>epimerase family protein [Arabidopsis<br>lyrata subsp. lyrata]<br>gi 297331075 gb EFH61494.1  aldose 1-<br>epimerase family protein [Arabidopsis<br>lyrata subsp. lyrata]                                                                                                                                                                                                                                                                                                                                                                                                                                                                                                                                                                                                                             | 343 | 341 | 0         | 99.4  | 88.9 | 95.3 | aldose 1-epimerase<br>family protein                          | gbpln | Arabidopsis<br>lyrata   | AT3G17940.1   Symbols:   Galactose<br>mutarotase-like superfamily protein  <br>chr3:6143707-6145244 REVERSE<br>LENGTH=341                                                  | 343 | 341 | 0         | 99.4  | 88.9 | 94.5 |
| Rsa1.0_00484.1.g14746.t1 | ref XP_002874264.1  hypothetical<br>protein ARALYDRAFT_489405<br>[Arabidopsis lyrata subsp. lyrata]<br>gi 297320101 gb EFH50523.1 <br>hypothetical protein<br>ARALYDRAFT_489405 [Arabidopsis<br>lyrata subsp. lyrata]                                                                                                                                                                                                                                                                                                                                                                                                                                                                                                                                                                                                                  | 268 | 280 | 8.00E-75  | 104.5 | 54.5 | 68.3 | hypothetical protein<br>ARALYDRAFT_489405                     | gbpln | Arabidopsis<br>lyrata   | AT5G25475.3   Symbols:   AP2/B3-like<br>transcriptional factor family protein  <br>chr5:8867920-8869492 REVERSE<br>LENGTH=282                                              | 268 | 282 | 5.00E-74  | 105.2 | 55.2 | 69.0 |



|                          |                                                                                                                                                                                                                                                                                                                                                                                                                                                                        |      |      |          |       |       |       |                                        |       |                      |                                                                                                                                                                                                                                                                                                                                                                                                                                                                                                                         |      |      |           |       |      |      |
|--------------------------|------------------------------------------------------------------------------------------------------------------------------------------------------------------------------------------------------------------------------------------------------------------------------------------------------------------------------------------------------------------------------------------------------------------------------------------------------------------------|------|------|----------|-------|-------|-------|----------------------------------------|-------|----------------------|-------------------------------------------------------------------------------------------------------------------------------------------------------------------------------------------------------------------------------------------------------------------------------------------------------------------------------------------------------------------------------------------------------------------------------------------------------------------------------------------------------------------------|------|------|-----------|-------|------|------|
| Rsa1.0_00484.1.g14747.t1 | ref[XP_002885234.1] hypothetical protein ARALYDRAFT_898147 [Arabidopsis lyrata subsp. lyrata] gi 297331074 gb EFH61493.1] hypothetical protein ARALYDRAFT_898147 [Arabidopsis lyrata subsp. lyrata]                                                                                                                                                                                                                                                                    | 188  | 190  | 8.00E-80 | 101.1 | 83.0  | 89.9  | hypothetical protein ARALYDRAFT_898147 | gbpln | Arabidopsis lyrata   | AT3G17930.1   Symbols:   unknown protein; FUNCTIONS IN: molecular function unknown; INVOLVED IN: biological process unknown; LOCATED IN: chloroplast thylakoid membrane; EXPRESSED IN: 22 plant structures; CONTAINS InterPro DOMAIN/s: Protein of unknown function DUF3007 (InterPro:IPR021562); Has 236 Blast hits to 236 proteins in 83 species: Archae - 0; Bacteria - 117; Metazoa - 0; Fungi - 0; Plants - 39; Viruses - 0; Other Eukaryotes - 80 (source: NCBI BLink).   chr3:6142307-6143246 REVERSE LENGTH=190 | 188  | 190  | 1.00E-80  | 101.1 | 82.4 | 89.9 |
| Rsa1.0_00484.1.g14748.t2 | gb EOA32684.1] hypothetical protein CARUB_v10015982mg [Capsella rubella]                                                                                                                                                                                                                                                                                                                                                                                               | 1020 | 1020 | 0        | 100.0 | 81.9  | 88.4  | hypothetical protein CARUB_v10015982mg | gbpln | Capsella rubella     | AT3G17920.1   Symbols:   Outer arm dynein light chain 1 protein   chr3:6137255-6142023 FORWARD LENGTH=1010                                                                                                                                                                                                                                                                                                                                                                                                              | 1020 | 1010 | 0         | 99.0  | 81.2 | 87.4 |
| Rsa1.0_00484.1.g14749.t1 | gb AAD17360.1] contains similarity to transposase [Arabidopsis thaliana]                                                                                                                                                                                                                                                                                                                                                                                               | 273  | 428  | 3.00E-26 | 156.8 | 22.7  | 30.8  | contains similarity to transposase     | gbpln | Arabidopsis thaliana | #                                                                                                                                                                                                                                                                                                                                                                                                                                                                                                                       | #    | #    | #         | #     | #    |      |
| Rsa1.0_00484.1.g14750.t1 | dbj BAA04994.1] glutamine synthetase [Raphanus sativus]                                                                                                                                                                                                                                                                                                                                                                                                                | 354  | 354  | 0        | 100.0 | 100.0 | 100.0 | glutamine synthetase                   | gbpln | Raphanus sativus     | AT3G17820.1   Symbols:   ATGSKB6, GLN1.3, GLN1.3   glutamine synthetase 1.3   chr3:6097503-6099408 FORWARD LENGTH=354                                                                                                                                                                                                                                                                                                                                                                                                   | 354  | 354  | 0         | 100.0 | 93.2 | 97.2 |
| Rsa1.0_00484.1.g14751.t1 | #                                                                                                                                                                                                                                                                                                                                                                                                                                                                      | #    | #    | #        | #     | #     | #     | -                                      | ----  | ----                 | #                                                                                                                                                                                                                                                                                                                                                                                                                                                                                                                       | #    | #    | #         | #     | #    |      |
| Rsa1.0_00484.1.g14752.t1 | ref NP_188408.1] pyrimidine 1 [Arabidopsis thaliana] gi 9294485 dbj BAB02704.1] senescens-related protein; dihydroorotate dehydrogenase-like protein [Arabidopsis thaliana] gi 14334712 gb AAK59534.1] putative dehydrogenase [Arabidopsis thaliana] gi 16323430 gb AAL15209.1] putative dehydrogenase [Arabidopsis thaliana] gi 24850451 gb AAN64919.1] putative dehydrogenase [Arabidopsis thaliana] gi 332642489 gb AEE76010.1] pyrimidine 1 [Arabidopsis thaliana] | 427  | 426  | 0        | 99.8  | 92.3  | 97.0  | pyrimidine 1                           | gbpln | Arabidopsis thaliana | AT3G17810.1   Symbols:   PYD1   pyrimidine 1   chr3:6094279-6096289 FORWARD LENGTH=426                                                                                                                                                                                                                                                                                                                                                                                                                                  | 427  | 426  | 0         | 99.8  | 92.3 | 97.0 |
| Rsa1.0_00484.1.g14753.t1 | dbj BAJ34170.1] unnamed protein product [Thellungiella halophila]                                                                                                                                                                                                                                                                                                                                                                                                      | 393  | 419  | 0        | 106.6 | 85.8  | 92.4  | unnamed protein product                | ----  | ----                 | AT3G17800.1   Symbols:   Protein of unknown function (DUF760)   chr3:6091248-6092873 REVERSE LENGTH=421                                                                                                                                                                                                                                                                                                                                                                                                                 | 393  | 421  | 1.00E-177 | 107.1 | 84.2 | 91.6 |
| Rsa1.0_00484.1.g14754.t1 | gb ADG45868.1] purple acid phosphatase 17 isoform 1 [Brassica oleracea var. viridis] gi 295854831 gb ADG45872.1] purple acid phosphatase 17 isoform 1 [Brassica oleracea var. viridis]                                                                                                                                                                                                                                                                                 | 334  | 337  | 0        | 100.9 | 95.5  | 97.6  | purple acid phosphatase 17 isoform 1   | gbpln | Brassica oleracea    | AT3G17790.1   Symbols:   ATACP5, ATPAP17, PAP17   purple acid phosphatase 17   chr3:6089779-6090988 FORWARD LENGTH=338                                                                                                                                                                                                                                                                                                                                                                                                  | 334  | 338  | 1.00E-170 | 101.2 | 85.3 | 92.8 |
| Rsa1.0_00484.1.g14755.t1 | ref XP_002891431.1] hypothetical protein ARALYDRAFT_473983 [Arabidopsis lyrata subsp. lyrata] gi 297337273 gb EFH67690.1] hypothetical protein ARALYDRAFT_473983 [Arabidopsis lyrata subsp. lyrata]                                                                                                                                                                                                                                                                    | 129  | 129  | 3.00E-59 | 100.0 | 86.0  | 92.2  | hypothetical protein ARALYDRAFT_473983 | gbpln | Arabidopsis lyrata   | AT1G48440.1   Symbols:   B-cell receptor-associated 31-like   chr1:1790705-17908327 FORWARD LENGTH=129                                                                                                                                                                                                                                                                                                                                                                                                                  | 129  | 129  | 3.00E-61  | 100.0 | 85.3 | 91.5 |
| Rsa1.0_00484.1.g14756.t3 | ref XP_002885229.1] dihydroxyacetone kinase family protein [Arabidopsis lyrata subsp. lyrata] gi 297331069 gb EFH61488.1] dihydroxyacetone kinase family protein [Arabidopsis lyrata subsp. lyrata]                                                                                                                                                                                                                                                                    | 618  | 595  | 0        | 96.3  | 88.5  | 91.6  | dihydroxyacetone kinase family protein | gbpln | Arabidopsis lyrata   | AT3G17770.1   Symbols:   Dihydroxyacetone kinase   chr3:6081973-6085957 REVERSE LENGTH=595                                                                                                                                                                                                                                                                                                                                                                                                                              | 618  | 595  | 0         | 96.3  | 88.7 | 91.4 |
| Rsa1.0_00484.1.g14757.t1 | gb EOA32282.1] hypothetical protein CARUB_v10015543mg [Capsella rubella]                                                                                                                                                                                                                                                                                                                                                                                               | 490  | 492  | 0        | 100.4 | 96.7  | 98.4  | hypothetical protein CARUB_v10015543mg | gbpln | Capsella rubella     | AT3G17760.2   Symbols:   GAD5   glutamate decarboxylase 5   chr3:6078893-6080838 REVERSE LENGTH=494                                                                                                                                                                                                                                                                                                                                                                                                                     | 490  | 494  | 0         | 100.8 | 95.1 | 98.0 |
| Rsa1.0_00484.1.g14758.t1 | ref XP_002883085.1] kinase family protein [Arabidopsis lyrata subsp. lyrata] gi 297328925 gb EFH59344.1] kinase family protein [Arabidopsis lyrata subsp. lyrata]                                                                                                                                                                                                                                                                                                      | 1039 | 1138 | 0        | 109.5 | 82.5  | 88.5  | kinase family protein                  | gbpln | Arabidopsis lyrata   | AT3G17750.1   Symbols:   Protein kinase superfamily protein   chr3:6074228-6078428 FORWARD LENGTH=1138                                                                                                                                                                                                                                                                                                                                                                                                                  | 1039 | 1138 | 0         | 109.5 | 82.2 | 88.0 |

|                          |                                                                                                                                                                                                                                                                                                                                                                                                                                                                                                                                                                                                                                                |      |      |           |       |      |      |                                        |       |                      |                                                                                                                                                                                                                                                                                                                                                                                                                                                                                                                                                                                                         |      |      |           |       |      |      |
|--------------------------|------------------------------------------------------------------------------------------------------------------------------------------------------------------------------------------------------------------------------------------------------------------------------------------------------------------------------------------------------------------------------------------------------------------------------------------------------------------------------------------------------------------------------------------------------------------------------------------------------------------------------------------------|------|------|-----------|-------|------|------|----------------------------------------|-------|----------------------|---------------------------------------------------------------------------------------------------------------------------------------------------------------------------------------------------------------------------------------------------------------------------------------------------------------------------------------------------------------------------------------------------------------------------------------------------------------------------------------------------------------------------------------------------------------------------------------------------------|------|------|-----------|-------|------|------|
| Rsa1.0_00484.1.g14759.t3 | ref XP_002885226.1  hypothetical protein ARALYDRAFT_479255 [Arabidopsis lyrata subsp. lyrata] gi 297331066 gb EFH61485.1  hypothetical protein ARALYDRAFT_479255 [Arabidopsis lyrata subsp. lyrata]                                                                                                                                                                                                                                                                                                                                                                                                                                            | 1357 | 1153 | 0         | 85.0  | 71.8 | 77.6 | hypothetical protein ARALYDRAFT_479255 | gbpln | Arabidopsis lyrata   | AT3G17740.1   Symbols:   unknown protein; FUNCTIONS IN: molecular_function unknown; INVOLVED IN: biological_process unknown; LOCATED IN: cellular_component unknown; EXPRESSED IN: 23 plant structures; CONTAINS InterPro DOMAIN/s: Protein of unknown function DUF1740 (InterPro:IPRO13633); BEST Arabidopsis thaliana protein match is: unknown protein (TAIR:AT3G17712.1); Has 409 Blast hits to 335 proteins in 133 species: Archae - 1; Bacteria - 0; Metazoa - 140; Fungi - 188; Plants - 42; Viruses - 0; Other Eukaryotes - 38 (source: NCBI BLINK).   chr3:6068003-6072814 REVERSE LENGTH=1149 | 1357 | 1149 | 0         | 84.7  | 71.8 | 77.0 |
| Rsa1.0_00484.1.g14760.t1 | ref XP_002887058.1  hypothetical protein ARALYDRAFT_315690 [Arabidopsis lyrata subsp. lyrata] gi 297332899 gb EFH63317.1  hypothetical protein ARALYDRAFT_315690 [Arabidopsis lyrata subsp. lyrata]                                                                                                                                                                                                                                                                                                                                                                                                                                            | 209  | 353  | 1.00E-25  | 168.9 | 30.1 | 35.4 | hypothetical protein ARALYDRAFT_315690 | gbpln | Arabidopsis lyrata   | AT3G17710.1   Symbols:   F-box and associated interaction domains-containing protein   chr3:6055597-6056703 FORWARD LENGTH=368                                                                                                                                                                                                                                                                                                                                                                                                                                                                          | 209  | 368  | 5.00E-27  | 176.1 | 32.1 | 35.4 |
| Rsa1.0_00484.1.g14761.t1 | ref NP_188400.1  NAC domain containing protein 57 [Arabidopsis thaliana] gi 9294586 dbj BAB02867.1  unnamed protein product [Arabidopsis thaliana] gi 67633638 gb AAAY78743.1  no apical meristem family protein [Arabidopsis thaliana] gi 332642479 gb AEE76000.1  NAC domain containing protein 57 [Arabidopsis thaliana]                                                                                                                                                                                                                                                                                                                    | 244  | 246  | 1.00E-131 | 100.8 | 94.7 | 98.0 | NAC domain containing protein 57       | gbpln | Arabidopsis thaliana | AT3G17730.1   Symbols: anac057, NAC057   NAC domain containing protein 57   chr3:6064379-6065813 FORWARD LENGTH=246                                                                                                                                                                                                                                                                                                                                                                                                                                                                                     | 244  | 246  | 1.00E-133 | 100.8 | 94.7 | 98.0 |
| Rsa1.0_00484.1.g14762.t1 | ref NP_566585.1  cyclic nucleotide gated channel [Arabidopsis thaliana] gi 38503198 sp Q9LD37.1 CNGC20_ARAT H RecName: Full=Probable cyclic nucleotide-gated ion channel 20, chloroplastic; AltName: Full=Cyclic nucleotide-binding transporter 1; Flags: Precursor gi 8131898 gb AAF73128.1 AF148541.1 cyclic nucleotide-binding transporter 1 [Arabidopsis thaliana] gi 8131901 gb AAF73130.1 AF148542.2 cyclic nucleotide-binding transporter 1 [Arabidopsis thaliana] gi 9294160 dbj BAB02062.1  unnamed protein product [Arabidopsis thaliana] gi 332642473 gb AEE75994.1  cyclic nucleotide-binding transporter 1 [Arabidopsis thaliana] | 720  | 764  | 0         | 106.1 | 85.6 | 91.9 | cyclic nucleotide gated channel        | gbpln | Arabidopsis thaliana | AT3G17700.1   Symbols: CNBT1, CNGC20, ATCNGC20   cyclic nucleotide-binding transporter 1   chr3:6049074-6052449 FORWARD LENGTH=764                                                                                                                                                                                                                                                                                                                                                                                                                                                                      | 720  | 764  | 0         | 106.1 | 85.6 | 91.9 |
| Rsa1.0_00484.1.g14763.t1 | ref XP_002892763.1  predicted protein [Arabidopsis lyrata subsp. lyrata] gi 297338605 gb EFH69022.1  predicted protein [Arabidopsis lyrata subsp. lyrata]                                                                                                                                                                                                                                                                                                                                                                                                                                                                                      | 377  | 804  | 4.00E-80  | 213.3 | 42.7 | 49.6 | predicted protein                      | gbpln | Arabidopsis lyrata   | AT1G13630.1   Symbols:   Tetratricopeptide repeat (TPR)-like superfamily protein   chr1:4669784-4672826 REVERSE LENGTH=806                                                                                                                                                                                                                                                                                                                                                                                                                                                                              | 377  | 806  | 5.00E-81  | 213.8 | 41.6 | 49.1 |
| Rsa1.0_00484.1.g14764.t1 | gb AAB87099.1  putative retroelement pol polyprotein [Arabidopsis thaliana]                                                                                                                                                                                                                                                                                                                                                                                                                                                                                                                                                                    | 1923 | 1496 | 0         | 77.8  | 34.9 | 43.8 | putative retroelement pol polyprotein  | gbpln | Arabidopsis thaliana | AT3G17690.1   Symbols: ATCNGC19, CNGC19   cyclic nucleotide gated channel 19   chr3:6045382-6048339 FORWARD LENGTH=729                                                                                                                                                                                                                                                                                                                                                                                                                                                                                  | 1923 | 729  | 0         | 37.9  | 24.4 | 27.8 |
| Rsa1.0_00484.1.g14765.t1 | ref XP_002883079.1  ATCNGC19 [Arabidopsis lyrata subsp. lyrata] gi 297328919 gb EFH59338.1  ATCNGC19 [Arabidopsis lyrata subsp. lyrata]                                                                                                                                                                                                                                                                                                                                                                                                                                                                                                        | 788  | 753  | 0         | 95.6  | 78.3 | 85.7 | ATCNGC19                               | gbpln | Arabidopsis lyrata   | AT3G17690.1   Symbols: ATCNGC19, CNGC19   cyclic nucleotide gated channel 19   chr3:6045382-6048339 FORWARD LENGTH=729                                                                                                                                                                                                                                                                                                                                                                                                                                                                                  | 788  | 729  | 0         | 92.5  | 74.5 | 81.5 |
| Rsa1.0_00485.1.g14766.t1 | gb AAM61483.1  unknown [Arabidopsis thaliana]                                                                                                                                                                                                                                                                                                                                                                                                                                                                                                                                                                                                  | 533  | 532  | 0         | 99.8  | 91.7 | 96.2 | unknown                                | gbpln | Arabidopsis thaliana | AT2G01680.1   Symbols:   Ankyrin repeat family protein   chr2:306597-308427 FORWARD LENGTH=532                                                                                                                                                                                                                                                                                                                                                                                                                                                                                                          | 533  | 532  | 0         | 99.8  | 91.6 | 96.1 |
| Rsa1.0_00485.1.g14767.t1 | ref NP_565275.1  uncharacterized protein [Arabidopsis thaliana] gi 75268025 sp Q9ZU97.2 VAC14_ARAT H RecName: Full=Protein VAC14 homolog gi 20197546 gb AAD12702.2  expressed protein [Arabidopsis thaliana] gi 33025039.1 gb AEC05485.1  uncharacterized protein AT2G01690 [Arabidopsis thaliana]                                                                                                                                                                                                                                                                                                                                             | 730  | 743  | 0         | 101.8 | 86.3 | 92.3 | uncharacterized protein                | gbpln | Arabidopsis thaliana | AT2G01690.1   Symbols:   ARM repeat superfamily protein   chr2:309144-313499 REVERSE LENGTH=743                                                                                                                                                                                                                                                                                                                                                                                                                                                                                                         | 730  | 743  | 0         | 101.8 | 86.3 | 92.3 |

|                          |                                                                                                                                                                                                                                                                                                                                                                     |     |      |           |       |      |      |                                                               |       |                       |                                                                                                                                                                                                                                                                                                                                                                          |     |      |           |       |      |      |
|--------------------------|---------------------------------------------------------------------------------------------------------------------------------------------------------------------------------------------------------------------------------------------------------------------------------------------------------------------------------------------------------------------|-----|------|-----------|-------|------|------|---------------------------------------------------------------|-------|-----------------------|--------------------------------------------------------------------------------------------------------------------------------------------------------------------------------------------------------------------------------------------------------------------------------------------------------------------------------------------------------------------------|-----|------|-----------|-------|------|------|
| Rsa1.0_00485.1.g14768.t2 | ref XP_002876772.1  ribophorin I family protein [Arabidopsis lyrata subsp. lyrata] gi 297322610 gb EFH53031.1  ribophorin I family protein [Arabidopsis lyrata subsp. lyrata]                                                                                                                                                                                       | 538 | 464  | 0         | 86.2  | 78.6 | 83.3 | ribophorin I family protein                                   | gbpln | Arabidopsis lyrata    | AT2G01720.1   Symbols:   Ribophorin I   chr2:317193-320016 REVERSE LENGTH=464                                                                                                                                                                                                                                                                                            | 538 | 464  | 0         | 86.2  | 78.1 | 82.7 |
| Rsa1.0_00485.1.g14769.t1 | #                                                                                                                                                                                                                                                                                                                                                                   | #   | #    | #         | #     | #    | #    | -                                                             | ----  | ----                  | #                                                                                                                                                                                                                                                                                                                                                                        | #   | #    | #         | #     | #    |      |
| Rsa1.0_00485.1.g14770.t1 | ref NP_849924.1  E3 ubiquitin protein ligase RIE1 [Arabidopsis thaliana] gi 75299491 sp Q8GUU2.1 RIE1_ARATH RecName: Full=E3 ubiquitin protein ligase RIE1; AltName: Full=Protein RING-FINGER FOR EMBRYOGENESIS 1 gi 27372067 gb AAN87884.1  RES protein [Arabidopsis thaliana] gi 330250396 gb AEC05490.1  E3 ubiquitin protein ligase RIE1 [Arabidopsis thaliana] | 399 | 359  | 1.00E-167 | 90.0  | 76.4 | 81.2 | E3 ubiquitin protein ligase RIE1                              | gbpln | Arabidopsis thaliana  | AT2G01735.1   Symbols: RIE1   RING-finger protein for embryogenesis   chr2:324499-325895 FORWARD LENGTH=359                                                                                                                                                                                                                                                              | 399 | 359  | 1.00E-169 | 90.0  | 76.4 | 81.2 |
| Rsa1.0_00485.1.g14771.t1 | #                                                                                                                                                                                                                                                                                                                                                                   | #   | #    | #         | #     | #    | #    | -                                                             | ----  | ----                  | #                                                                                                                                                                                                                                                                                                                                                                        | #   | #    | #         | #     | #    |      |
| Rsa1.0_00485.1.g14772.t1 | gb EOA25655.1  hypothetical protein CARUB_v10019005mg [Capsella rubella]                                                                                                                                                                                                                                                                                            | 652 | 628  | 0         | 96.3  | 86.3 | 91.3 | hypothetical protein CARUB_v10019005mg                        | gbpln | Capsella rubella      | AT2G01750.1   Symbols: ATMAP70-3, MAP70-3   microtubule-associated proteins 70-3   chr2:328351-331848 FORWARD LENGTH=629                                                                                                                                                                                                                                                 | 652 | 629  | 0         | 96.5  | 85.4 | 90.2 |
| Rsa1.0_00485.1.g14773.t1 | ref XP_002876776.1  hypothetical protein ARALYDRAFT_484093 [Arabidopsis lyrata subsp. lyrata] gi 297322614 gb EFH53035.1  hypothetical protein ARALYDRAFT_484093 [Arabidopsis lyrata subsp. lyrata]                                                                                                                                                                 | 170 | 166  | 5.00E-54  | 97.6  | 71.2 | 78.8 | hypothetical protein ARALYDRAFT_484093                        | gbpln | Arabidopsis lyrata    | AT2G01755.1   Symbols:   unknown protein; FUNCTIONS IN: molecular function unknown; INVOLVED IN: biological process unknown; LOCATED IN: chloroplast; Has 120 Blast hits to 120 proteins in 52 species: Archae - 0; Bacteria - 80; Metazoa - 0; Fungi - 0; Plants - 24; Viruses - 0; Other Eukaryotes - 16 (source: NCBI BLink).   chr2:332249-332770 REVERSE LENGTH=173 | 170 | 173  | 1.00E-53  | 101.8 | 68.8 | 77.1 |
| Rsa1.0_00485.1.g14774.t1 | #                                                                                                                                                                                                                                                                                                                                                                   | #   | #    | #         | #     | #    | #    | -                                                             | ----  | ----                  | #                                                                                                                                                                                                                                                                                                                                                                        | #   | #    | #         | #     | #    |      |
| Rsa1.0_00485.1.g14775.t1 | ref XP_004238758.1  PREDICTED: eukaryotic translation initiation factor 5A-3-like [Solanum lycopersicum]                                                                                                                                                                                                                                                            | 183 | 159  | 6.00E-17  | 86.9  | 31.7 | 48.6 | PREDICTED: eukaryotic translation initiation factor 5A-3-like | gbpln | Solanum lycopersicum  | AT1G69410.1   Symbols: ATELF5A-3, ELF5A-3   eukaryotic elongation factor 5A-3   chr1:2608901-26090194 FORWARD LENGTH=158                                                                                                                                                                                                                                                 | 183 | 158  | 2.00E-17  | 86.3  | 30.6 | 47.0 |
| Rsa1.0_00485.1.g14776.t1 | ref XP_002876777.1  hypothetical protein ARALYDRAFT_484095 [Arabidopsis lyrata subsp. lyrata] gi 297322615 gb EFH53036.1  hypothetical protein ARALYDRAFT_484095 [Arabidopsis lyrata subsp. lyrata]                                                                                                                                                                 | 250 | 250  | 1.00E-125 | 100.0 | 88.4 | 93.6 | hypothetical protein ARALYDRAFT_484095                        | gbpln | Arabidopsis lyrata    | AT2G01770.1   Symbols: VIT1, ATVIT1   vacuolar iron transporter 1   chr2:334775-336425 REVERSE LENGTH=250                                                                                                                                                                                                                                                                | 250 | 250  | 1.00E-127 | 100.0 | 88.0 | 93.2 |
| Rsa1.0_00485.1.g14777.t1 | ref NP_178290.1  RING/FYVE/PHD zinc finger-containing protein [Arabidopsis thaliana] gi 75268028 sp Q9ZUA9.1 Y2181_ARATH RecName: Full=PHD finger protein At2g01810 gi 4220491 gb AAD12714.1  hypothetical protein [Arabidopsis thaliana] gi 330250408 gb AEC05502.1  RING/FYVE/PHD zinc finger-containing protein [Arabidopsis thaliana]                           | 703 | 697  | 0         | 99.1  | 67.4 | 80.2 | RING/FYVE/PHD zinc finger-containing protein                  | gbpln | Arabidopsis thaliana  | AT2G01810.1   Symbols:   RING/FYVE/PHD zinc finger superfamily protein   chr2:347537-349952 FORWARD LENGTH=697                                                                                                                                                                                                                                                           | 703 | 697  | 0         | 99.1  | 67.4 | 80.2 |
| Rsa1.0_00485.1.g14778.t1 | #                                                                                                                                                                                                                                                                                                                                                                   | #   | #    | #         | #     | #    | #    | -                                                             | ----  | ----                  | #                                                                                                                                                                                                                                                                                                                                                                        | #   | #    | #         | #     | #    |      |
| Rsa1.0_00485.1.g14779.t1 | gb EOA23460.1  hypothetical protein CARUB_v10016649mg [Capsella rubella]                                                                                                                                                                                                                                                                                            | 954 | 947  | 0         | 99.3  | 81.3 | 89.6 | hypothetical protein CARUB_v10016649mg                        | gbpln | Capsella rubella      | AT2G01820.1   Symbols:   Leucine-rich repeat protein kinase family protein   chr2:357664-360681 REVERSE LENGTH=943                                                                                                                                                                                                                                                       | 954 | 943  | 0         | 98.8  | 80.4 | 88.7 |
| Rsa1.0_00485.1.g14780.t1 | dbj BAH47482.1  phytochrome E [Cardamine resedifolia]                                                                                                                                                                                                                                                                                                               | 262 | 1116 | 2.00E-67  | 426.0 | 58.8 | 69.8 | phytochrome E                                                 | gbpln | Cardamine resedifolia | AT4G18130.1   Symbols: PHYE   phytochrome E   chr4:10042312-10045948 REVERSE LENGTH=1112                                                                                                                                                                                                                                                                                 | 262 | 1112 | 1.00E-69  | 424.4 | 51.9 | 56.5 |
| Rsa1.0_00485.1.g14781.t1 | gb EOA23460.1  hypothetical protein CARUB_v10016649mg [Capsella rubella]                                                                                                                                                                                                                                                                                            | 114 | 947  | 5.00E-39  | 830.7 | 67.5 | 80.7 | hypothetical protein CARUB_v10016649mg                        | gbpln | Capsella rubella      | AT2G01820.1   Symbols:   Leucine-rich repeat protein kinase family protein   chr2:357664-360681 REVERSE LENGTH=943                                                                                                                                                                                                                                                       | 114 | 943  | 2.00E-39  | 827.2 | 64.9 | 78.9 |

|                          |                                                                                                                                                                                                                                                                                                                                                                                                                                                                                                                                                                                                                                                                                                                                                                                                                                                                                                                  |      |      |           |       |      |      |                                                |       |                      |                                                                                                                                                                                                                                                                                                                                                                                                                                                |      |      |           |       |      |      |
|--------------------------|------------------------------------------------------------------------------------------------------------------------------------------------------------------------------------------------------------------------------------------------------------------------------------------------------------------------------------------------------------------------------------------------------------------------------------------------------------------------------------------------------------------------------------------------------------------------------------------------------------------------------------------------------------------------------------------------------------------------------------------------------------------------------------------------------------------------------------------------------------------------------------------------------------------|------|------|-----------|-------|------|------|------------------------------------------------|-------|----------------------|------------------------------------------------------------------------------------------------------------------------------------------------------------------------------------------------------------------------------------------------------------------------------------------------------------------------------------------------------------------------------------------------------------------------------------------------|------|------|-----------|-------|------|------|
| Rsa1.0_00486.1.g14782.t1 | ref[NP_177024.1] putative nitrite transporter [Arabidopsis thaliana] gi 75266596 sp G9S20.1 PTR18.ARAT H RecName: Full=Probable nitrite transporter At1g68570 gi 5734721 gb AAD4986.1 AC008075_19 Similar to gb AF023472 peptide transporter from Hordeum vulgare and is a member of the PF 00854 Peptide transporter family. ESTs gb T41927 and gb AA395024 come from this gene [Arabidopsis thaliana] gi 20147231 gb AAM10330.1  At1g68570/F24J5.7 [Arabidopsis thaliana] gi 25090385 gb AAN72289.1  At1g68570/F24J5.7 [Arabidopsis thaliana] gi 110742209 dbj BAE99031.1  peptide transporter like [Arabidopsis thaliana] gi 332196691 gb AEE34812.1  probable nitrite transporter [Arabidopsis thaliana] ref XP_002887191.1  hypothetical protein ARALYDRAFT_475982 [Arabidopsis lyrata subsp. lyrata] gi 297333032 gb EFH63450.1  hypothetical protein ARALYDRAFT_475982 [Arabidopsis lyrata subsp. lyrata] | 595  | 596  | 0         | 100.2 | 88.9 | 93.9 | putative nitrite transporter                   | gbpln | Arabidopsis thaliana | AT1G68570.1   Symbols:   Major facilitator superfamily protein   chr1:25746811-25750110 FORWARD LENGTH=596                                                                                                                                                                                                                                                                                                                                     | 595  | 596  | 0         | 100.2 | 88.9 | 93.9 |
| Rsa1.0_00486.1.g14783.t1 | ref XP_002887191.1  hypothetical protein ARALYDRAFT_475982 [Arabidopsis lyrata subsp. lyrata] gi 297333032 gb EFH63450.1  hypothetical protein ARALYDRAFT_475982 [Arabidopsis lyrata subsp. lyrata]                                                                                                                                                                                                                                                                                                                                                                                                                                                                                                                                                                                                                                                                                                              | 669  | 649  | 0         | 97.0  | 70.9 | 79.5 | hypothetical protein ARALYDRAFT_475982         | gbpln | Arabidopsis lyrata   | AT1G68580.2   Symbols:   agenet domain-containing protein / bromo-adjacent homology (BAH) domain-containing protein   chr1:25752869-25755631 FORWARD LENGTH=648                                                                                                                                                                                                                                                                                | 669  | 648  | 0         | 96.9  | 68.3 | 77.3 |
| Rsa1.0_00486.1.g14784.t1 | gb EOA33969.1  hypothetical protein CARUB_v10021464mg [Capsella rubella]                                                                                                                                                                                                                                                                                                                                                                                                                                                                                                                                                                                                                                                                                                                                                                                                                                         | 68   | 115  | 6.00E-21  | 169.1 | 80.9 | 88.2 | hypothetical protein CARUB_v10021464mg         | gbpln | Capsella rubella     | AT1G68585.1   Symbols:   unknown protein; Has 23 Blast hits to 23 proteins in 6 species: Archae - 0; Bacteria - 0; Metazoa - 0; Fungi - 0; Plants - 23; Viruses - 0; Other Eukaryotes = 0 (source: NCBI BLink).   chr1:25756911-25757426 FORWARD LENGTH=116                                                                                                                                                                                    | 68   | 116  | 9.00E-23  | 170.6 | 77.9 | 88.2 |
| Rsa1.0_00486.1.g14785.t1 | gb AAM63350.1  plastid-specific ribosomal protein 3 precursor [Arabidopsis thaliana]                                                                                                                                                                                                                                                                                                                                                                                                                                                                                                                                                                                                                                                                                                                                                                                                                             | 161  | 166  | 9.00E-68  | 103.1 | 85.1 | 88.8 | plastid-specific ribosomal protein 3 precursor | gbpln | Arabidopsis thaliana | AT1G68590.1   Symbols:   Ribosomal protein PSR3-3/Ycf65   chr1:25757593-25758169 REVERSE LENGTH=166                                                                                                                                                                                                                                                                                                                                            | 161  | 166  | 6.00E-70  | 103.1 | 85.1 | 88.8 |
| Rsa1.0_00486.1.g14786.t1 | ref XP_002887194.1  hypothetical protein ARALYDRAFT_475988 [Arabidopsis lyrata subsp. lyrata] gi 297333035 gb EFH63453.1  hypothetical protein ARALYDRAFT_475988 [Arabidopsis lyrata subsp. lyrata]                                                                                                                                                                                                                                                                                                                                                                                                                                                                                                                                                                                                                                                                                                              | 329  | 336  | 1.00E-154 | 102.1 | 82.1 | 87.8 | hypothetical protein ARALYDRAFT_475988         | gbpln | Arabidopsis lyrata   | AT1G68620.1   Symbols:   alpha/beta-Hydrolases superfamily protein   chr1:25766018-25767028 FORWARD LENGTH=336                                                                                                                                                                                                                                                                                                                                 | 329  | 336  | 1.00E-152 | 102.1 | 78.7 | 86.9 |
| Rsa1.0_00486.1.g14787.t1 | emb CAN65188.1  hypothetical protein VITISV_004365 [Vitis vinifera]                                                                                                                                                                                                                                                                                                                                                                                                                                                                                                                                                                                                                                                                                                                                                                                                                                              | 1342 | 1265 | 0         | 94.3  | 53.6 | 66.7 | hypothetical protein VITISV_004365             | gbpln | Vitis vinifera       | AT4G23160.1   Symbols: CRK8   cysteine-rich RLK (RECEPTOR-like protein kinase) 8   chr4:12129485-12134086 FORWARD LENGTH=1262                                                                                                                                                                                                                                                                                                                  | 1342 | 1262 | 1.00E-103 | 94.0  | 14.2 | 22.7 |
| Rsa1.0_00486.1.g14788.t1 | gb EOA33841.1  hypothetical protein CARUB_v10021324mg [Capsella rubella]                                                                                                                                                                                                                                                                                                                                                                                                                                                                                                                                                                                                                                                                                                                                                                                                                                         | 113  | 161  | 3.00E-55  | 142.5 | 90.3 | 95.6 | hypothetical protein CARUB_v10021324mg         | gbpln | Capsella rubella     | AT1G68630.1   Symbols:   PLAC8 family protein   chr1:25768653-25769458 FORWARD LENGTH=161                                                                                                                                                                                                                                                                                                                                                      | 113  | 161  | 4.00E-57  | 142.5 | 91.2 | 94.7 |
| Rsa1.0_00486.1.g14789.t1 | gb EOA35838.1  hypothetical protein CARUB_v10021079mg [Capsella rubella]                                                                                                                                                                                                                                                                                                                                                                                                                                                                                                                                                                                                                                                                                                                                                                                                                                         | 164  | 159  | 3.00E-67  | 97.0  | 76.8 | 79.9 | hypothetical protein CARUB_v10021079mg         | gbpln | Capsella rubella     | AT1G68660.1   Symbols:   Ribosomal protein L12/ ATP-dependent Clp protease adaptor protein ClpS family protein   chr1:25778058-25779083 REVERSE LENGTH=159                                                                                                                                                                                                                                                                                     | 164  | 159  | 2.00E-68  | 97.0  | 76.2 | 78.7 |
| Rsa1.0_00486.1.g14790.t1 | ref XP_002887198.1  hypothetical protein ARALYDRAFT_315886 [Arabidopsis lyrata subsp. lyrata] gi 297333039 gb EFH63457.1  hypothetical protein ARALYDRAFT_315886 [Arabidopsis lyrata subsp. lyrata]                                                                                                                                                                                                                                                                                                                                                                                                                                                                                                                                                                                                                                                                                                              | 94   | 75   | 7.00E-26  | 79.8  | 62.8 | 67.0 | hypothetical protein ARALYDRAFT_315886         | gbpln | Arabidopsis lyrata   | AT1G68680.1   Symbols:   unknown protein; FUNCTIONS IN: molecular_function unknown; INVOLVED IN: biological_process unknown; LOCATED IN: chloroplast; EXPRESSED IN: 23 plant structures; EXPRESSED DURING: 16 growth stages; Has 20 Blast hits to 20 proteins in 11 species: Archae - 0; Bacteria - 0; Metazoa - 0; Fungi - 0; Plants - 20; Viruses - 0; Other Eukaryotes = 0 (source: NCBI BLink).   chr1:25785627-25786622 FORWARD LENGTH=75 | 94   | 75   | 7.00E-28  | 79.8  | 61.7 | 66.0 |

|                          |                                                                                                                                                                                                                                                                                                                                                                                                                                                                                                                                                                                                                                                                                                                                                                                                                                                                                                                                                                                                                                                                                                                                                          |     |     |           |       |      |      |                                                           |       |                      |                                                                                                                  |     |     |           |       |      |      |
|--------------------------|----------------------------------------------------------------------------------------------------------------------------------------------------------------------------------------------------------------------------------------------------------------------------------------------------------------------------------------------------------------------------------------------------------------------------------------------------------------------------------------------------------------------------------------------------------------------------------------------------------------------------------------------------------------------------------------------------------------------------------------------------------------------------------------------------------------------------------------------------------------------------------------------------------------------------------------------------------------------------------------------------------------------------------------------------------------------------------------------------------------------------------------------------------|-----|-----|-----------|-------|------|------|-----------------------------------------------------------|-------|----------------------|------------------------------------------------------------------------------------------------------------------|-----|-----|-----------|-------|------|------|
| Rsa1.0_00486.1.g14791.t1 | refNP_177036.1  protein kinase-like protein [Arabidopsis thaliana]<br>gi 75337798 sp Q9S31.1 PERK9_ARAT<br>H RecName: Full=Proline-rich receptor-like protein kinase PERK9; AltName: Full=Proline-rich extensin-like receptor kinase 9; Short=AtPERK9<br>gi 5734709 gb AAD49974.1 AC008075.7<br>Contains PF 00069 Eukaryotic protein kinase domain [Arabidopsis thaliana]<br>gi 14334806 gb AAK59581.1  putative protein kinase [Arabidopsis thaliana]<br>gi 21280865 gb AM44925.1  putative protein kinase [Arabidopsis thaliana]<br>gi 332196707 gb AEE34828.1  proline-rich receptor-like protein kinase PERK9 [Arabidopsis thaliana]<br>refNP_177038.1  phospholipid-translocating ATPase [Arabidopsis thaliana]<br>gi 12229673 sp Q9SX33.1 ALA9_ARATH<br>RecName: Full=Putative phospholipid-transporting ATPase 9; Short=AtALA9; AltName: Full=Aminophospholipid flippase 9<br>gi 5734708 gb AAD49973.1 AC008075.6<br>Similar to gb AF067820 ATPase II from Homo sapiens and is a member of PF 00122 E1-E2 ATPases family [Arabidopsis thaliana]<br>gi 332196709 gb AEE34830.1  putative phospholipid-transporting ATPase 9 [Arabidopsis thaliana] | 745 | 708 | 0         | 95.0  | 48.5 | 52.5 | protein kinase-like protein                               | gbpln | Arabidopsis thaliana | AT1G68690.1   Symbols:   Protein kinase superfamily protein   chr1:25789192-25791886 FORWARD LENGTH=708          | 745 | 708 | 0         | 95.0  | 48.5 | 52.5 |
| Rsa1.0_00486.1.g14792.t1 | refXP_002280608.2  PREDICTED: phosphate transporter PHO1 homolog 1 isoform 1 [Vitis vinifera]                                                                                                                                                                                                                                                                                                                                                                                                                                                                                                                                                                                                                                                                                                                                                                                                                                                                                                                                                                                                                                                            | 720 | 780 | 0         | 108.3 | 71.5 | 83.6 | PREDICTED: phosphate transporter PHO1 homolog 1 isoform 1 | gbpln | Vitis vinifera       | AT1G68740.1   Symbols: PHO1,H1   EXS (ERD1/XPR1/SYG1) family protein   chr1:25812735-25816574 REVERSE LENGTH=784 | 720 | 784 | 0         | 108.9 | 47.9 | 51.9 |
| Rsa1.0_00487.1.g14795.t1 | refXP_002867018.1  radical SAM domain-containing protein [Arabidopsis lyrata subsp. lyrata]<br>gi 297312854 gb EFH43277.1  radical SAM domain-containing protein [Arabidopsis lyrata subsp. lyrata]                                                                                                                                                                                                                                                                                                                                                                                                                                                                                                                                                                                                                                                                                                                                                                                                                                                                                                                                                      | 631 | 636 | 0         | 100.8 | 89.2 | 94.5 | radical SAM domain-containing protein                     | gbpln | Arabidopsis lyrata   | AT4G36390.1   Symbols:   Methylthiotransferase   chr4:17194746-17197054 REVERSE LENGTH=640                       | 631 | 640 | 0         | 101.4 | 87.5 | 92.2 |
| Rsa1.0_00487.1.g14796.t1 | refNP_568004.1  putative ubiquitin-conjugating enzyme E2 17 [Arabidopsis thaliana]<br>gi 75318090 sp O23239.1 UBC17_ARAT<br>H RecName: Full=Probable ubiquitin-conjugating enzyme E2 17; AltName: Full=Ubiquitin carrier protein 17<br>gi 2464941 emb CAB16814.1  ubiquitin-conjugating enzyme [Arabidopsis thaliana]<br>gi 2801446 gb AAC39326.1  ubiquitin-conjugating enzyme 17 [Arabidopsis thaliana]<br>gi 7270589 emb CAB80307.1  ubiquitin-conjugating enzyme [Arabidopsis thaliana]<br>gi 21593655 gb AAM65622.1  E2 ubiquitin-conjugating enzyme 17 (UBC17) [Arabidopsis thaliana]<br>gi 86354444 gb AA44857.1  ubiquitinating enzyme [Arabidopsis thaliana]<br>gi 332661253 gb AEE86653.1  putative ubiquitin-conjugating enzyme E2 17 [Arabidopsis thaliana]<br>gi 482553365 gb EOA17558.1  hypothetical protein<br>CARUB_v10005917mg [Capsella rubella]                                                                                                                                                                                                                                                                                      | 161 | 161 | 1.00E-82  | 100.0 | 96.9 | 98.8 | putative ubiquitin-conjugating enzyme E2 17               | gbpln | Arabidopsis thaliana | AT4G36410.1   Symbols: UBC17   ubiquitin-conjugating enzyme 17   chr4:17201969-17202890 FORWARD LENGTH=161       | 161 | 161 | 4.00E-85  | 100.0 | 96.9 | 98.8 |
| Rsa1.0_00487.1.g14797.t1 | emb CCJ34843.1  horseradish peroxidase isoenzyme HRP_08562.1 [Armoracia rusticana]                                                                                                                                                                                                                                                                                                                                                                                                                                                                                                                                                                                                                                                                                                                                                                                                                                                                                                                                                                                                                                                                       | 331 | 331 | 1.00E-175 | 100.0 | 92.4 | 97.0 | horseradish peroxidase isoenzyme HRP_08562.1              | gbpln | Armoracia rusticana  | AT4G36430.1   Symbols:   Peroxidase superfamily protein   chr4:17204648-17205917 REVERSE LENGTH=331              | 331 | 331 | 1.00E-176 | 100.0 | 90.3 | 96.7 |

|                          |                                                                                                                                                                                                                                                                                                                                                                                                                                                                                                                 |      |      |           |       |      |      |                                                                  |       |                      |                                                                                                                                                                                                                                                                                                                                                                                                                                                                                                                                  |      |      |           |       |      |      |
|--------------------------|-----------------------------------------------------------------------------------------------------------------------------------------------------------------------------------------------------------------------------------------------------------------------------------------------------------------------------------------------------------------------------------------------------------------------------------------------------------------------------------------------------------------|------|------|-----------|-------|------|------|------------------------------------------------------------------|-------|----------------------|----------------------------------------------------------------------------------------------------------------------------------------------------------------------------------------------------------------------------------------------------------------------------------------------------------------------------------------------------------------------------------------------------------------------------------------------------------------------------------------------------------------------------------|------|------|-----------|-------|------|------|
| Rsa1.0_00487.1.g14798.t1 | gb[AAM20633.1] putative protein [Arabidopsis thaliana] gi 22136408 gb AAM91282.1  putative protein [Arabidopsis thaliana]                                                                                                                                                                                                                                                                                                                                                                                       | 456  | 406  | 0         | 89.0  | 81.1 | 83.8 | putative protein                                                 | gbpln | Arabidopsis thaliana | AT4G36440.1   Symbols:   unknown protein; FUNCTIONS IN: molecular_function unknown; INVOLVED IN: biological_process unknown; LOCATED IN: endomembrane system; EXPRESSED IN: 24 plant structures; EXPRESSED DURING: 15 growth stages; Has 41 Blast hits to 41 proteins in 14 species: Archae - 0; Bacteria - 0; Metazoa - 0; Fungi - 0; Plants - 41; Viruses - 0; Other Eukaryotes - 0 (source: NCBI BLink).   chr4:17207213-17209873 REVERSE LENGTH=394                                                                          | 456  | 394  | 0         | 86.4  | 78.9 | 81.4 |
| Rsa1.0_00487.1.g14799.t1 | gb[ACH61906.1] serine palmitoyltransferase long chain base subunit [Brassica rapa subsp. chinensis] gi 197311352 gb ACH61907.1  serine palmitoyltransferase long chain base subunit [Brassica rapa subsp. chinensis]                                                                                                                                                                                                                                                                                            | 170  | 482  | 2.00E-37  | 283.5 | 47.6 | 48.8 | serine palmitoyltransferase long chain base subunit              | gbpln | Brassica rapa        | AT4G36480.2   Symbols: ATLCB1, LCB1, EMB2779, FBR11   long-chain base1   chr4:17218598-17221124 FORWARD LENGTH=482                                                                                                                                                                                                                                                                                                                                                                                                               | 170  | 482  | 5.00E-37  | 283.5 | 44.7 | 49.4 |
| Rsa1.0_00487.1.g14800.t1 | ref NP_195365.1  S-adenosyl-L-methionine-dependent methyltransferase-like protein [Arabidopsis thaliana] gi 4006915 emb CAB16845.1  hypothetical protein [Arabidopsis thaliana] gi 7270595 emb CAB80313.1  hypothetical protein [Arabidopsis thaliana] gi 48427662 gb AAT42380.1  At4g36470 [Arabidopsis thaliana] gi 110741629 dbj BAE98762.1  hypothetical protein [Arabidopsis thaliana] gi 332661259 gb AEE86659.1  S-adenosyl-L-methionine-dependent methyltransferase-like protein [Arabidopsis thaliana] | 359  | 371  | 1.00E-177 | 103.3 | 83.3 | 91.9 | S-adenosyl-L-methionine-dependent methyltransferase-like protein | gbpln | Arabidopsis thaliana | AT4G36470.1   Symbols:   S-adenosyl-L-methionine-dependent methyltransferases superfamily protein   chr4:17215128-17216475 REVERSE LENGTH=371                                                                                                                                                                                                                                                                                                                                                                                    | 359  | 371  | 1.00E-180 | 103.3 | 83.3 | 91.9 |
| Rsa1.0_00487.1.g14801.t1 | ref NP_195368.1  uncharacterized protein [Arabidopsis thaliana] gi 2464932 emb CAB16811.1  putative protein [Arabidopsis thaliana] gi 7270598 emb CAB80316.1  putative protein [Arabidopsis thaliana] gi 28393196 gb AAO42028.1  unknown protein [Arabidopsis thaliana] gi 28827518 gb AAO50603.1  unknown protein [Arabidopsis thaliana] gi 332661263 gb AEE86663.1  uncharacterized protein AT4G36500 [Arabidopsis thaliana]                                                                                  | 123  | 122  | 1.00E-51  | 99.2  | 90.2 | 93.5 | uncharacterized protein                                          | gbpln | Arabidopsis thaliana | AT4G36500.1   Symbols:   unknown protein; FUNCTIONS IN: molecular_function unknown; INVOLVED IN: biological_process unknown; LOCATED IN: mitochondrion; EXPRESSED IN: 22 plant structures; EXPRESSED DURING: 13 growth stages; BEST Arabidopsis thaliana protein match is: unknown protein (TAIR:AT2G18210.1); Has 50 Blast hits to 50 proteins in 7 species: Archae - 0; Bacteria - 0; Metazoa - 0; Fungi - 0; Plants - 50; Viruses - 0; Other Eukaryotes - 0 (source: NCBI BLink).   chr4:17226139-17226507 REVERSE LENGTH=122 | 123  | 122  | 2.00E-54  | 99.2  | 90.2 | 93.5 |
| Rsa1.0_00487.1.g14802.t1 | ref NP_195368.1  uncharacterized protein [Arabidopsis thaliana] gi 2464932 emb CAB16811.1  putative protein [Arabidopsis thaliana] gi 7270598 emb CAB80316.1  putative protein [Arabidopsis thaliana] gi 28393196 gb AAO42028.1  unknown protein [Arabidopsis thaliana] gi 28827518 gb AAO50603.1  unknown protein [Arabidopsis thaliana] gi 332661263 gb AEE86663.1  uncharacterized protein AT4G36500 [Arabidopsis thaliana]                                                                                  | 124  | 122  | 2.00E-52  | 98.4  | 91.1 | 91.9 | uncharacterized protein                                          | gbpln | Arabidopsis thaliana | AT4G36500.1   Symbols:   unknown protein; FUNCTIONS IN: molecular_function unknown; INVOLVED IN: biological_process unknown; LOCATED IN: mitochondrion; EXPRESSED IN: 22 plant structures; EXPRESSED DURING: 13 growth stages; BEST Arabidopsis thaliana protein match is: unknown protein (TAIR:AT2G18210.1); Has 50 Blast hits to 50 proteins in 7 species: Archae - 0; Bacteria - 0; Metazoa - 0; Fungi - 0; Plants - 50; Viruses - 0; Other Eukaryotes - 0 (source: NCBI BLink).   chr4:17226139-17226507 REVERSE LENGTH=122 | 124  | 122  | 3.00E-55  | 98.4  | 91.1 | 91.9 |
| Rsa1.0_00487.1.g14803.t1 | ref NP_195370.5  chaperone DnaJ-domain containing protein [Arabidopsis thaliana] gi 332661266 gb AEE86666.1  chaperone DnaJ-domain containing protein [Arabidopsis thaliana]                                                                                                                                                                                                                                                                                                                                    | 1311 | 1422 | 0         | 108.5 | 73.3 | 81.3 | chaperone DnaJ-domain containing protein                         | gbpln | Arabidopsis thaliana | AT4G36520.1   Symbols:   Chaperone DnaJ-domain superfamily protein   chr4:17230589-17235435 REVERSE LENGTH=1422                                                                                                                                                                                                                                                                                                                                                                                                                  | 1311 | 1422 | 0         | 108.5 | 73.3 | 81.3 |
| Rsa1.0_00487.1.g14804.t1 | ref XP_002867009.1  hydrolase, alpha/beta fold family protein [Arabidopsis lyrata subsp. lyrata] gi 297312845 gb EFH43268.1  hydrolase, alpha/beta fold family protein [Arabidopsis lyrata subsp. lyrata]                                                                                                                                                                                                                                                                                                       | 354  | 376  | 1.00E-177 | 106.2 | 88.7 | 93.2 | hydrolase, alpha/beta fold family protein                        | gbpln | Arabidopsis lyrata   | AT4G36530.2   Symbols:   alpha/beta-Hydrolases superfamily protein   chr4:17240120-17241770 REVERSE LENGTH=378                                                                                                                                                                                                                                                                                                                                                                                                                   | 354  | 378  | 1.00E-174 | 106.8 | 88.1 | 93.2 |
| Rsa1.0_00487.1.g14805.t1 | ref XP_002867008.1  U-box domain-containing protein 5 [Arabidopsis lyrata subsp. lyrata] gi 297312844 gb EFH43267.1  U-box domain-containing protein 5 [Arabidopsis lyrata subsp. lyrata]                                                                                                                                                                                                                                                                                                                       | 717  | 751  | 0         | 104.7 | 73.2 | 83.8 | U-box domain-containing protein 5                                | gbpln | Arabidopsis lyrata   | AT4G36550.1   Symbols:   ARM repeat superfamily protein   chr4:17245400-17247926 REVERSE LENGTH=718                                                                                                                                                                                                                                                                                                                                                                                                                              | 717  | 718  | 0         | 100.1 | 72.0 | 82.1 |

|                          |                                                                                                                                                                                                                                                                                                                                                                                                                                                                                                                                                      |      |      |           |       |      |      |                                                       |                      |                                                                                                                               |      |     |           |       |      |      |
|--------------------------|------------------------------------------------------------------------------------------------------------------------------------------------------------------------------------------------------------------------------------------------------------------------------------------------------------------------------------------------------------------------------------------------------------------------------------------------------------------------------------------------------------------------------------------------------|------|------|-----------|-------|------|------|-------------------------------------------------------|----------------------|-------------------------------------------------------------------------------------------------------------------------------|------|-----|-----------|-------|------|------|
| Rsa1.0_00487.1.g14806.t1 | gb EOA15655.1  hypothetical protein CARUB_v10006084mg, partial [Capsella rubella]                                                                                                                                                                                                                                                                                                                                                                                                                                                                    | 79   | 105  | 3.00E-33  | 132.9 | 86.1 | 91.1 | hypothetical protein CARUB_v10006084mg, gbpln partial | Capsella rubella     | AT1G75250.2   Symbols: ATRL6, RSM3, RL6   RAD-like 6   chr1:28244463-28245453 REVERSE LENGTH=97                               | 79   | 97  | 8.00E-26  | 122.8 | 62.0 | 79.7 |
| Rsa1.0_00487.1.g14807.t1 | ref NP_195376.2  AAA-type ATPase family protein [Arabidopsis thaliana] gi 332661274 gb AE86674.1  AAA-type ATPase family protein [Arabidopsis thaliana]                                                                                                                                                                                                                                                                                                                                                                                              | 601  | 632  | 0         | 105.2 | 86.0 | 90.3 | AAA-type ATPase family protein gbpln                  | Arabidopsis thaliana | AT4G36580.1   Symbols:   AAA-type ATPase family protein   chr4:17257958-17260661 FORWARD LENGTH=632                           | 601  | 632 | 0         | 105.2 | 86.0 | 90.3 |
| Rsa1.0_00487.1.g14808.t1 | gb EOA32387.1  hypothetical protein CARUB_v10015657mg [Capsella rubella]                                                                                                                                                                                                                                                                                                                                                                                                                                                                             | 250  | 313  | 4.00E-82  | 125.2 | 62.4 | 79.6 | hypothetical protein CARUB_v10015657mg gbpln          | Capsella rubella     | AT4G36610.1   Symbols:   alpha/beta-Hydrolases superfamily protein   chr4:17265545-17267274 REVERSE LENGTH=317                | 250  | 317 | 9.00E-83  | 126.8 | 60.4 | 78.4 |
| Rsa1.0_00487.1.g14809.t1 | ref XP_002867006.1  predicted protein [Arabidopsis lyrata subsp. lyrata] gi 297312842 gb EFH43265.1  predicted protein [Arabidopsis lyrata subsp. lyrata]                                                                                                                                                                                                                                                                                                                                                                                            | 315  | 315  | 1.00E-155 | 100.0 | 88.6 | 93.3 | predicted protein gbpln                               | Arabidopsis lyrata   | AT4G36610.1   Symbols:   alpha/beta-Hydrolases superfamily protein   chr4:17265545-17267274 REVERSE LENGTH=317                | 315  | 317 | 1.00E-156 | 100.6 | 87.6 | 92.4 |
| Rsa1.0_00487.1.g14810.t1 | gb EOA18681.1  hypothetical protein CARUB_v10007257mg [Capsella rubella]                                                                                                                                                                                                                                                                                                                                                                                                                                                                             | 293  | 293  | 1.00E-152 | 100.0 | 85.7 | 93.9 | hypothetical protein CARUB_v10007257mg gbpln          | Capsella rubella     | AT4G36640.1   Symbols:   Sec14p-like phosphatidylinositol transfer family protein   chr4:17277187-17278447 REVERSE LENGTH=294 | 293  | 294 | 1.00E-149 | 100.3 | 83.3 | 92.2 |
| Rsa1.0_00487.1.g14811.t1 | gb EOA16387.1  hypothetical protein CARUB_v10004541mg, partial [Capsella rubella]                                                                                                                                                                                                                                                                                                                                                                                                                                                                    | 510  | 540  | 0         | 105.9 | 86.9 | 91.4 | hypothetical protein CARUB_v10004541mg, gbpln partial | Capsella rubella     | AT4G36650.1   Symbols: ATPBRP, PBRP   plant-specific TFIIIB-related protein   chr4:17283283-17285527 REVERSE LENGTH=503       | 510  | 503 | 0         | 98.6  | 85.5 | 91.0 |
| Rsa1.0_00487.1.g14812.t1 | gb EOA18172.1  hypothetical protein CARUB_v10006648mg [Capsella rubella]                                                                                                                                                                                                                                                                                                                                                                                                                                                                             | 697  | 493  | 0         | 70.7  | 65.6 | 68.1 | hypothetical protein CARUB_v10006648mg gbpln          | Capsella rubella     | AT4G36670.1   Symbols:   Major facilitator superfamily protein   chr4:17287680-17289483 REVERSE LENGTH=493                    | 697  | 493 | 0         | 70.7  | 64.7 | 67.6 |
| Rsa1.0_00488.1.g14813.t1 | ref NP_174496.1  xyloglucan:xyloglucosyl transferase [Arabidopsis thaliana] gi 38605150 sp Q38908.2 XTH30_ARATH RecName: Full=Probable xyloglucan endotransglucosylase/hydrolase protein 30; Short=At-XTH30; Short=XTH-30; Flags: Precursor gi 10801367 gb AAG23439.1 AC084165.5 endoxyloglucan transferase, putative [Arabidopsis thaliana] gi 17065244 gb AAL32776.1  endoxyloglucan transferase, putative [Arabidopsis thaliana] gi 332193322 gb AEE31443.1  probable xyloglucan endotransglucosylase/hydrolase protein 30 [Arabidopsis thaliana] | 345  | 343  | 1.00E-178 | 99.4  | 92.5 | 96.2 | xyloglucan:xyloglucosyl transferase gbpln             | Arabidopsis thaliana | AT1G32170.1   Symbols: XTR4, XTH30   xyloglucan endotransglucosylase/hydrolase 30   chr1:11575434-11577776 FORWARD LENGTH=343 | 345  | 343 | 1.00E-180 | 99.4  | 92.5 | 96.2 |
| Rsa1.0_00488.1.g14814.t1 | ref NP_175150.1  F-box protein [Arabidopsis thaliana] gi 75268184 sp Q9C627.1 FB36_ARATH RecName: Full=Putative F-box protein At g46984 gi 12321006 gb AAG50624.1 AC083835.9 hypothetical protein [Arabidopsis thaliana] gi 332194012 gb AEE32133.1  F-box protein [Arabidopsis thaliana]                                                                                                                                                                                                                                                            | 398  | 370  | 4.00E-98  | 93.0  | 51.8 | 64.6 | F-box protein gbpln                                   | Arabidopsis thaliana | AT1G46984.1   Symbols:   F-box family protein   chr1:17274722-17275834 FORWARD LENGTH=370                                     | 398  | 370 | 1.00E-100 | 93.0  | 51.8 | 64.6 |
| Rsa1.0_00488.1.g14815.t1 | ref XP_002893707.1  hypothetical protein ARALYDRAFT_473399 [Arabidopsis lyrata subsp. lyrata] gi 297339549 gb EFH69966.1  hypothetical protein ARALYDRAFT_473399 [Arabidopsis lyrata subsp. lyrata]                                                                                                                                                                                                                                                                                                                                                  | 969  | 974  | 0         | 100.5 | 83.4 | 89.7 | hypothetical protein ARALYDRAFT_473399 gbpln          | Arabidopsis lyrata   | AT1G32180.1   Symbols: ATCSLD6, CSLD6   cellulose synthase-like D6   chr1:11586516-11589651 REVERSE LENGTH=979                | 969  | 979 | 0         | 101.0 | 83.3 | 89.9 |
| Rsa1.0_00488.1.g14816.t1 | gb AAG51783.1 AC079679.3 reverse transcriptase, putative; 16838-20266 [Arabidopsis thaliana]                                                                                                                                                                                                                                                                                                                                                                                                                                                         | 1225 | 1142 | 0         | 93.2  | 39.2 | 49.1 | reverse transcriptase, putative; 16838-20266 gbpln    | Arabidopsis thaliana | AT4G29090.1   Symbols:   Ribonuclease H-like superfamily protein   chr4:14333528-14335255 FORWARD LENGTH=575                  | 1225 | 575 | 2.00E-79  | 46.9  | 14.9 | 24.1 |
| Rsa1.0_00488.1.g14817.t1 | #                                                                                                                                                                                                                                                                                                                                                                                                                                                                                                                                                    | #    | #    | #         | #     | #    | #    | -                                                     | ----                 | ----                                                                                                                          | #    | #   | #         | #     | #    | #    |
| Rsa1.0_00488.1.g14818.t1 | gb AAG50806.1 AC079291.8 unknown protein [Arabidopsis thaliana]                                                                                                                                                                                                                                                                                                                                                                                                                                                                                      | 136  | 1213 | 3.00E-12  | 891.9 | 29.4 | 52.2 | unknown protein gbpln                                 | Arabidopsis thaliana | #                                                                                                                             | #    | #   | #         | #     | #    | #    |
| Rsa1.0_00488.1.g14819.t2 | ref XP_002893708.1  hypothetical protein ARALYDRAFT_473401 [Arabidopsis lyrata subsp. lyrata] gi 297339550 gb EFH69967.1  hypothetical protein ARALYDRAFT_473401 [Arabidopsis lyrata subsp. lyrata]                                                                                                                                                                                                                                                                                                                                                  | 438  | 429  | 0         | 97.9  | 83.8 | 86.3 | hypothetical protein ARALYDRAFT_473401 gbpln          | Arabidopsis lyrata   | AT1G32190.1   Symbols:   alpha/beta-Hydrolases superfamily protein   chr1:11593059-11595731 REVERSE LENGTH=422                | 438  | 422 | 0         | 96.3  | 82.0 | 85.4 |
| Rsa1.0_00488.1.g14820.t1 | #                                                                                                                                                                                                                                                                                                                                                                                                                                                                                                                                                    | #    | #    | #         | #     | #    | #    | -                                                     | ----                 | ----                                                                                                                          | #    | #   | #         | #     | #    | #    |

|                          |                                                                                                                                                                                                                                                                             |      |      |           |       |      |      |                                                         |       |                      |                                                                                                                                                                                                                                                                                                                                                                                                                                                                                                                                     |      |      |           |       |      |      |
|--------------------------|-----------------------------------------------------------------------------------------------------------------------------------------------------------------------------------------------------------------------------------------------------------------------------|------|------|-----------|-------|------|------|---------------------------------------------------------|-------|----------------------|-------------------------------------------------------------------------------------------------------------------------------------------------------------------------------------------------------------------------------------------------------------------------------------------------------------------------------------------------------------------------------------------------------------------------------------------------------------------------------------------------------------------------------------|------|------|-----------|-------|------|------|
| Rsa1.0_00488.1.g14821.t1 | dbj BAB09379.1  non-LTR retroelement reverse transcriptase-like protein [Arabidopsis thaliana]                                                                                                                                                                              | 714  | 1223 | 0         | 171.3 | 48.0 | 66.2 | non-LTR retroelement reverse transcriptase-like protein | gbpln | Arabidopsis thaliana | AT3G24255.1   Symbols:   RNA-directed DNA polymerase (reverse transcriptase)-related family protein   chr3:8789471-8793208 FORWARD LENGTH=746                                                                                                                                                                                                                                                                                                                                                                                       | 714  | 746  | 3.00E-71  | 104.5 | 21.7 | 29.3 |
| Rsa1.0_00488.1.g14822.t1 | gb AGC55014.1  glycerin-3-phosphate acylase 2 [Brassica oleracea var. viridis]                                                                                                                                                                                              | 453  | 451  | 0         | 99.6  | 94.0 | 96.5 | glycerin-3-phosphate acylase 2                          | gbpln | Brassica oleracea    | AT1G32200.2   Symbols: AT51, ACT1   phospholipid/glycerol acyltransferase family protein   chr1:11602223-11605001 REVERSE LENGTH=459                                                                                                                                                                                                                                                                                                                                                                                                | 453  | 459  | 0         | 101.3 | 87.9 | 93.8 |
| Rsa1.0_00489.1.g14823.t2 | gb ADL70730.1  indole-3-acetic acid inducible 20 [Arabidopsis thaliana]                                                                                                                                                                                                     | 208  | 171  | 9.00E-36  | 82.2  | 44.7 | 47.1 | indole-3-acetic acid inducible 20                       | gbpln | Arabidopsis thaliana | AT2G46990.1   Symbols: IAA20   indole-3-acetic acid inducible 20   chr2:19307861-19308869 FORWARD LENGTH=175                                                                                                                                                                                                                                                                                                                                                                                                                        | 208  | 175  | 1.00E-37  | 84.1  | 44.2 | 46.6 |
| Rsa1.0_00489.1.g14824.t1 | # # # # # # # #                                                                                                                                                                                                                                                             |      |      |           |       |      |      | -                                                       | ----  | ----                 | # # # # # # # #                                                                                                                                                                                                                                                                                                                                                                                                                                                                                                                     |      |      |           |       |      |      |
| Rsa1.0_00489.1.g14825.t1 | ref XP_002868583.1  ATCHX18 [Arabidopsis lyrata subsp. lyrata]   gi 297314419 gb EFH44842.1  ATCHX18 [Arabidopsis lyrata subsp. lyrata]                                                                                                                                     | 800  | 810  | 0         | 101.3 | 89.9 | 95.5 | ATCHX18                                                 | gbpln | Arabidopsis lyrata   | AT5G41610.1   Symbols: ATCHX18, CHX18   cation/H+ exchanger 18   chr5:16638554-16641146 REVERSE LENGTH=810                                                                                                                                                                                                                                                                                                                                                                                                                          | 800  | 810  | 0         | 101.3 | 88.6 | 94.3 |
| Rsa1.0_00489.1.g14826.t1 | gb EOA17391.1  hypothetical protein CARUB_v10005685mg [Capsella rubella]                                                                                                                                                                                                    | 163  | 224  | 2.00E-72  | 137.4 | 81.6 | 87.7 | hypothetical protein CARUB_v10005685mg                  | gbpln | Capsella rubella     | AT5G41590.1   Symbols:   Protein of unknown function (DUF567)   chr5:16632221-16633896 REVERSE LENGTH=221                                                                                                                                                                                                                                                                                                                                                                                                                           | 163  | 221  | 6.00E-73  | 135.6 | 79.1 | 85.3 |
| Rsa1.0_00489.1.g14827.t1 | gb AAD32898.1  putative retroelement pol polyprotein [Arabidopsis thaliana]                                                                                                                                                                                                 | 2161 | 1307 | 0         | 60.5  | 36.6 | 46.6 | putative retroelement pol polyprotein                   | gbpln | Arabidopsis thaliana | AT5G39020.1   Symbols:   Malectin/receptor-like protein kinase family protein   chr5:15616917-15619358 FORWARD LENGTH=813                                                                                                                                                                                                                                                                                                                                                                                                           | 2161 | 813  | 1.00E-175 | 37.6  | 14.1 | 16.3 |
| Rsa1.0_00489.1.g14828.t3 | dbj BAB11464.1  transcription factor-like protein [Arabidopsis thaliana]                                                                                                                                                                                                    | 643  | 719  | 1.00E-169 | 111.8 | 56.5 | 70.0 | transcription factor-like protein                       | gbpln | Arabidopsis thaliana | AT5G41580.1   Symbols:   RING/U-box superfamily protein   chr5:16626563-16630659 REVERSE LENGTH=760                                                                                                                                                                                                                                                                                                                                                                                                                                 | 643  | 760  | 1.00E-153 | 118.2 | 46.0 | 53.8 |
| Rsa1.0_00489.1.g14829.t1 | gb ACN89258.1  WRKY transcription factor 24 [Brassica napus]                                                                                                                                                                                                                | 176  | 150  | 8.00E-80  | 85.2  | 80.1 | 82.4 | WRKY transcription factor 24                            | gbpln | Brassica napus       | AT5G41570.1   Symbols: WRKY24, ATWRKY24   WRKY DNA-binding protein 24   chr5:16624220-16625689 FORWARD LENGTH=179                                                                                                                                                                                                                                                                                                                                                                                                                   | 176  | 179  | 1.00E-76  | 101.7 | 81.8 | 88.6 |
| Rsa1.0_00489.1.g14830.t1 | gb EOA17721.1  hypothetical protein CARUB_v10006102mg [Capsella rubella]                                                                                                                                                                                                    | 100  | 102  | 4.00E-45  | 102.0 | 90.0 | 95.0 | hypothetical protein CARUB_v10006102mg                  | gbpln | Capsella rubella     | AT5G41560.1   Symbols:   FUNCTIONS IN: molecular_function unknown; INVOLVED IN: biological_process unknown; LOCATED IN: chloroplast; EXPRESSED IN: 24 plant structures; EXPRESSED DURING: 15 growth stages; CONTAINS InterPro DOMAIN/s: Ubiquitin ligase, Det1/DBD1-complexing (InterPro:IPR018276); Has 1807 Blast hits to 1807 proteins in 277 species: Archae - 0; Bacteria - 0; Metazoa - 736; Fungi - 347; Plants - 385; Viruses - 0; Other Eukaryotes - 339 (source: NCBI BLINK).   chr5:16621427-16622619 REVERSE LENGTH=101 | 100  | 101  | 6.00E-47  | 101.0 | 89.0 | 94.0 |
| Rsa1.0_00489.1.g14831.t1 | ref XP_002868591.1  hypothetical protein ARALYDRAFT_493833 [Arabidopsis lyrata subsp. lyrata]   gi 297314427 gb EFH44850.1  hypothetical protein ARALYDRAFT_493833 [Arabidopsis lyrata subsp. lyrata]                                                                       | 179  | 183  | 8.00E-72  | 102.2 | 77.1 | 81.0 | hypothetical protein ARALYDRAFT_493833                  | gbpln | Arabidopsis lyrata   | AT5G41520.1   Symbols:   RNA binding Plectin/S10 domain-containing protein   chr5:16609377-16610583 REVERSE LENGTH=180                                                                                                                                                                                                                                                                                                                                                                                                              | 179  | 180  | 7.00E-66  | 100.6 | 75.4 | 78.2 |
| Rsa1.0_00489.1.g14832.t1 | gb EOA40394.1  hypothetical protein CARUB_v10009120mg [Capsella rubella]                                                                                                                                                                                                    | 436  | 449  | 2.00E-87  | 103.0 | 47.9 | 62.8 | hypothetical protein CARUB_v10009120mg                  | gbpln | Capsella rubella     | AT1G16930.1   Symbols:   F-box/RNI-like/FBD-like domains-containing protein   chr1:5789987-5791534 FORWARD LENGTH=449                                                                                                                                                                                                                                                                                                                                                                                                               | 436  | 449  | 1.00E-88  | 103.0 | 47.5 | 62.8 |
| Rsa1.0_00489.1.g14833.t1 | ref NP_198970.1  TIR-NBS-LRR class disease resistance protein [Arabidopsis thaliana]   gi 10178009 dbj BAB11461.1  disease resistance protein-like [Arabidopsis thaliana]   gi 332007308 gb AED94691.1  TIR-NBS-LRR class disease resistance protein [Arabidopsis thaliana] | 1491 | 1085 | 0         | 72.8  | 43.2 | 52.8 | TIR-NBS-LRR class disease resistance protein            | gbpln | Arabidopsis thaliana | AT5G41550.1   Symbols:   Disease resistance protein (TIR-NBS-LRR class) family   chr5:16617232-16620785 REVERSE LENGTH=1085                                                                                                                                                                                                                                                                                                                                                                                                         | 1491 | 1085 | 0         | 72.8  | 43.2 | 52.8 |
| Rsa1.0_00489.1.g14834.t1 | ref NP_198970.1  TIR-NBS-LRR class disease resistance protein [Arabidopsis thaliana]   gi 10178009 dbj BAB11461.1  disease resistance protein-like [Arabidopsis thaliana]   gi 332007308 gb AED94691.1  TIR-NBS-LRR class disease resistance protein [Arabidopsis thaliana] | 1083 | 1085 | 0         | 100.2 | 47.7 | 56.8 | TIR-NBS-LRR class disease resistance protein            | gbpln | Arabidopsis thaliana | AT5G41550.1   Symbols:   Disease resistance protein (TIR-NBS-LRR class) family   chr5:16617232-16620785 REVERSE LENGTH=1085                                                                                                                                                                                                                                                                                                                                                                                                         | 1083 | 1085 | 0         | 100.2 | 47.7 | 56.8 |
| Rsa1.0_00489.1.g14835.t1 | ref XP_002870622.1  predicted protein [Arabidopsis lyrata subsp. lyrata]   gi 297316458 gb EFH46881.1  predicted protein [Arabidopsis lyrata subsp. lyrata]                                                                                                                 | 162  | 1127 | 9.00E-69  | 695.7 | 79.6 | 87.0 | predicted protein                                       | gbpln | Arabidopsis lyrata   | AT5G41550.1   Symbols:   Disease resistance protein (TIR-NBS-LRR class) family   chr5:16617232-16620785 REVERSE LENGTH=1085                                                                                                                                                                                                                                                                                                                                                                                                         | 162  | 1085 | 9.00E-70  | 669.8 | 76.5 | 84.6 |



|                           |                                                                                                                                                                                                                                                                                                                                                                                                                                                                                                                                                                                                                                                                                                                     |      |      |           |       |      |      |                                        |       |                      |                                                                                                                                                                                                                                                                                                                                                                          |      |      |           |       |      |      |
|---------------------------|---------------------------------------------------------------------------------------------------------------------------------------------------------------------------------------------------------------------------------------------------------------------------------------------------------------------------------------------------------------------------------------------------------------------------------------------------------------------------------------------------------------------------------------------------------------------------------------------------------------------------------------------------------------------------------------------------------------------|------|------|-----------|-------|------|------|----------------------------------------|-------|----------------------|--------------------------------------------------------------------------------------------------------------------------------------------------------------------------------------------------------------------------------------------------------------------------------------------------------------------------------------------------------------------------|------|------|-----------|-------|------|------|
| Rsa1.0_00490.1.g14836.t1  | gb EOA26337.1  hypothetical protein CARUB_v10022511mg [Capsella rubella]                                                                                                                                                                                                                                                                                                                                                                                                                                                                                                                                                                                                                                            | 1337 | 1347 | 0         | 100.7 | 93.8 | 96.9 | hypothetical protein CARUB_v10022511mg | gbpln | Capsella rubella     | AT2G36910.1   Symbols: ATPGP1, PGP1, ABCB1   ATP binding cassette subfamily B1   chr2:15502162-15507050 FORWARD LENGTH=1286                                                                                                                                                                                                                                              | 1337 | 1286 | 0         | 96.2  | 91.5 | 94.3 |
| Rsa1.0_00490.1.g14837.t1  | ref NP_850272.1  uncharacterized protein [Arabidopsis thaliana] gi 22531199 gb AA097103.1  unknown protein [Arabidopsis thaliana] gi 23198030 gb AAN15542.1  unknown protein [Arabidopsis thaliana] gi 110741110 dbj BAE98649.1  hypothetical protein [Arabidopsis thaliana] gi 330254222 gb AEC09316.1  uncharacterized protein AT2G36895 [Arabidopsis thaliana]                                                                                                                                                                                                                                                                                                                                                   | 226  | 232  | 3.00E-99  | 102.7 | 82.7 | 88.1 | uncharacterized protein                | gbpln | Arabidopsis thaliana | AT2G36895.1   Symbols:   unknown protein; FUNCTIONS IN: molecular_function unknown; INVOLVED IN: biological_process unknown; LOCATED IN: chloroplast; Has 32 Blast hits to 32 proteins in 14 species: Archae - 0; Bacteria - 0; Metazoa - 0; Fungi - 0; Plants - 32; Viruses - 0; Other Eukaryotes - 0 (source: NCBI BLINK).   chr2:15489176-15490296 REVERSE LENGTH=232 | 226  | 232  | 1.00E-101 | 102.7 | 82.7 | 88.1 |
| Rsa1.0_00490.1.g14838.t1  | ref XP_002881476.1  hypothetical protein ARALYDRAFT_902809 [Arabidopsis lyrata subsp. lyrata] gi 297327315 gb EFH57735.1  hypothetical protein ARALYDRAFT_902809 [Arabidopsis lyrata subsp. lyrata] gi 482563079 gb EOA27269.1  hypothetical protein CARUB_v10023389mg [Capsella rubella] gi 482563080 gb EOA27270.1  hypothetical protein CARUB_v10023389mg [Capsella rubella]                                                                                                                                                                                                                                                                                                                                     | 390  | 390  | 0         | 100.0 | 98.5 | 99.5 | hypothetical protein ARALYDRAFT_902809 | gbpln | Arabidopsis lyrata   | AT2G36880.2   Symbols: MAT3   methionine adenosyltransferase 3   chr2:15479721-15480893 REVERSE LENGTH=390                                                                                                                                                                                                                                                               | 390  | 390  | 0         | 100.0 | 97.9 | 99.5 |
| Rsa1.0_00490.1.g14839.t1  | ref NP_181224.1  xyloglucan:xyloglucosyl transferase [Arabidopsis thaliana] gi 38605514 sp Q9S:JL9.1 XTH32 ARAT H RecName: Full=Probable xyloglucan endotransglucosylase/hydrolase protein 32; Short=At-XTH32; Short=XTH-32; Flags: Precursor gi 4883603 gb AAD31572.1  xyloglucan endotransglucosylase, putative [Arabidopsis thaliana] gi 15027967 gb AAK76514.1  putative xyloglucan endo-transglucosylase [Arabidopsis thaliana] gi 21595304 gb AAM66089.1  putative xyloglucan endo-transglucosylase [Arabidopsis thaliana] gi 22136872 gb AAM91780.1  putative xyloglucan endo-transglucosylase [Arabidopsis thaliana] gi 330254214 gb AEC09308.1  xyloglucan:xyloglucosyl transferase [Arabidopsis thaliana] | 299  | 299  | 1.00E-163 | 100.0 | 91.6 | 97.0 | xyloglucan:xyloglucosyl transferase    | gbpln | Arabidopsis thaliana | AT2G36870.1   Symbols: XTH32   xyloglucan endotransglucosylase/hydrolase 32   chr2:15472869-15474630 REVERSE LENGTH=299                                                                                                                                                                                                                                                  | 299  | 299  | 1.00E-166 | 100.0 | 91.6 | 97.0 |
| Rsa1.0_00490.1.g14840.t1  | ref XP_002881473.1  hypothetical protein ARALYDRAFT_482665 [Arabidopsis lyrata subsp. lyrata] gi 297327312 gb EFH57732.1  hypothetical protein ARALYDRAFT_482665 [Arabidopsis lyrata subsp. lyrata]                                                                                                                                                                                                                                                                                                                                                                                                                                                                                                                 | 416  | 411  | 0         | 98.8  | 88.9 | 92.8 | hypothetical protein ARALYDRAFT_482665 | gbpln | Arabidopsis lyrata   | AT2G36840.1   Symbols:   ACT-like superfamily protein   chr2:15451834-15453550 REVERSE LENGTH=410                                                                                                                                                                                                                                                                        | 416  | 410  | 0         | 98.6  | 88.7 | 92.8 |
| Rsa1.0_00490.1.g14841.t3  | dbj BAF00918.1  putative reverse transcriptase [Arabidopsis thaliana]                                                                                                                                                                                                                                                                                                                                                                                                                                                                                                                                                                                                                                               | 1692 | 910  | 0         | 53.8  | 26.7 | 35.0 | putative reverse transcriptase         | gbpln | Arabidopsis thaliana | AT1G43760.1   Symbols:   DNase I-like superfamily protein   chr1:16528880-16531065 REVERSE LENGTH=626                                                                                                                                                                                                                                                                    | 1692 | 626  | 1.00E-101 | 37.0  | 11.8 | 16.6 |
| Rsa1.0_00490.1.g14842.t1  | gb AAB51393.2  tonoplast intrinsic protein bobTIP26-1 [Brassica oleracea var. botrytis]                                                                                                                                                                                                                                                                                                                                                                                                                                                                                                                                                                                                                             | 251  | 251  | 1.00E-134 | 100.0 | 98.4 | 99.2 | tonoplast intrinsic protein bobTIP26-1 | gbpln | Brassica oleracea    | AT2G36830.1   Symbols: GAMMA-TIP, TIP1;1, GAMMA-TIP1   gamma tonoplast intrinsic protein   chr2:15445490-15446336 FORWARD LENGTH=251                                                                                                                                                                                                                                     | 251  | 251  | 1.00E-133 | 100.0 | 94.4 | 98.4 |
| Rsa1.0_00490.1.g14843.t13 | gb EOA29221.1  hypothetical protein CARUB_v10025495mg [Capsella rubella]                                                                                                                                                                                                                                                                                                                                                                                                                                                                                                                                                                                                                                            | 1692 | 1708 | 0         | 100.9 | 90.8 | 94.9 | hypothetical protein CARUB_v10025495mg | gbpln | Capsella rubella     | AT2G36810.1   Symbols:   ARM repeat superfamily protein   chr2:15425739-15439462 REVERSE LENGTH=1716                                                                                                                                                                                                                                                                     | 1692 | 1716 | 0         | 101.4 | 91.0 | 94.6 |

|                          |                                                                                                                                                                                                                                                                                                                                                                                                                                                                                                                                                                                                                                                                                                                                                                                                                                                                                                                                         |     |     |          |       |      |      |                                         |       |                      |                                                                                                                                        |     |     |          |       |      |      |
|--------------------------|-----------------------------------------------------------------------------------------------------------------------------------------------------------------------------------------------------------------------------------------------------------------------------------------------------------------------------------------------------------------------------------------------------------------------------------------------------------------------------------------------------------------------------------------------------------------------------------------------------------------------------------------------------------------------------------------------------------------------------------------------------------------------------------------------------------------------------------------------------------------------------------------------------------------------------------------|-----|-----|----------|-------|------|------|-----------------------------------------|-------|----------------------|----------------------------------------------------------------------------------------------------------------------------------------|-----|-----|----------|-------|------|------|
| Rsa1.0_00490.1.g14844.t1 | ref NP_181213.1  cytokinin-O-glucosyltransferase 1 [Arabidopsis thaliana]<br>gi 66774040 sp Q9ZQ99.1 U73C1_ARAT<br>H RecName: Full=UDP-glycosyltransferase 73C1; AltName: Full=Cytokinin-O-glucosyltransferase 1; AltName: Full=Zeatin O-glucosyltransferase 1; Short=AtZOG1<br>gi 4415920 gb AAD20151.1  putative glucosyl transferase [Arabidopsis thaliana] gi 46318041 gb AAS87590.1  zeatin O-glucosyltransferase 1 [Arabidopsis thaliana]<br>gi 11074234 gb ABH04490.1  At2g36750 [Arabidopsis thaliana]<br>gi 330254200 gb AEC09294.1  cytokinin-O-glucosyltransferase 1 [Arabidopsis thaliana]<br>ref NP_181214.1  UDP-glucosyl transferase 73C [Arabidopsis thaliana]<br>gi 75315659 sp Q9ZQ98.1 U73C2_ARAT<br>H RecName: Full=UDP-glycosyltransferase 73C2<br>gi 4415921 gb AAD20152.1  putative glucosyl transferase [Arabidopsis thaliana] gi 330254201 gb AEC09295.1  UDP-glucosyl transferase 73C2 [Arabidopsis thaliana] | 496 | 491 | 0        | 99.0  | 82.7 | 89.5 | cytokinin-O-glucosyltransferase 1       | gbpln | Arabidopsis thaliana | AT2G36750.1   Symbols: UGT73C1   UDP-glucosyl transferase 73C1   chr2:15410531-15412006 REVERSE LENGTH=491                             | 496 | 491 | 0        | 99.0  | 82.7 | 89.5 |
| Rsa1.0_00490.1.g14845.t1 | gi 4415921 gb AAD20152.1  putative glucosyl transferase [Arabidopsis thaliana] gi 330254201 gb AEC09295.1  UDP-glucosyl transferase 73C2 [Arabidopsis thaliana]                                                                                                                                                                                                                                                                                                                                                                                                                                                                                                                                                                                                                                                                                                                                                                         | 496 | 496 | 0        | 100.0 | 83.1 | 90.3 | UDP-glucosyl transferase 73C            | gbpln | Arabidopsis thaliana | AT2G36760.1   Symbols: UGT73C2   UDP-glucosyl transferase 73C2   chr2:15413042-15414532 REVERSE LENGTH=496                             | 496 | 496 | 0        | 100.0 | 83.1 | 90.3 |
| Rsa1.0_00490.1.g14846.t1 | gb EOA28908.1  hypothetical protein CARUB_v10025154mg [Capsella rubella]                                                                                                                                                                                                                                                                                                                                                                                                                                                                                                                                                                                                                                                                                                                                                                                                                                                                | 394 | 263 | 4.00E-59 | 66.8  | 34.0 | 40.9 | hypothetical protein CARUB_v10025154mg  | gbpln | Capsella rubella     | AT2G36540.1   Symbols:   Haloacid dehalogenase-like hydrolase (HAD) superfamily protein   chr2:15325237-15326449 FORWARD LENGTH=249    | 394 | 249 | 1.00E-55 | 63.2  | 31.0 | 36.3 |
| Rsa1.0_00490.1.g14847.t1 | #                                                                                                                                                                                                                                                                                                                                                                                                                                                                                                                                                                                                                                                                                                                                                                                                                                                                                                                                       | #   | #   | #        | #     | #    | -    | -                                       | ----  | ----                 | #                                                                                                                                      | #   | #   | #        | #     | #    |      |
| Rsa1.0_00490.1.g14848.t1 | gb EOA28908.1  hypothetical protein CARUB_v10025154mg [Capsella rubella]                                                                                                                                                                                                                                                                                                                                                                                                                                                                                                                                                                                                                                                                                                                                                                                                                                                                | 262 | 263 | 3.00E-94 | 100.4 | 70.2 | 83.6 | hypothetical protein CARUB_v10025154mg  | gbpln | Capsella rubella     | AT2G36540.1   Symbols:   Haloacid dehalogenase-like hydrolase (HAD) superfamily protein   chr2:15325237-15326449 FORWARD LENGTH=249    | 262 | 249 | 4.00E-83 | 95.0  | 64.9 | 76.7 |
| Rsa1.0_00490.1.g14849.t1 | #                                                                                                                                                                                                                                                                                                                                                                                                                                                                                                                                                                                                                                                                                                                                                                                                                                                                                                                                       | #   | #   | #        | #     | #    | -    | -                                       | ----  | ----                 | #                                                                                                                                      | #   | #   | #        | #     | #    |      |
| Rsa1.0_00490.1.g14850.t1 | gb EOA27123.1  hypothetical protein CARUB_v10023223mg [Capsella rubella]                                                                                                                                                                                                                                                                                                                                                                                                                                                                                                                                                                                                                                                                                                                                                                                                                                                                | 452 | 444 | 0        | 98.2  | 91.4 | 92.7 | hypothetical protein CARUB_v10023223mg  | gbpln | Capsella rubella     | AT2G36530.1   Symbols: LOS2, ENO2   Enolase   chr2:15321081-15323786 REVERSE LENGTH=444                                                | 452 | 444 | 0        | 98.2  | 90.9 | 92.7 |
| Rsa1.0_00490.1.g14851.t1 | gb EOA26873.1  hypothetical protein CARUB_v10022966mg [Capsella rubella]                                                                                                                                                                                                                                                                                                                                                                                                                                                                                                                                                                                                                                                                                                                                                                                                                                                                | 554 | 536 | 0        | 96.8  | 74.4 | 83.2 | hypothetical protein CARUB_v10022966mg  | gbpln | Capsella rubella     | AT2G36500.1   Symbols:   CBS / octicosapeptide/Phox/Bemp1 (PB1) domains-containing protein   chr2:15318473-15320083 FORWARD LENGTH=536 | 554 | 536 | 0        | 96.8  | 75.1 | 83.8 |
| Rsa1.0_00490.1.g14852.t2 | ref NP_181187.1  fructose-bisphosphate aldolase, class I [Arabidopsis thaliana]<br>gi 4581146 gb AAD24630.1  putative fructose biphosphate aldolase [Arabidopsis thaliana]<br>gi 14334412 gb AAK59404.1  putative fructose biphosphate aldolase [Arabidopsis thaliana]<br>gi 17104659 gb AAL34218.1  putative fructose biphosphate aldolase [Arabidopsis thaliana]<br>gi 21537327 gb AAM61668.1  putative fructose biphosphate aldolase [Arabidopsis thaliana]<br>gi 110741992 dbj BAE98935.1  putative fructose biphosphate aldolase [Arabidopsis thaliana]<br>gi 330254162 gb AEC09256.1  fructose-bisphosphate aldolase, class I [Arabidopsis thaliana]                                                                                                                                                                                                                                                                              | 359 | 358 | 0        | 99.7  | 91.6 | 96.4 | fructose-bisphosphate aldolase, class I | gbpln | Arabidopsis thaliana | AT2G36460.1   Symbols:   Aldolase superfamily protein   chr2:15296929-15298387 REVERSE LENGTH=358                                      | 359 | 358 | 0        | 99.7  | 91.6 | 96.4 |

|                           |                                                                                                                                                                                                                                                                                                                                                                                                                                                                                                                                                                                                                                               |      |      |           |       |      |      |                                              |       |                      |                                                                                                                                                                                                                                                                                                                                                                  |      |      |           |       |      |      |
|---------------------------|-----------------------------------------------------------------------------------------------------------------------------------------------------------------------------------------------------------------------------------------------------------------------------------------------------------------------------------------------------------------------------------------------------------------------------------------------------------------------------------------------------------------------------------------------------------------------------------------------------------------------------------------------|------|------|-----------|-------|------|------|----------------------------------------------|-------|----------------------|------------------------------------------------------------------------------------------------------------------------------------------------------------------------------------------------------------------------------------------------------------------------------------------------------------------------------------------------------------------|------|------|-----------|-------|------|------|
| Rsa1.0_00490.1.g14853.t1  | ref NP_181187.1  fructose-bisphosphate aldolase, class I [Arabidopsis thaliana] gi 4581146 gb AAD24630.1  putative fructose bisphosphate aldolase [Arabidopsis thaliana] gi 14334412 gb AAK59404.1  putative fructose bisphosphate aldolase [Arabidopsis thaliana] gi 17104659 gb AAL34218.1  putative fructose bisphosphate aldolase [Arabidopsis thaliana] gi 21537327 gb AAM61668.1  putative fructose bisphosphate aldolase [Arabidopsis thaliana] gi 110741992 dbj BAE98935.1  putative fructose bisphosphate aldolase [Arabidopsis thaliana] gi 330254162 gb AEC09256.1  fructose-bisphosphate aldolase, class I [Arabidopsis thaliana] | 169  | 358  | 4.00E-75  | 211.8 | 85.8 | 88.8 | fructose-bisphosphate aldolase, class I      | gbpln | Arabidopsis thaliana | AT2G36460.1   Symbols:   Aldolase superfamily protein   chr2:15296829-15298387 REVERSE LENGTH=358                                                                                                                                                                                                                                                                | 169  | 358  | 1.00E-77  | 211.8 | 85.8 | 88.8 |
| Rsa1.0_00490.1.g14854.t1  | gb EOA25343.1  hypothetical protein CARUB_v10018664mg [Capsella rubella]                                                                                                                                                                                                                                                                                                                                                                                                                                                                                                                                                                      | 161  | 181  | 8.00E-24  | 112.4 | 42.9 | 54.7 | hypothetical protein CARUB_v10018664mg       | gbpln | Capsella rubella     | AT4G09490.1   Symbols:   Polynucleotidyl transferase, ribonuclease H-like superfamily protein   chr4:6015583-6016575 REVERSE LENGTH=170                                                                                                                                                                                                                          | 161  | 170  | 4.00E-19  | 105.6 | 32.3 | 43.5 |
| Rsa1.0_00490.1.g14855.t1  | ref XP_002881444.1  AP2 domain-containing protein [Arabidopsis lyrata subsp. lyrata] gi 297327283 gb EFH57703.1  AP2 domain-containing protein [Arabidopsis lyrata subsp. lyrata]                                                                                                                                                                                                                                                                                                                                                                                                                                                             | 182  | 184  | 2.00E-71  | 101.1 | 79.7 | 87.4 | AP2 domain-containing protein                | gbpln | Arabidopsis lyrata   | AT2G36450.1   Symbols: HRD   Integrase-type DNA-binding superfamily protein   chr2:15294303-15294857 REVERSE LENGTH=184                                                                                                                                                                                                                                          | 182  | 184  | 1.00E-69  | 101.1 | 79.7 | 86.8 |
| Rsa1.0_00490.1.g14856.t1  | gb EOA27098.1  hypothetical protein CARUB_v10023196mg [Capsella rubella]                                                                                                                                                                                                                                                                                                                                                                                                                                                                                                                                                                      | 449  | 451  | 0         | 100.4 | 73.1 | 84.2 | hypothetical protein CARUB_v10023196mg       | gbpln | Capsella rubella     | AT2G36430.1   Symbols:   Plant protein of unknown function (DUF247)   chr2:15290211-15291557 FORWARD LENGTH=448                                                                                                                                                                                                                                                  | 449  | 448  | 0         | 99.8  | 74.4 | 85.5 |
| Rsa1.0_00490.1.g14857.t1  | ref XP_002879611.1  hypothetical protein ARALYDRAFT_482620 [Arabidopsis lyrata subsp. lyrata] gi 297325450 gb EFH55870.1  hypothetical protein ARALYDRAFT_482620 [Arabidopsis lyrata subsp. lyrata]                                                                                                                                                                                                                                                                                                                                                                                                                                           | 422  | 442  | 1.00E-157 | 104.7 | 78.9 | 87.0 | hypothetical protein ARALYDRAFT_482620       | gbpln | Arabidopsis lyrata   | AT2G36420.1   Symbols:   unknown protein; BEST Arabidopsis thaliana protein match is: unknown protein (TAIR:AT5G03670.1); Has 10588 Blast hits to 6606 proteins in 440 species: Archae - 8; Bacteria - 365; Metazoa - 4146; Fungi - 1198; Plants - 483; Viruses - 212; Other Eukaryotes - 4176 (source: NCBI BLINK).   chr2:15286498-15288990 FORWARD LENGTH=439 | 422  | 439  | 1.00E-158 | 104.0 | 77.5 | 85.5 |
| Rsa1.0_00491.1.g14858.t1  | gb AAG51783.1 AC079679_3 reverse transcriptase, putative; 16838-20266 [Arabidopsis thaliana]                                                                                                                                                                                                                                                                                                                                                                                                                                                                                                                                                  | 1329 | 1142 | 0         | 85.9  | 25.3 | 33.9 | reverse transcriptase, putative; 16838-20266 | gbpln | Arabidopsis thaliana | AT4G29090.1   Symbols:   Ribonuclease H-like superfamily protein   chr4:14333528-14335255 FORWARD LENGTH=575                                                                                                                                                                                                                                                     | 1329 | 575  | 1.00E-96  | 43.3  | 15.2 | 23.6 |
| Rsa1.0_00491.1.g14859.t1  | dbj BAA95777.1  unnamed protein product [Arabidopsis thaliana]                                                                                                                                                                                                                                                                                                                                                                                                                                                                                                                                                                                | 1140 | 1161 | 0         | 101.8 | 90.4 | 94.7 | unnamed protein product                      | gbpln | Arabidopsis thaliana | AT3G16830.1   Symbols: TPR2   TOPLESS-related 2   chr3:5731709-5737531 FORWARD LENGTH=1131                                                                                                                                                                                                                                                                       | 1140 | 1131 | 0         | 99.2  | 90.4 | 94.7 |
| Rsa1.0_00491.1.g14860.t1  | gb AFP47629.1  nitrile-specifier protein [Schouwia purpurea]                                                                                                                                                                                                                                                                                                                                                                                                                                                                                                                                                                                  | 511  | 467  | 0         | 91.4  | 71.0 | 81.0 | nitrile-specifier protein                    | gbpln | Schouwia purpurea    | AT3G16400.2   Symbols: ATMLP-470   nitrile specifier protein 1   chr3:5566516-5568330 FORWARD LENGTH=470                                                                                                                                                                                                                                                         | 511  | 470  | 0         | 92.0  | 68.5 | 78.5 |
| Rsa1.0_00491.1.g14861.t1  | ref NP_566559.1  protein pumilio 24 [Arabidopsis thaliana] gi 75273869 sp Q9LRZ3.1 PUM24_ARAT H RecName: Full=Pumilio homolog 24; Short=APUM-24; Short=AtPUM24 gi 7939573 dbj BAA95774.1  unnamed protein product [Arabidopsis thaliana] gi 15010674 gb AAK73996.1  AT3g16810/K2019_3 [Arabidopsis thaliana] gi 332642348 gb AEE75869.1  protein pumilio 24 [Arabidopsis thaliana]                                                                                                                                                                                                                                                            | 630  | 641  | 0         | 101.7 | 78.7 | 87.5 | protein pumilio 24                           | gbpln | Arabidopsis thaliana | AT3G16810.1   Symbols: APUM24, PUM24   pumilio 24   chr3:5723436-5727539 REVERSE LENGTH=641                                                                                                                                                                                                                                                                      | 630  | 641  | 0         | 101.7 | 78.7 | 87.5 |
| Rsa1.0_00491.1.g14862.t8  | ref XP_002883023.1  F-box family protein [Arabidopsis lyrata subsp. lyrata] gi 297328863 gb EFH59282.1  F-box family protein [Arabidopsis lyrata subsp. lyrata]                                                                                                                                                                                                                                                                                                                                                                                                                                                                               | 528  | 389  | 1.00E-101 | 73.7  | 40.5 | 49.1 | F-box family protein                         | gbpln | Arabidopsis lyrata   | AT3G16740.1   Symbols:   F-box and associated interaction domains-containing protein   chr3:5699476-5700651 FORWARD LENGTH=391                                                                                                                                                                                                                                   | 528  | 391  | 1.00E-101 | 74.1  | 39.2 | 48.7 |
| Rsa1.0_00491.1.g14863.t15 | gb EOA31942.1  hypothetical protein CARUB_v10015182mg [Capsella rubella]                                                                                                                                                                                                                                                                                                                                                                                                                                                                                                                                                                      | 1211 | 1096 | 0         | 90.5  | 86.2 | 87.9 | hypothetical protein CARUB_v10015182mg       | gbpln | Capsella rubella     | AT3G16785.1   Symbols: PLDP1, PLDZ1, PLDZETA1, PLD ZETA 1   phospholipase D P1   chr3:5711329-5718696 FORWARD LENGTH=1096                                                                                                                                                                                                                                        | 1211 | 1096 | 0         | 90.5  | 85.5 | 87.7 |
| Rsa1.0_00491.1.g14864.t1  | ref XP_002883026.1  60S ribosomal protein L19 [Arabidopsis lyrata subsp. lyrata] gi 297328866 gb EFH59285.1  60S ribosomal protein L19 [Arabidopsis lyrata subsp. lyrata]                                                                                                                                                                                                                                                                                                                                                                                                                                                                     | 186  | 209  | 8.00E-57  | 112.4 | 63.4 | 67.2 | 60S ribosomal protein L19                    | gbpln | Arabidopsis lyrata   | AT3G16780.1   Symbols:   Ribosomal protein L19e family protein   chr3:708982-5710249 FORWARD LENGTH=209                                                                                                                                                                                                                                                          | 186  | 209  | 8.00E-59  | 112.4 | 62.9 | 67.2 |

|                          |                                                                                                                                                                                                                                                                                                                                                                                                                                                                                                                                                                                                                                                                                                                                                                                                                                                                                                                                                                                                                                                                                                             |     |      |           |       |      |                                                       |                                                 |                      |                                                                                                                                                                                                                                                                                                                                                |                                                                                                                                          |      |           |          |       |      |      |
|--------------------------|-------------------------------------------------------------------------------------------------------------------------------------------------------------------------------------------------------------------------------------------------------------------------------------------------------------------------------------------------------------------------------------------------------------------------------------------------------------------------------------------------------------------------------------------------------------------------------------------------------------------------------------------------------------------------------------------------------------------------------------------------------------------------------------------------------------------------------------------------------------------------------------------------------------------------------------------------------------------------------------------------------------------------------------------------------------------------------------------------------------|-----|------|-----------|-------|------|-------------------------------------------------------|-------------------------------------------------|----------------------|------------------------------------------------------------------------------------------------------------------------------------------------------------------------------------------------------------------------------------------------------------------------------------------------------------------------------------------------|------------------------------------------------------------------------------------------------------------------------------------------|------|-----------|----------|-------|------|------|
| Rsa1.0_00491.1.g14865.t1 | refNP_188299.1  ethylene-responsive transcription factor RAP2-3 [Arabidopsis thaliana] gi 27735162 sp P42736.2 RAP23_ARATH RecName: Full=Ethylene-responsive transcription factor RAP2-3; AltName: Full=Cadmium-induced protein AS30; AltName: Full=Ethylene response factor 72; Short=ERF72; AltName: Full=Ethylene-responsive element binding protein; Short=AEBP; AltName: Full=Protein RELATED TO APETALA2 3; Short=Related to AP2 3 gi 2281631 gb AAC49769.1  AP2 domain containing protein RAP2.3 [Arabidopsis thaliana] gi 11994632 dbj BAB02769.1  AP2 domain transcription factor RAP2.3 [Arabidopsis thaliana] gi 14334854 gb AAK59605.1  putative AP2 domain containing protein RAP2.3 [Arabidopsis thaliana] gi 16649095 gb AAL24399.1  AP2 domain transcription factor RAP2.3 [Arabidopsis thaliana] gi 21593082 gb AAM65031.1  AP2 domain containing protein RAP2.3 [Arabidopsis thaliana] gi 23296611 gb AAN13131.1  putative AP2 domain containing protein RAP2.3 [Arabidopsis thaliana] gi 332642342 gb AEE75863.1  ethylene-responsive transcription factor RAP2-3 [Arabidopsis thaliana] | 237 | 248  | 3.00E-92  | 104.6 | 75.1 | 84.4                                                  | ethylene-responsive transcription factor RAP2-3 | gbpln                | Arabidopsis thaliana                                                                                                                                                                                                                                                                                                                           | AT3G16770.1   Symbols: RAP2.3, ATEBP, ERF72, EBP   ethylene-responsive element binding protein   chr3:5705784-5706768 FORWARD LENGTH=248 | 237  | 248       | 8.00E-95 | 104.6 | 75.1 | 84.4 |
| Rsa1.0_00491.1.g14866.t1 | refXP_002885164.1  hypothetical protein ARALYDRAFT_897993 [Arabidopsis lyrata subsp. lyrata] gi 297331004 gb EFH61423.1  hypothetical protein ARALYDRAFT_897993 [Arabidopsis lyrata subsp. lyrata]                                                                                                                                                                                                                                                                                                                                                                                                                                                                                                                                                                                                                                                                                                                                                                                                                                                                                                          | 663 | 683  | 0         | 103.0 | 88.4 | hypothetical protein ARALYDRAFT_897993                | gbpln                                           | Arabidopsis lyrata   | AT3G16730.1   Symbols:   CONTAINS InterPro DOMAIN/s: Non-SMC condensin II complex, subunit H2-like (InterPro:IPR009378); Has 249 Blast hits to 211 proteins in 82 species: Archae - 0; Bacteria - 0; Metazoa - 145; Fungi - 8; Plants - 30; Viruses - 0; Other Eukaryotes - 66 (source: NCBI BLINK).   chr3:5695633-5698863 REVERSE LENGTH=683 | 663                                                                                                                                      | 683  | 0         | 103.0    | 82.5  | 88.1 |      |
| Rsa1.0_00491.1.g14867.t1 | refXP_002883022.1  hypothetical protein ARALYDRAFT_479140 [Arabidopsis lyrata subsp. lyrata] gi 297328862 gb EFH59281.1  hypothetical protein ARALYDRAFT_479140 [Arabidopsis lyrata subsp. lyrata]                                                                                                                                                                                                                                                                                                                                                                                                                                                                                                                                                                                                                                                                                                                                                                                                                                                                                                          | 295 | 304  | 1.00E-103 | 103.1 | 83.4 | hypothetical protein ARALYDRAFT_479140                | gbpln                                           | Arabidopsis lyrata   | AT3G16720.1   Symbols: ATL2, TL2   TOXICOS EN LEVADURA 2   chr3:5692880-5693794 FORWARD LENGTH=304                                                                                                                                                                                                                                             | 295                                                                                                                                      | 304  | 1.00E-102 | 103.1    | 75.9  | 82.7 |      |
| Rsa1.0_00491.1.g14868.t1 | refXP_002889141.1  CYCA1_2 [Arabidopsis lyrata subsp. lyrata] gi 297334982 gb EFH65400.1  CYCA1_2 [Arabidopsis lyrata subsp. lyrata]                                                                                                                                                                                                                                                                                                                                                                                                                                                                                                                                                                                                                                                                                                                                                                                                                                                                                                                                                                        | 357 | 443  | 1.00E-112 | 124.1 | 65.3 | CYCA1_2                                               | gbpln                                           | Arabidopsis lyrata   | AT1G77390.1   Symbols: TAM, CYCA1.2, DYP, CYCA1   CYCLIN A1.2   chr1:29081904-29084137 REVERSE LENGTH=442                                                                                                                                                                                                                                      | 357                                                                                                                                      | 442  | 1.00E-111 | 123.8    | 64.1  | 74.2 |      |
| Rsa1.0_00491.1.g14869.t1 | gb AAM66134.1  translationally controlled tumor protein-like protein [Arabidopsis thaliana]                                                                                                                                                                                                                                                                                                                                                                                                                                                                                                                                                                                                                                                                                                                                                                                                                                                                                                                                                                                                                 | 168 | 168  | 2.00E-88  | 100.0 | 94.6 | translationally controlled tumor protein-like protein | gbpln                                           | Arabidopsis thaliana | AT3G16640.1   Symbols: TCTP   translationally controlled tumor protein   chr3:5669709-5670729 REVERSE LENGTH=168                                                                                                                                                                                                                               | 168                                                                                                                                      | 168  | 2.00E-90  | 100.0    | 94.0  | 97.6 |      |
| Rsa1.0_00491.1.g14870.t1 | refNP_188285.1  kinesin family member 2/24 [Arabidopsis thaliana] gi 30684173 refNP_850598.1  kinesin family member 2/24 [Arabidopsis thaliana] gi 15810129 gb AAL07208.1  putative kinesin protein [Arabidopsis thaliana] gi 110741480 dbj BAE98696.1  kinesin like protein [Arabidopsis thaliana] gi 332642324 gb AEE75845.1  kinesin 13A [Arabidopsis thaliana] gi 332642325 gb AEE75846.1  kinesin family member 2/24 [Arabidopsis thaliana]                                                                                                                                                                                                                                                                                                                                                                                                                                                                                                                                                                                                                                                            | 847 | 794  | 0         | 93.7  | 77.6 | kinesin family member 2/24                            | gbpln                                           | Arabidopsis thaliana | AT3G16630.2   Symbols: ATKINESIN-13A, KINESIN-13A   P-loop containing nucleoside triphosphate hydrolases superfamily protein   chr3:5662660-5667261 REVERSE LENGTH=794                                                                                                                                                                         | 847                                                                                                                                      | 794  | 0         | 93.7     | 77.6  | 82.4 |      |
| Rsa1.0_00491.1.g14871.t1 | refXP_002885158.1  hypothetical protein ARALYDRAFT_479127 [Arabidopsis lyrata subsp. lyrata] gi 297330998 gb EFH61417.1  hypothetical protein ARALYDRAFT_479127 [Arabidopsis lyrata subsp. lyrata]                                                                                                                                                                                                                                                                                                                                                                                                                                                                                                                                                                                                                                                                                                                                                                                                                                                                                                          | 715 | 1071 | 0         | 149.8 | 57.1 | hypothetical protein ARALYDRAFT_479127                | gbpln                                           | Arabidopsis lyrata   | AT3G16620.1   Symbols: ATTOG120, TOG120   translocon outer complex protein 120   chr3:5658469-5661738 REVERSE LENGTH=1089                                                                                                                                                                                                                      | 715                                                                                                                                      | 1089 | 0         | 152.3    | 56.8  | 63.2 |      |
| Rsa1.0_00492.1.g14872.t1 | gb AARI5430.1  autophagocytosis protein [Sisymbrium irio]                                                                                                                                                                                                                                                                                                                                                                                                                                                                                                                                                                                                                                                                                                                                                                                                                                                                                                                                                                                                                                                   | 310 | 312  | 1.00E-168 | 100.6 | 92.9 | autophagocytosis protein                              | gbpln                                           | Sisymbrium irio      | AT5G61500.1   Symbols: ATATG3, ATG3   autophagy 3 (APG3)   chr5:24734216-24736711 REVERSE LENGTH=313                                                                                                                                                                                                                                           | 310                                                                                                                                      | 313  | 1.00E-165 | 101.0    | 90.6  | 95.5 |      |

|                           |                                                                                                                                                                                                                                                                                                                                                                                                                                                                                                                                                                                                                                                                                                                                                                                                               |      |      |           |       |      |      |                                                |       |                      |                                                                                                                                                                                                                                                                                                                                                  |      |      |           |       |      |      |
|---------------------------|---------------------------------------------------------------------------------------------------------------------------------------------------------------------------------------------------------------------------------------------------------------------------------------------------------------------------------------------------------------------------------------------------------------------------------------------------------------------------------------------------------------------------------------------------------------------------------------------------------------------------------------------------------------------------------------------------------------------------------------------------------------------------------------------------------------|------|------|-----------|-------|------|------|------------------------------------------------|-------|----------------------|--------------------------------------------------------------------------------------------------------------------------------------------------------------------------------------------------------------------------------------------------------------------------------------------------------------------------------------------------|------|------|-----------|-------|------|------|
| Rsa1.0_00492.1.g14873.t29 | gb AAR15439.1  nuclear division RFT1-like protein [Sisymbrium irio]                                                                                                                                                                                                                                                                                                                                                                                                                                                                                                                                                                                                                                                                                                                                           | 597  | 481  | 0         | 80.6  | 68.8 | 72.2 | nuclear division RFT1-like protein             | gbpln | Sisymbrium irio      | AT5G07630.1   Symbols:   lipid transporters   chr5:2410703-2414523 FORWARD LENGTH=611                                                                                                                                                                                                                                                            | 597  | 611  | 0         | 102.3 | 67.3 | 74.0 |
| Rsa1.0_00492.1.g14874.t1  | ref NP_196383.1  structural maintenance of chromosomes 6A [Arabidopsis thaliana] gi 9759587 dbj BAB11444.1  SMC-like protein [Arabidopsis thaliana] gi 332003807 gb AED91190.1  structural maintenance of chromosomes 6A [Arabidopsis thaliana]                                                                                                                                                                                                                                                                                                                                                                                                                                                                                                                                                               | 1085 | 1058 | 0         | 97.5  | 77.9 | 86.6 | structural maintenance of chromosomes 6A       | gbpln | Arabidopsis thaliana | AT5G07660.1   Symbols: SMC6A   structural maintenance of chromosomes 6A   chr5:2422839-2429912 FORWARD LENGTH=1058                                                                                                                                                                                                                               | 1085 | 1058 | 0         | 97.5  | 77.9 | 86.6 |
| Rsa1.0_00492.1.g14875.t1  | ref NP_196384.2  F-box protein [Arabidopsis thaliana] gi 75248498 sp Q8VYT5.1 FB254_ARATH RecName: Full=F-box protein At5g07670 gi 17979057 gb AAL49796.1  unknown protein [Arabidopsis thaliana] gi 20465475 gb AAM20197.1  unknown protein [Arabidopsis thaliana] gi 222423582 dbj BAH19760.1  AT5G07670 [Arabidopsis thaliana] gi 332003808 gb AED91191.1  F-box protein [Arabidopsis thaliana] ref NP_568182.2  NAC domain containing protein 80 [Arabidopsis thaliana] gi 9759589 dbj BAB11446.1  NAM (no apical meristem)-like protein [Arabidopsis thaliana] gi 30102618 gb AAP21227.1  At5g07680 [Arabidopsis thaliana] gi 110736032 dbj BAE99988.1  no apical meristem (NAM)-like protein [Arabidopsis thaliana] gi 332003809 gb AED91192.1  NAC domain containing protein 80 [Arabidopsis thaliana] | 462  | 476  | 0         | 103.0 | 75.8 | 84.0 | F-box protein                                  | gbpln | Arabidopsis thaliana | AT5G07670.1   Symbols:   RNI-like superfamily protein   chr5:2430421-2432065 FORWARD LENGTH=476                                                                                                                                                                                                                                                  | 462  | 476  | 0         | 103.0 | 75.8 | 84.0 |
| Rsa1.0_00492.1.g14876.t1  | sp Q9FLQ7.3 FH20_ARATH RecName: Full=Formin-like protein 20; Short=AtFH20 gi 332003816 gb AED91199.1  actin binding protein [Arabidopsis thaliana]                                                                                                                                                                                                                                                                                                                                                                                                                                                                                                                                                                                                                                                            | 320  | 329  | 1.00E-161 | 102.8 | 89.4 | 94.1 | NAC domain containing protein 80               | gbpln | Arabidopsis thaliana | AT5G07680.1   Symbols: ANAC080, ANAC079, ATNAC4, NAC080   NAC domain containing protein 80   chr5:2436092-2437322 FORWARD LENGTH=329                                                                                                                                                                                                             | 320  | 329  | 1.00E-164 | 102.8 | 89.4 | 94.1 |
| Rsa1.0_00492.1.g14877.t1  | ref XP_002873324.1  flavin-containing monooxygenase family protein [Arabidopsis lyrata subsp. lyrata] gi 297319161 gb EFH49583.1  flavin-containing monooxygenase family protein [Arabidopsis lyrata subsp. lyrata]                                                                                                                                                                                                                                                                                                                                                                                                                                                                                                                                                                                           | 460  | 460  | 0         | 100.0 | 90.7 | 95.9 | flavin-containing monooxygenase family protein | gbpln | Arabidopsis lyrata   | AT5G07800.1   Symbols:   Flavin-binding monooxygenase family protein   chr5:2486717-2489241 REVERSE LENGTH=460                                                                                                                                                                                                                                   | 460  | 460  | 0         | 100.0 | 90.2 | 95.7 |
| Rsa1.0_00492.1.g14879.t1  | #                                                                                                                                                                                                                                                                                                                                                                                                                                                                                                                                                                                                                                                                                                                                                                                                             | #    | #    | #         | #     | #    | -    | ----                                           | ----  | ----                 | #                                                                                                                                                                                                                                                                                                                                                | #    | #    | #         | #     | #    |      |
| Rsa1.0_00492.1.g14880.t4  | gb ABD64939.1  hypothetical protein 24.t00017 [Brassica oleracea]                                                                                                                                                                                                                                                                                                                                                                                                                                                                                                                                                                                                                                                                                                                                             | 442  | 442  | 1.00E-134 | 100.0 | 54.8 | 62.2 | hypothetical protein 24.t00017                 | gbpln | Brassica oleracea    | AT2G13770.1   Symbols:   CONTAINS InterPro DOMAIN/s: Putative harbinger transposase-derived nuclease (InterPro:IPR006912); Has 451 Blast hits to 352 proteins in 33 species: Archae - 0; Bacteria - 0; Metazoa - 28; Fungi - 8; Plants - 388; Viruses - 0; Other Eukaryotes - 27 (source: NCBI BLINK).   chr2:5736603-5737847 FORWARD LENGTH=343 | 442  | 343  | 2.00E-41  | 77.6  | 25.3 | 34.8 |
| Rsa1.0_00492.1.g14881.t1  | gb ABD65170.1  hypothetical protein 40.t00057 [Brassica oleracea]                                                                                                                                                                                                                                                                                                                                                                                                                                                                                                                                                                                                                                                                                                                                             | 287  | 255  | 2.00E-65  | 88.9  | 48.4 | 59.9 | hypothetical protein 40.t00057                 | gbpln | Brassica oleracea    | AT3G47680.1   Symbols:   DNA binding   chr3:17577483-17578391 REVERSE LENGTH=302                                                                                                                                                                                                                                                                 | 287  | 302  | 1.00E-43  | 105.2 | 39.7 | 56.8 |
| Rsa1.0_00492.1.g14882.t1  | ref NP_565423.1  uncharacterized protein [Arabidopsis thaliana] gi 17933281 gb AAL48224.1 AF446349.1 At2g17710/T17A5.17 [Arabidopsis thaliana] gi 20453391 gb AAM19934.1  At2g17710/T17A5.17 [Arabidopsis thaliana] gi 110736849 dbj BAF00382.1  hypothetical protein [Arabidopsis thaliana] gi 330251578 gb AEC06672.1  uncharacterized protein AT2G17710 [Arabidopsis thaliana]                                                                                                                                                                                                                                                                                                                                                                                                                             | 287  | 152  | 3.00E-63  | 53.0  | 45.6 | 48.4 | uncharacterized protein                        | gbpln | Arabidopsis thaliana | AT2G17710.1   Symbols:   unknown protein; Has 39 Blast hits to 39 proteins in 14 species: Archae - 0; Bacteria - 0; Metazoa - 0; Fungi - 0; Plants - 39; Viruses - 0; Other Eukaryotes - 0 (source: NCBI BLINK).   chr2:7693856-7694554 FORWARD LENGTH=152                                                                                       | 287  | 152  | 8.00E-66  | 53.0  | 45.6 | 48.4 |

|                          |                                                                                                                                                                                                                                                                                                                                                                                                                                                                                                                                                                              |     |     |           |       |       |       |                                                                  |             |                      |                                                                                                                                            |     |     |           |       |       |       |
|--------------------------|------------------------------------------------------------------------------------------------------------------------------------------------------------------------------------------------------------------------------------------------------------------------------------------------------------------------------------------------------------------------------------------------------------------------------------------------------------------------------------------------------------------------------------------------------------------------------|-----|-----|-----------|-------|-------|-------|------------------------------------------------------------------|-------------|----------------------|--------------------------------------------------------------------------------------------------------------------------------------------|-----|-----|-----------|-------|-------|-------|
| Rsa1.0_00492.1.g14883.t1 | refNP_179363.1   2-oxoglutarate (2OG) and Fe(II)-dependent oxygenase-like protein [Arabidopsis thaliana] gi25411813 pir F84555 similar to prolyl 4-hydroxylase alpha subunit [imported] - Arabidopsis thaliana gi89274129 gb ABD65585.1   At2g17720 [Arabidopsis thaliana] gi110738861 dbj BAF01353.1   similar to prolyl 4-hydroxylase alpha subunit [Arabidopsis thaliana] gi330251579 gb AEC06673.1   2-oxoglutarate (2OG) and Fe(II)-dependent oxygenase-like protein [Arabidopsis thaliana]                                                                             | 308 | 291 | 1.00E-144 | 94.5  | 88.0  | 91.9  | 2-oxoglutarate (2OG) and Fe(II)-dependent oxygenase-like protein | gbpln       | Arabidopsis thaliana | AT2G17720.1   Symbols:   2-oxoglutarate (2OG) and Fe(II)-dependent oxygenase superfamily protein   chr2:7697513-7699174 FORWARD LENGTH=291 | 308 | 291 | 2.33E-156 | 94.5  | 88.0  | 91.9  |
| Rsa1.0_00492.1.g14884.t1 | dbj BAB01350.1   Mutator-like transposase [Arabidopsis thaliana]                                                                                                                                                                                                                                                                                                                                                                                                                                                                                                             | 206 | 811 | 4.00E-37  | 393.7 | 40.8  | 49.5  | Mutator-like transposase                                         | gbpln       | Arabidopsis thaliana | #                                                                                                                                          | #   | #   | #         | #     | #     |       |
| Rsa1.0_00493.1.g14885.t1 | gb AAZ66942.1   117M18_23 [Brassica rapa]                                                                                                                                                                                                                                                                                                                                                                                                                                                                                                                                    | 471 | 518 | 0         | 110.0 | 81.1  | 91.1  | 117M18_23                                                        | gbpln       | Brassica rapa        | AT5G44050.1   Symbols:   MATE efflux family protein   chr5:17722484-17726209 FORWARD LENGTH=491                                            | 471 | 491 | 0         | 104.2 | 78.3  | 88.1  |
| Rsa1.0_00493.1.g14886.t1 | tpg DAA55311.1   TPA: histone H3.2 [Zea mays]                                                                                                                                                                                                                                                                                                                                                                                                                                                                                                                                | 136 | 245 | 1.00E-72  | 180.1 | 100.0 | 100.0 | TPA: histone H3.2                                                | gbenv/gbpln | Zea mays             | AT5G65360.1   Symbols:   Histone superfamily protein   chr5:26120099-26120509 REVERSE LENGTH=136                                           | 136 | 136 | 5.00E-74  | 100.0 | 100.0 | 100.0 |
| Rsa1.0_00493.1.g14887.t1 | gb AAZ66937.1   117M18_18 [Brassica rapa]                                                                                                                                                                                                                                                                                                                                                                                                                                                                                                                                    | 249 | 249 | 1.00E-138 | 100.0 | 98.8  | 99.6  | 117M18_18                                                        | gbpln       | Brassica rapa        | AT5G10360.1   Symbols: EMB3010, RPS6B   Ribosomal protein S6e   chr5:3258734-3260142 REVERSE LENGTH=249                                    | 249 | 249 | 1.00E-136 | 100.0 | 96.0  | 97.6  |
| Rsa1.0_00493.1.g14888.t1 | #                                                                                                                                                                                                                                                                                                                                                                                                                                                                                                                                                                            | #   | #   | #         | #     | #     | -     | ----                                                             | ----        | #                    | #                                                                                                                                          | #   | #   | #         | #     | #     |       |
| Rsa1.0_00493.1.g14889.t1 | #                                                                                                                                                                                                                                                                                                                                                                                                                                                                                                                                                                            | #   | #   | #         | #     | #     | -     | ----                                                             | ----        | #                    | #                                                                                                                                          | #   | #   | #         | #     | #     |       |
| Rsa1.0_00493.1.g14890.t1 | ref XP_002873449.1   leucine-rich repeat family protein [Arabidopsis lyrata subsp. lyrata] gi297319286 gb EFH49708.1   leucine-rich repeat family protein [Arabidopsis lyrata subsp. lyrata]                                                                                                                                                                                                                                                                                                                                                                                 | 612 | 613 | 0         | 100.2 | 94.4  | 97.2  | leucine-rich repeat family protein                               | gbpln       | Arabidopsis lyrata   | AT5G10290.1   Symbols:   leucine-rich repeat transmembrane protein kinase family protein   chr5:3235462-3238171 REVERSE LENGTH=613         | 612 | 613 | 0         | 100.2 | 94.1  | 97.4  |
| Rsa1.0_00493.1.g14891.t1 | ref NP_196590.1   myb domain protein 92 [Arabidopsis thaliana] gi3941524 gb AAC9338.1   putative transcription factor [Arabidopsis thaliana] gi8953409 emb CAB96684.1   putative transcription factor MYB92 [Arabidopsis thaliana] gi27754493 gb AAO22694.1   putative myb family transcription factor [Arabidopsis thaliana] gi28393977 gb AAO42396.1   putative myb family transcription factor [Arabidopsis thaliana] gi41619378 gb AAS10089.1   MYB transcription factor [Arabidopsis thaliana] gi332004133 gb AED91516.1   myb domain protein 92 [Arabidopsis thaliana] | 338 | 334 | 1.00E-157 | 98.8  | 84.3  | 90.5  | myb domain protein 92                                            | gbpln       | Arabidopsis thaliana | AT5G10280.1   Symbols: MYB92, ATMYB64   myb domain protein 92   chr5:3232776-3233956 FORWARD LENGTH=334                                    | 338 | 334 | 1.00E-160 | 98.8  | 84.3  | 90.5  |
| Rsa1.0_00493.1.g14892.t1 | ref NP_196581.1   major facilitator protein [Arabidopsis thaliana] gi13430500 gb AAK25872.1 AF360162.1 unknown protein [Arabidopsis thaliana] gi21281225 gb AAM44941.1   unknown protein [Arabidopsis thaliana] gi332004123 gb AED91506.1   major facilitator protein [Arabidopsis thaliana]                                                                                                                                                                                                                                                                                 | 575 | 488 | 0         | 84.9  | 76.7  | 80.9  | major facilitator protein                                        | gbpln       | Arabidopsis thaliana | AT5G10190.1   Symbols:   Major facilitator superfamily protein   chr5:3199205-3201140 FORWARD LENGTH=488                                   | 575 | 488 | 0         | 84.9  | 76.7  | 80.9  |
| Rsa1.0_00493.1.g14893.t1 | gb ACO25294.1   low affinity sulfate transporter Bnst2-1 [Brassica napus]                                                                                                                                                                                                                                                                                                                                                                                                                                                                                                    | 650 | 677 | 0         | 104.2 | 96.3  | 98.0  | low affinity sulfate transporter Bnst2-1                         | gbpln       | Brassica napus       | AT5G10180.1   Symbols: AST68, SULTR2;1   sulfate transporter 2;1   chr5:3193225-3196818 FORWARD LENGTH=677                                 | 650 | 677 | 0         | 104.2 | 90.6  | 96.6  |
| Rsa1.0_00493.1.g14894.t1 | gb ACQ44221.1   putative inositol-3-phosphate synthase isozyme 3 [Arabis alpina]                                                                                                                                                                                                                                                                                                                                                                                                                                                                                             | 510 | 510 | 0         | 100.0 | 96.3  | 98.6  | putative inositol-3-phosphate synthase isozyme 3                 | gbpln       | Arabis alpina        | AT5G10170.1   Symbols: ATMIPS3, MIPS3   myo-inositol-1-phosphate synthase 3   chr5:3187538-3190161 REVERSE LENGTH=510                      | 510 | 510 | 0         | 100.0 | 95.3  | 98.0  |
| Rsa1.0_00493.1.g14895.t1 | #                                                                                                                                                                                                                                                                                                                                                                                                                                                                                                                                                                            | #   | #   | #         | #     | #     | -     | ----                                                             | ----        | #                    | #                                                                                                                                          | #   | #   | #         | #     | #     |       |
| Rsa1.0_00493.1.g14896.t1 | ref XP_002873442.1   hypothetical protein ARALYDRAFT_350224 [Arabidopsis lyrata subsp. lyrata] gi297319279 gb EFH49701.1   hypothetical protein ARALYDRAFT_350224 [Arabidopsis lyrata subsp. lyrata]                                                                                                                                                                                                                                                                                                                                                                         | 411 | 412 | 1.00E-169 | 100.2 | 78.8  | 84.7  | hypothetical protein ARALYDRAFT_350224                           | gbpln       | Arabidopsis lyrata   | AT5G10150.1   Symbols:   Domain of unknown function (DUF965)   chr5:3182176-3183834 REVERSE LENGTH=414                                     | 411 | 414 | 1.00E-169 | 100.7 | 80.3  | 86.4  |
| Rsa1.0_00493.1.g14897.t4 | gb EOA21702.1   hypothetical protein CARUB_v10002136mg [Capsella rubella]                                                                                                                                                                                                                                                                                                                                                                                                                                                                                                    | 166 | 164 | 8.00E-78  | 98.8  | 83.7  | 91.6  | hypothetical protein CARUB_v10002136mg                           | gbpln       | Capsella rubella     | AT5G10130.1   Symbols:   Pollen Ole e 1 allergen and extensin family protein   chr5:3171551-3172428 REVERSE LENGTH=164                     | 166 | 164 | 4.00E-79  | 98.8  | 84.9  | 91.0  |

|                          |                                                                                                                                                                                                                                                                                                                                                                                                                        |     |      |           |       |      |      |                                                                   |        |                      |                                                                                                                                                                                                                                                                                                                                                                                               |     |     |           |       |      |      |
|--------------------------|------------------------------------------------------------------------------------------------------------------------------------------------------------------------------------------------------------------------------------------------------------------------------------------------------------------------------------------------------------------------------------------------------------------------|-----|------|-----------|-------|------|------|-------------------------------------------------------------------|--------|----------------------|-----------------------------------------------------------------------------------------------------------------------------------------------------------------------------------------------------------------------------------------------------------------------------------------------------------------------------------------------------------------------------------------------|-----|-----|-----------|-------|------|------|
| Rsa1.0_00493.1.g14898.t1 | gb ACQ44230.1  putative ethylene insensitive 3 protein [Arabis alpina]                                                                                                                                                                                                                                                                                                                                                 | 539 | 460  | 0         | 85.3  | 63.1 | 66.8 | putative ethylene insensitive 3 protein                           | gb pln | Arabis alpina        | AT5G10120.1   Symbols:   Ethylene insensitive 3 family protein   chr5:3169732-3171147 FORWARD LENGTH=471                                                                                                                                                                                                                                                                                      | 539 | 471 | 0         | 87.4  | 62.5 | 66.4 |
| Rsa1.0_00493.1.g14899.t1 | gb AAZ67592.1  80A08.7 [Brassica rapa subsp. pekinensis]                                                                                                                                                                                                                                                                                                                                                               | 575 | 560  | 0         | 97.4  | 82.1 | 87.1 | 80A08.7                                                           | gb pln | Brassica rapa        | AT5G10090.1   Symbols: TPR13   Tetrapeptide repeat (TPR)-like superfamily protein   chr5:3153722-3155745 REVERSE LENGTH=594                                                                                                                                                                                                                                                                   | 575 | 594 | 0         | 103.3 | 82.3 | 90.3 |
| Rsa1.0_00493.1.g14900.t1 | ref XP_002873435.1  hypothetical protein ARALYDRAFT_487831 [Arabidopsis lyrata subsp. lyrata] gi 297319272 gb EFH49694.1  hypothetical protein ARALYDRAFT_487831 [Arabidopsis lyrata subsp. lyrata]                                                                                                                                                                                                                    | 485 | 470  | 0         | 96.9  | 84.1 | 88.5 | hypothetical protein ARALYDRAFT_487831                            | gb pln | Arabidopsis lyrata   | AT5G10060.1   Symbols:   ENTH/VHS family protein   chr5:3145994-3148049 REVERSE LENGTH=469                                                                                                                                                                                                                                                                                                    | 485 | 469 | 0         | 96.7  | 83.5 | 88.0 |
| Rsa1.0_00493.1.g14901.t1 | gb AAZ66925.1  117M18.6 [Brassica rapa]                                                                                                                                                                                                                                                                                                                                                                                | 317 | 280  | 1.00E-138 | 88.3  | 73.2 | 81.4 | 117M18.6                                                          | gb pln | Brassica rapa        | AT5G10050.1   Symbols:   NAD(P)-binding Rossmann-fold superfamily protein   chr5:3144254-3145643 FORWARD LENGTH=279                                                                                                                                                                                                                                                                           | 317 | 279 | 1.00E-137 | 88.0  | 71.3 | 79.5 |
| Rsa1.0_00494.1.g14902.t1 | ref XP_002877550.1  predicted protein [Arabidopsis lyrata subsp. lyrata] gi 297323388 gb EFH53809.1  predicted protein [Arabidopsis lyrata subsp. lyrata]                                                                                                                                                                                                                                                              | 448 | 467  | 2.33E-156 | 104.2 | 61.6 | 76.3 | predicted protein                                                 | gb pln | Arabidopsis lyrata   | AT3G47170.1   Symbols:   HXXXD-type acyl-transferase family protein   chr3:17368672-17370494 REVERSE LENGTH=468                                                                                                                                                                                                                                                                               | 448 | 468 | 1.00E-147 | 104.5 | 60.5 | 75.0 |
| Rsa1.0_00494.1.g14903.t1 | ref XP_003606631.1  Histone H2B [Medicago truncatula] gi 355507686 gb AES8828.1  Histone H2B [Medicago truncatula]                                                                                                                                                                                                                                                                                                     | 153 | 147  | 6.00E-63  | 96.1  | 86.3 | 90.2 | Histone H2B                                                       | gb pln | Medicago truncatula  | AT2G28720.1   Symbols:   Histone superfamily protein   chr2:12327043-12327498 FORWARD LENGTH=151                                                                                                                                                                                                                                                                                              | 153 | 151 | 8.00E-64  | 98.7  | 86.9 | 90.2 |
| Rsa1.0_00494.1.g14904.t1 | gb AAD29058.1  putative non-LTR retroelement reverse transcriptase [Arabidopsis thaliana]                                                                                                                                                                                                                                                                                                                              | 707 | 1229 | 0         | 173.8 | 48.7 | 67.8 | putative non-LTR retroelement reverse transcriptase               | gb pln | Arabidopsis thaliana | AT1G43760.1   Symbols:   DNase I-like superfamily protein   chr1:16528880-16531065 REVERSE LENGTH=626                                                                                                                                                                                                                                                                                         | 707 | 626 | 5.00E-27  | 88.5  | 11.3 | 16.7 |
| Rsa1.0_00494.1.g14905.t1 | gb EOA25343.1  hypothetical protein CARUB_v10018664mg [Capsella rubella]                                                                                                                                                                                                                                                                                                                                               | 161 | 181  | 6.00E-13  | 112.4 | 29.2 | 40.4 | hypothetical protein CARUB_v10018664mg                            | gb pln | Capsella rubella     | #                                                                                                                                                                                                                                                                                                                                                                                             | #   | #   | #         | #     | #    | #    |
| Rsa1.0_00494.1.g14906.t1 | gb EOA28002.1  hypothetical protein CARUB_v10024179mg, partial [Capsella rubella]                                                                                                                                                                                                                                                                                                                                      | 148 | 171  | 8.00E-65  | 115.5 | 90.5 | 95.9 | hypothetical protein CARUB_v10024179mg, partial                   | gb pln | Capsella rubella     | AT2G28710.1   Symbols:   C2H2-type zinc finger family protein   chr2:12322974-12323444 FORWARD LENGTH=156                                                                                                                                                                                                                                                                                     | 148 | 156 | 2.00E-65  | 105.4 | 89.2 | 93.9 |
| Rsa1.0_00494.1.g14907.t1 | gb EOA27317.1  hypothetical protein CARUB_v10023441mg, partial [Capsella rubella]                                                                                                                                                                                                                                                                                                                                      | 356 | 377  | 0         | 105.9 | 94.9 | 97.5 | hypothetical protein CARUB_v10023441mg, partial                   | gb pln | Capsella rubella     | AT2G28680.1   Symbols:   RmlC-like cupins superfamily protein   chr2:12303118-12304747 REVERSE LENGTH=356                                                                                                                                                                                                                                                                                     | 356 | 356 | 0         | 100.0 | 94.9 | 97.5 |
| Rsa1.0_00494.1.g14908.t1 | ref NP_973782.1  disease resistance-responsive, dirigent domain-containing protein [Arabidopsis thaliana] gi 8439894 gb AAF75080.1 AC007583_16 Contains similarity to disease resistance response protein from Pisum sativum gb M18250. EST gb F13940 comes from this gene [Arabidopsis thaliana] gi 332190051 gb AEE28172.1  disease resistance-responsive, dirigent domain-containing protein [Arabidopsis thaliana] | 418 | 389  | 1.00E-127 | 93.1  | 70.1 | 78.7 | disease resistance-responsive, dirigent domain-containing protein | gb pln | Arabidopsis thaliana | AT1G07730.2   Symbols:   Disease resistance-responsive (dirigent-like protein) family protein   chr1:2397527-2398696 REVERSE LENGTH=389                                                                                                                                                                                                                                                       | 418 | 389 | 1.00E-130 | 93.1  | 70.1 | 78.7 |
| Rsa1.0_00494.1.g14909.t1 | #                                                                                                                                                                                                                                                                                                                                                                                                                      | #   | #    | #         | #     | #    | -    | -                                                                 | ----   | ----                 | #                                                                                                                                                                                                                                                                                                                                                                                             | #   | #   | #         | #     | #    | #    |
| Rsa1.0_00494.1.g14910.t1 | #                                                                                                                                                                                                                                                                                                                                                                                                                      | #   | #    | #         | #     | #    | -    | -                                                                 | ----   | ----                 | #                                                                                                                                                                                                                                                                                                                                                                                             | #   | #   | #         | #     | #    | #    |
| Rsa1.0_00494.1.g14911.t1 | ref XP_002879179.1  copper-binding family protein [Arabidopsis lyrata subsp. lyrata] gi 297325018 gb EFH55438.1  copper-binding family protein [Arabidopsis lyrata subsp. lyrata]                                                                                                                                                                                                                                      | 265 | 258  | 7.00E-97  | 97.4  | 77.4 | 86.8 | copper-binding family protein                                     | gb pln | Arabidopsis lyrata   | AT2G28660.1   Symbols:   Chloroplast-targeted copper chaperone protein   chr2:12295419-12296944 FORWARD LENGTH=265                                                                                                                                                                                                                                                                            | 265 | 265 | 3.00E-82  | 100.0 | 72.8 | 82.3 |
| Rsa1.0_00494.1.g14912.t1 | gb EOA26326.1  hypothetical protein CARUB_v10025404mg [Capsella rubella]                                                                                                                                                                                                                                                                                                                                               | 569 | 609  | 0         | 107.0 | 77.9 | 87.2 | hypothetical protein CARUB_v10025404mg                            | gb pln | Capsella rubella     | AT2G28640.1   Symbols:   ATEXO70H5, EXO70H5   exocyst subunit exo70 family protein H5   chr2:12284625-12286645 REVERSE LENGTH=605                                                                                                                                                                                                                                                             | 569 | 605 | 0         | 106.3 | 76.8 | 86.6 |
| Rsa1.0_00494.1.g14913.t1 | gb EOA27024.1  hypothetical protein CARUB_v10023121mg [Capsella rubella]                                                                                                                                                                                                                                                                                                                                               | 476 | 476  | 0         | 100.0 | 91.2 | 96.8 | hypothetical protein CARUB_v10023121mg                            | gb pln | Capsella rubella     | AT2G28630.1   Symbols:   KCS12   3-ketoacyl-CoA synthase 12   chr2:12275719-12277149 REVERSE LENGTH=476                                                                                                                                                                                                                                                                                       | 476 | 476 | 0         | 100.0 | 89.1 | 93.9 |
| Rsa1.0_00494.1.g14914.t1 | gb EOA28833.1  hypothetical protein CARUB_v10025072mg [Capsella rubella]                                                                                                                                                                                                                                                                                                                                               | 80  | 100  | 7.00E-16  | 125.0 | 63.8 | 73.8 | hypothetical protein CARUB_v10025072mg                            | gb pln | Capsella rubella     | AT2G28625.1   Symbols:   unknown protein; FUNCTIONS IN: molecular_function unknown; INVOLVED IN: biological_process unknown; LOCATED IN: chloroplast; Has 35333 Blast hits to 34131 proteins in 2444 species: Archae - 798; Bacteria - 22429; Metazoa - 974; Fungi - 991; Plants - 531; Viruses - 0; Other Eukaryotes - 9610 (source: NCBI BLINK).   chr2:12272381-12272756 FORWARD LENGTH=98 | 80  | 98  | 1.00E-16  | 122.5 | 65.0 | 70.0 |

|                           |                                                                                                                                                                                                                                                                                                                                                                                                                                                                                                                                                                     |      |      |           |       |      |      |                                                     |       |                      |                                                                                                                                                |      |      |          |       |      |      |
|---------------------------|---------------------------------------------------------------------------------------------------------------------------------------------------------------------------------------------------------------------------------------------------------------------------------------------------------------------------------------------------------------------------------------------------------------------------------------------------------------------------------------------------------------------------------------------------------------------|------|------|-----------|-------|------|------|-----------------------------------------------------|-------|----------------------|------------------------------------------------------------------------------------------------------------------------------------------------|------|------|----------|-------|------|------|
| Rsa1.0_00494.1.g14915.t1  | refNP_195377.1  MADS-box transcription factor family protein [Arabidopsis thaliana] gi 4006904 emb CAB16834.1  putative MADS-box protein [Arabidopsis thaliana] gi 7270607 emb CAB80325.1  putative MADS-box protein [Arabidopsis thaliana] gi 21592306 gb AAM64257.1  putative MADS-box protein [Arabidopsis thaliana] gi 32402432 gb AAN52798.1  MADS-box protein AGL40 [Arabidopsis thaliana] gi 91806780 gb ABE66117.1  MADS-box protein [Arabidopsis thaliana] gi 332661275 gb AEE86675.1  MADS-box transcription factor family protein [Arabidopsis thaliana] | 174  | 248  | 1.00E-19  | 142.5 | 47.1 | 62.1 | MADS-box transcription factor family protein        | gbpln | Arabidopsis thaliana | AT4G36590.1   Symbols:   MADS-box transcription factor family protein   chr4:17261146-17262189 REVERSE LENGTH=248                              | 174  | 248  | 5.00E-22 | 142.5 | 47.1 | 62.1 |
| Rsa1.0_00494.1.g14916.t1  | refXP_002880998.1  hypothetical protein ARALYDRAFT_481773 [Arabidopsis lyrata subsp. lyrata] gi 297326837 gb EFH57257.1  hypothetical protein ARALYDRAFT_481773 [Arabidopsis lyrata subsp. lyrata]                                                                                                                                                                                                                                                                                                                                                                  | 1049 | 1042 | 0         | 99.3  | 92.2 | 95.5 | hypothetical protein ARALYDRAFT_481773              | gbpln | Arabidopsis lyrata   | AT2G28620.1   Symbols:   P-loop containing nucleoside triphosphate hydrolases superfamily protein   chr2:12265167-12270020 REVERSE LENGTH=1042 | 1049 | 1042 | 0        | 99.3  | 91.9 | 95.9 |
| Rsa1.0_00494.1.g14917.t2  | refXP_002879170.1  hypothetical protein ARALYDRAFT_481772 [Arabidopsis lyrata subsp. lyrata] gi 297325009 gb EFH5429.1  hypothetical protein ARALYDRAFT_481772 [Arabidopsis lyrata subsp. lyrata]                                                                                                                                                                                                                                                                                                                                                                   | 238  | 242  | 2.00E-82  | 101.7 | 82.4 | 90.3 | hypothetical protein ARALYDRAFT_481772              | gbpln | Arabidopsis lyrata   | AT2G28610.1   Symbols: PRS, WOX3, PRS1   Homeodomain-like superfamily protein   chr2:12262115-12263286 FORWARD LENGTH=244                      | 238  | 244  | 4.00E-83 | 102.5 | 81.5 | 89.1 |
| Rsa1.0_00495.1.g14918.t1  | gb AAF18630.1 AC006228.1 F5J5.1 [Arabidopsis thaliana]                                                                                                                                                                                                                                                                                                                                                                                                                                                                                                              | 259  | 1463 | 4.00E-84  | 564.9 | 59.5 | 71.0 | F5J5.1                                              | gbpln | Arabidopsis thaliana | AT4G23160.1   Symbols: CRK8   cysteine-rich RLK (RECEPTOR-like protein kinase) 8   chr4:12129485-12134086 FORWARD LENGTH=1262                  | 259  | 1262 | 5.00E-37 | 487.3 | 30.9 | 44.4 |
| Rsa1.0_00495.1.g14919.t10 | gb AAG52949.1  gag/pol polyprotein [Arabidopsis thaliana]                                                                                                                                                                                                                                                                                                                                                                                                                                                                                                           | 734  | 1643 | 1.00E-160 | 223.8 | 47.0 | 62.3 | gag/pol polyprotein                                 | gbpln | Arabidopsis thaliana | ATMG00820.1   Symbols: ORF170   Reverse transcriptase (RNA-dependent DNA polymerase)   chrM:228573-229085 REVERSE LENGTH=170                   | 734  | 170  | 2.00E-13 | 23.2  | 4.9  | 6.7  |
| Rsa1.0_00495.1.g14920.t1  | gb ACI96072.1  protein phosphatase 2a 55 kda regulatory subunit b [Brassica rapa subsp. pekinensis]                                                                                                                                                                                                                                                                                                                                                                                                                                                                 | 487  | 494  | 0         | 101.4 | 89.1 | 93.8 | protein phosphatase 2a 55 kda regulatory subunit b  | gbpln | Brassica rapa        | AT1G51690.3   Symbols: B ALPHA   protein phosphatase 2A 55 kda regulatory subunit B alpha isoform   chr1:19164124-19169974 FORWARD LENGTH=603  | 487  | 603  | 0        | 123.8 | 87.3 | 92.0 |
| Rsa1.0_00495.1.g14921.t1  | gb EOA31629.1  hypothetical protein CARUB_v10014828mg [Capsella rubella]                                                                                                                                                                                                                                                                                                                                                                                                                                                                                            | 140  | 154  | 8.00E-16  | 110.0 | 39.3 | 59.3 | hypothetical protein CARUB_v10014828mg              | gbpln | Capsella rubella     | AT2G20625.1   Symbols:   Protein of unknown function (DUF626)   chr2:8896154-8897218 REVERSE LENGTH=179                                        | 140  | 179  | 1.00E-14 | 127.9 | 25.0 | 38.6 |
| Rsa1.0_00495.1.g14922.t1  | gb EOA40270.1  hypothetical protein CARUB_v10008998mg [Capsella rubella]                                                                                                                                                                                                                                                                                                                                                                                                                                                                                            | 533  | 482  | 0         | 90.4  | 80.3 | 83.9 | hypothetical protein CARUB_v10008998mg              | gbpln | Capsella rubella     | AT1G51710.1   Symbols: UBP6, ATUBP6   ubiquitin-specific protease 6   chr1:19175805-19179894 REVERSE LENGTH=482                                | 533  | 482  | 0        | 90.4  | 79.2 | 83.1 |
| Rsa1.0_00495.1.g14923.t1  | gb AAD17398.1  putative non-LTR retroelement reverse transcriptase [Arabidopsis thaliana]                                                                                                                                                                                                                                                                                                                                                                                                                                                                           | 1222 | 1225 | 0         | 100.2 | 34.2 | 48.5 | putative non-LTR retroelement reverse transcriptase | gbpln | Arabidopsis thaliana | AT4G29090.1   Symbols:   Ribonuclease H-like superfamily protein   chr4:14333528-14335255 FORWARD LENGTH=575                                   | 1222 | 575  | 4.00E-65 | 47.1  | 13.7 | 22.5 |
| Rsa1.0_00495.1.g14924.t1  | gb AAG51783.1 AC079679_3 reverse transcriptase, putative; 16838-20266 [Arabidopsis thaliana]                                                                                                                                                                                                                                                                                                                                                                                                                                                                        | 919  | 1142 | 0         | 124.3 | 52.1 | 68.2 | reverse transcriptase, putative; 16838-20266        | gbpln | Arabidopsis thaliana | AT4G29090.1   Symbols:   Ribonuclease H-like superfamily protein   chr4:14333528-14335255 FORWARD LENGTH=575                                   | 919  | 575  | 1.00E-71 | 62.6  | 18.4 | 29.2 |
| Rsa1.0_00495.1.g14925.t1  | refXP_002864149.1  hypothetical protein ARALYDRAFT_495276 [Arabidopsis lyrata subsp. lyrata] gi 297309984 gb EFH40408.1  hypothetical protein ARALYDRAFT_495276 [Arabidopsis lyrata subsp. lyrata]                                                                                                                                                                                                                                                                                                                                                                  | 310  | 500  | 2.00E-92  | 161.3 | 57.4 | 65.8 | hypothetical protein ARALYDRAFT_495276              | gbpln | Arabidopsis lyrata   | AT5G52050.1   Symbols:   MATE efflux family protein   chr5:21138933-21140450 FORWARD LENGTH=505                                                | 310  | 505  | 5.00E-93 | 162.9 | 56.1 | 65.5 |



|                          |                                                                                                                                                                                                                                                                                                                                                                                                                                                                                                                                                                                                                                                                                                                               |     |     |          |       |      |      |                                                              |       |                      |                                                                                                                                    |     |     |          |       |      |      |
|--------------------------|-------------------------------------------------------------------------------------------------------------------------------------------------------------------------------------------------------------------------------------------------------------------------------------------------------------------------------------------------------------------------------------------------------------------------------------------------------------------------------------------------------------------------------------------------------------------------------------------------------------------------------------------------------------------------------------------------------------------------------|-----|-----|----------|-------|------|------|--------------------------------------------------------------|-------|----------------------|------------------------------------------------------------------------------------------------------------------------------------|-----|-----|----------|-------|------|------|
| Rsa1.0_00495.1.g14926.t2 | refNP_174690.1  lectin protein kinase-like protein [Arabidopsis thaliana] gi 75338636 sp Q9XID3.1 Y1343_ARATH RecName: Full=G-type lectin S-receptor-like serine/threonine-protein kinase At1g34300; Flags: Precursor gi 5091617 gb AAD39605.1 AC007454.4 Contains similarity to gi 479356 protein kinase PK1 from Zea mays, is a member of the PF00954 S-locus glycoprotein family and contains a PF00069 Eukaryotic protein kinase domain [Arabidopsis thaliana] gi 19699084 gb AAL80909.1  At1g34300/F23M19.5 [Arabidopsis thaliana] gi 24111429 gb AAN46865.1  At1g34300/F23M19.5 [Arabidopsis thaliana] gi 332193573 gb AEE31694.1  G-type lectin S-receptor-like serine/threonine-protein kinase [Arabidopsis thaliana] | 775 | 829 | 0        | 107.0 | 54.1 | 67.0 | lectin protein kinase-like protein                           | gbpln | Arabidopsis thaliana | AT1G34300.1   Symbols:   lectin protein kinase family protein   chr1:12503450-12505939 FORWARD LENGTH=829                          | 775 | 829 | 0        | 107.0 | 54.1 | 67.0 |
| Rsa1.0_00495.1.g14927.t6 | gb ABD96944.1  hypothetical protein [Cleome spinosa]                                                                                                                                                                                                                                                                                                                                                                                                                                                                                                                                                                                                                                                                          | 129 | 826 | 9.00E-11 | 640.3 | 26.4 | 40.3 | hypothetical protein                                         | gbpln | Cleome spinosa       | #                                                                                                                                  | #   | #   | #        | #     | #    |      |
| Rsa1.0_00495.1.g14928.t3 | refXP_002891654.1  hypothetical protein ARALYDRAFT_474290 [Arabidopsis lyrata subsp. lyrata] gi 297337496 gb EFH67913.1  hypothetical protein ARALYDRAFT_474290 [Arabidopsis lyrata subsp. lyrata]                                                                                                                                                                                                                                                                                                                                                                                                                                                                                                                            | 464 | 624 | 0        | 134.5 | 85.8 | 89.9 | hypothetical protein ARALYDRAFT_474290                       | gbpln | Arabidopsis lyrata   | AT1G51720.1   Symbols:   Amino acid dehydrogenase family protein   chr1:19181741-19186297 FORWARD LENGTH=637                       | 464 | 637 | 0        | 137.3 | 85.3 | 89.9 |
| Rsa1.0_00496.1.g14929.t1 | refNP_850164.1  protein autophagy 9 [Arabidopsis thaliana] gi 19715618 gb AAL91630.1  At2g31260/F16D14.10 [Arabidopsis thaliana] gi 19912149 dbj BAB88386.1  autophagy 9 [Arabidopsis thaliana] gi 20466356 gb AAM20495.1  unknown protein [Arabidopsis thaliana] gi 23198070 gb AAN15562.1  unknown protein [Arabidopsis thaliana] gi 23463043 gb AAN33191.1  At2g31260/F16D14.10 [Arabidopsis thaliana] gi 330253421 gb AEC08515.1  protein autophagy 9 [Arabidopsis thaliana]                                                                                                                                                                                                                                              | 877 | 866 | 0        | 98.7  | 84.7 | 89.1 | protein autophagy 9                                          | gbpln | Arabidopsis thaliana | AT2G31260.1   Symbols: APG9, ATAPG9   autophagy 9 (APG9)   chr2:13322291-13326293 REVERSE LENGTH=666                               | 877 | 866 | 0        | 98.7  | 84.7 | 89.1 |
| Rsa1.0_00496.1.g14930.t1 | gb EOA26748.1  hypothetical protein CARUB_v10022834mg [Capsella rubella]                                                                                                                                                                                                                                                                                                                                                                                                                                                                                                                                                                                                                                                      | 630 | 617 | 0        | 97.9  | 81.3 | 88.7 | hypothetical protein CARUB_v10022834mg                       | gbpln | Capsella rubella     | AT2G31240.1   Symbols:   Tetratricopeptide repeat (TPR)-like superfamily protein   chr2:13317570-13319518 REVERSE LENGTH=617       | 630 | 617 | 0        | 97.9  | 80.3 | 87.8 |
| Rsa1.0_00496.1.g14931.t1 | gb AAD20668.1  ethylene reponse factor-like AP2 domain transcription factor [Arabidopsis thaliana]                                                                                                                                                                                                                                                                                                                                                                                                                                                                                                                                                                                                                            | 254 | 236 | 3.00E-96 | 92.9  | 81.1 | 87.0 | ethylene reponse factor-like AP2 domain transcription factor | gbpln | Arabidopsis thaliana | AT2G31230.1   Symbols: ATERF15, ERF15   ethylene-responsive element binding factor 15   chr2:13306676-13307407 REVERSE LENGTH=243  | 254 | 243 | 2.00E-98 | 95.7  | 75.6 | 81.5 |
| Rsa1.0_00496.1.g14932.t2 | refNP_180680.2  transcription factor bHLH10 [Arabidopsis thaliana] gi 75298101 sp Q84TK1.1 BH010_ARATH RecName: Full=Transcription factor bHLH10; AltName: Full=Basic helix-loop-helix protein 10; Short=AtbHLH10; Short=bHLH 10; AltName: Full=Transcription factor EN 23; AltName: Full=bHLH transcription factor bHLH010 gi 28973613 gb AAO64131.1  putative bHLH protein [Arabidopsis thaliana] gi 30793963 gb AAP40433.1  putative bHLH protein [Arabidopsis thaliana] gi 11073711 dbj BAF00507.1  putative transcription factor BHLH10 [Arabidopsis thaliana] gi 330253417 gb AEC08511.1  transcription factor bHLH10 [Arabidopsis thaliana]                                                                            | 287 | 458 | 5.00E-81 | 159.6 | 55.4 | 60.3 | transcription factor bHLH10                                  | gbpln | Arabidopsis thaliana | AT2G31220.1   Symbols:   basic helix-loop-helix (bHLH) DNA-binding superfamily protein   chr2:13303014-13304661 FORWARD LENGTH=458 | 287 | 458 | 1.00E-83 | 159.6 | 55.4 | 60.3 |
| Rsa1.0_00496.1.g14933.t1 | refXP_00287931.1.1  basic helix-loop-helix family protein [Arabidopsis lyrata subsp. lyrata] gi 297325150 gb EFH55570.1  basic helix-loop-helix family protein [Arabidopsis lyrata subsp. lyrata]                                                                                                                                                                                                                                                                                                                                                                                                                                                                                                                             | 443 | 430 | 0        | 97.1  | 77.4 | 85.6 | basic helix-loop-helix family protein                        | gbpln | Arabidopsis lyrata   | AT2G31210.1   Symbols:   basic helix-loop-helix (bHLH) DNA-binding superfamily protein   chr2:13296655-13298139 FORWARD LENGTH=428 | 443 | 428 | 0        | 96.6  | 77.7 | 86.2 |

|                          |                                                                                                                                                                                                                                                                                                                                                                                                                                                    |      |      |           |       |      |      |                                                 |       |                      |                                                                                                                                                                                                                                                                  |      |      |           |       |      |      |
|--------------------------|----------------------------------------------------------------------------------------------------------------------------------------------------------------------------------------------------------------------------------------------------------------------------------------------------------------------------------------------------------------------------------------------------------------------------------------------------|------|------|-----------|-------|------|------|-------------------------------------------------|-------|----------------------|------------------------------------------------------------------------------------------------------------------------------------------------------------------------------------------------------------------------------------------------------------------|------|------|-----------|-------|------|------|
| Rsa1.0_00496.1.g14934.t1 | ref NP_565718.1  uncharacterized protein [Arabidopsis thaliana]   gi 20197897 gb AAD20664.2  expressed protein [Arabidopsis thaliana]   gi 21553562 gb AAM62655.1  unknown [Arabidopsis thaliana]   gi 109134157 gb ABG25076.1  At2g31190 [Arabidopsis thaliana]   gi 33025341 gb AEC08505.1  uncharacterized protein AT2G31190 [Arabidopsis thaliana]                                                                                             | 426  | 433  | 0         | 101.6 | 89.4 | 94.6 | uncharacterized protein                         | gbpln | Arabidopsis thaliana | AT2G31190.1   Symbols: RUS2, WXR1   Protein of unknown function, DUF647   chr2:13291458-13293681 REVERSE LENGTH=433                                                                                                                                              | 426  | 433  | 0         | 101.6 | 89.4 | 94.6 |
| Rsa1.0_00496.1.g14935.t1 | ref NP_180676.1  myb domain protein 14 [Arabidopsis thaliana]   gi 4432813 gb AAD20663.1  myb family transcription factor [Arabidopsis thaliana]   gi 20197333 gb AAM15030.1  myb DNA-binding protein [Arabidopsis thaliana]   gi 41619192 gb AAS10045.1  MYB transcription factor [Arabidopsis thaliana]   gi 89111928 gb ABD60736.1  At2g31180 [Arabidopsis thaliana]   gi 330253410 gb AEC08504.1  myb domain protein 14 [Arabidopsis thaliana] | 250  | 249  | 1.00E-123 | 99.6  | 84.8 | 92.8 | myb domain protein 14                           | gbpln | Arabidopsis thaliana | AT2G31180.1   Symbols: ATMYP14, MYB14AT, MYB14   myb domain protein 14   chr2:13286806-13288175 REVERSE LENGTH=249                                                                                                                                               | 250  | 249  | 1.00E-126 | 99.6  | 84.8 | 92.8 |
| Rsa1.0_00496.1.g14936.t1 | ref NP_565716.1  uncharacterized protein [Arabidopsis thaliana]   gi 3746060 gb AAC63835.1  expressed protein [Arabidopsis thaliana]   gi 1591221 gb AAL08239.1  At2g31160/T16B12.3 [Arabidopsis thaliana]   gi 19547989 gb AAL87358.1  At2g31160/T16B12.3 [Arabidopsis thaliana]   gi 330253407 gb AEC08501.1  uncharacterized protein AT2G31160 [Arabidopsis thaliana]                                                                           | 219  | 219  | 1.00E-89  | 100.0 | 88.1 | 90.9 | uncharacterized protein                         | gbpln | Arabidopsis thaliana | AT2G31160.1   Symbols: LSH3   Protein of unknown function (DUF640)   chr2:13277903-13278562 FORWARD LENGTH=219                                                                                                                                                   | 219  | 219  | 3.00E-92  | 100.0 | 88.1 | 90.9 |
| Rsa1.0_00496.1.g14937.t1 | ref XP_002862788.1  hypothetical protein ARALYDRAFT_920271 [Arabidopsis lyrata subsp. lyrata]   gi 297308512 gb EFH39046.1  hypothetical protein ARALYDRAFT_920271 [Arabidopsis lyrata subsp. lyrata]                                                                                                                                                                                                                                              | 187  | 417  | 5.00E-14  | 223.0 | 29.4 | 38.5 | hypothetical protein ARALYDRAFT_920271          | gbpln | Arabidopsis lyrata   | AT1G06190.1   Symbols:   Rho termination factor   chr1:1892467-1894078 REVERSE LENGTH=401                                                                                                                                                                        | 187  | 401  | 3.00E-13  | 214.4 | 23.0 | 30.5 |
| Rsa1.0_00496.1.g14938.t1 | # # # # # # # # - ---- # # # # # #                                                                                                                                                                                                                                                                                                                                                                                                                 |      |      |           |       |      |      |                                                 |       |                      |                                                                                                                                                                                                                                                                  |      |      |           |       |      |      |
| Rsa1.0_00496.1.g14939.t1 | ref NP_180705.1  F-box protein DOR [Arabidopsis thaliana]   gi 229807544 sp Q5BPS3.2 DOR_ARATH RecName: Full=F-box protein DOR; AltName: Full=Protein DROUGHT TOLERANCE REPRESSOR   gi 4589954 gb AAD26472.1  hypothetical protein [Arabidopsis thaliana]   gi 330253458 gb AEC08552.1  F-box protein DOR [Arabidopsis thaliana]                                                                                                                   | 402  | 387  | 1.00E-103 | 96.3  | 53.2 | 66.2 | F-box protein DOR                               | gbpln | Arabidopsis thaliana | AT2G31470.1   Symbols: DOR   F-box and associated interaction domains-containing protein   chr2:13407492-13408655 REVERSE LENGTH=387                                                                                                                             | 402  | 387  | 1.00E-106 | 96.3  | 53.2 | 66.2 |
| Rsa1.0_00496.1.g14940.t1 | gb EOA33274.1  hypothetical protein CARUB_v10019647mg [Capsella rubella]                                                                                                                                                                                                                                                                                                                                                                           | 2360 | 2361 | 0         | 100.0 | 98.4 | 99.2 | hypothetical protein CARUB_v10019647mg          | gbpln | Capsella rubella     | AT1G80070.1   Symbols: SUS2, EMB33, EMB177, EMB14   Pre-mRNA-processing-splicing factor   chr1:30118052-30127574 FORWARD LENGTH=2359                                                                                                                             | 2360 | 2359 | 0         | 100.0 | 97.9 | 99.0 |
| Rsa1.0_00496.1.g14941.t1 | gb EOA28821.1  hypothetical protein CARUB_v10025060mg [Capsella rubella]                                                                                                                                                                                                                                                                                                                                                                           | 96   | 191  | 1.00E-13  | 199.0 | 37.5 | 47.9 | hypothetical protein CARUB_v10025060mg          | gbpln | Capsella rubella     | AT2G31050.1   Symbols:   Cupredoxin superfamily protein   chr2:13212150-13212752 FORWARD LENGTH=200                                                                                                                                                              | 96   | 200  | 2.00E-14  | 208.3 | 39.6 | 47.9 |
| Rsa1.0_00496.1.g14942.t1 | gb EOA27142.1  hypothetical protein CARUB_v10023243mg, partial [Capsella rubella]                                                                                                                                                                                                                                                                                                                                                                  | 256  | 436  | 5.00E-39  | 170.3 | 37.9 | 43.0 | hypothetical protein CARUB_v10023243mg, partial | gbpln | Capsella rubella     | AT2G31130.1   Symbols:   unknown protein; Has 116 Blast hits to 113 proteins in 44 species: Archae - 0; Bacteria - 3; Metazoa - 21; Fungi - 2; Plants - 40; Viruses - 0; Other Eukaryotes - 50 (source: NCBI BLINK).   chr2:13263829-13265534 REVERSE LENGTH=419 | 256  | 419  | 2.00E-40  | 163.7 | 35.9 | 39.1 |
| Rsa1.0_00497.1.g14943.t1 | gb EOA36944.1  hypothetical protein CARUB_v10009854mg [Capsella rubella]                                                                                                                                                                                                                                                                                                                                                                           | 259  | 304  | 3.00E-55  | 117.4 | 47.1 | 63.7 | hypothetical protein CARUB_v10009854mg          | gbpln | Capsella rubella     | AT1G63900.1   Symbols: DAL1   E3 Ubiquitin ligase family protein   chr1:23717056-23719086 FORWARD LENGTH=343                                                                                                                                                     | 259  | 343  | 4.00E-20  | 132.4 | 31.3 | 48.3 |

|                          |                                                                                                                                                                                                                                                                                                                                                                                                                                                                                   |      |      |           |       |      |      |                                                |       |                      |                                                                                                                                                                 |      |      |           |       |      |      |
|--------------------------|-----------------------------------------------------------------------------------------------------------------------------------------------------------------------------------------------------------------------------------------------------------------------------------------------------------------------------------------------------------------------------------------------------------------------------------------------------------------------------------|------|------|-----------|-------|------|------|------------------------------------------------|-------|----------------------|-----------------------------------------------------------------------------------------------------------------------------------------------------------------|------|------|-----------|-------|------|------|
| Rsa1.0_00497.1.g14944.t1 | gb ABC25625.1  GAGA-binding transcriptional activator [Capsella rubella] gi 83616242 gb ABC25626.1  GAGA-binding transcriptional activator [Capsella rubella] gi 482574222 gb EOA38409.1  hypothetical protein CARUB_v10009978mg [Capsella rubella] gi 482574223 gb EOA38410.1  hypothetical protein CARUB_v10009978mg [Capsella rubella]                                                                                                                                         | 279  | 277  | 1.00E-134 | 99.3  | 86.7 | 91.0 | GAGA-binding transcriptional activator         | gbpln | Capsella rubella     | AT1G14685.1   Symbols: BPC2, BBR/BPC2, ATBPC2   basic pentacysteine 2   chr1:5043086-5043925 FORWARD LENGTH=279                                                 | 279  | 279  | 1.00E-131 | 100.0 | 83.9 | 88.2 |
| Rsa1.0_00497.1.g14945.t1 | gb AAF63169.1 AC010657.5 T5E21.13 [Arabidopsis thaliana]                                                                                                                                                                                                                                                                                                                                                                                                                          | 786  | 1776 | 0         | 226.0 | 86.0 | 91.1 | T5E21.13                                       | gbpln | Arabidopsis thaliana | AT1G14650.2   Symbols:   SWAP (Suppressor-of-White-Apricot)/surp domain-containing protein / ubiquitin family protein   chr1:5028077-5030520 FORWARD LENGTH=785 | 786  | 785  | 0         | 99.9  | 86.0 | 91.1 |
| Rsa1.0_00497.1.g14946.t1 | emb CAC05441.1  putative protein [Arabidopsis thaliana]                                                                                                                                                                                                                                                                                                                                                                                                                           | 847  | 706  | 0         | 83.4  | 51.4 | 62.5 | putative protein                               | gbpln | Arabidopsis thaliana | AT5G13130.1   Symbols:   Histidine kinase-, DNA gyrase B-, and HSP90-like ATPase family protein   chr5:4166755-4170324 FORWARD LENGTH=708                       | 847  | 708  | 0         | 83.6  | 53.6 | 64.9 |
| Rsa1.0_00497.1.g14947.t2 | ref NP_172913.1  Valyl-tRNA synthetase [Arabidopsis thaliana] gi 21542452 sp P93736.2 SYV_ARATH RecName: Full=Valine--tRNA ligase; AltName: Full=Valyl-tRNA synthetase; Short=ValRS gi 332191069 gb AEE29190.1  Valyl-tRNA synthetase [Arabidopsis thaliana]                                                                                                                                                                                                                      | 1030 | 1108 | 0         | 107.6 | 82.9 | 91.2 | Valyl-tRNA synthetase                          | gbpln | Arabidopsis thaliana | AT1G14610.1   Symbols: TWN2, VALRS   valyl-tRNA synthetase / valine-tRNA ligase (VALRS)   chr1:5008502-5014486 REVERSE LENGTH=1108                              | 1030 | 1108 | 0         | 107.6 | 82.9 | 91.2 |
| Rsa1.0_00497.1.g14948.t1 | dbj BAJ34269.1  unnamed protein product [Thellungiella halophila]                                                                                                                                                                                                                                                                                                                                                                                                                 | 470  | 472  | 0         | 100.4 | 89.6 | 94.0 | unnamed protein product                        | ----  | ----                 | AT1G14580.2   Symbols:   C2H2-like zinc finger protein   chr1:4990070-4992442 FORWARD LENGTH=467                                                                | 470  | 467  | 0         | 99.4  | 82.1 | 89.1 |
| Rsa1.0_00497.1.g14949.t1 | ref XP_002890064.1  UBX domain-containing protein [Arabidopsis lyrata subsp. lyrata] gi 297335906 gb EFH66323.1  UBX domain-containing protein [Arabidopsis lyrata subsp. lyrata]                                                                                                                                                                                                                                                                                                 | 464  | 472  | 0         | 101.7 | 78.7 | 87.9 | UBX domain-containing protein                  | gbpln | Arabidopsis lyrata   | AT1G14570.1   Symbols:   UBX domain-containing protein   chr1:4983770-4987192 FORWARD LENGTH=468                                                                | 464  | 468  | 0         | 100.9 | 77.6 | 86.2 |
| Rsa1.0_00497.1.g14950.t1 | ref NP_172908.1  Mitochondrial substrate carrier family protein [Arabidopsis thaliana] gi 332191060 gb AEE29181.1  Mitochondrial substrate carrier family protein [Arabidopsis thaliana]                                                                                                                                                                                                                                                                                          | 335  | 331  | 1.00E-176 | 98.8  | 93.7 | 96.7 | Mitochondrial substrate carrier family protein | gbpln | Arabidopsis thaliana | AT1G14560.1   Symbols:   Mitochondrial substrate carrier family protein   chr1:4981300-4983082 FORWARD LENGTH=331                                               | 335  | 331  | 1.00E-178 | 98.8  | 93.7 | 96.7 |
| Rsa1.0_00497.1.g14951.t1 | ref NP_172903.1  protein alfin-like 7 [Arabidopsis thaliana] gi 75245845 sp Q8LA16.1 ALFL7_ARATH RecName: Full=PHD finger protein ALFIN-LIKE 7; Short=Protein AL7 gi 21593666 gb AAM65633.1  nucleic acid binding protein (alfin-1), putative [Arabidopsis thaliana] gi 30017229 gb AAP12848.1  At1g14510 [Arabidopsis thaliana] gi 110736110 dbj BAF00027.1  hypothetical protein [Arabidopsis thaliana] gi 332191052 gb AEE29173.1  protein alfin-like 7 [Arabidopsis thaliana] | 251  | 252  | 1.00E-108 | 100.4 | 87.6 | 96.8 | protein alfin-like 7                           | gbpln | Arabidopsis thaliana | AT1G14510.1   Symbols: AL7   alfin-like 7   chr1:4962171-4964154 REVERSE LENGTH=252                                                                             | 251  | 252  | 1.00E-111 | 100.4 | 87.6 | 96.8 |

|                          |                                                                                                                                                                                                                                                                                                                                                                                                                                                                                                                                                                                                                                                                                                                                                                                                                                                                                                                                                                                                                                                                                                                                                                                                                                  |     |     |           |       |      |      |                                         |       |                      |                                                                                                                                |     |     |           |       |      |      |
|--------------------------|----------------------------------------------------------------------------------------------------------------------------------------------------------------------------------------------------------------------------------------------------------------------------------------------------------------------------------------------------------------------------------------------------------------------------------------------------------------------------------------------------------------------------------------------------------------------------------------------------------------------------------------------------------------------------------------------------------------------------------------------------------------------------------------------------------------------------------------------------------------------------------------------------------------------------------------------------------------------------------------------------------------------------------------------------------------------------------------------------------------------------------------------------------------------------------------------------------------------------------|-----|-----|-----------|-------|------|------|-----------------------------------------|-------|----------------------|--------------------------------------------------------------------------------------------------------------------------------|-----|-----|-----------|-------|------|------|
| Rsa1.0_00497.1.g14952.t1 | <p>ref NP_563952.1  NADH dehydrogenase (ubiquinone) [Arabidopsis thaliana] gi 297849852 ref XP_002892807.1  hypothetical protein ARALYDRAFT_471620 [Arabidopsis lyrata subsp. lyrata] gi 75191411 sp Q9M9R9.1 NDB3B_ARAT H RecName: Full=NADH dehydrogenase [ubiquinone] 1 beta subcomplex subunit 3-B gi 7262687 gb AAF43945.1 AC012188_22 Contains similarity to an unknown protein from Arabidopsis thaliana gb AC0004136.2. ESTs gb Z47683, gb Z47682, gb AA597850, gb Z29736, gb Z29735, gb AA042623 come from this gene [Arabidopsis thaliana] gi 12083314 gb AAG48816.1 AF332453_1 unknown protein [Arabidopsis thaliana] gi 21592691 gb AAM64640.1  unknown [Arabidopsis thaliana] gi 30725334 gb AAP37689.1  At1g14450 [Arabidopsis thaliana] gi 110736426 dbj BAF00181.1  hypothetical protein [Arabidopsis thaliana] gi 297338649 gb EFH69066.1  hypothetical protein ARALYDRAFT_471620 [Arabidopsis lyrata subsp. lyrata] gi 332191044 gb AEE29165.1  NADH dehydrogenase (ubiquinone) [Arabidopsis thaliana] ref XP_002892805.1  hypothetical protein ARALYDRAFT_471616 [Arabidopsis lyrata subsp. lyrata] gi 297338647 gb EFH69064.1  hypothetical protein ARALYDRAFT_471616 [Arabidopsis lyrata subsp. lyrata]</p> | 73  | 73  | 1.00E-33  | 100.0 | 94.5 | 95.9 | NADH dehydrogenase (ubiquinone)         | gbpln | Arabidopsis lyrata   | AT1G14450.1   Symbols: NADH dehydrogenase (ubiquinone)s   chr1:4947337-4947558 REVERSE LENGTH=73                               | 73  | 73  | 2.00E-36  | 100.0 | 94.5 | 95.9 |
| Rsa1.0_00497.1.g14953.t1 | <p>ref XP_002889764.1  F-box family protein [Arabidopsis lyrata subsp. lyrata] gi 297335606 gb EFH66023.1  F-box family protein [Arabidopsis lyrata subsp. lyrata] hypothetical protein ARALYDRAFT_471616 [Arabidopsis lyrata subsp. lyrata]</p>                                                                                                                                                                                                                                                                                                                                                                                                                                                                                                                                                                                                                                                                                                                                                                                                                                                                                                                                                                                 | 459 | 459 | 0         | 100.0 | 82.1 | 90.6 | hypothetical protein ARALYDRAFT_471616  | gbpln | Arabidopsis lyrata   | AT1G14420.1   Symbols: AT59   Pectate lyase family protein   chr1:4931844-4933405 REVERSE LENGTH=459                           | 459 | 459 | 0         | 100.0 | 81.7 | 89.5 |
| Rsa1.0_00497.1.g14954.t1 | <p>ref NP_172893.1  ssDNA-binding transcriptional regulator [Arabidopsis thaliana] gi 75191428 sp Q9M9S3.1 WHY1_ARATH RecName: Full=Single-stranded DNA-binding protein WHY1, chloroplastic; AltName: Full=Protein PLASTID TRANSCRIPTIONALLY ACTIVE 1; AltName: Full=Protein WHIRLY 1; Short=AtWHY1; Flags: Precursor gi 7262683 gb AAF43941.1 AC012188_18 Contains similarity to a hypothetical protein from Arabidopsis thaliana gb AC002521.2. EST gb AI995686 comes from this gene [Arabidopsis thaliana] gi 12083312 gb AAG48815.1 AF332452_1 putative DNA-binding protein p24 [Arabidopsis thaliana] gi 13877787 gb AAK43971.1 AF370156_1 putative DNA-binding protein p24 [Arabidopsis thaliana] gi 16323418 gb AAL15203.1  putative DNA-binding protein p24 [Arabidopsis thaliana] gi 332191039 gb AEE29160.1  ssDNA-binding transcriptional regulator [Arabidopsis thaliana]</p>                                                                                                                                                                                                                                                                                                                                        | 367 | 374 | 4.00E-93  | 101.9 | 56.7 | 69.2 | F-box family protein                    | gbpln | Arabidopsis lyrata   | AT1G09650.1   Symbols: F-box and associated interaction domains-containing protein   chr1:3125978-3127126 FORWARD LENGTH=382   | 367 | 382 | 3.00E-94  | 104.1 | 56.9 | 68.4 |
| Rsa1.0_00497.1.g14955.t1 | <p>ref NP_172893.1  ssDNA-binding transcriptional regulator [Arabidopsis thaliana] gi 75191428 sp Q9M9S3.1 WHY1_ARATH RecName: Full=Single-stranded DNA-binding protein WHY1, chloroplastic; AltName: Full=Protein PLASTID TRANSCRIPTIONALLY ACTIVE 1; AltName: Full=Protein WHIRLY 1; Short=AtWHY1; Flags: Precursor gi 7262683 gb AAF43941.1 AC012188_18 Contains similarity to a hypothetical protein from Arabidopsis thaliana gb AC002521.2. EST gb AI995686 comes from this gene [Arabidopsis thaliana] gi 12083312 gb AAG48815.1 AF332452_1 putative DNA-binding protein p24 [Arabidopsis thaliana] gi 13877787 gb AAK43971.1 AF370156_1 putative DNA-binding protein p24 [Arabidopsis thaliana] gi 16323418 gb AAL15203.1  putative DNA-binding protein p24 [Arabidopsis thaliana] gi 332191039 gb AEE29160.1  ssDNA-binding transcriptional regulator [Arabidopsis thaliana]</p>                                                                                                                                                                                                                                                                                                                                        | 269 | 263 | 1.00E-127 | 97.8  | 85.5 | 89.6 | ssDNA-binding transcriptional regulator | gbpln | Arabidopsis thaliana | AT1G14410.1   Symbols: ATWHY1, PTAC1, WHY1   ssDNA-binding transcriptional regulator   chr1:4929352-4930810 REVERSE LENGTH=263 | 269 | 263 | 1.00E-129 | 97.8  | 85.5 | 89.6 |

|                          |                                                                                                                                                                                                                                                                                                                                                                                                                                                                                                                                                                                                                                                                                                                                                                                                                                                                                                                                                                                                                                                                                                                                                                                                                                                                                                                                                                                                                                                                                                                                                                                                                                                                                                                                                                                                                                                                                                                                                                                                                                                                                                                                                                                                                                                                                                                                                                                                                                             |     |     |          |       |       |       |                                   |       |                    |                                                                                                             |     |     |          |       |       |       |
|--------------------------|---------------------------------------------------------------------------------------------------------------------------------------------------------------------------------------------------------------------------------------------------------------------------------------------------------------------------------------------------------------------------------------------------------------------------------------------------------------------------------------------------------------------------------------------------------------------------------------------------------------------------------------------------------------------------------------------------------------------------------------------------------------------------------------------------------------------------------------------------------------------------------------------------------------------------------------------------------------------------------------------------------------------------------------------------------------------------------------------------------------------------------------------------------------------------------------------------------------------------------------------------------------------------------------------------------------------------------------------------------------------------------------------------------------------------------------------------------------------------------------------------------------------------------------------------------------------------------------------------------------------------------------------------------------------------------------------------------------------------------------------------------------------------------------------------------------------------------------------------------------------------------------------------------------------------------------------------------------------------------------------------------------------------------------------------------------------------------------------------------------------------------------------------------------------------------------------------------------------------------------------------------------------------------------------------------------------------------------------------------------------------------------------------------------------------------------------|-----|-----|----------|-------|-------|-------|-----------------------------------|-------|--------------------|-------------------------------------------------------------------------------------------------------------|-----|-----|----------|-------|-------|-------|
| Rsa1.0_00497.1.g14956.t1 | <p>ref NP_563951.1  ubiquitin-conjugating enzyme E2 1 [Arabidopsis thaliana]<br/> gi 42571469 ref NP_973825.1  ubiquitin-conjugating enzyme E2 1 [Arabidopsis thaliana]<br/> gi 297849844 ref XP_002892803.1  hypothetical protein<br/> ARALYDRAFT_471614 [Arabidopsis lyrata subsp. lyrata]<br/> gi 136636 sp P25865.1 UBC1_ARATH<br/> RecName: Full=Ubiquitin-conjugating enzyme E2 1; AltName: Full=Ubiquitin carrier protein 1; AltName: Full=Ubiquitin-conjugating enzyme E2-17 kDa 1; AltName: Full=Ubiquitin-protein ligase 1<br/> gi 157834522 pdb 2AAK A Chain A, Ubiquitin Conjugating Enzyme From Arabidopsis Thaliana<br/> gi 7262682 gb AAF43940.1 AC012188_17<br/> Strong similarity to a Ubiquitin-conjugating Enzyme (E2-17 KD 1) from Arabidopsis thaliana gi 136636 and contains a Ubiquitin-conjugating Enzyme PF 00179 domain. ESTs gb AA728508, gb H36735, gb A1100736 come from this gene [Arabidopsis thaliana]<br/> gi 12083310 gb AAG48814.1 AF332451_1 putative E2, ubiquitin-conjugating enzyme 1 [Arabidopsis thaliana]<br/> gi 166924 gb AAA32903.1 ubiquitin carrier protein [Arabidopsis thaliana]<br/> gi 431260 gb AAA32897.1 ubiquitin-conjugating enzyme E2 1 [Arabidopsis thaliana]<br/> ref NP_563951.1  ubiquitin-conjugating enzyme E2 1 [Arabidopsis thaliana]<br/> gi 42571469 ref NP_973825.1  ubiquitin-conjugating enzyme E2 1 [Arabidopsis thaliana]<br/> gi 297849844 ref XP_002892803.1  hypothetical protein<br/> ARALYDRAFT_471614 [Arabidopsis lyrata subsp. lyrata]<br/> gi 136636 sp P25865.1 UBC1_ARATH<br/> RecName: Full=Ubiquitin-conjugating enzyme E2 1; AltName: Full=Ubiquitin carrier protein 1; AltName: Full=Ubiquitin-conjugating enzyme E2-17 kDa 1; AltName: Full=Ubiquitin-protein ligase 1<br/> gi 157834522 pdb 2AAK A Chain A, Ubiquitin Conjugating Enzyme From Arabidopsis Thaliana<br/> gi 7262682 gb AAF43940.1 AC012188_17<br/> Strong similarity to a Ubiquitin-conjugating Enzyme (E2-17 KD 1) from Arabidopsis thaliana gi 136636 and contains a Ubiquitin-conjugating Enzyme PF 00179 domain. ESTs gb AA728508, gb H36735, gb A1100736 come from this gene [Arabidopsis thaliana]<br/> gi 12083310 gb AAG48814.1 AF332451_1 putative E2, ubiquitin-conjugating enzyme 1 [Arabidopsis thaliana]<br/> gi 166924 gb AAA32903.1 ubiquitin carrier protein [Arabidopsis thaliana]<br/> gi 431260 gb AAA32897.1 ubiquitin-conjugating enzyme E2 1 [Arabidopsis</p> | 152 | 152 | 1.00E-84 | 100.0 | 100.0 | 100.0 | ubiquitin-conjugating enzyme E2 1 | gbpln | Arabidopsis lyrata | AT1G14400.2   Symbols: UBC1, ATUBC1   ubiquitin carrier protein 1   chr1:4927294-4928136 REVERSE LENGTH=152 | 152 | 152 | 4.00E-87 | 100.0 | 100.0 | 100.0 |
| Rsa1.0_00497.1.g14957.t2 | <p>ref NP_563951.1  ubiquitin-conjugating enzyme E2 1 [Arabidopsis thaliana]<br/> gi 42571469 ref NP_973825.1  ubiquitin-conjugating enzyme E2 1 [Arabidopsis thaliana]<br/> gi 297849844 ref XP_002892803.1  hypothetical protein<br/> ARALYDRAFT_471614 [Arabidopsis lyrata subsp. lyrata]<br/> gi 136636 sp P25865.1 UBC1_ARATH<br/> RecName: Full=Ubiquitin-conjugating enzyme E2 1; AltName: Full=Ubiquitin carrier protein 1; AltName: Full=Ubiquitin-conjugating enzyme E2-17 kDa 1; AltName: Full=Ubiquitin-protein ligase 1<br/> gi 157834522 pdb 2AAK A Chain A, Ubiquitin Conjugating Enzyme From Arabidopsis Thaliana<br/> gi 7262682 gb AAF43940.1 AC012188_17<br/> Strong similarity to a Ubiquitin-conjugating Enzyme (E2-17 KD 1) from Arabidopsis thaliana gi 136636 and contains a Ubiquitin-conjugating Enzyme PF 00179 domain. ESTs gb AA728508, gb H36735, gb A1100736 come from this gene [Arabidopsis thaliana]<br/> gi 12083310 gb AAG48814.1 AF332451_1 putative E2, ubiquitin-conjugating enzyme 1 [Arabidopsis thaliana]<br/> gi 166924 gb AAA32903.1 ubiquitin carrier protein [Arabidopsis thaliana]<br/> gi 431260 gb AAA32897.1 ubiquitin-conjugating enzyme E2 1 [Arabidopsis</p>                                                                                                                                                                                                                                                                                                                                                                                                                                                                                                                                                                                                                                                                                                                                                                                                                                                                                                                                                                                                                                                                                                                                                                                                                           | 168 | 152 | 6.00E-69 | 90.5  | 78.0  | 83.3  | ubiquitin-conjugating enzyme E2 1 | gbpln | Arabidopsis lyrata | AT1G14400.2   Symbols: UBC1, ATUBC1   ubiquitin carrier protein 1   chr1:4927294-4928136 REVERSE LENGTH=152 | 168 | 152 | 2.00E-71 | 90.5  | 78.0  | 83.3  |

|                          |                                                                                                                                                                                                                                                                                                                                                                                                                                                                                                                                                                                                                                                                                                                                                                                                                                                                                                                                                                                                                                                                                                                                                                                                                                                                                                                         |     |     |           |       |      |      |                                   |       |                      |                                                                                                                                    |     |     |           |       |      |      |
|--------------------------|-------------------------------------------------------------------------------------------------------------------------------------------------------------------------------------------------------------------------------------------------------------------------------------------------------------------------------------------------------------------------------------------------------------------------------------------------------------------------------------------------------------------------------------------------------------------------------------------------------------------------------------------------------------------------------------------------------------------------------------------------------------------------------------------------------------------------------------------------------------------------------------------------------------------------------------------------------------------------------------------------------------------------------------------------------------------------------------------------------------------------------------------------------------------------------------------------------------------------------------------------------------------------------------------------------------------------|-----|-----|-----------|-------|------|------|-----------------------------------|-------|----------------------|------------------------------------------------------------------------------------------------------------------------------------|-----|-----|-----------|-------|------|------|
| Rsa1.0_00497.1.g14958.t1 | ret NP_563951.1  ubiquitin-conjugating enzyme E2 1 [Arabidopsis thaliana] gi 42571469 ref NP_973825.1  ubiquitin-conjugating enzyme E2 1 [Arabidopsis thaliana] gi 297849844 ref XP_002892803.1  hypothetical protein ARALYDRAFT_471614 [Arabidopsis lyrata subsp. lyrata] gi 136636 sp P25865.1 UBC1_ARATH RecName: Full=Ubiquitin-conjugating enzyme E2 1; AltName: Full=Ubiquitin carrier protein 1; AltName: Full=Ubiquitin-conjugating enzyme E2-17 kDa 1; AltName: Full=Ubiquitin-protein ligase 1 gi 157834522 pdb 2AAK A Chain A. Ubiquitin Conjugating Enzyme From Arabidopsis Thaliana gi 7262682 gb AAF43940.1 AC012188_17 Strong similarity to a Ubiquitin-conjugating Enzyme (E2-17 KD 1) from Arabidopsis thaliana gi 136636 and contains a Ubiquitin-conjugating Enzyme PF 00179 domain. ESTs gb AA728508, gb H36735, gb A1100736 come from this gene [Arabidopsis thaliana] gi 12083310 gb AAG48814.1 AF332451_1 putative E2, ubiquitin-conjugating enzyme 1 [Arabidopsis thaliana] gi 166924 gb AAA32903.1  ubiquitin carrier protein [Arabidopsis thaliana] gi 431260 gb AAA32897.1  ubiquitin conjugating enzyme [Arabidopsis thaliana]                                                                                                                                                              | 144 | 152 | 4.00E-68  | 105.6 | 86.8 | 92.4 | ubiquitin-conjugating enzyme E2 1 | gbpln | Arabidopsis lyrata   | AT1G14400.2   Symbols: UBC1, ATUBC1   ubiquitin carrier protein 1   chr1:4927294-4928136 REVERSE LENGTH=152                        | 144 | 152 | 1.00E-70  | 105.6 | 86.8 | 92.4 |
| Rsa1.0_00497.1.g14959.t1 | gb AAM67095.1  unknown [Arabidopsis thaliana]                                                                                                                                                                                                                                                                                                                                                                                                                                                                                                                                                                                                                                                                                                                                                                                                                                                                                                                                                                                                                                                                                                                                                                                                                                                                           | 244 | 244 | 1.00E-114 | 100.0 | 87.3 | 93.0 | unknown                           | gbpln | Arabidopsis thaliana | AT1G14340.1   Symbols:   RNA-binding (RRM/RBD/RNP motifs) family protein   chr1:4897709-4898776 FORWARD LENGTH=244                 | 244 | 244 | 1.00E-115 | 100.0 | 86.9 | 92.6 |
| Rsa1.0_00497.1.g14960.t1 | ret NP_563945.2  60S ribosomal protein L10-1 [Arabidopsis thaliana] gi 297844336 ref XP_002890049.1  hypothetical protein ARALYDRAFT_888807 [Arabidopsis lyrata subsp. lyrata] gi 75305724 sp Q93V79.1 RL101_ARATH RecName: Full=60S ribosomal protein L10-1 gi 7262674 gb AAF43932.1 AC012188_9 Strong similarity, practically identical, to a 60S Ribosomal Protein L10 (Wilm's Tumor Suppressor Protein Homolog) from Arabidopsis thaliana gi 1172806, and contains a Ribosomal L10 PF 00826 domain. ESTs gb Z18472, gb T76209, gb N65098, gb T43013, gb T46279, gb AA394948, gb AA713166, gb T44895, gb AA042691 come from this gene [Arabidopsis thaliana] gi 16226263 gb AAL16118.1 AF428286_1 At g14320/F14L17_28 [Arabidopsis thaliana] gi 16226713 gb AAL16239.1 AF428470_1 At g14320/F14L17_28 [Arabidopsis thaliana] gi 15028019 gb AAK76540.1  putative tumor suppressor protein [Arabidopsis thaliana] gi 21281241 gb AN45037.1  putative tumor suppressor protein [Arabidopsis thaliana] gi 23397080 gb AAN31825.1  putative tumor suppressor [Arabidopsis thaliana] gi 297335891 gb EFH66308.1  hypothetical protein ref XP_002892796.1  ribonuclease T2 family protein [Arabidopsis lyrata subsp. lyrata] gi 297338638 gb EFH69055.1  ribonuclease T2 family protein [Arabidopsis lyrata subsp. lyrata] | 220 | 220 | 1.00E-124 | 100.0 | 99.1 | 99.1 | 60S ribosomal protein L10-1       | gbpln | Arabidopsis lyrata   | AT1G14320.1   Symbols: SAC52, RPL10, RPL10A   Ribosomal protein L16p/L10e family protein   chr1:4888270-4889408 FORWARD LENGTH=220 | 220 | 220 | 1.00E-127 | 100.0 | 99.1 | 99.1 |
| Rsa1.0_00497.1.g14961.t3 | ret XP_002892796.1  ribonuclease T2 family protein [Arabidopsis lyrata subsp. lyrata] gi 297338638 gb EFH69055.1  ribonuclease T2 family protein [Arabidopsis lyrata subsp. lyrata]                                                                                                                                                                                                                                                                                                                                                                                                                                                                                                                                                                                                                                                                                                                                                                                                                                                                                                                                                                                                                                                                                                                                     | 228 | 226 | 1.00E-114 | 99.1  | 85.1 | 92.5 | ribonuclease T2 family protein    | gbpln | Arabidopsis lyrata   | AT1G14220.1   Symbols:   Ribonuclease T2 family protein   chr1:4858642-4859601 REVERSE LENGTH=228                                  | 228 | 228 | 1.00E-109 | 100.0 | 80.3 | 89.5 |
| Rsa1.0_00497.1.g14962.t1 | #                                                                                                                                                                                                                                                                                                                                                                                                                                                                                                                                                                                                                                                                                                                                                                                                                                                                                                                                                                                                                                                                                                                                                                                                                                                                                                                       | #   | #   | #         | #     | #    | -    | ----                              | ----  | #                    | #                                                                                                                                  | #   | #   | #         | #     | #    |      |

|                          |                                                                                                                                                                                                                                                                                                                                                                                                                                                                                                                                                                                                                                                                                                                                                                                                                                                                                                                                                                                                                                                                                                                                                                       |     |     |           |       |      |      |                                                                                                                  |       |                      |                                                                                                                                            |     |     |           |       |      |      |
|--------------------------|-----------------------------------------------------------------------------------------------------------------------------------------------------------------------------------------------------------------------------------------------------------------------------------------------------------------------------------------------------------------------------------------------------------------------------------------------------------------------------------------------------------------------------------------------------------------------------------------------------------------------------------------------------------------------------------------------------------------------------------------------------------------------------------------------------------------------------------------------------------------------------------------------------------------------------------------------------------------------------------------------------------------------------------------------------------------------------------------------------------------------------------------------------------------------|-----|-----|-----------|-------|------|------|------------------------------------------------------------------------------------------------------------------|-------|----------------------|--------------------------------------------------------------------------------------------------------------------------------------------|-----|-----|-----------|-------|------|------|
| Rsa1.0_00497.1.g14963.t1 | refNP_172865.1   2-oxoglutarate (2OG) and Fe(II)-dependent oxygenase-like protein [Arabidopsis thaliana] gi 5080789 gb AAD39299.1 AC007576_22<br>Very similar to adventitious rooting related oxygenase [Arabidopsis thaliana] gi 26451604 dbj BAC42899.1 putative dioxygenase [Arabidopsis thaliana] gi 28973391 gb AAO64020.1 putative dioxygenase [Arabidopsis thaliana] gi 332190988 gb AEE29109.1 2-oxoglutarate (2OG) and Fe(II)-dependent oxygenase-like protein [Arabidopsis thaliana]<br>refNP_172864.1   2-oxoglutarate (2OG) and Fe(II)-dependent oxygenase-like protein [Arabidopsis thaliana] gi 5080788 gb AAD39298.1 AC007576_21<br>Very similar to adventitious rooting related oxygenase [Arabidopsis thaliana] gi 21553384 gb AAM62477.1 dioxygenase-like protein [Arabidopsis thaliana] gi 24030341 gb AAN41336.1 putative dioxygenase [Arabidopsis thaliana] gi 332190987 gb AEE29108.1 2-oxoglutarate (2OG) and Fe(II)-dependent oxygenase-like protein [Arabidopsis thaliana]<br>sp Q9XI80.1 FUT6_ARATH RecName: Full=Fucosyltransferase 6; Short=AtFUT6<br>gi 5080783 gb AAD39293.1 AC007576_16<br>Hypothetical protein [Arabidopsis thaliana] | 305 | 308 | 1.00E-159 | 101.0 | 87.9 | 94.4 | 2-oxoglutarate (2OG) and Fe(II)-dependent oxygenase-like protein                                                 | gbpln | Arabidopsis thaliana | AT1G14130.1   Symbols:   2-oxoglutarate (2OG) and Fe(II)-dependent oxygenase superfamily protein   chr1:4836041-4837040 REVERSE LENGTH=308 | 305 | 308 | 1.00E-162 | 101.0 | 87.9 | 94.4 |
| Rsa1.0_00497.1.g14964.t1 | refNP_172864.1   2-oxoglutarate (2OG) and Fe(II)-dependent oxygenase-like protein [Arabidopsis thaliana] gi 5080788 gb AAD39298.1 AC007576_21<br>Very similar to adventitious rooting related oxygenase [Arabidopsis thaliana] gi 21553384 gb AAM62477.1 dioxygenase-like protein [Arabidopsis thaliana] gi 24030341 gb AAN41336.1 putative dioxygenase [Arabidopsis thaliana] gi 332190987 gb AEE29108.1 2-oxoglutarate (2OG) and Fe(II)-dependent oxygenase-like protein [Arabidopsis thaliana]<br>sp Q9XI80.1 FUT6_ARATH RecName: Full=Fucosyltransferase 6; Short=AtFUT6<br>gi 5080783 gb AAD39293.1 AC007576_16<br>Hypothetical protein [Arabidopsis thaliana]                                                                                                                                                                                                                                                                                                                                                                                                                                                                                                   | 311 | 312 | 1.00E-127 | 100.3 | 68.5 | 81.4 | 2-oxoglutarate (2OG) and Fe(II)-dependent oxygenase-like protein                                                 | gbpln | Arabidopsis thaliana | AT1G14120.1   Symbols:   2-oxoglutarate (2OG) and Fe(II)-dependent oxygenase superfamily protein   chr1:4833648-4834833 REVERSE LENGTH=312 | 311 | 312 | 1.00E-130 | 100.3 | 68.5 | 81.4 |
| Rsa1.0_00497.1.g14965.t1 | refNP_187980.1   F-box/kelch-repeat protein [Arabidopsis thaliana] gi 75273359 sp Q9LID1.1 FBK54_ARATH RecName: Full=F-box/kelch-repeat protein At3g13680<br>gi 9294013 dbj BAB01916.1 unnamed protein product [Arabidopsis thaliana] gi 332641875 gb AEE75396.1 F-box/kelch-repeat protein [Arabidopsis thaliana]<br>refNP_187980.1   F-box/kelch-repeat protein [Arabidopsis thaliana] gi 75273359 sp Q9LID1.1 FBK54_ARATH RecName: Full=F-box/kelch-repeat protein At3g13680<br>gi 9294013 dbj BAB01916.1 unnamed protein product [Arabidopsis thaliana] gi 332641875 gb AEE75396.1 F-box/kelch-repeat protein [Arabidopsis thaliana]                                                                                                                                                                                                                                                                                                                                                                                                                                                                                                                              | 535 | 537 | 0         | 100.4 | 66.9 | 79.8 | RecName: Full=Fucosyltransferase 6; Short=AtFUT6<br>gi 5080783 gb AAD39293.1 AC007576_16<br>Hypothetical protein | gbpln | Arabidopsis thaliana | AT2G15390.2   Symbols: FUT4, atfut4   fucosyltransferase 4   chr2:6709345-6711044 REVERSE LENGTH=535                                       | 535 | 535 | 0         | 100.0 | 64.9 | 78.3 |
| Rsa1.0_00498.1.g14966.t1 | refNP_187980.1   F-box/kelch-repeat protein [Arabidopsis thaliana] gi 75273359 sp Q9LID1.1 FBK54_ARATH RecName: Full=F-box/kelch-repeat protein At3g13680<br>gi 9294013 dbj BAB01916.1 unnamed protein product [Arabidopsis thaliana] gi 332641875 gb AEE75396.1 F-box/kelch-repeat protein [Arabidopsis thaliana]<br>refNP_187980.1   F-box/kelch-repeat protein [Arabidopsis thaliana] gi 75273359 sp Q9LID1.1 FBK54_ARATH RecName: Full=F-box/kelch-repeat protein At3g13680<br>gi 9294013 dbj BAB01916.1 unnamed protein product [Arabidopsis thaliana] gi 332641875 gb AEE75396.1 F-box/kelch-repeat protein [Arabidopsis thaliana]                                                                                                                                                                                                                                                                                                                                                                                                                                                                                                                              | 371 | 395 | 3.00E-96  | 106.5 | 56.1 | 70.4 | F-box/kelch-repeat protein                                                                                       | gbpln | Arabidopsis thaliana | AT3G13680.1   Symbols:   F-box and associated interaction domains-containing protein   chr3:4477534-4478721 REVERSE LENGTH=395             | 371 | 395 | 8.00E-99  | 106.5 | 56.1 | 70.4 |
| Rsa1.0_00498.1.g14967.t1 | refNP_187980.1   F-box/kelch-repeat protein [Arabidopsis thaliana] gi 75273359 sp Q9LID1.1 FBK54_ARATH RecName: Full=F-box/kelch-repeat protein At3g13680<br>gi 9294013 dbj BAB01916.1 unnamed protein product [Arabidopsis thaliana] gi 332641875 gb AEE75396.1 F-box/kelch-repeat protein [Arabidopsis thaliana]                                                                                                                                                                                                                                                                                                                                                                                                                                                                                                                                                                                                                                                                                                                                                                                                                                                    | 371 | 395 | 5.00E-97  | 106.5 | 55.8 | 72.0 | F-box/kelch-repeat protein                                                                                       | gbpln | Arabidopsis thaliana | AT3G13680.1   Symbols:   F-box and associated interaction domains-containing protein   chr3:4477534-4478721 REVERSE LENGTH=395             | 371 | 395 | 1.00E-99  | 106.5 | 55.8 | 72.0 |
| Rsa1.0_00498.1.g14968.t1 | # # # # # # # # - ---- ---- # # # # # #                                                                                                                                                                                                                                                                                                                                                                                                                                                                                                                                                                                                                                                                                                                                                                                                                                                                                                                                                                                                                                                                                                                               |     |     |           |       |      |      |                                                                                                                  |       |                      |                                                                                                                                            |     |     |           |       |      |      |
| Rsa1.0_00498.1.g14969.t1 | refXP_002884981.1   F-box family protein [Arabidopsis lyrata subsp. lyrata] gi 297330821 gb EFH61240.1 F-box family protein [Arabidopsis lyrata subsp. lyrata]<br>refXP_002884981.1   F-box family protein [Arabidopsis lyrata subsp. lyrata] gi 297330821 gb EFH61240.1 F-box family protein [Arabidopsis lyrata subsp. lyrata]<br>refNP_187980.1   F-box/kelch-repeat protein [Arabidopsis thaliana] gi 75273359 sp Q9LID1.1 FBK54_ARATH RecName: Full=F-box/kelch-repeat protein At3g13680<br>gi 9294013 dbj BAB01916.1 unnamed protein product [Arabidopsis thaliana] gi 332641875 gb AEE75396.1 F-box/kelch-repeat protein [Arabidopsis thaliana]                                                                                                                                                                                                                                                                                                                                                                                                                                                                                                                | 333 | 400 | 3.00E-85  | 120.1 | 57.7 | 70.9 | F-box family protein                                                                                             | gbpln | Arabidopsis lyrata   | AT3G13680.1   Symbols:   F-box and associated interaction domains-containing protein   chr3:4477534-4478721 REVERSE LENGTH=395             | 333 | 395 | 1.00E-85  | 118.6 | 57.1 | 69.4 |
| Rsa1.0_00498.1.g14970.t1 | refXP_002884981.1   F-box family protein [Arabidopsis lyrata subsp. lyrata] gi 297330821 gb EFH61240.1 F-box family protein [Arabidopsis lyrata subsp. lyrata]<br>refNP_187980.1   F-box/kelch-repeat protein [Arabidopsis thaliana] gi 75273359 sp Q9LID1.1 FBK54_ARATH RecName: Full=F-box/kelch-repeat protein At3g13680<br>gi 9294013 dbj BAB01916.1 unnamed protein product [Arabidopsis thaliana] gi 332641875 gb AEE75396.1 F-box/kelch-repeat protein [Arabidopsis thaliana]                                                                                                                                                                                                                                                                                                                                                                                                                                                                                                                                                                                                                                                                                  | 386 | 400 | 3.00E-91  | 103.6 | 52.6 | 68.4 | F-box family protein                                                                                             | gbpln | Arabidopsis lyrata   | AT3G13680.1   Symbols:   F-box and associated interaction domains-containing protein   chr3:4477534-4478721 REVERSE LENGTH=395             | 386 | 395 | 9.00E-92  | 102.3 | 50.3 | 67.1 |
| Rsa1.0_00498.1.g14971.t1 | refNP_187980.1   F-box/kelch-repeat protein [Arabidopsis thaliana] gi 75273359 sp Q9LID1.1 FBK54_ARATH RecName: Full=F-box/kelch-repeat protein At3g13680<br>gi 9294013 dbj BAB01916.1 unnamed protein product [Arabidopsis thaliana] gi 332641875 gb AEE75396.1 F-box/kelch-repeat protein [Arabidopsis thaliana]                                                                                                                                                                                                                                                                                                                                                                                                                                                                                                                                                                                                                                                                                                                                                                                                                                                    | 296 | 395 | 3.00E-70  | 133.4 | 53.7 | 66.6 | F-box/kelch-repeat protein                                                                                       | gbpln | Arabidopsis thaliana | AT3G13680.1   Symbols:   F-box and associated interaction domains-containing protein   chr3:4477534-4478721 REVERSE LENGTH=395             | 296 | 395 | 8.00E-73  | 133.4 | 53.7 | 66.6 |

|                          |                                                                                                                                                                                                                                                                                                                                                                                                                                                                |      |      |           |       |      |      |                                                                   |       |                      |                                                                                                                                                                                                                                                                                                                                                                 |      |      |           |       |      |      |
|--------------------------|----------------------------------------------------------------------------------------------------------------------------------------------------------------------------------------------------------------------------------------------------------------------------------------------------------------------------------------------------------------------------------------------------------------------------------------------------------------|------|------|-----------|-------|------|------|-------------------------------------------------------------------|-------|----------------------|-----------------------------------------------------------------------------------------------------------------------------------------------------------------------------------------------------------------------------------------------------------------------------------------------------------------------------------------------------------------|------|------|-----------|-------|------|------|
| Rsa1.0_00498.1.g14972.t1 | ref XP_002868615.1  hypothetical protein ARALYDRAFT_916104 [Arabidopsis lyrata subsp. lyrata] gi 297314451 gb EFH44874.1  hypothetical protein ARALYDRAFT_916104 [Arabidopsis lyrata subsp. lyrata]                                                                                                                                                                                                                                                            | 163  | 254  | 4.00E-16  | 155.8 | 30.7 | 41.7 | hypothetical protein ARALYDRAFT_916104                            | gbpln | Arabidopsis lyrata   | AT5G41530.1   Symbols:   BEST Arabidopsis thaliana protein match is: DNA-binding storekeeper protein-related (TAIR:AT5G14280.1); Has 1807 Blast hits to 1807 proteins in 277 species: Archae - 0; Bacteria - 0; Metazoa - 736; Fungi - 347; Plants - 385; Viruses - 0; Other Eukaryotes - 339 (source: NCBI BLINK).   chr5:16611660-16612088 FORWARD LENGTH=142 | 163  | 142  | 4.00E-15  | 87.1  | 23.9 | 28.8 |
| Rsa1.0_00498.1.g14973.t9 | ref NP_181175.1  DNA-binding storekeeper protein-related transcriptional regulator [Arabidopsis thaliana] gi 4510343 gb AAD21432.1  hypothetical protein [Arabidopsis thaliana] gi 55740599 gb AAV63892.1  hypothetical protein At2g36340 [Arabidopsis thaliana] gi 225898571 dbj BAH30416.1  hypothetical protein [Arabidopsis thaliana] gi 330254141 gb AEC09235.1  DNA-binding storekeeper protein-related transcriptional regulator [Arabidopsis thaliana] | 463  | 414  | 4.00E-66  | 89.4  | 40.8 | 54.0 | DNA-binding storekeeper protein-related transcriptional regulator | gbpln | Arabidopsis thaliana | AT2G36340.1   Symbols:   DNA-binding storekeeper protein-related transcriptional regulator   chr2:15235858-15237489 FORWARD LENGTH=414                                                                                                                                                                                                                          | 463  | 414  | 9.00E-69  | 89.4  | 40.8 | 54.0 |
| Rsa1.0_00498.1.g14974.t1 | ref XP_002879607.1  predicted protein [Arabidopsis lyrata subsp. lyrata] gi 297325446 gb EFH55866.1  predicted protein [Arabidopsis lyrata subsp. lyrata]                                                                                                                                                                                                                                                                                                      | 924  | 941  | 0         | 101.8 | 76.1 | 83.4 | predicted protein                                                 | gbpln | Arabidopsis lyrata   | AT2G36370.1   Symbols:   ubiquitin-protein ligases   chr2:15247894-15252800 FORWARD LENGTH=898                                                                                                                                                                                                                                                                  | 924  | 898  | 0         | 97.2  | 72.3 | 80.1 |
| Rsa1.0_00498.1.g14975.t1 | dbj BAM77406.1  clubroot disease resistance protein [Brassica rapa]                                                                                                                                                                                                                                                                                                                                                                                            | 1087 | 1224 | 0         | 112.6 | 57.9 | 71.6 | clubroot disease resistance protein                               | gbpln | Brassica rapa        | AT3G44480.1   Symbols: RPP1, cog1   Disease resistance protein (TIR-NBS-LRR class) family   chr3:16090878-16096041 REVERSE LENGTH=1194                                                                                                                                                                                                                          | 1087 | 1194 | 0         | 109.8 | 51.7 | 67.8 |
| Rsa1.0_00498.1.g14976.t1 | ref XP_002879608.1  ATPDR6/PDR6 [Arabidopsis lyrata subsp. lyrata] gi 297325447 gb EFH55867.1  ATPDR6/PDR6 [Arabidopsis lyrata subsp. lyrata]                                                                                                                                                                                                                                                                                                                  | 1451 | 1452 | 0         | 100.1 | 91.2 | 96.2 | ATPDR6/PDR6                                                       | gbpln | Arabidopsis lyrata   | AT2G36380.1   Symbols: PDR6, ATPDR6   pleiotropic drug resistance 6   chr2:15257563-15263627 FORWARD LENGTH=1453                                                                                                                                                                                                                                                | 1451 | 1453 | 0         | 100.1 | 90.2 | 95.5 |
| Rsa1.0_00498.1.g14977.t1 | dbj BAC42083.1  unknown protein [Arabidopsis thaliana]                                                                                                                                                                                                                                                                                                                                                                                                         | 390  | 398  | 1.00E-148 | 102.1 | 83.3 | 87.7 | unknown protein                                                   | gbpln | Arabidopsis thaliana | AT2G36400.1   Symbols: AtGRF3, GRF3   growth-regulating factor 3   chr2:15270300-15272617 REVERSE LENGTH=398                                                                                                                                                                                                                                                    | 390  | 398  | 1.00E-144 | 102.1 | 82.6 | 87.2 |
| Rsa1.0_00498.1.g14978.t1 | #                                                                                                                                                                                                                                                                                                                                                                                                                                                              | #    | #    | #         | #     | #    | #    | -                                                                 | ----  | ----                 | #                                                                                                                                                                                                                                                                                                                                                               | #    | #    | #         | #     | #    |      |
| Rsa1.0_00498.1.g14979.t1 | gb EOA39854.1  hypothetical protein CARUB_v10008528mg [Capsella rubella]                                                                                                                                                                                                                                                                                                                                                                                       | 91   | 659  | 2.00E-20  | 724.2 | 61.5 | 64.8 | hypothetical protein CARUB_v10008528mg                            | gbpln | Capsella rubella     | AT1G48980.1   Symbols: QWRF2   Family of unknown function (DUF566)   chr1:18470282-18473463 FORWARD LENGTH=659                                                                                                                                                                                                                                                  | 91   | 659  | 2.00E-21  | 724.2 | 59.3 | 62.6 |
| Rsa1.0_00498.1.g14980.t1 | gb EOA28004.1  hypothetical protein CARUB_v10024181mg [Capsella rubella]                                                                                                                                                                                                                                                                                                                                                                                       | 174  | 170  | 1.00E-74  | 97.7  | 83.3 | 88.5 | hypothetical protein CARUB_v10024181mg                            | gbpln | Capsella rubella     | AT2G36410.2   Symbols:   Family of unknown function (DUF662)   chr2:15279041-15280270 FORWARD LENGTH=192                                                                                                                                                                                                                                                        | 174  | 192  | 3.00E-64  | 110.3 | 73.0 | 83.9 |
| Rsa1.0_00498.1.g14981.t1 | ref XP_002879610.1  hypothetical protein ARALYDRAFT_482617 [Arabidopsis lyrata subsp. lyrata] gi 297325449 gb EFH55869.1  hypothetical protein ARALYDRAFT_482617 [Arabidopsis lyrata subsp. lyrata]                                                                                                                                                                                                                                                            | 186  | 191  | 9.00E-82  | 102.7 | 88.7 | 91.4 | hypothetical protein ARALYDRAFT_482617                            | gbpln | Arabidopsis lyrata   | AT2G36410.1   Symbols:   Family of unknown function (DUF662)   chr2:15279041-15280270 FORWARD LENGTH=195                                                                                                                                                                                                                                                        | 186  | 195  | 1.00E-83  | 104.8 | 88.2 | 90.9 |
| Rsa1.0_00498.1.g14982.t1 | #                                                                                                                                                                                                                                                                                                                                                                                                                                                              | #    | #    | #         | #     | #    | #    | -                                                                 | ----  | ----                 | #                                                                                                                                                                                                                                                                                                                                                               | #    | #    | #         | #     | #    |      |
| Rsa1.0_00499.1.g14983.t1 | gb AAF79618.1 AC027665_19 F5M15.26 [Arabidopsis thaliana]                                                                                                                                                                                                                                                                                                                                                                                                      | 809  | 1838 | 0         | 227.2 | 43.3 | 55.7 | F5M15.26                                                          | gbpln | Arabidopsis thaliana | #                                                                                                                                                                                                                                                                                                                                                               | #    | #    | #         | #     | #    |      |
| Rsa1.0_00499.1.g14984.t2 | gb AAC28207.1  T24H24.13 gene product [Arabidopsis thaliana] gi 7267161 emb CAB77873.1  putative transposon protein [Arabidopsis thaliana]                                                                                                                                                                                                                                                                                                                     | 418  | 681  | 1.00E-14  | 162.9 | 12.4 | 17.7 | T24H24.13 gene product                                            | gbpln | Arabidopsis thaliana | #                                                                                                                                                                                                                                                                                                                                                               | #    | #    | #         | #     | #    |      |
| Rsa1.0_00499.1.g14985.t3 | gb EOA37510.1  hypothetical protein CARUB_v10011684mg, partial [Capsella rubella]                                                                                                                                                                                                                                                                                                                                                                              | 722  | 273  | 1.00E-26  | 37.8  | 7.9  | 13.2 | hypothetical protein CARUB_v10011684mg, partial                   | gbpln | Capsella rubella     | AT5G36228.1   Symbols:   nucleic acid binding/zinc ion binding   chr5:14271691-14272776 FORWARD LENGTH=361                                                                                                                                                                                                                                                      | 722  | 361  | 1.00E-15  | 50.0  | 6.5  | 10.9 |
| Rsa1.0_00499.1.g14986.t1 | gb ELR54187.1  hypothetical protein M91_18163 [Bos grunniens mutus]                                                                                                                                                                                                                                                                                                                                                                                            | 564  | 753  | 4.00E-19  | 133.5 | 8.9  | 14.7 | hypothetical protein M91_18163                                    | gbmam | Bos grunniens        | #                                                                                                                                                                                                                                                                                                                                                               | #    | #    | #         | #     | #    |      |
| Rsa1.0_00499.1.g14987.t1 | gb AAF69169.1 AC007915_21 F27F5.21 [Arabidopsis thaliana]                                                                                                                                                                                                                                                                                                                                                                                                      | 1093 | 1023 | 0         | 93.6  | 33.4 | 43.8 | F27F5.21                                                          | gbpln | Arabidopsis thaliana | AT1G43760.1   Symbols:   DNase I-like superfamily protein   chr1:16528880-16531065 REVERSE LENGTH=626                                                                                                                                                                                                                                                           | 1093 | 626  | 2.00E-25  | 57.3  | 6.0  | 9.3  |
| Rsa1.0_00499.1.g14988.t1 | #                                                                                                                                                                                                                                                                                                                                                                                                                                                              | #    | #    | #         | #     | #    | #    | -                                                                 | ----  | ----                 | #                                                                                                                                                                                                                                                                                                                                                               | #    | #    | #         | #     | #    |      |



|                          |                                                                                                                                                                                                     |      |      |           |       |      |      |                                                                                |       |                      |                                                                                                                              |      |     |           |       |      |      |
|--------------------------|-----------------------------------------------------------------------------------------------------------------------------------------------------------------------------------------------------|------|------|-----------|-------|------|------|--------------------------------------------------------------------------------|-------|----------------------|------------------------------------------------------------------------------------------------------------------------------|------|-----|-----------|-------|------|------|
| Rsa1.0_00499.1.g14989.t2 | ref[XP_002872056.1] hypothetical protein ARALYDRAFT_910353 [Arabidopsis lyrata subsp. lyrata] gi 297317893 gb EFH48315.1                                                                            | 168  | 588  | 4.00E-16  | 350.0 | 21.4 | 22.6 | hypothetical protein ARALYDRAFT_910353                                         | gbpln | Arabidopsis lyrata   | AT5G23400.1   Symbols:   Leucine-rich repeat (LRR) family protein   chr5:7880603-7882372 FORWARD LENGTH=589                  | 168  | 589 | 2.00E-18  | 350.6 | 21.4 | 22.6 |
| Rsa1.0_00499.1.g14990.t1 | gb ABD65062.1  hypothetical protein 27.t00126 [Brassica oleracea]                                                                                                                                   | 578  | 578  | 1.00E-144 | 100.0 | 47.1 | 63.3 | hypothetical protein 27.t00126                                                 | gbpln | Brassica oleracea    | AT2G15420.1   Symbols:   myosin heavy chain-related   chr2:6723948-6728183 REVERSE LENGTH=957                                | 578  | 957 | 4.00E-15  | 165.6 | 6.9  | 10.6 |
| Rsa1.0_00499.1.g14991.t1 | gb AAD30632.1 AC006085.5 Hypothetical protein [Arabidopsis thaliana]                                                                                                                                | 743  | 1295 | 6.00E-60  | 174.3 | 22.3 | 33.6 | Hypothetical protein                                                           | gbpln | Arabidopsis thaliana | #                                                                                                                            | #    | #   | #         | #     | #    | #    |
| Rsa1.0_00499.1.g14992.t1 | emb CAB39638.1  RNA-directed DNA polymerase-like protein [Arabidopsis thaliana] gi 7267666 emb CAB78094.1  RNA-directed DNA polymerase-like protein [Arabidopsis thaliana]                          | 800  | 1274 | 0         | 159.3 | 48.1 | 63.4 | RNA-directed DNA polymerase-like protein                                       | gbpln | Arabidopsis thaliana | AT4G29090.1   Symbols:   Ribonuclease H-like superfamily protein   chr4:14333528-14335255 FORWARD LENGTH=575                 | 800  | 575 | 1.00E-55  | 71.9  | 19.1 | 32.3 |
| Rsa1.0_00499.1.g14993.t1 | #                                                                                                                                                                                                   | #    | #    | #         | #     | #    | #    | -                                                                              | ----  | ----                 | #                                                                                                                            | #    | #   | #         | #     | #    | #    |
| Rsa1.0_00499.1.g14994.t1 | gb EMJ11389.1  hypothetical protein PRUPE_ppa017790mg [Prunus persica]                                                                                                                              | 897  | 1485 | 1.00E-148 | 165.6 | 34.2 | 47.4 | hypothetical protein PRUPE_ppa017790mg                                         | gbpln | Prunus persica       | AT1G47350.1   Symbols:   F-box associated ubiquitination effector family protein   chr1:17358447-17360722 REVERSE LENGTH=528 | 897  | 528 | 3.00E-30  | 58.9  | 7.6  | 10.0 |
| Rsa1.0_00500.1.g14995.t1 | #                                                                                                                                                                                                   | #    | #    | #         | #     | #    | #    | -                                                                              | ----  | ----                 | #                                                                                                                            | #    | #   | #         | #     | #    | #    |
| Rsa1.0_00500.1.g14996.t1 | ref[XP_002880160.1] hypothetical protein ARALYDRAFT_483647 [Arabidopsis lyrata subsp. lyrata] gi 297325999 gb EFH56419.1  hypothetical protein ARALYDRAFT_483647 [Arabidopsis lyrata subsp. lyrata] | 227  | 239  | 2.00E-72  | 105.3 | 62.6 | 70.9 | hypothetical protein ARALYDRAFT_483647                                         | gbpln | Arabidopsis lyrata   | AT2G45140.1   Symbols:   PVA12   plant VAP homolog 12   chr2:18611029-18612971 FORWARD LENGTH=239                            | 227  | 239 | 3.00E-73  | 105.3 | 61.2 | 70.9 |
| Rsa1.0_00500.1.g14997.t1 | ref[XP_002880157.1] hypothetical protein ARALYDRAFT_483645 [Arabidopsis lyrata subsp. lyrata] gi 297325996 gb EFH56416.1  hypothetical protein ARALYDRAFT_483645 [Arabidopsis lyrata subsp. lyrata] | 303  | 325  | 1.00E-111 | 107.3 | 78.9 | 86.1 | hypothetical protein ARALYDRAFT_483645                                         | gbpln | Arabidopsis lyrata   | AT2G45120.1   Symbols:   C2H2-like zinc finger protein   chr2:18603680-18604624 FORWARD LENGTH=314                           | 303  | 314 | 1.00E-100 | 103.6 | 72.9 | 81.2 |
| Rsa1.0_00500.1.g14998.t1 | ref[XP_002881717.1] transducin family protein [Arabidopsis lyrata subsp. lyrata] gi 297327556 gb EFH57976.1  transducin family protein [Arabidopsis lyrata subsp. lyrata]                           | 712  | 757  | 0         | 106.3 | 79.2 | 86.5 | transducin family protein                                                      | gbpln | Arabidopsis lyrata   | AT2G40360.1   Symbols:   Transducin/WD40 repeat-like superfamily protein   chr2:16853123-16856635 REVERSE LENGTH=753         | 712  | 753 | 0         | 105.8 | 77.7 | 85.7 |
| Rsa1.0_00500.1.g14999.t2 | gb AAC28189.1  contains similarity to Arabidopsis thaliana retrotransposon Athila (GB:X81801) [Arabidopsis thaliana]                                                                                | 675  | 940  | 5.00E-41  | 139.3 | 15.4 | 21.9 | contains similarity to Arabidopsis thaliana retrotransposon Athila (GB:X81801) | gbpln | Arabidopsis thaliana | #                                                                                                                            | #    | #   | #         | #     | #    | #    |
| Rsa1.0_00500.1.g15000.t1 | ref[XP_002886254.1] kinase family protein [Arabidopsis lyrata subsp. lyrata] gi 297332094 gb EFH62513.1  kinase family protein [Arabidopsis lyrata subsp. lyrata]                                   | 106  | 392  | 1.00E-28  | 369.8 | 55.7 | 58.5 | kinase family protein                                                          | gbpln | Arabidopsis lyrata   | AT2G18890.1   Symbols:   Protein kinase superfamily protein   chr2:8184027-8186685 FORWARD LENGTH=392                        | 106  | 392 | 2.00E-30  | 369.8 | 53.8 | 57.5 |
| Rsa1.0_00500.1.g15001.t1 | ref[XP_002880155.1] CYCP3_1 [Arabidopsis lyrata subsp. lyrata] gi 297325994 gb EFH56414.1  CYCP3_1 [Arabidopsis lyrata subsp. lyrata]                                                               | 224  | 222  | 1.00E-117 | 99.1  | 92.4 | 94.6 | CYCP3_1                                                                        | gbpln | Arabidopsis lyrata   | AT2G45080.1   Symbols:   cypc3.1   cyclin p3.1   chr2:18591688-18592443 FORWARD LENGTH=222                                   | 224  | 222 | 1.00E-119 | 99.1  | 91.5 | 94.6 |
| Rsa1.0_00500.1.g15002.t1 | #                                                                                                                                                                                                   | #    | #    | #         | #     | #    | #    | -                                                                              | ----  | ----                 | #                                                                                                                            | #    | #   | #         | #     | #    | #    |
| Rsa1.0_00500.1.g15003.t1 | gb EOA27694.1  hypothetical protein CARUB_v10023846mg [Capsella rubella]                                                                                                                            | 147  | 271  | 5.00E-29  | 184.4 | 42.2 | 44.2 | hypothetical protein CARUB_v10023846mg                                         | gbpln | Capsella rubella     | AT2G45060.1   Symbols:   Uncharacterised conserved protein UCP022280   chr2:18584674-18586688 REVERSE LENGTH=272             | 147  | 272 | 1.00E-30  | 185.0 | 40.8 | 43.5 |
| Rsa1.0_00500.1.g15004.t1 | ref[XP_002880148.1] hypothetical protein ARALYDRAFT_483623 [Arabidopsis lyrata subsp. lyrata] gi 297325987 gb EFH56407.1  hypothetical protein ARALYDRAFT_483623 [Arabidopsis lyrata subsp. lyrata] | 277  | 290  | 7.00E-99  | 104.7 | 74.4 | 82.7 | hypothetical protein ARALYDRAFT_483623                                         | gbpln | Arabidopsis lyrata   | AT2G44940.1   Symbols:   Integrase-type DNA-binding superfamily protein   chr2:18537294-18538181 FORWARD LENGTH=295          | 277  | 295 | 3.00E-92  | 106.5 | 69.7 | 80.1 |
| Rsa1.0_00500.1.g15005.t1 | #                                                                                                                                                                                                   | #    | #    | #         | #     | #    | #    | -                                                                              | ----  | ----                 | #                                                                                                                            | #    | #   | #         | #     | #    | #    |
| Rsa1.0_00500.1.g15006.t1 | gb AAC33961.1  contains similarity to reverse transcriptase (Pfam: rvt.hmm, score: 42.57) [Arabidopsis thaliana]                                                                                    | 1299 | 1662 | 1.00E-88  | 127.9 | 15.2 | 23.8 | contains similarity to reverse transcriptase (Pfam: rvt.hmm, score: 42.57)     | gbpln | Arabidopsis thaliana | AT1G43760.1   Symbols:   DNase I-like superfamily protein   chr1:16528880-16531065 REVERSE LENGTH=626                        | 1299 | 626 | 3.00E-35  | 48.2  | 8.6  | 14.0 |
| Rsa1.0_00500.1.g15007.t1 | gb EOA26609.1  hypothetical protein CARUB_v10022668mg [Capsella rubella]                                                                                                                            | 838  | 791  | 0         | 94.4  | 79.5 | 84.8 | hypothetical protein CARUB_v10022668mg                                         | gbpln | Capsella rubella     | AT3G60320.1   Symbols:   Protein of unknown function (DUF630 and DUF632)   chr3:22292073-22295228 REVERSE LENGTH=796         | 838  | 796 | 0         | 95.0  | 72.7 | 81.6 |

|                          |                                                                                                                                                                                                                                                                                                                                                                                                                     |      |      |           |        |      |      |                                                     |       |                      |                                                                                                                               |      |      |           |        |      |      |
|--------------------------|---------------------------------------------------------------------------------------------------------------------------------------------------------------------------------------------------------------------------------------------------------------------------------------------------------------------------------------------------------------------------------------------------------------------|------|------|-----------|--------|------|------|-----------------------------------------------------|-------|----------------------|-------------------------------------------------------------------------------------------------------------------------------|------|------|-----------|--------|------|------|
| Rsa1.0_00500.1.g15008.t1 | gb EOA26625.1  hypothetical protein CARUB_v10022689mg [Capsella rubella] gi 482562436 gb EOA26626.1  hypothetical protein CARUB_v10022689mg [Capsella rubella]                                                                                                                                                                                                                                                      | 63   | 767  | 6.00E-15  | 1217.5 | 66.7 | 74.6 | hypothetical protein CARUB_v10022689mg              | gbpln | Capsella rubella     | AT2G44830.1   Symbols:   Protein kinase superfamily protein   chr2:18490398-18492779 FORWARD LENGTH=765                       | 63   | 765  | 1.00E-17  | 1214.3 | 66.7 | 74.6 |
| Rsa1.0_00500.1.g15009.t1 | gb AAL65634.1  transaldolase-like protein [Arabidopsis thaliana] gi 22497334 gb AAL65636.1  transaldolase-like protein [Arabidopsis thaliana]                                                                                                                                                                                                                                                                       | 69   | 375  | 6.00E-12  | 543.5  | 68.1 | 76.8 | transaldolase-like protein                          | gbpln | Arabidopsis thaliana | AT1G12230.1   Symbols:   Aldolase superfamily protein   chr1:4148050-4150708 FORWARD LENGTH=405                               | 69   | 405  | 4.00E-14  | 587.0  | 66.7 | 76.8 |
| Rsa1.0_00500.1.g15010.t1 | gb AAB82639.1  putative non-LTR retroelement reverse transcriptase [Arabidopsis thaliana]                                                                                                                                                                                                                                                                                                                           | 1860 | 1374 | 0         | 73.9   | 41.1 | 55.2 | putative non-LTR retroelement reverse transcriptase | gbpln | Arabidopsis thaliana | AT4G29090.1   Symbols:   Ribonuclease H-like superfamily protein   chr4:14333528-14335255 FORWARD LENGTH=575                  | 1860 | 575  | 1.00E-172 | 30.9   | 14.6 | 21.4 |
| Rsa1.0_00500.1.g15011.t2 | gb EOA27938.1  hypothetical protein CARUB_v10024107mg [Capsella rubella]                                                                                                                                                                                                                                                                                                                                            | 216  | 195  | 1.00E-56  | 90.3   | 71.8 | 79.6 | hypothetical protein CARUB_v10024107mg              | gbpln | Capsella rubella     | AT2G44790.1   Symbols: UCC2   uclacyanin 2   chr2:18462182-18463232 REVERSE LENGTH=202                                        | 216  | 202  | 1.00E-43  | 93.5   | 60.2 | 69.9 |
| Rsa1.0_00500.1.g15012.t1 | ref NP_566027.1  ELMO/CED-12 domain-containing protein [Arabidopsis thaliana] gi 20197031 gb AAC27479.2  expressed protein [Arabidopsis thaliana] gi 21593197 gb AAM65146.1  unknown [Arabidopsis thaliana] gi 330255372 gb AEC10466.1  ELMO/CED-12 domain-containing protein [Arabidopsis thaliana]                                                                                                                | 282  | 266  | 1.00E-141 | 94.3   | 86.9 | 92.2 | ELMO/CED-12 domain-containing protein               | gbpln | Arabidopsis thaliana | AT2G44770.1   Symbols:   ELMO/CED-12 family protein   chr2:18457817-18459886 FORWARD LENGTH=266                               | 282  | 266  | 1.00E-143 | 94.3   | 86.9 | 92.2 |
| Rsa1.0_00500.1.g15013.t1 | ref NP_181961.1  C3HC4-type RING finger-containing protein [Arabidopsis thaliana] gi 3128178 gb AAC16082.1  hypothetical protein [Arabidopsis thaliana] gi 18491237 gb AAL69443.1  At2g44330/F411.14 [Arabidopsis thaliana] gi 70905065 gb AAZ14058.1  At2g44330 [Arabidopsis thaliana] gi 330255314 gb AEC10408.1  C3HC4-type RING finger-containing protein [Arabidopsis thaliana]                                | 175  | 180  | 2.00E-54  | 102.9  | 68.6 | 80.0 | C3HC4-type RING finger-containing protein           | gbpln | Arabidopsis thaliana | AT2G44330.1   Symbols:   RING/U-box superfamily protein   chr2:18310621-18311163 FORWARD LENGTH=180                           | 175  | 180  | 8.00E-57  | 102.9  | 68.6 | 80.0 |
| Rsa1.0_00500.1.g15014.t1 | #                                                                                                                                                                                                                                                                                                                                                                                                                   | #    | #    | #         | #      | #    | #    | -                                                   | ----  | ----                 | #                                                                                                                             | #    | #    | #         | #      | #    |      |
| Rsa1.0_00501.1.g15015.t1 | gb AAB82639.1  putative non-LTR retroelement reverse transcriptase [Arabidopsis thaliana]                                                                                                                                                                                                                                                                                                                           | 578  | 1374 | 1.00E-143 | 237.7  | 44.3 | 64.0 | putative non-LTR retroelement reverse transcriptase | gbpln | Arabidopsis thaliana | AT1G43760.1   Symbols:   DNase I-like superfamily protein   chr1:16528880-16531065 REVERSE LENGTH=626                         | 578  | 626  | 7.00E-36  | 108.3  | 17.3 | 26.6 |
| Rsa1.0_00501.1.g15016.t1 | ref XP_002886713.1  CYP79C2 [Arabidopsis lyrata subsp. lyrata] gi 297332554 gb EFH62972.1  CYP79C2 [Arabidopsis lyrata subsp. lyrata]                                                                                                                                                                                                                                                                               | 646  | 528  | 0         | 81.7   | 63.2 | 70.9 | CYP79C2                                             | gbpln | Arabidopsis lyrata   | AT1G58260.1   Symbols: CYP79C2, CYP79C3P   cytochrome p450 79c2   chr1:21605752-21607995 FORWARD LENGTH=530                   | 646  | 530  | 0         | 82.0   | 62.4 | 70.6 |
| Rsa1.0_00501.1.g15017.t1 | gb AAD17414.1  copia-like retroelement pol polyprotein [Arabidopsis thaliana]                                                                                                                                                                                                                                                                                                                                       | 1286 | 1166 | 0         | 90.7   | 51.6 | 65.1 | copia-like retroelement pol polyprotein             | gbpln | Arabidopsis thaliana | AT4G23160.1   Symbols: CRK8   cysteine-rich RLK (RECEPTOR-like protein kinase) 8   chr4:12129485-12134086 FORWARD LENGTH=1262 | 1286 | 1262 | 2.00E-86  | 98.1   | 14.1 | 22.2 |
| Rsa1.0_00501.1.g15018.t2 | ref XP_002875315.1  glycosyl hydrolase family protein 27 [Arabidopsis lyrata subsp. lyrata] gi 297321153 gb EFH51574.1  glycosyl hydrolase family protein 27 [Arabidopsis lyrata subsp. lyrata]                                                                                                                                                                                                                     | 641  | 651  | 0         | 101.6  | 86.9 | 93.0 | glycosyl hydrolase family protein 27                | gbpln | Arabidopsis lyrata   | AT3G26380.1   Symbols:   Melibiase family protein   chr3:9660140-9663145 FORWARD LENGTH=647                                   | 641  | 647  | 0         | 100.9  | 84.9 | 91.4 |
| Rsa1.0_00501.1.g15019.t1 | ref NP_566792.1  methyltransferase / nucleic acid binding protein [Arabidopsis thaliana] gi 13430750 gb AAK25997.1 AF360287.1 unknown protein [Arabidopsis thaliana] gi 9294300 db BAB02202.1  unnamed protein product [Arabidopsis thaliana] gi 15293219 gb AAK93720.1  unknown protein [Arabidopsis thaliana] gi 332643633 gb AEE77154.1  methyltransferase / nucleic acid binding protein [Arabidopsis thaliana] | 474  | 477  | 0         | 100.6  | 92.4 | 96.6 | methyltransferase / nucleic acid binding protein    | gbpln | Arabidopsis thaliana | AT3G26410.1   Symbols: TRM11, AtTRM11   methyltransferases;nucleic acid binding   chr3:9669508-9671273 REVERSE LENGTH=477     | 474  | 477  | 0         | 100.6  | 92.4 | 96.6 |

|                          |                                                                                                                                                                                                                                                                                                                                                                                                                                                                                                                                                                                                                                                                                                                                                                                                                                                                                                                                                                                                                                                                                                                                                                                                                                                                                                                                                                                                                                                                                                                                                                                                                                                                                                                                                                                                                                                                                                                                                                                                                                                                                                                                                                                                                                                                                                                                                                                                                                                                                                                                                                |     |     |          |       |      |      |                                                                           |             |                      |                                                                                                                                                                     |     |     |          |       |      |      |
|--------------------------|----------------------------------------------------------------------------------------------------------------------------------------------------------------------------------------------------------------------------------------------------------------------------------------------------------------------------------------------------------------------------------------------------------------------------------------------------------------------------------------------------------------------------------------------------------------------------------------------------------------------------------------------------------------------------------------------------------------------------------------------------------------------------------------------------------------------------------------------------------------------------------------------------------------------------------------------------------------------------------------------------------------------------------------------------------------------------------------------------------------------------------------------------------------------------------------------------------------------------------------------------------------------------------------------------------------------------------------------------------------------------------------------------------------------------------------------------------------------------------------------------------------------------------------------------------------------------------------------------------------------------------------------------------------------------------------------------------------------------------------------------------------------------------------------------------------------------------------------------------------------------------------------------------------------------------------------------------------------------------------------------------------------------------------------------------------------------------------------------------------------------------------------------------------------------------------------------------------------------------------------------------------------------------------------------------------------------------------------------------------------------------------------------------------------------------------------------------------------------------------------------------------------------------------------------------------|-----|-----|----------|-------|------|------|---------------------------------------------------------------------------|-------------|----------------------|---------------------------------------------------------------------------------------------------------------------------------------------------------------------|-----|-----|----------|-------|------|------|
| Rsa1.0_00501.1.g15021.t1 | <p>ref NP_189273.1  RNA recognition motif and CCHC-type zinc finger domain-containing protein [Arabidopsis thaliana] gi 15983477 gb AAL11606.1 AF424613.1 AT3g26420/F20C19_14 [Arabidopsis thaliana] gi 9294901 dbj BAE02203.1  unnamed protein product [Arabidopsis thaliana] gi 15451066 gb AAK98904.1  Unknown protein [Arabidopsis thaliana] gi 18377412 gb AAL66872.1  unknown protein [Arabidopsis thaliana] gi 62320797 dbj BAD93728.1  RNA-binding protein [Arabidopsis thaliana] gi 110742443 dbj BAE99140.1  putative RNA-binding protein [Arabidopsis thaliana] gi 332643635 gb AEE77156.1  RNA recognition motif and CCHC-type zinc finger domain-containing protein [Arabidopsis thaliana]</p> <p>ref NP_001168670.1  uncharacterized protein LOC100382458 [Zea mays] gi 223944871 gb ACN26519.1  unknown [Zea mays] gi 223950089 gb ACN29128.1  unknown [Zea mays] gi 224030281 gb ACN34216.1  unknown [Zea mays] gi 413924555 gb AFW64487.1  hypothetical protein ZEAMMB73_909642 [Zea mays] gi 413924556 gb AFW64488.1  hypothetical protein ZEAMMB73_909642 [Zea mays] gi 413924557 gb AFW64489.1  hypothetical protein ZEAMMB73_909642 [Zea mays] gi 413924558 gb AFW64490.1  hypothetical protein ZEAMMB73_909642 [Zea mays] ref NP_001049113.1  Os03g0171600 [Oryza sativa Japonica Group] gi 108706423 gb ABF94218.1  kelch repeat-containing F-box family protein, putative, expressed [Oryza sativa Japonica Group] gi 108706424 gb ABF94219.1  kelch repeat-containing F-box family protein, putative, expressed [Oryza sativa Japonica Group] gi 108706425 gb ABF94220.1  kelch repeat-containing F-box family protein, putative, expressed [Oryza sativa Japonica Group] gi 113547584 dbj BAF11027.1  Os03g0171600 [Oryza sativa Japonica Group] gi 125585086 gb EAZ25750.1  hypothetical protein OsJ_09589 [Oryza sativa Japonica Group] gi 215692448 dbj BAG87868.1  unnamed protein product [Oryza sativa Japonica Group] gi 215704271 dbj BAG93111.1  unnamed protein product [Oryza sativa Japonica Group] ref NP_189281.2  plant intracellular ras group-related LRR 2 [Arabidopsis thaliana] gi 9293927 dbj BAB01830.1  leucine-rich-repeat protein-like [Arabidopsis thaliana] gi 26453000 dbj BAC43576.1  unknown protein [Arabidopsis thaliana] gi 29824149 gb AAP04035.1  unknown protein [Arabidopsis thaliana] gi 57868146 gb AAW57411.1  plant intracellular Ras-group-related LRR protein 2 [Arabidopsis thaliana] gi 332643646 gb AEE77167.1  plant intracellular ras group-related LRR 2 [Arabidopsis thaliana]</p> | 230 | 245 | 7.00E-86 | 106.5 | 83.9 | 88.3 | RNA recognition motif and CCHC-type zinc finger domain-containing protein | gbpln       | Arabidopsis thaliana | AT3G26420.1   Symbols: ATRZ-1A   RNA-binding (RRM/RBD/RNP motifs) family protein with retrovirus zinc finger-like domain   chr:3:9671953-9673055 FORWARD LENGTH=245 | 230 | 245 | 2.00E-88 | 106.5 | 83.9 | 88.3 |
| Rsa1.0_00501.1.g15021.t1 | <p>ref NP_001168670.1  uncharacterized protein LOC100382458 [Zea mays] gi 223944871 gb ACN26519.1  unknown [Zea mays] gi 223950089 gb ACN29128.1  unknown [Zea mays] gi 224030281 gb ACN34216.1  unknown [Zea mays] gi 413924555 gb AFW64487.1  hypothetical protein ZEAMMB73_909642 [Zea mays] gi 413924556 gb AFW64488.1  hypothetical protein ZEAMMB73_909642 [Zea mays] gi 413924557 gb AFW64489.1  hypothetical protein ZEAMMB73_909642 [Zea mays] gi 413924558 gb AFW64490.1  hypothetical protein ZEAMMB73_909642 [Zea mays] ref NP_001049113.1  Os03g0171600 [Oryza sativa Japonica Group] gi 108706423 gb ABF94218.1  kelch repeat-containing F-box family protein, putative, expressed [Oryza sativa Japonica Group] gi 108706424 gb ABF94219.1  kelch repeat-containing F-box family protein, putative, expressed [Oryza sativa Japonica Group] gi 108706425 gb ABF94220.1  kelch repeat-containing F-box family protein, putative, expressed [Oryza sativa Japonica Group] gi 113547584 dbj BAF11027.1  Os03g0171600 [Oryza sativa Japonica Group] gi 125585086 gb EAZ25750.1  hypothetical protein OsJ_09589 [Oryza sativa Japonica Group] gi 215692448 dbj BAG87868.1  unnamed protein product [Oryza sativa Japonica Group] gi 215704271 dbj BAG93111.1  unnamed protein product [Oryza sativa Japonica Group] ref NP_189281.2  plant intracellular ras group-related LRR 2 [Arabidopsis thaliana] gi 9293927 dbj BAB01830.1  leucine-rich-repeat protein-like [Arabidopsis thaliana] gi 26453000 dbj BAC43576.1  unknown protein [Arabidopsis thaliana] gi 29824149 gb AAP04035.1  unknown protein [Arabidopsis thaliana] gi 57868146 gb AAW57411.1  plant intracellular Ras-group-related LRR protein 2 [Arabidopsis thaliana] gi 332643646 gb AEE77167.1  plant intracellular ras group-related LRR 2 [Arabidopsis thaliana]</p>                                                                                                                                                                                                                                                                                                                                                                                                                                                                                                                                                                                                                                                                                                             | 326 | 423 | 9.00E-37 | 129.8 | 30.4 | 45.4 | uncharacterized protein LOC100382458                                      | gbenv/gbpln | Zea mays             | AT2G02870.3   Symbols:   Galactose oxidase/kelch repeat superfamily protein   chr:2:838378-839781 FORWARD LENGTH=467                                                | 326 | 467 | 1.00E-36 | 143.3 | 27.3 | 42.9 |
| Rsa1.0_00501.1.g15022.t1 | <p>ref NP_001049113.1  Os03g0171600 [Oryza sativa Japonica Group] gi 108706423 gb ABF94218.1  kelch repeat-containing F-box family protein, putative, expressed [Oryza sativa Japonica Group] gi 108706424 gb ABF94219.1  kelch repeat-containing F-box family protein, putative, expressed [Oryza sativa Japonica Group] gi 108706425 gb ABF94220.1  kelch repeat-containing F-box family protein, putative, expressed [Oryza sativa Japonica Group] gi 113547584 dbj BAF11027.1  Os03g0171600 [Oryza sativa Japonica Group] gi 125585086 gb EAZ25750.1  hypothetical protein OsJ_09589 [Oryza sativa Japonica Group] gi 215692448 dbj BAG87868.1  unnamed protein product [Oryza sativa Japonica Group] gi 215704271 dbj BAG93111.1  unnamed protein product [Oryza sativa Japonica Group] ref NP_189281.2  plant intracellular ras group-related LRR 2 [Arabidopsis thaliana] gi 9293927 dbj BAB01830.1  leucine-rich-repeat protein-like [Arabidopsis thaliana] gi 26453000 dbj BAC43576.1  unknown protein [Arabidopsis thaliana] gi 29824149 gb AAP04035.1  unknown protein [Arabidopsis thaliana] gi 57868146 gb AAW57411.1  plant intracellular Ras-group-related LRR protein 2 [Arabidopsis thaliana] gi 332643646 gb AEE77167.1  plant intracellular ras group-related LRR 2 [Arabidopsis thaliana]</p>                                                                                                                                                                                                                                                                                                                                                                                                                                                                                                                                                                                                                                                                                                                                                                                                                                                                                                                                                                                                                                                                                                                                                                                                                                              | 366 | 431 | 2.00E-31 | 117.8 | 25.1 | 37.7 | Os03g0171600                                                              | gbpln       | Oryza sativa         | AT2G02870.3   Symbols:   Galactose oxidase/kelch repeat superfamily protein   chr:2:838378-839781 FORWARD LENGTH=467                                                | 366 | 467 | 2.00E-32 | 127.6 | 23.8 | 36.9 |
| Rsa1.0_00501.1.g15023.t1 | <p>ref NP_189281.2  plant intracellular ras group-related LRR 2 [Arabidopsis thaliana] gi 9293927 dbj BAB01830.1  leucine-rich-repeat protein-like [Arabidopsis thaliana] gi 26453000 dbj BAC43576.1  unknown protein [Arabidopsis thaliana] gi 29824149 gb AAP04035.1  unknown protein [Arabidopsis thaliana] gi 57868146 gb AAW57411.1  plant intracellular Ras-group-related LRR protein 2 [Arabidopsis thaliana] gi 332643646 gb AEE77167.1  plant intracellular ras group-related LRR 2 [Arabidopsis thaliana]</p>                                                                                                                                                                                                                                                                                                                                                                                                                                                                                                                                                                                                                                                                                                                                                                                                                                                                                                                                                                                                                                                                                                                                                                                                                                                                                                                                                                                                                                                                                                                                                                                                                                                                                                                                                                                                                                                                                                                                                                                                                                        | 473 | 471 | 0        | 99.6  | 82.0 | 90.7 | plant intracellular ras group-related LRR 2                               | gbpln       | Arabidopsis thaliana | AT3G26500.1   Symbols: PIRL2   plant intracellular ras group-related LRR 2   chr:3:9708195-9709944 REVERSE LENGTH=471                                               | 473 | 471 | 0        | 99.6  | 82.0 | 90.7 |
| Rsa1.0_00501.1.g15024.t1 | <p>gb EOA25849.1  hypothetical protein CARUB_v10018998mg [Capsella rubella]</p>                                                                                                                                                                                                                                                                                                                                                                                                                                                                                                                                                                                                                                                                                                                                                                                                                                                                                                                                                                                                                                                                                                                                                                                                                                                                                                                                                                                                                                                                                                                                                                                                                                                                                                                                                                                                                                                                                                                                                                                                                                                                                                                                                                                                                                                                                                                                                                                                                                                                                | 188 | 194 | 1.00E-68 | 103.2 | 81.9 | 89.4 | hypothetical protein CARUB_v10018998mg                                    | gbpln       | Capsella rubella     | AT3G26510.4   Symbols:   Octicosapeptide/Phox/Bem1p family protein   chr:3:9711886-9712588 REVERSE LENGTH=196                                                       | 188 | 196 | 5.00E-70 | 104.3 | 86.2 | 93.1 |

|                          |                                                                                                                                                                                                                                                                                                                                                                       |     |      |           |       |      |      |                                                     |       |                      |                                                                                                                                               |     |     |           |       |      |      |
|--------------------------|-----------------------------------------------------------------------------------------------------------------------------------------------------------------------------------------------------------------------------------------------------------------------------------------------------------------------------------------------------------------------|-----|------|-----------|-------|------|------|-----------------------------------------------------|-------|----------------------|-----------------------------------------------------------------------------------------------------------------------------------------------|-----|-----|-----------|-------|------|------|
| Rsa1.0_00501.1.g15025.t1 | gb AAM82604.1 AF525305.2 putative AP endonuclease/reverse transcriptase [Brassica napus]                                                                                                                                                                                                                                                                              | 611 | 1214 | 0         | 198.7 | 73.6 | 83.5 | putative AP endonuclease/reverse transcriptase      | gbpln | Brassica napus       | AT3G24255.1   Symbols:   RNA-directed DNA polymerase (reverse transcriptase)-related family protein   chr3:8789471-8793208 FORWARD LENGTH=746 | 611 | 746 | 3.00E-57  | 122.1 | 23.1 | 30.6 |
| Rsa1.0_00501.1.g15026.t1 | gb AAD39372.1 AF18381.1 tonoplast intrinsic protein [Brassica napus]                                                                                                                                                                                                                                                                                                  | 253 | 253  | 1.00E-129 | 100.0 | 93.7 | 97.2 | tonoplast intrinsic protein                         | gbpln | Brassica napus       | AT3G26520.1   Symbols: TIP2, SITIP, GAMMA-TIP2, TIP1.2   tonoplast intrinsic protein 2   chr3:9722770-9723703 REVERSE LENGTH=253              | 253 | 253 | 1.00E-129 | 100.0 | 91.3 | 95.7 |
| Rsa1.0_00501.1.g15027.t4 | dbj BAJ34149.1  unnamed protein product [Theellungiella halophila]                                                                                                                                                                                                                                                                                                    | 402 | 400  | 0         | 99.5  | 96.8 | 98.0 | unnamed protein product                             | ----  | ----                 | AT3G26650.1   Symbols: GAPA, GAPA-1   glycereraldehyde 3-phosphate dehydrogenase A subunit   chr3:9795226-9796848 FORWARD LENGTH=396          | 402 | 396 | 0         | 98.5  | 94.0 | 96.5 |
| Rsa1.0_00501.1.g15028.t1 | ref XP_002876987.1  hypothetical protein ARALYDRAFT_904865 [Arabidopsis lyrata subsp. lyrata] gi 297322825 gb EFH53246.1  hypothetical protein ARALYDRAFT_904865 [Arabidopsis lyrata subsp. lyrata]                                                                                                                                                                   | 199 | 202  | 5.00E-92  | 101.5 | 84.9 | 91.0 | hypothetical protein ARALYDRAFT_904865              | gbpln | Arabidopsis lyrata   | AT3G26690.2   Symbols: ATNUDT13, ATNUDX13, NUDX13   nudix hydrolase homolog 13   chr3:9804418-9805398 REVERSE LENGTH=202                      | 199 | 202 | 3.00E-94  | 101.5 | 84.9 | 90.5 |
| Rsa1.0_00501.1.g15029.t1 | gb AAB82639.1  putative non-LTR retroelement reverse transcriptase [Arabidopsis thaliana]                                                                                                                                                                                                                                                                             | 262 | 1374 | 3.00E-41  | 524.4 | 41.2 | 60.3 | putative non-LTR retroelement reverse transcriptase | gbpln | Arabidopsis thaliana | AT4G29090.1   Symbols:   Ribonuclease H-like superfamily protein   chr4:14333528-14335255 FORWARD LENGTH=575                                  | 262 | 575 | 2.00E-35  | 219.5 | 24.0 | 34.7 |
| Rsa1.0_00502.1.g15030.t1 | ref XP_002871867.1  hypothetical protein ARALYDRAFT_326316 [Arabidopsis lyrata subsp. lyrata] gi 297317704 gb EFH48126.1  hypothetical protein ARALYDRAFT_326316 [Arabidopsis lyrata subsp. lyrata]                                                                                                                                                                   | 161 | 390  | 9.00E-18  | 242.2 | 32.3 | 43.5 | hypothetical protein ARALYDRAFT_326316              | gbpln | Arabidopsis lyrata   | AT5G19170.1   Symbols:   Protein of Unknown Function (DUF239)   chr5:6445245-6447305 FORWARD LENGTH=391                                       | 161 | 391 | 2.00E-18  | 242.9 | 31.7 | 42.2 |
| Rsa1.0_00502.1.g15031.t1 | dbj BAJ34425.1  unnamed protein product [Theellungiella halophila]                                                                                                                                                                                                                                                                                                    | 313 | 311  | 1.00E-142 | 99.4  | 78.3 | 89.5 | unnamed protein product                             | ----  | ----                 | AT1G75300.1   Symbols:   NmrA-like negative transcriptional regulator family protein   chr1:28255552-28256927 FORWARD LENGTH=322              | 313 | 322 | 1.00E-137 | 102.9 | 76.4 | 87.5 |
| Rsa1.0_00502.1.g15032.t1 | dbj BAJ34425.1  unnamed protein product [Theellungiella halophila]                                                                                                                                                                                                                                                                                                    | 311 | 311  | 1.00E-167 | 100.0 | 92.3 | 97.4 | unnamed protein product                             | ----  | ----                 | AT1G75280.1   Symbols:   NmrA-like negative transcriptional regulator family protein   chr1:28252030-28253355 FORWARD LENGTH=310              | 311 | 310 | 1.00E-155 | 99.7  | 84.2 | 92.0 |
| Rsa1.0_00502.1.g15033.t1 | dbj BAJ34425.1  unnamed protein product [Theellungiella halophila]                                                                                                                                                                                                                                                                                                    | 312 | 311  | 1.00E-136 | 99.7  | 73.4 | 90.1 | unnamed protein product                             | ----  | ----                 | AT1G75280.1   Symbols:   NmrA-like negative transcriptional regulator family protein   chr1:28252030-28253355 FORWARD LENGTH=310              | 312 | 310 | 1.00E-129 | 99.4  | 70.5 | 85.6 |
| Rsa1.0_00502.1.g15034.t1 | gb EOA35043.1  hypothetical protein CARUB_v10020148mg [Capsella rubella]                                                                                                                                                                                                                                                                                              | 563 | 518  | 1.00E-122 | 92.0  | 54.9 | 66.6 | hypothetical protein CARUB_v10020148mg              | gbpln | Capsella rubella     | AT1G75260.1   Symbols:   oxidoreductases, acting on NADH or NADPH   chr1:28247854-28249395 FORWARD LENGTH=513                                 | 563 | 513 | 1.00E-123 | 91.1  | 56.7 | 68.6 |
| Rsa1.0_00502.1.g15035.t1 | ref NP_177661.1  RAD-like 6 protein [Arabidopsis thaliana] gi 10092271 gb AAG12684.1 AC025814.8 myb-related protein; 20671-21051 [Arabidopsis thaliana] gi 41618978 gb AAS09995.1  MYB transcription factor [Arabidopsis thaliana] gi 109946537 gb ABG48447.1  At1g75250 [Arabidopsis thaliana] gi 332197572 gb AEE35693.1  RAD-like 6 protein [Arabidopsis thaliana] | 92  | 126  | 7.00E-39  | 137.0 | 88.0 | 90.2 | RAD-like 6 protein                                  | gbpln | Arabidopsis thaliana | AT1G75250.1   Symbols: ATRL6, RSM3, RL6   RAD-like 6   chr1:28245073-28245453 REVERSE LENGTH=126                                              | 92  | 126 | 1.00E-41  | 137.0 | 88.0 | 90.2 |
| Rsa1.0_00502.1.g15036.t1 | gb EOA35498.1  hypothetical protein CARUB_v10020705mg [Capsella rubella]                                                                                                                                                                                                                                                                                              | 310 | 306  | 1.00E-115 | 98.7  | 84.2 | 89.4 | hypothetical protein CARUB_v10020705mg              | gbpln | Capsella rubella     | AT1G75240.1   Symbols: ATHB33, HB33, ZHD5   homeobox protein 33   chr1:28241576-28242505 FORWARD LENGTH=309                                   | 310 | 309 | 1.00E-103 | 99.7  | 83.2 | 88.7 |
| Rsa1.0_00502.1.g15037.t1 | gb EOA35085.1  hypothetical protein CARUB_v10020200mg [Capsella rubella]                                                                                                                                                                                                                                                                                              | 485 | 487  | 0         | 100.4 | 96.5 | 97.9 | hypothetical protein CARUB_v10020200mg              | gbpln | Capsella rubella     | AT1G75220.1   Symbols:   Major facilitator superfamily protein   chr1:28229412-28232606 REVERSE LENGTH=487                                    | 485 | 487 | 0         | 100.4 | 95.9 | 97.5 |
| Rsa1.0_00502.1.g15038.t2 | ref XP_002887578.1  hypothetical protein ARALYDRAFT_895388 [Arabidopsis lyrata subsp. lyrata] gi 297333419 gb EFH63837.1  hypothetical protein ARALYDRAFT_895388 [Arabidopsis lyrata subsp. lyrata]                                                                                                                                                                   | 562 | 642  | 0         | 114.2 | 85.6 | 91.1 | hypothetical protein ARALYDRAFT_895388              | gbpln | Arabidopsis lyrata   | AT1G75210.1   Symbols:   HAD-superfamily hydrolase, subfamily IG, 5'-nucleotidase   chr1:28223990-28228751 FORWARD LENGTH=642                 | 562 | 642 | 0         | 114.2 | 84.5 | 91.3 |
| Rsa1.0_00502.1.g15039.t1 | gb EOA33528.1  hypothetical protein CARUB_v10019936mg [Capsella rubella]                                                                                                                                                                                                                                                                                              | 648 | 647  | 0         | 99.8  | 87.7 | 93.7 | hypothetical protein CARUB_v10019936mg              | gbpln | Capsella rubella     | AT1G75200.1   Symbols:   flavodoxin family protein / radical SAM domain-containing protein   chr1:28220849-28223597 REVERSE LENGTH=647        | 648 | 647 | 0         | 99.8  | 86.7 | 93.2 |

|                          |                                                                                                                                                                                                               |      |      |           |       |      |      |                                             |       |                      |                                                                                                                                                                                                                                                                                 |      |      |           |       |      |      |
|--------------------------|---------------------------------------------------------------------------------------------------------------------------------------------------------------------------------------------------------------|------|------|-----------|-------|------|------|---------------------------------------------|-------|----------------------|---------------------------------------------------------------------------------------------------------------------------------------------------------------------------------------------------------------------------------------------------------------------------------|------|------|-----------|-------|------|------|
| Rsa1.0_00502.1.g15040.t1 | gb AAM62539.1  unknown [Arabidopsis thaliana] gi 24417366 gb AAN60293.1  unknown [Arabidopsis thaliana]                                                                                                       | 129  | 131  | 2.00E-11  | 101.6 | 65.9 | 74.4 | unknown                                     | gbpln | Arabidopsis thaliana | AT1G75190.1   Symbols:   unknown protein; Has 7306 Blast hits to 3858 proteins in 279 species: Archae - 15; Bacteria - 134; Metazoa - 3314; Fungi - 546; Plants - 228; Viruses - 207; Other Eukaryotes - 2862 (source: NCBI BLINK).   chr1:28219598-28219993 FORWARD LENGTH=131 | 129  | 131  | 1.00E-13  | 101.6 | 65.1 | 74.4 |
| Rsa1.0_00502.1.g15041.t1 | gb EOA35457.1  hypothetical protein CARUB_v10020666mg [Capsella rubella] gi 482571270 gb EOA35458.1  hypothetical protein CARUB_v10020666mg [Capsella rubella]                                                | 310  | 318  | 1.00E-130 | 102.6 | 82.6 | 88.4 | hypothetical protein CARUB_v10020666mg      | gbpln | Capsella rubella     | AT1G75180.3   Symbols:   Erythronate-4-phosphate dehydrogenase family protein   chr1:28216150-28217911 REVERSE LENGTH=315                                                                                                                                                       | 310  | 315  | 1.00E-129 | 101.6 | 79.7 | 84.2 |
| Rsa1.0_00502.1.g15042.t1 | gb EOA33881.1  hypothetical protein CARUB_v10021373mg [Capsella rubella]                                                                                                                                      | 301  | 296  | 1.00E-155 | 98.3  | 88.7 | 93.4 | hypothetical protein CARUB_v10021373mg      | gbpln | Capsella rubella     | AT1G75170.2   Symbols:   Sec14p-like phosphatidylinositol transfer family protein   chr1:28214405-28215686 FORWARD LENGTH=296                                                                                                                                                   | 301  | 296  | 1.00E-156 | 98.3  | 88.0 | 93.4 |
| Rsa1.0_00502.1.g15043.t1 | gb EOA35962.1  hypothetical protein CARUB_v10021223mg [Capsella rubella]                                                                                                                                      | 86   | 86   | 1.00E-24  | 100.0 | 80.2 | 83.7 | hypothetical protein CARUB_v10021223mg      | gbpln | Capsella rubella     | AT1G61570.1   Symbols: TIM13   translocase of the inner mitochondrial membrane 13   chr1:22718897-22719473 REVERSE LENGTH=87                                                                                                                                                    | 86   | 87   | 2.00E-24  | 101.2 | 70.9 | 80.2 |
| Rsa1.0_00502.1.g15044.t3 | ref XP_002889011.1  CYP721A1 [Arabidopsis lyrata subsp. lyrata] gi 297334832 gb EFH65270.1  CYP721A1 [Arabidopsis lyrata subsp. lyrata]                                                                       | 2005 | 505  | 0         | 25.2  | 20.2 | 21.8 | CYP721A1                                    | gbpln | Arabidopsis lyrata   | AT1G75130.1   Symbols: CYP721A1   cytochrome P450, family 721, subfamily A, polypeptide 1   chr1:28200073-28201911 REVERSE LENGTH=505                                                                                                                                           | 2005 | 505  | 0         | 25.2  | 20.0 | 22.0 |
| Rsa1.0_00502.1.g15045.t1 | ref XP_002888991.1  galactosyltransferase family protein [Arabidopsis lyrata subsp. lyrata] gi 297334832 gb EFH65250.1  galactosyltransferase family protein [Arabidopsis lyrata subsp. lyrata]               | 662  | 670  | 0         | 101.2 | 91.5 | 95.6 | galactosyltransferase family protein        | gbpln | Arabidopsis lyrata   | AT1G74800.1   Symbols:   Galactosyltransferase family protein   chr1:28102221-28104993 REVERSE LENGTH=672                                                                                                                                                                       | 662  | 672  | 0         | 101.5 | 90.8 | 95.6 |
| Rsa1.0_00502.1.g15046.t1 | gb EOA33703.1  hypothetical protein CARUB_v10019888mg [Capsella rubella]                                                                                                                                      | 687  | 694  | 0         | 101.0 | 87.9 | 93.9 | hypothetical protein CARUB_v10019888mg      | gbpln | Capsella rubella     | AT1G74790.1   Symbols:   catalytics   chr1:28098912-28101673 FORWARD LENGTH=695                                                                                                                                                                                                 | 687  | 695  | 0         | 101.2 | 86.9 | 92.6 |
| Rsa1.0_00502.1.g15047.t1 | ref XP_002888990.1  hypothetical protein ARALYDRAFT_476613 [Arabidopsis lyrata subsp. lyrata] gi 297334831 gb EFH65249.1  hypothetical protein ARALYDRAFT_476613 [Arabidopsis lyrata subsp. lyrata]           | 1255 | 1263 | 0         | 100.6 | 80.4 | 88.5 | hypothetical protein ARALYDRAFT_476613      | gbpln | Arabidopsis lyrata   | AT1G74770.1   Symbols:   zinc ion binding   chr1:28089695-28094834 REVERSE LENGTH=1259                                                                                                                                                                                          | 1255 | 1259 | 0         | 100.3 | 80.3 | 88.0 |
| Rsa1.0_00502.1.g15048.t1 | ref XP_002887557.1  pentatricopeptide repeat-containing protein [Arabidopsis lyrata subsp. lyrata] gi 297333398 gb EFH63816.1  pentatricopeptide repeat-containing protein [Arabidopsis lyrata subsp. lyrata] | 750  | 845  | 0         | 112.7 | 84.1 | 90.1 | pentatricopeptide repeat-containing protein | gbpln | Arabidopsis lyrata   | AT1G74750.1   Symbols:   Pentatricopeptide repeat (PPR) superfamily protein   chr1:28086800-28089367 FORWARD LENGTH=855                                                                                                                                                         | 750  | 855  | 0         | 114.0 | 84.1 | 90.0 |
| Rsa1.0_00502.1.g15049.t1 | dbj BAJ33607.1  unnamed protein product [Theilungiella halophila]                                                                                                                                             | 553  | 546  | 0         | 98.7  | 94.0 | 96.4 | unnamed protein product                     | ----  | ----                 | AT1G74740.1   Symbols: CPK30, CDPK1A, ATPCK30   calcium-dependent protein kinase 30   chr1:28080199-28082476 REVERSE LENGTH=541                                                                                                                                                 | 553  | 541  | 0         | 97.8  | 90.2 | 94.2 |
| Rsa1.0_00502.1.g15050.t1 | dbj BAJ33994.1  unnamed protein product [Theilungiella halophila]                                                                                                                                             | 747  | 567  | 0         | 75.9  | 64.1 | 66.5 | unnamed protein product                     | ----  | ----                 | AT1G74710.1   Symbols: EDS16, ICS1, SID2, ATICS1   ADC synthase superfamily protein   chr1:28070391-28073898 FORWARD LENGTH=569                                                                                                                                                 | 747  | 569  | 0         | 76.2  | 63.5 | 66.5 |
| Rsa1.0_00502.1.g15051.t1 | gb EOA35942.1  hypothetical protein CARUB_v10021199mg [Capsella rubella]                                                                                                                                      | 97   | 101  | 1.00E-34  | 104.1 | 90.7 | 95.9 | hypothetical protein CARUB_v10021199mg      | gbpln | Capsella rubella     | AT1G74660.1   Symbols: MIF1   mini zinc finger 1   chr1:28047742-28048050 REVERSE LENGTH=102                                                                                                                                                                                    | 97   | 102  | 2.00E-37  | 105.2 | 90.7 | 95.9 |
| Rsa1.0_00502.1.g15052.t1 | gb EOA35418.1  hypothetical protein CARUB_v10020618mg [Capsella rubella]                                                                                                                                      | 333  | 336  | 1.00E-136 | 100.9 | 78.4 | 85.3 | hypothetical protein CARUB_v10020618mg      | gbpln | Capsella rubella     | AT1G74650.1   Symbols: ATY13, ATMYB31, MYB31   myb domain protein 31   chr1:28041493-28042773 FORWARD LENGTH=330                                                                                                                                                                | 333  | 330  | 1.00E-136 | 99.1  | 78.7 | 84.1 |
| Rsa1.0_00503.1.g15053.t1 | ref XP_002876745.1  hypothetical protein ARALYDRAFT_904327 [Arabidopsis lyrata subsp. lyrata] gi 297322583 gb EFH53004.1  hypothetical protein ARALYDRAFT_904327 [Arabidopsis lyrata subsp. lyrata]           | 201  | 589  | 3.00E-12  | 293.0 | 26.9 | 37.8 | hypothetical protein ARALYDRAFT_904327      | gbpln | Arabidopsis lyrata   | #                                                                                                                                                                                                                                                                               | #    | #    | #         | #     | #    | #    |
| Rsa1.0_00503.1.g15054.t1 | ref NP_188947.2  CRM family member 3A [Arabidopsis thaliana] gi 332643191 gb AE76712.1  CRM family member 3A [Arabidopsis thaliana]                                                                           | 390  | 881  | 3.00E-66  | 225.9 | 33.6 | 40.3 | CRM family member 3A                        | gbpln | Arabidopsis thaliana | AT3G23070.1   Symbols: ATCFM3A, CFM3A   CRM family member 3A   chr3:8203548-8207243 FORWARD LENGTH=881                                                                                                                                                                          | 390  | 881  | 8.00E-69  | 225.9 | 33.6 | 40.3 |

|                          |                                                                                                                                                                                                                                                                                                                                                                                                                                                                                                                                                                                                                                                                                                                                                                                                                                                       |     |     |           |       |      |      |                                                                  |       |                      |                                                                                                                                                                                                                                                                                                                                                                                                                                                                                                                                                                                                                                                                                  |     |     |           |       |      |      |
|--------------------------|-------------------------------------------------------------------------------------------------------------------------------------------------------------------------------------------------------------------------------------------------------------------------------------------------------------------------------------------------------------------------------------------------------------------------------------------------------------------------------------------------------------------------------------------------------------------------------------------------------------------------------------------------------------------------------------------------------------------------------------------------------------------------------------------------------------------------------------------------------|-----|-----|-----------|-------|------|------|------------------------------------------------------------------|-------|----------------------|----------------------------------------------------------------------------------------------------------------------------------------------------------------------------------------------------------------------------------------------------------------------------------------------------------------------------------------------------------------------------------------------------------------------------------------------------------------------------------------------------------------------------------------------------------------------------------------------------------------------------------------------------------------------------------|-----|-----|-----------|-------|------|------|
| Rsa1.0_00503.1.g15055.t1 | refXP_002882759.1   hypothetical protein ARALYDRAFT_478549 [Arabidopsis lyrata subsp. lyrata] gi 297328599 gb EFH59018.1   hypothetical protein ARALYDRAFT_478549 [Arabidopsis lyrata subsp. lyrata]                                                                                                                                                                                                                                                                                                                                                                                                                                                                                                                                                                                                                                                  | 134 | 616 | 2.00E-33  | 459.7 | 62.7 | 69.4 | hypothetical protein ARALYDRAFT_478549                           | gbpln | Arabidopsis lyrata   | AT3G11980.1   Symbols: MS2, FAR2   Jojoba acyl CoA reductase-related male sterility protein   chr3:3814484-3816927 FORWARD LENGTH=616                                                                                                                                                                                                                                                                                                                                                                                                                                                                                                                                            | 134 | 616 | 1.00E-31  | 459.7 | 61.2 | 68.7 |
| Rsa1.0_00503.1.g15056.t2 | dbj BAD94568.1  putative acyl-CoA synthetase [Arabidopsis thaliana]                                                                                                                                                                                                                                                                                                                                                                                                                                                                                                                                                                                                                                                                                                                                                                                   | 175 | 228 | 3.00E-50  | 130.3 | 60.6 | 67.4 | putative acyl-CoA synthetase                                     | gbpln | Arabidopsis thaliana | AT2G47240.2   Symbols: LACS1   AMP-dependent synthetase and ligase family protein   chr2:19393835-19397616 FORWARD LENGTH=660                                                                                                                                                                                                                                                                                                                                                                                                                                                                                                                                                    | 175 | 660 | 2.00E-52  | 377.1 | 60.6 | 67.4 |
| Rsa1.0_00503.1.g15057.t1 | emb CBK20932.2  unnamed protein product [Blastocystis hominis] gi 300175649 emb CBK20960.2  unnamed protein product [Blastocystis hominis]                                                                                                                                                                                                                                                                                                                                                                                                                                                                                                                                                                                                                                                                                                            | 259 | 150 | 1.00E-19  | 57.9  | 25.5 | 35.1 | unnamed protein product                                          | gbpln | Blastocystis hominis | AT4G05320.6   Symbols: UBO10   polyubiquitin 10   chr4:2718559-2719932 FORWARD LENGTH=381                                                                                                                                                                                                                                                                                                                                                                                                                                                                                                                                                                                        | 259 | 381 | 1.00E-20  | 147.1 | 19.7 | 23.9 |
| Rsa1.0_00503.1.g15058.t1 | refNP_001154580.1   uncharacterized protein [Arabidopsis thaliana] gi 330255381 gb AEC10475.1   uncharacterized protein AT2G44850 [Arabidopsis thaliana]                                                                                                                                                                                                                                                                                                                                                                                                                                                                                                                                                                                                                                                                                              | 302 | 319 | 1.00E-120 | 105.6 | 77.8 | 86.8 | uncharacterized protein                                          | gbpln | Arabidopsis thaliana | AT2G44850.2   Symbols:   unknown protein; FUNCTIONS IN: molecular function unknown; INVOLVED IN: biological process unknown; LOCATED IN: cellular component unknown; EXPRESSED IN: 13 plant structures; EXPRESSED DURING: M germinated pollen stage, LP04 four leaves visible, 4 anthesis, petal differentiation and expansion stage, E expanded cotyledon stage; CONTAINS InterPro DOMAIN/s: Uncharacterised protein family UPF0565 (InterPro:IPR018881); Has 106 Blast hits to 106 proteins in 50 species: Archae - 0; Bacteria - 0; Metazoa - 73; Fungi - 0; Plants - 31; Viruses - 0; Other Eukaryotes - 2 (source: NCBI BLINK).   chr2:18499770-18500823 FORWARD LENGTH=319 | 302 | 319 | 1.00E-123 | 105.6 | 77.8 | 86.8 |
| Rsa1.0_00503.1.g15059.t1 | refNP_182011.1   ethylene-responsive transcription factor 13 [Arabidopsis thaliana] gi 57012834 sp Q8L9K1.2 ERF99_ARATH RecName: Full=Ethylene-responsive transcription factor 13; Short=AtERF13; AltName: Full=Ethylene-responsive element-binding factor 13; Short=EREBP-13 gi 13272437 gb AAK17157.1 AF325089.1 putative ethylene response element binding protein (EREBP) [Arabidopsis thaliana] gi 13699091 gb AAK49967.1 AF370540.1 putative ethylene response element binding protein: EREBP [Arabidopsis thaliana] gi 2344900 gb AAC31840.1   putative ethylene response element binding protein (EREBP) [Arabidopsis thaliana] gi 18377440 gb AAL66886.1   putative ethylene response element binding protein (EREBP) [Arabidopsis thaliana] gi 330255379 gb AEC10473.1   ethylene-responsive transcription factor 13 [Arabidopsis thaliana] | 226 | 226 | 7.00E-95  | 100.0 | 76.5 | 83.6 | ethylene-responsive transcription factor 13                      | gbpln | Arabidopsis thaliana | AT2G44840.1   Symbols: ATERF13, EREBP, ERF13   ethylene-responsive element binding factor 13   chr2:18495440-18496120 FORWARD LENGTH=226                                                                                                                                                                                                                                                                                                                                                                                                                                                                                                                                         | 226 | 226 | 2.00E-97  | 100.0 | 76.5 | 83.6 |
| Rsa1.0_00503.1.g15060.t1 | refNP_850426.1   protein kinase domain-containing protein [Arabidopsis thaliana] gi 330255378 gb AEC10472.1   protein kinase domain-containing protein [Arabidopsis thaliana]                                                                                                                                                                                                                                                                                                                                                                                                                                                                                                                                                                                                                                                                         | 678 | 765 | 0         | 112.8 | 86.1 | 91.4 | protein kinase domain-containing protein                         | gbpln | Arabidopsis thaliana | AT2G44830.1   Symbols:   Protein kinase superfamily protein   chr2:18490398-18492779 FORWARD LENGTH=765                                                                                                                                                                                                                                                                                                                                                                                                                                                                                                                                                                          | 678 | 765 | 0         | 112.8 | 86.1 | 91.4 |
| Rsa1.0_00503.1.g15061.t1 | #                                                                                                                                                                                                                                                                                                                                                                                                                                                                                                                                                                                                                                                                                                                                                                                                                                                     | #   | #   | #         | #     | #    | -    | ----                                                             | ----  | #                    | #                                                                                                                                                                                                                                                                                                                                                                                                                                                                                                                                                                                                                                                                                | #   | #   | #         | #     | #    |      |
| Rsa1.0_00503.1.g15062.t2 | refXP_002867613.1   hypothetical protein ARALYDRAFT_914041 [Arabidopsis lyrata subsp. lyrata] gi 297313449 gb EFH43872.1   hypothetical protein ARALYDRAFT_914041 [Arabidopsis lyrata subsp. lyrata]                                                                                                                                                                                                                                                                                                                                                                                                                                                                                                                                                                                                                                                  | 302 | 344 | 2.00E-43  | 113.9 | 44.0 | 55.0 | hypothetical protein ARALYDRAFT_914041                           | gbpln | Arabidopsis lyrata   | AT1G05080.1   Symbols:   F-box/RNI-like/FBD-like domains-containing protein   chr1:1459091-1460579 FORWARD LENGTH=439                                                                                                                                                                                                                                                                                                                                                                                                                                                                                                                                                            | 302 | 439 | 6.00E-24  | 145.4 | 35.1 | 46.4 |
| Rsa1.0_00503.1.g15063.t1 | #                                                                                                                                                                                                                                                                                                                                                                                                                                                                                                                                                                                                                                                                                                                                                                                                                                                     | #   | #   | #         | #     | #    | -    | ----                                                             | ----  | #                    | #                                                                                                                                                                                                                                                                                                                                                                                                                                                                                                                                                                                                                                                                                | #   | #   | #         | #     | #    |      |
| Rsa1.0_00503.1.g15064.t1 | refNP_182007.2   2-oxoglutarate (2OG) and Fe(II)-dependent oxygenase-like protein [Arabidopsis thaliana] gi 330255374 gb AEC10468.1   2-oxoglutarate (2OG) and Fe(II)-dependent oxygenase-like protein [Arabidopsis thaliana]                                                                                                                                                                                                                                                                                                                                                                                                                                                                                                                                                                                                                         | 356 | 357 | 0         | 100.3 | 88.2 | 93.8 | 2-oxoglutarate (2OG) and Fe(II)-dependent oxygenase-like protein | gbpln | Arabidopsis thaliana | AT2G44800.1   Symbols:   2-oxoglutarate (2OG) and Fe(II)-dependent oxygenase superfamily protein   chr2:18467004-18468551 FORWARD LENGTH=357                                                                                                                                                                                                                                                                                                                                                                                                                                                                                                                                     | 356 | 357 | 0         | 100.3 | 88.2 | 93.8 |
| Rsa1.0_00503.1.g15065.t1 | #                                                                                                                                                                                                                                                                                                                                                                                                                                                                                                                                                                                                                                                                                                                                                                                                                                                     | #   | #   | #         | #     | #    | -    | ----                                                             | ----  | #                    | #                                                                                                                                                                                                                                                                                                                                                                                                                                                                                                                                                                                                                                                                                | #   | #   | #         | #     | #    |      |

|                          |                                                                                                                                                                                                                                                                                                                                                                                                                                                                                                                                                                                                                                                                                                                                                                                                                                                                                                 |     |     |           |       |      |      |                                        |       |                      |                                                                                                                                                  |     |     |           |       |      |      |
|--------------------------|-------------------------------------------------------------------------------------------------------------------------------------------------------------------------------------------------------------------------------------------------------------------------------------------------------------------------------------------------------------------------------------------------------------------------------------------------------------------------------------------------------------------------------------------------------------------------------------------------------------------------------------------------------------------------------------------------------------------------------------------------------------------------------------------------------------------------------------------------------------------------------------------------|-----|-----|-----------|-------|------|------|----------------------------------------|-------|----------------------|--------------------------------------------------------------------------------------------------------------------------------------------------|-----|-----|-----------|-------|------|------|
| Rsa1.0_00503.1.g15066.t1 | ref NP_566027.1  ELMO/CED-12 domain-containing protein [Arabidopsis thaliana] gi 20197031 gb AAC27479.2  expressed protein [Arabidopsis thaliana] gi 21593197 gb AAM65146.1  unknown [Arabidopsis thaliana] gi 330255372 gb AEC10466.1  ELMO/CED-12 domain-containing protein [Arabidopsis thaliana]                                                                                                                                                                                                                                                                                                                                                                                                                                                                                                                                                                                            | 266 | 266 | 1.00E-150 | 100.0 | 96.6 | 98.9 | ELMO/CED-12 domain-containing protein  | gbpln | Arabidopsis thaliana | AT2G44770.1   Symbols:   ELMO/CED-12 family protein   chr2:18457817-18459886 FORWARD LENGTH=266                                                  | 266 | 266 | 1.00E-153 | 100.0 | 96.6 | 98.9 |
| Rsa1.0_00503.1.g15067.t1 | ref NP_189038.1  putative F-box protein [Arabidopsis thaliana] gi 75273446 sp Q9LJR1.1 FB182_ARATH RecName: Full=Putative F-box protein At3g23960 gi 9294665 dbj BAB03014.1  unnamed protein product [Arabidopsis thaliana] gi 332643318 gb AEE76839.1  putative F-box protein [Arabidopsis thaliana]                                                                                                                                                                                                                                                                                                                                                                                                                                                                                                                                                                                           | 400 | 402 | 1.00E-57  | 100.5 | 36.0 | 48.0 | putative F-box protein                 | gbpln | Arabidopsis thaliana | AT3G23960.1   Symbols:   F-box and associated interaction domains-containing protein   chr3:8657736-8658944 FORWARD LENGTH=402                   | 400 | 402 | 3.00E-60  | 100.5 | 36.0 | 48.0 |
| Rsa1.0_00503.1.g15068.t1 | ref XP_002881979.1  WRKY family transcription factor [Arabidopsis lyrata subsp. lyrata] gi 297327818 gb EFH58238.1  WRKY family transcription factor [Arabidopsis lyrata subsp. lyrata]                                                                                                                                                                                                                                                                                                                                                                                                                                                                                                                                                                                                                                                                                                         | 219 | 218 | 1.00E-100 | 99.5  | 88.1 | 90.9 | WRKY family transcription factor       | gbpln | Arabidopsis lyrata   | AT2G44745.1   Symbols:   WRKY family transcription factor   chr2:18447482-18449004 REVERSE LENGTH=218                                            | 219 | 218 | 1.00E-101 | 99.5  | 88.1 | 90.9 |
| Rsa1.0_00503.1.g15069.t1 | #                                                                                                                                                                                                                                                                                                                                                                                                                                                                                                                                                                                                                                                                                                                                                                                                                                                                                               | #   | #   | #         | #     | #    | #    | -                                      | ----  | ----                 | #                                                                                                                                                | #   | #   | #         | #     | #    | #    |
| Rsa1.0_00503.1.g15070.t1 | gb EOA27921.1  hypothetical protein CARUB_v10024094mg [Capsella rubella]                                                                                                                                                                                                                                                                                                                                                                                                                                                                                                                                                                                                                                                                                                                                                                                                                        | 201 | 199 | 5.00E-99  | 99.0  | 89.1 | 92.0 | hypothetical protein CARUB_v10024094mg | gbpln | Capsella rubella     | AT2G44740.1   Symbols: CYCP4.1   cyclin p4.1   chr2:18442287-18443304 REVERSE LENGTH=202                                                         | 201 | 202 | 7.00E-98  | 100.5 | 90.0 | 93.5 |
| Rsa1.0_00503.1.g15071.t1 | ref NP_566023.1  uncharacterized protein [Arabidopsis thaliana] gi 13272435 gb AAK17156.1 AF325088.1  unknown protein [Arabidopsis thaliana] gi 3341687 gb AAC27469.1  expressed protein [Arabidopsis thaliana] gi 15081775 gb AAK82542.1  At2g44670/F16B22.16 [Arabidopsis thaliana] gi 21593625 gb AAM65592.1  unknown [Arabidopsis thaliana] gi 24797042 gb AAN64533.1  At2g44670/F16B22.16 [Arabidopsis thaliana] gi 110736091 dbj BAF00018.1  hypothetical protein [Arabidopsis thaliana] gi 330255359 gb AEC10453.1  uncharacterized protein AT2G44670 [Arabidopsis thaliana]                                                                                                                                                                                                                                                                                                             | 95  | 93  | 4.00E-35  | 97.9  | 80.0 | 86.3 | uncharacterized protein                | gbpln | Arabidopsis thaliana | AT2G44670.1   Symbols:   Protein of unknown function (DUF581)   chr2:18425279-18425673 FORWARD LENGTH=93                                         | 95  | 93  | 7.00E-38  | 97.9  | 80.0 | 86.3 |
| Rsa1.0_00503.1.g15072.t1 | gb ABL97949.1  CHL-CPN10 [Brassica rapa]                                                                                                                                                                                                                                                                                                                                                                                                                                                                                                                                                                                                                                                                                                                                                                                                                                                        | 138 | 139 | 4.00E-68  | 100.7 | 92.8 | 95.7 | CHL-CPN10                              | gbpln | Brassica rapa        | AT2G44650.1   Symbols: CHL-CPN10, CPN10   chloroplast chaperonin 10   chr2:18419521-18420510 REVERSE LENGTH=139                                  | 138 | 139 | 3.00E-65  | 100.7 | 86.2 | 91.3 |
| Rsa1.0_00503.1.g15073.t1 | ref NP_181989.1  Ras-related protein RABH1B [Arabidopsis thaliana] gi 297828175 ref XP_002881970.1  hypothetical protein ARALYDRAFT_903887 [Arabidopsis lyrata subsp. lyrata] gi 75318653 sp O80501.1 RAH1B_ARATH RecName: Full=Ras-related protein RABH1b; Short=AtRABH1b; AltName: Full=Ras-related protein Rab6A; Short=AtRab6A gi 3341681 gb AAC27463.1  putative small GTP-binding protein [Arabidopsis thaliana] gi 21593488 gb AAM65455.1  putative small GTP-binding protein [Arabidopsis thaliana] gi 107738267 gb ABF83670.1  At2g44610 [Arabidopsis thaliana] gi 110742258 dbj BAE99055.1  putative small GTP-binding protein [Arabidopsis thaliana] gi 297327809 gb EFH58229.1  hypothetical protein ARALYDRAFT_903887 [Arabidopsis lyrata subsp. lyrata] gi 330255353 gb AEC10447.1  Ras-related protein RABH1B [Arabidopsis thaliana] gi 741994 prf I2008312A GTP-binding protein | 208 | 208 | 1.00E-116 | 100.0 | 99.0 | 99.0 | Ras-related protein RABH1B             | gbpln | Arabidopsis lyrata   | AT2G44610.1   Symbols: RAB6, ATRABH1B, ATRAB6A, RAB6A   Ras-related small GTP-binding family protein   chr2:18411778-18413883 REVERSE LENGTH=208 | 208 | 208 | 1.00E-119 | 100.0 | 99.0 | 99.0 |

|                          |                                                                                                                                                                                                                                                                                                                                                                              |     |      |           |       |      |      |                                             |       |                      |                                                                                                                                                                                                                                                                                                                                                                                                                                                              |     |      |           |       |      |      |
|--------------------------|------------------------------------------------------------------------------------------------------------------------------------------------------------------------------------------------------------------------------------------------------------------------------------------------------------------------------------------------------------------------------|-----|------|-----------|-------|------|------|---------------------------------------------|-------|----------------------|--------------------------------------------------------------------------------------------------------------------------------------------------------------------------------------------------------------------------------------------------------------------------------------------------------------------------------------------------------------------------------------------------------------------------------------------------------------|-----|------|-----------|-------|------|------|
| Rsa1.0_00503.1.g15074.t1 | dbj BAF01125.1  hypothetical protein [Arabidopsis thaliana]                                                                                                                                                                                                                                                                                                                  | 270 | 313  | 6.00E-85  | 115.9 | 71.1 | 81.9 | hypothetical protein                        | gbpln | Arabidopsis thaliana | AT2G44600.1   Symbols:   unknown protein; FUNCTIONS IN: molecular_function unknown; INVOLVED IN: biological_process unknown; LOCATED IN: plasma membrane; BEST Arabidopsis thaliana protein match is: unknown protein (TAIR:AT3G60200.1); Has 56 Blast hits to 55 proteins in 11 species: Archae - 0; Bacteria - 0; Metazoa - 2; Fungi - 0; Plants - 52; Viruses - 0; Other Eukaryotes - 2 (source: NCBI BLink).   chr2:18408845-18409786 FORWARD LENGTH=313 | 270 | 313  | 1.00E-86  | 115.9 | 71.1 | 81.9 |
| Rsa1.0_00503.1.g15075.t1 | ref XP_002881969.1  hypothetical protein ARALYDRAFT_483589 [Arabidopsis lyrata subsp. lyrata] gi 297327808 gb EFH58228.1  hypothetical protein ARALYDRAFT_483589 [Arabidopsis lyrata subsp. lyrata]                                                                                                                                                                          | 618 | 614  | 0         | 99.4  | 85.6 | 93.9 | hypothetical protein ARALYDRAFT_483589      | gbpln | Arabidopsis lyrata   | AT2G44590.3   Symbols: ADL1D, DL1D   DYNAMIN-like ID   chr2:18403856-18406961 REVERSE LENGTH=612                                                                                                                                                                                                                                                                                                                                                             | 618 | 612  | 0         | 99.0  | 85.1 | 93.5 |
| Rsa1.0_00503.1.g15076.t1 | gb AAC27460.1  putative RING zinc finger protein [Arabidopsis thaliana]                                                                                                                                                                                                                                                                                                      | 134 | 624  | 1.00E-51  | 465.7 | 70.9 | 85.1 | putative RING zinc finger protein           | gbpln | Arabidopsis thaliana | AT2G44581.1   Symbols:   RING/U-box superfamily protein   chr1:9434718-18398433 REVERSE LENGTH=145                                                                                                                                                                                                                                                                                                                                                           | 134 | 145  | 1.00E-53  | 108.2 | 70.9 | 85.1 |
| Rsa1.0_00504.1.g15077.t1 | gb EOA39486.1  hypothetical protein CARUB_v10008094mg [Capsella rubella] gi 482575300 gb EOA39487.1  hypothetical protein CARUB_v10008094mg [Capsella rubella]                                                                                                                                                                                                               | 998 | 1371 | 0         | 137.4 | 70.2 | 82.2 | hypothetical protein CARUB_v10008094mg      | gbpln | Capsella rubella     | AT1G27170.1   Symbols:   transmembrane receptors:ATP binding   chr1:9434718-9439219 FORWARD LENGTH=1384                                                                                                                                                                                                                                                                                                                                                      | 998 | 1384 | 0         | 138.7 | 69.1 | 82.0 |
| Rsa1.0_00504.1.g15078.t1 | ref NP_174062.1  kelch repeat-containing F-box protein [Arabidopsis thaliana] gi 374095396 sp Q9FZJ3.2 FBK16_ARAT H RecName: Full=Putative F-box/kelch-repeat protein At1g27420 gi 332192706 gb AEE30827.1  putative F-box/kelch-repeat protein [Arabidopsis thaliana]                                                                                                       | 345 | 346  | 1.00E-101 | 100.3 | 58.8 | 71.9 | kelch repeat-containing F-box protein       | gbpln | Arabidopsis thaliana | AT1G27420.1   Symbols:   Galactose oxidase/kelch repeat superfamily protein   chr1:9519108-9520520 FORWARD LENGTH=346                                                                                                                                                                                                                                                                                                                                        | 345 | 346  | 1.00E-104 | 100.3 | 58.8 | 71.9 |
| Rsa1.0_00504.1.g15079.t1 | ref NP_174062.1  kelch repeat-containing F-box protein [Arabidopsis thaliana] gi 374095396 sp Q9FZJ3.2 FBK16_ARAT H RecName: Full=Putative F-box/kelch-repeat protein At1g27420 gi 332192706 gb AEE30827.1  putative F-box/kelch-repeat protein [Arabidopsis thaliana]                                                                                                       | 321 | 346  | 2.00E-90  | 107.8 | 57.9 | 71.3 | kelch repeat-containing F-box protein       | gbpln | Arabidopsis thaliana | AT1G27420.1   Symbols:   Galactose oxidase/kelch repeat superfamily protein   chr1:9519108-9520520 FORWARD LENGTH=346                                                                                                                                                                                                                                                                                                                                        | 321 | 346  | 5.00E-93  | 107.8 | 57.9 | 71.3 |
| Rsa1.0_00504.1.g15080.t1 | ref XP_002893356.1  galactosyltransferase family protein [Arabidopsis lyrata subsp. lyrata] gi 297339198 gb EFH69615.1  galactosyltransferase family protein [Arabidopsis lyrata subsp. lyrata] ref NP_174031.2  StaR-like protein domain-containing protein [Arabidopsis thaliana] gi 60547597 gb AAX23762.1                                                                | 652 | 672  | 0         | 103.1 | 86.0 | 92.2 | galactosyltransferase family protein        | gbpln | Arabidopsis lyrata   | AT1G27120.1   Symbols:   Galactosyltransferase family protein   chr1:9421389-9423910 FORWARD LENGTH=673                                                                                                                                                                                                                                                                                                                                                      | 652 | 673  | 0         | 103.2 | 85.6 | 91.7 |
| Rsa1.0_00504.1.g15081.t1 | hypothetical protein At1g27110 [Arabidopsis thaliana] gi 332192659 gb AEE30780.1  StaR-like protein domain-containing protein [Arabidopsis thaliana]                                                                                                                                                                                                                         | 508 | 483  | 0         | 95.1  | 73.4 | 82.9 | StaR-like protein domain-containing protein | gbpln | Arabidopsis thaliana | AT1G27110.1   Symbols:   Tetratricopeptide repeat (TPR)-like superfamily protein   chr1:9413018-9417392 REVERSE LENGTH=483                                                                                                                                                                                                                                                                                                                                   | 508 | 483  | 0         | 95.1  | 73.4 | 82.9 |
| Rsa1.0_00504.1.g15082.t1 | ref NP_174030.2  Actin cross-linking protein [Arabidopsis thaliana] gi 110737362 dbj BAF00626.1  hypothetical protein [Arabidopsis thaliana] gi 190016000 gb ACE62888.1  At1g27100 [Arabidopsis thaliana] gi 332192658 gb AEE30779.1  Actin cross-linking protein [Arabidopsis thaliana]                                                                                     | 265 | 519  | 1.00E-113 | 195.8 | 83.0 | 91.7 | Actin cross-linking protein                 | gbpln | Arabidopsis thaliana | AT1G27100.1   Symbols:   Actin cross-linking protein   chr1:9407557-9411074 REVERSE LENGTH=519                                                                                                                                                                                                                                                                                                                                                               | 265 | 519  | 1.00E-116 | 195.8 | 83.0 | 91.7 |
| Rsa1.0_00504.1.g15083.t1 | ref NP_174029.1  uncharacterized glycine-rich protein [Arabidopsis thaliana] gi 8778876 gb AAF79875.1 AC000348.28 T7N9.15 [Arabidopsis thaliana] gi 18389240 gb AAL67063.1  unknown protein [Arabidopsis thaliana] gi 20259227 gb AAM14329.1  unknown protein [Arabidopsis thaliana] gi 332192657 gb AEE30778.1  uncharacterized glycine-rich protein [Arabidopsis thaliana] | 456 | 420  | 1.00E-120 | 92.1  | 62.7 | 73.2 | uncharacterized glycine-rich protein        | gbpln | Arabidopsis thaliana | AT1G27090.1   Symbols:   glycine-rich protein   chr1:9404041-9406098 REVERSE LENGTH=420                                                                                                                                                                                                                                                                                                                                                                      | 456 | 420  | 1.00E-122 | 92.1  | 62.7 | 73.2 |



|                          |                                                                                                                                                                                                                                                                                                                                                                                                                                                                                                |     |     |           |       |      |      |                                                                            |       |                      |                                                                                                                                                                                                                                                                                                                                                   |     |     |           |       |      |      |
|--------------------------|------------------------------------------------------------------------------------------------------------------------------------------------------------------------------------------------------------------------------------------------------------------------------------------------------------------------------------------------------------------------------------------------------------------------------------------------------------------------------------------------|-----|-----|-----------|-------|------|------|----------------------------------------------------------------------------|-------|----------------------|---------------------------------------------------------------------------------------------------------------------------------------------------------------------------------------------------------------------------------------------------------------------------------------------------------------------------------------------------|-----|-----|-----------|-------|------|------|
| Rsa1.0_00504.1.g15084.t1 | refXP_002893358.1  regulator of chromosome condensation family protein [Arabidopsis lyrata subsp. lyrata] gi 297339200 gb EFH69617.1  regulator of chromosome condensation family protein [Arabidopsis lyrata subsp. lyrata]                                                                                                                                                                                                                                                                   | 392 | 388 | 0         | 99.0  | 82.7 | 89.5 | regulator of chromosome condensation family protein                        | gbpln | Arabidopsis lyrata   | AT1G27060.1   Symbols:   Regulator of chromosome condensation (RCG1) family protein   chr1:9395023-9396673 FORWARD LENGTH=386                                                                                                                                                                                                                     | 392 | 386 | 1.00E-180 | 98.5  | 80.1 | 88.3 |
| Rsa1.0_00504.1.g15085.t1 | refXP_002893361.1  hypothetical protein ARALYDRAFT_890014 [Arabidopsis lyrata subsp. lyrata] gi 297339203 gb EFH69620.1  hypothetical protein ARALYDRAFT_890014 [Arabidopsis lyrata subsp. lyrata]                                                                                                                                                                                                                                                                                             | 310 | 310 | 1.00E-154 | 100.0 | 84.5 | 91.6 | hypothetical protein ARALYDRAFT_890014                                     | gbpln | Arabidopsis lyrata   | AT1G27030.1   Symbols:   unknown protein; BEST Arabidopsis thaliana protein match is: unknown protein (TAIR:AT1G27020.1); Has 504 Blast hits to 502 proteins in 169 species: Archae - 0; Bacteria - 299; Metazoa - 0; Fungi - 0; Plants - 67; Viruses - 0; Other Eukaryotes - 138 (source: NCBI BLink).   chr1:9381842-9383712 FORWARD LENGTH=310 | 310 | 310 | 1.00E-154 | 100.0 | 82.6 | 90.6 |
| Rsa1.0_00504.1.g15086.t1 | refNP_174062.1  kelch repeat-containing F-box protein [Arabidopsis thaliana] gi 374095396 sp Q9FZJ3.2 FBK16_ARAT H RecName: Full=Putative F-box/kelch-repeat protein At1g27420 gi 332192706 gb AEE30827.1  putative F-box/kelch-repeat protein [Arabidopsis thaliana]                                                                                                                                                                                                                          | 326 | 346 | 1.00E-112 | 106.1 | 69.0 | 78.2 | kelch repeat-containing F-box protein                                      | gbpln | Arabidopsis thaliana | AT1G27420.1   Symbols:   Galactose oxidase/kelch repeat superfamily protein   chr1:9519108-9520520 FORWARD LENGTH=346                                                                                                                                                                                                                             | 326 | 346 | 1.00E-115 | 106.1 | 69.0 | 78.2 |
| Rsa1.0_00504.1.g15087.t1 | gb AAF79851.1 AC000348.4 T7N9.6 [Arabidopsis thaliana]                                                                                                                                                                                                                                                                                                                                                                                                                                         | 314 | 334 | 1.00E-142 | 106.4 | 83.1 | 91.7 | T7N9.6                                                                     | gbpln | Arabidopsis thaliana | AT1G27000.1   Symbols:   Protein of unknown function (DUF1664)   chr1:9374068-9376422 FORWARD LENGTH=304                                                                                                                                                                                                                                          | 314 | 304 | 1.00E-140 | 96.8  | 78.7 | 86.9 |
| Rsa1.0_00504.1.g15088.t1 | refNP_174019.2  protein kinase domain-containing protein [Arabidopsis thaliana] gi 56236066 gb AAV84489.1  At1g26970 [Arabidopsis thaliana] gi 56790206 gb AAW30020.1  At1g26970 [Arabidopsis thaliana] gi 332192644 gb AEE30765.1  protein kinase domain-containing protein [Arabidopsis thaliana]                                                                                                                                                                                            | 410 | 412 | 0         | 100.5 | 82.9 | 89.8 | protein kinase domain-containing protein                                   | gbpln | Arabidopsis thaliana | AT1G26970.1   Symbols:   Protein kinase superfamily protein   chr1:9359826-9361666 FORWARD LENGTH=412                                                                                                                                                                                                                                             | 410 | 412 | 0         | 100.5 | 82.9 | 89.8 |
| Rsa1.0_00504.1.g15089.t1 | gb EOA37024.1  hypothetical protein CARUB_v10010076mg [Capsella rubella]                                                                                                                                                                                                                                                                                                                                                                                                                       | 255 | 254 | 1.00E-121 | 99.6  | 87.1 | 93.3 | hypothetical protein CARUB_v10010076mg                                     | gbpln | Capsella rubella     | AT1G26960.1   Symbols: AtHB23, HB23   homeobox protein 23   chr1:9356126-9357239 FORWARD LENGTH=255                                                                                                                                                                                                                                               | 255 | 255 | 1.00E-121 | 100.0 | 86.3 | 92.5 |
| Rsa1.0_00504.1.g15090.t1 | refNP_001031615.1  RNA-directed DNA polymerase (reverse transcriptase)-related family protein [Arabidopsis thaliana] gi 98962109 gb ABF59384.1  unknown protein [Arabidopsis thaliana] gi 332657509 gb AEE82909.1  RNA-directed DNA polymerase (reverse transcriptase)-related family protein [Arabidopsis thaliana]                                                                                                                                                                           | 213 | 146 | 4.00E-18  | 68.5  | 23.9 | 32.9 | RNA-directed DNA polymerase (reverse transcriptase)-related family protein | gbpln | Arabidopsis thaliana | AT4G10613.1   Symbols:   RNA-directed DNA polymerase (reverse transcriptase)-related family protein   chr4:6561039-6561479 FORWARD LENGTH=146                                                                                                                                                                                                     | 213 | 146 | 1.00E-20  | 68.5  | 23.9 | 32.9 |
| Rsa1.0_00504.1.g15091.t1 | gb EOA36365.1  hypothetical protein CARUB_v10010751mg [Capsella rubella]                                                                                                                                                                                                                                                                                                                                                                                                                       | 94  | 94  | 9.00E-34  | 100.0 | 78.7 | 80.9 | hypothetical protein CARUB_v10010751mg                                     | gbpln | Capsella rubella     | AT1G26945.1   Symbols: KDR   basic helix-loop-helix (bHLH) DNA-binding superfamily protein   chr1:9351571-9352474 FORWARD LENGTH=94                                                                                                                                                                                                               | 94  | 94  | 4.00E-36  | 100.0 | 77.7 | 80.9 |
| Rsa1.0_00504.1.g15092.t1 | gb EOA37078.1  hypothetical protein CARUB_v10010228mg [Capsella rubella]                                                                                                                                                                                                                                                                                                                                                                                                                       | 234 | 226 | 1.00E-105 | 96.6  | 82.9 | 88.5 | hypothetical protein CARUB_v10010228mg                                     | gbpln | Capsella rubella     | AT1G26940.1   Symbols:   Cyclophilin-like peptidyl-prolyl cis-trans isomerase family protein   chr1:9343193-9344962 FORWARD LENGTH=226                                                                                                                                                                                                            | 234 | 226 | 1.00E-106 | 96.6  | 80.8 | 86.8 |
| Rsa1.0_00504.1.g15093.t1 | gb EOA40529.1  hypothetical protein CARUB_v10009257mg [Capsella rubella]                                                                                                                                                                                                                                                                                                                                                                                                                       | 427 | 419 | 0         | 98.1  | 88.1 | 92.7 | hypothetical protein CARUB_v10009257mg                                     | gbpln | Capsella rubella     | AT1G26930.1   Symbols:   Galactose oxidase/kelch repeat superfamily protein   chr1:9336211-9337476 REVERSE LENGTH=421                                                                                                                                                                                                                             | 427 | 421 | 0         | 98.6  | 86.2 | 92.0 |
| Rsa1.0_00504.1.g15094.t1 | refNP_564266.1  uncharacterized protein [Arabidopsis thaliana] gi 13877719 gb AAK43937.1 AF370618.1 Unknown protein [Arabidopsis thaliana] gi 4262181 gb AAD14498.1  Unknown protein [Arabidopsis thaliana] gi 17065570 gb AAL32942.1  Unknown protein [Arabidopsis thaliana] gi 20148583 gb AAM10182.1  unknown protein [Arabidopsis thaliana] gi 21592517 gb AAM64467.1  unknown [Arabidopsis thaliana] gi 332192638 gb AEE30759.1  uncharacterized protein AT1G26920 [Arabidopsis thaliana] | 174 | 173 | 2.00E-61  | 99.4  | 72.4 | 86.8 | uncharacterized protein                                                    | gbpln | Arabidopsis thaliana | AT1G26920.1   Symbols:   unknown protein; BEST Arabidopsis thaliana protein match is: unknown protein (TAIR:AT1G69760.1); Has 47 Blast hits to 47 proteins in 13 species: Archae - 0; Bacteria - 0; Metazoa - 0; Fungi - 7; Plants - 34; Viruses - 0; Other Eukaryotes - 6 (source: NCBI BLink).   chr1:9329584-9330105 FORWARD LENGTH=173        | 174 | 173 | 8.00E-64  | 99.4  | 72.4 | 86.8 |

|                          |                                                                                                                                                                                                                                                                                                                                                                                                                                                                                                                                                                                                                                                                                                                               |     |      |           |        |      |      |                                                |       |                      |                                                                                                                                         |     |      |           |       |      |      |
|--------------------------|-------------------------------------------------------------------------------------------------------------------------------------------------------------------------------------------------------------------------------------------------------------------------------------------------------------------------------------------------------------------------------------------------------------------------------------------------------------------------------------------------------------------------------------------------------------------------------------------------------------------------------------------------------------------------------------------------------------------------------|-----|------|-----------|--------|------|------|------------------------------------------------|-------|----------------------|-----------------------------------------------------------------------------------------------------------------------------------------|-----|------|-----------|-------|------|------|
| Rsa1.0_00505.1.g15095.t2 | refXP_002873168.1  hypothetical protein ARALYDRAFT_908364 [Arabidopsis lyrata subsp. lyrata] gi 297319005 gb EFH49427.1  hypothetical protein ARALYDRAFT_908364 [Arabidopsis lyrata subsp. lyrata] ref NP_196094.1  ACT domain-containing protein [Arabidopsis thaliana] gi 7413536 emb CAB86016.1  putative protein [Arabidopsis thaliana] gi 9758449 dbj BAB08978.1  unnamed protein product [Arabidopsis thaliana] gi 18252933 gb AAL62393.1  putative protein [Arabidopsis thaliana] gi 21389645 gb AAM48021.1  putative protein [Arabidopsis thaliana] gi 332003394 gb AED90777.1  ACT domain-containing protein [Arabidopsis thaliana] gi 347949480 gb AEP31953.1  ACT domain-containing protein [Arabidopsis thaliana] | 190 | 213  | 8.00E-85  | 112.1  | 83.7 | 90.0 | hypothetical protein ARALYDRAFT_908364         | gbpln | Arabidopsis lyrata   | AT5G04760.1   Symbols:   Duplicated homeodomain-like superfamily protein   chr5:1373752-1374529 REVERSE LENGTH=215                      | 190 | 215  | 1.00E-77  | 113.2 | 80.0 | 87.9 |
| Rsa1.0_00505.1.g15096.t1 | ref NP_196094.1  ACT domain-containing protein [Arabidopsis thaliana] gi 7413536 emb CAB86016.1  putative protein [Arabidopsis thaliana] gi 9758449 dbj BAB08978.1  unnamed protein product [Arabidopsis thaliana] gi 18252933 gb AAL62393.1  putative protein [Arabidopsis thaliana] gi 21389645 gb AAM48021.1  putative protein [Arabidopsis thaliana] gi 332003394 gb AED90777.1  ACT domain-containing protein [Arabidopsis thaliana] gi 347949480 gb AEP31953.1  ACT domain-containing protein [Arabidopsis thaliana]                                                                                                                                                                                                    | 298 | 301  | 1.00E-136 | 101.0  | 83.2 | 90.3 | ACT domain-containing protein                  | gbpln | Arabidopsis thaliana | AT5G04740.1   Symbols:   ACT domain-containing protein   chr5:1368713-1371391 REVERSE LENGTH=301                                        | 298 | 301  | 1.00E-138 | 101.0 | 83.2 | 90.3 |
| Rsa1.0_00505.1.g15097.t1 | #                                                                                                                                                                                                                                                                                                                                                                                                                                                                                                                                                                                                                                                                                                                             | #   | #    | #         | #      | #    | #    | -                                              | ----  | ----                 | #                                                                                                                                       | #   | #    | #         | #     | #    | #    |
| Rsa1.0_00505.1.g15098.t1 | dbj BAJ34016.1  unnamed protein product [Thellungiella halophila]                                                                                                                                                                                                                                                                                                                                                                                                                                                                                                                                                                                                                                                             | 298 | 522  | 5.00E-46  | 175.2  | 35.6 | 41.3 | unnamed protein product                        | ----  | ----                 | AT5G04720.1   Symbols:   ADR1-L2   ADR1-like 2   chr5:1360748-1363665 FORWARD LENGTH=811                                                | 298 | 811  | 7.00E-46  | 272.1 | 33.2 | 37.9 |
| Rsa1.0_00505.1.g15099.t1 | ref NP_564870.1  homolog of anti-oxidant 1 [Arabidopsis thaliana] gi 14532548 gb AAK64002.1  At1g66240/T6J19.6 [Arabidopsis thaliana] gi 18655401 gb AAL76156.1  At1g66240/T6J19.6 [Arabidopsis thaliana] gi 332196360 gb AEE34481.1  homolog of anti-oxidant 1 [Arabidopsis thaliana]                                                                                                                                                                                                                                                                                                                                                                                                                                        | 77  | 106  | 4.00E-29  | 137.7  | 85.7 | 94.8 | homolog of anti-oxidant 1                      | gbpln | Arabidopsis thaliana | AT1G66240.1   Symbols:   ATX1, ATATX1   homolog of anti-oxidant 1   chr1:24686445-24687327 REVERSE LENGTH=106                           | 77  | 106  | 6.00E-32  | 137.7 | 85.7 | 94.8 |
| Rsa1.0_00505.1.g15100.t1 | gb EOA20007.1  hypothetical protein CARUB_v10000280mg [Capsella rubella]                                                                                                                                                                                                                                                                                                                                                                                                                                                                                                                                                                                                                                                      | 229 | 769  | 3.00E-76  | 335.8  | 69.4 | 79.5 | hypothetical protein CARUB_v10000280mg         | gbpln | Capsella rubella     | AT5G04670.1   Symbols:   Enhancer of polycomb-like transcription factor protein   chr5:1337898-1340884 REVERSE LENGTH=766               | 229 | 766  | 3.00E-72  | 334.5 | 64.6 | 75.5 |
| Rsa1.0_00505.1.g15101.t1 | #                                                                                                                                                                                                                                                                                                                                                                                                                                                                                                                                                                                                                                                                                                                             | #   | #    | #         | #      | #    | #    | -                                              | ----  | ----                 | #                                                                                                                                       | #   | #    | #         | #     | #    | #    |
| Rsa1.0_00505.1.g15102.t1 | gb EOA21520.1  hypothetical protein CARUB_v10001924mg [Capsella rubella]                                                                                                                                                                                                                                                                                                                                                                                                                                                                                                                                                                                                                                                      | 222 | 220  | 1.00E-104 | 99.1   | 89.6 | 94.1 | hypothetical protein CARUB_v10001924mg         | gbpln | Capsella rubella     | AT5G04600.1   Symbols:   RNA-binding (RRM/RBD/RNP motifs) family protein   chr5:1323700-1325486 FORWARD LENGTH=222                      | 222 | 222  | 1.00E-99  | 100.0 | 76.6 | 86.5 |
| Rsa1.0_00505.1.g15103.t1 | refXP_002873156.1  hypothetical protein ARALYDRAFT_908343 [Arabidopsis lyrata subsp. lyrata] gi 297318993 gb EFH49415.1  hypothetical protein ARALYDRAFT_908343 [Arabidopsis lyrata subsp. lyrata] ref NP_196074.2  Myotubularin-like phosphatases II-like protein [Arabidopsis thaliana] gi 332003375 gb AED90758.1  Myotubularin-like phosphatases II-like protein [Arabidopsis thaliana]                                                                                                                                                                                                                                                                                                                                   | 599 | 599  | 0         | 100.0  | 86.6 | 93.2 | hypothetical protein ARALYDRAFT_908343         | gbpln | Arabidopsis lyrata   | AT5G04550.1   Symbols:   Protein of unknown function (DUF668)   chr5:1303757-1305556 REVERSE LENGTH=599                                 | 599 | 599  | 0         | 100.0 | 86.3 | 93.2 |
| Rsa1.0_00505.1.g15104.t1 | ref NP_196074.2  Myotubularin-like phosphatases II-like protein [Arabidopsis thaliana] gi 332003375 gb AED90758.1  Myotubularin-like phosphatases II-like protein [Arabidopsis thaliana]                                                                                                                                                                                                                                                                                                                                                                                                                                                                                                                                      | 830 | 833  | 0         | 100.4  | 84.0 | 91.2 | Myotubularin-like phosphatases II-like protein | gbpln | Arabidopsis thaliana | AT5G04540.1   Symbols:   Myotubularin-like phosphatases II superfamily   chr5:1296826-1302299 REVERSE LENGTH=833                        | 830 | 833  | 0         | 100.4 | 84.0 | 91.2 |
| Rsa1.0_00505.1.g15105.t1 | refXP_002873154.1  beta-ketoacyl-CoA synthase family protein [Arabidopsis lyrata subsp. lyrata] gi 297318991 gb EFH49413.1  beta-ketoacyl-CoA synthase family protein [Arabidopsis lyrata subsp. lyrata]                                                                                                                                                                                                                                                                                                                                                                                                                                                                                                                      | 462 | 464  | 0         | 100.4  | 89.2 | 93.1 | beta-ketoacyl-CoA synthase family protein      | gbpln | Arabidopsis lyrata   | AT5G04530.1   Symbols:   KCS19   3-ketoacyl-CoA synthase 19   chr5:1292222-1293616 REVERSE LENGTH=464                                   | 462 | 464  | 0         | 100.4 | 88.3 | 93.7 |
| Rsa1.0_00505.1.g15106.t1 | #                                                                                                                                                                                                                                                                                                                                                                                                                                                                                                                                                                                                                                                                                                                             | #   | #    | #         | #      | #    | #    | -                                              | ----  | ----                 | #                                                                                                                                       | #   | #    | #         | #     | #    | #    |
| Rsa1.0_00505.1.g15107.t1 | gb EOA22612.1  hypothetical protein CARUB_v10003280mg [Capsella rubella]                                                                                                                                                                                                                                                                                                                                                                                                                                                                                                                                                                                                                                                      | 725 | 762  | 0         | 105.1  | 81.2 | 90.1 | hypothetical protein CARUB_v10003280mg         | gbpln | Capsella rubella     | AT5G04500.1   Symbols:   glycosyltransferase family protein 47   chr5:1283604-1286155 FORWARD LENGTH=765                                | 725 | 765  | 0         | 105.5 | 80.6 | 88.8 |
| Rsa1.0_00505.1.g15108.t1 | gb EOA19863.1  hypothetical protein CARUB_v10000114mg [Capsella rubella]                                                                                                                                                                                                                                                                                                                                                                                                                                                                                                                                                                                                                                                      | 209 | 1048 | 9.00E-32  | 501.4  | 31.1 | 36.4 | hypothetical protein CARUB_v10000114mg         | gbpln | Capsella rubella     | AT5G04480.1   Symbols:   UDP-Glycosyltransferase superfamily protein   chr5:1271886-1277793 REVERSE LENGTH=1050                         | 209 | 1050 | 3.00E-33  | 502.4 | 31.1 | 35.9 |
| Rsa1.0_00505.1.g15109.t1 | gb ACP30591.1  disease resistance protein [Brassica rapa subsp. pekinensis]                                                                                                                                                                                                                                                                                                                                                                                                                                                                                                                                                                                                                                                   | 112 | 1555 | 3.00E-17  | 1388.4 | 42.0 | 58.9 | disease resistance protein                     | gbpln | Brassica rapa        | AT4G09490.1   Symbols:   Polynucleotidyl transferase, ribonuclease H-like superfamily protein   chr4:6015583-6016575 REVERSE LENGTH=170 | 112 | 170  | 6.00E-12  | 151.8 | 32.1 | 47.3 |

|                          |                                                                                                                                                                                                                                                                                                                                                                                                                                                                                                                                                                                                                                                                                                                                                                                |     |     |           |       |      |      |                                                                                    |       |                      |                                                                                                                                     |     |     |           |       |      |      |
|--------------------------|--------------------------------------------------------------------------------------------------------------------------------------------------------------------------------------------------------------------------------------------------------------------------------------------------------------------------------------------------------------------------------------------------------------------------------------------------------------------------------------------------------------------------------------------------------------------------------------------------------------------------------------------------------------------------------------------------------------------------------------------------------------------------------|-----|-----|-----------|-------|------|------|------------------------------------------------------------------------------------|-------|----------------------|-------------------------------------------------------------------------------------------------------------------------------------|-----|-----|-----------|-------|------|------|
| Rsa1.0_00505.1.g15110.t1 | refNP_196067.1  cyclin-dependent protein kinase inhibitor [Arabidopsis thaliana]<br>gi 75181205 sp Q9L278.1 SIM_ARATH<br>RecName: Full=Cyclin-dependent protein kinase inhibitor SIM; AltName: Full=Protein SIAMESE<br>gi 7406451 emb CAB85553.1  putative protein [Arabidopsis thaliana]<br>gi 21537413 gb AAM61754.1  unknown [Arabidopsis thaliana]<br>gi 32815859 gb AAP88332.1  At5g04470 [Arabidopsis thaliana]<br>gi 332003366 gb AED90749.1  cyclin-dependent protein kinase inhibitor SIM [Arabidopsis thaliana]                                                                                                                                                                                                                                                      | 130 | 127 | 7.00E-29  | 97.7  | 57.7 | 65.4 | cyclin-dependent protein kinase inhibitor                                          | gbpln | Arabidopsis thaliana | AT5G04470.1   Symbols: SIM   cyclin-dependent protein kinase inhibitors   chr5:1266893-1267276 REVERSE<br>LENGTH=127                | 130 | 127 | 1.00E-31  | 97.7  | 57.7 | 65.4 |
| Rsa1.0_00505.1.g15111.t1 | gb EOA21054.1  hypothetical protein CARUB_v10001394mg [Capsella rubella]                                                                                                                                                                                                                                                                                                                                                                                                                                                                                                                                                                                                                                                                                                       | 330 | 334 | 1.00E-173 | 101.2 | 92.4 | 96.1 | hypothetical protein CARUB_v10001394mg                                             | gbpln | Capsella rubella     | AT5G04430.2   Symbols: BTR1, BTR1L   binding to TOMV RNA 1L (long form)   chr5:1250602-1253523 REVERSE<br>LENGTH=334                | 330 | 334 | 1.00E-175 | 101.2 | 91.5 | 95.5 |
| Rsa1.0_00505.1.g15112.t1 | refXP_002871092.1  hypothetical protein ARALYDRAFT_908325 [Arabidopsis lyrata subsp. lyrata]<br>gi 297316929 gb EFH47351.1  hypothetical protein ARALYDRAFT_908325 [Arabidopsis lyrata subsp. lyrata]<br>refNP_189058.1  putative type 1 membrane protein [Arabidopsis thaliana]<br>gi 4206765 gb AAD11797.1  putative type 1 membrane protein [Arabidopsis thaliana]<br>gi 11994235 db BAB01357.1  unnamed protein product [Arabidopsis thaliana]<br>gi 15450743 gb AAK96643.1  AT3g24160/MUJ8_16 [Arabidopsis thaliana]<br>gi 21537239 gb AAM61580.1  type 1 membrane protein, putative [Arabidopsis thaliana]<br>gi 22137144 gb AAM91417.1  AT3g24160/MUJ8_16 [Arabidopsis thaliana]<br>gi 332643343 gb AEE76864.1  putative type 1 membrane protein [Arabidopsis thaliana] | 547 | 568 | 0         | 103.8 | 80.8 | 88.8 | hypothetical protein ARALYDRAFT_908325                                             | gbpln | Arabidopsis lyrata   | AT5G04410.1   Symbols: NAC2, anac078   NAC domain containing protein 2   chr5:1243980-1246416 FORWARD<br>LENGTH=567                 | 547 | 567 | 0         | 103.7 | 79.7 | 88.5 |
| Rsa1.0_00506.1.g15113.t1 | sp O04955.2 GSHRC_BRARP RecName: Full=Glutathione reductase, cytosolic; Short=GR; Short=GRase<br>gi 7689373 gb AAF67753.1 AF255651.1 cytosolic glutathione reductase [Brassica rapa subsp. pekinensis]<br>gi 7547136 gb AAC49980.2  glutathione reductase [Brassica rapa]                                                                                                                                                                                                                                                                                                                                                                                                                                                                                                      | 365 | 364 | 1.00E-161 | 99.7  | 82.5 | 90.1 | putative type 1 membrane protein                                                   | gbpln | Arabidopsis thaliana | AT3G24160.1   Symbols: PMP   putative type 1 membrane protein   chr3:8726241-8729023 FORWARD LENGTH=364                             | 365 | 364 | 1.00E-164 | 99.7  | 82.5 | 90.1 |
| Rsa1.0_00506.1.g15114.t2 | RefXP_002883477.1  monoxygenase [Arabidopsis lyrata subsp. lyrata]<br>gi 297329317 gb EFH59736.1  monoxygenase [Arabidopsis lyrata subsp. lyrata]                                                                                                                                                                                                                                                                                                                                                                                                                                                                                                                                                                                                                              | 485 | 502 | 0         | 103.5 | 96.5 | 97.5 | Short=GRase<br>gi 7689373 gb AAF67753.1 AF255651.1 cytosolic glutathione reductase | gbpln | Brassica rapa        | AT3G24170.3   Symbols: ATGR1, GR1   glutathione-disulfide reductase   chr3:8729762-8734115 REVERSE<br>LENGTH=499                    | 485 | 499 | 0         | 102.9 | 93.8 | 97.7 |
| Rsa1.0_00506.1.g15115.t1 | gb EOA29913.1  hypothetical protein CARUB_v10013006mg [Capsella rubella]                                                                                                                                                                                                                                                                                                                                                                                                                                                                                                                                                                                                                                                                                                       | 832 | 799 | 0         | 96.0  | 88.0 | 91.2 | hypothetical protein CARUB_v10013006mg                                             | gbpln | Capsella rubella     | AT3G24190.1   Symbols:   Protein kinase superfamily protein   chr3:8743319-8747703 FORWARD LENGTH=793                               | 832 | 793 | 0         | 95.3  | 88.9 | 91.2 |
| Rsa1.0_00506.1.g15116.t1 | refXP_002883477.1  monoxygenase [Arabidopsis lyrata subsp. lyrata]<br>gi 297329317 gb EFH59736.1  monoxygenase [Arabidopsis lyrata subsp. lyrata]                                                                                                                                                                                                                                                                                                                                                                                                                                                                                                                                                                                                                              | 507 | 505 | 0         | 99.6  | 90.3 | 94.1 | monoxygenase                                                                       | gbpln | Arabidopsis lyrata   | AT3G24200.1   Symbols:   FAD/NAD(P)-binding oxidoreductase family protein   chr3:8748095-8751575 REVERSE<br>LENGTH=505              | 507 | 505 | 0         | 99.6  | 90.5 | 93.7 |
| Rsa1.0_00506.1.g15117.t1 | gb EOA30105.1  hypothetical protein CARUB_v10013216mg [Capsella rubella]                                                                                                                                                                                                                                                                                                                                                                                                                                                                                                                                                                                                                                                                                                       | 606 | 626 | 0         | 103.3 | 78.4 | 86.1 | hypothetical protein CARUB_v10013216mg                                             | gbpln | Capsella rubella     | AT3G24210.1   Symbols:   Ankyrin repeat family protein   chr3:8753712-8755627 REVERSE LENGTH=607                                    | 606 | 607 | 0         | 100.2 | 80.2 | 87.1 |
| Rsa1.0_00506.1.g15118.t1 | refXP_002885610.1  nine-cis-epoxycarotenoid dioxygenase 6 [Arabidopsis lyrata subsp. lyrata]<br>gi 297331450 gb EFH61869.1  nine-cis-epoxycarotenoid dioxygenase 6 [Arabidopsis lyrata subsp. lyrata]                                                                                                                                                                                                                                                                                                                                                                                                                                                                                                                                                                          | 585 | 577 | 0         | 98.6  | 84.6 | 90.8 | nine-cis-epoxycarotenoid dioxygenase 6                                             | gbpln | Arabidopsis lyrata   | AT3G24220.1   Symbols: NCED6, ATNCD6   nine-cis-epoxycarotenoid dioxygenase 6   chr3:8761439-8763172 FORWARD<br>LENGTH=577          | 585 | 577 | 0         | 98.6  | 83.2 | 90.8 |
| Rsa1.0_00506.1.g15119.t1 | #                                                                                                                                                                                                                                                                                                                                                                                                                                                                                                                                                                                                                                                                                                                                                                              | #   | #   | #         | #     | #    | #    | -                                                                                  | ----  | ----                 | #                                                                                                                                   | #   | #   | #         | #     | #    |      |
| Rsa1.0_00506.1.g15120.t1 | refXP_002886768.1  hypothetical protein ARALYDRAFT_475482 [Arabidopsis lyrata subsp. lyrata]<br>gi 297332609 gb EFH63027.1  hypothetical protein ARALYDRAFT_475482 [Arabidopsis lyrata subsp. lyrata]                                                                                                                                                                                                                                                                                                                                                                                                                                                                                                                                                                          | 428 | 435 | 0         | 101.6 | 85.3 | 93.0 | hypothetical protein ARALYDRAFT_475482                                             | gbpln | Arabidopsis lyrata   | AT1G64810.2   Symbols: APO1   Arabidopsis thaliana protein of unknown function (DUF794)   chr1:24086810-24088276 FORWARD LENGTH=460 | 428 | 460 | 0         | 107.5 | 84.6 | 92.1 |
| Rsa1.0_00506.1.g15121.t1 | #                                                                                                                                                                                                                                                                                                                                                                                                                                                                                                                                                                                                                                                                                                                                                                              | #   | #   | #         | #     | #    | #    | -                                                                                  | ----  | ----                 | #                                                                                                                                   | #   | #   | #         | #     | #    |      |

|                          |                                                                                                                                                                                                                                                                                                                                                          |      |      |           |       |      |      |                                                      |       |                      |                                                                                                                                          |      |      |           |       |      |      |
|--------------------------|----------------------------------------------------------------------------------------------------------------------------------------------------------------------------------------------------------------------------------------------------------------------------------------------------------------------------------------------------------|------|------|-----------|-------|------|------|------------------------------------------------------|-------|----------------------|------------------------------------------------------------------------------------------------------------------------------------------|------|------|-----------|-------|------|------|
| Rsa1.0_00506.1.g15122.t1 | emb[CAB39638.1] RNA-directed DNA polymerase-like protein [Arabidopsis thaliana] gi 7267666 emb[CAB78094.1] RNA-directed DNA polymerase-like protein [Arabidopsis thaliana]<br>ref NP_189065.2  putative pectate lyase 9 [Arabidopsis thaliana]<br>gi 32129847 sp Q9LRM5.1 PEL9_ARATH RecName: Full=Probable pectate lyase 9; Flags: Precursor            | 219  | 1274 | 8.00E-11  | 581.7 | 19.2 | 27.4 | RNA-directed DNA polymerase-like protein             | gbpln | Arabidopsis thaliana | AT1G10000.1   Symbols:   Ribonuclease H-like superfamily protein   chr1:3263877-3264788 REVERSE LENGTH=303                               | 219  | 303  | 1.00E-11  | 138.4 | 20.1 | 33.3 |
| Rsa1.0_00506.1.g15123.t1 | gi 11994243 dbj BA01365.1  pectate lyase [Arabidopsis thaliana]<br>gi 332643356 gb AAE76877.1  putative pectate lyase 9 [Arabidopsis thaliana]<br>ref XP_002884574.1  hypothetical protein ARALYDRAFT_896752 [Arabidopsis lyrata subsp. lyrata]<br>gi 297330414 gb EFH60833.1  hypothetical protein ARALYDRAFT_896752 [Arabidopsis lyrata subsp. lyrata] | 56   | 452  | 2.00E-11  | 807.1 | 66.1 | 78.6 | putative pectate lyase 9                             | gbpln | Arabidopsis thaliana | AT3G24230.1   Symbols:   Pectate lyase family protein   chr3:8774637-8777306 FORWARD LENGTH=452                                          | 56   | 452  | 3.00E-14  | 807.1 | 66.1 | 78.6 |
| Rsa1.0_00507.1.g15124.t1 | ref XP_002884572.1  DNAJ heat shock N-terminal domain-containing protein [Arabidopsis lyrata subsp. lyrata]<br>gi 297330412 gb EFH60831.1  DNAJ heat shock N-terminal domain-containing protein [Arabidopsis lyrata subsp. lyrata]                                                                                                                       | 559  | 554  | 0         | 99.1  | 89.1 | 93.0 | hypothetical protein ARALYDRAFT_896752               | gbpln | Arabidopsis lyrata   | AT3G06370.1   Symbols: NHX4, ATNHX4   sodium hydrogen exchanger 4   chr3:1930899-1933515 REVERSE LENGTH=503                              | 559  | 503  | 0         | 90.0  | 80.1 | 83.9 |
| Rsa1.0_00507.1.g15125.t1 | ref XP_002884572.1  DNAJ heat shock N-terminal domain-containing protein [Arabidopsis lyrata subsp. lyrata]<br>gi 297330412 gb EFH60831.1  DNAJ heat shock N-terminal domain-containing protein [Arabidopsis lyrata subsp. lyrata]                                                                                                                       | 648  | 671  | 0         | 103.5 | 61.6 | 75.3 | DNAJ heat shock N-terminal domain-containing protein | gbpln | Arabidopsis lyrata   | AT3G06340.3   Symbols:   DNAJ heat shock N-terminal domain-containing protein   chr3:1920607-1922628 REVERSE LENGTH=673                  | 648  | 673  | 0         | 103.9 | 61.0 | 76.1 |
| Rsa1.0_00507.1.g15126.t1 | gb EOA30590.1  hypothetical protein CARUB_v10013722mg [Capsella rubella]<br>ref XP_002882461.1  hypothetical protein ARALYDRAFT_896742 [Arabidopsis lyrata subsp. lyrata]<br>gi 297328301 gb EFH58720.1  hypothetical protein ARALYDRAFT_896742 [Arabidopsis lyrata subsp. lyrata]                                                                       | 465  | 440  | 0         | 94.6  | 77.2 | 82.4 | hypothetical protein CARUB_v10013722mg               | gbpln | Capsella rubella     | AT3G06330.1   Symbols:   RING/U-box superfamily protein   chr3:1917334-1919709 FORWARD LENGTH=426                                        | 465  | 426  | 1.00E-174 | 91.6  | 73.1 | 79.4 |
| Rsa1.0_00507.1.g15127.t2 | ref XP_002882461.1  hypothetical protein ARALYDRAFT_896742 [Arabidopsis lyrata subsp. lyrata]<br>gi 297328301 gb EFH58720.1  hypothetical protein ARALYDRAFT_896742 [Arabidopsis lyrata subsp. lyrata]                                                                                                                                                   | 416  | 409  | 1.00E-141 | 98.3  | 61.3 | 73.3 | hypothetical protein ARALYDRAFT_896742               | gbpln | Arabidopsis lyrata   | AT1G03710.2   Symbols:   Cystatin/monellin superfamily protein   chr1:923492-924287 FORWARD LENGTH=202                                   | 416  | 202  | 7.00E-25  | 48.6  | 18.8 | 27.6 |
| Rsa1.0_00507.1.g15128.t1 | ref XP_002882461.1  hypothetical protein ARALYDRAFT_896742 [Arabidopsis lyrata subsp. lyrata]<br>gi 297328301 gb EFH58720.1  hypothetical protein ARALYDRAFT_896742 [Arabidopsis lyrata subsp. lyrata]                                                                                                                                                   | 399  | 409  | 1.00E-140 | 102.5 | 64.2 | 78.4 | hypothetical protein ARALYDRAFT_896742               | gbpln | Arabidopsis lyrata   | AT1G03710.2   Symbols:   Cystatin/monellin superfamily protein   chr1:923492-924287 FORWARD LENGTH=202                                   | 399  | 202  | 3.00E-24  | 50.6  | 16.0 | 23.1 |
| Rsa1.0_00507.1.g15129.t1 | #                                                                                                                                                                                                                                                                                                                                                        | #    | #    | #         | #     | #    | #    | -                                                    | ----  | ----                 | #                                                                                                                                        | #    | #    | #         | #     | #    |      |
| Rsa1.0_00507.1.g15130.t2 | ref XP_002884569.1  hypothetical protein ARALYDRAFT_896743 [Arabidopsis lyrata subsp. lyrata]<br>gi 297330409 gb EFH60828.1  hypothetical protein ARALYDRAFT_896743 [Arabidopsis lyrata subsp. lyrata]                                                                                                                                                   | 297  | 280  | 2.00E-70  | 94.3  | 48.1 | 61.3 | hypothetical protein ARALYDRAFT_896743               | gbpln | Arabidopsis lyrata   | AT5G17080.1   Symbols:   Cysteine proteinases superfamily protein   chr5:5619594-5620949 FORWARD LENGTH=298                              | 297  | 298  | 2.00E-29  | 100.3 | 27.6 | 45.1 |
| Rsa1.0_00507.1.g15131.t3 | gb EOA31003.1  hypothetical protein CARUB_v10014146mg [Capsella rubella]<br>ref XP_002884568.1  hypothetical protein ARALYDRAFT_477928 [Arabidopsis lyrata subsp. lyrata]<br>gi 297330408 gb EFH60827.1  hypothetical protein ARALYDRAFT_477928 [Arabidopsis lyrata subsp. lyrata]                                                                       | 316  | 334  | 1.00E-155 | 105.7 | 89.6 | 91.8 | hypothetical protein CARUB_v10014146mg               | gbpln | Capsella rubella     | AT3G06300.1   Symbols: AT-P4H-2   P4H isoform 2   chr3:1907744-1909675 FORWARD LENGTH=299                                                | 316  | 299  | 1.00E-153 | 94.6  | 87.3 | 90.2 |
| Rsa1.0_00507.1.g15132.t1 | ref XP_002884568.1  hypothetical protein ARALYDRAFT_477928 [Arabidopsis lyrata subsp. lyrata]<br>gi 297330408 gb EFH60827.1  hypothetical protein ARALYDRAFT_477928 [Arabidopsis lyrata subsp. lyrata]                                                                                                                                                   | 1472 | 1703 | 0         | 115.7 | 78.3 | 85.6 | hypothetical protein ARALYDRAFT_477928               | gbpln | Arabidopsis lyrata   | AT3G06290.1   Symbols:   SAC3/GANP/Nin1/mts3/eIF-3 p25 family   chr3:1899123-1907297 REVERSE LENGTH=1697                                 | 1472 | 1697 | 0         | 115.3 | 76.5 | 84.3 |
| Rsa1.0_00507.1.g15133.t1 | gb EOA29649.1  hypothetical protein CARUB_v10015151mg [Capsella rubella]                                                                                                                                                                                                                                                                                 | 349  | 351  | 0         | 100.6 | 94.6 | 96.8 | hypothetical protein CARUB_v10015151mg               | gbpln | Capsella rubella     | AT3G06260.1   Symbols: GATL4   galacturonosyltransferase-like 4   chr3:1893804-1894859 REVERSE LENGTH=351                                | 349  | 351  | 0         | 100.6 | 94.6 | 97.4 |
| Rsa1.0_00507.1.g15134.t1 | gb EOA32170.1  hypothetical protein CARUB_v10015426mg [Capsella rubella]                                                                                                                                                                                                                                                                                 | 419  | 440  | 1.00E-144 | 105.0 | 65.2 | 79.5 | hypothetical protein CARUB_v10015426mg               | gbpln | Capsella rubella     | AT3G06240.1   Symbols:   F-box family protein   chr3:1887336-1888619 FORWARD LENGTH=427                                                  | 419  | 427  | 1.00E-143 | 101.9 | 64.0 | 77.6 |
| Rsa1.0_00507.1.g15135.t1 | gb EOA30696.1  hypothetical protein CARUB_v10013833mg [Capsella rubella]                                                                                                                                                                                                                                                                                 | 423  | 410  | 0         | 96.9  | 90.8 | 93.6 | hypothetical protein CARUB_v10013833mg               | gbpln | Capsella rubella     | AT3G06170.1   Symbols:   Serinc-domain containing serine and sphingolipid biosynthesis protein   chr3:1867520-1869738 FORWARD LENGTH=409 | 423  | 409  | 0         | 96.7  | 89.4 | 92.4 |
| Rsa1.0_00507.1.g15136.t2 | gb EOA30708.1  hypothetical protein CARUB_v10013845mg [Capsella rubella]                                                                                                                                                                                                                                                                                 | 361  | 407  | 0         | 112.7 | 89.8 | 93.9 | hypothetical protein CARUB_v10013845mg               | gbpln | Capsella rubella     | AT3G06190.1   Symbols: ATBPM2, BPM2   BTB-POZ and MATH domain 2   chr3:1874577-1876575 REVERSE LENGTH=406                                | 361  | 406  | 0         | 112.5 | 88.1 | 93.1 |

|                          |                                                                                                                                                                                                                                                                                                                                                                                                             |      |      |           |       |      |      |                                                                                |       |                      |                                                                                                                                                                                                                                                                                                                                                      |      |     |           |       |      |      |
|--------------------------|-------------------------------------------------------------------------------------------------------------------------------------------------------------------------------------------------------------------------------------------------------------------------------------------------------------------------------------------------------------------------------------------------------------|------|------|-----------|-------|------|------|--------------------------------------------------------------------------------|-------|----------------------|------------------------------------------------------------------------------------------------------------------------------------------------------------------------------------------------------------------------------------------------------------------------------------------------------------------------------------------------------|------|-----|-----------|-------|------|------|
| Rsa1.0_00507.1.g15137.t1 | ref NP_566276.1  guanylate kinase [Arabidopsis thaliana] gi 14190399 gb AAK55680.1 AF378877_1 AT3g06200/F28L1_14 [Arabidopsis thaliana]                                                                                                                                                                                                                                                                     | 281  | 282  | 1.00E-116 | 100.4 | 77.2 | 86.1 | guanylate kinase                                                               | gbpln | Arabidopsis thaliana | AT3G06200.1   Symbols:   P-loop containing nucleoside triphosphate hydrolases superfamily protein   chr3:1877678-1878526 FORWARD LENGTH=282                                                                                                                                                                                                          | 281  | 282 | 1.00E-119 | 100.4 | 77.2 | 86.1 |
| Rsa1.0_00507.1.g15138.t1 | ref NP_001118347.1  F-box protein [Arabidopsis thaliana] gi 33025181 gb AEC06905.1  F-box protein [Arabidopsis thaliana]                                                                                                                                                                                                                                                                                    | 171  | 218  | 9.00E-22  | 127.5 | 41.5 | 55.6 | F-box protein                                                                  | gbpln | Arabidopsis thaliana | AT2G19630.2   Symbols:   F-box and associated interaction domains-containing protein   chr2:8490217-8491110 REVERSE LENGTH=218                                                                                                                                                                                                                       | 171  | 218 | 4.00E-24  | 127.5 | 41.5 | 55.6 |
| Rsa1.0_00507.1.g15139.t1 | ref NP_187272.3  armadillo/beta-catenin-like repeat-containing protein [Arabidopsis thaliana] gi 6862925 gb AAF30314.1 AC018907_14 hypothetical protein [Arabidopsis thaliana] gi 332640840 gb AEE74361.1  armadillo/beta-catenin-like repeat-containing protein [Arabidopsis thaliana]                                                                                                                     | 866  | 840  | 0         | 97.0  | 81.3 | 87.4 | armadillo/beta-catenin-like repeat-containing protein                          | gbpln | Arabidopsis thaliana | AT3G06210.1   Symbols:   ARM repeat superfamily protein   chr3:1880093-1883317 FORWARD LENGTH=840                                                                                                                                                                                                                                                    | 866  | 840 | 0         | 97.0  | 81.3 | 87.4 |
| Rsa1.0_00507.1.g15140.t1 | #                                                                                                                                                                                                                                                                                                                                                                                                           | #    | #    | #         | #     | #    | #    | -                                                                              | ----  | ----                 | #                                                                                                                                                                                                                                                                                                                                                    | #    | #   | #         | #     | #    | #    |
| Rsa1.0_00507.1.g15141.t1 | #                                                                                                                                                                                                                                                                                                                                                                                                           | #    | #    | #         | #     | #    | #    | -                                                                              | ----  | ----                 | #                                                                                                                                                                                                                                                                                                                                                    | #    | #   | #         | #     | #    | #    |
| Rsa1.0_00507.1.g15142.t1 | ref NP_187266.1  uncharacterized protein [Arabidopsis thaliana] gi 6862919 gb AAF30308.1 AC018907_8 unknown protein [Arabidopsis thaliana] gi 332640832 gb AEE74353.1  uncharacterized protein AT3G06150 [Arabidopsis thaliana]                                                                                                                                                                             | 596  | 594  | 0         | 99.7  | 84.9 | 90.8 | uncharacterized protein                                                        | gbpln | Arabidopsis thaliana | AT3G06150.1   Symbols:   unknown protein; BEST Arabidopsis thaliana protein match is: unknown protein (TAIR:AT5G19060.1); Has 61 Blast hits to 59 proteins in 10 species: Archae - 0; Bacteria - 0; Metazoa - 3; Fungi - 0; Plants - 58; Viruses - 0; Other Eukaryotes - 0 (source: NCBI BLink).   chr3:1861971-1863755 REVERSE LENGTH=594           | 596  | 594 | 0         | 99.7  | 84.9 | 90.8 |
| Rsa1.0_00508.1.g15143.t1 | #                                                                                                                                                                                                                                                                                                                                                                                                           | #    | #    | #         | #     | #    | #    | -                                                                              | ----  | ----                 | #                                                                                                                                                                                                                                                                                                                                                    | #    | #   | #         | #     | #    | #    |
| Rsa1.0_00508.1.g15144.t1 | ref NP_565380.1  Plastocyanin-like domain-containing protein [Arabidopsis thaliana] gi 15294186 gb AAK95270.1 AF410284_1 At2g15780/F19G14.22 [Arabidopsis thaliana] gi 5306253 gb AAD41986.1  expressed protein [Arabidopsis thaliana] gi 20147265 gb AAM10346.1  At2g15780/F19G14.22 [Arabidopsis thaliana] gi 330251343 gb AEC06437.1  Plastocyanin-like domain-containing protein [Arabidopsis thaliana] | 258  | 257  | 5.00E-78  | 99.6  | 76.4 | 83.3 | Plastocyanin-like domain-containing protein                                    | gbpln | Arabidopsis thaliana | AT2G15780.1   Symbols:   Cuoredoxin superfamily protein   chr2:6873666-6874701 REVERSE LENGTH=257                                                                                                                                                                                                                                                    | 258  | 257 | 1.00E-80  | 99.6  | 76.4 | 83.3 |
| Rsa1.0_00508.1.g15145.t1 | gb EOA18064.1  hypothetical protein CARUB.v10006510mg, partial [Capsella rubella]                                                                                                                                                                                                                                                                                                                           | 165  | 555  | 9.00E-14  | 336.4 | 24.2 | 37.6 | hypothetical protein CARUB.v10006510mg, partial                                | gbpln | Capsella rubella     | AT1G52950.1   Symbols:   Nucleic acid-binding, OB-fold-like protein   chr1:19725483-19728007 FORWARD LENGTH=566                                                                                                                                                                                                                                      | 165  | 566 | 2.00E-12  | 343.0 | 21.8 | 35.2 |
| Rsa1.0_00508.1.g15146.t1 | #                                                                                                                                                                                                                                                                                                                                                                                                           | #    | #    | #         | #     | #    | #    | -                                                                              | ----  | ----                 | #                                                                                                                                                                                                                                                                                                                                                    | #    | #   | #         | #     | #    | #    |
| Rsa1.0_00508.1.g15147.t1 | #                                                                                                                                                                                                                                                                                                                                                                                                           | #    | #    | #         | #     | #    | #    | -                                                                              | ----  | ----                 | #                                                                                                                                                                                                                                                                                                                                                    | #    | #   | #         | #     | #    | #    |
| Rsa1.0_00508.1.g15148.t1 | gb AAG51783.1 AC079679_3 reverse transcriptase, putative: 16838-20266 [Arabidopsis thaliana]                                                                                                                                                                                                                                                                                                                | 380  | 1142 | 3.00E-39  | 300.5 | 23.7 | 35.8 | reverse transcriptase, putative: 16838-20266                                   | gbpln | Arabidopsis thaliana | AT2G22440.1   Symbols:   BEST Arabidopsis thaliana protein match is: Ribonuclease H-like superfamily protein (TAIR:AT4G29090.1); Has 208 Blast hits to 191 proteins in 10 species: Archae - 0; Bacteria - 0; Metazoa - 0; Fungi - 0; Plants - 208; Viruses - 0; Other Eukaryotes - 0 (source: NCBI BLink).   chr2:9528910-9529917 FORWARD LENGTH=256 | 380  | 256 | 1.00E-24  | 67.4  | 21.6 | 33.4 |
| Rsa1.0_00508.1.g15149.t1 | pir T00833 RNA-directed DNA polymerase homolog T13L16.7 - Arabidopsis thaliana (fragment)                                                                                                                                                                                                                                                                                                                   | 1192 | 1365 | 0         | 114.5 | 34.3 | 47.1 | RNA-directed DNA polymerase homolog T13L16.7 - Arabidopsis thaliana (fragment) | ----  | ----                 | ATMG00310.1   Symbols:   ORF154   RNA-directed DNA polymerase (reverse transcriptase)-related family protein   chrM:90883-91347 REVERSE LENGTH=154                                                                                                                                                                                                   | 1192 | 154 | 8.00E-29  | 12.9  | 4.7  | 6.2  |
| Rsa1.0_00508.1.g15150.t1 | #                                                                                                                                                                                                                                                                                                                                                                                                           | #    | #    | #         | #     | #    | #    | -                                                                              | ----  | ----                 | #                                                                                                                                                                                                                                                                                                                                                    | #    | #   | #         | #     | #    | #    |
| Rsa1.0_00508.1.g15151.t1 | #                                                                                                                                                                                                                                                                                                                                                                                                           | #    | #    | #         | #     | #    | #    | -                                                                              | ----  | ----                 | #                                                                                                                                                                                                                                                                                                                                                    | #    | #   | #         | #     | #    | #    |

|                          |                                                                                                                                                                                                                                                                                                                                                                                                           |      |      |           |       |      |      |                                                 |       |                      |                                                                                                                                                                                                                                                                                                                                                            |      |     |           |       |      |      |
|--------------------------|-----------------------------------------------------------------------------------------------------------------------------------------------------------------------------------------------------------------------------------------------------------------------------------------------------------------------------------------------------------------------------------------------------------|------|------|-----------|-------|------|------|-------------------------------------------------|-------|----------------------|------------------------------------------------------------------------------------------------------------------------------------------------------------------------------------------------------------------------------------------------------------------------------------------------------------------------------------------------------------|------|-----|-----------|-------|------|------|
| Rsa1.0_00508.1.g15152.t1 | refNP_565380.1  Plastocyanin-like domain-containing protein [Arabidopsis thaliana]<br>gi 15294186 gb AAK95270.1 AF410284.1 At2g15780/F19G14.22 [Arabidopsis thaliana] gi 5306253 gb AD41986.1 expressed protein [Arabidopsis thaliana] gi 20147265 gb AAM10346.1 At2g15780/F19G14.22 [Arabidopsis thaliana] gi 330251343 gb AEC06437.1 Plastocyanin-like domain-containing protein [Arabidopsis thaliana] | 275  | 257  | 1.00E-77  | 93.5  | 68.4 | 74.2 | Plastocyanin-like domain-containing protein     | gbpln | Arabidopsis thaliana | AT2G15780.1   Symbols:   Cupredoxin superfamily protein   chr2:6873666-6874701 REVERSE LENGTH=257                                                                                                                                                                                                                                                          | 275  | 257 | 3.00E-80  | 93.5  | 68.4 | 74.2 |
| Rsa1.0_00508.1.g15153.t1 | # # # # # # # # - ----                                                                                                                                                                                                                                                                                                                                                                                    |      |      |           |       |      |      |                                                 |       |                      | #                                                                                                                                                                                                                                                                                                                                                          |      |     |           |       |      |      |
| Rsa1.0_00508.1.g15154.t1 | gb ACP30609.1  disease resistance protein [Brassica rapa subsp. pekinensis]                                                                                                                                                                                                                                                                                                                               | 1328 | 2726 | 0         | 205.3 | 50.5 | 69.5 | disease resistance protein                      | gbpln | Brassica rapa        | ATMG00860.1   Symbols: ORF158   DNA/RNA polymerases superfamily protein   chrM:235916-236392 FORWARD LENGTH=158                                                                                                                                                                                                                                            | 1328 | 158 | 4.00E-36  | 11.9  | 5.5  | 6.9  |
| Rsa1.0_00508.1.g15155.t1 | gb AAD17399.1  putative Ta11-like non-LTR retroelement protein [Arabidopsis thaliana]                                                                                                                                                                                                                                                                                                                     | 543  | 589  | 2.00E-27  | 108.5 | 11.6 | 16.2 | putative Ta11-like non-LTR retroelement protein | gbpln | Arabidopsis thaliana | #                                                                                                                                                                                                                                                                                                                                                          | #    | #   | #         | #     | #    | #    |
| Rsa1.0_00508.1.g15156.t1 | gb AAG51783.1 AC079679.3 reverse transcriptase, putative; 16838-20266 [Arabidopsis thaliana]<br>refNP_565376.1  RING/U-box domain-containing protein [Arabidopsis thaliana] gi 20197705 gb AAD17402.2  putative RING-H2 zinc finger protein [Arabidopsis thaliana] gi 21594677 gb AAM66032.1  putative RING-H2 zinc finger protein [Arabidopsis thaliana]                                                 | 1191 | 1142 | 0         | 95.9  | 41.4 | 56.3 | reverse transcriptase, putative; 16838-20266    | gbpln | Arabidopsis thaliana | AT4G29090.1   Symbols:   Ribonuclease H-like superfamily protein   chr4:14333528-14335255 FORWARD LENGTH=575                                                                                                                                                                                                                                               | 1191 | 575 | 4.00E-77  | 48.3  | 12.1 | 19.4 |
| Rsa1.0_00508.1.g15157.t1 | gi 66865916 gb AAy57592.1  RING finger family protein [Arabidopsis thaliana] gi 149944335 gb ABR46210.1  At2g15580 [Arabidopsis thaliana] gi 22423846 dbj BAH19838.1  AT2G15580 [Arabidopsis thaliana] gi 330251325 gb AEC06419.1  RING/U-box domain-containing protein [Arabidopsis thaliana]                                                                                                            | 195  | 196  | 1.00E-92  | 100.5 | 85.1 | 90.8 | RING/U-box domain-containing protein            | gbpln | Arabidopsis thaliana | AT2G15580.1   Symbols:   RING/U-box superfamily protein   chr2:6797687-6798815 FORWARD LENGTH=196                                                                                                                                                                                                                                                          | 195  | 196 | 4.00E-95  | 100.5 | 85.1 | 90.8 |
| Rsa1.0_00509.1.g15158.t2 | refNP_001190294.1  uncharacterized protein [Arabidopsis thaliana] gi 34365673 gb AAQ65148.1  At5g12240 [Arabidopsis thaliana] gi 51969328 dbj BAD43356.1  unnamed protein product [Arabidopsis thaliana] gi 332004399 gb AED91782.1  uncharacterized protein AT5G12240 [Arabidopsis thaliana]                                                                                                             | 138  | 114  | 5.00E-39  | 82.6  | 67.4 | 74.6 | uncharacterized protein                         | gbpln | Arabidopsis thaliana | AT5G12240.2   Symbols:   unknown protein; FUNCTIONS IN: molecular_function unknown; INVOLVED IN: biological_process unknown; LOCATED IN: cellular_component unknown; EXPRESSED IN: 19 plant structures; EXPRESSED DURING: 10 growth stages.   chr5:3959120-3960777 REVERSE LENGTH=114                                                                      | 138  | 114 | 1.00E-41  | 82.6  | 67.4 | 74.6 |
| Rsa1.0_00509.1.g15159.t1 | dbj BAJ34332.1  unnamed protein product [Thellungiella halophila]                                                                                                                                                                                                                                                                                                                                         | 448  | 450  | 0         | 100.4 | 98.7 | 99.3 | unnamed protein product                         | ----  | ----                 | AT5G12250.1   Symbols: TUB6   beta-6 tubulin   chr5:3961317-3962971 REVERSE LENGTH=449                                                                                                                                                                                                                                                                     | 448  | 449 | 0         | 100.2 | 97.5 | 98.7 |
| Rsa1.0_00509.1.g15160.t2 | refXP_002871521.1  predicted protein [Arabidopsis lyrata subsp. lyrata] gi 297317336 gb EFH47780.1  predicted protein [Arabidopsis lyrata subsp. lyrata]                                                                                                                                                                                                                                                  | 656  | 631  | 0         | 96.2  | 71.8 | 80.2 | predicted protein                               | gbpln | Arabidopsis lyrata   | AT5G12260.1   Symbols:   BEST Arabidopsis thaliana protein match is: glycosyltransferase family protein 2 (TAIR:AT5G60700.1); Has 1807 Blast hits to 1807 proteins in 277 species: Archae - 0; Bacteria - 0; Metazoa - 736; Fungi - 347; Plants - 385; Viruses - 0; Other Eukaryotes - 339 (source: NCBI BLINK).   chr5:3966417-3968884 FORWARD LENGTH=624 | 656  | 624 | 0         | 95.1  | 71.3 | 80.0 |
| Rsa1.0_00509.1.g15161.t1 | dbj BAC43370.1  unknown protein [Arabidopsis thaliana]                                                                                                                                                                                                                                                                                                                                                    | 529  | 602  | 0         | 113.8 | 86.4 | 93.2 | unknown protein                                 | gbpln | Arabidopsis thaliana | AT5G12290.1   Symbols: DGS1   dgd1 suppressor 1   chr5:3974374-3978066 REVERSE LENGTH=602                                                                                                                                                                                                                                                                  | 529  | 602 | 0         | 113.8 | 82.0 | 90.0 |
| Rsa1.0_00509.1.g15162.t1 | refNP_193937.2  F-box protein [Arabidopsis thaliana] gi 374095389 sp O65454.2 FB334_ARAT H RecName: Full=Probable F-box protein At4g22060 gi 332659145 gb AEE84545.1  probable F-box protein [Arabidopsis thaliana]                                                                                                                                                                                       | 394  | 399  | 1.00E-109 | 101.3 | 58.6 | 72.8 | F-box protein                                   | gbpln | Arabidopsis thaliana | AT4G22060.1   Symbols:   F-box family protein with a domain of unknown function (DUF295)   chr4:11687620-11688819 FORWARD LENGTH=399                                                                                                                                                                                                                       | 394  | 399 | 1.00E-112 | 101.3 | 58.6 | 72.8 |
| Rsa1.0_00509.1.g15163.t1 | refNP_193936.2  aspartyl protease family protein [Arabidopsis thaliana] gi 332659144 gb AEE84544.1  aspartyl protease family protein [Arabidopsis thaliana]                                                                                                                                                                                                                                               | 357  | 354  | 8.00E-82  | 99.2  | 46.8 | 62.2 | aspartyl protease family protein                | gbpln | Arabidopsis thaliana | AT4G22050.1   Symbols:   Eukaryotic aspartyl protease family protein   chr4:11683865-11685506 FORWARD LENGTH=354                                                                                                                                                                                                                                           | 357  | 354 | 2.00E-84  | 99.2  | 46.8 | 62.2 |
| Rsa1.0_00509.1.g15164.t4 | dbj BAJ34639.1  unnamed protein product [Thellungiella halophila]                                                                                                                                                                                                                                                                                                                                         | 993  | 343  | 2.00E-82  | 34.5  | 16.3 | 19.1 | unnamed protein product                         | ----  | ----                 | AT1G33970.5   Symbols:   P-loop containing nucleoside triphosphate hydrolases superfamily protein   chr1:12349614-12350960 REVERSE LENGTH=342                                                                                                                                                                                                              | 993  | 342 | 7.00E-80  | 34.4  | 15.8 | 18.6 |

|                          |                                                                                                                                                                                                                                                                                                                                                                                                                                                                                                                                                                                                                                                                                                                                                              |      |      |           |       |      |      |                                                      |       |                      |                                                                                                                               |      |      |           |       |      |      |
|--------------------------|--------------------------------------------------------------------------------------------------------------------------------------------------------------------------------------------------------------------------------------------------------------------------------------------------------------------------------------------------------------------------------------------------------------------------------------------------------------------------------------------------------------------------------------------------------------------------------------------------------------------------------------------------------------------------------------------------------------------------------------------------------------|------|------|-----------|-------|------|------|------------------------------------------------------|-------|----------------------|-------------------------------------------------------------------------------------------------------------------------------|------|------|-----------|-------|------|------|
| Rsa1.0_00509.1.g15165.t1 | gb[EOA22673.1] hypothetical protein CARUB_v10003376mg [Capsella rubella]                                                                                                                                                                                                                                                                                                                                                                                                                                                                                                                                                                                                                                                                                     | 827  | 825  | 0         | 99.8  | 92.0 | 95.6 | hypothetical protein CARUB_v10003376mg               | gbpln | Capsella rubella     | AT5G12370.2   Symbols: SEC10   exocyst complex component sec10   chr5:4003002-4008445 REVERSE LENGTH=825                      | 827  | 825  | 0         | 99.8  | 91.9 | 95.4 |
| Rsa1.0_00509.1.g15166.t1 | ref[NP_568273.2] PHD-finger and DNA binding domain-containing protein [Arabidopsis thaliana] gi 332004422 gb AED91805.1  PHD-finger and DNA binding domain-containing protein [Arabidopsis thaliana]                                                                                                                                                                                                                                                                                                                                                                                                                                                                                                                                                         | 1509 | 1602 | 0         | 106.2 | 75.3 | 85.8 | PHD-finger and DNA binding domain-containing protein | gbpln | Arabidopsis thaliana | AT5G12400.1   Symbols:   DNA binding; zinc ion binding; DNA binding   chr5:4013813-4021018 FORWARD LENGTH=1602                | 1509 | 1602 | 0         | 106.2 | 75.3 | 85.8 |
| Rsa1.0_00509.1.g15167.t1 | ref[XP_002873570.1] hypothetical protein ARALYDRAFT_488089 [Arabidopsis lyrata subsp. lyrata] gi 297319407 gb EFH49829.1  hypothetical protein ARALYDRAFT_488089 [Arabidopsis lyrata subsp. lyrata]                                                                                                                                                                                                                                                                                                                                                                                                                                                                                                                                                          | 849  | 480  | 0         | 56.5  | 42.0 | 47.9 | hypothetical protein ARALYDRAFT_488089               | gbpln | Arabidopsis lyrata   | AT5G12420.1   Symbols:   O-acyltransferase (WSD1-like) family protein   chr5:4024568-4026715 REVERSE LENGTH=480               | 849  | 480  | 0         | 56.5  | 41.9 | 47.6 |
| Rsa1.0_00509.1.g15168.t1 | ref[NP_568275.1] O-acyltransferase (WSD1-like) family protein [Arabidopsis thaliana] gi 14588372 emb CAC42903.1  putative protein [Arabidopsis thaliana] gi 19424037 gb AAL87279.1  unknown protein [Arabidopsis thaliana] gi 21280907 gb AAM45124.1  unknown protein [Arabidopsis thaliana] gi 26450061 dbj BAC42150.1  unknown protein [Arabidopsis thaliana] gi 332004424 gb AED91807.1  O-acyltransferase (WSD1-like) family protein [Arabidopsis thaliana]                                                                                                                                                                                                                                                                                              | 80   | 480  | 1.00E-20  | 600.0 | 61.3 | 70.0 | O-acyltransferase (WSD1-like) family protein         | gbpln | Arabidopsis thaliana | AT5G12420.1   Symbols:   O-acyltransferase (WSD1-like) family protein   chr5:4024568-4026715 REVERSE LENGTH=480               | 80   | 480  | 2.00E-23  | 600.0 | 61.3 | 70.0 |
| Rsa1.0_00509.1.g15169.t1 | ref[XP_002873573.1] hypothetical protein ARALYDRAFT_325766 [Arabidopsis lyrata subsp. lyrata] gi 297319410 gb EFH49832.1  hypothetical protein ARALYDRAFT_325766 [Arabidopsis lyrata subsp. lyrata]                                                                                                                                                                                                                                                                                                                                                                                                                                                                                                                                                          | 517  | 651  | 0         | 125.9 | 78.3 | 85.1 | hypothetical protein ARALYDRAFT_325766               | gbpln | Arabidopsis lyrata   | AT5G12440.3   Symbols:   CCH-type zinc fingerfamily protein with RNA-binding domain   chr5:4036891-4038604 REVERSE LENGTH=650 | 517  | 650  | 0         | 125.7 | 77.4 | 84.5 |
| Rsa1.0_00509.1.g15170.t1 | ref[XP_002873579.1] hypothetical protein ARALYDRAFT_909228 [Arabidopsis lyrata subsp. lyrata] gi 297319416 gb EFH49838.1  hypothetical protein ARALYDRAFT_909228 [Arabidopsis lyrata subsp. lyrata]                                                                                                                                                                                                                                                                                                                                                                                                                                                                                                                                                          | 387  | 385  | 1.00E-174 | 99.5  | 82.7 | 89.1 | hypothetical protein ARALYDRAFT_909228               | gbpln | Arabidopsis lyrata   | AT5G12470.1   Symbols:   Protein of unknown function (DUF3411)   chr5:4044950-4047290 REVERSE LENGTH=386                      | 387  | 386  | 1.00E-175 | 99.7  | 82.2 | 89.1 |
| Rsa1.0_00509.1.g15171.t2 | ref[NP_568282.1] nuclear transcription factor Y subunit A-1 [Arabidopsis thaliana] gi 42573353 ref[NP_974773.1] nuclear transcription factor Y subunit A-1 [Arabidopsis thaliana] gi 75180950 sp Q9LXV5.1 NFYA1_ARAT H RecName: Full=Nuclear transcription factor Y subunit A-1; Short=AtNF-YA-1; AltName: Full=Protein EMBRYO DEFECTIVE 2220; AltName: Full=Transcriptional activator HAP2A gi 7630040 emb CAB88248.1  CCAAT box binding factor/ transcription factor Hap2a [Arabidopsis thaliana] gi 107738403 gb ABF83691.1  At5g12840 [Arabidopsis thaliana] gi 332004434 gb AED91817.1  nuclear transcription factor Y subunit A-1 [Arabidopsis thaliana] gi 332004437 gb AED91820.1  nuclear transcription factor Y subunit A-1 [Arabidopsis thaliana] | 256  | 272  | 4.00E-89  | 106.3 | 70.7 | 78.9 | nuclear transcription factor Y subunit A-1           | gbpln | Arabidopsis thaliana | AT5G12840.3   Symbols: HAP2A, ATHAP2A, NF-YA1   nuclear factor Y, subunit A1   chr5:4051147-4052961 REVERSE LENGTH=272        | 256  | 272  | 1.00E-91  | 106.3 | 70.7 | 78.9 |
| Rsa1.0_00510.1.g15172.t1 | gb AAZ66952.1  117M18_33 [Brassica rapa]                                                                                                                                                                                                                                                                                                                                                                                                                                                                                                                                                                                                                                                                                                                     | 1110 | 681  | 0         | 61.4  | 30.9 | 39.7 | 117M18_33                                            | gbpln | Brassica rapa        | AT4G23160.1   Symbols: CRK8   cysteine-rich RLK (RECEPTOR-like protein kinase) 8   chr4:12129485-12134086 FORWARD LENGTH=1262 | 1110 | 1262 | 8.00E-45  | 113.7 | 8.5  | 13.9 |
| Rsa1.0_00510.1.g15173.t1 | gb ACT67493.1  expansin A1 [Raphanus sativus]                                                                                                                                                                                                                                                                                                                                                                                                                                                                                                                                                                                                                                                                                                                | 258  | 258  | 1.00E-145 | 100.0 | 96.9 | 98.8 | expansin A1                                          | gbpln | Raphanus sativus     | AT2G39700.1   Symbols: ATEXPA4, ATEXP4, ATHEXP ALPHA 1.6, EXPA4   expansin A4   chr2:16544246-16545434 REVERSE LENGTH=257     | 258  | 257  | 2.33E-156 | 99.6  | 95.7 | 97.7 |
| Rsa1.0_00510.1.g15174.t1 | ref[XP_002879808.1] botrytis-induced kinase1 [Arabidopsis lyrata subsp. lyrata] gi 297325647 gb EFH56067.1  botrytis-induced kinase1 [Arabidopsis lyrata subsp. lyrata]                                                                                                                                                                                                                                                                                                                                                                                                                                                                                                                                                                                      | 393  | 394  | 0         | 100.3 | 89.8 | 94.1 | botrytis-induced kinase1                             | gbpln | Arabidopsis lyrata   | AT2G39660.1   Symbols: BIK1   botrytis-induced kinase1   chr2:16531943-16533601 FORWARD LENGTH=395                            | 393  | 395  | 0         | 100.5 | 89.3 | 93.9 |

|                          |                                                                                                                                                                                                                |      |      |           |       |      |       |                                             |       |                      |                                                                                                                                                                                                                                                                                                                                                                      |      |      |           |       |      |      |
|--------------------------|----------------------------------------------------------------------------------------------------------------------------------------------------------------------------------------------------------------|------|------|-----------|-------|------|-------|---------------------------------------------|-------|----------------------|----------------------------------------------------------------------------------------------------------------------------------------------------------------------------------------------------------------------------------------------------------------------------------------------------------------------------------------------------------------------|------|------|-----------|-------|------|------|
| Rsa1.0_00510.1.g15175.t1 | gb EOA27564.1  hypothetical protein CARUB_v10023703mg [Capsella rubella]                                                                                                                                       | 298  | 306  | 1.00E-138 | 102.7 | 84.6 | 91.3  | hypothetical protein CARUB_v10023703mg      | gbpln | Capsella rubella     | AT2G39650.1   Symbols:   Protein of unknown function (DUF506)   chr2:16528094-16529274 REVERSE LENGTH=291                                                                                                                                                                                                                                                            | 298  | 291  | 1.00E-139 | 97.7  | 83.9 | 87.6 |
| Rsa1.0_00510.1.g15176.t1 | gb EOA26396.1  hypothetical protein CARUB_v10023563mg [Capsella rubella]                                                                                                                                       | 337  | 342  | 1.00E-176 | 101.5 | 88.7 | 94.4  | hypothetical protein CARUB_v10023563mg      | gbpln | Capsella rubella     | AT2G39630.1   Symbols:   Nucleotide-diphospho-sugar transferases superfamily protein   chr2:16522008-16524561 REVERSE LENGTH=336                                                                                                                                                                                                                                     | 337  | 336  | 1.00E-176 | 99.7  | 87.2 | 93.8 |
| Rsa1.0_00510.1.g15177.t1 | ref XP_002881665.1  pentatricopeptide repeat-containing protein [Arabidopsis lyrata subsp. lyrata]   g 297327504 gb EFH57924.1  pentatricopeptide repeat-containing protein [Arabidopsis lyrata subsp. lyrata] | 836  | 836  | 0         | 100.0 | 78.7 | 88.3  | pentatricopeptide repeat-containing protein | gbpln | Arabidopsis lyrata   | AT2G39620.1   Symbols:   Pentatricopeptide repeat (PPR) superfamily protein   chr2:16518968-16521478 REVERSE LENGTH=836                                                                                                                                                                                                                                              | 836  | 836  | 0         | 100.0 | 76.0 | 86.1 |
| Rsa1.0_00510.1.g15178.t1 | gb AAB68964.1  trypsin inhibitor propeptide [Brassica oleracea]                                                                                                                                                | 140  | 214  | 9.00E-48  | 152.9 | 70.7 | 78.6  | trypsin inhibitor propeptide                | gbpln | Brassica oleracea    | AT1G73260.1   Symbols: ATKTI1, KTI1   kunitz trypsin inhibitor 1   chr1:27547410-27548057 REVERSE LENGTH=215                                                                                                                                                                                                                                                         | 140  | 215  | 4.00E-26  | 153.6 | 48.6 | 62.1 |
| Rsa1.0_00510.1.g15179.t1 | #                                                                                                                                                                                                              | #    | #    | #         | #     | #    | #     | -                                           | ----  | ----                 | #                                                                                                                                                                                                                                                                                                                                                                    | #    | #    | #         | #     | #    | #    |
| Rsa1.0_00510.1.g15180.t1 | gb AAM19777.1  At2g39480/F12L6.14 [Arabidopsis thaliana]                                                                                                                                                       | 1402 | 1407 | 0         | 100.4 | 93.8 | 96.7  | At2g39480/F12L6.14                          | gbpln | Arabidopsis thaliana | AT2G39480.1   Symbols: PGP6   P-glycoprotein 6   chr2:16478249-16484827 REVERSE LENGTH=1407                                                                                                                                                                                                                                                                          | 1402 | 1407 | 0         | 100.4 | 93.8 | 96.8 |
| Rsa1.0_00510.1.g15181.t1 | dbj BAJ33853.1  unnamed protein product [Thellungiella halophila]                                                                                                                                              | 154  | 154  | 4.00E-79  | 100.0 | 99.4 | 100.0 | unnamed protein product                     | ----  | ----                 | AT2G39460.2   Symbols: ATRPL23A, RPL23A, RPL23AA   ribosomal protein L23AA   chr2:16475049-16475904 FORWARD LENGTH=154                                                                                                                                                                                                                                               | 154  | 154  | 3.00E-59  | 100.0 | 96.8 | 97.4 |
| Rsa1.0_00510.1.g15182.t1 | ref XP_002881655.1  hypothetical protein ARALYDRAFT_321630 [Arabidopsis lyrata subsp. lyrata]   g 297327494 gb EFH57914.1  hypothetical protein ARALYDRAFT_321630 [Arabidopsis lyrata subsp. lyrata]           | 458  | 719  | 1.00E-132 | 157.0 | 63.1 | 75.3  | hypothetical protein ARALYDRAFT_321630      | gbpln | Arabidopsis lyrata   | AT2G39435.1   Symbols:   Phosphatidylinositol N-acetylglucosaminyltransferase subunit P-related   chr2:16464806-16466492 REVERSE LENGTH=464                                                                                                                                                                                                                          | 458  | 464  | 1.00E-135 | 101.3 | 62.0 | 75.1 |
| Rsa1.0_00510.1.g15183.t1 | gb EOA29283.1  hypothetical protein CARUB_v10025558mg [Capsella rubella]                                                                                                                                       | 313  | 325  | 1.00E-147 | 103.8 | 90.7 | 93.9  | hypothetical protein CARUB_v10025558mg      | gbpln | Capsella rubella     | AT2G39430.1   Symbols:   Disease resistance-responsive (dirigent-like protein) family protein   chr2:16463422-16464390 FORWARD LENGTH=322                                                                                                                                                                                                                            | 313  | 322  | 1.00E-149 | 102.9 | 92.7 | 94.2 |
| Rsa1.0_00510.1.g15184.t1 | ref XP_002879795.1  esterase/lipase/thioesterase family protein [Arabidopsis lyrata subsp. lyrata]   g 297325634 gb EFH56054.1  esterase/lipase/thioesterase family protein [Arabidopsis lyrata subsp. lyrata] | 337  | 317  | 1.00E-169 | 94.1  | 85.5 | 90.2  | esterase/lipase/thioesterase family protein | gbpln | Arabidopsis lyrata   | AT2G39420.1   Symbols:   alpha/beta-Hydrolases superfamily protein   chr2:16460442-16462872 FORWARD LENGTH=317                                                                                                                                                                                                                                                       | 337  | 317  | 1.00E-170 | 94.1  | 84.0 | 89.9 |
| Rsa1.0_00510.1.g15185.t1 | gb EOA28139.1  hypothetical protein CARUB_v10024328mg [Capsella rubella]                                                                                                                                       | 123  | 123  | 3.00E-59  | 100.0 | 95.9 | 98.4  | hypothetical protein CARUB_v10024328mg      | gbpln | Capsella rubella     | AT2G39390.1   Symbols:   Ribosomal L29 family protein   chr2:16450803-16451762 REVERSE LENGTH=123                                                                                                                                                                                                                                                                    | 123  | 123  | 2.00E-61  | 100.0 | 95.1 | 97.6 |
| Rsa1.0_00510.1.g15186.t1 | gb EOA18680.1  hypothetical protein CARUB_v10007256mg [Capsella rubella]                                                                                                                                       | 773  | 793  | 0         | 102.6 | 86.0 | 91.5  | hypothetical protein CARUB_v10007256mg      | gbpln | Capsella rubella     | AT4G38180.1   Symbols: FRS5   FAR1-related sequence 5   chr4:17906702-17909404 REVERSE LENGTH=788                                                                                                                                                                                                                                                                    | 773  | 788  | 0         | 101.9 | 85.5 | 90.3 |
| Rsa1.0_00511.1.g15187.t1 | gb AEQ02413.1  phospholipase D [Brassica napus]                                                                                                                                                                | 281  | 637  | 1.00E-101 | 226.7 | 62.6 | 64.8  | phospholipase D                             | gbpln | Brassica napus       | AT4G11850.1   Symbols: PLDGAMMA1, MEE54   phospholipase D gamma 1   chr4:7129352-7132937 REVERSE LENGTH=858                                                                                                                                                                                                                                                          | 281  | 858  | 2.00E-81  | 305.3 | 51.2 | 59.4 |
| Rsa1.0_00511.1.g15188.t1 | gb ACB98704.1  phospholipase D gamma 1 [Brassica oleracea var. capitata]                                                                                                                                       | 306  | 859  | 2.33E-156 | 280.7 | 80.7 | 90.5  | phospholipase D gamma 1                     | gbpln | Brassica oleracea    | AT4G11830.1   Symbols: PLDGAMMA2   phospholipase D gamma 2   chr4:7115985-7119683 REVERSE LENGTH=824                                                                                                                                                                                                                                                                 | 306  | 824  | 1.00E-147 | 269.3 | 81.0 | 90.5 |
| Rsa1.0_00511.1.g15189.t1 | #                                                                                                                                                                                                              | #    | #    | #         | #     | #    | #     | -                                           | ----  | ----                 | #                                                                                                                                                                                                                                                                                                                                                                    | #    | #    | #         | #     | #    | #    |
| Rsa1.0_00511.1.g15190.t1 | gb AAF67379.1  Hypothetical protein T15F17.k [Arabidopsis thaliana]                                                                                                                                            | 155  | 341  | 9.00E-23  | 220.0 | 45.2 | 58.7  | Hypothetical protein T15F17.k               | gbpln | Arabidopsis thaliana | #                                                                                                                                                                                                                                                                                                                                                                    | #    | #    | #         | #     | #    | #    |
| Rsa1.0_00511.1.g15191.t1 | gb ABK28372.1  unknown [Arabidopsis thaliana]                                                                                                                                                                  | 379  | 389  | 1.00E-108 | 102.6 | 53.6 | 66.8  | unknown                                     | gbpln | Arabidopsis thaliana | AT4G00893.1   Symbols:   unknown protein; LOCATED IN: chloroplast; BEST Arabidopsis thaliana protein match is: unknown protein (TAIR:AT4G12370.1); Has 220 Blast hits to 215 proteins in 11 species: Archae - 0; Bacteria - 0; Metazoa - 0; Fungi - 0; Plants - 220; Viruses - 0; Other Eukaryotes - 0 (source: NCBI BLink).   chr4:379971-381396 REVERSE LENGTH=388 | 379  | 388  | 1.00E-111 | 102.4 | 53.6 | 66.8 |
| Rsa1.0_00511.1.g15192.t1 | gb ABK28372.1  unknown [Arabidopsis thaliana]                                                                                                                                                                  | 268  | 389  | 8.00E-28  | 145.1 | 26.5 | 33.6  | unknown                                     | gbpln | Arabidopsis thaliana | AT4G00893.1   Symbols:   unknown protein; LOCATED IN: chloroplast; BEST Arabidopsis thaliana protein match is: unknown protein (TAIR:AT4G12370.1); Has 220 Blast hits to 215 proteins in 11 species: Archae - 0; Bacteria - 0; Metazoa - 0; Fungi - 0; Plants - 220; Viruses - 0; Other Eukaryotes - 0 (source: NCBI BLink).   chr4:379971-381396 REVERSE LENGTH=388 | 268  | 388  | 2.00E-30  | 144.8 | 26.5 | 33.6 |



|                          |                                                                                                                                                                                                                                                                                                                                                                                                                                                                                                                                                                                                                                                                                                                                                                                                           |     |     |           |       |      |      |                                            |       |                      |                                                                                                                                                   |     |     |           |       |      |      |
|--------------------------|-----------------------------------------------------------------------------------------------------------------------------------------------------------------------------------------------------------------------------------------------------------------------------------------------------------------------------------------------------------------------------------------------------------------------------------------------------------------------------------------------------------------------------------------------------------------------------------------------------------------------------------------------------------------------------------------------------------------------------------------------------------------------------------------------------------|-----|-----|-----------|-------|------|------|--------------------------------------------|-------|----------------------|---------------------------------------------------------------------------------------------------------------------------------------------------|-----|-----|-----------|-------|------|------|
| Rsa1.0.00511.1.g15193.t1 | ref NP_192903.1  heat stress transcription factor B-2b [Arabidopsis thaliana]<br>gi 12643858 sp Q9T0D3.1 HFB2B_ARAT H RecName: Full=Heat stress transcription factor B-2b; Short=AtHsfB2b; AltName: Full=AtHsf-11; AltName: Full=Heat shock factor protein 7; Short=HSF 7; AltName: Full=Heat shock transcription factor 7; Short=HSTF 7<br>gi 4539457 emb CAB39937.1  heat shock transcription factor-like protein [Arabidopsis thaliana]<br>gi 7267866 emb CAB78209.1  heat shock transcription factor-like protein [Arabidopsis thaliana]<br>gi 20260614 gb AAM13205.1  heat shock transcription factor-like protein [Arabidopsis thaliana]<br>gi 30725616 gb AAP37830.1  At4g11660 [Arabidopsis thaliana]<br>gi 332657636 gb AEE83036.1  heat stress transcription factor B-2b [Arabidopsis thaliana] | 310 | 377 | 1.00E-109 | 121.6 | 72.9 | 81.9 | heat stress transcription factor B-2b      | gbpln | Arabidopsis thaliana | AT4G11660.1   Symbols: AT-HSFB2B, HSFB2B   winged-helix DNA-binding transcription factor family protein   chr4:7043006-7044227 FORWARD LENGTH=377 | 310 | 377 | 1.00E-112 | 121.6 | 72.9 | 81.9 |
| Rsa1.0.00511.1.g15194.t1 | dbj BAJ34101.1  unnamed protein product [Thellungiella halophila]                                                                                                                                                                                                                                                                                                                                                                                                                                                                                                                                                                                                                                                                                                                                         | 221 | 222 | 1.00E-117 | 100.5 | 91.4 | 95.0 | unnamed protein product                    | ----  | ----                 | AT4G11650.1   Symbols: ATOSM34, OSM34   osmotin 34   chr4:7025127-7026113 REVERSE LENGTH=244                                                      | 221 | 244 | 1.00E-114 | 110.4 | 89.1 | 92.8 |
| Rsa1.0.00511.1.g15195.t1 | ref NP_171648.1  pumilio 22 [Arabidopsis thaliana]<br>gi 75264077 sp Q9LNI2.1 PUM22_ARAT H RecName: Full=Putative pumilio homolog 22; Short=APUM-22; Short=AtPUM22<br>gi 9665150 gb AAF97334.1 AC023628_15 Hypothetical protein [Arabidopsis thaliana] gi 332189162 gb AEE27283.1  pumilio 22 [Arabidopsis thaliana]<br>ref NP_171649.1  hydroquinone glucosyltransferase [Arabidopsis thaliana]<br>gi 75311399 sp Q9LNI1.1 U72B3_ARATH RecName: Full=UDP-glycosyltransferase 72B3<br>gi 9665137 gb AAF97321.1 AC023628_2 Similar to UTP-glucose glucosyltransferases [Arabidopsis thaliana] gi 145651796 gb ABP88123.1  At1g01420 [Arabidopsis thaliana] gi 332189163 gb AEE27284.1  UDP-glycosyltransferase 72B3 [Arabidopsis thaliana]                                                                 | 228 | 361 | 2.00E-47  | 158.3 | 43.4 | 52.6 | pumilio 22                                 | gbpln | Arabidopsis thaliana | AT1G01410.1   Symbols: APUM22, PUM22   pumilio 22   chr1:153113-154198 FORWARD LENGTH=361                                                         | 228 | 361 | 6.00E-50  | 158.3 | 43.4 | 52.6 |
| Rsa1.0.00511.1.g15196.t1 | gi 9665137 gb AAF97321.1 AC023628_2 Similar to UTP-glucose glucosyltransferases [Arabidopsis thaliana] gi 145651796 gb ABP88123.1  At1g01420 [Arabidopsis thaliana] gi 332189163 gb AEE27284.1  UDP-glycosyltransferase 72B3 [Arabidopsis thaliana]                                                                                                                                                                                                                                                                                                                                                                                                                                                                                                                                                       | 478 | 481 | 0         | 100.6 | 77.4 | 86.6 | hydroquinone glucosyltransferase           | gbpln | Arabidopsis thaliana | AT1G01420.1   Symbols: UGT72B3   UDP-glucosyl transferase 72B3   chr1:154566-156011 REVERSE LENGTH=481                                            | 478 | 481 | 0         | 100.6 | 77.4 | 86.6 |
| Rsa1.0.00511.1.g15197.t2 | gb EOA20251.1  hypothetical protein CARUB_v10000551mg [Capsella rubella]                                                                                                                                                                                                                                                                                                                                                                                                                                                                                                                                                                                                                                                                                                                                  | 566 | 584 | 0         | 103.2 | 76.3 | 85.5 | hypothetical protein CARUB_v10000551mg     | gbpln | Capsella rubella     | AT4G11560.1   Symbols:   bromo-adjacent homology (BAH) domain-containing protein   chr4:7000095-7003445 REVERSE LENGTH=587                        | 566 | 587 | 0         | 103.7 | 76.7 | 85.0 |
| Rsa1.0.00512.1.g15198.t1 | gb EOA22563.1  hypothetical protein CARUB_v10003224mg [Capsella rubella]                                                                                                                                                                                                                                                                                                                                                                                                                                                                                                                                                                                                                                                                                                                                  | 296 | 486 | 1.00E-85  | 164.2 | 63.2 | 72.6 | hypothetical protein CARUB_v10003224mg     | gbpln | Capsella rubella     | AT5G18950.1   Symbols:   Tetratricopeptide repeat (TPR)-like superfamily protein   chr5:6328519-6329970 REVERSE LENGTH=483                        | 296 | 483 | 1.00E-83  | 163.2 | 60.8 | 73.0 |
| Rsa1.0.00512.1.g15199.t1 | gb EOA19261.1  hypothetical protein CARUB_v10000255mg [Capsella rubella]                                                                                                                                                                                                                                                                                                                                                                                                                                                                                                                                                                                                                                                                                                                                  | 805 | 787 | 0         | 97.8  | 84.7 | 90.3 | hypothetical protein CARUB_v10000255mg     | gbpln | Capsella rubella     | AT5G18960.1   Symbols: FRS12   FAR1-related sequence 12   chr5:6330556-6333071 FORWARD LENGTH=788                                                 | 805 | 788 | 0         | 97.9  | 85.1 | 90.1 |
| Rsa1.0.00512.1.g15200.t1 | gb EOA21686.1  hypothetical protein CARUB_v10002111mg [Capsella rubella]                                                                                                                                                                                                                                                                                                                                                                                                                                                                                                                                                                                                                                                                                                                                  | 170 | 170 | 8.00E-88  | 100.0 | 94.7 | 98.2 | hypothetical protein CARUB_v10002111mg     | gbpln | Capsella rubella     | AT5G18970.1   Symbols:   AWPM-19-like family protein   chr5:6333714-6334539 REVERSE LENGTH=171                                                    | 170 | 171 | 5.00E-88  | 100.6 | 94.1 | 97.6 |
| Rsa1.0.00512.1.g15201.t1 | ref NP_197401.2  BTB-POZ and math domain-containing protein [Arabidopsis thaliana]<br>gi 75301130 sp Q8L765.1 BPM1_ARATH RecName: Full=BTB/POZ and MATH domain-containing protein 1; AltName: Full=Protein BTB-POZ AND MATH DOMAIN 1; Short=AtBPM1<br>gi 22531225 gb AAM97116.1  putative protein [Arabidopsis thaliana]<br>gi 27311975 gb AA000953.1  putative protein [Arabidopsis thaliana]<br>gi 332005254 gb AED92637.1  BTB-POZ and math domain-containing protein [Arabidopsis thaliana]                                                                                                                                                                                                                                                                                                           | 222 | 407 | 3.00E-72  | 183.3 | 59.5 | 63.1 | BTB-POZ and math domain-containing protein | gbpln | Arabidopsis thaliana | AT5G19000.1   Symbols: ATBPM1, BPM1   BTB-POZ and MATH domain 1   chr5:6342563-6344641 FORWARD LENGTH=407                                         | 222 | 407 | 1.00E-74  | 183.3 | 59.5 | 63.1 |
| Rsa1.0.00512.1.g15202.t1 | #                                                                                                                                                                                                                                                                                                                                                                                                                                                                                                                                                                                                                                                                                                                                                                                                         | #   | #   | #         | #     | #    | #    | -                                          | ----  | ----                 | #                                                                                                                                                 | #   | #   | #         | #     | #    |      |

|                          |                                                                                                                                                                                                                                                                                                                                                                                                                                                                                                                                                                                                                                                                                                                                                                                                                                                                                                      |      |      |           |       |      |      |                                                        |       |                      |                                                                                                                                                                                                                                                                                                                                                 |      |      |           |       |      |      |
|--------------------------|------------------------------------------------------------------------------------------------------------------------------------------------------------------------------------------------------------------------------------------------------------------------------------------------------------------------------------------------------------------------------------------------------------------------------------------------------------------------------------------------------------------------------------------------------------------------------------------------------------------------------------------------------------------------------------------------------------------------------------------------------------------------------------------------------------------------------------------------------------------------------------------------------|------|------|-----------|-------|------|------|--------------------------------------------------------|-------|----------------------|-------------------------------------------------------------------------------------------------------------------------------------------------------------------------------------------------------------------------------------------------------------------------------------------------------------------------------------------------|------|------|-----------|-------|------|------|
| Rsa1.0_00512.1.g15203.t2 | refNP_197406.1  esterase/lipase domain-containing protein [Arabidopsis thaliana] gi 14250874 emb CAC39243.1  hypothetical protein [Arabidopsis thaliana] gi 18377688 gb AAL66994.1  unknown protein [Arabidopsis thaliana] gi 23296801 gb AAN13173.1  unknown protein [Arabidopsis thaliana] gi 332005263 gb AED92646.1  esterase/lipase domain-containing protein [Arabidopsis thaliana] ref XP_002871857.1  hypothetical protein ARALYDRAFT_488790 [Arabidopsis lyrata subsp. lyrata] gi 297317694 gb EFH48116.1  hypothetical protein ARALYDRAFT_488790 [Arabidopsis lyrata subsp. lyrata] ref NP_197413.1  aspartyl protease family protein [Arabidopsis thaliana] gi 15010798 gb AAK74058.1  AT5g19120/T24G5_20 [Arabidopsis thaliana] gi 15810069 gb AAL06960.1  AT5g19120/T24G5_20 [Arabidopsis thaliana] gi 332005272 gb AED92655.1  aspartyl protease family protein [Arabidopsis thaliana] | 385  | 361  | 1.00E-170 | 93.8  | 79.2 | 80.8 | esterase/lipase domain-containing protein              | gbpln | Arabidopsis thaliana | AT5G19050.1   Symbols:   alpha/beta-Hydrolases superfamily protein   chr5:6369307-6371726 FORWARD LENGTH=361                                                                                                                                                                                                                                    | 385  | 361  | 1.00E-172 | 93.8  | 79.2 | 80.8 |
| Rsa1.0_00512.1.g15204.t1 | ref XP_002871857.1  hypothetical protein ARALYDRAFT_488790 [Arabidopsis lyrata subsp. lyrata] gi 297317694 gb EFH48116.1  hypothetical protein ARALYDRAFT_488790 [Arabidopsis lyrata subsp. lyrata] ref NP_197413.1  aspartyl protease family protein [Arabidopsis thaliana] gi 15010798 gb AAK74058.1  AT5g19120/T24G5_20 [Arabidopsis thaliana] gi 15810069 gb AAL06960.1  AT5g19120/T24G5_20 [Arabidopsis thaliana] gi 332005272 gb AED92655.1  aspartyl protease family protein [Arabidopsis thaliana]                                                                                                                                                                                                                                                                                                                                                                                           | 265  | 280  | 1.00E-106 | 105.7 | 79.6 | 83.8 | hypothetical protein ARALYDRAFT_488790                 | gbpln | Arabidopsis lyrata   | AT5G19070.1   Symbols:   SNARE associated Golgi protein family   chr5:6375569-6377470 FORWARD LENGTH=280                                                                                                                                                                                                                                        | 265  | 280  | 1.00E-108 | 105.7 | 79.2 | 83.8 |
| Rsa1.0_00512.1.g15205.t1 | ref NP_173247.1  G1 to S phase transition protein [Arabidopsis thaliana] gi 79318119 ref NP_001031063.1  G1 to S phase transition protein [Arabidopsis thaliana] gi 21539549 gb AAM53327.1  putative guanine nucleotide regulatory protein [Arabidopsis thaliana] gi 31711944 gb AAP69328.1  At1g18070 [Arabidopsis thaliana] gi 332191549 gb AEE29670.1  G1 to S phase transition protein [Arabidopsis thaliana] gi 332191550 gb AEE29671.1  Translation elongation factor E1A/initiation factor IF2gamma family protein [Arabidopsis thaliana] gb AAF18538.1 AC006551_24 Very similar to retrotransposon reverse transcriptase [Arabidopsis thaliana]                                                                                                                                                                                                                                              | 392  | 386  | 1.00E-164 | 98.5  | 75.0 | 86.0 | aspartyl protease family protein                       | gbpln | Arabidopsis thaliana | AT5G19120.1   Symbols:   Eukaryotic aspartyl protease family protein   chr5:6414589-6415745 FORWARD LENGTH=386                                                                                                                                                                                                                                  | 392  | 386  | 1.00E-167 | 98.5  | 75.0 | 86.0 |
| Rsa1.0_00512.1.g15206.t1 | ref NP_173247.1  G1 to S phase transition protein [Arabidopsis thaliana] gi 79318119 ref NP_001031063.1  G1 to S phase transition protein [Arabidopsis thaliana] gi 21539549 gb AAM53327.1  putative guanine nucleotide regulatory protein [Arabidopsis thaliana] gi 31711944 gb AAP69328.1  At1g18070 [Arabidopsis thaliana] gi 332191549 gb AEE29670.1  G1 to S phase transition protein [Arabidopsis thaliana] gi 332191550 gb AEE29671.1  Translation elongation factor E1A/initiation factor IF2gamma family protein [Arabidopsis thaliana] gb AAF18538.1 AC006551_24 Very similar to retrotransposon reverse transcriptase [Arabidopsis thaliana]                                                                                                                                                                                                                                              | 469  | 532  | 1.00E-80  | 113.4 | 39.7 | 57.1 | G1 to S phase transition protein                       | gbpln | Arabidopsis thaliana | AT1G18070.2   Symbols:   Translation elongation factor E1A/initiation factor IF2gamma family protein   chr1:6214236-6218211 REVERSE LENGTH=532                                                                                                                                                                                                  | 469  | 532  | 3.00E-83  | 113.4 | 39.7 | 57.1 |
| Rsa1.0_00512.1.g15207.t1 | gb AAF18538.1 AC006551_24 Very similar to retrotransposon reverse transcriptase [Arabidopsis thaliana]                                                                                                                                                                                                                                                                                                                                                                                                                                                                                                                                                                                                                                                                                                                                                                                               | 138  | 1231 | 1.00E-20  | 892.0 | 34.8 | 47.1 | Very similar to retrotransposon reverse transcriptase  | gbpln | Arabidopsis thaliana | #                                                                                                                                                                                                                                                                                                                                               | #    | #    | #         | #     | #    |      |
| Rsa1.0_00512.1.g15208.t1 | gb AF066531.1  putative NADH-ubiquinone oxidoreductase 20 kDa subunit [Brassica napus]                                                                                                                                                                                                                                                                                                                                                                                                                                                                                                                                                                                                                                                                                                                                                                                                               | 146  | 248  | 4.00E-64  | 169.9 | 87.7 | 91.1 | putative NADH-ubiquinone oxidoreductase 20 kDa subunit | gbpln | Brassica napus       | AT5G11770.1   Symbols:   NADH-ubiquinone oxidoreductase 20 kDa subunit, mitochondrial   chr5:3791148-3792929 REVERSE LENGTH=218                                                                                                                                                                                                                 | 146  | 218  | 3.00E-58  | 149.3 | 84.9 | 89.0 |
| Rsa1.0_00512.1.g15209.t1 | ref XP_002877525.1  hypothetical protein ARALYDRAFT_905911 [Arabidopsis lyrata subsp. lyrata] gi 297323363 gb EFH53784.1  hypothetical protein ARALYDRAFT_905911 [Arabidopsis lyrata subsp. lyrata]                                                                                                                                                                                                                                                                                                                                                                                                                                                                                                                                                                                                                                                                                                  | 266  | 158  | 9.00E-17  | 59.4  | 22.2 | 30.5 | hypothetical protein ARALYDRAFT_905911                 | gbpln | Arabidopsis lyrata   | AT3G02070.1   Symbols:   Cysteine proteinases superfamily protein   chr3:361368-363132 FORWARD LENGTH=219                                                                                                                                                                                                                                       | 266  | 219  | 2.00E-14  | 82.3  | 19.9 | 28.2 |
| Rsa1.0_00512.1.g15210.t1 | #                                                                                                                                                                                                                                                                                                                                                                                                                                                                                                                                                                                                                                                                                                                                                                                                                                                                                                    | #    | #    | #         | #     | #    | #    | -                                                      | ----  | ----                 | #                                                                                                                                                                                                                                                                                                                                               | #    | #    | #         | #     | #    |      |
| Rsa1.0_00512.1.g15211.t1 | ref NP_180542.1  putative F-box/kelch-repeat protein [Arabidopsis thaliana] gi 75100652 sp O82375.1 FBK39_ARATH RecName: Full=Putative F-box/kelch-repeat protein At2g29810 gi 3582323 gb AAC35220.1  hypothetical protein [Arabidopsis thaliana] gi 330253213 gb AEC08307.1  putative F-box/kelch-repeat protein [Arabidopsis thaliana] ref XP_002890292.1  zinc finger family protein [Arabidopsis lyrata subsp. lyrata] gi 297336134 gb EFH66551.1  zinc finger family protein [Arabidopsis lyrata subsp. lyrata]                                                                                                                                                                                                                                                                                                                                                                                 | 364  | 383  | 5.00E-80  | 105.2 | 48.1 | 64.8 | putative F-box/kelch-repeat protein                    | gbpln | Arabidopsis thaliana | AT2G29810.1   Symbols:   Galactose oxidase/kelch repeat superfamily protein   chr2:12726102-1272753 REVERSE LENGTH=383                                                                                                                                                                                                                          | 364  | 383  | 1.00E-82  | 105.2 | 48.1 | 64.8 |
| Rsa1.0_00512.1.g15212.t1 | ref XP_002890292.1  zinc finger family protein [Arabidopsis lyrata subsp. lyrata] gi 297336134 gb EFH66551.1  zinc finger family protein [Arabidopsis lyrata subsp. lyrata]                                                                                                                                                                                                                                                                                                                                                                                                                                                                                                                                                                                                                                                                                                                          | 224  | 476  | 4.00E-46  | 212.5 | 39.3 | 42.9 | zinc finger family protein                             | gbpln | Arabidopsis lyrata   | AT1G18660.1   Symbols:   zinc finger (G3HC4-type RING finger) family protein   chr1:6421433-6425565 FORWARD LENGTH=486                                                                                                                                                                                                                          | 224  | 486  | 4.00E-48  | 217.0 | 38.8 | 42.4 |
| Rsa1.0_00512.1.g15213.t2 | ref NP_001154709.2  uncharacterized protein [Arabidopsis thaliana] gi 332004329 gb AED91712.1  uncharacterized protein AT5G11700 [Arabidopsis thaliana]                                                                                                                                                                                                                                                                                                                                                                                                                                                                                                                                                                                                                                                                                                                                              | 1102 | 1476 | 0         | 133.9 | 39.3 | 42.3 | uncharacterized protein                                | gbpln | Arabidopsis thaliana | AT5G11700.2   Symbols:   BEST Arabidopsis thaliana protein match is: glycine-rich protein (TAIR:AT4G32920.3); Has 8203 Blast hits to 3102 proteins in 389 species: Archae - 3; Bacteria - 5624; Metazoa - 852; Fungi - 139; Plants - 704; Viruses - 77; Other Eukaryotes - 804 (source: NCBI BLINK).   chr5:3762961-3771123 REVERSE LENGTH=1476 | 1102 | 1476 | 0         | 133.9 | 39.3 | 42.3 |

|                          |                                                                                                                                                                                                                                                                                                                                                                                                                                                                                                                                                        |     |      |           |       |      |      |                                                                                                                                   |       |                      |                                                                                                                                                                                                                                                                                                                                                        |     |      |           |       |      |      |
|--------------------------|--------------------------------------------------------------------------------------------------------------------------------------------------------------------------------------------------------------------------------------------------------------------------------------------------------------------------------------------------------------------------------------------------------------------------------------------------------------------------------------------------------------------------------------------------------|-----|------|-----------|-------|------|------|-----------------------------------------------------------------------------------------------------------------------------------|-------|----------------------|--------------------------------------------------------------------------------------------------------------------------------------------------------------------------------------------------------------------------------------------------------------------------------------------------------------------------------------------------------|-----|------|-----------|-------|------|------|
| Rsa1.0_00512.1.g15214.t1 | ref[XP_002893723.1] predicted protein [Arabidopsis lyrata subsp. lyrata]   g[297339555]gb[EFH69982.1] predicted protein [Arabidopsis lyrata subsp. lyrata]                                                                                                                                                                                                                                                                                                                                                                                             | 603 | 385  | 1.00E-102 | 63.8  | 33.2 | 43.0 | predicted protein                                                                                                                 | gbpln | Arabidopsis lyrata   | AT3G16580.1   Symbols:   F-box and associated interaction domains-containing protein   chr3:5647577-5648725 REVERSE LENGTH=382                                                                                                                                                                                                                         | 603 | 382  | 2.00E-99  | 63.3  | 33.0 | 41.8 |
| Rsa1.0_00512.1.g15215.t1 | gb[ABV98631.1] aluminum-induced protein [Brassica rapa]                                                                                                                                                                                                                                                                                                                                                                                                                                                                                                | 220 | 236  | 1.00E-109 | 107.3 | 86.4 | 88.6 | aluminum-induced protein                                                                                                          | gbpln | Brassica rapa        | AT5G19140.1   Symbols: ATAILP1, AILP1   Aluminum induced protein with YGL and LRDR motifs   chr5:6423398-6425785 FORWARD LENGTH=234                                                                                                                                                                                                                    | 220 | 234  | 1.00E-108 | 106.4 | 85.0 | 87.3 |
| Rsa1.0_00512.1.g15216.t1 | ref[XP_002873934.1] carbohydrate kinase family [Arabidopsis lyrata subsp. lyrata]   g[297319777]gb[EFH50193.1] carbohydrate kinase family [Arabidopsis lyrata subsp. lyrata]                                                                                                                                                                                                                                                                                                                                                                           | 357 | 370  | 0         | 103.6 | 92.7 | 96.6 | carbohydrate kinase family                                                                                                        | gbpln | Arabidopsis lyrata   | AT5G19150.2   Symbols:   pfkB-like carbohydrate kinase family protein   chr5:6426280-6428402 REVERSE LENGTH=365                                                                                                                                                                                                                                        | 357 | 365  | 0         | 102.2 | 89.6 | 93.0 |
| Rsa1.0_00512.1.g15217.t1 | ref[XP_002871869.1] hypothetical protein ARALYDRAFT_909950 [Arabidopsis lyrata subsp. lyrata]   g[297317706]gb[EFH48128.1] hypothetical protein ARALYDRAFT_909950 [Arabidopsis lyrata subsp. lyrata]                                                                                                                                                                                                                                                                                                                                                   | 201 | 453  | 1.00E-86  | 225.4 | 77.6 | 84.6 | hypothetical protein ARALYDRAFT_909950                                                                                            | gbpln | Arabidopsis lyrata   | AT5G19180.1   Symbols: ECR1   E1 C-terminal related 1   chr5:6453375-6455750 FORWARD LENGTH=454                                                                                                                                                                                                                                                        | 201 | 454  | 1.00E-85  | 225.9 | 75.6 | 83.1 |
| Rsa1.0_00512.1.g15218.t1 | ref[NP_197420.1] uncharacterized protein [Arabidopsis thaliana]   g[26449943]dbj[BAC42092.1] unknown protein [Arabidopsis thaliana]   g[28972989]gb[AA063819.1] unknown protein [Arabidopsis thaliana]   g[332005285]gb[AED92688.1] uncharacterized protein AT5G19190 [Arabidopsis thaliana]                                                                                                                                                                                                                                                           | 106 | 154  | 6.00E-29  | 145.3 | 72.6 | 84.9 | uncharacterized protein                                                                                                           | gbpln | Arabidopsis thaliana | AT5G19190.1   Symbols:   unknown protein; BEST Arabidopsis thaliana protein match is: unknown protein (TAIR:AT3G06070.1); Has 1807 Blast hits to 1807 proteins in 277 species: Archae - 0; Bacteria - 0; Metazoa - 736; Fungi - 347; Plants - 385; Viruses - 0; Other Eukaryotes - 339 (source: NCBI BLINK).   chr5:6457349-6457918 FORWARD LENGTH=154 | 106 | 154  | 9.00E-32  | 145.3 | 72.6 | 84.9 |
| Rsa1.0_00512.1.g15219.t1 | gb[EOA19562.1] hypothetical protein CARUB_v10002583mg [Capsella rubella]                                                                                                                                                                                                                                                                                                                                                                                                                                                                               | 113 | 450  | 7.00E-60  | 398.2 | 96.5 | 96.5 | hypothetical protein CARUB_v10002583mg                                                                                            | gbpln | Capsella rubella     | AT5G19780.1   Symbols: TUA5   tubulin alpha-5   chr5:6687212-6688926 FORWARD LENGTH=450                                                                                                                                                                                                                                                                | 113 | 450  | 2.00E-62  | 398.2 | 96.5 | 96.5 |
| Rsa1.0_00512.1.g15220.t3 | gb[EOA19838.1] hypothetical protein CARUB_v10000085mg [Capsella rubella]                                                                                                                                                                                                                                                                                                                                                                                                                                                                               | 353 | 1116 | 0         | 316.1 | 96.0 | 97.7 | hypothetical protein CARUB_v10000085mg                                                                                            | gbpln | Capsella rubella     | AT5G19820.1   Symbols: emb2734   ARM repeat superfamily protein   chr5:6695731-6701247 REVERSE LENGTH=1116                                                                                                                                                                                                                                             | 353 | 1116 | 0         | 316.1 | 95.5 | 98.0 |
| Rsa1.0_00513.1.g15221.t1 | gb[ABD65089.1] zinc knuckle containing protein [Brassica oleracea]                                                                                                                                                                                                                                                                                                                                                                                                                                                                                     | 165 | 333  | 2.00E-74  | 201.8 | 83.0 | 93.3 | zinc knuckle containing protein                                                                                                   | gbpln | Brassica oleracea    | #                                                                                                                                                                                                                                                                                                                                                      | #   | #    | #         | #     | #    | #    |
| Rsa1.0_00513.1.g15222.t5 | gb[EOA26133.1] hypothetical protein CARUB_v10019559mg [Capsella rubella]                                                                                                                                                                                                                                                                                                                                                                                                                                                                               | 380 | 969  | 2.00E-66  | 255.0 | 33.9 | 36.1 | hypothetical protein CARUB_v10019559mg                                                                                            | gbpln | Capsella rubella     | AT3G42850.1   Symbols:   Mevalonate/galactokinase family protein   chr3:14940114-14945291 REVERSE LENGTH=964                                                                                                                                                                                                                                           | 380 | 964  | 2.00E-67  | 253.7 | 33.2 | 35.3 |
| Rsa1.0_00513.1.g15223.t1 | ref[XP_002874976.1] hypothetical protein ARALYDRAFT_912083 [Arabidopsis lyrata subsp. lyrata]   g[29732081]gb[EFH51235.1] hypothetical protein ARALYDRAFT_912083 [Arabidopsis lyrata subsp. lyrata]                                                                                                                                                                                                                                                                                                                                                    | 337 | 332  | 1.00E-125 | 98.5  | 72.4 | 81.0 | hypothetical protein ARALYDRAFT_912083                                                                                            | gbpln | Arabidopsis lyrata   | AT4G01500.1   Symbols: NGA4   AP2/B3-like transcriptional factor family protein   chr4:639791-640792 FORWARD LENGTH=333                                                                                                                                                                                                                                | 337 | 333  | 1.00E-126 | 98.8  | 71.5 | 79.5 |
| Rsa1.0_00513.1.g15224.t1 | gb[AAF79618.1]AC027665_19 F5M15.26 [Arabidopsis thaliana]                                                                                                                                                                                                                                                                                                                                                                                                                                                                                              | 485 | 1838 | 1.00E-158 | 379.0 | 59.2 | 75.7 | F5M15.26                                                                                                                          | gbpln | Arabidopsis thaliana | #                                                                                                                                                                                                                                                                                                                                                      | #   | #    | #         | #     | #    | #    |
| Rsa1.0_00513.1.g15225.t3 | #                                                                                                                                                                                                                                                                                                                                                                                                                                                                                                                                                      | #   | #    | #         | #     | #    | #    | -                                                                                                                                 | ----  | ----                 | #                                                                                                                                                                                                                                                                                                                                                      | #   | #    | #         | #     | #    | #    |
| Rsa1.0_00513.1.g15226.t1 | gb[AAD17351.1] contains similarity to retrovirus-related polyproteins and to CCHC zinc finger protein (Pfam: PF00098, Score=16.3, E=0.051, E= 1) [Arabidopsis thaliana]   g[7267432]emb[CAB77944.1] putative polyprotein [Arabidopsis thaliana]                                                                                                                                                                                                                                                                                                        | 494 | 1138 | 5.00E-74  | 230.4 | 30.2 | 46.4 | contains similarity to retrovirus-related polyproteins and to CCHC zinc finger protein (Pfam: PF00098, Score=16.3, E=0.051, E= 1) | gbpln | Arabidopsis thaliana | #                                                                                                                                                                                                                                                                                                                                                      | #   | #    | #         | #     | #    | #    |
| Rsa1.0_00513.1.g15227.t1 | #                                                                                                                                                                                                                                                                                                                                                                                                                                                                                                                                                      | #   | #    | #         | #     | #    | #    | -                                                                                                                                 | ----  | ----                 | #                                                                                                                                                                                                                                                                                                                                                      | #   | #    | #         | #     | #    | #    |
| Rsa1.0_00513.1.g15228.t1 | gb[EGV96854.1] Keratin-associated protein 4-3 [Cricetus griseus]   ref[NP_192064.1] NAC domain-containing protein 69 [Arabidopsis thaliana]   g[75181714]sp[Q9M126.1]NAC69_ARAT H RecName: Full=NAC domain-containing protein 69; Short=ANAC069; AltName: Full=Protein NAC WITH TRANSMEMBRANE MOTIF 2   g[7268198]emb[CAB77725.1] putative NAM-like protein [Arabidopsis thaliana]   g[110738499]dbj[BAF01175.1] putative NAM-like protein [Arabidopsis thaliana]   g[332656640]gb[AEE82040.1] NAC domain-containing protein 69 [Arabidopsis thaliana] | 416 | 224  | 1.00E-13  | 53.8  | 13.9 | 16.1 | Keratin-associated protein 4-3                                                                                                    | gbrod | Cricetus griseus     | #                                                                                                                                                                                                                                                                                                                                                      | #   | #    | #         | #     | #    | #    |
| Rsa1.0_00513.1.g15229.t1 | ref[NP_192064.1] NAC domain-containing protein 69 [Arabidopsis thaliana]   g[75181714]sp[Q9M126.1]NAC69_ARAT H RecName: Full=NAC domain-containing protein 69; Short=ANAC069; AltName: Full=Protein NAC WITH TRANSMEMBRANE MOTIF 2   g[7268198]emb[CAB77725.1] putative NAM-like protein [Arabidopsis thaliana]   g[110738499]dbj[BAF01175.1] putative NAM-like protein [Arabidopsis thaliana]   g[332656640]gb[AEE82040.1] NAC domain-containing protein 69 [Arabidopsis thaliana]                                                                    | 424 | 457  | 1.00E-140 | 107.8 | 65.1 | 77.4 | NAC domain-containing protein 69                                                                                                  | gbpln | Arabidopsis thaliana | AT4G01550.1   Symbols: anac069, NAC069   NAC domain containing protein 69   chr4:674025-676225 REVERSE LENGTH=457                                                                                                                                                                                                                                      | 424 | 457  | 1.00E-143 | 107.8 | 65.1 | 77.4 |

|                          |                                                                                                                                                                                                     |      |      |           |       |      |      |                                          |       |                      |                                                                                                                                                                                                                                                                                                                                                                                                 |      |      |           |       |      |      |
|--------------------------|-----------------------------------------------------------------------------------------------------------------------------------------------------------------------------------------------------|------|------|-----------|-------|------|------|------------------------------------------|-------|----------------------|-------------------------------------------------------------------------------------------------------------------------------------------------------------------------------------------------------------------------------------------------------------------------------------------------------------------------------------------------------------------------------------------------|------|------|-----------|-------|------|------|
| Rsa1.0_00513.1.g15230.t1 | gb AAG10817.1 AC011808.5 Putative retroelement polyprotein [Arabidopsis thaliana]                                                                                                                   | 1392 | 1413 | 0         | 101.5 | 65.2 | 78.1 | Putative retroelement polyprotein        | gbpln | Arabidopsis thaliana | AT4G23160.1   Symbols: CRK8   cysteine-rich RLK (RECEPTOR-like protein kinase) 8   chr4:12129485-12134086 FORWARD LENGTH=1262                                                                                                                                                                                                                                                                   | 1392 | 1262 | 0         | 90.7  | 22.4 | 28.4 |
| Rsa1.0_00513.1.g15231.t1 | gb ACA61620.1  hypothetical protein AP6_E08.1 [Arabidopsis lyrata subsp. petraea]                                                                                                                   | 217  | 220  | 1.00E-55  | 101.4 | 49.8 | 59.4 | hypothetical protein AP6_E08.1           | gbpln | Arabidopsis lyrata   | AT4G01590.2   Symbols:   unknown protein; BEST Arabidopsis thaliana protein match is: Arabidopsis protein of unknown function (DUF241) (TAIR:AT4G35680.1); Has 35333 Blast hits to 34131 proteins in 2444 species: Archae - 798; Bacteria - 22429; Metazoa - 974; Fungi - 991; Plants - 531; Viruses - 0; Other Eukaryotes - 9610 (source: NCBI BLink).   chr4:689077-690192 REVERSE LENGTH=199 | 217  | 199  | 5.00E-52  | 91.7  | 46.5 | 58.1 |
| Rsa1.0_00513.1.g15232.t1 | #                                                                                                                                                                                                   | #    | #    | #         | #     | #    | -    | ----                                     | ----  | ----                 | #                                                                                                                                                                                                                                                                                                                                                                                               | #    | #    | #         | #     | #    | #    |
| Rsa1.0_00513.1.g15233.t1 | gb EOA19391.1  hypothetical protein CARUB_v10000764mg [Capsella rubella]                                                                                                                            | 192  | 507  | 9.00E-90  | 264.1 | 90.1 | 94.3 | hypothetical protein CARUB_v10000764mg   | gbpln | Capsella rubella     | AT4G01730.1   Symbols:   DHHC-type zinc finger family protein   chr4:749574-752034 FORWARD LENGTH=508                                                                                                                                                                                                                                                                                           | 192  | 508  | 2.00E-82  | 264.6 | 89.6 | 93.8 |
| Rsa1.0_00513.1.g15234.t1 | gb EOA19391.1  hypothetical protein CARUB_v10000764mg [Capsella rubella]                                                                                                                            | 299  | 507  | 1.00E-130 | 169.6 | 83.6 | 89.6 | hypothetical protein CARUB_v10000764mg   | gbpln | Capsella rubella     | AT4G01730.1   Symbols:   DHHC-type zinc finger family protein   chr4:749574-752034 FORWARD LENGTH=508                                                                                                                                                                                                                                                                                           | 299  | 508  | 1.00E-127 | 169.9 | 85.6 | 92.0 |
| Rsa1.0_00513.1.g15235.t1 | ref XP_002863331.1  hypothetical protein ARALYDRAFT_916628 [Arabidopsis lyrata subsp. lyrata] gi 297309166 gb EFH39590.1  hypothetical protein ARALYDRAFT_916628 [Arabidopsis lyrata subsp. lyrata] | 106  | 243  | 1.00E-11  | 229.2 | 48.1 | 67.9 | hypothetical protein ARALYDRAFT_916628   | gbpln | Arabidopsis lyrata   | AT5G47590.1   Symbols:   Heat shock protein HSP20/alpha crystallin family   chr5:19297945-19299099 REVERSE LENGTH=264                                                                                                                                                                                                                                                                           | 106  | 264  | 1.00E-10  | 249.1 | 40.6 | 63.2 |
| Rsa1.0_00513.1.g15236.t1 | #                                                                                                                                                                                                   | #    | #    | #         | #     | #    | -    | ----                                     | ----  | ----                 | #                                                                                                                                                                                                                                                                                                                                                                                               | #    | #    | #         | #     | #    | #    |
| Rsa1.0_00513.1.g15237.t1 | #                                                                                                                                                                                                   | #    | #    | #         | #     | #    | -    | ----                                     | ----  | ----                 | #                                                                                                                                                                                                                                                                                                                                                                                               | #    | #    | #         | #     | #    | #    |
| Rsa1.0_00514.1.g15238.t1 | #                                                                                                                                                                                                   | #    | #    | #         | #     | #    | -    | ----                                     | ----  | ----                 | #                                                                                                                                                                                                                                                                                                                                                                                               | #    | #    | #         | #     | #    | #    |
| Rsa1.0_00514.1.g15239.t1 | ref XP_002892845.1  quiescin-sulfhydryl oxidase 1 [Arabidopsis lyrata subsp. lyrata] gi 297338687 gb EFH69104.1  quiescin-sulfhydryl oxidase 1 [Arabidopsis lyrata subsp. lyrata]                   | 141  | 528  | 2.00E-36  | 374.5 | 69.5 | 78.7 | quiescin-sulfhydryl oxidase 1            | gbpln | Arabidopsis lyrata   | AT1G15020.2   Symbols:   ATQSOX1, QSO2, QSOX1   quiescin-sulfhydryl oxidase 1   chr1:5173341-5176105 REVERSE LENGTH=528                                                                                                                                                                                                                                                                         | 141  | 528  | 2.00E-33  | 374.5 | 58.9 | 68.1 |
| Rsa1.0_00514.1.g15240.t1 | ref XP_002883045.1  hypothetical protein ARALYDRAFT_479182 [Arabidopsis lyrata subsp. lyrata] gi 297328885 gb EFH59304.1  hypothetical protein ARALYDRAFT_479182 [Arabidopsis lyrata subsp. lyrata] | 217  | 219  | 5.00E-83  | 100.9 | 79.3 | 87.1 | hypothetical protein ARALYDRAFT_479182   | gbpln | Arabidopsis lyrata   | AT3G17120.2   Symbols:   unknown protein; BEST Arabidopsis thaliana protein match is: unknown protein (TAIR:AT1G02380.1); Has 35333 Blast hits to 34131 proteins in 2444 species: Archae - 798; Bacteria - 22429; Metazoa - 974; Fungi - 991; Plants - 531; Viruses - 0; Other Eukaryotes - 9610 (source: NCBI BLink).   chr3:5842410-5843246 FORWARD LENGTH=219                                | 217  | 219  | 4.00E-84  | 100.9 | 77.9 | 86.2 |
| Rsa1.0_00514.1.g15241.t1 | emb CAB39638.1  RNA-directed DNA polymerase-like protein [Arabidopsis thaliana] gi 7267666 emb CAB78094.1  RNA-directed DNA polymerase-like protein [Arabidopsis thaliana]                          | 688  | 1274 | 1.00E-118 | 185.2 | 34.9 | 45.3 | RNA-directed DNA polymerase-like protein | gbpln | Arabidopsis thaliana | AT3G17130.1   Symbols:   Plant invertase/pectin methyltransferase inhibitor superfamily protein   chr3:5844495-5845046 REVERSE LENGTH=183                                                                                                                                                                                                                                                       | 688  | 183  | 1.00E-65  | 26.6  | 17.6 | 20.1 |
| Rsa1.0_00514.1.g15242.t2 | #                                                                                                                                                                                                   | #    | #    | #         | #     | #    | -    | ----                                     | ----  | ----                 | #                                                                                                                                                                                                                                                                                                                                                                                               | #    | #    | #         | #     | #    | #    |
| Rsa1.0_00514.1.g15243.t1 | dbj BAD95408.1  hypothetical protein [Arabidopsis thaliana]                                                                                                                                         | 283  | 478  | 2.00E-65  | 168.9 | 43.1 | 61.1 | hypothetical protein                     | gbpln | Arabidopsis thaliana | AT3G24255.1   Symbols:   RNA-directed DNA polymerase (reverse transcriptase)-related family protein   chr3:8789471-8793208 FORWARD LENGTH=746                                                                                                                                                                                                                                                   | 283  | 746  | 3.00E-53  | 263.6 | 36.0 | 49.5 |
| Rsa1.0_00514.1.g15244.t1 | #                                                                                                                                                                                                   | #    | #    | #         | #     | #    | -    | ----                                     | ----  | ----                 | #                                                                                                                                                                                                                                                                                                                                                                                               | #    | #    | #         | #     | #    | #    |
| Rsa1.0_00514.1.g15245.t1 | #                                                                                                                                                                                                   | #    | #    | #         | #     | #    | -    | ----                                     | ----  | ----                 | #                                                                                                                                                                                                                                                                                                                                                                                               | #    | #    | #         | #     | #    | #    |
| Rsa1.0_00514.1.g15246.t1 | gb AAC02666.1  polyprotein [Arabidopsis thaliana]                                                                                                                                                   | 1363 | 1451 | 0         | 106.5 | 59.5 | 73.1 | polyprotein                              | gbpln | Arabidopsis thaliana | AT4G23160.1   Symbols: CRK8   cysteine-rich RLK (RECEPTOR-like protein kinase) 8   chr4:12129485-12134086 FORWARD LENGTH=1262                                                                                                                                                                                                                                                                   | 1363 | 1262 | 9.00E-83  | 92.6  | 12.0 | 18.4 |
| Rsa1.0_00514.1.g15247.t2 | #                                                                                                                                                                                                   | #    | #    | #         | #     | #    | -    | ----                                     | ----  | ----                 | #                                                                                                                                                                                                                                                                                                                                                                                               | #    | #    | #         | #     | #    | #    |
| Rsa1.0_00514.1.g15248.t1 | gb EOA30281.1  hypothetical protein CARUB_v10013409mg [Capsella rubella]                                                                                                                            | 537  | 538  | 0         | 100.2 | 77.1 | 84.0 | hypothetical protein CARUB_v10013409mg   | gbpln | Capsella rubella     | AT3G21320.1   Symbols:   BEST Arabidopsis thaliana protein match is: hydroxyproline-rich glycoprotein family protein (TAIR:AT2G25930.1); Has 63 Blast hits to 58 proteins in 21 species: Archae - 0; Bacteria - 0; Metazoa - 3; Fungi - 0; Plants - 58; Viruses - 0; Other Eukaryotes - 2 (source: NCBI BLink).   chr3:7499408-7501312 REVERSE LENGTH=540                                       | 537  | 540  | 0         | 100.6 | 73.6 | 82.3 |
| Rsa1.0_00514.1.g15249.t1 | gb EOA32015.1  hypothetical protein CARUB_v10015258mg [Capsella rubella]                                                                                                                            | 381  | 384  | 0         | 100.8 | 80.8 | 87.1 | hypothetical protein CARUB_v10015258mg   | gbpln | Capsella rubella     | AT3G21310.1   Symbols:   Core-2/T-branching beta-1,6-N-acetylglucosaminyltransferase family protein   chr3:7497774-7499011 FORWARD LENGTH=383                                                                                                                                                                                                                                                   | 381  | 383  | 1.00E-180 | 100.5 | 80.8 | 88.7 |

|                           |                                                                                                                                                                                                                                                                                                                                                                                                                                                                                                                                                                                                                                             |      |      |           |       |      |      |                                                                                                                                                       |       |                      |                                                                                                                      |      |      |           |       |      |      |
|---------------------------|---------------------------------------------------------------------------------------------------------------------------------------------------------------------------------------------------------------------------------------------------------------------------------------------------------------------------------------------------------------------------------------------------------------------------------------------------------------------------------------------------------------------------------------------------------------------------------------------------------------------------------------------|------|------|-----------|-------|------|------|-------------------------------------------------------------------------------------------------------------------------------------------------------|-------|----------------------|----------------------------------------------------------------------------------------------------------------------|------|------|-----------|-------|------|------|
| Rsa1.0_00514.1.g15250.t1  | gb EOA30225.1  hypothetical protein CARUB_v10013347mg, partial [Capsella rubella]                                                                                                                                                                                                                                                                                                                                                                                                                                                                                                                                                           | 554  | 567  | 0         | 102.3 | 87.4 | 93.0 | hypothetical protein CARUB_v10013347mg, partial                                                                                                       | gbpln | Capsella rubella     | AT3G21300.1   Symbols:   RNA methyltransferase family protein   chr3:7493854-7496257 REVERSE LENGTH=554              | 554  | 554  | 0         | 100.0 | 87.5 | 93.1 |
| Rsa1.0_00514.1.g15251.t1  | gb EOA31808.1  hypothetical protein CARUB_v10015031mg [Capsella rubella]                                                                                                                                                                                                                                                                                                                                                                                                                                                                                                                                                                    | 74   | 75   | 5.00E-22  | 101.4 | 78.4 | 86.5 | hypothetical protein CARUB_v10015031mg                                                                                                                | gbpln | Capsella rubella     | #                                                                                                                    | #    | #    | #         | #     | #    | #    |
| Rsa1.0_00514.1.g15252.t1  | ref NP_001078195.1  uncharacterized protein [Arabidopsis thaliana] gi 332642968 gb AEE76489.1  uncharacterized protein AT3G21295 [Arabidopsis thaliana]                                                                                                                                                                                                                                                                                                                                                                                                                                                                                     | 581  | 645  | 1.00E-180 | 111.0 | 70.9 | 79.7 | uncharacterized protein                                                                                                                               | gbpln | Arabidopsis thaliana | AT3G21295.1   Symbols:   Tudor/PWPF/MBT superfamily protein   chr3:7489635-7492296 FORWARD LENGTH=645                | 581  | 645  | 0         | 111.0 | 70.9 | 79.7 |
| Rsa1.0_00514.1.g15253.t1  | ref NP_566681.1  dentin sialophosphoprotein-like protein [Arabidopsis thaliana] gi 332642967 gb AEE76488.1  dentin sialophosphoprotein-like protein [Arabidopsis thaliana]                                                                                                                                                                                                                                                                                                                                                                                                                                                                  | 1145 | 1192 | 0         | 104.1 | 75.4 | 82.6 | dentin sialophosphoprotein-like protein                                                                                                               | gbpln | Arabidopsis thaliana | AT3G21290.1   Symbols:   dentin sialophosphoprotein-related   chr3:7482318-7488676 FORWARD LENGTH=1192               | 1145 | 1192 | 0         | 104.1 | 75.4 | 82.6 |
| Rsa1.0_00515.1.g15254.t2  | ref NP_191470.1  protein kinase family protein [Arabidopsis thaliana] gi 7529754 emb CAB86939.1  receptor-like protein kinase [Arabidopsis thaliana] gi 332646358 gb AEE79879.1  protein kinase family protein [Arabidopsis thaliana]                                                                                                                                                                                                                                                                                                                                                                                                       | 482  | 512  | 0         | 106.2 | 84.9 | 90.0 | protein kinase family protein                                                                                                                         | gbpln | Arabidopsis thaliana | AT3G5110.1   Symbols:   Protein kinase superfamily protein   chr3:21855673-21857847 FORWARD LENGTH=512               | 482  | 512  | 0         | 106.2 | 84.9 | 90.0 |
| Rsa1.0_00515.1.g15255.t16 | ref NP_195508.2  Rhamnogalacturonate lyase family protein [Arabidopsis thaliana] gi 28393444 gb AAO42144.1  unknown protein [Arabidopsis thaliana] gi 110736900 dbj BAF00407.1  hypothetical protein [Arabidopsis thaliana] gi 332661457 gb AEE86857.1  Rhamnogalacturonate lyase family protein [Arabidopsis thaliana] ref NP_191480.2  F-box/LRR-repeat protein [Arabidopsis thaliana] gi 334186120 ref NP_001190132.1  F-box/LRR-repeat protein [Arabidopsis thaliana] gi 334186122 ref NP_001190133.1  F-box/LRR-repeat protein [Arabidopsis thaliana] gi 334186124 ref NP_001190134.1  F-box/LRR-repeat protein [Arabidopsis thaliana] | 1613 | 678  | 0         | 42.0  | 24.6 | 27.1 | Rhamnogalacturonate lyase family protein                                                                                                              | gbpln | Arabidopsis thaliana | AT4G37950.1   Symbols:   Rhamnogalacturonate lyase family protein   chr4:17844792-17849156 FORWARD LENGTH=678        | 1613 | 678  | 0         | 42.0  | 24.6 | 27.1 |
| Rsa1.0_00515.1.g15256.t1  | gi 75244355 sp O8GW80.1 FBL65_ARAT H RecName: Full=F-box/LRR-repeat protein At3g59210 gi 26453044 dbj BAC43598.1  unknown protein [Arabidopsis thaliana] gi 332646368 gb AEE79889.1  F-box/LRR-repeat protein [Arabidopsis thaliana] gi 332646369 gb AEE79890.1  F-box/LRR-repeat protein [Arabidopsis thaliana] gi 332646370 gb AEE79891.1  F-box/LRR-repeat protein [Arabidopsis thaliana] gi 332646371 gb AEE79892.1  F-box/LRR-repeat protein [Arabidopsis thaliana]                                                                                                                                                                    | 301  | 484  | 1.00E-138 | 160.8 | 82.4 | 87.7 | F-box/LRR-repeat protein                                                                                                                              | gbpln | Arabidopsis thaliana | AT3G59210.4   Symbols:   F-box/RNI-like superfamily protein   chr3:21889942-21891553 FORWARD LENGTH=484              | 301  | 484  | 1.00E-141 | 160.8 | 82.4 | 87.7 |
| Rsa1.0_00515.1.g15257.t1  | gb EOA23973.1  hypothetical protein CARUB_v10017193mg [Capsella rubella]                                                                                                                                                                                                                                                                                                                                                                                                                                                                                                                                                                    | 741  | 463  | 1.00E-158 | 62.5  | 38.7 | 46.3 | hypothetical protein CARUB_v10017193mg                                                                                                                | gbpln | Capsella rubella     | AT3G59250.1   Symbols:   F-box/RNI-like superfamily protein   chr3:21901726-21903284 REVERSE LENGTH=425              | 741  | 425  | 1.00E-156 | 57.4  | 39.1 | 46.0 |
| Rsa1.0_00515.1.g15258.t1  | gb AAF80658.1 AC012190_14 Similar to At2g29230 Mutator-like transposase gi 3980409 from Arabidopsis thaliana gb AC004561. It is a member of Transposase mutator family PF 00872 [Arabidopsis thaliana]                                                                                                                                                                                                                                                                                                                                                                                                                                      | 887  | 904  | 1.00E-157 | 101.9 | 36.9 | 55.4 | Similar to At2g29230 Mutator-like transposase gi 3980409 from Arabidopsis thaliana gb AC004561. It is a member of Transposase mutator family PF 00872 | gbpln | Arabidopsis thaliana | AT1G64260.1   Symbols:   MuDR family transposase   chr1:23847756-23849915 FORWARD LENGTH=719                         | 887  | 719  | 2.00E-29  | 81.1  | 12.6 | 23.8 |
| Rsa1.0_00515.1.g15259.t1  | gb ABD64941.1  Ulp1 protease family protein [Brassica oleracea]                                                                                                                                                                                                                                                                                                                                                                                                                                                                                                                                                                             | 912  | 871  | 2.00E-83  | 95.5  | 29.5 | 44.5 | Ulp1 protease family protein                                                                                                                          | gbpln | Brassica oleracea    | AT2G07240.1   Symbols:   cysteine-type peptidases;cysteine-type peptidases   chr2:3007102-3011701 REVERSE LENGTH=874 | 912  | 874  | 2.00E-25  | 95.8  | 7.7  | 11.6 |

|                          |                                                                                                                          |     |     |           |       |      |      |                                                 |       |                      |                                                                                                                                                                                                                                                                                                                                                                                                                                                                                                                                                    |     |     |           |       |      |      |
|--------------------------|--------------------------------------------------------------------------------------------------------------------------|-----|-----|-----------|-------|------|------|-------------------------------------------------|-------|----------------------|----------------------------------------------------------------------------------------------------------------------------------------------------------------------------------------------------------------------------------------------------------------------------------------------------------------------------------------------------------------------------------------------------------------------------------------------------------------------------------------------------------------------------------------------------|-----|-----|-----------|-------|------|------|
| Rsa1.0_00515.1.g15260.t1 | ref[XP_002876494.1] hypothetical protein ARALYDRAFT_324401 [Arabidopsis lyrata subsp. lyrata] g[297322332]gb[EFH52753.1] | 285 | 285 | 1.00E-131 | 100.0 | 79.6 | 89.1 | hypothetical protein ARALYDRAFT_324401          | gbpln | Arabidopsis lyrata   | AT3G59260.1   Symbols:   pirin, putative   chr3:21903839-21905188 FORWARD LENGTH=271                                                                                                                                                                                                                                                                                                                                                                                                                                                               | 285 | 271 | 1.00E-119 | 95.1  | 71.2 | 80.7 |
| Rsa1.0_00515.1.g15261.t1 | gb[EOA26103.1] hypothetical protein CARUB_v10019525mg, partial [Capsella rubella]                                        | 374 | 383 | 1.00E-154 | 102.4 | 73.0 | 84.2 | hypothetical protein CARUB_v10019525mg, partial | gbpln | Capsella rubella     | AT3G59270.1   Symbols:   FBD-like domain family protein   chr3:21906593-21907872 REVERSE LENGTH=335                                                                                                                                                                                                                                                                                                                                                                                                                                                | 374 | 335 | 1.00E-128 | 89.6  | 65.5 | 73.3 |
| Rsa1.0_00515.1.g15262.t1 | gb[EOA24964.1] hypothetical protein CARUB_v10018261mg [Capsella rubella]                                                 | 101 | 116 | 6.00E-47  | 114.9 | 93.1 | 96.0 | hypothetical protein CARUB_v10018261mg          | gbpln | Capsella rubella     | AT3G59280.1   Symbols:   TXR1   Protein Transporter, Pam16   chr3:21909266-21910519 REVERSE LENGTH=116                                                                                                                                                                                                                                                                                                                                                                                                                                             | 101 | 116 | 8.00E-47  | 114.9 | 87.1 | 94.1 |
| Rsa1.0_00515.1.g15263.t1 | gb[EOA26121.1] hypothetical protein CARUB_v10019547mg [Capsella rubella]                                                 | 339 | 594 | 1.00E-140 | 175.2 | 79.9 | 87.9 | hypothetical protein CARUB_v10019547mg          | gbpln | Capsella rubella     | AT3G59320.1   Symbols:   Eukaryotic protein of unknown function (DUF914)   chr3:21924705-21926840 REVERSE LENGTH=339                                                                                                                                                                                                                                                                                                                                                                                                                               | 339 | 339 | 1.00E-139 | 100.0 | 76.4 | 86.7 |
| Rsa1.0_00515.1.g15264.t1 | gb[EOA23981.1] hypothetical protein CARUB_v10017200mg [Capsella rubella]                                                 | 408 | 460 | 0         | 112.7 | 90.2 | 93.4 | hypothetical protein CARUB_v10017200mg          | gbpln | Capsella rubella     | AT3G59350.3   Symbols:   Protein kinase superfamily protein   chr3:21932930-21934883 FORWARD LENGTH=408                                                                                                                                                                                                                                                                                                                                                                                                                                            | 408 | 408 | 0         | 100.0 | 89.2 | 93.1 |
| Rsa1.0_00515.1.g15265.t1 | ref[XP_002876501.1] hypothetical protein ARALYDRAFT_486406 [Arabidopsis lyrata subsp. lyrata] g[297322339]gb[EFH52760.1] | 272 | 272 | 1.00E-136 | 100.0 | 89.7 | 94.9 | hypothetical protein ARALYDRAFT_486406          | gbpln | Arabidopsis lyrata   | AT3G59390.1   Symbols:   unknown protein; FUNCTIONS IN: molecular function unknown; INVOLVED IN: biological process unknown; LOCATED IN: endomembrane system; EXPRESSED IN: 22 plant structures; EXPRESSED DURING: 13 growth stages; CONTAINS InterPro DOMAIN/s: Protein of unknown function DUF2054 (InterPro:IPR019352); Has 184 Blast hits to 184 proteins in 72 species: Archae - 0; Bacteria - 0; Metazoa - 116; Fungi - 0; Plants - 43; Viruses - 0; Other Eukaryotes - 25 (source: NCBI BLINK).   chr3:21946160-21948166 FORWARD LENGTH=273 | 272 | 273 | 1.00E-133 | 100.4 | 87.9 | 94.1 |
| Rsa1.0_00515.1.g15266.t3 | gb[AFX68809.1] tetrapyrrole-binding protein [Brassica oleracea]                                                          | 258 | 256 | 1.00E-107 | 99.2  | 84.5 | 88.8 | tetrapyrrole-binding protein                    | gbpln | Brassica oleracea    | AT3G59400.1   Symbols:   GUN4   enzyme binding:tetrapyrrole binding   chr3:21948881-21949678 REVERSE LENGTH=265                                                                                                                                                                                                                                                                                                                                                                                                                                    | 258 | 265 | 2.00E-97  | 102.7 | 78.3 | 84.5 |
| Rsa1.0_00515.1.g15267.t1 | gb[AAM19705.1]AF499718.1 protein phosphatase 2c-like protein [Eutrema halophilum]                                        | 288 | 378 | 2.00E-20  | 131.3 | 20.8 | 25.3 | protein phosphatase 2c-like protein             | gbpln | Eutrema halophilum   | AT2G02040.1   Symbols:   ATPTR2-B, NTR1, PTR2-B, PTR2, ATPTR2   peptide transporter 2   chr2:487542-489707 FORWARD LENGTH=585                                                                                                                                                                                                                                                                                                                                                                                                                      | 288 | 585 | 4.00E-22  | 203.1 | 16.7 | 18.1 |
| Rsa1.0_00515.1.g15268.t1 | gb[EOA24726.1] hypothetical protein CARUB_v10018003mg, partial [Capsella rubella]                                        | 204 | 216 | 4.00E-94  | 105.9 | 83.3 | 89.2 | hypothetical protein CARUB_v10018003mg, partial | gbpln | Capsella rubella     | AT3G59440.1   Symbols:   Calcium-binding EF-hand family protein   chr3:21970423-21971010 FORWARD LENGTH=195                                                                                                                                                                                                                                                                                                                                                                                                                                        | 204 | 195 | 2.00E-94  | 95.6  | 83.8 | 87.7 |
| Rsa1.0_00515.1.g15269.t1 | gb[EOA24572.1] hypothetical protein CARUB_v10017836mg [Capsella rubella]                                                 | 397 | 269 | 1.00E-123 | 67.8  | 56.9 | 60.2 | hypothetical protein CARUB_v10017836mg          | gbpln | Capsella rubella     | AT3G59470.2   Symbols:   Far-red impaired responsive (FAR1) family protein   chr3:21978099-21980097 REVERSE LENGTH=251                                                                                                                                                                                                                                                                                                                                                                                                                             | 397 | 251 | 1.00E-124 | 63.2  | 54.9 | 57.2 |
| Rsa1.0_00515.1.g15270.t1 | gb[AAM64445.1] fructokinase-like protein [Arabidopsis thaliana]                                                          | 237 | 326 | 1.00E-115 | 137.6 | 89.0 | 92.0 | fructokinase-like protein                       | gbpln | Arabidopsis thaliana | AT3G59480.1   Symbols:   pFKB-like carbohydrate kinase family protein   chr3:21983103-21984440 FORWARD LENGTH=326                                                                                                                                                                                                                                                                                                                                                                                                                                  | 237 | 326 | 1.00E-117 | 137.6 | 89.0 | 91.6 |
| Rsa1.0_00516.1.g15271.t1 | ref[XP_002868672.1] hypothetical protein ARALYDRAFT_916251 [Arabidopsis lyrata subsp. lyrata] g[297314508]gb[EFH44931.1] | 323 | 328 | 1.00E-155 | 101.5 | 84.5 | 90.7 | hypothetical protein ARALYDRAFT_916251          | gbpln | Arabidopsis lyrata   | AT5G40150.1   Symbols:   Peroxidase superfamily protein   chr5:16059750-16060736 REVERSE LENGTH=328                                                                                                                                                                                                                                                                                                                                                                                                                                                | 323 | 328 | 1.00E-156 | 101.5 | 83.3 | 89.2 |
| Rsa1.0_00516.1.g15272.t1 | ref[XP_002873025.1] hypothetical protein ARALYDRAFT_486965 [Arabidopsis lyrata subsp. lyrata] g[297318862]gb[EFH49284.1] | 458 | 503 | 1.00E-140 | 109.8 | 60.0 | 74.9 | hypothetical protein ARALYDRAFT_486965          | gbpln | Arabidopsis lyrata   | AT5G01150.1   Symbols:   Protein of unknown function (DUF674)   chr5:51988-53649 FORWARD LENGTH=501                                                                                                                                                                                                                                                                                                                                                                                                                                                | 458 | 501 | 1.00E-142 | 109.4 | 59.2 | 74.7 |

|                          |                                                                                                                                                                                                                                                                                                                                                                                                                                                                                                                                                                                                                                                                                                                                                                                                                                                                                                                                                     |      |      |           |       |      |      |                                                     |       |                      |                                                                                                                                                                                                                                                                                                                                                                                                                                                                                                                                   |      |      |           |       |      |      |
|--------------------------|-----------------------------------------------------------------------------------------------------------------------------------------------------------------------------------------------------------------------------------------------------------------------------------------------------------------------------------------------------------------------------------------------------------------------------------------------------------------------------------------------------------------------------------------------------------------------------------------------------------------------------------------------------------------------------------------------------------------------------------------------------------------------------------------------------------------------------------------------------------------------------------------------------------------------------------------------------|------|------|-----------|-------|------|------|-----------------------------------------------------|-------|----------------------|-----------------------------------------------------------------------------------------------------------------------------------------------------------------------------------------------------------------------------------------------------------------------------------------------------------------------------------------------------------------------------------------------------------------------------------------------------------------------------------------------------------------------------------|------|------|-----------|-------|------|------|
| Rsa1.0_00516.1.g15273.t1 | <p>ref NP_198832.1  ankyrin repeat domain-containing protein EMB506 [Arabidopsis thaliana]<br/> gi 75313777 sp Q9SQK3.1 EM506_ARAT H RecName: Full=Ankyrin repeat domain-containing protein EMB506, chloroplastic; AltName: Full=Protein EMBRYO DEFECTIVE 506; Flags: Precursor<br/> gi 5911312 gb AAD55746.1 AF026167.1 ankyrin repeat protein EMB506 [Arabidopsis thaliana]<br/> gi 10177503 dbj BAB10897.1  ankyrin repeat protein EMB506 [Arabidopsis thaliana]<br/> gi 17380824 gb AAL36099.1  putative ankyrin repeat protein EMB506 [Arabidopsis thaliana]<br/> gi 21436371 gb AAM51355.1  putative ankyrin repeat protein EMB506 [Arabidopsis thaliana]<br/> gi 332007132 gb AED94515.1  ankyrin repeat domain-containing protein EMB506 [Arabidopsis thaliana]<br/> ref NP_001031402.1  serine carboxypeptidase-like 13 [Arabidopsis thaliana]<br/> gi 330252292 gb AEC07386.1  serine carboxypeptidase-like 13 [Arabidopsis thaliana]</p> | 324  | 315  | 1.00E-138 | 97.2  | 79.3 | 87.0 | ankyrin repeat domain-containing protein EMB506     | gbpln | Arabidopsis thaliana | AT5G40160.1   Symbols: EMB139, EMB506   Ankyrin repeat family protein   chr5:16062726-16064301 REVERSE LENGTH=315                                                                                                                                                                                                                                                                                                                                                                                                                 | 324  | 315  | 1.00E-141 | 97.2  | 79.3 | 87.0 |
| Rsa1.0_00516.1.g15274.t1 | <p>ref NP_001031402.1  serine carboxypeptidase-like 13 [Arabidopsis thaliana]<br/> gi 330252292 gb AEC07386.1  serine carboxypeptidase-like 13 [Arabidopsis thaliana]</p>                                                                                                                                                                                                                                                                                                                                                                                                                                                                                                                                                                                                                                                                                                                                                                           | 391  | 411  | 1.00E-174 | 105.1 | 75.7 | 85.4 | serine carboxypeptidase-like 13                     | gbpln | Arabidopsis thaliana | AT2G22980.2   Symbols: SCPL13   serine carboxypeptidase-like 13   chr2:9779029-9782915 FORWARD LENGTH=411                                                                                                                                                                                                                                                                                                                                                                                                                         | 391  | 411  | 1.00E-176 | 105.1 | 75.7 | 85.4 |
| Rsa1.0_00516.1.g15275.t1 | <p>gb EOA16285.1  hypothetical protein CARUB_v10004432mg [Capsella rubella]</p>                                                                                                                                                                                                                                                                                                                                                                                                                                                                                                                                                                                                                                                                                                                                                                                                                                                                     | 580  | 590  | 0         | 101.7 | 92.6 | 95.3 | hypothetical protein CARUB_v10004432mg              | gbpln | Capsella rubella     | AT5G40200.1   Symbols: DegP9   DegP protease 9   chr5:16070402-16073101 FORWARD LENGTH=592                                                                                                                                                                                                                                                                                                                                                                                                                                        | 580  | 592  | 0         | 102.1 | 91.6 | 95.0 |
| Rsa1.0_00516.1.g15276.t5 | <p>ref XP_002868667.1  nodulin MtN21 family protein [Arabidopsis lyrata subsp. lyrata]<br/> gi 297314503 gb EFH44926.1  nodulin MtN21 family protein [Arabidopsis lyrata subsp. lyrata]</p>                                                                                                                                                                                                                                                                                                                                                                                                                                                                                                                                                                                                                                                                                                                                                         | 254  | 336  | 2.00E-54  | 132.3 | 42.9 | 44.5 | nodulin MtN21 family protein                        | gbpln | Arabidopsis lyrata   | AT5G40210.1   Symbols:   nodulin MtN21 /EamA-like transporter family protein   chr5:16073725-16076088 REVERSE LENGTH=339                                                                                                                                                                                                                                                                                                                                                                                                          | 254  | 339  | 4.00E-56  | 133.5 | 42.1 | 44.1 |
| Rsa1.0_00516.1.g15277.t1 | <p>gb EOA19024.1  hypothetical protein CARUB_v10007676mg [Capsella rubella]</p>                                                                                                                                                                                                                                                                                                                                                                                                                                                                                                                                                                                                                                                                                                                                                                                                                                                                     | 368  | 365  | 1.00E-159 | 99.2  | 76.1 | 87.5 | hypothetical protein CARUB_v10007676mg              | gbpln | Capsella rubella     | AT5G40230.1   Symbols:   nodulin MtN21 /EamA-like transporter family protein   chr5:16079814-16081735 REVERSE LENGTH=370                                                                                                                                                                                                                                                                                                                                                                                                          | 368  | 370  | 1.00E-158 | 100.5 | 75.8 | 87.0 |
| Rsa1.0_00516.1.g15278.t2 | <p>ref NP_195557.2  uncharacterized protein [Arabidopsis thaliana]<br/> gi 26449867 dbj BAC42056.1  unknown protein [Arabidopsis thaliana]<br/> gi 28973069 gb AAO63859.1  unknown protein [Arabidopsis thaliana]<br/> gi 332661529 gb AEE86929.1  uncharacterized protein AT4G38440 [Arabidopsis thaliana]</p>                                                                                                                                                                                                                                                                                                                                                                                                                                                                                                                                                                                                                                     | 1417 | 1465 | 0         | 103.4 | 67.6 | 75.3 | uncharacterized protein                             | gbpln | Arabidopsis thaliana | AT4G38440.1   Symbols:   LOCATED IN: chloroplast; EXPRESSED IN: 21 plant structures; EXPRESSED DURING: 12 growth stages; CONTAINS InterPro DOMAIN/s: RNA polymerase II-associated protein 1, C-terminal (InterPro:IPR013929), RNA polymerase II-associated protein 1, N-terminal (InterPro:IPR013930); Has 276 Blast hits to 220 proteins in 102 species: Archae - 0; Bacteria - 2; Metazoa - 151; Fungi - 65; Plants - 41; Viruses - 0; Other Eukaryotes - 17 (source: NCBI BLINK).   chr4:17989115-17994549 FORWARD LENGTH=1465 | 1417 | 1465 | 0         | 103.4 | 67.6 | 75.3 |
| Rsa1.0_00516.1.g15279.t1 | <p>ref NP_198840.2  nodulin MtN21 /EamA-like transporter family protein [Arabidopsis thaliana]<br/> gi 75171374 sp Q9FL08.1 WTR42_ARAT H RecName: Full=WAT1-related protein At5g40240 gi 10177511 dbj BAB10905.1  nodulin-like protein [Arabidopsis thaliana]<br/> gi 30725298 gb AAP37671.1  At5g40240 [Arabidopsis thaliana]<br/> gi 110743630 dbj BAE99652.1  hypothetical protein [Arabidopsis thaliana]<br/> gi 332007140 gb AED94523.1  nodulin MtN21 /EamA-like transporter family protein [Arabidopsis thaliana]</p>                                                                                                                                                                                                                                                                                                                                                                                                                        | 403  | 368  | 1.00E-151 | 91.3  | 66.5 | 74.2 | nodulin MtN21 /EamA-like transporter family protein | gbpln | Arabidopsis thaliana | AT5G40240.1   Symbols:   nodulin MtN21 /EamA-like transporter family protein   chr5:16082325-16084466 REVERSE LENGTH=368                                                                                                                                                                                                                                                                                                                                                                                                          | 403  | 368  | 1.00E-154 | 91.3  | 66.5 | 74.2 |

|                           |                                                                                                                                                                                                                                                                                                                                                                                                                                                                                                  |      |      |           |       |      |      |                                                                     |       |                      |                                                                                                                                         |      |      |           |       |      |      |
|---------------------------|--------------------------------------------------------------------------------------------------------------------------------------------------------------------------------------------------------------------------------------------------------------------------------------------------------------------------------------------------------------------------------------------------------------------------------------------------------------------------------------------------|------|------|-----------|-------|------|------|---------------------------------------------------------------------|-------|----------------------|-----------------------------------------------------------------------------------------------------------------------------------------|------|------|-----------|-------|------|------|
| Rsa1.0_00516.1.g15280.t1  | ref NP_198840.2  nodulin MtN21 /EamA-like transporter family protein [Arabidopsis thaliana] gi 75171374 sp G9FL08.1 WTR42_ARAT H RecName: Full=WAT1-related protein At5g40240 gi 10177511 dbj BAB10905.1  nodulin-like protein [Arabidopsis thaliana] gi 30725298 gb AAP37671.1  At5g40240 [Arabidopsis thaliana] gi 110743630 dbj BAE9652.1  hypothetical protein [Arabidopsis thaliana] gi 332007140 gb AED94523.1  nodulin MtN21 /EamA-like transporter family protein [Arabidopsis thaliana] | 293  | 368  | 2.00E-77  | 125.6 | 50.5 | 55.3 | nodulin MtN21 /EamA-like transporter family protein                 | gbpln | Arabidopsis thaliana | AT5G40240.1   Symbols:   nodulin MtN21 /EamA-like transporter family protein   chr5:16082325-16084466 REVERSE LENGTH=368                | 293  | 368  | 5.00E-80  | 125.6 | 50.5 | 55.3 |
| Rsa1.0_00516.1.g15281.t1  | gb AAD32898.1  putative retroelement pol polyprotein [Arabidopsis thaliana]                                                                                                                                                                                                                                                                                                                                                                                                                      | 1344 | 1307 | 0         | 97.2  | 58.0 | 73.1 | putative retroelement pol polyprotein                               | gbpln | Arabidopsis thaliana | AT4G23160.1   Symbols: CRK8   cysteine-rich RLK (RECEPTOR-like protein kinase) 8   chr4:12129485-12134086 FORWARD LENGTH=1262           | 1344 | 1262 | 3.00E-99  | 93.9  | 13.9 | 23.0 |
| Rsa1.0_00516.1.g15282.t1  | gb EOA16864.1  hypothetical protein CARUB_v10005089mg [Capsella rubella]                                                                                                                                                                                                                                                                                                                                                                                                                         | 94   | 368  | 5.00E-37  | 391.5 | 78.7 | 89.4 | hypothetical protein CARUB_v10005089mg                              | gbpln | Capsella rubella     | AT5G40240.1   Symbols:   nodulin MtN21 /EamA-like transporter family protein   chr5:16082325-16084466 REVERSE LENGTH=368                | 94   | 368  | 2.00E-38  | 391.5 | 76.6 | 88.3 |
| Rsa1.0_00516.1.g15283.t1  | ref NP_177880.2  Winged helix-turn-helix transcription repressor DNA-binding protein [Arabidopsis thaliana] gi 51971819 dbj BAD44574.1  putative DNA-binding protein [Arabidopsis thaliana] gi 332197872 gb AEE35993.1  Winged helix-turn-helix transcription repressor DNA-binding protein [Arabidopsis thaliana]                                                                                                                                                                               | 143  | 147  | 2.00E-18  | 102.8 | 42.0 | 57.3 | Winged helix-turn-helix transcription repressor DNA-binding protein | gbpln | Arabidopsis thaliana | AT1G77570.1   Symbols:   Winged helix-turn-helix transcription repressor DNA-binding   chr1:29143350-29143793 FORWARD LENGTH=147        | 143  | 147  | 6.00E-21  | 102.8 | 42.0 | 57.3 |
| Rsa1.0_00516.1.g15284.t1  | gb AAK43485.1 AC084807.10 polyprotein, putative [Arabidopsis thaliana] gi 225898008 dbj BAH30336.1  hypothetical protein [Arabidopsis thaliana]                                                                                                                                                                                                                                                                                                                                                  | 1363 | 1459 | 0         | 107.0 | 60.2 | 73.8 | polyprotein, putative                                               | gbpln | Arabidopsis thaliana | AT4G23160.1   Symbols: CRK8   cysteine-rich RLK (RECEPTOR-like protein kinase) 8   chr4:12129485-12134086 FORWARD LENGTH=1262           | 1363 | 1262 | 1.00E-112 | 92.6  | 14.2 | 21.6 |
| Rsa1.0_00516.1.g15285.t1  | ref XP_002868698.1  hypothetical protein ARALYDRAFT_916318 [Arabidopsis lyrata subsp. lyrata] gi 297314534 gb EFH44957.1  hypothetical protein ARALYDRAFT_916318 [Arabidopsis lyrata subsp. lyrata]                                                                                                                                                                                                                                                                                              | 111  | 336  | 2.00E-14  | 302.7 | 53.2 | 64.0 | hypothetical protein ARALYDRAFT_916318                              | gbpln | Arabidopsis lyrata   | AT5G41200.1   Symbols: AGL75   AGAMOUS-like 75   chr5:16490544-16491536 FORWARD LENGTH=330                                              | 111  | 330  | 2.00E-12  | 297.3 | 52.3 | 63.1 |
| Rsa1.0_00516.1.g15286.t1  | ref XP_002868698.1  hypothetical protein ARALYDRAFT_916318 [Arabidopsis lyrata subsp. lyrata] gi 297314534 gb EFH44957.1  hypothetical protein ARALYDRAFT_916318 [Arabidopsis lyrata subsp. lyrata]                                                                                                                                                                                                                                                                                              | 290  | 336  | 3.00E-53  | 115.9 | 47.2 | 57.6 | hypothetical protein ARALYDRAFT_916318                              | gbpln | Arabidopsis lyrata   | AT5G41200.1   Symbols: AGL75   AGAMOUS-like 75   chr5:16490544-16491536 FORWARD LENGTH=330                                              | 290  | 330  | 7.00E-52  | 113.8 | 46.2 | 56.2 |
| Rsa1.0_00516.1.g15287.t1  | gb EOA19027.1  hypothetical protein CARUB_v10007680mg [Capsella rubella]                                                                                                                                                                                                                                                                                                                                                                                                                         | 363  | 376  | 1.00E-165 | 103.6 | 86.0 | 92.3 | hypothetical protein CARUB_v10007680mg                              | gbpln | Capsella rubella     | AT5G40250.1   Symbols:   RING/U-box superfamily protein   chr5:16086056-16087186 FORWARD LENGTH=376                                     | 363  | 376  | 1.00E-167 | 103.6 | 86.5 | 91.5 |
| Rsa1.0_00517.1.g15288.t1  | #                                                                                                                                                                                                                                                                                                                                                                                                                                                                                                | #    | #    | #         | #     | #    | -    | ---                                                                 | ---   | #                    | #                                                                                                                                       | #    | #    | #         | #     | #    | #    |
| Rsa1.0_00517.1.g15289.t1  | gb EMS54598.1  Transposon Ty3-G Gag-Pol polyprotein [Triticum urartu]                                                                                                                                                                                                                                                                                                                                                                                                                            | 180  | 1704 | 8.00E-16  | 946.7 | 21.1 | 28.9 | Transposon Ty3-G Gag-Pol polyprotein                                | gbpln | Triticum urartu      | #                                                                                                                                       | #    | #    | #         | #     | #    | #    |
| Rsa1.0_00517.1.g15290.t1  | gb EOA25703.1  hypothetical protein CARUB_v10019056mg [Capsella rubella]                                                                                                                                                                                                                                                                                                                                                                                                                         | 230  | 232  | 3.00E-87  | 100.9 | 85.7 | 90.9 | hypothetical protein CARUB_v10019056mg                              | gbpln | Capsella rubella     | AT3G50330.1   Symbols: HEC2   basic helix-loop-helix (bHLH) DNA-binding superfamily protein   chr3:18657423-18658118 REVERSE LENGTH=231 | 230  | 231  | 2.00E-89  | 100.4 | 84.8 | 88.7 |
| Rsa1.0_00517.1.g15291.t1  | dbj BAA97086.1  unnamed protein product [Arabidopsis thaliana]                                                                                                                                                                                                                                                                                                                                                                                                                                   | 302  | 341  | 2.00E-69  | 112.9 | 41.4 | 55.6 | unnamed protein product                                             | gbpln | Arabidopsis thaliana | #                                                                                                                                       | #    | #    | #         | #     | #    | #    |
| Rsa1.0_00517.1.g15292.t5  | gb EOA24845.1  hypothetical protein CARUB_v10018135mg [Capsella rubella]                                                                                                                                                                                                                                                                                                                                                                                                                         | 169  | 169  | 6.00E-81  | 100.0 | 88.8 | 92.9 | hypothetical protein CARUB_v10018135mg                              | gbpln | Capsella rubella     | AT3G50360.1   Symbols: ATCEN2, CEN1, CEN2   centrin2   chr3:18674421-18675502 FORWARD LENGTH=169                                        | 169  | 169  | 3.00E-83  | 100.0 | 88.8 | 93.5 |
| Rsa1.0_00517.1.g15293.t1  | ref XP_002877743.1  hypothetical protein ARALYDRAFT_485389 [Arabidopsis lyrata subsp. lyrata] gi 297323581 gb EFH54002.1  hypothetical protein ARALYDRAFT_485389 [Arabidopsis lyrata subsp. lyrata]                                                                                                                                                                                                                                                                                              | 114  | 117  | 1.00E-35  | 102.6 | 64.9 | 80.7 | hypothetical protein ARALYDRAFT_485389                              | gbpln | Arabidopsis lyrata   | AT5G51360.1   Symbols:   Transcription elongation factor (TFIIS) family protein   chr5:20871918-20872277 FORWARD LENGTH=119             | 114  | 119  | 8.00E-32  | 104.4 | 60.5 | 80.7 |
| Rsa1.0_00517.1.g15294.t16 | ref XP_002877744.1  hypothetical protein ARALYDRAFT_485391 [Arabidopsis lyrata subsp. lyrata] gi 297323582 gb EFH54003.1  hypothetical protein ARALYDRAFT_485391 [Arabidopsis lyrata subsp. lyrata]                                                                                                                                                                                                                                                                                              | 3174 | 3074 | 0         | 96.8  | 80.6 | 87.7 | hypothetical protein ARALYDRAFT_485391                              | gbpln | Arabidopsis lyrata   | AT3G50380.1   Symbols:   Protein of unknown function (DUF1162)   chr3:18686527-18700533 REVERSE LENGTH=3072                             | 3174 | 3072 | 0         | 96.8  | 80.4 | 87.3 |



|                          |                                                                                                                                                                                                                                                                                                                                                                                                                                                                                         |     |     |           |       |      |      |                                                  |       |                      |                                                                                                                                                                                                                                                                |     |      |           |       |      |      |
|--------------------------|-----------------------------------------------------------------------------------------------------------------------------------------------------------------------------------------------------------------------------------------------------------------------------------------------------------------------------------------------------------------------------------------------------------------------------------------------------------------------------------------|-----|-----|-----------|-------|------|------|--------------------------------------------------|-------|----------------------|----------------------------------------------------------------------------------------------------------------------------------------------------------------------------------------------------------------------------------------------------------------|-----|------|-----------|-------|------|------|
| Rsa1.0_00517.1.g15295.t1 | ref[XP_002862436.1] predicted protein [Arabidopsis lyrata subsp. lyrata] gi 297307949 gb EFH38694.1  predicted protein [Arabidopsis lyrata subsp. lyrata]                                                                                                                                                                                                                                                                                                                               | 260 | 530 | 4.00E-29  | 203.8 | 24.2 | 30.0 | predicted protein                                | gbpln | Arabidopsis lyrata   | #                                                                                                                                                                                                                                                              | #   | #    | #         | #     | #    | #    |
| Rsa1.0_00517.1.g15296.t1 | ref[XP_002876029.1] GDSL-motif lipase/hydrolase family protein [Arabidopsis lyrata subsp. lyrata] gi 297321867 gb EFH52288.1  GDSL-motif lipase/hydrolase family protein [Arabidopsis lyrata subsp. lyrata]                                                                                                                                                                                                                                                                             | 371 | 374 | 0         | 100.8 | 91.1 | 94.9 | GDSL-motif lipase/hydrolase family protein       | gbpln | Arabidopsis lyrata   | AT3G50400.1   Symbols:   GDSL-like Lipase/Acylhydrolase superfamily protein   chr3:18704797-18706437 FORWARD LENGTH=374                                                                                                                                        | 371 | 374  | 0         | 100.8 | 89.8 | 94.6 |
| Rsa1.0_00517.1.g15297.t1 | emb[CAB62472.1] hypothetical protein [Arabidopsis thaliana]                                                                                                                                                                                                                                                                                                                                                                                                                             | 698 | 730 | 0         | 104.6 | 65.8 | 76.8 | hypothetical protein                             | gbpln | Arabidopsis thaliana | AT3G50430.1   Symbols:   unknown protein; Has 54 Blast hits to 54 proteins in 22 species: Archaea = 0; Bacteria = 0; Metazoa = 29; Fungi = 0; Plants = 24; Viruses = 0; Other Eukaryotes = 1 (source: NCBI BLINK).   chr3:18713718-18716759 FORWARD LENGTH=642 | 698 | 642  | 0         | 92.0  | 61.2 | 70.2 |
| Rsa1.0_00517.1.g15298.t1 | ref[XP_004288064.1] PREDICTED: LOB domain-containing protein 36-like [Fragaria vesca subsp. vesca]                                                                                                                                                                                                                                                                                                                                                                                      | 117 | 306 | 8.00E-23  | 261.5 | 44.4 | 59.0 | PREDICTED: LOB domain-containing protein 36-like | gbpln | Fragaria vesca       | AT5G66870.1   Symbols: ASL1, LBD36   ASYMMETRIC LEAVES 2-like 1   chr5:26706621-26707562 FORWARD LENGTH=313                                                                                                                                                    | 117 | 313  | 6.00E-24  | 267.5 | 41.0 | 56.4 |
| Rsa1.0_00517.1.g15299.t1 | ref[NP_190620.1] LOB domain-containing protein 28 [Arabidopsis thaliana] gi 29428036 sp O9SCS4.1 LBD28_ARATH RecName: Full=LOB domain-containing protein 28; AltName: Full=ASYMMETRIC LEAVES 2-like protein 25; Short=AS2-like protein 25 gi 6561991 emb CAB62480.1  putative protein [Arabidopsis thaliana] gi 219807126 dbj BAH10569.1  ASYMMETRIC LEAVES2-like 25 protein [Arabidopsis thaliana] gi 332645153 gb AEE78674.1  LOB domain-containing protein 28 [Arabidopsis thaliana] | 224 | 198 | 3.00E-36  | 88.4  | 42.4 | 57.1 | LOB domain-containing protein 28                 | gbpln | Arabidopsis thaliana | AT3G50510.1   Symbols: LBD28   LOB domain-containing protein 28   chr3:18745002-18745598 REVERSE LENGTH=198                                                                                                                                                    | 224 | 198  | 8.00E-39  | 88.4  | 42.4 | 57.1 |
| Rsa1.0_00517.1.g15300.t1 | ref[NP_190621.1] phosphoglycerate mutase [Arabidopsis thaliana] gi 6561992 emb CAB62481.1  putative protein [Arabidopsis thaliana] gi 14334856 gb AAK59606.1  unknown protein [Arabidopsis thaliana] gi 17104695 gb AAL34236.1  unknown protein [Arabidopsis thaliana] gi 332645154 gb AEE78675.1  phosphoglycerate mutase [Arabidopsis thaliana]                                                                                                                                       | 229 | 230 | 1.00E-118 | 100.4 | 89.1 | 93.9 | phosphoglycerate mutase                          | gbpln | Arabidopsis thaliana | AT3G50520.1   Symbols:   Phosphoglycerate mutase family protein   chr3:18748058-18749418 FORWARD LENGTH=230                                                                                                                                                    | 229 | 230  | 1.00E-120 | 100.4 | 89.1 | 93.9 |
| Rsa1.0_00517.1.g15301.t1 | gb ACA61613.1  hypothetical protein AP2_E11.1 [Arabidopsis lyrata subsp. petraea]                                                                                                                                                                                                                                                                                                                                                                                                       | 737 | 471 | 0         | 63.9  | 43.6 | 51.6 | hypothetical protein AP2_E11.1                   | gbpln | Arabidopsis lyrata   | AT4G23160.1   Symbols: CRK8   cysteine-rich RLK (RECEPTOR-like protein kinase) 8   chr4:12129485-12134086 FORWARD LENGTH=1262                                                                                                                                  | 737 | 1262 | 5.00E-98  | 171.2 | 25.4 | 38.9 |
| Rsa1.0_00517.1.g15302.t1 | ref[XP_002876036.1] hypothetical protein ARALYDRAFT.485401 [Arabidopsis lyrata subsp. lyrata] gi 297321874 gb EFH52295.1  hypothetical protein ARALYDRAFT.485401 [Arabidopsis lyrata subsp. lyrata]                                                                                                                                                                                                                                                                                     | 595 | 597 | 0         | 100.3 | 86.2 | 89.9 | hypothetical protein ARALYDRAFT.485401           | gbpln | Arabidopsis lyrata   | AT3G50530.1   Symbols: CRK   CDPK-related kinase   chr3:18753833-18756487 FORWARD LENGTH=601                                                                                                                                                                   | 595 | 601  | 0         | 101.0 | 86.1 | 89.9 |
| Rsa1.0_00517.1.g15303.t1 | #                                                                                                                                                                                                                                                                                                                                                                                                                                                                                       | #   | #   | #         | #     | #    | #    | -                                                | ----  | ----                 | #                                                                                                                                                                                                                                                              | #   | #    | #         | #     | #    | #    |
| Rsa1.0_00517.1.g15304.t2 | gb EOA24556.1  hypothetical protein CARUB_v10017814mg [Capsella rubella]                                                                                                                                                                                                                                                                                                                                                                                                                | 277 | 275 | 1.00E-132 | 99.3  | 88.1 | 91.3 | hypothetical protein CARUB_v10017814mg           | gbpln | Capsella rubella     | AT3G50560.1   Symbols:   NAD(P)-binding Rossmann-fold superfamily protein   chr3:18761247-18763835 REVERSE LENGTH=272                                                                                                                                          | 277 | 272  | 1.00E-134 | 98.2  | 87.7 | 90.3 |
| Rsa1.0_00518.1.g15305.t1 | ref[NP_178819.1] Zinc knuckle (CCHC-type) family protein [Arabidopsis thaliana] gi 3327395 gb AAC26677.1  putative Ta11-like non-LTR retroelement protein [Arabidopsis thaliana] gi 330251037 gb AEC06131.1  Zinc knuckle (CCHC-type) family protein [Arabidopsis thaliana]                                                                                                                                                                                                             | 284 | 530 | 1.00E-22  | 186.6 | 17.6 | 21.8 | Zinc knuckle (CCHC-type) family protein          | gbpln | Arabidopsis thaliana | AT2G07760.1   Symbols:   Zinc knuckle (CCHC-type) family protein   chr2:3584420-3586278 REVERSE LENGTH=530                                                                                                                                                     | 284 | 530  | 3.00E-25  | 186.6 | 17.6 | 21.8 |
| Rsa1.0_00518.1.g15306.t1 | ref[XP_002894457.1] predicted protein [Arabidopsis lyrata subsp. lyrata] gi 297340299 gb EFH70716.1  predicted protein [Arabidopsis lyrata subsp. lyrata]                                                                                                                                                                                                                                                                                                                               | 92  | 769 | 2.00E-14  | 835.9 | 44.6 | 56.5 | predicted protein                                | gbpln | Arabidopsis lyrata   | AT1G53645.1   Symbols:   hydroxyproline-rich glycoprotein family protein   chr1:20026434-20028587 REVERSE LENGTH=523                                                                                                                                           | 92  | 523  | 3.00E-16  | 568.5 | 44.6 | 55.4 |

|                          |                                                                                                                                                                                                                                                                                                                                                                                                                                                                                                                                                                                                                                                                                                                                                                                                                                                                                                                                                                                                                          |      |      |           |       |      |      |                                                           |       |                      |                                                                                                                                               |      |      |           |       |      |      |
|--------------------------|--------------------------------------------------------------------------------------------------------------------------------------------------------------------------------------------------------------------------------------------------------------------------------------------------------------------------------------------------------------------------------------------------------------------------------------------------------------------------------------------------------------------------------------------------------------------------------------------------------------------------------------------------------------------------------------------------------------------------------------------------------------------------------------------------------------------------------------------------------------------------------------------------------------------------------------------------------------------------------------------------------------------------|------|------|-----------|-------|------|------|-----------------------------------------------------------|-------|----------------------|-----------------------------------------------------------------------------------------------------------------------------------------------|------|------|-----------|-------|------|------|
| Rsa1.0_00518.1.g15307.t1 | gb EOA40131.1  hypothetical protein CARUB_v10008838mg [Capsella rubella]                                                                                                                                                                                                                                                                                                                                                                                                                                                                                                                                                                                                                                                                                                                                                                                                                                                                                                                                                 | 562  | 525  | 1.00E-166 | 93.4  | 64.8 | 70.6 | hypothetical protein CARUB_v10008838mg                    | gbpln | Capsella rubella     | AT1G53645.1   Symbols:   hydroxyproline-rich glycoprotein family protein   chr1:20026434-20028567 REVERSE LENGTH=523                          | 562  | 523  | 1.00E-152 | 93.1  | 63.7 | 69.9 |
| Rsa1.0_00518.1.g15308.t1 | ref NP_001031182.1  CTC-interacting domain 8 protein [Arabidopsis thaliana]<br>gi 332194856 gb AE32977.1  CTC-interacting domain 8 protein [Arabidopsis thaliana]                                                                                                                                                                                                                                                                                                                                                                                                                                                                                                                                                                                                                                                                                                                                                                                                                                                        | 309  | 308  | 1.00E-128 | 99.7  | 79.0 | 86.4 | CTC-interacting domain 8 protein                          | gbpln | Arabidopsis thaliana | AT1G53650.2   Symbols: CID8   CTC-interacting domain 8   chr1:20029262-20031243 REVERSE LENGTH=308                                            | 309  | 308  | 1.00E-131 | 99.7  | 79.0 | 86.4 |
| Rsa1.0_00518.1.g15309.t1 | ref NP_564640.2  peptide methionine sulfoxide reductase B1 [Arabidopsis thaliana]<br>gi 75169541 sp Q9C8M2.1 MSRB1_ARATH RecName: Full=Peptide methionine sulfoxide reductase B1, chloroplastic; Short=AtMSRB1; AltName: Full=Peptide-methionine (R)-S-oxide reductase; Flags: Precursor<br>gi 12324015 gb AAG51964.1 AC024260_2 transcriptional regulator, putative; 35498-34111 [Arabidopsis thaliana]<br>gi 332194858 gb AEE32979.1  peptide methionine sulfoxide reductase B1 [Arabidopsis thaliana]                                                                                                                                                                                                                                                                                                                                                                                                                                                                                                                 | 221  | 202  | 9.00E-86  | 91.4  | 76.0 | 83.7 | peptide methionine sulfoxide reductase B1                 | gbpln | Arabidopsis thaliana | AT1G53670.1   Symbols: MSRB1, ATMSRB1   methionine sulfoxide reductase B 1   chr1:20036687-20038074 FORWARD LENGTH=202                        | 221  | 202  | 3.00E-88  | 91.4  | 76.0 | 83.7 |
| Rsa1.0_00518.1.g15310.t1 | gb AAD32898.1  putative retroelement pol polyprotein [Arabidopsis thaliana]                                                                                                                                                                                                                                                                                                                                                                                                                                                                                                                                                                                                                                                                                                                                                                                                                                                                                                                                              | 1359 | 1307 | 0         | 96.2  | 59.0 | 73.5 | putative retroelement pol polyprotein                     | gbpln | Arabidopsis thaliana | AT4G23160.1   Symbols: CRK8   cysteine-rich RLK (RECEPTOR-like protein kinase) 8   chr4:12129485-12134086 FORWARD LENGTH=1262                 | 1359 | 1262 | 1.00E-103 | 92.9  | 14.6 | 22.7 |
| Rsa1.0_00518.1.g15311.t1 | gb AAC33226.1  putative non-LTR retroelement reverse transcriptase [Arabidopsis thaliana]                                                                                                                                                                                                                                                                                                                                                                                                                                                                                                                                                                                                                                                                                                                                                                                                                                                                                                                                | 961  | 1529 | 0         | 159.1 | 53.6 | 69.2 | putative non-LTR retroelement reverse transcriptase       | gbpln | Arabidopsis thaliana | AT3G24255.1   Symbols:   RNA-directed DNA polymerase (reverse transcriptase)-related family protein   chr3:8789471-8793208 FORWARD LENGTH=746 | 961  | 746  | 1.00E-121 | 77.6  | 20.9 | 27.2 |
| Rsa1.0_00518.1.g15312.t1 | #                                                                                                                                                                                                                                                                                                                                                                                                                                                                                                                                                                                                                                                                                                                                                                                                                                                                                                                                                                                                                        | #    | #    | #         | #     | #    | -    | ----                                                      | ----  | ----                 | #                                                                                                                                             | #    | #    | #         | #     | #    | #    |
| Rsa1.0_00518.1.g15313.t1 | ref NP_197885.1  uncharacterized protein [Arabidopsis thaliana]<br>gi 332006007 gb AED93390.1  uncharacterized protein AT5G25030 [Arabidopsis thaliana]                                                                                                                                                                                                                                                                                                                                                                                                                                                                                                                                                                                                                                                                                                                                                                                                                                                                  | 204  | 193  | 1.00E-49  | 94.6  | 49.5 | 58.8 | uncharacterized protein                                   | gbpln | Arabidopsis thaliana | AT5G25030.1   Symbols:   Domain of unknown function (DUF2431)   chr5:8620083-8620991 REVERSE LENGTH=193                                       | 204  | 193  | 5.00E-52  | 94.6  | 49.5 | 58.8 |
| Rsa1.0_00518.1.g15314.t1 | gb EOA26640.1  hypothetical protein CARUB_v10022704mg [Capsella rubella]                                                                                                                                                                                                                                                                                                                                                                                                                                                                                                                                                                                                                                                                                                                                                                                                                                                                                                                                                 | 81   | 745  | 7.00E-17  | 919.8 | 46.9 | 49.4 | hypothetical protein CARUB_v10022704mg                    | gbpln | Capsella rubella     | AT2G27460.1   Symbols:   sec23/sec24 transport family protein   chr2:11740670-11744867 FORWARD LENGTH=745                                     | 81   | 745  | 5.00E-19  | 919.8 | 45.7 | 49.4 |
| Rsa1.0_00518.1.g15315.t1 | gb ABB20817.1  putative leucine-rich repeat transmembrane protein kinase [Isatis tinctoria]<br>gi 95020537 gb ABF50792.1  leucine-rich repeat transmembrane protein kinase [Isatis tinctoria]                                                                                                                                                                                                                                                                                                                                                                                                                                                                                                                                                                                                                                                                                                                                                                                                                            | 732  | 719  | 0         | 98.2  | 87.4 | 91.7 | putative leucine-rich repeat transmembrane protein kinase | gbpln | Isatis tinctoria     | AT1G53730.1   Symbols: SRF6   STRUBBELIG-receptor family 6   chr1:20061771-20065475 FORWARD LENGTH=719                                        | 732  | 719  | 0         | 98.2  | 84.4 | 90.0 |
| Rsa1.0_00518.1.g15316.t1 | ref NP_175778.1  regulatory particle triple-A 1A [Arabidopsis thaliana]<br>gi 297853156 ref XP_002894459.1  regulatory particle triple-A 1A [Arabidopsis lyrata subsp. lyrata]<br>gi 28558169 sp Q9SSB5.1 PRR7A_ARATH RecName: Full=26S protease regulatory subunit 7 homolog A; AltName: Full=26S proteasome AAA-ATPase subunit RPT1a; AltName: Full=26S proteasome subunit 7 homolog A; AltName: Full=Regulatory particle triple-A ATPase subunit 1a<br>gi 6056388 gb AAF02852.1 AC009324_1 26S proteasome ATPase subunit [Arabidopsis thaliana]<br>gi 12324021 gb AAG51970.1 AC024260_8 26S proteasome ATPase subunit; 3861-6284 [Arabidopsis thaliana]<br>gi 17065568 gb AAL32938.1  26S proteasome ATPase subunit [Arabidopsis thaliana]<br>gi 23197722 gb AANI5388.1  26S proteasome ATPase subunit [Arabidopsis thaliana]<br>gi 297340301 gb EFH70718.1  regulatory particle triple-A 1A [Arabidopsis lyrata subsp. lyrata]<br>gi 332194871 gb AEE32992.1  regulatory particle triple-A 1A [Arabidopsis thaliana] | 426  | 426  | 0         | 100.0 | 99.3 | 99.8 | regulatory particle triple-A 1A                           | gbpln | Arabidopsis lyrata   | AT1G53750.1   Symbols: RPT1A   regulatory particle triple-A 1A   chr1:20065921-20068324 REVERSE LENGTH=426                                    | 426  | 426  | 0         | 100.0 | 99.3 | 99.8 |

|                          |                                                                                                                                                                                                                                                                  |      |      |           |       |      |      |                                           |       |                      |                                                                                                                                                                                                                                                                                                                                                                                                                                                                                                                                                                                 |      |     |           |       |      |      |
|--------------------------|------------------------------------------------------------------------------------------------------------------------------------------------------------------------------------------------------------------------------------------------------------------|------|------|-----------|-------|------|------|-------------------------------------------|-------|----------------------|---------------------------------------------------------------------------------------------------------------------------------------------------------------------------------------------------------------------------------------------------------------------------------------------------------------------------------------------------------------------------------------------------------------------------------------------------------------------------------------------------------------------------------------------------------------------------------|------|-----|-----------|-------|------|------|
| Rsa1.0_00518.1.g15317.t1 | refXP_002891519.1  hypothetical protein ARALYDRAFT_337099 [Arabidopsis lyrata subsp. lyrata] gi 297337361 gb EFH67778.1                                                                                                                                          | 135  | 1163 | 1.00E-26  | 861.5 | 46.7 | 63.0 | hypothetical protein ARALYDRAFT_337099    | gbpln | Arabidopsis lyrata   | #                                                                                                                                                                                                                                                                                                                                                                                                                                                                                                                                                                               | #    | #   | #         | #     | #    |      |
| Rsa1.0_00518.1.g15318.t1 | hypothetical protein ARALYDRAFT_337099 [Arabidopsis lyrata subsp. lyrata] ref NP_175779.1  uncharacterized protein [Arabidopsis thaliana] gi 12324017 gb AAG51966.1 AC024260_4 hypothetical protein; 1267-3026 [Arabidopsis thaliana] gi 62321744 dbj BAD95368.1 | 266  | 272  | 1.00E-131 | 102.3 | 87.2 | 94.0 | uncharacterized protein                   | gbpln | Arabidopsis thaliana | AT1G53760.1   Symbols:   unknown protein; FUNCTIONS IN: molecular_function unknown; INVOLVED IN: biological_process unknown; LOCATED IN: mitochondrion, plasma membrane, plastid, membrane; EXPRESSED IN: 25 plant structures; EXPRESSED DURING: 13 growth stages; CONTAINS InterPro DOMAIN/s: Protein of unknown function DUF2343 (InterPro:IPR018786); Has 171 Blast hits to 171 proteins in 90 species: Archae - 0; Bacteria - 0; Metazoa - 0; Fungi - 127; Plants - 41; Viruses - 0; Other Eukaryotes - 3 (source: NCBI BLINK).   chr1:20069159-20070918 REVERSE LENGTH=272 | 266  | 272 | 1.00E-134 | 102.3 | 87.2 | 94.0 |
| Rsa1.0_00518.1.g15319.t1 | ref NP_175780.1  peptide-O-fucosyltransferase [Arabidopsis thaliana] gi 63003828 gb AAAY25443.1  At1g53770 [Arabidopsis thaliana] gi 332194874 gb AEE32995.1  peptide-O-fucosyltransferase [Arabidopsis thaliana]                                                | 549  | 563  | 0         | 102.6 | 79.6 | 88.0 | peptide-O-fucosyltransferase              | gbpln | Arabidopsis thaliana | AT1G53770.1   Symbols:   O-fucosyltransferase family protein   chr1:20071460-20073708 REVERSE LENGTH=563                                                                                                                                                                                                                                                                                                                                                                                                                                                                        | 549  | 563 | 0         | 102.6 | 79.6 | 88.0 |
| Rsa1.0_00518.1.g15320.t1 | gb EOA39987.1  hypothetical protein CARUB_v10008677mg [Capsella rubella]                                                                                                                                                                                         | 769  | 583  | 0         | 75.8  | 56.8 | 63.1 | hypothetical protein CARUB_v10008677mg    | gbpln | Capsella rubella     | AT1G53800.2   Symbols:   unknown protein; BEST Arabidopsis thaliana protein match is: unknown protein (TAIR:AT1G53250.1); Has 35333 Blast hits to 34131 proteins in 2444 species: Archae - 798; Bacteria - 22429; Metazoa - 974; Fungi - 991; Plants - 531; Viruses - 0; Other Eukaryotes - 9610 (source: NCBI BLINK).   chr1:20081888-20084320 FORWARD LENGTH=572                                                                                                                                                                                                              | 769  | 572 | 0         | 74.4  | 55.4 | 61.5 |
| Rsa1.0_00519.1.g15321.t2 | gb AAG50806.1 AC079281_8 unknown protein [Arabidopsis thaliana]                                                                                                                                                                                                  | 1763 | 1213 | 0         | 68.8  | 24.8 | 37.3 | unknown protein                           | gbpln | Arabidopsis thaliana | AT3G24255.1   Symbols:   RNA-directed DNA polymerase (reverse transcriptase)-related family protein   chr3:8789471-8793208 FORWARD LENGTH=746                                                                                                                                                                                                                                                                                                                                                                                                                                   | 1763 | 746 | 2.00E-53  | 42.3  | 7.4  | 11.2 |
| Rsa1.0_00519.1.g15322.t1 | gb EOA39265.1  hypothetical protein CARUB_v10012271mg [Capsella rubella]                                                                                                                                                                                         | 488  | 484  | 0         | 99.2  | 90.2 | 94.1 | hypothetical protein CARUB_v10012271mg    | gbpln | Capsella rubella     | AT1G30270.1   Symbols: CIPK23, SnRK3.23, ATCIPK23, LKS1   CBL-interacting protein kinase 23   chr1:10655270-10658524 FORWARD LENGTH=482                                                                                                                                                                                                                                                                                                                                                                                                                                         | 488  | 482 | 0         | 98.8  | 88.1 | 91.2 |
| Rsa1.0_00519.1.g15323.t1 | ref XP_002893610.1  heat shock protein binding protein [Arabidopsis lyrata subsp. lyrata] gi 297339452 gb EFH69869.1  heat shock protein binding protein [Arabidopsis lyrata subsp. lyrata]                                                                      | 439  | 455  | 1.00E-167 | 103.6 | 80.2 | 87.2 | heat shock protein binding protein        | gbpln | Arabidopsis lyrata   | AT1G30280.1   Symbols:   Chaperone DnaJ-domain superfamily protein   chr1:10662851-10664570 REVERSE LENGTH=455                                                                                                                                                                                                                                                                                                                                                                                                                                                                  | 439  | 455 | 1.00E-168 | 103.6 | 79.7 | 86.8 |
| Rsa1.0_00519.1.g15324.t1 | #                                                                                                                                                                                                                                                                | #    | #    | #         | #     | #    | -    | ----                                      | ----  | ----                 | #                                                                                                                                                                                                                                                                                                                                                                                                                                                                                                                                                                               | #    | #   | #         | #     | #    |      |
| Rsa1.0_00519.1.g15325.t1 | ref NP_174320.2  PPR repeat domain-containing protein [Arabidopsis thaliana] gi 332193082 gb AEE31203.1  PPR repeat domain-containing protein [Arabidopsis thaliana]                                                                                             | 791  | 806  | 0         | 101.9 | 82.0 | 88.9 | PPR repeat domain-containing protein      | gbpln | Arabidopsis thaliana | AT1G30290.1   Symbols:   Tetratricopeptide repeat (TPR)-like superfamily protein   chr1:10670320-10672740 REVERSE LENGTH=806                                                                                                                                                                                                                                                                                                                                                                                                                                                    | 791  | 806 | 0         | 101.9 | 82.0 | 88.9 |
| Rsa1.0_00519.1.g15326.t1 | gb AAG50569.1 AC073506_11 hypothetical protein [Arabidopsis thaliana]                                                                                                                                                                                            | 194  | 323  | 1.00E-103 | 166.5 | 92.3 | 95.9 | hypothetical protein                      | gbpln | Arabidopsis thaliana | AT1G30300.1   Symbols:   Metallo-hydrolase/oxidoreductase superfamily protein   chr1:10673084-10675061 FORWARD LENGTH=324                                                                                                                                                                                                                                                                                                                                                                                                                                                       | 194  | 324 | 1.00E-105 | 167.0 | 92.3 | 95.9 |
| Rsa1.0_00519.1.g15327.t1 | #                                                                                                                                                                                                                                                                | #    | #    | #         | #     | #    | -    | ----                                      | ----  | ----                 | #                                                                                                                                                                                                                                                                                                                                                                                                                                                                                                                                                                               | #    | #   | #         | #     | #    |      |
| Rsa1.0_00519.1.g15328.t1 | gb EOA39268.1  hypothetical protein CARUB_v10012274mg [Capsella rubella]                                                                                                                                                                                         | 73   | 516  | 1.00E-19  | 706.8 | 69.9 | 80.8 | hypothetical protein CARUB_v10012274mg    | gbpln | Capsella rubella     | AT1G30320.1   Symbols:   Remorin family protein   chr1:10680348-10682852 FORWARD LENGTH=509                                                                                                                                                                                                                                                                                                                                                                                                                                                                                     | 73   | 509 | 8.00E-18  | 697.3 | 61.6 | 72.6 |
| Rsa1.0_00519.1.g15329.t4 | gb EOA39268.1  hypothetical protein CARUB_v10012274mg [Capsella rubella]                                                                                                                                                                                         | 355  | 516  | 1.00E-162 | 145.4 | 81.4 | 87.9 | hypothetical protein CARUB_v10012274mg    | gbpln | Capsella rubella     | AT1G30320.1   Symbols:   Remorin family protein   chr1:10680348-10682852 FORWARD LENGTH=509                                                                                                                                                                                                                                                                                                                                                                                                                                                                                     | 355  | 509 | 1.00E-155 | 143.4 | 79.7 | 86.8 |
| Rsa1.0_00519.1.g15330.t1 | gb AAD20434.1  putative Athila retroelement ORF1 protein [Arabidopsis thaliana]                                                                                                                                                                                  | 356  | 507  | 2.00E-42  | 142.4 | 27.0 | 33.1 | putative Athila retroelement ORF1 protein | gbpln | Arabidopsis thaliana | #                                                                                                                                                                                                                                                                                                                                                                                                                                                                                                                                                                               | #    | #   | #         | #     | #    |      |

|                          |                                                                                                                                                                                                                                                                                                                                                                                                                                                   |      |      |           |       |      |      |                                                                                                                                                      |       |                      |                                                                                                                                           |      |      |          |       |      |      |
|--------------------------|---------------------------------------------------------------------------------------------------------------------------------------------------------------------------------------------------------------------------------------------------------------------------------------------------------------------------------------------------------------------------------------------------------------------------------------------------|------|------|-----------|-------|------|------|------------------------------------------------------------------------------------------------------------------------------------------------------|-------|----------------------|-------------------------------------------------------------------------------------------------------------------------------------------|------|------|----------|-------|------|------|
| Rsa1.0_00519.1.g15331.t1 | ref[NP_001031115.1] auxin response factor 6 [Arabidopsis thaliana] gi 238054274 sp Q9ZTX8.2 ARFF_ARAT H RecName: Full=Auxin response factor 6 gi 49616351 gb AAT67072.1  ARF6 [Arabidopsis thaliana] gi 332193086 gb AEE31207.1  auxin response factor 6 [Arabidopsis thaliana]                                                                                                                                                                   | 901  | 935  | 0         | 103.8 | 93.3 | 95.1 | auxin response factor 6                                                                                                                              | gbpln | Arabidopsis thaliana | AT1G30330.2   Symbols: ARF6   auxin response factor 6   chr1:10686125-10690036 REVERSE LENGTH=935                                         | 901  | 935  | 0        | 103.8 | 93.3 | 95.1 |
| Rsa1.0_00519.1.g15332.t1 | ref[XP_002890867.1] hypothetical protein ARALYDRAFT.473263 [Arabidopsis lyrata subsp. lyrata] gi 297336709 gb EFH67126.1  hypothetical protein ARALYDRAFT.473263 [Arabidopsis lyrata subsp. lyrata]                                                                                                                                                                                                                                               | 1623 | 1622 | 0         | 99.9  | 93.8 | 97.0 | hypothetical protein ARALYDRAFT.473263                                                                                                               | gbpln | Arabidopsis lyrata   | AT1G30400.2   Symbols: ATMRP1, EST1, ABCC1   multidrug resistance-associated protein 1   chr1:10728139-10737697 FORWARD LENGTH=1622       | 1623 | 1622 | 0        | 99.9  | 93.8 | 96.9 |
| Rsa1.0_00519.1.g15333.t1 | ref[XP_002890868.1] ATMRP13 [Arabidopsis lyrata subsp. lyrata] gi 297336710 gb EFH67127.1  ATMRP13 [Arabidopsis lyrata subsp. lyrata]                                                                                                                                                                                                                                                                                                             | 1489 | 1495 | 0         | 100.4 | 85.4 | 92.7 | ATMRP13                                                                                                                                              | gbpln | Arabidopsis lyrata   | AT1G30420.1   Symbols: ATMRP12, MRP12, ABCC1   multidrug resistance-associated protein 12   chr1:10748816-10756316 FORWARD LENGTH=1495    | 1489 | 1495 | 0        | 100.4 | 83.8 | 91.5 |
| Rsa1.0_00519.1.g15334.t1 | gb ABU90830.1  pollen-expressed protein MF10 [Brassica rapa subsp. oleifera]                                                                                                                                                                                                                                                                                                                                                                      | 288  | 434  | 5.00E-93  | 150.7 | 66.7 | 68.4 | pollen-expressed protein MF10                                                                                                                        | gbpln | Brassica rapa        | AT3G28980.1   Symbols:   Protein of unknown function (DUF216)   chr3:10993403-10994925 REVERSE LENGTH=445                                 | 288  | 445  | 1.00E-78 | 154.5 | 54.5 | 67.0 |
| Rsa1.0_00520.1.g15335.t1 | ref[NP_568551.1] aspartyl protease family protein [Arabidopsis thaliana] gi 10177438 db BAE10671.1  unnamed protein product [Arabidopsis thaliana] gi 15809850 gb AAL06853.1  AT5g37540/mpa22.p.70 [Arabidopsis thaliana] gi 20260182 gb AAMI2989.1  unknown protein [Arabidopsis thaliana] gi 23197748 gb AANI5401.1  unknown protein [Arabidopsis thaliana] gi 332006821 gb AED94204.1  aspartyl protease family protein [Arabidopsis thaliana] | 438  | 442  | 0         | 100.9 | 84.9 | 90.0 | aspartyl protease family protein                                                                                                                     | gbpln | Arabidopsis thaliana | AT5G37540.1   Symbols:   Eukaryotic aspartyl protease family protein   chr5:14912862-14914190 FORWARD LENGTH=442                          | 438  | 442  | 0        | 100.9 | 84.9 | 90.0 |
| Rsa1.0_00520.1.g15336.t1 | ref[XP_002893831.1] phosphoribosylglycinamide formyltransferase [Arabidopsis lyrata subsp. lyrata] gi 297339673 gb EFH70090.1  phosphoribosylglycinamide formyltransferase [Arabidopsis lyrata subsp. lyrata]                                                                                                                                                                                                                                     | 65   | 292  | 1.00E-20  | 449.2 | 72.3 | 75.4 | phosphoribosylglycinamide formyltransferase                                                                                                          | gbpln | Arabidopsis lyrata   | AT1G31220.1   Symbols:   Formyl transferase   chr1:11157064-11158408 FORWARD LENGTH=292                                                   | 65   | 292  | 1.00E-22 | 449.2 | 69.2 | 73.8 |
| Rsa1.0_00520.1.g15337.t1 | gb EOA16522.1  hypothetical protein CARUB_v10004681mg [Capsella rubella]                                                                                                                                                                                                                                                                                                                                                                          | 458  | 488  | 0         | 106.6 | 90.8 | 95.2 | hypothetical protein CARUB_v10004681mg                                                                                                               | gbpln | Capsella rubella     | AT5G37530.2   Symbols:   NAD(P)-binding Rossmann-fold superfamily protein   chr5:14906505-14909020 FORWARD LENGTH=456                     | 458  | 456  | 0        | 99.6  | 90.0 | 94.3 |
| Rsa1.0_00520.1.g15338.t1 | ref[NP_851103.1] NADH-ubiquinone oxidoreductase subunit [Arabidopsis thaliana] gi 10177435 db BAB10668.1  NADH-ubiquinone reductase 75kd subunit [Arabidopsis thaliana] gi 222423198 db BAH19576.1  AT5G37510 [Arabidopsis thaliana] gi 332006816 gb AED94199.1  NADH-ubiquinone oxidoreductase subunit [Arabidopsis thaliana]                                                                                                                    | 747  | 745  | 0         | 99.7  | 95.6 | 97.9 | NADH-ubiquinone oxidoreductase subunit                                                                                                               | gbpln | Arabidopsis thaliana | AT5G37510.1   Symbols: EMB1467, Cl76   NADH-ubiquinone dehydrogenase, mitochondrial, putative   chr5:14897490-14900352 FORWARD LENGTH=745 | 747  | 745  | 0        | 99.7  | 95.6 | 97.9 |
| Rsa1.0_00520.1.g15339.t1 | gb AAD36942.1 AF069441.2 hypothetical protein [Arabidopsis thaliana] gi 7267196 emb CAB77907.1  hypothetical protein [Arabidopsis thaliana]                                                                                                                                                                                                                                                                                                       | 846  | 963  | 4.00E-66  | 113.8 | 18.7 | 28.5 | hypothetical protein                                                                                                                                 | gbpln | Arabidopsis thaliana | AT1G31150.1   Symbols:   Domain of unknown function (DUF1985)   chr1:1120097-11122412 FORWARD LENGTH=673                                  | 846  | 673  | 8.00E-30 | 79.6  | 9.9  | 16.1 |
| Rsa1.0_00520.1.g15340.t1 | gb AAF80658.1 AC012190.14 Similar to At2g29230 Mutator-like transposase gi 3980409 from Arabidopsis thaliana gi AC004561. It is a member of Transposase mutator family PF00872 [Arabidopsis thaliana]                                                                                                                                                                                                                                             | 815  | 904  | 1.00E-136 | 110.9 | 38.5 | 56.3 | Similar to At2g29230 Mutator-like transposase gi 3980409 from Arabidopsis thaliana gi AC004561. It is a member of Transposase mutator family PF00872 | gbpln | Arabidopsis thaliana | AT1G64260.1   Symbols:   MuDR family transposase   chr1:23847756-23849915 FORWARD LENGTH=719                                              | 815  | 719  | 4.00E-30 | 88.2  | 12.3 | 20.5 |
| Rsa1.0_00520.1.g15341.t1 | ref[XP_002868612.1] predicted protein [Arabidopsis lyrata subsp. lyrata] gi 297314448 gb EFH44871.1  predicted protein [Arabidopsis lyrata subsp. lyrata]                                                                                                                                                                                                                                                                                         | 183  | 326  | 2.00E-13  | 178.1 | 39.9 | 55.7 | predicted protein                                                                                                                                    | gbpln | Arabidopsis lyrata   | #                                                                                                                                         | #    | #    | #        | #     | #    | #    |

|                          |                                                                                                                                                                                                                                                                                          |      |      |           |       |      |      |                                                     |       |                      |                                                                                                                                                                                                                                                                                                                                                              |      |      |           |       |      |      |
|--------------------------|------------------------------------------------------------------------------------------------------------------------------------------------------------------------------------------------------------------------------------------------------------------------------------------|------|------|-----------|-------|------|------|-----------------------------------------------------|-------|----------------------|--------------------------------------------------------------------------------------------------------------------------------------------------------------------------------------------------------------------------------------------------------------------------------------------------------------------------------------------------------------|------|------|-----------|-------|------|------|
| Rsa1.0_00520.1.g15342.t1 | ref[XP_002870538.1] predicted protein [Arabidopsis lyrata subsp. lyrata] gi 297316374 gb EFH46797.1  predicted protein [Arabidopsis lyrata subsp. lyrata]                                                                                                                                | 171  | 172  | 4.00E-57  | 100.6 | 71.9 | 84.2 | predicted protein                                   | gbpln | Arabidopsis lyrata   | AT5G37480.1   Symbols:   unknown protein; Has 30201 Blast hits to 17322 proteins in 780 species: Archae - 12; Bacteria - 1396; Metazoa - 17338; Fungi - 3422; Plants - 5037; Viruses - 0; Other Eukaryotes - 2996 (source: NCBI BLINK).   chr5:14884477-14885517 REVERSE LENGTH=156                                                                          | 171  | 156  | 3.00E-57  | 91.2  | 69.0 | 76.6 |
| Rsa1.0_00520.1.g15343.t1 | #                                                                                                                                                                                                                                                                                        | #    | #    | #         | #     | #    | #    | -                                                   | ----  | ----                 | #                                                                                                                                                                                                                                                                                                                                                            | #    | #    | #         | #     | #    |      |
| Rsa1.0_00520.1.g15344.t1 | #                                                                                                                                                                                                                                                                                        | #    | #    | #         | #     | #    | #    | -                                                   | ----  | ----                 | #                                                                                                                                                                                                                                                                                                                                                            | #    | #    | #         | #     | #    |      |
| Rsa1.0_00520.1.g15345.t2 | #                                                                                                                                                                                                                                                                                        | #    | #    | #         | #     | #    | #    | -                                                   | ----  | ----                 | #                                                                                                                                                                                                                                                                                                                                                            | #    | #    | #         | #     | #    |      |
| Rsa1.0_00520.1.g15346.t1 | ref[NP_974857.5] TPX2 (targeting protein for Xklp2) family protein [Arabidopsis thaliana] gi 332006812 gb AED94195.1  TPX2 (targeting protein for Xklp2) family protein [Arabidopsis thaliana] gb AAD17398.1  putative non-LTR retroelement reverse transcriptase [Arabidopsis thaliana] | 144  | 178  | 1.00E-71  | 123.6 | 89.6 | 95.1 | TPX2 (targeting protein for Xklp2) family protein   | gbpln | Arabidopsis thaliana | AT5G37478.1   Symbols:   TPX2 (targeting protein for Xklp2) protein family   chr5:14881560-14883799 FORWARD LENGTH=178                                                                                                                                                                                                                                       | 144  | 178  | 3.00E-74  | 123.6 | 89.6 | 95.1 |
| Rsa1.0_00520.1.g15347.t8 | gb AAD17398.1  putative non-LTR retroelement reverse transcriptase [Arabidopsis thaliana]                                                                                                                                                                                                | 1594 | 1225 | 1.00E-172 | 76.9  | 22.0 | 31.0 | putative non-LTR retroelement reverse transcriptase | gbpln | Arabidopsis thaliana | AT4G29090.1   Symbols:   Ribonuclease H-like superfamily protein   chr4:14333528-14335255 FORWARD LENGTH=575                                                                                                                                                                                                                                                 | 1594 | 575  | 5.00E-33  | 36.1  | 4.3  | 6.1  |
| Rsa1.0_00521.1.g15348.t1 | emb CAA57284.1  ACC oxidase [Brassica oleracea] gi 14148977 emb CAC39108.1  ACC oxidase [Brassica rapa subsp. rapa]                                                                                                                                                                      | 320  | 320  | 0         | 100.0 | 98.4 | 99.4 | ACC oxidase                                         | gbpln | Brassica oleracea    | AT1G62380.1   Symbols: ACO2, ATACO2   ACC oxidase 2   chr1:23082340-23084068 FORWARD LENGTH=320                                                                                                                                                                                                                                                              | 320  | 320  | 1.00E-177 | 100.0 | 91.9 | 96.3 |
| Rsa1.0_00521.1.g15349.t1 | #                                                                                                                                                                                                                                                                                        | #    | #    | #         | #     | #    | #    | -                                                   | ----  | ----                 | #                                                                                                                                                                                                                                                                                                                                                            | #    | #    | #         | #     | #    |      |
| Rsa1.0_00521.1.g15350.t1 | #                                                                                                                                                                                                                                                                                        | #    | #    | #         | #     | #    | #    | -                                                   | ----  | ----                 | #                                                                                                                                                                                                                                                                                                                                                            | #    | #    | #         | #     | #    |      |
| Rsa1.0_00521.1.g15351.t1 | #                                                                                                                                                                                                                                                                                        | #    | #    | #         | #     | #    | #    | -                                                   | ----  | ----                 | #                                                                                                                                                                                                                                                                                                                                                            | #    | #    | #         | #     | #    |      |
| Rsa1.0_00521.1.g15352.t1 | ref[NP_178819.1] Zinc knuckle (CCHC-type) family protein [Arabidopsis thaliana] gi 3327395 gb AAC26677.1  putative Ta11-like non-LTR retroelement protein [Arabidopsis thaliana] gi 33025103 gb AEC06131.1  Zinc knuckle (CCHC-type) family protein [Arabidopsis thaliana]               | 413  | 530  | 6.00E-13  | 128.3 | 9.9  | 14.8 | Zinc knuckle (CCHC-type) family protein             | gbpln | Arabidopsis thaliana | AT2G07760.1   Symbols:   Zinc knuckle (CCHC-type) family protein   chr2:3584420-3586278 REVERSE LENGTH=530                                                                                                                                                                                                                                                   | 413  | 530  | 2.00E-15  | 128.3 | 9.9  | 14.8 |
| Rsa1.0_00521.1.g15353.t1 | gb ACG60687.1  transposon related predicted protein [Brassica oleracea var. alboglabra]                                                                                                                                                                                                  | 120  | 183  | 3.00E-17  | 152.5 | 35.0 | 36.7 | transposon related predicted protein                | gbpln | Brassica oleracea    | #                                                                                                                                                                                                                                                                                                                                                            | #    | #    | #         | #     | #    |      |
| Rsa1.0_00521.1.g15354.t1 | gb ADD64787.1  SHOOT MERISTEMLESS [Brassica napus]                                                                                                                                                                                                                                       | 382  | 382  | 0         | 100.0 | 96.9 | 97.6 | SHOOT MERISTEMLESS                                  | gbpln | Brassica napus       | AT1G62360.1   Symbols: STM, BUM1, SHL, WAM1, BUM, WAM   KNOX/ELK homeobox transcription factor   chr1:23058796-23061722 REVERSE LENGTH=382                                                                                                                                                                                                                   | 382  | 382  | 1.00E-158 | 100.0 | 89.5 | 92.4 |
| Rsa1.0_00521.1.g15355.t1 | #                                                                                                                                                                                                                                                                                        | #    | #    | #         | #     | #    | #    | -                                                   | ----  | ----                 | #                                                                                                                                                                                                                                                                                                                                                            | #    | #    | #         | #     | #    |      |
| Rsa1.0_00521.1.g15356.t1 | gb EOA33213.1  hypothetical protein CARUB_v10019899mg, partial [Capsella rubella]                                                                                                                                                                                                        | 671  | 682  | 0         | 101.6 | 88.8 | 91.8 | hypothetical protein CARUB_v10019899mg, partial     | gbpln | Capsella rubella     | AT1G62330.1   Symbols:   O-fucosyltransferase family protein   chr1:23046965-23050053 FORWARD LENGTH=652                                                                                                                                                                                                                                                     | 671  | 652  | 0         | 97.2  | 89.1 | 91.8 |
| Rsa1.0_00521.1.g15357.t2 | db BAA77394.1  SAE1-S9-protein [Brassica rapa]                                                                                                                                                                                                                                           | 550  | 255  | 1.00E-45  | 46.4  | 15.6 | 21.6 | SAE1-S9-protein                                     | gbpln | Brassica rapa        | AT5G18880.1   Symbols:   RNA-directed DNA polymerase (reverse transcriptase)-related family protein   chr5:6300535-6301422 REVERSE LENGTH=295                                                                                                                                                                                                                | 550  | 295  | 4.00E-44  | 53.6  | 14.2 | 19.6 |
| Rsa1.0_00522.1.g15358.t1 | ref[XP_002892653.1] mate efflux family protein [Arabidopsis lyrata subsp. lyrata] gi 297338495 gb EFH68912.1  mate efflux family protein [Arabidopsis lyrata subsp. lyrata]                                                                                                              | 316  | 503  | 1.00E-161 | 159.2 | 86.7 | 94.9 | mate efflux family protein                          | gbpln | Arabidopsis lyrata   | AT1G11670.1   Symbols:   MATE efflux family protein   chr1:3928520-3931482 REVERSE LENGTH=503                                                                                                                                                                                                                                                                | 316  | 503  | 1.00E-163 | 159.2 | 86.4 | 94.9 |
| Rsa1.0_00522.1.g15359.t1 | #                                                                                                                                                                                                                                                                                        | #    | #    | #         | #     | #    | #    | -                                                   | ----  | ----                 | #                                                                                                                                                                                                                                                                                                                                                            | #    | #    | #         | #     | #    |      |
| Rsa1.0_00522.1.g15360.t1 | #                                                                                                                                                                                                                                                                                        | #    | #    | #         | #     | #    | #    | -                                                   | ----  | ----                 | #                                                                                                                                                                                                                                                                                                                                                            | #    | #    | #         | #     | #    |      |
| Rsa1.0_00522.1.g15361.t1 | ref[XP_002898987.1] CYP51G1 [Arabidopsis lyrata subsp. lyrata] gi 297335729 gb EFH66146.1  CYP51G1 [Arabidopsis lyrata subsp. lyrata]                                                                                                                                                    | 491  | 488  | 0         | 99.4  | 92.1 | 95.9 | CYP51G1                                             | gbpln | Arabidopsis lyrata   | AT1G11680.1   Symbols: CYP51G1, EMB1738, CYP51A2, CYP51   CYTOCHROME P450 51G1   chr1:3938925-3940585 FORWARD LENGTH=488                                                                                                                                                                                                                                     | 491  | 488  | 0         | 99.4  | 91.2 | 96.1 |
| Rsa1.0_00522.1.g15362.t1 | ref[XP_002898988.1] hypothetical protein ARALYDRAFT_888481 [Arabidopsis lyrata subsp. lyrata] gi 297335730 gb EFH66147.1  hypothetical protein ARALYDRAFT_888481 [Arabidopsis lyrata subsp. lyrata]                                                                                      | 304  | 247  | 2.00E-87  | 81.3  | 57.6 | 66.8 | hypothetical protein ARALYDRAFT_888481              | gbpln | Arabidopsis lyrata   | AT1G11690.1   Symbols:   unknown protein; BEST Arabidopsis thaliana protein match is: unknown protein (TAIR:AT3G20350.1); Has 5959 Blast hits to 4807 proteins in 476 species: Archae - 156; Bacteria - 436; Metazoa - 2789; Fungi - 309; Plants - 336; Viruses - 9; Other Eukaryotes - 1924 (source: NCBI BLINK).   chr1:3941469-3942212 FORWARD LENGTH=247 | 304  | 247  | 2.00E-88  | 81.3  | 56.6 | 66.4 |
| Rsa1.0_00522.1.g15363.t1 | gb EOA37371.1  hypothetical protein CARUB_v10011175mg [Capsella rubella]                                                                                                                                                                                                                 | 1054 | 1093 | 0         | 103.7 | 88.7 | 93.9 | hypothetical protein CARUB_v10011175mg              | gbpln | Capsella rubella     | AT1G11720.2   Symbols: SS3   starch synthase 3   chr1:3951597-3956840 FORWARD LENGTH=1094                                                                                                                                                                                                                                                                    | 1054 | 1094 | 0         | 103.8 | 88.2 | 93.5 |

|                          |                                                                                                                                                                                                                                                                                                                                                                                                                                                                                                                                                                                                                                           |     |     |           |       |      |      |                                                 |       |                      |                                                                                                                                                                                                                                                         |     |     |           |       |      |      |
|--------------------------|-------------------------------------------------------------------------------------------------------------------------------------------------------------------------------------------------------------------------------------------------------------------------------------------------------------------------------------------------------------------------------------------------------------------------------------------------------------------------------------------------------------------------------------------------------------------------------------------------------------------------------------------|-----|-----|-----------|-------|------|------|-------------------------------------------------|-------|----------------------|---------------------------------------------------------------------------------------------------------------------------------------------------------------------------------------------------------------------------------------------------------|-----|-----|-----------|-------|------|------|
| Rsa1.0_00522.1.g15364.t1 | ref[XP_002892654.1] ankyrin repeat family protein [Arabidopsis lyrata subsp. lyrata] gi 297338496 gb EFH68913.1  ankyrin repeat family protein [Arabidopsis lyrata subsp. lyrata]                                                                                                                                                                                                                                                                                                                                                                                                                                                         | 517 | 628 | 0         | 121.5 | 70.4 | 80.1 | ankyrin repeat family protein                   | gbpln | Arabidopsis lyrata   | AT1G11740.1   Symbols:   ankyrin repeat family protein   chr1:3969317-3966824 REVERSE LENGTH=644                                                                                                                                                        | 517 | 644 | 0         | 124.6 | 70.2 | 79.7 |
| Rsa1.0_00522.1.g15365.t2 | ref[XP_002898993.1] hypothetical protein ARALYDRAFT_471314 [Arabidopsis lyrata subsp. lyrata] gi 297335735 gb EFH66152.1  hypothetical protein ARALYDRAFT_471314 [Arabidopsis lyrata subsp. lyrata]                                                                                                                                                                                                                                                                                                                                                                                                                                       | 288 | 271 | 1.00E-136 | 94.1  | 87.5 | 88.9 | hypothetical protein ARALYDRAFT_471314          | gbpln | Arabidopsis lyrata   | AT1G11750.1   Symbols: CLPP6, NCLPP1, NCLPP6   CLP protease proteolytic subunit 6   chr1:3967609-3969535 FORWARD LENGTH=271                                                                                                                             | 288 | 271 | 1.00E-138 | 94.1  | 86.8 | 88.5 |
| Rsa1.0_00522.1.g15366.t2 | ref[XP_002892655.1] predicted protein [Arabidopsis lyrata subsp. lyrata] gi 297338497 gb EFH68914.1  predicted protein [Arabidopsis lyrata subsp. lyrata]                                                                                                                                                                                                                                                                                                                                                                                                                                                                                 | 238 | 414 | 6.00E-96  | 173.9 | 76.5 | 86.1 | predicted protein                               | gbpln | Arabidopsis lyrata   | AT1G11755.1   Symbols: LEW1   Undecaprenyl pyrophosphate synthetase family protein   chr1:3969987-3971488 REVERSE LENGTH=254                                                                                                                            | 238 | 254 | 3.00E-97  | 106.7 | 75.2 | 87.4 |
| Rsa1.0_00522.1.g15367.t1 | ref[NP_172641.2] uncharacterized protein [Arabidopsis thaliana] gi 75148615 sp Q84VW5.1 MED32_ARATH RecName: Full=Mediator of RNA polymerase II transcription subunit 32; AltName: Full=Mediator of RNA polymerase II transcription subunit 2 gi 28466841 gb AA044029.1  At1g11760 [Arabidopsis thaliana] gi 110736112 dbj BAF00028.1  hypothetical protein [Arabidopsis thaliana] gi 332190660 gb AEE28781.1  mediator of RNA polymerase II transcription subunit 32 [Arabidopsis thaliana]                                                                                                                                              | 157 | 151 | 2.00E-64  | 96.2  | 85.4 | 86.6 | uncharacterized protein                         | gbpln | Arabidopsis thaliana | AT1G11760.1   Symbols: MED32   MED32; Has 41 Blast hits to 40 proteins in 14 species: Archaea - 0; Bacteria - 0; Metazoa - 0; Fungi - 0; Plants - 41; Viruses - 0; Other Eukaryotes - 0 (source: NCBI BLINK).   chr1:3972356-3972811 REVERSE LENGTH=151 | 157 | 151 | 5.00E-67  | 96.2  | 85.4 | 86.6 |
| Rsa1.0_00522.1.g15368.t1 | ref[XP_002889896.1] prephenate dehydratase family protein [Arabidopsis lyrata subsp. lyrata] gi 297335738 gb EFH66155.1  prephenate dehydratase family protein [Arabidopsis lyrata subsp. lyrata] ref[NP_001184967.1] O-Glycosyl hydrolases family 17 protein [Arabidopsis thaliana] gi 357529541 sp O65399.3 E131_ARATH RecName: Full=Glucan endo-1,3-beta-glucosidase 1; AltName: Full=(1-3)-beta-glucan endohydrolase 1; Short=(1-3)-beta-glucanase 1; AltName: Full=Beta-1,3-endoglucanase 1; Short=Beta-1,3-glucanase 1; Flags: Precursor gi 332190670 gb AEE28791.1  O-Glycosyl hydrolases family 17 protein [Arabidopsis thaliana] | 385 | 392 | 0         | 101.8 | 89.1 | 93.0 | prephenate dehydratase family protein           | gbpln | Arabidopsis lyrata   | AT1G11790.1   Symbols: ADT1   arogenate dehydratase 1   chr1:3981476-3984962 FORWARD LENGTH=392                                                                                                                                                         | 385 | 392 | 0         | 101.8 | 88.8 | 92.5 |
| Rsa1.0_00522.1.g15369.t1 | ref[NP_001184967.1] O-Glycosyl hydrolases family 17 protein [Arabidopsis thaliana] gi 357529541 sp O65399.3 E131_ARATH RecName: Full=Glucan endo-1,3-beta-glucosidase 1; AltName: Full=(1-3)-beta-glucan endohydrolase 1; Short=(1-3)-beta-glucanase 1; AltName: Full=Beta-1,3-endoglucanase 1; Short=Beta-1,3-glucanase 1; Flags: Precursor gi 332190670 gb AEE28791.1  O-Glycosyl hydrolases family 17 protein [Arabidopsis thaliana]                                                                                                                                                                                                   | 517 | 511 | 0         | 98.8  | 84.5 | 90.5 | O-Glycosyl hydrolases family 17 protein         | gbpln | Arabidopsis thaliana | AT1G11820.2   Symbols:   O-Glycosyl hydrolases family 17 protein   chr1:3991144-3993327 REVERSE LENGTH=511                                                                                                                                              | 517 | 511 | 0         | 98.8  | 84.5 | 90.5 |
| Rsa1.0_00522.1.g15370.t3 | gb EOA40508.1  hypothetical protein CARUB_v10009236mg, partial [Capsella rubella] ref[NP_200105.1] uncharacterized protein [Arabidopsis thaliana] gi 10177107 dbj BAB10441.1  unnamed protein product [Arabidopsis thaliana] gi 60547939 gb AAX23933.1  hypothetical protein At5g52930 [Arabidopsis thaliana] gi 71905609 gb AAZ52782.1  expressed protein [Arabidopsis thaliana] gi 332008896 gb AED96279.1  uncharacterized protein AT5G52930 [Arabidopsis thaliana]                                                                                                                                                                    | 409 | 423 | 0         | 103.4 | 96.1 | 98.5 | hypothetical protein CARUB_v10009236mg, partial | gbpln | Capsella rubella     | AT1G11860.3   Symbols:   Glycine cleavage T-protein family   chr1:4001801-4003245 FORWARD LENGTH=408                                                                                                                                                    | 409 | 408 | 0         | 99.8  | 95.6 | 98.0 |
| Rsa1.0_00522.1.g15371.t1 | ref[NP_200105.1] uncharacterized protein [Arabidopsis thaliana] gi 10177107 dbj BAB10441.1  unnamed protein product [Arabidopsis thaliana] gi 60547939 gb AAX23933.1  hypothetical protein At5g52930 [Arabidopsis thaliana] gi 71905609 gb AAZ52782.1  expressed protein [Arabidopsis thaliana] gi 332008896 gb AED96279.1  uncharacterized protein AT5G52930 [Arabidopsis thaliana]                                                                                                                                                                                                                                                      | 348 | 359 | 4.00E-78  | 103.2 | 42.8 | 56.0 | uncharacterized protein                         | gbpln | Arabidopsis thaliana | AT5G52930.1   Symbols:   Protein of unknown function (DUF295)   chr5:21470370-21471449 FORWARD LENGTH=359                                                                                                                                               | 348 | 359 | 9.00E-81  | 103.2 | 42.8 | 56.0 |
| Rsa1.0_00522.1.g15372.t1 | ref[NP_172652.2] phosphatidylinositol glycan, class V [Arabidopsis thaliana] gi 46931244 gb AAT06426.1  At1g11880 [Arabidopsis thaliana] gi 50897228 gb AT85753.1  At1g11880 [Arabidopsis thaliana] gi 332190687 gb AEE28808.1  transferases, transferring hexosyl groups [Arabidopsis thaliana]                                                                                                                                                                                                                                                                                                                                          | 478 | 489 | 0         | 102.3 | 78.7 | 87.0 | phosphatidylinositol glycan, class V            | gbpln | Arabidopsis thaliana | AT1G11880.1   Symbols:   transferases, transferring hexosyl groups   chr1:4007909-4010327 REVERSE LENGTH=489                                                                                                                                            | 478 | 489 | 0         | 102.3 | 78.7 | 87.0 |
| Rsa1.0_00522.1.g15373.t1 | gb EOA38494.1  hypothetical protein CARUB_v10010262mg [Capsella rubella]                                                                                                                                                                                                                                                                                                                                                                                                                                                                                                                                                                  | 301 | 218 | 1.00E-121 | 72.4  | 71.1 | 71.8 | hypothetical protein CARUB_v10010262mg          | gbpln | Capsella rubella     | AT1G11890.1   Symbols: SEC22, ATSEC22   Synaptobrevin family protein   chr1:4011509-4012835 FORWARD LENGTH=218                                                                                                                                          | 301 | 218 | 1.00E-123 | 72.4  | 70.8 | 71.8 |

|                          |                                                                                                                                                                                                                                                                                                                                                                                         |     |     |           |       |      |      |                                                             |       |                      |                                                                                                                                                                                                                                                                                                                                                                                                                                                                                       |     |      |           |       |      |      |
|--------------------------|-----------------------------------------------------------------------------------------------------------------------------------------------------------------------------------------------------------------------------------------------------------------------------------------------------------------------------------------------------------------------------------------|-----|-----|-----------|-------|------|------|-------------------------------------------------------------|-------|----------------------|---------------------------------------------------------------------------------------------------------------------------------------------------------------------------------------------------------------------------------------------------------------------------------------------------------------------------------------------------------------------------------------------------------------------------------------------------------------------------------------|-----|------|-----------|-------|------|------|
| Rsa1.0_00522.1.g15374.t2 | dbj BAJ34217.1  unnamed protein product [Theellungiella halophila]                                                                                                                                                                                                                                                                                                                      | 512 | 506 | 0         | 98.8  | 91.8 | 95.5 | unnamed protein product                                     | ----  | ----                 | AT1G11910.1   Symbols: APA1, ATAPA1   aspartic proteinase A1   chr1:4017119-4019874 REVERSE LENGTH=506                                                                                                                                                                                                                                                                                                                                                                                | 512 | 506  | 0         | 98.8  | 92.2 | 94.3 |
| Rsa1.0_00522.1.g15375.t2 | ref XP_002889903.1  hypothetical protein ARALYDRAFT_471341 [Arabidopsis lyrata subsp. lyrata] gi 297335745 gb EFH6162.1  hypothetical protein ARALYDRAFT_471341 [Arabidopsis lyrata subsp. lyrata]                                                                                                                                                                                      | 330 | 329 | 1.00E-153 | 99.7  | 87.6 | 94.5 | hypothetical protein ARALYDRAFT_471341                      | gbpln | Arabidopsis lyrata   | AT1G11915.1   Symbols:   unknown protein; FUNCTIONS IN: molecular_function unknown; INVOLVED IN: biological_process unknown; LOCATED IN: endomembrane system; EXPRESSED IN: root; BEST Arabidopsis thaliana protein match is: unknown protein (TAIR:AT3G17350.1); Has 261 Blast hits to 261 proteins in 13 species: Archae - 0; Bacteria - 0; Metazoa - 0; Fungi - 0; Plants - 261; Viruses - 0; Other Eukaryotes - 0 (source: NCBI BLINK).   chr1:4021830-4023084 FORWARD LENGTH=329 | 330 | 329  | 1.00E-155 | 99.7  | 87.0 | 94.5 |
| Rsa1.0_00522.1.g15376.t1 | ref NP_849649.1  putative pyridoxal phosphate-dependent enzyme, YBL036C type [Arabidopsis thaliana] gi 3157934 gb AAC17617.1  Similar to hypothetical protein F09E5.8 gb U37429 from C. elegans. ESTs gb T42019 and gb N97000 come from this gene [Arabidopsis thaliana] gi 332190697 gb AEE28818.1  putative pyridoxal phosphate-dependent enzyme, YBL036C type [Arabidopsis thaliana] | 265 | 255 | 1.00E-133 | 96.2  | 88.7 | 92.5 | putative pyridoxal phosphate-dependent enzyme, YBL036C type | gbpln | Arabidopsis thaliana | AT1G11930.2   Symbols:   Predicted pyridoxal phosphate-dependent enzyme, YBL036C type   chr1:4028783-4030298 FORWARD LENGTH=255                                                                                                                                                                                                                                                                                                                                                       | 265 | 255  | 1.00E-135 | 96.2  | 88.7 | 92.5 |
| Rsa1.0_00522.1.g15377.t3 | ref XP_002892665.1  hypothetical protein ARALYDRAFT_312224 [Arabidopsis lyrata subsp. lyrata] gi 297338507 gb EFH68924.1  hypothetical protein ARALYDRAFT_312224 [Arabidopsis lyrata subsp. lyrata]                                                                                                                                                                                     | 381 | 383 | 0         | 100.5 | 82.4 | 89.2 | hypothetical protein ARALYDRAFT_312224                      | gbpln | Arabidopsis lyrata   | AT1G11940.1   Symbols:   Core-2/-branching beta-1,6-N-acetylglucosaminyltransferase family protein   chr1:4031768-4033946 REVERSE LENGTH=383                                                                                                                                                                                                                                                                                                                                          | 381 | 383  | 0         | 100.5 | 81.1 | 89.2 |
| Rsa1.0_00523.1.g15378.t2 | ref NP_194037.2  protein IQ-domain 22 [Arabidopsis thaliana] gi 56693675 gb AAW22634.1  calmodulin binding protein IQD22 [Arabidopsis thaliana] gi 332659301 gb AEE84701.1  protein IQ-domain 22 [Arabidopsis thaliana]                                                                                                                                                                 | 461 | 484 | 1.00E-174 | 105.0 | 74.4 | 83.5 | protein IQ-domain 22                                        | gbpln | Arabidopsis thaliana | AT4G23060.1   Symbols: IQD22   IQ-domain 22   chr4:12087283-12090408 FORWARD LENGTH=484                                                                                                                                                                                                                                                                                                                                                                                               | 461 | 484  | 1.00E-176 | 105.0 | 74.4 | 83.5 |
| Rsa1.0_00523.1.g15379.t2 | emb CAK24967.1  gamma-glutamylcysteine synthetase [Brassica napus]                                                                                                                                                                                                                                                                                                                      | 408 | 514 | 3.00E-82  | 126.0 | 40.7 | 43.1 | gamma-glutamylcysteine synthetase                           | gbpln | Brassica napus       | AT4G23100.3   Symbols: GSH1   glutamate-cysteine ligase   chr4:12103458-12106751 REVERSE LENGTH=522                                                                                                                                                                                                                                                                                                                                                                                   | 408 | 522  | 3.00E-82  | 127.9 | 40.7 | 44.6 |
| Rsa1.0_00523.1.g15380.t3 | gb EOA18852.1  hypothetical protein CARUB_v10007481mg [Capsella rubella]                                                                                                                                                                                                                                                                                                                | 622 | 653 | 0         | 105.0 | 74.4 | 84.6 | hypothetical protein CARUB_v10007481mg                      | gbpln | Capsella rubella     | AT4G23220.1   Symbols: CRK14   cysteine-rich RLK (RECEPTOR-like protein kinase) 14   chr4:12154091-12157091 REVERSE LENGTH=728                                                                                                                                                                                                                                                                                                                                                        | 622 | 728  | 0         | 117.0 | 61.6 | 75.9 |
| Rsa1.0_00523.1.g15381.t2 | gb EOA16184.1  hypothetical protein CARUB_v10004325mg [Capsella rubella]                                                                                                                                                                                                                                                                                                                | 659 | 654 | 0         | 99.2  | 68.4 | 78.5 | hypothetical protein CARUB_v10004325mg                      | gbpln | Capsella rubella     | AT4G23180.1   Symbols: CRK10, RLK4   cysteine-rich RLK (RECEPTOR-like protein kinase) 10   chr4:12138171-12140780 FORWARD LENGTH=669                                                                                                                                                                                                                                                                                                                                                  | 659 | 669  | 0         | 101.5 | 64.5 | 75.4 |
| Rsa1.0_00523.1.g15382.t1 | #                                                                                                                                                                                                                                                                                                                                                                                       | #   | #   | #         | #     | #    | #    | -                                                           | ----  | ----                 | #                                                                                                                                                                                                                                                                                                                                                                                                                                                                                     | #   | #    | #         | #     | #    |      |
| Rsa1.0_00523.1.g15383.t1 | ref XP_002867728.1  predicted protein [Arabidopsis lyrata subsp. lyrata] gi 297313564 gb EFH43987.1  predicted protein [Arabidopsis lyrata subsp. lyrata]                                                                                                                                                                                                                               | 660 | 671 | 0         | 101.7 | 78.5 | 85.9 | predicted protein                                           | gbpln | Arabidopsis lyrata   | AT4G23130.2   Symbols: CRK5, RLK6   cysteine-rich RLK (RECEPTOR-like protein kinase) 5   chr4:12117688-12120134 REVERSE LENGTH=663                                                                                                                                                                                                                                                                                                                                                    | 660 | 663  | 0         | 100.5 | 81.1 | 87.9 |
| Rsa1.0_00523.1.g15384.t1 | gb AAC95354.1  receptor-like protein kinase [Arabidopsis thaliana]                                                                                                                                                                                                                                                                                                                      | 649 | 684 | 0         | 105.4 | 72.6 | 81.7 | receptor-like protein kinase                                | gbpln | Arabidopsis thaliana | AT4G23250.1   Symbols: EMB1290, DUF26-21, RKC1, CRK17   kinases:protein kinases   chr4:12162004-12167026 REVERSE LENGTH=1035                                                                                                                                                                                                                                                                                                                                                          | 649 | 1035 | 0         | 159.5 | 71.5 | 80.6 |
| Rsa1.0_00523.1.g15385.t1 | ref XP_002867715.1  hypothetical protein ARALYDRAFT_492542 [Arabidopsis lyrata subsp. lyrata] gi 297313551 gb EFH43974.1  hypothetical protein ARALYDRAFT_492542 [Arabidopsis lyrata subsp. lyrata]                                                                                                                                                                                     | 677 | 659 | 0         | 97.3  | 72.5 | 81.7 | hypothetical protein ARALYDRAFT_492542                      | gbpln | Arabidopsis lyrata   | AT4G23260.1   Symbols: CRK18   cysteine-rich RLK (RECEPTOR-like protein kinase) 18   chr4:12167528-12170055 REVERSE LENGTH=659                                                                                                                                                                                                                                                                                                                                                        | 677 | 659  | 0         | 97.3  | 73.0 | 81.7 |
| Rsa1.0_00523.1.g15386.t1 | gb ACC91270.1  short-chain dehydrogenase/reductase family protein [Capsella rubella] gi 482552824 gb EOA17017.1  hypothetical protein CARUB_v10005252mg [Capsella rubella]                                                                                                                                                                                                              | 322 | 322 | 1.00E-163 | 100.0 | 86.3 | 93.2 | short-chain dehydrogenase/reductase family protein          | gbpln | Capsella rubella     | AT4G23420.2   Symbols:   NAD(P)-binding Rossmann-fold superfamily protein   chr4:12226288-12228562 FORWARD LENGTH=316                                                                                                                                                                                                                                                                                                                                                                 | 322 | 316  | 1.00E-164 | 98.1  | 83.9 | 91.6 |

|                          |                                                                                                                                                                                                                                                                                      |     |      |           |       |      |      |                                                         |       |                      |                                                                                                                                                                                                                                                                                    |     |     |           |       |      |      |
|--------------------------|--------------------------------------------------------------------------------------------------------------------------------------------------------------------------------------------------------------------------------------------------------------------------------------|-----|------|-----------|-------|------|------|---------------------------------------------------------|-------|----------------------|------------------------------------------------------------------------------------------------------------------------------------------------------------------------------------------------------------------------------------------------------------------------------------|-----|-----|-----------|-------|------|------|
| Rsa1.0_00523.1.g15387.t1 | refXP_002867705.1  hypothetical protein ARALYDRAFT_492522 [Arabidopsis lyrata subsp. lyrata] gi 297313541 gb EFH43964.1                                                                                                                                                              | 86  | 86   | 1.00E-30  | 100.0 | 79.1 | 88.4 | hypothetical protein ARALYDRAFT_492522                  | gbpln | Arabidopsis lyrata   | AT4G23493.1   Symbols:   unknown protein; Has 30201 Blast hits to 17322 proteins in 780 species: Archae - 12; Bacteria - 1396; Metazoa - 17338; Fungi - 3422; Plants - 5037; Viruses - 0; Other Eukaryotes - 2996 (source: NCBI BLINK).   chr4:12256327-12256693 REVERSE LENGTH=87 | 86  | 87  | 1.00E-31  | 101.2 | 77.9 | 88.4 |
| Rsa1.0_00523.1.g15388.t1 | refXP_002867704.1  hypothetical protein ARALYDRAFT_492521 [Arabidopsis lyrata subsp. lyrata] gi 297313540 gb EFH43963.1                                                                                                                                                              | 97  | 97   | 2.00E-25  | 100.0 | 70.1 | 76.3 | hypothetical protein ARALYDRAFT_492521                  | gbpln | Arabidopsis lyrata   | AT4G23496.1   Symbols: SP1L5   SPIRAL1-like5   chr4:12257914-12258297 REVERSE LENGTH=99                                                                                                                                                                                            | 97  | 99  | 3.00E-27  | 102.1 | 63.9 | 69.1 |
| Rsa1.0_00523.1.g15389.t2 | #                                                                                                                                                                                                                                                                                    | #   | #    | #         | #     | #    | -    | ----                                                    | ----  | #                    | #                                                                                                                                                                                                                                                                                  | #   | #   | #         | #     | #    | #    |
| Rsa1.0_00523.1.g15390.t1 | #                                                                                                                                                                                                                                                                                    | #   | #    | #         | #     | #    | -    | ----                                                    | ----  | #                    | #                                                                                                                                                                                                                                                                                  | #   | #   | #         | #     | #    | #    |
| Rsa1.0_00523.1.g15391.t1 | #                                                                                                                                                                                                                                                                                    | #   | #    | #         | #     | #    | -    | ----                                                    | ----  | #                    | #                                                                                                                                                                                                                                                                                  | #   | #   | #         | #     | #    | #    |
| Rsa1.0_00523.1.g15392.t1 | gb ACC91282.1  unknown [Capsella rubella] gi 482552567 gb EOA16760.1                                                                                                                                                                                                                 | 371 | 398  | 1.00E-135 | 107.3 | 73.3 | 83.3 | unknown                                                 | gbpln | Capsella rubella     | AT4G23530.1   Symbols:   Protein of unknown function (DUF793)   chr4:12279171-12280361 FORWARD LENGTH=396                                                                                                                                                                          | 371 | 396 | 1.00E-136 | 106.7 | 75.7 | 86.3 |
| Rsa1.0_00523.1.g15393.t1 | gb AAF99785.1 AC012463.2 T2E6.4 [Arabidopsis thaliana]                                                                                                                                                                                                                               | 149 | 740  | 2.00E-27  | 496.6 | 40.3 | 49.0 | T2E6.4                                                  | gbpln | Arabidopsis thaliana | #                                                                                                                                                                                                                                                                                  | #   | #   | #         | #     | #    | #    |
| Rsa1.0_00523.1.g15394.t1 | gb EOA36857.1  hypothetical protein CARUB_v10008803mg [Capsella rubella]                                                                                                                                                                                                             | 383 | 536  | 2.00E-63  | 139.9 | 29.8 | 38.6 | hypothetical protein CARUB_v10008803mg                  | gbpln | Capsella rubella     | AT2G07760.1   Symbols:   Zinc knuckle (GCHC-type) family protein   chr2:3584420-3586278 REVERSE LENGTH=530                                                                                                                                                                         | 383 | 530 | 7.00E-36  | 138.4 | 17.5 | 21.7 |
| Rsa1.0_00523.1.g15395.t1 | gb ACI14394.1  WRKY29-1 transcription factor [Brassica napus]                                                                                                                                                                                                                        | 308 | 302  | 1.00E-157 | 98.1  | 89.9 | 93.2 | WRKY29-1 transcription factor                           | gbpln | Brassica napus       | AT4G23550.1   Symbols: WRKY29, ATWRKY29   WRKY family transcription factor   chr4:12291831-12293088 FORWARD LENGTH=304                                                                                                                                                             | 308 | 304 | 1.00E-143 | 98.7  | 81.8 | 88.0 |
| Rsa1.0_00523.1.g15396.t1 | gb AAD15372.1  putative retroelement pol polyprotein [Arabidopsis thaliana]                                                                                                                                                                                                          | 135 | 469  | 2.00E-14  | 347.4 | 36.3 | 50.4 | putative retroelement pol polyprotein                   | gbpln | Arabidopsis thaliana | #                                                                                                                                                                                                                                                                                  | #   | #   | #         | #     | #    | #    |
| Rsa1.0_00523.1.g15397.t1 | ref NP_194090.2  tyrosine transaminase-like protein [Arabidopsis thaliana] gi 75161515 sp Q8VYP2.1 TAT4_ARATH                                                                                                                                                                        | 409 | 424  | 0         | 103.7 | 82.4 | 90.5 | tyrosine transaminase-like protein                      | gbpln | Arabidopsis thaliana | AT4G23590.1   Symbols:   Tyrosine transaminase family protein   chr4:12307195-12309445 FORWARD LENGTH=424                                                                                                                                                                          | 409 | 424 | 0         | 103.7 | 82.4 | 90.5 |
| Rsa1.0_00523.1.g15398.t1 | Full=Tyrosine aminotransferase 4 gi 17979319 gb AAL49885.1  putative tyrosine transaminase [Arabidopsis thaliana] gi 21689827 gb AAM67557.1  putative tyrosine transaminase [Arabidopsis thaliana] gi 332659380 gb AEE84780.1  probable aminotransferase TAT4 [Arabidopsis thaliana] | #   | #    | #         | #     | #    | -    | ----                                                    | ----  | #                    | #                                                                                                                                                                                                                                                                                  | #   | #   | #         | #     | #    | #    |
| Rsa1.0_00523.1.g15399.t1 | dbj BAJ34129.1  unnamed protein product [Thellungiella halophila]                                                                                                                                                                                                                    | 438 | 423  | 0         | 96.6  | 72.8 | 83.3 | unnamed protein product                                 | ----  | ----                 | AT4G23590.1   Symbols:   Tyrosine transaminase family protein   chr4:12307195-12309445 FORWARD LENGTH=424                                                                                                                                                                          | 438 | 424 | 0         | 96.8  | 71.2 | 82.9 |
| Rsa1.0_00523.1.g15400.t1 | dbj BAJ34129.1  unnamed protein product [Thellungiella halophila]                                                                                                                                                                                                                    | 400 | 423  | 1.00E-174 | 105.8 | 75.5 | 86.0 | unnamed protein product                                 | ----  | ----                 | AT4G23590.1   Symbols:   Tyrosine transaminase family protein   chr4:12307195-12309445 FORWARD LENGTH=424                                                                                                                                                                          | 400 | 424 | 1.00E-172 | 106.0 | 73.8 | 84.0 |
| Rsa1.0_00523.1.g15401.t1 | dbj BAJ34129.1  unnamed protein product [Thellungiella halophila]                                                                                                                                                                                                                    | 434 | 423  | 0         | 97.5  | 75.1 | 85.5 | unnamed protein product                                 | ----  | ----                 | AT4G23590.1   Symbols:   Tyrosine transaminase family protein   chr4:12307195-12309445 FORWARD LENGTH=424                                                                                                                                                                          | 434 | 424 | 0         | 97.7  | 73.0 | 83.9 |
| Rsa1.0_00523.1.g15402.t1 | dbj BAB08714.1  non-LTR retroelement reverse transcriptase-like protein [Arabidopsis thaliana]                                                                                                                                                                                       | 219 | 1197 | 5.00E-18  | 546.6 | 23.7 | 29.2 | non-LTR retroelement reverse transcriptase-like protein | gbpln | Arabidopsis thaliana | #                                                                                                                                                                                                                                                                                  | #   | #   | #         | #     | #    | #    |
| Rsa1.0_00523.1.g15403.t1 | #                                                                                                                                                                                                                                                                                    | #   | #    | #         | #     | #    | -    | ----                                                    | ----  | #                    | #                                                                                                                                                                                                                                                                                  | #   | #   | #         | #     | #    | #    |
| Rsa1.0_00523.1.g15404.t1 | dbj BAJ34129.1  unnamed protein product [Thellungiella halophila]                                                                                                                                                                                                                    | 423 | 423  | 0         | 100.0 | 79.2 | 88.9 | unnamed protein product                                 | ----  | ----                 | AT4G23590.1   Symbols:   Tyrosine transaminase family protein   chr4:12307195-12309445 FORWARD LENGTH=424                                                                                                                                                                          | 423 | 424 | 0         | 100.2 | 76.1 | 87.5 |



|                          |                                                                                                                                                                                                                                                                                                                                                                                                                                                                                                                                                                                                                                                                                       |      |      |           |       |      |      |                                                 |       |                      |                                                                                                                                            |      |      |           |       |      |      |
|--------------------------|---------------------------------------------------------------------------------------------------------------------------------------------------------------------------------------------------------------------------------------------------------------------------------------------------------------------------------------------------------------------------------------------------------------------------------------------------------------------------------------------------------------------------------------------------------------------------------------------------------------------------------------------------------------------------------------|------|------|-----------|-------|------|------|-------------------------------------------------|-------|----------------------|--------------------------------------------------------------------------------------------------------------------------------------------|------|------|-----------|-------|------|------|
| Rsa1.0_00524.1.g15405.t1 | ref NP_193408.1  ethylene-responsive transcription factor ERF039 [Arabidopsis thaliana] gi 75337675 sp Q9SUK8.1 ERF39_ARAT H RecName: Full=Ethylene-responsive transcription factor ERF039 gi 5302798 emb CAB46040.1  apetal2 domain TINY like protein [Arabidopsis thaliana] gi 7268425 emb CAB78717.1  apetal2 domain TINY like protein [Arabidopsis thaliana] gi 44021914 gb AAS46629.1  At4g16750 [Arabidopsis thaliana] gi 48479340 gb AAT44941.1  putative AP2/EREBP transcription factor [Arabidopsis thaliana] gi 58652080 gb AAW80865.1  At4g16750 [Arabidopsis thaliana] gi 332658397 gb AEE83797.1  ethylene-responsive transcription factor ERF039 [Arabidopsis thaliana] | 181  | 179  | 1.00E-70  | 98.9  | 85.1 | 87.8 | ethylene-responsive transcription factor ERF039 | gbpln | Arabidopsis thaliana | AT4G16750.1   Symbols:   Integrase-type DNA-binding superfamily protein   chr4:9421121-9421660 REVERSE LENGTH=179                          | 181  | 179  | 4.00E-73  | 98.9  | 85.1 | 87.8 |
| Rsa1.0_00524.1.g15406.t1 | emb CAB88075.1  hypothetical protein [Arabidopsis thaliana]                                                                                                                                                                                                                                                                                                                                                                                                                                                                                                                                                                                                                           | 383  | 305  | 3.00E-87  | 79.6  | 39.2 | 43.1 | hypothetical protein                            | gbpln | Arabidopsis thaliana | AT4G16765.1   Symbols:   2-oxoglutarate (2OG) and Fe(II)-dependent oxygenase superfamily protein   chr4:9429974-9431791 REVERSE LENGTH=247 | 383  | 247  | 1.00E-89  | 64.5  | 39.2 | 43.1 |
| Rsa1.0_00524.1.g15407.t1 | ref NP_567515.1  lipase class 3 family protein [Arabidopsis thaliana] gi 374095438 sp O23522.2 PLA14_ARAT H RecName: Full=Phospholipase A1-lbeta2, chloroplastic; Flags: Precursor gi 332658408 gb AEE83808.1  phospholipase A1-lbeta2 [Arabidopsis thaliana]                                                                                                                                                                                                                                                                                                                                                                                                                         | 508  | 517  | 0         | 101.8 | 90.2 | 94.1 | lipase class 3 family protein                   | gbpln | Arabidopsis thaliana | AT4G16820.1   Symbols: PLA-l[beta]2   alpha/beta-Hydrolases superfamily protein   chr4:9467563-9469116 FORWARD LENGTH=517                  | 508  | 517  | 0         | 101.8 | 90.2 | 94.1 |
| Rsa1.0_00524.1.g15408.t7 | gb ACP30552.1  disease resistance protein [Brassica rapa subsp. pekinensis]                                                                                                                                                                                                                                                                                                                                                                                                                                                                                                                                                                                                           | 1461 | 1346 | 0         | 92.1  | 73.4 | 76.6 | disease resistance protein                      | gbpln | Brassica rapa        | AT5G51630.1   Symbols:   Disease resistance protein (TIR-NBS-LRR class) family   chr5:20970069-20974666 FORWARD LENGTH=1229                | 1461 | 1229 | 0         | 84.1  | 39.5 | 48.6 |
| Rsa1.0_00524.1.g15409.t1 | gb EOA16302.1  hypothetical protein CARUB_v10004452mg [Capsella rubella]                                                                                                                                                                                                                                                                                                                                                                                                                                                                                                                                                                                                              | 581  | 580  | 0         | 99.8  | 91.4 | 94.5 | hypothetical protein CARUB_v10004452mg          | gbpln | Capsella rubella     | AT5G04770.1   Symbols: ATCAT6, CAT6   cationic amino acid transporter 6   chr5:1379118-1382304 FORWARD LENGTH=583                          | 581  | 583  | 1.00E-156 | 100.3 | 50.1 | 67.8 |
| Rsa1.0_00524.1.g15410.t1 | ref XP_002868125.1  hypothetical protein ARALYDRAFT_915089 [Arabidopsis lyrata subsp. lyrata] gi 297313961 gb EFH44384.1  hypothetical protein ARALYDRAFT_915089 [Arabidopsis lyrata subsp. lyrata] ref XP_002868122.1  hypothetical protein ARALYDRAFT_915086 [Arabidopsis lyrata subsp. lyrata] gi 297804534 ref XP_002870151.1  hypothetical protein ARALYDRAFT_915085 [Arabidopsis lyrata subsp. lyrata] gi 297313958 gb EFH44381.1  hypothetical protein ARALYDRAFT_915086 [Arabidopsis lyrata subsp. lyrata] gi 297315987 gb EFH46410.1  hypothetical protein ARALYDRAFT_915085 [Arabidopsis lyrata subsp. lyrata]                                                              | 406  | 429  | 1.00E-154 | 105.7 | 66.5 | 80.3 | hypothetical protein ARALYDRAFT_915089          | gbpln | Arabidopsis lyrata   | AT1G10270.1   Symbols: GRP23   glutamine-rich protein 23   chr1:3363535-3366276 FORWARD LENGTH=913                                         | 406  | 913  | 1.00E-66  | 224.9 | 38.4 | 59.6 |
| Rsa1.0_00524.1.g15411.t1 | ref XP_002868122.1  hypothetical protein ARALYDRAFT_915086 [Arabidopsis lyrata subsp. lyrata] gi 297313958 gb EFH44381.1  hypothetical protein ARALYDRAFT_915086 [Arabidopsis lyrata subsp. lyrata] gi 297315987 gb EFH46410.1  hypothetical protein ARALYDRAFT_915085 [Arabidopsis lyrata subsp. lyrata] ref NP_192838.1  ankyrin repeat-containing protein [Arabidopsis thaliana] gi 4539374 emb CAB40068.1  putative protein [Arabidopsis thaliana] gi 7267798 emb CAB1201.1  putative protein [Arabidopsis thaliana] gi 332657560 gb AEE82960.1  ankyrin repeat-containing protein [Arabidopsis thaliana]                                                                         | 329  | 283  | 7.00E-46  | 86.0  | 32.8 | 46.8 | hypothetical protein ARALYDRAFT_915086          | gbpln | Arabidopsis lyrata   | AT5G15300.1   Symbols:   Pentatricopeptide repeat (PPR) superfamily protein   chr5:4968384-4970030 REVERSE LENGTH=548                      | 329  | 548  | 5.00E-11  | 166.6 | 11.9 | 19.5 |
| Rsa1.0_00524.1.g15412.t3 | ref NP_192838.1  ankyrin repeat-containing protein [Arabidopsis thaliana] gi 4539374 emb CAB40068.1  putative protein [Arabidopsis thaliana] gi 7267798 emb CAB1201.1  putative protein [Arabidopsis thaliana] gi 332657560 gb AEE82960.1  ankyrin repeat-containing protein [Arabidopsis thaliana]                                                                                                                                                                                                                                                                                                                                                                                   | 354  | 406  | 3.00E-64  | 114.7 | 47.7 | 57.9 | ankyrin repeat-containing protein               | gbpln | Arabidopsis thaliana | AT4G11000.1   Symbols:   Ankyrin repeat family protein   chr4:6731020-6732464 FORWARD LENGTH=406                                           | 354  | 406  | 8.00E-67  | 114.7 | 47.7 | 57.9 |
| Rsa1.0_00524.1.g15413.t1 | ref XP_002864196.1  hypothetical protein ARALYDRAFT_918330 [Arabidopsis lyrata subsp. lyrata] gi 297310031 gb EFH40455.1  hypothetical protein ARALYDRAFT_918330 [Arabidopsis lyrata subsp. lyrata]                                                                                                                                                                                                                                                                                                                                                                                                                                                                                   | 441  | 472  | 1.00E-179 | 107.0 | 69.4 | 83.0 | hypothetical protein ARALYDRAFT_918330          | gbpln | Arabidopsis lyrata   | AT5G52820.1   Symbols:   WD-40 repeat family protein / notchless protein, putative   chr5:21401423-21404203 FORWARD LENGTH=473             | 441  | 473  | 0         | 107.3 | 68.9 | 82.8 |

|                          |                                                                                                                                                                                                                                                                                                                                                                                                                                                                                         |     |      |           |        |      |      |                                                      |       |                      |                                                                                                                                                                                                                                                                                                                                           |     |     |           |       |      |      |
|--------------------------|-----------------------------------------------------------------------------------------------------------------------------------------------------------------------------------------------------------------------------------------------------------------------------------------------------------------------------------------------------------------------------------------------------------------------------------------------------------------------------------------|-----|------|-----------|--------|------|------|------------------------------------------------------|-------|----------------------|-------------------------------------------------------------------------------------------------------------------------------------------------------------------------------------------------------------------------------------------------------------------------------------------------------------------------------------------|-----|-----|-----------|-------|------|------|
| Rsa1.0_00524.1.g15414.t1 | ref XP_002870122.1  hypothetical protein ARALYDRAFT_329817 [Arabidopsis lyrata subsp. lyrata] gi 297313958 gb EFH44381.1                                                                                                                                                                                                                                                                                                                                                                | 58  | 57   | 4.00E-21  | 98.3   | 86.2 | 91.4 | hypothetical protein ARALYDRAFT_329817               | gbpln | Arabidopsis lyrata   | AT4G17085.1   Symbols:   Putative membrane lipoprotein   chr4:9604527-9604804 FORWARD LENGTH=57                                                                                                                                                                                                                                           | 58  | 57  | 2.00E-23  | 98.3  | 86.2 | 89.7 |
| Rsa1.0_00524.1.g15415.t1 | gb EOA18043.1  hypothetical protein CARUB_v10006488mg [Capsella rubella]                                                                                                                                                                                                                                                                                                                                                                                                                | 547 | 548  | 0         | 100.2  | 95.8 | 98.5 | hypothetical protein CARUB_v10006488mg               | gbpln | Capsella rubella     | AT4G17090.1   Symbols: CT-BMY, BAM3, BMY8   chloroplast beta-amylase   chr4:9605266-9607250 REVERSE LENGTH=548                                                                                                                                                                                                                            | 547 | 548 | 0         | 100.2 | 95.1 | 97.8 |
| Rsa1.0_00524.1.g15416.t1 | ref XP_002868084.1  hypothetical protein ARALYDRAFT_915009 [Arabidopsis lyrata subsp. lyrata] gi 297313920 gb EFH44343.1                                                                                                                                                                                                                                                                                                                                                                | 425 | 447  | 0         | 105.2  | 88.9 | 95.3 | hypothetical protein ARALYDRAFT_915009               | gbpln | Arabidopsis lyrata   | AT4G17100.1   Symbols:   CONTAINS InterPro DOMAIN/s: Endoribonuclease XendoU (InterPro:IPR018998); Has 943 Blast hits to 770 proteins in 162 species: Archae - 0; Bacteria - 61; Metazoa - 472; Fungi - 40; Plants - 78; Viruses - 35; Other Eukaryotes - 257 (source: NCBI BLINK).   chr4:9610164-9612513 REVERSE LENGTH=434             | 425 | 434 | 0         | 102.1 | 88.2 | 94.4 |
| Rsa1.0_00524.1.g15417.t1 | ref NP_193450.1  RAB GTPase homolog B1C [Arabidopsis thaliana] gi 297800394 ref XP_002868081.1                                                                                                                                                                                                                                                                                                                                                                                          | 211 | 211  | 1.00E-119 | 100.0  | 97.6 | 99.1 | RAB GTPase homolog B1C                               | gbpln | Arabidopsis lyrata   | AT4G17170.1   Symbols: AT-RAB2, ATRABB1C, ATRAB2A, RAB2A, RABB1C, ATRAB-B1B, RAB-B1B   RAB GTPase homolog B1C   chr4:9644908-9646220 REVERSE LENGTH=211                                                                                                                                                                                   | 211 | 211 | 1.00E-121 | 100.0 | 97.6 | 99.1 |
| Rsa1.0_00524.1.g15418.t1 | hypothetical protein ARALYDRAFT_493160 [Arabidopsis lyrata subsp. lyrata] gi 1765896 emb CAA70498.1  Rab2-like protein [Arabidopsis thaliana] gi 5281023 emb CAB45962.1  GTP-binding RAB2A like protein [Arabidopsis thaliana] gi 7268468 emb CAB80988.1  GTP-binding RAB2A like protein [Arabidopsis thaliana] gi 27311815 gb AAO00873.1  GTP-binding RAB2A like protein [Arabidopsis thaliana] gi 30023652 gb AAP13359.1  At4g17170 [Arabidopsis thaliana] gi 297313917 gb EFH44340.1 | 211 | 211  | 1.00E-119 | 100.0  | 97.6 | 99.1 | RAB GTPase homolog B1C                               | gbpln | Arabidopsis lyrata   | AT4G17170.1   Symbols: AT-RAB2, ATRABB1C, ATRAB2A, RAB2A, RABB1C, ATRAB-B1B, RAB-B1B   RAB GTPase homolog B1C   chr4:9644908-9646220 REVERSE LENGTH=211                                                                                                                                                                                   | 211 | 211 | 1.00E-121 | 100.0 | 97.6 | 99.1 |
| Rsa1.0_00524.1.g15419.t1 | hypothetical protein ARALYDRAFT_493160 [Arabidopsis lyrata subsp. lyrata] gi 332658457 gb AEE83857.1  RAB GTPase homolog B1C [Arabidopsis thaliana] gi 482553233 gb EOA17426.1                                                                                                                                                                                                                                                                                                          | 95  | 1529 | 9.00E-15  | 1609.5 | 36.8 | 53.7 | putative non-LTR retroelement reverse transcriptase  | gbpln | Arabidopsis thaliana | # # # # # # #                                                                                                                                                                                                                                                                                                                             |     |     |           |       |      |      |
| Rsa1.0_00524.1.g15419.t1 | hypothetical protein ARALYDRAFT_493160 [Arabidopsis lyrata subsp. lyrata] gi 332658457 gb AEE83857.1  RAB GTPase homolog B1C [Arabidopsis thaliana] gi 482553233 gb EOA17426.1                                                                                                                                                                                                                                                                                                          | 95  | 1529 | 9.00E-15  | 1609.5 | 36.8 | 53.7 | putative non-LTR retroelement reverse transcriptase  | gbpln | Arabidopsis thaliana | # # # # # # #                                                                                                                                                                                                                                                                                                                             |     |     |           |       |      |      |
| Rsa1.0_00524.1.g15420.t1 | gb AAC33226.1  putative non-LTR retroelement reverse transcriptase [Arabidopsis thaliana]                                                                                                                                                                                                                                                                                                                                                                                               | 95  | 1529 | 9.00E-15  | 1609.5 | 36.8 | 53.7 | putative non-LTR retroelement reverse transcriptase  | gbpln | Arabidopsis thaliana | # # # # # # #                                                                                                                                                                                                                                                                                                                             |     |     |           |       |      |      |
| Rsa1.0_00524.1.g15421.t1 | gb ABD65130.1  hypothetical protein 40.t00005 [Brassica oleracea]                                                                                                                                                                                                                                                                                                                                                                                                                       | 529 | 530  | 0         | 100.2  | 94.0 | 97.2 | hypothetical protein 40.t00005                       | gbpln | Brassica oleracea    | AT4G17210.1   Symbols:   Plant protein of unknown function (DUF827)   chr4:9652585-9654257 REVERSE LENGTH=527                                                                                                                                                                                                                             | 529 | 527 | 0         | 99.6  | 77.1 | 87.3 |
| Rsa1.0_00524.1.g15422.t1 | gb ABD65131.1  hypothetical protein 40.t00006 [Brassica oleracea]                                                                                                                                                                                                                                                                                                                                                                                                                       | 151 | 148  | 2.00E-73  | 98.0   | 95.4 | 97.4 | hypothetical protein 40.t00006                       | gbpln | Brassica oleracea    | AT4G17215.1   Symbols:   Pollen Ole e 1 allergen and extensin family protein   chr4:9655884-9656425 FORWARD LENGTH=150                                                                                                                                                                                                                    | 151 | 150 | 2.00E-52  | 99.3  | 75.5 | 82.1 |
| Rsa1.0_00524.1.g15421.t1 | gb ABD65109.1  Myosin II heavy chain-like domain containing protein [Brassica oleracea]                                                                                                                                                                                                                                                                                                                                                                                                 | 489 | 508  | 0         | 103.9  | 89.2 | 93.3 | Myosin II heavy chain-like domain containing protein | gbpln | Brassica oleracea    | AT4G17220.1   Symbols: ATMAP70-5, MAP70-5   microtubule-associated proteins 70-5   chr4:9657008-9659405 REVERSE LENGTH=513                                                                                                                                                                                                                | 489 | 513 | 0         | 104.9 | 87.7 | 93.7 |
| Rsa1.0_00524.1.g15422.t1 | gb ABD65133.1  hypothetical protein 40.t00008 [Brassica oleracea]                                                                                                                                                                                                                                                                                                                                                                                                                       | 733 | 742  | 0         | 101.2  | 85.3 | 89.5 | hypothetical protein 40.t00008                       | gbpln | Brassica oleracea    | AT4G17250.1   Symbols:   unknown protein; BEST Arabidopsis thaliana protein match is: unknown protein (TAIR:AT5G47580.1); Has 31 Blast hits to 31 proteins in 6 species: Archae - 0; Bacteria - 0; Metazoa - 0; Fungi - 0; Plants - 31; Viruses - 0; Other Eukaryotes - 0 (source: NCBI BLINK).   chr4:9671104-9673329 FORWARD LENGTH=741 | 733 | 741 | 0         | 101.1 | 80.2 | 87.3 |
| Rsa1.0_00524.1.g15423.t1 | gb ABD65134.1  L-lactate dehydrogenase, putative [Brassica oleracea]                                                                                                                                                                                                                                                                                                                                                                                                                    | 350 | 350  | 0         | 100.0  | 97.1 | 98.9 | L-lactate dehydrogenase, putative                    | gbpln | Brassica oleracea    | AT4G17260.1   Symbols:   Lactate/malate dehydrogenase family protein   chr4:9674057-9675309 FORWARD LENGTH=353                                                                                                                                                                                                                            | 350 | 353 | 0         | 100.9 | 93.4 | 96.3 |

|                          |                                                                                                                                                                                                                                                                                                                                                                                                                                                                                                                                                                                                                                                                                                                                                                                                                                                                                                                                                                                                                                 |     |     |           |       |      |       |                                        |       |                      |                                                                                                                   |     |     |           |       |      |       |
|--------------------------|---------------------------------------------------------------------------------------------------------------------------------------------------------------------------------------------------------------------------------------------------------------------------------------------------------------------------------------------------------------------------------------------------------------------------------------------------------------------------------------------------------------------------------------------------------------------------------------------------------------------------------------------------------------------------------------------------------------------------------------------------------------------------------------------------------------------------------------------------------------------------------------------------------------------------------------------------------------------------------------------------------------------------------|-----|-----|-----------|-------|------|-------|----------------------------------------|-------|----------------------|-------------------------------------------------------------------------------------------------------------------|-----|-----|-----------|-------|------|-------|
| Rsa1.0_00524.1.g15424.t1 | refNP_193460.1  putative MO25-like protein [Arabidopsis thaliana]<br>gi 15214078 sp Q9M0M4.1 MO25M_ARA TH RecName: Full=Putative MO25-like protein At4g17270<br>gi 14190519 gb AAK55740.1 AF380659.1 AT4g17270/di4670w [Arabidopsis thaliana] gi 7268479 emb CAB78730.1  putative protein [Arabidopsis thaliana] gi 15810067 gb AAL06959.1  AT4g17270/di4670w [Arabidopsis thaliana] gi 332658472 gb AEE83872.1  putative MO25-like protein [Arabidopsis thaliana]                                                                                                                                                                                                                                                                                                                                                                                                                                                                                                                                                              | 339 | 343 | 1.00E-180 | 101.2 | 91.4 | 96.2  | putative MO25-like protein             | gbpln | Arabidopsis thaliana | AT4G17270.1   Symbols:   Mo25 family protein   chr4:9676406-9678568 FORWARD LENGTH=343                            | 339 | 343 | 0         | 101.2 | 91.4 | 96.2  |
| Rsa1.0_00524.1.g15425.t2 | gb ABD65136.1  oxidoreductase family protein [Brassica oleracea]                                                                                                                                                                                                                                                                                                                                                                                                                                                                                                                                                                                                                                                                                                                                                                                                                                                                                                                                                                | 367 | 397 | 0         | 108.2 | 94.3 | 97.3  | oxidoreductase family protein          | gbpln | Brassica oleracea    | AT4G17370.1   Symbols:   Oxidoreductase family protein   chr4:9706188-9708142 FORWARD LENGTH=368                  | 367 | 368 | 0         | 100.3 | 88.8 | 93.2  |
| Rsa1.0_00524.1.g15426.t1 | refNP_193405.1  60S ribosomal protein L15-1 [Arabidopsis thaliana]<br>gi 297800374 ref XP_002868071.1  60S ribosomal protein L15 [Arabidopsis lyrata subsp. lyrata]<br>gi 3122673 sp O23515.1 RL151_ARATH RecName: Full=60S ribosomal protein L15-1<br>gi 13878179 gb AAK44167.1 AF370352.1 putative ribosomal protein [Arabidopsis thaliana] gi 2245027 emb CAB10447.1  ribosomal protein [Arabidopsis thaliana] gi 7268422 emb CAB78714.1  ribosomal protein [Arabidopsis thaliana]<br>gi 16604446 gb AAL24229.1  AT4g16720/di4385c [Arabidopsis thaliana] gi 1971559 gb AAL91619.1  AT4g16720/di4385c [Arabidopsis thaliana] gi 21592436 gb AAM64387.1  ribosomal protein [Arabidopsis thaliana] gi 22136774 gb AAM91731.1  putative ribosomal protein [Arabidopsis thaliana] gi 23505795 gb AAN28757.1  AT4g16720/di4385c [Arabidopsis thaliana] gi 297313907 gb EFH44330.1  60S ribosomal protein L15 [Arabidopsis lyrata subsp. lyrata]<br>gi 332658391 gb AEE83791.1  60S ribosomal protein L15-1 [Arabidopsis thaliana] | 204 | 204 | 1.00E-113 | 100.0 | 99.5 | 100.0 | 60S ribosomal protein L15-1            | gbpln | Arabidopsis lyrata   | AT4G16720.1   Symbols:   Ribosomal protein L23/L15e family protein   chr4:9400156-9401315 REVERSE LENGTH=204      | 204 | 204 | 1.00E-115 | 100.0 | 99.5 | 100.0 |
| Rsa1.0_00524.1.g15427.t1 | gb ABD65094.1  myb family transcription factor [Brassica oleracea]                                                                                                                                                                                                                                                                                                                                                                                                                                                                                                                                                                                                                                                                                                                                                                                                                                                                                                                                                              | 172 | 359 | 7.00E-76  | 208.7 | 87.2 | 91.3  | myb family transcription factor        | gbpln | Brassica oleracea    | AT5G47390.1   Symbols:   myb-like transcription factor family protein   chr5:19227001-19228546 FORWARD LENGTH=365 | 172 | 365 | 3.00E-46  | 212.2 | 65.1 | 77.9  |
| Rsa1.0_00524.1.g15428.t1 | gb ABD65094.1  myb family transcription factor [Brassica oleracea]                                                                                                                                                                                                                                                                                                                                                                                                                                                                                                                                                                                                                                                                                                                                                                                                                                                                                                                                                              | 340 | 359 | 1.00E-158 | 105.6 | 85.6 | 90.6  | myb family transcription factor        | gbpln | Brassica oleracea    | AT5G47390.1   Symbols:   myb-like transcription factor family protein   chr5:19227001-19228546 FORWARD LENGTH=365 | 340 | 365 | 1.00E-126 | 107.4 | 71.5 | 80.6  |
| Rsa1.0_00525.1.g15429.t1 | refXP_002887812.1  zinc-finger protein 1 [Arabidopsis lyrata subsp. lyrata]<br>gi 297333653 gb EFH64071.1  zinc-finger protein 1 [Arabidopsis lyrata subsp. lyrata]                                                                                                                                                                                                                                                                                                                                                                                                                                                                                                                                                                                                                                                                                                                                                                                                                                                             | 209 | 220 | 2.00E-81  | 105.3 | 80.9 | 88.5  | zinc-finger protein 1                  | gbpln | Arabidopsis lyrata   | AT1G80730.1   Symbols: ZFP1, ATZFP1   zinc-finger protein 1   chr1:30339493-30340179 REVERSE LENGTH=228           | 209 | 228 | 3.00E-82  | 109.1 | 80.9 | 88.0  |
| Rsa1.0_00525.1.g15430.t1 | refXP_002899277.1  hypothetical protein ARALYDRAFT_340150 [Arabidopsis lyrata subsp. lyrata]<br>gi 297335118 gb EFH65536.1  hypothetical protein ARALYDRAFT_340150 [Arabidopsis lyrata subsp. lyrata]                                                                                                                                                                                                                                                                                                                                                                                                                                                                                                                                                                                                                                                                                                                                                                                                                           | 244 | 242 | 1.00E-117 | 99.2  | 84.4 | 91.4  | hypothetical protein ARALYDRAFT_340150 | gbpln | Arabidopsis lyrata   | AT1G80720.1   Symbols:   Mitochondrial glycoprotein family protein   chr1:30336289-30337347 FORWARD LENGTH=190    | 244 | 190 | 2.00E-94  | 77.9  | 65.2 | 72.1  |
| Rsa1.0_00525.1.g15431.t1 | refXP_002897814.1  transducin family protein [Arabidopsis lyrata subsp. lyrata] gi 297333655 gb EFH64073.1  transducin family protein [Arabidopsis lyrata subsp. lyrata]                                                                                                                                                                                                                                                                                                                                                                                                                                                                                                                                                                                                                                                                                                                                                                                                                                                        | 973 | 520 | 1.00E-171 | 53.4  | 33.6 | 39.3  | transducin family protein              | gbpln | Arabidopsis lyrata   | AT1G80710.1   Symbols: DRS1   DROUGHT SENSITIVE 1   chr1:30333499-30335796 REVERSE LENGTH=516                     | 973 | 516 | 1.00E-169 | 53.0  | 33.1 | 38.5  |

|                          |                                                                                                                                                                                                                                                                                                                                                                                                                                    |     |     |           |       |      |      |                                                                                                                                                                                                           |       |                      |                                                                                                                                                                                                                                                                                                                                                                                                                                                                   |     |     |           |       |      |      |
|--------------------------|------------------------------------------------------------------------------------------------------------------------------------------------------------------------------------------------------------------------------------------------------------------------------------------------------------------------------------------------------------------------------------------------------------------------------------|-----|-----|-----------|-------|------|------|-----------------------------------------------------------------------------------------------------------------------------------------------------------------------------------------------------------|-------|----------------------|-------------------------------------------------------------------------------------------------------------------------------------------------------------------------------------------------------------------------------------------------------------------------------------------------------------------------------------------------------------------------------------------------------------------------------------------------------------------|-----|-----|-----------|-------|------|------|
| Rsa1.0_00525.1.g15432.t1 | ref XP_002889278.1  hypothetical protein ARALYDRAFT_477177 [Arabidopsis lyrata subsp. lyrata] gi 297335119 gb EFH65537.1  hypothetical protein ARALYDRAFT_477177 [Arabidopsis lyrata subsp. lyrata]                                                                                                                                                                                                                                | 222 | 217 | 2.00E-80  | 97.7  | 79.3 | 84.7 | hypothetical protein ARALYDRAFT_477177                                                                                                                                                                    | gbpln | Arabidopsis lyrata   | AT1G80980.1   Symbols:   unknown protein; FUNCTIONS IN: molecular function unknown; INVOLVED IN: biological process unknown; LOCATED IN: mitochondrion; BEST Arabidopsis thaliana protein match is: unknown protein (TAIR:AT1G80700.1); Has 477 Blast hits to 341 proteins in 85 species: Archae - 2; Bacteria - 44; Metazoa - 78; Fungi - 37; Plants - 42; Viruses - 0; Other Eukaryotes - 274 (source: NCBI BLINK).   chr1:30422184-30423440 REVERSE LENGTH=214 | 222 | 214 | 3.00E-79  | 96.4  | 76.6 | 83.3 |
| Rsa1.0_00525.1.g15433.t1 | gb EOA35675.1  hypothetical protein CARUB_v10020909mg [Capsella rubella]                                                                                                                                                                                                                                                                                                                                                           | 234 | 224 | 1.00E-107 | 95.7  | 86.8 | 91.5 | hypothetical protein CARUB_v10020909mg                                                                                                                                                                    | gbpln | Capsella rubella     | AT1G80690.1   Symbols:   PPPDE putative thiol peptidase family protein   chr1:30329283-30330524 REVERSE LENGTH=227                                                                                                                                                                                                                                                                                                                                                | 234 | 227 | 1.00E-104 | 97.0  | 88.0 | 92.7 |
| Rsa1.0_00525.1.g15434.t1 | gb AAF79835.1 AC026875_15 T6D22.19 [Arabidopsis thaliana]                                                                                                                                                                                                                                                                                                                                                                          | 370 | 745 | 1.00E-104 | 201.4 | 48.1 | 65.4 | T6D22.19                                                                                                                                                                                                  | gbpln | Arabidopsis thaliana | AT3G42170.1   Symbols:   BED zinc finger hAT family dimerisation domain   chr3:14321838-14323928 FORWARD LENGTH=696                                                                                                                                                                                                                                                                                                                                               | 370 | 696 | 1.00E-40  | 188.1 | 25.1 | 39.5 |
| Rsa1.0_00525.1.g15435.t2 | gb EOA31083.1  hypothetical protein CARUB_v10014234mg, partial [Capsella rubella]                                                                                                                                                                                                                                                                                                                                                  | 356 | 309 | 3.00E-25  | 86.8  | 26.4 | 43.8 | hypothetical protein CARUB_v10014234mg, partial                                                                                                                                                           | gbpln | Capsella rubella     | AT3G01280.1   Symbols:   VDACC1, ATVDACC1   voltage dependent anion channel 1   chr3:85754-87612 FORWARD LENGTH=276                                                                                                                                                                                                                                                                                                                                               | 356 | 276 | 1.00E-26  | 77.5  | 24.2 | 41.6 |
| Rsa1.0_00525.1.g15436.t1 | #                                                                                                                                                                                                                                                                                                                                                                                                                                  | #   | #   | #         | #     | #    | #    | -                                                                                                                                                                                                         | ----  | ----                 | #                                                                                                                                                                                                                                                                                                                                                                                                                                                                 | #   | #   | #         | #     | #    |      |
| Rsa1.0_00525.1.g15437.t1 | #                                                                                                                                                                                                                                                                                                                                                                                                                                  | #   | #   | #         | #     | #    | #    | -                                                                                                                                                                                                         | ----  | ----                 | #                                                                                                                                                                                                                                                                                                                                                                                                                                                                 | #   | #   | #         | #     | #    |      |
| Rsa1.0_00525.1.g15438.t1 | ref NP_178182.1  Rae1-like protein [Arabidopsis thaliana] gi 83305440 sp Q38942.2 RAE1L_ARATH RecName: Full=Rae1-like protein At1g80670 gi 6503279 gb AAF14655.1 AC011713.3 F23AS.2(form2) [Arabidopsis thaliana] gi 21593271 gb AAM65220.1  mRNA export protein, putative [Arabidopsis thaliana] gi 94442413 gb ABF18994.1  At1g80670 [Arabidopsis thaliana] gi 332198314 gb AEE36435.1  Rae1-like protein [Arabidopsis thaliana] | 345 | 349 | 0         | 101.2 | 93.6 | 97.7 | Rae1-like protein                                                                                                                                                                                         | gbpln | Arabidopsis thaliana | AT1G80670.1   Symbols:   Transducin/WD40 repeat-like superfamily protein   chr1:30320809-30323543 REVERSE LENGTH=349                                                                                                                                                                                                                                                                                                                                              | 345 | 349 | 0         | 101.2 | 93.6 | 97.7 |
| Rsa1.0_00525.1.g15439.t1 | gb EOA33270.1  hypothetical protein CARUB_v10022427mg [Capsella rubella]                                                                                                                                                                                                                                                                                                                                                           | 937 | 955 | 0         | 101.9 | 96.9 | 98.8 | hypothetical protein CARUB_v10022427mg                                                                                                                                                                    | gbpln | Capsella rubella     | AT1G80660.1   Symbols:   AHA9, HA9   H(+)-ATPase 9   chr1:30316227-30319948 REVERSE LENGTH=954                                                                                                                                                                                                                                                                                                                                                                    | 937 | 954 | 0         | 101.8 | 95.9 | 98.4 |
| Rsa1.0_00525.1.g15440.t1 | ref XP_002889280.1  hypothetical protein ARALYDRAFT_316895 [Arabidopsis lyrata subsp. lyrata] gi 297335121 gb EFH65539.1  hypothetical protein ARALYDRAFT_316895 [Arabidopsis lyrata subsp. lyrata]                                                                                                                                                                                                                                | 132 | 190 | 9.00E-32  | 143.9 | 58.3 | 64.4 | hypothetical protein ARALYDRAFT_316895                                                                                                                                                                    | gbpln | Arabidopsis lyrata   | AT1G80650.1   Symbols:   RTL1   RNAse THREE-like protein 1   chr1:30314609-30315600 FORWARD LENGTH=198                                                                                                                                                                                                                                                                                                                                                            | 132 | 198 | 9.00E-32  | 150.0 | 55.3 | 62.1 |
| Rsa1.0_00525.1.g15441.t1 | gb EOA35187.1  hypothetical protein CARUB_v10020332mg [Capsella rubella]                                                                                                                                                                                                                                                                                                                                                           | 419 | 428 | 0         | 102.1 | 82.1 | 88.1 | hypothetical protein CARUB_v10020332mg                                                                                                                                                                    | gbpln | Capsella rubella     | AT1G80640.1   Symbols:   Protein kinase superfamily protein   chr1:30311979-30314238 FORWARD LENGTH=427                                                                                                                                                                                                                                                                                                                                                           | 419 | 427 | 0         | 101.9 | 81.9 | 89.0 |
| Rsa1.0_00525.1.g15442.t1 | ref XP_002897817.1  leucine-rich repeat family protein [Arabidopsis lyrata subsp. lyrata] gi 297333658 gb EFH64076.1  leucine-rich repeat family protein [Arabidopsis lyrata subsp. lyrata]                                                                                                                                                                                                                                        | 559 | 577 | 0         | 103.2 | 70.8 | 81.6 | leucine-rich repeat family protein                                                                                                                                                                        | gbpln | Arabidopsis lyrata   | AT1G80630.1   Symbols:   RNI-like superfamily protein   chr1:30308879-30310615 REVERSE LENGTH=578                                                                                                                                                                                                                                                                                                                                                                 | 559 | 578 | 0         | 103.4 | 69.1 | 80.7 |
| Rsa1.0_00525.1.g15443.t1 | gb EOA35169.1  hypothetical protein CARUB_v10020315mg [Capsella rubella]                                                                                                                                                                                                                                                                                                                                                           | 403 | 435 | 1.00E-145 | 107.9 | 74.4 | 81.9 | hypothetical protein CARUB_v10020315mg                                                                                                                                                                    | gbpln | Capsella rubella     | AT1G80620.1   Symbols:   S15/NS1, RNA-binding protein   chr1:30305404-30307182 FORWARD LENGTH=414                                                                                                                                                                                                                                                                                                                                                                 | 403 | 414 | 2.33E-156 | 102.7 | 73.0 | 81.9 |
| Rsa1.0_00525.1.g15444.t1 | gb EOA35732.1  hypothetical protein CARUB_v10020966mg [Capsella rubella]                                                                                                                                                                                                                                                                                                                                                           | 197 | 203 | 2.00E-75  | 103.0 | 79.2 | 86.3 | hypothetical protein CARUB_v10020966mg                                                                                                                                                                    | gbpln | Capsella rubella     | AT1G80610.1   Symbols:   unknown protein; BEST Arabidopsis thaliana protein match is: unknown protein (TAIR:AT1G5800.1); Has 73 Blast hits to 69 proteins in 15 species: Archae - 0; Bacteria - 0; Metazoa - 2; Fungi - 2; Plants - 55; Viruses - 0; Other Eukaryotes - 14 (source: NCBI BLINK).   chr1:30301204-30303960 REVERSE LENGTH=211                                                                                                                      | 197 | 211 | 3.00E-73  | 107.1 | 77.7 | 86.8 |
| Rsa1.0_00525.1.g15445.t1 | sp P29102.1 LEU3_BRANA RecName: Full=3-isopropylmalate dehydrogenase, chloroplastic; Short=3-IPM-DH; Short=IMDH; AltName: Full=Beta-IPM dehydrogenase; Flags: Precursor gi 17827 emb CAA42596.1  3-isopropylmalate dehydrogenase [Brassica napus]                                                                                                                                                                                  | 401 | 406 | 0         | 101.2 | 91.0 | 93.8 | RecName: Full=3-isopropylmalate dehydrogenase, chloroplastic; Short=3-IPM-DH; Short=IMDH; AltName: Full=Beta-IPM dehydrogenase; Flags: Precursor gi 17827 emb CAA42596.1  3-isopropylmalate dehydrogenase | gbpln | Brassica napus       | AT1G80560.1   Symbols:   ATIM2, IMD2   isopropylmalate dehydrogenase 2   chr1:30287833-30290126 FORWARD LENGTH=405                                                                                                                                                                                                                                                                                                                                                | 401 | 405 | 0         | 101.0 | 88.5 | 91.8 |

|                          |                                                                                                                                                                                                                                                                                                   |     |      |           |        |      |      |                                                     |       |                      |                                                                                                                                                                                                                                                                                                                                                                                                                                                                                                                                                                                                                                                                    |     |      |           |       |      |      |
|--------------------------|---------------------------------------------------------------------------------------------------------------------------------------------------------------------------------------------------------------------------------------------------------------------------------------------------|-----|------|-----------|--------|------|------|-----------------------------------------------------|-------|----------------------|--------------------------------------------------------------------------------------------------------------------------------------------------------------------------------------------------------------------------------------------------------------------------------------------------------------------------------------------------------------------------------------------------------------------------------------------------------------------------------------------------------------------------------------------------------------------------------------------------------------------------------------------------------------------|-----|------|-----------|-------|------|------|
| Rsa1.0_00525.1.g15446.t1 | gb EOA35156.1  hypothetical protein CARUB_v10020295mg [Capsella rubella]                                                                                                                                                                                                                          | 448 | 447  | 0         | 99.8   | 82.1 | 91.1 | hypothetical protein CARUB_v10020295mg              | gbpln | Capsella rubella     | AT1G80550.1   Symbols:   Pentatricopeptide repeat (PPR) superfamily protein   chr1:30285358-30286704 REVERSE LENGTH=448                                                                                                                                                                                                                                                                                                                                                                                                                                                                                                                                            | 448 | 448  | 0         | 100.0 | 81.3 | 90.8 |
| Rsa1.0_00525.1.g15447.t3 | gb EOA35018.1  hypothetical protein CARUB_v10020121mg [Capsella rubella]                                                                                                                                                                                                                          | 655 | 535  | 0         | 81.7   | 52.8 | 55.6 | hypothetical protein CARUB_v10020121mg              | gbpln | Capsella rubella     | AT1G80540.1   Symbols:   unknown protein; BEST Arabidopsis thaliana protein match is: unknown protein (TAIR:AT2G12400.1). Has 175 Blast hits to 171 proteins in 20 species: Archae - 0; Bacteria - 0; Metazoa - 2; Fungi - 0; Plants - 171; Viruses - 0; Other Eukaryotes - 2 (source: NCBI BLink).   chr1:30281638-30284258 REVERSE LENGTH=538                                                                                                                                                                                                                                                                                                                    | 655 | 538  | 0         | 82.1  | 51.8 | 55.0 |
| Rsa1.0_00525.1.g15448.t1 | ref XP_002897824.1  hypothetical protein ARALYDRAFT_895939 [Arabidopsis lyrata subsp. lyrata]   g 297333665 gb EFH64083.1  hypothetical protein ARALYDRAFT_895939 [Arabidopsis lyrata subsp. lyrata]                                                                                              | 559 | 563  | 0         | 100.7  | 81.4 | 92.3 | hypothetical protein ARALYDRAFT_895939              | gbpln | Arabidopsis lyrata   | AT1G80530.1   Symbols:   Major facilitator superfamily protein   chr1:30278224-30280247 REVERSE LENGTH=561                                                                                                                                                                                                                                                                                                                                                                                                                                                                                                                                                         | 559 | 561  | 0         | 100.4 | 80.5 | 91.4 |
| Rsa1.0_00525.1.g15449.t1 | gb EOA36532.1  hypothetical protein CARUB_v10011581mg [Capsella rubella]                                                                                                                                                                                                                          | 419 | 425  | 1.00E-100 | 101.4  | 54.2 | 67.5 | hypothetical protein CARUB_v10011581mg              | gbpln | Capsella rubella     | AT1G25150.1   Symbols:   F-box family protein   chr1:8821027-8822328 FORWARD LENGTH=433                                                                                                                                                                                                                                                                                                                                                                                                                                                                                                                                                                            | 419 | 433  | 1.00E-101 | 103.3 | 52.5 | 65.4 |
| Rsa1.0_00525.1.g15450.t1 | ref NP_178167.1  Sterile alpha motif (SAM) domain-containing protein [Arabidopsis thaliana]   g 6730731 gb AAF27121.1 AC018849.9 hypothetical protein: 42149-41571 [Arabidopsis thaliana]   g 332198294 gb AEE36415.1  Sterile alpha motif (SAM) domain-containing protein [Arabidopsis thaliana] | 183 | 192  | 1.00E-60  | 104.9  | 74.9 | 82.0 | Sterile alpha motif (SAM) domain-containing protein | gbpln | Arabidopsis thaliana | AT1G80520.1   Symbols:   Sterile alpha motif (SAM) domain-containing protein   chr1:30276481-30277059 FORWARD LENGTH=192                                                                                                                                                                                                                                                                                                                                                                                                                                                                                                                                           | 183 | 192  | 5.00E-63  | 104.9 | 74.9 | 82.0 |
| Rsa1.0_00526.1.g15451.t1 | gb EOA12787.1  hypothetical protein CARUB_v10025731mg [Capsella rubella]                                                                                                                                                                                                                          | 184 | 2732 | 4.00E-69  | 1484.8 | 77.2 | 84.8 | hypothetical protein CARUB_v10025731mg              | gbpln | Capsella rubella     | AT4G36150.1   Symbols:   Disease resistance protein (TIR-NBS-LRR class) family   chr4:17104776-17108711 FORWARD LENGTH=1179                                                                                                                                                                                                                                                                                                                                                                                                                                                                                                                                        | 184 | 1179 | 2.00E-43  | 640.8 | 53.8 | 70.1 |
| Rsa1.0_00526.1.g15452.t1 | ref XP_002891891.1  hypothetical protein ARALYDRAFT_337726 [Arabidopsis lyrata subsp. lyrata]   g 297337733 gb EFH68150.1  hypothetical protein ARALYDRAFT_337726 [Arabidopsis lyrata subsp. lyrata]                                                                                              | 183 | 183  | 1.00E-63  | 100.0  | 72.7 | 82.0 | hypothetical protein ARALYDRAFT_337726              | gbpln | Arabidopsis lyrata   | AT1G54400.1   Symbols:   HSP20-like chaperones superfamily protein   chr1:20307667-20308768 FORWARD LENGTH=183                                                                                                                                                                                                                                                                                                                                                                                                                                                                                                                                                     | 183 | 183  | 1.00E-61  | 100.0 | 71.0 | 80.9 |
| Rsa1.0_00526.1.g15453.t1 | ref NP_199342.2  RING/U-box domain-containing protein [Arabidopsis thaliana]   g 58652066 gb AAW80858.1  At5g45290 [Arabidopsis thaliana]   g 58652090 gb AAW80870.1  At5g45290 [Arabidopsis thaliana]   g 332007844 gb AED95227.1  RING/U-box domain-containing protein [Arabidopsis thaliana]   | 509 | 545  | 0         | 107.1  | 79.6 | 86.4 | RING/U-box domain-containing protein                | gbpln | Arabidopsis thaliana | AT5G45290.1   Symbols:   RING/U-box superfamily protein   chr5:18350011-18352092 REVERSE LENGTH=545                                                                                                                                                                                                                                                                                                                                                                                                                                                                                                                                                                | 509 | 545  | 0         | 107.1 | 79.6 | 86.4 |
| Rsa1.0_00526.1.g15454.t1 | gb ABD84941.1  Ulp1 protease family protein [Brassica oleracea]                                                                                                                                                                                                                                   | 129 | 871  | 3.00E-33  | 675.2  | 57.4 | 71.3 | Ulp1 protease family protein                        | gbpln | Brassica oleracea    | AT1G31150.1   Symbols:   Domain of unknown function (DUF1985)   chr1:1120097-1122412 FORWARD LENGTH=673                                                                                                                                                                                                                                                                                                                                                                                                                                                                                                                                                            | 129 | 673  | 3.00E-17  | 521.7 | 36.4 | 55.8 |
| Rsa1.0_00526.1.g15455.t1 | gb EOA14484.1  hypothetical protein CARUB_v10027699mg [Capsella rubella]                                                                                                                                                                                                                          | 276 | 198  | 2.00E-75  | 71.7   | 49.3 | 55.1 | hypothetical protein CARUB_v10027699mg              | gbpln | Capsella rubella     | AT5G45320.1   Symbols:   FUNCTIONS IN: molecular_function unknown; INVOLVED IN: biological_process unknown; LOCATED IN: endomembrane system; EXPRESSED IN: inflorescence meristem, root, flower; EXPRESSED DURING: petal differentiation and expansion stage; CONTAINS InterPro DOMAIN/s: Late embryogenesis abundant protein, group 2 (InterPro:IPR004864); BEST Arabidopsis thaliana protein match is: unknown protein (TAIR:AT3G26350.1). Has 253 Blast hits to 253 proteins in 16 species: Archae - 0; Bacteria - 0; Metazoa - 0; Fungi - 0; Plants - 253; Viruses - 0; Other Eukaryotes - 0 (source: NCBI BLink).   chr5:18362354-18363053 REVERSE LENGTH=198 | 276 | 198  | 3.00E-71  | 71.7  | 45.3 | 51.1 |
| Rsa1.0_00526.1.g15456.t1 | #                                                                                                                                                                                                                                                                                                 | #   | #    | #         | #      | #    | #    | -                                                   | ----  | ----                 | #                                                                                                                                                                                                                                                                                                                                                                                                                                                                                                                                                                                                                                                                  | #   | #    | #         | #     | #    | #    |
| Rsa1.0_00526.1.g15457.t1 | #                                                                                                                                                                                                                                                                                                 | #   | #    | #         | #      | #    | #    | -                                                   | ----  | ----                 | #                                                                                                                                                                                                                                                                                                                                                                                                                                                                                                                                                                                                                                                                  | #   | #    | #         | #     | #    | #    |

|                          |                                                                                                                                                                                                               |     |     |           |       |      |      |                                                 |       |                      |                                                                                                                                                                                                                                                                                                                                                                                                                                                                                                                                                                              |     |     |           |       |      |      |
|--------------------------|---------------------------------------------------------------------------------------------------------------------------------------------------------------------------------------------------------------|-----|-----|-----------|-------|------|------|-------------------------------------------------|-------|----------------------|------------------------------------------------------------------------------------------------------------------------------------------------------------------------------------------------------------------------------------------------------------------------------------------------------------------------------------------------------------------------------------------------------------------------------------------------------------------------------------------------------------------------------------------------------------------------------|-----|-----|-----------|-------|------|------|
| Rsa1.0_00526.1.g15458.t1 | ref XP_002865545.1  hypothetical protein ARALYDRAFT_494804 [Arabidopsis lyrata subsp. lyrata] gi 297311380 gb EFH41804.1                                                                                      | 389 | 390 | 0         | 100.3 | 91.5 | 96.1 | hypothetical protein ARALYDRAFT_494804          | gbpln | Arabidopsis lyrata   | AT5G42250.1   Symbols:   Zinc-binding alcohol dehydrogenase family protein   chr5:16894087-16897450 FORWARD LENGTH=390                                                                                                                                                                                                                                                                                                                                                                                                                                                       | 389 | 390 | 0         | 100.3 | 91.5 | 95.9 |
| Rsa1.0_00526.1.g15459.t1 | #                                                                                                                                                                                                             | #   | #   | #         | #     | #    | -    | ----                                            | ----  | #                    | #                                                                                                                                                                                                                                                                                                                                                                                                                                                                                                                                                                            | #   | #   | #         | #     | #    |      |
| Rsa1.0_00526.1.g15460.t1 | ref XP_002863486.1  F-box family protein [Arabidopsis lyrata subsp. lyrata] gi 297309321 gb EFH39745.1  F-box family protein [Arabidopsis lyrata subsp. lyrata]                                               | 315 | 317 | 1.00E-136 | 100.6 | 79.4 | 88.3 | F-box family protein                            | gbpln | Arabidopsis lyrata   | AT5G45360.1   Symbols:   F-box family protein   chr5:18384783-18386670 REVERSE LENGTH=316                                                                                                                                                                                                                                                                                                                                                                                                                                                                                    | 315 | 316 | 1.00E-136 | 100.3 | 76.8 | 87.6 |
| Rsa1.0_00526.1.g15461.t1 | ref XP_002874096.1  aspartyl protease family protein [Arabidopsis lyrata subsp. lyrata] gi 297319933 gb EFH50355.1  aspartyl protease family protein [Arabidopsis lyrata subsp. lyrata]                       | 189 | 493 | 4.00E-23  | 260.8 | 32.8 | 40.7 | aspartyl protease family protein                | gbpln | Arabidopsis lyrata   | AT5G22850.1   Symbols:   Eukaryotic aspartyl protease family protein   chr5:7633717-7636298 REVERSE LENGTH=493                                                                                                                                                                                                                                                                                                                                                                                                                                                               | 189 | 493 | 3.00E-25  | 260.8 | 32.3 | 40.7 |
| Rsa1.0_00526.1.g15462.t1 | #                                                                                                                                                                                                             | #   | #   | #         | #     | #    | -    | ----                                            | ----  | #                    | #                                                                                                                                                                                                                                                                                                                                                                                                                                                                                                                                                                            | #   | #   | #         | #     | #    |      |
| Rsa1.0_00526.1.g15463.t1 | dbj BAA82068.1  nClpP4 [Arabidopsis thaliana]                                                                                                                                                                 | 293 | 299 | 1.00E-145 | 102.0 | 87.7 | 88.4 | nClpP4                                          | gbpln | Arabidopsis thaliana | AT5G45390.1   Symbols: CLPP4, NCLPP4   CLP protease P4   chr5:18396351-18397586 FORWARD LENGTH=292                                                                                                                                                                                                                                                                                                                                                                                                                                                                           | 293 | 292 | 1.00E-147 | 99.7  | 87.7 | 88.4 |
| Rsa1.0_00526.1.g15464.t2 | gb EOA13618.1  hypothetical protein CARUB_v10026685mg [Capsella rubella] gi 482549425 gb EOA13619.1  hypothetical protein CARUB_v10026685mg [Capsella rubella]                                                | 204 | 353 | 9.00E-43  | 173.0 | 59.3 | 65.2 | hypothetical protein CARUB_v10026685mg          | gbpln | Capsella rubella     | AT5G45410.3   Symbols:   unknown protein; FUNCTIONS IN: molecular.function unknown; INVOLVED IN: biological.process unknown; LOCATED IN: cellular.component unknown; EXPRESSED IN: 24 plant structures; EXPRESSED DURING: 15 growth stages; BEST Arabidopsis thaliana protein match is: unknown protein (TAIR:AT4G25030.2); Has 124 Blast hits to 124 proteins in 34 species: Archae - 2; Bacteria - 31; Metazoa - 0; Fungi - 0; Plants - 91; Viruses - 0; Other Eukaryotes - 0 (source: NCBI BLINK).   chr5:18402071-18403282 REVERSE LENGTH=342                            | 204 | 342 | 3.00E-37  | 167.6 | 52.0 | 59.8 |
| Rsa1.0_00526.1.g15465.t1 | dbj BAJ34628.1  unnamed protein product [Thellungiella halophila]                                                                                                                                             | 299 | 314 | 1.00E-135 | 105.0 | 83.9 | 91.3 | unnamed protein product                         | ----  | ----                 | AT5G45420.1   Symbols:   Duplicated homeodomain-like superfamily protein   chr5:18405668-18406597 REVERSE LENGTH=309                                                                                                                                                                                                                                                                                                                                                                                                                                                         | 299 | 309 | 1.00E-110 | 103.3 | 77.9 | 87.0 |
| Rsa1.0_00526.1.g15466.t1 | gb EOA14350.1  hypothetical protein CARUB_v10027531mg [Capsella rubella]                                                                                                                                      | 217 | 493 | 1.00E-116 | 227.2 | 91.2 | 94.9 | hypothetical protein CARUB_v10027531mg          | gbpln | Capsella rubella     | AT5G45430.1   Symbols:   Protein kinase superfamily protein   chr5:18409200-18411711 FORWARD LENGTH=499                                                                                                                                                                                                                                                                                                                                                                                                                                                                      | 217 | 499 | 1.00E-118 | 230.0 | 91.2 | 94.5 |
| Rsa1.0_00527.1.g15467.t1 | ref XP_002869016.1  hypothetical protein ARALYDRAFT_328081 [Arabidopsis lyrata subsp. lyrata] gi 297314852 gb EFH45275.1  hypothetical protein ARALYDRAFT_328081 [Arabidopsis lyrata subsp. lyrata]           | 668 | 726 | 0         | 108.7 | 79.8 | 85.6 | hypothetical protein ARALYDRAFT_328081          | gbpln | Arabidopsis lyrata   | AT4G36870.2   Symbols: BLH2, SAW1   BEL1-like homeodomain 2   chr4:17369423-17373723 FORWARD LENGTH=739                                                                                                                                                                                                                                                                                                                                                                                                                                                                      | 668 | 739 | 0         | 110.6 | 79.5 | 85.3 |
| Rsa1.0_00527.1.g15468.t1 | #                                                                                                                                                                                                             | #   | #   | #         | #     | #    | -    | ----                                            | ----  | #                    | #                                                                                                                                                                                                                                                                                                                                                                                                                                                                                                                                                                            | #   | #   | #         | #     | #    |      |
| Rsa1.0_00527.1.g15469.t1 | gb EOA15637.1  hypothetical protein CARUB_v10005881mg [Capsella rubella]                                                                                                                                      | 150 | 173 | 3.00E-59  | 115.3 | 84.0 | 86.7 | hypothetical protein CARUB_v10005881mg          | gbpln | Capsella rubella     | AT4G37240.1   Symbols:   unknown protein; FUNCTIONS IN: molecular.function unknown; INVOLVED IN: N-terminal protein myristoylation; LOCATED IN: cellular.component unknown; EXPRESSED IN: 22 plant structures; EXPRESSED DURING: 13 growth stages; BEST Arabidopsis thaliana protein match is: unknown protein (TAIR:AT2G23690.1); Has 30201 Blast hits to 17822 proteins in 780 species: Archae - 12; Bacteria - 1396; Metazoa - 17338; Fungi - 3422; Plants - 5037; Viruses - 0; Other Eukaryotes - 2996 (source: NCBI BLINK).   chr4:17524546-17525052 FORWARD LENGTH=168 | 150 | 168 | 7.00E-55  | 112.0 | 80.0 | 85.3 |
| Rsa1.0_00527.1.g15470.t1 | gb ABY86895.1  stress responsive protein [Eutrema halophilum]                                                                                                                                                 | 203 | 203 | 1.00E-100 | 100.0 | 86.7 | 93.1 | stress responsive protein                       | gbpln | Eutrema halophilum   | AT4G37220.1   Symbols:   Cold acclimation protein WCOR413 family   chr4:17515106-17515969 FORWARD LENGTH=202                                                                                                                                                                                                                                                                                                                                                                                                                                                                 | 203 | 202 | 1.00E-92  | 99.5  | 81.3 | 89.7 |
| Rsa1.0_00527.1.g15471.t2 | ref XP_002866981.1  tetratricopeptide repeat-containing protein [Arabidopsis lyrata subsp. lyrata] gi 297312817 gb EFH43240.1  tetratricopeptide repeat-containing protein [Arabidopsis lyrata subsp. lyrata] | 485 | 498 | 0         | 102.7 | 79.4 | 86.0 | tetratricopeptide repeat-containing protein     | gbpln | Arabidopsis lyrata   | AT4G37210.1   Symbols:   Tetratricopeptide repeat (TPR)-like superfamily protein   chr4:17512376-17514421 FORWARD LENGTH=492                                                                                                                                                                                                                                                                                                                                                                                                                                                 | 485 | 492 | 0         | 101.4 | 77.7 | 83.7 |
| Rsa1.0_00527.1.g15472.t1 | gb EOA16738.1  hypothetical protein CARUB_v10004940mg, partial [Capsella rubella]                                                                                                                             | 326 | 409 | 1.00E-121 | 125.5 | 78.2 | 85.9 | hypothetical protein CARUB_v10004940mg, partial | gbpln | Capsella rubella     | AT4G37180.1   Symbols:   Homeodomain-like superfamily protein   chr4:17504648-17506107 FORWARD LENGTH=356                                                                                                                                                                                                                                                                                                                                                                                                                                                                    | 326 | 356 | 1.00E-119 | 109.2 | 77.3 | 84.4 |

|                          |                                                                                                                                                                                                                                                                                                                                                                                                                                                                                                                                                                                                                                                                                                                                                                                                                                                                                                                                                                                                                                                  |      |      |           |       |      |      |                                                 |       |                      |                                                                                                                                                                                                                                                                                                                                                                                                                                                                   |      |      |           |       |      |      |
|--------------------------|--------------------------------------------------------------------------------------------------------------------------------------------------------------------------------------------------------------------------------------------------------------------------------------------------------------------------------------------------------------------------------------------------------------------------------------------------------------------------------------------------------------------------------------------------------------------------------------------------------------------------------------------------------------------------------------------------------------------------------------------------------------------------------------------------------------------------------------------------------------------------------------------------------------------------------------------------------------------------------------------------------------------------------------------------|------|------|-----------|-------|------|------|-------------------------------------------------|-------|----------------------|-------------------------------------------------------------------------------------------------------------------------------------------------------------------------------------------------------------------------------------------------------------------------------------------------------------------------------------------------------------------------------------------------------------------------------------------------------------------|------|------|-----------|-------|------|------|
| Rsa1.0_00527.1.g15473.t1 | ref NP_195430.2  hydroxyproline-rich glycoprotein family protein [Arabidopsis thaliana] gi 20260346 gb AAM13071.1  unknown protein [Arabidopsis thaliana] gi 31711924 gb AAP68318.1  At4g37130 [Arabidopsis thaliana] gi 332661357 gb AEE86757.1  hydroxyproline-rich glycoprotein family protein [Arabidopsis thaliana]                                                                                                                                                                                                                                                                                                                                                                                                                                                                                                                                                                                                                                                                                                                         | 472  | 513  | 1.00E-152 | 108.7 | 66.5 | 75.0 | hydroxyproline-rich glycoprotein family protein | gbpln | Arabidopsis thaliana | AT4G37130.1   Symbols:   hydroxyproline-rich glycoprotein family protein   chr4:17489567-17491773 FORWARD LENGTH=513                                                                                                                                                                                                                                                                                                                                              | 472  | 513  | 1.00E-155 | 108.7 | 66.5 | 75.0 |
| Rsa1.0_00527.1.g15474.t1 | ref XP_002866975.1  hypothetical protein ARALYDRAFT_912652 [Arabidopsis lyrata subsp. lyrata] gi 29731281 gb EFH43234.1  hypothetical protein ARALYDRAFT_912652 [Arabidopsis lyrata subsp. lyrata]                                                                                                                                                                                                                                                                                                                                                                                                                                                                                                                                                                                                                                                                                                                                                                                                                                               | 190  | 188  | 4.00E-65  | 98.9  | 76.3 | 86.3 | hypothetical protein ARALYDRAFT_912652          | gbpln | Arabidopsis lyrata   | AT4G37090.1   Symbols:   unknown protein; FUNCTIONS IN: molecular_function unknown; LOCATED IN: biological_process unknown; EXPRESSED IN: 23 plant structures; EXPRESSED DURING: 13 growth stages; Has 30201 Blast hits to 17322 proteins in 780 species: Archae - 12; Bacteria - 1396; Metazoa - 17338; Fungi - 3422; Plants - 5037; Viruses - 0; Other Eukaryotes - 2996 (source: NCBI BLINK)   chr4:17477338-17478559 FORWARD LENGTH=186                       | 190  | 186  | 1.00E-58  | 97.9  | 73.2 | 82.1 |
| Rsa1.0_00527.1.g15475.t1 | ref NP_974698.1  uncharacterized protein [Arabidopsis thaliana] gi 334187237 ref NP_001190943.1  uncharacterized protein [Arabidopsis thaliana] gi 332661348 gb AEE86748.1  uncharacterized protein AT4G37080 [Arabidopsis thaliana] gi 332661350 gb AEE86750.1  uncharacterized protein AT4G37080 [Arabidopsis thaliana] ref NP_568014.1  methionine aminopeptidase 1D [Arabidopsis thaliana] gi 75172582 sp Q9FV50.1 AMP1D_ARAT H_RecName: Full=Methionine aminopeptidase 1D chloroplastic/mitochondrial; Short=MAP1D; Short=MetAP 1D; AltName: Full=Peptidase M 1D; Flags: Precursor gi 11320960 gb AAG33977.1 AF250963.1 methionine aminopeptidase-like protein [Arabidopsis thaliana] gi 21553973 gb AAM63054.1  methionyl aminopeptidase-like protein [Arabidopsis thaliana] gi 26451668 dbj BAC42930.1  putative ap2 methionine aminopeptidase [Arabidopsis thaliana] gi 28973551 gb AAO64100.1  putative methionyl aminopeptidase [Arabidopsis thaliana] gi 332661340 gb AEE86740.1  methionine aminopeptidase 1D [Arabidopsis thaliana] | 565  | 610  | 0         | 108.0 | 89.0 | 93.8 | uncharacterized protein                         | gbpln | Arabidopsis thaliana | AT4G37080.3   Symbols:   Protein of unknown function. DUF547   chr4:17473719-17476716 FORWARD LENGTH=610                                                                                                                                                                                                                                                                                                                                                          | 565  | 610  | 0         | 108.0 | 89.0 | 93.8 |
| Rsa1.0_00527.1.g15476.t3 | ref NP_195420.2  uncharacterized protein [Arabidopsis thaliana] gi 61742737 gb AAX55189.1  hypothetical protein At4g37030 [Arabidopsis thaliana] gi 332661339 gb AEE86739.1  uncharacterized protein AT4G37030 [Arabidopsis thaliana]                                                                                                                                                                                                                                                                                                                                                                                                                                                                                                                                                                                                                                                                                                                                                                                                            | 148  | 350  | 3.00E-37  | 236.5 | 55.4 | 64.9 | methionine aminopeptidase 1D                    | gbpln | Arabidopsis thaliana | AT4G37040.1   Symbols: MAP1D   methionine aminopeptidase 1D   chr4:17455175-17457085 FORWARD LENGTH=350                                                                                                                                                                                                                                                                                                                                                           | 148  | 350  | 7.00E-40  | 236.5 | 55.4 | 64.9 |
| Rsa1.0_00527.1.g15477.t1 | ref NP_179024.1  TIR-NBS-LRR class disease resistance protein [Arabidopsis thaliana] gi 330251184 gb AEC06278.1  TIR-NBS-LRR class disease resistance protein [Arabidopsis thaliana]                                                                                                                                                                                                                                                                                                                                                                                                                                                                                                                                                                                                                                                                                                                                                                                                                                                             | 1091 | 1215 | 0         | 111.4 | 55.3 | 69.2 | TIR-NBS-LRR class disease resistance protein    | gbpln | Arabidopsis thaliana | AT2G14080.1   Symbols:   Disease resistance protein (TIR-NBS-LRR class) family   chr2:5925225-5929600 FORWARD LENGTH=1215                                                                                                                                                                                                                                                                                                                                         | 1091 | 1215 | 0         | 111.4 | 55.3 | 69.2 |
| Rsa1.0_00527.1.g15478.t1 | ref NP_195420.2  uncharacterized protein [Arabidopsis thaliana] gi 61742737 gb AAX55189.1  hypothetical protein At4g37030 [Arabidopsis thaliana] gi 332661339 gb AEE86739.1  uncharacterized protein AT4G37030 [Arabidopsis thaliana]                                                                                                                                                                                                                                                                                                                                                                                                                                                                                                                                                                                                                                                                                                                                                                                                            | 780  | 569  | 0         | 72.9  | 65.8 | 68.7 | uncharacterized protein                         | gbpln | Arabidopsis thaliana | AT4G37030.1   Symbols:   unknown protein; FUNCTIONS IN: molecular_function unknown; INVOLVED IN: biological_process unknown; LOCATED IN: endomembrane system; BEST Arabidopsis thaliana protein match is: unknown protein (TAIR:AT4G12680.1); Has 101 Blast hits to 99 proteins in 12 species: Archae - 0; Bacteria - 0; Metazoa - 0; Fungi - 0; Plants - 101; Viruses - 0; Other Eukaryotes - 0 (source: NCBI BLINK)   chr4:17452150-17454629 FORWARD LENGTH=569 | 780  | 569  | 0         | 72.9  | 65.8 | 68.7 |
| Rsa1.0_00527.1.g15479.t1 | ref NP_568013.1  uncharacterized protein [Arabidopsis thaliana] gi 11782152 gb AAG40354.1 AF325002.1 AT4g37020 [Arabidopsis thaliana] gi 110736928 dbj BAF00421.1  hypothetical protein [Arabidopsis thaliana] gi 332661339 gb AEE86736.1  uncharacterized protein AT4G37020 [Arabidopsis thaliana]                                                                                                                                                                                                                                                                                                                                                                                                                                                                                                                                                                                                                                                                                                                                              | 217  | 212  | 4.00E-95  | 97.7  | 87.1 | 93.1 | uncharacterized protein                         | gbpln | Arabidopsis thaliana | AT4G37020.1   Symbols:   BEST Arabidopsis thaliana protein match is: eukaryotic initiation factor 4A-III (TAIR:AT3G19760.1); Has 30201 Blast hits to 17322 proteins in 780 species: Archae - 12; Bacteria - 1396; Metazoa - 17338; Fungi - 3422; Plants - 5037; Viruses - 0; Other Eukaryotes - 2996 (source: NCBI BLINK)   chr4:17445778-17447135 FORWARD LENGTH=212                                                                                             | 217  | 212  | 1.00E-97  | 97.7  | 87.1 | 93.1 |

|                          |                                                                                                                                                                                                                                                                                                                                                                            |      |      |           |       |      |      |                                                 |       |                      |                                                                                                                                               |      |      |           |       |      |      |
|--------------------------|----------------------------------------------------------------------------------------------------------------------------------------------------------------------------------------------------------------------------------------------------------------------------------------------------------------------------------------------------------------------------|------|------|-----------|-------|------|------|-------------------------------------------------|-------|----------------------|-----------------------------------------------------------------------------------------------------------------------------------------------|------|------|-----------|-------|------|------|
| Rsa1.0_00527.1.g15480.t1 | ref[XP_002863115.1] predicted protein [Arabidopsis lyrata subsp. lyrata] gi 297308939 gb EFH39374.1  predicted protein [Arabidopsis lyrata subsp. lyrata]                                                                                                                                                                                                                  | 940  | 1222 | 0         | 130.0 | 44.9 | 54.7 | predicted protein                               | gbpln | Arabidopsis lyrata   | AT5G38340.1   Symbols:   Disease resistance protein (TIR-NBS-LRR class) family   chr5:15320507-15324061 FORWARD LENGTH=1059                   | 940  | 1059 | 1.00E-159 | 112.7 | 30.1 | 36.9 |
| Rsa1.0_00527.1.g15481.t1 | ref[XP_002874357.1] predicted protein [Arabidopsis lyrata subsp. lyrata] gi 297320194 gb EFH50616.1  predicted protein [Arabidopsis lyrata subsp. lyrata]                                                                                                                                                                                                                  | 156  | 155  | 5.00E-15  | 99.4  | 37.8 | 46.8 | predicted protein                               | gbpln | Arabidopsis lyrata   | #                                                                                                                                             | #    | #    | #         | #     | #    | #    |
| Rsa1.0_00527.1.g15482.t1 | ref[XP_002863119.1] predicted protein [Arabidopsis lyrata subsp. lyrata] gi 297308943 gb EFH39378.1  predicted protein [Arabidopsis lyrata subsp. lyrata]                                                                                                                                                                                                                  | 1004 | 1121 | 0         | 111.7 | 55.4 | 69.5 | predicted protein                               | gbpln | Arabidopsis lyrata   | AT1G65850.1   Symbols:   Disease resistance protein (TIR-NBS-LRR class) family   chr1:24494734-24498485 FORWARD LENGTH=1036                   | 1004 | 1036 | 0         | 103.2 | 53.1 | 68.3 |
| Rsa1.0_00527.1.g15483.t2 | ref[XP_002866973.1] hypothetical protein ARALYDRAFT_912645 [Arabidopsis lyrata subsp. lyrata] gi 297312809 gb EFH43232.1  hypothetical protein ARALYDRAFT_912645 [Arabidopsis lyrata subsp. lyrata]                                                                                                                                                                        | 45   | 350  | 9.00E-11  | 777.8 | 77.8 | 82.2 | hypothetical protein ARALYDRAFT_912645          | gbpln | Arabidopsis lyrata   | AT4G37040.1   Symbols: MAP1D   methionine aminopeptidase 1D   chr4:17455175-17457085 FORWARD LENGTH=350                                       | 45   | 350  | 1.00E-13  | 777.8 | 77.8 | 82.2 |
| Rsa1.0_00527.1.g15484.t3 | ref[XP_002863116.1] predicted protein [Arabidopsis lyrata subsp. lyrata] gi 297308940 gb EFH39375.1  predicted protein [Arabidopsis lyrata subsp. lyrata]                                                                                                                                                                                                                  | 763  | 1090 | 1.00E-137 | 142.9 | 41.7 | 55.6 | predicted protein                               | gbpln | Arabidopsis lyrata   | AT5G11250.1   Symbols:   Disease resistance protein (TIR-NBS-LRR class)   chr5:3587978-3591960 REVERSE LENGTH=1189                            | 763  | 1189 | 3.00E-93  | 155.8 | 32.6 | 43.3 |
| Rsa1.0_00528.1.g15485.t1 | gb ABH07409.1  putative pol polyprotein [Brassica oleracea var. botrytis]                                                                                                                                                                                                                                                                                                  | 232  | 1239 | 1.00E-123 | 534.1 | 89.7 | 95.7 | putative pol polyprotein                        | gbpln | Brassica oleracea    | AT4G23160.1   Symbols: CRK8   cysteine-rich RLK (RECEPTOR-like protein kinase) 8   chr4:12129485-12134086 FORWARD LENGTH=1262                 | 232  | 1262 | 3.00E-34  | 544.0 | 31.9 | 46.6 |
| Rsa1.0_00528.1.g15486.t1 | ref[XP_002877131.1] expressed protein [Arabidopsis lyrata subsp. lyrata] gi 297322969 gb EFH53390.1  expressed protein [Arabidopsis lyrata subsp. lyrata]                                                                                                                                                                                                                  | 267  | 671  | 2.00E-72  | 251.3 | 46.4 | 58.1 | expressed protein                               | gbpln | Arabidopsis lyrata   | AT3G28780.1   Symbols:   Protein of unknown function (DUF1216)   chr3:10806131-10808369 REVERSE LENGTH=674                                    | 267  | 674  | 3.00E-74  | 252.4 | 46.4 | 56.9 |
| Rsa1.0_00528.1.g15487.t1 | ref[XP_002877469.1] predicted protein [Arabidopsis lyrata subsp. lyrata] gi 297323307 gb EFH53728.1  predicted protein [Arabidopsis lyrata subsp. lyrata]                                                                                                                                                                                                                  | 199  | 328  | 5.00E-34  | 164.8 | 37.2 | 53.8 | predicted protein                               | gbpln | Arabidopsis lyrata   | AT5G18880.1   Symbols:   RNA-directed DNA polymerase (reverse transcriptase)-related family protein   chr5:6300535-6301422 REVERSE LENGTH=295 | 199  | 295  | 6.00E-23  | 148.2 | 36.7 | 47.2 |
| Rsa1.0_00528.1.g15488.t1 | gb EOA11936.1  hypothetical protein CARUB_v10016547mg, partial [Capsella rubella]                                                                                                                                                                                                                                                                                          | 130  | 149  | 6.00E-17  | 114.6 | 35.4 | 47.7 | hypothetical protein CARUB_v10016547mg, partial | gbpln | Capsella rubella     | #                                                                                                                                             | #    | #    | #         | #     | #    |      |
| Rsa1.0_00528.1.g15489.t1 | ref[NP_189521.1] uncharacterized protein [Arabidopsis thaliana] gi 11994787 dbj BAB03177.1  unnamed protein product [Arabidopsis thaliana] gi 28973701 gb AAO64167.1  unknown protein [Arabidopsis thaliana] gi 110737047 dbj BAF00477.1  hypothetical protein [Arabidopsis thaliana] gi 332643970 gb AEE77491.1  uncharacterized protein AT3G28790 [Arabidopsis thaliana] | 779  | 608  | 2.00E-56  | 78.0  | 13.9 | 18.4 | uncharacterized protein                         | gbpln | Arabidopsis thaliana | AT3G28790.1   Symbols:   Protein of unknown function (DUF1216)   chr3:10813577-10815588 REVERSE LENGTH=608                                    | 779  | 608  | 4.00E-59  | 78.0  | 13.9 | 18.4 |
| Rsa1.0_00528.1.g15490.t1 | ref[XP_002876780.1] hypothetical protein ARALYDRAFT_484098 [Arabidopsis lyrata subsp. lyrata] gi 297322618 gb EFH53039.1  hypothetical protein ARALYDRAFT_484098 [Arabidopsis lyrata subsp. lyrata]                                                                                                                                                                        | 163  | 946  | 4.00E-21  | 580.4 | 33.1 | 44.2 | hypothetical protein ARALYDRAFT_484098          | gbpln | Arabidopsis lyrata   | AT2G01820.1   Symbols:   Leucine-rich repeat protein kinase family protein   chr2:357664-360681 REVERSE LENGTH=943                            | 163  | 943  | 7.00E-22  | 578.5 | 33.1 | 43.6 |
| Rsa1.0_00528.1.g15491.t1 | ref[XP_002875472.1] hypothetical protein ARALYDRAFT_484653 [Arabidopsis lyrata subsp. lyrata] gi 297321310 gb EFH51731.1  hypothetical protein ARALYDRAFT_484653 [Arabidopsis lyrata subsp. lyrata]                                                                                                                                                                        | 263  | 518  | 9.00E-53  | 197.0 | 43.3 | 58.9 | hypothetical protein ARALYDRAFT_484653          | gbpln | Arabidopsis lyrata   | AT3G28790.1   Symbols:   Protein of unknown function (DUF1216)   chr3:10813577-10815588 REVERSE LENGTH=608                                    | 263  | 608  | 6.00E-54  | 231.2 | 39.5 | 52.1 |



|                          |                                                                                                                                                                                                                                                                                                                                                                                                                                                                                                                                                                                        |      |      |           |       |      |      |                                                          |       |                      |                                                                                                                                               |      |      |           |       |      |      |
|--------------------------|----------------------------------------------------------------------------------------------------------------------------------------------------------------------------------------------------------------------------------------------------------------------------------------------------------------------------------------------------------------------------------------------------------------------------------------------------------------------------------------------------------------------------------------------------------------------------------------|------|------|-----------|-------|------|------|----------------------------------------------------------|-------|----------------------|-----------------------------------------------------------------------------------------------------------------------------------------------|------|------|-----------|-------|------|------|
|                          | ref NP_680368.1  glutaredoxin-like protein [Arabidopsis thaliana] gi 75171457 sp Q9FLE8.1 Y5986_ARATH RecName: Full=Uncharacterized protein At5g39865 gi 10176979 dbj BAB10211.1  unnamed protein product [Arabidopsis thaliana] gi 19347749 gb AAJ58293.1  unknown protein [Arabidopsis thaliana] gi 22136720 gb AAM91679.1  unknown protein [Arabidopsis thaliana] gi 332007102 gb AED94485.1  glutaredoxin-like protein [Arabidopsis thaliana]                                                                                                                                      | 333  | 390  | 1.00E-109 | 117.1 | 66.7 | 79.6 | glutaredoxin-like protein                                | gbpln | Arabidopsis thaliana | AT5G39865.1   Symbols:   Glutaredoxin family protein   chr5:15965560-15966732 REVERSE LENGTH=390                                              | 333  | 390  | 1.00E-112 | 117.1 | 66.7 | 79.6 |
| Rsa1.0_00528.1.g15492.t1 |                                                                                                                                                                                                                                                                                                                                                                                                                                                                                                                                                                                        |      |      |           |       |      |      |                                                          |       |                      |                                                                                                                                               |      |      |           |       |      |      |
| Rsa1.0_00528.1.g15493.t1 | dbj BAD95408.1  hypothetical protein [Arabidopsis thaliana]                                                                                                                                                                                                                                                                                                                                                                                                                                                                                                                            | 136  | 478  | 6.00E-27  | 351.5 | 44.1 | 62.5 | hypothetical protein                                     | gbpln | Arabidopsis thaliana | AT3G24255.1   Symbols:   RNA-directed DNA polymerase (reverse transcriptase)-related family protein   chr3:8789471-8793208 FORWARD LENGTH=746 | 136  | 746  | 1.00E-12  | 548.5 | 27.2 | 35.3 |
| Rsa1.0_00528.1.g15494.t1 | gb EOA26734.1  hypothetical protein CARUB_v10022820mg [Capsella rubella]                                                                                                                                                                                                                                                                                                                                                                                                                                                                                                               | 600  | 527  | 3.00E-55  | 87.8  | 30.0 | 43.5 | hypothetical protein CARUB_v10022820mg                   | gbpln | Capsella rubella     | AT4G05360.1   Symbols:   Zinc knuckle (CCHC-type) family protein   chr4:2728204-2732337 FORWARD LENGTH=735                                    | 600  | 735  | 7.00E-52  | 122.5 | 22.2 | 30.0 |
| Rsa1.0_00528.1.g15495.t1 | ref NP_974372.1  basic helix-loop-helix (bHLH) DNA-binding family protein [Arabidopsis thaliana] gi 9294226 dbj BAB02128.1  DNA-binding protein-like [Arabidopsis thaliana] gi 88900306 gb ABD57465.1  At3g28857 [Arabidopsis thaliana] gi 332643976 gb AEE77497.1  basic helix-loop-helix (bHLH) DNA-binding family protein [Arabidopsis thaliana] ref XP_002875477.1  hypothetical protein ARALYDRAFT_484658 [Arabidopsis lyrata subsp. lyrata] gi 297321315 gb EFH51736.1  hypothetical protein ARALYDRAFT_484658 [Arabidopsis lyrata subsp. lyrata]                                | 92   | 92   | 2.00E-35  | 100.0 | 87.0 | 94.6 | basic helix-loop-helix (bHLH) DNA-binding family protein | gbpln | Arabidopsis thaliana | AT3G28857.1   Symbols:   basic helix-loop-helix (bHLH) DNA-binding family protein   chr3:10855781-10856313 REVERSE LENGTH=92                  | 92   | 92   | 3.00E-38  | 100.0 | 87.0 | 94.6 |
| Rsa1.0_00528.1.g15496.t1 | ref XP_002875477.1  hypothetical protein ARALYDRAFT_484658 [Arabidopsis lyrata subsp. lyrata] gi 297321315 gb EFH51736.1  hypothetical protein ARALYDRAFT_484658 [Arabidopsis lyrata subsp. lyrata]                                                                                                                                                                                                                                                                                                                                                                                    | 797  | 780  | 0         | 97.9  | 62.5 | 72.9 | hypothetical protein ARALYDRAFT_484658                   | gbpln | Arabidopsis lyrata   | AT3G28880.1   Symbols:   Ankyrin repeat family protein   chr3:10892435-10895895 FORWARD LENGTH=772                                            | 797  | 772  | 0         | 96.9  | 60.0 | 70.6 |
| Rsa1.0_00528.1.g15497.t1 | gb EOA24881.1  hypothetical protein CARUB_v10018171mg, partial [Capsella rubella]                                                                                                                                                                                                                                                                                                                                                                                                                                                                                                      | 72   | 156  | 3.00E-17  | 216.7 | 69.4 | 75.0 | hypothetical protein CARUB_v10018171mg, partial          | gbpln | Capsella rubella     | AT3G28900.1   Symbols:   Ribosomal protein L34e superfamily protein   chr3:10902864-10904415 REVERSE LENGTH=120                               | 72   | 120  | 1.00E-19  | 166.7 | 68.1 | 75.0 |
| Rsa1.0_00528.1.g15498.t1 | dbj BAJ34042.1  unnamed protein product [Thellungiella halophila]                                                                                                                                                                                                                                                                                                                                                                                                                                                                                                                      | 332  | 337  | 1.00E-144 | 101.5 | 86.1 | 89.8 | unnamed protein product                                  | ----  | ----                 | AT3G28910.1   Symbols:   ATMYP30, MYB30   myb domain protein 30   chr3:10911443-10912856 FORWARD LENGTH=323                                   | 332  | 323  | 1.00E-142 | 97.3  | 80.7 | 86.1 |
| Rsa1.0_00528.1.g15499.t2 | gb ABD65039.1  GTP-binding protein, putative [Brassica oleracea]                                                                                                                                                                                                                                                                                                                                                                                                                                                                                                                       | 285  | 189  | 1.00E-36  | 66.3  | 26.7 | 27.4 | GTP-binding protein, putative                            | gbpln | Brassica oleracea    | AT5G47200.1   Symbols:   ATRABD2B, ATRAB1A, RAB1A   RAB GTPase homolog 1A   chr5:19167029-19168718 FORWARD LENGTH=202                         | 285  | 202  | 1.00E-37  | 70.9  | 26.0 | 27.0 |
| Rsa1.0_00528.1.g15500.t2 | emb CAB40035.1  retrotransposon like protein [Arabidopsis thaliana] gi 7267767 emb CAB81170.1  retrotransposon like protein [Arabidopsis thaliana]                                                                                                                                                                                                                                                                                                                                                                                                                                     | 1348 | 1515 | 0         | 112.4 | 58.1 | 72.8 | retrotransposon like protein                             | gbpln | Arabidopsis thaliana | AT4G23160.1   Symbols:   CRK8   cysteine-rich RLK (RECEPTOR-like protein kinase) 8   chr4:12129485-12134086 FORWARD LENGTH=1262               | 1348 | 1262 | 2.00E-90  | 93.6  | 12.8 | 18.9 |
| Rsa1.0_00528.1.g15501.t1 | gb EOA24839.1  hypothetical protein CARUB_v10018128mg [Capsella rubella]                                                                                                                                                                                                                                                                                                                                                                                                                                                                                                               | 168  | 170  | 8.00E-84  | 101.2 | 86.9 | 92.3 | hypothetical protein CARUB_v10018128mg                   | gbpln | Capsella rubella     | AT3G28940.1   Symbols:   AIG2-like (avirulence induced gene) family protein   chr3:10968324-10969311 REVERSE LENGTH=169                       | 168  | 169  | 5.00E-83  | 100.6 | 84.5 | 92.9 |
| Rsa1.0_00528.1.g15502.t1 | dbj BAJ34156.1  unnamed protein product [Thellungiella halophila]                                                                                                                                                                                                                                                                                                                                                                                                                                                                                                                      | 167  | 168  | 1.00E-85  | 100.6 | 91.0 | 94.6 | unnamed protein product                                  | ----  | ----                 | AT3G28930.1   Symbols:   AIG2   AIG2-like (avirulence induced gene) family protein   chr3:10959890-10960728 REVERSE LENGTH=170                | 167  | 170  | 3.00E-77  | 101.8 | 77.2 | 87.4 |
| Rsa1.0_00528.1.g15503.t1 | ref NP_001050981.1  Os03g0698500 [Oryza sativa Japonica Group] gi 28273361 gb AAO38447.1  putative zinc binding protein [Oryza sativa Japonica Group] gi 108710575 gb ABF98370.1  Yippee, putative, expressed [Oryza sativa Japonica Group] gi 113549452 dbj BAF12895.1  Os03g0698500 [Oryza sativa Japonica Group] gi 215766470 dbj BAG98778.1  unnamed protein product [Oryza sativa Japonica Group] gi 218193579 gb EEC76006.1  hypothetical protein Os_13146 [Oryza sativa Indica Group] gi 222625619 gb EEE59751.1  hypothetical protein Os_J_12219 [Oryza sativa Japonica Group] | 101  | 129  | 4.00E-12  | 127.7 | 43.6 | 61.4 | Os03g0698500                                             | gbpln | Oryza sativa         | AT3G08990.2   Symbols:   Yippee family putative zinc-binding protein   chr3:2743590-2744709 FORWARD LENGTH=128                                | 101  | 128  | 4.00E-12  | 126.7 | 41.6 | 57.4 |
| Rsa1.0_00528.1.g15504.t1 | #                                                                                                                                                                                                                                                                                                                                                                                                                                                                                                                                                                                      | #    | #    | #         | #     | #    | #    | -                                                        | ----  | ----                 | #                                                                                                                                             | #    | #    | #         | #     | #    | #    |

|                          |                                                                                                                                                                                                                                                                                                                                                                                                                                                                                                                                                                                                                 |     |     |           |        |      |       |                                                             |       |                      |                                                                                                                                                                                                                                                                                                                                                                                                                                                                                                                                      |     |     |           |       |      |      |
|--------------------------|-----------------------------------------------------------------------------------------------------------------------------------------------------------------------------------------------------------------------------------------------------------------------------------------------------------------------------------------------------------------------------------------------------------------------------------------------------------------------------------------------------------------------------------------------------------------------------------------------------------------|-----|-----|-----------|--------|------|-------|-------------------------------------------------------------|-------|----------------------|--------------------------------------------------------------------------------------------------------------------------------------------------------------------------------------------------------------------------------------------------------------------------------------------------------------------------------------------------------------------------------------------------------------------------------------------------------------------------------------------------------------------------------------|-----|-----|-----------|-------|------|------|
| Rsa1.0_00529.1.g15505.t2 | ref[XP_002867141.1] hypothetical protein ARALYDRAFT_491275 [Arabidopsis lyrata subsp. lyrata] gi 297312977 gb EFH43400.1  hypothetical protein ARALYDRAFT_491275 [Arabidopsis lyrata subsp. lyrata]                                                                                                                                                                                                                                                                                                                                                                                                             | 277 | 217 | 2.00E-30  | 78.3   | 35.0 | 40.8  | hypothetical protein ARALYDRAFT_491275                      | gbpln | Arabidopsis lyrata   | AT4G33980.1   Symbols:   BEST Arabidopsis thaliana protein match is: cold regulated gene 27 (TAIRAT5G42900.2); Has 30201 Blast hits to 17322 proteins in 780 species: Archae - 12; Bacteria - 1396; Metazoa - 17338; Fungi - 3422; Plants - 5037; Viruses - 0; Other Eukaryotes - 2996 (source: NCBI BLink).   chr4:16283047-16284946 REVERSE LENGTH=218                                                                                                                                                                             | 277 | 218 | 2.00E-30  | 78.7  | 33.2 | 37.9 |
| Rsa1.0_00529.1.g15506.t1 | ref[NP_195123.1] Pollen-specific leucine-rich repeat extensin-like protein 4 [Arabidopsis thaliana] gi 75318791 sp O81765.1 PLRX4_ARATH RecName: Full=Pollen-specific leucine-rich repeat extensin-like protein 4; Short=AtPEX4; Short=Pollen-specific LRR/EXTENSIN4; AltName: Full=Cell wall hydroxyproline-rich glycoprotein; Flags: Precursor gi 3297821 emb CAA19879.1  extensin-like protein [Arabidopsis thaliana] gi 7270346 emb CAB80114.1  extensin-like protein [Arabidopsis thaliana] gi 332660902 gb AEE86302.1  Pollen-specific leucine-rich repeat extensin-like protein 4 [Arabidopsis thaliana] | 693 | 699 | 0         | 100.9  | 54.7 | 58.7  | Pollen-specific leucine-rich repeat extensin-like protein 4 | gbpln | Arabidopsis thaliana | AT4G33970.1   Symbols:   Leucine-rich repeat (LRR) family protein   chr4:16279795-16281894 REVERSE LENGTH=699                                                                                                                                                                                                                                                                                                                                                                                                                        | 693 | 699 | 0         | 100.9 | 54.7 | 58.7 |
| Rsa1.0_00529.1.g15507.t1 | ref[NP_195122.1] uncharacterized protein [Arabidopsis thaliana] gi 3297820 emb CAA19878.1  putative protein [Arabidopsis thaliana] gi 7270345 emb CAB80113.1  putative protein [Arabidopsis thaliana] gi 38566498 gb AAR24139.1  At4g33960 [Arabidopsis thaliana] gi 40823521 gb AAR92287.1  At4g33960 [Arabidopsis thaliana] gi 332660901 gb AEE86301.1  uncharacterized protein AT4G33960 [Arabidopsis thaliana]                                                                                                                                                                                              | 65  | 67  | 3.00E-12  | 103.1  | 73.8 | 86.2  | uncharacterized protein                                     | gbpln | Arabidopsis thaliana | AT4G33960.1   Symbols:   unknown protein; FUNCTIONS IN: molecular_function unknown; INVOLVED IN: biological_process unknown; LOCATED IN: endomembrane system; EXPRESSED IN: 20 plant structures; EXPRESSED DURING: 10 growth stages; BEST Arabidopsis thaliana protein match is: unknown protein (TAIRAT2G15830.1). Has 32 Blast hits to 32 proteins in 4 species: Archae - 0; Bacteria - 0; Metazoa - 0; Fungi - 0; Plants - 32; Viruses - 0; Other Eukaryotes - 0 (source: NCBI BLink).   chr4:16277392-16277595 FORWARD LENGTH=67 | 65  | 67  | 6.00E-15  | 103.1 | 73.8 | 86.2 |
| Rsa1.0_00529.1.g15508.t1 | ref[XP_002869183.1] hypothetical protein ARALYDRAFT_491280 [Arabidopsis lyrata subsp. lyrata] gi 297315019 gb EFH45442.1  hypothetical protein ARALYDRAFT_491280 [Arabidopsis lyrata subsp. lyrata]                                                                                                                                                                                                                                                                                                                                                                                                             | 331 | 362 | 1.00E-176 | 109.4  | 97.6 | 100.0 | hypothetical protein ARALYDRAFT_491280                      | gbpln | Arabidopsis lyrata   | AT4G33950.1   Symbols: OST1, SNRK2-6, SRK2E, SNRK2.6, P44, ATOST1   Protein kinase superfamily protein   chr4:16272364-16274657 FORWARD LENGTH=362                                                                                                                                                                                                                                                                                                                                                                                   | 331 | 362 | 1.00E-179 | 109.4 | 97.3 | 99.7 |
| Rsa1.0_00529.1.g15509.t2 | gb EOA17941.1  hypothetical protein CARUB_v10006351mg [Capsella rubella]                                                                                                                                                                                                                                                                                                                                                                                                                                                                                                                                        | 463 | 464 | 0         | 100.2  | 87.9 | 93.1  | hypothetical protein CARUB_v10006351mg                      | gbpln | Capsella rubella     | AT4G33945.1   Symbols:   ARM repeat superfamily protein   chr4:16268119-16270514 FORWARD LENGTH=464                                                                                                                                                                                                                                                                                                                                                                                                                                  | 463 | 464 | 0         | 100.2 | 87.9 | 92.4 |
| Rsa1.0_00529.1.g15510.t1 | gb AAM62531.1  unknown [Arabidopsis thaliana]                                                                                                                                                                                                                                                                                                                                                                                                                                                                                                                                                                   | 238 | 262 | 1.00E-105 | 110.1  | 78.2 | 87.4  | unknown                                                     | gbpln | Arabidopsis thaliana | AT4G33940.1   Symbols:   RING/U-box superfamily protein   chr4:16266085-16267612 FORWARD LENGTH=262                                                                                                                                                                                                                                                                                                                                                                                                                                  | 238 | 262 | 1.00E-107 | 110.1 | 78.6 | 87.4 |
| Rsa1.0_00529.1.g15511.t1 | gb EOA17648.1  hypothetical protein CARUB_v10006015mg [Capsella rubella]                                                                                                                                                                                                                                                                                                                                                                                                                                                                                                                                        | 151 | 132 | 9.00E-61  | 87.4   | 79.5 | 82.8  | hypothetical protein CARUB_v10006015mg                      | gbpln | Capsella rubella     | AT4G33925.1   Symbols:   unknown protein; Has 30201 Blast hits to 17322 proteins in 780 species: Archae - 12; Bacteria - 1396; Metazoa - 17338; Fungi - 3422; Plants - 5037; Viruses - 0; Other Eukaryotes - 2996 (source: NCBI BLink).   chr4:16263292-16264064 FORWARD LENGTH=132                                                                                                                                                                                                                                                  | 151 | 132 | 3.00E-63  | 87.4  | 78.8 | 82.8 |
| Rsa1.0_00529.1.g15512.t1 | gb EEC76251.1  hypothetical protein OsI_13694 [Oryza sativa Indica Group]                                                                                                                                                                                                                                                                                                                                                                                                                                                                                                                                       | 56  | 828 | 5.00E-23  | 1478.6 | 80.4 | 85.7  | hypothetical protein OsI_13694                              | gbpln | Oryza sativa         | AT4G33865.1   Symbols:   Ribosomal protein S14p/S29e family protein   chr4:16233395-16234114 REVERSE LENGTH=56                                                                                                                                                                                                                                                                                                                                                                                                                       | 56  | 56  | 4.00E-25  | 100.0 | 91.1 | 94.6 |
| Rsa1.0_00529.1.g15513.t1 | gb EOA15721.1  hypothetical protein CARUB_v10006623mg [Capsella rubella]                                                                                                                                                                                                                                                                                                                                                                                                                                                                                                                                        | 348 | 353 | 1.00E-162 | 101.4  | 84.5 | 90.2  | hypothetical protein CARUB_v10006623mg                      | gbpln | Capsella rubella     | AT4G33880.1   Symbols: RSL2   ROOT HAIR DEFECTIVE 6-LIKE 2   chr4:16239566-16241052 REVERSE LENGTH=352                                                                                                                                                                                                                                                                                                                                                                                                                               | 348 | 352 | 1.00E-160 | 101.1 | 82.2 | 88.5 |
| Rsa1.0_00529.1.g15514.t1 | #                                                                                                                                                                                                                                                                                                                                                                                                                                                                                                                                                                                                               | #   | #   | #         | #      | #    | -     | ----                                                        | ----  | ----                 | #                                                                                                                                                                                                                                                                                                                                                                                                                                                                                                                                    | #   | #   | #         | #     | #    |      |
| Rsa1.0_00529.1.g15515.t1 | gb EOA18079.1  hypothetical protein CARUB_v10006531mg [Capsella rubella]                                                                                                                                                                                                                                                                                                                                                                                                                                                                                                                                        | 401 | 414 | 1.00E-162 | 103.2  | 73.8 | 83.8  | hypothetical protein CARUB_v10006531mg                      | gbpln | Capsella rubella     | AT4G33870.1   Symbols:   Peroxidase superfamily protein   chr4:16234670-16236492 REVERSE LENGTH=401                                                                                                                                                                                                                                                                                                                                                                                                                                  | 401 | 401 | 1.00E-155 | 100.0 | 69.3 | 80.0 |
| Rsa1.0_00529.1.g15516.t1 | ref[NP_567937.1] uncharacterized protein [Arabidopsis thaliana] gi 21594003 gb AAM65921.1  unknown [Arabidopsis thaliana] gi 107738065 gb ABF83626.1  At4g33800 [Arabidopsis thaliana] gi 332660879 gb AEE86279.1  uncharacterized protein AT4G33800 [Arabidopsis thaliana]                                                                                                                                                                                                                                                                                                                                     | 175 | 170 | 3.00E-60  | 97.1   | 74.3 | 77.1  | uncharacterized protein                                     | gbpln | Arabidopsis thaliana | AT4G33800.1   Symbols:   unknown protein; Has 30201 Blast hits to 17322 proteins in 780 species: Archae - 12; Bacteria - 1396; Metazoa - 17338; Fungi - 3422; Plants - 5037; Viruses - 0; Other Eukaryotes - 2996 (source: NCBI BLink).   chr4:16210404-16211307 REVERSE LENGTH=170                                                                                                                                                                                                                                                  | 175 | 170 | 1.00E-62  | 97.1  | 74.3 | 77.1 |

|                           |                                                                                                                                                                                                                                                                                                                                                                                                                 |      |      |           |       |      |      |                                                                                                                                                                                          |       |                      |                                                                                                                                                                                                                                                                                                                                                      |      |      |           |       |      |      |
|---------------------------|-----------------------------------------------------------------------------------------------------------------------------------------------------------------------------------------------------------------------------------------------------------------------------------------------------------------------------------------------------------------------------------------------------------------|------|------|-----------|-------|------|------|------------------------------------------------------------------------------------------------------------------------------------------------------------------------------------------|-------|----------------------|------------------------------------------------------------------------------------------------------------------------------------------------------------------------------------------------------------------------------------------------------------------------------------------------------------------------------------------------------|------|------|-----------|-------|------|------|
| Rsa1.0_00529.1.g15517.t9  | ref[XP_002867157.1] predicted protein [Arabidopsis lyrata subsp. lyrata] gi 297312993 gb EFH43416.1  predicted protein [Arabidopsis lyrata subsp. lyrata]                                                                                                                                                                                                                                                       | 526  | 493  | 0         | 93.7  | 69.6 | 77.9 | predicted protein                                                                                                                                                                        | gbpln | Arabidopsis lyrata   | AT4G33790.1   Symbols: CER4, G7, FAR3   Jobba acyl CoA reductase-related male sterility protein   chr4:16204325-16207891 REVERSE LENGTH=493                                                                                                                                                                                                          | 526  | 493  | 0         | 93.7  | 68.6 | 78.1 |
| Rsa1.0_00529.1.g15518.t1  | gb EOA16776.1  hypothetical protein CARUB_v10004995mg [Capsella rubella]                                                                                                                                                                                                                                                                                                                                        | 389  | 392  | 1.00E-174 | 100.8 | 83.8 | 90.5 | hypothetical protein CARUB_v10004995mg                                                                                                                                                   | gbpln | Capsella rubella     | AT4G33770.1   Symbols:   Inositol 1,3,4-trisphosphate 5/6-kinase family protein   chr4:16193589-16196242 REVERSE LENGTH=391                                                                                                                                                                                                                          | 389  | 391  | 1.00E-172 | 100.5 | 83.8 | 91.3 |
| Rsa1.0_00529.1.g15519.t1  | ref NP_195102.2  aspartyl-tRNA synthetase [Arabidopsis thaliana] gi 332660874 gb AEE86274.1  tRNA synthetase class II (D, K and N) family protein [Arabidopsis thaliana]                                                                                                                                                                                                                                        | 661  | 664  | 0         | 100.5 | 87.9 | 91.5 | aspartyl-tRNA synthetase                                                                                                                                                                 | gbpln | Arabidopsis thaliana | AT4G33760.1   Symbols:   tRNA synthetase class II (D, K and N) family protein   chr4:16189285-16193260 REVERSE LENGTH=664                                                                                                                                                                                                                            | 661  | 664  | 0         | 100.5 | 87.9 | 91.5 |
| Rsa1.0_00529.1.g15520.t1  | #                                                                                                                                                                                                                                                                                                                                                                                                               | #    | #    | #         | #     | #    | #    | -                                                                                                                                                                                        | ----  | ----                 | #                                                                                                                                                                                                                                                                                                                                                    | #    | #    | #         | #     | #    | #    |
| Rsa1.0_00530.1.g15521.t1  | dbj BAB09502.1  transposon protein-like [Arabidopsis thaliana]                                                                                                                                                                                                                                                                                                                                                  | 317  | 1089 | 6.00E-53  | 343.5 | 38.2 | 52.1 | transposon protein-like                                                                                                                                                                  | gbpln | Arabidopsis thaliana | #                                                                                                                                                                                                                                                                                                                                                    | #    | #    | #         | #     | #    | #    |
| Rsa1.0_00530.1.g15522.t1  | gb ACG60682.1  transposon-like ORF [Brassica oleracea var. abbotglabra]                                                                                                                                                                                                                                                                                                                                         | 354  | 704  | 1.00E-136 | 198.9 | 68.4 | 79.9 | transposon-like ORF                                                                                                                                                                      | gbpln | Brassica oleracea    | #                                                                                                                                                                                                                                                                                                                                                    | #    | #    | #         | #     | #    | #    |
| Rsa1.0_00530.1.g15523.t1  | ref NP_174766.1  RING-H2 finger protein AT134 [Arabidopsis thaliana] gi 68365270 sp C9C711.1 ATL34_ARATH RecName: Full=RING-H2 finger protein AT134; Flags: Precursor                                                                                                                                                                                                                                           | 359  | 327  | 1.00E-132 | 91.1  | 68.2 | 75.5 | RING-H2 finger protein AT134                                                                                                                                                             | gbpln | Arabidopsis thaliana | AT1G35330.1   Symbols:   RING/U-box superfamily protein   chr1:12965046-12966113 FORWARD LENGTH=327                                                                                                                                                                                                                                                  | 359  | 327  | 1.00E-135 | 91.1  | 68.2 | 75.5 |
| Rsa1.0_00530.1.g15524.t1  | gb EOA36180.1  hypothetical protein CARUB_v10010050mg [Capsella rubella]                                                                                                                                                                                                                                                                                                                                        | 250  | 260  | 1.00E-106 | 104.0 | 80.0 | 88.4 | hypothetical protein CARUB_v10010050mg                                                                                                                                                   | gbpln | Capsella rubella     | AT1G35460.1   Symbols:   basic helix-loop-helix (bHLH) DNA-binding superfamily protein   chr1:13040092-13041907 FORWARD LENGTH=259                                                                                                                                                                                                                   | 250  | 259  | 1.00E-106 | 103.6 | 84.8 | 91.6 |
| Rsa1.0_00530.1.g15525.t4  | #                                                                                                                                                                                                                                                                                                                                                                                                               | #    | #    | #         | #     | #    | #    | -                                                                                                                                                                                        | ----  | ----                 | #                                                                                                                                                                                                                                                                                                                                                    | #    | #    | #         | #     | #    | #    |
| Rsa1.0_00530.1.g15526.t11 | gb ABD65636.1  hypothetical protein 23.t00055 [Brassica oleracea]                                                                                                                                                                                                                                                                                                                                               | 787  | 414  | 2.00E-71  | 52.6  | 24.5 | 28.6 | hypothetical protein 23.t00055                                                                                                                                                           | gbpln | Brassica oleracea    | AT2G22440.1   Symbols:   BEST Arabidopsis thaliana protein match is: Ribonuclease H-like superfamily protein (TAIR:AT4G29090.1); Has 208 Blast hits to 191 proteins in 10 species: Archae - 0; Bacteria - 0; Metazoa - 0; Fungi - 0; Plants - 208; Viruses - 0; Other Eukaryotes - 0 (source: NCBI BLINK).   chr2:9528910-9529917 FORWARD LENGTH=256 | 787  | 256  | 1.00E-16  | 32.5  | 7.1  | 10.8 |
| Rsa1.0_00530.1.g15527.t1  | dbj BAB09502.1  transposon protein-like [Arabidopsis thaliana]                                                                                                                                                                                                                                                                                                                                                  | 1025 | 1089 | 0         | 106.2 | 51.3 | 67.3 | transposon protein-like                                                                                                                                                                  | gbpln | Arabidopsis thaliana | #                                                                                                                                                                                                                                                                                                                                                    | #    | #    | #         | #     | #    | #    |
| Rsa1.0_00530.1.g15528.t1  | gb AAD15525.1  Mutator-like transposase [Arabidopsis thaliana]                                                                                                                                                                                                                                                                                                                                                  | 393  | 550  | 2.00E-63  | 139.9 | 42.7 | 61.3 | Mutator-like transposase                                                                                                                                                                 | gbpln | Arabidopsis thaliana | #                                                                                                                                                                                                                                                                                                                                                    | #    | #    | #         | #     | #    | #    |
| Rsa1.0_00530.1.g15529.t2  | gb AAD20658.1  putative retroelement pol polyprotein [Arabidopsis thaliana]                                                                                                                                                                                                                                                                                                                                     | 1688 | 1611 | 0         | 95.4  | 46.6 | 59.2 | putative retroelement pol polyprotein                                                                                                                                                    | gbpln | Arabidopsis thaliana | ATMG00860.1   Symbols: ORF158   DNA/RNA polymerases superfamily protein   chrM:235916-236392 FORWARD LENGTH=158                                                                                                                                                                                                                                      | 1688 | 158  | 9.00E-24  | 9.4   | 3.3  | 4.7  |
| Rsa1.0_00530.1.g15530.t10 | #                                                                                                                                                                                                                                                                                                                                                                                                               | #    | #    | #         | #     | #    | #    | -                                                                                                                                                                                        | ----  | ----                 | AT5G15690.1   Symbols:   zinc ion binding   chr5:5113823-5114402 REVERSE LENGTH=169                                                                                                                                                                                                                                                                  | 136  | 169  | 3.00E-12  | 124.3 | 23.5 | 31.6 |
| Rsa1.0_00530.1.g15531.t1  | #                                                                                                                                                                                                                                                                                                                                                                                                               | #    | #    | #         | #     | #    | #    | -                                                                                                                                                                                        | ----  | ----                 | #                                                                                                                                                                                                                                                                                                                                                    | #    | #    | #         | #     | #    | #    |
| Rsa1.0_00531.1.g15532.t2  | sp H3K2Y6.1 MED12_ARATH RecName: Full=Mediator of RNA polymerase II transcription subunit 12; AltName: Full=Protein CENTER CITY; AltName: Full=Protein CRYPTIC PRECOCIOUS gi 374428817 dbj BAL49816.1  cryptic precocious [Arabidopsis thaliana] gi 374428819 dbj BAL49817.1  cryptic precocious splicing variant [Arabidopsis thaliana] gi 374428821 dbj BAL49818.1  cryptic precocious [Arabidopsis thaliana] | 2239 | 2235 | 0         | 99.8  | 85.4 | 91.2 | Full=Mediator of RNA polymerase II transcription subunit 12; AltName: Full=Protein CENTER CITY; AltName: Full=Protein CRYPTIC PRECOCIOUS gi 374428817 dbj BAL49816.1  cryptic precocious | gbpln | Arabidopsis thaliana | AT4G00450.1   Symbols: CRP, CCT   RNA polymerase II transcription mediators   chr4:202425-210666 FORWARD LENGTH=2253                                                                                                                                                                                                                                 | 2239 | 2253 | 0         | 100.6 | 80.8 | 87.4 |
| Rsa1.0_00531.1.g15533.t1  | gb EOA19675.1  hypothetical protein CARUB_v10003327mg [Capsella rubella]                                                                                                                                                                                                                                                                                                                                        | 476  | 479  | 0         | 100.6 | 92.6 | 95.6 | hypothetical protein CARUB_v10003327mg                                                                                                                                                   | gbpln | Capsella rubella     | AT4G00460.2   Symbols: ATROPGEF3, ROPGEF3   RHO guanyl-nucleotide exchange factor 3   chr4:211146-213094 REVERSE LENGTH=473                                                                                                                                                                                                                          | 476  | 473  | 0         | 99.4  | 91.0 | 94.5 |
| Rsa1.0_00531.1.g15534.t2  | gb EOA20272.1  hypothetical protein CARUB_v10000576mg [Capsella rubella]                                                                                                                                                                                                                                                                                                                                        | 530  | 573  | 0         | 108.1 | 73.6 | 82.3 | hypothetical protein CARUB_v10000576mg                                                                                                                                                   | gbpln | Capsella rubella     | AT4G00480.1   Symbols: ATMYC1, myc1   basic helix-loop-helix (bHLH) DNA-binding superfamily protein   chr4:217106-219684 REVERSE LENGTH=526                                                                                                                                                                                                          | 530  | 526  | 0         | 99.2  | 75.1 | 83.8 |

|                          |                                                                                                                                                                                                                                            |      |      |           |       |      |      |                                                                                                                                                                      |             |                      |                                                                                                                                                                                                                                                                               |      |      |           |       |      |      |
|--------------------------|--------------------------------------------------------------------------------------------------------------------------------------------------------------------------------------------------------------------------------------------|------|------|-----------|-------|------|------|----------------------------------------------------------------------------------------------------------------------------------------------------------------------|-------------|----------------------|-------------------------------------------------------------------------------------------------------------------------------------------------------------------------------------------------------------------------------------------------------------------------------|------|------|-----------|-------|------|------|
| Rsa1.0_00531.1.g15535.t1 | refXP_002875024.1   beta-amylase 9 [Arabidopsis lyrata subsp. lyrata] gi 297320861 gb EFH51283.1   beta-amylase 9 [Arabidopsis lyrata subsp. lyrata]                                                                                       | 549  | 542  | 0         | 98.7  | 86.9 | 90.5 | beta-amylase 9                                                                                                                                                       | gbpln       | Arabidopsis lyrata   | AT4G00490.1   Symbols: BAM2, BMY9   beta-amylase 2   chr4:222422-224862 FORWARD LENGTH=542                                                                                                                                                                                    | 549  | 542  | 0         | 98.7  | 86.3 | 89.4 |
| Rsa1.0_00531.1.g15536.t1 | refXP_002875022.1   hypothetical protein ARALYDRAFT_490514 [Arabidopsis lyrata subsp. lyrata] gi 297320859 gb EFH51281.1   hypothetical protein ARALYDRAFT_490514 [Arabidopsis lyrata subsp. lyrata]                                       | 124  | 140  | 3.00E-22  | 112.9 | 60.5 | 75.0 | hypothetical protein ARALYDRAFT_490514                                                                                                                               | gbpln       | Arabidopsis lyrata   | AT4G00525.1   Symbols:   unknown protein; Has 35333 Blast hits to 34131 proteins in 2444 species: Archae - 798; Bacteria - 22429; Metazoa - 974; Fungi - 991; Plants - 531; Viruses - 0; Other Eukaryotes - 9610 (source: NCBI BLINK)   chr4:231862-232769 FORWARD LENGTH=140 | 124  | 140  | 6.00E-23  | 112.9 | 58.1 | 73.4 |
| Rsa1.0_00531.1.g15537.t1 | refXP_002872946.1   hypothetical protein ARALYDRAFT_912190 [Arabidopsis lyrata subsp. lyrata] gi 297318783 gb EFH49205.1   hypothetical protein ARALYDRAFT_912190 [Arabidopsis lyrata subsp. lyrata]                                       | 189  | 153  | 1.00E-46  | 81.0  | 54.5 | 64.0 | hypothetical protein ARALYDRAFT_912190                                                                                                                               | gbpln       | Arabidopsis lyrata   | AT2G45760.1   Symbols: BAP2, BAL   BON association protein 2   chr2:18847125-18847748 REVERSE LENGTH=207                                                                                                                                                                      | 189  | 207  | 5.00E-26  | 109.5 | 33.3 | 44.4 |
| Rsa1.0_00531.1.g15538.t1 | dbj BAD94208.1   digalactosyl diacylglycerol synthase [Arabidopsis thaliana]                                                                                                                                                               | 100  | 149  | 1.00E-28  | 149.0 | 71.0 | 80.0 | digalactosyl diacylglycerol synthase                                                                                                                                 | gbpln       | Arabidopsis thaliana | AT4G00550.1   Symbols: DGD2   digalactosyl diacylglycerol deficient 2   chr4:238154-240019 REVERSE LENGTH=473                                                                                                                                                                 | 100  | 473  | 3.00E-31  | 473.0 | 71.0 | 80.0 |
| Rsa1.0_00531.1.g15539.t1 | gb EOA18986.1   hypothetical protein CARUB_v10007631mg [Capsella rubella]                                                                                                                                                                  | 293  | 347  | 1.00E-151 | 118.4 | 92.2 | 96.9 | hypothetical protein CARUB_v10007631mg                                                                                                                               | gbpln       | Capsella rubella     | AT2G22190.1   Symbols: TPPE   Haloacid dehalogenase-like hydrolase (HAD) superfamily protein   chr2:9433897-9436482 REVERSE LENGTH=354                                                                                                                                        | 293  | 354  | 1.00E-129 | 120.8 | 81.6 | 87.7 |
| Rsa1.0_00531.1.g15540.t1 | emb CAB39638.1   RNA-directed DNA polymerase-like protein [Arabidopsis thaliana] gi 267666 emb CAB78094.1   RNA-directed DNA polymerase-like protein [Arabidopsis thaliana]                                                                | 1059 | 1274 | 0         | 120.3 | 49.4 | 65.6 | RNA-directed DNA polymerase-like protein                                                                                                                             | gbpln       | Arabidopsis thaliana | AT4G2090.1   Symbols:   Ribonuclease H-like superfamily protein   chr4:14333528-14335255 FORWARD LENGTH=575                                                                                                                                                                   | 1059 | 575  | 3.00E-75  | 54.3  | 16.4 | 25.9 |
| Rsa1.0_00531.1.g15541.t1 | refXP_003537506.1   PREDICTED: uncharacterized protein LOC100816245 [Glycine max]                                                                                                                                                          | 218  | 705  | 3.00E-24  | 323.4 | 35.3 | 44.0 | PREDICTED: uncharacterized protein LOC100816245                                                                                                                      | gbpln/gbpln | Glycine max          | AT4G39680.2   Symbols:   SAP domain-containing protein   chr4:18414604-18416938 REVERSE LENGTH=633                                                                                                                                                                            | 218  | 633  | 6.00E-16  | 290.4 | 18.3 | 20.6 |
| Rsa1.0_00531.1.g15542.t1 | refXP_002866875.1   hypothetical protein ARALYDRAFT_912448 [Arabidopsis lyrata subsp. lyrata] gi 297312711 gb EFH43134.1   hypothetical protein ARALYDRAFT_912448 [Arabidopsis lyrata subsp. lyrata]                                       | 240  | 232  | 1.00E-103 | 96.7  | 77.9 | 83.3 | hypothetical protein ARALYDRAFT_912448                                                                                                                               | gbpln       | Arabidopsis lyrata   | AT4G39670.1   Symbols:   Glycolipid transfer protein (GLTP) family protein   chr4:18410172-18410861 FORWARD LENGTH=229                                                                                                                                                        | 240  | 229  | 1.00E-103 | 95.4  | 75.0 | 80.8 |
| Rsa1.0_00531.1.g15543.t1 | refXP_002866873.1   predicted protein [Arabidopsis lyrata subsp. lyrata] gi 297312709 gb EFH43132.1   predicted protein [Arabidopsis lyrata subsp. lyrata]                                                                                 | 567  | 578  | 0         | 101.9 | 82.2 | 90.5 | predicted protein                                                                                                                                                    | gbpln       | Arabidopsis lyrata   | AT4G39640.2   Symbols: GGT1   gamma-glutamyl transpeptidase 1   chr4:18400608-18402861 FORWARD LENGTH=572                                                                                                                                                                     | 567  | 572  | 0         | 100.9 | 82.4 | 90.7 |
| Rsa1.0_00531.1.g15544.t2 | gb AAF82236.1 AC069143_12 Contains similarity to a transposable element Tip100 protein for transposase from Ipomoea purpurea gb 4063769 and is a member of the transmembrane 4 family PF 00335 [Arabidopsis thaliana]                      | 1227 | 811  | 0         | 66.1  | 36.1 | 43.9 | Contains similarity to a transposable element Tip100 protein for transposase from Ipomoea purpurea gb 4063769 and is a member of the transmembrane 4 family PF 00335 | gbpln       | Arabidopsis thaliana | AT1G19260.1   Symbols:   TTF-type zinc finger protein with HAT dimerisation domain   chr1:6657260-6659569 REVERSE LENGTH=769                                                                                                                                                  | 1227 | 769  | 0         | 62.7  | 36.1 | 43.9 |
| Rsa1.0_00531.1.g15545.t1 | gb EOA16490.1   hypothetical protein CARUB_v10004648mg [Capsella rubella]                                                                                                                                                                  | 97   | 497  | 1.00E-34  | 512.4 | 78.4 | 82.5 | hypothetical protein CARUB_v10004648mg                                                                                                                               | gbpln       | Capsella rubella     | AT4G39620.1   Symbols: EMB2453, ATPPR5   Tetratricopeptide repeat (TPR)-like superfamily protein   chr4:18395294-18397578 FORWARD LENGTH=563                                                                                                                                  | 97   | 563  | 5.00E-36  | 580.4 | 74.2 | 78.4 |
| Rsa1.0_00532.1.g15546.t2 | refXP_002883265.1   hypothetical protein ARALYDRAFT_318821 [Arabidopsis lyrata subsp. lyrata] gi 297329105 gb EFH59524.1   hypothetical protein ARALYDRAFT_318821 [Arabidopsis lyrata subsp. lyrata]                                       | 1242 | 1199 | 0         | 96.5  | 87.2 | 91.8 | hypothetical protein ARALYDRAFT_318821                                                                                                                               | gbpln       | Arabidopsis lyrata   | AT3G20720.2   Symbols:   unknown protein; FUNCTIONS IN: molecular function unknown; INVOLVED IN: biological process unknown; EXPRESSED IN: 22 plant structures; EXPRESSED DURING: 13 growth stages.   chr3:7240098-7246754 FORWARD LENGTH=1199                                | 1242 | 1199 | 0         | 96.5  | 87.4 | 91.5 |
| Rsa1.0_00532.1.g15547.t1 | sp Q9LT48.1 PP244_ARATH RecName: Full=Pentatricopeptide repeat-containing protein At3g20730 gi 9294399 dbj BAB02480.1   unnamed protein product [Arabidopsis thaliana] gi 51971823 dbj BAD44576.1   unknown protein [Arabidopsis thaliana] | 234  | 565  | 6.00E-94  | 241.5 | 75.6 | 86.8 | RecName: Full=Pentatricopeptide repeat-containing protein At3g20730 gi 9294399 dbj BAB02480.1   unnamed protein product                                              | gbpln       | Arabidopsis thaliana | AT3G20730.1   Symbols:   Tetratricopeptide repeat (TPR)-like superfamily protein   chr3:7247095-7248878 FORWARD LENGTH=564                                                                                                                                                    | 234  | 564  | 2.00E-96  | 241.0 | 75.6 | 86.8 |

|                          |                                                                                                                                                                                                                                                                                                                                                                                                                                                                                                                                                                                                                                                    |     |      |           |       |      |      |                                                            |       |                      |                                                                                                                                                                                                                                                                                                                            |     |     |           |       |      |      |
|--------------------------|----------------------------------------------------------------------------------------------------------------------------------------------------------------------------------------------------------------------------------------------------------------------------------------------------------------------------------------------------------------------------------------------------------------------------------------------------------------------------------------------------------------------------------------------------------------------------------------------------------------------------------------------------|-----|------|-----------|-------|------|------|------------------------------------------------------------|-------|----------------------|----------------------------------------------------------------------------------------------------------------------------------------------------------------------------------------------------------------------------------------------------------------------------------------------------------------------------|-----|-----|-----------|-------|------|------|
| Rsa1.0_00532.1.g15548.t1 | refNP_188710.1  polycomb group protein FERTILIZATION-INDEPENDENT ENDOSPERM [Arabidopsis thaliana] gi 30913043 sp Q9LT47.2 FIE_ARATH RecName: Full=Polycomb group protein FERTILIZATION-INDEPENDENT ENDOSPERM; AltName: Full=Protein FERTILIZATION-INDEPENDENT SEED 3 gi 4567095 gb AAD23584.1 fertilization-independent endosperm protein [Arabidopsis thaliana] gi 26449331 dbj BAC41793.1  putative fertilization-independent endosperm protein [Arabidopsis thaliana] gi 28950933 gb AAO63390.1  At3g20730 [Arabidopsis thaliana] gi 332642897 gb AEE76418.1  polycomb group protein FERTILIZATION-INDEPENDENT ENDOSPERM [Arabidopsis thaliana] | 369 | 369  | 0         | 100.0 | 91.6 | 96.5 | polycomb group protein FERTILIZATION-INDEPENDENT ENDOSPERM | gbpln | Arabidopsis thaliana | AT3G20740.1   Symbols: FIE, FIS3, FIE1   Transducin/WD40 repeat-like superfamily protein   chr3:7249064-7252254 REVERSE LENGTH=369                                                                                                                                                                                         | 369 | 369 | 0         | 100.0 | 91.6 | 96.5 |
| Rsa1.0_00532.1.g15549.t1 | gb EOA33107.1  hypothetical protein CARUB_v10016445mg [Capsella rubella]                                                                                                                                                                                                                                                                                                                                                                                                                                                                                                                                                                           | 201 | 230  | 9.00E-30  | 114.4 | 48.3 | 63.2 | hypothetical protein CARUB_v10016445mg                     | gbpln | Capsella rubella     | AT3G20750.1   Symbols: GATA29   GATA transcription factor 29   chr3:7255016-7256140 FORWARD LENGTH=208                                                                                                                                                                                                                     | 201 | 208 | 3.00E-27  | 103.5 | 52.7 | 64.7 |
| Rsa1.0_00532.1.g15550.t1 | gb ABD65615.1  hypothetical protein 23.t00033 [Brassica oleracea]                                                                                                                                                                                                                                                                                                                                                                                                                                                                                                                                                                                  | 144 | 326  | 7.00E-15  | 226.4 | 28.5 | 46.5 | hypothetical protein 23.t00033                             | gbpln | Brassica oleracea    | #                                                                                                                                                                                                                                                                                                                          | #   | #   | #         | #     | #    | #    |
| Rsa1.0_00532.1.g15551.t1 | gb AAD36942.1 AF069441.2 hypothetical protein [Arabidopsis thaliana] gi 7267196 emb CAB77907.1  hypothetical protein [Arabidopsis thaliana]                                                                                                                                                                                                                                                                                                                                                                                                                                                                                                        | 632 | 963  | 6.00E-51  | 152.4 | 21.7 | 33.1 | hypothetical protein                                       | gbpln | Arabidopsis thaliana | AT2G07240.1   Symbols:   cysteine-type peptidases:cysteine-type peptidases   chr2:3007102-3011701 REVERSE LENGTH=874                                                                                                                                                                                                       | 632 | 874 | 1.00E-28  | 138.3 | 11.6 | 17.2 |
| Rsa1.0_00532.1.g15552.t1 | ref XP_002885442.1  hypothetical protein ARALYDRAFT_898595 [Arabidopsis lyrata subsp. lyrata] gi 297331282 gb EFH61701.1  hypothetical protein ARALYDRAFT_898595 [Arabidopsis lyrata subsp. lyrata]                                                                                                                                                                                                                                                                                                                                                                                                                                                | 219 | 238  | 1.00E-55  | 108.7 | 57.1 | 69.9 | hypothetical protein ARALYDRAFT_898595                     | gbpln | Arabidopsis lyrata   | AT2G16600.1   Symbols: ROC3   rotamase CYP 3   chr2:7200862-7201383 FORWARD LENGTH=173                                                                                                                                                                                                                                     | 219 | 173 | 3.00E-53  | 79.0  | 49.8 | 58.4 |
| Rsa1.0_00532.1.g15553.t1 | gb EOA30103.1  hypothetical protein CARUB_v10013213mg [Capsella rubella]                                                                                                                                                                                                                                                                                                                                                                                                                                                                                                                                                                           | 546 | 627  | 0         | 114.8 | 78.2 | 85.5 | hypothetical protein CARUB_v10013213mg                     | gbpln | Capsella rubella     | AT3G20770.1   Symbols: EIN3, AtEIN3   Ethylene insensitive 3 family protein   chr3:7260702-7262588 REVERSE LENGTH=628                                                                                                                                                                                                      | 546 | 628 | 0         | 115.0 | 77.5 | 83.5 |
| Rsa1.0_00532.1.g15554.t1 | gb EOA30908.1  hypothetical protein CARUB_v10014055mg, partial [Capsella rubella]                                                                                                                                                                                                                                                                                                                                                                                                                                                                                                                                                                  | 338 | 356  | 1.00E-163 | 105.3 | 85.8 | 85.8 | hypothetical protein CARUB_v10014055mg, partial            | gbpln | Capsella rubella     | AT3G20800.1   Symbols:   Cell differentiation, Rcd1-like protein   chr3:7271412-7273897 REVERSE LENGTH=316                                                                                                                                                                                                                 | 338 | 316 | 1.00E-164 | 93.5  | 84.9 | 85.2 |
| Rsa1.0_00532.1.g15555.t1 | #                                                                                                                                                                                                                                                                                                                                                                                                                                                                                                                                                                                                                                                  | #   | #    | #         | #     | #    | -    | ----                                                       | ----  | ----                 | #                                                                                                                                                                                                                                                                                                                          | #   | #   | #         | #     | #    | #    |
| Rsa1.0_00532.1.g15556.t1 | #                                                                                                                                                                                                                                                                                                                                                                                                                                                                                                                                                                                                                                                  | #   | #    | #         | #     | #    | -    | ----                                                       | ----  | ----                 | #                                                                                                                                                                                                                                                                                                                          | #   | #   | #         | #     | #    | #    |
| Rsa1.0_00532.1.g15557.t4 | #                                                                                                                                                                                                                                                                                                                                                                                                                                                                                                                                                                                                                                                  | #   | #    | #         | #     | #    | -    | ----                                                       | ----  | ----                 | #                                                                                                                                                                                                                                                                                                                          | #   | #   | #         | #     | #    | #    |
| Rsa1.0_00532.1.g15558.t1 | dbj BAB10503.1  retroelement pol polyprotein-like [Arabidopsis thaliana]                                                                                                                                                                                                                                                                                                                                                                                                                                                                                                                                                                           | 545 | 1475 | 3.00E-88  | 270.6 | 28.3 | 34.7 | retroelement pol polyprotein-like                          | gbpln | Arabidopsis thaliana | AT1G21280.1   Symbols:   CONTAINS InterPro DOMAIN/s: Retrotransposon gag protein (InterPro:IPR005162); Has 707 Blast hits to 705 proteins in 25 species: Archae - 0; Bacteria - 0; Metazoa - 4; Fungi - 0; Plants - 703; Viruses - 0; Other Eukaryotes - 0 (source: NCBI BLINK).   chr1:7447690-7448403 REVERSE LENGTH=237 | 545 | 237 | 2.00E-20  | 43.5  | 10.5 | 19.4 |
| Rsa1.0_00532.1.g15559.t1 | gb AAD23705.1  putative Athlia retroelement ORF1 protein [Arabidopsis thaliana]                                                                                                                                                                                                                                                                                                                                                                                                                                                                                                                                                                    | 432 | 333  | 2.00E-19  | 77.1  | 18.8 | 24.5 | putative Athlia retroelement ORF1 protein                  | gbpln | Arabidopsis thaliana | #                                                                                                                                                                                                                                                                                                                          | #   | #   | #         | #     | #    | #    |
| Rsa1.0_00533.1.g15560.t1 | gb EOA38827.1  hypothetical protein CARUB_v10011150mg [Capsella rubella]                                                                                                                                                                                                                                                                                                                                                                                                                                                                                                                                                                           | 184 | 196  | 2.00E-68  | 106.5 | 78.3 | 85.3 | hypothetical protein CARUB_v10011150mg                     | gbpln | Capsella rubella     | AT1G17700.1   Symbols: PRA1.F1   prenylated RAB acceptor 1.F1   chr1:6089588-6090130 FORWARD LENGTH=180                                                                                                                                                                                                                    | 184 | 180 | 2.00E-68  | 97.8  | 75.5 | 84.8 |
| Rsa1.0_00533.1.g15561.t1 | ref XP_002892964.1  phosphoric monoester hydrolase [Arabidopsis lyrata subsp. lyrata] gi 297338806 gb EFH69223.1  phosphoric monoester hydrolase [Arabidopsis lyrata subsp. lyrata]                                                                                                                                                                                                                                                                                                                                                                                                                                                                | 283 | 284  | 1.00E-142 | 100.4 | 86.9 | 93.6 | phosphoric monoester hydrolase                             | gbpln | Arabidopsis lyrata   | AT1G17710.1   Symbols:   Pyridoxal phosphate phosphatase-related protein   chr1:6090763-6091975 REVERSE LENGTH=279                                                                                                                                                                                                         | 283 | 279 | 1.00E-139 | 98.6  | 84.8 | 90.8 |
| Rsa1.0_00533.1.g15562.t8 | gb EOA40186.1  hypothetical protein CARUB_v10008904mg [Capsella rubella]                                                                                                                                                                                                                                                                                                                                                                                                                                                                                                                                                                           | 501 | 506  | 0         | 101.0 | 87.4 | 91.2 | hypothetical protein CARUB_v10008904mg                     | gbpln | Capsella rubella     | AT1G17720.2   Symbols: ATB BETA   Protein phosphatase 2A, regulatory subunit PR55   chr1:6093949-6098065 REVERSE LENGTH=500                                                                                                                                                                                                | 501 | 500 | 0         | 99.8  | 86.8 | 90.8 |
| Rsa1.0_00533.1.g15563.t1 | #                                                                                                                                                                                                                                                                                                                                                                                                                                                                                                                                                                                                                                                  | #   | #    | #         | #     | #    | -    | ----                                                       | ----  | ----                 | #                                                                                                                                                                                                                                                                                                                          | #   | #   | #         | #     | #    | #    |

|                          |                                                                                                                                                                                                                                                                                                                                                                                                                                                                                                                                                                                                                                                                                                                                                                                            |      |      |           |       |      |      |                                             |       |                      |                                                                                                                                                                                                                                                                                                                                                                   |      |      |           |       |      |      |
|--------------------------|--------------------------------------------------------------------------------------------------------------------------------------------------------------------------------------------------------------------------------------------------------------------------------------------------------------------------------------------------------------------------------------------------------------------------------------------------------------------------------------------------------------------------------------------------------------------------------------------------------------------------------------------------------------------------------------------------------------------------------------------------------------------------------------------|------|------|-----------|-------|------|------|---------------------------------------------|-------|----------------------|-------------------------------------------------------------------------------------------------------------------------------------------------------------------------------------------------------------------------------------------------------------------------------------------------------------------------------------------------------------------|------|------|-----------|-------|------|------|
| Rsa1.0_00533.1.g15564.t1 | refNP_173217.1  PEP1 receptor 2 [Arabidopsis thaliana] gi 75334548 sp Q9FZ59.1 PEPR2_ARAT H RecName: Full=Leucine-rich repeat receptor-like protein kinase PEPR2; AltName: Full=Elicitor peptide 1 receptor 2; Short=PEP1 receptor 2; Flags: Precursor gi 9802748 gb AAF99817.1 AC034257.9 Unknown protein [Arabidopsis thaliana] gi 224589394 gb ACN59231.1  leucine-rich repeat receptor-like protein kinase [Arabidopsis thaliana] gi 332191511 gb AEE29632.1  PEP1 receptor 2 [Arabidopsis thaliana] refXP_002890248.1  hypothetical protein ARALYDRAFT_312743 [Arabidopsis lyrata subsp. lyrata] gi 297336090 gb EFH66507.1  hypothetical protein ARALYDRAFT_312743 [Arabidopsis lyrata subsp. lyrata]                                                                                | 1112 | 1088 | 0         | 97.8  | 74.8 | 83.5 | PEP1 receptor 2                             | gbpln | Arabidopsis thaliana | AT1G17750.1   Symbols: PEPR2, AtPEPR2   PEP1 receptor 2   chr1:6106656-6110008 FORWARD LENGTH=1088                                                                                                                                                                                                                                                                | 1112 | 1088 | 0         | 97.8  | 74.8 | 83.5 |
| Rsa1.0_00533.1.g15565.t1 | refXP_002890248.1  hypothetical protein ARALYDRAFT_312743 [Arabidopsis lyrata subsp. lyrata] gi 297336090 gb EFH66507.1  hypothetical protein ARALYDRAFT_312743 [Arabidopsis lyrata subsp. lyrata]                                                                                                                                                                                                                                                                                                                                                                                                                                                                                                                                                                                         | 754  | 978  | 0         | 129.7 | 49.2 | 61.0 | hypothetical protein ARALYDRAFT_312743      | gbpln | Arabidopsis lyrata   | AT1G17770.1   Symbols: SUVH7, SDG17   SU(VAR)3-9 homolog 7   chr1:6120741-6122822 FORWARD LENGTH=693                                                                                                                                                                                                                                                              | 754  | 693  | 0         | 91.9  | 48.3 | 60.7 |
| Rsa1.0_00533.1.g15566.t1 | gb EOA39163.1  hypothetical protein CARUB_v10012112mg [Capsella rubella]                                                                                                                                                                                                                                                                                                                                                                                                                                                                                                                                                                                                                                                                                                                   | 117  | 273  | 8.00E-22  | 233.3 | 53.8 | 65.0 | hypothetical protein CARUB_v10012112mg      | gbpln | Capsella rubella     | AT2G16575.1   Symbols:   unknown protein; BEST Arabidopsis thaliana protein match is: unknown protein (TAIR:AT1G17780.2); Has 30201 Blast hits to 17322 proteins in 780 species: Archae - 12; Bacteria - 1396; Metazoa - 17338; Fungi - 3422; Plants - 5037; Viruses - 0; Other Eukaryotes - 2996 (source: NCBI BLINK).   chr2:7184652-7185245 FORWARD LENGTH=170 | 117  | 170  | 7.00E-24  | 145.3 | 52.1 | 65.0 |
| Rsa1.0_00533.1.g15567.t1 | refXP_002892967.1  hypothetical protein ARALYDRAFT_312744 [Arabidopsis lyrata subsp. lyrata] gi 297338809 gb EFH69226.1  hypothetical protein ARALYDRAFT_312744 [Arabidopsis lyrata subsp. lyrata]                                                                                                                                                                                                                                                                                                                                                                                                                                                                                                                                                                                         | 474  | 482  | 1.00E-143 | 101.7 | 62.9 | 71.1 | hypothetical protein ARALYDRAFT_312744      | gbpln | Arabidopsis lyrata   | AT1G17790.1   Symbols:   DNA-binding bromodomain-containing protein   chr1:6125532-6127276 REVERSE LENGTH=487                                                                                                                                                                                                                                                     | 474  | 487  | 1.00E-138 | 102.7 | 59.7 | 68.4 |
| Rsa1.0_00533.1.g15568.t1 | refNP_173223.1  putative aquaporin TIP3-2 [Arabidopsis thaliana] gi 32363213 sp O22588.1 TIP32_ARATH RecName: Full=Probable aquaporin TIP3-2; AltName: Full=Beta-tonoplast intrinsic protein; Short=Beta-TIP; AltName: Full=Tonoplast intrinsic protein 3-2; Short=AtTIP32 gi 9665059 gb AAF97261.1 AC034106.4 Identical to beta-tonoplast intrinsic protein (beta-TIP) from Arabidopsis thaliana gb AF026275 and contains a MIP (major intrinsic protein) PF 00230 domain. ESTs gb R64952. gb AI999191 come from this gene [Arabidopsis thaliana] gi 2605714 gb AAB84183.1  beta-tonoplast intrinsic protein [Arabidopsis thaliana] gi 110737967 dbj BAF00920.1  hypothetical protein [Arabidopsis thaliana] gi 332191518 gb AEE29639.1  putative aquaporin TIP3-2 [Arabidopsis thaliana] | 268  | 267  | 1.00E-127 | 99.6  | 90.3 | 95.9 | putative aquaporin TIP3-2                   | gbpln | Arabidopsis thaliana | AT1G17810.1   Symbols: BETA-TIP   beta-tonoplast intrinsic protein   chr1:6130209-6131442 FORWARD LENGTH=267                                                                                                                                                                                                                                                      | 268  | 267  | 1.00E-129 | 99.6  | 90.3 | 95.9 |
| Rsa1.0_00533.1.g15569.t1 | refXP_002892968.1  hypothetical protein ARALYDRAFT_889192 [Arabidopsis lyrata subsp. lyrata] gi 297338810 gb EFH69227.1  hypothetical protein ARALYDRAFT_889192 [Arabidopsis lyrata subsp. lyrata]                                                                                                                                                                                                                                                                                                                                                                                                                                                                                                                                                                                         | 780  | 797  | 0         | 102.2 | 81.8 | 89.5 | hypothetical protein ARALYDRAFT_889192      | gbpln | Arabidopsis lyrata   | AT1G17820.1   Symbols:   Putative integral membrane protein conserved region (DUF2404)   chr1:6131751-6135115 REVERSE LENGTH=803                                                                                                                                                                                                                                  | 780  | 803  | 0         | 102.9 | 80.6 | 88.3 |
| Rsa1.0_00533.1.g15570.t1 | refXP_002892969.1  hypothetical protein ARALYDRAFT_471996 [Arabidopsis lyrata subsp. lyrata] gi 297338811 gb EFH69228.1  hypothetical protein ARALYDRAFT_471996 [Arabidopsis lyrata subsp. lyrata]                                                                                                                                                                                                                                                                                                                                                                                                                                                                                                                                                                                         | 329  | 337  | 1.00E-148 | 102.4 | 83.3 | 90.3 | hypothetical protein ARALYDRAFT_471996      | gbpln | Arabidopsis lyrata   | AT1G17830.1   Symbols:   Protein of unknown function (DUF789)   chr1:6136118-6138172 REVERSE LENGTH=337                                                                                                                                                                                                                                                           | 329  | 337  | 1.00E-149 | 102.4 | 81.5 | 90.0 |
| Rsa1.0_00533.1.g15571.t1 | gb AGC11818.1  putative ABC transporter G family member 11 [Eutrema halophilum]                                                                                                                                                                                                                                                                                                                                                                                                                                                                                                                                                                                                                                                                                                            | 678  | 703  | 0         | 103.7 | 97.6 | 98.7 | putative ABC transporter G family member 11 | gbpln | Eutrema halophilum   | AT1G17840.1   Symbols: WBC11, ABCG11, DSO, COF1, ATWBC11   white-brown complex homolog protein 11   chr1:6142870-6145894 FORWARD LENGTH=703                                                                                                                                                                                                                       | 678  | 703  | 0         | 103.7 | 97.1 | 98.4 |

|                          |                                                                                                                                                                                                                                                                                                                                                                                                                                                                                                                                                                                                                                                                                                                                                                                                                                                                                                                                  |     |     |           |       |      |      |                                                                      |       |                      |                                                                                                                                                   |     |     |          |       |      |      |
|--------------------------|----------------------------------------------------------------------------------------------------------------------------------------------------------------------------------------------------------------------------------------------------------------------------------------------------------------------------------------------------------------------------------------------------------------------------------------------------------------------------------------------------------------------------------------------------------------------------------------------------------------------------------------------------------------------------------------------------------------------------------------------------------------------------------------------------------------------------------------------------------------------------------------------------------------------------------|-----|-----|-----------|-------|------|------|----------------------------------------------------------------------|-------|----------------------|---------------------------------------------------------------------------------------------------------------------------------------------------|-----|-----|----------|-------|------|------|
| Rsa1.0_00533.1.g15572.t1 | refNP_001185025.1  rhodanese homology domain-containing protein [Arabidopsis thaliana] gi384950757 sp F41933.1 STR8_ARATH RecName: Full=Rhodanese-like domain-containing protein 8, chloroplastic; AltName: Full=Sulfurtransferase 8; Short=AtStr8; Flags: Precursor gi332191523 gb AEE29644.1  rhodanese homology domain-containing protein [Arabidopsis thaliana]                                                                                                                                                                                                                                                                                                                                                                                                                                                                                                                                                              | 450 | 448 | 0         | 99.6  | 80.0 | 85.1 | rhodanese homology domain-containing protein                         | gbpln | Arabidopsis thaliana | AT1G17850.2   Symbols: Rhodanese/Cell cycle control phosphatase superfamily protein   chr1:6146470-6148820 REVERSE LENGTH=448                     | 450 | 448 | 0        | 99.6  | 80.0 | 85.1 |
| Rsa1.0_00533.1.g15573.t1 | refNP_173228.1  kunitz type trypsin and protease inhibitor domain-containing protein [Arabidopsis thaliana] gi9665064 gb AAF97266.1 AC034106.9 Contains similarity to a tumor-related protein from Nicotiana tabacum gb U66263 and contains a trypsin and protease inhibitor PF00197 domain. ESTs gb AV561824, gb T44961, gb H36186, gb T45060, gb N38006, gb F19847 come from this gene [Arabidopsis thaliana] gi12083240 gb AAG48779.1 AF332416.1 putative lemir (miraculin) protein [Arabidopsis thaliana] gi13899081 gb AAK48962.1 AF370535.1 Unknown protein [Arabidopsis thaliana] gi15294166 gb AAK95260.1 AF410274.1 At1g17860/F2H15.8 [Arabidopsis thaliana] gi20148401 gb AAM10091.1  unknown protein [Arabidopsis thaliana] gi20453293 gb AAM19885.1  At1g17860/F2H15.8 [Arabidopsis thaliana] gi332191524 gb AEE29645.1  kunitz type trypsin and protease inhibitor domain-containing protein [Arabidopsis thaliana] | 197 | 196 | 3.00E-80  | 99.5  | 74.1 | 83.2 | kunitz type trypsin and protease inhibitor domain-containing protein | gbpln | Arabidopsis thaliana | AT1G17860.1   Symbols: Kunitz family trypsin and protease inhibitor protein   chr1:6149343-6149933 FORWARD LENGTH=196                             | 197 | 196 | 1.00E-82 | 99.5  | 74.1 | 83.2 |
| Rsa1.0_00533.1.g15574.t1 | refXP_002892971.1  hypothetical protein ARALYDRAFT_889199 [Arabidopsis lyrata subsp. lyrata] gi297338813 gb EFH69230.1  hypothetical protein ARALYDRAFT_889199 [Arabidopsis lyrata subsp. lyrata]                                                                                                                                                                                                                                                                                                                                                                                                                                                                                                                                                                                                                                                                                                                                | 575 | 573 | 0         | 99.7  | 89.4 | 94.1 | hypothetical protein ARALYDRAFT_889199                               | gbpln | Arabidopsis lyrata   | AT1G17870.1   Symbols: ATEGY3, EGY3   ethylene-dependent gravitropism-deficient and yellow-green-like 3   chr1:6150036-6152185 REVERSE LENGTH=573 | 575 | 573 | 0        | 99.7  | 89.4 | 93.4 |
| Rsa1.0_00533.1.g15575.t1 | gb EOA37168.1  hypothetical protein CARUB_v10010502mg [Capsella rubella]                                                                                                                                                                                                                                                                                                                                                                                                                                                                                                                                                                                                                                                                                                                                                                                                                                                         | 173 | 163 | 4.00E-76  | 94.2  | 83.2 | 87.3 | hypothetical protein CARUB_v10010502mg                               | gbpln | Capsella rubella     | AT1G17880.1   Symbols: BTF3, ATBTF3   basic transcription factor 3   chr1:6152572-6153425 REVERSE LENGTH=165                                      | 173 | 165 | 5.00E-71 | 95.4  | 75.1 | 78.6 |
| Rsa1.0_00533.1.g15576.t1 | refNP_564040.1  GDP-L-fucose synthase [Arabidopsis thaliana] gi75174832 sp Q9LLMU0.1 FCL2_ARATH RecName: Full=Putative GDP-L-fucose synthase 2; AltName: Full=GDP-4-keto-6-deoxy-D-mannose-3, 5-epimerase-4-reductase 2; Short=AtGER2 gi9665067 gb AAF97269.1 AC034106.12 Strong similarity to GER1 from Arabidopsis thaliana gb AF045286. ESTs gb A1996642, gb AV533951 come from this gene [Arabidopsis thaliana] gi17380848 gb AAL36236.1  putative GDP-L-fucose synthetase [Arabidopsis thaliana] gi20465283 gb AAM20005.1  putative GDP-L-fucose synthetase [Arabidopsis thaliana] gi332191529 gb AEE29650.1  putative GDP-L-fucose synthase 2 [Arabidopsis thaliana]                                                                                                                                                                                                                                                       | 326 | 328 | 1.00E-180 | 100.6 | 92.6 | 96.9 | GDP-L-fucose synthase                                                | gbpln | Arabidopsis thaliana | AT1G17890.1   Symbols: GER2   NAD(P)-binding Rossmann-fold superfamily protein   chr1:6154478-6155596 REVERSE LENGTH=328                          | 326 | 328 | 0        | 100.6 | 92.6 | 96.9 |

|                          |                                                                                                                                                                                                                                                                                                                                                                                                                                                                                                                                                                                                                                                                                                                                                                                                                                          |     |     |           |       |      |      |                                                 |       |                      |                                                                                                                              |     |     |           |       |      |      |
|--------------------------|------------------------------------------------------------------------------------------------------------------------------------------------------------------------------------------------------------------------------------------------------------------------------------------------------------------------------------------------------------------------------------------------------------------------------------------------------------------------------------------------------------------------------------------------------------------------------------------------------------------------------------------------------------------------------------------------------------------------------------------------------------------------------------------------------------------------------------------|-----|-----|-----------|-------|------|------|-------------------------------------------------|-------|----------------------|------------------------------------------------------------------------------------------------------------------------------|-----|-----|-----------|-------|------|------|
| Rsa1.0_00533.1.g15577.t1 | ref[NP_564041.2] homeobox-leucine zipper protein HDG12 [Arabidopsis thaliana]<br>gi 75264044 sp Q9LMT8.1 HDG12_ARAT<br>H RecName: Full=Homeobox-leucine zipper protein HDG12; AltName: Full=HD-ZIP protein HDG12; AltName: Full=Homeodomain GLABRA 2-like protein 12; AltName: Full=Homeodomain transcription factor HDG12; AltName: Full=Protein HOMEODOMAIN GLABROUS 12<br>gi 9665069 gb AAF97271.1 AC034106_14<br>Strong similarity to meristem L1 layer homeobox protein (ATML1) from Arabidopsis thaliana gb U37589 and contains Transposase PF 01527, Homeobox PF 00046, and START PF 01852 domains. EST gb A1995645 comes from this gene [Arabidopsis thaliana] gi 225897942 dbj BAH30303.1  hypothetical protein [Arabidopsis thaliana] gi 332191531 gb AEE29652.1  homeobox-leucine zipper protein HDG12 [Arabidopsis thaliana] | 686 | 687 | 0         | 100.1 | 83.2 | 90.2 | homeobox-leucine zipper protein HDG12           | gbpln | Arabidopsis thaliana | AT1G17920.1   Symbols: HDG12   homeodomain GLABROUS 12   chr1:6162214-6165033 REVERSE LENGTH=687                             | 686 | 687 | 0         | 100.1 | 83.2 | 90.2 |
| Rsa1.0_00533.1.g15578.t1 | gb AAM62582.1  unknown [Arabidopsis thaliana]                                                                                                                                                                                                                                                                                                                                                                                                                                                                                                                                                                                                                                                                                                                                                                                            | 477 | 478 | 0         | 100.2 | 91.8 | 96.0 | unknown                                         | gbpln | Arabidopsis thaliana | AT1G17930.1   Symbols:   Aminotransferase-like, plant mobile domain family protein   chr1:6166638-6168432 REVERSE LENGTH=478 | 477 | 478 | 0         | 100.2 | 91.6 | 95.8 |
| Rsa1.0_00533.1.g15579.t1 | gb EOA35199.1  hypothetical protein CARUB_v10020350mg [Capsella rubella] gi 482571012 gb EOA35200.1  hypothetical protein CARUB_v10020350mg [Capsella rubella]                                                                                                                                                                                                                                                                                                                                                                                                                                                                                                                                                                                                                                                                           | 405 | 424 | 0         | 104.7 | 93.1 | 97.0 | hypothetical protein CARUB_v10020350mg          | gbpln | Capsella rubella     | AT1G17940.1   Symbols:   Endosomal targeting BRO1-like domain-containing protein   chr1:6169621-6172035 REVERSE LENGTH=405   | 405 | 405 | 0         | 100.0 | 94.1 | 97.0 |
| Rsa1.0_00534.1.g15580.t1 | dbj BAA97086.1  unnamed protein product [Arabidopsis thaliana]<br>ref XP_004136969.1  PREDICTED: polyadenylate-binding protein 2-like [Cucumis sativus]<br>gi 449495630 ref XP_004159899.1  PREDICTED: polyadenylate-binding protein 2-like [Cucumis sativus]                                                                                                                                                                                                                                                                                                                                                                                                                                                                                                                                                                            | 300 | 341 | 1.00E-37  | 113.7 | 39.7 | 54.7 | unnamed protein product                         | gbpln | Arabidopsis thaliana | #                                                                                                                            | #   | #   | #         | #     | #    | #    |
| Rsa1.0_00534.1.g15581.t1 | ref XP_002891531.1  PAB8 binding protein 8 [Arabidopsis lyrata subsp. lyrata] gi 297337373 gb EFH67790.1  PAB8 binding protein 8 [Arabidopsis lyrata subsp. lyrata]                                                                                                                                                                                                                                                                                                                                                                                                                                                                                                                                                                                                                                                                      | 205 | 649 | 2.00E-25  | 316.6 | 31.2 | 38.0 | PREDICTED: polyadenylate-binding protein 2-like | gbpln | Cucumis sativus      | AT1G49760.2   Symbols: PAB8   poly(A) binding protein 8   chr1:18416740-18419753 FORWARD LENGTH=671                          | 205 | 671 | 1.00E-26  | 327.3 | 30.2 | 35.6 |
| Rsa1.0_00534.1.g15582.t1 | ref XP_002891531.1  PAB8 binding protein 8 [Arabidopsis lyrata subsp. lyrata] gi 297337373 gb EFH67790.1  PAB8 binding protein 8 [Arabidopsis lyrata subsp. lyrata]                                                                                                                                                                                                                                                                                                                                                                                                                                                                                                                                                                                                                                                                      | 121 | 669 | 1.00E-32  | 552.9 | 58.7 | 76.0 | PAB8 binding protein 8                          | gbpln | Arabidopsis lyrata   | AT1G49760.2   Symbols: PAB8   poly(A) binding protein 8   chr1:18416740-18419753 FORWARD LENGTH=671                          | 121 | 671 | 6.00E-35  | 554.5 | 58.7 | 75.2 |
| Rsa1.0_00534.1.g15583.t1 | ref XP_002885307.1  leucine-rich repeat family protein [Arabidopsis lyrata subsp. lyrata] gi 297331147 gb EFH61566.1  leucine-rich repeat family protein [Arabidopsis lyrata subsp. lyrata]                                                                                                                                                                                                                                                                                                                                                                                                                                                                                                                                                                                                                                              | 459 | 494 | 0         | 107.6 | 83.7 | 88.9 | leucine-rich repeat family protein              | gbpln | Arabidopsis lyrata   | AT3G19320.1   Symbols:   Leucine-rich repeat (LRR) family protein   chr3:6696395-6698073 REVERSE LENGTH=493                  | 459 | 493 | 0         | 107.4 | 72.5 | 75.6 |
| Rsa1.0_00534.1.g15584.t1 | ref XP_002883171.1  phospholipase C [Arabidopsis lyrata subsp. lyrata] gi 297329011 gb EFH59430.1  phospholipase C [Arabidopsis lyrata subsp. lyrata]                                                                                                                                                                                                                                                                                                                                                                                                                                                                                                                                                                                                                                                                                    | 406 | 412 | 0         | 101.5 | 85.5 | 93.3 | phospholipase C                                 | gbpln | Arabidopsis lyrata   | AT3G19310.1   Symbols:   PLC-like phosphodiesterases superfamily protein   chr3:6694260-6696193 FORWARD LENGTH=413           | 406 | 413 | 0         | 101.7 | 84.0 | 93.6 |
| Rsa1.0_00534.1.g15585.t1 | ref XP_002885306.1  kinase family protein [Arabidopsis lyrata subsp. lyrata] gi 297331146 gb EFH61565.1  kinase family protein [Arabidopsis lyrata subsp. lyrata]                                                                                                                                                                                                                                                                                                                                                                                                                                                                                                                                                                                                                                                                        | 657 | 663 | 0         | 100.9 | 81.1 | 85.8 | kinase family protein                           | gbpln | Arabidopsis lyrata   | AT3G19300.1   Symbols:   Protein kinase superfamily protein   chr3:6690242-6693210 REVERSE LENGTH=663                        | 657 | 663 | 0         | 100.9 | 81.0 | 86.5 |
| Rsa1.0_00534.1.g15586.t2 | ref XP_002883170.1  hypothetical protein ARALYDRAFT_479444 [Arabidopsis lyrata subsp. lyrata] gi 297329010 gb EFH59429.1  hypothetical protein ARALYDRAFT_479444 [Arabidopsis lyrata subsp. lyrata]                                                                                                                                                                                                                                                                                                                                                                                                                                                                                                                                                                                                                                      | 371 | 432 | 1.00E-133 | 116.4 | 82.7 | 87.1 | hypothetical protein ARALYDRAFT_479444          | gbpln | Arabidopsis lyrata   | AT3G19290.1   Symbols: ABF4, AREB2   ABRE binding factor 4   chr3:6687956-6689784 FORWARD LENGTH=431                         | 371 | 431 | 1.00E-128 | 116.2 | 81.1 | 84.9 |
| Rsa1.0_00534.1.g15587.t1 | #                                                                                                                                                                                                                                                                                                                                                                                                                                                                                                                                                                                                                                                                                                                                                                                                                                        | #   | #   | #         | #     | #    | -    | ----                                            | ----  | #                    | #                                                                                                                            | #   | #   | #         | #     | #    |      |



|                           |                                                                                                                                                                                                                                                                                                                                                                                                                                                                                                                                                                                                                                                                                                                                      |      |      |           |       |      |      |                                                       |       |                      |                                                                                                                                          |      |     |          |       |      |      |
|---------------------------|--------------------------------------------------------------------------------------------------------------------------------------------------------------------------------------------------------------------------------------------------------------------------------------------------------------------------------------------------------------------------------------------------------------------------------------------------------------------------------------------------------------------------------------------------------------------------------------------------------------------------------------------------------------------------------------------------------------------------------------|------|------|-----------|-------|------|------|-------------------------------------------------------|-------|----------------------|------------------------------------------------------------------------------------------------------------------------------------------|------|-----|----------|-------|------|------|
| Rsa1.0_00534.1.g15588.t1  | ref NP_188559.1  glycoprotein 3-alpha-L-fucosyltransferase A [Arabidopsis thaliana]<br>gi 17376382 sp Q9LJK1.1 FUT1.1 ARAT H RecName: Full=Glycoprotein 3-alpha-L-fucosyltransferase A; AltName: Full=Core alpha-(1,3)-fucosyltransferase; AltName: Full=Fuc-T C3; AltName: Full=FucT1; AltName: Full=FucTA; AltName: Full=Fucosyltransferase 11; Short=AtFUT11<br>gi 9294630 dbj BAB02969.1  fucosyltransferase 3 (Fuct c3 protein) [Arabidopsis thaliana]<br>gi 13992483 emb CAC38048.1  alpha1,3-fucosyltransferase [Arabidopsis thaliana] gi 15722480 emb CAC78979.1  core-alpha1,3fucosyltransferase 1 [Arabidopsis thaliana]<br>gi 332642696 gb AEE76217.1  glycoprotein 3-alpha-L-fucosyltransferase A [Arabidopsis thaliana] | 496  | 501  | 0         | 101.0 | 80.2 | 88.7 | glycoprotein 3-alpha-L-fucosyltransferase A           | gbpln | Arabidopsis thaliana | AT3G19280.1   Symbols: FUT11, ATFUT11, FUCT1, FUCTA   fucosyltransferase 11   chr3:6681409-6683801 REVERSE LENGTH=501                    | 496  | 501 | 0        | 101.0 | 80.2 | 88.7 |
| Rsa1.0_00534.1.g15589.t1  | ref XP_002885304.1  CYP707A4 [Arabidopsis lyrata subsp. lyrata]<br>gi 297331144 gb EFH61563.1  CYP707A4 [Arabidopsis lyrata subsp. lyrata]                                                                                                                                                                                                                                                                                                                                                                                                                                                                                                                                                                                           | 473  | 468  | 0         | 98.9  | 89.2 | 94.5 | CYP707A4                                              | gbpln | Arabidopsis lyrata   | AT3G19270.1   Symbols: CYP707A4   cytochrome P450, family 707, subfamily A, polypeptide 4   chr3:6673885-6676400 REVERSE LENGTH=468      | 473  | 468 | 0        | 98.9  | 87.9 | 93.9 |
| Rsa1.0_00534.1.g15590.t1  | #                                                                                                                                                                                                                                                                                                                                                                                                                                                                                                                                                                                                                                                                                                                                    | #    | #    | #         | #     | #    | -    | -                                                     | ----  | ----                 | #                                                                                                                                        | #    | #   | #        | #     | #    |      |
| Rsa1.0_00535.1.g15591.t2  | #                                                                                                                                                                                                                                                                                                                                                                                                                                                                                                                                                                                                                                                                                                                                    | #    | #    | #         | #     | #    | -    | -                                                     | ----  | ----                 | #                                                                                                                                        | #    | #   | #        | #     | #    |      |
| Rsa1.0_00535.1.g15592.t1  | #                                                                                                                                                                                                                                                                                                                                                                                                                                                                                                                                                                                                                                                                                                                                    | #    | #    | #         | #     | #    | -    | -                                                     | ----  | ----                 | #                                                                                                                                        | #    | #   | #        | #     | #    |      |
| Rsa1.0_00535.1.g15593.t1  | #                                                                                                                                                                                                                                                                                                                                                                                                                                                                                                                                                                                                                                                                                                                                    | #    | #    | #         | #     | #    | -    | -                                                     | ----  | ----                 | #                                                                                                                                        | #    | #   | #        | #     | #    |      |
| Rsa1.0_00535.1.g15594.t4  | gb ABD65057.1  hypothetical protein 27.t00123 [Brassica oleracea]                                                                                                                                                                                                                                                                                                                                                                                                                                                                                                                                                                                                                                                                    | 914  | 190  | 4.00E-22  | 20.8  | 9.3  | 11.1 | hypothetical protein 27.t00123                        | gbpln | Brassica oleracea    | #                                                                                                                                        | #    | #   | #        | #     | #    |      |
| Rsa1.0_00535.1.g15595.t1  | gb ABD65063.1  hypothetical protein 27.t00041 [Brassica oleracea]                                                                                                                                                                                                                                                                                                                                                                                                                                                                                                                                                                                                                                                                    | 150  | 198  | 4.00E-37  | 132.0 | 56.7 | 70.0 | hypothetical protein 27.t00041                        | gbpln | Brassica oleracea    | #                                                                                                                                        | #    | #   | #        | #     | #    |      |
| Rsa1.0_00535.1.g15596.t1  | gb ABD65118.1  hypothetical protein 31.t00031 [Brassica oleracea]                                                                                                                                                                                                                                                                                                                                                                                                                                                                                                                                                                                                                                                                    | 495  | 467  | 1.00E-103 | 94.3  | 39.2 | 53.1 | hypothetical protein 31.t00031                        | gbpln | Brassica oleracea    | AT1G52950.1   Symbols:   Nucleic acid-binding, OB-fold-like protein   chr1:19725483-19728007 FORWARD LENGTH=566                          | 495  | 566 | 3.00E-50 | 114.3 | 26.5 | 48.3 |
| Rsa1.0_00535.1.g15597.t1  | gb ABD65118.1  hypothetical protein 31.t00031 [Brassica oleracea]                                                                                                                                                                                                                                                                                                                                                                                                                                                                                                                                                                                                                                                                    | 490  | 467  | 3.00E-89  | 95.3  | 38.6 | 50.4 | hypothetical protein 31.t00031                        | gbpln | Brassica oleracea    | AT1G52950.1   Symbols:   Nucleic acid-binding, OB-fold-like protein   chr1:19725483-19728007 FORWARD LENGTH=566                          | 490  | 566 | 2.00E-57 | 115.5 | 31.8 | 52.4 |
| Rsa1.0_00535.1.g15598.t2  | gb AAF18538.1 AC006551_24 Very similar to retrotransposon reverse transcriptase [Arabidopsis thaliana]                                                                                                                                                                                                                                                                                                                                                                                                                                                                                                                                                                                                                               | 1082 | 1231 | 0         | 113.8 | 48.2 | 63.7 | Very similar to retrotransposon reverse transcriptase | gbpln | Arabidopsis thaliana | AT4G29090.1   Symbols:   Ribonuclease H-like superfamily protein   chr4:14333528-14335255 FORWARD LENGTH=575                             | 1082 | 575 | 1.00E-76 | 53.1  | 15.9 | 24.9 |
| Rsa1.0_00535.1.g15599.t1  | gb AAD21778.1  putative non-LTR retroelement reverse transcriptase [Arabidopsis thaliana]                                                                                                                                                                                                                                                                                                                                                                                                                                                                                                                                                                                                                                            | 266  | 1715 | 5.00E-20  | 644.7 | 23.7 | 35.7 | putative non-LTR retroelement reverse transcriptase   | gbpln | Arabidopsis thaliana | #                                                                                                                                        | #    | #   | #        | #     | #    |      |
| Rsa1.0_00535.1.g15600.t1  | gb AAF79797.1 AC020646_20 T32E20.30 [Arabidopsis thaliana]                                                                                                                                                                                                                                                                                                                                                                                                                                                                                                                                                                                                                                                                           | 148  | 1397 | 7.00E-18  | 943.9 | 29.1 | 37.8 | T32E20.30                                             | gbpln | Arabidopsis thaliana | #                                                                                                                                        | #    | #   | #        | #     | #    |      |
| Rsa1.0_00535.1.g15601.t16 | dbj BAB03186.1  En/Spm transposon protein-like [Arabidopsis thaliana]                                                                                                                                                                                                                                                                                                                                                                                                                                                                                                                                                                                                                                                                | 671  | 1516 | 3.00E-72  | 225.9 | 24.4 | 35.3 | En/Spm transposon protein-like                        | gbpln | Arabidopsis thaliana | #                                                                                                                                        | #    | #   | #        | #     | #    |      |
| Rsa1.0_00535.1.g15602.t1  | dbj BAB03186.1  En/Spm transposon protein-like [Arabidopsis thaliana]                                                                                                                                                                                                                                                                                                                                                                                                                                                                                                                                                                                                                                                                | 309  | 1516 | 1.00E-103 | 490.6 | 59.9 | 73.1 | En/Spm transposon protein-like                        | gbpln | Arabidopsis thaliana | #                                                                                                                                        | #    | #   | #        | #     | #    |      |
| Rsa1.0_00535.1.g15603.t7  | gb AAD23705.1  putative Athila retroelement ORF1 protein [Arabidopsis thaliana]                                                                                                                                                                                                                                                                                                                                                                                                                                                                                                                                                                                                                                                      | 962  | 333  | 1.00E-17  | 34.6  | 6.5  | 10.1 | putative Athila retroelement ORF1 protein             | gbpln | Arabidopsis thaliana | #                                                                                                                                        | #    | #   | #        | #     | #    |      |
| Rsa1.0_00535.1.g15604.t1  | dbj BAB02259.1  retroelement pol polyprotein-like [Arabidopsis thaliana]                                                                                                                                                                                                                                                                                                                                                                                                                                                                                                                                                                                                                                                             | 849  | 777  | 5.00E-69  | 91.5  | 21.8 | 33.6 | retroelement pol polyprotein-like                     | gbpln | Arabidopsis thaliana | #                                                                                                                                        | #    | #   | #        | #     | #    |      |
| Rsa1.0_00535.1.g15605.t1  | #                                                                                                                                                                                                                                                                                                                                                                                                                                                                                                                                                                                                                                                                                                                                    | #    | #    | #         | #     | #    | -    | -                                                     | ----  | ----                 | #                                                                                                                                        | #    | #   | #        | #     | #    |      |
| Rsa1.0_00536.1.g15606.t3  | ref XP_002894190.1  predicted protein [Arabidopsis lyrata subsp. lyrata]<br>gi 297340032 gb EFH70449.1  predicted protein [Arabidopsis lyrata subsp. lyrata]                                                                                                                                                                                                                                                                                                                                                                                                                                                                                                                                                                         | 241  | 193  | 4.00E-28  | 80.1  | 32.8 | 42.7 | predicted protein                                     | gbpln | Arabidopsis lyrata   | AT1G1362.1   Symbols:   Plant invertase/pectin methyltransferase inhibitor superfamily protein   chr1:3824630-3825184 REVERSE LENGTH=184 | 241  | 184 | 2.00E-28 | 76.3  | 27.4 | 41.1 |

|                          |                                                                                                                                                                                                                                                                                                                                                                                                                                                                                                                                                                                                      |      |      |           |       |      |      |                                               |       |                          |                                                                                                                                   |      |      |           |       |      |      |  |
|--------------------------|------------------------------------------------------------------------------------------------------------------------------------------------------------------------------------------------------------------------------------------------------------------------------------------------------------------------------------------------------------------------------------------------------------------------------------------------------------------------------------------------------------------------------------------------------------------------------------------------------|------|------|-----------|-------|------|------|-----------------------------------------------|-------|--------------------------|-----------------------------------------------------------------------------------------------------------------------------------|------|------|-----------|-------|------|------|--|
| Rsa1.0_00536.1.g15607.t1 | refNP_564513.1  PPPDE putative thiol peptidase family protein [Arabidopsis thaliana] gi 42571793 refNP_973987.1  PPPDE putative thiol peptidase family protein [Arabidopsis thaliana] gi 19424079 gb AAL87252.1  unknown protein [Arabidopsis thaliana] gi 21280795 gb AAM45073.1  unknown protein [Arabidopsis thaliana] gi 110742177 dbj BAE99016.1  hypothetical protein [Arabidopsis thaliana] gi 332194085 gb AEE32206.1  PPPDE putative thiol peptidase family protein [Arabidopsis thaliana] gi 332194086 gb AEE32207.1  PPPDE putative thiol peptidase family protein [Arabidopsis thaliana] | 282  | 279  | 1.00E-135 | 98.9  | 86.5 | 91.1 | PPPDE putative thiol peptidase family protein | gbpln | Arabidopsis thaliana     | AT1G47740.2   Symbols:   PPPDE putative thiol peptidase family protein   chr1:17567903-17569035 FORWARD LENGTH=279                | 282  | 279  | 1.00E-137 | 98.9  | 86.5 | 91.1 |  |
| Rsa1.0_00536.1.g15608.t1 | gb AAM60843.1  unknown [Arabidopsis thaliana] gi 56368451 emb CAD58677.1  putative PEX11-3 protein [Arabidopsis thaliana]                                                                                                                                                                                                                                                                                                                                                                                                                                                                            | 246  | 248  | 1.00E-101 | 100.8 | 75.6 | 91.5 | unknown                                       | gbpln | Arabidopsis thaliana     | AT1G47750.1   Symbols: PEX11A   peroxin 11A   chr1:17569388-17570134 REVERSE LENGTH=248                                           | 246  | 248  | 1.00E-104 | 100.8 | 75.6 | 91.5 |  |
| Rsa1.0_00536.1.g15609.t1 | gb EOA30753.1  hypothetical protein CARUB_v10013896mg [Capsella rubella]                                                                                                                                                                                                                                                                                                                                                                                                                                                                                                                             | 388  | 393  | 1.00E-112 | 101.3 | 58.8 | 70.9 | hypothetical protein CARUB_v10013896mg        | gbpln | Capsella rubella         | AT1G47790.1   Symbols:   F-box and associated interaction domains-containing protein   chr1:17600004-17601173 REVERSE LENGTH=389  | 388  | 389  | 1.00E-112 | 100.3 | 54.9 | 69.3 |  |
| Rsa1.0_00536.1.g15610.t1 | gb EOA20860.1  hypothetical protein CARUB_v10001197mg [Capsella rubella]                                                                                                                                                                                                                                                                                                                                                                                                                                                                                                                             | 377  | 375  | 1.00E-177 | 99.5  | 81.2 | 88.9 | hypothetical protein CARUB_v10001197mg        | gbpln | Capsella rubella         | AT5G22100.1   Symbols:   RNA cyclase family protein   chr5:7329015-7330718 FORWARD LENGTH=375                                     | 377  | 375  | 1.00E-172 | 99.5  | 78.8 | 89.1 |  |
| Rsa1.0_00536.1.g15611.t1 | # # # # # # # # # #                                                                                                                                                                                                                                                                                                                                                                                                                                                                                                                                                                                  |      |      |           |       |      |      | -                                             | ----  | ----                     | # # # # # # # #                                                                                                                   |      |      |           |       |      |      |  |
| Rsa1.0_00536.1.g15612.t2 | ref XP_003745280.1  PREDICTED: DNA topoisomerase 2-alpha-like [Metaseiulus occidentalis] gb AAF99784.1 AC012463.1 T2E6.3 [Arabidopsis thaliana] gi 110737661 dbj BAF00770.1  hypothetical protein [Arabidopsis thaliana]                                                                                                                                                                                                                                                                                                                                                                             | 292  | 1411 | 3.00E-47  | 483.2 | 34.9 | 57.2 | PREDICTED: DNA topoisomerase 2-alpha-like     | gbinv | Metaseiulus occidentalis | AT3G23890.1   Symbols: TOPII, ATTOPII   topoisomerase II   chr3:8624931-8631106 FORWARD LENGTH=1473                               | 292  | 1473 | 3.00E-43  | 504.5 | 34.9 | 54.8 |  |
| Rsa1.0_00536.1.g15613.t1 | gb AAF99784.1 AC012463.1 T2E6.3 [Arabidopsis thaliana] gi 110737661 dbj BAF00770.1  hypothetical protein [Arabidopsis thaliana]                                                                                                                                                                                                                                                                                                                                                                                                                                                                      | 416  | 419  | 0         | 100.7 | 87.3 | 92.3 | T2E6.3                                        | gbpln | Arabidopsis thaliana     | AT1G75710.1   Symbols:   C2H2-like zinc finger protein   chr1:28428806-28431128 FORWARD LENGTH=462                                | 416  | 462  | 1.00E-130 | 111.1 | 63.9 | 76.0 |  |
| Rsa1.0_00537.1.g15614.t1 | ref NP_180137.3  embryo defective 2410 protein [Arabidopsis thaliana] gi 330252637 gb AEC07731.1  embryo defective 2410 protein [Arabidopsis thaliana]                                                                                                                                                                                                                                                                                                                                                                                                                                               | 2118 | 2166 | 0         | 102.3 | 89.4 | 94.5 | embryo defective 2410 protein                 | gbpln | Arabidopsis thaliana     | AT2G25660.1   Symbols: emb2410   embryo defective 2410   chr2:10916456-10927390 REVERSE LENGTH=2166                               | 2118 | 2166 | 0         | 102.3 | 89.4 | 94.5 |  |
| Rsa1.0_00537.1.g15615.t1 | ref XP_002878404.1  C2 domain-containing protein [Arabidopsis lyrata subsp. lyrata] gi 297324242 gb EFH54663.1  C2 domain-containing protein [Arabidopsis lyrata subsp. lyrata]                                                                                                                                                                                                                                                                                                                                                                                                                      | 802  | 791  | 0         | 98.6  | 65.3 | 75.6 | C2 domain-containing protein                  | gbpln | Arabidopsis lyrata       | AT3G61720.1   Symbols:   Ca2+dependent plant phosphoribosyltransferase family protein   chr3:22843011-22845398 REVERSE LENGTH=795 | 802  | 795  | 0         | 99.1  | 62.7 | 75.2 |  |
| Rsa1.0_00537.1.g15616.t1 | gb ABD65099.1  hypothetical protein 31.t00074 [Brassica oleracea]                                                                                                                                                                                                                                                                                                                                                                                                                                                                                                                                    | 230  | 258  | 4.00E-70  | 112.2 | 59.1 | 72.2 | hypothetical protein 31.t00074                | gbpln | Brassica oleracea        | AT5G41220.1   Symbols: ATGSTT3, GST10C, GSTT3   glutathione S-transferase THETA 3   chr5:16494560-16496969 REVERSE LENGTH=590     | 230  | 590  | 8.00E-41  | 256.5 | 33.5 | 43.5 |  |
| Rsa1.0_00537.1.g15617.t1 | gb ABD65112.1  hypothetical protein 31.t00014 [Brassica oleracea]                                                                                                                                                                                                                                                                                                                                                                                                                                                                                                                                    | 137  | 122  | 3.00E-30  | 89.1  | 52.6 | 66.4 | hypothetical protein 31.t00014                | gbpln | Brassica oleracea        | #                                                                                                                                 | #    | #    | #         | #     | #    |      |  |
| Rsa1.0_00537.1.g15618.t3 | dbj BAJ34331.1  unnamed protein product [Theilungiella halophila]                                                                                                                                                                                                                                                                                                                                                                                                                                                                                                                                    | 519  | 585  | 0         | 112.7 | 80.9 | 86.1 | unnamed protein product                       | ----  | ----                     | AT1G73730.1   Symbols: EIL3, SLIM1, ATSLIM, AtEIL3   ETHYLENE-INSENSITIVE3-like 3   chr1:27730434-27732363 REVERSE LENGTH=567     | 519  | 567  | 0         | 109.2 | 75.1 | 81.3 |  |
| Rsa1.0_00537.1.g15619.t1 | ref XP_002453601.1  hypothetical protein SORBIDRAFT_04g008820 [Sorghum bicolor] gi 241933432 gb EES06577.1  hypothetical protein SORBIDRAFT_04g008820 [Sorghum bicolor]                                                                                                                                                                                                                                                                                                                                                                                                                              | 247  | 266  | 1.00E-38  | 107.7 | 37.7 | 48.2 | hypothetical protein SORBIDRAFT_04g008820     | gbpln | Sorghum bicolor          | AT5G31412.1   Symbols:   hAT transposon superfamily protein   chr5:11541463-11543768 REVERSE LENGTH=433                           | 247  | 433  | 1.00E-19  | 175.3 | 16.2 | 21.5 |  |
| Rsa1.0_00537.1.g15620.t1 | ref XP_002868325.1  hypothetical protein ARALYDRAFT_915512 [Arabidopsis lyrata subsp. lyrata] gi 297314161 gb EFH44584.1  hypothetical protein ARALYDRAFT_915512 [Arabidopsis lyrata subsp. lyrata]                                                                                                                                                                                                                                                                                                                                                                                                  | 475  | 366  | 1.00E-106 | 77.1  | 46.7 | 55.4 | hypothetical protein ARALYDRAFT_915512        | gbpln | Arabidopsis lyrata       | AT4G36840.1   Symbols:   Galactose oxidase/kelch repeat superfamily protein   chr4:17352166-17352882 FORWARD LENGTH=238           | 475  | 238  | 2.00E-47  | 50.1  | 24.2 | 29.7 |  |
| Rsa1.0_00537.1.g15621.t1 | dbj BAJ33800.1  unnamed protein product [Theilungiella halophila]                                                                                                                                                                                                                                                                                                                                                                                                                                                                                                                                    | 127  | 631  | 9.00E-57  | 496.9 | 84.3 | 90.6 | unnamed protein product                       | ----  | ----                     | AT1G73680.1   Symbols: ALPHA DOX2   alpha dioxigenase   chr1:27704221-27707417 REVERSE LENGTH=631                                 | 127  | 631  | 4.00E-59  | 496.9 | 82.7 | 89.8 |  |

|                          |                                                                                                                                                                                                                                                                                                                                                                                                                               |      |      |           |       |      |      |                                                                                                          |       |                      |                                                                                                                                                                                                                                                                                                                                                                                                                                                                            |      |      |           |       |      |      |
|--------------------------|-------------------------------------------------------------------------------------------------------------------------------------------------------------------------------------------------------------------------------------------------------------------------------------------------------------------------------------------------------------------------------------------------------------------------------|------|------|-----------|-------|------|------|----------------------------------------------------------------------------------------------------------|-------|----------------------|----------------------------------------------------------------------------------------------------------------------------------------------------------------------------------------------------------------------------------------------------------------------------------------------------------------------------------------------------------------------------------------------------------------------------------------------------------------------------|------|------|-----------|-------|------|------|
| Rsa1.0_00537.1.g15622.t1 | ref XP_002889006.1  hypothetical protein ARALYDRAFT_476644 [Arabidopsis lyrata subsp. lyrata] g 297334847 gb EFH65265.1  hypothetical protein ARALYDRAFT_476644 [Arabidopsis lyrata subsp. lyrata]                                                                                                                                                                                                                            | 169  | 244  | 1.00E-57  | 144.4 | 67.5 | 79.3 | hypothetical protein ARALYDRAFT_476644                                                                   | gbpln | Arabidopsis lyrata   | AT1G75060.2   Symbols:   unknown protein; FUNCTIONS IN: molecular_function unknown; INVOLVED IN: biological_process unknown; LOCATED IN: cellular_component unknown; BEST Arabidopsis thaliana protein match is: unknown protein (TAIR:AT1G19330.2): Has 104 Blast hits to 104 proteins in 22 species: Archae - 0; Bacteria - 0; Metazoa - 0; Fungi - 0; Plants - 104; Viruses - 0; Other Eukaryotes - 0 (source: NCBI BLink).   chr1:28181481-28183285 REVERSE LENGTH=241 | 169  | 241  | 4.00E-57  | 142.6 | 65.1 | 75.1 |
| Rsa1.0_00537.1.g15623.t1 | #                                                                                                                                                                                                                                                                                                                                                                                                                             | #    | #    | #         | #     | #    | #    | -                                                                                                        | ----  | ----                 | #                                                                                                                                                                                                                                                                                                                                                                                                                                                                          | #    | #    | #         | #     | #    |      |
| Rsa1.0_00537.1.g15624.t1 | ref NP_180117.4  receptor like protein 21 [Arabidopsis thaliana] g 33025261.1 gb AEC07705.1  receptor like protein 21 [Arabidopsis thaliana]                                                                                                                                                                                                                                                                                  | 714  | 935  | 0         | 131.0 | 61.9 | 72.7 | receptor like protein 21                                                                                 | gbpln | Arabidopsis thaliana | AT2G25470.1   Symbols: AtRLP21, RLP21   receptor like protein 21   chr2:10838420-10841881 FORWARD LENGTH=935                                                                                                                                                                                                                                                                                                                                                               | 714  | 935  | 0         | 131.0 | 61.9 | 72.7 |
| Rsa1.0_00537.1.g15625.t1 | gb EOA26736.1  hypothetical protein CARUB_v10022822mg [Capsella rubella]                                                                                                                                                                                                                                                                                                                                                      | 646  | 628  | 0         | 97.2  | 80.7 | 89.0 | hypothetical protein CARUB_v10022822mg                                                                   | gbpln | Capsella rubella     | AT2G25490.1   Symbols: EBF1, FBL6   EIN3-binding F box protein 1   chr2:10848018-10850275 REVERSE LENGTH=628                                                                                                                                                                                                                                                                                                                                                               | 646  | 628  | 0         | 97.2  | 80.0 | 89.0 |
| Rsa1.0_00537.1.g15626.t1 | gb EOA26520.1  hypothetical protein CARUB_v10022573mg [Capsella rubella]                                                                                                                                                                                                                                                                                                                                                      | 916  | 974  | 0         | 106.3 | 62.9 | 75.4 | hypothetical protein CARUB_v10022573mg                                                                   | gbpln | Capsella rubella     | AT2G25470.1   Symbols: AtRLP21, RLP21   receptor like protein 21   chr2:10838420-10841881 FORWARD LENGTH=935                                                                                                                                                                                                                                                                                                                                                               | 916  | 935  | 0         | 102.1 | 60.9 | 73.9 |
| Rsa1.0_00537.1.g15627.t1 | #                                                                                                                                                                                                                                                                                                                                                                                                                             | #    | #    | #         | #     | #    | #    | -                                                                                                        | ----  | ----                 | #                                                                                                                                                                                                                                                                                                                                                                                                                                                                          | #    | #    | #         | #     | #    |      |
| Rsa1.0_00537.1.g15628.t1 | gb ACB59217.1  ENTH [Brassica oleracea]                                                                                                                                                                                                                                                                                                                                                                                       | 637  | 646  | 0         | 101.4 | 93.7 | 94.5 | ENTH                                                                                                     | gbpln | Brassica oleracea    | AT2G25430.1   Symbols:   epsin N-terminal homology (ENTH) domain-containing protein / clathrin assembly protein-related   chr2:10822716-10824677 FORWARD LENGTH=653                                                                                                                                                                                                                                                                                                        | 637  | 653  | 0         | 102.5 | 92.0 | 94.2 |
| Rsa1.0_00537.1.g15629.t1 | #                                                                                                                                                                                                                                                                                                                                                                                                                             | #    | #    | #         | #     | #    | #    | -                                                                                                        | ----  | ----                 | #                                                                                                                                                                                                                                                                                                                                                                                                                                                                          | #    | #    | #         | #     | #    |      |
| Rsa1.0_00538.1.g15630.t1 | gb EOA19925.1  hypothetical protein CARUB_v10000175mg [Capsella rubella]                                                                                                                                                                                                                                                                                                                                                      | 553  | 896  | 0         | 162.0 | 82.8 | 89.3 | hypothetical protein CARUB_v10000175mg                                                                   | gbpln | Capsella rubella     | AT5G06220.2   Symbols:   LETM1-like protein   chr5:1880049-1885366 FORWARD LENGTH=909                                                                                                                                                                                                                                                                                                                                                                                      | 553  | 909  | 0         | 164.4 | 79.7 | 87.9 |
| Rsa1.0_00538.1.g15631.t3 | ref XP_002871200.1  sucrose-proton symporter 6 [Arabidopsis lyrata subsp. lyrata] g 297317037 gb EFH47459.1  sucrose-proton symporter 6 [Arabidopsis lyrata subsp. lyrata]                                                                                                                                                                                                                                                    | 494  | 492  | 0         | 99.6  | 80.6 | 90.9 | sucrose-proton symporter 6                                                                               | gbpln | Arabidopsis lyrata   | AT1G66570.1   Symbols: ATSUC7, SUC7   sucrose-proton symporter 7   chr1:24835309-24837242 REVERSE LENGTH=491                                                                                                                                                                                                                                                                                                                                                               | 494  | 491  | 0         | 99.4  | 79.1 | 90.5 |
| Rsa1.0_00538.1.g15632.t1 | gb AAA50234.1  nucleosome assembly protein 1-like protein; similar to mouse nap 1, PIR Accession Number JS0707, partial [Arabidopsis thaliana]                                                                                                                                                                                                                                                                                | 128  | 382  | 1.00E-10  | 298.4 | 32.0 | 36.7 | nucleosome assembly protein 1-like protein; similar to mouse nap 1, PIR Accession Number JS0707, partial | gbpln | Arabidopsis thaliana | AT4G26110.1   Symbols: NAP1:1, ATNAP1:1   nucleosome assembly protein1:1   chr4:13232712-13235502 FORWARD LENGTH=372                                                                                                                                                                                                                                                                                                                                                       | 128  | 372  | 3.00E-13  | 290.6 | 32.0 | 36.7 |
| Rsa1.0_00538.1.g15633.t3 | gb AAO41731.1  cytoplasmic ribosomal protein S14 [Brassica napus]                                                                                                                                                                                                                                                                                                                                                             | 86   | 150  | 9.00E-43  | 174.4 | 98.8 | 98.8 | cytoplasmic ribosomal protein S14                                                                        | gbpln | Brassica napus       | AT3G11510.1   Symbols:   Ribosomal protein S11 family protein   chr3:3623757-3624866 REVERSE LENGTH=150                                                                                                                                                                                                                                                                                                                                                                    | 86   | 150  | 3.00E-43  | 174.4 | 93.0 | 97.7 |
| Rsa1.0_00538.1.g15634.t1 | gb EOA36691.1  hypothetical protein CARUB_v10012096mg [Capsella rubella]                                                                                                                                                                                                                                                                                                                                                      | 329  | 327  | 1.00E-160 | 99.4  | 80.5 | 88.4 | hypothetical protein CARUB_v10012096mg                                                                   | gbpln | Capsella rubella     | AT5G43690.1   Symbols:   P-loop containing nucleoside triphosphate hydrolases superfamily protein   chr5:17546273-17547268 FORWARD LENGTH=331                                                                                                                                                                                                                                                                                                                              | 329  | 331  | 1.00E-155 | 100.6 | 78.4 | 86.6 |
| Rsa1.0_00538.1.g15635.t1 | gb EOA36691.1  hypothetical protein CARUB_v10012096mg [Capsella rubella]                                                                                                                                                                                                                                                                                                                                                      | 331  | 327  | 1.00E-128 | 98.8  | 66.5 | 80.1 | hypothetical protein CARUB_v10012096mg                                                                   | gbpln | Capsella rubella     | AT5G43690.1   Symbols:   P-loop containing nucleoside triphosphate hydrolases superfamily protein   chr5:17546273-17547268 FORWARD LENGTH=331                                                                                                                                                                                                                                                                                                                              | 331  | 331  | 1.00E-125 | 100.0 | 64.4 | 78.5 |
| Rsa1.0_00538.1.g15636.t2 | ref NP_001190236.1  armadillo/beta-catenin-like repeat-containing protein [Arabidopsis thaliana] g 334187454 ref NP_001190237.1  armadillo/beta-catenin-like repeat-containing protein [Arabidopsis thaliana] g 332003588 gb AED90971.1  armadillo/beta-catenin-like repeat-containing protein [Arabidopsis thaliana] g 332003589 gb AED90972.1  armadillo/beta-catenin-like repeat-containing protein [Arabidopsis thaliana] | 1074 | 1052 | 0         | 98.0  | 85.1 | 89.3 | armadillo/beta-catenin-like repeat-containing protein                                                    | gbpln | Arabidopsis thaliana | AT5G06120.2   Symbols:   ARM repeat superfamily protein   chr5:1845309-1852601 FORWARD LENGTH=1052                                                                                                                                                                                                                                                                                                                                                                         | 1074 | 1052 | 0         | 98.0  | 85.1 | 89.3 |
| Rsa1.0_00538.1.g15637.t1 | ref NP_196227.1  glycerol-3-phosphate acyltransferase 7 [Arabidopsis thaliana] g 83288236 sp Q9LHS7.1 GPAT7, ARAT H RecName: Full=Glycerol-3-phosphate acyltransferase 7; Short=ATGPAT7 g 8978345 db BAA98198.1  unnamed protein product [Arabidopsis thaliana] g 332003580 gb AED90963.1  glycerol-3-phosphate acyltransferase 7 [Arabidopsis thaliana]                                                                      | 614  | 500  | 0         | 81.4  | 71.5 | 75.6 | glycerol-3-phosphate acyltransferase 7                                                                   | gbpln | Arabidopsis thaliana | AT5G06090.1   Symbols: ATGPAT7, GPAT7   glycerol-3-phosphate acyltransferase 7   chr5:1835106-1836722 FORWARD LENGTH=500                                                                                                                                                                                                                                                                                                                                                   | 614  | 500  | 0         | 81.4  | 71.5 | 75.6 |

|                           |                                                                                                                                                                                                                                                                                                                                                                                                                                                                                                                                                                |     |     |           |       |      |      |                                                |       |                      |                                                                                                                            |     |     |           |       |      |      |
|---------------------------|----------------------------------------------------------------------------------------------------------------------------------------------------------------------------------------------------------------------------------------------------------------------------------------------------------------------------------------------------------------------------------------------------------------------------------------------------------------------------------------------------------------------------------------------------------------|-----|-----|-----------|-------|------|------|------------------------------------------------|-------|----------------------|----------------------------------------------------------------------------------------------------------------------------|-----|-----|-----------|-------|------|------|
| Rsa1.0_00538.1.g15638.t1  | ref[XP_002873236.1] predicted protein [Arabidopsis lyrata subsp. lyrata] gi 297319073 gb EFH49495.1  predicted protein [Arabidopsis lyrata subsp. lyrata]                                                                                                                                                                                                                                                                                                                                                                                                      | 185 | 182 | 4.00E-82  | 98.4  | 79.5 | 87.0 | predicted protein                              | gbpln | Arabidopsis lyrata   | AT5G06080.1   Symbols: LBD33   LOB domain-containing protein 33   chr5:1830796-1831427 REVERSE LENGTH=177                  | 185 | 177 | 6.00E-79  | 95.7  | 75.1 | 82.2 |
| Rsa1.0_00538.1.g15639.t1  | ref[NP_568161.1] putative transcriptional regulator RABBIT EARS [Arabidopsis thaliana] gi 41688606 sp Q9LHS9.2 RBE_ARATH RecName: Full=Probable transcriptional regulator RABBIT EARS gi 37514920 dbj BAC98433.1  one finger-type zinc finger protein for RABBIT EARS [Arabidopsis thaliana] gi 94442519 gb ABF19047.1  At5g06070 [Arabidopsis thaliana] gi 332003578 gb AED90961.1  putative transcriptional regulator RABBIT EARS [Arabidopsis thaliana]                                                                                                     | 239 | 226 | 9.00E-93  | 94.6  | 72.4 | 80.8 | putative transcriptional regulator RABBIT EARS | gbpln | Arabidopsis thaliana | AT5G06070.1   Symbols: RBE, RAB   C2H2 and C2HC zinc fingers superfamily protein   chr5:1828426-1829106 REVERSE LENGTH=226 | 239 | 226 | 3.00E-95  | 94.6  | 72.4 | 80.8 |
| Rsa1.0_00538.1.g15640.t1  | ref[XP_002873234.1] hypothetical protein ARALYDRAFT_487407 [Arabidopsis lyrata subsp. lyrata] gi 297319071 gb EFH49493.1  hypothetical protein ARALYDRAFT_487407 [Arabidopsis lyrata subsp. lyrata] ref[NP_196224.1] putative methyltransferase PMT12 [Arabidopsis thaliana] gi 75262411 sp Q9FG39.1 PMTC_ARATH RecName: Full=Probable methyltransferase PMT12 gi 10257485 dbj BAB10206.1  ankyrin-like protein [Arabidopsis thaliana] gi 51536506 gb AAU05491.1  At5g06050 [Arabidopsis thaliana] gi 58652086 gb AAW80868.1  At5g06050 [Arabidopsis thaliana] | 262 | 262 | 1.00E-127 | 100.0 | 83.6 | 92.0 | hypothetical protein ARALYDRAFT_487407         | gbpln | Arabidopsis lyrata   | AT5G06060.1   Symbols:   NAD(P)-binding Rossmann-fold superfamily protein   chr5:1824066-1825833 REVERSE LENGTH=264        | 262 | 264 | 1.00E-130 | 100.8 | 83.2 | 92.4 |
| Rsa1.0_00538.1.g15641.t1  | gi 110740549 dbj BAE98380.1  ankyrin like protein [Arabidopsis thaliana] gi 332003576 gb AED90959.1  putative methyltransferase PMT12 [Arabidopsis thaliana]                                                                                                                                                                                                                                                                                                                                                                                                   | 476 | 682 | 0         | 143.3 | 79.2 | 81.9 | putative methyltransferase PMT12               | gbpln | Arabidopsis thaliana | AT5G06050.1   Symbols:   Putative methyltransferase family protein   chr5:1820196-1823572 FORWARD LENGTH=682               | 476 | 682 | 0         | 143.3 | 79.2 | 81.9 |
| Rsa1.0_00538.1.g15642.t1  | #                                                                                                                                                                                                                                                                                                                                                                                                                                                                                                                                                              | #   | #   | #         | #     | #    | #    | -                                              | ----  | ----                 | #                                                                                                                          | #   | #   | #         | #     | #    |      |
| Rsa1.0_00538.1.g15643.t1  | ref[NP_196224.1] putative methyltransferase PMT12 [Arabidopsis thaliana] gi 75262411 sp Q9FG39.1 PMTC_ARATH RecName: Full=Probable methyltransferase PMT12 gi 10257485 dbj BAB10206.1  ankyrin-like protein [Arabidopsis thaliana] gi 51536506 gb AAU05491.1  At5g06050 [Arabidopsis thaliana] gi 58652086 gb AAW80868.1  At5g06050 [Arabidopsis thaliana] gi 110740549 dbj BAE98380.1  ankyrin like protein [Arabidopsis thaliana] gi 332003576 gb AED90959.1  putative methyltransferase PMT12 [Arabidopsis thaliana]                                        | 307 | 682 | 4.00E-99  | 222.1 | 62.2 | 70.4 | putative methyltransferase PMT12               | gbpln | Arabidopsis thaliana | AT5G06050.1   Symbols:   Putative methyltransferase family protein   chr5:1820196-1823572 FORWARD LENGTH=682               | 307 | 682 | 1.00E-102 | 222.1 | 62.2 | 70.4 |
| Rsa1.0_00538.1.g15644.t1  | ref[XP_002873233.1] mitochondrial glycoprotein family protein [Arabidopsis lyrata subsp. lyrata] gi 297319070 gb EFH49492.1  mitochondrial glycoprotein family protein [Arabidopsis lyrata subsp. lyrata]                                                                                                                                                                                                                                                                                                                                                      | 262 | 259 | 1.00E-107 | 98.9  | 78.6 | 88.2 | mitochondrial glycoprotein family protein      | gbpln | Arabidopsis lyrata   | AT5G05990.1   Symbols:   Mitochondrial glycoprotein family protein   chr5:1806911-1807895 REVERSE LENGTH=259               | 262 | 259 | 1.00E-107 | 98.9  | 77.9 | 87.0 |
| Rsa1.0_00538.1.g15645.t10 | gb EOA20243.1  hypothetical protein CARUB_v10000544mg [Capsella rubella]                                                                                                                                                                                                                                                                                                                                                                                                                                                                                       | 583 | 587 | 0         | 100.7 | 88.2 | 92.1 | hypothetical protein CARUB_v10000544mg         | gbpln | Capsella rubella     | AT5G05980.1   Symbols: ATDFB, DFB, FPGS1   DHFS-FPGS homolog B   chr5:1799738-1804441 REVERSE LENGTH=571                   | 583 | 571 | 0         | 97.9  | 86.6 | 89.9 |
| Rsa1.0_00538.1.g15646.t1  | ref[XP_002871192.1] transducin family protein [Arabidopsis lyrata subsp. lyrata] gi 297317029 gb EFH47451.1  transducin family protein [Arabidopsis lyrata subsp. lyrata]                                                                                                                                                                                                                                                                                                                                                                                      | 750 | 780 | 0         | 104.0 | 81.9 | 89.2 | transducin family protein                      | gbpln | Arabidopsis lyrata   | AT5G05970.2   Symbols: NEDD1   Transducin/WD40 repeat-like superfamily protein   chr5:1795464-1799313 FORWARD LENGTH=782   | 750 | 782 | 0         | 104.3 | 80.7 | 88.1 |
| Rsa1.0_00539.1.g15647.t1  | #                                                                                                                                                                                                                                                                                                                                                                                                                                                                                                                                                              | #   | #   | #         | #     | #    | #    | -                                              | ----  | ----                 | #                                                                                                                          | #   | #   | #         | #     | #    |      |
| Rsa1.0_00539.1.g15648.t1  | dbj BAJ34392.1  unnamed protein product [Theillungiella halophila]                                                                                                                                                                                                                                                                                                                                                                                                                                                                                             | 350 | 350 | 1.00E-166 | 100.0 | 83.4 | 89.7 | unnamed protein product                        | ----  | ----                 | AT2G38380.1   Symbols:   Peroxidase superfamily protein   chr2:16076443-16078314 FORWARD LENGTH=349                        | 350 | 349 | 1.00E-167 | 99.7  | 81.7 | 88.6 |

|                          |                                                                                                                                                                                                                                                                                             |     |     |           |       |      |      |                                        |       |                      |                                                                                                                                                                                                                                                                                                                                                                                          |     |     |           |       |      |      |
|--------------------------|---------------------------------------------------------------------------------------------------------------------------------------------------------------------------------------------------------------------------------------------------------------------------------------------|-----|-----|-----------|-------|------|------|----------------------------------------|-------|----------------------|------------------------------------------------------------------------------------------------------------------------------------------------------------------------------------------------------------------------------------------------------------------------------------------------------------------------------------------------------------------------------------------|-----|-----|-----------|-------|------|------|
| Rsa1.0_00539.1.g15649.t1 | dbj BAJ34392.1  unnamed protein product [Theillungiella halophila]                                                                                                                                                                                                                          | 348 | 350 | 1.00E-157 | 100.6 | 80.7 | 88.2 | unnamed protein product                | ----  | ----                 | AT2G38380.1   Symbols:   Peroxidase superfamily protein   chr2:16076443-16078314 FORWARD LENGTH=349                                                                                                                                                                                                                                                                                      | 348 | 349 | 1.00E-155 | 100.3 | 78.2 | 85.1 |
| Rsa1.0_00539.1.g15650.t1 | dbj BAJ33985.1  unnamed protein product [Theillungiella halophila]                                                                                                                                                                                                                          | 645 | 478 | 0         | 74.1  | 69.9 | 72.4 | unnamed protein product                | ----  | ----                 | AT2G38400.1   Symbols: AGT3   alanine:glyoxylate aminotransferase 3   chr2:16083779-16085974 FORWARD LENGTH=477                                                                                                                                                                                                                                                                          | 645 | 477 | 0         | 74.0  | 67.9 | 71.0 |
| Rsa1.0_00539.1.g15651.t1 | ref XP_002881597.1  hypothetical protein ARALYDRAFT_345626 [Arabidopsis lyrata subsp. lyrata] gi 297327436 gb EFH57856.1  hypothetical protein ARALYDRAFT_345626 [Arabidopsis lyrata subsp. lyrata]                                                                                         | 373 | 366 | 2.33E-156 | 98.1  | 71.6 | 81.0 | hypothetical protein ARALYDRAFT_345626 | gbpln | Arabidopsis lyrata   | AT2G38430.1   Symbols:   unknown protein; BEST Arabidopsis thaliana protein match is: unknown protein (TAIR:AT3G54310.1); Has 35333 Blast hits to 34131 proteins in 2444 species: Archae - 798; Bacteria - 22429; Metazoa - 974; Fungi - 991; Plants - 531; Viruses - 0; Other Eukaryotes - 9610 (source: NCBI BLINK).   chr2:16092950-16094810 REVERSE LENGTH=393                       | 373 | 393 | 1.00E-148 | 105.4 | 71.6 | 82.3 |
| Rsa1.0_00539.1.g15652.t1 | emb CAC08339.1  katanin p80 subunit-like protein [Arabidopsis thaliana]                                                                                                                                                                                                                     | 235 | 823 | 5.00E-20  | 350.2 | 23.4 | 26.0 | katanin p80 subunit-like protein       | gbpln | Arabidopsis thaliana | AT5G08390.1   Symbols:   Transducin/WD40 repeat-like superfamily protein   chr5:2701448-2706910 FORWARD LENGTH=839                                                                                                                                                                                                                                                                       | 235 | 839 | 2.00E-22  | 357.0 | 23.4 | 26.0 |
| Rsa1.0_00539.1.g15653.t1 | gb AAC28761.1  hypothetical protein [Arabidopsis thaliana]                                                                                                                                                                                                                                  | 361 | 399 | 1.00E-116 | 110.5 | 62.9 | 78.4 | hypothetical protein                   | gbpln | Arabidopsis thaliana | AT2G38430.1   Symbols:   unknown protein; BEST Arabidopsis thaliana protein match is: unknown protein (TAIR:AT3G54310.1); Has 35333 Blast hits to 34131 proteins in 2444 species: Archae - 798; Bacteria - 22429; Metazoa - 974; Fungi - 991; Plants - 531; Viruses - 0; Other Eukaryotes - 9610 (source: NCBI BLINK).   chr2:16092950-16094810 REVERSE LENGTH=393                       | 361 | 393 | 1.00E-116 | 108.9 | 61.8 | 77.3 |
| Rsa1.0_00539.1.g15654.t1 | gb AAC28761.1  hypothetical protein [Arabidopsis thaliana]                                                                                                                                                                                                                                  | 401 | 399 | 1.00E-133 | 99.5  | 61.3 | 74.8 | hypothetical protein                   | gbpln | Arabidopsis thaliana | AT2G38430.1   Symbols:   unknown protein; BEST Arabidopsis thaliana protein match is: unknown protein (TAIR:AT3G54310.1); Has 35333 Blast hits to 34131 proteins in 2444 species: Archae - 798; Bacteria - 22429; Metazoa - 974; Fungi - 991; Plants - 531; Viruses - 0; Other Eukaryotes - 9610 (source: NCBI BLINK).   chr2:16092950-16094810 REVERSE LENGTH=393                       | 401 | 393 | 1.00E-133 | 98.0  | 60.1 | 73.8 |
| Rsa1.0_00539.1.g15655.t1 | gb EOA28106.1  hypothetical protein CARUB_v10024290mg [Capsella rubella]                                                                                                                                                                                                                    | 141 | 137 | 1.00E-53  | 97.2  | 77.3 | 86.5 | hypothetical protein CARUB_v10024290mg | gbpln | Capsella rubella     | AT2G38450.1   Symbols:   CONTAINS InterPro DOMAIN/s: Sell-like (InterPro:IPR006597); BEST Arabidopsis thaliana protein match is: unknown protein (TAIR:AT5G05360.1); Has 88 Blast hits to 88 proteins in 25 species: Archae - 0; Bacteria - 16; Metazoa - 0; Fungi - 0; Plants - 70; Viruses - 0; Other Eukaryotes - 2 (source: NCBI BLINK).   chr2:16102016-16102683 FORWARD LENGTH=138 | 141 | 138 | 3.00E-50  | 97.9  | 75.2 | 85.8 |
| Rsa1.0_00539.1.g15656.t1 | gb ACI14397.1  WRKY33-1 transcription factor [Brassica napus]                                                                                                                                                                                                                               | 505 | 490 | 0         | 97.0  | 88.5 | 90.9 | WRKY33-1 transcription factor          | gbpln | Brassica napus       | AT2G38470.1   Symbols: WRKY33, ATWRKY33   WRKY DNA-binding protein 33   chr2:16108476-16110539 FORWARD LENGTH=519                                                                                                                                                                                                                                                                        | 505 | 519 | 0         | 102.8 | 81.8 | 88.9 |
| Rsa1.0_00539.1.g15657.t1 | ref XP_002881599.1  hypothetical protein ARALYDRAFT_321547 [Arabidopsis lyrata subsp. lyrata] gi 391358735 sp D LBN4.1 OSPLH_ARA.LL RecName: Full=CASP-like protein ARALYDRAFT_321547 gi 297327438 gb EFH57858.1  hypothetical protein ARALYDRAFT_321547 [Arabidopsis lyrata subsp. lyrata] | 187 | 188 | 1.00E-79  | 100.5 | 80.2 | 88.2 | hypothetical protein ARALYDRAFT_321547 | gbpln | Arabidopsis lyrata   | AT2G38480.1   Symbols:   Uncharacterised protein family (UPF0497)   chr2:16110960-16111694 REVERSE LENGTH=188                                                                                                                                                                                                                                                                            | 187 | 188 | 4.00E-80  | 100.5 | 78.1 | 88.2 |
| Rsa1.0_00539.1.g15658.t1 | gb EOA27166.1  hypothetical protein CARUB_v10023265mg [Capsella rubella]                                                                                                                                                                                                                    | 430 | 428 | 0         | 99.5  | 86.5 | 92.3 | hypothetical protein CARUB_v10023265mg | gbpln | Capsella rubella     | AT2G38490.1   Symbols: CIPK22, SnRK3.19   CBL-interacting protein kinase 22   chr2:16113909-16115276 REVERSE LENGTH=455                                                                                                                                                                                                                                                                  | 430 | 455 | 0         | 105.8 | 87.2 | 94.0 |
| Rsa1.0_00539.1.g15659.t1 | gb EOA27392.1  hypothetical protein CARUB_v10023522mg [Capsella rubella]                                                                                                                                                                                                                    | 403 | 353 | 1.00E-164 | 87.6  | 78.2 | 82.1 | hypothetical protein CARUB_v10023522mg | gbpln | Capsella rubella     | AT2G38500.1   Symbols:   2-oxoglutarate (2OG) and Fe(II)-dependent oxygenase superfamily protein   chr2:16117610-16119041 REVERSE LENGTH=356                                                                                                                                                                                                                                             | 403 | 356 | 1.00E-164 | 88.3  | 77.7 | 80.9 |
| Rsa1.0_00539.1.g15660.t1 | dbj BAJ34462.1  unnamed protein product [Theillungiella halophila]                                                                                                                                                                                                                          | 390 | 381 | 1.00E-176 | 97.7  | 80.8 | 87.9 | unnamed protein product                | ----  | ----                 | AT2G38560.1   Symbols: TFIIS   transcript elongation factor IIS   chr2:16134802-16136319 FORWARD LENGTH=378                                                                                                                                                                                                                                                                              | 390 | 378 | 1.00E-167 | 96.9  | 78.2 | 86.4 |
| Rsa1.0_00539.1.g15661.t1 | gb EOA27387.1  hypothetical protein CARUB_v10023517mg [Capsella rubella]                                                                                                                                                                                                                    | 341 | 354 | 1.00E-104 | 103.8 | 69.8 | 80.1 | hypothetical protein CARUB_v10023517mg | gbpln | Capsella rubella     | AT2G38570.1   Symbols:   CONTAINS InterPro DOMAIN/s: PRC-barrel-like (InterPro:IPR011033); Has 300 Blast hits to 300 proteins in 81 species: Archae - 0; Bacteria - 135; Metazoa - 0; Fungi - 0; Plants - 37; Viruses - 0; Other Eukaryotes - 128 (source: NCBI BLINK).   chr2:16136854-16138417 REVERSE LENGTH=328                                                                      | 341 | 328 | 1.00E-101 | 96.2  | 66.3 | 76.2 |

|                          |                                                                                                                                                                                                                                                                                                                                                                                                                                                                                |      |      |           |       |      |      |                                                 |       |                      |                                                                                                                                  |      |      |           |       |      |      |
|--------------------------|--------------------------------------------------------------------------------------------------------------------------------------------------------------------------------------------------------------------------------------------------------------------------------------------------------------------------------------------------------------------------------------------------------------------------------------------------------------------------------|------|------|-----------|-------|------|------|-------------------------------------------------|-------|----------------------|----------------------------------------------------------------------------------------------------------------------------------|------|------|-----------|-------|------|------|
| Rsa1.0_00539.1.g15662.t1 | gb EOA29214.1  hypothetical protein CARUB_v10025488mg [Capsella rubella]                                                                                                                                                                                                                                                                                                                                                                                                       | 509  | 772  | 0         | 151.7 | 69.4 | 79.0 | hypothetical protein CARUB_v10025488mg          | gbpln | Capsella rubella     | AT2G38580.1   Symbols:   Mitochondrial ATP synthase D chain-related protein   chr2:16138838-16142371 FORWARD LENGTH=482          | 509  | 482  | 1.00E-170 | 94.7  | 65.4 | 74.5 |
| Rsa1.0_00540.1.g15663.t1 | ref NP_189436.2  exonuclease-like protein [Arabidopsis thaliana]   gi 193211503 gb ACF16171.1  At3g27970 [Arabidopsis thaliana]   gi 225898687 dbj BAH30474.1  hypothetical protein [Arabidopsis thaliana]   gi 332643867 gb AEE77388.1  exonuclease-like protein [Arabidopsis thaliana]                                                                                                                                                                                       | 351  | 357  | 0         | 101.7 | 92.0 | 96.3 | exonuclease-like protein                        | gbpln | Arabidopsis thaliana | AT3G27970.1   Symbols:   Exonuclease family protein   chr3:10389609-10391544 FORWARD LENGTH=357                                  | 351  | 357  | 0         | 101.7 | 92.0 | 96.3 |
| Rsa1.0_00540.1.g15664.t1 | gb AAG50751.1 AC079733_19 polyprotein, putative [Arabidopsis thaliana]                                                                                                                                                                                                                                                                                                                                                                                                         | 1478 | 1468 | 0         | 99.3  | 57.6 | 72.0 | polyprotein, putative                           | gbpln | Arabidopsis thaliana | AT4G23160.1   Symbols: CRK8   cysteine-rich RLK (RECEPTOR-like protein kinase) 8   chr4:12129485-12134086 FORWARD LENGTH=1262    | 1478 | 1262 | 1.00E-141 | 85.4  | 16.4 | 24.2 |
| Rsa1.0_00540.1.g15665.t1 | dbj BAA97287.1  retroelement pol polyprotein-like [Arabidopsis thaliana]                                                                                                                                                                                                                                                                                                                                                                                                       | 1261 | 1491 | 0         | 118.2 | 63.1 | 77.2 | retroelement pol polyprotein-like               | gbpln | Arabidopsis thaliana | AT4G23160.1   Symbols: CRK8   cysteine-rich RLK (RECEPTOR-like protein kinase) 8   chr4:12129485-12134086 FORWARD LENGTH=1262    | 1261 | 1262 | 1.00E-106 | 100.1 | 16.7 | 24.1 |
| Rsa1.0_00540.1.g15666.t1 | ref XP_002877087.1  nodulin MtN3 family protein [Arabidopsis lyrata subsp. lyrata]   gi 297322925 gb EFH53346.1  nodulin MtN3 family protein [Arabidopsis lyrata subsp. lyrata]                                                                                                                                                                                                                                                                                                | 213  | 252  | 1.00E-100 | 118.3 | 86.4 | 93.9 | nodulin MtN3 family protein                     | gbpln | Arabidopsis lyrata   | AT3G28007.1   Symbols: SWEET4, ATsWEET4   Nodulin MtN3 family protein   chr3:10408243-10409633 REVERSE LENGTH=251                | 213  | 251  | 1.00E-100 | 117.8 | 85.4 | 91.5 |
| Rsa1.0_00540.1.g15667.t1 | ref NP_566831.1  EamA domain-containing protein [Arabidopsis thaliana]   gi 75166353 sp Q94JU2.1 WTR18_ARAT H RecName: Full=WAT1-related protein At3g28050   gi 13937165 gb AAK50076.1 AF372936.1 AT3g28050/MMG15.6 [Arabidopsis thaliana]   gi 22137010 gb AAM91350.1  AT3g28050/MMG15.6 [Arabidopsis thaliana]   gi 332643874 gb AEE77395.1  nodulin MtN21-like transporter UMAMIT41 [Arabidopsis thaliana]                                                                  | 367  | 367  | 0         | 100.0 | 92.6 | 96.7 | EamA domain-containing protein                  | gbpln | Arabidopsis thaliana | AT3G28050.1   Symbols:   nodulin MtN21 /EamA-like transporter family protein   chr3:10442884-10445216 FORWARD LENGTH=367         | 367  | 367  | 0         | 100.0 | 92.6 | 96.7 |
| Rsa1.0_00540.1.g15668.t1 | ref XP_002875424.1  predicted protein [Arabidopsis lyrata subsp. lyrata]   gi 297321262 gb EFH51683.1  predicted protein [Arabidopsis lyrata subsp. lyrata]                                                                                                                                                                                                                                                                                                                    | 358  | 357  | 1.00E-171 | 99.7  | 84.6 | 92.7 | predicted protein                               | gbpln | Arabidopsis lyrata   | AT3G28100.1   Symbols:   nodulin MtN21 /EamA-like transporter family protein   chr3:10456151-10460813 FORWARD LENGTH=353         | 358  | 353  | 1.00E-158 | 98.6  | 83.2 | 91.3 |
| Rsa1.0_00540.1.g15669.t1 | gb EOA23588.1  hypothetical protein CARUB_v10016783mg [Capsella rubella]                                                                                                                                                                                                                                                                                                                                                                                                       | 675  | 673  | 0         | 99.7  | 93.9 | 97.3 | hypothetical protein CARUB_v10016783mg          | gbpln | Capsella rubella     | AT3G28180.1   Symbols: ATCSLC04, CSLC04, ATCSLC4, CSLC4   Cellulose-synthase-like C4   chr3:10506110-10509067 FORWARD LENGTH=673 | 675  | 673  | 0         | 99.7  | 93.2 | 97.0 |
| Rsa1.0_00540.1.g15670.t1 | dbj BAJ34116.1  unnamed protein product [Thellungiella halophila]                                                                                                                                                                                                                                                                                                                                                                                                              | 322  | 323  | 1.00E-156 | 100.3 | 82.6 | 87.9 | unnamed protein product                         | ----  | ----                 | AT3G28200.1   Symbols:   Peroxidase superfamily protein   chr3:10518082-10519032 FORWARD LENGTH=316                              | 322  | 316  | 1.00E-157 | 98.1  | 79.8 | 87.9 |
| Rsa1.0_00540.1.g15671.t1 | ref NP_001118726.2  F-box family protein [Arabidopsis thaliana]   gi 332643898 gb AEE77419.1  F-box family protein [Arabidopsis thaliana]                                                                                                                                                                                                                                                                                                                                      | 395  | 391  | 9.00E-80  | 99.0  | 43.8 | 60.3 | F-box family protein                            | gbpln | Arabidopsis thaliana | AT3G28223.1   Symbols:   F-box family protein   chr3:10527669-10528921 REVERSE LENGTH=391                                        | 395  | 391  | 2.00E-82  | 99.0  | 43.8 | 60.3 |
| Rsa1.0_00540.1.g15672.t1 | dbj BAB02625.1  unnamed protein product [Arabidopsis thaliana]                                                                                                                                                                                                                                                                                                                                                                                                                 | 415  | 420  | 1.00E-139 | 101.2 | 61.0 | 73.5 | unnamed protein product                         | gbpln | Arabidopsis thaliana | AT3G28330.1   Symbols:   F-box family protein-related   chr3:10586566-10587712 REVERSE LENGTH=349                                | 415  | 349  | 1.00E-117 | 84.1  | 50.8 | 61.0 |
| Rsa1.0_00540.1.g15673.t1 | ref NP_189483.1  Putative membrane lipoprotein [Arabidopsis thaliana]   gi 9294578 dbj BAB02859.1  unnamed protein product [Arabidopsis thaliana]   gi 38454112 gb AAR20750.1  At3g28420 [Arabidopsis thaliana]   gi 332643922 gb AEE77443.1  Putative membrane lipoprotein [Arabidopsis thaliana]                                                                                                                                                                             | 200  | 216  | 5.00E-73  | 108.0 | 83.0 | 88.0 | Putative membrane lipoprotein                   | gbpln | Arabidopsis thaliana | AT3G28420.1   Symbols:   Putative membrane lipoprotein   chr3:10654674-10655324 REVERSE LENGTH=216                               | 200  | 216  | 2.00E-75  | 108.0 | 83.0 | 88.0 |
| Rsa1.0_00540.1.g15674.t1 | ref NP_189486.1  leucine-rich repeat protein kinase-like protein [Arabidopsis thaliana]   gi 9294580 dbj BAB02861.1  receptor-like protein kinase-like protein [Arabidopsis thaliana]   gi 26449808 dbj BAC42027.1  putative receptor kinase [Arabidopsis thaliana]   gi 224589583 gb ACN59325.1  leucine-rich repeat receptor-like protein kinase [Arabidopsis thaliana]   gi 332643925 gb AEE77446.1  leucine-rich repeat protein kinase-like protein [Arabidopsis thaliana] | 614  | 605  | 0         | 98.5  | 80.1 | 88.6 | leucine-rich repeat protein kinase-like protein | gbpln | Arabidopsis thaliana | AT3G28450.1   Symbols:   Leucine-rich repeat protein kinase family protein   chr3:10667359-10669176 FORWARD LENGTH=605           | 614  | 605  | 0         | 98.5  | 80.1 | 88.6 |

|                          |                                                                                                                                                                                                                                                                                                                                                                                                                                                                                                                                                                                                                                                                                                                                                                                                                                                                                      |     |      |           |       |      |      |                                                    |       |                      |                                                                                                                                                                                                                                                                                                                                                                               |     |      |           |       |      |      |
|--------------------------|--------------------------------------------------------------------------------------------------------------------------------------------------------------------------------------------------------------------------------------------------------------------------------------------------------------------------------------------------------------------------------------------------------------------------------------------------------------------------------------------------------------------------------------------------------------------------------------------------------------------------------------------------------------------------------------------------------------------------------------------------------------------------------------------------------------------------------------------------------------------------------------|-----|------|-----------|-------|------|------|----------------------------------------------------|-------|----------------------|-------------------------------------------------------------------------------------------------------------------------------------------------------------------------------------------------------------------------------------------------------------------------------------------------------------------------------------------------------------------------------|-----|------|-----------|-------|------|------|
| Rsa1.0_00540.1.g15675.t1 | gb EOA25615.1  hypothetical protein CARUB_v10018963mg [Capsella rubella]                                                                                                                                                                                                                                                                                                                                                                                                                                                                                                                                                                                                                                                                                                                                                                                                             | 217 | 81   | 3.00E-30  | 37.3  | 31.3 | 33.6 | hypothetical protein CARUB_v10018963mg             | gbpln | Capsella rubella     | AT3G28455.1   Symbols: CLE25   CLAVATA3/ESR-RELATED 25   chr3:10670220-10670931 REVERSE LENGTH=81                                                                                                                                                                                                                                                                             | 217 | 81   | 2.00E-32  | 37.3  | 30.9 | 33.2 |
| Rsa1.0_00540.1.g15676.t1 | ref XP_002862551.1  hypothetical protein ARALYDRAFT_497404 [Arabidopsis lyrata subsp. lyrata]   gi 297815144 ref XP_002875455.1  hypothetical protein ARALYDRAFT_484625 [Arabidopsis lyrata subsp. lyrata]   gi 297308140 gb EFH38809.1  hypothetical protein ARALYDRAFT_497404 [Arabidopsis lyrata subsp. lyrata]   gi 297321293 gb EFH51714.1  hypothetical protein ARALYDRAFT_484625 [Arabidopsis lyrata subsp. lyrata]                                                                                                                                                                                                                                                                                                                                                                                                                                                           | 114 | 116  | 4.00E-29  | 101.8 | 70.2 | 77.2 | hypothetical protein ARALYDRAFT_497404             | gbpln | Arabidopsis lyrata   | AT3G28500.1   Symbols:   60S acidic ribosomal protein family   chr3:10682204-10682551 FORWARD LENGTH=115                                                                                                                                                                                                                                                                      | 114 | 115  | 5.00E-31  | 100.9 | 71.1 | 77.2 |
| Rsa1.0_00541.1.g15677.t1 | ref NP_187937.2  varicose-related protein [Arabidopsis thaliana]   gi 75335477 sp Q9LTT9.1 VCR_ARATH RecName: Full=Varicose-related protein   gi 9294535 dbj BAB02798.1  unnamed protein product [Arabidopsis thaliana]   gi 332641808 gb AEE75329.1  varicose-related protein [Arabidopsis thaliana]                                                                                                                                                                                                                                                                                                                                                                                                                                                                                                                                                                                | 331 | 1340 | 1.00E-141 | 404.8 | 78.2 | 86.4 | varicose-related protein                           | gbpln | Arabidopsis thaliana | AT3G13290.1   Symbols: VCR   varicose-related   chr3:4297529-4303113 FORWARD LENGTH=1340                                                                                                                                                                                                                                                                                      | 331 | 1340 | 1.00E-144 | 404.8 | 78.2 | 86.4 |
| Rsa1.0_00541.1.g15678.t1 | gb EOA31822.1  hypothetical protein CARUB_v10015044mg [Capsella rubella]                                                                                                                                                                                                                                                                                                                                                                                                                                                                                                                                                                                                                                                                                                                                                                                                             | 69  | 68   | 2.00E-23  | 98.6  | 81.2 | 87.0 | hypothetical protein CARUB_v10015044mg             | gbpln | Capsella rubella     | AT3G13275.1   Symbols:   unknown protein; FUNCTIONS IN: molecular_function unknown; INVOLVED IN: biological_process unknown; LOCATED IN: endomembrane system; Has 29 Blast hits to 29 proteins in 10 species: Archae - 0; Bacteria - 0; Metazoa - 0; Fungi - 0; Plants - 29; Viruses - 0; Other Eukaryotes - 0 (source: NCBI BLINK).   chr3:4289425-4289634 REVERSE LENGTH=69 | 69  | 69   | 2.00E-19  | 100.0 | 84.1 | 89.9 |
| Rsa1.0_00541.1.g15679.t1 | gb EOA32619.1  hypothetical protein CARUB_v10015913mg [Capsella rubella]                                                                                                                                                                                                                                                                                                                                                                                                                                                                                                                                                                                                                                                                                                                                                                                                             | 112 | 112  | 1.00E-31  | 100.0 | 73.2 | 79.5 | hypothetical protein CARUB_v10015913mg             | gbpln | Capsella rubella     | AT3G13227.1   Symbols:   serine-rich protein-related   chr3:4258028-4258363 FORWARD LENGTH=111                                                                                                                                                                                                                                                                                | 112 | 111  | 2.00E-30  | 99.1  | 71.4 | 77.7 |
| Rsa1.0_00541.1.g15680.t1 | ref XP_004294923.1  PREDICTED: ABC transporter G family member 26-like [Fragaria vesca subsp. vesca]                                                                                                                                                                                                                                                                                                                                                                                                                                                                                                                                                                                                                                                                                                                                                                                 | 194 | 688  | 3.00E-26  | 354.6 | 33.5 | 47.4 | PREDICTED: ABC transporter G family member 26-like | gbpln | Fragaria vesca       | AT3G13220.1   Symbols: WBC27, ABCG26   ABC-2 type transporter family protein   chr3:4247968-4250703 REVERSE LENGTH=685                                                                                                                                                                                                                                                        | 194 | 685  | 1.00E-28  | 353.1 | 40.7 | 47.9 |
| Rsa1.0_00541.1.g15681.t1 | gb EOA29633.1  hypothetical protein CARUB_v10014543mg [Capsella rubella]                                                                                                                                                                                                                                                                                                                                                                                                                                                                                                                                                                                                                                                                                                                                                                                                             | 232 | 230  | 1.00E-107 | 99.1  | 95.3 | 98.7 | hypothetical protein CARUB_v10014543mg             | gbpln | Capsella rubella     | AT3G13200.1   Symbols: EMB2769   Cwf15 / Cwc15 cell cycle control family protein   chr3:4242239-4243976 FORWARD LENGTH=230                                                                                                                                                                                                                                                    | 232 | 230  | 1.00E-99  | 99.1  | 94.4 | 97.8 |
| Rsa1.0_00541.1.g15682.t1 | ref NP_187925.1  uncharacterized protein [Arabidopsis thaliana]   gi 42572411 ref NP_974301.1  uncharacterized protein [Arabidopsis thaliana]   gi 145332373 ref NP_001078143.1  uncharacterized protein [Arabidopsis thaliana]   gi 75273724 sp Q9LK53.1 Y3319 ARATH RecName: Full=WEB family protein At3g13190   gi 10172607 dbj BAB01411.1  unnamed protein product [Arabidopsis thaliana]   gi 22531008 gb AAM97008.1  unknown protein [Arabidopsis thaliana]   gi 23197916 gb AANI5485.1  unknown protein [Arabidopsis thaliana]   gi 62320648 dbj BAD95315.1  hypothetical protein [Arabidopsis thaliana]   gi 332641786 gb AEE75307.1  uncharacterized protein AT3G13190 [Arabidopsis thaliana]   gi 332641787 gb AEE75308.1  uncharacterized protein AT3G13190 [Arabidopsis thaliana]   gi 332641788 gb AEE75309.1  uncharacterized protein AT3G13190 [Arabidopsis thaliana] | 326 | 316  | 2.00E-90  | 96.9  | 66.0 | 76.7 | uncharacterized protein                            | gbpln | Arabidopsis thaliana | AT3G13190.3   Symbols:   Plant protein of unknown function (DUF827)   chr3:4240751-4241804 FORWARD LENGTH=316                                                                                                                                                                                                                                                                 | 326 | 316  | 5.00E-93  | 96.9  | 66.0 | 76.7 |

|                          |                                                                                                                                                                                                                                                                                                                                                                                                                                                                                                                                                 |      |      |           |       |      |      |                                                      |       |                      |                                                                                                                                                                                                                                                                                                                                                                                                                                                                                                                                     |      |      |           |       |      |      |
|--------------------------|-------------------------------------------------------------------------------------------------------------------------------------------------------------------------------------------------------------------------------------------------------------------------------------------------------------------------------------------------------------------------------------------------------------------------------------------------------------------------------------------------------------------------------------------------|------|------|-----------|-------|------|------|------------------------------------------------------|-------|----------------------|-------------------------------------------------------------------------------------------------------------------------------------------------------------------------------------------------------------------------------------------------------------------------------------------------------------------------------------------------------------------------------------------------------------------------------------------------------------------------------------------------------------------------------------|------|------|-----------|-------|------|------|
| Rsa1.0_00541.1.g15683.t1 | ref[XP_002884950.1] hypothetical protein ARALYDRAFT_478694 [Arabidopsis lyrata subsp. lyrata] gi 297330790 gb EFH61209.1] hypothetical protein ARALYDRAFT_478694 [Arabidopsis lyrata subsp. lyrata]                                                                                                                                                                                                                                                                                                                                             | 105  | 106  | 4.00E-44  | 101.0 | 88.6 | 94.3 | hypothetical protein ARALYDRAFT_478694               | gbpln | Arabidopsis lyrata   | AT3G13175.1   Symbols:   unknown protein; FUNCTIONS IN: molecular function unknown; INVOLVED IN: biological process unknown; LOCATED IN: endomembrane system; EXPRESSED IN: 18 plant structures; EXPRESSED DURING: 12 growth stages; BEST Arabidopsis thaliana protein match is: unknown protein (TAIRAT4G16400.1); Has 29 Blast hits to 29 proteins in 8 species: Archae - 0; Bacteria - 0; Metazoa - 0; Fungi - 0; Plants - 29; Viruses - 0; Other Eukaryotes - 0 (source: NCBI BLINK).   chr3:4235260-4235580 REVERSE LENGTH=106 | 105  | 106  | 3.00E-45  | 101.0 | 86.7 | 91.4 |
| Rsa1.0_00541.1.g15684.t1 | ref[NP_566445.1] pentatricopeptide repeat-containing protein [Arabidopsis thaliana] gi 75273726 sp Q9LK57.1 PP226_ARATH RecName: Full=Pentatricopeptide repeat-containing protein At3g13160, mitochondrial; Flags: Precursor gi 10172603 dbj BAB01407.1] unnamed protein product [Arabidopsis thaliana] gi 22531265 gb AAM97136.1] expressed protein [Arabidopsis thaliana] gi 27311983 gb AAC000957.1] expressed protein [Arabidopsis thaliana] gi 332641782 gb AEE75303.1] pentatricopeptide repeat-containing protein [Arabidopsis thaliana] | 235  | 394  | 1.00E-50  | 167.7 | 45.1 | 55.3 | pentatricopeptide repeat-containing protein          | gbpln | Arabidopsis thaliana | AT3G13160.1   Symbols:   Tetratricopeptide repeat (TPR)-like superfamily protein   chr3:4229994-4231178 REVERSE LENGTH=394                                                                                                                                                                                                                                                                                                                                                                                                          | 235  | 394  | 4.00E-53  | 167.7 | 45.1 | 55.3 |
| Rsa1.0_00541.1.g15685.t1 | emb[CAB75932.1] putative protein [Arabidopsis thaliana]                                                                                                                                                                                                                                                                                                                                                                                                                                                                                         | 1354 | 1339 | 0         | 98.9  | 52.4 | 70.8 | putative protein                                     | gbpln | Arabidopsis thaliana | AT4G23160.1   Symbols: CRK8   cysteine-rich RLK (RECEPTOR-like protein kinase) 8   chr4:12129485-12134086 FORWARD LENGTH=1262                                                                                                                                                                                                                                                                                                                                                                                                       | 1354 | 1262 | 1.00E-108 | 93.2  | 14.9 | 23.0 |
| Rsa1.0_00541.1.g15686.t1 | ref[NP_187921.1] hydroxyproline-rich glycoprotein family protein [Arabidopsis thaliana] gi 10172601 dbj BAB01405.1] unnamed protein product [Arabidopsis thaliana] gi 67633630 gb AAV78739.1] hydroxyproline-rich glycoprotein family protein [Arabidopsis thaliana] gi 332641780 gb AEE75301.1] hydroxyproline-rich glycoprotein family protein [Arabidopsis thaliana]                                                                                                                                                                         | 183  | 183  | 1.00E-31  | 100.0 | 44.3 | 59.6 | hydroxyproline-rich glycoprotein family protein      | gbpln | Arabidopsis thaliana | AT3G13140.1   Symbols:   hydroxyproline-rich glycoprotein family protein   chr3:4226854-4227377 REVERSE LENGTH=183                                                                                                                                                                                                                                                                                                                                                                                                                  | 183  | 183  | 5.00E-34  | 100.0 | 44.3 | 59.6 |
| Rsa1.0_00541.1.g15687.t1 | ref[NP_187920.1] uncharacterized protein [Arabidopsis thaliana] gi 10172600 dbj BAB01404.1] unnamed protein product [Arabidopsis thaliana] gi 332641779 gb AEE75300.1] uncharacterized protein AT3G13130 [Arabidopsis thaliana]                                                                                                                                                                                                                                                                                                                 | 192  | 201  | 2.00E-60  | 104.7 | 67.7 | 83.9 | uncharacterized protein                              | gbpln | Arabidopsis thaliana | AT3G13130.1   Symbols:   unknown protein; FUNCTIONS IN: molecular function unknown; INVOLVED IN: biological process unknown; LOCATED IN: endomembrane system; EXPRESSED IN: male gametophyte; Has 140 Blast hits to 132 proteins in 41 species: Archae - 2; Bacteria - 4; Metazoa - 29; Fungi - 20; Plants - 51; Viruses - 0; Other Eukaryotes - 34 (source: NCBI BLINK).   chr3:4223008-4223613 FORWARD LENGTH=201                                                                                                                 | 192  | 201  | 6.00E-63  | 104.7 | 67.7 | 83.9 |
| Rsa1.0_00541.1.g15688.t1 | gb ABL97980.1] 30S ribosomal protein S10-like [Brassica rapa]                                                                                                                                                                                                                                                                                                                                                                                                                                                                                   | 198  | 193  | 1.00E-93  | 97.5  | 90.9 | 93.9 | 30S ribosomal protein S10-like                       | gbpln | Brassica rapa        | AT3G13120.2   Symbols:   Ribosomal protein S10p/S20e family protein   chr3:4220310-4221526 REVERSE LENGTH=191                                                                                                                                                                                                                                                                                                                                                                                                                       | 198  | 191  | 4.00E-88  | 96.5  | 86.9 | 90.4 |
| Rsa1.0_00541.1.g15689.t1 | gb AAT38561.1] mitochondrial serine acetyltransferase [Thlaspi goesingense]                                                                                                                                                                                                                                                                                                                                                                                                                                                                     | 389  | 395  | 0         | 101.5 | 88.2 | 93.1 | mitochondrial serine acetyltransferase               | gbpln | Thlaspi goesingense  | AT3G13110.1   Symbols: ATSERAT2.2, SAT-1, SAT-A, SAT3, SAT-M, SERAT2.2   serine acetyltransferase 2.2   chr3:4214939-4216114 REVERSE LENGTH=391                                                                                                                                                                                                                                                                                                                                                                                     | 389  | 391  | 0         | 100.5 | 85.3 | 89.7 |
| Rsa1.0_00541.1.g15690.t1 | ref[XP_002884943.1] predicted protein [Arabidopsis lyrata subsp. lyrata] gi 297330783 gb EFH61202.1] predicted protein [Arabidopsis lyrata subsp. lyrata]                                                                                                                                                                                                                                                                                                                                                                                       | 1484 | 1486 | 0         | 100.1 | 88.3 | 93.2 | predicted protein                                    | gbpln | Arabidopsis lyrata   | AT3G13100.1   Symbols: ATMMP7, MRP7, ABCO7   multidrug resistance-associated protein 7   chr3:4208859-4214173 REVERSE LENGTH=1493                                                                                                                                                                                                                                                                                                                                                                                                   | 1484 | 1493 | 0         | 100.6 | 87.5 | 92.5 |
| Rsa1.0_00541.1.g15691.t1 | ref[NP_179351.1] cysteine/histidine-rich C1 domain-containing protein [Arabidopsis thaliana] gi 4914381 gb AAD32917.1] unknown protein [Arabidopsis thaliana] gi 330251563 gb AEC06657.1] cysteine/histidine-rich C1 domain-containing protein [Arabidopsis thaliana]                                                                                                                                                                                                                                                                           | 550  | 580  | 2.33E-156 | 105.5 | 52.5 | 66.2 | cysteine/histidine-rich C1 domain-containing protein | gbpln | Arabidopsis thaliana | AT2G17600.1   Symbols:   Cysteine/Histidine-rich C1 domain family protein   chr2:7654477-7656219 REVERSE LENGTH=580                                                                                                                                                                                                                                                                                                                                                                                                                 | 550  | 580  | 1.00E-149 | 105.5 | 52.5 | 66.2 |
| Rsa1.0_00541.1.g15692.t1 | ref[XP_002884940.1] CBS domain-containing protein [Arabidopsis lyrata subsp. lyrata] gi 297330780 gb EFH61199.1] CBS domain-containing protein [Arabidopsis lyrata subsp. lyrata]                                                                                                                                                                                                                                                                                                                                                               | 664  | 660  | 0         | 99.4  | 91.1 | 95.3 | CBS domain-containing protein                        | gbpln | Arabidopsis lyrata   | AT3G13070.1   Symbols:   CBS domain-containing protein / transporter associated domain-containing protein   chr3:4191511-4195112 REVERSE LENGTH=661                                                                                                                                                                                                                                                                                                                                                                                 | 664  | 661  | 0         | 99.5  | 91.7 | 94.9 |



|                          |                                                                                                                                                                                                                                                                                                                      |     |      |           |       |      |      |                                                                |       |                      |                                                                                                                                                                                                                                                                                                                                                                                                             |     |      |           |       |      |      |
|--------------------------|----------------------------------------------------------------------------------------------------------------------------------------------------------------------------------------------------------------------------------------------------------------------------------------------------------------------|-----|------|-----------|-------|------|------|----------------------------------------------------------------|-------|----------------------|-------------------------------------------------------------------------------------------------------------------------------------------------------------------------------------------------------------------------------------------------------------------------------------------------------------------------------------------------------------------------------------------------------------|-----|------|-----------|-------|------|------|
| Rsa1.0_00541.1.g15693.t1 | gb EOA33017.1  hypothetical protein CARUB_v10016348mg [Capsella rubella]                                                                                                                                                                                                                                             | 689 | 688  | 0         | 99.9  | 87.8 | 93.6 | hypothetical protein CARUB_v10016348mg                         | gbpln | Capsella rubella     | AT3G13065.1   Symbols: SRF4   STRUBBELIG-receptor family 4   chr3:4187510-4190863 FORWARD LENGTH=687                                                                                                                                                                                                                                                                                                        | 689 | 687  | 0         | 99.7  | 85.5 | 93.5 |
| Rsa1.0_00541.1.g15694.t1 | ref XP_002882804.1  hypothetical protein ARALYDRAFT.478675 [Arabidopsis lyrata subsp. lyrata] gi 297328644 gb EFH59063.1  hypothetical protein ARALYDRAFT.478675 [Arabidopsis lyrata subsp. lyrata]                                                                                                                  | 628 | 635  | 0         | 101.1 | 83.4 | 88.5 | hypothetical protein ARALYDRAFT.478675                         | gbpln | Arabidopsis lyrata   | AT3G13060.2   Symbols: ECT5   evolutionarily conserved C-terminal region 5   chr3:4180625-4183632 FORWARD LENGTH=634                                                                                                                                                                                                                                                                                        | 628 | 634  | 0         | 101.0 | 82.8 | 87.9 |
| Rsa1.0_00541.1.g15695.t1 | ref NP_187908.1  hAT dimerization domain-containing protein [Arabidopsis thaliana] gi 15795134 dbj BAB02512.1  transposase-like protein [Arabidopsis thaliana] gi 332641756 gb AEE75277.1  hAT dimerization domain-containing protein [Arabidopsis thaliana]                                                         | 742 | 605  | 0         | 81.5  | 51.3 | 62.9 | hAT dimerization domain-containing protein                     | gbpln | Arabidopsis thaliana | AT3G13020.1   Symbols:   hAT transposon superfamily protein   chr3:4166995-4168917 REVERSE LENGTH=605                                                                                                                                                                                                                                                                                                       | 742 | 605  | 0         | 81.5  | 51.3 | 62.9 |
| Rsa1.0_00541.1.g15696.t1 | dbj BAJ33667.1  unnamed protein product [Thellungiella halophila]                                                                                                                                                                                                                                                    | 562 | 590  | 0         | 105.0 | 89.5 | 94.7 | unnamed protein product                                        | ----  | ----                 | AT3G13000.2   Symbols:   Protein of unknown function, DUF547   chr3:4158214-4160989 REVERSE LENGTH=582                                                                                                                                                                                                                                                                                                      | 562 | 582  | 0         | 103.6 | 85.9 | 93.2 |
| Rsa1.0_00541.1.g15697.t1 | ref XP_002882800.1  histone acetyltransferase 5 [Arabidopsis lyrata subsp. lyrata] gi 297328640 gb EFH59059.1  histone acetyltransferase 5 [Arabidopsis lyrata subsp. lyrata]                                                                                                                                        | 181 | 1657 | 2.00E-63  | 915.5 | 66.9 | 74.6 | histone acetyltransferase 5                                    | gbpln | Arabidopsis lyrata   | AT3G12980.1   Symbols: HAC5, ATHPCAT4   histone acetyltransferase of the CBP family 5   chr3:4146919-4154495 FORWARD LENGTH=1670                                                                                                                                                                                                                                                                            | 181 | 1670 | 1.00E-64  | 922.7 | 64.6 | 74.0 |
| Rsa1.0_00541.1.g15698.t1 | ref NP_001030683.2  no apical meristem-domain containing transcriptional regulator [Arabidopsis thaliana] gi 15795128 dbj BAB02506.1  NAM (no apical meristem) protein-like [Arabidopsis thaliana] gi 332641748 gb AEE75269.1  no apical meristem-domain containing transcriptional regulator [Arabidopsis thaliana] | 101 | 279  | 1.00E-26  | 276.2 | 69.3 | 76.2 | no apical meristem-domain containing transcriptional regulator | gbpln | Arabidopsis thaliana | AT3G12977.1   Symbols:   NAC (No Apical Meristem) domain transcriptional regulator superfamily protein   chr3:4143832-4145860 FORWARD LENGTH=279                                                                                                                                                                                                                                                            | 101 | 279  | 2.00E-29  | 276.2 | 69.3 | 76.2 |
| Rsa1.0_00542.1.g15699.t1 | gb EOA29854.1  hypothetical protein CARUB_v10012947mg [Capsella rubella]                                                                                                                                                                                                                                             | 764 | 885  | 0         | 115.8 | 86.1 | 91.8 | hypothetical protein CARUB_v10012947mg                         | gbpln | Capsella rubella     | AT3G06920.1   Symbols:   Tetratricopeptide repeat (TPR)-like superfamily protein   chr3:2181717-2184449 FORWARD LENGTH=871                                                                                                                                                                                                                                                                                  | 764 | 871  | 0         | 114.0 | 84.8 | 90.4 |
| Rsa1.0_00542.1.g15700.t1 | gb EOA29943.1  hypothetical protein CARUB_v10013043mg [Capsella rubella] gi 482565755 gb EOA29944.1  hypothetical protein CARUB_v10013043mg [Capsella rubella]                                                                                                                                                       | 832 | 748  | 0         | 89.9  | 71.4 | 77.0 | hypothetical protein CARUB_v10013043mg                         | gbpln | Capsella rubella     | AT1G49920.1   Symbols:   MuDR family transposase   chr1:18481798-18484233 REVERSE LENGTH=785                                                                                                                                                                                                                                                                                                                | 832 | 785  | 4.00E-19  | 94.4  | 9.3  | 16.9 |
| Rsa1.0_00542.1.g15701.t1 | ref XP_002882501.1  tRNA pseudouridine synthase family protein [Arabidopsis lyrata subsp. lyrata] gi 297328341 gb EFH58760.1  tRNA pseudouridine synthase family protein [Arabidopsis lyrata subsp. lyrata]                                                                                                          | 322 | 323  | 1.00E-163 | 100.3 | 86.3 | 91.3 | tRNA pseudouridine synthase family protein                     | gbpln | Arabidopsis lyrata   | AT3G06950.1   Symbols:   Pseudouridine synthase family protein   chr3:2192869-2194254 FORWARD LENGTH=323                                                                                                                                                                                                                                                                                                    | 322 | 323  | 1.00E-165 | 100.3 | 86.3 | 91.0 |
| Rsa1.0_00542.1.g15702.t1 | ref NP_187353.2  RNA recognition motif-containing protein [Arabidopsis thaliana] gi 91806393 gb ABE65924.1  RNA recognition motif-containing protein [Arabidopsis thaliana] gi 332640961 gb AEE74482.1  RNA recognition motif-containing protein [Arabidopsis thaliana]                                              | 391 | 317  | 1.00E-46  | 81.1  | 35.3 | 49.6 | RNA recognition motif-containing protein                       | gbpln | Arabidopsis thaliana | AT3G06970.1   Symbols:   RNA-binding (RRM/RBD/RNP motifs) family protein   chr3:2199653-2201150 REVERSE LENGTH=317                                                                                                                                                                                                                                                                                          | 391 | 317  | 3.00E-49  | 81.1  | 35.3 | 49.6 |
| Rsa1.0_00542.1.g15703.t1 | ref XP_002884620.1  UDP-glucose:sterol glucosyltransferase [Arabidopsis lyrata subsp. lyrata] gi 297330460 gb EFH60879.1  UDP-glucose:sterol glucosyltransferase [Arabidopsis lyrata subsp. lyrata]                                                                                                                  | 640 | 635  | 0         | 99.2  | 88.1 | 91.6 | UDP-glucose:sterol glucosyltransferase                         | gbpln | Arabidopsis lyrata   | AT3G07020.2   Symbols:   UDP-Glycosyltransferase superfamily protein   chr3:2218120-2221590 REVERSE LENGTH=637                                                                                                                                                                                                                                                                                              | 640 | 637  | 0         | 99.5  | 87.5 | 91.4 |
| Rsa1.0_00542.1.g15704.t1 | gb EOA30714.1  hypothetical protein CARUB_v10013850mg [Capsella rubella]                                                                                                                                                                                                                                             | 361 | 406  | 1.00E-83  | 112.5 | 56.5 | 61.2 | hypothetical protein CARUB_v10013850mg                         | gbpln | Capsella rubella     | AT3G07030.1   Symbols:   Alba DNA/RNA-binding protein   chr3:2223001-2225254 REVERSE LENGTH=405                                                                                                                                                                                                                                                                                                             | 361 | 405  | 9.00E-67  | 112.2 | 34.9 | 39.6 |
| Rsa1.0_00542.1.g15705.t2 | gb EOA31372.1  hypothetical protein CARUB_v10014546mg [Capsella rubella]                                                                                                                                                                                                                                             | 253 | 229  | 6.00E-71  | 90.5  | 61.7 | 68.4 | hypothetical protein CARUB_v10014546mg                         | gbpln | Capsella rubella     | AT4G33690.1   Symbols:   unknown protein; FUNCTIONS IN: molecular function unknown; INVOLVED IN: biological process unknown; LOCATED IN: chloroplast; EXPRESSED IN: pollen tube; Has 543 Blast hits to 512 proteins in 106 species: Archae - 0; Bacteria - 0; Metazoa - 281; Fungi - 54; Plants - 72; Viruses - 0; Other Eukaryotes - 136 (source: NCBI BLINK).   chr4:16175198-16176137 FORWARD LENGTH=246 | 253 | 246  | 7.00E-50  | 97.2  | 48.6 | 57.7 |

|                           |                                                                                                                                                                                                                                                                                                                                                                                                                               |      |      |           |       |      |      |                                               |       |                      |                                                                                                                                                                       |      |      |           |       |      |      |
|---------------------------|-------------------------------------------------------------------------------------------------------------------------------------------------------------------------------------------------------------------------------------------------------------------------------------------------------------------------------------------------------------------------------------------------------------------------------|------|------|-----------|-------|------|------|-----------------------------------------------|-------|----------------------|-----------------------------------------------------------------------------------------------------------------------------------------------------------------------|------|------|-----------|-------|------|------|
| Rsa1.0_00542.1.g15706.t1  | ref NP_187361.1  putative GTP-binding protein [Arabidopsis thaliana] gi 6729012 gb AAF27009.1 AC016827.20 putative GTPase [Arabidopsis thaliana] gi 332640972 gb AE74493.1  putative GTP-binding protein [Arabidopsis thaliana] gi 414420744 gb AFW99797.1  nucleostemin-like 1 protein [Arabidopsis thaliana]                                                                                                                | 584  | 582  | 0         | 99.7  | 85.6 | 89.2 | putative GTP-binding protein                  | gbpln | Arabidopsis thaliana | AT3G07050.1   Symbols:   GTP-binding family protein   chr3:2229602-2232279 REVERSE LENGTH=582                                                                         | 584  | 582  | 0         | 99.7  | 85.6 | 89.2 |
| Rsa1.0_00542.1.g15707.t1  | gb EOA30591.1  hypothetical protein CARUB_v10013723mg [Capsella rubella]                                                                                                                                                                                                                                                                                                                                                      | 462  | 440  | 1.00E-125 | 95.2  | 52.6 | 56.9 | hypothetical protein CARUB_v10013723mg        | gbpln | Capsella rubella     | AT3G07080.1   Symbols:   EamA-like transporter family   chr3:2241360-2242934 FORWARD LENGTH=438                                                                       | 462  | 438  | 1.00E-124 | 94.8  | 51.9 | 55.6 |
| Rsa1.0_00542.1.g15708.t3  | ref NP_187366.2  sec24-like transport protein [Arabidopsis thaliana] gi 78099801 sp Q9SFU0.2 SC24A_ARAT H RecName: Full=Protein transport protein Sec24-like At3g07100 gi 22531076 gb AAM97042.1  putative Sec24-like COPII protein [Arabidopsis thaliana] gi 23197930 gb AAN15492.1  putative Sec24-like COPII protein [Arabidopsis thaliana] gi 332640977 gb AE74498.1  sec24-like transport protein [Arabidopsis thaliana] | 1006 | 1038 | 0         | 103.2 | 88.0 | 91.8 | sec24-like transport protein                  | gbpln | Arabidopsis thaliana | AT3G07100.1   Symbols:   ERMO2, SEC24A   Sec23/Sec24 protein transport family protein   chr3:2245689-2250077 REVERSE LENGTH=1038                                      | 1006 | 1038 | 0         | 103.2 | 88.0 | 91.8 |
| Rsa1.0_00542.1.g15709.t1  | ref NP_187368.1  RING/U-box domain-containing protein [Arabidopsis thaliana] gi 6642653 gb AAF20234.1 AC012395.21 putative RING zinc finger protein [Arabidopsis thaliana] gi 56381891 gb AAV85664.1  At3g07120 [Arabidopsis thaliana] gi 58531344 gb AAW78594.1  At3g07120 [Arabidopsis thaliana] gi 332640980 gb AE74501.1  RING/U-box domain-containing protein [Arabidopsis thaliana]                                     | 349  | 360  | 1.00E-119 | 103.2 | 75.6 | 84.8 | RING/U-box domain-containing protein          | gbpln | Arabidopsis thaliana | AT3G07120.1   Symbols:   RING/U-box superfamily protein   chr3:2254560-2255642 FORWARD LENGTH=360                                                                     | 349  | 360  | 1.00E-122 | 103.2 | 75.6 | 84.8 |
| Rsa1.0_00542.1.g15710.t1  | gb EOA20112.1  hypothetical protein CARUB_v10000391mg [Capsella rubella]                                                                                                                                                                                                                                                                                                                                                      | 460  | 672  | 1.00E-161 | 146.1 | 62.6 | 73.5 | hypothetical protein CARUB_v10000391mg        | gbpln | Capsella rubella     | AT2G47250.1   Symbols:   RNA helicase family protein   chr2:19399923-19402981 REVERSE LENGTH=729                                                                      | 460  | 729  | 1.00E-162 | 158.5 | 62.2 | 76.3 |
| Rsa1.0_00542.1.g15711.t15 | ref NP_187372.5  callose synthase [Arabidopsis thaliana] gi 378405154 sp Q9SFU6.2 CALS9_ARA TH RecName: Full=Callose synthase 9; AltName: Full=1,3-beta-glucan synthase; AltName: Full=Protein GLUCAN SYNTHASE-LIKE 10 gi 332640985 gb AE74506.1  callose synthase 10 [Arabidopsis thaliana]                                                                                                                                  | 1961 | 1890 | 0         | 96.4  | 84.8 | 90.1 | callose synthase                              | gbpln | Arabidopsis thaliana | AT3G07160.1   Symbols:   ATGSL10, gsl10, CALS9   glucan synthase-like 10   chr3:2265142-2279383 REVERSE LENGTH=1890                                                   | 1961 | 1890 | 0         | 96.4  | 84.8 | 90.1 |
| Rsa1.0_00542.1.g15712.t2  | ref XP_002882515.1  sterile alpha motif domain-containing protein [Arabidopsis lyrata subsp. lyrata] gi 297328355 gb EFH58774.1  sterile alpha motif domain-containing protein [Arabidopsis lyrata subsp. lyrata]                                                                                                                                                                                                             | 201  | 203  | 7.00E-82  | 101.0 | 80.1 | 85.1 | sterile alpha motif domain-containing protein | gbpln | Arabidopsis lyrata   | AT3G07170.1   Symbols:   Sterile alpha motif (SAM) domain-containing protein   chr3:2280428-2282097 FORWARD LENGTH=203                                                | 201  | 203  | 5.00E-84  | 101.0 | 79.6 | 85.1 |
| Rsa1.0_00542.1.g15713.t1  | gb AAB87099.1  putative retroelement pol polyprotein [Arabidopsis thaliana]                                                                                                                                                                                                                                                                                                                                                   | 1483 | 1496 | 0         | 100.9 | 56.4 | 71.5 | putative retroelement pol polyprotein         | gbpln | Arabidopsis thaliana | AT4G23160.1   Symbols:   CRK8   cysteine-rich RLK (RECEPTOR-like protein kinase) 8   chr4:12129485-12134086 FORWARD LENGTH=1262                                       | 1483 | 1262 | 1.00E-133 | 85.1  | 15.6 | 22.9 |
| Rsa1.0_00542.1.g15714.t1  | ref XP_002882516.1  hypothetical protein ARALYDRAFT_896877 [Arabidopsis lyrata subsp. lyrata] gi 297328356 gb EFH58775.1  hypothetical protein ARALYDRAFT_896877 [Arabidopsis lyrata subsp. lyrata]                                                                                                                                                                                                                           | 233  | 225  | 1.00E-42  | 96.6  | 57.5 | 63.9 | hypothetical protein ARALYDRAFT_896877        | gbpln | Arabidopsis lyrata   | AT3G07195.1   Symbols:   RPM1-interacting protein 4 (RIN4) family protein   chr3:2288959-2290309 FORWARD LENGTH=225                                                   | 233  | 225  | 6.00E-43  | 96.6  | 53.6 | 60.9 |
| Rsa1.0_00542.1.g15715.t1  | ref XP_002884637.1  hypothetical protein ARALYDRAFT_340917 [Arabidopsis lyrata subsp. lyrata] gi 297330477 gb EFH60896.1  hypothetical protein ARALYDRAFT_340917 [Arabidopsis lyrata subsp. lyrata]                                                                                                                                                                                                                           | 277  | 286  | 3.00E-91  | 103.2 | 71.8 | 79.8 | hypothetical protein ARALYDRAFT_340917        | gbpln | Arabidopsis lyrata   | AT3G07250.1   Symbols:   nuclear transport factor 2 (NTF2) family protein / RNA recognition motif (RRM)-containing protein   chr3:2300579-2308305 REVERSE LENGTH=1294 | 277  | 1294 | 6.00E-78  | 467.1 | 63.9 | 72.2 |

|                          |                                                                                                                                                                                                                                                                                                                                                                                                                                                                                                                                                                                                                                                                                                           |      |      |           |       |      |      |                                                       |       |                      |                                                                                                                                                                                                                                                                                                                                                                   |      |      |           |       |      |      |
|--------------------------|-----------------------------------------------------------------------------------------------------------------------------------------------------------------------------------------------------------------------------------------------------------------------------------------------------------------------------------------------------------------------------------------------------------------------------------------------------------------------------------------------------------------------------------------------------------------------------------------------------------------------------------------------------------------------------------------------------------|------|------|-----------|-------|------|------|-------------------------------------------------------|-------|----------------------|-------------------------------------------------------------------------------------------------------------------------------------------------------------------------------------------------------------------------------------------------------------------------------------------------------------------------------------------------------------------|------|------|-----------|-------|------|------|
| Rsa1.0_00543.1.g15716.t1 | refNP_849679.1  SAUR-like auxin-responsive protein family [Arabidopsis thaliana]<br>gi 9665126 gb AAF97310.1 AC007843_13 Hypothetical protein [Arabidopsis thaliana] gi 26452787 dbj BAC43474.1  unknown protein [Arabidopsis thaliana] gi 109946549 gb ABG48453.1 <br>At1g17345 [Arabidopsis thaliana] gi 332191454 gb AEE29575.1  SAUR-like auxin-responsive protein family [Arabidopsis thaliana]                                                                                                                                                                                                                                                                                                      | 135  | 131  | 9.00E-51  | 97.0  | 74.8 | 83.7 | SAUR-like auxin-responsive protein family             | gbpln | Arabidopsis thaliana | AT1G17345.1   Symbols:   SAUR-like auxin-responsive protein family   chr1:5940525-5940920 FORWARD LENGTH=131                                                                                                                                                                                                                                                      | 135  | 131  | 2.00E-53  | 97.0  | 74.8 | 83.7 |
| Rsa1.0_00543.1.g15717.t2 | refNP_173178.3  putative complex I intermediate-associated protein 30 [Arabidopsis thaliana]<br>gi 209572597 sp Q9LQI7.2 CIA30_ARAT H RecName: Full=Probable complex I intermediate-associated protein 30 gi 117168231 gb ABK32198.1 <br>At1g17350 [Arabidopsis thaliana] gi 332191455 gb AEE29576.1  putative complex I intermediate-associated protein 30 [Arabidopsis thaliana]                                                                                                                                                                                                                                                                                                                        | 224  | 227  | 1.00E-109 | 101.3 | 86.6 | 91.1 | putative complex I intermediate-associated protein 30 | gbpln | Arabidopsis thaliana | AT1G17350.1   Symbols:   NADH:ubiquinone oxidoreductase intermediate-associated protein 30   chr1:5942391-5944272 FORWARD LENGTH=227                                                                                                                                                                                                                              | 224  | 227  | 1.00E-111 | 101.3 | 86.6 | 91.1 |
| Rsa1.0_00543.1.g15718.t1 | refNP_173179.4  uncharacterized protein [Arabidopsis thaliana]<br>gi 9665120 gb AAF97304.1 AC007843_7 Hypothetical protein [Arabidopsis thaliana] gi 332191457 gb AEE29578.1  uncharacterized protein AT1G17360 [Arabidopsis thaliana]                                                                                                                                                                                                                                                                                                                                                                                                                                                                    | 1034 | 1061 | 0         | 102.6 | 75.2 | 83.5 | uncharacterized protein                               | gbpln | Arabidopsis thaliana | AT1G17360.1   Symbols:   BEST Arabidopsis thaliana protein match is: COP1-interacting protein-related (TAIR:AT1G72410.1); Has 9949 Blast hits to 7480 proteins in 576 species: Archae - 12; Bacteria - 1007; Metazoa - 3636; Fungi - 982; Plants - 444; Viruses - 50; Other Eukaryotes - 3818 (source: NCBI BLINK).   chr1:5947441-5951399 FORWARD LENGTH=1061    | 1034 | 1061 | 0         | 102.6 | 75.2 | 83.5 |
| Rsa1.0_00543.1.g15719.t1 | refNP_564019.1  protein TIFY 11A [Arabidopsis thaliana]<br>gi 75173855 sp Q9LDU5.1 TI11A_ARATH RecName: Full=Protein TIFY 11A; AltName: Full=Jasmonate ZIM domain-containing protein 5<br>gi 8778483 gb AAF79491.1 AC022492_35 F1L3.3 [Arabidopsis thaliana]<br>gi 9665119 gb AAF97303.1 AC007843_6 Hypothetical protein [Arabidopsis thaliana] gi 23306360 gb AANI7407.1  expressed protein [Arabidopsis thaliana] gi 27311875 gb AAO00903.1  expressed protein [Arabidopsis thaliana] gi 332191460 gb AEE29581.1  protein TIFY 11A [Arabidopsis thaliana]                                                                                                                                               | 351  | 274  | 2.00E-89  | 78.1  | 51.9 | 60.7 | protein TIFY 11A                                      | gbpln | Arabidopsis thaliana | AT1G17380.1   Symbols: JAZ5, TIFY11A   jasmonate-zim-domain protein 5   chr1:5955654-5957070 REVERSE LENGTH=274                                                                                                                                                                                                                                                   | 351  | 274  | 5.00E-92  | 78.1  | 51.9 | 60.7 |
| Rsa1.0_00543.1.g15720.t1 | refXP_002892949.1  hypothetical protein ARALYDRAFT_471945 [Arabidopsis lyrata subsp. lyrata] gi 297338791 gb EFH69208.1  hypothetical protein ARALYDRAFT_471945 [Arabidopsis lyrata subsp. lyrata]                                                                                                                                                                                                                                                                                                                                                                                                                                                                                                        | 501  | 296  | 1.00E-119 | 59.1  | 50.3 | 54.9 | hypothetical protein ARALYDRAFT_471945                | gbpln | Arabidopsis lyrata   | AT1G17400.1   Symbols:   unknown protein; BEST Arabidopsis thaliana protein match is: unknown protein (TAIR:AT1G72490.1); Has 30201 Blast hits to 17322 proteins in 780 species: Archae - 12; Bacteria - 1396; Metazoa - 17338; Fungi - 3422; Plants - 5037; Viruses - 0; Other Eukaryotes - 2996 (source: NCBI BLINK).   chr1:5960920-5962245 REVERSE LENGTH=295 | 501  | 295  | 1.00E-120 | 58.9  | 50.1 | 54.5 |
| Rsa1.0_00543.1.g15721.t1 | refXP_002892951.1  hypothetical protein ARALYDRAFT_471949 [Arabidopsis lyrata subsp. lyrata] gi 297338793 gb EFH69210.1  hypothetical protein ARALYDRAFT_471949 [Arabidopsis lyrata subsp. lyrata]<br>refNP_564024.1  protein ELF4-like 4 [Arabidopsis thaliana] gi 238478519 refNP_001154348.1  protein ELF4-like 4 [Arabidopsis thaliana]<br>gi 75218652 sp Q570U6.1 EF4L4_ARATH RecName: Full=Protein ELF4-LIKE 4 gi 62318582 dbj BAD94981.1  hypothetical protein [Arabidopsis thaliana] gi 98961045 gb ABF59006.1 <br>At1g17455 [Arabidopsis thaliana] gi 332191470 gb AEE29591.1  protein ELF4-like 4 [Arabidopsis thaliana] gi 332191471 gb AEE29592.1  protein ELF4-like 4 [Arabidopsis thaliana] | 656  | 670  | 0         | 102.1 | 76.2 | 81.7 | hypothetical protein ARALYDRAFT_471949                | gbpln | Arabidopsis lyrata   | AT1G17440.2   Symbols: EER4, TAF12B   Transcription initiation factor TFIID subunit A   chr1:5984407-5987663 REVERSE LENGTH=683                                                                                                                                                                                                                                   | 656  | 683  | 0         | 104.1 | 66.3 | 70.3 |
| Rsa1.0_00543.1.g15722.t1 | refNP_18652 sp Q570U6.1 EF4L4_ARATH RecName: Full=Protein ELF4-LIKE 4 gi 62318582 dbj BAD94981.1  hypothetical protein [Arabidopsis thaliana] gi 98961045 gb ABF59006.1 <br>At1g17455 [Arabidopsis thaliana] gi 332191470 gb AEE29591.1  protein ELF4-like 4 [Arabidopsis thaliana] gi 332191471 gb AEE29592.1  protein ELF4-like 4 [Arabidopsis thaliana]                                                                                                                                                                                                                                                                                                                                                | 115  | 114  | 5.00E-55  | 99.1  | 95.7 | 98.3 | protein ELF4-like 4                                   | gbpln | Arabidopsis thaliana | AT1G17455.2   Symbols: ELF4-L4   ELF4-like 4   chr1:5997932-5998276 FORWARD LENGTH=114                                                                                                                                                                                                                                                                            | 115  | 114  | 8.00E-58  | 99.1  | 95.7 | 98.3 |
| Rsa1.0_00543.1.g15723.t1 | gb EOA37706.1  hypothetical protein CARUB_v10012426mg [Capsella rubella]                                                                                                                                                                                                                                                                                                                                                                                                                                                                                                                                                                                                                                  | 666  | 599  | 0         | 89.9  | 60.8 | 70.1 | hypothetical protein CARUB_v10012426mg                | gbpln | Capsella rubella     | AT1G17460.2   Symbols: TRFL3   TRF-like 3   chr1:5999519-6002546 FORWARD LENGTH=624                                                                                                                                                                                                                                                                               | 666  | 624  | 0         | 93.7  | 59.0 | 68.6 |

|                          |                                                                                                                                                                                                                                                                                                                                                                                                                                                                                                                                                                                                                        |     |     |           |       |      |      |                                                                             |       |                      |                                                                                                                                                                                                                                                                                                                                         |     |     |           |       |      |      |
|--------------------------|------------------------------------------------------------------------------------------------------------------------------------------------------------------------------------------------------------------------------------------------------------------------------------------------------------------------------------------------------------------------------------------------------------------------------------------------------------------------------------------------------------------------------------------------------------------------------------------------------------------------|-----|-----|-----------|-------|------|------|-----------------------------------------------------------------------------|-------|----------------------|-----------------------------------------------------------------------------------------------------------------------------------------------------------------------------------------------------------------------------------------------------------------------------------------------------------------------------------------|-----|-----|-----------|-------|------|------|
| Rsa1.0_00543.1.g15724.t1 | gb EOA40609.1  hypothetical protein CARUB_v10009345mg [Capsella rubella]                                                                                                                                                                                                                                                                                                                                                                                                                                                                                                                                               | 392 | 399 | 0         | 101.8 | 99.2 | 99.7 | hypothetical protein CARUB_v10009345mg                                      | gbpln | Capsella rubella     | AT1G17470.2   Symbols: ATDRG1, ATDRG, DRG1   developmentally regulated G-protein 1   chr1:6003442-6006155 FORWARD LENGTH=399                                                                                                                                                                                                            | 392 | 399 | 0         | 101.8 | 99.0 | 99.5 |
| Rsa1.0_00543.1.g15725.t1 | ref XP_002892953.1  IQ-domain 7 [Arabidopsis lyrata subsp. lyrata] gi 297338795 gb EFH69212.1  IQ-domain 7 [Arabidopsis lyrata subsp. lyrata]                                                                                                                                                                                                                                                                                                                                                                                                                                                                          | 375 | 376 | 1.00E-150 | 100.3 | 78.4 | 83.5 | IQ-domain 7                                                                 | gbpln | Arabidopsis lyrata   | AT1G17480.1   Symbols: IQD7   IQ-domain 7   chr1:6006675-6008132 REVERSE LENGTH=371                                                                                                                                                                                                                                                     | 375 | 371 | 2.33E-156 | 98.9  | 76.5 | 82.4 |
| Rsa1.0_00543.1.g15726.t1 | ref NP_564026.1  uncharacterized protein [Arabidopsis thaliana] gi 8778458 gb AAF79466.1 AC022492_10 F1L3.19 [Arabidopsis thaliana] gi 15450369 gb AAK96478.1  At1g17490/F1L3.4 [Arabidopsis thaliana] gi 16974479 gb AAL31243.1  At1g17490/F1L3.4 [Arabidopsis thaliana] gi 21537369 gb AAM61710.1  unknown [Arabidopsis thaliana] gi 332191477 gb AEE29598.1  uncharacterized protein AT1G17490 [Arabidopsis thaliana]                                                                                                                                                                                               | 82  | 77  | 4.00E-20  | 93.9  | 68.3 | 75.6 | uncharacterized protein                                                     | gbpln | Arabidopsis thaliana | AT1G17490.1   Symbols:   unknown protein; BEST Arabidopsis thaliana protein match is: unknown protein (TAIR:AT1G2690.1). Has 57 Blast hits to 45 proteins in 9 species: Archae - 0; Bacteria - 0; Metazoa - 0; Fungi - 0; Plants - 57; Viruses - 0; Other Eukaryotes - 0 (source: NCBI BLINK).   chr1:6008669-6009165 FORWARD LENGTH=77 | 82  | 77  | 7.00E-23  | 93.9  | 68.3 | 75.6 |
| Rsa1.0_00543.1.g15727.t1 | ref XP_002892954.1  hypothetical protein ARALYDRAFT_471958 [Arabidopsis lyrata subsp. lyrata] gi 297338796 gb EFH69213.1  hypothetical protein ARALYDRAFT_471958 [Arabidopsis lyrata subsp. lyrata]                                                                                                                                                                                                                                                                                                                                                                                                                    | 127 | 117 | 2.00E-26  | 92.1  | 57.5 | 66.9 | hypothetical protein ARALYDRAFT_471958                                      | gbpln | Arabidopsis lyrata   | AT1G17510.1   Symbols:   unknown protein; Has 11 Blast hits to 11 proteins in 4 species: Archae - 0; Bacteria - 0; Metazoa - 0; Fungi - 0; Plants - 11; Viruses - 0; Other Eukaryotes - 0 (source: NCBI BLINK).   chr1:6023704-6024211 REVERSE LENGTH=122                                                                               | 127 | 122 | 4.00E-24  | 96.1  | 51.2 | 62.2 |
| Rsa1.0_00543.1.g15728.t1 | ref NP_173195.2  Homeodomain-like/winged-helix DNA-binding protein [Arabidopsis thaliana] gi 332191480 gb AE29601.1  telomere repeat-binding factor 4 [Arabidopsis thaliana]                                                                                                                                                                                                                                                                                                                                                                                                                                           | 300 | 296 | 1.00E-90  | 98.7  | 67.0 | 79.7 | Homeodomain-like/winged-helix DNA-binding protein                           | gbpln | Arabidopsis thaliana | AT1G17520.1   Symbols:   Homeodomain-like/winged-helix DNA-binding family protein   chr1:6024959-6027224 REVERSE LENGTH=296                                                                                                                                                                                                             | 300 | 296 | 3.00E-93  | 98.7  | 67.0 | 79.7 |
| Rsa1.0_00543.1.g15729.t1 | ref NP_564028.1  translocase of inner mitochondrial membrane 23 [Arabidopsis thaliana] gi 75175255 sp Q9LNG1.1 TI231_ARATH RecName: Full=Mitochondrial import inner membrane translocase subunit TIM23-1 gi 8778460 gb AAF79468.1 AC022492_12 F1L3.24 [Arabidopsis thaliana] gi 15010570 gb AAK73944.1  At1g17530/F1A6.4 [Arabidopsis thaliana] gi 20147387 gb AAM10403.1  At1g17530/F1A6.4 [Arabidopsis thaliana] gi 38678776 gb AAR26373.1  mitochondrial inner membrane translocase TM23-1 [Arabidopsis thaliana] gi 332191481 gb AEE29602.1  translocase of inner mitochondrial membrane 23 [Arabidopsis thaliana] | 186 | 187 | 6.00E-66  | 100.5 | 74.2 | 82.3 | translocase of inner mitochondrial membrane 23                              | gbpln | Arabidopsis thaliana | AT1G17530.1   Symbols: ATTIM23-1, TIM23-1   translocase of inner mitochondrial membrane 23   chr1:6027723-6028286 FORWARD LENGTH=187                                                                                                                                                                                                    | 186 | 187 | 2.00E-68  | 100.5 | 74.2 | 82.3 |
| Rsa1.0_00543.1.g15730.t3 | ref NP_173197.2  Protein kinase protein with adenine nucleotide alpha hydrolases-like domain [Arabidopsis thaliana] gi 151969566 dbj BAD43475.1  putative protein kinase [Arabidopsis thaliana] gi 332191482 gb AEE29603.1  Protein kinase protein with adenine nucleotide alpha hydrolases-like domain [Arabidopsis thaliana]                                                                                                                                                                                                                                                                                         | 721 | 728 | 0         | 101.0 | 80.2 | 86.4 | Protein kinase protein with adenine nucleotide alpha hydrolases-like domain | gbpln | Arabidopsis thaliana | AT1G17540.1   Symbols:   Protein kinase protein with adenine nucleotide alpha hydrolases-like domain   chr1:6029551-6032641 REVERSE LENGTH=728                                                                                                                                                                                          | 721 | 728 | 0         | 101.0 | 80.2 | 86.4 |
| Rsa1.0_00543.1.g15731.t1 | ref XP_002890234.1  hypothetical protein ARALYDRAFT_889163 [Arabidopsis lyrata subsp. lyrata] gi 297338076 gb EFH66493.1  hypothetical protein ARALYDRAFT_889163 [Arabidopsis lyrata subsp. lyrata]                                                                                                                                                                                                                                                                                                                                                                                                                    | 515 | 514 | 0         | 99.8  | 88.5 | 93.2 | hypothetical protein ARALYDRAFT_889163                                      | gbpln | Arabidopsis lyrata   | AT1G17550.1   Symbols: HAB2   homology to ABIZ   chr1:6034917-6036939 FORWARD LENGTH=511                                                                                                                                                                                                                                                | 515 | 511 | 0         | 99.2  | 87.4 | 92.4 |
| Rsa1.0_00543.1.g15732.t1 | ref NP_173200.1  large subunit ribosomal protein L14 [Arabidopsis thaliana] gi 28393761 gb AAO42290.1  putative ribosomal protein [Arabidopsis thaliana] gi 28973235 gb AO63942.1  putative ribosomal protein [Arabidopsis thaliana] gi 332191485 gb AEE29606.1  large subunit ribosomal protein L14 [Arabidopsis thaliana]                                                                                                                                                                                                                                                                                            | 202 | 196 | 6.00E-65  | 97.0  | 70.8 | 79.2 | large subunit ribosomal protein L14                                         | gbpln | Arabidopsis thaliana | AT1G17560.1   Symbols: HLL   Ribosomal protein L14p/L23e family protein   chr1:6037635-6038574 REVERSE LENGTH=196                                                                                                                                                                                                                       | 202 | 196 | 2.00E-67  | 97.0  | 70.8 | 79.2 |

|                          |                                                                                                                                                                                                                                                                                                                                                                        |      |      |           |       |       |       |                                                                                                                                                   |       |                      |                                                                                                                                              |      |      |           |       |       |       |
|--------------------------|------------------------------------------------------------------------------------------------------------------------------------------------------------------------------------------------------------------------------------------------------------------------------------------------------------------------------------------------------------------------|------|------|-----------|-------|-------|-------|---------------------------------------------------------------------------------------------------------------------------------------------------|-------|----------------------|----------------------------------------------------------------------------------------------------------------------------------------------|------|------|-----------|-------|-------|-------|
| Rsa1.0_00543.1.g15733.t1 | ref[XP_002890238.1] predicted protein [Arabidopsis lyrata subsp. lyrata] gi 297336090 gb EFH66497.1  predicted protein [Arabidopsis lyrata subsp. lyrata]                                                                                                                                                                                                              | 379  | 380  | 0         | 100.3 | 82.1  | 88.4  | predicted protein                                                                                                                                 | gbpln | Arabidopsis lyrata   | AT1G17615.1   Symbols:   Disease resistance protein (TIR-NBS class)   chr1:6059441-6060667 FORWARD LENGTH=380                                | 379  | 380  | 1.00E-178 | 100.3 | 79.7  | 87.1  |
| Rsa1.0_00543.1.g15734.t1 | gb[EOA37010.1] hypothetical protein CARUB_v10010038mg [Capsella rubella]                                                                                                                                                                                                                                                                                               | 258  | 263  | 1.00E-105 | 101.9 | 82.2  | 92.6  | hypothetical protein CARUB_v10010038mg                                                                                                            | gbpln | Capsella rubella     | AT1G17620.1   Symbols:   Late embryogenesis abundant (LEA) hydroxyproline-rich glycoprotein family   chr1:6062313-6063107 FORWARD LENGTH=264 | 258  | 264  | 5.00E-97  | 102.3 | 81.8  | 90.7  |
| Rsa1.0_00544.1.g15735.t1 | sp Q941Q2.1 HBL2_BRANA RecName: Full=Non-symbiotic hemoglobin 2; AltName: Full=BRANA GLB2; AltName: Full=Hb2 gi 15809392 gb AAK07741.1  class 2 non-symbiotic hemoglobin [Brassica napus]                                                                                                                                                                              | 94   | 161  | 2.00E-39  | 171.3 | 85.1  | 88.3  | RecName: Full=Non-symbiotic hemoglobin 2; AltName: Full=BRANA GLB2; AltName: Full=Hb2 gi 15809392 gb AAK07741.1  class 2 non-symbiotic hemoglobin | gbpln | Brassica napus       | AT3G10520.1   Symbols: AHB2, GLB2, ARATH GLB2, NSHB2, ATGLB2, HB2   haemoglobin 2   chr3:3276516-3277765 REVERSE LENGTH=158                  | 94   | 158  | 1.00E-40  | 168.1 | 80.9  | 88.3  |
| Rsa1.0_00544.1.g15736.t1 | ref[XP_002871095.1] protein binding protein [Arabidopsis lyrata subsp. lyrata] gi 297316932 gb EFH47354.1  protein binding protein [Arabidopsis lyrata subsp. lyrata]                                                                                                                                                                                                  | 793  | 860  | 0         | 108.4 | 65.7  | 76.3  | protein binding protein                                                                                                                           | gbpln | Arabidopsis lyrata   | AT5G04460.3   Symbols:   RING/U-box superfamily protein   chr5:1260009-1263695 FORWARD LENGTH=863                                            | 793  | 863  | 0         | 108.8 | 65.6  | 76.4  |
| Rsa1.0_00544.1.g15737.t5 | ref[NP_850764.1] binding to TOMV RNA 1L (long form) protein [Arabidopsis thaliana] gi 332003360 gb AED90743.1  binding to TOMV RNA 1L (long form) protein [Arabidopsis thaliana]                                                                                                                                                                                       | 351  | 334  | 1.00E-92  | 95.2  | 56.4  | 70.4  | binding to TOMV RNA 1L (long form) protein                                                                                                        | gbpln | Arabidopsis thaliana | AT5G04430.2   Symbols: BTR1, BTR1L   binding to TOMV RNA 1L (long form)   chr5:1250602-1253523 REVERSE LENGTH=334                            | 351  | 334  | 3.00E-95  | 95.2  | 56.4  | 70.4  |
| Rsa1.0_00544.1.g15738.t1 | gb[EOA30567.1] hypothetical protein CARUB_v10013694mg [Capsella rubella]                                                                                                                                                                                                                                                                                               | 485  | 447  | 0         | 92.2  | 78.1  | 83.9  | hypothetical protein CARUB_v10013694mg                                                                                                            | gbpln | Capsella rubella     | AT3G10490.2   Symbols: ANAC052, NAC052   NAC domain containing protein 52   chr3:3268075-3270608 FORWARD LENGTH=451                          | 485  | 451  | 0         | 93.0  | 79.0  | 84.3  |
| Rsa1.0_00544.1.g15739.t1 | gb[EOA32729.1] hypothetical protein CARUB_v10016033mg [Capsella rubella]                                                                                                                                                                                                                                                                                               | 395  | 395  | 1.00E-141 | 100.0 | 74.2  | 80.8  | hypothetical protein CARUB_v10016033mg                                                                                                            | gbpln | Capsella rubella     | AT3G10470.1   Symbols:   C2H2-type zinc finger family protein   chr3:3260424-3261620 FORWARD LENGTH=398                                      | 395  | 398  | 1.00E-142 | 100.8 | 75.4  | 81.5  |
| Rsa1.0_00544.1.g15740.t5 | ref[NP_177471.1] serine carboxypeptidase-like 3 [Arabidopsis thaliana] gi 75169954 sp Q9CAU1.1 SCP3_ARATH RecName: Full=Serine carboxypeptidase-like 3; Flags: Precursor gi 123424329 gb AAG52138.1 AC010556_20 putative serine carboxypeptidase; 12385-14737 [Arabidopsis thaliana] gi 332197316 gb AEE35437.1  serine carboxypeptidase-like 3 [Arabidopsis thaliana] | 409  | 441  | 1.00E-179 | 107.8 | 74.6  | 83.6  | serine carboxypeptidase-like 3                                                                                                                    | gbpln | Arabidopsis thaliana | AT1G73280.1   Symbols: scpl3   serine carboxypeptidase-like 3   chr1:27552970-27555322 REVERSE LENGTH=441                                    | 409  | 441  | 0         | 107.8 | 74.6  | 83.6  |
| Rsa1.0_00544.1.g15741.t1 | gb[EOA30606.1] hypothetical protein CARUB_v10013737mg [Capsella rubella]                                                                                                                                                                                                                                                                                               | 418  | 437  | 0         | 104.5 | 77.5  | 85.2  | hypothetical protein CARUB_v10013737mg                                                                                                            | gbpln | Capsella rubella     | AT3G10450.1   Symbols: SCPL7   serine carboxypeptidase-like 7   chr3:3249544-3252320 FORWARD LENGTH=437                                      | 418  | 437  | 0         | 104.5 | 76.8  | 84.9  |
| Rsa1.0_00544.1.g15742.t1 | gb[EOA30599.1] hypothetical protein CARUB_v10013730mg [Capsella rubella]                                                                                                                                                                                                                                                                                               | 49   | 438  | 1.00E-16  | 893.9 | 77.6  | 83.7  | hypothetical protein CARUB_v10013730mg                                                                                                            | gbpln | Capsella rubella     | AT1G73280.1   Symbols: scpl3   serine carboxypeptidase-like 3   chr1:27552970-27555322 REVERSE LENGTH=441                                    | 49   | 441  | 5.00E-19  | 900.0 | 75.5  | 79.6  |
| Rsa1.0_00544.1.g15743.t1 | emb CAN80919.1  hypothetical protein VITISV_002640 [Vitis vinifera]                                                                                                                                                                                                                                                                                                    | 1438 | 1450 | 0         | 100.8 | 48.8  | 65.3  | hypothetical protein VITISV_002640                                                                                                                | gbpln | Vitis vinifera       | AT4G23160.1   Symbols: CRK8   cysteine-rich RLK (RECEPTOR-like protein kinase) 8   chr4:12129485-12134086 FORWARD LENGTH=1262                | 1438 | 1262 | 1.00E-136 | 87.8  | 16.9  | 23.9  |
| Rsa1.0_00544.1.g15744.t1 | gb[EOA32148.1] hypothetical protein CARUB_v10015399mg, partial [Capsella rubella]                                                                                                                                                                                                                                                                                      | 445  | 419  | 5.00E-81  | 94.2  | 45.6  | 58.0  | hypothetical protein CARUB_v10015399mg, partial                                                                                                   | gbpln | Capsella rubella     | AT1G22000.1   Symbols:   FBD, F-box and Leucine Rich Repeat domains containing protein   chr1:7744189-7747123 FORWARD LENGTH=717             | 445  | 717  | 3.00E-70  | 161.1 | 43.6  | 56.0  |
| Rsa1.0_00545.1.g15745.t1 | ref[NP_001078161.1] cytochrome c oxidase subunit Vb [Arabidopsis thaliana] gi 332642186 gb AEE75707.1  cytochrome c oxidase subunit Vb [Arabidopsis thaliana]                                                                                                                                                                                                          | 41   | 175  | 5.00E-17  | 426.8 | 100.0 | 100.0 | cytochrome c oxidase subunit Vb                                                                                                                   | gbpln | Arabidopsis thaliana | AT3G15640.2   Symbols:   Rubredoxin-like superfamily protein   chr3:5299273-5301371 FORWARD LENGTH=175                                       | 41   | 175  | 8.00E-20  | 426.8 | 100.0 | 100.0 |
| Rsa1.0_00545.1.g15746.t1 | ref[XP_002882955.1] hypothetical protein ARALYDRAFT_479016 [Arabidopsis lyrata subsp. lyrata] gi 297328795 gb EFH59214.1  hypothetical protein ARALYDRAFT_479016 [Arabidopsis lyrata subsp. lyrata]                                                                                                                                                                    | 179  | 177  | 7.00E-70  | 98.9  | 89.4  | 91.1  | hypothetical protein ARALYDRAFT_479016                                                                                                            | gbpln | Arabidopsis lyrata   | AT3G15640.1   Symbols:   Rubredoxin-like superfamily protein   chr3:5299273-5301371 FORWARD LENGTH=176                                       | 179  | 176  | 1.00E-70  | 98.3  | 89.4  | 90.5  |
| Rsa1.0_00545.1.g15747.t1 | ref[NP_001189903.1] phospholipase/carboxylesterase family protein [Arabidopsis thaliana] gi 332642188 gb AEE75709.1  phospholipase/carboxylesterase family protein [Arabidopsis thaliana]                                                                                                                                                                              | 255  | 274  | 1.00E-135 | 107.5 | 93.7  | 97.6  | phospholipase/carboxyl esterace family protein                                                                                                    | gbpln | Arabidopsis thaliana | AT3G15650.2   Symbols:   alpha/beta-Hydrolases superfamily protein   chr3:5306006-5307764 FORWARD LENGTH=274                                 | 255  | 274  | 1.00E-138 | 107.5 | 93.7  | 97.6  |

|                          |                                                                                                                                                                                                                                                                                                                                                                                                                                                |      |      |           |       |      |      |                                                             |       |                      |                                                                                                                              |      |      |           |       |      |      |
|--------------------------|------------------------------------------------------------------------------------------------------------------------------------------------------------------------------------------------------------------------------------------------------------------------------------------------------------------------------------------------------------------------------------------------------------------------------------------------|------|------|-----------|-------|------|------|-------------------------------------------------------------|-------|----------------------|------------------------------------------------------------------------------------------------------------------------------|------|------|-----------|-------|------|------|
| Rsa1.0_00545.1.g15748.t1 | dbj BAB88878.1  late embryogenesis-abundant protein [Brassica rapa]                                                                                                                                                                                                                                                                                                                                                                            | 204  | 226  | 2.00E-83  | 110.8 | 87.3 | 92.6 | late embryogenesis-abundant protein                         | gbpln | Brassica rapa        | AT3G15670.1   Symbols:   Late embryogenesis abundant protein (LEA) family protein   chr3:5310141-5310901 REVERSE LENGTH=225  | 204  | 225  | 7.00E-81  | 110.3 | 86.3 | 91.7 |
| Rsa1.0_00545.1.g15749.t1 | gb ADK63398.1  Ran-binding zinc finger protein [Brassica rapa]                                                                                                                                                                                                                                                                                                                                                                                 | 163  | 163  | 2.00E-79  | 100.0 | 97.5 | 99.4 | Ran-binding zinc finger protein                             | gbpln | Brassica rapa        | AT3G15680.1   Symbols:   Ran BP2/NZF zinc finger-like superfamily protein   chr3:5315437-5316049 FORWARD LENGTH=164          | 163  | 164  | 1.00E-72  | 100.6 | 87.7 | 92.6 |
| Rsa1.0_00545.1.g15750.t1 | ref XP_002885106.1  glycoside hydrolase family 28 protein [Arabidopsis lyrata subsp. lyrata]<br>gi 297330946 gb EFH61365.1  glycoside hydrolase family 28 protein [Arabidopsis lyrata subsp. lyrata]                                                                                                                                                                                                                                           | 414  | 454  | 0         | 109.7 | 79.0 | 84.5 | glycoside hydrolase family 28 protein                       | gbpln | Arabidopsis lyrata   | AT3G15720.1   Symbols:   Pectin lyase-like superfamily protein   chr3:5325329-5327457 REVERSE LENGTH=456                     | 414  | 456  | 0         | 110.1 | 77.3 | 84.8 |
| Rsa1.0_00545.1.g15751.t1 | ref XP_002885109.1  hypothetical protein ARALYDRAFT_897880 [Arabidopsis lyrata subsp. lyrata]<br>gi 297330949 gb EFH61368.1  hypothetical protein ARALYDRAFT_897880 [Arabidopsis lyrata subsp. lyrata]                                                                                                                                                                                                                                         | 214  | 220  | 1.00E-107 | 102.8 | 91.6 | 95.3 | hypothetical protein ARALYDRAFT_897880                      | gbpln | Arabidopsis lyrata   | AT3G15810.1   Symbols:   Protein of unknown function (DUF567)   chr3:5348054-5349178 REVERSE LENGTH=220                      | 214  | 220  | 1.00E-108 | 102.8 | 91.1 | 94.4 |
| Rsa1.0_00545.1.g15752.t1 | ref XP_002882965.1  hypothetical protein ARALYDRAFT_897881 [Arabidopsis lyrata subsp. lyrata]<br>gi 297328805 gb EFH59224.1  hypothetical protein ARALYDRAFT_897881 [Arabidopsis lyrata subsp. lyrata]                                                                                                                                                                                                                                         | 280  | 301  | 1.00E-130 | 107.5 | 86.8 | 92.5 | hypothetical protein ARALYDRAFT_897881                      | gbpln | Arabidopsis lyrata   | AT3G15820.1   Symbols: ROD1   phosphatidic acid phosphatase-related / PAP2-related   chr3:5351217-5353573 FORWARD LENGTH=301 | 280  | 301  | 1.00E-130 | 107.5 | 85.4 | 91.4 |
| Rsa1.0_00545.1.g15753.t1 | ref NP_566528.1  post-illumination chlorophyll fluorescence increase protein [Arabidopsis thaliana]<br>gi 11994356 dbj BAB02315.1  unnamed protein product [Arabidopsis thaliana]<br>gi 14334704 gb AAK59530.1  unknown protein [Arabidopsis thaliana]<br>gi 22136936 gb AAM91813.1  unknown protein [Arabidopsis thaliana]<br>gi 33264221.1 gb AEE75732.1  post-illumination chlorophyll fluorescence increase protein [Arabidopsis thaliana] | 268  | 268  | 2.33E-156 | 100.0 | 92.5 | 95.1 | post-illumination chlorophyll fluorescence increase protein | gbpln | Arabidopsis thaliana | AT3G15840.1   Symbols: PIFI   post-illumination chlorophyll fluorescence increase   chr3:5356782-5358418 REVERSE LENGTH=268  | 268  | 268  | 1.00E-149 | 100.0 | 92.5 | 95.1 |
| Rsa1.0_00545.1.g15754.t1 | dbj BAJ33684.1  unnamed protein product [Thellungiella halophila]                                                                                                                                                                                                                                                                                                                                                                              | 371  | 375  | 0         | 101.1 | 88.4 | 93.3 | unnamed protein product                                     | ----  | ----                 | AT3G15850.1   Symbols: FAD5, FAD6, JB67, ADS3   fatty acid desaturase 5   chr3:5359087-5360998 FORWARD LENGTH=371            | 371  | 371  | 1.00E-179 | 100.0 | 86.0 | 90.3 |
| Rsa1.0_00545.1.g15755.t1 | gb ABS86965.1  delta-9 fatty acid desaturase [Descurainia sophia]                                                                                                                                                                                                                                                                                                                                                                              | 329  | 377  | 1.00E-122 | 114.6 | 69.9 | 80.9 | delta-9 fatty acid desaturase                               | gbpln | Descurainia sophia   | AT3G15870.1   Symbols:   Fatty acid desaturase family protein   chr3:5362911-5364425 FORWARD LENGTH=361                      | 329  | 361  | 1.00E-119 | 109.7 | 66.3 | 76.3 |
| Rsa1.0_00545.1.g15756.t1 | ref NP_851003.2  Topless-related protein 4 [Arabidopsis thaliana]<br>gi 298352695 sp Q27GK7.2 TPR4_ARAT H RecName: Full=Topless-related protein 4; AltName: Full=WUS-interacting protein 2<br>gi 332642219 gb AEE75740.1  Topless-related protein 4 [Arabidopsis thaliana]                                                                                                                                                                     | 1105 | 1135 | 0         | 102.7 | 94.3 | 97.5 | Topless-related protein 4                                   | gbpln | Arabidopsis thaliana | AT3G15880.1   Symbols: WSIP2, TPR4   WUS-interacting protein 2   chr3:5364792-5371869 REVERSE LENGTH=1135                    | 1105 | 1135 | 0         | 102.7 | 94.3 | 97.5 |
| Rsa1.0_00545.1.g15757.t1 | ref XP_002882968.1  hypothetical protein ARALYDRAFT_479045 [Arabidopsis lyrata subsp. lyrata]<br>gi 297328808 gb EFH59227.1  hypothetical protein ARALYDRAFT_479045 [Arabidopsis lyrata subsp. lyrata]                                                                                                                                                                                                                                         | 348  | 359  | 1.00E-153 | 103.2 | 80.5 | 88.5 | hypothetical protein ARALYDRAFT_479045                      | gbpln | Arabidopsis lyrata   | AT3G15890.1   Symbols:   Protein kinase superfamily protein   chr3:5374389-5376114 FORWARD LENGTH=361                        | 348  | 361  | 1.00E-154 | 103.7 | 79.0 | 88.2 |
| Rsa1.0_00545.1.g15758.t1 | emb CAN64334.1  hypothetical protein VITISV_039730 [Vitis vinifera]                                                                                                                                                                                                                                                                                                                                                                            | 188  | 1098 | 6.00E-68  | 584.0 | 71.3 | 78.2 | hypothetical protein VITISV_039730                          | gbpln | Vitis vinifera       | AT4G14540.1   Symbols: NF-YB3   nuclear factor Y, subunit B3   chr4:8344663-8345148 FORWARD LENGTH=161                       | 188  | 161  | 9.00E-69  | 85.6  | 72.9 | 77.1 |
| Rsa1.0_00545.1.g15759.t4 | ref NP_188217.4  mismatched DNA binding / ATP binding protein [Arabidopsis thaliana]<br>gi 332642232 gb AEE75753.1  mismatched DNA binding / ATP binding protein [Arabidopsis thaliana]                                                                                                                                                                                                                                                        | 523  | 490  | 1.00E-128 | 93.7  | 55.1 | 67.7 | mismatched DNA binding / ATP binding protein                | gbpln | Arabidopsis thaliana | AT3G15960.1   Symbols:   mismatched DNA binding/ATP binding   chr3:5404000-5406461 REVERSE LENGTH=490                        | 523  | 490  | 1.00E-131 | 93.7  | 55.1 | 67.7 |
| Rsa1.0_00545.1.g15760.t1 | ref XP_002885120.1  Ran-binding protein 1 domain-containing protein [Arabidopsis lyrata subsp. lyrata]<br>gi 297330960 gb EFH61379.1  Ran-binding protein 1 domain-containing protein [Arabidopsis lyrata subsp. lyrata]                                                                                                                                                                                                                       | 379  | 470  | 9.00E-83  | 124.0 | 60.9 | 73.4 | Ran-binding protein 1 domain-containing protein             | gbpln | Arabidopsis lyrata   | AT3G15970.1   Symbols:   NUP50 (Nucleoporin 50 kDa) protein   chr3:5408982-5410379 REVERSE LENGTH=465                        | 379  | 465  | 7.00E-83  | 122.7 | 59.4 | 70.4 |

|                          |                                                                                                                                                                                                                                                                                                                                                                                                                                          |      |      |           |       |      |       |                                        |       |                      |                                                                                                                                              |      |      |           |       |      |      |
|--------------------------|------------------------------------------------------------------------------------------------------------------------------------------------------------------------------------------------------------------------------------------------------------------------------------------------------------------------------------------------------------------------------------------------------------------------------------------|------|------|-----------|-------|------|-------|----------------------------------------|-------|----------------------|----------------------------------------------------------------------------------------------------------------------------------------------|------|------|-----------|-------|------|------|
| Rsa1.0_00545.1.g15761.t1 | gb AAK43485.1 AC084807.10<br>polyprotein, putative [Arabidopsis thaliana] gi 225898008 dbj BAH30336.1 <br>hypothetical protein [Arabidopsis thaliana]                                                                                                                                                                                                                                                                                    | 1451 | 1459 | 0         | 100.6 | 61.0 | 75.3  | polyprotein, putative                  | gbpln | Arabidopsis thaliana | AT4G23160.1   Symbols: CRK8   cysteine-rich RLK (RECEPTOR-like protein kinase) 8   chr4:12129485-12134086 FORWARD<br>LENGTH=1262             | 1451 | 1262 | 1.00E-105 | 87.0  | 13.2 | 18.7 |
| Rsa1.0_00545.1.g15762.t1 | ref XP_002885142.1  IQ-domain 26 [Arabidopsis lyrata subsp. lyrata] gi 297330982 gb EFH61401.1  IQ-domain 26 [Arabidopsis lyrata subsp. lyrata]                                                                                                                                                                                                                                                                                          | 377  | 390  | 1.00E-167 | 103.4 | 86.5 | 91.2  | IQ-domain 26                           | gbpln | Arabidopsis lyrata   | AT3G16490.1   Symbols: IQD26   IQ-domain 26   chr3:5603962-5605489 REVERSE<br>LENGTH=389                                                     | 377  | 389  | 1.00E-165 | 103.2 | 85.7 | 89.9 |
| Rsa1.0_00546.1.g15763.t1 | ref NP_001078180.1  protein IDA-LIKE 4 [Arabidopsis thaliana] gi 75120853 sp O6DUW6.1 IDL4_ARATH<br>RefName: Full=Protein IDA-LIKE 4; Flags: Precursor<br>gi 49425320 gb AAT66018.1  ida like-protein 4 [Arabidopsis thaliana] gi 332642614 gb AEE76135.1  protein IDA-LIKE 4 [Arabidopsis thaliana]                                                                                                                                     | 94   | 93   | 8.00E-24  | 98.9  | 71.3 | 75.5  | protein IDA-LIKE 4                     | gbpln | Arabidopsis thaliana | AT3G18715.1   Symbols: IDL4   inflorescence deficient in abscission (IDA)-like 4   chr3:6441067-6441348 FORWARD<br>LENGTH=93                 | 94   | 93   | 1.00E-26  | 98.9  | 71.3 | 75.5 |
| Rsa1.0_00546.1.g15764.t1 | gb EOA32379.1  hypothetical protein CARUB_v10015646mg [Capsella rubella]                                                                                                                                                                                                                                                                                                                                                                 | 1327 | 1322 | 0         | 99.6  | 81.8 | 89.7  | hypothetical protein CARUB_v10015646mg | gbpln | Capsella rubella     | AT3G18730.1   Symbols: TSK, MGO3, BRU1   tetrapeptide repeat (TPR)-containing protein   chr3:6446062-6453045 REVERSE<br>LENGTH=1311          | 1327 | 1311 | 0         | 98.8  | 81.6 | 89.9 |
| Rsa1.0_00546.1.g15765.t1 | ref XP_002883147.1  60S ribosomal protein L30 [Arabidopsis lyrata subsp. lyrata] gi 297846666 ref XP_002891214.1  60S ribosomal protein L30 [Arabidopsis lyrata subsp. lyrata] gi 297328987 gb EFH59406.1  60S ribosomal protein L30 [Arabidopsis lyrata subsp. lyrata] gi 297337056 gb EFH67473.1  60S ribosomal protein L30 [Arabidopsis lyrata subsp. lyrata]                                                                         | 112  | 112  | 1.00E-57  | 100.0 | 99.1 | 100.0 | 60S ribosomal protein L30              | gbpln | Arabidopsis lyrata   | AT1G36240.1   Symbols:   Ribosomal protein L7Aa/L30e/S12e/Gadd45 family protein   chr1:13614890-13616233 FORWARD<br>LENGTH=112               | 112  | 112  | 1.00E-59  | 100.0 | 99.1 | 99.1 |
| Rsa1.0_00546.1.g15766.t2 | ref NP_566618.1  small subunit ribosomal protein S6 [Arabidopsis thaliana] gi 9293899 dbj BAB01802.1  unnamed protein product [Arabidopsis thaliana] gi 21617981 gb AAM67031.1  unknown [Arabidopsis thaliana] gi 26451219 dbj BAC42712.1  unknown protein [Arabidopsis thaliana] gi 2882770 gb AAO50729.1  unknown protein [Arabidopsis thaliana] gi 332642621 gb AEE76142.1  small subunit ribosomal protein S6 [Arabidopsis thaliana] | 138  | 139  | 2.00E-61  | 100.7 | 85.5 | 92.8  | small subunit ribosomal protein S6     | gbpln | Arabidopsis thaliana | AT3G18760.1   Symbols:   Translation elongation factor EF1B/ribosomal protein S6 family protein   chr3:6457930-6459558 REVERSE<br>LENGTH=139 | 138  | 139  | 6.00E-64  | 100.7 | 85.5 | 92.8 |
| Rsa1.0_00546.1.g15767.t1 | dbj BAJ33918.1  unnamed protein product [Theillungiella halophila]                                                                                                                                                                                                                                                                                                                                                                       | 213  | 225  | 5.00E-96  | 105.6 | 86.4 | 91.1  | unnamed protein product                | ----  | ----                 | AT3G18773.1   Symbols:   RING/U-box superfamily protein   chr3:6466304-6466966 FORWARD<br>LENGTH=220                                         | 213  | 220  | 1.00E-93  | 103.3 | 78.4 | 87.8 |
| Rsa1.0_00546.1.g15768.t1 | dbj BAB01805.1  unnamed protein product [Arabidopsis thaliana]                                                                                                                                                                                                                                                                                                                                                                           | 218  | 222  | 2.00E-97  | 101.8 | 81.7 | 87.6  | unnamed protein product                | gbpln | Arabidopsis thaliana | AT1G49230.1   Symbols:   RING/U-box superfamily protein   chr1:18209320-18209979 FORWARD<br>LENGTH=219                                       | 218  | 219  | 8.00E-78  | 100.5 | 68.3 | 75.7 |
| Rsa1.0_00546.1.g15769.t1 | emb CAB40035.1  retrotransposon like protein [Arabidopsis thaliana] gi 7267767 emb CAB81170.1  retrotransposon like protein [Arabidopsis thaliana]                                                                                                                                                                                                                                                                                       | 1275 | 1515 | 0         | 118.8 | 54.0 | 69.6  | retrotransposon like protein           | gbpln | Arabidopsis thaliana | AT4G23160.1   Symbols: CRK8   cysteine-rich RLK (RECEPTOR-like protein kinase) 8   chr4:12129485-12134086 FORWARD<br>LENGTH=1262             | 1275 | 1262 | 2.00E-84  | 99.0  | 12.9 | 20.3 |

|                          |                                                                                                                                                                                                                                                                                                                                                                                                                                                                                                                                                                                                                                                                                                                                                                                                                                                                                                                                                                                                                                                                                                                                         |     |     |           |       |       |       |                                        |       |                      |                                                                                                                                                                                                                                                                                                                                                                                                                                                                                                                |     |     |           |       |       |       |
|--------------------------|-----------------------------------------------------------------------------------------------------------------------------------------------------------------------------------------------------------------------------------------------------------------------------------------------------------------------------------------------------------------------------------------------------------------------------------------------------------------------------------------------------------------------------------------------------------------------------------------------------------------------------------------------------------------------------------------------------------------------------------------------------------------------------------------------------------------------------------------------------------------------------------------------------------------------------------------------------------------------------------------------------------------------------------------------------------------------------------------------------------------------------------------|-----|-----|-----------|-------|-------|-------|----------------------------------------|-------|----------------------|----------------------------------------------------------------------------------------------------------------------------------------------------------------------------------------------------------------------------------------------------------------------------------------------------------------------------------------------------------------------------------------------------------------------------------------------------------------------------------------------------------------|-----|-----|-----------|-------|-------|-------|
| Rsa1.0_00546.1.g15770.t1 | <p>ref NP_188508.1  actin 2 [Arabidopsis thaliana]</p> <p>gi 297830536 ref XP_002883150.1  hypothetical protein ARALYDRAFT_342019 [Arabidopsis lyrata subsp. lyrata]</p> <p>gi 297847210 ref XP_002891486.1  hypothetical protein ARALYDRAFT_474065 [Arabidopsis lyrata subsp. lyrata]</p> <p>gi 25452790 sp Q96292.1 ACT2_ARATH RecName: Full=Actin-2</p> <p>gi 16226780 gb AAL16260.1 AF428330.1 AT3g18780/MVE11.16 [Arabidopsis thaliana]</p> <p>gi 1669397 gb AB37098.1  actin 2 [Arabidopsis thaliana]</p> <p>gi 9293903 dbj BAB01806.1  actin 2 [Arabidopsis thaliana]</p> <p>gi 17381174 gb AAL36399.1  putative actin 2 protein [Arabidopsis thaliana]</p> <p>gi 20465835 gb AAM20022.1  putative actin 2 protein [Arabidopsis thaliana]</p> <p>gi 21593338 gb AAM65287.1  actin 2 [Arabidopsis thaliana]</p> <p>gi 110740435 dbj BAF02112.1  actin 2 [Arabidopsis thaliana]</p> <p>gi 222424040 dbj BAH19981.1  AT3G18780 [Arabidopsis thaliana]</p> <p>gi 241740080 gb ACS68188.1  actin2.2 [Brassica napus]</p> <p>gi 297328990 gb EFH59409.1  hypothetical protein ARALYDRAFT_342019 [Arabidopsis lyrata subsp. lyrata]</p> | 377 | 377 | 0         | 100.0 | 100.0 | 100.0 | actin 2                                | gbpln | Arabidopsis lyrata   | AT3G18780.2   Symbols: ACT2, DER1, LSR2, ENL2   actin 2   chr3:6475535-6476832 FORWARD LENGTH=377                                                                                                                                                                                                                                                                                                                                                                                                              | 377 | 377 | 0         | 100.0 | 100.0 | 100.0 |
| Rsa1.0_00546.1.g15770.t1 | #                                                                                                                                                                                                                                                                                                                                                                                                                                                                                                                                                                                                                                                                                                                                                                                                                                                                                                                                                                                                                                                                                                                                       | #   | #   | #         | #     | #     | #     | -                                      | ----  | ----                 | #                                                                                                                                                                                                                                                                                                                                                                                                                                                                                                              | #   | #   | #         | #     | #     |       |
| Rsa1.0_00546.1.g15772.t1 | <p>gb EOA31115.1  hypothetical protein CARUB_v10014275mg [Capsella rubella]</p> <p>gi 482566927 gb EOA31116.1  hypothetical protein CARUB_v10014275mg [Capsella rubella]</p>                                                                                                                                                                                                                                                                                                                                                                                                                                                                                                                                                                                                                                                                                                                                                                                                                                                                                                                                                            | 301 | 300 | 1.00E-130 | 99.7  | 84.1  | 91.7  | hypothetical protein CARUB_v10014275mg | gbpln | Capsella rubella     | AT3G18790.1   Symbols:   FUNCTIONS IN: molecular_function unknown; INVOLVED IN: biological_process unknown; LOCATED IN: chloroplast; EXPRESSED IN: 22 plant structures; EXPRESSED DURING: 13 growth stages; CONTAINS InterPro DOMAIN/s: lsy1-like splicing (InterPro:IPR009360); Has 1147 Blast hits to 965 proteins in 236 species: Archaee - 12; Bacteria - 13; Metazoa - 351; Fungi - 230; Plants - 49; Viruses - 9; Other Eukaryotes - 483 (source: NCBI BLink).   chr3:6477853-6478755 FORWARD LENGTH=300 | 301 | 300 | 1.00E-125 | 99.7  | 81.7  | 89.0  |
| Rsa1.0_00546.1.g15773.t1 | <p>ref NP_566619.1  uncharacterized protein [Arabidopsis thaliana]</p> <p>gi 9293905 dbj BAB01808.1  unnamed protein product [Arabidopsis thaliana]</p> <p>gi 21555103 gb AAM63777.1  unknown [Arabidopsis thaliana]</p> <p>gi 89001037 gb ABD59108.1  At3g18800 [Arabidopsis thaliana]</p> <p>gi 332642629 gb AEE76150.1  uncharacterized protein AT3G18800 [Arabidopsis thaliana]</p>                                                                                                                                                                                                                                                                                                                                                                                                                                                                                                                                                                                                                                                                                                                                                 | 200 | 197 | 2.00E-98  | 98.5  | 93.5  | 96.0  | uncharacterized protein                | gbpln | Arabidopsis thaliana | AT3G18800.1   Symbols:   unknown protein; FUNCTIONS IN: molecular_function unknown; INVOLVED IN: biological_process unknown; LOCATED IN: plasma membrane; EXPRESSED IN: 17 plant structures; EXPRESSED DURING: 12 growth stages; Has 58 Blast hits to 58 proteins in 12 species: Archaee - 0; Bacteria - 0; Metazoa - 0; Fungi - 0; Plants - 58; Viruses - 0; Other Eukaryotes - 0 (source: NCBI BLink).   chr3:6479746-6480339 FORWARD LENGTH=197                                                             | 200 | 197 | 1.00E-101 | 98.5  | 93.5  | 96.0  |
| Rsa1.0_00546.1.g15774.t1 | <p>ref XP_002895280.1  hypothetical protein ARALYDRAFT_898257 [Arabidopsis lyrata subsp. lyrata]</p> <p>gi 297331120 gb EFH61539.1  hypothetical protein ARALYDRAFT_898257 [Arabidopsis lyrata subsp. lyrata]</p>                                                                                                                                                                                                                                                                                                                                                                                                                                                                                                                                                                                                                                                                                                                                                                                                                                                                                                                       | 667 | 696 | 0         | 104.3 | 67.6  | 71.5  | hypothetical protein ARALYDRAFT_898257 | gbpln | Arabidopsis lyrata   | AT3G18810.1   Symbols:   Protein kinase superfamily protein   chr3:6480701-6483593 REVERSE LENGTH=700                                                                                                                                                                                                                                                                                                                                                                                                          | 667 | 700 | 0         | 104.9 | 66.9  | 71.5  |
| Rsa1.0_00546.1.g15775.t1 | <p>ref XP_002893153.1  hypothetical protein ARALYDRAFT_898258 [Arabidopsis lyrata subsp. lyrata]</p> <p>gi 297328993 gb EFH59412.1  hypothetical protein ARALYDRAFT_898258 [Arabidopsis lyrata subsp. lyrata]</p>                                                                                                                                                                                                                                                                                                                                                                                                                                                                                                                                                                                                                                                                                                                                                                                                                                                                                                                       | 215 | 206 | 1.00E-115 | 95.8  | 95.8  | 95.8  | hypothetical protein ARALYDRAFT_898258 | gbpln | Arabidopsis lyrata   | AT3G18820.1   Symbols: ATRABG3F, ATRAB7B, RAB71, RABG3F, RAB7B   RAB GTPase homolog G3F   chr3:6484266-6486005 FORWARD LENGTH=206                                                                                                                                                                                                                                                                                                                                                                              | 215 | 206 | 1.00E-116 | 95.8  | 94.4  | 94.9  |
| Rsa1.0_00546.1.g15776.t1 | <p>ref XP_002890609.1  hypothetical protein ARALYDRAFT_901029 [Arabidopsis lyrata subsp. lyrata]</p> <p>gi 297326448 gb EFH56868.1  hypothetical protein ARALYDRAFT_901029 [Arabidopsis lyrata subsp. lyrata]</p>                                                                                                                                                                                                                                                                                                                                                                                                                                                                                                                                                                                                                                                                                                                                                                                                                                                                                                                       | 520 | 464 | 3.00E-77  | 89.2  | 34.6  | 44.8  | hypothetical protein ARALYDRAFT_901029 | gbpln | Arabidopsis lyrata   | AT3G18150.1   Symbols:   RNI-like superfamily protein   chr3:6217929-6219500 FORWARD LENGTH=456                                                                                                                                                                                                                                                                                                                                                                                                                | 520 | 456 | 2.00E-74  | 87.7  | 32.1  | 41.9  |



|                          |                                                                                                                                                                                                                                                                                                                                                                                                                                                                                                                                                                                                                                                                                                                                                                                                                     |     |     |           |       |      |      |                                            |       |                      |                                                                                                                                                                     |     |     |           |       |      |      |
|--------------------------|---------------------------------------------------------------------------------------------------------------------------------------------------------------------------------------------------------------------------------------------------------------------------------------------------------------------------------------------------------------------------------------------------------------------------------------------------------------------------------------------------------------------------------------------------------------------------------------------------------------------------------------------------------------------------------------------------------------------------------------------------------------------------------------------------------------------|-----|-----|-----------|-------|------|------|--------------------------------------------|-------|----------------------|---------------------------------------------------------------------------------------------------------------------------------------------------------------------|-----|-----|-----------|-------|------|------|
| Rsa1.0_00546.1.g15777.t1 | gb EOA30023.1  hypothetical protein CARUB_v10013125mg [Capsella rubella]                                                                                                                                                                                                                                                                                                                                                                                                                                                                                                                                                                                                                                                                                                                                            | 663 | 678 | 0         | 102.3 | 80.5 | 90.0 | hypothetical protein CARUB_v10013125mg     | gbpln | Capsella rubella     | AT3G18840.2   Symbols:   Tetratricopeptide repeat (TPR)-like superfamily protein   chr3:6496198-6498234 FORWARD LENGTH=678                                          | 663 | 678 | 0         | 102.3 | 77.7 | 88.1 |
| Rsa1.0_00546.1.g15778.t1 | gb EOA32324.1  hypothetical protein CARUB_v10015587mg [Capsella rubella]                                                                                                                                                                                                                                                                                                                                                                                                                                                                                                                                                                                                                                                                                                                                            | 101 | 102 | 1.00E-34  | 101.0 | 75.2 | 84.2 | hypothetical protein CARUB_v10015587mg     | gbpln | Capsella rubella     | AT5G48485.1   Symbols: DIR1   Bifunctional inhibitor/lipid-transfer protein/seed storage 2S albumin superfamily protein   chr5:19648317-19646625 REVERSE LENGTH=102 | 101 | 102 | 5.00E-14  | 101.0 | 40.6 | 53.5 |
| Rsa1.0_00546.1.g15779.t1 | ref XP_002885282.1  hypothetical protein ARALYDRAFT_318646 [Arabidopsis lyrata subsp. lyrata] gi 297331122 gb EFH61541.1  hypothetical protein ARALYDRAFT_318646 [Arabidopsis lyrata subsp. lyrata] ref NP_566620.1  phospholipase A-2-activating protein [Arabidopsis thaliana] gi 15294240 gb AAK95297.1 AF410311.1 AT3g18860/MCS22.3 [Arabidopsis thaliana] gi 9294695 dbj BAB03095.1  unnamed protein product [Arabidopsis thaliana] gi 332642639 gb AEE76180.1  transducin family protein / WD-40 repeat family protein [Arabidopsis thaliana]                                                                                                                                                                                                                                                                 | 343 | 375 | 0         | 109.3 | 87.5 | 94.8 | hypothetical protein ARALYDRAFT_318646     | gbpln | Arabidopsis lyrata   | AT3G18850.4   Symbols: LPAT5   lysophosphatidyl acyltransferase 5   chr3:6499529-6500840 REVERSE LENGTH=375                                                         | 343 | 375 | 0         | 109.3 | 86.6 | 93.9 |
| Rsa1.0_00546.1.g15780.t4 | AT3g18860/MCS22.3 [Arabidopsis thaliana] gi 9294695 dbj BAB03095.1  unnamed protein product [Arabidopsis thaliana] gi 332642639 gb AEE76180.1  transducin family protein / WD-40 repeat family protein [Arabidopsis thaliana]                                                                                                                                                                                                                                                                                                                                                                                                                                                                                                                                                                                       | 791 | 760 | 0         | 96.1  | 86.2 | 91.3 | phospholipase A-2-activating protein       | gbpln | Arabidopsis thaliana | AT3G18860.1   Symbols:   transducin family protein / WD-40 repeat family protein   chr3:6501174-6508352 FORWARD LENGTH=760                                          | 791 | 760 | 0         | 96.1  | 86.2 | 91.3 |
| Rsa1.0_00546.1.g15781.t1 | gb EOA32273.1  hypothetical protein CARUB_v10015534mg [Capsella rubella]                                                                                                                                                                                                                                                                                                                                                                                                                                                                                                                                                                                                                                                                                                                                            | 283 | 277 | 1.00E-130 | 97.9  | 85.2 | 90.5 | hypothetical protein CARUB_v10015534mg     | gbpln | Capsella rubella     | AT3G18870.1   Symbols:   Mitochondrial transcription termination factor family protein   chr3:6508515-6509339 REVERSE LENGTH=274                                    | 283 | 274 | 1.00E-131 | 96.8  | 78.4 | 81.6 |
| Rsa1.0_00546.1.g15782.t1 | ref NP_188518.1  Nucleic acid-binding, OB-fold-like protein [Arabidopsis thaliana] gi 9294697 dbj BAB03097.1  40S ribosomal protein S17-like [Arabidopsis thaliana] gi 26451825 dbj BAC43005.1  putative ribosomal protein [Arabidopsis thaliana] gi 28416831 gb AAO42946.1  At3g18880 [Arabidopsis thaliana] gi 332642642 gb AEE76163.1  Nucleic acid-binding, OB-fold-like protein [Arabidopsis thaliana]                                                                                                                                                                                                                                                                                                                                                                                                         | 108 | 105 | 7.00E-42  | 97.2  | 82.4 | 88.0 | Nucleic acid-binding, OB-fold-like protein | gbpln | Arabidopsis thaliana | AT3G18880.1   Symbols:   Nucleic acid-binding, OB-fold-like protein   chr3:6509588-6510069 FORWARD LENGTH=105                                                       | 108 | 105 | 1.00E-44  | 97.2  | 82.4 | 88.0 |
| Rsa1.0_00546.1.g15783.t1 | gb ABV89636.1  catalytic/coenzyme binding protein [Brassica rapa]                                                                                                                                                                                                                                                                                                                                                                                                                                                                                                                                                                                                                                                                                                                                                   | 650 | 624 | 0         | 96.0  | 85.1 | 89.2 | catalytic/coenzyme binding protein         | gbpln | Brassica rapa        | AT3G18890.1   Symbols:   NAD(P)-binding Rossmann-fold superfamily protein   chr3:6511169-6514729 FORWARD LENGTH=641                                                 | 650 | 641 | 0         | 98.6  | 76.9 | 82.2 |
| Rsa1.0_00546.1.g15784.t1 | ref NP_188523.1  RING-H2 finger protein ATL65 [Arabidopsis thaliana] gi 42572481 ref NP_974336.1  RING-H2 finger protein ATL65 [Arabidopsis thaliana] gi 68565164 sp Q67Y16.2 ATL65_ARATH RecName: Full=RING-H2 finger protein ATL65 gi 9280310 dbj BAB01689.1  unnamed protein product [Arabidopsis thaliana] gi 20258806 gb AAM13984.1  unknown protein [Arabidopsis thaliana] gi 21689663 gb AAM67453.1  unknown protein [Arabidopsis thaliana] gi 22531227 gb AAM97117.1  unknown protein [Arabidopsis thaliana] gi 30725686 gb AAP37865.1  At3g18930 [Arabidopsis thaliana] gi 51969336 dbj BAD43360.1  unknown protein [Arabidopsis thaliana] gi 332642648 gb AEE76169.1  RING-H2 finger protein ATL65 [Arabidopsis thaliana] gi 332642649 gb AEE76170.1  RING-H2 finger protein ATL65 [Arabidopsis thaliana] | 281 | 411 | 1.00E-108 | 146.3 | 79.0 | 84.0 | RING-H2 finger protein ATL65               | gbpln | Arabidopsis thaliana | AT3G18930.2   Symbols:   RING/U-box superfamily protein   chr3:6524110-6525345 REVERSE LENGTH=411                                                                   | 281 | 411 | 1.00E-110 | 146.3 | 79.0 | 84.0 |
| Rsa1.0_00547.1.g15785.t1 | gb AAB63623.1  cellulose synthase isolog [Arabidopsis thaliana]                                                                                                                                                                                                                                                                                                                                                                                                                                                                                                                                                                                                                                                                                                                                                     | 298 | 730 | 1.00E-126 | 245.0 | 73.2 | 82.9 | cellulose synthase isolog                  | gbpln | Arabidopsis thaliana | AT4G24000.1   Symbols:   ATCSLG2, CSLG2   cellulose synthase like G2   chr4:12462142-12465471 FORWARD LENGTH=722                                                    | 298 | 722 | 1.00E-129 | 242.3 | 73.2 | 82.9 |
| Rsa1.0_00547.1.g15786.t1 | ref XP_002867682.1  hypothetical protein ARALYDRAFT_492461 [Arabidopsis lyrata subsp. lyrata] gi 297313518 gb EFH43941.1  hypothetical protein ARALYDRAFT_492461 [Arabidopsis lyrata subsp. lyrata]                                                                                                                                                                                                                                                                                                                                                                                                                                                                                                                                                                                                                 | 173 | 174 | 2.00E-75  | 100.6 | 90.2 | 93.6 | hypothetical protein ARALYDRAFT_492461     | gbpln | Arabidopsis lyrata   | AT4G24015.1   Symbols:   RING/U-box superfamily protein   chr4:12469887-12471197 REVERSE LENGTH=174                                                                 | 173 | 174 | 7.00E-78  | 100.6 | 90.2 | 93.6 |

|                          |                                                                                                                                                                                                                                                                                                                                                                                                                                                                                                                               |      |      |           |       |      |      |                                                    |       |                      |                                                                                                                                                                                                                                                                                                                                                                              |      |      |           |       |      |      |
|--------------------------|-------------------------------------------------------------------------------------------------------------------------------------------------------------------------------------------------------------------------------------------------------------------------------------------------------------------------------------------------------------------------------------------------------------------------------------------------------------------------------------------------------------------------------|------|------|-----------|-------|------|------|----------------------------------------------------|-------|----------------------|------------------------------------------------------------------------------------------------------------------------------------------------------------------------------------------------------------------------------------------------------------------------------------------------------------------------------------------------------------------------------|------|------|-----------|-------|------|------|
| Rsa1.0_00547.1.g15788.t1 | ref NP_194133.1  NIN like protein 7 [Arabidopsis thaliana]<br>gi 313471382 sp Q84TH9.2 NLP7_ARAT H RecName: Full=Protein NLP7; Short=AtNLP7; AltName: Full=NIN-like protein 7; AltName: Full=Nodule inception protein-like protein 7<br>gi 2262113 gb AAB63621.1  unknown protein [Arabidopsis thaliana]<br>gi 5668630 emb CAB51645.1  putative protein [Arabidopsis thaliana]<br>gi 7269251 emb CAB81320.1  putative protein [Arabidopsis thaliana]<br>gi 332659441 gb AEE84841.1  NIN like protein 7 [Arabidopsis thaliana] | 970  | 959  | 0         | 98.9  | 91.8 | 94.5 | NIN like protein 7                                 | gbpln | Arabidopsis thaliana | AT4G24020.1   Symbols: NLP7   NIN like protein 7   chr4:12479904-12483822 FORWARD LENGTH=959                                                                                                                                                                                                                                                                                 | 970  | 959  | 0         | 98.9  | 91.8 | 94.5 |
| Rsa1.0_00547.1.g15788.t1 | #                                                                                                                                                                                                                                                                                                                                                                                                                                                                                                                             | #    | #    | #         | #     | #    | #    | -                                                  | ----  | ----                 | AT4G24030.1   Symbols:   unknown protein; FUNCTIONS IN: molecular.function unknown; INVOLVED IN: biological.process unknown; LOCATED IN: endomembrane system; Has 4 Blast hits to 4 proteins in 2 species: Archae - 0; Bacteria - 0; Metazoa - 0; Fungi - 0; Plants - 4; Viruses - 0; Other Eukaryotes - 0 (source: NCBI BLink).   chr4:12486247-12486633 REVERSE LENGTH=128 | 93   | 128  | 1.00E-12  | 137.6 | 50.5 | 55.9 |
| Rsa1.0_00547.1.g15789.t1 | ref XP_002869744.1  ATTRE1 [Arabidopsis lyrata subsp. lyrata]<br>gi 297315580 gb EFH46003.1  ATTRE1 [Arabidopsis lyrata subsp. lyrata]<br>ref XP_002869743.1  short-chain dehydrogenase/reductase family protein [Arabidopsis lyrata subsp. lyrata]<br>gi 297315579 gb EFH46002.1  short-chain dehydrogenase/reductase family protein [Arabidopsis lyrata subsp. lyrata]                                                                                                                                                      | 562  | 628  | 0         | 111.7 | 84.9 | 91.8 | ATTRE1                                             | gbpln | Arabidopsis lyrata   | AT4G24040.1   Symbols: ATTRE1, TRE1   trehalase 1   chr4:12498242-12491060 FORWARD LENGTH=626                                                                                                                                                                                                                                                                                | 562  | 626  | 0         | 111.4 | 82.7 | 90.6 |
| Rsa1.0_00547.1.g15790.t1 | ref XP_002869743.1  short-chain dehydrogenase/reductase family protein [Arabidopsis lyrata subsp. lyrata]<br>gi 297315579 gb EFH46002.1  short-chain dehydrogenase/reductase family protein [Arabidopsis lyrata subsp. lyrata]                                                                                                                                                                                                                                                                                                | 332  | 332  | 0         | 100.0 | 92.5 | 97.9 | short-chain dehydrogenase/reductase family protein | gbpln | Arabidopsis lyrata   | AT4G24050.1   Symbols:   NAD(P)-binding Rossmann-fold superfamily protein   chr4:12497287-12499661 FORWARD LENGTH=332                                                                                                                                                                                                                                                        | 332  | 332  | 0         | 100.0 | 91.9 | 98.2 |
| Rsa1.0_00547.1.g15791.t1 | gb AAF19226.1 AC007505.2 Highly similar to Ta1-3 polyprotein [Arabidopsis thaliana]                                                                                                                                                                                                                                                                                                                                                                                                                                           | 1265 | 1356 | 0         | 107.2 | 56.8 | 74.9 | Highly similar to Ta1-3 polyprotein                | gbpln | Arabidopsis thaliana | AT4G23160.1   Symbols: CRK8   cysteine-rich RLK (RECEPTOR-like protein kinase) 8   chr4:12129485-12134086 FORWARD LENGTH=1262                                                                                                                                                                                                                                                | 1265 | 1262 | 1.00E-76  | 99.8  | 13.8 | 21.8 |
| Rsa1.0_00547.1.g15792.t1 | gb AAM65223.1  unknown [Arabidopsis thaliana]                                                                                                                                                                                                                                                                                                                                                                                                                                                                                 | 337  | 342  | 1.00E-137 | 101.5 | 79.8 | 85.2 | unknown                                            | gbpln | Arabidopsis thaliana | AT4G24060.1   Symbols:   Dof-type zinc finger DNA-binding family protein   chr4:12503970-12505417 FORWARD LENGTH=342                                                                                                                                                                                                                                                         | 337  | 342  | 1.00E-134 | 101.5 | 80.1 | 84.9 |
| Rsa1.0_00547.1.g15793.t1 | ref NP_194138.1  carbon-carbon lyase [Arabidopsis thaliana]<br>gi 2262109 gb AAB63617.1  hypothetical protein [Arabidopsis thaliana]<br>gi 5668635 emb CAB51650.1  putative protein [Arabidopsis thaliana]<br>gi 7269256 emb CAB81325.1  putative protein [Arabidopsis thaliana]<br>gi 332659447 gb AEE84847.1  carbon-carbon lyase [Arabidopsis thaliana]                                                                                                                                                                    | 77   | 66   | 1.00E-13  | 85.7  | 45.5 | 57.1 | carbon-carbon lyase                                | gbpln | Arabidopsis thaliana | AT4G24070.1   Symbols:   carbon-carbon lyases   chr4:12508895-12509095 FORWARD LENGTH=66                                                                                                                                                                                                                                                                                     | 77   | 66   | 2.00E-16  | 85.7  | 45.5 | 57.1 |
| Rsa1.0_00547.1.g15794.t1 | gb EOA18904.1  hypothetical protein CARUB_v10007534mg [Capsella rubella]                                                                                                                                                                                                                                                                                                                                                                                                                                                      | 439  | 283  | 1.00E-115 | 64.5  | 46.0 | 51.5 | hypothetical protein CARUB_v10007534mg             | gbpln | Capsella rubella     | AT4G24080.1   Symbols: ALL1   aldolase like   chr4:12511384-12512290 FORWARD LENGTH=231                                                                                                                                                                                                                                                                                      | 439  | 231  | 1.00E-98  | 52.6  | 41.2 | 45.1 |
| Rsa1.0_00547.1.g15795.t9 | ref NP_194141.2  protein kinase family protein [Arabidopsis thaliana]<br>gi 20268686 gb AAM14047.1  unknown protein [Arabidopsis thaliana]<br>gi 22136716 gb AAM91677.1  unknown protein [Arabidopsis thaliana]<br>gi 332659450 gb AEE84850.1  protein kinase family protein [Arabidopsis thaliana]                                                                                                                                                                                                                           | 1096 | 709  | 0         | 64.7  | 54.0 | 57.6 | protein kinase family protein                      | gbpln | Arabidopsis thaliana | AT4G24100.1   Symbols:   Protein kinase superfamily protein   chr4:12515223-12519336 FORWARD LENGTH=709                                                                                                                                                                                                                                                                      | 1096 | 709  | 0         | 64.7  | 54.0 | 57.6 |
| Rsa1.0_00547.1.g15796.t1 | gb EOA17299.1  hypothetical protein CARUB_v10005571mg [Capsella rubella]                                                                                                                                                                                                                                                                                                                                                                                                                                                      | 249  | 252  | 5.00E-94  | 101.2 | 84.3 | 90.0 | hypothetical protein CARUB_v10005571mg             | gbpln | Capsella rubella     | AT4G24110.1   Symbols:   unknown protein; Has 76 Blast hits to 76 proteins in 13 species: Archae - 0; Bacteria - 0; Metazoa - 1; Fungi - 0; Plants - 75; Viruses - 0; Other Eukaryotes - 0 (source: NCBI BLink).   chr4:12520010-12520762 REVERSE LENGTH=250                                                                                                                 | 249  | 250  | 3.00E-87  | 100.4 | 84.7 | 89.2 |

|                          |                                                                                                                                                                                                                                                                                                                                                                                                                                                                                         |     |      |           |       |      |      |                                                                   |       |                      |                                                                                                                                                                                                                                                                                                                                                                                                                                                                                                                                |     |     |          |       |      |      |
|--------------------------|-----------------------------------------------------------------------------------------------------------------------------------------------------------------------------------------------------------------------------------------------------------------------------------------------------------------------------------------------------------------------------------------------------------------------------------------------------------------------------------------|-----|------|-----------|-------|------|------|-------------------------------------------------------------------|-------|----------------------|--------------------------------------------------------------------------------------------------------------------------------------------------------------------------------------------------------------------------------------------------------------------------------------------------------------------------------------------------------------------------------------------------------------------------------------------------------------------------------------------------------------------------------|-----|-----|----------|-------|------|------|
| Rsa1.0_00547.1.g15797.t1 | ref[NP_567694.2] metal-nicotianamine transporter YSL1 [Arabidopsis thaliana] gi 160359043 sp Q6R3L0.2 YSL1_ARAT H RecName: Full=Metal-nicotianamine transporter YSL1; AltName: Full=Protein YELLOW STRIPE LIKE 1; Short=AtYSL1 gi 332659452 gb AEE84852.1  metal-nicotianamine transporter YSL1 [Arabidopsis thaliana]                                                                                                                                                                  | 674 | 673  | 0         | 99.9  | 92.7 | 96.6 | metal-nicotianamine transporter YSL1                              | gbpln | Arabidopsis thaliana | AT4G24120.1   Symbols: YSL1, ATYSL1   YELLOW STRIPE like 1   chr4:12524581-12527023 FORWARD LENGTH=673                                                                                                                                                                                                                                                                                                                                                                                                                         | 674 | 673 | 0        | 99.9  | 92.7 | 96.6 |
| Rsa1.0_00547.1.g15798.t1 | ref[XP_002869736.1] hypothetical protein ARALYDRAFT_492450 [Arabidopsis lyrata subsp. lyrata] gi 297315572 gb EFH45995.1  hypothetical protein ARALYDRAFT_492450 [Arabidopsis lyrata subsp. lyrata]                                                                                                                                                                                                                                                                                     | 157 | 157  | 9.00E-79  | 100.0 | 91.1 | 94.9 | hypothetical protein ARALYDRAFT_492450                            | gbpln | Arabidopsis lyrata   | AT4G24130.1   Symbols:   Protein of unknown function, DUF538   chr4:12527861-12528423 FORWARD LENGTH=157                                                                                                                                                                                                                                                                                                                                                                                                                       | 157 | 157 | 2.00E-80 | 100.0 | 89.8 | 94.3 |
| Rsa1.0_00548.1.g15799.t2 | emb[CAB39609.1] pumilio-like protein [Arabidopsis thaliana] gi 7269439 emb CAB79443.1  pumilio-like protein [Arabidopsis thaliana]                                                                                                                                                                                                                                                                                                                                                      | 232 | 849  | 1.00E-16  | 365.9 | 22.8 | 26.7 | pumilio-like protein                                              | gbpln | Arabidopsis thaliana | AT4G25880.1   Symbols: APUM6, PUM6   pumilio 6   chr4:13155518-13159078 FORWARD LENGTH=861                                                                                                                                                                                                                                                                                                                                                                                                                                     | 232 | 861 | 4.00E-19 | 371.1 | 22.8 | 26.7 |
| Rsa1.0_00548.1.g15800.t1 | #                                                                                                                                                                                                                                                                                                                                                                                                                                                                                       | #   | #    | #         | #     | #    | #    | -                                                                 | ----  | ----                 | AT1G10180.1   Symbols:   BEST Arabidopsis thaliana protein match is: exocyst complex component 84B (TAIR:AT5G49830.1); Has 132 Blast hits to 132 proteins in 25 species: Archae - 0; Bacteria - 0; Metazoa - 7; Fungi - 0; Plants - 117; Viruses - 0; Other Eukaryotes - 8 (source: NCBI BLink).   chr1:3338381-3341494 REVERSE LENGTH=769                                                                                                                                                                                     | 131 | 769 | 2.00E-12 | 587.0 | 22.9 | 25.2 |
| Rsa1.0_00548.1.g15801.t1 | #                                                                                                                                                                                                                                                                                                                                                                                                                                                                                       | #   | #    | #         | #     | #    | #    | -                                                                 | ----  | ----                 | AT1G61730.1   Symbols:   DNA-binding storekeeper protein-related transcriptional regulator   chr1:22793447-22794577 REVERSE LENGTH=376                                                                                                                                                                                                                                                                                                                                                                                         | 153 | 376 | 1.00E-10 | 245.8 | 21.6 | 30.1 |
| Rsa1.0_00548.1.g15802.t1 | ref[NP_176815.1] DNA-binding storekeeper protein-related transcriptional regulator [Arabidopsis thaliana] gi 12322267 gb AAG51162.1 AC074025_12 hypothetical protein [Arabidopsis thaliana] gi 12324403 gb AAG52170.1 AC020665_15 hypothetical protein; 78831-79679 [Arabidopsis thaliana] gi 225898052 db BAH30358.1  hypothetical protein [Arabidopsis thaliana] gi 332196386 gb AEE34507.1  DNA-binding storekeeper protein-related transcriptional regulator [Arabidopsis thaliana] | 311 | 282  | 3.00E-29  | 90.7  | 34.7 | 49.5 | DNA-binding storekeeper protein-related transcriptional regulator | gbpln | Arabidopsis thaliana | AT1G66420.1   Symbols:   DNA-binding storekeeper protein-related transcriptional regulator   chr1:24777184-24778032 FORWARD LENGTH=282                                                                                                                                                                                                                                                                                                                                                                                         | 311 | 282 | 9.00E-32 | 90.7  | 34.7 | 49.5 |
| Rsa1.0_00548.1.g15803.t1 | ref[XP_002868503.1] hypothetical protein ARALYDRAFT_493700 [Arabidopsis lyrata subsp. lyrata] gi 297314339 gb EFH44762.1  hypothetical protein ARALYDRAFT_493700 [Arabidopsis lyrata subsp. lyrata]                                                                                                                                                                                                                                                                                     | 605 | 632  | 0         | 104.5 | 74.5 | 82.5 | hypothetical protein ARALYDRAFT_493700                            | gbpln | Arabidopsis lyrata   | AT5G37010.1   Symbols:   unknown protein; FUNCTIONS IN: molecular_function unknown; INVOLVED IN: N-terminal protein myristoylation; EXPRESSED IN: 22 plant structures; EXPRESSED DURING: 13 growth stages; BEST Arabidopsis thaliana protein match is: unknown protein (TAIR:AT1G65710.1); Has 6746 Blast hits to 5259 proteins in 486 species: Archae - 7; Bacteria - 485; Metazoa - 3508; Fungi - 577; Plants - 378; Viruses - 50; Other Eukaryotes - 1741 (source: NCBI BLink).   chr5:14620853-14622879 REVERSE LENGTH=637 | 605 | 637 | 0        | 105.3 | 73.9 | 83.0 |
| Rsa1.0_00548.1.g15804.t1 | #                                                                                                                                                                                                                                                                                                                                                                                                                                                                                       | #   | #    | #         | #     | #    | #    | -                                                                 | ----  | ----                 | AT3G26115.1   Symbols:   Pyridoxal-5'-phosphate-dependent enzyme family protein   chr3:9542301-9544246 FORWARD LENGTH=427                                                                                                                                                                                                                                                                                                                                                                                                      | 73  | 427 | 6.00E-12 | 584.9 | 41.1 | 46.6 |
| Rsa1.0_00548.1.g15805.t1 | gb[AFD01306.1] auxin response factor 8-2 [Brassica rapa subsp. pekinensis]                                                                                                                                                                                                                                                                                                                                                                                                              | 820 | 844  | 0         | 102.9 | 96.2 | 97.1 | auxin response factor 8-2                                         | gbpln | Brassica rapa        | AT5G37020.1   Symbols: ARF8, ATARF8   auxin response factor 8   chr5:14630151-14634106 FORWARD LENGTH=811                                                                                                                                                                                                                                                                                                                                                                                                                      | 820 | 811 | 0        | 98.9  | 91.3 | 93.4 |
| Rsa1.0_00548.1.g15806.t1 | dbj[BAB11372.1] unnamed protein product [Arabidopsis thaliana]                                                                                                                                                                                                                                                                                                                                                                                                                          | 854 | 880  | 0         | 103.0 | 75.3 | 83.8 | unnamed protein product                                           | gbpln | Arabidopsis thaliana | AT5G37150.1   Symbols:   P-loop containing nucleoside triphosphate hydrolases superfamily protein   chr5:14701330-14704562 FORWARD LENGTH=839                                                                                                                                                                                                                                                                                                                                                                                  | 854 | 839 | 0        | 98.2  | 73.1 | 82.1 |
| Rsa1.0_00548.1.g15807.t1 | emb[CAB75481.1] copia-like polyprotein [Arabidopsis thaliana]                                                                                                                                                                                                                                                                                                                                                                                                                           | 761 | 1363 | 1.00E-130 | 179.1 | 36.7 | 52.6 | copia-like polyprotein                                            | gbpln | Arabidopsis thaliana | ATM003000.1   Symbols: ORF145A   Gag-Pol-related retrotransposon family protein   chrM:89617-90054 REVERSE LENGTH=145                                                                                                                                                                                                                                                                                                                                                                                                          | 761 | 145 | 1.00E-20 | 19.1  | 5.9  | 9.1  |

|                          |                                                                                                                                                                                                                                                                                                                                                                                      |     |     |           |       |       |       |                                                                                                                                                                                                                                                                                                                                     |       |                      |                                                                                                                                                                                                                                                                                                                                                                                                                                                                                             |     |     |           |       |       |       |
|--------------------------|--------------------------------------------------------------------------------------------------------------------------------------------------------------------------------------------------------------------------------------------------------------------------------------------------------------------------------------------------------------------------------------|-----|-----|-----------|-------|-------|-------|-------------------------------------------------------------------------------------------------------------------------------------------------------------------------------------------------------------------------------------------------------------------------------------------------------------------------------------|-------|----------------------|---------------------------------------------------------------------------------------------------------------------------------------------------------------------------------------------------------------------------------------------------------------------------------------------------------------------------------------------------------------------------------------------------------------------------------------------------------------------------------------------|-----|-----|-----------|-------|-------|-------|
| Rsa1.0_00548.1.g15808.t1 | dbj BAB11372.1  unnamed protein product [Arabidopsis thaliana]                                                                                                                                                                                                                                                                                                                       | 841 | 880 | 0         | 104.6 | 71.3  | 83.7  | unnamed protein product                                                                                                                                                                                                                                                                                                             | gbpln | Arabidopsis thaliana | AT5G37150.1   Symbols:   P-loop containing nucleoside triphosphate hydrolases superfamily protein   chr5:14701330-14704562 FORWARD LENGTH=839                                                                                                                                                                                                                                                                                                                                               | 841 | 839 | 0         | 99.8  | 70.0  | 81.9  |
| Rsa1.0_00548.1.g15809.t1 | gb EOA33463.1  hypothetical protein CARUB_v10021117mg [Capsella rubella]                                                                                                                                                                                                                                                                                                             | 145 | 145 | 6.00E-65  | 100.0 | 78.6  | 88.3  | hypothetical protein CARUB_v10021117mg                                                                                                                                                                                                                                                                                              | gbpln | Capsella rubella     | AT1G65820.1   Symbols:   microsomal glutathione s-transferase, putative   chr1:24485213-24486682 FORWARD LENGTH=146                                                                                                                                                                                                                                                                                                                                                                         | 145 | 146 | 4.00E-67  | 100.7 | 79.3  | 86.9  |
| Rsa1.0_00548.1.g15810.t1 | ref XP_002870519.1  hypothetical protein ARALYDRAFT_493710 [Arabidopsis lyrata subsp. lyrata] gi 297316355 gb EFH46778.1  hypothetical protein ARALYDRAFT_493710 [Arabidopsis lyrata subsp. lyrata]                                                                                                                                                                                  | 307 | 307 | 1.00E-130 | 100.0 | 75.9  | 83.1  | hypothetical protein ARALYDRAFT_493710                                                                                                                                                                                                                                                                                              | gbpln | Arabidopsis lyrata   | AT5G37360.1   Symbols:   unknown protein; FUNCTIONS IN: molecular.function unknown; INVOLVED IN: biological.process unknown; LOCATED IN: chloroplast thylakoid membrane, chloroplast; EXPRESSED IN: 23 plant structures; EXPRESSED DURING: 13 growth stages; Has 1807 Blast hits to 1807 proteins in 277 species: Archae - 0; Bacteria - 0; Metazoa - 736; Fungi - 347; Plants - 385; Viruses - 0; Other Eukaryotes - 339 (source: NCBI BLink).   chr5:14805437-14808113 REVERSE LENGTH=309 | 307 | 309 | 1.00E-125 | 100.7 | 78.2  | 85.7  |
| Rsa1.0_00548.1.g15811.t1 | ref XP_002870522.1  DNAJ heat shock N-terminal domain-containing protein [Arabidopsis lyrata subsp. lyrata] gi 297316358 gb EFH46781.1  DNAJ heat shock N-terminal domain-containing protein [Arabidopsis lyrata subsp. lyrata]                                                                                                                                                      | 97  | 419 | 6.00E-18  | 432.0 | 66.0  | 75.3  | DNAJ heat shock N-terminal domain-containing protein                                                                                                                                                                                                                                                                                | gbpln | Arabidopsis lyrata   | AT5G37380.5   Symbols:   Chaperone DnaJ-domain superfamily protein   chr5:14817035-14818330 REVERSE LENGTH=431                                                                                                                                                                                                                                                                                                                                                                              | 97  | 431 | 1.00E-19  | 444.3 | 67.0  | 77.3  |
| Rsa1.0_00548.1.g15812.t1 | gb EOA15471.1  hypothetical protein CARUB_v10004388mg [Capsella rubella]                                                                                                                                                                                                                                                                                                             | 605 | 618 | 0         | 102.1 | 55.0  | 71.9  | hypothetical protein CARUB_v10004388mg                                                                                                                                                                                                                                                                                              | gbpln | Capsella rubella     | AT5G37460.1   Symbols:   Family of unknown function (DUF577)   chr5:14858494-14860362 REVERSE LENGTH=622                                                                                                                                                                                                                                                                                                                                                                                    | 605 | 622 | 1.00E-179 | 102.8 | 55.9  | 71.4  |
| Rsa1.0_00548.1.g15813.t1 | gb AAF97298.1 AC007843.1 Hypothetical protein [Arabidopsis thaliana]                                                                                                                                                                                                                                                                                                                 | 342 | 362 | 2.00E-61  | 105.8 | 38.0  | 48.2  | Hypothetical protein                                                                                                                                                                                                                                                                                                                | gbpln | Arabidopsis thaliana | AT5G37410.1   Symbols:   Family of unknown function (DUF577)   chr5:14836661-14838508 FORWARD LENGTH=615                                                                                                                                                                                                                                                                                                                                                                                    | 342 | 615 | 7.00E-18  | 179.8 | 13.2  | 17.5  |
| Rsa1.0_00549.1.g15814.t1 | gb ABQ15204.1  rop [Musa acuminata]                                                                                                                                                                                                                                                                                                                                                  | 62  | 196 | 1.00E-29  | 316.1 | 100.0 | 100.0 | rop                                                                                                                                                                                                                                                                                                                                 | gbpln | Musa acuminata       | AT1G75840.1   Symbols: ARAC5, ATPG3, ROP4, ATROP4   RAC-like GTP binding protein 5   chr1:28475964-28477377 FORWARD LENGTH=196                                                                                                                                                                                                                                                                                                                                                              | 62  | 196 | 3.00E-31  | 316.1 | 100.0 | 100.0 |
| Rsa1.0_00549.1.g15815.t1 | ref XP_002890369.1  plant synaptotagmin [Arabidopsis lyrata subsp. lyrata] gi 297336211 gb EFH66628.1  plant synaptotagmin [Arabidopsis lyrata subsp. lyrata]                                                                                                                                                                                                                        | 537 | 537 | 0         | 100.0 | 93.3  | 95.9  | plant synaptotagmin                                                                                                                                                                                                                                                                                                                 | gbpln | Arabidopsis lyrata   | AT1G20080.1   Symbols: SYTB, ATSYTB, NTMC2YPE1.2, NTMC2T1.2, SYT2   Calcium-dependent lipid-binding (CaLB domain) family protein   chr1:6962236-6964912 FORWARD LENGTH=537                                                                                                                                                                                                                                                                                                                  | 537 | 537 | 0         | 100.0 | 92.4  | 95.5  |
| Rsa1.0_00549.1.g15816.t1 | gb EOA38550.1  hypothetical protein CARUB_v10010355mg [Capsella rubella]                                                                                                                                                                                                                                                                                                             | 172 | 195 | 5.00E-41  | 113.4 | 76.2  | 81.4  | hypothetical protein CARUB_v10010355mg                                                                                                                                                                                                                                                                                              | gbpln | Capsella rubella     | AT1G20070.1   Symbols:   unknown protein; FUNCTIONS IN: molecular.function unknown; INVOLVED IN: biological.process unknown; LOCATED IN: chloroplast; EXPRESSED IN: 20 plant structures; EXPRESSED DURING: 11 growth stages; Has 26 Blast hits to 26 proteins in 9 species: Archae - 0; Bacteria - 0; Metazoa - 0; Fungi - 2; Plants - 24; Viruses - 0; Other Eukaryotes - 0 (source: NCBI BLink).   chr1:6958244-6958825 REVERSE LENGTH=193                                                | 172 | 193 | 2.00E-40  | 112.2 | 69.2  | 79.7  |
| Rsa1.0_00549.1.g15817.t1 | gb AAF79911.1 AC022472.20 Contains similarity to ferredoxin-NADP+ reductase from Arabidopsis thaliana gb AJ243705 and contains an oxidoreductase FAD/NAD-binding PF 00175 domain. ESTs gb AI997056, gb AV520008, gb AV520028, gb AV536019, gb AI099538, gb T22815, gb R83951, gb AV526060, gb AV526098, gb AV527136, gb T76914, gb H37111 come from this gene [Arabidopsis thaliana] | 321 | 348 | 1.00E-161 | 108.4 | 90.3  | 93.8  | Contains similarity to ferredoxin-NADP+ reductase from Arabidopsis thaliana gb AJ243705 and contains an oxidoreductase FAD/NAD-binding PF 00175 domain. ESTs gb AI997056, gb AV520008, gb AV520028, gb AV536019, gb AI099538, gb T22815, gb R83951, gb AV526060, gb AV526098, gb AV527136, gb T76914, gb H37111 come from this gene | gbpln | Arabidopsis thaliana | AT1G20020.1   Symbols: ATLFNR2, FNR2   ferredoxin-NADP(+)-oxidoreductase 2   chr1:6942851-6944868 FORWARD LENGTH=369                                                                                                                                                                                                                                                                                                                                                                        | 321 | 369 | 1.00E-161 | 115.0 | 90.3  | 93.8  |

|                          |                                                                                                                                                                                                                                                                                                            |     |     |           |       |      |       |                                                             |       |                      |                                                                                                                                                                       |     |     |           |       |      |      |
|--------------------------|------------------------------------------------------------------------------------------------------------------------------------------------------------------------------------------------------------------------------------------------------------------------------------------------------------|-----|-----|-----------|-------|------|-------|-------------------------------------------------------------|-------|----------------------|-----------------------------------------------------------------------------------------------------------------------------------------------------------------------|-----|-----|-----------|-------|------|------|
| Rsa1.0_00549.1.g15818.t1 | refNP_173427.1   cytomatrix protein-like protein [Arabidopsis thaliana]   gi28392994   gb AAO41932.1   unknown protein [Arabidopsis thaliana]   gi28827278   gb AAO50483.1   unknown protein [Arabidopsis thaliana]   gi332191798   gb AEE29919.1   cytomatrix protein-like protein [Arabidopsis thaliana] | 336 | 342 | 1.00E-123 | 101.8 | 70.2 | 84.5  | cytomatrix protein-like protein                             | gbpln | Arabidopsis thaliana | AT1G19980.1   Symbols:   cytomatrix protein-related   chr1:6933162-6934643 FORWARD LENGTH=342                                                                         | 336 | 342 | 1.00E-126 | 101.8 | 70.2 | 84.5 |
| Rsa1.0_00549.1.g15819.t1 | gb EOA36994.1   hypothetical protein CARUB_v10010001mg [Capsella rubella]                                                                                                                                                                                                                                  | 272 | 272 | 1.00E-144 | 100.0 | 91.5 | 95.2  | hypothetical protein CARUB_v10010001mg                      | gbpln | Capsella rubella     | AT1G19970.1   Symbols:   ER lumen protein retaining receptor family protein   chr1:6931194-6932597 REVERSE LENGTH=272                                                 | 272 | 272 | 1.00E-147 | 100.0 | 90.4 | 95.6 |
| Rsa1.0_00549.1.g15820.t1 | # # # # # # # #                                                                                                                                                                                                                                                                                            |     |     |           |       |      |       | -                                                           | ----  | ----                 | # # # # # # #                                                                                                                                                         |     |     |           |       |      |      |
| Rsa1.0_00549.1.g15821.t2 | refXP_002890359.1   abscisic acid-responsive HVA22 family protein [Arabidopsis lyrata subsp. lyrata]   gi297336201   gb EFH66618.1   abscisic acid-responsive HVA22 family protein [Arabidopsis lyrata subsp. lyrata]                                                                                      | 309 | 309 | 1.00E-125 | 100.0 | 79.6 | 85.4  | abscisic acid-responsive HVA22 family protein               | gbpln | Arabidopsis lyrata   | AT1G19950.1   Symbols: HVA22H   HVA22-like protein H (ATHVA22H)   chr1:6925043-6926527 FORWARD LENGTH=315                                                             | 309 | 315 | 1.00E-119 | 101.9 | 78.0 | 84.5 |
| Rsa1.0_00549.1.g15822.t1 | gb AAB67995.1   ATP-sulfurylase precursor [Brassica oleracea]                                                                                                                                                                                                                                              | 431 | 483 | 0         | 112.1 | 94.4 | 97.2  | ATP-sulfurylase precursor                                   | gbpln | Brassica oleracea    | AT1G19920.1   Symbols: APS2, ASA1   Pseudouridine synthase/archaeosine transglycosylase-like family protein   chr1:6914835-6916657 REVERSE LENGTH=476                 | 431 | 476 | 0         | 110.4 | 89.6 | 95.4 |
| Rsa1.0_00549.1.g15823.t1 | refXP_002513751.1   vacuolar ATP synthase proteolipid subunit 1, 2, 3, putative [Ricinus communis]   gi223546837   gb EEF48334.1   vacuolar ATP synthase proteolipid subunit 1, 2, 3, putative [Ricinus communis]                                                                                          | 165 | 169 | 2.00E-84  | 102.4 | 99.4 | 100.0 | vacuolar ATP synthase proteolipid subunit 1, 2, 3, putative | gbpln | Ricinus communis     | AT1G19910.1   Symbols: AVA-P2, AVA-2PE, ATVHA-C2   ATPase, F0/V0 complex, subunit C protein   chr1:6913317-6914322 FORWARD LENGTH=165                                 | 165 | 165 | 1.00E-86  | 100.0 | 99.4 | 99.4 |
| Rsa1.0_00549.1.g15824.t1 | refNP_564097.1   protein IQ-domain 32 [Arabidopsis thaliana]   gi332278202   sp Q9FX15.3   [QD32 ARAT H RecName: Full=Protein IQ-DOMAIN 32   gi332191787   gb AEE29908.1   protein IQ-domain 32 [Arabidopsis thaliana]                                                                                     | 731 | 794 | 0         | 108.6 | 75.8 | 84.3  | protein IQ-domain 32                                        | gbpln | Arabidopsis thaliana | AT1G19870.1   Symbols: iqd32   IQ-domain 32   chr1:6895400-6898539 REVERSE LENGTH=794                                                                                 | 731 | 794 | 0         | 108.6 | 75.8 | 84.3 |
| Rsa1.0_00549.1.g15825.t1 | refXP_002893076.1   zinc finger (CCH-type) family protein [Arabidopsis lyrata subsp. lyrata]   gi297338918   gb EFH69335.1   zinc finger (CCH-type) family protein [Arabidopsis lyrata subsp. lyrata]                                                                                                      | 412 | 411 | 0         | 99.8  | 82.0 | 87.9  | zinc finger (CCH-type) family protein                       | gbpln | Arabidopsis lyrata   | AT1G19860.1   Symbols:   Zinc finger C-x8-C-x5-C-x3-H type family protein   chr1:6891654-6894400 REVERSE LENGTH=413                                                   | 412 | 413 | 1.00E-177 | 100.2 | 79.4 | 86.7 |
| Rsa1.0_00549.1.g15826.t1 | # # # # # # # #                                                                                                                                                                                                                                                                                            |     |     |           |       |      |       | -                                                           | ----  | ----                 | # # # # # # #                                                                                                                                                         |     |     |           |       |      |      |
| Rsa1.0_00549.1.g15827.t1 | gb AFD01300.1   auxin response factor 5-2 [Brassica rapa subsp. pekinensis]                                                                                                                                                                                                                                | 629 | 836 | 0         | 132.9 | 88.7 | 91.1  | auxin response factor 5-2                                   | gbpln | Brassica rapa        | AT1G19850.1   Symbols: MP, ARF5, IAA24   Transcriptional factor B3 family protein / auxin-responsive factor AUX/IAA-related   chr1:6887353-6891182 FORWARD LENGTH=902 | 629 | 902 | 0         | 143.4 | 86.5 | 90.8 |
| Rsa1.0_00549.1.g15828.t1 | gb AFD01299.1   auxin response factor 5-1 [Brassica rapa subsp. pekinensis]                                                                                                                                                                                                                                | 202 | 867 | 8.00E-96  | 429.2 | 85.1 | 88.1  | auxin response factor 5-1                                   | gbpln | Brassica rapa        | AT1G19850.1   Symbols: MP, ARF5, IAA24   Transcriptional factor B3 family protein / auxin-responsive factor AUX/IAA-related   chr1:6887353-6891182 FORWARD LENGTH=902 | 202 | 902 | 2.00E-95  | 446.5 | 84.2 | 88.1 |
| Rsa1.0_00549.1.g15829.t1 | # # # # # # # #                                                                                                                                                                                                                                                                                            |     |     |           |       |      |       | -                                                           | ----  | ----                 | # # # # # # #                                                                                                                                                         |     |     |           |       |      |      |
| Rsa1.0_00549.1.g15830.t1 | gb AAF79835.1   AC026875_15 T6D22.19 [Arabidopsis thaliana]                                                                                                                                                                                                                                                | 842 | 745 | 1.00E-178 | 88.5  | 37.1 | 50.8  | T6D22.19                                                    | gbpln | Arabidopsis thaliana | AT3G42170.1   Symbols:   BED zinc finger :hAT family dimerisation domain   chr3:14321838-14323928 FORWARD LENGTH=696                                                  | 842 | 696 | 2.00E-73  | 82.7  | 20.5 | 35.7 |
| Rsa1.0_00549.1.g15831.t1 | # # # # # # # #                                                                                                                                                                                                                                                                                            |     |     |           |       |      |       | -                                                           | ----  | ----                 | # # # # # # #                                                                                                                                                         |     |     |           |       |      |      |
| Rsa1.0_00549.1.g15832.t1 | refXP_002893072.1   auxin-responsive family protein [Arabidopsis lyrata subsp. lyrata]   gi297338914   gb EFH69331.1   auxin-responsive family protein [Arabidopsis lyrata subsp. lyrata]                                                                                                                  | 147 | 153 | 8.00E-63  | 104.1 | 87.1 | 91.2  | auxin-responsive family protein                             | gbpln | Arabidopsis lyrata   | AT1G19840.1   Symbols:   SAUR-like auxin-responsive protein family   chr1:6872794-6873255 REVERSE LENGTH=153                                                          | 147 | 153 | 3.00E-65  | 104.1 | 86.4 | 91.2 |
| Rsa1.0_00550.1.g15833.t1 | refXP_002873897.1   hypothetical protein ARALYDRAFT_488728 [Arabidopsis lyrata subsp. lyrata]   gi297319794   gb EFH50156.1   hypothetical protein ARALYDRAFT_488728 [Arabidopsis lyrata subsp. lyrata]                                                                                                    | 537 | 538 | 0         | 100.2 | 85.8 | 90.9  | hypothetical protein ARALYDRAFT_488728                      | gbpln | Arabidopsis lyrata   | AT5G18480.1   Symbols: PGSIP6   plant glycogenin-like starch initiation protein 6   chr5:6131307-6133787 REVERSE LENGTH=537                                           | 537 | 537 | 0         | 100.0 | 85.7 | 90.9 |

|                          |                                                                                                                                                                                                                                                                                                                                                                                                                                                                                                                                                                                                                   |     |     |           |       |      |      |                                                                     |       |                      |                                                                                                                                                                                                                                                                        |     |     |           |       |      |      |
|--------------------------|-------------------------------------------------------------------------------------------------------------------------------------------------------------------------------------------------------------------------------------------------------------------------------------------------------------------------------------------------------------------------------------------------------------------------------------------------------------------------------------------------------------------------------------------------------------------------------------------------------------------|-----|-----|-----------|-------|------|------|---------------------------------------------------------------------|-------|----------------------|------------------------------------------------------------------------------------------------------------------------------------------------------------------------------------------------------------------------------------------------------------------------|-----|-----|-----------|-------|------|------|
| Rsa1.0_00550.1.g15834.t1 | ref[NP_197351.1] protein kinase family protein [Arabidopsis thaliana]<br>gi 79328036 ref[NP_001031898.1] protein kinase family protein [Arabidopsis thaliana]<br>gi 75330007 sp Q8LEB6.1 Y5185_ARATH RecName: Full=Probable receptor-like protein kinase AT5g18500<br>gi 21553648 gb AAM62741.1  Ser Thr specific protein kinase-like protein [Arabidopsis thaliana]<br>gi 115646738 gb ABJ17100.1  At5g18500 [Arabidopsis thaliana]<br>gi 332005188 gb AED92571.1  protein kinase family protein [Arabidopsis thaliana] gi 332005189 gb AED92572.1  probable receptor-like protein kinase [Arabidopsis thaliana] | 305 | 484 | 1.00E-158 | 158.7 | 92.8 | 95.4 | protein kinase family protein                                       | gbpln | Arabidopsis thaliana | AT5G18500.2   Symbols:   Protein kinase superfamily protein   chr5:6139263-6141283 FORWARD LENGTH=484                                                                                                                                                                  | 305 | 484 | 1.00E-161 | 158.7 | 92.8 | 95.4 |
| Rsa1.0_00550.1.g15835.t1 | ref[NP_189068.2] RNA-directed DNA polymerase (reverse transcriptase)-related protein [Arabidopsis thaliana]<br>gi 332643359 gb AEE76880.1  RNA-directed DNA polymerase (reverse transcriptase)-related protein [Arabidopsis thaliana]                                                                                                                                                                                                                                                                                                                                                                             | 235 | 746 | 2.00E-38  | 317.4 | 31.1 | 42.1 | RNA-directed DNA polymerase (reverse transcriptase)-related protein | gbpln | Arabidopsis thaliana | AT3G24255.1   Symbols:   RNA-directed DNA polymerase (reverse transcriptase)-related family protein   chr5:6139263-6141283 8793208 FORWARD LENGTH=746                                                                                                                  | 235 | 746 | 5.00E-41  | 317.4 | 31.1 | 42.1 |
| Rsa1.0_00550.1.g15836.t1 | gb EOA20522.1  hypothetical protein CARUB_v10000836mg [Capsella rubella]                                                                                                                                                                                                                                                                                                                                                                                                                                                                                                                                          | 162 | 485 | 2.00E-66  | 299.4 | 78.4 | 84.0 | hypothetical protein CARUB_v10000836mg                              | gbpln | Capsella rubella     | AT5G18500.2   Symbols:   Protein kinase superfamily protein   chr5:6139263-6141283 FORWARD LENGTH=484                                                                                                                                                                  | 162 | 484 | 5.00E-68  | 298.8 | 77.8 | 84.0 |
| Rsa1.0_00550.1.g15837.t1 | ref[NP_175400.1] U-box domain-containing protein 26 [Arabidopsis thaliana]<br>gi 75173046 sp Q9FXA4.1 PUB26_ARATH RecName: Full=U-box domain-containing protein 26; AltName: Full=Plant U-box protein 26<br>gi 10120432 gb AAG13057.1 AC011807_16 Hypothetical protein [Arabidopsis thaliana] gi 115311483 gb ABI93922.1  At1g49780 [Arabidopsis thaliana]<br>gi 332194354 gb AEE32475.1  U-box domain-containing protein 26 [Arabidopsis thaliana]                                                                                                                                                               | 94  | 421 | 1.00E-30  | 447.9 | 72.3 | 75.5 | U-box domain-containing protein 26                                  | gbpln | Arabidopsis thaliana | AT1G49780.1   Symbols: PUB26   plant U-box 26   chr1:18429024-18430289 REVERSE LENGTH=421                                                                                                                                                                              | 94  | 421 | 2.00E-33  | 447.9 | 72.3 | 75.5 |
| Rsa1.0_00550.1.g15838.t1 | ref[NP_198605.2] E3 ubiquitin-protein ligase SINA-like 7 [Arabidopsis thaliana]<br>gi 75171229 sp Q9FKD7.1 SINL7_ARATH RecName: Full=E3 ubiquitin-protein ligase SINA-like 7; AltName: Full=Seven in absentia-like protein 7<br>gi 9758489 dbj BAB09035.1  unnamed protein product [Arabidopsis thaliana]<br>gi 18253003 gb AAL62428.1  putative protein [Arabidopsis thaliana]<br>gi 21389685 gb AAM48041.1  putative protein [Arabidopsis thaliana]<br>gi 332006861 gb AED94244.1  E3 ubiquitin-protein ligase SINA-like 7 [Arabidopsis thaliana]                                                               | 256 | 286 | 2.00E-70  | 111.7 | 50.4 | 66.0 | E3 ubiquitin-protein ligase SINA-like 7                             | gbpln | Arabidopsis thaliana | AT5G37890.1   Symbols:   Protein with RING/U-box and TRAF-like domains   chr5:15090512-15091822 REVERSE LENGTH=286                                                                                                                                                     | 256 | 286 | 6.00E-73  | 111.7 | 50.4 | 66.0 |
| Rsa1.0_00550.1.g15839.t1 | # # # # # # # # - ----                                                                                                                                                                                                                                                                                                                                                                                                                                                                                                                                                                                            |     |     |           |       |      |      |                                                                     |       |                      | # # # # # # # #                                                                                                                                                                                                                                                        |     |     |           |       |      |      |
| Rsa1.0_00550.1.g15840.t1 | ref[XP_002871820.1] hypothetical protein ARALYDRAFT_488733 [Arabidopsis lyrata subsp. lyrata]<br>gi 297317657 gb EFH48079.1  hypothetical protein ARALYDRAFT_488733 [Arabidopsis lyrata subsp. lyrata]                                                                                                                                                                                                                                                                                                                                                                                                            | 442 | 440 | 0         | 99.5  | 93.2 | 96.6 | hypothetical protein ARALYDRAFT_488733                              | gbpln | Arabidopsis lyrata   | AT5G18520.1   Symbols:   Lung seven transmembrane receptor family protein   chr5:6145027-6146349 FORWARD LENGTH=440                                                                                                                                                    | 442 | 440 | 0         | 99.5  | 92.8 | 95.7 |
| Rsa1.0_00550.1.g15841.t2 | ref[NP_197355.2] uncharacterized protein [Arabidopsis thaliana]<br>gi 48958465 gb AAT47785.1  At5g18540 [Arabidopsis thaliana]<br>gi 51972056 gb AAU15132.1  At5g18540 [Arabidopsis thaliana]<br>gi 332005193 gb AED92576.1  uncharacterized protein AT5G18540 [Arabidopsis thaliana]                                                                                                                                                                                                                                                                                                                             | 167 | 168 | 6.00E-58  | 100.6 | 92.8 | 97.6 | uncharacterized protein                                             | gbpln | Arabidopsis thaliana | AT5G18540.1   Symbols:   unknown protein; Has 2026 Blast hits to 792 proteins in 129 species: Archae - 2; Bacteria - 12; Metazoa - 1126; Fungi - 267; Plants - 292; Viruses - 0; Other Eukaryotes - 327 (source: NCBI BLINK)   chr5:6153924-6155877 FORWARD LENGTH=168 | 167 | 168 | 2.00E-60  | 100.6 | 92.8 | 97.6 |
| Rsa1.0_00550.1.g15842.t1 | gb ABD65170.1  hypothetical protein 40.t00057 [Brassica oleracea]                                                                                                                                                                                                                                                                                                                                                                                                                                                                                                                                                 | 334 | 255 | 3.00E-45  | 76.3  | 33.8 | 41.9 | hypothetical protein 40.t00057                                      | gbpln | Brassica oleracea    | AT3G47680.1   Symbols:   DNA binding   chr3:17577483-17578391 REVERSE LENGTH=302                                                                                                                                                                                       | 334 | 302 | 2.00E-45  | 90.4  | 32.0 | 44.3 |
| Rsa1.0_00550.1.g15843.t1 | gb EOA20563.1  hypothetical protein CARUB_v10000876mg [Capsella rubella]                                                                                                                                                                                                                                                                                                                                                                                                                                                                                                                                          | 454 | 473 | 0         | 104.2 | 78.9 | 86.3 | hypothetical protein CARUB_v10000876mg                              | gbpln | Capsella rubella     | AT5G18550.1   Symbols:   Zinc finger C-x8-C-x5-C-x3-H type family protein   chr5:6160515-6162729 FORWARD LENGTH=465                                                                                                                                                    | 454 | 465 | 0         | 102.4 | 79.7 | 85.7 |

|                          |                                                                                                                                                                                                                                                                                                                                                                   |      |      |           |       |      |       |                                                                  |       |                      |                                                                                                                                               |      |     |           |       |      |      |
|--------------------------|-------------------------------------------------------------------------------------------------------------------------------------------------------------------------------------------------------------------------------------------------------------------------------------------------------------------------------------------------------------------|------|------|-----------|-------|------|-------|------------------------------------------------------------------|-------|----------------------|-----------------------------------------------------------------------------------------------------------------------------------------------|------|-----|-----------|-------|------|------|
| Rsa1.0_00550.1.g15844.t1 | refNP_197357.2  ethylene response factor PUCHI [Arabidopsis thaliana] gi 334302788 sp Q6J9Q2.2 ERF86_ARAT H RecName: Full=Ethylene-responsive transcription factor ERF086 gi 332005196 gb AED92579.1  ethylene response factor PUCHI [Arabidopsis thaliana]                                                                                                       | 316  | 348  | 2.33E-156 | 110.1 | 88.3 | 92.7  | ethylene response factor PUCHI                                   | gbpln | Arabidopsis thaliana | AT5G18560.1   Symbols: PUCHI   Integrase-type DNA-binding superfamily protein   chr5:6164859-6165905 REVERSE LENGTH=348                       | 316  | 348 | 1.00E-149 | 110.1 | 88.3 | 92.7 |
| Rsa1.0_00550.1.g15845.t1 | refNP_197358.2  GTP1/OBG family protein [Arabidopsis thaliana] gi 22136032 gb AAM91598.1  GTP-binding protein obg-like [Arabidopsis thaliana] gi 30725516 gb AAP37780.1  At5g18570 [Arabidopsis thaliana] gi 332005197 gb AED92580.1  GTP1/OBG family protein [Arabidopsis thaliana]                                                                              | 677  | 681  | 0         | 100.6 | 88.9 | 93.5  | GTP1/OBG family protein                                          | gbpln | Arabidopsis thaliana | AT5G18570.1   Symbols: EMB269, ATOBGC, CPSARI   GTP1/OBG family protein   chr5:6171839-6174823 REVERSE LENGTH=681                             | 677  | 681 | 0         | 100.6 | 88.9 | 93.5 |
| Rsa1.0_00550.1.g15846.t2 | refXP_002871823.1  hypothetical protein ARALYDRAFT_909871 [Arabidopsis lyrata subsp. lyrata] gi 297317660 gb EFH48082.1  hypothetical protein ARALYDRAFT_909871 [Arabidopsis lyrata subsp. lyrata]                                                                                                                                                                | 480  | 480  | 0         | 100.0 | 94.4 | 95.0  | hypothetical protein ARALYDRAFT_909871                           | gbpln | Arabidopsis lyrata   | AT5G18580.1   Symbols: FASS, TON2, EMB40, FS1, GDO, FASS 2   tonneau 2 (TON2)   chr5:6175154-6178214 FORWARD LENGTH=480                       | 480  | 480 | 0         | 100.0 | 93.5 | 94.6 |
| Rsa1.0_00550.1.g15847.t1 | refXP_002873906.1  glutaredoxin family protein [Arabidopsis lyrata subsp. lyrata] gi 297319743 gb EFH50165.1  glutaredoxin family protein [Arabidopsis lyrata subsp. lyrata]                                                                                                                                                                                      | 102  | 102  | 1.00E-49  | 100.0 | 92.2 | 100.0 | glutaredoxin family protein                                      | gbpln | Arabidopsis lyrata   | AT5G18600.1   Symbols:   Thioredoxin superfamily protein   chr5:6183466-6183774 REVERSE LENGTH=102                                            | 102  | 102 | 4.00E-52  | 100.0 | 92.2 | 98.0 |
| Rsa1.0_00550.1.g15848.t4 | gb AAB84340.1  putative non-LTR retroelement reverse transcriptase [Arabidopsis thaliana]                                                                                                                                                                                                                                                                         | 1083 | 1094 | 0         | 101.0 | 29.0 | 38.2  | putative non-LTR retroelement reverse transcriptase              | gbpln | Arabidopsis thaliana | AT5G18610.2   Symbols:   Protein kinase superfamily protein   chr5:6192736-6195371 FORWARD LENGTH=513                                         | 1083 | 513 | 7.00E-41  | 47.4  | 8.0  | 8.7  |
| Rsa1.0_00550.1.g15849.t1 | gb EOA19325.1  hypothetical protein CARUB_v10003350mg [Capsella rubella]                                                                                                                                                                                                                                                                                          | 899  | 886  | 0         | 98.6  | 76.3 | 85.4  | hypothetical protein CARUB_v10003350mg                           | gbpln | Capsella rubella     | AT5G18860.1   Symbols:   inosine-uridine preferring nucleoside hydrolase family protein   chr5:6291023-6295581 FORWARD LENGTH=890             | 899  | 890 | 0         | 99.0  | 74.0 | 82.2 |
| Rsa1.0_00550.1.g15850.t1 | gb EOA21225.1  hypothetical protein CARUB_v10001574mg [Capsella rubella]                                                                                                                                                                                                                                                                                          | 295  | 300  | 1.00E-150 | 101.7 | 87.5 | 92.2  | hypothetical protein CARUB_v10001574mg                           | gbpln | Capsella rubella     | AT5G18900.1   Symbols:   2-oxoglutarate (2OG) and Fe(II)-dependent oxygenase superfamily protein   chr5:6304409-6306166 REVERSE LENGTH=298    | 295  | 298 | 1.00E-152 | 101.0 | 84.7 | 88.1 |
| Rsa1.0_00550.1.g15851.t1 | refNP_565032.2  P-loop containing nucleoside triphosphate hydrolase-like protein [Arabidopsis thaliana] gi 63003832 gb AAAY25445.1  At1g72040 [Arabidopsis thaliana] gi 110737520 dbj BAF00702.1  hypothetical protein [Arabidopsis thaliana] gi 332197145 gb AEE35266.1  P-loop containing nucleoside triphosphate hydrolase-like protein [Arabidopsis thaliana] | 233  | 580  | 2.00E-34  | 248.9 | 28.3 | 30.5  | P-loop containing nucleoside triphosphate hydrolase-like protein | gbpln | Arabidopsis thaliana | AT1G72040.1   Symbols:   P-loop containing nucleoside triphosphate hydrolases superfamily protein   chr1:27112159-27114248 REVERSE LENGTH=580 | 233  | 580 | 5.00E-37  | 248.9 | 28.3 | 30.5 |
| Rsa1.0_00550.1.g15852.t1 | #                                                                                                                                                                                                                                                                                                                                                                 | #    | #    | #         | #     | #    | -     | -                                                                | ----  | ----                 | #                                                                                                                                             | #    | #   | #         | #     | #    | #    |
| Rsa1.0_00550.1.g15853.t1 | gb EOA22691.1  hypothetical protein CARUB_v10003395mg [Capsella rubella]                                                                                                                                                                                                                                                                                          | 526  | 520  | 0         | 98.9  | 76.6 | 82.7  | hypothetical protein CARUB_v10003395mg                           | gbpln | Capsella rubella     | AT5G18910.1   Symbols:   Protein kinase superfamily protein   chr5:6306994-6309396 REVERSE LENGTH=511                                         | 526  | 511 | 0         | 97.1  | 75.5 | 81.6 |
| Rsa1.0_00550.1.g15854.t1 | #                                                                                                                                                                                                                                                                                                                                                                 | #    | #    | #         | #     | #    | -     | -                                                                | ----  | ----                 | #                                                                                                                                             | #    | #   | #         | #     | #    | #    |
| Rsa1.0_00550.1.g15855.t1 | refNP_001190334.1  BTB-POZ and math domain-containing protein [Arabidopsis thaliana] gi 332005255 gb AED92638.1  BTB-POZ and math domain-containing protein [Arabidopsis thaliana]                                                                                                                                                                                | 422  | 442  | 0         | 104.7 | 82.5 | 88.4  | BTB-POZ and math domain-containing protein                       | gbpln | Arabidopsis thaliana | AT5G19000.2   Symbols: BPM1   BTB-POZ and MATH domain 1   chr5:6342563-6344641 FORWARD LENGTH=442                                             | 422  | 442 | 0         | 104.7 | 82.5 | 88.4 |
| Rsa1.0_00550.1.g15856.t1 | dbj BAE43828.1  isopentenyltransferase [Brassica rapa subsp. pekinensis]                                                                                                                                                                                                                                                                                          | 334  | 331  | 1.00E-179 | 99.1  | 91.6 | 94.0  | isopentenyltransferase                                           | gbpln | Brassica rapa        | AT5G19040.1   Symbols: ATIPT5, IPT5   isopentenyltransferase 5   chr5:6362389-6363381 REVERSE LENGTH=330                                      | 334  | 330 | 1.00E-167 | 98.8  | 84.4 | 91.6 |
| Rsa1.0_00550.1.g15857.t1 | #                                                                                                                                                                                                                                                                                                                                                                 | #    | #    | #         | #     | #    | -     | -                                                                | ----  | ----                 | #                                                                                                                                             | #    | #   | #         | #     | #    | #    |
| Rsa1.0_00550.1.g15858.t1 | emb CAN75440.1  hypothetical protein VITISV_007304 [Vitis vinifera]                                                                                                                                                                                                                                                                                               | 142  | 1362 | 2.00E-43  | 959.2 | 62.0 | 78.9  | hypothetical protein VITISV_007304                               | gbpln | Vitis vinifera       | #                                                                                                                                             | #    | #   | #         | #     | #    | #    |

|                          |                                                                                                                                                                                                                                                                                                                                                                                                                                                            |      |      |           |       |      |      |                                                  |       |                      |                                                                                                                                                                                                                                                                                                                                                                              |      |      |           |       |      |      |
|--------------------------|------------------------------------------------------------------------------------------------------------------------------------------------------------------------------------------------------------------------------------------------------------------------------------------------------------------------------------------------------------------------------------------------------------------------------------------------------------|------|------|-----------|-------|------|------|--------------------------------------------------|-------|----------------------|------------------------------------------------------------------------------------------------------------------------------------------------------------------------------------------------------------------------------------------------------------------------------------------------------------------------------------------------------------------------------|------|------|-----------|-------|------|------|
| Rsa1.0_00551.1.g15859.t1 | ref NP_175998.1  uncharacterized protein [Arabidopsis thaliana]<br>gi 6056382 gb AAF02846.1 AC009894_17<br>Unknown protein [Arabidopsis thaliana]<br>gi 8778317 gb AAF79326.1 AC002304_19<br>F14J16.33 [Arabidopsis thaliana]<br>gi 44891358 gb AS47619.1 At1g56020<br>[Arabidopsis thaliana]<br>gi 4573898 gb AAS76753.1 At1g56020<br>[Arabidopsis thaliana]<br>gi 33219521 gb AEE33332.1 <br>uncharacterized protein AT1G56020<br>[Arabidopsis thaliana] | 334  | 398  | 3.00E-92  | 119.2 | 68.3 | 76.3 | uncharacterized protein                          | gbpln | Arabidopsis thaliana | AT1G56020.1   Symbols:   unknown protein; BEST Arabidopsis thaliana protein match is: unknown protein (TAIR:AT3G12970.1); Has 3011 Blast hits to 958 proteins in 192 species: Archae - 0; Bacteria - 193; Metazoa - 479; Fungi - 286; Plants - 158; Viruses - 8; Other Eukaryotes - 1887 (source: NCBI BLink).   chr1:20952216-20953412 FORWARD LENGTH=398                   | 334  | 398  | 8.00E-95  | 119.2 | 68.3 | 76.3 |
| Rsa1.0_00551.1.g15860.t1 | ref XP_002884938.1  hypothetical protein ARALYDRAFT_478672 [Arabidopsis lyrata subsp. lyrata]<br>gi 297330778 gb EFH61197.1 <br>hypothetical protein ARALYDRAFT_478672 [Arabidopsis lyrata subsp. lyrata]                                                                                                                                                                                                                                                  | 282  | 445  | 1.00E-57  | 157.8 | 48.6 | 57.1 | hypothetical protein ARALYDRAFT_478672           | gbpln | Arabidopsis lyrata   | AT3G13040.2   Symbols:   myb-like HTH transcriptional regulator family protein   chr3:4172415-4174456 REVERSE LENGTH=449                                                                                                                                                                                                                                                     | 282  | 449  | 1.00E-58  | 159.2 | 53.5 | 64.5 |
| Rsa1.0_00551.1.g15861.t1 | gb EOA37940.1  hypothetical protein CARUB_v10009408mg [Capsella rubella]                                                                                                                                                                                                                                                                                                                                                                                   | 371  | 387  | 1.00E-125 | 104.3 | 66.3 | 75.2 | hypothetical protein CARUB_v10009408mg           | gbpln | Capsella rubella     | AT1G55960.1   Symbols:   Polyketide cyclase/dehydrase and lipid transport superfamily protein   chr1:20927962-20929825 REVERSE LENGTH=403                                                                                                                                                                                                                                    | 371  | 403  | 1.00E-119 | 108.6 | 64.4 | 74.1 |
| Rsa1.0_00551.1.g15862.t1 | gb AAT38562.1  chloroplast serine acetyltransferase [Thlaspi goeingense]                                                                                                                                                                                                                                                                                                                                                                                   | 318  | 319  | 1.00E-141 | 100.3 | 81.8 | 88.1 | chloroplast serine acetyltransferase             | gbpln | Thlaspi goeingense   | AT1G55920.1   Symbols: ATSERAT2.1, SAT5, SAT1, SERAT2.1   serine acetyltransferase 2.1   chr1:20912378-20913322 FORWARD LENGTH=314                                                                                                                                                                                                                                           | 318  | 314  | 1.00E-141 | 98.7  | 78.6 | 87.1 |
| Rsa1.0_00551.1.g15863.t1 | gb EOA40594.1  hypothetical protein CARUB_v10009325mg, partial [Capsella rubella]                                                                                                                                                                                                                                                                                                                                                                          | 224  | 403  | 6.00E-68  | 179.9 | 54.0 | 58.5 | hypothetical protein CARUB_v10009325mg, partial  | gbpln | Capsella rubella     | AT1G55900.1   Symbols: TIM50, emb1860   Haloacid dehalogenase-like hydrolase (HAD) superfamily protein   chr1:20903163-20905420 FORWARD LENGTH=376                                                                                                                                                                                                                           | 224  | 376  | 3.00E-70  | 167.9 | 53.1 | 58.5 |
| Rsa1.0_00551.1.g15864.t1 | emb CAB10381.1  retrotransposon like protein [Arabidopsis thaliana]<br>gi 7268351 emb CAB78644.1 <br>retrotransposon like protein [Arabidopsis thaliana]                                                                                                                                                                                                                                                                                                   | 224  | 326  | 6.00E-39  | 145.5 | 34.8 | 41.5 | retrotransposon like protein                     | gbpln | Arabidopsis thaliana | #                                                                                                                                                                                                                                                                                                                                                                            | #    | #    | #         | #     | #    |      |
| Rsa1.0_00551.1.g15865.t1 | ref NP_175984.1  cysteine synthase A [Arabidopsis thaliana]<br>gi 6519441 gb AAS9702.1  At1g55880<br>[Arabidopsis thaliana]<br>gi 110741637 db BAE98765.1 <br>hypothetical protein [Arabidopsis thaliana]<br>gi 332195192 gb AEE33313.1 <br>pyridoxal-5'-phosphate-dependent enzyme family protein [Arabidopsis thaliana]                                                                                                                                  | 417  | 421  | 0         | 101.0 | 88.0 | 93.8 | cysteine synthase A                              | gbpln | Arabidopsis thaliana | AT1G55890.1   Symbols:   Pyridoxal-5'-phosphate-dependent enzyme family protein   chr1:20899292-20901140 REVERSE LENGTH=421                                                                                                                                                                                                                                                  | 417  | 421  | 0         | 101.0 | 88.0 | 93.8 |
| Rsa1.0_00551.1.g15866.t1 | ref XP_002891857.1  Poly(A)-specific ribonuclease [Arabidopsis lyrata subsp. lyrata]<br>gi 297337699 gb EFH68116.1 <br>Poly(A)-specific ribonuclease [Arabidopsis lyrata subsp. lyrata]                                                                                                                                                                                                                                                                    | 687  | 689  | 0         | 100.3 | 82.5 | 88.8 | Poly(A)-specific ribonuclease                    | gbpln | Arabidopsis lyrata   | AT1G55870.1   Symbols: ATPARN, AHG2   Polynucleotidyl transferase, ribonuclease H-like superfamily protein   chr1:20895663-20898359 FORWARD LENGTH=689                                                                                                                                                                                                                       | 687  | 689  | 0         | 100.3 | 80.9 | 88.2 |
| Rsa1.0_00551.1.g15867.t1 | gb EOA39047.1  hypothetical protein CARUB_v10011657mg [Capsella rubella]                                                                                                                                                                                                                                                                                                                                                                                   | 3620 | 3915 | 0         | 108.1 | 84.3 | 90.0 | hypothetical protein CARUB_v10011657mg           | gbpln | Capsella rubella     | AT1G55860.2   Symbols: UPL1   ubiquitin-protein ligase 1   chr1:20879900-20892910 REVERSE LENGTH=3681                                                                                                                                                                                                                                                                        | 3620 | 3681 | 0         | 101.7 | 84.6 | 90.0 |
| Rsa1.0_00551.1.g15868.t2 | ref NP_175980.1  sec.4-like phosphatidylinositol transfer protein [Arabidopsis thaliana]<br>gi 16930447 gb AAL31909.1 AF419577.1<br>At1g55840/F14J16.2 [Arabidopsis thaliana]<br>gi 19310517 gb AAL84992.1 <br>At1g55840/F14J16.2 [Arabidopsis thaliana]<br>gi 332195185 gb AEE33306.1 <br>sec.4-like phosphatidylinositol transfer protein [Arabidopsis thaliana]                                                                                         | 329  | 325  | 1.00E-172 | 98.8  | 89.1 | 93.9 | sec.4-like phosphatidylinositol transfer protein | gbpln | Arabidopsis thaliana | AT1G55840.1   Symbols:   Sec14p-like phosphatidylinositol transfer family protein   chr1:20873891-20876018 FORWARD LENGTH=325                                                                                                                                                                                                                                                | 329  | 325  | 1.00E-175 | 98.8  | 89.1 | 93.9 |
| Rsa1.0_00551.1.g15869.t1 | #                                                                                                                                                                                                                                                                                                                                                                                                                                                          | #    | #    | #         | #     | #    | -    | ----                                             | ----  | ----                 | #                                                                                                                                                                                                                                                                                                                                                                            | #    | #    | #         | #     | #    |      |
| Rsa1.0_00551.1.g15870.t1 | ref NP_001185244.1  uncharacterized protein [Arabidopsis thaliana]<br>gi 332195184 gb AEE33305.1 <br>uncharacterized protein AT1G55830<br>[Arabidopsis thaliana]                                                                                                                                                                                                                                                                                           | 491  | 493  | 0         | 100.4 | 74.1 | 85.3 | uncharacterized protein                          | gbpln | Arabidopsis thaliana | AT1G55830.2   Symbols:   unknown protein; FUNCTIONS IN: molecular_function unknown; INVOLVED IN: biological_process unknown; LOCATED IN: cellular_component unknown; EXPRESSED IN: 22 plant structures; EXPRESSED DURING: 13 growth stages; CONTAINS InterPro DOMAIN/s: Protein of unknown function DUF812 (InterPro:IPR008530).   chr1:20867918-20870205 REVERSE LENGTH=493 | 491  | 493  | 0         | 100.4 | 74.1 | 85.3 |
| Rsa1.0_00551.1.g15871.t1 | gb EOA23231.1  hypothetical protein CARUB_v10019219mg [Capsella rubella]                                                                                                                                                                                                                                                                                                                                                                                   | 392  | 444  | 1.00E-140 | 113.3 | 65.8 | 76.0 | hypothetical protein CARUB_v10019219mg           | gbpln | Capsella rubella     | AT2G40920.1   Symbols:   F-box and associated interaction domains-containing protein   chr2:17072586-17074012 REVERSE LENGTH=436                                                                                                                                                                                                                                             | 392  | 436  | 3.00E-82  | 111.2 | 46.9 | 61.5 |



|                          |                                                                                                                                                                                                                                                                                                                                                                                                                                                                        |     |     |           |       |      |      |                                                          |       |                      |                                                                                                                                                                                                                                                                                                                                                                              |     |     |           |       |      |      |
|--------------------------|------------------------------------------------------------------------------------------------------------------------------------------------------------------------------------------------------------------------------------------------------------------------------------------------------------------------------------------------------------------------------------------------------------------------------------------------------------------------|-----|-----|-----------|-------|------|------|----------------------------------------------------------|-------|----------------------|------------------------------------------------------------------------------------------------------------------------------------------------------------------------------------------------------------------------------------------------------------------------------------------------------------------------------------------------------------------------------|-----|-----|-----------|-------|------|------|
| Rsa1.0_00551.1.g15872.t1 | ref NP_001185244.1  uncharacterized protein [Arabidopsis thaliana] gi 332195184 gb AE33305.1  uncharacterized protein AT1G55830 [Arabidopsis thaliana]                                                                                                                                                                                                                                                                                                                 | 105 | 493 | 3.00E-25  | 469.5 | 55.2 | 59.0 | uncharacterized protein                                  | gbpln | Arabidopsis thaliana | AT1G55830.2   Symbols:   unknown protein; FUNCTIONS IN: molecular_function unknown; INVOLVED IN: biological_process unknown; LOCATED IN: cellular_component unknown; EXPRESSED IN: 22 plant structures; EXPRESSED DURING: 13 growth stages; CONTAINS InterPro DOMAIN/s: Protein of unknown function DUF812 (InterPro:IPR008530).   chr1:20867918-20870205 REVERSE LENGTH=493 | 105 | 493 | 4.00E-28  | 469.5 | 55.2 | 59.0 |
| Rsa1.0_00551.1.g15873.t1 | gb EOA40054.1  hypothetical protein CARUB_v10008748mg [Capsella rubella]                                                                                                                                                                                                                                                                                                                                                                                               | 663 | 554 | 1.00E-166 | 83.6  | 56.1 | 64.9 | hypothetical protein CARUB_v10008748mg                   | gbpln | Capsella rubella     | AT1G55820.1   Symbols:   Kinase-related protein of unknown function (DUF1296)   chr1:20864397-20867418 FORWARD LENGTH=575                                                                                                                                                                                                                                                    | 663 | 575 | 1.00E-162 | 86.7  | 54.9 | 64.6 |
| Rsa1.0_00551.1.g15874.t1 | #                                                                                                                                                                                                                                                                                                                                                                                                                                                                      | #   | #   | #         | #     | #    | -    | ----                                                     | ----  | #                    | #                                                                                                                                                                                                                                                                                                                                                                            | #   | #   | #         | #     | #    |      |
| Rsa1.0_00551.1.g15875.t2 | ref XP_002894530.1  hypothetical protein ARALYDRAFT_892585 [Arabidopsis lyrata subsp. lyrata] gi 297340372 gb EFH70789.1  hypothetical protein ARALYDRAFT_892585 [Arabidopsis lyrata subsp. lyrata]                                                                                                                                                                                                                                                                    | 454 | 480 | 1.00E-125 | 105.7 | 61.7 | 69.8 | hypothetical protein ARALYDRAFT_892585                   | gbpln | Arabidopsis lyrata   | AT1G55790.1   Symbols:   Domain of unknown function (DUF2431)   chr1:20852685-20856069 REVERSE LENGTH=515                                                                                                                                                                                                                                                                    | 454 | 515 | 1.00E-107 | 113.4 | 43.6 | 48.5 |
| Rsa1.0_00551.1.g15876.t1 | ref XP_002894528.1  invertase/pectin methylesterase inhibitor family protein [Arabidopsis lyrata subsp. lyrata] gi 297340370 gb EFH70787.1  invertase/pectin methylesterase inhibitor family protein [Arabidopsis lyrata subsp. lyrata]                                                                                                                                                                                                                                | 175 | 175 | 3.00E-68  | 100.0 | 84.0 | 91.4 | invertase/pectin methylesterase inhibitor family protein | gbpln | Arabidopsis lyrata   | AT1G55770.1   Symbols:   Plant invertase/pectin methylesterase inhibitor superfamily protein   chr1:20851039-20851566 REVERSE LENGTH=175                                                                                                                                                                                                                                     | 175 | 175 | 5.00E-67  | 100.0 | 80.6 | 89.7 |
| Rsa1.0_00552.1.g15877.t1 | gb AAF24568.1 AC007764_10 F22C12.22 [Arabidopsis thaliana]                                                                                                                                                                                                                                                                                                                                                                                                             | 75  | 651 | 7.00E-20  | 868.0 | 70.7 | 78.7 | F22C12.22                                                | gbpln | Arabidopsis thaliana | AT1G64010.1   Symbols:   Serine protease inhibitor (SERPIN) family protein   chr1:23750884-23751441 REVERSE LENGTH=185                                                                                                                                                                                                                                                       | 75  | 185 | 2.00E-22  | 246.7 | 70.7 | 78.7 |
| Rsa1.0_00552.1.g15878.t1 | gb EOA13968.1  hypothetical protein CARUB_v10027093mg [Capsella rubella]                                                                                                                                                                                                                                                                                                                                                                                               | 268 | 220 | 7.00E-81  | 82.1  | 62.3 | 73.1 | hypothetical protein CARUB_v10027093mg                   | gbpln | Capsella rubella     | AT5G51870.3   Symbols: AGL71   AGAMOUS-like 71   chr5:21085635-21087923 REVERSE LENGTH=219                                                                                                                                                                                                                                                                                   | 268 | 219 | 6.00E-80  | 81.7  | 60.8 | 70.1 |
| Rsa1.0_00552.1.g15879.t1 | gb EOA12032.1  hypothetical protein CARUB_v10008034mg [Capsella rubella]                                                                                                                                                                                                                                                                                                                                                                                               | 383 | 435 | 1.00E-110 | 113.6 | 61.4 | 71.3 | hypothetical protein CARUB_v10008034mg                   | gbpln | Capsella rubella     | AT1G62170.1   Symbols:   Serine protease inhibitor (SERPIN) family protein   chr1:22973876-22975463 FORWARD LENGTH=433                                                                                                                                                                                                                                                       | 383 | 433 | 1.00E-112 | 113.1 | 61.6 | 72.6 |
| Rsa1.0_00552.1.g15880.t1 | ref NP_568766.1  uncharacterized protein [Arabidopsis thaliana] gi 87116564 gb ABD19646.1  At5g51840 [Arabidopsis thaliana] gi 332008750 gb AED96133.1  uncharacterized protein AT5G51840 [Arabidopsis thaliana]                                                                                                                                                                                                                                                       | 263 | 245 | 1.00E-113 | 93.2  | 80.6 | 85.9 | uncharacterized protein                                  | gbpln | Arabidopsis thaliana | AT5G51840.1   Symbols:   unknown protein; Has 30201 Blast hits to 17322 proteins in 780 species: Archae - 12; Bacteria - 1396; Metazoa - 17338; Fungi - 3422; Plants - 5037; Viruses - 0; Other Eukaryotes - 2996 (source: NCBI BLINK).   chr5:21072143-21074131 FORWARD LENGTH=245                                                                                          | 263 | 245 | 1.00E-116 | 93.2  | 80.6 | 85.9 |
| Rsa1.0_00552.1.g15881.t2 | ref NP_199996.1  fructokinase [Arabidopsis thaliana] gi 13878053 gb AAK44104.1 AF370289.1 putative fructokinase 1 [Arabidopsis thaliana] gi 10177882 dbj BAB11252.1  fructokinase 1 [Arabidopsis thaliana] gi 17104645 gb AAL34211.1  putative fructokinase 1 [Arabidopsis thaliana] gi 332008749 gb AED96132.1  pfkB-like carbohydrate kinase family protein [Arabidopsis thaliana]                                                                                   | 350 | 343 | 1.00E-172 | 98.0  | 87.1 | 90.6 | fructokinase                                             | gbpln | Arabidopsis thaliana | AT5G51830.1   Symbols:   pfkB-like carbohydrate kinase family protein   chr5:21069709-21071450 FORWARD LENGTH=343                                                                                                                                                                                                                                                            | 350 | 343 | 1.00E-174 | 98.0  | 87.1 | 90.6 |
| Rsa1.0_00552.1.g15882.t1 | ref NP_199990.1  protein kinase family protein [Arabidopsis thaliana] gi 10177876 dbj BAB11246.1  unnamed protein product [Arabidopsis thaliana] gi 332008741 gb AED96124.1  protein kinase family protein [Arabidopsis thaliana]                                                                                                                                                                                                                                      | 608 | 654 | 0         | 107.6 | 71.1 | 78.5 | protein kinase family protein                            | gbpln | Arabidopsis thaliana | AT5G51770.1   Symbols:   Protein kinase superfamily protein   chr5:21031030-21032994 FORWARD LENGTH=654                                                                                                                                                                                                                                                                      | 608 | 654 | 0         | 107.6 | 71.1 | 78.5 |
| Rsa1.0_00552.1.g15883.t1 | ref NP_199989.1  protein phosphatase [Arabidopsis thaliana] gi 75309185 sp Q9FLI3.1 P2C75_ARATH RecName: Full=Probable protein phosphatase 2C 75; Short=AtPP2C75; AltName: Full=Protein ABA-HYPERSENSITIVE GERMINATION 1; AltName: Full=Protein phosphatase 2C AHG1; Short=PP2C AHG1 gi 10177875 dbj BAB11245.1  protein phosphatase-2C; PP2C-like protein [Arabidopsis thaliana] gi 332008740 gb AED96123.1  probable protein phosphatase AHG1 [Arabidopsis thaliana] | 423 | 416 | 1.00E-178 | 98.3  | 79.9 | 87.9 | protein phosphatase                                      | gbpln | Arabidopsis thaliana | AT5G51760.1   Symbols: AHG1   Protein phosphatase 2C family protein   chr5:21028916-21028912 FORWARD LENGTH=416                                                                                                                                                                                                                                                              | 423 | 416 | 0         | 98.3  | 79.9 | 87.9 |

|                          |                                                                                                                                                                                                                                                                                              |      |      |           |       |      |      |                                                   |       |                      |                                                                                                                                                               |      |      |           |       |      |      |  |
|--------------------------|----------------------------------------------------------------------------------------------------------------------------------------------------------------------------------------------------------------------------------------------------------------------------------------------|------|------|-----------|-------|------|------|---------------------------------------------------|-------|----------------------|---------------------------------------------------------------------------------------------------------------------------------------------------------------|------|------|-----------|-------|------|------|--|
| Rsa1.0_00552.1.g15884.t1 | refXP_002883761.1  hypothetical protein ARALYDRAFT_480234 [Arabidopsis lyrata subsp. lyrata] gi 297329601 gb EFH60020.1                                                                                                                                                                      | 128  | 128  | 8.00E-58  | 100.0 | 86.7 | 94.5 | hypothetical protein ARALYDRAFT_480234            | gbpln | Arabidopsis lyrata   | AT2G07340.1   Symbols: PFD1   PREFOLDIN 1   chr2:3045644-3046606 FORWARD LENGTH=128                                                                           | 128  | 128  | 2.00E-60  | 100.0 | 85.9 | 95.3 |  |
| Rsa1.0_00552.1.g15885.t1 | hypothetical protein ARALYDRAFT_480234 [Arabidopsis lyrata subsp. lyrata] refXP_002865872.1  1-amino-cyclopropane-1-carboxylate synthase 12 [Arabidopsis lyrata subsp. lyrata] gi 297311707 gb EFH42131.1  1-amino-cyclopropane-1-carboxylate synthase 12 [Arabidopsis lyrata subsp. lyrata] | 489  | 495  | 0         | 101.2 | 81.0 | 89.8 | 1-amino-cyclopropane-1-carboxylate synthase 12    | gbpln | Arabidopsis lyrata   | AT5G51690.1   Symbols: ACS12   1-amino-cyclopropane-1-carboxylate synthase 12   chr5:20999015-21000957 REVERSE LENGTH=495                                     | 489  | 495  | 0         | 101.2 | 80.4 | 89.6 |  |
| Rsa1.0_00552.1.g15886.t1 | refNP_001189515.1  SH3 domain-containing protein [Arabidopsis thaliana] gi 330250956 gb AEC06050.1  SH3 domain-containing protein [Arabidopsis thaliana]                                                                                                                                     | 1192 | 1198 | 0         | 100.5 | 93.6 | 97.5 | SH3 domain-containing protein                     | gbpln | Arabidopsis thaliana | AT2G07360.2   Symbols:   SH3 domain-containing protein   chr2:3047623-3057099 REVERSE LENGTH=1198                                                             | 1192 | 1198 | 0         | 100.5 | 93.6 | 97.5 |  |
| Rsa1.0_00552.1.g15887.t1 | gb EOA13428.1  hypothetical protein CARUB_v10026469mg [Capsella rubella]                                                                                                                                                                                                                     | 431  | 423  | 1.00E-135 | 98.1  | 73.1 | 80.3 | hypothetical protein CARUB_v10026469mg            | gbpln | Capsella rubella     | AT5G51590.1   Symbols:   AT hook motif DNA-binding family protein   chr5:20956863-20958929 REVERSE LENGTH=419                                                 | 431  | 419  | 1.00E-127 | 97.2  | 71.5 | 78.9 |  |
| Rsa1.0_00552.1.g15888.t1 | # # # # # # # # # #                                                                                                                                                                                                                                                                          |      |      |           |       |      |      |                                                   |       |                      |                                                                                                                                                               |      |      |           |       |      |      |  |
| Rsa1.0_00552.1.g15889.t3 | gb EOA12557.1  hypothetical protein CARUB_v10026824mg, partial [Capsella rubella]                                                                                                                                                                                                            | 325  | 309  | 1.00E-157 | 95.1  | 84.3 | 88.0 | hypothetical protein CARUB_v10026824mg, partial   | gbpln | Capsella rubella     | AT5G51570.1   Symbols:   SPFH/Band 7/PHB domain-containing membrane-associated protein family   chr5:20949511-20951234 FORWARD LENGTH=292                     | 325  | 292  | 1.00E-157 | 89.8  | 83.7 | 87.7 |  |
| Rsa1.0_00552.1.g15890.t1 | refXP_002866483.1  40S ribosomal protein S20 [Arabidopsis lyrata subsp. lyrata] gi 297312318 gb EFH42742.1  40S ribosomal protein S20 [Arabidopsis lyrata subsp. lyrata]                                                                                                                     | 123  | 124  | 3.00E-59  | 100.8 | 93.5 | 93.5 | 40S ribosomal protein S20                         | gbpln | Arabidopsis lyrata   | AT5G62300.2   Symbols:   Ribosomal protein S10p/S20e family protein   chr5:25021388-25022235 REVERSE LENGTH=124                                               | 123  | 124  | 2.00E-61  | 100.8 | 94.3 | 94.3 |  |
| Rsa1.0_00552.1.g15891.t1 | refXP_002866483.1  40S ribosomal protein S20 [Arabidopsis lyrata subsp. lyrata] gi 297312318 gb EFH42742.1  40S ribosomal protein S20 [Arabidopsis lyrata subsp. lyrata]                                                                                                                     | 207  | 124  | 6.00E-55  | 59.9  | 51.7 | 51.7 | 40S ribosomal protein S20                         | gbpln | Arabidopsis lyrata   | AT5G62300.2   Symbols:   Ribosomal protein S10p/S20e family protein   chr5:25021388-25022235 REVERSE LENGTH=124                                               | 207  | 124  | 5.00E-57  | 59.9  | 52.2 | 52.2 |  |
| Rsa1.0_00552.1.g15892.t1 | refXP_002864118.1  hypothetical protein ARALYDRAFT_495227 [Arabidopsis lyrata subsp. lyrata] gi 297309953 gb EFH40377.1  hypothetical protein ARALYDRAFT_495227 [Arabidopsis lyrata subsp. lyrata]                                                                                           | 178  | 184  | 2.00E-66  | 103.4 | 78.1 | 87.6 | hypothetical protein ARALYDRAFT_495227            | gbpln | Arabidopsis lyrata   | AT5G51545.1   Symbols: LPA2   low psii accumulation2   chr5:20936434-20937243 FORWARD LENGTH=185                                                              | 178  | 185  | 5.00E-65  | 103.9 | 77.0 | 87.1 |  |
| Rsa1.0_00552.1.g15893.t1 | gb AFJ66229.1  hypothetical protein 34G24.15 [Capsella rubella] gi 482548516 gb EOA12710.1  hypothetical protein CARUB_v10028013mg [Capsella rubella]                                                                                                                                        | 427  | 435  | 0         | 101.9 | 84.5 | 91.8 | hypothetical protein 34G24.15                     | gbpln | Capsella rubella     | AT5G51160.1   Symbols:   Ankyrin repeat family protein   chr5:20792280-20793681 FORWARD LENGTH=442                                                            | 427  | 442  | 0         | 103.5 | 83.8 | 89.5 |  |
| Rsa1.0_00552.1.g15894.t1 | gb EOA13190.1  hypothetical protein CARUB_v10026216mg [Capsella rubella]                                                                                                                                                                                                                     | 525  | 531  | 0         | 101.1 | 90.5 | 94.1 | hypothetical protein CARUB_v10026216mg            | gbpln | Capsella rubella     | AT5G51150.1   Symbols:   Mitochondrial import inner membrane translocase subunit Tim17/Tim22/Tim23 family protein   chr5:20789034-20791495 FORWARD LENGTH=531 | 525  | 531  | 0         | 101.1 | 85.3 | 89.1 |  |
| Rsa1.0_00552.1.g15895.t1 | refXP_002865844.1  pseudouridine synthase family protein [Arabidopsis lyrata subsp. lyrata] gi 297311679 gb EFH42103.1  pseudouridine synthase family protein [Arabidopsis lyrata subsp. lyrata]                                                                                             | 393  | 392  | 0         | 99.7  | 88.5 | 93.9 | pseudouridine synthase family protein             | gbpln | Arabidopsis lyrata   | AT5G51140.1   Symbols:   Pseudouridine synthase family protein   chr5:20784277-20786793 REVERSE LENGTH=395                                                    | 393  | 395  | 0         | 100.5 | 89.3 | 93.4 |  |
| Rsa1.0_00552.1.g15896.t1 | refXP_002864098.1  hypothetical protein ARALYDRAFT_495181 [Arabidopsis lyrata subsp. lyrata] gi 297309933 gb EFH40357.1  hypothetical protein ARALYDRAFT_495181 [Arabidopsis lyrata subsp. lyrata]                                                                                           | 326  | 313  | 1.00E-130 | 96.0  | 75.8 | 83.4 | hypothetical protein ARALYDRAFT_495181            | gbpln | Arabidopsis lyrata   | AT5G51130.1   Symbols:   S-adenosyl-L-methionine-dependent methyltransferases superfamily protein   chr5:20781896-20783901 FORWARD LENGTH=318                 | 326  | 318  | 1.00E-128 | 97.5  | 74.5 | 81.9 |  |
| Rsa1.0_00552.1.g15897.t1 | gb ADK63417.1  C2H2 type zinc finger protein [Brassica rapa]                                                                                                                                                                                                                                 | 381  | 349  | 1.00E-153 | 91.6  | 71.9 | 77.2 | C2H2 type zinc finger protein                     | gbpln | Brassica rapa        | AT4G06634.1   Symbols:   zinc finger (C2H2 type) family protein   chr4:3764499-3766439 REVERSE LENGTH=387                                                     | 381  | 387  | 1.00E-142 | 101.6 | 73.2 | 79.8 |  |
| Rsa1.0_00552.1.g15898.t4 | gb AAM61036.1  contains similarity to poly(A)-binding protein II [Arabidopsis thaliana]                                                                                                                                                                                                      | 254  | 227  | 6.00E-87  | 89.4  | 73.2 | 76.8 | contains similarity to poly(A)-binding protein II | gbpln | Arabidopsis thaliana | AT5G51120.2   Symbols: PABN1   polyadenylate-binding protein 1   chr5:20779760-20781241 FORWARD LENGTH=265                                                    | 254  | 265  | 1.00E-86  | 104.3 | 71.3 | 77.2 |  |
| Rsa1.0_00552.1.g15899.t1 | gb EOA13876.1  hypothetical protein CARUB_v10026978mg [Capsella rubella]                                                                                                                                                                                                                     | 215  | 257  | 2.00E-99  | 119.5 | 86.0 | 90.7 | hypothetical protein CARUB_v10026978mg            | gbpln | Capsella rubella     | AT5G51110.1   Symbols:   Transcriptional coactivator/pterin dehydratase   chr5:20778316-20779380 REVERSE LENGTH=220                                           | 215  | 220  | 2.00E-99  | 102.3 | 84.7 | 89.3 |  |

|                          |                                                                                                                                                                                                                                                                                                                                                                                                                                                                                               |      |      |           |       |      |      |                                              |       |                      |                                                                                                                                                                                                                                                                                                                                                                                                                                                                                                                                                                             |      |      |           |       |      |      |
|--------------------------|-----------------------------------------------------------------------------------------------------------------------------------------------------------------------------------------------------------------------------------------------------------------------------------------------------------------------------------------------------------------------------------------------------------------------------------------------------------------------------------------------|------|------|-----------|-------|------|------|----------------------------------------------|-------|----------------------|-----------------------------------------------------------------------------------------------------------------------------------------------------------------------------------------------------------------------------------------------------------------------------------------------------------------------------------------------------------------------------------------------------------------------------------------------------------------------------------------------------------------------------------------------------------------------------|------|------|-----------|-------|------|------|
| Rsa1.0_00552.1.g15900.t1 | gb EOA22066.1  hypothetical protein CARUB_v10002606mg [Capsella rubella]                                                                                                                                                                                                                                                                                                                                                                                                                      | 130  | 123  | 1.00E-36  | 94.6  | 63.8 | 75.4 | hypothetical protein CARUB_v10002606mg       | gbpln | Capsella rubella     | AT5G51105.1   Symbols:   Protein of unknown function (DUF1278)   chr5:20777632-20778003 FORWARD LENGTH=123                                                                                                                                                                                                                                                                                                                                                                                                                                                                  | 130  | 123  | 4.00E-34  | 94.6  | 60.0 | 72.3 |
| Rsa1.0_00552.1.g15901.t1 | gb EOA22066.1  hypothetical protein CARUB_v10002606mg [Capsella rubella]                                                                                                                                                                                                                                                                                                                                                                                                                      | 132  | 123  | 4.00E-40  | 93.2  | 65.9 | 79.5 | hypothetical protein CARUB_v10002606mg       | gbpln | Capsella rubella     | AT4G09545.1   Symbols:   ECA1 gametogenesis related family protein   chr4:6037569-6037937 FORWARD LENGTH=122                                                                                                                                                                                                                                                                                                                                                                                                                                                                | 132  | 122  | 4.00E-39  | 92.4  | 62.9 | 72.0 |
| Rsa1.0_00553.1.g15902.t1 | gb EOA21499.1  hypothetical protein CARUB_v10001894mg [Capsella rubella]                                                                                                                                                                                                                                                                                                                                                                                                                      | 251  | 227  | 1.00E-36  | 90.4  | 36.7 | 50.2 | hypothetical protein CARUB_v10001894mg       | gbpln | Capsella rubella     | AT5G03480.1   Symbols:   RNA-binding (RRM/RBD/RNP motifs) family protein   chr5:869208-870855 REVERSE LENGTH=321                                                                                                                                                                                                                                                                                                                                                                                                                                                            | 251  | 321  | 1.00E-25  | 127.9 | 29.5 | 42.2 |
| Rsa1.0_00553.1.g15903.t1 | #                                                                                                                                                                                                                                                                                                                                                                                                                                                                                             | #    | #    | #         | #     | #    | #    | -                                            | ----  | ----                 | #                                                                                                                                                                                                                                                                                                                                                                                                                                                                                                                                                                           | #    | #    | #         | #     | #    |      |
| Rsa1.0_00553.1.g15904.t1 | ref XP_002873209.1  predicted protein [Arabidopsis lyrata subsp. lyrata]   gi 297319046 gb EFH49468.1  predicted protein [Arabidopsis lyrata subsp. lyrata]                                                                                                                                                                                                                                                                                                                                   | 230  | 170  | 2.00E-28  | 73.9  | 33.5 | 44.8 | predicted protein                            | gbpln | Arabidopsis lyrata   | AT3G09160.1   Symbols:   RNA-binding (RRM/RBD/RNP motifs) family protein   chr3:2806262-2806912 REVERSE LENGTH=132                                                                                                                                                                                                                                                                                                                                                                                                                                                          | 230  | 132  | 2.00E-27  | 57.4  | 25.7 | 33.9 |
| Rsa1.0_00553.1.g15905.t5 | dbj BAJ34172.1  unnamed protein product [Thellungiella halophila]                                                                                                                                                                                                                                                                                                                                                                                                                             | 1177 | 1115 | 0         | 94.7  | 89.7 | 91.4 | unnamed protein product                      | ----  | ----                 | AT5G06600.1   Symbols:   UBPI2   ubiquitin-specific protease 12   chr5:2019545-2027834 REVERSE LENGTH=1116                                                                                                                                                                                                                                                                                                                                                                                                                                                                  | 1177 | 1116 | 0         | 94.8  | 89.0 | 90.9 |
| Rsa1.0_00553.1.g15906.t1 | ref XP_002871222.1  hypothetical protein ARALYDRAFT_487469 [Arabidopsis lyrata subsp. lyrata]   gi 297317059 gb EFH47481.1  hypothetical protein ARALYDRAFT_487469 [Arabidopsis lyrata subsp. lyrata]                                                                                                                                                                                                                                                                                         | 308  | 315  | 1.00E-123 | 102.3 | 76.0 | 86.4 | hypothetical protein ARALYDRAFT_487469       | gbpln | Arabidopsis lyrata   | AT5G06590.1   Symbols:   unknown protein; Has 38 Blast hits to 38 proteins in 14 species: Archae - 0; Bacteria - 2; Metazoa - 0; Fungi - 0; Plants - 36; Viruses - 0; Other Eukaryotes - 0 (source: NCBI BLINK).   chr5:2016713-2018744 FORWARD LENGTH=314                                                                                                                                                                                                                                                                                                                  | 308  | 314  | 1.00E-126 | 101.9 | 76.0 | 85.7 |
| Rsa1.0_00553.1.g15907.t1 | ref XP_002873268.1  FAD linked oxidase family protein [Arabidopsis lyrata subsp. lyrata]   gi 297319105 gb EFH49527.1  FAD linked oxidase family protein [Arabidopsis lyrata subsp. lyrata]   ref NP_196275.1  alpha/beta hydrolase fold-containing protein [Arabidopsis thaliana]   gi 30681513 ref NP_850782.1  alpha/beta hydrolase fold-containing protein [Arabidopsis thaliana]   gi 7533783 sp Q9FG13.1 CXE15_ARAT H RecName: Full=Probable carboxylesterase 15; AltName: Full=AtCXE15 | 556  | 566  | 0         | 101.8 | 83.1 | 88.5 | FAD linked oxidase family protein            | gbpln | Arabidopsis lyrata   | AT5G06590.1   Symbols:   FAD-linked oxidases family protein   chr5:2011486-2016473 REVERSE LENGTH=567                                                                                                                                                                                                                                                                                                                                                                                                                                                                       | 556  | 567  | 0         | 102.0 | 82.6 | 87.2 |
| Rsa1.0_00553.1.g15908.t1 | gi 10178113 dbj BAB11406.1  unnamed protein product [Arabidopsis thaliana]   gi 26452184 dbj BAC43180.1  unknown protein [Arabidopsis thaliana]   gi 30725374 gb AAP37709.1  At5g06570 [Arabidopsis thaliana]   gi 332003652 gb AED91035.1  probable carboxylesterase 15 [Arabidopsis thaliana]   gi 332003653 gb AED91036.1  alpha/beta hydrolase fold-containing protein [Arabidopsis thaliana]                                                                                             | 330  | 329  | 1.00E-152 | 99.7  | 83.0 | 91.8 | alpha/beta hydrolase fold-containing protein | gbpln | Arabidopsis thaliana | AT5G06570.2   Symbols:   alpha/beta-Hydrolases superfamily protein   chr5:2008075-2011013 REVERSE LENGTH=329                                                                                                                                                                                                                                                                                                                                                                                                                                                                | 330  | 329  | 1.00E-155 | 99.7  | 83.0 | 91.8 |
| Rsa1.0_00553.1.g15909.t2 | gb EOA2041.1  hypothetical protein CARUB_v10000722mg [Capsella rubella]   gi 482556220 gb EOA20412.1  hypothetical protein CARUB_v10000722mg [Capsella rubella]                                                                                                                                                                                                                                                                                                                               | 480  | 520  | 1.00E-153 | 108.3 | 64.2 | 73.8 | hypothetical protein CARUB_v10000722mg       | gbpln | Capsella rubella     | AT5G06560.1   Symbols:   Protein of unknown function, DUF593   chr5:2003678-2005543 REVERSE LENGTH=518                                                                                                                                                                                                                                                                                                                                                                                                                                                                      | 480  | 518  | 1.00E-155 | 107.9 | 64.8 | 74.8 |
| Rsa1.0_00553.1.g15910.t1 | gb EOA22732.1  hypothetical protein CARUB_v10003439mg [Capsella rubella]                                                                                                                                                                                                                                                                                                                                                                                                                      | 508  | 497  | 0         | 97.8  | 78.3 | 84.8 | hypothetical protein CARUB_v10003439mg       | gbpln | Capsella rubella     | AT5G06550.1   Symbols:   CONTAINS InterPro DOMAIN/s: Transcription factor jumoni/ aspartyl beta-hydroxylase (InterPro:IPR003347), F-box domain, Skp2-like (InterPro:IPR022364), Transcription factor jumoni (InterPro:IPR013129); BEST Arabidopsis thaliana protein match is: transferases, transferring glycosyl groups (TAIR:AT1G78280.1); Has 1762 Blast hits to 1747 proteins in 292 species: Archae - 0; Bacteria - 297; Metazoa - 877; Fungi - 168; Plants - 221; Viruses - 0; Other Eukaryotes - 199 (source: NCBI BLINK).   chr5:2001246-2003068 REVERSE LENGTH=502 | 508  | 502  | 0         | 98.8  | 76.0 | 81.9 |
| Rsa1.0_00553.1.g15911.t1 | ref XP_002873264.1  pentatricopeptide repeat-containing protein [Arabidopsis lyrata subsp. lyrata]   gi 297319101 gb EFH49523.1  pentatricopeptide repeat-containing protein [Arabidopsis lyrata subsp. lyrata]                                                                                                                                                                                                                                                                               | 617  | 624  | 0         | 101.1 | 85.7 | 91.9 | pentatricopeptide repeat-containing protein  | gbpln | Arabidopsis lyrata   | AT5G06540.1   Symbols:   Pentatricopeptide repeat (PPR) superfamily protein   chr5:1999181-2001049 REVERSE LENGTH=622                                                                                                                                                                                                                                                                                                                                                                                                                                                       | 617  | 622  | 0         | 100.8 | 84.1 | 91.7 |

|                          |                                                                                                                                                                                                                                                                                                                                                                                                                                                                                                                                                       |      |      |           |       |      |      |                                                                 |       |                      |                                                                                                                                               |      |      |           |        |      |      |
|--------------------------|-------------------------------------------------------------------------------------------------------------------------------------------------------------------------------------------------------------------------------------------------------------------------------------------------------------------------------------------------------------------------------------------------------------------------------------------------------------------------------------------------------------------------------------------------------|------|------|-----------|-------|------|------|-----------------------------------------------------------------|-------|----------------------|-----------------------------------------------------------------------------------------------------------------------------------------------|------|------|-----------|--------|------|------|
| Rsa1.0_00553.1.g15912.t1 | gb EOA20021.1  hypothetical protein CARUB_v10000295mg [Capsella rubella]                                                                                                                                                                                                                                                                                                                                                                                                                                                                              | 805  | 752  | 0         | 93.4  | 87.3 | 90.4 | hypothetical protein CARUB_v10000295mg                          | gbpln | Capsella rubella     | AT5G06530.1   Symbols:   ABC-2 type transporter family protein   chr5:1990060-1994605 REVERSE LENGTH=751                                      | 805  | 751  | 0         | 93.3   | 87.5 | 89.9 |
| Rsa1.0_00553.1.g15913.t1 | # # # # # # # #                                                                                                                                                                                                                                                                                                                                                                                                                                                                                                                                       |      |      |           |       |      |      |                                                                 |       |                      |                                                                                                                                               |      |      |           |        |      |      |
| Rsa1.0_00553.1.g15914.t1 | gb EOA13237.1  hypothetical protein CARUB_v10026265mg, partial [Capsella rubella]                                                                                                                                                                                                                                                                                                                                                                                                                                                                     | 487  | 504  | 0         | 103.5 | 73.5 | 81.5 | hypothetical protein CARUB_v10026265mg, partial                 | gbpln | Capsella rubella     | AT5G52820.1   Symbols:   WD-40 repeat family protein / notchless protein, putative   chr5:21401423-21404203 FORWARD LENGTH=473                | 487  | 473  | 0         | 97.1   | 73.1 | 81.3 |
| Rsa1.0_00553.1.g15915.t1 | ref XP_002871220.1  CCAAT-binding transcription factor (CBF-B/NF-YA) family protein [Arabidopsis lyrata subsp. lyrata] gi 297317057 gb EFH47479.1  CCAAT-binding transcription factor (CBF-B/NF-YA) family protein [Arabidopsis lyrata subsp. lyrata] ref NP_196268.1  protein agamous-like 96 [Arabidopsis thaliana] gi 10178106 dbj BAB11399.1  unnamed protein product [Arabidopsis thaliana] gi 67633788 gb AAY78818.1  MADS-box family protein [Arabidopsis thaliana] gi 332003641 gb AED91024.1  protein agamous-like 96 [Arabidopsis thaliana] | 268  | 269  | 1.00E-97  | 100.4 | 74.6 | 79.1 | CCAAT-binding transcription factor (CBF-B/NF-YA) family protein | gbpln | Arabidopsis lyrata   | AT5G06510.2   Symbols: NF-YA10   nuclear factor Y, subunit A10   chr5:1985439-1986591 FORWARD LENGTH=269                                      | 268  | 269  | 1.00E-95  | 100.4  | 72.0 | 77.2 |
| Rsa1.0_00553.1.g15916.t2 | ref XP_002873260.1  zinc finger family protein [Arabidopsis lyrata subsp. lyrata] gi 297319097 gb EFH49519.1  zinc finger family protein [Arabidopsis lyrata subsp. lyrata]                                                                                                                                                                                                                                                                                                                                                                           | 224  | 242  | 1.00E-34  | 108.0 | 42.9 | 59.4 | protein agamous-like 96                                         | gbpln | Arabidopsis thaliana | AT5G06500.1   Symbols: AGL96   AGAMOUS-like 96   chr5:1982444-1983172 FORWARD LENGTH=242                                                      | 224  | 242  | 4.00E-37  | 108.0  | 42.9 | 59.4 |
| Rsa1.0_00553.1.g15917.t1 | ref XP_002873258.1  glutaredoxin family protein [Arabidopsis lyrata subsp. lyrata] gi 297319095 gb EFH49517.1  glutaredoxin family protein [Arabidopsis lyrata subsp. lyrata]                                                                                                                                                                                                                                                                                                                                                                         | 189  | 197  | 3.00E-67  | 104.2 | 69.8 | 79.9 | zinc finger family protein                                      | gbpln | Arabidopsis lyrata   | AT5G06490.1   Symbols:   RING/U-box superfamily protein   chr5:1977996-1978589 REVERSE LENGTH=197                                             | 189  | 197  | 1.00E-68  | 104.2  | 69.3 | 77.8 |
| Rsa1.0_00553.1.g15918.t1 | gb EOA21743.1  hypothetical protein CARUB_v10002191mg [Capsella rubella]                                                                                                                                                                                                                                                                                                                                                                                                                                                                              | 150  | 152  | 2.00E-60  | 101.3 | 79.3 | 89.3 | hypothetical protein CARUB_v10002191mg                          | gbpln | Capsella rubella     | AT5G06480.1   Symbols:   Immunoglobulin E-set superfamily protein   chr5:1976219-1977231 REVERSE LENGTH=153                                   | 150  | 153  | 1.00E-61  | 102.0  | 72.0 | 78.7 |
| Rsa1.0_00553.1.g15919.t1 | ref XP_002873258.1  glutaredoxin family protein [Arabidopsis lyrata subsp. lyrata] gi 297319095 gb EFH49517.1  glutaredoxin family protein [Arabidopsis lyrata subsp. lyrata]                                                                                                                                                                                                                                                                                                                                                                         | 241  | 239  | 1.00E-105 | 99.2  | 80.9 | 88.0 | glutaredoxin family protein                                     | gbpln | Arabidopsis lyrata   | AT5G06470.1   Symbols:   Glutaredoxin family protein   chr5:1974659-1975378 REVERSE LENGTH=239                                                | 241  | 239  | 1.00E-107 | 99.2   | 80.9 | 88.8 |
| Rsa1.0_00553.1.g15920.t1 | gb EOA19837.1  hypothetical protein CARUB_v10000084mg [Capsella rubella]                                                                                                                                                                                                                                                                                                                                                                                                                                                                              | 1079 | 1122 | 0         | 104.0 | 90.1 | 95.0 | hypothetical protein CARUB_v10000084mg                          | gbpln | Capsella rubella     | AT5G06460.1   Symbols: ATUBA2, UBA 2   ubiquitin activating enzyme 2   chr5:1970239-1974382 FORWARD LENGTH=1077                               | 1079 | 1077 | 0         | 99.8   | 89.6 | 94.4 |
| Rsa1.0_00554.1.g15921.t1 | emb CAN66323.1  hypothetical protein VITISV_007384 [Vitis vinifera]                                                                                                                                                                                                                                                                                                                                                                                                                                                                                   | 94   | 1317 | 2.00E-20  | 140.1 | 50.0 | 56.4 | hypothetical protein VITISV_007384                              | gbpln | Vitis vinifera       | AT4G23160.1   Symbols: CRK8   cysteine-rich RLK (RECEPTOR-like protein kinase) 8   chr4:12129485-12134086 FORWARD LENGTH=1262                 | 94   | 1262 | 8.00E-12  | 1342.6 | 26.6 | 44.7 |
| Rsa1.0_00554.1.g15922.t1 | gb ABK28609.1  unknown [Arabidopsis thaliana]                                                                                                                                                                                                                                                                                                                                                                                                                                                                                                         | 260  | 249  | 1.00E-129 | 95.8  | 87.7 | 92.3 | unknown                                                         | gbpln | Arabidopsis thaliana | AT3G58780.1   Symbols: SHP1, AGL1   K-box region and MADS-box transcription factor family protein   chr3:21739150-21741766 FORWARD LENGTH=248 | 260  | 248  | 1.00E-132 | 95.4   | 87.7 | 92.3 |
| Rsa1.0_00554.1.g15923.t1 | gb EOA23218.1  hypothetical protein CARUB_v10019589mg [Capsella rubella]                                                                                                                                                                                                                                                                                                                                                                                                                                                                              | 116  | 119  | 9.00E-38  | 102.6 | 79.3 | 87.9 | hypothetical protein CARUB_v10019589mg                          | gbpln | Capsella rubella     | AT3G58850.1   Symbols: PAR2, HLH2   phy rapidly regulated 2   chr3:21759562-21759918 REVERSE LENGTH=118                                       | 116  | 118  | 1.00E-35  | 101.7  | 79.3 | 84.5 |
| Rsa1.0_00554.1.g15924.t1 | emb CAB39638.1  RNA-directed DNA polymerase-like protein [Arabidopsis thaliana] gi 267666 emb CAB78094.1  RNA-directed DNA polymerase-like protein [Arabidopsis thaliana]                                                                                                                                                                                                                                                                                                                                                                             | 1811 | 1274 | 0         | 70.3  | 34.0 | 45.2 | RNA-directed DNA polymerase-like protein                        | gbpln | Arabidopsis thaliana | AT4G29090.1   Symbols:   Ribonuclease H-like superfamily protein   chr4:14333528-14335255 FORWARD LENGTH=575                                  | 1811 | 575  | 2.00E-71  | 31.8   | 10.0 | 15.5 |
| Rsa1.0_00554.1.g15925.t1 | ref NP_191445.1  putative F-box protein [Arabidopsis thaliana] gi 75264355 sp Q9LXR6.1 FB207_ARAT H RecName: Full=Putative F-box protein At3g58860 gi 7630081 emb CAB88303.1  putative protein [Arabidopsis thaliana] gi 332646320 gb AEE79841.1  putative F-box protein [Arabidopsis thaliana]                                                                                                                                                                                                                                                       | 448  | 457  | 0         | 102.0 | 73.0 | 84.8 | putative F-box protein                                          | gbpln | Arabidopsis thaliana | AT3G58860.1   Symbols:   F-box/RNI-like superfamily protein   chr3:21763742-21765306 REVERSE LENGTH=457                                       | 448  | 457  | 0         | 102.0  | 73.0 | 84.8 |
| Rsa1.0_00554.1.g15926.t2 | dbj BAF00918.1  putative reverse transcriptase [Arabidopsis thaliana]                                                                                                                                                                                                                                                                                                                                                                                                                                                                                 | 1630 | 910  | 0         | 55.8  | 30.9 | 40.6 | putative reverse transcriptase                                  | gbpln | Arabidopsis thaliana | AT1G43760.1   Symbols:   DNase I-like superfamily protein   chr1:16528880-16531065 REVERSE LENGTH=626                                         | 1630 | 626  | 1.00E-134 | 38.4   | 13.8 | 20.4 |

|                          |                                                                                                                                                                                                                                                                                                                                                                                                                                                                                                                                                                                                                                                                                                                                                                                                                                              |     |      |           |       |      |      |                                                                                                                                                 |       |                      |                                                                                                                               |     |      |           |       |      |      |
|--------------------------|----------------------------------------------------------------------------------------------------------------------------------------------------------------------------------------------------------------------------------------------------------------------------------------------------------------------------------------------------------------------------------------------------------------------------------------------------------------------------------------------------------------------------------------------------------------------------------------------------------------------------------------------------------------------------------------------------------------------------------------------------------------------------------------------------------------------------------------------|-----|------|-----------|-------|------|------|-------------------------------------------------------------------------------------------------------------------------------------------------|-------|----------------------|-------------------------------------------------------------------------------------------------------------------------------|-----|------|-----------|-------|------|------|
| Rsa1.0_00554.1.g15927.t1 | ref NP_191460.1 pectinesterase 35 [Arabidopsis thaliana] gi 75311708 sp Q9LYT5.1 PME35_ARAT H RecName: Full=Probable pectinesterase/pectinesterase inhibitor 35; Includes: RecName: Full=Pectinesterase inhibitor 35; AltName: Full=Pectin methyltransferase inhibitor 35; Includes: RecName: Full=Pectinesterase 35; Short=PE 35; AltName: Full=Pectin methyltransferase 35; Short=AtPME35; Flags: Precursor gi 7529744 emb CAB86929.1 pectinesterase precursor-like protein [Arabidopsis thaliana] gi 16974625 gb AAL31215.1 AT3g59010/F17J16.60 [Arabidopsis thaliana] gi 24111417 gb AAN46858.1 At3g59010/F17J16.60 [Arabidopsis thaliana] gi 332646339 gb AEE79860.1 pectinesterase 35 [Arabidopsis thaliana]                                                                                                                           | 525 | 529  | 0         | 100.8 | 84.8 | 90.1 | pectinesterase 35                                                                                                                               | gbpln | Arabidopsis thaliana | AT3G59010.1   Symbols: PME61   pectin methyltransferase 61   chr3:21803015-21805098 REVERSE LENGTH=529                        | 525 | 529  | 0         | 100.8 | 84.8 | 90.1 |
| Rsa1.0_00554.1.g15928.t1 | gb AAD17414.1  copia-like retroelement pol polyprotein [Arabidopsis thaliana]                                                                                                                                                                                                                                                                                                                                                                                                                                                                                                                                                                                                                                                                                                                                                                | 151 | 1166 | 1.00E-11  | 772.2 | 28.5 | 41.7 | copia-like retroelement pol polyprotein                                                                                                         | gbpln | Arabidopsis thaliana | #                                                                                                                             | #   | #    | #         | #     | #    |      |
| Rsa1.0_00554.1.g15929.t1 | gb ABH07409.1  putative pol polyprotein [Brassica oleracea var. botrytis]                                                                                                                                                                                                                                                                                                                                                                                                                                                                                                                                                                                                                                                                                                                                                                    | 586 | 1239 | 0         | 211.4 | 61.4 | 73.5 | putative pol polyprotein                                                                                                                        | gbpln | Brassica oleracea    | AT4G23160.1   Symbols: CRK8   cysteine-rich RLK (RECEPTOR-like protein kinase) 8   chr4:12129485-12134086 FORWARD LENGTH=1262 | 586 | 1262 | 4.00E-69  | 215.4 | 25.6 | 38.4 |
| Rsa1.0_00554.1.g15930.t1 | ref NP_191535.2 cysteine synthase [Arabidopsis thaliana] gi 41019511 sp Q43725.3 CYSKM_ARAT H RecName: Full=Cysteine synthase, mitochondrial; AltName: Full=CSase C; Short=AtCS-C; Short=CS-C; AltName: Full=O-acetylserine (thiol)-lyase; AltName: Full=O-acetylserine sulfhydrylase; AltName: Full=OAS-TL C; Flags: Precursor gi 377656559 pdb 4AEC A Chain A, Crystal Structure Of The Arabidopsis Thaliana O-Acetyl- Serine-(Thio)-Lyase C gi 377656560 pdb 4AEC B Chain B, Crystal Structure Of The Arabidopsis Thaliana O-Acetyl- Serine-(Thio)-Lyase C gi 20466510 gb AAM20572.1 cysteine synthase [Arabidopsis thaliana] gi 22136414 gb AAM91285.1 cysteine synthase [Arabidopsis thaliana] gi 110740682 dbj BAE98443.1 cysteine synthase [Arabidopsis thaliana] gi 332646442 gb AEE79963.1 cysteine svnthase [Arabidopsis thaliana] | 420 | 430  | 0         | 102.4 | 89.8 | 94.8 | cysteine synthase                                                                                                                               | gbpln | Arabidopsis thaliana | AT3G59760.3   Symbols: OASC, ATCS-C   O-acetylserine (thiol) lyase isoform C   chr3:22072668-22075345 REVERSE LENGTH=430      | 420 | 430  | 0         | 102.4 | 89.8 | 94.8 |
| Rsa1.0_00554.1.g15931.t1 | #                                                                                                                                                                                                                                                                                                                                                                                                                                                                                                                                                                                                                                                                                                                                                                                                                                            | #   | #    | #         | #     | #    | -    | ----                                                                                                                                            | ----  | ----                 | #                                                                                                                             | #   | #    | #         | #     | #    |      |
| Rsa1.0_00554.1.g15932.t1 | ref XP_002881930.1 transducin family protein [Arabidopsis lyrata subsp. lyrata] gi 297327769 gb EFH58189.1 transducin family protein [Arabidopsis lyrata subsp. lyrata]                                                                                                                                                                                                                                                                                                                                                                                                                                                                                                                                                                                                                                                                      | 259 | 343  | 4.00E-20  | 132.4 | 23.6 | 27.4 | transducin family protein                                                                                                                       | gbpln | Arabidopsis lyrata   | AT2G43770.1   Symbols:   Transducin/WD40 repeat-like superfamily protein   chr2:18134272-18135303 REVERSE LENGTH=343          | 259 | 343  | 1.00E-22  | 132.4 | 23.6 | 27.4 |
| Rsa1.0_00554.1.g15933.t1 | sp Q40532.1 NTF4_TOBAC RecName: Full=Mitogen-activated protein kinase homolog NTF4; AltName: Full=P45 gi 634070 emb CAA58761.1 p45Ntf4 serine/threonine protein kinase [Nicotiana tabacum]                                                                                                                                                                                                                                                                                                                                                                                                                                                                                                                                                                                                                                                   | 358 | 393  | 1.00E-136 | 109.8 | 67.3 | 78.8 | RecName: Full=Mitogen-activated protein kinase homolog NTF4; AltName: Full=P45 gi 634070 emb CAA58761.1 p45Ntf4 serine/threonine protein kinase | gbpln | Nicotiana tabacum    | AT2G43790.1   Symbols: ATPMK6, MPK6, MAPK6, ATMAPK6   MAP kinase 6   chr2:18138477-18140693 FORWARD LENGTH=395                | 358 | 395  | 1.00E-131 | 110.3 | 66.2 | 76.8 |
| Rsa1.0_00554.1.g15934.t1 | #                                                                                                                                                                                                                                                                                                                                                                                                                                                                                                                                                                                                                                                                                                                                                                                                                                            | #   | #    | #         | #     | #    | -    | ----                                                                                                                                            | ----  | ----                 | #                                                                                                                             | #   | #    | #         | #     | #    |      |
| Rsa1.0_00554.1.g15935.t1 | ref XP_004287160.1 PREDICTED: U6 snRNA-associated Sm-like protein LSm6-like [Fragaria vesca subsp. vesca]                                                                                                                                                                                                                                                                                                                                                                                                                                                                                                                                                                                                                                                                                                                                    | 93  | 92   | 7.00E-39  | 98.9  | 88.2 | 91.4 | PREDICTED: U6 snRNA-associated Sm-like protein LSm6-like                                                                                        | gbpln | Fragaria vesca       | AT3G59810.1   Symbols:   Small nuclear ribonucleoprotein family protein   chr3:22096841-22097666 FORWARD LENGTH=91            | 93  | 91   | 6.00E-41  | 97.8  | 89.2 | 91.4 |
| Rsa1.0_00554.1.g15936.t1 | ref XP_002878295.1 hypothetical protein ARALYDRAFT_486447 [Arabidopsis lyrata subsp. lyrata] gi 297324133 gb EFH54554.1 hypothetical protein ARALYDRAFT_486447 [Arabidopsis lyrata subsp. lyrata]                                                                                                                                                                                                                                                                                                                                                                                                                                                                                                                                                                                                                                            | 746 | 755  | 0         | 101.2 | 89.8 | 94.2 | hypothetical protein ARALYDRAFT_486447                                                                                                          | gbpln | Arabidopsis lyrata   | AT3G59820.1   Symbols:   LETM1-like protein   chr3:22098306-22101759 REVERSE LENGTH=755                                       | 746 | 755  | 0         | 101.2 | 89.1 | 94.0 |

|                           |                                                                                                                                                                                                                                                                                                                                                                                        |      |      |           |       |      |      |                                              |       |                      |                                                                                                                                                                                                                                                                                                                                                                                                                                                                                    |      |      |           |       |      |      |
|---------------------------|----------------------------------------------------------------------------------------------------------------------------------------------------------------------------------------------------------------------------------------------------------------------------------------------------------------------------------------------------------------------------------------|------|------|-----------|-------|------|------|----------------------------------------------|-------|----------------------|------------------------------------------------------------------------------------------------------------------------------------------------------------------------------------------------------------------------------------------------------------------------------------------------------------------------------------------------------------------------------------------------------------------------------------------------------------------------------------|------|------|-----------|-------|------|------|
| Rsa1.0_00554.1.g15937.t1  | gb[EOA23944.1] hypothetical protein CARUB_v10017160mg [Capsella rubella]                                                                                                                                                                                                                                                                                                               | 421  | 473  | 1.00E-135 | 112.4 | 61.0 | 73.6 | hypothetical protein CARUB_v10017160mg       | gbpln | Capsella rubella     | AT1G06630.2   Symbols:   F-box/RNI-like superfamily protein   chr1:2028071-2029442 FORWARD LENGTH=403                                                                                                                                                                                                                                                                                                                                                                              | 421  | 403  | 1.00E-90  | 95.7  | 45.8 | 61.0 |
| Rsa1.0_00555.1.g15938.t1  | gb[EOA37440.1] hypothetical protein CARUB_v10011510mg [Capsella rubella]                                                                                                                                                                                                                                                                                                               | 159  | 158  | 4.00E-70  | 99.4  | 89.9 | 94.3 | hypothetical protein CARUB_v10011510mg       | gbpln | Capsella rubella     | AT1G29520.1   Symbols:   AWPM-19-like family protein   chr1:10323735-10324525 FORWARD LENGTH=158<br>AT1G29530.1   Symbols:   unknown protein; BEST Arabidopsis thaliana protein match is: unknown protein (TAIR:AT2G34310.3); Has 84 Blast hits to 78 proteins in 24 species: Archae - 2; Bacteria - 4; Metazoa - 9; Fungi - 8; Plants - 55; Viruses - 0; Other Eukaryotes - 6 (source: NCBI BLink).   chr1:10325553-10326651 REVERSE LENGTH=236                                   | 159  | 158  | 2.00E-71  | 99.4  | 88.7 | 93.7 |
| Rsa1.0_00555.1.g15939.t1  | gb[EOA36216.1] hypothetical protein CARUB_v10010140mg [Capsella rubella]                                                                                                                                                                                                                                                                                                               | 241  | 242  | 1.00E-41  | 100.4 | 53.5 | 63.1 | hypothetical protein CARUB_v10010140mg       | gbpln | Capsella rubella     | AT1G29550.1   Symbols:   Eukaryotic initiation factor 4E protein   chr1:10330514-10332094 FORWARD LENGTH=240                                                                                                                                                                                                                                                                                                                                                                       | 241  | 236  | 1.00E-41  | 97.9  | 54.4 | 61.4 |
| Rsa1.0_00555.1.g15940.t1  | gb[EOA36198.1] hypothetical protein CARUB_v1001012mg [Capsella rubella]                                                                                                                                                                                                                                                                                                                | 248  | 247  | 1.00E-104 | 99.6  | 74.6 | 86.7 | hypothetical protein CARUB_v1001012mg        | gbpln | Capsella rubella     | AT4G14370.1   Symbols:   Disease resistance protein (TIR-NBS-LRR class) family   chr4:8279946-8283263 REVERSE LENGTH=1008                                                                                                                                                                                                                                                                                                                                                          | 248  | 240  | 1.00E-102 | 96.8  | 73.4 | 83.1 |
| Rsa1.0_00555.1.g15941.t1  | #                                                                                                                                                                                                                                                                                                                                                                                      | #    | #    | #         | #     | #    | -    | ----                                         | ----  | #                    | #                                                                                                                                                                                                                                                                                                                                                                                                                                                                                  | #    | #    | #         | #     | #    |      |
| Rsa1.0_00555.1.g15942.t1  | ref[NP_193173.4] TIR-NBS-LRR class disease resistance protein [Arabidopsis thaliana] gi[33265803]gb[AEE83431.1] TIR-NBS-LRR class disease resistance protein [Arabidopsis thaliana]                                                                                                                                                                                                    | 1084 | 1008 | 0         | 93.0  | 60.1 | 70.1 | TIR-NBS-LRR class disease resistance protein | gbpln | Arabidopsis thaliana | AT4G14370.1   Symbols:   Disease resistance protein (TIR-NBS-LRR class) family   chr4:8279946-8283263 REVERSE LENGTH=1008                                                                                                                                                                                                                                                                                                                                                          | 1084 | 1008 | 0         | 93.0  | 60.1 | 70.1 |
| Rsa1.0_00555.1.g15943.t1  | #                                                                                                                                                                                                                                                                                                                                                                                      | #    | #    | #         | #     | #    | -    | ----                                         | ----  | #                    | #                                                                                                                                                                                                                                                                                                                                                                                                                                                                                  | #    | #    | #         | #     | #    |      |
| Rsa1.0_00555.1.g15944.t1  | emb[CAC37623.1] copia-like polyprotein [Arabidopsis thaliana]                                                                                                                                                                                                                                                                                                                          | 1338 | 1466 | 0         | 109.6 | 68.4 | 81.4 | copia-like polyprotein                       | gbpln | Arabidopsis thaliana | AT4G23160.1   Symbols:   CRK8   cysteine-rich RLK (RECEPTOR-like protein kinase) 8   chr4:12129485-12134086 FORWARD LENGTH=1262<br>AT3G57360.1   Symbols:   unknown protein; BEST Arabidopsis thaliana protein match is: unknown protein (TAIR:AT3G02370.2); Has 122 Blast hits to 122 proteins in 54 species: Archae - 0; Bacteria - 0; Metazoa - 74; Fungi - 4; Plants - 41; Viruses - 0; Other Eukaryotes - 3 (source: NCBI BLink).   chr3:21225571-21226621 FORWARD LENGTH=254 | 1338 | 1262 | 2.00E-85  | 94.3  | 13.5 | 20.2 |
| Rsa1.0_00555.1.g15945.t1  | gb[EOA24554.1] hypothetical protein CARUB_v10017811mg [Capsella rubella]                                                                                                                                                                                                                                                                                                               | 89   | 275  | 2.00E-12  | 309.0 | 52.8 | 57.3 | hypothetical protein CARUB_v10017811mg       | gbpln | Capsella rubella     | AT1G29640.1   Symbols:   Protein of unknown function, DUF584   chr1:10355959-10356381 REVERSE LENGTH=140                                                                                                                                                                                                                                                                                                                                                                           | 89   | 254  | 1.00E-13  | 285.4 | 51.7 | 56.2 |
| Rsa1.0_00555.1.g15946.t2  | ref[NP_174257.1] uncharacterized protein [Arabidopsis thaliana] gi[12323541]gb[AAG51753.1]AC068667_32 hypothetical protein; 98808-98386 [Arabidopsis thaliana] gi[28466825]gb[AC44021.1] At1g29640 [Arabidopsis thaliana] gi[11074301]gls[BAE99402.1] hypothetical protein [Arabidopsis thaliana] gi[332192993]gb[AEE31114.1] uncharacterized protein AT1G29640 [Arabidopsis thaliana] | 300  | 140  | 2.00E-41  | 46.7  | 33.3 | 35.3 | uncharacterized protein                      | gbpln | Arabidopsis thaliana | AT2G07760.1   Symbols:   Zinc knuckle (COHC-type) family protein   chr2:3584420-3586278 REVERSE LENGTH=530                                                                                                                                                                                                                                                                                                                                                                         | 300  | 140  | 4.00E-44  | 46.7  | 33.3 | 35.3 |
| Rsa1.0_00555.1.g15947.t1  | gb[EOA33828.1] hypothetical protein CARUB_v10021307mg [Capsella rubella]                                                                                                                                                                                                                                                                                                               | 607  | 515  | 3.00E-63  | 84.8  | 19.1 | 23.7 | hypothetical protein CARUB_v10021307mg       | gbpln | Capsella rubella     | AT1G29680.1   Symbols:   Protein of unknown function (DUF1264)   chr1:10377900-10378931 REVERSE LENGTH=237                                                                                                                                                                                                                                                                                                                                                                         | 607  | 530  | 4.00E-40  | 87.3  | 13.7 | 18.1 |
| Rsa1.0_00555.1.g15948.t1  | gb[EOA38724.1] hypothetical protein CARUB_v10010854mg [Capsella rubella]                                                                                                                                                                                                                                                                                                               | 237  | 237  | 1.00E-126 | 100.0 | 88.2 | 94.9 | hypothetical protein CARUB_v10010854mg       | gbpln | Capsella rubella     | AT1G29720.1   Symbols:   Leucine-rich repeat transmembrane protein kinase   chr1:10393894-10399771 REVERSE LENGTH=1019                                                                                                                                                                                                                                                                                                                                                             | 237  | 237  | 1.00E-124 | 100.0 | 87.3 | 92.4 |
| Rsa1.0_00555.1.g15949.t15 | gb[EOA39560.1] hypothetical protein CARUB_v10008178mg [Capsella rubella]                                                                                                                                                                                                                                                                                                               | 1013 | 1022 | 0         | 100.9 | 72.7 | 83.5 | hypothetical protein CARUB_v10008178mg       | gbpln | Capsella rubella     | AT1G29720.1   Symbols:   Leucine-rich repeat transmembrane protein kinase   chr1:10393894-10399771 REVERSE LENGTH=1019                                                                                                                                                                                                                                                                                                                                                             | 1013 | 1019 | 0         | 100.6 | 73.8 | 83.5 |
| Rsa1.0_00556.1.g15950.t1  | #                                                                                                                                                                                                                                                                                                                                                                                      | #    | #    | #         | #     | #    | -    | ----                                         | ----  | #                    | #                                                                                                                                                                                                                                                                                                                                                                                                                                                                                  | #    | #    | #         | #     | #    |      |

|                          |                                                                                                                                                                                                                                                                                                                                                                                                                                                                                                                                                                                                                                                                                                                                                                                                                                                                                                                                                                                                                                                                                                                                                                                                                            |     |     |           |       |      |      |                                                                          |       |                      |                                                                                                                                                |     |     |           |       |      |      |
|--------------------------|----------------------------------------------------------------------------------------------------------------------------------------------------------------------------------------------------------------------------------------------------------------------------------------------------------------------------------------------------------------------------------------------------------------------------------------------------------------------------------------------------------------------------------------------------------------------------------------------------------------------------------------------------------------------------------------------------------------------------------------------------------------------------------------------------------------------------------------------------------------------------------------------------------------------------------------------------------------------------------------------------------------------------------------------------------------------------------------------------------------------------------------------------------------------------------------------------------------------------|-----|-----|-----------|-------|------|------|--------------------------------------------------------------------------|-------|----------------------|------------------------------------------------------------------------------------------------------------------------------------------------|-----|-----|-----------|-------|------|------|
| Rsa1.0_00556.1.g15951.t1 | refNP_563684.1   histidine-containing phosphotransfer protein 5 [Arabidopsis thaliana]<br>gi 56749792 sp Q8L9T7.2 AHP5_ARATH<br>RecName: Full=Histidine-containing phosphotransfer protein 5<br>gi 7630189 dbj BAA94764.1   HPt phosphotransmitter [Arabidopsis thaliana] gi 51970654 dbj BAD44019.1   HPt phosphotransmitter (AHP5) [Arabidopsis thaliana]<br>gi 51971731 dbj BAD44530.1   HPt phosphotransmitter (AHP5) [Arabidopsis thaliana]<br>gi 149944283 gb ABR46184.1   At1g03430 [Arabidopsis thaliana]<br>gi 332189449 gb AEE27570.1   histidine-containing phosphotransfer protein 5 [Arabidopsis thaliana]<br>refXP_002889459.1   leucine-rich repeat family protein [Arabidopsis lyrata subsp. lyrata] gi 297335301 gb EFH65718.1   leucine-rich repeat family protein [Arabidopsis lyrata subsp. lyrata]<br>refXP_002892161.1   hypothetical protein ARALYDRAFT_470321 [Arabidopsis lyrata subsp. lyrata]<br>gi 297338003 gb EFH68420.1   hypothetical protein ARALYDRAFT_470321 [Arabidopsis lyrata subsp. lyrata]<br>refXP_002892163.1   coproporphyrinogen III oxidase [Arabidopsis lyrata subsp. lyrata] gi 297338005 gb EFH68422.1   coproporphyrinogen III oxidase [Arabidopsis lyrata subsp. lyrata] | 190 | 157 | 8.00E-75  | 82.6  | 76.3 | 78.9 | histidine-containing phosphotransfer protein 5                           | gbpln | Arabidopsis thaliana | AT1G03430.1   Symbols: AHP5   histidine-containing phosphotransfer factor 5   chr1:848159-849235 FORWARD<br>LENGTH=157                         | 190 | 157 | 3.00E-77  | 82.6  | 76.3 | 78.9 |
| Rsa1.0_00556.1.g15952.t1 | refXP_002889459.1   leucine-rich repeat family protein [Arabidopsis lyrata subsp. lyrata] gi 297335301 gb EFH65718.1   leucine-rich repeat family protein [Arabidopsis lyrata subsp. lyrata]<br>refXP_002892161.1   hypothetical protein ARALYDRAFT_470321 [Arabidopsis lyrata subsp. lyrata]<br>gi 297338003 gb EFH68420.1   hypothetical protein ARALYDRAFT_470321 [Arabidopsis lyrata subsp. lyrata]<br>refXP_002892163.1   coproporphyrinogen III oxidase [Arabidopsis lyrata subsp. lyrata] gi 297338005 gb EFH68422.1   coproporphyrinogen III oxidase [Arabidopsis lyrata subsp. lyrata]                                                                                                                                                                                                                                                                                                                                                                                                                                                                                                                                                                                                                            | 395 | 396 | 0         | 100.3 | 93.7 | 96.5 | leucine-rich repeat family protein                                       | gbpln | Arabidopsis lyrata   | AT1G03440.1   Symbols:   Leucine-rich repeat (LRR) family protein   chr1:852681-853874 FORWARD<br>LENGTH=397                                   | 395 | 397 | 0         | 100.5 | 92.2 | 96.5 |
| Rsa1.0_00556.1.g15953.t1 | refXP_002892161.1   hypothetical protein ARALYDRAFT_470321 [Arabidopsis lyrata subsp. lyrata]<br>gi 297338003 gb EFH68420.1   hypothetical protein ARALYDRAFT_470321 [Arabidopsis lyrata subsp. lyrata]<br>refXP_002892163.1   coproporphyrinogen III oxidase [Arabidopsis lyrata subsp. lyrata] gi 297338005 gb EFH68422.1   coproporphyrinogen III oxidase [Arabidopsis lyrata subsp. lyrata]                                                                                                                                                                                                                                                                                                                                                                                                                                                                                                                                                                                                                                                                                                                                                                                                                            | 425 | 435 | 0         | 102.4 | 81.4 | 87.8 | hypothetical protein ARALYDRAFT_470321                                   | gbpln | Arabidopsis lyrata   | AT1G03457.1   Symbols:   RNA-binding (RRM/RBD/RNP motifs) family protein   chr1:861109-864019 REVERSE<br>LENGTH=429                            | 425 | 429 | 0         | 100.9 | 79.8 | 86.8 |
| Rsa1.0_00556.1.g15954.t1 | refXP_002892163.1   coproporphyrinogen III oxidase [Arabidopsis lyrata subsp. lyrata] gi 297338005 gb EFH68422.1   coproporphyrinogen III oxidase [Arabidopsis lyrata subsp. lyrata]                                                                                                                                                                                                                                                                                                                                                                                                                                                                                                                                                                                                                                                                                                                                                                                                                                                                                                                                                                                                                                       | 388 | 387 | 0         | 99.7  | 91.8 | 96.1 | coproporphyrinogen III oxidase                                           | gbpln | Arabidopsis lyrata   | AT1G03475.1   Symbols: LIN2, HEMF1, ATCP0-1   Coproporphyrinogen III oxidase   chr1:869302-871175 REVERSE<br>LENGTH=386                        | 388 | 386 | 0         | 99.5  | 91.8 | 95.9 |
| Rsa1.0_00556.1.g15955.t2 | gb EOA39229.1   hypothetical protein CARUB_v10012206mg, partial [Capsella rubella]                                                                                                                                                                                                                                                                                                                                                                                                                                                                                                                                                                                                                                                                                                                                                                                                                                                                                                                                                                                                                                                                                                                                         | 546 | 447 | 2.00E-31  | 81.9  | 16.3 | 21.1 | hypothetical protein CARUB_v10012206mg, partial                          | gbpln | Capsella rubella     | AT1G03490.1   Symbols: ANAC006, NAC006   NAC domain containing protein 6   chr1:871874-872906 FORWARD<br>LENGTH=281                            | 546 | 281 | 5.00E-25  | 51.5  | 10.6 | 12.8 |
| Rsa1.0_00556.1.g15956.t1 | refNP_171850.1   pentatricopeptide repeat-containing protein [Arabidopsis thaliana]<br>gi 75180302 sp Q9LR72.1 PPR7_ARATH<br>RecName: Full=Putative pentatricopeptide repeat-containing protein At1g03510<br>gi 9280666 gb AAF86535.1 AC002560.28 F21B7.13 [Arabidopsis thaliana]<br>gi 332189459 gb AEE27580.1   pentatricopeptide repeat-containing protein [Arabidopsis thaliana]<br>refNP_171851.1   core-2/1-branching beta-1,6-N-acetylglucosaminyltransferase-like protein [Arabidopsis thaliana]<br>gi 9280665 gb AAF86534.1 AC002560.27 F21B7.14 [Arabidopsis thaliana]<br>gi 15292807 gb AAK92772.1   putative glycosylation enzyme [Arabidopsis thaliana] gi 20465791 gb AAM20384.1   putative glycosylation enzyme [Arabidopsis thaliana]<br>gi 332189460 gb AEE27581.1   core-2/1-branching beta-1,6-N-acetylglucosaminyltransferase-like protein [Arabidopsis thaliana]<br>refXP_002892167.1   hypothetical protein ARALYDRAFT_311450 [Arabidopsis lyrata subsp. lyrata]<br>gi 297338009 gb EFH68426.1   hypothetical protein ARALYDRAFT_311450 [Arabidopsis lyrata subsp. lyrata]                                                                                                                           | 154 | 429 | 5.00E-47  | 278.6 | 64.9 | 71.4 | pentatricopeptide repeat-containing protein                              | gbpln | Arabidopsis thaliana | AT1G03510.1   Symbols:   Tetratricopeptide repeat (TPR)-like superfamily protein   chr1:876258-877547 REVERSE<br>LENGTH=429                    | 154 | 429 | 2.00E-49  | 278.6 | 64.9 | 71.4 |
| Rsa1.0_00556.1.g15957.t1 | refNP_171851.1   core-2/1-branching beta-1,6-N-acetylglucosaminyltransferase-like protein [Arabidopsis thaliana]<br>gi 9280665 gb AAF86534.1 AC002560.27 F21B7.14 [Arabidopsis thaliana]<br>gi 15292807 gb AAK92772.1   putative glycosylation enzyme [Arabidopsis thaliana] gi 20465791 gb AAM20384.1   putative glycosylation enzyme [Arabidopsis thaliana]<br>gi 332189460 gb AEE27581.1   core-2/1-branching beta-1,6-N-acetylglucosaminyltransferase-like protein [Arabidopsis thaliana]<br>refXP_002892167.1   hypothetical protein ARALYDRAFT_311450 [Arabidopsis lyrata subsp. lyrata]<br>gi 297338009 gb EFH68426.1   hypothetical protein ARALYDRAFT_311450 [Arabidopsis lyrata subsp. lyrata]                                                                                                                                                                                                                                                                                                                                                                                                                                                                                                                   | 450 | 447 | 0         | 99.3  | 85.6 | 91.6 | core-2/1-branching beta-1,6-N-acetylglucosaminyltransferase-like protein | gbpln | Arabidopsis thaliana | AT1G03520.1   Symbols:   Core-2/1-branching beta-1,6-N-acetylglucosaminyltransferase family protein   chr1:877948-879553 REVERSE<br>LENGTH=447 | 450 | 447 | 0         | 99.3  | 85.6 | 91.6 |
| Rsa1.0_00556.1.g15958.t1 | refXP_002892167.1   hypothetical protein ARALYDRAFT_311450 [Arabidopsis lyrata subsp. lyrata]<br>gi 297338009 gb EFH68426.1   hypothetical protein ARALYDRAFT_311450 [Arabidopsis lyrata subsp. lyrata]                                                                                                                                                                                                                                                                                                                                                                                                                                                                                                                                                                                                                                                                                                                                                                                                                                                                                                                                                                                                                    | 722 | 804 | 0         | 111.4 | 64.5 | 73.4 | hypothetical protein ARALYDRAFT_311450                                   | gbpln | Arabidopsis lyrata   | AT1G03530.1   Symbols: ATNAF1, NAF1   nuclear assembly factor 1   chr1:880638-883338 REVERSE<br>LENGTH=801                                     | 722 | 801 | 0         | 110.9 | 64.4 | 73.3 |
| Rsa1.0_00556.1.g15959.t1 | gb EOA39421.1   hypothetical protein CARUB_v10012530mg [Capsella rubella]                                                                                                                                                                                                                                                                                                                                                                                                                                                                                                                                                                                                                                                                                                                                                                                                                                                                                                                                                                                                                                                                                                                                                  | 283 | 283 | 1.00E-151 | 100.0 | 90.1 | 95.1 | hypothetical protein CARUB_v10012530mg                                   | gbpln | Capsella rubella     | AT1G03550.1   Symbols:   Secretory carrier membrane protein (SCAMP) family protein   chr1:885851-887778 REVERSE<br>LENGTH=283                  | 283 | 283 | 1.00E-144 | 100.0 | 88.7 | 94.0 |

|                          |                                                                                                                                                                                                                                                                                                                                                                                                                                                                                                                                                                                                                |     |      |           |        |      |      |                                             |       |                      |                                                                                                                          |     |      |           |        |      |      |
|--------------------------|----------------------------------------------------------------------------------------------------------------------------------------------------------------------------------------------------------------------------------------------------------------------------------------------------------------------------------------------------------------------------------------------------------------------------------------------------------------------------------------------------------------------------------------------------------------------------------------------------------------|-----|------|-----------|--------|------|------|---------------------------------------------|-------|----------------------|--------------------------------------------------------------------------------------------------------------------------|-----|------|-----------|--------|------|------|
| Rsa1.0_00556.1.g15960.t1 | ref[XP_002892169.1] pentatricopeptide repeat-containing protein [Arabidopsis lyrata subsp. lyrata]<br>gi 29733801 gb EFH68428.1  pentatricopeptide repeat-containing protein [Arabidopsis lyrata subsp. lyrata]                                                                                                                                                                                                                                                                                                                                                                                                | 666 | 662  | 0         | 99.4   | 84.1 | 90.7 | pentatricopeptide repeat-containing protein | gbpln | Arabidopsis lyrata   | AT1G03560.1   Symbols:   Pentatricopeptide repeat (PPR-like) superfamily protein   chr1:890428-892410 REVERSE LENGTH=660 | 666 | 660  | 0         | 99.1   | 83.5 | 90.4 |
| Rsa1.0_00556.1.g15961.t1 | gb EOA40336.1  hypothetical protein CARUB_v10009068mg [Capsella rubella]<br>gi 482576150 gb EOA40337.1  hypothetical protein CARUB_v10009068mg [Capsella rubella]                                                                                                                                                                                                                                                                                                                                                                                                                                              | 460 | 462  | 0         | 100.4  | 83.7 | 91.1 | hypothetical protein CARUB_v10009068mg      | gbpln | Capsella rubella     | AT1G03590.1   Symbols:   Protein phosphatase 2C family protein   chr1:894480-896257 REVERSE LENGTH=462                   | 460 | 462  | 0         | 100.4  | 83.3 | 91.7 |
| Rsa1.0_00556.1.g15962.t1 | ref[XP_002870997.1] ubiquitin-protein ligase 4 [Arabidopsis lyrata subsp. lyrata]<br>gi 297316834 gb EFH47256.1  ubiquitin-protein ligase 4 [Arabidopsis lyrata subsp. lyrata]                                                                                                                                                                                                                                                                                                                                                                                                                                 | 149 | 1509 | 3.00E-27  | 1012.8 | 57.7 | 67.8 | ubiquitin-protein ligase 4                  | gbpln | Arabidopsis lyrata   | AT5G02880.1   Symbols: UPL4   ubiquitin-protein ligase 4   chr5:662643-668847 FORWARD LENGTH=1502                        | 149 | 1502 | 1.00E-26  | 1008.1 | 53.7 | 59.7 |
| Rsa1.0_00556.1.g15963.t1 | gb EOA39350.1  hypothetical protein CARUB_v10012401mg [Capsella rubella]                                                                                                                                                                                                                                                                                                                                                                                                                                                                                                                                       | 305 | 312  | 1.00E-156 | 102.3  | 90.5 | 93.8 | hypothetical protein CARUB_v10012401mg      | gbpln | Capsella rubella     | AT1G03610.1   Symbols:   Protein of unknown function (DUF789)   chr1:901304-902672 FORWARD LENGTH=308                    | 305 | 308  | 1.00E-158 | 101.0  | 89.2 | 93.4 |
| Rsa1.0_00556.1.g15964.t1 | ref[NP_171859.1] ELMO/CED-12 family protein [Arabidopsis thaliana]<br>gi 124300970 gb ABN04737.1  At1g03620 [Arabidopsis thaliana]<br>gi 332189469 gb AEE27590.1  ELMO/CED-12 family protein [Arabidopsis thaliana]                                                                                                                                                                                                                                                                                                                                                                                            | 265 | 265  | 1.00E-144 | 100.0  | 90.9 | 96.2 | ELMO/CED-12 family protein                  | gbpln | Arabidopsis thaliana | AT1G03620.1   Symbols:   ELMO/CED-12 family protein   chr1:904319-906013 REVERSE LENGTH=265                              | 265 | 265  | 2.33E-156 | 100.0  | 90.9 | 96.2 |
| Rsa1.0_00556.1.g15965.t1 | ref[XP_002889465.1] por C [Arabidopsis lyrata subsp. lyrata]<br>gi 297335307 gb EFH65724.1  por C [Arabidopsis lyrata subsp. lyrata]                                                                                                                                                                                                                                                                                                                                                                                                                                                                           | 401 | 401  | 0         | 100.0  | 94.8 | 98.5 | por C                                       | gbpln | Arabidopsis lyrata   | AT1G03630.1   Symbols: POR C, PORC   protochlorophyllide oxidoreductase C   chr1:907699-909245 FORWARD LENGTH=401        | 401 | 401  | 0         | 100.0  | 93.8 | 98.3 |
| Rsa1.0_00556.1.g15966.t1 | #                                                                                                                                                                                                                                                                                                                                                                                                                                                                                                                                                                                                              | #   | #    | #         | #      | #    | #    | -                                           | ----  | ----                 | #                                                                                                                        | #   | #    | #         | #      | #    |      |
| Rsa1.0_00556.1.g15967.t1 | ref[NP_563689.1] UPF0497 membrane protein [Arabidopsis thaliana]<br>gi 297843172 ref[XP_002889467.1] integral membrane family protein [Arabidopsis lyrata subsp. lyrata]<br>gi 75180289 sp Q9LR57.1 CSPL1_ARAT H RecName: Full=CASP-like protein At1g03700<br>gi 341958561 sp D7KCH2.1 CSPLA_ARA L RecName: Full=CASP-like protein ARALYDRAFT_470341<br>gi 9280651 gb AAF86520.1 AC002560.13 F21B7.30 [Arabidopsis thaliana]<br>gi 297335309 gb EFH65726.1  integral membrane family protein [Arabidopsis lyrata subsp. lyrata]<br>gi 332189478 gb AEE27599.1  UPF0497 membrane protein [Arabidopsis thaliana] | 164 | 164  | 1.00E-83  | 100.0  | 95.7 | 98.8 | UPF0497 membrane protein                    | gbpln | Arabidopsis lyrata   | AT1G03700.1   Symbols:   Uncharacterised protein family (UPF0497)   chr1:921038-921844 FORWARD LENGTH=164                | 164 | 164  | 3.00E-86  | 100.0  | 95.7 | 98.8 |
| Rsa1.0_00556.1.g15968.t1 | ref[XP_002889471.1] hypothetical protein ARALYDRAFT_470343 [Arabidopsis lyrata subsp. lyrata]<br>gi 297335313 gb EFH65730.1  hypothetical protein ARALYDRAFT_470343 [Arabidopsis lyrata subsp. lyrata]                                                                                                                                                                                                                                                                                                                                                                                                         | 188 | 219  | 2.00E-47  | 116.5  | 63.3 | 75.5 | hypothetical protein ARALYDRAFT_470343      | gbpln | Arabidopsis lyrata   | AT1G03710.2   Symbols:   Cystatin/monellin superfamily protein   chr1:923492-924287 FORWARD LENGTH=202                   | 188 | 202  | 5.00E-40  | 107.4  | 58.5 | 70.2 |
| Rsa1.0_00556.1.g15969.t1 | emb CAB39638.1  RNA-directed DNA polymerase-like protein [Arabidopsis thaliana]<br>gi 7267666 emb CAB78094.1  RNA-directed DNA polymerase-like protein [Arabidopsis thaliana]                                                                                                                                                                                                                                                                                                                                                                                                                                  | 403 | 1274 | 2.00E-50  | 316.1  | 31.5 | 50.4 | RNA-directed DNA polymerase-like protein    | gbpln | Arabidopsis thaliana | AT1G10000.1   Symbols:   Ribonuclease H-like superfamily protein   chr1:3263877-3264788 REVERSE LENGTH=303               | 403 | 303  | 9.00E-49  | 75.2   | 28.5 | 40.4 |
| Rsa1.0_00556.1.g15970.t1 | ref[XP_002889471.1] hypothetical protein ARALYDRAFT_470343 [Arabidopsis lyrata subsp. lyrata]<br>gi 297335313 gb EFH65730.1  hypothetical protein ARALYDRAFT_470343 [Arabidopsis lyrata subsp. lyrata]                                                                                                                                                                                                                                                                                                                                                                                                         | 229 | 219  | 1.00E-53  | 95.6   | 56.3 | 67.2 | hypothetical protein ARALYDRAFT_470343      | gbpln | Arabidopsis lyrata   | AT1G03710.2   Symbols:   Cystatin/monellin superfamily protein   chr1:923492-924287 FORWARD LENGTH=202                   | 229 | 202  | 1.00E-50  | 88.2   | 52.8 | 65.1 |
| Rsa1.0_00556.1.g15971.t1 | dbj BAJ34139.1  unnamed protein product [Thellungiella halophila]                                                                                                                                                                                                                                                                                                                                                                                                                                                                                                                                              | 156 | 158  | 8.00E-50  | 101.3  | 79.5 | 84.6 | unnamed protein product                     | ----  | ----                 | AT1G03850.2   Symbols:   Glutaredoxin family protein   chr1:977233-977685 REVERSE LENGTH=150                             | 156 | 150  | 3.00E-52  | 96.2   | 70.5 | 78.8 |
| Rsa1.0_00556.1.g15972.t1 | gb EOA39381.1  hypothetical protein CARUB_v10009925mg [Capsella rubella]                                                                                                                                                                                                                                                                                                                                                                                                                                                                                                                                       | 288 | 286  | 1.00E-162 | 99.3   | 96.9 | 98.3 | hypothetical protein CARUB_v10009925mg      | gbpln | Capsella rubella     | AT1G03860.3   Symbols: ATPHB2, PHB2   prohibitin 2   chr1:979611-981157 REVERSE LENGTH=286                               | 288 | 286  | 1.00E-156 | 99.3   | 95.8 | 98.3 |



|                          |                                                                                                                                                                                                                                                                                                                                                                                                                                                                                                                                                                                                                                                                                                          |     |     |           |       |      |      |                                        |       |                      |                                                                                                                                                                                                                                                                                                                                                                                                                                                                                                                                                                    |     |     |           |       |      |      |
|--------------------------|----------------------------------------------------------------------------------------------------------------------------------------------------------------------------------------------------------------------------------------------------------------------------------------------------------------------------------------------------------------------------------------------------------------------------------------------------------------------------------------------------------------------------------------------------------------------------------------------------------------------------------------------------------------------------------------------------------|-----|-----|-----------|-------|------|------|----------------------------------------|-------|----------------------|--------------------------------------------------------------------------------------------------------------------------------------------------------------------------------------------------------------------------------------------------------------------------------------------------------------------------------------------------------------------------------------------------------------------------------------------------------------------------------------------------------------------------------------------------------------------|-----|-----|-----------|-------|------|------|
| Rsa1.0_00556.1.g15973.t1 | gb ABK78690.1  unknown [Brassica rapa]                                                                                                                                                                                                                                                                                                                                                                                                                                                                                                                                                                                                                                                                   | 248 | 250 | 1.00E-122 | 100.8 | 93.1 | 96.4 | unknown                                | gbpln | Brassica rapa        | AT1G03870.1   Symbols: FLA9   FASCICLIN-like arabinogalactan 9   chr1:982625-983368 REVERSE LENGTH=247                                                                                                                                                                                                                                                                                                                                                                                                                                                             | 248 | 247 | 1.00E-103 | 99.6  | 70.6 | 79.4 |
| Rsa1.0_00556.1.g15974.t1 | gb AFQ32288.1  12S seed storage protein [Camelina sativa]                                                                                                                                                                                                                                                                                                                                                                                                                                                                                                                                                                                                                                                | 463 | 456 | 0         | 98.5  | 85.1 | 93.5 | 12S seed storage protein               | gbpln | Camelina sativa      | AT1G03880.1   Symbols: CRU2, CRB   cruciferin 2   chr1:985786-987916 FORWARD LENGTH=455                                                                                                                                                                                                                                                                                                                                                                                                                                                                            | 463 | 455 | 0         | 98.3  | 84.4 | 92.4 |
| Rsa1.0_00556.1.g15975.t1 | gb EOA35015.1  hypothetical protein CARUB_v10020118mg [Capsella rubella]                                                                                                                                                                                                                                                                                                                                                                                                                                                                                                                                                                                                                                 | 536 | 535 | 0         | 99.8  | 93.7 | 98.1 | hypothetical protein CARUB_v10020118mg | gbpln | Capsella rubella     | AT1G65660.1   Symbols: SMP1   Pre-mRNA splicing Prp18-interacting factor   chr1:24418295-24421231 REVERSE LENGTH=535                                                                                                                                                                                                                                                                                                                                                                                                                                               | 536 | 535 | 0         | 99.8  | 92.9 | 97.8 |
| Rsa1.0_00556.1.g15976.t1 | gb EOA38251.1  hypothetical protein CARUB_v10009732mg [Capsella rubella]                                                                                                                                                                                                                                                                                                                                                                                                                                                                                                                                                                                                                                 | 278 | 326 | 1.00E-118 | 117.3 | 85.6 | 88.1 | hypothetical protein CARUB_v10009732mg | gbpln | Capsella rubella     | AT1G03900.1   Symbols: ATNAP4, NAP4   non-intrinsic ABC protein 4   chr1:991252-992852 FORWARD LENGTH=272                                                                                                                                                                                                                                                                                                                                                                                                                                                          | 278 | 272 | 1.00E-117 | 97.8  | 84.9 | 87.4 |
| Rsa1.0_00556.1.g15977.t1 | ref XP_00289482.1  hypothetical protein ARALYDRAFT_333714 [Arabidopsis lyrata subsp. lyrata]   gb EFH65741.1  hypothetical protein ARALYDRAFT_333714 [Arabidopsis lyrata subsp. lyrata]                                                                                                                                                                                                                                                                                                                                                                                                                                                                                                                  | 664 | 671 | 0         | 101.1 | 89.5 | 93.5 | hypothetical protein ARALYDRAFT_333714 | gbpln | Arabidopsis lyrata   | AT1G03910.1   Symbols:   EXPRESSED IN: 25 plant structures; EXPRESSED DURING: 13 growth stages; CONTAINS InterPro DOMAIN/s: Cactin protein, cactus-binding domain, C-terminal (InterPro:IPR01816); Cactin, central region (InterPro:IPR01816); BEST Arabidopsis thaliana protein match is: unknown protein (TAIR:AT2G36815.2); Has 11711 Blast hits to 7382 proteins in 452 species: Archae - 31; Bacteria - 352; Metazoa - 6006; Fungi - 1138; Plants - 599; Viruses - 33; Other Eukaryotes - 3552 (source: NCBI BLINK).   chr1:996432-1000231 FORWARD LENGTH=672 | 664 | 672 | 0         | 101.2 | 88.4 | 92.3 |
| Rsa1.0_00556.1.g15978.t1 | gb EOA36843.1  hypothetical protein CARUB_v10008713mg [Capsella rubella]                                                                                                                                                                                                                                                                                                                                                                                                                                                                                                                                                                                                                                 | 567 | 569 | 0         | 100.4 | 89.4 | 94.2 | hypothetical protein CARUB_v10008713mg | gbpln | Capsella rubella     | AT1G03920.1   Symbols:   Protein kinase family protein   chr1:1001473-1004240 FORWARD LENGTH=569                                                                                                                                                                                                                                                                                                                                                                                                                                                                   | 567 | 569 | 0         | 100.4 | 86.2 | 92.9 |
| Rsa1.0_00556.1.g15979.t1 | #                                                                                                                                                                                                                                                                                                                                                                                                                                                                                                                                                                                                                                                                                                        | #   | #   | #         | #     | #    | #    | -                                      | ----  | ----                 | #                                                                                                                                                                                                                                                                                                                                                                                                                                                                                                                                                                  | #   | #   | #         | #     | #    | #    |
| Rsa1.0_00556.1.g15980.t1 | #                                                                                                                                                                                                                                                                                                                                                                                                                                                                                                                                                                                                                                                                                                        | #   | #   | #         | #     | #    | #    | -                                      | ----  | ----                 | #                                                                                                                                                                                                                                                                                                                                                                                                                                                                                                                                                                  | #   | #   | #         | #     | #    | #    |
| Rsa1.0_00556.1.g15981.t1 | ref XP_002892189.1  SNF7 family protein [Arabidopsis lyrata subsp. lyrata]   gi 297338031 gb EFH68448.1  SNF7 family protein [Arabidopsis lyrata subsp. lyrata]                                                                                                                                                                                                                                                                                                                                                                                                                                                                                                                                          | 211 | 210 | 1.00E-109 | 99.5  | 93.8 | 97.6 | SNF7 family protein                    | gbpln | Arabidopsis lyrata   | AT1G03950.1   Symbols: VPS2.3   vacuolar protein sorting-associated protein 2.3   chr1:1011388-1013212 REVERSE LENGTH=210                                                                                                                                                                                                                                                                                                                                                                                                                                          | 211 | 210 | 1.00E-111 | 99.5  | 93.8 | 96.7 |
| Rsa1.0_00556.1.g15982.t1 | ref NP_171893.1  G-box binding factor 4 [Arabidopsis thaliana]   gi 1169863 sp P42777.1 GBF4_ARATH RecName: Full=G-box-binding factor 4; AltName: Full=bZIP transcription factor 40; Short=AtbZIP40   gi 403418 gb AAA18414.1  GBF4 [Arabidopsis thaliana]   gi 4204292 gb AAD10673.1  GBF4 [Arabidopsis thaliana]   gi 21593196 gb AM65145.1  G-box binding factor, GBF4 [Arabidopsis thaliana]   gi 87116624 gb ABD19676.1  At1g03970 [Arabidopsis thaliana]   gi 332189519 gb AEE27640.1  G-box binding factor 4 [Arabidopsis thaliana]   ref XP_002892191.1  predicted protein [Arabidopsis lyrata subsp. lyrata]   gi 297338033 gb EFH68450.1  predicted protein [Arabidopsis lyrata subsp. lyrata] | 286 | 270 | 2.00E-81  | 94.4  | 70.3 | 77.6 | G-box binding factor 4                 | gbpln | Arabidopsis thaliana | AT1G03970.1   Symbols: GBF4   G-box binding factor 4   chr1:1018237-1019049 FORWARD LENGTH=270                                                                                                                                                                                                                                                                                                                                                                                                                                                                     | 286 | 270 | 7.00E-84  | 94.4  | 70.3 | 77.6 |
| Rsa1.0_00556.1.g15983.t1 | ref XP_002892191.1  predicted protein [Arabidopsis lyrata subsp. lyrata]   gi 297338033 gb EFH68450.1  predicted protein [Arabidopsis lyrata subsp. lyrata]                                                                                                                                                                                                                                                                                                                                                                                                                                                                                                                                              | 186 | 170 | 2.00E-47  | 91.4  | 60.2 | 64.5 | predicted protein                      | gbpln | Arabidopsis lyrata   | AT1G03982.1   Symbols:   PAK-box/P21-Rho-binding family protein   chr1:1022424-1023136 REVERSE LENGTH=177                                                                                                                                                                                                                                                                                                                                                                                                                                                          | 186 | 177 | 9.00E-42  | 95.2  | 48.9 | 52.2 |
| Rsa1.0_00556.1.g15984.t1 | gb EOA39375.1  hypothetical protein CARUB_v10012453mg [Capsella rubella]                                                                                                                                                                                                                                                                                                                                                                                                                                                                                                                                                                                                                                 | 756 | 752 | 0         | 99.5  | 80.7 | 91.0 | hypothetical protein CARUB_v10012453mg | gbpln | Capsella rubella     | AT1G03990.1   Symbols:   Long-chain fatty alcohol dehydrogenase family protein   chr1:1024847-1027616 FORWARD LENGTH=758                                                                                                                                                                                                                                                                                                                                                                                                                                           | 756 | 758 | 0         | 100.3 | 80.3 | 91.5 |
| Rsa1.0_00556.1.g15985.t1 | ref XP_002892192.1  hypothetical protein ARALYDRAFT_470377 [Arabidopsis lyrata subsp. lyrata]   gi 297338034 gb EFH68451.1  hypothetical protein ARALYDRAFT_470377 [Arabidopsis lyrata subsp. lyrata]                                                                                                                                                                                                                                                                                                                                                                                                                                                                                                    | 154 | 154 | 1.00E-50  | 100.0 | 72.1 | 81.2 | hypothetical protein ARALYDRAFT_470377 | gbpln | Arabidopsis lyrata   | AT1G04000.1   Symbols:   unknown protein; BEST Arabidopsis thaliana protein match is: unknown protein (TAIR:AT5G44060.1); Has 62 Blast hits to 62 proteins in 10 species: Archae - 0; Bacteria - 0; Metazoa - 0; Fungi - 0; Plants - 62; Viruses - 0; Other Eukaryotes - 0 (source: NCBI BLINK).   chr1:1028415-1028873 REVERSE LENGTH=152                                                                                                                                                                                                                         | 154 | 152 | 9.00E-50  | 98.7  | 69.5 | 77.3 |

|                          |                                                                                                                                                                                                                                                                                                                                                                                                                                                                                                                                                                                                                                                                                                                                                                                                                                                                                                                   |      |      |           |       |      |      |                                                                          |       |                      |                                                                                                                                            |      |      |           |       |      |      |
|--------------------------|-------------------------------------------------------------------------------------------------------------------------------------------------------------------------------------------------------------------------------------------------------------------------------------------------------------------------------------------------------------------------------------------------------------------------------------------------------------------------------------------------------------------------------------------------------------------------------------------------------------------------------------------------------------------------------------------------------------------------------------------------------------------------------------------------------------------------------------------------------------------------------------------------------------------|------|------|-----------|-------|------|------|--------------------------------------------------------------------------|-------|----------------------|--------------------------------------------------------------------------------------------------------------------------------------------|------|------|-----------|-------|------|------|
| Rsa1.0_00556.1.g15986.t2 | ref NP_171897.2  phospholipid sterol acyl transferase 1 [Arabidopsis thaliana] gi 308191549 sp Q4VCM1.2 LCAT2_ARA TH RecName: Full=Phospholipid-sterol O-acyltransferase; AltName: Full=Lecithin-cholesterol acyltransferase-like 2 gi 332189524 gb AEE27645.1  phospholipid sterol acyl transferase 1 [Arabidopsis thaliana]                                                                                                                                                                                                                                                                                                                                                                                                                                                                                                                                                                                     | 645  | 633  | 0         | 98.1  | 92.2 | 95.0 | phospholipid sterol acyl transferase 1                                   | gbpln | Arabidopsis thaliana | AT1G04010.1   Symbols: PSAT1, ATPSAT1   phospholipid sterol acyl transferase 1   chr1:1031703-1036128 REVERSE LENGTH=633                   | 645  | 633  | 0         | 98.1  | 92.2 | 95.0 |
| Rsa1.0_00556.1.g15987.t1 | ref NP_563699.1  mitochondrial import receptor subunit TOM22-1 [Arabidopsis thaliana] gi 75099064 sp O64497.1 TOM91_ARAT H RecName: Full=Mitochondrial import receptor subunit TOM9-1; AltName: Full=Mitochondrial import receptor subunit TOM22 homolog 1; AltName: Full=Translocase of outer membrane 22 kDa subunit homolog 1; AltName: Full=Translocase of outer membrane 9 kDa subunit TOM9-1 gi 3142296 gb AAC16747.1  Contains similarity to hypothetical mitochondrial import receptor subunit gb Z98597 from S. pombe. ESTs gb T45575 and gb Z26435 and gb AA394576 come from this gene [Arabidopsis thaliana] gi 21592382 gb AAM64333.1  unknown [Arabidopsis thaliana] gi 51969224 dbj BAD43304.1  unknown protein [Arabidopsis thaliana] gi 98961009 gb ABF58988.1  At1g04070 [Arabidopsis thaliana] gi 332189530 gb AEE27651.1  mitochondrial import receptor subunit TOM22-1 [Arabidopsis thaliana] | 97   | 94   | 8.00E-30  | 96.9  | 67.0 | 83.5 | mitochondrial import receptor subunit TOM22-1                            | gbpln | Arabidopsis thaliana | AT1G04070.1   Symbols: TOM22-L, ATTOM22-1   translocase of outer membrane 22-1   chr1:1050832-1051116 REVERSE LENGTH=94                    | 97   | 94   | 1.00E-32  | 96.9  | 67.0 | 83.5 |
| Rsa1.0_00556.1.g15988.t1 | ref XP_002889490.1  hypothetical protein ARALYDRAFT_333729 [Arabidopsis lyrata subsp. lyrata] gi 297335332 gb EFH65749.1  hypothetical protein ARALYDRAFT_333729 [Arabidopsis lyrata subsp. lyrata]                                                                                                                                                                                                                                                                                                                                                                                                                                                                                                                                                                                                                                                                                                               | 749  | 1328 | 0         | 177.3 | 79.6 | 87.2 | hypothetical protein ARALYDRAFT_333729                                   | gbpln | Arabidopsis lyrata   | AT1G04080.1   Symbols: PRP39   Tetratricopeptide repeat (TPR)-like superfamily protein   chr1:1051803-1056550 FORWARD LENGTH=768           | 749  | 768  | 0         | 102.5 | 82.8 | 89.5 |
| Rsa1.0_00556.1.g15989.t1 | ref XP_002889490.1  hypothetical protein ARALYDRAFT_333729 [Arabidopsis lyrata subsp. lyrata] gi 297335332 gb EFH65749.1  hypothetical protein ARALYDRAFT_333729 [Arabidopsis lyrata subsp. lyrata]                                                                                                                                                                                                                                                                                                                                                                                                                                                                                                                                                                                                                                                                                                               | 767  | 1328 | 0         | 173.1 | 57.9 | 62.6 | hypothetical protein ARALYDRAFT_333729                                   | gbpln | Arabidopsis lyrata   | AT1G04090.1   Symbols:   Plant protein of unknown function (DUF946)   chr1:1057225-1059247 FORWARD LENGTH=572                              | 767  | 572  | 0         | 74.6  | 56.8 | 61.8 |
| Rsa1.0_00556.1.g15990.t1 | gb ABD64827.1  putative subtilisin serine protease of stomatal density and distribution [Isatis tinctoria]                                                                                                                                                                                                                                                                                                                                                                                                                                                                                                                                                                                                                                                                                                                                                                                                        | 757  | 778  | 0         | 102.8 | 87.6 | 93.5 | putative subtilisin serine protease of stomatal density and distribution | gbpln | Isatis tinctoria     | AT1G04110.1   Symbols: SDD1   Subtilase family protein   chr1:1061457-1063784 REVERSE LENGTH=775                                           | 757  | 775  | 0         | 102.4 | 86.7 | 93.5 |
| Rsa1.0_00556.1.g15991.t1 | gb EOA39482.1  hypothetical protein CARUB_v10008087mg [Capsella rubella]                                                                                                                                                                                                                                                                                                                                                                                                                                                                                                                                                                                                                                                                                                                                                                                                                                          | 1486 | 1514 | 0         | 101.9 | 91.7 | 95.6 | hypothetical protein CARUB_v10008087mg                                   | gbpln | Capsella rubella     | AT1G04120.1   Symbols: ATMRP5, MRP5, ATABCC5, ABCC5   multidrug resistance-associated protein 5   chr1:1064848-1070396 REVERSE LENGTH=1514 | 1486 | 1514 | 0         | 101.9 | 91.4 | 95.6 |
| Rsa1.0_00557.1.g15992.t2 | # # # # # # # # # #                                                                                                                                                                                                                                                                                                                                                                                                                                                                                                                                                                                                                                                                                                                                                                                                                                                                                               |      |      |           |       |      |      |                                                                          |       |                      |                                                                                                                                            |      |      |           |       |      |      |
| Rsa1.0_00557.1.g15993.t1 | ref XP_002887872.1  short-chain dehydrogenase/reductase family protein [Arabidopsis lyrata subsp. lyrata] gi 297333713 gb EFH64131.1  short-chain dehydrogenase/reductase family protein [Arabidopsis lyrata subsp. lyrata]                                                                                                                                                                                                                                                                                                                                                                                                                                                                                                                                                                                                                                                                                       | 333  | 334  | 1.00E-153 | 100.3 | 87.1 | 91.9 | short-chain dehydrogenase/reductase family protein                       | gbpln | Arabidopsis lyrata   | AT1G64590.1   Symbols:   NAD(P)-binding Rossmann-fold superfamily protein   chr1:23993592-23995200 FORWARD LENGTH=334                      | 333  | 334  | 1.00E-153 | 100.3 | 85.9 | 91.3 |
| Rsa1.0_00557.1.g15994.t1 | gb EOA33754.1  hypothetical protein CARUB_v10019949mg [Capsella rubella]                                                                                                                                                                                                                                                                                                                                                                                                                                                                                                                                                                                                                                                                                                                                                                                                                                          | 646  | 636  | 0         | 98.5  | 86.8 | 91.6 | hypothetical protein CARUB_v10019949mg                                   | gbpln | Capsella rubella     | AT1G58030.1   Symbols: CAT2   cationic amino acid transporter 2   chr1:21464185-21468141 REVERSE LENGTH=635                                | 646  | 635  | 0         | 98.3  | 85.4 | 90.7 |

|                          |                                                                                                                                                                                                                                                                                                                                                                                                                                                                                                                                                                                                                                                                              |     |     |          |       |      |      |                                        |       |                      |                                                                                                                                   |     |     |          |       |      |      |
|--------------------------|------------------------------------------------------------------------------------------------------------------------------------------------------------------------------------------------------------------------------------------------------------------------------------------------------------------------------------------------------------------------------------------------------------------------------------------------------------------------------------------------------------------------------------------------------------------------------------------------------------------------------------------------------------------------------|-----|-----|----------|-------|------|------|----------------------------------------|-------|----------------------|-----------------------------------------------------------------------------------------------------------------------------------|-----|-----|----------|-------|------|------|
| Rsa1.0_00557.1.g15995.t1 | ref NP_176642.1  WD40 domain-containing protein [Arabidopsis thaliana] gi 42571997 ref NP_974089.1  WD40 domain-containing protein [Arabidopsis thaliana] gi 17381206 gb AAL36415.1  unknown protein [Arabidopsis thaliana] gi 2046581.1 gb AAN20010.1  unknown protein [Arabidopsis thaliana] gi 332196139 gb AEE34260.1  WD40 domain-containing protein [Arabidopsis thaliana] gi 332196140 gb AEE34261.1  WD40 domain-containing protein [Arabidopsis thaliana]                                                                                                                                                                                                           | 649 | 647 | 0        | 99.7  | 69.5 | 79.7 | WD40 domain-containing protein         | gbpln | Arabidopsis thaliana | AT1G64610.2   Symbols:   Transducin/WD40 repeat-like superfamily protein   chr1:23998920-24001297 REVERSE LENGTH=647              | 649 | 647 | 0        | 99.7  | 69.5 | 79.7 |
| Rsa1.0_00557.1.g15996.t1 | gb EOA35019.1  hypothetical protein CARUB_v10020122mg [Capsella rubella]                                                                                                                                                                                                                                                                                                                                                                                                                                                                                                                                                                                                     | 380 | 534 | 2.00E-95 | 140.5 | 51.8 | 56.8 | hypothetical protein CARUB_v10020122mg | gbpln | Capsella rubella     | AT1G64625.3   Symbols:   Serine/threonine-protein kinase WNK (With No Lysine)-related   chr1:24016878-24019181 FORWARD LENGTH=503 | 380 | 503 | 1.00E-96 | 132.4 | 48.9 | 55.8 |
| Rsa1.0_00557.1.g15997.t1 | gb AAF19684.1 AC009519_18 F1N19.24 [Arabidopsis thaliana]                                                                                                                                                                                                                                                                                                                                                                                                                                                                                                                                                                                                                    | 457 | 637 | 0        | 139.4 | 91.9 | 95.8 | F1N19.24                               | gbpln | Arabidopsis thaliana | AT1G64670.1   Symbols: BDG1   alpha/beta-Hydrolases superfamily protein   chr1:24030990-24033474 REVERSE LENGTH=469               | 457 | 469 | 0        | 102.6 | 91.9 | 95.8 |
| Rsa1.0_00557.1.g15998.t1 | ref NP_176647.1  methionine gamma-lyase [Arabidopsis thaliana] gi 75205145 sp Q9SGU9.1 MGL_ARATH RecName: Full=Methionine gamma-lyase; Short=AtMGL; AltName: Full=L-methioninase gi 6633821 gb AAF19680.1 AC009519_14 F1N19.23 [Arabidopsis thaliana] gi 16226491 gb AAL16181.1 AF428413.1 At1g64660/F1N19_22 [Arabidopsis thaliana] gi 15450932 gb AAK96737.1  similar to O-succinylhomoserine sulphydrylase [Arabidopsis thaliana] gi 30387533 gb AAP31932.1  At1g64660 [Arabidopsis thaliana] gi 110740851 dbj BAE98522.1  similar to O-succinylhomoserine sulphydrylase [Arabidopsis thaliana] gi 332196150 gb AEE34271.1  methionine gamma-lyase [Arabidopsis thaliana] | 441 | 441 | 0        | 100.0 | 88.4 | 93.2 | methionine gamma-lyase                 | gbpln | Arabidopsis thaliana | AT1G64660.1   Symbols: ATMGL, MGL   methionine gamma-lyase   chr1:24028977-24030537 FORWARD LENGTH=441                            | 441 | 441 | 0        | 100.0 | 88.4 | 93.2 |
| Rsa1.0_00557.1.g15999.t1 | ref XP_002886333.1  hypothetical protein ARALYDRAFT_474878 [Arabidopsis lyrata subsp. lyrata] gi 297332174 gb EFH62592.1  hypothetical protein ARALYDRAFT_474878 [Arabidopsis lyrata subsp. lyrata]                                                                                                                                                                                                                                                                                                                                                                                                                                                                          | 183 | 190 | 1.00E-79 | 103.8 | 85.2 | 92.3 | hypothetical protein ARALYDRAFT_474878 | gbpln | Arabidopsis lyrata   | AT1G64640.1   Symbols: ENODL8, AtENODL8   early nodulin-like protein 8   chr1:24022482-24023151 REVERSE LENGTH=191                | 183 | 191 | 2.00E-77 | 104.4 | 85.2 | 90.2 |
| Rsa1.0_00557.1.g16000.t1 | ref NP_199015.1  ORMDL domain-containing protein [Arabidopsis thaliana] gi 9757945 dbj BAB08433.1  unnamed protein product [Arabidopsis thaliana] gi 44681462 gb AAS47671.1  At5g42000 [Arabidopsis thaliana] gi 62320266 dbj BAD94546.1  putative protein [Arabidopsis thaliana] gi 332007369 gb AED94752.1  ORMDL domain-containing protein [Arabidopsis thaliana]                                                                                                                                                                                                                                                                                                         | 110 | 154 | 2.00E-55 | 140.0 | 93.6 | 97.3 | ORMDL domain-containing protein        | gbpln | Arabidopsis thaliana | AT5G42000.1   Symbols:   ORMDL family protein   chr5:16799455-16800681 FORWARD LENGTH=154                                         | 110 | 154 | 4.00E-58 | 140.0 | 93.6 | 97.3 |
| Rsa1.0_00558.1.g16001.t2 | gb EOA18305.1  hypothetical protein CARUB_v10006813mg [Capsella rubella]                                                                                                                                                                                                                                                                                                                                                                                                                                                                                                                                                                                                     | 175 | 769 | 2.00E-33 | 439.4 | 39.4 | 44.0 | hypothetical protein CARUB_v10006813mg | gbpln | Capsella rubella     | AT4G13820.1   Symbols:   Leucine-rich repeat (LRR) family protein   chr4:8008535-8010694 REVERSE LENGTH=719                       | 175 | 719 | 1.00E-33 | 410.9 | 38.9 | 46.3 |

Table S4-2 Genes of 80,521 predicted by Augustus. (continued)

| Query                     | vs NR (Non Redundant Database: <a href="http://blast.ncbi.nlm.nih.gov/Blast.cgi?PAGE=Proteins">http://blast.ncbi.nlm.nih.gov/Blast.cgi?PAGE=Proteins</a> )                                                                                                                                                                                                                                                                                                                                                                                                  |                |                  |           |         |           |           |                                                     |         |                      | vs TAIR10 of <i>A. thaliana</i>                                                                                                               |       |         |           |         |           |           |
|---------------------------|-------------------------------------------------------------------------------------------------------------------------------------------------------------------------------------------------------------------------------------------------------------------------------------------------------------------------------------------------------------------------------------------------------------------------------------------------------------------------------------------------------------------------------------------------------------|----------------|------------------|-----------|---------|-----------|-----------|-----------------------------------------------------|---------|----------------------|-----------------------------------------------------------------------------------------------------------------------------------------------|-------|---------|-----------|---------|-----------|-----------|
|                           | NR                                                                                                                                                                                                                                                                                                                                                                                                                                                                                                                                                          | Length (query) | Length (subject) | E-value   | Length% | Identity% | Positive% | Product                                             | Genbank | Species              | Subject                                                                                                                                       | Query | Subject | E-value   | Length% | Identity% | Positive% |
| Rsa1.0_00558.1.g16002.t1  | gb EOA15770.1  hypothetical protein CARUB_v10006927mg [Capsella rubella]                                                                                                                                                                                                                                                                                                                                                                                                                                                                                    | 723            | 852              | 0         | 117.8   | 65.6      | 76.6      | hypothetical protein CARUB_v10006927mg              | gbpln   | Capsella rubella     | AT4G13810.2   Symbols: RLP47   receptor like protein 47   chr4:8005062-8007464 REVERSE LENGTH=706                                             | 723   | 706     | 0         | 97.6    | 58.6      | 70.5      |
| Rsa1.0_00558.1.g16003.t1  | ref XP_002868327.1  hypothetical protein ARALYDRAFT_915517 [Arabidopsis lyrata subsp. lyrata]   g 297314163 gb EFH44586.1  hypothetical protein ARALYDRAFT_915517 [Arabidopsis lyrata subsp. lyrata]                                                                                                                                                                                                                                                                                                                                                        | 471            | 471              | 0         | 100.0   | 94.1      | 97.9      | hypothetical protein ARALYDRAFT_915517              | gbpln   | Arabidopsis lyrata   | AT4G13930.1   Symbols: SHM4   serine hydroxymethyltransferase 4   chr4:8048013-8050021 REVERSE LENGTH=471                                     | 471   | 471     | 0         | 100.0   | 93.6      | 97.5      |
| Rsa1.0_00558.1.g16004.t1  | #                                                                                                                                                                                                                                                                                                                                                                                                                                                                                                                                                           | #              | #                | #         | #       | #         | #         | -                                                   | ----    | ----                 | #                                                                                                                                             | #     | #       | #         | #       | #         | #         |
| Rsa1.0_00558.1.g16005.t1  | gb AAG09097.1 AC009323.8 Putative retroelement polyprotein [Arabidopsis thaliana]                                                                                                                                                                                                                                                                                                                                                                                                                                                                           | 103            | 1486             | 2.00E-25  | 1442.7  | 53.4      | 65.0      | Putative retroelement polyprotein                   | gbpln   | Arabidopsis thaliana | #                                                                                                                                             | #     | #       | #         | #       | #         | #         |
| Rsa1.0_00558.1.g16006.t1  | gb AAP92453.1  S-adenosyl-L-homocysteinylase [Arabidopsis thaliana]                                                                                                                                                                                                                                                                                                                                                                                                                                                                                         | 233            | 485              | 1.00E-133 | 208.2   | 98.3      | 98.7      | S-adenosyl-L-homocysteinylase                       | gbpln   | Arabidopsis thaliana | AT3G23810.1   Symbols: SAHH2, ATSAHH2   S-adenosyl-L-homocysteine (SAH) hydrolase 2   chr3:8588013-8589671 REVERSE LENGTH=485                 | 233   | 485     | 1.00E-133 | 208.2   | 96.1      | 98.3      |
| Rsa1.0_00558.1.g16007.t1  | gb AAC26241.1  F9D12.15 gene product [Arabidopsis thaliana]                                                                                                                                                                                                                                                                                                                                                                                                                                                                                                 | 438            | 850              | 1.00E-14  | 194.1   | 10.3      | 17.6      | F9D12.15 gene product                               | gbpln   | Arabidopsis thaliana | #                                                                                                                                             | #     | #       | #         | #       | #         | #         |
| Rsa1.0_00558.1.g16008.t1  | ref XP_002868326.1  hypothetical protein ARALYDRAFT_493518 [Arabidopsis lyrata subsp. lyrata]   g 297314162 gb EFH44585.1  hypothetical protein ARALYDRAFT_493518 [Arabidopsis lyrata subsp. lyrata]                                                                                                                                                                                                                                                                                                                                                        | 110            | 112              | 1.00E-43  | 101.8   | 78.2      | 96.4      | hypothetical protein ARALYDRAFT_493518              | gbpln   | Arabidopsis lyrata   | AT4G13950.1   Symbols: RALFL31   ralf-like 31   chr4:8058268-8058609 REVERSE LENGTH=113                                                       | 110   | 113     | 2.00E-44  | 102.7   | 74.5      | 85.5      |
| Rsa1.0_00558.1.g16009.t4  | gb AAG51783.1 AC079679.3 reverse transcriptase, putative; 16838-20266 [Arabidopsis thaliana]                                                                                                                                                                                                                                                                                                                                                                                                                                                                | 222            | 1142             | 2.00E-18  | 514.4   | 21.2      | 29.7      | reverse transcriptase, putative; 16838-20266        | gbpln   | Arabidopsis thaliana | AT3G23810.1   Symbols: SAHH2, ATSAHH2   S-adenosyl-L-homocysteine (SAH) hydrolase 2   chr3:8588013-8589671 REVERSE LENGTH=485                 | 222   | 485     | 9.00E-15  | 218.5   | 15.3      | 16.7      |
| Rsa1.0_00558.1.g16010.t1  | gb ABD65636.1  hypothetical protein Z3.t00055 [Brassica oleracea]                                                                                                                                                                                                                                                                                                                                                                                                                                                                                           | 393            | 414              | 3.00E-51  | 105.3   | 33.8      | 44.0      | hypothetical protein Z3.t00055                      | gbpln   | Brassica oleracea    | #                                                                                                                                             | #     | #       | #         | #       | #         | #         |
| Rsa1.0_00558.1.g16011.t17 | gb ACG60682.1  transposon-like ORF [Brassica oleracea var. alboglabra]                                                                                                                                                                                                                                                                                                                                                                                                                                                                                      | 807            | 704              | 1.00E-176 | 87.2    | 42.8      | 45.4      | transposon-like ORF                                 | gbpln   | Brassica oleracea    | #                                                                                                                                             | #     | #       | #         | #       | #         | #         |
| Rsa1.0_00558.1.g16012.t1  | gb AAC33226.1  putative non-LTR retroelement reverse transcriptase [Arabidopsis thaliana]                                                                                                                                                                                                                                                                                                                                                                                                                                                                   | 989            | 1529             | 1.00E-100 | 154.6   | 18.3      | 24.6      | putative non-LTR retroelement reverse transcriptase | gbpln   | Arabidopsis thaliana | AT3G24255.1   Symbols:   RNA-directed DNA polymerase (reverse transcriptase)-related family protein   chr3:8789471-8793208 FORWARD LENGTH=746 | 989   | 746     | 4.00E-85  | 75.4    | 16.7      | 21.3      |
| Rsa1.0_00559.1.g16013.t1  | ref NP_190242.1  methyl-CPG-binding domain protein 5 [Arabidopsis thaliana]   g 75206905 sp Q9SNC0.1 MBD5, ARAT H RecName: Full=Methyl-CpG-binding domain-containing protein 5; Short=AtMBD5; Short=MBD05; AltName: Full=Methyl-CpG-binding protein MBD5   g 6523061 emb CAB62328.1  putative protein [Arabidopsis thaliana]   g 17380750 gb AAL36205.1  unknown protein [Arabidopsis thaliana]   g 23296870 gb AANI13191.1  unknown protein [Arabidopsis thaliana]   g 332644653 gb AEE78174.1  methyl-CPG-binding domain protein 5 [Arabidopsis thaliana] | 184            | 182              | 8.00E-62  | 98.9    | 65.8      | 75.0      | methyl-CPG-binding domain protein 5                 | gbpln   | Arabidopsis thaliana | AT3G46580.1   Symbols: MBD05, MBD5, ATMBD5   methyl-CPG-binding domain protein 5   chr3:17148397-17149328 FORWARD LENGTH=182                  | 184   | 182     | 3.00E-64  | 98.9    | 65.8      | 75.0      |
| Rsa1.0_00559.1.g16014.t2  | gb AAG51783.1 AC079679.3 reverse transcriptase, putative; 16838-20266 [Arabidopsis thaliana]                                                                                                                                                                                                                                                                                                                                                                                                                                                                | 778            | 1142             | 0         | 146.8   | 49.6      | 66.1      | reverse transcriptase, putative; 16838-20266        | gbpln   | Arabidopsis thaliana | AT4G29090.1   Symbols:   Ribonuclease H-like superfamily protein   chr4:14333528-14335255 FORWARD LENGTH=575                                  | 778   | 575     | 7.00E-76  | 73.9    | 21.9      | 34.7      |
| Rsa1.0_00559.1.g16015.t1  | gb EOA14339.1  hypothetical protein CARUB_v10027520mg [Capsella rubella]                                                                                                                                                                                                                                                                                                                                                                                                                                                                                    | 310            | 495              | 1.00E-55  | 159.7   | 41.9      | 51.3      | hypothetical protein CARUB_v10027520mg              | gbpln   | Capsella rubella     | AT3G62120.2   Symbols:   Class II aaRS and biotin synthetases superfamily protein   chr3:23001227-23003849 REVERSE LENGTH=530                 | 310   | 530     | 8.00E-54  | 171.0   | 38.4      | 48.1      |
| Rsa1.0_00559.1.g16016.t1  | #                                                                                                                                                                                                                                                                                                                                                                                                                                                                                                                                                           | #              | #                | #         | #       | #         | #         | -                                                   | ----    | ----                 | #                                                                                                                                             | #     | #       | #         | #       | #         | #         |
| Rsa1.0_00559.1.g16017.t3  | gb AAU90169.1  putative polyprotein [Oryza sativa Japonica Group]                                                                                                                                                                                                                                                                                                                                                                                                                                                                                           | 1160           | 1154             | 1.00E-175 | 99.5    | 30.9      | 41.7      | putative polyprotein                                | gbpln   | Oryza sativa         | #                                                                                                                                             | #     | #       | #         | #       | #         | #         |
| Rsa1.0_00559.1.g16018.t1  | #                                                                                                                                                                                                                                                                                                                                                                                                                                                                                                                                                           | #              | #                | #         | #       | #         | #         | -                                                   | ----    | ----                 | #                                                                                                                                             | #     | #       | #         | #       | #         | #         |
| Rsa1.0_00559.1.g16019.t1  | #                                                                                                                                                                                                                                                                                                                                                                                                                                                                                                                                                           | #              | #                | #         | #       | #         | #         | -                                                   | ----    | ----                 | #                                                                                                                                             | #     | #       | #         | #       | #         | #         |
| Rsa1.0_00559.1.g16020.t1  | gb AAM15062.1  putative retroelement integrase [Arabidopsis thaliana]                                                                                                                                                                                                                                                                                                                                                                                                                                                                                       | 163            | 1215             | 4.00E-28  | 745.4   | 48.5      | 66.3      | putative retroelement integrase                     | gbpln   | Arabidopsis thaliana | #                                                                                                                                             | #     | #       | #         | #       | #         | #         |
| Rsa1.0_00559.1.g16021.t1  | #                                                                                                                                                                                                                                                                                                                                                                                                                                                                                                                                                           | #              | #                | #         | #       | #         | #         | -                                                   | ----    | ----                 | #                                                                                                                                             | #     | #       | #         | #       | #         | #         |
| Rsa1.0_00559.1.g16022.t1  | gb AAF79254.1 AC023279.3 F12K21.6 [Arabidopsis thaliana]                                                                                                                                                                                                                                                                                                                                                                                                                                                                                                    | 506            | 755              | 7.00E-42  | 149.2   | 22.9      | 36.8      | F12K21.6                                            | gbpln   | Arabidopsis thaliana | #                                                                                                                                             | #     | #       | #         | #       | #         | #         |

|                          |                                                                                                                                                                                                                                                                                                                                                                                                            |     |     |           |       |      |      |                                                 |       |                      |                                                                                                                                                                                                                                                                                                                                                                                                                                                                                    |     |      |           |       |      |      |
|--------------------------|------------------------------------------------------------------------------------------------------------------------------------------------------------------------------------------------------------------------------------------------------------------------------------------------------------------------------------------------------------------------------------------------------------|-----|-----|-----------|-------|------|------|-------------------------------------------------|-------|----------------------|------------------------------------------------------------------------------------------------------------------------------------------------------------------------------------------------------------------------------------------------------------------------------------------------------------------------------------------------------------------------------------------------------------------------------------------------------------------------------------|-----|------|-----------|-------|------|------|
| Rsa1.0_00559.1.g16023.t1 | gb ABW81018.1  gag-pol polymerase [Arabidopsis lyrata subsp. lyrata]                                                                                                                                                                                                                                                                                                                                       | 120 | 672 | 6.00E-11  | 560.0 | 25.0 | 33.3 | gag-pol polymerase                              | gbpln | Arabidopsis lyrata   | #                                                                                                                                                                                                                                                                                                                                                                                                                                                                                  | #   | #    | #         | #     | #    | #    |
| Rsa1.0_00559.1.g16024.t1 | gb ABD65062.1  hypothetical protein 27.t00126 [Brassica oleracea]                                                                                                                                                                                                                                                                                                                                          | 706 | 578 | 9.00E-93  | 81.9  | 27.2 | 36.5 | hypothetical protein 27.t00126                  | gbpln | Brassica oleracea    | AT4G32200.1   Symbols: ASY2   DNA-binding HORMA family protein   chr4:15548840-15554962 FORWARD LENGTH=1399                                                                                                                                                                                                                                                                                                                                                                        | 706 | 1399 | 3.00E-13  | 198.2 | 7.8  | 10.9 |
| Rsa1.0_00559.1.g16025.t1 | gb ABD65034.1  Ulp1 protease family protein [Brassica oleracea]                                                                                                                                                                                                                                                                                                                                            | 121 | 863 | 2.00E-36  | 713.2 | 66.9 | 78.5 | Ulp1 protease family protein                    | gbpln | Brassica oleracea    | #                                                                                                                                                                                                                                                                                                                                                                                                                                                                                  | #   | #    | #         | #     | #    | #    |
| Rsa1.0_00559.1.g16026.t1 | gb EEE68470.1  hypothetical protein OsJ_26870 [Oryza sativa Japonica Group]                                                                                                                                                                                                                                                                                                                                | 362 | 709 | 6.00E-62  | 195.9 | 37.3 | 53.0 | hypothetical protein OsJ_26870                  | gbpln | Oryza sativa         | #                                                                                                                                                                                                                                                                                                                                                                                                                                                                                  | #   | #    | #         | #     | #    | #    |
| Rsa1.0_00559.1.g16027.t2 | ref XP_002283871.1  PREDICTED: UDP-glucuronic acid decarboxylase 1 [Vitis vinifera] gi 147766093 emb CAN65700.1  hypothetical protein VITISV_010481 [Vitis vinifera] gi 296086255 emb CBI31696.3  unnamed protein product [Vitis vinifera]                                                                                                                                                                 | 146 | 345 | 3.00E-56  | 236.3 | 76.0 | 81.5 | PREDICTED: UDP-glucuronic acid decarboxylase 1  | gbpln | Vitis vinifera       | AT3G46440.2   Symbols: UXS5   UDP-XYL synthase 5   chr3:17089268-17091611 REVERSE LENGTH=341                                                                                                                                                                                                                                                                                                                                                                                       | 146 | 341  | 4.00E-55  | 233.6 | 81.5 | 84.9 |
| Rsa1.0_00559.1.g16028.t1 | ref NP_190214.1  receptor-like protein kinase HERK 1 [Arabidopsis thaliana] gi 75335601 sp Q9LX66.1 HERK_ARATH RecName: Full=Receptor-like protein kinase HERK 1; AltName: Full=Protein HERCULES RECEPTOR KINASE 1; Flags: Precursor gi 7799017 emb CAB90956.1  receptor protein kinase-like [Arabidopsis thaliana] gi 332644622 gb AEE78143.1  receptor-like protein kinase AEEK 1 [Arabidopsis thaliana] | 834 | 830 | 0         | 99.5  | 84.3 | 92.1 | receptor-like protein kinase HERK 1             | gbpln | Arabidopsis thaliana | AT3G46290.1   Symbols: HERK1   hercules receptor kinase 1   chr3:17013009-17015501 FORWARD LENGTH=830                                                                                                                                                                                                                                                                                                                                                                              | 834 | 830  | 0         | 99.5  | 84.3 | 92.1 |
| Rsa1.0_00559.1.g16029.t1 | #                                                                                                                                                                                                                                                                                                                                                                                                          | #   | #   | #         | #     | #    | -    | ----                                            | ----  | #                    | #                                                                                                                                                                                                                                                                                                                                                                                                                                                                                  | #   | #    | #         | #     | #    | #    |
| Rsa1.0_00559.1.g16030.t1 | #                                                                                                                                                                                                                                                                                                                                                                                                          | #   | #   | #         | #     | #    | -    | ----                                            | ----  | #                    | #                                                                                                                                                                                                                                                                                                                                                                                                                                                                                  | #   | #    | #         | #     | #    | #    |
| Rsa1.0_00560.1.g16031.t1 | ref XP_002875529.1  MYB121 [Arabidopsis lyrata subsp. lyrata] gi 297321367 gb EFH51788.1  MYB121 [Arabidopsis lyrata subsp. lyrata]                                                                                                                                                                                                                                                                        | 114 | 271 | 9.00E-23  | 237.7 | 59.6 | 68.4 | MYB121                                          | gbpln | Arabidopsis lyrata   | AT3G30210.1   Symbols: ATMYB121, MYB121   myb domain protein 121   chr3:11836567-11840313 FORWARD LENGTH=276                                                                                                                                                                                                                                                                                                                                                                       | 114 | 276  | 5.00E-25  | 242.1 | 61.4 | 74.6 |
| Rsa1.0_00560.1.g16032.t1 | #                                                                                                                                                                                                                                                                                                                                                                                                          | #   | #   | #         | #     | #    | -    | ----                                            | ----  | #                    | #                                                                                                                                                                                                                                                                                                                                                                                                                                                                                  | #   | #    | #         | #     | #    | #    |
| Rsa1.0_00560.1.g16033.t1 | gb EOA23861.1  hypothetical protein CARUB_v10017078mg, partial [Capsella rubella]                                                                                                                                                                                                                                                                                                                          | 464 | 496 | 0         | 106.9 | 93.8 | 98.1 | hypothetical protein CARUB_v10017078mg, partial | gbpln | Capsella rubella     | AT3G30180.1   Symbols: CYP85A2, BR6OX2   brassinosteroid-6-oxidase 2   chr3:11810867-11813509 FORWARD LENGTH=465                                                                                                                                                                                                                                                                                                                                                                   | 464 | 465  | 0         | 100.2 | 92.0 | 97.2 |
| Rsa1.0_00560.1.g16034.t1 | #                                                                                                                                                                                                                                                                                                                                                                                                          | #   | #   | #         | #     | #    | -    | ----                                            | ----  | #                    | #                                                                                                                                                                                                                                                                                                                                                                                                                                                                                  | #   | #    | #         | #     | #    | #    |
| Rsa1.0_00560.1.g16035.t1 | ref XP_002877204.1  hypothetical protein ARALYDRAFT_323027 [Arabidopsis lyrata subsp. lyrata] gi 297323042 gb EFH53463.1  hypothetical protein ARALYDRAFT_323027 [Arabidopsis lyrata subsp. lyrata]                                                                                                                                                                                                        | 913 | 977 | 1.00E-139 | 107.0 | 40.4 | 51.4 | hypothetical protein ARALYDRAFT_323027          | gbpln | Arabidopsis lyrata   | AT2G10440.1   Symbols:   unknown protein; BEST Arabidopsis thaliana protein match is: unknown protein (TAIR:AT1G15780.1); Has 8319 Blast hits to 5104 proteins in 317 species: Archae - 0; Bacteria - 285; Metazoa - 1706; Fungi - 535; Plants - 320; Viruses - 18; Other Eukaryotes - 5455 (source: NCBI BLink).   chr2:4013752-4018046 REVERSE LENGTH=935                                                                                                                        | 913 | 935  | 1.00E-123 | 102.4 | 35.8 | 45.1 |
| Rsa1.0_00560.1.g16036.t1 | ref XP_002877204.1  hypothetical protein ARALYDRAFT_323027 [Arabidopsis lyrata subsp. lyrata] gi 297323042 gb EFH53463.1  hypothetical protein ARALYDRAFT_323027 [Arabidopsis lyrata subsp. lyrata]                                                                                                                                                                                                        | 709 | 977 | 5.00E-79  | 137.8 | 24.3 | 30.2 | hypothetical protein ARALYDRAFT_323027          | gbpln | Arabidopsis lyrata   | AT2G10440.2   Symbols:   unknown protein; FUNCTIONS IN: molecular function unknown; INVOLVED IN: biological process unknown; LOCATED IN: cellular component unknown; BEST Arabidopsis thaliana protein match is: unknown protein (TAIR:AT1G15780.1); Has 1628 Blast hits to 1350 proteins in 149 species: Archae - 0; Bacteria - 39; Metazoa - 480; Fungi - 159; Plants - 187; Viruses - 2; Other Eukaryotes - 761 (source: NCBI BLink).   chr2:4013752-4018046 REVERSE LENGTH=845 | 709 | 845  | 1.00E-77  | 119.2 | 25.2 | 30.2 |
| Rsa1.0_00560.1.g16037.t1 | ref XP_002877216.1  predicted protein [Arabidopsis lyrata subsp. lyrata] gi 297323054 gb EFH53475.1  predicted protein [Arabidopsis lyrata subsp. lyrata]                                                                                                                                                                                                                                                  | 316 | 379 | 1.00E-110 | 119.9 | 71.5 | 81.0 | predicted protein                               | gbpln | Arabidopsis lyrata   | AT3G29760.1   Symbols:   Haloacid dehalogenase-like hydrolase (HAD) superfamily protein   chr3:11590064-11591833 REVERSE LENGTH=465                                                                                                                                                                                                                                                                                                                                                | 316 | 465  | 5.00E-67  | 147.2 | 34.8 | 38.6 |
| Rsa1.0_00560.1.g16038.t1 | ref XP_002877196.1  hypothetical protein ARALYDRAFT_905267 [Arabidopsis lyrata subsp. lyrata] gi 297323034 gb EFH53455.1  hypothetical protein ARALYDRAFT_905267 [Arabidopsis lyrata subsp. lyrata]                                                                                                                                                                                                        | 462 | 466 | 0         | 100.9 | 71.4 | 84.0 | hypothetical protein ARALYDRAFT_905267          | gbpln | Arabidopsis lyrata   | AT3G29635.1   Symbols:   HXXXD-type acyl-transferase family protein; chr3:11465851-11467227 REVERSE LENGTH=458                                                                                                                                                                                                                                                                                                                                                                     | 462 | 458  | 1.00E-155 | 99.1  | 58.7 | 76.2 |

|                          |                                                                                                                                                                                                                                                                                                                                                                                                                                                                                                                                                                                       |      |      |           |        |      |      |                                                     |       |                      |                                                                                                                                                               |      |     |           |       |      |      |
|--------------------------|---------------------------------------------------------------------------------------------------------------------------------------------------------------------------------------------------------------------------------------------------------------------------------------------------------------------------------------------------------------------------------------------------------------------------------------------------------------------------------------------------------------------------------------------------------------------------------------|------|------|-----------|--------|------|------|-----------------------------------------------------|-------|----------------------|---------------------------------------------------------------------------------------------------------------------------------------------------------------|------|-----|-----------|-------|------|------|
| Rsa1.0_00560.1.g16039.t1 | ref[XP_002877196.1] hypothetical protein ARALYDRAFT_905267 [Arabidopsis lyrata subsp. lyrata] gi 297323034 gb EFH54355.1                                                                                                                                                                                                                                                                                                                                                                                                                                                              | 555  | 466  | 0         | 84.0   | 56.9 | 65.4 | hypothetical protein ARALYDRAFT_905267              | gbpln | Arabidopsis lyrata   | AT3G29635.1   Symbols:   HXXXD-type acyl-transferase family protein   chr3:11465851-11467227 REVERSE LENGTH=458                                               | 555  | 458 | 1.00E-143 | 82.5  | 47.6 | 58.7 |
| Rsa1.0_00560.1.g16040.t1 | hypothetical protein ARALYDRAFT_905267 [Arabidopsis lyrata subsp. lyrata] ref[NP_189600.1] HXXXD-type acyl-transferase-like protein [Arabidopsis thaliana] gi 75273519 sp Q9LJB4.1 5MAT_ARATH RecName: Full=Malonyl-CoA:anthocyanidin 5-O-glucoside-6"-O-malonyltransferase; AltName: Full=Anthocyanin 5-aromatic acyltransferase-like protein; Short=At5MAT gi 11994162 dbj BAB01191.1  anthocyanin 5-aromatic acyltransferase-like protein [Arabidopsis thaliana] gi 332644071 gb AE77592.1  malonyl-CoA:anthocyanidin 5-O-glucoside-6"-O-malonyltransferase [Arabidopsis thaliana] | 453  | 449  | 0         | 99.1   | 83.9 | 92.3 | HXXXD-type acyl-transferase-like protein            | gbpln | Arabidopsis thaliana | AT3G29590.1   Symbols: AT5MAT   HXXXD-type acyl-transferase family protein   chr3:11398917-11400266 REVERSE LENGTH=449                                        | 453  | 449 | 0         | 99.1  | 83.9 | 92.3 |
| Rsa1.0_00560.1.g16041.t1 | gb EOA24648.1  hypothetical protein CARUB_v10017919mg, partial [Capsella rubella]                                                                                                                                                                                                                                                                                                                                                                                                                                                                                                     | 257  | 246  | 1.00E-81  | 95.7   | 71.2 | 79.4 | hypothetical protein CARUB_v10017919mg, partial     | gbpln | Capsella rubella     | AT3G29575.4   Symbols: AFP3   ABI five binding protein 3   chr3:11382416-11383657 REVERSE LENGTH=231                                                          | 257  | 231 | 6.00E-81  | 89.9  | 71.6 | 79.0 |
| Rsa1.0_00560.1.g16042.t3 | gb AAC23765.1  Mutator-like transposase [Arabidopsis thaliana]                                                                                                                                                                                                                                                                                                                                                                                                                                                                                                                        | 651  | 784  | 6.00E-75  | 120.4  | 25.3 | 33.2 | Mutator-like transposase                            | gbpln | Arabidopsis thaliana | AT3G29390.1   Symbols: RIK   RS2-interacting KH protein   chr3:11289675-11294524 FORWARD LENGTH=578                                                           | 651  | 578 | 2.00E-49  | 88.8  | 16.6 | 20.0 |
| Rsa1.0_00561.1.g16043.t1 | gb AAD24601.1  putative non-LTR retroelement reverse transcriptase [Arabidopsis thaliana]                                                                                                                                                                                                                                                                                                                                                                                                                                                                                             | 327  | 1319 | 6.00E-86  | 403.4  | 49.5 | 67.9 | putative non-LTR retroelement reverse transcriptase | gbpln | Arabidopsis thaliana | AT4G20520.1   Symbols:   RNA binding:RNA-directed DNA polymerases   chr4:11045912-11047716 FORWARD LENGTH=376                                                 | 327  | 376 | 2.00E-13  | 115.0 | 9.5  | 15.6 |
| Rsa1.0_00561.1.g16044.t1 | ref[XP_002864232.1] hypothetical protein ARALYDRAFT_495401 [Arabidopsis lyrata subsp. lyrata] gi 297310067 gb EFH40491.1                                                                                                                                                                                                                                                                                                                                                                                                                                                              | 270  | 269  | 3.00E-88  | 99.6   | 67.8 | 77.8 | hypothetical protein ARALYDRAFT_495401              | gbpln | Arabidopsis lyrata   | AT5G53280.1   Symbols: PDV1   plastid division 1   chr5:21607586-21609080 FORWARD LENGTH=272                                                                  | 270  | 272 | 3.00E-84  | 100.7 | 64.1 | 74.8 |
| Rsa1.0_00561.1.g16045.t1 | ref[XP_002862436.1] predicted protein [Arabidopsis lyrata subsp. lyrata] gi 297307949 gb EFH39694.1  predicted protein [Arabidopsis lyrata subsp. lyrata]                                                                                                                                                                                                                                                                                                                                                                                                                             | 546  | 530  | 1.00E-59  | 97.1   | 25.5 | 30.2 | predicted protein                                   | gbpln | Arabidopsis lyrata   | AT2G07760.1   Symbols:   Zinc knuckle (CCHC-type) family protein   chr2:3584420-3586278 REVERSE LENGTH=530                                                    | 546  | 530 | 3.00E-14  | 97.1  | 7.5  | 13.0 |
| Rsa1.0_00561.1.g16046.t1 | gb AAG50806.1 AC079281.8 unknown protein [Arabidopsis thaliana]                                                                                                                                                                                                                                                                                                                                                                                                                                                                                                                       | 1254 | 1213 | 0         | 96.7   | 34.2 | 49.8 | unknown protein                                     | gbpln | Arabidopsis thaliana | AT1G43760.1   Symbols:   DNase I-like superfamily protein   chr1:16528880-16531065 REVERSE LENGTH=626                                                         | 1254 | 626 | 7.00E-67  | 49.9  | 11.6 | 17.2 |
| Rsa1.0_00561.1.g16047.t1 | ref[XP_002864231.1] AGP22/ATAGP22 [Arabidopsis lyrata subsp. lyrata] gi 297310066 gb EFH40490.1  AGP22/ATAGP22 [Arabidopsis lyrata subsp. lyrata]                                                                                                                                                                                                                                                                                                                                                                                                                                     | 63   | 63   | 5.00E-25  | 100.0  | 95.2 | 98.4 | AGP22/ATAGP22                                       | gbpln | Arabidopsis lyrata   | AT5G53250.1   Symbols: AGP22, ATAGP22   arabinogalactan protein 22   chr5:21603715-21604007 FORWARD LENGTH=63                                                 | 63   | 63  | 5.00E-26  | 100.0 | 90.5 | 95.2 |
| Rsa1.0_00561.1.g16048.t1 | gb EOA39094.1  hypothetical protein CARUB_v10011830mg [Capsella rubella]                                                                                                                                                                                                                                                                                                                                                                                                                                                                                                              | 366  | 363  | 4.00E-97  | 99.2   | 51.1 | 63.9 | hypothetical protein CARUB_v10011830mg              | gbpln | Capsella rubella     | AT4G13680.1   Symbols:   Protein of unknown function (DUF295)   chr4:7951716-7952780 REVERSE LENGTH=354                                                       | 366  | 354 | 6.00E-95  | 96.7  | 51.1 | 62.8 |
| Rsa1.0_00561.1.g16049.t1 | emb CAB39638.1  RNA-directed DNA polymerase-like protein [Arabidopsis thaliana] gi 7267666 emb CAB78094.1  RNA-directed DNA polymerase-like protein [Arabidopsis thaliana]                                                                                                                                                                                                                                                                                                                                                                                                            | 103  | 1274 | 2.00E-20  | 1236.9 | 44.7 | 53.4 | RNA-directed DNA polymerase-like protein            | gbpln | Arabidopsis thaliana | #                                                                                                                                                             | #    | #   | #         | #     | #    | #    |
| Rsa1.0_00561.1.g16050.t1 | #                                                                                                                                                                                                                                                                                                                                                                                                                                                                                                                                                                                     | #    | #    | #         | #      | #    | #    | -                                                   | ----  | ----                 | #                                                                                                                                                             | #    | #   | #         | #     | #    | #    |
| Rsa1.0_00561.1.g16051.t4 | dbj BAJ34295.1  unnamed protein product [Thellungiella halophila]                                                                                                                                                                                                                                                                                                                                                                                                                                                                                                                     | 677  | 368  | 1.00E-153 | 54.4   | 46.1 | 48.4 | unnamed protein product                             | ----  | ----                 | AT5G53210.1   Symbols: SPCH   basic helix-loop-helix (bHLH) DNA-binding superfamily protein   chr5:21586606-21588941 REVERSE LENGTH=364                       | 677  | 364 | 1.00E-136 | 53.8  | 46.1 | 48.3 |
| Rsa1.0_00562.1.g16052.t1 | gb EOA23741.1  hypothetical protein CARUB_v10016954mg [Capsella rubella]                                                                                                                                                                                                                                                                                                                                                                                                                                                                                                              | 572  | 554  | 1.00E-120 | 96.9   | 55.1 | 67.0 | hypothetical protein CARUB_v10016954mg              | gbpln | Capsella rubella     | AT3G26050.1   Symbols:   TPX2 (targeting protein for Xklp2) protein family   chr3:9521907-9524241 FORWARD LENGTH=533                                          | 572  | 533 | 1.00E-106 | 93.2  | 49.5 | 62.2 |
| Rsa1.0_00562.1.g16053.t1 | gb EOA23303.1  hypothetical protein CARUB_v10018772mg [Capsella rubella]                                                                                                                                                                                                                                                                                                                                                                                                                                                                                                              | 473  | 476  | 0         | 100.6  | 86.7 | 92.2 | hypothetical protein CARUB_v10018772mg              | gbpln | Capsella rubella     | AT3G26030.1   Symbols: ATB' DELTA   serine/threonine protein phosphatase 2A 55 kDa regulatory subunit B prime delta   chr3:9517741-9519260 FORWARD LENGTH=477 | 473  | 477 | 0         | 100.8 | 86.3 | 91.5 |

|                          |                                                                                                                                                                                                                                                                                                                                                                                                                                                                                                                                                                                                                                                                                                                                                                                                                                                                                                             |      |      |           |       |      |                                                 |                                                                                |                  |                                                                                                         |                                                                                                                                 |      |           |           |       |      |      |
|--------------------------|-------------------------------------------------------------------------------------------------------------------------------------------------------------------------------------------------------------------------------------------------------------------------------------------------------------------------------------------------------------------------------------------------------------------------------------------------------------------------------------------------------------------------------------------------------------------------------------------------------------------------------------------------------------------------------------------------------------------------------------------------------------------------------------------------------------------------------------------------------------------------------------------------------------|------|------|-----------|-------|------|-------------------------------------------------|--------------------------------------------------------------------------------|------------------|---------------------------------------------------------------------------------------------------------|---------------------------------------------------------------------------------------------------------------------------------|------|-----------|-----------|-------|------|------|
| Rsa1.0_00562.1.g16054.t1 | ref[NP_189231.1] protein phosphatase 2A regulatory subunit B' eta [Arabidopsis thaliana] gi 79313549 ref[NP_001030770.1] protein phosphatase 2A regulatory subunit B' eta [Arabidopsis thaliana] gi 75274192 sp Q9LU89.1 2A5N ARATH RecName: Full=Serine/threonine protein phosphatase 2A 59 kDa regulatory subunit B' eta isoform; Short=AtB' eta; Short=PP2A, B' subunit, eta isoform gi 14194123 gb AAK56256.1 AF367267.1 AT3g26020/MPE11.17 [Arabidopsis thaliana] gi 9279607 dbj BAB01065.1 protein phosphatase 2A regulatory subunit B' [Arabidopsis thaliana] gi 16323340 gb AAL15383.1 AT3g26020/MPE11.17 [Arabidopsis thaliana] gi 222424130 dbj BAH20024.1 AT3G26020 [Arabidopsis thaliana] gi 332643581 gb AEE77102.1 protein phosphatase 2A regulatory subunit B' eta [Arabidopsis thaliana] gi 332643582 gb AEE77103.1 protein phosphatase 2A regulatory subunit B' eta [Arabidopsis thaliana] | 512  | 510  | 0         | 99.6  | 89.6 | 92.4                                            | protein phosphatase 2A regulatory subunit B' eta                               | gbpln            | Arabidopsis thaliana                                                                                    | AT3G26020.2   Symbols:   Protein phosphatase 2A regulatory B subunit family protein   chr3:9514363-9516585 FORWARD LENGTH=510   | 512  | 510       | 0         | 99.6  | 89.6 | 92.4 |
| Rsa1.0_00562.1.g16055.t1 | ref[XP_002876943.1] F-box family protein [Arabidopsis lyrata subsp. lyrata] gi 297322781 gb EFH53202.1  F-box family protein [Arabidopsis lyrata subsp. lyrata]                                                                                                                                                                                                                                                                                                                                                                                                                                                                                                                                                                                                                                                                                                                                             | 484  | 451  | 1.00E-141 | 93.2  | 56.2 | 63.4                                            | F-box family protein                                                           | gbpln            | Arabidopsis lyrata                                                                                      | AT3G26000.1   Symbols:   Ribonuclease inhibitor   chr3:9507042-9508542 REVERSE LENGTH=453                                       | 484  | 453       | 1.00E-136 | 93.6  | 53.7 | 62.0 |
| Rsa1.0_00562.1.g16056.t1 | gb EOA24178.1  hypothetical protein CARUB_v10017413mg, partial [Capsella rubella]                                                                                                                                                                                                                                                                                                                                                                                                                                                                                                                                                                                                                                                                                                                                                                                                                           | 400  | 391  | 1.00E-159 | 97.8  | 74.5 | hypothetical protein CARUB_v10017413mg, partial | gbpln                                                                          | Capsella rubella | AT3G25990.1   Symbols:   Homeodomain-like superfamily protein   chr3:9504846-9506703 REVERSE LENGTH=372 | 400                                                                                                                             | 372  | 1.00E-155 | 93.0      | 71.3  | 79.5 |      |
| Rsa1.0_00562.1.g16057.t1 | ref[XP_002876941.1] predicted protein [Arabidopsis lyrata subsp. lyrata] gi 297322779 gb EFH53200.1  predicted protein [Arabidopsis lyrata subsp. lyrata]                                                                                                                                                                                                                                                                                                                                                                                                                                                                                                                                                                                                                                                                                                                                                   | 629  | 652  | 0         | 103.7 | 81.6 | 89.8                                            | predicted protein                                                              | gbpln            | Arabidopsis lyrata                                                                                      | AT3G25970.1   Symbols:   Pentatricopeptide repeat (PPR) superfamily protein   chr3:9500116-9502221 REVERSE LENGTH=701           | 629  | 701       | 0         | 111.4 | 80.3 | 89.7 |
| Rsa1.0_00562.1.g16058.t1 | ref[XP_002876940.1] universal stress protein family protein [Arabidopsis lyrata subsp. lyrata] gi 297322778 gb EFH53199.1  universal stress protein family protein [Arabidopsis lyrata subsp. lyrata]                                                                                                                                                                                                                                                                                                                                                                                                                                                                                                                                                                                                                                                                                                       | 161  | 156  | 1.00E-51  | 96.9  | 62.1 | 72.7                                            | universal stress protein family protein                                        | gbpln            | Arabidopsis lyrata                                                                                      | AT3G25930.1   Symbols:   Adenine nucleotide alpha hydrolases-like superfamily protein   chr3:9493032-9493871 REVERSE LENGTH=154 | 161  | 154       | 8.00E-53  | 95.7  | 60.9 | 70.2 |
| Rsa1.0_00562.1.g16059.t1 | gb EOA25813.1  hypothetical protein CARUB_v10019181mg [Capsella rubella]                                                                                                                                                                                                                                                                                                                                                                                                                                                                                                                                                                                                                                                                                                                                                                                                                                    | 333  | 358  | 1.00E-124 | 107.5 | 78.4 | 83.8                                            | hypothetical protein CARUB_v10019181mg                                         | gbpln            | Capsella rubella                                                                                        | AT3G25910.1   Symbols:   Protein of unknown function (DUF1644)   chr3:9489836-9490954 FORWARD LENGTH=372                        | 333  | 372       | 1.00E-110 | 111.7 | 70.3 | 78.1 |
| Rsa1.0_00562.1.g16060.t1 | gb ABD65063.1  hypothetical protein 27.t00041 [Brassica oleracea]                                                                                                                                                                                                                                                                                                                                                                                                                                                                                                                                                                                                                                                                                                                                                                                                                                           | 181  | 198  | 2.00E-31  | 109.4 | 40.3 | 57.5                                            | hypothetical protein 27.t00041                                                 | gbpln            | Brassica oleracea                                                                                       | AT2G35280.1   Symbols:   F-box family protein   chr2:14859709-14860200 REVERSE LENGTH=163                                       | 181  | 163       | 1.00E-10  | 90.1  | 17.1 | 29.3 |
| Rsa1.0_00562.1.g16061.t1 | ref[NP_566783.1] protein CLAVATA3/ESR-related 27 [Arabidopsis thaliana] gi 75274199 sp Q9LU1.1 CLE27_ARATH RecName: Full=CLAVATA3/ESR (CLE)-related protein 27; Contains: RecName: Full=CLE27p; Flags: Precursor gi 9279595 dbj BAB01053.1  unnamed protein product [Arabidopsis thaliana] gi 114050673 gb ABI49486.1  AT3g25905 [Arabidopsis thaliana] gi 254803081 gb ACT82820.1  AT3g25905 [Arabidopsis thaliana] gi 332643568 gb AEE77089.1  protein CLAVATA3/ESR-related 27 [Arabidopsis thaliana]                                                                                                                                                                                                                                                                                                                                                                                                     | 81   | 91   | 4.00E-21  | 112.3 | 61.7 | 74.1                                            | protein CLAVATA3/ESR-related 27                                                | gbpln            | Arabidopsis thaliana                                                                                    | AT3G25905.1   Symbols: CLE27   CLAVATA3/ESR-RELATED 27   chr3:9486348-9486623 REVERSE LENGTH=91                                 | 81   | 91        | 6.00E-24  | 112.3 | 61.7 | 74.1 |
| Rsa1.0_00562.1.g16062.t7 | pir  T00833 RNA-directed DNA polymerase homolog T13L16.7 - Arabidopsis thaliana (fragment)                                                                                                                                                                                                                                                                                                                                                                                                                                                                                                                                                                                                                                                                                                                                                                                                                  | 1532 | 1365 | 0         | 89.1  | 33.9 | 47.5                                            | RNA-directed DNA polymerase homolog T13L16.7 - Arabidopsis thaliana (fragment) | -----            | -----                                                                                                   | AT4G29090.1   Symbols:   Ribonuclease H-like superfamily protein   chr4:14333528-14335255 FORWARD LENGTH=575                    | 1532 | 575       | 1.00E-49  | 37.5  | 9.5  | 14.4 |
| Rsa1.0_00562.1.g16063.t1 | dbj BAJ34405.1  unnamed protein product [Theilungiella halophila]                                                                                                                                                                                                                                                                                                                                                                                                                                                                                                                                                                                                                                                                                                                                                                                                                                           | 281  | 341  | 1.00E-102 | 121.4 | 78.3 | 85.8                                            | unnamed protein product                                                        | -----            | -----                                                                                                   | AT3G25890.2   Symbols:   Integrase-type DNA-binding superfamily protein   chr3:9476052-9477050 FORWARD LENGTH=332               | 281  | 332       | 1.00E-84  | 118.1 | 72.2 | 81.5 |
| Rsa1.0_00562.1.g16064.t5 | gb AAG50806.1 AC079281_8 unknown protein [Arabidopsis thaliana]                                                                                                                                                                                                                                                                                                                                                                                                                                                                                                                                                                                                                                                                                                                                                                                                                                             | 1533 | 1213 | 1.00E-180 | 79.1  | 26.2 | 38.7                                            | unknown protein                                                                | gbpln            | Arabidopsis thaliana                                                                                    | AT1G43760.1   Symbols:   DNAse I-like superfamily protein   chr1:16528880-16531065 REVERSE LENGTH=626                           | 1533 | 626       | 3.00E-53  | 40.8  | 8.7  | 14.8 |

|                          |                                                                                                                                                                                                                                                                                                                                                                                                                                                                                                                                                                                                                                                                                                                                          |      |      |          |       |      |      |                                        |       |                      |                                                                                                                                                                                                                                                                                                                                                                                                         |      |      |           |       |      |      |
|--------------------------|------------------------------------------------------------------------------------------------------------------------------------------------------------------------------------------------------------------------------------------------------------------------------------------------------------------------------------------------------------------------------------------------------------------------------------------------------------------------------------------------------------------------------------------------------------------------------------------------------------------------------------------------------------------------------------------------------------------------------------------|------|------|----------|-------|------|------|----------------------------------------|-------|----------------------|---------------------------------------------------------------------------------------------------------------------------------------------------------------------------------------------------------------------------------------------------------------------------------------------------------------------------------------------------------------------------------------------------------|------|------|-----------|-------|------|------|
| Rsa1.0_00562.1.g16065.t1 | refNP_683594.1  NIM1-interacting 2 protein [Arabidopsis thaliana]<br>gi 75274201 sp Q9LUA3.1 NIM12_ARATH RecName: Full=Protein NIM1-INTERACTING 2; Short=Protein NIMIN-2 gi 9279592 dbj BAB01050.1  unnamed protein product [Arabidopsis thaliana]<br>gi 12057156 emb CAC19845.1  NIMIN-2 protein [Arabidopsis thaliana]<br>gi 109946525 gb ABG48441.1  At3g25882 [Arabidopsis thaliana]<br>gi 332643562 gb AEE77083.1  protein NIM1-INTERACTING 2 [Arabidopsis thaliana]                                                                                                                                                                                                                                                                | 117  | 122  | 1.00E-40 | 104.3 | 78.6 | 85.5 | NIM1-interacting 2 protein             | gbpln | Arabidopsis thaliana | AT3G25882.1   Symbols: NIMIN-2   NIM1-interacting 2   chr3:9470521-9470889 REVERSE LENGTH=122                                                                                                                                                                                                                                                                                                           | 117  | 122  | 2.00E-43  | 104.3 | 78.6 | 85.5 |
| Rsa1.0_00563.1.g16066.t3 | gb ABD65090.1  hypothetical protein 27.t00116 [Brassica oleracea]                                                                                                                                                                                                                                                                                                                                                                                                                                                                                                                                                                                                                                                                        | 150  | 484  | 4.00E-12 | 322.7 | 36.0 | 57.3 | hypothetical protein 27.t00116         | gbpln | Brassica oleracea    | #                                                                                                                                                                                                                                                                                                                                                                                                       | #    | #    | #         | #     | #    | #    |
| Rsa1.0_00563.1.g16067.t1 | #                                                                                                                                                                                                                                                                                                                                                                                                                                                                                                                                                                                                                                                                                                                                        | #    | #    | #        | #     | #    | -    | -                                      | ----  | ----                 | #                                                                                                                                                                                                                                                                                                                                                                                                       | #    | #    | #         | #     | #    | #    |
| Rsa1.0_00563.1.g16068.t1 | gb ACP30598.1  disease resistance protein [Brassica rapa subsp. pekinensis]                                                                                                                                                                                                                                                                                                                                                                                                                                                                                                                                                                                                                                                              | 1851 | 2301 | 0        | 124.3 | 54.3 | 65.1 | disease resistance protein             | gbpln | Brassica rapa        | AT4G09060.1   Symbols:   unknown protein; LOCATED IN: membrane, EXPRESSED IN: leaf; BEST Arabidopsis thaliana protein match is: unknown protein (TAIR:AT1G14680.1); Has 8168 Blast hits to 6036 proteins in 601 species: Archae - 151; Bacteria - 570; Metazoa - 4684; Fungi - 544; Plants - 345; Viruses - 91; Other Eukaryotes - 1783 (source: NCBI BLink).   chr4:5797781-5800253 REVERSE LENGTH=341 | 1851 | 341  | 1.00E-138 | 18.4  | 14.0 | 15.8 |
| Rsa1.0_00563.1.g16069.t1 | ref XP_002891255.1  NLI interacting factor family protein [Arabidopsis lyrata subsp. lyrata]<br>gi 297337097 gb EFH67514.1  NLI interacting factor family protein [Arabidopsis lyrata subsp. lyrata]<br>ref NP_192642.1  arabinogalactan protein 10 [Arabidopsis thaliana]<br>gi 75181652 sp Q9M0S4.1 AGP10_ARATH RecName: Full=Classical arabinogalactan protein 10; Flags: Precursor<br>gi 10880497 gb AAG24278.1 AF195891.1 arabinogalactan protein [Arabidopsis thaliana]<br>gi 7267545 emb CAB78027.1  arabinogalactan-protein homolog [Arabidopsis thaliana]<br>gi 110738133 dbj BAF00998.1  arabinogalactan-protein AGP10 [Arabidopsis thaliana]<br>gi 332657314 gb AEE82714.1  arabinogalactan protein 10 [Arabidopsis thaliana] | 112  | 210  | 8.00E-24 | 187.5 | 50.0 | 60.7 | NLI interacting factor family protein  | gbpln | Arabidopsis lyrata   | AT1G43610.1   Symbols:   Haloacid dehalogenase-like hydrolase (HAD) superfamily protein   chr1:16424578-16425345 FORWARD LENGTH=255                                                                                                                                                                                                                                                                     | 112  | 255  | 6.00E-25  | 227.7 | 50.0 | 58.0 |
| Rsa1.0_00563.1.g16070.t1 | ref NP_192642.1  arabinogalactan protein 10 [Arabidopsis thaliana]<br>gi 75181652 sp Q9M0S4.1 AGP10_ARATH RecName: Full=Classical arabinogalactan protein 10; Flags: Precursor<br>gi 10880497 gb AAG24278.1 AF195891.1 arabinogalactan protein [Arabidopsis thaliana]<br>gi 7267545 emb CAB78027.1  arabinogalactan-protein homolog [Arabidopsis thaliana]<br>gi 110738133 dbj BAF00998.1  arabinogalactan-protein AGP10 [Arabidopsis thaliana]<br>gi 332657314 gb AEE82714.1  arabinogalactan protein 10 [Arabidopsis thaliana]                                                                                                                                                                                                         | 132  | 127  | 1.00E-20 | 96.2  | 68.9 | 77.3 | arabinogalactan protein 10             | gbpln | Arabidopsis thaliana | AT4G09030.1   Symbols: AGP10, ATAGP10   arabinogalactan protein 10   chr4:5792249-5792632 FORWARD LENGTH=127                                                                                                                                                                                                                                                                                            | 132  | 127  | 3.00E-23  | 96.2  | 68.9 | 77.3 |
| Rsa1.0_00563.1.g16071.t1 | #                                                                                                                                                                                                                                                                                                                                                                                                                                                                                                                                                                                                                                                                                                                                        | #    | #    | #        | #     | #    | -    | -                                      | ----  | ----                 | #                                                                                                                                                                                                                                                                                                                                                                                                       | #    | #    | #         | #     | #    | #    |
| Rsa1.0_00563.1.g16072.t1 | gb EOA14519.1  hypothetical protein CARUB_v10027748mg [Capsella rubella]                                                                                                                                                                                                                                                                                                                                                                                                                                                                                                                                                                                                                                                                 | 299  | 368  | 7.00E-63 | 123.1 | 47.2 | 58.5 | hypothetical protein CARUB_v10027748mg | gbpln | Capsella rubella     | AT4G38940.1   Symbols:   Galactose oxidase/kelch repeat superfamily protein   chr4:18152848-18153960 FORWARD LENGTH=370                                                                                                                                                                                                                                                                                 | 299  | 370  | 9.00E-50  | 123.7 | 38.8 | 54.5 |
| Rsa1.0_00563.1.g16073.t1 | #                                                                                                                                                                                                                                                                                                                                                                                                                                                                                                                                                                                                                                                                                                                                        | #    | #    | #        | #     | #    | -    | -                                      | ----  | ----                 | AT4G38940.1   Symbols:   Galactose oxidase/kelch repeat superfamily protein   chr4:18152848-18153960 FORWARD LENGTH=370                                                                                                                                                                                                                                                                                 | 116  | 370  | 5.00E-12  | 319.0 | 33.6 | 43.1 |
| Rsa1.0_00563.1.g16074.t1 | #                                                                                                                                                                                                                                                                                                                                                                                                                                                                                                                                                                                                                                                                                                                                        | #    | #    | #        | #     | #    | -    | -                                      | ----  | ----                 | #                                                                                                                                                                                                                                                                                                                                                                                                       | #    | #    | #         | #     | #    | #    |
| Rsa1.0_00563.1.g16075.t1 | gb EOA14519.1  hypothetical protein CARUB_v10027748mg [Capsella rubella]                                                                                                                                                                                                                                                                                                                                                                                                                                                                                                                                                                                                                                                                 | 322  | 368  | 9.00E-57 | 114.3 | 44.4 | 61.2 | hypothetical protein CARUB_v10027748mg | gbpln | Capsella rubella     | AT4G38940.1   Symbols:   Galactose oxidase/kelch repeat superfamily protein   chr4:18152848-18153960 FORWARD LENGTH=370                                                                                                                                                                                                                                                                                 | 322  | 370  | 4.00E-49  | 114.9 | 40.1 | 56.2 |
| Rsa1.0_00563.1.g16076.t1 | gb EOA14519.1  hypothetical protein CARUB_v10027748mg [Capsella rubella]                                                                                                                                                                                                                                                                                                                                                                                                                                                                                                                                                                                                                                                                 | 367  | 368  | 2.00E-68 | 100.3 | 45.5 | 60.2 | hypothetical protein CARUB_v10027748mg | gbpln | Capsella rubella     | AT4G38940.1   Symbols:   Galactose oxidase/kelch repeat superfamily protein   chr4:18152848-18153960 FORWARD LENGTH=370                                                                                                                                                                                                                                                                                 | 367  | 370  | 3.00E-68  | 100.8 | 43.1 | 57.5 |
| Rsa1.0_00563.1.g16077.t2 | gb AAF19226.1 AC007505.2 Highly similar to Ta1-3 polyprotein [Arabidopsis thaliana]                                                                                                                                                                                                                                                                                                                                                                                                                                                                                                                                                                                                                                                      | 1476 | 1356 | 0        | 91.9  | 45.1 | 61.0 | Highly similar to Ta1-3 polyprotein    | gbpln | Arabidopsis thaliana | AT4G23160.1   Symbols: CRK8   cysteine-rich RLK (RECEPTOR-like protein kinase) 8   chr4:12129485-12134086 FORWARD LENGTH=1262                                                                                                                                                                                                                                                                           | 1476 | 1262 | 4.00E-78  | 85.5  | 11.6 | 18.0 |
| Rsa1.0_00563.1.g16078.t1 | gb EOA14519.1  hypothetical protein CARUB_v10027748mg [Capsella rubella]                                                                                                                                                                                                                                                                                                                                                                                                                                                                                                                                                                                                                                                                 | 310  | 368  | 1.00E-56 | 118.7 | 46.1 | 57.7 | hypothetical protein CARUB_v10027748mg | gbpln | Capsella rubella     | AT4G38940.1   Symbols:   Galactose oxidase/kelch repeat superfamily protein   chr4:18152848-18153960 FORWARD LENGTH=370                                                                                                                                                                                                                                                                                 | 310  | 370  | 2.00E-47  | 119.4 | 39.4 | 55.5 |



|                          |                                                                                                                                                                                                                                                                                                                                                                                                                                                          |     |     |           |       |      |      |                                                 |       |                      |                                                                                                                                 |     |     |           |       |      |      |
|--------------------------|----------------------------------------------------------------------------------------------------------------------------------------------------------------------------------------------------------------------------------------------------------------------------------------------------------------------------------------------------------------------------------------------------------------------------------------------------------|-----|-----|-----------|-------|------|------|-------------------------------------------------|-------|----------------------|---------------------------------------------------------------------------------------------------------------------------------|-----|-----|-----------|-------|------|------|
| Rsa1.0_00563.1.g16079.t1 | refNP_192641.2   isoamylase 3 [Arabidopsis thaliana] gi 251764781 sp Q9M0S5.2 ISOA3_ARA TH RecName: Full=Isoamylase 3, chloroplastic; Short=AtISA3; Flags: Precursor gi 20259518 gb AAM13879.1 putative isoamylase [Arabidopsis thaliana] gi 22136708 gb AAM91673.1 putative isoamylase [Arabidopsis thaliana] gi 110742373 dbj BAE99109.1 isoamylase-like protein [Arabidopsis thaliana] gi 332657313 gb AEE82713.1 isoamylase 3 [Arabidopsis thaliana] | 735 | 764 | 0         | 103.9 | 86.7 | 91.6 | isoamylase 3                                    | gbpln | Arabidopsis thaliana | AT4G09020.1   Symbols: ATISA3, ISA3   isoamylase 3   chr4:5784099-5788839 FORWARD LENGTH=764                                    | 735 | 764 | 0         | 103.9 | 86.7 | 91.6 |
| Rsa1.0_00564.1.g16080.t1 | #                                                                                                                                                                                                                                                                                                                                                                                                                                                        | #   | #   | #         | #     | #    | #    | -                                               | ----  | ----                 | #                                                                                                                               | #   | #   | #         | #     | #    |      |
| Rsa1.0_00564.1.g16081.t1 | refXP_002875545.1   hypothetical protein ARALYDRAFT_905307 [Arabidopsis lyrata subsp. lyrata] gi 297321383 gb EFH51804.1   hypothetical protein ARALYDRAFT_905307 [Arabidopsis lyrata subsp. lyrata]                                                                                                                                                                                                                                                     | 113 | 116 | 2.00E-21  | 102.7 | 51.3 | 59.3 | hypothetical protein ARALYDRAFT_905307          | gbpln | Arabidopsis lyrata   | AT3G29780.1   Symbols: RALFL27   ralf-like 27   chr3:11671741-11672094 FORWARD LENGTH=117                                       | 113 | 117 | 6.00E-14  | 103.5 | 38.9 | 46.0 |
| Rsa1.0_00564.1.g16082.t1 | #                                                                                                                                                                                                                                                                                                                                                                                                                                                        | #   | #   | #         | #     | #    | #    | -                                               | ----  | ----                 | #                                                                                                                               | #   | #   | #         | #     | #    |      |
| Rsa1.0_00564.1.g16083.t1 | refXP_002875545.1   hypothetical protein ARALYDRAFT_905307 [Arabidopsis lyrata subsp. lyrata] gi 297321383 gb EFH51804.1   hypothetical protein ARALYDRAFT_905307 [Arabidopsis lyrata subsp. lyrata]                                                                                                                                                                                                                                                     | 114 | 116 | 9.00E-31  | 101.8 | 61.4 | 69.3 | hypothetical protein ARALYDRAFT_905307          | gbpln | Arabidopsis lyrata   | AT3G29780.1   Symbols: RALFL27   ralf-like 27   chr3:11671741-11672094 FORWARD LENGTH=117                                       | 114 | 117 | 1.00E-23  | 102.6 | 50.9 | 56.1 |
| Rsa1.0_00564.1.g16084.t1 | gb EOA24175.1   hypothetical protein CARUB_v10017408mg [Capsella rubella]                                                                                                                                                                                                                                                                                                                                                                                | 375 | 393 | 1.00E-170 | 104.8 | 87.7 | 92.5 | hypothetical protein CARUB_v10017408mg          | gbpln | Capsella rubella     | AT3G29770.1   Symbols: ATMES11, MES11   methyl esterase 11   chr3:11648471-11650565 FORWARD LENGTH=390                          | 375 | 390 | 1.00E-163 | 104.0 | 87.2 | 92.0 |
| Rsa1.0_00564.1.g16085.t1 | refNP_001077832.1   LYR family of Fe/S cluster biogenesis protein [Arabidopsis thaliana] gi 8778812 gb AAF79817.1 AC007396.17 T4012.27 [Arabidopsis thaliana] gi 62321766 dbj BAD95391.1   hypothetical protein [Arabidopsis thaliana] gi 98961727 gb ABF59193.1   unknown protein [Arabidopsis thaliana] gi 332197671 gb AEE35792.1   LYR family of Fe/S cluster biogenesis protein [Arabidopsis thaliana]                                              | 81  | 80  | 2.00E-31  | 98.8  | 84.0 | 87.7 | LYR family of Fe/S cluster biogenesis protein   | gbpln | Arabidopsis thaliana | AT1G76065.1   Symbols:   LYR family of Fe/S cluster biogenesis protein   chr1:28544899-28545306 REVERSE LENGTH=80               | 81  | 80  | 3.00E-34  | 98.8  | 84.0 | 87.7 |
| Rsa1.0_00564.1.g16086.t1 | refNP_189605.1   HXXXD-type acyl-transferase-like protein [Arabidopsis thaliana] gi 11994174 dbj BAB01203.1   anthocyanin acyltransferase-like protein [Arabidopsis thaliana] gi 332644074 gb AEE77595.1   HXXXD-type acyl-transferase-like protein [Arabidopsis thaliana]                                                                                                                                                                               | 405 | 458 | 1.00E-153 | 113.1 | 73.1 | 83.7 | HXXXD-type acyl-transferase-like protein        | gbpln | Arabidopsis thaliana | AT3G29635.1   Symbols:   HXXXD-type acyl-transferase family protein   chr3:11465851-11467227 REVERSE LENGTH=458                 | 405 | 458 | 1.00E-155 | 113.1 | 73.1 | 83.7 |
| Rsa1.0_00564.1.g16087.t1 | #                                                                                                                                                                                                                                                                                                                                                                                                                                                        | #   | #   | #         | #     | #    | #    | -                                               | ----  | ----                 | #                                                                                                                               | #   | #   | #         | #     | #    |      |
| Rsa1.0_00564.1.g16088.t1 | gb EOA24648.1   hypothetical protein CARUB_v10017919mg, partial [Capsella rubella]                                                                                                                                                                                                                                                                                                                                                                       | 253 | 246 | 2.00E-82  | 97.2  | 70.4 | 76.7 | hypothetical protein CARUB_v10017919mg, partial | gbpln | Capsella rubella     | AT3G29575.4   Symbols: AFP3   ABI five binding protein 3   chr3:11382416-11383657 REVERSE LENGTH=231                            | 253 | 231 | 7.00E-85  | 91.3  | 72.3 | 77.1 |
| Rsa1.0_00564.1.g16089.t1 | refNP_189586.1   exocyst complex component 7 [Arabidopsis thaliana] gi 11994523 dbj BAB02587.1   unnamed protein product [Arabidopsis thaliana] gi 30794118 gb AAP40501.1   unknown protein [Arabidopsis thaliana] gi 332644060 gb AEE77581.1   exocyst subunit exo70 family protein E1 [Arabidopsis thaliana]                                                                                                                                           | 644 | 658 | 0         | 102.2 | 85.1 | 91.8 | exocyst complex component 7                     | gbpln | Arabidopsis thaliana | AT3G29400.1   Symbols: ATEXO70E1, EXO70E1   exocyst subunit exo70 family protein E1   chr3:11297339-11299315 REVERSE LENGTH=656 | 644 | 658 | 0         | 102.2 | 85.1 | 91.8 |
| Rsa1.0_00564.1.g16090.t1 | refXP_002875519.1   hypothetical protein ARALYDRAFT_905257 [Arabidopsis lyrata subsp. lyrata] gi 297321357 gb EFH51778.1   hypothetical protein ARALYDRAFT_905257 [Arabidopsis lyrata subsp. lyrata]                                                                                                                                                                                                                                                     | 553 | 592 | 0         | 107.1 | 77.9 | 85.4 | hypothetical protein ARALYDRAFT_905257          | gbpln | Arabidopsis lyrata   | AT3G29390.1   Symbols: RIK   RS2-interacting KH protein   chr3:11289675-11294524 FORWARD LENGTH=578                             | 553 | 578 | 0         | 104.5 | 75.4 | 82.6 |
| Rsa1.0_00564.1.g16091.t1 | refXP_002877179.1   transcription factor IIB family protein [Arabidopsis lyrata subsp. lyrata] gi 297323017 gb EFH53438.1   transcription factor IIB family protein [Arabidopsis lyrata subsp. lyrata]                                                                                                                                                                                                                                                   | 335 | 336 | 1.00E-112 | 100.3 | 63.9 | 75.5 | transcription factor IIB family protein         | gbpln | Arabidopsis lyrata   | AT3G29380.1   Symbols:   Cyclin-like family protein   chr3:11282407-11283524 REVERSE LENGTH=336                                 | 335 | 336 | 1.00E-110 | 100.3 | 62.7 | 75.5 |

|                          |                                                                                                                                                                                                                                                                                                                                                                                                                                                                                                                                                                                                                                                                                                                                                                                                                                                                                                                                                                                                                                                                                                                                                                                            |     |     |           |       |      |      |                                                 |       |                      |                                                                                                                                                                                                                                                            |     |     |           |       |      |      |
|--------------------------|--------------------------------------------------------------------------------------------------------------------------------------------------------------------------------------------------------------------------------------------------------------------------------------------------------------------------------------------------------------------------------------------------------------------------------------------------------------------------------------------------------------------------------------------------------------------------------------------------------------------------------------------------------------------------------------------------------------------------------------------------------------------------------------------------------------------------------------------------------------------------------------------------------------------------------------------------------------------------------------------------------------------------------------------------------------------------------------------------------------------------------------------------------------------------------------------|-----|-----|-----------|-------|------|------|-------------------------------------------------|-------|----------------------|------------------------------------------------------------------------------------------------------------------------------------------------------------------------------------------------------------------------------------------------------------|-----|-----|-----------|-------|------|------|
| Rsa1.0_00564.1.g16093.t1 | ref[XP_002875515.1] predicted protein [Arabidopsis lyrata subsp. lyrata] gi 297321353 gb EFH51774.1  predicted protein [Arabidopsis lyrata subsp. lyrata]                                                                                                                                                                                                                                                                                                                                                                                                                                                                                                                                                                                                                                                                                                                                                                                                                                                                                                                                                                                                                                  | 247 | 257 | 1.00E-117 | 104.0 | 82.2 | 90.3 | predicted protein                               | gbpln | Arabidopsis lyrata   | AT5G39300.1   Symbols: ATEXPA25, EXP25, ATEXP25, ATHEXP_ALPHA 1.18, EXPA25   expansin A25   chr5:15737427-15738387 REVERSE LENGTH=260                                                                                                                      | 247 | 260 | 8.00E-88  | 105.3 | 59.9 | 72.9 |
| Rsa1.0_00564.1.g16093.t1 | ref[NP_189578.1] glycosyl transferase, family 35 protein [Arabidopsis thaliana] gi 75335028 sp Q9LIB2.1 PHS1_ARATH RecName: Full=Alpha-glucan phosphorylase 1; Short=AtPHS1; AltName: Full=Alpha-glucan phosphorylase, L isozyme; AltName: Full=Starch phosphorylase L; Flags: Precursor gi 11994512 dbj BAB02576.1  glycogen phosphorylase B; starch phosphorylase [Arabidopsis thaliana] gi 15146189 gb AAK83578.1  AT3g29320/MUO10.2 [Arabidopsis thaliana] gi 27764918 gb AAO23580.1  AT3g29320/MUO10.2 [Arabidopsis thaliana] gi 332644046 gb AEE77567.1  alpha-glucan phosphorylase 1 [Arabidopsis thaliana] ref[NP_189577.2] calmodulin-binding protein-like protein [Arabidopsis thaliana] gi 75273349 sp Q9LIB3.1 BAG8_ARATH RecName: Full=BAG family molecular chaperone regulator 8, chloroplastic; AltName: Full=Bcl-2-associated athanogene 8; Flags: Precursor gi 11994511 dbj BAB02575.1  unnamed protein product [Arabidopsis thaliana] gi 19310462 gb AAL84966.1  AT3g29310/MUO10.1 [Arabidopsis thaliana] gi 23506159 gb AAN31091.1  AT3g29310/MUO10.1 [Arabidopsis thaliana] gi 332644045 gb AEE77566.1  calmodulin-binding protein-like protein [Arabidopsis thaliana] | 945 | 962 | 0         | 101.8 | 88.9 | 93.8 | glycosyl transferase, family 35 protein         | gbpln | Arabidopsis thaliana | AT3G29320.1   Symbols: Glycosyl transferase, family 35   chr3:11252871-11257587 FORWARD LENGTH=962                                                                                                                                                         | 945 | 962 | 0         | 101.8 | 88.9 | 93.8 |
| Rsa1.0_00564.1.g16094.t1 | ref[NP_189577.2] calmodulin-binding protein-like protein [Arabidopsis thaliana] gi 75273349 sp Q9LIB3.1 BAG8_ARATH RecName: Full=BAG family molecular chaperone regulator 8, chloroplastic; AltName: Full=Bcl-2-associated athanogene 8; Flags: Precursor gi 11994511 dbj BAB02575.1  unnamed protein product [Arabidopsis thaliana] gi 19310462 gb AAL84966.1  AT3g29310/MUO10.1 [Arabidopsis thaliana] gi 23506159 gb AAN31091.1  AT3g29310/MUO10.1 [Arabidopsis thaliana] gi 332644045 gb AEE77566.1  calmodulin-binding protein-like protein [Arabidopsis thaliana]                                                                                                                                                                                                                                                                                                                                                                                                                                                                                                                                                                                                                    | 484 | 551 | 1.00E-118 | 113.8 | 60.1 | 71.9 | calmodulin-binding protein-like protein         | gbpln | Arabidopsis thaliana | AT3G29310.1   Symbols: calmodulin-binding protein-related   chr3:11249712-11251452 FORWARD LENGTH=551                                                                                                                                                      | 484 | 551 | 1.00E-120 | 113.8 | 60.1 | 71.9 |
| Rsa1.0_00564.1.g16095.t1 | gb EOA25900.1  hypothetical protein CARUB_v10019279mg [Capsella rubella]                                                                                                                                                                                                                                                                                                                                                                                                                                                                                                                                                                                                                                                                                                                                                                                                                                                                                                                                                                                                                                                                                                                   | 519 | 560 | 0         | 107.9 | 77.3 | 87.7 | hypothetical protein CARUB_v10019279mg          | gbpln | Capsella rubella     | AT3G29290.1   Symbols: emb2076   Pentatricopeptide repeat (PPR) superfamily protein   chr3:11238421-11240125 FORWARD LENGTH=540                                                                                                                            | 519 | 540 | 0         | 104.0 | 76.9 | 86.5 |
| Rsa1.0_00564.1.g16096.t1 | gb EOA24783.1  hypothetical protein CARUB_v10018062mg, partial [Capsella rubella]                                                                                                                                                                                                                                                                                                                                                                                                                                                                                                                                                                                                                                                                                                                                                                                                                                                                                                                                                                                                                                                                                                          | 172 | 193 | 3.00E-83  | 112.2 | 90.7 | 95.3 | hypothetical protein CARUB_v10018062mg, partial | gbpln | Capsella rubella     | AT3G29280.1   Symbols: unknown protein; Has 24 Blast hits to 24 proteins in 9 species: Archaea - 0; Bacteria - 0; Metazoa - 0; Fungi - 0; Plants - 24; Viruses - 0; Other Eukaryotes - 0 (source: NCBI BLINK).   chr3:11236705-11237947 REVERSE LENGTH=178 | 172 | 178 | 6.00E-81  | 103.5 | 83.1 | 86.0 |
| Rsa1.0_00564.1.g16097.t2 | ref[XP_002882791.1] hypothetical protein ARALYDRAFT_478647 [Arabidopsis lyrata subsp. lyrata] gi 297328631 gb EFH59050.1  hypothetical protein ARALYDRAFT_478647 [Arabidopsis lyrata subsp. lyrata]                                                                                                                                                                                                                                                                                                                                                                                                                                                                                                                                                                                                                                                                                                                                                                                                                                                                                                                                                                                        | 477 | 499 | 0         | 104.6 | 65.4 | 76.9 | hypothetical protein ARALYDRAFT_478647          | gbpln | Arabidopsis lyrata   | AT3G12860.1   Symbols: NOP56-like pre RNA processing ribonucleoprotein   chr3:4091678-4093921 FORWARD LENGTH=499                                                                                                                                           | 477 | 499 | 0         | 104.6 | 65.2 | 76.5 |
| Rsa1.0_00564.1.g16098.t1 | gb EOA15049.1  hypothetical protein CARUB_v10028408mg [Capsella rubella]                                                                                                                                                                                                                                                                                                                                                                                                                                                                                                                                                                                                                                                                                                                                                                                                                                                                                                                                                                                                                                                                                                                   | 108 | 122 | 1.00E-41  | 113.0 | 79.6 | 90.7 | hypothetical protein CARUB_v10028408mg          | gbpln | Capsella rubella     | AT2G14378.1   Symbols: Protein of unknown function (DUF1278)   chr2:6104869-6105231 REVERSE LENGTH=120                                                                                                                                                     | 108 | 120 | 2.00E-44  | 111.1 | 74.1 | 85.2 |
| Rsa1.0_00564.1.g16099.t1 | ref[NP_566847.1] uncharacterized protein [Arabidopsis thaliana] gi 30689543 ref NP_850648.1  uncharacterized protein [Arabidopsis thaliana] gi 9293917 dbj BAB01820.1  unnamed protein product [Arabidopsis thaliana] gi 19310484 gb AAL84976.1  AT3g29240/MXO21.9 [Arabidopsis thaliana] gi 21537141 gb AAM61482.1  unknown [Arabidopsis thaliana] gi 22654969 gb AAM98077.1  AT3g29240/MXO21.9 [Arabidopsis thaliana] gi 28416521 gb AAO42791.1  AT3g29240/MXO21.9 [Arabidopsis thaliana] gi 332644033 gb AEE77554.1  uncharacterized protein AT3G29240 [Arabidopsis thaliana] gi 332644034 gb AEE77555.1  uncharacterized protein AT3G29240 [Arabidopsis thaliana]                                                                                                                                                                                                                                                                                                                                                                                                                                                                                                                      | 309 | 317 | 1.00E-150 | 102.6 | 83.5 | 92.2 | uncharacterized protein                         | gbpln | Arabidopsis thaliana | AT3G29240.2   Symbols: Protein of unknown function (DUF179)   chr3:11191780-11192868 FORWARD LENGTH=317                                                                                                                                                    | 309 | 317 | 1.00E-153 | 102.6 | 83.5 | 92.2 |

|                          |                                                                                                                                                                                                                                                                                                                                                                                                                                                                                                                                                                                                                                                                                                 |      |      |           |       |       |       |                                                       |       |                         |                                                                                                                                         |      |      |           |       |       |       |
|--------------------------|-------------------------------------------------------------------------------------------------------------------------------------------------------------------------------------------------------------------------------------------------------------------------------------------------------------------------------------------------------------------------------------------------------------------------------------------------------------------------------------------------------------------------------------------------------------------------------------------------------------------------------------------------------------------------------------------------|------|------|-----------|-------|-------|-------|-------------------------------------------------------|-------|-------------------------|-----------------------------------------------------------------------------------------------------------------------------------------|------|------|-----------|-------|-------|-------|
| Rsa1.0_00565.1.g16100.t1 | ref NP_199482.1  Tetraspanin family protein [Arabidopsis thaliana]<br>gi 75262522 sp Q9FIQ5.1 TRN2_ARATH<br>RecName: Full=Protein TORNADO 2;<br>AltName: Full=Protein EKEKO; AltName:<br>Full=TETRASPANIN-1<br>gi 9758506 dbj BAB08914.1 <br>senescence-associated protein 5-like<br>protein [Arabidopsis thaliana]<br>gi 56381915 gb AAV85676.1  At5g46700<br>[Arabidopsis thaliana]<br>gi 110740669 dbj BAE98437.1 <br>senescence-associated protein 5-like<br>protein [Arabidopsis thaliana]<br>gi 332008032 gb AED95415.1 <br>Tetraspanin family protein [Arabidopsis<br>thaliana]                                                                                                          | 262  | 269  | 1.00E-106 | 102.7 | 77.5  | 89.3  | Tetraspanin family<br>protein                         | gbpln | Arabidopsis<br>thaliana | AT5G46700.1   Symbols: TET1, TRN2  <br>Tetraspanin family protein   chr5:18951035-<br>18952439 FORWARD LENGTH=269                       | 262  | 269  | 1.00E-108 | 102.7 | 77.5  | 89.3  |
| Rsa1.0_00565.1.g16101.t1 | gb EOA18064.1  hypothetical protein<br>CARUB_v10006510mg, partial [Capsella<br>rubella]                                                                                                                                                                                                                                                                                                                                                                                                                                                                                                                                                                                                         | 90   | 555  | 4.00E-12  | 616.7 | 32.2  | 58.9  | hypothetical protein<br>CARUB_v10006510mg,<br>partial | gbpln | Capsella<br>rubella     | AT1G52950.1   Symbols:   Nucleic acid-<br>binding, OB-fold-like protein  <br>chr1:19725483-19728007 FORWARD<br>LENGTH=566               | 90   | 566  | 1.00E-13  | 628.9 | 32.2  | 51.1  |
| Rsa1.0_00565.1.g16102.t1 | gb AAG51783.1 AC079679.3 reverse<br>transcriptase, putative; 16838-20266<br>[Arabidopsis thaliana]<br>ref NP_199482.1  Tetraspanin family<br>protein [Arabidopsis thaliana]<br>gi 75262522 sp Q9FIQ5.1 TRN2_ARATH<br>RecName: Full=Protein TORNADO 2;<br>AltName: Full=Protein EKEKO; AltName:<br>Full=TETRASPANIN-1<br>gi 9758506 dbj BAB08914.1 <br>senescence-associated protein 5-like<br>protein [Arabidopsis thaliana]<br>gi 56381915 gb AAV85676.1  At5g46700<br>[Arabidopsis thaliana]<br>gi 110740669 dbj BAE98437.1 <br>senescence-associated protein 5-like<br>protein [Arabidopsis thaliana]<br>gi 332008032 gb AED95415.1 <br>Tetraspanin family protein [Arabidopsis<br>thaliana] | 1789 | 1142 | 0         | 63.8  | 27.9  | 37.5  | reverse transcriptase,<br>putative; 16838-20266       | gbpln | Arabidopsis<br>thaliana | AT4G29090.1   Symbols:   Ribonuclease H-<br>like superfamily protein   chr4:14333528-<br>14335255 FORWARD LENGTH=575                    | 1789 | 575  | 5.00E-63  | 32.1  | 9.2   | 14.9  |
| Rsa1.0_00565.1.g16103.t1 | ref NP_199482.1  Tetraspanin family<br>protein [Arabidopsis thaliana]<br>gi 75262522 sp Q9FIQ5.1 TRN2_ARATH<br>RecName: Full=Protein TORNADO 2;<br>AltName: Full=Protein EKEKO; AltName:<br>Full=TETRASPANIN-1<br>gi 9758506 dbj BAB08914.1 <br>senescence-associated protein 5-like<br>protein [Arabidopsis thaliana]<br>gi 56381915 gb AAV85676.1  At5g46700<br>[Arabidopsis thaliana]<br>gi 110740669 dbj BAE98437.1 <br>senescence-associated protein 5-like<br>protein [Arabidopsis thaliana]<br>gi 332008032 gb AED95415.1 <br>Tetraspanin family protein [Arabidopsis<br>thaliana]                                                                                                       | 271  | 269  | 1.00E-123 | 99.3  | 85.6  | 93.7  | Tetraspanin family<br>protein                         | gbpln | Arabidopsis<br>thaliana | AT5G46700.1   Symbols: TET1, TRN2  <br>Tetraspanin family protein   chr5:18951035-<br>18952439 FORWARD LENGTH=269                       | 271  | 269  | 1.00E-126 | 99.3  | 85.6  | 93.7  |
| Rsa1.0_00565.1.g16104.t1 | #                                                                                                                                                                                                                                                                                                                                                                                                                                                                                                                                                                                                                                                                                               | #    | #    | #         | #     | #     | #     | -                                                     | ----  | ----                    | #                                                                                                                                       | #    | #    | #         | #     | #     |       |
| Rsa1.0_00565.1.g16105.t1 | dbj BAJ34641.1  unnamed protein<br>product [Theillungiella halophila]                                                                                                                                                                                                                                                                                                                                                                                                                                                                                                                                                                                                                           | 323  | 324  | 1.00E-150 | 100.3 | 91.0  | 95.4  | unnamed protein<br>product                            | ----  | ----                    | AT5G46690.1   Symbols: bHLH071   beta<br>HLH protein 71   chr5:18945639-18947434<br>FORWARD LENGTH=327                                  | 323  | 327  | 1.00E-139 | 101.2 | 85.1  | 91.6  |
| Rsa1.0_00565.1.g16106.t1 | #                                                                                                                                                                                                                                                                                                                                                                                                                                                                                                                                                                                                                                                                                               | #    | #    | #         | #     | #     | #     | -                                                     | ----  | ----                    | #                                                                                                                                       | #    | #    | #         | #     | #     |       |
| Rsa1.0_00565.1.g16107.t1 | ref NP_199477.1  RING-H2 finger<br>protein ATL30 [Arabidopsis thaliana]<br>gi 69565289 sp Q9FIQ0.1 ATL30_ARATH<br>RecName: Full=RING-H2 finger protein<br>ATL30 gi 9758501 dbj BAB08909.1 <br>unnamed protein product [Arabidopsis<br>thaliana] gi 332008027 gb AED95410.1 <br>RING-H2 finger protein ATL30<br>[Arabidopsis thaliana]                                                                                                                                                                                                                                                                                                                                                           | 287  | 289  | 1.00E-131 | 100.7 | 81.9  | 89.2  | RING-H2 finger protein<br>ATL30                       | gbpln | Arabidopsis<br>thaliana | AT5G46650.1   Symbols:   RING/U-box<br>superfamily protein   chr5:18930443-<br>18931312 FORWARD LENGTH=289                              | 287  | 289  | 1.00E-133 | 100.7 | 81.9  | 89.2  |
| Rsa1.0_00565.1.g16108.t1 | #                                                                                                                                                                                                                                                                                                                                                                                                                                                                                                                                                                                                                                                                                               | #    | #    | #         | #     | #     | #     | -                                                     | ----  | ----                    | #                                                                                                                                       | #    | #    | #         | #     | #     |       |
| Rsa1.0_00565.1.g16109.t1 | ref XP_002863395.1  hypothetical<br>protein ARALYDRAFT_494317<br>[Arabidopsis lyrata subsp. lyrata]<br>gi 297309230 gb EFH39654.1 <br>hypothetical protein<br>ARALYDRAFT_494317 [Arabidopsis<br>lyrata subsp. lyrata]                                                                                                                                                                                                                                                                                                                                                                                                                                                                           | 580  | 551  | 0         | 95.0  | 80.5  | 86.6  | hypothetical protein<br>ARALYDRAFT_494317             | gbpln | Arabidopsis<br>lyrata   | AT5G46610.1   Symbols:   Aluminium<br>activated malate transporter family protein  <br>chr5:18913115-18915736 REVERSE<br>LENGTH=543     | 580  | 543  | 0         | 93.6  | 80.0  | 86.4  |
| Rsa1.0_00565.1.g16110.t1 | gb AAG10817.1 AC011808.5 Putative<br>retroelement polyprotein [Arabidopsis<br>thaliana]                                                                                                                                                                                                                                                                                                                                                                                                                                                                                                                                                                                                         | 714  | 1413 | 1.00E-168 | 197.9 | 41.6  | 48.9  | Putative retroelement<br>polyprotein                  | gbpln | Arabidopsis<br>thaliana | AT4G23160.1   Symbols: CRK8   cysteine-<br>rich RLK (RECEPTOR-like protein kinase) 8  <br>chr4:12129485-12134086 FORWARD<br>LENGTH=1262 | 714  | 1262 | 1.00E-140 | 176.8 | 33.3  | 41.3  |
| Rsa1.0_00565.1.g16111.t1 | dbj BAA97087.1  copia-type pol<br>polyprotein-like [Arabidopsis thaliana]<br>gb AAL32631.1  putative elongation<br>factor 1-a [Arabidopsis thaliana]                                                                                                                                                                                                                                                                                                                                                                                                                                                                                                                                            | 158  | 1123 | 8.00E-48  | 710.8 | 55.7  | 65.8  | copia-type pol<br>polyprotein-like                    | gbpln | Arabidopsis<br>thaliana | #                                                                                                                                       | #    | #    | #         | #     | #     |       |
| Rsa1.0_00566.1.g16112.t1 | gi 21387133 gb AAM47970.1  putative<br>elongation factor 1-a [Arabidopsis<br>thaliana]                                                                                                                                                                                                                                                                                                                                                                                                                                                                                                                                                                                                          | 187  | 449  | 1.00E-107 | 240.1 | 100.0 | 100.0 | putative elongation<br>factor 1-a                     | gbpln | Arabidopsis<br>thaliana | AT5G60390.3   Symbols:   GTP binding<br>Elongation factor Tu family protein  <br>chr5:24289226-24290675 FORWARD<br>LENGTH=449           | 187  | 449  | 1.00E-110 | 240.1 | 100.0 | 100.0 |
| Rsa1.0_00566.1.g16113.t1 | ref XP_002889671.1  LOB domain<br>protein 1 [Arabidopsis lyrata subsp.<br>lyrata] gi 297335513 gb EFH65930.1 <br>LOB domain protein 1 [Arabidopsis<br>lyrata subsp. lyrata]                                                                                                                                                                                                                                                                                                                                                                                                                                                                                                                     | 207  | 190  | 1.00E-72  | 91.8  | 71.0  | 78.3  | LOB domain protein 1                                  | gbpln | Arabidopsis<br>lyrata   | AT1G07900.1   Symbols: LBD1   LOB<br>domain-containing protein 1   chr1:2442624-<br>2443631 FORWARD LENGTH=190                          | 207  | 190  | 2.00E-74  | 91.8  | 70.5  | 78.3  |

|                          |                                                                                                                                                                                                                                                                                                                                                                                                                                                                                                                                                                                     |      |      |           |       |       |       |                                        |             |                      |                                                                                                                                      |      |      |           |       |       |       |
|--------------------------|-------------------------------------------------------------------------------------------------------------------------------------------------------------------------------------------------------------------------------------------------------------------------------------------------------------------------------------------------------------------------------------------------------------------------------------------------------------------------------------------------------------------------------------------------------------------------------------|------|------|-----------|-------|-------|-------|----------------------------------------|-------------|----------------------|--------------------------------------------------------------------------------------------------------------------------------------|------|------|-----------|-------|-------|-------|
| Rsa1.0_00566.1.g16114.t1 | gb AAN60795.1  ascorbate peroxidase [Brassica juncea]                                                                                                                                                                                                                                                                                                                                                                                                                                                                                                                               | 250  | 250  | 1.00E-142 | 100.0 | 97.6  | 99.2  | ascorbate peroxidase                   | gbpln       | Brassica juncea      | AT1G07890.8   Symbols: APX1, MEE6, CS1, ATAPX1, ATAPX01   ascorbate peroxidase 1   chr1:2438005-2439435 FORWARD LENGTH=250           | 250  | 250  | 1.00E-141 | 100.0 | 94.4  | 98.0  |
| Rsa1.0_00566.1.g16115.t2 | ref XP_002892423.1  predicted protein [Arabidopsis lyrata subsp. lyrata] gi 297338285 gb EFH68682.1  predicted protein [Arabidopsis lyrata subsp. lyrata]                                                                                                                                                                                                                                                                                                                                                                                                                           | 360  | 363  | 0         | 100.8 | 92.2  | 96.9  | predicted protein                      | gbpln       | Arabidopsis lyrata   | AT1G07890.2   Symbols: ATMPK13   Protein kinase superfamily protein   chr1:2434193-2435712 REVERSE LENGTH=363                        | 360  | 363  | 0         | 100.8 | 90.3  | 96.4  |
| Rsa1.0_00566.1.g16116.t1 | ref XP_002889667.1  ribosomal protein L29 family protein [Arabidopsis lyrata subsp. lyrata] gi 297335509 gb EFH65926.1  ribosomal protein L29 family protein [Arabidopsis lyrata subsp. lyrata]                                                                                                                                                                                                                                                                                                                                                                                     | 147  | 143  | 3.00E-65  | 97.3  | 89.8  | 91.2  | ribosomal protein L29 family protein   | gbpln       | Arabidopsis lyrata   | AT1G07830.1   Symbols:   ribosomal protein L29 family protein   chr1:2422549-2423392 FORWARD LENGTH=144                              | 147  | 144  | 2.00E-65  | 98.0  | 89.8  | 90.5  |
| Rsa1.0_00566.1.g16117.t1 | tpg DAA40122.1  TPA: histone H4.3 [Zea mays]                                                                                                                                                                                                                                                                                                                                                                                                                                                                                                                                        | 103  | 248  | 3.00E-52  | 240.8 | 100.0 | 100.0 | TPA: histone H4.3                      | gbenv/gbpln | Zea mays             | AT5G59970.1   Symbols:   Histone superfamily protein   chr5:24146352-24146663 REVERSE LENGTH=103                                     | 103  | 103  | 2.00E-52  | 100.0 | 100.0 | 100.0 |
| Rsa1.0_00566.1.g16118.t1 | ref NP_172246.3  Ca2+-transporting ATPase [Arabidopsis thaliana] gi 12643934 sp O9XES1.2 ECA4_ARATH RecName: Full=Calcium-transporting ATPase 4, endoplasmic reticulum-type gi 8439902 gb AAF75088.1 AC007583_24 Strong similarity to ER-type calcium pump protein from Arabidopsis thaliana gb U93845. It is a member of Na+/K+ ATPase C-terminus PF 00690 and a member of E1-E2 ATPase PF 00122 [Arabidopsis thaliana] gi 332190039 gb AEE28160.1  calcium-transporting ATPase 4 [Arabidopsis thaliana]                                                                           | 1060 | 1061 | 0         | 100.1 | 94.2  | 97.4  | Ca2+-transporting ATPase               | gbpln       | Arabidopsis thaliana | AT1G07670.1   Symbols: ATECA4, ECA4   endomembrane-type CA-ATPase 4   chr1:2370305-2374196 REVERSE LENGTH=1061                       | 1060 | 1061 | 0         | 100.1 | 94.2  | 97.4  |
| Rsa1.0_00566.1.g16119.t1 | #                                                                                                                                                                                                                                                                                                                                                                                                                                                                                                                                                                                   | #    | #    | #         | #     | #     | #     | -                                      | ----        | ----                 | #                                                                                                                                    | #    | #    | #         | #     | #     |       |
| Rsa1.0_00566.1.g16120.t1 | ref XP_002892418.1  hypothetical protein ARALYDRAFT_470808 [Arabidopsis lyrata subsp. lyrata] gi 297338260 gb EFH68677.1  hypothetical protein ARALYDRAFT_470808 [Arabidopsis lyrata subsp. lyrata]                                                                                                                                                                                                                                                                                                                                                                                 | 356  | 356  | 0         | 100.0 | 90.4  | 94.9  | hypothetical protein ARALYDRAFT_470808 | gbpln       | Arabidopsis lyrata   | AT2G28680.1   Symbols:   RmlC-like cupins superfamily protein   chr2:12303118-12304747 REVERSE LENGTH=356                            | 356  | 356  | 0         | 100.0 | 88.8  | 94.9  |
| Rsa1.0_00566.1.g16121.t1 | ref NP_172236.1  40S ribosomal protein S15a-1 [Arabidopsis thaliana] gi 15238544 ref NP_200793.1  40S ribosomal protein S15a-1 [Arabidopsis thaliana] gi 42571385 ref NP_973783.1  40S ribosomal protein S15a-1 [Arabidopsis thaliana] gi 297796939 ref XP_002866354.1  RPS15A [Arabidopsis lyrata subsp. lyrata] gi 297815756 ref XP_002875761.1  RPS15A [Arabidopsis lyrata subsp. lyrata] gi 297849076 ref XP_002892419.1  RPS15A [Arabidopsis lyrata subsp. lyrata]                                                                                                             | 130  | 130  | 1.00E-69  | 100.0 | 100.0 | 100.0 | 40S ribosomal protein S15a-1           | gbpln       | Arabidopsis lyrata   | AT5G59850.1   Symbols:   Ribosomal protein S8 family protein   chr5:24112499-24113084 REVERSE LENGTH=130                             | 130  | 130  | 3.00E-72  | 100.0 | 100.0 | 100.0 |
| Rsa1.0_00566.1.g16122.t1 | gi 1173218 sp P42798.2 R15A1_ARATH RecName: Full=40S ribosomal protein S15a-1 gi 8439890 gb AAF75076.1 AC007583_12 Strong similarity to 40S ribosomal protein S15A from Arabidopsis thaliana gb L27461. EST gb R30315 comes from this gene [Arabidopsis thaliana] gi 12083302 gb AAG48810.1 AF332447_1 putative ribosomal protein S15 [Arabidopsis thaliana] gi 13430744 gb AAK25994.1 AF360284_1 putative ribosomal protein S15 [Arabidopsis thaliana] gi 14423370 gb AAK62367.1 AF386922_1 40S ribosomal protein S15A [Arabidopsis thaliana] gi 14409941 gb AAK61690.1 AF386922_1 | 317  | 137  | 2.00E-71  | 43.2  | 40.7  | 42.0  | hypothetical protein CARUB_v10012292mg | gbpln       | Capsella rubella     | AT1G07645.1   Symbols: ATDSI-1VOC, DSI-1VOC   desiccation-induced 1VOC superfamily protein   chr1:2367612-2368349 REVERSE LENGTH=137 | 317  | 137  | 9.00E-73  | 43.2  | 40.1  | 41.6  |

|                          |                                                                                                                                                                                                                                                                                                                                                          |      |      |           |       |       |       |                                                                                    |       |                      |                                                                                                                            |      |      |           |       |      |      |
|--------------------------|----------------------------------------------------------------------------------------------------------------------------------------------------------------------------------------------------------------------------------------------------------------------------------------------------------------------------------------------------------|------|------|-----------|-------|-------|-------|------------------------------------------------------------------------------------|-------|----------------------|----------------------------------------------------------------------------------------------------------------------------|------|------|-----------|-------|------|------|
| Rsa1.0_00566.1.g16123.t1 | gb ACR48175.1  OBF binding protein 2 Dof1.1-1 [Brassica rapa subsp. pekinensis]                                                                                                                                                                                                                                                                          | 324  | 317  | 1.00E-125 | 97.8  | 77.8  | 81.8  | OBF binding protein 2 Dof1.1-1                                                     | gbpln | Brassica rapa        | AT1G07640.3   Symbols: OBP2   Dof-type zinc finger DNA-binding family protein   chr1:2354707-2356012 REVERSE LENGTH=339    | 324  | 339  | 1.00E-103 | 104.6 | 69.8 | 78.1 |
| Rsa1.0_00566.1.g16124.t1 | gb EOA40249.1  hypothetical protein CARUB_v10008970mg [Capsella rubella]                                                                                                                                                                                                                                                                                 | 495  | 490  | 0         | 99.0  | 81.4  | 89.9  | hypothetical protein CARUB_v10008970mg                                             | gbpln | Capsella rubella     | AT1G07615.1   Symbols:   GTP-binding protein Obg/CglA   chr1:2342277-2344200 REVERSE LENGTH=493                            | 495  | 493  | 0         | 99.6  | 80.6 | 88.9 |
| Rsa1.0_00566.1.g16125.t1 | gb ABO71662.1  metallothionein protein [Brassica juncea]                                                                                                                                                                                                                                                                                                 | 45   | 45   | 4.00E-13  | 100.0 | 100.0 | 100.0 | metallothionein protein                                                            | gbpln | Brassica juncea      | AT1G07610.1   Symbols: MT1C   metallothionein 1C   chr1:2341603-2341865 FORWARD LENGTH=45                                  | 45   | 45   | 1.00E-13  | 100.0 | 91.1 | 93.3 |
| Rsa1.0_00566.1.g16126.t1 | gb EOA40109.1  hypothetical protein CARUB_v10008810mg [Capsella rubella]                                                                                                                                                                                                                                                                                 | 534  | 534  | 0         | 100.0 | 88.2  | 94.4  | hypothetical protein CARUB_v10008810mg                                             | gbpln | Capsella rubella     | AT1G07590.1   Symbols:   Tetratricopeptide repeat (TPR)-like superfamily protein   chr1:2336649-2338481 REVERSE LENGTH=534 | 534  | 534  | 0         | 100.0 | 88.8 | 94.6 |
| Rsa1.0_00566.1.g16127.t1 | gb EOA40572.1  hypothetical protein CARUB_v10009302mg [Capsella rubella] gi 482576386 gb EOA40573.1  hypothetical protein CARUB_v10009302mg [Capsella rubella]                                                                                                                                                                                           | 406  | 410  | 0         | 101.0 | 93.6  | 97.0  | hypothetical protein CARUB_v10009302mg                                             | gbpln | Capsella rubella     | AT1G07570.1   Symbols: APK1A, APK1   Protein kinase superfamily protein   chr1:2331369-2333210 REVERSE LENGTH=410          | 406  | 410  | 0         | 101.0 | 93.3 | 96.8 |
| Rsa1.0_00566.1.g16128.t1 | gb EOA37445.1  hypothetical protein CARUB_v10011533mg [Capsella rubella]                                                                                                                                                                                                                                                                                 | 812  | 871  | 0         | 107.3 | 81.7  | 90.1  | hypothetical protein CARUB_v10011533mg                                             | gbpln | Capsella rubella     | AT1G07560.1   Symbols:   Leucine-rich repeat protein kinase family protein   chr1:2327320-2331096 FORWARD LENGTH=871       | 812  | 871  | 0         | 107.3 | 76.0 | 85.8 |
| Rsa1.0_00566.1.g16129.t1 | gb EOA21150.1  hypothetical protein CARUB_v10001497mg [Capsella rubella]                                                                                                                                                                                                                                                                                 | 269  | 315  | 8.00E-97  | 117.1 | 69.1  | 78.1  | hypothetical protein CARUB_v10001497mg                                             | gbpln | Capsella rubella     | AT4G05460.1   Symbols:   RNI-like superfamily protein   chr4:2761106-2762400 REVERSE LENGTH=302                            | 269  | 302  | 5.00E-92  | 112.3 | 66.2 | 76.2 |
| Rsa1.0_00567.1.g16130.t1 | emb CAC19877.1  long chain acyl-CoA synthetase [Brassica napus]                                                                                                                                                                                                                                                                                          | 82   | 693  | 5.00E-34  | 845.1 | 84.1  | 90.2  | long chain acyl-CoA synthetase                                                     | gbpln | Brassica napus       | AT1G77590.1   Symbols: LACS9   long chain acyl-CoA synthetase 9   chr1:29148501-29151776 REVERSE LENGTH=691                | 82   | 691  | 8.00E-28  | 842.7 | 67.1 | 78.0 |
| Rsa1.0_00567.1.g16131.t1 | ref XP_002886918.1  hypothetical protein ARALYDRAFT_315582 [Arabidopsis lyrata subsp. lyrata] gi 297332759 gb EFH63177.1  hypothetical protein ARALYDRAFT_315582 [Arabidopsis lyrata subsp. lyrata]                                                                                                                                                      | 452  | 450  | 0         | 99.6  | 86.9  | 92.7  | hypothetical protein ARALYDRAFT_315582                                             | gbpln | Arabidopsis lyrata   | AT1G65450.1   Symbols:   HXXXD-type acyl-transferase family protein   chr1:24315875-24318895 FORWARD LENGTH=450            | 452  | 450  | 0         | 99.6  | 85.0 | 91.8 |
| Rsa1.0_00567.1.g16132.t1 | ref NP_851232.1  RING/U-box domain-containing protein [Arabidopsis thaliana] gi 79331627 ref NP_001032112.1  RING/U-box domain-containing protein [Arabidopsis thaliana] gi 332009965 gb AED97348.1  RING/U-box domain-containing protein [Arabidopsis thaliana] gi 332009967 gb AED97350.1  RING/U-box domain-containing protein [Arabidopsis thaliana] | 116  | 494  | 7.00E-11  | 425.9 | 31.9  | 33.6  | RING/U-box domain-containing protein                                               | gbpln | Arabidopsis thaliana | AT5G60580.4   Symbols:   RING/U-box superfamily protein   chr5:24354298-24356706 FORWARD LENGTH=494                        | 116  | 494  | 1.00E-13  | 425.9 | 31.9 | 33.6 |
| Rsa1.0_00567.1.g16133.t1 | gb EOA21404.1  hypothetical protein CARUB_v10001777mg [Capsella rubella]                                                                                                                                                                                                                                                                                 | 259  | 255  | 8.00E-35  | 98.5  | 29.0  | 31.3  | hypothetical protein CARUB_v10001777mg                                             | gbpln | Capsella rubella     | AT5G13830.1   Symbols:   FtsJ-like methyltransferase family protein   chr5:4467363-4468487 FORWARD LENGTH=224              | 259  | 224  | 3.00E-37  | 86.5  | 29.0 | 30.9 |
| Rsa1.0_00567.1.g16134.t1 | #                                                                                                                                                                                                                                                                                                                                                        | #    | #    | #         | #     | #     | -     | ----                                                                               | ----  | #                    | #                                                                                                                          | #    | #    | #         | #     | #    | #    |
| Rsa1.0_00567.1.g16135.t1 | ref NP_001077775.1  transcription elongation factor SPT6 [Arabidopsis thaliana] gi 332196253 gb AEE34374.1  transcription elongation factor SPT6-like protein [Arabidopsis thaliana]                                                                                                                                                                     | 1595 | 1642 | 0         | 102.9 | 81.6  | 87.6  | transcription elongation factor SPT6                                               | gbpln | Arabidopsis thaliana | AT1G65440.2   Symbols: GTB1   global transcription factor group B1   chr1:24306908-24314327 REVERSE LENGTH=1642            | 1595 | 1642 | 0         | 102.9 | 81.6 | 87.6 |
| Rsa1.0_00567.1.g16136.t1 | gb EOA34978.1  hypothetical protein CARUB_v10020067mg [Capsella rubella]                                                                                                                                                                                                                                                                                 | 563  | 566  | 0         | 100.5 | 88.8  | 94.1  | hypothetical protein CARUB_v10020067mg                                             | gbpln | Capsella rubella     | AT1G65430.1   Symbols: AR18, ATAR18   IBR domain-containing protein   chr1:24301165-24306159 REVERSE LENGTH=567            | 563  | 567  | 0         | 100.7 | 87.9 | 93.1 |
| Rsa1.0_00567.1.g16137.t1 | ref NP_564851.1  Ycf20-like protein [Arabidopsis thaliana] gi 209572697 sp O80813.2 Yc20L_ARAT H RecName: Full=Ycf20-like protein gi 10738233 gb ABF83666.1  At1g65420 [Arabidopsis thaliana] gi 332196250 gb AEE34371.1  Ycf20-like protein [Arabidopsis thaliana]                                                                                      | 200  | 197  | 3.00E-72  | 98.5  | 77.5  | 84.0  | Ycf20-like protein                                                                 | gbpln | Arabidopsis thaliana | AT1G65420.1   Symbols: NPQ7   Protein of unknown function (DUF565)   chr1:24297669-24298374 REVERSE LENGTH=197             | 200  | 197  | 1.00E-74  | 98.5  | 77.5 | 84.0 |
| Rsa1.0_00567.1.g16138.t1 | gb AAC27147.1  Contains similarity to ABC transporter gb 1651790 from Synechocystis sp. gb D90900 [Arabidopsis thaliana]                                                                                                                                                                                                                                 | 364  | 364  | 1.00E-154 | 100.0 | 78.8  | 83.2  | Contains similarity to ABC transporter gb 1651790 from Synechocystis sp. gb D90900 | gbpln | Arabidopsis thaliana | AT1G65410.1   Symbols: ATNAP11, TGD3, NAP11   non-intrinsic ABC protein 11   chr1:24295362-24297332 FORWARD LENGTH=345     | 364  | 345  | 1.00E-154 | 94.8  | 77.5 | 81.6 |

|                          |                                                                                                                                                                                                                                                                                                                                                                                                                                                                                                                                                                                                                                                                                                                                                                                                                                                                                                                                                                                                                                                                                                                                                                                                                                                                                                                                                                                                                                                                                                                                                                                                                                                                                                                                                                                                                                                                                                    |     |     |           |       |      |      |                                                    |                    |                                                                                                                         |                                                                                                                     |     |           |           |       |      |      |
|--------------------------|----------------------------------------------------------------------------------------------------------------------------------------------------------------------------------------------------------------------------------------------------------------------------------------------------------------------------------------------------------------------------------------------------------------------------------------------------------------------------------------------------------------------------------------------------------------------------------------------------------------------------------------------------------------------------------------------------------------------------------------------------------------------------------------------------------------------------------------------------------------------------------------------------------------------------------------------------------------------------------------------------------------------------------------------------------------------------------------------------------------------------------------------------------------------------------------------------------------------------------------------------------------------------------------------------------------------------------------------------------------------------------------------------------------------------------------------------------------------------------------------------------------------------------------------------------------------------------------------------------------------------------------------------------------------------------------------------------------------------------------------------------------------------------------------------------------------------------------------------------------------------------------------------|-----|-----|-----------|-------|------|------|----------------------------------------------------|--------------------|-------------------------------------------------------------------------------------------------------------------------|---------------------------------------------------------------------------------------------------------------------|-----|-----------|-----------|-------|------|------|
| Rsa1.0_00567.1.g16139.t1 | refXP_002868913.1   kelch repeat-containing F-box family protein [Arabidopsis lyrata subsp. lyrata] gi 297314749 gb EFH45172.1   kelch repeat-containing F-box family protein [Arabidopsis lyrata subsp. lyrata] ref NP_189581.1   histidine-containing phosphotransfer protein 2 [Arabidopsis thaliana] gi 51702212 sp Q9ZNV8.1 AHP2_ARATH RecName: Full=Histidine-containing phosphotransfer protein 2 gi 4107101 dbj BAA36336.1  AHP2 [Arabidopsis thaliana] gi 4156241 dbj BAA37110.1  ATHP1 [Arabidopsis thaliana] gi 11994516 dbj BAB02580.1   histidine-containing phosphotransfer protein-like [Arabidopsis thaliana] gi 17381272 gb AAL36054.1   AT3g29350/MUO10.5 [Arabidopsis thaliana] gi 20453361 gb AAM19919.1   AT3g29350/MUO10.5 [Arabidopsis thaliana] gi 332644050 gb AEE77571.1   histidine-containing phosphotransfer protein 2 [Arabidopsis thaliana] ref NP_566847.1   uncharacterized protein [Arabidopsis thaliana] gi 30689540 ref NP_850648.1   uncharacterized protein [Arabidopsis thaliana] gi 9293917 dtj BAB01820.1   unnamed protein product [Arabidopsis thaliana] gi 19310484 gb AAL84976.1   AT3g29240/MXO21.9 [Arabidopsis thaliana] gi 21537141 gb AAM61482.1   unknown [Arabidopsis thaliana] gi 22654968 gb AAM98077.1   AT3g29240/MXO21.9 [Arabidopsis thaliana] gi 28416521 gb AAO42791.1   AT3g29240/MXO21.9 [Arabidopsis thaliana] gi 332644033 gb AEE77554.1   uncharacterized protein AT3G29240 [Arabidopsis thaliana] gi 332644034 gb AEE77555.1   uncharacterized protein AT3G29240 [Arabidopsis thaliana] ref NP_566846.1   chorismate mutase 1 [Arabidopsis thaliana] gi 334302922 sp P42738.3 CM1_ARATH RecName: Full=Chorismate mutase 1, chloroplastic; Short=AtCM1; AltName: Full=CM-1; Flags: Precursor gi 89000961 gb ABD59070.1   At3g29200 [Arabidopsis thaliana] gi 332644031 gb AEE77552.1   chorismate mutase 1 [Arabidopsis thaliana] | 403 | 389 | 1.00E-132 | 96.5  | 62.0 | 71.5 | kelch repeat-containing F-box family gbpIn protein | Arabidopsis lyrata | AT4G38950.1   Symbols:   Galactose oxidase/kelch repeat superfamily protein   chr4:18380681-18381859 REVERSE LENGTH=392 | 403                                                                                                                 | 392 | 1.00E-133 | 97.3      | 64.8  | 74.7 |      |
| Rsa1.0_00568.1.g16140.t1 | ref NP_566847.1   uncharacterized protein [Arabidopsis thaliana] gi 30689540 ref NP_850648.1   uncharacterized protein [Arabidopsis thaliana] gi 9293917 dtj BAB01820.1   unnamed protein product [Arabidopsis thaliana] gi 19310484 gb AAL84976.1   AT3g29240/MXO21.9 [Arabidopsis thaliana] gi 21537141 gb AAM61482.1   unknown [Arabidopsis thaliana] gi 22654968 gb AAM98077.1   AT3g29240/MXO21.9 [Arabidopsis thaliana] gi 28416521 gb AAO42791.1   AT3g29240/MXO21.9 [Arabidopsis thaliana] gi 332644033 gb AEE77554.1   uncharacterized protein AT3G29240 [Arabidopsis thaliana] gi 332644034 gb AEE77555.1   uncharacterized protein AT3G29240 [Arabidopsis thaliana] ref NP_566846.1   chorismate mutase 1 [Arabidopsis thaliana] gi 334302922 sp P42738.3 CM1_ARATH RecName: Full=Chorismate mutase 1, chloroplastic; Short=AtCM1; AltName: Full=CM-1; Flags: Precursor gi 89000961 gb ABD59070.1   At3g29200 [Arabidopsis thaliana] gi 332644031 gb AEE77552.1   chorismate mutase 1 [Arabidopsis thaliana]                                                                                                                                                                                                                                                                                                                                                                                                                                                                                                                                                                                                                                                                                                                                                                                                                                                                            | 156 | 156 | 4.00E-75  | 100.0 | 87.2 | 93.6 | histidine-containing phosphotransfer protein 2     | gbpIn              | Arabidopsis thaliana                                                                                                    | AT3G29350.1   Symbols: AHP2   histidine-containing phosphotransmitter 2   chr3:11264379-11265408 REVERSE LENGTH=156 | 156 | 156       | 1.00E-77  | 100.0 | 87.2 | 93.6 |
| Rsa1.0_00568.1.g16141.t1 | ref NP_566846.1   chorismate mutase 1 [Arabidopsis thaliana] gi 334302922 sp P42738.3 CM1_ARATH RecName: Full=Chorismate mutase 1, chloroplastic; Short=AtCM1; AltName: Full=CM-1; Flags: Precursor gi 89000961 gb ABD59070.1   At3g29200 [Arabidopsis thaliana] gi 332644031 gb AEE77552.1   chorismate mutase 1 [Arabidopsis thaliana]                                                                                                                                                                                                                                                                                                                                                                                                                                                                                                                                                                                                                                                                                                                                                                                                                                                                                                                                                                                                                                                                                                                                                                                                                                                                                                                                                                                                                                                                                                                                                           | 308 | 317 | 1.00E-143 | 102.9 | 88.0 | 92.2 | uncharacterized protein                            | gbpIn              | Arabidopsis thaliana                                                                                                    | AT3G29240.2   Symbols:   Protein of unknown function (DUF179)   chr3:11191780-11192868 FORWARD LENGTH=317           | 308 | 317       | 2.33E-156 | 102.9 | 88.0 | 92.2 |
| Rsa1.0_00568.1.g16142.t1 | ref NP_566846.1   chorismate mutase 1 [Arabidopsis thaliana] gi 334302922 sp P42738.3 CM1_ARATH RecName: Full=Chorismate mutase 1, chloroplastic; Short=AtCM1; AltName: Full=CM-1; Flags: Precursor gi 89000961 gb ABD59070.1   At3g29200 [Arabidopsis thaliana] gi 332644031 gb AEE77552.1   chorismate mutase 1 [Arabidopsis thaliana]                                                                                                                                                                                                                                                                                                                                                                                                                                                                                                                                                                                                                                                                                                                                                                                                                                                                                                                                                                                                                                                                                                                                                                                                                                                                                                                                                                                                                                                                                                                                                           | 330 | 340 | 1.00E-154 | 103.0 | 86.4 | 90.9 | chorismate mutase 1                                | gbpIn              | Arabidopsis thaliana                                                                                                    | AT3G29200.1   Symbols: CM1, ATCM1   chorismate mutase 1   chr3:11164582-11166258 REVERSE LENGTH=340                 | 330 | 340       | 1.00E-157 | 103.0 | 86.4 | 90.9 |
| Rsa1.0_00568.1.g16143.t1 | #                                                                                                                                                                                                                                                                                                                                                                                                                                                                                                                                                                                                                                                                                                                                                                                                                                                                                                                                                                                                                                                                                                                                                                                                                                                                                                                                                                                                                                                                                                                                                                                                                                                                                                                                                                                                                                                                                                  | #   | #   | #         | #     | #    | -    | ----                                               | ----               | #                                                                                                                       | #                                                                                                                   | #   | #         | #         | #     | #    |      |
| Rsa1.0_00568.1.g16144.t1 | refXP_002875491.1   pectinesterase family protein [Arabidopsis lyrata subsp. lyrata] gi 297321329 gb EFH51750.1   pectinesterase family protein [Arabidopsis lyrata subsp. lyrata]                                                                                                                                                                                                                                                                                                                                                                                                                                                                                                                                                                                                                                                                                                                                                                                                                                                                                                                                                                                                                                                                                                                                                                                                                                                                                                                                                                                                                                                                                                                                                                                                                                                                                                                 | 317 | 317 | 1.00E-157 | 100.0 | 83.3 | 90.5 | pectinesterase family protein                      | gbpIn              | Arabidopsis lyrata                                                                                                      | AT3G29090.1   Symbols: PME31, ATPME31   pectin methyltransferase 31   chr3:11073804-11075335 FORWARD LENGTH=317     | 317 | 317       | 1.00E-159 | 100.0 | 82.0 | 90.5 |
| Rsa1.0_00568.1.g16145.t1 | gb AAS76703.1   At3g29075 [Arabidopsis thaliana] gi 46402446 gb AAS92325.1   At3g29075 [Arabidopsis thaliana]                                                                                                                                                                                                                                                                                                                                                                                                                                                                                                                                                                                                                                                                                                                                                                                                                                                                                                                                                                                                                                                                                                                                                                                                                                                                                                                                                                                                                                                                                                                                                                                                                                                                                                                                                                                      | 317 | 236 | 1.00E-34  | 74.4  | 25.6 | 29.0 | At3g29075                                          | gbpIn              | Arabidopsis thaliana                                                                                                    | AT3G29075.1   Symbols:   glycine-rich protein   chr3:11051645-11052629 REVERSE LENGTH=294                           | 317 | 294       | 3.00E-37  | 92.7  | 25.6 | 29.0 |
| Rsa1.0_00568.1.g16146.t1 | refXP_002875490.1   protein carrier [Arabidopsis lyrata subsp. lyrata] gi 297321328 gb EFH51749.1   protein carrier [Arabidopsis lyrata subsp. lyrata]                                                                                                                                                                                                                                                                                                                                                                                                                                                                                                                                                                                                                                                                                                                                                                                                                                                                                                                                                                                                                                                                                                                                                                                                                                                                                                                                                                                                                                                                                                                                                                                                                                                                                                                                             | 220 | 222 | 1.00E-100 | 100.9 | 79.5 | 89.1 | protein carrier                                    | gbpIn              | Arabidopsis lyrata                                                                                                      | AT3G29070.1   Symbols:   emp24/gp25L/p24 family/GOLD family protein   chr3:11050193-11051153 FORWARD LENGTH=225     | 220 | 225       | 2.00E-99  | 102.3 | 80.5 | 87.7 |

|                          |                                                                                                                                                                                                                                                                                                                                                                                                                                                                                                                                |      |      |           |       |      |      |                                                     |       |                      |                                                                                                                                                                       |      |      |           |       |      |      |
|--------------------------|--------------------------------------------------------------------------------------------------------------------------------------------------------------------------------------------------------------------------------------------------------------------------------------------------------------------------------------------------------------------------------------------------------------------------------------------------------------------------------------------------------------------------------|------|------|-----------|-------|------|------|-----------------------------------------------------|-------|----------------------|-----------------------------------------------------------------------------------------------------------------------------------------------------------------------|------|------|-----------|-------|------|------|
| Rsa1.0_00568.1.g16147.t1 | refNP_189549.2 phosphate transporter PHO1-9 [Arabidopsis thaliana]<br>gi75273666 sp Q9LJW0.1 PHO19_ARAT H RecName: Full=Phosphate transporter PHO1 homolog 9; AltName: Full=Protein PHO1 homolog 9; Short=AtPHO1;H9<br>gi11994710 dbj BAB02948.1  unnamed protein product [Arabidopsis thaliana]<br>gi332644009 gb AEE77530.1  phosphate transporter PHO1-9 [Arabidopsis thaliana]                                                                                                                                             | 793  | 800  | 0         | 100.9 | 82.2 | 91.0 | phosphate transporter PHO1-9                        | gbpln | Arabidopsis thaliana | AT3G29060.1   Symbols:   EXS (ERD1/XPRI/SYG1) family protein   chr3:11044990-11048465 REVERSE LENGTH=800                                                              | 793  | 800  | 0         | 100.9 | 82.2 | 91.0 |
| Rsa1.0_00568.1.g16148.t1 | refXP_002875486.1 ANAC059/ATNAC3 [Arabidopsis lyrata subsp. lyrata]<br>gi297321324 gb EFH51745.1  ANAC059/ATNAC3 [Arabidopsis lyrata subsp. lyrata]                                                                                                                                                                                                                                                                                                                                                                            | 326  | 322  | 1.00E-136 | 98.8  | 75.5 | 84.7 | ANAC059/ATNAC3                                      | gbpln | Arabidopsis lyrata   | AT3G29035.1   Symbols: ATNAC3, ANAC059, NAC3   NAC domain containing protein 3   chr3:11033839-11035006 FORWARD LENGTH=318                                            | 326  | 318  | 1.00E-133 | 97.5  | 72.7 | 82.5 |
| Rsa1.0_00568.1.g16149.t1 | gb AAC33226.1  putative non-LTR retroelement reverse transcriptase [Arabidopsis thaliana]                                                                                                                                                                                                                                                                                                                                                                                                                                      | 552  | 1529 | 1.00E-175 | 277.0 | 52.0 | 70.3 | putative non-LTR retroelement reverse transcriptase | gbpln | Arabidopsis thaliana | AT3G24255.1   Symbols:   RNA-directed DNA polymerase (reverse transcriptase)-related family protein   chr3:8789471-8793208 FORWARD LENGTH=746                         | 552  | 746  | 1.00E-124 | 135.1 | 39.9 | 49.6 |
| Rsa1.0_00568.1.g16150.t1 | refNP_189545.1 expansin A5 [Arabidopsis thaliana]<br>gi20138196 sp Q38864.1 EXPA5_ARAT H RecName: Full=Expansin-A5; Short=AtEXPA5; AltName: Full=Alpha-expansin-5; Short=At-EXP5; Short=AtEx5; AltName: Full=AtH-ExpAlpha-1.4; Flags: Precursor<br>gi1041704 gb AAB38071.1  expansin At-EXPA5 [Arabidopsis thaliana]<br>gi7939553 dbj BAA95756.1  expansin-like protein [Arabidopsis thaliana]<br>gi106879169 gb ABF82614.1  At3g29030 [Arabidopsis thaliana]<br>gi332644002 gb AEE77523.1  expansin A5 [Arabidopsis thaliana] | 255  | 255  | 1.00E-130 | 100.0 | 93.3 | 96.9 | expansin A5                                         | gbpln | Arabidopsis thaliana | AT3G29030.1   Symbols: ATEXPA5, ATEXP5, ATHEXP ALPHA 1.4, EXP5, EXPA5   expansin A5   chr3:11011538-11013068 REVERSE LENGTH=255                                       | 255  | 255  | 1.00E-132 | 100.0 | 93.3 | 96.9 |
| Rsa1.0_00568.1.g16151.t1 | refXP_002877150.1  MYB110 [Arabidopsis lyrata subsp. lyrata]<br>gi297322988 gb EFH53409.1  MYB110 [Arabidopsis lyrata subsp. lyrata]                                                                                                                                                                                                                                                                                                                                                                                           | 282  | 304  | 1.00E-114 | 107.8 | 78.4 | 84.8 | MYB110                                              | gbpln | Arabidopsis lyrata   | AT3G29020.2   Symbols: MYB110   myb domain protein 110   chr3:11008233-11009419 REVERSE LENGTH=305                                                                    | 282  | 305  | 1.00E-110 | 108.2 | 73.8 | 82.3 |
| Rsa1.0_00568.1.g16152.t1 | refXP_002875484.1  calcium-binding EF hand family protein [Arabidopsis lyrata subsp. lyrata]<br>gi297321322 gb EFH51743.1  calcium-binding EF hand family protein [Arabidopsis lyrata subsp. lyrata]                                                                                                                                                                                                                                                                                                                           | 120  | 178  | 9.00E-28  | 148.3 | 62.5 | 70.0 | calcium-binding EF hand family protein              | gbpln | Arabidopsis lyrata   | AT5G39670.1   Symbols:   Calcium-binding EF-hand family protein   chr5:15883270-15883884 FORWARD LENGTH=204                                                           | 120  | 204  | 3.00E-29  | 170.0 | 52.5 | 67.5 |
| Rsa1.0_00568.1.g16153.t1 | refXP_002534013.1  transcription factor, putative [Ricinus communis]<br>gi223525986 gb EEF28371.1  transcription factor, putative [Ricinus communis]                                                                                                                                                                                                                                                                                                                                                                           | 151  | 98   | 6.00E-33  | 64.9  | 47.7 | 49.7 | transcription factor, putative                      | gbpln | Ricinus communis     | AT3G28917.1   Symbols: MIF2   mini zinc finger 2   chr3:10925014-10925316 FORWARD LENGTH=100                                                                          | 151  | 100  | 1.00E-30  | 66.2  | 52.3 | 52.3 |
| Rsa1.0_00568.1.g16154.t1 | dbj BAJ34042.1  unnamed protein product [Thellungiella halophila]                                                                                                                                                                                                                                                                                                                                                                                                                                                              | 330  | 337  | 2.33E-156 | 102.1 | 88.8 | 92.1 | unnamed protein product                             | ----  | ----                 | AT3G28910.1   Symbols: ATMYB30, MYB30   myb domain protein 30   chr3:10911443-10912856 FORWARD LENGTH=323                                                             | 330  | 323  | 1.00E-143 | 97.9  | 87.0 | 89.7 |
| Rsa1.0_00568.1.g16155.t1 | gb EOA35904.1  hypothetical protein CARUB_v10021161mg [Capsella rubella]                                                                                                                                                                                                                                                                                                                                                                                                                                                       | 120  | 120  | 3.00E-58  | 100.0 | 94.2 | 97.5 | hypothetical protein CARUB_v10021161mg              | gbpln | Capsella rubella     | AT3G28900.1   Symbols:   Ribosomal protein L34e superfamily protein   chr3:10902864-10904415 REVERSE LENGTH=120                                                       | 120  | 120  | 8.00E-61  | 100.0 | 93.3 | 97.5 |
| Rsa1.0_00568.1.g16156.t1 | dbj BAC41846.1  putative P-glycoprotein [Arabidopsis thaliana]                                                                                                                                                                                                                                                                                                                                                                                                                                                                 | 229  | 1252 | 1.00E-121 | 546.7 | 93.9 | 96.9 | putative P-glycoprotein                             | gbpln | Arabidopsis thaliana | AT3G28860.1   Symbols: ATMDR1, ATMDR11, PGP19, MDR1, MDR1, ATPGP19, ABCB19, ATABC19   ATP binding cassette subfamily B19   chr3:10870287-10877286 REVERSE LENGTH=1252 | 229  | 1252 | 1.00E-123 | 546.7 | 93.9 | 96.9 |
| Rsa1.0_00569.1.g16157.t1 | emb CAN74139.1  hypothetical protein VITISV_038754 [Vitis vinifera]                                                                                                                                                                                                                                                                                                                                                                                                                                                            | 780  | 1387 | 4.00E-63  | 177.8 | 24.6 | 37.6 | hypothetical protein VITISV_038754                  | gbpln | Vitis vinifera       | # # # # # # #                                                                                                                                                         | #    | #    | #         | #     | #    | #    |
| Rsa1.0_00569.1.g16158.t1 | gb AAG52211.1 AC022288_10 hypothetical protein; 74056-75837 [Arabidopsis thaliana]                                                                                                                                                                                                                                                                                                                                                                                                                                             | 260  | 503  | 9.00E-34  | 193.5 | 30.8 | 36.2 | hypothetical protein; 74056-75837                   | gbpln | Arabidopsis thaliana | # # # # # # #                                                                                                                                                         | #    | #    | #         | #     | #    | #    |
| Rsa1.0_00569.1.g16159.t1 | #                                                                                                                                                                                                                                                                                                                                                                                                                                                                                                                              | #    | #    | #         | #     | #    | #    | -                                                   | ----  | ----                 | # # # # # # #                                                                                                                                                         | #    | #    | #         | #     | #    | #    |
| Rsa1.0_00569.1.g16160.t1 | gb AAF79318.1 AC002304_11 F14J16.17 [Arabidopsis thaliana]                                                                                                                                                                                                                                                                                                                                                                                                                                                                     | 132  | 450  | 2.00E-38  | 340.9 | 63.6 | 67.4 | F14J16.17                                           | gbpln | Arabidopsis thaliana | AT1G55915.1   Symbols:   zinc ion binding   chr1:20907663-20909429 FORWARD LENGTH=404                                                                                 | 132  | 404  | 5.00E-41  | 306.1 | 63.6 | 67.4 |
| Rsa1.0_00569.1.g16161.t2 | refNP_001185167.1  filament-like plant protein 6 [Arabidopsis thaliana]<br>gi332194106 gb AEE3227.1  filament-like plant protein 6 [Arabidopsis thaliana]                                                                                                                                                                                                                                                                                                                                                                      | 1096 | 1052 | 0         | 96.0  | 65.1 | 72.2 | filament-like plant protein 6                       | gbpln | Arabidopsis thaliana | AT1G47900.2   Symbols:   Plant protein of unknown function (DUF689)   chr1:17647340-17651035 REVERSE LENGTH=1052                                                      | 1096 | 1052 | 0         | 96.0  | 65.1 | 72.2 |

|                          |                                                                                                                                                                                                                                                                                                                                                                                                                                                                                                                                                                                                                                           |      |      |           |       |      |      |                                        |       |                      |                                                                                                                                                                                                                                                                                                                                                                                                                                                                                                                                                                                                                                    |      |      |           |       |      |      |
|--------------------------|-------------------------------------------------------------------------------------------------------------------------------------------------------------------------------------------------------------------------------------------------------------------------------------------------------------------------------------------------------------------------------------------------------------------------------------------------------------------------------------------------------------------------------------------------------------------------------------------------------------------------------------------|------|------|-----------|-------|------|------|----------------------------------------|-------|----------------------|------------------------------------------------------------------------------------------------------------------------------------------------------------------------------------------------------------------------------------------------------------------------------------------------------------------------------------------------------------------------------------------------------------------------------------------------------------------------------------------------------------------------------------------------------------------------------------------------------------------------------------|------|------|-----------|-------|------|------|
| Rsa1.0_00569.1.g16162.t2 | gb ACP30609.1  disease resistance protein [Brassica rapa subsp. pekinensis]                                                                                                                                                                                                                                                                                                                                                                                                                                                                                                                                                               | 1229 | 2726 | 0         | 221.8 | 62.1 | 77.8 | disease resistance protein             | gbpln | Brassica rapa        | ATMG00860.1   Symbols: ORF158   DNA/RNA polymerases superfamily protein   chrM:235916-236392 FORWARD LENGTH=158                                                                                                                                                                                                                                                                                                                                                                                                                                                                                                                    | 1229 | 158  | 1.00E-35  | 12.9  | 5.9  | 7.1  |
| Rsa1.0_00569.1.g16163.t1 | ref NP_194641.1  3-hydroxyisobutyrate dehydrogenase [Arabidopsis thaliana]   gi 75266757 sp Q9SZE1.1 3HID1_ARATH RecName: Full=Probable 3-hydroxyisobutyrate dehydrogenase-like 1, mitochondrial; Short=HIBADH-like; Flags: Precursor   gi 13877869 gb AAK44012.1 AF370197.1 unknown protein [Arabidopsis thaliana]   gi 4972058 emb CAB43926.1  putative protein [Arabidopsis thaliana]   gi 7269810 emb CAB79670.1  putative protein [Arabidopsis thaliana]   gi 17065608 gb AAL33784.1  unknown protein [Arabidopsis thaliana]   gi 332660189 gb AEE85589.1  probable 3-hydroxyisobutyrate dehydrogenase-like 1 [Arabidopsis thaliana] | 335  | 334  | 1.00E-170 | 99.7  | 88.1 | 94.0 | 3-hydroxyisobutyrate dehydrogenase     | gbpln | Arabidopsis thaliana | AT4G29120.1   Symbols:   6-phosphogluconate dehydrogenase family protein   chr4:14350861-14351865 FORWARD LENGTH=334                                                                                                                                                                                                                                                                                                                                                                                                                                                                                                               | 335  | 334  | 1.00E-172 | 99.7  | 88.1 | 94.0 |
| Rsa1.0_00569.1.g16164.t1 | #                                                                                                                                                                                                                                                                                                                                                                                                                                                                                                                                                                                                                                         | #    | #    | #         | #     | #    | #    | -                                      | ----  | ----                 | #                                                                                                                                                                                                                                                                                                                                                                                                                                                                                                                                                                                                                                  | #    | #    | #         | #     | #    |      |
| Rsa1.0_00569.1.g16165.t1 | #                                                                                                                                                                                                                                                                                                                                                                                                                                                                                                                                                                                                                                         | #    | #    | #         | #     | #    | #    | -                                      | ----  | ----                 | #                                                                                                                                                                                                                                                                                                                                                                                                                                                                                                                                                                                                                                  | #    | #    | #         | #     | #    |      |
| Rsa1.0_00569.1.g16166.t1 | ref XP_002894085.1  hypothetical protein ARALYDRAFT_891603 [Arabidopsis lyrata subsp. lyrata]   gi 297339927 gb EFH70344.1  hypothetical protein ARALYDRAFT_891603 [Arabidopsis lyrata subsp. lyrata]                                                                                                                                                                                                                                                                                                                                                                                                                                     | 161  | 152  | 2.00E-75  | 94.4  | 87.0 | 90.7 | hypothetical protein ARALYDRAFT_891603 | gbpln | Arabidopsis lyrata   | AT1G47960.1   Symbols: C/VIF1, ATC/VIF1   cell wall / vacuolar inhibitor of fructosidase 1   chr1:17681954-17683516 REVERSE LENGTH=205                                                                                                                                                                                                                                                                                                                                                                                                                                                                                             | 161  | 205  | 4.00E-71  | 127.3 | 79.5 | 83.2 |
| Rsa1.0_00569.1.g16167.t1 | ref XP_002891402.1  hypothetical protein ARALYDRAFT_473932 [Arabidopsis lyrata subsp. lyrata]   gi 297337244 gb EFH67661.1  hypothetical protein ARALYDRAFT_473932 [Arabidopsis lyrata subsp. lyrata]                                                                                                                                                                                                                                                                                                                                                                                                                                     | 195  | 196  | 6.00E-25  | 100.5 | 80.5 | 89.2 | hypothetical protein ARALYDRAFT_473932 | gbpln | Arabidopsis lyrata   | AT1G47970.1   Symbols:   unknown protein; FUNCTIONS IN: molecular_function unknown; INVOLVED IN: biological_process unknown; LOCATED IN: cytosol; EXPRESSED IN: 21 plant structures; EXPRESSED DURING: 11 growth stages; Has 93717 Blast hits to 40765 proteins in 1891 species: Archae - 1046; Bacteria - 16276; Metazoa - 26677; Fungi - 16127; Plants - 6028; Viruses - 1519; Other Eukaryotes - 26044 (source: NCBI BLink).   chr1:17687342-17688562 FORWARD LENGTH=198                                                                                                                                                        | 195  | 198  | 4.00E-25  | 101.5 | 75.9 | 86.2 |
| Rsa1.0_00569.1.g16168.t1 | db BAB09923.1  copia-like retrotransposable element [Arabidopsis thaliana]                                                                                                                                                                                                                                                                                                                                                                                                                                                                                                                                                                | 433  | 1342 | 2.00E-86  | 309.9 | 50.1 | 69.1 | copia-like retrotransposable element   | gbpln | Arabidopsis thaliana | AT4G23160.1   Symbols: CRK8   cysteine-rich RLK (RECEPTOR-like protein kinase) 8   chr4:12129485-12134086 FORWARD LENGTH=1262                                                                                                                                                                                                                                                                                                                                                                                                                                                                                                      | 433  | 1262 | 2.00E-30  | 291.5 | 18.7 | 31.6 |
| Rsa1.0_00569.1.g16169.t1 | gb AAM65140.1  desiccation-related protein, putative [Arabidopsis thaliana]                                                                                                                                                                                                                                                                                                                                                                                                                                                                                                                                                               | 309  | 315  | 1.00E-156 | 101.9 | 88.7 | 91.9 | desiccation-related protein, putative  | gbpln | Arabidopsis thaliana | AT1G47980.1   Symbols:   unknown protein; FUNCTIONS IN: molecular_function unknown; INVOLVED IN: biological_process unknown; LOCATED IN: endomembrane system; EXPRESSED IN: 6 plant structures; EXPRESSED DURING: 4 anthesis, F mature embryo stage, petal differentiation and expansion stage, E expanded cotyledon stage; BEST Arabidopsis thaliana protein match is: unknown protein (TAIR:AT3G62730.1); Has 169 Blast hits to 169 proteins in 41 species: Archae - 0; Bacteria - 68; Metazoa - 0; Fungi - 0; Plants - 101; Viruses - 0; Other Eukaryotes - 0 (source: NCBI BLink).   chr1:17691985-17693818 REVERSE LENGTH=315 | 309  | 315  | 1.00E-158 | 101.9 | 88.3 | 91.6 |
| Rsa1.0_00570.1.g16170.t1 | gb AAD12368.1  arginine-tRNA-protein transferase 1 [Arabidopsis thaliana]                                                                                                                                                                                                                                                                                                                                                                                                                                                                                                                                                                 | 634  | 629  | 0         | 99.2  | 76.0 | 83.3 | arginine-tRNA-protein transferase 1    | gbpln | Arabidopsis thaliana | AT5G05700.1   Symbols: ATE1, DLS1, ATATE1   arginine-tRNA protein transferase 1   chr5:1712950-1715639 REVERSE LENGTH=632                                                                                                                                                                                                                                                                                                                                                                                                                                                                                                          | 634  | 632  | 0         | 99.7  | 76.2 | 83.3 |
| Rsa1.0_00570.1.g16171.t1 | ref NP_180705.1  F-box protein DOR [Arabidopsis thaliana]   gi 229807544 sp Q5BPS3.2 DOR_ARATH RecName: Full=F-box protein DOR; AltName: Full=Protein DROUGHT TOLERANCE REPRESSOR   gi 4589954 gb AAD26472.1  hypothetical protein [Arabidopsis thaliana]   gi 330253458 gb AEC08552.1  F-box protein DOR [Arabidopsis thaliana]                                                                                                                                                                                                                                                                                                          | 370  | 387  | 4.00E-74  | 104.6 | 47.3 | 61.1 | F-box protein DOR                      | gbpln | Arabidopsis thaliana | AT2G31470.1   Symbols: DOR   F-box and associated interaction domains-containing protein   chr2:13407492-13408655 REVERSE LENGTH=387                                                                                                                                                                                                                                                                                                                                                                                                                                                                                               | 370  | 387  | 1.00E-76  | 104.6 | 47.3 | 61.1 |



|                          |                                                                                                                                                                                                                                                                                                                                                                                                                                                                           |     |     |           |       |      |      |                                                       |       |                      |                                                                                                                                                    |     |     |           |       |      |      |
|--------------------------|---------------------------------------------------------------------------------------------------------------------------------------------------------------------------------------------------------------------------------------------------------------------------------------------------------------------------------------------------------------------------------------------------------------------------------------------------------------------------|-----|-----|-----------|-------|------|------|-------------------------------------------------------|-------|----------------------|----------------------------------------------------------------------------------------------------------------------------------------------------|-----|-----|-----------|-------|------|------|
| Rsa1.0_00570.1.g16172.t1 | ref NP_180705.1  F-box protein DOR [Arabidopsis thaliana] gi 229807544 sp Q5BPS3.2 DOR_ARATH RecName: Full=F-box protein DOR; AltName: Full=Protein DROUGHT TOLERANCE REPRESSOR gi 4589954 gb AAD26472.1  hypothetical protein [Arabidopsis thaliana] gi 330253458 gb AEC08552.1  F-box protein DOR [Arabidopsis thaliana]                                                                                                                                                | 410 | 387 | 1.00E-102 | 94.4  | 49.5 | 63.2 | F-box protein DOR                                     | gbpln | Arabidopsis thaliana | AT2G31470.1   Symbols: DOR   F-box and associated interaction domains-containing protein   chr2:13407492-13408655 REVERSE LENGTH=387               | 410 | 387 | 1.00E-104 | 94.4  | 49.5 | 63.2 |
| Rsa1.0_00570.1.g16173.t1 | ref XP_002526888.1  anthranilate synthase component 1, putative [Ricinus communis] gi 223533787 gb IEEF35519.1  anthranilate synthase component 1, putative [Ricinus communis]                                                                                                                                                                                                                                                                                            | 71  | 574 | 5.00E-15  | 808.5 | 50.7 | 60.6 | anthranilate synthase component 1, putative           | gbpln | Ricinus communis     | AT5G05730.1   Symbols: ASA1, TRP5, AMT1, WEI2, JDL1   anthranilate synthase alpha subunit 1   chr5:1719740-1722811 REVERSE LENGTH=595              | 71  | 595 | 2.00E-17  | 838.0 | 56.3 | 64.8 |
| Rsa1.0_00570.1.g16174.t1 | ref NP_180705.1  F-box protein DOR [Arabidopsis thaliana] gi 229807544 sp Q5BPS3.2 DOR_ARATH RecName: Full=F-box protein DOR; AltName: Full=Protein DROUGHT TOLERANCE REPRESSOR gi 4589954 gb AAD26472.1  hypothetical protein [Arabidopsis thaliana] gi 330253458 gb AEC08552.1  F-box protein DOR [Arabidopsis thaliana]                                                                                                                                                | 399 | 387 | 1.00E-105 | 97.0  | 55.1 | 65.9 | F-box protein DOR                                     | gbpln | Arabidopsis thaliana | AT2G31470.1   Symbols: DOR   F-box and associated interaction domains-containing protein   chr2:13407492-13408655 REVERSE LENGTH=387               | 399 | 387 | 1.00E-108 | 97.0  | 55.1 | 65.9 |
| Rsa1.0_00570.1.g16175.t1 | ref NP_196192.1  anthranilate synthase component 1-1 [Arabidopsis thaliana] gi 418133 sp P32068.1 TRPE_ARATH RecName: Full=Anthranilate synthase component 1-1, chloroplastic; Flags: Precursor gi 166604 gb AA32738.1  anthranilate synthase alpha subunit [Arabidopsis thaliana] gi 9759098 dbj BAB09667.1  anthranilate synthase component 1-1 precursor [Arabidopsis thaliana] gi 332003532 gb AED90915.1  anthranilate synthase component 1-1 [Arabidopsis thaliana] | 595 | 595 | 0         | 100.0 | 93.1 | 95.8 | anthranilate synthase component 1-1                   | gbpln | Arabidopsis thaliana | AT5G05730.1   Symbols: ASA1, TRP5, AMT1, WEI2, JDL1   anthranilate synthase alpha subunit 1   chr5:1719740-1722811 REVERSE LENGTH=595              | 595 | 595 | 0         | 100.0 | 93.1 | 95.8 |
| Rsa1.0_00570.1.g16176.t1 | gb EOA22037.1  hypothetical protein CARUB_v10002562mg [Capsella rubella]                                                                                                                                                                                                                                                                                                                                                                                                  | 357 | 358 | 1.00E-163 | 100.3 | 85.2 | 89.9 | hypothetical protein CARUB_v10002562mg                | gbpln | Capsella rubella     | AT3G57340.2   Symbols:   Heat shock protein DnaJ, N-terminal with domain of unknown function (DUF1977)   chr3:21219175-21220278 FORWARD LENGTH=367 | 357 | 367 | 1.00E-137 | 102.8 | 72.0 | 84.6 |
| Rsa1.0_00570.1.g16177.t1 | ref XP_002871179.1  hypothetical protein ARALYDRAFT_349845 [Arabidopsis lyrata subsp. lyrata] gi 297317016 gb EFH47438.1  hypothetical protein ARALYDRAFT_349845 [Arabidopsis lyrata subsp. lyrata]                                                                                                                                                                                                                                                                       | 192 | 193 | 2.00E-78  | 100.5 | 79.7 | 84.9 | hypothetical protein ARALYDRAFT_349845                | gbpln | Arabidopsis lyrata   | AT3G11260.1   Symbols: WOX5   WUSCHEL related homeobox 5   chr3:3527606-3528263 FORWARD LENGTH=182                                                 | 192 | 182 | 1.00E-60  | 94.8  | 64.6 | 73.4 |
| Rsa1.0_00570.1.g16178.t1 | ref XP_002871180.1  ATHMOV34 [Arabidopsis lyrata subsp. lyrata] gi 297317017 gb EFH47439.1  ATHMOV34 [Arabidopsis lyrata subsp. lyrata]                                                                                                                                                                                                                                                                                                                                   | 308 | 308 | 1.00E-175 | 100.0 | 99.0 | 99.7 | ATHMOV34                                              | gbpln | Arabidopsis lyrata   | AT5G05780.1   Symbols: RPN8A, AE3, ATHMOV34   RP non-ATPase subunit 8A   chr5:1735862-1738176 FORWARD LENGTH=308                                   | 308 | 308 | 1.00E-177 | 100.0 | 99.0 | 99.4 |
| Rsa1.0_00570.1.g16179.t1 | ref NP_196198.1  duplicated SANT DNA-binding domain-containing protein [Arabidopsis thaliana] gi 9759104 dbj BAB09673.1  unnamed protein product [Arabidopsis thaliana] gi 41619004 gb AAS10001.1  MYB transcription factor [Arabidopsis thaliana] gi 109946463 gb ABG48410.1  At5g05790 [Arabidopsis thaliana] gi 332003542 gb AED90925.1  duplicated SANT DNA-binding domain-containing protein [Arabidopsis thaliana]                                                  | 271 | 277 | 1.00E-132 | 102.2 | 85.2 | 90.8 | duplicated SANT DNA-binding domain-containing protein | gbpln | Arabidopsis thaliana | AT5G05790.1   Symbols:   Duplicated homeodomain-like superfamily protein   chr5:1740724-1741671 REVERSE LENGTH=277                                 | 271 | 277 | 1.00E-135 | 102.2 | 85.2 | 90.8 |



|                           |                                                                                                                                                                                                                                                                                                                                                                                                                                                                                                                                                                                                                                                                                                                                                                                                                                                                                                        |     |     |           |       |      |      |                                                   |       |                      |                                                                                                                                                                                                                                                                                                                                                                                                                                                                                                                                                      |     |     |           |       |      |      |
|---------------------------|--------------------------------------------------------------------------------------------------------------------------------------------------------------------------------------------------------------------------------------------------------------------------------------------------------------------------------------------------------------------------------------------------------------------------------------------------------------------------------------------------------------------------------------------------------------------------------------------------------------------------------------------------------------------------------------------------------------------------------------------------------------------------------------------------------------------------------------------------------------------------------------------------------|-----|-----|-----------|-------|------|------|---------------------------------------------------|-------|----------------------|------------------------------------------------------------------------------------------------------------------------------------------------------------------------------------------------------------------------------------------------------------------------------------------------------------------------------------------------------------------------------------------------------------------------------------------------------------------------------------------------------------------------------------------------------|-----|-----|-----------|-------|------|------|
| Rsa1.0_00571.1.g16193.t1  | ref[NP_565419.1] endoribonuclease/protein kinase IRE1-like protein [Arabidopsis thaliana] gi 75168985 sp Q9C5S2.1 IRE1A_ARATH RecName: Full=Serine/threonine-protein kinase/endoribonuclease IRE1a; AltName: Full=Endoplasmic reticulum-to-nucleus signaling 1-2; AltName: Full=Inositol-requiring protein 1-2; Short=AtIRE1-2; AltName: Full=Serine/threonine-protein kinase/endoribonuclease IRE1-2; Includes: RecName: Full=Serine/threonine-protein kinase; Includes: RecName: Full=Endoribonuclease; Flags: Precursor gi 13194578 gb AAK15470.1 AF308596.1 endoribonuclease/protein kinase IRE1-like protein [Arabidopsis thaliana] gi 15277139 gb BA66367.1 Ire1 homolog:2 [Arabidopsis thaliana] gi 20198262 gb AAD32909.2 putative protein kinase/endoribonuclease [Arabidopsis thaliana] gi 330251546 gb AEC06640.1  endoribonuclease/protein kinase IRE1-like protein [Arabidopsis thaliana] | 904 | 841 | 0         | 93.0  | 62.9 | 71.8 | endoribonuclease/protein kinase IRE1-like protein | gbpln | Arabidopsis thaliana | AT2G17520.1   Symbols: IRE1A, ATIRE1-2, IRE1-2   Endoribonuclease/protein kinase IRE1-like   chr2:7617504-7620929 FORWARD LENGTH=841                                                                                                                                                                                                                                                                                                                                                                                                                 | 904 | 841 | 0         | 93.0  | 62.9 | 71.8 |
| Rsa1.0_00571.1.g16194.t1  | gb EOA31017.1  hypothetical protein CARUB_v10014165mg [Capsella rubella] gi 48256829 gb EOA31018.1  hypothetical protein CARUB_v10014165mg [Capsella rubella]                                                                                                                                                                                                                                                                                                                                                                                                                                                                                                                                                                                                                                                                                                                                          | 276 | 329 | 4.00E-78  | 119.2 | 71.0 | 79.7 | hypothetical protein CARUB_v10014165mg            | gbpln | Capsella rubella     | AT2G17540.3   Symbols:   unknown protein; FUNCTIONS IN: molecular_function unknown; INVOLVED IN: biological_process unknown; LOCATED IN: chloroplast; EXPRESSED IN: 21 plant structures; EXPRESSED DURING: 13 growth stages; BEST Arabidopsis thaliana protein match is: unknown protein (TAIR:AT4G35510.1); Has 30201 Blast hits to 17322 proteins in 780 species: Archae - 12; Bacteria - 1396; Metazoa - 17338; Fungi - 3422; Plants - 5037; Viruses - 0; Other Eukaryotes - 2996 (source: NCBI BLINK).   chr2:7630662-7631489 REVERSE LENGTH=275 | 276 | 275 | 6.00E-57  | 99.6  | 60.9 | 69.6 |
| Rsa1.0_00571.1.g16195.t1  | #                                                                                                                                                                                                                                                                                                                                                                                                                                                                                                                                                                                                                                                                                                                                                                                                                                                                                                      | #   | #   | #         | #     | #    | -    | ----                                              | ----  | #                    | #                                                                                                                                                                                                                                                                                                                                                                                                                                                                                                                                                    | #   | #   | #         | #     | #    |      |
| Rsa1.0_00571.1.g16196.t1  | ref[XP_002884069.1] polynucleotide adenyltransferase family protein [Arabidopsis lyrata subsp. lyrata] gi 297329909 gb EFH60328.1  polynucleotide adenyltransferase family protein [Arabidopsis lyrata subsp. lyrata]                                                                                                                                                                                                                                                                                                                                                                                                                                                                                                                                                                                                                                                                                  | 751 | 761 | 0         | 101.3 | 73.8 | 84.2 | polynucleotide adenyltransferase family protein   | gbpln | Arabidopsis lyrata   | AT2G17580.1   Symbols:   Polynucleotide adenyltransferase family protein   chr2:7646507-7650066 FORWARD LENGTH=757                                                                                                                                                                                                                                                                                                                                                                                                                                   | 751 | 757 | 0         | 100.8 | 73.4 | 83.5 |
| Rsa1.0_00571.1.g16197.t1  | #                                                                                                                                                                                                                                                                                                                                                                                                                                                                                                                                                                                                                                                                                                                                                                                                                                                                                                      | #   | #   | #         | #     | #    | -    | ----                                              | ----  | #                    | #                                                                                                                                                                                                                                                                                                                                                                                                                                                                                                                                                    | #   | #   | #         | #     | #    |      |
| Rsa1.0_00571.1.g16198.t8  | emb CAA83275.1  cyclin 2a protein [Arabidopsis thaliana]                                                                                                                                                                                                                                                                                                                                                                                                                                                                                                                                                                                                                                                                                                                                                                                                                                               | 429 | 429 | 1.00E-155 | 100.0 | 72.7 | 77.2 | cyclin 2a protein                                 | gbpln | Arabidopsis thaliana | AT2G17620.1   Symbols: CYCB2;1   Cyclin B2;1   chr2:7664164-7666261 FORWARD LENGTH=429                                                                                                                                                                                                                                                                                                                                                                                                                                                               | 429 | 429 | 1.00E-158 | 100.0 | 72.7 | 77.2 |
| Rsa1.0_00571.1.g16199.t1  | ref[XP_002886123.1] AtSerat3_1 [Arabidopsis lyrata subsp. lyrata] gi 297331963 gb EFH62382.1  AtSerat3_1 [Arabidopsis lyrata subsp. lyrata]                                                                                                                                                                                                                                                                                                                                                                                                                                                                                                                                                                                                                                                                                                                                                            | 320 | 323 | 1.00E-162 | 100.9 | 89.1 | 93.8 | AtSerat3_1                                        | gbpln | Arabidopsis lyrata   | AT2G17640.1   Symbols: ATSERAT3;1, SAT-106   Trimeric LpxA-like enzymes superfamily protein   chr2:7668238-7670226 REVERSE LENGTH=323                                                                                                                                                                                                                                                                                                                                                                                                                | 320 | 323 | 1.00E-158 | 100.9 | 89.7 | 94.1 |
| Rsa1.0_00571.1.g16200.t1  | ref[NP_179357.1] RPM1-interacting protein 4-like protein [Arabidopsis thaliana] gi 11762120 gb AAG40338.1 AF324986.1 At2g17660 [Arabidopsis thaliana] gi 115646839 gb ABJ17136.1  At2g17660 [Arabidopsis thaliana] gi 330251568 gb AEC06662.1  RPM1-interacting protein 4-like protein [Arabidopsis thaliana]                                                                                                                                                                                                                                                                                                                                                                                                                                                                                                                                                                                          | 69  | 69  | 4.00E-30  | 100.0 | 92.8 | 98.6 | RPM1-interacting protein 4-like protein           | gbpln | Arabidopsis thaliana | AT2G17660.1   Symbols:   RPM1-interacting protein 4 (RIN4) family protein   chr2:7673359-7673568 FORWARD LENGTH=69                                                                                                                                                                                                                                                                                                                                                                                                                                   | 69  | 69  | 7.00E-33  | 100.0 | 92.8 | 98.6 |
| Rsa1.0_00571.1.g16201.t16 | gb EOA31407.1  hypothetical protein CARUB_v10014585mg, partial [Capsella rubella]                                                                                                                                                                                                                                                                                                                                                                                                                                                                                                                                                                                                                                                                                                                                                                                                                      | 210 | 220 | 1.00E-106 | 104.8 | 85.2 | 93.8 | hypothetical protein CARUB_v10014585mg, partial   | gbpln | Capsella rubella     | AT2G17695.3   Symbols:   FUNCTIONS IN: molecular_function unknown; INVOLVED IN: biological_process unknown; CONTAINS InterPro DOMAIN/s: Domain of unknown function DUF1990 (InterPro:IPRO18960).   chr2:7684214-7685009 REVERSE LENGTH=205                                                                                                                                                                                                                                                                                                           | 210 | 205 | 1.00E-108 | 97.6  | 84.3 | 93.8 |

|                          |                                                                                                                                                                                                                                                                                                                                                                                                                                                                                                       |      |      |           |       |      |       |                                                                                                                                                     |       |                      |                                                                                                                                                                                                                                                                                                                                                |      |     |           |       |      |      |
|--------------------------|-------------------------------------------------------------------------------------------------------------------------------------------------------------------------------------------------------------------------------------------------------------------------------------------------------------------------------------------------------------------------------------------------------------------------------------------------------------------------------------------------------|------|------|-----------|-------|------|-------|-----------------------------------------------------------------------------------------------------------------------------------------------------|-------|----------------------|------------------------------------------------------------------------------------------------------------------------------------------------------------------------------------------------------------------------------------------------------------------------------------------------------------------------------------------------|------|-----|-----------|-------|------|------|
| Rsa1.0_00571.1.g16202.t1 | refNP_179389.1  SEC1 family transport protein SLY1 [Arabidopsis thaliana] gi 28201895 sp Q9SL48.1 SLY1_ARATH RecName: Full=SEC1 family transport protein SLY1; Short=AtSLY1 gi 4406820 gb AAD20128.1  putative SEC1 family transport protein [Arabidopsis thaliana] gi 15215770 gb AAK91430.1  At2g17980/T27K22.15 [Arabidopsis thaliana] gi 16974335 gb AAL31152.1  At2g17980/T27K22.15 [Arabidopsis thaliana] gi 330251617 gb AEC06711.1  SEC1 family transport protein SLY1 [Arabidopsis thaliana] | 628  | 627  | 0         | 99.8  | 87.7 | 92.0  | SEC1 family transport protein SLY1                                                                                                                  | gbpln | Arabidopsis thaliana | AT2G17980.1   Symbols: ATSLY1   Sec1/munc18-like (SM) proteins superfamily   chr2:7824352-7826404 FORWARD LENGTH=627                                                                                                                                                                                                                           | 628  | 627 | 0         | 99.8  | 87.7 | 92.0 |
| Rsa1.0_00571.1.g16203.t1 | refXP_002884094.1  hypothetical protein ARALYDRAFT_480699 [Arabidopsis lyrata subsp. lyrata] gi 297329934 gb EFH60353.1  hypothetical protein ARALYDRAFT_480699 [Arabidopsis lyrata subsp. lyrata]                                                                                                                                                                                                                                                                                                    | 309  | 337  | 1.00E-138 | 109.1 | 87.7 | 94.5  | hypothetical protein ARALYDRAFT_480699                                                                                                              | gbpln | Arabidopsis lyrata   | AT2G17990.1   Symbols:   BEST Arabidopsis thaliana protein match is: kinectin-related (TAIR:AT5G66250.3); Has 7578 Blast hits to 6129 proteins in 783 species: Archae - 220; Bacteria - 1045; Metazoa - 3605; Fungi - 575; Plants - 442; Viruses - 38; Other Eukaryotes - 1653 (source: NCBI BLINK).   chr2:7827480-7828596 FORWARD LENGTH=338 | 309  | 338 | 1.00E-137 | 109.4 | 85.8 | 93.5 |
| Rsa1.0_00571.1.g16204.t1 | pir [S65812 RNA-directed DNA polymerase (EC 2.7.7.49) (clone DW15) - Arabidopsis thaliana retrotransposon Ta11-1 gi 976278 gb AAA75254.1  reverse transcriptase [Arabidopsis thaliana]                                                                                                                                                                                                                                                                                                                | 1839 | 1333 | 0         | 72.5  | 37.1 | 48.5  | RNA-directed DNA polymerase (EC 2.7.7.49) (clone DW15) - Arabidopsis thaliana retrotransposon Ta11-1 gi 976278 gb AAA75254.1  reverse transcriptase | gbpln | Arabidopsis thaliana | AT4G29090.1   Symbols:   Ribonuclease H-like superfamily protein   chr4:14333528-14335255 FORWARD LENGTH=575                                                                                                                                                                                                                                   | 1839 | 575 | 1.00E-101 | 31.3  | 10.5 | 16.8 |
| Rsa1.0_00571.1.g16205.t1 | gb EOA31137.1  hypothetical protein CARUB_v10014300mg [Capsella rubella]                                                                                                                                                                                                                                                                                                                                                                                                                              | 258  | 290  | 1.00E-145 | 112.4 | 98.1 | 99.6  | hypothetical protein CARUB_v10014300mg                                                                                                              | gbpln | Capsella rubella     | AT4G36130.1   Symbols:   Ribosomal protein L2 family   chr4:17097613-17098656 FORWARD LENGTH=258                                                                                                                                                                                                                                               | 258  | 258 | 1.00E-144 | 100.0 | 95.7 | 98.8 |
| Rsa1.0_00571.1.g16206.t1 | dbj BAJ34365.1  unnamed protein product [Thellungiella halophila]                                                                                                                                                                                                                                                                                                                                                                                                                                     | 119  | 119  | 2.00E-61  | 100.0 | 97.5 | 100.0 | unnamed protein product                                                                                                                             | ----  | ----                 | AT2G18040.1   Symbols: PIN1AT   peptidylprolyl cis/trans isomerase, NIMA-interacting 1   chr2:7842346-7843537 FORWARD LENGTH=119                                                                                                                                                                                                               | 119  | 119 | 2.00E-62  | 100.0 | 95.0 | 99.2 |
| Rsa1.0_00571.1.g16207.t1 | refXP_002886147.1  hypothetical protein ARALYDRAFT_319761 [Arabidopsis lyrata subsp. lyrata] gi 297331987 gb EFH62406.1  hypothetical protein ARALYDRAFT_319761 [Arabidopsis lyrata subsp. lyrata]                                                                                                                                                                                                                                                                                                    | 491  | 503  | 0         | 102.4 | 91.0 | 95.3  | hypothetical protein ARALYDRAFT_319761                                                                                                              | gbpln | Arabidopsis lyrata   | AT4G36220.1   Symbols: FAH1, CYP84A1   ferulic acid 5-hydroxylase 1   chr4:17137584-17139619 REVERSE LENGTH=520                                                                                                                                                                                                                                | 491  | 520 | 0         | 105.9 | 75.2 | 88.4 |
| Rsa1.0_00571.1.g16208.t1 | gb EOA23342.1  hypothetical protein CARUB_v10019413mg [Capsella rubella]                                                                                                                                                                                                                                                                                                                                                                                                                              | 364  | 381  | 4.00E-69  | 104.7 | 41.5 | 63.2  | hypothetical protein CARUB_v10019413mg                                                                                                              | gbpln | Capsella rubella     | AT3G28270.1   Symbols:   Protein of unknown function (DUF677)   chr3:10538725-10539849 FORWARD LENGTH=374                                                                                                                                                                                                                                      | 364  | 374 | 9.00E-68  | 102.7 | 41.8 | 62.4 |
| Rsa1.0_00571.1.g16209.t1 | gb AAM15144.1  hypothetical protein [Arabidopsis thaliana] gi 20198201 gb AAM15455.1  hypothetical protein [Arabidopsis thaliana]                                                                                                                                                                                                                                                                                                                                                                     | 348  | 296  | 1.00E-24  | 85.1  | 25.0 | 29.0  | hypothetical protein                                                                                                                                | gbpln | Arabidopsis thaliana | #                                                                                                                                                                                                                                                                                                                                              | #    | #   | #         | #     | #    | #    |
| Rsa1.0_00571.1.g16210.t1 | dbj BAJ34571.1  unnamed protein product [Thellungiella halophila]                                                                                                                                                                                                                                                                                                                                                                                                                                     | 171  | 172  | 2.00E-73  | 100.6 | 88.3 | 93.6  | unnamed protein product                                                                                                                             | ----  | ----                 | AT2G18160.1   Symbols: ATBZIP2, GBF5, bZIP2   basic leucine-zipper 2   chr2:7898288-7898803 REVERSE LENGTH=171                                                                                                                                                                                                                                 | 171  | 171 | 4.00E-67  | 100.0 | 84.8 | 90.6 |
| Rsa1.0_00571.1.g16211.t1 | gb AAD31347.1  putative AAA-type ATPase [Arabidopsis thaliana]                                                                                                                                                                                                                                                                                                                                                                                                                                        | 535  | 996  | 0         | 186.2 | 74.8 | 80.2  | putative AAA-type ATPase                                                                                                                            | gbpln | Arabidopsis thaliana | AT2G18193.1   Symbols:   P-loop containing nucleoside triphosphate hydrolases superfamily protein   chr2:7917621-7919184 REVERSE LENGTH=495                                                                                                                                                                                                    | 535  | 495 | 0         | 92.5  | 74.8 | 80.2 |
| Rsa1.0_00571.1.g16212.t1 | refNP_179418.2  syntaxin-112 [Arabidopsis thaliana] gi 148887439 sp Q9ZPV9.2 SY112_ARATH RecName: Full=Syntaxin-112; Short=AtSYP112 gi 91806192 gb ABE65824.1  syntaxin-like protein [Arabidopsis thaliana] gi 330251653 gb AEC06747.1  syntaxin-112 [Arabidopsis thaliana]                                                                                                                                                                                                                           | 280  | 305  | 1.00E-125 | 108.9 | 82.5 | 90.4  | syntaxin-112                                                                                                                                        | gbpln | Arabidopsis thaliana | AT2G18260.1   Symbols: SYP112, ATSPY112   syntaxin of plants 112   chr2:7942275-7943192 FORWARD LENGTH=305                                                                                                                                                                                                                                     | 280  | 305 | 1.00E-128 | 108.9 | 82.5 | 90.4 |

|                          |                                                                                                                                                                                                                                                                                                                                                                                                                                                                                                                                                                                                                                                                                             |      |      |           |        |      |       |                                                         |       |                      |                                                                                                                                                          |      |      |           |       |      |       |
|--------------------------|---------------------------------------------------------------------------------------------------------------------------------------------------------------------------------------------------------------------------------------------------------------------------------------------------------------------------------------------------------------------------------------------------------------------------------------------------------------------------------------------------------------------------------------------------------------------------------------------------------------------------------------------------------------------------------------------|------|------|-----------|--------|------|-------|---------------------------------------------------------|-------|----------------------|----------------------------------------------------------------------------------------------------------------------------------------------------------|------|------|-----------|-------|------|-------|
| Rsa1.0_00571.1.g16213.t2 | ref NP_565433.1  anaphase-promoting complex subunit 10 [Arabidopsis thaliana]<br>gi 34395513 sp Q9ZPW2.2 APC10_ARAT H RecName: Full=Anaphase-promoting complex subunit 10; Short=APC10; AltName: Full=Cyclosome subunit 10<br>gi 20197809 gb AAD15507.2  expressed protein [Arabidopsis thaliana]<br>gi 90567996 gb ABD94068.1  At2g18290 [Arabidopsis thaliana]<br>gi 110738941 dbj BAF01391.1  hypothetical protein [Arabidopsis thaliana] gi 330251657 gb AEC06751.1  anaphase-promoting complex subunit 10 [Arabidopsis thaliana]                                                                                                                                                       | 164  | 192  | 3.00E-34  | 117.1  | 51.8 | 56.1  | anaphase-promoting complex subunit 10                   | gbpln | Arabidopsis thaliana | AT2G18290.1   Symbols: APC10   anaphase promoting complex 10   chr2:7948522-7950096 REVERSE LENGTH=192                                                   | 164  | 192  | 1.00E-36  | 117.1 | 51.8 | 56.1  |
| Rsa1.0_00571.1.g16214.t1 | gb EOA31794.1  hypothetical protein CARUB_v10015016mg [Capsella rubella]                                                                                                                                                                                                                                                                                                                                                                                                                                                                                                                                                                                                                    | 82   | 82   | 1.00E-28  | 100.0  | 86.6 | 91.5  | hypothetical protein CARUB_v10015016mg                  | gbpln | Capsella rubella     | AT2G18328.1   Symbols: ATRL4, RL4   RAD-like 4   chr2:7964478-7964711 FORWARD LENGTH=77                                                                  | 82   | 77   | 4.00E-28  | 93.9  | 65.9 | 72.0  |
| Rsa1.0_00571.1.g16215.t1 | gb EOA30093.1  hypothetical protein CARUB_v10013202mg [Capsella rubella]                                                                                                                                                                                                                                                                                                                                                                                                                                                                                                                                                                                                                    | 634  | 631  | 0         | 99.5   | 87.9 | 92.6  | hypothetical protein CARUB_v10013202mg                  | gbpln | Capsella rubella     | AT2G18330.1   Symbols:   AAA-type ATPase family protein   chr2:7965829-7966915 FORWARD LENGTH=636                                                        | 634  | 636  | 0         | 100.3 | 88.0 | 93.1  |
| Rsa1.0_00571.1.g16216.t1 | gb EOA32387.1  hypothetical protein CARUB_v10015657mg [Capsella rubella]                                                                                                                                                                                                                                                                                                                                                                                                                                                                                                                                                                                                                    | 374  | 313  | 1.00E-143 | 83.7   | 65.5 | 71.4  | hypothetical protein CARUB_v10015657mg                  | gbpln | Capsella rubella     | AT2G18360.1   Symbols:   alpha/beta-Hydrolases superfamily protein   chr2:7976848-7979221 REVERSE LENGTH=313                                             | 374  | 313  | 1.00E-145 | 83.7  | 65.0 | 71.9  |
| Rsa1.0_00571.1.g16217.t1 | ref NP_179430.1  ADP-ribosylation factor-like 2 [Arabidopsis thaliana]<br>gi 11131460 sp Q9ZPX1.1 ARF5_ARATH RecName: Full=Probable ADP-ribosylation factor At2g18390<br>gi 20514265 gb AAM22961.1 AF486852.1 ARL2 G-protein [Arabidopsis thaliana]<br>gi 4309728 gb AAD15498.1  putative ADP-ribosylation factor [Arabidopsis thaliana] gi 14334672 gb AAK59514.1  putative ADP-ribosylation factor [Arabidopsis thaliana]<br>gi 17104667 gb AAL34222.1  putative ADP-ribosylation factor [Arabidopsis thaliana] gi 21593903 gb AAM65870.1  putative ADP-ribosylation factor [Arabidopsis thaliana]<br>gi 330251670 gb AEC06764.1  probable ADP-ribosylation factor [Arabidopsis thaliana] | 185  | 185  | 1.00E-100 | 100.0  | 98.9 | 100.0 | ADP-ribosylation factor-like 2                          | gbpln | Arabidopsis thaliana | AT2G18390.1   Symbols: TTN5, HAL, ARL2, ATARL1   ADP-ribosylation factor family protein   chr2:7988335-7989374 FORWARD LENGTH=185                        | 185  | 185  | 1.00E-103 | 100.0 | 98.9 | 100.0 |
| Rsa1.0_00571.1.g16218.t1 | ref XP_004143514.1  PREDICTED: 60S ribosomal protein L6, mitochondrial-like [Cucumis sativus]<br>gi 449496483 ref XP_004160146.1  PREDICTED: 60S ribosomal protein L6, mitochondrial-like [Cucumis sativus]                                                                                                                                                                                                                                                                                                                                                                                                                                                                                 | 102  | 102  | 1.00E-47  | 100.0  | 91.2 | 94.1  | PREDICTED: 60S ribosomal protein L6, mitochondrial-like | gbpln | Cucumis sativus      | AT2G18400.1   Symbols:   ribosomal protein L6 family protein   chr2:7989665-7989973 REVERSE LENGTH=102                                                   | 102  | 102  | 6.00E-48  | 100.0 | 88.2 | 88.2  |
| Rsa1.0_00571.1.g16219.t2 | dbj BAJ33909.1  unnamed protein product [Thellungiella halophila]                                                                                                                                                                                                                                                                                                                                                                                                                                                                                                                                                                                                                           | 537  | 534  | 0         | 99.4   | 81.9 | 86.4  | unnamed protein product                                 | ----  | ----                 | AT1G44446.1   Symbols: CH1, ATCAO, CAO   Pheophorbide a oxygenase family protein with Rieske [2Fe-2S] domain   chr1:16848664-16851152 REVERSE LENGTH=536 | 537  | 536  | 0         | 99.8  | 79.5 | 84.7  |
| Rsa1.0_00571.1.g16220.t1 | ref NP_176586.1  serpin-Z1 [Arabidopsis thaliana]<br>gi 189029934 sp Q9SH52.2 SPZ1_ARAT H RecName: Full=Serpins-Z1; AltName: Full=ArathZ1<br>gi 332196061 gb AEE34182.1  serpin-Z1 [Arabidopsis thaliana]                                                                                                                                                                                                                                                                                                                                                                                                                                                                                   | 308  | 385  | 1.00E-115 | 125.0  | 74.7 | 83.8  | serpin-Z1                                               | gbpln | Arabidopsis thaliana | AT1G64030.1   Symbols: ATSRP3, SRP3   serpin 3   chr1:23752873-23754348 REVERSE LENGTH=385                                                               | 308  | 385  | 1.00E-117 | 125.0 | 74.7 | 83.8  |
| Rsa1.0_00572.1.g16221.t1 | #                                                                                                                                                                                                                                                                                                                                                                                                                                                                                                                                                                                                                                                                                           | #    | #    | #         | #      | #    | -     | ----                                                    | ----  | #                    | #                                                                                                                                                        | #    | #    | #         | #     | #    |       |
| Rsa1.0_00572.1.g16222.t1 | #                                                                                                                                                                                                                                                                                                                                                                                                                                                                                                                                                                                                                                                                                           | #    | #    | #         | #      | #    | -     | ----                                                    | ----  | #                    | #                                                                                                                                                        | #    | #    | #         | #     | #    |       |
| Rsa1.0_00572.1.g16223.t2 | gb AAF24584.1 AC007764_26 F22C12.1 [Arabidopsis thaliana]                                                                                                                                                                                                                                                                                                                                                                                                                                                                                                                                                                                                                                   | 171  | 3290 | 2.00E-30  | 1924.0 | 42.7 | 48.0  | F22C12.1                                                | gbpln | Arabidopsis thaliana | AT1G64255.1   Symbols:   MuDR family transposase   chr1:23844954-23847206 FORWARD LENGTH=750                                                             | 171  | 750  | 9.00E-33  | 438.6 | 42.7 | 48.0  |
| Rsa1.0_00572.1.g16224.t1 | gb AAD19784.1  putative retroelement pol polyprotein [Arabidopsis thaliana]                                                                                                                                                                                                                                                                                                                                                                                                                                                                                                                                                                                                                 | 1490 | 1501 | 0         | 100.7  | 57.8 | 73.4  | putative retroelement pol polyprotein                   | gbpln | Arabidopsis thaliana | AT4G23160.1   Symbols: CRK8   cysteine-rich RLK (RECEPTOR-like protein kinase) 8   chr4:12129485-12134086 FORWARD LENGTH=1262                            | 1490 | 1262 | 1.00E-142 | 84.7  | 16.2 | 22.8  |
| Rsa1.0_00572.1.g16225.t1 | gb AAC69114.1  putative gag-protease polyprotein [Arabidopsis thaliana]                                                                                                                                                                                                                                                                                                                                                                                                                                                                                                                                                                                                                     | 385  | 627  | 2.00E-41  | 162.9  | 24.9 | 36.4  | putative gag-protease polyprotein                       | gbpln | Arabidopsis thaliana | #                                                                                                                                                        | #    | #    | #         | #     | #    |       |
| Rsa1.0_00572.1.g16226.t1 | dbj BAB09379.1  non-LTR retroelement reverse transcriptase-like protein [Arabidopsis thaliana]                                                                                                                                                                                                                                                                                                                                                                                                                                                                                                                                                                                              | 727  | 1223 | 0         | 168.2  | 47.3 | 65.3  | non-LTR retroelement reverse transcriptase-like protein | gbpln | Arabidopsis thaliana | AT3G24255.1   Symbols:   RNA-directed DNA polymerase (reverse transcriptase)-related family protein   chr3:8789471-8793208 FORWARD LENGTH=746            | 727  | 746  | 2.00E-71  | 102.6 | 20.1 | 27.5  |

|                          |                                                                                                                                                                                                                                                                                                                                                                                                                                                                                                                                                                                                                                                                                                                                                                                                                                                                       |      |      |           |       |      |      |                                                   |       |                      |                                                                                                                              |      |      |           |       |      |      |
|--------------------------|-----------------------------------------------------------------------------------------------------------------------------------------------------------------------------------------------------------------------------------------------------------------------------------------------------------------------------------------------------------------------------------------------------------------------------------------------------------------------------------------------------------------------------------------------------------------------------------------------------------------------------------------------------------------------------------------------------------------------------------------------------------------------------------------------------------------------------------------------------------------------|------|------|-----------|-------|------|------|---------------------------------------------------|-------|----------------------|------------------------------------------------------------------------------------------------------------------------------|------|------|-----------|-------|------|------|
| Rsa1.0_00572.1.g16227.t1 | gb[EOA39981.1] hypothetical protein CARUB_v10008669mg [Capsella rubella]                                                                                                                                                                                                                                                                                                                                                                                                                                                                                                                                                                                                                                                                                                                                                                                              | 584  | 586  | 0         | 100.3 | 91.8 | 96.4 | hypothetical protein CARUB_v10008669mg            | gbpln | Capsella rubella     | AT1G17120.1   Symbols: CAT8   cationic amino acid transporter 8   chr1:5851964-5853736 FORWARD LENGTH=590                    | 584  | 590  | 0         | 101.0 | 92.1 | 96.9 |
| Rsa1.0_00572.1.g16228.t1 | gb[ABD65000.1] hypothetical protein 26.t00020 [Brassica oleracea]                                                                                                                                                                                                                                                                                                                                                                                                                                                                                                                                                                                                                                                                                                                                                                                                     | 281  | 302  | 3.00E-78  | 107.5 | 55.9 | 69.4 | hypothetical protein 26.t00020                    | gbpln | Brassica oleracea    | AT3G47600.1   Symbols:   DNA binding   chr3:17577483-17578391 REVERSE LENGTH=302                                             | 281  | 302  | 5.00E-52  | 107.5 | 41.6 | 57.3 |
| Rsa1.0_00572.1.g16229.t2 | # # # # # # # #                                                                                                                                                                                                                                                                                                                                                                                                                                                                                                                                                                                                                                                                                                                                                                                                                                                       |      |      |           |       |      |      | -                                                 | ----  | ----                 | # # # # # # # #                                                                                                              |      |      |           |       |      |      |
| Rsa1.0_00572.1.g16230.t1 | gb[EOA11936.1] hypothetical protein CARUB_v10016547mg, partial [Capsella rubella]                                                                                                                                                                                                                                                                                                                                                                                                                                                                                                                                                                                                                                                                                                                                                                                     | 196  | 149  | 7.00E-17  | 76.0  | 21.9 | 28.1 | hypothetical protein CARUB_v10016547mg, partial   | gbpln | Capsella rubella     | #                                                                                                                            | #    | #    | #         | #     | #    | #    |
| Rsa1.0_00572.1.g16231.t1 | gb[EOA36632.1] hypothetical protein CARUB_v10011872mg [Capsella rubella]                                                                                                                                                                                                                                                                                                                                                                                                                                                                                                                                                                                                                                                                                                                                                                                              | 2233 | 2254 | 0         | 100.9 | 94.7 | 97.9 | hypothetical protein CARUB_v10011872mg            | gbpln | Capsella rubella     | AT1G36160.2   Symbols: ACC1   acetyl-CoA carboxylase 1   chr1:13534196-13543773 FORWARD LENGTH=2254                          | 2233 | 2254 | 0         | 100.9 | 94.4 | 97.4 |
| Rsa1.0_00573.1.g16232.t1 | gb[AAC95212.1] Mutator-like transposase [Arabidopsis thaliana]                                                                                                                                                                                                                                                                                                                                                                                                                                                                                                                                                                                                                                                                                                                                                                                                        | 1014 | 915  | 1.00E-165 | 90.2  | 27.4 | 39.3 | Mutator-like transposase                          | gbpln | Arabidopsis thaliana | AT1G64260.1   Symbols:   MuDR family transposase   chr1:23847756-23849915 FORWARD LENGTH=719                                 | 1014 | 719  | 5.00E-39  | 70.9  | 13.0 | 23.3 |
| Rsa1.0_00573.1.g16233.t2 | gb[ABD64941.1] Ulp1 protease family protein [Brassica oleracea]                                                                                                                                                                                                                                                                                                                                                                                                                                                                                                                                                                                                                                                                                                                                                                                                       | 904  | 871  | 1.00E-155 | 96.3  | 40.5 | 57.6 | Ulp1 protease family protein                      | gbpln | Brassica oleracea    | AT2G07240.1   Symbols:   cysteine-type peptidases:cysteine-type peptidases   chr2:3007102-3011701 REVERSE LENGTH=874         | 904  | 874  | 3.00E-36  | 96.7  | 9.6  | 15.7 |
| Rsa1.0_00573.1.g16234.t2 | gb[EOA25699.1] hypothetical protein CARUB_v10019052mg [Capsella rubella]                                                                                                                                                                                                                                                                                                                                                                                                                                                                                                                                                                                                                                                                                                                                                                                              | 692  | 1016 | 0         | 146.8 | 57.8 | 65.9 | hypothetical protein CARUB_v10019052mg            | gbpln | Capsella rubella     | AT2G02220.1   Symbols: ATPSKR1, PSKR1   phytoosulfokin receptor 1   chr2:584098-587124 REVERSE LENGTH=1008                   | 692  | 1008 | 1.00E-165 | 145.7 | 47.7 | 53.9 |
| Rsa1.0_00573.1.g16235.t1 | ref[NP_172188.1] 60S ribosomal protein L35a-1 [Arabidopsis thaliana]<br>gi[297843500]ref[XP_002889631.1] 60S ribosomal protein L35a [Arabidopsis lyrata subsp. lyrata]<br>gi[75174783]sp[O9L.MK0.1]R35A1_ARAT H RecName: Full=60S ribosomal protein L35a-1<br>gi[8954039]gb[AAF82213.1]AC067971_21 Strong similarity to a ribosomal protein from Arabidopsis thaliana gb[AL161667]. It contains a ribosomal protein L35Ae domain PF01247 [Arabidopsis thaliana]<br>gi[21555376]gb[AAM63844.1] ribosomal protein, putative [Arabidopsis thaliana]<br>gi[26453120]dbj[BAC43636.1] unknown protein [Arabidopsis thaliana]<br>gi[28416859]gb[AAO42960.1] At1g07070 [Arabidopsis thaliana]<br>gi[297335473]gb[EFH65890.1] 60S ribosomal protein L35a [Arabidopsis lyrata subsp. lyrata]<br>gi[332189953]gb[AEE28074.1] 60S ribosomal protein L35a-1 [Arabidopsis thaliana] | 96   | 112  | 1.00E-44  | 116.7 | 96.9 | 99.0 | 60S ribosomal protein L35a-1                      | gbpln | Arabidopsis lyrata   | AT1G07070.1   Symbols:   Ribosomal protein L35Ae family protein   chr1:2168652-2169703 FORWARD LENGTH=112                    | 96   | 112  | 2.00E-47  | 116.7 | 96.9 | 99.0 |
| Rsa1.0_00573.1.g16236.t1 | ref[XP_002888971.1] ATHSP101 [Arabidopsis lyrata subsp. lyrata]<br>gi[297334812]gb[EFH65230.1] ATHSP101 [Arabidopsis lyrata subsp. lyrata]                                                                                                                                                                                                                                                                                                                                                                                                                                                                                                                                                                                                                                                                                                                            | 916  | 911  | 0         | 99.5  | 93.9 | 97.2 | ATHSP101                                          | gbpln | Arabidopsis lyrata   | AT1G74310.1   Symbols: ATHSP101, HSP101, HOT1   heat shock protein 101   chr1:27936715-27939862 REVERSE LENGTH=911           | 916  | 911  | 0         | 99.5  | 92.0 | 95.5 |
| Rsa1.0_00573.1.g16237.t1 | ref[XP_002888973.1] zinc finger family protein [Arabidopsis lyrata subsp. lyrata]<br>gi[297334814]gb[EFH65232.1] zinc finger family protein [Arabidopsis lyrata subsp. lyrata]                                                                                                                                                                                                                                                                                                                                                                                                                                                                                                                                                                                                                                                                                        | 225  | 259  | 2.00E-93  | 115.1 | 78.2 | 86.7 | zinc finger family protein                        | gbpln | Arabidopsis lyrata   | AT1G74370.1   Symbols:   RING/U-box superfamily protein   chr1:27958200-27958985 REVERSE LENGTH=261                          | 225  | 261  | 4.00E-94  | 116.0 | 77.8 | 86.7 |
| Rsa1.0_00573.1.g16238.t1 | ref[XP_002897538.1] galactosyl transferase GMA12/MNN10 family protein [Arabidopsis lyrata subsp. lyrata]<br>gi[297333379]gb[EFH63797.1] galactosyl transferase GMA12/MNN10 family protein [Arabidopsis lyrata subsp. lyrata]                                                                                                                                                                                                                                                                                                                                                                                                                                                                                                                                                                                                                                          | 459  | 457  | 0         | 99.6  | 93.5 | 95.2 | galactosyl transferase GMA12/MNN10 family protein | gbpln | Arabidopsis lyrata   | AT1G74380.1   Symbols: XXT5   xyloglucan xylosyltransferase 5   chr1:27959848-27961221 FORWARD LENGTH=457                    | 459  | 457  | 0         | 99.6  | 92.8 | 95.0 |
| Rsa1.0_00573.1.g16239.t1 | ref[XP_002897539.1] hypothetical protein ARALYDRAFT_339633 [Arabidopsis lyrata subsp. lyrata]<br>gi[297333380]gb[EFH63798.1] hypothetical protein ARALYDRAFT_339633 [Arabidopsis lyrata subsp. lyrata]                                                                                                                                                                                                                                                                                                                                                                                                                                                                                                                                                                                                                                                                | 471  | 665  | 0         | 141.2 | 77.7 | 88.1 | hypothetical protein ARALYDRAFT_339633            | gbpln | Arabidopsis lyrata   | AT1G74400.1   Symbols:   Tetratricopeptide repeat (TPR)-like superfamily protein   chr1:27963953-27965341 FORWARD LENGTH=462 | 471  | 462  | 0         | 98.1  | 74.5 | 84.1 |
| Rsa1.0_00573.1.g16240.t1 | ref[NP_974142.1] fucosyltransferase 3 [Arabidopsis thaliana]<br>gi[332197469]gb[AEI35590.1] fucosyltransferase 3 [Arabidopsis thaliana]                                                                                                                                                                                                                                                                                                                                                                                                                                                                                                                                                                                                                                                                                                                               | 503  | 525  | 0         | 104.4 | 77.1 | 87.5 | fucosyltransferase 3                              | gbpln | Arabidopsis thaliana | AT1G74420.2   Symbols: FUT3, ATFUT3   fucosyltransferase 3   chr1:27968021-27969799 REVERSE LENGTH=525                       | 503  | 525  | 0         | 104.4 | 77.1 | 87.5 |

|                          |                                                                                                                                                                                                                                                                                                                                                                                                                                                                                                                                                                               |     |      |           |       |      |      |                                                         |       |                      |                                                                                                                                                 |     |     |           |       |      |      |
|--------------------------|-------------------------------------------------------------------------------------------------------------------------------------------------------------------------------------------------------------------------------------------------------------------------------------------------------------------------------------------------------------------------------------------------------------------------------------------------------------------------------------------------------------------------------------------------------------------------------|-----|------|-----------|-------|------|------|---------------------------------------------------------|-------|----------------------|-------------------------------------------------------------------------------------------------------------------------------------------------|-----|-----|-----------|-------|------|------|
| Rsa1.0_00573.1.g16241.t1 | refNP_177583.1  myb domain protein 95 [Arabidopsis thaliana] gi 6715434 gb AAF26414.1 AF217205.1 putative transcription factor [Arabidopsis thaliana] gi 12324794 gb AA52356.1 AC011765.8 putative MYB family transcription factor: 31729-33438 [Arabidopsis thaliana] gi 26451798 dbj BAC42993.1  putative transcription factor MYB95 [Arabidopsis thaliana] gi 28950825 gb AAO63336.1  At1g74430 [Arabidopsis thaliana] gi 41619172 gb AAS10040.1  MYB transcription factor [Arabidopsis thaliana] gi 332197470 gb AEE35591.1  myb domain protein 95 [Arabidopsis thaliana] | 277 | 271  | 2.00E-85  | 97.8  | 63.2 | 73.6 | myb domain protein 95                                   | gbpln | Arabidopsis thaliana | AT1G74430.1   Symbols: MYB95, ATMYB95, ATMYBCP66   myb domain protein 95   chr1:27975409-27977118 FORWARD LENGTH=271                            | 277 | 271 | 4.00E-88  | 97.8  | 63.2 | 73.6 |
| Rsa1.0_00573.1.g16242.t1 | #                                                                                                                                                                                                                                                                                                                                                                                                                                                                                                                                                                             | #   | #    | #         | #     | #    | #    | -                                                       | ----  | ----                 | #                                                                                                                                               | #   | #   | #         | #     | #    |      |
| Rsa1.0_00573.1.g16243.t1 | refNP_177583.1  myb domain protein 95 [Arabidopsis thaliana] gi 6715434 gb AAF26414.1 AF217205.1 putative transcription factor [Arabidopsis thaliana] gi 12324794 gb AA52356.1 AC011765.8 putative MYB family transcription factor: 31729-33438 [Arabidopsis thaliana] gi 26451798 dbj BAC42993.1  putative transcription factor MYB95 [Arabidopsis thaliana] gi 28950825 gb AAO63336.1  At1g74430 [Arabidopsis thaliana] gi 41619172 gb AAS10040.1  MYB transcription factor [Arabidopsis thaliana] gi 332197470 gb AEE35591.1  myb domain protein 95 [Arabidopsis thaliana] | 273 | 271  | 2.00E-90  | 99.3  | 66.7 | 79.5 | myb domain protein 95                                   | gbpln | Arabidopsis thaliana | AT1G74430.1   Symbols: MYB95, ATMYB95, ATMYBCP66   myb domain protein 95   chr1:27975409-27977118 FORWARD LENGTH=271                            | 273 | 271 | 6.00E-93  | 99.3  | 66.7 | 79.5 |
| Rsa1.0_00573.1.g16244.t1 | #                                                                                                                                                                                                                                                                                                                                                                                                                                                                                                                                                                             | #   | #    | #         | #     | #    | #    | -                                                       | ----  | ----                 | #                                                                                                                                               | #   | #   | #         | #     | #    |      |
| Rsa1.0_00574.1.g16245.t1 | gb ACN65499.1  chloroplast carboxyltransferase alpha subunit isoform 1 [Brassica rapa]                                                                                                                                                                                                                                                                                                                                                                                                                                                                                        | 775 | 770  | 0         | 99.4  | 94.2 | 96.6 | chloroplast carboxyltransferase alpha subunit isoform 1 | gbpln | Brassica rapa        | AT2G38040.2   Symbols: CAC3   acetyl Co-enzyme a carboxylase carboxyltransferase alpha subunit   chr2:15917612-15920749 FORWARD LENGTH=769      | 775 | 769 | 0         | 99.2  | 81.0 | 88.0 |
| Rsa1.0_00574.1.g16246.t1 | refXP_002865572.1  eukaryotic release factor 1-1 [Arabidopsis lyrata subsp. lyrata] gi 297311407 gb EFH41831.1  eukaryotic release factor 1-1 [Arabidopsis lyrata subsp. lyrata]                                                                                                                                                                                                                                                                                                                                                                                              | 283 | 436  | 1.00E-104 | 154.1 | 67.1 | 79.9 | eukaryotic release factor 1-1                           | gbpln | Arabidopsis lyrata   | AT5G47880.2   Symbols: ERF1-1   eukaryotic release factor 1-1   chr5:19386555-19387865 REVERSE LENGTH=436                                       | 283 | 436 | 1.00E-106 | 154.1 | 66.4 | 79.5 |
| Rsa1.0_00574.1.g16247.t1 | dbj BAK41511.1  polyprotein [Arabidopsis thaliana]                                                                                                                                                                                                                                                                                                                                                                                                                                                                                                                            | 223 | 1466 | 4.00E-23  | 657.4 | 37.7 | 48.9 | polyprotein                                             | gbpln | Arabidopsis thaliana | #                                                                                                                                               | #   | #   | #         | #     | #    |      |
| Rsa1.0_00574.1.g16248.t1 | gb EOA27596.1  hypothetical protein CARUB_v10023736mg [Capsella rubella]                                                                                                                                                                                                                                                                                                                                                                                                                                                                                                      | 297 | 299  | 1.00E-160 | 100.7 | 91.2 | 94.9 | hypothetical protein CARUB_v10023736mg                  | gbpln | Capsella rubella     | AT2G38090.1   Symbols:   Duplicated homeodomain-like superfamily protein   chr2:15945278-15946775 FORWARD LENGTH=298                            | 297 | 298 | 1.00E-158 | 100.3 | 92.3 | 96.0 |
| Rsa1.0_00574.1.g16249.t1 | #                                                                                                                                                                                                                                                                                                                                                                                                                                                                                                                                                                             | #   | #    | #         | #     | #    | #    | -                                                       | ----  | ----                 | #                                                                                                                                               | #   | #   | #         | #     | #    |      |
| Rsa1.0_00574.1.g16250.t1 | gb AAF69169.1 AC007915.21 F27F5.21 [Arabidopsis thaliana]                                                                                                                                                                                                                                                                                                                                                                                                                                                                                                                     | 253 | 1023 | 5.00E-32  | 404.3 | 31.6 | 41.9 | F27F5.21                                                | gbpln | Arabidopsis thaliana | AT2G34320.1   Symbols:   Polynucleotidyl transferase, ribonuclease H-like superfamily protein   chr2:14484959-14485837 FORWARD LENGTH=292       | 253 | 292 | 4.00E-13  | 115.4 | 18.2 | 27.3 |
| Rsa1.0_00574.1.g16251.t1 | dbj BAB02990.1  retroelement pol polyprotein-like [Arabidopsis thaliana]                                                                                                                                                                                                                                                                                                                                                                                                                                                                                                      | 265 | 1250 | 6.00E-19  | 471.7 | 16.2 | 22.3 | retroelement pol polyprotein-like                       | gbpln | Arabidopsis thaliana | #                                                                                                                                               | #   | #   | #         | #     | #    |      |
| Rsa1.0_00574.1.g16252.t1 | gb ACZ67478.1  auxin resistant 1 protein [Brassica rapa subsp. oleifera]                                                                                                                                                                                                                                                                                                                                                                                                                                                                                                      | 493 | 493  | 0         | 100.0 | 95.1 | 97.0 | auxin resistant 1 protein                               | gbpln | Brassica rapa        | AT2G38120.1   Symbols: AUX1, WAV5, PIR1, MAP1   Transmembrane amino acid transporter family protein   chr2:15973493-15976792 FORWARD LENGTH=485 | 493 | 485 | 0         | 98.4  | 93.7 | 95.7 |
| Rsa1.0_00574.1.g16253.t1 | refXP_002879730.1  GDSL-motif lipase/hydrolase family protein [Arabidopsis lyrata subsp. lyrata] gi 297325569 gb EFH55989.1  GDSL-motif lipase/hydrolase family protein [Arabidopsis lyrata subsp. lyrata]                                                                                                                                                                                                                                                                                                                                                                    | 265 | 294  | 1.00E-120 | 110.9 | 78.5 | 86.8 | GDSL-motif lipase/hydrolase family protein              | gbpln | Arabidopsis lyrata   | AT2G38180.1   Symbols:   SGNH hydrolase-type esterase superfamily protein   chr2:15997187-15998751 FORWARD LENGTH=312                           | 265 | 312 | 1.00E-122 | 117.7 | 78.5 | 86.0 |

|                          |                                                                                                                                                                                                                                                                                                                                                                                                                                                                                                                                                    |      |      |           |       |      |      |                                                 |       |                      |                                                                                                                                                                   |      |      |           |       |      |      |  |                                                                                                                                                                                                                                                                                                                                                                                                                                                                                                                                                                        |    |    |          |       |      |      |
|--------------------------|----------------------------------------------------------------------------------------------------------------------------------------------------------------------------------------------------------------------------------------------------------------------------------------------------------------------------------------------------------------------------------------------------------------------------------------------------------------------------------------------------------------------------------------------------|------|------|-----------|-------|------|------|-------------------------------------------------|-------|----------------------|-------------------------------------------------------------------------------------------------------------------------------------------------------------------|------|------|-----------|-------|------|------|--|------------------------------------------------------------------------------------------------------------------------------------------------------------------------------------------------------------------------------------------------------------------------------------------------------------------------------------------------------------------------------------------------------------------------------------------------------------------------------------------------------------------------------------------------------------------------|----|----|----------|-------|------|------|
| Rsa1.0_00575.1.g16254.t1 | #                                                                                                                                                                                                                                                                                                                                                                                                                                                                                                                                                  | #    | #    | #         | #     | #    | #    | -                                               | ----  | ----                 |                                                                                                                                                                   |      |      |           |       |      |      |  | AT4G29735.1   Symbols:   unknown protein; FUNCTIONS IN: molecular_function unknown; INVOLVED IN: biological_process unknown; LOCATED IN: endomembrane system; EXPRESSED IN: 23 plant structures; EXPRESSED DURING: 15 growth stages; CONTAINS InterPro DOMAIN/s: Uncharacterised protein family UPF0197 (InterPro:IPR007915); Has 30201 Blast hits to 17322 proteins in 780 species: Archae - 12; Bacteria - 1396; Metazoa - 17338; Fungi - 3422; Plants - 5037; Viruses - 0; Other Eukaryotes - 2996 (source: NCBI BLink).   chr4:14562962-14564277 REVERSE LENGTH=76 | 35 | 76 | 6.00E-11 | 217.1 | 88.6 | 94.3 |
| Rsa1.0_00575.1.g16255.t1 | gb AAB68964.1  trypsin inhibitor propeptide [Brassica oleracea]                                                                                                                                                                                                                                                                                                                                                                                                                                                                                    | 152  | 214  | 1.00E-34  | 140.8 | 53.9 | 67.8 | trypsin inhibitor propeptide                    | gbpln | Brassica oleracea    | AT1G73260.1   Symbols: ATKTI1, KTI1   kunitz trypsin inhibitor 1   chr1:27547410-27548057 REVERSE LENGTH=215                                                      | 152  | 215  | 7.00E-26  | 141.4 | 42.8 | 55.9 |  |                                                                                                                                                                                                                                                                                                                                                                                                                                                                                                                                                                        |    |    |          |       |      |      |
| Rsa1.0_00575.1.g16256.t1 | gb AAB68964.1  trypsin inhibitor propeptide [Brassica oleracea]                                                                                                                                                                                                                                                                                                                                                                                                                                                                                    | 207  | 214  | 5.00E-56  | 103.4 | 58.5 | 71.5 | trypsin inhibitor propeptide                    | gbpln | Brassica oleracea    | AT1G73260.1   Symbols: ATKTI1, KTI1   kunitz trypsin inhibitor 1   chr1:27547410-27548057 REVERSE LENGTH=215                                                      | 207  | 215  | 5.00E-40  | 103.9 | 46.9 | 59.4 |  |                                                                                                                                                                                                                                                                                                                                                                                                                                                                                                                                                                        |    |    |          |       |      |      |
| Rsa1.0_00575.1.g16257.t1 | gb EOA40469.1  hypothetical protein CARUB_v10009194mg [Capsella rubella]                                                                                                                                                                                                                                                                                                                                                                                                                                                                           | 380  | 431  | 1.00E-116 | 113.4 | 65.8 | 76.3 | hypothetical protein CARUB_v10009194mg          | gbpln | Capsella rubella     | AT1G01670.1   Symbols:   RING/U-box superfamily protein   chr1:242943-245163 REVERSE LENGTH=365                                                                   | 380  | 365  | 1.00E-104 | 96.1  | 55.5 | 64.7 |  |                                                                                                                                                                                                                                                                                                                                                                                                                                                                                                                                                                        |    |    |          |       |      |      |
| Rsa1.0_00575.1.g16258.t1 | gb EOA27427.1  hypothetical protein CARUB_v10023560mg, partial [Capsella rubella]                                                                                                                                                                                                                                                                                                                                                                                                                                                                  | 321  | 343  | 1.00E-177 | 106.9 | 95.6 | 98.4 | hypothetical protein CARUB_v10023560mg, partial | gbpln | Capsella rubella     | AT4G29830.1   Symbols: VIP3   Transducin/WD40 repeat-like superfamily protein   chr4:14597728-14599157 FORWARD LENGTH=321                                         | 321  | 321  | 1.00E-180 | 100.0 | 95.6 | 99.1 |  |                                                                                                                                                                                                                                                                                                                                                                                                                                                                                                                                                                        |    |    |          |       |      |      |
| Rsa1.0_00575.1.g16259.t1 | ref NP_194713.1  threonine synthase 1 [Arabidopsis thaliana] gi 20140904 sp Q9S7B5.1 THRC1_ARATH RecName: Full=Threonine synthase 1, chloroplastic; AltName: Full=Protein METHIONINE OVER-ACCUMULATOR 2; Flags: Precursor gi 4850369 db JBA77707.1  threonine synthase [Arabidopsis thaliana] gi 4914408 emb CAB43659.1  threonine synthase [Arabidopsis thaliana] gi 7269883 emb CAB79742.1  threonine synthase [Arabidopsis thaliana] gi 332660284 gb AEE85684.1  threonine synthase 1 [Arabidopsis thaliana]                                    | 526  | 526  | 0         | 100.0 | 91.4 | 94.7 | threonine synthase 1                            | gbpln | Arabidopsis thaliana | AT4G29840.1   Symbols: MTO2, TS   Pyridoxal-5'-phosphate-dependent enzyme family protein   chr4:14599434-14601014 REVERSE LENGTH=526                              | 526  | 526  | 0         | 100.0 | 91.4 | 94.7 |  |                                                                                                                                                                                                                                                                                                                                                                                                                                                                                                                                                                        |    |    |          |       |      |      |
| Rsa1.0_00575.1.g16260.t1 | ref XP_002880694.1  hypothetical protein ARALYDRAFT_901214 [Arabidopsis lyrata subsp. lyrata] gi 297326533 gb EFH56953.1  hypothetical protein ARALYDRAFT_901214 [Arabidopsis lyrata subsp. lyrata]                                                                                                                                                                                                                                                                                                                                                | 294  | 422  | 1.00E-63  | 143.5 | 47.6 | 55.8 | hypothetical protein ARALYDRAFT_901214          | gbpln | Arabidopsis lyrata   | AT5G63820.1   Symbols:   Protein of unknown function (DUF626)   chr5:25541576-25542893 FORWARD LENGTH=225                                                         | 294  | 225  | 9.00E-34  | 76.5  | 31.3 | 40.5 |  |                                                                                                                                                                                                                                                                                                                                                                                                                                                                                                                                                                        |    |    |          |       |      |      |
| Rsa1.0_00575.1.g16261.t1 | ref XP_002880694.1  hypothetical protein ARALYDRAFT_901214 [Arabidopsis lyrata subsp. lyrata] gi 297326533 gb EFH56953.1  hypothetical protein ARALYDRAFT_901214 [Arabidopsis lyrata subsp. lyrata]                                                                                                                                                                                                                                                                                                                                                | 339  | 422  | 7.00E-68  | 124.5 | 42.2 | 50.1 | hypothetical protein ARALYDRAFT_901214          | gbpln | Arabidopsis lyrata   | AT4G29550.1   Symbols:   Protein of unknown function (DUF626)   chr4:14502433-14503763 FORWARD LENGTH=358                                                         | 339  | 358  | 2.00E-39  | 105.6 | 29.5 | 44.8 |  |                                                                                                                                                                                                                                                                                                                                                                                                                                                                                                                                                                        |    |    |          |       |      |      |
| Rsa1.0_00575.1.g16262.t1 | gb EOA15953.1  hypothetical protein CARUB_v10004050mg [Capsella rubella]                                                                                                                                                                                                                                                                                                                                                                                                                                                                           | 1012 | 1034 | 0         | 102.2 | 87.2 | 93.0 | hypothetical protein CARUB_v10004050mg          | gbpln | Capsella rubella     | AT4G29920.1   Symbols:   Double Clp-N motif-containing P-loop nucleoside triphosphate hydrolases superfamily protein   chr4:14632653-14635885 REVERSE LENGTH=1017 | 1012 | 1017 | 0         | 100.5 | 86.8 | 92.3 |  |                                                                                                                                                                                                                                                                                                                                                                                                                                                                                                                                                                        |    |    |          |       |      |      |
| Rsa1.0_00575.1.g16263.t1 | ref NP_001078471.1  transcription factor bHLH27 [Arabidopsis thaliana] gi 75294403 sp Q700E3.1 BH027_ARATH RecName: Full=Transcription factor bHLH27; AltName: Full=Basic helix-loop-helix protein 27; Short=AtbHLH27; Short=bHLH 27; AltName: Full=Transcription factor EN 42; AltName: Full=bHLH transcription factor bHLH027 gi 45935019 gb AAS79544.1  At4g29930 [Arabidopsis thaliana] gi 46367458 emb CAG25855.1  hypothetical protein [Arabidopsis thaliana] gi 332660296 gb AEE85696.1  transcription factor bHLH27 [Arabidopsis thaliana] | 240  | 263  | 1.00E-103 | 109.6 | 79.6 | 86.3 | transcription factor bHLH27                     | gbpln | Arabidopsis thaliana | AT4G29930.3   Symbols:   basic helix-loop-helix (bHLH) DNA-binding superfamily protein   chr4:14644108-14645505 FORWARD LENGTH=263                                | 240  | 263  | 1.00E-105 | 109.6 | 79.6 | 86.3 |  |                                                                                                                                                                                                                                                                                                                                                                                                                                                                                                                                                                        |    |    |          |       |      |      |



|                          |                                                                                                                                                                                                                                                                                                                                                                                                                                                                                                                                                                                                                                     |     |     |           |       |      |      |                                                 |       |                      |                                                                                                                                                                                                                                                                                                                                                                                                                                                                            |     |     |           |       |      |      |
|--------------------------|-------------------------------------------------------------------------------------------------------------------------------------------------------------------------------------------------------------------------------------------------------------------------------------------------------------------------------------------------------------------------------------------------------------------------------------------------------------------------------------------------------------------------------------------------------------------------------------------------------------------------------------|-----|-----|-----------|-------|------|------|-------------------------------------------------|-------|----------------------|----------------------------------------------------------------------------------------------------------------------------------------------------------------------------------------------------------------------------------------------------------------------------------------------------------------------------------------------------------------------------------------------------------------------------------------------------------------------------|-----|-----|-----------|-------|------|------|
| Rsa1.0_00575.1.g16264.t2 | ref[NP_194723.1] Pathogenesis-related homeodomain protein [Arabidopsis thaliana]<br>gi 1346790 sp P48785.1 PRH_ARATH<br>RecName: Full=Pathogenesis-related homeodomain protein; Short=PRHA<br>gi 507220 gb AAA32843.1  homeodomain protein [Arabidopsis thaliana]<br>gi 2501810 gb AAC49836.1  PRHA [Arabidopsis thaliana]<br>gi 4914418 emb CAB43669.1  pathogenesis related homeodomain protein (PRHA) [Arabidopsis thaliana]<br>gi 7269893 emb CAB79752.1  pathogenesis related homeodomain protein (PRHA) [Arabidopsis thaliana]<br>gi 332660298 gb AEE85698.1  Pathogenesis-related homeodomain protein [Arabidopsis thaliana] | 844 | 796 | 0         | 94.3  | 63.0 | 73.5 | Pathogenesis-related homeodomain protein        | gbpln | Arabidopsis thaliana | AT4G29940.1   Symbols: PRHA   pathogenesis related homeodomain protein A   chr4:14648346-14652710 REVERSE LENGTH=796                                                                                                                                                                                                                                                                                                                                                       | 844 | 796 | 0         | 94.3  | 63.0 | 73.5 |
| Rsa1.0_00575.1.g16265.t3 | gb EOA17148.1  hypothetical protein CARUB_v10005416mg [Capsella rubella]                                                                                                                                                                                                                                                                                                                                                                                                                                                                                                                                                            | 175 | 287 | 1.00E-36  | 164.0 | 44.6 | 47.4 | hypothetical protein CARUB_v10005416mg          | gbpln | Capsella rubella     | AT4G29960.1   Symbols:   unknown protein; FUNCTIONS IN: molecular_function unknown; INVOLVED IN: biological_process unknown; LOCATED IN: plasma membrane; EXPRESSED IN: 23 plant structures; EXPRESSED DURING: 15 growth stages; Has 30201 Blast hits to 17322 proteins in 780 species: Archae - 12; Bacteria - 1396; Metazoa - 17338; Fungi - 3422; Plants - 5037; Viruses - 0; Other Eukaryotes - 2996 (source: NCBI BLink).   chr4:14660753-14662274 REVERSE LENGTH=291 | 175 | 291 | 5.00E-39  | 166.3 | 44.6 | 46.9 |
| Rsa1.0_00575.1.g16266.t1 | gb EOA15663.1  hypothetical protein CARUB_v10006130mg [Capsella rubella]                                                                                                                                                                                                                                                                                                                                                                                                                                                                                                                                                            | 90  | 90  | 3.00E-42  | 100.0 | 88.9 | 95.6 | hypothetical protein CARUB_v10006130mg          | gbpln | Capsella rubella     | AT4G30010.1   Symbols:   unknown protein; FUNCTIONS IN: molecular_function unknown; INVOLVED IN: biological_process unknown; LOCATED IN: mitochondrion, plastid; EXPRESSED IN: 26 plant structures; EXPRESSED DURING: 15 growth stages; Has 39 Blast hits to 39 proteins in 18 species: Archae - 0; Bacteria - 0; Metazoa - 0; Fungi - 0; Plants - 39; Viruses - 0; Other Eukaryotes - 0 (source: NCBI BLink).   chr4:14672947-14673219 FORWARD LENGTH=90                  | 90  | 90  | 2.00E-44  | 100.0 | 87.8 | 96.7 |
| Rsa1.0_00575.1.g16267.t2 | ref[XP_002878873.1] predicted protein [Arabidopsis lyrata subsp. lyrata]<br>gi 297324712 gb EFH55132.1  predicted protein [Arabidopsis lyrata subsp. lyrata]                                                                                                                                                                                                                                                                                                                                                                                                                                                                        | 253 | 220 | 8.00E-49  | 87.0  | 43.9 | 55.3 | predicted protein                               | gbpln | Arabidopsis lyrata   | AT5G63820.1   Symbols:   Protein of unknown function (DUF625)   chr5:25541576-25542893 FORWARD LENGTH=225                                                                                                                                                                                                                                                                                                                                                                  | 253 | 225 | 4.00E-23  | 88.9  | 29.6 | 40.3 |
| Rsa1.0_00575.1.g16268.t1 | gb EOA18758.1  hypothetical protein CARUB_v10007364mg [Capsella rubella]                                                                                                                                                                                                                                                                                                                                                                                                                                                                                                                                                            | 412 | 400 | 0         | 97.1  | 88.1 | 91.5 | hypothetical protein CARUB_v10007364mg          | gbpln | Capsella rubella     | AT4G30060.1   Symbols:   Core-2/1-branching beta-1,6-N-acetylglucosaminyltransferase family protein   chr4:14689420-14691519 REVERSE LENGTH=401                                                                                                                                                                                                                                                                                                                            | 412 | 401 | 0         | 97.3  | 87.1 | 92.2 |
| Rsa1.0_00576.1.g16269.t1 | gb EOA14082.1  hypothetical protein CARUB_v10027219mg, partial [Capsella rubella]                                                                                                                                                                                                                                                                                                                                                                                                                                                                                                                                                   | 143 | 180 | 4.00E-77  | 125.9 | 97.9 | 99.3 | hypothetical protein CARUB_v10027219mg, partial | gbpln | Capsella rubella     | AT5G61170.1   Symbols:   Ribosomal protein S19e family protein   chr5:24611158-24612202 FORWARD LENGTH=143                                                                                                                                                                                                                                                                                                                                                                 | 143 | 143 | 1.00E-79  | 100.0 | 99.3 | 99.3 |
| Rsa1.0_00576.1.g16270.t1 | gb EOA14034.1  hypothetical protein CARUB_v10027167mg [Capsella rubella]                                                                                                                                                                                                                                                                                                                                                                                                                                                                                                                                                            | 197 | 198 | 2.00E-74  | 100.5 | 76.1 | 83.2 | hypothetical protein CARUB_v10027167mg          | gbpln | Capsella rubella     | AT5G61130.1   Symbols:   PCOB1   plasmodesmata callose-binding protein 1   chr5:24587438-24589369 REVERSE LENGTH=201                                                                                                                                                                                                                                                                                                                                                       | 197 | 201 | 1.00E-67  | 102.0 | 75.1 | 80.2 |
| Rsa1.0_00576.1.g16271.t1 | #                                                                                                                                                                                                                                                                                                                                                                                                                                                                                                                                                                                                                                   | #   | #   | #         | #     | #    | #    | -                                               | ----  | ----                 | #                                                                                                                                                                                                                                                                                                                                                                                                                                                                          | #   | #   | #         | #     | #    |      |
| Rsa1.0_00576.1.g16272.t1 | ref[XP_002866417.1] zinc ion binding protein [Arabidopsis lyrata subsp. lyrata]<br>gi 297312252 gb EFH42676.1  zinc ion binding protein [Arabidopsis lyrata subsp. lyrata]                                                                                                                                                                                                                                                                                                                                                                                                                                                          | 372 | 437 | 1.00E-144 | 117.5 | 70.7 | 80.1 | zinc ion binding protein                        | gbpln | Arabidopsis lyrata   | AT5G61120.1   Symbols:   BEST Arabidopsis thaliana protein match is: Polynucleotidyl transferase, ribonuclease H-like superfamily protein (TAIR:AT5G61090.1); Has 125 Blast hits to 115 proteins in 16 species: Archae - 0; Bacteria - 0; Metazoa - 22; Fungi - 0; Plants - 102; Viruses - 0; Other Eukaryotes - 1 (source: NCBI BLink).   chr5:24582486-24585030 REVERSE LENGTH=426                                                                                       | 372 | 426 | 1.00E-142 | 114.5 | 69.4 | 79.6 |
| Rsa1.0_00576.1.g16273.t1 | gb EOA14652.1  hypothetical protein CARUB_v10027913mg [Capsella rubella]                                                                                                                                                                                                                                                                                                                                                                                                                                                                                                                                                            | 299 | 228 | 3.00E-12  | 76.3  | 15.1 | 19.4 | hypothetical protein CARUB_v10027913mg          | gbpln | Capsella rubella     | AT5G61100.1   Symbols:   BEST Arabidopsis thaliana protein match is: zinc ion binding (TAIR:AT5G61110.1); Has 1807 Blast hits to 1807 proteins in 277 species: Archae - 0; Bacteria - 0; Metazoa - 736; Fungi - 347; Plants - 385; Viruses - 0; Other Eukaryotes - 339 (source: NCBI BLink).   chr5:24579170-24580327 REVERSE LENGTH=227                                                                                                                                   | 299 | 227 | 1.00E-13  | 75.9  | 14.0 | 18.1 |

|                          |                                                                                                                                                                                                                                                                                                                                                                                                                                                                                                                                                                                                                        |     |     |           |       |      |      |                                                                                |       |                      |                                                                                                                                                                                                                                                                                                                                                          |     |     |           |       |      |      |
|--------------------------|------------------------------------------------------------------------------------------------------------------------------------------------------------------------------------------------------------------------------------------------------------------------------------------------------------------------------------------------------------------------------------------------------------------------------------------------------------------------------------------------------------------------------------------------------------------------------------------------------------------------|-----|-----|-----------|-------|------|------|--------------------------------------------------------------------------------|-------|----------------------|----------------------------------------------------------------------------------------------------------------------------------------------------------------------------------------------------------------------------------------------------------------------------------------------------------------------------------------------------------|-----|-----|-----------|-------|------|------|
| Rsa1.0_00576.1.g16274.t1 | refNP_200914.2  histone deacetylase 5 [Arabidopsis thaliana] gi 75247631 sp Q8RX28.1 HDA5_ARATH RecName: Full=Histone deacetylase 5 gi 20259320 gb AAM13986.1  putative histone deacetylase [Arabidopsis thaliana] gi 21539579 gb AAM53342.1  histone deacetylase-like protein [Arabidopsis thaliana] gi 23197730 gb AAN15392.1  histone deacetylase-like protein [Arabidopsis thaliana] gi 332010034 gb AED97417.1  histone deacetylase 5 [Arabidopsis thaliana]                                                                                                                                                      | 688 | 660 | 0         | 95.9  | 80.2 | 86.5 | histone deacetylase 5                                                          | gbpln | Arabidopsis thaliana | AT5G61060.1   Symbols: HDA05, HDA5, ATHDA5   histone deacetylase 5   chr5:24567137-24570917 REVERSE LENGTH=660                                                                                                                                                                                                                                           | 688 | 660 | 0         | 95.9  | 80.2 | 86.5 |
| Rsa1.0_00576.1.g16275.t1 | refNP_200912.1  uncharacterized protein [Arabidopsis thaliana] gi 9759451 dbj BAB10367.1  unnamed protein product [Arabidopsis thaliana] gi 332010032 gb AED97415.1  uncharacterized protein AT5G61040 [Arabidopsis thaliana]                                                                                                                                                                                                                                                                                                                                                                                          | 548 | 590 | 0         | 107.7 | 78.6 | 86.3 | uncharacterized protein                                                        | gbpln | Arabidopsis thaliana | AT5G61040.1   Symbols:   unknown protein; BEST Arabidopsis thaliana protein match is: unknown protein (TAIR:AT5G08010.1); Has 1807 Blast hits to 1807 proteins in 277 species: Archae - 0; Bacteria - 0; Metazoa - 736; Fungi - 347; Plants - 385; Viruses - 0; Other Eukaryotes - 339 (source: NCBI BLink).   chr5:24562431-24564395 REVERSE LENGTH=590 | 548 | 590 | 0         | 107.7 | 78.6 | 86.3 |
| Rsa1.0_00576.1.g16276.t1 | refNP_200909.1  exocyst complex component 7 [Arabidopsis thaliana] gi 79331752 refNP_001032116.1  exocyst complex component 7 [Arabidopsis thaliana] gi 9759448 dbj BAB10364.1  leucine zipper protein-like [Arabidopsis thaliana] gi 15215764 gb AAK91427.1  AT5G61010 maff19_10 [Arabidopsis thaliana] gi 16974329 gb AAL31149.1  AT5G61010 maff19_10 [Arabidopsis thaliana] gi 222424078 dbj BAH19999.1  AT5G61010 [Arabidopsis thaliana] gi 332010027 gb AED97410.1  exocyst complex component 7 [Arabidopsis thaliana] gi 332010028 gb AED97411.1  exocyst subunit exo70 family protein E2 [Arabidopsis thaliana] | 966 | 639 | 0         | 66.1  | 48.2 | 54.1 | exocyst complex component 7                                                    | gbpln | Arabidopsis thaliana | AT5G61010.2   Symbols: ATEXO70E2, EXO70E2   exocyst subunit exo70 family protein E2   chr5:24554612-24556531 FORWARD LENGTH=639                                                                                                                                                                                                                          | 966 | 639 | 0         | 66.1  | 48.2 | 54.1 |
| Rsa1.0_00576.1.g16277.t1 | refNP_200908.1  Replication factor-A protein 1-like protein [Arabidopsis thaliana] gi 10177323 dbj BAB10649.1  replication protein A1 [Arabidopsis thaliana] gi 28393124 gb AAO41995.1  putative RNA helicase [Arabidopsis thaliana] gi 332010026 gb AED97409.1  Replication factor-A protein 1-like protein [Arabidopsis thaliana]                                                                                                                                                                                                                                                                                    | 626 | 629 | 0         | 100.5 | 88.7 | 94.4 | Replication factor-A protein 1-like protein                                    | gbpln | Arabidopsis thaliana | AT5G61000.1   Symbols: RPA70D, ATRPA70D   Replication factor-A protein 1-related   chr5:24549682-24552641 REVERSE LENGTH=629                                                                                                                                                                                                                             | 626 | 629 | 0         | 100.5 | 88.7 | 94.4 |
| Rsa1.0_00576.1.g16278.t1 | gb EOA13353.1  hypothetical protein CARUB_v10026387mg [Capsella rubella]                                                                                                                                                                                                                                                                                                                                                                                                                                                                                                                                               | 452 | 451 | 0         | 99.8  | 91.4 | 95.6 | hypothetical protein CARUB_v10026387mg                                         | gbpln | Capsella rubella     | AT5G60990.1   Symbols:   DEA(D/H)-box RNA helicase family protein   chr5:24546601-24549148 REVERSE LENGTH=456                                                                                                                                                                                                                                            | 452 | 456 | 0         | 100.9 | 91.6 | 95.1 |
| Rsa1.0_00576.1.g16279.t1 | refNP_200906.2  nuclear transport factor 2 and RNA recognition motif domain-containing protein [Arabidopsis thaliana] gi 10177321 dbj BAB10647.1  unnamed protein product [Arabidopsis thaliana] gi 17063173 gb AAL32982.1  AT5G60980/MSL3_100 [Arabidopsis thaliana] gi 27764908 gb AAO23575.1  AT5G60980/MSL3_100 [Arabidopsis thaliana] gi 332010024 gb AED97407.1  nuclear transport factor 2 and RNA recognition motif domain-containing protein [Arabidopsis thaliana]                                                                                                                                           | 459 | 460 | 0         | 100.2 | 83.0 | 86.3 | nuclear transport factor 2 and RNA recognition motif domain-containing protein | gbpln | Arabidopsis thaliana | AT5G60980.2   Symbols:   Nuclear transport factor 2 (NTF2) family protein with RNA binding (RRM-RBD-RNP motifs) domain   chr5:24543988-24546027 FORWARD LENGTH=460                                                                                                                                                                                       | 459 | 460 | 0         | 100.2 | 83.0 | 86.3 |
| Rsa1.0_00576.1.g16280.t1 | gb EOA13591.1  hypothetical protein CARUB_v10026656mg [Capsella rubella]                                                                                                                                                                                                                                                                                                                                                                                                                                                                                                                                               | 494 | 359 | 1.00E-162 | 72.7  | 63.4 | 67.8 | hypothetical protein CARUB_v10026656mg                                         | gbpln | Capsella rubella     | AT5G60970.1   Symbols: TCP5   TEOSINTE BRANCHED 1, cycloidea and PCF transcription factor 5   chr5:24535570-24536652 REVERSE LENGTH=360                                                                                                                                                                                                                  | 494 | 360 | 1.00E-153 | 72.9  | 61.3 | 66.8 |
| Rsa1.0_00576.1.g16281.t1 | refXP_002876993.1  hypothetical protein ARALYDRAFT_347050 [Arabidopsis lyrata subsp. lyrata] gi 297322831 gb EFH53252.1  hypothetical protein ARALYDRAFT_347050 [Arabidopsis lyrata subsp. lyrata]                                                                                                                                                                                                                                                                                                                                                                                                                     | 483 | 266 | 1.00E-104 | 55.1  | 41.6 | 47.2 | hypothetical protein ARALYDRAFT_347050                                         | gbpln | Arabidopsis lyrata   | AT3G26850.2   Symbols:   histone-lysine N-methyltransferases   chr3:9896541-9897415 REVERSE LENGTH=265                                                                                                                                                                                                                                                   | 483 | 265 | 1.00E-106 | 54.9  | 41.2 | 47.2 |
| Rsa1.0_00576.1.g16282.t1 | gb EOA14973.1  hypothetical protein CARUB_v10028321mg [Capsella rubella]                                                                                                                                                                                                                                                                                                                                                                                                                                                                                                                                               | 484 | 522 | 0         | 107.9 | 82.6 | 89.3 | hypothetical protein CARUB_v10028321mg                                         | gbpln | Capsella rubella     | AT5G60960.1   Symbols:   Pentatricopeptide repeat (PPR) superfamily protein   chr5:24528423-24529988 REVERSE LENGTH=521                                                                                                                                                                                                                                  | 484 | 521 | 0         | 107.6 | 81.6 | 89.5 |

|                          |                                                                                                                                                                                                                                                                                                                                                                                                                                                                                                                                                                                                                                           |      |      |           |        |      |      |                                                                                                                                                  |       |                      |                                                                                                                                                |      |      |           |        |      |      |  |
|--------------------------|-------------------------------------------------------------------------------------------------------------------------------------------------------------------------------------------------------------------------------------------------------------------------------------------------------------------------------------------------------------------------------------------------------------------------------------------------------------------------------------------------------------------------------------------------------------------------------------------------------------------------------------------|------|------|-----------|--------|------|------|--------------------------------------------------------------------------------------------------------------------------------------------------|-------|----------------------|------------------------------------------------------------------------------------------------------------------------------------------------|------|------|-----------|--------|------|------|--|
| Rsa1.0_00576.1.g16283.t1 | refNP_200903.1   COBRA-like protein 5 [Arabidopsis thaliana]<br>gi 34222630 sp Q9FME5.1 COBL5_ARATH<br>H RecName: Full=COBRA-like protein 5;<br>Flags: Precursor<br>gi 10177318 dbj BAB10644.1   unnamed protein product [Arabidopsis thaliana]<br>gi 38566616 gb AAR24198.1   At5g60950 [Arabidopsis thaliana]<br>gi 40824050 gb AAR92332.1   At5g60950 [Arabidopsis thaliana]<br>gi 332010019 gb AED97402.1   COBRA-like protein 5 [Arabidopsis thaliana]<br>refXP_002864711.1   transducin family protein [Arabidopsis lyrata subsp. lyrata] gi 297310546 gb EFH40970.1   transducin family protein [Arabidopsis lyrata subsp. lyrata] | 206  | 204  | 5.00E-93  | 99.0   | 79.6 | 88.3 | COBRA-like protein 5                                                                                                                             | gbpln | Arabidopsis thaliana | AT5G60950.1   Symbols: COBL5   COBRA-like protein 5 precursor   chr5:24527157-24528005 REVERSE LENGTH=204                                      | 206  | 204  | 2.00E-95  | 99.0   | 79.6 | 88.3 |  |
| Rsa1.0_00576.1.g16284.t1 | refXP_002864711.1   transducin family protein [Arabidopsis lyrata subsp. lyrata] gi 297310546 gb EFH40970.1   transducin family protein [Arabidopsis lyrata subsp. lyrata]                                                                                                                                                                                                                                                                                                                                                                                                                                                                | 476  | 429  | 0         | 90.1   | 80.9 | 85.3 | transducin family protein                                                                                                                        | gbpln | Arabidopsis lyrata   | AT5G60940.1   Symbols:   Transducin/WD40 repeat-like superfamily protein   chr5:24523092-24525655 FORWARD LENGTH=429                           | 476  | 429  | 0         | 90.1   | 80.9 | 85.5 |  |
| Rsa1.0_00576.1.g16285.t1 | gb EOA12365.1   hypothetical protein CARUB_v10025749mg [Capsella rubella]                                                                                                                                                                                                                                                                                                                                                                                                                                                                                                                                                                 | 1281 | 1298 | 0         | 101.3  | 87.0 | 92.3 | hypothetical protein CARUB_v10025749mg                                                                                                           | gbpln | Capsella rubella     | AT5G60930.1   Symbols:   P-loop containing nucleoside triphosphate hydrolases superfamily protein   chr5:24515398-24522511 REVERSE LENGTH=1294 | 1281 | 1294 | 0         | 101.0  | 84.4 | 89.6 |  |
| Rsa1.0_00576.1.g16286.t1 | sp Q39202.2 RLK1_ARATH RecName: Full=G-type lectin S-receptor-like serine/threonine-protein kinase RLK1; AltName: Full=Receptor-like protein kinase 1; Flags: Precursor                                                                                                                                                                                                                                                                                                                                                                                                                                                                   | 839  | 832  | 0         | 99.2   | 68.2 | 78.3 | RecName: Full=G-type lectin S-receptor-like serine/threonine-protein kinase RLK1; AltName: Full=Receptor-like protein kinase 1; Flags: Precursor | ----- | -----                | AT5G60900.1   Symbols: RLK1   receptor-like protein kinase 1   chr5:24498467-24501494 REVERSE LENGTH=748                                       | 839  | 748  | 0         | 89.2   | 63.5 | 73.2 |  |
| Rsa1.0_00576.1.g16287.t1 | gb EOA15342.1   hypothetical protein CARUB_v10004135mg [Capsella rubella]                                                                                                                                                                                                                                                                                                                                                                                                                                                                                                                                                                 | 870  | 825  | 0         | 94.8   | 63.4 | 72.5 | hypothetical protein CARUB_v10004135mg                                                                                                           | gbpln | Capsella rubella     | AT5G60900.1   Symbols: RLK1   receptor-like protein kinase 1   chr5:24498467-24501494 REVERSE LENGTH=748                                       | 870  | 748  | 0         | 86.0   | 61.6 | 68.5 |  |
| Rsa1.0_00576.1.g16288.t1 | gb ACR48185.1   MYB domain protein 34-2 [Brassica rapa subsp. pekinensis]                                                                                                                                                                                                                                                                                                                                                                                                                                                                                                                                                                 | 315  | 316  | 1.00E-158 | 100.3  | 86.0 | 92.4 | MYB domain protein 34-2                                                                                                                          | gbpln | Brassica rapa        | AT5G60890.1   Symbols: ATMVB34, ATR1, MYB34   myb domain protein 34   chr5:24495029-24496220 FORWARD LENGTH=295                                | 315  | 295  | 1.00E-129 | 93.7   | 75.6 | 83.2 |  |
| Rsa1.0_00576.1.g16289.t1 | # # # # # # # #                                                                                                                                                                                                                                                                                                                                                                                                                                                                                                                                                                                                                           |      |      |           |        |      |      |                                                                                                                                                  | ----- | -----                | # # # # # # # #                                                                                                                                |      |      |           |        |      |      |  |
| Rsa1.0_00576.1.g16290.t1 | gb EOA32065.1   hypothetical protein CARUB_v10015308mg [Capsella rubella]                                                                                                                                                                                                                                                                                                                                                                                                                                                                                                                                                                 | 112  | 1366 | 7.00E-24  | 1219.6 | 53.6 | 60.7 | hypothetical protein CARUB_v10015308mg                                                                                                           | gbpln | Capsella rubella     | AT3G01320.1   Symbols: SNL1   SIN3-like 1   chr3:106730-113197 FORWARD LENGTH=1372                                                             | 112  | 1372 | 7.00E-21  | 1225.0 | 50.0 | 54.5 |  |
| Rsa1.0_00576.1.g16291.t1 | refXP_002887681.1   binding protein [Arabidopsis lyrata subsp. lyrata] gi 297333522 gb EFH63940.1   binding protein [Arabidopsis lyrata subsp. lyrata]                                                                                                                                                                                                                                                                                                                                                                                                                                                                                    | 277  | 459  | 1.00E-128 | 165.7  | 83.0 | 89.9 | binding protein                                                                                                                                  | gbpln | Arabidopsis lyrata   | AT1G77405.1   Symbols:   Pentatricopeptide repeat (PPR) superfamily protein   chr1:29087145-29088521 FORWARD LENGTH=458                        | 277  | 458  | 1.00E-129 | 165.3  | 82.3 | 88.4 |  |
| Rsa1.0_00576.1.g16292.t1 | refXP_002866400.1   hypothetical protein ARALYDRAFT_919327 [Arabidopsis lyrata subsp. lyrata] gi 297312235 gb EFH42659.1   hypothetical protein ARALYDRAFT_919327 [Arabidopsis lyrata subsp. lyrata]                                                                                                                                                                                                                                                                                                                                                                                                                                      | 260  | 264  | 2.00E-93  | 101.5  | 80.0 | 88.5 | hypothetical protein ARALYDRAFT_919327                                                                                                           | gbpln | Arabidopsis lyrata   | AT5G60880.1   Symbols: BASL   breaking of asymmetry in the stomatal lineage   chr5:24488553-24489703 REVERSE LENGTH=262                        | 260  | 262  | 9.00E-95  | 100.8  | 77.7 | 85.8 |  |
| Rsa1.0_00576.1.g16293.t1 | refXP_002525153.1   protein with unknown function [Ricinus communis] gi 223535612 gb EEF37280.1   protein with unknown function [Ricinus communis]                                                                                                                                                                                                                                                                                                                                                                                                                                                                                        | 180  | 216  | 6.00E-95  | 120.0  | 94.4 | 97.2 | protein with unknown function                                                                                                                    | gbpln | Ricinus communis     | AT5G60860.1   Symbols: AtRABA1f, RABA1f   RAB GTPase homolog A1F   chr5:24484750-24485565 FORWARD LENGTH=217                                   | 180  | 217  | 3.00E-96  | 120.6  | 93.3 | 97.2 |  |
| Rsa1.0_00576.1.g16294.t1 | dbj BAJ34224.1   unnamed protein product [Thellungiella halophila]                                                                                                                                                                                                                                                                                                                                                                                                                                                                                                                                                                        | 302  | 300  | 1.00E-110 | 99.3   | 81.8 | 85.8 | unnamed protein product                                                                                                                          | ----- | -----                | AT5G60850.1   Symbols: OBP4   OBF binding protein 4   chr5:24480578-24481501 FORWARD LENGTH=307                                                | 302  | 307  | 1.00E-108 | 101.7  | 75.2 | 80.8 |  |
| Rsa1.0_00577.1.g16295.t1 | gb EOA33062.1   hypothetical protein CARUB_v10016395mg [Capsella rubella]                                                                                                                                                                                                                                                                                                                                                                                                                                                                                                                                                                 | 182  | 188  | 3.00E-78  | 103.3  | 78.6 | 86.8 | hypothetical protein CARUB_v10016395mg                                                                                                           | gbpln | Capsella rubella     | AT3G13720.1   Symbols: PRA1.F3, PRA8   PRA1 (Prenylated rab acceptor) family protein   chr3:4495202-4495768 REVERSE LENGTH=188                 | 182  | 188  | 2.00E-71  | 103.3  | 75.8 | 85.2 |  |
| Rsa1.0_00577.1.g16296.t1 | refNP_566461.1   PRA1 family protein F3 [Arabidopsis thaliana] gi 75273356 sp Q9LIC6.1 PRIF3_ARATH RecName: Full=PRA1 family protein F3; Short=AtPRA1.F3 gi 9294018 dbj BAB01921.1   unnamed protein product [Arabidopsis thaliana] gi 28393547 gb AAO42194.1   unknown protein [Arabidopsis thaliana] gi 28827282 gb AAO50485.1   unknown protein [Arabidopsis thaliana] gi 332641882 gb AEE75403.1   PRA1 family protein F3 [Arabidopsis thaliana]                                                                                                                                                                                      | 210  | 188  | 4.00E-44  | 89.5   | 51.9 | 63.8 | PRA1 family protein F3                                                                                                                           | gbpln | Arabidopsis thaliana | AT3G13720.1   Symbols: PRA1.F3, PRA8   PRA1 (Prenylated rab acceptor) family protein   chr3:4495202-4495768 REVERSE LENGTH=188                 | 210  | 188  | 1.00E-46  | 89.5   | 51.9 | 63.8 |  |

|                          |                                                                                                                                                                                                                                                                                                                                                                                                                                                                                                                                                                                                                                                                                                                   |     |     |           |       |      |      |                                                                                                |             |                      |                                                                                                                                                |     |     |           |       |      |      |
|--------------------------|-------------------------------------------------------------------------------------------------------------------------------------------------------------------------------------------------------------------------------------------------------------------------------------------------------------------------------------------------------------------------------------------------------------------------------------------------------------------------------------------------------------------------------------------------------------------------------------------------------------------------------------------------------------------------------------------------------------------|-----|-----|-----------|-------|------|------|------------------------------------------------------------------------------------------------|-------------|----------------------|------------------------------------------------------------------------------------------------------------------------------------------------|-----|-----|-----------|-------|------|------|
| Rsa1.0_00577.1.g16297.t1 | gb EOA33062.1  hypothetical protein CARUB_v10016395mg [Capsella rubella]                                                                                                                                                                                                                                                                                                                                                                                                                                                                                                                                                                                                                                          | 213 | 188 | 5.00E-39  | 88.3  | 48.8 | 59.6 | hypothetical protein CARUB_v10016395mg                                                         | gbpln       | Capsella rubella     | AT3G13720.1   Symbols: PRA1.F3, PRA8   PRA1 (Prenylated rab acceptor) family protein   chr3:4495202-4495768 REVERSE LENGTH=188                 | 213 | 188 | 9.00E-40  | 88.3  | 51.2 | 60.1 |
| Rsa1.0_00577.1.g16298.t2 | ref NP_187982.1  protein kinase protein with adenine nucleotide alpha hydrolases-like domain-containing protein [Arabidopsis thaliana] gi 9294015 dbj BAB1918.1  unnamed protein product [Arabidopsis thaliana] gi 332641878 gb AEE75399.1  protein kinase protein with adenine nucleotide alpha hydrolases-like domain-containing protein [Arabidopsis thaliana]                                                                                                                                                                                                                                                                                                                                                 | 763 | 753 | 0         | 98.7  | 89.8 | 93.3 | protein kinase protein with adenine nucleotide alpha hydrolases-like domain-containing protein | gbpln       | Arabidopsis thaliana | AT3G13690.1   Symbols:   Protein kinase protein with adenine nucleotide alpha hydrolases-like domain   chr3:4486920-4490011 FORWARD LENGTH=753 | 763 | 753 | 0         | 98.7  | 89.8 | 93.3 |
| Rsa1.0_00577.1.g16299.t1 | gb EOA29951.1  hypothetical protein CARUB_v10013055mg [Capsella rubella]                                                                                                                                                                                                                                                                                                                                                                                                                                                                                                                                                                                                                                          | 735 | 735 | 0         | 100.0 | 85.2 | 91.3 | hypothetical protein CARUB_v10013055mg                                                         | gbpln       | Capsella rubella     | AT3G13682.1   Symbols: LDL2   LSD1-like2   chr3:4479193-4481509 REVERSE LENGTH=746                                                             | 735 | 746 | 0         | 101.5 | 85.0 | 91.7 |
| Rsa1.0_00577.1.g16300.t1 | gb EOA31950.1  hypothetical protein CARUB_v10014742mg [Capsella rubella]                                                                                                                                                                                                                                                                                                                                                                                                                                                                                                                                                                                                                                          | 185 | 184 | 6.00E-75  | 99.5  | 74.6 | 84.3 | hypothetical protein CARUB_v10014742mg                                                         | gbpln       | Capsella rubella     | AT5G49040.1   Symbols:   Disease resistance-responsive (dirigent-like protein) family protein   chr5:19882676-19883251 REVERSE LENGTH=191      | 185 | 191 | 2.00E-69  | 103.2 | 69.7 | 81.6 |
| Rsa1.0_00577.1.g16301.t1 | ref NP_199715.1  disease resistance-responsive, dirigent domain-containing protein [Arabidopsis thaliana] gi 10177194 dbj BAB10328.1  unnamed protein product [Arabidopsis thaliana] gi 332008382 gb AED95765.1  disease resistance-responsive, dirigent domain-containing protein [Arabidopsis thaliana]                                                                                                                                                                                                                                                                                                                                                                                                         | 169 | 191 | 3.00E-60  | 113.0 | 75.7 | 83.4 | disease resistance-responsive, dirigent domain-containing protein                              | gbpln       | Arabidopsis thaliana | AT5G49040.1   Symbols:   Disease resistance-responsive (dirigent-like protein) family protein   chr5:19882676-19883251 REVERSE LENGTH=191      | 169 | 191 | 1.00E-62  | 113.0 | 75.7 | 83.4 |
| Rsa1.0_00577.1.g16302.t1 | ref NP_187969.1  calmodulin-binding protein-like protein [Arabidopsis thaliana] gi 11994562 dbj BAB02602.1  unnamed protein product [Arabidopsis thaliana] gi 332641860 gb AEE75381.1  calmodulin-binding protein-like protein [Arabidopsis thaliana]                                                                                                                                                                                                                                                                                                                                                                                                                                                             | 111 | 605 | 4.00E-26  | 545.0 | 51.4 | 51.4 | calmodulin-binding protein-like protein                                                        | gbpln       | Arabidopsis thaliana | AT3G13600.1   Symbols:   calmodulin-binding family protein   chr3:4445102-4447383 FORWARD LENGTH=805                                           | 111 | 605 | 7.00E-29  | 545.0 | 51.4 | 51.4 |
| Rsa1.0_00577.1.g16303.t1 | ref XP_002885061.1  oxidoreductase [Arabidopsis lyrata subsp. lyrata] gi 29733090.1 gb EFH61320.1  oxidoreductase [Arabidopsis lyrata subsp. lyrata]                                                                                                                                                                                                                                                                                                                                                                                                                                                                                                                                                              | 184 | 361 | 4.00E-99  | 196.2 | 94.6 | 99.5 | oxidoreductase                                                                                 | gbpln       | Arabidopsis lyrata   | AT3G13610.1   Symbols:   2-oxoglutarate (2OG) and Fe(II)-dependent oxygenase superfamily protein   chr3:4449448-4450616 FORWARD LENGTH=361     | 184 | 361 | 2.00E-98  | 196.2 | 91.3 | 97.8 |
| Rsa1.0_00577.1.g16304.t1 | #                                                                                                                                                                                                                                                                                                                                                                                                                                                                                                                                                                                                                                                                                                                 | #   | #   | #         | #     | #    | -    | ----                                                                                           | ----        | #                    | #                                                                                                                                              | #   | #   | #         | #     | #    |      |
| Rsa1.0_00577.1.g16305.t1 | #                                                                                                                                                                                                                                                                                                                                                                                                                                                                                                                                                                                                                                                                                                                 | #   | #   | #         | #     | #    | -    | ----                                                                                           | ----        | #                    | #                                                                                                                                              | #   | #   | #         | #     | #    |      |
| Rsa1.0_00577.1.g16306.t1 | ref NP_001142677.1  uncharacterized protein LOC100274972 [Zea mays] gi 195608106 gb ACG25883.1  hypothetical protein [Zea mays]                                                                                                                                                                                                                                                                                                                                                                                                                                                                                                                                                                                   | 251 | 249 | 1.00E-115 | 99.2  | 82.5 | 90.0 | uncharacterized protein LOC100274972                                                           | gbenv/gbpln | Zea mays             | AT3G13440.1   Symbols:   S-adenosyl-L-methionine-dependent methyltransferases superfamily protein   chr3:4378338-4379347 FORWARD LENGTH=278    | 251 | 278 | 1.00E-110 | 110.8 | 76.9 | 88.4 |
| Rsa1.0_00577.1.g16307.t1 | #                                                                                                                                                                                                                                                                                                                                                                                                                                                                                                                                                                                                                                                                                                                 | #   | #   | #         | #     | #    | -    | ----                                                                                           | ----        | #                    | #                                                                                                                                              | #   | #   | #         | #     | #    |      |
| Rsa1.0_00577.1.g16308.t1 | ref NP_187110.1  tryptophanyl-tRNA synthetase [Arabidopsis thaliana] gi 145331754 ref NP_001078104.1  tryptophanyl-tRNA synthetase [Arabidopsis thaliana] gi 6175164 gb AAF04890.1 AC011437.5 putative tryptophanyl-tRNA synthetase [Arabidopsis thaliana] gi 19310593 gb AAL85027.1  putative tryptophanyl-tRNA synthetase [Arabidopsis thaliana] gi 21436361 gb AAM51350.1  putative tryptophanyl-tRNA synthetase [Arabidopsis thaliana] gi 110740619 dbj BAE98413.1  putative tryptophanyl-tRNA synthetase [Arabidopsis thaliana] gi 332640582 gb AEE74103.1  tryptophanyl-tRNA synthetase [Arabidopsis thaliana] gi 332640584 gb AEE74105.1  tryptophanyl-tRNA synthetase-like protein [Arabidopsis thaliana] | 450 | 402 | 1.00E-164 | 89.3  | 62.2 | 72.7 | tryptophanyl-tRNA synthetase                                                                   | gbpln       | Arabidopsis thaliana | AT3G04600.3   Symbols:   Nucleotidyl transferase superfamily protein   chr3:1243152-1245958 FORWARD LENGTH=402                                 | 450 | 402 | 1.00E-166 | 89.3  | 62.2 | 72.7 |

|                           |                                                                                                                                                                                                                                                                                                                                                                                                                                                                     |     |     |           |       |      |      |                                                      |       |                      |                                                                                                                                                                                                                                                                                                                                                                                                                                                                                                                                         |     |     |           |       |      |      |
|---------------------------|---------------------------------------------------------------------------------------------------------------------------------------------------------------------------------------------------------------------------------------------------------------------------------------------------------------------------------------------------------------------------------------------------------------------------------------------------------------------|-----|-----|-----------|-------|------|------|------------------------------------------------------|-------|----------------------|-----------------------------------------------------------------------------------------------------------------------------------------------------------------------------------------------------------------------------------------------------------------------------------------------------------------------------------------------------------------------------------------------------------------------------------------------------------------------------------------------------------------------------------------|-----|-----|-----------|-------|------|------|
| Rsa1.0_00577.1.g16309.t1  | gb AAN60225.1  unknown [Arabidopsis thaliana]                                                                                                                                                                                                                                                                                                                                                                                                                       | 309 | 321 | 1.00E-147 | 103.9 | 87.7 | 91.9 | unknown                                              | gbpln | Arabidopsis thaliana | AT3G13410.1   Symbols:   unknown protein; FUNCTIONS IN: molecular_function unknown; INVOLVED IN: biological_process unknown; LOCATED IN: endoplasmic reticulum; EXPRESSED IN: 25 plant structures; EXPRESSED DURING: 15 growth stages; BEST Arabidopsis thaliana protein match is: unknown protein (TAIR:AT1G55546.1); Has 49 Blast hits to 49 proteins in 14 species: Archae - 0; Bacteria - 0; Metazoa - 0; Fungi - 0; Plants - 48; Viruses - 0; Other Eukaryotes - 1 (source: NCBI BLINK).   chr3:4362149-4364032 REVERSE LENGTH=321 | 309 | 321 | 1.00E-148 | 103.9 | 87.4 | 91.3 |
| Rsa1.0_00577.1.g16310.t1  | ref XP_002882820.1  hypothetical protein ARALYDRAFT_478721 [Arabidopsis lyrata subsp. lyrata] gi 297328660 gb EFH59079.1  hypothetical protein ARALYDRAFT_478721 [Arabidopsis lyrata subsp. lyrata]                                                                                                                                                                                                                                                                 | 551 | 551 | 0         | 100.0 | 94.6 | 98.0 | hypothetical protein ARALYDRAFT_478721               | gbpln | Arabidopsis lyrata   | AT3G13400.1   Symbols: sks13   SKU5 similar 13   chr3:4355257-4357305 FORWARD LENGTH=551                                                                                                                                                                                                                                                                                                                                                                                                                                                | 551 | 551 | 0         | 100.0 | 94.4 | 98.0 |
| Rsa1.0_00577.1.g16311.t1  | emb CAA47176.1  Bplo [Brassica napus]                                                                                                                                                                                                                                                                                                                                                                                                                               | 555 | 554 | 0         | 99.8  | 95.3 | 98.0 | Bplo                                                 | gbpln | Brassica napus       | AT1G55570.1   Symbols: sks12   SKU5 similar 12   chr1:20757882-20759771 FORWARD LENGTH=555                                                                                                                                                                                                                                                                                                                                                                                                                                              | 555 | 555 | 0         | 100.0 | 87.6 | 94.2 |
| Rsa1.0_00577.1.g16312.t1  | dbj BAB02805.1  unnamed protein product [Arabidopsis thaliana]                                                                                                                                                                                                                                                                                                                                                                                                      | 399 | 538 | 1.00E-121 | 134.8 | 69.2 | 76.9 | unnamed protein product                              | gbpln | Arabidopsis thaliana | AT3G13360.1   Symbols: WIP3   WPP domain interacting protein 3   chr3:4338472-4339982 REVERSE LENGTH=459                                                                                                                                                                                                                                                                                                                                                                                                                                | 399 | 459 | 1.00E-124 | 115.0 | 69.2 | 76.9 |
| Rsa1.0_00577.1.g16313.t3  | gb EOA30587.1  hypothetical protein CARUB_v10013719mg [Capsella rubella]                                                                                                                                                                                                                                                                                                                                                                                            | 477 | 441 | 0         | 92.5  | 83.2 | 96.8 | hypothetical protein CARUB_v10013719mg               | gbpln | Capsella rubella     | AT3G13320.1   Symbols: CAX2, atcax2   cation exchanger 2   chr3:4315418-4317997 FORWARD LENGTH=441                                                                                                                                                                                                                                                                                                                                                                                                                                      | 477 | 441 | 0         | 92.5  | 82.2 | 86.6 |
| Rsa1.0_00577.1.g16314.t1  | ref XP_002884960.1  DNAJ heat shock N-terminal domain-containing protein [Arabidopsis lyrata subsp. lyrata] gi 297330800 gb EFH61219.1  DNAJ heat shock N-terminal domain-containing protein [Arabidopsis lyrata subsp. lyrata]                                                                                                                                                                                                                                     | 160 | 157 | 8.00E-58  | 98.1  | 76.9 | 83.1 | DNAJ heat shock N-terminal domain-containing protein | gbpln | Arabidopsis lyrata   | AT3G13310.1   Symbols:   Chaperone DnaJ-domain superfamily protein   chr3:4310827-4311300 REVERSE LENGTH=157                                                                                                                                                                                                                                                                                                                                                                                                                            | 160 | 157 | 2.00E-59  | 98.1  | 75.6 | 83.1 |
| Rsa1.0_00577.1.g16315.t12 | ref NP_001189876.1  DNA damage-inducible protein 1 [Arabidopsis thaliana] gi 332641803 gb AEE75324.1  DNA damage-inducible protein 1 [Arabidopsis thaliana]                                                                                                                                                                                                                                                                                                         | 803 | 413 | 0         | 51.4  | 45.1 | 47.4 | DNA damage-inducible protein 1                       | gbpln | Arabidopsis thaliana | AT3G13235.3   Symbols:   ubiquitin family protein   chr3:4271492-4274348 REVERSE LENGTH=413                                                                                                                                                                                                                                                                                                                                                                                                                                             | 803 | 413 | 0         | 51.4  | 45.1 | 47.4 |
| Rsa1.0_00577.1.g16316.t1  | gb EOA29852.1  hypothetical protein CARUB_v10012949mg [Capsella rubella]                                                                                                                                                                                                                                                                                                                                                                                            | 890 | 883 | 0         | 99.2  | 72.4 | 82.4 | hypothetical protein CARUB_v10012949mg               | gbpln | Capsella rubella     | AT3G13225.2   Symbols:   WW domain-containing protein   chr3:4258928-4262853 REVERSE LENGTH=892                                                                                                                                                                                                                                                                                                                                                                                                                                         | 890 | 892 | 0         | 100.2 | 73.6 | 83.7 |
| Rsa1.0_00577.1.g16317.t1  | # # # # # # # # - ---- # # # # # #                                                                                                                                                                                                                                                                                                                                                                                                                                  |     |     |           |       |      |      |                                                      |       |                      |                                                                                                                                                                                                                                                                                                                                                                                                                                                                                                                                         |     |     |           |       |      |      |
| Rsa1.0_00577.1.g16318.t1  | ref NP_683559.2  RNA recognition motif-containing protein [Arabidopsis thaliana] gi 11994764 dbj BAB03120.1  unnamed protein product [Arabidopsis thaliana] gi 19347908 gb AAL85976.1  unknown protein [Arabidopsis thaliana] gi 21689785 gb AAM67536.1  unknown protein [Arabidopsis thaliana] gi 62320244 dbj BAD94504.1  hypothetical protein [Arabidopsis thaliana] gi 332641794 gb AEE75315.1  RNA recognition motif-containing protein [Arabidopsis thaliana] | 368 | 358 | 1.00E-129 | 97.3  | 84.5 | 86.7 | RNA recognition motif-containing protein             | gbpln | Arabidopsis thaliana | AT3G13224.2   Symbols:   RNA-binding (RRM/RBD/RNP motifs) family protein   chr3:4254848-4256621 FORWARD LENGTH=358                                                                                                                                                                                                                                                                                                                                                                                                                      | 368 | 358 | 1.00E-132 | 97.3  | 84.5 | 86.7 |
| Rsa1.0_00577.1.g16319.t2  | gb EOA31950.1  hypothetical protein CARUB_v10015191mg [Capsella rubella]                                                                                                                                                                                                                                                                                                                                                                                            | 558 | 572 | 1.00E-179 | 102.5 | 66.7 | 75.3 | hypothetical protein CARUB_v10015191mg               | gbpln | Capsella rubella     | AT3G13222.1   Symbols: GIP1   GBF-interacting protein 1   chr3:4251287-4254206 REVERSE LENGTH=567                                                                                                                                                                                                                                                                                                                                                                                                                                       | 558 | 567 | 1.00E-169 | 101.6 | 65.6 | 76.2 |
| Rsa1.0_00577.1.g16320.t1  | ref XP_002884953.1  abc transporter family protein [Arabidopsis lyrata subsp. lyrata] gi 297330793 gb EFH61212.1  abc transporter family protein [Arabidopsis lyrata subsp. lyrata]                                                                                                                                                                                                                                                                                 | 681 | 685 | 0         | 100.6 | 93.5 | 97.4 | abc transporter family protein                       | gbpln | Arabidopsis lyrata   | AT3G13220.1   Symbols: WBC27, ABCG26   ABC-2 type transporter family protein   chr3:4247968-4250703 REVERSE LENGTH=685                                                                                                                                                                                                                                                                                                                                                                                                                  | 681 | 685 | 0         | 100.6 | 93.1 | 96.9 |
| Rsa1.0_00577.1.g16321.t1  | gb EOA29633.1  hypothetical protein CARUB_v10014543mg [Capsella rubella]                                                                                                                                                                                                                                                                                                                                                                                            | 254 | 230 | 1.00E-100 | 90.6  | 83.1 | 88.2 | hypothetical protein CARUB_v10014543mg               | gbpln | Capsella rubella     | AT3G13200.1   Symbols: EMB2769   Cwf15 / Cwc15 cell cycle control family protein   chr3:4242239-4243976 FORWARD LENGTH=230                                                                                                                                                                                                                                                                                                                                                                                                              | 254 | 230 | 5.00E-94  | 90.6  | 82.3 | 85.8 |

|                          |                                                                                                                                                                                                                                                                                                                                                                                                                                                               |     |      |           |       |      |      |                                                 |       |                      |                                                                                                                                                                                                                                                                                                                                                                                                                                                            |     |     |           |       |      |      |
|--------------------------|---------------------------------------------------------------------------------------------------------------------------------------------------------------------------------------------------------------------------------------------------------------------------------------------------------------------------------------------------------------------------------------------------------------------------------------------------------------|-----|------|-----------|-------|------|------|-------------------------------------------------|-------|----------------------|------------------------------------------------------------------------------------------------------------------------------------------------------------------------------------------------------------------------------------------------------------------------------------------------------------------------------------------------------------------------------------------------------------------------------------------------------------|-----|-----|-----------|-------|------|------|
| Rsa1.0_00577.1.g16322.t1 | ref NP_187924.2  ribosomal RNA small subunit methyltransferase B [Arabidopsis thaliana] gi 18176252 gb AAL60011.1  putative sun protein fmu [Arabidopsis thaliana] gi 21436219 gb AAM51397.1  putative sun protein fmu [Arabidopsis thaliana] gi 110740623 dbj BAE09415.1  putative sun (fmu) protein [Arabidopsis thaliana] gi 332641785 gb AEE75306.1  NOL1/NOP2/sun family protein / antitermination NusB domain-containing protein [Arabidopsis thaliana] | 680 | 523  | 0         | 76.9  | 70.9 | 72.8 | ribosomal RNA small subunit methyltransferase B | gbpln | Arabidopsis thaliana | AT3G13180.1   Symbols:   NOL1/NOP2/sun family protein / antitermination NusB domain-containing protein   chr3:4236326-4238966 REVERSE LENGTH=523                                                                                                                                                                                                                                                                                                           | 680 | 523 | 0         | 76.9  | 70.9 | 72.8 |
| Rsa1.0_00578.1.g16323.t1 | ref XP_002881353.1  hypothetical protein ARALYDRAFT_902559 [Arabidopsis lyrata subsp. lyrata] gi 297327192 gb EFH57612.1  hypothetical protein ARALYDRAFT_902559 [Arabidopsis lyrata subsp. lyrata]                                                                                                                                                                                                                                                           | 850 | 859  | 0         | 101.1 | 94.4 | 96.9 | hypothetical protein ARALYDRAFT_902559          | gbpln | Arabidopsis lyrata   | AT2G34710.1   Symbols: PHB, ATHB14, ATHB-14, PHB-1D   Homeobox-leucine zipper family protein / lipid-binding START domain-containing protein   chr2:14639548-14643993 REVERSE LENGTH=852                                                                                                                                                                                                                                                                   | 850 | 852 | 0         | 100.2 | 94.7 | 97.3 |
| Rsa1.0_00578.1.g16324.t1 | gb AAB54117.1  putative serine/threonine protein kinase [Brassica rapa]                                                                                                                                                                                                                                                                                                                                                                                       | 431 | 439  | 0         | 101.9 | 94.9 | 97.2 | putative serine/threonine protein kinase        | gbpln | Brassica rapa        | AT2G34650.1   Symbols: PID, ABR   Protein kinase superfamily protein   chr2:14589934-14591557 REVERSE LENGTH=438                                                                                                                                                                                                                                                                                                                                           | 431 | 438 | 0         | 101.6 | 91.2 | 94.9 |
| Rsa1.0_00578.1.g16325.t1 | gb AAG51783.1 AC079679.3 reverse transcriptase, putative; 16838-20266 [Arabidopsis thaliana]                                                                                                                                                                                                                                                                                                                                                                  | 902 | 1142 | 0         | 126.6 | 45.1 | 59.1 | reverse transcriptase, putative; 16838-20266    | gbpln | Arabidopsis thaliana | AT4G29090.1   Symbols:   Ribonuclease H-like superfamily protein   chr4:14333528-14335255 FORWARD LENGTH=575                                                                                                                                                                                                                                                                                                                                               | 902 | 575 | 4.00E-53  | 63.7  | 14.9 | 24.2 |
| Rsa1.0_00578.1.g16326.t1 | ref NP_850233.1  uncharacterized protein [Arabidopsis thaliana] gi 17979357 gb AAL49904.1  unknown protein [Arabidopsis thaliana] gi 21689695 gb AAM67469.1  unknown protein [Arabidopsis thaliana] gi 330253904 gb AEC08998.1  uncharacterized protein AT2G34610 [Arabidopsis thaliana]                                                                                                                                                                      | 407 | 290  | 2.00E-76  | 71.3  | 40.0 | 47.2 | uncharacterized protein                         | gbpln | Arabidopsis thaliana | AT2G34610.1   Symbols:   unknown protein; BEST Arabidopsis thaliana protein match is: unknown protein (TAIR:AT1G30190.1). Has 342 Blast hits to 279 proteins in 74 species: Archae - 0; Bacteria - 7; Metazoa - 76; Fungi - 18; Plants - 51; Viruses - 0; Other Eukaryotes - 190 (source: NCBI BLINK).   chr2:14575467-14576339 FORWARD LENGTH=290                                                                                                         | 407 | 290 | 4.00E-79  | 71.3  | 40.0 | 47.2 |
| Rsa1.0_00578.1.g16327.t2 | #                                                                                                                                                                                                                                                                                                                                                                                                                                                             | #   | #    | #         | #     | #    | #    | -                                               | ----  | ----                 | #                                                                                                                                                                                                                                                                                                                                                                                                                                                          | #   | #   | #         | #     | #    |      |
| Rsa1.0_00578.1.g16328.t1 | ref NP_181007.1  protein TIFY 5B [Arabidopsis thaliana] gi 75099146 sp O64687.1 TIF5B_ARATH RecName: Full=Protein TIFY 5B; AltName: Full=Jasmonate ZIM domain-containing protein 7 gi 3128215 gb AAC26695.1  hypothetical protein [Arabidopsis thaliana] gi 38454058 gb AAR20723.1  At2g34600 [Arabidopsis thaliana] gi 38603996 gb AAR24741.1  At2g34600 [Arabidopsis thaliana] gi 330253903 gb AEC08997.1  protein TIFY 5B [Arabidopsis thaliana]           | 122 | 148  | 1.00E-43  | 121.3 | 75.4 | 86.9 | protein TIFY 5B                                 | gbpln | Arabidopsis thaliana | AT2G34600.1   Symbols: JAZ7, TIFY5B   jasmonate-zim-domain protein 7   chr2:14573172-14573718 FORWARD LENGTH=148                                                                                                                                                                                                                                                                                                                                           | 122 | 148 | 2.00E-46  | 121.3 | 75.4 | 86.9 |
| Rsa1.0_00578.1.g16329.t1 | ref XP_002881345.1  hypothetical protein ARALYDRAFT_902544 [Arabidopsis lyrata subsp. lyrata] gi 297327184 gb EFH57604.1  hypothetical protein ARALYDRAFT_902544 [Arabidopsis lyrata subsp. lyrata]                                                                                                                                                                                                                                                           | 86  | 81   | 6.00E-20  | 94.2  | 79.1 | 83.7 | hypothetical protein ARALYDRAFT_902544          | gbpln | Arabidopsis lyrata   | AT2G34585.1   Symbols:   unknown protein; FUNCTIONS IN: molecular function unknown; INVOLVED IN: biological process unknown; LOCATED IN: plasma membrane, vacuole; EXPRESSED IN: 24 plant structures; EXPRESSED DURING: 15 growth stages; Has 43 Blast hits to 43 proteins in 9 species: Archae - 0; Bacteria - 0; Metazoa - 0; Fungi - 0; Plants - 43; Viruses - 0; Other Eukaryotes - 0 (source: NCBI BLINK).   chr2:14568227-14568472 REVERSE LENGTH=81 | 86  | 81  | 1.00E-22  | 94.2  | 74.4 | 81.4 |
| Rsa1.0_00578.1.g16330.t1 | gb ACP30609.1  disease resistance protein [Brassica rapa subsp. pekinensis]                                                                                                                                                                                                                                                                                                                                                                                   | 914 | 2726 | 2.00E-40  | 298.2 | 10.6 | 16.1 | disease resistance protein                      | gbpln | Brassica rapa        | AT1G67020.1   Symbols:   unknown protein; FUNCTIONS IN: molecular function unknown; INVOLVED IN: biological process unknown; LOCATED IN: cellular component unknown; EXPRESSED IN: leaf; Has 72 Blast hits to 72 proteins in 9 species: Archae - 0; Bacteria - 0; Metazoa - 0; Fungi - 0; Plants - 72; Viruses - 0; Other Eukaryotes - 0 (source: NCBI BLINK).   chr1:25011008-25012987 REVERSE LENGTH=659                                                 | 914 | 659 | 6.00E-20  | 72.1  | 6.2  | 9.8  |
| Rsa1.0_00578.1.g16331.t1 | gb EOA28410.1  hypothetical protein CARUB_v10024616mg [Capsella rubella]                                                                                                                                                                                                                                                                                                                                                                                      | 326 | 336  | 1.00E-149 | 103.1 | 79.8 | 89.0 | hypothetical protein CARUB_v10024616mg          | gbpln | Capsella rubella     | AT2G34555.1   Symbols: ATGA2OX3, GA2OX3   gibberellin 2-oxidase 3   chr2:14557102-14558682 FORWARD LENGTH=335                                                                                                                                                                                                                                                                                                                                              | 326 | 335 | 1.00E-151 | 102.8 | 78.8 | 88.3 |

|                          |                                                                                                                                                                                                                                                                                                                                                                                                                                                                                                                                                                                                                                                                                                                                                                                                                                                                                                                                                                                                                                                                                                                                          |     |      |           |       |      |      |                                                   |       |                      |                                                                                                                                                                                                                                                                                                                                                                                                                                                 |     |     |           |       |      |      |
|--------------------------|------------------------------------------------------------------------------------------------------------------------------------------------------------------------------------------------------------------------------------------------------------------------------------------------------------------------------------------------------------------------------------------------------------------------------------------------------------------------------------------------------------------------------------------------------------------------------------------------------------------------------------------------------------------------------------------------------------------------------------------------------------------------------------------------------------------------------------------------------------------------------------------------------------------------------------------------------------------------------------------------------------------------------------------------------------------------------------------------------------------------------------------|-----|------|-----------|-------|------|------|---------------------------------------------------|-------|----------------------|-------------------------------------------------------------------------------------------------------------------------------------------------------------------------------------------------------------------------------------------------------------------------------------------------------------------------------------------------------------------------------------------------------------------------------------------------|-----|-----|-----------|-------|------|------|
| Rsa1.0_00578.1.g16332.t1 | ref XP_002877469.1  predicted protein [Arabidopsis lyrata subsp. lyrata] gi 297323307 gb EFH53728.1  predicted protein [Arabidopsis lyrata subsp. lyrata]                                                                                                                                                                                                                                                                                                                                                                                                                                                                                                                                                                                                                                                                                                                                                                                                                                                                                                                                                                                | 240 | 328  | 1.00E-24  | 136.7 | 28.8 | 40.0 | predicted protein                                 | gbpln | Arabidopsis lyrata   | AT1G60720.1   Symbols:   RNA-directed DNA polymerase (reverse transcriptase)-related family protein   chr1:22357072-22357941 FORWARD LENGTH=289                                                                                                                                                                                                                                                                                                 | 240 | 289 | 3.00E-24  | 120.4 | 24.2 | 36.7 |
| Rsa1.0_00579.1.g16333.t1 | gb AAZ67609.1  90A08_24 [Brassica rapa subsp. pekinensis]                                                                                                                                                                                                                                                                                                                                                                                                                                                                                                                                                                                                                                                                                                                                                                                                                                                                                                                                                                                                                                                                                | 440 | 475  | 9.00E-26  | 108.0 | 33.6 | 46.6 | 80A08_24                                          | gbpln | Brassica rapa        | #                                                                                                                                                                                                                                                                                                                                                                                                                                               | #   | #   | #         | #     | #    |      |
| Rsa1.0_00579.1.g16334.t1 | gb AAO85536.1  terpene synthase [Arabidopsis thaliana]                                                                                                                                                                                                                                                                                                                                                                                                                                                                                                                                                                                                                                                                                                                                                                                                                                                                                                                                                                                                                                                                                   | 602 | 603  | 0         | 100.2 | 70.6 | 84.4 | terpene synthase                                  | gbpln | Arabidopsis thaliana | AT3G29410.1   Symbols:   Terpenoid cyclases/Protein prenyltransferases superfamily protein   chr3:11302574-11305060 REVERSE LENGTH=603                                                                                                                                                                                                                                                                                                          | 602 | 603 | 0         | 100.2 | 71.1 | 83.7 |
| Rsa1.0_00579.1.g16335.t2 | gb EOA19267.1  hypothetical protein CARUB_v10000372mg [Capsella rubella]                                                                                                                                                                                                                                                                                                                                                                                                                                                                                                                                                                                                                                                                                                                                                                                                                                                                                                                                                                                                                                                                 | 239 | 686  | 3.00E-13  | 287.0 | 14.2 | 16.3 | hypothetical protein CARUB_v10000372mg            | gbpln | Capsella rubella     | AT4G04960.1   Symbols:   Concanavalin A-like lectin protein kinase family protein   chr4:2533096-2535156 FORWARD LENGTH=686                                                                                                                                                                                                                                                                                                                     | 239 | 686 | 9.00E-16  | 287.0 | 14.2 | 16.3 |
| Rsa1.0_00579.1.g16336.t1 | gb EOA31011.1  hypothetical protein CARUB_v10014154mg [Capsella rubella]                                                                                                                                                                                                                                                                                                                                                                                                                                                                                                                                                                                                                                                                                                                                                                                                                                                                                                                                                                                                                                                                 | 334 | 331  | 1.00E-155 | 99.1  | 83.5 | 88.0 | hypothetical protein CARUB_v10014154mg            | gbpln | Capsella rubella     | AT3G14450.1   Symbols: CID9   CTC-interacting domain 9   chr3:4849788-4851601 FORWARD LENGTH=327                                                                                                                                                                                                                                                                                                                                                | 334 | 327 | 1.00E-151 | 97.9  | 80.8 | 85.6 |
| Rsa1.0_00579.1.g16337.t1 | #                                                                                                                                                                                                                                                                                                                                                                                                                                                                                                                                                                                                                                                                                                                                                                                                                                                                                                                                                                                                                                                                                                                                        | #   | #    | #         | #     | #    | #    | -                                                 | ----  | ----                 | #                                                                                                                                                                                                                                                                                                                                                                                                                                               | #   | #   | #         | #     | #    |      |
| Rsa1.0_00579.1.g16338.t2 | gb AAG50806.1 AC079281_8 unknown protein [Arabidopsis thaliana]                                                                                                                                                                                                                                                                                                                                                                                                                                                                                                                                                                                                                                                                                                                                                                                                                                                                                                                                                                                                                                                                          | 893 | 1213 | 0         | 135.8 | 39.2 | 52.4 | unknown protein                                   | gbpln | Arabidopsis thaliana | AT1G43760.1   Symbols:   DNase I-like superfamily protein   chr1:16528800-16531065 REVERSE LENGTH=626                                                                                                                                                                                                                                                                                                                                           | 893 | 626 | 1.00E-74  | 70.1  | 16.6 | 24.9 |
| Rsa1.0_00579.1.g16339.t1 | gb AEN94304.1  9-cis-epoxycarotenoid dioxygenase [Brassica napus]                                                                                                                                                                                                                                                                                                                                                                                                                                                                                                                                                                                                                                                                                                                                                                                                                                                                                                                                                                                                                                                                        | 591 | 592  | 0         | 100.2 | 90.4 | 94.2 | 9-cis-epoxycarotenoid dioxygenase                 | gbpln | Brassica napus       | AT3G14440.1   Symbols: NCED3, ATNCED3, STO1, SIS7   nine-cis-epoxycarotenoid dioxygenase 3   chr3:4831678-4833477 REVERSE LENGTH=599                                                                                                                                                                                                                                                                                                            | 591 | 599 | 0         | 101.4 | 89.0 | 94.6 |
| Rsa1.0_00579.1.g16340.t2 | #                                                                                                                                                                                                                                                                                                                                                                                                                                                                                                                                                                                                                                                                                                                                                                                                                                                                                                                                                                                                                                                                                                                                        | #   | #    | #         | #     | #    | #    | -                                                 | ----  | ----                 | #                                                                                                                                                                                                                                                                                                                                                                                                                                               | #   | #   | #         | #     | #    |      |
| Rsa1.0_00579.1.g16341.t1 | gb EOA29697.1  hypothetical protein CARUB_v10016402mg [Capsella rubella]                                                                                                                                                                                                                                                                                                                                                                                                                                                                                                                                                                                                                                                                                                                                                                                                                                                                                                                                                                                                                                                                 | 76  | 76   | 2.00E-31  | 100.0 | 88.2 | 93.4 | hypothetical protein CARUB_v10016402mg            | gbpln | Capsella rubella     | AT3G14430.1   Symbols:   unknown protein; FUNCTIONS IN: molecular function unknown; INVOLVED IN: response to oxidative stress; LOCATED IN: mitochondrion; EXPRESSED IN: 23 plant structures; EXPRESSED DURING: 13 growth stages; Has 16 Blast hits to 16 proteins in 7 species: Archae - 0; Bacteria - 0; Metazoa - 0; Fungi - 0; Plants - 16; Viruses - 0; Other Eukaryotes - 0 (source: NCBI BLink).   chr3:4824399-4824732 REVERSE LENGTH=76 | 76  | 76  | 5.00E-34  | 100.0 | 88.2 | 93.4 |
| Rsa1.0_00579.1.g16342.t1 | ref NP_188060.1  putative peroxisomal (S)-2-hydroxy-acid oxidase 2 [Arabidopsis thaliana] gi 30633140 ref NP_850584.1  putative peroxisomal (S)-2-hydroxy-acid oxidase 2 [Arabidopsis thaliana] gi 297829994 ref XP_002882879.1  hypothetical protein ARALYDRAFT_478862 [Arabidopsis lyrata subsp. lyrata] gi 13124262 sp O9LRR9.1 GLO1_ARATH RecName: Full=Peroxisomal (S)-2-hydroxy-acid oxidase GLO1; AltName: Full=Glycolate oxidase 1; Short=AtGLO1; Short=GOX 1; AltName: Full=Short chain alpha-hydroxy acid oxidase GLO1 gi 16226423 gb AAL16164.1 AF428396.1 AT3g14420/MOA2.2 [Arabidopsis thaliana] gi 11994212 dbj BAB01334.1  glycolate oxidase [Arabidopsis thaliana] gi 15450741 gb AAK96642.1  AT3g14420/MOA2.2 [Arabidopsis thaliana] gi 18491119 gb AAL69528.1  AT3g14420/MOA2.2 [Arabidopsis thaliana] gi 297328719 gb EFH59138.1  hypothetical protein ARALYDRAFT_478862 [Arabidopsis lyrata subsp. lyrata] gi 332641997 gb AEE75518.1  putative peroxisomal (S)-2-hydroxy-acid oxidase 2 [Arabidopsis thaliana] gi 332641999 gb AEE75520.1  putative peroxisomal (S)-2-hydroxy-acid oxidase 2 [Arabidopsis thaliana] | 372 | 367  | 0         | 98.7  | 95.2 | 97.6 | putative peroxisomal (S)-2-hydroxy-acid oxidase 2 | gbpln | Arabidopsis lyrata   | AT3G14420.2   Symbols:   Aldolase-type TIM barrel family protein   chr3:4821804-4823899 FORWARD LENGTH=367                                                                                                                                                                                                                                                                                                                                      | 372 | 367 | 0         | 98.7  | 95.2 | 97.6 |
| Rsa1.0_00579.1.g16343.t1 | gb AAV28535.1  glycolate oxidase [Brassica napus]                                                                                                                                                                                                                                                                                                                                                                                                                                                                                                                                                                                                                                                                                                                                                                                                                                                                                                                                                                                                                                                                                        | 367 | 367  | 0         | 100.0 | 99.5 | 99.7 | glycolate oxidase                                 | gbpln | Brassica napus       | AT3G14415.3   Symbols:   Aldolase-type TIM barrel family protein   chr3:4818667-4820748 FORWARD LENGTH=367                                                                                                                                                                                                                                                                                                                                      | 367 | 367 | 0         | 100.0 | 96.2 | 98.9 |
| Rsa1.0_00579.1.g16344.t1 | gb EOA30970.1  hypothetical protein CARUB_v10014116mg [Capsella rubella]                                                                                                                                                                                                                                                                                                                                                                                                                                                                                                                                                                                                                                                                                                                                                                                                                                                                                                                                                                                                                                                                 | 366 | 339  | 1.00E-171 | 92.6  | 85.5 | 89.6 | hypothetical protein CARUB_v10014116mg            | gbpln | Capsella rubella     | AT3G14410.1   Symbols:   Nucleotide/sugar transporter family protein   chr3:4815982-4817852 REVERSE LENGTH=340                                                                                                                                                                                                                                                                                                                                  | 366 | 340 | 1.00E-173 | 92.9  | 85.0 | 89.1 |

|                          |                                                                                                                                                                                                                                                                                                                                                                                                                                                                                                                                                                                                                                                                                                                                                                                                                                                                                                                                                                    |     |     |           |       |      |      |                                                  |       |                      |                                                                                                                                                  |     |     |           |       |      |      |
|--------------------------|--------------------------------------------------------------------------------------------------------------------------------------------------------------------------------------------------------------------------------------------------------------------------------------------------------------------------------------------------------------------------------------------------------------------------------------------------------------------------------------------------------------------------------------------------------------------------------------------------------------------------------------------------------------------------------------------------------------------------------------------------------------------------------------------------------------------------------------------------------------------------------------------------------------------------------------------------------------------|-----|-----|-----------|-------|------|------|--------------------------------------------------|-------|----------------------|--------------------------------------------------------------------------------------------------------------------------------------------------|-----|-----|-----------|-------|------|------|
| Rsa1.0_00579.1.g16345.t1 | gb EOA32869.1  hypothetical protein CARUB_v10016184mg [Capsella rubella]                                                                                                                                                                                                                                                                                                                                                                                                                                                                                                                                                                                                                                                                                                                                                                                                                                                                                           | 293 | 576 | 1.00E-100 | 196.6 | 63.1 | 75.8 | hypothetical protein CARUB_v10016184mg           | gbpln | Capsella rubella     | AT4G02320.1   Symbols:   Plant invertase/pectin methyltransferase inhibitor superfamily   chr4:1022725-1026118 REVERSE LENGTH=518                | 293 | 518 | 2.00E-69  | 176.8 | 44.4 | 65.5 |
| Rsa1.0_00579.1.g16346.t1 | ref NP_188043.2  LURP-one-related 11 protein [Arabidopsis thaliana] gi 75335508 sp Q9LUM1.1 LOR11_ARATH RecName: Full=Protein LURP-one-related 11 gi 9279574 dbj BAB01032.1  unnamed protein product [Arabidopsis thaliana] gi 49660157 gb AAT68369.1  hypothetical protein At3g14260 [Arabidopsis thaliana] gi 67633632 gb AAV78740.1  hypothetical protein At3g14260 [Arabidopsis thaliana] gi 332641974 gb AEE75495.1  LURP-one-related 11 protein [Arabidopsis thaliana] ref NP_200279.1  transcription factor ILR3 [Arabidopsis thaliana] gi 297792933 ref XP_002864351.1  hypothetical protein ARALYDRAFT_495549 [Arabidopsis lyrata subsp. lyrata] gi 75309075 sp Q9FH37.1 ILR3_ARATH RecName: Full=Transcription factor ILR3; AltName: Full=Basic helix-loop-helix protein 105; Short=AtbHLH105; Short=bHLH 105; AltName: Full=Protein IAA-LEUCINE RESISTANT 3; AltName: Full=Transcription factor EN 133; AltName: Full=bHLH transcription factor bHLH105 | 208 | 230 | 1.00E-102 | 110.6 | 85.1 | 92.3 | LURP-one-related 11 protein                      | gbpln | Arabidopsis thaliana | AT3G14260.1   Symbols:   Protein of unknown function (DUF567)   chr3:4747986-4748779 REVERSE LENGTH=230                                          | 208 | 230 | 1.00E-105 | 110.6 | 85.1 | 92.3 |
| Rsa1.0_00580.1.g16347.t1 | gi 20127111 gb AAM10964.1 AF488629.1 putative bHLH transcription factor [Arabidopsis thaliana] gi 10176795 dbj BAB09934.1  unnamed protein product [Arabidopsis thaliana] gi 15451010 gb AAK96776.1  Unknown protein [Arabidopsis thaliana] gi 25084222 gb AAN72200.1  Unknown protein [Arabidopsis thaliana] gi 297310186 gb EFH40610.1  hypothetical protein ARALYDRAFT_495549 [Arabidopsis lyrata subsp. lyrata] gi 332009143 gb AED96526.1  transcription factor ILR3 [Arabidopsis thaliana]                                                                                                                                                                                                                                                                                                                                                                                                                                                                   | 117 | 234 | 2.00E-51  | 200.0 | 88.9 | 91.5 | transcription factor ILR3                        | gbpln | Arabidopsis lyrata   | AT5G54680.1   Symbols: ILR3, bHLH105   basic helix-loop-helix (bHLH) DNA-binding superfamily protein   chr5:22217270-22218993 FORWARD LENGTH=234 | 117 | 234 | 3.00E-54  | 200.0 | 88.9 | 91.5 |
| Rsa1.0_00580.1.g16348.t1 | #                                                                                                                                                                                                                                                                                                                                                                                                                                                                                                                                                                                                                                                                                                                                                                                                                                                                                                                                                                  | #   | #   | #         | #     | #    | #    | -                                                | ----  | ----                 | #                                                                                                                                                | #   | #   | #         | #     | #    |      |
| Rsa1.0_00580.1.g16349.t1 | gb EOA12956.1  hypothetical protein CARUB_v10025939mg [Capsella rubella] gi 482548763 gb EOA12957.1  hypothetical protein CARUB_v10025939mg [Capsella rubella]                                                                                                                                                                                                                                                                                                                                                                                                                                                                                                                                                                                                                                                                                                                                                                                                     | 754 | 754 | 0         | 100.0 | 92.8 | 96.3 | hypothetical protein CARUB_v10025939mg           | gbpln | Capsella rubella     | AT5G54670.1   Symbols: ATK3, KATC   kinesin 3   chr5:22209912-22213843 FORWARD LENGTH=754                                                        | 754 | 754 | 0         | 100.0 | 92.4 | 96.0 |
| Rsa1.0_00580.1.g16350.t1 | ref NP_568810.1  nuclear-enriched phloem companion cell 8 protein [Arabidopsis thaliana] gi 75262527 sp Q9FIT9.1 HS217_ARATH RecName: Full=21.7 kDa class VI heat shock protein; AltName: Full=21.7 kDa heat shock protein; Short=ATHsp21.7 gi 9758958 dbj BAB09345.1  unnamed protein product [Arabidopsis thaliana] gi 119360049 gb ABL66753.1  At5g54660 [Arabidopsis thaliana] gi 332009141 gb AED96524.1  class VI heat shock protein 21.7 [Arabidopsis thaliana]                                                                                                                                                                                                                                                                                                                                                                                                                                                                                             | 184 | 192 | 2.00E-88  | 104.3 | 88.0 | 93.5 | nuclear-enriched phloem companion cell 8 protein | gbpln | Arabidopsis thaliana | AT5G54660.1   Symbols:   HSP20-like chaperones superfamily protein   chr5:22203950-22204986 FORWARD LENGTH=192                                   | 184 | 192 | 6.00E-91  | 104.3 | 88.0 | 93.5 |
| Rsa1.0_00580.1.g16351.t1 | #                                                                                                                                                                                                                                                                                                                                                                                                                                                                                                                                                                                                                                                                                                                                                                                                                                                                                                                                                                  | #   | #   | #         | #     | #    | #    | -                                                | ----  | ----                 | #                                                                                                                                                | #   | #   | #         | #     | #    |      |
| Rsa1.0_00580.1.g16352.t1 | #                                                                                                                                                                                                                                                                                                                                                                                                                                                                                                                                                                                                                                                                                                                                                                                                                                                                                                                                                                  | #   | #   | #         | #     | #    | #    | -                                                | ----  | ----                 | #                                                                                                                                                | #   | #   | #         | #     | #    |      |
| Rsa1.0_00580.1.g16353.t1 | ref XP_003634699.1  PREDICTED: histone H2A.6 isoform 2 [Vitis vinifera]                                                                                                                                                                                                                                                                                                                                                                                                                                                                                                                                                                                                                                                                                                                                                                                                                                                                                            | 73  | 159 | 3.00E-16  | 217.8 | 71.2 | 74.0 | PREDICTED: histone H2A.6 isoform 2               | gbpln | Vitis vinifera       | AT1G51060.1   Symbols: HTA10   histone H2A 10   chr1:18926948-18927443 FORWARD LENGTH=132                                                        | 73  | 132 | 1.00E-18  | 180.8 | 64.4 | 65.8 |
| Rsa1.0_00580.1.g16354.t1 | #                                                                                                                                                                                                                                                                                                                                                                                                                                                                                                                                                                                                                                                                                                                                                                                                                                                                                                                                                                  | #   | #   | #         | #     | #    | #    | -                                                | ----  | ----                 | #                                                                                                                                                | #   | #   | #         | #     | #    |      |
| Rsa1.0_00580.1.g16355.t1 | dbj BAJ33911.1  unnamed protein product [Theellungiella halophila]                                                                                                                                                                                                                                                                                                                                                                                                                                                                                                                                                                                                                                                                                                                                                                                                                                                                                                 | 309 | 487 | 1.00E-150 | 157.6 | 88.7 | 92.9 | unnamed protein product                          | ----  | ----                 | AT5G54630.1   Symbols:   zinc finger protein-related   chr5:22192607-22194260 REVERSE LENGTH=472                                                 | 309 | 472 | 1.00E-151 | 152.8 | 88.3 | 91.9 |



|                          |                                                                                                                                                                                                                                                                                                                             |      |     |           |       |      |      |                                        |       |                      |                                                                                                                                           |      |     |           |       |      |       |
|--------------------------|-----------------------------------------------------------------------------------------------------------------------------------------------------------------------------------------------------------------------------------------------------------------------------------------------------------------------------|------|-----|-----------|-------|------|------|----------------------------------------|-------|----------------------|-------------------------------------------------------------------------------------------------------------------------------------------|------|-----|-----------|-------|------|-------|
| Rsa1.0_00580.1.g16356.t1 | refXP_002864348.1   50S ribosomal protein L24, chloroplast [Arabidopsis lyrata subsp. lyrata]<br>gi 297310183 gb EFH40607.1   50S ribosomal protein L24, chloroplast [Arabidopsis lyrata subsp. lyrata]                                                                                                                     | 198  | 198 | 1.00E-91  | 100.0 | 90.9 | 96.0 | 50S ribosomal protein L24, chloroplast | gbpln | Arabidopsis lyrata   | AT5G54600.1   Symbols:   Translation protein SH3-like family protein   chr5:22183046-22184403 FORWARD LENGTH=198                          | 198  | 198 | 2.00E-92  | 100.0 | 89.4 | 94.4  |
| Rsa1.0_00580.1.g16357.t1 | gb EOA14610.1   hypothetical protein CARUB_v10027862mg [Capsella rubella]                                                                                                                                                                                                                                                   | 377  | 369 | 1.00E-111 | 97.9  | 57.3 | 72.1 | hypothetical protein CARUB_v10027862mg | gbpln | Capsella rubella     | AT5G55270.1   Symbols:   Protein of unknown function (DUF295)   chr5:22419218-22420303 FORWARD LENGTH=361                                 | 377  | 361 | 1.00E-108 | 95.8  | 57.3 | 70.3  |
| Rsa1.0_00580.1.g16358.t1 | #                                                                                                                                                                                                                                                                                                                           | #    | #   | #         | #     | #    | #    | -                                      | ----  | ----                 | #                                                                                                                                         | #    | #   | #         | #     | #    | #     |
| Rsa1.0_00580.1.g16359.t1 | db BAJ34286.1   unnamed protein product [Thellungiella halophila]                                                                                                                                                                                                                                                           | 310  | 358 | 6.00E-56  | 115.5 | 33.5 | 35.2 | unnamed protein product                | ----  | ----                 | #                                                                                                                                         | #    | #   | #         | #     | #    | #     |
| Rsa1.0_00580.1.g16360.t1 | gb AAA81907.1   napin [Brassica napus]<br>gi 468020 gb AAA81908.1   napin [Brassica napus]<br>gi 45593278 gb AAS68187.1   napin [Brassica napus var. napus]                                                                                                                                                                 | 175  | 180 | 2.00E-76  | 102.9 | 84.6 | 92.6 | napin                                  | gbpln | Brassica napus       | AT4G27170.1   Symbols: SESA4, AT2S4   seed storage albumin 4   chr4:13613637-13614137 FORWARD LENGTH=166                                  | 175  | 166 | 9.00E-53  | 94.9  | 59.4 | 173.7 |
| Rsa1.0_00580.1.g16361.t1 | ref NP_200267.1   uncharacterized protein [Arabidopsis thaliana]<br>gi 9758948 db BAB09335.1   unnamed protein product [Arabidopsis thaliana]<br>gi 91805707 gb ABE65582.1   hypothetical protein AT5g54560 [Arabidopsis thaliana]<br>gi 332009127 gb AED96510.1   uncharacterized protein AT5G54560 [Arabidopsis thaliana] | 375  | 360 | 2.00E-99  | 96.0  | 56.0 | 68.5 | uncharacterized protein                | gbpln | Arabidopsis thaliana | AT5G54560.1   Symbols:   Protein of unknown function (DUF295)   chr5:22161134-22162216 FORWARD LENGTH=360                                 | 375  | 360 | 1.00E-102 | 96.0  | 56.0 | 68.5  |
| Rsa1.0_00580.1.g16362.t2 | gb EOA37834.1   hypothetical protein CARUB_v10011422mg [Capsella rubella]                                                                                                                                                                                                                                                   | 366  | 373 | 1.00E-102 | 101.9 | 51.9 | 65.8 | hypothetical protein CARUB_v10011422mg | gbpln | Capsella rubella     | AT5G52940.1   Symbols:   Protein of unknown function (DUF295)   chr5:21472301-21473389 FORWARD LENGTH=362                                 | 366  | 362 | 1.00E-102 | 98.9  | 52.2 | 63.7  |
| Rsa1.0_00580.1.g16363.t1 | refXP_002864339.1   hypothetical protein ARALYDRAFT_495534 [Arabidopsis lyrata subsp. lyrata]<br>gi 297310174 gb EFH40598.1   hypothetical protein ARALYDRAFT_495534 [Arabidopsis lyrata subsp. lyrata]                                                                                                                     | 288  | 297 | 1.00E-101 | 103.1 | 72.6 | 83.3 | hypothetical protein ARALYDRAFT_495534 | gbpln | Arabidopsis lyrata   | AT5G54540.1   Symbols:   Uncharacterised conserved protein (UCP12943)   chr5:22156604-22157857 FORWARD LENGTH=297                         | 288  | 297 | 4.00E-97  | 103.1 | 71.2 | 81.9  |
| Rsa1.0_00580.1.g16364.t1 | #                                                                                                                                                                                                                                                                                                                           | #    | #   | #         | #     | #    | #    | -                                      | ----  | ----                 | #                                                                                                                                         | #    | #   | #         | #     | #    | #     |
| Rsa1.0_00581.1.g16365.t2 | gb AAC97237.1   putative TNP2-like transposon protein [Arabidopsis thaliana]                                                                                                                                                                                                                                                | 978  | 889 | 1.00E-164 | 90.9  | 28.0 | 32.0 | putative TNP2-like transposon protein  | gbpln | Arabidopsis thaliana | AT2G31750.1   Symbols: UGT74D1   UDP-glucosyl transferase 74D1   chr2:13497312-13499870 FORWARD LENGTH=456                                | 978  | 456 | 1.00E-126 | 46.6  | 22.0 | 23.4  |
| Rsa1.0_00581.1.g16366.t1 | refXP_002879339.1   hypothetical protein ARALYDRAFT_482098 [Arabidopsis lyrata subsp. lyrata]<br>gi 297325178 gb EFH55598.1   hypothetical protein ARALYDRAFT_482098 [Arabidopsis lyrata subsp. lyrata]                                                                                                                     | 968  | 456 | 0         | 47.1  | 42.5 | 45.2 | hypothetical protein ARALYDRAFT_482098 | gbpln | Arabidopsis lyrata   | AT2G31750.1   Symbols: UGT74D1   UDP-glucosyl transferase 74D1   chr2:13497312-13499870 FORWARD LENGTH=456                                | 968  | 456 | 0         | 47.1  | 42.3 | 45.1  |
| Rsa1.0_00581.1.g16367.t1 | refXP_002879340.1   hypothetical protein ARALYDRAFT_320921 [Arabidopsis lyrata subsp. lyrata]<br>gi 297325179 gb EFH55599.1   hypothetical protein ARALYDRAFT_320921 [Arabidopsis lyrata subsp. lyrata]                                                                                                                     | 397  | 528 | 1.00E-141 | 133.0 | 65.0 | 74.1 | hypothetical protein ARALYDRAFT_320921 | gbpln | Arabidopsis lyrata   | AT2G31770.1   Symbols: ARI9, ATARI9   RING/U-box superfamily protein   chr2:13511579-13513550 FORWARD LENGTH=543                          | 397  | 543 | 1.00E-138 | 136.8 | 64.7 | 74.1  |
| Rsa1.0_00581.1.g16368.t1 | gb ACR10283.1   UDP-glucosyl transferase 74c1 [Brassica rapa subsp. pekinensis]                                                                                                                                                                                                                                             | 547  | 456 | 0         | 83.4  | 77.9 | 80.8 | UDP-glucosyl transferase 74c1          | gbpln | Brassica rapa        | AT2G31790.1   Symbols:   UDP-Glycosyltransferase superfamily protein   chr2:13518269-13520167 FORWARD LENGTH=457                          | 547  | 457 | 0         | 83.5  | 67.8 | 74.4  |
| Rsa1.0_00581.1.g16369.t1 | gb AAT94403.1   ankyrin protein kinase [Brassica napus]                                                                                                                                                                                                                                                                     | 411  | 476 | 0         | 115.8 | 87.8 | 92.2 | ankyrin protein kinase                 | gbpln | Brassica napus       | AT2G31800.1   Symbols:   Integrin-linked protein kinase family   chr2:13520605-13523646 REVERSE LENGTH=476                                | 411  | 476 | 0         | 115.8 | 88.1 | 93.7  |
| Rsa1.0_00581.1.g16370.t1 | refXP_002879344.1   hypothetical protein ARALYDRAFT_482103 [Arabidopsis lyrata subsp. lyrata]<br>gi 297325183 gb EFH55603.1   hypothetical protein ARALYDRAFT_482103 [Arabidopsis lyrata subsp. lyrata]                                                                                                                     | 524  | 492 | 0         | 93.9  | 76.5 | 81.9 | hypothetical protein ARALYDRAFT_482103 | gbpln | Arabidopsis lyrata   | AT2G31810.1   Symbols:   ACT domain-containing small subunit of acetolactate synthase protein   chr2:13524271-13528246 FORWARD LENGTH=491 | 524  | 491 | 0         | 93.7  | 76.0 | 82.1  |
| Rsa1.0_00581.1.g16371.t8 | gb EOA28988.1   hypothetical protein CARUB_v10025247mg [Capsella rubella]                                                                                                                                                                                                                                                   | 1223 | 876 | 0         | 71.6  | 39.2 | 47.6 | hypothetical protein CARUB_v10025247mg | gbpln | Capsella rubella     | AT3G25020.1   Symbols: AtRLP42, RLP42   receptor like protein 42   chr3:9116868-9119540 REVERSE LENGTH=890                                | 1223 | 890 | 0         | 72.8  | 41.3 | 48.6  |
| Rsa1.0_00581.1.g16372.t1 | #                                                                                                                                                                                                                                                                                                                           | #    | #   | #         | #     | #    | #    | -                                      | ----  | ----                 | #                                                                                                                                         | #    | #   | #         | #     | #    | #     |

|                          |                                                                                                                                                                                                                                                                                                                                                                                                                                                                  |     |      |           |       |      |      |                                                                            |       |                      |                                                                                                                                                                                                                                                                                                                                             |     |      |           |       |      |      |
|--------------------------|------------------------------------------------------------------------------------------------------------------------------------------------------------------------------------------------------------------------------------------------------------------------------------------------------------------------------------------------------------------------------------------------------------------------------------------------------------------|-----|------|-----------|-------|------|------|----------------------------------------------------------------------------|-------|----------------------|---------------------------------------------------------------------------------------------------------------------------------------------------------------------------------------------------------------------------------------------------------------------------------------------------------------------------------------------|-----|------|-----------|-------|------|------|
| Rsa1.0_00581.1.g16373.t1 | refNP_180827.1   receptor like protein 23 [Arabidopsis thaliana] gi 2914705 gb AAC04495.1   putative disease resistance protein [Arabidopsis thaliana] gi 330253621 gb AEC08715.1   receptor like protein 23 [Arabidopsis thaliana]                                                                                                                                                                                                                              | 886 | 890  | 0         | 100.5 | 65.1 | 77.5 | receptor like protein 23                                                   | gbpln | Arabidopsis thaliana | AT2G32680.1   Symbols: AtRLP23, RLP23   receptor like protein 23   chr2:13859942-13862614 REVERSE LENGTH=890                                                                                                                                                                                                                                | 886 | 890  | 0         | 100.5 | 65.1 | 77.5 |
| Rsa1.0_00581.1.g16374.t2 | gb AAD17409.1   putative retroelement pol polyprotein [Arabidopsis thaliana]                                                                                                                                                                                                                                                                                                                                                                                     | 672 | 1347 | 0         | 200.4 | 74.7 | 83.0 | putative retroelement pol polyprotein                                      | gbpln | Arabidopsis thaliana | AT4G23160.1   Symbols: CRK8   cysteine-rich RLK (RECEPTOR-like protein kinase) 8   chr4:12129485-12134086 FORWARD LENGTH=1262                                                                                                                                                                                                               | 672 | 1262 | 1.00E-99  | 187.8 | 26.9 | 41.8 |
| Rsa1.0_00581.1.g16375.t1 | #                                                                                                                                                                                                                                                                                                                                                                                                                                                                | #   | #    | #         | #     | #    | #    | -                                                                          | ----  | ----                 | #                                                                                                                                                                                                                                                                                                                                           | #   | #    | #         | #     | #    |      |
| Rsa1.0_00581.1.g16376.t1 | gb ACB59218.1   leucine-rich repeat family protein [Brassica oleracea]                                                                                                                                                                                                                                                                                                                                                                                           | 250 | 724  | 4.00E-94  | 289.6 | 80.8 | 85.6 | leucine-rich repeat family protein                                         | gbpln | Brassica oleracea    | AT3G24900.1   Symbols: AtRLP39, RLP39   receptor like protein 39   chr3:9099183-9101837 REVERSE LENGTH=884                                                                                                                                                                                                                                  | 250 | 884  | 8.00E-77  | 353.6 | 65.6 | 75.2 |
| Rsa1.0_00581.1.g16377.t1 | gb AAD19784.1   putative retroelement pol polyprotein [Arabidopsis thaliana]                                                                                                                                                                                                                                                                                                                                                                                     | 331 | 1501 | 2.00E-97  | 453.5 | 54.1 | 67.1 | putative retroelement pol polyprotein                                      | gbpln | Arabidopsis thaliana | AT4G23160.1   Symbols: CRK8   cysteine-rich RLK (RECEPTOR-like protein kinase) 8   chr4:12129485-12134086 FORWARD LENGTH=1262                                                                                                                                                                                                               | 331 | 1262 | 2.00E-58  | 381.3 | 34.7 | 46.2 |
| Rsa1.0_00581.1.g16378.t1 | gb AAK43485.1   AC084807.10 polyprotein, putative [Arabidopsis thaliana] gi 225898008 dbj BAH30336.1   hypothetical protein [Arabidopsis thaliana]                                                                                                                                                                                                                                                                                                               | 763 | 1459 | 0         | 191.2 | 59.9 | 74.4 | polyprotein, putative                                                      | gbpln | Arabidopsis thaliana | AT4G23160.1   Symbols: CRK8   cysteine-rich RLK (RECEPTOR-like protein kinase) 8   chr4:12129485-12134086 FORWARD LENGTH=1262                                                                                                                                                                                                               | 763 | 1262 | 1.00E-102 | 165.4 | 25.8 | 39.1 |
| Rsa1.0_00581.1.g16379.t1 | #                                                                                                                                                                                                                                                                                                                                                                                                                                                                | #   | #    | #         | #     | #    | #    | -                                                                          | ----  | ----                 | #                                                                                                                                                                                                                                                                                                                                           | #   | #    | #         | #     | #    |      |
| Rsa1.0_00581.1.g16380.t1 | #                                                                                                                                                                                                                                                                                                                                                                                                                                                                | #   | #    | #         | #     | #    | #    | -                                                                          | ----  | ----                 | #                                                                                                                                                                                                                                                                                                                                           | #   | #    | #         | #     | #    |      |
| Rsa1.0_00581.1.g16381.t1 | ref NP_850179.1   uncharacterized protein [Arabidopsis thaliana] gi 26452388 dbj BAC43279.1   unknown protein [Arabidopsis thaliana] gi 28950805 gb AA063326.1   At2g31985 [Arabidopsis thaliana] gi 330253524 gb AEC08618.1   uncharacterized protein AT2G31985 [Arabidopsis thaliana]                                                                                                                                                                          | 241 | 241  | 1.00E-129 | 100.0 | 90.9 | 94.6 | uncharacterized protein                                                    | gbpln | Arabidopsis thaliana | AT2G31985.1   Symbols:   Protein of unknown function (DUF1264)   chr2:13614086-13615619 REVERSE LENGTH=241                                                                                                                                                                                                                                  | 241 | 241  | 1.00E-132 | 100.0 | 90.9 | 94.6 |
| Rsa1.0_00581.1.g16382.t1 | gb EOA26764.1   hypothetical protein CARUB_v10022849mg [Capsella rubella]                                                                                                                                                                                                                                                                                                                                                                                        | 586 | 598  | 0         | 102.0 | 91.6 | 95.2 | hypothetical protein CARUB_v10022849mg                                     | gbpln | Capsella rubella     | AT2G32010.2   Symbols: CVL1   CVP2 like 1   chr2:13625344-13628081 FORWARD LENGTH=594                                                                                                                                                                                                                                                       | 586 | 594  | 0         | 101.4 | 90.3 | 94.2 |
| Rsa1.0_00582.1.g16383.t1 | gb ABV89649.1   universal stress protein family protein [Brassica rapa]                                                                                                                                                                                                                                                                                                                                                                                          | 175 | 172  | 5.00E-92  | 98.3  | 96.0 | 97.1 | universal stress protein family protein                                    | gbpln | Brassica rapa        | AT3G01520.1   Symbols:   Adenine nucleotide alpha hydrolases-like superfamily protein   chr3:208506-209921 FORWARD LENGTH=175                                                                                                                                                                                                               | 175 | 175  | 2.00E-88  | 100.0 | 87.4 | 92.6 |
| Rsa1.0_00582.1.g16384.t1 | gb EOA32918.1   hypothetical protein CARUB_v10016245mg [Capsella rubella]                                                                                                                                                                                                                                                                                                                                                                                        | 208 | 203  | 1.00E-85  | 97.6  | 76.9 | 86.1 | hypothetical protein CARUB_v10016245mg                                     | gbpln | Capsella rubella     | AT3G01530.1   Symbols: ATMVB57, MYB57   myb domain protein 57   chr3:210352-211151 REVERSE LENGTH=206                                                                                                                                                                                                                                       | 208 | 206  | 3.00E-86  | 99.0  | 76.9 | 82.2 |
| Rsa1.0_00582.1.g16385.t1 | ref XP_002882170.1   glycosyl transferase family 17 protein [Arabidopsis lyrata subsp. lyrata] gi 297328010 gb EFH58429.1   glycosyl transferase family 17 protein [Arabidopsis lyrata subsp. lyrata]                                                                                                                                                                                                                                                            | 381 | 388  | 0         | 101.8 | 84.3 | 91.3 | glycosyl transferase family 17 protein                                     | gbpln | Arabidopsis lyrata   | AT3G01620.1   Symbols:   beta-1,4-N-acetylglucosaminyltransferase family protein   chr3:235327-236729 REVERSE LENGTH=388                                                                                                                                                                                                                    | 381 | 388  | 0         | 101.8 | 85.6 | 91.6 |
| Rsa1.0_00582.1.g16386.t9 | ref NP_186815.1   S-adenosylmethionine-dependent methyltransferase domain-containing protein [Arabidopsis thaliana] gi 6016723 gb AAAF01549.1   AC009325.19 hypothetical protein [Arabidopsis thaliana] gi 38454124 gb AAR20756.1   At3g01660 [Arabidopsis thaliana] gi 46402482 gb AAS92343.1   At3g01660 [Arabidopsis thaliana] gi 332640179 gb AEE73700.1   S-adenosylmethionine-dependent methyltransferase domain-containing protein [Arabidopsis thaliana] | 280 | 273  | 1.00E-135 | 97.5  | 83.9 | 89.6 | S-adenosylmethionine-dependent methyltransferase domain-containing protein | gbpln | Arabidopsis thaliana | AT3G01660.1   Symbols:   S-adenosyl-L-methionine-dependent methyltransferases superfamily protein   chr3:245532-246432 FORWARD LENGTH=273                                                                                                                                                                                                   | 280 | 273  | 1.00E-137 | 97.5  | 83.9 | 89.6 |
| Rsa1.0_00582.1.g16387.t1 | gb AAAF01550.1   AC009325.20 unknown protein [Arabidopsis thaliana]                                                                                                                                                                                                                                                                                                                                                                                              | 824 | 846  | 0         | 102.7 | 87.9 | 94.4 | unknown protein                                                            | gbpln | Arabidopsis thaliana | AT3G01670.1   Symbols:   unknown protein; BEST Arabidopsis thaliana protein match is: unknown protein (TAIR:AT3G01680.1); Has 121 Blast hits to 111 proteins in 12 species: Archae - 0; Bacteria - 0; Metazoa - 0; Fungi - 0; Plants - 121; Viruses - 0; Other Eukaryotes - 0 (source: NCBI BLink).   chr3:247288-250261 FORWARD LENGTH=822 | 824 | 822  | 0         | 99.8  | 87.9 | 94.4 |

|                          |                                                                                                                                                                                                                                                                                                                                                                                                                                                            |     |     |          |       |      |      |                                                        |       |                      |                                                                                                                                                                                                                                                                                                                                                                                                              |     |     |          |       |      |      |
|--------------------------|------------------------------------------------------------------------------------------------------------------------------------------------------------------------------------------------------------------------------------------------------------------------------------------------------------------------------------------------------------------------------------------------------------------------------------------------------------|-----|-----|----------|-------|------|------|--------------------------------------------------------|-------|----------------------|--------------------------------------------------------------------------------------------------------------------------------------------------------------------------------------------------------------------------------------------------------------------------------------------------------------------------------------------------------------------------------------------------------------|-----|-----|----------|-------|------|------|
| Rsa1.0_00582.1.g16388.t1 | ref NP_186817.1  uncharacterized protein [Arabidopsis thaliana] gi 6016725 gb AAF01551.1 AC009325.21 unknown protein [Arabidopsis thaliana] gi 30725324 gb AAP37684.1  At3g01680 [Arabidopsis thaliana] gi 110736167 dbj BAF00055.1  hypothetical protein [Arabidopsis thaliana] gi 307101698 gb ADN32814.1  sieve element occlusion b [Arabidopsis thaliana] gi 332640181 gb AEE73702.1  uncharacterized protein AT3G01680 [Arabidopsis thaliana]         | 739 | 740 | 0        | 100.1 | 90.9 | 95.8 | uncharacterized protein                                | gbpln | Arabidopsis thaliana | AT3G01680.1   Symbols:   CONTAINS InterPro DOMAIN/s: Mediator complex subunit Med28 (InterPro:IPRO21640); BEST Arabidopsis thaliana protein match is: unknown protein (TAIR:AT3G01670.1); Has 122 Blast hits to 112 proteins in 13 species: Archae - 0; Bacteria - 0; Metazoa - 0; Fungi - 0; Plants - 122; Viruses - 0; Other Eukaryotes - 0 (source: NCBI BLink).   chr:3:252033-255246 FORWARD LENGTH=740 | 739 | 740 | 0        | 100.1 | 90.9 | 95.8 |
| Rsa1.0_00582.1.g16389.t1 | #                                                                                                                                                                                                                                                                                                                                                                                                                                                          | #   | #   | #        | #     | #    | #    | -                                                      | ----  | ----                 | #                                                                                                                                                                                                                                                                                                                                                                                                            | #   | #   | #        | #     | #    |      |
| Rsa1.0_00582.1.g16390.t1 | emb CAB42531.1  AGP6 protein [Arabidopsis thaliana]                                                                                                                                                                                                                                                                                                                                                                                                        | 138 | 150 | 1.00E-33 | 108.7 | 71.0 | 81.9 | AGP6 protein                                           | gbpln | Arabidopsis thaliana | AT5G14380.1   Symbols: AGP6   arabinogalactan protein 6   chr:5:4636088-4636540 REVERSE LENGTH=150                                                                                                                                                                                                                                                                                                           | 138 | 150 | 4.00E-35 | 108.7 | 69.6 | 80.4 |
| Rsa1.0_00582.1.g16391.t1 | ref XP_002884262.1  hypothetical protein ARALYDRAFT_896070 [Arabidopsis lyrata subsp. lyrata] gi 297330102 gb EFH60521.1  hypothetical protein ARALYDRAFT_896070 [Arabidopsis lyrata subsp. lyrata]                                                                                                                                                                                                                                                        | 129 | 125 | 6.00E-35 | 96.9  | 71.3 | 75.2 | hypothetical protein ARALYDRAFT_896070                 | gbpln | Arabidopsis lyrata   | AT3G01740.1   Symbols:   Mitochondrial ribosomal protein L37   chr:3:268118-268498 FORWARD LENGTH=126                                                                                                                                                                                                                                                                                                        | 129 | 126 | 6.00E-36 | 97.7  | 69.8 | 73.6 |
| Rsa1.0_00582.1.g16392.t1 | ref XP_002884261.1  hypothetical protein ARALYDRAFT_896068 [Arabidopsis lyrata subsp. lyrata] gi 297330101 gb EFH60520.1  hypothetical protein ARALYDRAFT_896068 [Arabidopsis lyrata subsp. lyrata]                                                                                                                                                                                                                                                        | 371 | 449 | 0        | 121.0 | 82.7 | 88.1 | hypothetical protein ARALYDRAFT_896068                 | gbpln | Arabidopsis lyrata   | AT1G61270.1   Symbols:   Transmembrane amino acid transporter family protein   chr:1:22599665-22602140 REVERSE LENGTH=451                                                                                                                                                                                                                                                                                    | 371 | 451 | 0        | 121.6 | 81.7 | 88.9 |
| Rsa1.0_00582.1.g16393.t2 | ref NP_186833.1  protein kinase domain-containing protein [Arabidopsis thaliana] gi 75337203 sp Q9SGI7.1 LYK2_ARATH RecName: Full=Protein LYK2; AltName: Full=LysM domain receptor-like kinase 2; AltName: Full=LysM-containing receptor-like kinase 2; Flags: Precursor gi 6091745 gb AAF03457.1 AC010797.33 putative protein kinase [Arabidopsis thaliana] gi 332640202 gb AEE73723.1  protein LYK2 [Arabidopsis thaliana]                               | 866 | 654 | 0        | 75.5  | 51.4 | 57.4 | protein kinase domain-containing protein               | gbpln | Arabidopsis thaliana | AT3G01840.1   Symbols:   Protein kinase superfamily protein   chr:3:296582-298634 REVERSE LENGTH=654                                                                                                                                                                                                                                                                                                         | 866 | 654 | 0        | 75.5  | 51.4 | 57.4 |
| Rsa1.0_00582.1.g16394.t1 | ref XP_002884255.1  hypothetical protein ARALYDRAFT_896056 [Arabidopsis lyrata subsp. lyrata] gi 297330095 gb EFH60514.1  hypothetical protein ARALYDRAFT_896056 [Arabidopsis lyrata subsp. lyrata]                                                                                                                                                                                                                                                        | 591 | 583 | 0        | 98.6  | 74.3 | 85.1 | hypothetical protein ARALYDRAFT_896056                 | gbpln | Arabidopsis lyrata   | AT3G01870.1   Symbols:   Plant protein of unknown function (DUF946)   chr:3:305276-307027 FORWARD LENGTH=583                                                                                                                                                                                                                                                                                                 | 591 | 583 | 0        | 98.6  | 73.1 | 83.6 |
| Rsa1.0_00582.1.g16395.t1 | ref NP_566155.1  cytochrome P450, family 94, subfamily B, polypeptide 2 [Arabidopsis thaliana] gi 6091730 gb AAF03442.1 AC010797.18 putative cytochrome P450 [Arabidopsis thaliana] gi 6513941 gb AAF14845.1 AC011664.27 putative cytochrome P450 [Arabidopsis thaliana] gi 332640210 gb AEE73731.1  cytochrome P450, family 94, subfamily B, polypeptide 2 [Arabidopsis thaliana]                                                                         | 500 | 496 | 0        | 99.2  | 81.8 | 89.0 | cytochrome P450, family 94, subfamily B, polypeptide 2 | gbpln | Arabidopsis thaliana | AT3G01900.1   Symbols: CYP94B2   cytochrome P450, family 94, subfamily B, polypeptide 2   chr:3:312359-313849 REVERSE LENGTH=496                                                                                                                                                                                                                                                                             | 500 | 496 | 0        | 99.2  | 81.8 | 89.0 |
| Rsa1.0_00582.1.g16396.t1 | #                                                                                                                                                                                                                                                                                                                                                                                                                                                          | #   | #   | #        | #     | #    | #    | -                                                      | ----  | ----                 | #                                                                                                                                                                                                                                                                                                                                                                                                            | #   | #   | #        | #     | #    |      |
| Rsa1.0_00582.1.g16397.t1 | ref NP_186844.1  uncharacterized protein [Arabidopsis thaliana] gi 6091734 gb AAF03446.1 AC010797.22 hypothetical protein [Arabidopsis thaliana] gi 6513936 gb AAF14840.1 AC011664.22 hypothetical protein [Arabidopsis thaliana] gi 26453294 dbj BAC43720.1  GPI-anchored protein [Arabidopsis thaliana] gi 28416747 gb AAO42904.1  At3g01950 [Arabidopsis thaliana] gi 332640218 gb AEE73739.1  uncharacterized protein AT3G01950 [Arabidopsis thaliana] | 70  | 70  | 1.00E-28 | 100.0 | 94.3 | 98.6 | uncharacterized protein                                | gbpln | Arabidopsis thaliana | AT3G01950.1   Symbols:   Protein of unknown function (DUF 3339)   chr:3:324026-324238 FORWARD LENGTH=70                                                                                                                                                                                                                                                                                                      | 70  | 70  | 2.00E-31 | 100.0 | 94.3 | 98.6 |

|                          |                                                                                                                                                                                                                         |     |     |          |       |      |      |                                                 |       |                      |                                                                                                                                                                                                                                                                                                                                                                                                            |     |     |          |       |      |      |
|--------------------------|-------------------------------------------------------------------------------------------------------------------------------------------------------------------------------------------------------------------------|-----|-----|----------|-------|------|------|-------------------------------------------------|-------|----------------------|------------------------------------------------------------------------------------------------------------------------------------------------------------------------------------------------------------------------------------------------------------------------------------------------------------------------------------------------------------------------------------------------------------|-----|-----|----------|-------|------|------|
| Rsa1.0_00582.1.g16398.t2 | refXP_002886105.1   hypothetical protein ARALYDRAFT_480605 [Arabidopsis lyrata subsp. lyrata]   g 297331945 gb EFH62364.1                                                                                               | 168 | 414 | 3.00E-27 | 246.4 | 34.5 | 36.3 | hypothetical protein ARALYDRAFT_480605          | gbpln | Arabidopsis lyrata   | AT2G17220.2   Symbols:   Protein kinase superfamily protein   chr2:7487866-7489768 REVERSE LENGTH=413                                                                                                                                                                                                                                                                                                      | 168 | 413 | 7.00E-29 | 245.8 | 33.9 | 35.7 |
| Rsa1.0_00582.1.g16399.t1 | hypothetical protein ARALYDRAFT_480605 [Arabidopsis lyrata subsp. lyrata]   refXP_002882155.1   hypothetical protein ARALYDRAFT_316997 [Arabidopsis lyrata subsp. lyrata]   g 297327995 gb EFH58414.1                   | 139 | 138 | 1.00E-53 | 99.3  | 75.5 | 85.6 | hypothetical protein ARALYDRAFT_316997          | gbpln | Arabidopsis lyrata   | AT3G01960.1   Symbols:   unknown protein; Has 13 Blast hits to 13 proteins in 5 species: Archae - 0; Bacteria - 0; Metazoa - 0; Fungi - 0; Plants - 13; Viruses - 0; Other Eukaryotes - 0 (source: NCBI BLink).   chr3:324581-325087 REVERSE LENGTH=138                                                                                                                                                    | 139 | 138 | 4.00E-55 | 99.3  | 77.0 | 87.1 |
| Rsa1.0_00582.1.g16400.t1 | gb ACH99806.1  WRKY45 transcription factor [Brassica napus]                                                                                                                                                             | 228 | 144 | 1.00E-71 | 63.2  | 61.0 | 62.3 | WRKY45 transcription factor                     | gbpln | Brassica napus       | AT3G01970.1   Symbols: WRKY45, ATWRKY45   WRKY DNA-binding protein 45   chr3:326614-327159 REVERSE LENGTH=147                                                                                                                                                                                                                                                                                              | 228 | 147 | 3.00E-55 | 64.5  | 50.9 | 53.9 |
| Rsa1.0_00582.1.g16401.t1 | ref NP_188565.1  uncharacterized protein [Arabidopsis thaliana]   g 20260589 gb AAM13192.1  unknown protein [Arabidopsis thaliana]   g 332642706 gb AE76227.1  uncharacterized protein AT3G19340 [Arabidopsis thaliana] | 487 | 487 | 0        | 100.0 | 90.1 | 95.7 | uncharacterized protein                         | gbpln | Arabidopsis thaliana | AT3G19340.1   Symbols:   Protein of unknown function (DUF3754)   chr3:6701387-6704071 REVERSE LENGTH=487                                                                                                                                                                                                                                                                                                   | 487 | 487 | 0        | 100.0 | 90.1 | 95.7 |
| Rsa1.0_00582.1.g16402.t1 | db BAA97156.1  unnamed protein product [Arabidopsis thaliana]                                                                                                                                                           | 127 | 329 | 3.00E-15 | 259.1 | 40.9 | 48.0 | unnamed protein product                         | gbpln | Arabidopsis thaliana | AT2G22440.1   Symbols:   BEST Arabidopsis thaliana protein match is: Ribonuclease H-like superfamily protein (TAIR:AT4G29090.1); Has 208 Blast hits to 191 proteins in 10 species: Archae - 0; Bacteria - 0; Metazoa - 0; Fungi - 0; Plants - 208; Viruses - 0; Other Eukaryotes - 0 (source: NCBI BLink).   chr2:9528910-9529917 FORWARD LENGTH=256                                                       | 127 | 256 | 6.00E-15 | 201.6 | 36.2 | 48.0 |
| Rsa1.0_00582.1.g16403.t1 | #                                                                                                                                                                                                                       | #   | #   | #        | #     | #    | -    | ----                                            | ----  | ----                 | #                                                                                                                                                                                                                                                                                                                                                                                                          | #   | #   | #        | #     | #    | #    |
| Rsa1.0_00583.1.g16404.t1 | gb EOA36870.1  hypothetical protein CARUB_v10008862mg [Capsella rubella]                                                                                                                                                | 520 | 519 | 0        | 99.8  | 90.6 | 94.0 | hypothetical protein CARUB_v10008862mg          | gbpln | Capsella rubella     | AT1G27680.1   Symbols: APL2   ADPGLC-PPase large subunit   chr1:9631630-9634450 FORWARD LENGTH=518                                                                                                                                                                                                                                                                                                         | 520 | 518 | 0        | 99.6  | 89.6 | 93.7 |
| Rsa1.0_00583.1.g16405.t2 | gb EOA36870.1  hypothetical protein CARUB_v10008862mg [Capsella rubella]                                                                                                                                                | 122 | 519 | 8.00E-37 | 425.4 | 63.1 | 68.0 | hypothetical protein CARUB_v10008862mg          | gbpln | Capsella rubella     | AT1G27680.1   Symbols: APL2   ADPGLC-PPase large subunit   chr1:9631630-9634450 FORWARD LENGTH=518                                                                                                                                                                                                                                                                                                         | 122 | 518 | 2.00E-37 | 424.6 | 61.5 | 66.4 |
| Rsa1.0_00583.1.g16406.t1 | refXP_002893484.1   hypothetical protein ARALYDRAFT_890303 [Arabidopsis lyrata subsp. lyrata]   g 297339326 gb EFH69743.1                                                                                               | 262 | 256 | 7.00E-95 | 97.7  | 69.5 | 79.4 | hypothetical protein ARALYDRAFT_890303          | gbpln | Arabidopsis lyrata   | AT1G27670.1   Symbols:   unknown protein; BEST Arabidopsis thaliana protein match is: unknown protein (TAIR:AT1G75360.1); Has 35 Blast hits to 35 proteins in 6 species: Archae - 0; Bacteria - 0; Metazoa - 0; Fungi - 0; Plants - 35; Viruses - 0; Other Eukaryotes - 0 (source: NCBI BLink).   chr1:9627715-9628413 REVERSE LENGTH=232                                                                  | 262 | 232 | 8.00E-82 | 88.5  | 64.5 | 73.7 |
| Rsa1.0_00583.1.g16407.t1 | refXP_002893783.1   predicted protein [Arabidopsis lyrata subsp. lyrata]   g 297339625 gb EFH70042.1                                                                                                                    | 256 | 276 | 2.00E-31 | 107.8 | 33.6 | 45.3 | predicted protein                               | gbpln | Arabidopsis lyrata   | AT5G03495.1   Symbols:   RNA-binding (RRM/RBD/RNP motifs) family protein   chr5:873804-875025 REVERSE LENGTH=226                                                                                                                                                                                                                                                                                           | 256 | 226 | 3.00E-23 | 88.3  | 28.9 | 40.2 |
| Rsa1.0_00583.1.g16408.t1 | refXP_002893783.1   predicted protein [Arabidopsis lyrata subsp. lyrata]   g 297339625 gb EFH70042.1                                                                                                                    | 170 | 276 | 1.00E-12 | 162.4 | 24.1 | 32.4 | predicted protein                               | gbpln | Arabidopsis lyrata   | AT5G03480.1   Symbols:   RNA-binding (RRM/RBD/RNP motifs) family protein   chr5:869208-870855 REVERSE LENGTH=321                                                                                                                                                                                                                                                                                           | 170 | 321 | 5.00E-12 | 188.8 | 21.2 | 36.5 |
| Rsa1.0_00583.1.g16409.t1 | ref NP_568874.2  phototropin 2 [Arabidopsis thaliana]   g 332009618 gb AED97001.1                                                                                                                                       | 193 | 689 | 2.00E-17 | 357.0 | 29.0 | 34.2 | phototropin 2                                   | gbpln | Arabidopsis thaliana | AT5G58140.4   Symbols: PHOT2, NPL1   phototropin 2   chr5:23524771-23528541 FORWARD LENGTH=689                                                                                                                                                                                                                                                                                                             | 193 | 689 | 8.00E-20 | 357.0 | 29.0 | 34.2 |
| Rsa1.0_00583.1.g16410.t1 | #                                                                                                                                                                                                                       | #   | #   | #        | #     | #    | -    | ----                                            | ----  | ----                 | #                                                                                                                                                                                                                                                                                                                                                                                                          | #   | #   | #        | #     | #    | #    |
| Rsa1.0_00583.1.g16411.t1 | #                                                                                                                                                                                                                       | #   | #   | #        | #     | #    | -    | ----                                            | ----  | ----                 | #                                                                                                                                                                                                                                                                                                                                                                                                          | #   | #   | #        | #     | #    | #    |
| Rsa1.0_00583.1.g16412.t1 | refXP_004230758.1   PREDICTED: polyadenylate-binding protein 2-like [Solanum lycopersicum]                                                                                                                              | 104 | 643 | 1.00E-15 | 618.3 | 44.2 | 60.6 | PREDICTED: polyadenylate-binding protein 2-like | gbpln | Solanum lycopersicum | AT2G23350.1   Symbols: PAB4, PABP4   poly(A) binding protein 4   chr2:9943209-9946041 FORWARD LENGTH=662                                                                                                                                                                                                                                                                                                   | 104 | 662 | 5.00E-17 | 636.5 | 38.5 | 51.9 |
| Rsa1.0_00583.1.g16413.t1 | gb EOA37527.1  hypothetical protein CARUB_v10011729mg [Capsella rubella]                                                                                                                                                | 166 | 174 | 6.00E-83 | 104.8 | 92.8 | 95.2 | hypothetical protein CARUB_v10011729mg          | gbpln | Capsella rubella     | AT1G27530.1   Symbols:   CONTAINS InterPro DOMAIN/s: Ubiquitin-conjugating enzyme/RWD-like (InterPro:IPR016135). Ubiquitin-fold modifier-conjugating enzyme 1 (InterPro:IPR014806). Has 269 Blast hits to 269 proteins in 110 species: Archae - 0; Bacteria - 0; Metazoa - 175; Fungi - 0; Plants - 42; Viruses - 0; Other Eukaryotes - 52 (source: NCBI BLink).   chr1:9562761-9563887 REVERSE LENGTH=174 | 166 | 174 | 3.00E-84 | 104.8 | 91.6 | 94.6 |

|                          |                                                                                                                                                                                                                                                                                                                                                                                                                                                                                                                                                                                                                                   |     |     |           |       |      |      |                                                         |       |                      |                                                                                                                                                                                                                                                                                                                                                                                                            |     |     |           |       |      |      |
|--------------------------|-----------------------------------------------------------------------------------------------------------------------------------------------------------------------------------------------------------------------------------------------------------------------------------------------------------------------------------------------------------------------------------------------------------------------------------------------------------------------------------------------------------------------------------------------------------------------------------------------------------------------------------|-----|-----|-----------|-------|------|------|---------------------------------------------------------|-------|----------------------|------------------------------------------------------------------------------------------------------------------------------------------------------------------------------------------------------------------------------------------------------------------------------------------------------------------------------------------------------------------------------------------------------------|-----|-----|-----------|-------|------|------|
| Rsa1.0_00583.1.g16414.t1 | ref[XP_002885580.1] predicted protein [Arabidopsis lyrata subsp. lyrata] gi 297331420 gb EFH61839.1  predicted protein [Arabidopsis lyrata subsp. lyrata]                                                                                                                                                                                                                                                                                                                                                                                                                                                                         | 93  | 252 | 6.00E-13  | 271.0 | 43.0 | 59.1 | predicted protein                                       | gbpln | Arabidopsis lyrata   | #                                                                                                                                                                                                                                                                                                                                                                                                          | #   | #   | #         | #     | #    | #    |
| Rsa1.0_00583.1.g16415.t1 | gb EOA37527.1  hypothetical protein CARUB_v10011729mg [Capsella rubella]                                                                                                                                                                                                                                                                                                                                                                                                                                                                                                                                                          | 162 | 174 | 2.00E-77  | 107.4 | 88.9 | 92.0 | hypothetical protein CARUB_v10011729mg                  | gbpln | Capsella rubella     | AT1G27530.1   Symbols:   CONTAINS InterPro DOMAIN/s: Ubiquitin-conjugating enzyme/RWD-like (InterPro:IPR016135). Ubiquitin-fold modifier-conjugating enzyme 1 (InterPro:IPR014806). Has 269 Blast hits to 269 proteins in 110 species: Archae - 0; Bacteria - 0; Metazoa - 175; Fungi - 0; Plants - 42; Viruses - 0; Other Eukaryotes - 52 (source: NCBI BLINK).   chr1:9562761-9563887 REVERSE LENGTH=174 | 162 | 174 | 1.00E-78  | 107.4 | 87.7 | 91.4 |
| Rsa1.0_00583.1.g16416.t1 | ref[XP_002890731.1] glycoside hydrolase family 47 protein [Arabidopsis lyrata subsp. lyrata] gi 297336573 gb EFH66990.1  glycoside hydrolase family 47 protein [Arabidopsis lyrata subsp. lyrata]                                                                                                                                                                                                                                                                                                                                                                                                                                 | 585 | 574 | 0         | 98.1  | 86.0 | 91.5 | glycoside hydrolase family 47 protein                   | gbpln | Arabidopsis lyrata   | AT1G27520.1   Symbols:   Glycosyl hydrolase family 47 protein   chr1:9558752-9562091 FORWARD LENGTH=574                                                                                                                                                                                                                                                                                                    | 585 | 574 | 0         | 98.1  | 85.1 | 90.6 |
| Rsa1.0_00583.1.g16417.t1 | ref[XP_002893471.1] hypothetical protein ARALYDRAFT.472955 [Arabidopsis lyrata subsp. lyrata] gi 297339313 gb EFH69730.1  hypothetical protein ARALYDRAFT.472955 [Arabidopsis lyrata subsp. lyrata]                                                                                                                                                                                                                                                                                                                                                                                                                               | 663 | 645 | 0         | 97.3  | 83.0 | 89.1 | hypothetical protein ARALYDRAFT.472955                  | gbpln | Arabidopsis lyrata   | AT1G27500.1   Symbols:   Tetratricopeptide repeat (TPR)-like superfamily protein   chr1:9551629-9553654 REVERSE LENGTH=650                                                                                                                                                                                                                                                                                 | 663 | 650 | 0         | 98.0  | 81.7 | 89.4 |
| Rsa1.0_00583.1.g16418.t4 | ref[NP_174067.2] transducin family protein / WD-40 repeat family protein [Arabidopsis thaliana] gi 17979117 gb AAL49816.1  unknown protein [Arabidopsis thaliana] gi 23297582 gb AAN12900.1  unknown protein [Arabidopsis thaliana] gi 332192715 gb AEE30836.1  transducin family protein / WD-40 repeat family protein [Arabidopsis thaliana]                                                                                                                                                                                                                                                                                    | 863 | 810 | 0         | 93.9  | 77.6 | 84.1 | transducin family protein / WD-40 repeat family protein | gbpln | Arabidopsis thaliana | AT1G27470.1   Symbols:   transducin family protein / WD-40 repeat family protein   chr1:9540368-9544218 REVERSE LENGTH=810                                                                                                                                                                                                                                                                                 | 863 | 810 | 0         | 93.9  | 77.6 | 84.1 |
| Rsa1.0_00583.1.g16419.t1 | ref[NP_001117365.1] uncharacterized protein [Arabidopsis thaliana] gi 98961611 gb ABF59135.1  unknown protein [Arabidopsis thaliana] gi 332192714 gb AEE30835.1  uncharacterized protein AT1G27461 [Arabidopsis thaliana]                                                                                                                                                                                                                                                                                                                                                                                                         | 363 | 354 | 1.00E-148 | 97.5  | 77.4 | 86.5 | uncharacterized protein                                 | gbpln | Arabidopsis thaliana | AT1G27461.1   Symbols:   unknown protein; Has 30201 Blast hits to 17322 proteins in 780 species: Archae - 12; Bacteria - 1396; Metazoa - 17338; Fungi - 3422; Plants - 5037; Viruses - 0; Other Eukaryotes - 2996 (source: NCBI BLINK).   chr1:9537948-9539012 REVERSE LENGTH=354                                                                                                                          | 363 | 354 | 1.00E-150 | 97.5  | 77.4 | 86.5 |
| Rsa1.0_00583.1.g16420.t6 | gb AAP85303.1  adenine phosphoribosyltransferase [Brassica napus]                                                                                                                                                                                                                                                                                                                                                                                                                                                                                                                                                                 | 292 | 204 | 1.00E-85  | 69.9  | 57.5 | 58.2 | adenine phosphoribosyltransferase                       | gbpln | Brassica napus       | AT1G27450.1   Symbols: APT1, ATAPT1   adenine phosphoribosyl transferase 1   chr1:9532042-9533807 FORWARD LENGTH=243                                                                                                                                                                                                                                                                                       | 292 | 243 | 2.00E-86  | 83.2  | 55.5 | 57.2 |
| Rsa1.0_00583.1.g16421.t1 | #                                                                                                                                                                                                                                                                                                                                                                                                                                                                                                                                                                                                                                 | #   | #   | #         | #     | #    | #    | -                                                       | ----  | ----                 | AT5G61840.1   Symbols: GUT1   Exostosin family protein   chr5:24839365-24841703 REVERSE LENGTH=415                                                                                                                                                                                                                                                                                                         | 56  | 415 | 3.00E-11  | 741.1 | 51.8 | 55.4 |
| Rsa1.0_00583.1.g16422.t1 | ref[NP_174060.1] 60S ribosomal protein L17-1 [Arabidopsis thaliana] gi 27734446 sp Q93V13.1 RL171_ARATH RecName: Full=60S ribosomal protein L17-1 gi 16226209 gb AAL16103.1 AF428271_1 At1g27400/F17L21.20 [Arabidopsis thaliana] gi 16226630 gb AAL16218.1 AF428449_1 At1g27400/F17L21.20 [Arabidopsis thaliana] gi 14335140 gb AAK59850.1  At1g27400/F17L21.20 [Arabidopsis thaliana] gi 18655347 gb AAL76129.1  At1g27400/F17L21.20 [Arabidopsis thaliana] gi 21594923 gb AAM66056.1  putative 60S ribosomal protein L17 [Arabidopsis thaliana] gi 332192704 gb AEE30825.1  60S ribosomal protein L17-1 [Arabidopsis thaliana] | 176 | 176 | 1.00E-98  | 100.0 | 98.3 | 99.4 | 60S ribosomal protein L17-1                             | gbpln | Arabidopsis thaliana | AT1G27400.1   Symbols:   Ribosomal protein L22p/L17e family protein   chr1:9515230-9516725 FORWARD LENGTH=176                                                                                                                                                                                                                                                                                              | 176 | 176 | 1.00E-101 | 100.0 | 98.3 | 99.4 |
| Rsa1.0_00584.1.g16423.t1 | gb EOA19024.1  hypothetical protein CARUB_v10007676mg [Capsella rubella]                                                                                                                                                                                                                                                                                                                                                                                                                                                                                                                                                          | 412 | 365 | 1.00E-137 | 88.6  | 62.9 | 73.5 | hypothetical protein CARUB_v10007676mg                  | gbpln | Capsella rubella     | AT5G40230.1   Symbols:   nodulin MtN21 /EamA-like transporter family protein   chr5:16079814-16081735 REVERSE LENGTH=370                                                                                                                                                                                                                                                                                   | 412 | 370 | 1.00E-138 | 89.8  | 62.9 | 73.5 |

|                          |                                                                                                                                                                                                                                                                                                                                                                                                                                        |      |      |           |       |      |      |                                                                |       |                      |                                                                                                                                                                                                                                                                                  |      |      |           |       |      |      |
|--------------------------|----------------------------------------------------------------------------------------------------------------------------------------------------------------------------------------------------------------------------------------------------------------------------------------------------------------------------------------------------------------------------------------------------------------------------------------|------|------|-----------|-------|------|------|----------------------------------------------------------------|-------|----------------------|----------------------------------------------------------------------------------------------------------------------------------------------------------------------------------------------------------------------------------------------------------------------------------|------|------|-----------|-------|------|------|
| Rsa1.0_00584.1.g16424.t1 | ref[XP_002865424.1] hypothetical protein ARALYDRAFT_494656 [Arabidopsis lyrata subsp. lyrata] gi 297311259 gb EFH41683.1                                                                                                                                                                                                                                                                                                               | 380  | 379  | 1.00E-133 | 99.7  | 77.4 | 85.0 | hypothetical protein ARALYDRAFT_494656                         | gbpln | Arabidopsis lyrata   | AT5G43420.1   Symbols:   RING/U-box superfamily protein   chr5:17451790-17452917 FORWARD LENGTH=375                                                                                                                                                                              | 380  | 375  | 1.00E-136 | 98.7  | 77.1 | 84.7 |
| Rsa1.0_00584.1.g16425.t1 | hypothetical protein ARALYDRAFT_494656 [Arabidopsis lyrata subsp. lyrata] emb[CAB40035.1] retrotransposon like protein [Arabidopsis thaliana] gi 7267767 emb CAB81170.1  retrotransposon like protein [Arabidopsis thaliana]                                                                                                                                                                                                           | 1476 | 1515 | 0         | 102.6 | 59.1 | 72.7 | retrotransposon like protein                                   | gbpln | Arabidopsis thaliana | AT4G23160.1   Symbols: CRK8   cysteine-rich RLK (RECEPTOR-like protein kinase) 8   chr4:12129485-12134086 FORWARD LENGTH=1262                                                                                                                                                    | 1476 | 1262 | 1.00E-107 | 85.5  | 13.3 | 19.6 |
| Rsa1.0_00584.1.g16426.t1 | gb EOA13618.1  hypothetical protein CARUB_v10026685mg [Capsella rubella] gi 482549425 gb EOA13619.1  hypothetical protein CARUB_v10026685mg [Capsella rubella]                                                                                                                                                                                                                                                                         | 132  | 353  | 2.00E-11  | 267.4 | 26.5 | 30.3 | hypothetical protein CARUB_v10026685mg                         | gbpln | Capsella rubella     | #                                                                                                                                                                                                                                                                                | #    | #    | #         | #     | #    | #    |
| Rsa1.0_00584.1.g16427.t4 | gb ACP30609.1  disease resistance protein [Brassica rapa subsp. pekinensis]                                                                                                                                                                                                                                                                                                                                                            | 1357 | 2726 | 0         | 200.9 | 54.5 | 70.6 | disease resistance protein                                     | gbpln | Brassica rapa        | AT3G29750.1   Symbols:   Eukaryotic aspartyl protease family protein   chr3:11579125-11580600 REVERSE LENGTH=421                                                                                                                                                                 | 1357 | 421  | 5.00E-14  | 31.0  | 3.5  | 5.6  |
| Rsa1.0_00584.1.g16428.t2 | ref[XP_002863658.1] hypothetical protein ARALYDRAFT_917317 [Arabidopsis lyrata subsp. lyrata] gi 297309493 gb EFH39917.1  hypothetical protein ARALYDRAFT_917317 [Arabidopsis lyrata subsp. lyrata]                                                                                                                                                                                                                                    | 650  | 657  | 0         | 101.1 | 78.5 | 87.8 | hypothetical protein ARALYDRAFT_917317                         | gbpln | Arabidopsis lyrata   | AT5G43400.1   Symbols:   Uncharacterised conserved protein UCP015417, vWA   chr5:17426182-17428149 REVERSE LENGTH=655                                                                                                                                                            | 650  | 655  | 0         | 100.8 | 77.7 | 87.5 |
| Rsa1.0_00584.1.g16429.t2 | ref[XP_003635668.1] PREDICTED: uncharacterized protein LOC100854178, partial [Vitis vinifera]                                                                                                                                                                                                                                                                                                                                          | 235  | 478  | 7.00E-33  | 203.4 | 35.3 | 50.6 | PREDICTED: uncharacterized protein LOC100854178, partial       | gbpln | Vitis vinifera       | #                                                                                                                                                                                                                                                                                | #    | #    | #         | #     | #    | #    |
| Rsa1.0_00584.1.g16430.t1 | #                                                                                                                                                                                                                                                                                                                                                                                                                                      | #    | #    | #         | #     | #    | #    | -                                                              | ----  | ----                 | #                                                                                                                                                                                                                                                                                | #    | #    | #         | #     | #    | #    |
| Rsa1.0_00584.1.g16431.t1 | #                                                                                                                                                                                                                                                                                                                                                                                                                                      | #    | #    | #         | #     | #    | #    | -                                                              | ----  | ----                 | #                                                                                                                                                                                                                                                                                | #    | #    | #         | #     | #    | #    |
| Rsa1.0_00584.1.g16432.t1 | gb AAG51783.1 AC079679.3 reverse transcriptase, putative; 16838-20266 [Arabidopsis thaliana]                                                                                                                                                                                                                                                                                                                                           | 290  | 1142 | 1.00E-62  | 393.8 | 43.1 | 58.6 | reverse transcriptase, putative; 16838-20266                   | gbpln | Arabidopsis thaliana | AT4G29090.1   Symbols:   Ribonuclease H-like superfamily protein   chr4:14333528-14335255 FORWARD LENGTH=575                                                                                                                                                                     | 290  | 575  | 3.00E-30  | 198.3 | 27.2 | 47.2 |
| Rsa1.0_00584.1.g16433.t1 | ref[XP_002886661.1] hypothetical protein ARALYDRAFT_893587 [Arabidopsis lyrata subsp. lyrata] gi 297332502 gb EFH62920.1  hypothetical protein ARALYDRAFT_893587 [Arabidopsis lyrata subsp. lyrata]                                                                                                                                                                                                                                    | 289  | 988  | 6.00E-12  | 341.9 | 12.1 | 15.2 | hypothetical protein ARALYDRAFT_893587                         | gbpln | Arabidopsis lyrata   | AT1G59760.1   Symbols:   RNA helicase, ATP-dependent, SK12/DOB1 protein   chr1:21984571-21990110 REVERSE LENGTH=988                                                                                                                                                              | 289  | 988  | 5.00E-14  | 341.9 | 11.8 | 15.2 |
| Rsa1.0_00585.1.g16434.t1 | gb AAM62487.1  unknown [Arabidopsis thaliana]                                                                                                                                                                                                                                                                                                                                                                                          | 70   | 70   | 2.00E-21  | 100.0 | 85.7 | 87.1 | unknown                                                        | gbpln | Arabidopsis thaliana | AT5G24570.1   Symbols:   unknown protein; Has 30201 Blast hits to 17322 proteins in 780 species: Archae - 12; Bacteria - 1396; Metazoa - 17338; Fungi - 3422; Plants - 5037; Viruses - 0; Other Eukaryotes - 2996 (source: NCBI BLINK);   chr5:8405814-8406026 REVERSE LENGTH=70 | 70   | 70   | 1.00E-23  | 100.0 | 84.3 | 85.7 |
| Rsa1.0_00585.1.g16435.t1 | #                                                                                                                                                                                                                                                                                                                                                                                                                                      | #    | #    | #         | #     | #    | #    | -                                                              | ----  | ----                 | #                                                                                                                                                                                                                                                                                | #    | #    | #         | #     | #    | #    |
| Rsa1.0_00585.1.g16436.t1 | #                                                                                                                                                                                                                                                                                                                                                                                                                                      | #    | #    | #         | #     | #    | #    | -                                                              | ----  | ----                 | #                                                                                                                                                                                                                                                                                | #    | #    | #         | #     | #    | #    |
| Rsa1.0_00585.1.g16437.t1 | ref[NP_568449.1] heavy metal transport/detoxification domain-containing protein [Arabidopsis thaliana] gi 10177858 dbj BAB11210.1  unnamed protein product [Arabidopsis thaliana] gi 18175601 gb AL59894.1  unknown protein [Arabidopsis thaliana] gi 22136850 gb AAM91769.1  unknown protein [Arabidopsis thaliana] gi 332005944 gb AED93327.1  heavy metal transport/detoxification domain-containing protein [Arabidopsis thaliana] | 314  | 319  | 1.00E-106 | 101.6 | 81.2 | 86.0 | heavy metal transport/detoxification domain-containing protein | gbpln | Arabidopsis thaliana | AT5G24580.1   Symbols:   Heavy metal transport/detoxification superfamily protein   chr5:8410394-8412087 REVERSE LENGTH=319                                                                                                                                                      | 314  | 319  | 1.00E-109 | 101.6 | 81.2 | 86.0 |
| Rsa1.0_00585.1.g16438.t1 | gb AAG51783.1 AC079679.3 reverse transcriptase, putative; 16838-20266 [Arabidopsis thaliana]                                                                                                                                                                                                                                                                                                                                           | 1244 | 1142 | 0         | 91.8  | 53.0 | 67.2 | reverse transcriptase, putative; 16838-20266                   | gbpln | Arabidopsis thaliana | AT4G29090.1   Symbols:   Ribonuclease H-like superfamily protein   chr4:14333528-14335255 FORWARD LENGTH=575                                                                                                                                                                     | 1244 | 575  | 4.00E-80  | 46.2  | 14.7 | 23.3 |

|                          |                                                                                                                                                                                                                                                                                                                                                                                                                        |      |      |           |       |      |      |                                                 |       |                      |                                                                                                                                                 |      |      |           |       |      |      |
|--------------------------|------------------------------------------------------------------------------------------------------------------------------------------------------------------------------------------------------------------------------------------------------------------------------------------------------------------------------------------------------------------------------------------------------------------------|------|------|-----------|-------|------|------|-------------------------------------------------|-------|----------------------|-------------------------------------------------------------------------------------------------------------------------------------------------|------|------|-----------|-------|------|------|
| Rsa1.0_00585.1.g16439.t1 | refNP_197848.1  uncharacterized protein [Arabidopsis thaliana] gi 10177860 dbj BAB11212.1  unnamed protein product [Arabidopsis thaliana] gi 48310199 gb AAT41773.1  At5g24600 [Arabidopsis thaliana] gi 50198891 gb AAT70465.1  At5g24600 [Arabidopsis thaliana] gi 332005949 gb AED93332.1  uncharacterized protein AT5G24600 [Arabidopsis thaliana]                                                                 | 245  | 248  | 1.00E-124 | 101.2 | 90.6 | 93.9 | uncharacterized protein                         | gbpln | Arabidopsis thaliana | AT5G24600.1   Symbols:   Protein of unknown function, DUF599   chr5:8421790-8423342 REVERSE LENGTH=248                                          | 245  | 248  | 1.00E-126 | 101.2 | 90.6 | 93.9 |
| Rsa1.0_00585.1.g16440.t1 | refNP_197850.2  pathogenesis-related thaumatin-like protein [Arabidopsis thaliana] gi 193788746 gb ACF20472.1  At5g24620 [Arabidopsis thaliana] gi 332005952 gb AED93335.1  pathogenesis-related thaumatin-like protein [Arabidopsis thaliana]                                                                                                                                                                         | 441  | 420  | 0         | 95.2  | 78.9 | 84.4 | pathogenesis-related thaumatin-like protein     | gbpln | Arabidopsis thaliana | AT5G24620.1   Symbols:   Pathogenesis-related thaumatin superfamily protein   chr5:8430918-8432289 FORWARD LENGTH=420                           | 441  | 420  | 0         | 95.2  | 78.9 | 84.4 |
| Rsa1.0_00585.1.g16441.t1 | refNP_197854.1  response to low sulfur 2 [Arabidopsis thaliana] gi 9759206 dbj BAB09648.1  unnamed protein product [Arabidopsis thaliana] gi 21555007 gb AAM63752.1  unknown protein [Arabidopsis thaliana] gi 26452227 dbj BAC43201.1  unknown protein [Arabidopsis thaliana] gi 28416793 gb AAO42927.1  At5g24660 [Arabidopsis thaliana] gi 332005963 gb AED93346.1  response to low sulfur 2 [Arabidopsis thaliana] | 100  | 94   | 9.00E-40  | 94.0  | 82.0 | 88.0 | response to low sulfur 2                        | gbpln | Arabidopsis thaliana | AT5G24660.1   Symbols: LSU2   response to low sulfur 2   chr5:8443472-8443756 REVERSE LENGTH=94                                                 | 100  | 94   | 1.00E-42  | 94.0  | 82.0 | 88.0 |
| Rsa1.0_00585.1.g16442.t1 | refNP_568452.2  sterol glucosyltransferase-like protein [Arabidopsis thaliana] gi 332005971 gb AED93354.1  sterol glucosyltransferase-like protein [Arabidopsis thaliana]                                                                                                                                                                                                                                              | 899  | 520  | 0         | 57.8  | 45.9 | 50.5 | sterol glucosyltransferase-like protein         | gbpln | Arabidopsis thaliana | AT5G24750.1   Symbols:   UDP-glucosyltransferase superfamily protein   chr5:8490821-8494536 REVERSE LENGTH=520                                  | 899  | 520  | 0         | 57.8  | 45.9 | 50.5 |
| Rsa1.0_00585.1.g16443.t1 | gb EOA21357.1  hypothetical protein CARUB_v10001720mg [Capsella rubella]                                                                                                                                                                                                                                                                                                                                               | 264  | 268  | 9.00E-99  | 101.5 | 67.4 | 79.9 | hypothetical protein CARUB_v10001720mg          | gbpln | Capsella rubella     | AT5G24770.1   Symbols: VSP2, ATVSP2   vegetative storage protein 2   chr5:8500713-8501844 REVERSE LENGTH=265                                    | 264  | 265  | 9.00E-97  | 100.4 | 69.7 | 82.2 |
| Rsa1.0_00585.1.g16444.t1 | gb EOA21129.1  hypothetical protein CARUB_v10001471mg [Capsella rubella]                                                                                                                                                                                                                                                                                                                                               | 291  | 320  | 1.00E-125 | 110.0 | 85.2 | 89.7 | hypothetical protein CARUB_v10001471mg          | gbpln | Capsella rubella     | AT5G24800.1   Symbols: ATBZIP9, BZO2H2, BZIP9   basic leucine zipper 9   chr5:8515259-8516541 FORWARD LENGTH=277                                | 291  | 277  | 1.00E-127 | 95.2  | 81.1 | 85.6 |
| Rsa1.0_00585.1.g16445.t1 | gb EOA19667.1  hypothetical protein CARUB_v10003319mg [Capsella rubella]                                                                                                                                                                                                                                                                                                                                               | 968  | 1011 | 0         | 104.4 | 88.3 | 94.2 | hypothetical protein CARUB_v10003319mg          | gbpln | Capsella rubella     | AT5G24810.1   Symbols:   ABC1 family protein   chr5:8516902-8522616 REVERSE LENGTH=1009                                                         | 968  | 1009 | 0         | 104.2 | 86.5 | 93.6 |
| Rsa1.0_00585.1.g16446.t1 | # # # # # # # # # # # #                                                                                                                                                                                                                                                                                                                                                                                                | #    | #    | #         | #     | #    | #    | -                                               | ----  | ----                 | #                                                                                                                                               | #    | #    | #         | #     | #    | #    |
| Rsa1.0_00586.1.g16447.t1 | # # # # # # # # # # # #                                                                                                                                                                                                                                                                                                                                                                                                | #    | #    | #         | #     | #    | #    | -                                               | ----  | ----                 | #                                                                                                                                               | #    | #    | #         | #     | #    | #    |
| Rsa1.0_00586.1.g16448.t1 | dbj BAA97290.1  non-LTR retroelement reverse transcriptase-like [Arabidopsis thaliana]                                                                                                                                                                                                                                                                                                                                 | 1651 | 1072 | 0         | 64.9  | 30.4 | 40.0 | non-LTR retroelement reverse transcriptase-like | gbpln | Arabidopsis thaliana | AT1G60720.1   Symbols:   RNA-directed DNA polymerase (reverse transcriptase)-related family protein   chr1:22357072-22357941 FORWARD LENGTH=289 | 1651 | 289  | 4.00E-73  | 17.5  | 8.2  | 11.3 |
| Rsa1.0_00586.1.g16449.t1 | gb EOA35811.1  hypothetical protein CARUB_v10021047mg [Capsella rubella]                                                                                                                                                                                                                                                                                                                                               | 143  | 168  | 3.00E-56  | 117.5 | 76.9 | 85.3 | hypothetical protein CARUB_v10021047mg          | gbpln | Capsella rubella     | AT1G71000.1   Symbols:   Chaperone DnaJ-domain superfamily protein   chr1:26769336-26770111 REVERSE LENGTH=165                                  | 143  | 165  | 5.00E-57  | 115.4 | 76.9 | 83.2 |
| Rsa1.0_00586.1.g16450.t1 | refNP_565006.1  hydroxyproline-rich glycoprotein family protein [Arabidopsis thaliana] gi 21536546 gb AAM60878.1  unknown [Arabidopsis thaliana] gi 332197026 gb AEE35147.1  hydroxyproline-rich glycoprotein family protein [Arabidopsis thaliana]                                                                                                                                                                    | 148  | 135  | 1.00E-41  | 91.2  | 72.3 | 77.7 | hydroxyproline-rich glycoprotein family protein | gbpln | Arabidopsis thaliana | AT1G70985.1   Symbols:   hydroxyproline-rich glycoprotein family protein   chr1:26764774-26765181 REVERSE LENGTH=135                            | 148  | 135  | 3.00E-44  | 91.2  | 72.3 | 77.7 |
| Rsa1.0_00586.1.g16451.t1 | emb CAN79684.1  hypothetical protein VITISV_003855 [Vitis vinifera]                                                                                                                                                                                                                                                                                                                                                    | 320  | 406  | 7.00E-73  | 126.9 | 50.6 | 62.5 | hypothetical protein VITISV_003855              | gbpln | Vitis vinifera       | #                                                                                                                                               | #    | #    | #         | #     | #    | #    |
| Rsa1.0_00586.1.g16452.t1 | refNP_001077806.1  MLP-like protein 28 [Arabidopsis thaliana] gi 332197002 gb AEE35123.1  MLP-like protein 28 [Arabidopsis thaliana]                                                                                                                                                                                                                                                                                   | 225  | 201  | 5.00E-81  | 89.3  | 67.1 | 69.8 | MLP-like protein 28                             | gbpln | Arabidopsis thaliana | AT1G70830.3   Symbols: MLP28   MLP-like protein 28   chr1:26710203-26711395 REVERSE LENGTH=201                                                  | 225  | 201  | 1.00E-83  | 89.3  | 67.1 | 69.8 |
| Rsa1.0_00586.1.g16453.t1 | gb ACG60680.1  unknown protein [Brassica oleracea var. alboglabra]                                                                                                                                                                                                                                                                                                                                                     | 122  | 128  | 1.00E-11  | 104.9 | 35.2 | 55.7 | unknown protein                                 | gbpln | Brassica oleracea    | #                                                                                                                                               | #    | #    | #         | #     | #    | #    |
| Rsa1.0_00586.1.g16454.t5 | gb EOA33919.1  hypothetical protein CARUB_v10021412mg [Capsella rubella]                                                                                                                                                                                                                                                                                                                                               | 326  | 615  | 4.00E-28  | 188.7 | 25.2 | 31.0 | hypothetical protein CARUB_v10021412mg          | gbpln | Capsella rubella     | AT1G70820.1   Symbols:   phosphoglucomutase, putative / glucose phosphomutase, putative   chr1:26705594-26708034 FORWARD LENGTH=615             | 326  | 615  | 1.00E-29  | 188.7 | 25.8 | 31.3 |
| Rsa1.0_00586.1.g16455.t1 | # # # # # # # # # # # #                                                                                                                                                                                                                                                                                                                                                                                                | #    | #    | #         | #     | #    | #    | -                                               | ----  | ----                 | #                                                                                                                                               | #    | #    | #         | #     | #    | #    |

|                          |                                                                                                                                                                                                                                                                                                                                                                                                                                                         |      |      |           |       |      |      |                                                                                                                                                                                              |             |                      |                                                                                                                                                                                                                                                                                                                                                                                                                                                                                                                                                                                           |      |     |           |       |      |      |
|--------------------------|---------------------------------------------------------------------------------------------------------------------------------------------------------------------------------------------------------------------------------------------------------------------------------------------------------------------------------------------------------------------------------------------------------------------------------------------------------|------|------|-----------|-------|------|------|----------------------------------------------------------------------------------------------------------------------------------------------------------------------------------------------|-------------|----------------------|-------------------------------------------------------------------------------------------------------------------------------------------------------------------------------------------------------------------------------------------------------------------------------------------------------------------------------------------------------------------------------------------------------------------------------------------------------------------------------------------------------------------------------------------------------------------------------------------|------|-----|-----------|-------|------|------|
| Rsa1.0_00586.1.g16456.t2 | emb[CAB39638.1] RNA-directed DNA polymerase-like protein [Arabidopsis thaliana] gi 7267666 emb[CAB78094.1] RNA-directed DNA polymerase-like protein [Arabidopsis thaliana]                                                                                                                                                                                                                                                                              | 1807 | 1274 | 0         | 70.5  | 38.7 | 48.8 | RNA-directed DNA polymerase-like protein                                                                                                                                                     | gbpln       | Arabidopsis thaliana | AT4G29090.1   Symbols:   Ribonuclease H-like superfamily protein   chr4:14333528-14335255 FORWARD LENGTH=575                                                                                                                                                                                                                                                                                                                                                                                                                                                                              | 1807 | 575 | 5.00E-64  | 31.8  | 9.9  | 14.9 |
| Rsa1.0_00586.1.g16457.t1 | dbj BAJ34604.1  unnamed protein product [Theillungiella halophila]                                                                                                                                                                                                                                                                                                                                                                                      | 132  | 141  | 4.00E-58  | 106.8 | 84.8 | 91.7 | unnamed protein product                                                                                                                                                                      | ----        | ----                 | AT1G70780.1   Symbols:   unknown protein; FUNCTIONS IN: molecular.function unknown; INVOLVED IN: biological.process unknown; LOCATED IN: mitochondrion; EXPRESSED IN: sperm cell, male gametophyte, pollen tube; EXPRESSED DURING: L mature pollen stage, M germinated pollen stage; BEST Arabidopsis thaliana protein match is: unknown protein (TAIRAT1G23150.1); Has 143 Blast hits to 143 proteins in 17 species: Archae - 0; Bacteria - 0; Metazoa - 0; Fungi - 0; Plants - 143; Viruses - 0; Other Eukaryotes - 0 (source: NCBI BLink).   chr1:26695462-26695975 REVERSE LENGTH=140 | 132  | 140 | 1.00E-58  | 106.1 | 82.6 | 91.7 |
| Rsa1.0_00586.1.g16458.t1 | ref XP_002888794.1  hypothetical protein ARALYDRAFT_476207 [Arabidopsis lyrata subsp. lyrata] gi 297334635 gb EFH65053.1  hypothetical protein ARALYDRAFT_476207 [Arabidopsis lyrata subsp. lyrata]                                                                                                                                                                                                                                                     | 602  | 616  | 0         | 102.3 | 84.9 | 90.0 | hypothetical protein ARALYDRAFT_476207                                                                                                                                                       | gbpln       | Arabidopsis lyrata   | AT1G70770.2   Symbols:   Protein of unknown function DUF2359, transmembrane   chr1:26688622-26691185 REVERSE LENGTH=610                                                                                                                                                                                                                                                                                                                                                                                                                                                                   | 602  | 610 | 0         | 101.3 | 83.6 | 89.5 |
| Rsa1.0_00586.1.g16459.t1 | gb ACG25170.1  hypothetical protein [Zea mays]                                                                                                                                                                                                                                                                                                                                                                                                          | 193  | 192  | 1.00E-98  | 99.5  | 91.7 | 93.3 | hypothetical protein                                                                                                                                                                         | gbenv/gbpln | Zea mays             | AT1G70760.1   Symbols: CRR23   inorganic carbon transport protein-related   chr1:26687267-26688201 FORWARD LENGTH=191                                                                                                                                                                                                                                                                                                                                                                                                                                                                     | 193  | 191 | 3.00E-89  | 99.0  | 82.9 | 87.0 |
| Rsa1.0_00586.1.g16460.t1 | #                                                                                                                                                                                                                                                                                                                                                                                                                                                       | #    | #    | #         | #     | #    | -    | ----                                                                                                                                                                                         | ----        | #                    | #                                                                                                                                                                                                                                                                                                                                                                                                                                                                                                                                                                                         | #    | #   | #         | #     | #    |      |
| Rsa1.0_00586.1.g16461.t1 | gb EOA33298.1  hypothetical protein CARUB_v10019836mg [Capsella rubella]                                                                                                                                                                                                                                                                                                                                                                                | 427  | 776  | 1.00E-113 | 181.7 | 54.6 | 60.4 | hypothetical protein CARUB_v10019836mg                                                                                                                                                       | gbpln       | Capsella rubella     | AT1G70750.1   Symbols:   Protein of unknown function, DUF593   chr1:26680728-26683147 REVERSE LENGTH=749                                                                                                                                                                                                                                                                                                                                                                                                                                                                                  | 427  | 749 | 1.00E-113 | 175.4 | 54.8 | 61.4 |
| Rsa1.0_00587.1.g16462.t2 | dbj BAB02259.1  retroelement pol polyprotein-like [Arabidopsis thaliana]                                                                                                                                                                                                                                                                                                                                                                                | 714  | 777  | 5.00E-49  | 108.8 | 15.8 | 23.7 | retroelement pol polyprotein-like                                                                                                                                                            | gbpln       | Arabidopsis thaliana | #                                                                                                                                                                                                                                                                                                                                                                                                                                                                                                                                                                                         | #    | #   | #         | #     | #    |      |
| Rsa1.0_00587.1.g16463.t1 | #                                                                                                                                                                                                                                                                                                                                                                                                                                                       | #    | #    | #         | #     | #    | -    | ----                                                                                                                                                                                         | ----        | #                    | #                                                                                                                                                                                                                                                                                                                                                                                                                                                                                                                                                                                         | #    | #   | #         | #     |      |      |
| Rsa1.0_00587.1.g16464.t1 | gb EOA19086.1  hypothetical protein CARUB_v10007753mg [Capsella rubella]                                                                                                                                                                                                                                                                                                                                                                                | 170  | 172  | 1.00E-67  | 101.2 | 73.5 | 82.4 | hypothetical protein CARUB_v10007753mg                                                                                                                                                       | gbpln       | Capsella rubella     | AT5G39720.1   Symbols: AIG2L   avirulence induced gene 2 like protein   chr5:15899673-15900517 FORWARD LENGTH=165                                                                                                                                                                                                                                                                                                                                                                                                                                                                         | 170  | 165 | 6.00E-69  | 97.1  | 72.9 | 81.2 |
| Rsa1.0_00587.1.g16465.t1 | ref XP_002868704.1  EMB2744 [Arabidopsis lyrata subsp. lyrata] gi 297314540 gb EFH44963.1  EMB2744 [Arabidopsis lyrata subsp. lyrata] ref NP_568568.1  putative calcium-binding protein CML45 [Arabidopsis thaliana]                                                                                                                                                                                                                                    | 680  | 710  | 0         | 104.4 | 76.2 | 87.4 | EMB2744                                                                                                                                                                                      | gbpln       | Arabidopsis lyrata   | AT5G39680.1   Symbols: EMB2744   Pentatricopeptide repeat (PPR) superfamily protein   chr5:15884236-15886368 REVERSE LENGTH=710                                                                                                                                                                                                                                                                                                                                                                                                                                                           | 680  | 710 | 0         | 104.4 | 75.4 | 87.2 |
| Rsa1.0_00587.1.g16466.t1 | ref NP_568568.1  putative calcium-binding protein CML45 [Arabidopsis thaliana] gi 75331780 sp Q93Z27.1 CML45 ARAT H RecName: Full=Probable calcium-binding protein CML45; AltName: Full=Calmmodulin-like protein 45 gi 16648830 gb AAL25605.1  AT5g39670/MJ24_140 [Arabidopsis thaliana] gi 20466131 gb AAM19987.1  AT5g39670/MJ24_140 [Arabidopsis thaliana] gi 332007079 gb AED94462.1  putative calcium-binding protein CML45 [Arabidopsis thaliana] | 188  | 204  | 2.00E-80  | 108.5 | 81.4 | 89.9 | putative calcium-binding protein CML45                                                                                                                                                       | gbpln       | Arabidopsis thaliana | AT5G39670.1   Symbols:   Calcium-binding EF-hand family protein   chr5:15883270-15883884 FORWARD LENGTH=204                                                                                                                                                                                                                                                                                                                                                                                                                                                                               | 188  | 204 | 7.00E-83  | 108.5 | 81.4 | 89.9 |
| Rsa1.0_00587.1.g16467.t3 | #                                                                                                                                                                                                                                                                                                                                                                                                                                                       | #    | #    | #         | #     | #    | -    | ----                                                                                                                                                                                         | ----        | #                    | #                                                                                                                                                                                                                                                                                                                                                                                                                                                                                                                                                                                         | #    | #   | #         | #     |      |      |
| Rsa1.0_00587.1.g16468.t1 | #                                                                                                                                                                                                                                                                                                                                                                                                                                                       | #    | #    | #         | #     | #    | -    | ----                                                                                                                                                                                         | ----        | #                    | #                                                                                                                                                                                                                                                                                                                                                                                                                                                                                                                                                                                         | #    | #   | #         | #     |      |      |
| Rsa1.0_00587.1.g16469.t1 | gb AAL10495.1  AT5g39660/MJ24_130 [Arabidopsis thaliana]                                                                                                                                                                                                                                                                                                                                                                                                | 413  | 457  | 1.00E-126 | 110.7 | 69.7 | 77.5 | AT5g39660/MJ24_130                                                                                                                                                                           | gbpln       | Arabidopsis thaliana | AT5G39660.2   Symbols: CDF2   cycling DOF factor 2   chr5:15878920-15880712 FORWARD LENGTH=457                                                                                                                                                                                                                                                                                                                                                                                                                                                                                            | 413  | 457 | 1.00E-128 | 110.7 | 69.7 | 77.5 |
| Rsa1.0_00587.1.g16470.t1 | gb AAD29789.1 AF147259_12 contains similarity to a family of Arabidopsis thaliana hypothetical proteins, which have similarity to retrotransposon Athila gi 7267359 emb CAB81132.1  putative athila transposon protein [Arabidopsis thaliana]                                                                                                                                                                                                           | 277  | 683  | 4.00E-15  | 246.6 | 18.8 | 25.3 | contains similarity to a family of Arabidopsis thaliana hypothetical proteins, which have similarity to retrotransposon Athila gi 7267359 emb CAB81132.1  putative athila transposon protein | gbpln       | Arabidopsis thaliana | #                                                                                                                                                                                                                                                                                                                                                                                                                                                                                                                                                                                         | #    | #   | #         | #     | #    |      |
| Rsa1.0_00587.1.g16471.t1 | #                                                                                                                                                                                                                                                                                                                                                                                                                                                       | #    | #    | #         | #     | #    | -    | ----                                                                                                                                                                                         | ----        | #                    | #                                                                                                                                                                                                                                                                                                                                                                                                                                                                                                                                                                                         | #    | #   | #         | #     |      |      |
| Rsa1.0_00587.1.g16472.t1 | #                                                                                                                                                                                                                                                                                                                                                                                                                                                       | #    | #    | #         | #     | #    | -    | ----                                                                                                                                                                                         | ----        | #                    | #                                                                                                                                                                                                                                                                                                                                                                                                                                                                                                                                                                                         | #    | #   | #         | #     |      |      |
| Rsa1.0_00587.1.g16473.t1 | dbj BAA97083.1  unnamed protein product [Arabidopsis thaliana]                                                                                                                                                                                                                                                                                                                                                                                          | 257  | 583  | 6.00E-11  | 226.8 | 14.4 | 18.7 | unnamed protein product                                                                                                                                                                      | gbpln       | Arabidopsis thaliana | #                                                                                                                                                                                                                                                                                                                                                                                                                                                                                                                                                                                         | #    | #   | #         | #     | #    |      |
| Rsa1.0_00587.1.g16474.t1 | #                                                                                                                                                                                                                                                                                                                                                                                                                                                       | #    | #    | #         | #     | #    | -    | ----                                                                                                                                                                                         | ----        | #                    | #                                                                                                                                                                                                                                                                                                                                                                                                                                                                                                                                                                                         | #    | #   | #         | #     |      |      |



|                          |                                                                                                                                                                                                                                                                                                                                                                                                                                                                                                                                                                             |     |      |           |       |      |      |                                                     |       |                      |                                                                                                                                               |     |     |           |       |      |      |
|--------------------------|-----------------------------------------------------------------------------------------------------------------------------------------------------------------------------------------------------------------------------------------------------------------------------------------------------------------------------------------------------------------------------------------------------------------------------------------------------------------------------------------------------------------------------------------------------------------------------|-----|------|-----------|-------|------|------|-----------------------------------------------------|-------|----------------------|-----------------------------------------------------------------------------------------------------------------------------------------------|-----|-----|-----------|-------|------|------|
| Rsa1.0_00587.1.g16475.t1 | #                                                                                                                                                                                                                                                                                                                                                                                                                                                                                                                                                                           | #   | #    | #         | #     | #    | #    | #                                                   | -     | ----                 | ----                                                                                                                                          | #   | #   | #         | #     | #    | #    |
| Rsa1.0_00587.1.g16476.t1 | #                                                                                                                                                                                                                                                                                                                                                                                                                                                                                                                                                                           | #   | #    | #         | #     | #    | #    | #                                                   | -     | ----                 | ----                                                                                                                                          | #   | #   | #         | #     | #    | #    |
| Rsa1.0_00587.1.g16477.t1 | gb EOA19050.1  hypothetical protein CARUB_v10007711mg [Capsella rubella]                                                                                                                                                                                                                                                                                                                                                                                                                                                                                                    | 318 | 319  | 1.00E-159 | 100.3 | 86.5 | 92.8 | hypothetical protein CARUB_v10007711mg              | gbpln | Capsella rubella     | AT5G39580.1   Symbols:   Peroxidase superfamily protein   chr5:15847281-15849027 REVERSE LENGTH=319                                           | 318 | 319 | 1.00E-160 | 100.3 | 85.8 | 92.1 |
| Rsa1.0_00588.1.g16478.t2 | gb AAD17398.1  putative non-LTR retroelement reverse transcriptase [Arabidopsis thaliana]                                                                                                                                                                                                                                                                                                                                                                                                                                                                                   | 361 | 1225 | 1.00E-54  | 339.3 | 28.8 | 42.7 | putative non-LTR retroelement reverse transcriptase | gbpln | Arabidopsis thaliana | AT1G23160.1   Symbols:   Auxin-responsive GH3 family protein   chr1:8209232-8211325 FORWARD LENGTH=578                                        | 361 | 578 | 3.00E-34  | 160.1 | 22.4 | 29.6 |
| Rsa1.0_00588.1.g16479.t1 | gb EOA14421.1  hypothetical protein CARUB_v10027623mg [Capsella rubella]                                                                                                                                                                                                                                                                                                                                                                                                                                                                                                    | 669 | 672  | 0         | 100.4 | 89.2 | 95.5 | hypothetical protein CARUB_v10027623mg              | gbpln | Capsella rubella     | AT5G53550.2   Symbols: YSL3   YELLOW STRIPE like 3   chr5:21756081-21758776 FORWARD LENGTH=675                                                | 669 | 675 | 0         | 100.9 | 87.6 | 93.6 |
| Rsa1.0_00588.1.g16480.t1 | ref NP_200165.1  vacuolar protein sorting 26A [Arabidopsis thaliana] gi 75171014 sp Q9FJD0.1 VP26A_ARAT H RecName: Full=Vacuolar protein sorting-associated protein 26A; AltName: Full=Vesicle protein sorting 26A gi 9759192 dbj BAB09729.1  vacuolar protein-like; embryogenesis protein H beta 58-like protein [Arabidopsis thaliana] gi 110735821 dbj BAE99887.1  vacuolar protein-like [Arabidopsis thaliana] gi 332008990 gb AED96373.1  vacuolar protein sorting 26A [Arabidopsis thaliana]                                                                          | 302 | 302  | 1.00E-168 | 100.0 | 95.0 | 98.0 | vacuolar protein sorting 26A                        | gbpln | Arabidopsis thaliana | AT5G53530.1   Symbols: VPS26A   vacuolar protein sorting 26A   chr5:21746275-21748156 REVERSE LENGTH=302                                      | 302 | 302 | 1.00E-170 | 100.0 | 95.0 | 98.0 |
| Rsa1.0_00588.1.g16481.t1 | ref XP_002864248.1  predicted protein [Arabidopsis lyrata subsp. lyrata] gi 297310083 gb EFH40507.1  predicted protein [Arabidopsis lyrata subsp. lyrata]                                                                                                                                                                                                                                                                                                                                                                                                                   | 739 | 739  | 0         | 100.0 | 89.4 | 96.6 | predicted protein                                   | gbpln | Arabidopsis lyrata   | AT5G53520.1   Symbols: ATOPT8, OPT8   oligopeptide transporter 8   chr5:21743450-21745981 FORWARD LENGTH=733                                  | 739 | 733 | 0         | 99.2  | 88.8 | 95.3 |
| Rsa1.0_00588.1.g16482.t1 | gb EOA14879.1  hypothetical protein CARUB_v10028205mg [Capsella rubella]                                                                                                                                                                                                                                                                                                                                                                                                                                                                                                    | 110 | 179  | 2.00E-17  | 162.7 | 44.5 | 62.7 | hypothetical protein CARUB_v10028205mg              | gbpln | Capsella rubella     | AT5G46940.1   Symbols:   Plant invertase/pectin methyltransferase inhibitor superfamily protein   chr5:19058230-19058760 REVERSE LENGTH=176   | 110 | 176 | 2.00E-18  | 160.0 | 40.0 | 57.3 |
| Rsa1.0_00588.1.g16483.t1 | gb EOA14879.1  hypothetical protein CARUB_v10028205mg [Capsella rubella]                                                                                                                                                                                                                                                                                                                                                                                                                                                                                                    | 176 | 179  | 3.00E-37  | 101.7 | 47.7 | 64.8 | hypothetical protein CARUB_v10028205mg              | gbpln | Capsella rubella     | AT5G46950.1   Symbols:   Plant invertase/pectin methyltransferase inhibitor superfamily protein   chr5:19059565-19060089 REVERSE LENGTH=174   | 176 | 174 | 3.00E-38  | 98.9  | 48.3 | 64.8 |
| Rsa1.0_00588.1.g16484.t1 | #                                                                                                                                                                                                                                                                                                                                                                                                                                                                                                                                                                           | #   | #    | #         | #     | #    | #    | -                                                   | ----  | ----                 | #                                                                                                                                             | #   | #   | #         | #     | #    | #    |
| Rsa1.0_00588.1.g16485.t1 | ref NP_200162.1  transducin/WD40 domain-containing protein [Arabidopsis thaliana] gi 9759189 dbj BAB09726.1  unnamed protein product [Arabidopsis thaliana] gi 20268729 gb AAM14068.1  unknown protein [Arabidopsis thaliana] gi 23296399 gb AAN13109.1  unknown protein [Arabidopsis thaliana] gi 332008987 gb AED96370.1  transducin/WD40 domain-containing protein [Arabidopsis thaliana]                                                                                                                                                                                | 737 | 654  | 0         | 88.7  | 68.4 | 74.6 | transducin/WD40 domain-containing protein           | gbpln | Arabidopsis thaliana | AT5G53500.1   Symbols:   Transducin/WD40 repeat-like superfamily protein   chr5:21726167-21728524 REVERSE LENGTH=654                          | 737 | 654 | 0         | 88.7  | 68.4 | 74.6 |
| Rsa1.0_00588.1.g16486.t1 | gb AAB94051.1  PAP-specific phosphatase [Arabidopsis thaliana]                                                                                                                                                                                                                                                                                                                                                                                                                                                                                                              | 127 | 373  | 1.00E-25  | 293.7 | 44.1 | 48.0 | PAP-specific phosphatase                            | gbpln | Arabidopsis thaliana | AT5G54390.1   Symbols: AHL, AT AHL, HL   HAL2-like   chr5:22086133-22087586 FORWARD LENGTH=373                                                | 127 | 373 | 3.00E-28  | 293.7 | 44.1 | 48.0 |
| Rsa1.0_00588.1.g16487.t1 | ref NP_200159.1  acyl-CoA binding protein 1 [Arabidopsis thaliana] gi 75266075 sp Q9SM23.2 ACBP1_ARAT H RecName: Full=Acyl-CoA-binding domain-containing protein 1; Short=Acyl-CoA binding protein 1 gi 8843776 dbj BAA97324.1  unnamed protein product [Arabidopsis thaliana] gi 16649023 gb AAL24363.1  Unknown protein [Arabidopsis thaliana] gi 20260070 gb AAM13382.1  unknown protein [Arabidopsis thaliana] gi 21284374 gb AAF08323.2  acyl-CoA binding protein [Arabidopsis thaliana] gi 332008978 gb AED96361.1  acyl-CoA binding protein 1 [Arabidopsis thaliana] | 341 | 338  | 1.00E-152 | 99.1  | 86.8 | 92.1 | acyl-CoA binding protein 1                          | gbpln | Arabidopsis thaliana | AT5G53470.1   Symbols: ACBP1, ACBP   acyl-CoA binding protein 1   chr5:21710497-21712391 FORWARD LENGTH=338                                   | 341 | 338 | 1.00E-155 | 99.1  | 86.8 | 92.1 |
| Rsa1.0_00588.1.g16488.t1 | gb EOA14610.1  hypothetical protein CARUB_v10027862mg [Capsella rubella]                                                                                                                                                                                                                                                                                                                                                                                                                                                                                                    | 282 | 369  | 1.00E-65  | 130.9 | 48.9 | 57.8 | hypothetical protein CARUB_v10027862mg              | gbpln | Capsella rubella     | AT5G54550.1   Symbols:   Protein of unknown function (DUF295)   chr5:22158401-22159480 FORWARD LENGTH=359                                     | 282 | 359 | 9.00E-67  | 127.3 | 46.1 | 55.0 |
| Rsa1.0_00588.1.g16489.t1 | gb AAC95175.1  putative non-LTR retroelement reverse transcriptase [Arabidopsis thaliana]                                                                                                                                                                                                                                                                                                                                                                                                                                                                                   | 487 | 1352 | 1.00E-117 | 277.6 | 46.8 | 64.7 | putative non-LTR retroelement reverse transcriptase | gbpln | Arabidopsis thaliana | AT3G24255.1   Symbols:   RNA-directed DNA polymerase (reverse transcriptase)-related family protein   chr3:8789471-8793208 FORWARD LENGTH=746 | 487 | 746 | 2.00E-58  | 153.2 | 27.3 | 38.0 |
| Rsa1.0_00588.1.g16490.t1 | #                                                                                                                                                                                                                                                                                                                                                                                                                                                                                                                                                                           | #   | #    | #         | #     | #    | #    | -                                                   | ----  | ----                 | #                                                                                                                                             | #   | #   | #         | #     | #    | #    |

|                          |                                                                                                                                                                                                                                                                                                                                                                                                                                                   |     |     |           |       |      |      |                                                     |       |                      |                                                                                                                                              |     |     |           |       |      |      |
|--------------------------|---------------------------------------------------------------------------------------------------------------------------------------------------------------------------------------------------------------------------------------------------------------------------------------------------------------------------------------------------------------------------------------------------------------------------------------------------|-----|-----|-----------|-------|------|------|-----------------------------------------------------|-------|----------------------|----------------------------------------------------------------------------------------------------------------------------------------------|-----|-----|-----------|-------|------|------|
| Rsa1.0_00588.1.g16491.t1 | #                                                                                                                                                                                                                                                                                                                                                                                                                                                 | #   | #   | #         | #     | #    | #    | -                                                   | ----  | ----                 | #                                                                                                                                            | #   | #   | #         | #     | #    |      |
| Rsa1.0_00589.1.g16492.t1 | gb EOA13893.1  hypothetical protein CARUB_v10027002mg [Capsella rubella]                                                                                                                                                                                                                                                                                                                                                                          | 147 | 247 | 7.00E-17  | 168.0 | 34.0 | 44.2 | hypothetical protein CARUB_v10027002mg              | gbpln | Capsella rubella     | AT1G73490.1   Symbols:   RNA-binding (RRM/RBD/RNP motifs) family protein   chr1:27632496-27634867 REVERSE LENGTH=259                         | 147 | 259 | 3.00E-16  | 176.2 | 38.8 | 57.1 |
| Rsa1.0_00589.1.g16493.t1 | #                                                                                                                                                                                                                                                                                                                                                                                                                                                 | #   | #   | #         | #     | #    | #    | -                                                   | ----  | ----                 | #                                                                                                                                            | #   | #   | #         | #     | #    |      |
| Rsa1.0_00589.1.g16494.t1 | gb EOA29053.1  hypothetical protein CARUB_v10025307mg [Capsella rubella]                                                                                                                                                                                                                                                                                                                                                                          | 207 | 207 | 1.00E-103 | 100.0 | 93.2 | 96.6 | hypothetical protein CARUB_v10025307mg              | gbpln | Capsella rubella     | AT2G38310.1   Symbols: PYL4, RCAR10   PYR1-like 4   chr2:16050251-16050874 FORWARD LENGTH=207                                                | 207 | 207 | 1.00E-106 | 100.0 | 92.8 | 96.6 |
| Rsa1.0_00589.1.g16495.t1 | ref NP_198523.1  uncharacterized protein [Arabidopsis thaliana]<br>gi 10177986 dbj BAB11359.1  unnamed protein product [Arabidopsis thaliana]<br>gi 34365659 gb AAQ65141.1  At5g37070 [Arabidopsis thaliana]<br>gi 51970366 dbj BAD43875.1  putative protein [Arabidopsis thaliana]<br>gi 51971132 dbj BAD44258.1  putative protein [Arabidopsis thaliana]<br>gi 33200676 gb AED94144.1  uncharacterized protein AT5G37070 [Arabidopsis thaliana] | 121 | 170 | 2.00E-61  | 140.5 | 95.9 | 97.5 | uncharacterized protein                             | gbpln | Arabidopsis thaliana | AT5G37070.1   Symbols:   Protein of unknown function, DUF538   chr5:14651091-14652147 FORWARD LENGTH=170                                     | 121 | 170 | 4.00E-64  | 140.5 | 95.9 | 97.5 |
| Rsa1.0_00589.1.g16496.t1 | dbj BAB11167.1  40S ribosomal protein S4 [Arabidopsis thaliana]                                                                                                                                                                                                                                                                                                                                                                                   | 270 | 263 | 1.00E-149 | 97.4  | 94.4 | 97.0 | 40S ribosomal protein S4                            | gbpln | Arabidopsis thaliana | AT2G17360.1   Symbols:   Ribosomal protein S4 (RPS4A) family protein   chr2:7546598-7548138 FORWARD LENGTH=261                               | 270 | 261 | 1.00E-150 | 96.7  | 94.1 | 95.9 |
| Rsa1.0_00589.1.g16497.t1 | gb EOA33218.1  hypothetical protein CARUB_v10020320mg [Capsella rubella]                                                                                                                                                                                                                                                                                                                                                                          | 80  | 432 | 2.00E-23  | 540.0 | 67.5 | 72.5 | hypothetical protein CARUB_v10020320mg              | gbpln | Capsella rubella     | AT1G20610.1   Symbols: CYCB2.3   Cyclin B2.3   chr1:7135073-7137273 REVERSE LENGTH=429                                                       | 80  | 429 | 1.00E-24  | 536.3 | 61.3 | 75.0 |
| Rsa1.0_00589.1.g16498.t1 | dbj BAJ34198.1  unnamed protein product [Thellungiella halophila]                                                                                                                                                                                                                                                                                                                                                                                 | 179 | 958 | 4.00E-85  | 535.2 | 83.8 | 92.7 | unnamed protein product                             | ----  | ----                 | AT3G51770.2   Symbols: ETO1   tetratricopeptide repeat (TPR)-containing protein   chr3:19200328-19203998 REVERSE LENGTH=959                  | 179 | 959 | 1.00E-85  | 535.8 | 82.1 | 91.6 |
| Rsa1.0_00589.1.g16499.t1 | gb ABD64955.1  hypothetical protein Z5.t00048 [Brassica oleracea]                                                                                                                                                                                                                                                                                                                                                                                 | 239 | 339 | 1.00E-108 | 141.8 | 79.9 | 85.4 | hypothetical protein Z5.t00048                      | gbpln | Brassica oleracea    | AT2G38255.1   Symbols:   Protein of Unknown Function (DUF239)   chr2:16021750-16024825 REVERSE LENGTH=333                                    | 239 | 333 | 6.00E-80  | 139.3 | 61.1 | 74.9 |
| Rsa1.0_00589.1.g16500.t1 | ref NP_001030839.5  tetratricopeptide repeat (TPR)-containing protein [Arabidopsis thaliana]<br>gi 332645320 gb AE78841.1  tetratricopeptide repeat (TPR)-containing protein [Arabidopsis thaliana]                                                                                                                                                                                                                                               | 885 | 959 | 0         | 108.4 | 83.5 | 91.1 | tetratricopeptide repeat (TPR)-containing protein   | gbpln | Arabidopsis thaliana | AT3G51770.2   Symbols: ETO1   tetratricopeptide repeat (TPR)-containing protein   chr3:19200328-19203998 REVERSE LENGTH=959                  | 885 | 959 | 0         | 108.4 | 83.5 | 91.1 |
| Rsa1.0_00589.1.g16501.t1 | ref NP_181364.2  myb-like HTH transcriptional regulator-like protein [Arabidopsis thaliana]<br>gi 26450454 dbj BAC42341.1  unknown protein [Arabidopsis thaliana]<br>gi 28827324 gb AAO50506.1  unknown protein [Arabidopsis thaliana]<br>gi 330254426 gb AEC09520.1  myb-like HTH transcriptional regulator-like protein [Arabidopsis thaliana]                                                                                                  | 342 | 340 | 1.00E-138 | 99.4  | 81.6 | 88.0 | myb-like HTH transcriptional regulator-like protein | gbpln | Arabidopsis thaliana | AT2G38300.1   Symbols:   myb-like HTH transcriptional regulator family protein   chr2:16044175-16045679 REVERSE LENGTH=340                   | 342 | 340 | 1.00E-140 | 99.4  | 81.6 | 88.0 |
| Rsa1.0_00589.1.g16502.t1 | dbj BAJ33778.1  unnamed protein product [Thellungiella halophila]                                                                                                                                                                                                                                                                                                                                                                                 | 489 | 490 | 0         | 100.2 | 92.4 | 95.5 | unnamed protein product                             | ----  | ----                 | AT2G38290.1   Symbols: ATAMT2, AMT2.1, AMT2   ammonium transporter 2   chr2:16039672-16042291 REVERSE LENGTH=475                             | 489 | 475 | 0         | 97.1  | 89.2 | 93.7 |
| Rsa1.0_00589.1.g16503.t1 | ref NP_565886.1  AMP deaminase [Arabidopsis thaliana]<br>gi 30687456 ref NP_850294.1  AMP deaminase [Arabidopsis thaliana]<br>gi 75223196 sp O80452.2 AMPD_ARATH RecName: Full=AMP deaminase; Short=ATAMPD; AltName: Full=Protein EMBRYONIC FACTOR 1                                                                                                                                                                                              | 865 | 839 | 0         | 97.0  | 91.7 | 93.8 | AMP deaminase                                       | gbpln | Arabidopsis thaliana | AT2G38280.2   Symbols: FAC1, ATAMPD   AMP deaminase, putative / myoadenylate deaminase, putative   chr2:16033767-16038793 REVERSE LENGTH=839 | 865 | 839 | 0         | 97.0  | 91.7 | 93.8 |
| Rsa1.0_00589.1.g16504.t1 | ref XP_002879733.1  predicted protein [Arabidopsis lyrata subsp. lyrata]<br>gi 297325572 gb EFH55992.1  predicted protein [Arabidopsis lyrata subsp. lyrata]                                                                                                                                                                                                                                                                                      | 294 | 291 | 1.00E-104 | 99.0  | 81.3 | 87.1 | predicted protein                                   | gbpln | Arabidopsis lyrata   | AT2G38250.1   Symbols:   Homeodomain-like superfamily protein   chr2:16018384-16019500 FORWARD LENGTH=289                                    | 294 | 289 | 3.00E-98  | 98.3  | 81.6 | 87.4 |

|                          |                                                                                                                                                                                                                                                                                                                                                                                                                                                                                                                                                                                                                                                                                                                                                                                                                                                                                                                                                                                                                                                                                                                                                                                                   |     |     |           |       |      |      |                                        |       |                      |                                                                                                                                                                                                                                                                                                                                                                                                                                                                                                 |     |     |           |       |      |      |
|--------------------------|---------------------------------------------------------------------------------------------------------------------------------------------------------------------------------------------------------------------------------------------------------------------------------------------------------------------------------------------------------------------------------------------------------------------------------------------------------------------------------------------------------------------------------------------------------------------------------------------------------------------------------------------------------------------------------------------------------------------------------------------------------------------------------------------------------------------------------------------------------------------------------------------------------------------------------------------------------------------------------------------------------------------------------------------------------------------------------------------------------------------------------------------------------------------------------------------------|-----|-----|-----------|-------|------|------|----------------------------------------|-------|----------------------|-------------------------------------------------------------------------------------------------------------------------------------------------------------------------------------------------------------------------------------------------------------------------------------------------------------------------------------------------------------------------------------------------------------------------------------------------------------------------------------------------|-----|-----|-----------|-------|------|------|
| Rsa1.0_00589.1.g16505.t2 | refNP_565884.2   RING-finger domain-containing protein [Arabidopsis thaliana] gi 42571115 refNP_973631.1   RING-finger domain-containing protein [Arabidopsis thaliana] gi 110736245 dbj BAF00093.1   hypothetical protein [Arabidopsis thaliana] gi 330254409 gb AEC09503.1   RING-finger domain-containing protein [Arabidopsis thaliana] gi 330254410 gb AEC09504.1   RING-finger domain-containing protein [Arabidopsis thaliana] refNP_565877.1   Yos1-like protein [Arabidopsis thaliana] gi 297827347 ref XP_002881556.1   hypothetical protein ARALYDRAFT_902987 [Arabidopsis lyrata subsp. lyrata] gi 21536714 gb AAM61046.1   unknown [Arabidopsis thaliana] gi 62319249 dbj BAD94470.1   hypothetical protein [Arabidopsis thaliana] gi 89010893 gb ABD38869.1   At2g37975 [Arabidopsis thaliana] gi 297327395 gb EFH57815.1   hypothetical protein ARALYDRAFT_902987 [Arabidopsis lyrata subsp. lyrata] gi 330254379 gb AEC09473.1   Yos1-like protein [Arabidopsis thaliana] gb AAK43920.1 AF370601.1   Unknown protein [Arabidopsis thaliana] gi 15451064 gb AAK96803.1   Unknown protein [Arabidopsis thaliana] gi 20148421 gb AAM10101.1   unknown protein [Arabidopsis thaliana] | 315 | 441 | 9.00E-85  | 140.0 | 54.9 | 70.2 | RING-finger domain-containing protein  | gbpln | Arabidopsis thaliana | AT2G38185.2   Symbols:   RING/U-box superfamily protein   chr2:16000155-16002699 FORWARD LENGTH=441                                                                                                                                                                                                                                                                                                                                                                                             | 315 | 441 | 2.00E-87  | 140.0 | 54.9 | 70.2 |
| Rsa1.0_00589.1.g16506.t5 | gi 62319249 dbj BAD94470.1   hypothetical protein [Arabidopsis thaliana] gi 89010893 gb ABD38869.1   At2g37975 [Arabidopsis thaliana] gi 297327395 gb EFH57815.1   hypothetical protein ARALYDRAFT_902987 [Arabidopsis lyrata subsp. lyrata] gi 330254379 gb AEC09473.1   Yos1-like protein [Arabidopsis thaliana] gb AAK43920.1 AF370601.1   Unknown protein [Arabidopsis thaliana] gi 15451064 gb AAK96803.1   Unknown protein [Arabidopsis thaliana] gi 20148421 gb AAM10101.1   unknown protein [Arabidopsis thaliana]                                                                                                                                                                                                                                                                                                                                                                                                                                                                                                                                                                                                                                                                        | 78  | 78  | 2.00E-36  | 100.0 | 96.2 | 98.7 | Yos1-like protein                      | gbpln | Arabidopsis lyrata   | AT2G37975.1   Symbols:   Yos1-like protein   chr2:15891900-15892136 REVERSE LENGTH=78                                                                                                                                                                                                                                                                                                                                                                                                           | 78  | 78  | 4.00E-39  | 100.0 | 96.2 | 98.7 |
| Rsa1.0_00589.1.g16507.t1 | refXP_002881555.1   hypothetical protein ARALYDRAFT_902985 [Arabidopsis lyrata subsp. lyrata] gi 297327394 gb EFH57814.1   hypothetical protein ARALYDRAFT_902985 [Arabidopsis lyrata subsp. lyrata]                                                                                                                                                                                                                                                                                                                                                                                                                                                                                                                                                                                                                                                                                                                                                                                                                                                                                                                                                                                              | 202 | 215 | 1.00E-91  | 106.4 | 85.1 | 92.1 | Unknown protein                        | gbpln | Arabidopsis thaliana | AT2G37970.1   Symbols: SOUL-1   SOUL heme-binding family protein   chr2:15891027-15891704 FORWARD LENGTH=225                                                                                                                                                                                                                                                                                                                                                                                    | 202 | 225 | 4.00E-94  | 111.4 | 85.1 | 92.1 |
| Rsa1.0_00589.1.g16508.t1 | refXP_002881554.1   hypothetical protein ARALYDRAFT_482801 [Arabidopsis lyrata subsp. lyrata] gi 297327393 gb EFH57813.1   hypothetical protein ARALYDRAFT_482801 [Arabidopsis lyrata subsp. lyrata] refXP_00287916.1   hypothetical protein ARALYDRAFT_482800 [Arabidopsis lyrata subsp. lyrata] gi 297325555 gb EFH55975.1   hypothetical protein ARALYDRAFT_482800 [Arabidopsis lyrata subsp. lyrata] refXP_00287915.1   hypothetical protein ARALYDRAFT_345557 [Arabidopsis lyrata subsp. lyrata] gi 297325554 gb EFH55974.1   hypothetical protein ARALYDRAFT_345557 [Arabidopsis lyrata subsp. lyrata]                                                                                                                                                                                                                                                                                                                                                                                                                                                                                                                                                                                      | 409 | 483 | 1.00E-141 | 118.1 | 67.7 | 78.0 | hypothetical protein ARALYDRAFT_902985 | gbpln | Arabidopsis lyrata   | AT2G37960.2   Symbols:   unknown protein; FUNCTIONS IN: molecular_function unknown; INVOLVED IN: biological_process unknown; LOCATED IN: cellular_component unknown; BEST Arabidopsis thaliana protein match is: unknown protein (TAIR:AT3G54060.2); Has 30201 Blast hits to 17322 proteins in 780 species: Archaee - 12; Bacteria - 1396; Metazoa - 17338; Fungi - 3422; Plants - 5037; Viruses - 0; Other Eukaryotes - 2996 (source: NCBI BLINK).   chr2:15886962-15889180 REVERSE LENGTH=480 | 409 | 480 | 1.00E-138 | 117.4 | 65.5 | 77.5 |
| Rsa1.0_00589.1.g16509.t1 | refXP_00287916.1   hypothetical protein ARALYDRAFT_482800 [Arabidopsis lyrata subsp. lyrata] gi 297325555 gb EFH55975.1   hypothetical protein ARALYDRAFT_482800 [Arabidopsis lyrata subsp. lyrata] refXP_00287915.1   hypothetical protein ARALYDRAFT_345557 [Arabidopsis lyrata subsp. lyrata] gi 297325554 gb EFH55974.1   hypothetical protein ARALYDRAFT_345557 [Arabidopsis lyrata subsp. lyrata]                                                                                                                                                                                                                                                                                                                                                                                                                                                                                                                                                                                                                                                                                                                                                                                           | 212 | 207 | 5.00E-89  | 97.6  | 77.8 | 87.7 | hypothetical protein ARALYDRAFT_482801 | gbpln | Arabidopsis lyrata   | AT2G37950.1   Symbols:   RING/FYVE/PHD zinc finger superfamily protein   chr2:15882536-15883665 REVERSE LENGTH=207                                                                                                                                                                                                                                                                                                                                                                              | 212 | 207 | 2.00E-88  | 97.6  | 78.8 | 86.8 |
| Rsa1.0_00589.1.g16510.t1 | refXP_00287915.1   hypothetical protein ARALYDRAFT_345557 [Arabidopsis lyrata subsp. lyrata] gi 297325554 gb EFH55974.1   hypothetical protein ARALYDRAFT_345557 [Arabidopsis lyrata subsp. lyrata]                                                                                                                                                                                                                                                                                                                                                                                                                                                                                                                                                                                                                                                                                                                                                                                                                                                                                                                                                                                               | 305 | 305 | 1.00E-170 | 100.0 | 94.4 | 96.7 | hypothetical protein ARALYDRAFT_482800 | gbpln | Arabidopsis lyrata   | AT2G37940.1   Symbols: AtIPCS2   Arabidopsis Inositol phosphorylceramide synthase 2   chr2:15877169-15879411 FORWARD LENGTH=305                                                                                                                                                                                                                                                                                                                                                                 | 305 | 305 | 1.00E-172 | 100.0 | 94.1 | 96.7 |
| Rsa1.0_00589.1.g16511.t1 | gb EOA28075.1   hypothetical protein CARUB_v10024256mg [Capsella rubella]                                                                                                                                                                                                                                                                                                                                                                                                                                                                                                                                                                                                                                                                                                                                                                                                                                                                                                                                                                                                                                                                                                                         | 290 | 574 | 1.00E-109 | 197.9 | 72.1 | 84.1 | hypothetical protein ARALYDRAFT_345557 | gbpln | Arabidopsis lyrata   | AT2G37930.1   Symbols:   Protein of unknown function (DUF3527)   chr2:15873284-15874770 FORWARD LENGTH=467                                                                                                                                                                                                                                                                                                                                                                                      | 290 | 467 | 1.00E-110 | 161.0 | 70.3 | 82.1 |
| Rsa1.0_00589.1.g16512.t1 | gb EOA26793.1   hypothetical protein CARUB_v10022888mg [Capsella rubella]                                                                                                                                                                                                                                                                                                                                                                                                                                                                                                                                                                                                                                                                                                                                                                                                                                                                                                                                                                                                                                                                                                                         | 150 | 149 | 3.00E-60  | 99.3  | 82.7 | 87.3 | hypothetical protein CARUB_v10024256mg | gbpln | Capsella rubella     | AT2G37925.1   Symbols: COPT4   copper transporter 4   chr2:15870258-15870695 REVERSE LENGTH=145                                                                                                                                                                                                                                                                                                                                                                                                 | 150 | 145 | 7.00E-56  | 96.7  | 76.7 | 81.3 |
| Rsa1.0_00589.1.g16513.t1 | gb EOA26793.1   hypothetical protein CARUB_v10022888mg [Capsella rubella]                                                                                                                                                                                                                                                                                                                                                                                                                                                                                                                                                                                                                                                                                                                                                                                                                                                                                                                                                                                                                                                                                                                         | 583 | 583 | 0         | 100.0 | 79.8 | 88.5 | hypothetical protein CARUB_v10022888mg | gbpln | Capsella rubella     | AT2G37900.1   Symbols:   Major facilitator superfamily protein   chr2:15864396-15866408 REVERSE LENGTH=575                                                                                                                                                                                                                                                                                                                                                                                      | 583 | 575 | 0         | 98.6  | 78.7 | 87.7 |

|                          |                                                                                                                                                                                                                                                                                                                                                                                                                                                                                         |     |     |           |       |      |      |                                                                             |       |                      |                                                                                                                                                                                                                                                            |     |     |           |       |      |      |
|--------------------------|-----------------------------------------------------------------------------------------------------------------------------------------------------------------------------------------------------------------------------------------------------------------------------------------------------------------------------------------------------------------------------------------------------------------------------------------------------------------------------------------|-----|-----|-----------|-------|------|------|-----------------------------------------------------------------------------|-------|----------------------|------------------------------------------------------------------------------------------------------------------------------------------------------------------------------------------------------------------------------------------------------------|-----|-----|-----------|-------|------|------|
| Rsa1.0_00589.1.g16514.t1 | refNP_565872.1  protease inhibitor/seed storage/lipid transfer protein (LTP) family protein [Arabidopsis thaliana] gi15451110 gb AAK96826.1  Unknown protein [Arabidopsis thaliana] gi18377476 gb AAL66904.1  unknown protein [Arabidopsis thaliana] gi330254366 gb AEC09460.1  protease inhibitor/seed storage/lipid transfer protein (LTP) family protein [Arabidopsis thaliana]                                                                                                      | 176 | 115 | 1.00E-45  | 65.3  | 52.8 | 55.1 | protease inhibitor/seed storage/lipid transfer protein (LTP) family protein | gbpln | Arabidopsis thaliana | AT2G37870.1   Symbols:   Bifunctional inhibitor/lipid-transfer protein/seed storage 2S albumin superfamily protein   chr2:15859280-15859723 FORWARD LENGTH=115                                                                                             | 176 | 115 | 5.00E-48  | 65.3  | 52.8 | 55.1 |
| Rsa1.0_00589.1.g16515.t1 | refXP_002879711.1  hypothetical protein ARALYDRAFT_482793 [Arabidopsis lyrata subsp. lyrata] gi297325550 gb EFH55970.1  hypothetical protein ARALYDRAFT_482793 [Arabidopsis lyrata subsp. lyrata]                                                                                                                                                                                                                                                                                       | 457 | 431 | 1.00E-178 | 94.3  | 75.5 | 81.8 | hypothetical protein ARALYDRAFT_482793                                      | gbpln | Arabidopsis lyrata   | AT2G37860.3   Symbols: LCD1   Protein of unknown function (DUF3411)   chr2:15856952-15858793 FORWARD LENGTH=432                                                                                                                                            | 457 | 432 | 1.00E-177 | 94.5  | 74.6 | 80.7 |
| Rsa1.0_00589.1.g16516.t1 | #                                                                                                                                                                                                                                                                                                                                                                                                                                                                                       | #   | #   | #         | #     | #    | #    | -                                                                           | ----  | ----                 | #                                                                                                                                                                                                                                                          | #   | #   | #         | #     | #    | #    |
| Rsa1.0_00589.1.g16517.t1 | gb EOA28788.1  hypothetical protein CARUB_v10025020mg [Capsella rubella]                                                                                                                                                                                                                                                                                                                                                                                                                | 302 | 286 | 1.00E-131 | 94.7  | 79.8 | 86.4 | hypothetical protein CARUB_v10025020mg                                      | gbpln | Capsella rubella     | AT2G37820.1   Symbols:   Cysteine/Histidine-rich C1 domain family protein   chr2:15847541-15848413 FORWARD LENGTH=290                                                                                                                                      | 302 | 290 | 1.00E-131 | 96.0  | 77.2 | 85.4 |
| Rsa1.0_00589.1.g16518.t1 | ref NP_181315.2  NAD(P)-linked oxidoreductase-like protein [Arabidopsis thaliana] gi75243290 sp Q84TF0.1 AKRCA_ARAT_H RecName: Full=Aldo-keto reductase family 4 member C10 gi29028836 gb AAO64797.1  At2g37790 [Arabidopsis thaliana] gi110742937 db BAE99364.1  putative alcohol dehydrogenase [Arabidopsis thaliana] gi111182167 gb ABH07516.1  aldo-keto reductase [Arabidopsis thaliana] gi330254357 gb AEC09451.1  aldo-keto reductase family 4 member C10 [Arabidopsis thaliana] | 314 | 314 | 1.00E-173 | 100.0 | 93.9 | 97.1 | NAD(P)-linked oxidoreductase-like protein                                   | gbpln | Arabidopsis thaliana | AT2G37790.1   Symbols:   NAD(P)-linked oxidoreductase superfamily protein   chr2:15838838-15840752 FORWARD LENGTH=314                                                                                                                                      | 314 | 314 | 1.00E-176 | 100.0 | 93.9 | 97.1 |
| Rsa1.0_00589.1.g16519.t1 | gb EOA29194.1  hypothetical protein CARUB_v10025466mg [Capsella rubella]                                                                                                                                                                                                                                                                                                                                                                                                                | 226 | 182 | 4.00E-63  | 80.5  | 54.9 | 61.5 | hypothetical protein CARUB_v10025466mg                                      | gbpln | Capsella rubella     | AT2G37780.1   Symbols:   Cysteine/Histidine-rich C1 domain family protein   chr2:15837442-15838302 REVERSE LENGTH=286                                                                                                                                      | 226 | 286 | 2.00E-58  | 126.5 | 49.6 | 59.7 |
| Rsa1.0_00589.1.g16520.t1 | db BAJ33839.1  unnamed protein product [Thellungiella halophila]                                                                                                                                                                                                                                                                                                                                                                                                                        | 313 | 315 | 1.00E-157 | 100.6 | 85.3 | 92.0 | unnamed protein product                                                     | ----  | ----                 | AT2G37770.2   Symbols:   NAD(P)-linked oxidoreductase superfamily protein   chr2:15834888-15836659 FORWARD LENGTH=315                                                                                                                                      | 313 | 315 | 1.00E-159 | 100.6 | 84.0 | 91.7 |
| Rsa1.0_00589.1.g16521.t1 | db BAJ33839.1  unnamed protein product [Thellungiella halophila]                                                                                                                                                                                                                                                                                                                                                                                                                        | 315 | 315 | 1.00E-172 | 100.0 | 93.0 | 96.5 | unnamed protein product                                                     | ----  | ----                 | AT2G37770.2   Symbols:   NAD(P)-linked oxidoreductase superfamily protein   chr2:15834888-15836659 FORWARD LENGTH=315                                                                                                                                      | 315 | 315 | 1.00E-170 | 100.0 | 89.8 | 95.6 |
| Rsa1.0_00589.1.g16522.t1 | ref XP_002879706.1  hypothetical protein ARALYDRAFT_482777 [Arabidopsis lyrata subsp. lyrata] gi297325545 gb EFH55965.1  hypothetical protein ARALYDRAFT_482777 [Arabidopsis lyrata subsp. lyrata]                                                                                                                                                                                                                                                                                      | 80  | 81  | 6.00E-17  | 101.3 | 70.0 | 82.5 | hypothetical protein ARALYDRAFT_482777                                      | gbpln | Arabidopsis lyrata   | AT2G37750.1   Symbols:   unknown protein; Has 21 Blast hits to 21 proteins in 7 species: Archae - 0; Bacteria - 0; Metazoa - 0; Fungi - 0; Plants - 21; Viruses - 0; Other Eukaryotes - 0 (source: NCBI BLINK).   chr2:15831017-15831265 FORWARD LENGTH=82 | 80  | 82  | 2.00E-18  | 102.5 | 66.3 | 81.3 |
| Rsa1.0_00589.1.g16523.t1 | ref NP_181310.1  zinc-finger protein 10 [Arabidopsis thaliana] gi3236256 gb AAC23644.1  putative C2H2-type zinc finger protein [Arabidopsis thaliana] gi330254347 gb AEC09441.1  zinc-finger protein 10 [Arabidopsis thaliana]                                                                                                                                                                                                                                                          | 291 | 304 | 1.00E-102 | 104.5 | 72.9 | 79.7 | zinc-finger protein 10                                                      | gbpln | Arabidopsis thaliana | AT2G37740.1   Symbols: ATZFP10, ZFP10   zinc-finger protein 10   chr2:15827706-15828620 REVERSE LENGTH=304                                                                                                                                                 | 291 | 304 | 1.00E-105 | 104.5 | 72.9 | 79.7 |
| Rsa1.0_00590.1.g16524.t1 | gb EOA36913.1  hypothetical protein CARUB_v10011480mg [Capsella rubella]                                                                                                                                                                                                                                                                                                                                                                                                                | 104 | 527 | 8.00E-43  | 506.7 | 76.0 | 90.4 | hypothetical protein CARUB_v10011480mg                                      | gbpln | Capsella rubella     | AT1G30720.1   Symbols:   FAD-binding Berberine family protein   chr1:10898197-10899780 FORWARD LENGTH=527                                                                                                                                                  | 104 | 527 | 2.00E-45  | 506.7 | 77.9 | 87.5 |
| Rsa1.0_00590.1.g16525.t1 | ref NP_174363.1  FAD-binding and BBE domain-containing protein [Arabidopsis thaliana] gi16323167 gb AAL15318.1  At1g30760/T518.22 [Arabidopsis thaliana] gi28416457 gb AAO42759.1  At1g30760/T518.22 [Arabidopsis thaliana] gi332193149 gb AEE31270.1  FAD-binding and BBE domain-containing protein [Arabidopsis thaliana]                                                                                                                                                             | 635 | 534 | 0         | 84.1  | 74.8 | 79.1 | FAD-binding and BBE domain-containing protein                               | gbpln | Arabidopsis thaliana | AT1G30760.1   Symbols:   FAD-binding Berberine family protein   chr1:10918321-10920441 FORWARD LENGTH=534                                                                                                                                                  | 635 | 534 | 0         | 84.1  | 74.8 | 79.1 |

|                          |                                                                                                                                                                                                                                                                                                                                                                                                                                                                                                                                                                                                                                                                                                                                                                   |      |      |           |       |      |      |                                                     |       |                      |                                                                                                                                                              |      |     |           |       |      |      |
|--------------------------|-------------------------------------------------------------------------------------------------------------------------------------------------------------------------------------------------------------------------------------------------------------------------------------------------------------------------------------------------------------------------------------------------------------------------------------------------------------------------------------------------------------------------------------------------------------------------------------------------------------------------------------------------------------------------------------------------------------------------------------------------------------------|------|------|-----------|-------|------|------|-----------------------------------------------------|-------|----------------------|--------------------------------------------------------------------------------------------------------------------------------------------------------------|------|-----|-----------|-------|------|------|
| Rsa1.0_00590.1.g16526.t2 | ref[XP_002893649.1] hypothetical protein ARALYDRAFT_473316 [Arabidopsis lyrata subsp. lyrata] gi 297339491 gb EFH69908.1                                                                                                                                                                                                                                                                                                                                                                                                                                                                                                                                                                                                                                          | 602  | 600  | 0         | 99.7  | 92.4 | 95.7 | hypothetical protein ARALYDRAFT_473316              | gbpln | Arabidopsis lyrata   | AT1G30820.1   Symbols:   CTP synthase family protein   chr1:10945251-10948825 REVERSE LENGTH=600                                                             | 602  | 600 | 0         | 99.7  | 90.7 | 94.5 |
| Rsa1.0_00590.1.g16527.t1 | gb AAC33226.1  putative non-LTR retroelement reverse transcriptase [Arabidopsis thaliana]                                                                                                                                                                                                                                                                                                                                                                                                                                                                                                                                                                                                                                                                         | 813  | 1529 | 0         | 188.1 | 45.4 | 63.3 | putative non-LTR retroelement reverse transcriptase | gbpln | Arabidopsis thaliana | AT3G24255.1   Symbols:   RNA-directed DNA polymerase (reverse transcriptase)-related family protein   chr3:8789471-8793208 FORWARD LENGTH=746                | 813  | 746 | 2.00E-68  | 91.8  | 17.5 | 23.7 |
| Rsa1.0_00590.1.g16528.t1 | gb AAC63678.1  putative non-LTR retroelement reverse transcriptase [Arabidopsis thaliana]                                                                                                                                                                                                                                                                                                                                                                                                                                                                                                                                                                                                                                                                         | 714  | 1216 | 1.00E-173 | 170.3 | 45.1 | 64.4 | putative non-LTR retroelement reverse transcriptase | gbpln | Arabidopsis thaliana | AT3G24255.1   Symbols:   RNA-directed DNA polymerase (reverse transcriptase)-related family protein   chr3:8789471-8793208 FORWARD LENGTH=746                | 714  | 746 | 4.00E-78  | 104.5 | 22.5 | 31.7 |
| Rsa1.0_00590.1.g16529.t1 | #                                                                                                                                                                                                                                                                                                                                                                                                                                                                                                                                                                                                                                                                                                                                                                 | #    | #    | #         | #     | #    | #    | -                                                   | ----  | ----                 | #                                                                                                                                                            | #    | #   | #         | #     | #    |      |
| Rsa1.0_00590.1.g16530.t1 | #                                                                                                                                                                                                                                                                                                                                                                                                                                                                                                                                                                                                                                                                                                                                                                 | #    | #    | #         | #     | #    | #    | -                                                   | ----  | ----                 | #                                                                                                                                                            | #    | #   | #         | #     | #    |      |
| Rsa1.0_00591.1.g16531.t1 | #                                                                                                                                                                                                                                                                                                                                                                                                                                                                                                                                                                                                                                                                                                                                                                 | #    | #    | #         | #     | #    | #    | -                                                   | ----  | ----                 | #                                                                                                                                                            | #    | #   | #         | #     | #    |      |
| Rsa1.0_00591.1.g16532.t2 | #                                                                                                                                                                                                                                                                                                                                                                                                                                                                                                                                                                                                                                                                                                                                                                 | #    | #    | #         | #     | #    | #    | -                                                   | ----  | ----                 | #                                                                                                                                                            | #    | #   | #         | #     | #    |      |
| Rsa1.0_00591.1.g16533.t1 | emb CAD48302.1  MADS-box protein AGL3-a [Brassica oleracea var. botrytis]                                                                                                                                                                                                                                                                                                                                                                                                                                                                                                                                                                                                                                                                                         | 263  | 256  | 1.00E-132 | 97.3  | 86.3 | 92.8 | MADS-box protein AGL3-a                             | gbpln | Brassica oleracea    | AT2G03710.2   Symbols: SEP4, AGL3   K-box region and MADS-box transcription factor family protein   chr2:1129622-1131628 FORWARD LENGTH=257                  | 263  | 257 | 1.00E-128 | 97.7  | 87.5 | 92.8 |
| Rsa1.0_00591.1.g16534.t1 | ref[NP_178465.1] ubiquinone biosynthesis protein COQ4-like protein [Arabidopsis thaliana] gi 24211606 sp Q9ZPR0.1 COQ4_ARATH RecName: Full=Ubiquinone biosynthesis protein COQ4 homolog, mitochondrial; AltName: Full=Coenzyme Q biosynthesis protein 4 homolog; Flags: Precursor gi 4406761 gb AAD20072.1  putative ubiquinone biosynthesis protein [Arabidopsis thaliana] gi 17473563 gb AAL38257.1  putative ubiquinone biosynthesis protein [Arabidopsis thaliana] gi 21386913 gb AAM47860.1  putative ubiquinone biosynthesis protein [Arabidopsis thaliana] gi 21553964 gb AAM63045.1  putative ubiquinone biosynthesis protein [Arabidopsis thaliana] gi 330250643 gb AEC05737.1  ubiquinone biosynthesis protein COQ4-like protein [Arabidopsis thaliana] | 226  | 226  | 1.00E-125 | 100.0 | 95.1 | 97.8 | ubiquinone biosynthesis protein COQ4-like protein   | gbpln | Arabidopsis thaliana | AT2G03690.1   Symbols:   coenzyme Q biosynthesis Coq4 family protein / ubiquinone biosynthesis Coq4 family protein   chr2:1122122-1123011 REVERSE LENGTH=226 | 226  | 226 | 1.00E-128 | 100.0 | 95.1 | 97.8 |
| Rsa1.0_00591.1.g16535.t1 | gb EOA24844.1  hypothetical protein CARUB_v10018134mg, partial [Capsella rubella]                                                                                                                                                                                                                                                                                                                                                                                                                                                                                                                                                                                                                                                                                 | 110  | 169  | 2.00E-34  | 153.6 | 82.7 | 86.4 | hypothetical protein CARUB_v10018134mg, partial     | gbpln | Capsella rubella     | AT2G03680.2   Symbols: SPR1, SKU6   spiral1   chr2:1121398-1121850 FORWARD LENGTH=119                                                                        | 110  | 119 | 2.00E-36  | 108.2 | 80.0 | 82.7 |
| Rsa1.0_00591.1.g16536.t1 | ref[XP_002867135.1] predicted protein [Arabidopsis lyrata subsp. lyrata] gi 297312971 gb EFH43394.1  predicted protein [Arabidopsis lyrata subsp. lyrata]                                                                                                                                                                                                                                                                                                                                                                                                                                                                                                                                                                                                         | 480  | 482  | 0         | 100.4 | 83.5 | 90.8 | predicted protein                                   | gbpln | Arabidopsis lyrata   | AT4G34131.1   Symbols: UGT73B3   UDP-glucosyl transferase 73B3   chr4:16343268-16344713 REVERSE LENGTH=481                                                   | 480  | 481 | 0         | 100.2 | 81.7 | 88.5 |
| Rsa1.0_00591.1.g16537.t1 | ref[XP_002867135.1] predicted protein [Arabidopsis lyrata subsp. lyrata] gi 297312971 gb EFH43394.1  predicted protein [Arabidopsis lyrata subsp. lyrata]                                                                                                                                                                                                                                                                                                                                                                                                                                                                                                                                                                                                         | 480  | 482  | 0         | 100.4 | 82.9 | 90.2 | predicted protein                                   | gbpln | Arabidopsis lyrata   | AT4G34131.1   Symbols: UGT73B3   UDP-glucosyl transferase 73B3   chr4:16343268-16344713 REVERSE LENGTH=481                                                   | 480  | 481 | 0         | 100.2 | 80.4 | 87.7 |
| Rsa1.0_00591.1.g16538.t1 | ref[NP_565303.1] ureide permease 1 [Arabidopsis thaliana] gi 68566149 sp Q9ZPR7.1 UPS1_ARATH RecName: Full=Ureide permease 1; Short=AUPS1 gi 4406761 gb AAD20067.1  expressed protein [Arabidopsis thaliana] gi 21554091 gb AAM63172.1  putative integral membrane protein [Arabidopsis thaliana] gi 115646808 gb ABJ17125.1  At2g03590 [Arabidopsis thaliana] gi 330250624 gb AEC05718.1  ureide permease 1 [Arabidopsis thaliana]                                                                                                                                                                                                                                                                                                                               | 390  | 390  | 0         | 100.0 | 93.8 | 97.2 | ureide permease 1                                   | gbpln | Arabidopsis thaliana | AT2G03590.1   Symbols: ATUPS1, UPS1   ureide permease 1   chr2:1095129-1096711 FORWARD LENGTH=390                                                            | 390  | 390 | 0         | 100.0 | 93.8 | 97.2 |
| Rsa1.0_00591.1.g16539.t1 | gb AAD32898.1  putative retroelement pol polyprotein [Arabidopsis thaliana]                                                                                                                                                                                                                                                                                                                                                                                                                                                                                                                                                                                                                                                                                       | 1708 | 1307 | 0         | 76.5  | 44.3 | 56.5 | putative retroelement pol polyprotein               | gbpln | Arabidopsis thaliana | AT2G03510.1   Symbols:   SPFH/Band 7/PHB domain-containing membrane-associated protein family   chr2:1066717-1068934 FORWARD LENGTH=356                      | 1708 | 356 | 0         | 20.8  | 17.7 | 18.9 |

|                          |                                                                                                                                                                                                                                                                                                                                                                                                                                                    |      |      |           |       |      |      |                                              |       |                      |                                                                                                                                                                                                                                                                                                                                                      |      |      |           |       |      |      |
|--------------------------|----------------------------------------------------------------------------------------------------------------------------------------------------------------------------------------------------------------------------------------------------------------------------------------------------------------------------------------------------------------------------------------------------------------------------------------------------|------|------|-----------|-------|------|------|----------------------------------------------|-------|----------------------|------------------------------------------------------------------------------------------------------------------------------------------------------------------------------------------------------------------------------------------------------------------------------------------------------------------------------------------------------|------|------|-----------|-------|------|------|
| Rsa1.0_00591.1.g16540.t1 | ref[XP_002875207.1] myb family transcription factor [Arabidopsis lyrata subsp. lyrata] gi 297321045 gb EFH51466.1  myb family transcription factor [Arabidopsis lyrata subsp. lyrata]                                                                                                                                                                                                                                                              | 423  | 432  | 0         | 102.1 | 86.3 | 90.3 | myb family transcription factor              | gbpln | Arabidopsis lyrata   | AT2G03500.1   Symbols:   Homeodomain-like superfamily protein   chr2:1059926-1062259 FORWARD LENGTH=432                                                                                                                                                                                                                                              | 423  | 432  | 0         | 102.1 | 86.5 | 89.8 |
| Rsa1.0_00592.1.g16541.t1 | gb ACJ11252.1  epithiospecifier protein [Brassica rapa subsp. pekinensis]                                                                                                                                                                                                                                                                                                                                                                          | 135  | 343  | 7.00E-23  | 254.1 | 40.7 | 44.4 | epithiospecifier protein                     | gbpln | Brassica rapa        | AT5G44450.1   Symbols:   methyltransferases   chr5:17914360-17916017 REVERSE LENGTH=334                                                                                                                                                                                                                                                              | 135  | 334  | 4.00E-18  | 247.4 | 29.6 | 31.1 |
| Rsa1.0_00592.1.g16542.t1 | ref[XP_002865365.1] predicted protein [Arabidopsis lyrata subsp. lyrata] gi 297311200 gb EFH41624.1  predicted protein [Arabidopsis lyrata subsp. lyrata]                                                                                                                                                                                                                                                                                          | 379  | 412  | 0         | 108.7 | 94.7 | 97.1 | predicted protein                            | gbpln | Arabidopsis lyrata   | AT5G44480.1   Symbols: DUR   NAD(P)-binding Rossmann-fold superfamily protein   chr5:17921515-17923643 FORWARD LENGTH=436                                                                                                                                                                                                                            | 379  | 436  | 0         | 115.0 | 94.5 | 97.1 |
| Rsa1.0_00592.1.g16543.t1 | gb EOA13806.1  hypothetical protein CARUB_v10026901mg [Capsella rubella]                                                                                                                                                                                                                                                                                                                                                                           | 289  | 289  | 1.00E-140 | 100.0 | 84.8 | 93.4 | hypothetical protein CARUB_v10026901mg       | gbpln | Capsella rubella     | AT5G44520.1   Symbols:   NagB/RpiA/CoA transferase-like superfamily protein   chr5:17934610-17936441 REVERSE LENGTH=296                                                                                                                                                                                                                              | 289  | 296  | 1.00E-130 | 102.4 | 79.6 | 88.6 |
| Rsa1.0_00592.1.g16544.t1 | gb EOA14555.1  hypothetical protein CARUB_v10027793mg [Capsella rubella]                                                                                                                                                                                                                                                                                                                                                                           | 862  | 845  | 0         | 98.0  | 84.1 | 91.9 | hypothetical protein CARUB_v10027793mg       | gbpln | Capsella rubella     | AT5G44530.1   Symbols:   Subtilase family protein   chr5:17937931-17941193 FORWARD LENGTH=840                                                                                                                                                                                                                                                        | 862  | 840  | 0         | 97.4  | 83.3 | 90.5 |
| Rsa1.0_00592.1.g16545.t1 | emb CAA50331.1  SaTAP 44 [Sinapis alba]                                                                                                                                                                                                                                                                                                                                                                                                            | 116  | 115  | 2.00E-49  | 99.1  | 86.2 | 91.4 | SaTAP 44                                     | gbpln | Sinapis alba         | AT5G44540.1   Symbols:   Tapetum specific protein TAP35/TAP44   chr5:17941287-17941646 REVERSE LENGTH=119                                                                                                                                                                                                                                            | 116  | 119  | 3.00E-34  | 102.6 | 75.9 | 82.8 |
| Rsa1.0_00592.1.g16546.t1 | ref[NP_199268.1] uncharacterized protein [Arabidopsis thaliana] gi 175170734 sp Q9F110.1 CSPLW_ARAT H RecName: Full=CASP-like protein At5g44550 gi 9758708 dbj BAB09162.1  unnamed protein product [Arabidopsis thaliana] gi 17473557 gb AAL38255.1  unknown protein [Arabidopsis thaliana] gi 21386917 gb AAM47862.1  unknown protein [Arabidopsis thaliana] gi 332007739 gb AED95122.1  uncharacterized protein AT5G44550 [Arabidopsis thaliana] | 199  | 197  | 2.00E-90  | 99.0  | 88.9 | 93.5 | uncharacterized protein                      | gbpln | Arabidopsis thaliana | AT5G44550.1   Symbols:   Uncharacterised protein family (UPF0497)   chr5:17942100-17943174 REVERSE LENGTH=197                                                                                                                                                                                                                                        | 199  | 197  | 8.00E-93  | 99.0  | 88.9 | 93.5 |
| Rsa1.0_00592.1.g16547.t1 | gb ADK63407.1  zinc finger protein [Brassica rapa]                                                                                                                                                                                                                                                                                                                                                                                                 | 162  | 191  | 8.00E-57  | 117.9 | 77.2 | 83.3 | zinc finger protein                          | gbpln | Brassica rapa        | AT4G20380.7   Symbols: LSD1   LSD1 zinc finger family protein   chr4:11005012-11006438 FORWARD LENGTH=189                                                                                                                                                                                                                                            | 162  | 189  | 8.00E-53  | 116.7 | 72.2 | 79.6 |
| Rsa1.0_00592.1.g16548.t1 | ref[XP_002872140.1] CYP71B11 [Arabidopsis lyrata subsp. lyrata] gi 297317977 gb EFH48399.1  CYP71B11 [Arabidopsis lyrata subsp. lyrata]                                                                                                                                                                                                                                                                                                            | 496  | 496  | 0         | 100.0 | 79.0 | 89.9 | CYP71B11                                     | gbpln | Arabidopsis lyrata   | AT5G25120.1   Symbols: CYP71B11   tytochrome p450, family 71, subfamily B, polypeptide 11   chr5:8662851-8664432 FORWARD LENGTH=496                                                                                                                                                                                                                  | 496  | 496  | 0         | 100.0 | 78.8 | 90.7 |
| Rsa1.0_00592.1.g16549.t1 | ref[XP_002862972.1] predicted protein [Arabidopsis lyrata subsp. lyrata] gi 297308761 gb EFH39231.1  predicted protein [Arabidopsis lyrata subsp. lyrata]                                                                                                                                                                                                                                                                                          | 207  | 223  | 4.00E-99  | 107.7 | 96.6 | 99.0 | predicted protein                            | gbpln | Arabidopsis lyrata   | AT5G44560.1   Symbols: VPS2.2   SNF7 family protein   chr5:17946081-17948222 FORWARD LENGTH=222                                                                                                                                                                                                                                                      | 207  | 222  | 1.00E-100 | 107.2 | 92.8 | 95.2 |
| Rsa1.0_00592.1.g16550.t1 | gb AAD25557.1 AC005850.14 Hypothetical protein [Arabidopsis thaliana]                                                                                                                                                                                                                                                                                                                                                                              | 192  | 404  | 3.00E-53  | 210.4 | 53.6 | 66.7 | Hypothetical protein                         | gbpln | Arabidopsis thaliana | AT1G43722.1   Symbols:   unknown protein; BEST Arabidopsis thaliana protein match is: unknown protein (TAIR:AT5G28730.1); Has 924 Blast hits to 912 proteins in 109 species: Archae - 0; Bacteria - 0; Metazoa - 222; Fungi - 31; Plants - 661; Viruses - 0; Other Eukaryotes - 10 (source: NCBI BLINK).   chr1:16496403-16497377 FORWARD LENGTH=324 | 192  | 324  | 1.00E-25  | 168.8 | 31.3 | 49.0 |
| Rsa1.0_00592.1.g16551.t1 | ref[XP_002863624.1] pfkB-type carbohydrate kinase family protein [Arabidopsis lyrata subsp. lyrata] gi 297309459 gb EFH39883.1  pfkB-type carbohydrate kinase family protein [Arabidopsis lyrata subsp. lyrata]                                                                                                                                                                                                                                    | 365  | 365  | 0         | 100.0 | 85.8 | 91.8 | pfkB-type carbohydrate kinase family protein | gbpln | Arabidopsis lyrata   | AT5G43910.2   Symbols:   pfkB-like carbohydrate kinase family protein   chr5:17667537-17670085 REVERSE LENGTH=365                                                                                                                                                                                                                                    | 365  | 365  | 1.00E-179 | 100.0 | 84.7 | 91.2 |
| Rsa1.0_00592.1.g16552.t1 | gb EOA18090.1  hypothetical protein CARUB_v10006542mg [Capsella rubella]                                                                                                                                                                                                                                                                                                                                                                           | 470  | 480  | 0         | 102.1 | 90.2 | 93.8 | hypothetical protein CARUB_v10006542mg       | gbpln | Capsella rubella     | AT4G20360.1   Symbols: ATRAB8D, ATRABE1B, RABE1b   RAB GTPase homolog E1B   chr4:10990036-10991466 FORWARD LENGTH=476                                                                                                                                                                                                                                | 470  | 476  | 0         | 101.3 | 89.8 | 93.2 |
| Rsa1.0_00592.1.g16553.t1 | gb AAF19226.1 AC007505.2 Highly similar to Ta1-3 polyprotein [Arabidopsis thaliana]                                                                                                                                                                                                                                                                                                                                                                | 1562 | 1356 | 0         | 86.8  | 45.3 | 59.7 | Highly similar to Ta1-3 polyprotein          | gbpln | Arabidopsis thaliana | AT4G23160.1   Symbols: CRK8   cysteine-rich RLK (RECEPTOR-like protein kinase) 8   chr4:12129485-12134086 FORWARD LENGTH=1262                                                                                                                                                                                                                        | 1562 | 1262 | 4.00E-79  | 80.8  | 10.4 | 17.2 |
| Rsa1.0_00593.1.g16554.t1 | ref[XP_002869540.1] hypothetical protein ARALYDRAFT_913747 [Arabidopsis lyrata subsp. lyrata] gi 297315376 gb EFH45799.1  hypothetical protein ARALYDRAFT_913747 [Arabidopsis lyrata subsp. lyrata]                                                                                                                                                                                                                                                | 369  | 367  | 0         | 99.5  | 88.6 | 92.4 | hypothetical protein ARALYDRAFT_913747       | gbpln | Arabidopsis lyrata   | AT5G54160.1   Symbols: ATOMT1, OMT1   O-methyltransferase 1   chr5:21982075-21984167 FORWARD LENGTH=363                                                                                                                                                                                                                                              | 369  | 363  | 1.00E-164 | 98.4  | 73.2 | 86.4 |

|                          |                                                                                                                                                                                                                                                                                                                                                                                                                                |     |      |           |       |      |      |                                                     |       |                      |                                                                                                                                                                                                                                                                                                                                                                                                                                   |     |     |           |       |      |      |
|--------------------------|--------------------------------------------------------------------------------------------------------------------------------------------------------------------------------------------------------------------------------------------------------------------------------------------------------------------------------------------------------------------------------------------------------------------------------|-----|------|-----------|-------|------|------|-----------------------------------------------------|-------|----------------------|-----------------------------------------------------------------------------------------------------------------------------------------------------------------------------------------------------------------------------------------------------------------------------------------------------------------------------------------------------------------------------------------------------------------------------------|-----|-----|-----------|-------|------|------|
| Rsa1.0_00593.1.g16555.t1 | dbj BAJ34030.1  unnamed protein product [Thelelungella halophila]                                                                                                                                                                                                                                                                                                                                                              | 393 | 390  | 0         | 99.2  | 88.8 | 94.9 | unnamed protein product                             | ----  | ----                 | AT4G27800.1   Symbols: TAP38, PPH1   thylakoid-associated phosphatase 38   chr4:13852013-13854091 REVERSE LENGTH=388                                                                                                                                                                                                                                                                                                              | 393 | 388 | 0         | 98.7  | 86.0 | 93.6 |
| Rsa1.0_00593.1.g16556.t1 | ref XP_002867481.1  hypothetical protein ARALYDRAFT_492001 [Arabidopsis lyrata subsp. lyrata] gi 297313317 gb EFH43740.1  hypothetical protein ARALYDRAFT_492001 [Arabidopsis lyrata subsp. lyrata]                                                                                                                                                                                                                            | 192 | 195  | 3.00E-62  | 101.6 | 69.3 | 73.4 | hypothetical protein ARALYDRAFT_492001              | gbpln | Arabidopsis lyrata   | AT4G27810.1   Symbols:   unknown protein; CONTAINS InterPro DOMAIN/s: Protein of unknown function DUF688 (InterPro:IPR007789). BEST Arabidopsis thaliana protein match is: unknown protein (TAIR:AT5G53000.1); Has 73 Blast hits to 66 proteins in 11 species: Archae - 0; Bacteria - 0; Metazoa - 0; Fungi - 0; Plants - 73; Viruses - 0; Other Eukaryotes - 0 (source: NCBI BLINK).   chr4:13854641-13855671 REVERSE LENGTH=196 | 192 | 196 | 1.00E-63  | 102.1 | 67.2 | 72.4 |
| Rsa1.0_00593.1.g16557.t1 | ref XP_002893415.1  hypothetical protein ARALYDRAFT_890136 [Arabidopsis lyrata subsp. lyrata] gi 297339257 gb EFH69674.1  hypothetical protein ARALYDRAFT_890136 [Arabidopsis lyrata subsp. lyrata]                                                                                                                                                                                                                            | 364 | 400  | 9.00E-30  | 109.9 | 26.9 | 34.1 | hypothetical protein ARALYDRAFT_890136              | gbpln | Arabidopsis lyrata   | AT3G19890.1   Symbols:   F-box family protein   chr3:6914910-6916142 REVERSE LENGTH=410                                                                                                                                                                                                                                                                                                                                           | 364 | 410 | 2.00E-29  | 112.6 | 23.1 | 32.4 |
| Rsa1.0_00593.1.g16558.t1 | ref NP_194513.1  SNARE-like family protein [Arabidopsis thaliana] gi 4972115 emb CAB43972.1  putative protein [Arabidopsis thaliana] gi 7269637 emb CAB81433.1  putative protein [Arabidopsis thaliana] gi 17978989 gb AAL47455.1  AT4g27840/T2E11.80 [Arabidopsis thaliana] gi 22655346 gb AAM98265.1  AT4g27840/T2E11.80 [Arabidopsis thaliana] gi 332659999 gb AEE85399.1  SNARE-like family protein [Arabidopsis thaliana] | 252 | 260  | 5.00E-95  | 103.2 | 75.0 | 85.3 | SNARE-like family protein                           | gbpln | Arabidopsis thaliana | AT4G27840.1   Symbols:   SNARE-like superfamily protein   chr3:13865268-13866050 REVERSE LENGTH=260                                                                                                                                                                                                                                                                                                                               | 252 | 260 | 2.00E-97  | 103.2 | 75.0 | 85.3 |
| Rsa1.0_00593.1.g16559.t1 | gb AAD15377.1  putative non-LTR retroelement reverse transcriptase [Arabidopsis thaliana]                                                                                                                                                                                                                                                                                                                                      | 330 | 1044 | 7.00E-99  | 316.4 | 53.6 | 72.1 | putative non-LTR retroelement reverse transcriptase | gbpln | Arabidopsis thaliana | AT1G43760.1   Symbols:   DNase I-like superfamily protein   chr1:16528880-16531065 REVERSE LENGTH=626                                                                                                                                                                                                                                                                                                                             | 330 | 626 | 5.00E-19  | 189.7 | 14.8 | 23.0 |
| Rsa1.0_00593.1.g16560.t1 | emb CAB43975.1  putative protein [Arabidopsis thaliana] gi 7269640 emb CAB81436.1  putative protein [Arabidopsis thaliana]                                                                                                                                                                                                                                                                                                     | 694 | 770  | 1.00E-127 | 111.0 | 51.0 | 63.8 | putative protein                                    | gbpln | Arabidopsis thaliana | AT4G27870.1   Symbols:   Vacuolar iron transporter (VIT) family protein   chr4:13878983-13882679 FORWARD LENGTH=761                                                                                                                                                                                                                                                                                                               | 694 | 761 | 1.00E-117 | 109.7 | 49.0 | 61.7 |
| Rsa1.0_00593.1.g16561.t1 | ref XP_002869536.1  hypothetical protein ARALYDRAFT_328905 [Arabidopsis lyrata subsp. lyrata] gi 297315372 gb EFH45795.1  hypothetical protein ARALYDRAFT_328905 [Arabidopsis lyrata subsp. lyrata]                                                                                                                                                                                                                            | 321 | 777  | 1.00E-99  | 242.1 | 66.4 | 77.9 | hypothetical protein ARALYDRAFT_328905              | gbpln | Arabidopsis lyrata   | AT4G27870.1   Symbols:   Vacuolar iron transporter (VIT) family protein   chr4:13878983-13882679 FORWARD LENGTH=761                                                                                                                                                                                                                                                                                                               | 321 | 761 | 2.00E-94  | 237.1 | 67.3 | 79.4 |
| Rsa1.0_00593.1.g16562.t1 | gb EOA18541.1  hypothetical protein CARUB_v10007095mg [Capsella rubella]                                                                                                                                                                                                                                                                                                                                                       | 276 | 301  | 2.00E-73  | 109.1 | 58.0 | 71.4 | hypothetical protein CARUB_v10007095mg              | gbpln | Capsella rubella     | AT4G27890.1   Symbols:   HSP20-like chaperones superfamily protein   chr4:13886033-13887220 FORWARD LENGTH=293                                                                                                                                                                                                                                                                                                                    | 276 | 293 | 4.00E-73  | 106.2 | 55.4 | 71.7 |
| Rsa1.0_00593.1.g16563.t1 | ref NP_194524.2  ethylene-responsive transcription factor CRF4 [Arabidopsis thaliana] gi 334302779 sp Q9SUE3.2 CRF4_ARATH RecName: Full=Ethylene-responsive transcription factor CRF4; AltName: Full=Protein CYTOKININ RESPONSE FACTOR 4 gi 192571732 gb ACF04811.1  At4g27950 [Arabidopsis thaliana] gi 332660012 gb AEE85412.1  ethylene-responsive transcription factor CRF4 [Arabidopsis thaliana]                         | 329 | 335  | 1.00E-118 | 101.8 | 73.9 | 83.0 | ethylene-responsive transcription factor CRF4       | gbpln | Arabidopsis thaliana | AT4G27950.1   Symbols: CRF4   cytokinin response factor 4   chr4:13909732-13910739 REVERSE LENGTH=335                                                                                                                                                                                                                                                                                                                             | 329 | 335 | 1.00E-121 | 101.8 | 73.9 | 83.0 |
| Rsa1.0_00593.1.g16564.t2 | ref NP_567792.1  SLAC1 homologue 2 [Arabidopsis thaliana] gi 75167715 sp Q9ASQ7.1 SLAH2_ARATH RecName: Full=S-type anion channel SLAH2; AltName: Full=SLAC1-homolog protein 2 gi 13605877 gb AAK32924.1 AF367337.1 AT4g27970/T13J8.80 [Arabidopsis thaliana] gi 25090193 gb AAN72249.1  AT4g27970/T13J8.80 [Arabidopsis thaliana] gi 332660015 gb AEE85415.1  SLAC1 homologue 2 [Arabidopsis thaliana]                         | 533 | 519  | 0         | 97.4  | 80.5 | 86.5 | SLAC1 homologue 2                                   | gbpln | Arabidopsis thaliana | AT4G27970.1   Symbols: SLAH2   SLAC1 homologue 2   chr4:13918290-13920122 REVERSE LENGTH=519                                                                                                                                                                                                                                                                                                                                      | 533 | 519 | 0         | 97.4  | 80.5 | 86.5 |

|                          |                                                                                                                                                                                                                                                                                                                                                         |      |      |           |       |      |      |                                                        |       |                      |                                                                                                                                                                                                                                                                                                                                                                                                                                                                                           |      |      |           |       |      |      |
|--------------------------|---------------------------------------------------------------------------------------------------------------------------------------------------------------------------------------------------------------------------------------------------------------------------------------------------------------------------------------------------------|------|------|-----------|-------|------|------|--------------------------------------------------------|-------|----------------------|-------------------------------------------------------------------------------------------------------------------------------------------------------------------------------------------------------------------------------------------------------------------------------------------------------------------------------------------------------------------------------------------------------------------------------------------------------------------------------------------|------|------|-----------|-------|------|------|
| Rsa1.0_00593.1.g16565.t1 | refXP_002869528.1   hypothetical protein ARALYDRAFT_491985 [Arabidopsis lyrata subsp. lyrata] gi 297315364 gb EFH45787.1   hypothetical protein ARALYDRAFT_491985 [Arabidopsis lyrata subsp. lyrata]                                                                                                                                                    | 497  | 566  | 1.00E-149 | 113.9 | 65.0 | 78.1 | hypothetical protein ARALYDRAFT_491985                 | gbpln | Arabidopsis lyrata   | AT4G27980.1   Symbols:   Domain of unknown function (DUF3444)   chr4:13921677-13923374 FORWARD LENGTH=565                                                                                                                                                                                                                                                                                                                                                                                 | 497  | 565  | 1.00E-150 | 113.7 | 63.6 | 77.5 |
| Rsa1.0_00593.1.g16566.t1 | refNP_194529.4   AAA-type ATPase family protein [Arabidopsis thaliana] gi 332660018 gb AEE85418.1   AAA-type ATPase family protein [Arabidopsis thaliana]                                                                                                                                                                                               | 815  | 830  | 0         | 101.8 | 91.4 | 95.7 | AAA-type ATPase family protein                         | gbpln | Arabidopsis thaliana | AT4G28000.1   Symbols:   P-loop containing nucleoside triphosphate hydrolases superfamily protein   chr4:13925456-13929280 FORWARD LENGTH=830                                                                                                                                                                                                                                                                                                                                             | 815  | 830  | 0         | 101.8 | 91.4 | 95.7 |
| Rsa1.0_00593.1.g16567.t1 | refXP_002867473.1   hypothetical protein ARALYDRAFT_491980 [Arabidopsis lyrata subsp. lyrata] gi 297313309 gb EFH43732.1   hypothetical protein ARALYDRAFT_491980 [Arabidopsis lyrata subsp. lyrata]                                                                                                                                                    | 216  | 156  | 3.00E-54  | 72.2  | 57.9 | 62.5 | hypothetical protein ARALYDRAFT_491980                 | gbpln | Arabidopsis lyrata   | AT4G28025.1   Symbols:   unknown protein; FUNCTIONS IN: molecular.function unknown; INVOLVED IN: biological.process unknown; LOCATED IN: chloroplast thylakoid membrane; EXPRESSED IN: 23 plant structures; EXPRESSED DURING: 13 growth stages; Has 30201 Blast hits to 17322 proteins in 780 species: Archae - 12; Bacteria - 1396; Metazoa - 17338; Fungi - 3422; Plants - 5037; Viruses - 0; Other Eukaryotes - 2996 (source: NCBI ELink).   chr4:13935836-13937367 REVERSE LENGTH=157 | 216  | 157  | 1.00E-52  | 72.7  | 59.3 | 62.5 |
| Rsa1.0_00593.1.g16568.t1 | refNP_567795.1   GCN5-related N-acetyltransferase (GNAT) family protein [Arabidopsis thaliana] gi 15081771 gb AAK82540.1   AT4g28030/T13J8.140 [Arabidopsis thaliana] gi 22137098 gb AAM91394.1   AT4g28030/T13J8.140 [Arabidopsis thaliana] gi 332660024 gb AEE85424.1   GCN5-related N-acetyltransferase (GNAT) family protein [Arabidopsis thaliana] | 265  | 274  | 1.00E-123 | 103.4 | 84.5 | 90.9 | GCN5-related N-acetyltransferase (GNAT) family protein | gbpln | Arabidopsis thaliana | AT4G28030.1   Symbols:   Acyl-CoA N-acyltransferases (NAT) superfamily protein   chr4:13937748-13939131 REVERSE LENGTH=274                                                                                                                                                                                                                                                                                                                                                                | 265  | 274  | 1.00E-126 | 103.4 | 84.5 | 90.9 |
| Rsa1.0_00593.1.g16569.t1 | gb EOA18435.1   hypothetical protein CARUB_v10006978mg [Capsella rubella]                                                                                                                                                                                                                                                                               | 270  | 264  | 1.00E-116 | 97.8  | 75.6 | 83.3 | hypothetical protein CARUB_v10006978mg                 | gbpln | Capsella rubella     | AT4G28050.1   Symbols: TET7   tetraspanin7   chr4:13942566-13943621 REVERSE LENGTH=263                                                                                                                                                                                                                                                                                                                                                                                                    | 270  | 263  | 1.00E-116 | 97.4  | 74.4 | 82.6 |
| Rsa1.0_00593.1.g16570.t1 | gb EOA17644.1   hypothetical protein CARUB_v10006010mg [Capsella rubella]                                                                                                                                                                                                                                                                               | 135  | 133  | 2.00E-48  | 98.5  | 77.0 | 82.2 | hypothetical protein CARUB_v10006010mg                 | gbpln | Capsella rubella     | AT5G57815.1   Symbols:   Cytochrome c oxidase, subunit Vib family protein   chr5:23426753-23427637 FORWARD LENGTH=78                                                                                                                                                                                                                                                                                                                                                                      | 135  | 78   | 1.00E-41  | 57.8  | 55.6 | 57.8 |
| Rsa1.0_00593.1.g16571.t1 | refNP_194537.7   tetratricopeptide repeat domain protein [Arabidopsis thaliana] gi 332660036 gb AEE85436.1   tetratricopeptide repeat domain protein [Arabidopsis thaliana]                                                                                                                                                                             | 1767 | 1819 | 0         | 102.9 | 85.0 | 90.8 | tetratricopeptide repeat domain protein                | gbpln | Arabidopsis thaliana | AT4G28080.1   Symbols:   Tetratricopeptide repeat (TPR)-like superfamily protein   chr4:13948993-13957840 REVERSE LENGTH=1819                                                                                                                                                                                                                                                                                                                                                             | 1767 | 1819 | 0         | 102.9 | 85.0 | 90.8 |
| Rsa1.0_00593.1.g16572.t1 | refXP_002867465.1   AtMYB41 [Arabidopsis lyrata subsp. lyrata] gi 297313301 gb EFH43724.1   AtMYB41 [Arabidopsis lyrata subsp. lyrata]                                                                                                                                                                                                                  | 282  | 283  | 1.00E-124 | 100.4 | 82.6 | 89.7 | AtMYB41                                                | gbpln | Arabidopsis lyrata   | AT4G28110.1   Symbols: AtMYB41, MYB41   myb domain protein 41   chr4:13968166-13969384 REVERSE LENGTH=282                                                                                                                                                                                                                                                                                                                                                                                 | 282  | 282  | 1.00E-117 | 100.0 | 80.9 | 89.4 |
| Rsa1.0_00593.1.g16573.t2 | refNP_194542.2   diacylglycerol kinase 6 [Arabidopsis thaliana] gi 487523707 sp F4JKI3.1   DGK6_ARATH RecName: Full=Diacylglycerol kinase 6; Short=ADGK6; Short=DAG kinase 6; AltName: Full=Diglyceride kinase 6; Short=DKG 6 gi 332660043 gb AEE85443.1   diacylglycerol kinase 6 [Arabidopsis thaliana]                                               | 535  | 466  | 0         | 87.1  | 67.5 | 75.9 | diacylglycerol kinase 6                                | gbpln | Arabidopsis thaliana | AT4G28130.1   Symbols: DGK6, ATDGK6   diacylglycerol kinase 6   chr4:13971552-13974323 FORWARD LENGTH=466                                                                                                                                                                                                                                                                                                                                                                                 | 535  | 466  | 0         | 87.1  | 67.5 | 75.9 |
| Rsa1.0_00593.1.g16574.t1 | refXP_002867464.1   hypothetical protein ARALYDRAFT_491982 [Arabidopsis lyrata subsp. lyrata] gi 297313300 gb EFH43723.1   hypothetical protein ARALYDRAFT_491982 [Arabidopsis lyrata subsp. lyrata]                                                                                                                                                    | 282  | 278  | 1.00E-103 | 98.6  | 74.5 | 83.0 | hypothetical protein ARALYDRAFT_491982                 | gbpln | Arabidopsis lyrata   | AT4G28140.1   Symbols:   Integrase-type DNA-binding superfamily protein   chr4:13974905-13975783 REVERSE LENGTH=292                                                                                                                                                                                                                                                                                                                                                                       | 282  | 292  | 1.00E-103 | 103.5 | 73.0 | 82.6 |
| Rsa1.0_00593.1.g16575.t1 | refXP_002867463.1   hypothetical protein ARALYDRAFT_491980 [Arabidopsis lyrata subsp. lyrata] gi 297313299 gb EFH43722.1   hypothetical protein ARALYDRAFT_491980 [Arabidopsis lyrata subsp. lyrata]                                                                                                                                                    | 284  | 284  | 1.00E-147 | 100.0 | 88.0 | 95.1 | hypothetical protein ARALYDRAFT_491980                 | gbpln | Arabidopsis lyrata   | AT4G28150.1   Symbols:   Protein of unknown function (DUF789)   chr4:13977642-13978912 REVERSE LENGTH=285                                                                                                                                                                                                                                                                                                                                                                                 | 284  | 285  | 1.00E-141 | 100.4 | 83.8 | 89.8 |



|                          |                                                                                                                                                                                                                                                                                                                                                                                                                                                                                                                                                                                                              |     |     |           |       |      |      |                                                 |       |                      |                                                                                                                                                                                                                                                                                                                                                                                                                                                         |     |     |           |       |      |      |
|--------------------------|--------------------------------------------------------------------------------------------------------------------------------------------------------------------------------------------------------------------------------------------------------------------------------------------------------------------------------------------------------------------------------------------------------------------------------------------------------------------------------------------------------------------------------------------------------------------------------------------------------------|-----|-----|-----------|-------|------|------|-------------------------------------------------|-------|----------------------|---------------------------------------------------------------------------------------------------------------------------------------------------------------------------------------------------------------------------------------------------------------------------------------------------------------------------------------------------------------------------------------------------------------------------------------------------------|-----|-----|-----------|-------|------|------|
| Rsa1.0_00593.1.g16576.t1 | refXP_002869518.1  hypothetical protein ARALYDRAFT_491959 [Arabidopsis lyrata subsp. lyrata] gi 297315354 gb EFH45777.1  hypothetical protein ARALYDRAFT_491959 [Arabidopsis lyrata subsp. lyrata]                                                                                                                                                                                                                                                                                                                                                                                                           | 124 | 113 | 7.00E-29  | 91.1  | 56.5 | 67.7 | hypothetical protein ARALYDRAFT_491959          | gbpln | Arabidopsis lyrata   | AT4G28160.1   Symbols:   hydroxyproline-rich glycoprotein family protein   chr4:13980390-13980725 FORWARD LENGTH=111                                                                                                                                                                                                                                                                                                                                    | 124 | 111 | 9.00E-31  | 89.5  | 55.6 | 65.3 |
| Rsa1.0_00593.1.g16577.t1 | #                                                                                                                                                                                                                                                                                                                                                                                                                                                                                                                                                                                                            | #   | #   | #         | #     | #    | #    | -                                               | ----  | ----                 | #                                                                                                                                                                                                                                                                                                                                                                                                                                                       | #   | #   | #         | #     | #    |      |
| Rsa1.0_00594.1.g16578.t1 | emb CAD92450.1  amino acid permease 6 [Brassica napus]                                                                                                                                                                                                                                                                                                                                                                                                                                                                                                                                                       | 470 | 481 | 0         | 102.3 | 98.5 | 99.6 | amino acid permease 6                           | gbpln | Brassica napus       | AT5G49630.1   Symbols: AAP6   amino acid permease 6   chr5:20142681-20146441 REVERSE LENGTH=481                                                                                                                                                                                                                                                                                                                                                         | 470 | 481 | 0         | 102.3 | 91.5 | 96.0 |
| Rsa1.0_00594.1.g16579.t1 | gb EOA35503.1  hypothetical protein CARUB_v10020710mg, partial [Capsella rubella]                                                                                                                                                                                                                                                                                                                                                                                                                                                                                                                            | 243 | 304 | 1.00E-102 | 125.1 | 78.6 | 86.4 | hypothetical protein CARUB_v10020710mg, partial | gbpln | Capsella rubella     | AT1G65690.1   Symbols:   Late embryogenesis abundant (LEA) hydroxyproline-rich glycoprotein family   chr1:24431642-24432898 REVERSE LENGTH=252                                                                                                                                                                                                                                                                                                          | 243 | 252 | 1.00E-102 | 103.7 | 79.0 | 86.8 |
| Rsa1.0_00594.1.g16580.t1 | ref NP_176747.1  U6 snRNA-associated Sm-like protein LSm8 [Arabidopsis thaliana] gi 79320777 ref NP_001031238.1  U6 snRNA-associated Sm-like protein LSm8 [Arabidopsis thaliana] gi 17979539 gb AAL50104.1  At g65700/F1E22.3 [Arabidopsis thaliana] gi 20334918 gb AAM16215.1  At g65700/F1E22.3 [Arabidopsis thaliana] gi 21592627 gb AAM64576.1  small nuclear ribonucleoprotein, putative [Arabidopsis thaliana] gi 332196292 gb AEE34413.1  U6 snRNA-associated Sm-like protein LSm8 [Arabidopsis thaliana] gi 332196293 gb AEE34414.1  U6 snRNA-associated Sm-like protein LSm8 [Arabidopsis thaliana] | 98  | 98  | 2.00E-45  | 100.0 | 94.9 | 96.9 | U6 snRNA-associated Sm-like protein LSm8        | gbpln | Arabidopsis thaliana | AT1G65700.2   Symbols:   Small nuclear ribonucleoprotein family protein   chr1:24434463-24435870 REVERSE LENGTH=98                                                                                                                                                                                                                                                                                                                                      | 98  | 98  | 4.00E-48  | 100.0 | 94.9 | 96.9 |
| Rsa1.0_00594.1.g16581.t1 | gb EOA34542.1  hypothetical protein CARUB_v10022088mg [Capsella rubella]                                                                                                                                                                                                                                                                                                                                                                                                                                                                                                                                     | 187 | 186 | 2.00E-50  | 99.5  | 64.7 | 74.3 | hypothetical protein CARUB_v10022088mg          | gbpln | Capsella rubella     | AT1G65720.1   Symbols:   unknown protein; FUNCTIONS IN: molecular_function unknown; INVOLVED IN: biological_process unknown; LOCATED IN: endomembrane system; EXPRESSED IN: 24 plant structures; EXPRESSED DURING: 15 growth stages; Has 44 Blast hits to 44 proteins in 14 species: Archae - 0; Bacteria - 0; Metazoa - 0; Fungi - 0; Plants - 44; Viruses - 0; Other Eukaryotes - 0 (source: NCBI BLink).   chr1:24440471-24441013 REVERSE LENGTH=180 | 187 | 180 | 4.00E-45  | 96.3  | 65.8 | 74.3 |
| Rsa1.0_00594.1.g16582.t2 | ref NP_176758.1  glutathione S-transferase [Arabidopsis thaliana] gi 25991925 gb AAN76990.1 AF461148.1 MAPEG-like protein [Arabidopsis thaliana] gi 14517464 gb AAK62622.1  At g65820/F1E22.4 [Arabidopsis thaliana] gi 17978909 gb AAL47424.1  At g65820/F1E22.4 [Arabidopsis thaliana] gi 21617891 gb AAM66941.1  glutathione-s-transferase, putative [Arabidopsis thaliana] gi 332196306 gb AEE34427.1  glutathione S-transferase [Arabidopsis thaliana]                                                                                                                                                  | 153 | 146 | 4.00E-70  | 95.4  | 85.0 | 89.5 | glutathione S-transferase                       | gbpln | Arabidopsis thaliana | AT1G65820.1   Symbols:   microsomal glutathione s-transferase, putative   chr1:24485213-24486682 FORWARD LENGTH=146                                                                                                                                                                                                                                                                                                                                     | 153 | 146 | 1.00E-72  | 95.4  | 85.0 | 89.5 |
| Rsa1.0_00594.1.g16583.t1 | ref NP_176759.1  putative polyamine oxidase 4 [Arabidopsis thaliana] gi 75151901 sp Q8H191.1 PAO4_ARATH RecName: Full=Probable polyamine oxidase 4; Short=AtPAO4; AltName: Full=Amine oxidase 2 gi 29468126 gb AAO85405.1 AF364953.1 putative amine oxidase 2 [Arabidopsis thaliana] gi 23198290 gb AAN15672.1  putative protein kinase gb AAD22129 [Arabidopsis thaliana] gi 332196309 gb AEE34430.1  putative polyamine oxidase 4 [Arabidopsis thaliana]                                                                                                                                                   | 495 | 497 | 0         | 100.4 | 91.9 | 96.8 | putative polyamine oxidase 4                    | gbpln | Arabidopsis thaliana | AT1G65840.1   Symbols: ATPAO4, PAO4   polyamine oxidase 4   chr1:24490173-24492728 FORWARD LENGTH=497                                                                                                                                                                                                                                                                                                                                                   | 495 | 497 | 0         | 100.4 | 91.9 | 96.8 |
| Rsa1.0_00594.1.g16584.t1 | #                                                                                                                                                                                                                                                                                                                                                                                                                                                                                                                                                                                                            | #   | #   | #         | #     | #    | #    | -                                               | ----  | ----                 | #                                                                                                                                                                                                                                                                                                                                                                                                                                                       | #   | #   | #         | #     | #    |      |
| Rsa1.0_00594.1.g16585.t1 | gb AAP03024.1  acyl-activating enzyme 11 [Arabidopsis thaliana]                                                                                                                                                                                                                                                                                                                                                                                                                                                                                                                                              | 579 | 572 | 0         | 98.8  | 79.1 | 86.7 | acyl-activating enzyme 11                       | gbpln | Arabidopsis thaliana | AT1G66120.1   Symbols:   AMP-dependent synthetase and ligase family protein   chr1:24612640-24614690 FORWARD LENGTH=572                                                                                                                                                                                                                                                                                                                                 | 579 | 572 | 0         | 98.8  | 78.6 | 86.4 |

|                           |                                                                                                                                                                                                                                                                                                                                                                                                                                                                                                     |      |      |           |        |      |      |                                              |       |                      |                                                                                                                                                                       |      |     |           |        |      |      |
|---------------------------|-----------------------------------------------------------------------------------------------------------------------------------------------------------------------------------------------------------------------------------------------------------------------------------------------------------------------------------------------------------------------------------------------------------------------------------------------------------------------------------------------------|------|------|-----------|--------|------|------|----------------------------------------------|-------|----------------------|-----------------------------------------------------------------------------------------------------------------------------------------------------------------------|------|-----|-----------|--------|------|------|
| Rsa1.0_00594.1.g16586.t2  | dbj BAB02146.1  copia retroelement pol polyprotein-like [Arabidopsis thaliana]                                                                                                                                                                                                                                                                                                                                                                                                                      | 475  | 526  | 8.00E-60  | 110.7  | 25.7 | 34.1 | copia retroelement pol polyprotein-like      | gbpln | Arabidopsis thaliana | #                                                                                                                                                                     | #    | #   | #         | #      | #    |      |
| Rsa1.0_00594.1.g16587.t1  | gb ACP30609.1  disease resistance protein [Brassica rapa subsp. pekinensis]                                                                                                                                                                                                                                                                                                                                                                                                                         | 1420 | 2726 | 0         | 192.0  | 48.9 | 67.9 | disease resistance protein                   | gbpln | Brassica rapa        | ATMG00860.1   Symbols: ORF158   DNA/RNA polymerases superfamily protein   chrM:235916-236392 FORWARD LENGTH=158                                                       | 1420 | 158 | 6.00E-37  | 11.1   | 5.0  | 6.3  |
| Rsa1.0_00594.1.g16588.t1  | ref XP_002894230.1  aminotransferase class IV family protein [Arabidopsis lyrata subsp. lyrata]   g 297340072 gb EFH70489.1  aminotransferase class IV family protein [Arabidopsis lyrata subsp. lyrata]                                                                                                                                                                                                                                                                                            | 232  | 355  | 1.00E-114 | 153.0  | 84.9 | 93.5 | aminotransferase class IV family protein     | gbpln | Arabidopsis lyrata   | AT1G50090.1   Symbols:   D-aminoacid aminotransferase-like PLP-dependent enzymes superfamily protein   chrI:18554641-18556794 REVERSE LENGTH=367                      | 232  | 367 | 1.00E-115 | 158.2  | 83.2 | 92.7 |
| Rsa1.0_00595.1.g16589.t1  | ref XP_002888066.1  glucose-6-phosphate/phosphate translocator 2 [Arabidopsis lyrata subsp. lyrata]   g 297333907 gb EFH64325.1  glucose-6-phosphate/phosphate translocator 2 [Arabidopsis lyrata subsp. lyrata]                                                                                                                                                                                                                                                                                    | 412  | 388  | 0         | 94.2   | 84.0 | 89.6 | glucose-6-phosphate/phosphate translocator 2 | gbpln | Arabidopsis lyrata   | AT1G61800.1   Symbols: GPT2, ATGPT2   glucose-6-phosphate/phosphate translocator 2   chrI:22824527-22826459 FORWARD LENGTH=388                                        | 412  | 388 | 0         | 94.2   | 81.1 | 86.4 |
| Rsa1.0_00595.1.g16590.t28 | ref NP_187680.2  DNA gyrase subunit A [Arabidopsis thaliana]   g 110808536 sp Q9CAF6.2 GYRA_ARAT H RecName: Full=Probable DNA gyrase subunit A, chloroplastic/mitochondrial; Flags: Precursor   g 332641422 gb AEE74943.1  DNA gyrase subunit A [Arabidopsis thaliana]                                                                                                                                                                                                                              | 91   | 950  | 5.00E-23  | 1044.0 | 62.6 | 65.9 | DNA gyrase subunit A                         | gbpln | Arabidopsis thaliana | AT3G10690.1   Symbols: GYRA   DNA GYRASE A   chr3:3339612-3346243 REVERSE LENGTH=950                                                                                  | 91   | 950 | 8.00E-26  | 1044.0 | 62.6 | 65.9 |
| Rsa1.0_00595.1.g16591.t1  | ref XP_002886504.1  hypothetical protein ARALYDRAFT_475144 [Arabidopsis lyrata subsp. lyrata]   g 297332345 gb EFH62763.1  hypothetical protein ARALYDRAFT_475144 [Arabidopsis lyrata subsp. lyrata]                                                                                                                                                                                                                                                                                                | 395  | 388  | 0         | 98.2   | 90.4 | 92.9 | hypothetical protein ARALYDRAFT_475144       | gbpln | Arabidopsis lyrata   | AT1G61860.1   Symbols:   Protein kinase superfamily protein   chrI:22863079-22864619 REVERSE LENGTH=389                                                               | 395  | 389 | 0         | 98.5   | 89.4 | 91.9 |
| Rsa1.0_00595.1.g16592.t1  | gb EOA35229.1  hypothetical protein CARUB_v10020389mg [Capsella rubella]                                                                                                                                                                                                                                                                                                                                                                                                                            | 410  | 408  | 0         | 99.5   | 84.4 | 92.7 | hypothetical protein CARUB_v10020389mg       | gbpln | Capsella rubella     | AT1G61870.1   Symbols: PPR336   pentatricopeptide repeat 336   chrI:22865326-22866552 REVERSE LENGTH=408                                                              | 410  | 408 | 0         | 99.5   | 85.4 | 92.9 |
| Rsa1.0_00595.1.g16593.t1  | ref XP_002878376.1  pentatricopeptide repeat-containing protein [Arabidopsis lyrata subsp. lyrata]   g 297324214 gb EFH54635.1  pentatricopeptide repeat-containing protein [Arabidopsis lyrata subsp. lyrata]                                                                                                                                                                                                                                                                                      | 144  | 498  | 6.00E-19  | 345.8  | 28.5 | 32.6 | pentatricopeptide repeat-containing protein  | gbpln | Arabidopsis lyrata   | AT3G61360.1   Symbols:   Tetratricopeptide repeat (TPR)-like superfamily protein   chr3:22704630-22706126 REVERSE LENGTH=498                                          | 144  | 498 | 3.00E-20  | 345.8  | 29.2 | 31.9 |
| Rsa1.0_00595.1.g16594.t1  | dbj BAJ34317.1  unnamed protein product [Thellungiella halophila]                                                                                                                                                                                                                                                                                                                                                                                                                                   | 501  | 501  | 0         | 100.0  | 93.2 | 96.8 | unnamed protein product                      | ----  | ----                 | AT1G61890.1   Symbols:   MATE efflux family protein   chrI:22868103-22871163 REVERSE LENGTH=501                                                                       | 501  | 501 | 0         | 100.0  | 91.8 | 96.8 |
| Rsa1.0_00595.1.g16595.t1  | #                                                                                                                                                                                                                                                                                                                                                                                                                                                                                                   | #    | #    | #         | #      | #    | -    | ----                                         | ----  | #                    | #                                                                                                                                                                     | #    | #   | #         | #      |      |      |
| Rsa1.0_00595.1.g16596.t1  | #                                                                                                                                                                                                                                                                                                                                                                                                                                                                                                   | #    | #    | #         | #      | #    | -    | ----                                         | ----  | #                    | #                                                                                                                                                                     | #    | #   | #         | #      |      |      |
| Rsa1.0_00595.1.g16597.t1  | gb EOA34147.1  hypothetical protein CARUB_v10021649mg [Capsella rubella]                                                                                                                                                                                                                                                                                                                                                                                                                            | 409  | 430  | 0         | 105.1  | 80.2 | 90.2 | hypothetical protein CARUB_v10021649mg       | gbpln | Capsella rubella     | AT1G61900.3   Symbols:   unknown protein; BEST Arabidopsis thaliana protein match is: unknown protein (TAIR:AT2G30700.i).   chrI:22882508-22884722 REVERSE LENGTH=429 | 409  | 429 | 0         | 104.9  | 80.2 | 89.5 |
| Rsa1.0_00595.1.g16598.t2  | gb EOA32429.1  hypothetical protein CARUB_v10015703mg [Capsella rubella]                                                                                                                                                                                                                                                                                                                                                                                                                            | 631  | 697  | 0         | 110.5  | 60.1 | 65.5 | hypothetical protein CARUB_v10015703mg       | gbpln | Capsella rubella     | AT3G24550.1   Symbols: ATPERK1, PERK1   proline extensin-like receptor kinase 1   chr3:8960411-8963303 FORWARD LENGTH=652                                             | 631  | 652 | 0         | 103.3  | 59.6 | 66.6 |
| Rsa1.0_00595.1.g16599.t1  | ref NP_189078.2  syntaxin-32 [Arabidopsis thaliana]   g 28380163 sp Q9LK09.1 SYP32_ARAT H RecName: Full=Syntaxin-32; Short=AtSYP32   g 11994697 dbj BAB02935.1  probable t-SNARE (soluble NSF attachment protein receptor) SED5; ER to Golgi transport [Arabidopsis thaliana]   g 28393777 gb AAO42298.1  putative syntaxin SYP32 [Arabidopsis thaliana]   g 30793955 gb AAP40429.1  putative syntaxin SYP32 [Arabidopsis thaliana]   g 332643371 gb AEE76892.1  syntaxin-32 [Arabidopsis thaliana] | 346  | 347  | 1.00E-136 | 100.3  | 79.2 | 86.7 | syntaxin-32                                  | gbpln | Arabidopsis thaliana | AT3G24350.1   Symbols: SYP32, ATSYP32   syntaxin of plants 32   chr3:8837733-8839402 FORWARD LENGTH=347                                                               | 346  | 347 | 1.00E-139 | 100.3  | 79.2 | 86.7 |
| Rsa1.0_00595.1.g16600.t1  | gb AAD23706.1  putative Athila retroelement ORF1 protein [Arabidopsis thaliana]                                                                                                                                                                                                                                                                                                                                                                                                                     | 324  | 733  | 7.00E-25  | 226.2  | 28.1 | 48.8 | putative Athila retroelement ORF1 protein    | gbpln | Arabidopsis thaliana | #                                                                                                                                                                     | #    | #   | #         | #      | #    |      |
| Rsa1.0_00595.1.g16601.t1  | #                                                                                                                                                                                                                                                                                                                                                                                                                                                                                                   | #    | #    | #         | #      | #    | -    | ----                                         | ----  | #                    | #                                                                                                                                                                     | #    | #   | #         | #      |      |      |

|                          |                                                                                                                                                                                                                                                                                                                                                                                                                                                                                              |     |      |           |       |      |      |                                        |       |                      |                                                                                                                                               |     |     |           |       |      |      |
|--------------------------|----------------------------------------------------------------------------------------------------------------------------------------------------------------------------------------------------------------------------------------------------------------------------------------------------------------------------------------------------------------------------------------------------------------------------------------------------------------------------------------------|-----|------|-----------|-------|------|------|----------------------------------------|-------|----------------------|-----------------------------------------------------------------------------------------------------------------------------------------------|-----|-----|-----------|-------|------|------|
| Rsa1.0_00595.1.g16602.t1 | gb ACG60686.1  En/Spm-related transposon protein [Brassica oleracea var. alboglabra]                                                                                                                                                                                                                                                                                                                                                                                                         | 223 | 695  | 8.00E-36  | 311.7 | 36.3 | 41.3 | En/Spm-related transposon protein      | gbpln | Brassica oleracea    | #                                                                                                                                             | #   | #   | #         | #     | #    | #    |
| Rsa1.0_00595.1.g16603.t1 | #                                                                                                                                                                                                                                                                                                                                                                                                                                                                                            | #   | #    | #         | #     | #    | -    | -                                      | ----  | ----                 | #                                                                                                                                             | #   | #   | #         | #     | #    | #    |
| Rsa1.0_00595.1.g16604.t1 | ref XP_002885636.1  hypothetical protein ARALYDRAFT_479944 [Arabidopsis lyrata subsp. lyrata] gi 297331476 gb EFH61895.1  hypothetical protein ARALYDRAFT_479944 [Arabidopsis lyrata subsp. lyrata]                                                                                                                                                                                                                                                                                          | 274 | 274  | 1.00E-105 | 100.0 | 82.5 | 86.9 | hypothetical protein ARALYDRAFT_479944 | gbpln | Arabidopsis lyrata   | AT3G24310.1   Symbols: MYB305, ATMYB71   myb domain protein 305   chr3:8811336-8812330 REVERSE LENGTH=269                                     | 274 | 269 | 1.00E-106 | 98.2  | 83.2 | 89.1 |
| Rsa1.0_00595.1.g16605.t1 | gb EOA29700.1  hypothetical protein CARUB_v10016472mg [Capsella rubella]                                                                                                                                                                                                                                                                                                                                                                                                                     | 491 | 498  | 0         | 101.4 | 91.0 | 95.1 | hypothetical protein CARUB_v10016472mg | gbpln | Capsella rubella     | AT3G24300.1   Symbols: AMT1;3, ATAMT1;3   ammonium transporter 1;3   chr3:8805858-8807354 REVERSE LENGTH=498                                  | 491 | 498 | 0         | 101.4 | 90.0 | 93.9 |
| Rsa1.0_00595.1.g16606.t1 | gb EOA30145.1  hypothetical protein CARUB_v10013252mg [Capsella rubella]                                                                                                                                                                                                                                                                                                                                                                                                                     | 613 | 609  | 0         | 99.3  | 94.0 | 95.8 | hypothetical protein CARUB_v10013252mg | gbpln | Capsella rubella     | AT3G23940.1   Symbols:   dehydratase family   chr3:8648780-8652323 FORWARD LENGTH=608                                                         | 613 | 608 | 0         | 99.2  | 93.3 | 95.3 |
| Rsa1.0_00595.1.g16607.t1 | #                                                                                                                                                                                                                                                                                                                                                                                                                                                                                            | #   | #    | #         | #     | #    | -    | -                                      | ----  | ----                 | #                                                                                                                                             | #   | #   | #         | #     | #    | #    |
| Rsa1.0_00595.1.g16608.t3 | #                                                                                                                                                                                                                                                                                                                                                                                                                                                                                            | #   | #    | #         | #     | #    | -    | -                                      | ----  | ----                 | #                                                                                                                                             | #   | #   | #         | #     | #    | #    |
| Rsa1.0_00595.1.g16609.t1 | gb EOA33053.1  hypothetical protein CARUB_v10016386mg [Capsella rubella]                                                                                                                                                                                                                                                                                                                                                                                                                     | 246 | 243  | 1.00E-130 | 98.8  | 95.9 | 97.6 | hypothetical protein CARUB_v10016386mg | gbpln | Capsella rubella     | AT3G24020.1   Symbols:   Disease resistance-responsive (dirigent-like protein) family protein   chr3:8678827-8679558 FORWARD LENGTH=243       | 246 | 243 | 1.00E-131 | 98.8  | 95.1 | 96.3 |
| Rsa1.0_00595.1.g16610.t1 | ref XP_002883496.1  glycosyltransferase family 14 protein [Arabidopsis lyrata subsp. lyrata] gi 297329336 gb EFH59755.1  glycosyltransferase family 14 protein [Arabidopsis lyrata subsp. lyrata]                                                                                                                                                                                                                                                                                            | 404 | 416  | 0         | 103.0 | 83.2 | 88.6 | glycosyltransferase family 14 protein  | gbpln | Arabidopsis lyrata   | AT3G24040.1   Symbols:   Core-2/I-branching beta-1,6-N-acetylglucosaminyltransferase family protein   chr3:8681118-8683211 REVERSE LENGTH=417 | 404 | 417 | 0         | 103.2 | 81.2 | 87.9 |
| Rsa1.0_00595.1.g16611.t1 | ref NP_189048.1  self-incompatibility S1 family protein [Arabidopsis thaliana] gi 9294675 dbj BAB03024.1  unnamed protein product [Arabidopsis thaliana] gi 332643328 gb AEE76849.1  self-incompatibility S1 family protein [Arabidopsis thaliana]                                                                                                                                                                                                                                           | 126 | 147  | 9.00E-60  | 116.7 | 86.5 | 93.7 | self-incompatibility S1 family protein | gbpln | Arabidopsis thaliana | AT3G24060.1   Symbols:   Plant self-incompatibility protein S1 family   chr3:8689589-8690032 REVERSE LENGTH=147                               | 126 | 147 | 2.00E-62  | 116.7 | 86.5 | 93.7 |
| Rsa1.0_00595.1.g16612.t1 | gb ABD65088.1  hypothetical protein 27.t00109 [Brassica oleracea]                                                                                                                                                                                                                                                                                                                                                                                                                            | 289 | 1176 | 1.00E-82  | 406.9 | 47.8 | 70.9 | hypothetical protein 27.t00109         | gbpln | Brassica oleracea    | AT2G07190.1   Symbols:   Domain of unknown function (DUF1985)   chr2:2987367-2988945 FORWARD LENGTH=452                                       | 289 | 452 | 2.00E-42  | 156.4 | 29.4 | 40.5 |
| Rsa1.0_00595.1.g16613.t3 | ref XP_002868499.1  ATCHX24 [Arabidopsis lyrata subsp. lyrata] gi 297314335 gb EFH44758.1  ATCHX24 [Arabidopsis lyrata subsp. lyrata]                                                                                                                                                                                                                                                                                                                                                        | 803 | 861  | 0         | 107.2 | 72.0 | 85.3 | ATCHX24                                | gbpln | Arabidopsis lyrata   | AT5G37060.1   Symbols: ATCHX24, CHX24   cation/H <sup>+</sup> exchanger 24   chr5:14642741-14645414 REVERSE LENGTH=859                        | 803 | 859 | 0         | 107.0 | 71.1 | 84.3 |
| Rsa1.0_00596.1.g16614.t1 | ref NP_850951.2  homeobox protein knotted-1-like 6 [Arabidopsis thaliana] gi 75146711 sp Q84JS6.1 KNAT6_ARAT H RecName: Full=Homeobox protein knotted-1-like 6; AltName: Full=Protein KNAT6 gi 27754596 gb AAO22744.1  putative homeobox domain transcription factor KNAT6 [Arabidopsis thaliana] gi 28393913 gb AAO42364.1  putative homeobox domain transcription factor KNAT6 [Arabidopsis thaliana] gi 332192260 gb AEE30381.1  homeobox protein knotted-1-like 6 [Arabidopsis thaliana] | 230 | 327  | 2.00E-85  | 142.2 | 70.4 | 75.7 | homeobox protein knotted-1-like 6      | gbpln | Arabidopsis thaliana | AT1G23380.1   Symbols: KNAT6, KNAT6L, KNAT6S   KNOTTED1-like homeobox gene 6   chr1:8297499-8302492 REVERSE LENGTH=327                        | 230 | 327 | 6.00E-88  | 142.2 | 70.4 | 75.7 |
| Rsa1.0_00596.1.g16615.t1 | ref XP_002893283.1  hypothetical protein ARALYDRAFT_472599 [Arabidopsis lyrata subsp. lyrata] gi 297339125 gb EFH69542.1  hypothetical protein ARALYDRAFT_472599 [Arabidopsis lyrata subsp. lyrata]                                                                                                                                                                                                                                                                                          | 126 | 329  | 2.00E-53  | 261.1 | 86.5 | 91.3 | hypothetical protein ARALYDRAFT_472599 | gbpln | Arabidopsis lyrata   | AT1G23380.2   Symbols: KNAT6, KNAT6L, KNAT6S   KNOTTED1-like homeobox gene 6   chr1:8297499-8302492 REVERSE LENGTH=329                        | 126 | 329 | 2.00E-55  | 261.1 | 84.1 | 90.5 |

|                          |                                                                                                                                                                                                                                                                                                                                                                                                                                                                                                                                                                                                                                                                                                                                                                                       |     |     |           |       |      |      |                                                                            |       |                      |                                                                                                                                                  |     |     |           |       |      |      |
|--------------------------|---------------------------------------------------------------------------------------------------------------------------------------------------------------------------------------------------------------------------------------------------------------------------------------------------------------------------------------------------------------------------------------------------------------------------------------------------------------------------------------------------------------------------------------------------------------------------------------------------------------------------------------------------------------------------------------------------------------------------------------------------------------------------------------|-----|-----|-----------|-------|------|------|----------------------------------------------------------------------------|-------|----------------------|--------------------------------------------------------------------------------------------------------------------------------------------------|-----|-----|-----------|-------|------|------|
| Rsa1.0_00596.1.g16616.t1 | ref NP_173750.3  S-adenosylmethionine-dependent methyltransferase domain-containing protein [Arabidopsis thaliana] gi 122215535 sp Q3ED65.2 MENG_ARAT H RecName: Full=2-phytyl-1,4-beta-naphthoquinone methyltransferase, chloroplastic; AltName: Full=Demethylphyloquinone methyltransferase; AltName: Full=Menaquinone biosynthesis methyltransferase ubiE-like protein; Flags: Precursor gi 222423878 dbj BAH19903.1  AT1G23360 [Arabidopsis thaliana] gi 332192256 gb AEE30377.1  2-phytyl-1,4-beta-naphthoquinone methyltransferase [Arabidopsis thaliana]                                                                                                                                                                                                                       | 273 | 261 | 1.00E-121 | 95.6  | 80.2 | 86.1 | S-adenosylmethionine-dependent methyltransferase domain-containing protein | gbpln | Arabidopsis thaliana | AT1G23360.1   Symbols: MENG   S-adenosyl-L-methionine-dependent methyltransferases superfamily protein   chr1:8295421-8296893 REVERSE LENGTH=261 | 273 | 261 | 1.00E-123 | 95.6  | 80.2 | 86.1 |
| Rsa1.0_00596.1.g16617.t1 | gb EOA37605.1  hypothetical protein CARUB_v10011971mg [Capsella rubella]                                                                                                                                                                                                                                                                                                                                                                                                                                                                                                                                                                                                                                                                                                              | 166 | 166 | 3.00E-63  | 100.0 | 76.5 | 85.5 | hypothetical protein CARUB_v10011971mg                                     | gbpln | Capsella rubella     | AT1G23350.1   Symbols:   Plant invertase/pectin methyltransferase inhibitor superfamily protein   chr1:8293696-8294175 REVERSE LENGTH=159        | 166 | 159 | 8.00E-63  | 95.8  | 75.3 | 83.7 |
| Rsa1.0_00596.1.g16618.t1 | gb AFU75878.1  lipase [Brassica napus]                                                                                                                                                                                                                                                                                                                                                                                                                                                                                                                                                                                                                                                                                                                                                | 464 | 468 | 0         | 100.9 | 86.2 | 92.9 | lipase                                                                     | gbpln | Brassica napus       | AT1G23330.1   Symbols:   alpha/beta-Hydrolases superfamily protein   chr1:8279874-8281891 REVERSE LENGTH=471                                     | 464 | 471 | 0         | 101.5 | 83.4 | 92.2 |
| Rsa1.0_00596.1.g16619.t1 | gb EOA40275.1  hypothetical protein CARUB_v10009003mg [Capsella rubella]                                                                                                                                                                                                                                                                                                                                                                                                                                                                                                                                                                                                                                                                                                              | 478 | 481 | 0         | 100.6 | 96.7 | 98.7 | hypothetical protein CARUB_v10009003mg                                     | gbpln | Capsella rubella     | AT1G23310.1   Symbols: GGT1, AOAT1, GGAT1   glutamate:glyoxylate aminotransferase   chr1:8268720-8271329 REVERSE LENGTH=481                      | 478 | 481 | 0         | 100.6 | 96.0 | 99.0 |
| Rsa1.0_00596.1.g16620.t1 | ref NP_173743.1  60S ribosomal protein L27a-2 [Arabidopsis thaliana] gi 297845396 ref XP_002890579.1  RPL27A [Arabidopsis lyrata subsp. lyrata] gi 20143883 sp Q9LR33.1 R27A2_ARAT H RecName: Full=60S ribosomal protein L27a-2 gi 9295692 gb AAF86998.1 AC005292.7 F26F24.13 [Arabidopsis thaliana] gi 11692928 gb AAG40067.1 AF324716.1 At1g23290 [Arabidopsis thaliana] gi 13194820 gb AAK15572.1 AF349525.1 putative 60s ribosomal protein l27a [Arabidopsis thaliana] gi 15294179 gb AAK95266.1 AF410280.1 At1g23290/F26F24.23 [Arabidopsis thaliana] gi 23308293 gb AAN18111.1  At1g23290/F26F24.23 [Arabidopsis thaliana] gi 29733642 gb EFH66838.1  RPL27A [Arabidopsis lyrata subsp. lyrata] gi 332192247 gb AEE30368.1  60S ribosomal protein L27a-2 [Arabidopsis thaliana] | 146 | 146 | 5.00E-74  | 100.0 | 93.8 | 97.9 | 60S ribosomal protein L27a-2                                               | gbpln | Arabidopsis lyrata   | AT1G23290.1   Symbols: RPL27A, RPL27AB   Ribosomal protein L18e/L15 superfamily protein   chr1:8263007-8263447 FORWARD LENGTH=146                | 146 | 146 | 1.00E-76  | 100.0 | 93.8 | 97.9 |
| Rsa1.0_00596.1.g16621.t1 | ref NP_564191.1  ubiquitin-conjugating enzyme E2 variant 1A [Arabidopsis thaliana] gi 75305892 sp Q93YP0.1 UEV1A_ARAT H RecName: Full=Ubiquitin-conjugating enzyme E2 variant 1A; Short=Ubc enzyme variant 1A; AltName: Full=Protein MMS ZWEI HOMOLOG 1 gi 16649053 gb AAL24378.1  similar to DNA binding protein [Arabidopsis thaliana] gi 20259984 gb AAM13339.1  similar to DNA binding protein [Arabidopsis thaliana] gi 332192244 gb AEE30365.1  ubiquitin-conjugating enzyme E2 variant 1A [Arabidopsis thaliana]                                                                                                                                                                                                                                                               | 158 | 158 | 4.00E-86  | 100.0 | 96.2 | 98.1 | ubiquitin-conjugating enzyme E2 variant 1A                                 | gbpln | Arabidopsis thaliana | AT1G23260.1   Symbols: MMZ1, UEV1A   MMS ZWEI homologue 1   chr1:8257209-8258573 REVERSE LENGTH=158                                              | 158 | 158 | 1.00E-88  | 100.0 | 96.2 | 98.1 |
| Rsa1.0_00596.1.g16622.t1 | gb EOA36326.1  hypothetical protein CARUB_v10010634mg [Capsella rubella]                                                                                                                                                                                                                                                                                                                                                                                                                                                                                                                                                                                                                                                                                                              | 107 | 129 | 2.00E-31  | 120.6 | 66.4 | 71.0 | hypothetical protein CARUB_v10010634mg                                     | gbpln | Capsella rubella     | AT1G23220.1   Symbols:   Dynein light chain type 1 family protein   chr1:8242614-8244136 FORWARD LENGTH=129                                      | 107 | 129 | 9.00E-34  | 120.6 | 66.4 | 70.1 |
| Rsa1.0_00596.1.g16623.t1 | dbj BAJ34519.1  unnamed protein product [Thellungiella halophila]                                                                                                                                                                                                                                                                                                                                                                                                                                                                                                                                                                                                                                                                                                                     | 583 | 582 | 0         | 99.8  | 96.9 | 99.1 | unnamed protein product                                                    | ----  | ----                 | AT1G23190.1   Symbols: PGM3   Phosphoglucomutase/phosphomannomutase family protein   chr1:8219946-8224186 FORWARD LENGTH=583                     | 583 | 583 | 0         | 100.0 | 96.7 | 98.1 |

|                          |                                                                                                                                                                                                                                                                                                                                                                                                                                                                                                                                                                                                                                                                                                                                                                                                                                                                                                                                                                                                                                                     |     |      |           |        |      |      |                                                       |       |                      |                                                                                                                                            |     |     |           |        |      |      |
|--------------------------|-----------------------------------------------------------------------------------------------------------------------------------------------------------------------------------------------------------------------------------------------------------------------------------------------------------------------------------------------------------------------------------------------------------------------------------------------------------------------------------------------------------------------------------------------------------------------------------------------------------------------------------------------------------------------------------------------------------------------------------------------------------------------------------------------------------------------------------------------------------------------------------------------------------------------------------------------------------------------------------------------------------------------------------------------------|-----|------|-----------|--------|------|------|-------------------------------------------------------|-------|----------------------|--------------------------------------------------------------------------------------------------------------------------------------------|-----|-----|-----------|--------|------|------|
| Rsa1.0_00596.1.g16624.t1 | ref NP_173731.2  armadillo/beta-catenin-like repeat-containing protein [Arabidopsis thaliana]<br>gi 25083231 gb AAAN72053.1  unknown protein [Arabidopsis thaliana]<br>gi 31711764 gb AAP68238.1  At1g23180 [Arabidopsis thaliana]<br>gi 110742235 dbj BAE99044.1  hypothetical protein [Arabidopsis thaliana]<br>gi 332192231 gb AEE30352.1  armadillo/beta-catenin-like repeat-containing protein [Arabidopsis thaliana]                                                                                                                                                                                                                                                                                                                                                                                                                                                                                                                                                                                                                          | 838 | 834  | 0         | 99.5   | 82.2 | 89.6 | armadillo/beta-catenin-like repeat-containing protein | gbpln | Arabidopsis thaliana | AT1G23180.1   Symbols:   ARM repeat superfamily protein   chr1:8216125-8219515 FORWARD LENGTH=834                                          | 838 | 834 | 0         | 99.5   | 82.2 | 89.6 |
| Rsa1.0_00596.1.g16625.t1 | gb EOA36585.1  hypothetical protein CARUB_v10011772mg [Capsella rubella]                                                                                                                                                                                                                                                                                                                                                                                                                                                                                                                                                                                                                                                                                                                                                                                                                                                                                                                                                                            | 290 | 148  | 3.00E-63  | 51.0   | 39.7 | 43.8 | hypothetical protein CARUB_v10011772mg                | gbpln | Capsella rubella     | AT1G23120.1   Symbols:   Polyketide cyclase/dehydrase and lipid transport superfamily protein   chr1:8198788-8199359 FORWARD LENGTH=148    | 290 | 148 | 3.00E-65  | 51.0   | 39.7 | 43.4 |
| Rsa1.0_00596.1.g16626.t1 | gb EOA36585.1  hypothetical protein CARUB_v10011772mg [Capsella rubella]                                                                                                                                                                                                                                                                                                                                                                                                                                                                                                                                                                                                                                                                                                                                                                                                                                                                                                                                                                            | 307 | 148  | 2.00E-68  | 48.2   | 40.7 | 43.3 | hypothetical protein CARUB_v10011772mg                | gbpln | Capsella rubella     | AT1G23120.1   Symbols:   Polyketide cyclase/dehydrase and lipid transport superfamily protein   chr1:8198788-8199359 FORWARD LENGTH=148    | 307 | 148 | 1.00E-70  | 48.2   | 41.0 | 43.3 |
| Rsa1.0_00596.1.g16627.t1 | ref NP_198153.1  SRPBCC ligand-binding domain-containing protein [Arabidopsis thaliana]<br>gi 332006375 gb AED93758.1  SRPBCC ligand-binding domain-containing protein [Arabidopsis thaliana]                                                                                                                                                                                                                                                                                                                                                                                                                                                                                                                                                                                                                                                                                                                                                                                                                                                       | 157 | 166  | 9.00E-74  | 105.7  | 82.8 | 92.4 | SRPBCC ligand-binding domain-containing protein       | gbpln | Arabidopsis thaliana | AT5G28010.1   Symbols:   Polyketide cyclase/dehydrase and lipid transport superfamily protein   chr5:10024813-10025382 FORWARD LENGTH=166  | 157 | 166 | 3.00E-76  | 105.7  | 82.8 | 92.4 |
| Rsa1.0_00596.1.g16628.t1 | ref NP_849700.1  auxin efflux carrier component 7 [Arabidopsis thaliana]<br>gi 42558877 sp Q940Y5.2 PIN7_ARATH RecName: Full=Auxin efflux carrier component 7; Short=AtPIN7<br>gi 5817305 gb AAD5269.1 AF087820.1 auxin transport protein [Arabidopsis thaliana]<br>gi 33219221 gb AEE30332.1  auxin efflux carrier component 7 [Arabidopsis thaliana]                                                                                                                                                                                                                                                                                                                                                                                                                                                                                                                                                                                                                                                                                              | 615 | 619  | 0         | 100.7  | 78.9 | 84.4 | auxin efflux carrier component 7                      | gbpln | Arabidopsis thaliana | AT1G23080.1   Symbols: PIN7, ATPIN7   Auxin efflux carrier family protein   chr1:8180768-8183406 REVERSE LENGTH=619                        | 615 | 619 | 0         | 100.7  | 78.9 | 84.4 |
| Rsa1.0_00596.1.g16629.t1 | ref NP_565012.1  ethylene-responsive transcription factor ERF070 [Arabidopsis thaliana]<br>gi 75333560 sp Q9C995.1 ERF70_ARAT H RecName: Full=Ethylene-responsive transcription factor ERF070<br>gi 12323426 gb AAG51689.1 AC016972_8 hypothetical protein: 47633-48118 [Arabidopsis thaliana]<br>gi 51969298 dbj BAD43341.1  unknown protein [Arabidopsis thaliana]<br>gi 51969508 dbj BAD43446.1  unknown protein [Arabidopsis thaliana]<br>gi 51969622 dbj BAD43503.1  unknown protein [Arabidopsis thaliana]<br>gi 51969690 dbj BAD43537.1  unknown protein [Arabidopsis thaliana]<br>gi 51970004 dbj BAD43694.1  unknown protein [Arabidopsis thaliana]<br>gi 51970228 dbj BAD43806.1  unknown protein [Arabidopsis thaliana]<br>gi 51970430 dbj BAD43907.1  unknown protein [Arabidopsis thaliana]<br>gi 51970702 dbj BAD44043.1  unknown protein [Arabidopsis thaliana]<br>gi 98961105 gb ABF59036.1  At1g71130 [Arabidopsis thaliana]<br>gi 332197043 gb AEE35164.1  ethylene-responsive transcription factor ERF070 [Arabidopsis thaliana] | 119 | 161  | 3.00E-27  | 135.3  | 61.3 | 70.6 | ethylene-responsive transcription factor ERF070       | gbpln | Arabidopsis thaliana | AT1G71130.1   Symbols:   Integrase-type DNA-binding superfamily protein   chr1:26822877-26823362 FORWARD LENGTH=161                        | 119 | 161 | 5.00E-30  | 135.3  | 61.3 | 70.6 |
| Rsa1.0_00596.1.g16631.t1 | ref XP_002893253.1  hypothetical protein ARALYDRAFT_313173 [Arabidopsis lyrata subsp. lyrata]<br>gi 297339095 gb EFH69512.1  hypothetical protein ARALYDRAFT_313173 [Arabidopsis lyrata subsp. lyrata]                                                                                                                                                                                                                                                                                                                                                                                                                                                                                                                                                                                                                                                                                                                                                                                                                                              | 47  | 1147 | 2.00E-12  | 2440.4 | 74.5 | 80.9 | hypothetical protein ARALYDRAFT_313173                | gbpln | Arabidopsis lyrata   | AT1G22960.1   Symbols:   Pentatricopeptide repeat (PPR) superfamily protein   chr1:8128086-8130242 REVERSE LENGTH=718                      | 47  | 718 | 4.00E-13  | 1527.7 | 70.2 | 78.7 |
| Rsa1.0_00596.1.g16631.t1 | ref NP_173708.3  uncharacterized PKHD-type hydroxylase [Arabidopsis thaliana]<br>gi 193806639 sp Q3ED68.2 Y1295_ARAT H RecName: Full=Uncharacterized PKHD-type hydroxylase At1g22950<br>gi 332192193 gb AEE30314.1  uncharacterized PKHD-type hydroxylase [Arabidopsis thaliana]                                                                                                                                                                                                                                                                                                                                                                                                                                                                                                                                                                                                                                                                                                                                                                    | 401 | 397  | 1.00E-160 | 99.0   | 68.8 | 80.3 | uncharacterized PKHD-type hydroxylase                 | gbpln | Arabidopsis thaliana | AT1G22950.1   Symbols:   2-oxoglutarate (2OG) and Fe(II)-dependent oxygenase superfamily protein   chr1:8125291-8127168 REVERSE LENGTH=397 | 401 | 397 | 1.00E-163 | 99.0   | 68.8 | 80.3 |

|                          |                                                                                                                                                                                                                                                                                                                                                                                                                                                                                                                                                                                                                                                                                                                                                                                                                                                                                                                                                                                                                                                                                                                                                                                                  |      |      |           |       |      |      |                                                |       |                      |                                                                                                                                                  |      |     |          |       |      |      |
|--------------------------|--------------------------------------------------------------------------------------------------------------------------------------------------------------------------------------------------------------------------------------------------------------------------------------------------------------------------------------------------------------------------------------------------------------------------------------------------------------------------------------------------------------------------------------------------------------------------------------------------------------------------------------------------------------------------------------------------------------------------------------------------------------------------------------------------------------------------------------------------------------------------------------------------------------------------------------------------------------------------------------------------------------------------------------------------------------------------------------------------------------------------------------------------------------------------------------------------|------|------|-----------|-------|------|------|------------------------------------------------|-------|----------------------|--------------------------------------------------------------------------------------------------------------------------------------------------|------|-----|----------|-------|------|------|
| Rsa1.0_00597.1.g16632.t1 | gb EOA37644.1  hypothetical protein CARUB_v10012122mg [Capsella rubella]                                                                                                                                                                                                                                                                                                                                                                                                                                                                                                                                                                                                                                                                                                                                                                                                                                                                                                                                                                                                                                                                                                                         | 171  | 171  | 1.00E-87  | 100.0 | 91.2 | 94.7 | hypothetical protein CARUB_v10012122mg         | gbpln | Capsella rubella     | AT1G29140.1   Symbols:   Pollen Ole e 1 allergen and extensin family protein   chr1:10179029-10179811 FORWARD LENGTH=171                         | 171  | 171 | 3.00E-87 | 100.0 | 87.7 | 93.0 |
| Rsa1.0_00597.1.g16633.t1 | #<br>ref NP_174210.1  26S proteasome regulatory subunit N6 [Arabidopsis thaliana]<br>gi 75264101 sp O9LP45.1 PSD11_ARAT_H RecName: Full=26S proteasome non-ATPase regulatory subunit 11; AltName: Full=19S proteasome subunit 9; AltName: Full=26S proteasome regulatory subunit N6; AltName: Full=26S proteasome regulatory subunit RPN6a; AltName: Full=26S proteasome regulatory subunit S9; Short=AtS9 gi 9502423 gb AAF88122.1 AC021043_15 Similar to 26S proteasome subunits [Arabidopsis thaliana]<br>gi 13877881 gb AAK44018.1 AF370203.1 putative 19S proteasome subunit 9 [Arabidopsis thaliana]<br>gi 15810545 gb AAL07160.1  putative 19S proteasome subunit 9 [Arabidopsis thaliana] gi 32700024 gb AAP86662.1  26S proteasome subunit RPN6a [Arabidopsis thaliana]<br>gi 32700026 gb AAP86663.1  26S proteasome subunit RPN6a [Arabidopsis thaliana]<br>gi 332192929 gb AEE31050.1  26S proteasome non-ATPase regulatory subunit 11 [Arabidopsis thaliana] ref XP_002893549.1  Dof-type zinc finger domain-containing protein [Arabidopsis lyrata subsp. lyrata]<br>gi 29733939.1 gb EFH69808.1  Dof-type zinc finger domain-containing protein [Arabidopsis lyrata subsp. lyrata] | #    | #    | #         | #     | #    | #    | -                                              | ----  | ----                 | #                                                                                                                                                | #    | #   | #        | #     | #    |      |
| Rsa1.0_00597.1.g16634.t1 | gi 13877881 gb AAK44018.1 AF370203.1 putative 19S proteasome subunit 9 [Arabidopsis thaliana]<br>gi 15810545 gb AAL07160.1  putative 19S proteasome subunit 9 [Arabidopsis thaliana] gi 32700024 gb AAP86662.1  26S proteasome subunit RPN6a [Arabidopsis thaliana]<br>gi 32700026 gb AAP86663.1  26S proteasome subunit RPN6a [Arabidopsis thaliana]<br>gi 332192929 gb AEE31050.1  26S proteasome non-ATPase regulatory subunit 11 [Arabidopsis thaliana] ref XP_002893549.1  Dof-type zinc finger domain-containing protein [Arabidopsis lyrata subsp. lyrata]<br>gi 29733939.1 gb EFH69808.1  Dof-type zinc finger domain-containing protein [Arabidopsis lyrata subsp. lyrata]                                                                                                                                                                                                                                                                                                                                                                                                                                                                                                              | 419  | 419  | 0         | 100.0 | 96.4 | 99.0 | 26S proteasome regulatory subunit N6           | gbpln | Arabidopsis thaliana | AT1G29150.1   Symbols: AT59, RPN6   non-ATPase subunit 9   chr1:10181240-10182499 FORWARD LENGTH=419                                             | 419  | 419 | 0        | 100.0 | 96.4 | 99.0 |
| Rsa1.0_00597.1.g16635.t1 | gi 13877881 gb AAK44018.1 AF370203.1 putative 19S proteasome subunit 9 [Arabidopsis thaliana]<br>gi 15810545 gb AAL07160.1  putative 19S proteasome subunit 9 [Arabidopsis thaliana] gi 32700024 gb AAP86662.1  26S proteasome subunit RPN6a [Arabidopsis thaliana]<br>gi 32700026 gb AAP86663.1  26S proteasome subunit RPN6a [Arabidopsis thaliana]<br>gi 332192929 gb AEE31050.1  26S proteasome non-ATPase regulatory subunit 11 [Arabidopsis thaliana] ref XP_002893549.1  Dof-type zinc finger domain-containing protein [Arabidopsis lyrata subsp. lyrata]<br>gi 29733939.1 gb EFH69808.1  Dof-type zinc finger domain-containing protein [Arabidopsis lyrata subsp. lyrata]                                                                                                                                                                                                                                                                                                                                                                                                                                                                                                              | 176  | 173  | 5.00E-79  | 98.3  | 86.9 | 90.9 | Dof-type zinc finger domain-containing protein | gbpln | Arabidopsis lyrata   | AT1G29160.1   Symbols:   Dof-type zinc finger DNA-binding family protein   chr1:10183797-10184324 REVERSE LENGTH=175                             | 176  | 175 | 5.00E-81 | 99.4  | 84.7 | 88.1 |
| Rsa1.0_00597.1.g16636.t1 | gb EOA12097.1  hypothetical protein CARUB_v10016515mg [Capsella rubella]                                                                                                                                                                                                                                                                                                                                                                                                                                                                                                                                                                                                                                                                                                                                                                                                                                                                                                                                                                                                                                                                                                                         | 656  | 409  | 1.00E-60  | 62.3  | 18.8 | 27.4 | hypothetical protein CARUB_v10016515mg         | gbpln | Capsella rubella     | AT2G06420.1   Symbols:   Domain of unknown function (DUF1985)   chr2:2539083-2539985 FORWARD LENGTH=249                                          | 656  | 249 | 8.00E-30 | 38.0  | 11.7 | 16.5 |
| Rsa1.0_00597.1.g16637.t3 | dbj BAB01350.1  Mutator-like transposase [Arabidopsis thaliana]                                                                                                                                                                                                                                                                                                                                                                                                                                                                                                                                                                                                                                                                                                                                                                                                                                                                                                                                                                                                                                                                                                                                  | 653  | 811  | 1.00E-80  | 124.2 | 31.2 | 45.0 | Mutator-like transposase                       | gbpln | Arabidopsis thaliana | AT1G64255.1   Symbols:   MuDR family transposase   chr1:23844954-23847206 FORWARD LENGTH=750                                                     | 653  | 750 | 1.00E-11 | 114.9 | 10.4 | 17.5 |
| Rsa1.0_00597.1.g16638.t1 | gb AAF97969.1 AC000103_19 F21J9.30 [Arabidopsis thaliana]                                                                                                                                                                                                                                                                                                                                                                                                                                                                                                                                                                                                                                                                                                                                                                                                                                                                                                                                                                                                                                                                                                                                        | 1410 | 1270 | 1.00E-108 | 90.1  | 15.8 | 22.1 | F21J9.30                                       | gbpln | Arabidopsis thaliana | ATMG00310.1   Symbols: ORF154   RNA-directed DNA polymerase (reverse transcriptase)-related family protein   chrM:90883-91347 REVERSE LENGTH=154 | 1410 | 154 | 1.00E-35 | 10.9  | 4.9  | 6.5  |
| Rsa1.0_00597.1.g16639.t1 | #                                                                                                                                                                                                                                                                                                                                                                                                                                                                                                                                                                                                                                                                                                                                                                                                                                                                                                                                                                                                                                                                                                                                                                                                | #    | #    | #         | #     | #    | #    | -                                              | ----  | ----                 | #                                                                                                                                                | #    | #   | #        | #     | #    |      |
| Rsa1.0_00597.1.g16640.t1 | gb EMS58970.1  Protein FIZZY-RELATED 3 [Triticum urartu]                                                                                                                                                                                                                                                                                                                                                                                                                                                                                                                                                                                                                                                                                                                                                                                                                                                                                                                                                                                                                                                                                                                                         | 116  | 389  | 9.00E-11  | 335.3 | 26.7 | 35.3 | Protein FIZZY-RELATED 3                        | gbpln | Triticum urartu      | AT4G22910.1   Symbols: FZR2, CCSS2A1   FIZZY-related 2   chr4:12012743-12015663 FORWARD LENGTH=483                                               | 116  | 483 | 4.00E-13 | 416.4 | 26.7 | 32.8 |
| Rsa1.0_00597.1.g16641.t1 | #                                                                                                                                                                                                                                                                                                                                                                                                                                                                                                                                                                                                                                                                                                                                                                                                                                                                                                                                                                                                                                                                                                                                                                                                | #    | #    | #         | #     | #    | #    | -                                              | ----  | ----                 | #                                                                                                                                                | #    | #   | #        | #     | #    |      |
| Rsa1.0_00597.1.g16642.t1 | gb AAG50806.1 AC079281_8 unknown protein [Arabidopsis thaliana]                                                                                                                                                                                                                                                                                                                                                                                                                                                                                                                                                                                                                                                                                                                                                                                                                                                                                                                                                                                                                                                                                                                                  | 1067 | 1213 | 0         | 113.7 | 53.0 | 69.8 | unknown protein                                | gbpln | Arabidopsis thaliana | AT1G43760.1   Symbols:   DNase I-like superfamily protein   chr1:16528880-16531065 REVERSE LENGTH=626                                            | 1067 | 626 | 4.00E-66 | 58.7  | 12.7 | 20.7 |
| Rsa1.0_00597.1.g16643.t1 | gb ACB59223.1  glutathione S-transferase [Brassica oleracea]                                                                                                                                                                                                                                                                                                                                                                                                                                                                                                                                                                                                                                                                                                                                                                                                                                                                                                                                                                                                                                                                                                                                     | 237  | 523  | 7.00E-50  | 220.7 | 51.5 | 62.9 | glutathione S-transferase                      | gbpln | Brassica oleracea    | #                                                                                                                                                | #    | #   | #        | #     | #    |      |
| Rsa1.0_00597.1.g16644.t1 | #                                                                                                                                                                                                                                                                                                                                                                                                                                                                                                                                                                                                                                                                                                                                                                                                                                                                                                                                                                                                                                                                                                                                                                                                | #    | #    | #         | #     | #    | #    | -                                              | ----  | ----                 | #                                                                                                                                                | #    | #   | #        | #     | #    |      |
| Rsa1.0_00597.1.g16645.t1 | #                                                                                                                                                                                                                                                                                                                                                                                                                                                                                                                                                                                                                                                                                                                                                                                                                                                                                                                                                                                                                                                                                                                                                                                                | #    | #    | #         | #     | #    | #    | -                                              | ----  | ----                 | #                                                                                                                                                | #    | #   | #        | #     | #    |      |
| Rsa1.0_00597.1.g16646.t1 | #                                                                                                                                                                                                                                                                                                                                                                                                                                                                                                                                                                                                                                                                                                                                                                                                                                                                                                                                                                                                                                                                                                                                                                                                | #    | #    | #         | #     | #    | #    | -                                              | ----  | ----                 | #                                                                                                                                                | #    | #   | #        | #     | #    |      |

|                          |                                                                                                                                                                                                                                                                                                                                                                                                                                         |      |      |           |       |      |      |                                                     |       |                      |                                                                                                                                                                                                                                                                                                                                                                                                                                                                                                                                                                                                                    |      |     |          |       |      |      |
|--------------------------|-----------------------------------------------------------------------------------------------------------------------------------------------------------------------------------------------------------------------------------------------------------------------------------------------------------------------------------------------------------------------------------------------------------------------------------------|------|------|-----------|-------|------|------|-----------------------------------------------------|-------|----------------------|--------------------------------------------------------------------------------------------------------------------------------------------------------------------------------------------------------------------------------------------------------------------------------------------------------------------------------------------------------------------------------------------------------------------------------------------------------------------------------------------------------------------------------------------------------------------------------------------------------------------|------|-----|----------|-------|------|------|
| Rsa1.0_00597.1.g16647.t1 | gb[EOA37296.1] hypothetical protein CARUB_v10010917mg [Capsella rubella]                                                                                                                                                                                                                                                                                                                                                                | 176  | 184  | 4.00E-69  | 104.5 | 80.1 | 86.9 | hypothetical protein CARUB_v10010917mg              | gbpln | Capsella rubella     | AT1G29195.1   Symbols:   unknown protein; FUNCTIONS IN: molecular_function unknown; INVOLVED IN: biological_process unknown; LOCATED IN: chloroplast; EXPRESSED IN: 13 plant structures; EXPRESSED DURING: 4 anthesis, C globular stage, 4 leaf senescence stage, petal differentiation and expansion stage; BEST Arabidopsis thaliana protein match is: unknown protein (TAIR:AT2G30230.1); Has 180 Blast hits to 180 proteins in 14 species: Archae - 0; Bacteria - 0; Metazoa - 0; Fungi - 0; Plants - 180; Viruses - 0; Other Eukaryotes - 0 (source: NCBI BLINK).   chr1:10202673-10203254 REVERSE LENGTH=193 | 176  | 193 | 1.00E-70 | 109.7 | 81.3 | 91.5 |
| Rsa1.0_00597.1.g16648.t1 | gb[AAG51783.1]AC079679_3 reverse transcriptase, putative; 16838-20266 [Arabidopsis thaliana]                                                                                                                                                                                                                                                                                                                                            | 134  | 1142 | 2.00E-21  | 852.2 | 43.3 | 60.4 | reverse transcriptase, putative; 16838-20266        | gbpln | Arabidopsis thaliana | AT4G29090.1   Symbols:   Ribonuclease H-like superfamily protein   chr4:14333528-14335255 FORWARD LENGTH=575                                                                                                                                                                                                                                                                                                                                                                                                                                                                                                       | 134  | 575 | 8.00E-11 | 429.1 | 32.1 | 49.3 |
| Rsa1.0_00598.1.g16649.t1 | gb[ABD65035.1] hypothetical protein 26.t00052 [Brassica oleracea]                                                                                                                                                                                                                                                                                                                                                                       | 473  | 695  | 1.00E-120 | 146.9 | 54.5 | 68.3 | hypothetical protein 26.t00052                      | gbpln | Brassica oleracea    | #                                                                                                                                                                                                                                                                                                                                                                                                                                                                                                                                                                                                                  | #    | #   | #        | #     | #    |      |
| Rsa1.0_00598.1.g16650.t1 | gb[ABW81060.1] GagPol3 [Arabidopsis lyrata subsp. lyrata]                                                                                                                                                                                                                                                                                                                                                                               | 1729 | 1103 | 0         | 63.8  | 29.2 | 36.9 | GagPol3                                             | gbpln | Arabidopsis lyrata   | #                                                                                                                                                                                                                                                                                                                                                                                                                                                                                                                                                                                                                  | #    | #   | #        | #     | #    |      |
| Rsa1.0_00598.1.g16651.t1 | #                                                                                                                                                                                                                                                                                                                                                                                                                                       | #    | #    | #         | #     | #    | -    | ----                                                | ----  | ----                 | #                                                                                                                                                                                                                                                                                                                                                                                                                                                                                                                                                                                                                  | #    | #   | #        | #     | #    |      |
| Rsa1.0_00598.1.g16652.t1 | gb[EOA20431.1] hypothetical protein CARUB_v10000741mg [Capsella rubella]                                                                                                                                                                                                                                                                                                                                                                | 514  | 514  | 0         | 100.0 | 92.4 | 96.7 | hypothetical protein CARUB_v10000741mg              | gbpln | Capsella rubella     | AT4G02290.1   Symbols: AtGH9B13, GH9B13   glycosyl hydrolase 9B13   chr4:1002654-1005125 REVERSE LENGTH=516                                                                                                                                                                                                                                                                                                                                                                                                                                                                                                        | 514  | 516 | 0        | 100.4 | 91.1 | 95.3 |
| Rsa1.0_00598.1.g16653.t1 | #                                                                                                                                                                                                                                                                                                                                                                                                                                       | #    | #    | #         | #     | #    | -    | ----                                                | ----  | ----                 | #                                                                                                                                                                                                                                                                                                                                                                                                                                                                                                                                                                                                                  | #    | #   | #        | #     | #    |      |
| Rsa1.0_00598.1.g16654.t1 | ref[XP_002872848.1] pollen ole e 1 allergen and extensin family protein [Arabidopsis lyrata subsp. lyrata]   gi 297318685 gb EFH49107.1  pollen ole e 1 allergen and extensin family protein [Arabidopsis lyrata subsp. lyrata]   ref[XP_002874925.1] hypothetical protein ARALYDRAFT_490346 [Arabidopsis lyrata subsp. lyrata]   gi 297320762 gb EFH51184.1  hypothetical protein ARALYDRAFT_490346 [Arabidopsis lyrata subsp. lyrata] | 165  | 165  | 3.00E-84  | 100.0 | 92.1 | 95.8 | pollen ole e 1 allergen and extensin family protein | gbpln | Arabidopsis lyrata   | AT4G02270.1   Symbols: RHS13   root hair specific 13   chr4:992383-992996 REVERSE LENGTH=165                                                                                                                                                                                                                                                                                                                                                                                                                                                                                                                       | 165  | 165 | 6.00E-82 | 100.0 | 85.5 | 92.7 |
| Rsa1.0_00598.1.g16655.t1 | hypothetical protein ARALYDRAFT_490346 [Arabidopsis lyrata subsp. lyrata]                                                                                                                                                                                                                                                                                                                                                               | 866  | 883  | 0         | 102.0 | 91.6 | 95.2 | hypothetical protein ARALYDRAFT_490346              | gbpln | Arabidopsis lyrata   | AT4G02260.2   Symbols: RSH1, AT-RSH1   RELA/SPOT homolog 1   chr4:985451-991178 FORWARD LENGTH=883                                                                                                                                                                                                                                                                                                                                                                                                                                                                                                                 | 866  | 883 | 0        | 102.0 | 91.0 | 94.9 |
| Rsa1.0_00598.1.g16656.t3 | gb[AAC95212.1] Mutator-like transposase [Arabidopsis thaliana]                                                                                                                                                                                                                                                                                                                                                                          | 808  | 915  | 1.00E-126 | 113.2 | 28.2 | 39.5 | Mutator-like transposase                            | gbpln | Arabidopsis thaliana | AT1G64260.1   Symbols:   MuDR family transposase   chr1:23847756-23849915 FORWARD LENGTH=719                                                                                                                                                                                                                                                                                                                                                                                                                                                                                                                       | 808  | 719 | 1.00E-29 | 89.0  | 12.0 | 22.6 |
| Rsa1.0_00598.1.g16657.t1 | gb[EOA29684.1] hypothetical protein CARUB_v10016007mg [Capsella rubella]                                                                                                                                                                                                                                                                                                                                                                | 128  | 134  | 4.00E-15  | 104.7 | 32.0 | 46.1 | hypothetical protein CARUB_v10016007mg              | gbpln | Capsella rubella     | AT2G07505.1   Symbols:   zinc ion binding   chr2:3125671-3126173 FORWARD LENGTH=143                                                                                                                                                                                                                                                                                                                                                                                                                                                                                                                                | 128  | 143 | 6.00E-14 | 111.7 | 26.6 | 31.3 |
| Rsa1.0_00598.1.g16658.t3 | gb[ABD64941.1] Ulp1 protease family protein [Brassica oleracea]                                                                                                                                                                                                                                                                                                                                                                         | 827  | 871  | 0         | 105.3 | 51.0 | 62.4 | Ulp1 protease family protein                        | gbpln | Brassica oleracea    | AT2G07240.1   Symbols:   cysteine-type peptidases:cysteine-type peptidases   chr2:3007102-3011701 REVERSE LENGTH=874                                                                                                                                                                                                                                                                                                                                                                                                                                                                                               | 827  | 874 | 3.00E-41 | 105.7 | 11.7 | 18.1 |
| Rsa1.0_00598.1.g16659.t4 | emb[CAB39638.1] RNA-directed DNA polymerase-like protein [Arabidopsis thaliana]   gi 7267666 emb[CAB78094.1] RNA-directed DNA polymerase-like protein [Arabidopsis thaliana]                                                                                                                                                                                                                                                            | 1632 | 1274 | 0         | 78.1  | 33.6 | 45.1 | RNA-directed DNA polymerase-like protein            | gbpln | Arabidopsis thaliana | AT4G29090.1   Symbols:   Ribonuclease H-like superfamily protein   chr4:14333528-14335255 FORWARD LENGTH=575                                                                                                                                                                                                                                                                                                                                                                                                                                                                                                       | 1632 | 575 | 6.00E-56 | 35.2  | 9.9  | 16.4 |
| Rsa1.0_00598.1.g16660.t1 | gb[AAT41847.1] At4g02250 [Arabidopsis thaliana]                                                                                                                                                                                                                                                                                                                                                                                         | 184  | 184  | 1.00E-88  | 100.0 | 87.0 | 94.0 | At4g02250                                           | gbpln | Arabidopsis thaliana | AT4G02250.1   Symbols:   Plant invertase/pectin methyltransferase inhibitor superfamily protein   chr4:983970-984523 FORWARD LENGTH=160                                                                                                                                                                                                                                                                                                                                                                                                                                                                            | 184  | 160 | 2.00E-72 | 87.0  | 74.5 | 81.5 |
| Rsa1.0_00598.1.g16661.t1 | ref[XP_002893409.1] hypothetical protein ARALYDRAFT_890118 [Arabidopsis lyrata subsp. lyrata]   gi 297339251 gb EFH69668.1  hypothetical protein ARALYDRAFT_890118 [Arabidopsis lyrata subsp. lyrata]                                                                                                                                                                                                                                   | 123  | 191  | 4.00E-15  | 155.3 | 33.3 | 54.5 | hypothetical protein ARALYDRAFT_890118              | gbpln | Arabidopsis lyrata   | AT1G14800.1   Symbols:   Nucleic acid-binding, OB-fold-like protein   chr1:5099572-5102558 FORWARD LENGTH=384                                                                                                                                                                                                                                                                                                                                                                                                                                                                                                      | 123  | 384 | 2.00E-16 | 312.2 | 34.1 | 59.3 |

|                          |                                                                                                                                                                                                                                                                      |     |     |           |       |      |      |                                                      |       |                      |                                                                                                                                                                                                                                                                                                                                                                                                                                                                                                                                                                                                  |     |     |           |       |      |      |
|--------------------------|----------------------------------------------------------------------------------------------------------------------------------------------------------------------------------------------------------------------------------------------------------------------|-----|-----|-----------|-------|------|------|------------------------------------------------------|-------|----------------------|--------------------------------------------------------------------------------------------------------------------------------------------------------------------------------------------------------------------------------------------------------------------------------------------------------------------------------------------------------------------------------------------------------------------------------------------------------------------------------------------------------------------------------------------------------------------------------------------------|-----|-----|-----------|-------|------|------|
| Rsa1.0_00598.1.g16662.t3 | gb AAK38380.1 AC079028.3<br>hypothetical protein [Arabidopsis thaliana]                                                                                                                                                                                              | 354 | 609 | 3.00E-15  | 172.0 | 13.8 | 20.9 | hypothetical protein                                 | gbpln | Arabidopsis thaliana | AT1G51172.1   Symbols:   unknown protein; FUNCTIONS IN: molecular_function unknown; INVOLVED IN: biological_process unknown; LOCATED IN: cellular_component unknown; CONTAINS InterPro DOMAIN/s: Protein of unknown function DUF601 (InterPro:IPR006736); BEST Arabidopsis thaliana protein match is: Protein of unknown function, DUF601 (TAIR:AT1G46896.1); Has 1849 Blast hits to 1554 proteins in 272 species: Archaea - 15; Bacteria - 116; Metazoa - 677; Fungi - 267; Plants - 154; Viruses - 11; Other Eukaryotes - 609 (source: NCBI BLINK)   chr1:18963205-18965571 FORWARD LENGTH=681 | 354 | 681 | 8.00E-11  | 192.4 | 8.2  | 14.1 |
| Rsa1.0_00599.1.g16663.t1 | gb AAG52211.1 AC022288_10<br>hypothetical protein; 74056-75837 [Arabidopsis thaliana]                                                                                                                                                                                | 83  | 503 | 8.00E-22  | 606.0 | 68.7 | 79.5 | hypothetical protein; 74056-75837                    | gbpln | Arabidopsis thaliana | #                                                                                                                                                                                                                                                                                                                                                                                                                                                                                                                                                                                                | #   | #   | #         | #     | #    |      |
| Rsa1.0_00599.1.g16664.t1 | ref NP_179250.2  Translocon-associated protein (TRAP), alpha subunit [Arabidopsis thaliana]<br>gi 50897256 gb AAT85767.1  At2g16595 [Arabidopsis thaliana]<br>gi 330251422 gb AEC06516.1  Translocon-associated protein (TRAP), alpha subunit [Arabidopsis thaliana] | 120 | 251 | 2.00E-42  | 209.2 | 74.2 | 78.3 | Translocon-associated protein (TRAP), alpha subunit  | gbpln | Arabidopsis thaliana | AT2G16595.1   Symbols:   Translocon-associated protein (TRAP), alpha subunit   chr2:7198363-7200086 FORWARD LENGTH=251                                                                                                                                                                                                                                                                                                                                                                                                                                                                           | 120 | 251 | 4.00E-45  | 209.2 | 74.2 | 78.3 |
| Rsa1.0_00599.1.g16665.t1 | gb EOA26734.1  hypothetical protein CARUB_v10022820mg [Capsella rubella]                                                                                                                                                                                             | 615 | 527 | 4.00E-82  | 85.7  | 33.8 | 47.3 | hypothetical protein CARUB_v10022820mg               | gbpln | Capsella rubella     | AT4G05360.1   Symbols:   Zinc knuckle (CCHC-type) family protein   chr4:2728204-2732337 FORWARD LENGTH=735                                                                                                                                                                                                                                                                                                                                                                                                                                                                                       | 615 | 735 | 9.00E-77  | 119.5 | 27.6 | 38.9 |
| Rsa1.0_00599.1.g16666.t1 | gb EOA11936.1  hypothetical protein CARUB_v10016547mg, partial [Capsella rubella]                                                                                                                                                                                    | 229 | 149 | 2.00E-19  | 65.1  | 24.0 | 33.6 | hypothetical protein CARUB_v10016547mg, partial      | gbpln | Capsella rubella     | AT2G34320.1   Symbols:   Polynucleotidyl transferase, ribonuclease H-like superfamily protein   chr2:14484959-14485837 FORWARD LENGTH=292                                                                                                                                                                                                                                                                                                                                                                                                                                                        | 229 | 292 | 2.00E-12  | 127.5 | 17.5 | 30.6 |
| Rsa1.0_00599.1.g16667.t1 | #                                                                                                                                                                                                                                                                    | #   | #   | #         | #     | #    | #    | -                                                    | ----  | ----                 | #                                                                                                                                                                                                                                                                                                                                                                                                                                                                                                                                                                                                | #   | #   | #         | #     | #    |      |
| Rsa1.0_00599.1.g16668.t1 | #                                                                                                                                                                                                                                                                    | #   | #   | #         | #     | #    | #    | -                                                    | ----  | ----                 | #                                                                                                                                                                                                                                                                                                                                                                                                                                                                                                                                                                                                | #   | #   | #         | #     | #    |      |
| Rsa1.0_00599.1.g16669.t1 | gb ABD65099.1  hypothetical protein 31.t00074 [Brassica oleracea]                                                                                                                                                                                                    | 194 | 258 | 1.00E-23  | 133.0 | 30.9 | 42.8 | hypothetical protein 31.t00074                       | gbpln | Brassica oleracea    | AT5G41220.1   Symbols: ATGSTT3, GST10C, GSTT3   glutathione S-transferase THETA 3   chr5:16494560-16498669 REVERSE LENGTH=590                                                                                                                                                                                                                                                                                                                                                                                                                                                                    | 194 | 590 | 4.00E-22  | 304.1 | 25.8 | 37.6 |
| Rsa1.0_00599.1.g16670.t1 | ref XP_002883908.1  hypothetical protein ARALYDRAFT_899780 [Arabidopsis lyrata subsp. lyrata]<br>gi 297329748 gb EFH60167.1  hypothetical protein ARALYDRAFT_899780 [Arabidopsis lyrata subsp. lyrata]                                                               | 293 | 378 | 1.00E-19  | 129.0 | 21.2 | 30.7 | hypothetical protein ARALYDRAFT_899780               | gbpln | Arabidopsis lyrata   | AT2G05350.1   Symbols:   unknown protein; Has 22 Blast hits to 16 proteins in 5 species: Archaea - 0; Bacteria - 0; Metazoa - 0; Fungi - 0; Plants - 22; Viruses - 0; Other Eukaryotes - 0 (source: NCBI BLINK)   chr2:1950455-1954740 FORWARD LENGTH=453                                                                                                                                                                                                                                                                                                                                        | 293 | 453 | 3.00E-13  | 154.6 | 13.0 | 17.7 |
| Rsa1.0_00599.1.g16671.t1 | ref XP_002883909.1  predicted protein [Arabidopsis lyrata subsp. lyrata]<br>gi 297329749 gb EFH60168.1  predicted protein [Arabidopsis lyrata subsp. lyrata]                                                                                                         | 184 | 528 | 2.00E-13  | 287.0 | 35.3 | 52.2 | predicted protein                                    | gbpln | Arabidopsis lyrata   | #                                                                                                                                                                                                                                                                                                                                                                                                                                                                                                                                                                                                | #   | #   | #         | #     | #    |      |
| Rsa1.0_00599.1.g16672.t1 | #                                                                                                                                                                                                                                                                    | #   | #   | #         | #     | #    | #    | -                                                    | ----  | ----                 | #                                                                                                                                                                                                                                                                                                                                                                                                                                                                                                                                                                                                | #   | #   | #         | #     | #    |      |
| Rsa1.0_00599.1.g16673.t1 | #                                                                                                                                                                                                                                                                    | #   | #   | #         | #     | #    | #    | -                                                    | ----  | ----                 | #                                                                                                                                                                                                                                                                                                                                                                                                                                                                                                                                                                                                | #   | #   | #         | #     | #    |      |
| Rsa1.0_00599.1.g16674.t1 | #                                                                                                                                                                                                                                                                    | #   | #   | #         | #     | #    | #    | -                                                    | ----  | ----                 | #                                                                                                                                                                                                                                                                                                                                                                                                                                                                                                                                                                                                | #   | #   | #         | #     | #    |      |
| Rsa1.0_00599.1.g16675.t1 | ref XP_002886057.1  amidophosphoribosyltransferase [Arabidopsis lyrata subsp. lyrata]<br>gi 297331897 gb EFH62316.1  amidophosphoribosyltransferase [Arabidopsis lyrata subsp. lyrata]                                                                               | 566 | 563 | 0         | 99.5  | 90.3 | 92.6 | amidophosphoribosyltransferase                       | gbpln | Arabidopsis lyrata   | AT2G16570.1   Symbols: ATASE, ATASE1, ASE1   GLN phosphoribosyl pyrophosphate amidotransferase 1   chr2:7180424-7182124 REVERSE LENGTH=566                                                                                                                                                                                                                                                                                                                                                                                                                                                       | 566 | 566 | 0         | 100.0 | 89.4 | 92.0 |
| Rsa1.0_00599.1.g16676.t1 | #                                                                                                                                                                                                                                                                    | #   | #   | #         | #     | #    | #    | -                                                    | ----  | ----                 | AT1G27600.2   Symbols: IRX9-L, I9H   Nucleotide-diphosphor-sugar transferases superfamily protein   chr1:9604083-9605881 REVERSE LENGTH=394                                                                                                                                                                                                                                                                                                                                                                                                                                                      | 99  | 394 | 2.00E-11  | 398.0 | 26.3 | 29.3 |
| Rsa1.0_00599.1.g16677.t2 | ref XP_002872763.1  3-oxo-5-alpha-steroid 4-dehydrogenase family protein [Arabidopsis lyrata subsp. lyrata]<br>gi 297318600 gb EFH49022.1  3-oxo-5-alpha-steroid 4-dehydrogenase family protein [Arabidopsis lyrata subsp. lyrata]                                   | 357 | 342 | 1.00E-150 | 95.8  | 75.9 | 82.9 | 3-oxo-5-alpha-steroid 4-dehydrogenase family protein | gbpln | Arabidopsis lyrata   | AT2G16530.1   Symbols:   3-oxo-5-alpha-steroid 4-dehydrogenase family protein   chr2:7163276-7165064 REVERSE LENGTH=343                                                                                                                                                                                                                                                                                                                                                                                                                                                                          | 357 | 343 | 1.00E-151 | 96.1  | 75.4 | 82.9 |



| Accession                | Description                                                                                                                                                                                                                                                                                                                                                    | Length | Score | E-value  | Bit Score | RecName | Model | Species | Accession            | Description                                                                                                                                                                                                                                                                                                              | Length | Score | E-value   | Bit Score | RecName |      |
|--------------------------|----------------------------------------------------------------------------------------------------------------------------------------------------------------------------------------------------------------------------------------------------------------------------------------------------------------------------------------------------------------|--------|-------|----------|-----------|---------|-------|---------|----------------------|--------------------------------------------------------------------------------------------------------------------------------------------------------------------------------------------------------------------------------------------------------------------------------------------------------------------------|--------|-------|-----------|-----------|---------|------|
| Rsa1.0_00599.1.g16678.t1 | sp O82475.1 SPE1_BRAJU RecName: Full=Arginine decarboxylase; Short=ADC; Short=ARGDC gi 3342902 gb AAC62017.1  arginine decarboxylase [Brassica juncea]                                                                                                                                                                                                         | 705    | 702   | 0        | 99.6      | 93.3    | 95.7  | gbpln   | Brassica juncea      | AT2G16500.1   Symbols: ADC1, ARGDC1, ARGDC, SPE1   arginine decarboxylase 1   chr2:7150796-7152904 REVERSE LENGTH=702                                                                                                                                                                                                    | 705    | 702   | 0         | 99.6      | 84.8    | 90.2 |
| Rsa1.0_00599.1.g16679.t1 | gb ABD64965.1  hypothetical protein 25.t00002 [Brassica oleracea]                                                                                                                                                                                                                                                                                              | 204    | 445   | 3.00E-19 | 218.1     | 30.4    | 35.3  | gbpln   | Brassica oleracea    | AT5G47620.4   Symbols:   RNA-binding (RRM/RBD/RNP motifs) family protein   chr5:19302548-19304278 REVERSE LENGTH=453                                                                                                                                                                                                     | 204    | 453   | 8.00E-19  | 222.1     | 30.4    | 32.4 |
| Rsa1.0_00599.1.g16680.t1 | # # # # # # # # - - - - # # # # # # #                                                                                                                                                                                                                                                                                                                          |        |       |          |           |         |       |         |                      |                                                                                                                                                                                                                                                                                                                          |        |       |           |           |         |      |
| Rsa1.0_00599.1.g16681.t1 | gb AAC13599.1  similar to reverse transcriptase (Pfam: transcript_fact.hmm, score: 72.31) [Arabidopsis thaliana]                                                                                                                                                                                                                                               | 674    | 928   | 2.00E-90 | 137.7     | 23.7    | 32.0  | gbpln   | Arabidopsis thaliana | AT3G24255.1   Symbols:   RNA-directed DNA polymerase (reverse transcriptase)-related family protein   chr3:8789471-8793208 FORWARD LENGTH=746                                                                                                                                                                            | 674    | 746   | 4.00E-52  | 110.7     | 17.7    | 24.5 |
| Rsa1.0_00599.1.g16682.t1 | ref XP_002884156.1  predicted protein [Arabidopsis lyrata subsp. lyrata] gi 297329996 gb EFH60415.1  predicted protein [Arabidopsis lyrata subsp. lyrata]                                                                                                                                                                                                      | 109    | 511   | 9.00E-50 | 468.8     | 91.7    | 94.5  | gbpln   | Arabidopsis lyrata   | AT2G16120.1   Symbols: PMT1, ATPMT1   polyol/monosaccharide transporter 1   chr2:6996727-6998441 REVERSE LENGTH=511                                                                                                                                                                                                      | 109    | 511   | 2.00E-52  | 468.8     | 89.9    | 95.4 |
| Rsa1.0_00600.1.g16683.t1 | # # # # # # # # - - - - # # # # # # #                                                                                                                                                                                                                                                                                                                          |        |       |          |           |         |       |         |                      |                                                                                                                                                                                                                                                                                                                          |        |       |           |           |         |      |
| Rsa1.0_00600.1.g16684.t1 | gb EOA37768.1  hypothetical protein CARUB_v10012626mg [Capsella rubella]                                                                                                                                                                                                                                                                                       | 104    | 90    | 5.00E-33 | 86.5      | 65.4    | 73.1  | gbpln   | Capsella rubella     | AT1G27220.1   Symbols:   paired amphipathic helix repeat-containing protein   chr1:9463806-9465444 FORWARD LENGTH=184                                                                                                                                                                                                    | 104    | 184   | 3.00E-34  | 176.9     | 62.5    | 67.3 |
| Rsa1.0_00600.1.g16685.t1 | ref XP_002893336.1  predicted protein [Arabidopsis lyrata subsp. lyrata] gi 297339178 gb EFH69595.1  predicted protein [Arabidopsis lyrata subsp. lyrata]                                                                                                                                                                                                      | 347    | 810   | 3.00E-26 | 233.4     | 31.4    | 42.7  | gbpln   | Arabidopsis lyrata   | AT1G24220.1   Symbols:   paired amphipathic helix repeat-containing protein   chr1:8578658-8582413 REVERSE LENGTH=744                                                                                                                                                                                                    | 347    | 744   | 1.00E-17  | 214.4     | 26.5    | 38.0 |
| Rsa1.0_00600.1.g16686.t1 | gb EOA40424.1  hypothetical protein CARUB_v10009149mg [Capsella rubella]                                                                                                                                                                                                                                                                                       | 237    | 442   | 3.00E-77 | 186.5     | 68.4    | 77.2  | gbpln   | Capsella rubella     | AT1G24180.1   Symbols: IAR4   Thiamin diphosphate-binding fold (THDP-binding) superfamily protein   chr1:8560777-8563382 REVERSE LENGTH=393                                                                                                                                                                              | 237    | 393   | 5.00E-79  | 165.8     | 69.2    | 76.8 |
| Rsa1.0_00600.1.g16687.t1 | gb EOA37428.1  hypothetical protein CARUB_v10011392mg [Capsella rubella]                                                                                                                                                                                                                                                                                       | 386    | 390   | 0        | 101.0     | 86.3    | 90.4  | gbpln   | Capsella rubella     | AT1G24170.1   Symbols: GATL8, LGT9   Nucleotide-diphospho-sugar transferases superfamily protein   chr1:8557451-8558632 REVERSE LENGTH=393                                                                                                                                                                               | 386    | 393   | 0         | 101.8     | 84.7    | 88.6 |
| Rsa1.0_00600.1.g16688.t1 | ref XP_002893328.1  hypothetical protein ARALYDRAFT_472677 [Arabidopsis lyrata subsp. lyrata] gi 297339170 gb EFH69587.1  hypothetical protein ARALYDRAFT_472677 [Arabidopsis lyrata subsp. lyrata]                                                                                                                                                            | 534    | 539   | 0        | 100.9     | 70.0    | 78.7  | gbpln   | Arabidopsis lyrata   | AT1G24160.2   Symbols:   unknown protein; FUNCTIONS IN: molecular_function unknown; INVOLVED IN: biological_process unknown; LOCATED IN: cellular_component unknown; EXPRESSED IN: guard cell; BEST Arabidopsis thaliana protein match is: unknown protein (TAIR:AT1G70100.3).   chr1:8553669-8555830 REVERSE LENGTH=540 | 534    | 540   | 1.00E-173 | 101.1     | 68.7    | 77.9 |
| Rsa1.0_00600.1.g16689.t1 | ref NP_180861.1  receptor like protein 24 [Arabidopsis thaliana] gi 2924789 gb AAC04918.1  putative leucine-rich repeat disease resistance protein [Arabidopsis thaliana] gi 20196994 gb AAM14862.1  putative leucine-rich repeat disease resistance protein [Arabidopsis thaliana] gi 33025368 gb AEC08775.1  receptor like protein 24 [Arabidopsis thaliana] | 877    | 864   | 0        | 98.5      | 66.8    | 77.5  | gbpln   | Arabidopsis thaliana | AT2G33020.1   Symbols: AtRLP24, RLP24   receptor like protein 24   chr2:14013874-14016516 REVERSE LENGTH=864                                                                                                                                                                                                             | 877    | 864   | 0         | 98.5      | 66.8    | 77.5 |
| Rsa1.0_00600.1.g16690.t1 | gb ACB59209.1  group I formin [Brassica oleracea]                                                                                                                                                                                                                                                                                                              | 747    | 719   | 0        | 96.3      | 84.1    | 87.0  | gbpln   | Brassica oleracea    | AT1G70140.1   Symbols: ATFH8, FH8   formin 8   chr1:26412688-26415048 REVERSE LENGTH=760                                                                                                                                                                                                                                 | 747    | 760   | 0         | 101.7     | 70.7    | 82.1 |
| Rsa1.0_00600.1.g16691.t1 | gb ACB59207.1  matrixin family protein [Brassica oleracea]                                                                                                                                                                                                                                                                                                     | 535    | 383   | 0        | 71.6      | 63.9    | 66.0  | gbpln   | Brassica oleracea    | AT1G24140.1   Symbols:   Matrixin family protein   chr1:8536131-8537285 REVERSE LENGTH=384                                                                                                                                                                                                                               | 535    | 384   | 1.00E-170 | 71.8      | 54.0    | 58.7 |
| Rsa1.0_00600.1.g16692.t1 | gb ACB59206.1  transducin family protein [Brassica oleracea]                                                                                                                                                                                                                                                                                                   | 409    | 410   | 0        | 100.2     | 91.7    | 94.9  | gbpln   | Brassica oleracea    | AT1G24130.1   Symbols:   Transducin/WD40 repeat-like superfamily protein   chr1:8534183-8535430 REVERSE LENGTH=415                                                                                                                                                                                                       | 409    | 415   | 1.00E-176 | 101.5     | 82.6    | 90.5 |
| Rsa1.0_00600.1.g16693.t1 | emb CAB39638.1  RNA-directed DNA polymerase-like protein [Arabidopsis thaliana] gi 7267666 emb CAB78094.1  RNA-directed DNA polymerase-like protein [Arabidopsis thaliana]                                                                                                                                                                                     | 364    | 1274  | 3.00E-37 | 350.0     | 28.6    | 40.1  | gbpln   | Arabidopsis thaliana | AT1G10000.1   Symbols:   Ribonuclease H-like superfamily protein   chr1:3263877-3264788 REVERSE LENGTH=303                                                                                                                                                                                                               | 364    | 303   | 3.00E-29  | 83.2      | 25.3    | 37.6 |

|                          |                                                                                                                                                                                                                                                                                                                                                                                                                                                                                                                                                                                                                                |     |      |           |       |      |      |                                                             |       |                         |                                                                                                                                                                                                                                                                                                                                                                                                                                                                                                                                                                                                                                                                                                                      |     |     |           |       |      |      |  |
|--------------------------|--------------------------------------------------------------------------------------------------------------------------------------------------------------------------------------------------------------------------------------------------------------------------------------------------------------------------------------------------------------------------------------------------------------------------------------------------------------------------------------------------------------------------------------------------------------------------------------------------------------------------------|-----|------|-----------|-------|------|------|-------------------------------------------------------------|-------|-------------------------|----------------------------------------------------------------------------------------------------------------------------------------------------------------------------------------------------------------------------------------------------------------------------------------------------------------------------------------------------------------------------------------------------------------------------------------------------------------------------------------------------------------------------------------------------------------------------------------------------------------------------------------------------------------------------------------------------------------------|-----|-----|-----------|-------|------|------|--|
|                          | ref NP_173822.2  chaperone protein<br>dnaJ 16 [Arabidopsis thaliana]<br>gi 67462409 sp Q8VXV4.1 DNJ16_ARAT<br>H RecName: Full=Chaperone protein<br>dnaJ 16; Short=AtDJB16; Short=AtJ16;<br>AltName: Full=Protein ARG1-LIKE 1;<br>Short=AARL1                                                                                                                                                                                                                                                                                                                                                                                   |     |      |           |       |      |      |                                                             |       |                         |                                                                                                                                                                                                                                                                                                                                                                                                                                                                                                                                                                                                                                                                                                                      |     |     |           |       |      |      |  |
| Rsa1.0_00600.1.g16694.t1 | gi 18377835 gb AAL67104.1<br>At1g24120.F316.4 [Arabidopsis<br>thaliana] gi 34583419 gb AAP49704.1 <br>ARG1-like protein 1 [Arabidopsis<br>thaliana] gi 109134177 gb ABG25086.1 <br>At1g24120 [Arabidopsis thaliana]<br>gi 332192359 gb AEE30480.1  chaperone<br>protein dnaJ 16 [Arabidopsis thaliana]                                                                                                                                                                                                                                                                                                                         | 439 | 436  | 0         | 99.3  | 91.8 | 97.3 | chaperone protein<br>dnaJ 16                                | gbpln | Arabidopsis<br>thaliana | AT1G24120.1   Symbols: ARL1   ARG1-like 1<br>  chr1:8529233-8531946 REVERSE<br>LENGTH=436                                                                                                                                                                                                                                                                                                                                                                                                                                                                                                                                                                                                                            | 439 | 436 | 0         | 99.3  | 91.8 | 97.3 |  |
| Rsa1.0_00600.1.g16695.t1 | gb ACB59205.1  peroxidase [Brassica<br>oleracea]                                                                                                                                                                                                                                                                                                                                                                                                                                                                                                                                                                               | 300 | 331  | 1.00E-164 | 110.3 | 96.0 | 97.7 | peroxidase                                                  | gbpln | Brassica<br>oleracea    | AT1G24110.1   Symbols: Peroxidase<br>superfamily protein   chr1:8527838-8528818<br>FORWARD LENGTH=326                                                                                                                                                                                                                                                                                                                                                                                                                                                                                                                                                                                                                | 300 | 326 | 1.00E-140 | 108.7 | 81.0 | 90.7 |  |
| Rsa1.0_00600.1.g16696.t1 | ref NP_180632.1  protein kinase-like<br>protein [Arabidopsis thaliana]<br>gi 75318362 sp O49339.1 PTI12_ARATH<br>RecName: Full=PTI1-like tyrosine-<br>protein kinase 2; Short=PTI1-2<br>gi 2880051 gb AAC02745.1  putative<br>protein kinase [Arabidopsis thaliana]<br>gi 13374083 emb CAC34450.1  putative<br>PTI1-like protein tyrosine kinase<br>[Arabidopsis thaliana]<br>gi 90093302 gb ABD85164.1  At2g30740<br>[Arabidopsis thaliana]<br>gi 110740423 dbj BAF02106.1  putative<br>protein kinase [Arabidopsis thaliana]<br>gi 330253340 gb AEC08434.1  PTI1-like<br>tyrosine-protein kinase 2 [Arabidopsis<br>thaliana] | 270 | 366  | 2.00E-96  | 135.6 | 63.7 | 65.9 | protein kinase-like<br>protein                              | gbpln | Arabidopsis<br>thaliana | AT2G30740.1   Symbols: Protein kinase<br>superfamily protein   chr2:13096399-<br>13098285 FORWARD LENGTH=366                                                                                                                                                                                                                                                                                                                                                                                                                                                                                                                                                                                                         | 270 | 366 | 5.00E-99  | 135.6 | 63.7 | 65.9 |  |
| Rsa1.0_00601.1.g16697.t1 | ref XP_002893522.1  hypothetical<br>protein ARALYDRAFT_473042<br>[Arabidopsis lyrata subsp. lyrata]<br>gi 297339364 gb EFH69781.1 <br>hypothetical protein<br>ARALYDRAFT_473042 [Arabidopsis<br>lyrata subsp. lyrata]                                                                                                                                                                                                                                                                                                                                                                                                          | 299 | 321  | 1.00E-112 | 107.4 | 81.3 | 88.6 | hypothetical protein<br>ARALYDRAFT_473042                   | gbpln | Arabidopsis<br>lyrata   | AT1G28310.2   Symbols:   Dof-type zinc<br>finger DNA-binding family protein  <br>chr1:9912534-9913685 REVERSE<br>LENGTH=325                                                                                                                                                                                                                                                                                                                                                                                                                                                                                                                                                                                          | 299 | 325 | 1.00E-112 | 108.7 | 80.6 | 87.0 |  |
| Rsa1.0_00601.1.g16698.t1 | gb EOA38805.1  hypothetical protein<br>CARUB.v10011114mg [Capsella rubella]                                                                                                                                                                                                                                                                                                                                                                                                                                                                                                                                                    | 854 | 709  | 0         | 83.0  | 65.9 | 72.1 | hypothetical protein<br>CARUB.v10011114mg                   | gbpln | Capsella<br>rubella     | AT1G28320.1   Symbols: DEG15   protease-<br>related   chr1:9920673-9924347 REVERSE<br>LENGTH=709                                                                                                                                                                                                                                                                                                                                                                                                                                                                                                                                                                                                                     | 854 | 709 | 0         | 83.0  | 65.5 | 71.7 |  |
| Rsa1.0_00601.1.g16699.t2 | gb ACQ90305.1  dormancy-associated<br>protein 1 [Brassica rapa subsp.<br>pekinensis]                                                                                                                                                                                                                                                                                                                                                                                                                                                                                                                                           | 193 | 128  | 1.00E-55  | 66.3  | 60.6 | 61.1 | dormancy-associated<br>protein 1                            | gbpln | Brassica<br>rapa        | AT1G28330.5   Symbols: DYLL1   dormancy-<br>associated protein-like 1   chr1:9934252-<br>9935216 REVERSE LENGTH=159                                                                                                                                                                                                                                                                                                                                                                                                                                                                                                                                                                                                  | 193 | 159 | 9.00E-51  | 82.4  | 57.0 | 58.5 |  |
| Rsa1.0_00601.1.g16700.t1 | gb AAF18538.1 AC006551_24 Very<br>similar to retrotransposon reverse<br>transcriptase [Arabidopsis thaliana]                                                                                                                                                                                                                                                                                                                                                                                                                                                                                                                   | 490 | 1231 | 3.00E-81  | 251.2 | 37.1 | 51.4 | Very similar to<br>retrotransposon<br>reverse transcriptase | gbpln | Arabidopsis<br>thaliana | AT4G29090.1   Symbols:   Ribonuclease H-<br>like superfamily protein   chr4:14333528-<br>14335255 FORWARD LENGTH=575                                                                                                                                                                                                                                                                                                                                                                                                                                                                                                                                                                                                 | 490 | 575 | 1.00E-43  | 117.3 | 26.3 | 42.4 |  |
| Rsa1.0_00601.1.g16701.t1 | gb EOA39898.1  hypothetical protein<br>CARUB.v10008578mg [Capsella rubella]                                                                                                                                                                                                                                                                                                                                                                                                                                                                                                                                                    | 629 | 626  | 0         | 99.5  | 89.5 | 94.9 | hypothetical protein<br>CARUB.v10008578mg                   | gbpln | Capsella<br>rubella     | AT1G28340.1   Symbols: AtRLP4, RLP4  <br>receptor like protein 4   chr1:9940175-<br>9943252 FORWARD LENGTH=626                                                                                                                                                                                                                                                                                                                                                                                                                                                                                                                                                                                                       | 629 | 626 | 0         | 99.5  | 89.7 | 95.5 |  |
| Rsa1.0_00601.1.g16702.t1 | ref XP_002890772.1  ATERF12/ERF12<br>[Arabidopsis lyrata subsp. lyrata]<br>gi 297336614 gb EFH67031.1 <br>ATERF12/ERF12 [Arabidopsis lyrata<br>subsp. lyrata]                                                                                                                                                                                                                                                                                                                                                                                                                                                                  | 182 | 183  | 1.00E-66  | 100.5 | 79.1 | 86.8 | ATERF12/ERF12                                               | gbpln | Arabidopsis<br>lyrata   | AT1G28360.1   Symbols: ERF12, ATERF12  <br>ERF domain protein 12   chr1:9951934-<br>9952503 FORWARD LENGTH=189                                                                                                                                                                                                                                                                                                                                                                                                                                                                                                                                                                                                       | 182 | 189 | 7.00E-67  | 103.8 | 78.0 | 85.7 |  |
| Rsa1.0_00601.1.g16703.t1 | gb EOA37505.1  hypothetical protein<br>CARUB.v10011676mg [Capsella rubella]                                                                                                                                                                                                                                                                                                                                                                                                                                                                                                                                                    | 161 | 168  | 4.00E-40  | 104.3 | 63.4 | 73.9 | hypothetical protein<br>CARUB.v10011676mg                   | gbpln | Capsella<br>rubella     | AT1G28370.1   Symbols: ERF11, ATERF11  <br>ERF domain protein 11   chr1:9956351-<br>9956851 REVERSE LENGTH=166                                                                                                                                                                                                                                                                                                                                                                                                                                                                                                                                                                                                       | 161 | 166 | 9.00E-40  | 103.1 | 61.5 | 70.2 |  |
| Rsa1.0_00601.1.g16704.t1 | dbj BAJ34587.1  unnamed protein<br>product [Thellungiella halophila]                                                                                                                                                                                                                                                                                                                                                                                                                                                                                                                                                           | 607 | 612  | 0         | 100.8 | 85.0 | 91.9 | unnamed protein<br>product                                  | ----  | ----                    | AT1G28380.1   Symbols: NSL1  <br>MAC/Perforin domain-containing protein  <br>chr1:9963696-9966060 FORWARD<br>LENGTH=612<br>AT1G28395.3   Symbols:   unknown protein;<br>FUNCTIONS IN: molecular_function unknown;<br>INVOLVED IN: biological_process unknown;<br>LOCATED IN: chloroplast; EXPRESSED IN:<br>22 plant structures; EXPRESSED DURING:<br>13 growth stages; BEST Arabidopsis thaliana<br>protein match is: unknown protein<br>(TAIR:AT2G33847.2); Has 35333 Blast hits to<br>34131 proteins in 2444 species: Archae -<br>798; Bacteria - 22429; Metazoa - 974; Fungi<br>- 991; Plants - 531; Viruses - 0; Other<br>Eukaryotes - 9610 (source: NCBI BLINK).  <br>chr1:9970134-9971433 REVERSE<br>LENGTH=95 | 607 | 612 | 0         | 100.8 | 79.2 | 88.8 |  |
| Rsa1.0_00601.1.g16705.t1 | gb EOA36323.1  hypothetical protein<br>CARUB.v10010643mg [Capsella rubella]<br>gi 482572138 gb EOA36325.1 <br>hypothetical protein<br>CARUB.v10010643mg [Capsella rubella]                                                                                                                                                                                                                                                                                                                                                                                                                                                     | 132 | 127  | 3.00E-25  | 96.2  | 41.7 | 43.9 | hypothetical protein<br>CARUB.v10010643mg                   | gbpln | Capsella<br>rubella     |                                                                                                                                                                                                                                                                                                                                                                                                                                                                                                                                                                                                                                                                                                                      | 132 | 95  | 5.00E-27  | 72.0  | 40.2 | 43.2 |  |

| Rsa1.0_00601.1.g16706.t1 | #                                                                                                                                                                                                     | #    | #    | #         | #     | #    | #    | -                                                    | ----  | ----                 | #                                                                                                                                                                                                                                                                                                                                                                                                                                                                                                                                                            | #    | #    | #         | #     | #    |      |
|--------------------------|-------------------------------------------------------------------------------------------------------------------------------------------------------------------------------------------------------|------|------|-----------|-------|------|------|------------------------------------------------------|-------|----------------------|--------------------------------------------------------------------------------------------------------------------------------------------------------------------------------------------------------------------------------------------------------------------------------------------------------------------------------------------------------------------------------------------------------------------------------------------------------------------------------------------------------------------------------------------------------------|------|------|-----------|-------|------|------|
| Rsa1.0_00601.1.g16707.t1 | gb EOA38190.1  hypothetical protein CARUB_v10009667mg [Capsella rubella]                                                                                                                              | 318  | 337  | 1.00E-124 | 106.0 | 80.2 | 87.1 | hypothetical protein CARUB_v10009667mg               | gbpln | Capsella rubella     | AT1G28400.1   Symbols:   unknown protein; FUNCTIONS IN: molecular_function unknown; INVOLVED IN: biological_process unknown; LOCATED IN: endomembrane system; EXPRESSED IN: 22 plant structures; EXPRESSED DURING: 13 growth stages; BEST Arabidopsis thaliana protein match is: unknown protein (TAIR:AT2G33850.1). Has 45374 Blast hits to 18870 proteins in 668 species: Archae - 72; Bacteria - 1460; Metazoa - 1191; Fungi - 1038; Plants - 174; Viruses - 64; Other Eukaryotes - 41375 (source: NCBI BLINK).   chr1:9972732-9973739 REVERSE LENGTH=335 | 318  | 335  | 1.00E-122 | 105.3 | 80.8 | 87.7 |
| Rsa1.0_00601.1.g16708.t1 | ref NP_174163.2  uncharacterized protein [Arabidopsis thaliana]   g 332192853 gb AEE30974.1  uncharacterized protein AT1G28410 [Arabidopsis thaliana]                                                 | 256  | 277  | 1.00E-96  | 108.2 | 75.0 | 87.5 | uncharacterized protein                              | gbpln | Arabidopsis thaliana | AT1G28410.1   Symbols:   FUNCTIONS IN: molecular_function unknown; INVOLVED IN: biological_process unknown; LOCATED IN: endomembrane system; EXPRESSED IN: 23 plant structures; EXPRESSED DURING: 15 growth stages; BEST Arabidopsis thaliana protein match is: myosin heavy chain-related (TAIR:AT4G31340.2). Has 425 Blast hits to 402 proteins in 77 species: Archae - 4; Bacteria - 22; Metazoa - 249; Fungi - 4; Plants - 98; Viruses - 0; Other Eukaryotes - 48 (source: NCBI BLINK).   chr1:9976596-9979080 REVERSE LENGTH=277                        | 256  | 277  | 3.00E-99  | 108.2 | 75.0 | 87.5 |
| Rsa1.0_00601.1.g16709.t1 | ref XP_002890775.1  HB-1 [Arabidopsis lyrata subsp. lyrata]   g 297336617 gb EFH67034.1  HB-1 [Arabidopsis lyrata subsp. lyrata]                                                                      | 1720 | 1705 | 0         | 99.1  | 77.7 | 85.4 | HB-1                                                 | gbpln | Arabidopsis lyrata   | AT1G28420.1   Symbols: HB-1   homeobox-1   chr1:9979936-9987460 FORWARD LENGTH=1705                                                                                                                                                                                                                                                                                                                                                                                                                                                                          | 1720 | 1705 | 0         | 99.1  | 76.6 | 84.5 |
| Rsa1.0_00601.1.g16710.t2 | #                                                                                                                                                                                                     | #    | #    | #         | #     | #    | #    | -                                                    | ----  | ----                 | #                                                                                                                                                                                                                                                                                                                                                                                                                                                                                                                                                            | #    | #    | #         | #     | #    |      |
| Rsa1.0_00601.1.g16711.t1 | ref XP_002890776.1  hypothetical protein ARALYDRAFT.473063 [Arabidopsis lyrata subsp. lyrata]   g 297336618 gb EFH67035.1  hypothetical protein ARALYDRAFT.473063 [Arabidopsis lyrata subsp. lyrata]  | 996  | 996  | 0         | 100.0 | 84.0 | 90.9 | hypothetical protein ARALYDRAFT.473063               | gbpln | Arabidopsis lyrata   | AT1G28440.1   Symbols: HSL1   HAESA-like 1   chr1:9996914-1000171 FORWARD LENGTH=996                                                                                                                                                                                                                                                                                                                                                                                                                                                                         | 996  | 996  | 0         | 100.0 | 83.8 | 90.6 |
| Rsa1.0_00601.1.g16712.t1 | ref NP_564309.1  NAC domain containing protein 10 [Arabidopsis thaliana]   g 332192859 gb AEE30980.1  NAC domain containing protein 10 [Arabidopsis thaliana]                                         | 314  | 314  | 1.00E-174 | 100.0 | 94.3 | 95.9 | NAC domain containing protein 10                     | gbpln | Arabidopsis thaliana | AT1G28470.1   Symbols: ANAC010, SND3, NAC010   NAC domain containing protein 10   chr1:10010259-10011867 FORWARD LENGTH=314                                                                                                                                                                                                                                                                                                                                                                                                                                  | 314  | 314  | 1.00E-176 | 100.0 | 94.3 | 95.9 |
| Rsa1.0_00602.1.g16713.t1 | gb EOA31555.1  hypothetical protein CARUB_v10014747mg [Capsella rubella]                                                                                                                              | 112  | 182  | 2.00E-49  | 162.5 | 86.6 | 88.4 | hypothetical protein CARUB_v10014747mg               | gbpln | Capsella rubella     | AT3G13550.1   Symbols: FUS9, EMB144, COP10, CIN4   Ubiquitin-conjugating enzyme family protein   chr3:4423569-4424797 REVERSE LENGTH=182                                                                                                                                                                                                                                                                                                                                                                                                                     | 112  | 182  | 4.00E-52  | 162.5 | 85.7 | 88.4 |
| Rsa1.0_00602.1.g16714.t1 | ref XP_002884972.1  glycosyl hydrolase family 17 protein [Arabidopsis lyrata subsp. lyrata]   g 297330812 gb EFH61231.1  glycosyl hydrolase family 17 protein [Arabidopsis lyrata subsp. lyrata]      | 503  | 501  | 0         | 99.6  | 84.5 | 90.5 | glycosyl hydrolase family 17 protein                 | gbpln | Arabidopsis lyrata   | AT3G13560.2   Symbols:   O-Glycosyl hydrolases family 17 protein   chr3:4425484-4427284 REVERSE LENGTH=505                                                                                                                                                                                                                                                                                                                                                                                                                                                   | 503  | 505  | 0         | 100.4 | 84.9 | 91.1 |
| Rsa1.0_00602.1.g16715.t1 | ref NP_187968.1  cysteine/histidine-rich C1 domain-containing protein [Arabidopsis thaliana]   g 332641858 gb AEE75379.1  cysteine/histidine-rich C1 domain-containing protein [Arabidopsis thaliana] | 560  | 513  | 6.00E-47  | 91.6  | 19.8 | 25.5 | cysteine/histidine-rich C1 domain-containing protein | gbpln | Arabidopsis thaliana | AT3G13590.1   Symbols:   Cysteine/Histidine-rich C1 domain family protein   chr3:4435316-4437334 REVERSE LENGTH=513                                                                                                                                                                                                                                                                                                                                                                                                                                          | 560  | 513  | 1.00E-49  | 91.6  | 19.8 | 25.5 |
| Rsa1.0_00602.1.g16716.t1 | gb EOA30149.1  hypothetical protein CARUB_v10013255mg [Capsella rubella]                                                                                                                              | 582  | 608  | 0         | 104.5 | 87.6 | 92.3 | hypothetical protein CARUB_v10013255mg               | gbpln | Capsella rubella     | AT3G13600.1   Symbols:   calmodulin-binding family protein   chr3:4445102-4447383 FORWARD LENGTH=605                                                                                                                                                                                                                                                                                                                                                                                                                                                         | 582  | 605  | 0         | 104.0 | 85.7 | 91.6 |
| Rsa1.0_00602.1.g16717.t1 | ref XP_002885061.1  oxidoreductase [Arabidopsis lyrata subsp. lyrata]   g 297330901 gb EFH61320.1  oxidoreductase [Arabidopsis lyrata subsp. lyrata]                                                  | 361  | 361  | 0         | 100.0 | 92.0 | 97.8 | oxidoreductase                                       | gbpln | Arabidopsis lyrata   | AT3G13610.1   Symbols:   2-oxoglutarate (2OG) and Fe(II)-dependent oxygenase superfamily protein   chr3:4449448-4450616 FORWARD LENGTH=361                                                                                                                                                                                                                                                                                                                                                                                                                   | 361  | 361  | 0         | 100.0 | 89.2 | 96.1 |
| Rsa1.0_00602.1.g16718.t1 | gb EOA30472.1  hypothetical protein CARUB_v10013597mg [Capsella rubella]                                                                                                                              | 472  | 478  | 0         | 101.3 | 91.1 | 97.0 | hypothetical protein CARUB_v10013597mg               | gbpln | Capsella rubella     | AT3G13620.1   Symbols:   Amino acid permease family protein   chr3:4450904-4452556 REVERSE LENGTH=478                                                                                                                                                                                                                                                                                                                                                                                                                                                        | 472  | 478  | 0         | 101.3 | 90.3 | 96.4 |

|                          |                                                                                                                                                                                                                                                                                                                                                                                                                                                                                |     |     |           |       |      |      |                                                                                                |       |                      |                                                                                                                                                |     |     |           |       |      |      |
|--------------------------|--------------------------------------------------------------------------------------------------------------------------------------------------------------------------------------------------------------------------------------------------------------------------------------------------------------------------------------------------------------------------------------------------------------------------------------------------------------------------------|-----|-----|-----------|-------|------|------|------------------------------------------------------------------------------------------------|-------|----------------------|------------------------------------------------------------------------------------------------------------------------------------------------|-----|-----|-----------|-------|------|------|
| Rsa1.0_00602.1.g16719.t1 | ref NP_187974.1  disease resistance-responsive, dirigent domain-containing protein [Arabidopsis thaliana]<br>gi 9294009 dbj BAB01912.1  disease resistance response protein-like [Arabidopsis thaliana]<br>gi 26451116 dbj CAC42662.1  putative dirigent protein [Arabidopsis thaliana]<br>gi 37201988 gb AAQ89609.1  At3g13650 [Arabidopsis thaliana]<br>gi 332641866 gb AEE75387.1  disease resistance-responsive, dirigent domain-containing protein [Arabidopsis thaliana] | 186 | 186 | 4.00E-86  | 100.0 | 81.2 | 90.9 | disease resistance-responsive, dirigent domain-containing protein                              | gbpln | Arabidopsis thaliana | AT3G13650.1   Symbols:   Disease resistance-responsive (dirigent-like protein) family protein   chr3:4463056-4463616 FORWARD LENGTH=186        | 186 | 186 | 1.00E-88  | 100.0 | 81.2 | 90.9 |
| Rsa1.0_00602.1.g16720.t1 | ref XP_002882838.1  kinase family protein [Arabidopsis lyrata subsp. lyrata]<br>gi 297328678 gb EFH59097.1  kinase family protein [Arabidopsis lyrata subsp. lyrata]                                                                                                                                                                                                                                                                                                           | 679 | 703 | 0         | 103.5 | 95.4 | 97.3 | kinase family protein                                                                          | gbpln | Arabidopsis lyrata   | AT3G13670.1   Symbols:   Protein kinase family protein   chr3:4469434-4473234 FORWARD LENGTH=703                                               | 679 | 703 | 0         | 103.5 | 93.8 | 96.3 |
| Rsa1.0_00602.1.g16721.t1 | #                                                                                                                                                                                                                                                                                                                                                                                                                                                                              | #   | #   | #         | #     | #    | #    | -                                                                                              | ----  | ----                 | #                                                                                                                                              | #   | #   | #         | #     | #    | #    |
| Rsa1.0_00602.1.g16722.t1 | ref XP_002882838.1  kinase family protein [Arabidopsis lyrata subsp. lyrata]<br>gi 297328678 gb EFH59097.1  kinase family protein [Arabidopsis lyrata subsp. lyrata]                                                                                                                                                                                                                                                                                                           | 695 | 703 | 0         | 101.2 | 93.5 | 96.1 | kinase family protein                                                                          | gbpln | Arabidopsis lyrata   | AT3G13670.1   Symbols:   Protein kinase family protein   chr3:4469434-4473234 FORWARD LENGTH=703                                               | 695 | 703 | 0         | 101.2 | 92.7 | 95.7 |
| Rsa1.0_00602.1.g16723.t3 | gb EOA29851.1  hypothetical protein CARUB_v10013055mg [Capsella rubella]                                                                                                                                                                                                                                                                                                                                                                                                       | 276 | 735 | 3.00E-36  | 266.3 | 39.1 | 45.7 | hypothetical protein CARUB_v10013055mg                                                         | gbpln | Capsella rubella     | AT3G13682.1   Symbols: LDL2   LSD1-like2   chr3:4479193-4481509 REVERSE LENGTH=746                                                             | 276 | 746 | 1.00E-37  | 270.3 | 38.0 | 45.3 |
| Rsa1.0_00602.1.g16724.t2 | ref NP_187982.1  protein kinase protein with adenine nucleotide alpha hydrolases-like domain-containing protein [Arabidopsis thaliana]<br>gi 9294015 dbj BAB01918.1  unnamed protein product [Arabidopsis thaliana]<br>gi 332641878 gb AEE75399.1  protein kinase protein with adenine nucleotide alpha hydrolases-like domain-containing protein [Arabidopsis thaliana]                                                                                                       | 756 | 753 | 0         | 99.6  | 92.5 | 95.5 | protein kinase protein with adenine nucleotide alpha hydrolases-like domain-containing protein | gbpln | Arabidopsis thaliana | AT3G13690.1   Symbols:   Protein kinase protein with adenine nucleotide alpha hydrolases-like domain   chr3:4486920-4490011 FORWARD LENGTH=753 | 756 | 753 | 0         | 99.6  | 92.5 | 95.5 |
| Rsa1.0_00602.1.g16725.t1 | ref NP_001118622.1  RNA recognition motif-containing protein [Arabidopsis thaliana]<br>gi 26449895 dbj BAC42069.1  unknown protein [Arabidopsis thaliana]<br>gi 332641890 gb AEE75401.1  RNA recognition motif-containing protein [Arabidopsis thaliana]                                                                                                                                                                                                                       | 270 | 287 | 1.00E-126 | 106.3 | 86.3 | 90.4 | RNA recognition motif-containing protein                                                       | gbpln | Arabidopsis thaliana | AT3G13700.2   Symbols:   RNA-binding (RRM/RBD/RNP motifs) family protein   chr3:4490859-4492632 REVERSE LENGTH=287                             | 270 | 287 | 1.00E-129 | 106.3 | 86.3 | 90.4 |
| Rsa1.0_00602.1.g16726.t1 | gb EOA33062.1  hypothetical protein CARUB_v10016395mg [Capsella rubella]                                                                                                                                                                                                                                                                                                                                                                                                       | 182 | 188 | 6.00E-75  | 103.3 | 77.5 | 85.2 | hypothetical protein CARUB_v10016395mg                                                         | gbpln | Capsella rubella     | AT3G13720.1   Symbols: PRA1.F3, PRA8   PRA1 (Prenylated rab acceptor) family protein   chr3:4495202-4495768 REVERSE LENGTH=188                 | 182 | 188 | 1.00E-70  | 103.3 | 76.9 | 85.2 |
| Rsa1.0_00602.1.g16727.t1 | dbj BAB01922.1  cytochrome P450-like protein [Arabidopsis thaliana]                                                                                                                                                                                                                                                                                                                                                                                                            | 463 | 464 | 0         | 100.2 | 86.6 | 90.9 | cytochrome P450-like protein                                                                   | gbpln | Arabidopsis thaliana | AT3G13730.1   Symbols: CYP90D1   cytochrome P450, family 90, subfamily D, polypeptide 1   chr3:4498330-4500836 REVERSE LENGTH=491              | 463 | 491 | 0         | 106.0 | 86.6 | 90.9 |
| Rsa1.0_00603.1.g16728.t1 | gb EOA20111.1  hypothetical protein CARUB_v10000390mg [Capsella rubella]                                                                                                                                                                                                                                                                                                                                                                                                       | 672 | 673 | 0         | 100.1 | 69.8 | 83.3 | hypothetical protein CARUB_v10000390mg                                                         | gbpln | Capsella rubella     | AT4G02420.1   Symbols:   Concanavalin A-like lectin protein kinase family protein   chr4:1064363-1066372 REVERSE LENGTH=669                    | 672 | 669 | 0         | 99.6  | 70.2 | 81.5 |
| Rsa1.0_00603.1.g16729.t1 | gb EOA20111.1  hypothetical protein CARUB_v10000390mg [Capsella rubella]                                                                                                                                                                                                                                                                                                                                                                                                       | 676 | 673 | 0         | 99.6  | 67.5 | 81.2 | hypothetical protein CARUB_v10000390mg                                                         | gbpln | Capsella rubella     | AT4G02420.1   Symbols:   Concanavalin A-like lectin protein kinase family protein   chr4:1064363-1066372 REVERSE LENGTH=669                    | 676 | 669 | 0         | 99.0  | 67.9 | 80.0 |
| Rsa1.0_00603.1.g16730.t1 | ref NP_567234.1  concanavalin A-like lectin kinase-like protein [Arabidopsis thaliana]<br>gi 75318755 sp O81291.1 LRK44_ARATH RecName: Full=L-type lectin-domain containing receptor kinase IV.4; Short=LecRK-IV.4; Flags: Precursor<br>gi 3193290 gb AAC19274.1  T14P8.4 [Arabidopsis thaliana]<br>gi 7269002 emb CAB80735.1  AT4g02420 [Arabidopsis thaliana]<br>gi 332656768 gb AEE82168.1  concanavalin A-like lectin kinase-like protein [Arabidopsis thaliana]           | 667 | 669 | 0         | 100.3 | 72.6 | 84.0 | concanavalin A-like lectin kinase-like protein                                                 | gbpln | Arabidopsis thaliana | AT4G02420.1   Symbols:   Concanavalin A-like lectin protein kinase family protein   chr4:1064363-1066372 REVERSE LENGTH=669                    | 667 | 669 | 0         | 100.3 | 72.6 | 84.0 |



|                          |                                                                                                                                                                                                                                                                                                                                                                                                                                                                                                                                 |     |     |           |       |      |      |                                            |       |                      |                                                                                                                                                                                                                                                                                                                                                  |     |     |           |       |      |      |
|--------------------------|---------------------------------------------------------------------------------------------------------------------------------------------------------------------------------------------------------------------------------------------------------------------------------------------------------------------------------------------------------------------------------------------------------------------------------------------------------------------------------------------------------------------------------|-----|-----|-----------|-------|------|------|--------------------------------------------|-------|----------------------|--------------------------------------------------------------------------------------------------------------------------------------------------------------------------------------------------------------------------------------------------------------------------------------------------------------------------------------------------|-----|-----|-----------|-------|------|------|
| Rsa1.0_00604.1.g16748.t1 | refXP_002882981.1  hypothetical protein ARALYDRAFT_479067 [Arabidopsis lyrata subsp. lyrata] gi 297328821 gb EFH59240.1  hypothetical protein ARALYDRAFT_479067 [Arabidopsis lyrata subsp. lyrata] ref NP_188235.1  photosystem I reaction center subunit VI-1 [Arabidopsis thaliana] gi 20143886 sp Q9SUI7.1 PSAH1_ARAT H RecName: Full=Photosystem I reaction center subunit VI-1, chloroplastic; AltName: Full=PSI-H1; Flags: Precursor gi 5734522 emb CAB52749.1  photosystem I subunit VI precursor [Arabidopsis thaliana] | 552 | 577 | 0         | 104.5 | 78.3 | 88.6 | hypothetical protein ARALYDRAFT_479067     | gbpln | Arabidopsis lyrata   | AT3G16130.1   Symbols: ATROPGEF13, ROPGEF13, PIRF2   RHO guanyl-nucleotide exchange factor 13   chr3:5466246-5468512 FORWARD LENGTH=576                                                                                                                                                                                                          | 552 | 576 | 0         | 104.3 | 76.4 | 87.0 |
| Rsa1.0_00604.1.g16749.t1 | gi 9294461 dbj BAB02680.1  photosystem I subunit VI (PSI-H) precursor-like protein [Arabidopsis thaliana] gi 21618081 gb AAM67131.1  photosystem I subunit VI precursor [Arabidopsis thaliana] gi 110740595 dbj BAE98402.1  PSI-H protein [Arabidopsis thaliana] gi 114050607 gb ABI49453.1  At3g16140 [Arabidopsis thaliana] gi 332642255 gb AEE75776.1  photosystem I reaction center subunit VI-1 [Arabidopsis thaliana]                                                                                                     | 132 | 145 | 2.00E-43  | 109.8 | 72.7 | 75.8 | photosystem I reaction center subunit VI-1 | gbpln | Arabidopsis thaliana | AT3G16140.1   Symbols: PSAH-1   photosystem I subunit H-1   chr3:5468670-5469415 REVERSE LENGTH=145                                                                                                                                                                                                                                              | 132 | 145 | 4.00E-46  | 109.8 | 72.7 | 75.8 |
| Rsa1.0_00604.1.g16750.t1 | #                                                                                                                                                                                                                                                                                                                                                                                                                                                                                                                               | #   | #   | #         | #     | #    | -    | ----                                       | ----  | #                    | #                                                                                                                                                                                                                                                                                                                                                | #   | #   | #         | #     | #    |      |
| Rsa1.0_00604.1.g16751.t1 | gb EOA31031.1  hypothetical protein CARUB_v10014177mg [Capsella rubella]                                                                                                                                                                                                                                                                                                                                                                                                                                                        | 323 | 325 | 1.00E-176 | 100.6 | 94.1 | 96.9 | hypothetical protein CARUB_v10014177mg     | gbpln | Capsella rubella     | AT3G16150.1   Symbols:   N-terminal nucleophile aminohydrolases (Ntn hydrolases) superfamily protein   chr3:5471794-5473033 FORWARD LENGTH=325                                                                                                                                                                                                   | 323 | 325 | 1.00E-177 | 100.6 | 93.2 | 96.6 |
| Rsa1.0_00604.1.g16752.t1 | dbj BAB02797.1  unnamed protein product [Arabidopsis thaliana]                                                                                                                                                                                                                                                                                                                                                                                                                                                                  | 80  | 345 | 4.00E-16  | 431.3 | 61.3 | 72.5 | unnamed protein product                    | gbpln | Arabidopsis thaliana | AT3G13280.1   Symbols:   Putative endonuclease or glycosyl hydrolase   chr3:4295327-4297000 REVERSE LENGTH=383                                                                                                                                                                                                                                   | 80  | 383 | 3.00E-15  | 478.8 | 55.0 | 65.0 |
| Rsa1.0_00604.1.g16753.t1 | gb ABD64939.1  hypothetical protein 24.t00017 [Brassica oleracea]                                                                                                                                                                                                                                                                                                                                                                                                                                                               | 211 | 442 | 5.00E-87  | 209.5 | 72.0 | 78.7 | hypothetical protein 24.t00017             | gbpln | Brassica oleracea    | AT2G13770.1   Symbols:   CONTAINS InterPro DOMAIN/s: Putative harbinger transposase-derived nuclease (InterPro:IPR006912); Has 451 Blast hits to 352 proteins in 33 species: Archae - 0; Bacteria - 0; Metazoa - 28; Fungi - 8; Plants - 388; Viruses - 0; Other Eukaryotes - 27 (source: NCBI BLINK).   chr2:5736603-5737847 FORWARD LENGTH=343 | 211 | 343 | 1.00E-25  | 162.6 | 25.6 | 32.2 |
| Rsa1.0_00604.1.g16754.t1 | gb ABD65099.1  hypothetical protein 31.t00074 [Brassica oleracea]                                                                                                                                                                                                                                                                                                                                                                                                                                                               | 246 | 258 | 2.00E-39  | 104.9 | 44.7 | 60.6 | hypothetical protein 31.t00074             | gbpln | Brassica oleracea    | AT3G47680.1   Symbols:   DNA binding   chr3:17577483-17578391 REVERSE LENGTH=302                                                                                                                                                                                                                                                                 | 246 | 302 | 2.00E-33  | 122.8 | 40.2 | 58.1 |
| Rsa1.0_00604.1.g16755.t1 | gb ABD65108.1  hypothetical protein 40.t00055 [Brassica oleracea]                                                                                                                                                                                                                                                                                                                                                                                                                                                               | 121 | 154 | 6.00E-34  | 127.3 | 53.7 | 71.9 | hypothetical protein 40.t00055             | gbpln | Brassica oleracea    | #                                                                                                                                                                                                                                                                                                                                                | #   | #   | #         | #     | #    |      |
| Rsa1.0_00604.1.g16756.t1 | refXP_002882983.1  hypothetical protein ARALYDRAFT_318392 [Arabidopsis lyrata subsp. lyrata] gi 297328823 gb EFH59242.1  hypothetical protein ARALYDRAFT_318392 [Arabidopsis lyrata subsp. lyrata]                                                                                                                                                                                                                                                                                                                              | 593 | 608 | 0         | 102.5 | 87.0 | 94.1 | hypothetical protein ARALYDRAFT_318392     | gbpln | Arabidopsis lyrata   | AT3G16170.1   Symbols:   AMP-dependent synthetase and ligase family protein   chr3:5476490-5480128 FORWARD LENGTH=544                                                                                                                                                                                                                            | 593 | 544 | 0         | 91.7  | 81.5 | 87.4 |
| Rsa1.0_00604.1.g16757.t1 | gb EOA31619.1  hypothetical protein CARUB_v10014816mg [Capsella rubella]                                                                                                                                                                                                                                                                                                                                                                                                                                                        | 158 | 158 | 1.00E-59  | 100.0 | 73.4 | 83.5 | hypothetical protein CARUB_v10014816mg     | gbpln | Capsella rubella     | AT3G16175.1   Symbols:   Thioesterase superfamily protein   chr3:5480497-5481208 FORWARD LENGTH=157                                                                                                                                                                                                                                              | 158 | 157 | 2.00E-60  | 99.4  | 70.9 | 83.5 |
| Rsa1.0_00604.1.g16758.t1 | ref NP_188239.1  major facilitator protein [Arabidopsis thaliana] gi 310947330 sp Q8LPL2.2 PTR32_ARAT H RecName: Full=Probable peptide/nitrate transporter At3g16180 gi 332642260 gb AEE75781.1  probable peptide/nitrate transporter [Arabidopsis thaliana]                                                                                                                                                                                                                                                                    | 594 | 591 | 0         | 99.5  | 86.4 | 91.2 | major facilitator protein                  | gbpln | Arabidopsis thaliana | AT3G16180.1   Symbols:   Major facilitator superfamily protein   chr3:5481477-5484943 REVERSE LENGTH=591                                                                                                                                                                                                                                         | 594 | 591 | 0         | 99.5  | 86.4 | 91.2 |
| Rsa1.0_00604.1.g16759.t1 | refXP_002885129.1  hypothetical protein ARALYDRAFT_479073 [Arabidopsis lyrata subsp. lyrata] gi 297330969 gb EFH61388.1  hypothetical protein ARALYDRAFT_479073 [Arabidopsis lyrata subsp. lyrata]                                                                                                                                                                                                                                                                                                                              | 477 | 456 | 0         | 95.6  | 84.7 | 89.1 | hypothetical protein ARALYDRAFT_479073     | gbpln | Arabidopsis lyrata   | AT3G16200.1   Symbols:   unknown protein; Has 97 Blast hits to 97 proteins in 15 species: Archae - 0; Bacteria - 8; Metazoa - 0; Fungi - 0; Plants - 36; Viruses - 0; Other Eukaryotes - 53 (source: NCBI BLINK).   chr3:5491619-5493605 REVERSE LENGTH=456                                                                                      | 477 | 456 | 0         | 95.6  | 84.5 | 89.1 |

|                          |                                                                                                                                                                                                                                                                                                                                                                                                                                                                                                                                                                                                                                                                                                    |     |      |           |       |      |      |                                                 |       |                      |                                                                                                                                                                                                                                                                                                                                               |     |      |           |       |      |      |
|--------------------------|----------------------------------------------------------------------------------------------------------------------------------------------------------------------------------------------------------------------------------------------------------------------------------------------------------------------------------------------------------------------------------------------------------------------------------------------------------------------------------------------------------------------------------------------------------------------------------------------------------------------------------------------------------------------------------------------------|-----|------|-----------|-------|------|------|-------------------------------------------------|-------|----------------------|-----------------------------------------------------------------------------------------------------------------------------------------------------------------------------------------------------------------------------------------------------------------------------------------------------------------------------------------------|-----|------|-----------|-------|------|------|
| Rsa1.0_00604.1.g16760.t1 | gb EOA31266.1  hypothetical protein CARUB_v10014438mg [Capsella rubella]                                                                                                                                                                                                                                                                                                                                                                                                                                                                                                                                                                                                                           | 278 | 258  | 6.00E-93  | 92.8  | 62.9 | 72.3 | hypothetical protein CARUB_v10014438mg          | gbpln | Capsella rubella     | AT3G16220.1   Symbols:   Predicted eukaryotic LigT   chr3:5497713-5499068 FORWARD LENGTH=257                                                                                                                                                                                                                                                  | 278 | 257  | 1.00E-91  | 92.4  | 59.7 | 70.5 |
| Rsa1.0_00604.1.g16761.t1 | gb EOA31266.1  hypothetical protein CARUB_v10014438mg [Capsella rubella]                                                                                                                                                                                                                                                                                                                                                                                                                                                                                                                                                                                                                           | 249 | 258  | 1.00E-77  | 103.6 | 59.4 | 71.9 | hypothetical protein CARUB_v10014438mg          | gbpln | Capsella rubella     | AT3G16220.1   Symbols:   Predicted eukaryotic LigT   chr3:5497713-5499068 FORWARD LENGTH=257                                                                                                                                                                                                                                                  | 249 | 257  | 1.00E-78  | 103.2 | 59.4 | 70.7 |
| Rsa1.0_00604.1.g16762.t1 | ref NP_188245.1  aquaporin TIP2-1 [Arabidopsis thaliana]<br>gi 32363275 sp Q41951.2 TIP2_ARATH RecName: Full=Aquaporin TIP2-1; AltName: Full=Delta-tonoplast intrinsic protein; Short=Delta-TIP; AltName: Full=Tonoplast intrinsic protein 2-1; Short=AtTIP2;1<br>gi 1145697 gb AAC49281.1  delta tonoplast integral protein [Arabidopsis thaliana] gi 9279707 dbj BAB01264.1  delta tonoplast intrinsic protein [Arabidopsis thaliana]<br>gi 21554052 gb AM63133.1  delta tonoplast integral protein delta-TIP [Arabidopsis thaliana]<br>gi 110739746 dbj BAF01780.1  delta tonoplast integral protein [Arabidopsis thaliana] gi 332642268 gb AEE75789.1  aquaporin TIP2-1 [Arabidopsis thaliana] | 249 | 250  | 1.00E-128 | 100.4 | 95.6 | 98.4 | aquaporin TIP2-1                                | gbpln | Arabidopsis thaliana | AT3G16240.1   Symbols: DELTA-TIP, TIP2;1, DELTA-TIP1, AQP1, ATTIP2;1   delta tonoplast integral protein   chr3:5505534-5506788 FORWARD LENGTH=250                                                                                                                                                                                             | 249 | 250  | 1.00E-130 | 100.4 | 95.6 | 98.4 |
| Rsa1.0_00604.1.g16763.t1 | gb EOA31467.1  hypothetical protein CARUB_v10014651mg [Capsella rubella]                                                                                                                                                                                                                                                                                                                                                                                                                                                                                                                                                                                                                           | 204 | 205  | 1.00E-105 | 100.5 | 92.6 | 94.6 | hypothetical protein CARUB_v10014651mg          | gbpln | Capsella rubella     | AT3G16250.1   Symbols: NDF4   NDH-dependent cyclic electron flow 1   chr3:5507091-5508320 REVERSE LENGTH=204                                                                                                                                                                                                                                  | 204 | 204  | 1.00E-102 | 100.0 | 89.2 | 91.7 |
| Rsa1.0_00604.1.g16764.t1 | gb EOA31439.1  hypothetical protein CARUB_v10014623mg [Capsella rubella]                                                                                                                                                                                                                                                                                                                                                                                                                                                                                                                                                                                                                           | 204 | 210  | 2.00E-94  | 102.9 | 84.3 | 92.2 | hypothetical protein CARUB_v10014623mg          | gbpln | Capsella rubella     | AT3G16330.1   Symbols:   unknown protein; BEST Arabidopsis thaliana protein match is: unknown protein (TAIR:AT1G52140.1); Has 109 Blast hits to 109 proteins in 16 species: Archae - 0; Bacteria - 0; Metazoa - 0; Fungi - 0; Plants - 109; Viruses - 0; Other Eukaryotes - 0 (source: NCBI BLink).   chr3:5535263-5535880 FORWARD LENGTH=205 | 204 | 205  | 4.00E-93  | 100.5 | 80.9 | 88.7 |
| Rsa1.0_00604.1.g16765.t2 | #                                                                                                                                                                                                                                                                                                                                                                                                                                                                                                                                                                                                                                                                                                  | #   | #    | #         | #     | #    | #    | -                                               | ----  | ----                 | #                                                                                                                                                                                                                                                                                                                                             | #   | #    | #         | #     | #    | #    |
| Rsa1.0_00604.1.g16766.t1 | ref NP_001189911.1  ABC transporter G family member 29 [Arabidopsis thaliana] gi 332642279 gb AEE75800.1  ABC transporter G family member 29 [Arabidopsis thaliana]                                                                                                                                                                                                                                                                                                                                                                                                                                                                                                                                | 333 | 1411 | 1.00E-122 | 423.7 | 74.5 | 80.8 | ABC transporter G family member 29              | gbpln | Arabidopsis thaliana | AT3G16340.2   Symbols: PDR1   pleiotropic drug resistance 1   chr3:5539897-5546263 FORWARD LENGTH=1411                                                                                                                                                                                                                                        | 333 | 1411 | 1.00E-125 | 423.7 | 74.5 | 80.8 |
| Rsa1.0_00604.1.g16767.t1 | gb AFP47629.1  nitrile-specifier protein [Schouwia purpurea]                                                                                                                                                                                                                                                                                                                                                                                                                                                                                                                                                                                                                                       | 467 | 467  | 0         | 100.0 | 93.8 | 97.2 | nitrile-specifier protein                       | gbpln | Schouwia purpurea    | AT3G16400.2   Symbols: ATMLP-470   nitrile specifier protein 1   chr3:5566516-5568330 FORWARD LENGTH=470                                                                                                                                                                                                                                      | 467 | 470  | 0         | 100.6 | 80.5 | 88.0 |
| Rsa1.0_00604.1.g16768.t1 | gb AAB63636.1  jasmonate inducible protein isolog [Arabidopsis thaliana] gi 9279640 dbj BAB01140.1  jasmonate inducible protein; myrosinase binding protein-like [Arabidopsis thaliana]                                                                                                                                                                                                                                                                                                                                                                                                                                                                                                            | 463 | 429  | 1.00E-173 | 92.7  | 71.3 | 78.8 | jasmonate inducible protein isolog              | gbpln | Arabidopsis thaliana | AT1G52030.1   Symbols: MBP2, MBP1.2, F-ATMBP   myrosinase-binding protein 2   chr1:19346090-19348282 REVERSE LENGTH=642                                                                                                                                                                                                                       | 463 | 642  | 1.00E-116 | 138.7 | 52.5 | 68.0 |
| Rsa1.0_00604.1.g16769.t1 | #                                                                                                                                                                                                                                                                                                                                                                                                                                                                                                                                                                                                                                                                                                  | #   | #    | #         | #     | #    | #    | -                                               | ----  | ----                 | #                                                                                                                                                                                                                                                                                                                                             | #   | #    | #         | #     | #    | #    |
| Rsa1.0_00605.1.g16770.t1 | ref XP_002892571.1  protein phosphatase 2a-2 [Arabidopsis lyrata subsp. lyrata] gi 297338413 gb EFH68830.1  protein phosphatase 2a-2 [Arabidopsis lyrata subsp. lyrata]                                                                                                                                                                                                                                                                                                                                                                                                                                                                                                                            | 306 | 306  | 1.00E-177 | 100.0 | 97.1 | 98.4 | protein phosphatase 2a-2                        | gbpln | Arabidopsis lyrata   | AT1G10430.1   Symbols: PP2A-2   protein phosphatase 2A-2   chr1:3428705-3430437 REVERSE LENGTH=306                                                                                                                                                                                                                                            | 306 | 306  | 1.00E-179 | 100.0 | 96.7 | 98.4 |
| Rsa1.0_00605.1.g16771.t1 | ref XP_002886670.1  hypothetical protein ARALYDRAFT_893615 [Arabidopsis lyrata subsp. lyrata] gi 29733251 gb EFH62929.1  hypothetical protein ARALYDRAFT_893615 [Arabidopsis lyrata subsp. lyrata]                                                                                                                                                                                                                                                                                                                                                                                                                                                                                                 | 266 | 264  | 4.00E-95  | 99.2  | 71.1 | 81.6 | hypothetical protein ARALYDRAFT_893615          | gbpln | Arabidopsis lyrata   | AT1G59640.1   Symbols: ZCW32, BPE, BPEub   BIG PETAL P   chr1:21909464-21911030 REVERSE LENGTH=264                                                                                                                                                                                                                                            | 266 | 264  | 1.00E-96  | 99.2  | 71.8 | 81.6 |
| Rsa1.0_00605.1.g16772.t5 | gb EOA40541.1  hypothetical protein CARUB_v10009270mg, partial [Capsella rubella] gi 482576355 gb EOA40542.1  hypothetical protein CARUB_v10009270mg, partial [Capsella rubella]                                                                                                                                                                                                                                                                                                                                                                                                                                                                                                                   | 380 | 417  | 1.00E-127 | 109.7 | 68.2 | 75.5 | hypothetical protein CARUB_v10009270mg, partial | gbpln | Capsella rubella     | AT1G10417.1   Symbols:   Encodes protein with unknown function whose expression is repressed by inoculation with Agrobacterium tumefaciens.   chr1:3424616-3427457 REVERSE LENGTH=431                                                                                                                                                         | 380 | 431  | 1.00E-85  | 113.4 | 53.7 | 64.5 |
| Rsa1.0_00605.1.g16773.t1 | ref XP_002892568.1  hypothetical protein ARALYDRAFT_471155 [Arabidopsis lyrata subsp. lyrata] gi 297338410 gb EFH68827.1  hypothetical protein ARALYDRAFT_471155 [Arabidopsis lyrata subsp. lyrata]                                                                                                                                                                                                                                                                                                                                                                                                                                                                                                | 504 | 485  | 0         | 96.2  | 82.7 | 88.9 | hypothetical protein ARALYDRAFT_471155          | gbpln | Arabidopsis lyrata   | AT1G10410.1   Symbols:   Protein of unknown function (DUF1336)   chr1:3416842-3419264 REVERSE LENGTH=485                                                                                                                                                                                                                                      | 504 | 485  | 0         | 96.2  | 83.3 | 89.3 |

|                          |                                                                                                                                                                                                                                                                                                                                                                                                                                                                                                                                |      |      |           |       |      |      |                                                                            |       |                      |                                                                                                                                               |      |      |           |       |      |      |
|--------------------------|--------------------------------------------------------------------------------------------------------------------------------------------------------------------------------------------------------------------------------------------------------------------------------------------------------------------------------------------------------------------------------------------------------------------------------------------------------------------------------------------------------------------------------|------|------|-----------|-------|------|------|----------------------------------------------------------------------------|-------|----------------------|-----------------------------------------------------------------------------------------------------------------------------------------------|------|------|-----------|-------|------|------|
| Rsa1.0_00605.1.g16774.t1 | refNP_172510.2  Nucleoporin autopeptidase [Arabidopsis thaliana] gi 79317517 refNP_001031018.1  Nucleoporin autopeptidase [Arabidopsis thaliana] gi 19310423 gb AAL84948.1  At1g10390/F14N23.29 [Arabidopsis thaliana] gi 27764948 gb AAO23595.1  At1g10390/F14N23.29 [Arabidopsis thaliana] gi 11074221 dbj BAE99032.1  hypothetical protein [Arabidopsis thaliana] gi 332190453 gb AEE28574.1  Nucleoporin autopeptidase [Arabidopsis thaliana] gi 332190454 gb AEE28575.1  Nucleoporin autopeptidase [Arabidopsis thaliana] | 1055 | 1041 | 0         | 98.7  | 84.6 | 90.2 | Nucleoporin autopeptidase                                                  | gbpln | Arabidopsis thaliana | AT1G10390.2   Symbols:   Nucleoporin autopeptidase   chr1:3407265-3412045 REVERSE LENGTH=1041                                                 | 1055 | 1041 | 0         | 98.7  | 84.6 | 90.2 |
| Rsa1.0_00605.1.g16775.t1 | refXP_002889802.1  hypothetical protein ARALYDRAFT_888300 [Arabidopsis lyrata subsp. lyrata] gi 297335644 gb EFH66061.1  hypothetical protein ARALYDRAFT_888300 [Arabidopsis lyrata subsp. lyrata]                                                                                                                                                                                                                                                                                                                             | 294  | 306  | 1.00E-135 | 104.1 | 83.3 | 84.7 | hypothetical protein ARALYDRAFT_888300                                     | gbpln | Arabidopsis lyrata   | AT1G10380.1   Symbols:   Putative membrane lipoprotein   chr1:3400706-3402110 FORWARD LENGTH=305                                              | 294  | 305  | 1.00E-134 | 103.7 | 81.3 | 83.3 |
| Rsa1.0_00605.1.g16776.t1 | dbj BAJ33933.1  unnamed protein product [Thehungiella halophila]                                                                                                                                                                                                                                                                                                                                                                                                                                                               | 227  | 228  | 1.00E-115 | 100.4 | 87.7 | 95.2 | unnamed protein product                                                    | ----  | ----                 | AT1G10370.1   Symbols: GST30, ATGSTU17, GST30B, ERD9   Glutathione S-transferase family protein   chr1:3397274-3398273 REVERSE LENGTH=227     | 227  | 227  | 1.00E-112 | 100.0 | 83.7 | 92.5 |
| Rsa1.0_00605.1.g16777.t1 | gb EOA37379.1  hypothetical protein CARUB.v10011208mg [Capsella rubella]                                                                                                                                                                                                                                                                                                                                                                                                                                                       | 458  | 467  | 0         | 102.0 | 77.9 | 88.0 | hypothetical protein CARUB.v10011208mg                                     | gbpln | Capsella rubella     | AT1G10330.1   Symbols:   Tetratricopeptide repeat (TPR)-like superfamily protein   chr1:3388747-3390150 FORWARD LENGTH=467                    | 458  | 467  | 0         | 102.0 | 76.4 | 86.9 |
| Rsa1.0_00605.1.g16778.t1 | #                                                                                                                                                                                                                                                                                                                                                                                                                                                                                                                              | #    | #    | #         | #     | #    | #    | -                                                                          | ----  | ----                 | AT3G04830.2   Symbols:   Protein prenyltransferase superfamily protein   chr3:1326289-1329132 FORWARD LENGTH=299                              | 117  | 299  | 1.00E-10  | 255.6 | 25.6 | 29.1 |
| Rsa1.0_00605.1.g16779.t1 | refXP_002889800.1  hypothetical protein ARALYDRAFT_888292 [Arabidopsis lyrata subsp. lyrata] gi 297335642 gb EFH66059.1  hypothetical protein ARALYDRAFT_888292 [Arabidopsis lyrata subsp. lyrata]                                                                                                                                                                                                                                                                                                                             | 650  | 668  | 0         | 102.8 | 78.5 | 89.7 | hypothetical protein ARALYDRAFT_888292                                     | gbpln | Arabidopsis lyrata   | AT1G50920.1   Symbols:   Nucleolar GTP-binding protein   chr1:18870555-18872570 FORWARD LENGTH=671                                            | 650  | 671  | 0         | 103.2 | 74.8 | 88.6 |
| Rsa1.0_00605.1.g16780.t1 | refXP_002887691.1  nucleotide-binding family protein [Arabidopsis lyrata subsp. lyrata] gi 297335532 gb EFH63950.1  nucleotide-binding family protein [Arabidopsis lyrata subsp. lyrata]                                                                                                                                                                                                                                                                                                                                       | 362  | 355  | 1.00E-150 | 98.1  | 74.3 | 85.4 | nucleotide-binding family protein                                          | gbpln | Arabidopsis lyrata   | AT5G50960.1   Symbols: NBP35, ATNBP35   nucleotide binding protein 35   chr5:20734267-20735824 FORWARD LENGTH=350                             | 362  | 350  | 1.00E-151 | 96.7  | 73.8 | 83.7 |
| Rsa1.0_00605.1.g16781.t3 | gb EOA39624.1  hypothetical protein CARUB.v10008252mg [Capsella rubella]                                                                                                                                                                                                                                                                                                                                                                                                                                                       | 942  | 911  | 0         | 96.7  | 88.6 | 91.8 | hypothetical protein CARUB.v10008252mg                                     | gbpln | Capsella rubella     | AT1G59610.1   Symbols: ADL3, CF1, DRP2B, DL3   dynamin-like 3   chr1:21893413-21900780 FORWARD LENGTH=920                                     | 942  | 920  | 0         | 97.7  | 86.5 | 90.6 |
| Rsa1.0_00605.1.g16782.t1 | refXP_002863741.1  hypothetical protein ARALYDRAFT_917455 [Arabidopsis lyrata subsp. lyrata] gi 297309576 gb EFH40000.1  hypothetical protein ARALYDRAFT_917455 [Arabidopsis lyrata subsp. lyrata]                                                                                                                                                                                                                                                                                                                             | 270  | 390  | 5.00E-38  | 144.4 | 27.0 | 42.6 | hypothetical protein ARALYDRAFT_917455                                     | gbpln | Arabidopsis lyrata   | AT4G04650.1   Symbols:   RNA-directed DNA polymerase (reverse transcriptase)-related family protein   chr4:2353989-2355213 REVERSE LENGTH=332 | 270  | 332  | 5.00E-32  | 123.0 | 25.9 | 44.8 |
| Rsa1.0_00605.1.g16783.t1 | refNP_172499.1  Core-2/I-branching beta-1,6-N-acetylglucosaminyltransferase family protein [Arabidopsis thaliana] gi 4914330 gb AAD32878.1 AC005489.16 F14N23.16 [Arabidopsis thaliana] gi 117168053 gb ABK32109.1  At1g10280 [Arabidopsis thaliana] gi 332190440 gb AEE28561.1  Core-2/I-branching beta-1,6-N-acetylglucosaminyltransferase family protein [Arabidopsis thaliana]                                                                                                                                             | 416  | 412  | 0         | 99.0  | 88.2 | 93.8 | Core-2/I-branching beta-1,6-N-acetylglucosaminyltransferase family protein | gbpln | Arabidopsis thaliana | AT1G10280.1   Symbols:   Core-2/I-branching beta-1,6-N-acetylglucosaminyltransferase family protein   chr1:3366795-3368739 REVERSE LENGTH=412 | 416  | 412  | 0         | 99.0  | 88.2 | 93.8 |
| Rsa1.0_00605.1.g16784.t1 | gb EOA37763.1  hypothetical protein CARUB.v10012602mg [Capsella rubella]                                                                                                                                                                                                                                                                                                                                                                                                                                                       | 821  | 888  | 0         | 108.2 | 77.6 | 84.5 | hypothetical protein CARUB.v10012602mg                                     | gbpln | Capsella rubella     | AT1G10270.1   Symbols: GRP23   glutamine-rich protein 23   chr1:3363535-3366276 FORWARD LENGTH=913                                            | 821  | 913  | 0         | 111.2 | 75.9 | 83.8 |
| Rsa1.0_00605.1.g16785.t1 | gb EOA37760.1  hypothetical protein CARUB.v10012599mg [Capsella rubella]                                                                                                                                                                                                                                                                                                                                                                                                                                                       | 679  | 679  | 0         | 100.0 | 94.7 | 98.4 | hypothetical protein CARUB.v10012599mg                                     | gbpln | Capsella rubella     | AT1G10240.1   Symbols: FRS11   FARI-related sequence 11   chr1:3356835-3359271 REVERSE LENGTH=680                                             | 679  | 680  | 0         | 100.1 | 93.7 | 98.1 |
| Rsa1.0_00605.1.g16786.t1 | gb AD179334.1  chloroplast biotin carboxylase [Brassica napus]                                                                                                                                                                                                                                                                                                                                                                                                                                                                 | 535  | 536  | 0         | 100.2 | 97.8 | 99.4 | chloroplast biotin carboxylase                                             | gbpln | Brassica napus       | AT5G35360.1   Symbols: CAC2   acetyl Co-enzyme A carboxylase biotin carboxylase subunit   chr5:13584300-13588268 FORWARD LENGTH=537           | 535  | 537  | 0         | 100.4 | 90.5 | 93.6 |



|                          |                                                                                                                                                                                                                                                                                                     |     |      |           |       |      |      |                                                                                                                                |       |                      |                                                                                                                                                                                                                                                                                                                                                     |     |      |           |       |      |      |
|--------------------------|-----------------------------------------------------------------------------------------------------------------------------------------------------------------------------------------------------------------------------------------------------------------------------------------------------|-----|------|-----------|-------|------|------|--------------------------------------------------------------------------------------------------------------------------------|-------|----------------------|-----------------------------------------------------------------------------------------------------------------------------------------------------------------------------------------------------------------------------------------------------------------------------------------------------------------------------------------------------|-----|------|-----------|-------|------|------|
| Rsa1.0_00606.1.g16787.t1 | ref[XP_002872610.1] pentatricopeptide repeat-containing protein [Arabidopsis lyrata subsp. lyrata]<br>gi 297318447 gb EFH48869.1  pentatricopeptide repeat-containing protein [Arabidopsis lyrata subsp. lyrata]                                                                                    | 107 | 575  | 4.00E-42  | 537.4 | 79.4 | 87.9 | pentatricopeptide repeat-containing protein                                                                                    | gbpln | Arabidopsis lyrata   | AT4G11690.1   Symbols:   Pentatricopeptide repeat (PPR-like) superfamily protein   chr4:7056254-7057954 FORWARD LENGTH=566                                                                                                                                                                                                                          | 107 | 566  | 5.00E-40  | 529.0 | 72.0 | 81.3 |
| Rsa1.0_00606.1.g16788.t1 | #                                                                                                                                                                                                                                                                                                   | #   | #    | #         | #     | #    | #    | -                                                                                                                              | ----  | ----                 | #                                                                                                                                                                                                                                                                                                                                                   | #   | #    | #         | #     | #    | #    |
| Rsa1.0_00606.1.g16789.t1 | gb EOA37583.1  hypothetical protein CARUB_v10011933mg [Capsella rubella]                                                                                                                                                                                                                            | 303 | 481  | 3.00E-54  | 158.7 | 39.9 | 48.8 | hypothetical protein CARUB_v10011933mg                                                                                         | gbpln | Capsella rubella     | AT1G23770.1   Symbols:   F-box family protein   chr1:8405214-8406266 REVERSE LENGTH=350                                                                                                                                                                                                                                                             | 303 | 350  | 3.00E-49  | 115.5 | 40.9 | 50.8 |
| Rsa1.0_00606.1.g16790.t1 | #                                                                                                                                                                                                                                                                                                   | #   | #    | #         | #     | #    | #    | -                                                                                                                              | ----  | ----                 | #                                                                                                                                                                                                                                                                                                                                                   | #   | #    | #         | #     | #    | #    |
| Rsa1.0_00606.1.g16791.t1 | gb EOA20188.1  hypothetical protein CARUB_v10000484mg, partial [Capsella rubella]                                                                                                                                                                                                                   | 553 | 617  | 0         | 111.6 | 82.5 | 89.5 | hypothetical protein CARUB_v10000484mg, partial                                                                                | gbpln | Capsella rubella     | AT4G11740.1   Symbols: SAY1   Ubiquitin-like superfamily protein   chr4:7071955-7075256 FORWARD LENGTH=564                                                                                                                                                                                                                                          | 553 | 564  | 0         | 102.0 | 81.2 | 88.4 |
| Rsa1.0_00606.1.g16792.t1 | ref[XP_002872624.1] hypothetical protein ARALYDRAFT_489994 [Arabidopsis lyrata subsp. lyrata]<br>gi 297318461 gb EFH48883.1  hypothetical protein ARALYDRAFT_489994 [Arabidopsis lyrata subsp. lyrata]                                                                                              | 480 | 477  | 1.00E-164 | 99.4  | 71.9 | 81.0 | hypothetical protein ARALYDRAFT_489994                                                                                         | gbpln | Arabidopsis lyrata   | AT4G11780.1   Symbols:   unknown protein; BEST Arabidopsis thaliana protein match is: unknown protein (TAIR:AT4G23020.2). Has 550 Blast hits to 387 proteins in 92 species: Archae - 0; Bacteria - 32; Metazoa - 132; Fungi - 122; Plants - 80; Viruses - 0; Other Eukaryotes - 184 (source: NCBI BLINK).   chr4:7085970-7088212 FORWARD LENGTH=473 | 480 | 473  | 1.00E-166 | 98.5  | 71.5 | 79.4 |
| Rsa1.0_00606.1.g16793.t1 | #                                                                                                                                                                                                                                                                                                   | #   | #    | #         | #     | #    | #    | -                                                                                                                              | ----  | ----                 | #                                                                                                                                                                                                                                                                                                                                                   | #   | #    | #         | #     | #    | #    |
| Rsa1.0_00606.1.g16794.t1 | ref[XP_002883909.1] predicted protein [Arabidopsis lyrata subsp. lyrata]<br>gi 297329749 gb EFH60168.1  predicted protein [Arabidopsis lyrata subsp. lyrata]                                                                                                                                        | 202 | 528  | 8.00E-19  | 261.4 | 33.2 | 49.5 | predicted protein                                                                                                              | gbpln | Arabidopsis lyrata   | #                                                                                                                                                                                                                                                                                                                                                   | #   | #    | #         | #     | #    | #    |
| Rsa1.0_00606.1.g16795.t1 | gb EOA18216.1  hypothetical protein CARUB_v10006701mg, partial [Capsella rubella]                                                                                                                                                                                                                   | 123 | 279  | 4.00E-11  | 226.8 | 29.3 | 32.5 | hypothetical protein CARUB_v10006701mg, partial                                                                                | gbpln | Capsella rubella     | AT5G37890.1   Symbols:   Protein with RING/U-box and TRAF-like domains   chr5:15090512-15091822 REVERSE LENGTH=286                                                                                                                                                                                                                                  | 123 | 286  | 1.00E-12  | 232.5 | 27.6 | 30.1 |
| Rsa1.0_00606.1.g16796.t1 | #                                                                                                                                                                                                                                                                                                   | #   | #    | #         | #     | #    | #    | -                                                                                                                              | ----  | ----                 | #                                                                                                                                                                                                                                                                                                                                                   | #   | #    | #         | #     | #    | #    |
| Rsa1.0_00606.1.g16797.t1 | ref[XP_002872625.1] hypothetical protein ARALYDRAFT_489995 [Arabidopsis lyrata subsp. lyrata]<br>gi 297318462 gb EFH48884.1  hypothetical protein ARALYDRAFT_489995 [Arabidopsis lyrata subsp. lyrata]                                                                                              | 359 | 425  | 1.00E-123 | 118.4 | 76.3 | 82.5 | hypothetical protein ARALYDRAFT_489995                                                                                         | gbpln | Arabidopsis lyrata   | AT4G11790.1   Symbols:   Pleckstrin homology (PH) domain superfamily protein   chr4:7090456-7093208 FORWARD LENGTH=443                                                                                                                                                                                                                              | 359 | 443  | 1.00E-115 | 123.4 | 74.1 | 80.2 |
| Rsa1.0_00606.1.g16798.t1 | gb EOA19882.1  hypothetical protein CARUB_v10000128mg [Capsella rubella]                                                                                                                                                                                                                            | 986 | 1013 | 0         | 102.7 | 89.4 | 94.4 | hypothetical protein CARUB_v10000128mg                                                                                         | gbpln | Capsella rubella     | AT4G11800.1   Symbols:   Calcineurin-like metallo-phosphoesterase superfamily protein   chr4:7093666-7098519 REVERSE LENGTH=1013                                                                                                                                                                                                                    | 986 | 1013 | 0         | 102.7 | 88.7 | 94.1 |
| Rsa1.0_00607.1.g16799.t1 | #                                                                                                                                                                                                                                                                                                   | #   | #    | #         | #     | #    | #    | -                                                                                                                              | ----  | ----                 | #                                                                                                                                                                                                                                                                                                                                                   | #   | #    | #         | #     | #    | #    |
| Rsa1.0_00607.1.g16800.t1 | #                                                                                                                                                                                                                                                                                                   | #   | #    | #         | #     | #    | #    | -                                                                                                                              | ----  | ----                 | #                                                                                                                                                                                                                                                                                                                                                   | #   | #    | #         | #     | #    | #    |
| Rsa1.0_00607.1.g16801.t1 | ref[XP_002872519.1] oxidoreductase [Arabidopsis lyrata subsp. lyrata]<br>gi 297318356 gb EFH48778.1  oxidoreductase [Arabidopsis lyrata subsp. lyrata]                                                                                                                                              | 261 | 350  | 1.00E-136 | 134.1 | 88.1 | 94.3 | oxidoreductase                                                                                                                 | gbpln | Arabidopsis lyrata   | AT4G10500.1   Symbols:   2-oxoglutarate (2OG) and Fe(II)-dependent oxygenase superfamily protein   chr4:6491089-6492342 FORWARD LENGTH=349                                                                                                                                                                                                          | 261 | 349  | 1.00E-136 | 133.7 | 85.4 | 93.5 |
| Rsa1.0_00607.1.g16802.t1 | ref[NP_175207.1] protein agamous-like 102 [Arabidopsis thaliana]<br>gi 9802597 gb AAF99799.1 AC012463_16 T2E6.17 [Arabidopsis thaliana]<br>gi 32402446 gb AAN52805.1  MADS-box protein AGL102 [Arabidopsis thaliana]<br>gi 332194088 gb AEE32209.1  protein agamous-like 102 [Arabidopsis thaliana] | 145 | 184  | 5.00E-15  | 126.9 | 35.9 | 59.3 | protein agamous-like 102                                                                                                       | gbpln | Arabidopsis thaliana | AT1G47760.1   Symbols: AGL102   AGAMOUS-like 102   chr1:17572451-17573159 FORWARD LENGTH=184                                                                                                                                                                                                                                                        | 145 | 184  | 1.00E-17  | 126.9 | 35.9 | 59.3 |
| Rsa1.0_00607.1.g16803.t1 | gb ABK28054.1  unknown [Arabidopsis thaliana]                                                                                                                                                                                                                                                       | 75  | 73   | 3.00E-11  | 97.3  | 57.3 | 69.3 | unknown                                                                                                                        | gbpln | Arabidopsis thaliana | #                                                                                                                                                                                                                                                                                                                                                   | #   | #    | #         | #     | #    | #    |
| Rsa1.0_00607.1.g16804.t1 | gb AAC35520.1  contains similarity to tropomyosin (Pfam: Tropomyosin.hmm, score: 14.57) and ATP synthase (Pfam: ATP-synt.B.hmm, score: 10.89) [Arabidopsis thaliana]                                                                                                                                | 92  | 466  | 4.00E-16  | 506.5 | 48.9 | 59.8 | contains similarity to tropomyosin (Pfam: Tropomyosin.hmm, score: 14.57) and ATP synthase (Pfam: ATP-synt.B.hmm, score: 10.89) | gbpln | Arabidopsis thaliana | AT4G10790.1   Symbols:   UBX domain-containing protein   chr4:6640752-6643035 REVERSE LENGTH=480                                                                                                                                                                                                                                                    | 92  | 480  | 6.00E-19  | 521.7 | 48.9 | 59.8 |
| Rsa1.0_00607.1.g16805.t1 | ref[XP_002874637.1] ubiquitin carboxyl-terminal hydrolase family protein [Arabidopsis lyrata subsp. lyrata]<br>gi 297320474 gb EFH50896.1  ubiquitin carboxyl-terminal hydrolase family protein [Arabidopsis lyrata subsp. lyrata]                                                                  | 907 | 913  | 0         | 100.7 | 87.0 | 93.9 | ubiquitin carboxyl-terminal hydrolase family protein                                                                           | gbpln | Arabidopsis lyrata   | AT4G10570.1   Symbols: UB9   ubiquitin-specific protease 9   chr4:6523657-6528058 REVERSE LENGTH=923                                                                                                                                                                                                                                                | 907 | 923  | 0         | 101.8 | 86.4 | 93.5 |
| Rsa1.0_00607.1.g16806.t1 | #                                                                                                                                                                                                                                                                                                   | #   | #    | #         | #     | #    | #    | -                                                                                                                              | ----  | ----                 | #                                                                                                                                                                                                                                                                                                                                                   | #   | #    | #         | #     | #    | #    |

|                          |                                                                                                                                                                                                                                                                                                                                                                                                                                                                                                                                                                                     |     |      |           |       |      |      |                                           |       |                      |                                                                                                                                                                                                                                                                                                                                                                                                                                                                                                                                                                   |     |      |           |       |      |      |
|--------------------------|-------------------------------------------------------------------------------------------------------------------------------------------------------------------------------------------------------------------------------------------------------------------------------------------------------------------------------------------------------------------------------------------------------------------------------------------------------------------------------------------------------------------------------------------------------------------------------------|-----|------|-----------|-------|------|------|-------------------------------------------|-------|----------------------|-------------------------------------------------------------------------------------------------------------------------------------------------------------------------------------------------------------------------------------------------------------------------------------------------------------------------------------------------------------------------------------------------------------------------------------------------------------------------------------------------------------------------------------------------------------------|-----|------|-----------|-------|------|------|
| Rsa1.0_00607.1.g16807.t1 | refXP_002874638.1   PHD finger family protein [Arabidopsis lyrata subsp. lyrata] gi 297320475 gb EFH50897.1   PHD finger family protein [Arabidopsis lyrata subsp. lyrata]                                                                                                                                                                                                                                                                                                                                                                                                          | 207 | 230  | 1.00E-60  | 111.1 | 62.3 | 71.0 | PHD finger family protein                 | gbpln | Arabidopsis lyrata   | AT4G10600.1   Symbols:   RING/FYVE/PHD zinc finger superfamily protein   chr4:6547934-6548647 REVERSE LENGTH=237                                                                                                                                                                                                                                                                                                                                                                                                                                                  | 207 | 237  | 8.00E-59  | 114.5 | 64.3 | 71.0 |
| Rsa1.0_00607.1.g16808.t1 | refXP_002872527.1   RNA-binding protein 37 [Arabidopsis lyrata subsp. lyrata] gi 297318364 gb EFH48786.1   RNA-binding protein 37 [Arabidopsis lyrata subsp. lyrata]                                                                                                                                                                                                                                                                                                                                                                                                                | 339 | 336  | 1.00E-151 | 99.1  | 83.5 | 88.5 | RNA-binding protein 37                    | gbpln | Arabidopsis lyrata   | AT4G10610.1   Symbols: RBP37, ATRBP37, CID12   CTC-interacting domain 12   chr4:6557336-6559143 FORWARD LENGTH=336                                                                                                                                                                                                                                                                                                                                                                                                                                                | 339 | 336  | 1.00E-153 | 99.1  | 82.6 | 87.9 |
| Rsa1.0_00608.1.g16809.t1 | refXP_002879272.1   hypothetical protein ARALYDRAFT_481979 [Arabidopsis lyrata subsp. lyrata] gi 297325111 gb EFH55531.1   hypothetical protein ARALYDRAFT_481979 [Arabidopsis lyrata subsp. lyrata]                                                                                                                                                                                                                                                                                                                                                                                | 274 | 264  | 2.00E-63  | 96.4  | 69.3 | 73.0 | hypothetical protein ARALYDRAFT_481979    | gbpln | Arabidopsis lyrata   | AT2G30620.1   Symbols:   winged-helix DNA-binding transcription factor family protein   chr2:13045360-13046267 FORWARD LENGTH=273                                                                                                                                                                                                                                                                                                                                                                                                                                 | 274 | 273  | 3.00E-61  | 99.6  | 70.4 | 74.8 |
| Rsa1.0_00608.1.g16810.t1 | refNP_973567.1   nucleoside/nucleotide kinase-like protein [Arabidopsis thaliana] gi 330253327 gb AEC08421.1   nucleoside/nucleotide kinase-like protein [Arabidopsis thaliana] gb AAC02734.1   putative Mutator-like transposase [Arabidopsis thaliana] gi 20198324 gb AAM15523.1   putative Mutator-like transposase [Arabidopsis thaliana]                                                                                                                                                                                                                                       | 317 | 552  | 1.00E-125 | 174.1 | 71.9 | 73.5 | nucleoside/nucleotide kinase-like protein | gbpln | Arabidopsis thaliana | AT2G30630.2   Symbols:   P-loop containing nucleoside triphosphate hydrolases superfamily protein   chr2:13046883-13049106 REVERSE LENGTH=552                                                                                                                                                                                                                                                                                                                                                                                                                     | 317 | 552  | 1.00E-128 | 174.1 | 71.9 | 73.5 |
| Rsa1.0_00608.1.g16811.t1 | refNP_001184913.1   callose synthase 1 [Arabidopsis thaliana] gi 332189735 gb AEE27856.1   callose synthase 1 [Arabidopsis thaliana]                                                                                                                                                                                                                                                                                                                                                                                                                                                | 275 | 1909 | 1.00E-22  | 694.2 | 27.6 | 43.3 | callose synthase 1                        | gbpln | Arabidopsis thaliana | AT1G05570.2   Symbols: CALS1   callose synthase 1   chr1:1647880-1658677 REVERSE LENGTH=1909                                                                                                                                                                                                                                                                                                                                                                                                                                                                      | 275 | 1909 | 4.00E-25  | 694.2 | 27.6 | 43.3 |
| Rsa1.0_00608.1.g16813.t1 | refXP_002879276.1   hypothetical protein ARALYDRAFT_344831 [Arabidopsis lyrata subsp. lyrata] gi 297325115 gb EFH55535.1   hypothetical protein ARALYDRAFT_344831 [Arabidopsis lyrata subsp. lyrata]                                                                                                                                                                                                                                                                                                                                                                                | 722 | 761  | 0         | 105.4 | 67.7 | 76.3 | hypothetical protein ARALYDRAFT_344831    | gbpln | Arabidopsis lyrata   | AT2G30690.1   Symbols:   Protein of unknown function, DUF593   chr2:13076229-13078595 FORWARD LENGTH=760                                                                                                                                                                                                                                                                                                                                                                                                                                                          | 722 | 760  | 0         | 105.3 | 68.0 | 76.6 |
| Rsa1.0_00608.1.g16814.t1 | gb EOA28009.1   hypothetical protein CARUB_v10024186mg [Capsella rubella]                                                                                                                                                                                                                                                                                                                                                                                                                                                                                                           | 66  | 170  | 7.00E-16  | 257.6 | 65.2 | 74.2 | hypothetical protein CARUB_v10024186mg    | gbpln | Capsella rubella     | AT2G30930.1   Symbols:   unknown protein; FUNCTIONS IN: molecular_function unknown; INVOLVED IN: biological_process unknown; LOCATED IN: chloroplast, plasma membrane, membrane; EXPRESSED IN: 24 plant structures; EXPRESSED DURING: 14 growth stages; BEST Arabidopsis thaliana protein match is: unknown protein (TAIR:AT1G06540.1); Has 194 Blast hits to 176 proteins in 78 species: Archae - 0; Bacteria - 101; Metazoa - 15; Fungi - 25; Plants - 12; Viruses - 4; Other Eukaryotes - 37 (source: NCBI BLINK).   chr2:13162458-13163156 FORWARD LENGTH=164 | 66  | 164  | 2.00E-17  | 248.5 | 62.1 | 71.2 |
| Rsa1.0_00608.1.g16815.t1 | refNP_195605.1   F-box/kelch-repeat protein [Arabidopsis thaliana] gi 75212071 sp Q9SVJ9.1 FBK95_ARATH RecName: Full=F-box/kelch-repeat protein At4g38940 gi 4539313 emb CAB38814.1   putative protein [Arabidopsis thaliana] gi 7270877 emb CAB80557.1   putative protein [Arabidopsis thaliana] gi 21593554 gb AAM65521.1   unknown [Arabidopsis thaliana] gi 51968770 dbj BAD43077.1   unknown protein [Arabidopsis thaliana] gi 51969398 dbj BAD43391.1   unknown protein [Arabidopsis thaliana] gi 332661596 gb AEE86996.1   F-box/kelch-repeat protein [Arabidopsis thaliana] | 389 | 370  | 6.00E-67  | 95.1  | 38.6 | 55.5 | F-box/kelch-repeat protein                | gbpln | Arabidopsis thaliana | AT4G38940.1   Symbols:   Galactose oxidase/kelch repeat superfamily protein   chr4:18152848-18153960 FORWARD LENGTH=370                                                                                                                                                                                                                                                                                                                                                                                                                                           | 389 | 370  | 1.00E-69  | 95.1  | 38.6 | 55.5 |
| Rsa1.0_00608.1.g16816.t1 | gb EOA14519.1   hypothetical protein CARUB_v10027748mg [Capsella rubella]                                                                                                                                                                                                                                                                                                                                                                                                                                                                                                           | 348 | 368  | 1.00E-75  | 105.7 | 48.6 | 64.4 | hypothetical protein CARUB_v10027748mg    | gbpln | Capsella rubella     | AT4G38940.1   Symbols:   Galactose oxidase/kelch repeat superfamily protein   chr4:18152848-18153960 FORWARD LENGTH=370                                                                                                                                                                                                                                                                                                                                                                                                                                           | 348 | 370  | 6.00E-75  | 106.3 | 44.3 | 64.7 |
| Rsa1.0_00608.1.g16817.t3 | gb EOA28434.1   hypothetical protein CARUB_v10024642mg [Capsella rubella]                                                                                                                                                                                                                                                                                                                                                                                                                                                                                                           | 438 | 426  | 0         | 97.3  | 78.3 | 85.8 | hypothetical protein CARUB_v10024642mg    | gbpln | Capsella rubella     | AT2G30940.1   Symbols:   Protein kinase superfamily protein   chr2:13168533-13170285 FORWARD LENGTH=451                                                                                                                                                                                                                                                                                                                                                                                                                                                           | 438 | 451  | 0         | 103.0 | 76.9 | 84.9 |

|                          |                                                                                                                                                                                                                                                                                                                                                                                                                                                                    |     |     |           |       |      |      |                                        |       |                      |                                                                                                                                                                                                                                                                               |     |     |           |       |      |      |
|--------------------------|--------------------------------------------------------------------------------------------------------------------------------------------------------------------------------------------------------------------------------------------------------------------------------------------------------------------------------------------------------------------------------------------------------------------------------------------------------------------|-----|-----|-----------|-------|------|------|----------------------------------------|-------|----------------------|-------------------------------------------------------------------------------------------------------------------------------------------------------------------------------------------------------------------------------------------------------------------------------|-----|-----|-----------|-------|------|------|
| Rsa1.0_00608.1.g16818.t1 | refXP_002879294.1   hypothetical protein ARALYDRAFT_482018 [Arabidopsis lyrata subsp. lyrata] gi 297325133 gb EFH55553.1   hypothetical protein ARALYDRAFT_482018 [Arabidopsis lyrata subsp. lyrata]                                                                                                                                                                                                                                                               | 695 | 695 | 0         | 100.0 | 92.5 | 96.1 | hypothetical protein ARALYDRAFT_482018 | gbpln | Arabidopsis lyrata   | AT2G30950.1   Symbols: VAR2, FTSH2   FtsH extracellular protease family   chr2:13174692-13177064 FORWARD LENGTH=695                                                                                                                                                           | 695 | 695 | 0         | 100.0 | 90.6 | 94.0 |
| Rsa1.0_00608.1.g16819.t1 | gb EOA29296.1   hypothetical protein CARUB_v10025574mg [Capsella rubella]                                                                                                                                                                                                                                                                                                                                                                                          | 242 | 268 | 1.00E-26  | 110.7 | 50.0 | 64.9 | hypothetical protein CARUB_v10025574mg | gbpln | Capsella rubella     | AT2G30960.1   Symbols:   unknown protein; Has 4906 Blast hits to 2903 proteins in 334 species: Archaea - 5; Bacteria - 381; Metazoa - 1639; Fungi - 509; Plants - 244; Viruses - 5; Other Eukaryotes - 2123 (source: NCBI BLink).   chr2:13177541-13178323 REVERSE LENGTH=260 | 242 | 260 | 4.00E-22  | 107.4 | 44.2 | 60.3 |
| Rsa1.0_00608.1.g16820.t1 | refXP_002879295.1   hypothetical protein ARALYDRAFT_482020 [Arabidopsis lyrata subsp. lyrata] gi 297325134 gb EFH55554.1   hypothetical protein ARALYDRAFT_482020 [Arabidopsis lyrata subsp. lyrata]                                                                                                                                                                                                                                                               | 429 | 430 | 0         | 100.2 | 92.1 | 95.6 | hypothetical protein ARALYDRAFT_482020 | gbpln | Arabidopsis lyrata   | AT2G30970.2   Symbols: ASP1   aspartate aminotransferase 1   chr2:13179012-13181686 FORWARD LENGTH=430                                                                                                                                                                        | 429 | 430 | 0         | 100.2 | 91.6 | 95.6 |
| Rsa1.0_00608.1.g16821.t4 | refXP_002881148.1   hypothetical protein ARALYDRAFT_482023 [Arabidopsis lyrata subsp. lyrata] gi 297326987 gb EFH57407.1   hypothetical protein ARALYDRAFT_482023 [Arabidopsis lyrata subsp. lyrata]                                                                                                                                                                                                                                                               | 561 | 591 | 1.00E-129 | 105.3 | 58.8 | 65.8 | hypothetical protein ARALYDRAFT_482023 | gbpln | Arabidopsis lyrata   | AT2G30990.2   Symbols:   Protein of unknown function (DUF688)   chr2:13187776-13189761 REVERSE LENGTH=593                                                                                                                                                                     | 561 | 593 | 1.00E-128 | 105.7 | 56.5 | 65.8 |
| Rsa1.0_00608.1.g16822.t1 | refNP_001078598.1   rubredoxin family protein [Arabidopsis thaliana] gi 332005009 gb AED92392.1   rubredoxin family protein [Arabidopsis thaliana]                                                                                                                                                                                                                                                                                                                 | 187 | 224 | 4.00E-47  | 119.8 | 59.9 | 64.7 | rubredoxin family protein              | gbpln | Arabidopsis thaliana | AT5G17170.2   Symbols: ENH1   rubredoxin family protein   chr5:5649335-5650835 FORWARD LENGTH=224                                                                                                                                                                             | 187 | 224 | 1.00E-49  | 119.8 | 59.9 | 64.7 |
| Rsa1.0_00608.1.g16823.t1 | gb EOA29196.1   hypothetical protein CARUB_v10025469mg [Capsella rubella]                                                                                                                                                                                                                                                                                                                                                                                          | 200 | 194 | 3.00E-68  | 97.0  | 71.0 | 79.0 | hypothetical protein CARUB_v10025469mg | gbpln | Capsella rubella     | AT2G31050.1   Symbols:   Cupredoxin superfamily protein   chr2:13212150-13212752 FORWARD LENGTH=200                                                                                                                                                                           | 200 | 200 | 7.00E-70  | 100.0 | 67.5 | 77.0 |
| Rsa1.0_00608.1.g16824.t1 | dbj BAJ34111.1   unnamed protein product [Theilungella halophila]                                                                                                                                                                                                                                                                                                                                                                                                  | 347 | 349 | 1.00E-141 | 100.6 | 83.3 | 87.0 | unnamed protein product                | ----  | ----                 | AT2G31070.1   Symbols: TCP10   TCP domain protein 10   chr2:13220984-13222069 REVERSE LENGTH=361                                                                                                                                                                              | 347 | 361 | 1.00E-116 | 104.0 | 78.1 | 83.0 |
| Rsa1.0_00608.1.g16825.t1 | #                                                                                                                                                                                                                                                                                                                                                                                                                                                                  | #   | #   | #         | #     | #    | #    | -                                      | ----  | ----                 | #                                                                                                                                                                                                                                                                             | #   | #   | #         | #     | #    |      |
| Rsa1.0_00608.1.g16826.t1 | gb EOA29350.1   hypothetical protein CARUB_v10025636mg [Capsella rubella]                                                                                                                                                                                                                                                                                                                                                                                          | 82  | 81  | 7.00E-29  | 98.8  | 78.0 | 85.4 | hypothetical protein CARUB_v10025636mg | gbpln | Capsella rubella     | AT2G31085.1   Symbols: CLE6   CLAVATA3/ESR-RELATED 6   chr2:13254263-13254508 FORWARD LENGTH=81                                                                                                                                                                               | 82  | 81  | 2.00E-29  | 98.8  | 72.0 | 82.9 |
| Rsa1.0_00608.1.g16827.t1 | sp O82274.2 PLA19_ARATH RecName: Full=Phospholipase A1-Ibeta                                                                                                                                                                                                                                                                                                                                                                                                       | 414 | 414 | 0         | 100.0 | 78.0 | 85.5 | RecName: Full=Phospholipase A1-Ibeta   | ----  | ----                 | AT2G31100.1   Symbols:   alpha/beta-Hydrolases superfamily protein   chr2:13256738-13258174 REVERSE LENGTH=414                                                                                                                                                                | 414 | 414 | 0         | 100.0 | 78.0 | 85.5 |
| Rsa1.0_00608.1.g16828.t1 | gb EOA29166.1   hypothetical protein CARUB_v10025433mg [Capsella rubella]                                                                                                                                                                                                                                                                                                                                                                                          | 259 | 349 | 5.00E-76  | 134.7 | 60.6 | 74.5 | hypothetical protein CARUB_v10025433mg | gbpln | Capsella rubella     | AT2G41930.1   Symbols:   Protein kinase superfamily protein   chr2:17501629-17502684 FORWARD LENGTH=351                                                                                                                                                                       | 259 | 351 | 5.00E-75  | 135.5 | 57.5 | 76.1 |
| Rsa1.0_00609.1.g16829.t1 | gb EOA33134.1   hypothetical protein CARUB_v10016476mg [Capsella rubella]                                                                                                                                                                                                                                                                                                                                                                                          | 346 | 354 | 1.00E-166 | 102.3 | 86.7 | 91.6 | hypothetical protein CARUB_v10016476mg | gbpln | Capsella rubella     | AT3G01400.1   Symbols:   ARM repeat superfamily protein   chr3:151920-152987 FORWARD LENGTH=355                                                                                                                                                                               | 346 | 355 | 1.00E-166 | 102.6 | 85.8 | 90.5 |
| Rsa1.0_00609.1.g16830.t1 | gb EOA31134.1   hypothetical protein CARUB_v10014297mg [Capsella rubella]                                                                                                                                                                                                                                                                                                                                                                                          | 302 | 292 | 1.00E-112 | 96.7  | 70.9 | 80.8 | hypothetical protein CARUB_v10014297mg | gbpln | Capsella rubella     | AT3G01410.2   Symbols:   Polynucleotidyl transferase, ribonuclease H-like superfamily protein   chr3:153650-155439 REVERSE LENGTH=294                                                                                                                                         | 302 | 294 | 1.00E-111 | 97.4  | 70.5 | 80.1 |
| Rsa1.0_00609.1.g16831.t1 | emb CAC01808.1   putative protein [Arabidopsis thaliana]                                                                                                                                                                                                                                                                                                                                                                                                           | 153 | 733 | 2.00E-51  | 479.1 | 67.3 | 74.5 | putative protein                       | gbpln | Arabidopsis thaliana | AT5G14890.1   Symbols:   NHL domain-containing protein   chr5:4818056-4821534 FORWARD LENGTH=754                                                                                                                                                                              | 153 | 754 | 8.00E-54  | 492.8 | 67.3 | 74.5 |
| Rsa1.0_00609.1.g16832.t1 | refNP_974205.1   uncharacterized protein [Arabidopsis thaliana] gi 75123851 sp Q6ID77.1 MED11_ARATH RecName: Full=Mediator of RNA polymerase II transcription subunit 11 gi 48310228 gb AAT41779.1   At3g01435 [Arabidopsis thaliana] gi 52218796 gb AAU29468.1   At3g01435 [Arabidopsis thaliana] gi 110738543 dbj BAF01197.1   hypothetical protein [Arabidopsis thaliana] gi 332640145 gb AEE73666.1   uncharacterized protein AT3G01435 [Arabidopsis thaliana] | 115 | 115 | 2.00E-53  | 100.0 | 86.1 | 93.9 | uncharacterized protein                | gbpln | Arabidopsis thaliana | AT3G01435.1   Symbols:   Expressed protein   chr3:166853-167984 REVERSE LENGTH=115                                                                                                                                                                                            | 115 | 115 | 3.00E-56  | 100.0 | 86.1 | 93.9 |

|                          |                                                                                                                                                                                                                                                                                                                                                                                                                                                                                                                                                                   |      |      |           |       |      |      |                                                 |       |                      |                                                                                                                                                                                                                                                                                                                                                                                                                                                           |      |      |           |       |      |      |
|--------------------------|-------------------------------------------------------------------------------------------------------------------------------------------------------------------------------------------------------------------------------------------------------------------------------------------------------------------------------------------------------------------------------------------------------------------------------------------------------------------------------------------------------------------------------------------------------------------|------|------|-----------|-------|------|------|-------------------------------------------------|-------|----------------------|-----------------------------------------------------------------------------------------------------------------------------------------------------------------------------------------------------------------------------------------------------------------------------------------------------------------------------------------------------------------------------------------------------------------------------------------------------------|------|------|-----------|-------|------|------|
| Rsa1.0_00609.1.g16833.t2 | refXP_002884279.1   methyl-CpG-binding domain 9 [Arabidopsis lyrata subsp. lyrata]<br>gi 297330119 gb EFH60538.1   methyl-CpG-binding domain 9 [Arabidopsis lyrata subsp. lyrata]<br>db BAJ33940.1   unnamed protein product [Thellungiella halophila]<br>gi 312283511 db BAJ34621.1   unnamed protein product [Thellungiella halophila]                                                                                                                                                                                                                          | 2140 | 2183 | 0         | 102.0 | 81.6 | 88.5 | methyl-CpG-binding domain 9                     | gbpln | Arabidopsis lyrata   | AT3G01460.1   Symbols: MBD9, ATMBD9   methyl-CpG-binding domain 9   chr3:173316-182038 FORWARD LENGTH=2176                                                                                                                                                                                                                                                                                                                                                | 2140 | 2176 | 0         | 101.7 | 80.8 | 87.9 |
| Rsa1.0_00609.1.g16834.t1 | db BAJ33940.1   unnamed protein product [Thellungiella halophila]<br>gi 312283511 db BAJ34621.1   unnamed protein product [Thellungiella halophila]                                                                                                                                                                                                                                                                                                                                                                                                               | 271  | 274  | 1.00E-107 | 101.1 | 76.8 | 84.9 | unnamed protein product                         | ----  | ----                 | AT3G01470.1   Symbols: ATHB-1, ATHB1, HD-ZIP-1, HAT5, HB-1   homeobox 1   chr3:182648-184034 REVERSE LENGTH=272                                                                                                                                                                                                                                                                                                                                           | 271  | 272  | 4.00E-99  | 100.4 | 76.0 | 81.5 |
| Rsa1.0_00609.1.g16835.t1 | #                                                                                                                                                                                                                                                                                                                                                                                                                                                                                                                                                                 | #    | #    | #         | #     | #    | -    |                                                 | ----  | ----                 | #                                                                                                                                                                                                                                                                                                                                                                                                                                                         | #    | #    | #         | #     | #    | #    |
| Rsa1.0_00609.1.g16836.t1 | gb AD152861.1   chloroplast beta-carbonic anhydrase [Brassica napus]                                                                                                                                                                                                                                                                                                                                                                                                                                                                                              | 332  | 331  | 1.00E-176 | 99.7  | 94.6 | 97.3 | chloroplast beta-carbonic anhydrase             | gbpln | Brassica napus       | AT3G01500.2   Symbols: CA1   carbonic anhydrase 1   chr3:194853-197873 REVERSE LENGTH=347                                                                                                                                                                                                                                                                                                                                                                 | 332  | 347  | 1.00E-170 | 104.5 | 93.7 | 96.7 |
| Rsa1.0_00609.1.g16837.t1 | refXP_002882192.1   hypothetical protein ARALYDRAFT_896138 [Arabidopsis lyrata subsp. lyrata]<br>gi 297328032 gb EFH58451.1   hypothetical protein ARALYDRAFT_896138 [Arabidopsis lyrata subsp. lyrata]                                                                                                                                                                                                                                                                                                                                                           | 174  | 126  | 6.00E-27  | 72.4  | 44.8 | 57.5 | hypothetical protein ARALYDRAFT_896138          | gbpln | Arabidopsis lyrata   | AT3G01230.1   Symbols:   unknown protein; FUNCTIONS IN: molecular function unknown; INVOLVED IN: biological process unknown; LOCATED IN: endomembrane system; BEST Arabidopsis thaliana protein match is: unknown protein (TAIR:AT3G01240.1). Has 11 Blast hits to 11 proteins in 2 species: Archae - 0; Bacteria - 0; Metazoa - 0; Fungi - 0; Plants - 11; Viruses - 0; Other Eukaryotes - 0 (source: NCBI BLink).   chr3:76937-77317 REVERSE LENGTH=126 | 174  | 126  | 8.00E-29  | 72.4  | 44.3 | 58.0 |
| Rsa1.0_00609.1.g16838.t1 | emb CAB39638.1   RNA-directed DNA polymerase-like protein [Arabidopsis thaliana] gi 2767666 emb CAB78094.1   RNA-directed DNA polymerase-like protein [Arabidopsis thaliana]                                                                                                                                                                                                                                                                                                                                                                                      | 591  | 1274 | 1.00E-107 | 215.6 | 32.1 | 43.1 | RNA-directed DNA polymerase-like protein        | gbpln | Arabidopsis thaliana | AT4G29090.1   Symbols:   Ribonuclease H-like superfamily protein   chr4:14333528-14335255 FORWARD LENGTH=575                                                                                                                                                                                                                                                                                                                                              | 591  | 575  | 1.00E-38  | 97.3  | 15.2 | 24.0 |
| Rsa1.0_00609.1.g16839.t1 | refXP_002884288.1   ATHB20 [Arabidopsis lyrata subsp. lyrata]<br>gi 297330128 gb EFH60547.1   ATHB20 [Arabidopsis lyrata subsp. lyrata]                                                                                                                                                                                                                                                                                                                                                                                                                           | 263  | 283  | 1.00E-130 | 107.6 | 87.5 | 94.3 | ATHB20                                          | gbpln | Arabidopsis lyrata   | AT3G01220.1   Symbols: ATHB20, HB20   homeobox protein 20   chr3:73599-75295 FORWARD LENGTH=286                                                                                                                                                                                                                                                                                                                                                           | 263  | 286  | 1.00E-128 | 108.7 | 84.0 | 90.5 |
| Rsa1.0_00609.1.g16840.t1 | refXP_002882193.1   hypothetical protein ARALYDRAFT_477409 [Arabidopsis lyrata subsp. lyrata]<br>gi 297328033 gb EFH58452.1   hypothetical protein ARALYDRAFT_477409 [Arabidopsis lyrata subsp. lyrata]                                                                                                                                                                                                                                                                                                                                                           | 370  | 378  | 1.00E-177 | 102.2 | 84.9 | 89.7 | hypothetical protein ARALYDRAFT_477409          | gbpln | Arabidopsis lyrata   | AT3G01200.1   Symbols: AtRP2, RP2   PPK regulatory protein 2   chr3:69826-71348 REVERSE LENGTH=377                                                                                                                                                                                                                                                                                                                                                        | 370  | 377  | 1.00E-179 | 101.9 | 83.8 | 90.3 |
| Rsa1.0_00609.1.g16841.t1 | gb EOA32852.1   hypothetical protein CARUB_v10016167mg, partial [Capsella rubella]                                                                                                                                                                                                                                                                                                                                                                                                                                                                                | 319  | 318  | 1.00E-167 | 99.7  | 88.7 | 94.0 | hypothetical protein CARUB_v10016167mg, partial | gbpln | Capsella rubella     | AT3G01190.1   Symbols:   Peroxidase superfamily protein   chr3:67236-68477 REVERSE LENGTH=321                                                                                                                                                                                                                                                                                                                                                             | 319  | 321  | 1.00E-168 | 100.6 | 89.0 | 93.4 |
| Rsa1.0_00609.1.g16842.t1 | gb EOA29906.1   hypothetical protein CARUB_v10013000mg [Capsella rubella]                                                                                                                                                                                                                                                                                                                                                                                                                                                                                         | 104  | 804  | 3.00E-16  | 773.1 | 51.0 | 57.7 | hypothetical protein CARUB_v10013000mg          | gbpln | Capsella rubella     | AT3G01180.1   Symbols: AtSS2, SS2   starch synthase 2   chr3:62456-65678 REVERSE LENGTH=792                                                                                                                                                                                                                                                                                                                                                               | 104  | 792  | 5.00E-17  | 761.5 | 49.0 | 55.8 |
| Rsa1.0_00609.1.g16843.t1 | ref NP_186767.1   starch synthase 2 [Arabidopsis thaliana]<br>gi 75264912 sp Q9MAC8.1 SSY2_ARATH RecName: Full=Starch synthase 2, chloroplastic/amyloplastic; Short=AtSS2. AltName: Full=Soluble starch synthase II; Flags: Precursor<br>gi 6714470 gb AAF26156.1 AC008261.13 putative glycogen synthase [Arabidopsis thaliana] gi 15450775 gb AAK96659.1   putative glycogen synthase [Arabidopsis thaliana] gi 27311899 gb AAO00915.1   putative glycogen synthase [Arabidopsis thaliana] gi 332640100 gb AEE73621.1   starch synthase 2 [Arabidopsis thaliana] | 197  | 792  | 1.00E-103 | 402.0 | 92.9 | 94.9 | starch synthase 2                               | gbpln | Arabidopsis thaliana | AT3G01180.1   Symbols: AtSS2, SS2   starch synthase 2   chr3:62456-65678 REVERSE LENGTH=792                                                                                                                                                                                                                                                                                                                                                               | 197  | 792  | 1.00E-105 | 402.0 | 92.9 | 94.9 |
| Rsa1.0_00609.1.g16844.t1 | gb EOA30212.1   hypothetical protein CARUB_v10013334mg [Capsella rubella]                                                                                                                                                                                                                                                                                                                                                                                                                                                                                         | 576  | 572  | 0         | 99.3  | 66.1 | 78.3 | hypothetical protein CARUB_v10013334mg          | gbpln | Capsella rubella     | AT3G01175.1   Symbols:   Protein of unknown function (DUF1666)   chr3:59484-60845 FORWARD LENGTH=401                                                                                                                                                                                                                                                                                                                                                      | 576  | 401  | 1.00E-140 | 69.6  | 47.0 | 56.1 |
| Rsa1.0_00609.1.g16845.t2 | refXP_002884293.1   polypyrimidine tract-binding [Arabidopsis lyrata subsp. lyrata] gi 297330133 gb EFH60552.1   polypyrimidine tract-binding [Arabidopsis lyrata subsp. lyrata]                                                                                                                                                                                                                                                                                                                                                                                  | 396  | 398  | 0         | 100.5 | 90.7 | 95.5 | polypyrimidine tract-binding                    | gbpln | Arabidopsis lyrata   | AT3G01150.1   Symbols: PTB, ATPTB1, PTB1   polypyrimidine tract-binding protein 1   chr3:51732-54344 FORWARD LENGTH=399                                                                                                                                                                                                                                                                                                                                   | 396  | 399  | 0         | 100.8 | 89.1 | 93.9 |
| Rsa1.0_00609.1.g16846.t1 | refXP_002882197.1   hypothetical protein ARALYDRAFT_477416 [Arabidopsis lyrata subsp. lyrata]<br>gi 297328037 gb EFH58456.1   hypothetical protein ARALYDRAFT_477416 [Arabidopsis lyrata subsp. lyrata]                                                                                                                                                                                                                                                                                                                                                           | 330  | 390  | 1.00E-153 | 118.2 | 84.5 | 90.0 | hypothetical protein ARALYDRAFT_477416          | gbpln | Arabidopsis lyrata   | AT3G01140.1   Symbols: MYB106, NOK, ATMYB106   myb domain protein 106   chr3:46619-48143 REVERSE LENGTH=388                                                                                                                                                                                                                                                                                                                                               | 330  | 388  | 2.33E-156 | 117.6 | 82.4 | 87.0 |

|                          |                                                                                                                                                                                                                                                                                                                                                                                                                                                                                                                                                                                                                                                          |     |     |           |       |      |      |                                                  |       |                      |                                                                                                                                                                                                                                                                                                                                                                                                                                                                                                                                             |     |      |           |       |      |      |
|--------------------------|----------------------------------------------------------------------------------------------------------------------------------------------------------------------------------------------------------------------------------------------------------------------------------------------------------------------------------------------------------------------------------------------------------------------------------------------------------------------------------------------------------------------------------------------------------------------------------------------------------------------------------------------------------|-----|-----|-----------|-------|------|------|--------------------------------------------------|-------|----------------------|---------------------------------------------------------------------------------------------------------------------------------------------------------------------------------------------------------------------------------------------------------------------------------------------------------------------------------------------------------------------------------------------------------------------------------------------------------------------------------------------------------------------------------------------|-----|------|-----------|-------|------|------|
| Rsa1.0_00609.1.g16847.t1 | gb ABA96411.1  retrotransposon protein, putative, unclassified [Oryza sativa Japonica Group]                                                                                                                                                                                                                                                                                                                                                                                                                                                                                                                                                             | 171 | 256 | 2.00E-72  | 149.7 | 74.3 | 87.1 | retrotransposon protein, putative, unclassified  | gbpln | Oryza sativa         | AT4G23160.1   Symbols: CRK8   cysteine-rich RLK (RECEPTOR-like protein kinase) 8   chr4:12129485-12134086 FORWARD LENGTH=1262                                                                                                                                                                                                                                                                                                                                                                                                               | 171 | 1262 | 5.00E-33  | 738.0 | 33.3 | 49.7 |
| Rsa1.0_00610.1.g16848.t1 | ref XP_002864628.1  hypothetical protein ARALYDRAFT_496062 [Arabidopsis lyrata subsp. lyrata] gi 297310463 gb EFH40887.1  hypothetical protein ARALYDRAFT_496062 [Arabidopsis lyrata subsp. lyrata]                                                                                                                                                                                                                                                                                                                                                                                                                                                      | 396 | 284 | 1.00E-73  | 71.7  | 47.7 | 53.3 | hypothetical protein ARALYDRAFT_496062           | gbpln | Arabidopsis lyrata   | AT5G59350.1   Symbols:   unknown protein; FUNCTIONS IN: molecular.function unknown; INVOLVED IN: biological.process unknown; LOCATED IN: endomembrane system; EXPRESSED IN: 23 plant structures; EXPRESSED DURING: 13 growth stages; Has 1807 Blast hits to 1807 proteins in 277 species: Archae - 0; Bacteria - 0; Metazoa - 736; Fungi - 347; Plants - 385; Viruses - 0; Other Eukaryotes - 339 (source: NCBI BLink).   chr5:23941132-23941995 FORWARD LENGTH=287                                                                         | 396 | 287  | 2.00E-74  | 72.5  | 47.0 | 53.3 |
| Rsa1.0_00610.1.g16849.t1 | ref XP_002866327.1  predicted protein [Arabidopsis lyrata subsp. lyrata] gi 297312162 gb EFH42586.1  predicted protein [Arabidopsis lyrata subsp. lyrata]                                                                                                                                                                                                                                                                                                                                                                                                                                                                                                | 241 | 261 | 5.00E-93  | 108.3 | 75.1 | 83.8 | predicted protein                                | gbpln | Arabidopsis lyrata   | AT5G59340.1   Symbols: WOX2   WUSCHEL related homeobox 2   chr5:23933408-23934627 REVERSE LENGTH=260                                                                                                                                                                                                                                                                                                                                                                                                                                        | 241 | 260  | 3.00E-92  | 107.9 | 73.4 | 83.4 |
| Rsa1.0_00610.1.g16850.t1 | gb EOA23128.1  hypothetical protein CARUB_v100024710mg, partial [Capsella rubella]                                                                                                                                                                                                                                                                                                                                                                                                                                                                                                                                                                       | 646 | 488 | 1.00E-136 | 75.5  | 35.8 | 48.0 | hypothetical protein CARUB_v100024710mg, partial | gbpln | Capsella rubella     | AT3G42170.1   Symbols:   BED zinc finger ;hAT family dimerisation domain   chr3:14321838-14323928 FORWARD LENGTH=696                                                                                                                                                                                                                                                                                                                                                                                                                        | 646 | 696  | 5.00E-30  | 107.7 | 22.4 | 38.2 |
| Rsa1.0_00610.1.g16851.t2 | gb EOA14120.1  hypothetical protein CARUB_v10027262mg [Capsella rubella]                                                                                                                                                                                                                                                                                                                                                                                                                                                                                                                                                                                 | 154 | 166 | 3.00E-85  | 107.8 | 97.4 | 99.4 | hypothetical protein CARUB_v10027262mg           | gbpln | Capsella rubella     | AT5G59300.1   Symbols: UBC7, ATUBC7   ubiquitin carrier protein 7   chr5:23919868-23921304 REVERSE LENGTH=203                                                                                                                                                                                                                                                                                                                                                                                                                               | 154 | 203  | 2.00E-87  | 131.8 | 96.1 | 98.7 |
| Rsa1.0_00610.1.g16852.t1 | gb EOA15174.1  hypothetical protein CARUB_v10028557mg [Capsella rubella]                                                                                                                                                                                                                                                                                                                                                                                                                                                                                                                                                                                 | 358 | 329 | 3.00E-97  | 91.9  | 52.2 | 69.6 | hypothetical protein CARUB_v10028557mg           | gbpln | Capsella rubella     | AT5G60110.1   Symbols: APUM18, PUM18   pumilio 18   chr5:24201954-24202937 FORWARD LENGTH=327                                                                                                                                                                                                                                                                                                                                                                                                                                               | 358 | 327  | 3.00E-92  | 91.3  | 53.4 | 68.2 |
| Rsa1.0_00610.1.g16853.t1 | gb EOA23482.1  hypothetical protein CARUB_v10016683mg, partial [Capsella rubella]                                                                                                                                                                                                                                                                                                                                                                                                                                                                                                                                                                        | 797 | 845 | 0         | 106.0 | 71.6 | 82.4 | hypothetical protein CARUB_v10016683mg, partial  | gbpln | Capsella rubella     | AT3G46740.1   Symbols: TOC75-III, MAR1   translocan at the outer envelope membrane of chloroplasts 75-III   chr3:17216104-17219296 REVERSE LENGTH=818                                                                                                                                                                                                                                                                                                                                                                                       | 797 | 818  | 0         | 102.6 | 71.0 | 81.4 |
| Rsa1.0_00610.1.g16854.t1 | ref NP_200711.1  copper transporter 1 [Arabidopsis thaliana] gi 12230995 sp Q39065.2 COPT1_ARAT H RecName: Full=Copper transporter 1; Short=AtCOPT1 gi 18496858 gb AAL74265.1 AF466373.1 copper transporter COPT1 [Arabidopsis thaliana] gi 10177631 dbj BAB10779.1  copper transporter-like protein [Arabidopsis thaliana] gi 20258855 gb AAM13909.1  putative copper transport protein [Arabidopsis thaliana] gi 21689855 gb AAM67571.1  putative copper transport protein [Arabidopsis thaliana] gi 110741978 dbj BAE98928.1  copper transport protein [Arabidopsis thaliana] gi 332009749 gb AED97132.1  copper transporter 1 [Arabidopsis thaliana] | 161 | 170 | 3.00E-59  | 105.6 | 81.4 | 87.6 | copper transporter 1                             | gbpln | Arabidopsis thaliana | AT5G59030.1   Symbols: COPT1   copper transporter 1   chr5:23833945-23834457 REVERSE LENGTH=170                                                                                                                                                                                                                                                                                                                                                                                                                                             | 161 | 170  | 1.00E-61  | 105.6 | 81.4 | 87.6 |
| Rsa1.0_00610.1.g16855.t1 | ref NP_200713.2  uncharacterized protein [Arabidopsis thaliana] gi 33200975 gb AED97134.1  uncharacterized protein AT5G59050 [Arabidopsis thaliana]                                                                                                                                                                                                                                                                                                                                                                                                                                                                                                      | 299 | 312 | 1.00E-113 | 104.3 | 81.3 | 88.0 | uncharacterized protein                          | gbpln | Arabidopsis thaliana | AT5G59050.1   Symbols:   unknown protein; BEST Arabidopsis thaliana protein match is: unknown protein (TAIRAT3G54000.1). Has 35333 Blast hits to 34131 proteins in 2444 species: Archae - 798; Bacteria - 22429; Metazoa - 974; Fungi - 991; Plants - 531; Viruses - 0; Other Eukaryotes - 9610 (source: NCBI BLink).   chr5:23839494-23842519 REVERSE LENGTH=312                                                                                                                                                                           | 299 | 312  | 1.00E-115 | 104.3 | 81.3 | 88.0 |
| Rsa1.0_00610.1.g16856.t1 | ref XP_002864620.1  hypothetical protein ARALYDRAFT_496048 [Arabidopsis lyrata subsp. lyrata] gi 297310455 gb EFH40879.1  hypothetical protein ARALYDRAFT_496048 [Arabidopsis lyrata subsp. lyrata]                                                                                                                                                                                                                                                                                                                                                                                                                                                      | 133 | 135 | 1.00E-50  | 101.5 | 84.2 | 88.0 | hypothetical protein ARALYDRAFT_496048           | gbpln | Arabidopsis lyrata   | AT5G59080.1   Symbols:   unknown protein; FUNCTIONS IN: molecular.function unknown; INVOLVED IN: response to oxidative stress; LOCATED IN: chloroplast; EXPRESSED IN: 18 plant structures; EXPRESSED DURING: 9 growth stages; BEST Arabidopsis thaliana protein match is: unknown protein (TAIRAT3G46880.1). Has 1807 Blast hits to 1807 proteins in 277 species: Archae - 0; Bacteria - 0; Metazoa - 736; Fungi - 347; Plants - 385; Viruses - 0; Other Eukaryotes - 339 (source: NCBI BLink).   chr5:23847691-23848403 REVERSE LENGTH=135 | 133 | 135  | 2.00E-51  | 101.5 | 82.0 | 88.0 |

|                          |                                                                                                                                                                                                                                                                                                                                                                                                                                                                                                                                                                                                                                                                                               |     |     |           |       |      |      |                                                                               |       |                      |                                                                                                                                                                                                                                                                                                                                                                                                                                                                                      |     |     |           |       |      |      |
|--------------------------|-----------------------------------------------------------------------------------------------------------------------------------------------------------------------------------------------------------------------------------------------------------------------------------------------------------------------------------------------------------------------------------------------------------------------------------------------------------------------------------------------------------------------------------------------------------------------------------------------------------------------------------------------------------------------------------------------|-----|-----|-----------|-------|------|------|-------------------------------------------------------------------------------|-------|----------------------|--------------------------------------------------------------------------------------------------------------------------------------------------------------------------------------------------------------------------------------------------------------------------------------------------------------------------------------------------------------------------------------------------------------------------------------------------------------------------------------|-----|-----|-----------|-------|------|------|
| Rsa1.0_00610.1.g16857.t1 | refNP_568898.2  subtilase 4.13 [Arabidopsis thaliana] gi 9759234 dbj BAB09758.1  serine protease-like protein [Arabidopsis thaliana] gi 20260320 gb AAI13058.1  unknown protein [Arabidopsis thaliana] gi 34098789 gb AAQ56777.1  At5g59120 [Arabidopsis thaliana] gi 332009762 gb AED97145.1  subtilase 4.13 [Arabidopsis thaliana] ref NP_195321.1  L-ascorbate peroxidase [Arabidopsis thaliana] gi 118572829 sp Q7XZP5.2 APX5_ARAT H RecName: Full=L-ascorbate peroxidase 5, peroxisomal; Short=AtAPX04; Flags: Precursor gi 3036801 emb CAA18491.1  putative ascorbate peroxidase [Arabidopsis thaliana] gi 3805863 emb CAA21483.1  putative ascorbate peroxidase [Arabidopsis thaliana] | 736 | 732 | 0         | 99.5  | 81.1 | 87.6 | subtilase 4.13                                                                | gbpln | Arabidopsis thaliana | AT5G59120.1   Symbols: ATSBT4.13, SBT4.13   subtilase 4.13   chr5:23864897-23868020 REVERSE LENGTH=732                                                                                                                                                                                                                                                                                                                                                                               | 736 | 732 | 0         | 99.5  | 81.1 | 87.6 |
| Rsa1.0_00611.1.g16858.t1 | refNP_195321.1  L-ascorbate peroxidase [Arabidopsis thaliana] gi 118572829 sp Q7XZP5.2 APX5_ARAT H RecName: Full=L-ascorbate peroxidase 5, peroxisomal; Short=AtAPX04; Flags: Precursor gi 3036801 emb CAA18491.1  putative ascorbate peroxidase [Arabidopsis thaliana] gi 3805863 emb CAA21483.1  putative ascorbate peroxidase [Arabidopsis thaliana] gi 7270549 emb CAB81506.1  putative ascorbate peroxidase [Arabidopsis thaliana] gi 26453046 dbj BAC43599.1  putative ascorbate peroxidase [Arabidopsis thaliana] gi 29924155 gb AAP04038.1  putative ascorbate peroxidase [Arabidopsis thaliana] gi 332661196 gb AEE86596.1  L-ascorbate peroxidase [Arabidopsis thaliana]            | 280 | 279 | 1.00E-137 | 99.6  | 84.3 | 91.8 | L-ascorbate peroxidase                                                        | gbpln | Arabidopsis thaliana | AT4G35970.1   Symbols: APX5   ascorbate peroxidase 5   chr4:17028651-17030205 FORWARD LENGTH=279                                                                                                                                                                                                                                                                                                                                                                                     | 280 | 279 | 1.00E-140 | 99.6  | 84.3 | 91.8 |
| Rsa1.0_00611.1.g16859.t1 | refXP_002867044.1  predicted protein [Arabidopsis lyrata subsp. lyrata] gi 297312820 gb EFH43303.1  predicted protein [Arabidopsis lyrata subsp. lyrata]                                                                                                                                                                                                                                                                                                                                                                                                                                                                                                                                      | 96  | 540 | 3.00E-39  | 562.5 | 81.3 | 84.4 | predicted protein                                                             | gbpln | Arabidopsis lyrata   | AT4G35980.1   Symbols:   unknown protein; FUNCTIONS IN: molecular_function unknown; INVOLVED IN: biological_process unknown; LOCATED IN: cellular_component unknown; EXPRESSED IN: 24 plant structures; EXPRESSED DURING: 15 growth stages; Has 30201 Blast hits to 17322 proteins in 780 species: Archae - 12; Bacteria - 1396; Metazoa - 17338; Fungi - 3422; Plants - 5037; Viruses - 0; Other Eukaryotes - 2996 (source: NCBI BLINK).   chr4:17030816-17031586 REVERSE LENGTH=67 | 96  | 87  | 2.00E-37  | 90.6  | 76.0 | 83.3 |
| Rsa1.0_00611.1.g16860.t1 | refNP_680769.4  S-adenosyl-L-methionine-dependent methyltransferase domain-containing protein [Arabidopsis thaliana] gi 332661199 gb AEE86599.1  S-adenosyl-L-methionine-dependent methyltransferase domain-containing protein [Arabidopsis thaliana]                                                                                                                                                                                                                                                                                                                                                                                                                                         | 307 | 304 | 1.00E-148 | 99.0  | 81.8 | 90.6 | S-adenosyl-L-methionine-dependent methyltransferase domain-containing protein | gbpln | Arabidopsis thaliana | AT4G35987.1   Symbols:   S-adenosyl-L-methionine-dependent methyltransferases superfamily protein   chr4:17035121-17036823 FORWARD LENGTH=304                                                                                                                                                                                                                                                                                                                                        | 307 | 304 | 1.00E-150 | 99.0  | 81.8 | 90.6 |
| Rsa1.0_00611.1.g16861.t1 | gb EOA17099.1  hypothetical protein CARUB_v10005355mg [Capsella rubella]                                                                                                                                                                                                                                                                                                                                                                                                                                                                                                                                                                                                                      | 301 | 301 | 1.00E-138 | 100.0 | 89.0 | 94.0 | hypothetical protein CARUB_v10005355mg                                        | gbpln | Capsella rubella     | AT4G36010.2   Symbols:   Pathogenesis-related thaumatin superfamily protein   chr4:17039472-17040976 REVERSE LENGTH=301                                                                                                                                                                                                                                                                                                                                                              | 301 | 301 | 1.00E-137 | 100.0 | 87.4 | 92.4 |
| Rsa1.0_00611.1.g16862.t1 | refNP_195326.1  cellular nucleic acid-binding protein [Arabidopsis thaliana] gi 75318587 sp O65639.1 CSP1_ARATH RecName: Full=Cold shock protein 1; Short=AtCSP1; AltName: Full=Cold shock domain-containing protein 1 gi 3036806 emb CAA18496.1  glycine-rich protein [Arabidopsis thaliana] gi 7270554 emb CAB81511.1  glycine-rich protein [Arabidopsis thaliana] gi 110741941 dbj BAE98911.1  glycine-rich protein [Arabidopsis thaliana] gi 332661203 gb AEE86603.1  cold shock protein 1 [Arabidopsis thaliana]                                                                                                                                                                         | 282 | 299 | 7.00E-77  | 106.0 | 63.5 | 70.6 | cellular nucleic acid-binding protein                                         | gbpln | Arabidopsis thaliana | AT4G36020.1   Symbols: CSDP1   cold shock domain protein 1   chr4:17043443-17044342 REVERSE LENGTH=299                                                                                                                                                                                                                                                                                                                                                                               | 282 | 299 | 2.00E-79  | 106.0 | 63.5 | 70.6 |
| Rsa1.0_00611.1.g16863.t1 | dbj BAJ34233.1  unnamed protein product [Thellungiella halophila]                                                                                                                                                                                                                                                                                                                                                                                                                                                                                                                                                                                                                             | 167 | 162 | 8.00E-67  | 97.0  | 87.4 | 91.6 | unnamed protein product                                                       | ----  | ----                 | AT4G36040.1   Symbols:   Chaperone DnaJ-domain superfamily protein   chr4:17049708-17050193 REVERSE LENGTH=161                                                                                                                                                                                                                                                                                                                                                                       | 167 | 161 | 3.00E-68  | 96.4  | 86.8 | 91.6 |
| Rsa1.0_00611.1.g16864.t1 | refXP_002867038.1  endonuclease/exonuclease/phosphatase family protein [Arabidopsis lyrata subsp. lyrata] gi 297312874 gb EFH43297.1  endonuclease/exonuclease/phosphatase family protein [Arabidopsis lyrata subsp. lyrata]                                                                                                                                                                                                                                                                                                                                                                                                                                                                  | 594 | 616 | 0         | 103.7 | 80.1 | 85.7 | endonuclease/exonuclease/phosphatase family protein                           | gbpln | Arabidopsis lyrata   | AT4G36050.2   Symbols:   endonuclease/exonuclease/phosphatase family protein   chr4:17052323-17055044 REVERSE LENGTH=610                                                                                                                                                                                                                                                                                                                                                             | 594 | 610 | 0         | 102.7 | 81.3 | 86.4 |

|                          |                                                                                                                                                                                                                                                                                                                                                                                                                                             |      |      |           |       |      |      |                                                              |       |                      |                                                                                                                                                                                                                                                                                                                                                |      |      |           |       |      |      |
|--------------------------|---------------------------------------------------------------------------------------------------------------------------------------------------------------------------------------------------------------------------------------------------------------------------------------------------------------------------------------------------------------------------------------------------------------------------------------------|------|------|-----------|-------|------|------|--------------------------------------------------------------|-------|----------------------|------------------------------------------------------------------------------------------------------------------------------------------------------------------------------------------------------------------------------------------------------------------------------------------------------------------------------------------------|------|------|-----------|-------|------|------|
| Rsa1.0_00611.1.g16865.t5 | refNP_680770.2<br>transformation/transcription domain-associated protein [Arabidopsis thaliana] gi 332661212 gb AEE86612.1 transformation/transcription domain-associated protein [Arabidopsis thaliana]                                                                                                                                                                                                                                    | 4007 | 3834 | 0         | 95.7  | 81.9 | 87.0 | transformation/transcription domain-associated protein       | gbpln | Arabidopsis thaliana | AT4G36080.1   Symbols:   phosphotransferases, alcohol group as acceptor;binding;inositol or phosphatidylinositol kinases   chr4:17059996-17077628 REVERSE LENGTH=3834                                                                                                                                                                          | 4007 | 3834 | 0         | 95.7  | 81.9 | 87.0 |
| Rsa1.0_00611.1.g16866.t1 | refXP_002867035.1 oxidoreductase [Arabidopsis lyrata subsp. lyrata] gi 297312871 gb EFH43294.1 oxidoreductase [Arabidopsis lyrata subsp. lyrata]                                                                                                                                                                                                                                                                                            | 476  | 490  | 1.00E-180 | 102.9 | 71.8 | 81.3 | oxidoreductase                                               | gbpln | Arabidopsis lyrata   | AT4G36090.3   Symbols:   oxidoreductase, 2OG-Fe(II) oxygenase family protein   chr4:17078376-17080670 REVERSE LENGTH=520                                                                                                                                                                                                                       | 476  | 520  | 1.00E-180 | 109.2 | 72.7 | 81.7 |
| Rsa1.0_00611.1.g16867.t1 | gb EOA17042.1  hypothetical protein CARUB_v10005277mg [Capsella rubella]                                                                                                                                                                                                                                                                                                                                                                    | 336  | 318  | 6.00E-90  | 94.6  | 62.5 | 70.5 | hypothetical protein CARUB_v10005277mg                       | gbpln | Capsella rubella     | AT2G17990.1   Symbols:   BEST Arabidopsis thaliana protein match is: kinectin-related (TAIR:AT5G66250.3); Has 7578 Blast hits to 6129 proteins in 783 species: Archae - 220; Bacteria - 1045; Metazoa - 3605; Fungi - 575; Plants - 442; Viruses - 38; Other Eukaryotes - 1653 (source: NCBI BLINK).   chr2:7827480-7828596 FORWARD LENGTH=338 | 336  | 338  | 1.00E-74  | 100.6 | 50.6 | 61.3 |
| Rsa1.0_00611.1.g16868.t1 | refXP_002869044.1  hypothetical protein ARALYDRAFT_491020 [Arabidopsis lyrata subsp. lyrata] gi 297314880 gb EFH45303.1 hypothetical protein ARALYDRAFT_491020 [Arabidopsis lyrata subsp. lyrata]                                                                                                                                                                                                                                           | 104  | 104  | 3.00E-48  | 100.0 | 84.6 | 95.2 | hypothetical protein ARALYDRAFT_491020                       | gbpln | Arabidopsis lyrata   | AT4G36110.1   Symbols:   SAUR-like auxin-responsive protein family   chr4:17090031-17090345 FORWARD LENGTH=104                                                                                                                                                                                                                                 | 104  | 104  | 3.00E-50  | 100.0 | 84.6 | 94.2 |
| Rsa1.0_00611.1.g16869.t1 | refXP_002867034.1  hypothetical protein ARALYDRAFT_491019 [Arabidopsis lyrata subsp. lyrata] gi 297312870 gb EFH43293.1 hypothetical protein ARALYDRAFT_491019 [Arabidopsis lyrata subsp. lyrata]                                                                                                                                                                                                                                           | 813  | 975  | 0         | 119.9 | 54.5 | 59.5 | hypothetical protein ARALYDRAFT_491019                       | gbpln | Arabidopsis lyrata   | AT4G36120.1   Symbols:   Plant protein of unknown function (DUF869)   chr4:17093213-17096573 REVERSE LENGTH=996                                                                                                                                                                                                                                | 813  | 996  | 0         | 122.5 | 53.0 | 58.1 |
| Rsa1.0_00611.1.g16870.t1 | refXP_002869043.1  60S ribosomal protein L8 [Arabidopsis lyrata subsp. lyrata] gi 297314879 gb EFH45302.1 60S ribosomal protein L8 [Arabidopsis lyrata subsp. lyrata]                                                                                                                                                                                                                                                                       | 258  | 258  | 1.00E-144 | 100.0 | 97.3 | 99.2 | 60S ribosomal protein L8                                     | gbpln | Arabidopsis lyrata   | AT4G36130.1   Symbols:   Ribosomal protein L2 family   chr4:17097613-17098656 FORWARD LENGTH=258                                                                                                                                                                                                                                               | 258  | 258  | 2.33E-156 | 100.0 | 96.5 | 99.2 |
| Rsa1.0_00611.1.g16871.t1 | gb EOA15884.1  hypothetical protein CARUB_v10003971mg [Capsella rubella]                                                                                                                                                                                                                                                                                                                                                                    | 1456 | 1946 | 0         | 133.7 | 67.6 | 78.6 | hypothetical protein CARUB_v10003971mg                       | gbpln | Capsella rubella     | AT4G36140.1   Symbols:   disease resistance protein (TIR-NBS-LRR class), putative   chr4:17098956-17104479 REVERSE LENGTH=1607                                                                                                                                                                                                                 | 1456 | 1607 | 0         | 110.4 | 56.8 | 63.9 |
| Rsa1.0_00611.1.g16872.t2 | gb ACP30607.1  disease resistance protein [Brassica rapa subsp. pekinensis]                                                                                                                                                                                                                                                                                                                                                                 | 1004 | 1128 | 0         | 112.4 | 83.1 | 86.5 | disease resistance protein                                   | gbpln | Brassica rapa        | AT4G36150.1   Symbols:   Disease resistance protein (TIR-NBS-LRR class) family   chr4:17104776-17108711 FORWARD LENGTH=1179                                                                                                                                                                                                                    | 1004 | 1179 | 0         | 117.4 | 73.6 | 81.7 |
| Rsa1.0_00612.1.g16873.t1 | refNP_849612.1  late embryogenesis abundant hydroxyproline-rich glycoprotein [Arabidopsis thaliana] gi 75161568 sp Q8VZ13.1 Y1816_ARATH RecName: Full=Uncharacterized protein At1g08160 gi 17529202 gb AAL38827.1  unknown protein [Arabidopsis thaliana] gi 20259001 gb AAM14216.1  unknown protein [Arabidopsis thaliana] gi 332190134 gb AEE28255.1  late embryogenesis abundant hydroxyproline-rich glycoprotein [Arabidopsis thaliana] | 207  | 221  | 9.00E-87  | 106.8 | 87.0 | 92.8 | late embryogenesis abundant hydroxyproline-rich glycoprotein | gbpln | Arabidopsis thaliana | AT1G08160.1   Symbols:   Late embryogenesis abundant (LEA) hydroxyproline-rich glycoprotein family   chr1:2559672-2560337 REVERSE LENGTH=221                                                                                                                                                                                                   | 207  | 221  | 3.00E-89  | 106.8 | 87.0 | 92.8 |
| Rsa1.0_00612.1.g16874.t1 | refNP_172295.1  histone H2B [Arabidopsis thaliana] gi 75337200 sp Q9SGE3.1 H2B2_ARATH RecName: Full=Histone H2B.2; AltName: Full=HTB8 gi 6579213 gb AAF18256.1 AC011438_18 T23G18.3 [Arabidopsis thaliana] gi 8778831 gb AAF79830.1 AC026875_10 T6D22.26 [Arabidopsis thaliana] gi 67633360 gb AAY78605.1  histone H2B family protein [Arabidopsis thaliana] gi 332190136 gb AEE28257.1  histone H2B [Arabidopsis thaliana]                 | 257  | 243  | 2.00E-64  | 94.6  | 58.4 | 68.9 | histone H2B                                                  | gbpln | Arabidopsis thaliana | AT1G08170.1   Symbols:   Histone superfamily protein   chr1:2562941-2563672 REVERSE LENGTH=243                                                                                                                                                                                                                                                 | 257  | 243  | 6.00E-67  | 94.6  | 58.4 | 68.9 |
| Rsa1.0_00612.1.g16875.t1 | #                                                                                                                                                                                                                                                                                                                                                                                                                                           | #    | #    | #         | #     | #    | #    | -                                                            | ----  | ----                 | #                                                                                                                                                                                                                                                                                                                                              | #    | #    | #         | #     | #    |      |

|                          |                                                                                                                                                                                                                                                                                                                                                                                                                                                                                                                                                                                                                                   |      |      |           |       |      |      |                                        |       |                      |                                                                                                                                                                                                                                                              |      |      |           |       |      |      |
|--------------------------|-----------------------------------------------------------------------------------------------------------------------------------------------------------------------------------------------------------------------------------------------------------------------------------------------------------------------------------------------------------------------------------------------------------------------------------------------------------------------------------------------------------------------------------------------------------------------------------------------------------------------------------|------|------|-----------|-------|------|------|----------------------------------------|-------|----------------------|--------------------------------------------------------------------------------------------------------------------------------------------------------------------------------------------------------------------------------------------------------------|------|------|-----------|-------|------|------|
| Rsa1.0_00612.1.g16876.t1 | ref[XP_002892445.1] hypothetical protein ARALYDRAFT_888049 [Arabidopsis lyrata subsp. lyrata] gi 297338287 gb EFH68704.1                                                                                                                                                                                                                                                                                                                                                                                                                                                                                                          | 354  | 111  | 1.00E-30  | 31.4  | 24.3 | 26.3 | hypothetical protein ARALYDRAFT_888049 | gbpln | Arabidopsis lyrata   | AT1G08180.1   Symbols:   unknown protein; Has 53 Blast hits to 53 proteins in 9 species: Archae - 0; Bacteria - 0; Metazoa - 1; Fungi - 0; Plants - 52; Viruses - 0; Other Eukaryotes - 0 (source: NCBI BLINK).   chr1:2564741-2565076 REVERSE LENGTH=111    | 354  | 111  | 2.00E-32  | 31.4  | 24.0 | 26.0 |
| Rsa1.0_00612.1.g16877.t1 | gb[EOA36603.1] hypothetical protein CARUB_v10011806mg [Capsella rubella]                                                                                                                                                                                                                                                                                                                                                                                                                                                                                                                                                          | 961  | 971  | 0         | 101.0 | 91.8 | 95.5 | hypothetical protein CARUB_v10011806mg | gbpln | Capsella rubella     | AT1G08190.1   Symbols: ATPVS41, ZIP2, VPS41, ATVAM2, VAM2   vacuolar protein sorting 41   chr1:2567652-2573142 FORWARD LENGTH=980                                                                                                                            | 961  | 980  | 0         | 102.0 | 91.5 | 95.9 |
| Rsa1.0_00612.1.g16878.t1 | gb[EOA37933.1] hypothetical protein CARUB_v10009400mg [Capsella rubella]                                                                                                                                                                                                                                                                                                                                                                                                                                                                                                                                                          | 368  | 389  | 0         | 105.7 | 97.8 | 98.6 | hypothetical protein CARUB_v10009400mg | gbpln | Capsella rubella     | AT1G08200.1   Symbols: AXS2   UDP-D-epiose/UDP-D-xylose synthase 2   chr1:2574259-2576609 REVERSE LENGTH=389                                                                                                                                                 | 368  | 389  | 0         | 105.7 | 97.0 | 98.6 |
| Rsa1.0_00612.1.g16879.t1 | gb[EOA25534.1] hypothetical protein CARUB_v10018879mg [Capsella rubella]                                                                                                                                                                                                                                                                                                                                                                                                                                                                                                                                                          | 158  | 159  | 2.00E-68  | 100.6 | 84.8 | 93.0 | hypothetical protein CARUB_v10018879mg | gbpln | Capsella rubella     | AT3G50685.1   Symbols:   unknown protein; Has 52 Blast hits to 46 proteins in 20 species: Archae - 0; Bacteria - 0; Metazoa - 0; Fungi - 0; Plants - 45; Viruses - 0; Other Eukaryotes - 7 (source: NCBI BLINK).   chr3:18834272-18834748 REVERSE LENGTH=158 | 158  | 158  | 3.00E-70  | 100.0 | 84.2 | 90.5 |
| Rsa1.0_00612.1.g16880.t5 | ref[NP_172303.5] DNA polymerase epsilon subunit 1 [Arabidopsis thaliana] gi 426019656 sp F4HW04.1 DPOE1_ARA TH RecName: Full=DNA polymerase epsilon catalytic subunit A; AltName: Full=DNA polymerase 2 a; Short=AlPOL2a; AltName: Full=DNA polymerase II subunit a; AltName: Full=Protein ABA OVERLY SENSITIVE a; AltName: Full=Protein EARLY IN SHORT DAYS 7; AltName: Full=Protein EMBRYO DEFECTIVE 142; AltName: Full=Protein EMBRYO DEFECTIVE 2284; AltName: Full=Protein EMBRYO DEFECTIVE 529; AltName: Full=Protein TILTED 1 gi 332190145 gb AEE28266.1  DNA polymerase epsilon catalytic subunit A [Arabidopsis thaliana] | 2203 | 2161 | 0         | 98.1  | 86.7 | 91.7 | DNA polymerase epsilon subunit 1       | gbpln | Arabidopsis thaliana | AT1G08260.1   Symbols: EMB142, EMB2284, POL2A, TIL1, EMB529, ABO4, ESD7   DNA polymerase epsilon catalytic subunit   chr1:2590944-2606892 FORWARD LENGTH=2161                                                                                                | 2203 | 2161 | 0         | 98.1  | 86.7 | 91.7 |
| Rsa1.0_00612.1.g16881.t1 | gb[EOA27146.1] hypothetical protein CARUB_v10023246mg [Capsella rubella]                                                                                                                                                                                                                                                                                                                                                                                                                                                                                                                                                          | 436  | 435  | 0         | 99.8  | 92.7 | 95.4 | hypothetical protein CARUB_v10023246mg | gbpln | Capsella rubella     | AT2G27600.1   Symbols: SKD1, VPS4, ATSKD1   AAA-type ATPase family protein   chr2:11781226-11783730 FORWARD LENGTH=435                                                                                                                                       | 436  | 435  | 0         | 99.8  | 92.4 | 95.4 |
| Rsa1.0_00612.1.g16882.t1 | gb[EOA37894.1] hypothetical protein CARUB_v10009362mg [Capsella rubella]                                                                                                                                                                                                                                                                                                                                                                                                                                                                                                                                                          | 401  | 396  | 0         | 98.8  | 80.8 | 88.0 | hypothetical protein CARUB_v10009362mg | gbpln | Capsella rubella     | AT1G08280.1   Symbols:   Glycosyltransferase family 29 (sialyltransferase) family protein   chr1:2608408-2609604 FORWARD LENGTH=398                                                                                                                          | 401  | 398  | 0         | 99.3  | 80.8 | 88.5 |
| Rsa1.0_00612.1.g16883.t1 | gb[EOA38145.1] hypothetical protein CARUB_v10009617mg [Capsella rubella]                                                                                                                                                                                                                                                                                                                                                                                                                                                                                                                                                          | 141  | 346  | 7.00E-78  | 245.4 | 96.5 | 97.9 | hypothetical protein CARUB_v10009617mg | gbpln | Capsella rubella     | AT1G08290.1   Symbols: WIP3   WIP domain protein 3   chr1:2610680-2613180 REVERSE LENGTH=337                                                                                                                                                                 | 141  | 337  | 2.00E-79  | 239.0 | 95.0 | 96.5 |
| Rsa1.0_00612.1.g16884.t1 | ref[NP_172306.1] WIP domain protein 3 [Arabidopsis thaliana] gi 6579204 gb AAF18247.1 AC011438.9 T23G18.15 [Arabidopsis thaliana] gi 18027014 gb AAL55723.1 AF254448.1 WIP3 protein [Arabidopsis thaliana] gi 20258782 gb AAM13913.1  unknown protein [Arabidopsis thaliana] gi 26452714 dbj BAC43439.1  unknown protein [Arabidopsis thaliana] gi 332190149 gb AEE28270.1  WIP domain protein 3 [Arabidopsis thaliana]                                                                                                                                                                                                           | 210  | 337  | 8.00E-76  | 160.5 | 71.9 | 80.0 | WIP domain protein 3                   | gbpln | Arabidopsis thaliana | AT1G08290.1   Symbols: WIP3   WIP domain protein 3   chr1:2610680-2613180 REVERSE LENGTH=337                                                                                                                                                                 | 210  | 337  | 3.00E-78  | 160.5 | 71.9 | 80.0 |
| Rsa1.0_00612.1.g16885.t1 | ref[XP_002899684.1] hypothetical protein ARALYDRAFT_470891 [Arabidopsis lyrata subsp. lyrata] gi 297335526 gb EFH65943.1                                                                                                                                                                                                                                                                                                                                                                                                                                                                                                          | 916  | 456  | 1.00E-168 | 49.8  | 33.2 | 36.9 | hypothetical protein ARALYDRAFT_470891 | gbpln | Arabidopsis lyrata   | AT4G13750.1   Symbols: NOV   Histidine kinase-, DNA gyrase B-, and HSP90-like ATPase family protein   chr4:7975191-7987558 FORWARD LENGTH=2729                                                                                                               | 916  | 2729 | 1.00E-165 | 297.9 | 32.5 | 38.1 |
| Rsa1.0_00612.1.g16886.t1 | ref[XP_002890492.1] hypothetical protein ARALYDRAFT_889708 [Arabidopsis lyrata subsp. lyrata] gi 297336334 gb EFH66751.1                                                                                                                                                                                                                                                                                                                                                                                                                                                                                                          | 341  | 326  | 8.00E-50  | 95.6  | 38.7 | 53.4 | hypothetical protein ARALYDRAFT_889708 | gbpln | Arabidopsis lyrata   | AT1G22090.1   Symbols: emb2204   Protein of unknown function (DUF626)   chr1:7795721-7797252 FORWARD LENGTH=329                                                                                                                                              | 341  | 329  | 7.00E-50  | 96.5  | 38.7 | 53.7 |



|                           |                                                                                                                                                                                                                                                                                                                                                                                                                                                                                                                                                           |      |      |           |       |      |      |                                                                                                                                                        |             |                      |                                                                                                                               |      |      |           |       |      |      |
|---------------------------|-----------------------------------------------------------------------------------------------------------------------------------------------------------------------------------------------------------------------------------------------------------------------------------------------------------------------------------------------------------------------------------------------------------------------------------------------------------------------------------------------------------------------------------------------------------|------|------|-----------|-------|------|------|--------------------------------------------------------------------------------------------------------------------------------------------------------|-------------|----------------------|-------------------------------------------------------------------------------------------------------------------------------|------|------|-----------|-------|------|------|
| Rsa1.0_00612.1.g16887.t1  | gb AAF18244.1 AC011438.6 T23G18.18 [Arabidopsis thaliana]                                                                                                                                                                                                                                                                                                                                                                                                                                                                                                 | 296  | 382  | 1.00E-144 | 129.1 | 81.8 | 89.2 | T23G18.18                                                                                                                                              | gbpln       | Arabidopsis thaliana | AT1G08310.1   Symbols:   alpha/beta-Hydrolases superfamily protein   chr1:12619134-2620338 FORWARD LENGTH=315                 | 296  | 315  | 1.00E-141 | 106.4 | 82.8 | 90.2 |
| Rsa1.0_00612.1.g16888.t1  | gb EOA37335.1  hypothetical protein CARUB_v10011052mg [Capsella rubella]<br>ref NP_563810.2  bZIP transcription factor-like protein [Arabidopsis thaliana]<br>gi 79317351 ref NP_001030999.1  bZIP transcription factor-like protein [Arabidopsis thaliana]                                                                                                                                                                                                                                                                                               | 321  | 322  | 1.00E-158 | 100.3 | 88.2 | 94.7 | hypothetical protein CARUB_v10011052mg                                                                                                                 | gbpln       | Capsella rubella     | AT1G08315.1   Symbols:   ARM repeat superfamily protein   chr1:2620500-2621477 REVERSE LENGTH=325                             | 321  | 325  | 1.00E-155 | 101.2 | 87.9 | 94.1 |
| Rsa1.0_00612.1.g16889.t8  | gi 14272369 emb CAC40022.1  bZIP transcription factor [Arabidopsis thaliana] gi 309952053 gb ADO95300.1  bZIP21 [Arabidopsis thaliana] gi 332190154 gb AEE28275.1  bZIP transcription factor-like protein [Arabidopsis thaliana] gi 332190156 gb AEE28277.1  bZIP transcription factor-like protein [Arabidopsis thaliana]                                                                                                                                                                                                                                | 524  | 481  | 0         | 91.8  | 73.7 | 75.4 | bZIP transcription factor-like protein                                                                                                                 | gbpln       | Arabidopsis thaliana | AT1G08320.3   Symbols: TGA9, bZIP21   bZIP transcription factor family protein   chr1:2622113-2627451 REVERSE LENGTH=481      | 524  | 481  | 0         | 91.8  | 73.7 | 75.4 |
| Rsa1.0_00613.1.g16890.t1  | dbj BAB02990.1  retroelement pol polyprotein-like [Arabidopsis thaliana]                                                                                                                                                                                                                                                                                                                                                                                                                                                                                  | 754  | 1250 | 0         | 165.8 | 56.6 | 71.4 | retroelement pol polyprotein-like                                                                                                                      | gbpln       | Arabidopsis thaliana | AT4G23160.1   Symbols: CRK8   cysteine-rich RLK (RECEPTOR-like protein kinase) 8   chr4:12129485-12134086 FORWARD LENGTH=1262 | 754  | 1262 | 2.00E-68  | 167.4 | 19.4 | 28.9 |
| Rsa1.0_00613.1.g16891.t1  | ref XP_003529636.1  PREDICTED: 5'-adenylsulfate reductase 3, chloroplastic-like [Glycine max]                                                                                                                                                                                                                                                                                                                                                                                                                                                             | 372  | 466  | 9.00E-20  | 125.3 | 15.6 | 16.1 | PREDICTED: 5'-adenylsulfate reductase 3, chloroplastic-like                                                                                            | gbenv/gbpln | Glycine max          | AT4G21990.1   Symbols: APR3, PRH-26, PRH26, ATAPR3   APS reductase 3   chr4:11657284-11658973 REVERSE LENGTH=458              | 372  | 458  | 2.00E-21  | 123.1 | 15.1 | 15.9 |
| Rsa1.0_00613.1.g16892.t2  | #                                                                                                                                                                                                                                                                                                                                                                                                                                                                                                                                                         | #    | #    | #         | #     | #    | #    | -                                                                                                                                                      | ----        | ----                 | #                                                                                                                             | #    | #    | #         | #     | #    | #    |
| Rsa1.0_00613.1.g16893.t1  | #                                                                                                                                                                                                                                                                                                                                                                                                                                                                                                                                                         | #    | #    | #         | #     | #    | #    | -                                                                                                                                                      | ----        | ----                 | #                                                                                                                             | #    | #    | #         | #     | #    | #    |
| Rsa1.0_00613.1.g16894.t1  | gb EOA22450.1  hypothetical protein CARUB_v10003097mg [Capsella rubella]                                                                                                                                                                                                                                                                                                                                                                                                                                                                                  | 207  | 91   | 1.00E-34  | 44.0  | 34.8 | 36.2 | hypothetical protein CARUB_v10003097mg                                                                                                                 | gbpln       | Capsella rubella     | AT4G04580.1   Symbols:   Homeodomain-like superfamily protein   chr4:2293761-2294906 REVERSE LENGTH=166                       | 207  | 166  | 2.00E-28  | 80.2  | 35.3 | 47.3 |
| Rsa1.0_00613.1.g16895.t2  | #                                                                                                                                                                                                                                                                                                                                                                                                                                                                                                                                                         | #    | #    | #         | #     | #    | #    | -                                                                                                                                                      | ----        | ----                 | #                                                                                                                             | #    | #    | #         | #     | #    | #    |
| Rsa1.0_00613.1.g16896.t1  | dbj BAA97287.1  retroelement pol polyprotein-like [Arabidopsis thaliana]                                                                                                                                                                                                                                                                                                                                                                                                                                                                                  | 1445 | 1491 | 0         | 103.2 | 57.2 | 74.0 | retroelement pol polyprotein-like                                                                                                                      | gbpln       | Arabidopsis thaliana | AT4G23160.1   Symbols: CRK8   cysteine-rich RLK (RECEPTOR-like protein kinase) 8   chr4:12129485-12134086 FORWARD LENGTH=1262 | 1445 | 1262 | 1.00E-135 | 87.3  | 16.5 | 24.1 |
| Rsa1.0_00613.1.g16897.t1  | ref XP_002872697.1  predicted protein [Arabidopsis lyrata subsp. lyrata] gi 297318534 gb EFH48956.1  predicted protein [Arabidopsis lyrata subsp. lyrata]                                                                                                                                                                                                                                                                                                                                                                                                 | 656  | 659  | 0         | 100.5 | 78.7 | 86.9 | predicted protein                                                                                                                                      | gbpln       | Arabidopsis lyrata   | AT4G04540.1   Symbols: CRK39   cysteine-rich RLK (RECEPTOR-like protein kinase) 39   chr4:2259580-2262138 FORWARD LENGTH=659  | 656  | 659  | 0         | 100.5 | 78.5 | 86.6 |
| Rsa1.0_00613.1.g16898.t1  | #                                                                                                                                                                                                                                                                                                                                                                                                                                                                                                                                                         | #    | #    | #         | #     | #    | #    | -                                                                                                                                                      | ----        | ----                 | #                                                                                                                             | #    | #    | #         | #     | #    | #    |
| Rsa1.0_00613.1.g16899.t2  | ref NP_192363.1  putative cysteine-rich receptor-like protein kinase 39 [Arabidopsis thaliana] gi 75337882 sp Q9SYS7.1 CRK39_ARAT H RecName: Full=Putative cysteine-rich receptor-like protein kinase 39; Short=Cysteine-rich RLK39; Flags: Precursor gi 4773893 gb AAD29766.1 AF076243.13 putative receptor-like protein kinase [Arabidopsis thaliana] gi 7267211 emb CAB77922.1  putative receptor-like protein kinase [Arabidopsis thaliana] gi 332656997 gb AEE82397.1  putative cysteine-rich receptor-like protein kinase 39 [Arabidopsis thaliana] | 583  | 659  | 0         | 113.0 | 74.4 | 85.8 | putative cysteine-rich receptor-like protein kinase 39                                                                                                 | gbpln       | Arabidopsis thaliana | AT4G04540.1   Symbols: CRK39   cysteine-rich RLK (RECEPTOR-like protein kinase) 39   chr4:2259580-2262138 FORWARD LENGTH=659  | 583  | 659  | 0         | 113.0 | 74.4 | 85.8 |
| Rsa1.0_00613.1.g16900.t1  | ref XP_002886226.1  predicted protein [Arabidopsis lyrata subsp. lyrata] gi 297332066 gb EFH62485.1  predicted protein [Arabidopsis lyrata subsp. lyrata]                                                                                                                                                                                                                                                                                                                                                                                                 | 416  | 475  | 7.00E-29  | 114.2 | 16.3 | 17.8 | predicted protein                                                                                                                                      | gbpln       | Arabidopsis lyrata   | AT2G16430.2   Symbols: PAP10, ATPAP10   purple acid phosphatase 10   chr2:7120502-7122772 REVERSE LENGTH=468                  | 416  | 468  | 2.00E-31  | 112.5 | 16.3 | 17.8 |
| Rsa1.0_00613.1.g16901.t10 | gb AAF80658.1 AC012190.14 Similar to At2g29230 Mutator-like transposase gi 3980409 from Arabidopsis thaliana gb AC004561.1 It is a member of Transposase mutator family PF 00872 [Arabidopsis thaliana]                                                                                                                                                                                                                                                                                                                                                   | 680  | 904  | 1.00E-84  | 132.9 | 27.8 | 40.4 | Similar to At2g29230 Mutator-like transposase gi 3980409 from Arabidopsis thaliana gb AC004561.1 It is a member of Transposase mutator family PF 00872 | gbpln       | Arabidopsis thaliana | AT1G64260.1   Symbols:   MuDR family transposase   chr1:23847756-23849915 FORWARD LENGTH=719                                  | 680  | 719  | 1.00E-12  | 105.7 | 10.0 | 18.5 |

|                          |                                                                                                                                                                                                                                                                                                                                                                                                                                                                                                                                                                        |     |      |           |       |       |       |                                                  |       |                      |                                                                                                                                               |     |     |           |       |       |       |
|--------------------------|------------------------------------------------------------------------------------------------------------------------------------------------------------------------------------------------------------------------------------------------------------------------------------------------------------------------------------------------------------------------------------------------------------------------------------------------------------------------------------------------------------------------------------------------------------------------|-----|------|-----------|-------|-------|-------|--------------------------------------------------|-------|----------------------|-----------------------------------------------------------------------------------------------------------------------------------------------|-----|-----|-----------|-------|-------|-------|
| Rsa1.0_00613.1.g16902.t1 | gb AAG10812.1 AC018460.6 Putative retroelement polyprotein [Arabidopsis thaliana]                                                                                                                                                                                                                                                                                                                                                                                                                                                                                      | 208 | 1404 | 2.00E-47  | 675.0 | 56.3  | 70.2  | Putative retroelement polyprotein                | gbpln | Arabidopsis thaliana | #                                                                                                                                             | #   | #   | #         | #     | #     |       |
| Rsa1.0_00613.1.g16903.t1 | ref NP_001031620.1  putative stress-inducible protein [Arabidopsis thaliana]<br>gi 5281051 emb CAB45987.1  stress-induced protein sti1-like protein [Arabidopsis thaliana]<br>gi 7267942 emb CAB78283.1  stress-induced protein sti1-like protein [Arabidopsis thaliana]<br>gi 332657726 gb AEE83126.1  putative stress-inducible protein [Arabidopsis thaliana]                                                                                                                                                                                                       | 568 | 558  | 0         | 98.2  | 85.4  | 91.2  | putative stress-inducible protein                | gbpln | Arabidopsis thaliana | AT4G12400.2   Symbols: Hop3   stress-inducible protein, putative   chr4:7338866-7341239 REVERSE LENGTH=558                                    | 568 | 558 | 0         | 98.2  | 85.4  | 91.2  |
| Rsa1.0_00613.1.g16904.t1 | #                                                                                                                                                                                                                                                                                                                                                                                                                                                                                                                                                                      | #   | #    | #         | #     | #     | -     | -                                                | ----  | ----                 | #                                                                                                                                             | #   | #   | #         | #     | #     |       |
| Rsa1.0_00613.1.g16905.t1 | gb ABD65636.1  hypothetical protein Z3.t00055 [Brassica oleracea]                                                                                                                                                                                                                                                                                                                                                                                                                                                                                                      | 516 | 414  | 4.00E-39  | 80.2  | 22.9  | 28.7  | hypothetical protein Z3.t00055                   | gbpln | Brassica oleracea    | #                                                                                                                                             | #   | #   | #         | #     | #     |       |
| Rsa1.0_00613.1.g16906.t1 | #                                                                                                                                                                                                                                                                                                                                                                                                                                                                                                                                                                      | #   | #    | #         | #     | #     | -     | -                                                | ----  | ----                 | #                                                                                                                                             | #   | #   | #         | #     | #     |       |
| Rsa1.0_00614.1.g16907.t1 | ref NP_179853.1  C3HC4-type RING finger domain-containing protein [Arabidopsis thaliana]<br>gi 4314365 gb AAD15576.1  copia-like retroelement pol polyprotein [Arabidopsis thaliana]<br>gi 20268717 gb AAM14062.1  putative copia-like retroelement pol polyprotein [Arabidopsis thaliana]<br>gi 23296688 gb AAN13147.1  putative copia-like retroelement pol polyprotein [Arabidopsis thaliana]<br>gi 70905061 gb AAZ14056.1  At2g22680 [Arabidopsis thaliana]<br>gi 330252246 gb AEC07340.1  C3HC4-type RING finger domain-containing protein [Arabidopsis thaliana] | 675 | 683  | 0         | 101.2 | 77.3  | 86.7  | C3HC4-type RING finger domain-containing protein | gbpln | Arabidopsis thaliana | AT2G22680.1   Symbols:   Zinc finger (C3HC4-type RING finger) family protein   chr2:9645433-9647484 FORWARD LENGTH=683                        | 675 | 683 | 0         | 101.2 | 77.3  | 86.7  |
| Rsa1.0_00614.1.g16908.t1 | #                                                                                                                                                                                                                                                                                                                                                                                                                                                                                                                                                                      | #   | #    | #         | #     | #     | -     | -                                                | ----  | ----                 | #                                                                                                                                             | #   | #   | #         | #     | #     |       |
| Rsa1.0_00614.1.g16909.t1 | #                                                                                                                                                                                                                                                                                                                                                                                                                                                                                                                                                                      | #   | #    | #         | #     | #     | -     | -                                                | ----  | ----                 | #                                                                                                                                             | #   | #   | #         | #     | #     |       |
| Rsa1.0_00614.1.g16910.t1 | gb EOA27465.1  hypothetical protein CARUB_v10023602mg [Capsella rubella]                                                                                                                                                                                                                                                                                                                                                                                                                                                                                               | 271 | 323  | 1.00E-127 | 119.2 | 87.8  | 93.0  | hypothetical protein CARUB_v10023602mg           | gbpln | Capsella rubella     | AT2G22670.4   Symbols: IAA8   indoleacetic acid-induced protein 8   chr2:9636877-9638459 FORWARD LENGTH=338                                   | 271 | 338 | 1.00E-129 | 124.7 | 87.5  | 92.6  |
| Rsa1.0_00614.1.g16911.t1 | #                                                                                                                                                                                                                                                                                                                                                                                                                                                                                                                                                                      | #   | #    | #         | #     | #     | -     | -                                                | ----  | ----                 | #                                                                                                                                             | #   | #   | #         | #     | #     |       |
| Rsa1.0_00614.1.g16912.t1 | ref XP_002878627.1  hypothetical protein ARALYDRAFT_343817 [Arabidopsis lyrata subsp. lyrata]<br>gi 297324466 gb EFH54886.1  hypothetical protein ARALYDRAFT_343817 [Arabidopsis lyrata subsp. lyrata]                                                                                                                                                                                                                                                                                                                                                                 | 865 | 920  | 0         | 106.4 | 77.6  | 84.4  | hypothetical protein ARALYDRAFT_343817           | gbpln | Arabidopsis lyrata   | AT2G22660.2   Symbols:   Protein of unknown function (duplicated DUF1399)   chr2:9627737-9630840 FORWARD LENGTH=819                           | 865 | 819 | 0         | 94.7  | 74.1  | 81.3  |
| Rsa1.0_00614.1.g16913.t1 | ref NP_179849.2  protein BRICK 1 [Arabidopsis thaliana]<br>gi 75166375 sp Q94J4.1 BRK1_ARATH RecName: Full=Protein BRICK 1; Short=AtBRK1<br>gi 13899071 gb AAK48957.1 AF370530.1 Unknown protein [Arabidopsis thaliana]<br>gi 21553772 gb AAM62865.1  unknown [Arabidopsis thaliana]<br>gi 23197618 gb AAN15336.1  Unknown protein [Arabidopsis thaliana]<br>gi 330252238 gb AEC07332.1  protein BRICK 1 [Arabidopsis thaliana]<br>gi 482564046 gb EOA28236.1  hypothetical protein CARUB_v10024428mg [Capsella rubella]                                               | 85  | 85   | 4.00E-41  | 100.0 | 100.0 | 100.0 | protein BRICK 1                                  | gbpln | Arabidopsis thaliana | AT2G22640.1   Symbols: HSPC300, BRK1, ATBRK1   BRICK1, putative   chr2:9623283-9623938 FORWARD LENGTH=85                                      | 85  | 85  | 7.00E-44  | 100.0 | 100.0 | 100.0 |
| Rsa1.0_00614.1.g16914.t1 | gb EOA27841.1  hypothetical protein CARUB_v10023996mg [Capsella rubella]                                                                                                                                                                                                                                                                                                                                                                                                                                                                                               | 112 | 228  | 1.00E-53  | 203.6 | 90.2  | 93.8  | hypothetical protein CARUB_v10023996mg           | gbpln | Capsella rubella     | AT4G37940.1   Symbols: AGL21   AGAMOUS-like 21   chr4:17835695-17836821 REVERSE LENGTH=228                                                    | 112 | 228 | 6.00E-54  | 203.6 | 86.6  | 93.8  |
| Rsa1.0_00615.1.g16915.t1 | gb AAD32866.1 AC005489.4 F14N23.4 [Arabidopsis thaliana]                                                                                                                                                                                                                                                                                                                                                                                                                                                                                                               | 295 | 1161 | 7.00E-60  | 393.6 | 40.0  | 55.9  | F14N23.4                                         | gbpln | Arabidopsis thaliana | AT4G04650.1   Symbols:   RNA-directed DNA polymerase (reverse transcriptase)-related family protein   chr4:2353989-2355213 REVERSE LENGTH=332 | 295 | 332 | 2.00E-61  | 112.5 | 40.7  | 57.6  |
| Rsa1.0_00615.1.g16916.t1 | #                                                                                                                                                                                                                                                                                                                                                                                                                                                                                                                                                                      | #   | #    | #         | #     | #     | -     | -                                                | ----  | ----                 | #                                                                                                                                             | #   | #   | #         | #     | #     |       |
| Rsa1.0_00615.1.g16917.t1 | gb AAL58072.1  sucrose transporter SUC2 [Brassica oleracea]                                                                                                                                                                                                                                                                                                                                                                                                                                                                                                            | 468 | 508  | 0         | 108.5 | 94.7  | 96.4  | sucrose transporter SUC2                         | gbpln | Brassica oleracea    | AT1G22710.1   Symbols: SUC2, SUT1, ATSUC2   sucrose-proton symporter 2   chr1:8030911-8032970 REVERSE LENGTH=512                              | 468 | 512 | 0         | 109.4 | 90.8  | 94.9  |

|                          |                                                                                                                                                                                                                                                                                                                 |      |      |           |       |      |      |                                                 |       |                      |                                                                                                                                                         |      |      |           |       |      |      |
|--------------------------|-----------------------------------------------------------------------------------------------------------------------------------------------------------------------------------------------------------------------------------------------------------------------------------------------------------------|------|------|-----------|-------|------|------|-------------------------------------------------|-------|----------------------|---------------------------------------------------------------------------------------------------------------------------------------------------------|------|------|-----------|-------|------|------|
| Rsa1.0_00615.1.g16918.t1 | refXP_002893245.1   tetratricopeptide repeat-containing protein [Arabidopsis lyrata subsp. lyrata]<br>gi 297339087 gb EFH69504.1   tetratricopeptide repeat-containing protein [Arabidopsis lyrata subsp. lyrata]                                                                                               | 291  | 291  | 1.00E-140 | 100.0 | 90.7 | 93.8 | tetratricopeptide repeat-containing protein     | gbpln | Arabidopsis lyrata   | AT1G22700.2   Symbols:   Tetratricopeptide repeat (TPR)-like superfamily protein   chr1:8028323-8029878 REVERSE LENGTH=296                              | 291  | 296  | 1.00E-142 | 101.7 | 90.7 | 93.1 |
| Rsa1.0_00615.1.g16919.t1 | gb EOA37204.1   hypothetical protein CARUB_v10010675mg [Capsella rubella]                                                                                                                                                                                                                                       | 139  | 120  | 3.00E-14  | 86.3  | 30.2 | 33.8 | hypothetical protein CARUB_v10010675mg          | gbpln | Capsella rubella     | #                                                                                                                                                       | #    | #    | #         | #     | #    | #    |
| Rsa1.0_00615.1.g16920.t1 | #                                                                                                                                                                                                                                                                                                               | #    | #    | #         | #     | #    | -    | -                                               | ----  | ----                 | #                                                                                                                                                       | #    | #    | #         | #     | #    | #    |
| Rsa1.0_00615.1.g16921.t1 | #                                                                                                                                                                                                                                                                                                               | #    | #    | #         | #     | #    | -    | -                                               | ----  | ----                 | #                                                                                                                                                       | #    | #    | #         | #     | #    | #    |
| Rsa1.0_00615.1.g16922.t1 | refXP_002893243.1   predicted protein [Arabidopsis lyrata subsp. lyrata]<br>gi 297339085 gb EFH69502.1   predicted protein [Arabidopsis lyrata subsp. lyrata]                                                                                                                                                   | 312  | 426  | 4.00E-75  | 136.5 | 54.5 | 67.0 | predicted protein                               | gbpln | Arabidopsis lyrata   | AT1G22670.1   Symbols:   Protease-associated (PA) RING/U-box zinc finger family protein   chr1:8021854-8023516 REVERSE LENGTH=422                       | 312  | 422  | 3.00E-73  | 135.3 | 52.6 | 64.4 |
| Rsa1.0_00615.1.g16923.t1 | ref NP_564177.1   putative neutral invertase [Arabidopsis thaliana]<br>gi 332192143 gb AE30264.1   putative neutral invertase [Arabidopsis thaliana]                                                                                                                                                            | 540  | 534  | 0         | 98.9  | 93.3 | 96.5 | putative neutral invertase                      | gbpln | Arabidopsis thaliana | AT1G22650.1   Symbols:   Plant neutral invertase family protein   chr1:8013529-8015647 REVERSE LENGTH=534                                               | 540  | 534  | 0         | 98.9  | 93.3 | 96.5 |
| Rsa1.0_00615.1.g16924.t2 | #                                                                                                                                                                                                                                                                                                               | #    | #    | #         | #     | #    | -    | -                                               | ----  | ----                 | #                                                                                                                                                       | #    | #    | #         | #     | #    | #    |
| Rsa1.0_00615.1.g16925.t1 | dbj BAJ34375.1   unnamed protein product [Thellungiella halophila]                                                                                                                                                                                                                                              | 266  | 273  | 1.00E-120 | 102.6 | 85.0 | 88.0 | unnamed protein product                         | ----  | ----                 | AT1G22640.1   Symbols: ATMYB3, MYB3   myb domain protein 3   chr1:8006289-8007219 FORWARD LENGTH=257                                                    | 266  | 257  | 1.00E-102 | 96.6  | 76.3 | 81.6 |
| Rsa1.0_00615.1.g16926.t1 | refXP_002890521.1   C2 domain-containing protein [Arabidopsis lyrata subsp. lyrata]<br>gi 297336363 gb EFH66780.1   C2 domain-containing protein [Arabidopsis lyrata subsp. lyrata]                                                                                                                             | 1021 | 1025 | 0         | 100.4 | 90.0 | 94.1 | C2 domain-containing protein                    | gbpln | Arabidopsis lyrata   | AT1G22610.1   Symbols:   C2 calcium/lipid-binding plant phosphoribosyltransferase family protein   chr1:7994478-7997567 FORWARD LENGTH=1029             | 1021 | 1029 | 0         | 100.8 | 89.3 | 93.8 |
| Rsa1.0_00615.1.g16927.t1 | #                                                                                                                                                                                                                                                                                                               | #    | #    | #         | #     | #    | -    | -                                               | ----  | ----                 | #                                                                                                                                                       | #    | #    | #         | #     | #    | #    |
| Rsa1.0_00615.1.g16928.t1 | gb EOA11936.1   hypothetical protein CARUB_v10016547mg, partial [Capsella rubella]                                                                                                                                                                                                                              | 203  | 149  | 8.00E-26  | 73.4  | 29.6 | 38.4 | hypothetical protein CARUB_v10016547mg, partial | gbpln | Capsella rubella     | AT2G34320.1   Symbols:   Polynucleotidyl transferase, ribonuclease H-like superfamily protein   chr2:14484959-14485837 FORWARD LENGTH=292               | 203  | 292  | 2.00E-14  | 143.8 | 19.7 | 30.0 |
| Rsa1.0_00616.1.g16929.t7 | gb EMJ24402.1   hypothetical protein PRUPE_ppa009332mg [Prunus persica]                                                                                                                                                                                                                                         | 80   | 297  | 1.00E-10  | 371.3 | 47.5 | 52.5 | hypothetical protein PRUPE_ppa009332mg          | gbpln | Prunus persica       | AT2G31610.1   Symbols:   Ribosomal protein S3 family protein   chr2:13450384-13451669 FORWARD LENGTH=250                                                | 80   | 250  | 4.00E-13  | 312.5 | 42.5 | 47.5 |
| Rsa1.0_00616.1.g16930.t1 | gb EOA26346.1   hypothetical protein CARUB_v10022726mg [Capsella rubella]                                                                                                                                                                                                                                       | 179  | 723  | 8.00E-63  | 403.9 | 64.2 | 65.9 | hypothetical protein CARUB_v10022726mg          | gbpln | Capsella rubella     | AT2G32950.1   Symbols: COP1, ATCOP1, DET340, FUS1, EMB168   Transducin/WD40 repeat-like superfamily protein   chr2:13978000-13983282 FORWARD LENGTH=675 | 179  | 675  | 5.00E-65  | 377.1 | 64.2 | 65.9 |
| Rsa1.0_00616.1.g16931.t1 | refXP_002881253.1   hypothetical protein ARALYDRAFT_345050 [Arabidopsis lyrata subsp. lyrata]<br>gi 297327092 gb EFH57512.1   hypothetical protein ARALYDRAFT_345050 [Arabidopsis lyrata subsp. lyrata]                                                                                                         | 418  | 460  | 1.00E-155 | 110.0 | 69.6 | 81.1 | hypothetical protein ARALYDRAFT_345050          | gbpln | Arabidopsis lyrata   | AT2G32930.1   Symbols: ZFN2   zinc finger nuclease 2   chr2:13965990-13968419 REVERSE LENGTH=453                                                        | 418  | 453  | 1.00E-151 | 108.4 | 66.0 | 78.5 |
| Rsa1.0_00616.1.g16932.t1 | ref NP_180848.1   protein ralF-like 17 [Arabidopsis thaliana]<br>gi 75098498 sp O48776.1 RLF17_ARATH RecName: Full=Protein RALF-like 17; Flags: Precursor<br>gi 2702275 gb AAB91978.1   hypothetical protein [Arabidopsis thaliana]<br>gi 330253664 gb AEC08758.1   protein ralF-like 17 [Arabidopsis thaliana] | 76   | 77   | 3.00E-16  | 101.3 | 86.8 | 93.4 | protein ralF-like 17                            | gbpln | Arabidopsis thaliana | AT2G32890.1   Symbols: RALFL17   RALF-like 17   chr2:13953058-13953291 REVERSE LENGTH=77                                                                | 76   | 77   | 5.00E-19  | 101.3 | 86.8 | 93.4 |
| Rsa1.0_00616.1.g16933.t1 | refXP_002879420.1   glycosyl hydrolase family 1 protein [Arabidopsis lyrata subsp. lyrata]<br>gi 297325259 gb EFH55679.1   glycosyl hydrolase family 1 protein [Arabidopsis lyrata subsp. lyrata]                                                                                                               | 597  | 614  | 0         | 102.8 | 78.1 | 88.8 | glycosyl hydrolase family 1 protein             | gbpln | Arabidopsis lyrata   | AT2G32860.1   Symbols: BGLU33   beta glucosidase 33   chr2:13940233-13943596 FORWARD LENGTH=613                                                         | 597  | 613  | 0         | 102.7 | 76.5 | 87.8 |
| Rsa1.0_00616.1.g16934.t1 | refXP_002881245.1   hypothetical protein ARALYDRAFT_902346 [Arabidopsis lyrata subsp. lyrata]<br>gi 297327084 gb EFH57504.1   hypothetical protein ARALYDRAFT_902346 [Arabidopsis lyrata subsp. lyrata]                                                                                                         | 896  | 887  | 0         | 99.0  | 89.0 | 94.6 | hypothetical protein ARALYDRAFT_902346          | gbpln | Arabidopsis lyrata   | AT2G32810.1   Symbols: BGAL9   beta galactosidase 9   chr2:13919410-13925325 REVERSE LENGTH=887                                                         | 896  | 887  | 0         | 99.0  | 89.1 | 94.5 |
| Rsa1.0_00616.1.g16935.t1 | refXP_002881642.1   predicted protein [Arabidopsis lyrata subsp. lyrata]<br>gi 297327481 gb EFH57901.1   predicted protein [Arabidopsis lyrata subsp. lyrata]                                                                                                                                                   | 374  | 405  | 7.00E-83  | 108.3 | 50.3 | 63.6 | predicted protein                               | gbpln | Arabidopsis lyrata   | AT1G49790.1   Symbols:   F-box associated ubiquitination effector family protein   chr1:18436137-18437068 REVERSE LENGTH=283                            | 374  | 283  | 1.00E-65  | 75.7  | 38.2 | 47.3 |

|                          |                                                                                                                                                                                                                                                                                                                                                         |      |      |           |       |      |      |                                                 |       |                      |                                                                                                                                                                                                                                                                                                                                                                                                                                                                                              |      |      |           |       |      |      |
|--------------------------|---------------------------------------------------------------------------------------------------------------------------------------------------------------------------------------------------------------------------------------------------------------------------------------------------------------------------------------------------------|------|------|-----------|-------|------|------|-------------------------------------------------|-------|----------------------|----------------------------------------------------------------------------------------------------------------------------------------------------------------------------------------------------------------------------------------------------------------------------------------------------------------------------------------------------------------------------------------------------------------------------------------------------------------------------------------------|------|------|-----------|-------|------|------|
| Rsa1.0_00616.1.g16936.t1 | refNP_850197.1  uncharacterized protein [Arabidopsis thaliana] gi18700113 gb AAL77668.1  At2g32760/F24L7.10 [Arabidopsis thaliana] gi62320642 bj BAD95308.1  hypothetical protein [Arabidopsis thaliana] gi94442409 gb ABF18992.1  At2g32760 [Arabidopsis thaliana] gi330253639 gb AEC08733.1  uncharacterized protein AT2G32760 [Arabidopsis thaliana] | 371  | 352  | 1.00E-174 | 94.9  | 80.1 | 84.9 | uncharacterized protein                         | gbpln | Arabidopsis thaliana | AT2G32760.1   Symbols:   unknown protein; Has 229 Blast hits to 229 proteins in 104 species: Archae - 0; Bacteria - 2; Metazoa - 79; Fungi - 90; Plants - 49; Viruses - 0; Other Eukaryotes - 9 (source: NCBI BLink).   chr2:13892140-13894295 FORWARD LENGTH=352                                                                                                                                                                                                                            | 371  | 352  | 1.00E-177 | 94.9  | 80.1 | 84.9 |
| Rsa1.0_00616.1.g16937.t1 | refXP_002879410.1  exostosin family protein [Arabidopsis lyrata subsp. lyrata] gi297325249 gb EFH55669.1  exostosin family protein [Arabidopsis lyrata subsp. lyrata]                                                                                                                                                                                   | 475  | 469  | 0         | 98.7  | 79.4 | 88.2 | exostosin family protein                        | gbpln | Arabidopsis lyrata   | AT2G32740.1   Symbols: ATGT13, GT13   galactosyltransferase 13   chr2:13886826-13888232 FORWARD LENGTH=468                                                                                                                                                                                                                                                                                                                                                                                   | 475  | 468  | 0         | 98.5  | 78.9 | 88.0 |
| Rsa1.0_00616.1.g16938.t1 | refXP_002879409.1  hypothetical protein ARALYDRAFT_482209 [Arabidopsis lyrata subsp. lyrata] gi297325248 gb EFH55668.1  hypothetical protein ARALYDRAFT_482209 [Arabidopsis lyrata subsp. lyrata]                                                                                                                                                       | 1038 | 1002 | 0         | 96.5  | 92.4 | 93.8 | hypothetical protein ARALYDRAFT_482209          | gbpln | Arabidopsis lyrata   | AT2G32730.1   Symbols:   26S proteasome regulatory complex, non-ATPase subcomplex, Rpn2/Psm1 subunit   chr2:13880189-13885464 FORWARD LENGTH=1004                                                                                                                                                                                                                                                                                                                                            | 1038 | 1004 | 0         | 96.7  | 92.0 | 93.4 |
| Rsa1.0_00616.1.g16939.t1 | refXP_002881239.1  B5 #4 [Arabidopsis lyrata subsp. lyrata] gi297327078 gb EFH57498.1  B5 #4 [Arabidopsis lyrata subsp. lyrata]                                                                                                                                                                                                                         | 135  | 134  | 4.00E-69  | 99.3  | 94.8 | 96.3 | B5 #4                                           | gbpln | Arabidopsis lyrata   | AT2G32720.1   Symbols: B5 #4, ATCB5-B, CB5-B   cytochrome B5 isoform B   chr2:13877013-13878447 REVERSE LENGTH=134                                                                                                                                                                                                                                                                                                                                                                           | 135  | 134  | 4.00E-71  | 99.3  | 93.3 | 96.3 |
| Rsa1.0_00616.1.g16940.t1 | gb EOA27561.1  hypothetical protein CARUB_v10023701mg, partial [Capsella rubella]                                                                                                                                                                                                                                                                       | 234  | 306  | 4.00E-67  | 130.8 | 70.1 | 80.8 | hypothetical protein CARUB_v10023701mg, partial | gbpln | Capsella rubella     | AT2G32710.2   Symbols: KRP4, ACK2, ICK7   Cyclin-dependent kinase inhibitor family protein   chr2:13873496-13875350 FORWARD LENGTH=286                                                                                                                                                                                                                                                                                                                                                       | 234  | 286  | 6.00E-63  | 122.2 | 71.4 | 80.8 |
| Rsa1.0_00616.1.g16941.t1 | #                                                                                                                                                                                                                                                                                                                                                       | #    | #    | #         | #     | #    | #    | -                                               | ----  | ----                 | AT2G32700.2   Symbols: LUH   LEUNIG homolog   chr2:13867235-13871844 FORWARD LENGTH=787                                                                                                                                                                                                                                                                                                                                                                                                      | 130  | 787  | 6.00E-12  | 605.4 | 36.9 | 40.8 |
| Rsa1.0_00616.1.g16942.t1 | refXP_002881238.1  hypothetical protein ARALYDRAFT_482197 [Arabidopsis lyrata subsp. lyrata] gi297327077 gb EFH57497.1  hypothetical protein ARALYDRAFT_482197 [Arabidopsis lyrata subsp. lyrata]                                                                                                                                                       | 203  | 163  | 4.00E-24  | 80.3  | 24.1 | 26.6 | hypothetical protein ARALYDRAFT_482197          | gbpln | Arabidopsis lyrata   | AT2G32690.4   Symbols: ATGRP23, GRP23   glycine-rich protein 23   chr2:13863934-13864539 REVERSE LENGTH=172                                                                                                                                                                                                                                                                                                                                                                                  | 203  | 172  | 6.00E-26  | 84.7  | 23.6 | 26.6 |
| Rsa1.0_00617.1.g16943.t1 | refXP_002879242.1  hypothetical protein ARALYDRAFT_901974 [Arabidopsis lyrata subsp. lyrata] gi297325081 gb EFH55501.1  hypothetical protein ARALYDRAFT_901974 [Arabidopsis lyrata subsp. lyrata]                                                                                                                                                       | 129  | 129  | 6.00E-46  | 100.0 | 68.2 | 83.7 | hypothetical protein ARALYDRAFT_901974          | gbpln | Arabidopsis lyrata   | AT4G12617.1   Symbols:   unknown protein; FUNCTIONS IN: molecular_function unknown; INVOLVED IN: biological_process unknown; LOCATED IN: cellular_component unknown; BEST Arabidopsis thaliana protein match is: unknown protein (TAIR:AT4G05630.1). Has 30201 Blast hits to 17322 proteins in 780 species: Archae - 12; Bacteria - 1396; Metazoa - 17338; Fungi - 3422; Plants - 5037; Viruses - 0; Other Eukaryotes - 2996 (source: NCBI BLink).   chr4:7459180-7459563 FORWARD LENGTH=127 | 129  | 127  | 4.00E-25  | 98.4  | 42.6 | 62.8 |
| Rsa1.0_00617.1.g16944.t1 | gb EOA14790.1  hypothetical protein CARUB_v10028090mg [Capsella rubella]                                                                                                                                                                                                                                                                                | 427  | 419  | 1.00E-120 | 98.1  | 57.8 | 71.7 | hypothetical protein CARUB_v10028090mg          | gbpln | Capsella rubella     | AT1G32375.1   Symbols:   F-box/RNI-like/FBD-like domains-containing protein   chr1:11678230-11680679 FORWARD LENGTH=422                                                                                                                                                                                                                                                                                                                                                                      | 427  | 422  | 1.00E-122 | 98.8  | 56.7 | 70.0 |
| Rsa1.0_00617.1.g16945.t1 | gb EOA18720.1  hypothetical protein CARUB_v10007298mg [Capsella rubella]                                                                                                                                                                                                                                                                                | 131  | 465  | 4.00E-15  | 355.0 | 38.9 | 49.6 | hypothetical protein CARUB_v10007298mg          | gbpln | Capsella rubella     | AT4G24150.1   Symbols: AtGRF8, GRF8   growth-regulating factor 8   chr4:12535972-12539387 FORWARD LENGTH=493                                                                                                                                                                                                                                                                                                                                                                                 | 131  | 493  | 4.00E-11  | 376.3 | 34.4 | 41.2 |
| Rsa1.0_00617.1.g16946.t2 | gb EOA37082.1  hypothetical protein CARUB_v10010237mg [Capsella rubella]                                                                                                                                                                                                                                                                                | 196  | 223  | 1.00E-72  | 113.8 | 77.6 | 88.3 | hypothetical protein CARUB_v10010237mg          | gbpln | Capsella rubella     | AT1G05190.1   Symbols: emb2394   Ribosomal protein L6 family   chr1:1502515-1503738 REVERSE LENGTH=223                                                                                                                                                                                                                                                                                                                                                                                       | 196  | 223  | 4.00E-74  | 113.8 | 76.5 | 87.8 |
| Rsa1.0_00617.1.g16947.t1 | refXP_002866147.1  F-box family protein [Arabidopsis lyrata subsp. lyrata] gi297311982 gb EFH42406.1  F-box family protein [Arabidopsis lyrata subsp. lyrata]                                                                                                                                                                                           | 394  | 423  | 3.00E-97  | 107.4 | 52.8 | 69.8 | F-box family protein                            | gbpln | Arabidopsis lyrata   | AT5G56420.2   Symbols:   F-box/RNI-like/FBD-like domains-containing protein   chr5:22850863-22852334 REVERSE LENGTH=422                                                                                                                                                                                                                                                                                                                                                                      | 394  | 422  | 2.00E-97  | 107.1 | 51.5 | 69.5 |
| Rsa1.0_00617.1.g16948.t1 | refXP_002866147.1  F-box family protein [Arabidopsis lyrata subsp. lyrata] gi297311982 gb EFH42406.1  F-box family protein [Arabidopsis lyrata subsp. lyrata]                                                                                                                                                                                           | 539  | 423  | 1.00E-105 | 78.5  | 38.4 | 52.3 | F-box family protein                            | gbpln | Arabidopsis lyrata   | AT5G56420.2   Symbols:   F-box/RNI-like/FBD-like domains-containing protein   chr5:22850863-22852334 REVERSE LENGTH=422                                                                                                                                                                                                                                                                                                                                                                      | 539  | 422  | 1.00E-105 | 78.3  | 38.0 | 52.1 |
| Rsa1.0_00617.1.g16949.t1 | refXP_002866147.1  F-box family protein [Arabidopsis lyrata subsp. lyrata] gi297311982 gb EFH42406.1  F-box family protein [Arabidopsis lyrata subsp. lyrata]                                                                                                                                                                                           | 425  | 423  | 0         | 99.5  | 80.0 | 89.9 | F-box family protein                            | gbpln | Arabidopsis lyrata   | AT5G56420.2   Symbols:   F-box/RNI-like/FBD-like domains-containing protein   chr5:22850863-22852334 REVERSE LENGTH=422                                                                                                                                                                                                                                                                                                                                                                      | 425  | 422  | 0         | 99.3  | 78.8 | 89.6 |

|                          |                                                                                                                                                                                                                                                                                                                                                                                                                                                                                                                                        |     |     |           |       |      |       |                                                   |       |                      |                                                                                                                                                                                                                                                                                                                                                                                                                                                 |     |     |           |       |      |       |
|--------------------------|----------------------------------------------------------------------------------------------------------------------------------------------------------------------------------------------------------------------------------------------------------------------------------------------------------------------------------------------------------------------------------------------------------------------------------------------------------------------------------------------------------------------------------------|-----|-----|-----------|-------|------|-------|---------------------------------------------------|-------|----------------------|-------------------------------------------------------------------------------------------------------------------------------------------------------------------------------------------------------------------------------------------------------------------------------------------------------------------------------------------------------------------------------------------------------------------------------------------------|-----|-----|-----------|-------|------|-------|
| Rsa1.0_00617.1.g16950.t1 | gb EOA12750.1  hypothetical protein CARUB_v10028431mg [Capsella rubella]                                                                                                                                                                                                                                                                                                                                                                                                                                                               | 237 | 423 | 1.00E-35  | 178.5 | 38.0 | 49.4  | hypothetical protein CARUB_v10028431mg            | gbpln | Capsella rubella     | AT5G56440.1   Symbols:   F-box/RNI-like/FBD-like domains-containing protein   chr5:22855742-22857117 REVERSE LENGTH=430                                                                                                                                                                                                                                                                                                                         | 237 | 430 | 3.00E-35  | 181.4 | 37.6 | 43.9  |
| Rsa1.0_00617.1.g16951.t1 | ref NP_200455.1  FBD-associated F-box protein [Arabidopsis thaliana]   gi 75262697 sp Q9FM87.1 FBD26_ARATH RecName: Full=Putative FBD-associated F-box protein At5g56440   gi 10177843 dbj BAB11272.1  unnamed protein product [Arabidopsis thaliana]   gi 332009382 gb AED96765.1  FBD-associated F-box protein [Arabidopsis thaliana]                                                                                                                                                                                                | 420 | 430 | 1.00E-116 | 102.4 | 56.4 | 68.8  | FBD-associated F-box protein                      | gbpln | Arabidopsis thaliana | AT5G56440.1   Symbols:   F-box/RNI-like/FBD-like domains-containing protein   chr5:22855742-22857117 REVERSE LENGTH=430                                                                                                                                                                                                                                                                                                                         | 420 | 430 | 1.00E-119 | 102.4 | 56.4 | 68.8  |
| Rsa1.0_00617.1.g16952.t1 | #                                                                                                                                                                                                                                                                                                                                                                                                                                                                                                                                      | #   | #   | #         | #     | #    | -     | ----                                              | ----  | #                    | #                                                                                                                                                                                                                                                                                                                                                                                                                                               | #   | #   | #         | #     | #    |       |
| Rsa1.0_00617.1.g16953.t1 | ref XP_002864456.1  hypothetical protein ARALYDRAFT_331952 [Arabidopsis lyrata subsp. lyrata]   gi 297310292 gb EFH40715.1  hypothetical protein ARALYDRAFT_331952 [Arabidopsis lyrata subsp. lyrata]                                                                                                                                                                                                                                                                                                                                  | 414 | 419 | 0         | 101.2 | 93.2 | 95.9  | hypothetical protein ARALYDRAFT_331952            | gbpln | Arabidopsis lyrata   | AT5G56460.1   Symbols:   Protein kinase superfamily protein   chr5:22865509-22867866 FORWARD LENGTH=408                                                                                                                                                                                                                                                                                                                                         | 414 | 408 | 0         | 98.6  | 91.3 | 94.7  |
| Rsa1.0_00617.1.g16954.t1 | ref XP_002864457.1  predicted protein [Arabidopsis lyrata subsp. lyrata]   gi 297310292 gb EFH40716.1  predicted protein [Arabidopsis lyrata subsp. lyrata]                                                                                                                                                                                                                                                                                                                                                                            | 736 | 578 | 0         | 78.5  | 64.5 | 70.2  | predicted protein                                 | gbpln | Arabidopsis lyrata   | AT1G32300.1   Symbols:   D-arabinono-1,4-lactone oxidase family protein   chr1:11651342-11653365 FORWARD LENGTH=595                                                                                                                                                                                                                                                                                                                             | 736 | 595 | 0         | 80.8  | 63.5 | 69.3  |
| Rsa1.0_00617.1.g16955.t1 | #                                                                                                                                                                                                                                                                                                                                                                                                                                                                                                                                      | #   | #   | #         | #     | #    | -     | ----                                              | ----  | #                    | #                                                                                                                                                                                                                                                                                                                                                                                                                                               | #   | #   | #         | #     | #    |       |
| Rsa1.0_00618.1.g16956.t1 | gb EOA29697.1  hypothetical protein CARUB_v10016402mg [Capsella rubella]                                                                                                                                                                                                                                                                                                                                                                                                                                                               | 73  | 76  | 2.00E-28  | 104.1 | 89.0 | 93.2  | hypothetical protein CARUB_v10016402mg            | gbpln | Capsella rubella     | AT3G14430.1   Symbols:   unknown protein; FUNCTIONS IN: molecular function unknown; INVOLVED IN: response to oxidative stress; LOCATED IN: mitochondrion; EXPRESSED IN: 23 plant structures; EXPRESSED DURING: 13 growth stages; Has 16 Blast hits to 16 proteins in 7 species: Archae - 0; Bacteria - 0; Metazoa - 0; Fungi - 0; Plants - 16; Viruses - 0; Other Eukaryotes - 0 (source: NCBI BLink).   chr3:4824399-4824732 REVERSE LENGTH=76 | 73  | 76  | 5.00E-31  | 104.1 | 89.0 | 93.2  |
| Rsa1.0_00618.1.g16957.t1 | ref NP_188060.1  putative peroxisomal (S)-2-hydroxy-acid oxidase 2 [Arabidopsis thaliana]   gi 30683149 ref NP_850584.1  putative peroxisomal (S)-2-hydroxy-acid oxidase 2 [Arabidopsis thaliana]   gi 297829994 ref XP_002882879.1  hypothetical protein ARALYDRAFT_478862 [Arabidopsis lyrata subsp. lyrata]   gi 13124262 sp Q9LRR9.1 GLO1_ARATH RecName: Full=Peroxisomal (S)-2-hydroxy-acid oxidase GLO1; AltName: Full=Glycolate oxidase 1; Short=AtGLO1; Short=GOX 1; AltName: Full=Short chain alpha-hydroxy acid oxidase GLO1 | 367 | 367 | 0         | 100.0 | 97.8 | 100.0 | putative peroxisomal (S)-2-hydroxy-acid oxidase 2 | gbpln | Arabidopsis lyrata   | AT3G14420.2   Symbols:   Aldolase-type TIM barrel family protein   chr3:481804-4823899 FORWARD LENGTH=367                                                                                                                                                                                                                                                                                                                                       | 367 | 367 | 0         | 100.0 | 97.8 | 100.0 |
| Rsa1.0_00618.1.g16958.t5 | gb AAV28535.1  glycolate oxidase [Brassica napus]                                                                                                                                                                                                                                                                                                                                                                                                                                                                                      | 393 | 367 | 1.00E-176 | 93.4  | 83.0 | 87.0  | glycolate oxidase                                 | gbpln | Brassica napus       | AT3G14415.3   Symbols:   Aldolase-type TIM barrel family protein   chr3:4818667-4820748 FORWARD LENGTH=367                                                                                                                                                                                                                                                                                                                                      | 393 | 367 | 1.00E-177 | 93.4  | 82.2 | 86.0  |

|                          |                                                                                                                                                                                                                                                                                                                                                                                                                                                                                                                                                                    |     |     |           |       |      |       |                                          |       |                      |                                                                                                                                                                                                                                                       |     |     |           |       |      |       |
|--------------------------|--------------------------------------------------------------------------------------------------------------------------------------------------------------------------------------------------------------------------------------------------------------------------------------------------------------------------------------------------------------------------------------------------------------------------------------------------------------------------------------------------------------------------------------------------------------------|-----|-----|-----------|-------|------|-------|------------------------------------------|-------|----------------------|-------------------------------------------------------------------------------------------------------------------------------------------------------------------------------------------------------------------------------------------------------|-----|-----|-----------|-------|------|-------|
| Rsa1.0_00618.1.g16959.t1 | refXP_002885043.1   hypothetical protein ARALYDRAFT_897714 [Arabidopsis lyrata subsp. lyrata] gi 297330883 gb EFH61302.1   hypothetical protein ARALYDRAFT_897714 [Arabidopsis lyrata subsp. lyrata]                                                                                                                                                                                                                                                                                                                                                               | 347 | 339 | 1.00E-179 | 97.7  | 93.1 | 95.4  | hypothetical protein ARALYDRAFT_897714   | gbpln | Arabidopsis lyrata   | AT3G14410.1   Symbols:   Nucleotide/sugar transporter family protein   chr3:4815982-4817852 REVERSE LENGTH=340                                                                                                                                        | 347 | 340 | 1.00E-179 | 98.0  | 93.1 | 95.7  |
| Rsa1.0_00618.1.g16960.t1 | refXP_002885042.1   ubiquitin-specific protease 25 [Arabidopsis lyrata subsp. lyrata] gi 297330882 gb EFH61301.1   ubiquitin-specific protease 25 [Arabidopsis lyrata subsp. lyrata]                                                                                                                                                                                                                                                                                                                                                                               | 684 | 662 | 0         | 96.8  | 75.7 | 83.5  | ubiquitin-specific protease 25           | gbpln | Arabidopsis lyrata   | AT3G14400.1   Symbols: UBP25   ubiquitin-specific protease 25   chr3:4811953-4815210 REVERSE LENGTH=661                                                                                                                                               | 684 | 661 | 0         | 96.6  | 75.7 | 83.3  |
| Rsa1.0_00618.1.g16961.t1 | refXP_002882878.1   hypothetical protein ARALYDRAFT_478858 [Arabidopsis lyrata subsp. lyrata] gi 297328718 gb EFH59137.1   hypothetical protein ARALYDRAFT_478858 [Arabidopsis lyrata subsp. lyrata]                                                                                                                                                                                                                                                                                                                                                               | 76  | 75  | 2.00E-18  | 98.7  | 77.6 | 86.8  | hypothetical protein ARALYDRAFT_478858   | gbpln | Arabidopsis lyrata   | AT3G14395.1   Symbols:   unknown protein; Has 4 Blast hits to 4 proteins in 2 species: Archae - 0; Bacteria - 0; Metazoa - 0; Fungi - 0; Plants - 4; Viruses - 0; Other Eukaryotes - 0 (source: NCBI BLINK).   chr3:4811044-4811271 FORWARD LENGTH=75 | 76  | 75  | 7.00E-21  | 98.7  | 77.6 | 85.5  |
| Rsa1.0_00618.1.g16962.t1 | refXP_002885041.1   integral membrane family protein [Arabidopsis lyrata subsp. lyrata] gi 341958542 sp D7L342.1 CSPL8_ARAL.L RecName: Full=CASP-like protein ARALYDRAFT_478855 gi 297330881 gb EFH61300.1   integral membrane family protein [Arabidopsis lyrata subsp. lyrata]                                                                                                                                                                                                                                                                                   | 230 | 178 | 4.00E-44  | 77.4  | 50.9 | 59.1  | integral membrane family protein         | gbpln | Arabidopsis lyrata   | AT3G14380.1   Symbols:   Uncharacterised protein family (UPF0497)   chr3:4803175-4803799 REVERSE LENGTH=178                                                                                                                                           | 230 | 178 | 1.00E-43  | 77.4  | 48.3 | 58.3  |
| Rsa1.0_00618.1.g16963.t1 | ref[NP_188054.1] protein kinase WAG2 [Arabidopsis thaliana] gi 9279584 dbj BAB01042.1   protein kinase [Arabidopsis thaliana] gi 21618089 gb AAM67139.1   putative protein kinase [Arabidopsis thaliana] gi 116325946 gb ABJ98574.1   At3g14370 [Arabidopsis thaliana] gi 332641988 gb AEE75509.1   protein kinase WAG2 [Arabidopsis thaliana] gb AAF99763.1 AC003981.13 F22O13.21 [Arabidopsis thaliana] gi 9293930 dbj BAB01833.1   Mutator-like transposase [Arabidopsis thaliana] gi 10177478 dbj BAB10869.1   mutator-like transposase [Arabidopsis thaliana] | 480 | 480 | 0         | 100.0 | 93.3 | 96.3  | protein kinase WAG2                      | gbpln | Arabidopsis thaliana | AT3G14370.1   Symbols: WAG2   Protein kinase superfamily protein   chr3:4798026-4799468 REVERSE LENGTH=480                                                                                                                                            | 480 | 480 | 0         | 100.0 | 93.3 | 96.3  |
| Rsa1.0_00618.1.g16964.t1 | gi 332641988 gb AEE75509.1   protein kinase WAG2 [Arabidopsis thaliana] gb AAF99763.1 AC003981.13 F22O13.21 [Arabidopsis thaliana] gi 9293930 dbj BAB01833.1   Mutator-like transposase [Arabidopsis thaliana] gi 10177478 dbj BAB10869.1   mutator-like transposase [Arabidopsis thaliana]                                                                                                                                                                                                                                                                        | 964 | 915 | 1.00E-139 | 94.9  | 26.9 | 38.4  | F22O13.21                                | gbpln | Arabidopsis thaliana | AT1G64260.1   Symbols:   MuDR family transposase   chr1:2384756-23849915 FORWARD LENGTH=719                                                                                                                                                           | 964 | 719 | 3.00E-27  | 74.6  | 12.3 | 22.3  |
| Rsa1.0_00618.1.g16965.t1 | gb ABD65615.1   hypothetical protein 23.t00033 [Brassica oleracea]                                                                                                                                                                                                                                                                                                                                                                                                                                                                                                 | 203 | 326 | 4.00E-25  | 160.6 | 31.0 | 47.3  | hypothetical protein 23.t00033           | gbpln | Brassica oleracea    | #                                                                                                                                                                                                                                                     | #   | #   | #         | #     | #    | #     |
| Rsa1.0_00618.1.g16966.t1 | gb ABD64941.1   Ulp1 protease family protein [Brassica oleracea]                                                                                                                                                                                                                                                                                                                                                                                                                                                                                                   | 944 | 871 | 2.00E-86  | 92.3  | 29.7 | 44.8  | Ulp1 protease family protein             | gbpln | Brassica oleracea    | AT2G07240.1   Symbols:   cysteine-type peptidases;cysteine-type peptidases   chr2:3007102-3011701 REVERSE LENGTH=874                                                                                                                                  | 944 | 874 | 4.00E-34  | 92.6  | 10.1 | 16.0  |
| Rsa1.0_00618.1.g16967.t1 | #                                                                                                                                                                                                                                                                                                                                                                                                                                                                                                                                                                  | #   | #   | #         | #     | #    | -     | ----                                     | ----  | ----                 | #                                                                                                                                                                                                                                                     | #   | #   | #         | #     | #    | #     |
| Rsa1.0_00618.1.g16968.t1 | refXP_002882876.1   lipase class 3 family protein [Arabidopsis lyrata subsp. lyrata] gi 297328716 gb EFH59135.1   lipase class 3 family protein [Arabidopsis lyrata subsp. lyrata]                                                                                                                                                                                                                                                                                                                                                                                 | 520 | 521 | 0         | 100.2 | 81.2 | 88.8  | lipase class 3 family protein            | gbpln | Arabidopsis lyrata   | AT3G14360.1   Symbols:   alpha/beta-Hydrolases superfamily protein   chr3:4791596-4793534 FORWARD LENGTH=518                                                                                                                                          | 520 | 518 | 0         | 99.6  | 79.6 | 87.9  |
| Rsa1.0_00618.1.g16969.t1 | gb AFQ91933.1   leucine-rich repeat receptor-like kinase [Brassica rapa subsp. oleifera]                                                                                                                                                                                                                                                                                                                                                                                                                                                                           | 830 | 707 | 0         | 85.2  | 79.8 | 81.6  | leucine-rich repeat receptor-like kinase | gbpln | Brassica rapa        | AT3G14350.1   Symbols: SRF7   STRUBBELG-receptor family 7   chr3:4783115-4786999 REVERSE LENGTH=717                                                                                                                                                   | 830 | 717 | 0         | 86.4  | 77.3 | 81.9  |
| Rsa1.0_00618.1.g16970.t1 | #                                                                                                                                                                                                                                                                                                                                                                                                                                                                                                                                                                  | #   | #   | #         | #     | #    | -     | ----                                     | ----  | ----                 | #                                                                                                                                                                                                                                                     | #   | #   | #         | #     | #    | #     |
| Rsa1.0_00619.1.g16971.t1 | #                                                                                                                                                                                                                                                                                                                                                                                                                                                                                                                                                                  | #   | #   | #         | #     | #    | -     | ----                                     | ----  | ----                 | #                                                                                                                                                                                                                                                     | #   | #   | #         | #     | #    | #     |
| Rsa1.0_00619.1.g16972.t1 | #                                                                                                                                                                                                                                                                                                                                                                                                                                                                                                                                                                  | #   | #   | #         | #     | #    | -     | ----                                     | ----  | ----                 | #                                                                                                                                                                                                                                                     | #   | #   | #         | #     | #    | #     |
| Rsa1.0_00619.1.g16973.t1 | refXP_002881476.1   hypothetical protein ARALYDRAFT_902809 [Arabidopsis lyrata subsp. lyrata] gi 297327315 gb EFH57735.1   hypothetical protein ARALYDRAFT_902809 [Arabidopsis lyrata subsp. lyrata] gi 482563079 gb EOA27269.1   hypothetical protein CARUB.v10023389mg [Capsella rubella] gi 482563080 gb EOA27270.1   hypothetical protein CARUB.v10023389mg [Capsella rubella]                                                                                                                                                                                 | 390 | 390 | 0         | 100.0 | 99.2 | 100.0 | hypothetical protein ARALYDRAFT_902809   | gbpln | Arabidopsis lyrata   | AT2G36880.2   Symbols: MAT3   methionine adenosyltransferase 3   chr2:15479721-15480893 REVERSE LENGTH=390                                                                                                                                            | 390 | 390 | 0         | 100.0 | 98.7 | 100.0 |

|                          |                                                                                                                                                                                                                                                                                                                                                                                                                                          |      |      |           |       |      |      |                                              |       |                      |                                                                                                                                                 |      |      |           |       |      |      |
|--------------------------|------------------------------------------------------------------------------------------------------------------------------------------------------------------------------------------------------------------------------------------------------------------------------------------------------------------------------------------------------------------------------------------------------------------------------------------|------|------|-----------|-------|------|------|----------------------------------------------|-------|----------------------|-------------------------------------------------------------------------------------------------------------------------------------------------|------|------|-----------|-------|------|------|
| Rsa1.0_00619.1.g16974.t1 | gb EOA27604.1  hypothetical protein CARUB_v10023744mg [Capsella rubella]                                                                                                                                                                                                                                                                                                                                                                 | 288  | 297  | 1.00E-113 | 103.1 | 81.3 | 86.5 | hypothetical protein CARUB_v10023744mg       | gbpln | Capsella rubella     | AT2G36890.1   Symbols: RAX2, MYB38, ATMYB38, BIT1   Duplicated homeodomain-like superfamily protein   chr2:15485821-15487245 FORWARD LENGTH=298 | 288  | 298  | 1.00E-108 | 103.5 | 80.6 | 87.5 |
| Rsa1.0_00619.1.g16975.t2 | #                                                                                                                                                                                                                                                                                                                                                                                                                                        | #    | #    | #         | #     | #    | -    | ----                                         | ----  | ----                 | #                                                                                                                                               | #    | #    | #         | #     | #    |      |
| Rsa1.0_00619.1.g16976.t1 | #                                                                                                                                                                                                                                                                                                                                                                                                                                        | #    | #    | #         | #     | #    | -    | ----                                         | ----  | ----                 | #                                                                                                                                               | #    | #    | #         | #     | #    |      |
| Rsa1.0_00619.1.g16977.t1 | gb EOA26337.1  hypothetical protein CARUB_v10022511mg [Capsella rubella]                                                                                                                                                                                                                                                                                                                                                                 | 301  | 1347 | 1.00E-133 | 447.5 | 83.7 | 87.7 | hypothetical protein CARUB_v10022511mg       | gbpln | Capsella rubella     | AT2G36910.1   Symbols: ATPGP1, PGP1, ABCB1   ATP binding cassette subfamily B1   chr2:15502162-15507050 FORWARD LENGTH=1286                     | 301  | 1286 | 1.00E-127 | 427.2 | 72.1 | 73.8 |
| Rsa1.0_00619.1.g16978.t1 | gb AAD32898.1  putative retroelement pol polyprotein [Arabidopsis thaliana]                                                                                                                                                                                                                                                                                                                                                              | 1366 | 1307 | 0         | 95.7  | 59.5 | 74.0 | putative retroelement pol polyprotein        | gbpln | Arabidopsis thaliana | AT4G23160.1   Symbols: CRK8   cysteine-rich RLK (RECEPTOR-like protein kinase) 8   chr4:12129485-12134086 FORWARD LENGTH=1262                   | 1366 | 1262 | 1.00E-103 | 92.4  | 14.8 | 22.5 |
| Rsa1.0_00619.1.g16979.t1 | gb ABB97035.1  ABC transporter-like protein [Brassica rapa]                                                                                                                                                                                                                                                                                                                                                                              | 1014 | 1300 | 0         | 128.2 | 98.7 | 99.5 | ABC transporter-like protein                 | gbpln | Brassica rapa        | AT2G36910.1   Symbols: ATPGP1, PGP1, ABCB1   ATP binding cassette subfamily B1   chr2:15502162-15507050 FORWARD LENGTH=1286                     | 1014 | 1286 | 0         | 126.8 | 96.6 | 98.9 |
| Rsa1.0_00619.1.g16980.t2 | ref NP_565854.1  C2H2-type zinc finger-containing protein [Arabidopsis thaliana] gi 15027949 e AAK76505.1  unknown protein [Arabidopsis thaliana] gi 20197946 g AD31578.2  expressed protein [Arabidopsis thaliana] gi 20259185 g AAM14308.1  unknown protein [Arabidopsis thaliana] gi 330254229 g AEC09323.1  C2H2-type zinc finger-containing protein [Arabidopsis thaliana]                                                          | 109  | 198  | 9.00E-48  | 181.7 | 87.2 | 90.8 | C2H2-type zinc finger-containing protein     | gbpln | Arabidopsis thaliana | AT2G36930.1   Symbols:   zinc finger (C2H2 type) family protein   chr2:15510002-15511347 REVERSE LENGTH=198                                     | 109  | 198  | 1.00E-50  | 181.7 | 87.2 | 90.8 |
| Rsa1.0_00620.1.g16981.t2 | ref XP_002873770.1  hypothetical protein ARALYDRAFT_488488 [Arabidopsis lyrata subsp. lyrata] gi 297319607 g EFH50029.1  hypothetical protein ARALYDRAFT_488488 [Arabidopsis lyrata subsp. lyrata]                                                                                                                                                                                                                                       | 314  | 282  | 9.00E-74  | 89.8  | 48.1 | 55.7 | hypothetical protein ARALYDRAFT_488488       | gbpln | Arabidopsis lyrata   | AT5G16360.1   Symbols:   NC domain-containing protein-related   chr5:5355236-5356195 REVERSE LENGTH=283                                         | 314  | 283  | 3.00E-75  | 90.1  | 47.1 | 54.8 |
| Rsa1.0_00620.1.g16982.t1 | ref NP_197136.1  protein FRIGIDA like 1 [Arabidopsis thaliana] gi 9759114 dbj BAB09599.1  unnamed protein product [Arabidopsis thaliana] gi 18700117 g AAL77670.1  AT5g16320/MQK4.4 [Arabidopsis thaliana] gi 20856075 g AAM26646.1  AT5g16320/MQK4.4 [Arabidopsis thaliana] gi 46810269 tpg DAA05285.1  TPA_exp: flowering time protein [Arabidopsis thaliana] gi 332004896 g AED92279.1  protein FRIGIDA like 1 [Arabidopsis thaliana] | 466  | 470  | 1.00E-156 | 100.9 | 66.3 | 79.8 | protein FRIGIDA like 1                       | gbpln | Arabidopsis thaliana | AT5G16320.1   Symbols: FRL1   FRIGIDA like 1   chr5:5344507-5345919 FORWARD LENGTH=470                                                          | 466  | 470  | 1.00E-158 | 100.9 | 66.3 | 79.8 |
| Rsa1.0_00620.1.g16983.t1 | ref XP_002871714.1  hypothetical protein ARALYDRAFT_488483 [Arabidopsis lyrata subsp. lyrata] gi 297317551 g EFH47973.1  hypothetical protein ARALYDRAFT_488483 [Arabidopsis lyrata subsp. lyrata]                                                                                                                                                                                                                                       | 1133 | 1067 | 0         | 94.2  | 83.4 | 88.6 | hypothetical protein ARALYDRAFT_488483       | gbpln | Arabidopsis lyrata   | AT5G16300.1   Symbols:   Vps51/Vps67 family (components of vesicular transport) protein   chr5:5338119-5342186 FORWARD LENGTH=1068              | 1133 | 1068 | 0         | 94.3  | 83.1 | 88.5 |
| Rsa1.0_00620.1.g16984.t2 | ref NP_197132.2  uncharacterized protein [Arabidopsis thaliana] gi 332004885 g AED92268.1  uncharacterized protein AT5G16280 [Arabidopsis thaliana]                                                                                                                                                                                                                                                                                      | 1275 | 1272 | 0         | 99.8  | 87.6 | 93.1 | uncharacterized protein                      | gbpln | Arabidopsis thaliana | AT5G16280.1   Symbols:   Tetratricopeptide repeat (TPR)-like superfamily protein   chr5:5323377-5331345 REVERSE LENGTH=1272                     | 1275 | 1272 | 0         | 99.8  | 87.6 | 93.1 |
| Rsa1.0_00620.1.g16985.t1 | gb EOA23068.1  hypothetical protein CARUB_v10003848mg [Capsella rubella]                                                                                                                                                                                                                                                                                                                                                                 | 342  | 341  | 5.00E-29  | 99.7  | 24.6 | 33.6 | hypothetical protein CARUB_v10003848mg       | gbpln | Capsella rubella     | AT4G11340.1   Symbols:   Disease resistance protein (TIR-NBS-LRR class) family   chr4:6894208-6899130 REVERSE LENGTH=495                        | 342  | 495  | 4.00E-31  | 144.7 | 23.4 | 30.4 |
| Rsa1.0_00620.1.g16986.t1 | ref NP_192873.1  TIR-NBS-LRR class disease resistance protein [Arabidopsis thaliana] gi 5596480 emb CAB51418.1  putative protein [Arabidopsis thaliana] gi 7267833 emb CAB81235.1  putative protein [Arabidopsis thaliana] gi 332657598 g AEE82998.1  TIR-NBS-LRR class disease resistance protein [Arabidopsis thaliana]                                                                                                                | 393  | 495  | 8.00E-30  | 126.0 | 20.9 | 25.4 | TIR-NBS-LRR class disease resistance protein | gbpln | Arabidopsis thaliana | AT4G11340.1   Symbols:   Disease resistance protein (TIR-NBS-LRR class) family   chr4:6894208-6899130 REVERSE LENGTH=495                        | 393  | 495  | 2.00E-32  | 126.0 | 20.9 | 25.4 |
| Rsa1.0_00620.1.g16987.t1 | #                                                                                                                                                                                                                                                                                                                                                                                                                                        | #    | #    | #         | #     | #    | -    | ----                                         | ----  | ----                 | #                                                                                                                                               | #    | #    | #         | #     | #    |      |

|                          |                                                                                                                                                                                                                                                                                                                                                                                                                                                                                                        |      |      |           |       |      |      |                                                 |       |                      |                                                                                                                                                                                                                                                                                                                                                                                                                                                                                                                                                                         |      |      |           |       |      |      |
|--------------------------|--------------------------------------------------------------------------------------------------------------------------------------------------------------------------------------------------------------------------------------------------------------------------------------------------------------------------------------------------------------------------------------------------------------------------------------------------------------------------------------------------------|------|------|-----------|-------|------|------|-------------------------------------------------|-------|----------------------|-------------------------------------------------------------------------------------------------------------------------------------------------------------------------------------------------------------------------------------------------------------------------------------------------------------------------------------------------------------------------------------------------------------------------------------------------------------------------------------------------------------------------------------------------------------------------|------|------|-----------|-------|------|------|
| Rsa1.0_00620.1.g16988.t4 | refXP_002871712.1   hypothetical protein ARALYDRAFT_909607 [Arabidopsis lyrata subsp. lyrata] gi 297317549 gb EFH47971.1   hypothetical protein ARALYDRAFT_909607 [Arabidopsis lyrata subsp. lyrata]                                                                                                                                                                                                                                                                                                   | 1037 | 1030 | 0         | 99.3  | 78.9 | 86.6 | hypothetical protein ARALYDRAFT_909607          | gbpln | Arabidopsis lyrata   | AT5G16270.1   Symbols: ATRAD21.3, SYN4   sister chromatid cohesion 1 protein 4   chr5:5316783-5322330 FORWARD LENGTH=1031                                                                                                                                                                                                                                                                                                                                                                                                                                               | 1037 | 1031 | 0         | 99.4  | 77.0 | 84.7 |
| Rsa1.0_00620.1.g16989.t1 | ref NP_197130.1  HIV Tat-specific factor 1 [Arabidopsis thaliana] gi 9755836 emb CAC01867.1  putative protein [Arabidopsis thaliana] gi 63003814 gb AA25436.1  At5g16260 [Arabidopsis thaliana] gi 110738266 db BAF01062.1   hypothetical protein [Arabidopsis thaliana] gi 332004883 gb AED92266.1   RNA binding protein ELF9 [Arabidopsis thaliana]                                                                                                                                                  | 534  | 519  | 0         | 97.2  | 79.0 | 86.5 | HIV Tat-specific factor 1                       | gbpln | Arabidopsis thaliana | AT5G16260.1   Symbols: ELF9   RNA binding (RRM/RBD/RNP motifs) family protein   chr5:5311363-5315496 FORWARD LENGTH=519                                                                                                                                                                                                                                                                                                                                                                                                                                                 | 534  | 519  | 0         | 97.2  | 79.0 | 86.5 |
| Rsa1.0_00620.1.g16990.t1 | gb AAM63009.1  unknown [Arabidopsis thaliana]                                                                                                                                                                                                                                                                                                                                                                                                                                                          | 185  | 183  | 1.00E-84  | 98.9  | 89.7 | 95.7 | unknown                                         | gbpln | Arabidopsis thaliana | AT5G16250.1   Symbols:   unknown protein; BEST Arabidopsis thaliana protein match is: unknown protein (TAIR:AT3G02640.1); Has 1807 Blast hits to 1807 proteins in 277 species: Archae - 0; Bacteria - 0; Metazoa - 736; Fungi - 347; Plants - 385; Viruses - 0; Other Eukaryotes - 339 (source: NCBI BLink).   chr5:5310264-5310815 REVERSE LENGTH=183                                                                                                                                                                                                                  | 185  | 183  | 1.00E-86  | 98.9  | 89.2 | 95.1 |
| Rsa1.0_00620.1.g16991.t1 | gb EOA18445.1  hypothetical protein CARUB_v10006988mg [Capsella rubella]                                                                                                                                                                                                                                                                                                                                                                                                                               | 217  | 683  | 4.00E-53  | 314.7 | 49.8 | 65.9 | hypothetical protein CARUB_v10006988mg          | gbpln | Capsella rubella     | #                                                                                                                                                                                                                                                                                                                                                                                                                                                                                                                                                                       | #    | #    | #         | #     | #    | #    |
| Rsa1.0_00620.1.g16992.t1 | gb EOA20786.1  hypothetical protein CARUB_v10001122mg [Capsella rubella]                                                                                                                                                                                                                                                                                                                                                                                                                               | 420  | 399  | 0         | 95.0  | 82.1 | 88.1 | hypothetical protein CARUB_v10001122mg          | gbpln | Capsella rubella     | AT3G02630.1   Symbols:   Plant stearyl-acyl-carrier-protein desaturase family protein   chr3:562164-564524 FORWARD LENGTH=396                                                                                                                                                                                                                                                                                                                                                                                                                                           | 420  | 396  | 0         | 94.3  | 79.5 | 86.4 |
| Rsa1.0_00620.1.g16993.t1 | ref NP_197127.1  acyl-[acyl-carrier-protein] desaturase [Arabidopsis thaliana] gi 334302876 sp Q9LF05.3 STAD3_ARA TH RecName: Full=Acyl-[acyl-carrier-protein] desaturase 3, chloroplastic; AltName: Full=Stearoyl-ACP desaturase 3; Flags: Precursor gi 9755833 emb CAC01864.1  stearyl-acyl carrier protein desaturase [Arabidopsis thaliana] gi 117168051 gb ABK32108.1  At5g16230 [Arabidopsis thaliana] gi 332004880 gb AED92263.1  acyl-[acyl-carrier-protein] desaturase [Arabidopsis thaliana] | 430  | 401  | 0         | 93.3  | 83.7 | 87.9 | acyl-                                           | gbpln | Arabidopsis thaliana | AT5G16230.1   Symbols:   Plant stearyl-acyl-carrier-protein desaturase family protein   chr5:5303394-5305944 FORWARD LENGTH=401                                                                                                                                                                                                                                                                                                                                                                                                                                         | 430  | 401  | 0         | 93.3  | 83.7 | 87.9 |
| Rsa1.0_00620.1.g16994.t2 | gb EOA20509.1  hypothetical protein CARUB_v10000823mg [Capsella rubella]                                                                                                                                                                                                                                                                                                                                                                                                                               | 493  | 490  | 1.00E-172 | 99.4  | 72.2 | 79.1 | hypothetical protein CARUB_v10000823mg          | gbpln | Capsella rubella     | AT5G16220.1   Symbols:   Octicosapeptide/Phox/Bem1p family protein   chr5:5298604-5300579 REVERSE LENGTH=476                                                                                                                                                                                                                                                                                                                                                                                                                                                            | 493  | 476  | 1.00E-167 | 96.6  | 69.0 | 76.1 |
| Rsa1.0_00621.1.g16995.t1 | gb EOA18862.1  hypothetical protein CARUB_v10007485mg [Capsella rubella]                                                                                                                                                                                                                                                                                                                                                                                                                               | 85   | 86   | 3.00E-27  | 101.2 | 74.1 | 83.5 | hypothetical protein CARUB_v10007485mg          | gbpln | Capsella rubella     | AT4G37290.1   Symbols:   unknown protein; FUNCTIONS IN: molecular function unknown; INVOLVED IN: response to karrikin; LOCATED IN: endomembrane system; EXPRESSED IN: cotyledon, hypocotyl, leaf; EXPRESSED DURING: LP.04 four leaves visible; BEST Arabidopsis thaliana protein match is: unknown protein (TAIR:AT2G23270.1); Has 30201 Blast hits to 17322 proteins in 780 species: Archae - 12; Bacteria - 1396; Metazoa - 17338; Fungi - 3422; Plants - 5037; Viruses - 0; Other Eukaryotes - 2996 (source: NCBI BLink).   chr4:17549929-17550183 REVERSE LENGTH=84 | 85   | 84   | 7.00E-27  | 98.8  | 71.8 | 80.0 |
| Rsa1.0_00621.1.g16996.t1 | gb AAC49776.1  AP2 domain containing protein RAP2.10 [Arabidopsis thaliana] gi 2632063 emb CAA05630.1  TINY-like protein [Arabidopsis thaliana]                                                                                                                                                                                                                                                                                                                                                        | 186  | 259  | 1.00E-67  | 139.2 | 84.4 | 86.6 | AP2 domain containing protein RAP2.10           | gbpln | Arabidopsis thaliana | AT4G36900.1   Symbols: RAP2.10, DEAR4   related to AP2 10   chr4:17389015-17389605 FORWARD LENGTH=196                                                                                                                                                                                                                                                                                                                                                                                                                                                                   | 186  | 196  | 2.00E-69  | 105.4 | 84.4 | 86.6 |
| Rsa1.0_00621.1.g16997.t1 | gb EOA17171.1  hypothetical protein CARUB_v10005437mg, partial [Capsella rubella]                                                                                                                                                                                                                                                                                                                                                                                                                      | 233  | 282  | 1.00E-99  | 121.0 | 83.3 | 88.4 | hypothetical protein CARUB_v10005437mg, partial | gbpln | Capsella rubella     | AT4G36910.1   Symbols: LEJ2, CDOP2   Cystathionine beta-synthase (CBS) family protein   chr4:17391016-17393218 REVERSE LENGTH=236                                                                                                                                                                                                                                                                                                                                                                                                                                       | 233  | 236  | 7.00E-99  | 101.3 | 82.8 | 88.8 |
| Rsa1.0_00621.1.g16998.t1 | gb ADU04499.1  APETALA2 [Brassica napus]                                                                                                                                                                                                                                                                                                                                                                                                                                                               | 433  | 432  | 0         | 99.8  | 93.1 | 95.8 | APETALA2                                        | gbpln | Brassica napus       | AT4G36920.2   Symbols: AP2   Integrase-type DNA-binding superfamily protein   chr4:17400998-17403140 FORWARD LENGTH=432                                                                                                                                                                                                                                                                                                                                                                                                                                                 | 433  | 432  | 0         | 99.8  | 86.8 | 91.0 |



|                          |                                                                                                                                                                                                                                                                                                                                       |     |     |           |       |      |      |                                                    |       |                      |                                                                                                                                                                    |     |     |           |       |      |      |
|--------------------------|---------------------------------------------------------------------------------------------------------------------------------------------------------------------------------------------------------------------------------------------------------------------------------------------------------------------------------------|-----|-----|-----------|-------|------|------|----------------------------------------------------|-------|----------------------|--------------------------------------------------------------------------------------------------------------------------------------------------------------------|-----|-----|-----------|-------|------|------|
| Rsa1.0_00621.1.g16999.t1 | refNP_195412.3  nicotinate phosphoribosyltransferase 1 [Arabidopsis thaliana] gi 20260210 gb AAM13003.1  unknown protein [Arabidopsis thaliana] gi 332661321 gb AEE86721.1  nicotinate phosphoribosyltransferase 1 [Arabidopsis thaliana]                                                                                             | 568 | 559 | 0         | 98.4  | 90.3 | 93.7 | nicotinate phosphoribosyltransferase 1             | gbpln | Arabidopsis thaliana | AT4G36940.1   Symbols: NAPRT1   nicotinate phosphoribosyltransferase 1   chr4:17416938-17419883 FORWARD LENGTH=559                                                 | 568 | 559 | 0         | 98.4  | 90.3 | 93.7 |
| Rsa1.0_00621.1.g17000.t1 | refNP_001078503.4  phospholipase C/ phosphoric diester hydrolase [Arabidopsis thaliana] gi 332661322 gb AEE86722.1  phospholipase C/ phosphoric diester hydrolase [Arabidopsis thaliana]                                                                                                                                              | 413 | 408 | 0         | 98.8  | 80.6 | 88.6 | phospholipase C/ phosphoric diester hydrolase      | gbpln | Arabidopsis thaliana | AT4G36945.1   Symbols:   PLC-like phosphodiesterases superfamily protein   chr4:17420098-17422047 REVERSE LENGTH=408                                               | 413 | 408 | 0         | 98.8  | 80.6 | 88.6 |
| Rsa1.0_00621.1.g17001.t1 | refXP_002869001.1  hypothetical protein ARALYDRAFT_328051 [Arabidopsis lyrata subsp. lyrata] gi 297314837 gb EFH45260.1  hypothetical protein ARALYDRAFT_328051 [Arabidopsis lyrata subsp. lyrata]                                                                                                                                    | 346 | 787 | 1.00E-150 | 227.5 | 78.0 | 86.7 | hypothetical protein ARALYDRAFT_328051             | gbpln | Arabidopsis lyrata   | AT4G36950.1   Symbols: MAPKKK21   mitogen-activated protein kinase kinase 21   chr4:17422834-17423844 REVERSE LENGTH=336                                           | 346 | 336 | 1.00E-149 | 97.1  | 77.5 | 85.0 |
| Rsa1.0_00621.1.g17002.t1 | refXP_002866967.1  RNA recognition motif-containing protein [Arabidopsis lyrata subsp. lyrata] gi 297312803 gb EFH43226.1  RNA recognition motif-containing protein [Arabidopsis lyrata subsp. lyrata]                                                                                                                                | 384 | 380 | 0         | 99.0  | 90.6 | 94.3 | RNA recognition motif-containing protein           | gbpln | Arabidopsis lyrata   | AT4G36960.2   Symbols:   RNA-binding (RRM/RBD/RNP motifs) family protein   chr4:17427349-17429589 FORWARD LENGTH=379                                               | 384 | 379 | 0         | 98.7  | 88.0 | 92.4 |
| Rsa1.0_00621.1.g17003.t1 | refXP_002869002.1  hypothetical protein ARALYDRAFT_912636 [Arabidopsis lyrata subsp. lyrata] gi 297314838 gb EFH45261.1  hypothetical protein ARALYDRAFT_912636 [Arabidopsis lyrata subsp. lyrata]                                                                                                                                    | 423 | 433 | 1.00E-134 | 102.4 | 75.7 | 81.1 | hypothetical protein ARALYDRAFT_912636             | gbpln | Arabidopsis lyrata   | AT4G36970.1   Symbols:   Remorin family protein   chr4:17429826-17431459 REVERSE LENGTH=427                                                                        | 423 | 427 | 1.00E-136 | 100.9 | 73.8 | 81.1 |
| Rsa1.0_00621.1.g17004.t1 | gb ABV89640.1  heat shock factor 4 [Brassica rapa]                                                                                                                                                                                                                                                                                    | 271 | 285 | 1.00E-125 | 105.2 | 88.6 | 93.0 | heat shock factor 4                                | gbpln | Brassica rapa        | AT4G36990.1   Symbols: HSF4, HSF1, AT-HSF1, ATHSF4   heat shock factor 4   chr4:17440660-17441706 FORWARD LENGTH=284                                               | 271 | 284 | 1.00E-110 | 104.8 | 79.7 | 86.3 |
| Rsa1.0_00621.1.g17005.t1 | #                                                                                                                                                                                                                                                                                                                                     | #   | #   | #         | #     | #    | -    | -                                                  | ----  | ----                 | #                                                                                                                                                                  | #   | #   | #         | #     | #    | #    |
| Rsa1.0_00621.1.g17006.t1 | gb AAB81881.1  putative MuDR-A-like transposon protein [Arabidopsis thaliana] gi 7267510 emb CAB77993.1  putative MuDR-A-like transposon protein [Arabidopsis thaliana]                                                                                                                                                               | 338 | 761 | 1.00E-95  | 225.1 | 47.0 | 58.6 | putative MuDR-A-like transposon protein            | gbpln | Arabidopsis thaliana | #                                                                                                                                                                  | #   | #   | #         | #     | #    | #    |
| Rsa1.0_00621.1.g17007.t3 | refXP_002869006.1  hypothetical protein ARALYDRAFT_490916 [Arabidopsis lyrata subsp. lyrata] gi 297314842 gb EFH45265.1  hypothetical protein ARALYDRAFT_490916 [Arabidopsis lyrata subsp. lyrata]                                                                                                                                    | 469 | 412 | 0         | 87.8  | 69.9 | 78.7 | hypothetical protein ARALYDRAFT_490916             | gbpln | Arabidopsis lyrata   | AT4G37050.1   Symbols: PLP4, PLA V, AtPLAIVC   PATATIN-like protein 4   chr4:17457261-17459642 REVERSE LENGTH=428                                                  | 469 | 428 | 0         | 91.3  | 69.5 | 78.7 |
| Rsa1.0_00621.1.g17008.t1 | gb EOA18418.1  hypothetical protein CARUB_v10006962mg [Capsella rubella]                                                                                                                                                                                                                                                              | 408 | 414 | 0         | 101.5 | 85.3 | 93.4 | hypothetical protein CARUB_v10006962mg             | gbpln | Capsella rubella     | AT4G37070.2   Symbols: PLP1, PLA IVA, AtPLAIVA   Acyl transferase/acyl hydrolase/lysophospholipase superfamily protein   chr4:17464916-17467058 REVERSE LENGTH=414 | 408 | 414 | 0         | 101.5 | 84.3 | 93.1 |
| Rsa1.0_00622.1.g17009.t4 | refXP_002893514.1  hypothetical protein ARALYDRAFT_473032 [Arabidopsis lyrata subsp. lyrata] gi 297339356 gb EFH69773.1  hypothetical protein ARALYDRAFT_473032 [Arabidopsis lyrata subsp. lyrata]                                                                                                                                    | 895 | 578 | 0         | 64.6  | 50.8 | 54.3 | hypothetical protein ARALYDRAFT_473032             | gbpln | Arabidopsis lyrata   | AT1G28240.1   Symbols:   Protein of unknown function (DUF1616)   chr1:9868521-9871798 REVERSE LENGTH=581                                                           | 895 | 581 | 0         | 64.9  | 51.4 | 54.6 |
| Rsa1.0_00622.1.g17010.t1 | refNP_173137.1  F-box/RNI-like/FBD-like domains-containing protein [Arabidopsis thaliana] gi 75263252 sp Q9FZ52.1 FDL3 ARATH protein At1g16930 gi 8802769 gb AAAF99838.1 AC051629_5 Hypothetical protein [Arabidopsis thaliana] gi 332191402 gb AEE29523.1  F-box/RNI-like/FBD-like domains-containing protein [Arabidopsis thaliana] | 267 | 449 | 1.00E-37  | 168.2 | 39.0 | 44.9 | F-box/RNI-like/FBD-like domains-containing protein | gbpln | Arabidopsis thaliana | AT1G16930.1   Symbols:   F-box/RNI-like/FBD-like domains-containing protein   chr1:5789987-5791534 FORWARD LENGTH=449                                              | 267 | 449 | 4.00E-40  | 168.2 | 39.0 | 44.9 |

|                          |                                                                                                                                                                                                                                                                                                                                                                                                                                                                                                                                                                                                                                                                                                                                                                                                                           |     |      |           |        |      |      |                                                                |             |                      |                                                                                                                                                                                                                                                            |     |     |           |       |      |      |
|--------------------------|---------------------------------------------------------------------------------------------------------------------------------------------------------------------------------------------------------------------------------------------------------------------------------------------------------------------------------------------------------------------------------------------------------------------------------------------------------------------------------------------------------------------------------------------------------------------------------------------------------------------------------------------------------------------------------------------------------------------------------------------------------------------------------------------------------------------------|-----|------|-----------|--------|------|------|----------------------------------------------------------------|-------------|----------------------|------------------------------------------------------------------------------------------------------------------------------------------------------------------------------------------------------------------------------------------------------------|-----|-----|-----------|-------|------|------|
| Rsa1.0_00622.1.g17011.t1 | gb EOA38694.1  hypothetical protein CARUB_v10010709mg [Capsella rubella]                                                                                                                                                                                                                                                                                                                                                                                                                                                                                                                                                                                                                                                                                                                                                  | 159 | 106  | 1.00E-34  | 66.7   | 54.7 | 61.6 | hypothetical protein CARUB_v10010709mg                         | gbpln       | Capsella rubella     | AT1G28250.1   Symbols:   unknown protein; Has 22 Blast hits to 22 proteins in 10 species: Archae - 0; Bacteria - 0; Metazoa - 0; Fungi - 0; Plants - 22; Viruses - 0; Other Eukaryotes - 0 (source: NCBI BLINK).   chr1:9874296-9875175 FORWARD LENGTH=102 | 159 | 102 | 2.00E-35  | 64.2  | 53.5 | 58.5 |
| Rsa1.0_00622.1.g17012.t1 | gb EOA37416.1  hypothetical protein CARUB_v10011353mg [Capsella rubella]                                                                                                                                                                                                                                                                                                                                                                                                                                                                                                                                                                                                                                                                                                                                                  | 860 | 914  | 0         | 106.3  | 78.8 | 85.9 | hypothetical protein CARUB_v10011353mg                         | gbpln       | Capsella rubella     | AT1G28260.2   Symbols:   Telomerase activating protein Est1   chr1:9875776-9878782 REVERSE LENGTH=880                                                                                                                                                      | 860 | 880 | 0         | 102.3 | 79.1 | 86.2 |
| Rsa1.0_00622.1.g17013.t1 | #                                                                                                                                                                                                                                                                                                                                                                                                                                                                                                                                                                                                                                                                                                                                                                                                                         | #   | #    | #         | #      | #    | #    | -                                                              | ----        | ----                 | #                                                                                                                                                                                                                                                          | #   | #   | #         | #     | #    |      |
| Rsa1.0_00622.1.g17014.t1 | ref NP_174148.1  protein raf-like 4 [Arabidopsis thaliana] gi 297845772 ref XP_002890767.1  hypothetical protein ARALYDRAFT_473036 [Arabidopsis lyrata subsp. lyrata] gi 75173390 sp Q9FZA0.1 RLF4_ARATH RecName: Full=Protein RALF-like 4; Flags: Precursor gi 9795610 gb AAAF98428.1 AC021044.7 Hypothetical protein [Arabidopsis thaliana] gi 28973673 gb AAO64155.1  unknown protein [Arabidopsis thaliana] gi 110737076 db BAF00491.1  hypothetical protein [Arabidopsis thaliana] gi 297336609 gb EFH67026.1  hypothetical protein ARALYDRAFT_473036 [Arabidopsis lyrata subsp. lyrata] gi 332192818 gb AAE30939.1  protein raf-like 4 [Arabidopsis thaliana] ref NP_001117368.1  VQ motif-containing protein [Arabidopsis thaliana] gi 332192820 gb AAE30941.1  VQ motif-containing protein [Arabidopsis thaliana] | 95  | 110  | 2.00E-46  | 115.8  | 95.8 | 98.9 | protein raf-like 4                                             | gbpln       | Arabidopsis lyrata   | AT1G28270.1   Symbols: RALFL4   raf-liike 4   chr1:9883165-9883497 FORWARD LENGTH=110                                                                                                                                                                      | 95  | 110 | 3.00E-49  | 115.8 | 95.8 | 98.9 |
| Rsa1.0_00622.1.g17015.t1 | #                                                                                                                                                                                                                                                                                                                                                                                                                                                                                                                                                                                                                                                                                                                                                                                                                         | #   | #    | #         | #      | #    | #    | -                                                              | ----        | ----                 | #                                                                                                                                                                                                                                                          | #   | #   | #         | #     | #    |      |
| Rsa1.0_00622.1.g17016.t1 | db BAF01102.1  putative proline-rich protein [Arabidopsis thaliana]                                                                                                                                                                                                                                                                                                                                                                                                                                                                                                                                                                                                                                                                                                                                                       | 359 | 315  | 2.00E-79  | 87.7   | 72.1 | 78.6 | putative proline-rich protein                                  | gbpln       | Arabidopsis thaliana | AT1G28290.1   Symbols: AGP31   arabinogalactan protein 31   chr1:9889331-9890843 REVERSE LENGTH=359                                                                                                                                                        | 359 | 359 | 2.00E-65  | 100.0 | 30.4 | 35.4 |
| Rsa1.0_00622.1.g17018.t1 | #                                                                                                                                                                                                                                                                                                                                                                                                                                                                                                                                                                                                                                                                                                                                                                                                                         | #   | #    | #         | #      | #    | #    | -                                                              | ----        | ----                 | #                                                                                                                                                                                                                                                          | #   | #   | #         | #     | #    |      |
| Rsa1.0_00622.1.g17019.t1 | gb AAG51783.1 AC079679.3 reverse transcriptase, putative; 16838-20266 [Arabidopsis thaliana]                                                                                                                                                                                                                                                                                                                                                                                                                                                                                                                                                                                                                                                                                                                              | 880 | 1142 | 1.00E-154 | 129.8  | 32.2 | 42.2 | reverse transcriptase, putative; 16838-20266                   | gbpln       | Arabidopsis thaliana | AT4G29090.1   Symbols:   Ribonuclease H-like superfamily protein   chr4:14333528-14335255 FORWARD LENGTH=575                                                                                                                                               | 880 | 575 | 2.00E-74  | 65.3  | 19.2 | 30.8 |
| Rsa1.0_00622.1.g17020.t1 | #                                                                                                                                                                                                                                                                                                                                                                                                                                                                                                                                                                                                                                                                                                                                                                                                                         | #   | #    | #         | #      | #    | #    | -                                                              | ----        | ----                 | #                                                                                                                                                                                                                                                          | #   | #   | #         | #     | #    |      |
| Rsa1.0_00622.1.g17021.t1 | gb ADO16343.1  leafy cotyledon 2 [Brassica napus]                                                                                                                                                                                                                                                                                                                                                                                                                                                                                                                                                                                                                                                                                                                                                                         | 356 | 349  | 1.00E-133 | 98.0   | 73.3 | 81.7 | leafy cotyledon 2                                              | gbpln       | Brassica napus       | AT1G28300.1   Symbols: LEC2   AP2/B3-like transcriptional factor family protein   chr1:9897054-9899838 REVERSE LENGTH=363                                                                                                                                  | 356 | 363 | 1.00E-122 | 102.0 | 68.0 | 80.3 |
| Rsa1.0_00623.1.g17022.t1 | db BAB69682.1  receptor kinase 3 [Brassica rapa]                                                                                                                                                                                                                                                                                                                                                                                                                                                                                                                                                                                                                                                                                                                                                                          | 522 | 847  | 0         | 162.3  | 78.9 | 87.4 | receptor kinase 3                                              | gbpln       | Brassica rapa        | AT4G21380.1   Symbols: ARK3, RK3   receptor kinase 3   chr4:11389219-11393090 REVERSE LENGTH=850                                                                                                                                                           | 522 | 850 | 0         | 162.8 | 65.9 | 78.9 |
| Rsa1.0_00623.1.g17023.t1 | ref XP_003553761.1  PREDICTED: ankyrin repeat domain-containing protein 13C-B-like [Glycine max]                                                                                                                                                                                                                                                                                                                                                                                                                                                                                                                                                                                                                                                                                                                          | 490 | 629  | 1.00E-120 | 128.4  | 56.9 | 66.5 | PREDICTED: ankyrin repeat domain-containing protein 13C-B-like | gbenv/gbpln | Glycine max          | AT3G04470.1   Symbols:   Ankyrin repeat family protein   chr3:1189841-1191853 REVERSE LENGTH=640                                                                                                                                                           | 490 | 640 | 6.00E-91  | 130.6 | 46.3 | 53.3 |
| Rsa1.0_00623.1.g17024.t3 | ref XP_002872330.1  calcium-binding EF hand family protein [Arabidopsis lyrata subsp. lyrata] gi 297318187 gb EFH48589.1  calcium-binding EF hand family protein [Arabidopsis lyrata subsp. lyrata] gb AAD20714.1  putative non-LTR retroelement reverse transcriptase [Arabidopsis thaliana]                                                                                                                                                                                                                                                                                                                                                                                                                                                                                                                             | 584 | 536  | 0         | 91.8   | 83.0 | 87.2 | calcium-binding EF hand family protein                         | gbpln       | Arabidopsis lyrata   | AT5G28900.1   Symbols:   Calcium-binding EF-hand family protein   chr5:10925852-10929892 FORWARD LENGTH=536                                                                                                                                                | 584 | 536 | 0         | 91.8  | 82.7 | 86.8 |
| Rsa1.0_00623.1.g17025.t1 | gb AET14213.1  GDP-D-mannose-3,5-epimerase [Brassica rapa subsp. chinensis]                                                                                                                                                                                                                                                                                                                                                                                                                                                                                                                                                                                                                                                                                                                                               | 379 | 379  | 0         | 100.0  | 98.9 | 99.5 | GDP-D-mannose-3,5-epimerase                                    | gbpln       | Brassica rapa        | AT5G28840.2   Symbols: GME   GDP-D-mannose 3,5-epimerase   chr5:10862472-10864024 REVERSE LENGTH=377                                                                                                                                                       | 379 | 377 | 0         | 99.5  | 96.8 | 97.9 |
| Rsa1.0_00623.1.g17027.t1 | gb AAC63678.1  putative non-LTR retroelement reverse transcriptase [Arabidopsis thaliana]                                                                                                                                                                                                                                                                                                                                                                                                                                                                                                                                                                                                                                                                                                                                 | 98  | 1216 | 3.00E-12  | 1240.8 | 38.8 | 57.1 | putative non-LTR retroelement reverse transcriptase            | gbpln       | Arabidopsis thaliana | #                                                                                                                                                                                                                                                          | #   | #   | #         | #     | #    |      |
| Rsa1.0_00623.1.g17028.t1 | ref XP_002872303.1  cysteine synthase [Arabidopsis lyrata subsp. lyrata] gi 297318140 gb EFH48562.1  cysteine synthase [Arabidopsis lyrata subsp. lyrata]                                                                                                                                                                                                                                                                                                                                                                                                                                                                                                                                                                                                                                                                 | 323 | 324  | 1.00E-158 | 100.3  | 86.4 | 93.5 | cysteine synthase                                              | gbpln       | Arabidopsis lyrata   | AT5G28020.6   Symbols: CYSD2, ATCYSD2   cysteine synthase D2   chr5:10026395-10028166 REVERSE LENGTH=323                                                                                                                                                   | 323 | 323 | 1.00E-159 | 100.0 | 89.5 | 95.4 |
| Rsa1.0_00623.1.g17029.t1 | #                                                                                                                                                                                                                                                                                                                                                                                                                                                                                                                                                                                                                                                                                                                                                                                                                         | #   | #    | #         | #      | #    | #    | -                                                              | ----        | ----                 | #                                                                                                                                                                                                                                                          | #   | #   | #         | #     | #    |      |

|                          |                                                                                                                                                                                                                                                                                                                                                                                                                                                                                                                                                                                                                                 |      |      |           |       |      |      |                                                       |       |                      |                                                                                                                                             |      |      |           |       |      |      |
|--------------------------|---------------------------------------------------------------------------------------------------------------------------------------------------------------------------------------------------------------------------------------------------------------------------------------------------------------------------------------------------------------------------------------------------------------------------------------------------------------------------------------------------------------------------------------------------------------------------------------------------------------------------------|------|------|-----------|-------|------|------|-------------------------------------------------------|-------|----------------------|---------------------------------------------------------------------------------------------------------------------------------------------|------|------|-----------|-------|------|------|
| Rsa1.0_00623.1.g17030.t1 | ref NP_198150.1  Seed maturation protein [Arabidopsis thaliana]  gi26452310 dbj BAC43241.1  putative embryonic abundant protein [Arabidopsis thaliana]  gi332006372 gb AED93755.1  Seed maturation protein [Arabidopsis thaliana]                                                                                                                                                                                                                                                                                                                                                                                               | 191  | 192  | 9.00E-78  | 100.5 | 85.3 | 90.1 | Seed maturation protein                               | gbpln | Arabidopsis thaliana | AT5G27980.1   Symbols:   Seed maturation protein   chr5:10015883-10016676 REVERSE LENGTH=192                                                | 191  | 192  | 3.00E-80  | 100.5 | 85.3 | 90.1 |
| Rsa1.0_00623.1.g17031.t8 | ref NP_198149.2  armadillo/beta-catenin-like repeat-containing protein [Arabidopsis thaliana]  gi332006370 gb AED93753.1  armadillo/beta-catenin-like repeat-containing protein [Arabidopsis thaliana]                                                                                                                                                                                                                                                                                                                                                                                                                          | 1620 | 1630 | 0         | 100.6 | 92.4 | 95.9 | armadillo/beta-catenin-like repeat-containing protein | gbpln | Arabidopsis thaliana | AT5G27970.1   Symbols:   ARM repeat superfamily protein   chr5:10004720-10015429 FORWARD LENGTH=1630                                        | 1620 | 1630 | 0         | 100.6 | 92.4 | 95.9 |
| Rsa1.0_00623.1.g17032.t1 | ref XP_002882393.1  hypothetical protein ARALYDRAFT_317378 [Arabidopsis lyrata subsp. lyrata]  gi297328233 gb EFH58652.1  hypothetical protein ARALYDRAFT_317378 [Arabidopsis lyrata subsp. lyrata]                                                                                                                                                                                                                                                                                                                                                                                                                             | 313  | 341  | 2.33E-156 | 108.9 | 81.2 | 92.3 | hypothetical protein ARALYDRAFT_317378                | gbpln | Arabidopsis lyrata   | AT3G05100.1   Symbols:   S-adenosyl-L-methionine-dependent methyltransferases superfamily protein   chr3:1424155-1425667 FORWARD LENGTH=336 | 313  | 336  | 1.00E-147 | 107.3 | 81.8 | 92.3 |
| Rsa1.0_00623.1.g17033.t1 | gb EOA19672.1  hypothetical protein CARUB_v10003325mg [Capsella rubella]                                                                                                                                                                                                                                                                                                                                                                                                                                                                                                                                                        | 634  | 636  | 0         | 100.3 | 86.1 | 91.3 | hypothetical protein CARUB_v10003325mg                | gbpln | Capsella rubella     | AT5G27950.1   Symbols:   P-loop containing nucleoside triphosphate hydrolases superfamily protein   chr5:9984774-9987493 FORWARD LENGTH=625 | 634  | 625  | 0         | 98.6  | 84.4 | 89.9 |
| Rsa1.0_00623.1.g17034.t1 | ref XP_002872288.1  pentatricopeptide repeat-containing protein [Arabidopsis lyrata subsp. lyrata]  gi297318125 gb EFH48547.1  pentatricopeptide repeat-containing protein [Arabidopsis lyrata subsp. lyrata]                                                                                                                                                                                                                                                                                                                                                                                                                   | 688  | 690  | 0         | 100.3 | 81.3 | 91.0 | pentatricopeptide repeat-containing protein           | gbpln | Arabidopsis lyrata   | AT5G27110.1   Symbols:   Tetratricopeptide repeat (TPR)-like superfamily protein   chr5:9538572-9540647 REVERSE LENGTH=691                  | 688  | 691  | 0         | 100.4 | 80.2 | 90.4 |
| Rsa1.0_00623.1.g17035.t1 | ref NP_198064.1  putative nucleolar protein 5-1 [Arabidopsis thaliana]  gi14744575 sp O04658.2 NOP5A_ARA TH RecName: Full=Probable nucleolar protein 5-1; AltName: Full=MAR-binding NOP56/58 homolog 1; AltName: Full=NOP58-like protein F108; AltName: Full=Nucleolar protein 58-1  gi11878185 gb AAG40836.1 AF302490.1 NOP58-like protein F108 [Arabidopsis thaliana]  gi18377656 gb AAL66978.1  putative SAR DNA-binding protein [Arabidopsis thaliana]  gi20465699 gb AAM20318.1  putative SAR DNA-binding protein [Arabidopsis thaliana]  gi332006269 gb AED93652.1  putative nucleolar protein 5-1 [Arabidopsis thaliana] | 535  | 533  | 0         | 99.6  | 77.0 | 81.5 | putative nucleolar protein 5-1                        | gbpln | Arabidopsis thaliana | AT5G27120.1   Symbols:   NOP56-like pre RNA processing ribonucleoprotein   chr5:9541287-9543684 FORWARD LENGTH=533                          | 535  | 533  | 0         | 99.6  | 77.0 | 81.5 |
| Rsa1.0_00623.1.g17036.t1 | gb EOA19817.1  hypothetical protein CARUB_v10000063mg [Capsella rubella]                                                                                                                                                                                                                                                                                                                                                                                                                                                                                                                                                        | 1259 | 1207 | 0         | 95.9  | 82.9 | 88.0 | hypothetical protein CARUB_v10000063mg                | gbpln | Capsella rubella     | AT3G05040.1   Symbols: HST, HST1   ARM repeat superfamily protein   chr3:1401479-1408095 REVERSE LENGTH=1202                                | 1259 | 1202 | 0         | 95.5  | 74.7 | 83.2 |
| Rsa1.0_00623.1.g17037.t1 | ref XP_002874393.1  predicted protein [Arabidopsis lyrata subsp. lyrata]  gi297320230 gb EFH50652.1  predicted protein [Arabidopsis lyrata subsp. lyrata]                                                                                                                                                                                                                                                                                                                                                                                                                                                                       | 1257 | 1191 | 0         | 94.7  | 53.5 | 68.0 | predicted protein                                     | gbpln | Arabidopsis lyrata   | AT5G27220.1   Symbols:   Frigida-like protein   chr5:9578757-9582752 FORWARD LENGTH=1181                                                    | 1257 | 1181 | 0         | 94.0  | 51.3 | 64.6 |
| Rsa1.0_00623.1.g17038.t1 | gb EOA19886.1  hypothetical protein CARUB_v10000134mg [Capsella rubella]                                                                                                                                                                                                                                                                                                                                                                                                                                                                                                                                                        | 1036 | 1000 | 0         | 96.5  | 56.3 | 68.8 | hypothetical protein CARUB_v10000134mg                | gbpln | Capsella rubella     | AT5G27230.1   Symbols:   Frigida-like protein   chr5:9584255-9587838 FORWARD LENGTH=948                                                     | 1036 | 948  | 0         | 91.5  | 51.4 | 61.4 |
| Rsa1.0_00623.1.g17039.t1 | gb AAB61072.1  contains similarity to a DNAJ-like domain [Arabidopsis thaliana]                                                                                                                                                                                                                                                                                                                                                                                                                                                                                                                                                 | 659  | 1609 | 1.00E-110 | 244.2 | 35.5 | 42.8 | contains similarity to a DNAJ-like domain             | gbpln | Arabidopsis thaliana | AT5G27240.1   Symbols:   DNAJ heat shock N-terminal domain-containing protein   chr5:9597552-9600866 FORWARD LENGTH=1104                    | 659  | 1104 | 1.00E-112 | 167.5 | 35.5 | 42.8 |
| Rsa1.0_00623.1.g17040.t1 | gb EOA19865.1  hypothetical protein CARUB_v10000116mg [Capsella rubella]                                                                                                                                                                                                                                                                                                                                                                                                                                                                                                                                                        | 1405 | 1039 | 0         | 74.0  | 56.6 | 63.3 | hypothetical protein CARUB_v10000116mg                | gbpln | Capsella rubella     | AT5G27270.1   Symbols: EMB976   Tetratricopeptide repeat (TPR)-like superfamily protein   chr5:9609650-9609625 FORWARD LENGTH=1038          | 1405 | 1038 | 0         | 73.9  | 51.6 | 56.7 |
| Rsa1.0_00623.1.g17041.t1 | ref XP_002886121.1  hypothetical protein ARALYDRAFT_480649 [Arabidopsis lyrata subsp. lyrata]  gi297331961 gb EFH62380.1  hypothetical protein ARALYDRAFT_480649 [Arabidopsis lyrata subsp. lyrata]                                                                                                                                                                                                                                                                                                                                                                                                                             | 133  | 143  | 3.00E-31  | 107.5 | 54.9 | 63.2 | hypothetical protein ARALYDRAFT_480649                | gbpln | Arabidopsis lyrata   | AT2G17560.2   Symbols: HMGB4, NFD4, NFD04   high mobility group B4   chr2:7642486-7643468 REVERSE LENGTH=138                                | 133  | 138  | 2.00E-33  | 103.8 | 51.9 | 60.9 |
| Rsa1.0_00624.1.g17042.t2 | gb EOA38874.1  hypothetical protein CARUB_v10011239mg [Capsella rubella]                                                                                                                                                                                                                                                                                                                                                                                                                                                                                                                                                        | 165  | 216  | 5.00E-61  | 130.9 | 69.1 | 73.9 | hypothetical protein CARUB_v10011239mg                | gbpln | Capsella rubella     | AT1G49230.1   Symbols:   RING/U-box superfamily protein   chr1:18209320-18209979 FORWARD LENGTH=219                                         | 165  | 219  | 4.00E-62  | 132.7 | 67.3 | 72.1 |

|                          |                                                                                                                                                                                                                                                                                                                                                                                                                                                                                                                                                                                                                                                                                                                                                    |     |      |           |       |      |      |                                        |       |                      |                                                                                                                                                                                                                                                                                                                                                                                                                                                                                                          |     |     |           |       |      |      |
|--------------------------|----------------------------------------------------------------------------------------------------------------------------------------------------------------------------------------------------------------------------------------------------------------------------------------------------------------------------------------------------------------------------------------------------------------------------------------------------------------------------------------------------------------------------------------------------------------------------------------------------------------------------------------------------------------------------------------------------------------------------------------------------|-----|------|-----------|-------|------|------|----------------------------------------|-------|----------------------|----------------------------------------------------------------------------------------------------------------------------------------------------------------------------------------------------------------------------------------------------------------------------------------------------------------------------------------------------------------------------------------------------------------------------------------------------------------------------------------------------------|-----|-----|-----------|-------|------|------|
| Rsa1.0_00624.1.g17043.t1 | gb EOA38711.1  hypothetical protein CARUB_v10010802mg [Capsella rubella]                                                                                                                                                                                                                                                                                                                                                                                                                                                                                                                                                                                                                                                                           | 76  | 76   | 6.00E-19  | 100.0 | 69.7 | 80.3 | hypothetical protein CARUB_v10010802mg | gbpln | Capsella rubella     | AT1G49245.1   Symbols:   Prefoldin chaperone subunit family protein   chr1:18218861-18219085 FORWARD LENGTH=74                                                                                                                                                                                                                                                                                                                                                                                           | 76  | 74  | 3.00E-16  | 97.4  | 64.5 | 78.9 |
| Rsa1.0_00624.1.g17044.t1 | ref XP_002891480.1  hypothetical protein ARALYDRAFT_474061 [Arabidopsis lyrata subsp. lyrata] gi 297337322 gb EFH67739.1  hypothetical protein ARALYDRAFT_474061 [Arabidopsis lyrata subsp. lyrata]                                                                                                                                                                                                                                                                                                                                                                                                                                                                                                                                                | 434 | 530  | 2.00E-96  | 122.1 | 53.2 | 70.0 | hypothetical protein ARALYDRAFT_474061 | gbpln | Arabidopsis lyrata   | AT1G49190.1   Symbols: ARR19, RR19   response regulator 19   chr1:18191342-18193598 FORWARD LENGTH=608                                                                                                                                                                                                                                                                                                                                                                                                   | 434 | 608 | 5.00E-57  | 140.1 | 27.6 | 36.2 |
| Rsa1.0_00624.1.g17045.t1 | emb CAB75484.1  putative protein [Arabidopsis thaliana]                                                                                                                                                                                                                                                                                                                                                                                                                                                                                                                                                                                                                                                                                            | 144 | 851  | 5.00E-13  | 591.0 | 28.5 | 41.0 | putative protein                       | gbpln | Arabidopsis thaliana | AT3G09510.1   Symbols:   Ribonuclease H-like superfamily protein   chr3:2921804-2923258 FORWARD LENGTH=484                                                                                                                                                                                                                                                                                                                                                                                               | 144 | 484 | 2.00E-12  | 336.1 | 25.7 | 36.1 |
| Rsa1.0_00624.1.g17046.t1 | gb EOA36184.1  hypothetical protein CARUB_v10010068mg [Capsella rubella]                                                                                                                                                                                                                                                                                                                                                                                                                                                                                                                                                                                                                                                                           | 206 | 256  | 1.00E-113 | 124.3 | 96.1 | 97.6 | hypothetical protein CARUB_v10010068mg | gbpln | Capsella rubella     | AT1G49300.2   Symbols: ATRAB7, ATRABG3E, RABG3E   RAB GTPase homolog G3E   chr1:18234842-18236968 FORWARD LENGTH=206                                                                                                                                                                                                                                                                                                                                                                                     | 206 | 206 | 1.00E-116 | 100.0 | 95.6 | 97.1 |
| Rsa1.0_00624.1.g17047.t1 | ref XP_002894168.1  hypothetical protein ARALYDRAFT_314350 [Arabidopsis lyrata subsp. lyrata] gi 297340010 gb EFH70427.1  hypothetical protein ARALYDRAFT_314350 [Arabidopsis lyrata subsp. lyrata]                                                                                                                                                                                                                                                                                                                                                                                                                                                                                                                                                | 81  | 81   | 2.00E-26  | 100.0 | 76.5 | 85.2 | hypothetical protein ARALYDRAFT_314350 | gbpln | Arabidopsis lyrata   | AT1G49310.1   Symbols:   unknown protein; FUNCTIONS IN: molecular_function unknown; INVOLVED IN: biological_process unknown; LOCATED IN: endomembrane system; EXPRESSED IN: 9 plant structures; EXPRESSED DURING: LP.04 four leaves visible, petal differentiation and expansion stage; Has 11 Blast hits to 11 proteins in 6 species: Archae - 0; Bacteria - 0; Metazoa - 0; Fungi - 0; Plants - 11; Viruses - 0; Other Eukaryotes - 0 (source: NCBI BLink).   chr1:18237997-18238325 REVERSE LENGTH=82 | 81  | 82  | 4.00E-29  | 101.2 | 75.3 | 82.7 |
| Rsa1.0_00624.1.g17048.t1 | gb EOA30781.1  hypothetical protein CARUB_v10013925mg [Capsella rubella]                                                                                                                                                                                                                                                                                                                                                                                                                                                                                                                                                                                                                                                                           | 123 | 385  | 4.00E-26  | 313.0 | 54.5 | 66.7 | hypothetical protein CARUB_v10013925mg | gbpln | Capsella rubella     | AT1G53910.3   Symbols: RAP2.12   related to AP2.12   chr1:20135242-20136581 FORWARD LENGTH=356                                                                                                                                                                                                                                                                                                                                                                                                           | 123 | 356 | 1.00E-17  | 289.4 | 43.9 | 48.8 |
| Rsa1.0_00624.1.g17049.t1 | gb ACO54862.1  BURP domain protein [Brassica napus] gi 226427147 gb ACO54863.1  BURP domain protein [Brassica napus]                                                                                                                                                                                                                                                                                                                                                                                                                                                                                                                                                                                                                               | 281 | 281  | 1.00E-150 | 100.0 | 91.1 | 94.0 | BURP domain protein                    | gbpln | Brassica napus       | AT1G49320.1   Symbols: ATUSPL1, USPL1   unknown seed protein like 1   chr1:18246441-18247817 FORWARD LENGTH=280                                                                                                                                                                                                                                                                                                                                                                                          | 281 | 280 | 1.00E-127 | 99.6  | 74.4 | 86.8 |
| Rsa1.0_00624.1.g17050.t1 | ref NP_175355.1  RAB GTPase homolog G3E [Arabidopsis thaliana] gi 79319588 ref NP_001031161.1  RAB GTPase homolog G3E [Arabidopsis thaliana] gi 75215673 sp Q9X198.1 RAG3E_ARATH RecName: Full=Ras-related protein RABG3e; Short=AtRABG3e; AltName: Full=Ras-related protein Rab74; Short=AtRab74 gi 5430767 gb AAD43167.1 AC007504.22 Putative RAB7 GTP-binding Protein [Arabidopsis thaliana] gi 15718414 dbj BAB68374.1  AtRab74 [Arabidopsis thaliana] gi 28416619 gb AAO42840.1  At1g49300 [Arabidopsis thaliana] gi 11074331 dbj BAE99544.1  hypothetical protein [Arabidopsis thaliana] gi 332194293 gb AEE32414.1  RAB GTPase homolog G3E [Arabidopsis thaliana] gi 332194294 gb AEE32415.1  RAB GTPase homolog G3E [Arabidopsis thaliana] | 88  | 206  | 4.00E-30  | 234.1 | 70.5 | 72.7 | RAB GTPase homolog G3E                 | gbpln | Arabidopsis thaliana | AT1G49300.2   Symbols: ATRAB7, ATRABG3E, RABG3E   RAB GTPase homolog G3E   chr1:18234842-18236968 FORWARD LENGTH=206                                                                                                                                                                                                                                                                                                                                                                                     | 88  | 206 | 6.00E-33  | 234.1 | 70.5 | 72.7 |
| Rsa1.0_00624.1.g17051.t1 | #                                                                                                                                                                                                                                                                                                                                                                                                                                                                                                                                                                                                                                                                                                                                                  | #   | #    | #         | #     | #    | #    | -                                      | ----  | ----                 | #                                                                                                                                                                                                                                                                                                                                                                                                                                                                                                        | #   | #   | #         | #     | #    | #    |
| Rsa1.0_00624.1.g17052.t1 | ref XP_002894168.1  hypothetical protein ARALYDRAFT_314350 [Arabidopsis lyrata subsp. lyrata] gi 297340010 gb EFH70427.1  hypothetical protein ARALYDRAFT_314350 [Arabidopsis lyrata subsp. lyrata]                                                                                                                                                                                                                                                                                                                                                                                                                                                                                                                                                | 81  | 81   | 7.00E-28  | 100.0 | 77.8 | 88.9 | hypothetical protein ARALYDRAFT_314350 | gbpln | Arabidopsis lyrata   | AT1G49310.1   Symbols:   unknown protein; FUNCTIONS IN: molecular_function unknown; INVOLVED IN: biological_process unknown; LOCATED IN: endomembrane system; EXPRESSED IN: 9 plant structures; EXPRESSED DURING: LP.04 four leaves visible, petal differentiation and expansion stage; Has 11 Blast hits to 11 proteins in 6 species: Archae - 0; Bacteria - 0; Metazoa - 0; Fungi - 0; Plants - 11; Viruses - 0; Other Eukaryotes - 0 (source: NCBI BLink).   chr1:18237997-18238325 REVERSE LENGTH=82 | 81  | 82  | 1.00E-30  | 101.2 | 76.5 | 86.4 |
| Rsa1.0_00624.1.g17053.t1 | dbj BAB09502.1  transposon protein-like [Arabidopsis thaliana]                                                                                                                                                                                                                                                                                                                                                                                                                                                                                                                                                                                                                                                                                     | 680 | 1089 | 0         | 160.1 | 64.6 | 77.1 | transposon protein-like                | gbpln | Arabidopsis thaliana | #                                                                                                                                                                                                                                                                                                                                                                                                                                                                                                        | #   | #   | #         | #     | #    | #    |

|                           |                                                                                                                                                                                                                                                                                                                                                                                                                                                                                                                                |      |      |           |       |      |      |                                          |       |                      |                                                                                                                                     |      |      |           |       |      |      |
|---------------------------|--------------------------------------------------------------------------------------------------------------------------------------------------------------------------------------------------------------------------------------------------------------------------------------------------------------------------------------------------------------------------------------------------------------------------------------------------------------------------------------------------------------------------------|------|------|-----------|-------|------|------|------------------------------------------|-------|----------------------|-------------------------------------------------------------------------------------------------------------------------------------|------|------|-----------|-------|------|------|
| Rsa1.0_00624.1.g17054.t4  | emb[CAB39638.1] RNA-directed DNA polymerase-like protein [Arabidopsis thaliana] gi 7267666 emb[CAB78094.1] RNA-directed DNA polymerase-like protein [Arabidopsis thaliana]                                                                                                                                                                                                                                                                                                                                                     | 2111 | 1274 | 0         | 60.4  | 28.6 | 39.2 | RNA-directed DNA polymerase-like protein | gbpln | Arabidopsis thaliana | AT4G29090.1   Symbols:   Ribonuclease H-like superfamily protein   chr4:14333528-14335255 FORWARD LENGTH=575                        | 2111 | 575  | 3.00E-64  | 27.2  | 8.5  | 12.6 |
| Rsa1.0_00624.1.g17055.t14 | ref XP_002891491.1  predicted protein [Arabidopsis lyrata subsp. lyrata] gi 297337333 gb EFH67750.1  predicted protein [Arabidopsis lyrata subsp. lyrata]                                                                                                                                                                                                                                                                                                                                                                      | 351  | 294  | 7.00E-85  | 83.8  | 49.0 | 56.4 | predicted protein                        | gbpln | Arabidopsis lyrata   | AT1G49330.1   Symbols:   hydroxyproline-rich glycoprotein family protein   chr1:18250043-18251038 FORWARD LENGTH=331                | 351  | 331  | 3.00E-83  | 94.3  | 49.9 | 59.0 |
| Rsa1.0_00625.1.g17056.t1  | gb AAD14492.1  Hypothetical protein [Arabidopsis thaliana]                                                                                                                                                                                                                                                                                                                                                                                                                                                                     | 112  | 240  | 2.00E-18  | 214.3 | 47.3 | 60.7 | Hypothetical protein                     | gbpln | Arabidopsis thaliana | AT1G10000.1   Symbols:   Ribonuclease H-like superfamily protein   chr1:3263877-3264788 REVERSE LENGTH=303                          | 112  | 303  | 4.00E-11  | 270.5 | 31.3 | 48.2 |
| Rsa1.0_00625.1.g17057.t1  | # # # # # # # #                                                                                                                                                                                                                                                                                                                                                                                                                                                                                                                |      |      |           |       |      |      | -                                        | ----  | ----                 | # # # # # # # #                                                                                                                     |      |      |           |       |      |      |
| Rsa1.0_00625.1.g17058.t1  | gb AGI14391.1  WRKY26-1 transcription factor [Brassica napus]                                                                                                                                                                                                                                                                                                                                                                                                                                                                  | 321  | 344  | 1.00E-159 | 107.2 | 88.8 | 94.1 | WRKY26-1 transcription factor            | gbpln | Brassica napus       | AT5G07100.1   Symbols: WRKY26   WRKY DNA-binding protein 26   chr5:2204313-2205647 FORWARD LENGTH=309                               | 321  | 309  | 1.00E-115 | 96.3  | 68.8 | 79.1 |
| Rsa1.0_00625.1.g17059.t1  | gb EOA31247.1  hypothetical protein CARUB_v10014418mg [Capsella rubella]                                                                                                                                                                                                                                                                                                                                                                                                                                                       | 283  | 262  | 1.00E-145 | 92.6  | 88.7 | 90.8 | hypothetical protein CARUB_v10014418mg   | gbpln | Capsella rubella     | AT2G17360.1   Symbols:   Ribosomal protein S4 (RPS4A) family protein   chr2:7546598-7548138 FORWARD LENGTH=261                      | 283  | 261  | 2.33E-156 | 92.2  | 88.0 | 90.5 |
| Rsa1.0_00625.1.g17060.t1  | gb EOA22250.1  hypothetical protein CARUB_v10002839mg [Capsella rubella]                                                                                                                                                                                                                                                                                                                                                                                                                                                       | 442  | 455  | 0         | 102.9 | 76.5 | 88.0 | hypothetical protein CARUB_v10002839mg   | gbpln | Capsella rubella     | AT5G07070.1   Symbols: CIPK2, SnRK3.2   CBL-interacting protein kinase 2   chr5:2196743-2198113 REVERSE LENGTH=456                  | 442  | 456  | 0         | 103.2 | 74.9 | 87.6 |
| Rsa1.0_00625.1.g17061.t1  | gb AAM62950.1  unknown [Arabidopsis thaliana]                                                                                                                                                                                                                                                                                                                                                                                                                                                                                  | 153  | 235  | 3.00E-50  | 153.6 | 78.4 | 81.0 | unknown                                  | gbpln | Arabidopsis thaliana | AT5G07020.1   Symbols:   proline-rich family protein   chr5:2180669-2182284 REVERSE LENGTH=235                                      | 153  | 235  | 3.00E-51  | 153.6 | 73.9 | 77.1 |
| Rsa1.0_00625.1.g17062.t1  | ref NP_568177.1  sulfotransferase 2A [Arabidopsis thaliana] gi 75153823 sp Q8L5A7.1 SOT15_ARATH RecName: Full=Cytosolic sulfotransferase 15; Short=AtSOT15; AltName: Full=Sulfotransferase 2a; Short=AtST2a gi 20466868 gb AAM20660.1  steroid sulfotransferase-like protein [Arabidopsis thaliana] gi 21537216 gb AAM61557.1  steroid sulfotransferase-like protein [Arabidopsis thaliana] gi 31711860 gb AAP68286.1  At5g07010 [Arabidopsis thaliana] gi 332003715 gb AED91098.1  sulfotransferase 2A [Arabidopsis thaliana] | 364  | 359  | 1.00E-177 | 98.6  | 83.5 | 92.3 | sulfotransferase 2A                      | gbpln | Arabidopsis thaliana | AT5G07010.1   Symbols: ATST2A, ST2A   sulfotransferase 2A   chr5:2174960-2176039 REVERSE LENGTH=359                                 | 364  | 359  | 1.00E-179 | 98.6  | 83.5 | 92.3 |
| Rsa1.0_00625.1.g17063.t1  | gb EOA22608.1  hypothetical protein CARUB_v10003275mg [Capsella rubella]                                                                                                                                                                                                                                                                                                                                                                                                                                                       | 258  | 258  | 1.00E-124 | 100.0 | 91.1 | 93.8 | hypothetical protein CARUB_v10003275mg   | gbpln | Capsella rubella     | AT5G06990.1   Symbols:   Protein of unknown function, DUFG17   chr5:2169699-2170484 FORWARD LENGTH=261                              | 258  | 261  | 1.00E-124 | 101.2 | 90.7 | 94.2 |
| Rsa1.0_00625.1.g17064.t2  | gb EOA21076.1  hypothetical protein CARUB_v10001413mg [Capsella rubella]                                                                                                                                                                                                                                                                                                                                                                                                                                                       | 337  | 330  | 1.00E-134 | 97.9  | 78.6 | 85.8 | hypothetical protein CARUB_v10001413mg   | gbpln | Capsella rubella     | AT5G06960.2   Symbols: OBF5, TGA5   OCS-element binding factor 5   chr5:2155742-2157400 FORWARD LENGTH=330                          | 337  | 330  | 1.00E-135 | 97.9  | 77.7 | 85.8 |
| Rsa1.0_00625.1.g17065.t1  | ref XP_002873284.1  predicted protein [Arabidopsis lyrata subsp. lyrata] gi 297319121 gb EFH49543.1  predicted protein [Arabidopsis lyrata subsp. lyrata]                                                                                                                                                                                                                                                                                                                                                                      | 475  | 525  | 0         | 110.5 | 89.5 | 94.9 | predicted protein                        | gbpln | Arabidopsis lyrata   | AT5G06905.1   Symbols: CYP712A2   cytochrome P450, family 712, subfamily A, polypeptide 2   chr5:2138438-2140078 REVERSE LENGTH=521 | 475  | 521  | 0         | 109.7 | 89.7 | 94.7 |
| Rsa1.0_00625.1.g17066.t1  | ref XP_002873283.1  predicted protein [Arabidopsis lyrata subsp. lyrata] gi 297319120 gb EFH49542.1  predicted protein [Arabidopsis lyrata subsp. lyrata]                                                                                                                                                                                                                                                                                                                                                                      | 794  | 508  | 0         | 64.0  | 55.3 | 59.8 | predicted protein                        | gbpln | Arabidopsis lyrata   | AT5G06900.1   Symbols: CYP93D1   cytochrome P450, family 93, subfamily D, polypeptide 1   chr5:2136160-2137925 REVERSE LENGTH=507   | 794  | 507  | 0         | 63.9  | 54.8 | 60.2 |
| Rsa1.0_00625.1.g17067.t1  | ref XP_002871231.1  predicted protein [Arabidopsis lyrata subsp. lyrata] gi 297317068 gb EFH47489.1  predicted protein [Arabidopsis lyrata subsp. lyrata]                                                                                                                                                                                                                                                                                                                                                                      | 573  | 1144 | 0         | 199.7 | 68.6 | 80.6 | predicted protein                        | gbpln | Arabidopsis lyrata   | AT5G06810.1   Symbols:   Mitochondrial transcription termination factor family protein   chr5:2108493-2112256 FORWARD LENGTH=1141   | 573  | 1141 | 0         | 199.1 | 68.1 | 80.6 |
| Rsa1.0_00625.1.g17068.t1  | ref XP_002871230.1  hypothetical protein ARALYDRAFT_487493 [Arabidopsis lyrata subsp. lyrata] gi 297317067 gb EFH47489.1  hypothetical protein ARALYDRAFT_487493 [Arabidopsis lyrata subsp. lyrata]                                                                                                                                                                                                                                                                                                                            | 372  | 365  | 1.00E-163 | 98.1  | 79.6 | 87.4 | hypothetical protein ARALYDRAFT_487493   | gbpln | Arabidopsis lyrata   | AT5G06800.1   Symbols:   myb-like HTH transcriptional regulator family protein   chr5:2103374-2105680 FORWARD LENGTH=375            | 372  | 375  | 1.00E-161 | 100.8 | 80.6 | 87.6 |

|                          |                                                                                                                                                                                                                                                           |      |      |           |       |      |      |                                                        |       |                      |                                                                                                                                         |      |      |           |       |      |      |
|--------------------------|-----------------------------------------------------------------------------------------------------------------------------------------------------------------------------------------------------------------------------------------------------------|------|------|-----------|-------|------|------|--------------------------------------------------------|-------|----------------------|-----------------------------------------------------------------------------------------------------------------------------------------|------|------|-----------|-------|------|------|
| Rsa1.0_00625.1.g17069.t2 | ref[XP_002884884.1] KH domain-containing protein [Arabidopsis lyrata subsp. lyrata] gi 297330724 gb EFH61143.1  KH domain-containing protein [Arabidopsis lyrata subsp. lyrata]                                                                           | 182  | 245  | 1.00E-23  | 134.6 | 31.9 | 37.4 | KH domain-containing protein                           | gbpln | Arabidopsis lyrata   | AT5G06770.1   Symbols:   KH domain-containing protein / zinc finger (CCH type) family protein   chr5:2090937-2092787 REVERSE LENGTH=240 | 182  | 240  | 2.00E-23  | 131.9 | 31.3 | 36.3 |
| Rsa1.0_00625.1.g17070.t1 | dbj BAB09809.1  protein phosphatase 2C-like [Arabidopsis thaliana]                                                                                                                                                                                        | 307  | 386  | 1.00E-156 | 125.7 | 90.2 | 94.5 | protein phosphatase 2C-like                            | gbpln | Arabidopsis thaliana | AT5G06750.3   Symbols:   Protein phosphatase 2C family protein   chr5:2086403-2088245 REVERSE LENGTH=393                                | 307  | 393  | 1.00E-158 | 128.0 | 90.2 | 94.5 |
| Rsa1.0_00626.1.g17071.t1 | emb CAA09986.1  WUSCHEL protein [Arabidopsis thaliana]                                                                                                                                                                                                    | 294  | 291  | 1.00E-115 | 99.0  | 75.5 | 85.7 | WUSCHEL protein                                        | gbpln | Arabidopsis thaliana | AT2G17950.1   Symbols: WUS, PGA6, WUS1   Homeodomain-like superfamily protein   chr2:7809100-7810671 REVERSE LENGTH=292                 | 294  | 292  | 1.00E-111 | 99.3  | 74.8 | 85.0 |
| Rsa1.0_00626.1.g17072.t1 | ref NP_179383.3  transformation/transcription domain-associated protein [Arabidopsis thaliana] gi 330251608 gb AEC06702.1  phosphatidylinositol 3- and 4-kinase family protein with FAT domain [Arabidopsis thaliana]                                     | 3871 | 3858 | 0         | 99.7  | 95.0 | 97.1 | transformation/transcription domain-associated protein | gbpln | Arabidopsis thaliana | AT2G17930.1   Symbols:   Phosphatidylinositol 3- and 4-kinase family protein with FAT domain   chr2:7784455-7802230 REVERSE LENGTH=3858 | 3871 | 3858 | 0         | 99.7  | 95.0 | 97.1 |
| Rsa1.0_00626.1.g17073.t3 | ref NP_179379.1  calcium-dependent protein kinase 16 [Arabidopsis thaliana] gi 75327228 sp Q7XJR9.1 CDPKG_ARAT H RecName: Full=Calcium-dependent protein kinase 16 gi 330251605 gb AEC06699.1  calcium-dependent protein kinase 16 [Arabidopsis thaliana] | 895  | 571  | 0         | 63.8  | 58.3 | 59.9 | calcium-dependent protein kinase 16                    | gbpln | Arabidopsis thaliana | AT2G17890.1   Symbols: CPK16   calcium-dependent protein kinase 16   chr2:7769885-7772627 REVERSE LENGTH=571                            | 895  | 571  | 0         | 63.8  | 58.3 | 59.9 |
| Rsa1.0_00626.1.g17074.t1 | ref NP_176527.4  Rossmann-fold NAD(P)-binding domain-containing protein [Arabidopsis thaliana] gi 332195971 gb AE34092.1  Rossmann-fold NAD(P)-binding domain-containing protein [Arabidopsis thaliana]                                                   | 278  | 282  | 1.00E-125 | 101.4 | 77.0 | 88.1 | Rossmann-fold NAD(P)-binding domain-containing protein | gbpln | Arabidopsis thaliana | AT1G63380.1   Symbols:   NAD(P)-binding Rossmann-fold superfamily protein   chr1:23505582-23506504 FORWARD LENGTH=282                   | 278  | 282  | 1.00E-127 | 101.4 | 77.0 | 88.1 |
| Rsa1.0_00626.1.g17075.t1 | ref XP_002886134.1  hypothetical protein ARALYDRAFT_480688 [Arabidopsis lyrata subsp. lyrata] gi 297331974 gb EFH62393.1  hypothetical protein ARALYDRAFT_480688 [Arabidopsis lyrata subsp. lyrata]                                                       | 157  | 158  | 7.00E-49  | 100.6 | 73.9 | 81.5 | hypothetical protein ARALYDRAFT_480688                 | gbpln | Arabidopsis lyrata   | AT2G17880.1   Symbols:   Chaperone DnaJ-domain superfamily protein   chr2:7767176-7767658 REVERSE LENGTH=160                            | 157  | 160  | 3.00E-51  | 101.9 | 70.1 | 79.0 |
| Rsa1.0_00626.1.g17076.t1 | ref XP_002876294.1  short-chain dehydrogenase/reductase family protein [Arabidopsis lyrata subsp. lyrata] gi 297322132 gb EFH52553.1  short-chain dehydrogenase/reductase family protein [Arabidopsis lyrata subsp. lyrata]                               | 278  | 280  | 1.00E-133 | 100.7 | 85.6 | 94.6 | short-chain dehydrogenase/reductase family protein     | gbpln | Arabidopsis lyrata   | AT3G55290.2   Symbols:   NAD(P)-binding Rossmann-fold superfamily protein   chr3:20502653-20503730 FORWARD LENGTH=279                   | 278  | 279  | 1.00E-134 | 100.4 | 84.2 | 93.9 |
| Rsa1.0_00626.1.g17077.t1 | ref XP_002886130.1  early-responsive to dehydration 7 [Arabidopsis lyrata subsp. lyrata] gi 297331970 gb EFH62389.1  early-responsive to dehydration 7 [Arabidopsis lyrata subsp. lyrata]                                                                 | 462  | 450  | 0         | 97.4  | 82.9 | 89.8 | early-responsive to dehydration 7                      | gbpln | Arabidopsis lyrata   | AT2G17840.1   Symbols: ERD7   Senescence/dehydration-associated protein-related   chr2:7755923-7757798 REVERSE LENGTH=452               | 462  | 452  | 0         | 97.8  | 82.9 | 90.0 |
| Rsa1.0_00626.1.g17078.t1 | ref XP_004233565.1  PREDICTED: rac-like GTP-binding protein ARAC1-like [Solanum lycopersicum]                                                                                                                                                             | 175  | 197  | 2.00E-86  | 112.6 | 94.9 | 97.7 | PREDICTED: rac-like GTP-binding protein ARAC1-like     | gbpln | Solanum lycopersicum | AT4G35950.1   Symbols: ARAC6, RAC2, ATROP5, ATRAC6, ROP5, RAC6   RAC-like 6   chr4:17024051-17025514 REVERSE LENGTH=197                 | 175  | 197  | 5.00E-85  | 112.6 | 97.7 | 99.4 |
| Rsa1.0_00626.1.g17079.t1 | ref XP_002882336.1  hypothetical protein ARALYDRAFT_896441 [Arabidopsis lyrata subsp. lyrata] gi 297328176 gb EFH58595.1  hypothetical protein ARALYDRAFT_896441 [Arabidopsis lyrata subsp. lyrata]                                                       | 146  | 319  | 1.00E-14  | 218.5 | 41.1 | 56.2 | hypothetical protein ARALYDRAFT_896441                 | gbpln | Arabidopsis lyrata   | # # # # # #                                                                                                                             |      |      |           |       |      |      |
| Rsa1.0_00626.1.g17080.t1 | gb EOA32800.1  hypothetical protein CARUB_v10016111mg [Capsella rubella]                                                                                                                                                                                  | 514  | 513  | 0         | 99.8  | 84.8 | 90.9 | hypothetical protein CARUB_v10016111mg                 | gbpln | Capsella rubella     | AT2G17760.1   Symbols:   Eukaryotic aspartyl protease family protein   chr2:7713488-7716269 FORWARD LENGTH=513                          | 514  | 513  | 0         | 99.8  | 86.8 | 92.4 |
| Rsa1.0_00626.1.g17081.t1 | gb EOA23612.1  hypothetical protein CARUB_v10016812mg [Capsella rubella]                                                                                                                                                                                  | 597  | 651  | 1.00E-165 | 109.0 | 54.9 | 71.7 | hypothetical protein CARUB_v10016812mg                 | gbpln | Capsella rubella     | AT3G58940.1   Symbols:   F-box/RNI-like superfamily protein   chr3:21781002-21783213 REVERSE LENGTH=618                                 | 597  | 618  | 1.00E-158 | 103.5 | 54.1 | 68.3 |

|                           |                                                                                                                                                                                                                                                                                                                                                                                                                                                                                                                                |      |      |           |       |      |      |                                             |       |                      |                                                                                                                                      |      |      |           |       |      |      |
|---------------------------|--------------------------------------------------------------------------------------------------------------------------------------------------------------------------------------------------------------------------------------------------------------------------------------------------------------------------------------------------------------------------------------------------------------------------------------------------------------------------------------------------------------------------------|------|------|-----------|-------|------|------|---------------------------------------------|-------|----------------------|--------------------------------------------------------------------------------------------------------------------------------------|------|------|-----------|-------|------|------|
| Rsa1.0_00626.1.g17082.t1  | ref NP_179364.2  NEP1-interacting protein 2 [Arabidopsis thaliana] gi 68565195 sp Q8GT74.1 NIP2_ARATH RecName: Full=NEP1-interacting protein 2; AltName: Full=RING-H2 finger protein AT_L25 gi 27524904 emb CAC81898.1  NEP1-interacting protein 2 [Arabidopsis thaliana] gi 330251581 gb AEC06675.1  NEP1-interacting protein 2 [Arabidopsis thaliana]                                                                                                                                                                        | 190  | 241  | 3.00E-54  | 126.8 | 62.6 | 72.1 | NEP1-interacting protein 2                  | gbpln | Arabidopsis thaliana | AT2G17730.1   Symbols: NIP2   NEP-interacting protein 2   chr2:7704142-7705312 FORWARD LENGTH=241                                    | 190  | 241  | 1.00E-56  | 126.8 | 62.6 | 72.1 |
| Rsa1.0_00626.1.g17083.t1  | ref NP_191453.1  F-box/LRR-repeat protein [Arabidopsis thaliana] gi 75264349 sp Q9LXQ8.1 FBL60_ARATH RecName: Full=F-box/LRR-repeat protein At3g58940 gi 7630089 emb CAB88311.1  putative protein [Arabidopsis thaliana] gi 332646331 gb AEE79852.1  F-box/LRR-repeat protein [Arabidopsis thaliana]                                                                                                                                                                                                                           | 264  | 618  | 2.00E-78  | 234.1 | 59.5 | 73.1 | F-box/LRR-repeat protein                    | gbpln | Arabidopsis thaliana | AT3G58940.1   Symbols:   F-box/RNI-like superfamily protein   chr3:21781002-21783213 REVERSE LENGTH=618                              | 264  | 618  | 6.00E-81  | 234.1 | 59.5 | 73.1 |
| Rsa1.0_00627.1.g17084.t1  | gb ACP30598.1  disease resistance protein [Brassica rapa subsp. pekinensis]                                                                                                                                                                                                                                                                                                                                                                                                                                                    | 444  | 2301 | 1.00E-148 | 518.2 | 59.7 | 70.5 | disease resistance protein                  | gbpln | Brassica rapa        | AT4G23160.1   Symbols: CRK8   cysteine-rich RLK (RECEPTOR-like protein kinase) 8   chr4:12129485-12134086 FORWARD LENGTH=1262        | 444  | 1262 | 2.00E-43  | 284.2 | 19.4 | 28.4 |
| Rsa1.0_00627.1.g17085.t2  | gb AAD05576.1  Cu/Zn superoxide dismutase [Raphanus sativus]                                                                                                                                                                                                                                                                                                                                                                                                                                                                   | 147  | 152  | 7.00E-76  | 103.4 | 98.6 | 99.3 | Cu/Zn superoxide dismutase                  | gbpln | Raphanus sativus     | AT1G08830.2   Symbols: CSD1   copper/zinc superoxide dismutase 1   chr1:2827700-2829053 FORWARD LENGTH=152                           | 147  | 152  | 1.00E-74  | 103.4 | 94.6 | 95.9 |
| Rsa1.0_00627.1.g17086.t1  | ref XP_002894041.1  hypothetical protein ARALYDRAFT_473884 [Arabidopsis lyrata subsp. lyrata] gi 297339883 gb EFH70300.1  hypothetical protein ARALYDRAFT_473884 [Arabidopsis lyrata subsp. lyrata]                                                                                                                                                                                                                                                                                                                            | 458  | 480  | 1.00E-126 | 104.8 | 54.8 | 64.4 | hypothetical protein ARALYDRAFT_473884      | gbpln | Arabidopsis lyrata   | AT1G47340.1   Symbols:   F-box and associated interaction domains-containing protein   chr1:17354123-17356494 REVERSE LENGTH=459     | 458  | 459  | 1.00E-126 | 100.2 | 54.6 | 65.5 |
| Rsa1.0_00627.1.g17087.t12 | ref NP_172361.1  DNA replication ATP-dependent helicase Dna2 [Arabidopsis thaliana] gi 332190235 gb AEE28356.1  DNA replication ATP-dependent helicase Dna2 [Arabidopsis thaliana]                                                                                                                                                                                                                                                                                                                                             | 1267 | 1296 | 0         | 102.3 | 85.2 | 90.2 | DNA replication ATP-dependent helicase Dna2 | gbpln | Arabidopsis thaliana | AT1G08840.1   Symbols: emb2411   DNA replication helicase, putative   chr1:2829579-2838369 REVERSE LENGTH=1296                       | 1267 | 1296 | 0         | 102.3 | 85.2 | 90.2 |
| Rsa1.0_00627.1.g17088.t1  | ref NP_001154322.1  Ribosomal L8/L5e family protein [Arabidopsis thaliana] gi 332190239 gb AEE28359.1  Ribosomal L8/L5e family protein [Arabidopsis thaliana]                                                                                                                                                                                                                                                                                                                                                                  | 188  | 234  | 1.00E-101 | 124.5 | 95.7 | 97.3 | Ribosomal L8/L5e family protein             | gbpln | Arabidopsis thaliana | AT1G08845.2   Symbols:   Ribosomal L18p/L5e family protein   chr1:2838789-2840955 FORWARD LENGTH=234                                 | 188  | 234  | 1.00E-104 | 124.5 | 95.7 | 97.3 |
| Rsa1.0_00627.1.g17089.t1  | ref NP_172362.3  protein BONZAI 3 [Arabidopsis thaliana] gi 7527788 sp Q5XQC7.1 BON3_ARATH RecName: Full=Protein BONZAI 3 gi 53636240 gb AAU89273.1  BON3 [Arabidopsis thaliana] gi 332190239 gb AEE28360.1  protein BONZAI 3 [Arabidopsis thaliana]                                                                                                                                                                                                                                                                           | 586  | 584  | 0         | 99.7  | 86.7 | 93.2 | protein BONZAI 3                            | gbpln | Arabidopsis thaliana | AT1G08860.1   Symbols: BON3   Calcium-dependent phospholipid-binding Copine family protein   chr1:2842153-2846138 FORWARD LENGTH=584 | 586  | 584  | 0         | 99.7  | 86.7 | 93.2 |
| Rsa1.0_00627.1.g17090.t1  | ref XP_002867835.1  hypothetical protein ARALYDRAFT_914502 [Arabidopsis lyrata subsp. lyrata] gi 297313671 gb EFH44094.1  hypothetical protein ARALYDRAFT_914502 [Arabidopsis lyrata subsp. lyrata]                                                                                                                                                                                                                                                                                                                            | 511  | 584  | 1.00E-175 | 114.3 | 74.4 | 84.0 | hypothetical protein ARALYDRAFT_914502      | gbpln | Arabidopsis lyrata   | AT4G21660.1   Symbols:   proline-rich spliceosome-associated (PSP) family protein   chr4:11506259-11509772 REVERSE LENGTH=584        | 511  | 584  | 1.00E-178 | 114.3 | 74.4 | 83.4 |
| Rsa1.0_00627.1.g17091.t2  | #                                                                                                                                                                                                                                                                                                                                                                                                                                                                                                                              | #    | #    | #         | #     | #    | -    | ---                                         | ---   | #                    | #                                                                                                                                    | #    | #    | #         | #     | #    | #    |
| Rsa1.0_00627.1.g17092.t1  | ref XP_002889721.1  EMB3001 [Arabidopsis lyrata subsp. lyrata] gi 297335563 gb EFH65980.1  EMB3001 [Arabidopsis lyrata subsp. lyrata]                                                                                                                                                                                                                                                                                                                                                                                          | 757  | 836  | 0         | 110.4 | 50.2 | 57.6 | EMB3001                                     | gbpln | Arabidopsis lyrata   | AT1G08910.1   Symbols: EMB3001   zinc ion binding; zinc ion binding   chr1:2856227-2860816 FORWARD LENGTH=829                        | 757  | 829  | 0         | 109.5 | 48.5 | 57.1 |
| Rsa1.0_00627.1.g17093.t1  | ref NP_563829.1  sugar transporter ERD6-like 3 [Arabidopsis thaliana] gi 75332302 sp Q94KE0.1 ERDL3_ARATH RecName: Full=Sugar transporter ERD6-like 3; AltName: Full=Sugar transporter-like protein 2 gi 14194109 gb AAK56249.1 AF367260.1 At1g08920/F7G19.20 [Arabidopsis thaliana] gi 22137064 gb AAM91377.1  At1g08920/F7G19.20 [Arabidopsis thaliana] gi 169403716 emb CAQ16329.1  hexose transporter-like protein [Arabidopsis thaliana] gi 332190246 gb AEE28367.1  sugar transporter ERD6-like 3 [Arabidopsis thaliana] | 470  | 470  | 0         | 100.0 | 85.5 | 93.2 | sugar transporter ERD6-like 3               | gbpln | Arabidopsis thaliana | AT1G08920.1   Symbols: ESL1   ERD (early response to dehydration) six-like 1   chr1:2867446-2870360 FORWARD LENGTH=470               | 470  | 470  | 0         | 100.0 | 85.5 | 93.2 |

|                          |                                                                                                                                                                                                                                                                                                                                                                                                                                                                                                                                                                                                                                                                                                                                                                                                                                                                                                                                                                                                                                                                                                                                                                                                                                                                                         |     |     |           |       |      |      |                                                   |       |                      |                                                                                                                             |     |     |           |       |      |      |
|--------------------------|-----------------------------------------------------------------------------------------------------------------------------------------------------------------------------------------------------------------------------------------------------------------------------------------------------------------------------------------------------------------------------------------------------------------------------------------------------------------------------------------------------------------------------------------------------------------------------------------------------------------------------------------------------------------------------------------------------------------------------------------------------------------------------------------------------------------------------------------------------------------------------------------------------------------------------------------------------------------------------------------------------------------------------------------------------------------------------------------------------------------------------------------------------------------------------------------------------------------------------------------------------------------------------------------|-----|-----|-----------|-------|------|------|---------------------------------------------------|-------|----------------------|-----------------------------------------------------------------------------------------------------------------------------|-----|-----|-----------|-------|------|------|
| Rsa1.0_00627.1.g17094.t1 | ref[NP_563830.1] sugar transporter ERD6 [Arabidopsis thaliana]<br>gi 79317421 ref[NP_001031006.1] sugar transporter ERD6 [Arabidopsis thaliana]<br>gi 117940144 sp O04036.3 ERD6_ARATH<br>RecName: Full=Sugar transporter ERD6;<br>AltName: Full=Early-responsive to dehydration protein 6; AltName:<br>Full=Sugar transporter-like protein 1<br>gi 3123712 db BAA25989.1  ERD6 protein [Arabidopsis thaliana]<br>gi 6686825 emb CAB64732.1  putative sugar transporter [Arabidopsis thaliana]<br>gi 30794056 gb AAP40473.1  putative zinc finger protein ATZF1 [Arabidopsis thaliana]<br>gi 332190249 gb AEE28370.1  sugar transporter ERD6 [Arabidopsis thaliana]<br>gi 332190250 gb AEE28371.1  sugar transporter ERD6 [Arabidopsis thaliana]<br>ref[NP_172370.3] cation exchanger 11 [Arabidopsis thaliana]<br>gi 75096914 sp O04034.1 CCX5_ARATH<br>RecName: Full=Cation/calcium exchanger 5; AltName: Full=Protein CATION EXCHANGER 11<br>gi 1922938 gb AAB70411.1  Similar to Caenorhabditis hypothetical protein C07A9.11 (gb Z29094) [Arabidopsis thaliana]<br>gi 45773954 gb AAS76781.1  At1g08960 [Arabidopsis thaliana]<br>gi 62320618 db BAD95271.1  hypothetical protein [Arabidopsis thaliana]<br>gi 332190252 gb AEE28373.1  cation exchanger 11 [Arabidopsis thaliana] | 497 | 496 | 0         | 99.8  | 91.5 | 96.8 | sugar transporter ERD6                            | gbpln | Arabidopsis thaliana | AT1G08930.2   Symbols: ERD6   Major facilitator superfamily protein   chr1:2873604-2876979 FORWARD LENGTH=496               | 497 | 496 | 0         | 99.8  | 91.5 | 96.8 |
| Rsa1.0_00627.1.g17095.t1 | db BAJ33993.1  unnamed protein product [Thellungiella halophila]<br>ref[XP_002889727.1] hypothetical protein ARALYDRAFT_888131 [Arabidopsis lyrata subsp. lyrata]<br>gi 297335569 gb EFH65986.1  hypothetical protein ARALYDRAFT_888131 [Arabidopsis lyrata subsp. lyrata]<br>ref[NP_172373.3] plant glycogenin-like starch initiation protein 5 [Arabidopsis thaliana]<br>gi 385178635 sp F4HZC3.1 GUX5_ARATH<br>RecName: Full=Putative UDP-glucuronate:xylan alpha-glucuronosyltransferase 5; Short=UDP-GlcA:xylan glucuronyltransferase 5; AltName: Full=Glycogenin-like protein 5; AltName: Full=Plant glycogenin-like starch initiation protein 5; AltName: Full=Protein GLUCURONIC ACID SUBSTITUTION OF XYLAN 5; Short=AtGUX5<br>gi 332190259 gb AEE28380.1  plant glycogenin-like starch initiation protein 5 [Arabidopsis thaliana]<br>emb CAG28416.1  plasma membrane sulphate transporter [Brassica oleracea var. viridis]                                                                                                                                                                                                                                                                                                                                                    | 529 | 546 | 0         | 103.2 | 86.0 | 91.3 | cation exchanger 11                               | gbpln | Arabidopsis thaliana | AT1G08960.1   Symbols: CAX11, ATCAX11   cation exchanger 11   chr1:2879698-2881877 FORWARD LENGTH=546                       | 529 | 546 | 0         | 103.2 | 86.0 | 91.3 |
| Rsa1.0_00627.1.g17096.t1 | db BAJ33993.1  unnamed protein product [Thellungiella halophila]                                                                                                                                                                                                                                                                                                                                                                                                                                                                                                                                                                                                                                                                                                                                                                                                                                                                                                                                                                                                                                                                                                                                                                                                                        | 231 | 234 | 1.00E-115 | 101.3 | 96.1 | 97.4 | unnamed protein product                           | ----  | ----                 | AT1G08970.2   Symbols: HAP5C, NF-YC9   nuclear factor Y, subunit C9   chr1:2883144-2883839 FORWARD LENGTH=231               | 231 | 231 | 1.00E-110 | 100.0 | 90.0 | 91.3 |
| Rsa1.0_00627.1.g17097.t5 | ref[XP_002889727.1] hypothetical protein ARALYDRAFT_888131 [Arabidopsis lyrata subsp. lyrata]<br>gi 297335569 gb EFH65986.1  hypothetical protein ARALYDRAFT_888131 [Arabidopsis lyrata subsp. lyrata]<br>ref[NP_172373.3] plant glycogenin-like starch initiation protein 5 [Arabidopsis thaliana]<br>gi 385178635 sp F4HZC3.1 GUX5_ARATH<br>RecName: Full=Putative UDP-glucuronate:xylan alpha-glucuronosyltransferase 5; Short=UDP-GlcA:xylan glucuronyltransferase 5; AltName: Full=Glycogenin-like protein 5; AltName: Full=Plant glycogenin-like starch initiation protein 5; AltName: Full=Protein GLUCURONIC ACID SUBSTITUTION OF XYLAN 5; Short=AtGUX5<br>gi 332190259 gb AEE28380.1  plant glycogenin-like starch initiation protein 5 [Arabidopsis thaliana]                                                                                                                                                                                                                                                                                                                                                                                                                                                                                                                 | 495 | 425 | 0         | 85.9  | 71.1 | 77.6 | hypothetical protein ARALYDRAFT_888131            | gbpln | Arabidopsis lyrata   | AT1G08980.1   Symbols: ATAMI1, AMI1, ATTO64-I, TOC64-I   amidase 1   chr1:2884455-2886430 FORWARD LENGTH=425                | 495 | 425 | 0         | 85.9  | 71.9 | 77.8 |
| Rsa1.0_00627.1.g17098.t1 | emb CAG28416.1  plasma membrane sulphate transporter [Brassica oleracea var. viridis]                                                                                                                                                                                                                                                                                                                                                                                                                                                                                                                                                                                                                                                                                                                                                                                                                                                                                                                                                                                                                                                                                                                                                                                                   | 529 | 566 | 0         | 107.0 | 80.9 | 88.3 | plant glycogenin-like starch initiation protein 5 | gbpln | Arabidopsis thaliana | AT1G08990.1   Symbols: PGSIP5   plant glycogenin-like starch initiation protein 5   chr1:2888753-2890753 FORWARD LENGTH=566 | 529 | 566 | 0         | 107.0 | 80.9 | 88.3 |
| Rsa1.0_00628.1.g17099.t1 | ref[NP_188221.2] MAR-binding filament-like protein 1 [Arabidopsis thaliana]<br>gi 83304464 sp Q9LW85.2 MFP1_ARATH<br>RecName: Full=MAR-binding filament-like protein 1<br>gi 30794108 gb AAP40496.1  putative myosin heavy chain [Arabidopsis thaliana]<br>gi 332642240 gb AEE75761.1  MAR-binding filament-like protein 1 [Arabidopsis thaliana]<br>gb AFO11038.1  S domain subfamily receptor-like kinase [Arabidopsis thaliana]                                                                                                                                                                                                                                                                                                                                                                                                                                                                                                                                                                                                                                                                                                                                                                                                                                                      | 656 | 656 | 0         | 100.0 | 95.6 | 97.1 | plasma membrane sulphate transporter              | gbpln | Brassica oleracea    | AT3G15990.1   Symbols: SULTR3.4   sulfate transporter 3;4   chr3:5427081-5430679 FORWARD LENGTH=653                         | 656 | 653 | 0         | 99.5  | 91.3 | 95.4 |
| Rsa1.0_00628.1.g17100.t1 | ref[NP_188221.2] MAR-binding filament-like protein 1 [Arabidopsis thaliana]<br>gi 83304464 sp Q9LW85.2 MFP1_ARATH<br>RecName: Full=MAR-binding filament-like protein 1<br>gi 30794108 gb AAP40496.1  putative myosin heavy chain [Arabidopsis thaliana]<br>gi 332642240 gb AEE75761.1  MAR-binding filament-like protein 1 [Arabidopsis thaliana]                                                                                                                                                                                                                                                                                                                                                                                                                                                                                                                                                                                                                                                                                                                                                                                                                                                                                                                                       | 724 | 726 | 0         | 100.3 | 75.6 | 87.6 | MAR-binding filament-like protein 1               | gbpln | Arabidopsis thaliana | AT3G16000.1   Symbols: MFP1   MAR binding filament-like protein 1   chr3:5431041-5433613 REVERSE LENGTH=726                 | 724 | 726 | 0         | 100.3 | 75.6 | 87.6 |
| Rsa1.0_00628.1.g17101.t2 | gb AFO11038.1  S domain subfamily receptor-like kinase [Arabidopsis thaliana]                                                                                                                                                                                                                                                                                                                                                                                                                                                                                                                                                                                                                                                                                                                                                                                                                                                                                                                                                                                                                                                                                                                                                                                                           | 965 | 852 | 0         | 88.3  | 71.0 | 76.7 | S domain subfamily receptor-like kinase           | gbpln | Arabidopsis thaliana | AT3G16030.1   Symbols: CES101   lectin protein kinase family protein   chr3:5439609-5442802 FORWARD LENGTH=850              | 965 | 850 | 0         | 88.1  | 66.0 | 71.8 |



|                          |                                                                                                                                                                                                                                                                                                                                                                                                                                                                                                                                                                                                                   |     |      |           |       |      |      |                                                     |       |                      |                                                                                                                                                                                                                                                                                                                                           |     |     |           |       |      |      |
|--------------------------|-------------------------------------------------------------------------------------------------------------------------------------------------------------------------------------------------------------------------------------------------------------------------------------------------------------------------------------------------------------------------------------------------------------------------------------------------------------------------------------------------------------------------------------------------------------------------------------------------------------------|-----|------|-----------|-------|------|------|-----------------------------------------------------|-------|----------------------|-------------------------------------------------------------------------------------------------------------------------------------------------------------------------------------------------------------------------------------------------------------------------------------------------------------------------------------------|-----|-----|-----------|-------|------|------|
| Rsa1.0_00628.1.g17102.t2 | gb EOA30013.1  hypothetical protein CARUB_v10013116mg [Capsella rubella]                                                                                                                                                                                                                                                                                                                                                                                                                                                                                                                                          | 716 | 687  | 0         | 95.9  | 86.3 | 88.8 | hypothetical protein CARUB_v10013116mg              | gbpln | Capsella rubella     | AT3G16060.1   Symbols:   ATP binding microtubule motor family protein   chr3:5447503-5451196 FORWARD LENGTH=684                                                                                                                                                                                                                           | 716 | 684 | 0         | 95.5  | 84.8 | 87.7 |
| Rsa1.0_00628.1.g17103.t1 | ref NP_188228.1  uncharacterized protein [Arabidopsis thaliana]<br>gi 8294453 dbj BAB02672.1  unnamed protein product [Arabidopsis thaliana]<br>gi 332642247 gb AE75768.1  uncharacterized protein AT3G16070 [Arabidopsis thaliana]                                                                                                                                                                                                                                                                                                                                                                               | 151 | 150  | 4.00E-65  | 99.3  | 80.1 | 86.1 | uncharacterized protein                             | gbpln | Arabidopsis thaliana | AT3G16070.1   Symbols:   unknown protein; BEST Arabidopsis thaliana protein match is: unknown protein (TAIR:AT1G15260.1). Has 26 Blast hits to 26 proteins in 7 species: Archae - 0; Bacteria - 0; Metazoa - 0; Fungi - 0; Plants - 26; Viruses - 0; Other Eukaryotes - 0 (source: NCBI BLINK).   chr3:5451864-5452316 REVERSE LENGTH=150 | 151 | 150 | 1.00E-67  | 99.3  | 80.1 | 86.1 |
| Rsa1.0_00628.1.g17104.t1 | ref NP_175640.1  60S ribosomal protein L37-2 [Arabidopsis thaliana]<br>gi 20143906 sp Q43292.2 RL372_ARATH RecName: Full=60S ribosomal protein L37-2<br>gi 12323122 gb AAG51542.1 AC037424.7 60S ribosomal protein L37, putative; 56921-57860 [Arabidopsis thaliana]<br>gi 13877907 gb AAK44031.1 AF370216.1 putative 60S ribosomal protein L37 [Arabidopsis thaliana]<br>gi 21280805 gb AAM44969.1  putative 60S ribosomal protein L37 [Arabidopsis thaliana]<br>gi 222423584 dbj BAH19761.1  AT1G52300 [Arabidopsis thaliana]<br>gi 332194658 gb AEE32779.1  60S ribosomal protein L37-2 [Arabidopsis thaliana] | 96  | 95   | 5.00E-43  | 99.0  | 90.6 | 95.8 | 60S ribosomal protein L37-2                         | gbpln | Arabidopsis thaliana | AT1G52300.1   Symbols:   Zinc-binding ribosomal protein family protein   chr1:19475213-19476152 REVERSE LENGTH=95                                                                                                                                                                                                                         | 96  | 95  | 8.00E-46  | 99.0  | 90.6 | 95.8 |
| Rsa1.0_00628.1.g17105.t1 | gb EOA31101.1  hypothetical protein CARUB_v10014254mg [Capsella rubella]                                                                                                                                                                                                                                                                                                                                                                                                                                                                                                                                          | 385 | 304  | 1.00E-111 | 79.0  | 51.4 | 59.0 | hypothetical protein CARUB_v10014254mg              | gbpln | Capsella rubella     | AT3G24600.1   Symbols:   Late embryogenesis abundant protein, group 2   chr3:8972195-8974867 REVERSE LENGTH=506                                                                                                                                                                                                                           | 385 | 506 | 1.00E-37  | 131.4 | 19.2 | 31.4 |
| Rsa1.0_00628.1.g17106.t1 | gb EOA33145.1  hypothetical protein CARUB_v10016487mg [Capsella rubella]<br>gi 482568957 gb EOA33146.1  hypothetical protein CARUB_v10016487mg [Capsella rubella]                                                                                                                                                                                                                                                                                                                                                                                                                                                 | 93  | 93   | 1.00E-43  | 100.0 | 91.4 | 95.7 | hypothetical protein CARUB_v10016487mg              | gbpln | Capsella rubella     | AT3G16120.1   Symbols:   Dynein light chain type 1 family protein   chr3:5465035-5465395 FORWARD LENGTH=93                                                                                                                                                                                                                                | 93  | 93  | 4.00E-45  | 100.0 | 90.3 | 94.6 |
| Rsa1.0_00628.1.g17107.t1 | ref XP_002882981.1  hypothetical protein ARALYDRAFT_479067 [Arabidopsis lyrata subsp. lyrata]<br>gi 297328821 gb EFH59240.1  hypothetical protein ARALYDRAFT_479067 [Arabidopsis lyrata subsp. lyrata]                                                                                                                                                                                                                                                                                                                                                                                                            | 544 | 577  | 0         | 106.1 | 76.1 | 87.1 | hypothetical protein ARALYDRAFT_479067              | gbpln | Arabidopsis lyrata   | AT3G16130.1   Symbols:   ATROPGEF13, ROPGEF13, PIRF2   RHO guanyl-nucleotide exchange factor 13   chr3:5466246-5468512 FORWARD LENGTH=576                                                                                                                                                                                                 | 544 | 576 | 0         | 105.9 | 74.3 | 85.8 |
| Rsa1.0_00628.1.g17108.t1 | gb EOA31654.1  hypothetical protein CARUB_v10014858mg [Capsella rubella]                                                                                                                                                                                                                                                                                                                                                                                                                                                                                                                                          | 145 | 145  | 8.00E-70  | 100.0 | 93.1 | 95.9 | hypothetical protein CARUB_v10014858mg              | gbpln | Capsella rubella     | AT3G16140.1   Symbols:   PSAH-1   photosystem I subunit H-1   chr3:5468670-5469415 REVERSE LENGTH=145                                                                                                                                                                                                                                     | 145 | 145 | 9.00E-72  | 100.0 | 91.7 | 95.9 |
| Rsa1.0_00628.1.g17109.t1 | gb AAG51783.1 AC079679.3 reverse transcriptase, putative; 16838-20266 [Arabidopsis thaliana]                                                                                                                                                                                                                                                                                                                                                                                                                                                                                                                      | 164 | 1142 | 6.00E-19  | 696.3 | 32.9 | 43.3 | reverse transcriptase, putative; 16838-20266        | gbpln | Arabidopsis thaliana | #                                                                                                                                                                                                                                                                                                                                         | #   | #   | #         | #     | #    | #    |
| Rsa1.0_00628.1.g17110.t1 | gb EOA31031.1  hypothetical protein CARUB_v10014177mg [Capsella rubella]                                                                                                                                                                                                                                                                                                                                                                                                                                                                                                                                          | 324 | 325  | 1.00E-176 | 100.3 | 94.4 | 97.2 | hypothetical protein CARUB_v10014177mg              | gbpln | Capsella rubella     | AT3G16150.1   Symbols:   N-terminal nucleophile aminohydrolases (Ntn hydrolases) superfamily protein   chr3:5471794-5473033 FORWARD LENGTH=325                                                                                                                                                                                            | 324 | 325 | 1.00E-178 | 100.3 | 94.1 | 96.9 |
| Rsa1.0_00628.1.g17111.t1 | ref XP_002882983.1  hypothetical protein ARALYDRAFT_318392 [Arabidopsis lyrata subsp. lyrata]<br>gi 297328823 gb EFH59242.1  hypothetical protein ARALYDRAFT_318392 [Arabidopsis lyrata subsp. lyrata]                                                                                                                                                                                                                                                                                                                                                                                                            | 588 | 608  | 0         | 103.4 | 86.7 | 93.4 | hypothetical protein ARALYDRAFT_318392              | gbpln | Arabidopsis lyrata   | AT3G16170.1   Symbols:   AMP-dependent synthetase and ligase family protein   chr3:5476490-5480128 FORWARD LENGTH=544                                                                                                                                                                                                                     | 588 | 544 | 0         | 92.5  | 81.0 | 86.9 |
| Rsa1.0_00628.1.g17112.t1 | #                                                                                                                                                                                                                                                                                                                                                                                                                                                                                                                                                                                                                 | #   | #    | #         | #     | #    | -    | ----                                                | ----  | ----                 | #                                                                                                                                                                                                                                                                                                                                         | #   | #   | #         | #     | #    | #    |
| Rsa1.0_00628.1.g17113.t1 | ref NP_188239.1  major facilitator protein [Arabidopsis thaliana]<br>gi 310947330 sp Q8LP2.2 PTR32_ARATH RecName: Full=Probable peptide/nitrate transporter At3g16180<br>gi 332642260 gb AEE75781.1  probable peptide/nitrate transporter [Arabidopsis thaliana]                                                                                                                                                                                                                                                                                                                                                  | 593 | 591  | 0         | 99.7  | 89.7 | 94.3 | major facilitator protein                           | gbpln | Arabidopsis thaliana | AT3G16180.1   Symbols:   Major facilitator superfamily protein   chr3:5481477-5484943 REVERSE LENGTH=591                                                                                                                                                                                                                                  | 593 | 591 | 0         | 99.7  | 89.7 | 94.3 |
| Rsa1.0_00628.1.g17114.t1 | gb AAD17395.1  putative non-LTR retroelement reverse transcriptase [Arabidopsis thaliana]                                                                                                                                                                                                                                                                                                                                                                                                                                                                                                                         | 264 | 1138 | 5.00E-49  | 431.1 | 37.9 | 59.8 | putative non-LTR retroelement reverse transcriptase | gbpln | Arabidopsis thaliana | AT4G2090.1   Symbols:   Ribonuclease H-like superfamily protein   chr4:14333528-14335255 FORWARD LENGTH=575                                                                                                                                                                                                                               | 264 | 575 | 5.00E-26  | 217.8 | 28.4 | 44.3 |

|                          |                                                                                                                                                                                                                                                                                                                                                                     |      |      |           |       |      |      |                                                     |       |                      |                                                                                                                                                                                                                                                                                                                                                  |      |      |           |       |      |      |
|--------------------------|---------------------------------------------------------------------------------------------------------------------------------------------------------------------------------------------------------------------------------------------------------------------------------------------------------------------------------------------------------------------|------|------|-----------|-------|------|------|-----------------------------------------------------|-------|----------------------|--------------------------------------------------------------------------------------------------------------------------------------------------------------------------------------------------------------------------------------------------------------------------------------------------------------------------------------------------|------|------|-----------|-------|------|------|
| Rsa1.0_00628.1.g17115.t1 | dbj BAJ33727.1  unnamed protein product [Theilungiella halophila]                                                                                                                                                                                                                                                                                                   | 210  | 196  | 2.00E-98  | 93.3  | 86.2 | 89.5 | unnamed protein product                             | ----- | -----                | AT3G16190.1   Symbols:   Isochorismatase family protein   chr3:5489883-5491195 REVERSE LENGTH=196                                                                                                                                                                                                                                                | 210  | 196  | 2.00E-95  | 93.3  | 81.4 | 86.7 |
| Rsa1.0_00628.1.g17116.t1 | ref XP_002885129.1  hypothetical protein ARALYDRAFT_479073 [Arabidopsis lyrata subsp. lyrata] gi 297330969 gb EFH61388.1  hypothetical protein ARALYDRAFT_479073 [Arabidopsis lyrata subsp. lyrata] ref XP_002885130.1  F-box family protein [Arabidopsis lyrata subsp. lyrata] gi 297330970 gb EFH61389.1  F-box family protein [Arabidopsis lyrata subsp. lyrata] | 463  | 456  | 0         | 98.5  | 90.9 | 96.1 | hypothetical protein ARALYDRAFT_479073              | gbpln | Arabidopsis lyrata   | AT3G16200.1   Symbols:   unknown protein; Has 97 Blast hits to 97 proteins in 15 species: Archae - 0; Bacteria - 8; Metazoa - 0; Fungi - 0; Plants - 38; Viruses - 0; Other Eukaryotes - 53 (source: NCBI BLINK).   chr3:5491619-5493605 REVERSE LENGTH=456                                                                                      | 463  | 456  | 0         | 98.5  | 90.7 | 96.1 |
| Rsa1.0_00628.1.g17117.t1 | gb ABD65099.1  hypothetical protein 31.t00074 [Brassica oleracea]                                                                                                                                                                                                                                                                                                   | 280  | 362  | 1.00E-116 | 129.3 | 71.4 | 84.3 | F-box family protein                                | gbpln | Arabidopsis lyrata   | AT3G16210.1   Symbols:   F-box family protein   chr3:5494533-5495615 REVERSE LENGTH=360                                                                                                                                                                                                                                                          | 280  | 360  | 1.00E-118 | 128.6 | 71.4 | 83.9 |
| Rsa1.0_00628.1.g17118.t1 | gb ABD65099.1  hypothetical protein 31.t00074 [Brassica oleracea]                                                                                                                                                                                                                                                                                                   | 356  | 258  | 2.00E-42  | 72.5  | 29.5 | 37.9 | hypothetical protein 31.t00074                      | gbpln | Brassica oleracea    | AT3G47680.1   Symbols:   DNA binding   chr3:17577483-17578391 REVERSE LENGTH=302                                                                                                                                                                                                                                                                 | 356  | 302  | 2.00E-30  | 84.8  | 24.7 | 32.9 |
| Rsa1.0_00628.1.g17119.t1 | gb ABD64939.1  hypothetical protein 24.t00017 [Brassica oleracea]                                                                                                                                                                                                                                                                                                   | 317  | 442  | 1.00E-118 | 139.4 | 65.9 | 72.9 | hypothetical protein 24.t00017                      | gbpln | Brassica oleracea    | AT2G13770.1   Symbols:   CONTAINS InterPro DOMAIN/s: Putative harbinger transposase-derived nuclease (InterPro:IPR006912); Has 451 Blast hits to 352 proteins in 33 species: Archae - 0; Bacteria - 0; Metazoa - 28; Fungi - 8; Plants - 388; Viruses - 0; Other Eukaryotes - 27 (source: NCBI BLINK).   chr2:5736603-5737847 FORWARD LENGTH=343 | 317  | 343  | 4.00E-57  | 108.2 | 40.4 | 50.2 |
| Rsa1.0_00628.1.g17120.t1 | gb AAG51783.1 AC079679.3 reverse transcriptase, putative; 16838-20266 [Arabidopsis thaliana]                                                                                                                                                                                                                                                                        | 346  | 1142 | 2.00E-66  | 330.1 | 39.9 | 57.5 | reverse transcriptase, putative; 16838-20266        | gbpln | Arabidopsis thaliana | AT4G2090.1   Symbols:   Ribonuclease H-like superfamily protein   chr4:14333528-14335255 FORWARD LENGTH=575                                                                                                                                                                                                                                      | 346  | 575  | 3.00E-40  | 166.2 | 29.2 | 48.8 |
| Rsa1.0_00628.1.g17121.t1 | dbj BAB01275.1  histidine-containing phosphotransfer protein-like [Arabidopsis thaliana]                                                                                                                                                                                                                                                                            | 133  | 133  | 1.00E-66  | 100.0 | 91.0 | 95.5 | histidine-containing phosphotransfer protein-like   | gbpln | Arabidopsis thaliana | AT3G16360.2   Symbols: AHP4   HPT phosphotransmitter 4   chr3:5554351-5555518 FORWARD LENGTH=145                                                                                                                                                                                                                                                 | 133  | 145  | 6.00E-68  | 109.0 | 88.7 | 93.2 |
| Rsa1.0_00628.1.g17122.t2 | dbj BAJ33787.1  unnamed protein product [Theilungiella halophila]                                                                                                                                                                                                                                                                                                   | 354  | 358  | 0         | 101.1 | 94.1 | 96.6 | unnamed protein product                             | ----- | -----                | AT3G16370.1   Symbols:   GDSL-like Lipase/Acylhydrolase superfamily protein   chr3:5556928-5558351 FORWARD LENGTH=353                                                                                                                                                                                                                            | 354  | 353  | 0         | 99.7  | 87.0 | 91.2 |
| Rsa1.0_00628.1.g17123.t1 | gb EOA30118.1  hypothetical protein CARUB_v10013228mg [Capsella rubella]                                                                                                                                                                                                                                                                                            | 573  | 622  | 0         | 108.6 | 67.9 | 77.3 | hypothetical protein CARUB_v10013228mg              | gbpln | Capsella rubella     | AT3G16390.1   Symbols: PAB6   poly(A) binding protein 6   chr3:5558676-5560993 REVERSE LENGTH=537                                                                                                                                                                                                                                                | 573  | 537  | 0         | 93.7  | 63.7 | 72.6 |
| Rsa1.0_00628.1.g17124.t1 | gb AAM64705.1  outward rectifying potassium channel KCO [Arabidopsis thaliana]                                                                                                                                                                                                                                                                                      | 100  | 363  | 3.00E-14  | 363.0 | 47.0 | 57.0 | outward rectifying potassium channel KCO            | gbpln | Arabidopsis thaliana | AT5G5630.2   Symbols: KCO1, TPK1   Outward rectifying potassium channel protein   chr5:22531718-22532893 FORWARD LENGTH=363                                                                                                                                                                                                                      | 100  | 363  | 5.00E-17  | 363.0 | 47.0 | 57.0 |
| Rsa1.0_00628.1.g17125.t1 | emb CAA72271.1  jasmonate inducible protein [Brassica napus]                                                                                                                                                                                                                                                                                                        | 674  | 680  | 0         | 100.9 | 55.3 | 59.5 | jasmonate inducible protein                         | gbpln | Brassica napus       | AT1G52040.1   Symbols: MBP1, ATMBP   myrosinase-binding protein 1   chr1:19350595-19352578 REVERSE LENGTH=462                                                                                                                                                                                                                                    | 674  | 462  | 1.00E-131 | 68.5  | 36.9 | 47.3 |
| Rsa1.0_00628.1.g17126.t1 | ref XP_002885141.1  hypothetical protein ARALYDRAFT_479107 [Arabidopsis lyrata subsp. lyrata] gi 297330981 gb EFH61400.1  hypothetical protein ARALYDRAFT_479107 [Arabidopsis lyrata subsp. lyrata]                                                                                                                                                                 | 450  | 451  | 0         | 100.2 | 82.2 | 90.0 | hypothetical protein ARALYDRAFT_479107              | gbpln | Arabidopsis lyrata   | AT3G16470.2   Symbols: JR1   Mannose-binding lectin superfamily protein   chr3:5596096-5597709 REVERSE LENGTH=451                                                                                                                                                                                                                                | 450  | 451  | 0         | 100.2 | 82.0 | 90.0 |
| Rsa1.0_00628.1.g17127.t7 | gb AAS21632.1  voltage-dependent anion-selective channel protein [Brassica rapa]                                                                                                                                                                                                                                                                                    | 281  | 276  | 4.00E-41  | 98.2  | 35.6 | 43.4 | voltage-dependent anion-selective channel protein   | gbpln | Brassica rapa        | AT5G15090.2   Symbols: VDACC3   voltage dependent anion channel 3   chr5:4889641-4891389 REVERSE LENGTH=274                                                                                                                                                                                                                                      | 281  | 274  | 9.00E-35  | 97.5  | 31.3 | 40.2 |
| Rsa1.0_00629.1.g17128.t5 | ref XP_002883053.1  hypothetical protein ARALYDRAFT_479191 [Arabidopsis lyrata subsp. lyrata] gi 297328893 gb EFH59312.1  hypothetical protein ARALYDRAFT_479191 [Arabidopsis lyrata subsp. lyrata]                                                                                                                                                                 | 1099 | 1029 | 0         | 93.6  | 85.2 | 89.4 | hypothetical protein ARALYDRAFT_479191              | gbpln | Arabidopsis lyrata   | AT3G17205.3   Symbols: UPL6   ubiquitin protein ligase 6   chr3:5873528-5881132 FORWARD LENGTH=1029                                                                                                                                                                                                                                              | 1099 | 1029 | 0         | 93.6  | 84.3 | 89.2 |
| Rsa1.0_00629.1.g17129.t1 | gb AAD12028.1  putative non-LTR retroelement reverse transcriptase [Arabidopsis thaliana]                                                                                                                                                                                                                                                                           | 910  | 1447 | 9.00E-95  | 159.0 | 24.7 | 38.7 | putative non-LTR retroelement reverse transcriptase | gbpln | Arabidopsis thaliana | AT3G24255.1   Symbols:   RNA-directed DNA polymerase (reverse transcriptase)-related family protein   chr3:8789471-8793208 FORWARD LENGTH=746                                                                                                                                                                                                    | 910  | 746  | 7.00E-43  | 82.0  | 12.7 | 19.0 |
| Rsa1.0_00629.1.g17130.t1 | emb CAB39638.1  RNA-directed DNA polymerase-like protein [Arabidopsis thaliana] gi 7267666 emb CAB78094.1  RNA-directed DNA polymerase-like protein [Arabidopsis thaliana]                                                                                                                                                                                          | 881  | 1274 | 0         | 144.6 | 56.9 | 69.2 | RNA-directed DNA polymerase-like protein            | gbpln | Arabidopsis thaliana | AT1G43760.1   Symbols:   DNase I-like superfamily protein   chr1:16528880-16531065 REVERSE LENGTH=626                                                                                                                                                                                                                                            | 881  | 626  | 3.00E-37  | 71.1  | 13.1 | 21.5 |

|                          |                                                                                                                                                                                                                                                                                                                                                                                                                                                                                                                                                                                                                                                                                                                                                                                                                                                                                                                                                                                                                                                                                                                                                                                                                                                                                                                                                                                                          |     |     |           |       |      |      |                                        |       |                      |                                                                                                                                                                                                                                                                                                                                                                                                                                                            |     |     |           |       |      |      |
|--------------------------|----------------------------------------------------------------------------------------------------------------------------------------------------------------------------------------------------------------------------------------------------------------------------------------------------------------------------------------------------------------------------------------------------------------------------------------------------------------------------------------------------------------------------------------------------------------------------------------------------------------------------------------------------------------------------------------------------------------------------------------------------------------------------------------------------------------------------------------------------------------------------------------------------------------------------------------------------------------------------------------------------------------------------------------------------------------------------------------------------------------------------------------------------------------------------------------------------------------------------------------------------------------------------------------------------------------------------------------------------------------------------------------------------------|-----|-----|-----------|-------|------|------|----------------------------------------|-------|----------------------|------------------------------------------------------------------------------------------------------------------------------------------------------------------------------------------------------------------------------------------------------------------------------------------------------------------------------------------------------------------------------------------------------------------------------------------------------------|-----|-----|-----------|-------|------|------|
| Rsa1.0_00629.1.g17131.t1 | refXP_002883298.1   basic helix-loop-helix family protein [Arabidopsis lyrata subsp. lyrata]<br>gi 297329138 gb EF59557.1   basic helix-loop-helix family protein [Arabidopsis lyrata subsp. lyrata]                                                                                                                                                                                                                                                                                                                                                                                                                                                                                                                                                                                                                                                                                                                                                                                                                                                                                                                                                                                                                                                                                                                                                                                                     | 337 | 374 | 1.00E-161 | 111.0 | 89.6 | 93.2 | basic helix-loop-helix family protein  | gbpln | Arabidopsis lyrata   | AT3G21330.1   Symbols:   basic helix-loop-helix (bHLH) DNA-binding superfamily protein   chr3:7507720-7508841 FORWARD LENGTH=373                                                                                                                                                                                                                                                                                                                           | 337 | 373 | 1.00E-158 | 110.7 | 90.2 | 93.5 |
| Rsa1.0_00629.1.g17132.t1 | gb EOA32824.1   hypothetical protein CARUB_v10016135mg [Capsella rubella]                                                                                                                                                                                                                                                                                                                                                                                                                                                                                                                                                                                                                                                                                                                                                                                                                                                                                                                                                                                                                                                                                                                                                                                                                                                                                                                                | 890 | 897 | 0         | 100.8 | 76.2 | 86.0 | hypothetical protein CARUB_v10016135mg | gbpln | Capsella rubella     | AT3G21340.1   Symbols:   Leucine-rich repeat protein kinase family protein   chr3:7511848-7515937 REVERSE LENGTH=899                                                                                                                                                                                                                                                                                                                                       | 890 | 899 | 0         | 101.0 | 76.7 | 86.5 |
| Rsa1.0_00629.1.g17133.t1 | refXP_002883299.1   hypothetical protein ARALYDRAFT.479655 [Arabidopsis lyrata subsp. lyrata]<br>gi 297329139 gb EFH59558.1   hypothetical protein ARALYDRAFT.479655 [Arabidopsis lyrata subsp. lyrata]                                                                                                                                                                                                                                                                                                                                                                                                                                                                                                                                                                                                                                                                                                                                                                                                                                                                                                                                                                                                                                                                                                                                                                                                  | 259 | 257 | 1.00E-120 | 99.2  | 85.7 | 92.3 | hypothetical protein ARALYDRAFT.479655 | gbpln | Arabidopsis lyrata   | AT3G21350.1   Symbols: MED6   RNA polymerase transcriptional regulation mediator-related   chr3:7517106-7518587 FORWARD LENGTH=257                                                                                                                                                                                                                                                                                                                         | 259 | 257 | 1.00E-122 | 99.2  | 84.6 | 92.3 |
| Rsa1.0_00629.1.g17134.t1 | refNP_001078196.1   uncharacterized protein [Arabidopsis thaliana]<br>gi 98961873 gb ABF59266.1   unknown protein [Arabidopsis thaliana]<br>gi 332642978 gb AAE76499.1   uncharacterized protein AT3G21352 [Arabidopsis thaliana]                                                                                                                                                                                                                                                                                                                                                                                                                                                                                                                                                                                                                                                                                                                                                                                                                                                                                                                                                                                                                                                                                                                                                                        | 74  | 74  | 1.00E-21  | 100.0 | 74.3 | 82.4 | uncharacterized protein                | gbpln | Arabidopsis thaliana | AT3G21352.1   Symbols:   known protein; FUNCTIONS IN: molecular function unknown; INVOLVED IN: biological process unknown; LOCATED IN: endomembrane system; BEST Arabidopsis thaliana protein match is: unknown protein (TAIR:AT3G21351.1). Has 26 Blast hits to 26 proteins in 5 species: Archae - 0; Bacteria - 0; Metazoa - 0; Fungi - 0; Plants - 26; Viruses - 0; Other Eukaryotes - 0 (source: NCBI BLink).   chr3:7520033-7520360 FORWARD LENGTH=74 | 74  | 74  | 2.00E-24  | 100.0 | 74.3 | 82.4 |
| Rsa1.0_00629.1.g17135.t1 | refNP_188773.1   clavamate synthase-like protein [Arabidopsis thaliana]<br>gi 73921104 sp Q9LIG0.1 Y3136_ARATH RecName: Full=Clavamate synthase-like protein At3g21360<br>gi 56967335 pdb 1Y0Z A Chain A, X-Ray Structure Of Gene Product From Arabidopsis Thaliana At3g21360<br>gi 56967336 pdb 1Y0Z B Chain B, X-Ray Structure Of Gene Product From Arabidopsis Thaliana At3g21360<br>gi 150261485 pdb 2Q4A A Chain A, Ensemble Refinement Of The Protein Crystal Structure Of Gene Product From Arabidopsis Thaliana At3g21360<br>gi 150261486 pdb 2Q4A B Chain B, Ensemble Refinement Of The Protein Crystal Structure Of Gene Product From Arabidopsis Thaliana At3g21360<br>gi 9294683 dbj BAB03049.1   syringomycin biosynthesis enzyme-like protein [Arabidopsis thaliana]<br>gi 26450615 dbj BAC42419.1   unknown protein [Arabidopsis thaliana]<br>gi 182623791 gb ACB88834.1   At3g21360 [Arabidopsis thaliana]<br>gi 332642979 gb AAE76500.1   clavamate synthase-like protein [Arabidopsis thaliana]<br>refNP_188777.1   uncharacterized protein [Arabidopsis thaliana]<br>gi 9294687 dbj BAB03053.1   unnamed protein product [Arabidopsis thaliana]<br>gi 26453072 dbj BAC43612.1   unknown protein [Arabidopsis thaliana]<br>gi 28973457 gb AAO64053.1   unknown protein [Arabidopsis thaliana]<br>gi 332642984 gb AAE76505.1   uncharacterized protein AT3G21400 [Arabidopsis thaliana] | 328 | 330 | 1.00E-172 | 100.6 | 90.5 | 94.8 | clavamate synthase-like protein        | gbpln | Arabidopsis thaliana | AT3G21360.1   Symbols:   2-oxoglutarate (2OG) and Fe(II)-dependent oxygenase superfamily protein   chr3:7522865-7524036 FORWARD LENGTH=330                                                                                                                                                                                                                                                                                                                 | 328 | 330 | 1.00E-175 | 100.6 | 90.5 | 94.8 |
| Rsa1.0_00629.1.g17136.t1 | refNP_188777.1   uncharacterized protein [Arabidopsis thaliana]<br>gi 9294687 dbj BAB03053.1   unnamed protein product [Arabidopsis thaliana]<br>gi 26453072 dbj BAC43612.1   unknown protein [Arabidopsis thaliana]<br>gi 28973457 gb AAO64053.1   unknown protein [Arabidopsis thaliana]<br>gi 332642984 gb AAE76505.1   uncharacterized protein AT3G21400 [Arabidopsis thaliana]                                                                                                                                                                                                                                                                                                                                                                                                                                                                                                                                                                                                                                                                                                                                                                                                                                                                                                                                                                                                                      | 188 | 188 | 5.00E-83  | 100.0 | 83.5 | 89.9 | uncharacterized protein                | gbpln | Arabidopsis thaliana | AT3G21400.1   Symbols:   unknown protein; FUNCTIONS IN: molecular function unknown; INVOLVED IN: N-terminal protein myristoylation; EXPRESSED IN: 22 plant structures; EXPRESSED DURING: 13 growth stages; Has 29 Blast hits to 29 proteins in 12 species: Archae - 0; Bacteria - 0; Metazoa - 2; Fungi - 0; Plants - 27; Viruses - 0; Other Eukaryotes - 0 (source: NCBI BLink).   chr3:7534824-7536293 REVERSE LENGTH=188                                | 188 | 188 | 2.00E-85  | 100.0 | 83.5 | 89.9 |
| Rsa1.0_00629.1.g17137.t1 | #                                                                                                                                                                                                                                                                                                                                                                                                                                                                                                                                                                                                                                                                                                                                                                                                                                                                                                                                                                                                                                                                                                                                                                                                                                                                                                                                                                                                        | #   | #   | #         | #     | #    | #    | -                                      | ----  | ----                 | #                                                                                                                                                                                                                                                                                                                                                                                                                                                          | #   | #   | #         | #     | #    | #    |
| Rsa1.0_00629.1.g17138.t1 | gb EOA30874.1   hypothetical protein CARUB_v10014020mg [Capsella rubella]                                                                                                                                                                                                                                                                                                                                                                                                                                                                                                                                                                                                                                                                                                                                                                                                                                                                                                                                                                                                                                                                                                                                                                                                                                                                                                                                | 363 | 364 | 0         | 100.3 | 92.0 | 95.6 | hypothetical protein CARUB_v10014020mg | gbpln | Capsella rubella     | AT3G21420.1   Symbols:   2-oxoglutarate (2OG) and Fe(II)-dependent oxygenase superfamily protein   chr3:7541579-7543221 FORWARD LENGTH=364                                                                                                                                                                                                                                                                                                                 | 363 | 364 | 0         | 100.3 | 91.7 | 95.3 |

|                          |                                                                                                                                                                                                                                                                                                                                                                                                                                                                                                                                                                                                                                                                                                  |      |      |           |       |      |      |                                              |       |                      |                                                                                                                                                                                                                                                                                                                                                                                                                                                                                       |      |      |           |       |      |      |
|--------------------------|--------------------------------------------------------------------------------------------------------------------------------------------------------------------------------------------------------------------------------------------------------------------------------------------------------------------------------------------------------------------------------------------------------------------------------------------------------------------------------------------------------------------------------------------------------------------------------------------------------------------------------------------------------------------------------------------------|------|------|-----------|-------|------|------|----------------------------------------------|-------|----------------------|---------------------------------------------------------------------------------------------------------------------------------------------------------------------------------------------------------------------------------------------------------------------------------------------------------------------------------------------------------------------------------------------------------------------------------------------------------------------------------------|------|------|-----------|-------|------|------|
| Rsa1.0_00630.1.g17139.t1 | ref XP_002867492.1  hypothetical protein ARALYDRAFT_492028 [Arabidopsis lyrata subsp. lyrata] gi 297313328 gb EFH43751.1  hypothetical protein ARALYDRAFT_492028 [Arabidopsis lyrata subsp. lyrata]                                                                                                                                                                                                                                                                                                                                                                                                                                                                                              | 341  | 337  | 1.00E-161 | 98.8  | 83.0 | 89.1 | hypothetical protein ARALYDRAFT_492028       | gbpln | Arabidopsis lyrata   | AT4G27610.3   Symbols:   unknown protein; FUNCTIONS IN: molecular_function unknown; INVOLVED IN: biological_process unknown; LOCATED IN: cellular_component unknown; BEST Arabidopsis thaliana protein match is: unknown protein (TAIR:AT4G27620.2). Has 1304 Blast hits to 1173 proteins in 200 species: Archae - 14; Bacteria - 115; Metazoa - 628; Fungi - 104; Plants - 95; Viruses - 8; Other Eukaryotes - 340 (source: NCBI BLink).   chr4:13785648-13787332 REVERSE LENGTH=334 | 341  | 334  | 1.00E-152 | 97.9  | 80.6 | 87.4 |
| Rsa1.0_00630.1.g17140.t1 | ref NP_567780.1  pfkB-like carbohydrate kinase family protein [Arabidopsis thaliana] gi 15450507 gb AAK96546.1  AT4g27600/T29A15_90 [Arabidopsis thaliana] gi 16974333 gb AAL31151.1  AT4g27600/T29A15_90 [Arabidopsis thaliana] gi 332659964 gb AEE85364.1  pfkB-like carbohydrate kinase family protein [Arabidopsis thaliana]                                                                                                                                                                                                                                                                                                                                                                 | 404  | 471  | 0         | 116.6 | 89.9 | 93.6 | pfkB-like carbohydrate kinase family protein | gbpln | Arabidopsis thaliana | AT4G27600.1   Symbols: NARA5   pfkB-like carbohydrate kinase family protein   chr4:13782753-13785005 REVERSE LENGTH=471                                                                                                                                                                                                                                                                                                                                                               | 404  | 471  | 0         | 116.6 | 89.9 | 93.6 |
| Rsa1.0_00630.1.g17141.t1 | gb EOA15913.1  hypothetical protein CARUB_v10004004mg [Capsella rubella]                                                                                                                                                                                                                                                                                                                                                                                                                                                                                                                                                                                                                         | 1274 | 1255 | 0         | 98.5  | 72.4 | 82.4 | hypothetical protein CARUB_v10004004mg       | gbpln | Capsella rubella     | AT4G27595.1   Symbols:   Plant protein of unknown function (DUF827)   chr4:13772819-13777128 REVERSE LENGTH=1221                                                                                                                                                                                                                                                                                                                                                                      | 1274 | 1221 | 0         | 95.8  | 73.3 | 81.6 |
| Rsa1.0_00630.1.g17142.t1 | ref XP_002869556.1  hypothetical protein ARALYDRAFT_913778 [Arabidopsis lyrata subsp. lyrata] gi 297315392 gb EFH45815.1  hypothetical protein ARALYDRAFT_913778 [Arabidopsis lyrata subsp. lyrata]                                                                                                                                                                                                                                                                                                                                                                                                                                                                                              | 156  | 161  | 2.00E-66  | 103.2 | 83.3 | 90.4 | hypothetical protein ARALYDRAFT_913778       | gbpln | Arabidopsis lyrata   | AT4G27590.1   Symbols:   Heavy metal transport/detoxification superfamily protein   chr4:13771224-13771790 FORWARD LENGTH=156                                                                                                                                                                                                                                                                                                                                                         | 156  | 156  | 3.00E-64  | 100.0 | 80.8 | 89.1 |
| Rsa1.0_00630.1.g17143.t1 | gb EOA16742.1  hypothetical protein CARUB_v10004943mg [Capsella rubella]                                                                                                                                                                                                                                                                                                                                                                                                                                                                                                                                                                                                                         | 402  | 408  | 0         | 101.5 | 89.6 | 93.3 | hypothetical protein CARUB_v10004943mg       | gbpln | Capsella rubella     | AT4G27585.1   Symbols:   SPFH/Band 7/PHB domain-containing membrane-associated protein family   chr4:13766984-13769832 REVERSE LENGTH=411                                                                                                                                                                                                                                                                                                                                             | 402  | 411  | 0         | 102.2 | 88.3 | 94.0 |
| Rsa1.0_00630.1.g17144.t1 | emb CAB38270.1  putative protein [Arabidopsis thaliana] gi 7269612 emb CAB81408.1  putative protein [Arabidopsis thaliana]                                                                                                                                                                                                                                                                                                                                                                                                                                                                                                                                                                       | 101  | 515  | 3.00E-29  | 509.9 | 78.2 | 83.2 | putative protein                             | gbpln | Arabidopsis thaliana | AT4G27580.1   Symbols:   unknown protein; FUNCTIONS IN: molecular_function unknown; INVOLVED IN: biological_process unknown; LOCATED IN: mitochondrion, cell wall; EXPRESSED IN: 9 plant structures; EXPRESSED DURING: 6 growth stages; Has 30201 Blast hits to 17322 proteins in 780 species: Archae - 12; Bacteria - 1396; Metazoa - 17338; Fungi - 3422; Plants - 5037; Viruses - 0; Other Eukaryotes - 2996 (source: NCBI BLink).   chr4:13765832-13766306 REVERSE LENGTH=104     | 101  | 104  | 2.00E-31  | 103.0 | 78.2 | 83.2 |
| Rsa1.0_00630.1.g17145.t1 | gb EOA17344.1  hypothetical protein CARUB_v10005627mg [Capsella rubella]                                                                                                                                                                                                                                                                                                                                                                                                                                                                                                                                                                                                                         | 245  | 238  | 1.00E-114 | 97.1  | 88.6 | 93.5 | hypothetical protein CARUB_v10005627mg       | gbpln | Capsella rubella     | AT4G27540.1   Symbols: PRA1.H   prenylated RAB acceptor 1.H   chr4:13753449-13754660 REVERSE LENGTH=241                                                                                                                                                                                                                                                                                                                                                                               | 245  | 241  | 1.00E-116 | 98.4  | 89.8 | 94.3 |
| Rsa1.0_00630.1.g17146.t1 | ref NP_194482.1  early nodulin-like protein 2 [Arabidopsis thaliana] gi 34395735 sp Q9T076.1 ENL2_ARATH RecName: Full=Early nodulin-like protein 2; AltName: Full=Phycocyanin-like protein; Flags: Precursor gi 11762218 gb AAG40387.1 AF325035.1 AT4g27520 [Arabidopsis thaliana] gi 4469003 emb CAB38264.1  putative protein [Arabidopsis thaliana] gi 7269606 emb CAB81402.1  putative protein [Arabidopsis thaliana] gi 23397249 gb AAN31906.1  unknown protein [Arabidopsis thaliana] gi 24417234 gb AAN60227.1  unknown [Arabidopsis thaliana] gi 56381997 gb AAV85717.1  At4g27520 [Arabidopsis thaliana] gi 332659953 gb AEE85353.1  early nodulin-like protein 2 [Arabidopsis thaliana] | 316  | 349  | 5.00E-93  | 110.4 | 69.9 | 77.2 | early nodulin-like protein 2                 | gbpln | Arabidopsis thaliana | AT4G27520.1   Symbols: ENODL2, AENODL2   early nodulin-like protein 2   chr4:13750668-13751819 REVERSE LENGTH=349                                                                                                                                                                                                                                                                                                                                                                     | 316  | 349  | 1.00E-95  | 110.4 | 69.9 | 77.2 |
| Rsa1.0_00630.1.g17147.t1 | #                                                                                                                                                                                                                                                                                                                                                                                                                                                                                                                                                                                                                                                                                                | #    | #    | #         | #     | #    | -    | ----                                         | ----  | ----                 | #                                                                                                                                                                                                                                                                                                                                                                                                                                                                                     | #    | #    | #         | #     | #    |      |
| Rsa1.0_00630.1.g17148.t1 | ref XP_002867500.1  hypothetical protein ARALYDRAFT_492043 [Arabidopsis lyrata subsp. lyrata] gi 297313336 gb EFH43759.1  hypothetical protein ARALYDRAFT_492043 [Arabidopsis lyrata subsp. lyrata]                                                                                                                                                                                                                                                                                                                                                                                                                                                                                              | 707  | 733  | 0         | 103.7 | 69.9 | 82.3 | hypothetical protein ARALYDRAFT_492043       | gbpln | Arabidopsis lyrata   | AT4G27510.1   Symbols:   unknown protein; Has 25 Blast hits to 23 proteins in 8 species: Archae - 0; Bacteria - 0; Metazoa - 0; Fungi - 0; Plants - 25; Viruses - 0; Other Eukaryotes - 0 (source: NCBI BLink).   chr4:13746284-13748996 REVERSE LENGTH=728                                                                                                                                                                                                                           | 707  | 728  | 0         | 103.0 | 68.5 | 81.8 |

|                          |                                                                                                                                                                                                                                                                                                                                                                                                                                                                                                                                                                                                                                                                                                                                                                                                                                                                                            |      |      |           |       |      |      |                                                                            |       |                      |                                                                                                                                                 |      |     |           |       |      |      |
|--------------------------|--------------------------------------------------------------------------------------------------------------------------------------------------------------------------------------------------------------------------------------------------------------------------------------------------------------------------------------------------------------------------------------------------------------------------------------------------------------------------------------------------------------------------------------------------------------------------------------------------------------------------------------------------------------------------------------------------------------------------------------------------------------------------------------------------------------------------------------------------------------------------------------------|------|------|-----------|-------|------|------|----------------------------------------------------------------------------|-------|----------------------|-------------------------------------------------------------------------------------------------------------------------------------------------|------|-----|-----------|-------|------|------|
| Rsa1.0_00630.1.g17149.t2 | ref[XP_002869559.1] hypothetical protein ARALYDRAFT_328945 [Arabidopsis lyrata subsp. lyrata] gi 297315395 gb EFH45818.1                                                                                                                                                                                                                                                                                                                                                                                                                                                                                                                                                                                                                                                                                                                                                                   | 579  | 617  | 0         | 106.6 | 77.0 | 85.5 | hypothetical protein ARALYDRAFT_328945                                     | gbpln | Arabidopsis lyrata   | AT4G27500.1   Symbols: PPI1   proton pump interactor 1   chr4:13743614-13745900 FORWARD LENGTH=612                                              | 579  | 612 | 0         | 105.7 | 73.6 | 81.5 |
| Rsa1.0_00630.1.g17150.t1 | hypothetical protein ARALYDRAFT_328945 [Arabidopsis lyrata subsp. lyrata] ref[NP_194479.2] 3'-5'-exoribonuclease family protein [Arabidopsis thaliana] gi 124300968 gb ABN04736.1  At4g27490 [Arabidopsis thaliana] gi 124301080 gb ABN04792.1  At4g27490 [Arabidopsis thaliana] gi 332659949 gb AEE85349.1  3'-5'-exoribonuclease family protein [Arabidopsis thaliana] ref[NP_194478.3] Core-2/1-branching beta-1,6-N-acetylglucosaminyltransferase family protein [Arabidopsis thaliana] gi 186514118 ref[NP_001119069.1] Core-2/1-branching beta-1,6-N-acetylglucosaminyltransferase family protein [Arabidopsis thaliana] gi 332659947 gb AEE85347.1  Core-2/1-branching beta-1,6-N-acetylglucosaminyltransferase family protein [Arabidopsis thaliana] gi 332659948 gb AEE85348.1  Core-2/1-branching beta-1,6-N-acetylglucosaminyltransferase family protein [Arabidopsis thaliana] | 257  | 256  | 1.00E-135 | 99.6  | 92.2 | 94.9 | 3'-5'-exoribonuclease family protein                                       | gbpln | Arabidopsis thaliana | AT4G27490.1   Symbols:   3'-5'-exoribonuclease family protein   chr4:13739961-13741647 FORWARD LENGTH=256                                       | 257  | 256 | 1.00E-138 | 99.6  | 92.2 | 94.9 |
| Rsa1.0_00630.1.g17151.t2 | ref[NP_194478.3] Core-2/1-branching beta-1,6-N-acetylglucosaminyltransferase family protein [Arabidopsis thaliana] gi 186514118 ref[NP_001119069.1] Core-2/1-branching beta-1,6-N-acetylglucosaminyltransferase family protein [Arabidopsis thaliana] gi 332659947 gb AEE85347.1  Core-2/1-branching beta-1,6-N-acetylglucosaminyltransferase family protein [Arabidopsis thaliana] gi 332659948 gb AEE85348.1  Core-2/1-branching beta-1,6-N-acetylglucosaminyltransferase family protein [Arabidopsis thaliana] ref[XP_002869561.1] zinc finger family protein [Arabidopsis lyrata subsp. lyrata] gi 297315397 gb EFH45820.1  zinc finger family protein [Arabidopsis lyrata subsp. lyrata]                                                                                                                                                                                              | 350  | 421  | 1.00E-141 | 120.3 | 75.1 | 83.4 | Core-2/1-branching beta-1,6-N-acetylglucosaminyltransferase family protein | gbpln | Arabidopsis thaliana | AT4G27480.2   Symbols:   Core-2/1-branching beta-1,6-N-acetylglucosaminyltransferase family protein   chr4:13736835-13738317 REVERSE LENGTH=421 | 350  | 421 | 1.00E-144 | 120.3 | 75.1 | 83.4 |
| Rsa1.0_00630.1.g17152.t1 | ref[XP_002869561.1] zinc finger family protein [Arabidopsis lyrata subsp. lyrata] gi 297315397 gb EFH45820.1  zinc finger family protein [Arabidopsis lyrata subsp. lyrata]                                                                                                                                                                                                                                                                                                                                                                                                                                                                                                                                                                                                                                                                                                                | 248  | 243  | 1.00E-106 | 98.0  | 79.4 | 83.9 | zinc finger family protein                                                 | gbpln | Arabidopsis lyrata   | AT4G27470.1   Symbols: ATRMA3, RMA3   RING membrane-anchor 3   chr4:13735576-13736307 FORWARD LENGTH=243                                        | 248  | 243 | 1.00E-108 | 98.0  | 79.0 | 83.5 |
| Rsa1.0_00630.1.g17153.t1 | ref[XP_002869562.1] hypothetical protein ARALYDRAFT_328949 [Arabidopsis lyrata subsp. lyrata] gi 297315398 gb EFH45821.1  hypothetical protein ARALYDRAFT_328949 [Arabidopsis lyrata subsp. lyrata]                                                                                                                                                                                                                                                                                                                                                                                                                                                                                                                                                                                                                                                                                        | 386  | 394  | 1.00E-165 | 102.1 | 79.5 | 88.3 | hypothetical protein ARALYDRAFT_328949                                     | gbpln | Arabidopsis lyrata   | AT4G27460.1   Symbols:   Cystathionine beta-synthase (CBS) family protein   chr4:13732939-13734263 FORWARD LENGTH=391                           | 386  | 391 | 1.00E-160 | 101.3 | 77.7 | 87.8 |
| Rsa1.0_00630.1.g17154.t1 | gb EOA14968.1  hypothetical protein CARUB_v10028315mg [Capsella rubella]                                                                                                                                                                                                                                                                                                                                                                                                                                                                                                                                                                                                                                                                                                                                                                                                                   | 143  | 536  | 1.00E-27  | 374.8 | 44.1 | 51.0 | hypothetical protein CARUB_v10028315mg                                     | gbpln | Capsella rubella     | AT5G49950.1   Symbols:   alpha/beta-Hydrolases superfamily protein   chr5:20319871-20323552 REVERSE LENGTH=537                                  | 143  | 537 | 3.00E-23  | 375.5 | 46.9 | 51.0 |
| Rsa1.0_00630.1.g17155.t1 | gb AAG51228.1 AC035249_3 Tam3-like transposon protein; 93317-95488 [Arabidopsis thaliana] gi 12323055 gb AAG51515.1 AC068324_3 hAT-element transposase, putative [Arabidopsis thaliana] emb CAB39638.1  RNA-directed DNA polymerase-like protein [Arabidopsis thaliana] gi 7267666 emb CAB78094.1  RNA-directed DNA polymerase-like protein [Arabidopsis thaliana]                                                                                                                                                                                                                                                                                                                                                                                                                                                                                                                         | 715  | 723  | 0         | 101.1 | 55.4 | 73.0 | Tam3-like transposon protein; 93317-95488                                  | gbpln | Arabidopsis thaliana | AT3G42170.1   Symbols:   BED zinc finger hAT family dimerisation domain   chr3:14321838-14323928 FORWARD LENGTH=696                             | 715  | 696 | 3.00E-50  | 97.3  | 23.4 | 42.5 |
| Rsa1.0_00630.1.g17156.t1 | emb CAB39638.1  RNA-directed DNA polymerase-like protein [Arabidopsis thaliana] gi 7267666 emb CAB78094.1  RNA-directed DNA polymerase-like protein [Arabidopsis thaliana]                                                                                                                                                                                                                                                                                                                                                                                                                                                                                                                                                                                                                                                                                                                 | 1013 | 1274 | 0         | 125.8 | 48.5 | 64.3 | RNA-directed DNA polymerase-like protein                                   | gbpln | Arabidopsis thaliana | AT4G29090.1   Symbols:   Ribonuclease H-like superfamily protein   chr4:14333528-14335255 FORWARD LENGTH=575                                    | 1013 | 575 | 4.00E-67  | 56.8  | 16.4 | 26.0 |
| Rsa1.0_00630.1.g17157.t1 | # # # # # # # # # #                                                                                                                                                                                                                                                                                                                                                                                                                                                                                                                                                                                                                                                                                                                                                                                                                                                                        |      |      |           |       |      |      |                                                                            |       |                      |                                                                                                                                                 |      |     |           |       |      |      |
| Rsa1.0_00630.1.g17158.t1 | ref[NP_567775.1] aluminum induced protein with YGL and LRDR motifs [Arabidopsis thaliana] gi 297799238 ref[XP_002867503.1] hypothetical protein ARALYDRAFT_913794 [Arabidopsis lyrata subsp. lyrata] gi 14030723 gb AAK53036.1 AF375452.1 AT4g27450/F27G19_50 [Arabidopsis thaliana] gi 15028057 gb AAK76559.1  unknown protein [Arabidopsis thaliana] gi 20259059 gb AAM14245.1  unknown protein [Arabidopsis thaliana] gi 21593019 gb AAM64968.1  unknown protein [Arabidopsis thaliana] gi 297313339 gb EFH43762.1  hypothetical protein ARALYDRAFT_913794 [Arabidopsis lyrata subsp. lyrata] gi 332659944 gb AEE85344.1  aluminum induced protein with YGL and LRDR motifs [Arabidopsis thaliana]                                                                                                                                                                                      | 250  | 250  | 1.00E-142 | 100.0 | 96.8 | 98.4 | aluminum induced protein with YGL and LRDR motifs                          | gbpln | Arabidopsis lyrata   | AT4G27450.1   Symbols:   Aluminium induced protein with YGL and LRDR motifs   chr4:13727665-13728683 REVERSE LENGTH=250                         | 250  | 250 | 1.00E-144 | 100.0 | 96.8 | 98.4 |

|                          |                                                                                                                                                                                                                                                                                                                                                                                                                                                                                                                                                                               |      |      |           |       |      |      |                                          |       |                      |                                                                                                                                         |      |      |           |       |      |      |
|--------------------------|-------------------------------------------------------------------------------------------------------------------------------------------------------------------------------------------------------------------------------------------------------------------------------------------------------------------------------------------------------------------------------------------------------------------------------------------------------------------------------------------------------------------------------------------------------------------------------|------|------|-----------|-------|------|------|------------------------------------------|-------|----------------------|-----------------------------------------------------------------------------------------------------------------------------------------|------|------|-----------|-------|------|------|
| Rsa1.0_00630.1.g17159.t1 | ref XP_002869563.1  hypothetical protein ARALYDRAFT_492051 [Arabidopsis lyrata subsp. lyrata] gi 297315399 gb EFH45822.1  hypothetical protein ARALYDRAFT_492051 [Arabidopsis lyrata subsp. lyrata]                                                                                                                                                                                                                                                                                                                                                                           | 398  | 401  | 0         | 100.8 | 95.2 | 98.0 | hypothetical protein ARALYDRAFT_492051   | gbpln | Arabidopsis lyrata   | AT4G27440.2   Symbols: PORB   protochlorophyllide oxidoreductase B   chr4:13725648-13727107 FORWARD LENGTH=401                          | 398  | 401  | 0         | 100.8 | 94.7 | 97.2 |
| Rsa1.0_00630.1.g17160.t1 | gb EOA17531.1  hypothetical protein CARUB_v10005876mg [Capsella rubella]                                                                                                                                                                                                                                                                                                                                                                                                                                                                                                      | 173  | 173  | 2.00E-92  | 100.0 | 96.5 | 98.3 | hypothetical protein CARUB_v10005876mg   | gbpln | Capsella rubella     | AT4G27435.1   Symbols:   Protein of unknown function (DUF218)   chr4:13723903-13724872 FORWARD LENGTH=173                               | 173  | 173  | 1.00E-94  | 100.0 | 95.4 | 98.8 |
| Rsa1.0_00630.1.g17161.t1 | ref NP_194473.1  COP1-interacting protein 7 [Arabidopsis thaliana] gi 186514102 ref NP_001119068.1  COP1-interacting protein 7 [Arabidopsis thaliana] gi 3327868 dbj BAA31738.1  COP1-Interacting Protein 7 (CIP7) [Arabidopsis thaliana] gi 4972068 emb CAB43875.1  COP1-interacting protein 7 (CIP7) [Arabidopsis thaliana] gi 7269597 emb CAB81393.1  COP1-interacting protein 7 (CIP7) [Arabidopsis thaliana] gi 332659939 gb AEE85339.1  COP1-interacting protein 7 [Arabidopsis thaliana] gi 332659940 gb AEE85340.1  COP1-interacting protein 7 [Arabidopsis thaliana] | 1052 | 1058 | 0         | 100.6 | 76.0 | 83.9 | COP1-interacting protein 7               | gbpln | Arabidopsis thaliana | AT4G27430.2   Symbols: CIP7   COP1-interacting protein 7   chr4:13718817-13722736 FORWARD LENGTH=1058                                   | 1052 | 1058 | 0         | 100.6 | 76.0 | 83.9 |
| Rsa1.0_00631.1.g17162.t1 | ref XP_002881104.1  hypothetical protein ARALYDRAFT_481948 [Arabidopsis lyrata subsp. lyrata] gi 297326943 gb EFH57363.1  hypothetical protein ARALYDRAFT_481948 [Arabidopsis lyrata subsp. lyrata]                                                                                                                                                                                                                                                                                                                                                                           | 425  | 434  | 0         | 102.1 | 85.2 | 91.1 | hypothetical protein ARALYDRAFT_481948   | gbpln | Arabidopsis lyrata   | AT2G30360.1   Symbols: CIPK11, PKS5, SIP4, SNRK3.22   SOS3-interacting protein 4   chr2:12937265-12938572 REVERSE LENGTH=435            | 425  | 435  | 0         | 102.4 | 84.2 | 90.8 |
| Rsa1.0_00631.1.g17163.t5 | emb CAB39638.1  RNA-directed DNA polymerase-like protein [Arabidopsis thaliana] gi 7267666 emb CAB78094.1  RNA-directed DNA polymerase-like protein [Arabidopsis thaliana]                                                                                                                                                                                                                                                                                                                                                                                                    | 2451 | 1274 | 0         | 52.0  | 23.4 | 32.5 | RNA-directed DNA polymerase-like protein | gbpln | Arabidopsis thaliana | AT3G42170.1   Symbols:   BED zinc finger :hAT family dimerisation domain   chr3:14321838-14323928 FORWARD LENGTH=696                    | 2451 | 696  | 2.00E-65  | 28.4  | 7.5  | 12.8 |
| Rsa1.0_00631.1.g17164.t1 | gb EOA28561.1  hypothetical protein CARUB_v10024779mg [Capsella rubella]                                                                                                                                                                                                                                                                                                                                                                                                                                                                                                      | 135  | 160  | 2.00E-44  | 118.5 | 73.3 | 79.3 | hypothetical protein CARUB_v10024779mg   | gbpln | Capsella rubella     | AT2G30370.2   Symbols: CHAL, EPFL6   allergen-related   chr2:12940577-12942167 REVERSE LENGTH=156                                       | 135  | 156  | 9.00E-47  | 115.6 | 76.3 | 84.4 |
| Rsa1.0_00631.1.g17165.t1 | ref XP_002879262.1  hypothetical protein ARALYDRAFT_902024 [Arabidopsis lyrata subsp. lyrata] gi 297325101 gb EFH55521.1  hypothetical protein ARALYDRAFT_902024 [Arabidopsis lyrata subsp. lyrata]                                                                                                                                                                                                                                                                                                                                                                           | 69   | 420  | 2.00E-18  | 608.7 | 76.8 | 82.6 | hypothetical protein ARALYDRAFT_902024   | gbpln | Arabidopsis lyrata   | #                                                                                                                                       | #    | #    | #         | #     | #    | #    |
| Rsa1.0_00631.1.g17166.t1 | gb EOA27511.1  hypothetical protein CARUB_v10023651mg [Capsella rubella]                                                                                                                                                                                                                                                                                                                                                                                                                                                                                                      | 316  | 320  | 1.00E-102 | 101.3 | 71.2 | 81.0 | hypothetical protein CARUB_v10023651mg   | gbpln | Capsella rubella     | AT2G30400.1   Symbols: ATOFP2, OFP2   ovate family protein 2   chr2:12956592-12957554 FORWARD LENGTH=320                                | 316  | 320  | 5.00E-97  | 101.3 | 70.3 | 80.7 |
| Rsa1.0_00631.1.g17167.t1 | ref NP_181887.1  chitinase-like protein [Arabidopsis thaliana] gi 2281111 gb AAB64047.1  putative endochitinase [Arabidopsis thaliana] gi 20196867 gb AAM14810.1  putative endochitinase [Arabidopsis thaliana] gi 32815951 gb AAP88360.1  At2g43590 [Arabidopsis thaliana] gi 110736333 dbj BAF00136.1  putative endochitinase [Arabidopsis thaliana] gi 330255199 gb AEC10293.1  chitinase-like protein [Arabidopsis thaliana]                                                                                                                                              | 272  | 264  | 1.00E-125 | 97.1  | 81.3 | 84.9 | chitinase-like protein                   | gbpln | Arabidopsis thaliana | AT2G43590.1   Symbols:   Chitinase family protein   chr2:18081592-18082749 REVERSE LENGTH=264                                           | 272  | 264  | 1.00E-127 | 97.1  | 81.3 | 84.9 |
| Rsa1.0_00631.1.g17168.t1 | gb ACP30609.1  disease resistance protein [Brassica rapa subsp. pekinensis]                                                                                                                                                                                                                                                                                                                                                                                                                                                                                                   | 1622 | 2726 | 0         | 168.1 | 52.8 | 69.5 | disease resistance protein               | gbpln | Brassica rapa        | ATMG00860.1   Symbols: ORF158   DNA/RNA polymerases superfamily protein   chrM:235916-236392 FORWARD LENGTH=158                         | 1622 | 158  | 4.00E-36  | 9.7   | 4.4  | 5.3  |
| Rsa1.0_00631.1.g17169.t1 | gb ACP30591.1  disease resistance protein [Brassica rapa subsp. pekinensis]                                                                                                                                                                                                                                                                                                                                                                                                                                                                                                   | 321  | 1555 | 2.00E-23  | 484.4 | 19.0 | 25.5 | disease resistance protein               | gbpln | Brassica rapa        | AT4G09490.1   Symbols:   Polynucleotidyl transferase, ribonuclease H-like superfamily protein   chr4:6015583-6016575 REVERSE LENGTH=170 | 321  | 170  | 1.00E-17  | 53.0  | 15.3 | 23.7 |
| Rsa1.0_00631.1.g17170.t1 | gb EOA27407.1  hypothetical protein CARUB_v10023541mg [Capsella rubella]                                                                                                                                                                                                                                                                                                                                                                                                                                                                                                      | 91   | 349  | 9.00E-22  | 383.5 | 61.5 | 72.5 | hypothetical protein CARUB_v10023541mg   | gbpln | Capsella rubella     | AT2G30440.1   Symbols: TPP   thylakoid processing peptide   chr2:12973244-12975027 FORWARD LENGTH=340                                   | 91   | 340  | 7.00E-24  | 373.6 | 61.5 | 71.4 |

|                          |                                                                                                                                                                                                                                                                                                                                                                                                                                                                                                                                                                                                                                                                                                                                                                                                                                                                                                                                   |      |      |           |       |      |      |                                             |       |                      |                                                                                                                                                                                                                                                                                                                                                                                                                                                              |      |      |           |       |      |      |
|--------------------------|-----------------------------------------------------------------------------------------------------------------------------------------------------------------------------------------------------------------------------------------------------------------------------------------------------------------------------------------------------------------------------------------------------------------------------------------------------------------------------------------------------------------------------------------------------------------------------------------------------------------------------------------------------------------------------------------------------------------------------------------------------------------------------------------------------------------------------------------------------------------------------------------------------------------------------------|------|------|-----------|-------|------|------|---------------------------------------------|-------|----------------------|--------------------------------------------------------------------------------------------------------------------------------------------------------------------------------------------------------------------------------------------------------------------------------------------------------------------------------------------------------------------------------------------------------------------------------------------------------------|------|------|-----------|-------|------|------|
| Rsa1.0_00632.1.g17171.t1 | ref[XP_002864881.1] hypothetical protein ARALYDRAFT_496593 [Arabidopsis lyrata subsp. lyrata] gi 297310716 gb EFH41140.1                                                                                                                                                                                                                                                                                                                                                                                                                                                                                                                                                                                                                                                                                                                                                                                                          | 218  | 357  | 1.00E-105 | 163.8 | 90.8 | 95.0 | hypothetical protein ARALYDRAFT_496593      | gbpln | Arabidopsis lyrata   | AT5G63990.1   Symbols: Inositol monophosphatase family protein   chr5:25613387-25615736 FORWARD LENGTH=357                                                                                                                                                                                                                                                                                                                                                   | 218  | 357  | 1.00E-106 | 163.8 | 90.4 | 94.0 |
| Rsa1.0_00632.1.g17172.t1 | hypothetical protein ARALYDRAFT_496593 [Arabidopsis lyrata subsp. lyrata] ref[NP_201205.1] SAL2 phosphatase [Arabidopsis thaliana] gi 34395614 sp O49623.1 DPNP2_ARAT H RecName: Full=SAL2 phosphatase; AltName: Full=3'(2'),5'-bisphosphate nucleotidase 2; AltName: Full=3'(2'),5'-bisphosphonucleoside 3'(2')-phosphohydrolase 2; AltName: Full=DPNPase 2; AltName: Full=Inositol polyphosphate 1-phosphatase 2; Short=IPase 2; AltName: Full=Inositol-1,4-bisphosphate 1-phosphatase 2 gi 2765667 emb CAB05889.1  3'(2'),5'-bisphosphate nucleotidase [Arabidopsis thaliana] gi 8777313 dbj BAA96903.1  3'(2'),5'-bisphosphate nucleotidase [Arabidopsis thaliana] gi 17979307 gb AAL49879.1  putative 3(2),5-bisphosphate nucleotidase [Arabidopsis thaliana] gi 20466007 gb AM20225.1  putative 3(2),5-bisphosphate nucleotidase [Arabidopsis thaliana] gi 332010445 gb AED97828.1  SAL2 phosphatase [Arabidopsis thaliana] | 355  | 347  | 1.00E-167 | 97.7  | 82.8 | 89.6 | SAL2 phosphatase                            | gbpln | Arabidopsis thaliana | AT5G64000.1   Symbols: SAL2, ATSAL2   Inositol monophosphatase family protein   chr5:25616664-25618478 FORWARD LENGTH=347                                                                                                                                                                                                                                                                                                                                    | 355  | 347  | 1.00E-169 | 97.7  | 82.8 | 89.6 |
| Rsa1.0_00632.1.g17173.t1 | ref[XP_002866586.1] hypothetical protein ARALYDRAFT_496595 [Arabidopsis lyrata subsp. lyrata] gi 297312421 gb EFH42845.1                                                                                                                                                                                                                                                                                                                                                                                                                                                                                                                                                                                                                                                                                                                                                                                                          | 233  | 236  | 1.00E-101 | 101.3 | 81.1 | 89.3 | hypothetical protein ARALYDRAFT_496595      | gbpln | Arabidopsis lyrata   | AT5G64010.1   Symbols: unknown protein; FUNCTIONS IN: molecular function unknown; INVOLVED IN: biological process unknown; LOCATED IN: cellular component unknown; EXPRESSED IN: 23 plant structures; EXPRESSED DURING: 13 growth stages; Has 34 Blast hits to 34 proteins in 12 species: Archae - 0; Bacteria - 0; Metazoa - 0; Fungi - 0; Plants - 34; Viruses - 0; Other Eukaryotes - 0 (source: NCBI BLINK).   chr5:25618810-25620179 REVERSE LENGTH=236 | 233  | 236  | 1.00E-100 | 101.3 | 79.4 | 87.1 |
| Rsa1.0_00632.1.g17174.t1 | hypothetical protein ARALYDRAFT_496595 [Arabidopsis lyrata subsp. lyrata] gb[EOA14829.1] hypothetical protein CARUB_v10028139mg [Capsella rubella]                                                                                                                                                                                                                                                                                                                                                                                                                                                                                                                                                                                                                                                                                                                                                                                | 976  | 817  | 0         | 83.7  | 65.6 | 70.3 | hypothetical protein CARUB_v10028139mg      | gbpln | Capsella rubella     | AT5G64030.1   Symbols: S-adenosyl-L-methionine-dependent methyltransferases superfamily protein   chr5:25624965-25628257 FORWARD LENGTH=829                                                                                                                                                                                                                                                                                                                  | 976  | 829  | 0         | 84.9  | 63.8 | 68.2 |
| Rsa1.0_00632.1.g17175.t1 | ref[XP_002866588.1] photosystem I reaction center subunit psi-N [Arabidopsis lyrata subsp. lyrata] gi 297312423 gb EFH42847.1                                                                                                                                                                                                                                                                                                                                                                                                                                                                                                                                                                                                                                                                                                                                                                                                     | 167  | 171  | 6.00E-83  | 102.4 | 92.8 | 96.4 | photosystem I reaction center subunit psi-N | gbpln | Arabidopsis lyrata   | AT5G64040.1   Symbols: PSAN   photosystem I reaction center subunit PSI-N, chloroplast, putative / PSI-N, putative (PSAN)   chr5:25628724-25629409 REVERSE LENGTH=171                                                                                                                                                                                                                                                                                        | 167  | 171  | 5.00E-85  | 102.4 | 92.2 | 95.8 |
| Rsa1.0_00632.1.g17176.t3 | photosystem I reaction center subunit psi-N [Arabidopsis lyrata subsp. lyrata] gb[EOA14683.1] hypothetical protein CARUB_v10027955mg [Capsella rubella]                                                                                                                                                                                                                                                                                                                                                                                                                                                                                                                                                                                                                                                                                                                                                                           | 542  | 570  | 0         | 105.2 | 93.9 | 96.7 | hypothetical protein CARUB_v10027955mg      | gbpln | Capsella rubella     | AT5G64050.1   Symbols: ATERS, OVA3, ERS   glutamate tRNA synthetase   chr5:25630196-25633099 REVERSE LENGTH=570                                                                                                                                                                                                                                                                                                                                              | 542  | 570  | 0         | 105.2 | 93.0 | 95.9 |
| Rsa1.0_00632.1.g17177.t1 | gb[EOA13578.1] hypothetical protein CARUB_v10026643mg [Capsella rubella]                                                                                                                                                                                                                                                                                                                                                                                                                                                                                                                                                                                                                                                                                                                                                                                                                                                          | 170  | 364  | 6.00E-38  | 214.1 | 43.5 | 45.3 | hypothetical protein CARUB_v10026643mg      | gbpln | Capsella rubella     | AT5G64060.1   Symbols: anac103, NAC103   NAC domain containing protein 103   chr5:25633818-25635152 REVERSE LENGTH=356                                                                                                                                                                                                                                                                                                                                       | 170  | 356  | 3.00E-39  | 209.4 | 42.4 | 45.3 |
| Rsa1.0_00632.1.g17178.t2 | ref[XP_002866591.1] phosphatidylinositol 4-kinase [Arabidopsis lyrata subsp. lyrata] gi 297312426 gb EFH42850.1                                                                                                                                                                                                                                                                                                                                                                                                                                                                                                                                                                                                                                                                                                                                                                                                                   | 1153 | 1123 | 0         | 97.4  | 89.2 | 91.9 | phosphatidylinositol 4-kinase               | gbpln | Arabidopsis lyrata   | AT5G64070.1   Symbols: PI-4KBETA1, PI4KBETA1   phosphatidylinositol 4-OH kinase beta 1   chr5:25637492-25643902 REVERSE LENGTH=1121                                                                                                                                                                                                                                                                                                                          | 1153 | 1121 | 0         | 97.2  | 88.7 | 91.9 |
| Rsa1.0_00632.1.g17179.t1 | phosphatidylinositol 4-kinase [Arabidopsis lyrata subsp. lyrata]                                                                                                                                                                                                                                                                                                                                                                                                                                                                                                                                                                                                                                                                                                                                                                                                                                                                  | #    | #    | #         | #     | #    | #    | -                                           | ----  | ----                 | #                                                                                                                                                                                                                                                                                                                                                                                                                                                            | #    | #    | #         | #     | #    | #    |

|                          |                                                                                                                                                                                                                                                                                                                                                                                                                                                                                                                                                                                                                                                                                                                                                                                                                                                                                                                                                                                                                                                                |     |      |           |       |      |      |                                                  |       |                      |                                                                                                                                                                |     |     |           |       |      |      |   |
|--------------------------|----------------------------------------------------------------------------------------------------------------------------------------------------------------------------------------------------------------------------------------------------------------------------------------------------------------------------------------------------------------------------------------------------------------------------------------------------------------------------------------------------------------------------------------------------------------------------------------------------------------------------------------------------------------------------------------------------------------------------------------------------------------------------------------------------------------------------------------------------------------------------------------------------------------------------------------------------------------------------------------------------------------------------------------------------------------|-----|------|-----------|-------|------|------|--------------------------------------------------|-------|----------------------|----------------------------------------------------------------------------------------------------------------------------------------------------------------|-----|-----|-----------|-------|------|------|---|
| Rsa1.0_00632.1.g17180.t1 | refNP_568984.1   Non-specific lipid-transfer protein-like protein [Arabidopsis thaliana] gi 75161488 sp Q8VY19.1 NLT5_ARATH RecName: Full=Non-specific lipid-transfer protein-like protein At5g64080; Flags: Precursor gi 17979494 gb AAL50083.1   AT5g64080/MHJ24.6 [Arabidopsis thaliana] gi 20147301 gb AAM10364.1   AT5g64080/MHJ24.6 [Arabidopsis thaliana] gi 332010454 gb AED97837.1   Non-specific lipid-transfer protein-like protein [Arabidopsis thaliana]                                                                                                                                                                                                                                                                                                                                                                                                                                                                                                                                                                                          | 183 | 182  | 2.00E-56  | 99.5  | 70.5 | 80.3 | Non-specific lipid-transfer protein-like protein | gbpln | Arabidopsis thaliana | AT5G64080.1   Symbols:   Bifunctional inhibitor/lipid-transfer protein/seed storage 2S albumin superfamily protein   chr5:25645475-25646638 REVERSE LENGTH=182 | 183 | 182 | 7.00E-59  | 99.5  | 70.5 | 80.3 |   |
| Rsa1.0_00632.1.g17181.t1 | dbj BAJ34593.1   unnamed protein product [Thellungiella halophila]                                                                                                                                                                                                                                                                                                                                                                                                                                                                                                                                                                                                                                                                                                                                                                                                                                                                                                                                                                                             | 334 | 333  | 1.00E-169 | 99.7  | 89.5 | 93.7 | unnamed protein product                          | ----  | ----                 | AT5G64100.1   Symbols:   Peroxidase superfamily protein   chr5:25650824-25652062 REVERSE LENGTH=331                                                            | 334 | 331 | 1.00E-156 | 99.1  | 85.9 | 91.0 |   |
| Rsa1.0_00632.1.g17182.t1 | gb EOA14660.1   hypothetical protein CARUB_v10027924mg [Capsella rubella]                                                                                                                                                                                                                                                                                                                                                                                                                                                                                                                                                                                                                                                                                                                                                                                                                                                                                                                                                                                      | 333 | 332  | 1.00E-159 | 99.7  | 82.3 | 88.9 | hypothetical protein CARUB_v10027924mg           | gbpln | Capsella rubella     | AT5G64110.1   Symbols:   Peroxidase superfamily protein   chr5:25654575-25655946 REVERSE LENGTH=330                                                            | 333 | 330 | 1.00E-156 | 99.1  | 81.4 | 86.2 |   |
| Rsa1.0_00632.1.g17183.t1 | gb EOA13703.1   hypothetical protein CARUB_v10026774mg [Capsella rubella]                                                                                                                                                                                                                                                                                                                                                                                                                                                                                                                                                                                                                                                                                                                                                                                                                                                                                                                                                                                      | 329 | 328  | 1.00E-166 | 99.7  | 87.5 | 92.7 | hypothetical protein CARUB_v10026774mg           | gbpln | Capsella rubella     | AT5G64120.1   Symbols:   Peroxidase superfamily protein   chr5:25659551-25660946 REVERSE LENGTH=328                                                            | 329 | 328 | 1.00E-165 | 99.7  | 85.4 | 91.8 |   |
| Rsa1.0_00632.1.g17184.t1 | gb ABD84964.1   hypothetical protein 25.t00001 [Brassica oleracea] refNP_568985.1   cAMP-regulated phosphoprotein 19-related protein [Arabidopsis thaliana] gi 16648718 gb AAL25551.1   AT5g64130/MHJ24.11 [Arabidopsis thaliana] gi 20453353 gb AAM19915.1   AT5g64130/MHJ24.11 [Arabidopsis thaliana] gi 21618212 gb AAM67262.1   unknown [Arabidopsis thaliana] gi 332010460 gb AED97843.1   cAMP-regulated phosphoprotein 19-related protein [Arabidopsis thaliana] refXP_002881853.1   hypothetical protein ARALYDRAFT_903615 [Arabidopsis lyrata subsp. lyrata] gi 297327692 gb EFH58112.1   hypothetical protein ARALYDRAFT_903615 [Arabidopsis lyrata subsp. lyrata] refNP_201220.1   RNA methyltransferase family protein [Arabidopsis thaliana] gi 10176963 dbj BAB10283.1   unnamed protein product [Arabidopsis thaliana] gi 15451004 gb AAK96773.1   Unknown protein [Arabidopsis thaliana] gi 30725624 gb AAP37834.1   At5g64156 [Arabidopsis thaliana] gi 332010464 gb AED97847.1   RNA methyltransferase family protein [Arabidopsis thaliana] | 998 | 1103 | 3.00E-32  | 110.5 | 7.0  | 9.3  | hypothetical protein 25.t00001                   | gbpln | Brassica oleracea    | #                                                                                                                                                              | #   | #   | #         | #     | #    | #    | # |
| Rsa1.0_00632.1.g17185.t1 | refNP_568985.1   cAMP-regulated phosphoprotein 19-related protein [Arabidopsis thaliana] gi 16648718 gb AAL25551.1   AT5g64130/MHJ24.11 [Arabidopsis thaliana] gi 20453353 gb AAM19915.1   AT5g64130/MHJ24.11 [Arabidopsis thaliana] gi 21618212 gb AAM67262.1   unknown [Arabidopsis thaliana] gi 332010460 gb AED97843.1   cAMP-regulated phosphoprotein 19-related protein [Arabidopsis thaliana] refXP_002881853.1   hypothetical protein ARALYDRAFT_903615 [Arabidopsis lyrata subsp. lyrata] gi 297327692 gb EFH58112.1   hypothetical protein ARALYDRAFT_903615 [Arabidopsis lyrata subsp. lyrata] refNP_201220.1   RNA methyltransferase family protein [Arabidopsis thaliana] gi 10176963 dbj BAB10283.1   unnamed protein product [Arabidopsis thaliana] gi 15451004 gb AAK96773.1   Unknown protein [Arabidopsis thaliana] gi 30725624 gb AAP37834.1   At5g64156 [Arabidopsis thaliana] gi 332010464 gb AED97847.1   RNA methyltransferase family protein [Arabidopsis thaliana]                                                                    | 73  | 115  | 6.00E-27  | 157.5 | 79.5 | 82.2 | cAMP-regulated phosphoprotein 19-related protein | gbpln | Arabidopsis thaliana | AT5G64130.1   Symbols:   cAMP-regulated phosphoprotein 19-related protein   chr5:25664547-25665339 REVERSE LENGTH=115                                          | 73  | 115 | 1.00E-29  | 157.5 | 79.5 | 82.2 |   |
| Rsa1.0_00632.1.g17186.t1 | refXP_002881853.1   hypothetical protein ARALYDRAFT_903615 [Arabidopsis lyrata subsp. lyrata] gi 297327692 gb EFH58112.1   hypothetical protein ARALYDRAFT_903615 [Arabidopsis lyrata subsp. lyrata] refNP_201220.1   RNA methyltransferase family protein [Arabidopsis thaliana] gi 10176963 dbj BAB10283.1   unnamed protein product [Arabidopsis thaliana] gi 15451004 gb AAK96773.1   Unknown protein [Arabidopsis thaliana] gi 30725624 gb AAP37834.1   At5g64156 [Arabidopsis thaliana] gi 332010464 gb AED97847.1   RNA methyltransferase family protein [Arabidopsis thaliana]                                                                                                                                                                                                                                                                                                                                                                                                                                                                         | 372 | 370  | 2.00E-94  | 99.5  | 54.8 | 70.7 | hypothetical protein ARALYDRAFT_903615           | gbpln | Arabidopsis lyrata   | AT2G42480.1   Symbols:   TRAF-like family protein   chr2:17685805-17689851 REVERSE LENGTH=743                                                                  | 372 | 743 | 1.00E-74  | 199.7 | 50.5 | 65.1 |   |
| Rsa1.0_00632.1.g17187.t2 | refNP_201220.1   RNA methyltransferase family protein [Arabidopsis thaliana] gi 10176963 dbj BAB10283.1   unnamed protein product [Arabidopsis thaliana] gi 15451004 gb AAK96773.1   Unknown protein [Arabidopsis thaliana] gi 30725624 gb AAP37834.1   At5g64156 [Arabidopsis thaliana] gi 332010464 gb AED97847.1   RNA methyltransferase family protein [Arabidopsis thaliana]                                                                                                                                                                                                                                                                                                                                                                                                                                                                                                                                                                                                                                                                              | 421 | 377  | 1.00E-154 | 89.5  | 70.3 | 76.7 | RNA methyltransferase family protein             | gbpln | Arabidopsis thaliana | AT5G64150.1   Symbols:   RNA methyltransferase family protein   chr5:25668997-25670731 REVERSE LENGTH=377                                                      | 421 | 377 | 1.00E-157 | 89.5  | 70.3 | 76.7 |   |
| Rsa1.0_00632.1.g17188.t1 | dbj BAB09864.1   non-phototropic hypocotyl 3 [Arabidopsis thaliana]                                                                                                                                                                                                                                                                                                                                                                                                                                                                                                                                                                                                                                                                                                                                                                                                                                                                                                                                                                                            | 729 | 745  | 0         | 102.2 | 91.2 | 94.1 | non-phototropic hypocotyl 3                      | gbpln | Arabidopsis thaliana | AT5G64330.1   Symbols:   NPH3, RPT3, JK218   Phototropic-responsive NPH3 family protein   chr5:25727568-25730225 FORWARD LENGTH=746                            | 729 | 746 | 0         | 102.3 | 90.9 | 93.8 |   |
| Rsa1.0_00632.1.g17189.t1 | gb EOA12685.1   hypothetical protein CARUB_v10027906mg [Capsella rubella]                                                                                                                                                                                                                                                                                                                                                                                                                                                                                                                                                                                                                                                                                                                                                                                                                                                                                                                                                                                      | 374 | 339  | 6.00E-95  | 90.6  | 58.0 | 63.4 | hypothetical protein CARUB_v10027906mg           | gbpln | Capsella rubella     | AT5G64340.1   Symbols:   SAC51   sequence-specific DNA binding transcription factor:transcription regulators   chr5:25730890-25731936 REVERSE LENGTH=348       | 374 | 348 | 5.00E-95  | 93.0  | 58.0 | 63.9 |   |
| Rsa1.0_00632.1.g17190.t1 | refXP_002866611.1   FK506-binding protein 12 kD [Arabidopsis lyrata subsp. lyrata] gi 297312446 gb EFH42870.1   FK506-binding protein 12 kD [Arabidopsis lyrata subsp. lyrata]                                                                                                                                                                                                                                                                                                                                                                                                                                                                                                                                                                                                                                                                                                                                                                                                                                                                                 | 112 | 112  | 1.00E-54  | 100.0 | 94.6 | 97.3 | FK506-binding protein 12 kD                      | gbpln | Arabidopsis lyrata   | AT5G64350.1   Symbols:   FKBP12, ATFKBP12   FK506-binding protein 12   chr5:25734810-25735990 REVERSE LENGTH=112                                               | 112 | 112 | 5.00E-56  | 100.0 | 92.9 | 94.6 |   |
| Rsa1.0_00632.1.g17191.t1 | refXP_002869205.1   carbonic anhydrase family protein [Arabidopsis lyrata subsp. lyrata] gi 297315041 gb EFH45464.1   carbonic anhydrase family protein [Arabidopsis lyrata subsp. lyrata]                                                                                                                                                                                                                                                                                                                                                                                                                                                                                                                                                                                                                                                                                                                                                                                                                                                                     | 316 | 301  | 7.00E-95  | 95.3  | 56.0 | 72.8 | carbonic anhydrase family protein                | gbpln | Arabidopsis lyrata   | AT4G33580.1   Symbols:   ATBCA5, BCA5   beta carbonic anhydrase 5   chr4:16139406-16141363 FORWARD LENGTH=301                                                  | 316 | 301 | 1.00E-95  | 95.3  | 56.6 | 71.5 |   |



|                          |                                                                                                                                                                                                                                                                                                                                                                               |      |      |           |       |      |      |                                                     |       |                      |                                                                                                                                           |      |      |           |       |      |      |
|--------------------------|-------------------------------------------------------------------------------------------------------------------------------------------------------------------------------------------------------------------------------------------------------------------------------------------------------------------------------------------------------------------------------|------|------|-----------|-------|------|------|-----------------------------------------------------|-------|----------------------|-------------------------------------------------------------------------------------------------------------------------------------------|------|------|-----------|-------|------|------|
| Rsa1.0_00632.1.g17192.t1 | gb EOA12386.1  hypothetical protein CARUB_v10026348mg [Capsella rubella] gi 482548193 gb EOA12387.1  hypothetical protein CARUB_v10026348mg [Capsella rubella]                                                                                                                                                                                                                | 464  | 469  | 1.00E-177 | 101.1 | 73.3 | 81.0 | hypothetical protein CARUB_v10026348mg              | gbpln | Capsella rubella     | AT5G64360.4   Symbols:   Chaperone DnaJ-domain superfamily protein   chr5:25737208-25738602 REVERSE LENGTH=464                            | 464  | 464  | 1.00E-165 | 100.0 | 71.1 | 78.9 |
| Rsa1.0_00632.1.g17193.t1 | ref NP_201242.2  beta-ureidopropionase [Arabidopsis thaliana] gi 28193999 gb AAO33358.1 AF465754.1 N-carbamyl-beta-alanine amidohydrolase [Arabidopsis thaliana] gi 23306402 gb AAN17428.1  beta-ureidopropionase [Arabidopsis thaliana] gi 30725680 gb AAP37862.1  At5g64370 [Arabidopsis thaliana] gi 332010498 gb AED97881.1  beta-ureidopropionase [Arabidopsis thaliana] | 408  | 408  | 0         | 100.0 | 92.2 | 96.8 | beta-ureidopropionase                               | gbpln | Arabidopsis thaliana | AT5G64370.1   Symbols: BETA-UP, PYD3   beta-ureidopropionase   chr5:25739264-25741031 FORWARD LENGTH=408                                  | 408  | 408  | 0         | 100.0 | 92.2 | 96.8 |
| Rsa1.0_00632.1.g17194.t1 | ref XP_002864897.1  fructose-1,6-bisphosphatase family protein [Arabidopsis lyrata subsp. lyrata] gi 297310732 gb EFH41156.1  fructose-1,6-bisphosphatase family protein [Arabidopsis lyrata subsp. lyrata]                                                                                                                                                                   | 412  | 403  | 0         | 97.8  | 89.6 | 92.5 | fructose-1,6-bisphosphatase family protein          | gbpln | Arabidopsis lyrata   | AT5G64380.1   Symbols:   Inositol monophosphatase family protein   chr5:25741342-25743024 FORWARD LENGTH=404                              | 412  | 404  | 0         | 98.1  | 88.8 | 92.2 |
| Rsa1.0_00632.1.g17195.t1 | ref XP_002864897.1  fructose-1,6-bisphosphatase family protein [Arabidopsis lyrata subsp. lyrata] gi 297310732 gb EFH41156.1  fructose-1,6-bisphosphatase family protein [Arabidopsis lyrata subsp. lyrata]                                                                                                                                                                   | 75   | 403  | 7.00E-35  | 537.3 | 96.0 | 98.7 | fructose-1,6-bisphosphatase family protein          | gbpln | Arabidopsis lyrata   | AT5G64380.1   Symbols:   Inositol monophosphatase family protein   chr5:25741342-25743024 FORWARD LENGTH=404                              | 75   | 404  | 5.00E-37  | 538.7 | 94.7 | 97.3 |
| Rsa1.0_00632.1.g17196.t2 | ref XP_002864898.1  predicted protein [Arabidopsis lyrata subsp. lyrata] gi 297310733 gb EFH41157.1  predicted protein [Arabidopsis lyrata subsp. lyrata]                                                                                                                                                                                                                     | 868  | 865  | 0         | 99.7  | 77.3 | 85.1 | predicted protein                                   | gbpln | Arabidopsis lyrata   | AT5G64390.1   Symbols: HEN4   RNA-binding KH domain-containing protein   chr5:25743442-25747380 FORWARD LENGTH=857                        | 868  | 857  | 0         | 98.7  | 75.9 | 83.8 |
| Rsa1.0_00632.1.g17197.t1 | ref NP_196519.1  Cox19-like CHCH family protein [Arabidopsis thaliana] gi 7671432 emb CAB89373.1  putative protein [Arabidopsis thaliana] gi 26452406 dbj BAC43288.1  unknown protein [Arabidopsis thaliana] gi 28372814 gb AAO39889.1  At5g09570 [Arabidopsis thaliana] gi 332004028 gb AED9141.1  Cox19-like CHCH family protein [Arabidopsis thaliana]                     | 143  | 139  | 6.00E-45  | 97.2  | 65.0 | 78.3 | Cox19-like CHCH family protein                      | gbpln | Arabidopsis thaliana | AT5G09570.1   Symbols:   Cox19-like CHCH family protein   chr5:2970733-2971970 FORWARD LENGTH=139                                         | 143  | 139  | 2.00E-47  | 97.2  | 65.0 | 78.3 |
| Rsa1.0_00632.1.g17198.t1 | ref XP_002864901.1  DNA polymerase V family [Arabidopsis lyrata subsp. lyrata] gi 297310736 gb EFH41160.1  DNA polymerase V family [Arabidopsis lyrata subsp. lyrata]                                                                                                                                                                                                         | 1311 | 1301 | 0         | 99.2  | 81.3 | 89.2 | DNA polymerase V family                             | gbpln | Arabidopsis lyrata   | AT5G64420.1   Symbols:   DNA polymerase V family   chr5:25756416-25761122 FORWARD LENGTH=1306                                             | 1311 | 1306 | 0         | 99.6  | 80.1 | 87.9 |
| Rsa1.0_00632.1.g17199.t1 | gb EOA12745.1  hypothetical protein CARUB_v10028367mg [Capsella rubella]                                                                                                                                                                                                                                                                                                      | 494  | 503  | 0         | 101.8 | 76.5 | 81.0 | hypothetical protein CARUB_v10028367mg              | gbpln | Capsella rubella     | AT5G64430.1   Symbols:   Octicosapeptide/Phox/Bem1p family protein   chr5:25762540-25764081 REVERSE LENGTH=513                            | 494  | 513  | 1.00E-167 | 103.8 | 76.3 | 81.0 |
| Rsa1.0_00632.1.g17200.t1 | ref NP_201249.2  fatty acid amide hydrolase [Arabidopsis thaliana] gi 75142814 sp O7X.JJ7.1 FAAH ARATH RecName: Full=Fatty acid amide hydrolase; AltName: Full=N-acylthanolamine amidohydrolase gi 32454719 gb AAP83139.1  N-acylthanolamine amidohydrolase [Arabidopsis thaliana] gi 332010510 gb AED97893.1  fatty acid amide hydrolase [Arabidopsis thaliana]              | 436  | 607  | 0         | 139.2 | 70.4 | 75.2 | fatty acid amide hydrolase                          | gbpln | Arabidopsis thaliana | AT5G64440.1   Symbols: AtFAAH, FAAH   fatty acid amide hydrolase   chr5:25766229-25770260 FORWARD LENGTH=607                              | 436  | 607  | 0         | 139.2 | 70.4 | 75.2 |
| Rsa1.0_00633.1.g17201.t1 | #                                                                                                                                                                                                                                                                                                                                                                             | #    | #    | #         | #     | #    | -    | ----                                                | ----  | #                    | #                                                                                                                                         | #    | #    | #         | #     | #    |      |
| Rsa1.0_00633.1.g17202.t1 | ref XP_002875017.1  dehydration-responsive family protein [Arabidopsis lyrata subsp. lyrata] gi 297320854 gb EFH51276.1  dehydration-responsive family protein [Arabidopsis lyrata subsp. lyrata]                                                                                                                                                                             | 624  | 633  | 0         | 101.4 | 91.2 | 95.8 | dehydration-responsive family protein               | gbpln | Arabidopsis lyrata   | AT4G00750.1   Symbols:   S-adenosyl-L-methionine-dependent methyltransferases superfamily protein   chr4:314405-317507 FORWARD LENGTH=633 | 624  | 633  | 0         | 101.4 | 89.6 | 94.9 |
| Rsa1.0_00633.1.g17203.t1 | #                                                                                                                                                                                                                                                                                                                                                                             | #    | #    | #         | #     | #    | -    | ----                                                | ----  | #                    | #                                                                                                                                         | #    | #    | #         | #     | #    |      |
| Rsa1.0_00633.1.g17204.t2 | gb ABD64958.1  ethylene responsive element binding factor -related [Brassica oleracea]                                                                                                                                                                                                                                                                                        | 732  | 954  | 2.00E-33  | 130.3 | 20.5 | 31.4 | ethylene responsive element binding factor -related | gbpln | Brassica oleracea    | #                                                                                                                                         | #    | #    | #         | #     | #    |      |
| Rsa1.0_00633.1.g17205.t5 | gb EOA32134.1  hypothetical protein CARUB_v10015385mg, partial [Capsella rubella]                                                                                                                                                                                                                                                                                             | 370  | 581  | 6.00E-14  | 157.0 | 12.2 | 15.4 | hypothetical protein CARUB_v10015385mg, partial     | gbpln | Capsella rubella     | #                                                                                                                                         | #    | #    | #         | #     | #    |      |

|                          |                                                                                                                                                                                                                                                                                                                                                                                                                                                                          |     |      |           |       |      |      |                                                           |       |                         |                                                                                                                                                                                                                                                                                                                                                                       |     |     |           |       |      |      |
|--------------------------|--------------------------------------------------------------------------------------------------------------------------------------------------------------------------------------------------------------------------------------------------------------------------------------------------------------------------------------------------------------------------------------------------------------------------------------------------------------------------|-----|------|-----------|-------|------|------|-----------------------------------------------------------|-------|-------------------------|-----------------------------------------------------------------------------------------------------------------------------------------------------------------------------------------------------------------------------------------------------------------------------------------------------------------------------------------------------------------------|-----|-----|-----------|-------|------|------|
| Rsa1.0_00633.1.g17206.t2 | refXP_004301998.1  PREDICTED:<br>uncharacterized protein LOC101300066<br>[Fragaria vesca subsp. vesca]                                                                                                                                                                                                                                                                                                                                                                   | 525 | 583  | 2.00E-78  | 111.0 | 34.9 | 48.2 | PREDICTED:<br>uncharacterized<br>protein LOC101300066     | gbpln | Fragaria<br>vesca       | AT5G31412.1   Symbols:   hAT transposon<br>superfamily protein   chr5:11541463-<br>11543768 REVERSE LENGTH=433                                                                                                                                                                                                                                                        | 525 | 433 | 3.00E-59  | 82.5  | 27.4 | 35.2 |
| Rsa1.0_00633.1.g17207.t1 | refXP_002875016.1  F-box family<br>protein [Arabidopsis lyrata subsp.<br>lyrata] gi 297320835 gb EFH51275.1  F-<br>box family protein [Arabidopsis lyrata<br>subsp. lyrata]                                                                                                                                                                                                                                                                                              | 368 | 380  | 1.00E-151 | 103.3 | 75.3 | 85.6 | F-box family protein                                      | gbpln | Arabidopsis<br>lyrata   | AT4G00755.2   Symbols:   F-box family<br>protein   chr4:325294-326787 FORWARD<br>LENGTH=377                                                                                                                                                                                                                                                                           | 368 | 377 | 1.00E-150 | 102.4 | 72.0 | 84.2 |
| Rsa1.0_00633.1.g17208.t7 | gb AAF18641.1 AC006228_12 F5J5.16<br>[Arabidopsis thaliana]                                                                                                                                                                                                                                                                                                                                                                                                              | 694 | 1024 | 2.00E-13  | 147.6 | 6.6  | 8.6  | F5J5.16                                                   | gbpln | Arabidopsis<br>thaliana | #                                                                                                                                                                                                                                                                                                                                                                     | #   | #   | #         | #     | #    | #    |
| Rsa1.0_00633.1.g17209.t1 | gb ABW81060.1  GagPol3 [Arabidopsis<br>lyrata subsp. lyrata]                                                                                                                                                                                                                                                                                                                                                                                                             | 204 | 1103 | 2.00E-49  | 540.7 | 50.5 | 60.3 | GagPol3                                                   | gbpln | Arabidopsis<br>lyrata   | #                                                                                                                                                                                                                                                                                                                                                                     | #   | #   | #         | #     | #    | #    |
| Rsa1.0_00633.1.g17210.t1 | gb ABW81060.1  GagPol3 [Arabidopsis<br>lyrata subsp. lyrata]                                                                                                                                                                                                                                                                                                                                                                                                             | 803 | 1103 | 0         | 137.4 | 56.0 | 69.2 | GagPol3                                                   | gbpln | Arabidopsis<br>lyrata   | #                                                                                                                                                                                                                                                                                                                                                                     | #   | #   | #         | #     | #    | #    |
| Rsa1.0_00633.1.g17211.t1 | gb AAC26241.1  F9D12.15 gene product<br>[Arabidopsis thaliana]                                                                                                                                                                                                                                                                                                                                                                                                           | 543 | 850  | 5.00E-42  | 156.5 | 21.4 | 31.5 | F9D12.15 gene product                                     | gbpln | Arabidopsis<br>thaliana | #                                                                                                                                                                                                                                                                                                                                                                     | #   | #   | #         | #     | #    | #    |
| Rsa1.0_00633.1.g17212.t1 | #                                                                                                                                                                                                                                                                                                                                                                                                                                                                        | #   | #    | #         | #     | #    | #    | -                                                         | ----  | ----                    | #                                                                                                                                                                                                                                                                                                                                                                     | #   | #   | #         | #     | #    | #    |
| Rsa1.0_00633.1.g17213.t1 | gb ABD65060.1  hypothetical protein<br>27.t00039 [Brassica oleracea]                                                                                                                                                                                                                                                                                                                                                                                                     | 181 | 1367 | 6.00E-39  | 755.2 | 44.8 | 58.6 | hypothetical protein<br>27.t00039                         | gbpln | Brassica<br>oleracea    | #                                                                                                                                                                                                                                                                                                                                                                     | #   | #   | #         | #     | #    | #    |
| Rsa1.0_00633.1.g17214.t2 | gb EOA34846.1  hypothetical protein<br>CARUB_v10022425mg, partial [Capsella<br>rubella]                                                                                                                                                                                                                                                                                                                                                                                  | 595 | 719  | 3.00E-99  | 120.8 | 35.3 | 44.7 | hypothetical protein<br>CARUB_v10022425mg,<br>partial     | gbpln | Capsella<br>rubella     | AT5G33406.1   Symbols:   hAT dimerisation<br>domain-containing protein / transposase-<br>related   chr5:12676126-12678403 REVERSE<br>LENGTH=509                                                                                                                                                                                                                       | 595 | 509 | 1.00E-66  | 85.5  | 25.7 | 33.3 |
| Rsa1.0_00633.1.g17215.t1 | gb ABE65508.1  hypothetical protein<br>At4g01240 [Arabidopsis thaliana]                                                                                                                                                                                                                                                                                                                                                                                                  | 474 | 478  | 0         | 100.8 | 92.4 | 95.4 | hypothetical protein<br>At4g01240                         | gbpln | Arabidopsis<br>thaliana | AT4G01240.1   Symbols:   S-adenosyl-L-<br>methionine-dependent methyltransferases<br>superfamily protein   chr4:517795-521972<br>REVERSE LENGTH=659                                                                                                                                                                                                                   | 474 | 659 | 0         | 139.0 | 88.0 | 91.4 |
| Rsa1.0_00634.1.g17216.t1 | refXP_002883854.1  hypothetical<br>protein ARALYDRAFT_899691<br>[Arabidopsis lyrata subsp. lyrata]<br>gi 297329694 gb EFH60113.1 <br>hypothetical protein<br>ARALYDRAFT_899691 [Arabidopsis<br>lyrata subsp. lyrata]                                                                                                                                                                                                                                                     | 624 | 627  | 0         | 100.5 | 93.8 | 95.8 | hypothetical protein<br>ARALYDRAFT_899691                 | gbpln | Arabidopsis<br>lyrata   | AT2G14740.2   Symbols:   ATVSR3, VSR3,<br>VSR2.2, BP80-2.2   vacuolar sorting<br>receptor 3   chr2:6308895-6312303<br>FORWARD LENGTH=628                                                                                                                                                                                                                              | 624 | 628 | 0         | 100.6 | 93.6 | 95.7 |
| Rsa1.0_00634.1.g17217.t1 | gb AAC33226.1  putative non-LTR<br>retroelement reverse transcriptase<br>[Arabidopsis thaliana]                                                                                                                                                                                                                                                                                                                                                                          | 532 | 1529 | 4.00E-67  | 287.4 | 25.4 | 32.0 | putative non-LTR<br>retroelement reverse<br>transcriptase | gbpln | Arabidopsis<br>thaliana | AT3G24255.1   Symbols:   RNA-directed<br>DNA polymerase (reverse transcriptase)-<br>related family protein   chr3:8789471-<br>8793208 FORWARD LENGTH=746                                                                                                                                                                                                              | 532 | 746 | 2.00E-54  | 140.2 | 20.3 | 27.8 |
| Rsa1.0_00634.1.g17218.t1 | refXP_002885939.1  basic helix-loop-<br>helix protein [Arabidopsis lyrata subsp.<br>lyrata] gi 297331779 gb EFH62198.1 <br>basic helix-loop-helix protein<br>[Arabidopsis lyrata subsp. lyrata]                                                                                                                                                                                                                                                                          | 305 | 328  | 1.00E-121 | 107.5 | 74.4 | 83.0 | basic helix-loop-helix<br>protein                         | gbpln | Arabidopsis<br>lyrata   | AT2G14760.1   Symbols:   basic helix-loop-<br>helix (bHLH) DNA-binding superfamily<br>protein   chr2:6321840-6323312 REVERSE<br>LENGTH=328                                                                                                                                                                                                                            | 305 | 328 | 1.00E-118 | 107.5 | 74.4 | 81.3 |
| Rsa1.0_00634.1.g17219.t1 | gb EOA30095.1  hypothetical protein<br>CARUB_v10013204mg [Capsella rubella]                                                                                                                                                                                                                                                                                                                                                                                              | 635 | 631  | 0         | 99.4  | 86.8 | 93.9 | hypothetical protein<br>CARUB_v10013204mg                 | gbpln | Capsella<br>rubella     | AT2G14820.1   Symbols:   NPY2  <br>Phototropic-responsive NPH3 family protein<br>  chr2:6358864-6361300 FORWARD<br>LENGTH=634                                                                                                                                                                                                                                         | 635 | 634 | 0         | 99.8  | 85.4 | 92.9 |
| Rsa1.0_00634.1.g17220.t1 | gb EOA31658.1  hypothetical protein<br>CARUB_v10014863mg [Capsella rubella]                                                                                                                                                                                                                                                                                                                                                                                              | 271 | 144  | 1.00E-39  | 53.1  | 28.8 | 31.4 | hypothetical protein<br>CARUB_v10014863mg                 | gbpln | Capsella<br>rubella     | AT2G14830.2   Symbols:   Regulator of Vps4<br>activity in the MVB pathway protein  <br>chr2:6362524-6363893 FORWARD<br>LENGTH=146                                                                                                                                                                                                                                     | 271 | 146 | 4.00E-42  | 53.9  | 28.8 | 31.0 |
| Rsa1.0_00634.1.g17221.t1 | gb EOA30958.1  hypothetical protein<br>CARUB_v10014104mg [Capsella rubella]                                                                                                                                                                                                                                                                                                                                                                                              | 343 | 343  | 0         | 100.0 | 91.3 | 95.6 | hypothetical protein<br>CARUB_v10014104mg                 | gbpln | Capsella<br>rubella     | AT2G14835.2   Symbols:   RING/U-box<br>superfamily protein   chr2:6367238-6370610<br>FORWARD LENGTH=343                                                                                                                                                                                                                                                               | 343 | 343 | 0         | 100.0 | 90.1 | 95.3 |
| Rsa1.0_00634.1.g17222.t1 | #                                                                                                                                                                                                                                                                                                                                                                                                                                                                        | #   | #    | #         | #     | #    | #    | -                                                         | ----  | ----                    | #                                                                                                                                                                                                                                                                                                                                                                     | #   | #   | #         | #     | #    | #    |
| Rsa1.0_00634.1.g17223.t4 | gb ABS30827.1  myrosinase [Brassica<br>oleracea]                                                                                                                                                                                                                                                                                                                                                                                                                         | 545 | 546  | 0         | 100.2 | 88.1 | 93.0 | myrosinase                                                | gbpln | Brassica<br>oleracea    | AT5G26000.1   Symbols:   TGG1, BGLU38  <br>thioglycoside glucosyltransferase 1  <br>chr5:9079678-9082347 REVERSE<br>LENGTH=541                                                                                                                                                                                                                                        | 545 | 541 | 0         | 99.3  | 71.4 | 81.8 |
| Rsa1.0_00634.1.g17224.t1 | refNP_179091.1  uncharacterized<br>protein [Arabidopsis thaliana]<br>gi 3650027 gb AAC61282.1  hypothetical<br>protein [Arabidopsis thaliana]<br>gi 17529282 gb AAL38868.1  unknown<br>protein [Arabidopsis thaliana]<br>gi 20197261 gb AAM14999.1 <br>hypothetical protein [Arabidopsis<br>thaliana] gi 20465829 gb AAM20019.1 <br>unknown protein [Arabidopsis thaliana]<br>gi 330251248 gb AEC06342.1 <br>uncharacterized protein AT2G14850<br>[Arabidopsis thaliana] | 270 | 291  | 1.00E-94  | 107.8 | 69.3 | 81.9 | uncharacterized<br>protein                                | gbpln | Arabidopsis<br>thaliana | AT2G14850.1   Symbols:   unknown protein;<br>BEST Arabidopsis thaliana protein match is:<br>unknown protein (TAIR:AT4G33890.2); Has<br>140 Blast hits to 132 proteins in 17 species:<br>Archae - 0; Bacteria - 0; Metazoa - 1; Fungi<br>- 2; Plants - 133; Viruses - 0; Other<br>Eukaryotes - 4 (source: NCBI BLink).  <br>chr2:6386400-6387275 FORWARD<br>LENGTH=291 | 270 | 291 | 3.00E-97  | 107.8 | 69.3 | 81.9 |
| Rsa1.0_00634.1.g17225.t1 | gb EOA32458.1  hypothetical protein<br>CARUB_v10015735mg [Capsella rubella]                                                                                                                                                                                                                                                                                                                                                                                              | 249 | 256  | 2.00E-96  | 102.8 | 74.3 | 81.9 | hypothetical protein<br>CARUB_v10015735mg                 | gbpln | Capsella<br>rubella     | AT2G14860.1   Symbols:   Peroxisomal<br>membrane 22 kDa (Mpv17/PMP22) family<br>protein   chr2:6387820-6389563 REVERSE<br>LENGTH=252                                                                                                                                                                                                                                  | 249 | 252 | 1.00E-97  | 101.2 | 74.3 | 80.3 |
| Rsa1.0_00635.1.g17226.t1 | #                                                                                                                                                                                                                                                                                                                                                                                                                                                                        | #   | #    | #         | #     | #    | #    | -                                                         | ----  | ----                    | #                                                                                                                                                                                                                                                                                                                                                                     | #   | #   | #         | #     | #    | #    |

|                          |                                                                                                                                                                                                                                                                                                                                                                                                                                           |      |      |           |       |      |      |                                        |       |                      |                                                                                                                                                                                                                                                                                                                                                                                                                                                                                                                                                              |      |      |           |       |      |      |
|--------------------------|-------------------------------------------------------------------------------------------------------------------------------------------------------------------------------------------------------------------------------------------------------------------------------------------------------------------------------------------------------------------------------------------------------------------------------------------|------|------|-----------|-------|------|------|----------------------------------------|-------|----------------------|--------------------------------------------------------------------------------------------------------------------------------------------------------------------------------------------------------------------------------------------------------------------------------------------------------------------------------------------------------------------------------------------------------------------------------------------------------------------------------------------------------------------------------------------------------------|------|------|-----------|-------|------|------|
| Rsa1.0_00635.1.g17227.t1 | gb[EOA19787.1] hypothetical protein CARUB_v10000034mg [Capsella rubella]                                                                                                                                                                                                                                                                                                                                                                  | 669  | 1498 | 1.00E-167 | 223.9 | 52.8 | 58.1 | hypothetical protein CARUB_v10000034mg | gbpln | Capsella rubella     | AT5G17910.2   Symbols:   unknown protein; FUNCTIONS IN: molecular.function unknown; INVOLVED IN: biological.process unknown; LOCATED IN: mitochondrion; EXPRESSED IN: 23 plant structures; EXPRESSED DURING: 15 growth stages; BEST Arabidopsis thaliana protein match is: unknown protein (TAIR:AT2G29620.1).   chr5:5927906-5932292 FORWARD LENGTH=1342                                                                                                                                                                                                    | 669  | 1342 | 1.00E-166 | 200.6 | 53.1 | 60.5 |
| Rsa1.0_00635.1.g17228.t1 | gb[EOA15185.1] hypothetical protein CARUB_v10028571mg [Capsella rubella]                                                                                                                                                                                                                                                                                                                                                                  | 214  | 209  | 3.00E-87  | 97.7  | 81.8 | 85.0 | hypothetical protein CARUB_v10028571mg | gbpln | Capsella rubella     | AT5G58250.1   Symbols:   unknown protein; FUNCTIONS IN: molecular.function unknown; INVOLVED IN: biological.process unknown; LOCATED IN: thylakoid, chloroplast; EXPRESSED IN: 22 plant structures; EXPRESSED DURING: 14 growth stages; CONTAINS InterPro DOMAIN/s: Protein of unknown function DUF2488 (InterPro:IPRO19616); Has 1807 Blast hits to 1807 proteins in 277 species: Archae - 0; Bacteria - 0; Metazoa - 736; Fungi - 347; Plants - 385; Viruses - 0; Other Eukaryotes - 339 (source: NCBI BLINK).   chr5:23559558-23560372 FORWARD LENGTH=211 | 214  | 211  | 1.00E-84  | 98.6  | 77.6 | 80.8 |
| Rsa1.0_00635.1.g17229.t1 | gb[AAO24535.1] At5g58240 [Arabidopsis thaliana] gi[110736300]dbj[BAF00120.1] bis(5'-adenosyl)-triphosphatase-like [Arabidopsis thaliana]                                                                                                                                                                                                                                                                                                  | 159  | 180  | 3.00E-85  | 113.2 | 93.1 | 98.1 | At5g58240                              | gbpln | Arabidopsis thaliana | AT5G58240.1   Symbols: FHIT   FRAGILE HISTIDINE TRIAD   chr5:23558349-23559313 REVERSE LENGTH=180                                                                                                                                                                                                                                                                                                                                                                                                                                                            | 159  | 180  | 4.00E-87  | 113.2 | 92.5 | 97.5 |
| Rsa1.0_00635.1.g17230.t1 | ref[XP_002864557.1] hypothetical protein ARALYDRAFT_495932 [Arabidopsis lyrata subsp. lyrata] gi[297310392]gb[EFH40816.1] hypothetical protein ARALYDRAFT_495932 [Arabidopsis lyrata subsp. lyrata]                                                                                                                                                                                                                                       | 428  | 426  | 0         | 99.5  | 83.6 | 92.8 | hypothetical protein ARALYDRAFT_495932 | gbpln | Arabidopsis lyrata   | AT5G58230.1   Symbols: MS1. MEE70. ATMS1   Transducin/WD40 repeat-like superfamily protein   chr5:23556112-23557994 FORWARD LENGTH=424                                                                                                                                                                                                                                                                                                                                                                                                                       | 428  | 424  | 0         | 99.1  | 83.4 | 92.5 |
| Rsa1.0_00635.1.g17231.t1 | gb[EOA12800.1] hypothetical protein CARUB_v10025755mg [Capsella rubella]                                                                                                                                                                                                                                                                                                                                                                  | 1276 | 1252 | 0         | 98.1  | 75.6 | 81.8 | hypothetical protein CARUB_v10025755mg | gbpln | Capsella rubella     | AT5G58160.1   Symbols:   actin binding   chr5:23533724-23539465 FORWARD LENGTH=1324                                                                                                                                                                                                                                                                                                                                                                                                                                                                          | 1276 | 1324 | 0         | 103.8 | 75.5 | 81.7 |
| Rsa1.0_00635.1.g17232.t1 | ref[NP_851210.1] phototropin 2 [Arabidopsis thaliana] gi[30697010]ref[NP_851211.1] phototropin 2 [Arabidopsis thaliana] gi[82593023]sp[P93025.2]PHOT2_ARAT H RecName: Full=Phototropin-2; AltName: Full=Defective in chloroplast avoidance protein 1; AltName: Full=Non-phototropic hypocotyl 1-like protein 1; Short=AtKin7; Short=NPH1-like protein 1 gi[5391442]gb[AAC27293.2] non phototropic hypocotyl 1-like [Arabidopsis thaliana] | 118  | 915  | 2.00E-58  | 775.4 | 94.1 | 94.9 | phototropin 2                          | gbpln | Arabidopsis thaliana | AT5G58140.1   Symbols: PHOT2, NPL1   phototropin 2   chr5:23524771-23529993 FORWARD LENGTH=915                                                                                                                                                                                                                                                                                                                                                                                                                                                               | 118  | 915  | 4.00E-61  | 775.4 | 94.1 | 94.9 |
| Rsa1.0_00635.1.g17233.t1 | dbj[BAB08861.1] unnamed protein product [Arabidopsis thaliana]                                                                                                                                                                                                                                                                                                                                                                            | 164  | 166  | 4.00E-54  | 101.2 | 73.8 | 86.0 | unnamed protein product                | gbpln | Arabidopsis thaliana | AT5G57910.1   Symbols:   unknown protein; BEST Arabidopsis thaliana protein match is: unknown protein (TAIR:AT4G30630.1). Has 30201 Blast hits to 17322 proteins in 780 species: Archae - 12; Bacteria - 1396; Metazoa - 17338; Fungi - 3422; Plants - 5037; Viruses - 0; Other Eukaryotes - 2996 (source: NCBI BLINK).   chr5:23451259-23452463 REVERSE LENGTH=207                                                                                                                                                                                          | 164  | 207  | 3.00E-56  | 126.2 | 73.8 | 86.0 |

|                          |                                                                                                                                                                                                                                                                                                                                                                                                                                                                                                                                                |     |      |           |       |      |      |                                                     |       |                      |                                                                                                                                                                                                                                                                                                                                                                                                                                           |     |      |           |       |      |      |
|--------------------------|------------------------------------------------------------------------------------------------------------------------------------------------------------------------------------------------------------------------------------------------------------------------------------------------------------------------------------------------------------------------------------------------------------------------------------------------------------------------------------------------------------------------------------------------|-----|------|-----------|-------|------|------|-----------------------------------------------------|-------|----------------------|-------------------------------------------------------------------------------------------------------------------------------------------------------------------------------------------------------------------------------------------------------------------------------------------------------------------------------------------------------------------------------------------------------------------------------------------|-----|------|-----------|-------|------|------|
| Rsa1.0_00635.1.g17234.t1 | ref[NP_568870.1] F-box protein SKIP1 [Arabidopsis thaliana] gi 7533679 sp Q9FDX1.1 SKIP1_ARATH RecName: Full=F-box protein SKIP1; AltName: Full=SKP1-interacting partner 1 gi 9758359 dbj BAB08860.1  unnamed protein product [Arabidopsis thaliana] gi 10716947 gb AAG21976.1  SKP1 interacting partner 1 [Arabidopsis thaliana] gi 109946489 gb ABG48423.1  At5g57900 [Arabidopsis thaliana] gi 110738798 dbj BAF01322.1  hypothetical protein [Arabidopsis thaliana] gi 332009586 gb AED96969.1  F-box protein SKIP1 [Arabidopsis thaliana] | 303 | 300  | 1.00E-147 | 99.0  | 85.5 | 90.1 | F-box protein SKIP1                                 | gbpln | Arabidopsis thaliana | AT5G57900.1   Symbols: SKIP1   SKP1 interacting partner 1   chr5:23449916-23450915 REVERSE LENGTH=300                                                                                                                                                                                                                                                                                                                                     | 303 | 300  | 1.00E-150 | 99.0  | 85.5 | 90.1 |
| Rsa1.0_00635.1.g17235.t1 | ref[XP_002864534.1] hypothetical protein ARALYDRAFT_918971 [Arabidopsis lyrata subsp. lyrata] gi 297310369 gb EFH40793.1  hypothetical protein ARALYDRAFT_918971 [Arabidopsis lyrata subsp. lyrata]                                                                                                                                                                                                                                                                                                                                            | 436 | 388  | 1.00E-140 | 89.0  | 62.8 | 67.7 | hypothetical protein ARALYDRAFT_918971              | gbpln | Arabidopsis lyrata   | AT5G57880.1   Symbols: MPS1, ATPRD2, PRD2   multipolar spindle 1   chr5:23443977-23446439 FORWARD LENGTH=385                                                                                                                                                                                                                                                                                                                              | 436 | 385  | 1.00E-143 | 88.3  | 65.4 | 69.5 |
| Rsa1.0_00635.1.g17236.t1 | ref[NP_200591.2] uncharacterized protein [Arabidopsis thaliana] gi 332009574 gb AED96957.1  uncharacterized protein AT5G57830 [Arabidopsis thaliana]                                                                                                                                                                                                                                                                                                                                                                                           | 370 | 387  | 1.00E-150 | 104.6 | 81.9 | 90.0 | uncharacterized protein                             | gbpln | Arabidopsis thaliana | AT5G57830.1   Symbols:   Protein of unknown function, DUF593   chr5:23429406-23430860 REVERSE LENGTH=387                                                                                                                                                                                                                                                                                                                                  | 370 | 387  | 1.00E-153 | 104.6 | 81.9 | 90.0 |
| Rsa1.0_00635.1.g17237.t1 | gb EOA15016.1  hypothetical protein CARUB_v10028373mg [Capsella rubella]                                                                                                                                                                                                                                                                                                                                                                                                                                                                       | 148 | 154  | 4.00E-38  | 104.1 | 60.1 | 72.3 | hypothetical protein CARUB_v10028373mg              | gbpln | Capsella rubella     | AT5G57820.1   Symbols:   zinc ion binding   chr5:23428601-23429165 FORWARD LENGTH=161                                                                                                                                                                                                                                                                                                                                                     | 148 | 161  | 1.00E-37  | 108.8 | 56.1 | 73.0 |
| Rsa1.0_00635.1.g17238.t1 | ref[NP_568866.1] tetraspanin15 [Arabidopsis thaliana] gi 122180030 sp Q1PD1.1 TET15_ARATH RecName: Full=Tetraspanin-15 gi 91807060 gb ABE66257.1  senescence-associated protein-like protein [Arabidopsis thaliana] gi 332009571 gb AED96954.1  tetraspanin15 [Arabidopsis thaliana]                                                                                                                                                                                                                                                           | 316 | 317  | 1.00E-138 | 100.3 | 83.9 | 91.1 | tetraspanin15                                       | gbpln | Arabidopsis thaliana | AT5G57810.1   Symbols: TET15   tetraspanin15   chr5:23424466-23425589 REVERSE LENGTH=317                                                                                                                                                                                                                                                                                                                                                  | 316 | 317  | 1.00E-140 | 100.3 | 83.9 | 91.1 |
| Rsa1.0_00635.1.g17239.t1 | dbj BAJ33654.1  unnamed protein product [Thellungiella halophila]                                                                                                                                                                                                                                                                                                                                                                                                                                                                              | 647 | 631  | 0         | 97.5  | 86.6 | 91.7 | unnamed protein product                             | ----  | ----                 | AT5G57800.1   Symbols: FLP1, YRE, CER3, WAX2   Fatty acid hydroxylase superfamily   chr5:23420589-23423832 FORWARD LENGTH=632                                                                                                                                                                                                                                                                                                             | 647 | 632  | 0         | 97.7  | 85.3 | 91.0 |
| Rsa1.0_00635.1.g17240.t1 | gb AAD19784.1  putative retroelement pol polyprotein [Arabidopsis thaliana]                                                                                                                                                                                                                                                                                                                                                                                                                                                                    | 639 | 1501 | 0         | 234.9 | 52.6 | 62.9 | putative retroelement pol polyprotein               | gbpln | Arabidopsis thaliana | AT4G23160.1   Symbols: CRK8   cysteine-rich RLK (RECEPTOR-like protein kinase) 8   chr4:12129485-12134086 FORWARD LENGTH=1262                                                                                                                                                                                                                                                                                                             | 639 | 1262 | 1.00E-138 | 197.5 | 34.7 | 49.1 |
| Rsa1.0_00635.1.g17241.t2 | gb EOA20295.1  hypothetical protein CARUB_v1000603mg [Capsella rubella]                                                                                                                                                                                                                                                                                                                                                                                                                                                                        | 132 | 559  | 7.00E-21  | 423.5 | 37.1 | 37.9 | hypothetical protein CARUB_v1000603mg               | gbpln | Capsella rubella     | AT5G08690.1   Symbols:   ATP synthase alpha/beta family protein   chr5:2821992-2824683 FORWARD LENGTH=559                                                                                                                                                                                                                                                                                                                                 | 132 | 559  | 6.00E-23  | 423.5 | 36.4 | 37.9 |
| Rsa1.0_00635.1.g17242.t1 | #                                                                                                                                                                                                                                                                                                                                                                                                                                                                                                                                              | #   | #    | #         | #     | #    | #    | -                                                   | ----  | ----                 | #                                                                                                                                                                                                                                                                                                                                                                                                                                         | #   | #    | #         | #     | #    |      |
| Rsa1.0_00635.1.g17243.t1 | gb AAD26953.1  putative non-LTR retroelement reverse transcriptase [Arabidopsis thaliana]                                                                                                                                                                                                                                                                                                                                                                                                                                                      | 350 | 323  | 7.00E-71  | 92.3  | 39.7 | 53.7 | putative non-LTR retroelement reverse transcriptase | gbpln | Arabidopsis thaliana | AT4G04650.1   Symbols:   RNA-directed DNA polymerase (reverse transcriptase)-related family protein   chr4:2353989-2355213 REVERSE LENGTH=332                                                                                                                                                                                                                                                                                             | 350 | 332  | 4.00E-66  | 94.9  | 35.7 | 49.4 |
| Rsa1.0_00635.1.g17244.t1 | #                                                                                                                                                                                                                                                                                                                                                                                                                                                                                                                                              | #   | #    | #         | #     | #    | #    | -                                                   | ----  | ----                 | #                                                                                                                                                                                                                                                                                                                                                                                                                                         | #   | #    | #         | #     | #    |      |
| Rsa1.0_00635.1.g17245.t1 | ref[XP_002866229.1] predicted protein [Arabidopsis lyrata subsp. lyrata] gi 297312064 gb EFH42488.1  predicted protein [Arabidopsis lyrata subsp. lyrata]                                                                                                                                                                                                                                                                                                                                                                                      | 164 | 173  | 4.00E-67  | 105.5 | 76.8 | 87.8 | predicted protein                                   | gbpln | Arabidopsis lyrata   | AT5G57780.1   Symbols:   EXPRESSED IN: 18 plant structures; EXPRESSED DURING: 12 growth stages; BEST Arabidopsis thaliana protein match is: sequence-specific DNA binding transcription factors (TAIR:AT4G30410.1); Has 123 Blast hits to 123 proteins in 11 species: Archae - 0; Bacteria - 0; Metazoa - 0; Fungi - 0; Plants - 123; Viruses - 0; Other Eukaryotes - 0 (source: NCBI BLINK).   chr5:23405505-23406008 REVERSE LENGTH=167 | 164 | 167  | 1.00E-68  | 101.8 | 75.6 | 86.6 |

|                          |                                                                                                                                                                                                                                                                                                                                                                                                                                                                                                                                                                                                                                                                                                                                                                                                             |     |     |          |       |      |      |                                                                  |                      |                                                                                                                                                                                                                                                                |     |     |          |       |      |      |
|--------------------------|-------------------------------------------------------------------------------------------------------------------------------------------------------------------------------------------------------------------------------------------------------------------------------------------------------------------------------------------------------------------------------------------------------------------------------------------------------------------------------------------------------------------------------------------------------------------------------------------------------------------------------------------------------------------------------------------------------------------------------------------------------------------------------------------------------------|-----|-----|----------|-------|------|------|------------------------------------------------------------------|----------------------|----------------------------------------------------------------------------------------------------------------------------------------------------------------------------------------------------------------------------------------------------------------|-----|-----|----------|-------|------|------|
| Rsa1.0_00636.1.g17246.t1 | ref NP_850488.1  SNF1-related protein kinase catalytic subunit alpha KIN10 [Arabidopsis thaliana]<br>gi 38503401 sp Q38997.2 KIN10_ARATH<br>RecName: Full=SNF1-related protein kinase catalytic subunit alpha KIN10; Short=AKIN10; AltName: Full=AKIN alpha-2; Short=AKINalpha2<br>gi 20260542 gb AAM13169.1  putative SNF1-related protein kinase [Arabidopsis thaliana]<br>gi 34098893 gb AAQ56829.1  At3g01090 [Arabidopsis thaliana]<br>gi 332640087 gb AEE73608.1  SNF1-related protein kinase catalytic subunit alpha KIN10 [Arabidopsis thaliana]<br>ref NP_683519.2  protein kinase domain-containing protein [Arabidopsis thaliana]<br>gi 195546964 gb ACG49252.1  At3g01085 [Arabidopsis thaliana]<br>gi 332640085 gb AEE73606.1  protein kinase domain-containing protein [Arabidopsis thaliana] | 511 | 535 | 0        | 104.7 | 96.1 | 97.7 | SNF1-related protein kinase catalytic subunit gb pln alpha KIN10 | Arabidopsis thaliana | AT3G01090.2   Symbols: AKIN10, KIN10   SNF1 kinase homolog 10   chr3:31437-34143 REVERSE LENGTH=535                                                                                                                                                            | 511 | 535 | 0        | 104.7 | 96.1 | 97.7 |
| Rsa1.0_00636.1.g17247.t1 | ref NP_186756.1  early nodulin-like protein 16 [Arabidopsis thaliana]<br>gi 6714481 gb AAF26167.1 AC008261_24 putative lamin [Arabidopsis thaliana]<br>gi 62319463 dbj BAD94832.1  lamin-like predicted GPI-anchored protein [Arabidopsis thaliana]<br>gi 194708794 gb ACF88481.1  At3g01070 [Arabidopsis thaliana]<br>gi 332640083 gb AEE73604.1  early nodulin-like protein 16 [Arabidopsis thaliana]                                                                                                                                                                                                                                                                                                                                                                                                     | 631 | 629 | 0        | 99.7  | 89.2 | 92.7 | protein kinase domain-containing protein gb pln                  | Arabidopsis thaliana | AT3G01085.1   Symbols:   Protein kinase superfamily protein   chr3:28060-30556 FORWARD LENGTH=629                                                                                                                                                              | 631 | 629 | 0        | 99.7  | 89.2 | 92.7 |
| Rsa1.0_00636.1.g17248.t1 | ref NP_186756.1  early nodulin-like protein 16 [Arabidopsis thaliana]<br>gi 6714481 gb AAF26167.1 AC008261_24 putative lamin [Arabidopsis thaliana]<br>gi 62319463 dbj BAD94832.1  lamin-like predicted GPI-anchored protein [Arabidopsis thaliana]<br>gi 194708794 gb ACF88481.1  At3g01070 [Arabidopsis thaliana]<br>gi 332640083 gb AEE73604.1  early nodulin-like protein 16 [Arabidopsis thaliana]                                                                                                                                                                                                                                                                                                                                                                                                     | 176 | 167 | 4.00E-61 | 94.9  | 77.3 | 83.5 | early nodulin-like protein 16 gb pln                             | Arabidopsis thaliana | AT3G01070.1   Symbols: ENODL16, AtENODL16   early nodulin-like protein 16   chr3:19659-20444 FORWARD LENGTH=167                                                                                                                                                | 176 | 167 | 2.00E-63 | 94.9  | 77.3 | 83.5 |
| Rsa1.0_00636.1.g17249.t1 | gb ABC41272.1  unknown [Brassica rapa]                                                                                                                                                                                                                                                                                                                                                                                                                                                                                                                                                                                                                                                                                                                                                                      | 444 | 453 | 0        | 102.0 | 96.4 | 98.9 | unknown gb pln                                                   | Brassica rapa        | AT3G01060.1   Symbols:   unknown protein; Has 640 Blast hits to 638 proteins in 201 species: Archae - 0; Bacteria - 293; Metazoa - 0; Fungi - 71; Plants - 72; Viruses - 0; Other Eukaryotes - 204 (source: NCBI BLINK).   chr3:16831-18782 REVERSE LENGTH=455 | 444 | 455 | 0        | 102.5 | 90.5 | 95.7 |
| Rsa1.0_00636.1.g17250.t1 | ref NP_186857.1  40S ribosomal protein S19-1 [Arabidopsis thaliana]<br>gi 27923843 sp Q9SGA6.1 RS191_ARATH<br>H RecName: Full=40S ribosomal protein S19-1<br>gi 6513924 gb AAF14828.1 AC011664_10 putative 40S ribosomal protein S19 [Arabidopsis thaliana]<br>gi 13878029 gb AAK44092.1 AF370277_1 putative 40S ribosomal protein S19 [Arabidopsis thaliana]<br>gi 17104595 gb AAL34186.1  putative 40S ribosomal protein S19 [Arabidopsis thaliana]<br>gi 21593712 gb AAM65679.1  putative 40S ribosomal protein S19 [Arabidopsis thaliana]<br>gi 332640239 gb AEE73760.1  40S ribosomal protein S19-1 [Arabidopsis thaliana]<br>gi 482567473 gb EOA31662.1  hypothetical protein CARUB_v10014866mg [Capsella rubella]                                                                                    | 143 | 143 | 7.00E-77 | 100.0 | 97.9 | 99.3 | 40S ribosomal protein S19-1 gb pln                               | Arabidopsis thaliana | AT3G02080.1   Symbols:   Ribosomal protein S19e family protein   chr3:364138-365161 REVERSE LENGTH=143                                                                                                                                                         | 143 | 143 | 2.00E-79 | 100.0 | 97.9 | 99.3 |

|                          |                                                                                                                                                                                                                                                                                                                                                                                                                                                                                                                                                                                                                                                                                                                                                                                                                             |      |      |           |       |      |      |                                             |       |                      |                                                                                                                                                                                                                                                                                                                                                     |      |      |           |       |      |      |
|--------------------------|-----------------------------------------------------------------------------------------------------------------------------------------------------------------------------------------------------------------------------------------------------------------------------------------------------------------------------------------------------------------------------------------------------------------------------------------------------------------------------------------------------------------------------------------------------------------------------------------------------------------------------------------------------------------------------------------------------------------------------------------------------------------------------------------------------------------------------|------|------|-----------|-------|------|------|---------------------------------------------|-------|----------------------|-----------------------------------------------------------------------------------------------------------------------------------------------------------------------------------------------------------------------------------------------------------------------------------------------------------------------------------------------------|------|------|-----------|-------|------|------|
| Rsa1.0_00636.1.g17251.t1 | refNP_186858.1  mitochondrial processing peptidase [Arabidopsis thaliana]<br>gi 85700445 sp Q42290.2 MPPB_ARATH<br>RecName: Full=Probable mitochondrial-processing peptidase subunit beta;<br>AltName: Full=Beta-MPP; Flags:<br>Precursor<br>gi 6513923 gb AAF14827.1 AC011664.9<br>putative mitochondrial processing peptidase [Arabidopsis thaliana]<br>gi 22022518 gb AAM83217.1 <br>AT3g02090/F1C9_12 [Arabidopsis thaliana] gi 23397047 gb AAN31809.1 <br>putative mitochondrial processing peptidase [Arabidopsis thaliana]<br>gi 23463071 gb AAN33205.1 <br>At3g02090/F1C9_12 [Arabidopsis thaliana] gi 25054848 gb AAN71914.1 <br>putative mitochondrial processing peptidase [Arabidopsis thaliana]<br>gi 332640240 gb AEE73761.1  probable mitochondrial-processing peptidase subunit beta [Arabidopsis thaliana] | 527  | 531  | 0         | 100.8 | 92.4 | 96.4 | mitochondrial processing peptidase          | gbpln | Arabidopsis thaliana | AT3G02090.1   Symbols: MPPBETA   Insulinase (Peptidase family M16) protein   chr3:365624-368526 FORWARD<br>LENGTH=531                                                                                                                                                                                                                               | 527  | 531  | 0         | 100.8 | 92.4 | 96.4 |
| Rsa1.0_00636.1.g17252.t1 | gb AAM64731.1  nitrilase associated protein-like [Arabidopsis thaliana]                                                                                                                                                                                                                                                                                                                                                                                                                                                                                                                                                                                                                                                                                                                                                     | 103  | 127  | 1.00E-10  | 123.3 | 68.9 | 76.7 | nitrilase associated protein-like           | gbpln | Arabidopsis thaliana | AT5G15600.1   Symbols: SP1L4   SPIRAL1-like4   chr5:5078405-5078863 FORWARD<br>LENGTH=127                                                                                                                                                                                                                                                           | 103  | 127  | 4.00E-13  | 123.3 | 68.9 | 76.7 |
| Rsa1.0_00636.1.g17253.t1 | gb EOA29756.1  hypothetical protein CARUB_v10012845mg [Capsella rubella]                                                                                                                                                                                                                                                                                                                                                                                                                                                                                                                                                                                                                                                                                                                                                    | 1519 | 1155 | 0         | 76.0  | 66.6 | 70.2 | hypothetical protein CARUB_v10012845mg      | gbpln | Capsella rubella     | AT3G02130.1   Symbols: RPK2, TOAD2, CLI1   receptor-like protein kinase 2   chr3:380726-384181 FORWARD<br>LENGTH=1151                                                                                                                                                                                                                               | 1519 | 1151 | 0         | 75.8  | 66.2 | 70.4 |
| Rsa1.0_00636.1.g17254.t1 | ref XP_002884309.1  hypothetical protein ARALYDRAFT_477457 [Arabidopsis lyrata subsp. lyrata]<br>gi 297330149 gb EFH60568.1 <br>hypothetical protein ARALYDRAFT_477457 [Arabidopsis lyrata subsp. lyrata]                                                                                                                                                                                                                                                                                                                                                                                                                                                                                                                                                                                                                   | 129  | 227  | 3.00E-32  | 176.0 | 55.0 | 61.2 | hypothetical protein ARALYDRAFT_477457      | gbpln | Arabidopsis lyrata   | AT3G02220.1   Symbols:   unknown protein; CONTAINS InterPro DOMAIN/s: Protein of unknown function DUF2039 (InterPro:IPRO19351); Has 215 Blast hits to 215 proteins in 94 species: Archae - 2; Bacteria - 2; Metazoa - 125; Fungi - 4; Plants - 38; Viruses - 0; Other Eukaryotes - 44 (source: NCBI BLink).   chr3:412210-413536 REVERSE LENGTH=227 | 129  | 227  | 3.00E-31  | 176.0 | 51.9 | 58.9 |
| Rsa1.0_00636.1.g17255.t2 | ref XP_002316078.1  predicted protein [Populus trichocarpa]<br>gi 222865118 gb EEF02249.1  predicted protein [Populus trichocarpa]                                                                                                                                                                                                                                                                                                                                                                                                                                                                                                                                                                                                                                                                                          | 416  | 358  | 1.00E-171 | 86.1  | 71.6 | 77.2 | predicted protein                           | gbpln | Populus trichocarpa  | AT3G02230.1   Symbols: RGP1, ATRGP1   reversibly glycosylated polypeptide 1   chr3:415463-417304 FORWARD<br>LENGTH=357                                                                                                                                                                                                                              | 416  | 357  | 1.00E-171 | 85.8  | 74.3 | 77.4 |
| Rsa1.0_00636.1.g17256.t1 | ref XP_002884311.1  hypothetical protein ARALYDRAFT_896190 [Arabidopsis lyrata subsp. lyrata]<br>gi 297330151 gb EFH60570.1 <br>hypothetical protein ARALYDRAFT_896190 [Arabidopsis lyrata subsp. lyrata]                                                                                                                                                                                                                                                                                                                                                                                                                                                                                                                                                                                                                   | 523  | 513  | 0         | 98.1  | 91.2 | 96.4 | hypothetical protein ARALYDRAFT_896190      | gbpln | Arabidopsis lyrata   | AT3G02250.1   Symbols:   O-fucosyltransferase family protein   chr3:424185-426376 REVERSE<br>LENGTH=512                                                                                                                                                                                                                                             | 523  | 512  | 0         | 97.9  | 91.0 | 95.4 |
| Rsa1.0_00636.1.g17257.t1 | #                                                                                                                                                                                                                                                                                                                                                                                                                                                                                                                                                                                                                                                                                                                                                                                                                           | #    | #    | #         | #     | #    | #    | -                                           | ----  | ----                 | #                                                                                                                                                                                                                                                                                                                                                   | #    | #    | #         | #     | #    | #    |
| Rsa1.0_00636.1.g17258.t8 | #                                                                                                                                                                                                                                                                                                                                                                                                                                                                                                                                                                                                                                                                                                                                                                                                                           | #    | #    | #         | #     | #    | #    | -                                           | ----  | ----                 | #                                                                                                                                                                                                                                                                                                                                                   | #    | #    | #         | #     | #    | #    |
| Rsa1.0_00636.1.g17259.t1 | #                                                                                                                                                                                                                                                                                                                                                                                                                                                                                                                                                                                                                                                                                                                                                                                                                           | #    | #    | #         | #     | #    | #    | -                                           | ----  | ----                 | #                                                                                                                                                                                                                                                                                                                                                   | #    | #    | #         | #     | #    | #    |
| Rsa1.0_00636.1.g17260.t1 | #                                                                                                                                                                                                                                                                                                                                                                                                                                                                                                                                                                                                                                                                                                                                                                                                                           | #    | #    | #         | #     | #    | #    | -                                           | ----  | ----                 | AT3G02300.1   Symbols:   Regulator of chromosome condensation (RCC1) family protein   chr3:461551-463929 FORWARD<br>LENGTH=471                                                                                                                                                                                                                      | 84   | 471  | 1.00E-11  | 560.7 | 34.5 | 44.0 |
| Rsa1.0_00636.1.g17261.t1 | ref XP_002884314.1  SEPALLATA2 [Arabidopsis lyrata subsp. lyrata]<br>gi 297330154 gb EFH60573.1 <br>SEPALLATA2 [Arabidopsis lyrata subsp. lyrata]                                                                                                                                                                                                                                                                                                                                                                                                                                                                                                                                                                                                                                                                           | 253  | 250  | 1.00E-133 | 98.8  | 94.1 | 96.4 | SEPALLATA2                                  | gbpln | Arabidopsis lyrata   | AT3G02310.1   Symbols: SEP2, AGL4   K-box region and MADS-box transcription factor family protein   chr3:464554-466687 REVERSE LENGTH=250                                                                                                                                                                                                           | 253  | 250  | 1.00E-134 | 98.8  | 92.5 | 95.3 |
| Rsa1.0_00636.1.g17262.t1 | ref XP_002882222.1  RNA binding protein [Arabidopsis lyrata subsp. lyrata]<br>gi 297328062 gb EFH58481.1 <br>RNA binding protein [Arabidopsis lyrata subsp. lyrata]                                                                                                                                                                                                                                                                                                                                                                                                                                                                                                                                                                                                                                                         | 573  | 589  | 0         | 102.8 | 90.6 | 95.3 | RNA binding protein                         | gbpln | Arabidopsis lyrata   | AT3G02320.1   Symbols:   N2.N2-dimethylguanosine tRNA methyltransferase   chr3:470097-473492 FORWARD<br>LENGTH=589                                                                                                                                                                                                                                  | 573  | 589  | 0         | 102.8 | 89.5 | 94.6 |
| Rsa1.0_00636.1.g17263.t1 | ref NP_186882.2  pentatricopeptide repeat-containing protein [Arabidopsis thaliana]<br>gi 218546764 sp Q9FWA6.2 PP207_ARA<br>TH RecName: Full=Pentatricopeptide repeat-containing protein At3g02330<br>gi 332640272 gb AEE73793.1 <br>pentatricopeptide repeat-containing protein [Arabidopsis thaliana]                                                                                                                                                                                                                                                                                                                                                                                                                                                                                                                    | 892  | 903  | 0         | 101.2 | 87.7 | 93.7 | pentatricopeptide repeat-containing protein | gbpln | Arabidopsis thaliana | AT3G02330.1   Symbols:   Pentatricopeptide repeat (PPR) superfamily protein   chr3:473861-476592 REVERSE<br>LENGTH=903                                                                                                                                                                                                                              | 892  | 903  | 0         | 101.2 | 87.7 | 93.7 |

|                          |                                                                                                                                                                                                                                                                                                                                                                                                                                                                                                                                                                                        |      |      |           |       |      |      |                                                        |       |                      |                                                                                                                                              |      |      |           |       |      |      |
|--------------------------|----------------------------------------------------------------------------------------------------------------------------------------------------------------------------------------------------------------------------------------------------------------------------------------------------------------------------------------------------------------------------------------------------------------------------------------------------------------------------------------------------------------------------------------------------------------------------------------|------|------|-----------|-------|------|------|--------------------------------------------------------|-------|----------------------|----------------------------------------------------------------------------------------------------------------------------------------------|------|------|-----------|-------|------|------|
| Rsa1.0_00636.1.g17264.t1 | refXP_002882223.1   hypothetical protein ARALYDRAFT_477467 [Arabidopsis lyrata subsp. lyrata] gi 297328063 gb EFH5482.1   hypothetical protein ARALYDRAFT_477467 [Arabidopsis lyrata subsp. lyrata]                                                                                                                                                                                                                                                                                                                                                                                    | 191  | 406  | 2.00E-38  | 212.6 | 62.8 | 72.3 | hypothetical protein ARALYDRAFT_477467                 | gbpln | Arabidopsis lyrata   | AT3G02340.1   Symbols:   RING/U-box superfamily protein   chr3:477032-478261 FORWARD LENGTH=409                                              | 191  | 409  | 6.00E-30  | 214.1 | 59.7 | 69.1 |
| Rsa1.0_00637.1.g17265.t1 | #                                                                                                                                                                                                                                                                                                                                                                                                                                                                                                                                                                                      | #    | #    | #         | #     | #    | #    | -                                                      | ----  | ----                 | #                                                                                                                                            | #    | #    | #         | #     | #    |      |
| Rsa1.0_00637.1.g17266.t1 | gb EOA26378.1   hypothetical protein CARUB_v10023356mg [Capsella rubella]                                                                                                                                                                                                                                                                                                                                                                                                                                                                                                              | 427  | 401  | 0         | 93.9  | 87.8 | 91.6 | hypothetical protein CARUB_v10023356mg                 | gbpln | Capsella rubella     | AT2G43710.1   Symbols: SSI2, FAB2   Plant stearyl-acyl-carrier-protein desaturase family protein   chr2:18120107-18122495 FORWARD LENGTH=401 | 427  | 401  | 0         | 93.9  | 87.6 | 90.9 |
| Rsa1.0_00637.1.g17267.t1 | ref NP_181898.1   concanavalin A-like lectin protein kinase-like protein [Arabidopsis thaliana] gi 75318036 sp O22833.1 LRK54_ARATH RecName: Full=L-type lectin-domain containing receptor kinase V.4; Short=Arabidopsis thaliana lectin-receptor kinase c1; Short=ALhLeCRK-c1; Short=LecRK-V.4; Flags: Precursor gi 2281100 gb AAB64036.1   putative receptor protein kinase [Arabidopsis thaliana] gi 18491245 gb AAL69447.1   At2g43700/F18O19.19 [Arabidopsis thaliana] gi 330255215 gb AEC10309.1   concanavalin A-like lectin protein kinase-like protein [Arabidopsis thaliana] | 652  | 658  | 0         | 100.9 | 77.6 | 85.9 | concanavalin A-like lectin protein kinase-like protein | gbpln | Arabidopsis thaliana | AT2G43700.1   Symbols:   Concanavalin A-like lectin protein kinase family protein   chr2:18116523-18118499 FORWARD LENGTH=658                | 652  | 658  | 0         | 100.9 | 77.6 | 85.9 |
| Rsa1.0_00637.1.g17268.t1 | ref XP_002880061.1   predicted protein [Arabidopsis lyrata subsp. lyrata] gi 297325900 gb EFH56320.1   predicted protein [Arabidopsis lyrata subsp. lyrata]                                                                                                                                                                                                                                                                                                                                                                                                                            | 433  | 631  | 1.00E-154 | 145.7 | 66.3 | 76.9 | predicted protein                                      | gbpln | Arabidopsis lyrata   | AT2G43690.1   Symbols:   Concanavalin A-like lectin protein kinase family protein   chr2:18112589-18114583 FORWARD LENGTH=664                | 433  | 664  | 1.00E-147 | 153.3 | 64.7 | 76.9 |
| Rsa1.0_00637.1.g17269.t2 | ref XP_002880059.1   hypothetical protein ARALYDRAFT_903766 [Arabidopsis lyrata subsp. lyrata] gi 297325898 gb EFH56318.1   hypothetical protein ARALYDRAFT_903766 [Arabidopsis lyrata subsp. lyrata]                                                                                                                                                                                                                                                                                                                                                                                  | 603  | 682  | 0         | 113.1 | 73.3 | 79.9 | hypothetical protein ARALYDRAFT_903766                 | gbpln | Arabidopsis lyrata   | AT2G43680.3   Symbols: IQD14   IQ-domain 14   chr2:18109302-18111587 FORWARD LENGTH=668                                                      | 603  | 668  | 0         | 110.8 | 72.6 | 79.4 |
| Rsa1.0_00637.1.g17270.t1 | ref XP_002880057.1   Sas10/U3 ribonucleoprotein family protein [Arabidopsis lyrata subsp. lyrata] gi 297325896 gb EFH56316.1   Sas10/U3 ribonucleoprotein family protein [Arabidopsis lyrata subsp. lyrata]                                                                                                                                                                                                                                                                                                                                                                            | 650  | 662  | 0         | 101.8 | 76.0 | 84.6 | Sas10/U3 ribonucleoprotein family protein              | gbpln | Arabidopsis lyrata   | AT2G43650.1   Symbols: EMB2777   Sas10/U3 ribonucleoprotein (Utp) family protein   chr2:18099430-18103147 FORWARD LENGTH=654                 | 650  | 654  | 0         | 100.6 | 72.8 | 82.0 |
| Rsa1.0_00637.1.g17271.t1 | ref XP_002881922.1   signal recognition particle 14 kDa family protein [Arabidopsis lyrata subsp. lyrata] gi 297327761 gb EFH58181.1   signal recognition particle 14 kDa family protein [Arabidopsis lyrata subsp. lyrata]                                                                                                                                                                                                                                                                                                                                                            | 126  | 118  | 1.00E-49  | 93.7  | 86.5 | 89.7 | signal recognition particle 14 kDa family protein      | gbpln | Arabidopsis lyrata   | AT2G43640.2   Symbols:   Signal recognition particle, SRP9/SRP14 subunit   chr2:18097614-18098619 REVERSE LENGTH=121                         | 126  | 121  | 6.00E-51  | 96.0  | 84.9 | 88.1 |
| Rsa1.0_00637.1.g17272.t1 | dbj BAK48742.1   endochitinase [Brassica rapa subsp. chinensis]                                                                                                                                                                                                                                                                                                                                                                                                                                                                                                                        | 275  | 278  | 1.00E-153 | 101.1 | 97.5 | 98.5 | endochitinase                                          | gbpln | Brassica rapa        | AT2G43620.1   Symbols:   Chitinase family protein   chr2:18093954-18095025 REVERSE LENGTH=283                                                | 275  | 283  | 1.00E-141 | 102.9 | 86.2 | 91.3 |
| Rsa1.0_00637.1.g17273.t1 | #                                                                                                                                                                                                                                                                                                                                                                                                                                                                                                                                                                                      | #    | #    | #         | #     | #    | #    | -                                                      | ----  | ----                 | #                                                                                                                                            | #    | #    | #         | #     | #    |      |
| Rsa1.0_00637.1.g17274.t2 | ref XP_002881920.1   glycoside hydrolase family 19 protein [Arabidopsis lyrata subsp. lyrata] gi 297327759 gb EFH58179.1   glycoside hydrolase family 19 protein [Arabidopsis lyrata subsp. lyrata]                                                                                                                                                                                                                                                                                                                                                                                    | 269  | 281  | 1.00E-148 | 104.5 | 95.2 | 96.7 | glycoside hydrolase family 19 protein                  | gbpln | Arabidopsis lyrata   | AT2G43610.1   Symbols:   Chitinase family protein   chr2:18088058-18089184 REVERSE LENGTH=281                                                | 269  | 281  | 1.00E-149 | 104.5 | 94.1 | 96.3 |
| Rsa1.0_00637.1.g17275.t1 | gb AAD26943.1   putative retroelement pol polyprotein [Arabidopsis thaliana]                                                                                                                                                                                                                                                                                                                                                                                                                                                                                                           | 1448 | 1454 | 0         | 100.4 | 67.5 | 82.0 | putative retroelement pol polyprotein                  | gbpln | Arabidopsis thaliana | AT4G23160.1   Symbols: CRK8   cysteine-rich RLK (RECEPTOR-like protein kinase) 8   chr4:12129485-12134086 FORWARD LENGTH=1262                | 1448 | 1262 | 1.00E-172 | 87.2  | 20.6 | 26.6 |
| Rsa1.0_00637.1.g17276.t1 | ref XP_002881919.1   glycoside hydrolase family 19 protein [Arabidopsis lyrata subsp. lyrata] gi 297327758 gb EFH58178.1   glycoside hydrolase family 19 protein [Arabidopsis lyrata subsp. lyrata]                                                                                                                                                                                                                                                                                                                                                                                    | 183  | 269  | 2.00E-93  | 147.0 | 89.1 | 92.9 | glycoside hydrolase family 19 protein                  | gbpln | Arabidopsis lyrata   | AT2G43600.1   Symbols:   Chitinase family protein   chr2:18086049-18087018 REVERSE LENGTH=273                                                | 183  | 273  | 6.00E-93  | 149.2 | 89.6 | 93.4 |
| Rsa1.0_00637.1.g17277.t1 | #                                                                                                                                                                                                                                                                                                                                                                                                                                                                                                                                                                                      | #    | #    | #         | #     | #    | #    | -                                                      | ----  | ----                 | #                                                                                                                                            | #    | #    | #         | #     | #    |      |
| Rsa1.0_00637.1.g17278.t1 | gb EOA26434.1   hypothetical protein CARUB_v10025330mg [Capsella rubella]                                                                                                                                                                                                                                                                                                                                                                                                                                                                                                              | 280  | 280  | 1.00E-110 | 100.0 | 66.4 | 80.4 | hypothetical protein CARUB_v10025330mg                 | gbpln | Capsella rubella     | AT2G43600.1   Symbols:   Chitinase family protein   chr2:18086049-18087018 REVERSE LENGTH=273                                                | 280  | 273  | 1.00E-109 | 97.5  | 65.4 | 78.9 |
| Rsa1.0_00638.1.g17279.t1 | #                                                                                                                                                                                                                                                                                                                                                                                                                                                                                                                                                                                      | #    | #    | #         | #     | #    | #    | -                                                      | ----  | ----                 | #                                                                                                                                            | #    | #    | #         | #     | #    |      |

|                          |                                                                                                                                                                                                                                                                                                                                                                                                                                                                                                                          |      |      |           |       |      |      |                                                                        |       |                      |                                                                                                                                                                                                                                                                                                                                                                     |      |      |           |       |      |      |  |
|--------------------------|--------------------------------------------------------------------------------------------------------------------------------------------------------------------------------------------------------------------------------------------------------------------------------------------------------------------------------------------------------------------------------------------------------------------------------------------------------------------------------------------------------------------------|------|------|-----------|-------|------|------|------------------------------------------------------------------------|-------|----------------------|---------------------------------------------------------------------------------------------------------------------------------------------------------------------------------------------------------------------------------------------------------------------------------------------------------------------------------------------------------------------|------|------|-----------|-------|------|------|--|
| Rsa1.0_00638.1.g17280.t1 | refXP_002876582.1   hypothetical protein ARALYDRAFT_486551 [Arabidopsis lyrata subsp. lyrata] gi 297322420 gb EFH52841.1   hypothetical protein ARALYDRAFT_486551 [Arabidopsis lyrata subsp. lyrata]                                                                                                                                                                                                                                                                                                                     | 463  | 494  | 1.00E-103 | 106.7 | 46.7 | 60.9 | hypothetical protein ARALYDRAFT_486551                                 | gbpln | Arabidopsis lyrata   | AT3G60790.1   Symbols: F-box family protein   chr3:22464623-22466948 FORWARD LENGTH=488                                                                                                                                                                                                                                                                             | 463  | 488  | 4.00E-95  | 105.4 | 44.3 | 57.7 |  |
| Rsa1.0_00638.1.g17281.t1 | gb EOA24450.1   hypothetical protein CARUB_v10017708mg [Capsella rubella]                                                                                                                                                                                                                                                                                                                                                                                                                                                | 304  | 306  | 1.00E-157 | 100.7 | 92.4 | 96.7 | hypothetical protein CARUB_v10017708mg                                 | gbpln | Capsella rubella     | AT3G60800.1   Symbols: DHHC-type zinc finger family protein   chr3:22467486-22469273 REVERSE LENGTH=307                                                                                                                                                                                                                                                             | 304  | 307  | 1.00E-156 | 101.0 | 91.1 | 94.7 |  |
| Rsa1.0_00638.1.g17282.t1 | emb CAA47753.1   proteasome subunit [Arabidopsis thaliana]                                                                                                                                                                                                                                                                                                                                                                                                                                                               | 223  | 230  | 1.00E-123 | 103.1 | 94.6 | 97.3 | proteasome subunit                                                     | gbpln | Arabidopsis thaliana | AT3G60820.3   Symbols: PBF1   N-terminal nucleophile aminohydrolases (Ntn hydrolases) superfamily protein   chr3:22472038-22473809 REVERSE LENGTH=223                                                                                                                                                                                                               | 223  | 223  | 1.00E-125 | 100.0 | 94.6 | 97.3 |  |
| Rsa1.0_00638.1.g17283.t1 | emb CAB82687.1   actin-like protein [Arabidopsis thaliana]                                                                                                                                                                                                                                                                                                                                                                                                                                                               | 198  | 368  | 1.00E-98  | 185.9 | 87.9 | 92.9 | actin-like protein                                                     | gbpln | Arabidopsis thaliana | AT3G60830.1   Symbols: ATARP7, ARP7   actin-related protein 7   chr3:22474298-22476000 FORWARD LENGTH=363                                                                                                                                                                                                                                                           | 198  | 363  | 4.00E-96  | 183.3 | 86.9 | 90.4 |  |
| Rsa1.0_00638.1.g17284.t1 | sp Q9LZY0.2 MA654.ARATH RecName: Full=65-kDa microtubule-associated protein 4; Short=AtMAP65-4                                                                                                                                                                                                                                                                                                                                                                                                                           | 681  | 677  | 0         | 99.4  | 83.6 | 90.7 | RecName: Full=65-kDa microtubule-associated protein 4; Short=AtMAP65-4 | ----- | -----                | AT3G60840.1   Symbols: MAP65-4   microtubule-associated protein 65-4   chr3:22477573-22480463 REVERSE LENGTH=648                                                                                                                                                                                                                                                    | 681  | 648  | 0         | 95.2  | 79.6 | 86.5 |  |
| Rsa1.0_00638.1.g17285.t1 | gb EOA22050.1   hypothetical protein CARUB_v10002590mg, partial [Capsella rubella]                                                                                                                                                                                                                                                                                                                                                                                                                                       | 223  | 254  | 2.00E-39  | 113.9 | 33.6 | 49.3 | hypothetical protein CARUB_v10002590mg, partial                        | gbpln | Capsella rubella     | AT4G29090.1   Symbols:   Ribonuclease H-like superfamily protein   chr4:14333528-14335255 FORWARD LENGTH=575                                                                                                                                                                                                                                                        | 223  | 575  | 3.00E-39  | 257.8 | 33.6 | 48.0 |  |
| Rsa1.0_00638.1.g17286.t3 | refXP_002874898.1   transducin family protein [Arabidopsis lyrata subsp. lyrata] gi 297320735 gb EFH51157.1   transducin family protein [Arabidopsis lyrata subsp. lyrata]                                                                                                                                                                                                                                                                                                                                               | 224  | 327  | 1.00E-44  | 146.0 | 39.7 | 43.3 | transducin family protein                                              | gbpln | Arabidopsis lyrata   | AT4G02730.1   Symbols:   Transducin/WD40 repeat-like superfamily protein   chr4:1207759-1209066 FORWARD LENGTH=333                                                                                                                                                                                                                                                  | 224  | 333  | 2.00E-46  | 148.7 | 38.8 | 43.3 |  |
| Rsa1.0_00638.1.g17287.t3 | refXP_002876588.1   dihydrodipicolinate synthase 1 [Arabidopsis lyrata subsp. lyrata] gi 297322426 gb EFH52847.1   dihydrodipicolinate synthase 1 [Arabidopsis lyrata subsp. lyrata]                                                                                                                                                                                                                                                                                                                                     | 365  | 365  | 0         | 100.0 | 90.4 | 95.9 | dihydrodipicolinate synthase 1                                         | gbpln | Arabidopsis lyrata   | AT3G60880.2   Symbols: DHDP5, DHDP5   dihydrodipicolinate synthase 1   chr3:22495086-22496542 FORWARD LENGTH=365                                                                                                                                                                                                                                                    | 365  | 365  | 0         | 100.0 | 89.9 | 95.9 |  |
| Rsa1.0_00638.1.g17288.t1 | ref NP_001118868.1   protein little zipper 2 [Arabidopsis thaliana] gi 332646602 gb AEE80123.1   protein little zipper 2 [Arabidopsis thaliana]                                                                                                                                                                                                                                                                                                                                                                          | 93   | 106  | 6.00E-31  | 114.0 | 79.6 | 87.1 | protein little zipper 2                                                | gbpln | Arabidopsis thaliana | AT3G60890.2   Symbols: ZPR2   protein binding   chr3:22497024-22497442 REVERSE LENGTH=106                                                                                                                                                                                                                                                                           | 93   | 106  | 1.00E-33  | 114.0 | 79.6 | 87.1 |  |
| Rsa1.0_00638.1.g17289.t1 | refXP_002878354.1   hypothetical protein ARALYDRAFT_324535 [Arabidopsis lyrata subsp. lyrata] gi 297324192 gb EFH54613.1   hypothetical protein ARALYDRAFT_324535 [Arabidopsis lyrata subsp. lyrata]                                                                                                                                                                                                                                                                                                                     | 2620 | 2860 | 0         | 109.2 | 82.2 | 88.4 | hypothetical protein ARALYDRAFT_324535                                 | gbpln | Arabidopsis lyrata   | AT2G45540.1   Symbols:   WD-40 repeat family protein / beige-related   chr2:18757881-18772229 REVERSE LENGTH=2946                                                                                                                                                                                                                                                   | 2620 | 2946 | 0         | 112.4 | 76.7 | 85.3 |  |
| Rsa1.0_00638.1.g17290.t1 | refXP_002882021.1   CYP76C2 [Arabidopsis lyrata subsp. lyrata] gi 297327860 gb EFH58280.1   CYP76C2 [Arabidopsis lyrata subsp. lyrata]                                                                                                                                                                                                                                                                                                                                                                                   | 365  | 512  | 1.00E-140 | 140.3 | 66.8 | 81.6 | CYP76C2                                                                | gbpln | Arabidopsis lyrata   | AT2G45570.1   Symbols: CYP76C2   cytochrome P450, family 76, subfamily C, polypeptide 2   chr2:18779935-18781922 REVERSE LENGTH=512                                                                                                                                                                                                                                 | 365  | 512  | 1.00E-138 | 140.3 | 64.4 | 80.5 |  |
| Rsa1.0_00638.1.g17291.t1 | # # # # # # # # - ---- # # # # # #                                                                                                                                                                                                                                                                                                                                                                                                                                                                                       |      |      |           |       |      |      |                                                                        |       |                      |                                                                                                                                                                                                                                                                                                                                                                     |      |      |           |       |      |      |  |
| Rsa1.0_00639.1.g17292.t1 | ref NP_181002.1   gibberellin 2-beta-dioxygenase 3 [Arabidopsis thaliana] gi 49035761 sp O64692.1 G2OX3.ARATH RecName: Full=Gibberellin 2-beta-dioxygenase 3; AltName: Full=GA 2-oxidase 3; AltName: Full=Gibberellin 2-beta-hydroxylase 3; AltName: Full=Gibberellin 2-oxidase 3 gi 4678370 emb CAB41009.1   GA 2-oxidase [Arabidopsis thaliana] gi 20197080 gb AAM14908.1   putative gibberellin 2-oxidase [Arabidopsis thaliana] gi 330253895 gb AEC08989.1   gibberellin 2-beta-dioxygenase 3 [Arabidopsis thaliana] | 326  | 335  | 1.00E-150 | 102.8 | 78.8 | 87.4 | gibberellin 2-beta-dioxygenase 3                                       | gbpln | Arabidopsis thaliana | AT2G34555.1   Symbols: ATGA2OX3, GA2OX3   gibberellin 2-oxidase 3   chr2:14557102-14558682 FORWARD LENGTH=335                                                                                                                                                                                                                                                       | 326  | 335  | 1.00E-153 | 102.8 | 78.8 | 87.4 |  |
| Rsa1.0_00639.1.g17293.t1 | refXP_002879501.1   binding protein [Arabidopsis lyrata subsp. lyrata] gi 297325340 gb EFH55760.1   binding protein [Arabidopsis lyrata subsp. lyrata]                                                                                                                                                                                                                                                                                                                                                                   | 286  | 290  | 1.00E-136 | 101.4 | 87.4 | 93.7 | binding protein                                                        | gbpln | Arabidopsis lyrata   | AT2G34540.2   Symbols:   unknown protein; BEST Arabidopsis thaliana protein match is: unknown protein (TAIR:AT2G34530.1); Has 35333 Blast hits to 34131 proteins in 2444 species: Archaea - 798; Bacteria - 22429; Metazoa - 974; Fungi - 991; Plants - 531; Viruses - 0; Other Eukaryotes - 9610 (source: NCBI BLINK).   chr2:14550699-14552037 FORWARD LENGTH=288 | 286  | 288  | 1.00E-134 | 100.7 | 82.2 | 91.6 |  |



|                          |                                                                                                                                                                                                                                                                                                                                                                                                                                                                                                                                                                                                                                                                                                                                                                                                                                                                                                                                                                                                                                                                                                                                                                                                                                                                                                                                                                                                                                                                                                                                                                                                                                                                                                                                                                                                               |     |     |           |       |      |       |                                          |       |                      |                                                                                                                                                                                                                                                                                                                                                                                                                                                                                                                                                                           |     |     |           |       |      |       |
|--------------------------|---------------------------------------------------------------------------------------------------------------------------------------------------------------------------------------------------------------------------------------------------------------------------------------------------------------------------------------------------------------------------------------------------------------------------------------------------------------------------------------------------------------------------------------------------------------------------------------------------------------------------------------------------------------------------------------------------------------------------------------------------------------------------------------------------------------------------------------------------------------------------------------------------------------------------------------------------------------------------------------------------------------------------------------------------------------------------------------------------------------------------------------------------------------------------------------------------------------------------------------------------------------------------------------------------------------------------------------------------------------------------------------------------------------------------------------------------------------------------------------------------------------------------------------------------------------------------------------------------------------------------------------------------------------------------------------------------------------------------------------------------------------------------------------------------------------|-----|-----|-----------|-------|------|-------|------------------------------------------|-------|----------------------|---------------------------------------------------------------------------------------------------------------------------------------------------------------------------------------------------------------------------------------------------------------------------------------------------------------------------------------------------------------------------------------------------------------------------------------------------------------------------------------------------------------------------------------------------------------------------|-----|-----|-----------|-------|------|-------|
| Rsa1.0_00639.1.g17294.t1 | gb AAC26706.1  hypothetical protein [Arabidopsis thaliana]                                                                                                                                                                                                                                                                                                                                                                                                                                                                                                                                                                                                                                                                                                                                                                                                                                                                                                                                                                                                                                                                                                                                                                                                                                                                                                                                                                                                                                                                                                                                                                                                                                                                                                                                                    | 261 | 266 | 1.00E-110 | 101.9 | 76.6 | 85.8  | hypothetical protein                     | gbpln | Arabidopsis thaliana | AT2G34530.1   Symbols:   unknown protein; FUNCTIONS IN: molecular_function unknown; INVOLVED IN: biological_process unknown; LOCATED IN: endomembrane system; EXPRESSED IN: flower; EXPRESSED DURING: petal differentiation and expansion stage; BEST Arabidopsis thaliana protein match is: unknown protein (TAIR:AT2G34540.2); Has 35333 Blast hits to 34131 proteins in 2444 species: Archae - 798; Bacteria - 22429; Metazoa - 974; Fungi - 991; Plants - 531; Viruses - 0; Other Eukaryotes - 9610 (source: NCBI BLink).   chr2:14549141-14550217 REVERSE LENGTH=282 | 261 | 282 | 1.00E-103 | 108.0 | 73.6 | 82.0  |
| Rsa1.0_00639.1.g17295.t1 | ref XP_002881341.1  hypothetical protein ARALYDRAFT_482413 [Arabidopsis lyrata subsp. lyrata] gi 297327180 gb EFH57600.1  hypothetical protein ARALYDRAFT_482413 [Arabidopsis lyrata subsp. lyrata]                                                                                                                                                                                                                                                                                                                                                                                                                                                                                                                                                                                                                                                                                                                                                                                                                                                                                                                                                                                                                                                                                                                                                                                                                                                                                                                                                                                                                                                                                                                                                                                                           | 159 | 164 | 2.00E-63  | 103.1 | 80.5 | 86.8  | hypothetical protein ARALYDRAFT_482413   | gbpln | Arabidopsis lyrata   | AT2G34520.1   Symbols: RPS14   mitochondrial ribosomal protein S14   chr2:14548218-14548712 REVERSE LENGTH=164                                                                                                                                                                                                                                                                                                                                                                                                                                                            | 159 | 164 | 3.00E-63  | 103.1 | 77.4 | 85.5  |
| Rsa1.0_00639.1.g17296.t1 | ref NP_180998.1  uncharacterized protein [Arabidopsis thaliana] gi 1327242.1 gb AAK17149.1 AF325081.1 unknown protein [Arabidopsis thaliana] gi 3128209 gb AAC26689.1  unknown protein [Arabidopsis thaliana] gi 330253889 gb AEC08983.1  uncharacterized protein AT2G34510 [Arabidopsis thaliana] ref NP_180997.1  cytochrome P450, family 710, subfamily A [Arabidopsis thaliana] gi 75278303 sp O64697.1 C7101_ARATH RecName: Full=Cytochrome P450 710A1; AltName: Full=C-22 sterol desaturase gi 3128210 gb AAC26690.1  putative cytochrome P450 [Arabidopsis thaliana] gi 20197156 gb AAM14944.1  putative cytochrome P450 [Arabidopsis thaliana] gi 25083451 gb AAN72080.1  putative cytochrome P450 [Arabidopsis thaliana] gi 34365731 gb AAQ65177.1 At2g34500 [Arabidopsis thaliana] gi 84468537 dbj BAE71351.1  CYP710 [Arabidopsis thaliana] gi 330253888 gb AEC08982.1  cytochrome P450 710A1 [Arabidopsis thaliana] ref NP_180995.1  60S ribosomal protein L18a-2 [Arabidopsis thaliana] gi 297826909 ref XP_002881337.1  60S ribosomal protein L18A [Arabidopsis lyrata subsp. lyrata] gi 21431842 sp P51418.2 R18A2_ARATH RecName: Full=60S ribosomal protein L18a-2 gi 3128228 gb AAC26708.1  60S ribosomal protein L18A [Arabidopsis thaliana] gi 14596031 gb AAK68743.1  Unknown protein [Arabidopsis thaliana] gi 20197170 gb AAM14956.1  60S ribosomal protein L18A [Arabidopsis thaliana] gi 21539567 gb AAM53336.1  60S ribosomal protein L18A [Arabidopsis thaliana] gi 23197736 gb AAN15395.1  60S ribosomal protein L18A [Arabidopsis thaliana] gi 30102899 gb AAP21367.1  At2g34480 [Arabidopsis thaliana] gi 297327176 gb EFH57596.1  60S ribosomal protein L18A [Arabidopsis lyrata subsp. lyrata] gi 330253886 gb AEC08980.1  60S ribosomal protein L18a-2 [Arabidopsis thaliana] | 422 | 401 | 0         | 95.0  | 85.1 | 91.2  | uncharacterized protein                  | gbpln | Arabidopsis thaliana | AT2G34510.1   Symbols:   Protein of unknown function, DUF642   chr2:14544114-14546732 REVERSE LENGTH=401                                                                                                                                                                                                                                                                                                                                                                                                                                                                  | 422 | 401 | 0         | 95.0  | 85.1 | 91.2  |
| Rsa1.0_00639.1.g17297.t1 | ref NP_180995.1  60S ribosomal protein L18a-2 [Arabidopsis thaliana] gi 297826909 ref XP_002881337.1  60S ribosomal protein L18A [Arabidopsis lyrata subsp. lyrata] gi 21431842 sp P51418.2 R18A2_ARATH RecName: Full=60S ribosomal protein L18a-2 gi 3128228 gb AAC26708.1  60S ribosomal protein L18A [Arabidopsis thaliana] gi 14596031 gb AAK68743.1  Unknown protein [Arabidopsis thaliana] gi 20197170 gb AAM14956.1  60S ribosomal protein L18A [Arabidopsis thaliana] gi 21539567 gb AAM53336.1  60S ribosomal protein L18A [Arabidopsis thaliana] gi 23197736 gb AAN15395.1  60S ribosomal protein L18A [Arabidopsis thaliana] gi 30102899 gb AAP21367.1  At2g34480 [Arabidopsis thaliana] gi 297327176 gb EFH57596.1  60S ribosomal protein L18A [Arabidopsis lyrata subsp. lyrata] gi 330253886 gb AEC08980.1  60S ribosomal protein L18a-2 [Arabidopsis thaliana]                                                                                                                                                                                                                                                                                                                                                                                                                                                                                                                                                                                                                                                                                                                                                                                                                                                                                                                                 | 501 | 495 | 0         | 98.8  | 85.4 | 92.2  | cytochrome P450, family 710, subfamily A | gbpln | Arabidopsis thaliana | AT2G34500.1   Symbols: CYP710A1   cytochrome P450, family 710, subfamily A, polypeptide 1   chr2:14539712-14541199 REVERSE LENGTH=495                                                                                                                                                                                                                                                                                                                                                                                                                                     | 501 | 495 | 0         | 98.8  | 85.4 | 92.2  |
| Rsa1.0_00639.1.g17298.t1 | ribosomal protein L18A [Arabidopsis thaliana] gi 21539567 gb AAM53336.1  60S ribosomal protein L18A [Arabidopsis thaliana] gi 23197736 gb AAN15395.1  60S ribosomal protein L18A [Arabidopsis thaliana] gi 30102899 gb AAP21367.1  At2g34480 [Arabidopsis thaliana] gi 297327176 gb EFH57596.1  60S ribosomal protein L18A [Arabidopsis lyrata subsp. lyrata] gi 330253886 gb AEC08980.1  60S ribosomal protein L18a-2 [Arabidopsis thaliana]                                                                                                                                                                                                                                                                                                                                                                                                                                                                                                                                                                                                                                                                                                                                                                                                                                                                                                                                                                                                                                                                                                                                                                                                                                                                                                                                                                 | 178 | 178 | 1.00E-100 | 100.0 | 98.3 | 100.0 | 60S ribosomal protein L18a-2             | gbpln | Arabidopsis lyrata   | AT2G34480.1   Symbols:   Ribosomal protein L18ae/LX family protein   chr2:14532916-14534161 REVERSE LENGTH=178                                                                                                                                                                                                                                                                                                                                                                                                                                                            | 178 | 178 | 1.00E-102 | 100.0 | 98.3 | 100.0 |

|                           |                                                                                                                                                                                                                                                                                                                                                                             |      |      |           |       |      |       |                                                                                                                                                                                 |       |                      |                                                                                                                                                 |      |      |           |       |      |      |
|---------------------------|-----------------------------------------------------------------------------------------------------------------------------------------------------------------------------------------------------------------------------------------------------------------------------------------------------------------------------------------------------------------------------|------|------|-----------|-------|------|-------|---------------------------------------------------------------------------------------------------------------------------------------------------------------------------------|-------|----------------------|-------------------------------------------------------------------------------------------------------------------------------------------------|------|------|-----------|-------|------|------|
| Rsa1.0_00639.1.g17299.t1  | ref[XP_002279938.1] PREDICTED: eukaryotic translation initiation factor 1A-like [Vitis vinifera] gi 225459517 ref[XP_002285844.1] PREDICTED: eukaryotic translation initiation factor 1A [Vitis vinifera] gi 147807310 emb CAN73005.1  hypothetical protein VITISV_021007 [Vitis vinifera] gi 147821636 emb CAN70425.1  hypothetical protein VITISV_033730 [Vitis vinifera] | 148  | 145  | 3.00E-51  | 98.0  | 70.9 | 81.8  | PREDICTED: eukaryotic translation initiation factor 1A-like                                                                                                                     | gbpln | Vitis vinifera       | AT2G04520.1   Symbols:   Nucleic acid-binding, OB-fold-like protein   chr2:1574802-1575239 REVERSE LENGTH=145                                   | 148  | 145  | 7.00E-49  | 98.0  | 68.9 | 79.7 |
| Rsa1.0_00639.1.g17300.t1  | sp P13851.1 CB21_SINAL RecName: Full=Chlorophyll a-b binding protein 1, chloroplastic; AltName: Full=LHCII type I CAB-1; Short=LHCP; Flags: Precursor gi 21138 emb CAA34459.1  unnamed protein product [Sinapis alba] gi 21140 emb CAA33903.1  chlorophyll a/b-binding polypeptide [Sinapis alba]                                                                           | 232  | 266  | 1.00E-131 | 114.7 | 99.1 | 100.0 | RecName: Full=Chlorophyll a-b binding protein 1, chloroplastic; AltName: Full=LHCII type I CAB-1; Short=LHCP; Flags: Precursor gi 21138 emb CAA34459.1  unnamed protein product | gbpln | Sinapis alba         | AT2G34430.1   Symbols: LHB1B1, LHCB1.4   light-harvesting chlorophyll-protein complex II subunit B1   chr2:14524818-14525618 FORWARD LENGTH=266 | 232  | 266  | 1.00E-131 | 114.7 | 97.0 | 99.1 |
| Rsa1.0_00639.1.g17301.t1  | sp P13851.1 CB21_SINAL RecName: Full=Chlorophyll a-b binding protein 1, chloroplastic; AltName: Full=LHCII type I CAB-1; Short=LHCP; Flags: Precursor gi 21138 emb CAA34459.1  unnamed protein product [Sinapis alba] gi 21140 emb CAA33903.1  chlorophyll a/b-binding polypeptide [Sinapis alba]                                                                           | 266  | 266  | 1.00E-151 | 100.0 | 99.6 | 99.6  | RecName: Full=Chlorophyll a-b binding protein 1, chloroplastic; AltName: Full=LHCII type I CAB-1; Short=LHCP; Flags: Precursor gi 21138 emb CAA34459.1  unnamed protein product | gbpln | Sinapis alba         | AT2G34430.1   Symbols: LHB1B1, LHCB1.4   light-harvesting chlorophyll-protein complex II subunit B1   chr2:14524818-14525618 FORWARD LENGTH=266 | 266  | 266  | 1.00E-149 | 100.0 | 96.6 | 98.1 |
| Rsa1.0_00639.1.g17302.t6  | ref[XP_002879496.1] pentatricopeptide repeat-containing protein [Arabidopsis lyrata subsp. lyrata] gi 297325335 gb EFH55755.1  pentatricopeptide repeat-containing protein [Arabidopsis lyrata subsp. lyrata]                                                                                                                                                               | 880  | 617  | 0         | 70.1  | 55.6 | 61.8  | pentatricopeptide repeat-containing protein                                                                                                                                     | gbpln | Arabidopsis lyrata   | AT2G34400.1   Symbols:   Pentatricopeptide repeat (PPR-like) superfamily protein   chr2:14516226-14518186 FORWARD LENGTH=621                    | 880  | 621  | 0         | 70.6  | 54.8 | 61.7 |
| Rsa1.0_00639.1.g17303.t1  | gb ACD75049.1  aquaporin [Arabidopsis thaliana]                                                                                                                                                                                                                                                                                                                             | 282  | 282  | 1.00E-157 | 100.0 | 98.2 | 99.3  | aquaporin                                                                                                                                                                       | gbpln | Arabidopsis thaliana | AT2G34390.1   Symbols: NIP2.1, NLM4   NOD26-like intrinsic protein 2.1   chr2:14514617-14515793 REVERSE LENGTH=288                              | 282  | 288  | 1.00E-144 | 102.1 | 88.3 | 95.7 |
| Rsa1.0_00639.1.g17304.t13 | ref NP_174267.4  Leucine-rich repeat transmembrane protein kinase [Arabidopsis thaliana] gi 332193002 gb AE31123.1  Leucine-rich repeat transmembrane protein kinase [Arabidopsis thaliana]                                                                                                                                                                                 | 923  | 1078 | 0         | 116.8 | 73.3 | 85.7  | Leucine-rich repeat transmembrane protein kinase                                                                                                                                | gbpln | Arabidopsis thaliana | AT1G29740.1   Symbols:   Leucine-rich repeat transmembrane protein kinase   chr1:10407379-10412997 REVERSE LENGTH=1078                          | 923  | 1078 | 0         | 116.8 | 73.3 | 85.7 |
| Rsa1.0_00639.1.g17305.t1  | ref XP_002879493.1  mate efflux family protein [Arabidopsis lyrata subsp. lyrata] gi 297325332 gb EFH55752.1  mate efflux family protein [Arabidopsis lyrata subsp. lyrata]                                                                                                                                                                                                 | 483  | 473  | 0         | 97.9  | 82.6 | 90.3  | mate efflux family protein                                                                                                                                                      | gbpln | Arabidopsis lyrata   | AT2G34360.1   Symbols:   MATE efflux family protein   chr2:14507294-14510231 FORWARD LENGTH=480                                                 | 483  | 480  | 0         | 99.4  | 83.9 | 91.5 |
| Rsa1.0_00639.1.g17306.t2  | gb EOA26471.1  hypothetical protein CARUB_v10022520mg [Capsella rubella]                                                                                                                                                                                                                                                                                                    | 1402 | 1281 | 0         | 91.4  | 76.3 | 82.5  | hypothetical protein CARUB_v10022520mg                                                                                                                                          | gbpln | Capsella rubella     | AT2G34357.1   Symbols:   ARM repeat superfamily protein   chr2:14499236-14505555 FORWARD LENGTH=1280                                            | 1402 | 1280 | 0         | 91.3  | 76.9 | 82.5 |
| Rsa1.0_00639.1.g17307.t1  | ref XP_002881332.1  hypothetical protein ARALYDRAFT_482377 [Arabidopsis lyrata subsp. lyrata] gi 297327171 gb EFH57591.1  hypothetical protein ARALYDRAFT_482377 [Arabidopsis lyrata subsp. lyrata]                                                                                                                                                                         | 134  | 134  | 5.00E-41  | 100.0 | 68.7 | 82.1  | hypothetical protein ARALYDRAFT_482377                                                                                                                                          | gbpln | Arabidopsis lyrata   | AT2G34340.1   Symbols:   Protein of unknown function (DUF2431)   chr2:14489032-14489442 REVERSE LENGTH=136                                      | 134  | 136  | 3.00E-38  | 101.5 | 67.2 | 78.4 |
| Rsa1.0_00640.1.g17308.t1  | gb EOA32454.1  hypothetical protein CARUB_v10015730mg [Capsella rubella]                                                                                                                                                                                                                                                                                                    | 165  | 543  | 3.00E-20  | 329.1 | 28.5 | 41.8  | hypothetical protein CARUB_v10015730mg                                                                                                                                          | gbpln | Capsella rubella     | AT1G52950.1   Symbols:   Nucleic acid-binding, OB-fold-like protein   chr1:19725483-19728007 FORWARD LENGTH=566                                 | 165  | 566  | 5.00E-15  | 343.0 | 20.6 | 40.0 |
| Rsa1.0_00640.1.g17309.t1  | gb EOA16073.1  hypothetical protein CARUB_v10004206mg [Capsella rubella]                                                                                                                                                                                                                                                                                                    | 728  | 763  | 0         | 104.8 | 44.6 | 51.6  | hypothetical protein CARUB_v10004206mg                                                                                                                                          | gbpln | Capsella rubella     | AT3G51690.1   Symbols:   PIF1 helicase   chr3:19176731-19178107 REVERSE LENGTH=331                                                              | 728  | 331  | 4.00E-75  | 45.5  | 19.4 | 26.5 |
| Rsa1.0_00640.1.g17310.t1  | ref XP_003617633.1  hypothetical protein MTR_5g093740 [Medicago truncatula] gi 355518968 gb AET00592.1  hypothetical protein MTR_5g093740 [Medicago truncatula]                                                                                                                                                                                                             | 414  | 525  | 8.00E-86  | 126.8 | 41.8 | 58.5  | hypothetical protein MTR_5g093740                                                                                                                                               | gbpln | Medicago truncatula  | AT5G56080.1   Symbols:   Domain of unknown function (DUF2431)   chr5:22704008-22704892 FORWARD LENGTH=220                                       | 414  | 220  | 2.00E-62  | 53.1  | 28.3 | 34.1 |
| Rsa1.0_00640.1.g17311.t1  | gb AFH08366.1  nicotianamine synthase 2 [Arabidopsis halleri subsp. halleri]                                                                                                                                                                                                                                                                                                | 320  | 320  | 1.00E-174 | 100.0 | 91.3 | 97.2  | nicotianamine synthase 2                                                                                                                                                        | gbpln | Arabidopsis halleri  | AT5G56080.1   Symbols: ATNAS2, NAS2   nicotianamine synthase 2   chr5:22711402-22712364 REVERSE LENGTH=320                                      | 320  | 320  | 1.00E-175 | 100.0 | 90.3 | 96.9 |

| Rsa1.0_00640.1.g17312.t1 | #                                                                                                                                                                                                                                                                                                                                                                                                                                                                                                                                                                                                                                                                                                                                                                                                                                                            | #   | #   | #         | #     | #    | #    | -                                                           | ----  | ----                 | #                                                                                                                                                                                                                                                              | #   | #   | #         | #     | #    |      |
|--------------------------|--------------------------------------------------------------------------------------------------------------------------------------------------------------------------------------------------------------------------------------------------------------------------------------------------------------------------------------------------------------------------------------------------------------------------------------------------------------------------------------------------------------------------------------------------------------------------------------------------------------------------------------------------------------------------------------------------------------------------------------------------------------------------------------------------------------------------------------------------------------|-----|-----|-----------|-------|------|------|-------------------------------------------------------------|-------|----------------------|----------------------------------------------------------------------------------------------------------------------------------------------------------------------------------------------------------------------------------------------------------------|-----|-----|-----------|-------|------|------|
| Rsa1.0_00640.1.g17313.t1 | ref[XP_002864430.1] hypothetical protein ARALYDRAFT_918751 [Arabidopsis lyrata subsp. lyrata] gi 297310265 gb EFH40689.1                                                                                                                                                                                                                                                                                                                                                                                                                                                                                                                                                                                                                                                                                                                                     | 145 | 143 | 4.00E-43  | 98.6  | 70.3 | 75.9 | hypothetical protein ARALYDRAFT_918751                      | gbpln | Arabidopsis lyrata   | AT5G56100.1   Symbols:   glycine-rich protein / oleosin   chr5:227117121-22717573 FORWARD LENGTH=150                                                                                                                                                           | 145 | 150 | 1.00E-44  | 103.4 | 70.3 | 77.2 |
| Rsa1.0_00640.1.g17314.t1 | ref[NP_200422.1] myb domain protein 103 [Arabidopsis thaliana] gi 5163509 gb AAD40692.1 AF048839.1 Atmyb103 [Arabidopsis thaliana] gi 9758631 dbj BAB09293.1  Atmyb103 [Arabidopsis thaliana] gi 41619468 gb AAS10109.1  MYB transcription factor [Arabidopsis thaliana] gi 225879122 dbj BAH30631.1] hypothetical protein [Arabidopsis thaliana] gi 332009339 gb AED96722.1  myb domain protein 103 [Arabidopsis thaliana]                                                                                                                                                                                                                                                                                                                                                                                                                                  | 326 | 320 | 1.00E-147 | 98.2  | 90.8 | 95.1 | myb domain protein 103                                      | gbpln | Arabidopsis thaliana | AT5G56110.1   Symbols: AtMYB103, ATMYB80, MYB103, MS188   myb domain protein 103   chr5:22719191-22720664 FORWARD LENGTH=320                                                                                                                                   | 326 | 320 | 1.00E-149 | 98.2  | 90.8 | 95.1 |
| Rsa1.0_00640.1.g17315.t1 | ref[XP_002274367.1] PREDICTED: ubiquitin-conjugating enzyme E2-17 kDa isoform 2 [Vitis vinifera] gi 225462033 ref[XP_002274335.1] PREDICTED: ubiquitin-conjugating enzyme E2-17 kDa isoform 1 [Vitis vinifera] gi 359494225 ref[XP_003634740.1] PREDICTED: ubiquitin-conjugating enzyme E2-17 kDa [Vitis vinifera] gi 147771931 emb CAN77946.1] hypothetical protein VITISV_029275 [Vitis vinifera] gi 296089984 emb CB139803.3  unnamed protein product [Vitis vinifera] ref[NP_200428.1] LORELEI-LIKE-GPI-ANCHORED PROTEIN 1 [Arabidopsis thaliana] gi 9758637 dbj BAB09299.1] unnamed protein product [Arabidopsis thaliana] gi 23306374 gb AAN17414.1] putative protein [Arabidopsis thaliana] gi 24899659 gb AAN65044.1] putative protein [Arabidopsis thaliana] gi 332009346 gb AED96729.1] LORELEI-LIKE-GPI-ANCHORED PROTEIN 1 [Arabidopsis thaliana] | 331 | 148 | 3.00E-73  | 44.7  | 39.6 | 41.7 | PREDICTED: ubiquitin-conjugating enzyme E2-17 kDa isoform 2 | gbpln | Vitis vinifera       | AT5G56150.2   Symbols: UBC30   ubiquitin-conjugating enzyme 30   chr5:22729756-22730964 FORWARD LENGTH=148                                                                                                                                                     | 331 | 148 | 1.00E-73  | 44.7  | 38.1 | 40.8 |
| Rsa1.0_00640.1.g17316.t1 | ref[XP_002274367.1] PREDICTED: ubiquitin-conjugating enzyme E2-17 kDa isoform 2 [Vitis vinifera] gi 359494225 ref[XP_003634740.1] PREDICTED: ubiquitin-conjugating enzyme E2-17 kDa [Vitis vinifera] gi 147771931 emb CAN77946.1] hypothetical protein VITISV_029275 [Vitis vinifera] gi 296089984 emb CB139803.3  unnamed protein product [Vitis vinifera] ref[NP_200428.1] LORELEI-LIKE-GPI-ANCHORED PROTEIN 1 [Arabidopsis thaliana] gi 9758637 dbj BAB09299.1] unnamed protein product [Arabidopsis thaliana] gi 23306374 gb AAN17414.1] putative protein [Arabidopsis thaliana] gi 24899659 gb AAN65044.1] putative protein [Arabidopsis thaliana] gi 332009346 gb AED96729.1] LORELEI-LIKE-GPI-ANCHORED PROTEIN 1 [Arabidopsis thaliana]                                                                                                               | 111 | 168 | 3.00E-42  | 151.4 | 71.2 | 91.0 | LORELEI-LIKE-GPI-ANCHORED PROTEIN 1                         | gbpln | Arabidopsis thaliana | AT5G56170.1   Symbols: LLG1   LORELEI-LIKE-GPI-ANCHORED PROTEIN 1   chr5:22736072-22737108 FORWARD LENGTH=168                                                                                                                                                  | 111 | 168 | 5.00E-45  | 151.4 | 71.2 | 91.0 |
| Rsa1.0_00640.1.g17317.t1 | gb EOA12511.1] hypothetical protein CARUB_v10026334mg [Capsella rubella]                                                                                                                                                                                                                                                                                                                                                                                                                                                                                                                                                                                                                                                                                                                                                                                     | 469 | 473 | 0         | 100.9 | 88.9 | 94.9 | hypothetical protein CARUB_v10026334mg                      | gbpln | Capsella rubella     | AT5G56180.1   Symbols: ATARP8, ARP8   actin-related protein 8   chr5:22737539-22740986 REVERSE LENGTH=471                                                                                                                                                      | 469 | 471 | 0         | 100.4 | 89.6 | 95.1 |
| Rsa1.0_00640.1.g17318.t1 | gb EOA13366.1] hypothetical protein CARUB_v10026403mg [Capsella rubella]                                                                                                                                                                                                                                                                                                                                                                                                                                                                                                                                                                                                                                                                                                                                                                                     | 644 | 444 | 0         | 68.9  | 62.3 | 64.4 | hypothetical protein CARUB_v10026403mg                      | gbpln | Capsella rubella     | AT5G56190.2   Symbols:   Transducin/WD40 repeat-like superfamily protein   chr5:22742654-22744909 FORWARD LENGTH=447                                                                                                                                           | 644 | 447 | 0         | 69.4  | 61.0 | 64.1 |
| Rsa1.0_00640.1.g17319.t1 | ref[NP_200431.1] C2H2 type zinc finger transcription factor-like protein [Arabidopsis thaliana] gi 9758747 dbj BAB09111.1] unnamed protein product [Arabidopsis thaliana] gi 225879124 dbj BAH30632.1] hypothetical protein [Arabidopsis thaliana] gi 332009351 gb AED96734.1] C2H2 type zinc finger transcription factor-like protein [Arabidopsis thaliana]                                                                                                                                                                                                                                                                                                                                                                                                                                                                                                | 464 | 493 | 1.00E-117 | 106.3 | 66.4 | 74.8 | C2H2 type zinc finger transcription factor-like protein     | gbpln | Arabidopsis thaliana | AT5G56200.1   Symbols:   C2H2 type zinc finger transcription factor family   chr5:22747768-22749249 FORWARD LENGTH=493                                                                                                                                         | 464 | 493 | 1.00E-120 | 106.3 | 66.4 | 74.8 |
| Rsa1.0_00640.1.g17320.t1 | ref[XP_002866132.1] hypothetical protein ARALYDRAFT_495713 [Arabidopsis lyrata subsp. lyrata] gi 297311967 gb EFH42391.1] hypothetical protein ARALYDRAFT_495713 [Arabidopsis lyrata subsp. lyrata]                                                                                                                                                                                                                                                                                                                                                                                                                                                                                                                                                                                                                                                          | 896 | 993 | 0         | 110.8 | 67.7 | 76.0 | hypothetical protein ARALYDRAFT_495713                      | gbpln | Arabidopsis lyrata   | AT5G56240.2   Symbols:   INVOLVED IN: biological_process unknown; EXPRESSED IN: 22 plant structures; EXPRESSED DURING: 13 growth stages; BEST Arabidopsis thaliana protein match is: hapless 8 (TAIR:AT5G56250.1).   chr5:22760088-22763539 REVERSE LENGTH=987 | 896 | 987 | 0         | 110.2 | 67.0 | 76.1 |
| Rsa1.0_00641.1.g17322.t1 | ref[XP_002885750.1] hypothetical protein ARALYDRAFT_342773 [Arabidopsis lyrata subsp. lyrata] gi 297331590 gb EFH62009.1] hypothetical protein ARALYDRAFT_342773 [Arabidopsis lyrata subsp. lyrata]                                                                                                                                                                                                                                                                                                                                                                                                                                                                                                                                                                                                                                                          | 449 | 453 | 0         | 100.9 | 94.2 | 96.7 | hypothetical protein ARALYDRAFT_342773                      | gbpln | Arabidopsis lyrata   | AT2G04305.1   Symbols:   Magnesium transporter CorA-like family protein   chr2:1501679-1503448 REVERSE LENGTH=434                                                                                                                                              | 449 | 434 | 0         | 96.7  | 88.2 | 91.8 |

|                          |                                                                                                                                                                                                                                                                                                                                                                                             |      |      |           |       |      |      |                                                                                                                                                                                                                                                                                                                                                     |       |                      |                                                                                                                                               |      |     |           |       |      |      |
|--------------------------|---------------------------------------------------------------------------------------------------------------------------------------------------------------------------------------------------------------------------------------------------------------------------------------------------------------------------------------------------------------------------------------------|------|------|-----------|-------|------|------|-----------------------------------------------------------------------------------------------------------------------------------------------------------------------------------------------------------------------------------------------------------------------------------------------------------------------------------------------------|-------|----------------------|-----------------------------------------------------------------------------------------------------------------------------------------------|------|-----|-----------|-------|------|------|
| Rsa1.0_00641.1.g17323.t2 | gb AAF79797.1 AC020646_20 T32E20.30 [Arabidopsis thaliana]                                                                                                                                                                                                                                                                                                                                  | 718  | 1397 | 2.00E-40  | 194.6 | 14.5 | 20.5 | T32E20.30                                                                                                                                                                                                                                                                                                                                           | gbpln | Arabidopsis thaliana | #                                                                                                                                             | #    | #   | #         | #     | #    | #    |
| Rsa1.0_00641.1.g17324.t1 | ref XP_002877500.1  predicted protein [Arabidopsis lyrata subsp. lyrata] gi 297323338 gb EFH53759.1  predicted protein [Arabidopsis lyrata subsp. lyrata]                                                                                                                                                                                                                                   | 187  | 136  | 3.00E-31  | 72.7  | 34.2 | 46.5 | predicted protein                                                                                                                                                                                                                                                                                                                                   | gbpln | Arabidopsis lyrata   | AT5G18880.1   Symbols:   RNA-directed DNA polymerase (reverse transcriptase)-related family protein   chr5:6300535-6301422 REVERSE LENGTH=295 | 187  | 295 | 5.00E-19  | 157.8 | 36.4 | 52.9 |
| Rsa1.0_00641.1.g17325.t1 | sp Q9M462.1 GLGS_BRANA RecName: Full=Glucose-1-phosphate adenylyltransferase small subunit, chloroplastic; AltName: Full=ADP-glucose pyrophosphorylase; AltName: Full=ADP-glucose synthase; AltName: Full=AGPase B; AltName: Full=Alpha-D-glucose-1-phosphate adenylyltransferase; Flags: Precursor gi 7688095 emb CAB89863.1  ADP-glucose pyrophosphorylase small subunit [Brassica napus] | 519  | 520  | 0         | 100.2 | 98.5 | 98.5 | RecName: Full=Glucose-1-phosphate adenylyltransferase small subunit, chloroplastic; AltName: Full=ADP-glucose pyrophosphorylase; AltName: Full=ADP-glucose synthase; AltName: Full=AGPase B; AltName: Full=Alpha-D-glucose-1-phosphate adenylyltransferase; Flags: Precursor gi 7688095 emb CAB89863.1  ADP-glucose pyrophosphorylase small subunit | gbpln | Brassica napus       | AT5G48300.1   Symbols: ADG1, APS1   ADP glucose pyrophosphorylase 1   chr5:19570326-19572557 FORWARD LENGTH=520                               | 519  | 520 | 0         | 100.2 | 87.5 | 93.8 |
| Rsa1.0_00641.1.g17326.t1 | gb ACG60669.1  copia-type polyprotein-like protein [Brassica oleracea var. alboglabra]                                                                                                                                                                                                                                                                                                      | 118  | 196  | 5.00E-36  | 166.1 | 64.4 | 69.5 | copia-type polyprotein-like protein                                                                                                                                                                                                                                                                                                                 | gbpln | Brassica oleracea    | #                                                                                                                                             | #    | #   | #         | #     | #    | #    |
| Rsa1.0_00641.1.g17327.t1 | ref XP_002883731.1  hypothetical protein ARALYDRAFT_899405 [Arabidopsis lyrata subsp. lyrata] gi 297329571 gb EFH59990.1  hypothetical protein ARALYDRAFT_899405 [Arabidopsis lyrata subsp. lyrata]                                                                                                                                                                                         | 375  | 393  | 2.00E-55  | 104.8 | 39.5 | 50.7 | hypothetical protein ARALYDRAFT_899405                                                                                                                                                                                                                                                                                                              | gbpln | Arabidopsis lyrata   | AT2G06020.1   Symbols:   Homeodomain-like superfamily protein   chr2:2342535-2346207 FORWARD LENGTH=301                                       | 375  | 301 | 2.00E-34  | 80.3  | 23.2 | 25.9 |
| Rsa1.0_00641.1.g17328.t1 | ref XP_002885736.1  mate efflux family protein [Arabidopsis lyrata subsp. lyrata] gi 297331573 gb EFH61995.1  mate efflux family protein [Arabidopsis lyrata subsp. lyrata]                                                                                                                                                                                                                 | 483  | 483  | 0         | 100.0 | 84.5 | 91.1 | mate efflux family protein                                                                                                                                                                                                                                                                                                                          | gbpln | Arabidopsis lyrata   | AT2G04100.1   Symbols:   MATE efflux family protein   chr2:1377020-1379051 REVERSE LENGTH=483                                                 | 483  | 483 | 0         | 100.0 | 83.9 | 90.7 |
| Rsa1.0_00641.1.g17329.t1 | #                                                                                                                                                                                                                                                                                                                                                                                           | #    | #    | #         | #     | #    | -    | ----                                                                                                                                                                                                                                                                                                                                                | ----  | ----                 | #                                                                                                                                             | #    | #   | #         | #     | #    | #    |
| Rsa1.0_00641.1.g17330.t2 | gb EOA30054.1  hypothetical protein CARUB_v10013160mg [Capsella rubella]                                                                                                                                                                                                                                                                                                                    | 181  | 660  | 4.00E-15  | 364.6 | 22.1 | 23.2 | hypothetical protein CARUB_v10013160mg                                                                                                                                                                                                                                                                                                              | gbpln | Capsella rubella     | AT3G14400.1   Symbols: UBP25   ubiquitin-specific protease 25   chr3:4811953-4815210 REVERSE LENGTH=661                                       | 181  | 661 | 3.00E-17  | 365.2 | 22.1 | 23.2 |
| Rsa1.0_00641.1.g17331.t1 | gb EOA26734.1  hypothetical protein CARUB_v10022820mg [Capsella rubella]                                                                                                                                                                                                                                                                                                                    | 316  | 527  | 4.00E-43  | 166.8 | 37.7 | 45.6 | hypothetical protein CARUB_v10022820mg                                                                                                                                                                                                                                                                                                              | gbpln | Capsella rubella     | AT4G05360.1   Symbols:   Zinc knuckle (CCHC-type) family protein   chr4:2728204-2732337 FORWARD LENGTH=735                                    | 316  | 735 | 3.00E-12  | 232.6 | 10.4 | 13.0 |
| Rsa1.0_00641.1.g17332.t3 | pir [T00833 RNA-directed DNA polymerase homolog T13L16.7 - Arabidopsis thaliana (fragment)]                                                                                                                                                                                                                                                                                                 | 1170 | 1365 | 0         | 116.7 | 43.4 | 60.3 | RNA-directed DNA polymerase homolog T13L16.7 - Arabidopsis thaliana (fragment)                                                                                                                                                                                                                                                                      | ----  | ----                 | AT4G29090.1   Symbols:   Ribonuclease H-like superfamily protein   chr4:14333528-14335255 FORWARD LENGTH=575                                  | 1170 | 575 | 8.00E-68  | 49.1  | 13.6 | 22.8 |
| Rsa1.0_00641.1.g17333.t1 | #                                                                                                                                                                                                                                                                                                                                                                                           | #    | #    | #         | #     | #    | -    | ----                                                                                                                                                                                                                                                                                                                                                | ----  | ----                 | #                                                                                                                                             | #    | #   | #         | #     | #    | #    |
| Rsa1.0_00641.1.g17334.t1 | ref XP_002885733.1  mate efflux family protein [Arabidopsis lyrata subsp. lyrata] gi 297331573 gb EFH61995.1  mate efflux family protein [Arabidopsis lyrata subsp. lyrata]                                                                                                                                                                                                                 | 246  | 476  | 1.00E-111 | 193.5 | 81.7 | 86.2 | mate efflux family protein                                                                                                                                                                                                                                                                                                                          | gbpln | Arabidopsis lyrata   | AT2G04040.1   Symbols: ATDTX1, TX1   MATE efflux family protein   chr2:1334614-1336480 REVERSE LENGTH=476                                     | 246  | 476 | 1.00E-113 | 193.5 | 79.7 | 87.8 |
| Rsa1.0_00642.1.g17335.t1 | gb EOA29836.1  hypothetical protein CARUB_v10012933mg [Capsella rubella]                                                                                                                                                                                                                                                                                                                    | 735  | 907  | 0         | 123.4 | 85.4 | 92.2 | hypothetical protein CARUB_v10012933mg                                                                                                                                                                                                                                                                                                              | gbpln | Capsella rubella     | AT3G14810.1   Symbols: MSL5   mechanosensitive channel of small conductance-like 5   chr3:4971223-4974216 REVERSE LENGTH=881                  | 735  | 881 | 0         | 119.9 | 83.9 | 91.0 |
| Rsa1.0_00642.1.g17336.t2 | ref XP_002882888.1  CYP72A15 [Arabidopsis lyrata subsp. lyrata] gi 297328728 gb EFH59147.1  CYP72A15 [Arabidopsis lyrata subsp. lyrata]                                                                                                                                                                                                                                                     | 1104 | 512  | 0         | 46.4  | 36.1 | 39.9 | CYP72A15                                                                                                                                                                                                                                                                                                                                            | gbpln | Arabidopsis lyrata   | AT3G14690.1   Symbols: CYP72A15   cytochrome P450, family 72, subfamily A, polypeptide 15   chr3:4937410-4939310 FORWARD LENGTH=512           | 1104 | 512 | 0         | 46.4  | 36.0 | 39.9 |
| Rsa1.0_00642.1.g17337.t1 | ref XP_002882888.1  CYP72A15 [Arabidopsis lyrata subsp. lyrata] gi 297328728 gb EFH59147.1  CYP72A15 [Arabidopsis lyrata subsp. lyrata]                                                                                                                                                                                                                                                     | 560  | 512  | 0         | 91.4  | 74.8 | 82.0 | CYP72A15                                                                                                                                                                                                                                                                                                                                            | gbpln | Arabidopsis lyrata   | AT3G14690.1   Symbols: CYP72A15   cytochrome P450, family 72, subfamily A, polypeptide 15   chr3:4937410-4939310 FORWARD LENGTH=512           | 560  | 512 | 0         | 91.4  | 74.1 | 82.0 |

|                          |                                                                                                                                                                                                                                                                                                                                                                                                                                                                                                                                                                                                                                                                                                                                                                                                                                                                                                                                                                                                                                                                                                                                                                                                                                                                                                                                                                                                                                                                                                                                                                                                  |     |      |           |       |      |      |                                                        |       |                      |                                                                                                                                               |     |     |           |       |      |      |
|--------------------------|--------------------------------------------------------------------------------------------------------------------------------------------------------------------------------------------------------------------------------------------------------------------------------------------------------------------------------------------------------------------------------------------------------------------------------------------------------------------------------------------------------------------------------------------------------------------------------------------------------------------------------------------------------------------------------------------------------------------------------------------------------------------------------------------------------------------------------------------------------------------------------------------------------------------------------------------------------------------------------------------------------------------------------------------------------------------------------------------------------------------------------------------------------------------------------------------------------------------------------------------------------------------------------------------------------------------------------------------------------------------------------------------------------------------------------------------------------------------------------------------------------------------------------------------------------------------------------------------------|-----|------|-----------|-------|------|------|--------------------------------------------------------|-------|----------------------|-----------------------------------------------------------------------------------------------------------------------------------------------|-----|-----|-----------|-------|------|------|
| Rsa1.0_00642.1.g17338.t1 | refNP_188081.1   cytochrome P450, family 72, subfamily A, polypeptide 9 [Arabidopsis thaliana] gi 332642028 gb AE75549.1   cytochrome P450, family 72, subfamily A, polypeptide 9 [Arabidopsis thaliana] refNP_180995.1   60S ribosomal protein L18a-2 [Arabidopsis thaliana] gi 297826909 ref XP_002881337.1   60S ribosomal protein L18A [Arabidopsis lyrata subsp. lyrata] gi 21431842 sp P51418.2 R18A2_ARATH RecName: Full=60S ribosomal protein L18a-2 gi 3128228 gb AAC26708.1   60S ribosomal protein L18A [Arabidopsis thaliana] gi 14596031 gb AAK68743.1   Unknown protein [Arabidopsis thaliana] gi 20197170 gb AAM14956.1   60S ribosomal protein L18A [Arabidopsis thaliana] gi 21539567 gb AAM53336.1   60S ribosomal protein L18A [Arabidopsis thaliana] gi 23197736 gb AAN15395.1   60S ribosomal protein L18A [Arabidopsis thaliana] gi 30102898 gb AAP21367.1   At2g34480 [Arabidopsis thaliana] gi 297327176 gb EPH57596.1   60S ribosomal protein L18A [Arabidopsis lyrata subsp. lyrata] gi 330253886 gb AEC08980.1   60S ribosomal protein L18a-2 [Arabidopsis thaliana] refNP_188067.1   terpene cyclase, C1 domain-containing protein [Arabidopsis thaliana] gi 317412204 sp Q9LRR2.2 TPS17_ARATH RecName: Full=Terpenoid synthase 17; Short=AtTPS17 gi 332642011 gb AEE75532.1   terpenoid synthase 17 [Arabidopsis thaliana] refNP_188063.1   CTC-interacting domain 9 protein [Arabidopsis thaliana] gi 11994215 dbj BAB01337.1   unnamed protein product [Arabidopsis thaliana] gi 332642006 gb AE75527.1   CTC-interacting domain 9 protein [Arabidopsis thaliana] | 508 | 508  | 0         | 100.0 | 81.7 | 90.6 | cytochrome P450, family 72, subfamily A, polypeptide 9 | gbpln | Arabidopsis thaliana | AT3G14630.1   Symbols: CYP72A9   cytochrome P450, family 72, subfamily A, polypeptide 9   chr3:4917498-4919409 FORWARD LENGTH=508             | 508 | 508 | 0         | 100.0 | 81.7 | 90.6 |
| Rsa1.0_00642.1.g17339.t1 | ribosomal protein L18A [Arabidopsis thaliana] gi 21539567 gb AAM53336.1   60S ribosomal protein L18A [Arabidopsis thaliana] gi 23197736 gb AAN15395.1   60S ribosomal protein L18A [Arabidopsis thaliana] gi 30102898 gb AAP21367.1   At2g34480 [Arabidopsis thaliana] gi 297327176 gb EPH57596.1   60S ribosomal protein L18A [Arabidopsis lyrata subsp. lyrata] gi 330253886 gb AEC08980.1   60S ribosomal protein L18a-2 [Arabidopsis thaliana]                                                                                                                                                                                                                                                                                                                                                                                                                                                                                                                                                                                                                                                                                                                                                                                                                                                                                                                                                                                                                                                                                                                                               | 201 | 178  | 9.00E-94  | 88.6  | 82.1 | 84.6 | 60S ribosomal protein L18a-2                           | gbpln | Arabidopsis lyrata   | AT2G34480.1   Symbols:   Ribosomal protein L18ae/LX family protein   chr2:14532916-14534161 REVERSE LENGTH=178                                | 201 | 178 | 3.00E-96  | 88.6  | 82.1 | 84.6 |
| Rsa1.0_00642.1.g17340.t1 | refNP_188067.1   terpene cyclase, C1 domain-containing protein [Arabidopsis thaliana] gi 317412204 sp Q9LRR2.2 TPS17_ARATH RecName: Full=Terpenoid synthase 17; Short=AtTPS17 gi 332642011 gb AEE75532.1   terpenoid synthase 17 [Arabidopsis thaliana]                                                                                                                                                                                                                                                                                                                                                                                                                                                                                                                                                                                                                                                                                                                                                                                                                                                                                                                                                                                                                                                                                                                                                                                                                                                                                                                                          | 589 | 601  | 0         | 102.0 | 80.5 | 89.0 | terpene cyclase, C1 domain-containing protein          | gbpln | Arabidopsis thaliana | AT3G14490.1   Symbols:   Terpenoid cyclases/Protein prenyltransferases superfamily protein   chr3:4863631-4865949 REVERSE LENGTH=601          | 589 | 601 | 0         | 102.0 | 80.5 | 89.0 |
| Rsa1.0_00642.1.g17341.t1 | refNP_188063.1   CTC-interacting domain 9 protein [Arabidopsis thaliana] gi 11994215 dbj BAB01337.1   unnamed protein product [Arabidopsis thaliana] gi 332642006 gb AE75527.1   CTC-interacting domain 9 protein [Arabidopsis thaliana]                                                                                                                                                                                                                                                                                                                                                                                                                                                                                                                                                                                                                                                                                                                                                                                                                                                                                                                                                                                                                                                                                                                                                                                                                                                                                                                                                         | 326 | 327  | 1.00E-158 | 100.3 | 86.5 | 90.2 | CTC-interacting domain 9 protein                       | gbpln | Arabidopsis thaliana | AT3G14450.1   Symbols: CID9   CTC-interacting domain 9   chr3:4849788-4851601 FORWARD LENGTH=327                                              | 326 | 327 | 1.00E-161 | 100.3 | 86.5 | 90.2 |
| Rsa1.0_00642.1.g17342.t1 | #                                                                                                                                                                                                                                                                                                                                                                                                                                                                                                                                                                                                                                                                                                                                                                                                                                                                                                                                                                                                                                                                                                                                                                                                                                                                                                                                                                                                                                                                                                                                                                                                | #   | #    | #         | #     | #    | -    | ----                                                   | ----  | #                    | #                                                                                                                                             | #   | #   | #         | #     | #    |      |
| Rsa1.0_00642.1.g17343.t1 | gb AAC33226.1   putative non-LTR retroelement reverse transcriptase [Arabidopsis thaliana]                                                                                                                                                                                                                                                                                                                                                                                                                                                                                                                                                                                                                                                                                                                                                                                                                                                                                                                                                                                                                                                                                                                                                                                                                                                                                                                                                                                                                                                                                                       | 695 | 1529 | 0         | 220.0 | 59.6 | 75.4 | putative non-LTR retroelement reverse transcriptase    | gbpln | Arabidopsis thaliana | AT3G24255.1   Symbols:   RNA-directed DNA polymerase (reverse transcriptase)-related family protein   chr3:8789471-8793208 FORWARD LENGTH=746 | 695 | 746 | 6.00E-78  | 107.3 | 22.2 | 26.6 |
| Rsa1.0_00642.1.g17344.t1 | gb AEN94304.1   9-cis-epoxycarotenoid dioxygenase [Brassica napus]                                                                                                                                                                                                                                                                                                                                                                                                                                                                                                                                                                                                                                                                                                                                                                                                                                                                                                                                                                                                                                                                                                                                                                                                                                                                                                                                                                                                                                                                                                                               | 592 | 592  | 0         | 100.0 | 95.3 | 98.0 | 9-cis-epoxycarotenoid dioxygenase                      | gbpln | Brassica napus       | AT3G14440.1   Symbols: NCED3, ATNCED3, STO1, SIS7   nine-cis-epoxycarotenoid dioxygenase 3   chr3:4831678-4833477 REVERSE LENGTH=599          | 592 | 599 | 0         | 101.2 | 91.7 | 96.3 |

|                          |                                                                                                                                                                                                                                                                                                                                                                                                                                                                                                                                                                                                                  |     |     |           |       |      |      |                                                   |       |                      |                                                                                                                                                                                                                                                                                                                                           |     |     |           |       |      |      |  |
|--------------------------|------------------------------------------------------------------------------------------------------------------------------------------------------------------------------------------------------------------------------------------------------------------------------------------------------------------------------------------------------------------------------------------------------------------------------------------------------------------------------------------------------------------------------------------------------------------------------------------------------------------|-----|-----|-----------|-------|------|------|---------------------------------------------------|-------|----------------------|-------------------------------------------------------------------------------------------------------------------------------------------------------------------------------------------------------------------------------------------------------------------------------------------------------------------------------------------|-----|-----|-----------|-------|------|------|--|
|                          | ref NP_188060.1  putative peroxisomal (S)-2-hydroxy-acid oxidase 2 [Arabidopsis thaliana]<br>gi 30683149 ref NP_850584.1  putative peroxisomal (S)-2-hydroxy-acid oxidase 2 [Arabidopsis thaliana]<br>gi 297829994 ref XP_002882879.1  hypothetical protein ARALYDRAFT_478862 [Arabidopsis lyrata subsp. lyrata]<br>gi 13124262 sp Q9LRR9.1 GLO1_ARATH<br>RefName: Full=Peroxisomal (S)-2-hydroxy-acid oxidase GLO1; AltName: Full=Glycolate oxidase 1; Short=ATGLO1; Short=GOX 1; AltName: Full=Short chain alpha-hydroxy acid oxidase GLO1                                                                     |     |     |           |       |      |      |                                                   |       |                      |                                                                                                                                                                                                                                                                                                                                           |     |     |           |       |      |      |  |
| Rsa1.0_00642.1.g17345.t1 | gi 16226423 gb AAL16164.1 AF428396.1 AT3g14420/MOA2.2 [Arabidopsis thaliana] gi 11994212 dbj BAB01334.1  glycolate oxidase [Arabidopsis thaliana]<br>gi 15450741 gb AAK96642.1  AT3g14420/MOA2.2 [Arabidopsis thaliana] gi 18491119 gb AAL69528.1  AT3g14420/MOA2.2 [Arabidopsis thaliana] gi 297328719 gb EFH59138.1  hypothetical protein ARALYDRAFT_478862 [Arabidopsis lyrata subsp. lyrata]<br>gi 332641997 gb AEE75518.1  putative peroxisomal (S)-2-hydroxy-acid oxidase 2 [Arabidopsis thaliana]<br>gi 332641999 gb AEE75520.1  putative peroxisomal (S)-2-hydroxy-acid oxidase 2 [Arabidopsis thaliana] | 109 | 367 | 9.00E-28  | 336.7 | 56.0 | 56.9 | putative peroxisomal (S)-2-hydroxy-acid oxidase 2 | gbpln | Arabidopsis lyrata   | AT3G14420.2   Symbols:   Aldolase-type TIM barrel family protein   chr3:4821804-4823899 FORWARD LENGTH=367                                                                                                                                                                                                                                | 109 | 367 | 2.00E-30  | 336.7 | 56.0 | 56.9 |  |
| Rsa1.0_00642.1.g17346.t1 | gb AAV28535.1  glycolate oxidase [Brassica napus]                                                                                                                                                                                                                                                                                                                                                                                                                                                                                                                                                                | 367 | 367 | 0         | 100.0 | 99.5 | 99.7 | glycolate oxidase                                 | gbpln | Brassica napus       | AT3G14415.3   Symbols:   Aldolase-type TIM barrel family protein   chr3:4818667-4820748 FORWARD LENGTH=367                                                                                                                                                                                                                                | 367 | 367 | 0         | 100.0 | 96.2 | 98.9 |  |
| Rsa1.0_00642.1.g17347.t1 | ref XP_002885042.1  ubiquitin-specific protease 25 [Arabidopsis lyrata subsp. lyrata] gi 297330888 gb EFH61301.1  ubiquitin-specific protease 25 [Arabidopsis lyrata subsp. lyrata]<br>ref XP_002885025.1  hypothetical protein ARALYDRAFT_478841 [Arabidopsis lyrata subsp. lyrata]<br>gi 297330865 gb EFH61284.1  hypothetical protein ARALYDRAFT_478841 [Arabidopsis lyrata subsp. lyrata]                                                                                                                                                                                                                    | 673 | 662 | 0         | 98.4  | 77.1 | 86.2 | ubiquitin-specific protease 25                    | gbpln | Arabidopsis lyrata   | AT3G14400.1   Symbols: UBP25   ubiquitin-specific protease 25   chr3:4811953-4815210 REVERSE LENGTH=661                                                                                                                                                                                                                                   | 673 | 661 | 0         | 98.2  | 76.8 | 86.0 |  |
| Rsa1.0_00642.1.g17348.t1 | ref XP_002885025.1  hypothetical protein ARALYDRAFT_478841 [Arabidopsis lyrata subsp. lyrata]<br>gi 297330865 gb EFH61284.1  hypothetical protein ARALYDRAFT_478841 [Arabidopsis lyrata subsp. lyrata]                                                                                                                                                                                                                                                                                                                                                                                                           | 407 | 776 | 0         | 190.7 | 93.6 | 97.5 | hypothetical protein ARALYDRAFT_478841            | gbpln | Arabidopsis lyrata   | AT3G14240.1   Symbols:   Subtilase family protein   chr3:4741637-4743964 REVERSE LENGTH=775                                                                                                                                                                                                                                               | 407 | 775 | 0         | 190.4 | 93.6 | 97.1 |  |
| Rsa1.0_00642.1.g17349.t1 | gb EOA30781.1  hypothetical protein CARUB_v10013925mg [Capsella rubella]                                                                                                                                                                                                                                                                                                                                                                                                                                                                                                                                         | 350 | 385 | 1.00E-131 | 110.0 | 78.3 | 86.6 | hypothetical protein CARUB_v10013925mg            | gbpln | Capsella rubella     | AT3G14230.2   Symbols: RAP2.2   related to AP2 2   chr3:4737616-4739000 REVERSE LENGTH=375                                                                                                                                                                                                                                                | 350 | 375 | 1.00E-123 | 107.1 | 77.4 | 86.0 |  |
| Rsa1.0_00642.1.g17350.t1 | ref NP_188036.1  chaperone DnaJ-domain containing protein [Arabidopsis thaliana] gi 9294648 dbj BAB02987.1  unnamed protein product [Arabidopsis thaliana] gi 20268707 gb AAM14057.1  unknown protein [Arabidopsis thaliana]<br>gi 21689888 gb AAM67503.1  unknown protein [Arabidopsis thaliana]<br>gi 110743929 dbj BAE99798.1  hypothetical protein [Arabidopsis thaliana] gi 332641964 gb AEE75485.1  chaperone DnaJ-domain containing protein [Arabidopsis thaliana]                                                                                                                                        | 227 | 230 | 2.00E-94  | 101.3 | 81.1 | 88.1 | chaperone DnaJ-domain containing protein          | gbpln | Arabidopsis thaliana | AT3G14200.1   Symbols:   Chaperone DnaJ-domain superfamily protein   chr3:4712881-4714361 REVERSE LENGTH=230                                                                                                                                                                                                                              | 227 | 230 | 6.00E-97  | 101.3 | 81.1 | 88.1 |  |
| Rsa1.0_00642.1.g17351.t1 | ref XP_002882871.1  At3g14190 [Arabidopsis lyrata subsp. lyrata]<br>gi 297328711 gb EFH59130.1  At3g14190 [Arabidopsis lyrata subsp. lyrata]                                                                                                                                                                                                                                                                                                                                                                                                                                                                     | 199 | 193 | 7.00E-82  | 97.0  | 77.4 | 86.4 | At3g14190                                         | gbpln | Arabidopsis lyrata   | AT3G14190.1   Symbols:   unknown protein; BEST Arabidopsis thaliana protein match is: unknown protein (TAIR:AT5G12360.1); Has 18 Blast hits to 18 proteins in 5 species: Archae - 0; Bacteria - 0; Metazoa - 0; Fungi - 0; Plants - 18; Viruses - 0; Other Eukaryotes - 0 (source: NCBI BLink).   chr3:4710907-4711790 FORWARD LENGTH=193 | 199 | 193 | 2.00E-80  | 97.0  | 76.4 | 84.9 |  |

|                          |                                                                                                                                                                                                                                                                                                                                                                                                                                                                                                                                                                                                                                                                                                                                                                                                                                                                                                                                                                                                                                                                                                                                                        |      |      |           |       |      |      |                                                    |       |                      |                                                                                                                                                                                                                                                                                                                                                                                                                                                                                               |      |      |           |       |      |      |
|--------------------------|--------------------------------------------------------------------------------------------------------------------------------------------------------------------------------------------------------------------------------------------------------------------------------------------------------------------------------------------------------------------------------------------------------------------------------------------------------------------------------------------------------------------------------------------------------------------------------------------------------------------------------------------------------------------------------------------------------------------------------------------------------------------------------------------------------------------------------------------------------------------------------------------------------------------------------------------------------------------------------------------------------------------------------------------------------------------------------------------------------------------------------------------------------|------|------|-----------|-------|------|------|----------------------------------------------------|-------|----------------------|-----------------------------------------------------------------------------------------------------------------------------------------------------------------------------------------------------------------------------------------------------------------------------------------------------------------------------------------------------------------------------------------------------------------------------------------------------------------------------------------------|------|------|-----------|-------|------|------|
| Rsa1.0_00642.1.g17352.t1 | ref NP_188034.1  sequence-specific DNA binding transcription factor [Arabidopsis thaliana] gi 9294645 dbj BAB02984.1  unnamed protein product [Arabidopsis thaliana] gi 18176240 gb AAL60009.1  unknown protein [Arabidopsis thaliana] gi 21281263 gb AAM44901.1  unknown protein [Arabidopsis thaliana] gi 332641962 gb AEE75483.1  sequence-specific DNA binding transcription factor [Arabidopsis thaliana]                                                                                                                                                                                                                                                                                                                                                                                                                                                                                                                                                                                                                                                                                                                                         | 449  | 443  | 0         | 98.7  | 78.0 | 83.5 | sequence-specific DNA binding transcription factor | gbpln | Arabidopsis thaliana | AT3G14180.1   Symbols:   sequence-specific DNA binding transcription factors   chr3:4707290-4708621 REVERSE LENGTH=443                                                                                                                                                                                                                                                                                                                                                                        | 449  | 443  | 0         | 98.7  | 78.0 | 83.5 |
| Rsa1.0_00642.1.g17353.t1 | #                                                                                                                                                                                                                                                                                                                                                                                                                                                                                                                                                                                                                                                                                                                                                                                                                                                                                                                                                                                                                                                                                                                                                      | #    | #    | #         | #     | #    | #    | -                                                  | ----  | ----                 | #                                                                                                                                                                                                                                                                                                                                                                                                                                                                                             | #    | #    | #         | #     | #    |      |
| Rsa1.0_00642.1.g17354.t1 | ref XP_002885016.1  hypothetical protein ARALYDRAFT_478831 [Arabidopsis lyrata subsp. lyrata] gi 297330856 gb EFH61275.1  hypothetical protein ARALYDRAFT_478831 [Arabidopsis lyrata subsp. lyrata]                                                                                                                                                                                                                                                                                                                                                                                                                                                                                                                                                                                                                                                                                                                                                                                                                                                                                                                                                    | 1161 | 1256 | 0         | 108.2 | 79.6 | 86.7 | hypothetical protein ARALYDRAFT_478831             | gbpln | Arabidopsis lyrata   | AT3G14172.1   Symbols:   FUNCTIONS IN: molecular_function unknown; INVOLVED IN: biological_process unknown; LOCATED IN: cellular_component unknown; BEST Arabidopsis thaliana protein match is: COP1-interacting protein-related (TAIR:AT1G72410.1); Has 30201 Blast hits to 17322 proteins in 780 species: Archae - 12; Bacteria - 1396; Metazoa - 17338; Fungi - 3422; Plants - 5037; Viruses - 0; Other Eukaryotes - 2996 (source: NCBI ELink).   chr3:4698860-4704773 REVERSE LENGTH=1270 | 1161 | 1270 | 0         | 109.4 | 80.2 | 87.2 |
| Rsa1.0_00642.1.g17355.t1 | gb EOA25626.1  hypothetical protein CARUB_v10018979mg [Capsella rubella]                                                                                                                                                                                                                                                                                                                                                                                                                                                                                                                                                                                                                                                                                                                                                                                                                                                                                                                                                                                                                                                                               | 114  | 121  | 1.00E-53  | 106.1 | 90.4 | 93.0 | hypothetical protein CARUB_v10018979mg             | gbpln | Capsella rubella     | AT3G26620.1   Symbols: LBD23   LOB domain-containing protein 23   chr3:9790628-9791112 FORWARD LENGTH=121                                                                                                                                                                                                                                                                                                                                                                                     | 114  | 121  | 3.00E-55  | 106.1 | 87.7 | 92.1 |
| Rsa1.0_00642.1.g17356.t1 | ref NP_188031.1  Aldolase-type TIM barrel family protein [Arabidopsis thaliana] gi 145332391 ref NP_001078152.1  Aldolase-type TIM barrel family protein [Arabidopsis thaliana] gi 122195548 sp Q24JJ8.1 GLO3 ARAT H RecName: Full=Peroxisomal (S)-2-hydroxy-acid oxidase GLO3; AltName: Full=Glycolate oxidase 3; Short=AtGLO3; Short=GOX 3; AltName: Full=Short chain alpha-hydroxy acid oxidase GLO3 gi 90093298 gb ABD85162.1  At3g14150 [Arabidopsis thaliana] gi 332641956 gb AEE75477.1  Aldolase-type TIM barrel family protein [Arabidopsis thaliana] gi 332641957 gb AEE75478.1  Aldolase-type TIM barrel family protein [Arabidopsis thaliana] ref NP_566478.1  fluorescent in blue light protein [Arabidopsis thaliana] gi 175331838 sp Q940U6.1 FLU ARATH RecName: Full=Protein FLUORESCENT IN BLUE LIGHT, chloroplastic; Flags: Precursor gi 17386154 gb AAL38623.1 AF446890_1 AT3g14110/MAG2.6 [Arabidopsis thaliana] gi 15450619 gb AAK96581.1  AT3g14110/MAG2.6 [Arabidopsis thaliana] gi 21593122 gb AAM65071.1  unknown [Arabidopsis thaliana] gi 332641949 gb AEE75470.1  fluorescent in blue light protein [Arabidopsis thaliana] | 363  | 363  | 0         | 100.0 | 86.8 | 95.3 | Aldolase-type TIM barrel family protein            | gbpln | Arabidopsis thaliana | AT3G14150.2   Symbols:   Aldolase-type TIM barrel family protein   chr3:4690667-4692679 REVERSE LENGTH=363                                                                                                                                                                                                                                                                                                                                                                                    | 363  | 363  | 0         | 100.0 | 86.8 | 95.3 |
| Rsa1.0_00642.1.g17357.t1 | ref XP_002882865.1  hypothetical protein ARALYDRAFT_897659 [Arabidopsis lyrata subsp. lyrata] gi 297328705 gb EFH59124.1  hypothetical protein ARALYDRAFT_897659 [Arabidopsis lyrata subsp. lyrata]                                                                                                                                                                                                                                                                                                                                                                                                                                                                                                                                                                                                                                                                                                                                                                                                                                                                                                                                                    | 469  | 316  | 1.00E-127 | 67.4  | 51.8 | 57.4 | fluorescent in blue light protein                  | gbpln | Arabidopsis thaliana | AT3G14110.1   Symbols: FLU   Tetratricopeptide repeat (TPR)-like superfamily protein   chr3:4676222-4677602 REVERSE LENGTH=316                                                                                                                                                                                                                                                                                                                                                                | 469  | 316  | 1.00E-130 | 67.4  | 51.8 | 57.4 |
| Rsa1.0_00642.1.g17358.t3 | ref XP_002882865.1  hypothetical protein ARALYDRAFT_897659 [Arabidopsis lyrata subsp. lyrata] gi 297328705 gb EFH59124.1  hypothetical protein ARALYDRAFT_897659 [Arabidopsis lyrata subsp. lyrata]                                                                                                                                                                                                                                                                                                                                                                                                                                                                                                                                                                                                                                                                                                                                                                                                                                                                                                                                                    | 652  | 597  | 1.00E-120 | 91.6  | 43.1 | 50.2 | hypothetical protein ARALYDRAFT_897659             | gbpln | Arabidopsis lyrata   | AT3G14010.4   Symbols: CID4   CTC-interacting domain 4   chr3:4637164-4640324 FORWARD LENGTH=549                                                                                                                                                                                                                                                                                                                                                                                              | 652  | 549  | 1.00E-121 | 84.2  | 42.9 | 49.2 |
| Rsa1.0_00642.1.g17359.t1 | gb AEK86528.1  growth-regulating factor 5 [Brassica rapa subsp. pekinensis]                                                                                                                                                                                                                                                                                                                                                                                                                                                                                                                                                                                                                                                                                                                                                                                                                                                                                                                                                                                                                                                                            | 363  | 363  | 1.00E-153 | 100.0 | 83.2 | 87.3 | growth-regulating factor 5                         | gbpln | Brassica rapa        | AT3G13960.1   Symbols: AtGRF5, GRF5   growth-regulating factor 5   chr3:4608526-4610160 FORWARD LENGTH=397                                                                                                                                                                                                                                                                                                                                                                                    | 363  | 397  | 1.00E-123 | 109.4 | 76.6 | 84.8 |
| Rsa1.0_00642.1.g17360.t1 | gb EOA32882.1  hypothetical protein CARUB_v10016198mg [Capsella rubella]                                                                                                                                                                                                                                                                                                                                                                                                                                                                                                                                                                                                                                                                                                                                                                                                                                                                                                                                                                                                                                                                               | 510  | 541  | 0         | 106.1 | 87.5 | 92.5 | hypothetical protein CARUB_v10016198mg             | gbpln | Capsella rubella     | AT3G13930.1   Symbols:   Dihydroipoamide acetyltransferase, long form protein   chr3:4596240-4600143 FORWARD LENGTH=539                                                                                                                                                                                                                                                                                                                                                                       | 510  | 539  | 0         | 105.7 | 86.9 | 91.6 |
| Rsa1.0_00643.1.g17361.t1 | #                                                                                                                                                                                                                                                                                                                                                                                                                                                                                                                                                                                                                                                                                                                                                                                                                                                                                                                                                                                                                                                                                                                                                      | #    | #    | #         | #     | #    | #    | -                                                  | ----  | ----                 | #                                                                                                                                                                                                                                                                                                                                                                                                                                                                                             | #    | #    | #         | #     | #    |      |

|                           |                                                                                                                                                                                                                                                                                                                                                            |      |      |           |       |      |      |                                   |       |                      |                                                                                                                                                                                                                                                                                                                                                                                                                                                                                                                                                       |      |      |          |       |      |      |
|---------------------------|------------------------------------------------------------------------------------------------------------------------------------------------------------------------------------------------------------------------------------------------------------------------------------------------------------------------------------------------------------|------|------|-----------|-------|------|------|-----------------------------------|-------|----------------------|-------------------------------------------------------------------------------------------------------------------------------------------------------------------------------------------------------------------------------------------------------------------------------------------------------------------------------------------------------------------------------------------------------------------------------------------------------------------------------------------------------------------------------------------------------|------|------|----------|-------|------|------|
| Rsa1.0_00643.1.g17362.t1  | #                                                                                                                                                                                                                                                                                                                                                          | #    | #    | #         | #     | #    | #    | -                                 | ----  | ----                 | #                                                                                                                                                                                                                                                                                                                                                                                                                                                                                                                                                     | #    | #    | #        | #     | #    |      |
| Rsa1.0_00643.1.g17363.t1  | #                                                                                                                                                                                                                                                                                                                                                          | #    | #    | #         | #     | #    | #    | -                                 | ----  | ----                 | #                                                                                                                                                                                                                                                                                                                                                                                                                                                                                                                                                     | #    | #    | #        | #     | #    |      |
| Rsa1.0_00643.1.g17364.t4  | gb AFJ66186.1  hypothetical protein 11M19.5 [Arabidopsis halleri]                                                                                                                                                                                                                                                                                          | 634  | 1557 | 6.00E-33  | 245.6 | 15.1 | 22.9 | hypothetical protein 11M19.5      | gbpln | Arabidopsis halleri  | #                                                                                                                                                                                                                                                                                                                                                                                                                                                                                                                                                     | #    | #    | #        | #     | #    |      |
| Rsa1.0_00643.1.g17365.t1  | #                                                                                                                                                                                                                                                                                                                                                          | #    | #    | #         | #     | #    | #    | -                                 | ----  | ----                 | #                                                                                                                                                                                                                                                                                                                                                                                                                                                                                                                                                     | #    | #    | #        | #     | #    |      |
| Rsa1.0_00643.1.g17366.t1  | #                                                                                                                                                                                                                                                                                                                                                          | #    | #    | #         | #     | #    | #    | -                                 | ----  | ----                 | #                                                                                                                                                                                                                                                                                                                                                                                                                                                                                                                                                     | #    | #    | #        | #     | #    |      |
| Rsa1.0_00643.1.g17367.t5  | gb AFJ66186.1  hypothetical protein 11M19.5 [Arabidopsis halleri]                                                                                                                                                                                                                                                                                          | 689  | 1557 | 0         | 226.0 | 52.0 | 60.5 | hypothetical protein 11M19.5      | gbpln | Arabidopsis halleri  | ATMG00860.1   Symbols: ORF158   DNA/RNA polymerases superfamily protein   chrM:235916-236392 FORWARD LENGTH=158                                                                                                                                                                                                                                                                                                                                                                                                                                       | 689  | 158  | 3.00E-23 | 22.9  | 7.5  | 9.4  |
| Rsa1.0_00643.1.g17368.t1  | dbj BAB10837.1  retroelement pol polyprotein-like [Arabidopsis thaliana]                                                                                                                                                                                                                                                                                   | 716  | 1462 | 0         | 204.2 | 52.1 | 67.9 | retroelement pol polyprotein-like | gbpln | Arabidopsis thaliana | AT4G23160.1   Symbols: CRK8   cysteine-rich RLK (RECEPTOR-like protein kinase) 8   chr4:12129485-12134086 FORWARD LENGTH=1262                                                                                                                                                                                                                                                                                                                                                                                                                         | 716  | 1262 | 5.00E-93 | 176.3 | 23.2 | 35.8 |
| Rsa1.0_00643.1.g17369.t1  | gb AAG09097.1 AC009323_8 Putative retroelement polyprotein [Arabidopsis thaliana]                                                                                                                                                                                                                                                                          | 490  | 1486 | 1.00E-127 | 303.3 | 51.0 | 69.4 | Putative retroelement polyprotein | gbpln | Arabidopsis thaliana | AT1G21280.1   Symbols:   CONTAINS InterPro DOMAIN/s: Retrotransposon gag protein (InterPro:IPR005162); Has 707 Blast hits to 705 proteins in 25 species: Archae - 0; Bacteria - 0; Metazoa - 4; Fungi - 0; Plants - 703; Viruses - 0; Other Eukaryotes - 0 (source: NCBI BLink).   chr1:7447690-7448403 REVERSE LENGTH=237                                                                                                                                                                                                                            | 490  | 237  | 2.00E-13 | 48.4  | 10.0 | 18.6 |
| Rsa1.0_00643.1.g17370.t1  | ref NP_176329.1  F-box protein [Arabidopsis thaliana] gi 75244390 sp Q8CX77.1 FB316_ARAT_H RecName: F-box protein At1g61340 gi 26451816 dbj BAC43001.1  unknown protein [Arabidopsis thaliana] gi 33219570 gb AEE33822.1  F-box protein [Arabidopsis thaliana]                                                                                             | 177  | 185  | 1.00E-59  | 104.5 | 74.0 | 79.1 | F-box protein                     | gbpln | Arabidopsis thaliana | AT1G61340.1   Symbols:   F-box family protein   chr1:22628526-22629741 FORWARD LENGTH=185                                                                                                                                                                                                                                                                                                                                                                                                                                                             | 177  | 185  | 6.00E-62 | 104.5 | 74.0 | 79.1 |
| Rsa1.0_00643.1.g17371.t14 | #                                                                                                                                                                                                                                                                                                                                                          | #    | #    | #         | #     | #    | #    | -                                 | ----  | ----                 | #                                                                                                                                                                                                                                                                                                                                                                                                                                                                                                                                                     | #    | #    | #        | #     | #    |      |
| Rsa1.0_00643.1.g17372.t1  | gb ABD65088.1  hypothetical protein 27.t00109 [Brassica oleracea]                                                                                                                                                                                                                                                                                          | 403  | 1176 | 1.00E-41  | 291.8 | 27.5 | 42.2 | hypothetical protein 27.t00109    | gbpln | Brassica oleracea    | AT2G07190.1   Symbols:   Domain of unknown function (DUF985)   chr2:2987367-2988945 FORWARD LENGTH=452                                                                                                                                                                                                                                                                                                                                                                                                                                                | 403  | 452  | 2.00E-24 | 112.2 | 19.9 | 30.3 |
| Rsa1.0_00643.1.g17373.t1  | ref NP_564773.1  uncharacterized protein [Arabidopsis thaliana] gi 2443885 gb AAB71478.1  Unknown protein [Arabidopsis thaliana] gi 30017227 gb AAP12847.1  At1g61170 [Arabidopsis thaliana] gi 110735914 dbj BAE99932.1  hypothetical protein [Arabidopsis thaliana] gi 332195677 gb AEE33798.1  uncharacterized protein AT1G61170 [Arabidopsis thaliana] | 491  | 251  | 4.00E-69  | 51.1  | 33.6 | 37.9 | uncharacterized protein           | gbpln | Arabidopsis thaliana | AT1G61170.1   Symbols:   unknown protein; FUNCTIONS IN: molecular function unknown; INVOLVED IN: N-terminal protein myristoylation; LOCATED IN: cellular component unknown; EXPRESSED IN: 19 plant structures; EXPRESSED DURING: 12 growth stages; BEST Arabidopsis thaliana protein match is: unknown protein (TAIR:AT1G1125.1); Has 54 Blast hits to 54 proteins in 15 species: Archae - 0; Bacteria - 0; Metazoa - 17; Fungi - 0; Plants - 34; Viruses - 1; Other Eukaryotes - 2 (source: NCBI BLink).   chr1:22549718-22550473 FORWARD LENGTH=251 | 491  | 251  | 9.00E-72 | 51.1  | 33.6 | 37.9 |
| Rsa1.0_00643.1.g17374.t1  | #                                                                                                                                                                                                                                                                                                                                                          | #    | #    | #         | #     | #    | #    | -                                 | ----  | ----                 | #                                                                                                                                                                                                                                                                                                                                                                                                                                                                                                                                                     | #    | #    | #        | #     | #    |      |
| Rsa1.0_00643.1.g17375.t1  | #                                                                                                                                                                                                                                                                                                                                                          | #    | #    | #         | #     | #    | #    | -                                 | ----  | ----                 | #                                                                                                                                                                                                                                                                                                                                                                                                                                                                                                                                                     | #    | #    | #        | #     | #    |      |
| Rsa1.0_00644.1.g17376.t8  | gb AAC02669.1  polyprotein [Arabidopsis thaliana]                                                                                                                                                                                                                                                                                                          | 519  | 1451 | 3.00E-43  | 279.6 | 21.0 | 28.1 | polyprotein                       | gbpln | Arabidopsis thaliana | AT4G23160.1   Symbols: CRK8   cysteine-rich RLK (RECEPTOR-like protein kinase) 8   chr4:12129485-12134086 FORWARD LENGTH=1262                                                                                                                                                                                                                                                                                                                                                                                                                         | 519  | 1262 | 2.00E-20 | 243.2 | 10.4 | 17.1 |
| Rsa1.0_00644.1.g17377.t2  | emb CAE46442.1  sulphate transporter [Brassica napus]                                                                                                                                                                                                                                                                                                      | 658  | 658  | 0         | 100.0 | 96.4 | 98.6 | sulphate transporter              | gbpln | Brassica napus       | AT3G51895.1   Symbols: SULTR3.1, AST12   sulfate transporter 3:1   chr3:19251503-19255677 REVERSE LENGTH=658                                                                                                                                                                                                                                                                                                                                                                                                                                          | 658  | 658  | 0        | 100.0 | 91.5 | 96.2 |
| Rsa1.0_00644.1.g17378.t1  | ref NP_974413.1  high mobility group protein B1 [Arabidopsis thaliana] gi 222423104 dbj BAH19531.1  AT3G51880 [Arabidopsis thaliana] gi 332645335 gb AEE78856.1  high mobility group protein B1 [Arabidopsis thaliana]                                                                                                                                     | 201  | 185  | 1.00E-68  | 92.0  | 70.1 | 73.6 | high mobility group protein B1    | gbpln | Arabidopsis thaliana | AT3G51880.2   Symbols: HMGB1, NFD1   high mobility group B1   chr3:19247241-19248491 REVERSE LENGTH=185                                                                                                                                                                                                                                                                                                                                                                                                                                               | 201  | 185  | 5.00E-71 | 92.0  | 70.1 | 73.6 |
| Rsa1.0_00644.1.g17379.t1  | gb ACA61613.1  hypothetical protein AP2_E11.1 [Arabidopsis lyrata subsp. petraea]                                                                                                                                                                                                                                                                          | 1155 | 471  | 1.00E-145 | 40.8  | 22.1 | 27.0 | hypothetical protein AP2_E11.1    | gbpln | Arabidopsis lyrata   | AT1G34070.1   Symbols:   CONTAINS InterPro DOMAIN/s: Retrotransposon gag protein (InterPro:IPR005162); BEST Arabidopsis thaliana protein match is: unknown protein (TAIR:AT5G48050.1); Has 648 Blast hits to 647 proteins in 29 species: Archae - 0; Bacteria - 0; Metazoa - 16; Fungi - 25; Plants - 607; Viruses - 0; Other Eukaryotes - 0 (source: NCBI BLink).   chr1:12402283-12403209 FORWARD LENGTH=308                                                                                                                                        | 1155 | 308  | 1.00E-80 | 26.7  | 13.4 | 17.2 |



|                          |                                                                                                                                                                                                                                                                                                                                                                                                                                                                                                                                                                                                                                                                                                                                                                                                                                                                                                                                                                                                                                                                                                                                                                    |     |     |           |       |      |      |                                                 |       |                      |                                                                                                                           |     |     |           |       |      |      |
|--------------------------|--------------------------------------------------------------------------------------------------------------------------------------------------------------------------------------------------------------------------------------------------------------------------------------------------------------------------------------------------------------------------------------------------------------------------------------------------------------------------------------------------------------------------------------------------------------------------------------------------------------------------------------------------------------------------------------------------------------------------------------------------------------------------------------------------------------------------------------------------------------------------------------------------------------------------------------------------------------------------------------------------------------------------------------------------------------------------------------------------------------------------------------------------------------------|-----|-----|-----------|-------|------|------|-------------------------------------------------|-------|----------------------|---------------------------------------------------------------------------------------------------------------------------|-----|-----|-----------|-------|------|------|
| Rsa1.0_00644.1.g17380.t1 | ref NP_190752.1  acyl-coenzyme A oxidase 4 [Arabidopsis thaliana]<br>gi 62286630 sp O96329.1 ACOX4_ARAT<br>H RecName: Full=Acyl-coenzyme A oxidase 4, peroxisomal; Short=AOX 4; AltName: Full=G6p; AltName: Full=Short-chain acyl-CoA oxidase; Short=AtCX4; Short=AtG6; Short=SAOX gi 114794822 pdb 2IX5 A Chain A, Short Chain Specific Acyl-Coa Oxidase From Arabidopsis Thaliana, Acx4 In Complex With Acetoacetyl-Coa<br>gi 114794824 pdb 2IX5 C Chain C, Short Chain Specific Acyl-Coa Oxidase From Arabidopsis Thaliana, Acx4 In Complex With Acetoacetyl-Coa<br>gi 114794825 pdb 2IX5 D Chain D, Short Chain Specific Acyl-Coa Oxidase From Arabidopsis Thaliana, Acx4 In Complex With Acetoacetyl-Coa<br>gi 1657621 gb AAB18129.1  G6p [Arabidopsis thaliana]<br>gi 3068711 gb AAC14411.1  putative acyl-coA dehydrogenase [Arabidopsis thaliana] gi 5478795 dbj BAA82478.1  Short-chain acyl CoA oxidase [Arabidopsis thaliana]<br>gi 20453143 gb AAM19813.1  At3g51840/AtG6 [Arabidopsis thaliana]<br>ref XP_002877826.1  ATG4/CHLG/G4 [Arabidopsis lyrata subsp. lyrata]<br>gi 297323664 gb EFH54085.1  ATG4/CHLG/G4 [Arabidopsis lyrata subsp. lyrata] | 438 | 436 | 0         | 99.5  | 89.3 | 93.6 | acyl-coenzyme A oxidase 4                       | gbpln | Arabidopsis thaliana | AT3G51840.1   Symbols: ACX4, ATSCX, ATG6   acyl-CoA oxidase 4   chr3:19225653-19229008 REVERSE LENGTH=436                 | 438 | 436 | 0         | 99.5  | 89.3 | 93.6 |
| Rsa1.0_00644.1.g17381.t1 | ref NP_001190060.1  metalloproteinase M24 domain-containing protein [Arabidopsis thaliana]<br>gi 332645325 gb AE78846.1  metalloproteinase M24 domain-containing protein [Arabidopsis thaliana]<br>ref XP_002877824.1  hypothetical protein ARALYDRAFT_485534 [Arabidopsis lyrata subsp. lyrata]<br>gi 297323662 gb EFH54083.1  hypothetical protein ARALYDRAFT_485534 [Arabidopsis lyrata subsp. lyrata]<br>ref NP_190746.2  BCL-2-associated athanogene 4 [Arabidopsis thaliana]<br>gi 75158813 sp Q8RX71.1 BAG4_ARATH RecName: Full=BAG family molecular chaperone regulator 4; AltName: Full=Bcl-2-associated athanogene 4<br>gi 19699283 gb AAL91253.1  At3g51780/ORF3 [Arabidopsis thaliana]<br>gi 23055833 gb AAN28776.1  At3g51780/ORF3 [Arabidopsis thaliana]<br>gi 332645321 gb AE78842.1  BCL-2-associated athanogene 4 [Arabidopsis thaliana]                                                                                                                                                                                                                                                                                                          | 411 | 387 | 0         | 94.2  | 83.5 | 85.9 | ATG4/CHLG/G4                                    | gbpln | Arabidopsis lyrata   | AT3G51820.1   Symbols: ATG4, G4, CHLG   UbiA prenyltransferase family protein   chr3:19216301-19218934 REVERSE LENGTH=387 | 411 | 387 | 0         | 94.2  | 82.7 | 85.6 |
| Rsa1.0_00644.1.g17382.t1 | ref NP_001190060.1  metalloproteinase M24 domain-containing protein [Arabidopsis thaliana]<br>gi 332645325 gb AE78846.1  metalloproteinase M24 domain-containing protein [Arabidopsis thaliana]<br>ref XP_002877824.1  hypothetical protein ARALYDRAFT_485534 [Arabidopsis lyrata subsp. lyrata]<br>gi 297323662 gb EFH54083.1  hypothetical protein ARALYDRAFT_485534 [Arabidopsis lyrata subsp. lyrata]<br>ref NP_190746.2  BCL-2-associated athanogene 4 [Arabidopsis thaliana]<br>gi 75158813 sp Q8RX71.1 BAG4_ARATH RecName: Full=BAG family molecular chaperone regulator 4; AltName: Full=Bcl-2-associated athanogene 4<br>gi 19699283 gb AAL91253.1  At3g51780/ORF3 [Arabidopsis thaliana]<br>gi 23055833 gb AAN28776.1  At3g51780/ORF3 [Arabidopsis thaliana]<br>gi 332645321 gb AE78842.1  BCL-2-associated athanogene 4 [Arabidopsis thaliana]                                                                                                                                                                                                                                                                                                          | 391 | 385 | 0         | 98.5  | 86.2 | 92.1 | metalloproteinase M24 domain-containing protein | gbpln | Arabidopsis thaliana | AT3G51800.3   Symbols: ATG2   metalloproteinase M24 family protein   chr3:19211261-19213568 REVERSE LENGTH=385            | 391 | 385 | 0         | 98.5  | 86.2 | 92.1 |
| Rsa1.0_00644.1.g17383.t1 | ref XP_002877824.1  hypothetical protein ARALYDRAFT_485534 [Arabidopsis lyrata subsp. lyrata]<br>gi 297323662 gb EFH54083.1  hypothetical protein ARALYDRAFT_485534 [Arabidopsis lyrata subsp. lyrata]<br>ref NP_190746.2  BCL-2-associated athanogene 4 [Arabidopsis thaliana]<br>gi 75158813 sp Q8RX71.1 BAG4_ARATH RecName: Full=BAG family molecular chaperone regulator 4; AltName: Full=Bcl-2-associated athanogene 4<br>gi 19699283 gb AAL91253.1  At3g51780/ORF3 [Arabidopsis thaliana]<br>gi 23055833 gb AAN28776.1  At3g51780/ORF3 [Arabidopsis thaliana]<br>gi 332645321 gb AE78842.1  BCL-2-associated athanogene 4 [Arabidopsis thaliana]                                                                                                                                                                                                                                                                                                                                                                                                                                                                                                             | 251 | 257 | 1.00E-114 | 102.4 | 82.5 | 86.1 | hypothetical protein ARALYDRAFT_485534          | gbpln | Arabidopsis lyrata   | AT3G51790.1   Symbols: ATG1, TG1   transmembrane protein G1P-related 1   chr3:19209893-19210663 REVERSE LENGTH=256        | 251 | 256 | 1.00E-116 | 102.0 | 82.5 | 85.7 |
| Rsa1.0_00644.1.g17384.t1 | ref NP_190746.2  BCL-2-associated athanogene 4 [Arabidopsis thaliana]<br>gi 75158813 sp Q8RX71.1 BAG4_ARATH RecName: Full=BAG family molecular chaperone regulator 4; AltName: Full=Bcl-2-associated athanogene 4<br>gi 19699283 gb AAL91253.1  At3g51780/ORF3 [Arabidopsis thaliana]<br>gi 23055833 gb AAN28776.1  At3g51780/ORF3 [Arabidopsis thaliana]<br>gi 332645321 gb AE78842.1  BCL-2-associated athanogene 4 [Arabidopsis thaliana]                                                                                                                                                                                                                                                                                                                                                                                                                                                                                                                                                                                                                                                                                                                       | 278 | 269 | 1.00E-111 | 96.8  | 79.5 | 88.8 | BCL-2-associated athanogene 4                   | gbpln | Arabidopsis thaliana | AT3G51780.1   Symbols: ATBAG4, BAG4   BCL-2-associated athanogene 4   chr3:19207029-19208178 REVERSE LENGTH=269           | 278 | 269 | 1.00E-114 | 96.8  | 79.5 | 88.8 |
| Rsa1.0_00644.1.g17385.t1 | dbj BAJ34198.1  unnamed protein product [Theilungiella halophila]                                                                                                                                                                                                                                                                                                                                                                                                                                                                                                                                                                                                                                                                                                                                                                                                                                                                                                                                                                                                                                                                                                  | 953 | 958 | 0         | 100.5 | 90.1 | 93.3 | unnamed protein product                         | ----  | ----                 | AT3G51770.2   Symbols: ETO1   tetrapeptide repeat (TPR)-containing protein   chr3:19200328-19203998 REVERSE LENGTH=959    | 953 | 959 | 0         | 100.6 | 87.5 | 91.5 |
| Rsa1.0_00644.1.g17386.t1 | ref XP_002877821.1  hypothetical protein ARALYDRAFT_906526 [Arabidopsis lyrata subsp. lyrata]<br>gi 297323659 gb EFH54080.1  hypothetical protein ARALYDRAFT_906526 [Arabidopsis lyrata subsp. lyrata]                                                                                                                                                                                                                                                                                                                                                                                                                                                                                                                                                                                                                                                                                                                                                                                                                                                                                                                                                             | 249 | 257 | 1.00E-113 | 103.2 | 84.3 | 92.8 | hypothetical protein ARALYDRAFT_906526          | gbpln | Arabidopsis lyrata   | AT3G51760.2   Symbols:   Protein of unknown function (DUF688)   chr3:19198541-19199405 REVERSE LENGTH=259                 | 249 | 259 | 1.00E-113 | 104.0 | 83.5 | 91.2 |
| Rsa1.0_00644.1.g17387.t1 | dbj BAJ33968.1  unnamed protein product [Theilungiella halophila]                                                                                                                                                                                                                                                                                                                                                                                                                                                                                                                                                                                                                                                                                                                                                                                                                                                                                                                                                                                                                                                                                                  | 216 | 213 | 2.00E-89  | 98.6  | 81.5 | 88.9 | unnamed protein product                         | ----  | ----                 | AT3G51730.1   Symbols:   saposin B domain-containing protein   chr3:19186970-19188436 FORWARD LENGTH=213                  | 216 | 213 | 2.00E-88  | 98.6  | 76.4 | 87.0 |

|                          |                                                                                                                                                                                                                                                                                                                                                                                                                                                                                                                                                                                                              |      |     |           |       |      |      |                                                  |       |                      |                                                                                                                                                                                                                                                                                                                                                                                                                                                |      |      |           |       |      |      |
|--------------------------|--------------------------------------------------------------------------------------------------------------------------------------------------------------------------------------------------------------------------------------------------------------------------------------------------------------------------------------------------------------------------------------------------------------------------------------------------------------------------------------------------------------------------------------------------------------------------------------------------------------|------|-----|-----------|-------|------|------|--------------------------------------------------|-------|----------------------|------------------------------------------------------------------------------------------------------------------------------------------------------------------------------------------------------------------------------------------------------------------------------------------------------------------------------------------------------------------------------------------------------------------------------------------------|------|------|-----------|-------|------|------|
| Rsa1.0_00644.1.g17388.t1 | gb EOA29438.1  hypothetical protein CARUB_v100225660mg, partial [Capsella rubella]                                                                                                                                                                                                                                                                                                                                                                                                                                                                                                                           | 275  | 382 | 1.00E-109 | 138.9 | 68.0 | 73.1 | hypothetical protein CARUB_v100225660mg, partial | gbpln | Capsella rubella     | AT3G47090.1   Symbols:   Leucine-rich repeat protein kinase family protein   chr3:17341512-17344645 REVERSE LENGTH=1009                                                                                                                                                                                                                                                                                                                        | 275  | 1009 | 1.00E-108 | 366.9 | 66.2 | 73.1 |
| Rsa1.0_00645.1.g17389.t1 | gb AAF97297.1 AC010164.19 Hypothetical protein [Arabidopsis thaliana]<br>ref NP_191481.1  pirin [Arabidopsis thaliana]<br>gi 1419501.1 sp Q9LX49.1 PRN1_ARATH RecName: Full=Pirin-1; AltName: Full=ATPirin1                                                                                                                                                                                                                                                                                                                                                                                                  | 76   | 308 | 2.00E-26  | 405.3 | 75.0 | 88.2 | Hypothetical protein                             | gbpln | Arabidopsis thaliana | #                                                                                                                                                                                                                                                                                                                                                                                                                                              | #    | #    | #         | #     | #    | #    |
| Rsa1.0_00645.1.g17390.t1 | gi 19070663 gb AAL83949.1 AF353716.1 pirin [Arabidopsis thaliana]<br>gi 7801672 emb CAB91592.1  pirin-like protein [Arabidopsis thaliana]<br>gi 109946467 gb ABG48412.1  AT3g59220 [Arabidopsis thaliana]<br>gi 332646372 gb AEE79893.1  pirin [Arabidopsis thaliana]<br>ref NP_567081.1  uncharacterized protein [Arabidopsis thaliana]<br>gi 16416387 dbj BAB70614.1  anthocyanin-related membrane protein 3 [Arabidopsis thaliana]                                                                                                                                                                        | 289  | 287 | 1.00E-137 | 99.3  | 81.0 | 89.3 | pirin                                            | gbpln | Arabidopsis thaliana | AT3G59220.1   Symbols: PRN, PRN1, ATPIRIN1   pirin   chr3:21894205-21895501 FORWARD LENGTH=287                                                                                                                                                                                                                                                                                                                                                 | 289  | 287  | 1.00E-140 | 99.3  | 81.0 | 89.3 |
| Rsa1.0_00645.1.g17391.t1 | gi 332646386 gb AEE79907.1  uncharacterized protein AT3G59340 [Arabidopsis thaliana]<br>ref NP_567081.1  uncharacterized protein [Arabidopsis thaliana]<br>gi 16416387 dbj BAB70614.1  anthocyanin-related membrane protein 3 [Arabidopsis thaliana]                                                                                                                                                                                                                                                                                                                                                         | 434  | 333 | 1.00E-147 | 76.7  | 59.9 | 67.1 | uncharacterized protein                          | gbpln | Arabidopsis thaliana | AT3G59340.1   Symbols:   Eukaryotic protein of unknown function (DUF914)   chr3:21928971-21931030 REVERSE LENGTH=333                                                                                                                                                                                                                                                                                                                           | 434  | 333  | 1.00E-149 | 76.7  | 59.9 | 67.1 |
| Rsa1.0_00645.1.g17392.t1 | gi 332646386 gb AEE79907.1  uncharacterized protein AT3G59340 [Arabidopsis thaliana]<br>ref NP_567082.2  protein kinase family protein [Arabidopsis thaliana]<br>gi 79315708 ref NP_001030893.1  protein kinase family protein [Arabidopsis thaliana]<br>gi 317411799 sp B9DFG5.1 PTI13_ARATH RecName: Full=PTI1-like tyrosine-protein kinase 3; Short=PTI1-3<br>gi 222422997 dbj BAH19482.1  AT3G59350 [Arabidopsis thaliana]<br>gi 332646387 gb AEE79908.1  protein kinase family protein [Arabidopsis thaliana]<br>gi 332646389 gb AEE79910.1  PTI1-like tyrosine-protein kinase 3 [Arabidopsis thaliana] | 337  | 333 | 1.00E-144 | 98.8  | 77.2 | 87.8 | uncharacterized protein                          | gbpln | Arabidopsis thaliana | AT3G59340.1   Symbols:   Eukaryotic protein of unknown function (DUF914)   chr3:21928971-21931030 REVERSE LENGTH=333                                                                                                                                                                                                                                                                                                                           | 337  | 333  | 2.33E-156 | 98.8  | 77.2 | 87.8 |
| Rsa1.0_00645.1.g17393.t1 | gi 317411799 sp B9DFG5.1 PTI13_ARATH RecName: Full=PTI1-like tyrosine-protein kinase 3; Short=PTI1-3<br>gi 222422997 dbj BAH19482.1  AT3G59350 [Arabidopsis thaliana]<br>gi 332646387 gb AEE79908.1  protein kinase family protein [Arabidopsis thaliana]<br>gi 332646389 gb AEE79910.1  PTI1-like tyrosine-protein kinase 3 [Arabidopsis thaliana]                                                                                                                                                                                                                                                          | 407  | 408 | 0         | 100.2 | 92.4 | 94.8 | protein kinase family protein                    | gbpln | Arabidopsis thaliana | AT3G59350.3   Symbols:   Protein kinase superfamily protein   chr3:21932930-21934883 FORWARD LENGTH=408                                                                                                                                                                                                                                                                                                                                        | 407  | 408  | 0         | 100.2 | 92.4 | 94.8 |
| Rsa1.0_00645.1.g17394.t1 | gb AAM64445.1  fructokinase-like protein [Arabidopsis thaliana]                                                                                                                                                                                                                                                                                                                                                                                                                                                                                                                                              | 326  | 326 | 1.00E-180 | 100.0 | 94.2 | 97.9 | fructokinase-like protein                        | gbpln | Arabidopsis thaliana | AT3G59480.1   Symbols:   pfkB-like carbohydrate kinase family protein   chr3:21983103-21984440 FORWARD LENGTH=326                                                                                                                                                                                                                                                                                                                              | 326  | 326  | 0         | 100.0 | 93.9 | 97.2 |
| Rsa1.0_00645.1.g17395.t1 | gb EOA26152.1  hypothetical protein CARUB_v10019590mg [Capsella rubella]                                                                                                                                                                                                                                                                                                                                                                                                                                                                                                                                     | 236  | 289 | 1.00E-104 | 122.5 | 80.9 | 88.1 | hypothetical protein CARUB_v10019590mg           | gbpln | Capsella rubella     | AT3G59490.2   Symbols:   unknown protein; FUNCTIONS IN: molecular function unknown; INVOLVED IN: biological process unknown; EXPRESSED IN: 22 plant structures; EXPRESSED DURING: 13 growth stages; Has 30201 Blast hits to 17322 proteins in 780 species: Archaea - 12; Bacteria - 1396; Metazoa - 17338; Fungi - 3422; Plants - 5037; Viruses - 0; Other Eukaryotes - 2996 (source: NCBI BLINK).   chr3:21984660-21986262 REVERSE LENGTH=293 | 236  | 293  | 1.00E-106 | 124.2 | 80.9 | 88.1 |
| Rsa1.0_00645.1.g17396.t1 | gb EOA24578.1  hypothetical protein CARUB_v10017840mg [Capsella rubella]<br>ref XP_002878275.1  leucine-rich repeat family protein [Arabidopsis lyrata subsp. lyrata]<br>gi 297324113 gb EFH54534.1  leucine-rich repeat family protein [Arabidopsis lyrata subsp. lyrata]                                                                                                                                                                                                                                                                                                                                   | 273  | 269 | 2.33E-156 | 98.5  | 91.9 | 96.3 | hypothetical protein CARUB_v10017840mg           | gbpln | Capsella rubella     | AT3G59500.1   Symbols:   Integral membrane HRF1 family protein   chr3:21987110-21988169 FORWARD LENGTH=269                                                                                                                                                                                                                                                                                                                                     | 273  | 269  | 1.00E-147 | 98.5  | 91.9 | 96.0 |
| Rsa1.0_00645.1.g17397.t1 | ref XP_002878275.1  leucine-rich repeat family protein [Arabidopsis lyrata subsp. lyrata]<br>gi 297324113 gb EFH54534.1  leucine-rich repeat family protein [Arabidopsis lyrata subsp. lyrata]                                                                                                                                                                                                                                                                                                                                                                                                               | 410  | 416 | 0         | 101.5 | 87.1 | 93.2 | leucine-rich repeat family protein               | gbpln | Arabidopsis lyrata   | AT3G59510.1   Symbols:   Leucine-rich repeat (LRR) family protein   chr3:21988453-21989712 REVERSE LENGTH=419                                                                                                                                                                                                                                                                                                                                  | 410  | 419  | 0         | 102.2 | 85.4 | 92.2 |
| Rsa1.0_00645.1.g17398.t1 | #                                                                                                                                                                                                                                                                                                                                                                                                                                                                                                                                                                                                            | #    | #   | #         | #     | #    | #    | -                                                | ----  | ----                 | #                                                                                                                                                                                                                                                                                                                                                                                                                                              | #    | #    | #         | #     | #    | #    |
| Rsa1.0_00645.1.g17399.t1 | gb EOA33287.1  hypothetical protein CARUB_v10019720mg [Capsella rubella]                                                                                                                                                                                                                                                                                                                                                                                                                                                                                                                                     | 1244 | 984 | 0         | 79.1  | 58.0 | 66.2 | hypothetical protein CARUB_v10019720mg           | gbpln | Capsella rubella     | AT3G42170.1   Symbols:   BED zinc finger hAT family dimerisation domain   chr3:14321838-14323928 FORWARD LENGTH=696                                                                                                                                                                                                                                                                                                                            | 1244 | 696  | 1.00E-142 | 55.9  | 20.7 | 28.4 |

|                          |                                                                                                                                                                                                                                                                                                             |     |      |           |       |      |      |                                                 |       |                      |                                                                                                                                       |     |     |           |       |      |      |
|--------------------------|-------------------------------------------------------------------------------------------------------------------------------------------------------------------------------------------------------------------------------------------------------------------------------------------------------------|-----|------|-----------|-------|------|------|-------------------------------------------------|-------|----------------------|---------------------------------------------------------------------------------------------------------------------------------------|-----|-----|-----------|-------|------|------|
| Rsa1.0_00645.1.g17400.t1 | gb AAx38236.1  strictosidine synthase family protein [Brassica napus]                                                                                                                                                                                                                                       | 414 | 414  | 0         | 100.0 | 93.7 | 97.6 | strictosidine synthase family protein           | gbpln | Brassica napus       | AT3G59530.2   Symbols: LAP3   Calcium-dependent phosphotriesterase superfamily protein   chr3:21993710-21995164 FORWARD LENGTH=403    | 414 | 403 | 0         | 97.3  | 88.6 | 93.2 |
| Rsa1.0_00645.1.g17401.t1 | gb EOA25003.1  hypothetical protein CARUB_v10018301mg, partial [Capsella rubella]                                                                                                                                                                                                                           | 64  | 100  | 2.00E-28  | 156.3 | 98.4 | 98.4 | hypothetical protein CARUB_v10018301mg, partial | gbpln | Capsella rubella     | AT3G59540.1   Symbols:   Ribosomal L38e protein family   chr3:21995897-21996742 REVERSE LENGTH=69                                     | 64  | 69  | 8.00E-31  | 107.8 | 98.4 | 98.4 |
| Rsa1.0_00645.1.g17402.t7 | gb AAG44843.1 AF281155.1 cohesion family protein SYN3 [Arabidopsis thaliana]                                                                                                                                                                                                                                | 367 | 692  | 1.00E-107 | 188.6 | 62.7 | 72.2 | cohesion family protein SYN3                    | gbpln | Arabidopsis thaliana | AT3G59550.1   Symbols: SYN3, ATRAD21.2, ATSYN3   Rad21/Rec8-like family protein   chr3:21997262-22000496 FORWARD LENGTH=693           | 367 | 693 | 1.00E-104 | 188.8 | 62.9 | 72.8 |
| Rsa1.0_00645.1.g17403.t1 | gb ACR10272.1  sulfotransferase 5b [Brassica rapa subsp. pekinensis]                                                                                                                                                                                                                                        | 306 | 342  | 1.00E-119 | 111.8 | 73.5 | 81.7 | sulfotransferase 5b                             | gbpln | Brassica rapa        | AT1G74090.1   Symbols: SOT18, ATSOT18, ATST5B   desulfo-glucosinolate sulfotransferase 18   chr1:27863003-27864055 FORWARD LENGTH=350 | 306 | 350 | 1.00E-108 | 114.4 | 69.0 | 77.8 |
| Rsa1.0_00645.1.g17404.t1 | ref NP_191520.1  F-box/kelch-repeat protein [Arabidopsis thaliana] gi 75264553 sp Q9M1A7.1 FBK75_ARAT H RecName: Full=F-box/kelch-repeat protein At3g59610 gi 6996297 emb CAB75458.1  putative protein [Arabidopsis thaliana] gi 332646424 gb AEE79945.1  F-box/kelch-repeat protein [Arabidopsis thaliana] | 508 | 521  | 1.00E-142 | 102.6 | 55.5 | 69.9 | F-box/kelch-repeat protein                      | gbpln | Arabidopsis thaliana | AT3G59610.1   Symbols:   F-box family protein / jacalin lectin family protein   chr3:22019553-22021199 FORWARD LENGTH=521             | 508 | 521 | 1.00E-145 | 102.6 | 55.5 | 69.9 |
| Rsa1.0_00645.1.g17405.t1 | # # # # # # # # - ----                                                                                                                                                                                                                                                                                      |     |      |           |       |      |      |                                                 |       |                      |                                                                                                                                       |     |     |           |       |      |      |
| Rsa1.0_00645.1.g17406.t1 | gb EOA23604.1  hypothetical protein CARUB_v10016803mg [Capsella rubella]                                                                                                                                                                                                                                    | 660 | 657  | 0         | 99.5  | 83.3 | 91.1 | hypothetical protein CARUB_v10016803mg          | gbpln | Capsella rubella     | AT3G59700.1   Symbols: ATHLECRK, LECRK1, HLECRK   lectin-receptor kinase   chr3:22052146-22054131 FORWARD LENGTH=661                  | 660 | 661 | 0         | 100.2 | 83.5 | 90.5 |
| Rsa1.0_00645.1.g17407.t1 | gb AFE83591.1  putative coat protein [Raphanus sativas chrysovirus 1]                                                                                                                                                                                                                                       | 541 | 1101 | 1.00E-134 | 203.5 | 47.9 | 62.5 | putative coat protein                           | gbvrl | Raphanus sativas     | # # # # # # #                                                                                                                         |     |     |           |       |      |      |
| Rsa1.0_00645.1.g17408.t2 | gb EOA23944.1  hypothetical protein CARUB_v10017160mg [Capsella rubella]                                                                                                                                                                                                                                    | 553 | 473  | 1.00E-101 | 85.5  | 36.0 | 42.7 | hypothetical protein CARUB_v10017160mg          | gbpln | Capsella rubella     | AT3G60040.1   Symbols:   F-box family protein   chr3:22175937-22179728 REVERSE LENGTH=838                                             | 553 | 838 | 2.00E-72  | 151.5 | 28.2 | 36.7 |
| Rsa1.0_00645.1.g17409.t1 | gb EOA23880.1  hypothetical protein CARUB_v10017095mg, partial [Capsella rubella]                                                                                                                                                                                                                           | 440 | 491  | 1.00E-156 | 111.6 | 67.0 | 81.1 | hypothetical protein CARUB_v10017095mg, partial | gbpln | Capsella rubella     | AT3G60040.1   Symbols:   F-box family protein   chr3:22175937-22179728 REVERSE LENGTH=838                                             | 440 | 838 | 1.00E-116 | 190.5 | 55.2 | 69.3 |
| Rsa1.0_00645.1.g17410.t1 | gb EOA24035.1  hypothetical protein CARUB_v10017252mg [Capsella rubella]                                                                                                                                                                                                                                    | 444 | 444  | 0         | 100.0 | 95.5 | 98.2 | hypothetical protein CARUB_v10017252mg          | gbpln | Capsella rubella     | AT3G59920.1   Symbols: ATGDI2, GDI2   RAB GDP dissociation inhibitor 2   chr3:22135157-22138221 FORWARD LENGTH=444                    | 444 | 444 | 0         | 100.0 | 95.5 | 97.7 |
| Rsa1.0_00645.1.g17411.t2 | ref XP_002878306.1  autophagy 4b [Arabidopsis lyrata subsp. lyrata] gi 297324144 gb EFH54565.1  autophagy 4b [Arabidopsis lyrata subsp. lyrata]                                                                                                                                                             | 425 | 476  | 0         | 112.0 | 88.5 | 92.7 | autophagy 4b                                    | gbpln | Arabidopsis lyrata   | AT3G59950.1   Symbols:   Peptidase family C54 protein   chr3:22144468-22146887 REVERSE LENGTH=477                                     | 425 | 477 | 0         | 112.2 | 87.5 | 93.2 |
| Rsa1.0_00645.1.g17412.t1 | gb EOA27380.1  hypothetical protein CARUB_v10023499mg [Capsella rubella]                                                                                                                                                                                                                                    | 220 | 361  | 2.00E-69  | 164.1 | 63.2 | 75.9 | hypothetical protein CARUB_v10023499mg          | gbpln | Capsella rubella     | AT3G59960.1   Symbols: ASHH4, SDG24   histone-lysine N-methyltransferase ASHH4   chr3:22148334-22150386 FORWARD LENGTH=352            | 220 | 352 | 2.00E-71  | 160.0 | 60.5 | 65.5 |

|                          |                                                                                                                                                                                                                                                                                                                                                                                                                                                                                                                       |     |     |           |       |      |      |                                                 |       |                      |                                                                                                                                          |     |     |           |       |      |      |
|--------------------------|-----------------------------------------------------------------------------------------------------------------------------------------------------------------------------------------------------------------------------------------------------------------------------------------------------------------------------------------------------------------------------------------------------------------------------------------------------------------------------------------------------------------------|-----|-----|-----------|-------|------|------|-------------------------------------------------|-------|----------------------|------------------------------------------------------------------------------------------------------------------------------------------|-----|-----|-----------|-------|------|------|
| Rsa1.0_00645.1.g17413.t1 | ref[NP_567089.1] methionine aminopeptidase 2B [Arabidopsis thaliana] gi 30695106 ref[NP_850725.1] methionine aminopeptidase 2B [Arabidopsis thaliana] gi 79315754 ref[NP_001030898.1] methionine aminopeptidase 2B [Arabidopsis thaliana] gi 334186141 ref[NP_001190139.1] methionine aminopeptidase 2B [Arabidopsis thaliana] gi 85700451 sp G56Y85.2 AMP2B_ARAT H RecName: Full=Methionine aminopeptidase 2B; Short=MAP 2B; Short=MetAP 2B; AltName: Full=Peptidase M 2B                                            | 442 | 439 | 0         | 99.3  | 88.9 | 92.5 | methionine aminopeptidase 2B                    | gbpln | Arabidopsis thaliana | AT3G59990.4   Symbols: MAP2B   methionine aminopeptidase 2B   chr:3:22155921-22158551 REVERSE LENGTH=439                                 | 442 | 439 | 0         | 99.3  | 88.9 | 92.5 |
| Rsa1.0_00645.1.g17414.t1 | gi 11344922 gb AAG34551.1 AF300880.1 putative methionine aminopeptidase 2 [Arabidopsis thaliana] gi 21536943 gb AAM61284.1  putative methionine aminopeptidase [Arabidopsis thaliana] gi 332646475 gb AEE79996.1  methionine aminopeptidase 2B [Arabidopsis thaliana] gi 332646476 gb AEE79997.1  methionine aminopeptidase 2B [Arabidopsis thaliana] gi 332646477 gb AEE79998.1  methionine aminopeptidase 2B [Arabidopsis thaliana] gi 332646478 gb AEE79999.1  methionine aminopeptidase 2B [Arabidopsis thaliana] | #   | #   | #         | #     | #    | #    | -                                               | ----  | ----                 | #                                                                                                                                        | #   | #   | #         | #     | #    |      |
| Rsa1.0_00645.1.g17415.t1 | gb[EMJ20595.1] hypothetical protein PRUPE_ppa020403mg [Prunus persica]                                                                                                                                                                                                                                                                                                                                                                                                                                                | 158 | 156 | 3.00E-50  | 98.7  | 62.7 | 75.3 | hypothetical protein PRUPE_ppa020403mg          | gbpln | Prunus persica       | AT1G75950.1   Symbols: SKP1, ASK1, ATSKP1, SKP1A, UIP1   S phase kinase-associated protein 1   chr1:28516715-28517454 FORWARD LENGTH=160 | 158 | 160 | 2.00E-49  | 101.3 | 62.0 | 79.7 |
| Rsa1.0_00645.1.g17416.t1 | ref[XP_002269499.1] PREDICTED: uncharacterized protein LOC100247715 [Vitis vinifera] gi 296080944 emb CB18666.3  unnamed protein product [Vitis vinifera]                                                                                                                                                                                                                                                                                                                                                             | 376 | 409 | 1.00E-91  | 108.8 | 46.3 | 66.0 | PREDICTED: uncharacterized protein LOC100247715 | gbpln | Vitis vinifera       | AT5G56530.2   Symbols:   Protein of Unknown Function (DUF239)   chr:5:22889382-22891439 FORWARD LENGTH=420                               | 376 | 420 | 4.00E-90  | 111.7 | 45.5 | 61.4 |
| Rsa1.0_00645.1.g17417.t1 | ref[XP_002269499.1] PREDICTED: uncharacterized protein LOC100247715 [Vitis vinifera] gi 296080944 emb CB18666.3  unnamed protein product [Vitis vinifera]                                                                                                                                                                                                                                                                                                                                                             | 378 | 409 | 4.00E-90  | 108.2 | 45.5 | 66.9 | PREDICTED: uncharacterized protein LOC100247715 | gbpln | Vitis vinifera       | AT5G56530.2   Symbols:   Protein of Unknown Function (DUF239)   chr:5:22889382-22891439 FORWARD LENGTH=420                               | 378 | 420 | 6.00E-89  | 111.1 | 45.5 | 62.2 |
| Rsa1.0_00645.1.g17418.t1 | ref[XP_002269499.1] PREDICTED: uncharacterized protein LOC100247715 [Vitis vinifera] gi 296080944 emb CB18666.3  unnamed protein product [Vitis vinifera]                                                                                                                                                                                                                                                                                                                                                             | 425 | 409 | 1.00E-109 | 96.2  | 44.9 | 64.5 | PREDICTED: uncharacterized protein LOC100247715 | gbpln | Vitis vinifera       | AT5G56530.2   Symbols:   Protein of Unknown Function (DUF239)   chr:5:22889382-22891439 FORWARD LENGTH=420                               | 425 | 420 | 1.00E-111 | 98.8  | 44.5 | 62.8 |
| Rsa1.0_00645.1.g17419.t1 | ref[XP_002878314.1] pentatricopeptide repeat-containing protein [Arabidopsis lyrata subsp. lyrata] gi 297324152 gb EFH54573.1  pentatricopeptide repeat-containing protein [Arabidopsis lyrata subsp. lyrata]                                                                                                                                                                                                                                                                                                         | 477 | 475 | 0         | 99.6  | 83.4 | 89.3 | pentatricopeptide repeat-containing protein     | gbpln | Arabidopsis lyrata   | AT3G60050.1   Symbols:   Pentatricopeptide repeat (PPR) superfamily protein   chr:3:22180231-22181652 REVERSE LENGTH=473                 | 477 | 473 | 0         | 99.2  | 82.8 | 89.3 |
| Rsa1.0_00645.1.g17420.t1 | ref[NP_191566.5] major facilitator protein [Arabidopsis thaliana] gi 21703097 gb AAM74491.1  AT3g60070.7/2Q9_50 [Arabidopsis thaliana] gi 332646487 gb AEE80008.1  major facilitator protein [Arabidopsis thaliana]                                                                                                                                                                                                                                                                                                   | 459 | 458 | 0         | 99.8  | 93.7 | 96.9 | major facilitator protein                       | gbpln | Arabidopsis thaliana | AT3G60070.1   Symbols:   Major facilitator superfamily protein   chr:3:22183572-22185941 REVERSE LENGTH=458                              | 459 | 458 | 0         | 99.8  | 93.7 | 96.9 |
| Rsa1.0_00646.1.g17421.t1 | #                                                                                                                                                                                                                                                                                                                                                                                                                                                                                                                     | #   | #   | #         | #     | #    | #    | -                                               | ----  | ----                 | #                                                                                                                                        | #   | #   | #         | #     | #    |      |
| Rsa1.0_00646.1.g17422.t1 | gb[EOA27783.1] hypothetical protein CARUB_v10023935mg, partial [Capsella rubella]                                                                                                                                                                                                                                                                                                                                                                                                                                     | 212 | 244 | 1.00E-105 | 115.1 | 90.6 | 95.3 | hypothetical protein CARUB_v10023935mg, partial | gbpln | Capsella rubella     | AT2G44065.2   Symbols:   Ribosomal protein L2 family   chr:2:18228860-18230368 FORWARD LENGTH=214                                        | 212 | 214 | 1.00E-107 | 100.9 | 89.6 | 94.8 |
| Rsa1.0_00646.1.g17423.t1 | gb[EOA27458.1] hypothetical protein CARUB_v10023596mg [Capsella rubella]                                                                                                                                                                                                                                                                                                                                                                                                                                              | 326 | 332 | 1.00E-155 | 101.8 | 87.7 | 93.9 | hypothetical protein CARUB_v10023596mg          | gbpln | Capsella rubella     | AT2G44060.2   Symbols:   Late embryogenesis abundant protein, group 2   chr:2:18226922-18227988 FORWARD LENGTH=325                       | 326 | 325 | 1.00E-155 | 99.7  | 84.0 | 90.8 |

|                          |                                                                                                                                                                                                                                                                                                                                                                                                                                                                                                                                                                                                                                                                                                                                                                                                                                   |      |      |           |       |      |      |                                                 |       |                      |                                                                                                                                                                                                                                                                                                                                            |      |      |           |       |      |      |
|--------------------------|-----------------------------------------------------------------------------------------------------------------------------------------------------------------------------------------------------------------------------------------------------------------------------------------------------------------------------------------------------------------------------------------------------------------------------------------------------------------------------------------------------------------------------------------------------------------------------------------------------------------------------------------------------------------------------------------------------------------------------------------------------------------------------------------------------------------------------------|------|------|-----------|-------|------|------|-------------------------------------------------|-------|----------------------|--------------------------------------------------------------------------------------------------------------------------------------------------------------------------------------------------------------------------------------------------------------------------------------------------------------------------------------------|------|------|-----------|-------|------|------|
| Rsa1.0_00646.1.g17424.t1 | ref NP_181933.1  6,7-dimethyl-8-ribityllumazine synthase [Arabidopsis thaliana]<br>gi 20139375 sp O80575.1 RISB_ARATH<br>RecName: Full=6,7-dimethyl-8-ribityllumazine synthase, chloroplastic; Short=DMRL synthase; Short=L.S; Short=Lumazine synthase; Flags:<br>Precursor<br>gi 5532610 gb AAD44810.1 AF148649.1<br>6,7-dimethyl-8-ribityllumazine synthase precursor [Arabidopsis thaliana]<br>gi 3212862 gb AAC23413.1  6,7-dimethyl-8-ribityllumazine synthase precursor [Arabidopsis thaliana]<br>gi 15292959 gb AAK93590.1  putative 6,7-dimethyl-8-ribityllumazine synthase precursor [Arabidopsis thaliana]<br>gi 20259133 gb AAM14282.1  putative 6,7-dimethyl-8-ribityllumazine synthase precursor [Arabidopsis thaliana]<br>gi 33025527 gb AEC10365.1  6,7-dimethyl-8-ribityllumazine synthase [Arabidopsis thaliana] | 231  | 227  | 1.00E-103 | 98.3  | 86.1 | 89.2 | 6,7-dimethyl-8-ribityllumazine synthase         | gbpln | Arabidopsis thaliana | AT2G44050.1   Symbols: COS1   6,7-dimethyl-8-ribityllumazine synthase / DMRL synthase / lumazine synthase / riboflavin synthase   chr2:18224304-18225917 FORWARD LENGTH=227                                                                                                                                                                | 231  | 227  | 1.00E-106 | 98.3  | 86.1 | 89.2 |
| Rsa1.0_00646.1.g17425.t1 | gb EOA27404.1  hypothetical protein CARUB_v10023537mg [Capsella rubella]                                                                                                                                                                                                                                                                                                                                                                                                                                                                                                                                                                                                                                                                                                                                                          | 349  | 350  | 1.00E-175 | 100.3 | 87.1 | 92.3 | hypothetical protein CARUB_v10023537mg          | gbpln | Capsella rubella     | AT2G44040.1   Symbols:   Dihydrodipicolinate reductase, bacterial/plant   chr2:18221985-18223998 REVERSE LENGTH=347                                                                                                                                                                                                                        | 349  | 347  | 1.00E-176 | 99.4  | 87.4 | 90.8 |
| Rsa1.0_00646.1.g17426.t1 | gb EOA28560.1  hypothetical protein CARUB_v10024778mg [Capsella rubella]                                                                                                                                                                                                                                                                                                                                                                                                                                                                                                                                                                                                                                                                                                                                                          | 98   | 100  | 1.00E-32  | 102.0 | 77.6 | 85.7 | hypothetical protein CARUB_v10024778mg          | gbpln | Capsella rubella     | AT2G44010.1   Symbols:   unknown protein; BEST Arabidopsis thaliana protein match is: unknown protein (TAIR:AT3G5980.1); Has 18 Blast hits to 18 proteins in 7 species: Archae - 0; Bacteria - 0; Metazoa - 0; Fungi - 0; Plants - 18; Viruses - 0; Other Eukaryotes - 0 (source: NCBI BLINK).   chr2:18216879-18217184 FORWARD LENGTH=101 | 98   | 101  | 9.00E-33  | 103.1 | 75.5 | 83.7 |
| Rsa1.0_00646.1.g17427.t1 | ref XP_002880077.1  hypothetical protein ARALYDRAFT_483519 [Arabidopsis lyrata subsp. lyrata]<br>gi 297325916 gb EFH56336.1  hypothetical protein ARALYDRAFT_483519 [Arabidopsis lyrata subsp. lyrata]                                                                                                                                                                                                                                                                                                                                                                                                                                                                                                                                                                                                                            | 208  | 209  | 1.00E-77  | 100.5 | 73.6 | 83.7 | hypothetical protein ARALYDRAFT_483519          | gbpln | Arabidopsis lyrata   | AT2G44000.1   Symbols:   Late embryogenesis abundant (LEA) hydroxyproline-rich glycoprotein family   chr2:18214627-18215256 FORWARD LENGTH=209                                                                                                                                                                                             | 208  | 209  | 2.00E-74  | 100.5 | 70.2 | 82.2 |
| Rsa1.0_00646.1.g17428.t1 | ref XP_002868402.1  arogenate dehydrogenase [Arabidopsis lyrata subsp. lyrata]<br>gi 297314239 gb EFH44661.1  arogenate dehydrogenase [Arabidopsis lyrata subsp. lyrata]                                                                                                                                                                                                                                                                                                                                                                                                                                                                                                                                                                                                                                                          | 621  | 618  | 0         | 99.5  | 77.3 | 84.2 | arogenate dehydrogenase                         | gbpln | Arabidopsis lyrata   | AT5G34930.1   Symbols:   arogenate dehydrogenase   chr5:13233391-13235522 FORWARD LENGTH=640                                                                                                                                                                                                                                               | 621  | 640  | 0         | 103.1 | 76.0 | 83.1 |
| Rsa1.0_00646.1.g17429.t1 | gb EOA27254.1  hypothetical protein CARUB_v10023373mg, partial [Capsella rubella]                                                                                                                                                                                                                                                                                                                                                                                                                                                                                                                                                                                                                                                                                                                                                 | 534  | 395  | 1.00E-151 | 74.0  | 51.9 | 56.9 | hypothetical protein CARUB_v10023373mg, partial | gbpln | Capsella rubella     | AT2G43950.1   Symbols: OEP37, ATOEP37   chloroplast outer envelope protein 37   chr2:18200553-18202644 REVERSE LENGTH=343                                                                                                                                                                                                                  | 534  | 343  | 1.00E-153 | 64.2  | 51.5 | 56.2 |
| Rsa1.0_00646.1.g17430.t1 | gb EOA29354.1  hypothetical protein CARUB_v10025640mg [Capsella rubella]                                                                                                                                                                                                                                                                                                                                                                                                                                                                                                                                                                                                                                                                                                                                                          | 1295 | 1294 | 0         | 99.9  | 87.0 | 92.6 | hypothetical protein CARUB_v10025640mg          | gbpln | Capsella rubella     | AT2G43900.1   Symbols:   Endonuclease/exonuclease/phosphatase family protein   chr2:18178801-18183823 REVERSE LENGTH=1316                                                                                                                                                                                                                  | 1295 | 1316 | 0         | 101.6 | 78.5 | 82.7 |
| Rsa1.0_00646.1.g17431.t1 | ref XP_002881935.1  hypothetical protein ARALYDRAFT_483504 [Arabidopsis lyrata subsp. lyrata]<br>gi 297327774 gb EFH58194.1  hypothetical protein ARALYDRAFT_483504 [Arabidopsis lyrata subsp. lyrata]                                                                                                                                                                                                                                                                                                                                                                                                                                                                                                                                                                                                                            | 386  | 384  | 0         | 99.5  | 93.5 | 96.1 | hypothetical protein ARALYDRAFT_483504          | gbpln | Arabidopsis lyrata   | AT2G43870.1   Symbols:   Pectin lyase-like superfamily protein   chr2:18166615-18168264 REVERSE LENGTH=384                                                                                                                                                                                                                                 | 386  | 384  | 0         | 99.5  | 93.3 | 96.4 |
| Rsa1.0_00646.1.g17432.t1 | ref XP_002881934.1  predicted protein [Arabidopsis lyrata subsp. lyrata]<br>gi 297327773 gb EFH58193.1  predicted protein [Arabidopsis lyrata subsp. lyrata]                                                                                                                                                                                                                                                                                                                                                                                                                                                                                                                                                                                                                                                                      | 409  | 405  | 0         | 99.0  | 80.9 | 88.5 | predicted protein                               | gbpln | Arabidopsis lyrata   | AT2G43860.1   Symbols:   Pectin lyase-like superfamily protein   chr2:18162945-18164428 REVERSE LENGTH=405                                                                                                                                                                                                                                 | 409  | 405  | 0         | 99.0  | 80.2 | 89.2 |
| Rsa1.0_00646.1.g17433.t1 | gb EOA27104.1  hypothetical protein CARUB_v10023202mg [Capsella rubella]                                                                                                                                                                                                                                                                                                                                                                                                                                                                                                                                                                                                                                                                                                                                                          | 334  | 449  | 1.00E-144 | 134.4 | 73.1 | 77.5 | hypothetical protein CARUB_v10023202mg          | gbpln | Capsella rubella     | AT2G43820.1   Symbols: GT, UGT74F2, ATSAGT1, SGT1, SAGT1   UDP-glucosyltransferase 74F2   chr2:18152279-18153715 FORWARD LENGTH=449                                                                                                                                                                                                        | 334  | 449  | 1.00E-140 | 134.4 | 70.4 | 76.3 |
| Rsa1.0_00646.1.g17434.t1 | gb EOA27104.1  hypothetical protein CARUB_v10023202mg [Capsella rubella]                                                                                                                                                                                                                                                                                                                                                                                                                                                                                                                                                                                                                                                                                                                                                          | 296  | 449  | 1.00E-131 | 151.7 | 75.3 | 80.1 | hypothetical protein CARUB_v10023202mg          | gbpln | Capsella rubella     | AT2G43820.1   Symbols: GT, UGT74F2, ATSAGT1, SGT1, SAGT1   UDP-glucosyltransferase 74F2   chr2:18152279-18153715 FORWARD LENGTH=449                                                                                                                                                                                                        | 296  | 449  | 1.00E-127 | 151.7 | 72.0 | 78.4 |

|                          |                                                                                                                                                                                                                                                                                                                                                                                                                                                                                                                      |      |      |           |       |      |      |                                                     |       |                      |                                                                                                                                                                                                                                                                                                                                                          |      |      |           |       |      |      |
|--------------------------|----------------------------------------------------------------------------------------------------------------------------------------------------------------------------------------------------------------------------------------------------------------------------------------------------------------------------------------------------------------------------------------------------------------------------------------------------------------------------------------------------------------------|------|------|-----------|-------|------|------|-----------------------------------------------------|-------|----------------------|----------------------------------------------------------------------------------------------------------------------------------------------------------------------------------------------------------------------------------------------------------------------------------------------------------------------------------------------------------|------|------|-----------|-------|------|------|
| Rsa1.0_00646.1.g17435.t1 | gb AAD12028.1  putative non-LTR retroelement reverse transcriptase [Arabidopsis thaliana]                                                                                                                                                                                                                                                                                                                                                                                                                            | 242  | 1447 | 4.00E-30  | 597.9 | 38.8 | 58.3 | putative non-LTR retroelement reverse transcriptase | gbpln | Arabidopsis thaliana | AT5G18880.1   Symbols:   RNA-directed DNA polymerase (reverse transcriptase)-related family protein   chr5:6300535-6301422 REVERSE LENGTH=295                                                                                                                                                                                                            | 242  | 295  | 1.00E-22  | 121.9 | 30.2 | 45.5 |
| Rsa1.0_00647.1.g17436.t1 | ref XP_002881863.1  phosphoenolpyruvate carboxylase [Arabidopsis lyrata subsp. lyrata] gi 297327702 gb EFH58122.1  phosphoenolpyruvate carboxylase [Arabidopsis lyrata subsp. lyrata]                                                                                                                                                                                                                                                                                                                                | 964  | 963  | 0         | 99.9  | 97.5 | 98.9 | phosphoenolpyruvate carboxylase                     | gbpln | Arabidopsis lyrata   | AT2G42600.1   Symbols: ATPPC2, PPC2   phosphoenolpyruvate carboxylase 2   chr2:17734541-17738679 REVERSE LENGTH=963                                                                                                                                                                                                                                      | 964  | 963  | 0         | 99.9  | 97.2 | 98.8 |
| Rsa1.0_00647.1.g17437.t1 | gb EOA29463.1  hypothetical protein CARUB_v100241591mg [Capsella rubella] gi 482563274 gb EOA29464.1  hypothetical protein CARUB_v100241591mg [Capsella rubella]                                                                                                                                                                                                                                                                                                                                                     | 169  | 178  | 2.00E-79  | 105.3 | 89.3 | 90.5 | hypothetical protein CARUB_v100241591mg             | gbpln | Capsella rubella     | AT2G42610.2   Symbols: LSH10   Protein of unknown function [DUF640]   chr2:17748005-17748538 FORWARD LENGTH=177                                                                                                                                                                                                                                          | 169  | 177  | 8.00E-80  | 104.7 | 87.6 | 89.3 |
| Rsa1.0_00647.1.g17438.t1 | gb AAG51228.1 AC035249_3 Tam3-like transposon protein; 93317-95488 [Arabidopsis thaliana] gi 12323055 gb AAG51515.1 AC068324_3 hAT-element transposase, putative [Arabidopsis thaliana]                                                                                                                                                                                                                                                                                                                              | 723  | 723  | 0         | 100.0 | 56.4 | 72.8 | Tam3-like transposon protein; 93317-95488           | gbpln | Arabidopsis thaliana | AT3G42170.1   Symbols:   BED zinc finger hAT family dimerisation domain   chr3:14321838-14323928 FORWARD LENGTH=696                                                                                                                                                                                                                                      | 723  | 696  | 3.00E-54  | 96.3  | 23.2 | 41.9 |
| Rsa1.0_00647.1.g17439.t1 | dbj BAJ33992.1  unnamed protein product [Theilungiella halophila]                                                                                                                                                                                                                                                                                                                                                                                                                                                    | 689  | 701  | 0         | 101.7 | 87.7 | 93.6 | unnamed protein product                             | ----  | ----                 | AT2G42620.1   Symbols: MAX2, ORE9, PPS   RNI-like superfamily protein   chr2:17756170-17758251 FORWARD LENGTH=693                                                                                                                                                                                                                                        | 689  | 693  | 0         | 100.6 | 86.2 | 92.7 |
| Rsa1.0_00647.1.g17440.t7 | ref XP_002881864.1  hypothetical protein ARALYDRAFT_903636 [Arabidopsis lyrata subsp. lyrata] gi 297327703 gb EFH58123.1  hypothetical protein ARALYDRAFT_903636 [Arabidopsis lyrata subsp. lyrata]                                                                                                                                                                                                                                                                                                                  | 642  | 740  | 1.00E-166 | 115.3 | 54.4 | 68.8 | hypothetical protein ARALYDRAFT_903636              | gbpln | Arabidopsis lyrata   | AT3G58640.2   Symbols:   Mitogen activated protein kinase kinase-related   chr3:21687153-21692675 REVERSE LENGTH=809                                                                                                                                                                                                                                     | 642  | 809  | 1.00E-119 | 126.0 | 30.5 | 37.4 |
| Rsa1.0_00647.1.g17441.t1 | ref NP_181797.1  alpha/beta-hydrolase domain-containing protein [Arabidopsis thaliana] gi 75265946 sp Q9SJJ7.1 PLA20_ARATH RecName: Full=Phospholipase A1-IIdelta gi 4512683 gb AAD21737.1  putative lipase [Arabidopsis thaliana] gi 15293122 gb AAK93875.1  putative lipase [Arabidopsis thaliana] gi 19310713 gb AAL85087.1  putative lipase [Arabidopsis thaliana] gi 20198071 gb AAM15382.1  putative lipase [Arabidopsis thaliana] gi 330255062 gb AEC10156.1  phospholipase A1-IIdelta [Arabidopsis thaliana] | 414  | 412  | 0         | 99.5  | 88.9 | 94.0 | alpha/beta-hydrolase domain-containing protein      | gbpln | Arabidopsis thaliana | AT2G42690.1   Symbols:   alpha/beta-Hydrolases superfamily protein   chr2:17778356-17777682 REVERSE LENGTH=412                                                                                                                                                                                                                                           | 414  | 412  | 0         | 99.5  | 88.9 | 94.0 |
| Rsa1.0_00647.1.g17442.t1 | gb EOA27699.1  hypothetical protein CARUB_v10023852mg [Capsella rubella]                                                                                                                                                                                                                                                                                                                                                                                                                                             | 251  | 267  | 5.00E-67  | 106.4 | 66.1 | 78.9 | hypothetical protein CARUB_v10023852mg              | gbpln | Capsella rubella     | AT2G42760.1   Symbols:   unknown protein; CONTAINS InterPro DOMAIN/s; Protein of unknown function DUF1685 (InterPro:IPR012881); Has 170 Blast hits to 164 proteins in 34 species: Archae - 0; Bacteria - 1; Metazoa - 26; Fungi - 10; Plants - 107; Viruses - 0; Other Eukaryotes - 26 (source: NCBI BLINK).   chr2:17796382-17797185 REVERSE LENGTH=267 | 251  | 267  | 4.00E-69  | 106.4 | 65.7 | 77.7 |
| Rsa1.0_00647.1.g17443.t1 | emb CAN61307.1  hypothetical protein VITISV_035681 [Vitis vinifera]                                                                                                                                                                                                                                                                                                                                                                                                                                                  | 167  | 249  | 3.00E-17  | 149.1 | 32.3 | 49.1 | hypothetical protein VITISV_035681                  | gbpln | Vitis vinifera       | AT1G05920.1   Symbols:   Domain of unknown function [DUF313]   chr1:1797044-1797991 FORWARD LENGTH=315                                                                                                                                                                                                                                                   | 167  | 315  | 4.00E-16  | 188.6 | 25.7 | 43.1 |
| Rsa1.0_00647.1.g17444.t1 | #                                                                                                                                                                                                                                                                                                                                                                                                                                                                                                                    | #    | #    | #         | #     | #    | -    | ----                                                | ----  | ----                 | #                                                                                                                                                                                                                                                                                                                                                        | #    | #    | #         | #     | #    | #    |
| Rsa1.0_00647.1.g17445.t1 | #                                                                                                                                                                                                                                                                                                                                                                                                                                                                                                                    | #    | #    | #         | #     | #    | -    | ----                                                | ----  | ----                 | #                                                                                                                                                                                                                                                                                                                                                        | #    | #    | #         | #     | #    | #    |
| Rsa1.0_00647.1.g17446.t1 | emb CAA18463.1  putative protein [Arabidopsis thaliana] gi 7269163 emb CAB79271.1  putative protein [Arabidopsis thaliana]                                                                                                                                                                                                                                                                                                                                                                                           | 170  | 1240 | 6.00E-38  | 729.4 | 51.2 | 61.2 | putative protein                                    | gbpln | Arabidopsis thaliana | AT4G23160.1   Symbols: CRK8   cysteine-rich RLK (RECEPTOR-like protein kinase) 8   chr4:12129485-12134086 FORWARD LENGTH=1262                                                                                                                                                                                                                            | 170  | 1262 | 3.00E-40  | 742.4 | 51.2 | 61.2 |
| Rsa1.0_00647.1.g17447.t1 | #                                                                                                                                                                                                                                                                                                                                                                                                                                                                                                                    | #    | #    | #         | #     | #    | -    | ----                                                | ----  | ----                 | #                                                                                                                                                                                                                                                                                                                                                        | #    | #    | #         | #     | #    | #    |
| Rsa1.0_00647.1.g17448.t1 | gb EOA26283.1  hypothetical protein CARUB_v10023965mg, partial [Capsella rubella]                                                                                                                                                                                                                                                                                                                                                                                                                                    | 236  | 237  | 1.00E-108 | 100.4 | 88.1 | 92.8 | hypothetical protein CARUB_v10023965mg, partial     | gbpln | Capsella rubella     | AT2G42770.1   Symbols:   Peroxisomal membrane 22 kDa (Mpv17/PMP22) family protein   chr2:17798635-17799927 REVERSE LENGTH=232                                                                                                                                                                                                                            | 236  | 232  | 1.00E-102 | 98.3  | 89.8 | 94.1 |
| Rsa1.0_00647.1.g17449.t1 | emb CAB39638.1  RNA-directed DNA polymerase-like protein [Arabidopsis thaliana] gi 7267666 emb CAB78094.1  RNA-directed DNA polymerase-like protein [Arabidopsis thaliana]                                                                                                                                                                                                                                                                                                                                           | 2009 | 1274 | 0         | 63.4  | 29.5 | 39.8 | RNA-directed DNA polymerase-like protein            | gbpln | Arabidopsis thaliana | AT4G29090.1   Symbols:   Ribonuclease H-like superfamily protein   chr4:14333528-14335255 FORWARD LENGTH=575                                                                                                                                                                                                                                             | 2009 | 575  | 1.00E-62  | 28.6  | 7.9  | 13.7 |
| Rsa1.0_00647.1.g17450.t1 | #                                                                                                                                                                                                                                                                                                                                                                                                                                                                                                                    | #    | #    | #         | #     | #    | -    | ----                                                | ----  | ----                 | #                                                                                                                                                                                                                                                                                                                                                        | #    | #    | #         | #     | #    | #    |

|                          |                                                                                                                                                                                                                                                                                                                                                    |      |      |           |       |      |      |                                                           |       |                      |                                                                                                                                           |      |     |           |       |      |      |
|--------------------------|----------------------------------------------------------------------------------------------------------------------------------------------------------------------------------------------------------------------------------------------------------------------------------------------------------------------------------------------------|------|------|-----------|-------|------|------|-----------------------------------------------------------|-------|----------------------|-------------------------------------------------------------------------------------------------------------------------------------------|------|-----|-----------|-------|------|------|
| Rsa1.0_00648.1.g17451.t1 | gb EOA15832.1  hypothetical protein CARUB_v10007453mg [Capsella rubella]                                                                                                                                                                                                                                                                           | 187  | 187  | 1.00E-100 | 100.0 | 94.7 | 97.3 | hypothetical protein CARUB_v10007453mg                    | gbpln | Capsella rubella     | AT4G15770.1   Symbols:   RNA binding   chr4:8978060-8978623 FORWARD LENGTH=187                                                            | 187  | 187 | 1.00E-101 | 100.0 | 93.0 | 96.3 |
| Rsa1.0_00648.1.g17452.t1 | gb ABD65089.1  zinc knuckle containing protein [Brassica oleracea]                                                                                                                                                                                                                                                                                 | 244  | 333  | 5.00E-31  | 136.5 | 30.7 | 33.6 | zinc knuckle containing protein                           | gbpln | Brassica oleracea    | AT4G15780.1   Symbols:   ATVAMP724, VAMP724   vesicle-associated membrane protein 724   chr4:8980081-8981697 REVERSE LENGTH=222           | 244  | 222 | 1.00E-17  | 91.0  | 18.0 | 18.9 |
| Rsa1.0_00648.1.g17453.t1 | emb CAB75484.1  putative protein [Arabidopsis thaliana]                                                                                                                                                                                                                                                                                            | 675  | 851  | 1.00E-100 | 126.1 | 28.7 | 40.6 | putative protein                                          | gbpln | Arabidopsis thaliana | AT4G29090.1   Symbols:   Ribonuclease H-like superfamily protein   chr4:14333528-14335255 FORWARD LENGTH=575                              | 675  | 575 | 6.00E-62  | 85.2  | 18.2 | 27.3 |
| Rsa1.0_00648.1.g17454.t2 | ref XP_002868179.1  predicted protein [Arabidopsis lyrata subsp. lyrata] gi 297314015 gb EFH44438.1  predicted protein [Arabidopsis lyrata subsp. lyrata]                                                                                                                                                                                          | 82   | 90   | 1.00E-24  | 109.8 | 75.6 | 80.5 | predicted protein                                         | gbpln | Arabidopsis lyrata   | AT4G15802.1   Symbols:   HSBP, AthSBP   heat shock factor binding protein   chr4:8986864-8988339 REVERSE LENGTH=86                        | 82   | 86  | 8.00E-27  | 104.9 | 72.0 | 78.0 |
| Rsa1.0_00648.1.g17455.t1 | gb AAM65484.1  unknown [Arabidopsis thaliana]                                                                                                                                                                                                                                                                                                      | 303  | 296  | 1.00E-136 | 97.7  | 83.8 | 91.1 | unknown                                                   | gbpln | Arabidopsis thaliana | AT4G15830.1   Symbols:   ARM repeat superfamily protein   chr4:8995285-8996548 REVERSE LENGTH=296                                         | 303  | 296 | 1.00E-138 | 97.7  | 83.2 | 91.1 |
| Rsa1.0_00648.1.g17456.t1 | ref XP_002870203.1  hypothetical protein ARALYDRAFT_493298 [Arabidopsis lyrata subsp. lyrata] gi 297316039 gb EFH46462.1  hypothetical protein ARALYDRAFT_493298 [Arabidopsis lyrata subsp. lyrata]                                                                                                                                                | 458  | 499  | 0         | 109.0 | 74.9 | 85.2 | hypothetical protein ARALYDRAFT_493298                    | gbpln | Arabidopsis lyrata   | AT4G15880.1   Symbols:   ESD4, ATESD4   Cysteine proteinases superfamily protein   chr4:9012769-9015797 FORWARD LENGTH=489                | 458  | 489 | 0         | 106.8 | 74.0 | 83.6 |
| Rsa1.0_00648.1.g17457.t1 | ref NP_193328.4  dynein light chain LC8-type [Arabidopsis thaliana] gi 28466885 gb AAO44051.1  At4g15930 [Arabidopsis thaliana] gi 332658267 gb AEE83667.1  dynein light chain LC8-type [Arabidopsis thaliana]                                                                                                                                     | 104  | 123  | 6.00E-38  | 118.3 | 77.9 | 84.6 | dynein light chain LC8-type                               | gbpln | Arabidopsis thaliana | AT4G15930.1   Symbols:   Dynein light chain type 1 family protein   chr4:9036344-9037825 FORWARD LENGTH=123                               | 104  | 123 | 1.00E-40  | 118.3 | 77.9 | 84.6 |
| Rsa1.0_00648.1.g17458.t1 | gb AAL14388.1  AT4g15940/dl4011w [Arabidopsis thaliana] gi 21593651 gb AAM65618.1  isomerase like protein [Arabidopsis thaliana] gi 58331823 gb AAW70409.1  AT4g15940 [Arabidopsis thaliana]                                                                                                                                                       | 223  | 223  | 1.00E-121 | 100.0 | 95.1 | 98.2 | AT4g15940/dl4011w                                         | gbpln | Arabidopsis thaliana | AT4G15940.1   Symbols:   Fumarylacetoacetate (FAA) hydrolase family   chr4:9038361-9040163 FORWARD LENGTH=222                             | 223  | 222 | 1.00E-122 | 99.6  | 94.6 | 97.8 |
| Rsa1.0_00648.1.g17459.t1 | gb AAM62604.1  growth factor like protein [Arabidopsis thaliana]                                                                                                                                                                                                                                                                                   | 279  | 282  | 1.00E-135 | 101.1 | 80.3 | 92.8 | growth factor like protein                                | gbpln | Arabidopsis thaliana | AT4G12720.3   Symbols:   AtNUDT7, GFG1, ATNUDX7   MuT/nudix family protein   chr4:7487716-7489557 FORWARD LENGTH=282                      | 279  | 282 | 1.00E-137 | 101.1 | 79.6 | 91.4 |
| Rsa1.0_00648.1.g17460.t1 | gb EOA16118.1  hypothetical protein CARUB_v10004250mg, partial [Capsella rubella]                                                                                                                                                                                                                                                                  | 322  | 715  | 1.00E-152 | 222.0 | 82.9 | 88.5 | hypothetical protein CARUB_v10004250mg, partial           | gbpln | Capsella rubella     | AT4G15960.1   Symbols:   alpha/beta-Hydrolases superfamily protein   chr4:9045763-9047199 REVERSE LENGTH=375                              | 322  | 375 | 1.00E-151 | 116.5 | 81.1 | 87.0 |
| Rsa1.0_00648.1.g17461.t1 | ref XP_002870193.1  hypothetical protein ARALYDRAFT_329916 [Arabidopsis lyrata subsp. lyrata] gi 297316029 gb EFH46452.1  hypothetical protein ARALYDRAFT_329916 [Arabidopsis lyrata subsp. lyrata]                                                                                                                                                | 274  | 242  | 3.00E-72  | 88.3  | 57.7 | 66.1 | hypothetical protein ARALYDRAFT_329916                    | gbpln | Arabidopsis lyrata   | AT3G16720.1   Symbols:   ATL2, TL2   TOXICOS EN LEVADURA 2   chr3:5692880-5693794 FORWARD LENGTH=304                                      | 274  | 304 | 6.00E-65  | 110.9 | 58.8 | 72.6 |
| Rsa1.0_00648.1.g17462.t1 | ref XP_002868170.1  predicted protein [Arabidopsis lyrata subsp. lyrata] gi 297314006 gb EFH44429.1  predicted protein [Arabidopsis lyrata subsp. lyrata]                                                                                                                                                                                          | 736  | 713  | 0         | 96.9  | 71.9 | 82.1 | predicted protein                                         | gbpln | Arabidopsis lyrata   | AT4G15980.1   Symbols:   Plant invertase/pectin methyltransferase inhibitor superfamily   chr4:9057466-9059983 REVERSE LENGTH=701         | 736  | 701 | 0         | 95.2  | 71.6 | 81.4 |
| Rsa1.0_00648.1.g17463.t1 | gb ABD64994.1  hypothetical protein 26.t00013 [Brassica oleracea]                                                                                                                                                                                                                                                                                  | 126  | 103  | 1.00E-11  | 81.7  | 34.9 | 46.0 | hypothetical protein 26.t00013                            | gbpln | Brassica oleracea    | #                                                                                                                                         | #    | #   | #         | #     | #    | #    |
| Rsa1.0_00648.1.g17464.t5 | gb AAC63844.1  putative non-LTR retroelement reverse transcriptase [Arabidopsis thaliana]                                                                                                                                                                                                                                                          | 1653 | 1231 | 0         | 74.5  | 43.0 | 53.0 | putative non-LTR retroelement reverse transcriptase       | gbpln | Arabidopsis thaliana | AT5G42905.1   Symbols:   Polynucleotidyl transferase, ribonuclease H-like superfamily protein   chr5:17201414-17202323 REVERSE LENGTH=258 | 1653 | 258 | 3.00E-80  | 15.6  | 8.8  | 11.2 |
| Rsa1.0_00648.1.g17465.t1 | gb EOA25923.1  hypothetical protein CARUB_v10019305mg, partial [Capsella rubella]                                                                                                                                                                                                                                                                  | 225  | 361  | 3.00E-76  | 160.4 | 57.3 | 72.9 | hypothetical protein CARUB_v10019305mg, partial           | gbpln | Capsella rubella     | AT2G01050.1   Symbols:   zinc ion binding/nucleic acid binding   chr2:68337-68884 REVERSE LENGTH=515                                      | 225  | 515 | 2.00E-74  | 228.9 | 55.6 | 69.8 |
| Rsa1.0_00648.1.g17466.t1 | ref NP_193340.2  Aminotransferase-like, plant mobile domain family protein [Arabidopsis thaliana] gi 19699015 gb AAL91243.1  unknown protein [Arabidopsis thaliana] gi 22136336 gb AAM91246.1  unknown protein [Arabidopsis thaliana] gi 332658286 gb AEE83686.1  Aminotransferase-like, plant mobile domain family protein [Arabidopsis thaliana] | 731  | 666  | 0         | 91.1  | 55.3 | 67.2 | Aminotransferase-like, plant mobile domain family protein | gbpln | Arabidopsis thaliana | AT4G16050.1   Symbols:   Aminotransferase-like, plant mobile domain family protein   chr4:9092243-9094243 FORWARD LENGTH=666              | 731  | 666 | 0         | 91.1  | 55.3 | 67.2 |

|                          |                                                                                                                                                                                                                                                                                                                                                                                                                                                                                                                                                                                                      |      |      |          |       |      |      |                                                 |       |                      |                                                                                                                               |      |      |           |       |      |      |
|--------------------------|------------------------------------------------------------------------------------------------------------------------------------------------------------------------------------------------------------------------------------------------------------------------------------------------------------------------------------------------------------------------------------------------------------------------------------------------------------------------------------------------------------------------------------------------------------------------------------------------------|------|------|----------|-------|------|------|-------------------------------------------------|-------|----------------------|-------------------------------------------------------------------------------------------------------------------------------|------|------|-----------|-------|------|------|
| Rsa1.0_00648.1.g17467.t1 | dbj BAF01893.1  galactokinase like protein [Arabidopsis thaliana]                                                                                                                                                                                                                                                                                                                                                                                                                                                                                                                                    | 220  | 587  | 1.00E-11 | 266.8 | 24.1 | 27.7 | galactokinase like protein                      | gbpln | Arabidopsis thaliana | AT4G16130.1   Symbols: ARA1, ISA1, ATISA1   arabinose kinase   chr4:9120875-9127656 FORWARD LENGTH=1039                       | 220  | 1039 | 6.00E-14  | 472.3 | 24.1 | 27.7 |
| Rsa1.0_00649.1.g17468.t1 | ref XP_002884185.1  hypothetical protein ARALYDRAFT_343571 [Arabidopsis lyrata subsp. lyrata] gi 297330025 gb EFH60444.1  hypothetical protein ARALYDRAFT_343571 [Arabidopsis lyrata subsp. lyrata]                                                                                                                                                                                                                                                                                                                                                                                                  | 614  | 607  | 0        | 98.9  | 88.6 | 93.0 | hypothetical protein ARALYDRAFT_343571          | gbpln | Arabidopsis lyrata   | AT2G18915.2   Symbols: LKP2, ADO2   LOV KELCH protein 2   chr2:8194792-8197255 REVERSE LENGTH=611                             | 614  | 611  | 0         | 99.5  | 88.6 | 92.7 |
| Rsa1.0_00649.1.g17469.t1 | ref NP_849983.1  LOV KELCH protein 2 [Arabidopsis thaliana] gi 75162385 sp Q8W420.1 ADO2_ARATH RecName: Full=Adagio protein 2; AltName: Full=F-box only protein 2c; Short=FBX2c; AltName: Full=Flavin-binding kelch repeat F-box protein 1-like protein 1; Short=FKF1-like protein 1; AltName: Full=LOV kelch protein 2 gi 18146958 dbj BAB83169.1  LOV kelch protein 2 [Arabidopsis thaliana] gi 20466486 gb AAM20560.1  unknown protein [Arabidopsis thaliana] gi 209414528 gb ACI46504.1  At2g18915 [Arabidopsis thaliana] gi 330251732 gb AEC06826.1  LOV KELCH protein 2 [Arabidopsis thaliana] | 78   | 611  | 8.00E-33 | 783.3 | 91.0 | 92.3 | LOV KELCH protein 2                             | gbpln | Arabidopsis thaliana | AT2G18915.2   Symbols: LKP2, ADO2   LOV KELCH protein 2   chr2:8194792-8197255 REVERSE LENGTH=611                             | 78   | 611  | 1.00E-35  | 783.3 | 91.0 | 92.3 |
| Rsa1.0_00649.1.g17470.t1 | ref NP_565444.2  LOV KELCH protein 2 [Arabidopsis thaliana] gi 330251731 gb AEC06825.1  LOV KELCH protein 2 [Arabidopsis thaliana]                                                                                                                                                                                                                                                                                                                                                                                                                                                                   | 515  | 601  | 0        | 116.7 | 90.3 | 93.6 | LOV KELCH protein 2                             | gbpln | Arabidopsis thaliana | AT2G18915.1   Symbols: LKP2, ADO2   LOV KELCH protein 2   chr2:8194792-8197255 REVERSE LENGTH=601                             | 515  | 601  | 0         | 116.7 | 90.3 | 93.6 |
| Rsa1.0_00649.1.g17471.t1 | gb EOA30141.1  hypothetical protein CARUB_v10013248mg [Capsella rubella]                                                                                                                                                                                                                                                                                                                                                                                                                                                                                                                             | 569  | 612  | 0        | 107.6 | 86.3 | 91.6 | hypothetical protein CARUB_v10013248mg          | gbpln | Capsella rubella     | AT2G18915.2   Symbols: LKP2, ADO2   LOV KELCH protein 2   chr2:8194792-8197255 REVERSE LENGTH=611                             | 569  | 611  | 0         | 107.4 | 85.4 | 91.2 |
| Rsa1.0_00649.1.g17472.t1 | gb AFB74211.1  homogentisate phytyltransferase [Brassica napus]                                                                                                                                                                                                                                                                                                                                                                                                                                                                                                                                      | 481  | 394  | 0        | 81.9  | 73.6 | 74.8 | homogentisate phytyltransferase                 | gbpln | Brassica napus       | AT2G18950.1   Symbols: HPT1, TPT1, ATHPT, VTE2   homogentisate phytyltransferase 1   chr2:8207491-8210047 FORWARD LENGTH=393  | 481  | 393  | 0         | 81.7  | 69.9 | 72.3 |
| Rsa1.0_00649.1.g17473.t1 | #                                                                                                                                                                                                                                                                                                                                                                                                                                                                                                                                                                                                    | #    | #    | #        | #     | #    | -    | -                                               | ----  | ----                 | #                                                                                                                             | #    | #    | #         | #     | #    | #    |
| Rsa1.0_00649.1.g17474.t1 | #                                                                                                                                                                                                                                                                                                                                                                                                                                                                                                                                                                                                    | #    | #    | #        | #     | #    | -    | -                                               | ----  | ----                 | #                                                                                                                             | #    | #    | #         | #     | #    | #    |
| Rsa1.0_00649.1.g17475.t1 | #                                                                                                                                                                                                                                                                                                                                                                                                                                                                                                                                                                                                    | #    | #    | #        | #     | #    | -    | -                                               | ----  | ----                 | #                                                                                                                             | #    | #    | #         | #     | #    | #    |
| Rsa1.0_00649.1.g17476.t1 | gb AAB87099.1  putative retroelement pol polyprotein [Arabidopsis thaliana]                                                                                                                                                                                                                                                                                                                                                                                                                                                                                                                          | 1420 | 1496 | 0        | 105.4 | 56.5 | 71.1 | putative retroelement pol polyprotein           | gbpln | Arabidopsis thaliana | AT4G23160.1   Symbols: CRK8   cysteine-rich RLK (RECEPTOR-like protein kinase) 8   chr4:12129485-12134086 FORWARD LENGTH=1262 | 1420 | 1262 | 1.00E-123 | 88.9  | 15.5 | 21.9 |
| Rsa1.0_00649.1.g17477.t1 | gb EOA29818.1  hypothetical protein CARUB_v10012913mg [Capsella rubella]                                                                                                                                                                                                                                                                                                                                                                                                                                                                                                                             | 949  | 949  | 0        | 100.0 | 98.4 | 99.4 | hypothetical protein CARUB_v10012913mg          | gbpln | Capsella rubella     | AT2G18960.1   Symbols: AHA1, PMA, OST2, HA1   H(+)-ATPase 1   chr2:8221858-8227268 FORWARD LENGTH=949                         | 949  | 949  | 0         | 100.0 | 97.7 | 99.1 |
| Rsa1.0_00649.1.g17478.t1 | gb ACP30609.1  disease resistance protein [Brassica rapa subsp. pekinensis]                                                                                                                                                                                                                                                                                                                                                                                                                                                                                                                          | 1505 | 2726 | 0        | 181.1 | 51.8 | 69.2 | disease resistance protein                      | gbpln | Brassica rapa        | ATMG00860.1   Symbols: ORF158   DNA/RNA polymerases superfamily protein   chrM:235916-236392 FORWARD LENGTH=158               | 1505 | 158  | 4.00E-37  | 10.5  | 5.0  | 5.8  |
| Rsa1.0_00650.1.g17479.t1 | gb EOA11936.1  hypothetical protein CARUB_v10016547mg, partial [Capsella rubella]                                                                                                                                                                                                                                                                                                                                                                                                                                                                                                                    | 222  | 149  | 6.00E-23 | 67.1  | 21.6 | 32.4 | hypothetical protein CARUB_v10016547mg, partial | gbpln | Capsella rubella     | #                                                                                                                             | #    | #    | #         | #     | #    | #    |
| Rsa1.0_00650.1.g17480.t1 | #                                                                                                                                                                                                                                                                                                                                                                                                                                                                                                                                                                                                    | #    | #    | #        | #     | #    | -    | -                                               | ----  | ----                 | #                                                                                                                             | #    | #    | #         | #     | #    | #    |
| Rsa1.0_00650.1.g17481.t1 | #                                                                                                                                                                                                                                                                                                                                                                                                                                                                                                                                                                                                    | #    | #    | #        | #     | #    | -    | -                                               | ----  | ----                 | #                                                                                                                             | #    | #    | #         | #     | #    | #    |
| Rsa1.0_00650.1.g17482.t1 | #                                                                                                                                                                                                                                                                                                                                                                                                                                                                                                                                                                                                    | #    | #    | #        | #     | #    | -    | -                                               | ----  | ----                 | #                                                                                                                             | #    | #    | #         | #     | #    | #    |
| Rsa1.0_00650.1.g17483.t1 | ref XP_002865381.1  zinc finger family protein [Arabidopsis lyrata subsp. lyrata] gi 297311216 gb EFH41640.1  zinc finger family protein [Arabidopsis lyrata subsp. lyrata]                                                                                                                                                                                                                                                                                                                                                                                                                          | 461  | 464  | 0        | 100.7 | 85.5 | 90.5 | zinc finger family protein                      | gbpln | Arabidopsis lyrata   | AT5G44160.1   Symbols: NUC   C2H2-like zinc finger protein   chr5:17773091-17775513 FORWARD LENGTH=466                        | 461  | 466  | 0         | 101.1 | 86.1 | 90.7 |
| Rsa1.0_00650.1.g17484.t1 | gb AAF18630.1 AC006228.1 F5J5.1 [Arabidopsis thaliana]                                                                                                                                                                                                                                                                                                                                                                                                                                                                                                                                               | 167  | 1463 | 1.00E-42 | 876.0 | 55.7 | 73.1 | F5J5.1                                          | gbpln | Arabidopsis thaliana | #                                                                                                                             | #    | #    | #         | #     | #    | #    |
| Rsa1.0_00650.1.g17485.t3 | ref NP_199231.1  Homeodomain-like transcriptional regulator [Arabidopsis thaliana] gi 9759519 dbj BAB10985.1  unnamed protein product [Arabidopsis thaliana] gi 332007687 gb AED95070.1  Homeodomain-like transcriptional regulator [Arabidopsis thaliana]                                                                                                                                                                                                                                                                                                                                           | 1633 | 1694 | 0        | 103.7 | 80.8 | 87.2 | Homeodomain-like transcriptional regulator      | gbpln | Arabidopsis thaliana | AT5G44180.1   Symbols:   Homeodomain-like transcriptional regulator   chr5:17783172-17789872 FORWARD LENGTH=1694              | 1633 | 1694 | 0         | 103.7 | 80.8 | 87.2 |



|                           |                                                                                                                                                                                                                                                                                                                                                                                                                                                                                                                                                                                                                                                                    |     |     |           |       |      |      |                                        |       |                      |                                                                                                                                                                                                                                                                                                                                                  |     |     |           |       |      |      |
|---------------------------|--------------------------------------------------------------------------------------------------------------------------------------------------------------------------------------------------------------------------------------------------------------------------------------------------------------------------------------------------------------------------------------------------------------------------------------------------------------------------------------------------------------------------------------------------------------------------------------------------------------------------------------------------------------------|-----|-----|-----------|-------|------|------|----------------------------------------|-------|----------------------|--------------------------------------------------------------------------------------------------------------------------------------------------------------------------------------------------------------------------------------------------------------------------------------------------------------------------------------------------|-----|-----|-----------|-------|------|------|
| Rsa1.0_00650.1.g17486.t1  | gb ABD64939.1  hypothetical protein 24.t00017 [Brassica oleracea]                                                                                                                                                                                                                                                                                                                                                                                                                                                                                                                                                                                                  | 448 | 442 | 5.00E-94  | 98.7  | 36.4 | 39.5 | hypothetical protein 24.t00017         | gbpln | Brassica oleracea    | AT2G13770.1   Symbols:   CONTAINS InterPro DOMAIN/s: Putative harbinger transposase-derived nuclease (InterPro:IPR006912); Has 451 Blast hits to 352 proteins in 33 species: Archae - 0; Bacteria - 0; Metazoa - 28; Fungi - 8; Plants - 388; Viruses - 0; Other Eukaryotes - 27 (source: NCBI BLink).   chr2:5736603-5737847 FORWARD LENGTH=343 | 448 | 343 | 2.00E-24  | 76.6  | 10.9 | 12.9 |
| Rsa1.0_00650.1.g17487.t1  | ref NP_199232.1  protein GOLDEN2-like 2 [Arabidopsis thaliana]<br>gi 75333752 sp Q9FFH0.1 GLK2_ARATH<br>RecName: Full=Transcription activator GLK2; AltName: Full=GBF'S PRO-RICH REGION-INTERACTING factor 2;<br>AltName: Full=Golden2-like protein 2; Short=AtGLK2<br>gi 9759520 dbj BAB10986.1  unnamed protein product [Arabidopsis thaliana]<br>gi 13311005 gb AAK16744.1  golden2-like transcription factor [Arabidopsis thaliana]<br>gi 13432090 gb AAK20121.1  golden2-like protein 2 [Arabidopsis thaliana]<br>gi 17221601 dbj BAB78467.1  GPR12 [Arabidopsis thaliana]<br>gi 332007689 gb AED95072.1  transcription activator GLK2 [Arabidopsis thaliana] | 377 | 386 | 1.00E-150 | 102.4 | 81.4 | 87.5 | protein GOLDEN2-like 2                 | gbpln | Arabidopsis thaliana | AT5G44190.1   Symbols: GLK2, ATGLK2, GPR12   GOLDEN2-like 2   chr5:17798435-17800647 FORWARD LENGTH=386                                                                                                                                                                                                                                          | 377 | 386 | 1.00E-153 | 102.4 | 81.4 | 87.5 |
| Rsa1.0_00651.1.g17488.t1  | ref XP_002877484.1  predicted protein [Arabidopsis lyrata subsp. lyrata]<br>gi 297323322 gb EFH53743.1  predicted protein [Arabidopsis lyrata subsp. lyrata]                                                                                                                                                                                                                                                                                                                                                                                                                                                                                                       | 489 | 494 | 0         | 101.0 | 84.3 | 89.2 | predicted protein                      | gbpln | Arabidopsis lyrata   | AT3G46450.1   Symbols:   SEC14 cytosolic factor family protein / phosphoglyceride transfer family protein   chr3:17093297-17095319 REVERSE LENGTH=486                                                                                                                                                                                            | 489 | 486 | 0         | 99.4  | 82.4 | 87.5 |
| Rsa1.0_00651.1.g17489.t1  | gb EOA28162.1  hypothetical protein CARUB_v10024350mg [Capsella rubella]                                                                                                                                                                                                                                                                                                                                                                                                                                                                                                                                                                                           | 112 | 114 | 7.00E-28  | 101.8 | 86.6 | 90.2 | hypothetical protein CARUB_v10024350mg | gbpln | Capsella rubella     | AT2G27710.4   Symbols:   60S acidic ribosomal protein family   chr2:11816929-11817670 FORWARD LENGTH=98                                                                                                                                                                                                                                          | 112 | 98  | 2.00E-28  | 87.5  | 56.3 | 58.0 |
| Rsa1.0_00651.1.g17490.t10 | # # # # # # # # # #                                                                                                                                                                                                                                                                                                                                                                                                                                                                                                                                                                                                                                                |     |     |           |       |      |      | -                                      | ----  | ----                 | #                                                                                                                                                                                                                                                                                                                                                | #   | #   | #         | #     | #    | #    |
| Rsa1.0_00651.1.g17491.t1  | ref NP_190194.1  C2H2-type zinc finger protein [Arabidopsis thaliana]<br>gi 75335605 sp Q9LX85.1 ZAT8_ARATH<br>RecName: Full=Zinc finger protein ZAT8<br>gi 7798996 emb CAB90935.1  zinc finger-like protein [Arabidopsis thaliana]<br>gi 225898695 dbj BAH30478.1  hypothetical protein [Arabidopsis thaliana]<br>gi 332644589 gb AEE78110.1  zinc finger protein ZAT8 [Arabidopsis thaliana]                                                                                                                                                                                                                                                                     | 162 | 164 | 5.00E-48  | 101.2 | 67.3 | 75.9 | C2H2-type zinc finger protein          | gbpln | Arabidopsis thaliana | AT3G46080.1   Symbols:   C2H2-type zinc finger family protein   chr3:16922753-16923247 REVERSE LENGTH=164                                                                                                                                                                                                                                        | 162 | 164 | 2.00E-50  | 101.2 | 67.3 | 75.9 |
| Rsa1.0_00651.1.g17492.t1  | ref XP_002864652.1  hypothetical protein ARALYDRAFT_919218 [Arabidopsis lyrata subsp. lyrata]<br>gi 297310487 gb EFH40911.1  hypothetical protein ARALYDRAFT_919218 [Arabidopsis lyrata subsp. lyrata]                                                                                                                                                                                                                                                                                                                                                                                                                                                             | 171 | 162 | 1.00E-43  | 94.7  | 60.8 | 72.5 | hypothetical protein ARALYDRAFT_919218 | gbpln | Arabidopsis lyrata   | AT3G46080.1   Symbols:   C2H2-type zinc finger family protein   chr3:16922753-16923247 REVERSE LENGTH=164                                                                                                                                                                                                                                        | 171 | 164 | 1.00E-45  | 95.9  | 60.8 | 70.2 |

|                          |                                                                                                                                                                                                                                                                                                                                                                                                                                                                                                                                                                                                                                                                                                                                                                                                                                                                                                                                                                                                                                                                                                                                                                                                                                                                                                                                                                                                                                                                                                                                                                                                                                                                                                                                                                                                                                                                                                                                                                                                                                                                                                                                                                                                                                                                                                                                                                                                                                                                                                                                                                                                                                                                                                                             |     |     |           |       |       |       |                                          |       |                      |                                                                                                                                                                                                                                                           |     |     |           |       |       |       |
|--------------------------|-----------------------------------------------------------------------------------------------------------------------------------------------------------------------------------------------------------------------------------------------------------------------------------------------------------------------------------------------------------------------------------------------------------------------------------------------------------------------------------------------------------------------------------------------------------------------------------------------------------------------------------------------------------------------------------------------------------------------------------------------------------------------------------------------------------------------------------------------------------------------------------------------------------------------------------------------------------------------------------------------------------------------------------------------------------------------------------------------------------------------------------------------------------------------------------------------------------------------------------------------------------------------------------------------------------------------------------------------------------------------------------------------------------------------------------------------------------------------------------------------------------------------------------------------------------------------------------------------------------------------------------------------------------------------------------------------------------------------------------------------------------------------------------------------------------------------------------------------------------------------------------------------------------------------------------------------------------------------------------------------------------------------------------------------------------------------------------------------------------------------------------------------------------------------------------------------------------------------------------------------------------------------------------------------------------------------------------------------------------------------------------------------------------------------------------------------------------------------------------------------------------------------------------------------------------------------------------------------------------------------------------------------------------------------------------------------------------------------------|-----|-----|-----------|-------|-------|-------|------------------------------------------|-------|----------------------|-----------------------------------------------------------------------------------------------------------------------------------------------------------------------------------------------------------------------------------------------------------|-----|-----|-----------|-------|-------|-------|
| Rsa1.0_00651.1.g17493.t5 | <p>ref NP_190192.1  Ras--related protein ARA-3 [Arabidopsis thaliana]</p> <p>gi 145332765 ref NP_001078248.1  Ras-related protein ARA-3 [Arabidopsis thaliana]</p> <p>gi 186510716 ref NP_001118780.1  Ras-related protein ARA-3 [Arabidopsis thaliana]</p> <p>gi 297815758 ref XP_002875762.1  hypothetical protein ARALYDRAFT_484985 [Arabidopsis lyrata subsp. lyrata]</p> <p>gi 14088 sp P28186.1 RAE1C_ARATH</p> <p>RecName: Full=Ras--related protein RABE1c; Short=AtRABE1c; AltName: Full=Ras--related protein Ara-3; AltName: Full=Ras--related protein Rab8A; Short=AtRab8A</p> <p>gi 217837 dbj BAA00830.1  small GTP-binding protein [Arabidopsis thaliana]</p> <p>gi 778994 emb CAB90933.1  GTP-binding protein ara-3 [Arabidopsis thaliana]</p> <p>gi 14334918 gb AAK59637.1  putative GTP-binding protein ara-3 [Arabidopsis thaliana]</p> <p>gi 14596015 gb AAK68735.1  GTP-binding protein ara-3 [Arabidopsis thaliana]</p> <p>gi 25054949 gb AAN71951.1  putative GTP-binding protein ara-3 [Arabidopsis thaliana]</p> <p>gi 25084212 gb AAN72197.1  GTP-binding protein ara-3 [Arabidopsis thaliana]</p> <p>gi 297321600 gb EFH52021.1  hypothetical protein</p> <p>ref XP_002877404.1  lectin protein kinase family protein [Arabidopsis lyrata subsp. lyrata]</p> <p>gi 297323242 gb EFH53663.1  lectin protein kinase family protein [Arabidopsis lyrata subsp. lyrata]</p> <p>ref NP_190058.1  arogenate dehydratase 4 [Arabidopsis thaliana]</p> <p>gi 75097389 sp C2224.1 AROD4_ARATH</p> <p>RecName: Full=Arogenate dehydratase 4, chloroplastic; Short=AtADT4; Flags: Precursor</p> <p>gi 2392772 gb AAB70035.1  putative chloroplast prephenate dehydratase [Arabidopsis thaliana]</p> <p>gi 17065232 gb AAL32770.1  putative chloroplast prephenate dehydratase [Arabidopsis thaliana]</p> <p>gi 31711890 gb AAP68301.1  At3g44720 [Arabidopsis thaliana]</p> <p>gi 89340488 gb ABD67753.1  arogenate dehydratase isoform 4 [Arabidopsis thaliana]</p> <p>gi 332644418 gb AEE77939.1  arogenate dehydratase 4 [Arabidopsis thaliana]</p> <p>emb CCD74534.1  myrosinase-binding protein--like protein [Arabidopsis halleri subsp. halleri]</p> <p>emb CAC03543.1  putative protein [Arabidopsis thaliana]</p> <p>ref NP_190082.1  uncharacterized protein [Arabidopsis thaliana]</p> <p>gi 7671397 emb CAB9311.1  putative protein [Arabidopsis thaliana]</p> <p>gi 332644452 gb AEE77973.1  uncharacterized protein AT3G44960 [Arabidopsis thaliana]</p> <p>ref XP_004251248.1  PREDICTED: calmodulin-like isoform 1 [Solanum lycopersicum]</p> <p>ref NP_178872.2  MAK10-like protein [Arabidopsis thaliana]</p> <p>gi 330251069 gb AEC06163.1  MAK10-like protein [Arabidopsis thaliana]</p> | 216 | 216 | 1.00E-123 | 100.0 | 100.0 | 100.0 | Ras-related protein ARA-3                | gbpln | Arabidopsis lyrata   | AT3G44600.3   Symbols: ARA3   RAB GTPase homolog 8A   chr3:16917908-16919740 FORWARD LENGTH=216                                                                                                                                                           | 216 | 216 | 1.00E-125 | 100.0 | 100.0 | 100.0 |
| Rsa1.0_00651.1.g17494.t1 | <p>ref XP_002877404.1  lectin protein kinase family protein [Arabidopsis lyrata subsp. lyrata]</p> <p>gi 297323242 gb EFH53663.1  lectin protein kinase family protein [Arabidopsis lyrata subsp. lyrata]</p> <p>ref NP_190058.1  arogenate dehydratase 4 [Arabidopsis thaliana]</p> <p>gi 75097389 sp C2224.1 AROD4_ARATH</p> <p>RecName: Full=Arogenate dehydratase 4, chloroplastic; Short=AtADT4; Flags: Precursor</p> <p>gi 2392772 gb AAB70035.1  putative chloroplast prephenate dehydratase [Arabidopsis thaliana]</p> <p>gi 17065232 gb AAL32770.1  putative chloroplast prephenate dehydratase [Arabidopsis thaliana]</p> <p>gi 31711890 gb AAP68301.1  At3g44720 [Arabidopsis thaliana]</p> <p>gi 89340488 gb ABD67753.1  arogenate dehydratase isoform 4 [Arabidopsis thaliana]</p> <p>gi 332644418 gb AEE77939.1  arogenate dehydratase 4 [Arabidopsis thaliana]</p> <p>emb CCD74534.1  myrosinase-binding protein--like protein [Arabidopsis halleri subsp. halleri]</p> <p>emb CAC03543.1  putative protein [Arabidopsis thaliana]</p> <p>ref NP_190082.1  uncharacterized protein [Arabidopsis thaliana]</p> <p>gi 7671397 emb CAB9311.1  putative protein [Arabidopsis thaliana]</p> <p>gi 332644452 gb AEE77973.1  uncharacterized protein AT3G44960 [Arabidopsis thaliana]</p> <p>ref XP_004251248.1  PREDICTED: calmodulin-like isoform 1 [Solanum lycopersicum]</p> <p>ref NP_178872.2  MAK10-like protein [Arabidopsis thaliana]</p> <p>gi 330251069 gb AEC06163.1  MAK10-like protein [Arabidopsis thaliana]</p>                                                                                                                                                                                                                                                                                                                                                                                                                                                                                                                                                                                                                                                                                                                                                                                                                                                                                                                                                                                                                                                                                                                                                                                     | 673 | 670 | 0         | 99.6  | 75.5  | 84.5  | lectin protein kinase family protein     | gbpln | Arabidopsis lyrata   | AT3G45440.1   Symbols: Concanavalin A--like lectin protein kinase family protein   chr3:16664875-16666884 REVERSE LENGTH=669                                                                                                                              | 673 | 669 | 0         | 99.4  | 74.3  | 84.1  |
| Rsa1.0_00651.1.g17495.t1 | <p>ref NP_190058.1  arogenate dehydratase 4 [Arabidopsis thaliana]</p> <p>gi 75097389 sp C2224.1 AROD4_ARATH</p> <p>RecName: Full=Arogenate dehydratase 4, chloroplastic; Short=AtADT4; Flags: Precursor</p> <p>gi 2392772 gb AAB70035.1  putative chloroplast prephenate dehydratase [Arabidopsis thaliana]</p> <p>gi 17065232 gb AAL32770.1  putative chloroplast prephenate dehydratase [Arabidopsis thaliana]</p> <p>gi 31711890 gb AAP68301.1  At3g44720 [Arabidopsis thaliana]</p> <p>gi 89340488 gb ABD67753.1  arogenate dehydratase isoform 4 [Arabidopsis thaliana]</p> <p>gi 332644418 gb AEE77939.1  arogenate dehydratase 4 [Arabidopsis thaliana]</p> <p>emb CCD74534.1  myrosinase-binding protein--like protein [Arabidopsis halleri subsp. halleri]</p> <p>emb CAC03543.1  putative protein [Arabidopsis thaliana]</p> <p>ref NP_190082.1  uncharacterized protein [Arabidopsis thaliana]</p> <p>gi 7671397 emb CAB9311.1  putative protein [Arabidopsis thaliana]</p> <p>gi 332644452 gb AEE77973.1  uncharacterized protein AT3G44960 [Arabidopsis thaliana]</p> <p>ref XP_004251248.1  PREDICTED: calmodulin-like isoform 1 [Solanum lycopersicum]</p> <p>ref NP_178872.2  MAK10-like protein [Arabidopsis thaliana]</p> <p>gi 330251069 gb AEC06163.1  MAK10-like protein [Arabidopsis thaliana]</p>                                                                                                                                                                                                                                                                                                                                                                                                                                                                                                                                                                                                                                                                                                                                                                                                                                                                                                                                                                                                                                                                                                                                                                                                                                                                                                                                                                                                   | 422 | 424 | 0         | 100.5 | 88.9  | 93.6  | arogenate dehydratase 4                  | gbpln | Arabidopsis thaliana | AT3G44720.1   Symbols: ADT4   arogenate dehydratase 4   chr3:16271759-16273033 FORWARD LENGTH=424                                                                                                                                                         | 422 | 424 | 0         | 100.5 | 88.9  | 93.6  |
| Rsa1.0_00651.1.g17496.t1 | <p>emb CCD74534.1  myrosinase-binding protein--like protein [Arabidopsis halleri subsp. halleri]</p> <p>emb CAC03543.1  putative protein [Arabidopsis thaliana]</p> <p>ref NP_190082.1  uncharacterized protein [Arabidopsis thaliana]</p> <p>gi 7671397 emb CAB9311.1  putative protein [Arabidopsis thaliana]</p> <p>gi 332644452 gb AEE77973.1  uncharacterized protein AT3G44960 [Arabidopsis thaliana]</p> <p>ref XP_004251248.1  PREDICTED: calmodulin-like isoform 1 [Solanum lycopersicum]</p> <p>ref NP_178872.2  MAK10-like protein [Arabidopsis thaliana]</p> <p>gi 330251069 gb AEC06163.1  MAK10-like protein [Arabidopsis thaliana]</p>                                                                                                                                                                                                                                                                                                                                                                                                                                                                                                                                                                                                                                                                                                                                                                                                                                                                                                                                                                                                                                                                                                                                                                                                                                                                                                                                                                                                                                                                                                                                                                                                                                                                                                                                                                                                                                                                                                                                                                                                                                                                       | 465 | 463 | 0         | 99.6  | 73.5  | 82.6  | myrosinase-binding protein--like protein | gbpln | Arabidopsis halleri  | AT2G25980.1   Symbols: Mannose-binding lectin superfamily protein   chr2:11077718-11079642 REVERSE LENGTH=449                                                                                                                                             | 465 | 449 | 0         | 96.6  | 72.0  | 81.5  |
| Rsa1.0_00651.1.g17497.t1 | <p>emb CAC03543.1  putative protein [Arabidopsis thaliana]</p> <p>ref NP_190082.1  uncharacterized protein [Arabidopsis thaliana]</p> <p>gi 7671397 emb CAB9311.1  putative protein [Arabidopsis thaliana]</p> <p>gi 332644452 gb AEE77973.1  uncharacterized protein AT3G44960 [Arabidopsis thaliana]</p> <p>ref XP_004251248.1  PREDICTED: calmodulin-like isoform 1 [Solanum lycopersicum]</p> <p>ref NP_178872.2  MAK10-like protein [Arabidopsis thaliana]</p> <p>gi 330251069 gb AEC06163.1  MAK10-like protein [Arabidopsis thaliana]</p>                                                                                                                                                                                                                                                                                                                                                                                                                                                                                                                                                                                                                                                                                                                                                                                                                                                                                                                                                                                                                                                                                                                                                                                                                                                                                                                                                                                                                                                                                                                                                                                                                                                                                                                                                                                                                                                                                                                                                                                                                                                                                                                                                                            | 809 | 731 | 0         | 90.4  | 67.1  | 78.1  | putative protein                         | gbpln | Arabidopsis thaliana | AT3G44930.1   Symbols: ATCHX10, CHX10   cation/H+ exchanger 10   chr3:16402058-16404672 REVERSE LENGTH=783                                                                                                                                                | 809 | 783 | 0         | 96.8  | 67.1  | 78.1  |
| Rsa1.0_00651.1.g17498.t3 | <p>ref NP_190082.1  uncharacterized protein [Arabidopsis thaliana]</p> <p>gi 7671397 emb CAB9311.1  putative protein [Arabidopsis thaliana]</p> <p>gi 332644452 gb AEE77973.1  uncharacterized protein AT3G44960 [Arabidopsis thaliana]</p> <p>ref XP_004251248.1  PREDICTED: calmodulin-like isoform 1 [Solanum lycopersicum]</p> <p>ref NP_178872.2  MAK10-like protein [Arabidopsis thaliana]</p> <p>gi 330251069 gb AEC06163.1  MAK10-like protein [Arabidopsis thaliana]</p>                                                                                                                                                                                                                                                                                                                                                                                                                                                                                                                                                                                                                                                                                                                                                                                                                                                                                                                                                                                                                                                                                                                                                                                                                                                                                                                                                                                                                                                                                                                                                                                                                                                                                                                                                                                                                                                                                                                                                                                                                                                                                                                                                                                                                                           | 229 | 207 | 2.00E-48  | 90.4  | 56.8  | 68.6  | uncharacterized protein                  | gbpln | Arabidopsis thaliana | AT3G44960.1   Symbols: unknown protein; Has 34 Blast hits to 34 proteins in 10 species: Archaea - 0; Bacteria - 0; Metazoa - 3; Fungi - 0; Plants - 31; Viruses - 0; Other Eukaryotes - 0 (source: NCBI BLINK); chr3:16427795-16429151 FORWARD LENGTH=207 | 229 | 207 | 7.00E-51  | 90.4  | 56.8  | 68.6  |
| Rsa1.0_00651.1.g17499.t1 | <p>ref XP_004251248.1  PREDICTED: calmodulin-like isoform 1 [Solanum lycopersicum]</p> <p>ref NP_178872.2  MAK10-like protein [Arabidopsis thaliana]</p> <p>gi 330251069 gb AEC06163.1  MAK10-like protein [Arabidopsis thaliana]</p>                                                                                                                                                                                                                                                                                                                                                                                                                                                                                                                                                                                                                                                                                                                                                                                                                                                                                                                                                                                                                                                                                                                                                                                                                                                                                                                                                                                                                                                                                                                                                                                                                                                                                                                                                                                                                                                                                                                                                                                                                                                                                                                                                                                                                                                                                                                                                                                                                                                                                       | 149 | 180 | 6.00E-80  | 120.8 | 99.3  | 100.0 | PREDICTED: calmodulin-like isoform 1     | gbpln | Solanum lycopersicum | AT2G27030.3   Symbols: CAM5   calmodulin 5   chr2:11532069-11534176 FORWARD LENGTH=181                                                                                                                                                                    | 149 | 181 | 1.00E-81  | 121.5 | 98.0  | 100.0 |
| Rsa1.0_00651.1.g17500.t1 | <p>ref NP_178872.2  MAK10-like protein [Arabidopsis thaliana]</p> <p>gi 330251069 gb AEC06163.1  MAK10-like protein [Arabidopsis thaliana]</p>                                                                                                                                                                                                                                                                                                                                                                                                                                                                                                                                                                                                                                                                                                                                                                                                                                                                                                                                                                                                                                                                                                                                                                                                                                                                                                                                                                                                                                                                                                                                                                                                                                                                                                                                                                                                                                                                                                                                                                                                                                                                                                                                                                                                                                                                                                                                                                                                                                                                                                                                                                              | 743 | 728 | 0         | 98.0  | 82.2  | 89.0  | MAK10-like protein                       | gbpln | Arabidopsis thaliana | AT2G11000.1   Symbols: ATMAK10, MAK10   MAK10 homologue   chr2:4341328-4347768 REVERSE LENGTH=728                                                                                                                                                         | 743 | 728 | 0         | 98.0  | 82.2  | 89.0  |

|                          |                                                                                                                                                                                                                                                                                                                                                                                                                                                                                         |      |      |           |       |      |      |                                                                                                                                                                                                                                                                                       |       |                      |                                                                                                                                       |      |      |          |       |      |      |
|--------------------------|-----------------------------------------------------------------------------------------------------------------------------------------------------------------------------------------------------------------------------------------------------------------------------------------------------------------------------------------------------------------------------------------------------------------------------------------------------------------------------------------|------|------|-----------|-------|------|------|---------------------------------------------------------------------------------------------------------------------------------------------------------------------------------------------------------------------------------------------------------------------------------------|-------|----------------------|---------------------------------------------------------------------------------------------------------------------------------------|------|------|----------|-------|------|------|
| Rsa1.0_00651.1.g17501.t1 | ref[XP_002866765.1] hypothetical protein ARALYDRAFT_920105 [Arabidopsis lyrata subsp. lyrata] gi 297312600 gb EFH43024.1                                                                                                                                                                                                                                                                                                                                                                | 102  | 100  | 1.00E-26  | 98.0  | 62.7 | 70.6 | hypothetical protein ARALYDRAFT_920105                                                                                                                                                                                                                                                | gbpln | Arabidopsis lyrata   | #                                                                                                                                     | #    | #    | #        | #     | #    |      |
| Rsa1.0_00651.1.g17502.t1 | hypothetical protein ARALYDRAFT_920105 [Arabidopsis lyrata subsp. lyrata]<br>ref[XP_002877284.1] tubulin family protein [Arabidopsis lyrata subsp. lyrata] gi 297323122 gb EFH53543.1  tubulin family protein [Arabidopsis lyrata subsp. lyrata]                                                                                                                                                                                                                                        | 1200 | 1211 | 0         | 100.9 | 83.3 | 88.5 | tubulin family protein                                                                                                                                                                                                                                                                | gbpln | Arabidopsis lyrata   | AT3G43610.1   Symbols:   Spc97 / Spc98 family of spindle pole body (SBP) component   chr3:15517772-15523927 REVERSE LENGTH=1207       | 1200 | 1207 | 0        | 100.6 | 81.3 | 87.9 |
| Rsa1.0_00651.1.g17503.t1 | ref[XP_002877283.1] hypothetical protein ARALYDRAFT_323092 [Arabidopsis lyrata subsp. lyrata] gi 297323121 gb EFH53542.1                                                                                                                                                                                                                                                                                                                                                                | 1282 | 1318 | 0         | 102.8 | 81.1 | 89.5 | hypothetical protein ARALYDRAFT_323092                                                                                                                                                                                                                                                | gbpln | Arabidopsis lyrata   | AT3G43600.1   Symbols: AAO2, AO3, atAO-2, AOGamma, AtAO3   aldehyde oxidase 2   chr3:15512778-15517375 REVERSE LENGTH=1321            | 1282 | 1321 | 0        | 103.0 | 80.7 | 89.5 |
| Rsa1.0_00651.1.g17504.t1 | hypothetical protein ARALYDRAFT_323092 [Arabidopsis lyrata subsp. lyrata]<br>ref[XP_002875609.1] hypothetical protein ARALYDRAFT_484801 [Arabidopsis lyrata subsp. lyrata] gi 297321447 gb EFH51868.1                                                                                                                                                                                                                                                                                   | 226  | 241  | 1.00E-66  | 106.6 | 76.1 | 83.2 | hypothetical protein ARALYDRAFT_484801                                                                                                                                                                                                                                                | gbpln | Arabidopsis lyrata   | AT3G43520.1   Symbols:   Transmembrane proteins 14C   chr3:15406088-15407699 FORWARD LENGTH=240                                       | 226  | 240  | 3.00E-68 | 106.2 | 70.4 | 78.3 |
| Rsa1.0_00651.1.g17505.t2 | sp F4IXW2.2 BIG5_ARATH RecName: Full=Brefeldin A-inhibited guanine nucleotide-exchange protein 5; Short=BIG5; AltName: Full=ARF guanine-nucleotide exchange factor BIG5; AltName: Full=Protein BFA-VISUALIZED ENDOCYTIC TRAFFICKING DEFECTIVE 1; Short=Protein BEN1; AltName: Full=Protein HOPM INTERACTOR 7                                                                                                                                                                            | 1734 | 1739 | 0         | 100.3 | 91.5 | 94.6 | RecName: Full=Brefeldin A-inhibited guanine nucleotide-exchange protein 5; Short=BIG5; AltName: Full=ARF guanine-nucleotide exchange factor BIG5; AltName: Full=Protein BFA-VISUALIZED ENDOCYTIC TRAFFICKING DEFECTIVE 1; Short=Protein BEN1; AltName: Full=Protein HOPM INTERACTOR 7 | ----  | ----                 | AT3G43300.1   Symbols: ATMIN7, BEN1   HOPM interactor 7   chr3:15234235-15245034 REVERSE LENGTH=1758                                  | 1734 | 1758 | 0        | 101.4 | 91.5 | 94.6 |
| Rsa1.0_00651.1.g17506.t1 | dbj BAJ33808.1  unnamed protein product [Thellungiella halophila]                                                                                                                                                                                                                                                                                                                                                                                                                       | 483  | 479  | 0         | 99.2  | 76.2 | 83.2 | unnamed protein product                                                                                                                                                                                                                                                               | ----  | ----                 | AT3G43230.1   Symbols:   RING/FYVE/PHD-type zinc finger family protein   chr3:15207776-15209599 FORWARD LENGTH=485                    | 483  | 485  | 0        | 100.4 | 71.8 | 79.1 |
| Rsa1.0_00651.1.g17507.t1 | gb EOA23461.1  hypothetical protein CARUB_v10016650mg [Capsella rubella]                                                                                                                                                                                                                                                                                                                                                                                                                | 909  | 941  | 0         | 103.5 | 87.2 | 92.7 | hypothetical protein CARUB_v10016650mg                                                                                                                                                                                                                                                | gbpln | Capsella rubella     | AT3G43210.1   Symbols: TES, ATNACK2, NACK2   ATP binding microtubule motor family protein   chr3:15191429-15196021 FORWARD LENGTH=938 | 909  | 938  | 0        | 103.2 | 87.5 | 92.6 |
| Rsa1.0_00651.1.g17508.t1 | ref[XP_004306259.1] PREDICTED: SKP1-like protein 4-like [Fragaria vesca subsp. vesca]                                                                                                                                                                                                                                                                                                                                                                                                   | 161  | 172  | 2.00E-36  | 106.8 | 54.0 | 72.0 | PREDICTED: SKP1-like protein 4-like                                                                                                                                                                                                                                                   | gbpln | Fragaria vesca       | AT1G20140.1   Symbols: ASK4, SK4   SKP1-like 4   chr1:6986430-6987079 FORWARD LENGTH=163                                              | 161  | 163  | 1.00E-38 | 101.2 | 52.2 | 70.2 |
| Rsa1.0_00651.1.g17509.t1 | gb EOA24721.1  hypothetical protein CARUB_v10017999mg [Capsella rubella]                                                                                                                                                                                                                                                                                                                                                                                                                | 220  | 216  | 1.00E-100 | 98.2  | 85.5 | 89.1 | hypothetical protein CARUB_v10017999mg                                                                                                                                                                                                                                                | gbpln | Capsella rubella     | AT3G26060.1   Symbols: ATPRX Q   Thioredoxin superfamily protein   chr3:9524807-9526123 FORWARD LENGTH=216                            | 220  | 216  | 5.00E-98 | 98.2  | 83.2 | 86.4 |
| Rsa1.0_00651.1.g17510.t1 | ref[NP_189874.1] leucine-rich repeat protein kinase-like protein [Arabidopsis thaliana] gi 7529259 emb CAB86675.1  receptor protein kinase-like protein [Arabidopsis thaliana] gi 1906510 gb ABE65985.1  leucine-rich repeat transmembrane protein kinase [Arabidopsis thaliana] gi 224589585 gb ACNS59326.1  leucine-rich repeat receptor-like protein kinase [Arabidopsis thaliana] gi 332644237 gb AEE7758.1  leucine-rich repeat protein kinase-like protein [Arabidopsis thaliana] | 636  | 633  | 0         | 99.5  | 81.6 | 90.9 | leucine-rich repeat protein kinase-like protein                                                                                                                                                                                                                                       | gbpln | Arabidopsis thaliana | AT3G42880.1   Symbols:   Leucine-rich repeat protein kinase family protein   chr3:14954587-14956577 FORWARD LENGTH=633                | 636  | 633  | 0        | 99.5  | 81.6 | 90.9 |
| Rsa1.0_00651.1.g17511.t1 | emb CAB39638.1  RNA-directed DNA polymerase-like protein [Arabidopsis thaliana] gi 7267666 emb CAB78094.1  RNA-directed DNA polymerase-like protein [Arabidopsis thaliana]                                                                                                                                                                                                                                                                                                              | 1216 | 1274 | 0         | 104.8 | 41.5 | 55.0 | RNA-directed DNA polymerase-like protein                                                                                                                                                                                                                                              | gbpln | Arabidopsis thaliana | AT1G43760.1   Symbols:   DNase I-like superfamily protein   chr1:16528880-16531065 REVERSE LENGTH=626                                 | 1216 | 626  | 3.00E-35 | 51.5  | 9.0  | 16.1 |

|                          |                                                                                                                                                                                                                                                                                                                                                                                                                                                                                                                                                          |     |      |           |       |      |      |                                                     |       |                      |                                                                                                                                                                                                                                                                                                                                                                |     |     |           |       |      |      |
|--------------------------|----------------------------------------------------------------------------------------------------------------------------------------------------------------------------------------------------------------------------------------------------------------------------------------------------------------------------------------------------------------------------------------------------------------------------------------------------------------------------------------------------------------------------------------------------------|-----|------|-----------|-------|------|------|-----------------------------------------------------|-------|----------------------|----------------------------------------------------------------------------------------------------------------------------------------------------------------------------------------------------------------------------------------------------------------------------------------------------------------------------------------------------------------|-----|-----|-----------|-------|------|------|
| Rsa1.0_00651.1.g17512.t1 | gb EOA23959.1  hypothetical protein CARUB_v10017176mg [Capsella rubella]                                                                                                                                                                                                                                                                                                                                                                                                                                                                                 | 464 | 469  | 0         | 101.1 | 83.6 | 89.9 | hypothetical protein CARUB_v10017176mg              | gbpln | Capsella rubella     | AT3G52610.1   Symbols:   unknown protein; Has 68 Blast hits to 67 proteins in 21 species: Archae - 0; Bacteria - 11; Metazoa - 0; Fungi - 0; Plants - 55; Viruses - 0; Other Eukaryotes - 2 (source: NCBI BLink).   chr3:19510513-19512547 FORWARD LENGTH=475                                                                                                  | 464 | 475 | 0         | 102.4 | 82.3 | 89.2 |
| Rsa1.0_00651.1.g17513.t1 | ref XP_002876160.1  hypothetical protein ARALYDRAFT_485631 [Arabidopsis lyrata subsp. lyrata] gi 297321998 gb EFH52419.1  hypothetical protein ARALYDRAFT_485631 [Arabidopsis lyrata subsp. lyrata]                                                                                                                                                                                                                                                                                                                                                      | 90  | 87   | 8.00E-25  | 96.7  | 81.1 | 90.0 | hypothetical protein ARALYDRAFT_485631              | gbpln | Arabidopsis lyrata   | AT3G52620.1   Symbols:   unknown protein; Has 11 Blast hits to 11 proteins in 5 species: Archae - 0; Bacteria - 0; Metazoa - 0; Fungi - 0; Plants - 11; Viruses - 0; Other Eukaryotes - 0 (source: NCBI BLink).   chr3:19513113-19513556 FORWARD LENGTH=87                                                                                                     | 90  | 87  | 3.00E-22  | 96.7  | 75.6 | 86.7 |
| Rsa1.0_00652.1.g17514.t1 | gb AAC95175.1  putative non-LTR retroelement reverse transcriptase [Arabidopsis thaliana]                                                                                                                                                                                                                                                                                                                                                                                                                                                                | 500 | 1352 | 2.00E-72  | 270.4 | 34.2 | 49.6 | putative non-LTR retroelement reverse transcriptase | gbpln | Arabidopsis thaliana | AT3G24255.1   Symbols:   RNA-directed DNA polymerase (reverse transcriptase)-related family protein   chr3:8789471-8793208 FORWARD LENGTH=746                                                                                                                                                                                                                  | 500 | 746 | 2.00E-55  | 149.2 | 27.0 | 38.0 |
| Rsa1.0_00652.1.g17515.t1 | gb EOA25343.1  hypothetical protein CARUB_v10018664mg [Capsella rubella]                                                                                                                                                                                                                                                                                                                                                                                                                                                                                 | 172 | 181  | 1.00E-22  | 105.2 | 39.0 | 55.2 | hypothetical protein CARUB_v10018664mg              | gbpln | Capsella rubella     | AT4G09490.1   Symbols:   Polynucleotidyl transferase, ribonuclease H-like superfamily protein   chr4:6015583-6016575 REVERSE LENGTH=170                                                                                                                                                                                                                        | 172 | 170 | 3.00E-19  | 98.8  | 31.4 | 45.3 |
| Rsa1.0_00652.1.g17516.t1 | ref NP_175139.1  receptor like protein 6 [Arabidopsis thaliana] gi 12321005 gb AAG50623.1 AC083835_8 disease resistance protein, putative [Arabidopsis thaliana] gi 332193999 gb AEE32120.1  receptor like protein 6 [Arabidopsis thaliana]                                                                                                                                                                                                                                                                                                              | 937 | 994  | 0         | 106.1 | 66.4 | 77.3 | receptor like protein 6                             | gbpln | Arabidopsis thaliana | AT1G45616.1   Symbols:   AtRLP6, RLP6   receptor like protein 6   chr1:17183550-17186534 REVERSE LENGTH=994                                                                                                                                                                                                                                                    | 937 | 994 | 0         | 106.1 | 66.4 | 77.3 |
| Rsa1.0_00652.1.g17517.t1 | ref NP_192110.2  protein kinase family protein [Arabidopsis thaliana] gi 21928159 gb AAM78107.1  AT4g02010.T10M13.2 [Arabidopsis thaliana] gi 32815839 gb AAP88328.1  AT4g02010.T10M13.2 [Arabidopsis thaliana] gi 332656711 gb AEE82111.1  protein kinase family protein [Arabidopsis thaliana]                                                                                                                                                                                                                                                         | 714 | 725  | 0         | 101.5 | 90.1 | 92.9 | protein kinase family protein                       | gbpln | Arabidopsis thaliana | AT4G02010.1   Symbols:   Protein kinase superfamily protein   chr4:881457-885222 FORWARD LENGTH=725                                                                                                                                                                                                                                                            | 714 | 725 | 0         | 101.5 | 90.1 | 92.9 |
| Rsa1.0_00652.1.g17518.t1 | ref NP_680560.1  uncharacterized protein [Arabidopsis thaliana] gi 17065174 gb AAL32741.1  Unknown protein [Arabidopsis thaliana] gi 20259852 gb AAM13323.1  unknown protein [Arabidopsis thaliana] gi 332656709 gb AEE82109.1  uncharacterized protein AT4G01995 [Arabidopsis thaliana]                                                                                                                                                                                                                                                                 | 258 | 258  | 1.00E-113 | 100.0 | 84.5 | 89.9 | uncharacterized protein                             | gbpln | Arabidopsis thaliana | AT4G01995.1   Symbols:   unknown protein; BEST Arabidopsis thaliana protein match is: unknown protein (TAIR:AT1G64680.1); Has 30201 Blast hits to 17322 proteins in 780 species: Archae - 12; Bacteria - 1396; Metazoa - 1738; Fungi - 3422; Plants - 5037; Viruses - 0; Other Eukaryotes - 2996 (source: NCBI BLink).   chr4:873075-874619 FORWARD LENGTH=258 | 258 | 258 | 1.00E-116 | 100.0 | 84.5 | 89.9 |
| Rsa1.0_00652.1.g17519.t1 | ref XP_002872860.1  hypothetical protein ARALYDRAFT_490379 [Arabidopsis lyrata subsp. lyrata] gi 297318697 gb EFH49119.1  hypothetical protein ARALYDRAFT_490379 [Arabidopsis lyrata subsp. lyrata]                                                                                                                                                                                                                                                                                                                                                      | 502 | 500  | 0         | 99.6  | 76.3 | 87.8 | hypothetical protein ARALYDRAFT_490379              | gbpln | Arabidopsis lyrata   | AT4G01990.1   Symbols:   Tetratricopeptide repeat (TPR)-like superfamily protein   chr4:871268-872885 REVERSE LENGTH=502                                                                                                                                                                                                                                       | 502 | 502 | 0         | 100.0 | 74.1 | 86.5 |
| Rsa1.0_00652.1.g17520.t1 | dbj BAJ34109.1  unnamed protein product [Theellungiella halophila]                                                                                                                                                                                                                                                                                                                                                                                                                                                                                       | 520 | 521  | 0         | 100.2 | 87.1 | 94.0 | unnamed protein product                             | ----  | ----                 | AT4G01950.1   Symbols:   ATGPAT3, GPAT3   glycerol-3-phosphate acyltransferase 3   chr4:844597-846710 REVERSE LENGTH=520                                                                                                                                                                                                                                       | 520 | 520 | 0         | 100.0 | 86.7 | 93.8 |
| Rsa1.0_00652.1.g17521.t1 | ref NP_567219.1  NifU-like protein 1 [Arabidopsis thaliana] gi 75163233 sp Q93W77.1 NIFU1_ARATH RecName: Full=NifU-like protein 1, chloroplastic; Short=AtCNF1; Short=AtCnF1-IVb; Flags: Precursor gi 14517434 gb AAK62607.1  AT4g01940.T7B11.20 [Arabidopsis thaliana] gi 15215670 gb AAK91380.1  AT4g01940.T7B11.20 [Arabidopsis thaliana] gi 20908090 gb AAM6728.1  AT4g01940.T7B11.20 [Arabidopsis thaliana] gi 28207816 emb CAD55558.1  NIFU1 protein [Arabidopsis thaliana] gi 332656703 gb AEE82103.1  NifU-like protein 1 [Arabidopsis thaliana] | 229 | 231  | 5.00E-96  | 100.9 | 85.6 | 88.2 | NifU-like protein 1                                 | gbpln | Arabidopsis thaliana | AT4G01940.1   Symbols:   NIFU1, AtCNFU1   NIFU domain protein 1   chr4:842265-843388 REVERSE LENGTH=231                                                                                                                                                                                                                                                        | 229 | 231 | 2.00E-98  | 100.9 | 85.6 | 88.2 |
| Rsa1.0_00652.1.g17522.t1 | gb AAGS2094.1 AC012680.5 putative Mutator-like transposase; 12516-14947 [Arabidopsis thaliana]                                                                                                                                                                                                                                                                                                                                                                                                                                                           | 352 | 761  | 2.00E-59  | 216.2 | 41.2 | 54.0 | putative Mutator-like transposase; 12516-14947      | gbpln | Arabidopsis thaliana | # # # # # # #                                                                                                                                                                                                                                                                                                                                                  | #   | #   | #         | #     | #    | #    |

|                          |                                                                                                                                                                                                                                                                                                                                                                                    |     |     |           |       |      |      |                                                                           |       |                      |                                                                                                                                                                                                                                                                                                                                                      |     |     |           |       |      |      |
|--------------------------|------------------------------------------------------------------------------------------------------------------------------------------------------------------------------------------------------------------------------------------------------------------------------------------------------------------------------------------------------------------------------------|-----|-----|-----------|-------|------|------|---------------------------------------------------------------------------|-------|----------------------|------------------------------------------------------------------------------------------------------------------------------------------------------------------------------------------------------------------------------------------------------------------------------------------------------------------------------------------------------|-----|-----|-----------|-------|------|------|
| Rsa1.0_00652.1.g17523.t1 | refXP_002872902.1   hypothetical protein ARALYDRAFT_912111 [Arabidopsis lyrata subsp. lyrata] gi 297318739 gb EFH49161.1                                                                                                                                                                                                                                                           | 338 | 356 | 1.00E-142 | 105.3 | 75.7 | 85.5 | hypothetical protein ARALYDRAFT_912111                                    | gbpln | Arabidopsis lyrata   | AT4G01220.1   Symbols:   Nucleotide-diphospho-sugar transferase family protein   chr4:513431-515648 REVERSE LENGTH=360                                                                                                                                                                                                                               | 338 | 360 | 1.00E-141 | 106.5 | 70.4 | 79.6 |
| Rsa1.0_00652.1.g17524.t1 | hypothetical protein ARALYDRAFT_912111 [Arabidopsis lyrata subsp. lyrata] refXP_002872902.1   hypothetical protein ARALYDRAFT_912111 [Arabidopsis lyrata subsp. lyrata] gi 297318739 gb EFH49161.1                                                                                                                                                                                 | 344 | 356 | 1.00E-143 | 103.5 | 74.7 | 81.4 | hypothetical protein ARALYDRAFT_912111                                    | gbpln | Arabidopsis lyrata   | AT4G01220.1   Symbols:   Nucleotide-diphospho-sugar transferase family protein   chr4:513431-515648 REVERSE LENGTH=360                                                                                                                                                                                                                               | 344 | 360 | 1.00E-145 | 104.7 | 71.2 | 76.7 |
| Rsa1.0_00652.1.g17525.t1 | gb EOA19468.1   hypothetical protein CARUB_v10002012mg [Capsella rubella]                                                                                                                                                                                                                                                                                                          | 196 | 195 | 7.00E-86  | 99.5  | 82.7 | 89.3 | hypothetical protein CARUB_v10002012mg                                    | gbpln | Capsella rubella     | AT4G01900.1   Symbols:   PII, GLB1   GLNB1 homolog   chr4:821736-823294 FORWARD LENGTH=196                                                                                                                                                                                                                                                           | 196 | 196 | 6.00E-87  | 100.0 | 83.2 | 88.8 |
| Rsa1.0_00652.1.g17526.t1 | refXP_002872869.1   predicted protein [Arabidopsis lyrata subsp. lyrata] gi 297318706 gb EFH49128.1   predicted protein [Arabidopsis lyrata subsp. lyrata]                                                                                                                                                                                                                         | 147 | 122 | 2.00E-50  | 83.0  | 69.4 | 76.2 | predicted protein                                                         | gbpln | Arabidopsis lyrata   | AT4G01897.1   Symbols:   unknown protein; CONTAINS InterPro DOMAIN/s: Protein of unknown function DUF952 (InterPro:IPR009297). Has 763 Blast hits to 763 proteins in 180 species: Archae - 0; Bacteria - 351; Metazoa - 0; Fungi - 0; Plants - 29; Viruses - 0; Other Eukaryotes - 383 (source: NCBI BLINK).   chr4:820487-821466 REVERSE LENGTH=122 | 147 | 122 | 1.00E-50  | 83.0  | 66.0 | 76.2 |
| Rsa1.0_00652.1.g17527.t1 | ref NP_567218.2   systemic acquired resistance (SAR) regulator protein NIMIN-1-like protein [Arabidopsis thaliana] gi 12057175 emb CAC19852.1   NIMIN-1b protein [Arabidopsis thaliana] gi 109946491 gb ABG48424.1   At4g01895 [Arabidopsis thaliana] gi 332656692 gb AE82092.1   systemic acquired resistance (SAR) regulator protein NIMIN-1-like protein [Arabidopsis thaliana] | 130 | 140 | 9.00E-26  | 107.7 | 60.0 | 73.8 | systemic acquired resistance (SAR) regulator protein NIMIN-1-like protein | gbpln | Arabidopsis thaliana | AT4G01895.1   Symbols:   systemic acquired resistance (SAR) regulator protein NIMIN-1-related   chr4:819957-820379 FORWARD LENGTH=140                                                                                                                                                                                                                | 130 | 140 | 2.00E-28  | 107.7 | 60.0 | 73.8 |
| Rsa1.0_00652.1.g17528.t2 | gb EOA19709.1   hypothetical protein CARUB_v10003570mg [Capsella rubella]                                                                                                                                                                                                                                                                                                          | 485 | 477 | 0         | 98.4  | 75.9 | 82.9 | hypothetical protein CARUB_v10003570mg                                    | gbpln | Capsella rubella     | AT4G01890.1   Symbols:   Pectin lyase-like superfamily protein   chr4:816210-818428 FORWARD LENGTH=468                                                                                                                                                                                                                                               | 485 | 468 | 0         | 96.5  | 73.2 | 81.4 |
| Rsa1.0_00653.1.g17529.t1 | gb ABD65028.1   hypothetical protein 26.t00082 [Brassica oleracea]                                                                                                                                                                                                                                                                                                                 | 105 | 220 | 4.00E-14  | 209.5 | 42.9 | 51.4 | hypothetical protein 26.t00082                                            | gbpln | Brassica oleracea    | AT1G14800.1   Symbols:   Nucleic acid-binding, OB-fold-like protein   chr1:5099572-5102558 FORWARD LENGTH=384                                                                                                                                                                                                                                        | 105 | 384 | 5.00E-12  | 365.7 | 26.7 | 36.2 |
| Rsa1.0_00653.1.g17530.t1 | refXP_002889446.1   EDGP precursor [Arabidopsis lyrata subsp. lyrata] gi 297335288 gb EFH65705.1   EDGP precursor [Arabidopsis lyrata subsp. lyrata]                                                                                                                                                                                                                               | 419 | 433 | 0         | 103.3 | 79.7 | 88.1 | EDGP precursor                                                            | gbpln | Arabidopsis lyrata   | AT1G03220.1   Symbols:   Eukaryotic aspartyl protease family protein   chr1:787143-788444 FORWARD LENGTH=433                                                                                                                                                                                                                                         | 419 | 433 | 0         | 103.3 | 77.8 | 87.6 |
| Rsa1.0_00653.1.g17531.t1 | refXP_002889446.1   EDGP precursor [Arabidopsis lyrata subsp. lyrata] gi 297335288 gb EFH65705.1   EDGP precursor [Arabidopsis lyrata subsp. lyrata]                                                                                                                                                                                                                               | 432 | 433 | 0         | 100.2 | 85.2 | 91.0 | EDGP precursor                                                            | gbpln | Arabidopsis lyrata   | AT1G03220.1   Symbols:   Eukaryotic aspartyl protease family protein   chr1:787143-788444 FORWARD LENGTH=433                                                                                                                                                                                                                                         | 432 | 433 | 0         | 100.2 | 83.6 | 90.7 |
| Rsa1.0_00653.1.g17532.t3 | refXP_002892154.1   hypothetical protein ARALYDRAFT_887478 [Arabidopsis lyrata subsp. lyrata] gi 297337996 gb EFH68413.1                                                                                                                                                                                                                                                           | 351 | 274 | 1.00E-134 | 78.1  | 72.1 | 74.9 | hypothetical protein ARALYDRAFT_887478                                    | gbpln | Arabidopsis lyrata   | AT1G03260.1   Symbols:   SNARE associated Golgi protein family   chr1:795678-798102 REVERSE LENGTH=274                                                                                                                                                                                                                                               | 351 | 274 | 1.00E-136 | 78.1  | 71.5 | 74.9 |
| Rsa1.0_00653.1.g17533.t1 | gb EOA40220.1   hypothetical protein CARUB_v10008943mg [Capsella rubella]                                                                                                                                                                                                                                                                                                          | 500 | 496 | 0         | 99.2  | 87.0 | 91.2 | hypothetical protein CARUB_v10008943mg                                    | gbpln | Capsella rubella     | AT1G03270.1   Symbols:   CBS domain-containing protein with a domain of unknown function (DUF21)   chr1:799191-802436 FORWARD LENGTH=499                                                                                                                                                                                                             | 500 | 499 | 0         | 99.8  | 89.8 | 92.4 |
| Rsa1.0_00653.1.g17534.t1 | gb EOA38324.1   hypothetical protein CARUB_v10009825mg, partial [Capsella rubella]                                                                                                                                                                                                                                                                                                 | 332 | 306 | 4.00E-14  | 92.2  | 19.0 | 21.1 | hypothetical protein CARUB_v10009825mg, partial                           | gbpln | Capsella rubella     | AT1G03470.2   Symbols:   Kinase interacting (KIP1-like) family protein   chr1:866217-867493 REVERSE LENGTH=269                                                                                                                                                                                                                                       | 332 | 269 | 2.00E-12  | 81.0  | 16.6 | 21.7 |
| Rsa1.0_00653.1.g17535.t2 | gb EOA39421.1   hypothetical protein CARUB_v10012530mg [Capsella rubella]                                                                                                                                                                                                                                                                                                          | 285 | 283 | 1.00E-147 | 99.3  | 89.1 | 94.4 | hypothetical protein CARUB_v10012530mg                                    | gbpln | Capsella rubella     | AT1G03550.1   Symbols:   Secretory carrier membrane protein (SCAMP) family protein   chr1:885851-887778 REVERSE LENGTH=283                                                                                                                                                                                                                           | 285 | 283 | 1.00E-143 | 99.3  | 89.1 | 93.7 |
| Rsa1.0_00653.1.g17536.t1 | gb EOA38556.1   hypothetical protein CARUB_v10010366mg, partial [Capsella rubella]                                                                                                                                                                                                                                                                                                 | 158 | 191 | 2.00E-78  | 120.9 | 87.3 | 94.3 | hypothetical protein CARUB_v10010366mg, partial                           | gbpln | Capsella rubella     | AT1G03650.1   Symbols:   Acyl-CoA N-acyltransferases (NAT) superfamily protein   chr1:910249-911103 REVERSE LENGTH=158                                                                                                                                                                                                                               | 158 | 158 | 6.00E-79  | 100.0 | 86.1 | 94.3 |
| Rsa1.0_00653.1.g17537.t1 | #                                                                                                                                                                                                                                                                                                                                                                                  | #   | #   | #         | #     | #    | #    | -                                                                         | ----  | ----                 | #                                                                                                                                                                                                                                                                                                                                                    | #   | #   | #         | #     | #    | #    |

|                          |                                                                                                                                                                                                                                                                                                                                                                                                                 |     |      |           |       |      |      |                                                                                                                        |       |                      |                                                                                                                                                                                                                                                                                                                                         |     |     |           |       |      |      |
|--------------------------|-----------------------------------------------------------------------------------------------------------------------------------------------------------------------------------------------------------------------------------------------------------------------------------------------------------------------------------------------------------------------------------------------------------------|-----|------|-----------|-------|------|------|------------------------------------------------------------------------------------------------------------------------|-------|----------------------|-----------------------------------------------------------------------------------------------------------------------------------------------------------------------------------------------------------------------------------------------------------------------------------------------------------------------------------------|-----|-----|-----------|-------|------|------|
| Rsa1.0_00653.1.g17538.t2 | sp Q9XGS0.1 TRXM_BRANA RecName: Full=Thioredoxin M-type, chloroplastic; Short=Trx-M; Flags: Precursor gi 1943720 gb AAB54209.1  thioredoxin-m [Brassica napus] gi 5566283 gb AAD45358.1  thioredoxin-m precursor [Brassica napus]                                                                                                                                                                               | 181 | 177  | 1.00E-83  | 97.8  | 89.0 | 90.6 | RecName: Full=Thioredoxin M-type, chloroplastic; Short=Trx-M; Flags: Precursor gi 1943720 gb AAB52409.1  thioredoxin-m | gbpln | Brassica napus       | AT1G03680.1   Symbols: ATHM1, TRX-M1, ATM1, THM1   thioredoxin M-type 1   chr1:916990-917865 REVERSE LENGTH=179                                                                                                                                                                                                                         | 181 | 179 | 1.00E-80  | 98.9  | 81.2 | 88.4 |
| Rsa1.0_00653.1.g17539.t1 | gb EOA37950.1  hypothetical protein CARUB_v10009418mg [Capsella rubella]                                                                                                                                                                                                                                                                                                                                        | 385 | 386  | 0         | 100.3 | 82.6 | 90.9 | hypothetical protein CARUB_v10009418mg                                                                                 | gbpln | Capsella rubella     | AT1G03687.1   Symbols:   DTW domain-containing protein   chr1:918308-920306 FORWARD LENGTH=381                                                                                                                                                                                                                                          | 385 | 381 | 0         | 99.0  | 82.1 | 89.6 |
| Rsa1.0_00653.1.g17540.t1 | ref NP_563690.1  uncharacterized protein [Arabidopsis thaliana] gi 10773805 gb ABF83624.1  At1g03730 [Arabidopsis thaliana] gi 332189482 gb AEE27603.1  uncharacterized protein AT1G03730 [Arabidopsis thaliana]                                                                                                                                                                                                | 164 | 167  | 9.00E-69  | 101.8 | 91.5 | 95.1 | uncharacterized protein                                                                                                | gbpln | Arabidopsis thaliana | AT1G03730.1   Symbols:   unknown protein; BEST Arabidopsis thaliana protein match is: unknown protein (TAIR.ATG03600.1); Has 50 Blast hits to 50 proteins in 10 species: Archae - 0; Bacteria - 0; Metazoa - 0; Fungi - 0; Plants - 50; Viruses - 0; Other Eukaryotes - 0 (source: NCBI BLINK).   chr1:931017-931520 REVERSE LENGTH=167 | 164 | 167 | 3.00E-71  | 101.8 | 91.5 | 95.1 |
| Rsa1.0_00653.1.g17541.t1 | ref NP_171870.4  protein kinase domain-containing protein [Arabidopsis thaliana] gi 9280653 gb AAF86522.1 AC002560.15 F21B7.34 [Arabidopsis thaliana] gi 13430452 gb AAK25848.1 AF360138.1 putative protein kinase [Arabidopsis thaliana] gi 14532736 gb AAK64069.1  putative protein kinase [Arabidopsis thaliana] gi 332189483 gb AEE27604.1  protein kinase domain-containing protein [Arabidopsis thaliana] | 724 | 740  | 0         | 102.2 | 75.1 | 84.3 | protein kinase domain-containing protein                                                                               | gbpln | Arabidopsis thaliana | AT1G03740.1   Symbols:   Protein kinase superfamily protein   chr1:934055-936792 FORWARD LENGTH=740                                                                                                                                                                                                                                     | 724 | 740 | 0         | 102.2 | 75.1 | 84.3 |
| Rsa1.0_00653.1.g17542.t1 | ref XP_002889473.1  predicted protein [Arabidopsis lyrata subsp. lyrata] gi 297335315 gb EFH65732.1  predicted protein [Arabidopsis lyrata subsp. lyrata]                                                                                                                                                                                                                                                       | 872 | 876  | 0         | 100.5 | 86.2 | 93.3 | predicted protein                                                                                                      | gbpln | Arabidopsis lyrata   | AT1G03750.1   Symbols: CHR9   switch 2   chr1:937920-941068 FORWARD LENGTH=862                                                                                                                                                                                                                                                          | 872 | 862 | 0         | 98.9  | 85.8 | 92.3 |
| Rsa1.0_00653.1.g17543.t1 | ref XP_002892523.1  hypothetical protein ARALYDRAFT_334257 [Arabidopsis lyrata subsp. lyrata] gi 297338365 gb EFH6782.1  hypothetical protein ARALYDRAFT_334257 [Arabidopsis lyrata subsp. lyrata]                                                                                                                                                                                                              | 323 | 305  | 1.00E-70  | 94.4  | 48.9 | 64.4 | hypothetical protein ARALYDRAFT_334257                                                                                 | gbpln | Arabidopsis lyrata   | AT2G42470.1   Symbols:   TRAF-like family protein   chr2:17679887-17685187 REVERSE LENGTH=898                                                                                                                                                                                                                                           | 323 | 898 | 4.00E-61  | 278.0 | 40.6 | 55.7 |
| Rsa1.0_00653.1.g17544.t4 | #                                                                                                                                                                                                                                                                                                                                                                                                               | #   | #    | #         | #     | #    | #    | -                                                                                                                      | ----  | ----                 | #                                                                                                                                                                                                                                                                                                                                       | #   | #   | #         | #     | #    |      |
| Rsa1.0_00653.1.g17545.t1 | gb ABD65112.1  hypothetical protein 31.t00014 [Brassica oleracea]                                                                                                                                                                                                                                                                                                                                               | 210 | 122  | 5.00E-16  | 58.1  | 26.7 | 33.8 | hypothetical protein 31.t00014                                                                                         | gbpln | Brassica oleracea    | #                                                                                                                                                                                                                                                                                                                                       | #   | #   | #         | #     | #    |      |
| Rsa1.0_00653.1.g17546.t1 | gb ABD65090.1  hypothetical protein 27.t00116 [Brassica oleracea]                                                                                                                                                                                                                                                                                                                                               | 593 | 484  | 5.00E-86  | 81.6  | 26.8 | 34.1 | hypothetical protein 27.t00116                                                                                         | gbpln | Brassica oleracea    | #                                                                                                                                                                                                                                                                                                                                       | #   | #   | #         | #     | #    |      |
| Rsa1.0_00653.1.g17547.t1 | gb AAF79797.1 AC020646.20 T32E20.30 [Arabidopsis thaliana]                                                                                                                                                                                                                                                                                                                                                      | 148 | 1397 | 1.00E-23  | 943.9 | 38.5 | 50.7 | T32E20.30                                                                                                              | gbpln | Arabidopsis thaliana | #                                                                                                                                                                                                                                                                                                                                       | #   | #   | #         | #     | #    |      |
| Rsa1.0_00654.1.g17548.t1 | gb EOA39129.1  hypothetical protein CARUB_v10012051mg [Capsella rubella]                                                                                                                                                                                                                                                                                                                                        | 371 | 426  | 0         | 114.8 | 98.1 | 98.4 | hypothetical protein CARUB_v10012051mg                                                                                 | gbpln | Capsella rubella     | AT1G53750.1   Symbols: RPT1A   regulatory particle triple-A 1A   chr1:20065921-20068324 REVERSE LENGTH=426                                                                                                                                                                                                                              | 371 | 426 | 0         | 114.8 | 98.1 | 98.4 |
| Rsa1.0_00654.1.g17549.t1 | gb EOA28228.1  hypothetical protein CARUB_v10024418mg [Capsella rubella]                                                                                                                                                                                                                                                                                                                                        | 96  | 87   | 4.00E-26  | 90.6  | 78.1 | 82.3 | hypothetical protein CARUB_v10024418mg                                                                                 | gbpln | Capsella rubella     | AT2G39705.1   Symbols: RTFL8, DVL11   ROTUNDIFOLIA like 8   chr2:16557038-16557301 FORWARD LENGTH=87                                                                                                                                                                                                                                    | 96  | 87  | 6.00E-26  | 90.6  | 69.8 | 72.9 |
| Rsa1.0_00654.1.g17550.t1 | ref XP_002881671.1  aspartyl protease family protein [Arabidopsis lyrata subsp. lyrata] gi 297327510 gb EFH57930.1  aspartyl protease family protein [Arabidopsis lyrata subsp. lyrata]                                                                                                                                                                                                                         | 363 | 438  | 0         | 120.7 | 87.6 | 94.5 | aspartyl protease family protein                                                                                       | gbpln | Arabidopsis lyrata   | AT2G39710.1   Symbols:   Eukaryotic aspartyl protease family protein   chr2:16562051-16563379 REVERSE LENGTH=442                                                                                                                                                                                                                        | 363 | 442 | 0         | 121.8 | 86.8 | 93.9 |
| Rsa1.0_00654.1.g17551.t1 | #                                                                                                                                                                                                                                                                                                                                                                                                               | #   | #    | #         | #     | #    | #    | -                                                                                                                      | ----  | ----                 | #                                                                                                                                                                                                                                                                                                                                       | #   | #   | #         | #     | #    |      |
| Rsa1.0_00654.1.g17552.t1 | gb EOA27259.1  hypothetical protein CARUB_v10023378mg [Capsella rubella]                                                                                                                                                                                                                                                                                                                                        | 341 | 393  | 1.00E-135 | 115.2 | 80.4 | 87.4 | hypothetical protein CARUB_v10023378mg                                                                                 | gbpln | Capsella rubella     | AT2G39720.1   Symbols: RHC2A   RING-H2 finger C2A   chr2:16567506-16568711 REVERSE LENGTH=401                                                                                                                                                                                                                                           | 341 | 401 | 1.00E-119 | 117.6 | 70.4 | 75.1 |
| Rsa1.0_00654.1.g17553.t1 | #                                                                                                                                                                                                                                                                                                                                                                                                               | #   | #    | #         | #     | #    | #    | -                                                                                                                      | ----  | ----                 | #                                                                                                                                                                                                                                                                                                                                       | #   | #   | #         | #     | #    |      |
| Rsa1.0_00654.1.g17554.t1 | ref XP_002881673.1  hypothetical protein ARALYDRAFT_482998 [Arabidopsis lyrata subsp. lyrata] gi 297327512 gb EFH57932.1  hypothetical protein ARALYDRAFT_482998 [Arabidopsis lyrata subsp. lyrata]                                                                                                                                                                                                             | 472 | 474  | 0         | 100.4 | 94.9 | 97.2 | hypothetical protein ARALYDRAFT_482998                                                                                 | gbpln | Arabidopsis lyrata   | AT2G39730.1   Symbols: RCA   rubisco activase   chr2:16570951-16573345 REVERSE LENGTH=474                                                                                                                                                                                                                                               | 472 | 474 | 0         | 100.4 | 93.9 | 96.2 |
| Rsa1.0_00654.1.g17555.t2 | ref XP_002881674.1  dehydration-responsive family protein [Arabidopsis lyrata subsp. lyrata] gi 297327513 gb EFH57933.1  dehydration-responsive family protein [Arabidopsis lyrata subsp. lyrata]                                                                                                                                                                                                               | 710 | 689  | 0         | 97.0  | 83.4 | 88.6 | dehydration-responsive family protein                                                                                  | gbpln | Arabidopsis lyrata   | AT2G39750.1   Symbols:   S-adenosyl-L-methionine-dependent methyltransferases superfamily protein   chr2:16578986-16582281 REVERSE LENGTH=694                                                                                                                                                                                           | 710 | 694 | 0         | 97.7  | 82.7 | 88.3 |

|                          |                                                                                                                                                                                                                                                                                                                                                                                                                                                                                      |      |      |           |       |      |      |                                              |       |                      |                                                                                                                                                 |      |     |           |       |      |      |
|--------------------------|--------------------------------------------------------------------------------------------------------------------------------------------------------------------------------------------------------------------------------------------------------------------------------------------------------------------------------------------------------------------------------------------------------------------------------------------------------------------------------------|------|------|-----------|-------|------|------|----------------------------------------------|-------|----------------------|-------------------------------------------------------------------------------------------------------------------------------------------------|------|-----|-----------|-------|------|------|
| Rsa1.0_00654.1.g17556.t1 | ref NP_192226.1  AP2/B3 domain-containing protein [Arabidopsis thaliana] gi 75267842 sp Q9ZR14.1 Y4317_ARATH RecName: Full=Putative B3 domain-containing protein At4g03170 gi 4262145 gb AAD14445.1  hypothetical protein [Arabidopsis thaliana] gi 7270187 emb CAB77802.1  hypothetical protein [Arabidopsis thaliana] gi 225898763 dbj BAH30512.1  hypothetical protein [Arabidopsis thaliana] gi 332656884 gb AEE82284.1  AP2/B3 domain-containing protein [Arabidopsis thaliana] | 209  | 250  | 2.00E-23  | 119.6 | 35.9 | 48.8 | AP2/B3 domain-containing protein             | gbpln | Arabidopsis thaliana | AT4G03170.1   Symbols:   AP2/B3-like transcriptional factor family protein   chr4:1400832-1401584 FORWARD LENGTH=250                            | 209  | 250 | 6.00E-26  | 119.6 | 35.9 | 48.8 |
| Rsa1.0_00654.1.g17557.t1 | ref NP_192226.1  AP2/B3 domain-containing protein [Arabidopsis thaliana] gi 75267842 sp Q9ZR14.1 Y4317_ARATH RecName: Full=Putative B3 domain-containing protein At4g03170 gi 4262145 gb AAD14445.1  hypothetical protein [Arabidopsis thaliana] gi 7270187 emb CAB77802.1  hypothetical protein [Arabidopsis thaliana] gi 225898763 dbj BAH30512.1  hypothetical protein [Arabidopsis thaliana] gi 332656884 gb AEE82284.1  AP2/B3 domain-containing protein [Arabidopsis thaliana] | 304  | 250  | 1.00E-22  | 82.2  | 21.7 | 31.3 | AP2/B3 domain-containing protein             | gbpln | Arabidopsis thaliana | AT4G03170.1   Symbols:   AP2/B3-like transcriptional factor family protein   chr4:1400832-1401584 FORWARD LENGTH=250                            | 304  | 250 | 3.00E-25  | 82.2  | 21.7 | 31.3 |
| Rsa1.0_00654.1.g17558.t1 | ref XP_002879822.1  mitochondrial glycoprotein family protein [Arabidopsis lyrata subsp. lyrata] gi 297325661 gb EFH56081.1  mitochondrial glycoprotein family protein [Arabidopsis lyrata subsp. lyrata]                                                                                                                                                                                                                                                                            | 250  | 250  | 1.00E-100 | 100.0 | 80.0 | 85.6 | mitochondrial glycoprotein family protein    | gbpln | Arabidopsis lyrata   | AT2G39795.1   Symbols:   Mitochondrial glycoprotein family protein   chr2:16597026-16598028 FORWARD LENGTH=250                                  | 250  | 250 | 1.00E-101 | 100.0 | 78.4 | 85.6 |
| Rsa1.0_00654.1.g17559.t1 | gb AAK01360.1 AF314811.1 delta 1-pyrroline-5-carboxylate synthetase A [Brassica napus]                                                                                                                                                                                                                                                                                                                                                                                               | 762  | 717  | 0         | 94.1  | 93.6 | 93.8 | delta 1-pyrroline-5-carboxylate synthetase A | gbpln | Brassica napus       | AT2G39800.4   Symbols: P5CS1   delta-1-pyrroline-5-carboxylate synthase 1   chr2:16598516-16602939 REVERSE LENGTH=717                           | 762  | 717 | 0         | 94.1  | 90.7 | 92.7 |
| Rsa1.0_00654.1.g17560.t1 | gb AAG50806.1 AC079281_8 unknown protein [Arabidopsis thaliana]                                                                                                                                                                                                                                                                                                                                                                                                                      | 1740 | 1213 | 0         | 69.7  | 37.8 | 48.9 | unknown protein                              | gbpln | Arabidopsis thaliana | AT1G60720.1   Symbols:   RNA-directed DNA polymerase (reverse transcriptase)-related family protein   chr1:22357072-22357941 FORWARD LENGTH=289 | 1740 | 289 | 3.00E-77  | 16.6  | 7.9  | 10.7 |
| Rsa1.0_00654.1.g17561.t1 | # # # # # # # -                                                                                                                                                                                                                                                                                                                                                                                                                                                                      | #    | #    | #         | #     | #    | -    | ----                                         | ----  | #                    | # # # # # # #                                                                                                                                   | #    | #   | #         | #     | #    | #    |
| Rsa1.0_00654.1.g17562.t1 | ref NP_181513.3  DA1-related protein 2 [Arabidopsis thaliana] gi 122236286 sp QOWSN2.1 DAR2_ARATH RecName: Full=Protein DA1-related 2 gi 110735778 dbj BAE99866.1  hypothetical protein [Arabidopsis thaliana] gi 330254642 gb AEC09736.1  DA1-related protein 2 [Arabidopsis thaliana]                                                                                                                                                                                              | 527  | 528  | 0         | 100.2 | 89.8 | 92.8 | DA1-related protein 2                        | gbpln | Arabidopsis thaliana | AT2G39830.1   Symbols: DAR2   DA1-related protein 2   chr2:16619950-16623658 REVERSE LENGTH=528                                                 | 527  | 528 | 0         | 100.2 | 89.8 | 92.8 |
| Rsa1.0_00655.1.g17563.t1 | ref XP_004170560.1  PREDICTED: sugar transport protein 10-like [Cucumis sativus]                                                                                                                                                                                                                                                                                                                                                                                                     | 53   | 515  | 3.00E-13  | 971.7 | 79.2 | 88.7 | PREDICTED: sugar transport protein 10-like   | gbpln | Cucumis sativus      | AT5G23270.1   Symbols: STP11, ATSTP11   sugar transporter 11   chr5:7839132-7840874 FORWARD LENGTH=514                                          | 53   | 514 | 3.00E-15  | 969.8 | 75.5 | 83.0 |
| Rsa1.0_00655.1.g17564.t1 | # # # # # # # -                                                                                                                                                                                                                                                                                                                                                                                                                                                                      | #    | #    | #         | #     | #    | -    | ----                                         | ----  | #                    | # # # # # # #                                                                                                                                   | #    | #   | #         | #     | #    | #    |
| Rsa1.0_00655.1.g17565.t1 | ref XP_002883213.1  zinc finger family protein [Arabidopsis lyrata subsp. lyrata] gi 297329053 gb EFH59472.1  zinc finger family protein [Arabidopsis lyrata subsp. lyrata]                                                                                                                                                                                                                                                                                                          | 308  | 330  | 1.00E-115 | 107.1 | 75.6 | 82.5 | zinc finger family protein                   | gbpln | Arabidopsis lyrata   | AT3G19950.1   Symbols:   RING/U-box superfamily protein   chr3:8942853-6943839 FORWARD LENGTH=328                                               | 308  | 328 | 1.00E-114 | 106.5 | 76.0 | 82.8 |
| Rsa1.0_00655.1.g17566.t1 | ref NP_001190727.1  structural constituent of ribosome [Arabidopsis thaliana] gi 332658002 gb AEE83402.1  structural constituent of ribosome [Arabidopsis thaliana]                                                                                                                                                                                                                                                                                                                  | 323  | 815  | 1.00E-74  | 252.3 | 50.8 | 66.9 | structural constituent of ribosome           | gbpln | Arabidopsis thaliana | AT4G14250.2   Symbols:   structural constituent of ribosome   chr4:8208985-8213237 REVERSE LENGTH=815                                           | 323  | 815 | 3.00E-77  | 252.3 | 50.8 | 66.9 |

|                          |                                                                                                                                                                                                                                                                                                                                                                                                                                                                                                                                                                                                                                                                                                                                                                                                                                                                                                                                                                            |     |      |           |        |      |      |                                                               |       |                      |                                                                                                                                                                                                                                                           |     |      |           |        |      |      |
|--------------------------|----------------------------------------------------------------------------------------------------------------------------------------------------------------------------------------------------------------------------------------------------------------------------------------------------------------------------------------------------------------------------------------------------------------------------------------------------------------------------------------------------------------------------------------------------------------------------------------------------------------------------------------------------------------------------------------------------------------------------------------------------------------------------------------------------------------------------------------------------------------------------------------------------------------------------------------------------------------------------|-----|------|-----------|--------|------|------|---------------------------------------------------------------|-------|----------------------|-----------------------------------------------------------------------------------------------------------------------------------------------------------------------------------------------------------------------------------------------------------|-----|------|-----------|--------|------|------|
| Rsa1.0_00655.1.g17567.t1 | ref NP_175454.1  phytochrome-associated serine/threonine protein phosphatase 1 [Arabidopsis thaliana] gi 297847376 ref XP_002891569.1  hypothetical protein ARALYDRAFT.474164 [Arabidopsis lyrata subsp. lyrata] gi 75314041 sp Q9S52.1 FYPP1_ARAT H RecName: Full=Phytochrome-associated serine/threonine-protein phosphatase 1; Short=AtFyPP1 gi 5734785 gb AAD50050.1 AC007980_15 phosphoprotein phosphatase [Arabidopsis thaliana] gi 16226940 gb AAL16304.1 AF428374.1 At1g50370/F1413_10 [Arabidopsis thaliana] gi 21593021 gb AAM64970.1  phosphoprotein phosphatase [Arabidopsis thaliana] gi 56550683 gb AAV97795.1  At1g50370 [Arabidopsis thaliana] gi 29733741 gb EFH67828.1  hypothetical protein ARALYDRAFT.474164 [Arabidopsis lyrata subsp. lyrata] gi 332194420 gb AEE32541.1  phytochrome-associated serine/threonine protein phosphatase 1 [Arabidopsis thaliana] gi 482574158 gb EOA38345.1  hypothetical protein CARUB_v10009861mg [Capsella rubella] | 303 | 303  | 1.00E-175 | 100.0  | 96.4 | 99.0 | phytochrome-associated serine/threonine protein phosphatase 1 | gbpln | Arabidopsis lyrata   | AT1G50370.1   Symbols:   Calcineurin-like metallo-phosphoesterase superfamily protein   chr1:18658894-18661672 FORWARD LENGTH=303                                                                                                                         | 303 | 303  | 1.00E-178 | 100.0  | 96.4 | 99.0 |
| Rsa1.0_00655.1.g17568.t8 | ref NP_188635.1  SNF2 and helicase domain-containing protein [Arabidopsis thaliana] gi 11994776 dbj BAB03166.1  transcription factor-like protein [Arabidopsis thaliana] gi 332642797 gb AEE76318.1  SNF2 and helicase domain-containing protein [Arabidopsis thaliana]                                                                                                                                                                                                                                                                                                                                                                                                                                                                                                                                                                                                                                                                                                    | 280 | 1047 | 2.00E-16  | 373.9  | 20.0 | 26.4 | SNF2 and helicase domain-containing protein                   | gbpln | Arabidopsis thaliana | AT3G20010.1   Symbols:   SNF2 domain-containing protein / helicase domain-containing protein / zinc finger protein-related   chr3:6971352-6976340 FORWARD LENGTH=1047                                                                                     | 280 | 1047 | 6.00E-19  | 373.9  | 20.0 | 26.4 |
| Rsa1.0_00655.1.g17569.t1 | #                                                                                                                                                                                                                                                                                                                                                                                                                                                                                                                                                                                                                                                                                                                                                                                                                                                                                                                                                                          | #   | #    | #         | #      | #    | #    | -                                                             | ----  | ----                 | #                                                                                                                                                                                                                                                         | #   | #    | #         | #      | #    |      |
| Rsa1.0_00655.1.g17570.t1 | gb EOA29760.1  hypothetical protein CARUB_v10012850mg [Capsella rubella]                                                                                                                                                                                                                                                                                                                                                                                                                                                                                                                                                                                                                                                                                                                                                                                                                                                                                                   | 88  | 1138 | 2.00E-36  | 1293.2 | 84.1 | 90.9 | hypothetical protein CARUB_v10012850mg                        | gbpln | Capsella rubella     | AT3G20010.1   Symbols:   SNF2 domain-containing protein / helicase domain-containing protein / zinc finger protein-related   chr3:6971352-6976340 FORWARD LENGTH=1047                                                                                     | 88  | 1047 | 2.00E-38  | 1189.8 | 83.0 | 89.8 |
| Rsa1.0_00655.1.g17571.t2 | gb EOA31967.1  hypothetical protein CARUB_v10015209mg [Capsella rubella]                                                                                                                                                                                                                                                                                                                                                                                                                                                                                                                                                                                                                                                                                                                                                                                                                                                                                                   | 316 | 216  | 5.00E-54  | 68.4   | 35.8 | 46.2 | hypothetical protein CARUB_v10015209mg                        | gbpln | Capsella rubella     | AT3G20155.1   Symbols:   unknown protein; Has 36 Blast hits to 36 proteins in 5 species: Archae - 0; Bacteria - 0; Metazoa - 0; Fungi - 0; Plants - 36; Viruses - 0; Other Eukaryotes - 0 (source: NCBI BLINK).   chr3:7037251-7038260 FORWARD LENGTH=216 | 316 | 216  | 3.00E-55  | 68.4   | 35.4 | 45.3 |
| Rsa1.0_00655.1.g17572.t1 | #                                                                                                                                                                                                                                                                                                                                                                                                                                                                                                                                                                                                                                                                                                                                                                                                                                                                                                                                                                          | #   | #    | #         | #      | #    | #    | -                                                             | ----  | ----                 | #                                                                                                                                                                                                                                                         | #   | #    | #         | #      | #    |      |
| Rsa1.0_00655.1.g17573.t1 | dbj BAJ33773.1  unnamed protein product [Theilungella halophila]                                                                                                                                                                                                                                                                                                                                                                                                                                                                                                                                                                                                                                                                                                                                                                                                                                                                                                           | 71  | 444  | 2.00E-24  | 625.4  | 80.3 | 80.3 | unnamed protein product                                       | ----  | ----                 | AT2G36530.1   Symbols: LOS2, ENO2   Enolase   chr2:15321081-15323786 REVERSE LENGTH=444                                                                                                                                                                   | 71  | 444  | 3.00E-27  | 625.4  | 80.3 | 80.3 |
| Rsa1.0_00655.1.g17574.t1 | ref XP_002883236.1  DELTA-VPE [Arabidopsis lyrata subsp. lyrata] gi 297329076 gb EFH59495.1  DELTA-VPE [Arabidopsis lyrata subsp. lyrata] ref NP_566657.1  EPS15 homology domain 1 protein [Arabidopsis thaliana] gi 79313303 ref NP_001030731.1  EPS15 homology domain 1 protein [Arabidopsis thaliana] gi 14334440 gb AAK59418.1  unknown protein [Arabidopsis thaliana] gi 28394001 gb AAO42408.1  unknown protein [Arabidopsis thaliana] gi 222424046 dbj BAH19984.1  AT3G20290 [Arabidopsis thaliana] gi 332642838 gb AEE76359.1  EPS15 homology domain 1 protein [Arabidopsis thaliana] gi 332642839 gb AEE76360.1  EPS15 homology domain 1 protein [Arabidopsis thaliana]                                                                                                                                                                                                                                                                                           | 187 | 466  | 1.00E-63  | 249.2  | 69.5 | 80.2 | DELTA-VPE                                                     | gbpln | Arabidopsis lyrata   | AT3G20210.1   Symbols: DELTA-VPE, DELTAVPE   delta vacuolar processing enzyme   chr3:7052482-7054525 FORWARD LENGTH=466                                                                                                                                   | 187 | 466  | 7.00E-66  | 249.2  | 69.0 | 80.7 |
| Rsa1.0_00655.1.g17575.t1 | gi 28394001 gb AAO42408.1  unknown protein [Arabidopsis thaliana] gi 222424046 dbj BAH19984.1  AT3G20290 [Arabidopsis thaliana] gi 332642838 gb AEE76359.1  EPS15 homology domain 1 protein [Arabidopsis thaliana] gi 332642839 gb AEE76360.1  EPS15 homology domain 1 protein [Arabidopsis thaliana]                                                                                                                                                                                                                                                                                                                                                                                                                                                                                                                                                                                                                                                                      | 984 | 545  | 0         | 55.4   | 51.0 | 52.4 | EPS15 homology domain 1 protein                               | gbpln | Arabidopsis thaliana | AT3G20290.2   Symbols: ATEHD1, EHD1   EPS15 homology domain 1   chr3:7075057-7078655 REVERSE LENGTH=545                                                                                                                                                   | 984 | 545  | 0         | 55.4   | 51.0 | 52.4 |



|                          |                                                                                                                                                                                                                                                                                                                                                                                                                                                       |      |      |           |       |      |      |                                                     |       |                      |                                                                                                                                                                              |      |     |           |       |      |      |
|--------------------------|-------------------------------------------------------------------------------------------------------------------------------------------------------------------------------------------------------------------------------------------------------------------------------------------------------------------------------------------------------------------------------------------------------------------------------------------------------|------|------|-----------|-------|------|------|-----------------------------------------------------|-------|----------------------|------------------------------------------------------------------------------------------------------------------------------------------------------------------------------|------|-----|-----------|-------|------|------|
| Rsa1.0_00655.1.g17576.t1 | gb EOA30798.1  hypothetical protein CARUB_v10013942mg [Capsella rubella] gi 482566610 gb EOA30799.1  hypothetical protein CARUB_v10013942mg [Capsella rubella]                                                                                                                                                                                                                                                                                        | 598  | 381  | 1.00E-151 | 63.7  | 46.0 | 49.7 | hypothetical protein CARUB_v10013942mg              | gbpln | Capsella rubella     | AT3G20320.1   Symbols: TGD2   trigalactosyl diacylglycerol2   chr3:7087657-7089640 REVERSE LENGTH=381                                                                        | 598  | 381 | 1.00E-153 | 63.7  | 46.0 | 49.7 |
| Rsa1.0_00655.1.g17577.t2 | gb EOA30740.1  hypothetical protein CARUB_v10013880mg [Capsella rubella]                                                                                                                                                                                                                                                                                                                                                                              | 488  | 398  | 1.00E-159 | 81.6  | 62.9 | 68.0 | hypothetical protein CARUB_v10013880mg              | gbpln | Capsella rubella     | AT3G20330.1   Symbols: PYRB   PYRIMIDINE B   chr3:7090354-7091904 REVERSE LENGTH=390                                                                                         | 488  | 390 | 1.00E-154 | 79.9  | 61.5 | 66.0 |
| Rsa1.0_00655.1.g17578.t1 | ref XP_002885368.1  hypothetical protein ARALYDRAFT_898447 [Arabidopsis lyrata subsp. lyrata] gi 297331208 gb EFH61627.1  hypothetical protein ARALYDRAFT_898447 [Arabidopsis lyrata subsp. lyrata] ref NP_188671.1  TRAF-like family protein [Arabidopsis thaliana] gi 18087637 gb AL58948.1 AF462862.1 At3g20360/MQC12.1 [Arabidopsis thaliana] gi 332642847 gb AEE76368.1  TRAF-like family protein [Arabidopsis thaliana]                         | 107  | 116  | 2.00E-27  | 108.4 | 68.2 | 81.3 | hypothetical protein ARALYDRAFT_898447              | gbpln | Arabidopsis lyrata   | AT3G20340.1   Symbols:   Expression of the gene is downregulated in the presence of paraquat, an inducer of photooxidative stress.   chr3:7093075-7093422 REVERSE LENGTH=115 | 107  | 115 | 2.00E-29  | 107.5 | 67.3 | 79.4 |
| Rsa1.0_00655.1.g17579.t2 | ref XP_002883241.1  hypothetical protein ARALYDRAFT_479561 [Arabidopsis lyrata subsp. lyrata] gi 297329081 gb EFH59500.1  hypothetical protein ARALYDRAFT_479561 [Arabidopsis lyrata subsp. lyrata]                                                                                                                                                                                                                                                   | 360  | 363  | 1.00E-148 | 100.8 | 72.5 | 84.2 | TRAF-like family protein                            | gbpln | Arabidopsis thaliana | AT3G20360.1   Symbols:   TRAF-like family protein   chr3:7099952-7101589 REVERSE LENGTH=363                                                                                  | 360  | 363 | 1.00E-150 | 100.8 | 72.5 | 84.2 |
| Rsa1.0_00655.1.g17580.t1 | ref XP_002883241.1  hypothetical protein ARALYDRAFT_479561 [Arabidopsis lyrata subsp. lyrata] gi 297329081 gb EFH59500.1  hypothetical protein ARALYDRAFT_479561 [Arabidopsis lyrata subsp. lyrata]                                                                                                                                                                                                                                                   | 721  | 385  | 1.00E-155 | 53.4  | 35.9 | 40.9 | hypothetical protein ARALYDRAFT_479561              | gbpln | Arabidopsis lyrata   | AT3G20370.1   Symbols:   TRAF-like family protein   chr3:7105481-7107079 FORWARD LENGTH=379                                                                                  | 721  | 379 | 1.00E-149 | 52.6  | 34.7 | 40.1 |
| Rsa1.0_00655.1.g17581.t1 | gb EOA29522.1  hypothetical protein CARUB_v10014733mg [Capsella rubella] ref NP_188676.1  calmodulin-domain protein kinase 9 [Arabidopsis thaliana] gi 75319414 sp Q38868.1 CDPK9 ARAT H RecName: Full=Calcium-dependent protein kinase 9; AltName: Full=Calmodulin-domain protein kinase CDPK isoform 9                                                                                                                                              | 156  | 187  | 2.00E-53  | 119.9 | 66.0 | 69.9 | hypothetical protein CARUB_v10014733mg              | gbpln | Capsella rubella     | AT3G20390.1   Symbols:   endoribonuclease L-PSP family protein   chr3:7110227-7111695 REVERSE LENGTH=187                                                                     | 156  | 187 | 7.00E-55  | 119.9 | 64.7 | 69.9 |
| Rsa1.0_00655.1.g17582.t1 | gi 1399265 gb AAB03242.1  calmodulin-domain protein kinase CDPK isoform 9 [Arabidopsis thaliana] gi 2945611 db BAB02824.1  calmodulin-domain protein kinase CDPK isoform 9 [Arabidopsis thaliana] gi 21539465 gb AAM53285.1  calmodulin-domain protein kinase CDPK isoform 9 [Arabidopsis thaliana] gi 31711962 gb AAP68337.1  At3g20410 [Arabidopsis thaliana] gi 332642854 gb AEE76375.1  calmodulin-domain protein kinase 9 [Arabidopsis thaliana] | 538  | 541  | 0         | 100.6 | 93.5 | 95.5 | calmodulin-domain protein kinase 9                  | gbpln | Arabidopsis thaliana | AT3G20410.1   Symbols: GPK9   calmodulin-domain protein kinase 9   chr3:7116388-7118824 FORWARD LENGTH=541                                                                   | 538  | 541 | 0         | 100.6 | 93.5 | 95.5 |
| Rsa1.0_00655.1.g17583.t1 | #                                                                                                                                                                                                                                                                                                                                                                                                                                                     | #    | #    | #         | #     | #    | -    | ----                                                | ----  | #                    | #                                                                                                                                                                            | #    | #   | #         | #     | #    |      |
| Rsa1.0_00655.1.g17584.t2 | #                                                                                                                                                                                                                                                                                                                                                                                                                                                     | #    | #    | #         | #     | #    | -    | ----                                                | ----  | #                    | #                                                                                                                                                                            | #    | #   | #         | #     | #    |      |
| Rsa1.0_00655.1.g17585.t1 | #                                                                                                                                                                                                                                                                                                                                                                                                                                                     | #    | #    | #         | #     | #    | -    | ----                                                | ----  | #                    | #                                                                                                                                                                            | #    | #   | #         | #     | #    |      |
| Rsa1.0_00655.1.g17586.t1 | #                                                                                                                                                                                                                                                                                                                                                                                                                                                     | #    | #    | #         | #     | #    | -    | ----                                                | ----  | #                    | #                                                                                                                                                                            | #    | #   | #         | #     | #    |      |
| Rsa1.0_00656.1.g17587.t1 | ref XP_002887735.1  VQ motif-containing protein [Arabidopsis lyrata subsp. lyrata] gi 297333576 gb EFH63994.1  VQ motif-containing protein [Arabidopsis lyrata subsp. lyrata]                                                                                                                                                                                                                                                                         | 104  | 110  | 3.00E-37  | 105.8 | 78.8 | 87.5 | VQ motif-containing protein                         | gbpln | Arabidopsis lyrata   | AT1G78410.1   Symbols:   VQ motif-containing protein   chr1:29502728-29503054 FORWARD LENGTH=108                                                                             | 104  | 108 | 2.00E-39  | 103.8 | 77.9 | 85.6 |
| Rsa1.0_00656.1.g17588.t1 | gb EOA34325.1  hypothetical protein CARUB_v10021845mg [Capsella rubella]                                                                                                                                                                                                                                                                                                                                                                              | 403  | 406  | 0         | 100.7 | 77.7 | 87.8 | hypothetical protein CARUB_v10021845mg              | gbpln | Capsella rubella     | AT1G78400.1   Symbols:   Pectin lyase-like superfamily protein   chr1:29498261-29499682 REVERSE LENGTH=404                                                                   | 403  | 404 | 1.00E-172 | 100.2 | 73.0 | 84.9 |
| Rsa1.0_00656.1.g17589.t4 | #                                                                                                                                                                                                                                                                                                                                                                                                                                                     | #    | #    | #         | #     | #    | -    | ----                                                | ----  | #                    | #                                                                                                                                                                            | #    | #   | #         | #     | #    |      |
| Rsa1.0_00656.1.g17590.t1 | gb EOA34913.1  hypothetical protein CARUB_v10019990mg, partial [Capsella rubella]                                                                                                                                                                                                                                                                                                                                                                     | 610  | 616  | 0         | 101.0 | 86.1 | 93.0 | hypothetical protein CARUB_v10019990mg, partial     | gbpln | Capsella rubella     | AT1G78390.1   Symbols: NCED9, ATNCED9   nine-cis-epoxycarotenoid dioxygenase 9   chr1:29490895-29492868 REVERSE LENGTH=657                                                   | 610  | 657 | 0         | 107.7 | 86.4 | 93.4 |
| Rsa1.0_00656.1.g17591.t2 | gb AAD24601.1  putative non-LTR retroelement reverse transcriptase [Arabidopsis thaliana]                                                                                                                                                                                                                                                                                                                                                             | 1633 | 1319 | 0         | 80.8  | 28.3 | 40.4 | putative non-LTR retroelement reverse transcriptase | gbpln | Arabidopsis thaliana | AT4G29090.1   Symbols:   Ribonuclease H-like superfamily protein   chr4:14333528-14335255 FORWARD LENGTH=575                                                                 | 1633 | 575 | 6.00E-43  | 35.2  | 6.8  | 11.1 |
| Rsa1.0_00656.1.g17592.t1 | gb EEC76289.1  hypothetical protein Osl_13796 [Oryza sativa Indica Group]                                                                                                                                                                                                                                                                                                                                                                             | 84   | 268  | 1.00E-23  | 319.0 | 76.2 | 85.7 | hypothetical protein Osl_13796                      | gbpln | Oryza sativa         | AT4G18360.2   Symbols:   Aldolase-type TIM barrel family protein   chr4:10146627-10148386 REVERSE LENGTH=314                                                                 | 84   | 314 | 5.00E-25  | 373.8 | 76.2 | 85.7 |

|                          |                                                                                                                                                                                                                                                                                                                                                                       |     |     |           |       |      |      |                                                   |       |                         |                                                                                                                                          |     |     |           |       |      |      |
|--------------------------|-----------------------------------------------------------------------------------------------------------------------------------------------------------------------------------------------------------------------------------------------------------------------------------------------------------------------------------------------------------------------|-----|-----|-----------|-------|------|------|---------------------------------------------------|-------|-------------------------|------------------------------------------------------------------------------------------------------------------------------------------|-----|-----|-----------|-------|------|------|
| Rsa1.0_00656.1.g17593.t1 | ref XP_002889189.1  F3F9.11<br>[Arabidopsis lyrata subsp. lyrata]<br>gi 297335030 gb EFH65448.1  F3F9.11<br>[Arabidopsis lyrata subsp. lyrata]                                                                                                                                                                                                                        | 221 | 646 | 1.00E-101 | 292.3 | 81.9 | 92.3 | F3F9.11                                           | gbpln | Arabidopsis<br>lyrata   | AT1G78360.1   Symbols: ATGSTU21,<br>GSTU21   glutathione S-transferase TAU 21<br>  chr1:29482070-29482966 REVERSE<br>LENGTH=222          | 221 | 222 | 1.00E-103 | 100.5 | 79.2 | 90.5 |
| Rsa1.0_00656.1.g17594.t1 | ref XP_002889189.1  F3F9.11<br>[Arabidopsis lyrata subsp. lyrata]<br>gi 297335030 gb EFH65448.1  F3F9.11<br>[Arabidopsis lyrata subsp. lyrata]                                                                                                                                                                                                                        | 220 | 646 | 1.00E-104 | 293.6 | 82.7 | 93.2 | F3F9.11                                           | gbpln | Arabidopsis<br>lyrata   | AT1G78360.1   Symbols: ATGSTU21,<br>GSTU21   glutathione S-transferase TAU 21<br>  chr1:29482070-29482966 REVERSE<br>LENGTH=222          | 220 | 222 | 1.00E-106 | 100.9 | 80.9 | 91.4 |
| Rsa1.0_00656.1.g17595.t1 | gb AAF71799.1 ACO13430.8 F3F9.13<br>[Arabidopsis thaliana]                                                                                                                                                                                                                                                                                                            | 278 | 439 | 3.00E-98  | 157.9 | 60.1 | 64.4 | F3F9.13                                           | gbpln | Arabidopsis<br>thaliana | AT1G78340.1   Symbols: ATGSTU22,<br>GSTU22   glutathione S-transferase TAU 22<br>  chr1:29473046-29473797 REVERSE<br>LENGTH=218          | 278 | 218 | 2.00E-99  | 78.4  | 60.8 | 65.5 |
| Rsa1.0_00656.1.g17596.t1 | gb EOA33873.1  hypothetical protein<br>CARUB_v10021365mg [Capsella rubella]                                                                                                                                                                                                                                                                                           | 290 | 316 | 5.00E-96  | 109.0 | 77.6 | 83.8 | hypothetical protein<br>CARUB_v10021365mg         | gbpln | Capsella<br>rubella     | AT1G78310.1   Symbols:   VQ motif-<br>containing protein   chr1:29464003-29464938<br>REVERSE LENGTH=311                                  | 290 | 311 | 2.00E-87  | 107.2 | 81.0 | 86.6 |
| Rsa1.0_00656.1.g17597.t1 | gb AAK26634.1 AF342780.1 GF14<br>omega [Brassica napus]                                                                                                                                                                                                                                                                                                               | 260 | 260 | 1.00E-141 | 100.0 | 96.2 | 96.9 | GF14 omega                                        | gbpln | Brassica<br>napus       | AT1G78300.1   Symbols: GRF2, 14-3-<br>3OMEGA, GF14 OMEGA   general regulatory<br>factor 2   chr1:29461883-29463052<br>FORWARD LENGTH=259 | 260 | 259 | 1.00E-140 | 99.6  | 92.7 | 95.8 |
| Rsa1.0_00656.1.g17598.t2 | gb EOA33589.1  hypothetical protein<br>CARUB_v10019734mg [Capsella rubella]                                                                                                                                                                                                                                                                                           | 965 | 944 | 0         | 97.8  | 84.5 | 88.8 | hypothetical protein<br>CARUB_v10019734mg         | gbpln | Capsella<br>rubella     | AT1G78280.1   Symbols:   transferases,<br>transferring glycosyl groups  <br>chr1:29452823-29457118 FORWARD<br>LENGTH=943                 | 965 | 943 | 0         | 97.7  | 84.0 | 88.9 |
| Rsa1.0_00656.1.g17599.t1 | ref XP_002890510.1  hypothetical<br>protein ARALYDRAFT_472481<br>[Arabidopsis lyrata subsp. lyrata]<br>gi 297336352 gb EFH6769.1 <br>hypothetical protein<br>ARALYDRAFT_472481 [Arabidopsis<br>lyrata subsp. lyrata]                                                                                                                                                  | 431 | 527 | 0         | 122.3 | 85.4 | 88.9 | hypothetical protein<br>ARALYDRAFT_472481         | gbpln | Arabidopsis<br>lyrata   | AT1G22410.1   Symbols:   Class-II DAHP<br>synthetase family protein   chr1:7912120-<br>7914742 FORWARD LENGTH=527                        | 431 | 527 | 0         | 122.3 | 84.7 | 88.6 |
| Rsa1.0_00656.1.g17600.t1 | gb ABD64987.1  hypothetical protein<br>26.t00003 [Brassica oleracea]                                                                                                                                                                                                                                                                                                  | 433 | 330 | 9.00E-12  | 76.2  | 14.3 | 19.9 | hypothetical protein<br>26.t00003                 | gbpln | Brassica<br>oleracea    | #                                                                                                                                        | #   | #   | #         | #     | #    | #    |
| Rsa1.0_00656.1.g17601.t1 | ref NP_565175.1  RNA recognition<br>motif-containing protein [Arabidopsis<br>thaliana] gi 21537200 gb AAM61541.1 <br>RNA recognition motif-containing<br>protein SEB-4 [Arabidopsis thaliana]<br>gi 124300976 gb ABN04740.1 <br>At1g78260 [Arabidopsis thaliana]<br>gi 332197966 gb AEE36087.1  RNA<br>recognition motif-containing protein<br>[Arabidopsis thaliana] | 284 | 287 | 1.00E-116 | 101.1 | 92.3 | 95.1 | RNA recognition motif-<br>containing protein      | gbpln | Arabidopsis<br>thaliana | AT1G78260.1   Symbols:   RNA-binding<br>(RRM/RBD/RNP motifs) family protein  <br>chr1:29447317-29450181 FORWARD<br>LENGTH=287            | 284 | 287 | 1.00E-118 | 101.1 | 92.3 | 95.1 |
| Rsa1.0_00657.1.g17602.t1 | ref XP_002871312.1  hypothetical<br>protein ARALYDRAFT_487656<br>[Arabidopsis lyrata subsp. lyrata]<br>gi 297317149 gb EFH47571.1 <br>hypothetical protein<br>ARALYDRAFT_487656 [Arabidopsis<br>lyrata subsp. lyrata]                                                                                                                                                 | 429 | 407 | 1.00E-161 | 94.9  | 80.2 | 86.2 | hypothetical protein<br>ARALYDRAFT_487656         | gbpln | Arabidopsis<br>lyrata   | AT5G08200.1   Symbols:   peptidoglycan-<br>binding LysM domain-containing protein  <br>chr5:2638385-2640508 FORWARD<br>LENGTH=409        | 429 | 409 | 1.00E-163 | 95.3  | 80.2 | 85.5 |
| Rsa1.0_00657.1.g17603.t1 | ref XP_002873350.1  hypothetical<br>protein ARALYDRAFT_908776<br>[Arabidopsis lyrata subsp. lyrata]<br>gi 297319187 gb EFH49609.1 <br>hypothetical protein<br>ARALYDRAFT_908776 [Arabidopsis<br>lyrata subsp. lyrata]                                                                                                                                                 | 426 | 382 | 0         | 89.7  | 82.6 | 85.9 | hypothetical protein<br>ARALYDRAFT_908776         | gbpln | Arabidopsis<br>lyrata   | AT5G08280.1   Symbols: HEMC  <br>hydroxymethylbilane synthase  <br>chr5:2663763-2665596 REVERSE<br>LENGTH=382                            | 426 | 382 | 0         | 89.7  | 81.7 | 85.4 |
| Rsa1.0_00657.1.g17604.t1 | ref XP_002871316.1  hypothetical<br>protein ARALYDRAFT_487662<br>[Arabidopsis lyrata subsp. lyrata]<br>gi 297319183 gb EFH47575.1 <br>hypothetical protein<br>ARALYDRAFT_487662 [Arabidopsis<br>lyrata subsp. lyrata]                                                                                                                                                 | 340 | 347 | 0         | 102.1 | 95.3 | 97.4 | hypothetical protein<br>ARALYDRAFT_487662         | gbpln | Arabidopsis<br>lyrata   | AT5G08300.1   Symbols:   Succinyl-CoA<br>ligase, alpha subunit   chr5:2667579-2669672<br>FORWARD LENGTH=347                              | 340 | 347 | 0         | 102.1 | 95.0 | 97.4 |
| Rsa1.0_00657.1.g17605.t1 | ref NP_196448.2  pentatricopeptide<br>repeat-containing protein [Arabidopsis<br>thaliana]<br>gi 223635617 sp POC8Q6.1 PP368_ARAT<br>H RecName: Full=Putative<br>pentatricopeptide repeat-containing<br>protein At5g08310, mitochondrial; Flags:<br>Precursor gi 332003898 gb AED91281.1 <br>pentatricopeptide repeat-containing<br>protein [Arabidopsis thaliana]     | 824 | 832 | 0         | 101.0 | 82.8 | 89.7 | pentatricopeptide<br>repeat-containing<br>protein | gbpln | Arabidopsis<br>thaliana | AT5G08310.1   Symbols:   Tetratricopeptide<br>repeat (TPR)-like superfamily protein  <br>chr5:2672756-2675254 REVERSE<br>LENGTH=832      | 824 | 832 | 0         | 101.0 | 82.8 | 89.7 |

|                          |                                                                                                                                                                                                                                                                                                                                                              |      |      |           |       |      |      |                                                        |       |                      |                                                                                                                                                                                                                                                                                                                                           |      |      |           |       |      |      |
|--------------------------|--------------------------------------------------------------------------------------------------------------------------------------------------------------------------------------------------------------------------------------------------------------------------------------------------------------------------------------------------------------|------|------|-----------|-------|------|------|--------------------------------------------------------|-------|----------------------|-------------------------------------------------------------------------------------------------------------------------------------------------------------------------------------------------------------------------------------------------------------------------------------------------------------------------------------------|------|------|-----------|-------|------|------|
| Rsa1.0_00657.1.g17606.t1 | refXP_002871318.1   hypothetical protein ARALYDRAFT_908781 [Arabidopsis lyrata subsp. lyrata] gi 297317155 gb EFH47577.1   hypothetical protein ARALYDRAFT_908781 [Arabidopsis lyrata subsp. lyrata]                                                                                                                                                         | 150  | 150  | 5.00E-71  | 100.0 | 86.0 | 90.7 | hypothetical protein ARALYDRAFT_908781                 | gbpln | Arabidopsis lyrata   | AT5G08320.1   Symbols:   CONTAINS InterPro DOMAIN's: E2F-associated phosphoprotein, C-terminal (InterPro:IPR019370); Has 149 Blast hits to 149 proteins in 78 species: Archae - 0; Bacteria - 0; Metazoa - 79; Fungi - 0; Plants - 35; Viruses - 0; Other Eukaryotes - 35 (source: NCBI BLINK).   chr5:2677153-2678603 FORWARD LENGTH=150 | 150  | 150  | 1.00E-72  | 100.0 | 84.7 | 90.0 |
| Rsa1.0_00657.1.g17607.t1 | gb EOA21459.1   hypothetical protein CARUB_v10001850mg [Capsella rubella]                                                                                                                                                                                                                                                                                    | 238  | 238  | 1.00E-92  | 100.0 | 84.0 | 87.0 | hypothetical protein CARUB_v10001850mg                 | gbpln | Capsella rubella     | AT5G08330.1   Symbols:   TCP family transcription factor   chr5:2680828-2681547 FORWARD LENGTH=239                                                                                                                                                                                                                                        | 238  | 239  | 3.00E-88  | 100.4 | 81.5 | 84.9 |
| Rsa1.0_00657.1.g17608.t1 | refXP_002871320.1   prenylcysteine alpha-carboxyl methyltransferase [Arabidopsis lyrata subsp. lyrata] gi 297317167 gb EFH47579.1   prenylcysteine alpha-carboxyl methyltransferase [Arabidopsis lyrata subsp. lyrata]                                                                                                                                       | 182  | 197  | 9.00E-91  | 108.2 | 88.5 | 94.5 | prenylcysteine alpha-carboxyl methyltransferase        | gbpln | Arabidopsis lyrata   | AT5G08335.1   Symbols: ATSTE14B, ATICMTB, ICMTB   Isoprenylcysteine carboxyl methyltransferase (ICMT) family   chr5:2683012-2683605 FORWARD LENGTH=197                                                                                                                                                                                    | 182  | 197  | 1.00E-92  | 108.2 | 86.3 | 94.5 |
| Rsa1.0_00657.1.g17609.t1 | refXP_002873354.1   alpha-galactosidase 2 [Arabidopsis lyrata subsp. lyrata] gi 297319191 gb EFH49613.1   alpha-galactosidase 2 [Arabidopsis lyrata subsp. lyrata]                                                                                                                                                                                           | 398  | 394  | 0         | 99.0  | 89.9 | 93.5 | alpha-galactosidase 2                                  | gbpln | Arabidopsis lyrata   | AT5G08370.1   Symbols: AtAGAL2, AGAL2   alpha-galactosidase 2   chr5:2691116-2693441 REVERSE LENGTH=396                                                                                                                                                                                                                                   | 398  | 396  | 0         | 99.5  | 89.7 | 93.5 |
| Rsa1.0_00657.1.g17610.t1 | ref NP_196455.1   alpha-galactosidase 1 [Arabidopsis thaliana] gi 10178280 emb CA09338.1   alpha-galactosidase-like protein [Arabidopsis thaliana] gi 332003909 gb AED91292.1   alpha-galactosidase 1 [Arabidopsis thaliana]                                                                                                                                 | 431  | 410  | 0         | 95.1  | 83.1 | 88.9 | alpha-galactosidase 1                                  | gbpln | Arabidopsis thaliana | AT5G08380.1   Symbols: AtAGAL1, AGAL1   alpha-galactosidase 1   chr5:2694851-2697616 REVERSE LENGTH=410                                                                                                                                                                                                                                   | 431  | 410  | 0         | 95.1  | 83.1 | 88.9 |
| Rsa1.0_00657.1.g17611.t1 | refXP_002871323.1   hypothetical protein ARALYDRAFT_487673 [Arabidopsis lyrata subsp. lyrata] gi 297317160 gb EFH47582.1   hypothetical protein ARALYDRAFT_487673 [Arabidopsis lyrata subsp. lyrata] gi 482557717 gb EOA21909.1   hypothetical protein CARUB_v10002392mg [Capsella rubella]                                                                  | 69   | 69   | 1.00E-30  | 100.0 | 98.6 | 98.6 | hypothetical protein ARALYDRAFT_487673                 | gbpln | Arabidopsis lyrata   | AT5G08391.1   Symbols:   Protein of unknown function (DUF 3339)   chr5:2699357-2699566 FORWARD LENGTH=69                                                                                                                                                                                                                                  | 69   | 69   | 5.00E-33  | 100.0 | 97.1 | 98.6 |
| Rsa1.0_00657.1.g17612.t1 | #                                                                                                                                                                                                                                                                                                                                                            | #    | #    | #         | #     | #    | #    | -                                                      | ----  | ----                 | #                                                                                                                                                                                                                                                                                                                                         | #    | #    | #         | #     | #    |      |
| Rsa1.0_00657.1.g17613.t1 | gb EOA22984.1   hypothetical protein CARUB_v10003725mg [Capsella rubella]                                                                                                                                                                                                                                                                                    | 388  | 395  | 0         | 101.8 | 90.5 | 93.8 | hypothetical protein CARUB_v10003725mg                 | gbpln | Capsella rubella     | AT5G08415.1   Symbols:   Radical SAM superfamily protein   chr5:2710983-2713101 REVERSE LENGTH=394                                                                                                                                                                                                                                        | 388  | 394  | 0         | 101.5 | 90.2 | 93.6 |
| Rsa1.0_00657.1.g17614.t1 | refXP_002871325.1   hypothetical protein ARALYDRAFT_487679 [Arabidopsis lyrata subsp. lyrata] gi 297317162 gb EFH47584.1   hypothetical protein ARALYDRAFT_487679 [Arabidopsis lyrata subsp. lyrata]                                                                                                                                                         | 316  | 391  | 1.00E-107 | 123.7 | 55.4 | 63.3 | hypothetical protein ARALYDRAFT_487679                 | gbpln | Arabidopsis lyrata   | AT5G08420.1   Symbols:   RNA-binding KH domain-containing protein   chr5:2713555-2716064 FORWARD LENGTH=391                                                                                                                                                                                                                               | 316  | 391  | 1.00E-105 | 123.7 | 57.9 | 64.2 |
| Rsa1.0_00657.1.g17615.t2 | ref NP_196460.2   SWIB/MDM2 and Plus-3 and GYF domain-containing protein [Arabidopsis thaliana] gi 73622094 sp O9FT92.2 Y5843_ARATH RecName: Full=Uncharacterized protein At5g08430 gi 192807344 gb ACF06124.1   At5g08430 [Arabidopsis thaliana] gi 332003917 gb AED91300.1   SWIB/MDM2 and Plus-3 and GYF domain-containing protein [Arabidopsis thaliana] | 553  | 553  | 0         | 100.0 | 73.2 | 84.6 | SWIB/MDM2 and Plus-3 and GYF domain-containing protein | gbpln | Arabidopsis thaliana | AT5G08430.1   Symbols:   SWIB/MDM2 domain-Plus-3:GYF   chr5:2716974-2720095 FORWARD LENGTH=553                                                                                                                                                                                                                                            | 553  | 553  | 0         | 100.0 | 73.2 | 84.6 |
| Rsa1.0_00657.1.g17616.t1 | db BAJ34067.1   unnamed protein product [Theilungiella halophila]                                                                                                                                                                                                                                                                                            | 287  | 305  | 1.00E-126 | 106.3 | 85.4 | 93.4 | unnamed protein product                                | ----  | ----                 | AT5G08520.1   Symbols:   Duplicated homeodomain-like superfamily protein   chr5:2755470-2757741 REVERSE LENGTH=298                                                                                                                                                                                                                        | 287  | 298  | 1.00E-125 | 103.8 | 83.3 | 91.6 |
| Rsa1.0_00657.1.g17617.t1 | #                                                                                                                                                                                                                                                                                                                                                            | #    | #    | #         | #     | #    | #    | -                                                      | ----  | ----                 | #                                                                                                                                                                                                                                                                                                                                         | #    | #    | #         | #     | #    |      |
| Rsa1.0_00657.1.g17618.t5 | refXP_002285341.2   PREDICTED: topless-related protein 4-like isoform 1 [Vitis vinifera] gi 297738983 emb CB28228.3   unnamed protein product [Vitis vinifera]                                                                                                                                                                                               | 1162 | 1133 | 0         | 97.5  | 71.9 | 81.9 | PREDICTED: topless-related protein 4-like isoform 1    | gbpln | Vitis vinifera       | AT3G15880.2   Symbols: WSIP2, TPR4   WUS-interacting protein 2   chr3:5364454-5371869 REVERSE LENGTH=1137                                                                                                                                                                                                                                 | 1162 | 1137 | 0         | 97.8  | 65.9 | 78.5 |
| Rsa1.0_00657.1.g17619.t1 | gb EOA22779.1   hypothetical protein CARUB_v10003496mg [Capsella rubella]                                                                                                                                                                                                                                                                                    | 552  | 564  | 0         | 102.2 | 83.0 | 89.5 | hypothetical protein CARUB_v10003496mg                 | gbpln | Capsella rubella     | AT5G08620.1   Symbols: STRS2, ATRH25   DEA(D/H)-box RNA helicase family protein   chr5:2794540-2797548 FORWARD LENGTH=563                                                                                                                                                                                                                 | 552  | 563  | 0         | 102.0 | 81.5 | 88.8 |

|                          |                                                                                                                                                                                                                                                                                                                                                                                                                                                                                                                                                                                                                                                                                                                                                    |      |      |           |       |      |       |                                                                                                                                                        |       |                      |                                                                                                                                         |      |     |           |       |      |      |
|--------------------------|----------------------------------------------------------------------------------------------------------------------------------------------------------------------------------------------------------------------------------------------------------------------------------------------------------------------------------------------------------------------------------------------------------------------------------------------------------------------------------------------------------------------------------------------------------------------------------------------------------------------------------------------------------------------------------------------------------------------------------------------------|------|------|-----------|-------|------|-------|--------------------------------------------------------------------------------------------------------------------------------------------------------|-------|----------------------|-----------------------------------------------------------------------------------------------------------------------------------------|------|-----|-----------|-------|------|------|
| Rsa1.0_00657.1.g17620.t1 | refXP_002873375.1   hypothetical protein ARALYDRAFT_487706 [Arabidopsis lyrata subsp. lyrata] gi 297319212 gb EFH49634.1   hypothetical protein ARALYDRAFT_487706 [Arabidopsis lyrata subsp. lyrata]                                                                                                                                                                                                                                                                                                                                                                                                                                                                                                                                               | 694  | 680  | 0         | 98.0  | 90.9 | 94.7  | hypothetical protein ARALYDRAFT_487706                                                                                                                 | gbpln | Arabidopsis lyrata   | AT5G08650.1   Symbols:   Small GTP-binding protein   chr5:2806533-2813220 REVERSE LENGTH=681                                            | 694  | 681 | 0         | 98.1  | 91.5 | 95.1 |
| Rsa1.0_00657.1.g17621.t1 | ref NP_680154.2  uncharacterized protein [Arabidopsis thaliana] gi 13548324 emb CAC35871.1   putative protein [Arabidopsis thaliana] gi 332003952 gb AED91335.1   uncharacterized protein AT5G08660 [Arabidopsis thaliana]                                                                                                                                                                                                                                                                                                                                                                                                                                                                                                                         | 640  | 649  | 0         | 101.4 | 88.1 | 93.4  | uncharacterized protein                                                                                                                                | gbpln | Arabidopsis thaliana | AT5G08660.1   Symbols:   Protein of unknown function (DUF668)   chr5:2814526-2817845 FORWARD LENGTH=649                                 | 640  | 649 | 0         | 101.4 | 88.1 | 93.4 |
| Rsa1.0_00657.1.g17622.t1 | gb EOA20295.1  hypothetical protein CARUB_v10000603mg [Capsella rubella]                                                                                                                                                                                                                                                                                                                                                                                                                                                                                                                                                                                                                                                                           | 181  | 559  | 1.00E-101 | 308.8 | 99.4 | 100.0 | hypothetical protein CARUB_v10000603mg                                                                                                                 | gbpln | Capsella rubella     | AT5G08680.1   Symbols:   ATP synthase alpha/beta family protein   chr5:2821992-2824683 FORWARD LENGTH=559                               | 181  | 559 | 1.00E-102 | 308.8 | 98.3 | 99.4 |
| Rsa1.0_00658.1.g17623.t1 | gb AAF80658.1 AC012190.14 Similar to At2g29230 Mutator-like transposase gi 3980409 from Arabidopsis thaliana gb AC004561.1 It is a member of Transposase mutator family PF 00872 [Arabidopsis thaliana]                                                                                                                                                                                                                                                                                                                                                                                                                                                                                                                                            | 268  | 904  | 7.00E-63  | 337.3 | 44.4 | 64.2  | Similar to At2g29230 Mutator-like transposase gi 3980409 from Arabidopsis thaliana gb AC004561.1 It is a member of Transposase mutator family PF 00872 | gbpln | Arabidopsis thaliana | AT1G64260.1   Symbols:   MuDR family transposase   chr1:23847756-23849915 FORWARD LENGTH=719                                            | 268  | 719 | 1.00E-11  | 268.3 | 23.1 | 43.3 |
| Rsa1.0_00658.1.g17624.t1 | refXP_002869436.1   hypothetical protein ARALYDRAFT_913570 [Arabidopsis lyrata subsp. lyrata] gi 297315272 gb EFH45695.1   hypothetical protein ARALYDRAFT_913570 [Arabidopsis lyrata subsp. lyrata]                                                                                                                                                                                                                                                                                                                                                                                                                                                                                                                                               | 344  | 386  | 5.00E-69  | 112.2 | 51.2 | 63.4  | hypothetical protein ARALYDRAFT_913570                                                                                                                 | gbpln | Arabidopsis lyrata   | AT5G39560.1   Symbols:   Galactose oxidase/kelch repeat superfamily protein   chr5:15841885-15843096 REVERSE LENGTH=403                 | 344  | 403 | 8.00E-55  | 117.2 | 41.0 | 57.3 |
| Rsa1.0_00658.1.g17625.t1 | gb EOA40271.1  hypothetical protein CARUB_v10008999mg [Capsella rubella] gi 482576085 gb EOA40272.1   hypothetical protein CARUB_v10008999mg [Capsella rubella]                                                                                                                                                                                                                                                                                                                                                                                                                                                                                                                                                                                    | 436  | 482  | 0         | 110.6 | 92.2 | 95.4  | hypothetical protein CARUB_v10008999mg                                                                                                                 | gbpln | Capsella rubella     | AT1G50420.1   Symbols: SCL3, SCL-3   scarecrow-like 3   chr1:18678177-18679625 REVERSE LENGTH=482                                       | 436  | 482 | 0         | 110.6 | 91.7 | 95.9 |
| Rsa1.0_00658.1.g17626.t3 | ref NP_175460.1  7-dehydrocholesterol reductase [Arabidopsis thaliana] gi 20140296 sp Q9LDU6.1 ST7R_ARATH RecName: Full=7-dehydrocholesterol reductase; Short=7-DHO reductase; AltName: Full=Protein DWARF 5; AltName: Full=Sterol Delta(7)-reductase gi 7542561 gb AAF63498.1 AF239701.1 sterol delta7 reductase [Arabidopsis thaliana] gi 9454565 gb AAF87888.1 AC012561_21 sterol delta7 reductase [Arabidopsis thaliana] gi 20466246 gb AAM20440.1   sterol delta7 reductase [Arabidopsis thaliana] gi 23198074 gb AANI5564.1   sterol delta7 reductase [Arabidopsis thaliana] gi 110742801 dbj BAE99303.1   sterol delta7 reductase [Arabidopsis thaliana] gi 332194426 gb AEE32547.1   7-dehydrocholesterol reductase [Arabidopsis thaliana] | 455  | 432  | 0         | 94.9  | 89.9 | 92.1  | 7-dehydrocholesterol reductase                                                                                                                         | gbpln | Arabidopsis thaliana | AT1G50430.1   Symbols: DWF5, PA, LE, ST7R, 7RED   Ergosterol biosynthesis ERG4/ERG24 family   chr1:18682175-18685555 REVERSE LENGTH=432 | 455  | 432 | 0         | 94.9  | 89.9 | 92.1 |
| Rsa1.0_00658.1.g17627.t1 | #                                                                                                                                                                                                                                                                                                                                                                                                                                                                                                                                                                                                                                                                                                                                                  | #    | #    | #         | #     | #    | #     | -                                                                                                                                                      | ----  | ----                 | #                                                                                                                                       | #    | #   | #         | #     | #    | #    |
| Rsa1.0_00658.1.g17628.t1 | #                                                                                                                                                                                                                                                                                                                                                                                                                                                                                                                                                                                                                                                                                                                                                  | #    | #    | #         | #     | #    | #     | -                                                                                                                                                      | ----  | ----                 | #                                                                                                                                       | #    | #   | #         | #     | #    | #    |
| Rsa1.0_00658.1.g17629.t1 | refXP_002883225.1   hexokinase [Arabidopsis lyrata subsp. lyrata] gi 297329065 gb EFH59484.1   hexokinase [Arabidopsis lyrata subsp. lyrata]                                                                                                                                                                                                                                                                                                                                                                                                                                                                                                                                                                                                       | 92   | 502  | 4.00E-29  | 545.7 | 72.8 | 83.7  | hexokinase                                                                                                                                             | gbpln | Arabidopsis lyrata   | AT1G50460.1   Symbols: HKL1, ATHKL1   hexokinase-like 1   chr1:18694031-18697429 FORWARD LENGTH=498                                     | 92   | 498 | 1.00E-28  | 541.3 | 62.0 | 66.3 |
| Rsa1.0_00658.1.g17630.t1 | gb EMJ11389.1  hypothetical protein PRUPE_ppa017790mg [Prunus persica]                                                                                                                                                                                                                                                                                                                                                                                                                                                                                                                                                                                                                                                                             | 1422 | 1485 | 0         | 104.4 | 44.4 | 60.1  | hypothetical protein PRUPE_ppa017790mg                                                                                                                 | gbpln | Prunus persica       | ATMG00860.1   Symbols: ORF158   DNA/RNA polymerases superfamily protein   chrM:235916-236392 FORWARD LENGTH=158                         | 1422 | 158 | 1.00E-27  | 11.1  | 3.8  | 5.8  |
| Rsa1.0_00658.1.g17631.t2 | refXP_002891576.1   hypothetical protein ARALYDRAFT_474175 [Arabidopsis lyrata subsp. lyrata] gi 297337418 gb EFH67835.1   hypothetical protein ARALYDRAFT_474175 [Arabidopsis lyrata subsp. lyrata]                                                                                                                                                                                                                                                                                                                                                                                                                                                                                                                                               | 199  | 498  | 1.00E-86  | 250.3 | 79.4 | 84.9  | hypothetical protein ARALYDRAFT_474175                                                                                                                 | gbpln | Arabidopsis lyrata   | AT1G50460.1   Symbols: HKL1, ATHKL1   hexokinase-like 1   chr1:18694031-18697429 FORWARD LENGTH=498                                     | 199  | 498 | 1.00E-87  | 250.3 | 78.9 | 84.4 |

|                          |                                                                                                                                                          |      |      |           |       |      |      |                                        |       |                         |                                                                                                                                                                                                                                                                                                                                                                                                                                                                     |      |      |           |       |      |      |
|--------------------------|----------------------------------------------------------------------------------------------------------------------------------------------------------|------|------|-----------|-------|------|------|----------------------------------------|-------|-------------------------|---------------------------------------------------------------------------------------------------------------------------------------------------------------------------------------------------------------------------------------------------------------------------------------------------------------------------------------------------------------------------------------------------------------------------------------------------------------------|------|------|-----------|-------|------|------|
| Rsa1.0_00658.1.g17632.t1 | ref[XP_002894257.1] heat-intolerant 1 [Arabidopsis lyrata subsp. lyrata] g[297340099]gb[EFH70516.1] heat-intolerant 1 [Arabidopsis lyrata subsp. lyrata] | 826  | 828  | 0         | 100.2 | 91.8 | 95.5 | heat-intolerant 1                      | gbpln | Arabidopsis lyrata      | AT1G50500.1   Symbols: HIT1, ATPVPS53, VPS53   Membrane trafficking VPS53 family protein   chr1:18708217-18715597 REVERSE LENGTH=828                                                                                                                                                                                                                                                                                                                                | 826  | 828  | 0         | 100.2 | 91.4 | 95.6 |
| Rsa1.0_00658.1.g17633.t1 | gb[EOA37472.1] hypothetical protein CARUB_v10011600mg [Capsella rubella]                                                                                 | 680  | 689  | 0         | 101.3 | 81.5 | 89.0 | hypothetical protein CARUB_v10011600mg | gbpln | Capsella rubella        | AT1G50610.1   Symbols:   Leucine-rich repeat protein kinase family protein   chr1:18742171-18744501 FORWARD LENGTH=686                                                                                                                                                                                                                                                                                                                                              | 680  | 686  | 0         | 100.9 | 80.1 | 88.2 |
| Rsa1.0_00658.1.g17634.t1 | gb[AAF79618.1]AC027665_19 F5M15.26 [Arabidopsis thaliana]                                                                                                | 1355 | 1838 | 0         | 135.6 | 28.5 | 35.6 | F5M15.26                               | gbpln | Arabidopsis thaliana    | ATMG00860.1   Symbols: ORF158   DNA/RNA polymerases superfamily protein   chrM:235916-236392 FORWARD LENGTH=158                                                                                                                                                                                                                                                                                                                                                     | 1355 | 158  | 2.00E-18  | 11.7  | 3.5  | 5.1  |
| Rsa1.0_00658.1.g17635.t1 | #                                                                                                                                                        | #    | #    | #         | #     | #    | #    | -                                      | ----  | ----                    | #                                                                                                                                                                                                                                                                                                                                                                                                                                                                   | #    | #    | #         | #     | #    |      |
| Rsa1.0_00659.1.g17636.t1 | gb[EOA15770.1] hypothetical protein CARUB_v10006927mg [Capsella rubella]                                                                                 | 506  | 852  | 1.00E-149 | 168.4 | 65.2 | 77.3 | hypothetical protein CARUB_v10006927mg | gbpln | Capsella rubella        | AT4G13820.1   Symbols:   Leucine-rich repeat (LRR) family protein   chr4:8008535-8010694 REVERSE LENGTH=719                                                                                                                                                                                                                                                                                                                                                         | 506  | 719  | 1.00E-145 | 142.1 | 64.0 | 74.9 |
| Rsa1.0_00659.1.g17637.t2 | gb[ABD65088.1] hypothetical protein 27.t00109 [Brassica oleracea]                                                                                        | 693  | 1176 | 1.00E-106 | 169.7 | 39.8 | 46.6 | hypothetical protein 27.t00109         | gbpln | Brassica oleracea       | AT1G31150.1   Symbols:   Domain of unknown function (DUF1985)   chr1:1120097-1122412 FORWARD LENGTH=673                                                                                                                                                                                                                                                                                                                                                             | 693  | 673  | 1.00E-11  | 97.1  | 6.9  | 11.5 |
| Rsa1.0_00659.1.g17638.t1 | gb[AFK08576.1] glycine-rich RNA binding protein 2a [Camelina sativa] g[387861099]gb[AFK08579.1] glycine-rich RNA binding protein 2a [Camelina sativa]    | 150  | 160  | 2.00E-53  | 106.7 | 68.0 | 74.0 | glycine-rich RNA binding protein 2a    | gbpln | Camelina sativa         | AT4G13850.1   Symbols: ATGRP2, GR- RBP2, GRP2   glycine-rich RNA-binding protein 2   chr4:8021314-8022065 FORWARD LENGTH=158                                                                                                                                                                                                                                                                                                                                        | 150  | 158  | 2.00E-53  | 105.3 | 66.0 | 73.3 |
| Rsa1.0_00659.1.g17639.t1 | gb[AC26241.1] F9D12.15 gene product [Arabidopsis thaliana]                                                                                               | 177  | 850  | 2.00E-27  | 480.2 | 44.6 | 58.8 | F9D12.15 gene product                  | gbpln | Arabidopsis thaliana    | #                                                                                                                                                                                                                                                                                                                                                                                                                                                                   | #    | #    | #         | #     | #    |      |
| Rsa1.0_00659.1.g17640.t1 | gb[AAF18641.1]AC006228_12 F5J5.16 [Arabidopsis thaliana]                                                                                                 | 161  | 1024 | 1.00E-33  | 636.0 | 44.7 | 52.2 | F5J5.16                                | gbpln | Arabidopsis thaliana    | #                                                                                                                                                                                                                                                                                                                                                                                                                                                                   | #    | #    | #         | #     | #    |      |
| Rsa1.0_00659.1.g17641.t1 | gb[ABW81181.1] gag-pol20 [Arabidopsis cebernensis]                                                                                                       | 132  | 498  | 3.00E-12  | 377.3 | 25.8 | 41.7 | gag-pol20                              | gbpln | Arabidopsis cebernensis | #                                                                                                                                                                                                                                                                                                                                                                                                                                                                   | #    | #    | #         | #     | #    |      |
| Rsa1.0_00659.1.g17642.t2 | #                                                                                                                                                        | #    | #    | #         | #     | #    | #    | -                                      | ----  | ----                    | #                                                                                                                                                                                                                                                                                                                                                                                                                                                                   | #    | #    | #         | #     | #    |      |
| Rsa1.0_00659.1.g17643.t1 | gb[ABW81060.1] GagPol3 [Arabidopsis lyrata subsp. lyrata]                                                                                                | 284  | 1103 | 1.00E-116 | 388.4 | 70.8 | 81.7 | GagPol3                                | gbpln | Arabidopsis lyrata      | #                                                                                                                                                                                                                                                                                                                                                                                                                                                                   | #    | #    | #         | #     | #    |      |
| Rsa1.0_00659.1.g17644.t1 | #                                                                                                                                                        | #    | #    | #         | #     | #    | #    | -                                      | ----  | ----                    | #                                                                                                                                                                                                                                                                                                                                                                                                                                                                   | #    | #    | #         | #     | #    |      |
| Rsa1.0_00659.1.g17645.t1 | gb[AAB87099.1] putative retroelement pol polyprotein [Arabidopsis thaliana]                                                                              | 1502 | 1496 | 0         | 99.6  | 57.2 | 70.9 | putative retroelement pol polyprotein  | gbpln | Arabidopsis thaliana    | AT4G23160.1   Symbols: CRK8   cysteine-rich RLK (RECEPTOR-like protein kinase) 8   chr4:12129485-12134086 FORWARD LENGTH=1262                                                                                                                                                                                                                                                                                                                                       | 1502 | 1262 | 1.00E-141 | 84.0  | 16.0 | 22.9 |
| Rsa1.0_00659.1.g17646.t4 | emb[CAB40051.1] putative protein [Arabidopsis thaliana] g[7267781]emb[CAB81184.1] putative protein [Arabidopsis thaliana]                                | 1004 | 1294 | 1.00E-168 | 128.9 | 30.4 | 38.8 | putative protein                       | gbpln | Arabidopsis thaliana    | AT3G31430.1   Symbols:   unknown protein; FUNCTIONS IN: molecular_function unknown; INVOLVED IN: biological_process unknown; LOCATED IN: endomembrane system; BEST Arabidopsis thaliana protein match is: unknown protein (TAIR:AT5G18636.1). Has 295 Blast hits to 291 proteins in 12 species: Archae - 0; Bacteria - 0; Metazoa - 0; Fungi - 0; Plants - 295; Viruses - 0; Other Eukaryotes - 0 (source: NCBI BLink).   chr3:12795861-12796871 REVERSE LENGTH=336 | 1004 | 336  | 7.00E-47  | 33.5  | 9.2  | 12.6 |
| Rsa1.0_00659.1.g17647.t1 | gb[AFK08576.1] glycine-rich RNA binding protein 2a [Camelina sativa] g[387861099]gb[AFK08579.1] glycine-rich RNA binding protein 2a [Camelina sativa]    | 144  | 160  | 2.00E-53  | 111.1 | 70.8 | 77.1 | glycine-rich RNA binding protein 2a    | gbpln | Camelina sativa         | AT4G13850.3   Symbols: ATGRP2   glycine-rich RNA-binding protein 2   chr4:8021314-8022065 FORWARD LENGTH=144                                                                                                                                                                                                                                                                                                                                                        | 144  | 144  | 4.00E-53  | 100.0 | 68.8 | 75.7 |
| Rsa1.0_00659.1.g17648.t1 | #                                                                                                                                                        | #    | #    | #         | #     | #    | #    | -                                      | ----  | ----                    | #                                                                                                                                                                                                                                                                                                                                                                                                                                                                   | #    | #    | #         | #     | #    |      |
| Rsa1.0_00659.1.g17649.t1 | gb[AAF18641.1]AC006228_12 F5J5.16 [Arabidopsis thaliana]                                                                                                 | 1459 | 1024 | 2.00E-58  | 70.2  | 9.1  | 12.1 | F5J5.16                                | gbpln | Arabidopsis thaliana    | #                                                                                                                                                                                                                                                                                                                                                                                                                                                                   | #    | #    | #         | #     | #    |      |
| Rsa1.0_00659.1.g17650.t1 | #                                                                                                                                                        | #    | #    | #         | #     | #    | #    | -                                      | ----  | ----                    | #                                                                                                                                                                                                                                                                                                                                                                                                                                                                   | #    | #    | #         | #     | #    |      |
| Rsa1.0_00659.1.g17651.t1 | gb[ABD65062.1] hypothetical protein 27.t00126 [Brassica oleracea]                                                                                        | 156  | 578  | 2.00E-24  | 370.5 | 41.7 | 51.3 | hypothetical protein 27.t00126         | gbpln | Brassica oleracea       | #                                                                                                                                                                                                                                                                                                                                                                                                                                                                   | #    | #    | #         | #     | #    |      |
| Rsa1.0_00660.1.g17652.t3 | gb[AAO86825.1] hypothetical protein [Arabidopsis thaliana]                                                                                               | 231  | 657  | 4.00E-43  | 284.4 | 48.5 | 56.7 | hypothetical protein                   | gbpln | Arabidopsis thaliana    | AT2G04680.1   Symbols:   Cysteine/Histidine-rich C1 domain family protein   chr2:1640188-1642161 FORWARD LENGTH=657                                                                                                                                                                                                                                                                                                                                                 | 231  | 657  | 1.00E-45  | 284.4 | 48.5 | 56.7 |

|                          |                                                                                                                                                                                                                                                                                                                                                                                                                                                                                                                                                                                                                                                                                                                                                                                                 |     |      |          |       |      |      |                                                 |       |                      |                                                                                                                                                 |     |     |          |       |      |      |
|--------------------------|-------------------------------------------------------------------------------------------------------------------------------------------------------------------------------------------------------------------------------------------------------------------------------------------------------------------------------------------------------------------------------------------------------------------------------------------------------------------------------------------------------------------------------------------------------------------------------------------------------------------------------------------------------------------------------------------------------------------------------------------------------------------------------------------------|-----|------|----------|-------|------|------|-------------------------------------------------|-------|----------------------|-------------------------------------------------------------------------------------------------------------------------------------------------|-----|-----|----------|-------|------|------|
| Rsa1.0_00660.1.g17653.t1 | ref NP_179559.2  phospholipase A2-beta [Arabidopsis thaliana] gi 75299644 sp Q8GB4.1 PLA2B_ARAT H RecName: Full=Phospholipase A2-beta; AltName: Full=Secretory phospholipase A2-beta; Short=AtsPLA2-beta; Flags: Precursor gi 2592715 gb AA7229.1  phospholipase A2 beta [Arabidopsis thaliana] gi 330251819 gb AEC06913.1  phospholipase A2-beta [Arabidopsis thaliana]                                                                                                                                                                                                                                                                                                                                                                                                                        | 145 | 147  | 1.00E-59 | 101.4 | 75.9 | 79.3 | phospholipase A2-beta                           | gbpln | Arabidopsis thaliana | AT2G19690.1   Symbols: PLA2-BETA   phospholipase A2-beta   chr2:8503326-8504549 FORWARD LENGTH=147                                              | 145 | 147 | 4.00E-62 | 101.4 | 75.9 | 79.3 |
| Rsa1.0_00660.1.g17654.t1 | gb EOA29824.1  hypothetical protein CARUB_v10012919mg [Capsella rubella]                                                                                                                                                                                                                                                                                                                                                                                                                                                                                                                                                                                                                                                                                                                        | 937 | 933  | 0        | 99.6  | 70.5 | 79.5 | hypothetical protein CARUB_v10012919mg          | gbpln | Capsella rubella     | AT2G19710.1   Symbols:   Regulator of Vps4 activity in the MVB pathway protein   chr2:8506339-8509817 FORWARD LENGTH=937                        | 937 | 937 | 0        | 100.0 | 71.6 | 80.5 |
| Rsa1.0_00660.1.g17655.t1 | ref NP_194672.1  40S ribosomal protein S15a-5 [Arabidopsis thaliana] gi 297803094 ref XP_002869431.1  RPS15AE [Arabidopsis lyrata subsp. lyrata] gi 75311751 sp Q9M0E0.1 R15A5_ARAT H RecName: Full=40S ribosomal protein S15a-5 gi 7269842 emb CAB79701.1  ribosomal protein S15a homolog [Arabidopsis thaliana] gi 21553914 gb AAM62997.1  ribosomal protein S15a homolog [Arabidopsis thaliana] gi 110737866 dbj BAF00871.1  ribosomal protein S15a homolog [Arabidopsis thaliana] gi 111074474 gb ABH04610.1  At4g29430 [Arabidopsis thaliana] gi 297315267 gb EFH45690.1  RPS15AE [Arabidopsis lyrata subsp. lyrata] gi 332660230 gb AEE85630.1  40S ribosomal protein S15a-5 [Arabidopsis thaliana] gi 482553463 gb EOA17656.1  hypothetical protein CARUB_v10006023mg [Capsella rubella] | 129 | 129  | 2.00E-67 | 100.0 | 94.6 | 99.2 | 40S ribosomal protein S15a-5                    | gbpln | Arabidopsis lyrata   | AT4G29430.1   Symbols: rps15ae   ribosomal protein S15A E   chr4:14472440-14473383 FORWARD LENGTH=129                                           | 129 | 129 | 5.00E-70 | 100.0 | 94.6 | 99.2 |
| Rsa1.0_00660.1.g17656.t1 | gb ACF23027.1  ST45-109 [Eutrema halophilum]                                                                                                                                                                                                                                                                                                                                                                                                                                                                                                                                                                                                                                                                                                                                                    | 143 | 143  | 2.00E-73 | 100.0 | 95.8 | 97.2 | ST45-109                                        | gbpln | Eutrema halophilum   | AT2G19730.3   Symbols:   Ribosomal L28e protein family   chr2:8511752-8512995 FORWARD LENGTH=143                                                | 143 | 143 | 8.00E-71 | 100.0 | 89.5 | 94.4 |
| Rsa1.0_00660.1.g17657.t1 | gb EOA16024.1  hypothetical protein CARUB_v10004149mg [Capsella rubella]                                                                                                                                                                                                                                                                                                                                                                                                                                                                                                                                                                                                                                                                                                                        | 812 | 815  | 0        | 100.4 | 93.2 | 97.4 | hypothetical protein CARUB_v10004149mg          | gbpln | Capsella rubella     | AT2G21790.1   Symbols: R1, RNRI, CLS8, ATRNR1   ribonucleotide reductase 1   chr2:9293529-9297580 FORWARD LENGTH=816                            | 812 | 816 | 0        | 100.5 | 91.6 | 96.6 |
| Rsa1.0_00660.1.g17658.t1 | dbj BAA97290.1  non-LTR retroelement reverse transcriptase-like [Arabidopsis thaliana]                                                                                                                                                                                                                                                                                                                                                                                                                                                                                                                                                                                                                                                                                                          | 363 | 1072 | 5.00E-97 | 295.3 | 47.4 | 63.4 | non-LTR retroelement reverse transcriptase-like | gbpln | Arabidopsis thaliana | AT1G60720.1   Symbols:   RNA-directed DNA polymerase (reverse transcriptase)-related family protein   chr1.22357072-22357941 FORWARD LENGTH=289 | 363 | 289 | 9.00E-75 | 79.6  | 37.5 | 50.7 |
| Rsa1.0_00660.1.g17659.t1 | ref NP_198719.1  putative receptor-like protein kinase [Arabidopsis thaliana] gi 75333904 sp Q9FID5.1 Y5393_ARATH RecName: Full=Probable receptor-like protein kinase At5g39030; Flags: Precursor gi 10177548 dbj BAB10827.1  precursor protein kinase-like protein [Arabidopsis thaliana] gi 332007006 gb AED94389.1  putative receptor-like protein kinase [Arabidopsis thaliana]                                                                                                                                                                                                                                                                                                                                                                                                             | 799 | 806  | 0        | 100.9 | 66.5 | 76.2 | putative receptor-like protein kinase           | gbpln | Arabidopsis thaliana | AT5G39030.1   Symbols:   Protein kinase superfamily protein   chr5:15620066-15622486 FORWARD LENGTH=806                                         | 799 | 806 | 0        | 100.9 | 66.5 | 76.2 |
| Rsa1.0_00660.1.g17660.t1 | ref NP_198719.1  putative receptor-like protein kinase [Arabidopsis thaliana] gi 75333904 sp Q9FID5.1 Y5393_ARATH RecName: Full=Probable receptor-like protein kinase At5g39030; Flags: Precursor gi 10177548 dbj BAB10827.1  precursor protein kinase-like protein [Arabidopsis thaliana] gi 332007006 gb AED94389.1  putative receptor-like protein kinase [Arabidopsis thaliana]                                                                                                                                                                                                                                                                                                                                                                                                             | 802 | 806  | 0        | 100.5 | 64.2 | 75.1 | putative receptor-like protein kinase           | gbpln | Arabidopsis thaliana | AT5G39030.1   Symbols:   Protein kinase superfamily protein   chr5:15620066-15622486 FORWARD LENGTH=806                                         | 802 | 806 | 0        | 100.5 | 64.2 | 75.1 |

|                           |                                                                                                                                                                                                                                                                                                                                                                                                                                                                                                                                                                                                                                                                                                                                                                                                     |     |      |           |       |       |       |                                                                                                      |       |                      |                                                                                                                                                                                                                                                                                                                                                                   |     |      |           |       |       |       |
|---------------------------|-----------------------------------------------------------------------------------------------------------------------------------------------------------------------------------------------------------------------------------------------------------------------------------------------------------------------------------------------------------------------------------------------------------------------------------------------------------------------------------------------------------------------------------------------------------------------------------------------------------------------------------------------------------------------------------------------------------------------------------------------------------------------------------------------------|-----|------|-----------|-------|-------|-------|------------------------------------------------------------------------------------------------------|-------|----------------------|-------------------------------------------------------------------------------------------------------------------------------------------------------------------------------------------------------------------------------------------------------------------------------------------------------------------------------------------------------------------|-----|------|-----------|-------|-------|-------|
| Rsa1.0_00660.1.g17661.t1  | refNP_179564.1  60S ribosomal protein L31-1 [Arabidopsis thaliana] gi 297836284 refXP_002886024.1  60S ribosomal protein L31 [Arabidopsis lyrata subsp. lyrata] gi 75266051 sp Q9SLL7.1 RL31_1_ARATH RecName: Full=60S ribosomal protein L31-1 gi 3687244 gb AAC62142.1  60S ribosomal protein L31 [Arabidopsis thaliana] gi 15450425 gb AAK96506.1  At2g19740/F6F22.23 [Arabidopsis thaliana] gi 15451072 gb AAK96807.1  60S ribosomal protein L31 [Arabidopsis thaliana] gi 16974433 gb AAL31220.1  At2g19740/F6F22.23 [Arabidopsis thaliana] gi 18377416 gb AAL66874.1  60S ribosomal protein L31 [Arabidopsis thaliana] gi 297331864 gb EFH62283.1  60S ribosomal protein L31 [Arabidopsis lyrata subsp. lyrata] gi 330251827 gb AEC06921.1  60S ribosomal protein L31-1 [Arabidopsis thaliana] | 112 | 119  | 4.00E-42  | 106.3 | 75.9  | 80.4  | 60S ribosomal protein L31-1                                                                          | gbpln | Arabidopsis lyrata   | AT2G19740.1   Symbols:   Ribosomal protein L31e family protein   chr2:8513577-8514346 FORWARD LENGTH=119                                                                                                                                                                                                                                                          | 112 | 119  | 7.00E-45  | 106.3 | 75.9  | 80.4  |
| Rsa1.0_00660.1.g17662.t1  | dbj BAK06364.1  predicted protein [Hordeum vulgare subsp. vulgare]                                                                                                                                                                                                                                                                                                                                                                                                                                                                                                                                                                                                                                                                                                                                  | 123 | 69   | 2.00E-16  | 56.1  | 35.8  | 38.2  | predicted protein                                                                                    | gbpln | Hordeum vulgare      | AT5C56670.1   Symbols:   Ribosomal protein S30 family protein   chr5:22935413-22935981 REVERSE LENGTH=62                                                                                                                                                                                                                                                          | 123 | 62   | 4.00E-13  | 50.4  | 36.6  | 36.6  |
| Rsa1.0_00660.1.g17663.t1  | dbj BAB02625.1  unnamed protein product [Arabidopsis thaliana]                                                                                                                                                                                                                                                                                                                                                                                                                                                                                                                                                                                                                                                                                                                                      | 418 | 420  | 4.00E-83  | 100.5 | 48.1  | 60.3  | unnamed protein product                                                                              | gbpln | Arabidopsis thaliana | AT3G28223.1   Symbols:   F-box family protein   chr3:10527669-10528921 REVERSE LENGTH=391                                                                                                                                                                                                                                                                         | 418 | 391  | 3.00E-70  | 93.5  | 42.6  | 53.3  |
| Rsa1.0_00660.1.g17664.t1  | gb EOA31704.1  hypothetical protein CARUB_v10014910mg [Capsella rubella]                                                                                                                                                                                                                                                                                                                                                                                                                                                                                                                                                                                                                                                                                                                            | 131 | 131  | 6.00E-63  | 100.0 | 89.3  | 93.9  | hypothetical protein CARUB_v10014910mg                                                               | gbpln | Capsella rubella     | AT2G19760.1   Symbols: PFN1, PRF1   profilin 1   chr2:8517074-8518067 REVERSE LENGTH=131                                                                                                                                                                                                                                                                          | 131 | 131  | 1.00E-64  | 100.0 | 89.3  | 92.4  |
| Rsa1.0_00660.1.g17665.t1  | # # # # # # # #                                                                                                                                                                                                                                                                                                                                                                                                                                                                                                                                                                                                                                                                                                                                                                                     | #   | #    | #         | #     | #     | #     | -                                                                                                    | ----  | ----                 | #                                                                                                                                                                                                                                                                                                                                                                 | #   | #    | #         | #     | #     |       |
| Rsa1.0_00660.1.g17666.t1  | gb EOA31559.1  hypothetical protein CARUB_v10014752mg, partial [Capsella rubella] refXP_002883969.1  myo-inositol oxygenase 2 [Arabidopsis lyrata subsp. lyrata] gi 297329809 gb EFH60228.1  myo-inositol oxygenase 2 [Arabidopsis lyrata subsp. lyrata]                                                                                                                                                                                                                                                                                                                                                                                                                                                                                                                                            | 143 | 179  | 6.00E-80  | 125.2 | 100.0 | 100.0 | hypothetical protein CARUB_v10014752mg, partial                                                      | gbpln | Capsella rubella     | AT2G19790.1   Symbols:   SNARE-like superfamily protein   chr2:8527302-8528395 FORWARD LENGTH=143                                                                                                                                                                                                                                                                 | 143 | 143  | 2.00E-81  | 100.0 | 100.0 | 100.0 |
| Rsa1.0_00660.1.g17667.t1  | refXP_002883969.1  myo-inositol oxygenase 2 [Arabidopsis lyrata subsp. lyrata] gi 297329809 gb EFH60228.1  myo-inositol oxygenase 2 [Arabidopsis lyrata subsp. lyrata]                                                                                                                                                                                                                                                                                                                                                                                                                                                                                                                                                                                                                              | 317 | 317  | 1.00E-173 | 100.0 | 92.4  | 95.0  | myo-inositol oxygenase 2                                                                             | gbpln | Arabidopsis lyrata   | AT2G19800.1   Symbols: MIOX2   myo-inositol oxygenase 2   chr2:8531106-8533354 REVERSE LENGTH=317                                                                                                                                                                                                                                                                 | 317 | 317  | 1.00E-172 | 100.0 | 91.2  | 94.6  |
| Rsa1.0_00661.1.g17668.t1  | gb ACR48181.1  MYB domain protein 29-1 [Brassica rapa subsp. pekinensis]                                                                                                                                                                                                                                                                                                                                                                                                                                                                                                                                                                                                                                                                                                                            | 340 | 330  | 1.00E-157 | 97.1  | 83.5  | 88.2  | MYB domain protein 29-1                                                                              | gbpln | Brassica rapa        | AT5G07690.1   Symbols: MYB29, ATMYB29, PMG2   myb domain protein 29   chr5:2447090-2448285 FORWARD LENGTH=336                                                                                                                                                                                                                                                     | 340 | 336  | 1.00E-131 | 98.8  | 75.6  | 83.2  |
| Rsa1.0_00661.1.g17669.t18 | refNP_568183.1  uncharacterized protein [Arabidopsis thaliana] gi 15451038 gb AAK96790.1  Unknown protein [Arabidopsis thaliana] gi 18377548 gb AAL66940.1  unknown protein [Arabidopsis thaliana] gi 332003815 gb AED91198.1  uncharacterized protein AT5G07730 [Arabidopsis thaliana]                                                                                                                                                                                                                                                                                                                                                                                                                                                                                                             | 231 | 264  | 5.00E-61  | 114.3 | 70.1  | 78.4  | uncharacterized protein                                                                              | gbpln | Arabidopsis thaliana | AT5G07730.1   Symbols:   unknown protein; BEST Arabidopsis thaliana protein match is: unknown protein (TAIR:AT5G61360.1); Has 30201 Blast hits to 17322 proteins in 780 species: Archae - 12; Bacteria - 1396; Metazoa - 17338; Fungi - 3422; Plants - 5037; Viruses - 0; Other Eukaryotes - 2996 (source: NCBI BLINK).   chr5:2457509-2458383 REVERSE LENGTH=264 | 231 | 264  | 2.00E-63  | 114.3 | 70.1  | 78.4  |
| Rsa1.0_00661.1.g17670.t1  | sp Q9FLQ7.3 FH20_ARATH RecName: Full=Formin-like protein 20; Short=AtFH20 gi 332003816 gb AED91199.1  actin binding protein [Arabidopsis thaliana]                                                                                                                                                                                                                                                                                                                                                                                                                                                                                                                                                                                                                                                  | 704 | 1649 | 2.33E-156 | 234.2 | 36.2  | 41.3  | RecName: Full=Formin-like protein 20; Short=AtFH20 gi 332003816 gb AED91199.1  actin binding protein | gbpln | Arabidopsis thaliana | AT5G07740.1   Symbols:   actin binding   chr5:2459076-2466580 REVERSE LENGTH=1649                                                                                                                                                                                                                                                                                 | 704 | 1649 | 1.00E-149 | 234.2 | 36.2  | 41.3  |
| Rsa1.0_00661.1.g17671.t2  | sp Q9FLQ7.3 FH20_ARATH RecName: Full=Formin-like protein 20; Short=AtFH20 gi 332003816 gb AED91199.1  actin binding protein [Arabidopsis thaliana]                                                                                                                                                                                                                                                                                                                                                                                                                                                                                                                                                                                                                                                  | 394 | 1649 | 1.00E-117 | 418.5 | 56.9  | 64.7  | RecName: Full=Formin-like protein 20; Short=AtFH20 gi 332003816 gb AED91199.1  actin binding protein | gbpln | Arabidopsis thaliana | AT5G07740.1   Symbols:   actin binding   chr5:2459076-2466580 REVERSE LENGTH=1649                                                                                                                                                                                                                                                                                 | 394 | 1649 | 1.00E-120 | 418.5 | 56.9  | 64.7  |
| Rsa1.0_00661.1.g17672.t1  | refXP_002871290.1  hypothetical protein ARALYDRAFT_487610 [Arabidopsis lyrata subsp. lyrata] gi 297317127 gb EFH47549.1  hypothetical protein ARALYDRAFT_487610 [Arabidopsis lyrata subsp. lyrata]                                                                                                                                                                                                                                                                                                                                                                                                                                                                                                                                                                                                  | 542 | 617  | 1.00E-122 | 113.8 | 56.1  | 69.6  | hypothetical protein ARALYDRAFT_487610                                                               | gbpln | Arabidopsis lyrata   | AT5G07790.2   Symbols:   unknown protein; FUNCTIONS IN: molecular_function unknown; INVOLVED IN: biological_process unknown; LOCATED IN: cellular_component unknown; BEST Arabidopsis thaliana protein match is: unknown protein (TAIR:AT5G61300.1).   chr5:2484073-2486107 FORWARD LENGTH=616                                                                    | 542 | 616  | 1.00E-124 | 113.7 | 57.0  | 69.7  |

|                          |                                                                                                                                                                                                                                                                                                                                                                                                       |      |      |           |       |      |      |                                          |       |                      |                                                                                                                                                                                                                                                                                                |      |      |           |       |      |      |
|--------------------------|-------------------------------------------------------------------------------------------------------------------------------------------------------------------------------------------------------------------------------------------------------------------------------------------------------------------------------------------------------------------------------------------------------|------|------|-----------|-------|------|------|------------------------------------------|-------|----------------------|------------------------------------------------------------------------------------------------------------------------------------------------------------------------------------------------------------------------------------------------------------------------------------------------|------|------|-----------|-------|------|------|
| Rsa1.0_00661.1.g17673.t1 | refNP_001190233.1   26S proteasome regulatory subunit N8 [Arabidopsis thaliana] gi 332003541 gb AED90924.1  probable 26S proteasome non-ATPase regulatory subunit 7 [Arabidopsis thaliana]                                                                                                                                                                                                            | 314  | 305  | 8.00E-56  | 97.1  | 37.6 | 42.7 | 26S proteasome regulatory subunit N8     | gbpln | Arabidopsis thaliana | AT5G05780.2   Symbols: RPN8A   RP non-ATPase subunit 8A   chr5:1735862-1738176 FORWARD LENGTH=305                                                                                                                                                                                              | 314  | 305  | 2.00E-58  | 97.1  | 37.6 | 42.7 |
| Rsa1.0_00661.1.g17674.t1 | gb AAL67083.1  unknown protein [Arabidopsis thaliana]                                                                                                                                                                                                                                                                                                                                                 | 224  | 616  | 4.00E-25  | 275.0 | 25.9 | 30.4 | unknown protein                          | gbpln | Arabidopsis thaliana | AT5G07790.2   Symbols:   unknown protein; FUNCTIONS IN: molecular.function unknown; INVOLVED IN: biological.process unknown; LOCATED IN: cellular.component unknown; BEST Arabidopsis thaliana protein match is: unknown protein (TAIR:AT5G61300.1).   chr5:2484073-2486107 FORWARD LENGTH=616 | 224  | 616  | 1.00E-27  | 275.0 | 25.9 | 30.4 |
| Rsa1.0_00661.1.g17675.t1 | refXP_002873325.1   SNF2 domain-containing protein [Arabidopsis lyrata subsp. lyrata] gi 297319162 gb EFH49584.1  SNF2 domain-containing protein [Arabidopsis lyrata subsp. lyrata]                                                                                                                                                                                                                   | 1180 | 1194 | 0         | 101.2 | 80.3 | 89.1 | SNF2 domain-containing protein           | gbpln | Arabidopsis lyrata   | AT5G07810.1   Symbols:   SNF2 domain-containing protein / helicase domain-containing protein / HNH endonuclease domain-containing protein   chr5:2491412-2498484 REVERSE LENGTH=1190                                                                                                           | 1180 | 1190 | 0         | 100.8 | 79.2 | 88.3 |
| Rsa1.0_00661.1.g17676.t1 | refXP_002894507.1   hypothetical protein ARALYDRAFT.474610 [Arabidopsis lyrata subsp. lyrata] gi 297340349 gb EFH70766.1  hypothetical protein ARALYDRAFT.474610 [Arabidopsis lyrata subsp. lyrata]                                                                                                                                                                                                   | 201  | 200  | 2.00E-85  | 99.5  | 79.6 | 86.1 | hypothetical protein ARALYDRAFT.474610   | gbpln | Arabidopsis lyrata   | AT3G13445.1   Symbols: TBP1, TFID-1   TATA binding protein 1   chr3:4380317-4381869 FORWARD LENGTH=200                                                                                                                                                                                         | 201  | 200  | 1.00E-87  | 99.5  | 79.1 | 87.1 |
| Rsa1.0_00661.1.g17677.t1 | gb EOA20264.1  hypothetical protein CARUB_v10000566mg [Capsella rubella]                                                                                                                                                                                                                                                                                                                              | 440  | 579  | 4.00E-71  | 131.6 | 43.6 | 49.3 | hypothetical protein CARUB_v10000566mg   | gbpln | Capsella rubella     | AT5G07820.1   Symbols:   Plant calmodulin-binding protein-related   chr5:2498861-2500546 REVERSE LENGTH=561                                                                                                                                                                                    | 440  | 561  | 1.00E-61  | 127.5 | 42.5 | 48.9 |
| Rsa1.0_00661.1.g17678.t1 | refNP_196404.1   HXXXD-type acyl-transferase-like protein [Arabidopsis thaliana] gi 6562301 emb CAB62599.1  N-hydroxycinnamoyl/benzoyltransferase-like protein [Arabidopsis thaliana] gi 10176721 dbj BAE09951.1  N-hydroxycinnamoyl/benzoyltransferase-like protein [Arabidopsis thaliana] gi 332003831 gb AED91214.1  HXXXD-type acyl-transferase-like protein [Arabidopsis thaliana]               | 459  | 464  | 0         | 101.1 | 72.3 | 82.6 | HXXXD-type acyl-transferase-like protein | gbpln | Arabidopsis thaliana | AT5G07870.1   Symbols:   HXXXD-type acyl-transferase family protein   chr5:2513864-2515351 FORWARD LENGTH=464                                                                                                                                                                                  | 459  | 464  | 0         | 101.1 | 72.3 | 82.6 |
| Rsa1.0_00661.1.g17679.t1 | refNP_196406.2   myosin heavy chain-like protein [Arabidopsis thaliana] gi 79327239 refNP_001031851.1   myosin heavy chain-like protein [Arabidopsis thaliana] gi 222423567 dbj BAH19753.1   AT5G07890 [Arabidopsis thaliana] gi 332003833 gb AED91216.1   myosin heavy chain-like protein [Arabidopsis thaliana] gi 332003835 gb AED91218.1   myosin heavy chain-like protein [Arabidopsis thaliana] | 407  | 409  | 1.00E-151 | 100.5 | 72.5 | 83.3 | myosin heavy chain-like protein          | gbpln | Arabidopsis thaliana | AT5G07890.3   Symbols:   myosin heavy chain-related   chr5:2517718-2519493 REVERSE LENGTH=409                                                                                                                                                                                                  | 407  | 409  | 1.00E-153 | 100.5 | 72.5 | 83.3 |
| Rsa1.0_00661.1.g17680.t1 | emb CAB10225.1  retrovirus-related like polyprotein [Arabidopsis thaliana] gi 7268152 emb CAB78488.1  retrovirus-related like polyprotein [Arabidopsis thaliana]                                                                                                                                                                                                                                      | 1505 | 1489 | 0         | 98.9  | 57.7 | 71.8 | retrovirus-related like polyprotein      | gbpln | Arabidopsis thaliana | AT4G23160.1   Symbols: CRK8   cysteine-rich RLK (RECEPTOR-like protein kinase) 8   chr4:12129485-12134086 FORWARD LENGTH=1262                                                                                                                                                                  | 1505 | 1262 | 1.00E-172 | 83.9  | 19.5 | 25.5 |
| Rsa1.0_00661.1.g17681.t2 | refXP_002873330.1   leucine-rich repeat family protein [Arabidopsis lyrata subsp. lyrata] gi 297319167 gb EFH49589.1   leucine-rich repeat family protein [Arabidopsis lyrata subsp. lyrata]                                                                                                                                                                                                          | 268  | 262  | 1.00E-129 | 97.8  | 86.6 | 92.2 | leucine-rich repeat family protein       | gbpln | Arabidopsis lyrata   | AT5G07910.1   Symbols:   Leucine-rich repeat (LRR) family protein   chr5:2521937-2523769 REVERSE LENGTH=262                                                                                                                                                                                    | 268  | 262  | 1.00E-121 | 97.8  | 86.2 | 91.8 |
| Rsa1.0_00661.1.g17682.t1 | refXP_002873331.1   hypothetical protein ARALYDRAFT.487625 [Arabidopsis lyrata subsp. lyrata] gi 297319168 gb EFH49590.1  hypothetical protein ARALYDRAFT.487625 [Arabidopsis lyrata subsp. lyrata]                                                                                                                                                                                                   | 727  | 728  | 0         | 100.1 | 90.8 | 95.6 | hypothetical protein ARALYDRAFT.487625   | gbpln | Arabidopsis lyrata   | AT5G07920.1   Symbols: DGK1, ATDGK1   diacylglycerol kinase 1   chr5:2525197-2528396 REVERSE LENGTH=728                                                                                                                                                                                        | 727  | 728  | 0         | 100.1 | 90.2 | 95.6 |
| Rsa1.0_00661.1.g17683.t1 | refNP_196419.1   RPA70-kDa subunit B [Arabidopsis thaliana] gi 6562316 emb CAB62614.1   replication factor A-like protein [Arabidopsis thaliana] gi 332003852 gb AED91235.1   RPA70-kDa subunit B [Arabidopsis thaliana]                                                                                                                                                                              | 602  | 604  | 0         | 100.3 | 88.2 | 94.9 | RPA70-kDa subunit B                      | gbpln | Arabidopsis thaliana | AT5G08020.1   Symbols: ATRPA70B, RPA70B   RPA70-kDa subunit B   chr5:2572107-2574879 FORWARD LENGTH=604                                                                                                                                                                                        | 602  | 604  | 0         | 100.3 | 88.2 | 94.9 |



|                          |                                                                                                                                                                                                                                                                                                                                                                                                                                                                                                                                                                                                                                                                                                        |     |     |           |       |      |      |                                                 |       |                      |                                                                                                                                                                                                                                                                                                                                                                                                                                                                                                                                                              |     |     |           |       |      |      |
|--------------------------|--------------------------------------------------------------------------------------------------------------------------------------------------------------------------------------------------------------------------------------------------------------------------------------------------------------------------------------------------------------------------------------------------------------------------------------------------------------------------------------------------------------------------------------------------------------------------------------------------------------------------------------------------------------------------------------------------------|-----|-----|-----------|-------|------|------|-------------------------------------------------|-------|----------------------|--------------------------------------------------------------------------------------------------------------------------------------------------------------------------------------------------------------------------------------------------------------------------------------------------------------------------------------------------------------------------------------------------------------------------------------------------------------------------------------------------------------------------------------------------------------|-----|-----|-----------|-------|------|------|
| Rsa1.0_00661.1.g17684.t1 | gb EOA21885.1  hypothetical protein CARUB_v10002362mg, partial [Capsella rubella]                                                                                                                                                                                                                                                                                                                                                                                                                                                                                                                                                                                                                      | 54  | 84  | 1.00E-17  | 155.6 | 77.8 | 90.7 | hypothetical protein CARUB_v10002362mg, partial | gbpln | Capsella rubella     | AT5G08040.1   Symbols: TOM5   mitochondrial import receptor subunit TOM5 homolog   chr5:2577358-2578073 REVERSE LENGTH=54                                                                                                                                                                                                                                                                                                                                                                                                                                    | 54  | 54  | 1.00E-17  | 100.0 | 68.5 | 90.7 |
| Rsa1.0_00661.1.g17685.t1 | ref NP_196422.1  uncharacterized protein [Arabidopsis thaliana]   gi 8562319 emb CAB62617.1  putative protein [Arabidopsis thaliana]   gi 332003855 gb AED91238.1  uncharacterized protein AT5G08050 [Arabidopsis thaliana]                                                                                                                                                                                                                                                                                                                                                                                                                                                                            | 157 | 158 | 3.00E-64  | 100.6 | 89.8 | 95.5 | uncharacterized protein                         | gbpln | Arabidopsis thaliana | AT5G08050.1   Symbols:   Protein of unknown function (DUF1118)   chr5:2578418-2578964 FORWARD LENGTH=158                                                                                                                                                                                                                                                                                                                                                                                                                                                     | 157 | 158 | 9.00E-67  | 100.6 | 89.8 | 95.5 |
| Rsa1.0_00661.1.g17686.t1 | #                                                                                                                                                                                                                                                                                                                                                                                                                                                                                                                                                                                                                                                                                                      | #   | #   | #         | #     | #    | #    | -                                               | ----  | ----                 | #                                                                                                                                                                                                                                                                                                                                                                                                                                                                                                                                                            | #   | #   | #         | #     | #    |      |
| Rsa1.0_00661.1.g17687.t1 | ref XP_002871323.1  hypothetical protein ARALYDRAFT_487673 [Arabidopsis lyrata subsp. lyrata]   gi 297317160 gb EFH47582.1  hypothetical protein ARALYDRAFT_487673 [Arabidopsis lyrata subsp. lyrata]   gi 482557717 gb EOA21909.1  hypothetical protein CARUB_v10002392mg [Capsella rubella]                                                                                                                                                                                                                                                                                                                                                                                                          | 69  | 69  | 2.00E-30  | 100.0 | 97.1 | 98.6 | hypothetical protein ARALYDRAFT_487673          | gbpln | Arabidopsis lyrata   | AT5G08391.1   Symbols:   Protein of unknown function (DUF 3339)   chr5:2699357-2699566 FORWARD LENGTH=69                                                                                                                                                                                                                                                                                                                                                                                                                                                     | 69  | 69  | 5.00E-33  | 100.0 | 95.7 | 98.6 |
| Rsa1.0_00661.1.g17688.t1 | ref NP_568194.2  katanin p80 subunit-like protein [Arabidopsis thaliana]   gi 33200391.1 gb AED91294.1  katanin p80 subunit-like protein [Arabidopsis thaliana]                                                                                                                                                                                                                                                                                                                                                                                                                                                                                                                                        | 711 | 839 | 0         | 118.0 | 85.5 | 90.4 | katanin p80 subunit-like protein                | gbpln | Arabidopsis thaliana | AT5G08390.1   Symbols:   Transducin/WD40 repeat-like superfamily protein   chr5:2701448-2706910 FORWARD LENGTH=839                                                                                                                                                                                                                                                                                                                                                                                                                                           | 711 | 839 | 0         | 118.0 | 85.5 | 90.4 |
| Rsa1.0_00661.1.g17689.t1 | gb EOA21100.1  hypothetical protein CARUB_v10001440mg, partial [Capsella rubella]                                                                                                                                                                                                                                                                                                                                                                                                                                                                                                                                                                                                                      | 243 | 327 | 1.00E-116 | 134.6 | 85.6 | 92.2 | hypothetical protein CARUB_v10001440mg, partial | gbpln | Capsella rubella     | AT5G08400.2   Symbols:   Protein of unknown function (DUF3531)   chr5:2707225-2708911 REVERSE LENGTH=300                                                                                                                                                                                                                                                                                                                                                                                                                                                     | 243 | 300 | 1.00E-118 | 123.5 | 84.8 | 91.8 |
| Rsa1.0_00661.1.g17690.t1 | gb EOA22822.1  hypothetical protein CARUB_v10003540mg [Capsella rubella]                                                                                                                                                                                                                                                                                                                                                                                                                                                                                                                                                                                                                               | 177 | 184 | 1.00E-67  | 104.0 | 80.8 | 84.7 | hypothetical protein CARUB_v10003540mg          | gbpln | Capsella rubella     | AT5G08410.1   Symbols: FTRA2   ferredoxin/thioredoxin reductase subunit A (variable subunit) 2   chr5:2709974-2710528 REVERSE LENGTH=184                                                                                                                                                                                                                                                                                                                                                                                                                     | 177 | 184 | 8.00E-69  | 104.0 | 80.8 | 87.0 |
| Rsa1.0_00661.1.g17691.t1 | emb CB127710.3  unnamed protein product [Vitis vinifera]   ref NP_196462.2  uncharacterized protein [Arabidopsis thaliana]   gi 30682392 ref NP_851033.1  uncharacterized protein [Arabidopsis thaliana]   gi 79327334 ref NP_001031857.1  uncharacterized protein [Arabidopsis thaliana]   gi 20259547 gb AAM13893.1  unknown protein [Arabidopsis thaliana]   gi 21689693 gb AAM67468.1  unknown protein [Arabidopsis thaliana]   gi 332003920 gb AED91303.1  uncharacterized protein AT5G08450 [Arabidopsis thaliana]   gi 332003921 gb AED91304.1  uncharacterized protein AT5G08450 [Arabidopsis thaliana]   gi 332003922 gb AED91305.1  uncharacterized protein AT5G08450 [Arabidopsis thaliana] | 136 | 201 | 7.00E-41  | 147.8 | 64.7 | 74.3 | unnamed protein product                         | gbpln | Vitis vinifera       | #                                                                                                                                                                                                                                                                                                                                                                                                                                                                                                                                                            | #   | #   | #         | #     | #    |      |
| Rsa1.0_00661.1.g17692.t1 | ref XP_002871330.1  predicted protein [Arabidopsis lyrata subsp. lyrata]   gi 297317167 gb EFH47589.1  predicted protein [Arabidopsis lyrata subsp. lyrata]   ref XP_002873361.1  pentatricopeptide repeat-containing protein [Arabidopsis lyrata subsp. lyrata]   gi 297319198 gb EFH49620.1  pentatricopeptide repeat-containing protein [Arabidopsis lyrata subsp. lyrata]                                                                                                                                                                                                                                                                                                                          | 922 | 918 | 0         | 99.6  | 82.2 | 88.3 | uncharacterized protein                         | gbpln | Arabidopsis thaliana | AT5G08450.3   Symbols:   FUNCTIONS IN: molecular function unknown; INVOLVED IN: biological_process unknown; LOCATED IN: cellular_component unknown; EXPRESSED IN: 25 plant structures; EXPRESSED DURING: 15 growth stages; CONTAINS InterPro DOMAIN/s: Histone deacetylation protein Rxt3 (InterPro:IPR013951); Has 34444 Blast hits to 20801 proteins in 1175 species: Archaea - 64; Bacteria - 2390; Metazoa - 15568; Fungi - 3729; Plants - 1886; Viruses - 208; Other Eukaryotes - 10599 (source: NCBI BLink).   chr5:2727970-2732572 REVERSE LENGTH=918 | 922 | 918 | 0         | 99.6  | 82.2 | 88.3 |
| Rsa1.0_00661.1.g17693.t1 | ref XP_002871330.1  predicted protein [Arabidopsis lyrata subsp. lyrata]   gi 297317167 gb EFH47589.1  predicted protein [Arabidopsis lyrata subsp. lyrata]   ref XP_002873361.1  pentatricopeptide repeat-containing protein [Arabidopsis lyrata subsp. lyrata]                                                                                                                                                                                                                                                                                                                                                                                                                                       | 174 | 175 | 3.00E-77  | 100.6 | 89.7 | 94.8 | predicted protein                               | gbpln | Arabidopsis lyrata   | AT5G08480.2   Symbols:   VQ motif-containing protein   chr5:2744486-2745007 FORWARD LENGTH=173                                                                                                                                                                                                                                                                                                                                                                                                                                                               | 174 | 173 | 9.00E-75  | 99.4  | 87.9 | 93.7 |
| Rsa1.0_00661.1.g17694.t1 | ref XP_002873361.1  pentatricopeptide repeat-containing protein [Arabidopsis lyrata subsp. lyrata]   gi 297319198 gb EFH49620.1  pentatricopeptide repeat-containing protein [Arabidopsis lyrata subsp. lyrata]                                                                                                                                                                                                                                                                                                                                                                                                                                                                                        | 851 | 849 | 0         | 99.8  | 82.4 | 90.1 | pentatricopeptide repeat-containing protein     | gbpln | Arabidopsis lyrata   | AT5G08490.1   Symbols:   Tetrapentapeptide repeat (TPR)-like superfamily protein   chr5:2745208-2747757 REVERSE LENGTH=849                                                                                                                                                                                                                                                                                                                                                                                                                                   | 851 | 849 | 0         | 99.8  | 82.5 | 90.2 |
| Rsa1.0_00661.1.g17695.t1 | dbj BAJ34067.1  unnamed protein product [Theillungiella halophila]                                                                                                                                                                                                                                                                                                                                                                                                                                                                                                                                                                                                                                     | 320 | 305 | 1.00E-142 | 95.3  | 83.1 | 89.7 | unnamed protein product                         | ----  | ----                 | AT5G08520.1   Symbols:   Duplicated homeodomain-like superfamily protein   chr5:2755470-2757741 REVERSE LENGTH=298                                                                                                                                                                                                                                                                                                                                                                                                                                           | 320 | 298 | 1.00E-135 | 93.1  | 80.3 | 86.6 |
| Rsa1.0_00662.1.g17696.t1 | #                                                                                                                                                                                                                                                                                                                                                                                                                                                                                                                                                                                                                                                                                                      | #   | #   | #         | #     | #    | #    | -                                               | ----  | ----                 | #                                                                                                                                                                                                                                                                                                                                                                                                                                                                                                                                                            | #   | #   | #         | #     | #    |      |

|                          |                                                                                                                                                                                                                                                                                                                                                                                                                                                                                                                                                                                                                                                                       |     |     |           |       |      |      |                                                                |       |                      |                                                                                                                                                                                                                                                                                                                                           |     |     |           |       |      |      |
|--------------------------|-----------------------------------------------------------------------------------------------------------------------------------------------------------------------------------------------------------------------------------------------------------------------------------------------------------------------------------------------------------------------------------------------------------------------------------------------------------------------------------------------------------------------------------------------------------------------------------------------------------------------------------------------------------------------|-----|-----|-----------|-------|------|------|----------------------------------------------------------------|-------|----------------------|-------------------------------------------------------------------------------------------------------------------------------------------------------------------------------------------------------------------------------------------------------------------------------------------------------------------------------------------|-----|-----|-----------|-------|------|------|
| Rsa1.0_00662.1.g17697.t1 | ref NP_199286.1  haloacid dehalogenase-like hydrolase domain-containing protein [Arabidopsis thaliana] gi 42573575 ref NP_974884.1  haloacid dehalogenase-like hydrolase domain-containing protein [Arabidopsis thaliana] gi 2660676 gb AAC79147.1  Dreg-2 like protein [Arabidopsis thaliana] gi 9758377 dbj BAB08828.1  Dreg-2 like protein [Arabidopsis thaliana] gi 106879171 gb ABF82615.1  At5g44730 [Arabidopsis thaliana] gi 332007769 gb AED95152.1  haloacid dehalogenase-like hydrolase domain-containing protein [Arabidopsis thaliana] gi 332007770 gb AED95153.1  haloacid dehalogenase-like hydrolase domain-containing protein [Arabidopsis thaliana] | 247 | 255 | 1.00E-129 | 103.2 | 91.1 | 96.4 | haloacid dehalogenase-like hydrolase domain-containing protein | gbpln | Arabidopsis thaliana | AT5G44730.1   Symbols:   Haloacid dehalogenase-like hydrolase (HAD) superfamily protein   chr5:18045589-18046519 REVERSE LENGTH=255                                                                                                                                                                                                       | 247 | 255 | 1.00E-132 | 103.2 | 91.1 | 96.4 |
| Rsa1.0_00662.1.g17698.t1 | ref XP_002865328.1  molybdenum cofactor sulfurase family protein [Arabidopsis lyrata subsp. lyrata] gi 297311163 gb EFH41587.1  molybdenum cofactor sulfurase family protein [Arabidopsis lyrata subsp. lyrata]                                                                                                                                                                                                                                                                                                                                                                                                                                                       | 308 | 308 | 1.00E-138 | 100.0 | 77.6 | 86.7 | molybdenum cofactor sulfurase family protein                   | gbpln | Arabidopsis lyrata   | AT5G44720.1   Symbols:   Molybdenum cofactor sulfurase family protein   chr5:18043086-18045275 FORWARD LENGTH=308                                                                                                                                                                                                                         | 308 | 308 | 1.00E-139 | 100.0 | 76.0 | 85.7 |
| Rsa1.0_00662.1.g17699.t1 | ref XP_002865328.1  molybdenum cofactor sulfurase family protein [Arabidopsis lyrata subsp. lyrata] gi 297311163 gb EFH41587.1  molybdenum cofactor sulfurase family protein [Arabidopsis lyrata subsp. lyrata]                                                                                                                                                                                                                                                                                                                                                                                                                                                       | 308 | 308 | 1.00E-157 | 100.0 | 86.0 | 93.5 | molybdenum cofactor sulfurase family protein                   | gbpln | Arabidopsis lyrata   | AT5G44720.1   Symbols:   Molybdenum cofactor sulfurase family protein   chr5:18043086-18045275 FORWARD LENGTH=308                                                                                                                                                                                                                         | 308 | 308 | 1.00E-155 | 100.0 | 82.8 | 91.2 |
| Rsa1.0_00662.1.g17700.t1 | gb ABL97982.1  putative TRAPP subunit [Brassica rapa]                                                                                                                                                                                                                                                                                                                                                                                                                                                                                                                                                                                                                 | 102 | 135 | 2.00E-47  | 132.4 | 99.0 | 99.0 | putative TRAPP subunit                                         | gbpln | Brassica rapa        | AT1G80500.1   Symbols:   SNARE-like superfamily protein   chr1:30271195-30272431 FORWARD LENGTH=135                                                                                                                                                                                                                                       | 102 | 135 | 5.00E-49  | 132.4 | 96.1 | 98.0 |
| Rsa1.0_00662.1.g17701.t1 | gb EOA33803.1  hypothetical protein CARUB_v10021274mg [Capsella rubella]                                                                                                                                                                                                                                                                                                                                                                                                                                                                                                                                                                                              | 329 | 304 | 7.00E-90  | 92.4  | 52.3 | 60.8 | hypothetical protein CARUB_v10021274mg                         | gbpln | Capsella rubella     | AT2G40560.1   Symbols:   Protein kinase superfamily protein   chr2:16938705-16939616 REVERSE LENGTH=303                                                                                                                                                                                                                                   | 329 | 303 | 3.00E-74  | 92.1  | 45.9 | 57.4 |
| Rsa1.0_00662.1.g17702.t1 | gb EOA37158.1  hypothetical protein CARUB_v10010491mg, partial [Capsella rubella]                                                                                                                                                                                                                                                                                                                                                                                                                                                                                                                                                                                     | 102 | 167 | 9.00E-49  | 163.7 | 92.2 | 97.1 | hypothetical protein CARUB_v10010491mg, partial                | gbpln | Capsella rubella     | AT5G44710.1   Symbols:   CONTAINS InterPro DOMAIN/s: Ribosomal protein S27/S33, mitochondrial (InterPro:IPR013219); Has 101 Blast hits to 101 proteins in 55 species: Archae - 0; Bacteria - 0; Metazoa - 8; Fungi - 59; Plants - 26; Viruses - 0; Other Eukaryotes - 8 (source: NCBI BLINK).   chr5:18041621-18042322 FORWARD LENGTH=102 | 102 | 102 | 2.00E-50  | 100.0 | 92.2 | 96.1 |
| Rsa1.0_00662.1.g17703.t1 | gb EOA40356.1  hypothetical protein CARUB_v10009084mg [Capsella rubella]                                                                                                                                                                                                                                                                                                                                                                                                                                                                                                                                                                                              | 435 | 459 | 1.00E-147 | 105.5 | 70.1 | 81.8 | hypothetical protein CARUB_v10009084mg                         | gbpln | Capsella rubella     | AT1G50040.1   Symbols:   Protein of unknown function (DUF1005)   chr1:18542236-18543823 FORWARD LENGTH=460                                                                                                                                                                                                                                | 435 | 460 | 1.00E-145 | 105.7 | 69.4 | 81.4 |
| Rsa1.0_00662.1.g17704.t1 | ref NP_199276.1  alpha-barbatene synthase [Arabidopsis thaliana] gi 254810224 sp Q4KSH9.2 BARS_ARAT H RecName: Full=Alpha-barbatene synthase; Short=ATBS; AltName: Full=Beta-chamigrene synthase; AltName: Full=Terpendeoid synthase 11; Short=AtTPS11; AltName: Full=Thujopsene synthase gi 126352284 gb ABO09887.1  At5g44630 [Arabidopsis thaliana] gi 332007757 gb AED95140.1  alpha-barbatene synthase [Arabidopsis thaliana]                                                                                                                                                                                                                                    | 514 | 557 | 0         | 108.4 | 73.7 | 84.2 | alpha-barbatene synthase                                       | gbpln | Arabidopsis thaliana | AT5G44630.1   Symbols:   Terpenoid cyclases/Protein prenyltransferases superfamily protein   chr5:18003280-18005616 FORWARD LENGTH=557                                                                                                                                                                                                    | 514 | 557 | 0         | 108.4 | 73.7 | 84.2 |
| Rsa1.0_00662.1.g17705.t1 | ref NP_199276.1  alpha-barbatene synthase [Arabidopsis thaliana] gi 254810224 sp Q4KSH9.2 BARS_ARAT H RecName: Full=Alpha-barbatene synthase; Short=ATBS; AltName: Full=Beta-chamigrene synthase; AltName: Full=Terpendeoid synthase 11; Short=AtTPS11; AltName: Full=Thujopsene synthase gi 126352284 gb ABO09887.1  At5g44630 [Arabidopsis thaliana] gi 332007757 gb AED95140.1  alpha-barbatene synthase [Arabidopsis thaliana]                                                                                                                                                                                                                                    | 298 | 557 | 1.00E-62  | 186.9 | 38.3 | 45.3 | alpha-barbatene synthase                                       | gbpln | Arabidopsis thaliana | AT5G44630.1   Symbols:   Terpenoid cyclases/Protein prenyltransferases superfamily protein   chr5:18003280-18005616 FORWARD LENGTH=557                                                                                                                                                                                                    | 298 | 557 | 3.00E-65  | 186.9 | 38.3 | 45.3 |

|                          |                                                                                                                                                                                                                                                                                                                                                                           |      |      |           |       |      |      |                                               |       |                      |                                                                                                                                         |      |      |           |       |      |      |
|--------------------------|---------------------------------------------------------------------------------------------------------------------------------------------------------------------------------------------------------------------------------------------------------------------------------------------------------------------------------------------------------------------------|------|------|-----------|-------|------|------|-----------------------------------------------|-------|----------------------|-----------------------------------------------------------------------------------------------------------------------------------------|------|------|-----------|-------|------|------|
| Rsa1.0_00662.1.g17706.t1 | dbj BAJ33888.1  unnamed protein product [Theilingella halophila]                                                                                                                                                                                                                                                                                                          | 244  | 245  | 6.00E-37  | 100.4 | 42.6 | 50.4 | unnamed protein product                       | ----  | ----                 | AT4G20260.3   Symbols: ATPCAP1, PCAP1   plasma-membrane associated cation-binding protein 1   chr4:10941593-10943227 FORWARD LENGTH=225 | 244  | 225  | 4.00E-34  | 92.2  | 38.1 | 45.9 |
| Rsa1.0_00662.1.g17707.t1 | ref XP_002862972.1  predicted protein [Arabidopsis lyrata subsp. lyrata]   gi 297308761 gb EFH39231.1  predicted protein [Arabidopsis lyrata subsp. lyrata]                                                                                                                                                                                                               | 203  | 223  | 3.00E-98  | 109.9 | 96.6 | 99.5 | predicted protein                             | gbpln | Arabidopsis lyrata   | AT5G44560.1   Symbols: VPS2.2   SNF7 family protein   chr5:17946081-17948222 FORWARD LENGTH=222                                         | 203  | 222  | 1.00E-100 | 109.4 | 92.6 | 96.1 |
| Rsa1.0_00662.1.g17708.t1 | ref NP_176572.1  TIR-NBS-LRR class disease resistance protein [Arabidopsis thaliana]   gi 12325006 gb AAG52448.1 AC010852.5 putative disease resistance protein; 24665-28198 [Arabidopsis thaliana]   gi 332196042 gb AEE34163.1  TIR-NBS-LRR class disease resistance protein [Arabidopsis thaliana]                                                                     | 1018 | 1017 | 0         | 99.9  | 60.7 | 72.9 | TIR-NBS-LRR class disease resistance protein  | gbpln | Arabidopsis thaliana | AT1G63880.1   Symbols:   Disease resistance protein (TIR-NBS-LRR class) family   chr1:23712514-23716047 REVERSE LENGTH=1017             | 1018 | 1017 | 0         | 99.9  | 60.7 | 72.9 |
| Rsa1.0_00662.1.g17709.t1 | #                                                                                                                                                                                                                                                                                                                                                                         | #    | #    | #         | #     | #    | -    | ----                                          | ----  | #                    | #                                                                                                                                       | #    | #    | #         | #     | #    |      |
| Rsa1.0_00662.1.g17710.t1 | ref NP_199261.1  UDP-arabinose 4-epimerase [Arabidopsis thaliana]   gi 75309104 sp O9F11.7 ARAE4_ARATH RecName: Full=Putative UDP-arabinose 4-epimerase 4; AltName: Full=UDP-D-xylose 4-epimerase 4   gi 9758701 dbj BAB09155.1  unnamed protein product [Arabidopsis thaliana]   gi 332007730 gb AED95113.1  putative UDP-arabinose 4-epimerase 4 [Arabidopsis thaliana] | 383  | 436  | 0         | 113.8 | 95.3 | 97.9 | UDP-arabinose 4-epimerase                     | gbpln | Arabidopsis thaliana | AT5G44480.1   Symbols: DUR   NAD(P)-binding Rossmann-fold superfamily protein   chr5:17921515-17923643 FORWARD LENGTH=436               | 383  | 436  | 0         | 113.8 | 95.3 | 97.9 |
| Rsa1.0_00662.1.g17711.t1 | ref XP_002863575.1  hypothetical protein ARALYDRAFT_494541 [Arabidopsis lyrata subsp. lyrata]   gi 297309410 gb EFH39834.1  hypothetical protein ARALYDRAFT_494541 [Arabidopsis lyrata subsp. lyrata]                                                                                                                                                                     | 334  | 335  | 1.00E-163 | 100.3 | 86.5 | 91.3 | hypothetical protein ARALYDRAFT_494541        | gbpln | Arabidopsis lyrata   | AT5G44450.1   Symbols:   methyltransferases   chr5:17914360-17916017 REVERSE LENGTH=334                                                 | 334  | 334  | 1.00E-164 | 100.0 | 85.0 | 90.1 |
| Rsa1.0_00662.1.g17712.t1 | gb EOA13178.1  hypothetical protein CARUB_v10026203mg [Capsella rubella]                                                                                                                                                                                                                                                                                                  | 530  | 538  | 0         | 101.5 | 82.8 | 91.7 | hypothetical protein CARUB_v10026203mg        | gbpln | Capsella rubella     | AT5G44410.1   Symbols:   FAD-binding Berberine family protein   chr5:17891246-17892853 REVERSE LENGTH=535                               | 530  | 535  | 0         | 100.9 | 82.8 | 91.7 |
| Rsa1.0_00662.1.g17713.t1 | ref XP_002863581.1  FAD-binding domain-containing protein [Arabidopsis lyrata subsp. lyrata]   gi 297309416 gb EFH39840.1  FAD-binding domain-containing protein [Arabidopsis lyrata subsp. lyrata]                                                                                                                                                                       | 481  | 540  | 0         | 112.3 | 82.1 | 91.7 | FAD-binding domain-containing protein         | gbpln | Arabidopsis lyrata   | AT5G44400.1   Symbols:   FAD-binding Berberine family protein   chr5:17886365-17888071 REVERSE LENGTH=537                               | 481  | 537  | 0         | 111.6 | 82.7 | 91.3 |
| Rsa1.0_00662.1.g17714.t1 | ref NP_199252.1  FAD-binding and BBE domain-containing protein [Arabidopsis thaliana]   gi 10176894 dbj BAB10124.1  berberine bridge enzyme-like protein [Arabidopsis thaliana]   gi 332007721 gb AED95104.1  FAD-binding and BBE domain-containing protein [Arabidopsis thaliana]                                                                                        | 480  | 542  | 0         | 112.9 | 76.5 | 89.0 | FAD-binding and BBE domain-containing protein | gbpln | Arabidopsis thaliana | AT5G44390.1   Symbols:   FAD-binding Berberine family protein   chr5:17882329-17884906 REVERSE LENGTH=542                               | 480  | 542  | 0         | 112.9 | 76.5 | 89.0 |
| Rsa1.0_00662.1.g17715.t1 | ref XP_002863582.1  FAD-binding domain-containing protein [Arabidopsis lyrata subsp. lyrata]   gi 297309417 gb EFH39841.1  FAD-binding domain-containing protein [Arabidopsis lyrata subsp. lyrata]                                                                                                                                                                       | 541  | 541  | 0         | 100.0 | 78.4 | 88.2 | FAD-binding domain-containing protein         | gbpln | Arabidopsis lyrata   | AT5G44390.1   Symbols:   FAD-binding Berberine family protein   chr5:17882329-17884906 REVERSE LENGTH=542                               | 541  | 542  | 0         | 100.2 | 77.1 | 87.4 |
| Rsa1.0_00662.1.g17716.t1 | ref XP_002863627.1  hypothetical protein ARALYDRAFT_494617 [Arabidopsis lyrata subsp. lyrata]   gi 297309462 gb EFH39886.1  hypothetical protein ARALYDRAFT_494617 [Arabidopsis lyrata subsp. lyrata]                                                                                                                                                                     | 764  | 833  | 0         | 109.0 | 75.8 | 82.2 | hypothetical protein ARALYDRAFT_494617        | gbpln | Arabidopsis lyrata   | AT5G43890.1   Symbols:   Protein of unknown function (DJF3741)   chr5:17639975-17642848 REVERSE LENGTH=836                              | 764  | 836  | 0         | 109.4 | 75.7 | 82.5 |
| Rsa1.0_00662.1.g17717.t1 | ref XP_002865397.1  chlorophyll-chlorophyllido hydrolase 2 [Arabidopsis lyrata subsp. lyrata]   gi 297311232 gb EFH41656.1  chlorophyll-chlorophyllido hydrolase 2 [Arabidopsis lyrata subsp. lyrata]                                                                                                                                                                     | 308  | 318  | 1.00E-138 | 103.2 | 79.5 | 87.0 | chlorophyll-chlorophyllido hydrolase 2        | gbpln | Arabidopsis lyrata   | AT5G43860.1   Symbols: ATCLH2, CLH2   chlorophyllase 2   chr5:17630492-17632184 FORWARD LENGTH=318                                      | 308  | 318  | 1.00E-140 | 103.2 | 78.9 | 86.7 |
| Rsa1.0_00662.1.g17718.t1 | gb AAM63708.1  submergence induced protein 2A [Arabidopsis thaliana]                                                                                                                                                                                                                                                                                                      | 285  | 187  | 2.00E-90  | 65.6  | 55.1 | 57.5 | submergence induced protein 2A                | gbpln | Arabidopsis thaliana | AT5G43850.1   Symbols: ATARD4, ARD4   RmlC-like cupins superfamily protein   chr5:17627364-17629122 REVERSE LENGTH=187                  | 285  | 187  | 1.00E-92  | 65.6  | 54.7 | 57.9 |
| Rsa1.0_00663.1.g17719.t1 | #                                                                                                                                                                                                                                                                                                                                                                         | #    | #    | #         | #     | #    | -    | ----                                          | ----  | #                    | #                                                                                                                                       | #    | #    | #         | #     | #    |      |

|                          |                                                                                                                                                                                                                                                                                                                                                                                                                                                                                                                                                                                                                         |      |      |           |       |      |      |                                                     |       |                      |                                                                                                                                                                                                                                                                                                                                                                          |      |      |           |       |      |      |
|--------------------------|-------------------------------------------------------------------------------------------------------------------------------------------------------------------------------------------------------------------------------------------------------------------------------------------------------------------------------------------------------------------------------------------------------------------------------------------------------------------------------------------------------------------------------------------------------------------------------------------------------------------------|------|------|-----------|-------|------|------|-----------------------------------------------------|-------|----------------------|--------------------------------------------------------------------------------------------------------------------------------------------------------------------------------------------------------------------------------------------------------------------------------------------------------------------------------------------------------------------------|------|------|-----------|-------|------|------|
| Rsa1.0_00663.1.g17720.t1 | gb AAG10817.1 AC011808.5 Putative retroelement polyprotein [Arabidopsis thaliana]                                                                                                                                                                                                                                                                                                                                                                                                                                                                                                                                       | 1461 | 1413 | 0         | 96.7  | 61.3 | 72.7 | Putative retroelement polyprotein                   | gbpln | Arabidopsis thaliana | AT4G23160.1   Symbols: CRK8   cysteine-rich RLK (RECEPTOR-like protein kinase) 8   chr4:12129485-12134086 FORWARD LENGTH=1262                                                                                                                                                                                                                                            | 1461 | 1262 | 1.00E-173 | 86.4  | 20.4 | 25.9 |
| Rsa1.0_00663.1.g17721.t2 | ref NP_567941.1  oxidoreductase, 2OG-Fe(II) oxygenase family protein [Arabidopsis thaliana]<br>gi 17381226 gb AAL36425.1  unknown protein [Arabidopsis thaliana]<br>gi 20465827 gb AAM20018.1  unknown protein [Arabidopsis thaliana]<br>gi 21592377 gb AAM64328.1  putative dioxygenase [Arabidopsis thaliana]<br>gi 332660892 gb AEE86292.1  oxidoreductase, 2OG-Fe(II) oxygenase family protein [Arabidopsis thaliana]                                                                                                                                                                                               | 299  | 288  | 1.00E-154 | 96.3  | 86.6 | 93.3 | oxidoreductase, 2OG-Fe(II) oxygenase family protein | gbpln | Arabidopsis thaliana | AT4G33910.1   Symbols:   2-oxoglutarate (2OG) and Fe(II)-dependent oxygenase superfamily protein   chr4:16256943-16258614 REVERSE LENGTH=288                                                                                                                                                                                                                             | 299  | 288  | 1.00E-156 | 96.3  | 86.6 | 93.3 |
| Rsa1.0_00663.1.g17722.t1 | dbj BAB09815.1  non-LTR retroelement reverse transcriptase-like [Arabidopsis thaliana]                                                                                                                                                                                                                                                                                                                                                                                                                                                                                                                                  | 337  | 676  | 1.00E-110 | 200.6 | 55.5 | 72.4 | non-LTR retroelement reverse transcriptase-like     | gbpln | Arabidopsis thaliana | AT5G42905.1   Symbols:   Polynucleotidyl transferase, ribonuclease H-like superfamily protein   chr5:17201414-17202323 REVERSE LENGTH=258                                                                                                                                                                                                                                | 337  | 258  | 5.00E-71  | 76.6  | 39.2 | 50.1 |
| Rsa1.0_00663.1.g17723.t1 | gb AAK62371.1 AF386926.1 Unknown protein [Arabidopsis thaliana]                                                                                                                                                                                                                                                                                                                                                                                                                                                                                                                                                         | 583  | 587  | 0         | 100.7 | 91.3 | 96.2 | Unknown protein                                     | gbpln | Arabidopsis thaliana | AT4G34030.1   Symbols: MCCB   3-methylcrotonyl-CoA carboxylase   chr4:16301298-16303949 FORWARD LENGTH=587                                                                                                                                                                                                                                                               | 583  | 587  | 0         | 100.7 | 91.4 | 96.4 |
| Rsa1.0_00663.1.g17724.t1 | gb ABE41833.1  caffeoyl-CoA 3-O-methyltransferase [Brassica rapa subsp. pekinensis]                                                                                                                                                                                                                                                                                                                                                                                                                                                                                                                                     | 258  | 258  | 1.00E-147 | 100.0 | 98.4 | 98.8 | caffeoyl-CoA 3-O-methyltransferase                  | gbpln | Brassica rapa        | AT4G34050.1   Symbols: CCoAOMT1   S-adenosyl-L-methionine-dependent methyltransferases superfamily protein   chr4:16310844-16311973 FORWARD LENGTH=259                                                                                                                                                                                                                   | 258  | 259  | 1.00E-141 | 100.4 | 93.0 | 94.2 |
| Rsa1.0_00663.1.g17725.t1 | ref XP_002869176.1  protein binding protein [Arabidopsis lyrata subsp. lyrata] gi 297315012 gb EFH45435.1  protein binding protein [Arabidopsis lyrata subsp. lyrata]                                                                                                                                                                                                                                                                                                                                                                                                                                                   | 1060 | 1108 | 0         | 104.5 | 92.3 | 95.4 | protein binding protein                             | gbpln | Arabidopsis lyrata   | AT4G34100.2   Symbols:   RING/U-box superfamily protein   chr4:16330590-16334864 FORWARD LENGTH=1107                                                                                                                                                                                                                                                                     | 1060 | 1107 | 0         | 104.4 | 91.4 | 95.0 |
| Rsa1.0_00663.1.g17726.t1 | ref XP_002867144.1  hypothetical protein ARALYDRAFT_491284 [Arabidopsis lyrata subsp. lyrata] gi 297312980 gb EFH43403.1  hypothetical protein ARALYDRAFT_491284 [Arabidopsis lyrata subsp. lyrata]                                                                                                                                                                                                                                                                                                                                                                                                                     | 257  | 326  | 2.00E-55  | 126.8 | 62.3 | 73.5 | hypothetical protein ARALYDRAFT_491284              | gbpln | Arabidopsis lyrata   | AT4G33930.1   Symbols:   Cupredoxin superfamily protein   chr4:16264389-16265420 REVERSE LENGTH=343                                                                                                                                                                                                                                                                      | 257  | 343  | 6.00E-50  | 133.5 | 38.1 | 42.8 |
| Rsa1.0_00663.1.g17727.t1 | ref NP_001119113.1  RING/U-box domain-containing protein [Arabidopsis thaliana] gi 332660924 gb AEE86324.1  RING/U-box domain-containing protein [Arabidopsis thaliana]                                                                                                                                                                                                                                                                                                                                                                                                                                                 | 833  | 1107 | 0         | 132.9 | 52.5 | 59.5 | RING/U-box domain-containing protein                | gbpln | Arabidopsis thaliana | AT4G34100.2   Symbols:   RING/U-box superfamily protein   chr4:16330590-16334864 FORWARD LENGTH=1107                                                                                                                                                                                                                                                                     | 833  | 1107 | 0         | 132.9 | 52.5 | 59.5 |
| Rsa1.0_00663.1.g17728.t1 | ref NP_195137.5  Polyadenylate-binding protein 2 [Arabidopsis thaliana] gi 1171978 sp P4273.1 PABP2_ARATH RecName: Full=Polyadenylate-binding protein 2; Short=PABP-2; Short=Poly(A)-binding protein 2 gi 304109 gb AA61780.1  poly(A)-binding protein [Arabidopsis thaliana] gi 2911051 emb CAA17561.1  poly(A)-binding protein [Arabidopsis thaliana] gi 7270360 emb CAB80129.1  poly(A)-binding protein [Arabidopsis thaliana] gi 26983870 gb AAN86187.1  putative polyadenylate-binding protein 2 (PABP2) [Arabidopsis thaliana] gi 332660925 gb AEE86325.1  Polyadenylate-binding protein 2 [Arabidopsis thaliana] | 620  | 629  | 0         | 101.5 | 88.4 | 93.2 | Polyadenylate-binding protein 2                     | gbpln | Arabidopsis thaliana | AT4G34110.1   Symbols: PAB2, PABP2, ATPAB2   poly(A) binding protein 2   chr4:16336732-16339892 FORWARD LENGTH=629                                                                                                                                                                                                                                                       | 620  | 629  | 0         | 101.5 | 88.4 | 93.2 |
| Rsa1.0_00663.1.g17729.t1 | ref XP_002871498.1  hypothetical protein ARALYDRAFT_909147 [Arabidopsis lyrata subsp. lyrata] gi 297317335 gb EFH47757.1  hypothetical protein ARALYDRAFT_909147 [Arabidopsis lyrata subsp. lyrata]                                                                                                                                                                                                                                                                                                                                                                                                                     | 166  | 146  | 9.00E-20  | 88.0  | 42.2 | 54.8 | hypothetical protein ARALYDRAFT_909147              | gbpln | Arabidopsis lyrata   | AT5G11760.1   Symbols:   unknown protein; CONTAINS InterPro DOMAIN/s. Protein of unknown function DUF1764, eukaryotic (InterPro:IPR013885); Has 1807 Blast hits to 1807 proteins in 277 species: Archae - 0; Bacteria - 0; Metazoa - 736; Fungi - 347; Plants - 385; Viruses - 0; Other Eukaryotes - 339 (source: NCBI BLINK).   chr5:3789754-3790299 FORWARD LENGTH=181 | 166  | 181  | 1.00E-17  | 109.0 | 39.8 | 54.2 |
| Rsa1.0_00663.1.g17730.t1 | ref XP_002885623.1  pentatricopeptide repeat-containing protein [Arabidopsis lyrata subsp. lyrata] gi 297331463 gb EFH61882.1  pentatricopeptide repeat-containing protein [Arabidopsis lyrata subsp. lyrata]                                                                                                                                                                                                                                                                                                                                                                                                           | 854  | 624  | 0         | 73.1  | 61.6 | 66.0 | pentatricopeptide repeat-containing protein         | gbpln | Arabidopsis lyrata   | AT3G24000.1   Symbols:   Tetratricopeptide repeat (TPR)-like superfamily protein   chr3:8672774-8674881 FORWARD LENGTH=665                                                                                                                                                                                                                                               | 854  | 665  | 0         | 77.9  | 60.8 | 65.6 |

|                          |                                                                                                                                                                                                                                                                                                                                                                                                                                                                                                   |     |      |           |       |      |      |                                                                   |       |                      |                                                                                                                                   |     |     |           |       |      |      |
|--------------------------|---------------------------------------------------------------------------------------------------------------------------------------------------------------------------------------------------------------------------------------------------------------------------------------------------------------------------------------------------------------------------------------------------------------------------------------------------------------------------------------------------|-----|------|-----------|-------|------|------|-------------------------------------------------------------------|-------|----------------------|-----------------------------------------------------------------------------------------------------------------------------------|-----|-----|-----------|-------|------|------|
| Rsa1.0_00663.1.g17731.t1 | refXP_002867135.1  predicted protein [Arabidopsis lyrata subsp. lyrata] gi 297312971 gb EFH43394.1  predicted protein [Arabidopsis lyrata subsp. lyrata]                                                                                                                                                                                                                                                                                                                                          | 480 | 482  | 0         | 100.4 | 83.3 | 91.3 | predicted protein                                                 | gbpln | Arabidopsis lyrata   | AT4G34131.1   Symbols: UGT73B3   UDP-glucosyl transferase 73B3   chr4:16343268-16344713 REVERSE LENGTH=481                        | 480 | 481 | 0         | 100.2 | 81.0 | 89.2 |
| Rsa1.0_00663.1.g17732.t1 | refXP_002867135.1  predicted protein [Arabidopsis lyrata subsp. lyrata] gi 297312971 gb EFH43394.1  predicted protein [Arabidopsis lyrata subsp. lyrata]                                                                                                                                                                                                                                                                                                                                          | 482 | 482  | 0         | 100.0 | 83.4 | 90.5 | predicted protein                                                 | gbpln | Arabidopsis lyrata   | AT4G34131.1   Symbols: UGT73B3   UDP-glucosyl transferase 73B3   chr4:16343268-16344713 REVERSE LENGTH=481                        | 482 | 481 | 0         | 99.8  | 81.5 | 88.8 |
| Rsa1.0_00663.1.g17733.t1 | refXP_002867133.1  UDP-glucosyl transferase 73B1 [Arabidopsis lyrata subsp. lyrata] gi 297312969 gb EFH43392.1  UDP-glucosyl transferase 73B1 [Arabidopsis lyrata subsp. lyrata]                                                                                                                                                                                                                                                                                                                  | 490 | 488  | 0         | 99.6  | 82.4 | 91.2 | UDP-glucosyl transferase 73B1                                     | gbpln | Arabidopsis lyrata   | AT4G34138.1   Symbols: UGT73B1   UDP-glucosyl transferase 73B1   chr4:16348267-16349858 REVERSE LENGTH=488                        | 490 | 488 | 0         | 99.6  | 80.8 | 91.0 |
| Rsa1.0_00663.1.g17734.t1 | emb CAB39638.1  RNA-directed DNA polymerase-like protein [Arabidopsis thaliana] gi 7267666 emb CAB78094.1  RNA-directed DNA polymerase-like protein [Arabidopsis thaliana]                                                                                                                                                                                                                                                                                                                        | 475 | 1274 | 6.00E-76  | 268.2 | 36.4 | 52.8 | RNA-directed DNA polymerase-like protein                          | gbpln | Arabidopsis thaliana | AT3G09510.1   Symbols:   Ribonuclease H-like superfamily protein   chr3:2921804-2923258 FORWARD LENGTH=484                        | 475 | 484 | 6.00E-44  | 101.9 | 27.2 | 44.0 |
| Rsa1.0_00663.1.g17735.t1 | refXP_002869171.1  hypothetical protein ARALYDRAFT_912986 [Arabidopsis lyrata subsp. lyrata] gi 297315007 gb EFH45430.1  hypothetical protein ARALYDRAFT_912986 [Arabidopsis lyrata subsp. lyrata]                                                                                                                                                                                                                                                                                                | 229 | 248  | 6.00E-80  | 108.3 | 66.4 | 71.6 | hypothetical protein ARALYDRAFT_912986                            | gbpln | Arabidopsis lyrata   | AT4G34150.1   Symbols:   Calcium-dependent lipid-binding (CaLB domain) family protein   chr4:16355035-16356955 FORWARD LENGTH=247 | 229 | 247 | 3.00E-77  | 107.9 | 62.9 | 69.0 |
| Rsa1.0_00663.1.g17736.t2 | refNP_195142.1  cyclin-D3-1 [Arabidopsis thaliana] gi 59802919 sp P42753.3 CCD31_ARATH RecName: Full=Cyclin-D3-1; AltName: Full=Cyclin-delta-3; Short=Cyclin-d3; D3-1; Short=CycD3.1 gi 2911046 emb CAA17556.1  cyclin delta-3 [Arabidopsis thaliana] gi 7270365 emb CAB80133.1  cyclin delta-3 [Arabidopsis thaliana] gi 62320771 dbj BAD95437.1  cyclin delta-3 [Arabidopsis thaliana] gi 332660935 gb AEE86335.1  cyclin-D3-1 [Arabidopsis thaliana]                                           | 431 | 376  | 1.00E-155 | 87.2  | 70.5 | 78.2 | cyclin-D3-1                                                       | gbpln | Arabidopsis thaliana | AT4G34160.1   Symbols: CYCD3.1, CYCD3   CYCLIN D3.1   chr4:16357903-16359304 FORWARD LENGTH=376                                   | 431 | 376 | 1.00E-158 | 87.2  | 70.5 | 78.2 |
| Rsa1.0_00664.1.g17737.t1 | refXP_003527486.1  PREDICTED: RING-box protein 1a-like [Glycine max] gi 83701143 gb ABC114.1  RING-box protein [Arachis hypogaea]                                                                                                                                                                                                                                                                                                                                                                 | 116 | 116  | 7.00E-57  | 100.0 | 90.5 | 95.7 | PREDICTED: RING-box protein 1a-like                               | gbpln | Arachis hypogaea     | AT5G20570.1   Symbols: ROC1, RBX1, HRT1, ATRBX1   RING-box 1   chr5:6956905-6958221 REVERSE LENGTH=118                            | 116 | 118 | 9.00E-57  | 101.7 | 90.5 | 96.6 |
| Rsa1.0_00664.1.g17738.t1 | refNP_197534.1  beta-1,3-glucanase 5 [Arabidopsis thaliana] gi 2808439 emb CA56135.1  bg5 [Arabidopsis thaliana] gi 332005450 gb AED92833.1  beta-1,3-glucanase 5 [Arabidopsis thaliana]                                                                                                                                                                                                                                                                                                          | 287 | 354  | 1.00E-115 | 123.3 | 74.9 | 84.7 | beta-1,3-glucanase 5                                              | gbpln | Arabidopsis thaliana | AT5G20340.1   Symbols: BG5   beta-1,3-glucanase 5   chr5:6874787-6875851 FORWARD LENGTH=354                                       | 287 | 354 | 1.00E-118 | 123.3 | 74.9 | 84.7 |
| Rsa1.0_00664.1.g17739.t1 | gb EOA20662.1  hypothetical protein CARUB_v10000976mg [Capsella rubella]                                                                                                                                                                                                                                                                                                                                                                                                                          | 375 | 440  | 1.00E-176 | 117.3 | 88.0 | 92.8 | hypothetical protein CARUB_v10000976mg                            | gbpln | Capsella rubella     | AT5G20540.1   Symbols: ATBRXL4, BRX-LIKE4, BRXL4   BREVIS RADIX-like 4   chr5:6947943-6951760 FORWARD LENGTH=384                  | 375 | 384 | 1.00E-177 | 102.4 | 88.3 | 92.3 |
| Rsa1.0_00664.1.g17740.t1 | refNP_568395.1  protein wavy growth 2 / esterase-lipase domain-containing protein [Arabidopsis thaliana] gi 19347881 gb AAL85997.1  unknown protein [Arabidopsis thaliana] gi 21280815 gb AAM45057.1  unknown protein [Arabidopsis thaliana] gi 21593162 gb AAM65111.1  unknown [Arabidopsis thaliana] gi 57157671 dbj BAD83800.1  Bem46-like protein [Arabidopsis thaliana] gi 332005472 gb AED92855.1  protein wavy growth 2 / esterase-lipase domain-containing protein [Arabidopsis thaliana] | 318 | 308  | 1.00E-153 | 96.9  | 83.0 | 89.3 | protein wavy growth 2 / esterase-lipase domain-containing protein | gbpln | Arabidopsis thaliana | AT5G20520.1   Symbols: WAV2   alpha/beta-Hydrolases superfamily protein   chr5:6943536-6946315 REVERSE LENGTH=308                 | 318 | 308 | 1.00E-156 | 96.9  | 83.0 | 89.3 |
| Rsa1.0_00664.1.g17741.t1 | gb EOA22161.1  hypothetical protein CARUB_v10002729mg [Capsella rubella]                                                                                                                                                                                                                                                                                                                                                                                                                          | 298 | 267  | 1.00E-103 | 89.6  | 74.2 | 80.2 | hypothetical protein CARUB_v10002729mg                            | gbpln | Capsella rubella     | AT5G20510.1   Symbols: AL5   alfin-like 5   chr5:6939991-6942846 REVERSE LENGTH=260                                               | 298 | 260 | 1.00E-104 | 87.2  | 70.5 | 78.2 |

|                          |                                                                                                                                                                                                                                                                                                                                                                                                                                                                                                                                                                                                                                                                                                                                                                                                                                     |      |      |           |       |      |      |                                        |       |                      |                                                                                                                                     |      |      |           |       |      |      |
|--------------------------|-------------------------------------------------------------------------------------------------------------------------------------------------------------------------------------------------------------------------------------------------------------------------------------------------------------------------------------------------------------------------------------------------------------------------------------------------------------------------------------------------------------------------------------------------------------------------------------------------------------------------------------------------------------------------------------------------------------------------------------------------------------------------------------------------------------------------------------|------|------|-----------|-------|------|------|----------------------------------------|-------|----------------------|-------------------------------------------------------------------------------------------------------------------------------------|------|------|-----------|-------|------|------|
| Rsa1.0_00664.1.g17742.t1 | refXP_002883118.1   hypothetical protein ARALYDRAFT_898177 [Arabidopsis lyrata subsp. lyrata] gi 297328958 gb EFH59377.1   hypothetical protein ARALYDRAFT_898177 [Arabidopsis lyrata subsp. lyrata] ref NP_197550.1  glutaredoxin-C4 [Arabidopsis thaliana] gi 119370637 sp Q8LFC6.2 GRXC4_ARA TH RecName: Full=Glutaredoxin-C4; Short=AtGrxC4 gi 6735386 emb CAB69043.1  glutaredoxin [Arabidopsis thaliana] gi 25082927 gb AA72016.1  glutaredoxin [Arabidopsis thaliana] gi 25082941 gb AA72019.1  glutaredoxin [Arabidopsis thaliana] gi 98960865 gb ABF58916.1  At5g20500 [Arabidopsis thaliana] gi 332005470 gb AED92853.1  glutaredoxin-C4 [Arabidopsis thaliana] ref XP_002873998.1  predicted protein [Arabidopsis lyrata subsp. lyrata] gi 297319835 gb EFH50257.1  predicted protein [Arabidopsis lyrata subsp. lyrata] | 118  | 536  | 5.00E-34  | 454.2 | 63.6 | 66.1 | hypothetical protein ARALYDRAFT_898177 | gbpln | Arabidopsis lyrata   | AT3G18190.1   Symbols:   TCP-1/cpn60 chaperonin family protein   chr3:6232226-6233836 FORWARD LENGTH=536                            | 118  | 536  | 8.00E-37  | 454.2 | 63.6 | 66.1 |
| Rsa1.0_00664.1.g17743.t1 | glutaredoxin [Arabidopsis thaliana] gi 25082927 gb AA72016.1  glutaredoxin [Arabidopsis thaliana] gi 25082941 gb AA72019.1  glutaredoxin [Arabidopsis thaliana] gi 98960865 gb ABF58916.1  At5g20500 [Arabidopsis thaliana] gi 332005470 gb AED92853.1  glutaredoxin-C4 [Arabidopsis thaliana] ref XP_002873998.1  predicted protein [Arabidopsis lyrata subsp. lyrata] gi 297319835 gb EFH50257.1  predicted protein [Arabidopsis lyrata subsp. lyrata]                                                                                                                                                                                                                                                                                                                                                                            | 281  | 135  | 7.00E-32  | 48.0  | 23.1 | 26.7 | glutaredoxin-C4                        | gbpln | Arabidopsis thaliana | AT5G20500.1   Symbols:   Glutaredoxin family protein   chr5:6938652-6939665 FORWARD LENGTH=135                                      | 281  | 135  | 2.00E-34  | 48.0  | 23.1 | 26.7 |
| Rsa1.0_00664.1.g17744.t1 | ref XP_002873998.1  predicted protein [Arabidopsis lyrata subsp. lyrata] gi 297319835 gb EFH50257.1  predicted protein [Arabidopsis lyrata subsp. lyrata]                                                                                                                                                                                                                                                                                                                                                                                                                                                                                                                                                                                                                                                                           | 1530 | 1539 | 0         | 100.6 | 94.8 | 96.6 | predicted protein                      | gbpln | Arabidopsis lyrata   | AT5G20490.1   Symbols:   XIK, ATXIK, XI-17   Myosin family protein with Dil domain   chr5:6927064-6936825 REVERSE LENGTH=1545       | 1530 | 1545 | 0         | 101.0 | 94.6 | 96.4 |
| Rsa1.0_00664.1.g17745.t1 | gb EMJ03759.1  hypothetical protein PRUPE_ppa011299mg [Prunus persica]                                                                                                                                                                                                                                                                                                                                                                                                                                                                                                                                                                                                                                                                                                                                                              | 222  | 216  | 9.00E-81  | 97.3  | 67.1 | 79.3 | hypothetical protein PRUPE_ppa011299mg | gbpln | Prunus persica       | AT5G45550.1   Symbols:   Mob1/phocein family protein   chr5:18462284-18464840 FORWARD LENGTH=215                                    | 222  | 215  | 2.00E-79  | 96.8  | 64.4 | 76.6 |
| Rsa1.0_00664.1.g17746.t1 | gb EOA20550.1  hypothetical protein CARUB_v10000862mg [Capsella rubella]                                                                                                                                                                                                                                                                                                                                                                                                                                                                                                                                                                                                                                                                                                                                                            | 473  | 476  | 0         | 100.6 | 91.3 | 96.6 | hypothetical protein CARUB_v10000862mg | gbpln | Capsella rubella     | AT5G20410.1   Symbols:   MGD2, ATMGD2   monogalactosyldiacylglycerol synthase 2   chr5:6896765-6898581 FORWARD LENGTH=468           | 473  | 468  | 0         | 98.9  | 88.8 | 94.1 |
| Rsa1.0_00664.1.g17747.t2 | ref XP_002873995.1  hypothetical protein ARALYDRAFT_910078 [Arabidopsis lyrata subsp. lyrata] gi 297319832 gb EFH50254.1   hypothetical protein ARALYDRAFT_910078 [Arabidopsis lyrata subsp. lyrata] ref XP_002873994.1  hypothetical protein ARALYDRAFT_910077 [Arabidopsis lyrata subsp. lyrata] gi 297319831 gb EFH50253.1   hypothetical protein ARALYDRAFT_910077 [Arabidopsis lyrata subsp. lyrata]                                                                                                                                                                                                                                                                                                                                                                                                                           | 549  | 517  | 0         | 94.2  | 79.8 | 84.0 | hypothetical protein ARALYDRAFT_910078 | gbpln | Arabidopsis lyrata   | AT5G20380.1   Symbols:   PHT4.5   phosphate transporter 4.5   chr5:6887936-6892358 REVERSE LENGTH=517                               | 549  | 517  | 0         | 94.2  | 80.0 | 83.8 |
| Rsa1.0_00664.1.g17748.t1 | ref XP_002873994.1  hypothetical protein ARALYDRAFT_910077 [Arabidopsis lyrata subsp. lyrata] gi 297319831 gb EFH50253.1   hypothetical protein ARALYDRAFT_910077 [Arabidopsis lyrata subsp. lyrata]                                                                                                                                                                                                                                                                                                                                                                                                                                                                                                                                                                                                                                | 166  | 169  | 5.00E-43  | 101.8 | 68.1 | 75.9 | hypothetical protein ARALYDRAFT_910077 | gbpln | Arabidopsis lyrata   | AT5G20370.1   Symbols:   serine-rich protein-related   chr5:6886931-6887458 REVERSE LENGTH=175                                      | 166  | 175  | 3.00E-38  | 105.4 | 65.7 | 75.3 |
| Rsa1.0_00664.1.g17749.t1 | gb EOA20179.1  hypothetical protein CARUB_v10000476mg [Capsella rubella]                                                                                                                                                                                                                                                                                                                                                                                                                                                                                                                                                                                                                                                                                                                                                            | 578  | 620  | 0         | 107.3 | 93.9 | 97.4 | hypothetical protein CARUB_v10000476mg | gbpln | Capsella rubella     | AT5G20350.1   Symbols:   TIP1   Ankyrin repeat family protein with DHC zinc finger domain   chr5:6876772-6881102 FORWARD LENGTH=620 | 578  | 620  | 0         | 107.3 | 92.9 | 96.4 |
| Rsa1.0_00664.1.g17750.t1 | gb AAK43485.1 AC084807_10 polyprotein, putative [Arabidopsis thaliana] gi 225898008 db BAH300336.1   hypothetical protein [Arabidopsis thaliana]                                                                                                                                                                                                                                                                                                                                                                                                                                                                                                                                                                                                                                                                                    | 1578 | 1459 | 0         | 92.5  | 48.9 | 62.6 | polyprotein, putative                  | gbpln | Arabidopsis thaliana | AT5G20340.1   Symbols:   BG5   beta-1,3-glucanase 5   chr5:6874787-6875851 FORWARD LENGTH=354                                       | 1578 | 354  | 1.00E-124 | 22.4  | 13.4 | 14.6 |
| Rsa1.0_00664.1.g17751.t1 | ref XP_002871934.1  beta-1,3-glucanase bg4 [Arabidopsis lyrata subsp. lyrata] gi 297317771 gb EFH48193.1  beta-1,3-glucanase bg4 [Arabidopsis lyrata subsp. lyrata]                                                                                                                                                                                                                                                                                                                                                                                                                                                                                                                                                                                                                                                                 | 129  | 345  | 1.00E-23  | 267.4 | 41.1 | 49.6 | beta-1,3-glucanase bg4                 | gbpln | Arabidopsis lyrata   | AT5G20330.1   Symbols:   BETAG4   beta-1,3-glucanase 4   chr5:6871620-6872657 FORWARD LENGTH=345                                    | 129  | 345  | 2.00E-25  | 267.4 | 40.3 | 52.7 |
| Rsa1.0_00665.1.g17752.t1 | #                                                                                                                                                                                                                                                                                                                                                                                                                                                                                                                                                                                                                                                                                                                                                                                                                                   | #    | #    | #         | #     | #    | -    | ----                                   | ----  | #                    | #                                                                                                                                   | #    | #    | #         | #     | #    |      |
| Rsa1.0_00665.1.g17753.t1 | gb ABW81060.1  GagPol3 [Arabidopsis lyrata subsp. lyrata]                                                                                                                                                                                                                                                                                                                                                                                                                                                                                                                                                                                                                                                                                                                                                                           | 612  | 1103 | 4.00E-66  | 180.2 | 20.1 | 26.0 | GagPol3                                | gbpln | Arabidopsis lyrata   | #                                                                                                                                   | #    | #    | #         | #     | #    |      |
| Rsa1.0_00665.1.g17754.t1 | ref XP_002891341.1  hypothetical protein ARALYDRAFT_473874 [Arabidopsis lyrata subsp. lyrata] gi 297337183 gb EFH67600.1   hypothetical protein ARALYDRAFT_473874 [Arabidopsis lyrata subsp. lyrata]                                                                                                                                                                                                                                                                                                                                                                                                                                                                                                                                                                                                                                | 283  | 277  | 1.00E-115 | 97.9  | 75.6 | 78.4 | hypothetical protein ARALYDRAFT_473874 | gbpln | Arabidopsis lyrata   | AT1G47250.1   Symbols:   PAF2   20S proteasome alpha subunit F2   chr1:17319220-17320900 FORWARD LENGTH=277                         | 283  | 277  | 1.00E-116 | 97.9  | 74.6 | 77.7 |
| Rsa1.0_00665.1.g17755.t2 | gb AAF67379.1  Hypothetical protein T15F17.k [Arabidopsis thaliana]                                                                                                                                                                                                                                                                                                                                                                                                                                                                                                                                                                                                                                                                                                                                                                 | 308  | 341  | 1.00E-91  | 110.7 | 61.0 | 73.7 | Hypothetical protein T15F17.k          | gbpln | Arabidopsis thaliana | #                                                                                                                                   | #    | #    | #         | #     | #    |      |
| Rsa1.0_00665.1.g17756.t1 | gb ABD65073.1  hypothetical protein 27.t00059 [Brassica oleracea]                                                                                                                                                                                                                                                                                                                                                                                                                                                                                                                                                                                                                                                                                                                                                                   | 307  | 341  | 1.00E-19  | 111.1 | 20.5 | 24.1 | hypothetical protein 27.t00059         | gbpln | Brassica oleracea    | #                                                                                                                                   | #    | #    | #         | #     | #    |      |

|                           |                                                                                                                                                                                                                                                                                                                        |     |      |           |       |      |      |                                        |       |                      |                                                                                                                                                                                                                                                                                                                                                                                                                                                                                                                                    |     |     |           |       |      |      |
|---------------------------|------------------------------------------------------------------------------------------------------------------------------------------------------------------------------------------------------------------------------------------------------------------------------------------------------------------------|-----|------|-----------|-------|------|------|----------------------------------------|-------|----------------------|------------------------------------------------------------------------------------------------------------------------------------------------------------------------------------------------------------------------------------------------------------------------------------------------------------------------------------------------------------------------------------------------------------------------------------------------------------------------------------------------------------------------------------|-----|-----|-----------|-------|------|------|
| Rsa1.0_00665.1.g17757.t2  | gb AAD20646.1  putative TNP2-like transposon protein [Arabidopsis thaliana]                                                                                                                                                                                                                                            | 393 | 1040 | 2.00E-90  | 264.6 | 45.3 | 55.2 | putative TNP2-like transposon protein  | gbpln | Arabidopsis thaliana | #                                                                                                                                                                                                                                                                                                                                                                                                                                                                                                                                  | #   | #   | #         | #     | #    | #    |
| Rsa1.0_00665.1.g17758.t1  | ref XP_002865486.1  hypothetical protein ARALYDRAFT_331125 [Arabidopsis lyrata subsp. lyrata] gi 297311321 gb EFH41745.1  hypothetical protein ARALYDRAFT_331125 [Arabidopsis lyrata subsp. lyrata]                                                                                                                    | 344 | 348  | 1.00E-175 | 101.2 | 85.5 | 92.4 | hypothetical protein ARALYDRAFT_331125 | gbpln | Arabidopsis lyrata   | AT5G42760.1   Symbols:   Leucine carboxyl methyltransferase   chr5:17148953-17150105 FORWARD LENGTH=348                                                                                                                                                                                                                                                                                                                                                                                                                            | 344 | 348 | 1.00E-177 | 101.2 | 85.8 | 91.9 |
| Rsa1.0_00665.1.g17759.t1  | dbj BAA97083.1  unnamed protein product [Arabidopsis thaliana]                                                                                                                                                                                                                                                         | 186 | 583  | 3.00E-17  | 313.4 | 32.8 | 47.3 | unnamed protein product                | gbpln | Arabidopsis thaliana | #                                                                                                                                                                                                                                                                                                                                                                                                                                                                                                                                  | #   | #   | #         | #     | #    | #    |
| Rsa1.0_00665.1.g17760.t12 | dbj BAB02259.1  retroelement pol polyprotein-like [Arabidopsis thaliana]                                                                                                                                                                                                                                               | 969 | 777  | 7.00E-31  | 80.2  | 15.0 | 24.8 | retroelement pol polyprotein-like      | gbpln | Arabidopsis thaliana | #                                                                                                                                                                                                                                                                                                                                                                                                                                                                                                                                  | #   | #   | #         | #     | #    | #    |
| Rsa1.0_00665.1.g17761.t1  | #                                                                                                                                                                                                                                                                                                                      | #   | #    | #         | #     | #    | #    | -                                      | ----  | ----                 | #                                                                                                                                                                                                                                                                                                                                                                                                                                                                                                                                  | #   | #   | #         | #     | #    | #    |
| Rsa1.0_00665.1.g17762.t1  | ref XP_002865493.1  glycosyl hydrolase family 17 protein [Arabidopsis lyrata subsp. lyrata] gi 297311328 gb EFH41752.1  glycosyl hydrolase family 17 protein [Arabidopsis lyrata subsp. lyrata]                                                                                                                        | 430 | 435  | 0         | 101.2 | 84.7 | 90.2 | glycosyl hydrolase family 17 protein   | gbpln | Arabidopsis lyrata   | AT5G42720.1   Symbols:   Glycosyl hydrolase family 17 protein   chr5:17130535-17132763 FORWARD LENGTH=438                                                                                                                                                                                                                                                                                                                                                                                                                          | 430 | 438 | 0         | 101.9 | 84.2 | 90.2 |
| Rsa1.0_00665.1.g17763.t1  | #                                                                                                                                                                                                                                                                                                                      | #   | #    | #         | #     | #    | #    | -                                      | ----  | ----                 | #                                                                                                                                                                                                                                                                                                                                                                                                                                                                                                                                  | #   | #   | #         | #     | #    | #    |
| Rsa1.0_00666.1.g17764.t1  | #                                                                                                                                                                                                                                                                                                                      | #   | #    | #         | #     | #    | #    | -                                      | ----  | ----                 | #                                                                                                                                                                                                                                                                                                                                                                                                                                                                                                                                  | #   | #   | #         | #     | #    | #    |
| Rsa1.0_00666.1.g17765.t1  | ref XP_002888671.1  hypothetical protein ARALYDRAFT_475977 [Arabidopsis lyrata subsp. lyrata] gi 297334512 gb EFH64930.1  hypothetical protein ARALYDRAFT_475977 [Arabidopsis lyrata subsp. lyrata]                                                                                                                    | 318 | 327  | 4.00E-85  | 102.8 | 64.5 | 74.2 | hypothetical protein ARALYDRAFT_475977 | gbpln | Arabidopsis lyrata   | AT1G68550.2   Symbols:   Integrase-type DNA-binding superfamily protein   chr1:25725810-25726784 REVERSE LENGTH=324                                                                                                                                                                                                                                                                                                                                                                                                                | 318 | 324 | 1.00E-84  | 101.9 | 63.2 | 72.3 |
| Rsa1.0_00666.1.g17766.t1  | ref NP_177020.1  3-ketoacyl-CoA synthase 6 [Arabidopsis thaliana] gi 75315046 sp Q9XF43.1 KCS6_ARATH RecName: Full=3-ketoacyl-CoA synthase 6; Short=KCS-6; AltName: Full=Cuticular protein 1; AltName: Full=Very long-chain fatty acid condensing enzyme 6; Short=VLCFA condensing enzyme 6                            | 497 | 497  | 0         | 100.0 | 94.8 | 97.2 | 3-ketoacyl-CoA synthase 6              | gbpln | Arabidopsis thaliana | AT1G68530.1   Symbols: CUT1, POP1, CER6, G2, KCS6   3-ketoacyl-CoA synthase 6   chr1:25712881-25714733 REVERSE LENGTH=497                                                                                                                                                                                                                                                                                                                                                                                                          | 497 | 497 | 0         | 100.0 | 94.8 | 97.2 |
| Rsa1.0_00666.1.g17767.t1  | gi 5001734 gb AAD37122.1 AF129511_1 very-long-chain fatty acid condensing enzyme CUT1 [Arabidopsis thaliana] gi 12324880 gb AAG52390.1 AC011915_4 very-long-chain fatty acid condensing enzyme (CUT1); 56079-54227 [Arabidopsis thaliana] gi 332196683 gb AEE34804.1  3-ketoacyl-CoA synthase 6 [Arabidopsis thaliana] | 402 | 406  | 1.00E-174 | 101.0 | 80.3 | 88.8 | zinc finger protein CONSTANS-LIKE 6    | gbpln | Arabidopsis thaliana | AT1G68520.1   Symbols:   B-box type zinc finger protein with CCT domain   chr1:25709331-25710749 REVERSE LENGTH=406                                                                                                                                                                                                                                                                                                                                                                                                                | 402 | 406 | 1.00E-176 | 101.0 | 80.3 | 88.8 |
| Rsa1.0_00666.1.g17768.t1  | ref NP_564932.1  zinc finger protein CONSTANS-LIKE 6 [Arabidopsis thaliana] gi 52840167 sp Q8LG76.2 COL6_ARATH RecName: Full=Zinc finger protein CONSTANS-LIKE 6                                                                                                                                                       | #   | #    | #         | #     | #    | #    | -                                      | ----  | ----                 | #                                                                                                                                                                                                                                                                                                                                                                                                                                                                                                                                  | #   | #   | #         | #     | #    | #    |
| Rsa1.0_00666.1.g17769.t1  | gi 15451090 gb AAK96816.1  putative B-box zinc finger protein [Arabidopsis thaliana] gi 20148425 gb AAM10103.1  putative B-box zinc finger protein [Arabidopsis thaliana] gi 332196681 gb AEE34802.1  zinc finger protein CONSTANS-LIKE 6 [Arabidopsis thaliana]                                                       | 176 | 183  | 2.00E-69  | 104.0 | 85.8 | 90.9 | uncharacterized protein                | gbpln | Arabidopsis thaliana | AT1G68490.1   Symbols:   unknown protein; FUNCTIONS IN: molecular_function unknown; INVOLVED IN: biological_process unknown; LOCATED IN: chloroplast; EXPRESSED IN: 22 plant structures; EXPRESSED DURING: 13 growth stages; BEST Arabidopsis thaliana protein match is: unknown protein (TAIR:AT1G13390.2); Has 125 Blast hits to 125 proteins in 18 species: Archae - 0; Bacteria - 0; Metazoa - 0; Fungi - 0; Plants - 125; Viruses - 0; Other Eukaryotes - 0 (source: NCBI BLINK);   chr1:25693926-25694946 FORWARD LENGTH=183 | 176 | 183 | 6.00E-72  | 104.0 | 85.8 | 90.9 |

|                          |                                                                                                                                                                                                                                                                                 |      |      |           |       |      |      |                                              |       |                      |                                                                                                                                                |      |      |           |       |      |      |
|--------------------------|---------------------------------------------------------------------------------------------------------------------------------------------------------------------------------------------------------------------------------------------------------------------------------|------|------|-----------|-------|------|------|----------------------------------------------|-------|----------------------|------------------------------------------------------------------------------------------------------------------------------------------------|------|------|-----------|-------|------|------|
| Rsa1.0_00666.1.g17770.t2 | refXP_002881289.1  hypothetical protein ARALYDRAFT_482302 [Arabidopsis lyrata subsp. lyrata] gi 297327128 gb EFH57548.1                                                                                                                                                         | 157  | 394  | 6.00E-24  | 251.0 | 52.2 | 56.1 | hypothetical protein ARALYDRAFT_482302       | gbpln | Arabidopsis lyrata   | AT2G33560.2   Symbols: BUBR1   BUB1-related (BUB1: budding uninhibited by benzimidazol 1)   chr2:14213810-14215918 REVERSE LENGTH=396          | 157  | 396  | 6.00E-26  | 252.2 | 50.3 | 56.7 |
| Rsa1.0_00666.1.g17771.t1 | dbj BAE43826.1  isopentenyltransferase [Brassica rapa subsp. pekinensis]                                                                                                                                                                                                        | 298  | 348  | 1.00E-142 | 116.8 | 86.2 | 90.3 | isopentenyltransferase                       | gbpln | Brassica rapa        | AT1G68460.1   Symbols: ATIPT1, IPT1   isopentenyltransferase 1   chr1:25668976-25670049 REVERSE LENGTH=357                                     | 298  | 357  | 1.00E-130 | 119.8 | 76.5 | 86.9 |
| Rsa1.0_00667.1.g17772.t1 | gb EOA29659.1  hypothetical protein CARUB_v10015473mg [Capsella rubella]                                                                                                                                                                                                        | 64   | 162  | 1.00E-13  | 253.1 | 64.1 | 70.3 | hypothetical protein CARUB_v10015473mg       | gbpln | Capsella rubella     | AT1G47960.1   Symbols: C/VIF1, ATC/VIF1   cell wall / vacuolar inhibitor of fructosidase 1   chr1:17681954-17683516 REVERSE LENGTH=205         | 64   | 205  | 8.00E-12  | 320.3 | 45.3 | 54.7 |
| Rsa1.0_00667.1.g17773.t1 | gb EOA29659.1  hypothetical protein CARUB_v10015473mg [Capsella rubella]                                                                                                                                                                                                        | 163  | 162  | 3.00E-67  | 99.4  | 77.9 | 84.7 | hypothetical protein CARUB_v10015473mg       | gbpln | Capsella rubella     | AT3G17140.1   Symbols:   Plant invertase/pectin methyltransferase inhibitor superfamily protein   chr3:5846002-5846589 REVERSE LENGTH=112      | 163  | 112  | 3.00E-46  | 68.7  | 50.9 | 56.4 |
| Rsa1.0_00667.1.g17774.t1 | gb AAG51783.1 AC079679.3 reverse transcriptase, putative; 16838-20266 [Arabidopsis thaliana]                                                                                                                                                                                    | 151  | 1142 | 7.00E-26  | 756.3 | 43.7 | 55.6 | reverse transcriptase, putative; 16838-20266 | gbpln | Arabidopsis thaliana | AT4G29090.1   Symbols:   Ribonuclease H-like superfamily protein   chr4:14333528-14335255 FORWARD LENGTH=575                                   | 151  | 575  | 1.00E-11  | 380.8 | 25.8 | 43.0 |
| Rsa1.0_00667.1.g17775.t1 | gb ACJ68115.1  invertase inhibitor-like protein [Brassica napus]                                                                                                                                                                                                                | 172  | 153  | 1.00E-64  | 89.0  | 69.8 | 76.7 | invertase inhibitor-like protein             | gbpln | Brassica napus       | AT3G17152.1   Symbols:   Plant invertase/pectin methyltransferase inhibitor superfamily protein   chr3:5848812-5849544 FORWARD LENGTH=175      | 172  | 175  | 3.00E-56  | 101.7 | 65.1 | 80.2 |
| Rsa1.0_00667.1.g17776.t1 | gb ACJ68115.1  invertase inhibitor-like protein [Brassica napus]                                                                                                                                                                                                                | 172  | 153  | 4.00E-72  | 89.0  | 75.6 | 83.1 | invertase inhibitor-like protein             | gbpln | Brassica napus       | AT3G17152.1   Symbols:   Plant invertase/pectin methyltransferase inhibitor superfamily protein   chr3:5848812-5849544 FORWARD LENGTH=175      | 172  | 175  | 2.00E-55  | 101.7 | 64.0 | 79.7 |
| Rsa1.0_00667.1.g17777.t1 | gb ACJ68115.1  invertase inhibitor-like protein [Brassica napus]                                                                                                                                                                                                                | 152  | 153  | 2.00E-54  | 100.7 | 67.1 | 78.9 | invertase inhibitor-like protein             | gbpln | Brassica napus       | AT3G17152.1   Symbols:   Plant invertase/pectin methyltransferase inhibitor superfamily protein   chr3:5848812-5849544 FORWARD LENGTH=175      | 152  | 175  | 1.00E-50  | 115.1 | 62.5 | 76.3 |
| Rsa1.0_00667.1.g17778.t1 | gb ACJ68115.1  invertase inhibitor-like protein [Brassica napus]                                                                                                                                                                                                                | 171  | 153  | 2.00E-64  | 89.5  | 69.0 | 79.5 | invertase inhibitor-like protein             | gbpln | Brassica napus       | AT3G17152.1   Symbols:   Plant invertase/pectin methyltransferase inhibitor superfamily protein   chr3:5848812-5849544 FORWARD LENGTH=175      | 171  | 175  | 2.00E-55  | 102.3 | 62.0 | 77.2 |
| Rsa1.0_00667.1.g17779.t1 | gb AAM62870.1  unknown [Arabidopsis thaliana]                                                                                                                                                                                                                                   | 301  | 314  | 1.00E-122 | 104.3 | 82.1 | 90.4 | unknown                                      | gbpln | Arabidopsis thaliana | AT3G17170.1   Symbols: RFC3   Translation elongation factor EF1B/ribosomal protein S6 family protein   chr3:5853186-5854853 REVERSE LENGTH=314 | 301  | 314  | 1.00E-124 | 104.3 | 82.1 | 90.7 |
| Rsa1.0_00667.1.g17780.t1 | ref NP_188343.1  protein serine carboxypeptidase-like 33 [Arabidopsis thaliana] gi 334302854 sp Q9LSM9.2 SCP33_ARATH RecName: Full=Serine carboxypeptidase-like 33; Flags: Precursor gi 332642394 gb AEE75915.1  protein serine carboxypeptidase-like 33 [Arabidopsis thaliana] | 474  | 478  | 0         | 100.8 | 87.6 | 94.3 | protein serine carboxypeptidase-like 33      | gbpln | Arabidopsis thaliana | AT3G17180.1   Symbols: scp33   serine carboxypeptidase-like 33   chr3:5855861-5859157 REVERSE LENGTH=478                                       | 474  | 478  | 0         | 100.8 | 87.6 | 94.3 |
| Rsa1.0_00667.1.g17781.t4 | gb EOA15341.1  hypothetical protein CARUB_v10004114mg [Capsella rubella]                                                                                                                                                                                                        | 190  | 864  | 2.00E-50  | 454.7 | 52.6 | 53.7 | hypothetical protein CARUB_v10004114mg       | gbpln | Capsella rubella     | AT4G14330.1   Symbols:   P-loop containing nucleoside triphosphate hydrolases superfamily protein   chr4:8244228-8247286 FORWARD LENGTH=869    | 190  | 869  | 5.00E-52  | 457.4 | 52.1 | 53.2 |
| Rsa1.0_00667.1.g17782.t1 | gb EOA36857.1  hypothetical protein CARUB_v10008803mg [Capsella rubella]                                                                                                                                                                                                        | 609  | 536  | 4.00E-93  | 88.0  | 27.4 | 35.5 | hypothetical protein CARUB_v10008803mg       | gbpln | Capsella rubella     | AT2G07760.1   Symbols:   Zinc knuckle (CCHC-type) family protein   chr2:3584420-3586278 REVERSE LENGTH=530                                     | 609  | 530  | 7.00E-52  | 87.0  | 13.8 | 17.6 |
| Rsa1.0_00667.1.g17783.t1 | ref XP_002883053.1  hypothetical protein ARALYDRAFT_479191 [Arabidopsis lyrata subsp. lyrata] gi 297328893 gb EFH59312.1  hypothetical protein ARALYDRAFT_479191 [Arabidopsis lyrata subsp. lyrata]                                                                             | 1054 | 1029 | 0         | 97.6  | 87.3 | 92.3 | hypothetical protein ARALYDRAFT_479191       | gbpln | Arabidopsis lyrata   | AT3G17205.3   Symbols: UPL6   ubiquitin protein ligase 6   chr3:5873528-5881132 FORWARD LENGTH=1029                                            | 1054 | 1029 | 0         | 97.6  | 86.4 | 92.2 |



|                          |                                                                                                                                                                                                                                                                                                                         |      |      |           |       |      |      |                                        |       |                    |                                                                                                                                                                                        |      |      |           |       |      |      |
|--------------------------|-------------------------------------------------------------------------------------------------------------------------------------------------------------------------------------------------------------------------------------------------------------------------------------------------------------------------|------|------|-----------|-------|------|------|----------------------------------------|-------|--------------------|----------------------------------------------------------------------------------------------------------------------------------------------------------------------------------------|------|------|-----------|-------|------|------|
| Rsa1.0_00667.1.g17784.t1 | pdb 1Q53 A Chain A, Solution Structure Of Hypothetical Arabidopsis Thaliana Protein At3g17210. Center For Eukaryotic Structural Genomics Target 13081 g 159162872 pdb 1Q53 B Chain B, Solution Structure Of Hypothetical Arabidopsis Thaliana Protein At3g17210. Center For Eukaryotic Structural Genomics Target 13081 | 107  | 112  | 4.00E-51  | 104.7 | 91.6 | 97.2 | g 159162872 pdb 1Q53                   | ----  | ----               | AT3G17210.1   Symbols: ATHS1, HS1   heat stable protein 1   chr3:5882318-5882896 FORWARD LENGTH=109                                                                                    | 107  | 109  | 8.00E-54  | 101.9 | 91.6 | 97.2 |
| Rsa1.0_00667.1.g17785.t1 | gb EOA32350.1  hypothetical protein CARUB_v10015617mg [Capsella rubella]                                                                                                                                                                                                                                                | 180  | 173  | 1.00E-42  | 96.1  | 52.8 | 65.6 | hypothetical protein CARUB_v10015617mg | gbpln | Capsella rubella   | AT3G17220.1   Symbols: ATPMEI2, PMEI2   pectin methyltransferase inhibitor 2   chr3:5883328-5883849 REVERSE LENGTH=173                                                                 | 180  | 173  | 2.00E-43  | 96.1  | 51.1 | 65.0 |
| Rsa1.0_00667.1.g17786.t2 | gb EOA29133.1  hypothetical protein CARUB_v10025401mg [Capsella rubella]                                                                                                                                                                                                                                                | 357  | 354  | 6.00E-56  | 99.2  | 41.7 | 59.1 | hypothetical protein CARUB_v10025401mg | gbpln | Capsella rubella   | AT3G17540.1   Symbols:   F-box and associated interaction domains-containing protein   chr3:6002783-6003973 FORWARD LENGTH=396                                                         | 357  | 396  | 4.00E-56  | 110.9 | 43.1 | 59.7 |
| Rsa1.0_00667.1.g17787.t1 | ref XP_002886107.1  predicted protein [Arabidopsis lyrata subsp. lyrata] g 297331947 gb EFH62366.1  predicted protein [Arabidopsis lyrata subsp. lyrata]                                                                                                                                                                | 542  | 337  | 4.00E-56  | 62.2  | 30.1 | 37.5 | predicted protein                      | gbpln | Arabidopsis lyrata | #                                                                                                                                                                                      | #    | #    | #         | #     | #    | #    |
| Rsa1.0_00667.1.g17788.t1 | #                                                                                                                                                                                                                                                                                                                       | #    | #    | #         | #     | #    | -    | ----                                   | ----  | #                  | #                                                                                                                                                                                      | #    | #    | #         | #     | #    | #    |
| Rsa1.0_00668.1.g17789.t1 | #                                                                                                                                                                                                                                                                                                                       | #    | #    | #         | #     | #    | -    | ----                                   | ----  | #                  | #                                                                                                                                                                                      | #    | #    | #         | #     | #    | #    |
| Rsa1.0_00668.1.g17790.t1 | gb ACP30606.1  disease resistance protein [Brassica rapa subsp. pekinensis]                                                                                                                                                                                                                                             | 776  | 836  | 0         | 107.7 | 81.3 | 88.9 | disease resistance protein             | gbpln | Brassica rapa      | AT4G33300.2   Symbols: ADR1-L1   ADR1-like 1   chr4:16051162-16054005 REVERSE LENGTH=816                                                                                               | 776  | 816  | 0         | 105.2 | 72.0 | 83.5 |
| Rsa1.0_00668.1.g17791.t1 | emb CAA11819.1  hypothetical protein [Brassica napus]                                                                                                                                                                                                                                                                   | 458  | 457  | 0         | 99.8  | 97.8 | 98.9 | hypothetical protein                   | gbpln | Brassica napus     | AT4G33270.1   Symbols: CDC20.1   Transducin family protein / WD-40 repeat family protein   chr4:16044545-16046590 REVERSE LENGTH=457                                                   | 458  | 457  | 0         | 99.8  | 94.5 | 96.9 |
| Rsa1.0_00668.1.g17792.t1 | ref XP_002867191.1  hypothetical protein ARALYDRAFT_913095 [Arabidopsis lyrata subsp. lyrata] g 297313027 gb EFH43450.1  hypothetical protein ARALYDRAFT_913095 [Arabidopsis lyrata subsp. lyrata]                                                                                                                      | 229  | 228  | 1.00E-121 | 99.6  | 93.0 | 96.9 | hypothetical protein ARALYDRAFT_913095 | gbpln | Arabidopsis lyrata | AT4G33250.1   Symbols: EIF3K, TIF3K1, ATTIF3K1   eukaryotic translation initiation factor 3K   chr4:16039066-16040617 REVERSE LENGTH=226                                               | 229  | 226  | 1.00E-121 | 98.7  | 92.1 | 95.2 |
| Rsa1.0_00668.1.g17793.t1 | ref XP_002867192.1  hypothetical protein ARALYDRAFT_491361 [Arabidopsis lyrata subsp. lyrata] g 297313028 gb EFH43451.1  hypothetical protein ARALYDRAFT_491361 [Arabidopsis lyrata subsp. lyrata]                                                                                                                      | 1735 | 1755 | 0         | 101.2 | 86.3 | 91.1 | hypothetical protein ARALYDRAFT_491361 | gbpln | Arabidopsis lyrata | AT4G33240.2   Symbols: FAB1A   1-phosphatidylinositol-4-phosphate 5-kinases;zinc ion binding;1-phosphatidylinositol-3-phosphate 5-kinases   chr4:16029504-16037278 REVERSE LENGTH=1756 | 1735 | 1756 | 0         | 101.2 | 86.1 | 90.9 |
| Rsa1.0_00668.1.g17794.t1 | ref XP_002869219.1  predicted protein [Arabidopsis lyrata subsp. lyrata] g 297315055 gb EFH45478.1  predicted protein [Arabidopsis lyrata subsp. lyrata]                                                                                                                                                                | 505  | 525  | 0         | 104.0 | 84.6 | 92.3 | predicted protein                      | gbpln | Arabidopsis lyrata | AT4G33220.1   Symbols: PME44, ATPME44   pectin methyltransferase 44   chr4:16022506-16026130 FORWARD LENGTH=525                                                                        | 505  | 525  | 0         | 104.0 | 84.0 | 92.1 |
| Rsa1.0_00668.1.g17795.t2 | ref XP_002867194.1  predicted protein [Arabidopsis lyrata subsp. lyrata] g 297313030 gb EFH43453.1  predicted protein [Arabidopsis lyrata subsp. lyrata]                                                                                                                                                                | 992  | 990  | 0         | 99.8  | 89.1 | 93.2 | predicted protein                      | gbpln | Arabidopsis lyrata | AT4G33210.1   Symbols: SLOMO   F-box family protein   chr4:16015971-16020697 REVERSE LENGTH=990                                                                                        | 992  | 990  | 0         | 99.8  | 88.5 | 93.1 |
| Rsa1.0_00668.1.g17796.t1 | ref XP_002867195.1  hypothetical protein ARALYDRAFT_913100 [Arabidopsis lyrata subsp. lyrata] g 297313031 gb EFH43454.1  hypothetical protein ARALYDRAFT_913100 [Arabidopsis lyrata subsp. lyrata]                                                                                                                      | 1535 | 1522 | 0         | 99.2  | 90.4 | 94.1 | hypothetical protein ARALYDRAFT_913100 | gbpln | Arabidopsis lyrata | AT4G33200.1   Symbols: XI-1, ATX1-I, XI-15   myosin, putative   chr4:16002768-16014792 REVERSE LENGTH=1522                                                                             | 1535 | 1522 | 0         | 99.2  | 90.5 | 94.0 |
| Rsa1.0_00668.1.g17797.t2 | gb EOA18803.1  hypothetical protein CARUB_v10007416mg [Capsella rubella]                                                                                                                                                                                                                                                | 278  | 562  | 2.00E-32  | 202.2 | 28.4 | 33.8 | hypothetical protein CARUB_v10007416mg | gbpln | Capsella rubella   | AT4G35540.1   Symbols:   zinc ion binding;transcription regulators   chr4:16873939-16875522 FORWARD LENGTH=527                                                                         | 278  | 527  | 6.00E-27  | 189.6 | 28.1 | 33.5 |

|                          |                                                                                                                                                                                                                                                                                                 |     |      |           |       |      |       |                                                         |       |                      |                                                                                                                                               |     |     |           |       |      |       |
|--------------------------|-------------------------------------------------------------------------------------------------------------------------------------------------------------------------------------------------------------------------------------------------------------------------------------------------|-----|------|-----------|-------|------|-------|---------------------------------------------------------|-------|----------------------|-----------------------------------------------------------------------------------------------------------------------------------------------|-----|-----|-----------|-------|------|-------|
| Rsa1.0_00668.1.g17798.t1 | refXP_002865966.1  hypothetical protein ARALYDRAFT_357572 [Arabidopsis lyrata subsp. lyrata] gi 297311801 gb EFH4225.1  hypothetical protein ARALYDRAFT_357572 [Arabidopsis lyrata subsp. lyrata]                                                                                               | 577 | 455  | 1.00E-95  | 78.9  | 38.3 | 48.0  | hypothetical protein ARALYDRAFT_357572                  | gbpln | Arabidopsis lyrata   | AT1G30790.1   Symbols:   F-box and associated interaction domains-containing protein   chr1:10932713-10933912 FORWARD LENGTH=399              | 577 | 399 | 4.00E-74  | 69.2  | 30.8 | 41.4  |
| Rsa1.0_00668.1.g17799.t1 | #                                                                                                                                                                                                                                                                                               | #   | #    | #         | #     | #    | #     | -                                                       | ----  | ----                 | #                                                                                                                                             | #   | #   | #         | #     | #    |       |
| Rsa1.0_00668.1.g17800.t1 | refXP_002867196.1  pentatricopeptide repeat-containing protein [Arabidopsis lyrata subsp. lyrata] gi 297313032 gb EFH43455.1  pentatricopeptide repeat-containing protein [Arabidopsis lyrata subsp. lyrata]                                                                                    | 987 | 997  | 0         | 101.0 | 87.2 | 93.7  | pentatricopeptide repeat-containing protein             | gbpln | Arabidopsis lyrata   | AT4G33170.1   Symbols:   Tetratricopeptide repeat (TPR)-like superfamily protein   chr4:15995701-15998673 REVERSE LENGTH=990                  | 987 | 990 | 0         | 100.3 | 85.1 | 93.1  |
| Rsa1.0_00668.1.g17801.t1 | refNP_567915.3  F-box only protein 13 [Arabidopsis thaliana] gi 334302802 sp Q9SMZ3.2 FBX13_ARA TH RecName: Full=F-box only protein 13 gi 332660785 gb AEE86185.1  F-box only protein 13 [Arabidopsis thaliana]                                                                                 | 410 | 457  | 0         | 111.5 | 78.5 | 88.0  | F-box only protein 13                                   | gbpln | Arabidopsis thaliana | AT4G33160.1   Symbols:   F-box family protein   chr4:15994160-15995533 FORWARD LENGTH=457                                                     | 410 | 457 | 0         | 111.5 | 78.5 | 88.0  |
| Rsa1.0_00669.1.g17802.t1 | gb AAF79348.1 AC007887.7 F15O4.13 [Arabidopsis thaliana]                                                                                                                                                                                                                                        | 271 | 1887 | 4.00E-16  | 696.3 | 14.0 | 19.2  | F15O4.13                                                | gbpln | Arabidopsis thaliana | #                                                                                                                                             | #   | #   | #         | #     | #    |       |
| Rsa1.0_00669.1.g17803.t1 | #                                                                                                                                                                                                                                                                                               | #   | #    | #         | #     | #    | #     | -                                                       | ----  | ----                 | #                                                                                                                                             | #   | #   | #         | #     | #    |       |
| Rsa1.0_00669.1.g17804.t1 | emb CAN66576.1  hypothetical protein VITISV_016964 [Vitis vinifera]                                                                                                                                                                                                                             | 432 | 1316 | 1.00E-68  | 304.6 | 38.7 | 53.9  | hypothetical protein VITISV_016964                      | gbpln | Vitis vinifera       | #                                                                                                                                             | #   | #   | #         | #     | #    |       |
| Rsa1.0_00669.1.g17805.t2 | gb EOA24720.1  hypothetical protein CARUB_v10017998mg [Capsella rubella]                                                                                                                                                                                                                        | 216 | 216  | 1.00E-122 | 100.0 | 99.1 | 100.0 | hypothetical protein CARUB_v10017998mg                  | gbpln | Capsella rubella     | AT3G46060.3   Symbols: ARA3   RAB GTPase homolog 8A   chr3:16917908-16919740 FORWARD LENGTH=216                                               | 216 | 216 | 1.00E-124 | 100.0 | 99.1 | 100.0 |
| Rsa1.0_00669.1.g17806.t1 | gb EOA24096.1  hypothetical protein CARUB_v10017326mg [Capsella rubella]                                                                                                                                                                                                                        | 423 | 422  | 0         | 99.8  | 82.0 | 90.5  | hypothetical protein CARUB_v10017326mg                  | gbpln | Capsella rubella     | AT2G39570.1   Symbols:   ACT domain-containing protein   chr2:16507963-16509741 FORWARD LENGTH=411                                            | 423 | 411 | 1.00E-137 | 97.2  | 56.0 | 71.2  |
| Rsa1.0_00669.1.g17807.t1 | refXP_002891526.1  hypothetical protein ARALYDRAFT_337115 [Arabidopsis lyrata subsp. lyrata] gi 297337368 gb EFH67785.1  hypothetical protein ARALYDRAFT_337115 [Arabidopsis lyrata subsp. lyrata]                                                                                              | 793 | 824  | 1.00E-121 | 103.9 | 38.0 | 53.3  | hypothetical protein ARALYDRAFT_337115                  | gbpln | Arabidopsis lyrata   | AT2G07190.1   Symbols:   Domain of unknown function (DUF1985)   chr2:2987367-2988945 FORWARD LENGTH=452                                       | 793 | 452 | 2.00E-52  | 57.0  | 20.8 | 30.1  |
| Rsa1.0_00669.1.g17808.t1 | refNP_197073.1  zinc ion binding protein [Arabidopsis thaliana] gi 9755614 emb CAC01768.1  putative protein [Arabidopsis thaliana] gi 91806864 gb ABE66159.1  hypothetical protein At5g15690 [Arabidopsis thaliana] gi 332004809 gb AED92192.1  zinc ion binding protein [Arabidopsis thaliana] | 119 | 169  | 1.00E-22  | 142.0 | 40.3 | 59.7  | zinc ion binding protein                                | gbpln | Arabidopsis thaliana | AT5G15690.1   Symbols:   zinc ion binding   chr5:5113823-5114402 REVERSE LENGTH=169                                                           | 119 | 169 | 2.00E-25  | 142.0 | 40.3 | 59.7  |
| Rsa1.0_00669.1.g17809.t1 | emb CAB51200.1  putative protein [Arabidopsis thaliana]                                                                                                                                                                                                                                         | 714 | 739  | 1.00E-127 | 103.5 | 36.1 | 56.2  | putative protein                                        | gbpln | Arabidopsis thaliana | AT1G49920.1   Symbols:   MuDR family transposase   chr1:18481798-18484233 REVERSE LENGTH=785                                                  | 714 | 785 | 5.00E-29  | 109.9 | 17.9 | 30.4  |
| Rsa1.0_00669.1.g17810.t1 | dbj BAB09379.1  non-LTR retroelement reverse transcriptase-like protein [Arabidopsis thaliana]                                                                                                                                                                                                  | 992 | 1223 | 0         | 123.3 | 42.8 | 60.3  | non-LTR retroelement reverse transcriptase-like protein | gbpln | Arabidopsis thaliana | AT3G24255.1   Symbols:   RNA-directed DNA polymerase (reverse transcriptase)-related family protein   chr3:8789471-8793208 FORWARD LENGTH=746 | 992 | 746 | 3.00E-89  | 75.2  | 17.1 | 23.0  |
| Rsa1.0_00669.1.g17811.t2 | #                                                                                                                                                                                                                                                                                               | #   | #    | #         | #     | #    | #     | -                                                       | ----  | ----                 | #                                                                                                                                             | #   | #   | #         | #     | #    |       |
| Rsa1.0_00669.1.g17812.t1 | #                                                                                                                                                                                                                                                                                               | #   | #    | #         | #     | #    | #     | -                                                       | ----  | ----                 | #                                                                                                                                             | #   | #   | #         | #     | #    |       |
| Rsa1.0_00669.1.g17813.t2 | gb AAG51046.1 AC069473.8 gypsy/Ty-3 retroelement polyprotein; 69905-74404 [Arabidopsis thaliana] gi 10998138 dbj BAB03109.1  retroelement pol polyprotein [Arabidopsis thaliana]                                                                                                                | 710 | 1499 | 1.00E-114 | 211.1 | 32.4 | 41.1  | gypsy/Ty-3 retroelement polyprotein; 69905-74404        | gbpln | Arabidopsis thaliana | #                                                                                                                                             | #   | #   | #         | #     | #    |       |
| Rsa1.0_00670.1.g17814.t1 | dbj BAJ34208.1  unnamed protein product [Theellungiella halophila]                                                                                                                                                                                                                              | 813 | 895  | 0         | 110.1 | 78.2 | 84.9  | unnamed protein product                                 | ----  | ----                 | AT3G02170.1   Symbols: LNG2   longifolia2   chr3:396208-399393 REVERSE LENGTH=905                                                             | 813 | 905 | 0         | 111.3 | 76.5 | 83.8  |
| Rsa1.0_00670.1.g17815.t1 | gb EOA31955.1  hypothetical protein CARUB_v10015197mg [Capsella rubella]                                                                                                                                                                                                                        | 205 | 382  | 1.00E-14  | 186.3 | 28.8 | 33.7  | hypothetical protein CARUB_v10015197mg                  | gbpln | Capsella rubella     | AT3G02160.1   Symbols:   Bromodomain transcription factor   chr3:394615-395808 FORWARD LENGTH=397                                             | 205 | 397 | 1.00E-13  | 193.7 | 23.4 | 28.8  |

|                          |                                                                                                                                                                                                                                                                                                                                                                                                                                                                                                                                                                                                                                                                                                                                                                                                                          |     |     |           |       |      |      |                                      |       |                      |                                                                                                                                                                                                                                                                                                                                                                                                                                                                                                |     |     |           |       |      |      |
|--------------------------|--------------------------------------------------------------------------------------------------------------------------------------------------------------------------------------------------------------------------------------------------------------------------------------------------------------------------------------------------------------------------------------------------------------------------------------------------------------------------------------------------------------------------------------------------------------------------------------------------------------------------------------------------------------------------------------------------------------------------------------------------------------------------------------------------------------------------|-----|-----|-----------|-------|------|------|--------------------------------------|-------|----------------------|------------------------------------------------------------------------------------------------------------------------------------------------------------------------------------------------------------------------------------------------------------------------------------------------------------------------------------------------------------------------------------------------------------------------------------------------------------------------------------------------|-----|-----|-----------|-------|------|------|
| Rsa1.0_00670.1.g17816.t1 | <p>ref NP_850501.1  transcription factor TCP13 [Arabidopsis thaliana]<br/>gi 75194218 sp Q9S7W5.1 TCP13_ARATH RecName: Full=Transcription factor TCP13; AltName: Full=Plastid transcription factor 1; AltName: Full=TFPD<br/>gi 6041802 gb AAAF02122.1 AC009755_15 unknown protein [Arabidopsis thaliana]<br/>gi 6513919 gb AAAF14823.1 AC011664_5 unknown protein [Arabidopsis thaliana]<br/>gi 6681577 dbj BAA88760.1 TFPD [Arabidopsis thaliana]<br/>gi 25082706 gb AAN71993.1  expressed protein [Arabidopsis thaliana]<br/>gi 31711844 gb AAP68278.1  At3g02156 [Arabidopsis thaliana]<br/>gi 332640249 gb AEE73770.1  transcription factor TCP13 [Arabidopsis thaliana]</p>                                                                                                                                        | 310 | 355 | 1.00E-121 | 114.5 | 80.3 | 85.8 | transcription factor TCP13           | gbpln | Arabidopsis thaliana | AT3G02150.2   Symbols: PTF1, TFPD   plastid transcription factor 1   chr3:391522-392589 FORWARD LENGTH=355                                                                                                                                                                                                                                                                                                                                                                                     | 310 | 355 | 1.00E-123 | 114.5 | 80.3 | 85.8 |
| Rsa1.0_00670.1.g17816.t1 | <p>ref NP_566162.1  uncharacterized protein [Arabidopsis thaliana]<br/>gi 91806371 gb ABE65913.1  hypothetical protein At3g02125 [Arabidopsis thaliana]<br/>gi 332640245 gb AEE73766.1  uncharacterized protein AT3G02125 [Arabidopsis thaliana]</p>                                                                                                                                                                                                                                                                                                                                                                                                                                                                                                                                                                     | 356 | 355 | 2.00E-89  | 99.7  | 63.2 | 73.3 | uncharacterized protein              | gbpln | Arabidopsis thaliana | AT3G02125.1   Symbols:   unknown protein; FUNCTIONS IN: molecular_function unknown; INVOLVED IN: biological_process unknown; LOCATED IN: chloroplast; EXPRESSED IN: pollen tube; BEST Arabidopsis thaliana protein match is: unknown protein (TAIR:AT5G39200.1); Has 2247 Blast hits to 1434 proteins in 202 species: Archae - 4; Bacteria - 111; Metazoa - 942; Fungi - 239; Plants - 140; Viruses - 37; Other Eukaryotes - 774 (source: NCBI BLINK).   chr3:378205-379382 FORWARD LENGTH=355 | 356 | 355 | 6.00E-92  | 99.7  | 63.2 | 73.3 |
| Rsa1.0_00670.1.g17818.t4 | <p>ref NP_186859.1  UDP-glycosyltransferase-like protein [Arabidopsis thaliana]<br/>gi 75265806 sp Q9SGA8.1 U83A1_ARATH RecName: Full=UDP-glycosyltransferase 83A1<br/>gi 6513946 gb AAAF14850.1 AC011664_32 putative UDP-glucosyl transferase [Arabidopsis thaliana]<br/>gi 332640242 gb AEE73763.1  UDP-glycosyltransferase 83A1 [Arabidopsis thaliana]</p>                                                                                                                                                                                                                                                                                                                                                                                                                                                            | 458 | 464 | 0         | 101.3 | 81.4 | 88.4 | UDP-glycosyltransferase-like protein | gbpln | Arabidopsis thaliana | AT3G02100.1   Symbols:   UDP-Glycosyltransferase superfamily protein   chr3:368840-370484 REVERSE LENGTH=464                                                                                                                                                                                                                                                                                                                                                                                   | 458 | 464 | 0         | 101.3 | 81.4 | 88.4 |
| Rsa1.0_00670.1.g17819.t1 | <p>ref NP_186858.1  mitochondrial processing peptidase [Arabidopsis thaliana]<br/>gi 85700445 sp Q42290.2 MPPB_ARATH RecName: Full=Probable mitochondrial-processing peptidase subunit beta; AltName: Full=Beta-MPP; Flags: Precursor<br/>gi 6513923 gb AAAF14827.1 AC011664_9 putative mitochondrial processing peptidase [Arabidopsis thaliana]<br/>gi 22022518 gb AM83217.1  AT3g02090/F1C9_12 [Arabidopsis thaliana]<br/>gi 23397047 gb AAN31809.1  putative mitochondrial processing peptidase [Arabidopsis thaliana]<br/>gi 23463071 gb AAN33205.1  At3g02090/F1C9_12 [Arabidopsis thaliana]<br/>gi 25054848 gb AAN71914.1  putative mitochondrial processing peptidase [Arabidopsis thaliana]<br/>gi 332640240 gb AEE73761.1  probable mitochondrial-processing peptidase subunit beta [Arabidopsis thaliana]</p> | 527 | 531 | 0         | 100.8 | 90.1 | 94.7 | mitochondrial processing peptidase   | gbpln | Arabidopsis thaliana | AT3G02090.1   Symbols: MPPBETA   Insulinase (Peptidase family M16) protein   chr3:365624-368526 FORWARD LENGTH=531                                                                                                                                                                                                                                                                                                                                                                             | 527 | 531 | 0         | 100.8 | 90.1 | 94.7 |

|                          |                                                                                                                                                                                                                                                                                                                                                                                                                                                                                                                                                                                                                                                                                                                      |     |     |          |       |      |      |                                                     |       |                      |                                                                                                                                                                                                                                                               |     |     |          |       |      |      |
|--------------------------|----------------------------------------------------------------------------------------------------------------------------------------------------------------------------------------------------------------------------------------------------------------------------------------------------------------------------------------------------------------------------------------------------------------------------------------------------------------------------------------------------------------------------------------------------------------------------------------------------------------------------------------------------------------------------------------------------------------------|-----|-----|----------|-------|------|------|-----------------------------------------------------|-------|----------------------|---------------------------------------------------------------------------------------------------------------------------------------------------------------------------------------------------------------------------------------------------------------|-----|-----|----------|-------|------|------|
| Rsa1.0_00670.1.g17820.t1 | ref NP_186857.1  40S ribosomal protein S19-1 [Arabidopsis thaliana]<br>gi 27923843 sp Q9SGA6.1 RS191_ARAT H RecName: Full=40S ribosomal protein S19-1<br>gi 6513924 gb AAFI4828.1 AC011664.10 putative 40S ribosomal protein S19 [Arabidopsis thaliana]<br>gi 13878029 gb AAK44092.1 AF370277.1 putative 40S ribosomal protein S19 [Arabidopsis thaliana]<br>gi 17104595 gb AAL34186.1  putative 40S ribosomal protein S19 [Arabidopsis thaliana]<br>gi 21593712 gb AAM65679.1  putative 40S ribosomal protein S19 [Arabidopsis thaliana]<br>gi 332640239 gb AEE73760.1  40S ribosomal protein S19-1 [Arabidopsis thaliana]<br>gi 482567473 gb EOA31662.1  hypothetical protein CARUB_v10014866mg [Capsella rubella] | 143 | 143 | 7.00E-77 | 100.0 | 97.9 | 99.3 | 40S ribosomal protein S19-1                         | gbpln | Arabidopsis thaliana | AT3G02080.1   Symbols:   Ribosomal protein S19e family protein   chr3:364138-365161 REVERSE LENGTH=143                                                                                                                                                        | 143 | 143 | 2.00E-79 | 100.0 | 97.9 | 99.3 |
| Rsa1.0_00670.1.g17821.t4 | ref XP_002884297.1  GAUT13 [Arabidopsis lyrata subsp. lyrata]<br>gi 297330137 gb EFH60556.1  GAUT13 [Arabidopsis lyrata subsp. lyrata]                                                                                                                                                                                                                                                                                                                                                                                                                                                                                                                                                                               | 545 | 533 | 0        | 97.8  | 85.5 | 88.4 | GAUT13                                              | gbpln | Arabidopsis lyrata   | AT3G01040.1   Symbols: GAUT13   galacturonosyltransferase 13   chr3:9392-11979 FORWARD LENGTH=533                                                                                                                                                             | 545 | 533 | 0        | 97.8  | 85.3 | 87.9 |
| Rsa1.0_00670.1.g17822.t1 | ref NP_186756.1  early nodulin-like protein 16 [Arabidopsis thaliana]<br>gi 6714481 gb AAF26167.1 AC008261_24 putative lamin [Arabidopsis thaliana]<br>gi 62319463 db BAD94832.1  lamin - like predicted GPI-anchored protein [Arabidopsis thaliana]<br>gi 194708794 gb ACF8481.1  At3g01070 [Arabidopsis thaliana]<br>gi 332640083 gb AEE73604.1  early nodulin-like protein 16 [Arabidopsis thaliana]                                                                                                                                                                                                                                                                                                              | 173 | 167 | 5.00E-61 | 96.5  | 76.9 | 84.4 | early nodulin-like protein 16                       | gbpln | Arabidopsis thaliana | AT3G01070.1   Symbols: ENODL16, AtENODL16   early nodulin-like protein 16   chr3:19659-20444 FORWARD LENGTH=167                                                                                                                                               | 173 | 167 | 2.00E-63 | 96.5  | 76.9 | 84.4 |
| Rsa1.0_00671.1.g17823.t1 | gb EOA26345.1  hypothetical protein CARUB_v10022725mg [Capsella rubella]                                                                                                                                                                                                                                                                                                                                                                                                                                                                                                                                                                                                                                             | 166 | 723 | 3.00E-71 | 435.5 | 78.9 | 81.9 | hypothetical protein CARUB_v10022725mg              | gbpln | Capsella rubella     | AT2G45340.1   Symbols:   Leucine-rich repeat protein kinase family protein   chr2:18691739-18694466 FORWARD LENGTH=691                                                                                                                                        | 166 | 691 | 2.00E-73 | 416.3 | 80.1 | 81.9 |
| Rsa1.0_00671.1.g17824.t1 | gb EOA26625.1  hypothetical protein CARUB_v10022689mg [Capsella rubella]<br>gi 482562436 gb EOA26626.1  hypothetical protein CARUB_v10022689mg [Capsella rubella]                                                                                                                                                                                                                                                                                                                                                                                                                                                                                                                                                    | 699 | 767 | 0        | 109.7 | 87.1 | 92.0 | hypothetical protein CARUB_v10022689mg              | gbpln | Capsella rubella     | AT2G44830.1   Symbols:   Protein kinase superfamily protein   chr2:18490398-18492779 FORWARD LENGTH=765                                                                                                                                                       | 699 | 765 | 0        | 109.4 | 86.8 | 91.8 |
| Rsa1.0_00671.1.g17825.t1 | gb EOA27930.1  hypothetical protein CARUB_v10024100mg [Capsella rubella]                                                                                                                                                                                                                                                                                                                                                                                                                                                                                                                                                                                                                                             | 196 | 196 | 2.00E-49 | 100.0 | 53.1 | 60.2 | hypothetical protein CARUB_v10024100mg              | gbpln | Capsella rubella     | AT2G44820.1   Symbols:   unknown protein; Has 70 Blast hits to 70 proteins in 25 species: Archae - 0; Bacteria - 0; Metazoa - 9; Fungi - 4; Plants - 47; Viruses - 0; Other Eukaryotes - 10 (source: NCBI BLINK).   chr2:18484690-18485517 FORWARD LENGTH=194 | 196 | 194 | 9.00E-46 | 99.0  | 52.6 | 61.2 |
| Rsa1.0_00671.1.g17826.t1 | dbj BAC23081.1  DAD1 [Brassica rapa]                                                                                                                                                                                                                                                                                                                                                                                                                                                                                                                                                                                                                                                                                 | 446 | 446 | 0        | 100.0 | 97.1 | 99.1 | DAD1                                                | gbpln | Brassica rapa        | AT2G44810.1   Symbols: DAD1   alpha/beta-Hydrolases superfamily protein   chr2:18479095-18480168 FORWARD LENGTH=357                                                                                                                                           | 446 | 357 | 0        | 80.0  | 74.4 | 78.5 |
| Rsa1.0_00671.1.g17827.t1 | # # # # # # # #                                                                                                                                                                                                                                                                                                                                                                                                                                                                                                                                                                                                                                                                                                      | #   | #   | #        | #     | #    | #    | -                                                   | ----  | ----                 | # # # # # # # #                                                                                                                                                                                                                                               | #   | #   | #        | #     | #    | #    |
| Rsa1.0_00671.1.g17828.t3 | gb AAD32950.1  putative non-LTR retroelement reverse transcriptase [Arabidopsis thaliana]                                                                                                                                                                                                                                                                                                                                                                                                                                                                                                                                                                                                                            | 404 | 773 | 2.00E-34 | 191.3 | 16.8 | 21.8 | putative non-LTR retroelement reverse transcriptase | gbpln | Arabidopsis thaliana | ATMG00310.1   Symbols: ORF154   RNA-directed DNA polymerase (reverse transcriptase)-related family protein   chrM:90883-91347 REVERSE LENGTH=154                                                                                                              | 404 | 154 | 1.00E-27 | 38.1  | 13.4 | 20.0 |
| Rsa1.0_00671.1.g17829.t1 | ref XP_002880137.1  oxidoreductase [Arabidopsis lyrata subsp. lyrata]<br>gi 297325976 gb EFH56396.1  oxidoreductase [Arabidopsis lyrata subsp. lyrata]                                                                                                                                                                                                                                                                                                                                                                                                                                                                                                                                                               | 682 | 357 | 0        | 52.3  | 43.8 | 47.8 | oxidoreductase                                      | gbpln | Arabidopsis lyrata   | AT2G44800.1   Symbols:   2-oxoglutarate (2OG) and Fe(II)-dependent oxygenase superfamily protein   chr2:18467004-18468551 FORWARD LENGTH=357                                                                                                                  | 682 | 357 | 0        | 52.3  | 43.8 | 47.7 |
| Rsa1.0_00671.1.g17830.t1 | gb AAB47973.1  blue copper-binding protein II [Arabidopsis thaliana]                                                                                                                                                                                                                                                                                                                                                                                                                                                                                                                                                                                                                                                 | 202 | 199 | 2.00E-57 | 98.5  | 66.8 | 76.7 | blue copper-binding protein II                      | gbpln | Arabidopsis thaliana | AT2G44790.1   Symbols: UCC2   uelacyanin 2   chr2:18462182-18463232 REVERSE LENGTH=202                                                                                                                                                                        | 202 | 202 | 8.00E-53 | 100.0 | 60.9 | 71.8 |
| Rsa1.0_00671.1.g17831.t1 | ref XP_002881980.1  hypothetical protein ARALYDRAFT_483605 [Arabidopsis lyrata subsp. lyrata]<br>gi 297327819 gb EFH58239.1  hypothetical protein ARALYDRAFT_483605 [Arabidopsis lyrata subsp. lyrata]                                                                                                                                                                                                                                                                                                                                                                                                                                                                                                               | 472 | 499 | 0        | 105.7 | 86.2 | 93.6 | hypothetical protein ARALYDRAFT_483605              | gbpln | Arabidopsis lyrata   | AT2G44760.1   Symbols:   Domain of unknown function (DUF3598)   chr2:18452937-18454785 REVERSE LENGTH=500                                                                                                                                                     | 472 | 500 | 0        | 105.9 | 84.5 | 92.6 |

|                           |                                                                                                                                                                                                                                                                                                                                               |     |     |           |       |      |      |                                                 |       |                      |                                                                                                                                              |     |     |           |       |      |      |
|---------------------------|-----------------------------------------------------------------------------------------------------------------------------------------------------------------------------------------------------------------------------------------------------------------------------------------------------------------------------------------------|-----|-----|-----------|-------|------|------|-------------------------------------------------|-------|----------------------|----------------------------------------------------------------------------------------------------------------------------------------------|-----|-----|-----------|-------|------|------|
| Rsa1.0_00671.1.g17832.t1  | gb ABK28536.1  unknown [Arabidopsis thaliana]                                                                                                                                                                                                                                                                                                 | 215 | 219 | 7.00E-99  | 101.9 | 91.6 | 94.9 | unknown                                         | gbpln | Arabidopsis thaliana | AT2G44745.1   Symbols:   WRKY family transcription factor   chr2:18447482-18449004 REVERSE LENGTH=218                                        | 215 | 218 | 1.00E-101 | 101.4 | 91.6 | 94.9 |
| Rsa1.0_00671.1.g17833.t1  | gb EOA27921.1  hypothetical protein CARUB_v10024094mg [Capsella rubella]                                                                                                                                                                                                                                                                      | 199 | 199 | 3.00E-93  | 100.0 | 86.9 | 92.0 | hypothetical protein CARUB_v10024094mg          | gbpln | Capsella rubella     | AT2G44740.1   Symbols:   CYCP4.1   cyclin p4.1   chr2:18442287-18443304 REVERSE LENGTH=202                                                   | 199 | 202 | 3.00E-93  | 101.5 | 83.4 | 89.4 |
| Rsa1.0_00671.1.g17834.t1  | gb EOA28564.1  hypothetical protein CARUB_v10024782mg [Capsella rubella]                                                                                                                                                                                                                                                                      | 455 | 420 | 0         | 92.3  | 73.2 | 80.7 | hypothetical protein CARUB_v10024782mg          | gbpln | Capsella rubella     | AT5G51160.1   Symbols:   Ankyrin repeat family protein   chr5:20792280-20793681 FORWARD LENGTH=442                                           | 455 | 442 | 1.00E-62  | 97.1  | 29.5 | 51.2 |
| Rsa1.0_00671.1.g17835.t1  | gb EOA29393.1  hypothetical protein CARUB_v10025686mg, partial [Capsella rubella]                                                                                                                                                                                                                                                             | 442 | 432 | 1.00E-159 | 97.7  | 68.3 | 78.5 | hypothetical protein CARUB_v10025686mg, partial | gbpln | Capsella rubella     | AT5G51160.1   Symbols:   Ankyrin repeat family protein   chr5:20792280-20793681 FORWARD LENGTH=442                                           | 442 | 442 | 8.00E-41  | 100.0 | 28.7 | 45.7 |
| Rsa1.0_00671.1.g17836.t1  | gb EOA26431.1  hypothetical protein CARUB_v10025047mg [Capsella rubella]                                                                                                                                                                                                                                                                      | 285 | 395 | 5.00E-85  | 138.6 | 70.9 | 81.8 | hypothetical protein CARUB_v10025047mg          | gbpln | Capsella rubella     | AT2G44730.1   Symbols:   Alcohol dehydrogenase transcription factor Myb/SANT-like family protein   chr2:18437447-18438565 REVERSE LENGTH=372 | 285 | 372 | 2.00E-85  | 130.5 | 68.4 | 77.5 |
| Rsa1.0_00671.1.g17837.t3  | gb EOA26601.1  hypothetical protein CARUB_v10022661mg [Capsella rubella]                                                                                                                                                                                                                                                                      | 210 | 798 | 4.00E-15  | 380.0 | 28.6 | 33.3 | hypothetical protein CARUB_v10022661mg          | gbpln | Capsella rubella     | AT2G44710.1   Symbols:   RNA-binding (RRM/RBD/RNP motifs) family protein   chr2:18432902-18436629 FORWARD LENGTH=809                         | 210 | 809 | 4.00E-17  | 385.2 | 21.4 | 22.9 |
| Rsa1.0_00671.1.g17838.t1  | ref XP_002880123.1  hypothetical protein ARALYDRAFT_483580 [Arabidopsis lyrata subsp. lyrata]   gi 297325962 gb EFH56382.1  hypothetical protein ARALYDRAFT_483580 [Arabidopsis lyrata subsp. lyrata]                                                                                                                                         | 94  | 170 | 6.00E-23  | 180.9 | 55.3 | 57.4 | hypothetical protein ARALYDRAFT_483580          | gbpln | Arabidopsis lyrata   | AT2G44525.1   Symbols:   Protein of unknown function (DUF498/DUF598)   chr2:18382130-18383320 FORWARD LENGTH=170                             | 94  | 170 | 2.00E-25  | 180.9 | 55.3 | 57.4 |
| Rsa1.0_00671.1.g17839.t1  | ref NP_181978.1  axi 1 protein-like protein [Arabidopsis thaliana]   gi 13877693 gb AAK43924.1 AF370605.1 axi 1 protein-like protein [Arabidopsis thaliana]   gi 3128192 gb AAC16096.1 similar to axi 1 protein from Nicotiana tabacum [Arabidopsis thaliana]   gi 330255336 gb AEC10430.1  axi 1 protein-like protein [Arabidopsis thaliana] | 579 | 573 | 0         | 99.0  | 83.4 | 86.2 | axi 1 protein-like protein                      | gbpln | Arabidopsis thaliana | AT2G44500.1   Symbols:   O-fucosyltransferase family protein   chr2:18374447-18376435 FORWARD LENGTH=573                                     | 579 | 573 | 0         | 99.0  | 83.4 | 86.2 |
| Rsa1.0_00671.1.g17840.t1  | # # # # # # # # -                                                                                                                                                                                                                                                                                                                             |     |     |           |       |      |      |                                                 | ----  | ----                 | #                                                                                                                                            | #   | #   | #         | #     | #    | #    |
| Rsa1.0_00671.1.g17841.t1  | ref XP_002880113.1  predicted protein [Arabidopsis lyrata subsp. lyrata]   gi 297325952 gb EFH56372.1  predicted protein [Arabidopsis lyrata subsp. lyrata]                                                                                                                                                                                   | 510 | 539 | 0         | 105.7 | 74.3 | 85.5 | predicted protein                               | gbpln | Arabidopsis lyrata   | AT3G60120.1   Symbols:   BGLU27   beta glucosidase 27   chr3:22206238-22208952 FORWARD LENGTH=540                                            | 510 | 540 | 0         | 105.9 | 71.2 | 83.1 |
| Rsa1.0_00671.1.g17842.t1  | dbj BAJ34435.1  unnamed protein product [Thellungiella halophila]                                                                                                                                                                                                                                                                             | 554 | 563 | 0         | 101.6 | 95.3 | 98.2 | unnamed protein product                         | ----  | ----                 | AT2G44490.1   Symbols:   PEN2, BGLU26   Glycosyl hydrolase superfamily protein   chr2:18364872-18367515 FORWARD LENGTH=560                   | 554 | 560 | 0         | 101.1 | 93.5 | 97.1 |
| Rsa1.0_00671.1.g17843.t13 | gb EOA29106.1  hypothetical protein CARUB_v10025373mg, partial [Capsella rubella]                                                                                                                                                                                                                                                             | 597 | 555 | 0         | 93.0  | 70.0 | 78.4 | hypothetical protein CARUB_v10025373mg, partial | gbpln | Capsella rubella     | AT5G24550.1   Symbols:   BGLU32   beta glucosidase 32   chr5:8392059-8395302 REVERSE LENGTH=534                                              | 597 | 534 | 0         | 89.4  | 66.3 | 77.2 |
| Rsa1.0_00671.1.g17844.t1  | gb EOA32597.1  hypothetical protein CARUB_v10015890mg, partial [Capsella rubella]                                                                                                                                                                                                                                                             | 199 | 343 | 9.00E-51  | 172.4 | 57.3 | 73.4 | hypothetical protein CARUB_v10015890mg, partial | gbpln | Capsella rubella     | AT2G17750.1   Symbols:   NIP1   NEP-interacting protein 1   chr2:7709238-7711151 REVERSE LENGTH=396                                          | 199 | 396 | 1.00E-41  | 199.0 | 40.2 | 52.3 |
| Rsa1.0_00672.1.g17845.t1  | # # # # # # # # -                                                                                                                                                                                                                                                                                                                             |     |     |           |       |      |      |                                                 | ----  | ----                 | #                                                                                                                                            | #   | #   | #         | #     | #    | #    |
| Rsa1.0_00672.1.g17846.t1  | gb EOA27770.1  hypothetical protein CARUB_v10023925mg [Capsella rubella]                                                                                                                                                                                                                                                                      | 249 | 248 | 1.00E-111 | 99.6  | 88.0 | 93.2 | hypothetical protein CARUB_v10023925mg          | gbpln | Capsella rubella     | AT2G36080.1   Symbols:   AP2/B3-like transcriptional factor family protein   chr2:15148612-15151411 REVERSE LENGTH=244                       | 249 | 244 | 1.00E-113 | 98.0  | 86.3 | 91.6 |
| Rsa1.0_00672.1.g17847.t1  | ref NP_001046391.2  Os02g0236500 [Oryza sativa Japonica Group]   gi 255670750 dbj BAF08305.2  Os02g0236500 [Oryza sativa Japonica Group]                                                                                                                                                                                                      | 769 | 918 | 0         | 119.4 | 45.3 | 64.1 | Os02g0236500                                    | gbpln | Oryza sativa         | AT4G10200.1   Symbols:   TTF-type zinc finger protein with HAT dimerisation domain   chr4:6353172-6355591 FORWARD LENGTH=733                 | 769 | 733 | 1.00E-179 | 95.3  | 45.1 | 59.0 |
| Rsa1.0_00672.1.g17848.t1  | ref XP_002881423.1  ATOFP15/OFP15 [Arabidopsis lyrata subsp. lyrata]   gi 297327262 gb EFH57682.1  ATOFP15/OFP15 [Arabidopsis lyrata subsp. lyrata]                                                                                                                                                                                           | 270 | 259 | 1.00E-88  | 95.9  | 75.9 | 88.5 | ATOFP15/OFP15                                   | gbpln | Arabidopsis lyrata   | AT2G36050.1   Symbols:   ATOFP15, OFP15   ovate family protein 15   chr2:15135852-15136637 REVERSE LENGTH=261                                | 270 | 261 | 5.00E-76  | 96.7  | 72.6 | 86.7 |
| Rsa1.0_00672.1.g17849.t1  | gb EOA29313.1  hypothetical protein CARUB_v10025594mg [Capsella rubella]                                                                                                                                                                                                                                                                      | 187 | 185 | 4.00E-63  | 98.9  | 75.9 | 81.8 | hypothetical protein CARUB_v10025594mg          | gbpln | Capsella rubella     | AT2G36026.1   Symbols:   Ovate family protein   chr2:15127265-15127816 FORWARD LENGTH=183                                                    | 187 | 183 | 1.00E-61  | 97.9  | 73.8 | 81.3 |
| Rsa1.0_00672.1.g17850.t1  | ref XP_002881422.1  abscisic acid-responsive HVA22 family protein [Arabidopsis lyrata subsp. lyrata]   gi 297327261 gb EFH57681.1  abscisic acid-responsive HVA22 family protein [Arabidopsis lyrata subsp. lyrata]                                                                                                                           | 251 | 258 | 1.00E-120 | 102.8 | 87.6 | 94.8 | abscisic acid-responsive HVA22 family protein   | gbpln | Arabidopsis lyrata   | AT2G36020.1   Symbols:   HVA22J   HVA22-like protein J   chr2:15123424-15125140 REVERSE LENGTH=258                                           | 251 | 258 | 1.00E-121 | 102.8 | 86.9 | 94.8 |

|                          |                                                                                                                                                                                                                                                                                                                                                                                                                                                                                                                                                                                                                                                                                                                                                                                                                              |     |      |           |       |      |      |                                                             |       |                      |                                                                                                                                                    |     |     |           |       |      |      |
|--------------------------|------------------------------------------------------------------------------------------------------------------------------------------------------------------------------------------------------------------------------------------------------------------------------------------------------------------------------------------------------------------------------------------------------------------------------------------------------------------------------------------------------------------------------------------------------------------------------------------------------------------------------------------------------------------------------------------------------------------------------------------------------------------------------------------------------------------------------|-----|------|-----------|-------|------|------|-------------------------------------------------------------|-------|----------------------|----------------------------------------------------------------------------------------------------------------------------------------------------|-----|-----|-----------|-------|------|------|
| Rsa1.0_00672.1.g17851.t1 | refNP_565829.1   TPX2 (targeting protein for Xklp2)-like protein [Arabidopsis thaliana] gi 16209720 gb AAL14415.1   At2g35880/F11F19.21 [Arabidopsis thaliana] gi 20197995 gb AAD21469.2   expressed protein [Arabidopsis thaliana] gi 22655282 gb AAM98231.1   unknown protein [Arabidopsis thaliana] gi 330254079 gb AEC09173.1   TPX2 (targeting protein for Xklp2)-like protein [Arabidopsis thaliana] refNP_850254.1   RING-H2 finger protein ATL70 [Arabidopsis thaliana] gi 68565230 sp Q8RX29.1   ATL70_ARAT H RecName: Full=RING-H2 finger protein ATL70 gi 20258808 gb AAM13985.1   putative RING zinc finger protein [Arabidopsis thaliana] gi 21689891 gb AAM67506.1   putative RING zinc finger protein [Arabidopsis thaliana] gi 330254082 gb AEC09176.1   RING-H2 finger protein ATL70 [Arabidopsis thaliana] | 457 | 432  | 1.00E-134 | 94.5  | 70.2 | 76.4 | TPX2 (targeting protein for Xklp2)-like protein             | gbpln | Arabidopsis thaliana | AT2G35880.1   Symbols:   TPX2 (targeting protein for Xklp2) protein family   chr2:15063204-15065259 REVERSE LENGTH=432                             | 457 | 432 | 1.00E-137 | 94.5  | 70.2 | 76.4 |
| Rsa1.0_00672.1.g17852.t1 | gi 20258808 gb AAM13985.1   putative RING zinc finger protein [Arabidopsis thaliana] gi 21689891 gb AAM67506.1   putative RING zinc finger protein [Arabidopsis thaliana] gi 330254082 gb AEC09176.1   RING-H2 finger protein ATL70 [Arabidopsis thaliana]                                                                                                                                                                                                                                                                                                                                                                                                                                                                                                                                                                   | 175 | 217  | 3.00E-57  | 124.0 | 72.0 | 78.3 | RING-H2 finger protein ATL70                                | gbpln | Arabidopsis thaliana | AT2G35910.1   Symbols:   RING/U-box superfamily protein   chr2:15073225-15073878 REVERSE LENGTH=217                                                | 175 | 217 | 1.00E-59  | 124.0 | 72.0 | 78.3 |
| Rsa1.0_00672.1.g17853.t1 | gb EOA28706.1   hypothetical protein CARUB_v10024934mg [Capsella rubella]                                                                                                                                                                                                                                                                                                                                                                                                                                                                                                                                                                                                                                                                                                                                                    | 408 | 408  | 0         | 100.0 | 86.5 | 91.9 | hypothetical protein CARUB_v10024934mg                      | gbpln | Capsella rubella     | AT2G35930.1   Symbols:   PUB23   plant U-box 23   chr2:15083101-15084336 REVERSE LENGTH=411                                                        | 408 | 411 | 0         | 100.7 | 87.3 | 92.6 |
| Rsa1.0_00672.1.g17854.t1 | gb ABD65101.1   hypothetical protein 31.t00082 [Brassica oleracea]                                                                                                                                                                                                                                                                                                                                                                                                                                                                                                                                                                                                                                                                                                                                                           | 250 | 226  | 1.00E-89  | 90.4  | 64.0 | 76.0 | hypothetical protein 31.t00082                              | gbpln | Brassica oleracea    | # # # # # #                                                                                                                                        |     |     |           |       |      |      |
| Rsa1.0_00672.1.g17855.t1 | gb ABD65117.1   hypothetical protein 31.t00030 [Brassica oleracea]                                                                                                                                                                                                                                                                                                                                                                                                                                                                                                                                                                                                                                                                                                                                                           | 961 | 1471 | 0         | 153.1 | 77.8 | 84.1 | hypothetical protein 31.t00030                              | gbpln | Brassica oleracea    | AT3G51700.1   Symbols:   PIF1 helicase   chr3:19179443-19181145 REVERSE LENGTH=344                                                                 | 961 | 344 | 3.00E-84  | 35.8  | 16.0 | 20.9 |
| Rsa1.0_00672.1.g17856.t1 | gb ABD65118.1   hypothetical protein 31.t00031 [Brassica oleracea]                                                                                                                                                                                                                                                                                                                                                                                                                                                                                                                                                                                                                                                                                                                                                           | 519 | 467  | 0         | 90.0  | 61.7 | 68.4 | hypothetical protein 31.t00031                              | gbpln | Brassica oleracea    | AT1G52950.1   Symbols:   Nucleic acid-binding, OB-fold-like protein   chr1:19725483-19728007 FORWARD LENGTH=566                                    | 519 | 566 | 7.00E-79  | 109.1 | 32.2 | 53.9 |
| Rsa1.0_00673.1.g17857.t1 | dbj BAE98403.1   putative non-LTR reverse transcriptase [Arabidopsis thaliana]                                                                                                                                                                                                                                                                                                                                                                                                                                                                                                                                                                                                                                                                                                                                               | 186 | 278  | 7.00E-11  | 149.5 | 16.7 | 23.1 | putative non-LTR reverse transcriptase                      | gbpln | Arabidopsis thaliana | # # # # # #                                                                                                                                        |     |     |           |       |      |      |
| Rsa1.0_00673.1.g17858.t1 | gb EOA37823.1   hypothetical protein CARUB_v10012001mg [Capsella rubella]                                                                                                                                                                                                                                                                                                                                                                                                                                                                                                                                                                                                                                                                                                                                                    | 232 | 236  | 3.00E-89  | 101.7 | 75.4 | 84.5 | hypothetical protein CARUB_v10012001mg                      | gbpln | Capsella rubella     | AT1G26100.1   Symbols:   Cytochrome b561/ferric reductase transmembrane protein family   chr1:9022716-9024081 REVERSE LENGTH=236                   | 232 | 236 | 1.00E-89  | 101.7 | 74.1 | 84.5 |
| Rsa1.0_00673.1.g17859.t1 | refXP_002867139.1   EMB2758 [Arabidopsis lyrata subsp. lyrata] gi 297312975 gb EFH43398.1   EMB2758 [Arabidopsis lyrata subsp. lyrata] refXP_002882653.1   predicted protein [Arabidopsis lyrata subsp. lyrata] gi 297328493 gb EFH58912.1   predicted protein [Arabidopsis lyrata subsp. lyrata]                                                                                                                                                                                                                                                                                                                                                                                                                                                                                                                            | 837 | 824  | 0         | 98.4  | 81.2 | 88.5 | EMB2758                                                     | gbpln | Arabidopsis lyrata   | AT4G33990.1   Symbols:   EMB2758   Tetratricopeptide repeat (TPR)-like superfamily protein   chr4:16290141-16292612 REVERSE LENGTH=823             | 837 | 823 | 0         | 98.3  | 80.6 | 87.8 |
| Rsa1.0_00673.1.g17860.t1 | refXP_002882653.1   predicted protein [Arabidopsis lyrata subsp. lyrata] gi 297328493 gb EFH58912.1   predicted protein [Arabidopsis lyrata subsp. lyrata]                                                                                                                                                                                                                                                                                                                                                                                                                                                                                                                                                                                                                                                                   | 202 | 173  | 8.00E-28  | 85.6  | 36.6 | 48.0 | predicted protein                                           | gbpln | Arabidopsis lyrata   | AT3G10116.1   Symbols:   COBRA-like extracellular glycosyl-phosphatidyl inositol-anchored protein family   chr3:3126023-3126619 FORWARD LENGTH=170 | 202 | 170 | 6.00E-25  | 84.2  | 34.7 | 45.5 |
| Rsa1.0_00673.1.g17861.t1 | refXP_002874050.1   hypothetical protein ARALYDRAFT_910198 [Arabidopsis lyrata subsp. lyrata] gi 297319887 gb EFH50309.1   hypothetical protein ARALYDRAFT_910198 [Arabidopsis lyrata subsp. lyrata]                                                                                                                                                                                                                                                                                                                                                                                                                                                                                                                                                                                                                         | 452 | 450  | 0         | 99.6  | 84.1 | 90.5 | hypothetical protein ARALYDRAFT_910198                      | gbpln | Arabidopsis lyrata   | AT5G22130.1   Symbols:   PNT1   mannosyltransferase family protein   chr5:7337486-7339831 REVERSE LENGTH=450                                       | 452 | 450 | 0         | 99.6  | 83.8 | 88.9 |
| Rsa1.0_00673.1.g17862.t1 | refXP_002874051.1   pyridine nucleotide-disulfide oxidoreductase family protein [Arabidopsis lyrata subsp. lyrata] gi 297319888 gb EFH50310.1   pyridine nucleotide-disulfide oxidoreductase family protein [Arabidopsis lyrata subsp. lyrata]                                                                                                                                                                                                                                                                                                                                                                                                                                                                                                                                                                               | 367 | 365  | 0         | 99.5  | 89.1 | 94.0 | pyridine nucleotide-disulfide oxidoreductase family protein | gbpln | Arabidopsis lyrata   | AT5G22140.1   Symbols:   FAD/NAD(P)-binding oxidoreductase family protein   chr5:7340284-7341657 REVERSE LENGTH=365                                | 367 | 365 | 0         | 99.5  | 88.3 | 93.7 |
| Rsa1.0_00673.1.g17863.t1 | gb EOA24755.1   hypothetical protein CARUB_v10018033mg [Capsella rubella]                                                                                                                                                                                                                                                                                                                                                                                                                                                                                                                                                                                                                                                                                                                                                    | 209 | 206  | 1.00E-74  | 98.6  | 66.5 | 76.6 | hypothetical protein CARUB_v10018033mg                      | gbpln | Capsella rubella     | AT3G44220.1   Symbols:   Late embryogenesis abundant (LEA) hydroxyproline-rich glycoprotein family   chr3:15928216-15929645 FORWARD LENGTH=206     | 209 | 206 | 1.00E-76  | 98.6  | 66.0 | 76.1 |
| Rsa1.0_00673.1.g17864.t1 | refXP_002871996.1   hypothetical protein ARALYDRAFT_351250 [Arabidopsis lyrata subsp. lyrata] gi 297317833 gb EFH48255.1   hypothetical protein ARALYDRAFT_351250 [Arabidopsis lyrata subsp. lyrata]                                                                                                                                                                                                                                                                                                                                                                                                                                                                                                                                                                                                                         | 155 | 164  | 3.00E-63  | 105.8 | 81.3 | 87.7 | hypothetical protein ARALYDRAFT_351250                      | gbpln | Arabidopsis lyrata   | AT5G22240.1   Symbols:   ATOFP10, OFP10   Ovate family protein   chr5:7364689-7365279 FORWARD LENGTH=196                                           | 155 | 196 | 2.00E-62  | 126.5 | 71.6 | 76.1 |

|                          |                                                                                                                                                                                                                                                                                                                                                                                                                                                                                                                                           |     |     |           |       |      |      |                                        |       |                      |                                                                                                                                                                                                                                                                                                                                                                                                                                                                                                                                       |     |     |           |       |      |      |
|--------------------------|-------------------------------------------------------------------------------------------------------------------------------------------------------------------------------------------------------------------------------------------------------------------------------------------------------------------------------------------------------------------------------------------------------------------------------------------------------------------------------------------------------------------------------------------|-----|-----|-----------|-------|------|------|----------------------------------------|-------|----------------------|---------------------------------------------------------------------------------------------------------------------------------------------------------------------------------------------------------------------------------------------------------------------------------------------------------------------------------------------------------------------------------------------------------------------------------------------------------------------------------------------------------------------------------------|-----|-----|-----------|-------|------|------|
| Rsa1.0_00673.1.g17865.t1 | refNP_197617.1  putative CCR4-associated factor 1-11 [Arabidopsis thaliana]<br>gi 75334084 sp Q9FMS6.1 CAF1K_ARAT H RecName: Full=Probable CCR4-associated factor 1 homolog 11<br>gi 9757805 dbj BAB08323.1  CCR4-associated factor-like protein [Arabidopsis thaliana]<br>gi 17381058 gb AAL36341.1  putative CCR4-associated factor [Arabidopsis thaliana] gi 25054979 gb AAN71961.1  putative CCR4-associated factor [Arabidopsis thaliana]<br>gi 332005618 gb AED93001.1  putative CCR4-associated factor 1-11 [Arabidopsis thaliana] | 278 | 278 | 1.00E-130 | 100.0 | 83.1 | 89.6 | putative CCR4-associated factor 1-11   | gbpln | Arabidopsis thaliana | AT5G22250.1   Symbols:   Polynucleotidyl transferase, ribonuclease H-like superfamily protein   chr5:7365605-7366441 REVERSE LENGTH=278                                                                                                                                                                                                                                                                                                                                                                                               | 278 | 278 | 1.00E-133 | 100.0 | 83.1 | 89.6 |
| Rsa1.0_00673.1.g17866.t1 | refXP_002887346.1  hypothetical protein ARALYDRAFT_476243 [Arabidopsis lyrata subsp. lyrata] gi 297333187 gb EFH63605.1  hypothetical protein ARALYDRAFT_476243 [Arabidopsis lyrata subsp. lyrata]                                                                                                                                                                                                                                                                                                                                        | 232 | 557 | 1.00E-28  | 240.1 | 25.9 | 28.4 | hypothetical protein ARALYDRAFT_476243 | gbpln | Arabidopsis lyrata   | AT1G71110.1   Symbols:   unknown protein; FUNCTIONS IN: molecular_function unknown; INVOLVED IN: biological_process unknown; LOCATED IN: endomembrane system; BEST Arabidopsis thaliana protein match is: unknown protein (TAIR:AT2G12400.1); Has 173 Blast hits to 169 proteins in 21 species: Archae - 0; Bacteria - 0; Metazoa - 3; Fungi - 0; Plants - 165; Viruses - 0; Other Eukaryotes - 5 (source: NCBI BLink).   chr1:26818244-26820852 FORWARD LENGTH=557                                                                   | 232 | 557 | 2.00E-30  | 240.1 | 25.0 | 28.0 |
| Rsa1.0_00673.1.g17867.t1 | refNP_197619.1  uncharacterized protein [Arabidopsis thaliana] gi 9757807 dbj BAB08325.1  unnamed protein product [Arabidopsis thaliana] gi 15450476 gb AAK96531.1  AT5G22270/MWD9.5 [Arabidopsis thaliana] gi 20466099 gb AAM19971.1  AT5G22270/MWD9.5 [Arabidopsis thaliana] gi 227206166 dbj BAH57138.1  AT5G22270 [Arabidopsis thaliana] gi 332005620 gb AED93003.1  uncharacterized protein AT5G22270 [Arabidopsis thaliana]                                                                                                         | 88  | 93  | 1.00E-14  | 105.7 | 59.1 | 64.8 | uncharacterized protein                | gbpln | Arabidopsis thaliana | AT5G22270.1   Symbols:   unknown protein; BEST Arabidopsis thaliana protein match is: unknown protein (TAIR:AT3G11600.1). Has 136 Blast hits to 136 proteins in 15 species: Archae - 0; Bacteria - 0; Metazoa - 0; Fungi - 0; Plants - 136; Viruses - 0; Other Eukaryotes - 0 (source: NCBI BLink).   chr5:7372487-7372768 REVERSE LENGTH=93                                                                                                                                                                                          | 88  | 93  | 2.00E-17  | 105.7 | 59.1 | 64.8 |
| Rsa1.0_00673.1.g17868.t1 | refXP_002874058.1  hypothetical protein ARALYDRAFT_489079 [Arabidopsis lyrata subsp. lyrata] gi 297319895 gb EFH50317.1  hypothetical protein ARALYDRAFT_489079 [Arabidopsis lyrata subsp. lyrata]                                                                                                                                                                                                                                                                                                                                        | 108 | 108 | 8.00E-51  | 100.0 | 93.5 | 96.3 | hypothetical protein ARALYDRAFT_489079 | gbpln | Arabidopsis lyrata   | AT5G22280.1   Symbols:   unknown protein; FUNCTIONS IN: molecular_function unknown; INVOLVED IN: biological_process unknown; LOCATED IN: endomembrane system; EXPRESSED IN: 22 plant structures; EXPRESSED DURING: 13 growth stages; BEST Arabidopsis thaliana protein match is: unknown protein (TAIR:AT3G44280.1); Has 82 Blast hits to 82 proteins in 13 species: Archae - 0; Bacteria - 0; Metazoa - 0; Fungi - 0; Plants - 82; Viruses - 0; Other Eukaryotes - 0 (source: NCBI BLink).   chr5:7374211-7375112 REVERSE LENGTH=108 | 108 | 108 | 9.00E-53  | 100.0 | 92.6 | 95.4 |
| Rsa1.0_00673.1.g17869.t2 | refXP_002874060.1  predicted protein [Arabidopsis lyrata subsp. lyrata] gi 297319897 gb EFH50319.1  predicted protein [Arabidopsis lyrata subsp. lyrata]                                                                                                                                                                                                                                                                                                                                                                                  | 515 | 121 | 3.00E-22  | 23.5  | 10.7 | 12.8 | predicted protein                      | gbpln | Arabidopsis lyrata   | #                                                                                                                                                                                                                                                                                                                                                                                                                                                                                                                                     | #   | #   | #         | #     | #    | #    |
| Rsa1.0_00673.1.g17870.t1 | gb ABM55735.1  nitrilase 4 [Brassica rapa]                                                                                                                                                                                                                                                                                                                                                                                                                                                                                                | 357 | 357 | 0         | 100.0 | 95.5 | 97.5 | nitrilase 4                            | gbpln | Brassica rapa        | AT5G22300.1   Symbols:   NIT4, AtNIT4   nitrilase 4   chr5:7379401-7381764 FORWARD LENGTH=355                                                                                                                                                                                                                                                                                                                                                                                                                                         | 357 | 355 | 0         | 99.4  | 87.7 | 92.7 |
| Rsa1.0_00673.1.g17871.t1 | gb EOA20612.1  hypothetical protein CARUB_v10000923mg [Capsella rubella]                                                                                                                                                                                                                                                                                                                                                                                                                                                                  | 458 | 458 | 0         | 100.0 | 98.5 | 99.6 | hypothetical protein CARUB_v10000923mg | gbpln | Capsella rubella     | AT5G22330.1   Symbols:   ATTIP49A, RIN1   P-loop containing nucleoside triphosphate hydrolases superfamily protein   chr5:7391026-7394071 REVERSE LENGTH=458                                                                                                                                                                                                                                                                                                                                                                          | 458 | 458 | 0         | 100.0 | 98.3 | 99.3 |
| Rsa1.0_00673.1.g17872.t1 | refXP_002874065.1  hypothetical protein ARALYDRAFT_910225 [Arabidopsis lyrata subsp. lyrata] gi 297319902 gb EFH50324.1  hypothetical protein ARALYDRAFT_910225 [Arabidopsis lyrata subsp. lyrata]                                                                                                                                                                                                                                                                                                                                        | 425 | 427 | 0         | 100.5 | 90.4 | 96.0 | hypothetical protein ARALYDRAFT_910225 | gbpln | Arabidopsis lyrata   | AT5G22350.1   Symbols:   ELM1   Protein of unknown function (DUF1022)   chr5:7397762-7400746 REVERSE LENGTH=427                                                                                                                                                                                                                                                                                                                                                                                                                       | 425 | 427 | 0         | 100.5 | 89.6 | 95.8 |
| Rsa1.0_00673.1.g17873.t1 | gb ABM30199.2  synaptobrevin-like protein [Brassica juncea]                                                                                                                                                                                                                                                                                                                                                                                                                                                                               | 221 | 221 | 1.00E-122 | 100.0 | 95.9 | 97.7 | synaptobrevin-like protein             | gbpln | Brassica juncea      | AT5G22360.1   Symbols:   ATVAMP714, VAMP714   vesicle-associated membrane protein 714   chr5:7404379-7405654 REVERSE LENGTH=221                                                                                                                                                                                                                                                                                                                                                                                                       | 221 | 221 | 1.00E-123 | 100.0 | 93.2 | 98.2 |
| Rsa1.0_00673.1.g17874.t1 | #                                                                                                                                                                                                                                                                                                                                                                                                                                                                                                                                         | #   | #   | #         | #     | #    | #    | -                                      | ----  | ----                 | #                                                                                                                                                                                                                                                                                                                                                                                                                                                                                                                                     | #   | #   | #         | #     | #    | #    |

|                          |                                                                                                                                                                                                                                                                                    |      |      |           |       |      |      |                                              |       |                      |                                                                                                                                             |      |     |           |       |      |      |
|--------------------------|------------------------------------------------------------------------------------------------------------------------------------------------------------------------------------------------------------------------------------------------------------------------------------|------|------|-----------|-------|------|------|----------------------------------------------|-------|----------------------|---------------------------------------------------------------------------------------------------------------------------------------------|------|-----|-----------|-------|------|------|
| Rsa1.0_00673.1.g17875.t1 | gb AAG51783.1 AC079679.3 reverse transcriptase, putative; 16838-20266 [Arabidopsis thaliana]                                                                                                                                                                                       | 589  | 1142 | 0         | 193.9 | 55.7 | 70.8 | reverse transcriptase, putative; 16838-20266 | gbpln | Arabidopsis thaliana | AT4G29090.1   Symbols:   Ribonuclease H-like superfamily protein   chr4:14333528-14335255 FORWARD LENGTH=575                                | 589  | 575 | 1.00E-29  | 97.6  | 9.8  | 14.3 |
| Rsa1.0_00674.1.g17876.t1 | ref XP_002864340.1  hypothetical protein ARALYDRAFT_495535 [Arabidopsis lyrata subsp. lyrata] gi 297310175 gb EFH40599.1  hypothetical protein ARALYDRAFT_495535 [Arabidopsis lyrata subsp. lyrata]                                                                                | 266  | 335  | 2.00E-70  | 125.9 | 48.9 | 56.8 | hypothetical protein ARALYDRAFT_495535       | gbpln | Arabidopsis lyrata   | AT5G54550.1   Symbols:   Protein of unknown function (DUF295)   chr5:22158401-22159480 FORWARD LENGTH=359                                   | 266  | 359 | 3.00E-70  | 135.0 | 47.7 | 54.5 |
| Rsa1.0_00674.1.g17877.t1 | #                                                                                                                                                                                                                                                                                  | #    | #    | #         | #     | #    | -    | ----                                         | ----  | #                    | #                                                                                                                                           | #    | #   | #         | #     | #    | #    |
| Rsa1.0_00674.1.g17878.t1 | ref NP_568793.1  CCT motif family protein [Arabidopsis thaliana] gi 20466574 gb AAM20604.1  putative protein [Arabidopsis thaliana] gi 23198144 gb AANI5599.1  putative protein [Arabidopsis thaliana] gi 332008967 gb AED96350.1  CCT motif family protein [Arabidopsis thaliana] | 274  | 264  | 1.00E-122 | 96.4  | 82.8 | 86.9 | CCT motif family protein                     | gbpln | Arabidopsis thaliana | AT5G53420.1   Symbols:   CCT motif family protein   chr5:21673683-21675469 FORWARD LENGTH=264                                               | 274  | 264 | 1.00E-125 | 96.4  | 82.8 | 86.9 |
| Rsa1.0_00674.1.g17879.t1 | #                                                                                                                                                                                                                                                                                  | #    | #    | #         | #     | #    | -    | ----                                         | ----  | #                    | #                                                                                                                                           | #    | #   | #         | #     | #    | #    |
| Rsa1.0_00674.1.g17880.t1 | ref NP_200138.1  Seed maturation protein [Arabidopsis thaliana] gi 9759173 dbj BAB09788.1  unnamed protein product [Arabidopsis thaliana] gi 332008947 gb AED96330.1  Seed maturation protein [Arabidopsis thaliana]                                                               | 187  | 176  | 4.00E-59  | 94.1  | 65.2 | 77.5 | Seed maturation protein                      | gbpln | Arabidopsis thaliana | AT5G53260.1   Symbols:   Seed maturation protein   chr5:21604662-21605674 REVERSE LENGTH=176                                                | 187  | 176 | 2.00E-61  | 94.1  | 65.2 | 77.5 |
| Rsa1.0_00674.1.g17881.t1 | ref XP_002864231.1  AGP22/ATAGP22 [Arabidopsis lyrata subsp. lyrata] gi 297310066 gb EFH40490.1  AGP22/ATAGP22 [Arabidopsis lyrata subsp. lyrata]                                                                                                                                  | 63   | 63   | 6.00E-25  | 100.0 | 95.2 | 98.4 | AGP22/ATAGP22                                | gbpln | Arabidopsis lyrata   | AT5G53250.1   Symbols:   AGP22, ATAGP22   arabinogalactan protein 22   chr5:21603715-21604007 FORWARD LENGTH=63                             | 63   | 63  | 1.00E-26  | 100.0 | 93.7 | 95.2 |
| Rsa1.0_00674.1.g17882.t1 | ref NP_200266.1  uncharacterized protein [Arabidopsis thaliana] gi 9758947 dbj BAB09334.1  unnamed protein product [Arabidopsis thaliana] gi 332009126 gb AED96509.1  uncharacterized protein AT5G54550 [Arabidopsis thaliana]                                                     | 373  | 359  | 1.00E-109 | 96.2  | 59.0 | 68.6 | uncharacterized protein                      | gbpln | Arabidopsis thaliana | AT5G54550.1   Symbols:   Protein of unknown function (DUF295)   chr5:22158401-22159480 FORWARD LENGTH=359                                   | 373  | 359 | 1.00E-112 | 96.2  | 59.0 | 68.6 |
| Rsa1.0_00674.1.g17883.t1 | ref XP_002871160.1  hypothetical protein ARALYDRAFT_908458 [Arabidopsis lyrata subsp. lyrata] gi 297316997 gb EFH47419.1  hypothetical protein ARALYDRAFT_908458 [Arabidopsis lyrata subsp. lyrata]                                                                                | 526  | 593  | 0         | 112.7 | 75.9 | 85.9 | hypothetical protein ARALYDRAFT_908458       | gbpln | Arabidopsis lyrata   | AT5G05450.1   Symbols:   P-loop containing nucleoside triphosphate hydrolases superfamily protein   chr5:1612077-1615195 FORWARD LENGTH=593 | 526  | 593 | 0         | 112.7 | 76.2 | 86.3 |
| Rsa1.0_00674.1.g17884.t1 | #                                                                                                                                                                                                                                                                                  | #    | #    | #         | #     | #    | -    | ----                                         | ----  | #                    | #                                                                                                                                           | #    | #   | #         | #     | #    | #    |
| Rsa1.0_00674.1.g17885.t1 | dbj BAJ34295.1  unnamed protein product [Thellungiella halophila]                                                                                                                                                                                                                  | 356  | 368  | 1.00E-147 | 103.4 | 86.8 | 91.3 | unnamed protein product                      | ----  | ----                 | AT5G53210.1   Symbols:   SPCH   basic helix-loop-helix (bHLH) DNA-binding superfamily protein   chr5:21586606-21588941 REVERSE LENGTH=364   | 356  | 364 | 1.00E-127 | 102.2 | 88.2 | 91.6 |
| Rsa1.0_00674.1.g17886.t1 | #                                                                                                                                                                                                                                                                                  | #    | #    | #         | #     | #    | -    | ----                                         | ----  | #                    | #                                                                                                                                           | #    | #   | #         | #     | #    | #    |
| Rsa1.0_00674.1.g17887.t1 | #                                                                                                                                                                                                                                                                                  | #    | #    | #         | #     | #    | -    | ----                                         | ----  | #                    | #                                                                                                                                           | #    | #   | #         | #     | #    | #    |
| Rsa1.0_00674.1.g17888.t1 | #                                                                                                                                                                                                                                                                                  | #    | #    | #         | #     | #    | -    | ----                                         | ----  | #                    | #                                                                                                                                           | #    | #   | #         | #     | #    | #    |
| Rsa1.0_00674.1.g17889.t2 | ref XP_002865955.1  FTSH11 [Arabidopsis lyrata subsp. lyrata] gi 297311790 gb EFH42214.1  FTSH11 [Arabidopsis lyrata subsp. lyrata]                                                                                                                                                | 1133 | 805  | 0         | 71.1  | 63.0 | 65.8 | FTSH11                                       | gbpln | Arabidopsis lyrata   | AT5G53170.1   Symbols:   FTSH11   FTSH protease 11   chr5:21563023-21567922 REVERSE LENGTH=806                                              | 1133 | 806 | 0         | 71.1  | 62.8 | 65.6 |
| Rsa1.0_00674.1.g17890.t1 | ref XP_002864227.1  hypothetical protein ARALYDRAFT_918386 [Arabidopsis lyrata subsp. lyrata] gi 297310062 gb EFH40486.1  hypothetical protein ARALYDRAFT_918386 [Arabidopsis lyrata subsp. lyrata]                                                                                | 188  | 193  | 9.00E-91  | 102.7 | 87.8 | 91.5 | hypothetical protein ARALYDRAFT_918386       | gbpln | Arabidopsis lyrata   | AT5G53160.2   Symbols:   RCAR3, PYL8   regulatory components of ABA receptor 3   chr5:21561026-21561953 FORWARD LENGTH=188                  | 188  | 188 | 2.00E-92  | 100.0 | 88.3 | 93.6 |
| Rsa1.0_00674.1.g17891.t1 | #                                                                                                                                                                                                                                                                                  | #    | #    | #         | #     | #    | -    | ----                                         | ----  | #                    | #                                                                                                                                           | #    | #   | #         | #     | #    | #    |
| Rsa1.0_00675.1.g17892.t1 | ref XP_002881717.1  transducin family protein [Arabidopsis lyrata subsp. lyrata] gi 297327556 gb EFH57976.1  transducin family protein [Arabidopsis lyrata subsp. lyrata]                                                                                                          | 865  | 757  | 0         | 87.5  | 64.6 | 68.9 | transducin family protein                    | gbpln | Arabidopsis lyrata   | AT2G40360.1   Symbols:   Transducin/WD40 repeat-like superfamily protein   chr2:16853123-16856635 REVERSE LENGTH=753                        | 865  | 753 | 0         | 87.1  | 63.7 | 68.7 |



|                          |                                                                                                                                                                                                                                                                                                                                                                  |      |      |           |       |      |      |                                                                        |       |                      |                                                                                                                                                                                                                                                                                                                                                                                         |      |      |           |       |      |      |
|--------------------------|------------------------------------------------------------------------------------------------------------------------------------------------------------------------------------------------------------------------------------------------------------------------------------------------------------------------------------------------------------------|------|------|-----------|-------|------|------|------------------------------------------------------------------------|-------|----------------------|-----------------------------------------------------------------------------------------------------------------------------------------------------------------------------------------------------------------------------------------------------------------------------------------------------------------------------------------------------------------------------------------|------|------|-----------|-------|------|------|
| Rsa1.0_00675.1.g17893.t1 | refNP_182036.1  expansin B4 [Arabidopsis thaliana] gi 20138422 sp Q9SHD1.1 EXPB4_ARAT H RecName: Full=Expansin-B4; Short=At-EXPB4; Short=ATEXPB4; AltName: Full=AtH-ExpBeta-1.1; AltName: Full=Beta-expansin-4; Flags: Precursor gi 330255414 gb AEC10508.1  expansin B4 [Arabidopsis thaliana]                                                                  | 259  | 259  | 1.00E-117 | 100.0 | 76.8 | 88.4 | expansin B4                                                            | gbpln | Arabidopsis thaliana | AT2G45110.1   Symbols: ATEXPB4, EXPB4, ATHEXP BETA 1.1   expansin B4   chr2:18599575-18601237 FORWARD LENGTH=259                                                                                                                                                                                                                                                                        | 259  | 259  | 1.00E-119 | 100.0 | 76.8 | 88.4 |
| Rsa1.0_00675.1.g17894.t1 | gb AAD32898.1  putative retroelement pol polyprotein [Arabidopsis thaliana]                                                                                                                                                                                                                                                                                      | 1386 | 1307 | 0         | 94.3  | 58.4 | 73.7 | putative retroelement pol polyprotein                                  | gbpln | Arabidopsis thaliana | AT4G23160.1   Symbols: CRK8   cysteine-rich RLK (RECEPTOR-like protein kinase) 8   chr4:12129485-12134086 FORWARD LENGTH=1262                                                                                                                                                                                                                                                           | 1386 | 1262 | 1.00E-106 | 91.1  | 14.1 | 22.4 |
| Rsa1.0_00675.1.g17895.t1 | refNP_564860.3  putative expansin-B2 [Arabidopsis thaliana] gi 20138423 sp Q9SHY6.2 EXPB2_ARAT H RecName: Full=Putative expansin-B2; Short=At-EXPB2; Short=ATEXPB2; AltName: Full=AtH-ExpBeta-1.4; AltName: Full=Beta-expansin-2; Flags: Precursor gi 332196289 gb AEE34410.1  putative expansin-B2 [Arabidopsis thaliana]                                       | 265  | 273  | 1.00E-109 | 103.0 | 76.6 | 84.9 | putative expansin-B2                                                   | gbpln | Arabidopsis thaliana | AT1G65680.1   Symbols: ATEXPB2, EXPB2, ATHEXP BETA 1.4   expansin B2   chr1:24427266-24428399 FORWARD LENGTH=273                                                                                                                                                                                                                                                                        | 265  | 273  | 1.00E-111 | 103.0 | 76.6 | 84.9 |
| Rsa1.0_00675.1.g17896.t1 | gb EOA27868.1  hypothetical protein CARUB_v10024026mg [Capsella rubella]                                                                                                                                                                                                                                                                                         | 222  | 220  | 1.00E-119 | 99.1  | 94.6 | 97.3 | hypothetical protein CARUB_v10024026mg                                 | gbpln | Capsella rubella     | AT2G45080.1   Symbols: cypc3:1   cyclin p3:1   chr2:18591688-18592443 FORWARD LENGTH=222                                                                                                                                                                                                                                                                                                | 222  | 222  | 1.00E-120 | 100.0 | 94.1 | 97.3 |
| Rsa1.0_00675.1.g17897.t1 | ref XP_004133771.1  PREDICTED: protein transport protein Sec61 subunit beta-like isoform 1 [Cucumis sativus] gi 449431968 ref XP_004133772.1  PREDICTED: protein transport protein Sec61 subunit beta-like isoform 2 [Cucumis sativus] gi 449431970 ref XP_004133773.1  PREDICTED: protein transport protein Sec61 subunit beta-like isoform 3 [Cucumis sativus] | 81   | 82   | 5.00E-28  | 101.2 | 80.2 | 87.7 | PREDICTED: protein transport protein Sec61 subunit beta-like isoform 1 | gbpln | Cucumis sativus      | AT2G45070.4   Symbols: SEC61 BETA   Preprotein translocase Sec. Sec61-beta subunit protein   chr2:18587208-18587456 REVERSE LENGTH=82                                                                                                                                                                                                                                                   | 81   | 82   | 1.00E-29  | 101.2 | 84.0 | 86.4 |
| Rsa1.0_00675.1.g17898.t1 | gb ADK63416.1  GATA type zinc finger protein [Brassica rapa]                                                                                                                                                                                                                                                                                                     | 258  | 256  | 1.00E-109 | 99.2  | 84.5 | 88.8 | GATA type zinc finger protein                                          | gbpln | Brassica rapa        | AT2G45050.1   Symbols: GATA2   GATA transcription factor 2   chr2:18582958-18583845 FORWARD LENGTH=264                                                                                                                                                                                                                                                                                  | 258  | 264  | 1.00E-107 | 102.3 | 85.3 | 89.1 |
| Rsa1.0_00675.1.g17899.t1 | refNP_182030.1  matrix metalloprotease domain-containing protein [Arabidopsis thaliana] gi 26452204 dbj BAC43190.1  putative metalloproteinase [Arabidopsis thaliana] gi 31711730 gb AAP68221.1  At2g45040 [Arabidopsis thaliana] gi 330255405 gb AEC10499.1  matrix metalloprotease domain-containing protein [Arabidopsis thaliana]                            | 337  | 342  | 1.00E-159 | 101.5 | 81.6 | 89.3 | matrix metalloprotease domain-containing protein                       | gbpln | Arabidopsis thaliana | AT2G45040.1   Symbols:   Matrixin family protein   chr2:18577693-18578721 FORWARD LENGTH=342                                                                                                                                                                                                                                                                                            | 337  | 342  | 1.00E-162 | 101.5 | 81.6 | 89.3 |
| Rsa1.0_00675.1.g17900.t1 | gb EOA26634.1  hypothetical protein CARUB_v10022698mg [Capsella rubella]                                                                                                                                                                                                                                                                                         | 757  | 754  | 0         | 99.6  | 92.7 | 96.3 | hypothetical protein CARUB_v10022698mg                                 | gbpln | Capsella rubella     | AT2G45030.1   Symbols:   Translation elongation factor EFG/EF2 protein   chr2:18572411-18576756 FORWARD LENGTH=754                                                                                                                                                                                                                                                                      | 757  | 754  | 0         | 99.6  | 92.1 | 96.6 |
| Rsa1.0_00675.1.g17901.t1 | gb EOA28399.1  hypothetical protein CARUB_v10024605mg [Capsella rubella]                                                                                                                                                                                                                                                                                         | 148  | 166  | 1.00E-65  | 112.2 | 84.5 | 89.2 | hypothetical protein CARUB_v10024605mg                                 | gbpln | Capsella rubella     | AT2G28105.1   Symbols:   CONTAINS InterPro DOMAIN/s: Nucleic acid-binding, OB-fold-like (InterPro:IPR016027), Replication factor A, C-terminal (InterPro:IPR013955). Has 20 Blast hits to 20 proteins in 10 species: Archae - 0; Bacteria - 0; Metazoa - 2; Fungi - 0; Plants - 18; Viruses - 0; Other Eukaryotes - 0 (source: NCBI BLINK).   chr2:11976764-11977713 FORWARD LENGTH=166 | 148  | 166  | 6.00E-68  | 112.2 | 83.8 | 89.9 |
| Rsa1.0_00675.1.g17902.t3 | ref XP_002880151.1  hypothetical protein ARALYDRAFT_483631 [Arabidopsis lyrata subsp. lyrata] gi 297325990 gb EFH56410.1  hypothetical protein ARALYDRAFT_483631 [Arabidopsis lyrata subsp. lyrata]                                                                                                                                                              | 245  | 244  | 1.00E-128 | 99.6  | 93.5 | 96.7 | hypothetical protein ARALYDRAFT_483631                                 | gbpln | Arabidopsis lyrata   | AT2G45010.1   Symbols:   PLAC8 family protein   chr2:18568045-18569615 FORWARD LENGTH=244                                                                                                                                                                                                                                                                                               | 245  | 244  | 1.00E-130 | 99.6  | 93.5 | 96.7 |
| Rsa1.0_00675.1.g17903.t2 | ref XP_002881993.1  hypothetical protein ARALYDRAFT_483627 [Arabidopsis lyrata subsp. lyrata] gi 297327832 gb EFH58252.1  hypothetical protein ARALYDRAFT_483627 [Arabidopsis lyrata subsp. lyrata]                                                                                                                                                              | 864  | 873  | 0         | 101.0 | 89.7 | 94.7 | hypothetical protein ARALYDRAFT_483627                                 | gbpln | Arabidopsis lyrata   | AT2G44980.2   Symbols:   SNF2 domain-containing protein / helicase domain-containing protein   chr2:18552343-18556669 REVERSE LENGTH=877                                                                                                                                                                                                                                                | 864  | 877  | 0         | 101.5 | 89.4 | 94.2 |

|                          |                                                                                                                                                                                                                                                                                                                                             |      |      |           |       |      |      |                                        |       |                      |                                                                                                                                                                                                                                                                                                                                                                |      |      |           |       |      |      |
|--------------------------|---------------------------------------------------------------------------------------------------------------------------------------------------------------------------------------------------------------------------------------------------------------------------------------------------------------------------------------------|------|------|-----------|-------|------|------|----------------------------------------|-------|----------------------|----------------------------------------------------------------------------------------------------------------------------------------------------------------------------------------------------------------------------------------------------------------------------------------------------------------------------------------------------------------|------|------|-----------|-------|------|------|
| Rsa1.0_00675.1.g17904.t1 | ref[XP_002881991.1] histone mono-ubiquitination 1 [Arabidopsis lyrata subsp. lyrata] gi 297327830 gb EFH58250.1  histone mono-ubiquitination 1 [Arabidopsis lyrata subsp. lyrata]                                                                                                                                                           | 877  | 878  | 0         | 100.1 | 87.0 | 93.5 | histone mono-ubiquitination 1          | gbpln | Arabidopsis lyrata   | AT2G44950.1   Symbols: RDO4, HUB1   histone mono-ubiquitination 1   chr2:18542602-18548247 REVERSE LENGTH=878                                                                                                                                                                                                                                                  | 877  | 878  | 0         | 100.1 | 86.5 | 92.9 |
| Rsa1.0_00675.1.g17905.t1 | ref[XP_002880148.1] hypothetical protein ARALYDRAFT_483623 [Arabidopsis lyrata subsp. lyrata] gi 297325987 gb EFH56407.1  hypothetical protein ARALYDRAFT_483623 [Arabidopsis lyrata subsp. lyrata]                                                                                                                                         | 296  | 290  | 1.00E-107 | 98.0  | 74.3 | 83.4 | hypothetical protein ARALYDRAFT_483623 | gbpln | Arabidopsis lyrata   | AT2G44940.1   Symbols:   Integrase-type DNA-binding superfamily protein   chr2:18537294-18538181 FORWARD LENGTH=295                                                                                                                                                                                                                                            | 296  | 295  | 1.00E-102 | 99.7  | 70.9 | 80.4 |
| Rsa1.0_00675.1.g17906.t1 | gb AFZ41789.1  putative progesterone 5-beta-reductase [Raphanus sativus]                                                                                                                                                                                                                                                                    | 203  | 390  | 2.00E-33  | 192.1 | 33.5 | 35.5 | putative progesterone 5-beta-reductase | gbpln | Raphanus sativus     | AT4G24220.1   Symbols: VEP1, AWI31   NAD(P)-binding Rossmann-fold superfamily protein   chr4:12565219-12566474 FORWARD LENGTH=388                                                                                                                                                                                                                              | 203  | 388  | 4.00E-35  | 191.1 | 34.0 | 36.9 |
| Rsa1.0_00675.1.g17907.t2 | gb EOA14700.1  hypothetical protein CARUB_v10027975mg [Capsella rubella]                                                                                                                                                                                                                                                                    | 592  | 766  | 0         | 129.4 | 58.1 | 68.9 | hypothetical protein CARUB_v10027975mg | gbpln | Capsella rubella     | AT1G19260.1   Symbols:   TTF-type zinc finger protein with HAT dimerisation domain   chr1:6657260-6659569 REVERSE LENGTH=769                                                                                                                                                                                                                                   | 592  | 769  | 0         | 129.9 | 59.0 | 70.4 |
| Rsa1.0_00675.1.g17908.t1 | ref NP_173766.1  uncharacterized protein [Arabidopsis thaliana] gi 8778585 gb AAF79593.1 AC007945_13 F28C11.15 [Arabidopsis thaliana] gi 4056435 gb AAC98008.1  Similar to OBP32pep protein gi U37698 from Arabidopsis thaliana [Arabidopsis thaliana] gi 332192277 gb AEE30398.1  uncharacterized protein AT1G23520 [Arabidopsis thaliana] | 267  | 263  | 9.00E-72  | 98.5  | 54.7 | 71.2 | uncharacterized protein                | gbpln | Arabidopsis thaliana | AT1G23520.1   Symbols:   Domain of unknown function (DUF220)   chr1:8343571-8344675 REVERSE LENGTH=263                                                                                                                                                                                                                                                         | 267  | 263  | 2.00E-74  | 98.5  | 54.7 | 71.2 |
| Rsa1.0_00676.1.g17909.t1 | gb EOA22792.1  hypothetical protein CARUB_v10003509mg [Capsella rubella]                                                                                                                                                                                                                                                                    | 350  | 360  | 1.00E-176 | 102.9 | 85.4 | 93.4 | hypothetical protein CARUB_v10003509mg | gbpln | Capsella rubella     | AT5G07010.1   Symbols: ATST2A, ST2A   sulfotransferase 2A   chr5:2174960-2176039 REVERSE LENGTH=359                                                                                                                                                                                                                                                            | 350  | 359  | 1.00E-176 | 102.6 | 83.4 | 92.6 |
| Rsa1.0_00676.1.g17910.t1 | ref NP_196316.1  uncharacterized protein [Arabidopsis thaliana] gi 9759555 db BAB11157.1  unnamed protein product [Arabidopsis thaliana] gi 71905551 gb AAZ52753.1  expressed protein [Arabidopsis thaliana] gi 332003713 gb AED91096.1  uncharacterized protein AT5G06990 [Arabidopsis thaliana]                                           | 258  | 261  | 1.00E-120 | 101.2 | 88.8 | 94.6 | uncharacterized protein                | gbpln | Arabidopsis thaliana | AT5G06990.1   Symbols:   Protein of unknown function, DUF617   chr5:2169699-2170484 FORWARD LENGTH=261                                                                                                                                                                                                                                                         | 258  | 261  | 1.00E-123 | 101.2 | 88.8 | 94.6 |
| Rsa1.0_00676.1.g17911.t1 | db BAJ33600.1  unnamed protein product [Theilingiella halophila]                                                                                                                                                                                                                                                                            | 287  | 286  | 1.00E-120 | 99.7  | 80.5 | 84.7 | unnamed protein product                | ----  | ----                 | AT5G06980.4   Symbols:   unknown protein; FUNCTIONS IN: molecular_function unknown; INVOLVED IN: response to karrikin; LOCATED IN: cellular_component unknown; EXPRESSED IN: 21 plant structures; EXPRESSED DURING: 11 growth stages; BEST Arabidopsis thaliana protein match is: unknown protein (TAIRAT3G12320.1).   chr5:2167799-2169110 FORWARD LENGTH=279 | 287  | 279  | 6.00E-99  | 97.2  | 70.4 | 78.4 |
| Rsa1.0_00676.1.g17912.t1 | ref[XP_002873288.1] hypothetical protein ARALYDRAFT_487516 [Arabidopsis lyrata subsp. lyrata] gi 297319125 gb EFH49547.1  hypothetical protein ARALYDRAFT_487516 [Arabidopsis lyrata subsp. lyrata]                                                                                                                                         | 1127 | 1101 | 0         | 97.7  | 90.7 | 93.8 | hypothetical protein ARALYDRAFT_487516 | gbpln | Arabidopsis lyrata   | AT5G06970.1   Symbols:   Protein of unknown function (DUF810)   chr5:2158431-2166004 REVERSE LENGTH=1101                                                                                                                                                                                                                                                       | 1127 | 1101 | 0         | 97.7  | 89.8 | 93.8 |
| Rsa1.0_00676.1.g17913.t1 | gb EOA21559.1  hypothetical protein CARUB_v10001968mg [Capsella rubella]                                                                                                                                                                                                                                                                    | 213  | 209  | 9.00E-96  | 98.1  | 79.3 | 88.7 | hypothetical protein CARUB_v10001968mg | gbpln | Capsella rubella     | AT3G56180.1   Symbols:   Protein of unknown function (DUF567)   chr3:20844765-20845548 FORWARD LENGTH=204                                                                                                                                                                                                                                                      | 213  | 204  | 7.00E-36  | 95.8  | 36.6 | 56.3 |

|                          |                                                                                                                                                                                                                                                                                                                                                                                                                                                                                                                                                                                                           |      |      |           |       |      |      |                                                       |       |                      |                                                                                                                                                                        |      |      |           |       |      |      |
|--------------------------|-----------------------------------------------------------------------------------------------------------------------------------------------------------------------------------------------------------------------------------------------------------------------------------------------------------------------------------------------------------------------------------------------------------------------------------------------------------------------------------------------------------------------------------------------------------------------------------------------------------|------|------|-----------|-------|------|------|-------------------------------------------------------|-------|----------------------|------------------------------------------------------------------------------------------------------------------------------------------------------------------------|------|------|-----------|-------|------|------|
| Rsa1.0_00676.1.g17914.t1 | ref NP_196389.1  xyloglucan 6-xylosyltransferase [Arabidopsis thaliana]<br>gi 46576342 sp Q9LF80.1 GT3_ARATH<br>RecName: Full=Putative glycosyltransferase 3; Short=AtGT3<br>gi 9716848 emb CAC01676.1  putative golgi glycosyltransferase [Arabidopsis thaliana] gi 9759594 dbj BAB11451.1 <br>alpha galactosyltransferase protein [Arabidopsis thaliana]<br>gi 34098851 gb AAQ56808.1  At5g07720 [Arabidopsis thaliana]<br>gi 110743797 dbj BAE99734.1  alpha galactosyltransferase protein [Arabidopsis thaliana]<br>gi 332003814 gb AED91197.1  putative glycosyltransferase 3 [Arabidopsis thaliana] | 456  | 457  | 0         | 100.2 | 89.9 | 96.1 | xyloglucan 6-xylosyltransferase                       | gbpln | Arabidopsis thaliana | AT5G07720.1   Symbols:   Galactosyl transferase GMA12/MNN10 family protein   chr5:2455757-2457130 FORWARD LENGTH=457                                                   | 456  | 457  | 0         | 100.2 | 89.9 | 96.1 |
| Rsa1.0_00676.1.g17915.t7 | gb EOA23129.1  hypothetical protein CARUB_v100028210mg, partial [Capsella rubella]                                                                                                                                                                                                                                                                                                                                                                                                                                                                                                                        | 1320 | 809  | 0         | 61.3  | 36.5 | 41.5 | hypothetical protein CARUB_v100028210mg, partial      | gbpln | Capsella rubella     | AT5G07740.1   Symbols:   actin binding   chr5:2459076-2466580 REVERSE LENGTH=1649                                                                                      | 1320 | 1649 | 0         | 124.9 | 32.8 | 36.4 |
| Rsa1.0_00676.1.g17916.t1 | ref NP_196382.2  Actin-binding FH2 protein [Arabidopsis thaliana]<br>gi 332003806 gb AED91189.1  Actin-binding FH2 protein [Arabidopsis thaliana]                                                                                                                                                                                                                                                                                                                                                                                                                                                         | 1296 | 815  | 0         | 62.9  | 35.8 | 43.8 | Actin-binding FH2 protein                             | gbpln | Arabidopsis thaliana | AT5G07650.1   Symbols:   Actin-binding FH2 protein   chr5:2416375-2421814 REVERSE LENGTH=815                                                                           | 1296 | 815  | 0         | 62.9  | 35.8 | 43.8 |
| Rsa1.0_00676.1.g17917.t1 | ref NP_196397.1  flavin-containing monooxygenase-like protein [Arabidopsis thaliana]<br>gi 75170143 sp Q9FF12.1 GSXL9_ARATH<br>H RecName: Full=Flavin-containing monooxygenase FMO GS-OX-like 9; AltName: Full=Flavin-monoxygenase glucosinolate S-oxygenase-like 9<br>gi 10176714 dbj BAB09944.1  dimethylaniline monooxygenase-like protein [Arabidopsis thaliana]<br>gi 332003823 gb AED91206.1  flavin-containing monooxygenase FMO GS-OX-like 9 [Arabidopsis thaliana]                                                                                                                               | 461  | 460  | 0         | 99.8  | 91.8 | 96.5 | flavin-containing monooxygenase-like protein          | gbpln | Arabidopsis thaliana | AT5G07800.1   Symbols:   Flavin-binding monooxygenase family protein   chr5:2486717-2489241 REVERSE LENGTH=460                                                         | 461  | 460  | 0         | 99.8  | 91.8 | 96.5 |
| Rsa1.0_00676.1.g17918.t1 | gb EOA20264.1  hypothetical protein CARUB_v1000566mg [Capsella rubella]                                                                                                                                                                                                                                                                                                                                                                                                                                                                                                                                   | 540  | 579  | 1.00E-151 | 107.2 | 69.1 | 78.1 | hypothetical protein CARUB_v1000566mg                 | gbpln | Capsella rubella     | AT5G07820.1   Symbols:   Plant calmodulin-binding protein-related   chr5:2498861-2500546 REVERSE LENGTH=561                                                            | 540  | 561  | 1.00E-140 | 103.9 | 67.8 | 76.7 |
| Rsa1.0_00676.1.g17919.t1 | emb CAB62595.1  putative protein [Arabidopsis thaliana]                                                                                                                                                                                                                                                                                                                                                                                                                                                                                                                                                   | 522  | 521  | 0         | 99.8  | 87.7 | 95.4 | putative protein                                      | gbpln | Arabidopsis thaliana | AT5G07830.1   Symbols:   AtGUS2, GUS2   glucuronidase 2   chr5:2504168-2506567 FORWARD LENGTH=543                                                                      | 522  | 543  | 0         | 104.0 | 87.7 | 95.4 |
| Rsa1.0_00676.1.g17920.t1 | dbj BAJ34130.1  unnamed protein product [Thellungiella halophila]                                                                                                                                                                                                                                                                                                                                                                                                                                                                                                                                         | 306  | 302  | 1.00E-115 | 98.7  | 72.5 | 82.0 | unnamed protein product                               | ----  | ----                 | AT5G61210.1   Symbols:   SNAP33, ATSNAP33, SNP33, ATSNAP33B   soluble N-ethylmaleimide-sensitive factor adaptor protein 33   chr5:24624027-24625366 FORWARD LENGTH=300 | 306  | 300  | 1.00E-112 | 98.0  | 68.0 | 80.1 |
| Rsa1.0_00676.1.g17921.t1 | ref NP_193725.3  Toll-Interleukin-Resistance domain-containing protein [Arabidopsis thaliana]<br>gi 332658846 gb AEE84246.1  Toll-Interleukin-Resistance domain-containing protein [Arabidopsis thaliana]                                                                                                                                                                                                                                                                                                                                                                                                 | 268  | 274  | 8.00E-67  | 102.2 | 49.3 | 58.2 | Toll-Interleukin-Resistance domain-containing protein | gbpln | Arabidopsis thaliana | AT4G19920.1   Symbols:   Toll-Interleukin-Resistance (TIR) domain family protein   chr4:10797392-10798360 REVERSE LENGTH=274                                           | 268  | 274  | 2.00E-69  | 102.2 | 49.3 | 58.2 |
| Rsa1.0_00676.1.g17922.t1 | ref NP_196406.2  myosin heavy chain-like protein [Arabidopsis thaliana]<br>gi 79327239 ref NP_001031851.1  myosin heavy chain-like protein [Arabidopsis thaliana]<br>gi 222423567 dbj BAH19753.1  AT5G07890 [Arabidopsis thaliana]<br>gi 332003833 gb AED91216.1  myosin heavy chain-like protein [Arabidopsis thaliana]<br>gi 332003835 gb AED91218.1  myosin heavy chain-like protein [Arabidopsis thaliana]                                                                                                                                                                                            | 435  | 409  | 1.00E-149 | 94.0  | 67.4 | 75.6 | myosin heavy chain-like protein                       | gbpln | Arabidopsis thaliana | AT5G07890.3   Symbols:   myosin heavy chain-related   chr5:2517718-2519493 REVERSE LENGTH=409                                                                          | 435  | 409  | 1.00E-152 | 94.0  | 67.4 | 75.6 |
| Rsa1.0_00677.1.g17923.t1 | gb EOA28676.1  hypothetical protein CARUB_v10024900mg [Capsella rubella]                                                                                                                                                                                                                                                                                                                                                                                                                                                                                                                                  | 361  | 901  | 3.00E-85  | 249.6 | 42.7 | 60.1 | hypothetical protein CARUB_v10024900mg                | gbpln | Capsella rubella     | AT5G28780.1   Symbols:   PIF1 helicase   chr5:10812907-10814173 REVERSE LENGTH=337                                                                                     | 361  | 337  | 6.00E-39  | 93.4  | 21.9 | 32.1 |
| Rsa1.0_00677.1.g17924.t1 | ref XP_003609074.1  ATP-dependent DNA helicase PIF1 [Medicago truncatula]<br>gi 355510129 gb AES91271.1  ATP-dependent DNA helicase PIF1 [Medicago truncatula]                                                                                                                                                                                                                                                                                                                                                                                                                                            | 786  | 1531 | 1.00E-157 | 194.8 | 35.1 | 49.9 | ATP-dependent DNA helicase PIF1                       | gbpln | Medicago truncatula  | #                                                                                                                                                                      | #    | #    | #         | #     | #    |      |

|                          |                                                                                                                                                                                                                                                      |      |      |           |       |      |      |                                           |       |                      |                                                                                                                                                                                                                                                                                                                            |      |     |           |       |      |      |
|--------------------------|------------------------------------------------------------------------------------------------------------------------------------------------------------------------------------------------------------------------------------------------------|------|------|-----------|-------|------|------|-------------------------------------------|-------|----------------------|----------------------------------------------------------------------------------------------------------------------------------------------------------------------------------------------------------------------------------------------------------------------------------------------------------------------------|------|-----|-----------|-------|------|------|
| Rsa1.0_00677.1.g17925.t1 | emb[CAB10225.1] retrovirus-related like polyprotein [Arabidopsis thaliana] gi 7268152 emb[CAB78488.1] retrovirus-related like polyprotein [Arabidopsis thaliana]                                                                                     | 802  | 1489 | 1.00E-157 | 185.7 | 40.6 | 58.7 | retrovirus-related like polyprotein       | gbpln | Arabidopsis thaliana | AT1G21280.1   Symbols:   CONTAINS InterPro DOMAIN/s: Retrotransposon gag protein (InterPro:IPR005162); Has 707 Blast hits to 705 proteins in 25 species: Archae - 0; Bacteria - 0; Metazoa - 4; Fungi - 0; Plants - 703; Viruses - 0; Other Eukaryotes - 0 (source: NCBI BLink).   chr1:7447690-7448403 REVERSE LENGTH=237 | 802  | 237 | 1.00E-14  | 29.6  | 7.1  | 12.6 |
| Rsa1.0_00677.1.g17926.t1 | gb AAG52950.1  putative envelope protein [Arabidopsis thaliana]                                                                                                                                                                                      | 342  | 461  | 3.00E-12  | 134.8 | 14.9 | 25.1 | putative envelope protein                 | gbpln | Arabidopsis thaliana | #                                                                                                                                                                                                                                                                                                                          | #    | #   | #         | #     | #    | #    |
| Rsa1.0_00677.1.g17927.t1 | gb ABD65090.1  hypothetical protein 27.100116 [Brassica oleracea]                                                                                                                                                                                    | 565  | 484  | 8.00E-49  | 85.7  | 22.7 | 29.6 | hypothetical protein 27.100116            | gbpln | Brassica oleracea    | #                                                                                                                                                                                                                                                                                                                          | #    | #   | #         | #     | #    | #    |
| Rsa1.0_00677.1.g17928.t1 | ref XP_002866410.1  evolutionary conserved C-terminal 3 [Arabidopsis lyrata subsp. lyrata] gi 297312245 gb EFH42669.1  evolutionary conserved C-terminal 3 [Arabidopsis lyrata subsp. lyrata]                                                        | 483  | 498  | 1.00E-139 | 103.1 | 58.0 | 66.9 | evolutionary conserved C-terminal 3       | gbpln | Arabidopsis lyrata   | AT5G61020.2   Symbols: ECT3   evolutionarily conserved C-terminal region 3   chr5:24557485-24559780 REVERSE LENGTH=493                                                                                                                                                                                                     | 483  | 493 | 1.00E-135 | 102.1 | 59.0 | 68.5 |
| Rsa1.0_00677.1.g17929.t1 | #                                                                                                                                                                                                                                                    | #    | #    | #         | #     | #    | -    | ----                                      | ----  | #                    | #                                                                                                                                                                                                                                                                                                                          | #    | #   | #         | #     | #    | #    |
| Rsa1.0_00677.1.g17930.t1 | #                                                                                                                                                                                                                                                    | #    | #    | #         | #     | #    | -    | ----                                      | ----  | #                    | #                                                                                                                                                                                                                                                                                                                          | #    | #   | #         | #     | #    | #    |
| Rsa1.0_00677.1.g17931.t1 | ref XP_002875043.1  LOB domain protein 30 [Arabidopsis lyrata subsp. lyrata] gi 297320890 gb EFH51302.1  LOB domain protein 30 [Arabidopsis lyrata subsp. lyrata]                                                                                    | 65   | 226  | 6.00E-18  | 347.7 | 73.8 | 78.5 | LOB domain protein 30                     | gbpln | Arabidopsis lyrata   | AT4G00220.1   Symbols: LBD30, JLO   Lateral organ boundaries (LOB) domain family protein   chr4:90147-92087 FORWARD LENGTH=228                                                                                                                                                                                             | 65   | 228 | 2.00E-20  | 350.8 | 72.3 | 80.0 |
| Rsa1.0_00677.1.g17932.t1 | gb AAF63110.1 AC006423.11 putative retroelement pol polyprotein [Arabidopsis thaliana]                                                                                                                                                               | 222  | 1150 | 4.00E-23  | 518.0 | 33.3 | 43.7 | putative retroelement pol polyprotein     | gbpln | Arabidopsis thaliana | #                                                                                                                                                                                                                                                                                                                          | #    | #   | #         | #     | #    | #    |
| Rsa1.0_00677.1.g17933.t1 | ref XP_002875039.1  hypothetical protein ARALYDRAFT_490540 [Arabidopsis lyrata subsp. lyrata] gi 297320876 gb EFH51298.1  hypothetical protein ARALYDRAFT_490540 [Arabidopsis lyrata subsp. lyrata]                                                  | 498  | 788  | 0         | 158.2 | 76.3 | 85.7 | hypothetical protein ARALYDRAFT_490540    | gbpln | Arabidopsis lyrata   | AT4G00300.1   Symbols:   fringe-related protein   chr4:126509-130126 FORWARD LENGTH=785                                                                                                                                                                                                                                    | 498  | 785 | 0         | 157.6 | 75.9 | 84.5 |
| Rsa1.0_00677.1.g17934.t1 | #                                                                                                                                                                                                                                                    | #    | #    | #         | #     | #    | -    | ----                                      | ----  | #                    | #                                                                                                                                                                                                                                                                                                                          | #    | #   | #         | #     | #    | #    |
| Rsa1.0_00677.1.g17935.t1 | ref NP_001190642.1  fringe-related protein [Arabidopsis thaliana] gi 110737285 dbj BAF00589.1  hypothetical protein [Arabidopsis thaliana] gi 332656452 gb AEE81852.1  fringe-related protein [Arabidopsis thaliana]                                 | 474  | 478  | 0         | 100.8 | 78.3 | 86.3 | fringe-related protein                    | gbpln | Arabidopsis thaliana | AT4G00300.2   Symbols:   fringe-related protein   chr4:128890-130126 FORWARD LENGTH=478                                                                                                                                                                                                                                    | 474  | 478 | 0         | 100.8 | 78.3 | 86.3 |
| Rsa1.0_00677.1.g17936.t1 | #                                                                                                                                                                                                                                                    | #    | #    | #         | #     | #    | -    | ----                                      | ----  | #                    | #                                                                                                                                                                                                                                                                                                                          | #    | #   | #         | #     | #    | #    |
| Rsa1.0_00677.1.g17937.t1 | #                                                                                                                                                                                                                                                    | #    | #    | #         | #     | #    | -    | ----                                      | ----  | #                    | #                                                                                                                                                                                                                                                                                                                          | #    | #   | #         | #     | #    | #    |
| Rsa1.0_00677.1.g17938.t1 | ref NP_567167.1  RING/U-box domain-containing protein [Arabidopsis thaliana] gi 332656453 gb AEE81853.1  RING/U-box domain-containing protein [Arabidopsis thaliana]                                                                                 | 126  | 126  | 1.00E-46  | 100.0 | 75.4 | 84.1 | RING/U-box domain-containing protein      | gbpln | Arabidopsis thaliana | AT4G00305.1   Symbols:   RING/U-box superfamily protein   chr4:131550-131930 FORWARD LENGTH=126                                                                                                                                                                                                                            | 126  | 126 | 2.00E-49  | 100.0 | 75.4 | 84.1 |
| Rsa1.0_00677.1.g17939.t1 | #                                                                                                                                                                                                                                                    | #    | #    | #         | #     | #    | -    | ----                                      | ----  | #                    | #                                                                                                                                                                                                                                                                                                                          | #    | #   | #         | #     | #    | #    |
| Rsa1.0_00677.1.g17940.t1 | gb ACG60686.1  En/Spm-related transposon protein [Brassica oleracea var. alboglabra]                                                                                                                                                                 | 808  | 695  | 0         | 86.0  | 43.6 | 44.8 | En/Spm-related transposon protein         | gbpln | Brassica oleracea    | #                                                                                                                                                                                                                                                                                                                          | #    | #   | #         | #     | #    | #    |
| Rsa1.0_00678.1.g17941.t2 | gb EOA15973.1  hypothetical protein CARUB_v10004068mg [Capsella rubella] gi 482551781 gb EOA15974.1  hypothetical protein CARUB_v10004068mg [Capsella rubella] gi 482551782 gb EOA15975.1  hypothetical protein CARUB_v10004068mg [Capsella rubella] | 1017 | 972  | 0         | 95.6  | 75.8 | 80.8 | hypothetical protein CARUB_v10004068mg    | gbpln | Capsella rubella     | AT4G35270.1   Symbols:   Plant regulator RWP-RK family protein   chr4:16777657-16780824 REVERSE LENGTH=963                                                                                                                                                                                                                 | 1017 | 963 | 0         | 94.7  | 74.6 | 79.7 |
| Rsa1.0_00678.1.g17942.t1 | gb EOA18908.1  hypothetical protein CARUB_v10007538mg [Capsella rubella]                                                                                                                                                                             | 253  | 253  | 1.00E-109 | 100.0 | 81.4 | 92.1 | hypothetical protein CARUB_v10007538mg    | gbpln | Capsella rubella     | AT4G35200.1   Symbols:   Arabidopsis protein of unknown function (DUF241)   chr4:16749142-16749903 REVERSE LENGTH=253                                                                                                                                                                                                      | 253  | 253 | 1.00E-110 | 100.0 | 81.0 | 91.3 |
| Rsa1.0_00678.1.g17943.t1 | gb EOA18908.1  hypothetical protein CARUB_v10007538mg [Capsella rubella]                                                                                                                                                                             | 196  | 253  | 7.00E-57  | 129.1 | 72.4 | 82.7 | hypothetical protein CARUB_v10007538mg    | gbpln | Capsella rubella     | AT4G35200.1   Symbols:   Arabidopsis protein of unknown function (DUF241)   chr4:16749142-16749903 REVERSE LENGTH=253                                                                                                                                                                                                      | 196  | 253 | 6.00E-57  | 129.1 | 70.9 | 82.7 |
| Rsa1.0_00678.1.g17944.t1 | gb AAG51228.1 AC035249.3 Tam3-like transposon protein; 93317-95488 [Arabidopsis thaliana] gi 12323055 gb AAG51515.1 AC068324.3 hAT-element transposase, putative [Arabidopsis thaliana]                                                              | 784  | 723  | 0         | 92.2  | 46.2 | 59.2 | Tam3-like transposon protein; 93317-95488 | gbpln | Arabidopsis thaliana | AT3G42170.1   Symbols:   BED zinc finger hAT family dimerisation domain   chr3:14321838-14323928 FORWARD LENGTH=696                                                                                                                                                                                                        | 784  | 696 | 1.00E-36  | 88.8  | 16.6 | 30.5 |

| Rsa1.0_00678.1.g17945.t1 | #                                                                                                                                                                                                                                                                                                                                                                                                                                                                                                                                                                                                                                  | #   | #    | #         | #     | #    | #    | -                                      | ----  | ----                 | #                                                                                                                                                                                                                                                                                                                                                                                                                                                                                                                                                 | #   | #   | #        | #     | #    |      |
|--------------------------|------------------------------------------------------------------------------------------------------------------------------------------------------------------------------------------------------------------------------------------------------------------------------------------------------------------------------------------------------------------------------------------------------------------------------------------------------------------------------------------------------------------------------------------------------------------------------------------------------------------------------------|-----|------|-----------|-------|------|------|----------------------------------------|-------|----------------------|---------------------------------------------------------------------------------------------------------------------------------------------------------------------------------------------------------------------------------------------------------------------------------------------------------------------------------------------------------------------------------------------------------------------------------------------------------------------------------------------------------------------------------------------------|-----|-----|----------|-------|------|------|
| Rsa1.0_00678.1.g17945.t1 | ref NP_195187.1  BEL1-like homeodomain 6 [Arabidopsis thaliana] gi 186516293 ref NP_001119116.1  BEL1-like homeodomain 6 [Arabidopsis thaliana] gi 75219970 sp O65685.1 BLH6 ARATH RecName: Full=BEL1-like homeodomain protein 6; Short=BEL1-like protein 6 gi 3096930 emb CAA18840.1  Homeodomain-like protein [Arabidopsis thaliana] gi 727041 emb CAB80178.1  Homeodomain-like protein [Arabidopsis thaliana] gi 45773948 gb AAS76778.1  At4g34610 [Arabidopsis thaliana] gi 332660999 gb AEE86399.1  BEL1-like homeodomain 6 [Arabidopsis thaliana] gi 332661000 gb AEE86400.1  BEL1-like homeodomain 6 [Arabidopsis thaliana] |     |      |           |       |      |      |                                        |       |                      |                                                                                                                                                                                                                                                                                                                                                                                                                                                                                                                                                   |     |     |          |       |      |      |
| Rsa1.0_00678.1.g17946.t2 |                                                                                                                                                                                                                                                                                                                                                                                                                                                                                                                                                                                                                                    | 532 | 532  | 0         | 100.0 | 85.0 | 90.4 | BEL1-like homeodomain 6                | gbpln | Arabidopsis thaliana | AT4G34610.2   Symbols: BLH6   BEL1-like homeodomain 6   chr4:16530546-16532498 REVERSE LENGTH=532                                                                                                                                                                                                                                                                                                                                                                                                                                                 | 532 | 532 | 0        | 100.0 | 85.0 | 90.4 |
| Rsa1.0_00678.1.g17947.t1 | #                                                                                                                                                                                                                                                                                                                                                                                                                                                                                                                                                                                                                                  | #   | #    | #         | #     | #    | #    | -                                      | ----  | ----                 | #                                                                                                                                                                                                                                                                                                                                                                                                                                                                                                                                                 | #   | #   | #        | #     | #    |      |
| Rsa1.0_00678.1.g17948.t1 | gb EOA17614.1  hypothetical protein CARUB_v10005978mg [Capsella rubella]                                                                                                                                                                                                                                                                                                                                                                                                                                                                                                                                                           | 153 | 143  | 8.00E-53  | 93.5  | 71.2 | 75.8 | hypothetical protein CARUB_v10005978mg | gbpln | Capsella rubella     | AT4G34590.1   Symbols: ATB2, GBF6, AtbZIP11, BZIP11   G-box binding factor 6   chr4:16522449-16522928 FORWARD LENGTH=159<br>AT5G48050.1   Symbols:   CONTAINS InterPro DOMAIN/s: Retrotransposon gag protein (InterPro:IPRO05162); BEST Arabidopsis thaliana protein match is: unknown protein (TAIR:AT1G34070.1); Has 1807 Blast hits to 1807 proteins in 277 species: Archae - 0; Bacteria - 0; Metazoa - 736; Fungi - 347; Plants - 385; Viruses - 0; Other Eukaryotes - 339 (source: NCBI BLINK).   chr5:19472661-19473770 REVERSE LENGTH=369 | 153 | 159 | 5.00E-54 | 103.9 | 71.2 | 76.5 |
| Rsa1.0_00678.1.g17949.t2 | gb AAF99727.1 AC004557_6 F17L21.7 [Arabidopsis thaliana]                                                                                                                                                                                                                                                                                                                                                                                                                                                                                                                                                                           | 481 | 1534 | 1.00E-160 | 318.9 | 61.5 | 74.6 | F17L21.7                               | gbpln | Arabidopsis thaliana | AT4G34560.1   Symbols:   unknown protein; BEST Arabidopsis thaliana protein match is: unknown protein (TAIR:AT5G66440.1); Has 67 Blast hits to 66 proteins in 11 species: Archae - 0; Bacteria - 0; Metazoa - 0; Fungi - 0; Plants - 67; Viruses - 0; Other Eukaryotes - 0 (source: NCBI BLINK).   chr4:16507923-16508588 FORWARD LENGTH=221                                                                                                                                                                                                      | 481 | 369 | 1.00E-11 | 76.7  | 13.9 | 21.6 |
| Rsa1.0_00678.1.g17950.t1 | gb EOA17396.1  hypothetical protein CARUB_v10005690mg [Capsella rubella]                                                                                                                                                                                                                                                                                                                                                                                                                                                                                                                                                           | 222 | 221  | 9.00E-85  | 99.5  | 80.2 | 88.7 | hypothetical protein CARUB_v10005690mg | gbpln | Capsella rubella     | AT4G34490.1   Symbols: ATCAP1, CAP 1, CAP1   cyclase associated protein 1   chr4:16484896-16487355 REVERSE LENGTH=476                                                                                                                                                                                                                                                                                                                                                                                                                             | 222 | 221 | 2.00E-78 | 99.5  | 77.0 | 84.7 |
| Rsa1.0_00678.1.g17951.t2 | gb EOA18989.1  hypothetical protein CARUB_v10007634mg [Capsella rubella]                                                                                                                                                                                                                                                                                                                                                                                                                                                                                                                                                           | 236 | 475  | 4.00E-21  | 201.3 | 20.8 | 22.0 | hypothetical protein CARUB_v10007634mg | gbpln | Capsella rubella     | AT4G34480.1   Symbols:   O-Glycosyl hydrolases family 17 protein   chr4:16481147-16483988 REVERSE LENGTH=504                                                                                                                                                                                                                                                                                                                                                                                                                                      | 236 | 476 | 1.00E-23 | 201.7 | 20.8 | 22.0 |
| Rsa1.0_00678.1.g17952.t1 | ref NP_195174.6  glucan endo-1,3-beta-glucosidase 7 [Arabidopsis thaliana] gi 259016223 sp Q9M069.2 E137_ARATH RecName: Full=Glucan endo-1,3-beta-glucosidase 7; AltName: Full=(1-3)-beta-glucan endohydrolase 7; Short=(1-3)-beta-glucanase 7; Name: Full=Beta-1,3-endoglucanase 7; Short=Beta-1,3-glucanase 7; Flags: Precursor gi 332660984 gb AEE86384.1  glucan endo-1,3-beta-glucosidase 7 [Arabidopsis thaliana]                                                                                                                                                                                                            | 463 | 504  | 0         | 108.9 | 82.7 | 89.0 | glucan endo-1,3-beta-glucosidase 7     | gbpln | Arabidopsis thaliana | AT4G34460.1   Symbols: AGB1, ELK4, ATAGB1   GTP binding protein beta 1   chr4:16477393-16479266 REVERSE LENGTH=377                                                                                                                                                                                                                                                                                                                                                                                                                                | 463 | 504 | 0        | 108.9 | 82.7 | 89.0 |
| Rsa1.0_00678.1.g17953.t1 | dbj BAJ34135.1  unnamed protein product [Theellungiella halophila]                                                                                                                                                                                                                                                                                                                                                                                                                                                                                                                                                                 | 392 | 377  | 0         | 96.2  | 91.1 | 93.6 | unnamed protein product                | ----  | ----                 | AT4G34412.1   Symbols:   CONTAINS InterPro DOMAIN/s: Kinase binding protein CGI-121 (InterPro:IPRO13926); Has 275 Blast hits to 275 proteins in 139 species: Archae - 0; Bacteria - 5; Metazoa - 98; Fungi - 109; Plants - 42; Viruses - 0; Other Eukaryotes - 21 (source: NCBI BLINK).   chr4:16453099-16454515 REVERSE LENGTH=172                                                                                                                                                                                                               | 392 | 377 | 0        | 96.2  | 88.8 | 92.6 |
| Rsa1.0_00678.1.g17954.t1 | gb EOA17538.1  hypothetical protein CARUB_v10005889mg [Capsella rubella]                                                                                                                                                                                                                                                                                                                                                                                                                                                                                                                                                           | 172 | 172  | 2.00E-86  | 100.0 | 91.3 | 97.1 | hypothetical protein CARUB_v10005889mg | gbpln | Capsella rubella     | AT4G34410.1   Symbols: RRTF1   redox responsive transcription factor 1   chr4:16451992-16452798 FORWARD LENGTH=268                                                                                                                                                                                                                                                                                                                                                                                                                                | 172 | 172 | 4.00E-87 | 100.0 | 91.9 | 95.3 |
| Rsa1.0_00678.1.g17955.t1 | gb EOA15869.1  hypothetical protein CARUB_v10007825mg [Capsella rubella]                                                                                                                                                                                                                                                                                                                                                                                                                                                                                                                                                           | 275 | 272  | 4.00E-92  | 98.9  | 74.9 | 82.9 | hypothetical protein CARUB_v10007825mg | gbpln | Capsella rubella     |                                                                                                                                                                                                                                                                                                                                                                                                                                                                                                                                                   | 275 | 268 | 1.00E-87 | 97.5  | 75.6 | 82.9 |

|                          |                                                                                                                                                                                                                                                                                                                                                                        |      |      |          |       |      |      |                                        |       |                      |                                                                                                                                                                                                                                                                                                                                                    |      |      |          |       |      |      |
|--------------------------|------------------------------------------------------------------------------------------------------------------------------------------------------------------------------------------------------------------------------------------------------------------------------------------------------------------------------------------------------------------------|------|------|----------|-------|------|------|----------------------------------------|-------|----------------------|----------------------------------------------------------------------------------------------------------------------------------------------------------------------------------------------------------------------------------------------------------------------------------------------------------------------------------------------------|------|------|----------|-------|------|------|
| Rsa1.0_00678.1.g17956.t1 | refXP_002869150.1  hypothetical protein ARALYDRAFT_912952 [Arabidopsis lyrata subsp. lyrata] gi 297314986 gb EFH45409.1  hypothetical protein ARALYDRAFT_912952 [Arabidopsis lyrata subsp. lyrata]                                                                                                                                                                     | 332  | 373  | 8.00E-83 | 112.3 | 57.5 | 67.8 | hypothetical protein ARALYDRAFT_912952 | gbpln | Arabidopsis lyrata   | AT3G06160.2   Symbols:   AP2/B3-like transcriptional factor family protein   chr3:1864326-1867192 FORWARD LENGTH=374                                                                                                                                                                                                                               | 332  | 374  | 7.00E-74 | 112.7 | 47.0 | 61.1 |
| Rsa1.0_00678.1.g17957.t1 | refXP_002869151.1  extra-large GTP-binding protein 2 [Arabidopsis lyrata subsp. lyrata] gi 297314987 gb EFH45410.1  extra-large GTP-binding protein 2 [Arabidopsis lyrata subsp. lyrata]                                                                                                                                                                               | 820  | 859  | 0        | 104.8 | 75.1 | 84.9 | extra-large GTP-binding protein 2      | gbpln | Arabidopsis lyrata   | AT4G34390.1   Symbols:   XLG2   extra-large GTP-binding protein 2   chr4:16441579-16444840 FORWARD LENGTH=861                                                                                                                                                                                                                                      | 820  | 861  | 0        | 105.0 | 75.5 | 85.5 |
| Rsa1.0_00678.1.g17958.t1 | gb EOA18995.1  hypothetical protein CARUB_v10007640mg [Capsella rubella]                                                                                                                                                                                                                                                                                               | 493  | 492  | 0        | 99.8  | 81.9 | 89.5 | hypothetical protein CARUB_v10007640mg | gbpln | Capsella rubella     | AT4G34390.1   Symbols:   Transducin/WD40 repeat-like superfamily protein   chr4:16438835-16440322 FORWARD LENGTH=495                                                                                                                                                                                                                               | 493  | 495  | 0        | 100.4 | 79.9 | 87.8 |
| Rsa1.0_00678.1.g17959.t1 | refNP_195158.1  uncharacterized protein [Arabidopsis thaliana] gi 75213510 sp Q9SYZ7.1 U496A_ARAT H RecName: Full=UPF0496 protein At4g34320 gi 4455177 emb CAB36709.1  putative protein [Arabidopsis thaliana] gi 7270382 emb CAB80149.1  putative protein [Arabidopsis thaliana] gi 332660959 gb AEE86359.1  uncharacterized protein AT4G34320 [Arabidopsis thaliana] | 379  | 374  | 0        | 98.7  | 90.2 | 95.8 | uncharacterized protein                | gbpln | Arabidopsis thaliana | AT4G34320.1   Symbols:   Protein of unknown function (DUF677)   chr4:16422436-16423824 FORWARD LENGTH=374                                                                                                                                                                                                                                          | 379  | 374  | 0        | 98.7  | 90.2 | 95.8 |
| Rsa1.0_00678.1.g17960.t1 | refXP_002869158.1  hypothetical protein ARALYDRAFT_491238 [Arabidopsis lyrata subsp. lyrata] gi 297314994 gb EFH45417.1  hypothetical protein ARALYDRAFT_491238 [Arabidopsis lyrata subsp. lyrata]                                                                                                                                                                     | 140  | 144  | 7.00E-54 | 102.9 | 83.6 | 89.3 | hypothetical protein ARALYDRAFT_491238 | gbpln | Arabidopsis lyrata   | AT4G34290.1   Symbols:   SWB/MDM2 domain superfamily protein   chr4:16410883-16412122 FORWARD LENGTH=144                                                                                                                                                                                                                                           | 140  | 144  | 9.00E-53 | 102.9 | 79.3 | 88.6 |
| Rsa1.0_00678.1.g17961.t1 | refXP_002869162.1  hypothetical protein ARALYDRAFT_491244 [Arabidopsis lyrata subsp. lyrata] gi 297314998 gb EFH45421.1  hypothetical protein ARALYDRAFT_491244 [Arabidopsis lyrata subsp. lyrata]                                                                                                                                                                     | 491  | 493  | 0        | 100.4 | 82.5 | 91.2 | hypothetical protein ARALYDRAFT_491244 | gbpln | Arabidopsis lyrata   | AT4G34250.1   Symbols:   KCS16   3-ketoacyl-CoA synthase 16   chr4:16394749-16396230 FORWARD LENGTH=493                                                                                                                                                                                                                                            | 491  | 493  | 0        | 100.4 | 82.1 | 90.2 |
| Rsa1.0_00679.1.g17962.t1 | refNP_197435.2  uncharacterized protein [Arabidopsis thaliana] gi 40823080 gb AAR2257.1  At5g19340 [Arabidopsis thaliana] gi 4572682 gb AAS76239.1  At5g19340 [Arabidopsis thaliana] gi 110738485 dbj BAF01168.1  hypothetical protein [Arabidopsis thaliana] gi 332005305 gb AED92688.1  uncharacterized protein AT5G19340 [Arabidopsis thaliana]                     | 251  | 263  | 2.00E-62 | 104.8 | 78.5 | 86.5 | uncharacterized protein                | gbpln | Arabidopsis thaliana | AT5G19340.1   Symbols:   unknown protein; BEST Arabidopsis thaliana protein match is: unknown protein (TAIR:AT3G05980.1); Has 1000 Blast hits to 906 proteins in 61 species: Archae - 0; Bacteria - 4; Metazoa - 62; Fungi - 36; Plants - 128; Viruses - 4; Other Eukaryotes - 766 (source: NCBI BLINK).   chr5:6515371-6516162 REVERSE LENGTH=263 | 251  | 263  | 5.00E-65 | 104.8 | 78.5 | 86.5 |
| Rsa1.0_00679.1.g17963.t1 | refXP_002871881.1  hypothetical protein ARALYDRAFT_488820 [Arabidopsis lyrata subsp. lyrata] gi 297317718 gb EFH48140.1  hypothetical protein ARALYDRAFT_488820 [Arabidopsis lyrata subsp. lyrata]                                                                                                                                                                     | 418  | 426  | 0        | 101.9 | 84.2 | 89.0 | hypothetical protein ARALYDRAFT_488820 | gbpln | Arabidopsis lyrata   | AT5G19350.1   Symbols:   RNA-binding (RRM/RBD/RNP motifs) family protein   chr5:6518978-6521295 FORWARD LENGTH=425                                                                                                                                                                                                                                 | 418  | 425  | 0        | 101.7 | 83.7 | 89.0 |
| Rsa1.0_00679.1.g17964.t1 | gb EOA22641.1  hypothetical protein CARUB_v10003311mg [Capsella rubella]                                                                                                                                                                                                                                                                                               | 517  | 524  | 0        | 101.4 | 94.2 | 97.5 | hypothetical protein CARUB_v10003311mg | gbpln | Capsella rubella     | AT5G19360.1   Symbols:   CPK34   calcium-dependent protein kinase 34   chr5:6521716-6523780 REVERSE LENGTH=523                                                                                                                                                                                                                                     | 517  | 523  | 0        | 101.2 | 93.8 | 96.9 |
| Rsa1.0_00679.1.g17965.t3 | refXP_002871882.1  hypothetical protein ARALYDRAFT_488825 [Arabidopsis lyrata subsp. lyrata] gi 297317719 gb EFH48141.1  hypothetical protein ARALYDRAFT_488825 [Arabidopsis lyrata subsp. lyrata]                                                                                                                                                                     | 892  | 870  | 0        | 97.5  | 87.7 | 91.7 | hypothetical protein ARALYDRAFT_488825 | gbpln | Arabidopsis lyrata   | AT5G19390.2   Symbols:   Rho GTPase activation protein (RhoGAP) with PH domain   chr5:6531906-6538206 FORWARD LENGTH=870                                                                                                                                                                                                                           | 892  | 870  | 0        | 97.5  | 87.3 | 91.4 |
| Rsa1.0_00679.1.g17966.t2 | refXP_002871883.1  hypothetical protein ARALYDRAFT_488829 [Arabidopsis lyrata subsp. lyrata] gi 297317720 gb EFH48142.1  hypothetical protein ARALYDRAFT_488829 [Arabidopsis lyrata subsp. lyrata]                                                                                                                                                                     | 1027 | 1047 | 0        | 101.9 | 77.1 | 85.3 | hypothetical protein ARALYDRAFT_488829 | gbpln | Arabidopsis lyrata   | AT5G19400.2   Symbols:   SMG7   Telomerase activating protein Est1   chr5:6540603-6544262 FORWARD LENGTH=1059                                                                                                                                                                                                                                      | 1027 | 1059 | 0        | 103.1 | 74.6 | 84.4 |
| Rsa1.0_00679.1.g17967.t1 | gb EOA20169.1  hypothetical protein CARUB_v10000467mg [Capsella rubella]                                                                                                                                                                                                                                                                                               | 616  | 624  | 0        | 101.3 | 83.6 | 89.1 | hypothetical protein CARUB_v10000467mg | gbpln | Capsella rubella     | AT5G19410.1   Symbols:   ABC-2 type transporter family protein   chr5:6545237-6547111 REVERSE LENGTH=624                                                                                                                                                                                                                                           | 616  | 624  | 0        | 101.3 | 83.3 | 89.1 |

|                          |                                                                                                                                                                                                                                                        |      |      |           |       |      |      |                                                                                |       |                      |                                                                                                                                                                                                                                                                                                                                                                |      |      |           |       |      |      |
|--------------------------|--------------------------------------------------------------------------------------------------------------------------------------------------------------------------------------------------------------------------------------------------------|------|------|-----------|-------|------|------|--------------------------------------------------------------------------------|-------|----------------------|----------------------------------------------------------------------------------------------------------------------------------------------------------------------------------------------------------------------------------------------------------------------------------------------------------------------------------------------------------------|------|------|-----------|-------|------|------|
| Rsa1.0_00679.1.g17968.t1 | refNP_197443.3  regulator of chromosome condensation-like protein with FYVE zinc finger domain [Arabidopsis thaliana] gi332005320 gb AED92703.1  regulator of chromosome condensation-like protein with FYVE zinc finger domain [Arabidopsis thaliana] | 1098 | 1105 | 0         | 100.6 | 92.3 | 96.4 | regulator of chromosome condensation-like protein with FYVE zinc finger domain | gbpln | Arabidopsis thaliana | AT5G19420.1   Symbols:   Regulator of chromosome condensation (RCG1) family with FYVE zinc finger domain   chr5:6547945-6552866 REVERSE LENGTH=1105                                                                                                                                                                                                            | 1098 | 1105 | 0         | 100.6 | 92.3 | 96.4 |
| Rsa1.0_00679.1.g17969.t1 | refXP_002871885.1  hypothetical protein ARALYDRAFT_488833 [Arabidopsis lyrata subsp. lyrata] gi297317722 gb EFH48144.1  hypothetical protein ARALYDRAFT_488833 [Arabidopsis lyrata subsp. lyrata]                                                      | 369  | 326  | 1.00E-177 | 88.3  | 79.9 | 84.8 | hypothetical protein ARALYDRAFT_488833                                         | gbpln | Arabidopsis lyrata   | AT5G19440.1   Symbols:   NAD(P)-binding Rossmann-fold superfamily protein   chr5:6556493-6558123 FORWARD LENGTH=326                                                                                                                                                                                                                                            | 369  | 326  | 1.00E-176 | 88.3  | 79.1 | 83.5 |
| Rsa1.0_00679.1.g17970.t1 | emb[CAB39638.1] RNA-directed DNA polymerase-like protein [Arabidopsis thaliana] gi7267666 emb[CAB78094.1] RNA-directed DNA polymerase-like protein [Arabidopsis thaliana]                                                                              | 1922 | 1274 | 0         | 66.3  | 31.3 | 42.5 | RNA-directed DNA polymerase-like protein                                       | gbpln | Arabidopsis thaliana | AT4G2090.1   Symbols:   Ribonuclease H-like superfamily protein   chr4:1433528-14335255 FORWARD LENGTH=575                                                                                                                                                                                                                                                     | 1922 | 575  | 2.00E-71  | 29.9  | 9.3  | 14.6 |
| Rsa1.0_00679.1.g17971.t1 | refXP_002871885.1  hypothetical protein ARALYDRAFT_488833 [Arabidopsis lyrata subsp. lyrata] gi297317722 gb EFH48144.1  hypothetical protein ARALYDRAFT_488833 [Arabidopsis lyrata subsp. lyrata]                                                      | 326  | 326  | 1.00E-169 | 100.0 | 87.1 | 94.2 | hypothetical protein ARALYDRAFT_488833                                         | gbpln | Arabidopsis lyrata   | AT5G19440.1   Symbols:   NAD(P)-binding Rossmann-fold superfamily protein   chr5:6556493-6558123 FORWARD LENGTH=326                                                                                                                                                                                                                                            | 326  | 326  | 1.00E-169 | 100.0 | 85.6 | 92.9 |
| Rsa1.0_00679.1.g17972.t1 | refXP_002873948.1  calcium-dependent protein kinase 19 [Arabidopsis lyrata subsp. lyrata] gi297319785 gb EFH50207.1  calcium-dependent protein kinase 19 [Arabidopsis lyrata subsp. lyrata]                                                            | 534  | 533  | 0         | 99.8  | 94.4 | 97.6 | calcium-dependent protein kinase 19                                            | gbpln | Arabidopsis lyrata   | AT5G19450.2   Symbols: CDPK19, CPK8   calcium-dependent protein kinase 19   chr5:6558672-6561471 REVERSE LENGTH=533                                                                                                                                                                                                                                            | 534  | 533  | 0         | 99.8  | 94.2 | 97.2 |
| Rsa1.0_00679.1.g17973.t1 | gb EOA20848.1  hypothetical protein CARUB_v10001185mg [Capsella rubella]                                                                                                                                                                               | 365  | 378  | 1.00E-169 | 103.6 | 84.7 | 90.1 | hypothetical protein CARUB_v10001185mg                                         | gbpln | Capsella rubella     | AT5G19460.1   Symbols: atnudt20, NUDT20   nudix hydrolase homolog 20   chr5:6563112-6565178 FORWARD LENGTH=374                                                                                                                                                                                                                                                 | 365  | 374  | 1.00E-166 | 102.5 | 81.6 | 88.2 |
| Rsa1.0_00679.1.g17974.t1 | refXP_002871889.1  hypothetical protein ARALYDRAFT_488840 [Arabidopsis lyrata subsp. lyrata] gi297317726 gb EFH48148.1  hypothetical protein ARALYDRAFT_488840 [Arabidopsis lyrata subsp. lyrata]                                                      | 295  | 208  | 5.00E-69  | 70.5  | 55.9 | 62.7 | hypothetical protein ARALYDRAFT_488840                                         | gbpln | Arabidopsis lyrata   | AT5G19480.2   Symbols:   unknown protein; BEST Arabidopsis thaliana protein match is: unknown protein (TAIR:AT5G12230.1); Has 15754 Blast hits to 7644 proteins in 441 species: Archae - 6; Bacteria - 451; Metazoa - 7628; Fungi - 1448; Plants - 1196; Viruses - 38; Other Eukaryotes - 4987 (source: NCBI BLINK).   chr5:6571828-6572929 FORWARD LENGTH=207 | 295  | 207  | 2.00E-60  | 70.2  | 51.9 | 56.3 |
| Rsa1.0_00679.1.g17975.t1 | gb EOA20537.1  hypothetical protein CARUB_v10000850mg, partial [Capsella rubella]                                                                                                                                                                      | 457  | 481  | 0         | 105.3 | 89.9 | 94.3 | hypothetical protein CARUB_v10000850mg, partial                                | gbpln | Capsella rubella     | AT5G19485.1   Symbols:   transferases:nucleotidyltransferases   chr5:6573907-6576352 REVERSE LENGTH=456                                                                                                                                                                                                                                                        | 457  | 456  | 0         | 99.8  | 89.3 | 94.3 |
| Rsa1.0_00679.1.g17976.t1 | #                                                                                                                                                                                                                                                      | #    | #    | #         | #     | #    | #    | -                                                                              | ----  | ----                 | #                                                                                                                                                                                                                                                                                                                                                              | #    | #    | #         | #     | #    | #    |
| Rsa1.0_00679.1.g17977.t1 | gb EOA19454.1  hypothetical protein CARUB_v10001845mg, partial [Capsella rubella]                                                                                                                                                                      | 221  | 240  | 9.00E-99  | 108.6 | 84.6 | 91.9 | hypothetical protein CARUB_v10001845mg, partial                                | gbpln | Capsella rubella     | AT5G12110.1   Symbols:   Glutathione S-transferase, C-terminal-like; Translation elongation factor EF1B/ribosomal protein S6   chr5:3914483-3915732 FORWARD LENGTH=228                                                                                                                                                                                         | 221  | 228  | 2.00E-94  | 103.2 | 84.6 | 91.0 |
| Rsa1.0_00679.1.g17978.t1 | #                                                                                                                                                                                                                                                      | #    | #    | #         | #     | #    | #    | -                                                                              | ----  | ----                 | AT5G19520.1   Symbols: MSL9, ATMSL9   mechanosensitive channel of small conductance-like 9   chr5:6586079-6588771 FORWARD LENGTH=742                                                                                                                                                                                                                           | 125  | 742  | 1.00E-10  | 593.6 | 33.6 | 40.0 |
| Rsa1.0_00680.1.g17979.t1 | emb[CAB89177.1] SLL3 ORF2 protein [Brassica napus var. napus]                                                                                                                                                                                          | 170  | 291  | 1.00E-36  | 171.2 | 48.2 | 57.1 | SLL3 ORF2 protein                                                              | gbpln | Brassica napus       | #                                                                                                                                                                                                                                                                                                                                                              | #    | #    | #         | #     | #    | #    |
| Rsa1.0_00680.1.g17980.t1 | gb ACG60686.1  En/Spm-related transposon protein [Brassica oleracea var. alboglabra]                                                                                                                                                                   | 134  | 695  | 3.00E-60  | 518.7 | 91.0 | 92.5 | En/Spm-related transposon protein                                              | gbpln | Brassica oleracea    | #                                                                                                                                                                                                                                                                                                                                                              | #    | #    | #         | #     | #    | #    |
| Rsa1.0_00680.1.g17981.t1 | #                                                                                                                                                                                                                                                      | #    | #    | #         | #     | #    | #    | -                                                                              | ----  | ----                 | #                                                                                                                                                                                                                                                                                                                                                              | #    | #    | #         | #     | #    | #    |
| Rsa1.0_00680.1.g17982.t6 | gb EOA23571.1  hypothetical protein CARUB_v10016766mg [Capsella rubella] gi482559381 gb EOA23572.1  hypothetical protein CARUB_v10016766mg [Capsella rubella]                                                                                          | 137  | 693  | 4.00E-24  | 505.8 | 45.3 | 51.8 | hypothetical protein CARUB_v10016766mg                                         | gbpln | Capsella rubella     | AT3G26540.1   Symbols:   Tetratricopeptide repeat (TPR)-like superfamily protein   chr3:9744542-9746644 REVERSE LENGTH=700                                                                                                                                                                                                                                     | 137  | 700  | 7.00E-26  | 510.9 | 44.5 | 50.4 |
| Rsa1.0_00680.1.g17983.t1 | #                                                                                                                                                                                                                                                      | #    | #    | #         | #     | #    | #    | -                                                                              | ----  | ----                 | #                                                                                                                                                                                                                                                                                                                                                              | #    | #    | #         | #     | #    | #    |
| Rsa1.0_00680.1.g17984.t1 | gb AAG50886.1 AC025294_24 hypothetical protein [Arabidopsis thaliana]                                                                                                                                                                                  | 553  | 629  | 1.00E-158 | 113.7 | 48.5 | 68.5 | hypothetical protein                                                           | gbpln | Arabidopsis thaliana | AT3G24255.1   Symbols:   RNA-directed DNA polymerase (reverse transcriptase)-related family protein   chr3:8789471-8793208 FORWARD LENGTH=746                                                                                                                                                                                                                  | 553  | 746  | 1.00E-106 | 134.9 | 36.5 | 50.5 |
| Rsa1.0_00680.1.g17985.t1 | #                                                                                                                                                                                                                                                      | #    | #    | #         | #     | #    | #    | -                                                                              | ----  | ----                 | #                                                                                                                                                                                                                                                                                                                                                              | #    | #    | #         | #     | #    | #    |

|                          |                                                                                                                                                                                                                                                                                                                                                                                                                                                                                                                                                                                                                                                                                                                                                                                                                                                                                                                                                                                                                                                                                                                                                                                                                                                                                                                                                                                                                                                                                  |      |      |           |       |      |      |                                                       |       |                      |                                                                                                                                                |      |      |           |       |      |      |
|--------------------------|----------------------------------------------------------------------------------------------------------------------------------------------------------------------------------------------------------------------------------------------------------------------------------------------------------------------------------------------------------------------------------------------------------------------------------------------------------------------------------------------------------------------------------------------------------------------------------------------------------------------------------------------------------------------------------------------------------------------------------------------------------------------------------------------------------------------------------------------------------------------------------------------------------------------------------------------------------------------------------------------------------------------------------------------------------------------------------------------------------------------------------------------------------------------------------------------------------------------------------------------------------------------------------------------------------------------------------------------------------------------------------------------------------------------------------------------------------------------------------|------|------|-----------|-------|------|------|-------------------------------------------------------|-------|----------------------|------------------------------------------------------------------------------------------------------------------------------------------------|------|------|-----------|-------|------|------|
| Rsa1.0_00680.1.g17986.t3 | refXP_002883433.1   hypothetical protein ARALYDRAFT_898865 [Arabidopsis lyrata subsp. lyrata] gi 297329273 gb EFH59692.1   hypothetical protein ARALYDRAFT_898865 [Arabidopsis lyrata subsp. lyrata] ref NP_178722.1   cycloartenol synthase [Arabidopsis thaliana] gi 21542399 sp P38605.2 CAS1_ARATH RecName: Full=Cycloartenol synthase; Short=AtCYC; AltName: Full=2,3-epoxysqualene--cycloartenol cyclase gi 20197302 gb AAM15015.1                                                                                                                                                                                                                                                                                                                                                                                                                                                                                                                                                                                                                                                                                                                                                                                                                                                                                                                                                                                                                                         | 778  | 867  | 0         | 111.4 | 76.0 | 87.0 | hypothetical protein ARALYDRAFT_898865                | gbpln | Arabidopsis lyrata   | AT3G23530.1   Symbols:   Cyclopropane-fatty-acyl-phospholipid synthase   chr3:8437472-8442597 FORWARD LENGTH=867                               | 778  | 867  | 0         | 111.4 | 75.6 | 86.9 |
| Rsa1.0_00680.1.g17987.t1 | cycloartenol synthase [Arabidopsis thaliana] gi 20453056 gb AAM19773.1   At2g07050/T4E14.16 [Arabidopsis thaliana] gi 24796994 gb AAN64509.1   At2g07050/T4E14.16 [Arabidopsis thaliana] gi 330250938 gb AEC06032.1   cycloartenol synthase [Arabidopsis thaliana] ref NP_182079.1   cytochrome P450 76C4 [Arabidopsis thaliana] gi 5915834 sp O64635.1 C76C4_ARATH RecName: Full=Cytochrome P450 76C4 gi 2979547 gb AAC06156.1   putative cytochrome P450 [Arabidopsis thaliana] gi 330255475 gb AEC10569.1   cytochrome P450 76C4 [Arabidopsis thaliana] ref NP_177887.1   ethylene-responsive transcription factor ERF013 [Arabidopsis thaliana] gi 75262287 sp Q9CAP4.1 ERF13_ARATH RecName: Full=Ethylene-responsive transcription factor ERF013 gi 12323380 gb AAG51661.1 AC010704.5   hypothetical protein; 89317-90051 [Arabidopsis thaliana] gi 46931289 gb AAT06448.1   At1g77640 [Arabidopsis thaliana] gi 48479278 gb AAT44910.1   putative AP2/EREBP transcription factor [Arabidopsis thaliana] gi 332197882 gb AEE36003.1   ethylene-responsive transcription factor ERF013 [Arabidopsis thaliana] ref XP_002889151.1   nucleoside-triphosphatase/ nucleotide binding protein [Arabidopsis lyrata subsp. lyrata] gi 297334992 gb EFH65410.1   nucleoside-triphosphatase/ nucleotide binding protein [Arabidopsis lyrata subsp. lyrata] ref XP_002862808.1   hypothetical protein ARALYDRAFT_497286 [Arabidopsis lyrata subsp. lyrata] gi 297308543 gb EFH439066.1 | 198  | 759  | 6.00E-85  | 383.3 | 80.8 | 85.9 | cycloartenol synthase                                 | gbpln | Arabidopsis thaliana | AT2G07050.1   Symbols: CAS1   cycloartenol synthase 1   chr2:2924629-2930295 FORWARD LENGTH=759                                                | 198  | 759  | 2.00E-87  | 383.3 | 80.8 | 85.9 |
| Rsa1.0_00680.1.g17988.t1 | cytochrome P450 76C4 [Arabidopsis thaliana] gi 2979547 gb AAC06156.1   putative cytochrome P450 [Arabidopsis thaliana] gi 330255475 gb AEC10569.1   cytochrome P450 76C4 [Arabidopsis thaliana] ref NP_177887.1   ethylene-responsive transcription factor ERF013 [Arabidopsis thaliana] gi 75262287 sp Q9CAP4.1 ERF13_ARATH RecName: Full=Ethylene-responsive transcription factor ERF013 gi 12323380 gb AAG51661.1 AC010704.5   hypothetical protein; 89317-90051 [Arabidopsis thaliana] gi 46931289 gb AAT06448.1   At1g77640 [Arabidopsis thaliana] gi 48479278 gb AAT44910.1   putative AP2/EREBP transcription factor [Arabidopsis thaliana] gi 332197882 gb AEE36003.1   ethylene-responsive transcription factor ERF013 [Arabidopsis thaliana] ref XP_002889151.1   nucleoside-triphosphatase/ nucleotide binding protein [Arabidopsis lyrata subsp. lyrata] gi 297334992 gb EFH65410.1   nucleoside-triphosphatase/ nucleotide binding protein [Arabidopsis lyrata subsp. lyrata] ref XP_002862808.1   hypothetical protein ARALYDRAFT_497286 [Arabidopsis lyrata subsp. lyrata] gi 297308543 gb EFH439066.1                                                                                                                                                                                                                                                                                                                                                            | 469  | 511  | 0         | 109.0 | 74.8 | 85.1 | cytochrome P450 76C4                                  | gbpln | Arabidopsis thaliana | AT2G45550.1   Symbols: CYP76C4   cytochrome P450, family 76, subfamily C, polypeptide 4   chr2:18773541-18775654 REVERSE LENGTH=511            | 469  | 511  | 0         | 109.0 | 74.8 | 85.1 |
| Rsa1.0_00681.1.g17989.t1 | ethylene-responsive transcription factor ERF013 [Arabidopsis thaliana] gi 75262287 sp Q9CAP4.1 ERF13_ARATH RecName: Full=Ethylene-responsive transcription factor ERF013 gi 12323380 gb AAG51661.1 AC010704.5   hypothetical protein; 89317-90051 [Arabidopsis thaliana] gi 46931289 gb AAT06448.1   At1g77640 [Arabidopsis thaliana] gi 48479278 gb AAT44910.1   putative AP2/EREBP transcription factor [Arabidopsis thaliana] gi 332197882 gb AEE36003.1   ethylene-responsive transcription factor ERF013 [Arabidopsis thaliana] ref XP_002889151.1   nucleoside-triphosphatase/ nucleotide binding protein [Arabidopsis lyrata subsp. lyrata] gi 297334992 gb EFH65410.1   nucleoside-triphosphatase/ nucleotide binding protein [Arabidopsis lyrata subsp. lyrata] ref XP_002862808.1   hypothetical protein ARALYDRAFT_497286 [Arabidopsis lyrata subsp. lyrata] gi 297308543 gb EFH439066.1                                                                                                                                                                                                                                                                                                                                                                                                                                                                                                                                                                              | 237  | 244  | 3.00E-66  | 103.0 | 75.1 | 82.3 | ethylene-responsive transcription factor ERF013       | gbpln | Arabidopsis thaliana | AT1G77640.1   Symbols:   Integrase-type DNA-binding superfamily protein   chr1:29178796-29179530 FORWARD LENGTH=244                            | 237  | 244  | 8.00E-69  | 103.0 | 75.1 | 82.3 |
| Rsa1.0_00681.1.g17990.t1 | nucleoside-triphosphatase/ nucleotide binding protein [Arabidopsis lyrata subsp. lyrata] gi 297334992 gb EFH65410.1   nucleoside-triphosphatase/ nucleotide binding protein [Arabidopsis lyrata subsp. lyrata] ref XP_002889151.1   nucleoside-triphosphatase/ nucleotide binding protein [Arabidopsis lyrata subsp. lyrata] gi 297334992 gb EFH65410.1   nucleoside-triphosphatase/ nucleotide binding protein [Arabidopsis lyrata subsp. lyrata] ref XP_002862808.1   hypothetical protein ARALYDRAFT_497286 [Arabidopsis lyrata subsp. lyrata] gi 297308543 gb EFH439066.1                                                                                                                                                                                                                                                                                                                                                                                                                                                                                                                                                                                                                                                                                                                                                                                                                                                                                                    | 1068 | 1154 | 0         | 108.1 | 72.0 | 83.2 | nucleoside-triphosphatase/ nucleotide binding protein | gbpln | Arabidopsis lyrata   | AT1G77620.1   Symbols:   P-loop containing nucleoside triphosphate hydrolases superfamily protein   chr1:29167934-29172867 REVERSE LENGTH=1151 | 1068 | 1151 | 0         | 107.8 | 72.0 | 82.7 |
| Rsa1.0_00681.1.g17991.t1 | hypothetical protein ARALYDRAFT_497286 [Arabidopsis lyrata subsp. lyrata] ref XP_002889148.1   hypothetical protein ARALYDRAFT_476922 [Arabidopsis lyrata subsp. lyrata] gi 297334989 gb EFH65407.1                                                                                                                                                                                                                                                                                                                                                                                                                                                                                                                                                                                                                                                                                                                                                                                                                                                                                                                                                                                                                                                                                                                                                                                                                                                                              | 338  | 336  | 0         | 99.4  | 95.9 | 98.8 | hypothetical protein ARALYDRAFT_497286                | gbpln | Arabidopsis lyrata   | AT1G77610.1   Symbols:   EamA-like transporter family protein   chr1:29165489-29167486 FORWARD LENGTH=336                                      | 338  | 336  | 0         | 99.4  | 95.6 | 98.5 |
| Rsa1.0_00681.1.g17992.t1 | hypothetical protein ARALYDRAFT_476922 [Arabidopsis lyrata subsp. lyrata] ref NP_177876.1   O-methyltransferase family protein [Arabidopsis thaliana] gi 12323395 gb AAG51676.1 AC010704.20   putative caffeic acid 3-O-methyltransferase; 41078-42528 [Arabidopsis thaliana] gi 332197867 gb AEE35988.1   O-methyltransferase family protein [Arabidopsis thaliana] gb EOA11936.1   hypothetical protein CARUB_v10016547mg, partial [Capsella rubella]                                                                                                                                                                                                                                                                                                                                                                                                                                                                                                                                                                                                                                                                                                                                                                                                                                                                                                                                                                                                                          | 729  | 780  | 0         | 107.0 | 72.8 | 82.9 | hypothetical protein ARALYDRAFT_476922                | gbpln | Arabidopsis lyrata   | AT1G77580.2   Symbols:   Plant protein of unknown function (DUF869)   chr1:29144191-29146793 REVERSE LENGTH=779                                | 729  | 779  | 0         | 106.9 | 71.9 | 82.3 |
| Rsa1.0_00681.1.g17993.t1 | O-methyltransferase family protein [Arabidopsis thaliana] gi 12323395 gb AAG51676.1 AC010704.20   putative caffeic acid 3-O-methyltransferase; 41078-42528 [Arabidopsis thaliana] gi 332197867 gb AEE35988.1   O-methyltransferase family protein [Arabidopsis thaliana] gb EOA11936.1   hypothetical protein CARUB_v10016547mg, partial [Capsella rubella]                                                                                                                                                                                                                                                                                                                                                                                                                                                                                                                                                                                                                                                                                                                                                                                                                                                                                                                                                                                                                                                                                                                      | 373  | 381  | 1.00E-148 | 102.1 | 67.3 | 81.2 | O-methyltransferase family protein                    | gbpln | Arabidopsis thaliana | AT1G77520.1   Symbols:   O-methyltransferase family protein   chr1:29130557-29132007 FORWARD LENGTH=381                                        | 373  | 381  | 1.00E-151 | 102.1 | 67.3 | 81.2 |
| Rsa1.0_00681.1.g17994.t1 | hypothetical protein CARUB_v10016547mg, partial [Capsella rubella]                                                                                                                                                                                                                                                                                                                                                                                                                                                                                                                                                                                                                                                                                                                                                                                                                                                                                                                                                                                                                                                                                                                                                                                                                                                                                                                                                                                                               | 117  | 149  | 7.00E-25  | 127.4 | 41.9 | 64.1 | hypothetical protein CARUB_v10016547mg, partial       | gbpln | Capsella rubella     | AT2G34320.1   Symbols:   Polynucleotidyl transferase, ribonuclease H-like superfamily protein   chr2:14484959-14485837 FORWARD LENGTH=292      | 117  | 292  | 1.00E-12  | 249.6 | 30.8 | 53.0 |



|                          |                                                                                                                                                                                                                                                                                                             |     |     |           |       |      |      |                                          |       |                      |                                                                                                                                                                                                                                                                                                                                                                                                                                                           |     |     |           |       |      |      |
|--------------------------|-------------------------------------------------------------------------------------------------------------------------------------------------------------------------------------------------------------------------------------------------------------------------------------------------------------|-----|-----|-----------|-------|------|------|------------------------------------------|-------|----------------------|-----------------------------------------------------------------------------------------------------------------------------------------------------------------------------------------------------------------------------------------------------------------------------------------------------------------------------------------------------------------------------------------------------------------------------------------------------------|-----|-----|-----------|-------|------|------|
| Rsa1.0_00681.1.g17995.t1 | gb ABB17025.1  protein disulfide isomerase [Brassica carinata]                                                                                                                                                                                                                                              | 509 | 509 | 0         | 100.0 | 95.1 | 98.0 | protein disulfide isomerase              | gbpln | Brassica carinata    | AT1G77510.1   Symbols: ATPDIL1-2, PDI6, ATPD16, PDIL1-2   PDI-like 1-2   chr1:29126742-29129433 FORWARD LENGTH=508                                                                                                                                                                                                                                                                                                                                        | 509 | 508 | 0         | 99.8  | 84.7 | 91.2 |
| Rsa1.0_00681.1.g17996.t1 | ref XP_002887687.1  hypothetical protein ARALYDRAFT_476915 [Arabidopsis lyrata subsp. lyrata] gi 297333528 gb EFH63946.1  hypothetical protein ARALYDRAFT_476915 [Arabidopsis lyrata subsp. lyrata]                                                                                                         | 876 | 880 | 0         | 100.5 | 68.8 | 79.5 | hypothetical protein ARALYDRAFT_476915   | gbpln | Arabidopsis lyrata   | AT1G77500.1   Symbols:   Protein of unknown function (DUF630 and DUF632)   chr1:29121753-29124937 FORWARD LENGTH=879                                                                                                                                                                                                                                                                                                                                      | 876 | 879 | 0         | 100.3 | 68.3 | 77.2 |
| Rsa1.0_00681.1.g17997.t1 | emb CC55737.1  thylakoid-bound ascorbate peroxidase [Brassica rapa subsp. oleifera]                                                                                                                                                                                                                         | 433 | 437 | 0         | 100.9 | 90.5 | 92.4 | thylakoid-bound ascorbate peroxidase     | gbpln | Brassica rapa        | AT1G77490.1   Symbols: TAPX   thylakoidal ascorbate peroxidase   chr1:29117688-29120046 FORWARD LENGTH=426                                                                                                                                                                                                                                                                                                                                                | 433 | 426 | 0         | 98.4  | 80.8 | 87.3 |
| Rsa1.0_00681.1.g17998.t1 | ref XP_002889144.1  hypothetical protein ARALYDRAFT_476912 [Arabidopsis lyrata subsp. lyrata] gi 297334985 gb EFH65403.1  hypothetical protein ARALYDRAFT_476912 [Arabidopsis lyrata subsp. lyrata]                                                                                                         | 466 | 467 | 0         | 100.2 | 82.0 | 88.4 | hypothetical protein ARALYDRAFT_476912   | gbpln | Arabidopsis lyrata   | AT1G77480.1   Symbols:   Eukaryotic aspartyl protease family protein   chr1:29114705-29117150 REVERSE LENGTH=466                                                                                                                                                                                                                                                                                                                                          | 466 | 466 | 0         | 100.0 | 82.0 | 88.0 |
| Rsa1.0_00681.1.g17999.t1 | gb EOA35654.1  hypothetical protein CARUB_v10020878mg [Capsella rubella]                                                                                                                                                                                                                                    | 227 | 236 | 2.00E-72  | 104.0 | 77.5 | 84.1 | hypothetical protein CARUB_v10020878mg   | gbpln | Capsella rubella     | AT1G77400.1   Symbols:   CONTAINS InterPro DOMAIN/s: Protein of unknown function DUF688 (InterPro:IPR007789); BEST Arabidopsis thaliana protein match is: hydroxyproline-rich glycoprotein family protein (TAIR:AT1G21695.1); Has 328 Blast hits to 314 proteins in 61 species: Archae = 0; Bacteria = 12; Metazoa = 130; Fungi = 28; Plants = 92; Viruses = 10; Other Eukaryotes = 56 (source: NCBI BLink).   chr1:29085881-29086579 FORWARD LENGTH=232  | 227 | 232 | 2.00E-74  | 102.2 | 79.3 | 87.2 |
| Rsa1.0_00681.1.g18000.t1 | ref NP_177863.2  cyclin-A1-2 [Arabidopsis thaliana] gi 148887347 sp G9FVX0.2 CCA12_ARATH RecName: Full=Cyclin-A1-2; AltName: Full=G2/mitotic-specific cyclin-A1-2; Short=CycA1.2; AltName: Full=Protein TARDY ASYNCHRONOUS MEIOSIS gi 332197851 gb AEE35972.1  cyclin-A1-2 [Arabidopsis thaliana]           | 389 | 442 | 1.00E-169 | 113.6 | 79.2 | 87.9 | cyclin-A1-2                              | gbpln | Arabidopsis thaliana | AT1G77390.1   Symbols: TAM, CYCA1.2, DYP, CYCA1   CYCLIN A1.2   chr1:29081904-29084137 REVERSE LENGTH=442                                                                                                                                                                                                                                                                                                                                                 | 389 | 442 | 1.00E-172 | 113.6 | 79.2 | 87.9 |
| Rsa1.0_00682.1.g18001.t1 | ref XP_002888847.1  hypothetical protein ARALYDRAFT_476299 [Arabidopsis lyrata subsp. lyrata] gi 297334688 gb EFH65106.1  hypothetical protein ARALYDRAFT_476299 [Arabidopsis lyrata subsp. lyrata]                                                                                                         | 255 | 190 | 1.00E-48  | 74.5  | 36.5 | 39.6 | hypothetical protein ARALYDRAFT_476299   | gbpln | Arabidopsis lyrata   | AT1G71780.1   Symbols:   unknown protein; FUNCTIONS IN: molecular function unknown; INVOLVED IN: biological process unknown; LOCATED IN: endoplasmic reticulum; EXPRESSED IN: 25 plant structures; EXPRESSED DURING: 15 growth stages; Has 34 Blast hits to 34 proteins in 11 species: Archae = 0; Bacteria = 0; Metazoa = 0; Fungi = 0; Plants = 34; Viruses = 0; Other Eukaryotes = 0 (source: NCBI BLink).   chr1:26995406-26996638 REVERSE LENGTH=197 | 255 | 197 | 2.00E-49  | 77.3  | 34.9 | 39.6 |
| Rsa1.0_00682.1.g18002.t1 | ref XP_002888846.1  hypothetical protein ARALYDRAFT_339396 [Arabidopsis lyrata subsp. lyrata] gi 297334687 gb EFH65105.1  hypothetical protein ARALYDRAFT_339396 [Arabidopsis lyrata subsp. lyrata]                                                                                                         | 686 | 685 | 0         | 99.9  | 87.3 | 92.1 | hypothetical protein ARALYDRAFT_339396   | gbpln | Arabidopsis lyrata   | AT1G71770.2   Symbols: PAB5   poly(A)-binding protein 5   chr1:26990777-26993489 REVERSE LENGTH=682                                                                                                                                                                                                                                                                                                                                                       | 686 | 682 | 0         | 99.4  | 84.5 | 90.4 |
| Rsa1.0_00682.1.g18003.t1 | ref NP_177321.1  uncharacterized protein [Arabidopsis thaliana] gi 7239503 gb AAF43229.1 AC012654_13 F14O23.14 [Arabidopsis thaliana] gi 52354211 gb AAU44426.1  hypothetical protein AT1G71760 [Arabidopsis thaliana] gi 332197107 gb AEE35228.1  uncharacterized protein AT1G71760 [Arabidopsis thaliana] | 249 | 259 | 1.00E-87  | 104.0 | 68.7 | 79.9 | uncharacterized protein                  | gbpln | Arabidopsis thaliana | AT1G71760.1   Symbols:   unknown protein; Has 92 Blast hits to 92 proteins in 41 species: Archae = 0; Bacteria = 0; Metazoa = 44; Fungi = 0; Plants = 32; Viruses = 0; Other Eukaryotes = 16 (source: NCBI BLink).   chr1:26988414-26990499 FORWARD LENGTH=259                                                                                                                                                                                            | 249 | 259 | 4.00E-90  | 104.0 | 68.7 | 79.9 |
| Rsa1.0_00682.1.g18004.t1 | ref XP_002888845.1  phosphoribosyltransferase family protein [Arabidopsis lyrata subsp. lyrata] gi 297334686 gb EFH65104.1  phosphoribosyltransferase family protein [Arabidopsis lyrata subsp. lyrata]                                                                                                     | 187 | 187 | 1.00E-93  | 100.0 | 90.4 | 94.7 | phosphoribosyltransferase family protein | gbpln | Arabidopsis lyrata   | AT1G71750.1   Symbols: HGPT   Hypoxanthine-guanine phosphoribosyltransferase   chr1:26987954-26989144 REVERSE LENGTH=188                                                                                                                                                                                                                                                                                                                                  | 187 | 188 | 2.00E-93  | 100.5 | 88.2 | 94.1 |

|                          |                                                                                                                                                                                                                                                                                                                                                                   |      |      |          |        |      |      |                                          |       |                      |                                                                                                                                                                                                                                                              |      |     |          |       |      |      |
|--------------------------|-------------------------------------------------------------------------------------------------------------------------------------------------------------------------------------------------------------------------------------------------------------------------------------------------------------------------------------------------------------------|------|------|----------|--------|------|------|------------------------------------------|-------|----------------------|--------------------------------------------------------------------------------------------------------------------------------------------------------------------------------------------------------------------------------------------------------------|------|-----|----------|-------|------|------|
| Rsa1.0_00682.1.g18005.t1 | ref NP_177319.1  uncharacterized protein [Arabidopsis thaliana]<br>gi 7239501 gb AAF43227.1 AC012654.11 F14Q23.12 [Arabidopsis thaliana]<br>gi 61742554 gb AA55098.1  hypothetical protein At1g71740 [Arabidopsis thaliana]<br>gi 332197104 gb AEE35225.1  uncharacterized protein AT1G71740 [Arabidopsis thaliana]                                               | 138  | 130  | 1.00E-52 | 94.2   | 74.6 | 86.2 | uncharacterized protein                  | gbpln | Arabidopsis thaliana | AT1G71740.1   Symbols:   unknown protein; Has 82 Blast hits to 82 proteins in 12 species: Archae - 0; Bacteria - 0; Metazoa - 0; Fungi - 0; Plants - 82; Viruses - 0; Other Eukaryotes - 0 (source: NCBI BLink).   chr1:26987245-26987637 FORWARD LENGTH=130 | 138  | 130 | 4.00E-55 | 94.2  | 74.6 | 86.2 |
| Rsa1.0_00682.1.g18006.t1 | gb ABL97948.1  unknown [Brassica rapa]                                                                                                                                                                                                                                                                                                                            | 159  | 157  | 1.00E-65 | 98.7   | 83.6 | 87.4 | unknown                                  | gbpln | Brassica rapa        | AT1G71730.1   Symbols:   unknown protein; Has 52 Blast hits to 52 proteins in 24 species: Archae - 0; Bacteria - 0; Metazoa - 4; Fungi - 0; Plants - 41; Viruses - 0; Other Eukaryotes - 7 (source: NCBI BLink).   chr1:26986298-26986831 REVERSE LENGTH=177 | 159  | 177 | 7.00E-52 | 111.3 | 73.0 | 81.8 |
| Rsa1.0_00682.1.g18007.t1 | ref XP_002887384.1  predicted protein [Arabidopsis lyrata subsp. lyrata]<br>gi 297333225 gb EFH63643.1  predicted protein [Arabidopsis lyrata subsp. lyrata]                                                                                                                                                                                                      | 503  | 501  | 0        | 99.6   | 81.3 | 86.5 | predicted protein                        | gbpln | Arabidopsis lyrata   | AT1G71720.1   Symbols:   Nucleic acid-binding proteins superfamily   chr1:26983744-26985893 FORWARD LENGTH=500                                                                                                                                               | 503  | 500 | 0        | 99.4  | 80.5 | 87.3 |
| Rsa1.0_00682.1.g18008.t1 | dbj BAJ34469.1  unnamed protein product [Thellungiella halophila]                                                                                                                                                                                                                                                                                                 | 678  | 661  | 0        | 97.5   | 84.7 | 89.8 | unnamed protein product                  | ----  | ----                 | AT1G71710.1   Symbols:   DNase I-like superfamily protein   chr1:26973796-26976774 REVERSE LENGTH=664                                                                                                                                                        | 678  | 664 | 0        | 97.9  | 84.5 | 90.1 |
| Rsa1.0_00682.1.g18009.t2 | gb EOA34450.1  hypothetical protein CARUB_v10021986mg [Capsella rubella]                                                                                                                                                                                                                                                                                          | 353  | 348  | 0        | 98.6   | 86.4 | 92.1 | hypothetical protein CARUB_v10021986mg   | gbpln | Capsella rubella     | AT1G71697.1   Symbols: ATCK1, CK, CK1   choline kinase 1   chr1:26971537-26973177 FORWARD LENGTH=346                                                                                                                                                         | 353  | 346 | 0        | 98.0  | 86.4 | 91.5 |
| Rsa1.0_00682.1.g18010.t1 | gb EMJ11389.1  hypothetical protein PRUPE_ppa017790mg [Prunus persica]                                                                                                                                                                                                                                                                                            | 1433 | 1485 | 0        | 103.6  | 44.0 | 58.5 | hypothetical protein PRUPE_ppa017790mg   | gbpln | Prunus persica       | ATMG00860.1   Symbols: ORF158   DNA/RNA polymerases superfamily protein   chrM:235916-236392 FORWARD LENGTH=158                                                                                                                                              | 1433 | 158 | 8.00E-24 | 11.0  | 3.5  | 5.6  |
| Rsa1.0_00682.1.g18011.t1 | dbj BAJ33705.1  unnamed protein product [Thellungiella halophila]                                                                                                                                                                                                                                                                                                 | 362  | 385  | 0        | 106.4  | 90.3 | 94.5 | unnamed protein product                  | ----  | ----                 | AT1G71695.1   Symbols:   Peroxidase superfamily protein   chr1:26964359-26966557 FORWARD LENGTH=358                                                                                                                                                          | 362  | 358 | 0        | 98.9  | 88.1 | 92.8 |
| Rsa1.0_00682.1.g18012.t8 | emb CAB39638.1  RNA-directed DNA polymerase-like protein [Arabidopsis thaliana]<br>gi 7267666 emb CAB78094.1  RNA-directed DNA polymerase-like protein [Arabidopsis thaliana]                                                                                                                                                                                     | 1969 | 1274 | 0        | 64.7   | 24.4 | 32.7 | RNA-directed DNA polymerase-like protein | gbpln | Arabidopsis thaliana | AT4G29090.1   Symbols:   Ribonuclease H-like superfamily protein   chr4:14333528-14335255 FORWARD LENGTH=575                                                                                                                                                 | 1969 | 575 | 2.00E-65 | 29.2  | 8.7  | 14.5 |
| Rsa1.0_00682.1.g18013.t1 | ref NP_851232.1  RING/U-box domain-containing protein [Arabidopsis thaliana]<br>gi 79331627 ref NP_001032112.1  RING/U-box domain-containing protein [Arabidopsis thaliana]<br>gi 332009965 gb AED97348.1  RING/U-box domain-containing protein [Arabidopsis thaliana]<br>gi 332009967 gb AED97350.1  RING/U-box domain-containing protein [Arabidopsis thaliana] | 128  | 494  | 2.00E-32 | 385.9  | 57.0 | 62.5 | RING/U-box domain-containing protein     | gbpln | Arabidopsis thaliana | AT5G60580.4   Symbols:   RING/U-box superfamily protein   chr5:24354298-24356706 FORWARD LENGTH=494                                                                                                                                                          | 128  | 494 | 4.00E-35 | 385.9 | 57.0 | 62.5 |
| Rsa1.0_00682.1.g18014.t1 | gb EOA30046.1  hypothetical protein CARUB_v10013151mg [Capsella rubella]                                                                                                                                                                                                                                                                                          | 152  | 664  | 1.00E-20 | 436.8  | 32.9 | 34.9 | hypothetical protein CARUB_v10013151mg   | gbpln | Capsella rubella     | AT3G01750.1   Symbols:   Ankyrin repeat family protein   chr3:270615-272691 FORWARD LENGTH=664                                                                                                                                                               | 152  | 664 | 2.00E-22 | 436.8 | 32.2 | 34.2 |
| Rsa1.0_00683.1.g18015.t1 | gb AAG52949.1  gag/pol polyprotein [Arabidopsis thaliana]                                                                                                                                                                                                                                                                                                         | 96   | 1643 | 4.00E-19 | 1711.5 | 45.8 | 67.7 | gag/pol polyprotein                      | gbpln | Arabidopsis thaliana | # # # # # #                                                                                                                                                                                                                                                  | #    | #   | #        | #     | #    | #    |
| Rsa1.0_00683.1.g18016.t1 | gb ABL97983.1  auxin-induced protein-like [Brassica rapa]                                                                                                                                                                                                                                                                                                         | 97   | 99   | 3.00E-42 | 102.1  | 90.7 | 94.8 | auxin-induced protein-like               | gbpln | Brassica rapa        | AT5G18030.1   Symbols:   SAUR-like auxin-responsive protein family   chr5:5968527-5968793 FORWARD LENGTH=88                                                                                                                                                  | 97   | 88  | 1.00E-42 | 90.7  | 86.6 | 88.7 |
| Rsa1.0_00683.1.g18017.t1 | gb ABL97983.1  auxin-induced protein-like [Brassica rapa]                                                                                                                                                                                                                                                                                                         | 98   | 99   | 3.00E-43 | 101.0  | 88.8 | 93.9 | auxin-induced protein-like               | gbpln | Brassica rapa        | AT5G18020.1   Symbols:   SAUR-like auxin-responsive protein family   chr5:5966305-5966580 REVERSE LENGTH=91                                                                                                                                                  | 98   | 91  | 5.00E-42 | 92.9  | 82.7 | 87.8 |
| Rsa1.0_00683.1.g18018.t1 | gb EOA21868.1  hypothetical protein CARUB_v10002345mg [Capsella rubella]<br>gi 48255767 gb EOA21869.1  hypothetical protein CARUB_v10002345mg [Capsella rubella]                                                                                                                                                                                                  | 92   | 92   | 1.00E-40 | 100.0  | 85.9 | 94.6 | hypothetical protein CARUB_v10002345mg   | gbpln | Capsella rubella     | AT5G18030.1   Symbols:   SAUR-like auxin-responsive protein family   chr5:5968527-5968793 FORWARD LENGTH=88                                                                                                                                                  | 92   | 88  | 3.00E-38 | 95.7  | 79.3 | 87.0 |
| Rsa1.0_00683.1.g18019.t1 | gb ABL97983.1  auxin-induced protein-like [Brassica rapa]                                                                                                                                                                                                                                                                                                         | 98   | 99   | 3.00E-41 | 101.0  | 85.7 | 92.9 | auxin-induced protein-like               | gbpln | Brassica rapa        | AT5G18020.1   Symbols:   SAUR-like auxin-responsive protein family   chr5:5966305-5966580 REVERSE LENGTH=91                                                                                                                                                  | 98   | 91  | 7.00E-40 | 92.9  | 78.6 | 86.7 |
| Rsa1.0_00683.1.g18020.t1 | gb ABL97983.1  auxin-induced protein-like [Brassica rapa]                                                                                                                                                                                                                                                                                                         | 97   | 99   | 2.00E-40 | 102.1  | 87.6 | 94.8 | auxin-induced protein-like               | gbpln | Brassica rapa        | AT5G18020.1   Symbols:   SAUR-like auxin-responsive protein family   chr5:5966305-5966580 REVERSE LENGTH=91                                                                                                                                                  | 97   | 91  | 3.00E-41 | 93.8  | 81.4 | 86.6 |

|                          |                                                                                                                                                                                                                                                                                                                                                                                                                                                                                                                                                                                                                                                                                                                           |      |      |           |       |      |      |                                                                                             |       |                      |                                                                                                                                                                                                                                                                                                                       |      |      |           |       |      |      |
|--------------------------|---------------------------------------------------------------------------------------------------------------------------------------------------------------------------------------------------------------------------------------------------------------------------------------------------------------------------------------------------------------------------------------------------------------------------------------------------------------------------------------------------------------------------------------------------------------------------------------------------------------------------------------------------------------------------------------------------------------------------|------|------|-----------|-------|------|------|---------------------------------------------------------------------------------------------|-------|----------------------|-----------------------------------------------------------------------------------------------------------------------------------------------------------------------------------------------------------------------------------------------------------------------------------------------------------------------|------|------|-----------|-------|------|------|
| Rsa1.0_00683.1.g18021.t1 | refNP_197299.1   C2 calcium/lipid-binding and phosphoribosyltransferase C-terminal domain-containing protein [Arabidopsis thaliana] gi 9757890 dbj BAB08397.1   phosphoribosylanthranilate transferase-like protein [Arabidopsis thaliana] gi 332005109 gb AED92492.1   C2 calcium/lipid-binding and phosphoribosyltransferase C-terminal domain-containing protein [Arabidopsis thaliana]                                                                                                                                                                                                                                                                                                                                | 1502 | 1049 | 0         | 69.8  | 62.1 | 65.1 | C2 calcium/lipid-binding and phosphoribosyltransferase C-terminal domain-containing protein | gbpln | Arabidopsis thaliana | AT5G17980.1   Symbols:   C2 calcium/lipid-binding plant phosphoribosyltransferase family protein   chr5:5953596-5956745 FORWARD LENGTH=1049                                                                                                                                                                           | 1502 | 1049 | 0         | 69.8  | 62.1 | 65.1 |
| Rsa1.0_00683.1.g18022.t1 | refNP_197337.1   TIR-NBS-LRR class disease resistance protein [Arabidopsis thaliana] gi 332005160 gb AED92543.1   TIR-NBS-LRR class disease resistance protein [Arabidopsis thaliana]                                                                                                                                                                                                                                                                                                                                                                                                                                                                                                                                     | 1201 | 900  | 0         | 74.9  | 38.4 | 50.2 | TIR-NBS-LRR class disease resistance protein                                                | gbpln | Arabidopsis thaliana | AT5G18360.1   Symbols:   Disease resistance protein (TIR-NBS-LRR class) family   chr5:6080049-6083027 REVERSE LENGTH=900                                                                                                                                                                                              | 1201 | 900  | 0         | 74.9  | 38.4 | 50.2 |
| Rsa1.0_00683.1.g18023.t1 | refXP_002871787.1   cobalamin-independent methionine synthase [Arabidopsis lyrata subsp. lyrata] gi 297317624 gb EFH48046.1   cobalamin-independent methionine synthase [Arabidopsis lyrata subsp. lyrata]                                                                                                                                                                                                                                                                                                                                                                                                                                                                                                                | 738  | 765  | 0         | 103.7 | 92.8 | 95.0 | cobalamin-independent methionine synthase                                                   | gbpln | Arabidopsis lyrata   | AT5G17920.2   Symbols: ATGIMS   Cobalamin-independent synthase family protein   chr5:5935771-5939195 FORWARD LENGTH=765                                                                                                                                                                                               | 738  | 765  | 0         | 103.7 | 92.5 | 94.9 |
| Rsa1.0_00683.1.g18024.t1 | gb EOA19787.1   hypothetical protein CARUB_v10000034mg [Capsella rubella]                                                                                                                                                                                                                                                                                                                                                                                                                                                                                                                                                                                                                                                 | 1451 | 1498 | 0         | 103.2 | 72.7 | 81.0 | hypothetical protein CARUB_v10000034mg                                                      | gbpln | Capsella rubella     | AT5G17910.2   Symbols:   unknown protein; FUNCTIONS IN: molecular function unknown; INVOLVED IN: biological process unknown; LOCATED IN: mitochondrion; EXPRESSED DURING: 15 growth stages; BEST Arabidopsis thaliana protein match is: unknown protein (TAIRAT2G29620.1).   chr5:5927906-5932292 FORWARD LENGTH=1342 | 1451 | 1342 | 1.00E-107 | 92.5  | 15.0 | 16.7 |
| Rsa1.0_00683.1.g18025.t1 | refXP_002871786.1   hypothetical protein ARALYDRAFT_488655 [Arabidopsis lyrata subsp. lyrata] gi 297317623 gb EFH48045.1   hypothetical protein ARALYDRAFT_488655 [Arabidopsis lyrata subsp. lyrata]                                                                                                                                                                                                                                                                                                                                                                                                                                                                                                                      | 679  | 435  | 1.00E-168 | 64.1  | 53.0 | 57.3 | hypothetical protein ARALYDRAFT_488655                                                      | gbpln | Arabidopsis lyrata   | AT4G08580.1   Symbols:   microfibillar-associated protein-related   chr4:5462190-5463718 FORWARD LENGTH=435                                                                                                                                                                                                           | 679  | 435  | 1.00E-168 | 64.1  | 53.2 | 57.9 |
| Rsa1.0_00683.1.g18026.t2 | dbj BAB11222.1   disease resistance protein-like [Arabidopsis thaliana]                                                                                                                                                                                                                                                                                                                                                                                                                                                                                                                                                                                                                                                   | 1350 | 1251 | 0         | 92.7  | 48.6 | 56.9 | disease resistance protein-like                                                             | gbpln | Arabidopsis thaliana | AT5G17890.1   Symbols: CHS3, DAR4   DA1-related protein 4   chr5:5917015-5923160 FORWARD LENGTH=1613                                                                                                                                                                                                                  | 1350 | 1613 | 0         | 119.5 | 48.6 | 56.9 |
| Rsa1.0_00683.1.g18027.t1 | refNP_197290.1   TIR-NBS-LRR class disease resistance protein [Arabidopsis thaliana] gi 332005098 gb AED92481.1   TIR-NBS-LRR class disease resistance protein [Arabidopsis thaliana]                                                                                                                                                                                                                                                                                                                                                                                                                                                                                                                                     | 1170 | 1197 | 0         | 102.3 | 71.8 | 82.5 | TIR-NBS-LRR class disease resistance protein                                                | gbpln | Arabidopsis thaliana | AT5G17880.1   Symbols: CSA1   disease resistance protein (TIR-NBS-LRR class)   chr5:5908874-5913096 REVERSE LENGTH=1197                                                                                                                                                                                               | 1170 | 1197 | 0         | 102.3 | 71.8 | 82.5 |
| Rsa1.0_00683.1.g18028.t1 | refNP_568358.1   plastid-specific 50S ribosomal protein 6 [Arabidopsis thaliana] gi 75171293 sp Q9FKP0.1 PSRP6_ARAT H RecName: Full=50S ribosomal protein 6, chloroplastic; AltName: Full=CL25; AltName: Full=Plastid-specific 50S ribosomal protein 6; Short=PSRP-6; Flags: Precursor gi 10177888 dbj BAB11220.1   unnamed protein product [Arabidopsis thaliana] gi 14517428 gb AAK62604.1   AT5g17870/MPI7_10 [Arabidopsis thaliana] gi 20147339 gb AAM10383.1   AT5g17870/MPI7_10 [Arabidopsis thaliana] gi 21554906 gb AAM63726.1   plastid-specific ribosomal protein 6 precursor (Psrp-6)-like [Arabidopsis thaliana] gi 332005097 gb AED92480.1   plastid-specific 50S ribosomal protein 6 [Arabidopsis thaliana] | 106  | 106  | 3.00E-48  | 100.0 | 91.5 | 93.4 | plastid-specific 50S ribosomal protein 6                                                    | gbpln | Arabidopsis thaliana | AT5G17870.1   Symbols: PSRP6   plastid-specific 50S ribosomal protein 6   chr5:5907817-5908137 FORWARD LENGTH=106                                                                                                                                                                                                     | 106  | 106  | 5.00E-51  | 100.0 | 91.5 | 93.4 |
| Rsa1.0_00683.1.g18029.t1 | dbj BAJ34263.1   unnamed protein product [Thellungiella halophila]                                                                                                                                                                                                                                                                                                                                                                                                                                                                                                                                                                                                                                                        | 575  | 577  | 0         | 100.3 | 88.3 | 93.6 | unnamed protein product                                                                     | ----  | ----                 | AT5G17860.1   Symbols: CAX7   calcium exchanger 7   chr5:5902638-5904350 REVERSE LENGTH=570                                                                                                                                                                                                                           | 575  | 570  | 0         | 99.1  | 85.9 | 91.7 |

|                           |                                                                                                                                                                                                                                                                                                                                                                                                                                                        |      |      |           |        |      |      |                                                                                                                                                                                                                                        |       |                      |                                                                                                                                                                                                                                                                                                                                               |      |      |           |       |      |      |
|---------------------------|--------------------------------------------------------------------------------------------------------------------------------------------------------------------------------------------------------------------------------------------------------------------------------------------------------------------------------------------------------------------------------------------------------------------------------------------------------|------|------|-----------|--------|------|------|----------------------------------------------------------------------------------------------------------------------------------------------------------------------------------------------------------------------------------------|-------|----------------------|-----------------------------------------------------------------------------------------------------------------------------------------------------------------------------------------------------------------------------------------------------------------------------------------------------------------------------------------------|------|------|-----------|-------|------|------|
| Rsa1.0_00683.1.g18030.t1  | refNP_197287.1  Sodium/calcium exchanger family protein [Arabidopsis thaliana]<br>gi 75171295 sp Q9FKP2.1 CCX2_ARATH<br>RecName: Full=Cation/calcium exchanger 2; AltName: Full=Protein CATION EXCHANGER 8<br>gi 10177886 dbj BAB11218.1  Na/Ca,K-exchanger-like protein [Arabidopsis thaliana] gi 332005095 gb AED92478.1  Sodium/calcium exchanger family protein [Arabidopsis thaliana]<br>gb AAF99801.1 AC012463.18 T2E6.13 [Arabidopsis thaliana] | 550  | 559  | 0         | 101.6  | 84.5 | 92.0 | Sodium/calcium exchanger family protein                                                                                                                                                                                                | gbpln | Arabidopsis thaliana | AT5G17850.1   Symbols: Sodium/calcium exchanger family protein   chr5:5899253-5900932 FORWARD LENGTH=559                                                                                                                                                                                                                                      | 550  | 559  | 0         | 101.6 | 84.5 | 92.0 |
| Rsa1.0_00684.1.g18031.t1  | sp P34794.1 RUB2_BRANA RecName: Full=RubisCO large subunit-binding protein subunit alpha, chloroplastic; AltName: Full=60 kDa chaperonin subunit alpha; AltName: Full=CPN-60 alpha; Flags: Precursor<br>gi 415925 emb CAA81736.1  chaperonin-60 alpha subunit [Brassica napus]                                                                                                                                                                         | 101  | 165  | 1.00E-16  | 163.4  | 37.6 | 58.4 | T2E6.13                                                                                                                                                                                                                                | gbpln | Arabidopsis thaliana | #                                                                                                                                                                                                                                                                                                                                             | #    | #    | #         | #     | #    |      |
| Rsa1.0_00684.1.g18032.t1  | sp P34794.1 RUB2_BRANA RecName: Full=RubisCO large subunit-binding protein subunit alpha, chloroplastic; AltName: Full=60 kDa chaperonin subunit alpha; AltName: Full=CPN-60 alpha; Flags: Precursor<br>gi 415925 emb CAA81736.1  chaperonin-60 alpha subunit [Brassica napus]                                                                                                                                                                         | 603  | 583  | 0         | 96.7   | 93.2 | 94.2 | RecName: Full=RubisCO large subunit-binding protein subunit alpha, chloroplastic; AltName: Full=60 kDa chaperonin subunit alpha; AltName: Full=CPN-60 alpha; Flags: Precursor<br>gi 415925 emb CAA81736.1  chaperonin-60 alpha subunit | gbpln | Brassica napus       | AT2G28000.1   Symbols: CPN60A, CH-CPN60A, SLP   chaperonin-60alpha   chr2:11926603-11929184 FORWARD LENGTH=586                                                                                                                                                                                                                                | 603  | 586  | 0         | 97.2  | 89.6 | 92.2 |
| Rsa1.0_00684.1.g18033.t2  | gb EOA39500.1  hypothetical protein CARUB_v10008106mg [Capsella rubella]                                                                                                                                                                                                                                                                                                                                                                               | 1260 | 1260 | 0         | 100.0  | 87.4 | 93.4 | hypothetical protein CARUB_v10008106mg                                                                                                                                                                                                 | gbpln | Capsella rubella     | AT1G42470.1   Symbols: Patched family protein   chr1:15926987-15935128 FORWARD LENGTH=1272                                                                                                                                                                                                                                                    | 1260 | 1272 | 0         | 101.0 | 81.5 | 86.0 |
| Rsa1.0_00684.1.g18034.t31 | dbj BAF36296.1  hypothetical protein [Ipomoea trifida]                                                                                                                                                                                                                                                                                                                                                                                                 | 82   | 1291 | 2.00E-34  | 1574.4 | 82.9 | 85.4 | hypothetical protein                                                                                                                                                                                                                   | gbpln | Ipomoea trifida      | AT2G27970.1   Symbols: CKS2   CDK-subunit 2   chr2:11912460-11913112 REVERSE LENGTH=83                                                                                                                                                                                                                                                        | 82   | 83   | 4.00E-37  | 101.2 | 85.4 | 86.6 |
| Rsa1.0_00684.1.g18035.t1  | refXP_002879127.1  hypothetical protein ARALYDRAFT_901726 [Arabidopsis lyrata subsp. lyrata]<br>gi 297324966 gb EFH55386.1  hypothetical protein ARALYDRAFT_901726 [Arabidopsis lyrata subsp. lyrata]                                                                                                                                                                                                                                                  | 836  | 840  | 0         | 100.5  | 79.4 | 86.1 | hypothetical protein ARALYDRAFT_901726                                                                                                                                                                                                 | gbpln | Arabidopsis lyrata   | AT2G27950.1   Symbols: Ring/U-Box superfamily protein   chr2:11899422-11903171 REVERSE LENGTH=639                                                                                                                                                                                                                                             | 836  | 839  | 0         | 100.4 | 77.9 | 85.3 |
| Rsa1.0_00684.1.g18036.t1  | #                                                                                                                                                                                                                                                                                                                                                                                                                                                      | #    | #    | #         | #      | #    | -    | ----                                                                                                                                                                                                                                   | ----  | ----                 | #                                                                                                                                                                                                                                                                                                                                             | #    | #    | #         | #     | #    |      |
| Rsa1.0_00684.1.g18037.t1  | refNP_180360.4  PLATZ transcription factor family protein [Arabidopsis thaliana] gi 330252967 gb AEC08061.1  PLATZ transcription factor family protein [Arabidopsis thaliana]<br>refXP_002880962.1  hypothetical protein ARALYDRAFT_481718 [Arabidopsis lyrata subsp. lyrata]<br>gi 297326801 gb EFH57221.1  hypothetical protein ARALYDRAFT_481718 [Arabidopsis lyrata subsp. lyrata]                                                                 | 189  | 189  | 2.00E-88  | 100.0  | 91.0 | 93.7 | PLATZ transcription factor family protein                                                                                                                                                                                              | gbpln | Arabidopsis thaliana | AT2G27930.1   Symbols: PLATZ transcription factor family protein   chr2:11892369-11893488 FORWARD LENGTH=189                                                                                                                                                                                                                                  | 189  | 189  | 7.00E-91  | 100.0 | 91.0 | 93.7 |
| Rsa1.0_00684.1.g18038.t1  | refXP_002880962.1  hypothetical protein ARALYDRAFT_481718 [Arabidopsis lyrata subsp. lyrata]<br>gi 297326801 gb EFH57221.1  hypothetical protein ARALYDRAFT_481718 [Arabidopsis lyrata subsp. lyrata]                                                                                                                                                                                                                                                  | 968  | 1001 | 0         | 103.4  | 75.5 | 84.2 | hypothetical protein ARALYDRAFT_481718                                                                                                                                                                                                 | gbpln | Arabidopsis lyrata   | AT2G27880.1   Symbols: AGO5   Argonaute family protein   chr2:11871488-11876712 FORWARD LENGTH=997                                                                                                                                                                                                                                            | 968  | 997  | 0         | 103.0 | 75.0 | 84.5 |
| Rsa1.0_00684.1.g18039.t1  | #                                                                                                                                                                                                                                                                                                                                                                                                                                                      | #    | #    | #         | #      | #    | #    | -                                                                                                                                                                                                                                      | ----  | ----                 | AT1G08200.1   Symbols: AXS2   UDP-D-apiose/UDP-D-xyllose synthase 2   chr1:2574259-2576609 REVERSE LENGTH=389                                                                                                                                                                                                                                 | 105  | 389  | 9.00E-13  | 370.5 | 41.9 | 49.5 |
| Rsa1.0_00684.1.g18040.t1  | refNP_565660.1  uncharacterized protein [Arabidopsis thaliana] gi 3860249 gb AAC73017.1  expressed protein [Arabidopsis thaliana] gi 17473713 gb AAL38309.1  unknown protein [Arabidopsis thaliana] gi 21386999 gb AAM47903.1  unknown protein [Arabidopsis thaliana] gi 21592892 gb AAM64842.1  unknown protein [Arabidopsis thaliana] gi 330252957 gb AEC08051.1  uncharacterized protein AT2G27830 [Arabidopsis thaliana]                           | 196  | 190  | 6.00E-80  | 96.9   | 79.1 | 82.7 | uncharacterized protein                                                                                                                                                                                                                | gbpln | Arabidopsis thaliana | AT2G27830.1   Symbols: unknown protein; BEST Arabidopsis thaliana protein match is: unknown protein (TAIR:AT4G22758.1); Has 131 Blast hits to 131 proteins in 17 species: Archae - 0; Bacteria - 0; Metazoa - 0; Fungi - 0; Plants - 131; Viruses - 0; Other Eukaryotes - 0 (source: NCBI BLINK).   chr2:11860734-11861306 FORWARD LENGTH=190 | 196  | 190  | 2.00E-82  | 96.9  | 79.1 | 82.7 |
| Rsa1.0_00685.1.g18041.t1  | #                                                                                                                                                                                                                                                                                                                                                                                                                                                      | #    | #    | #         | #      | #    | -    | ----                                                                                                                                                                                                                                   | ----  | ----                 | #                                                                                                                                                                                                                                                                                                                                             | #    | #    | #         | #     | #    |      |
| Rsa1.0_00685.1.g18042.t1  | #                                                                                                                                                                                                                                                                                                                                                                                                                                                      | #    | #    | #         | #      | #    | -    | ----                                                                                                                                                                                                                                   | ----  | ----                 | #                                                                                                                                                                                                                                                                                                                                             | #    | #    | #         | #     | #    |      |
| Rsa1.0_00685.1.g18043.t1  | #                                                                                                                                                                                                                                                                                                                                                                                                                                                      | #    | #    | #         | #      | #    | -    | ----                                                                                                                                                                                                                                   | ----  | ----                 | #                                                                                                                                                                                                                                                                                                                                             | #    | #    | #         | #     | #    |      |
| Rsa1.0_00685.1.g18044.t1  | gb EOA30650.1  hypothetical protein CARUB_v10013787mg [Capsella rubella]                                                                                                                                                                                                                                                                                                                                                                               | 380  | 422  | 1.00E-153 | 111.1  | 82.4 | 88.4 | hypothetical protein CARUB_v10013787mg                                                                                                                                                                                                 | gbpln | Capsella rubella     | AT3G22190.2   Symbols: IQD5   IQ-domain 5   chr3:7831280-7833512 REVERSE LENGTH=422                                                                                                                                                                                                                                                           | 380  | 422  | 1.00E-155 | 111.1 | 82.9 | 88.2 |

|                          |                                                                                                                                                                                                                                                                                                                                                                                                                                                                                                                                                                                                                                        |     |     |           |       |      |      |                                             |       |                      |                                                                                                                                                                                                                                                                                                                                                                                                                |     |      |           |       |      |      |
|--------------------------|----------------------------------------------------------------------------------------------------------------------------------------------------------------------------------------------------------------------------------------------------------------------------------------------------------------------------------------------------------------------------------------------------------------------------------------------------------------------------------------------------------------------------------------------------------------------------------------------------------------------------------------|-----|-----|-----------|-------|------|------|---------------------------------------------|-------|----------------------|----------------------------------------------------------------------------------------------------------------------------------------------------------------------------------------------------------------------------------------------------------------------------------------------------------------------------------------------------------------------------------------------------------------|-----|------|-----------|-------|------|------|
| Rsa1.0_00685.1.g18045.t1 | ref[NP_188856.2] far-red elongated hypocotyls 3 protein [Arabidopsis thaliana]<br>gi 186510310 ref[NP_001118673.1] far-red elongated hypocotyls 3 protein [Arabidopsis thaliana]<br>gi 75273369 sp Q9LIE5.1 FHY3_ARATH RecName: Full=Protein FAR-RED ELONGATED HYPOCOTYL 3<br>gi 11994736 dbj BAB03065.1  far-red impaired response protein; Mutator-like transposase-like protein; phytochrome A signaling protein-like [Arabidopsis thaliana] gi 332643075 gb AEE76596.1  far-red elongated hypocotyls 3 protein [Arabidopsis thaliana]<br>gi 332643076 gb AEE76597.1  far-red elongated hypocotyls 3 protein [Arabidopsis thaliana] | 830 | 839 | 0         | 101.1 | 84.8 | 91.6 | far-red elongated hypocotyls 3 protein      | gbpln | Arabidopsis thaliana | AT3G22170.2   Symbols: FHY3   far-red elongated hypocotyls 3   chr3:7822359-7825414 REVERSE LENGTH=839                                                                                                                                                                                                                                                                                                         | 830 | 839  | 0         | 101.1 | 84.8 | 91.6 |
| Rsa1.0_00685.1.g18046.t1 | gb EOA31512.1  hypothetical protein CARUB_v10014701mg [Capsella rubella]                                                                                                                                                                                                                                                                                                                                                                                                                                                                                                                                                               | 199 | 195 | 9.00E-57  | 98.0  | 76.4 | 83.9 | hypothetical protein CARUB_v10014701mg      | gbpln | Capsella rubella     | AT3G22160.1   Symbols:   VQ motif-containing protein   chr3:7818148-7818726 REVERSE LENGTH=192                                                                                                                                                                                                                                                                                                                 | 199 | 192  | 2.00E-56  | 96.5  | 76.9 | 83.4 |
| Rsa1.0_00685.1.g18047.t1 | ref[NP_188854.1] pentatricopeptide repeat-containing protein [Arabidopsis thaliana]<br>gi 75273371 sp Q9LIE7.1 PP246_ARATH RecName: Full=Pentatricopeptide repeat-containing protein At3g22150, chloroplastic; Flags: Precursor<br>gi 11994734 dbj BAB03063.1  selenium-binding protein-like [Arabidopsis thaliana] gi 110739449 dbj BAF01634.1  hypothetical protein [Arabidopsis thaliana] gi 332643073 gb AEE76594.1  pentatricopeptide repeat-containing protein [Arabidopsis thaliana]                                                                                                                                            | 814 | 820 | 0         | 100.7 | 86.4 | 92.9 | pentatricopeptide repeat-containing protein | gbpln | Arabidopsis thaliana | AT3G22150.1   Symbols:   Tetratricopeptide repeat (TPR)-like superfamily protein   chr3:7813028-7815490 FORWARD LENGTH=820                                                                                                                                                                                                                                                                                     | 814 | 820  | 0         | 100.7 | 86.4 | 92.9 |
| Rsa1.0_00685.1.g18048.t2 | #                                                                                                                                                                                                                                                                                                                                                                                                                                                                                                                                                                                                                                      | #   | #   | #         | #     | #    | -    | ----                                        | ----  | ----                 | #                                                                                                                                                                                                                                                                                                                                                                                                              | #   | #    | #         | #     | #    |      |
| Rsa1.0_00685.1.g18049.t1 | #                                                                                                                                                                                                                                                                                                                                                                                                                                                                                                                                                                                                                                      | #   | #   | #         | #     | #    | -    | ----                                        | ----  | ----                 | #                                                                                                                                                                                                                                                                                                                                                                                                              | #   | #    | #         | #     | #    |      |
| Rsa1.0_00685.1.g18050.t1 | #                                                                                                                                                                                                                                                                                                                                                                                                                                                                                                                                                                                                                                      | #   | #   | #         | #     | #    | -    | ----                                        | ----  | ----                 | #                                                                                                                                                                                                                                                                                                                                                                                                              | #   | #    | #         | #     | #    |      |
| Rsa1.0_00685.1.g18051.t1 | ref[XP_002885484.1] predicted protein [Arabidopsis lyrata subsp. lyrata] gi 297331324 gb EFH61743.1  predicted protein [Arabidopsis lyrata subsp. lyrata]                                                                                                                                                                                                                                                                                                                                                                                                                                                                              | 388 | 722 | 2.00E-58  | 186.1 | 45.9 | 51.0 | predicted protein                           | gbpln | Arabidopsis lyrata   | AT3G22142.1   Symbols:   Bifunctional inhibitor/lipid-transfer protein/seed storage 2S albumin superfamily protein   chr3:7803604-7808046 REVERSE LENGTH=1480                                                                                                                                                                                                                                                  | 388 | 1480 | 2.00E-56  | 381.4 | 45.4 | 52.3 |
| Rsa1.0_00686.1.g18052.t2 | ref[NP_181854.1] uncharacterized protein [Arabidopsis thaliana] gi 3763934 gb AAC64314.1  hypothetical protein [Arabidopsis thaliana] gi 110737676 dbj BAF00777.1  hypothetical protein [Arabidopsis thaliana] gi 330255143 gb AEC10237.1  uncharacterized protein AT2G43250 [Arabidopsis thaliana]                                                                                                                                                                                                                                                                                                                                    | 74  | 625 | 7.00E-15  | 844.6 | 63.5 | 77.0 | uncharacterized protein                     | gbpln | Arabidopsis thaliana | AT2G43250.1   Symbols:   unknown protein; Has 32 Blast hits to 32 proteins in 11 species: Archae - 0; Bacteria - 0; Metazoa - 0; Fungi - 0; Plants - 32; Viruses - 0; Other Eukaryotes - 0 (source: NCBI BLINK).   chr2:17977619-17979496 FORWARD LENGTH=625                                                                                                                                                   | 74  | 625  | 1.00E-17  | 844.6 | 63.5 | 77.0 |
| Rsa1.0_00686.1.g18053.t1 | #                                                                                                                                                                                                                                                                                                                                                                                                                                                                                                                                                                                                                                      | #   | #   | #         | #     | #    | -    | ----                                        | ----  | ----                 | #                                                                                                                                                                                                                                                                                                                                                                                                              | #   | #    | #         | #     | #    |      |
| Rsa1.0_00686.1.g18054.t1 | emb CAB43055.1  putative protein [Arabidopsis thaliana] gi 7267819 emb CAB81221.1  putative protein [Arabidopsis thaliana]                                                                                                                                                                                                                                                                                                                                                                                                                                                                                                             | 310 | 462 | 5.00E-43  | 149.0 | 37.1 | 53.5 | putative protein                            | gbpln | Arabidopsis thaliana | #                                                                                                                                                                                                                                                                                                                                                                                                              | #   | #    | #         | #     | #    |      |
| Rsa1.0_00686.1.g18055.t1 | ref[XP_002881893.1] hypothetical protein ARALYDRAFT_903711 [Arabidopsis lyrata subsp. lyrata] gi 297327732 gb EFH58152.1  hypothetical protein ARALYDRAFT_903711 [Arabidopsis lyrata subsp. lyrata]                                                                                                                                                                                                                                                                                                                                                                                                                                    | 225 | 189 | 5.00E-20  | 84.0  | 24.0 | 34.2 | hypothetical protein ARALYDRAFT_903711      | gbpln | Arabidopsis lyrata   | AT2G43261.1   Symbols:   unknown protein; FUNCTIONS IN: molecular_function unknown; INVOLVED IN: biological_process unknown; LOCATED IN: cellular_component unknown; Has 30201 Blast hits to 17322 proteins in 780 species: Archae - 12; Bacteria - 1396; Metazoa - 17338; Fungi - 3422; Plants - 5037; Viruses - 0; Other Eukaryotes - 2996 (source: NCBI BLINK).   chr2:17985581-17986559 REVERSE LENGTH=190 | 225 | 190  | 8.00E-18  | 84.4  | 24.0 | 33.3 |
| Rsa1.0_00686.1.g18056.t1 | gb EOA27181.1  hypothetical protein CARUB_v10023282mg [Capsella rubella]                                                                                                                                                                                                                                                                                                                                                                                                                                                                                                                                                               | 415 | 423 | 2.00E-96  | 101.9 | 53.7 | 64.6 | hypothetical protein CARUB_v10023282mg      | gbpln | Capsella rubella     | AT2G43270.1   Symbols:   F-box and associated interaction domains-containing protein   chr2:17988207-17989491 REVERSE LENGTH=387                                                                                                                                                                                                                                                                               | 415 | 387  | 1.00E-98  | 93.3  | 53.5 | 64.3 |
| Rsa1.0_00686.1.g18057.t1 | gb EOA27181.1  hypothetical protein CARUB_v10023282mg [Capsella rubella]                                                                                                                                                                                                                                                                                                                                                                                                                                                                                                                                                               | 421 | 423 | 1.00E-158 | 100.5 | 68.2 | 80.5 | hypothetical protein CARUB_v10023282mg      | gbpln | Capsella rubella     | AT2G43260.1   Symbols:   F-box and associated interaction domains-containing protein   chr2:17983744-17985089 REVERSE LENGTH=420                                                                                                                                                                                                                                                                               | 421 | 420  | 1.00E-152 | 99.8  | 67.0 | 79.8 |
| Rsa1.0_00686.1.g18058.t1 | gb EOA26935.1  hypothetical protein CARUB_v10023029mg [Capsella rubella]                                                                                                                                                                                                                                                                                                                                                                                                                                                                                                                                                               | 503 | 509 | 0         | 101.2 | 91.5 | 96.0 | hypothetical protein CARUB_v10023029mg      | gbpln | Capsella rubella     | AT2G43330.1   Symbols: ATINT1, INT1   inositol transporter 1   chr2:18001135-18003854 FORWARD LENGTH=509                                                                                                                                                                                                                                                                                                       | 503 | 509  | 0         | 101.2 | 91.7 | 96.2 |

|                          |                                                                                                                                                                                                                                                                                                                                                                                                                                                                                                                                                                                                                                                                                                                                                                                                                                                                                                                                                                                                   |     |     |           |       |      |      |                                                             |       |                      |                                                                                                                                     |     |     |           |       |      |      |
|--------------------------|---------------------------------------------------------------------------------------------------------------------------------------------------------------------------------------------------------------------------------------------------------------------------------------------------------------------------------------------------------------------------------------------------------------------------------------------------------------------------------------------------------------------------------------------------------------------------------------------------------------------------------------------------------------------------------------------------------------------------------------------------------------------------------------------------------------------------------------------------------------------------------------------------------------------------------------------------------------------------------------------------|-----|-----|-----------|-------|------|------|-------------------------------------------------------------|-------|----------------------|-------------------------------------------------------------------------------------------------------------------------------------|-----|-----|-----------|-------|------|------|
| Rsa1.0_00686.1.g18059.t1 | gb EOA27961.1  hypothetical protein CARUB_v10024131mg [Capsella rubella]                                                                                                                                                                                                                                                                                                                                                                                                                                                                                                                                                                                                                                                                                                                                                                                                                                                                                                                          | 172 | 186 | 8.00E-61  | 108.1 | 77.9 | 84.9 | hypothetical protein CARUB_v10024131mg                      | gbpln | Capsella rubella     | AT2G43340.1   Symbols:   Protein of unknown function (DUF1685)   chr2:18007769-18008416 FORWARD LENGTH=189                          | 172 | 189 | 2.00E-55  | 109.9 | 79.1 | 84.3 |
| Rsa1.0_00686.1.g18060.t1 | gb EOA27306.1  hypothetical protein CARUB_v10023426mg [Capsella rubella]                                                                                                                                                                                                                                                                                                                                                                                                                                                                                                                                                                                                                                                                                                                                                                                                                                                                                                                          | 376 | 380 | 0         | 101.1 | 94.1 | 95.5 | hypothetical protein CARUB_v10023426mg                      | gbpln | Capsella rubella     | AT2G43360.1   Symbols: BIO2_BIOB   Radical SAM superfamily protein   chr2:18010918-18013129 REVERSE LENGTH=378                      | 376 | 378 | 0         | 100.5 | 93.4 | 95.7 |
| Rsa1.0_00686.1.g18061.t1 | gb ABD65166.1  F-box domain containing protein [Brassica oleracea]                                                                                                                                                                                                                                                                                                                                                                                                                                                                                                                                                                                                                                                                                                                                                                                                                                                                                                                                | 356 | 391 | 1.00E-95  | 109.8 | 56.7 | 69.1 | F-box domain containing protein                             | gbpln | Brassica oleracea    | AT2G43445.1   Symbols:   F-box and associated interaction domains-containing protein   chr2:18041511-18042995 FORWARD LENGTH=405    | 356 | 405 | 1.00E-93  | 113.8 | 53.7 | 69.9 |
| Rsa1.0_00686.1.g18062.t1 | #                                                                                                                                                                                                                                                                                                                                                                                                                                                                                                                                                                                                                                                                                                                                                                                                                                                                                                                                                                                                 | #   | #   | #         | #     | #    | #    | -                                                           | ----  | ----                 | #                                                                                                                                   | #   | #   | #         | #     | #    |      |
| Rsa1.0_00686.1.g18063.t1 | gb EOA28793.1  hypothetical protein CARUB_v10025025mg [Capsella rubella]                                                                                                                                                                                                                                                                                                                                                                                                                                                                                                                                                                                                                                                                                                                                                                                                                                                                                                                          | 619 | 624 | 0         | 100.8 | 90.1 | 93.1 | hypothetical protein CARUB_v10025025mg                      | gbpln | Capsella rubella     | AT2G43400.1   Symbols: ETFQO   electron-transfer flavoprotein:ubiquinone oxidoreductase   chr2:18021304-18025041 FORWARD LENGTH=633 | 619 | 633 | 0         | 102.3 | 91.0 | 93.7 |
| Rsa1.0_00686.1.g18064.t1 | ref XP_002881902.1  hypothetical protein ARALYDRAFT_483451 [Arabidopsis lyrata subsp. lyrata] gi 297327741 gb EFH58161.1  hypothetical protein ARALYDRAFT_483451 [Arabidopsis lyrata subsp. lyrata] ref NP_565998.1  3beta-hydroxysteroid-dehydrogenase/decarboxylase isoform 3 [Arabidopsis thaliana] gi 229890389 sp A9X4U2.2 HSDD3_ARATH RecName: Full=3beta-hydroxysteroid-dehydrogenase/decarboxylase isoform 3; Short=At3BETAHSD/D3; AltName: Full=4alpha-carboxysterol-C3-dehydrogenase/C4-decarboxylase isoform 1-3; AltName: Full=Reticulon-like protein B20; Short=AtRTNLB20; AltName: Full=Sterol-4-alpha-carboxylate 3-dehydrogenase 3, decarboxylating                                                                                                                                                                                                                                                                                                                               | 851 | 902 | 0         | 106.0 | 81.2 | 88.0 | hypothetical protein ARALYDRAFT_483451                      | gbpln | Arabidopsis lyrata   | AT2G43410.1   Symbols: FPA   RNA binding   chr2:18026397-18030989 REVERSE LENGTH=858                                                | 851 | 858 | 0         | 100.8 | 81.3 | 88.1 |
| Rsa1.0_00686.1.g18065.t1 | ref NP_565998.1  3beta-hydroxysteroid-dehydrogenase/decarboxylase isoform 3; Short=At3BETAHSD/D3; AltName: Full=4alpha-carboxysterol-C3-dehydrogenase/C4-decarboxylase isoform 1-3; AltName: Full=Reticulon-like protein B20; Short=AtRTNLB20; AltName: Full=Sterol-4-alpha-carboxylate 3-dehydrogenase 3, decarboxylating                                                                                                                                                                                                                                                                                                                                                                                                                                                                                                                                                                                                                                                                        | 606 | 561 | 0         | 92.6  | 79.9 | 85.1 | 3beta-hydroxysteroid-dehydrogenase/decarb oxylase isoform 3 | gbpln | Arabidopsis thaliana | AT2G43420.1   Symbols:   3-beta hydroxysteroid dehydrogenase/isomerase family protein   chr2:18031493-18034936 REVERSE LENGTH=561   | 606 | 561 | 0         | 92.6  | 79.9 | 85.1 |
| Rsa1.0_00686.1.g18066.t3 | gi 15027969 gb AAK76515.1  putative sterol dehydrogenase [Arabidopsis thaliana] gi 20196859 gb AAB6437.2  putative sterol dehydrogenase [Arabidopsis thaliana] gi 26450922 dbj BAC42568.1  putative sterol dehydrogenase [Arabidopsis thaliana] gi 330255172 gb AEC10268.1  3beta-hydroxysteroid-dehydrogenase/decarboxylase isoform 3 [Arabidopsis thaliana] ref NP_565999.1  Hydroxyacylglutathione hydrolase 1 [Arabidopsis thaliana] gi 21264419 sp O24495.2 GLO2M_ARATH RecName: Full=Hydroxyacylglutathione hydrolase 1, mitochondrial; AltName: Full=Glyoxalase II; Short=Glx II; Flags: Precursor gi 2570338 gb AAC49865.1  glyoxalase II isozyme [Arabidopsis thaliana] gi 17380664 gb AAL36162.1  putative glyoxalase II [Arabidopsis thaliana] gi 20196860 gb AAB64315.2  putative glyoxalase II [Arabidopsis thaliana] gi 20259003 gb AAM14217.1  putative glyoxalase II [Arabidopsis thaliana] gi 330255174 gb AEC10268.1  Hydroxyacylglutathione hydrolase 1 [Arabidopsis thaliana] | 337 | 331 | 1.00E-177 | 98.2  | 88.7 | 94.4 | Hydroxyacylglutathione hydrolase 1                          | gbpln | Arabidopsis thaliana | AT2G43430.1   Symbols: GLX2-1, GLY1   glyoxalase 2-1   chr2:18035569-18038064 REVERSE LENGTH=331                                    | 337 | 331 | 1.00E-180 | 98.2  | 88.7 | 94.4 |
| Rsa1.0_00686.1.g18067.t1 | ref NP_001154572.1  RNA-binding ASCH domain protein [Arabidopsis thaliana] gi 330255179 gb AEC10273.1  RNA-binding ASCH domain protein [Arabidopsis thaliana]                                                                                                                                                                                                                                                                                                                                                                                                                                                                                                                                                                                                                                                                                                                                                                                                                                     | 477 | 388 | 1.00E-154 | 81.3  | 57.7 | 65.0 | RNA-binding ASCH domain protein                             | gbpln | Arabidopsis thaliana | AT2G43465.1   Symbols:   RNA-binding ASCH domain protein   chr2:18047732-18049709 REVERSE LENGTH=388                                | 477 | 388 | 1.00E-156 | 81.3  | 57.7 | 65.0 |
| Rsa1.0_00686.1.g18068.t1 | ref NP_181875.5  uncharacterized protein [Arabidopsis thaliana] gi 330255180 gb AEC10274.1  uncharacterized protein AT2G43470 [Arabidopsis thaliana]                                                                                                                                                                                                                                                                                                                                                                                                                                                                                                                                                                                                                                                                                                                                                                                                                                              | 245 | 210 | 2.00E-32  | 85.7  | 36.7 | 48.2 | uncharacterized protein                                     | gbpln | Arabidopsis thaliana | AT2G43470.1   Symbols:   Protein of unknown function (DUF3755)   chr2:18049944-18051218 REVERSE LENGTH=210                          | 245 | 210 | 4.00E-35  | 85.7  | 36.7 | 48.2 |

|                           |                                                                                                                                                                                                                                                                                                                                                                                                                                                                                                               |     |      |           |       |      |      |                                              |       |                      |                                                                                                                                                                                                                                                                                                                                                                                                                                                 |     |     |           |       |      |      |
|---------------------------|---------------------------------------------------------------------------------------------------------------------------------------------------------------------------------------------------------------------------------------------------------------------------------------------------------------------------------------------------------------------------------------------------------------------------------------------------------------------------------------------------------------|-----|------|-----------|-------|------|------|----------------------------------------------|-------|----------------------|-------------------------------------------------------------------------------------------------------------------------------------------------------------------------------------------------------------------------------------------------------------------------------------------------------------------------------------------------------------------------------------------------------------------------------------------------|-----|-----|-----------|-------|------|------|
| Rsa1.0_00687.1.g18069.t1  | ref NP_565065.1  uncharacterized protein [Arabidopsis thaliana] gi 21593462 gb AAM65429.1  unknown [Arabidopsis thaliana] gi 124301178 gb ABN04841.1  At1g73470 [Arabidopsis thaliana] gi 332197343 gb AEE35464.1  uncharacterized protein AT1G73470 [Arabidopsis thaliana]                                                                                                                                                                                                                                   | 358 | 351  | 1.00E-165 | 98.0  | 83.0 | 90.2 | uncharacterized protein                      | gbpln | Arabidopsis thaliana | AT1G73470.1   Symbols:   unknown protein; FUNCTIONS IN: molecular_function unknown; INVOLVED IN: biological_process unknown; LOCATED IN: chloroplast; EXPRESSED IN: 22 plant structures; EXPRESSED DURING: 13 growth stages; Has 72 Blast hits to 72 proteins in 35 species; Archae - 0; Bacteria - 50; Metazoa - 0; Fungi - 0; Plants - 22; Viruses - 0; Other Eukaryotes - 0 (source: NCBI BLINK)   chr1:27625208-27627604 FORWARD LENGTH=351 | 358 | 351 | 1.00E-168 | 98.0  | 83.0 | 90.2 |
| Rsa1.0_00687.1.g18070.t26 | ref XP_002887484.1  hypothetical protein ARALYDRAFT_895203 [Arabidopsis lyrata subsp. lyrata] gi 297333325 gb EFH63743.1  hypothetical protein ARALYDRAFT_895203 [Arabidopsis lyrata subsp. lyrata]                                                                                                                                                                                                                                                                                                           | 808 | 784  | 0         | 97.0  | 84.7 | 87.5 | hypothetical protein ARALYDRAFT_895203       | gbpln | Arabidopsis lyrata   | AT1G73430.2   Symbols:   sec34-like family protein   chr1:27604096-27610829 FORWARD LENGTH=784                                                                                                                                                                                                                                                                                                                                                  | 808 | 784 | 0         | 97.0  | 84.3 | 87.1 |
| Rsa1.0_00687.1.g18071.t1  | ref NP_177484.1  myb domain protein 54 [Arabidopsis thaliana] gi 11120806 gb AAG30986.1 AC012396_22 myb-like transcription factor, putative [Arabidopsis thaliana] gi 41619168 gb AAS10039.1  MYB transcription factor [Arabidopsis thaliana] gi 89111924 gb ABD60734.1  At1g73410 [Arabidopsis thaliana] gi 110743027 cb BAE99406.1  hypothetical protein [Arabidopsis thaliana] gi 332197337 gb AEE35458.1  myb domain protein 54 [Arabidopsis thaliana]                                                    | 234 | 243  | 1.00E-106 | 103.8 | 86.3 | 91.9 | myb domain protein 54                        | gbpln | Arabidopsis thaliana | AT1G73410.1   Symbols: ATMYB54, MYB54   myb domain protein 54   chr1:27601852-27603038 FORWARD LENGTH=243                                                                                                                                                                                                                                                                                                                                       | 234 | 243 | 1.00E-108 | 103.8 | 86.3 | 91.9 |
| Rsa1.0_00687.1.g18072.t1  | gb EOA35177.1  hypothetical protein CARUB_v10020322mg [Capsella rubella]                                                                                                                                                                                                                                                                                                                                                                                                                                      | 433 | 431  | 1.00E-163 | 99.5  | 71.8 | 82.4 | hypothetical protein CARUB_v10020322mg       | gbpln | Capsella rubella     | AT1G73380.1   Symbols:   unknown protein; CONTAINS InterPro DOMAIN/s: Protein of unknown function DUF1308 (InterPro:IPR010733); Has 162 Blast hits to 160 proteins in 67 species; Archae - 0; Bacteria - 2; Metazoa - 120; Fungi - 0; Plants - 34; Viruses - 0; Other Eukaryotes - 6 (source: NCBI BLINK)   chr1:27589100-27590657 FORWARD LENGTH=434                                                                                           | 433 | 434 | 1.00E-154 | 100.2 | 71.6 | 80.6 |
| Rsa1.0_00687.1.g18073.t1  | gb AAB68964.1  trypsin inhibitor propeptide [Brassica oleracea]                                                                                                                                                                                                                                                                                                                                                                                                                                               | 206 | 214  | 3.00E-61  | 103.9 | 60.2 | 72.8 | trypsin inhibitor propeptide                 | gbpln | Brassica oleracea    | AT1G73260.1   Symbols: ATKTI1, KTI1   kunitz trypsin inhibitor 1   chr1:27547410-27548057 REVERSE LENGTH=215                                                                                                                                                                                                                                                                                                                                    | 206 | 215 | 4.00E-48  | 104.4 | 51.0 | 64.6 |
| Rsa1.0_00687.1.g18074.t1  | gb AAB68964.1  trypsin inhibitor propeptide [Brassica oleracea]                                                                                                                                                                                                                                                                                                                                                                                                                                               | 209 | 214  | 6.00E-73  | 102.4 | 68.9 | 77.0 | trypsin inhibitor propeptide                 | gbpln | Brassica oleracea    | AT1G73260.1   Symbols: ATKTI1, KTI1   kunitz trypsin inhibitor 1   chr1:27547410-27548057 REVERSE LENGTH=215                                                                                                                                                                                                                                                                                                                                    | 209 | 215 | 4.00E-55  | 102.9 | 56.5 | 65.6 |
| Rsa1.0_00687.1.g18075.t1  | gb EOA33228.1  hypothetical protein CARUB_v10021058mg [Capsella rubella] gi 482569041 gb EOA33229.1  hypothetical protein CARUB_v10021058mg [Capsella rubella]                                                                                                                                                                                                                                                                                                                                                | 166 | 164  | 2.00E-73  | 98.8  | 91.6 | 93.4 | hypothetical protein CARUB_v10021058mg       | gbpln | Capsella rubella     | AT1G73230.1   Symbols:   Nascent polypeptide-associated complex NAC   chr1:27540506-27541364 REVERSE LENGTH=165                                                                                                                                                                                                                                                                                                                                 | 166 | 165 | 2.00E-74  | 99.4  | 91.6 | 93.4 |
| Rsa1.0_00687.1.g18076.t1  | gb AAG51783.1 AC079679_3 reverse transcriptase, putative; 16838-20266 [Arabidopsis thaliana]                                                                                                                                                                                                                                                                                                                                                                                                                  | 367 | 1142 | 2.00E-85  | 311.2 | 47.1 | 59.9 | reverse transcriptase, putative; 16838-20266 | gbpln | Arabidopsis thaliana | AT4G29090.1   Symbols:   Ribonuclease H-like superfamily protein   chr4:14333528-14335255 FORWARD LENGTH=575                                                                                                                                                                                                                                                                                                                                    | 367 | 575 | 2.00E-35  | 156.7 | 27.5 | 48.5 |
| Rsa1.0_00687.1.g18077.t1  | ref NP_565059.2  organic cation/carnitine transporter1 [Arabidopsis thaliana] gi 75262291 sp Q9CAT6.1 OCT1_ARATH RecName: Full=Organic cation/carnitine transporter 1; Short=AtOCT1 gi 12324316 gb AAG52125.1 AC010556_7 putative transporter; 29320-27598 [Arabidopsis thaliana] gi 27311699 gb AAO00815.1  putative transporter [Arabidopsis thaliana] gi 31711954 gb AAP68333.1  At1g73220 [Arabidopsis thaliana] gi 332197310 gb AEE35431.1  organic cation/carnitine transporter1 [Arabidopsis thaliana] | 538 | 539  | 0         | 100.2 | 86.8 | 92.4 | organic cation/carnitine transporter1        | gbpln | Arabidopsis thaliana | AT1G73220.1   Symbols: AtOCT1, 1-Oct   organic cation/carnitine transporter 1   chr1:27536367-27540109 FORWARD LENGTH=539                                                                                                                                                                                                                                                                                                                       | 538 | 539 | 0         | 100.2 | 86.8 | 92.4 |

|                           |                                                                                                                                                                                                                                                                                                                                                                                                                                                                                                                                                                                                                                                                                                                                                                                                                                                                                                                                                                                                                                                                                                                                                                                                                                                                                                                                                                 |     |      |           |       |      |      |                                                               |       |                      |                                                                                                                                                                                                                                                                                      |     |      |           |       |      |      |
|---------------------------|-----------------------------------------------------------------------------------------------------------------------------------------------------------------------------------------------------------------------------------------------------------------------------------------------------------------------------------------------------------------------------------------------------------------------------------------------------------------------------------------------------------------------------------------------------------------------------------------------------------------------------------------------------------------------------------------------------------------------------------------------------------------------------------------------------------------------------------------------------------------------------------------------------------------------------------------------------------------------------------------------------------------------------------------------------------------------------------------------------------------------------------------------------------------------------------------------------------------------------------------------------------------------------------------------------------------------------------------------------------------|-----|------|-----------|-------|------|------|---------------------------------------------------------------|-------|----------------------|--------------------------------------------------------------------------------------------------------------------------------------------------------------------------------------------------------------------------------------------------------------------------------------|-----|------|-----------|-------|------|------|
| Rsa1.0_00687.1.g18078.t1  | ref NP_565059.2  organic cation/carnitine transporter1 [Arabidopsis thaliana] gi 75262291 sp Q9CAT6.1 OCT1_ARATH RecName: Full=Organic cation/carnitine transporter 1; Short=AtOCT1 gi 12324316 gb AA652125.1 AC010556.7 putative transporter; 29320-27598 [Arabidopsis thaliana] gi 27311699 gb AA000815.1  putative transporter [Arabidopsis thaliana] gi 31711954 gb AAP68333.1  At1g73220 [Arabidopsis thaliana] gi 332197310 gb AEE35431.1  organic cation/carnitine transporter1 [Arabidopsis thaliana]                                                                                                                                                                                                                                                                                                                                                                                                                                                                                                                                                                                                                                                                                                                                                                                                                                                   | 536 | 539  | 0         | 100.6 | 87.9 | 93.3 | organic cation/carnitine transporter1                         | gbpln | Arabidopsis thaliana | AT1G73220.1   Symbols: ALOCT1, 1-Oct   organic cation/carnitine transporter1   chr1:27538397-27540109 FORWARD LENGTH=539                                                                                                                                                             | 536 | 539  | 0         | 100.6 | 87.9 | 93.3 |
| Rsa1.0_00687.1.g18079.t1  | #                                                                                                                                                                                                                                                                                                                                                                                                                                                                                                                                                                                                                                                                                                                                                                                                                                                                                                                                                                                                                                                                                                                                                                                                                                                                                                                                                               | #   | #    | #         | #     | #    | #    | -                                                             | ----  | ----                 | #                                                                                                                                                                                                                                                                                    | #   | #    | #         | #     | #    |      |
| Rsa1.0_00688.1.g18080.t12 | gb EOA28251.1  hypothetical protein CARUB_v10024444mg [Capsella rubella]                                                                                                                                                                                                                                                                                                                                                                                                                                                                                                                                                                                                                                                                                                                                                                                                                                                                                                                                                                                                                                                                                                                                                                                                                                                                                        | 78  | 78   | 9.00E-34  | 100.0 | 96.2 | 98.7 | hypothetical protein CARUB_v10024444mg                        | gbpln | Capsella rubella     | AT2G21820.1   Symbols:   unknown protein; Has 45 Blast hits to 45 proteins in 13 species: Archaee - 0; Bacteria - 0; Metazoa - 0; Fungi - 0; Plants - 45; Viruses - 0; Other Eukaryotes - 0 (source: NCBI BLink).   chr2:9302983-9303219 REVERSE LENGTH=78                           | 78  | 78   | 5.00E-36  | 100.0 | 94.9 | 97.4 |
| Rsa1.0_00688.1.g18081.t2  | gb ACT33453.1  mercapto-pyruvate sulfurtransferase 1 [Brassica napus]                                                                                                                                                                                                                                                                                                                                                                                                                                                                                                                                                                                                                                                                                                                                                                                                                                                                                                                                                                                                                                                                                                                                                                                                                                                                                           | 376 | 379  | 0         | 100.8 | 88.0 | 95.2 | mercapto-pyruvate sulfurtransferase 1                         | gbpln | Brassica napus       | AT1G79230.1   Symbols: ST1, ATMST1, MST1, ATRDH1, STR1   mercapto-pyruvate sulfurtransferase 1   chr1:29800824-29803679 FORWARD LENGTH=379                                                                                                                                           | 376 | 379  | 0         | 100.8 | 85.4 | 92.0 |
| Rsa1.0_00688.1.g18082.t1  | ref XP_002887773.1  mitochondrial transcription termination factor family protein [Arabidopsis lyrata subsp. lyrata] gi 297333611 gb EFH64032.1  mitochondrial transcription termination factor family protein [Arabidopsis lyrata subsp. lyrata] ref NP_1/3096.1  proteasome subunit alpha type-2-A [Arabidopsis thaliana] gi 79318062 ref NP_001031057.1  proteasome subunit alpha type-2-A [Arabidopsis thaliana] gi 6093778 sp O23708.1 PSA2A_ARATH RecName: Full=Proteasome subunit alpha type-2-A; AltName: Full=20S proteasome alpha subunit B; AltName: Full=Proteasome component 3 gi 4966368 gb AAD34699.1 AC006341_27 Identical to gb Y13176 Arabidopsis thaliana mRNA for proteasome subunit pro3. ESTs gb H36972, gb T22551 and gb T13800 come from this gene [Arabidopsis thaliana] gi 12083342 gb AAG48830.1 AF332467.1 putative multicatalytic endopeptidase [Arabidopsis thaliana] gi 2511574 emb CAA73619.1  multicatalytic endopeptidase [Arabidopsis thaliana] gi 3421075 gb AAC32056.1  20S proteasome subunit PAB1 [Arabidopsis thaliana] gi 21617900 gb AAM66950.1  multicatalytic endopeptidase [Arabidopsis thaliana] gi 222423615 dbj BAH19776.1  AT1G16470 [Arabidopsis thaliana] gi 222424243 dbj BAH20079.1  AT1G16470 [Arabidopsis thaliana] gi 332191336 gb AEE29457.1  proteasome subunit alpha type-2-A [Arabidopsis thaliana] | 411 | 405  | 1.00E-163 | 98.5  | 72.5 | 83.0 | mitochondrial transcription termination factor family protein | gbpln | Arabidopsis lyrata   | AT1G79220.1   Symbols:   Mitochondrial transcription termination factor family protein   chr1:29799227-29800426 FORWARD LENGTH=399                                                                                                                                                   | 411 | 399  | 1.00E-160 | 97.1  | 71.8 | 82.0 |
| Rsa1.0_00688.1.g18083.t1  | gi 12083342 gb AAG48830.1 AF332467.1 putative multicatalytic endopeptidase [Arabidopsis thaliana] gi 2511574 emb CAA73619.1  multicatalytic endopeptidase [Arabidopsis thaliana] gi 3421075 gb AAC32056.1  20S proteasome subunit PAB1 [Arabidopsis thaliana] gi 21617900 gb AAM66950.1  multicatalytic endopeptidase [Arabidopsis thaliana] gi 222423615 dbj BAH19776.1  AT1G16470 [Arabidopsis thaliana] gi 222424243 dbj BAH20079.1  AT1G16470 [Arabidopsis thaliana] gi 332191336 gb AEE29457.1  proteasome subunit alpha type-2-A [Arabidopsis thaliana]                                                                                                                                                                                                                                                                                                                                                                                                                                                                                                                                                                                                                                                                                                                                                                                                   | 235 | 235  | 1.00E-132 | 100.0 | 99.6 | 99.6 | proteasome subunit alpha type-2-A                             | gbpln | Arabidopsis thaliana | AT1G16470.2   Symbols: PAB1   proteasome subunit PAB1   chr1:5623122-5625439 FORWARD LENGTH=235                                                                                                                                                                                      | 235 | 235  | 1.00E-135 | 100.0 | 99.6 | 99.6 |
| Rsa1.0_00688.1.g18084.t1  | gb EOA35828.1  hypothetical protein CARUB_v10021069mg [Capsella rubella]                                                                                                                                                                                                                                                                                                                                                                                                                                                                                                                                                                                                                                                                                                                                                                                                                                                                                                                                                                                                                                                                                                                                                                                                                                                                                        | 159 | 162  | 3.00E-50  | 101.9 | 78.0 | 84.9 | hypothetical protein CARUB_v10021069mg                        | gbpln | Capsella rubella     | AT1G79200.1   Symbols:   unknown protein; Has 30201 Blast hits to 17322 proteins in 780 species: Archaee - 12; Bacteria - 1396; Metazoa - 17338; Fungi - 3422; Plants - 5037; Viruses - 0; Other Eukaryotes - 2996 (source: NCBI BLink).   chr1:29794404-29795711 FORWARD LENGTH=159 | 159 | 159  | 4.00E-47  | 100.0 | 76.7 | 83.0 |
| Rsa1.0_00688.1.g18085.t4  | gb AAC17063.1  YUP8H12R20 [Arabidopsis thaliana]                                                                                                                                                                                                                                                                                                                                                                                                                                                                                                                                                                                                                                                                                                                                                                                                                                                                                                                                                                                                                                                                                                                                                                                                                                                                                                                | 404 | 1325 | 2.00E-42  | 328.0 | 24.5 | 29.0 | YUP8H12R20                                                    | gbpln | Arabidopsis thaliana | AT1G79190.1   Symbols:   ARM repeat superfamily protein   chr1:29788639-29794116 FORWARD LENGTH=1335                                                                                                                                                                                 | 404 | 1335 | 2.00E-44  | 330.4 | 24.3 | 28.5 |



|                          |                                                                                                                                                                                                                                                                                                                                                                           |      |      |           |       |      |      |                                                                                            |       |                      |                                                                                                                                                                                                                                                                                                                                                 |      |      |           |       |      |      |
|--------------------------|---------------------------------------------------------------------------------------------------------------------------------------------------------------------------------------------------------------------------------------------------------------------------------------------------------------------------------------------------------------------------|------|------|-----------|-------|------|------|--------------------------------------------------------------------------------------------|-------|----------------------|-------------------------------------------------------------------------------------------------------------------------------------------------------------------------------------------------------------------------------------------------------------------------------------------------------------------------------------------------|------|------|-----------|-------|------|------|
| Rsa1.0_00688.1.g18086.t1 | refXP_002887770.1   hypothetical protein ARALYDRAFT_477086 [Arabidopsis lyrata subsp. lyrata] gi 29733361 gb EFH64029.1                                                                                                                                                                                                                                                   | 282  | 290  | 1.00E-115 | 102.8 | 81.2 | 88.3 | hypothetical protein ARALYDRAFT_477086                                                     | gbpln | Arabidopsis lyrata   | AT1G79180.1   Symbols: ATMYB63, MYB63   myb domain protein 63   chr1:29786509-29787589 FORWARD LENGTH=294                                                                                                                                                                                                                                       | 282  | 294  | 1.00E-112 | 104.3 | 80.5 | 88.7 |
| Rsa1.0_00688.1.g18087.t1 | refXP_002889235.1   hypothetical protein ARALYDRAFT_316812 [Arabidopsis lyrata subsp. lyrata] gi 297335076 gb EFH65494.1                                                                                                                                                                                                                                                  | 240  | 238  | 1.00E-87  | 99.2  | 80.0 | 85.0 | hypothetical protein ARALYDRAFT_316812                                                     | gbpln | Arabidopsis lyrata   | AT1G79160.1   Symbols:   unknown protein; BEST Arabidopsis thaliana protein match is: unknown protein (TAIR:AT1G16500.1); Has 104 Blast hits to 102 proteins in 13 species: Archae - 0; Bacteria - 0; Metazoa - 0; Fungi - 0; Plants - 104; Viruses - 0; Other Eukaryotes - 0 (source: NCBI BLink).   chr1:29779862-29780668 REVERSE LENGTH=239 | 240  | 239  | 1.00E-80  | 99.6  | 77.1 | 82.5 |
| Rsa1.0_00688.1.g18088.t3 | refXP_002889234.1   hypothetical protein ARALYDRAFT_895820 [Arabidopsis lyrata subsp. lyrata] gi 297335075 gb EFH65493.1                                                                                                                                                                                                                                                  | 863  | 826  | 0         | 95.7  | 79.5 | 86.9 | hypothetical protein ARALYDRAFT_895820                                                     | gbpln | Arabidopsis lyrata   | AT1G79150.1   Symbols:   binding   chr1:29772716-29777874 REVERSE LENGTH=830                                                                                                                                                                                                                                                                    | 863  | 830  | 0         | 96.2  | 77.4 | 86.0 |
| Rsa1.0_00688.1.g18089.t1 | refNP_178034.1   SAUR-like auxin-responsive protein [Arabidopsis thaliana] gi 3152585 gb AAC17066.1   Contains similarity to auxin-induced protein TM018A10.6 from A. thaliana BAC gb AF013294 [Arabidopsis thaliana] gi 89001087 gb ABD59133.1   At1g79130 [Arabidopsis thaliana] gi 332198087 gb AEE36208.1   SAUR-like auxin-responsive protein [Arabidopsis thaliana] | 141  | 134  | 1.00E-43  | 95.0  | 67.4 | 75.9 | SAUR-like auxin-responsive protein                                                         | gbpln | Arabidopsis thaliana | AT1G79130.1   Symbols:   SAUR-like auxin-responsive protein family   chr1:29771319-29771723 FORWARD LENGTH=134                                                                                                                                                                                                                                  | 141  | 134  | 3.00E-46  | 95.0  | 67.4 | 75.9 |
| Rsa1.0_00688.1.g18090.t1 | refXP_002889232.1   hypothetical protein ARALYDRAFT_477083 [Arabidopsis lyrata subsp. lyrata] gi 297335073 gb EFH65491.1                                                                                                                                                                                                                                                  | 376  | 377  | 0         | 100.3 | 88.6 | 93.6 | hypothetical protein ARALYDRAFT_477083                                                     | gbpln | Arabidopsis lyrata   | AT1G79120.1   Symbols:   Ubiquitin carboxyl-terminal hydrolase family protein   chr1:29767314-29768555 REVERSE LENGTH=413                                                                                                                                                                                                                       | 376  | 413  | 0         | 109.8 | 86.7 | 93.4 |
| Rsa1.0_00688.1.g18091.t1 | refXP_002887768.1   protein binding protein [Arabidopsis lyrata subsp. lyrata] gi 297333609 gb EFH64027.1   protein binding protein [Arabidopsis lyrata subsp. lyrata]                                                                                                                                                                                                    | 314  | 346  | 1.00E-108 | 110.2 | 71.3 | 81.8 | protein binding protein                                                                    | gbpln | Arabidopsis lyrata   | AT1G79110.2   Symbols:   zinc ion binding   chr1:29759345-29760586 FORWARD LENGTH=355                                                                                                                                                                                                                                                           | 314  | 355  | 1.00E-104 | 113.1 | 70.1 | 79.3 |
| Rsa1.0_00688.1.g18092.t1 | refXP_002889230.1   pentatricopeptide repeat-containing protein [Arabidopsis lyrata subsp. lyrata] gi 297335071 gb EFH65489.1   pentatricopeptide repeat-containing protein [Arabidopsis lyrata subsp. lyrata]                                                                                                                                                            | 550  | 580  | 0         | 105.5 | 86.2 | 94.0 | pentatricopeptide repeat-containing protein                                                | gbpln | Arabidopsis lyrata   | AT1G79080.1   Symbols:   Pentatricopeptide repeat (PPR) superfamily protein   chr1:29747102-29748832 REVERSE LENGTH=576                                                                                                                                                                                                                         | 550  | 576  | 0         | 104.7 | 84.7 | 92.9 |
| Rsa1.0_00688.1.g18093.t1 | #                                                                                                                                                                                                                                                                                                                                                                         | #    | #    | #         | #     | #    | #    | -                                                                                          | ----  | ----                 | #                                                                                                                                                                                                                                                                                                                                               | #    | #    | #         | #     | #    | #    |
| Rsa1.0_00689.1.g18094.t1 | refXP_002892398.1   hypothetical protein ARALYDRAFT_470764 [Arabidopsis lyrata subsp. lyrata] gi 297338240 gb EFH68657.1                                                                                                                                                                                                                                                  | 438  | 437  | 0         | 99.8  | 78.3 | 84.2 | hypothetical protein ARALYDRAFT_470764                                                     | gbpln | Arabidopsis lyrata   | AT1G07430.1   Symbols: HAI2   highly ABA-induced PP2C gene 2   chr1:2281151-2282656 REVERSE LENGTH=442                                                                                                                                                                                                                                          | 438  | 442  | 0         | 100.9 | 79.0 | 85.8 |
| Rsa1.0_00689.1.g18095.t1 | #                                                                                                                                                                                                                                                                                                                                                                         | #    | #    | #         | #     | #    | #    | -                                                                                          | ----  | ----                 | #                                                                                                                                                                                                                                                                                                                                               | #    | #    | #         | #     | #    | #    |
| Rsa1.0_00689.1.g18096.t1 | refXP_002889647.1   sterol 4-alpha-methyl-oxidase 2 [Arabidopsis lyrata subsp. lyrata] gi 297335489 gb EFH65906.1   sterol 4-alpha-methyl-oxidase 2 [Arabidopsis lyrata subsp. lyrata]                                                                                                                                                                                    | 204  | 266  | 2.00E-70  | 130.4 | 62.7 | 63.7 | sterol 4-alpha-methyl-oxidase 2                                                            | gbpln | Arabidopsis lyrata   | AT1G07420.1   Symbols: ATSMO2, SMO2-1   sterol 4-alpha-methyl-oxidase 2-1   chr1:2277910-2280033 FORWARD LENGTH=266                                                                                                                                                                                                                             | 204  | 266  | 6.00E-72  | 130.4 | 62.3 | 63.2 |
| Rsa1.0_00689.1.g18097.t1 | gb EOA39531.1   hypothetical protein CARUB_v10008151mg [Capsella rubella]                                                                                                                                                                                                                                                                                                 | 1067 | 1078 | 0         | 101.0 | 80.9 | 88.1 | hypothetical protein CARUB_v10008151mg                                                     | gbpln | Capsella rubella     | AT1G07390.1   Symbols: AtRLP1, RLP1   receptor like protein 1   chr1:2269893-2274654 FORWARD LENGTH=1034                                                                                                                                                                                                                                        | 1067 | 1034 | 0         | 96.9  | 78.7 | 85.1 |
| Rsa1.0_00689.1.g18098.t1 | sp Q43124.1 PCNA_BRANA RecName: Full=Proliferating cell nuclear antigen; Short=PCNA gi 408232 gb AAB27811.1  PCNA [Brassica napus]                                                                                                                                                                                                                                        | 264  | 263  | 1.00E-148 | 99.6  | 97.3 | 98.1 | RecName: Full=Proliferating cell nuclear antigen; Short=PCNA gi 408232 gb AAB27811.1  PCNA | gbpln | Brassica napus       | AT1G07370.1   Symbols: PCNA1, ATPCNA1   proliferating cellular nuclear antigen 1   chr1:2263204-2264382 FORWARD LENGTH=263                                                                                                                                                                                                                      | 264  | 263  | 1.00E-149 | 99.6  | 98.1 | 98.1 |
| Rsa1.0_00689.1.g18099.t1 | gb EOA38384.1   hypothetical protein CARUB_v10009944mg [Capsella rubella]                                                                                                                                                                                                                                                                                                 | 228  | 283  | 1.00E-56  | 124.1 | 52.6 | 55.7 | hypothetical protein CARUB_v10009944mg                                                     | gbpln | Capsella rubella     | AT1G07320.2   Symbols: RPL4   ribosomal protein L4   chr1:2249190-2250189 FORWARD LENGTH=280                                                                                                                                                                                                                                                    | 228  | 280  | 5.00E-56  | 122.8 | 50.4 | 55.3 |

|                          |                                                                                                                                                                                                                                                                                                                                                                                                                                                                                                                                                                                                                                                                                                                                                                                                                                                                                                                                              |     |     |           |       |      |      |                                        |       |                      |                                                                                                                                 |     |     |           |       |      |      |
|--------------------------|----------------------------------------------------------------------------------------------------------------------------------------------------------------------------------------------------------------------------------------------------------------------------------------------------------------------------------------------------------------------------------------------------------------------------------------------------------------------------------------------------------------------------------------------------------------------------------------------------------------------------------------------------------------------------------------------------------------------------------------------------------------------------------------------------------------------------------------------------------------------------------------------------------------------------------------------|-----|-----|-----------|-------|------|------|----------------------------------------|-------|----------------------|---------------------------------------------------------------------------------------------------------------------------------|-----|-----|-----------|-------|------|------|
| Rsa1.0_00689.1.g18100.t1 | gb EOA38103.1  hypothetical protein CARUB_v10009572mg [Capsella rubella]                                                                                                                                                                                                                                                                                                                                                                                                                                                                                                                                                                                                                                                                                                                                                                                                                                                                     | 341 | 355 | 1.00E-105 | 104.1 | 70.7 | 77.7 | hypothetical protein CARUB_v10009572mg | gbpln | Capsella rubella     | AT1G07310.1   Symbols:   Calcium-dependent lipid-binding (CaLB domain) family protein   chr1:2247775-2248833 REVERSE LENGTH=352 | 341 | 352 | 1.00E-103 | 103.2 | 71.6 | 77.7 |
| Rsa1.0_00689.1.g18101.t1 | ref NP_172210.1  josephin protein-like protein [Arabidopsis thaliana] gi 38454076 gb AAR20732.1  At1g07300 [Arabidopsis thaliana] gi 38603892 gb AAR24739.1  At1g07300 [Arabidopsis thaliana] gi 332189983 gb AEE28104.1  josephin protein-like protein [Arabidopsis thaliana]                                                                                                                                                                                                                                                                                                                                                                                                                                                                                                                                                                                                                                                               | 131 | 128 | 1.00E-46  | 97.7  | 74.0 | 80.9 | josephin protein-like protein          | gbpln | Arabidopsis thaliana | AT1G07300.1   Symbols:   josephin protein-related   chr1:2245914-2246300 REVERSE LENGTH=128                                     | 131 | 128 | 3.00E-49  | 97.7  | 74.0 | 80.9 |
| Rsa1.0_00689.1.g18102.t1 | gb EOA38012.1  hypothetical protein CARUB_v10009481mg [Capsella rubella]                                                                                                                                                                                                                                                                                                                                                                                                                                                                                                                                                                                                                                                                                                                                                                                                                                                                     | 376 | 372 | 0         | 98.9  | 87.5 | 93.1 | hypothetical protein CARUB_v10009481mg | gbpln | Capsella rubella     | AT1G07290.1   Symbols: GONST2   golgi nucleotide sugar transporter 2   chr1:2242284-2244428 REVERSE LENGTH=375                  | 376 | 375 | 0         | 99.7  | 87.8 | 92.6 |
| Rsa1.0_00689.1.g18103.t1 | ref NP_563784.2  UDP-glucosyl transferase 71C4 [Arabidopsis thaliana] gi 75311371 sp O9LML6.2 U71C4_ARAT H RecName: Full=UDP-glycosyltransferase 71C4; AltName: Full=Flavonol 3-O-glucosyltransferase UGT71C4; AltName: Full=Flavonol 7-O-glucosyltransferase UGT71C4 gi 10567858 gb AAG18592.1 AC067971_33 Contains similarity to an unknown flavonol 3-o-glucosyltransferase At2g29750 gi 3582329 from Arabidopsis thaliana BAC T27A16 gb AC005496. It contains a UDP-glucuronosyl and UDP-glucosyl transferases domain PF100201. ESTs gb A1993795, gb N97301 and gb Z18063 come from this gene [Arabidopsis thaliana] gi 25054917 gb AAN71937.1  putative UDP-glucose glucosyltransferase [Arabidopsis thaliana] gi 332189976 gb AEE28097.1  UDP-glucosyl transferase 71C4 [Arabidopsis thaliana]                                                                                                                                         | 476 | 479 | 0         | 100.6 | 79.0 | 88.7 | UDP-glucosyl transferase 71C4          | gbpln | Arabidopsis thaliana | AT1G07250.1   Symbols: UGT71C4   UDP-glucosyl transferase 71C4   chr1:2225963-2227402 FORWARD LENGTH=479                        | 476 | 479 | 0         | 100.6 | 79.0 | 88.7 |
| Rsa1.0_00689.1.g18104.t1 | ref NP_172204.1  UDP-glucosyl transferase 71C5 [Arabidopsis thaliana] gi 75308970 sp O9FE68.1 U71C5_ARAT H RecName: Full=UDP-glycosyltransferase 71C5 gi 10567857 gb AAG18591.1 AC067971_4 Contains similarity to an unknown flavonol 3-o-glucosyltransferase At2g29750 gi 3582329 from Arabidopsis thaliana BAC T27A16 gb AC005496. It contains a UDP-glucuronosyl and UDP-glucosyl transferases domain PF100201. ESTs gb A1997635, gb T13644, gb AV546216 and gb A1996826 come from this gene [Arabidopsis thaliana] gi 12083248 gb AAG48783.1 AF332420.1 putative UDP-glucose glucosyltransferase [Arabidopsis thaliana] gi 17473894 gb AAL38366.1  unknown protein [Arabidopsis thaliana] gi 20259790 gb AAM13242.1  unknown protein [Arabidopsis thaliana] gi 21594310 gb AAM65993.1  UDP-glucose glucosyltransferase, putative [Arabidopsis thaliana] gi 332189975 gb AEE28096.1  UDP-glucosyl transferase 71C5 [Arabidopsis thaliana] | 275 | 480 | 8.00E-15  | 174.5 | 22.2 | 28.7 | UDP-glucosyl transferase 71C5          | gbpln | Arabidopsis thaliana | AT1G07240.1   Symbols: UGT71C5   UDP-glucosyl transferase 71C5   chr1:2223889-2225331 FORWARD LENGTH=480                        | 275 | 480 | 2.00E-17  | 174.5 | 22.2 | 28.7 |
| Rsa1.0_00689.1.g18105.t1 | gb EOA40174.1  hypothetical protein CARUB_v10008891mg [Capsella rubella]                                                                                                                                                                                                                                                                                                                                                                                                                                                                                                                                                                                                                                                                                                                                                                                                                                                                     | 505 | 509 | 0         | 100.8 | 88.5 | 94.3 | hypothetical protein CARUB_v10008891mg | gbpln | Capsella rubella     | AT1G07220.1   Symbols:   Arabidopsis thaliana protein of unknown function (DJF321)   chr1:2217073-2219379 REVERSE LENGTH=507    | 505 | 507 | 0         | 100.4 | 85.9 | 92.9 |
| Rsa1.0_00689.1.g18106.t1 | gb EOA38264.1  hypothetical protein CARUB_v10009750mg [Capsella rubella]                                                                                                                                                                                                                                                                                                                                                                                                                                                                                                                                                                                                                                                                                                                                                                                                                                                                     | 288 | 323 | 2.00E-84  | 112.2 | 63.2 | 74.7 | hypothetical protein CARUB_v10009750mg | gbpln | Capsella rubella     | AT1G07210.1   Symbols:   Ribosomal protein S18   chr1:2215320-2216668 FORWARD LENGTH=261                                        | 288 | 261 | 4.00E-81  | 90.6  | 60.4 | 71.9 |

|                          |                                                                                                                                                                                                                                                                                                                                                                                                                                                                                                                                                                                                                                                                                                                                                                                                                                                                                                              |     |      |           |       |      |      |                                                  |       |                      |                                                                                                                                                                 |     |      |           |       |      |      |
|--------------------------|--------------------------------------------------------------------------------------------------------------------------------------------------------------------------------------------------------------------------------------------------------------------------------------------------------------------------------------------------------------------------------------------------------------------------------------------------------------------------------------------------------------------------------------------------------------------------------------------------------------------------------------------------------------------------------------------------------------------------------------------------------------------------------------------------------------------------------------------------------------------------------------------------------------|-----|------|-----------|-------|------|------|--------------------------------------------------|-------|----------------------|-----------------------------------------------------------------------------------------------------------------------------------------------------------------|-----|------|-----------|-------|------|------|
| Rsa1.0_00689.1.g18107.t1 | ref XP_002892387.1  hypothetical protein ARALYDRAFT_311783 [Arabidopsis lyrata subsp. lyrata] gi 297338229 gb EFH68646.1                                                                                                                                                                                                                                                                                                                                                                                                                                                                                                                                                                                                                                                                                                                                                                                     | 948 | 977  | 0         | 103.1 | 77.3 | 85.8 | hypothetical protein ARALYDRAFT_311783           | gbpln | Arabidopsis lyrata   | AT1G07200.2   Symbols:   Double Clop-N motif-containing P-loop nucleoside triphosphate hydrolases superfamily protein   chr1:2209033-2212316 REVERSE LENGTH=979 | 948 | 979  | 0         | 103.3 | 75.7 | 84.1 |
| Rsa1.0_00689.1.g18108.t2 | hypothetical protein ARALYDRAFT_311783 [Arabidopsis lyrata subsp. lyrata] ref NP_174267.4  Leucine-rich repeat transmembrane protein kinase [Arabidopsis thaliana] gi 332193002 gb AE31123.1  Leucine-rich repeat transmembrane protein kinase [Arabidopsis thaliana]                                                                                                                                                                                                                                                                                                                                                                                                                                                                                                                                                                                                                                        | 986 | 1078 | 0         | 109.3 | 85.5 | 92.6 | Leucine-rich repeat transmembrane protein kinase | gbpln | Arabidopsis thaliana | AT1G29740.1   Symbols:   Leucine-rich repeat transmembrane protein kinase   chr1:10407379-10412997 REVERSE LENGTH=1078                                          | 986 | 1078 | 0         | 109.3 | 85.5 | 92.6 |
| Rsa1.0_00690.1.g18109.t3 | gb EOA36640.1  hypothetical protein CARUB_v10011892mg [Capsella rubella]                                                                                                                                                                                                                                                                                                                                                                                                                                                                                                                                                                                                                                                                                                                                                                                                                                     | 819 | 1530 | 0         | 186.8 | 92.2 | 95.8 | hypothetical protein CARUB_v10011892mg           | gbpln | Capsella rubella     | AT1G08730.1   Symbols: XIC, ATXIC   Myosin family protein with Dil domain   chr1:2779963-2788325 FORWARD LENGTH=1538                                            | 819 | 1538 | 0         | 187.8 | 92.2 | 96.2 |
| Rsa1.0_00690.1.g18110.t1 | ref NP_563825.1  peptidase C13-like protein [Arabidopsis thaliana] gi 30680805 ref NP_849616.1  peptidase C13-like protein [Arabidopsis thaliana] gi 42571407 ref NP_973794.1  peptidase C13-like protein [Arabidopsis thaliana] gi 26450273 dbj BAC42253.1  putative GPI-anchor transamidase [Arabidopsis thaliana] gi 332190220 gb AEE28341.1  peptidase C13-like protein [Arabidopsis thaliana] gi 332190221 gb AEE28342.1  peptidase C13-like protein [Arabidopsis thaliana] gi 332190222 gb AEE28343.1  peptidase C13-like protein [Arabidopsis thaliana]                                                                                                                                                                                                                                                                                                                                               | 392 | 388  | 0         | 99.0  | 87.8 | 92.9 | peptidase C13-like protein                       | gbpln | Arabidopsis thaliana | AT1G08750.3   Symbols:   Peptidase C13 family   chr1:2801283-2804392 FORWARD LENGTH=388                                                                         | 392 | 388  | 0         | 99.0  | 87.8 | 92.9 |
| Rsa1.0_00690.1.g18111.t1 | dbj BAJ34479.1  unnamed protein product [Theilungella halophila]                                                                                                                                                                                                                                                                                                                                                                                                                                                                                                                                                                                                                                                                                                                                                                                                                                             | 939 | 760  | 0         | 80.9  | 63.8 | 69.2 | unnamed protein product                          | ----  | ----                 | AT1G08760.1   Symbols:   Plant protein of unknown function (DUF936)   chr1:2805478-2808409 FORWARD LENGTH=748                                                   | 939 | 748  | 0         | 79.7  | 61.1 | 66.9 |
| Rsa1.0_00690.1.g18112.t1 | ref XP_002892471.1  hypothetical protein ARALYDRAFT_334161 [Arabidopsis lyrata subsp. lyrata] gi 297338313 gb EFH68730.1                                                                                                                                                                                                                                                                                                                                                                                                                                                                                                                                                                                                                                                                                                                                                                                     | 142 | 129  | 1.00E-57  | 90.8  | 76.1 | 84.5 | hypothetical protein ARALYDRAFT_334161           | gbpln | Arabidopsis lyrata   | AT1G08780.1   Symbols: AIP3, PFD4   ABI3-interacting protein 3   chr1:2809825-2811126 REVERSE LENGTH=129                                                        | 142 | 129  | 9.00E-60  | 90.8  | 76.1 | 83.1 |
| Rsa1.0_00690.1.g18113.t1 | ref XP_002899715.1  predicted protein [Arabidopsis lyrata subsp. lyrata] gi 297335557 gb EFH65974.1  predicted protein [Arabidopsis lyrata subsp. lyrata]                                                                                                                                                                                                                                                                                                                                                                                                                                                                                                                                                                                                                                                                                                                                                    | 197 | 190  | 4.00E-73  | 96.4  | 84.3 | 88.3 | predicted protein                                | gbpln | Arabidopsis lyrata   | AT1G08790.1   Symbols:   Protein of unknown function (DUF1685)   chr1:2811989-2812646 FORWARD LENGTH=190                                                        | 197 | 190  | 3.00E-75  | 96.4  | 84.3 | 87.8 |
| Rsa1.0_00690.1.g18114.t1 | gb EOA39537.1  hypothetical protein CARUB_v10008154mg [Capsella rubella] gi 482575351 gb EOA39538.1  hypothetical protein CARUB_v10008154mg [Capsella rubella]                                                                                                                                                                                                                                                                                                                                                                                                                                                                                                                                                                                                                                                                                                                                               | 890 | 1073 | 0         | 120.6 | 66.4 | 77.5 | hypothetical protein CARUB_v10008154mg           | gbpln | Capsella rubella     | AT1G08800.2   Symbols:   Protein of unknown function, DUF593   chr1:2813578-2817078 REVERSE LENGTH=1113                                                         | 890 | 1113 | 0         | 125.1 | 52.8 | 61.9 |
| Rsa1.0_00690.1.g18115.t2 | ref NP_172359.2  vamp/synaptobrevin-associated protein 27-2 [Arabidopsis thaliana] gi 79317397 ref NP_001031004.1  vamp/synaptobrevin-associated protein 27-2 [Arabidopsis thaliana] gi 313471716 sp B9DHD7.1 VAP22_ARA TH RecName: Full=Vesicle-associated protein 2-2; AltName: Full=Plant VAP homolog 22; Short=AtPVA22; AltName: Full=VAMP-associated protein 2-2; AltName: Full=Vesicle-associated protein 27-2 gi 222424397 dbj BAH20154.1  AT1G08820 [Arabidopsis thaliana] gi 222424668 dbj BAH20288.1  AT1G08820 [Arabidopsis thaliana] gi 332190231 gb AEE28352.1  vamp/synaptobrevin-associated protein 27-2 [Arabidopsis thaliana] gi 332190232 gb AEE28353.1  vamp/synaptobrevin-associated protein 27-2 [Arabidopsis thaliana] ref NP_001154322.1  Ribosomal L.8/L5e family protein [Arabidopsis thaliana] gi 332190238 gb AEE28359.1  Ribosomal L.8/L5e family protein [Arabidopsis thaliana] | 424 | 386  | 1.00E-157 | 91.0  | 68.2 | 75.5 | vamp/synaptobrevin-associated protein 27-2       | gbpln | Arabidopsis thaliana | AT1G08820.2   Symbols: VAP27-2   vamp/synaptobrevin-associated protein 27-2   chr1:2821810-2824412 REVERSE LENGTH=386                                           | 424 | 386  | 1.00E-160 | 91.0  | 68.2 | 75.5 |
| Rsa1.0_00690.1.g18116.t1 | ref NP_001154322.1  Ribosomal L.8/L5e family protein [Arabidopsis thaliana] gi 332190238 gb AEE28359.1  Ribosomal L.8/L5e family protein [Arabidopsis thaliana]                                                                                                                                                                                                                                                                                                                                                                                                                                                                                                                                                                                                                                                                                                                                              | 375 | 234  | 4.00E-97  | 62.4  | 46.4 | 48.0 | Ribosomal L.8/L5e family protein                 | gbpln | Arabidopsis thaliana | AT1G08845.2   Symbols:   Ribosomal L18p/L5e family protein   chr1:2838789-2840955 FORWARD LENGTH=234                                                            | 375 | 234  | 1.00E-99  | 62.4  | 46.4 | 48.0 |

|                          |                                                                                                                                                                                                                                                                                                                                                                                                                                                                                                                                             |      |      |           |       |      |      |                                                     |       |                      |                                                                                                                                                                                                                                                                                                                    |      |     |           |       |      |      |
|--------------------------|---------------------------------------------------------------------------------------------------------------------------------------------------------------------------------------------------------------------------------------------------------------------------------------------------------------------------------------------------------------------------------------------------------------------------------------------------------------------------------------------------------------------------------------------|------|------|-----------|-------|------|------|-----------------------------------------------------|-------|----------------------|--------------------------------------------------------------------------------------------------------------------------------------------------------------------------------------------------------------------------------------------------------------------------------------------------------------------|------|-----|-----------|-------|------|------|
| Rsa1.0_00690.1.g18117.t1 | refXP_002892475.1   hypothetical protein ARALYDRAFT_888122 [Arabidopsis lyrata subsp. lyrata] gi 297338317 gb EFH6734.1                                                                                                                                                                                                                                                                                                                                                                                                                     | 142  | 142  | 8.00E-73  | 100.0 | 97.9 | 98.6 | hypothetical protein ARALYDRAFT_888122              | gbpln | Arabidopsis lyrata   | AT1G08880.1   Symbols: HTA5, H2AXA, G-H2AX, GAMMA-H2AX   Histone superfamily protein   chr1:2847144-2847676 REVERSE LENGTH=142                                                                                                                                                                                     | 142  | 142 | 2.00E-74  | 100.0 | 96.5 | 97.9 |
| Rsa1.0_00690.1.g18118.t1 | refXP_002889721.1   EMB3001 [Arabidopsis lyrata subsp. lyrata] gi 297335563 gb EFH65980.1   EMB3001 [Arabidopsis lyrata subsp. lyrata] ref NP_563829.1   sugar transporter ERD6-like 3 [Arabidopsis thaliana] gi 75332302 sp Q94KE0.1   ERDL3_ARAT H RecName: Full= Sugar transporter ERD6-like 3; AltName: Full= Sugar transporter-like protein 2 gi 14194109 gb AAK56249.1   AF367260_1 At g08920/F7G19.20 [Arabidopsis thaliana] gi 22137064 gb AAM91377.1   At g08920/F7G19.20 [Arabidopsis thaliana]                                   | 688  | 836  | 1.00E-163 | 121.5 | 47.4 | 54.9 | EMB3001                                             | gbpln | Arabidopsis lyrata   | AT1G08910.1   Symbols: EMB3001   zinc ion binding: zinc ion binding   chr1:2856227-2860816 FORWARD LENGTH=829                                                                                                                                                                                                      | 688  | 829 | 1.00E-147 | 120.5 | 44.6 | 53.6 |
| Rsa1.0_00690.1.g18119.t1 | ref NP_563829.1   sugar transporter ERD6-like 3 [Arabidopsis thaliana] gi 75332302 sp Q94KE0.1   ERDL3_ARAT H RecName: Full= Sugar transporter ERD6-like 3; AltName: Full= Sugar transporter-like protein 2 gi 14194109 gb AAK56249.1   AF367260_1 At g08920/F7G19.20 [Arabidopsis thaliana] gi 22137064 gb AAM91377.1   At g08920/F7G19.20 [Arabidopsis thaliana] gi 169403716 emb CAQ16329.1   hexose transporter-like protein [Arabidopsis thaliana] gi 332190246 gb AEE28367.1   sugar transporter ERD6-like 3 [Arabidopsis thaliana]   | 470  | 470  | 0         | 100.0 | 90.0 | 94.5 | sugar transporter ERD6-like 3                       | gbpln | Arabidopsis thaliana | AT1G08920.1   Symbols: ESL1   ERD (early response to dehydration) six-like 1   chr1:2867446-2870360 FORWARD LENGTH=470                                                                                                                                                                                             | 470  | 470 | 0         | 100.0 | 90.0 | 94.5 |
| Rsa1.0_00690.1.g18120.t1 | refXP_002889723.1   hypothetical protein ARALYDRAFT_888127 [Arabidopsis lyrata subsp. lyrata] gi 297335565 gb EFH65982.1   hypothetical protein ARALYDRAFT_888127 [Arabidopsis lyrata subsp. lyrata] ref NP_172369.1   Phosphoglycerate mutase-like protein [Arabidopsis thaliana] gi 2342686 gb AAB70412.1   Similar to Saccharomyces hypothetical protein YDR051c (gb Z49209). ESTs gb T44436.g 42252 come from this gene [Arabidopsis thaliana] gi 332190251 gb AEE28372.1   Phosphoglycerate mutase-like protein [Arabidopsis thaliana] | 481  | 496  | 0         | 103.1 | 86.5 | 92.9 | hypothetical protein ARALYDRAFT_888127              | gbpln | Arabidopsis lyrata   | AT1G08930.2   Symbols: ERD6   Major facilitator superfamily protein   chr1:2873604-2876979 FORWARD LENGTH=496                                                                                                                                                                                                      | 481  | 496 | 0         | 103.1 | 86.1 | 93.3 |
| Rsa1.0_00690.1.g18121.t1 | ref NP_172369.1   Phosphoglycerate mutase-like protein [Arabidopsis thaliana] gi 2342686 gb AAB70412.1   Similar to Saccharomyces hypothetical protein YDR051c (gb Z49209). ESTs gb T44436.g 42252 come from this gene [Arabidopsis thaliana] gi 332190251 gb AEE28372.1   Phosphoglycerate mutase-like protein [Arabidopsis thaliana]                                                                                                                                                                                                      | 280  | 281  | 2.33E-156 | 100.4 | 89.3 | 93.9 | Phosphoglycerate mutase-like protein                | gbpln | Arabidopsis thaliana | AT1G08940.1   Symbols:   Phosphoglycerate mutase family protein   chr1:2877694-2879104 FORWARD LENGTH=281                                                                                                                                                                                                          | 280  | 281 | 1.00E-148 | 100.4 | 89.3 | 93.9 |
| Rsa1.0_00690.1.g18122.t1 | #                                                                                                                                                                                                                                                                                                                                                                                                                                                                                                                                           | #    | #    | #         | #     | #    | #    | -                                                   | ----  | ----                 | #                                                                                                                                                                                                                                                                                                                  | #    | #   | #         | #     | #    | #    |
| Rsa1.0_00690.1.g18123.t1 | refXP_002892478.1   hypothetical protein ARALYDRAFT_888138 [Arabidopsis lyrata subsp. lyrata] gi 297338320 gb EFH6737.1   hypothetical protein ARALYDRAFT_888138 [Arabidopsis lyrata subsp. lyrata] refXP_002863741.1   hypothetical protein ARALYDRAFT_917455 [Arabidopsis lyrata subsp. lyrata] gi 297309576 gb EFH40000.1   hypothetical protein ARALYDRAFT_917455 [Arabidopsis lyrata subsp. lyrata]                                                                                                                                    | 132  | 139  | 1.00E-56  | 105.3 | 80.3 | 83.3 | hypothetical protein ARALYDRAFT_888138              | gbpln | Arabidopsis lyrata   | AT1G09030.1   Symbols: NF-YB4   nuclear factor Y, subunit B4   chr1:2908611-2909030 REVERSE LENGTH=139                                                                                                                                                                                                             | 132  | 139 | 6.00E-58  | 105.3 | 78.8 | 82.6 |
| Rsa1.0_00690.1.g18124.t1 | refXP_002863741.1   hypothetical protein ARALYDRAFT_917455 [Arabidopsis lyrata subsp. lyrata] gi 297309576 gb EFH40000.1   hypothetical protein ARALYDRAFT_917455 [Arabidopsis lyrata subsp. lyrata]                                                                                                                                                                                                                                                                                                                                        | 390  | 390  | 7.00E-72  | 100.0 | 41.8 | 59.2 | hypothetical protein ARALYDRAFT_917455              | gbpln | Arabidopsis lyrata   | AT1G43730.1   Symbols:   RNA-directed DNA polymerase (reverse transcriptase)-related family protein   chr1:16508723-16509784 REVERSE LENGTH=320                                                                                                                                                                    | 390  | 320 | 3.00E-29  | 82.1  | 22.1 | 32.8 |
| Rsa1.0_00691.1.g18125.t1 | #                                                                                                                                                                                                                                                                                                                                                                                                                                                                                                                                           | #    | #    | #         | #     | #    | #    | -                                                   | ----  | ----                 | #                                                                                                                                                                                                                                                                                                                  | #    | #   | #         | #     | #    | #    |
| Rsa1.0_00691.1.g18126.t1 | #                                                                                                                                                                                                                                                                                                                                                                                                                                                                                                                                           | #    | #    | #         | #     | #    | #    | -                                                   | ----  | ----                 | #                                                                                                                                                                                                                                                                                                                  | #    | #   | #         | #     | #    | #    |
| Rsa1.0_00691.1.g18127.t2 | dbj BAB03186.1   En/Spm transposon protein-like [Arabidopsis thaliana]                                                                                                                                                                                                                                                                                                                                                                                                                                                                      | 1862 | 1516 | 0         | 81.4  | 30.6 | 35.3 | En/Spm transposon protein-like                      | gbpln | Arabidopsis thaliana | AT1G40087.1   Symbols:   Plant transposase (PttA/En/Spm family)   chr1:14999762-15001868 REVERSE LENGTH=390                                                                                                                                                                                                        | 1862 | 390 | 5.00E-11  | 20.9  | 3.4  | 5.9  |
| Rsa1.0_00691.1.g18128.t1 | gb AAG51783.1   AC079679.3 reverse transcriptase, putative; 16838-20266 [Arabidopsis thaliana]                                                                                                                                                                                                                                                                                                                                                                                                                                              | 211  | 1142 | 1.00E-35  | 541.2 | 40.8 | 56.9 | reverse transcriptase, putative; 16838-20266        | gbpln | Arabidopsis thaliana | AT4G29090.1   Symbols:   Ribonuclease H-like superfamily protein   chr4:14333528-14335255 FORWARD LENGTH=575                                                                                                                                                                                                       | 211  | 575 | 1.00E-15  | 272.5 | 27.5 | 45.5 |
| Rsa1.0_00691.1.g18129.t2 | gb ABD65057.1   hypothetical protein 27.t00123 [Brassica oleracea]                                                                                                                                                                                                                                                                                                                                                                                                                                                                          | 1040 | 190  | 4.00E-38  | 18.3  | 8.5  | 10.0 | hypothetical protein 27.t00123                      | gbpln | Brassica oleracea    | #                                                                                                                                                                                                                                                                                                                  | #    | #   | #         | #     | #    | #    |
| Rsa1.0_00691.1.g18130.t2 | gb AAD32950.1   putative non-LTR retroelement reverse transcriptase [Arabidopsis thaliana]                                                                                                                                                                                                                                                                                                                                                                                                                                                  | 337  | 773  | 2.00E-22  | 229.4 | 21.1 | 27.0 | putative non-LTR retroelement reverse transcriptase | gbpln | Arabidopsis thaliana | AT4G29090.1   Symbols:   Ribonuclease H-like superfamily protein   chr4:14333528-14335255 FORWARD LENGTH=575                                                                                                                                                                                                       | 337  | 575 | 5.00E-17  | 170.6 | 17.8 | 29.1 |
| Rsa1.0_00691.1.g18131.t1 | ref NP_001119364.1   uncharacterized protein [Arabidopsis thaliana] gi 332007523 gb AED94906.1   uncharacterized protein AT5G43066 [Arabidopsis thaliana]                                                                                                                                                                                                                                                                                                                                                                                   | 80   | 74   | 7.00E-16  | 92.5  | 63.8 | 75.0 | uncharacterized protein                             | gbpln | Arabidopsis thaliana | AT5G43066.1   Symbols:   unknown protein; LOCATED IN: endomembrane system; Has 30201 Blast hits to 17322 proteins in 780 species: Archae - 12; Bacteria - 1396; Metazoa - 1738; Fungi - 3422; Plants - 5037; Viruses - 0; Other Eukaryotes - 2996 (source: NCBI ELink);   chr5:17284583-17284807 FORWARD LENGTH=74 | 80   | 74  | 1.00E-18  | 92.5  | 63.8 | 75.0 |

| Rsa1.0_00691.1.g18132.t1 | #                                                                                                                                                                                                                                            | #    | #    | #         | #     | #    | #    | #                                                       | -     | ----                 | ----                                                                                                                                                   | #    | #    | #         | #     | #    | #    |
|--------------------------|----------------------------------------------------------------------------------------------------------------------------------------------------------------------------------------------------------------------------------------------|------|------|-----------|-------|------|------|---------------------------------------------------------|-------|----------------------|--------------------------------------------------------------------------------------------------------------------------------------------------------|------|------|-----------|-------|------|------|
| Rsa1.0_00691.1.g18133.t1 | #                                                                                                                                                                                                                                            | #    | #    | #         | #     | #    | #    | #                                                       | -     | ----                 | ----                                                                                                                                                   | #    | #    | #         | #     | #    | #    |
| Rsa1.0_00692.1.g18134.t1 | gb AAG50806.1 AC079281.8 unknown protein [Arabidopsis thaliana]                                                                                                                                                                              | 1770 | 1213 | 0         | 68.5  | 25.1 | 37.0 | unknown protein                                         | gbpln | Arabidopsis thaliana | AT1G43760.1   Symbols:   DNase I-like superfamily protein   chr1:16528880-16531065 REVERSE LENGTH=626                                                  | 1770 | 626  | 1.00E-64  | 35.4  | 7.6  | 12.3 |
| Rsa1.0_00692.1.g18135.t1 | gb AAG50886.1 AC025294.24 hypothetical protein [Arabidopsis thaliana]                                                                                                                                                                        | 419  | 629  | 9.00E-84  | 150.1 | 37.9 | 48.7 | hypothetical protein                                    | gbpln | Arabidopsis thaliana | AT3G24255.1   Symbols:   RNA-directed DNA polymerase (reverse transcriptase)-related family protein   chr3:8789471-8793208 FORWARD LENGTH=746          | 419  | 746  | 4.00E-59  | 178.0 | 27.0 | 36.8 |
| Rsa1.0_00692.1.g18136.t2 | gb EOA35144.1  hypothetical protein CARUB_v10020279mg [Capsella rubella]                                                                                                                                                                     | 454  | 454  | 0         | 100.0 | 89.4 | 93.0 | hypothetical protein CARUB_v10020279mg                  | gbpln | Capsella rubella     | AT1G67320.2   Symbols:   DNA primase, large subunit family   chr1:25205520-25208966 REVERSE LENGTH=454                                                 | 454  | 454  | 0         | 100.0 | 88.8 | 92.7 |
| Rsa1.0_00692.1.g18137.t1 | ref XP_002888589.1  calmodulin binding protein [Arabidopsis lyrata subsp. lyrata] gi 297334430 gb EFH64848.1  calmodulin binding protein [Arabidopsis lyrata subsp. lyrata]                                                                  | 1069 | 1031 | 0         | 96.4  | 67.4 | 76.0 | calmodulin binding protein                              | gbpln | Arabidopsis lyrata   | AT1G67310.1   Symbols:   Calmodulin-binding transcription activator protein with CG-1 and Ankyrin domains   chr1:25198182-25203126 REVERSE LENGTH=1016 | 1069 | 1016 | 0         | 95.0  | 64.8 | 74.0 |
| Rsa1.0_00692.1.g18138.t1 | ref XP_002888587.1  hypothetical protein ARALYDRAFT_475824 [Arabidopsis lyrata subsp. lyrata] gi 297334428 gb EFH64846.1  hypothetical protein ARALYDRAFT_475824 [Arabidopsis lyrata subsp. lyrata]                                          | 592  | 599  | 0         | 101.2 | 78.2 | 88.0 | hypothetical protein ARALYDRAFT_475824                  | gbpln | Arabidopsis lyrata   | AT1G67290.1   Symbols:   glyoxal oxidase-related protein   chr1:25191168-25193160 REVERSE LENGTH=615                                                   | 592  | 615  | 0         | 103.9 | 77.2 | 87.0 |
| Rsa1.0_00692.1.g18139.t1 | dbj BAB09379.1  non-LTR retroelement reverse transcriptase-like protein [Arabidopsis thaliana]                                                                                                                                               | 386  | 1223 | 2.00E-72  | 316.8 | 37.3 | 55.2 | non-LTR retroelement reverse transcriptase-like protein | gbpln | Arabidopsis thaliana | AT3G24255.1   Symbols:   RNA-directed DNA polymerase (reverse transcriptase)-related family protein   chr3:8789471-8793208 FORWARD LENGTH=746          | 386  | 746  | 9.00E-49  | 193.3 | 31.1 | 43.8 |
| Rsa1.0_00692.1.g18140.t1 | gb EOA39471.1  hypothetical protein CARUB_v10008066mg [Capsella rubella]                                                                                                                                                                     | 2177 | 2170 | 0         | 99.7  | 85.8 | 92.2 | hypothetical protein CARUB_v10008066mg                  | gbpln | Capsella rubella     | AT1G20960.2   Symbols:   U5 small nuclear ribonucleoprotein helicase, putative   chr1:7302591-7309914 REVERSE LENGTH=2171                              | 2177 | 2171 | 0         | 99.7  | 85.9 | 91.8 |
| Rsa1.0_00692.1.g18141.t1 | #                                                                                                                                                                                                                                            | #    | #    | #         | #     | #    | #    | -                                                       | ----  | ----                 | #                                                                                                                                                      | #    | #    | #         | #     | #    | #    |
| Rsa1.0_00692.1.g18142.t1 | gb EOA21678.1  hypothetical protein CARUB_v10002101mg [Capsella rubella]                                                                                                                                                                     | 173  | 172  | 2.00E-67  | 99.4  | 73.4 | 84.4 | hypothetical protein CARUB_v10002101mg                  | gbpln | Capsella rubella     | AT4G12340.1   Symbols:   copper ion binding   chr4:7321492-7322004 REVERSE LENGTH=170                                                                  | 173  | 170  | 3.00E-60  | 98.3  | 69.4 | 79.2 |
| Rsa1.0_00693.1.g18143.t1 | dbj BAJ34476.1  unnamed protein product [Thehungiella halophila]                                                                                                                                                                             | 170  | 172  | 3.00E-83  | 101.2 | 90.6 | 95.3 | unnamed protein product                                 | ----  | ----                 | AT3G60690.1   Symbols:   SAUR-like auxin-responsive protein family   chr3:22435262-22435774 FORWARD LENGTH=170                                         | 170  | 170  | 2.00E-81  | 100.0 | 85.3 | 92.4 |
| Rsa1.0_00693.1.g18144.t1 | ref XP_002876575.1  hypothetical protein ARALYDRAFT_907600 [Arabidopsis lyrata subsp. lyrata] gi 297322413 gb EFH52834.1  hypothetical protein ARALYDRAFT_907600 [Arabidopsis lyrata subsp. lyrata]                                          | 398  | 494  | 1.00E-141 | 124.1 | 74.4 | 84.2 | hypothetical protein ARALYDRAFT_907600                  | gbpln | Arabidopsis lyrata   | AT3G60680.1   Symbols:   Plant protein of unknown function (DUF641)   chr3:22430246-22431745 FORWARD LENGTH=499                                        | 398  | 499  | 1.00E-143 | 125.4 | 71.9 | 82.2 |
| Rsa1.0_00693.1.g18145.t1 | ref XP_002878345.1  hypothetical protein ARALYDRAFT_486540 [Arabidopsis lyrata subsp. lyrata] gi 297324183 gb EFH54604.1  hypothetical protein ARALYDRAFT_486540 [Arabidopsis lyrata subsp. lyrata]                                          | 242  | 245  | 1.00E-116 | 101.2 | 84.7 | 90.9 | hypothetical protein ARALYDRAFT_486540                  | gbpln | Arabidopsis lyrata   | AT3G60670.1   Symbols:   PLATZ transcription factor family protein   chr3:22424695-22426074 REVERSE LENGTH=245                                         | 242  | 245  | 1.00E-117 | 101.2 | 85.1 | 90.9 |
| Rsa1.0_00693.1.g18146.t1 | ref NP_191622.1  scarecrow-like protein 22 [Arabidopsis thaliana] gi 75181377 sp Q9M000.1 SCL22_ARAT H RecName: Full=Scarecrow-like protein 22; Short=AtSCL22; AltName: Full=GRAS family protein 21; Short=AtGRAS-21; AltName: Full=SCL6-III | 588  | 623  | 0         | 106.0 | 72.8 | 82.5 | scarecrow-like protein 22                               | gbpln | Arabidopsis thaliana | AT3G60630.1   Symbols:   HAM2, ATHAM2, LOM2   GRAS family transcription factor   chr3:22410496-22412367 REVERSE LENGTH=623                             | 588  | 623  | 0         | 106.0 | 72.8 | 82.5 |
| Rsa1.0_00693.1.g18147.t1 | #                                                                                                                                                                                                                                            | #    | #    | #         | #     | #    | #    | -                                                       | ----  | ----                 | AT2G45150.3   Symbols:   cytidinediphosphate diacylglycerol synthase 4   chr2:18613519-18615347 FORWARD LENGTH=382                                     | 76   | 382  | 2.00E-12  | 502.6 | 56.6 | 64.5 |

|                          |                                                                                                                                                                                                     |     |     |           |       |      |      |                                                                                                                                          |       |                      |                                                                                                                                                                                                                                                                                                                                                                    |     |     |           |       |      |      |
|--------------------------|-----------------------------------------------------------------------------------------------------------------------------------------------------------------------------------------------------|-----|-----|-----------|-------|------|------|------------------------------------------------------------------------------------------------------------------------------------------|-------|----------------------|--------------------------------------------------------------------------------------------------------------------------------------------------------------------------------------------------------------------------------------------------------------------------------------------------------------------------------------------------------------------|-----|-----|-----------|-------|------|------|
| Rsa1.0_00693.1.g18148.t1 | ref[NP_974468.1] uncharacterized protein [Arabidopsis thaliana] gi 332646561 gb AE80082.1  uncharacterized protein AT3G60590 [Arabidopsis thaliana]                                                 | 384 | 404 | 1.00E-149 | 105.2 | 71.4 | 78.4 | uncharacterized protein                                                                                                                  | gbpln | Arabidopsis thaliana | AT3G60590.3   Symbols:   unknown protein; BEST Arabidopsis thaliana protein match is: unknown protein (TAIR:AT1G48460.1); Has 35333 Blast hits to 34131 proteins in 2444 species: Archae - 798; Bacteria - 22429; Metazoa - 974; Fungi - 991; Plants - 531; Viruses - 0; Other Eukaryotes - 9610 (source: NCBI BLINK).   chr3:22398228-22399753 FORWARD LENGTH=404 | 384 | 404 | 1.00E-152 | 105.2 | 71.4 | 78.4 |
| Rsa1.0_00693.1.g18149.t1 | sp Q9M203.2 EXPB5_ARATH RecName: Full=Expansin-B5; Short=At-EXPB5; Short=AtEXPB5; AltName: Full=AtH-ExpBeta-1.3; AltName: Full=Beta-expansin-5; Flags: Precursor                                    | 148 | 264 | 2.00E-62  | 178.4 | 77.0 | 87.8 | RecName: Full=Expansin-B5; Short=At-EXPB5; Short=AtEXPB5; AltName: Full=AtH-ExpBeta-1.3; AltName: Full=Beta-expansin-5; Flags: Precursor | ----  | ----                 | AT3G60570.1   Symbols: ATEXPB5, EXPB5, ATHEXP BETA 1.3   expansin B5   chr3:22391247-22392463 FORWARD LENGTH=252                                                                                                                                                                                                                                                   | 148 | 252 | 9.00E-63  | 170.3 | 74.3 | 85.1 |
| Rsa1.0_00693.1.g18150.t1 | ref[XP_002959357.1] hypothetical protein VOLCADRAFT_100797 [Volvox carteri f. nagariensis] gi 300255236 gb EFJ39573.1  hypothetical protein VOLCADRAFT_100797 [Volvox carteri f. nagariensis]       | 138 | 233 | 1.00E-11  | 168.8 | 29.0 | 36.2 | hypothetical protein VOLCADRAFT_100797                                                                                                   | gbpln | Volvox carteri       | #                                                                                                                                                                                                                                                                                                                                                                  | #   | #   | #         | #     | #    |      |
| Rsa1.0_00693.1.g18151.t1 | ref[XP_002883985.1] hypothetical protein ARALYDRAFT_480516 [Arabidopsis lyrata subsp. lyrata] gi 297329825 gb EFH60244.1  hypothetical protein ARALYDRAFT_480516 [Arabidopsis lyrata subsp. lyrata] | 136 | 414 | 7.00E-28  | 304.4 | 51.5 | 53.7 | hypothetical protein ARALYDRAFT_480516                                                                                                   | gbpln | Arabidopsis lyrata   | AT2G19560.1   Symbols: EER5   proteasome family protein   chr2:8465924-8469069 REVERSE LENGTH=413                                                                                                                                                                                                                                                                  | 136 | 413 | 4.00E-29  | 303.7 | 50.7 | 52.2 |
| Rsa1.0_00693.1.g18152.t1 | ref[XP_002876557.1] hypothetical protein ARALYDRAFT_486518 [Arabidopsis lyrata subsp. lyrata] gi 297322395 gb EFH52816.1  hypothetical protein ARALYDRAFT_486518 [Arabidopsis lyrata subsp. lyrata] | 276 | 274 | 1.00E-136 | 99.3  | 82.6 | 92.0 | hypothetical protein ARALYDRAFT_486518                                                                                                   | gbpln | Arabidopsis lyrata   | AT3G60450.1   Symbols:   Phosphoglycerate mutase family protein   chr3:22340982-22342187 FORWARD LENGTH=274                                                                                                                                                                                                                                                        | 276 | 274 | 1.00E-137 | 99.3  | 81.9 | 91.3 |
| Rsa1.0_00693.1.g18153.t1 | ref[NP_191603.2] phosphoglycerate mutase-like protein [Arabidopsis thaliana] gi 332646541 gb AEE80062.1  phosphoglycerate mutase-like protein [Arabidopsis thaliana]                                | 283 | 291 | 1.00E-125 | 102.8 | 77.7 | 88.0 | phosphoglycerate mutase-like protein                                                                                                     | gbpln | Arabidopsis thaliana | AT3G60440.1   Symbols:   Phosphoglycerate mutase family protein   chr3:22337820-22339145 FORWARD LENGTH=291                                                                                                                                                                                                                                                        | 283 | 291 | 1.00E-127 | 102.8 | 77.7 | 88.0 |
| Rsa1.0_00693.1.g18154.t1 | gb AAL47433.1  AT5g62580/K19B1.19 [Arabidopsis thaliana]                                                                                                                                            | 188 | 615 | 2.00E-17  | 327.1 | 36.2 | 43.1 | AT5g62580/K19B1.19                                                                                                                       | gbpln | Arabidopsis thaliana | AT5G62580.1   Symbols:   ARM repeat superfamily protein   chr5:25120010-25122259 FORWARD LENGTH=615                                                                                                                                                                                                                                                                | 188 | 615 | 8.00E-20  | 327.1 | 36.2 | 43.1 |
| Rsa1.0_00693.1.g18155.t1 | ref[XP_002876554.1] hypothetical protein ARALYDRAFT_907564 [Arabidopsis lyrata subsp. lyrata] gi 297322392 gb EFH52813.1  hypothetical protein ARALYDRAFT_907564 [Arabidopsis lyrata subsp. lyrata] | 264 | 274 | 1.00E-109 | 103.8 | 70.5 | 82.6 | hypothetical protein ARALYDRAFT_907564                                                                                                   | gbpln | Arabidopsis lyrata   | AT3G60420.1   Symbols:   Phosphoglycerate mutase family protein   chr3:22334446-22335710 FORWARD LENGTH=270                                                                                                                                                                                                                                                        | 264 | 270 | 1.00E-110 | 102.3 | 69.7 | 82.2 |
| Rsa1.0_00693.1.g18156.t1 | ref[XP_002876554.1] hypothetical protein ARALYDRAFT_907564 [Arabidopsis lyrata subsp. lyrata] gi 297322392 gb EFH52813.1  hypothetical protein ARALYDRAFT_907564 [Arabidopsis lyrata subsp. lyrata] | 269 | 274 | 1.00E-104 | 101.9 | 69.1 | 81.8 | hypothetical protein ARALYDRAFT_907564                                                                                                   | gbpln | Arabidopsis lyrata   | AT3G60420.1   Symbols:   Phosphoglycerate mutase family protein   chr3:22334446-22335710 FORWARD LENGTH=270                                                                                                                                                                                                                                                        | 269 | 270 | 1.00E-106 | 100.4 | 69.9 | 81.4 |
| Rsa1.0_00693.1.g18157.t1 | #                                                                                                                                                                                                   | #   | #   | #         | #     | #    | -    | ----                                                                                                                                     | ----  | #                    | #                                                                                                                                                                                                                                                                                                                                                                  | #   | #   | #         | #     | #    |      |
| Rsa1.0_00693.1.g18158.t2 | #                                                                                                                                                                                                   | #   | #   | #         | #     | #    | -    | ----                                                                                                                                     | ----  | #                    | #                                                                                                                                                                                                                                                                                                                                                                  | #   | #   | #         | #     | #    |      |
| Rsa1.0_00693.1.g18159.t2 | gb EOA36857.1  hypothetical protein CARUB_v10008803mg [Capsella rubella]                                                                                                                            | 659 | 536 | 1.00E-89  | 81.3  | 25.3 | 33.1 | hypothetical protein CARUB_v10008803mg                                                                                                   | gbpln | Capsella rubella     | AT2G07760.1   Symbols:   Zinc knuckle (CCHC-type) family protein   chr2:3584420-3586278 REVERSE LENGTH=530                                                                                                                                                                                                                                                         | 659 | 530 | 3.00E-49  | 80.4  | 15.2 | 19.9 |
| Rsa1.0_00694.1.g18160.t1 | #                                                                                                                                                                                                   | #   | #   | #         | #     | #    | -    | ----                                                                                                                                     | ----  | #                    | #                                                                                                                                                                                                                                                                                                                                                                  | #   | #   | #         | #     | #    |      |
| Rsa1.0_00694.1.g18161.t1 | db BAJ34017.1  unnamed protein product [Thellungiella halophila]                                                                                                                                    | 389 | 389 | 0         | 100.0 | 98.5 | 99.2 | unnamed protein product                                                                                                                  | ----  | ----                 | AT3G27000.1   Symbols: ARP2, ATARP2, WRM   actin related protein 2   chr3:9952787-9955784 REVERSE LENGTH=389                                                                                                                                                                                                                                                       | 389 | 389 | 0         | 100.0 | 98.2 | 99.2 |
| Rsa1.0_00694.1.g18162.t1 | ref[XP_002875350.1] ubiquitin family protein [Arabidopsis lyrata subsp. lyrata] gi 297321188 gb EFH51609.1  ubiquitin family protein [Arabidopsis lyrata subsp. lyrata]                             | 127 | 120 | 9.00E-57  | 94.5  | 85.8 | 92.1 | ubiquitin family protein                                                                                                                 | gbpln | Arabidopsis lyrata   | AT3G26980.1   Symbols: MUB4   membrane-anchored ubiquitin-fold protein 4 precursor   chr3:9946467-9947444 REVERSE LENGTH=120                                                                                                                                                                                                                                       | 127 | 120 | 1.00E-58  | 94.5  | 85.8 | 91.3 |
| Rsa1.0_00694.1.g18163.t1 | gb EOA23822.1  hypothetical protein CARUB_v10017036mg [Capsella rubella]                                                                                                                            | 450 | 513 | 1.00E-178 | 114.0 | 78.9 | 86.9 | hypothetical protein CARUB_v10017036mg                                                                                                   | gbpln | Capsella rubella     | AT3G26990.1   Symbols:   ENTH/VHS family protein   chr3:9948426-9951557 REVERSE LENGTH=513                                                                                                                                                                                                                                                                         | 450 | 513 | 1.00E-177 | 114.0 | 81.6 | 89.1 |
| Rsa1.0_00694.1.g18164.t1 | #                                                                                                                                                                                                   | #   | #   | #         | #     | #    | -    | ----                                                                                                                                     | ----  | #                    | #                                                                                                                                                                                                                                                                                                                                                                  | #   | #   | #         | #     | #    |      |

|                          |                                                                                                                                                                                                                                                                                                                                                                                                                                                                                                                                                                                                                                                                                                                                                                                                                                                                                                                                  |     |     |           |       |      |      |                                                               |       |                      |                                                                                                                                                                                                                                                                                                                                                                                     |     |     |           |       |      |      |
|--------------------------|----------------------------------------------------------------------------------------------------------------------------------------------------------------------------------------------------------------------------------------------------------------------------------------------------------------------------------------------------------------------------------------------------------------------------------------------------------------------------------------------------------------------------------------------------------------------------------------------------------------------------------------------------------------------------------------------------------------------------------------------------------------------------------------------------------------------------------------------------------------------------------------------------------------------------------|-----|-----|-----------|-------|------|------|---------------------------------------------------------------|-------|----------------------|-------------------------------------------------------------------------------------------------------------------------------------------------------------------------------------------------------------------------------------------------------------------------------------------------------------------------------------------------------------------------------------|-----|-----|-----------|-------|------|------|
| Rsa1.0_00694.1.g18165.t1 | ref NP_199678.1  agamous-like MADS-box protein AGL80 [Arabidopsis thaliana]<br>gi 7533956 sp Q9FJK3.1 AGL80 ARAT H<br>RecName: Full=Agamous-like MADS-box protein AGL80<br>gi 10177357 dbj BAB10700.1  unnamed protein product [Arabidopsis thaliana]<br>gi 67633864 gb AA78856.1  MADS-box family protein [Arabidopsis thaliana]<br>gi 89275220 gb ABD66036.1  MADS box transcription factor AGL80 [Arabidopsis thaliana]<br>gi 332008326 gb AED95709.1  agamous-like MADS-box protein AGL80 [Arabidopsis thaliana]                                                                                                                                                                                                                                                                                                                                                                                                             | 322 | 321 | 2.00E-52  | 99.7  | 42.5 | 56.2 | agamous-like MADS-box protein AGL80                           | gbpln | Arabidopsis thaliana | AT5G48670.1   Symbols: FEM111, AGL80   AGAMOUS-like 80   chr5:19738825-19739790 REVERSE LENGTH=321                                                                                                                                                                                                                                                                                  | 322 | 321 | 6.00E-55  | 99.7  | 42.5 | 56.2 |
| Rsa1.0_00694.1.g18166.t1 | gb EOA24039.1  hypothetical protein CARUB_v10017257mg [Capsella rubella]                                                                                                                                                                                                                                                                                                                                                                                                                                                                                                                                                                                                                                                                                                                                                                                                                                                         | 445 | 443 | 0         | 99.6  | 88.8 | 93.7 | hypothetical protein CARUB_v10017257mg                        | gbpln | Capsella rubella     | AT3G26935.1   Symbols:   DHHC-type zinc finger family protein   chr3:9933001-9935218 REVERSE LENGTH=443                                                                                                                                                                                                                                                                             | 445 | 443 | 0         | 99.6  | 88.8 | 93.0 |
| Rsa1.0_00694.1.g18167.t1 | ref XP_002877005.1  dsRNA-binding protein 3 [Arabidopsis lyrata subsp. lyrata]<br>gi 297322843 gb EFH53264.1  dsRNA-binding protein 3 [Arabidopsis lyrata subsp. lyrata]                                                                                                                                                                                                                                                                                                                                                                                                                                                                                                                                                                                                                                                                                                                                                         | 323 | 356 | 1.00E-122 | 110.2 | 77.1 | 82.4 | dsRNA-binding protein 3                                       | gbpln | Arabidopsis lyrata   | AT3G26932.2   Symbols: DRB3   dsRNA-binding protein 3   chr3:9930460-9931714 REVERSE LENGTH=359                                                                                                                                                                                                                                                                                     | 323 | 359 | 1.00E-124 | 111.1 | 76.8 | 82.0 |
| Rsa1.0_00694.1.g18168.t1 | ref NP_001078213.1  uncharacterized protein [Arabidopsis thaliana]<br>gi 11994158 dbj BAB01187.1  unnamed protein product [Arabidopsis thaliana]<br>gi 332643723 gb AEE7244.1  uncharacterized protein AT3G26934 [Arabidopsis thaliana]                                                                                                                                                                                                                                                                                                                                                                                                                                                                                                                                                                                                                                                                                          | 132 | 153 | 7.00E-26  | 115.9 | 56.1 | 67.4 | uncharacterized protein                                       | gbpln | Arabidopsis thaliana | AT3G26934.1   Symbols:   unknown protein; FUNCTIONS IN: molecular_function unknown; INVOLVED IN: biological_process unknown; LOCATED IN: cellular_component unknown; Has 11 Blast hits to 11 proteins in 6 species: Archae - 0; Bacteria - 0; Metazoa - 3; Fungi - 0; Plants - 3; Viruses - 0; Other Eukaryotes - 5 (source: NCBI BLINK).   chr3:9928316-9929123 REVERSE LENGTH=153 | 132 | 153 | 2.00E-28  | 115.9 | 56.1 | 67.4 |
| Rsa1.0_00694.1.g18169.t1 | sp Q3EA38.2 FDL48_ARATH<br>RecName: Full=Putative F-box/FBD/LRR-repeat protein At4g13965                                                                                                                                                                                                                                                                                                                                                                                                                                                                                                                                                                                                                                                                                                                                                                                                                                         | 377 | 427 | 1.00E-101 | 113.3 | 57.0 | 70.8 | RecName: Full=Putative F-box/FBD/LRR-repeat protein At4g13965 | ----  | ----                 | AT1G55030.1   Symbols:   RNI-like superfamily protein   chr1:20530417-20531768 REVERSE LENGTH=422                                                                                                                                                                                                                                                                                   | 377 | 422 | 2.00E-88  | 111.9 | 52.8 | 65.3 |
| Rsa1.0_00694.1.g18170.t1 | gb EOA23598.1  hypothetical protein CARUB_v10016795mg [Capsella rubella]                                                                                                                                                                                                                                                                                                                                                                                                                                                                                                                                                                                                                                                                                                                                                                                                                                                         | 660 | 663 | 0         | 100.5 | 87.9 | 94.2 | hypothetical protein CARUB_v10016795mg                        | gbpln | Capsella rubella     | AT3G26782.1   Symbols:   Tetratricopeptide repeat (TPR)-like superfamily protein   chr3:9850594-9852682 FORWARD LENGTH=659                                                                                                                                                                                                                                                          | 660 | 659 | 0         | 99.8  | 87.6 | 94.1 |
| Rsa1.0_00694.1.g18171.t1 | gb AFG29442.1  inducer of CBF expression 1 protein [Isatis tinctoria]                                                                                                                                                                                                                                                                                                                                                                                                                                                                                                                                                                                                                                                                                                                                                                                                                                                            | 474 | 499 | 1.00E-176 | 105.3 | 79.1 | 82.9 | inducer of CBF expression 1 protein                           | gbpln | Isatis tinctoria     | AT3G26744.4   Symbols: ICE1, ATICE1, SCRMI   basic helix-loop-helix (bHLH) DNA-binding superfamily protein   chr3:9832953-9834790 REVERSE LENGTH=494                                                                                                                                                                                                                                | 474 | 494 | 1.00E-164 | 104.2 | 73.2 | 77.8 |
| Rsa1.0_00694.1.g18172.t1 | gb EOA24196.1  hypothetical protein CARUB_v10017433mg [Capsella rubella]                                                                                                                                                                                                                                                                                                                                                                                                                                                                                                                                                                                                                                                                                                                                                                                                                                                         | 393 | 380 | 1.00E-174 | 96.7  | 80.9 | 86.3 | hypothetical protein CARUB_v10017433mg                        | gbpln | Capsella rubella     | AT3G26700.1   Symbols:   Protein kinase superfamily protein   chr3:9810669-9812356 FORWARD LENGTH=360                                                                                                                                                                                                                                                                               | 393 | 380 | 1.00E-177 | 96.7  | 80.9 | 86.5 |
| Rsa1.0_00694.1.g18173.t1 | # # # # # # # # # #                                                                                                                                                                                                                                                                                                                                                                                                                                                                                                                                                                                                                                                                                                                                                                                                                                                                                                              | #   | #   | #         | #     | #    | #    | -                                                             | ----  | ----                 | # # # # # # # #                                                                                                                                                                                                                                                                                                                                                                     | #   | #   | #         | #     | #    | #    |
| Rsa1.0_00694.1.g18174.t1 | ref NP_189295.3  peptide chain release factor eRF subunit 1 [Arabidopsis thaliana]<br>gi 549010 sp P35614.1 ERF1Z_ARATH<br>RecName: Full=Eukaryotic peptide chain release factor subunit 1-3;<br>Short=Eukaryotic release factor 1-3;<br>Short=eRF1-3; AltName: Full=Omnipotent suppressor protein 1 homolog 3; Short=SUP1 homolog 3<br>gi 16514 emb CAA49172.1  unnamed protein product [Arabidopsis thaliana]<br>gi 1402882 emb CA66813.1  eukaryotic early release factor subunit 1-like protein [Arabidopsis thaliana]<br>gi 1495249 emb CA66118.1  eRF1-3 [Arabidopsis thaliana]<br>gi 11994297 dbj BAB01727.1  translation release factor subunit 1 [Arabidopsis thaliana]<br>gi 15215648 gb AAK91369.1  MFE16.15/MFE16.15 [Arabidopsis thaliana]<br>gi 21435997 gb AAM51576.1  At3g26618/MFE16.15 [Arabidopsis thaliana]<br>gi 332643666 gb AEE77187.1  peptide chain release factor eRF subunit 1 [Arabidopsis thaliana] | 801 | 435 | 0         | 54.3  | 52.6 | 53.4 | peptide chain release factor eRF subunit 1                    | gbpln | Arabidopsis thaliana | AT3G26618.1   Symbols: ERF1-3   eukaryotic release factor 1-3   chr3:9788854-9790161 FORWARD LENGTH=435                                                                                                                                                                                                                                                                             | 801 | 435 | 0         | 54.3  | 52.6 | 53.4 |
| Rsa1.0_00694.1.g18175.t1 | gb EOA23652.1  hypothetical protein CARUB_v10016853mg [Capsella rubella]                                                                                                                                                                                                                                                                                                                                                                                                                                                                                                                                                                                                                                                                                                                                                                                                                                                         | 610 | 614 | 0         | 100.7 | 81.6 | 91.0 | hypothetical protein CARUB_v10016853mg                        | gbpln | Capsella rubella     | AT3G26600.1   Symbols: ARO4   armadillo repeat only 4   chr3:9769889-9771736 FORWARD LENGTH=615                                                                                                                                                                                                                                                                                     | 610 | 615 | 0         | 100.8 | 83.4 | 91.3 |

|                          |                                                                                                                                                                                                                                                                                                                                                                                                                                                                                                                   |     |     |           |       |      |      |                                                    |       |                      |                                                                                                                                                                                                                                                                                                                                                                                                                                                                                        |     |     |           |       |      |      |
|--------------------------|-------------------------------------------------------------------------------------------------------------------------------------------------------------------------------------------------------------------------------------------------------------------------------------------------------------------------------------------------------------------------------------------------------------------------------------------------------------------------------------------------------------------|-----|-----|-----------|-------|------|------|----------------------------------------------------|-------|----------------------|----------------------------------------------------------------------------------------------------------------------------------------------------------------------------------------------------------------------------------------------------------------------------------------------------------------------------------------------------------------------------------------------------------------------------------------------------------------------------------------|-----|-----|-----------|-------|------|------|
| Rsa1.0_00695.1.g18176.t1 | gb EOA14684.1  hypothetical protein CARUB_v10027956mg [Capsella rubella]                                                                                                                                                                                                                                                                                                                                                                                                                                          | 496 | 496 | 1.00E-106 | 100.0 | 55.0 | 67.1 | hypothetical protein CARUB_v10027956mg             | gbpln | Capsella rubella     | AT5G53220.3   Symbols:   unknown protein; FUNCTIONS IN: molecular_function unknown; INVOLVED IN: biological_process unknown; LOCATED IN: cellular_component unknown; EXPRESSED IN: 23 plant structures; EXPRESSED DURING: 13 growth stages; Has 30201 Blast hits to 17322 proteins in 780 species: Archaes = 12; Bacteria = 1396; Metazoa = 17338; Fungi = 3422; Plants = 5037; Viruses = 0; Other Eukaryotes = 2996 (source: NCBI BLink).   chr5:21596824-21598004 FORWARD LENGTH=368 | 496 | 368 | 1.00E-96  | 74.2  | 45.8 | 53.8 |
| Rsa1.0_00695.1.g18177.t1 | dbj BAJ34295.1  unnamed protein product [Thellungiella halophila]                                                                                                                                                                                                                                                                                                                                                                                                                                                 | 332 | 368 | 1.00E-140 | 110.8 | 88.6 | 93.1 | unnamed protein product                            | ----  | ----                 | AT5G53210.1   Symbols: SPCH   basic helix-loop-helix (bHLH) DNA-binding superfamily protein   chr5:21586606-21588941 REVERSE LENGTH=364                                                                                                                                                                                                                                                                                                                                                | 332 | 364 | 1.00E-121 | 109.6 | 87.0 | 91.9 |
| Rsa1.0_00695.1.g18178.t3 | #                                                                                                                                                                                                                                                                                                                                                                                                                                                                                                                 | #   | #   | #         | #     | #    | #    | -                                                  | ----  | ----                 | AT5G53170.1   Symbols: FTSH1   FTSH protease 11   chr5:21563023-21567922 REVERSE LENGTH=806                                                                                                                                                                                                                                                                                                                                                                                            | 140 | 806 | 2.00E-11  | 575.7 | 20.7 | 20.7 |
| Rsa1.0_00695.1.g18179.t2 | ref NP_200128.1  abscisic acid receptor PYL8 [Arabidopsis thaliana]<br>gi 75170450 sp Q9FGM1.1 PYL8_ARATH RecName: Full=Abscisic acid receptor PYL8; AltName: Full=ABI1-binding protein 1; AltName: Full=PYR1-like protein 8; AltName: Full=Regulatory components of ABA receptor 3<br>gi 9757997 dbj BAB08419.1  unnamed protein product [Arabidopsis thaliana]<br>gi 27808528 gb AAO24544.1  At5g53160 [Arabidopsis thaliana]<br>gi 332008933 gb AED96316.1  abscisic acid receptor PYL8 [Arabidopsis thaliana] | 181 | 188 | 1.00E-90  | 103.9 | 93.4 | 95.6 | abscisic acid receptor PYL8                        | gbpln | Arabidopsis thaliana | AT5G53160.2   Symbols: RCAR3, PYL8   regulatory components of ABA receptor 3   chr5:21561026-21561953 FORWARD LENGTH=188                                                                                                                                                                                                                                                                                                                                                               | 181 | 188 | 6.00E-93  | 103.9 | 93.4 | 95.6 |
| Rsa1.0_00695.1.g18180.t2 | ref XP_002864225.1  hypothetical protein ARALYDRAFT_918384 [Arabidopsis lyrata subsp. lyrata]<br>gi 297310060 gb EFH40484.1  hypothetical protein ARALYDRAFT_918384 [Arabidopsis lyrata subsp. lyrata]                                                                                                                                                                                                                                                                                                            | 435 | 420 | 0         | 96.6  | 79.1 | 84.1 | hypothetical protein ARALYDRAFT_918384             | gbpln | Arabidopsis lyrata   | AT5G53140.1   Symbols:   Protein phosphatase 2C family protein   chr5:21549228-21552132 FORWARD LENGTH=420                                                                                                                                                                                                                                                                                                                                                                             | 435 | 420 | 0         | 96.6  | 77.7 | 83.9 |
| Rsa1.0_00695.1.g18181.t1 | ref NP_190191.1  putative F-box/kelch-repeat protein [Arabidopsis thaliana]<br>gi 75180796 sp Q9LX87.1 FBK74_ARATH RecName: Full=Putative F-box/kelch-repeat protein At3g46050<br>gi 7798993 emb CAB90932.1  putative protein [Arabidopsis thaliana]<br>gi 332644584 gb AEE78105.1  putative F-box/kelch-repeat protein [Arabidopsis thaliana]                                                                                                                                                                    | 335 | 370 | 9.00E-58  | 110.4 | 45.7 | 61.2 | putative F-box/kelch-repeat protein                | gbpln | Arabidopsis thaliana | AT3G46050.1   Symbols:   Galactose oxidase/kelch repeat superfamily protein   chr3:16916072-16917184 FORWARD LENGTH=370                                                                                                                                                                                                                                                                                                                                                                | 335 | 370 | 2.00E-60  | 110.4 | 45.7 | 61.2 |
| Rsa1.0_00695.1.g18182.t2 | ref NP_001190533.1  F-box/RNI-like/FBD-like domains-containing protein [Arabidopsis thaliana]<br>gi 75262547 sp Q9FJC1.1 FBD31_ARATH RecName: Full=Putative FBD-associated F-box protein At5g53635<br>gi 9759202 dbj BAB09739.1  heat shock transcription factor HSF30-like protein [Arabidopsis thaliana]<br>gi 332009006 gb AED96389.1  F-box/RNI-like/FBD-like domains-containing protein [Arabidopsis thaliana]                                                                                               | 431 | 426 | 2.00E-96  | 98.8  | 51.0 | 66.1 | F-box/RNI-like/FBD-like domains-containing protein | gbpln | Arabidopsis thaliana | AT5G53635.1   Symbols:   F-box/RNI-like/FBD-like domains-containing protein   chr5:21785999-21787444 REVERSE LENGTH=426                                                                                                                                                                                                                                                                                                                                                                | 431 | 426 | 4.00E-99  | 98.8  | 51.0 | 66.1 |
| Rsa1.0_00696.1.g18183.t1 | ref NP_199536.1  putative disease resistance protein [Arabidopsis thaliana]<br>gi 46396007 sp Q9LV74.1 DRL37_ARATH RecName: Full=Probable disease resistance protein At5g47250<br>gi 8809608 dbj BAA97159.1  NBS/LRR disease resistance protein [Arabidopsis thaliana]<br>gi 11074182 dbj BAE98856.1  NBS/LRR disease resistance protein [Arabidopsis thaliana]<br>gi 332008108 gb AED95491.1  putative disease resistance protein [Arabidopsis thaliana]                                                         | 882 | 843 | 0         | 95.6  | 56.0 | 67.7 | putative disease resistance protein                | gbpln | Arabidopsis thaliana | AT5G47250.1   Symbols:   LRR and NB-ARC domains-containing disease resistance protein   chr5:19186045-19188576 REVERSE LENGTH=843                                                                                                                                                                                                                                                                                                                                                      | 882 | 843 | 0         | 95.6  | 56.0 | 67.7 |



|                          |                                                                                                                                                                                                                                                                                                                                                                                                                                                                                       |      |      |          |       |      |      |                                        |       |                      |                                                                                                                                                |      |      |          |       |      |      |
|--------------------------|---------------------------------------------------------------------------------------------------------------------------------------------------------------------------------------------------------------------------------------------------------------------------------------------------------------------------------------------------------------------------------------------------------------------------------------------------------------------------------------|------|------|----------|-------|------|------|----------------------------------------|-------|----------------------|------------------------------------------------------------------------------------------------------------------------------------------------|------|------|----------|-------|------|------|
| Rsa1.0_00696.1.g18184.t1 | gb EOA14559.1  hypothetical protein CARUB_v10027797mg [Capsella rubella]                                                                                                                                                                                                                                                                                                                                                                                                              | 837  | 1251 | 0        | 149.5 | 50.7 | 66.9 | hypothetical protein CARUB_v10027797mg | gbpln | Capsella rubella     | AT5G47260.1   Symbols:   ATP binding;GTP binding;nucleotide binding;nucleoside-triphosphatases   chr5:19189411-19192516 FORWARD LENGTH=948     | 837  | 948  | 0        | 113.3 | 50.2 | 65.2 |
| Rsa1.0_00696.1.g18185.t1 | ref NP_199536.1  putative disease resistance protein [Arabidopsis thaliana]<br>gi 46396007 sp Q9LVT4.1 DRL37_ARAT H RecName: Full=Probable disease resistance protein At5g47250<br>gi 8809608 dbj BAA97159.1 NBS/LRR disease resistance protein [Arabidopsis thaliana] gi 110741827 dbj BAE98856.1 NBS/LRR disease resistance protein [Arabidopsis thaliana]<br>gi 332008108 gb AED95491.1  putative disease resistance protein [Arabidopsis thaliana]                                | 944  | 843  | 0        | 89.3  | 50.1 | 62.8 | putative disease resistance protein    | gbpln | Arabidopsis thaliana | AT5G47250.1   Symbols:   LRR and NB-ARC domains-containing disease resistance protein   chr5:19186045-19188576 REVERSE LENGTH=843              | 944  | 843  | 0        | 89.3  | 50.1 | 62.8 |
| Rsa1.0_00696.1.g18186.t1 | dbj BAH30638.1  hypothetical protein [Arabidopsis thaliana]<br>ref NP_199537.2  putative disease resistance protein [Arabidopsis thaliana]<br>gi 190358917 sp Q9LVT3.2 DRL38_ARA TH RecName: Full=Probable disease resistance protein At5g47260<br>gi 332008109 gb AED95492.1  putative disease resistance protein [Arabidopsis thaliana]                                                                                                                                             | 342  | 556  | 4.00E-55 | 162.6 | 43.3 | 58.2 | hypothetical protein                   | gbpln | Arabidopsis thaliana | AT5G59390.1   Symbols:   XH/XS domain-containing protein   chr5:23954934-23957151 FORWARD LENGTH=561                                           | 342  | 561  | 5.00E-57 | 164.0 | 42.7 | 58.2 |
| Rsa1.0_00696.1.g18187.t7 | gi 190358917 sp Q9LVT3.2 DRL38_ARA TH RecName: Full=Probable disease resistance protein At5g47260<br>gi 332008109 gb AED95492.1  putative disease resistance protein [Arabidopsis thaliana]                                                                                                                                                                                                                                                                                           | 994  | 948  | 0        | 95.4  | 55.1 | 65.2 | putative disease resistance protein    | gbpln | Arabidopsis thaliana | AT5G47260.1   Symbols:   ATP binding;GTP binding;nucleotide binding;nucleoside-triphosphatases   chr5:19189411-19192516 FORWARD LENGTH=948     | 994  | 948  | 0        | 95.4  | 55.1 | 65.2 |
| Rsa1.0_00696.1.g18188.t1 | gb ABD65033.1  YDG/SRA domain containing protein [Brassica oleracea]<br>ref XP_002865469.1  GYF domain-containing protein [Arabidopsis lyrata subsp. lyrata]<br>gi 297311304 gb EFH41728.1  GYF domain-containing protein [Arabidopsis lyrata subsp. lyrata]                                                                                                                                                                                                                          | 93   | 498  | 2.00E-22 | 535.5 | 57.0 | 62.4 | YDG/SRA domain containing protein      | gbpln | Brassica oleracea    | AT5G47160.1   Symbols:   YDG/SRA domain-containing protein   chr5:19156731-19157978 FORWARD LENGTH=415                                         | 93   | 415  | 1.00E-15 | 446.2 | 39.8 | 52.7 |
| Rsa1.0_00696.1.g18189.t1 | ref XP_002865469.1  GYF domain-containing protein [Arabidopsis lyrata subsp. lyrata]<br>gi 297311304 gb EFH41728.1  GYF domain-containing protein [Arabidopsis lyrata subsp. lyrata]                                                                                                                                                                                                                                                                                                  | 293  | 1714 | 3.00E-11 | 585.0 | 14.7 | 18.4 | GYF domain-containing protein          | gbpln | Arabidopsis lyrata   | AT5G42950.1   Symbols:   GYF domain-containing protein   chr5:17224436-17231044 FORWARD LENGTH=1714                                            | 293  | 1714 | 2.00E-13 | 585.0 | 14.7 | 18.4 |
| Rsa1.0_00696.1.g18190.t1 | #                                                                                                                                                                                                                                                                                                                                                                                                                                                                                     | #    | #    | #        | #     | #    | #    | -                                      | ----  | ----                 | #                                                                                                                                              | #    | #    | #        | #     | #    |      |
| Rsa1.0_00696.1.g18191.t7 | gb ABD65043.1  hypothetical protein 26.t00101 [Brassica oleracea]                                                                                                                                                                                                                                                                                                                                                                                                                     | 497  | 189  | 2.00E-23 | 38.0  | 14.9 | 18.7 | hypothetical protein 26.t00101         | gbpln | Brassica oleracea    | #                                                                                                                                              | #    | #    | #        | #     | #    |      |
| Rsa1.0_00697.1.g18192.t1 | gb EOA16103.1  hypothetical protein CARUB_v10004236mg [Capsella rubella]                                                                                                                                                                                                                                                                                                                                                                                                              | 480  | 725  | 0        | 151.0 | 69.4 | 77.5 | hypothetical protein CARUB_v10004236mg | gbpln | Capsella rubella     | AT4G24000.1   Symbols:   ATCSLG2, CSLG2   cellulose synthase like G2   chr4:12462142-12465471 FORWARD LENGTH=722                               | 480  | 722  | 0        | 150.4 | 68.8 | 76.0 |
| Rsa1.0_00697.1.g18193.t1 | dbj BAA85459.1  ORF-a [Brassica rapa]<br>ref NP_567692.2  cellulose synthase-like protein G2 [Arabidopsis thaliana]<br>gi 175161526 sp O8VYR4.1 CSLG2_ARAT H RecName: Full=Cellulose synthase-like protein G2. Short=AtCaG2<br>gi 17979143 gb AAL49829.1  unknown protein [Arabidopsis thaliana]<br>gi 20465365 gb AAM20086.1  unknown protein [Arabidopsis thaliana]<br>gi 332659438 gb AEE84838.1  cellulose synthase-like protein G2 [Arabidopsis thaliana]                        | 490  | 427  | 9.00E-48 | 87.1  | 23.7 | 25.5 | ORF-a                                  | gbpln | Brassica rapa        | #                                                                                                                                              | #    | #    | #        | #     | #    |      |
| Rsa1.0_00697.1.g18194.t1 | gi 17979143 gb AAL49829.1  unknown protein [Arabidopsis thaliana]<br>gi 20465365 gb AAM20086.1  unknown protein [Arabidopsis thaliana]<br>gi 332659438 gb AEE84838.1  cellulose synthase-like protein G2 [Arabidopsis thaliana]                                                                                                                                                                                                                                                       | 607  | 722  | 0        | 118.9 | 76.8 | 86.3 | cellulose synthase-like protein G2     | gbpln | Arabidopsis thaliana | AT4G24000.1   Symbols:   ATCSLG2, CSLG2   cellulose synthase like G2   chr4:12462142-12465471 FORWARD LENGTH=722                               | 607  | 722  | 0        | 118.9 | 76.8 | 86.3 |
| Rsa1.0_00697.1.g18195.t1 | gb AFD01307.1  auxin response factor 9-1 [Brassica rapa subsp. pekinensis]<br>ref NP_567691.1  FtsH extracellular protease [Arabidopsis thaliana]<br>gi 22821181 gb AA853826.1  cell division protein isolog [Arabidopsis thaliana]<br>gi 4972089 emb CAB43894.1  cell division protein-like [Arabidopsis thaliana]<br>gi 7269243 emb CAB81312.1  cell division protein-like [Arabidopsis thaliana]<br>gi 332659430 gb AEE84830.1  FtsH extracellular protease [Arabidopsis thaliana] | 601  | 602  | 0        | 100.2 | 93.0 | 95.2 | auxin response factor 9-1              | gbpln | Brassica rapa        | AT4G23980.2   Symbols:   ARF9   auxin response factor 9   chr4:12451592-12454737 FORWARD LENGTH=636                                            | 601  | 636  | 0        | 105.8 | 84.2 | 91.2 |
| Rsa1.0_00697.1.g18196.t1 | gi 4972089 emb CAB43894.1  cell division protein-like [Arabidopsis thaliana]<br>gi 7269243 emb CAB81312.1  cell division protein-like [Arabidopsis thaliana]<br>gi 332659430 gb AEE84830.1  FtsH extracellular protease [Arabidopsis thaliana]                                                                                                                                                                                                                                        | 1514 | 946  | 0        | 62.5  | 52.6 | 55.4 | FtsH extracellular protease            | gbpln | Arabidopsis thaliana | AT4G23940.1   Symbols:   FtsH extracellular protease family   chr4:12437108-12441841 FORWARD LENGTH=946                                        | 1514 | 946  | 0        | 62.5  | 52.6 | 55.4 |
| Rsa1.0_00697.1.g18197.t1 | gb EOA17481.1  hypothetical protein CARUB_v10005808mg [Capsella rubella]                                                                                                                                                                                                                                                                                                                                                                                                              | 197  | 191  | 9.00E-78 | 97.0  | 75.1 | 86.3 | hypothetical protein CARUB_v10005808mg | gbpln | Capsella rubella     | AT4G23930.1   Symbols:   Late embryogenesis abundant (LEA) hydroxyproline-rich glycoprotein family   chr4:12436131-12436694 REVERSE LENGTH=187 | 197  | 187  | 2.00E-76 | 94.9  | 75.1 | 84.8 |

|                          |                                                                                                                                                                                                                                                                                                                                                                                                                                                                                                                                                                                                                                                                                                                                                                 |     |     |           |       |      |      |                                             |       |                      |                                                                                                                                                                                                                                                                                                                                                                                                                                                                                                                                                                              |     |     |           |       |      |      |
|--------------------------|-----------------------------------------------------------------------------------------------------------------------------------------------------------------------------------------------------------------------------------------------------------------------------------------------------------------------------------------------------------------------------------------------------------------------------------------------------------------------------------------------------------------------------------------------------------------------------------------------------------------------------------------------------------------------------------------------------------------------------------------------------------------|-----|-----|-----------|-------|------|------|---------------------------------------------|-------|----------------------|------------------------------------------------------------------------------------------------------------------------------------------------------------------------------------------------------------------------------------------------------------------------------------------------------------------------------------------------------------------------------------------------------------------------------------------------------------------------------------------------------------------------------------------------------------------------------|-----|-----|-----------|-------|------|------|
| Rsa1.0_00697.1.g18198.t1 | ref XP_002869754.1  UDP-D-glucose/UDP-D-galactose 4-epimerase 2 [Arabidopsis lyrata subsp. lyrata] gi 297315590 gb EFH46013.1  UDP-D-glucose/UDP-D-galactose 4-epimerase 2 [Arabidopsis lyrata subsp. lyrata]                                                                                                                                                                                                                                                                                                                                                                                                                                                                                                                                                   | 339 | 350 | 0         | 103.2 | 92.6 | 95.0 | UDP-D-glucose/UDP-D-galactose 4-epimerase 2 | gbpln | Arabidopsis lyrata   | AT4G23920.1   Symbols: UGE2, ATUGE2   UDP-D-glucose/UDP-D-galactose 4-epimerase 2   chr4:12431416-12433666 FORWARD LENGTH=350                                                                                                                                                                                                                                                                                                                                                                                                                                                | 339 | 350 | 0         | 103.2 | 91.7 | 94.7 |
| Rsa1.0_00697.1.g18199.t4 | dbj BAE99702.1  hypothetical protein [Arabidopsis thaliana]                                                                                                                                                                                                                                                                                                                                                                                                                                                                                                                                                                                                                                                                                                     | 334 | 138 | 3.00E-36  | 41.3  | 26.0 | 30.8 | hypothetical protein                        | gbpln | Arabidopsis thaliana | AT4G23910.2   Symbols:   unknown protein; FUNCTIONS IN: molecular_function unknown; INVOLVED IN: biological_process unknown; LOCATED IN: cellular_component unknown; EXPRESSED IN: 21 plant structures; EXPRESSED DURING: 13 growth stages; BEST Arabidopsis thaliana protein match is: unknown protein (TAIRAT4G10970.4).   chr4:12427055-12429287 FORWARD LENGTH=198                                                                                                                                                                                                       | 334 | 198 | 2.00E-38  | 59.3  | 25.1 | 29.6 |
| Rsa1.0_00697.1.g18200.t1 | ref NP_567690.1  nucleoside diphosphate kinase IV [Arabidopsis thaliana] gi 45477149 sp Q8LAH8.2 NDK4_ARATH RecName: Full=Nucleoside diphosphate kinase IV, chloroplastic/mitochondrial; Short=NDK IV; Short=NDP kinase IV; Short=NDPK IV; AltName: Full=Nucleoside diphosphate kinase 4; Flags: Precursor gi 4972094 emb CAB43890.1  hypothetical protein [Arabidopsis thaliana] gi 7269239 emb CAB81308.1  hypothetical protein [Arabidopsis thaliana] gi 11990430 dbj BAB19789.1  nucleoside diphosphate kinase 4 [Arabidopsis thaliana] gi 26450853 dbj BAC42534.1  unknown protein [Arabidopsis thaliana] gi 105829682 gb ABF74700.1  At4g23900 [Arabidopsis thaliana] gi 332659424 gb AEE84824.1  nucleoside diphosphate kinase IV [Arabidopsis thaliana] | 319 | 237 | 1.00E-119 | 74.3  | 65.2 | 69.3 | nucleoside diphosphate kinase IV            | gbpln | Arabidopsis thaliana | AT4G23900.1   Symbols:   Nucleoside diphosphate kinase family protein   chr4:12424505-12426318 FORWARD LENGTH=237                                                                                                                                                                                                                                                                                                                                                                                                                                                            | 319 | 237 | 1.00E-121 | 74.3  | 65.2 | 69.3 |
| Rsa1.0_00697.1.g18201.t1 | gb EOA18489.1  hypothetical protein CARUB_v100057040mg [Capsella rubella]                                                                                                                                                                                                                                                                                                                                                                                                                                                                                                                                                                                                                                                                                       | 245 | 248 | 1.00E-106 | 101.2 | 85.3 | 91.4 | hypothetical protein CARUB_v10007040mg      | gbpln | Capsella rubella     | AT4G23890.1   Symbols:   unknown protein; FUNCTIONS IN: molecular_function unknown; INVOLVED IN: biological_process unknown; LOCATED IN: chloroplast_thylakoid membrane, chloroplast; EXPRESSED IN: 22 plant structures; EXPRESSED DURING: 13 growth stages; CONTAINS InterPro DOMAIN/s: Protein of unknown function DUF3252 (InterPro:IPRO21659); Has 287 Blast hits to 287 proteins in 81 species: Archae - 0; Bacteria - 118; Metazoa - 12; Fungi - 6; Plants - 40; Viruses - 0; Other Eukaryotes - 111 (source: NCBI BLINK).   chr4:12420593-12421345 REVERSE LENGTH=250 | 245 | 250 | 1.00E-108 | 102.0 | 83.7 | 90.2 |
| Rsa1.0_00697.1.g18202.t1 | ref XP_002869758.1  hypothetical protein ARALYDRAFT_914208 [Arabidopsis lyrata subsp. lyrata] gi 297315594 gb EFH46017.1  hypothetical protein ARALYDRAFT_914208 [Arabidopsis lyrata subsp. lyrata]                                                                                                                                                                                                                                                                                                                                                                                                                                                                                                                                                             | 75  | 76  | 5.00E-27  | 101.3 | 85.3 | 88.0 | hypothetical protein ARALYDRAFT_914208      | gbpln | Arabidopsis lyrata   | AT4G23885.1   Symbols:   unknown protein; BEST Arabidopsis thaliana protein match is: unknown protein (TAIR:AT5G24165.1); Has 30201 Blast hits to 17322 proteins in 780 species: Archae - 12; Bacteria - 1396; Metazoa - 17338; Fungi - 3422; Plants - 5037; Viruses - 0; Other Eukaryotes - 2996 (source: NCBI BLINK).   chr4:12419472-12420240 FORWARD LENGTH=77                                                                                                                                                                                                           | 75  | 77  | 2.00E-28  | 102.7 | 85.3 | 86.7 |
| Rsa1.0_00697.1.g18203.t1 | gb EOA17457.1  hypothetical protein CARUB_v10005780mg [Capsella rubella]                                                                                                                                                                                                                                                                                                                                                                                                                                                                                                                                                                                                                                                                                        | 174 | 197 | 7.00E-57  | 113.2 | 69.5 | 82.2 | hypothetical protein CARUB_v10005780mg      | gbpln | Capsella rubella     | AT4G23880.1   Symbols:   unknown protein; Has 73 Blast hits to 69 proteins in 22 species: Archae - 0; Bacteria - 4; Metazoa - 9; Fungi - 2; Plants - 18; Viruses - 0; Other Eukaryotes - 40 (source: NCBI BLINK).   chr4:12415789-12416388 REVERSE LENGTH=199                                                                                                                                                                                                                                                                                                                | 174 | 199 | 7.00E-56  | 114.4 | 70.1 | 82.2 |



|                          |                                                                                                                                                                                                                                                                                                                                                                                                                                                                                                             |      |      |           |       |      |      |                                                     |             |                      |                                                                                                                                               |      |      |           |       |      |      |
|--------------------------|-------------------------------------------------------------------------------------------------------------------------------------------------------------------------------------------------------------------------------------------------------------------------------------------------------------------------------------------------------------------------------------------------------------------------------------------------------------------------------------------------------------|------|------|-----------|-------|------|------|-----------------------------------------------------|-------------|----------------------|-----------------------------------------------------------------------------------------------------------------------------------------------|------|------|-----------|-------|------|------|
| Rsa1.0_00698.1.g18219.t1 | ref NP_199069.1  5'-3' exoribonuclease 2 [Arabidopsis thaliana]<br>gi 75262831 sp Q9FQ02.1 XRN2_ARATH<br>RecName: Full=5'-3' exoribonuclease 2;<br>AltName: Full=Protein EXORIBONUCLEASE 2<br>gi 11875630 gb AA040733.1 AF286720.1<br>XRN2 [Arabidopsis thaliana]<br>gi 51970342 dbj BAD43863.1  unnamed protein product [Arabidopsis thaliana]<br>gi 62319144 dbj BAD94308.1  5'-3' exoribonuclease 2 [Arabidopsis thaliana]<br>gi 332007441 gb AED94824.1  5'-3' exoribonuclease 2 [Arabidopsis thaliana] | 995  | 1012 | 0         | 101.7 | 71.6 | 83.3 | 5'-3' exoribonuclease 2                             | gbpln       | Arabidopsis thaliana | AT5G42540.1   Symbols: XRN2, AtXRN2   exoribonuclease 2   chr5:17007513-17014534<br>FORWARD LENGTH=1012                                       | 995  | 1012 | 0         | 101.7 | 71.6 | 83.3 |
| Rsa1.0_00698.1.g18220.t3 | dbj BAB01349.1  En/Spm-like transposon protein-like [Arabidopsis thaliana]                                                                                                                                                                                                                                                                                                                                                                                                                                  | 1050 | 714  | 9.00E-61  | 68.0  | 11.5 | 15.7 | En/Spm-like transposon protein-like                 | gbpln       | Arabidopsis thaliana | AT2G06420.1   Symbols:   Domain of unknown function (DUF1985)   chr2:2539083-2539985 FORWARD LENGTH=249                                       | 1050 | 249  | 2.00E-26  | 23.7  | 6.6  | 10.2 |
| Rsa1.0_00698.1.g18221.t1 | #                                                                                                                                                                                                                                                                                                                                                                                                                                                                                                           | #    | #    | #         | #     | #    | #    | -                                                   | ----        | ----                 | #                                                                                                                                             | #    | #    | #         | #     | #    | #    |
| Rsa1.0_00698.1.g18222.t1 | dbj BAB01350.1  Mutator-like transposase [Arabidopsis thaliana]                                                                                                                                                                                                                                                                                                                                                                                                                                             | 581  | 811  | 1.00E-124 | 139.6 | 39.4 | 52.7 | Mutator-like transposase                            | gbpln       | Arabidopsis thaliana | AT1G64260.1   Symbols:   MuDR family transposase   chr1:23847756-23849915 FORWARD LENGTH=719                                                  | 581  | 719  | 5.00E-17  | 123.8 | 17.7 | 33.6 |
| Rsa1.0_00698.1.g18223.t1 | gb EOA13585.1  hypothetical protein CARUB_v10026651mg, partial [Capsella rubella]                                                                                                                                                                                                                                                                                                                                                                                                                           | 290  | 361  | 1.00E-137 | 124.5 | 87.2 | 92.1 | hypothetical protein CARUB_v10026651mg, partial     | gbpln       | Capsella rubella     | AT5G42560.1   Symbols:   Abscisic acid-responsive (TBZ/DP1, HVA22) family protein   chr5:17015573-17016969 FORWARD LENGTH=296                 | 290  | 296  | 1.00E-133 | 102.1 | 85.2 | 90.0 |
| Rsa1.0_00699.1.g18224.t2 | ref XP_002887324.1  hypothetical protein ARALYDRAFT_476197 [Arabidopsis lyrata subsp. lyrata]<br>gi 297333165 gb EFH63583.1 <br>hypothetical protein ARALYDRAFT_476197 [Arabidopsis lyrata subsp. lyrata]                                                                                                                                                                                                                                                                                                   | 199  | 300  | 1.00E-68  | 150.8 | 74.4 | 82.9 | hypothetical protein ARALYDRAFT_476197              | gbpln       | Arabidopsis lyrata   | AT1G0690.1   Symbols: HW1, PDLP5   Receptor-like protein kinase-related family protein   chr1:26652099-26653381 FORWARD LENGTH=299            | 199  | 299  | 1.00E-69  | 150.3 | 72.9 | 81.9 |
| Rsa1.0_00699.1.g18225.t1 | ref NP_177227.5  protein TIFY 7 [Arabidopsis thaliana]<br>gi 342187044 sp Q8W4J8.2 TIF7_ARATH<br>RecName: Full=Protein TIFY 7;<br>AltName: Full=Jasmonate ZIM domain-containing protein 9<br>gi 332196980 gb AEE35101.1  protein TIFY 7 [Arabidopsis thaliana]                                                                                                                                                                                                                                              | 266  | 267  | 3.00E-90  | 100.4 | 69.2 | 78.2 | protein TIFY 7                                      | gbpln       | Arabidopsis thaliana | AT1G0700.1   Symbols: JAZ9, TIFY7   TIFY domain/Divergent CCT motif family protein   chr1:26654951-26656804 FORWARD LENGTH=267                | 266  | 267  | 9.00E-93  | 100.4 | 69.2 | 78.2 |
| Rsa1.0_00699.1.g18226.t1 | gb EOA35078.1  hypothetical protein CARUB_v10020190mg [Capsella rubella]                                                                                                                                                                                                                                                                                                                                                                                                                                    | 496  | 492  | 0         | 99.2  | 92.7 | 96.8 | hypothetical protein CARUB_v10020190mg              | gbpln       | Capsella rubella     | AT1G07010.1   Symbols: ATGH9B1, CEL1, GH9B1   glycosyl hydrolase 9B1   chr1:26659356-26662962 REVERSE LENGTH=492                              | 496  | 492  | 0         | 99.2  | 91.3 | 95.8 |
| Rsa1.0_00699.1.g18227.t1 | gb AAC33226.1  putative non-LTR retroelement reverse transcriptase [Arabidopsis thaliana]                                                                                                                                                                                                                                                                                                                                                                                                                   | 1656 | 1529 | 0         | 92.3  | 46.9 | 64.4 | putative non-LTR retroelement reverse transcriptase | gbpln       | Arabidopsis thaliana | AT3G24255.1   Symbols:   RNA-directed DNA polymerase (reverse transcriptase)-related family protein   chr3:8789471-8793208 FORWARD LENGTH=746 | 1656 | 746  | 1.00E-138 | 45.0  | 14.1 | 18.6 |
| Rsa1.0_00699.1.g18228.t1 | ref NP_177231.2  protein kinase domain-containing protein [Arabidopsis thaliana]<br>gi 193870477 gb ACF22895.1 <br>At1g70740 [Arabidopsis thaliana]<br>gi 332196987 gb AEE35108.1  protein kinase domain-containing protein [Arabidopsis thaliana]                                                                                                                                                                                                                                                          | 600  | 425  | 0         | 70.8  | 61.7 | 66.5 | protein kinase domain-containing protein            | gbpln       | Arabidopsis thaliana | AT1G07040.1   Symbols:   Protein kinase superfamily protein   chr1:26673847-26675687 REVERSE LENGTH=425                                       | 600  | 425  | 0         | 70.8  | 61.7 | 66.5 |
| Rsa1.0_00699.1.g18229.t1 | ref XP_002888793.1  hypothetical protein ARALYDRAFT_894893 [Arabidopsis lyrata subsp. lyrata]<br>gi 297334634 gb EFH65052.1 <br>hypothetical protein ARALYDRAFT_894893 [Arabidopsis lyrata subsp. lyrata]                                                                                                                                                                                                                                                                                                   | 878  | 758  | 1.00E-159 | 86.3  | 38.5 | 42.9 | hypothetical protein ARALYDRAFT_894893              | gbpln       | Arabidopsis lyrata   | AT1G07050.1   Symbols:   Protein of unknown function, DUF593   chr1:26680728-26683147 REVERSE LENGTH=749                                      | 878  | 749  | 1.00E-160 | 85.3  | 37.7 | 42.8 |
| Rsa1.0_00699.1.g18230.t1 | #                                                                                                                                                                                                                                                                                                                                                                                                                                                                                                           | #    | #    | #         | #     | #    | #    | -                                                   | ----        | ----                 | #                                                                                                                                             | #    | #    | #         | #     | #    | #    |
| Rsa1.0_00699.1.g18231.t2 | #                                                                                                                                                                                                                                                                                                                                                                                                                                                                                                           | #    | #    | #         | #     | #    | #    | -                                                   | ----        | ----                 | #                                                                                                                                             | #    | #    | #         | #     | #    | #    |
| Rsa1.0_00699.1.g18232.t1 | gb ACG25170.1  hypothetical protein [Zea mays]                                                                                                                                                                                                                                                                                                                                                                                                                                                              | 98   | 192  | 2.00E-26  | 195.9 | 68.4 | 71.4 | hypothetical protein                                | gbenv/gbpln | Zea mays             | AT1G07060.1   Symbols: CRR23   inorganic carbon transport protein-related   chr1:26687267-26688201 FORWARD LENGTH=191                         | 98   | 191  | 2.00E-24  | 194.9 | 60.2 | 65.3 |

|                          |                                                                                                                                                                                                                                                                                                                                                                                                                                                                                                                                                                                                                        |      |      |           |       |      |      |                                                   |       |                      |   |   |   |   |   |   |   |   |   |                                                                                                                                                                                                                                                                                                                                                                                                                                                                                                                                                                                            |      |      |           |       |      |      |   |
|--------------------------|------------------------------------------------------------------------------------------------------------------------------------------------------------------------------------------------------------------------------------------------------------------------------------------------------------------------------------------------------------------------------------------------------------------------------------------------------------------------------------------------------------------------------------------------------------------------------------------------------------------------|------|------|-----------|-------|------|------|---------------------------------------------------|-------|----------------------|---|---|---|---|---|---|---|---|---|--------------------------------------------------------------------------------------------------------------------------------------------------------------------------------------------------------------------------------------------------------------------------------------------------------------------------------------------------------------------------------------------------------------------------------------------------------------------------------------------------------------------------------------------------------------------------------------------|------|------|-----------|-------|------|------|---|
| Rsa1.0_00699.1.g18233.t4 | dbj BAJ34604.1  unnamed protein product [Theilungiella halophila]                                                                                                                                                                                                                                                                                                                                                                                                                                                                                                                                                      | 130  | 141  | 3.00E-60  | 108.5 | 92.3 | 93.8 | unnamed protein product                           | ----  | ----                 |   |   |   |   |   |   |   |   |   | AT1G70780.1   Symbols:   unknown protein; FUNCTIONS IN: molecular_function unknown; INVOLVED IN: biological_process unknown; LOCATED IN: mitochondrion; EXPRESSED IN: sperm cell, male gametophyte, pollen tube; EXPRESSED DURING: L mature pollen stage, M germinated pollen stage; BEST Arabidopsis thaliana protein match is: unknown protein (TAIR:AT1G23150.1); Has 143 Blast hits to 143 proteins in 17 species: Archae - 0; Bacteria - 0; Metazoa - 0; Fungi - 0; Plants - 143; Viruses - 0; Other Eukaryotes - 0 (source: NCBI BLink).   chr1:26695462-26695975 REVERSE LENGTH=140 | 130  | 140  | 2.00E-61  | 107.7 | 90.0 | 93.8 |   |
| Rsa1.0_00699.1.g18234.t1 | gb EOA34244.1  hypothetical protein CARUB_v10021755mg [Capsella rubella]                                                                                                                                                                                                                                                                                                                                                                                                                                                                                                                                               | 165  | 159  | 3.00E-60  | 96.4  | 69.1 | 92.4 | hypothetical protein CARUB_v10021755mg            | gbpln | Capsella rubella     |   |   |   |   |   |   |   |   |   | AT1G70880.1   Symbols:   Polyketide cyclase/dehydrase and lipid transport superfamily protein   chr1:26723086-26723717 REVERSE LENGTH=159                                                                                                                                                                                                                                                                                                                                                                                                                                                  | 165  | 159  | 1.00E-58  | 96.4  | 65.5 | 78.8 |   |
| Rsa1.0_00699.1.g18235.t1 | ref NP_001077806.1  MLP-like protein 28 [Arabidopsis thaliana]<br>gi 332197002 gb AEE35123.1  MLP-like protein 28 [Arabidopsis thaliana]                                                                                                                                                                                                                                                                                                                                                                                                                                                                               | 158  | 201  | 1.00E-57  | 127.2 | 64.6 | 81.6 | MLP-like protein 28                               | gbpln | Arabidopsis thaliana |   |   |   |   |   |   |   |   |   | AT1G70830.3   Symbols: MLP28   MLP-like protein 28   chr1:26710203-26711395 REVERSE LENGTH=201                                                                                                                                                                                                                                                                                                                                                                                                                                                                                             | 158  | 201  | 3.00E-60  | 127.2 | 64.6 | 81.6 |   |
| Rsa1.0_00699.1.g18236.t1 | #                                                                                                                                                                                                                                                                                                                                                                                                                                                                                                                                                                                                                      | #    | #    | #         | #     | #    | #    | -                                                 | ----  | ----                 | # | # | # | # | # | # | # | # | # |                                                                                                                                                                                                                                                                                                                                                                                                                                                                                                                                                                                            | #    | #    | #         | #     | #    | #    | # |
| Rsa1.0_00699.1.g18237.t1 | ref NP_565004.1  protein CLAVATA3/ESR-related 17 [Arabidopsis thaliana]<br>gi 145327213 ref NP_001077808.1  protein CLAVATA3/ESR-related 17 [Arabidopsis thaliana]<br>gi 75154575 sp Q8L9H6.1 CLE17_ARAT H RecName: Full=CLAVATA3/ESR (CLE)-related protein 17; Contains: RecName: Full=CLE17p; Flags: Precursor: gi 21618200 gb AAM67250.1  unknown [Arabidopsis thaliana]<br>gi 88900320 gb ABD57472.1  At1g70895 [Arabidopsis thaliana]<br>gi 332197014 gb AEE35135.1  protein CLAVATA3/ESR-related 17 [Arabidopsis thaliana]<br>gi 332197015 gb AEE35136.1  protein CLAVATA3/ESR-related 17 [Arabidopsis thaliana] | 64   | 99   | 1.00E-10  | 154.7 | 64.1 | 73.4 | protein CLAVATA3/ESR-related 17                   | gbpln | Arabidopsis thaliana |   |   |   |   |   |   |   |   |   | AT1G70895.2   Symbols: CLE17   CLAVATA3/ESR-RELATED 17   chr1:26728170-26728469 FORWARD LENGTH=99                                                                                                                                                                                                                                                                                                                                                                                                                                                                                          | 64   | 99   | 2.00E-13  | 154.7 | 64.1 | 73.4 |   |
| Rsa1.0_00699.1.g18238.t1 | gb EOA35647.1  hypothetical protein CARUB_v10020864mg [Capsella rubella]                                                                                                                                                                                                                                                                                                                                                                                                                                                                                                                                               | 244  | 244  | 1.00E-133 | 100.0 | 93.4 | 96.7 | hypothetical protein CARUB_v10020864mg            | gbpln | Capsella rubella     |   |   |   |   |   |   |   |   |   | AT1G70900.1   Symbols:   unknown protein; BEST Arabidopsis thaliana protein match is: unknown protein (TAIR:AT1G23110.4); Has 57 Blast hits to 57 proteins in 14 species: Archae - 0; Bacteria - 0; Metazoa - 0; Fungi - 0; Plants - 57; Viruses - 0; Other Eukaryotes - 0 (source: NCBI BLink).   chr1:26732456-26733637 FORWARD LENGTH=244                                                                                                                                                                                                                                               | 244  | 244  | 1.00E-134 | 100.0 | 91.8 | 96.3 |   |
| Rsa1.0_00699.1.g18239.t1 | #                                                                                                                                                                                                                                                                                                                                                                                                                                                                                                                                                                                                                      | #    | #    | #         | #     | #    | #    | -                                                 | ----  | ----                 | # | # | # | # | # | # | # | # | # |                                                                                                                                                                                                                                                                                                                                                                                                                                                                                                                                                                                            | #    | #    | #         | #     | #    | #    |   |
| Rsa1.0_00699.1.g18240.t1 | gb AAG51783.1 AC079679.3 reverse transcriptase, putative: 16838-20266 [Arabidopsis thaliana]                                                                                                                                                                                                                                                                                                                                                                                                                                                                                                                           | 224  | 1142 | 6.00E-41  | 509.8 | 41.1 | 53.1 | reverse transcriptase, putative: 16838-20266      | gbpln | Arabidopsis thaliana |   |   |   |   |   |   |   |   |   | AT2G34320.1   Symbols:   Polynucleotidyl transferase, ribonuclease H-like superfamily protein   chr2:14484959-14485837 FORWARD LENGTH=292                                                                                                                                                                                                                                                                                                                                                                                                                                                  | 224  | 292  | 3.00E-13  | 130.4 | 22.3 | 35.3 |   |
| Rsa1.0_00699.1.g18241.t1 | emb CAC67688.1  efflux carrier, pin3 [Brassica juncea]                                                                                                                                                                                                                                                                                                                                                                                                                                                                                                                                                                 | 628  | 635  | 0         | 101.1 | 97.6 | 98.6 | efflux carrier, pin3                              | gbpln | Brassica juncea      |   |   |   |   |   |   |   |   |   | AT1G70940.1   Symbols: PIN3, ATPIN3   Auxin efflux carrier family protein   chr1:26743170-26745871 FORWARD LENGTH=640                                                                                                                                                                                                                                                                                                                                                                                                                                                                      | 628  | 640  | 0         | 101.9 | 92.0 | 96.2 |   |
| Rsa1.0_00699.1.g18242.t3 | ref NP_177251.2  TPX2 (targeting protein for Xklp2) protein family [Arabidopsis thaliana]<br>gi 151971395 dbj BAD44362.1  At1g70950 [Arabidopsis thaliana]<br>gi 332197022 gb AEE35143.1  TPX2 (targeting protein for Xklp2) protein family [Arabidopsis thaliana]                                                                                                                                                                                                                                                                                                                                                     | 495  | 478  | 1.00E-173 | 96.6  | 67.7 | 77.2 | TPX2 (targeting protein for Xklp2) protein family | gbpln | Arabidopsis thaliana |   |   |   |   |   |   |   |   |   | AT1G70950.1   Symbols:   TPX2 (targeting protein for Xklp2) protein family   chr1:26752779-26755242 FORWARD LENGTH=478                                                                                                                                                                                                                                                                                                                                                                                                                                                                     | 495  | 478  | 1.00E-176 | 96.6  | 67.7 | 77.2 |   |
| Rsa1.0_00699.1.g18243.t1 | dbj BAA97287.1  retroelement pol polyprotein-like [Arabidopsis thaliana]                                                                                                                                                                                                                                                                                                                                                                                                                                                                                                                                               | 1478 | 1491 | 0         | 100.9 | 56.4 | 71.5 | retroelement pol polyprotein-like                 | gbpln | Arabidopsis thaliana |   |   |   |   |   |   |   |   |   | AT4G23160.1   Symbols: CRK8   cysteine-rich RLK (RECEPTOR-like protein kinase) 8   chr4:12129485-12134086 FORWARD LENGTH=1262                                                                                                                                                                                                                                                                                                                                                                                                                                                              | 1478 | 1262 | 1.00E-140 | 85.4  | 17.3 | 25.0 |   |
| Rsa1.0_00699.1.g18244.t1 | ref XP_002890553.1  hypothetical protein ARALYDRAFT.472555 [Arabidopsis lyrata subsp. lyrata]<br>gi 297336395 gb EFH66812.1  hypothetical protein ARALYDRAFT.472555 [Arabidopsis lyrata subsp. lyrata]                                                                                                                                                                                                                                                                                                                                                                                                                 | 103  | 158  | 1.00E-18  | 153.4 | 52.4 | 63.1 | hypothetical protein ARALYDRAFT.472555            | gbpln | Arabidopsis lyrata   |   |   |   |   |   |   |   |   |   | AT1G70985.1   Symbols:   hydroxyproline-rich glycoprotein family protein   chr1:26764774-26765181 REVERSE LENGTH=135                                                                                                                                                                                                                                                                                                                                                                                                                                                                       | 103  | 135  | 3.00E-17  | 131.1 | 52.4 | 60.2 |   |

|                          |                                                                                                                                                                                                                                                                                                                                                                                                                                                                                                                                                                                                                                                                                             |     |      |           |       |      |      |                                                         |       |                      |                                                                                                                                                                                                                                                                                                                                                                                                                                                                                                                                    |     |     |           |       |      |      |
|--------------------------|---------------------------------------------------------------------------------------------------------------------------------------------------------------------------------------------------------------------------------------------------------------------------------------------------------------------------------------------------------------------------------------------------------------------------------------------------------------------------------------------------------------------------------------------------------------------------------------------------------------------------------------------------------------------------------------------|-----|------|-----------|-------|------|------|---------------------------------------------------------|-------|----------------------|------------------------------------------------------------------------------------------------------------------------------------------------------------------------------------------------------------------------------------------------------------------------------------------------------------------------------------------------------------------------------------------------------------------------------------------------------------------------------------------------------------------------------------|-----|-----|-----------|-------|------|------|
| Rsa1.0.00700.1.g18245.t1 | ref NP_564930.1  uncharacterized protein [Arabidopsis thaliana] gi 6714347 gb AAF26038.1 AC015986.1 unknown protein; 9003-8083 [Arabidopsis thaliana] gi 16648773 gb AAL25577.1  At1g68440/T2E12.1 [Arabidopsis thaliana] gi 21592921 gb AAM64871.1  unknown [Arabidopsis thaliana] gi 21700823 gb AAM70535.1  At1g68440/T2E12.1 [Arabidopsis thaliana] gi 332196673 gb AEE34794.1  uncharacterized protein AT1G68440 [Arabidopsis thaliana]                                                                                                                                                                                                                                                | 303 | 306  | 2.00E-99  | 101.0 | 72.6 | 84.5 | uncharacterized protein                                 | gbpln | Arabidopsis thaliana | AT1G68440.1   Symbols:   unknown protein; BEST Arabidopsis thaliana protein match is: unknown protein (TAIR:AT1G25400.2); Has 86 Blast hits to 86 proteins in 29 species: Archae - 0; Bacteria - 6; Metazoa - 27; Fungi - 11; Plants - 24; Viruses - 0; Other Eukaryotes - 18 (source: NCBI BLink).   chr1:25658115-25659035 FORWARD LENGTH=306                                                                                                                                                                                    | 303 | 306 | 1.00E-102 | 101.0 | 72.6 | 84.5 |
| Rsa1.0.00700.1.g18246.t1 | ref NP_177014.1  Exostosin family protein [Arabidopsis thaliana] gi 12324886 gb AAG52396.1 AC011915.10 hypothetical protein; 19613-17891 [Arabidopsis thaliana] gi 332196676 gb AEE34797.1  Exostosin family protein [Arabidopsis thaliana] dbj BAB09379.1  non-LTR retroelement reverse transcriptase-like protein [Arabidopsis thaliana]                                                                                                                                                                                                                                                                                                                                                  | 466 | 455  | 0         | 97.6  | 82.6 | 89.9 | Exostosin family protein                                | gbpln | Arabidopsis thaliana | AT1G68470.1   Symbols:   Exostosin family protein   chr1:25676545-25678267 REVERSE LENGTH=455                                                                                                                                                                                                                                                                                                                                                                                                                                      | 466 | 455 | 0         | 97.6  | 82.6 | 89.9 |
| Rsa1.0.00700.1.g18247.t1 | ref XP_002888667.1  hypothetical protein ARALYDRAFT.475967 [Arabidopsis lyrata subsp. lyrata] gi 297334508 gb EFH64926.1  hypothetical protein ARALYDRAFT.475967 [Arabidopsis lyrata subsp. lyrata]                                                                                                                                                                                                                                                                                                                                                                                                                                                                                         | 843 | 1223 | 1.00E-149 | 145.1 | 37.7 | 54.9 | non-LTR retroelement reverse transcriptase-like protein | gbpln | Arabidopsis thaliana | AT1G43760.1   Symbols:   DNase I-like superfamily protein   chr1:16528880-16531065 REVERSE LENGTH=626                                                                                                                                                                                                                                                                                                                                                                                                                              | 843 | 626 | 1.00E-32  | 74.3  | 8.4  | 14.7 |
| Rsa1.0.00700.1.g18248.t1 | ref XP_002888667.1  hypothetical protein ARALYDRAFT.475967 [Arabidopsis lyrata subsp. lyrata] gi 297334508 gb EFH64926.1  hypothetical protein ARALYDRAFT.475967 [Arabidopsis lyrata subsp. lyrata]                                                                                                                                                                                                                                                                                                                                                                                                                                                                                         | 217 | 253  | 9.00E-78  | 116.6 | 79.3 | 83.9 | hypothetical protein ARALYDRAFT.475967                  | gbpln | Arabidopsis lyrata   | AT1G68480.1   Symbols: JAG   C2H2 and C2HC zinc fingers superfamily protein   chr1:25684543-25685932 REVERSE LENGTH=253                                                                                                                                                                                                                                                                                                                                                                                                            | 217 | 253 | 3.00E-78  | 116.6 | 77.0 | 82.9 |
| Rsa1.0.00700.1.g18249.t1 | #                                                                                                                                                                                                                                                                                                                                                                                                                                                                                                                                                                                                                                                                                           | #   | #    | #         | #     | #    | #    | -                                                       | ----  | ----                 | #                                                                                                                                                                                                                                                                                                                                                                                                                                                                                                                                  | #   | #   | #         | #     | #    |      |
| Rsa1.0.00700.1.g18250.t1 | ref NP_564931.1  uncharacterized protein [Arabidopsis thaliana] gi 12324888 gb AAG52398.1 AC011915.12 unknown protein; 35272-36292 [Arabidopsis thaliana] gi 21593205 gb AAM65154.1  unknown [Arabidopsis thaliana] gi 29028824 gb AA064791.1  At1g68490 [Arabidopsis thaliana] gi 110736380 dbj BAF00159.1  hypothetical protein [Arabidopsis thaliana] gi 332196678 gb AEE34799.1  uncharacterized protein AT1G68490 [Arabidopsis thaliana]                                                                                                                                                                                                                                               | 163 | 183  | 9.00E-60  | 112.3 | 79.8 | 88.3 | uncharacterized protein                                 | gbpln | Arabidopsis thaliana | AT1G68490.1   Symbols:   unknown protein; FUNCTIONS IN: molecular_function unknown; INVOLVED IN: biological_process unknown; LOCATED IN: chloroplast; EXPRESSED IN: 22 plant structures; EXPRESSED DURING: 13 growth stages; BEST Arabidopsis thaliana protein match is: unknown protein (TAIR:AT1G13390.2); Has 125 Blast hits to 125 proteins in 18 species: Archae - 0; Bacteria - 0; Metazoa - 0; Fungi - 0; Plants - 125; Viruses - 0; Other Eukaryotes - 0 (source: NCBI BLink).   chr1:25693926-25694946 FORWARD LENGTH=183 | 163 | 183 | 3.00E-62  | 112.3 | 79.8 | 88.3 |
| Rsa1.0.00700.1.g18251.t1 | #                                                                                                                                                                                                                                                                                                                                                                                                                                                                                                                                                                                                                                                                                           | #   | #    | #         | #     | #    | #    | -                                                       | ----  | ----                 | #                                                                                                                                                                                                                                                                                                                                                                                                                                                                                                                                  | #   | #   | #         | #     | #    |      |
| Rsa1.0.00700.1.g18252.t1 | #                                                                                                                                                                                                                                                                                                                                                                                                                                                                                                                                                                                                                                                                                           | #   | #    | #         | #     | #    | #    | -                                                       | ----  | ----                 | #                                                                                                                                                                                                                                                                                                                                                                                                                                                                                                                                  | #   | #   | #         | #     | #    |      |
| Rsa1.0.00700.1.g18253.t1 | ref NP_177017.2  uncharacterized protein [Arabidopsis thaliana] gi 28393283 gb AAO42069.1  unknown protein [Arabidopsis thaliana] gi 28973117 gb AA063883.1  unknown protein [Arabidopsis thaliana] gi 332196679 gb AEE34800.1  uncharacterized protein AT1G68500 [Arabidopsis thaliana] ref NP_188829.1  putative cysteine-rich repeat secretory protein 17 [Arabidopsis thaliana] gi 75273781 sp G9LRM2.1 ORR17_ARAT H RecName: Full=Putative cysteine-rich repeat secretory protein 17; Flags: Precursor gi 9279742 dbj BAB01368.1  unnamed protein product [Arabidopsis thaliana] gi 332643044 gb AEE76965.1  putative cysteine-rich repeat secretory protein 17 [Arabidopsis thaliana] | 87  | 93   | 2.00E-19  | 106.9 | 72.4 | 83.9 | uncharacterized protein                                 | gbpln | Arabidopsis thaliana | AT1G68500.1   Symbols:   unknown protein; BEST Arabidopsis thaliana protein match is: unknown protein (TAIR:AT1G25422.1); Has 16 Blast hits to 16 proteins in 6 species: Archae - 0; Bacteria - 0; Metazoa - 0; Fungi - 0; Plants - 16; Viruses - 0; Other Eukaryotes - 0 (source: NCBI BLink).   chr1:25702041-25702322 FORWARD LENGTH=93                                                                                                                                                                                         | 87  | 93  | 3.00E-22  | 106.9 | 72.4 | 83.9 |
| Rsa1.0.00701.1.g18254.t1 | ref NP_188829.1  putative cysteine-rich repeat secretory protein 17 [Arabidopsis thaliana] gi 75273781 sp G9LRM2.1 ORR17_ARAT H RecName: Full=Putative cysteine-rich repeat secretory protein 17; Flags: Precursor gi 9279742 dbj BAB01368.1  unnamed protein product [Arabidopsis thaliana] gi 332643044 gb AEE76965.1  putative cysteine-rich repeat secretory protein 17 [Arabidopsis thaliana]                                                                                                                                                                                                                                                                                          | 206 | 278  | 5.00E-30  | 135.0 | 32.0 | 41.3 | putative cysteine-rich repeat secretory protein 17      | gbpln | Arabidopsis thaliana | AT3G21910.1   Symbols:   Domain of unknown function (DUF26)   chr3:7717372-7718405 FORWARD LENGTH=278                                                                                                                                                                                                                                                                                                                                                                                                                              | 206 | 278 | 2.00E-32  | 135.0 | 32.0 | 41.3 |
| Rsa1.0.00701.1.g18255.t1 | gb EOA32183.1  hypothetical protein CARUB_v10015439mg [Capsella rubella]                                                                                                                                                                                                                                                                                                                                                                                                                                                                                                                                                                                                                    | 269 | 278  | 6.00E-70  | 103.3 | 52.4 | 70.3 | hypothetical protein CARUB_v10015439mg                  | gbpln | Capsella rubella     | AT3G21910.1   Symbols:   Domain of unknown function (DUF26)   chr3:7717372-7718405 FORWARD LENGTH=278                                                                                                                                                                                                                                                                                                                                                                                                                              | 269 | 278 | 2.00E-72  | 103.3 | 50.6 | 69.9 |

|                          |                                                                                                                                                                                                                                                                                                                                                                                                                                                                                                                                                                                                                                               |     |      |           |       |      |      |                                                          |       |                      |                                                                                                                                 |     |     |           |       |      |      |
|--------------------------|-----------------------------------------------------------------------------------------------------------------------------------------------------------------------------------------------------------------------------------------------------------------------------------------------------------------------------------------------------------------------------------------------------------------------------------------------------------------------------------------------------------------------------------------------------------------------------------------------------------------------------------------------|-----|------|-----------|-------|------|------|----------------------------------------------------------|-------|----------------------|---------------------------------------------------------------------------------------------------------------------------------|-----|-----|-----------|-------|------|------|
| Rsa1.0_00701.1.g18256.t1 | ref[XP_002885475.1] zinc finger (B-box type) family protein [Arabidopsis lyrata subsp. lyrata]<br>gi 297835188 ref[XP_002885476.1] zinc finger (B-box type) family protein [Arabidopsis lyrata subsp. lyrata]<br>gi 297331315 gb EFH61734.1  zinc finger (B-box type) family protein [Arabidopsis lyrata subsp. lyrata]<br>gi 297331316 gb EFH61735.1  zinc finger (B-box type) family protein [Arabidopsis lyrata subsp. lyrata]<br>ref[XP_002883322.1] zinc finger (B-box type) family protein [Arabidopsis lyrata subsp. lyrata]<br>gi 297329162 gb EFH59581.1  zinc finger (B-box type) family protein [Arabidopsis lyrata subsp. lyrata] | 199 | 123  | 7.00E-43  | 61.8  | 46.7 | 52.8 | zinc finger (B-box type) family protein                  | gbpln | Arabidopsis lyrata   | AT3G21890.1   Symbols:   B-box type zinc finger family protein   chr3:7709298-7709663 REVERSE LENGTH=121                        | 199 | 121 | 4.00E-44  | 60.8  | 45.2 | 51.3 |
| Rsa1.0_00701.1.g18257.t1 | ref[XP_002883322.1] zinc finger (B-box type) family protein [Arabidopsis lyrata subsp. lyrata]<br>gi 297329162 gb EFH59581.1  zinc finger (B-box type) family protein [Arabidopsis lyrata subsp. lyrata]<br>ref[XP_002885473.1] hypothetical protein ARALYDRAFT_479706 [Arabidopsis lyrata subsp. lyrata]<br>gi 297331313 gb EFH61732.1  hypothetical protein ARALYDRAFT_479706 [Arabidopsis lyrata subsp. lyrata]                                                                                                                                                                                                                            | 386 | 377  | 1.00E-156 | 97.7  | 72.5 | 79.8 | zinc finger (B-box type) family protein                  | gbpln | Arabidopsis lyrata   | AT3G21880.1   Symbols:   B-box type zinc finger protein with CCT domain   chr3:7706748-7708093 FORWARD LENGTH=364               | 386 | 364 | 1.00E-152 | 94.3  | 69.4 | 78.5 |
| Rsa1.0_00701.1.g18258.t1 | ref[XP_002885473.1] hypothetical protein ARALYDRAFT_479706 [Arabidopsis lyrata subsp. lyrata]<br>gi 297331313 gb EFH61732.1  hypothetical protein ARALYDRAFT_479706 [Arabidopsis lyrata subsp. lyrata]                                                                                                                                                                                                                                                                                                                                                                                                                                        | 254 | 282  | 1.00E-99  | 111.0 | 83.1 | 87.0 | hypothetical protein ARALYDRAFT_479706                   | gbpln | Arabidopsis lyrata   | AT3G21865.1   Symbols: PEX22   peroxin 22   chr3:7701308-7703218 REVERSE LENGTH=283                                             | 254 | 283 | 1.00E-100 | 111.4 | 81.1 | 86.6 |
| Rsa1.0_00701.1.g18259.t1 | #                                                                                                                                                                                                                                                                                                                                                                                                                                                                                                                                                                                                                                             | #   | #    | #         | #     | #    | #    | -                                                        | ----  | ----                 | #                                                                                                                               | #   | #   | #         | #     | #    |      |
| Rsa1.0_00701.1.g18260.t3 | ref[XP_002883320.1] hypothetical protein ARALYDRAFT_898633 [Arabidopsis lyrata subsp. lyrata]<br>gi 297329160 gb EFH59579.1  hypothetical protein ARALYDRAFT_898633 [Arabidopsis lyrata subsp. lyrata]<br>ref[XP_002885466.1] UDP-glucuronosyl/UDP-glucosyl transferase family protein [Arabidopsis lyrata subsp. lyrata]<br>gi 297331306 gb EFH61725.1  UDP-glucuronosyl/UDP-glucosyl transferase family protein [Arabidopsis lyrata subsp. lyrata]                                                                                                                                                                                          | 484 | 436  | 1.00E-111 | 90.1  | 53.3 | 62.2 | hypothetical protein ARALYDRAFT_898633                   | gbpln | Arabidopsis lyrata   | AT3G21810.1   Symbols:   Zinc finger C-x8-C-x5-C-x3-H type family protein   chr3:7684852-7688360 FORWARD LENGTH=437             | 484 | 437 | 1.00E-109 | 90.3  | 51.4 | 59.1 |
| Rsa1.0_00701.1.g18261.t1 | ref[XP_002885466.1] UDP-glucuronosyl/UDP-glucosyl transferase family protein [Arabidopsis lyrata subsp. lyrata]<br>gi 297331306 gb EFH61725.1  UDP-glucuronosyl/UDP-glucosyl transferase family protein [Arabidopsis lyrata subsp. lyrata]                                                                                                                                                                                                                                                                                                                                                                                                    | 496 | 494  | 0         | 99.6  | 70.6 | 83.5 | UDP-glucuronosyl/UDP-glucosyl transferase family protein | gbpln | Arabidopsis lyrata   | AT3G21790.1   Symbols:   UDP-Glycosyltransferase superfamily protein   chr3:7676927-7678414 REVERSE LENGTH=495                  | 496 | 495 | 0         | 99.8  | 67.9 | 82.1 |
| Rsa1.0_00701.1.g18262.t1 | gb ACT35472.1  peroxidase 30, partial [Brassica rapa]                                                                                                                                                                                                                                                                                                                                                                                                                                                                                                                                                                                         | 329 | 354  | 1.00E-172 | 107.6 | 89.4 | 93.6 | peroxidase 30, partial                                   | gbpln | Brassica rapa        | AT3G21770.1   Symbols:   Peroxidase superfamily protein   chr3:7673345-7674661 FORWARD LENGTH=329                               | 329 | 329 | 1.00E-173 | 100.0 | 88.4 | 93.3 |
| Rsa1.0_00701.1.g18263.t1 | ref[XP_002883317.1] UDP-glucuronosyl/UDP-glucosyl transferase family protein [Arabidopsis lyrata subsp. lyrata]<br>gi 297329157 gb EFH59576.1  UDP-glucuronosyl/UDP-glucosyl transferase family protein [Arabidopsis lyrata subsp. lyrata]                                                                                                                                                                                                                                                                                                                                                                                                    | 467 | 485  | 0         | 103.9 | 69.8 | 82.2 | UDP-glucuronosyl/UDP-glucosyl transferase family protein | gbpln | Arabidopsis lyrata   | AT3G21760.1   Symbols: HYR1   UDP-Glycosyltransferase superfamily protein   chr3:7667099-7668556 FORWARD LENGTH=485             | 467 | 485 | 0         | 103.9 | 68.7 | 81.8 |
| Rsa1.0_00701.1.g18264.t1 | #                                                                                                                                                                                                                                                                                                                                                                                                                                                                                                                                                                                                                                             | #   | #    | #         | #     | #    | #    | -                                                        | ----  | ----                 | #                                                                                                                               | #   | #   | #         | #     | #    |      |
| Rsa1.0_00702.1.g18265.t1 | gb AAD17398.1  putative non-LTR retroelement reverse transcriptase [Arabidopsis thaliana]<br>ref NP_190493.1  pentatricopeptide repeat-containing protein [Arabidopsis thaliana]<br>gi 75183725 sp Q9M3A8.1 PP273_ARAT H RecName: Full=Pentatricopeptide repeat-containing protein At3g49240; AltName: Full=Protein EMBRYO DEFECTIVE 1796                                                                                                                                                                                                                                                                                                     | 217 | 1225 | 4.00E-54  | 564.5 | 46.5 | 68.2 | putative non-LTR retroelement reverse transcriptase      | gbpln | Arabidopsis thaliana | AT1G43760.1   Symbols:   DNase I-like superfamily protein   chr1:16528880-16531065 REVERSE LENGTH=626                           | 217 | 626 | 2.00E-13  | 288.5 | 17.5 | 30.0 |
| Rsa1.0_00702.1.g18266.t1 | gi 6723394 emb CAB66403.1  putative protein [Arabidopsis thaliana]<br>gi 20466250 gb AAM20442.1  putative protein [Arabidopsis thaliana]<br>gi 31711738 gb AAP68225.1  At3g49240 [Arabidopsis thaliana]<br>gi 58013028 gb AAW62967.1  mitochondrial embryo-defective 1796 [Arabidopsis thaliana]<br>gi 332644993 gb AEE78514.1  pentatricopeptide repeat-containing protein [Arabidopsis thaliana]                                                                                                                                                                                                                                            | 636 | 629  | 0         | 98.9  | 82.7 | 90.3 | pentatricopeptide repeat-containing protein              | gbpln | Arabidopsis thaliana | AT3G49240.1   Symbols: emb1796   Pentatricopeptide repeat (PPR) superfamily protein   chr3:18256086-18257975 FORWARD LENGTH=629 | 636 | 629 | 0         | 98.9  | 82.7 | 90.3 |
| Rsa1.0_00702.1.g18267.t1 | gb EOA25878.1  hypothetical protein CARUB_v10019256mg [Capsella rubella]                                                                                                                                                                                                                                                                                                                                                                                                                                                                                                                                                                      | 503 | 339  | 1.00E-135 | 67.4  | 47.3 | 53.7 | hypothetical protein CARUB_v10019256mg                   | gbpln | Capsella rubella     | AT3G49340.1   Symbols:   Cysteine proteinases superfamily protein   chr3:18293347-18294577 REVERSE LENGTH=341                   | 503 | 341 | 1.00E-136 | 67.8  | 45.5 | 53.1 |
| Rsa1.0_00702.1.g18268.t1 | #                                                                                                                                                                                                                                                                                                                                                                                                                                                                                                                                                                                                                                             | #   | #    | #         | #     | #    | #    | -                                                        | ----  | ----                 | #                                                                                                                               | #   | #   | #         | #     | #    |      |

|                          |                                                                                                                                                                                                                                                                                                                   |      |      |           |       |      |      |                                                                |       |                      |                                                                                                                                                            |      |      |           |       |      |      |
|--------------------------|-------------------------------------------------------------------------------------------------------------------------------------------------------------------------------------------------------------------------------------------------------------------------------------------------------------------|------|------|-----------|-------|------|------|----------------------------------------------------------------|-------|----------------------|------------------------------------------------------------------------------------------------------------------------------------------------------------|------|------|-----------|-------|------|------|
| Rsa1.0_00702.1.g18269.t1 | refNP_190504.2  RabGAP/TBC domain-containing protein [Arabidopsis thaliana] gi 66792662 gb AA556433.1  At3g49350 [Arabidopsis thaliana] gi 110738525 gb BAF01188.1  GTPase activating-like protein [Arabidopsis thaliana] gi 332645010 gb AEE78531.1  RabGAP/TBC domain-containing protein [Arabidopsis thaliana] | 533  | 539  | 0         | 101.1 | 88.7 | 92.7 | RabGAP/TBC domain-containing protein                           | gbpln | Arabidopsis thaliana | AT3G49350.1   Symbols:   Ypt/Rab-GAP domain of gyp1p superfamily protein   chr3:18297663-18299846 REVERSE LENGTH=539                                       | 533  | 539  | 0         | 101.1 | 88.7 | 92.7 |
| Rsa1.0_00702.1.g18270.t1 | #                                                                                                                                                                                                                                                                                                                 | #    | #    | #         | #     | #    | #    | -                                                              | ----  | ----                 | #                                                                                                                                                          | #    | #    | #         | #     | #    |      |
| Rsa1.0_00702.1.g18271.t1 | ref XP_002877669.1  glucosamine/galactosamine-6-phosphate isomerase family protein [Arabidopsis lyrata subsp. lyrata] gi 297323507 gb EFH53928.1  glucosamine/galactosamine-6-phosphate isomerase family protein [Arabidopsis lyrata subsp. lyrata]                                                               | 258  | 259  | 1.00E-137 | 100.4 | 92.2 | 96.1 | glucosamine/galactosamine-6-phosphate isomerase family protein | gbpln | Arabidopsis lyrata   | AT3G49360.1   Symbols: PGL2   6-phosphogluconolactonase 2   chr3:18303189-18304283 REVERSE LENGTH=259                                                      | 258  | 259  | 1.00E-138 | 100.4 | 90.3 | 95.0 |
| Rsa1.0_00703.1.g18272.t1 | gb EOA29772.1  hypothetical protein CARUB_v10012863mg [Capsella rubella]                                                                                                                                                                                                                                          | 298  | 1102 | 1.00E-115 | 369.8 | 67.8 | 70.1 | hypothetical protein CARUB_v10012863mg                         | gbpln | Capsella rubella     | AT3G06480.1   Symbols:   DEAD box RNA helicase family protein   chr3:1985697-1989666 REVERSE LENGTH=1088                                                   | 298  | 1088 | 1.00E-117 | 365.1 | 67.1 | 69.8 |
| Rsa1.0_00703.1.g18273.t4 | gb ADF30185.1  boron transporter [Brassica napus]                                                                                                                                                                                                                                                                 | 780  | 738  | 0         | 94.6  | 91.4 | 93.1 | boron transporter                                              | gbpln | Brassica napus       | AT3G06450.2   Symbols:   HCO3-transporter family   chr3:1976085-1979303 REVERSE LENGTH=732                                                                 | 780  | 732  | 0         | 93.8  | 86.9 | 90.1 |
| Rsa1.0_00703.1.g18274.t1 | ref XP_002884578.1  hypothetical protein ARALYDRAFT_477945 [Arabidopsis lyrata subsp. lyrata] gi 297330418 gb EFH60837.1  hypothetical protein ARALYDRAFT_477945 [Arabidopsis lyrata subsp. lyrata]                                                                                                               | 119  | 119  | 7.00E-59  | 100.0 | 90.8 | 97.5 | hypothetical protein ARALYDRAFT_477945                         | gbpln | Arabidopsis lyrata   | AT3G06420.1   Symbols: ATG8H   Ubiquitin-like superfamily protein   chr3:1955219-1956274 REVERSE LENGTH=119                                                | 119  | 119  | 2.00E-61  | 100.0 | 89.9 | 97.5 |
| Rsa1.0_00703.1.g18275.t2 | gb ADK63414.1  CCH type zinc finger protein [Brassica rapa]                                                                                                                                                                                                                                                       | 620  | 455  | 0         | 73.4  | 62.7 | 65.2 | CCH type zinc finger protein                                   | gbpln | Brassica rapa        | AT3G06410.1   Symbols:   Zinc finger C-x8-C-x5-C-x3-H type family protein   chr3:1947471-1949528 REVERSE LENGTH=462                                        | 620  | 462  | 1.00E-162 | 74.5  | 58.2 | 62.4 |
| Rsa1.0_00703.1.g18276.t1 | ref XP_002884573.1  EMB3004/MEE32 [Arabidopsis lyrata subsp. lyrata] gi 297330413 gb EFH60832.1  EMB3004/MEE32 [Arabidopsis lyrata subsp. lyrata]                                                                                                                                                                 | 541  | 603  | 0         | 111.5 | 85.0 | 91.3 | EMB3004/MEE32                                                  | gbpln | Arabidopsis lyrata   | AT3G06350.1   Symbols: EMB3004, MEE32   dehydroquinase dehydratase, putative / shikimate dehydrogenase, putative   chr3:1924536-1927701 REVERSE LENGTH=603 | 541  | 603  | 0         | 111.5 | 84.5 | 90.6 |
| Rsa1.0_00703.1.g18277.t1 | ref XP_002884572.1  DNAJ heat shock N-terminal domain-containing protein [Arabidopsis lyrata subsp. lyrata] gi 297330412 gb EFH60831.1  DNAJ heat shock N-terminal domain-containing protein [Arabidopsis lyrata subsp. lyrata]                                                                                   | 657  | 671  | 0         | 102.1 | 63.9 | 75.8 | DNAJ heat shock N-terminal domain-containing protein           | gbpln | Arabidopsis lyrata   | AT3G06340.3   Symbols:   DNAJ heat shock N-terminal domain-containing protein   chr3:1920607-1922628 REVERSE LENGTH=673                                    | 657  | 673  | 0         | 102.4 | 65.6 | 77.2 |
| Rsa1.0_00703.1.g18278.t2 | gb EOA30590.1  hypothetical protein CARUB_v10013722mg [Capsella rubella]                                                                                                                                                                                                                                          | 449  | 440  | 0         | 98.0  | 79.3 | 84.0 | hypothetical protein CARUB_v10013722mg                         | gbpln | Capsella rubella     | AT3G06330.1   Symbols:   RING/U-box superfamily protein   chr3:1917334-1919709 FORWARD LENGTH=426                                                          | 449  | 426  | 1.00E-173 | 94.9  | 74.2 | 80.2 |
| Rsa1.0_00703.1.g18279.t1 | gb EOA31003.1  hypothetical protein CARUB_v10014146mg [Capsella rubella]                                                                                                                                                                                                                                          | 300  | 334  | 1.00E-156 | 111.3 | 93.3 | 96.0 | hypothetical protein CARUB_v10014146mg                         | gbpln | Capsella rubella     | AT3G06300.1   Symbols: AT-P4H-2   P4H isoform 2   chr3:1907744-1909675 FORWARD LENGTH=299                                                                  | 300  | 299  | 1.00E-157 | 99.7  | 92.7 | 95.0 |
| Rsa1.0_00703.1.g18280.t1 | ref XP_002884568.1  hypothetical protein ARALYDRAFT_477928 [Arabidopsis lyrata subsp. lyrata] gi 297330408 gb EFH60827.1  hypothetical protein ARALYDRAFT_477928 [Arabidopsis lyrata subsp. lyrata]                                                                                                               | 1649 | 1703 | 0         | 103.3 | 81.0 | 87.8 | hypothetical protein ARALYDRAFT_477928                         | gbpln | Arabidopsis lyrata   | AT3G06290.1   Symbols:   SAC3/GANP/Nin1/mts3/eIF-3 p25 family   chr3:1899123-1897297 REVERSE LENGTH=1697                                                   | 1649 | 1697 | 0         | 102.9 | 79.0 | 86.8 |
| Rsa1.0_00703.1.g18281.t1 | ref XP_002882459.1  hypothetical protein ARALYDRAFT_477927 [Arabidopsis lyrata subsp. lyrata] gi 297328299 gb EFH58718.1  hypothetical protein ARALYDRAFT_477927 [Arabidopsis lyrata subsp. lyrata]                                                                                                               | 352  | 348  | 1.00E-179 | 98.9  | 88.6 | 92.9 | hypothetical protein ARALYDRAFT_477927                         | gbpln | Arabidopsis lyrata   | AT3G06270.1   Symbols:   Protein phosphatase 2C family protein   chr3:1896763-1897887 FORWARD LENGTH=348                                                   | 352  | 348  | 1.00E-180 | 98.9  | 88.1 | 92.3 |
| Rsa1.0_00703.1.g18282.t1 | gb EOA29649.1  hypothetical protein CARUB_v10015151mg [Capsella rubella]                                                                                                                                                                                                                                          | 346  | 351  | 0         | 101.4 | 93.6 | 97.1 | hypothetical protein CARUB_v10015151mg                         | gbpln | Capsella rubella     | AT3G06260.1   Symbols: GATL4   galacturonosyltransferase-like 4   chr3:1893804-1894859 REVERSE LENGTH=351                                                  | 346  | 351  | 0         | 101.4 | 94.2 | 98.0 |
| Rsa1.0_00703.1.g18283.t1 | dbj BAF00918.1  putative reverse transcriptase [Arabidopsis thaliana]                                                                                                                                                                                                                                             | 1079 | 910  | 0         | 84.3  | 38.6 | 49.9 | putative reverse transcriptase                                 | gbpln | Arabidopsis thaliana | AT1G43760.1   Symbols:   DNase I-like superfamily protein   chr1:16528880-16531065 REVERSE LENGTH=626                                                      | 1079 | 626  | 4.00E-91  | 58.0  | 15.5 | 22.2 |
| Rsa1.0_00703.1.g18284.t1 | gb AAF79677.1 AC022314.18 F9C16.26 [Arabidopsis thaliana]                                                                                                                                                                                                                                                         | 511  | 1902 | 4.00E-80  | 372.2 | 28.2 | 37.4 | F9C16.26                                                       | gbpln | Arabidopsis thaliana | AT5G32613.1   Symbols:   Zinc knuckle (CCHC-type) family protein   chr5:12263255-12265041 FORWARD LENGTH=457                                               | 511  | 457  | 2.00E-36  | 89.4  | 17.8 | 23.3 |



|                          |                                                                                                                                                                                                                                                                                          |      |      |           |       |      |      |                                              |       |                      |                                                                                                                                                                                                                                                                                                                                                             |      |      |           |       |      |      |
|--------------------------|------------------------------------------------------------------------------------------------------------------------------------------------------------------------------------------------------------------------------------------------------------------------------------------|------|------|-----------|-------|------|------|----------------------------------------------|-------|----------------------|-------------------------------------------------------------------------------------------------------------------------------------------------------------------------------------------------------------------------------------------------------------------------------------------------------------------------------------------------------------|------|------|-----------|-------|------|------|
| Rsa1.0_00703.1.g18285.t1 | gb EOA17964.1  hypothetical protein CARUB_v10006379mg [Capsella rubella]                                                                                                                                                                                                                 | 393  | 435  | 2.00E-57  | 110.7 | 36.1 | 53.2 | hypothetical protein CARUB_v10006379mg       | gbpln | Capsella rubella     | AT4G30030.1   Symbols:   Eukaryotic aspartyl protease family protein   chr4:14682210-14683464 REVERSE LENGTH=424                                                                                                                                                                                                                                            | 393  | 424  | 8.00E-60  | 107.9 | 36.9 | 52.2 |
| Rsa1.0_00703.1.g18286.t1 | gb AAQ51783.1 AC079679.3 reverse transcriptase, putative; 16838-20266 [Arabidopsis thaliana]                                                                                                                                                                                             | 386  | 1142 | 6.00E-65  | 295.9 | 31.6 | 43.8 | reverse transcriptase, putative; 16838-20266 | gbpln | Arabidopsis thaliana | AT4G29090.1   Symbols:   Ribonuclease H-like superfamily protein   chr4:14333528-14335255 FORWARD LENGTH=575                                                                                                                                                                                                                                                | 386  | 575  | 5.00E-27  | 149.0 | 19.2 | 28.2 |
| Rsa1.0_00703.1.g18287.t1 | dbj BAJ34465.1  unnamed protein product [The lungiella halophila]                                                                                                                                                                                                                        | 118  | 198  | 2.00E-48  | 167.8 | 82.2 | 86.4 | unnamed protein product                      | ----  | ----                 | AT2G34720.1   Symbols: NF-YA4   nuclear factor Y, subunit A4   chr2:14650018-14651255 REVERSE LENGTH=198                                                                                                                                                                                                                                                    | 118  | 198  | 2.00E-50  | 167.8 | 82.2 | 88.1 |
| Rsa1.0_00704.1.g18288.t1 | emb CAB72466.1  putative protein [Arabidopsis thaliana]                                                                                                                                                                                                                                  | 700  | 377  | 1.00E-127 | 53.9  | 33.1 | 37.6 | putative protein                             | gbpln | Arabidopsis thaliana | AT5G27260.1   Symbols:   unknown protein; BEST Arabidopsis thaliana protein match is: unknown protein (TAIR:AT2G29880.1); Has 1807 Blast hits to 1807 proteins in 277 species: Archae - 0; Bacteria - 0; Metazoa - 736; Fungi - 347; Plants - 385; Viruses - 0; Other Eukaryotes - 339 (source: NCBI BLink).   chr5:9603943-9604930 FORWARD LENGTH=303      | 700  | 303  | 4.00E-70  | 43.3  | 21.0 | 27.6 |
| Rsa1.0_00704.1.g18289.t1 | gb AAB87099.1  putative retroelement pol polyprotein [Arabidopsis thaliana]                                                                                                                                                                                                              | 1387 | 1496 | 0         | 107.9 | 53.5 | 66.2 | putative retroelement pol polyprotein        | gbpln | Arabidopsis thaliana | AT4G23160.1   Symbols: CRK8   cysteine-rich RLK (RECEPTOR-like protein kinase) 8   chr4:12129485-12134086 FORWARD LENGTH=1262                                                                                                                                                                                                                               | 1387 | 1262 | 1.00E-134 | 91.0  | 16.1 | 22.5 |
| Rsa1.0_00704.1.g18290.t1 | #                                                                                                                                                                                                                                                                                        | #    | #    | #         | #     | #    | -    | ----                                         | ----  | ----                 | #                                                                                                                                                                                                                                                                                                                                                           | #    | #    | #         | #     | #    | #    |
| Rsa1.0_00704.1.g18291.t1 | ref XP_002874774.1  hypothetical protein ARALYDRAFT_490049 [Arabidopsis lyrata subsp. lyrata] gi 29732061.1 gb EFH51033.1  hypothetical protein ARALYDRAFT_490049 [Arabidopsis lyrata subsp. lyrata]                                                                                     | 161  | 277  | 1.00E-59  | 172.0 | 80.7 | 83.9 | hypothetical protein ARALYDRAFT_490049       | gbpln | Arabidopsis lyrata   | AT4G12450.1   Symbols:   unknown protein; BEST Arabidopsis thaliana protein match is: unknown protein (TAIR:AT4G22560.1); Has 380 Blast hits to 380 proteins in 23 species: Archae - 0; Bacteria - 0; Metazoa - 1; Fungi - 4; Plants - 374; Viruses - 0; Other Eukaryotes - 1 (source: NCBI BLink).   chr4:7385841-7386674 REVERSE LENGTH=277               | 161  | 277  | 1.00E-61  | 172.0 | 82.0 | 85.1 |
| Rsa1.0_00704.1.g18292.t1 | #                                                                                                                                                                                                                                                                                        | #    | #    | #         | #     | #    | -    | ----                                         | ----  | ----                 | #                                                                                                                                                                                                                                                                                                                                                           | #    | #    | #         | #     | #    | #    |
| Rsa1.0_00704.1.g18293.t1 | #                                                                                                                                                                                                                                                                                        | #    | #    | #         | #     | #    | -    | ----                                         | ----  | ----                 | #                                                                                                                                                                                                                                                                                                                                                           | #    | #    | #         | #     | #    | #    |
| Rsa1.0_00704.1.g18294.t1 | #                                                                                                                                                                                                                                                                                        | #    | #    | #         | #     | #    | -    | ----                                         | ----  | ----                 | #                                                                                                                                                                                                                                                                                                                                                           | #    | #    | #         | #     | #    | #    |
| Rsa1.0_00705.1.g18295.t1 | #                                                                                                                                                                                                                                                                                        | #    | #    | #         | #     | #    | -    | ----                                         | ----  | ----                 | #                                                                                                                                                                                                                                                                                                                                                           | #    | #    | #         | #     | #    | #    |
| Rsa1.0_00705.1.g18296.t1 | gb EOA28140.1  hypothetical protein CARUB_v10024329mg [Capsella rubella]                                                                                                                                                                                                                 | 61   | 123  | 2.00E-22  | 201.6 | 90.2 | 95.1 | hypothetical protein CARUB_v10024329mg       | gbpln | Capsella rubella     | AT2G41905.1   Symbols:   BEST Arabidopsis thaliana protein match is: arabinogalactan protein 23 (TAIR:AT3G57690.1); Has 35333 Blast hits to 34131 proteins in 2444 species: Archae - 798; Bacteria - 22429; Metazoa - 974; Fungi - 991; Plants - 531; Viruses - 0; Other Eukaryotes - 9610 (source: NCBI BLink).   chr2:17495766-17495951 FORWARD LENGTH=61 | 61   | 61   | 4.00E-25  | 100.0 | 93.4 | 95.1 |
| Rsa1.0_00705.1.g18297.t1 | dbj BAJ33641.1  unnamed protein product [The lungiella halophila]                                                                                                                                                                                                                        | 165  | 723  | 5.00E-21  | 438.2 | 41.8 | 46.1 | unnamed protein product                      | ----  | ----                 | AT2G41900.1   Symbols:   CCH-type zinc finger protein with ARM repeat domain   chr2:17491352-17493502 FORWARD LENGTH=716                                                                                                                                                                                                                                    | 165  | 716  | 3.00E-23  | 433.9 | 41.8 | 45.5 |
| Rsa1.0_00705.1.g18298.t1 | gb EOA27653.1  hypothetical protein CARUB_v10023800mg [Capsella rubella]                                                                                                                                                                                                                 | 453  | 283  | 1.00E-122 | 62.5  | 53.0 | 54.7 | hypothetical protein CARUB_v10023800mg       | gbpln | Capsella rubella     | AT1G58684.1   Symbols:   Ribosomal protein S5 family protein   chr1:21770021-21771217 REVERSE LENGTH=284                                                                                                                                                                                                                                                    | 453  | 284  | 1.00E-121 | 62.7  | 45.7 | 47.5 |
| Rsa1.0_00705.1.g18299.t1 | gb EOA24665.1  hypothetical protein CARUB_v10017938mg [Capsella rubella]                                                                                                                                                                                                                 | 225  | 242  | 2.00E-31  | 107.6 | 51.6 | 65.8 | hypothetical protein CARUB_v10017938mg       | gbpln | Capsella rubella     | AT3G57440.1   Symbols:   unknown protein; Has 31 Blast hits to 31 proteins in 11 species: Archae - 0; Bacteria - 0; Metazoa - 0; Fungi - 0; Plants - 31; Viruses - 0; Other Eukaryotes - 0 (source: NCBI BLink).   chr3:21258732-21260249 FORWARD LENGTH=241                                                                                                | 225  | 241  | 5.00E-33  | 107.1 | 52.0 | 64.9 |
| Rsa1.0_00705.1.g18300.t1 | ref NP_565960.1  uncharacterized protein [Arabidopsis thaliana] gi 2335100 gb AAC02770.1  expressed protein [Arabidopsis thaliana] gi 15810461 gb AL07118.1  unknown protein [Arabidopsis thaliana] gi 330254936 gb AEC10030.1  uncharacterized protein AT2G41770 [Arabidopsis thaliana] | 756  | 771  | 0         | 102.0 | 89.9 | 95.2 | uncharacterized protein                      | gbpln | Arabidopsis thaliana | AT2G41770.1   Symbols:   Protein of unknown function (DUF288)   chr2:17424549-17427042 REVERSE LENGTH=771                                                                                                                                                                                                                                                   | 756  | 771  | 0         | 102.0 | 89.9 | 95.2 |
| Rsa1.0_00705.1.g18301.t1 | ref XP_002879951.1  hypothetical protein ARALYDRAFT_903515 [Arabidopsis lyrata subsp. lyrata] gi 297325790 gb EFH56210.1  hypothetical protein ARALYDRAFT_903515 [Arabidopsis lyrata subsp. lyrata]                                                                                      | 212  | 221  | 1.00E-109 | 104.2 | 89.2 | 95.8 | hypothetical protein ARALYDRAFT_903515       | gbpln | Arabidopsis lyrata   | AT2G41760.1   Symbols:   unknown protein; CONTAINS InterPro DOMAIN/s: Protein of unknown function WDYHV (InterPro:IPR019161); Has 201 Blast hits to 201 proteins in 90 species: Archae - 0; Bacteria - 2; Metazoa - 132; Fungi - 10; Plants - 30; Viruses - 0; Other Eukaryotes - 27 (source: NCBI BLink).   chr2:17422864-17424255 FORWARD LENGTH=221      | 212  | 221  | 1.00E-110 | 104.2 | 89.6 | 94.8 |

|                          |                                                                                                                                                                                                                                                                                                                                                                                                                                                                                                                                                                                                                                                                                                                                                                                                                                                                                                                                                                                                                                                                                                                                                                                                                                                                                                                                                                                                           |      |      |           |       |      |      |                                        |       |                      |                                                                                                                                                                                                                                                             |      |      |           |       |      |      |
|--------------------------|-----------------------------------------------------------------------------------------------------------------------------------------------------------------------------------------------------------------------------------------------------------------------------------------------------------------------------------------------------------------------------------------------------------------------------------------------------------------------------------------------------------------------------------------------------------------------------------------------------------------------------------------------------------------------------------------------------------------------------------------------------------------------------------------------------------------------------------------------------------------------------------------------------------------------------------------------------------------------------------------------------------------------------------------------------------------------------------------------------------------------------------------------------------------------------------------------------------------------------------------------------------------------------------------------------------------------------------------------------------------------------------------------------------|------|------|-----------|-------|------|------|----------------------------------------|-------|----------------------|-------------------------------------------------------------------------------------------------------------------------------------------------------------------------------------------------------------------------------------------------------------|------|------|-----------|-------|------|------|
| Rsa1.0_00705.1.g18302.t1 | ref NP_565958.1  villin 2 [Arabidopsis thaliana]<br>gi 25091521 sp O81644.2 VIL12_ARATH RecName: Full=Villin-2<br>gi 19310558 gb AAL85012.1  putative villin 2 protein [Arabidopsis thaliana]<br>gi 20196894 gb AAC02774.2  putative villin 2 [Arabidopsis thaliana]<br>gi 22136974 gb AAM91716.1  putative villin 2 protein [Arabidopsis thaliana]<br>gi 110742058 dbj BAE98961.1  putative villin 2 protein [Arabidopsis thaliana]<br>gi 330254933 gb AEC10027.1  villin 2 [Arabidopsis thaliana]<br>ref NP_850354.2  ABC transporter A family member 1 [Arabidopsis thaliana]<br>gi 75327922 sp Q84M24.2 AB1A_ARATH RecName: Full=ABC transporter A family member 1; Short=ABC transporter ABCA.1; Short=AtABCA1; AltName: Full=ABC one homolog protein 1; Short=AtAOH1<br>gi 45504175 dbj BAC75958.2  AtABCA1 [Arabidopsis thaliana]<br>gi 330254923 gb AEC10017.1  ABC transporter A family member 1 [Arabidopsis thaliana]<br>ref NP_181700.1  heat stress transcription factor B-3 [Arabidopsis thaliana]<br>gi 75277249 sp O22230.1 HSFB3_ARATH RecName: Full=Heat stress transcription factor B-3; Short=AtHsfB3; AltName: Full=AtHsf-05<br>gi 2618703 gb AAB84350.1  putative heat shock transcription factor [Arabidopsis thaliana]<br>gi 117958747 gb ABK59681.1  At2g41690 [Arabidopsis thaliana]<br>gi 330254922 gb AEC10016.1  heat stress transcription factor B-3 [Arabidopsis thaliana] | 962  | 976  | 0         | 101.5 | 88.9 | 94.3 | villin 2                               | gbpln | Arabidopsis thaliana | AT2G41740.1   Symbols: VLN2, ATVLN2   villin 2   chr2:17410962-17416878 REVERSE LENGTH=976                                                                                                                                                                  | 962  | 976  | 0         | 101.5 | 88.9 | 94.3 |
| Rsa1.0_00705.1.g18303.t1 | ref NP_850354.2  ABC transporter A family member 1 [Arabidopsis thaliana]<br>gi 75327922 sp Q84M24.2 AB1A_ARATH RecName: Full=ABC transporter A family member 1; Short=ABC transporter ABCA.1; Short=AtABCA1; AltName: Full=ABC one homolog protein 1; Short=AtAOH1<br>gi 45504175 dbj BAC75958.2  AtABCA1 [Arabidopsis thaliana]<br>gi 330254923 gb AEC10017.1  ABC transporter A family member 1 [Arabidopsis thaliana]<br>ref NP_181700.1  heat stress transcription factor B-3 [Arabidopsis thaliana]<br>gi 75277249 sp O22230.1 HSFB3_ARATH RecName: Full=Heat stress transcription factor B-3; Short=AtHsfB3; AltName: Full=AtHsf-05<br>gi 2618703 gb AAB84350.1  putative heat shock transcription factor [Arabidopsis thaliana]<br>gi 117958747 gb ABK59681.1  At2g41690 [Arabidopsis thaliana]<br>gi 330254922 gb AEC10016.1  heat stress transcription factor B-3 [Arabidopsis thaliana]                                                                                                                                                                                                                                                                                                                                                                                                                                                                                                        | 1850 | 1882 | 0         | 101.7 | 90.2 | 94.9 | ABC transporter A family member 1      | gbpln | Arabidopsis thaliana | AT2G41700.1   Symbols: ABCA1, AtABCA1   ATP-binding cassette A1   chr2:17383239-17396110 REVERSE LENGTH=1882                                                                                                                                                | 1850 | 1882 | 0         | 101.7 | 90.2 | 94.9 |
| Rsa1.0_00705.1.g18304.t1 | ref NP_181700.1  heat stress transcription factor B-3 [Arabidopsis thaliana]<br>gi 75277249 sp O22230.1 HSFB3_ARATH RecName: Full=Heat stress transcription factor B-3; Short=AtHsfB3; AltName: Full=AtHsf-05<br>gi 2618703 gb AAB84350.1  putative heat shock transcription factor [Arabidopsis thaliana]<br>gi 117958747 gb ABK59681.1  At2g41690 [Arabidopsis thaliana]<br>gi 330254922 gb AEC10016.1  heat stress transcription factor B-3 [Arabidopsis thaliana]                                                                                                                                                                                                                                                                                                                                                                                                                                                                                                                                                                                                                                                                                                                                                                                                                                                                                                                                     | 317  | 244  | 4.00E-46  | 77.0  | 35.0 | 37.9 | heat stress transcription factor B-3   | gbpln | Arabidopsis thaliana | AT2G41690.1   Symbols: AT-HSFB3, HSFB3   heat shock transcription factor B3   chr2:17381723-17382577 FORWARD LENGTH=244                                                                                                                                     | 317  | 244  | 1.00E-48  | 77.0  | 35.0 | 37.9 |
| Rsa1.0_00705.1.g18305.t1 | gb EOA26894.1  hypothetical protein CARUB_v10022987mg [Capsella rubella]                                                                                                                                                                                                                                                                                                                                                                                                                                                                                                                                                                                                                                                                                                                                                                                                                                                                                                                                                                                                                                                                                                                                                                                                                                                                                                                                  | 549  | 528  | 0         | 96.2  | 87.1 | 89.8 | hypothetical protein CARUB_v10022987mg | gbpln | Capsella rubella     | AT2G41680.1   Symbols: NTRC   NADPH-dependent thioredoxin reductase C   chr2:17376349-17379028 REVERSE LENGTH=529                                                                                                                                           | 549  | 529  | 0         | 96.4  | 86.0 | 89.3 |
| Rsa1.0_00705.1.g18306.t2 | gb AAD28689.1  putative TNP1-like transposon protein [Arabidopsis thaliana]<br>ref XP_002867786.1  plant UBX domain-containing protein 3 [Arabidopsis lyrata subsp. lyrata]<br>gi 297313622 gb EFH44045.1  plant UBX domain-containing protein 3 [Arabidopsis lyrata subsp. lyrata]<br>ref XP_002869839.1  hypothetical protein ARALYDRAFT_492649 [Arabidopsis lyrata subsp. lyrata]<br>gi 297315675 gb EFH46098.1  hypothetical protein ARALYDRAFT_492649 [Arabidopsis lyrata subsp. lyrata]<br>ref XP_002869837.1  hypothetical protein ARALYDRAFT_914405 [Arabidopsis lyrata subsp. lyrata]<br>gi 297315673 gb EFH46096.1  hypothetical protein ARALYDRAFT_914405 [Arabidopsis lyrata subsp. lyrata]<br>ref XP_002869837.1  hypothetical protein ARALYDRAFT_914405 [Arabidopsis lyrata subsp. lyrata]<br>gi 297315673 gb EFH46096.1  hypothetical protein ARALYDRAFT_914405 [Arabidopsis lyrata subsp. lyrata]                                                                                                                                                                                                                                                                                                                                                                                                                                                                                         | 245  | 984  | 3.00E-26  | 401.6 | 24.1 | 33.5 | putative TNP1-like transposon protein  | gbpln | Arabidopsis thaliana | #                                                                                                                                                                                                                                                           | #    | #    | #         | #     | #    | #    |
| Rsa1.0_00706.1.g18307.t2 | ref XP_002867786.1  plant UBX domain-containing protein 3 [Arabidopsis lyrata subsp. lyrata]<br>gi 297313622 gb EFH44045.1  plant UBX domain-containing protein 3 [Arabidopsis lyrata subsp. lyrata]<br>ref XP_002869839.1  hypothetical protein ARALYDRAFT_492649 [Arabidopsis lyrata subsp. lyrata]<br>gi 297315675 gb EFH46098.1  hypothetical protein ARALYDRAFT_492649 [Arabidopsis lyrata subsp. lyrata]<br>ref XP_002869837.1  hypothetical protein ARALYDRAFT_914405 [Arabidopsis lyrata subsp. lyrata]<br>gi 297315673 gb EFH46096.1  hypothetical protein ARALYDRAFT_914405 [Arabidopsis lyrata subsp. lyrata]                                                                                                                                                                                                                                                                                                                                                                                                                                                                                                                                                                                                                                                                                                                                                                                  | 257  | 302  | 1.00E-112 | 117.5 | 85.2 | 89.5 | plant UBX domain-containing protein 3  | gbpln | Arabidopsis lyrata   | AT4G22150.1   Symbols: PUX3   plant UBX domain-containing protein 3   chr4:11731272-11732800 REVERSE LENGTH=367                                                                                                                                             | 257  | 367  | 1.00E-111 | 142.8 | 82.9 | 87.5 |
| Rsa1.0_00706.1.g18308.t1 | ref XP_002869839.1  hypothetical protein ARALYDRAFT_492649 [Arabidopsis lyrata subsp. lyrata]<br>gi 297315675 gb EFH46098.1  hypothetical protein ARALYDRAFT_492649 [Arabidopsis lyrata subsp. lyrata]<br>ref XP_002869837.1  hypothetical protein ARALYDRAFT_914405 [Arabidopsis lyrata subsp. lyrata]<br>gi 297315673 gb EFH46096.1  hypothetical protein ARALYDRAFT_914405 [Arabidopsis lyrata subsp. lyrata]                                                                                                                                                                                                                                                                                                                                                                                                                                                                                                                                                                                                                                                                                                                                                                                                                                                                                                                                                                                          | 133  | 148  | 8.00E-30  | 111.3 | 59.4 | 69.2 | hypothetical protein ARALYDRAFT_492649 | gbpln | Arabidopsis lyrata   | AT4G22160.1   Symbols:   unknown protein; Has 42 Blast hits to 42 proteins in 7 species: Archae - 0; Bacteria - 0; Metazoa - 0; Fungi - 0; Plants - 42; Viruses - 0; Other Eukaryotes - 0 (source: NCBI BLink).   chr4:11733182-11733610 FORWARD LENGTH=142 | 133  | 142  | 4.00E-31  | 106.8 | 57.1 | 68.4 |
| Rsa1.0_00706.1.g18309.t1 | ref XP_002869837.1  hypothetical protein ARALYDRAFT_914405 [Arabidopsis lyrata subsp. lyrata]<br>gi 297315673 gb EFH46096.1  hypothetical protein ARALYDRAFT_914405 [Arabidopsis lyrata subsp. lyrata]<br>ref XP_002869837.1  hypothetical protein ARALYDRAFT_914405 [Arabidopsis lyrata subsp. lyrata]<br>gi 297315673 gb EFH46096.1  hypothetical protein ARALYDRAFT_914405 [Arabidopsis lyrata subsp. lyrata]                                                                                                                                                                                                                                                                                                                                                                                                                                                                                                                                                                                                                                                                                                                                                                                                                                                                                                                                                                                          | 339  | 384  | 1.00E-86  | 113.3 | 57.8 | 71.4 | hypothetical protein ARALYDRAFT_914405 | gbpln | Arabidopsis lyrata   | AT4G22180.1   Symbols:   F-box family protein with a domain of unknown function (DUF295)   chr4:11738574-11739782 FORWARD LENGTH=402                                                                                                                        | 339  | 402  | 3.00E-80  | 118.6 | 53.7 | 67.8 |
| Rsa1.0_00706.1.g18310.t1 | ref XP_002869837.1  hypothetical protein ARALYDRAFT_914405 [Arabidopsis lyrata subsp. lyrata]<br>gi 297315673 gb EFH46096.1  hypothetical protein ARALYDRAFT_914405 [Arabidopsis lyrata subsp. lyrata]                                                                                                                                                                                                                                                                                                                                                                                                                                                                                                                                                                                                                                                                                                                                                                                                                                                                                                                                                                                                                                                                                                                                                                                                    | 388  | 384  | 1.00E-111 | 99.0  | 58.0 | 68.6 | hypothetical protein ARALYDRAFT_914405 | gbpln | Arabidopsis lyrata   | AT4G22170.1   Symbols:   F-box family protein with a domain of unknown function (DUF295)   chr4:11736653-11737744 FORWARD LENGTH=363                                                                                                                        | 388  | 363  | 1.00E-104 | 93.6  | 52.8 | 65.5 |

|                          |                                                                                                                                                                                                                                                                                                                                                                    |     |     |           |       |      |      |                                                                                                                                                              |       |                      |                                                                                                                                                                                                                                                                                                                                |     |     |           |       |      |      |
|--------------------------|--------------------------------------------------------------------------------------------------------------------------------------------------------------------------------------------------------------------------------------------------------------------------------------------------------------------------------------------------------------------|-----|-----|-----------|-------|------|------|--------------------------------------------------------------------------------------------------------------------------------------------------------------|-------|----------------------|--------------------------------------------------------------------------------------------------------------------------------------------------------------------------------------------------------------------------------------------------------------------------------------------------------------------------------|-----|-----|-----------|-------|------|------|
| Rsa1.0_00706.1.g18311.t1 | refNP_567650.2   uncharacterized protein [Arabidopsis thaliana] gi 20466282 gb AAM20458.1   unknown protein [Arabidopsis thaliana] gi 22136352 gb AAM91254.1   unknown protein [Arabidopsis thaliana] gi 332659170 gb AEE84570.1   uncharacterized protein AT4G22190 [Arabidopsis thaliana]                                                                        | 336 | 387 | 1.00E-135 | 115.2 | 82.7 | 89.6 | uncharacterized protein                                                                                                                                      | gbpln | Arabidopsis thaliana | AT4G22190.1   Symbols:   unknown protein; Has 283 Blast hits to 154 proteins in 44 species: Archae - 0; Bacteria - 2; Metazoa - 24; Fungi - 12; Plants - 48; Viruses - 0; Other Eukaryotes - 197 (source: NCBI BLink).   chr4:11742102-11743265 REVERSE LENGTH=387                                                             | 336 | 387 | 1.00E-137 | 115.2 | 82.7 | 89.6 |
| Rsa1.0_00706.1.g18312.t1 | refNP_567651.1   Potassium channel AKT2/3 [Arabidopsis thaliana] gi 44887668 sp Q38898.1 AKT2_ARATH RecName: Full=Potassium channel AKT2/3 gi 1100898 gb AAA97865.1   potassium channel [Arabidopsis thaliana] gi 110739319 dbj BAF01572.1   potassium channel [Arabidopsis thaliana] gi 332659171 gb AEE84571.1   Potassium channel AKT2/3 [Arabidopsis thaliana] | 814 | 802 | 0         | 98.5  | 84.9 | 90.7 | Potassium channel AKT2/3                                                                                                                                     | gbpln | Arabidopsis thaliana | AT4G22200.1   Symbols: AKT2/3, AKT3, AKT2, KT2/3   potassium transport 2/3   chr4:11746666-11750091 REVERSE LENGTH=802                                                                                                                                                                                                         | 814 | 802 | 0         | 98.5  | 84.9 | 90.7 |
| Rsa1.0_00706.1.g18313.t3 | #                                                                                                                                                                                                                                                                                                                                                                  | #   | #   | #         | #     | #    | #    | -                                                                                                                                                            | ----  | ----                 | #                                                                                                                                                                                                                                                                                                                              | #   | #   | #         | #     | #    |      |
| Rsa1.0_00706.1.g18314.t1 | refXP_002867782.1   iron-sulfur cluster assembly complex protein [Arabidopsis lyrata subsp. lyrata] gi 297313618 gb EFH44041.1   iron-sulfur cluster assembly complex protein [Arabidopsis lyrata subsp. lyrata]                                                                                                                                                   | 158 | 167 | 3.00E-86  | 105.7 | 96.2 | 98.7 | iron-sulfur cluster assembly complex protein                                                                                                                 | gbpln | Arabidopsis lyrata   | AT4G22220.1   Symbols: ISU1, ATISU1   SufE/NiFU family protein   chr4:11759444-11760881 REVERSE LENGTH=167                                                                                                                                                                                                                     | 158 | 167 | 3.00E-88  | 105.7 | 95.6 | 98.1 |
| Rsa1.0_00706.1.g18315.t1 | sp Q94KU6.1 PAP2_BRACM RecName: Full=Plastid lipid-associated protein 2, chloroplastic; Flags: Precursor gi 14248556 gb AAK57565.1 AF290567.1 plastid-lipid associated protein PAP2 [Brassica rapa subsp. oleifera]                                                                                                                                                | 317 | 319 | 1.00E-160 | 100.6 | 91.8 | 95.0 | RecName: Full=Plastid lipid-associated protein 2, chloroplastic; Flags: Precursor gi 14248556 gb AAK57565.1 AF290567.1 plastid-lipid associated protein PAP2 | gbpln | Brassica rapa        | AT4G22240.1   Symbols:   Plastid-lipid associated protein PAP / fibrillin family protein   chr4:11766090-11767227 REVERSE LENGTH=310                                                                                                                                                                                           | 317 | 310 | 1.00E-142 | 97.8  | 82.3 | 86.4 |
| Rsa1.0_00706.1.g18316.t1 | refXP_002867780.1   hypothetical protein ARALYDRAFT_492641 [Arabidopsis lyrata subsp. lyrata] gi 297313616 gb EFH44039.1   hypothetical protein ARALYDRAFT_492641 [Arabidopsis lyrata subsp. lyrata]                                                                                                                                                               | 206 | 214 | 4.00E-75  | 103.9 | 76.2 | 83.0 | hypothetical protein ARALYDRAFT_492641                                                                                                                       | gbpln | Arabidopsis lyrata   | AT4G22250.1   Symbols:   RING/U-box superfamily protein   chr4:11767885-11768329 REVERSE LENGTH=214                                                                                                                                                                                                                            | 206 | 214 | 4.00E-77  | 103.9 | 75.7 | 81.6 |
| Rsa1.0_00706.1.g18317.t1 | gb EOA16917.1   hypothetical protein CARUB_v10005140mg [Capsella rubella]                                                                                                                                                                                                                                                                                          | 351 | 353 | 1.00E-169 | 100.6 | 84.3 | 89.7 | hypothetical protein CARUB_v10005140mg                                                                                                                       | gbpln | Capsella rubella     | AT4G22260.1   Symbols: IM, IM1   Alternative oxidase family protein   chr4:11769967-11772350 REVERSE LENGTH=351                                                                                                                                                                                                                | 351 | 351 | 1.00E-166 | 100.0 | 82.6 | 88.6 |
| Rsa1.0_00706.1.g18318.t1 | gb EOA16619.1   hypothetical protein CARUB_v10004790mg [Capsella rubella]                                                                                                                                                                                                                                                                                          | 430 | 444 | 0         | 103.3 | 90.2 | 94.4 | hypothetical protein CARUB_v10004790mg                                                                                                                       | gbpln | Capsella rubella     | AT4G22270.1   Symbols: MRB1, ATMRB1   Protein of unknown function (DUF3537)   chr4:11773396-11775782 FORWARD LENGTH=437                                                                                                                                                                                                        | 430 | 437 | 0         | 101.6 | 88.1 | 93.5 |
| Rsa1.0_00706.1.g18319.t1 | gb EOA16644.1   hypothetical protein CARUB_v10004819mg [Capsella rubella]                                                                                                                                                                                                                                                                                          | 414 | 442 | 0         | 106.8 | 90.3 | 94.2 | hypothetical protein CARUB_v10004819mg                                                                                                                       | gbpln | Capsella rubella     | AT4G22290.1   Symbols:   Ubiquitin-specific protease family C19-related protein   chr4:11783199-11785730 REVERSE LENGTH=445                                                                                                                                                                                                    | 414 | 445 | 0         | 107.5 | 90.1 | 93.7 |
| Rsa1.0_00706.1.g18320.t1 | refXP_002867776.1   hypothetical protein ARALYDRAFT_492635 [Arabidopsis lyrata subsp. lyrata] gi 297313612 gb EFH44035.1   hypothetical protein ARALYDRAFT_492635 [Arabidopsis lyrata subsp. lyrata]                                                                                                                                                               | 212 | 234 | 4.00E-64  | 110.4 | 74.1 | 80.7 | hypothetical protein ARALYDRAFT_492635                                                                                                                       | gbpln | Arabidopsis lyrata   | AT4G22320.2   Symbols:   unknown protein; FUNCTIONS IN: molecular_function unknown; INVOLVED IN: biological_process unknown; EXPRESSED IN: 24 plant structures; EXPRESSED DURING: 14 growth stages; BEST Arabidopsis thaliana protein match is: unknown protein (TAIR:AT5G5210.1).   chr4:11793129-11794596 REVERSE LENGTH=237 | 212 | 237 | 5.00E-63  | 111.8 | 71.7 | 80.7 |
| Rsa1.0_00706.1.g18321.t1 | gb EOA17285.1   hypothetical protein CARUB_v10005555mg [Capsella rubella]                                                                                                                                                                                                                                                                                          | 255 | 255 | 2.33E-156 | 100.0 | 96.9 | 98.8 | hypothetical protein CARUB_v10005555mg                                                                                                                       | gbpln | Capsella rubella     | AT4G22330.1   Symbols: ATCES1   Alkaline phytoceramidase (aPHO)   chr4:11798483-11799549 FORWARD LENGTH=255                                                                                                                                                                                                                    | 255 | 255 | 1.00E-148 | 100.0 | 96.5 | 98.4 |
| Rsa1.0_00706.1.g18322.t1 | refXP_002867775.1   hypothetical protein ARALYDRAFT_492631 [Arabidopsis lyrata subsp. lyrata] gi 297313611 gb EFH44034.1   hypothetical protein ARALYDRAFT_492631 [Arabidopsis lyrata subsp. lyrata]                                                                                                                                                               | 423 | 423 | 0         | 100.0 | 94.1 | 96.9 | hypothetical protein ARALYDRAFT_492631                                                                                                                       | gbpln | Arabidopsis lyrata   | AT4G22340.3   Symbols: CDS2   cytidinediphosphate diacylglycerol synthase 2   chr4:11800150-11802621 REVERSE LENGTH=447                                                                                                                                                                                                        | 423 | 447 | 0         | 105.7 | 93.6 | 96.5 |
| Rsa1.0_00706.1.g18323.t1 | refXP_002867774.1   ubiquitin carboxyl-terminal hydrolase family protein [Arabidopsis lyrata subsp. lyrata] gi 297313610 gb EFH44033.1   ubiquitin carboxyl-terminal hydrolase family protein [Arabidopsis lyrata subsp. lyrata]                                                                                                                                   | 510 | 506 | 0         | 99.2  | 88.8 | 93.1 | ubiquitin carboxyl-terminal hydrolase family protein                                                                                                         | gbpln | Arabidopsis lyrata   | AT4G22350.1   Symbols:   Ubiquitin C-terminal hydrolase superfamily protein   chr4:11804073-11806939 REVERSE LENGTH=510                                                                                                                                                                                                        | 510 | 510 | 0         | 100.0 | 87.8 | 92.4 |

|                          |                                                                                                                                                                                                                                                                                                                                                                                                                                                                                                                      |      |     |           |       |      |       |                                                |       |                      |                                                                                                                                                                                                                                                             |      |     |           |       |      |      |
|--------------------------|----------------------------------------------------------------------------------------------------------------------------------------------------------------------------------------------------------------------------------------------------------------------------------------------------------------------------------------------------------------------------------------------------------------------------------------------------------------------------------------------------------------------|------|-----|-----------|-------|------|-------|------------------------------------------------|-------|----------------------|-------------------------------------------------------------------------------------------------------------------------------------------------------------------------------------------------------------------------------------------------------------|------|-----|-----------|-------|------|------|
| Rsa1.0_00706.1.g18324.t1 | emb[CAA16787.1] hypothetical protein [Arabidopsis thaliana]<br>[g17269083]emb[CAB79192.1] hypothetical protein [Arabidopsis thaliana]                                                                                                                                                                                                                                                                                                                                                                                | 279  | 205 | 4.00E-54  | 73.5  | 45.2 | 52.0  | hypothetical protein                           | gbpln | Arabidopsis thaliana | AT4G22370.1   Symbols:   unknown protein; Has 12 Blast hits to 12 proteins in 6 species: Archae - 0; Bacteria - 0; Metazoa - 0; Fungi - 0; Plants - 12; Viruses - 0; Other Eukaryotes - 0 (source: NCBI BLINK).   chr4:11810169-11810957 REVERSE LENGTH=130 | 279  | 130 | 3.00E-50  | 46.6  | 38.0 | 41.6 |
| Rsa1.0_00706.1.g18325.t1 | gb[ABL97959.1] ribosomal protein L7Ae-like [Brassica rapa]                                                                                                                                                                                                                                                                                                                                                                                                                                                           | 128  | 128 | 2.00E-66  | 100.0 | 98.4 | 100.0 | ribosomal protein L7Ae-like                    | gbpln | Brassica rapa        | AT5G20160.1   Symbols:   Ribosomal protein L7Ae/L30e/S12e/Gadd45 family protein   chr5:6804075-6805102 REVERSE LENGTH=128                                                                                                                                   | 128  | 128 | 1.00E-59  | 100.0 | 95.3 | 97.7 |
| Rsa1.0_00706.1.g18326.t1 | ref[XP_002869826.1] hypothetical protein ARALYDRAFT_914375 [Arabidopsis lyrata subsp. lyrata]<br>[g1297315682]gb[EFH46085.1] hypothetical protein ARALYDRAFT_914375 [Arabidopsis lyrata subsp. lyrata]                                                                                                                                                                                                                                                                                                               | 246  | 246 | 1.00E-137 | 100.0 | 97.2 | 98.4  | hypothetical protein ARALYDRAFT_914375         | gbpln | Arabidopsis lyrata   | AT4G12590.1   Symbols:   Protein of unknown function DUF106, transmembrane   chr4:7451291-7452976 REVERSE LENGTH=246                                                                                                                                        | 246  | 246 | 1.00E-138 | 100.0 | 96.3 | 97.6 |
| Rsa1.0_00706.1.g18327.t1 | sp[Q3EGR3.3]FB305_ARATH RecName: Full=Putative F-box protein At1g53360                                                                                                                                                                                                                                                                                                                                                                                                                                               | 396  | 384 | 3.00E-75  | 97.0  | 44.9 | 59.1  | RecName: Full=Putative F-box protein At1g53360 | ----  | ----                 | AT1G53360.1   Symbols:   F-box associated ubiquitination effector family protein   chr1:19907517-19908548 FORWARD LENGTH=343                                                                                                                                | 396  | 343 | 2.00E-74  | 86.6  | 43.4 | 56.3 |
| Rsa1.0_00706.1.g18328.t1 | emb[CAA16549.1] putative protein [Arabidopsis thaliana]                                                                                                                                                                                                                                                                                                                                                                                                                                                              | 140  | 140 | 2.00E-34  | 100.0 | 55.0 | 77.9  | putative protein                               | gbpln | Arabidopsis thaliana | AT4G22640.1   Symbols:   Bifunctional inhibitor/lipid-transfer protein/seed storage 2S albumin superfamily protein   chr4:11911658-11912008 FORWARD LENGTH=116                                                                                              | 140  | 116 | 1.00E-27  | 82.9  | 43.6 | 62.1 |
| Rsa1.0_00706.1.g18329.t1 | ref[XP_002869813.1] hypothetical protein ARALYDRAFT_492602 [Arabidopsis lyrata subsp. lyrata]<br>[g1297315649]gb[EFH46072.1] hypothetical protein ARALYDRAFT_492602 [Arabidopsis lyrata subsp. lyrata]                                                                                                                                                                                                                                                                                                               | 404  | 425 | 1.00E-134 | 105.2 | 63.6 | 67.8  | hypothetical protein ARALYDRAFT_492602         | gbpln | Arabidopsis lyrata   | AT4G22670.1   Symbols:   AtHip1, HIP1, TPR11   HSP70-interacting protein 1   chr4:11918236-11920671 FORWARD LENGTH=441                                                                                                                                      | 404  | 441 | 1.00E-136 | 109.2 | 63.4 | 67.6 |
| Rsa1.0_00706.1.g18330.t1 | dbj[BAF00918.1] putative reverse transcriptase [Arabidopsis thaliana]                                                                                                                                                                                                                                                                                                                                                                                                                                                | 1557 | 910 | 0         | 58.4  | 29.7 | 41.0  | putative reverse transcriptase                 | gbpln | Arabidopsis thaliana | AT1G43760.1   Symbols:   DNase I-like superfamily protein   chr1:16528880-16531065 REVERSE LENGTH=626                                                                                                                                                       | 1557 | 626 | 1.00E-114 | 40.2  | 12.9 | 19.6 |
| Rsa1.0_00706.1.g18331.t1 | gb[EOA17210.1] hypothetical protein CARUB_v10005483mg [Capsella rubella]                                                                                                                                                                                                                                                                                                                                                                                                                                             | 267  | 271 | 1.00E-121 | 101.5 | 81.3 | 87.6  | hypothetical protein CARUB_v10005483mg         | gbpln | Capsella rubella     | AT4G22680.1   Symbols:   MYB85, AtMYB85   myb domain protein 85   chr4:11922789-11924080 REVERSE LENGTH=266                                                                                                                                                 | 267  | 266 | 1.00E-116 | 99.6  | 79.8 | 88.8 |
| Rsa1.0_00706.1.g18332.t1 | ref[XP_002869812.1] hypothetical protein ARALYDRAFT_354499 [Arabidopsis lyrata subsp. lyrata]<br>[g1297315648]gb[EFH46071.1] hypothetical protein ARALYDRAFT_354499 [Arabidopsis lyrata subsp. lyrata]                                                                                                                                                                                                                                                                                                               | 524  | 524 | 0         | 100.0 | 94.5 | 98.1  | hypothetical protein ARALYDRAFT_354499         | gbpln | Arabidopsis lyrata   | AT4G22690.1   Symbols:   CYP706A1   cytochrome P450, family 706, subfamily A, polypeptide 1   chr4:11929847-11931520 FORWARD LENGTH=557                                                                                                                     | 524  | 557 | 0         | 106.3 | 93.7 | 97.7 |
| Rsa1.0_00706.1.g18333.t1 | ref[XP_002869810.1] glycoprotease M22 family protein [Arabidopsis lyrata subsp. lyrata]<br>[g1297315646]gb[EFH46069.1] glycoprotease M22 family protein [Arabidopsis lyrata subsp. lyrata]                                                                                                                                                                                                                                                                                                                           | 351  | 353 | 0         | 100.6 | 95.7 | 98.3  | glycoprotease M22 family protein               | gbpln | Arabidopsis lyrata   | AT4G22720.2   Symbols:   Actin-like ATPase superfamily protein   chr4:11937467-11938717 FORWARD LENGTH=353                                                                                                                                                  | 351  | 353 | 0         | 100.6 | 94.9 | 98.0 |
| Rsa1.0_00706.1.g18334.t1 | ref[XP_002869809.1] hypothetical protein ARALYDRAFT_492596 [Arabidopsis lyrata subsp. lyrata]<br>[g1297315645]gb[EFH46068.1] hypothetical protein ARALYDRAFT_492596 [Arabidopsis lyrata subsp. lyrata]                                                                                                                                                                                                                                                                                                               | 688  | 687 | 0         | 99.9  | 87.9 | 94.0  | hypothetical protein ARALYDRAFT_492596         | gbpln | Arabidopsis lyrata   | AT4G22730.1   Symbols:   Leucine-rich repeat protein kinase family protein   chr4:11941384-11943696 FORWARD LENGTH=688                                                                                                                                      | 688  | 688 | 0         | 100.0 | 88.7 | 93.5 |
| Rsa1.0_00706.1.g18335.t1 | gb[EOA16462.1] hypothetical protein CARUB_v10004615mg [Capsella rubella]                                                                                                                                                                                                                                                                                                                                                                                                                                             | 472  | 508 | 1.00E-112 | 107.6 | 52.8 | 63.3  | hypothetical protein CARUB_v10004615mg         | gbpln | Capsella rubella     | AT5G46000.1   Symbols:   Mannose-binding lectin superfamily protein   chr5:18654319-18656376 REVERSE LENGTH=396                                                                                                                                             | 472  | 396 | 3.00E-94  | 83.9  | 48.7 | 56.4 |
| Rsa1.0_00706.1.g18336.t1 | ref[NP_567666.1] glycine-rich protein [Arabidopsis thaliana]<br>[g1306859.1] [ref]NP_849421.1] glycine-rich protein [Arabidopsis thaliana]<br>[g115809950]gb[AAL06902.1] AT4g22740/T12H17_130 [Arabidopsis thaliana]<br>[g119347920]gb[AAL85981.1] unknown protein [Arabidopsis thaliana]<br>[g121436279]gb[AAM51278.1] unknown protein [Arabidopsis thaliana]<br>[g1332659246]gb[AEE84646.1] glycine-rich protein [Arabidopsis thaliana]<br>[g1332659247]gb[AEE84647.1] glycine-rich protein [Arabidopsis thaliana] | 618  | 356 | 2.00E-62  | 57.6  | 23.6 | 25.7  | glycine-rich protein                           | gbpln | Arabidopsis thaliana | AT4G22740.2   Symbols:   glycine-rich protein   chr4:11944050-11945565 REVERSE LENGTH=356                                                                                                                                                                   | 618  | 356 | 4.00E-65  | 57.6  | 23.6 | 25.7 |



|                          |                                                                                                                                                                                                                                                                                                                                                                                                                                                                                                                                                                                                                                                                                                                                                                                                                                                                                                                                                                                                                                                                                                                                                                                                      |      |      |           |       |      |      |                                                          |       |                      |                                                                                                                                                                                                                                                                                                                                                                                                                                                          |      |      |           |       |      |      |
|--------------------------|------------------------------------------------------------------------------------------------------------------------------------------------------------------------------------------------------------------------------------------------------------------------------------------------------------------------------------------------------------------------------------------------------------------------------------------------------------------------------------------------------------------------------------------------------------------------------------------------------------------------------------------------------------------------------------------------------------------------------------------------------------------------------------------------------------------------------------------------------------------------------------------------------------------------------------------------------------------------------------------------------------------------------------------------------------------------------------------------------------------------------------------------------------------------------------------------------|------|------|-----------|-------|------|------|----------------------------------------------------------|-------|----------------------|----------------------------------------------------------------------------------------------------------------------------------------------------------------------------------------------------------------------------------------------------------------------------------------------------------------------------------------------------------------------------------------------------------------------------------------------------------|------|------|-----------|-------|------|------|
| Rsa1.0_00706.1.g18349.t1 | refNP_194012.1  putative AT-hook DNA-binding family protein [Arabidopsis thaliana] gi 2827558 emb CAA16566.1  putative DNA binding protein [Arabidopsis thaliana] gi 7269128 emb CAB79236.1  putative DNA binding protein [Arabidopsis thaliana] gi 11073851 dbj BAF01184.1  putative DNA binding protein [Arabidopsis thaliana] gi 119657392 tpd FAA00295.1  TPA: AT-hook motif nuclear localized protein 24 [Arabidopsis thaliana] gi 225898801 dbj BAH30531.1  hypothetical protein [Arabidopsis thaliana] gi 332659260 gb AEE84660.1  putative AT-hook DNA-binding family protein [Arabidopsis thaliana] refNP_181213.1  cytokinin-O-glucosyltransferase 1 [Arabidopsis thaliana] gi 66774040 sp Q9ZQ99.1 U73C1_ARAT H RecName: Full=UDP-glycosyltransferase 73C1; AltName: Full=Cytokinin-O-glucosyltransferase 1; AltName: Full=Zeatin O-glucosyltransferase 1; Short=AtZOG1 gi 4415920 gb AAD20151.1  putative glucosyl transferase [Arabidopsis thaliana] gi 46318041 gb AAS87590.1  zeatin O-glucosyltransferase 1 [Arabidopsis thaliana] gi 111074234 gb ABH04490.1  At2g36750 [Arabidopsis thaliana] gi 330254200 gb AEC09294.1  cytokinin-O-glucosyltransferase 1 [Arabidopsis thaliana] | 326  | 324  | 1.00E-114 | 99.4  | 86.5 | 99.9 | putative AT-hook DNA-binding family protein              | gbpln | Arabidopsis thaliana | AT4G22810.1   Symbols:   Predicted AT-hook DNA-binding family protein   chr4:11984432-11985406 FORWARD LENGTH=324                                                                                                                                                                                                                                                                                                                                        | 326  | 324  | 1.00E-117 | 99.4  | 86.5 | 89.9 |
| Rsa1.0_00707.1.g18350.t1 | refXP_002881468.1  UDP-glucuronosyl/UDP-glucosyl transferase family protein [Arabidopsis lyrata subsp. lyrata] gi 297327307 gb EFH57727.1  UDP-glucuronosyl/UDP-glucosyl transferase family protein [Arabidopsis lyrata subsp. lyrata] refXP_002881469.1  don-glucosyltransferase [Arabidopsis lyrata subsp. lyrata] gi 297327308 gb EFH57728.1  don-glucosyltransferase [Arabidopsis lyrata subsp. lyrata]                                                                                                                                                                                                                                                                                                                                                                                                                                                                                                                                                                                                                                                                                                                                                                                          | 495  | 491  | 0         | 99.2  | 82.4 | 90.7 | cytokinin-O-glucosyltransferase 1                        | gbpln | Arabidopsis thaliana | AT2G36750.1   Symbols: UGT73C1   UDP-glucosyl transferase 73C1   chr2:15410531-15412006 REVERSE LENGTH=491                                                                                                                                                                                                                                                                                                                                               | 495  | 491  | 0         | 99.2  | 82.4 | 90.7 |
| Rsa1.0_00707.1.g18351.t1 | refXP_002881468.1  UDP-glucuronosyl/UDP-glucosyl transferase family protein [Arabidopsis lyrata subsp. lyrata] gi 297327307 gb EFH57727.1  UDP-glucuronosyl/UDP-glucosyl transferase family protein [Arabidopsis lyrata subsp. lyrata] refXP_002881469.1  don-glucosyltransferase [Arabidopsis lyrata subsp. lyrata] gi 297327308 gb EFH57728.1  don-glucosyltransferase [Arabidopsis lyrata subsp. lyrata]                                                                                                                                                                                                                                                                                                                                                                                                                                                                                                                                                                                                                                                                                                                                                                                          | 496  | 496  | 0         | 100.0 | 81.3 | 90.7 | UDP-glucuronosyl/UDP-glucosyl transferase family protein | gbpln | Arabidopsis lyrata   | AT2G36780.1   Symbols:   UDP-Glycosyltransferase superfamily protein   chr2:154117618-154119108 REVERSE LENGTH=496                                                                                                                                                                                                                                                                                                                                       | 496  | 496  | 0         | 100.0 | 82.5 | 90.3 |
| Rsa1.0_00707.1.g18352.t1 | gb EOA26985.1  hypothetical protein CARUB_v10023081mg [Capsella rubella]                                                                                                                                                                                                                                                                                                                                                                                                                                                                                                                                                                                                                                                                                                                                                                                                                                                                                                                                                                                                                                                                                                                             | 497  | 496  | 0         | 99.8  | 83.3 | 91.5 | don-glucosyltransferase                                  | gbpln | Arabidopsis lyrata   | AT2G36800.1   Symbols: DOGT1, UGT73C5   don-glucosyltransferase 1   chr2:15423493-15424980 REVERSE LENGTH=495                                                                                                                                                                                                                                                                                                                                            | 497  | 495  | 0         | 99.6  | 81.9 | 90.3 |
| Rsa1.0_00707.1.g18353.t1 | gb EOA26985.1  hypothetical protein CARUB_v10023081mg [Capsella rubella]                                                                                                                                                                                                                                                                                                                                                                                                                                                                                                                                                                                                                                                                                                                                                                                                                                                                                                                                                                                                                                                                                                                             | 496  | 495  | 0         | 99.8  | 83.1 | 90.9 | hypothetical protein CARUB_v10023081mg                   | gbpln | Capsella rubella     | AT2G36800.1   Symbols: DOGT1, UGT73C5   don-glucosyltransferase 1   chr2:15423493-15424980 REVERSE LENGTH=495                                                                                                                                                                                                                                                                                                                                            | 496  | 495  | 0         | 99.8  | 81.5 | 90.1 |
| Rsa1.0_00707.1.g18354.t1 | gb EOA28137.1  hypothetical protein CARUB_v10024326mg [Capsella rubella]                                                                                                                                                                                                                                                                                                                                                                                                                                                                                                                                                                                                                                                                                                                                                                                                                                                                                                                                                                                                                                                                                                                             | 127  | 124  | 3.00E-60  | 97.6  | 92.1 | 96.1 | hypothetical protein CARUB_v10024326mg                   | gbpln | Capsella rubella     | AT2G36835.1   Symbols:   unknown protein; FUNCTIONS IN: molecular.function unknown; INVOLVED IN: biological.process unknown; LOCATED IN: chloroplast envelope; EXPRESSED IN: 22 plant structures; EXPRESSED DURING: 13 growth stages; Has 26 Blast hits to 26 proteins in 11 species: Archae - 0; Bacteria - 0; Metazoa - 0; Fungi - 0; Plants - 26; Viruses - 0; Other Eukaryotes - 0 (source: NCBI BLink).   chr2:15449839-15451307 REVERSE LENGTH=124 | 127  | 124  | 6.00E-62  | 97.6  | 91.3 | 95.3 |
| Rsa1.0_00707.1.g18355.t1 | gb EOA26452.1  hypothetical protein CARUB_v10022498mg [Capsella rubella]                                                                                                                                                                                                                                                                                                                                                                                                                                                                                                                                                                                                                                                                                                                                                                                                                                                                                                                                                                                                                                                                                                                             | 1930 | 1897 | 0         | 98.3  | 90.3 | 94.2 | hypothetical protein CARUB_v10022498mg                   | gbpln | Capsella rubella     | AT2G36850.1   Symbols: ATGSL08, GSL8, GSL08, ATGSL8, CHOR   glucan synthase-like 8   chr2:15454935-15469666 REVERSE LENGTH=1904                                                                                                                                                                                                                                                                                                                          | 1930 | 1904 | 0         | 98.7  | 90.1 | 94.3 |
| Rsa1.0_00707.1.g18356.t1 | refNP_174450.2  putative copper amine oxidase [Arabidopsis thaliana] gi 332193282 gb AEE31383.1  putative copper amine oxidase [Arabidopsis thaliana]                                                                                                                                                                                                                                                                                                                                                                                                                                                                                                                                                                                                                                                                                                                                                                                                                                                                                                                                                                                                                                                | 156  | 677  | 1.00E-59  | 434.0 | 72.4 | 78.2 | putative copper amine oxidase                            | gbpln | Arabidopsis thaliana | AT1G31690.1   Symbols:   Copper amine oxidase family protein   chr1:11343980-11347767 FORWARD LENGTH=677                                                                                                                                                                                                                                                                                                                                                 | 156  | 677  | 5.00E-62  | 434.0 | 72.4 | 78.2 |

|                          |                                                                                                                                                                                                                                                                                                                                                                                                                                                                                                                                                                                                                                                                                                                     |     |      |           |       |      |      |                                                                                                                                                                                              |       |                      |                                                                                                                                                                                                                                                                                                                                                                                                             |     |     |           |       |      |      |
|--------------------------|---------------------------------------------------------------------------------------------------------------------------------------------------------------------------------------------------------------------------------------------------------------------------------------------------------------------------------------------------------------------------------------------------------------------------------------------------------------------------------------------------------------------------------------------------------------------------------------------------------------------------------------------------------------------------------------------------------------------|-----|------|-----------|-------|------|------|----------------------------------------------------------------------------------------------------------------------------------------------------------------------------------------------|-------|----------------------|-------------------------------------------------------------------------------------------------------------------------------------------------------------------------------------------------------------------------------------------------------------------------------------------------------------------------------------------------------------------------------------------------------------|-----|-----|-----------|-------|------|------|
| Rsa1.0_00707.1.g18357.t1 | ref NP_181224.1  xyloglucan:xyloglucosyl transferase [Arabidopsis thaliana] gi 38605514 sp Q9S5JL9.1 XTH32_ARAT H RecName: Full=Probable xyloglucan endotransglucosylase/hydrolase protein 32; Short=At-XTH32; Short=XTH-32; Flags: Precursor gi 4883603 gb AAD31572.1  xyloglucan endotransglucosylase, putative [Arabidopsis thaliana] gi 15027967 gb AAK76514.1  putative xyloglucan endo-transglucosylase [Arabidopsis thaliana] gi 21595304 gb AAM66089.1  putative xyloglucan endo-transglucosylase [Arabidopsis thaliana] gi 22136872 gb AAM91780.1  putative xyloglucan endo-transglucosylase [Arabidopsis thaliana] gi 330254214 gb AEC09308.1  xyloglucan:xyloglucosyl transferase [Arabidopsis thaliana] | 299 | 299  | 1.00E-167 | 100.0 | 94.6 | 98.0 | xyloglucan:xyloglucosyl transferase                                                                                                                                                          | gbpln | Arabidopsis thaliana | AT2G36870.1   Symbols: XTH32   xyloglucan endotransglucosylase/hydrolase 32   chr2:15472869-15474630 REVERSE LENGTH=299                                                                                                                                                                                                                                                                                     | 299 | 299 | 1.00E-170 | 100.0 | 94.6 | 98.0 |
| Rsa1.0_00707.1.g18358.t1 | #                                                                                                                                                                                                                                                                                                                                                                                                                                                                                                                                                                                                                                                                                                                   | #   | #    | #         | #     | #    | #    | -                                                                                                                                                                                            | ----  | ----                 | #                                                                                                                                                                                                                                                                                                                                                                                                           | #   | #   | #         | #     | #    |      |
| Rsa1.0_00707.1.g18359.t1 | emb CAB39638.1  RNA-directed DNA polymerase-like protein [Arabidopsis thaliana] gi 7267666 emb CAB78094.1  RNA-directed DNA polymerase-like protein [Arabidopsis thaliana]                                                                                                                                                                                                                                                                                                                                                                                                                                                                                                                                          | 900 | 1274 | 0         | 141.6 | 47.0 | 64.8 | RNA-directed DNA polymerase-like protein                                                                                                                                                     | gbpln | Arabidopsis thaliana | AT4G29090.1   Symbols:   Ribonuclease H-like superfamily protein   chr4:14333528-14335255 FORWARD LENGTH=575                                                                                                                                                                                                                                                                                                | 900 | 575 | 1.00E-75  | 63.9  | 19.6 | 30.1 |
| Rsa1.0_00707.1.g18360.t1 | sp P48498.1 METK1_PETHY RecName: Full=S-adenosylmethionine synthase 1; Short=AdoMet synthase 1; AltName: Full=Methionine adenosyltransferase 1; Short=MAT 1 gi 559506 emb CAA57696.1  methionine adenosyltransferase [Petunia x hybrida]                                                                                                                                                                                                                                                                                                                                                                                                                                                                            | 333 | 390  | 1.00E-158 | 117.1 | 89.2 | 94.3 | RecName: Full=S-adenosylmethionine synthase 1; Short=AdoMet synthase 1; AltName: Full=Methionine adenosyltransferase 1; Short=MAT 1 gi 559506 emb CAA57696.1  methionine adenosyltransferase | gbpln | Petunia x            | AT3G17390.1   Symbols: MTO3, SAMS3, MAT4   S-adenosylmethionine synthetase family protein   chr3:5952484-5953665 REVERSE LENGTH=393                                                                                                                                                                                                                                                                         | 333 | 393 | 1.00E-153 | 118.0 | 85.0 | 92.8 |
| Rsa1.0_00707.1.g18361.t1 | ref NP_565853.1  uncharacterized protein [Arabidopsis thaliana] gi 20197943 gb AAM15322.1  Expressed protein [Arabidopsis thaliana] gi 21555809 gb AAM63938.1  unknown [Arabidopsis thaliana] gi 26983960 gb AAN86182.1  unknown protein [Arabidopsis thaliana] gi 330254219 gb AEC09313.1  uncharacterized protein AT2G36885 [Arabidopsis thaliana]                                                                                                                                                                                                                                                                                                                                                                | 256 | 256  | 1.00E-104 | 100.0 | 82.4 | 87.1 | uncharacterized protein                                                                                                                                                                      | gbpln | Arabidopsis thaliana | AT2G36885.1   Symbols:   unknown protein; FUNCTIONS IN: molecular function unknown; LOCATED IN: chloroplast; EXPRESSED IN: 22 plant structures; EXPRESSED DURING: 13 growth stages; Has 172 Blast hits to 172 proteins in 58 species: Archae - 0; Bacteria - 116; Metazoa - 0; Fungi - 0; Plants - 32; Viruses - 0; Other Eukaryotes - 24 (source: NCBI BLINK).   chr2:15482167-15483676 REVERSE LENGTH=256 | 256 | 256 | 1.00E-107 | 100.0 | 82.4 | 87.1 |
| Rsa1.0_00707.1.g18362.t1 | gb EOA27604.1  hypothetical protein CARUB_v10023744mg [Capsella rubella]                                                                                                                                                                                                                                                                                                                                                                                                                                                                                                                                                                                                                                            | 292 | 297  | 1.00E-118 | 101.7 | 82.2 | 86.3 | hypothetical protein CARUB_v10023744mg                                                                                                                                                       | gbpln | Capsella rubella     | AT2G36890.1   Symbols: RAX2, MYB38, ATMYB38, BT1   Duplicated homeodomain-like superfamily protein   chr2:15485821-15487245 FORWARD LENGTH=296                                                                                                                                                                                                                                                              | 292 | 298 | 1.00E-108 | 102.1 | 80.8 | 85.6 |
| Rsa1.0_00707.1.g18363.t1 | ref XP_002881481.1  MEMB11 [Arabidopsis lyrata subsp. lyrata] gi 297327320 gb EFH57740.1  MEMB11 [Arabidopsis lyrata subsp. lyrata]                                                                                                                                                                                                                                                                                                                                                                                                                                                                                                                                                                                 | 226 | 225  | 1.00E-108 | 99.6  | 86.7 | 95.1 | MEMB11                                                                                                                                                                                       | gbpln | Arabidopsis lyrata   | AT2G36900.1   Symbols: MEMB11, ATMEMB11   membrin 1   chr2:15491615-15492587 REVERSE LENGTH=225                                                                                                                                                                                                                                                                                                             | 226 | 225 | 1.00E-110 | 99.6  | 86.7 | 93.8 |
| Rsa1.0_00707.1.g18364.t1 | #                                                                                                                                                                                                                                                                                                                                                                                                                                                                                                                                                                                                                                                                                                                   | #   | #    | #         | #     | #    | #    | -                                                                                                                                                                                            | ----  | ----                 | #                                                                                                                                                                                                                                                                                                                                                                                                           | #   | #   | #         | #     | #    |      |
| Rsa1.0_00707.1.g18365.t1 | gb ABC69917.1  phenylalanine ammonia-lyase [Brassica napus]                                                                                                                                                                                                                                                                                                                                                                                                                                                                                                                                                                                                                                                         | 657 | 719  | 0         | 109.4 | 97.4 | 98.5 | phenylalanine ammonia-lyase                                                                                                                                                                  | gbpln | Brassica napus       | AT2G37040.1   Symbols: PAL1, ATPAL1   PHE ammonia lyase 1   chr2:15557602-15560237 REVERSE LENGTH=725                                                                                                                                                                                                                                                                                                       | 657 | 725 | 0         | 110.4 | 94.5 | 96.7 |
| Rsa1.0_00707.1.g18366.t1 | gb EOA26491.1  hypothetical protein CARUB_v10022540mg [Capsella rubella]                                                                                                                                                                                                                                                                                                                                                                                                                                                                                                                                                                                                                                            | 905 | 1088 | 0         | 120.2 | 86.0 | 92.0 | hypothetical protein CARUB_v10022540mg                                                                                                                                                       | gbpln | Capsella rubella     | AT2G37050.3   Symbols:   Leucine-rich repeat protein kinase family protein   chr2:15569290-15573477 FORWARD LENGTH=934                                                                                                                                                                                                                                                                                      | 905 | 934 | 0         | 103.2 | 86.0 | 91.8 |

|                          |                                                                                                                                                                                                                                                                                                                                                                                                                                                                                                                       |     |     |           |       |       |       |                                                 |       |                      |                                                                                                                                                                                                                                                                                                                                             |     |     |           |       |      |      |
|--------------------------|-----------------------------------------------------------------------------------------------------------------------------------------------------------------------------------------------------------------------------------------------------------------------------------------------------------------------------------------------------------------------------------------------------------------------------------------------------------------------------------------------------------------------|-----|-----|-----------|-------|-------|-------|-------------------------------------------------|-------|----------------------|---------------------------------------------------------------------------------------------------------------------------------------------------------------------------------------------------------------------------------------------------------------------------------------------------------------------------------------------|-----|-----|-----------|-------|------|------|
| Rsa1.0_00707.1.g18367.t1 | ref[NP_181245.1] interactor of constitutive active ROPs 2 [Arabidopsis thaliana]<br>gi 75216208 sp Q9ZQC5.1 ICR2_ARATH<br>RecName: Full=Interactor of constitutive active ROPs 2, chloroplastic; Flags: Precursor<br>gi 4371293 gb AAD18151.1  putative myosin heavy chain [Arabidopsis thaliana] gi 56461746 gb AAV91329.1  At2g37080 [Arabidopsis thaliana] gi 56790246 gb AAW30040.1  At2g37080 [Arabidopsis thaliana] gi 330254255 gb AEC09349.1  interactor of constitutive active ROPs 2 [Arabidopsis thaliana] | 571 | 583 | 0         | 102.1 | 84.6  | 91.9  | interactor of constitutive active ROPs 2        | gbpln | Arabidopsis thaliana | AT2G37080.1   Symbols: RIP3   ROP interactive partner 3   chr2:15581565-15584057 REVERSE LENGTH=583                                                                                                                                                                                                                                         | 571 | 583 | 0         | 102.1 | 84.6 | 91.9 |
| Rsa1.0_00707.1.g18368.t1 | gb EOA29117.1  hypothetical protein CARUB_v10025384mg [Capsella rubella]                                                                                                                                                                                                                                                                                                                                                                                                                                              | 347 | 352 | 0         | 101.4 | 88.2  | 94.5  | hypothetical protein CARUB_v10025384mg          | gbpln | Capsella rubella     | AT2G37090.1   Symbols: IRX9   Nucleotide-diphospho-sugar transferases superfamily protein   chr2:15587671-15589223 REVERSE LENGTH=351                                                                                                                                                                                                       | 347 | 351 | 0         | 101.2 | 87.9 | 94.5 |
| Rsa1.0_00707.1.g18369.t1 | ref[XP_002879651.1] hypothetical protein ARALYDRAFT_482699 [Arabidopsis lyrata subsp. lyrata] gi 297325490 gb EFH55910.1  hypothetical protein ARALYDRAFT_482699 [Arabidopsis lyrata subsp. lyrata]                                                                                                                                                                                                                                                                                                                   | 292 | 295 | 6.00E-75  | 101.0 | 68.5  | 79.1  | hypothetical protein ARALYDRAFT_482699          | gbpln | Arabidopsis lyrata   | AT2G37100.1   Symbols:   protamine P1 family protein   chr2:15591147-15592040 FORWARD LENGTH=297                                                                                                                                                                                                                                            | 292 | 297 | 4.00E-75  | 101.7 | 65.8 | 77.7 |
| Rsa1.0_00707.1.g18370.t1 | dbj BAA92260.1  Plasma membrane aquaporin 2b [Raphanus sativus]                                                                                                                                                                                                                                                                                                                                                                                                                                                       | 283 | 283 | 1.00E-160 | 100.0 | 100.0 | 100.0 | Plasma membrane aquaporin 2b                    | gbpln | Raphanus sativus     | AT2G37170.1   Symbols: PIP2B, PIP2.2   plasma membrane intrinsic protein 2   chr2:15613624-15614791 REVERSE LENGTH=285                                                                                                                                                                                                                      | 283 | 285 | 1.00E-157 | 100.7 | 95.4 | 98.2 |
| Rsa1.0_00707.1.g18371.t1 | dbj BAA92260.1  Plasma membrane aquaporin 2b [Raphanus sativus]                                                                                                                                                                                                                                                                                                                                                                                                                                                       | 285 | 283 | 1.00E-158 | 99.3  | 97.5  | 98.2  | Plasma membrane aquaporin 2b                    | gbpln | Raphanus sativus     | AT2G37170.1   Symbols: PIP2B, PIP2.2   plasma membrane intrinsic protein 2   chr2:15613624-15614791 REVERSE LENGTH=285                                                                                                                                                                                                                      | 285 | 285 | 1.00E-156 | 100.0 | 94.4 | 97.2 |
| Rsa1.0_00707.1.g18372.t3 | gb EOA26421.1  hypothetical protein CARUB_v10024039mg [Capsella rubella]                                                                                                                                                                                                                                                                                                                                                                                                                                              | 446 | 215 | 1.00E-108 | 48.2  | 43.0  | 44.6  | hypothetical protein CARUB_v10024039mg          | gbpln | Capsella rubella     | AT2G37210.1   Symbols:   lysine decarboxylase family protein   chr2:15624253-15626834 REVERSE LENGTH=215                                                                                                                                                                                                                                    | 446 | 215 | 1.00E-110 | 48.2  | 42.6 | 44.2 |
| Rsa1.0_00707.1.g18373.t1 | ref[XP_002881497.1] hypothetical protein ARALYDRAFT_482714 [Arabidopsis lyrata subsp. lyrata] gi 297327336 gb EFH57756.1  hypothetical protein ARALYDRAFT_482714 [Arabidopsis lyrata subsp. lyrata]                                                                                                                                                                                                                                                                                                                   | 279 | 289 | 1.00E-116 | 103.6 | 82.4  | 86.7  | hypothetical protein ARALYDRAFT_482714          | gbpln | Arabidopsis lyrata   | AT2G37220.1   Symbols:   RNA-binding (RRM/RBD/RNP motifs) family protein   chr2:15634980-15636331 REVERSE LENGTH=289                                                                                                                                                                                                                        | 279 | 289 | 1.00E-111 | 103.6 | 78.5 | 84.2 |
| Rsa1.0_00707.1.g18374.t1 | ref[XP_002881499.1] hypothetical protein ARALYDRAFT_482716 [Arabidopsis lyrata subsp. lyrata] gi 297327338 gb EFH57758.1  hypothetical protein ARALYDRAFT_482716 [Arabidopsis lyrata subsp. lyrata]                                                                                                                                                                                                                                                                                                                   | 261 | 248 | 1.00E-117 | 95.0  | 83.9  | 88.5  | hypothetical protein ARALYDRAFT_482716          | gbpln | Arabidopsis lyrata   | AT2G37240.1   Symbols:   Thioredoxin superfamily protein   chr2:15640235-15641720 REVERSE LENGTH=248                                                                                                                                                                                                                                        | 261 | 248 | 1.00E-116 | 95.0  | 79.7 | 82.0 |
| Rsa1.0_00707.1.g18375.t2 | ref[NP_181263.2] WRKY transcription factor 44 [Arabidopsis thaliana] gi 29839696 sp Q9ZUJ0.2 WRK44_ARATH<br>H RecName: Full=WRKY transcription factor 44; AltName: Full=Protein TRANSPARENT TESTA GLABRA 2; AltName: Full=WRKY DNA-binding protein 44<br>gi 154090558 dbj BAF74397.1  WRKY transcription factor [Arabidopsis thaliana] gi 330254279 gb AEC09373.1  WRKY transcription factor 44 [Arabidopsis thaliana]                                                                                                | 410 | 429 | 1.00E-172 | 104.6 | 77.3  | 85.6  | WRKY transcription factor 44                    | gbpln | Arabidopsis thaliana | AT2G37260.1   Symbols: TTG2, ATWRKY44, WRKY44, DSL1   WRKY family transcription factor family protein   chr2:15645277-15646792 FORWARD LENGTH=429                                                                                                                                                                                           | 410 | 429 | 1.00E-175 | 104.6 | 77.3 | 85.6 |
| Rsa1.0_00707.1.g18376.t1 | gb EOA27796.1  hypothetical protein CARUB_v10023948mg, partial [Capsella rubella]                                                                                                                                                                                                                                                                                                                                                                                                                                     | 207 | 241 | 1.00E-115 | 116.4 | 98.1  | 99.0  | hypothetical protein CARUB_v10023948mg, partial | gbpln | Capsella rubella     | AT2G37270.2   Symbols: ATRPS5B, RPS5B   ribosomal protein 5B   chr2:15647883-15649042 REVERSE LENGTH=207                                                                                                                                                                                                                                    | 207 | 207 | 1.00E-117 | 100.0 | 97.1 | 99.0 |
| Rsa1.0_00708.1.g18377.t1 | gb EOA17556.1  hypothetical protein CARUB_v10005915mg [Capsella rubella]                                                                                                                                                                                                                                                                                                                                                                                                                                              | 150 | 162 | 8.00E-55  | 108.0 | 74.7  | 83.3  | hypothetical protein CARUB_v10005915mg          | gbpln | Capsella rubella     | AT4G21745.1   Symbols:   PAK-box/P21-Rho-binding family protein   chr4:11549340-11550415 FORWARD LENGTH=156                                                                                                                                                                                                                                 | 150 | 156 | 4.00E-43  | 104.0 | 59.3 | 66.7 |
| Rsa1.0_00708.1.g18378.t1 | ref[XP_002869843.1] hypothetical protein ARALYDRAFT_354556 [Arabidopsis lyrata subsp. lyrata] gi 297315679 gb EFH46102.1  hypothetical protein ARALYDRAFT_354556 [Arabidopsis lyrata subsp. lyrata]                                                                                                                                                                                                                                                                                                                   | 142 | 504 | 1.00E-50  | 354.9 | 75.4  | 81.7  | hypothetical protein ARALYDRAFT_354556          | gbpln | Arabidopsis lyrata   | AT4G21740.1   Symbols:   unknown protein; BEST Arabidopsis thaliana protein match is: unknown protein (TAIR:AT1G30515.1); Has 20 Blast hits to 20 proteins in 4 species: Archae - 0; Bacteria - 0; Metazoa - 0; Fungi - 0; Plants - 20; Viruses - 0; Other Eukaryotes - 0 (source: NCBI BLINK).   chr4:11545926-11546396 FORWARD LENGTH=156 | 142 | 156 | 3.00E-48  | 109.9 | 75.4 | 79.6 |



|                          |                                                                                                                                                                                                                                                                                                                                                     |      |      |          |       |      |      |                                        |       |                      |                                                                                                                                                                                                                                                                             |      |      |           |        |      |      |
|--------------------------|-----------------------------------------------------------------------------------------------------------------------------------------------------------------------------------------------------------------------------------------------------------------------------------------------------------------------------------------------------|------|------|----------|-------|------|------|----------------------------------------|-------|----------------------|-----------------------------------------------------------------------------------------------------------------------------------------------------------------------------------------------------------------------------------------------------------------------------|------|------|-----------|--------|------|------|
| Rsa1.0_00708.1.g18379.t1 | gb EOA17622.1  hypothetical protein CARUB_v10005987mg [Capsella rubella]                                                                                                                                                                                                                                                                            | 138  | 136  | 3.00E-48 | 98.6  | 82.6 | 89.9 | hypothetical protein CARUB_v10005987mg | gbpln | Capsella rubella     | AT4G21720.1   Symbols:   unknown protein; Has 2692 Blast hits to 975 proteins in 186 species: Archae - 4; Bacteria - 460; Metazoa - 658; Fungi - 93; Plants - 1089; Viruses - 100; Other Eukaryotes - 288 (source: NCBI BLink).   chr4:11542561-11544274 FORWARD LENGTH=139 | 138  | 139  | 1.00E-48  | 100.7  | 79.0 | 88.4 |
| Rsa1.0_00708.1.g18380.t1 | ref XP_002867829.1  hypothetical protein ARALYDRAFT_492703 [Arabidopsis lyrata subsp. lyrata]   gi 297313665 gb EFH44088.1  hypothetical protein ARALYDRAFT_492703 [Arabidopsis lyrata subsp. lyrata]                                                                                                                                               | 1289 | 1188 | 0        | 92.2  | 83.9 | 85.2 | hypothetical protein ARALYDRAFT_492703 | gbpln | Arabidopsis lyrata   | AT4G21710.1   Symbols: NRPB2, EMB1989, RPB2   DNA-directed RNA polymerase family protein   chr4:11535684-11542200 REVERSE LENGTH=1188                                                                                                                                       | 1289 | 1188 | 0         | 92.2   | 83.9 | 85.1 |
| Rsa1.0_00708.1.g18381.t1 | gb EOA16508.1  hypothetical protein CARUB_v10004666mg [Capsella rubella]                                                                                                                                                                                                                                                                            | 515  | 492  | 0        | 95.5  | 77.7 | 86.0 | hypothetical protein CARUB_v10004666mg | gbpln | Capsella rubella     | AT4G21705.1   Symbols:   Tetratricopeptide repeat (TPR)-like superfamily protein   chr4:11533257-11534817 REVERSE LENGTH=492                                                                                                                                                | 515  | 492  | 0         | 95.5   | 77.3 | 86.0 |
| Rsa1.0_00708.1.g18382.t1 | gb EOA16294.1  hypothetical protein CARUB_v10004438mg [Capsella rubella]                                                                                                                                                                                                                                                                            | 583  | 586  | 0        | 100.5 | 91.6 | 95.9 | hypothetical protein CARUB_v10004438mg | gbpln | Capsella rubella     | AT4G21680.1   Symbols: NRT1.8   NITRATE TRANSPORTER 1.8   chr4:11517540-11519576 REVERSE LENGTH=589                                                                                                                                                                         | 583  | 589  | 0         | 101.0  | 90.1 | 95.2 |
| Rsa1.0_00708.1.g18383.t1 | ref XP_002869873.1  hypothetical protein ARALYDRAFT_492708 [Arabidopsis lyrata subsp. lyrata]   gi 297315709 gb EFH46132.1  hypothetical protein ARALYDRAFT_492708 [Arabidopsis lyrata subsp. lyrata]                                                                                                                                               | 953  | 965  | 0        | 101.3 | 84.4 | 91.0 | hypothetical protein ARALYDRAFT_492708 | gbpln | Arabidopsis lyrata   | AT4G21670.1   Symbols: CPL1, FRY2, ATCPL1   C-terminal domain phosphatase-like 1   chr4:11511511-11516922 FORWARD LENGTH=967                                                                                                                                                | 953  | 967  | 0         | 101.5  | 83.1 | 89.5 |
| Rsa1.0_00708.1.g18384.t2 | #                                                                                                                                                                                                                                                                                                                                                   | #    | #    | #        | #     | #    | #    | -                                      | ----  | ----                 | #                                                                                                                                                                                                                                                                           | #    | #    | #         | #      | #    |      |
| Rsa1.0_00708.1.g18385.t1 | ref NP_567633.2  Subtilase family protein [Arabidopsis thaliana]   gi 27311663 gb AAO00797.1  subtilisin proteinase - like [Arabidopsis thaliana]   gi 332659085 gb AEE84485.1  Subtilase family protein [Arabidopsis thaliana]                                                                                                                     | 729  | 766  | 0        | 105.1 | 82.0 | 88.5 | Subtilase family protein               | gbpln | Arabidopsis thaliana | AT4G21650.1   Symbols:   Subtilase family protein   chr4:11501314-11504656 REVERSE LENGTH=766                                                                                                                                                                               | 729  | 766  | 0         | 105.1  | 82.0 | 88.5 |
| Rsa1.0_00708.1.g18386.t1 | ref NP_567633.2  Subtilase family protein [Arabidopsis thaliana]   gi 27311663 gb AAO00797.1  subtilisin proteinase - like [Arabidopsis thaliana]   gi 332659085 gb AEE84485.1  Subtilase family protein [Arabidopsis thaliana]                                                                                                                     | 709  | 766  | 0        | 108.0 | 82.8 | 88.9 | Subtilase family protein               | gbpln | Arabidopsis thaliana | AT4G21650.1   Symbols:   Subtilase family protein   chr4:11501314-11504656 REVERSE LENGTH=766                                                                                                                                                                               | 709  | 766  | 0         | 108.0  | 82.8 | 88.9 |
| Rsa1.0_00708.1.g18387.t1 | ref NP_567633.2  Subtilase family protein [Arabidopsis thaliana]   gi 27311663 gb AAO00797.1  subtilisin proteinase - like [Arabidopsis thaliana]   gi 332659085 gb AEE84485.1  Subtilase family protein [Arabidopsis thaliana]                                                                                                                     | 769  | 766  | 0        | 99.6  | 79.3 | 87.5 | Subtilase family protein               | gbpln | Arabidopsis thaliana | AT4G21650.1   Symbols:   Subtilase family protein   chr4:11501314-11504656 REVERSE LENGTH=766                                                                                                                                                                               | 769  | 766  | 0         | 99.6   | 79.3 | 87.5 |
| Rsa1.0_00708.1.g18388.t1 | gb EOA18922.1  hypothetical protein CARUB_v10007555mg [Capsella rubella]                                                                                                                                                                                                                                                                            | 134  | 133  | 1.00E-31 | 99.3  | 86.6 | 94.8 | hypothetical protein CARUB_v10007555mg | gbpln | Capsella rubella     | AT4G21620.1   Symbols:   glycine-rich protein   chr4:11491519-11491914 FORWARD LENGTH=131                                                                                                                                                                                   | 134  | 131  | 8.00E-31  | 97.8   | 79.1 | 83.6 |
| Rsa1.0_00708.1.g18389.t2 | emb CAA18718.1  putative protein [Arabidopsis thaliana]   gi 7268951 emb CAB61261.1  putative protein [Arabidopsis thaliana]                                                                                                                                                                                                                        | 137  | 1240 | 2.00E-13 | 905.1 | 30.7 | 35.0 | putative protein                       | gbpln | Arabidopsis thaliana | AT4G21530.1   Symbols:   Transducin/WD40 repeat-like superfamily protein   chr4:11450743-11455862 FORWARD LENGTH=777                                                                                                                                                        | 137  | 777  | 2.00E-14  | 567.2  | 30.7 | 35.0 |
| Rsa1.0_00708.1.g18390.t1 | ref NP_193885.6  sphingosine kinase 1 [Arabidopsis thaliana]   gi 75154185 sp Q8L7L1.1 SPHK1_ARAT_H ResName: Full=Sphingosine kinase 1   gi 22136030 gb AAM91597.1  putative protein [Arabidopsis thaliana]   gi 30387599 gb AAP31965.1  At4g21540 [Arabidopsis thaliana]   gi 332659065 gb AEE84465.1  sphingosine kinase 1 [Arabidopsis thaliana] | 483  | 485  | 0        | 100.4 | 84.9 | 91.9 | sphingosine kinase 1                   | gbpln | Arabidopsis thaliana | AT4G21540.1   Symbols: SPHK1   sphingosine kinase 1   chr4:11459609-11462356 FORWARD LENGTH=485                                                                                                                                                                             | 483  | 485  | 0         | 100.4  | 84.9 | 91.9 |
| Rsa1.0_00709.1.g18391.t1 | #                                                                                                                                                                                                                                                                                                                                                   | #    | #    | #        | #     | #    | #    | -                                      | ----  | ----                 | #                                                                                                                                                                                                                                                                           | #    | #    | #         | #      | #    |      |
| Rsa1.0_00709.1.g18392.t1 | #                                                                                                                                                                                                                                                                                                                                                   | #    | #    | #        | #     | #    | #    | -                                      | ----  | ----                 | #                                                                                                                                                                                                                                                                           | #    | #    | #         | #      | #    |      |
| Rsa1.0_00709.1.g18393.t1 | gb EOA28352.1  hypothetical protein CARUB_v10024557mg [Capsella rubella]                                                                                                                                                                                                                                                                            | 91   | 863  | 6.00E-12 | 948.4 | 41.8 | 56.0 | hypothetical protein CARUB_v10024557mg | gbpln | Capsella rubella     | AT5G45570.1   Symbols:   Ulp1 protease family protein   chr5:18472301-18475574 FORWARD LENGTH=921                                                                                                                                                                           | 91   | 921  | 3.00E-14  | 1012.1 | 36.3 | 52.7 |
| Rsa1.0_00709.1.g18394.t1 | ref XP_002870738.1  hypothetical protein ARALYDRAFT_916278 [Arabidopsis lyrata subsp. lyrata]   gi 297316574 gb EFH46997.1  hypothetical protein ARALYDRAFT_916278 [Arabidopsis lyrata subsp. lyrata]                                                                                                                                               | 492  | 467  | 0        | 94.9  | 67.9 | 78.0 | hypothetical protein ARALYDRAFT_916278 | gbpln | Arabidopsis lyrata   | AT5G12420.1   Symbols:   O-acyltransferase (WSD1-like) family protein   chr5:4024568-4026715 REVERSE LENGTH=480                                                                                                                                                             | 492  | 480  | 1.00E-157 | 97.6   | 55.7 | 70.9 |

|                          |                                                                                                                                                                                                                                                                                                                                                                                                                                                                                                                                                                                                                                |      |      |           |       |      |      |                                        |       |                      |                                                                                                                                                 |      |      |           |       |      |      |
|--------------------------|--------------------------------------------------------------------------------------------------------------------------------------------------------------------------------------------------------------------------------------------------------------------------------------------------------------------------------------------------------------------------------------------------------------------------------------------------------------------------------------------------------------------------------------------------------------------------------------------------------------------------------|------|------|-----------|-------|------|------|----------------------------------------|-------|----------------------|-------------------------------------------------------------------------------------------------------------------------------------------------|------|------|-----------|-------|------|------|
| Rsa1.0_00709.1.g18395.t2 | ref[XP_002864303.1] calcium ion binding protein [Arabidopsis lyrata subsp. lyrata] gi 297310138 gb EFH40562.1  calcium ion binding protein [Arabidopsis lyrata subsp. lyrata]                                                                                                                                                                                                                                                                                                                                                                                                                                                  | 168  | 437  | 5.00E-48  | 260.1 | 63.1 | 70.8 | calcium ion binding protein            | gbpln | Arabidopsis lyrata   | AT5G54130.2   Symbols:   Calcium-binding endonuclease/exonuclease/phosphatase family   chr5:21962900-21965279 FORWARD LENGTH=436                | 168  | 436  | 7.00E-50  | 259.5 | 62.5 | 70.2 |
| Rsa1.0_00709.1.g18396.t1 | gb[EOA18868.1] hypothetical protein CARUB_v10007491mg [Capsella rubella]                                                                                                                                                                                                                                                                                                                                                                                                                                                                                                                                                       | 441  | 445  | 0         | 100.9 | 84.6 | 90.5 | hypothetical protein CARUB_v10007491mg | gbpln | Capsella rubella     | AT5G39990.1   Symbols:   Core-2/1-branching beta-1,6-N-acetylglucosaminyltransferase family protein   chr5:16004494-16006428 FORWARD LENGTH=447 | 441  | 447  | 0         | 101.4 | 85.9 | 90.9 |
| Rsa1.0_00709.1.g18397.t1 | ref[NP_198816.1] AAA-type ATPase family protein [Arabidopsis thaliana] gi 332007117 gb AED94500.1  AAA-type ATPase family protein [Arabidopsis thaliana]                                                                                                                                                                                                                                                                                                                                                                                                                                                                       | 475  | 470  | 0         | 98.9  | 78.3 | 88.0 | AAA-type ATPase family protein         | gbpln | Arabidopsis thaliana | AT5G40000.1   Symbols:   P-loop containing nucleoside triphosphate hydrolases superfamily protein   chr5:16011072-16012484 REVERSE LENGTH=470   | 475  | 470  | 0         | 98.9  | 78.3 | 88.0 |
| Rsa1.0_00709.1.g18398.t1 | #                                                                                                                                                                                                                                                                                                                                                                                                                                                                                                                                                                                                                              | #    | #    | #         | #     | #    | -    | -                                      | ----  | ----                 | #                                                                                                                                               | #    | #    | #         | #     | #    | #    |
| Rsa1.0_00709.1.g18399.t2 | ref[NP_198816.1] AAA-type ATPase family protein [Arabidopsis thaliana] gi 332007117 gb AED94500.1  AAA-type ATPase family protein [Arabidopsis thaliana]                                                                                                                                                                                                                                                                                                                                                                                                                                                                       | 465  | 470  | 1.00E-156 | 101.1 | 62.6 | 73.5 | AAA-type ATPase family protein         | gbpln | Arabidopsis thaliana | AT5G40000.1   Symbols:   P-loop containing nucleoside triphosphate hydrolases superfamily protein   chr5:16011072-16012484 REVERSE LENGTH=470   | 465  | 470  | 1.00E-158 | 101.1 | 62.6 | 73.5 |
| Rsa1.0_00709.1.g18400.t1 | #                                                                                                                                                                                                                                                                                                                                                                                                                                                                                                                                                                                                                              | #    | #    | #         | #     | #    | -    | -                                      | ----  | ----                 | #                                                                                                                                               | #    | #    | #         | #     | #    | #    |
| Rsa1.0_00709.1.g18401.t1 | ref[NP_189491.1] 60S acidic ribosomal protein P2-3 [Arabidopsis thaliana] gi 75273208 sp Q9LH85.1 RLA23.ARAT H RecName: Full=60S acidic ribosomal protein P2-3 gi 9294100 dbj BAB01952.1  unnamed protein product [Arabidopsis thaliana] gi 21555286 gb AAM63824.1  acidic ribosomal protein P2b (rpp2b), putative [Arabidopsis thaliana] gi 28393165 gb AAO42015.1  putative acidic ribosomal protein P2b (rpp2b) [Arabidopsis thaliana] gi 28827552 gb AAO50620.1  putative acidic ribosomal protein P2b (rpp2b) [Arabidopsis thaliana] gi 332643932 gb AEE77453.1  60S acidic ribosomal protein P2-3 [Arabidopsis thaliana] | 113  | 115  | 4.00E-32  | 101.8 | 77.0 | 84.1 | 60S acidic ribosomal protein P2-3      | gbpln | Arabidopsis thaliana | AT3G28500.1   Symbols:   60S acidic ribosomal protein family   chr3:10682204-10682551 FORWARD LENGTH=115                                        | 113  | 115  | 7.00E-35  | 101.8 | 77.0 | 84.1 |
| Rsa1.0_00709.1.g18402.t1 | #                                                                                                                                                                                                                                                                                                                                                                                                                                                                                                                                                                                                                              | #    | #    | #         | #     | #    | -    | -                                      | ----  | ----                 | #                                                                                                                                               | #    | #    | #         | #     | #    | #    |
| Rsa1.0_00709.1.g18403.t1 | ref[XP_002870728.1] hypothetical protein ARALYDRAFT_355985 [Arabidopsis lyrata subsp. lyrata] gi 297316564 gb EFH46987.1  hypothetical protein ARALYDRAFT_355985 [Arabidopsis lyrata subsp. lyrata]                                                                                                                                                                                                                                                                                                                                                                                                                            | 504  | 500  | 0         | 99.2  | 91.3 | 94.0 | hypothetical protein ARALYDRAFT_355985 | gbpln | Arabidopsis lyrata   | AT5G40030.1   Symbols:   Protein kinase superfamily protein   chr5:16026227-16028283 FORWARD LENGTH=499                                         | 504  | 499  | 0         | 99.0  | 90.5 | 93.5 |
| Rsa1.0_00710.1.g18404.t1 | gb[AAB61378.1] aquaporin [Brassica rapa subsp. oleifera]                                                                                                                                                                                                                                                                                                                                                                                                                                                                                                                                                                       | 286  | 286  | 1.00E-163 | 100.0 | 99.7 | 99.7 | aquaporin                              | gbpln | Brassica rapa        | AT2G45960.1   Symbols:   PIP1B, TMP-A, ATHH2, PIP1:2   plasma membrane intrinsic protein 1B   chr2:18910450-18911703 FORWARD LENGTH=286         | 286  | 286  | 1.00E-164 | 100.0 | 98.6 | 99.3 |
| Rsa1.0_00710.1.g18405.t1 | #                                                                                                                                                                                                                                                                                                                                                                                                                                                                                                                                                                                                                              | #    | #    | #         | #     | #    | -    | -                                      | ----  | ----                 | #                                                                                                                                               | #    | #    | #         | #     | #    | #    |
| Rsa1.0_00710.1.g18406.t1 | ref[XP_002880213.1] ATBRM/CHR2 [Arabidopsis lyrata subsp. lyrata] gi 297326052 gb EFH56472.1  ATBRM/CHR2 [Arabidopsis lyrata subsp. lyrata]                                                                                                                                                                                                                                                                                                                                                                                                                                                                                    | 2153 | 2186 | 0         | 101.5 | 89.3 | 93.3 | ATBRM/CHR2                             | gbpln | Arabidopsis lyrata   | AT2G46020.2   Symbols:   CHR2, ATBRM, BRM, CHA2   transcription regulatory protein SNF2, putative   chr2:18923304-18931769 FORWARD LENGTH=2193  | 2153 | 2193 | 0         | 101.9 | 89.3 | 93.1 |

|                          |                                                                                                                                                                                                                                                                                                                                                                                                                                                                                                                                                                                                                                                                                                                                                                                                                                           |     |      |           |       |      |      |                                                       |       |                      |                                                                                                                                                                                                                                                                                                                                                                   |     |     |           |       |      |      |
|--------------------------|-------------------------------------------------------------------------------------------------------------------------------------------------------------------------------------------------------------------------------------------------------------------------------------------------------------------------------------------------------------------------------------------------------------------------------------------------------------------------------------------------------------------------------------------------------------------------------------------------------------------------------------------------------------------------------------------------------------------------------------------------------------------------------------------------------------------------------------------|-----|------|-----------|-------|------|------|-------------------------------------------------------|-------|----------------------|-------------------------------------------------------------------------------------------------------------------------------------------------------------------------------------------------------------------------------------------------------------------------------------------------------------------------------------------------------------------|-----|-----|-----------|-------|------|------|
| Rsa1.0_00710.1.g18407.t1 | refNP_566062.1  ubiquitin-conjugating enzyme E2 6 [Arabidopsis thaliana] gi 21542470 sp P42750.2 UBC6_ARATH RecName: Full=Ubiquitin-conjugating enzyme E2 6; AltName: Full=Ubiquitin carrier protein 6; AltName: Full=Ubiquitin-conjugating enzyme E2-21 kDa 3; AltName: Full=Ubiquitin-protein ligase 6 gi 807095 gb AAB32508.1  UBC6=E2-related ubiquitin-conjugating protein [Arabidopsis thaliana, Peptide, 183 aa] gi 3702350 gb AAC62907.1  E2, ubiquitin-conjugating enzyme 6 (UBC6) [Arabidopsis thaliana] gi 28950697 gb AAO63272.1  At2g46030 [Arabidopsis thaliana] gi 66354415 gb AAAY44847.1  ubiquitinating enzyme [Arabidopsis thaliana] gi 110736450 dbj BAF00193.1  putative ubiquitin-conjugating enzyme E2 [Arabidopsis thaliana] gi 330255540 gb AEC10634.1  ubiquitin-conjugating enzyme E2 6 [Arabidopsis thaliana] | 190 | 183  | 1.00E-81  | 96.3  | 75.8 | 78.9 | ubiquitin-conjugating enzyme E2 6                     | gbpln | Arabidopsis thaliana | AT2G46030.1   Symbols: UBC6   ubiquitin-conjugating enzyme 6   chr2:18932243-18933421 REVERSE LENGTH=183                                                                                                                                                                                                                                                          | 190 | 183 | 4.00E-84  | 96.3  | 75.8 | 78.9 |
| Rsa1.0_00710.1.g18408.t1 | refXP_002882049.1  hypothetical protein ARALYDRAFT_322261 [Arabidopsis lyrata subsp. lyrata] gi 297327888 gb EFH58308.1  hypothetical protein ARALYDRAFT_322261 [Arabidopsis lyrata subsp. lyrata]                                                                                                                                                                                                                                                                                                                                                                                                                                                                                                                                                                                                                                        | 502 | 406  | 1.00E-138 | 80.9  | 51.8 | 56.2 | hypothetical protein ARALYDRAFT_322261                | gbpln | Arabidopsis lyrata   | AT2G46070.1   Symbols: ATPMK12, MAPK12, MPK12   mitogen-activated protein kinase 12   chr2:18946134-18947770 REVERSE LENGTH=372                                                                                                                                                                                                                                   | 502 | 372 | 1.00E-139 | 74.1  | 48.8 | 51.6 |
| Rsa1.0_00710.1.g18409.t1 | gb AAF18538.1 AC006551.24 Very similar to retrotransposon reverse transcriptase [Arabidopsis thaliana]                                                                                                                                                                                                                                                                                                                                                                                                                                                                                                                                                                                                                                                                                                                                    | 149 | 1231 | 2.00E-15  | 826.2 | 30.2 | 50.3 | Very similar to retrotransposon reverse transcriptase | gbpln | Arabidopsis thaliana | AT5G19270.1   Symbols:   unknown protein; BEST Arabidopsis thaliana protein match is: unknown protein (TAIR:AT4G03566.1). Has 30201 Blast hits to 17322 proteins in 780 species: Archae - 12; Bacteria - 1396; Metazoa - 17338; Fungi - 3422; Plants - 5037; Viruses - 0; Other Eukaryotes - 2996 (source: NCBI BLINK).   chr5:6485617-6487009 REVERSE LENGTH=365 | 149 | 365 | 6.00E-16  | 245.0 | 31.5 | 43.6 |
| Rsa1.0_00710.1.g18410.t1 | gb EOA39454.1  hypothetical protein CARUB_v10012651mg [Capsella rubella]                                                                                                                                                                                                                                                                                                                                                                                                                                                                                                                                                                                                                                                                                                                                                                  | 239 | 233  | 1.00E-122 | 97.5  | 92.1 | 93.7 | hypothetical protein CARUB_v10012651mg                | gbpln | Capsella rubella     | AT1G14620.1   Symbols: DECOY   decoy   chr1:5014948-5016501 REVERSE LENGTH=233                                                                                                                                                                                                                                                                                    | 239 | 233 | 1.00E-123 | 97.5  | 90.0 | 92.5 |
| Rsa1.0_00710.1.g18411.t1 | gb EOA28020.1  hypothetical protein CARUB_v10024196mg [Capsella rubella]                                                                                                                                                                                                                                                                                                                                                                                                                                                                                                                                                                                                                                                                                                                                                                  | 166 | 166  | 6.00E-81  | 100.0 | 88.6 | 95.8 | hypothetical protein CARUB_v10024196mg                | gbpln | Capsella rubella     | AT2G46140.1   Symbols:   Late embryogenesis abundant protein   chr2:18959163-18960362 FORWARD LENGTH=166                                                                                                                                                                                                                                                          | 166 | 166 | 1.00E-82  | 100.0 | 88.6 | 95.2 |
| Rsa1.0_00710.1.g18412.t1 | #                                                                                                                                                                                                                                                                                                                                                                                                                                                                                                                                                                                                                                                                                                                                                                                                                                         | #   | #    | #         | #     | #    | #    | -                                                     | ----  | ----                 | #                                                                                                                                                                                                                                                                                                                                                                 | #   | #   | #         | #     | #    |      |
| Rsa1.0_00710.1.g18413.t1 | refXP_002880225.1  hypothetical protein ARALYDRAFT_483769 [Arabidopsis lyrata subsp. lyrata] gi 297326064 gb EFH56484.1  hypothetical protein ARALYDRAFT_483769 [Arabidopsis lyrata subsp. lyrata]                                                                                                                                                                                                                                                                                                                                                                                                                                                                                                                                                                                                                                        | 237 | 237  | 1.00E-103 | 100.0 | 78.9 | 86.9 | hypothetical protein ARALYDRAFT_483769                | gbpln | Arabidopsis lyrata   | AT2G46220.1   Symbols:   Uncharacterized conserved protein (DUF2358)   chr2:18979655-18980557 FORWARD LENGTH=241                                                                                                                                                                                                                                                  | 237 | 241 | 4.00E-99  | 101.7 | 78.9 | 86.9 |
| Rsa1.0_00710.1.g18414.t1 | refXP_002880226.1  hypothetical protein ARALYDRAFT_483770 [Arabidopsis lyrata subsp. lyrata] gi 297326065 gb EFH56485.1  hypothetical protein ARALYDRAFT_483770 [Arabidopsis lyrata subsp. lyrata]                                                                                                                                                                                                                                                                                                                                                                                                                                                                                                                                                                                                                                        | 297 | 298  | 1.00E-142 | 100.3 | 87.2 | 91.2 | hypothetical protein ARALYDRAFT_483770                | gbpln | Arabidopsis lyrata   | AT2G46225.1   Symbols: ABIL1   ABI-1-like 1   chr2:18982113-18984074 FORWARD LENGTH=298                                                                                                                                                                                                                                                                           | 297 | 298 | 1.00E-144 | 100.3 | 86.9 | 91.2 |
| Rsa1.0_00710.1.g18415.t1 | refNP_566069.1  BTB/POZ/Kelch-associated protein [Arabidopsis thaliana] gi 75220239 sp O82343.2 Y2626_ARATH RecName: Full=BTB/POZ domain-containing protein At2g46260 gi 15028123 gb AAK76685.1  unknown protein [Arabidopsis thaliana] gi 19310797 gb AAL85129.1  unknown protein [Arabidopsis thaliana] gi 20197378 gb AAC62880.2  expressed protein [Arabidopsis thaliana] gi 330255572 gb AEC10666.1  BTB/POZ/Kelch-associated protein [Arabidopsis thaliana]                                                                                                                                                                                                                                                                                                                                                                         | 546 | 561  | 0         | 102.7 | 88.6 | 93.2 | BTB/POZ/Kelch-associated protein                      | gbpln | Arabidopsis thaliana | AT2G46260.1   Symbols:   BTB/POZ/Kelch-associated protein   chr2:18996111-18998463 FORWARD LENGTH=561                                                                                                                                                                                                                                                             | 546 | 561 | 0         | 102.7 | 88.6 | 93.2 |

|                          |                                                                                                                                                                                                                                                                                                                                                                                                                                                                                                                                                                                                                          |     |     |           |       |      |      |                                                                  |       |                      |                                                                                                                                                                                                                                                                                    |     |     |           |       |      |      |
|--------------------------|--------------------------------------------------------------------------------------------------------------------------------------------------------------------------------------------------------------------------------------------------------------------------------------------------------------------------------------------------------------------------------------------------------------------------------------------------------------------------------------------------------------------------------------------------------------------------------------------------------------------------|-----|-----|-----------|-------|------|------|------------------------------------------------------------------|-------|----------------------|------------------------------------------------------------------------------------------------------------------------------------------------------------------------------------------------------------------------------------------------------------------------------------|-----|-----|-----------|-------|------|------|
| Rsa1.0_00710.1.g18416.t1 | gb[EOA28724.1] hypothetical protein CARUB_v10024952mg [Capsella rubella]                                                                                                                                                                                                                                                                                                                                                                                                                                                                                                                                                 | 326 | 249 | 3.00E-90  | 76.4  | 63.5 | 68.1 | hypothetical protein CARUB_v10024952mg                           | gbpln | Capsella rubella     | AT2G46300.1   Symbols:   Late embryogenesis abundant (LEA) hydroxyproline-rich glycoprotein family   chr2:19002392-19009247 FORWARD LENGTH=252                                                                                                                                     | 326 | 252 | 1.00E-92  | 77.3  | 61.3 | 66.9 |
| Rsa1.0_00710.1.g18417.t1 | gb[EOA27621.1] hypothetical protein CARUB_v10023769mg [Capsella rubella]                                                                                                                                                                                                                                                                                                                                                                                                                                                                                                                                                 | 287 | 290 | 1.00E-89  | 101.0 | 66.2 | 73.2 | hypothetical protein CARUB_v10023769mg                           | gbpln | Capsella rubella     | AT2G46310.1   Symbols: GRF5   cytokinin response factor 5   chr2:19011614-19012498 FORWARD LENGTH=294                                                                                                                                                                              | 287 | 294 | 4.00E-85  | 102.4 | 65.5 | 73.2 |
| Rsa1.0_00710.1.g18418.t1 | gb[EOA28262.1] hypothetical protein CARUB_v10024456mg [Capsella rubella]                                                                                                                                                                                                                                                                                                                                                                                                                                                                                                                                                 | 73  | 73  | 4.00E-28  | 100.0 | 93.2 | 95.9 | hypothetical protein CARUB_v10024456mg                           | gbpln | Capsella rubella     | AT2G46330.1   Symbols: AGP16, ATAGP16   arabinogalactan protein 16   chr2:19018730-19019108 REVERSE LENGTH=73                                                                                                                                                                      | 73  | 73  | 1.00E-30  | 100.0 | 91.8 | 94.5 |
| Rsa1.0_00711.1.g18419.t1 | #                                                                                                                                                                                                                                                                                                                                                                                                                                                                                                                                                                                                                        | #   | #   | #         | #     | #    | #    | -                                                                | ----  | ----                 | #                                                                                                                                                                                                                                                                                  | #   | #   | #         | #     | #    |      |
| Rsa1.0_00711.1.g18420.t1 | gb[EOA31571.1] hypothetical protein CARUB_v10014763mg [Capsella rubella]                                                                                                                                                                                                                                                                                                                                                                                                                                                                                                                                                 | 173 | 176 | 9.00E-61  | 101.7 | 79.2 | 83.8 | hypothetical protein CARUB_v10014763mg                           | gbpln | Capsella rubella     | AT3G15640.1   Symbols:   Rubredoxin-like superfamily protein   chr3:5299273-5301371 FORWARD LENGTH=176                                                                                                                                                                             | 173 | 176 | 3.00E-61  | 101.7 | 87.9 | 90.2 |
| Rsa1.0_00711.1.g18421.t3 | ref NP_566520.1  (6-4)DNA photolyase [Arabidopsis thaliana] gi 306756349 sp O48652.2 UVR3_ARAT H RecName: Full=(6-4)DNA photolyase; AltName: Full=Protein UV repair defective 3 gi 332642182 gb AEE75703.1  (6-4)DNA photolyase [Arabidopsis thaliana]                                                                                                                                                                                                                                                                                                                                                                   | 538 | 556 | 0         | 103.3 | 87.0 | 92.4 | (6-4)DNA photolyase                                              | gbpln | Arabidopsis thaliana | AT3G15620.1   Symbols: UVR3   DNA photolyase family protein   chr3:5293475-5296548 REVERSE LENGTH=556                                                                                                                                                                              | 538 | 556 | 0         | 103.3 | 87.0 | 92.4 |
| Rsa1.0_00711.1.g18422.t1 | gb[EOA31692.1] hypothetical protein CARUB_v10014898mg [Capsella rubella]                                                                                                                                                                                                                                                                                                                                                                                                                                                                                                                                                 | 134 | 134 | 2.00E-61  | 100.0 | 97.0 | 98.5 | hypothetical protein CARUB_v10014898mg                           | gbpln | Capsella rubella     | AT1G52740.1   Symbols: HTA9   histone H2A protein 9   chr1:19645409-19646221 FORWARD LENGTH=134                                                                                                                                                                                    | 134 | 134 | 1.00E-61  | 100.0 | 94.0 | 96.3 |
| Rsa1.0_00711.1.g18423.t1 | gb[EOA32639.1] hypothetical protein CARUB_v10015934mg [Capsella rubella]                                                                                                                                                                                                                                                                                                                                                                                                                                                                                                                                                 | 679 | 708 | 0         | 104.3 | 79.7 | 86.7 | hypothetical protein CARUB_v10015934mg                           | gbpln | Capsella rubella     | AT3G15550.1   Symbols:   unknown protein; Has 25732 Blast hits to 16979 proteins in 961 species: Archae - 144; Bacteria - 1801; Metazoa - 12681; Fungi - 1868; Plants - 912; Viruses - 94; Other Eukaryotes - 8232 (source: NCBI BLINK);   chr3:5267351-5270095 FORWARD LENGTH=729 | 679 | 729 | 0         | 107.4 | 80.3 | 88.7 |
| Rsa1.0_00711.1.g18424.t1 | ref XP_002882971.1  pentatricopeptide repeat-containing protein [Arabidopsis lyrata subsp. lyrata] gi 29732881.1 gb EFH59230.1  pentatricopeptide repeat-containing protein [Arabidopsis lyrata subsp. lyrata]                                                                                                                                                                                                                                                                                                                                                                                                           | 163 | 642 | 6.00E-21  | 393.9 | 54.0 | 64.4 | pentatricopeptide repeat-containing protein                      | gbpln | Arabidopsis lyrata   | AT3G16010.1   Symbols:   Pentatricopeptide repeat (PPR-like) superfamily protein   chr3:5434142-5436244 FORWARD LENGTH=642                                                                                                                                                         | 163 | 642 | 2.00E-22  | 393.9 | 49.1 | 57.7 |
| Rsa1.0_00711.1.g18425.t1 | ref NP_174124.1  2-oxoglutarate (2OG) and Fe(II)-dependent oxygenase-like protein [Arabidopsis thaliana] gi 12322993 gb AAG51483.1 AC069471.14 oxidoreductase, putative [Arabidopsis thaliana] gi 332192783 gb AEE30904.1  2-oxoglutarate (2OG) and Fe(II)-dependent oxygenase-like protein [Arabidopsis thaliana]                                                                                                                                                                                                                                                                                                       | 323 | 322 | 1.00E-138 | 99.7  | 72.4 | 86.1 | 2-oxoglutarate (2OG) and Fe(II)-dependent oxygenase-like protein | gbpln | Arabidopsis thaliana | AT1G28030.1   Symbols:   2-oxoglutarate (2OG) and Fe(II)-dependent oxygenase superfamily protein   chr1:9771793-9773345 FORWARD LENGTH=322                                                                                                                                         | 323 | 322 | 1.00E-141 | 99.7  | 72.4 | 86.1 |
| Rsa1.0_00711.1.g18426.t1 | ref NP_174124.1  2-oxoglutarate (2OG) and Fe(II)-dependent oxygenase-like protein [Arabidopsis thaliana] gi 12322993 gb AAG51483.1 AC069471.14 oxidoreductase, putative [Arabidopsis thaliana] gi 332192783 gb AEE30904.1  2-oxoglutarate (2OG) and Fe(II)-dependent oxygenase-like protein [Arabidopsis thaliana]                                                                                                                                                                                                                                                                                                       | 325 | 322 | 1.00E-116 | 99.1  | 65.2 | 79.4 | 2-oxoglutarate (2OG) and Fe(II)-dependent oxygenase-like protein | gbpln | Arabidopsis thaliana | AT1G28030.1   Symbols:   2-oxoglutarate (2OG) and Fe(II)-dependent oxygenase superfamily protein   chr1:9771793-9773345 FORWARD LENGTH=322                                                                                                                                         | 325 | 322 | 1.00E-119 | 99.1  | 65.2 | 79.4 |
| Rsa1.0_00711.1.g18427.t1 | #                                                                                                                                                                                                                                                                                                                                                                                                                                                                                                                                                                                                                        | #   | #   | #         | #     | #    | #    | -                                                                | ----  | ----                 | #                                                                                                                                                                                                                                                                                  | #   | #   | #         | #     | #    |      |
| Rsa1.0_00711.1.g18428.t1 | ref NP_188173.1  auxin-responsive protein IAA19 [Arabidopsis thaliana] gi 17365900 sp O24409.2 IAA19_ARATH RecName: Full=Auxin-responsive protein IAA19; AltName: Full=Indoleacetic acid-induced protein 19; AltName: Full=Protein MASSUGU 2 gi 7021739 gb AAF35420.1  early auxin-induced protein, IAA19 [Arabidopsis thaliana] gi 15795119 dbj BAB02383.1  auxin-regulated protein, IAA19 [Arabidopsis thaliana] gi 49616371 gb AAT67082.1  IAA19 [Arabidopsis thaliana] gi 88193790 gb ABD42984.1  At3g15540 [Arabidopsis thaliana] gi 332642169 gb AEE75690.1  auxin-responsive protein IAA19 [Arabidopsis thaliana] | 165 | 197 | 1.00E-77  | 119.4 | 90.9 | 95.2 | auxin-responsive protein IAA19                                   | gbpln | Arabidopsis thaliana | AT3G15540.1   Symbols: IAA19, MSG2   indole-3-acetic acid inducible 19   chr3:5264100-5265378 FORWARD LENGTH=197                                                                                                                                                                   | 165 | 197 | 5.00E-80  | 119.4 | 90.9 | 95.2 |

|                          |                                                                                                                                                                                                                                                                                                                                                                                                                                         |      |      |           |       |      |      |                                                |       |                      |                                                                                                                                                                                                                                                                                                                                                                                         |      |      |           |       |      |      |
|--------------------------|-----------------------------------------------------------------------------------------------------------------------------------------------------------------------------------------------------------------------------------------------------------------------------------------------------------------------------------------------------------------------------------------------------------------------------------------|------|------|-----------|-------|------|------|------------------------------------------------|-------|----------------------|-----------------------------------------------------------------------------------------------------------------------------------------------------------------------------------------------------------------------------------------------------------------------------------------------------------------------------------------------------------------------------------------|------|------|-----------|-------|------|------|
| Rsa1.0_00711.1.g18429.t1 | gb[EOA29538.1] hypothetical protein CARUB_v10015041mg [Capsella rubella]                                                                                                                                                                                                                                                                                                                                                                | 133  | 67   | 2.00E-14  | 50.4  | 28.6 | 36.1 | hypothetical protein CARUB_v10015041mg         | gbpln | Capsella rubella     | #                                                                                                                                                                                                                                                                                                                                                                                       | #    | #    | #         | #     | #    |      |
| Rsa1.0_00711.1.g18430.t1 | ref[XP_002885092.1] hypothetical protein ARALYDRAFT_479001 [Arabidopsis lyrata subsp. lyrata] gi 297330932 gb EFH61351.1  hypothetical protein ARALYDRAFT_479001 [Arabidopsis lyrata subsp. lyrata]                                                                                                                                                                                                                                     | 400  | 288  | 1.00E-150 | 72.0  | 68.3 | 69.8 | hypothetical protein ARALYDRAFT_479001         | gbpln | Arabidopsis lyrata   | AT3G15530.2   Symbols:   S-adenosyl-L-methionine-dependent methyltransferases superfamily protein   chr3:5253253-5254193 REVERSE LENGTH=288                                                                                                                                                                                                                                             | 400  | 288  | 1.00E-145 | 72.0  | 68.5 | 69.5 |
| Rsa1.0_00711.1.g18431.t1 | dbj BAJ34312.1  unnamed protein product [Theellungiella halophila]                                                                                                                                                                                                                                                                                                                                                                      | 362  | 364  | 1.00E-157 | 100.6 | 86.7 | 91.2 | unnamed protein product                        | ----  | ----                 | AT3G15510.1   Symbols: ATNAC2, ANAC056, NARS1, NAC2   NAC domain containing protein 2   chr3:5243696-5245037 FORWARD LENGTH=364                                                                                                                                                                                                                                                         | 362  | 364  | 1.00E-158 | 100.6 | 85.4 | 90.6 |
| Rsa1.0_00711.1.g18432.t1 | gb ABK28184.1  unknown [Arabidopsis thaliana]                                                                                                                                                                                                                                                                                                                                                                                           | 176  | 488  | 1.00E-54  | 277.3 | 55.7 | 77.8 | unknown                                        | gbpln | Arabidopsis thaliana | AT5G36228.1   Symbols:   nucleic acid binding:zinc ion binding   chr5:14271691-14272776 FORWARD LENGTH=361                                                                                                                                                                                                                                                                              | 176  | 361  | 3.00E-23  | 205.1 | 34.1 | 54.0 |
| Rsa1.0_00712.1.g18433.t1 | gb AAG51754.1 AC068667_33 reverse transcriptase, putative; 100033-105622 [Arabidopsis thaliana]                                                                                                                                                                                                                                                                                                                                         | 411  | 1557 | 1.00E-74  | 378.8 | 38.9 | 58.2 | reverse transcriptase, putative; 100033-105622 | gbpln | Arabidopsis thaliana | AT4G29090.1   Symbols:   Ribonuclease H-like superfamily protein   chr4:14333528-14335255 FORWARD LENGTH=575                                                                                                                                                                                                                                                                            | 411  | 575  | 2.00E-40  | 139.9 | 31.9 | 50.4 |
| Rsa1.0_00712.1.g18434.t2 | gb EOA16247.1  hypothetical protein CARUB_v10004393mg [Capsella rubella]                                                                                                                                                                                                                                                                                                                                                                | 560  | 613  | 0         | 109.5 | 82.1 | 88.0 | hypothetical protein CARUB_v10004393mg         | gbpln | Capsella rubella     | AT4G37670.2   Symbols: NAGS2   N-acetyl-L-glutamate synthase 2   chr4:17696179-17698836 REVERSE LENGTH=613                                                                                                                                                                                                                                                                              | 560  | 613  | 0         | 109.5 | 80.4 | 85.0 |
| Rsa1.0_00712.1.g18435.t1 | ref[XP_002868977.1] ribosomal protein L12 family protein [Arabidopsis lyrata subsp. lyrata] gi 297314813 gb EFH45236.1  ribosomal protein L12 family protein [Arabidopsis lyrata subsp. lyrata]                                                                                                                                                                                                                                         | 168  | 167  | 6.00E-73  | 99.4  | 84.5 | 89.3 | ribosomal protein L12 family protein           | gbpln | Arabidopsis lyrata   | AT4G37660.1   Symbols:   Ribosomal protein L12/ ATP-dependent Clp protease adaptor protein ClpS family protein   chr4:17695543-17696046 FORWARD LENGTH=167                                                                                                                                                                                                                              | 168  | 167  | 1.00E-69  | 99.4  | 82.7 | 91.1 |
| Rsa1.0_00712.1.g18436.t1 | ref[XP_002868978.1] hypothetical protein ARALYDRAFT_912572 [Arabidopsis lyrata subsp. lyrata] gi 297314814 gb EFH45237.1  hypothetical protein ARALYDRAFT_912572 [Arabidopsis lyrata subsp. lyrata]                                                                                                                                                                                                                                     | 530  | 531  | 0         | 100.2 | 92.5 | 94.9 | hypothetical protein ARALYDRAFT_912572         | gbpln | Arabidopsis lyrata   | AT4G37650.1   Symbols: SHR, SGR7   GRAS family transcription factor   chr4:17691871-17693466 FORWARD LENGTH=531                                                                                                                                                                                                                                                                         | 530  | 531  | 0         | 100.2 | 91.9 | 94.3 |
| Rsa1.0_00712.1.g18437.t1 | gb EOA15958.1  hypothetical protein CARUB_v10004056mg [Capsella rubella] gi 482551766 gb EOA15959.1  hypothetical protein CARUB_v10004056mg [Capsella rubella]                                                                                                                                                                                                                                                                          | 1017 | 1014 | 0         | 99.7  | 96.4 | 98.6 | hypothetical protein CARUB_v10004056mg         | gbpln | Capsella rubella     | AT4G37640.1   Symbols: ACA2   calcium ATPase 2   chr4:17683225-17686808 REVERSE LENGTH=1014                                                                                                                                                                                                                                                                                             | 1017 | 1014 | 0         | 99.7  | 96.0 | 98.3 |
| Rsa1.0_00712.1.g18438.t1 | gb EOA17000.1  hypothetical protein CARUB_v10005238mg [Capsella rubella]                                                                                                                                                                                                                                                                                                                                                                | 273  | 229  | 8.00E-63  | 83.9  | 46.9 | 50.9 | hypothetical protein CARUB_v10005238mg         | gbpln | Capsella rubella     | AT4G37630.1   Symbols: CYCD5;1   cyclin d5;1   chr4:17679497-17680788 FORWARD LENGTH=323                                                                                                                                                                                                                                                                                                | 273  | 323  | 7.00E-65  | 118.3 | 47.6 | 51.3 |
| Rsa1.0_00712.1.g18439.t1 | emb CAB10225.1  retrovirus-related like polyprotein [Arabidopsis thaliana] gi 7268152 emb CAB78488.1  retrovirus-related like polyprotein [Arabidopsis thaliana]                                                                                                                                                                                                                                                                        | 1551 | 1489 | 0         | 96.0  | 55.4 | 70.3 | retrovirus-related like polyprotein            | gbpln | Arabidopsis thaliana | AT4G23160.1   Symbols: CRK8   cysteine-rich RLK (RECEPTOR-like protein kinase) 8   chr4:12129485-12134086 FORWARD LENGTH=1262                                                                                                                                                                                                                                                           | 1551 | 1262 | 1.00E-164 | 81.4  | 17.7 | 23.9 |
| Rsa1.0_00712.1.g18440.t1 | ref[NP_568031.1] BTB and TAZ domain protein 5 [Arabidopsis thaliana] gi 75255062 sp Q6EJ98.1 BT5_ARATH RecName: Full=BTB/POZ and TAZ domain-containing protein 5; AltName: Full=BTB and TAZ domain protein 5 gi 36955924 gb AAQ87008.1  BTB and TAZ domain protein 5 [Arabidopsis thaliana] gi 94442425 gb ABF19000.1  At4g37610 [Arabidopsis thaliana] gi 332661416 gb AEE86816.1  BTB and TAZ domain protein 5 [Arabidopsis thaliana] | 376  | 368  | 0         | 97.9  | 83.0 | 89.6 | BTB and TAZ domain protein 5                   | gbpln | Arabidopsis thaliana | AT4G37610.1   Symbols: BT5   BTB and TAZ domain protein 5   chr4:17670606-17671992 REVERSE LENGTH=368                                                                                                                                                                                                                                                                                   | 376  | 368  | 0         | 97.9  | 83.0 | 89.6 |
| Rsa1.0_00712.1.g18441.t1 | gb EOA17745.1  hypothetical protein CARUB_v10006133mg [Capsella rubella]                                                                                                                                                                                                                                                                                                                                                                | 107  | 88   | 1.00E-18  | 82.2  | 50.5 | 60.7 | hypothetical protein CARUB_v10006133mg         | gbpln | Capsella rubella     | AT4G37608.1   Symbols:   unknown protein; FUNCTIONS IN: molecular_function unknown; INVOLVED IN: biological_process unknown; LOCATED IN: cellular_component unknown; Has 22 Blast hits to 22 proteins in 10 species: Archaea - 0; Bacteria - 0; Metazoa - 0; Fungi - 0; Plants - 22; Viruses - 0; Other Eukaryotes - 0 (source: NCBI BLINK).   chr4:17669825-17670429 FORWARD LENGTH=87 | 107  | 87   | 5.00E-19  | 81.3  | 44.9 | 55.1 |
| Rsa1.0_00712.1.g18442.t1 | gb AAK96859.1  putative protein [Arabidopsis thaliana] gi 20148337 gb AAM10059.1  putative protein [Arabidopsis thaliana]                                                                                                                                                                                                                                                                                                               | 580  | 580  | 0         | 100.0 | 86.7 | 93.6 | putative protein                               | gbpln | Arabidopsis thaliana | AT4G37590.1   Symbols: NPY5   Phototropic-responsive NPH3 family protein   chr4:17663080-17665299 REVERSE LENGTH=580                                                                                                                                                                                                                                                                    | 580  | 580  | 0         | 100.0 | 86.6 | 93.6 |

|                          |                                                                                                                                                                                                                                                                                                                                                                                                                      |     |      |           |       |      |      |                                                 |       |                      |                                                                                                                                                                                                                                                                                                                                                                                                                          |     |      |           |       |      |      |
|--------------------------|----------------------------------------------------------------------------------------------------------------------------------------------------------------------------------------------------------------------------------------------------------------------------------------------------------------------------------------------------------------------------------------------------------------------|-----|------|-----------|-------|------|------|-------------------------------------------------|-------|----------------------|--------------------------------------------------------------------------------------------------------------------------------------------------------------------------------------------------------------------------------------------------------------------------------------------------------------------------------------------------------------------------------------------------------------------------|-----|------|-----------|-------|------|------|
| Rsa1.0_00712.1.g18443.t1 | gb EOA16747.1  hypothetical protein CARUB_v10004955mg [Capsella rubella]                                                                                                                                                                                                                                                                                                                                             | 403 | 404  | 0         | 100.2 | 91.3 | 95.5 | hypothetical protein CARUB_v10004955mg          | gbpln | Capsella rubella     | AT4G37580.1   Symbols: HLS1, COP3, UNS2   Acyl-CoA N-acyltransferases (NAT) superfamily protein   chr4:17658932-17660564 FORWARD LENGTH=403                                                                                                                                                                                                                                                                              | 403 | 403  | 0         | 100.0 | 91.1 | 95.0 |
| Rsa1.0_00712.1.g18444.t1 | #                                                                                                                                                                                                                                                                                                                                                                                                                    | #   | #    | #         | #     | #    | -    | ----                                            | ----  | ----                 | #                                                                                                                                                                                                                                                                                                                                                                                                                        | #   | #    | #         | #     | #    |      |
| Rsa1.0_00712.1.g18445.t1 | #                                                                                                                                                                                                                                                                                                                                                                                                                    | #   | #    | #         | #     | #    | -    | ----                                            | ----  | ----                 | #                                                                                                                                                                                                                                                                                                                                                                                                                        | #   | #    | #         | #     | #    |      |
| Rsa1.0_00712.1.g18446.t1 | #                                                                                                                                                                                                                                                                                                                                                                                                                    | #   | #    | #         | #     | #    | -    | ----                                            | ----  | ----                 | #                                                                                                                                                                                                                                                                                                                                                                                                                        | #   | #    | #         | #     | #    |      |
| Rsa1.0_00712.1.g18447.t1 | ref XP_002866942.1  ribonuclease III family protein [Arabidopsis lyrata subsp. lyrata] gi 29731277 gb EFH43201.1  ribonuclease III family protein [Arabidopsis lyrata subsp. lyrata]                                                                                                                                                                                                                                 | 82  | 537  | 7.00E-17  | 654.9 | 52.4 | 61.0 | ribonuclease III family protein                 | gbpln | Arabidopsis lyrata   | AT4G37510.1   Symbols:   Ribonuclease III family protein   chr4:17626259-17628854 REVERSE LENGTH=537                                                                                                                                                                                                                                                                                                                     | 82  | 537  | 2.00E-19  | 654.9 | 52.4 | 61.0 |
| Rsa1.0_00712.1.g18448.t1 | gb EOA17212.1  hypothetical protein CARUB_v10005485mg [Capsella rubella]                                                                                                                                                                                                                                                                                                                                             | 134 | 271  | 5.00E-68  | 202.2 | 93.3 | 95.5 | hypothetical protein CARUB_v10005485mg          | gbpln | Capsella rubella     | AT4G37470.1   Symbols:   alpha/beta-Hydrolases superfamily protein   chr4:17617045-17618363 REVERSE LENGTH=270                                                                                                                                                                                                                                                                                                           | 134 | 270  | 3.00E-66  | 201.5 | 88.1 | 94.0 |
| Rsa1.0_00713.1.g18449.t1 | ref XP_002865546.1  hypothetical protein ARALYDRAFT_494806 [Arabidopsis lyrata subsp. lyrata] gi 297311381 gb EFH41805.1  hypothetical protein ARALYDRAFT_494806 [Arabidopsis lyrata subsp. lyrata]                                                                                                                                                                                                                  | 466 | 473  | 0         | 101.5 | 78.5 | 86.5 | hypothetical protein ARALYDRAFT_494806          | gbpln | Arabidopsis lyrata   | AT5G42240.1   Symbols: scp 42   serine carboxypeptidase-like 42   chr5:16888717-16890931 FORWARD LENGTH=473                                                                                                                                                                                                                                                                                                              | 466 | 473  | 0         | 101.5 | 78.1 | 86.1 |
| Rsa1.0_00713.1.g18450.t1 | ref NP_565039.4  uncharacterized protein [Arabidopsis thaliana] gi 332197175 gb AEE35296.1  uncharacterized protein AT1G72270 [Arabidopsis thaliana]                                                                                                                                                                                                                                                                 | 432 | 2845 | 1.00E-131 | 658.6 | 63.4 | 71.3 | uncharacterized protein                         | gbpln | Arabidopsis thaliana | AT1G72270.1   Symbols:   CONTAINS InterPro DOMAIN/s: Ribosome 60S biogenesis N-terminal (InterPro:IPR021714); BEST Arabidopsis thaliana protein match is: unknown protein (TAIRAT4G27010.1); Has 772 Blast hits to 657 proteins in 120 species: Archae - 0; Bacteria - 0; Metazoa - 344; Fungi - 94; Plants - 322; Viruses - 0; Other Eukaryotes - 12 (source: NCBI BLINK).   chr1:27198733-27211122 REVERSE LENGTH=2845 | 432 | 2845 | 1.00E-134 | 658.6 | 63.4 | 71.3 |
| Rsa1.0_00713.1.g18451.t6 | ref XP_002885864.1  hypothetical protein ARALYDRAFT_899550 [Arabidopsis lyrata subsp. lyrata] gi 297335966 ref XP_002885865.1  hypothetical protein ARALYDRAFT_480295 [Arabidopsis lyrata subsp. lyrata] gi 297331704 gb EFH62123.1  hypothetical protein ARALYDRAFT_899550 [Arabidopsis lyrata subsp. lyrata] gi 297331705 gb EFH62124.1  hypothetical protein ARALYDRAFT_480295 [Arabidopsis lyrata subsp. lyrata] | 261 | 256  | 1.00E-124 | 98.1  | 87.0 | 91.2 | hypothetical protein ARALYDRAFT_899550          | gbpln | Arabidopsis lyrata   | AT2G12646.1   Symbols:   PLATZ transcription factor family protein   chr2:5167179-5169022 REVERSE LENGTH=256                                                                                                                                                                                                                                                                                                             | 261 | 256  | 1.00E-126 | 98.1  | 87.0 | 91.2 |
| Rsa1.0_00713.1.g18452.t1 | dbj BAJ33858.1  unnamed protein product [Thellungiella halophila]                                                                                                                                                                                                                                                                                                                                                    | 401 | 438  | 0         | 109.2 | 98.8 | 99.5 | unnamed protein product                         | ----  | ----                 | AT2G13360.2   Symbols: AGT, AGT1, SGAT   alanine:glyoxylate aminotransferase   chr2:5539417-5540902 REVERSE LENGTH=401                                                                                                                                                                                                                                                                                                   | 401 | 401  | 0         | 100.0 | 95.8 | 98.8 |
| Rsa1.0_00713.1.g18453.t1 | ref XP_002885870.1  hypothetical protein ARALYDRAFT_480303 [Arabidopsis lyrata subsp. lyrata] gi 297331710 gb EFH62129.1  hypothetical protein ARALYDRAFT_480303 [Arabidopsis lyrata subsp. lyrata]                                                                                                                                                                                                                  | 409 | 402  | 0         | 98.3  | 86.3 | 89.5 | hypothetical protein ARALYDRAFT_480303          | gbpln | Arabidopsis lyrata   | AT2G13350.1   Symbols:   Calcium-dependent lipid-binding (CaLB domain) family protein   chr2:5536525-5537730 REVERSE LENGTH=401                                                                                                                                                                                                                                                                                          | 409 | 401  | 0         | 98.0  | 85.6 | 89.0 |
| Rsa1.0_00713.1.g18454.t1 | gb EOA29945.1  hypothetical protein CARUB_v10013044mg, partial [Capsella rubella]                                                                                                                                                                                                                                                                                                                                    | 695 | 747  | 0         | 107.5 | 89.9 | 93.4 | hypothetical protein CARUB_v10013044mg, partial | gbpln | Capsella rubella     | AT2G13440.1   Symbols:   glucose-inhibited division family A protein   chr2:5593270-5598296 REVERSE LENGTH=723                                                                                                                                                                                                                                                                                                           | 695 | 723  | 0         | 104.0 | 86.0 | 89.8 |
| Rsa1.0_00713.1.g18455.t1 | dbj BAJ34245.1  unnamed protein product [Thellungiella halophila]                                                                                                                                                                                                                                                                                                                                                    | 870 | 848  | 0         | 97.5  | 88.9 | 93.3 | unnamed protein product                         | ----  | ----                 | AT2G13540.1   Symbols: ENS, ABH1, CBP80, ATCBP80   ARM repeat superfamily protein   chr2:5637053-5642813 FORWARD LENGTH=848                                                                                                                                                                                                                                                                                              | 870 | 848  | 0         | 97.5  | 87.5 | 91.8 |
| Rsa1.0_00713.1.g18456.t1 | ref XP_002885881.1  hypothetical protein ARALYDRAFT_899587 [Arabidopsis lyrata subsp. lyrata] gi 297331721 gb EFH62140.1  hypothetical protein ARALYDRAFT_899587 [Arabidopsis lyrata subsp. lyrata]                                                                                                                                                                                                                  | 209 | 213  | 3.00E-89  | 101.9 | 85.6 | 89.0 | hypothetical protein ARALYDRAFT_899587          | gbpln | Arabidopsis lyrata   | AT2G13570.1   Symbols: NF-YB7   nuclear factor Y, subunit B7   chr2:5655842-5656489 REVERSE LENGTH=215                                                                                                                                                                                                                                                                                                                   | 209 | 215  | 6.00E-91  | 102.9 | 88.0 | 91.4 |
| Rsa1.0_00713.1.g18457.t1 | #                                                                                                                                                                                                                                                                                                                                                                                                                    | #   | #    | #         | #     | #    | -    | ----                                            | ----  | ----                 | #                                                                                                                                                                                                                                                                                                                                                                                                                        | #   | #    | #         | #     | #    |      |

|                          |                                                                                                                                                                                                                                                                                                                                                                                                                                                                                                                                                                                                                                                                                                                                                                                                                                                                                               |     |     |           |       |      |      |                                                 |       |                      |                                                                                                                                |     |     |           |       |      |      |
|--------------------------|-----------------------------------------------------------------------------------------------------------------------------------------------------------------------------------------------------------------------------------------------------------------------------------------------------------------------------------------------------------------------------------------------------------------------------------------------------------------------------------------------------------------------------------------------------------------------------------------------------------------------------------------------------------------------------------------------------------------------------------------------------------------------------------------------------------------------------------------------------------------------------------------------|-----|-----|-----------|-------|------|------|-------------------------------------------------|-------|----------------------|--------------------------------------------------------------------------------------------------------------------------------|-----|-----|-----------|-------|------|------|
| Rsa1.0_00713.1.g18458.t1 | ref NP_178983.1  pentatricopeptide repeat-containing protein [Arabidopsis thaliana]<br>gi 75206168 sp Q9SIT7.1 PP151_ARATH<br>RecName: Full=Pentatricopeptide repeat-containing protein At2g13600<br>gi 4558664 gb AAD2282.1  hypothetical protein [Arabidopsis thaliana]<br>gi 330251150 gb AEC06244.1  pentatricopeptide repeat-containing protein [Arabidopsis thaliana]                                                                                                                                                                                                                                                                                                                                                                                                                                                                                                                   | 697 | 697 | 0         | 100.0 | 85.4 | 91.4 | pentatricopeptide repeat-containing protein     | gbpln | Arabidopsis thaliana | AT2G13600.1   Symbols: Pentatricopeptide repeat (PPR) superfamily protein   chr2:5671493-5673586 FORWARD LENGTH=697            | 697 | 697 | 0         | 100.0 | 85.4 | 91.4 |
| Rsa1.0_00713.1.g18459.t1 | gb EOA33038.1  hypothetical protein CARUB_v10016369mg [Capsella rubella]                                                                                                                                                                                                                                                                                                                                                                                                                                                                                                                                                                                                                                                                                                                                                                                                                      | 642 | 649 | 0         | 101.1 | 91.6 | 94.9 | hypothetical protein CARUB_v10016369mg          | gbpln | Capsella rubella     | AT2G13610.1   Symbols: ABC-2 type transporter family protein   chr2:5673827-5675776 REVERSE LENGTH=649                         | 642 | 649 | 0         | 101.1 | 91.4 | 94.4 |
| Rsa1.0_00713.1.g18460.t1 | #                                                                                                                                                                                                                                                                                                                                                                                                                                                                                                                                                                                                                                                                                                                                                                                                                                                                                             | #   | #   | #         | #     | #    | -    | ----                                            | ----  | ----                 | #                                                                                                                              | #   | #   | #         | #     | #    | #    |
| Rsa1.0_00713.1.g18461.t1 | emb CAA08995.1  MAP3K alpha 1 protein kinase [Brassica napus]                                                                                                                                                                                                                                                                                                                                                                                                                                                                                                                                                                                                                                                                                                                                                                                                                                 | 607 | 591 | 0         | 97.4  | 91.6 | 93.2 | MAP3K alpha 1 protein kinase                    | gbpln | Brassica napus       | AT1G53570.3   Symbols: MAP3KA, MAPKKK3   mitogen-activated protein kinase kinase 3   chr1:19987391-19990733 FORWARD LENGTH=608 | 607 | 608 | 0         | 100.2 | 73.6 | 81.1 |
| Rsa1.0_00713.1.g18462.t1 | ref NP_565359.1  AGD2-like defense response protein 1 [Arabidopsis thaliana]<br>gi 75216244 sp Q9ZQI7.2 ALD1_ARATH<br>RecName: Full=Aminotransferase ALD1; AltName: Full=AGD2-like defense response protein 1<br>gi 451928665 pdb 4FLO A Chain A. Crystal Structure Of Ald1 From Arabidopsis Thaliana<br>gi 451928666 pdb 4FLO B Chain B. Crystal Structure Of Ald1 From Arabidopsis Thaliana<br>gi 15982838 gb AAL09766.1  At2g13810/F13J11.16 [Arabidopsis thaliana] gi 20197607 gb AAD15433.2  putative aspartate aminotransferase [Arabidopsis thaliana]<br>gi 20197797 gb AAM15253.1  putative aspartate aminotransferase [Arabidopsis thaliana]<br>gi 23505955 gb AAN28837.1  At2g13810/F13J11.16 [Arabidopsis thaliana] gi 41323505 gb AAR9910.1  aminotransferase ALD1 [Arabidopsis thaliana] gi 330251167 gb AEC06261.1  AGD2-like defense response protein 1 [Arabidopsis thaliana] | 456 | 456 | 0         | 100.0 | 87.9 | 92.8 | AGD2-like defense response protein 1            | gbpln | Arabidopsis thaliana | AT2G13810.1   Symbols: ALD1   AGD2-like defense response protein 1   chr2:5768489-5772138 FORWARD LENGTH=456                   | 456 | 456 | 0         | 100.0 | 87.9 | 92.8 |
| Rsa1.0_00713.1.g18463.t1 | ref NP_565374.1  uncharacterized protein [Arabidopsis thaliana]<br>gi 4544369 gb AAD2280.1  expressed protein [Arabidopsis thaliana]<br>gi 21592803 gb AAM64752.1  unknown [Arabidopsis thaliana]<br>gi 115311445 gb AB193903.1  At2g15440 [Arabidopsis thaliana]<br>gi 330251307 gb AEC06401.1  uncharacterized protein AT2G15440 [Arabidopsis thaliana]                                                                                                                                                                                                                                                                                                                                                                                                                                                                                                                                     | 330 | 329 | 1.00E-128 | 99.7  | 79.1 | 87.0 | uncharacterized protein                         | gbpln | Arabidopsis thaliana | AT2G15440.1   Symbols: Protein of unknown function (DUF579)   chr2:6743792-6744781 REVERSE LENGTH=329                          | 330 | 329 | 1.00E-131 | 99.7  | 79.1 | 87.0 |
| Rsa1.0_00713.1.g18464.t1 | ref XP_002883897.1  UDP-glucosyl transferase 73B5 [Arabidopsis lyrata subsp. lyrata]<br>gi 297329737 gb EFH60156.1  UDP-glucosyl transferase 73B5 [Arabidopsis lyrata subsp. lyrata]                                                                                                                                                                                                                                                                                                                                                                                                                                                                                                                                                                                                                                                                                                          | 472 | 484 | 0         | 102.5 | 86.4 | 93.4 | UDP-glucosyl transferase 73B5                   | gbpln | Arabidopsis lyrata   | AT2G15480.1   Symbols: UGT73B5   UDP-glucosyl transferase 73B5   chr2:6758817-6760452 FORWARD LENGTH=484                       | 472 | 484 | 0         | 102.5 | 85.2 | 92.4 |
| Rsa1.0_00713.1.g18465.t1 | ref XP_002883899.1  hypothetical protein ARALYDRAFT_899764 [Arabidopsis lyrata subsp. lyrata]<br>gi 297329739 gb EFH60158.1  hypothetical protein ARALYDRAFT_899764 [Arabidopsis lyrata subsp. lyrata]                                                                                                                                                                                                                                                                                                                                                                                                                                                                                                                                                                                                                                                                                        | 626 | 655 | 0         | 104.6 | 89.1 | 93.1 | hypothetical protein ARALYDRAFT_899764          | gbpln | Arabidopsis lyrata   | AT4G34110.1   Symbols: PAB2, PABP2, ATPAB2   poly(A) binding protein 2   chr4:16336732-16339892 FORWARD LENGTH=629             | 626 | 629 | 0         | 100.5 | 80.5 | 87.7 |
| Rsa1.0_00713.1.g18466.t1 | gb EOA13384.1  hypothetical protein CARUB_v10026424mg, partial [Capsella rubella]                                                                                                                                                                                                                                                                                                                                                                                                                                                                                                                                                                                                                                                                                                                                                                                                             | 270 | 437 | 8.00E-22  | 161.9 | 19.6 | 23.7 | hypothetical protein CARUB_v10026424mg, partial | gbpln | Capsella rubella     | AT3G06720.2   Symbols: AT-IMP, ATKAP ALPHA, AIMP ALPHA   importin alpha isoform 1   chr3:2120559-2123555 FORWARD LENGTH=532    | 270 | 532 | 6.00E-23  | 197.0 | 19.6 | 23.7 |

|                          |                                                                                                                                                                                                                                                                                                                                                                                                                                                                                                                                                                                                                                                                                                                                                                                                                                                                                                                                                                                                                                                                                          |     |     |           |       |      |       |                                                                             |       |                      |                                                                                                                                                  |     |     |           |       |      |       |
|--------------------------|------------------------------------------------------------------------------------------------------------------------------------------------------------------------------------------------------------------------------------------------------------------------------------------------------------------------------------------------------------------------------------------------------------------------------------------------------------------------------------------------------------------------------------------------------------------------------------------------------------------------------------------------------------------------------------------------------------------------------------------------------------------------------------------------------------------------------------------------------------------------------------------------------------------------------------------------------------------------------------------------------------------------------------------------------------------------------------------|-----|-----|-----------|-------|------|-------|-----------------------------------------------------------------------------|-------|----------------------|--------------------------------------------------------------------------------------------------------------------------------------------------|-----|-----|-----------|-------|------|-------|
| Rsa1.0_00714.1.g18467.t1 | ref NP_563718.1  ubiquitin-associated (UBA)/TS-N domain-containing protein [Arabidopsis thaliana] gi 7211981 gb AAF40452.1 AC004809_10 ESTs gb N65605.gb N38087.gb T20485.gb T13726.gb N38339.gb F15440 and gb N97201 come from this gene [Arabidopsis thaliana] gi 17065066 gb AAL32687.1  Unknown protein [Arabidopsis thaliana] gi 21594053 gb AAM65971.1  unknown [Arabidopsis thaliana] gi 23197878 gb AANI5466.1  Unknown protein [Arabidopsis thaliana] gi 332189630 gb AEE27751.1  ubiquitin-associated (UBA)/TS-N domain-containing protein [Arabidopsis thaliana]                                                                                                                                                                                                                                                                                                                                                                                                                                                                                                              | 123 | 413 | 5.00E-66  | 335.8 | 97.6 | 100.0 | ubiquitin-associated (UBA)/TS-N domain-containing protein                   | gbpln | Arabidopsis thaliana | AT1G04850.1   Symbols:   ubiquitin-associated (UBA)/TS-N domain-containing protein   chr1:1365311-1368706 REVERSE LENGTH=413                     | 123 | 413 | 9.00E-69  | 335.8 | 97.6 | 100.0 |
| Rsa1.0_00714.1.g18468.t1 | gb AAF40453.1 AC004809_11 Similar to gi 3217452 F45E6.3 gene product from C. elegans cosmid gb Z68117 [Arabidopsis thaliana]                                                                                                                                                                                                                                                                                                                                                                                                                                                                                                                                                                                                                                                                                                                                                                                                                                                                                                                                                             | 440 | 438 | 0         | 99.5  | 86.8 | 91.6  | Similar to gi 3217452 F45E6.3 gene product from C. elegans cosmid gb Z68117 | gbpln | Arabidopsis thaliana | AT1G04830.1   Symbols:   Ypt/Rab-GAP domain of gyp1p superfamily protein   chr1:1359087-1361844 REVERSE LENGTH=448                               | 440 | 448 | 0         | 101.8 | 81.6 | 86.6  |
| Rsa1.0_00714.1.g18469.t1 | ref NP_563716.3  ankyrin repeat-containing protein [Arabidopsis thaliana] gi 26451052 dbj BAC42631.1  unknown protein [Arabidopsis thaliana] gi 332189622 gb AEE27743.1  ankyrin repeat-containing protein [Arabidopsis thaliana]                                                                                                                                                                                                                                                                                                                                                                                                                                                                                                                                                                                                                                                                                                                                                                                                                                                        | 658 | 664 | 0         | 100.9 | 89.5 | 95.3  | ankyrin repeat-containing protein                                           | gbpln | Arabidopsis thaliana | AT1G04780.1   Symbols:   Ankyrin repeat family protein   chr1:1342965 REVERSE LENGTH=664                                                         | 658 | 664 | 0         | 100.9 | 89.5 | 95.3  |
| Rsa1.0_00714.1.g18470.t1 | gb EOA38336.1  hypothetical protein CARUB_v10009848mg [Capsella rubella]                                                                                                                                                                                                                                                                                                                                                                                                                                                                                                                                                                                                                                                                                                                                                                                                                                                                                                                                                                                                                 | 285 | 305 | 1.00E-133 | 107.0 | 87.0 | 90.5  | hypothetical protein CARUB_v10009848mg                                      | gbpln | Capsella rubella     | AT1G04770.1   Symbols:   Tetratricopeptide repeat (TPR)-like superfamily protein   chr1:1336564-1337767 REVERSE LENGTH=303                       | 285 | 303 | 1.00E-133 | 106.3 | 87.0 | 90.5  |
| Rsa1.0_00714.1.g18471.t1 | gb EOA37088.1  hypothetical protein CARUB_v10010251mg [Capsella rubella]                                                                                                                                                                                                                                                                                                                                                                                                                                                                                                                                                                                                                                                                                                                                                                                                                                                                                                                                                                                                                 | 219 | 219 | 1.00E-126 | 100.0 | 99.5 | 100.0 | hypothetical protein CARUB_v10010251mg                                      | gbpln | Capsella rubella     | AT1G04750.1   Symbols: VAMP7B, VAMP721, ATVAMP721, AT VAMP7B   vesicle-associated membrane protein 721   chr1:1331857-1333426 REVERSE LENGTH=219 | 219 | 219 | 1.00E-128 | 100.0 | 98.6 | 100.0 |
| Rsa1.0_00714.1.g18472.t1 | ref NP_180873.1  3-ketoacyl-CoA thiolase 2 [Arabidopsis thaliana] gi 73919871 sp Q56WD9.2 THIK2_ARAT H RecName: Full=3-ketoacyl-CoA thiolase 2, peroxisomal; AltName: Full=Acetyl-CoA acyltransferase 2; AltName: Full=beta-ketothiolase 2; AltName: Full=Peroxisomal 3-oxoacyl-CoA thiolase 2; AltName: Full=Peroxisome defective protein 1; Flags: Precursor gi 11993853 gb AAG42910.1 AF327529_1 putative 3-ketoacyl-CoA thiolase [Arabidopsis thaliana] gi 13194830 gb AAK15577.1 AF349530_1 putative 3-ketoacyl-CoA thiolase [Arabidopsis thaliana] gi 2924779 gb AAC04908.1  3-ketoacyl-CoA thiolase [Arabidopsis thaliana] gi 2981618 dbj BAA25248.1  3-ketoacyl-CoA thiolase [Arabidopsis thaliana] gi 2981618 dbj BAA25249.1  3-ketoacyl-CoA thiolase [Arabidopsis thaliana] gi 15450669 gb AAK96606.1  At2g33150/F25118.11 [Arabidopsis thaliana] gi 17380614 gb AAL36070.1  At2g33150/F25118.11 [Arabidopsis thaliana] gi 21593136 gb AAM65085.1  3-ketoacyl-CoA thiolase [Arabidopsis thaliana] gi 330253697 gb AEC08791.1  3-ketoacyl-CoA thiolase 2 [Arabidopsis thaliana] | 443 | 462 | 0         | 104.3 | 86.7 | 92.6  | 3-ketoacyl-CoA thiolase 2                                                   | gbpln | Arabidopsis thaliana | AT2G33150.1   Symbols: PKT3, PED1, KAT2   peroxisomal 3-ketoacyl-CoA thiolase 3   chr2:14047814-14050983 REVERSE LENGTH=462                      | 443 | 462 | 0         | 104.3 | 86.7 | 92.6  |
| Rsa1.0_00714.1.g18473.t1 | gb EOA39837.1  hypothetical protein CARUB_v10008506mg [Capsella rubella]                                                                                                                                                                                                                                                                                                                                                                                                                                                                                                                                                                                                                                                                                                                                                                                                                                                                                                                                                                                                                 | 667 | 671 | 0         | 100.6 | 93.1 | 97.3  | hypothetical protein CARUB_v10008506mg                                      | gbpln | Capsella rubella     | AT1G50920.1   Symbols:   Nucleolar GTP-binding protein   chr1:18870555-18872570 FORWARD LENGTH=671                                               | 667 | 671 | 0         | 100.6 | 91.2 | 96.4  |
| Rsa1.0_00714.1.g18474.t1 | gb EOA38234.1  hypothetical protein CARUB_v10009717mg [Capsella rubella]                                                                                                                                                                                                                                                                                                                                                                                                                                                                                                                                                                                                                                                                                                                                                                                                                                                                                                                                                                                                                 | 328 | 328 | 0         | 100.0 | 98.2 | 99.4  | hypothetical protein CARUB_v10009717mg                                      | gbpln | Capsella rubella     | AT1G04690.1   Symbols: KAB1, KV-BETA1   potassium channel beta subunit 1   chr1:1313662-1315420 FORWARD LENGTH=328                               | 328 | 328 | 0         | 100.0 | 97.9 | 99.4  |



|                          |                                                                                                                                                                                                                                                                                                                                                                                                                                                                                                                                                                                                         |      |      |           |       |      |      |                                                      |       |                      |                                                                                                                                                                                                                                                                                   |      |      |           |       |      |      |
|--------------------------|---------------------------------------------------------------------------------------------------------------------------------------------------------------------------------------------------------------------------------------------------------------------------------------------------------------------------------------------------------------------------------------------------------------------------------------------------------------------------------------------------------------------------------------------------------------------------------------------------------|------|------|-----------|-------|------|------|------------------------------------------------------|-------|----------------------|-----------------------------------------------------------------------------------------------------------------------------------------------------------------------------------------------------------------------------------------------------------------------------------|------|------|-----------|-------|------|------|
| Rsa1.0_00714.1.g18475.t1 | ref[NP_563715.1] putative pectate lyase 1 [Arabidopsis thaliana]<br>gi 32129844 sp Q940Q1.2 PEL1_ARATH<br>RecName: Full=Probable pectate lyase 1; AltName: Full=Pectate lyase A1; Flags: Precursor<br>gi 2494113 gb AAB80622.1  Strong similarity to Musa pectate lyase (gb X92943). ESTs gb AA042458, gb ATTS4502, gb N38552 come from this gene [Arabidopsis thaliana]<br>gi 18086433 gb AL57671.1  At1g04680/T1G11.6 [Arabidopsis thaliana] gi 21593312 gb AAM65261.1  putative pectate lyase A11 [Arabidopsis thaliana] gi 332189611 gb AEE27732.1  putative pectate lyase 1 [Arabidopsis thaliana] | 429  | 431  | 0         | 100.5 | 93.5 | 95.8 | putative pectate lyase 1                             | gbpln | Arabidopsis thaliana | AT1G04680.1   Symbols:   Pectin lyase-like superfamily protein   chr1:1300452-1307780 REVERSE LENGTH=431                                                                                                                                                                          | 429  | 431  | 0         | 100.5 | 93.5 | 95.8 |
| Rsa1.0_00714.1.g18476.t1 | ref[XP_002892235.1] predicted protein [Arabidopsis lyrata subsp. lyrata]<br>gi 297339077 gb EFH68494.1  predicted protein [Arabidopsis lyrata subsp. lyrata]                                                                                                                                                                                                                                                                                                                                                                                                                                            | 220  | 207  | 3.00E-16  | 94.1  | 20.0 | 22.7 | predicted protein                                    | gbpln | Arabidopsis lyrata   | AT1G04660.1   Symbols:   glycine-rich protein   chr1:1300668-1301306 REVERSE LENGTH=212                                                                                                                                                                                           | 220  | 212  | 4.00E-18  | 96.4  | 20.0 | 22.3 |
| Rsa1.0_00714.1.g18477.t2 | ref[NP_171959.2] uncharacterized protein [Arabidopsis thaliana]<br>gi 332189608 gb AEE27729.1  uncharacterized protein AT1G04650 [Arabidopsis thaliana]                                                                                                                                                                                                                                                                                                                                                                                                                                                 | 975  | 997  | 0         | 102.3 | 79.5 | 89.3 | uncharacterized protein                              | gbpln | Arabidopsis thaliana | AT1G04650.1   Symbols:   unknown protein; Has 30201 Blast hits to 17322 proteins in 780 species: Archae - 12; Bacteria - 1396; Metazoa - 17338; Fungi - 3422; Plants - 5037; Viruses - 0; Other Eukaryotes - 2996 (source: NCBI BLINK).   chr1:1294893-1298903 REVERSE LENGTH=997 | 975  | 997  | 0         | 102.3 | 79.5 | 89.3 |
| Rsa1.0_00714.1.g18478.t2 | ref[XP_002889516.1] hypothetical protein ARALYDRAFT_887631 [Arabidopsis lyrata subsp. lyrata]<br>gi 297335358 gb EFH65775.1  hypothetical protein ARALYDRAFT_887631 [Arabidopsis lyrata subsp. lyrata]                                                                                                                                                                                                                                                                                                                                                                                                  | 1748 | 1715 | 0         | 98.1  | 84.4 | 90.1 | hypothetical protein ARALYDRAFT_887631               | gbpln | Arabidopsis lyrata   | AT1G04600.1   Symbols: XIA, ATXIA   myosin XI A   chr1:1262123-1272376 FORWARD LENGTH=1730                                                                                                                                                                                        | 1748 | 1730 | 0         | 99.0  | 83.8 | 89.6 |
| Rsa1.0_00714.1.g18479.t1 | #                                                                                                                                                                                                                                                                                                                                                                                                                                                                                                                                                                                                       | #    | #    | #         | #     | #    | #    | -                                                    | ----  | ----                 | #                                                                                                                                                                                                                                                                                 | #    | #    | #         | #     | #    |      |
| Rsa1.0_00714.1.g18480.t1 | gb ACB59212.1  unknown protein [Brassica oleracea]                                                                                                                                                                                                                                                                                                                                                                                                                                                                                                                                                      | 89   | 610  | 4.00E-12  | 685.4 | 46.1 | 62.9 | unknown protein                                      | gbpln | Brassica oleracea    | AT3G47680.1   Symbols:   DNA binding   chr3:17577483-17578391 REVERSE LENGTH=302                                                                                                                                                                                                  | 89   | 302  | 3.00E-12  | 339.3 | 40.4 | 51.7 |
| Rsa1.0_00715.1.g18481.t1 | ref[NP_179007.1] cysteine/histidine-rich C1 domain-containing protein [Arabidopsis thaliana]<br>gi 20197610 gb AAM15153.1  hypothetical protein [Arabidopsis thaliana] gi 29725844 gb AAO89210.1  hypothetical protein [Arabidopsis thaliana] gi 60547703 gb AAAX23815.1  hypothetical protein At2g13900 [Arabidopsis thaliana]<br>gi 330251172 gb AEC06266.1  cysteine/histidine-rich C1 domain-containing protein [Arabidopsis thaliana]                                                                                                                                                              | 653  | 661  | 0         | 101.2 | 59.9 | 72.4 | cysteine/histidine-rich C1 domain-containing protein | gbpln | Arabidopsis thaliana | AT2G13900.1   Symbols:   Cysteine/Histidine-rich C1 domain family protein   chr2:5833102-5835087 FORWARD LENGTH=661                                                                                                                                                               | 653  | 661  | 0         | 101.2 | 59.9 | 72.4 |
| Rsa1.0_00715.1.g18482.t1 | gb EOA12717.1  hypothetical protein CARUB_v10028097mg [Capsella rubella]                                                                                                                                                                                                                                                                                                                                                                                                                                                                                                                                | 364  | 364  | 1.00E-178 | 100.0 | 80.5 | 91.2 | hypothetical protein CARUB_v10028097mg               | gbpln | Capsella rubella     | AT5G59530.1   Symbols:   2-oxoglutarate (2OG) and Fe(II)-dependent oxygenase superfamily protein   chr5:23994434-23995715 REVERSE LENGTH=364                                                                                                                                      | 364  | 364  | 1.00E-179 | 100.0 | 80.5 | 90.7 |
| Rsa1.0_00715.1.g18483.t2 | ref[XP_002866336.1] oxidoreductase [Arabidopsis lyrata subsp. lyrata]<br>gi 297312171 gb EFH42595.1  oxidoreductase [Arabidopsis lyrata subsp. lyrata]                                                                                                                                                                                                                                                                                                                                                                                                                                                  | 727  | 365  | 1.00E-174 | 50.2  | 40.4 | 44.3 | oxidoreductase                                       | gbpln | Arabidopsis lyrata   | AT5G59540.1   Symbols:   2-oxoglutarate (2OG) and Fe(II)-dependent oxygenase superfamily protein   chr5:23996293-23997576 REVERSE LENGTH=366                                                                                                                                      | 727  | 366  | 1.00E-173 | 50.3  | 39.5 | 43.9 |
| Rsa1.0_00715.1.g18484.t1 | ref[XP_002866336.1] oxidoreductase [Arabidopsis lyrata subsp. lyrata]<br>gi 297312171 gb EFH42595.1  oxidoreductase [Arabidopsis lyrata subsp. lyrata]                                                                                                                                                                                                                                                                                                                                                                                                                                                  | 366  | 365  | 1.00E-178 | 99.7  | 80.9 | 91.0 | oxidoreductase                                       | gbpln | Arabidopsis lyrata   | AT5G59540.1   Symbols:   2-oxoglutarate (2OG) and Fe(II)-dependent oxygenase superfamily protein   chr5:23996293-23997576 REVERSE LENGTH=366                                                                                                                                      | 366  | 366  | 1.00E-180 | 100.0 | 80.1 | 91.0 |
| Rsa1.0_00715.1.g18485.t1 | ref[XP_002866336.1] oxidoreductase [Arabidopsis lyrata subsp. lyrata]<br>gi 297312171 gb EFH42595.1  oxidoreductase [Arabidopsis lyrata subsp. lyrata]                                                                                                                                                                                                                                                                                                                                                                                                                                                  | 379  | 365  | 1.00E-179 | 96.3  | 78.9 | 85.5 | oxidoreductase                                       | gbpln | Arabidopsis lyrata   | AT5G59540.1   Symbols:   2-oxoglutarate (2OG) and Fe(II)-dependent oxygenase superfamily protein   chr5:23996293-23997576 REVERSE LENGTH=366                                                                                                                                      | 379  | 366  | 1.00E-179 | 96.6  | 77.0 | 84.7 |
| Rsa1.0_00715.1.g18486.t1 | ref[XP_002866337.1] hypothetical protein ARALYDRAFT_496089 [Arabidopsis lyrata subsp. lyrata]<br>gi 297312172 gb EFH42596.1  hypothetical protein ARALYDRAFT_496089 [Arabidopsis lyrata subsp. lyrata]                                                                                                                                                                                                                                                                                                                                                                                                  | 393  | 406  | 1.00E-147 | 103.3 | 76.6 | 83.5 | hypothetical protein ARALYDRAFT_496089               | gbpln | Arabidopsis lyrata   | AT5G59550.1   Symbols:   zinc finger (C3HC4-type RING finger) family protein   chr5:23998422-23999645 REVERSE LENGTH=407                                                                                                                                                          | 393  | 407  | 1.00E-144 | 103.6 | 76.8 | 84.2 |

|                          |                                                                                                                                                                                                                                                                                                                                                                                                                                                                                                                                                                                                                                                                                         |     |     |          |       |      |      |                              |       |                      |                                                                                                                                                                                                                                                                                                                  |     |     |          |       |      |      |
|--------------------------|-----------------------------------------------------------------------------------------------------------------------------------------------------------------------------------------------------------------------------------------------------------------------------------------------------------------------------------------------------------------------------------------------------------------------------------------------------------------------------------------------------------------------------------------------------------------------------------------------------------------------------------------------------------------------------------------|-----|-----|----------|-------|------|------|------------------------------|-------|----------------------|------------------------------------------------------------------------------------------------------------------------------------------------------------------------------------------------------------------------------------------------------------------------------------------------------------------|-----|-----|----------|-------|------|------|
| Rsa1.0_00715.1.g18487.t1 | ref[XP_002866339.1] predicted protein [Arabidopsis lyrata subsp. lyrata] gi 297312174 gb EFH42598.1  predicted protein [Arabidopsis lyrata subsp. lyrata]                                                                                                                                                                                                                                                                                                                                                                                                                                                                                                                               | 652 | 453 | 0        | 69.5  | 57.4 | 63.7 | predicted protein            | gbpln | Arabidopsis lyrata   | AT5G59580.1   Symbols: UGT76E1   UDP-glucosyl transferase 76E1   chr5:24006239-24007689 REVERSE LENGTH=453                                                                                                                                                                                                       | 652 | 453 | 0        | 69.5  | 56.6 | 63.2 |
| Rsa1.0_00715.1.g18488.t1 | ref[XP_002866375.1] APUM18 [Arabidopsis lyrata subsp. lyrata] gi 297312210 gb EFH42634.1  APUM18 [Arabidopsis lyrata subsp. lyrata]                                                                                                                                                                                                                                                                                                                                                                                                                                                                                                                                                     | 335 | 328 | 2.00E-71 | 97.9  | 47.5 | 60.3 | APUM18                       | gbpln | Arabidopsis lyrata   | AT5G60180.1   Symbols: APUM19, PUM19   pumilio 19   chr5:24233024-24234007 REVERSE LENGTH=327                                                                                                                                                                                                                    | 335 | 327 | 3.00E-65 | 97.6  | 45.7 | 58.2 |
| Rsa1.0_00715.1.g18489.t1 | ref[XP_002866375.1] APUM18 [Arabidopsis lyrata subsp. lyrata] gi 297312210 gb EFH42634.1  APUM18 [Arabidopsis lyrata subsp. lyrata] ref[NP_190227.1] uncharacterized protein [Arabidopsis thaliana] gi 22327975 ref[NP_680457.1] uncharacterized protein [Arabidopsis thaliana] gi 334188494 ref[NP_001190570.1] uncharacterized protein [Arabidopsis thaliana] gi 297796915 ref[XP_002866342.1] hypothetical protein ARALYDRAFT_496097 [Arabidopsis lyrata subsp. lyrata] gi 297815794 ref[XP_002875780.1] hypothetical protein ARALYDRAFT_485014 [Arabidopsis lyrata subsp. lyrata]                                                                                                   | 355 | 328 | 8.00E-74 | 92.4  | 44.5 | 58.6 | APUM18                       | gbpln | Arabidopsis lyrata   | AT5G60180.1   Symbols: APUM19, PUM19   pumilio 19   chr5:24233024-24234007 REVERSE LENGTH=327                                                                                                                                                                                                                    | 355 | 327 | 9.00E-66 | 92.1  | 40.3 | 53.2 |
| Rsa1.0_00715.1.g18490.t1 | gi 6522622 emb CAB62034.1  putative protein [Arabidopsis thaliana] gi 17065520 gb AAL32914.1  Unknown protein [Arabidopsis thaliana] gi 17381284 gb AAL36060.1  AT3g46430/F18L15_150 [Arabidopsis thaliana] gi 20148461 gb AAM10121.1  unknown protein [Arabidopsis thaliana] gi 20453375 gb AAM19926.1  AT3g46430/F18L15_150 [Arabidopsis thaliana] gi 26450436 dbj BAC42332.1  unknown protein [Arabidopsis thaliana] gi 26451867 dbj BAC43026.1  unknown protein [Arabidopsis thaliana] gi 297312177 gb EFH42601.1  hypothetical protein ARALYDRAFT_496097 [Arabidopsis lyrata subsp. lyrata]                                                                                        | 55  | 55  | 6.00E-23 | 100.0 | 96.4 | 96.4 | uncharacterized protein      | gbpln | Arabidopsis lyrata   | AT5G59613.2   Symbols:   unknown protein; FUNCTIONS IN: molecular_function unknown; INVOLVED IN: biological_process unknown; LOCATED IN: mitochondrial respiratory chain complex III; BEST Arabidopsis thaliana protein match is: unknown protein (TAIR:AT3G46430.1).   chr5:24015726-24016500 REVERSE LENGTH=55 | 55  | 55  | 1.00E-25 | 100.0 | 96.4 | 96.4 |
| Rsa1.0_00715.1.g18491.t1 | ref[NP_200775.2] Receptor-like protein kinase [Arabidopsis thaliana] gi 75334110 sp Q9FN94.1 RLK7_ARATH RecName: Full=Receptor-like protein kinase At5g59670; AltName: Full=Leucine-rich repeat receptor-like protein kinase At5g59670; Flags: Precursor gi 9758833 dbj BAB09505.1  receptor-like protein kinase [Arabidopsis thaliana] gi 20466280 gb AAM20457.1  serine/threonine-specific protein kinase-like [Arabidopsis thaliana] gi 31711772 gb AAP68242.1  At5g59670 [Arabidopsis thaliana] gi 224589733 gb ACN59398.1  leucine-rich repeat receptor-like protein kinase [Arabidopsis thaliana] gi 332009835 gb AED97218.1  Receptor-like protein kinase [Arabidopsis thaliana] | 208 | 868 | 7.00E-67 | 417.3 | 63.0 | 70.2 | Receptor-like protein kinase | gbpln | Arabidopsis thaliana | AT5G59670.1   Symbols:   Leucine-rich repeat protein kinase family protein   chr5:24041538-24045478 FORWARD LENGTH=868                                                                                                                                                                                           | 208 | 868 | 2.00E-69 | 417.3 | 63.0 | 70.2 |

|                           |                                                                                                                                                                                                                                                                                                                                                                                                                                                                                                                                                                                                                                                                                                           |     |     |           |       |       |       |                                                               |             |                      |                                                                                                                                    |     |     |           |       |       |       |
|---------------------------|-----------------------------------------------------------------------------------------------------------------------------------------------------------------------------------------------------------------------------------------------------------------------------------------------------------------------------------------------------------------------------------------------------------------------------------------------------------------------------------------------------------------------------------------------------------------------------------------------------------------------------------------------------------------------------------------------------------|-----|-----|-----------|-------|-------|-------|---------------------------------------------------------------|-------------|----------------------|------------------------------------------------------------------------------------------------------------------------------------|-----|-----|-----------|-------|-------|-------|
| Rsa1.0_00715.1.g18492.t1  | ref NP_200775.2  Receptor-like protein kinase [Arabidopsis thaliana]<br>gi 75334110 sp Q9FN94.1 RLK7_ARATH<br>RecName: Full=Receptor-like protein kinase At5g59670; AltName: Full=Leucine-rich repeat receptor-like protein kinase At5g59670; Flags: Precursor gi 9758833 dbj BAB09505.1  receptor-like protein kinase [Arabidopsis thaliana]<br>gi 20466280 gb AAM20457.1  serine/threonine-specific protein kinase-like [Arabidopsis thaliana]<br>gi 31711772 gb AAP68242.1  At5g59670 [Arabidopsis thaliana]<br>gi 224589733 gb ACN59398.1  leucine-rich repeat receptor-like protein kinase [Arabidopsis thaliana]<br>gi 332009835 gb AED97218.1  Receptor-like protein kinase [Arabidopsis thaliana] | 655 | 868 | 0         | 132.5 | 62.7  | 72.4  | Receptor-like protein kinase                                  | gbpln       | Arabidopsis thaliana | AT5G59670.1   Symbols:   Leucine-rich repeat protein kinase family protein   chr5:24041538-24045478 FORWARD LENGTH=868             | 655 | 868 | 0         | 132.5 | 62.7  | 72.4  |
| Rsa1.0_00715.1.g18493.t10 | gb EOA12886.1  hypothetical protein CARUB_v10025859mg [Capsella rubella]                                                                                                                                                                                                                                                                                                                                                                                                                                                                                                                                                                                                                                  | 979 | 887 | 0         | 90.6  | 58.8  | 70.7  | hypothetical protein CARUB_v10025859mg                        | gbpln       | Capsella rubella     | AT5G59680.1   Symbols:   Leucine-rich repeat protein kinase family protein   chr5:24046792-24050801 FORWARD LENGTH=887             | 979 | 887 | 0         | 90.6  | 57.8  | 69.3  |
| Rsa1.0_00715.1.g18494.t1  | gb EOA12886.1  hypothetical protein CARUB_v10025859mg [Capsella rubella]                                                                                                                                                                                                                                                                                                                                                                                                                                                                                                                                                                                                                                  | 440 | 887 | 3.00E-82  | 201.6 | 35.0  | 44.1  | hypothetical protein CARUB_v10025859mg                        | gbpln       | Capsella rubella     | AT5G59680.1   Symbols:   Leucine-rich repeat protein kinase family protein   chr5:24046792-24050801 FORWARD LENGTH=887             | 440 | 887 | 2.00E-84  | 201.6 | 33.6  | 42.7  |
| Rsa1.0_00715.1.g18495.t1  | tpg DAA40122.1  TPA: histone H4.3 [Zea mays]                                                                                                                                                                                                                                                                                                                                                                                                                                                                                                                                                                                                                                                              | 103 | 248 | 3.00E-52  | 240.8 | 100.0 | 100.0 | TPA: histone H4.3                                             | gbenv/gbpln | Zea mays             | AT5G59970.1   Symbols:   Histone superfamily protein   chr5:24146352-24146663 REVERSE LENGTH=103                                   | 103 | 103 | 2.00E-52  | 100.0 | 100.0 | 100.0 |
| Rsa1.0_00715.1.g18496.t1  | ref NP_568912.2  VIRE2 interacting protein 2 [Arabidopsis thaliana]<br>gi 325530323 sp Q9FPW4.2 VIP2_ARATH<br>H RecName: Full=Probable NOT transcription complex subunit VIP2; AltName: Full=Protein VIRE2 INTERACTING PROTEIN2; Short=AtVIP2<br>gi 332009839 gb AED97222.1  VIRE2 interacting protein 2 [Arabidopsis thaliana]                                                                                                                                                                                                                                                                                                                                                                           | 292 | 614 | 1.00E-112 | 210.3 | 84.6  | 89.7  | VIRE2 interacting protein 2                                   | gbpln       | Arabidopsis thaliana | AT5G59710.1   Symbols: VIP2, AtVIP2   VIRE2 interacting protein 2   chr5:24058157-24061736 FORWARD LENGTH=614                      | 292 | 614 | 1.00E-115 | 210.3 | 84.6  | 89.7  |
| Rsa1.0_00716.1.g18497.t1  | ref NP_200466.1  oxidative stress 3 [Arabidopsis thaliana]<br>gi 8809630 dbj BAA97181.1  unnamed protein product [Arabidopsis thaliana]<br>gi 51969112 dbj BAD43248.1  putative protein [Arabidopsis thaliana]<br>gi 51971389 dbj BAD44359.1  putative protein [Arabidopsis thaliana]<br>gi 332009397 gb AED96780.1  oxidative stress 3 [Arabidopsis thaliana]                                                                                                                                                                                                                                                                                                                                            | 117 | 172 | 5.00E-26  | 147.0 | 71.8  | 78.6  | oxidative stress 3                                            | gbpln       | Arabidopsis thaliana | AT5G56550.1   Symbols: OXS3, ATOXS3   oxidative stress 3   chr5:22895847-22896502 REVERSE LENGTH=172                               | 117 | 172 | 9.00E-29  | 147.0 | 71.8  | 78.6  |
| Rsa1.0_00716.1.g18498.t1  | sp Q9FJV2.2 FBD27_ARATH RecName: Full=Putative FBD-associated F-box protein At5g56560                                                                                                                                                                                                                                                                                                                                                                                                                                                                                                                                                                                                                     | 427 | 418 | 1.00E-139 | 97.9  | 59.7  | 73.1  | RecName: Full=Putative FBD-associated F-box protein At5g56560 | ----        | ----                 | AT5G56560.1   Symbols:   FBD, F-box and Leucine Rich Repeat domains containing protein   chr5:22899724-22901985 FORWARD LENGTH=607 | 427 | 607 | 1.00E-106 | 142.2 | 44.3  | 52.2  |
| Rsa1.0_00716.1.g18499.t1  | #                                                                                                                                                                                                                                                                                                                                                                                                                                                                                                                                                                                                                                                                                                         | #   | #   | #         | #     | #     | #     | -                                                             | ----        | ----                 | #                                                                                                                                  | #   | #   | #         | #     | #     |       |
| Rsa1.0_00716.1.g18500.t1  | gb EOA14381.1  hypothetical protein CARUB_v10027574mg [Capsella rubella]                                                                                                                                                                                                                                                                                                                                                                                                                                                                                                                                                                                                                                  | 517 | 618 | 1.00E-145 | 119.5 | 59.6  | 74.9  | hypothetical protein CARUB_v10027574mg                        | gbpln       | Capsella rubella     | AT5G56560.1   Symbols:   FBD, F-box and Leucine Rich Repeat domains containing protein   chr5:22899724-22901985 FORWARD LENGTH=607 | 517 | 607 | 1.00E-140 | 117.4 | 57.6  | 73.1  |
| Rsa1.0_00716.1.g18501.t1  | ref XP_002866159.1  hypothetical protein ARALYDRAFT_495755 [Arabidopsis lyrata subsp. lyrata]<br>gi 297311994 gb EFH42418.1  hypothetical protein ARALYDRAFT_495755 [Arabidopsis lyrata subsp. lyrata]                                                                                                                                                                                                                                                                                                                                                                                                                                                                                                    | 319 | 315 | 1.00E-162 | 98.7  | 85.3  | 89.0  | hypothetical protein ARALYDRAFT_495755                        | gbpln       | Arabidopsis lyrata   | AT5G56640.1   Symbols: MIOX5   myo-inositol oxygenase 5   chr5:22927534-22929638 REVERSE LENGTH=314                                | 319 | 314 | 1.00E-161 | 98.4  | 84.6  | 88.1  |

|                          |                                                                                                                                                                                                                                                                                                                                                                                                                                                                                                                                                                                                                                                                                                                                                                                                                                                                                                                                                                                                                                                                                                                                                                                                                                                                                                                                                |      |      |           |       |       |       |                                        |       |                      |                                                                                                                                                                                                                                                                                                                            |      |     |           |       |       |       |
|--------------------------|------------------------------------------------------------------------------------------------------------------------------------------------------------------------------------------------------------------------------------------------------------------------------------------------------------------------------------------------------------------------------------------------------------------------------------------------------------------------------------------------------------------------------------------------------------------------------------------------------------------------------------------------------------------------------------------------------------------------------------------------------------------------------------------------------------------------------------------------------------------------------------------------------------------------------------------------------------------------------------------------------------------------------------------------------------------------------------------------------------------------------------------------------------------------------------------------------------------------------------------------------------------------------------------------------------------------------------------------|------|------|-----------|-------|-------|-------|----------------------------------------|-------|----------------------|----------------------------------------------------------------------------------------------------------------------------------------------------------------------------------------------------------------------------------------------------------------------------------------------------------------------------|------|-----|-----------|-------|-------|-------|
|                          | ref NP_194668.1  40S ribosomal protein S30 [Arabidopsis thaliana]<br>gi 15241895 ref NP_200478.1  40S ribosomal protein S30 [Arabidopsis thaliana] gi 18399137 ref NP_565458.1  40S ribosomal protein S30 [Arabidopsis thaliana]<br>gi 297796551 ref XP_002866160.1  40S ribosomal protein S30 [Arabidopsis lyrata subsp. lyrata]<br>gi 297799054 ref XP_002867411.1  predicted protein [Arabidopsis lyrata subsp. lyrata]<br>gi 297836282 ref XP_002896023.1  40S ribosomal protein S30 [Arabidopsis lyrata subsp. lyrata]<br>gi 22096379 sp P49689.3 RS30_ARATH RecName: Full=40S ribosomal protein S30 gi 7269837 emb CAB79697.1  RIBOSOMAL PROTEIN S30 homolog [Arabidopsis thaliana]<br>gi 10176771 dbj BAB09885.1  40S ribosomal protein S30 homolog [Arabidopsis thaliana]<br>gi 15450480 gb AAK96533.1  At2g19750/F6F22.22 [Arabidopsis thaliana] gi 16974467 gb AAL31237.1  At2g19750/F6F22.22 [Arabidopsis thaliana] gi 20197294 gb AAC62141.2  40S ribosomal protein S30 [Arabidopsis thaliana] gi 21618031 gb AAM67081.1  40S ribosomal protein S30 [Arabidopsis thaliana] gi 22135964 gb AAM91564.1  40S ribosomal protein S30-like protein ref XP_002888797.1  bet v I allergen family protein [Arabidopsis lyrata subsp. lyrata] gi 297334638 gb EFH65056.1  bet v I allergen family protein [Arabidopsis lyrata subsp. lyrata] | 62   | 62   | 5.00E-26  | 100.0 | 100.0 | 100.0 | 40S ribosomal protein S30              | gbpln | Arabidopsis lyrata   | AT5G56670.1   Symbols:   Ribosomal protein S30 family protein   chr5:22935413-22935981 REVERSE LENGTH=62                                                                                                                                                                                                                   | 62   | 62  | 8.00E-29  | 100.0 | 100.0 | 100.0 |
| Rsa1.0_00716.1.g18502.t1 |                                                                                                                                                                                                                                                                                                                                                                                                                                                                                                                                                                                                                                                                                                                                                                                                                                                                                                                                                                                                                                                                                                                                                                                                                                                                                                                                                |      |      |           |       |       |       |                                        |       |                      |                                                                                                                                                                                                                                                                                                                            |      |     |           |       |       |       |
| Rsa1.0_00716.1.g18503.t1 | gb EOA17998.1  hypothetical protein CARUB_v10006433mg [Capsella rubella]                                                                                                                                                                                                                                                                                                                                                                                                                                                                                                                                                                                                                                                                                                                                                                                                                                                                                                                                                                                                                                                                                                                                                                                                                                                                       | 119  | 119  | 1.00E-60  | 100.0 | 98.3  | 99.2  | hypothetical protein CARUB_v10006433mg | gbpln | Capsella rubella     | AT5G56710.1   Symbols:   Ribosomal protein L31e family protein   chr5:22944003-22944767 REVERSE LENGTH=119                                                                                                                                                                                                                 | 119  | 119 | 2.00E-62  | 100.0 | 96.6  | 99.2  |
| Rsa1.0_00716.1.g18504.t1 | ref XP_002864477.1  ndr family protein [Arabidopsis lyrata subsp. lyrata] gi 297310312 gb EFH40736.1  ndr family protein [Arabidopsis lyrata subsp. lyrata]                                                                                                                                                                                                                                                                                                                                                                                                                                                                                                                                                                                                                                                                                                                                                                                                                                                                                                                                                                                                                                                                                                                                                                                    | 144  | 346  | 1.00E-49  | 240.3 | 66.7  | 72.9  | ndr family protein                     | gbpln | Arabidopsis lyrata   | AT5G56750.1   Symbols: NDL1   N-MYC downregulated-like 1   chr5:22957986-22960606 FORWARD LENGTH=346                                                                                                                                                                                                                       | 144  | 346 | 3.00E-52  | 240.3 | 66.7  | 72.9  |
| Rsa1.0_00716.1.g18505.t1 | gb EOA13035.1  hypothetical protein CARUB_v10026029mg [Capsella rubella]                                                                                                                                                                                                                                                                                                                                                                                                                                                                                                                                                                                                                                                                                                                                                                                                                                                                                                                                                                                                                                                                                                                                                                                                                                                                       | 661  | 669  | 0         | 101.2 | 89.9  | 95.0  | hypothetical protein CARUB_v10026029mg | gbpln | Capsella rubella     | AT5G56790.1   Symbols:   Protein kinase superfamily protein   chr5:22968610-22971391 FORWARD LENGTH=669                                                                                                                                                                                                                    | 661  | 669 | 0         | 101.2 | 88.5  | 94.9  |
| Rsa1.0_00716.1.g18506.t1 | ref NP_200492.1  putative F-box/FBD/LRR-repeat protein [Arabidopsis thaliana] gi 75262578 sp Q9FJT2.1 FDL40 ARATH RecName: Full=Putative F-box/FBD/LRR-repeat protein At5g56810 gi 10176785 dbj BAB09899.1  unnamed protein product [Arabidopsis thaliana] gi 332009427 gb AED96810.1  putative F-box/FBD/LRR-repeat protein [Arabidopsis thaliana]                                                                                                                                                                                                                                                                                                                                                                                                                                                                                                                                                                                                                                                                                                                                                                                                                                                                                                                                                                                            | 451  | 435  | 2.00E-87  | 96.5  | 49.4  | 62.7  | putative F-box/FBD/LRR-repeat protein  | gbpln | Arabidopsis thaliana | AT5G56810.1   Symbols:   F-box/RNI-like/FBD-like domains-containing protein   chr5:22974520-22975992 FORWARD LENGTH=435                                                                                                                                                                                                    | 451  | 435 | 5.00E-90  | 96.5  | 49.4  | 62.7  |
| Rsa1.0_00716.1.g18507.t1 |                                                                                                                                                                                                                                                                                                                                                                                                                                                                                                                                                                                                                                                                                                                                                                                                                                                                                                                                                                                                                                                                                                                                                                                                                                                                                                                                                |      |      |           |       |       |       |                                        |       |                      |                                                                                                                                                                                                                                                                                                                            |      |     |           |       |       |       |
| Rsa1.0_00716.1.g18508.t1 |                                                                                                                                                                                                                                                                                                                                                                                                                                                                                                                                                                                                                                                                                                                                                                                                                                                                                                                                                                                                                                                                                                                                                                                                                                                                                                                                                | #    | #    | #         | #     | #     | -     |                                        | ----  | ----                 | #                                                                                                                                                                                                                                                                                                                          | #    | #   | #         | #     | #     | #     |
| Rsa1.0_00716.1.g18509.t1 | ref XP_002866147.1  F-box family protein [Arabidopsis lyrata subsp. lyrata] gi 297311982 gb EFH42406.1  F-box family protein [Arabidopsis lyrata subsp. lyrata]                                                                                                                                                                                                                                                                                                                                                                                                                                                                                                                                                                                                                                                                                                                                                                                                                                                                                                                                                                                                                                                                                                                                                                                | 422  | 423  | 1.00E-68  | 100.2 | 39.6  | 59.5  | F-box family protein                   | gbpln | Arabidopsis lyrata   | AT5G56420.2   Symbols:   F-box/RNI-like/FBD-like domains-containing protein   chr5:22850863-22852334 REVERSE LENGTH=422                                                                                                                                                                                                    | 422  | 422 | 8.00E-69  | 100.0 | 38.4  | 59.7  |
| Rsa1.0_00716.1.g18510.t1 | gb EOA13498.1  hypothetical protein CARUB_v10026556mg [Capsella rubella]                                                                                                                                                                                                                                                                                                                                                                                                                                                                                                                                                                                                                                                                                                                                                                                                                                                                                                                                                                                                                                                                                                                                                                                                                                                                       | 392  | 395  | 1.00E-134 | 100.8 | 80.6  | 87.0  | hypothetical protein CARUB_v10026556mg | gbpln | Capsella rubella     | AT5G56860.1   Symbols: GNC, GATA21   GATA type zinc finger transcription factor family protein   chr5:22989630-22991351 REVERSE LENGTH=398                                                                                                                                                                                 | 392  | 398 | 1.00E-135 | 101.5 | 79.3  | 85.5  |
| Rsa1.0_00716.1.g18511.t2 |                                                                                                                                                                                                                                                                                                                                                                                                                                                                                                                                                                                                                                                                                                                                                                                                                                                                                                                                                                                                                                                                                                                                                                                                                                                                                                                                                | #    | #    | #         | #     | #     | -     |                                        | ----  | ----                 | #                                                                                                                                                                                                                                                                                                                          | #    | #   | #         | #     | #     | #     |
| Rsa1.0_00717.1.g18512.t1 | dbj BAA97287.1  retroelement pol polyprotein-like [Arabidopsis thaliana]                                                                                                                                                                                                                                                                                                                                                                                                                                                                                                                                                                                                                                                                                                                                                                                                                                                                                                                                                                                                                                                                                                                                                                                                                                                                       | 1028 | 1491 | 0         | 145.0 | 61.2  | 73.7  | retroelement pol polyprotein-like      | gbpln | Arabidopsis thaliana | AT1G21280.1   Symbols:   CONTAINS InterPro DOMAIN/s: Retrotransposon gag protein (InterPro:IPR005162); Has 707 Blast hits to 705 proteins in 25 species: Archae - 0; Bacteria - 0; Metazoa - 4; Fungi - 0; Plants - 703; Viruses - 0; Other Eukaryotes - 0 (source: NCBI BLINK).   chr1:7447690-7448403 REVERSE LENGTH=237 | 1028 | 237 | 7.00E-31  | 23.1  | 6.8   | 11.1  |

|                          |                                                                                                                                                                                                                                                                                                                                                                                                                                                                                                                                                                                                                                                                                                                                                                                                                                                                                                                                                                                                                                                                                         |      |      |          |       |      |      |                                                 |       |                      |                                                                                                                               |      |      |          |       |      |      |
|--------------------------|-----------------------------------------------------------------------------------------------------------------------------------------------------------------------------------------------------------------------------------------------------------------------------------------------------------------------------------------------------------------------------------------------------------------------------------------------------------------------------------------------------------------------------------------------------------------------------------------------------------------------------------------------------------------------------------------------------------------------------------------------------------------------------------------------------------------------------------------------------------------------------------------------------------------------------------------------------------------------------------------------------------------------------------------------------------------------------------------|------|------|----------|-------|------|------|-------------------------------------------------|-------|----------------------|-------------------------------------------------------------------------------------------------------------------------------|------|------|----------|-------|------|------|
| Rsa1.0_00717.1.g18513.t1 | ref NP_564417.1  60S ribosomal protein L9-1 [Arabidopsis thaliana]<br>gi 18398761 ref NP_564418.1  60S ribosomal protein L9-1 [Arabidopsis thaliana]<br>gi 22096367 sp P49209.3 RL91_ARATH<br>RecName: Full=60S ribosomal protein L9-1<br>gi 9665161 gb AAF97345.1 AC021045.2 Putative 60S ribosomal protein L9 [Arabidopsis thaliana]<br>gi 9665164 gb AAF97348.1 AC021045.5 Putative 60S ribosomal protein L9 [Arabidopsis thaliana]<br>gi 11692872 gb AAG40039.1 AF324688.1 At1g33120 [Arabidopsis thaliana]<br>gi 11908052 gb AAG41455.1 AF326873.1 putative ribosomal protein L9 [Arabidopsis thaliana]<br>gi 12642868 gb AAK00376.1 AF339694.1 putative ribosomal protein L9 [Arabidopsis thaliana]<br>gi 14030657 gb AAK53003.1 AF375419.1 At1g33140/T9L6.10 [Arabidopsis thaliana] gi 14517516 gb AAK62648.1  At1g33140/T9L6.10 [Arabidopsis thaliana] gi 15809778 gb AAL06817.1  At1g33140/T9L6.10 [Arabidopsis thaliana] gi 16604306 gb AAL24159.1  At1g33140/T9L6.10 [Arabidopsis thaliana] gi 18253023 gb AAL62438.1  ribosomal protein L9, putative [Arabidopsis thaliana] | 223  | 194  | 5.00E-97 | 87.0  | 82.1 | 86.1 | 60S ribosomal protein L9-1                      | gbpln | Arabidopsis thaliana | AT1G33140.1   Symbols: PGY2   Ribosomal protein L6 family   chr1:12023360-12024502 FORWARD LENGTH=194                         | 223  | 194  | 2.00E-99 | 87.0  | 82.1 | 86.1 |
| Rsa1.0_00717.1.g18514.t1 | gb EOA15229.1  hypothetical protein CARUB_v10028623mg [Capsella rubella]                                                                                                                                                                                                                                                                                                                                                                                                                                                                                                                                                                                                                                                                                                                                                                                                                                                                                                                                                                                                                | 535  | 535  | 0        | 100.0 | 88.0 | 93.6 | hypothetical protein CARUB_v10028623mg          | gbpln | Capsella rubella     | AT5G43380.1   Symbols: PHT3, ATPPT4, PHT1.3   phosphate transporter 1.3   chr5:17409524-17411214 FORWARD LENGTH=521           | 535  | 521  | 0        | 97.4  | 80.6 | 88.2 |
| Rsa1.0_00717.1.g18515.t1 | ref NP_974876.1  actin-related protein 9 [Arabidopsis thaliana]<br>gi 332007588 gb AED94971.1  actin-related protein 9 [Arabidopsis thaliana]                                                                                                                                                                                                                                                                                                                                                                                                                                                                                                                                                                                                                                                                                                                                                                                                                                                                                                                                           | 541  | 584  | 0        | 107.9 | 77.4 | 88.9 | actin-related protein 9                         | gbpln | Arabidopsis thaliana | AT5G43500.2   Symbols: ATARP9, ARP9   actin-related protein 9   chr5:17469991-17473429 FORWARD LENGTH=584                     | 541  | 584  | 0        | 107.9 | 77.4 | 88.9 |
| Rsa1.0_00717.1.g18516.t2 | gb AAC14510.1  En/Spm-like transposon protein [Arabidopsis thaliana]                                                                                                                                                                                                                                                                                                                                                                                                                                                                                                                                                                                                                                                                                                                                                                                                                                                                                                                                                                                                                    | 195  | 292  | 3.00E-12 | 149.7 | 26.2 | 32.3 | En/Spm-like transposon protein                  | gbpln | Arabidopsis thaliana | #                                                                                                                             | #    | #    | #        | #     | #    |      |
| Rsa1.0_00717.1.g18517.t1 | #                                                                                                                                                                                                                                                                                                                                                                                                                                                                                                                                                                                                                                                                                                                                                                                                                                                                                                                                                                                                                                                                                       | #    | #    | #        | #     | #    | -    | -                                               | ----  | ----                 | #                                                                                                                             | #    | #    | #        | #     | #    |      |
| Rsa1.0_00717.1.g18518.t1 | ref NP_199194.1  putative alpha-mannosidase I MNS4 [Arabidopsis thaliana]<br>gi 75262426 sp Q9FG93.1 MNS4_ARATH<br>RecName: Full=Probable alpha-mannosidase I MNS4<br>gi 13877731 gb AAK43943.1 AF370128.1 unknown protein [Arabidopsis thaliana]<br>gi 10177939 db BAB11298.1  unnamed protein product [Arabidopsis thaliana]<br>gi 14532840 gb AAK64102.1  unknown protein [Arabidopsis thaliana]<br>gi 332007616 gb AED94999.1  putative alpha-mannosidase I MNS4 [Arabidopsis thaliana]                                                                                                                                                                                                                                                                                                                                                                                                                                                                                                                                                                                             | 691  | 624  | 0        | 90.3  | 78.6 | 81.8 | putative alpha-mannosidase I MNS4               | gbpln | Arabidopsis thaliana | AT5G43710.1   Symbols:   Glycosyl hydrolase family 47 protein   chr5:17552252-17556523 REVERSE LENGTH=624                     | 691  | 624  | 0        | 90.3  | 78.6 | 81.8 |
| Rsa1.0_00717.1.g18519.t1 | gb AAD17409.1  putative retroelement pol polyprotein [Arabidopsis thaliana]                                                                                                                                                                                                                                                                                                                                                                                                                                                                                                                                                                                                                                                                                                                                                                                                                                                                                                                                                                                                             | 1073 | 1347 | 0        | 125.5 | 44.9 | 51.1 | putative retroelement pol polyprotein           | gbpln | Arabidopsis thaliana | AT4G23160.1   Symbols: CRK8   cysteine-rich RLK (RECEPTOR-like protein kinase) 8   chr4:12129485-12134086 FORWARD LENGTH=1262 | 1073 | 1262 | 5.00E-55 | 117.6 | 10.2 | 15.5 |
| Rsa1.0_00717.1.g18520.t1 | gb EOA13697.1  hypothetical protein CARUB_v10026768mg, partial [Capsella rubella]                                                                                                                                                                                                                                                                                                                                                                                                                                                                                                                                                                                                                                                                                                                                                                                                                                                                                                                                                                                                       | 133  | 330  | 4.00E-25 | 248.1 | 63.9 | 70.7 | hypothetical protein CARUB_v10026768mg, partial | gbpln | Capsella rubella     | AT5G43720.1   Symbols:   Protein of unknown function (DUF2361)   chr5:17557431-17559238 REVERSE LENGTH=329                    | 133  | 329  | 5.00E-25 | 247.4 | 63.2 | 69.2 |
| Rsa1.0_00717.1.g18521.t1 | ref XP_002891264.1  hypothetical protein ARALYDRAFT_902378 [Arabidopsis lyrata subsp. lyrata]<br>gi 297327103 gb EFH57523.1  hypothetical protein ARALYDRAFT_902378 [Arabidopsis lyrata subsp. lyrata]                                                                                                                                                                                                                                                                                                                                                                                                                                                                                                                                                                                                                                                                                                                                                                                                                                                                                  | 103  | 101  | 4.00E-24 | 98.1  | 60.2 | 70.9 | hypothetical protein ARALYDRAFT_902378          | gbpln | Arabidopsis lyrata   | AT2G33130.1   Symbols: RALFL18, RALF18   ralfl-like 18   chr2:14046521-14046832 REVERSE LENGTH=103                            | 103  | 103  | 2.00E-26 | 100.0 | 59.2 | 73.8 |
| Rsa1.0_00717.1.g18522.t1 | gb AAC13582.1  similar to maize transposon MuDR (GB.M76978) [Arabidopsis thaliana]<br>gi 8843876 db BAA97402.1  mutator-like transposase [Arabidopsis thaliana]                                                                                                                                                                                                                                                                                                                                                                                                                                                                                                                                                                                                                                                                                                                                                                                                                                                                                                                         | 169  | 806  | 6.00E-29 | 476.9 | 39.1 | 47.9 | similar to maize transposon MuDR (GB.M76978)    | gbpln | Arabidopsis thaliana | #                                                                                                                             | #    | #    | #        | #     | #    |      |

|                          |                                                                                                                                                                                                      |      |      |           |       |      |      |                                                 |       |                      |                                                                                                                                                                                                                                                                                                                                                                                                                                                                                                                                                                                                                                                         |      |          |           |       |      |      |
|--------------------------|------------------------------------------------------------------------------------------------------------------------------------------------------------------------------------------------------|------|------|-----------|-------|------|------|-------------------------------------------------|-------|----------------------|---------------------------------------------------------------------------------------------------------------------------------------------------------------------------------------------------------------------------------------------------------------------------------------------------------------------------------------------------------------------------------------------------------------------------------------------------------------------------------------------------------------------------------------------------------------------------------------------------------------------------------------------------------|------|----------|-----------|-------|------|------|
| Rsa1.0_00718.1.g18523.t1 | gb AAG51247.1 AC055769.6 copia-type polyprotein, putative; 28768-32772 [Arabidopsis thaliana]                                                                                                        | 965  | 1334 | 0         | 138.2 | 55.1 | 71.9 | copia-type polyprotein, putative; 28768-32772   | gbpln | Arabidopsis thaliana | AT4G23160.1   Symbols: CRK8   cysteine-rich RLK (RECEPTOR-like protein kinase) 8   chr4:12129485-12134086 FORWARD LENGTH=1262                                                                                                                                                                                                                                                                                                                                                                                                                                                                                                                           | 965  | 1262     | 9.00E-89  | 130.8 | 19.3 | 29.5 |
| Rsa1.0_00718.1.g18524.t1 | ref XP_002864721.1  hypothetical protein ARALYDRAFT_919360 [Arabidopsis lyrata subsp. lyrata]   g 297310556 gb EFH40980.1  hypothetical protein ARALYDRAFT_919360 [Arabidopsis lyrata subsp. lyrata] | 297  | 303  | 7.00E-62  | 102.0 | 43.4 | 49.5 | hypothetical protein ARALYDRAFT_919360          | gbpln | Arabidopsis lyrata   | AT5G61180.1   Symbols:   Putative endonuclease or glycosyl hydrolase   chr5:24612867-24614174 FORWARD LENGTH=346                                                                                                                                                                                                                                                                                                                                                                                                                                                                                                                                        | 297  | 346      | 2.00E-59  | 116.5 | 37.0 | 45.5 |
| Rsa1.0_00718.1.g18525.t1 | gb EOA14082.1  hypothetical protein CARUB_v10027219mg, partial [Capsella rubella]                                                                                                                    | 143  | 180  | 4.00E-77  | 125.9 | 97.9 | 99.3 | hypothetical protein CARUB_v10027219mg, partial | gbpln | Capsella rubella     | AT5G61170.1   Symbols:   Ribosomal protein S19e family protein   chr5:24611158-24612202 FORWARD LENGTH=143<br>AT3G22520.1   Symbols:   unknown protein; INVOLVED IN: biological_process unknown; LOCATED IN: chloroplast stroma, chloroplast, chloroplast envelope; EXPRESSED IN: 24 plant structures; EXPRESSED DURING: 13 growth stages; BEST Arabidopsis thaliana protein match is: unknown protein (TAIR:AT4G14840.1); Has 717 Blast hits to 703 proteins in 179 species: Archae - 14; Bacteria - 134; Metazoa - 141; Fungi - 74; Plants - 209; Viruses - 0; Other Eukaryotes - 145 (source: NCBI BLINK).   chr3:7974984-7977406 FORWARD LENGTH=600 | 143  | 143      | 1.00E-79  | 100.0 | 99.3 | 99.3 |
| Rsa1.0_00718.1.g18526.t1 | #                                                                                                                                                                                                    | #    | #    | #         | #     | #    | #    | -                                               | ----  | ----                 | 57                                                                                                                                                                                                                                                                                                                                                                                                                                                                                                                                                                                                                                                      | 600  | 7.00E-12 | 1052.6    | 59.6  | 68.4 |      |
| Rsa1.0_00718.1.g18527.t1 | gb EOA13076.1  hypothetical protein CARUB_v10026081mg [Capsella rubella]                                                                                                                             | 612  | 626  | 0         | 102.3 | 69.0 | 73.9 | hypothetical protein CARUB_v10026081mg          | gbpln | Capsella rubella     | AT5G61150.2   Symbols: VIP4   leo1-like family protein   chr5:24603846-24607528 REVERSE LENGTH=623                                                                                                                                                                                                                                                                                                                                                                                                                                                                                                                                                      | 612  | 623      | 0         | 101.8 | 75.7 | 82.7 |
| Rsa1.0_00718.1.g18528.t1 | gb EOA14801.1  hypothetical protein CARUB_v10028107mg [Capsella rubella]                                                                                                                             | 2161 | 2084 | 0         | 96.4  | 87.6 | 90.9 | hypothetical protein CARUB_v10028107mg          | gbpln | Capsella rubella     | AT5G61140.2   Symbols:   U5 small nuclear ribonucleoprotein helicase   chr5:24589999-24603311 FORWARD LENGTH=2157                                                                                                                                                                                                                                                                                                                                                                                                                                                                                                                                       | 2161 | 2157     | 0         | 99.8  | 87.0 | 90.7 |
| Rsa1.0_00718.1.g18529.t1 | gb EOA14034.1  hypothetical protein CARUB_v10027167mg [Capsella rubella]                                                                                                                             | 229  | 198  | 5.00E-73  | 86.5  | 67.7 | 74.7 | hypothetical protein CARUB_v10027167mg          | gbpln | Capsella rubella     | AT5G61130.1   Symbols: PDCB1   plasmodesmata callose-binding protein 1   chr5:24587438-24589369 REVERSE LENGTH=201                                                                                                                                                                                                                                                                                                                                                                                                                                                                                                                                      | 229  | 201      | 4.00E-66  | 87.8  | 64.2 | 69.0 |
| Rsa1.0_00718.1.g18530.t7 | emb CBY05413.1  FRUITFULL-like protein [Aethionema carneum]                                                                                                                                          | 508  | 228  | 2.00E-91  | 44.9  | 34.8 | 36.2 | FRUITFULL-like protein                          | gbpln | Aethionema carneum   | AT5G60910.1   Symbols: AGL8, FUL   AGAMOUS-like 8   chr5:24502736-24506013 REVERSE LENGTH=242                                                                                                                                                                                                                                                                                                                                                                                                                                                                                                                                                           | 508  | 242      | 3.00E-93  | 47.6  | 32.9 | 33.7 |
| Rsa1.0_00718.1.g18531.t1 | db BAM78216.1  Myb transcription factor BoMyb34 [Brassica oleracea var. viridis]                                                                                                                     | 299  | 316  | 1.00E-123 | 105.7 | 77.6 | 86.0 | Myb transcription factor BoMyb34                | gbpln | Brassica oleracea    | AT5G60890.1   Symbols: ATMVB34, ATR1, MYB34   myb domain protein 34   chr5:24495029-24496220 FORWARD LENGTH=295                                                                                                                                                                                                                                                                                                                                                                                                                                                                                                                                         | 299  | 295      | 1.00E-111 | 98.7  | 70.6 | 80.3 |
| Rsa1.0_00718.1.g18532.t1 | emb CAB40035.1  retrotransposon like protein [Arabidopsis thaliana]   g 7267767 emb CAB81170.1  retrotransposon like protein [Arabidopsis thaliana]                                                  | 433  | 1515 | 1.00E-172 | 349.9 | 64.9 | 80.1 | retrotransposon like protein                    | gbpln | Arabidopsis thaliana | AT4G23160.1   Symbols: CRK8   cysteine-rich RLK (RECEPTOR-like protein kinase) 8   chr4:12129485-12134086 FORWARD LENGTH=1262                                                                                                                                                                                                                                                                                                                                                                                                                                                                                                                           | 433  | 1262     | 2.00E-90  | 291.5 | 38.3 | 55.7 |
| Rsa1.0_00718.1.g18533.t1 | gb AAF69172.1 AC007915.24 F27F5.11 [Arabidopsis thaliana]                                                                                                                                            | 753  | 1313 | 1.00E-131 | 174.4 | 37.6 | 49.9 | F27F5.11                                        | gbpln | Arabidopsis thaliana | AT5G48050.1   Symbols:   CONTAINS InterPro DOMAIN/s: Retrotransposon gag protein (InterPro:IPR005162); BEST Arabidopsis thaliana protein match is: unknown protein (TAIR:AT1G34070.1); Has 1807 Blast hits to 1807 proteins in 277 species: Archae - 0; Bacteria - 0; Metazoa - 736; Fungi - 347; Plants - 385; Viruses - 0; Other Eukaryotes - 339 (source: NCBI BLINK).   chr5:19472661-19473770 REVERSE LENGTH=369                                                                                                                                                                                                                                   | 753  | 369      | 3.00E-17  | 49.0  | 8.2  | 15.8 |
| Rsa1.0_00718.1.g18534.t1 | gb AAV25873.1  Putative bHLH family protein [Brassica oleracea]                                                                                                                                      | 359  | 240  | 9.00E-84  | 66.9  | 51.5 | 54.0 | Putative bHLH family protein                    | gbpln | Brassica oleracea    | AT5G08130.6   Symbols: BIM1   basic helix-loop-helix (bHLH) DNA-binding superfamily protein   chr5:2606655-2609571 REVERSE LENGTH=529                                                                                                                                                                                                                                                                                                                                                                                                                                                                                                                   | 359  | 529      | 3.00E-79  | 147.4 | 58.5 | 69.1 |
| Rsa1.0_00718.1.g18535.t1 | #                                                                                                                                                                                                    | #    | #    | #         | #     | #    | #    | -                                               | ----  | ----                 | #                                                                                                                                                                                                                                                                                                                                                                                                                                                                                                                                                                                                                                                       | #    | #        | #         | #     | #    |      |
| Rsa1.0_00718.1.g18536.t1 | gb AAV25874.1  2-isopropylmalate synthase [Brassica oleracea]                                                                                                                                        | 497  | 505  | 0         | 101.6 | 92.2 | 96.2 | 2-isopropylmalate synthase                      | gbpln | Brassica oleracea    | AT5G23010.1   Symbols: MAM1, IMS3   methylthioalkylmalate synthase 1   chr5:7703173-7706769 FORWARD LENGTH=506                                                                                                                                                                                                                                                                                                                                                                                                                                                                                                                                          | 497  | 506      | 0         | 101.8 | 78.9 | 86.9 |
| Rsa1.0_00718.1.g18537.t1 | gb AAV25876.1  Putative Sequence-associated protein [Brassica oleracea]                                                                                                                              | 263  | 263  | 1.00E-124 | 100.0 | 95.1 | 97.7 | Putative Sequence-associated protein            | gbpln | Brassica oleracea    | AT5G23030.1   Symbols: TETT2   tetraspanin12   chr5:7726819-7727709 FORWARD LENGTH=264                                                                                                                                                                                                                                                                                                                                                                                                                                                                                                                                                                  | 263  | 264      | 1.00E-108 | 100.4 | 80.2 | 90.9 |
| Rsa1.0_00718.1.g18538.t1 | ref XP_002872040.1  enhancer of ag-4 2 [Arabidopsis lyrata subsp. lyrata]   g 297317877 gb EFH48299.1  enhancer of ag-4 2 [Arabidopsis lyrata subsp. lyrata]                                         | 1358 | 1398 | 0         | 102.9 | 59.2 | 64.5 | enhancer of ag-4 2                              | gbpln | Arabidopsis lyrata   | AT5G23150.1   Symbols: HUA2   Tudor/PWWP/MBT domain-containing protein   chr5:7786173-7792080 FORWARD LENGTH=1392                                                                                                                                                                                                                                                                                                                                                                                                                                                                                                                                       | 1358 | 1392     | 0         | 102.5 | 58.5 | 64.3 |

|                          |                                                                                                                                                                                                                                                                                                                                                                                                                                                                                                                                                                                                                                                                                                                                                                                                                                                                 |      |      |          |        |      |      |                                                             |       |                      |                                                                                                                                                                                                                                                                                                                                                         |      |      |           |        |      |      |
|--------------------------|-----------------------------------------------------------------------------------------------------------------------------------------------------------------------------------------------------------------------------------------------------------------------------------------------------------------------------------------------------------------------------------------------------------------------------------------------------------------------------------------------------------------------------------------------------------------------------------------------------------------------------------------------------------------------------------------------------------------------------------------------------------------------------------------------------------------------------------------------------------------|------|------|----------|--------|------|------|-------------------------------------------------------------|-------|----------------------|---------------------------------------------------------------------------------------------------------------------------------------------------------------------------------------------------------------------------------------------------------------------------------------------------------------------------------------------------------|------|------|-----------|--------|------|------|
| Rsa1.0_00718.1.g18539.t1 | emb CAI23696.1  putative carboxypeptidase [Arabidopsis thaliana] gi 63146754 emb CAI23698.1  putative carboxypeptidase [Arabidopsis thaliana]                                                                                                                                                                                                                                                                                                                                                                                                                                                                                                                                                                                                                                                                                                                   | 250  | 271  | 5.00E-76 | 108.4  | 67.2 | 75.2 | putative carboxypeptidase                                   | gbpln | Arabidopsis thaliana | AT5G23160.1   Symbols:   unknown protein; BEST Arabidopsis thaliana protein match is: unknown protein (TAIR:AT5G08240.1); Has 1807 Blast hits to 1807 proteins in 277 species: Archaea - 0; Bacteria - 0; Metazoa - 736; Fungi - 347; Plants - 385; Viruses - 0; Other Eukaryotes - 339 (source: NCBI BLink).   chr5:7795409-7796310 REVERSE LENGTH=271 | 250  | 271  | 2.00E-78  | 108.4  | 67.2 | 75.2 |
| Rsa1.0_00718.1.g18540.t1 | ref XP_002874114.1  CYP86B1 [Arabidopsis lyrata subsp. lyrata] gi 297319951 gb EFH50373.1  CYP86B1 [Arabidopsis lyrata subsp. lyrata]                                                                                                                                                                                                                                                                                                                                                                                                                                                                                                                                                                                                                                                                                                                           | 520  | 559  | 0        | 107.5  | 90.2 | 95.0 | CYP86B1                                                     | gbpln | Arabidopsis lyrata   | AT5G23190.1   Symbols: CYP86B1   cytochrome P450, family 86, subfamily B, polypeptide 1   chr5:7803478-7805659 REVERSE LENGTH=559                                                                                                                                                                                                                       | 520  | 559  | 0         | 107.5  | 90.4 | 95.4 |
| Rsa1.0_00718.1.g18541.t1 | gb AAD32898.1  putative retroelement pol polyprotein [Arabidopsis thaliana]                                                                                                                                                                                                                                                                                                                                                                                                                                                                                                                                                                                                                                                                                                                                                                                     | 1353 | 1307 | 0        | 96.6   | 55.1 | 68.6 | putative retroelement pol polyprotein                       | gbpln | Arabidopsis thaliana | AT4G23160.1   Symbols: CRK8   cysteine-rich RLK (RECEPTOR-like protein kinase) 8   chr4:12129485-12134086 FORWARD LENGTH=1262                                                                                                                                                                                                                           | 1353 | 1262 | 1.00E-105 | 93.3   | 14.3 | 22.8 |
| Rsa1.0_00718.1.g18542.t1 | gb EOA20478.1  hypothetical protein CARUB_v10000790mg [Capsella rubella]                                                                                                                                                                                                                                                                                                                                                                                                                                                                                                                                                                                                                                                                                                                                                                                        | 503  | 499  | 0        | 99.2   | 86.3 | 91.7 | hypothetical protein CARUB_v10000790mg                      | gbpln | Capsella rubella     | AT5G23210.1   Symbols: SCPL34   serine carboxypeptidase-like 34   chr5:7810892-7814837 FORWARD LENGTH=499                                                                                                                                                                                                                                               | 503  | 499  | 0         | 99.2   | 84.5 | 90.7 |
| Rsa1.0_00718.1.g18543.t1 | ref NP_197714.1  nicotinamidase 2 [Arabidopsis thaliana] gi 10177812 dbj BAB11178.1  unnamed protein product [Arabidopsis thaliana] gi 28466925 gb AO44071.1  At5g23230 [Arabidopsis thaliana] gi 110743859 dbj BAE99764.1  hypothetical protein [Arabidopsis thaliana] gi 332005756 gb AED93139.1  nicotinamidase 2 [Arabidopsis thaliana]                                                                                                                                                                                                                                                                                                                                                                                                                                                                                                                     | 198  | 198  | 2.00E-89 | 100.0  | 80.8 | 89.9 | nicotinamidase 2                                            | gbpln | Arabidopsis thaliana | AT5G23230.1   Symbols: NIC2   nicotinamidase 2   chr5:7826005-7826601 REVERSE LENGTH=198                                                                                                                                                                                                                                                                | 198  | 198  | 8.00E-92  | 100.0  | 80.8 | 89.9 |
| Rsa1.0_00719.1.g18544.t1 | gb EOA23251.1  hypothetical protein CARUB_v10017299mg [Capsella rubella]                                                                                                                                                                                                                                                                                                                                                                                                                                                                                                                                                                                                                                                                                                                                                                                        | 421  | 431  | 5.00E-32 | 102.4  | 20.0 | 32.8 | hypothetical protein CARUB_v10017299mg                      | gbpln | Capsella rubella     | #                                                                                                                                                                                                                                                                                                                                                       | #    | #    | #         | #      | #    | #    |
| Rsa1.0_00719.1.g18545.t4 | gb AAG52949.1  gag/pol polyprotein [Arabidopsis thaliana]                                                                                                                                                                                                                                                                                                                                                                                                                                                                                                                                                                                                                                                                                                                                                                                                       | 1684 | 1643 | 0        | 97.6   | 47.9 | 65.0 | gag/pol polyprotein                                         | gbpln | Arabidopsis thaliana | AT4G23160.1   Symbols: CRK8   cysteine-rich RLK (RECEPTOR-like protein kinase) 8   chr4:12129485-12134086 FORWARD LENGTH=1262                                                                                                                                                                                                                           | 1684 | 1262 | 1.00E-83  | 74.9   | 9.9  | 15.3 |
| Rsa1.0_00719.1.g18546.t1 | gb AAG51783.1 AC079679_3 reverse transcriptase, putative; 16838-20266 [Arabidopsis thaliana]                                                                                                                                                                                                                                                                                                                                                                                                                                                                                                                                                                                                                                                                                                                                                                    | 1166 | 1142 | 0        | 97.9   | 37.8 | 50.9 | reverse transcriptase, putative; 16838-20266                | gbpln | Arabidopsis thaliana | AT4G29090.1   Symbols:   Ribonuclease H-like superfamily protein   chr4:14333528-14335255 FORWARD LENGTH=575                                                                                                                                                                                                                                            | 1166 | 575  | 2.00E-36  | 49.3   | 9.8  | 13.8 |
| Rsa1.0_00719.1.g18547.t1 | emb CAA70587.1  myrosinase binding protein [Brassica napus]                                                                                                                                                                                                                                                                                                                                                                                                                                                                                                                                                                                                                                                                                                                                                                                                     | 1015 | 988  | 0        | 97.3   | 69.5 | 73.3 | myrosinase binding protein                                  | gbpln | Brassica napus       | AT1G52030.1   Symbols: MBP2, MBP1.2, F-ATMBP   myrosinase-binding protein 2   chr1:19346090-19348282 REVERSE LENGTH=642                                                                                                                                                                                                                                 | 1015 | 642  | 1.00E-120 | 63.3   | 29.3 | 37.4 |
| Rsa1.0_00719.1.g18548.t1 | ref NP_178048.2  nucleoprotein TPR [Arabidopsis thaliana] gi 302425121 sp A4GSN8.1 NUA_ARATH RecName: Full=Nuclear-pore anchor; AltName: Full=Protein TRANSLOCATED PROMOTER REGION; Short=AtTPR gi 126594444 gb ABO21684.1  nuclear-pore anchor [Arabidopsis thaliana] gi 332198105 gb AEE36226.1  nucleoprotein TPR [Arabidopsis thaliana]                                                                                                                                                                                                                                                                                                                                                                                                                                                                                                                     | 157  | 2093 | 2.00E-66 | 1333.1 | 84.1 | 91.1 | nucleoprotein TPR                                           | gbpln | Arabidopsis thaliana | AT1G79280.1   Symbols: NUA, AtTPR   nuclear pore anchor   chr1:29819176-29832809 REVERSE LENGTH=2093                                                                                                                                                                                                                                                    | 157  | 2093 | 7.00E-69  | 1333.1 | 84.1 | 91.1 |
| Rsa1.0_00719.1.g18549.t1 | ref NP_175610.1  putative mitochondrial-processing peptidase subunit alpha-1 [Arabidopsis thaliana] gi 29839695 sp Q9ZU25.1 MPPA1_ARATH RecName: Full=Probable mitochondrial-processing peptidase subunit alpha-1; AltName: Full=Alpha-MPP 1; Flags: Precursor gi 4220446 gb AAD12673.1  Strong similarity to gi 2062155 T02O04.2 mitochondrial processing peptidase alpha subunit precursor isolog from Arabidopsis thaliana BAC gb AC001645. ESTs gb Z18504 and gb AA395715 come from this gene [Arabidopsis thaliana] gi 17529270 gb AAL38862.1  putative mitochondrial processing peptidase alpha subunit [Arabidopsis thaliana] gi 20258957 gb AAM14194.1  putative mitochondrial processing peptidase alpha subunit [Arabidopsis thaliana] gi 332194621 gb AEE32742.1  putative mitochondrial-processing peptidase subunit alpha-1 [Arabidopsis thaliana] | 535  | 503  | 0        | 94.0   | 82.1 | 87.7 | putative mitochondrial-processing peptidase subunit alpha-1 | gbpln | Arabidopsis thaliana | AT1G51980.1   Symbols:   Insulinase (Peptidase family M16) protein   chr1:19323692-19326771 REVERSE LENGTH=503                                                                                                                                                                                                                                          | 535  | 503  | 0         | 94.0   | 82.1 | 87.7 |

|                          |                                                                                                                                                                                                                                                                                                                                                                                                                                                                                                                                                                                                                                                                                                    |      |      |           |       |      |      |                                                |       |                      |                                                                                                                                                           |      |      |           |       |      |      |
|--------------------------|----------------------------------------------------------------------------------------------------------------------------------------------------------------------------------------------------------------------------------------------------------------------------------------------------------------------------------------------------------------------------------------------------------------------------------------------------------------------------------------------------------------------------------------------------------------------------------------------------------------------------------------------------------------------------------------------------|------|------|-----------|-------|------|------|------------------------------------------------|-------|----------------------|-----------------------------------------------------------------------------------------------------------------------------------------------------------|------|------|-----------|-------|------|------|
| Rsa1.0_00719.1.g18550.t1 | ref[XP_002891672.1] hypothetical protein ARALYDRAFT_892185 [Arabidopsis lyrata subsp. lyrata] gi 297337514 gb EFH67931.1                                                                                                                                                                                                                                                                                                                                                                                                                                                                                                                                                                           | 258  | 268  | 1.00E-109 | 103.9 | 81.4 | 85.7 | hypothetical protein ARALYDRAFT_892185         | gbpln | Arabidopsis lyrata   | AT1G51950.1   Symbols: IAA18   indole-3-acetic acid inducible 18   chr1:19305670-19307130 FORWARD LENGTH=267                                              | 258  | 267  | 1.00E-109 | 103.5 | 78.3 | 84.5 |
| Rsa1.0_00719.1.g18551.t1 | gb EOA36821.1  hypothetical protein CARUB_v10008527mg [Capsella rubella]                                                                                                                                                                                                                                                                                                                                                                                                                                                                                                                                                                                                                           | 633  | 660  | 0         | 104.3 | 88.6 | 93.2 | hypothetical protein CARUB_v10008527mg         | gbpln | Capsella rubella     | AT1G51940.1   Symbols:   protein kinase family protein / peptidoglycan-binding LysM domain-containing protein   chr1:19296092-19298941 REVERSE LENGTH=651 | 633  | 651  | 0         | 102.8 | 85.0 | 90.5 |
| Rsa1.0_00720.1.g18552.t1 | ref[NP_563969.1] translation machinery associated protein TMA7 [Arabidopsis thaliana] gi 297849952 ref[XP_002892857.1] hypothetical protein ARALYDRAFT_471721 [Arabidopsis lyrata subsp. lyrata] gi 5103825 gb AAD39655.1 AC007591_20 ESTs gb AA650895. gb AA720043 and gb R29777 come from this gene [Arabidopsis thaliana] gi 12484215 gb AG54006.1 AF336925.1 unknown protein [Arabidopsis thaliana] gi 15028107 gb AAK76677.1  unknown protein [Arabidopsis thaliana] gi 17065256 gb AAL32782.1  Unknown protein [Arabidopsis thaliana] gi 20260078 gb AAM13386.1  unknown protein [Arabidopsis thaliana] gi 21592316 gb AAM64267.1  unknown [Arabidopsis thaliana] gi 297338699 gb EFH69116.1 | 64   | 64   | 5.00E-24  | 100.0 | 95.3 | 98.4 | translation machinery associated protein TMA7  | gbpln | Arabidopsis lyrata   | AT1G15270.1   Symbols:   Translation machinery associated TMA7   chr1:5250833-5252020 REVERSE LENGTH=64                                                   | 64   | 64   | 9.00E-27  | 100.0 | 95.3 | 98.4 |
| Rsa1.0_00720.1.g18553.t1 | gb EOA36831.1  hypothetical protein CARUB_v10010517mg [Capsella rubella]                                                                                                                                                                                                                                                                                                                                                                                                                                                                                                                                                                                                                           | 147  | 159  | 3.00E-67  | 108.2 | 89.1 | 91.8 | hypothetical protein CARUB_v10010517mg         | gbpln | Capsella rubella     | AT1G15220.2   Symbols: ATCCMH. CCMH   cytochrome c biogenesis protein family   chr1:5240471-5241117 REVERSE LENGTH=159                                    | 147  | 159  | 3.00E-66  | 108.2 | 85.7 | 89.1 |
| Rsa1.0_00720.1.g18554.t1 | ref[XP_002892853.1] ATPDR7/PDR7 [Arabidopsis lyrata subsp. lyrata] gi 297338695 gb EFH69112.1  ATPDR7/PDR7 [Arabidopsis lyrata subsp. lyrata]                                                                                                                                                                                                                                                                                                                                                                                                                                                                                                                                                      | 1437 | 1445 | 0         | 100.6 | 90.8 | 96.6 | ATPDR7/PDR7                                    | gbpln | Arabidopsis lyrata   | AT1G15210.1   Symbols: PDR7. ATPDR7   pleiotropic drug resistance 7   chr1:5231552-5236573 REVERSE LENGTH=1442                                            | 1437 | 1442 | 0         | 100.3 | 90.3 | 96.7 |
| Rsa1.0_00720.1.g18555.t1 | gb EOA36212.1  hypothetical protein CARUB_v10010136mg [Capsella rubella]                                                                                                                                                                                                                                                                                                                                                                                                                                                                                                                                                                                                                           | 240  | 243  | 2.00E-76  | 101.3 | 71.3 | 79.6 | hypothetical protein CARUB_v10010136mg         | gbpln | Capsella rubella     | AT1G15190.1   Symbols:   Fasciclin-like arabinogalactan family protein   chr1:5227275-5228021 FORWARD LENGTH=248                                          | 240  | 248  | 9.00E-76  | 103.3 | 70.4 | 80.0 |
| Rsa1.0_00720.1.g18556.t1 | ref[XP_002890091.1] mate efflux family protein [Arabidopsis lyrata subsp. lyrata] gi 297335933 gb EFH66350.1  mate efflux family protein [Arabidopsis lyrata subsp. lyrata]                                                                                                                                                                                                                                                                                                                                                                                                                                                                                                                        | 479  | 483  | 0         | 100.8 | 79.7 | 91.0 | mate efflux family protein                     | gbpln | Arabidopsis lyrata   | AT1G15170.1   Symbols:   MATE efflux family protein   chr1:5220690-5222756 FORWARD LENGTH=481                                                             | 479  | 481  | 0         | 100.4 | 78.5 | 90.4 |
| Rsa1.0_00720.1.g18557.t1 | gb EOA38363.1  hypothetical protein CARUB_v10009891mg [Capsella rubella]                                                                                                                                                                                                                                                                                                                                                                                                                                                                                                                                                                                                                           | 301  | 295  | 1.00E-143 | 98.0  | 85.7 | 91.7 | hypothetical protein CARUB_v10009891mg         | gbpln | Capsella rubella     | AT1G15140.1   Symbols:   FAD/NAD(P)-binding oxidoreductase   chr1:5210403-5212137 REVERSE LENGTH=295                                                      | 301  | 295  | 1.00E-144 | 98.0  | 84.1 | 92.0 |
| Rsa1.0_00720.1.g18558.t1 | ref[NP_172964.1] Ubiquinol-cytochrome C reductase hinge protein [Arabidopsis thaliana] gi 110740918 dbj BAE98555.1  ubiquinol-cytochrome-c reductase like protein [Arabidopsis thaliana] gi 114050691 gb ABI49495.1  At1g15120 [Arabidopsis thaliana] gi 227204459 dbj BAH57081.1  AT1G15120 [Arabidopsis thaliana] gi 332191146 gb AEE29267.1  Ubiquinol-cytochrome C reductase hinge protein [Arabidopsis thaliana]                                                                                                                                                                                                                                                                              | 74   | 69   | 2.00E-30  | 93.2  | 86.5 | 89.2 | Ubiquinol-cytochrome C reductase hinge protein | gbpln | Arabidopsis thaliana | AT1G15120.1   Symbols:   Ubiquinol-cytochrome C reductase hinge protein   chr1:5203091-5203897 FORWARD LENGTH=69                                          | 74   | 69   | 4.00E-33  | 93.2  | 86.5 | 89.2 |
| Rsa1.0_00720.1.g18559.t1 | ref[XP_002892848.1] hypothetical protein ARALYDRAFT_888899 [Arabidopsis lyrata subsp. lyrata] gi 297338690 gb EFH69107.1                                                                                                                                                                                                                                                                                                                                                                                                                                                                                                                                                                           | 601  | 575  | 0         | 95.7  | 83.4 | 88.9 | hypothetical protein ARALYDRAFT_888899         | gbpln | Arabidopsis lyrata   | AT1G15060.1   Symbols:   Uncharacterised conserved protein UCPO31088. alpha/beta hydrolase   chr1:5184053-5186856 REVERSE LENGTH=578                      | 601  | 578  | 0         | 96.2  | 82.9 | 89.0 |



|                          |                                                                                                                                                                                                                                                                                                                                                                                                                     |     |     |           |       |      |      |                                                             |       |                      |                                                                                                                                                                                                                                                                                                                                            |     |     |           |       |      |      |
|--------------------------|---------------------------------------------------------------------------------------------------------------------------------------------------------------------------------------------------------------------------------------------------------------------------------------------------------------------------------------------------------------------------------------------------------------------|-----|-----|-----------|-------|------|------|-------------------------------------------------------------|-------|----------------------|--------------------------------------------------------------------------------------------------------------------------------------------------------------------------------------------------------------------------------------------------------------------------------------------------------------------------------------------|-----|-----|-----------|-------|------|------|
| Rsa1.0_00720.1.g18560.t1 | gb EOA38634.1  hypothetical protein CARUB_v10010520mg [Capsella rubella]                                                                                                                                                                                                                                                                                                                                            | 143 | 158 | 2.00E-58  | 110.5 | 80.4 | 84.6 | hypothetical protein CARUB_v10010520mg                      | gbpln | Capsella rubella     | AT1G15010.1   Symbols:   unknown protein; BEST Arabidopsis thaliana protein match is: unknown protein (TAIR:AT2G01300.1); Has 71 Blast hits to 71 proteins in 13 species: Archae - 0; Bacteria - 2; Metazoa - 0; Fungi - 0; Plants - 69; Viruses - 0; Other Eukaryotes - 0 (source: NCBI BLink).   chr1:5171215-5171643 FORWARD LENGTH=142 | 143 | 142 | 2.00E-53  | 99.3  | 72.0 | 77.6 |
| Rsa1.0_00720.1.g18561.t1 | dbj BAJ34090.1  unnamed protein product [Theellungiella halophila]                                                                                                                                                                                                                                                                                                                                                  | 98  | 98  | 1.00E-46  | 100.0 | 95.9 | 98.0 | unnamed protein product                                     | ----  | ----                 | AT1G14980.1   Symbols: CPN10   chaperonin 10   chr1:5165930-5166654 REVERSE LENGTH=98                                                                                                                                                                                                                                                      | 98  | 98  | 3.00E-49  | 100.0 | 94.9 | 98.0 |
| Rsa1.0_00720.1.g18562.t1 | ref XP_002890079.1  invertase/pectin methyltransferase inhibitor family protein [Arabidopsis lyrata subsp. lyrata] gi 297335921 gb EFH68338.1  invertase/pectin methyltransferase inhibitor family protein [Arabidopsis lyrata subsp. lyrata]                                                                                                                                                                       | 204 | 201 | 1.00E-99  | 98.5  | 87.7 | 93.1 | invertase/pectin methyltransferase inhibitor family protein | gbpln | Arabidopsis lyrata   | AT1G14890.1   Symbols:   Plant invertase/pectin methyltransferase inhibitor superfamily protein   chr1:5137045-5137704 FORWARD LENGTH=219                                                                                                                                                                                                  | 204 | 219 | 1.00E-101 | 107.4 | 86.3 | 92.2 |
| Rsa1.0_00720.1.g18564.t8 | ref XP_002892832.1  hypothetical protein ARALYDRAFT_888870 [Arabidopsis lyrata subsp. lyrata] gi 297338674 gb EFH69091.1  hypothetical protein ARALYDRAFT_888870 [Arabidopsis lyrata subsp. lyrata]                                                                                                                                                                                                                 | 678 | 614 | 0         | 90.6  | 88.5 | 89.4 | hypothetical protein ARALYDRAFT_888870                      | gbpln | Arabidopsis lyrata   | AT1G14830.1   Symbols: ADL1C, ADL5, DRP1C, DL1C   DYNAMIN-like 1C   chr1:5107699-5111470 REVERSE LENGTH=614                                                                                                                                                                                                                                | 678 | 614 | 0         | 90.6  | 87.9 | 89.4 |
| Rsa1.0_00720.1.g18564.t1 | ref NP_172934.1  semialdehyde dehydrogenase-like protein [Arabidopsis thaliana] gi 17979524 gb AAL50097.1  At1g14810/F10B6.6 [Arabidopsis thaliana] gi 20856224 gb AAM26654.1  At1g14810/F10B6.6 [Arabidopsis thaliana] gi 21536731 gb AAM61063.1  aspartate-semialdehyde dehydrogenase, putative [Arabidopsis thaliana] gi 332191107 gb AEE29228.1  semialdehyde dehydrogenase-like protein [Arabidopsis thaliana] | 375 | 375 | 0         | 100.0 | 94.4 | 96.8 | semialdehyde dehydrogenase-like protein                     | gbpln | Arabidopsis thaliana | AT1G14810.1   Symbols:   semialdehyde dehydrogenase family protein   chr1:5102684-5104633 REVERSE LENGTH=375                                                                                                                                                                                                                               | 375 | 375 | 0         | 100.0 | 94.4 | 96.8 |
| Rsa1.0_00720.1.g18565.t1 | ref XP_002892827.1  hypothetical protein ARALYDRAFT_471662 [Arabidopsis lyrata subsp. lyrata] gi 297338669 gb EFH69086.1  hypothetical protein ARALYDRAFT_471662 [Arabidopsis lyrata subsp. lyrata]                                                                                                                                                                                                                 | 526 | 581 | 0         | 110.5 | 77.8 | 84.2 | hypothetical protein ARALYDRAFT_471662                      | gbpln | Arabidopsis lyrata   | AT1G14750.1   Symbols: SDS   Cyclin family protein   chr1:5079674-5082423 REVERSE LENGTH=578                                                                                                                                                                                                                                               | 526 | 578 | 0         | 109.9 | 78.3 | 85.0 |
| Rsa1.0_00720.1.g18566.t1 | #                                                                                                                                                                                                                                                                                                                                                                                                                   | #   | #   | #         | #     | #    | #    | -                                                           | ----  | ----                 | #                                                                                                                                                                                                                                                                                                                                          | #   | #   | #         | #     | #    |      |
| Rsa1.0_00720.1.g18567.t1 | gb EOA39760.1  hypothetical protein CARUB_v10008407mg [Capsella rubella]                                                                                                                                                                                                                                                                                                                                            | 706 | 738 | 0         | 104.5 | 83.0 | 89.5 | hypothetical protein CARUB_v10008407mg                      | gbpln | Capsella rubella     | AT1G14740.1   Symbols:   Protein of unknown function (DUF1423)   chr1:5075450-5077732 REVERSE LENGTH=733                                                                                                                                                                                                                                   | 706 | 733 | 0         | 103.8 | 81.7 | 89.1 |
| Rsa1.0_00720.1.g18568.t2 | ref NP_563957.1  hydroxyproline-rich glycoprotein-like protein [Arabidopsis thaliana] gi 30683962 ref NP_849663.1  hydroxyproline-rich glycoprotein-like protein [Arabidopsis thaliana] gi 332191091 gb AEE29212.1  hydroxyproline-rich glycoprotein-like protein [Arabidopsis thaliana] gi 332191082 gb AEE29213.1  hydroxyproline-rich glycoprotein-like protein [Arabidopsis thaliana]                           | 585 | 601 | 0         | 102.7 | 71.6 | 79.5 | hydroxyproline-rich glycoprotein-like protein               | gbpln | Arabidopsis thaliana | AT1G14710.2   Symbols:   hydroxyproline-rich glycoprotein family protein   chr1:5062168-5064697 REVERSE LENGTH=601                                                                                                                                                                                                                         | 585 | 601 | 0         | 102.7 | 71.6 | 79.5 |
| Rsa1.0_00720.1.g18569.t1 | ref NP_172923.3  purple acid phosphatase 3 [Arabidopsis thaliana] gi 75244598 sp Q8H129.1 PPA3_ARATH RecName: Full=Purple acid phosphatase 3; Flags: Precursor gi 24030193 gb AAN41277.1  putative purple acid phosphatase [Arabidopsis thaliana] gi 51101268 gb AAT95435.1  putative purple acid phosphatase [Arabidopsis thaliana] gi 332191089 gb AEE29210.1  purple acid phosphatase 3 [Arabidopsis thaliana]   | 268 | 366 | 1.00E-134 | 136.6 | 86.2 | 91.8 | purple acid phosphatase 3                                   | gbpln | Arabidopsis thaliana | AT1G14700.1   Symbols: PAP3, ATPAP3   purple acid phosphatase 3   chr1:5058680-5060988 FORWARD LENGTH=366                                                                                                                                                                                                                                  | 268 | 366 | 1.00E-137 | 136.6 | 86.2 | 91.8 |

|                          |                                                                                                                                                                                                                                                                                                                                                                                                                                                                                                                                                                                                                         |      |      |           |       |      |      |                                                       |       |                      |                                                                                                                                                                                                                                                                                                                                                                                                                                                                   |      |      |           |       |      |      |
|--------------------------|-------------------------------------------------------------------------------------------------------------------------------------------------------------------------------------------------------------------------------------------------------------------------------------------------------------------------------------------------------------------------------------------------------------------------------------------------------------------------------------------------------------------------------------------------------------------------------------------------------------------------|------|------|-----------|-------|------|------|-------------------------------------------------------|-------|----------------------|-------------------------------------------------------------------------------------------------------------------------------------------------------------------------------------------------------------------------------------------------------------------------------------------------------------------------------------------------------------------------------------------------------------------------------------------------------------------|------|------|-----------|-------|------|------|
| Rsa1.0_00720.1.g18570.t2 | ref XP_002890058.1  hypothetical protein ARALYDRAFT_334745 [Arabidopsis lyrata subsp. lyrata] gi 297335900 gb EFH66317.1  hypothetical protein ARALYDRAFT_334745 [Arabidopsis lyrata subsp. lyrata]                                                                                                                                                                                                                                                                                                                                                                                                                     | 286  | 310  | 7.00E-42  | 108.4 | 43.0 | 54.5 | hypothetical protein ARALYDRAFT_334745                | gbpln | Arabidopsis lyrata   | AT1G14688.1   Symbols:   FUNCTIONS IN: molecular function unknown; INVOLVED IN: biological_process unknown; LOCATED IN: cellular_component unknown; CONTAINS InterPro DOMAIN/s: E3 Ubiquitin ligase (InterPro:IPR022170). Has 30201 Blast hits to 17322 proteins in 780 species: Archae - 12; Bacteria - 1396; Metazoa - 17338; Fungi - 3422; Plants - 5037; Viruses - 0; Other Eukaryotes - 2996 (source: NCBI BLink).   chr1:5049654-5050983 REVERSE LENGTH=170 | 286  | 170  | 2.00E-21  | 59.4  | 18.9 | 21.3 |
| Rsa1.0_00720.1.g18571.t1 | dbj BAA11674.1  unnamed protein product [Nicotiana tabacum]                                                                                                                                                                                                                                                                                                                                                                                                                                                                                                                                                             | 1324 | 1338 | 0         | 101.1 | 57.4 | 75.2 | unnamed protein product                               | gbpln | Nicotiana tabacum    | AT4G23160.1   Symbols: CRK8   cysteine-rich RLK (RECEPTOR-like protein kinase) 8   chr4:12129485-12134086 FORWARD LENGTH=1262                                                                                                                                                                                                                                                                                                                                     | 1324 | 1262 | 1.00E-94  | 95.3  | 14.7 | 23.2 |
| Rsa1.0_00721.1.g18572.t1 | ref XP_002867360.1  hypothetical protein ARALYDRAFT_491727 [Arabidopsis lyrata subsp. lyrata] gi 297313196 gb EFH43619.1  hypothetical protein ARALYDRAFT_491727 [Arabidopsis lyrata subsp. lyrata]                                                                                                                                                                                                                                                                                                                                                                                                                     | 211  | 308  | 1.00E-80  | 146.0 | 81.0 | 87.2 | hypothetical protein ARALYDRAFT_491727                | gbpln | Arabidopsis lyrata   | AT4G30240.1   Symbols:   Syntaxin/t-SNARE family protein   chr4:14808359-14809745 REVERSE LENGTH=300                                                                                                                                                                                                                                                                                                                                                              | 211  | 300  | 5.00E-77  | 142.2 | 76.8 | 83.4 |
| Rsa1.0_00721.1.g18573.t1 | gb EOA17247.1  hypothetical protein CARUB_v10005521mg [Capsella rubella]                                                                                                                                                                                                                                                                                                                                                                                                                                                                                                                                                | 250  | 263  | 2.00E-77  | 105.2 | 71.6 | 82.0 | hypothetical protein CARUB_v10005521mg                | gbpln | Capsella rubella     | AT4G30230.1   Symbols:   unknown protein; Has 42 Blast hits to 42 proteins in 5 species: Archae - 0; Bacteria - 0; Metazoa - 0; Fungi - 0; Plants - 42; Viruses - 0; Other Eukaryotes - 0 (source: NCBI BLink).   chr4:14806376-14807158 FORWARD LENGTH=260                                                                                                                                                                                                       | 250  | 260  | 2.00E-77  | 104.0 | 69.2 | 80.8 |
| Rsa1.0_00721.1.g18574.t1 | gb AAF18538.1 AC006551.24 Very similar to retrotransposon reverse transcriptase [Arabidopsis thaliana]                                                                                                                                                                                                                                                                                                                                                                                                                                                                                                                  | 525  | 1231 | 1.00E-129 | 234.5 | 45.7 | 63.0 | Very similar to retrotransposon reverse transcriptase | gbpln | Arabidopsis thaliana | AT4G29090.1   Symbols:   Ribonuclease H-like superfamily protein   chr4:14333528-14335255 FORWARD LENGTH=575                                                                                                                                                                                                                                                                                                                                                      | 525  | 575  | 1.00E-81  | 109.5 | 31.8 | 52.0 |
| Rsa1.0_00721.1.g18575.t1 | dbj BAJ33878.1  unnamed protein product [Thellungiella halophila]                                                                                                                                                                                                                                                                                                                                                                                                                                                                                                                                                       | 709  | 711  | 0         | 100.3 | 93.9 | 96.5 | unnamed protein product                               | ----  | ----                 | AT4G30210.2   Symbols: ATR2, AR2   P450 reductase 2   chr4:14796900-14800578 FORWARD LENGTH=711                                                                                                                                                                                                                                                                                                                                                                   | 709  | 711  | 0         | 100.3 | 91.3 | 95.3 |
| Rsa1.0_00721.1.g18576.t1 | #                                                                                                                                                                                                                                                                                                                                                                                                                                                                                                                                                                                                                       | #    | #    | #         | #     | #    | -    | ----                                                  | ----  | ----                 | #                                                                                                                                                                                                                                                                                                                                                                                                                                                                 | #    | #    | #         | #     | #    |      |
| Rsa1.0_00721.1.g18577.t1 | ref XP_002867362.1  hypothetical protein ARALYDRAFT_491730 [Arabidopsis lyrata subsp. lyrata] gi 297313198 gb EFH43621.1  hypothetical protein ARALYDRAFT_491730 [Arabidopsis lyrata subsp. lyrata]                                                                                                                                                                                                                                                                                                                                                                                                                     | 642  | 718  | 0         | 111.8 | 82.9 | 88.9 | hypothetical protein ARALYDRAFT_491730                | gbpln | Arabidopsis lyrata   | AT4G30200.3   Symbols: VEL1, VIL2   vernalization5/VIN3-like   chr4:14786852-14790070 REVERSE LENGTH=702                                                                                                                                                                                                                                                                                                                                                          | 642  | 702  | 0         | 109.3 | 81.8 | 88.3 |
| Rsa1.0_00721.1.g18578.t1 | #                                                                                                                                                                                                                                                                                                                                                                                                                                                                                                                                                                                                                       | #    | #    | #         | #     | #    | -    | ----                                                  | ----  | ----                 | #                                                                                                                                                                                                                                                                                                                                                                                                                                                                 | #    | #    | #         | #     | #    |      |
| Rsa1.0_00721.1.g18579.t1 | gb ABD65170.1  hypothetical protein 40.t00057 [Brassica oleracea]                                                                                                                                                                                                                                                                                                                                                                                                                                                                                                                                                       | 146  | 255  | 7.00E-34  | 174.7 | 55.5 | 65.1 | hypothetical protein 40.t00057                        | gbpln | Brassica oleracea    | AT3G47680.1   Symbols:   DNA binding   chr3:17577483-17578391 REVERSE LENGTH=302                                                                                                                                                                                                                                                                                                                                                                                  | 146  | 302  | 1.00E-21  | 206.8 | 41.1 | 58.2 |
| Rsa1.0_00721.1.g18580.t1 | gb EOA15440.1  hypothetical protein CARUB_v10004082mg [Capsella rubella]                                                                                                                                                                                                                                                                                                                                                                                                                                                                                                                                                | 948  | 948  | 0         | 100.0 | 94.8 | 97.8 | hypothetical protein CARUB_v10004082mg                | gbpln | Capsella rubella     | AT4G30190.1   Symbols: AHA2, PMA2, HA2   H(+)-ATPase 2   chr4:14770820-14775920 REVERSE LENGTH=948                                                                                                                                                                                                                                                                                                                                                                | 948  | 948  | 0         | 100.0 | 94.8 | 97.8 |
| Rsa1.0_00721.1.g18581.t1 | ref XP_002869391.1  transcription factor/ transcription regulator [Arabidopsis lyrata subsp. lyrata] gi 297315227 gb EFH45650.1  transcription factor/ transcription regulator [Arabidopsis lyrata subsp. lyrata]                                                                                                                                                                                                                                                                                                                                                                                                       | 162  | 156  | 3.00E-61  | 96.3  | 84.0 | 89.5 | transcription factor/ transcription regulator         | gbpln | Arabidopsis lyrata   | AT4G30180.1   Symbols:   sequence-specific DNA binding transcription factors:transcription regulators   chr4:14769028-14769504 FORWARD LENGTH=158                                                                                                                                                                                                                                                                                                                 | 162  | 158  | 2.00E-57  | 97.5  | 84.0 | 90.7 |
| Rsa1.0_00722.1.g18582.t1 | gb AAC16262.1  putative CCAAT-binding transcription factor subunit [Arabidopsis thaliana] ref NP_680161.1  protein ATAF2 [Arabidopsis thaliana] gi 75168917 sp Q9C598.1 NAC81_ARAT H RecName: Full=Protein ATAF2; AltName: Full=NAC domain-containing protein 81; Short=ANAC081 gi 13548337 emb CAC35884.1  ATAF2 protein [Arabidopsis thaliana] gi 19424091 gb AAL87335.1  unknown protein [Arabidopsis thaliana] gi 22136754 gb AAM91696.1  unknown protein [Arabidopsis thaliana] gi 110737514 dbj BAF00699.1  ATAF2 protein [Arabidopsis thaliana] gi 332003967 gb AED91350.1  protein ATAF2 [Arabidopsis thaliana] | 243  | 226  | 1.00E-63  | 93.0  | 50.6 | 54.7 | putative CCAAT-binding transcription factor subunit   | gbpln | Arabidopsis thaliana | AT2G34720.1   Symbols: NF-YA4   nuclear factor Y, subunit A4   chr2:14650018-14651255 REVERSE LENGTH=198                                                                                                                                                                                                                                                                                                                                                          | 243  | 198  | 5.00E-66  | 81.5  | 48.6 | 51.9 |
| Rsa1.0_00722.1.g18583.t1 | ref XP_002869391.1  transcription factor/ transcription regulator [Arabidopsis lyrata subsp. lyrata] gi 297315227 gb EFH45650.1  transcription factor/ transcription regulator [Arabidopsis lyrata subsp. lyrata]                                                                                                                                                                                                                                                                                                                                                                                                       | 280  | 283  | 1.00E-150 | 101.1 | 93.9 | 96.8 | protein ATAF2                                         | gbpln | Arabidopsis thaliana | AT5G08790.1   Symbols: ATAF2, anac081   NAC (No Apical Meristem) domain transcriptional regulator superfamily protein   chr5:2859113-2860144 REVERSE LENGTH=283                                                                                                                                                                                                                                                                                                   | 280  | 283  | 1.00E-153 | 101.1 | 93.9 | 96.8 |

|                          |                                                                                                                                                                                                                                                                                                                                                                                                                                                                                                                                                                                                   |     |      |           |       |      |      |                                                                                    |       |                      |                                                                                                                                                                                                                                                                                                                                                                                                                                                                              |     |     |           |       |      |      |
|--------------------------|---------------------------------------------------------------------------------------------------------------------------------------------------------------------------------------------------------------------------------------------------------------------------------------------------------------------------------------------------------------------------------------------------------------------------------------------------------------------------------------------------------------------------------------------------------------------------------------------------|-----|------|-----------|-------|------|------|------------------------------------------------------------------------------------|-------|----------------------|------------------------------------------------------------------------------------------------------------------------------------------------------------------------------------------------------------------------------------------------------------------------------------------------------------------------------------------------------------------------------------------------------------------------------------------------------------------------------|-----|-----|-----------|-------|------|------|
| Rsa1.0_00722.1.g18584.t1 | refXP_002871359.1  histone H1/H5 family protein [Arabidopsis lyrata subsp. lyrata]   gi297317196 gb EFH47618.1  histone H1/H5 family protein [Arabidopsis lyrata subsp. lyrata]                                                                                                                                                                                                                                                                                                                                                                                                                   | 451 | 460  | 1.00E-148 | 102.0 | 65.6 | 76.7 | histone H1/H5 family protein                                                       | gbpln | Arabidopsis lyrata   | AT5G08780.1   Symbols:   winged-helix DNA-binding transcription factor family protein   chr5:2856782-2858810 FORWARD LENGTH=457                                                                                                                                                                                                                                                                                                                                              | 451 | 457 | 1.00E-137 | 101.3 | 65.0 | 75.6 |
| Rsa1.0_00722.1.g18585.t1 | gb EOA22394.1  hypothetical protein CARUB_v10003030mg [Capsella rubella]                                                                                                                                                                                                                                                                                                                                                                                                                                                                                                                          | 305 | 304  | 2.00E-92  | 99.7  | 75.4 | 82.0 | hypothetical protein CARUB_v10003030mg                                             | gbpln | Capsella rubella     | AT5G08770.1   Symbols:   unknown protein; Has 30201 Blast hits to 17322 proteins in 780 species: Archae - 12; Bacteria - 1396; Metazoa - 17338; Fungi - 3422; Plants - 5037; Viruses - 0; Other Eukaryotes - 2996 (source: NCBI BLink).   chr5:2855638-2856531 REVERSE LENGTH=297                                                                                                                                                                                            | 305 | 297 | 9.00E-91  | 97.4  | 74.8 | 81.3 |
| Rsa1.0_00722.1.g18586.t1 | refNP_568206.1  RING/FYVE/PHD zinc finger-containing protein [Arabidopsis thaliana]   gi145334331 ref NP_001078547.1  RING/FYVE/PHD zinc finger-containing protein [Arabidopsis thaliana]   gi13548333 emb CAC35880.1  putative protein [Arabidopsis thaliana]   gi26451043 dbj BAC42627.1  unknown protein [Arabidopsis thaliana]   gi34442419 gb ADP18997.1  At5g08750 [Arabidopsis thaliana]   gi332003961 gb AED91344.1  RING/FYVE/PHD zinc finger-containing protein [Arabidopsis thaliana]   gi332003962 gb AED91345.1  RING/FYVE/PHD zinc finger-containing protein [Arabidopsis thaliana] | 370 | 363  | 1.00E-167 | 98.1  | 82.2 | 87.0 | RING/FYVE/PHD zinc finger-containing protein                                       | gbpln | Arabidopsis thaliana | AT5G08750.2   Symbols:   RING/FYVE/PHD zinc finger superfamily protein   chr5:2853066-2854343 FORWARD LENGTH=363                                                                                                                                                                                                                                                                                                                                                             | 370 | 363 | 1.00E-170 | 98.1  | 82.2 | 87.0 |
| Rsa1.0_00722.1.g18587.t1 | sp Q8GXR9.2 DHNA_ARATH RecName: Full=NADH dehydrogenase C1, chloroplastic/mitochondrial; Flags: Precursor                                                                                                                                                                                                                                                                                                                                                                                                                                                                                         | 525 | 519  | 0         | 98.9  | 86.3 | 93.0 | RecName: Full=NADH dehydrogenase C1, chloroplastic/mitochondrial; Flags: Precursor | ----- | -----                | AT5G08740.1   Symbols: NDC1   NAD(P)H dehydrogenase C1   chr5:2848752-2851323 REVERSE LENGTH=519                                                                                                                                                                                                                                                                                                                                                                             | 525 | 519 | 0         | 98.9  | 85.9 | 92.6 |
| Rsa1.0_00722.1.g18588.t1 | refXP_002873380.1  IBR domain-containing protein [Arabidopsis lyrata subsp. lyrata]   gi297319217 gb EFH49639.1  IBR domain-containing protein [Arabidopsis lyrata subsp. lyrata]                                                                                                                                                                                                                                                                                                                                                                                                                 | 720 | 497  | 1.00E-133 | 69.0  | 36.3 | 46.7 | IBR domain-containing protein                                                      | gbpln | Arabidopsis lyrata   | AT5G08730.1   Symbols: ATARI16, ARI16   IBR domain-containing protein   chr5:2845824-2847415 REVERSE LENGTH=500                                                                                                                                                                                                                                                                                                                                                              | 720 | 500 | 1.00E-134 | 69.4  | 35.8 | 46.1 |
| Rsa1.0_00722.1.g18589.t1 | refXP_002873379.1  hypothetical protein ARALYDRAFT_487714 [Arabidopsis lyrata subsp. lyrata]   gi297319216 gb EFH49638.1  hypothetical protein ARALYDRAFT_487714 [Arabidopsis lyrata subsp. lyrata]                                                                                                                                                                                                                                                                                                                                                                                               | 722 | 722  | 0         | 100.0 | 86.1 | 90.9 | hypothetical protein ARALYDRAFT_487714                                             | gbpln | Arabidopsis lyrata   | AT5G08720.1   Symbols:   CONTAINS InterPro DOMAIN/s: Streptomyces cyclase/dehydrase (InterPro:IPR005031); BEST Arabidopsis thaliana protein match is: Polyketide cyclase / dehydrase and lipid transport protein (TAIR:AT4G01650.1); Has 30201 Blast hits to 17322 proteins in 780 species: Archae - 12; Bacteria - 1396; Metazoa - 17338; Fungi - 3422; Plants - 5037; Viruses - 0; Other Eukaryotes - 2996 (source: NCBI BLink).   chr5:2841536-2845335 REVERSE LENGTH=719 | 722 | 719 | 0         | 99.6  | 85.6 | 90.2 |
| Rsa1.0_00722.1.g18590.t2 | gb AAD15377.1  putative non-LTR retroelement reverse transcriptase [Arabidopsis thaliana]                                                                                                                                                                                                                                                                                                                                                                                                                                                                                                         | 679 | 1044 | 1.00E-156 | 153.8 | 43.6 | 62.3 | putative non-LTR retroelement reverse transcriptase                                | gbpln | Arabidopsis thaliana | AT2G06845.1   Symbols:   Beta-galactosidase related protein   chr2:2754666-2756008 FORWARD LENGTH=315                                                                                                                                                                                                                                                                                                                                                                        | 679 | 315 | 3.00E-42  | 46.4  | 15.6 | 20.5 |
| Rsa1.0_00722.1.g18591.t1 | gb EOA20295.1  hypothetical protein CARUB_v10000603mg [Capsella rubella]                                                                                                                                                                                                                                                                                                                                                                                                                                                                                                                          | 613 | 559  | 0         | 91.2  | 71.9 | 73.2 | hypothetical protein CARUB_v10000603mg                                             | gbpln | Capsella rubella     | AT5G08680.1   Symbols:   ATP synthase alpha/beta family protein   chr5:2821992-2824683 FORWARD LENGTH=559                                                                                                                                                                                                                                                                                                                                                                    | 613 | 559 | 0         | 91.2  | 69.8 | 70.3 |
| Rsa1.0_00722.1.g18592.t1 | gb EOA20295.1  hypothetical protein CARUB_v10000603mg [Capsella rubella]                                                                                                                                                                                                                                                                                                                                                                                                                                                                                                                          | 560 | 559  | 0         | 99.8  | 90.5 | 92.1 | hypothetical protein CARUB_v10000603mg                                             | gbpln | Capsella rubella     | AT5G08680.1   Symbols:   ATP synthase alpha/beta family protein   chr5:2821992-2824683 FORWARD LENGTH=559                                                                                                                                                                                                                                                                                                                                                                    | 560 | 559 | 0         | 99.8  | 87.7 | 88.8 |
| Rsa1.0_00722.1.g18593.t1 | refNP_568037.1  uncharacterized protein [Arabidopsis thaliana]   gi21593523 gb AAM65490.1  unknown [Arabidopsis thaliana]   gi23297383 gb AAN12956.1  unknown protein [Arabidopsis thaliana]   gi33266149 gb AEE86898.1  uncharacterized protein AT4G38225 [Arabidopsis thaliana]                                                                                                                                                                                                                                                                                                                 | 354 | 363  | 1.00E-143 | 102.5 | 73.7 | 81.4 | uncharacterized protein                                                            | gbpln | Arabidopsis thaliana | AT4G38225.1   Symbols:   unknown protein; FUNCTIONS IN: molecular_function unknown; INVOLVED IN: biological_process unknown; LOCATED IN: chloroplast; EXPRESSED IN: 21 plant structures; EXPRESSED DURING: 13 growth stages; Has 30201 Blast hits to 17322 proteins in 780 species: Archae - 12; Bacteria - 1396; Metazoa - 17338; Fungi - 3422; Plants - 5037; Viruses - 0; Other Eukaryotes - 2996 (source: NCBI BLink).   chr4:17927230-17928613 FORWARD LENGTH=363       | 354 | 363 | 1.00E-145 | 102.5 | 73.7 | 81.4 |

|                          |                                                                                                                                                                                                                                                                                                                                       |      |      |           |       |      |      |                                                       |       |                      |                                                                                                                                             |     |     |          |       |      |      |
|--------------------------|---------------------------------------------------------------------------------------------------------------------------------------------------------------------------------------------------------------------------------------------------------------------------------------------------------------------------------------|------|------|-----------|-------|------|------|-------------------------------------------------------|-------|----------------------|---------------------------------------------------------------------------------------------------------------------------------------------|-----|-----|----------|-------|------|------|
| Rsa1.0_00722.1.g18594.t1 | ref NP_680154.2  uncharacterized protein [Arabidopsis thaliana] gi 13548324 emb CAC35871.1  putative protein [Arabidopsis thaliana] gi 332003952 gb AED91335.1  uncharacterized protein AT5G08660 [Arabidopsis thaliana]                                                                                                              | 639  | 649  | 0         | 101.6 | 85.8 | 91.1 | uncharacterized protein                               | gbpln | Arabidopsis thaliana | AT5G08660.1   Symbols:   Protein of unknown function (DUF668)   chr5:2814526-2817845 FORWARD LENGTH=649                                     | 639 | 649 | 0        | 101.6 | 85.8 | 91.1 |
| Rsa1.0_00722.1.g18595.t1 | gb EOA21042.1  hypothetical protein CARUB_v10001381mg [Capsella rubella]                                                                                                                                                                                                                                                              | 336  | 336  | 1.00E-180 | 100.0 | 90.2 | 96.1 | hypothetical protein CARUB_v10001381mg                | gbpln | Capsella rubella     | AT5G08640.2   Symbols: FLS1   flavonol synthase 1   chr5:2804009-2805175 FORWARD LENGTH=336                                                 | 336 | 336 | 0        | 100.0 | 90.8 | 95.8 |
| Rsa1.0_00722.1.g18596.t1 | # # # # # # # #                                                                                                                                                                                                                                                                                                                       | #    | #    | #         | #     | #    | #    | -                                                     | ----  | ----                 | # # # # # # #                                                                                                                               | #   | #   | #        | #     | #    | #    |
| Rsa1.0_00722.1.g18597.t1 | ref XP_002873374.1  DDT domain-containing protein [Arabidopsis lyrata subsp. lyrata] gi 297319211 gb EFH49633.1  DDT domain-containing protein [Arabidopsis lyrata subsp. lyrata]                                                                                                                                                     | 699  | 722  | 0         | 103.3 | 82.1 | 88.1 | DDT domain-containing protein                         | gbpln | Arabidopsis lyrata   | AT5G08630.1   Symbols:   DDT domain-containing protein   chr5:2798575-2802138 REVERSE LENGTH=723                                            | 699 | 723 | 0        | 103.4 | 80.4 | 88.0 |
| Rsa1.0_00722.1.g18598.t1 | gb EOA22779.1  hypothetical protein CARUB_v10003496mg [Capsella rubella]                                                                                                                                                                                                                                                              | 562  | 564  | 0         | 100.4 | 89.1 | 93.2 | hypothetical protein CARUB_v10003496mg                | gbpln | Capsella rubella     | AT5G08620.1   Symbols: STRS2, ATRH25   DEA(D/H)-box RNA helicase family protein   chr5:2794540-2797548 FORWARD LENGTH=563                   | 562 | 563 | 0        | 100.2 | 87.7 | 92.3 |
| Rsa1.0_00722.1.g18599.t1 | gb AAF18538.1 AC006551_24 Very similar to retrotransposon reverse transcriptase [Arabidopsis thaliana]                                                                                                                                                                                                                                | 152  | 1231 | 1.00E-26  | 809.9 | 40.8 | 56.6 | Very similar to retrotransposon reverse transcriptase | gbpln | Arabidopsis thaliana | #                                                                                                                                           | #   | #   | #        | #     | #    | #    |
| Rsa1.0_00722.1.g18600.t2 | gb EOA19348.1  hypothetical protein CARUB_v10000281mg [Capsella rubella]                                                                                                                                                                                                                                                              | 728  | 766  | 0         | 105.2 | 88.3 | 92.7 | hypothetical protein CARUB_v10000281mg                | gbpln | Capsella rubella     | AT5G08610.1   Symbols:   P-loop containing nucleoside triphosphate hydrolases superfamily protein   chr5:2790341-2794059 FORWARD LENGTH=850 | 728 | 850 | 0        | 116.8 | 85.7 | 90.1 |
| Rsa1.0_00723.1.g18601.t1 | gb ACG60682.1  transposon-like ORF [Brassica oleracea var. alboglabra]                                                                                                                                                                                                                                                                | 520  | 704  | 1.00E-139 | 135.4 | 49.6 | 52.1 | transposon-like ORF                                   | gbpln | Brassica oleracea    | #                                                                                                                                           | #   | #   | #        | #     | #    | #    |
| Rsa1.0_00723.1.g18602.t3 | gb AAF79618.1 AC027665_19 F5M15.26 [Arabidopsis thaliana]                                                                                                                                                                                                                                                                             | 1077 | 1838 | 4.00E-52  | 170.7 | 12.3 | 20.7 | F5M15.26                                              | gbpln | Arabidopsis thaliana | #                                                                                                                                           | #   | #   | #        | #     | #    | #    |
| Rsa1.0_00723.1.g18603.t1 | gb AAF04414.1 AC010927.7 hypothetical protein [Arabidopsis thaliana]                                                                                                                                                                                                                                                                  | 903  | 1004 | 1.00E-28  | 111.2 | 19.8 | 32.9 | hypothetical protein                                  | gbpln | Arabidopsis thaliana | AT2G15420.1   Symbols:   myosin heavy chain-related   chr2:6723948-6728183 REVERSE LENGTH=957                                               | 903 | 957 | 1.00E-24 | 106.0 | 18.8 | 29.6 |
| Rsa1.0_00723.1.g18604.t1 | gb AAG51783.1 AC079679_3 reverse transcriptase, putative; 16838-20266 [Arabidopsis thaliana]                                                                                                                                                                                                                                          | 636  | 1142 | 1.00E-100 | 179.6 | 30.5 | 40.7 | reverse transcriptase, putative; 16838-20266          | gbpln | Arabidopsis thaliana | AT4G29090.1   Symbols:   Ribonuclease H-like superfamily protein   chr4:14333528-14335255 FORWARD LENGTH=575                                | 636 | 575 | 2.00E-38 | 90.4  | 18.7 | 31.8 |
| Rsa1.0_00723.1.g18605.t1 | gb AAD25557.1 AC005850_14 Hypothetical protein [Arabidopsis thaliana]                                                                                                                                                                                                                                                                 | 374  | 404  | 8.00E-12  | 108.0 | 10.4 | 12.0 | Hypothetical protein                                  | gbpln | Arabidopsis thaliana | #                                                                                                                                           | #   | #   | #        | #     | #    | #    |
| Rsa1.0_00723.1.g18606.t4 | ref NP_567204.3  cysteine-rich receptor-like protein kinase 41 [Arabidopsis thaliana] gi 152013451 sp O23081.2 CRK41_ARAT H RecName: Full=Cysteine-rich receptor-like protein kinase 41; Short=Cysteine-rich RLK41; Flags: Precursor gi 332656562 gb AEE81962.1  cysteine-rich receptor-like protein kinase 41 [Arabidopsis thaliana] | 667  | 665  | 0         | 99.7  | 72.7 | 82.5 | cysteine-rich receptor-like protein kinase 41         | gbpln | Arabidopsis thaliana | AT4G00970.1   Symbols: CRK41   cysteine-rich RLK (RECEPTOR-like protein kinase) 41   chr4:418437-421694 FORWARD LENGTH=665                  | 667 | 665 | 0        | 99.7  | 72.7 | 82.5 |
| Rsa1.0_00723.1.g18607.t1 | gb AAG51228.1 AC035249_3 Tam3-like transposon protein; 93317-95488 [Arabidopsis thaliana] gi 12323055 gb AAG51515.1 AC068324_3 hAT-element transposase, putative [Arabidopsis thaliana]                                                                                                                                               | 718  | 723  | 0         | 100.7 | 52.6 | 68.0 | Tam3-like transposon protein; 93317-95488             | gbpln | Arabidopsis thaliana | AT3G42170.1   Symbols:   BED zinc finger hAT family dimerisation domain   chr3:14321838-14323928 FORWARD LENGTH=696                         | 718 | 696 | 2.00E-45 | 96.9  | 22.6 | 40.3 |
| Rsa1.0_00723.1.g18608.t8 | gb AAD15376.1  putative retroelement pol polyprotein [Arabidopsis thaliana]                                                                                                                                                                                                                                                           | 1100 | 962  | 3.00E-35  | 87.5  | 9.7  | 13.9 | putative retroelement pol polyprotein                 | gbpln | Arabidopsis thaliana | #                                                                                                                                           | #   | #   | #        | #     | #    | #    |
| Rsa1.0_00723.1.g18609.t1 | gb EOA23025.1  hypothetical protein CARUB_v10003790mg [Capsella rubella]                                                                                                                                                                                                                                                              | 478  | 485  | 0         | 101.5 | 84.7 | 91.2 | hypothetical protein CARUB_v10003790mg                | gbpln | Capsella rubella     | AT4G00910.1   Symbols:   Aluminium activated malate transporter family protein   chr4:389370-391287 REVERSE LENGTH=497                      | 478 | 497 | 0        | 104.0 | 84.7 | 90.4 |
| Rsa1.0_00723.1.g18610.t1 | ref XP_002875008.1  hypothetical protein ARALYDRAFT_490476 [Arabidopsis lyrata subsp. lyrata] gi 297320845 gb EFH51267.1  hypothetical protein ARALYDRAFT_490476 [Arabidopsis lyrata subsp. lyrata]                                                                                                                                   | 184  | 190  | 6.00E-54  | 103.3 | 73.4 | 81.0 | hypothetical protein ARALYDRAFT_490476                | gbpln | Arabidopsis lyrata   | AT4G00895.1   Symbols:   ATPase, F1 complex, OSCP/delta subunit protein   chr4:381823-382398 FORWARD LENGTH=191                             | 184 | 191 | 2.00E-51 | 103.8 | 69.6 | 76.1 |
| Rsa1.0_00723.1.g18611.t1 | gb EOA19956.1  hypothetical protein CARUB_v10000206mg [Capsella rubella]                                                                                                                                                                                                                                                              | 859  | 854  | 4.00E-33  | 99.4  | 36.0 | 45.1 | hypothetical protein CARUB_v10000206mg                | gbpln | Capsella rubella     | AT4G00890.1   Symbols:   proline-rich family protein   chr4:374055-375350 REVERSE LENGTH=431                                                | 859 | 431 | 3.00E-20 | 50.2  | 7.9  | 8.8  |
| Rsa1.0_00723.1.g18612.t1 | # # # # # # # #                                                                                                                                                                                                                                                                                                                       | #    | #    | #         | #     | #    | #    | -                                                     | ----  | ----                 | # # # # # # #                                                                                                                               | #   | #   | #        | #     | #    | #    |

|                          |                                                                                                                                                                                                           |      |      |          |       |      |      |                                                                                                                                     |       |                      |                                                                                                                                                                                                                                                                                                                                                                                                                                                                                                                                                                                           |      |      |           |       |      |      |
|--------------------------|-----------------------------------------------------------------------------------------------------------------------------------------------------------------------------------------------------------|------|------|----------|-------|------|------|-------------------------------------------------------------------------------------------------------------------------------------|-------|----------------------|-------------------------------------------------------------------------------------------------------------------------------------------------------------------------------------------------------------------------------------------------------------------------------------------------------------------------------------------------------------------------------------------------------------------------------------------------------------------------------------------------------------------------------------------------------------------------------------------|------|------|-----------|-------|------|------|
| Rsa1.0_00724.1.g18613.t1 | refXP_002875078.1   hypothetical protein ARALYDRAFT_322499 [Arabidopsis lyrata subsp. lyrata] gi 297320916 gb EFH51337.1   hypothetical protein ARALYDRAFT_322499 [Arabidopsis lyrata subsp. lyrata]      | 141  | 137  | 3.00E-58 | 97.2  | 83.0 | 87.2 | hypothetical protein ARALYDRAFT_322499                                                                                              | gbpln | Arabidopsis lyrata   | AT1G70780.1   Symbols:   unknown protein; FUNCTIONS IN: molecular_function unknown; INVOLVED IN: biological_process unknown; LOCATED IN: mitochondrion; EXPRESSED IN: sperm cell, male gametophyte, pollen tube; EXPRESSED DURING: L mature pollen stage, M germinated pollen stage; BEST Arabidopsis thaliana protein match is: unknown protein (TAIRAT1G23150.1); Has 143 Blast hits to 143 proteins in 17 species: Archae - 0; Bacteria - 0; Metazoa - 0; Fungi - 0; Plants - 143; Viruses - 0; Other Eukaryotes - 0 (source: NCBI BLink).   chr1:26695462-26695975 REVERSE LENGTH=140 | 141  | 140  | 8.00E-36  | 99.3  | 56.0 | 68.1 |
| Rsa1.0_00724.1.g18614.t1 | gb AAFO2855.1 AC009324.4 Similar to retrotransposon proteins [Arabidopsis thaliana]                                                                                                                       | 1039 | 1522 | 0        | 146.5 | 60.4 | 75.8 | Similar to retrotransposon proteins                                                                                                 | gbpln | Arabidopsis thaliana | AT4G23160.1   Symbols: CRK8   cysteine-rich RLK (RECEPTOR-like protein kinase) 8   chr4:12129485-12134086 FORWARD LENGTH=1262                                                                                                                                                                                                                                                                                                                                                                                                                                                             | 1039 | 1262 | 1.00E-106 | 121.5 | 18.8 | 26.5 |
| Rsa1.0_00724.1.g18615.t1 | sp Q5BN23.1 RGA1_BRACM RecName: Full=DELLA protein RGA1; AltName: Full=BrRGA1; AltName: Full=RGA-like protein 1 gi 60656559 gb AAAX33297.1   DELLA protein [Brassica rapa]                                | 575  | 573  | 0        | 99.7  | 93.0 | 94.8 | RecName: Full=DELLA protein RGA1; AltName: Full=BrRGA1; AltName: Full=RGA-like protein 1 gi 60656559 gb AAAX33297.1   DELLA protein | gbpln | Brassica rapa        | AT2G01570.1   Symbols: RGA1, RGA   GRAS family transcription factor family protein   chr2:255581-257344 REVERSE LENGTH=587                                                                                                                                                                                                                                                                                                                                                                                                                                                                | 575  | 587  | 0         | 102.1 | 85.2 | 89.7 |
| Rsa1.0_00724.1.g18616.t1 | #                                                                                                                                                                                                         | #    | #    | #        | #     | #    | #    | -                                                                                                                                   | ----  | ----                 | #                                                                                                                                                                                                                                                                                                                                                                                                                                                                                                                                                                                         | #    | #    | #         | #     | #    |      |
| Rsa1.0_00724.1.g18617.t1 | gb EOA29259.1   hypothetical protein CARUB_v10025533mg, partial [Capsella rubella]                                                                                                                        | 165  | 293  | 2.00E-14 | 177.6 | 23.6 | 27.9 | hypothetical protein CARUB_v10025533mg, partial                                                                                     | gbpln | Capsella rubella     | AT1G34070.1   Symbols:   CONTAINS InterPro DOMAIN/s: Retrotransposon gag protein (InterPro:IPR005162); BEST Arabidopsis thaliana protein match is: unknown protein (TAIR:AT5G48050.1); Has 648 Blast hits to 647 proteins in 29 species: Archae - 0; Bacteria - 0; Metazoa - 16; Fungi - 25; Plants - 607; Viruses - 0; Other Eukaryotes - 0 (source: NCBI BLink).   chr1:12402283-12403209 FORWARD LENGTH=308                                                                                                                                                                            | 165  | 308  | 6.00E-14  | 186.7 | 20.6 | 26.1 |
| Rsa1.0_00724.1.g18618.t1 | #                                                                                                                                                                                                         | #    | #    | #        | #     | #    | #    | -                                                                                                                                   | ----  | ----                 | #                                                                                                                                                                                                                                                                                                                                                                                                                                                                                                                                                                                         | #    | #    | #         | #     | #    |      |
| Rsa1.0_00724.1.g18619.t1 | #                                                                                                                                                                                                         | #    | #    | #        | #     | #    | #    | -                                                                                                                                   | ----  | ----                 | #                                                                                                                                                                                                                                                                                                                                                                                                                                                                                                                                                                                         | #    | #    | #         | #     | #    |      |
| Rsa1.0_00724.1.g18620.t1 | refXP_002876764.1   hypothetical protein ARALYDRAFT_484074 [Arabidopsis lyrata subsp. lyrata] gi 297322602 gb EFH53023.1   hypothetical protein ARALYDRAFT_484074 [Arabidopsis lyrata subsp. lyrata]      | 191  | 191  | 6.00E-79 | 100.0 | 87.4 | 95.8 | hypothetical protein ARALYDRAFT_484074                                                                                              | gbpln | Arabidopsis lyrata   | AT2G01580.1   Symbols:   unknown protein; BEST Arabidopsis thaliana protein match is: unknown protein (TAIR:AT3G07510.2); Has 129 Blast hits to 129 proteins in 12 species: Archae - 0; Bacteria - 0; Metazoa - 0; Fungi - 0; Plants - 129; Viruses - 0; Other Eukaryotes - 0 (source: NCBI BLink).   chr2:265181-265756 REVERSE LENGTH=191                                                                                                                                                                                                                                               | 191  | 191  | 3.00E-71  | 100.0 | 86.9 | 93.7 |
| Rsa1.0_00724.1.g18621.t1 | dbj BAB09379.1   non-LTR retroelement reverse transcriptase-like protein [Arabidopsis thaliana]                                                                                                           | 279  | 1223 | 8.00E-57 | 438.4 | 43.0 | 60.6 | non-LTR retroelement reverse transcriptase-like protein                                                                             | gbpln | Arabidopsis thaliana | AT3G24255.1   Symbols:   RNA-directed DNA polymerase (reverse transcriptase)-related family protein   chr3:8789471-8793208 FORWARD LENGTH=746                                                                                                                                                                                                                                                                                                                                                                                                                                             | 279  | 746  | 7.00E-36  | 267.4 | 30.5 | 43.7 |
| Rsa1.0_00724.1.g18622.t1 | refXP_002875082.1   hypothetical protein ARALYDRAFT_904366 [Arabidopsis lyrata subsp. lyrata] gi 297320920 gb EFH51341.1   hypothetical protein ARALYDRAFT_904366 [Arabidopsis lyrata subsp. lyrata]      | 556  | 562  | 0        | 101.1 | 87.4 | 92.1 | hypothetical protein ARALYDRAFT_904366                                                                                              | gbpln | Arabidopsis lyrata   | AT2G01600.1   Symbols:   ENTH/ANTH/VHS superfamily protein   chr2:268975-272356 FORWARD LENGTH=571                                                                                                                                                                                                                                                                                                                                                                                                                                                                                        | 556  | 571  | 0         | 102.7 | 86.7 | 91.9 |
| Rsa1.0_00724.1.g18623.t1 | gb AAF22135.1 AF127919.1 high mobility group protein L/Y [Brassica napus]                                                                                                                                 | 211  | 203  | 2.00E-90 | 96.2  | 87.2 | 90.5 | high mobility group protein L/Y                                                                                                     | gbpln | Brassica napus       | AT1G14900.1   Symbols: HMGA   high mobility group A   chr1:5138665-5139353 REVERSE LENGTH=204                                                                                                                                                                                                                                                                                                                                                                                                                                                                                             | 211  | 204  | 3.00E-54  | 96.7  | 63.5 | 70.1 |
| Rsa1.0_00724.1.g18624.t1 | gb EOA25668.1   hypothetical protein CARUB_v10019019mg [Capsella rubella]                                                                                                                                 | 215  | 227  | 3.00E-50 | 105.6 | 55.3 | 69.8 | hypothetical protein CARUB_v10019019mg                                                                                              | gbpln | Capsella rubella     | AT2G01610.1   Symbols:   Plant invertase/pectin methyltransferase inhibitor superfamily protein   chr2:274124-274792 REVERSE LENGTH=222                                                                                                                                                                                                                                                                                                                                                                                                                                                   | 215  | 222  | 6.00E-50  | 103.3 | 50.7 | 64.2 |
| Rsa1.0_00724.1.g18625.t1 | #                                                                                                                                                                                                         | #    | #    | #        | #     | #    | #    | -                                                                                                                                   | ----  | ----                 | #                                                                                                                                                                                                                                                                                                                                                                                                                                                                                                                                                                                         | #    | #    | #         | #     | #    |      |
| Rsa1.0_00725.1.g18626.t1 | ref NP_188081.1   cytochrome P450, family 72, subfamily A, polypeptide 9 [Arabidopsis thaliana] gi 332642028 gb AE75549.1   cytochrome P450, family 72, subfamily A, polypeptide 9 [Arabidopsis thaliana] | 508  | 508  | 0        | 100.0 | 83.7 | 92.7 | cytochrome P450, family 72, subfamily A, polypeptide 9                                                                              | gbpln | Arabidopsis thaliana | AT3G14630.1   Symbols: CYP72A9   cytochrome P450, family 72, subfamily A, polypeptide 9   chr3:4917498-4919409 FORWARD LENGTH=508                                                                                                                                                                                                                                                                                                                                                                                                                                                         | 508  | 508  | 0         | 100.0 | 83.7 | 92.7 |
| Rsa1.0_00725.1.g18627.t1 | refXP_002882888.1   CYP72A15 [Arabidopsis lyrata subsp. lyrata] gi 297328728 gb EFH59147.1   CYP72A15 [Arabidopsis lyrata subsp. lyrata]                                                                  | 512  | 512  | 0        | 100.0 | 85.2 | 92.2 | CYP72A15                                                                                                                            | gbpln | Arabidopsis lyrata   | AT3G14690.1   Symbols: CYP72A15   cytochrome P450, family 72, subfamily A, polypeptide 15   chr3:4937410-4939310 FORWARD LENGTH=512                                                                                                                                                                                                                                                                                                                                                                                                                                                       | 512  | 512  | 0         | 100.0 | 84.2 | 91.6 |

|                           |                                                                                                                                                                                                                                                                                                                                                                                                                                                                                 |     |      |           |       |      |      |                                                     |       |                      |                                                                                                                                                                                                                                                                                                                                                                                                                                                                                            |     |      |           |       |      |      |
|---------------------------|---------------------------------------------------------------------------------------------------------------------------------------------------------------------------------------------------------------------------------------------------------------------------------------------------------------------------------------------------------------------------------------------------------------------------------------------------------------------------------|-----|------|-----------|-------|------|------|-----------------------------------------------------|-------|----------------------|--------------------------------------------------------------------------------------------------------------------------------------------------------------------------------------------------------------------------------------------------------------------------------------------------------------------------------------------------------------------------------------------------------------------------------------------------------------------------------------------|-----|------|-----------|-------|------|------|
| Rsa1.0_00725.1.g18628.t1  | ref[XP_002882888.1] CYP72A15 [Arabidopsis lyrata subsp. lyrata] gi297328728[gb]EFH59147.1   CYP72A15 [Arabidopsis lyrata subsp. lyrata]                                                                                                                                                                                                                                                                                                                                         | 513 | 512  | 0         | 99.8  | 88.7 | 94.5 | CYP72A15                                            | gbpln | Arabidopsis lyrata   | AT3G14690.1   Symbols: CYP72A15   cytochrome P450, family 72, subfamily A, polypeptide 15   chr3:4937410-4939310 FORWARD LENGTH=512                                                                                                                                                                                                                                                                                                                                                        | 513 | 512  | 0         | 99.8  | 88.5 | 94.3 |
| Rsa1.0_00725.1.g18629.t1  | dbj[BAJ33634.1] unnamed protein product [Thellungiella halophila]                                                                                                                                                                                                                                                                                                                                                                                                               | 718 | 512  | 0         | 71.3  | 58.8 | 64.1 | unnamed protein product                             | ----  | ----                 | AT3G14690.1   Symbols: CYP72A15   cytochrome P450, family 72, subfamily A, polypeptide 15   chr3:4937410-4939310 FORWARD LENGTH=512                                                                                                                                                                                                                                                                                                                                                        | 718 | 512  | 0         | 71.3  | 57.1 | 63.8 |
| Rsa1.0_00725.1.g18630.t1  | ref[NP_188090.2] mitogen-activated protein kinase 19 [Arabidopsis thaliana] gi209572650[sp]G9LUC3.2[MPK19_ARA TH RecName: Full=Mitogen-activated protein kinase 19; Short=ATMPK19; Short=MAP kinase 19 gi332642038[gb]AEE75559.1] mitogen-activated protein kinase 19 [Arabidopsis thaliana]                                                                                                                                                                                    | 554 | 598  | 0         | 107.9 | 89.0 | 94.4 | mitogen-activated protein kinase 19                 | gbpln | Arabidopsis thaliana | AT3G14720.1   Symbols: ATMPK19, MPK19   MAP kinase 19   chr3:4946057-4948906 FORWARD LENGTH=598                                                                                                                                                                                                                                                                                                                                                                                            | 554 | 598  | 0         | 107.9 | 89.0 | 94.4 |
| Rsa1.0_00725.1.g18631.t1  | gb[EOA32067.1] hypothetical protein CARUB_v10015310mg [Capsella rubella]                                                                                                                                                                                                                                                                                                                                                                                                        | 362 | 335  | 1.00E-141 | 92.5  | 72.7 | 78.7 | hypothetical protein CARUB_v10015310mg              | gbpln | Capsella rubella     | AT3G14740.2   Symbols:   RING/FYVE/PHD zinc finger superfamily protein   chr3:4952185-4953306 REVERSE LENGTH=343                                                                                                                                                                                                                                                                                                                                                                           | 362 | 343  | 1.00E-141 | 94.8  | 74.3 | 81.8 |
| Rsa1.0_00725.1.g18632.t1  | ref[XP_002885054.1] hypothetical protein ARALYDRAFT_478888 [Arabidopsis lyrata subsp. lyrata] gi297330894[gb]EFH61313.1   hypothetical protein ARALYDRAFT_478888 [Arabidopsis lyrata subsp. lyrata]                                                                                                                                                                                                                                                                             | 329 | 329  | 1.00E-125 | 100.0 | 77.2 | 82.1 | hypothetical protein ARALYDRAFT_478888              | gbpln | Arabidopsis lyrata   | AT3G14750.1   Symbols:   unknown protein; BEST Arabidopsis thaliana protein match is: unknown protein (TAIR-AT1G67170.1); Has 4036 Blast hits to 3091 proteins in 519 species: Archae - 61; Bacteria - 669; Metazoa - 1503; Fungi - 255; Plants - 421; Viruses - 4; Other Eukaryotes - 1123 (source: NCBI BLINK)   chr3:4953765-4955373 REVERSE LENGTH=331                                                                                                                                 | 329 | 331  | 1.00E-125 | 100.6 | 76.3 | 81.8 |
| Rsa1.0_00725.1.g18633.t1  | ref[NP_566493.1] nodulin MtN3-like protein [Arabidopsis thaliana] gi75273203[sp]O9LH79.1 SWET2_ARAT H RecName: Full=Bidirectional sugar transporter SWEET2; Short=ASWEET2 gi11994587[dbj]BAB02642.1  MtN3-like protein [Arabidopsis thaliana] gi15809923[gb]AAL06889.1   AT3g14770/T21E2.2 [Arabidopsis thaliana] gi17978879[gb]AAL47411.1   AT3g14770/T21E2.2 [Arabidopsis thaliana] gi332642044[gb]AEE75565.1   bidirectional sugar transporter SWEET2 [Arabidopsis thaliana] | 236 | 236  | 1.00E-113 | 100.0 | 88.1 | 94.5 | nodulin MtN3-like protein                           | gbpln | Arabidopsis thaliana | AT3G14770.1   Symbols: SWEET2, ASWEET2   Nodulin MtN3 family protein   chr3:4957787-4959202 REVERSE LENGTH=236                                                                                                                                                                                                                                                                                                                                                                             | 236 | 236  | 1.00E-115 | 100.0 | 88.1 | 94.5 |
| Rsa1.0_00725.1.g18634.t2  | #                                                                                                                                                                                                                                                                                                                                                                                                                                                                               | #   | #    | #         | #     | #    | #    | -                                                   | ----  | ----                 | #                                                                                                                                                                                                                                                                                                                                                                                                                                                                                          | #   | #    | #         | #     | #    | #    |
| Rsa1.0_00725.1.g18635.t1  | gb[EOA30048.1] hypothetical protein CARUB_v10013153mg [Capsella rubella]                                                                                                                                                                                                                                                                                                                                                                                                        | 665 | 664  | 0         | 99.8  | 95.3 | 97.3 | hypothetical protein CARUB_v10013153mg              | gbpln | Capsella rubella     | AT3G14790.1   Symbols: RHM3, ATRHM3   rhamnose biosynthesis 3   chr3:4964791-4966875 FORWARD LENGTH=664                                                                                                                                                                                                                                                                                                                                                                                    | 665 | 664  | 0         | 99.8  | 94.6 | 96.7 |
| Rsa1.0_00725.1.g18636.t10 | ref[XP_002882895.1] hypothetical protein ARALYDRAFT_478897 [Arabidopsis lyrata subsp. lyrata] gi297328735[gb]EFH59154.1   hypothetical protein ARALYDRAFT_478897 [Arabidopsis lyrata subsp. lyrata]                                                                                                                                                                                                                                                                             | 567 | 475  | 0         | 83.8  | 68.8 | 73.2 | hypothetical protein ARALYDRAFT_478897              | gbpln | Arabidopsis lyrata   | AT3G14830.2   Symbols:   unknown protein; FUNCTIONS IN: molecular function unknown; INVOLVED IN: biological process unknown; LOCATED IN: cellular component unknown; BEST Arabidopsis thaliana protein match is: unknown protein (TAIR-AT1G53450.2); Has 35333 Blast hits to 34131 proteins in 2444 species: Archae - 798; Bacteria - 22429; Metazoa - 974; Fungi - 991; Plants - 531; Viruses - 0; Other Eukaryotes - 9610 (source: NCBI BLINK)   chr3:4983386-4985666 FORWARD LENGTH=476 | 567 | 476  | 0         | 84.0  | 68.1 | 72.5 |
| Rsa1.0_00725.1.g18637.t7  | ref[NP_188102.5] Leucine-rich repeat transmembrane protein kinase [Arabidopsis thaliana] gi313471762[sp]COLGN2.1 Y3148_ARAT H RecName: Full=Probable leucine-rich repeat receptor-like serine/threonine-protein kinase At3g14840; Flags: Precursor gi224589567[gb]ACN59317.1   leucine-rich repeat receptor-like protein kinase [Arabidopsis thaliana] gi332642053[gb]AEE75574.1   Leucine-rich repeat transmembrane protein kinase [Arabidopsis thaliana]                      | 992 | 1020 | 0         | 102.8 | 76.4 | 86.3 | Leucine-rich repeat transmembrane protein kinase    | gbpln | Arabidopsis thaliana | AT3G14840.2   Symbols:   Leucine-rich repeat transmembrane protein kinase   chr3:4988271-4993891 FORWARD LENGTH=1020                                                                                                                                                                                                                                                                                                                                                                       | 992 | 1020 | 0         | 102.8 | 76.4 | 86.3 |
| Rsa1.0_00726.1.g18638.t1  | #                                                                                                                                                                                                                                                                                                                                                                                                                                                                               | #   | #    | #         | #     | #    | #    | -                                                   | ----  | ----                 | #                                                                                                                                                                                                                                                                                                                                                                                                                                                                                          | #   | #    | #         | #     | #    | #    |
| Rsa1.0_00726.1.g18639.t1  | gb[ABD64958.1] ethylene responsive element binding factor -related [Brassica oleracea]                                                                                                                                                                                                                                                                                                                                                                                          | 516 | 954  | 3.00E-54  | 184.9 | 27.1 | 31.2 | ethylene responsive element binding factor -related | gbpln | Brassica oleracea    | #                                                                                                                                                                                                                                                                                                                                                                                                                                                                                          | #   | #    | #         | #     | #    | #    |

|                          |                                                                                                                                                                                                                                                                                                                                                                                                                                                                                                                                                                                                                        |      |      |           |       |      |      |                                                          |       |                      |                                                                                                                               |      |      |           |       |      |      |
|--------------------------|------------------------------------------------------------------------------------------------------------------------------------------------------------------------------------------------------------------------------------------------------------------------------------------------------------------------------------------------------------------------------------------------------------------------------------------------------------------------------------------------------------------------------------------------------------------------------------------------------------------------|------|------|-----------|-------|------|------|----------------------------------------------------------|-------|----------------------|-------------------------------------------------------------------------------------------------------------------------------|------|------|-----------|-------|------|------|
| Rsa1.0_00726.1.g18640.t1 | refNP_566893.1   HhH-GPD base excision DNA repair protein-related protein [Arabidopsis thaliana] gi 332644814 gb AE78335.1   HhH-GPD base excision DNA repair protein-related protein [Arabidopsis thaliana] refXP_002875864.1   hypothetical protein ARALYDRAFT_485139 [Arabidopsis lyrata subsp. lyrata] gi 297321702 gb EFH52123.1   hypothetical protein ARALYDRAFT_485139 [Arabidopsis lyrata subsp. lyrata] refXP_002875861.1   hypothetical protein ARALYDRAFT_485136 [Arabidopsis lyrata subsp. lyrata] gi 297321699 gb EFH52120.1   hypothetical protein ARALYDRAFT_485136 [Arabidopsis lyrata subsp. lyrata] | 287  | 293  | 1.00E-138 | 102.1 | 84.3 | 93.0 | HhH-GPD base excision DNA repair protein-related protein | gbpln | Arabidopsis thaliana | AT3G47830.1   Symbols:   DNA glycosylase superfamily protein   chr3:17647069-17648346 FORWARD LENGTH=293                      | 287  | 293  | 1.00E-141 | 102.1 | 84.3 | 93.0 |
| Rsa1.0_00726.1.g18641.t1 | refXP_002875864.1   hypothetical protein ARALYDRAFT_485139 [Arabidopsis lyrata subsp. lyrata] gi 297321702 gb EFH52123.1   hypothetical protein ARALYDRAFT_485139 [Arabidopsis lyrata subsp. lyrata] refXP_002875861.1   hypothetical protein ARALYDRAFT_485136 [Arabidopsis lyrata subsp. lyrata] gi 297321699 gb EFH52120.1   hypothetical protein ARALYDRAFT_485136 [Arabidopsis lyrata subsp. lyrata]                                                                                                                                                                                                              | 943  | 935  | 0         | 99.2  | 82.4 | 89.7 | hypothetical protein ARALYDRAFT_485139                   | gbpln | Arabidopsis lyrata   | AT3G47780.1   Symbols: ATATH6, ATH6   ABC2 homolog 6   chr3:17624500-17628972 FORWARD LENGTH=935                              | 943  | 935  | 0         | 99.2  | 81.9 | 89.1 |
| Rsa1.0_00726.1.g18642.t1 | refXP_002875861.1   hypothetical protein ARALYDRAFT_485136 [Arabidopsis lyrata subsp. lyrata] gi 297321699 gb EFH52120.1   hypothetical protein ARALYDRAFT_485136 [Arabidopsis lyrata subsp. lyrata]                                                                                                                                                                                                                                                                                                                                                                                                                   | 169  | 937  | 7.00E-82  | 554.4 | 86.4 | 90.5 | hypothetical protein ARALYDRAFT_485136                   | gbpln | Arabidopsis lyrata   | AT3G47760.1   Symbols: ATATH4, ATH4, ABCA5   ABC2 homolog 4   chr3:17611787-17616639 FORWARD LENGTH=872                       | 169  | 872  | 1.00E-83  | 516.0 | 85.8 | 90.5 |
| Rsa1.0_00726.1.g18643.t2 | dbj BAB09502.1   transposon protein-like [Arabidopsis thaliana] gb AAF71981.1   AC013453.6 Hypothetical protein [Arabidopsis thaliana]                                                                                                                                                                                                                                                                                                                                                                                                                                                                                 | 1004 | 1089 | 0         | 108.5 | 47.5 | 54.7 | transposon protein-like                                  | gbpln | Arabidopsis thaliana | #                                                                                                                             | #    | #    | #         | #     | #    | #    |
| Rsa1.0_00726.1.g18644.t1 | dbj BAB09502.1   transposon protein-like [Arabidopsis thaliana] gb AAF71981.1   AC013453.6 Hypothetical protein [Arabidopsis thaliana]                                                                                                                                                                                                                                                                                                                                                                                                                                                                                 | 360  | 399  | 1.00E-126 | 110.8 | 62.5 | 77.5 | Hypothetical protein                                     | gbpln | Arabidopsis thaliana | #                                                                                                                             | #    | #    | #         | #     | #    | #    |
| Rsa1.0_00726.1.g18645.t2 | gb EOA23464.1   hypothetical protein CARUB_v10016655mg [Capsella rubella] gb AAF18630.1   AC006228.1 F5J5.1 [Arabidopsis thaliana]                                                                                                                                                                                                                                                                                                                                                                                                                                                                                     | 207  | 933  | 4.00E-73  | 450.7 | 69.1 | 79.2 | hypothetical protein CARUB_v10016655mg                   | gbpln | Capsella rubella     | AT3G47780.1   Symbols: ATATH6, ATH6   ABC2 homolog 6   chr3:17624500-17628972 FORWARD LENGTH=935                              | 207  | 935  | 3.00E-75  | 451.7 | 66.7 | 76.8 |
| Rsa1.0_00726.1.g18646.t1 | gb AAF18630.1   AC006228.1 F5J5.1 [Arabidopsis thaliana] refNP_190358.3   ABC transporter A family member 3 [Arabidopsis thaliana] gi 374095510 sp Q1PEH6.3 AB3A.ARAT H RecName: Full=ABC transporter A family member 3; Short=ABC transporter ABCA.3; Short=AtABCA3; AltName: Full=ABC2 homolog 2 gi 332644803 gb AE78324.1   ABC transporter A family member 3 [Arabidopsis thaliana]                                                                                                                                                                                                                                | 453  | 1463 | 1.00E-46  | 323.0 | 28.5 | 47.7 | F5J5.1                                                   | gbpln | Arabidopsis thaliana | #                                                                                                                             | #    | #    | #         | #     | #    | #    |
| Rsa1.0_00726.1.g18647.t2 | refNP_190358.3   ABC transporter A family member 3 [Arabidopsis thaliana] gi 374095510 sp Q1PEH6.3 AB3A.ARAT H RecName: Full=ABC transporter A family member 3; Short=ABC transporter ABCA.3; Short=AtABCA3; AltName: Full=ABC2 homolog 2 gi 332644803 gb AE78324.1   ABC transporter A family member 3 [Arabidopsis thaliana]                                                                                                                                                                                                                                                                                         | 327  | 932  | 1.00E-101 | 285.0 | 58.1 | 68.5 | ABC transporter A family member 3                        | gbpln | Arabidopsis thaliana | AT3G47740.1   Symbols: ATATH2, ATH2, ABCA3   ABC2 homolog 2   chr3:17600651-17604965 FORWARD LENGTH=932                       | 327  | 932  | 1.00E-104 | 285.0 | 58.1 | 68.5 |
| Rsa1.0_00726.1.g18648.t5 | #                                                                                                                                                                                                                                                                                                                                                                                                                                                                                                                                                                                                                      | #    | #    | #         | #     | #    | #    | -                                                        | ----  | ----                 | #                                                                                                                             | #    | #    | #         | #     | #    | #    |
| Rsa1.0_00726.1.g18649.t1 | dbj BAB10503.1   retroelement pol polyprotein-like [Arabidopsis thaliana] gb AAQ82842.1   At4g20730 [Arabidopsis thaliana] gi 51970840 dbj BAD44112.1   putative protein [Arabidopsis thaliana]                                                                                                                                                                                                                                                                                                                                                                                                                        | 1381 | 1475 | 0         | 106.8 | 59.9 | 76.0 | retroelement pol polyprotein-like                        | gbpln | Arabidopsis thaliana | AT4G23160.1   Symbols: CRK8   cysteine-rich RLK (RECEPTOR-like protein kinase) 8   chr4:12129485-12134086 FORWARD LENGTH=1262 | 1381 | 1262 | 0         | 91.4  | 23.2 | 29.6 |
| Rsa1.0_00726.1.g18650.t1 | gb AAQ82842.1   At4g20730 [Arabidopsis thaliana] gi 51970840 dbj BAD44112.1   putative protein [Arabidopsis thaliana]                                                                                                                                                                                                                                                                                                                                                                                                                                                                                                  | 976  | 800  | 6.00E-33  | 82.0  | 18.9 | 32.4 | At4g20730                                                | gbpln | Arabidopsis thaliana | AT4G32200.1   Symbols: ASY2   DNA-binding HORMA family protein   chr4:15548840-15554962 FORWARD LENGTH=1399                   | 976  | 1399 | 8.00E-29  | 143.3 | 17.6 | 32.1 |
| Rsa1.0_00726.1.g18651.t7 | gb AAF79618.1   AC027665_19 F5M15.26 [Arabidopsis thaliana] refXP_002873002.1   hypothetical protein ARALYDRAFT_486913 [Arabidopsis lyrata subsp. lyrata] gi 297318839 gb EFH49261.1   hypothetical protein ARALYDRAFT_486913 [Arabidopsis lyrata subsp. lyrata] refXP_002873001.1   hypothetical protein ARALYDRAFT_486912 [Arabidopsis lyrata subsp. lyrata] gi 297318838 gb EFH49260.1   hypothetical protein ARALYDRAFT_486912 [Arabidopsis lyrata subsp. lyrata]                                                                                                                                                  | 474  | 1838 | 4.00E-41  | 387.8 | 25.1 | 39.9 | F5M15.26                                                 | gbpln | Arabidopsis thaliana | #                                                                                                                             | #    | #    | #         | #     | #    | #    |
| Rsa1.0_00727.1.g18652.t1 | refXP_002873002.1   hypothetical protein ARALYDRAFT_486913 [Arabidopsis lyrata subsp. lyrata] gi 297318839 gb EFH49261.1   hypothetical protein ARALYDRAFT_486913 [Arabidopsis lyrata subsp. lyrata] refXP_002873001.1   hypothetical protein ARALYDRAFT_486912 [Arabidopsis lyrata subsp. lyrata] gi 297318838 gb EFH49260.1   hypothetical protein ARALYDRAFT_486912 [Arabidopsis lyrata subsp. lyrata]                                                                                                                                                                                                              | 170  | 170  | 4.00E-85  | 100.0 | 89.4 | 97.1 | hypothetical protein ARALYDRAFT_486913                   | gbpln | Arabidopsis lyrata   | AT5G01610.1   Symbols:   Protein of unknown function, DUF538   chr5:231075-231994 FORWARD LENGTH=170                          | 170  | 170  | 4.00E-87  | 100.0 | 88.8 | 96.5 |
| Rsa1.0_00727.1.g18653.t2 | refXP_002873001.1   hypothetical protein ARALYDRAFT_486912 [Arabidopsis lyrata subsp. lyrata] gi 297318838 gb EFH49260.1   hypothetical protein ARALYDRAFT_486912 [Arabidopsis lyrata subsp. lyrata]                                                                                                                                                                                                                                                                                                                                                                                                                   | 453  | 448  | 0         | 98.9  | 85.0 | 89.6 | hypothetical protein ARALYDRAFT_486912                   | gbpln | Arabidopsis lyrata   | AT5G01620.2   Symbols:   TRICHOME BIREFRINGENCE-LIKE 35   chr5:232882-234821 FORWARD LENGTH=449                               | 453  | 449  | 0         | 99.1  | 85.2 | 89.8 |
| Rsa1.0_00727.1.g18654.t2 | refNP_195783.3   breast cancer 2 susceptibility protein [Arabidopsis thaliana] gi 31335362 emb CAD32572.1   breast cancer susceptibility protein 2b [Arabidopsis thaliana] gi 332002986 gb AED90369.1   protein BRCA2-like B [Arabidopsis thaliana]                                                                                                                                                                                                                                                                                                                                                                    | 1065 | 1155 | 0         | 108.5 | 76.2 | 83.1 | breast cancer 2 susceptibility protein                   | gbpln | Arabidopsis thaliana | AT5G01630.1   Symbols: BRCA2B, BRCA2(V), ATBRCA2(V)   BRCA2-like B   chr5:235117-240911 REVERSE LENGTH=1155                   | 1065 | 1155 | 0         | 108.5 | 76.2 | 83.1 |
| Rsa1.0_00727.1.g18655.t1 | gb EOA19529.1   hypothetical protein CARUB_v10002469mg [Capsella rubella] refNP_195783.3   breast cancer 2 susceptibility protein [Arabidopsis thaliana] gi 31335362 emb CAD32572.1   breast cancer susceptibility protein 2b [Arabidopsis thaliana] gi 332002986 gb AED90369.1   protein BRCA2-like B [Arabidopsis thaliana]                                                                                                                                                                                                                                                                                          | 213  | 224  | 2.00E-85  | 105.2 | 78.9 | 86.4 | hypothetical protein CARUB_v10002469mg                   | gbpln | Capsella rubella     | AT5G01640.1   Symbols: PRA1.B5   prenylated RAB acceptor 1.B5   chr5:241442-242113 REVERSE LENGTH=223                         | 213  | 223  | 8.00E-86  | 104.7 | 76.1 | 83.6 |

|                          |                                                                                                                                                                                                                                                                               |     |      |           |        |      |      |                                                                                                                                                                                      |       |                      |                                                                                                                                                                                                                                                                                                                                                                                                                                                |     |     |           |       |      |      |
|--------------------------|-------------------------------------------------------------------------------------------------------------------------------------------------------------------------------------------------------------------------------------------------------------------------------|-----|------|-----------|--------|------|------|--------------------------------------------------------------------------------------------------------------------------------------------------------------------------------------|-------|----------------------|------------------------------------------------------------------------------------------------------------------------------------------------------------------------------------------------------------------------------------------------------------------------------------------------------------------------------------------------------------------------------------------------------------------------------------------------|-----|-----|-----------|-------|------|------|
| Rsa1.0_00727.1.g18656.t1 | refNP_001154692.1   macrophage migration inhibitory factor family protein [Arabidopsis thaliana]   g1332002989   g1AED90372.1   macrophage migration inhibitory factor family protein [Arabidopsis thaliana]                                                                  | 135 | 122  | 4.00E-47  | 90.4   | 70.4 | 74.8 | macrophage migration inhibitory factor family protein                                                                                                                                | gbpln | Arabidopsis thaliana | AT5G01650.2   Symbols:   Tautomerase/MIF superfamily protein   chr5:243067-244033 REVERSE LENGTH=122                                                                                                                                                                                                                                                                                                                                           | 135 | 122 | 1.00E-49  | 90.4  | 70.4 | 74.8 |
| Rsa1.0_00727.1.g18657.t1 | gb EOA23003.1   hypothetical protein CARUB_v10003758mg [Capsella rubella]                                                                                                                                                                                                     | 322 | 322  | 1.00E-169 | 100.0  | 87.0 | 95.0 | hypothetical protein CARUB_v10003758mg                                                                                                                                               | gbpln | Capsella rubella     | AT5G01670.1   Symbols:   NAD(P)-linked oxidoreductase superfamily protein   chr5:252000-253856 FORWARD LENGTH=322                                                                                                                                                                                                                                                                                                                              | 322 | 322 | 1.00E-170 | 100.0 | 86.0 | 94.7 |
| Rsa1.0_00727.1.g18658.t1 | gb AAF18538.1   AC006551.24 Very similar to retrotransposon reverse transcriptase [Arabidopsis thaliana]   refXP_002870901.1   F-box family protein [Arabidopsis lyrata subsp. lyrata]   g1297316738   g1EFH47160.1   F-box family protein [Arabidopsis lyrata subsp. lyrata] | 99  | 1231 | 1.00E-14  | 1243.4 | 40.4 | 53.5 | Very similar to retrotransposon reverse transcriptase                                                                                                                                | gbpln | Arabidopsis thaliana | #                                                                                                                                                                                                                                                                                                                                                                                                                                              | #   | #   | #         | #     | #    | #    |
| Rsa1.0_00727.1.g18659.t1 | refXP_002870901.1   F-box family protein [Arabidopsis lyrata subsp. lyrata]   g1297316738   g1EFH47160.1   F-box family protein [Arabidopsis lyrata subsp. lyrata]                                                                                                            | 675 | 665  | 0         | 98.5   | 83.1 | 89.8 | F-box family protein                                                                                                                                                                 | gbpln | Arabidopsis lyrata   | AT5G01720.1   Symbols:   RNI-like superfamily protein   chr5:267118-270391 REVERSE LENGTH=665                                                                                                                                                                                                                                                                                                                                                  | 675 | 665 | 0         | 98.5  | 83.6 | 90.2 |
| Rsa1.0_00727.1.g18660.t1 | gb AAM62599.1   unknown [Arabidopsis thaliana]                                                                                                                                                                                                                                | 190 | 174  | 4.00E-83  | 91.6   | 79.5 | 84.2 | unknown                                                                                                                                                                              | gbpln | Arabidopsis thaliana | AT5G01750.2   Symbols:   Protein of unknown function (DUF567)   chr5:290034-291109 FORWARD LENGTH=217                                                                                                                                                                                                                                                                                                                                          | 190 | 217 | 5.00E-85  | 114.2 | 79.5 | 85.8 |
| Rsa1.0_00727.1.g18661.t1 | gb EOA22786.1   hypothetical protein CARUB_v10003503mg [Capsella rubella]                                                                                                                                                                                                     | 551 | 568  | 0         | 103.1  | 75.5 | 80.4 | hypothetical protein CARUB_v10003503mg                                                                                                                                               | gbpln | Capsella rubella     | AT5G01760.1   Symbols:   ENTH/VHS/GAT family protein   chr5:291753-294127 FORWARD LENGTH=542                                                                                                                                                                                                                                                                                                                                                   | 551 | 542 | 0         | 98.4  | 71.5 | 78.6 |
| Rsa1.0_00727.1.g18662.t1 | refXP_002870897.1   hypothetical protein ARALYDRAFT_907968 [Arabidopsis lyrata subsp. lyrata]   g1297316734   g1EFH47156.1   hypothetical protein ARALYDRAFT_907968 [Arabidopsis lyrata subsp. lyrata]                                                                        | 191 | 191  | 5.00E-54  | 100.0  | 68.1 | 78.0 | hypothetical protein ARALYDRAFT_907968                                                                                                                                               | gbpln | Arabidopsis lyrata   | AT5G01790.1   Symbols:   unknown protein; FUNCTIONS IN: molecular_function unknown; INVOLVED IN: biological_process unknown; LOCATED IN: chloroplast; EXPRESSED IN: 19 plant structures; EXPRESSED DURING: 13 growth stages; Has 121 Blast hits to 121 proteins in 12 species: Archae - 0; Bacteria - 0; Metazoa - 0; Fungi - 0; Plants - 121; Viruses - 0; Other Eukaryotes - 0 (source: NCBI BLink).   chr5:305057-305683 REVERSE LENGTH=208 | 191 | 208 | 6.00E-56  | 108.9 | 67.5 | 77.5 |
| Rsa1.0_00727.1.g18663.t1 | refXP_002872989.1   zinc finger family protein [Arabidopsis lyrata subsp. lyrata]   g1297318826   g1EFH49248.1   zinc finger family protein [Arabidopsis lyrata subsp. lyrata]                                                                                                | 235 | 224  | 3.00E-68  | 95.3   | 64.3 | 74.5 | zinc finger family protein                                                                                                                                                           | gbpln | Arabidopsis lyrata   | AT5G01860.1   Symbols:   C2H2 and C2HC zinc fingers superfamily protein   chr5:335630-336277 FORWARD LENGTH=215                                                                                                                                                                                                                                                                                                                                | 235 | 215 | 1.00E-57  | 91.5  | 59.1 | 66.8 |
| Rsa1.0_00727.1.g18664.t1 | refXP_002870893.1   hypothetical protein ARALYDRAFT_907956 [Arabidopsis lyrata subsp. lyrata]   g1297316730   g1EFH47152.1   hypothetical protein ARALYDRAFT_907956 [Arabidopsis lyrata subsp. lyrata]                                                                        | 174 | 189  | 6.00E-42  | 108.6  | 57.5 | 63.2 | hypothetical protein ARALYDRAFT_907956                                                                                                                                               | gbpln | Arabidopsis lyrata   | AT5G01910.1   Symbols:   unknown protein; Has 66 Blast hits to 66 proteins in 27 species: Archae - 0; Bacteria - 2; Metazoa - 18; Fungi - 7; Plants - 29; Viruses - 0; Other Eukaryotes - 10 (source: NCBI BLink).   chr5:357950-358655 REVERSE LENGTH=180                                                                                                                                                                                     | 174 | 180 | 4.00E-44  | 103.4 | 58.0 | 63.2 |
| Rsa1.0_00727.1.g18665.t1 | dbj BAC41802.1   unknown protein [Arabidopsis thaliana]                                                                                                                                                                                                                       | 479 | 504  | 0         | 105.2  | 83.9 | 91.2 | unknown protein                                                                                                                                                                      | gbpln | Arabidopsis thaliana | AT5G01920.1   Symbols:   STN8   Protein kinase superfamily protein   chr5:359154-360867 FORWARD LENGTH=495                                                                                                                                                                                                                                                                                                                                     | 479 | 495 | 0         | 103.3 | 83.9 | 91.2 |
| Rsa1.0_00727.1.g18666.t7 | refXP_002870892.1   hypothetical protein ARALYDRAFT_349416 [Arabidopsis lyrata subsp. lyrata]   g1297316729   g1EFH47151.1   hypothetical protein ARALYDRAFT_349416 [Arabidopsis lyrata subsp. lyrata]                                                                        | 694 | 448  | 0         | 64.6   | 58.2 | 61.7 | hypothetical protein ARALYDRAFT_349416                                                                                                                                               | gbpln | Arabidopsis lyrata   | AT5G01930.1   Symbols:   MAN6, AtMAN6   Glycosyl hydrolase superfamily protein   chr5:361189-362867 REVERSE LENGTH=448                                                                                                                                                                                                                                                                                                                         | 694 | 448 | 0         | 64.6  | 58.2 | 61.7 |
| Rsa1.0_00727.1.g18667.t1 | refXP_002870890.1   ATP binding protein [Arabidopsis lyrata subsp. lyrata]   g1297316727   g1EFH47149.1   ATP binding protein [Arabidopsis lyrata subsp. lyrata]                                                                                                              | 944 | 951  | 0         | 100.7  | 88.7 | 93.4 | ATP binding protein                                                                                                                                                                  | gbpln | Arabidopsis lyrata   | AT5G01950.1   Symbols:   Leucine-rich repeat protein kinase family protein   chr5:365040-369532 REVERSE LENGTH=951                                                                                                                                                                                                                                                                                                                             | 944 | 951 | 0         | 100.7 | 88.8 | 93.8 |
| Rsa1.0_00727.1.g18668.t1 | sp C0LGU1.1 Y5374.ARATH RecName: Full=Probable LRR receptor-like serine/threonine-protein kinase At5g37450; Flags: Precursor   g1224589689   g1ACN59376.1   leucine-rich repeat receptor-like protein kinase [Arabidopsis thaliana]                                           | 959 | 959  | 0         | 100.0  | 80.6 | 89.3 | RecName: Full=Probable LRR receptor-like serine/threonine-protein kinase At5g37450; Flags: Precursor   g1224589689   g1ACN59376.1   leucine-rich repeat receptor-like protein kinase | gbpln | Arabidopsis thaliana | AT5G37450.1   Symbols:   Leucine-rich repeat protein kinase family protein   chr5:14852801-14857098 REVERSE LENGTH=935                                                                                                                                                                                                                                                                                                                         | 959 | 935 | 0         | 97.5  | 75.5 | 83.8 |



|                          |                                                                                                                                                                                                                                                                                                                                                                                                                                                                                                                                                                                                                                                                                        |     |     |           |       |       |       |                                                              |       |                      |                                                                                                                                                                                                                                                                                                                                                                                                                                                                                        |     |     |           |       |      |       |
|--------------------------|----------------------------------------------------------------------------------------------------------------------------------------------------------------------------------------------------------------------------------------------------------------------------------------------------------------------------------------------------------------------------------------------------------------------------------------------------------------------------------------------------------------------------------------------------------------------------------------------------------------------------------------------------------------------------------------|-----|-----|-----------|-------|-------|-------|--------------------------------------------------------------|-------|----------------------|----------------------------------------------------------------------------------------------------------------------------------------------------------------------------------------------------------------------------------------------------------------------------------------------------------------------------------------------------------------------------------------------------------------------------------------------------------------------------------------|-----|-----|-----------|-------|------|-------|
| Rsa1.0_00728.1.g18669.t1 | ref[XP_002871965.1] hypothetical protein ARALYDRAFT_489014 [Arabidopsis lyrata subsp. lyrata] gi 297317802 gb EFH48224.1] hypothetical protein ARALYDRAFT_489014 [Arabidopsis lyrata subsp. lyrata]                                                                                                                                                                                                                                                                                                                                                                                                                                                                                    | 38  | 353 | 8.00E-11  | 928.9 | 89.5  | 92.1  | hypothetical protein ARALYDRAFT_489014                       | gbpln | Arabidopsis lyrata   | AT5G21050.1   Symbols:   LOCATED IN: chloroplast; EXPRESSED IN: 14 plant structures; EXPRESSED DURING: 8 growth stages; CONTAINS InterPro DOMAIN/s: Hyccin (InterPro:IPR018619); BEST Arabidopsis thaliana protein match is: unknown protein (TAIR:AT5G64090.1); Has 206 Blast hits to 206 proteins in 60 species: Archae - 0; Bacteria - 0; Metazoa - 145; Fungi - 0; Plants - 50; Viruses - 0; Other Eukaryotes - 11 (source: NCBI BLink).   chr5:7147890-7148957 FORWARD LENGTH=355 | 38  | 355 | 4.00E-13  | 934.2 | 86.8 | 92.1  |
| Rsa1.0_00728.1.g18670.t1 | ref[NP_197608.1] leucine-rich repeat-containing protein [Arabidopsis thaliana] gi 11762126 gb AAG40341.1 AF324989.1 AT5g21090 [Arabidopsis thaliana] gi 13899097 gb AAK48970.1 AF370543.1 Unknown protein [Arabidopsis thaliana] gi 20148427 gb AAM10104.1] unknown protein [Arabidopsis thaliana] gi 27311823 gb AAO00877.1] Unknown protein [Arabidopsis thaliana] gi 29294060 gb AAO73897.1] leucine rich repeat protein (LRP), putative [Arabidopsis thaliana] gi 30023686 gb AAP13376.1] AT5g21090 [Arabidopsis thaliana] gi 222424256 dbj BAH20085.1] AT5G21090 [Arabidopsis thaliana] gi 332005547 gb AED92930.1] leucine-rich repeat-containing protein [Arabidopsis thaliana] | 198 | 218 | 3.00E-98  | 110.1 | 91.9  | 94.9  | leucine-rich repeat-containing protein                       | gbpln | Arabidopsis thaliana | AT5G21090.1   Symbols:   Leucine-rich repeat (LRP) family protein   chr5:7164758-7166904 FORWARD LENGTH=218                                                                                                                                                                                                                                                                                                                                                                            | 198 | 218 | 1.00E-101 | 110.1 | 91.9 | 94.9  |
| Rsa1.0_00728.1.g18671.t1 | ref[NP_197612.1] late embryogenesis abundant hydroxyproline-rich glycoprotein [Arabidopsis thaliana] gi 29294053 gb AAO73890.1] hypothetical protein [Arabidopsis thaliana] gi 52354467 gb AAU44554.1] hypothetical protein AT5G21130 [Arabidopsis thaliana] gi 332005555 gb AED92938.1] late embryogenesis abundant hydroxyproline-rich glycoprotein [Arabidopsis thaliana]                                                                                                                                                                                                                                                                                                           | 308 | 281 | 7.00E-87  | 91.2  | 54.5  | 68.8  | late embryogenesis abundant hydroxyproline-rich glycoprotein | gbpln | Arabidopsis thaliana | AT5G21130.1   Symbols:   Late embryogenesis abundant (LEA) hydroxyproline-rich glycoprotein family   chr5:7185968-7186813 FORWARD LENGTH=281                                                                                                                                                                                                                                                                                                                                           | 308 | 281 | 2.00E-89  | 91.2  | 54.5 | 68.8  |
| Rsa1.0_00728.1.g18672.t1 | gb EOA19730.1] hypothetical protein CARUB_v10003787mg [Capsella rubella]                                                                                                                                                                                                                                                                                                                                                                                                                                                                                                                                                                                                               | 344 | 821 | 4.00E-41  | 238.7 | 35.5  | 43.0  | hypothetical protein CARUB_v10003787mg                       | gbpln | Capsella rubella     | AT5G21160.1   Symbols:   LA RNA-binding protein   chr5:7199191-7203879 REVERSE LENGTH=826                                                                                                                                                                                                                                                                                                                                                                                              | 344 | 826 | 2.00E-34  | 240.1 | 34.6 | 42.7  |
| Rsa1.0_00728.1.g18673.t1 | ref[XP_004251248.1] PREDICTED: calmodulin-like isoform 1 [Solanum lycopersicum]                                                                                                                                                                                                                                                                                                                                                                                                                                                                                                                                                                                                        | 149 | 180 | 4.00E-80  | 120.8 | 100.0 | 100.0 | PREDICTED: calmodulin-like isoform 1                         | gbpln | Solanum lycopersicum | AT2G27030.3   Symbols: CAM5   calmodulin 5   chr2:11532069-11534176 FORWARD LENGTH=181                                                                                                                                                                                                                                                                                                                                                                                                 | 149 | 181 | 6.00E-82  | 121.5 | 98.7 | 100.0 |
| Rsa1.0_00728.1.g18674.t1 | ref[NP_680178.1] RNI-like family protein-like protein [Arabidopsis thaliana] gi 13374849 amb CAC34483.1] DNA excision repair protein [Arabidopsis thaliana] gi 29294068 gb AAO73905.1] hypothetical protein [Arabidopsis thaliana] gi 53828573 gb AAU94396.1] AT5g21900 [Arabidopsis thaliana] gi 55167908 gb AAV43786.1] AT5g21900 [Arabidopsis thaliana] gi 332005569 gb AED92952.1] RNI-like family protein-like protein [Arabidopsis thaliana]                                                                                                                                                                                                                                     | 574 | 544 | 1.00E-148 | 94.8  | 48.4  | 61.3  | RNI-like family protein-like protein                         | gbpln | Arabidopsis thaliana | AT5G21900.1   Symbols:   RNI-like superfamily protein   chr5:7238239-7240338 FORWARD LENGTH=544                                                                                                                                                                                                                                                                                                                                                                                        | 574 | 544 | 1.00E-151 | 94.8  | 48.4 | 61.3  |
| Rsa1.0_00728.1.g18675.t1 | gb EOA21421.1] hypothetical protein CARUB_v10001794mg [Capsella rubella]                                                                                                                                                                                                                                                                                                                                                                                                                                                                                                                                                                                                               | 325 | 251 | 1.00E-108 | 77.2  | 61.8  | 66.8  | hypothetical protein CARUB_v10001794mg                       | gbpln | Capsella rubella     | AT5G21920.1   Symbols: YLMG2, ATYLMG2   YGGT family protein   chr5:7241350-7242765 REVERSE LENGTH=251                                                                                                                                                                                                                                                                                                                                                                                  | 325 | 251 | 1.00E-108 | 77.2  | 60.6 | 66.2  |
| Rsa1.0_00728.1.g18676.t1 | gb EOA21360.1] hypothetical protein CARUB_v10001723mg [Capsella rubella]                                                                                                                                                                                                                                                                                                                                                                                                                                                                                                                                                                                                               | 239 | 267 | 6.00E-60  | 111.7 | 65.3  | 75.3  | hypothetical protein CARUB_v10001723mg                       | gbpln | Capsella rubella     | AT5G21940.1   Symbols:   unknown protein; BEST Arabidopsis thaliana protein match is: unknown protein (TAIR:AT3G43850.1); Has 30201 Blast hits to 17322 proteins in 780 species: Archae - 12; Bacteria - 1396; Metazoa - 17338; Fungi - 3422; Plants - 5037; Viruses - 0; Other Eukaryotes - 2996 (source: NCBI BLink).   chr5:7249446-7250353 REVERSE LENGTH=264                                                                                                                      | 239 | 264 | 4.00E-56  | 110.5 | 63.6 | 71.1  |

|                           |                                                                                                                                                                                                                                                                                                                                                                                                                                                                                                                                                                                                                                                                                                                                                                                                                                                            |      |     |           |       |      |      |                                                 |       |                      |                                                                                                                                 |      |     |           |       |      |      |
|---------------------------|------------------------------------------------------------------------------------------------------------------------------------------------------------------------------------------------------------------------------------------------------------------------------------------------------------------------------------------------------------------------------------------------------------------------------------------------------------------------------------------------------------------------------------------------------------------------------------------------------------------------------------------------------------------------------------------------------------------------------------------------------------------------------------------------------------------------------------------------------------|------|-----|-----------|-------|------|------|-------------------------------------------------|-------|----------------------|---------------------------------------------------------------------------------------------------------------------------------|------|-----|-----------|-------|------|------|
| Rsa1.0_00728.1.g18677.t1  | ref[NP_680184.1] ethylene-responsive transcription factor ERF016 [Arabidopsis thaliana] gi 7533357 sp Q9C591.1 ERF16_ARAT H RecName: Full=Ethylene-responsive transcription factor ERF016 gi 13374855 emb CAC34489.1  putative protein [Arabidopsis thaliana] gi 29294061 gb AAO73898.1  AP2 domain transcription factor, putative [Arabidopsis thaliana] gi 44021931 gb AAS46630.1  At5g21960 [Arabidopsis thaliana] gi 45773852 gb AAS76730.1  At5g21960 [Arabidopsis thaliana] gi 48479324 gb AAT44933.1  putative AP2/EREBP transcription factor [Arabidopsis thaliana] gi 332005578 gb AED92961.1  ethylene-responsive transcription factor ERF016 [Arabidopsis thaliana] ref[XP_002874039.1] hypothetical protein ARALYDRAFT_489044 [Arabidopsis thaliana] gi 297319876 gb EFH50298.1  hypothetical protein ARALYDRAFT_489044 [Arabidopsis thaliana] | 207  | 216 | 2.00E-74  | 104.3 | 76.8 | 85.0 | ethylene-responsive transcription factor ERF016 | gbpln | Arabidopsis thaliana | AT5G21960.1   Symbols:   Integrase-type DNA-binding superfamily protein   chr5:7258560-7259210 REVERSE LENGTH=216               | 207  | 216 | 6.00E-77  | 104.3 | 76.8 | 85.0 |
| Rsa1.0_00728.1.g18678.t1  | ref[XP_002874039.1] hypothetical protein ARALYDRAFT_489044 [Arabidopsis thaliana] gi 297319876 gb EFH50298.1  hypothetical protein ARALYDRAFT_489044 [Arabidopsis thaliana]                                                                                                                                                                                                                                                                                                                                                                                                                                                                                                                                                                                                                                                                                | 248  | 292 | 6.00E-73  | 117.7 | 71.4 | 79.4 | hypothetical protein ARALYDRAFT_489044          | gbpln | Arabidopsis thaliana | AT5G21280.1   Symbols:   hydroxyproline-rich glycoprotein family protein   chr5:7264094-7265514 REVERSE LENGTH=302              | 248  | 302 | 8.00E-74  | 121.8 | 72.6 | 80.2 |
| Rsa1.0_00728.1.g18679.t1  | dbj BAC43348.1  unknown protein [Arabidopsis thaliana]                                                                                                                                                                                                                                                                                                                                                                                                                                                                                                                                                                                                                                                                                                                                                                                                     | 577  | 554 | 0         | 96.0  | 83.2 | 87.9 | unknown protein                                 | gbpln | Arabidopsis thaliana | AT5G21990.1   Symbols: TPR7   Tetratricopeptide repeat (TPR)-like superfamily protein   chr5:7273395-7276318 FORWARD LENGTH=554 | 577  | 554 | 0         | 96.0  | 83.2 | 87.7 |
| Rsa1.0_00728.1.g18680.t1  | ref[XP_002871983.1] hypothetical protein ARALYDRAFT_489047 [Arabidopsis thaliana] gi 297317820 gb EFH48242.1  hypothetical protein ARALYDRAFT_489047 [Arabidopsis thaliana]                                                                                                                                                                                                                                                                                                                                                                                                                                                                                                                                                                                                                                                                                | 296  | 376 | 1.00E-116 | 127.0 | 83.1 | 87.2 | hypothetical protein ARALYDRAFT_489047          | gbpln | Arabidopsis thaliana | AT5G22000.2   Symbols: RHF2A   RING-H2 group F2A   chr5:7277436-7279553 FORWARD LENGTH=375                                      | 296  | 375 | 1.00E-115 | 126.7 | 82.1 | 86.1 |
| Rsa1.0_00728.1.g18681.t1  | #                                                                                                                                                                                                                                                                                                                                                                                                                                                                                                                                                                                                                                                                                                                                                                                                                                                          | #    | #   | #         | #     | #    | -    | ----                                            | ----  | #                    | #                                                                                                                               | #    | #   | #         | #     | #    |      |
| Rsa1.0_00728.1.g18682.t1  | ref[XP_002874087.1] hypothetical protein ARALYDRAFT_910271 [Arabidopsis thaliana] gi 297319924 gb EFH50346.1  hypothetical protein ARALYDRAFT_910271 [Arabidopsis thaliana]                                                                                                                                                                                                                                                                                                                                                                                                                                                                                                                                                                                                                                                                                | 99   | 261 | 6.00E-24  | 263.6 | 55.6 | 73.7 | hypothetical protein ARALYDRAFT_910271          | gbpln | Arabidopsis thaliana | AT5G22791.2   Symbols:   F-box family protein   chr5:7603579-7604771 REVERSE LENGTH=355                                         | 99   | 355 | 3.00E-18  | 358.6 | 48.5 | 68.7 |
| Rsa1.0_00728.1.g18683.t1  | ref[XP_002874089.1] hypothetical protein ARALYDRAFT_910273 [Arabidopsis thaliana] gi 297319926 gb EFH50348.1  hypothetical protein ARALYDRAFT_910273 [Arabidopsis thaliana]                                                                                                                                                                                                                                                                                                                                                                                                                                                                                                                                                                                                                                                                                | 203  | 393 | 4.00E-19  | 193.6 | 36.5 | 47.3 | hypothetical protein ARALYDRAFT_910273          | gbpln | Arabidopsis thaliana | AT5G22791.2   Symbols:   F-box family protein   chr5:7603579-7604771 REVERSE LENGTH=355                                         | 203  | 355 | 5.00E-18  | 174.9 | 31.5 | 44.8 |
| Rsa1.0_00728.1.g18684.t17 | gb EOA19946.1  hypothetical protein CARUB_v10000196mg [Capsella rubella]                                                                                                                                                                                                                                                                                                                                                                                                                                                                                                                                                                                                                                                                                                                                                                                   | 2221 | 868 | 0         | 39.1  | 35.1 | 36.8 | hypothetical protein CARUB_v10000196mg          | gbpln | Capsella rubella     | AT5G22030.1   Symbols: UBP8   ubiquitin-specific protease 8   chr5:7290155-7296344 REVERSE LENGTH=913                           | 2221 | 913 | 0         | 41.1  | 35.2 | 36.9 |
| Rsa1.0_00729.1.g18685.t1  | gb EOA17519.1  hypothetical protein CARUB_v10005852mg [Capsella rubella]                                                                                                                                                                                                                                                                                                                                                                                                                                                                                                                                                                                                                                                                                                                                                                                   | 136  | 180 | 8.00E-47  | 132.4 | 75.0 | 83.1 | hypothetical protein CARUB_v10005852mg          | gbpln | Capsella rubella     | AT4G30410.1   Symbols:   sequence-specific DNA binding transcription factors   chr4:14871309-14871851 REVERSE LENGTH=180        | 136  | 180 | 1.00E-47  | 132.4 | 78.7 | 84.6 |
| Rsa1.0_00729.1.g18686.t1  | ref[NP_567846.1] RING-H2 finger protein ATL13 [Arabidopsis thaliana] gi 68565248 sp Q94004.2 ATL13_ARAT H RecName: Full=RING-H2 finger protein ATL13 gi 332660360 gb AEE85760.1  RING-H2 finger protein ATL13 [Arabidopsis thaliana]                                                                                                                                                                                                                                                                                                                                                                                                                                                                                                                                                                                                                       | 465  | 472 | 0         | 101.5 | 82.6 | 87.7 | RING-H2 finger protein ATL13                    | gbpln | Arabidopsis thaliana | AT4G30400.1   Symbols:   RING/U-box superfamily protein   chr4:14867068-14868486 FORWARD LENGTH=472                             | 465  | 472 | 0         | 101.5 | 82.6 | 87.7 |
| Rsa1.0_00729.1.g18687.t1  | ref[XP_002867352.1] zinc finger family protein [Arabidopsis thaliana] gi 297313188 gb EFH43611.1  zinc finger family protein [Arabidopsis thaliana]                                                                                                                                                                                                                                                                                                                                                                                                                                                                                                                                                                                                                                                                                                        | 163  | 169 | 2.00E-43  | 103.7 | 68.1 | 77.9 | zinc finger family protein                      | gbpln | Arabidopsis thaliana | AT4G30370.1   Symbols:   RING/U-box superfamily protein   chr4:14858743-14859273 REVERSE LENGTH=176                             | 163  | 176 | 2.00E-45  | 108.0 | 66.3 | 76.1 |

|                          |                                                                                                                                                                                                                                                                                                                                                                                                                                                                                                                                                                                                                 |     |      |           |       |      |      |                                                      |       |                      |                                                                                                                                                                                |     |     |           |       |      |      |
|--------------------------|-----------------------------------------------------------------------------------------------------------------------------------------------------------------------------------------------------------------------------------------------------------------------------------------------------------------------------------------------------------------------------------------------------------------------------------------------------------------------------------------------------------------------------------------------------------------------------------------------------------------|-----|------|-----------|-------|------|------|------------------------------------------------------|-------|----------------------|--------------------------------------------------------------------------------------------------------------------------------------------------------------------------------|-----|-----|-----------|-------|------|------|
| Rsa1.0_00729.1.g18688.t1 | ref[NP_194765.2] cyclic nucleotide gated channel [Arabidopsis thaliana] gi 38503044 sp Q8L7Z0.1 CNG17_ARATH RecName: Full=Probable cyclic nucleotide-gated ion channel 17; AltName: Full=Cyclic nucleotide- and calmodulin-regulated ion channel 17 gi 21703138 gb AAM74509.1  AT4g30360/F17123.300 [Arabidopsis thaliana] gi 25090415 gb AAN72295.1  At4g30360/F17123.300 [Arabidopsis thaliana] gi 110742607 dbj BAE99216.1  cyclic nucleotide and calmodulin-regulated ion channel-like protein [Arabidopsis thaliana] gi 332660356 gb AEE85756.1  cyclic nucleotide-gated channel 17 [Arabidopsis thaliana] | 275 | 720  | 0         | 99.3  | 86.9 | 91.3 | cyclic nucleotide gated channel                      | gbpln | Arabidopsis thaliana | AT4G30360.1   Symbols: ATCNGC17, CNGC17   cyclic nucleotide-gated channel 17   chr4:14855060-14857779 REVERSE LENGTH=720                                                       | 725 | 720 | 0         | 99.3  | 86.9 | 91.3 |
| Rsa1.0_00729.1.g18690.t1 | ref[NP_194764.1] heat shock-related protein [Arabidopsis thaliana] gi 7269935 emb CAB81028.1  putative protein [Arabidopsis thaliana] gi 332660355 gb AEE85755.1  heat shock-related protein [Arabidopsis thaliana]                                                                                                                                                                                                                                                                                                                                                                                             | 901 | 924  | 0         | 102.6 | 83.1 | 88.8 | heat shock-related protein                           | gbpln | Arabidopsis thaliana | AT4G30350.1   Symbols:   Double Ctp-N motif-containing P-loop nucleoside triphosphate hydrolases superfamily protein   chr4:14848031-14850973 FORWARD LENGTH=924               | 901 | 924 | 0         | 102.6 | 83.1 | 88.8 |
| Rsa1.0_00729.1.g18690.t1 | gb ACP30591.1  disease resistance protein [Brassica rapa subsp. pekinensis]                                                                                                                                                                                                                                                                                                                                                                                                                                                                                                                                     | 697 | 1555 | 1.00E-107 | 223.1 | 26.3 | 33.4 | disease resistance protein                           | gbpln | Brassica rapa        | AT4G29090.1   Symbols:   Ribonuclease H-like superfamily protein   chr4:14333528-14335255 FORWARD LENGTH=575                                                                   | 697 | 575 | 2.00E-59  | 82.5  | 22.2 | 34.6 |
| Rsa1.0_00729.1.g18691.t1 | ref[NP_567845.4] diacylglycerol kinase 7 [Arabidopsis thaliana] gi 487523322 sp F4JQ95.1 DGK7_ARATH RecName: Full=Diacylglycerol kinase 7; Short=ADGK7; Short=DAG kinase 7; AltName: Full=Diglyceride kinase 7; Short=DKG 7 gi 332660354 gb AEE85754.1  diacylglycerol kinase 7 [Arabidopsis thaliana]                                                                                                                                                                                                                                                                                                          | 493 | 492  | 0         | 99.8  | 90.5 | 95.3 | diacylglycerol kinase 7                              | gbpln | Arabidopsis thaliana | AT4G30340.1   Symbols: ATDGK7, DGK7   diacylglycerol kinase 7   chr4:14838465-14840941 REVERSE LENGTH=492                                                                      | 493 | 492 | 0         | 99.8  | 90.5 | 95.3 |
| Rsa1.0_00729.1.g18692.t1 | gb EOA18929.1  hypothetical protein CARUB_v10007576mg [Capsella rubella]                                                                                                                                                                                                                                                                                                                                                                                                                                                                                                                                        | 168 | 164  | 5.00E-73  | 97.6  | 80.4 | 85.1 | hypothetical protein CARUB_v10007576mg               | gbpln | Capsella rubella     | AT4G30320.1   Symbols:   CAP (Cysteine-rich secretory proteins, Antigen 5, and Pathogenesis-related 1 protein) superfamily protein   chr4:14835833-14836318 FORWARD LENGTH=161 | 168 | 161 | 5.00E-69  | 95.8  | 73.8 | 78.6 |
| Rsa1.0_00729.1.g18693.t1 | ref[NP_199618.1] xyloglucan endotransglucosylase/hydrolase protein 20 [Arabidopsis thaliana] gi 38605468 sp Q9F131.1 XTH20_ARATH RecName: Full=Xyloglucan endotransglucosylase/hydrolase protein 20; Short=At-XTH20; Short=XTH-20; Flags: Precursor gi 10177758 dbj BAB11071.1  xyloglucan endo-1,4-beta-D-glucanase [Arabidopsis thaliana] gi 45825157 gb AAS77486.1  At5g48070 [Arabidopsis thaliana] gi 62320256 dbj BAD94531.1  xyloglucan endo-1,4-beta-D-glucanase [Arabidopsis thaliana] gi 332008233 gb AED95616.1  xyloglucan endotransglucosylase/hydrolase protein 20 [Arabidopsis thaliana]         | 282 | 282  | 1.00E-138 | 100.0 | 82.3 | 87.6 | xyloglucan endotransglucosylase/hydrolase protein 20 | gbpln | Arabidopsis thaliana | AT5G48070.1   Symbols: ATXTH20, XTH20   xyloglucan endotransglucosylase/hydrolase 20   chr5:19482158-19483231 FORWARD LENGTH=282                                               | 282 | 282 | 1.00E-140 | 100.0 | 82.3 | 87.6 |
| Rsa1.0_00729.1.g18694.t1 | ref[XP_002867357.1] ATXTH18/XTH18 [Arabidopsis lyrata subsp. lyrata] gi 297313183 gb EFH43616.1  ATXTH18/XTH18 [Arabidopsis lyrata subsp. lyrata]                                                                                                                                                                                                                                                                                                                                                                                                                                                               | 282 | 282  | 1.00E-144 | 100.0 | 89.0 | 93.3 | ATXTH18/XTH18                                        | gbpln | Arabidopsis lyrata   | AT4G30280.1   Symbols: ATXTH18, XTH18   xyloglucan endotransglucosylase/hydrolase 18   chr4:14825958-14826998 REVERSE LENGTH=282                                               | 282 | 282 | 2.33E-156 | 100.0 | 88.7 | 92.6 |
| Rsa1.0_00729.1.g18695.t1 | gb AEX07595.1  xyloglucosyl transferase 2, partial [Brassica juncea]                                                                                                                                                                                                                                                                                                                                                                                                                                                                                                                                            | 282 | 265  | 1.00E-153 | 94.0  | 91.1 | 92.2 | xyloglucosyl transferase 2, partial                  | gbpln | Brassica juncea      | AT4G30270.1   Symbols: MERI5B, MERI-5, XTH24, SEN4   xyloglucan endotransglucosylase/hydrolase 24   chr4:14819445-14820448 REVERSE LENGTH=269                                  | 282 | 269 | 1.00E-147 | 95.4  | 87.6 | 91.1 |
| Rsa1.0_00729.1.g18696.t3 | gb EOA15588.1  hypothetical protein CARUB_v10005446mg [Capsella rubella]                                                                                                                                                                                                                                                                                                                                                                                                                                                                                                                                        | 176 | 280  | 1.00E-68  | 159.1 | 84.7 | 88.6 | hypothetical protein CARUB_v10005446mg               | gbpln | Capsella rubella     | AT4G30260.1   Symbols:   Integral membrane Yip1 family protein   chr4:14816890-14818722 REVERSE LENGTH=280                                                                     | 176 | 280 | 2.00E-63  | 159.1 | 84.1 | 88.1 |
| Rsa1.0_00729.1.g18697.t1 | gb EOA17963.1  hypothetical protein CARUB_v10006378mg [Capsella rubella]                                                                                                                                                                                                                                                                                                                                                                                                                                                                                                                                        | 526 | 523  | 0         | 99.4  | 86.7 | 92.4 | hypothetical protein CARUB_v10006378mg               | gbpln | Capsella rubella     | AT4G30250.1   Symbols:   P-loop containing nucleoside triphosphate hydrolases superfamily protein   chr4:14811262-14812821 REVERSE LENGTH=519                                  | 526 | 519 | 0         | 98.7  | 86.7 | 92.2 |

|                           |                                                                                                                                                                                                                                                                                                                                                                                                                                                                                                                                                                                                                                  |      |      |           |       |      |      |                                                       |       |                      |                                                                                                                      |      |      |           |       |      |      |
|---------------------------|----------------------------------------------------------------------------------------------------------------------------------------------------------------------------------------------------------------------------------------------------------------------------------------------------------------------------------------------------------------------------------------------------------------------------------------------------------------------------------------------------------------------------------------------------------------------------------------------------------------------------------|------|------|-----------|-------|------|------|-------------------------------------------------------|-------|----------------------|----------------------------------------------------------------------------------------------------------------------|------|------|-----------|-------|------|------|
| Rsa1.0_00730.1.g18698.t2  | gb[EOA19817.1] hypothetical protein CARUB_v10000063mg [Capsella rubella]                                                                                                                                                                                                                                                                                                                                                                                                                                                                                                                                                         | 270  | 1207 | 6.00E-52  | 447.0 | 39.6 | 44.1 | hypothetical protein CARUB_v10000063mg                | gbpln | Capsella rubella     | AT3G05040.1   Symbols: HST, HST1   ARM repeat superfamily protein   chr3:1401479-1408095 REVERSE LENGTH=1202         | 270  | 1202 | 8.00E-49  | 445.2 | 37.0 | 40.7 |
| Rsa1.0_00730.1.g18699.t1  | ref NP_175249.1  MADS-box domain-containing protein [Arabidopsis thaliana] gi 8778530 gb AAF79538.1 AC023673.26 F21D18.12 [Arabidopsis thaliana] gi 332194135 gb AE32256.1  MADS-box domain-containing protein [Arabidopsis thaliana]                                                                                                                                                                                                                                                                                                                                                                                            | 274  | 323  | 6.00E-61  | 117.9 | 56.2 | 71.2 | MADS-box domain-containing protein                    | gbpln | Arabidopsis thaliana | AT1G48150.1   Symbols:   MADS-box transcription factor family protein   chr1:17785397-17786368 FORWARD LENGTH=323    | 274  | 323  | 2.00E-63  | 117.9 | 56.2 | 71.2 |
| Rsa1.0_00730.1.g18700.t1  | ref NP_198064.1  putative nucleolar protein 5-1 [Arabidopsis thaliana] gi 147744575 sp O04658.2 NOP5A_ARA TH RecName: Full=Probable nucleolar protein 5-1; AltName: Full=MAR-binding NOP56/58 homolog 1; AltName: Full=NOP58-like protein F108; AltName: Full=Nucleolar protein 58-1 gi 11878185 gb AAG40836.1 AF302490.1 NOP58-like protein F108 [Arabidopsis thaliana] gi 18377656 gb AAL66978.1  putative SAR DNA-binding protein [Arabidopsis thaliana] gi 20465699 gb AAM20318.1  putative SAR DNA-binding protein [Arabidopsis thaliana] gi 332006269 gb AED93652.1  putative nucleolar protein 5-1 [Arabidopsis thaliana] | 511  | 533  | 0         | 104.3 | 73.8 | 79.6 | putative nucleolar protein 5-1                        | gbpln | Arabidopsis thaliana | AT5G27120.1   Symbols:   NOP56-like pre RNA processing ribonucleoprotein   chr5:9541287-9543684 FORWARD LENGTH=533   | 511  | 533  | 0         | 104.3 | 73.8 | 79.6 |
| Rsa1.0_00730.1.g18701.t27 | ref NP_198149.2  armadillo/beta-catenin-like repeat-containing protein [Arabidopsis thaliana] gi 332006370 gb AED93753.1  armadillo/beta-catenin-like repeat-containing protein [Arabidopsis thaliana]                                                                                                                                                                                                                                                                                                                                                                                                                           | 1599 | 1630 | 0         | 101.9 | 90.2 | 93.2 | armadillo/beta-catenin-like repeat-containing protein | gbpln | Arabidopsis thaliana | AT5G27970.1   Symbols:   ARM repeat superfamily protein   chr5:10004720-10015429 FORWARD LENGTH=1630                 | 1599 | 1630 | 0         | 101.9 | 90.2 | 93.2 |
| Rsa1.0_00730.1.g18702.t1  | ref NP_198150.1  Seed maturation protein [Arabidopsis thaliana] gi 26452310 dbj BAC43241.1  putative embryonic abundant protein [Arabidopsis thaliana] gi 332006372 gb AED93755.1  Seed maturation protein [Arabidopsis thaliana]                                                                                                                                                                                                                                                                                                                                                                                                | 186  | 192  | 1.00E-71  | 103.2 | 85.5 | 88.7 | Seed maturation protein                               | gbpln | Arabidopsis thaliana | AT5G27980.1   Symbols:   Seed maturation protein   chr5:10015883-10016676 REVERSE LENGTH=192                         | 186  | 192  | 4.00E-74  | 103.2 | 85.5 | 88.7 |
| Rsa1.0_00730.1.g18703.t1  | ref XP_002872303.1  cysteine synthase [Arabidopsis lyrata subsp. lyrata] gi 297318140 gb EFH48562.1  cysteine synthase [Arabidopsis lyrata subsp. lyrata]                                                                                                                                                                                                                                                                                                                                                                                                                                                                        | 346  | 324  | 1.00E-157 | 93.6  | 82.9 | 89.0 | cysteine synthase                                     | gbpln | Arabidopsis lyrata   | AT5G28020.6   Symbols: CYSD2, ATCYSD2   cysteine synthase D2   chr5:10026395-10028166 REVERSE LENGTH=323             | 346  | 323  | 1.00E-156 | 93.4  | 84.4 | 90.5 |
| Rsa1.0_00730.1.g18704.t1  | ref XP_002874422.1  hypothetical protein ARALYDRAFT_489646 [Arabidopsis lyrata subsp. lyrata] gi 297320259 gb EFH50681.1  hypothetical protein ARALYDRAFT_489646 [Arabidopsis lyrata subsp. lyrata]                                                                                                                                                                                                                                                                                                                                                                                                                              | 590  | 567  | 0         | 96.1  | 81.0 | 85.3 | hypothetical protein ARALYDRAFT_489646                | gbpln | Arabidopsis lyrata   | AT5G28290.1   Symbols: ATNEK3, NEK3   NIMA-related kinase 3   chr5:10278880-10281880 REVERSE LENGTH=568              | 590  | 568  | 0         | 96.3  | 80.3 | 84.6 |
| Rsa1.0_00730.1.g18705.t1  | gb[EOA20220.1] hypothetical protein CARUB_v10000523mg [Capsella rubella]                                                                                                                                                                                                                                                                                                                                                                                                                                                                                                                                                         | 604  | 597  | 0         | 98.8  | 73.2 | 80.6 | hypothetical protein CARUB_v10000523mg                | gbpln | Capsella rubella     | AT5G28300.1   Symbols:   Duplicated homeodomain-like superfamily protein   chr5:10292789-10295101 REVERSE LENGTH=619 | 604  | 619  | 0         | 102.5 | 75.8 | 83.1 |
| Rsa1.0_00730.1.g18706.t1  | gb[EOA19400.1] hypothetical protein CARUB_v10001016mg [Capsella rubella]                                                                                                                                                                                                                                                                                                                                                                                                                                                                                                                                                         | 436  | 429  | 0         | 98.4  | 75.7 | 84.9 | hypothetical protein CARUB_v10001016mg                | gbpln | Capsella rubella     | AT4G29250.1   Symbols:   HXXXD-type acyl-transferase family protein   chr4:14420713-14422177 FORWARD LENGTH=460      | 436  | 460  | 4.00E-48  | 105.5 | 31.7 | 51.1 |
| Rsa1.0_00730.1.g18707.t1  | ref XP_002872312.1  predicted protein [Arabidopsis lyrata subsp. lyrata] gi 297318149 gb EFH48571.1  predicted protein [Arabidopsis lyrata subsp. lyrata]                                                                                                                                                                                                                                                                                                                                                                                                                                                                        | 573  | 561  | 0         | 97.9  | 81.3 | 90.2 | predicted protein                                     | gbpln | Arabidopsis lyrata   | AT5G28470.1   Symbols:   Major facilitator superfamily protein   chr5:10429813-10432357 FORWARD LENGTH=559           | 573  | 559  | 0         | 97.6  | 79.6 | 89.0 |
| Rsa1.0_00730.1.g18708.t1  | ref NP_198201.1  uncharacterized protein [Arabidopsis thaliana] gi 34851102 gb AAQ82901.1  light-dependent short hypocotyl 1 [Arabidopsis thaliana] gi 38566596 gb AAR24188.1  At5g28490 [Arabidopsis thaliana] gi 40824076 gb AAR92340.1  At5g28490 [Arabidopsis thaliana] gi 332006422 gb AED93805.1  uncharacterized protein AT5G28490 [Arabidopsis thaliana]                                                                                                                                                                                                                                                                 | 189  | 190  | 7.00E-76  | 100.5 | 91.0 | 93.1 | uncharacterized protein                               | gbpln | Arabidopsis thaliana | AT5G28490.1   Symbols: LSH1   Protein of unknown function (DUF640)   chr5:10454541-10455113 REVERSE LENGTH=190       | 189  | 190  | 3.00E-78  | 100.5 | 91.0 | 93.1 |

|                          |                                                                                                                                                                                                                                                                                                             |      |      |           |       |      |      |                                                         |       |                      |                                                                                                                                                                                                                                                                                                                                                                                                                                                                                                                 |      |      |           |       |      |      |
|--------------------------|-------------------------------------------------------------------------------------------------------------------------------------------------------------------------------------------------------------------------------------------------------------------------------------------------------------|------|------|-----------|-------|------|------|---------------------------------------------------------|-------|----------------------|-----------------------------------------------------------------------------------------------------------------------------------------------------------------------------------------------------------------------------------------------------------------------------------------------------------------------------------------------------------------------------------------------------------------------------------------------------------------------------------------------------------------|------|------|-----------|-------|------|------|
| Rsa1.0_00731.1.g18709.t4 | gb EOA38742.1  hypothetical protein CARUB_v10010894mg [Capsella rubella]                                                                                                                                                                                                                                    | 761  | 423  | 0         | 55.6  | 49.4 | 51.8 | hypothetical protein CARUB_v10010894mg                  | gbpln | Capsella rubella     | AT1G50710.1   Symbols:   unknown protein; Has 109 Blast hits to 109 proteins in 44 species: Archae - 0; Bacteria - 2; Metazoa - 61; Fungi - 8; Plants - 36; Viruses - 0; Other Eukaryotes - 2 (source: NCBI BLink).   chr1:18784719-18787615 REVERSE LENGTH=423                                                                                                                                                                                                                                                 | 761  | 423  | 0         | 55.6  | 49.1 | 51.6 |
| Rsa1.0_00731.1.g18710.t1 | ref XP_002894269.1  hypothetical protein ARALYDRAFT_474200 [Arabidopsis lyrata subsp. lyrata] gi 29734011.1 gb EFH70528.1  hypothetical protein ARALYDRAFT_474200 [Arabidopsis lyrata subsp. lyrata]                                                                                                        | 344  | 337  | 1.00E-119 | 98.0  | 64.5 | 77.3 | hypothetical protein ARALYDRAFT_474200                  | gbpln | Arabidopsis lyrata   | AT1G50680.1   Symbols:   AP2/B3 transcription factor family protein   chr1:18777601-18778614 REVERSE LENGTH=337                                                                                                                                                                                                                                                                                                                                                                                                 | 344  | 337  | 1.00E-118 | 98.0  | 64.2 | 75.6 |
| Rsa1.0_00731.1.g18711.t1 | gb EOA36251.1  hypothetical protein CARUB_v10010299mg [Capsella rubella]                                                                                                                                                                                                                                    | 208  | 208  | 1.00E-116 | 100.0 | 96.2 | 98.1 | hypothetical protein CARUB_v10010299mg                  | gbpln | Capsella rubella     | AT1G50670.1   Symbols:   OTU-like cysteine protease family protein   chr1:18775086-18776552 REVERSE LENGTH=208                                                                                                                                                                                                                                                                                                                                                                                                  | 208  | 208  | 1.00E-116 | 100.0 | 94.7 | 97.1 |
| Rsa1.0_00731.1.g18712.t1 | ref NP_175481.1  uncharacterized protein [Arabidopsis thaliana] gi 9454546 gb AAF87869.1 AC012561.2 Unknown protein [Arabidopsis thaliana] gi 12322324 gb AAG51180.1 AC079279.1 unknown protein [Arabidopsis thaliana] gi 332194455 gb AEE32576.1  uncharacterized protein AT1G50660 [Arabidopsis thaliana] | 647  | 725  | 0         | 112.1 | 88.7 | 93.8 | uncharacterized protein                                 | gbpln | Arabidopsis thaliana | AT1G50660.1   Symbols:   unknown protein; INVOLVED IN: biological process unknown; LOCATED IN: chloroplast; EXPRESSED IN: 22 plant structures; EXPRESSED DURING: 13 growth stages; BEST Arabidopsis thaliana protein match is: unknown protein (TAIR:AT3G20350.1); Has 21445 Blast hits to 15134 proteins in 1325 species: Archae - 461; Bacteria - 2309; Metazoa - 11052; Fungi - 1737; Plants - 1035; Viruses - 42; Other Eukaryotes - 4809 (source: NCBI BLink).   chr1:18771386-18774385 FORWARD LENGTH=725 | 647  | 725  | 0         | 112.1 | 88.7 | 93.8 |
| Rsa1.0_00731.1.g18713.t1 | gb EOA18953.1  hypothetical protein CARUB_v10007587mg [Capsella rubella]                                                                                                                                                                                                                                    | 221  | 527  | 7.00E-18  | 238.5 | 24.4 | 31.7 | hypothetical protein CARUB_v10007587mg                  | gbpln | Capsella rubella     | AT2G07760.1   Symbols:   Zinc knuckle (CCHC-type) family protein   chr2:3584420-3586278 REVERSE LENGTH=530                                                                                                                                                                                                                                                                                                                                                                                                      | 221  | 530  | 6.00E-12  | 239.8 | 22.6 | 29.9 |
| Rsa1.0_00731.1.g18714.t1 | ref XP_002894266.1  predicted protein [Arabidopsis lyrata subsp. lyrata] gi 297340106 gb EFH70525.1  predicted protein [Arabidopsis lyrata subsp. lyrata]                                                                                                                                                   | 173  | 173  | 1.00E-62  | 100.0 | 69.9 | 78.0 | predicted protein                                       | gbpln | Arabidopsis lyrata   | AT1G50650.1   Symbols:   Stigma-specific Stig1 family protein   chr1:18763773-18764297 REVERSE LENGTH=174                                                                                                                                                                                                                                                                                                                                                                                                       | 173  | 174  | 2.00E-60  | 100.6 | 69.9 | 77.5 |
| Rsa1.0_00731.1.g18715.t1 | emb CAA20201.1  putative transposable element [Arabidopsis thaliana] gi 7268932 emb CAB79135.1  putative transposable element [Arabidopsis thaliana]                                                                                                                                                        | 684  | 1308 | 8.00E-75  | 191.2 | 21.6 | 31.3 | putative transposable element                           | gbpln | Arabidopsis thaliana | AT4G23160.1   Symbols: CRK8   cysteine-rich RLK (RECEPTOR-like protein kinase) 8   chr4:12129485-12134086 FORWARD LENGTH=1262                                                                                                                                                                                                                                                                                                                                                                                   | 684  | 1262 | 3.00E-24  | 184.5 | 12.6 | 21.2 |
| Rsa1.0_00731.1.g18716.t1 | #                                                                                                                                                                                                                                                                                                           | #    | #    | #         | #     | #    | -    | ----                                                    | ----  | #                    | #                                                                                                                                                                                                                                                                                                                                                                                                                                                                                                               | #    | #    | #         | #     | #    |      |
| Rsa1.0_00731.1.g18717.t1 | ref XP_002894264.1  ATERF3/ERF3 [Arabidopsis lyrata subsp. lyrata] gi 297340106 gb EFH70523.1  ATERF3/ERF3 [Arabidopsis lyrata subsp. lyrata]                                                                                                                                                               | 211  | 224  | 3.00E-67  | 106.2 | 79.1 | 85.8 | ATERF3/ERF3                                             | gbpln | Arabidopsis lyrata   | AT1G50640.1   Symbols: ERF3, ATERF3   ethylene responsive element binding factor 3   chr1:18757602-18758279 REVERSE LENGTH=225                                                                                                                                                                                                                                                                                                                                                                                  | 211  | 225  | 2.00E-58  | 106.6 | 73.5 | 81.0 |
| Rsa1.0_00731.1.g18718.t8 | dbj BAB08714.1  non-LTR retroelement reverse transcriptase-like protein [Arabidopsis thaliana]                                                                                                                                                                                                              | 1630 | 1197 | 1.00E-155 | 73.4  | 19.9 | 27.4 | non-LTR retroelement reverse transcriptase-like protein | gbpln | Arabidopsis thaliana | AT4G29090.1   Symbols:   Ribonuclease H-like superfamily protein   chr4:14333528-14335255 FORWARD LENGTH=575                                                                                                                                                                                                                                                                                                                                                                                                    | 1630 | 575  | 4.00E-48  | 35.3  | 9.5  | 15.6 |
| Rsa1.0_00731.1.g18719.t4 | #                                                                                                                                                                                                                                                                                                           | #    | #    | #         | #     | #    | -    | ----                                                    | ----  | #                    | #                                                                                                                                                                                                                                                                                                                                                                                                                                                                                                               | #    | #    | #         | #     | #    |      |
| Rsa1.0_00731.1.g18720.t2 | gb AAN72190.1  Unknown protein [Arabidopsis thaliana] gi 110742754 dbj BAE99285.1  hypothetical protein [Arabidopsis thaliana]                                                                                                                                                                              | 218  | 667  | 6.00E-34  | 306.0 | 46.3 | 53.7 | Unknown protein                                         | gbpln | Arabidopsis thaliana | AT3G13460.4   Symbols: ECT2   evolutionarily conserved C-terminal region 2   chr3:4385274-4388220 REVERSE LENGTH=666                                                                                                                                                                                                                                                                                                                                                                                            | 218  | 666  | 2.00E-36  | 305.5 | 46.3 | 53.7 |
| Rsa1.0_00731.1.g18721.t1 | #                                                                                                                                                                                                                                                                                                           | #    | #    | #         | #     | #    | -    | ----                                                    | ----  | #                    | #                                                                                                                                                                                                                                                                                                                                                                                                                                                                                                               | #    | #    | #         | #     | #    |      |
| Rsa1.0_00732.1.g18722.t1 | gb EOA13888.1  hypothetical protein CARUB_v10026998mg [Capsella rubella]                                                                                                                                                                                                                                    | 245  | 248  | 1.00E-137 | 101.2 | 97.1 | 98.8 | hypothetical protein CARUB_v10026998mg                  | gbpln | Capsella rubella     | AT5G50370.1   Symbols:   Adenylate kinase family protein   chr5:20509382-20510631 REVERSE LENGTH=248                                                                                                                                                                                                                                                                                                                                                                                                            | 245  | 248  | 1.00E-133 | 101.2 | 96.3 | 98.4 |
| Rsa1.0_00732.1.g18723.t3 | ref XP_002866374.1  hypothetical protein ARALYDRAFT_332278 [Arabidopsis lyrata subsp. lyrata] gi 297312209 gb EFH42633.1  hypothetical protein ARALYDRAFT_332278 [Arabidopsis lyrata subsp. lyrata]                                                                                                         | 481  | 477  | 0         | 99.2  | 92.7 | 96.3 | hypothetical protein ARALYDRAFT_332278                  | gbpln | Arabidopsis lyrata   | AT5G60160.1   Symbols:   Zn-dependent exopeptidases superfamily protein   chr5:24223887-24226783 REVERSE LENGTH=477                                                                                                                                                                                                                                                                                                                                                                                             | 481  | 477  | 0         | 99.2  | 92.1 | 95.6 |
| Rsa1.0_00732.1.g18724.t1 | #                                                                                                                                                                                                                                                                                                           | #    | #    | #         | #     | #    | -    | ----                                                    | ----  | #                    | #                                                                                                                                                                                                                                                                                                                                                                                                                                                                                                               | #    | #    | #         | #     | #    |      |

|                          |                                                                                                                                                                                                                                                 |      |      |          |       |      |      |                                                                                                   |       |                      |                                                                                                                                                                                                                                                                                                                                                                                                                                                               |      |     |          |       |      |      |
|--------------------------|-------------------------------------------------------------------------------------------------------------------------------------------------------------------------------------------------------------------------------------------------|------|------|----------|-------|------|------|---------------------------------------------------------------------------------------------------|-------|----------------------|---------------------------------------------------------------------------------------------------------------------------------------------------------------------------------------------------------------------------------------------------------------------------------------------------------------------------------------------------------------------------------------------------------------------------------------------------------------|------|-----|----------|-------|------|------|
| Rsa1.0_00732.1.g18725.t1 | gb[EOA13082.1] hypothetical protein CARUB_v10026087mg [Capsella rubella]                                                                                                                                                                        | 581  | 622  | 0        | 107.1 | 78.7 | 84.9 | hypothetical protein CARUB_v10026087mg                                                            | gbpln | Capsella rubella     | AT5G50350.1   Symbols:   unknown protein; FUNCTIONS IN: molecular function unknown; INVOLVED IN: response to oxidative stress; LOCATED IN: chloroplast; EXPRESSED IN: 22 plant structures; EXPRESSED DURING: 13 growth stages; Has 1807 Blast hits to 1807 proteins in 277 species: Archae - 0; Bacteria - 0; Metazoa - 736; Fungi - 347; Plants - 385; Viruses - 0; Other Eukaryotes - 339 (source: NCBI BLink).   chr5:20498697-20501611 REVERSE LENGTH=584 | 581  | 584 | 0        | 100.5 | 78.7 | 85.0 |
| Rsa1.0_00732.1.g18726.t1 | gb[EOA36657.1] hypothetical protein CARUB_v10011946mg, partial [Capsella rubella]                                                                                                                                                               | 194  | 188  | 4.00E-34 | 96.9  | 35.1 | 53.6 | hypothetical protein CARUB_v10011946mg, gbpln partial                                             |       | Capsella rubella     | AT5G19270.1   Symbols:   unknown protein; BEST Arabidopsis thaliana protein match is: unknown protein (TAIR:AT4G03566.1); Has 30201 Blast hits to 17322 proteins in 780 species: Archae - 12; Bacteria - 1396; Metazoa - 17338; Fungi - 3422; Plants - 5037; Viruses - 0; Other Eukaryotes - 2996 (source: NCBI BLink).   chr5:6485617-6487009 REVERSE LENGTH=365                                                                                             | 194  | 365 | 6.00E-36 | 188.1 | 41.8 | 56.2 |
| Rsa1.0_00732.1.g18727.t2 | pir  T00833 RNA-directed DNA polymerase homolog T13L16.7 - Arabidopsis thaliana (fragment)                                                                                                                                                      | 1563 | 1365 | 0        | 87.3  | 32.9 | 45.4 | RNA-directed DNA polymerase homolog T13L16.7 - Arabidopsis thaliana (fragment)                    | ----  | ----                 | AT4G29090.1   Symbols:   Ribonuclease H-like superfamily protein   chr4:14333528-14335255 FORWARD LENGTH=575                                                                                                                                                                                                                                                                                                                                                  | 1563 | 575 | 4.00E-64 | 36.8  | 8.5  | 12.0 |
| Rsa1.0_00732.1.g18728.t1 | #                                                                                                                                                                                                                                               | #    | #    | #        | #     | #    | #    | -                                                                                                 | ----  | ----                 | #                                                                                                                                                                                                                                                                                                                                                                                                                                                             | #    | #   | #        | #     | #    |      |
| Rsa1.0_00732.1.g18729.t1 | gb AAF78267.1 AC020576.11 Contains weak similarity to 25.7 kDa protein from Cicer arietinum gb AJ276422 and contains a transposase mutator PF 00872 domain. ESTs gb T13756, gb AA712647, gb AA585980 come from this gene [Arabidopsis thaliana] | 1031 | 1206 | 0        | 117.0 | 42.0 | 58.1 | transposase mutator PF 00872 domain. ESTs gb T13756, gb AA712647, gb AA585980 come from this gene | gbpln | Arabidopsis thaliana | AT1G64260.1   Symbols:   MuDR family transposase   chr1:23847756-23849915 FORWARD LENGTH=719                                                                                                                                                                                                                                                                                                                                                                  | 1031 | 719 | 1.00E-30 | 69.7  | 12.9 | 21.5 |
| Rsa1.0_00732.1.g18730.t1 | #                                                                                                                                                                                                                                               | #    | #    | #        | #     | #    | #    | -                                                                                                 | ----  | ----                 | #                                                                                                                                                                                                                                                                                                                                                                                                                                                             | #    | #   | #        | #     | #    |      |
| Rsa1.0_00732.1.g18731.t1 | gb[EOA39894.1] hypothetical protein CARUB_v10008573mg [Capsella rubella]                                                                                                                                                                        | 986  | 630  | 4.00E-63 | 63.9  | 16.7 | 25.5 | hypothetical protein CARUB_v10008573mg                                                            | gbpln | Capsella rubella     | AT1G31150.1   Symbols:   Domain of unknown function (DUF1955)   chr1:1120097-11122412 FORWARD LENGTH=673                                                                                                                                                                                                                                                                                                                                                      | 986  | 673 | 5.00E-51 | 68.3  | 12.7 | 18.3 |
| Rsa1.0_00732.1.g18732.t1 | gb[EOA13075.1] hypothetical protein CARUB_v10026080mg, partial [Capsella rubella]                                                                                                                                                               | 568  | 627  | 0        | 110.4 | 81.9 | 88.4 | hypothetical protein CARUB_v10026080mg, gbpln partial                                             |       | Capsella rubella     | AT5G50340.1   Symbols:   ATP-dependent peptidases;nucleotide binding;serine-type endopeptidases;DNA helicases;ATP binding;damaged DNA binding;nucleoside-triphosphatases   chr5:20491635-20495830 REVERSE LENGTH=587                                                                                                                                                                                                                                          | 568  | 587 | 0        | 103.3 | 82.7 | 89.3 |
| Rsa1.0_00732.1.g18733.t1 | ref XP_002883034.1  hypothetical protein ARALYDRAFT_341831 [Arabidopsis lyrata subsp. lyrata] gi 297328874 gb EFH59293.1  hypothetical protein ARALYDRAFT_341831 [Arabidopsis lyrata subsp. lyrata]                                             | 100  | 401  | 2.00E-33 | 401.0 | 65.0 | 79.0 | hypothetical protein ARALYDRAFT_341831                                                            | gbpln | Arabidopsis lyrata   | AT5G18460.1   Symbols:   Protein of Unknown Function (DUF239)   chr5:6123205-6126505 FORWARD LENGTH=430                                                                                                                                                                                                                                                                                                                                                       | 100  | 430 | 2.00E-28 | 430.0 | 52.0 | 69.0 |
| Rsa1.0_00732.1.g18734.t1 | #                                                                                                                                                                                                                                               | #    | #    | #        | #     | #    | #    | -                                                                                                 | ----  | ----                 | #                                                                                                                                                                                                                                                                                                                                                                                                                                                             | #    | #   | #        | #     | #    |      |
| Rsa1.0_00732.1.g18735.t1 | ref XP_002865784.1  hypothetical protein ARALYDRAFT_495092 [Arabidopsis lyrata subsp. lyrata] gi 297311619 gb EFH42043.1  hypothetical protein ARALYDRAFT_495092 [Arabidopsis lyrata subsp. lyrata]                                             | 565  | 565  | 0        | 100.0 | 99.3 | 99.6 | hypothetical protein ARALYDRAFT_495092                                                            | gbpln | Arabidopsis lyrata   | AT5G50320.1   Symbols:   ELO3, HAG3, HAC8, ELP3, AteLP3   radical SAM domain-containing protein / GCN5-related N-acetyltransferase (GNAT) family protein   chr5:20481200-20484811 REVERSE LENGTH=565                                                                                                                                                                                                                                                          | 565  | 565 | 0        | 100.0 | 98.9 | 99.5 |
| Rsa1.0_00732.1.g18736.t1 | gb AAF19546.1 AC007190.14 F23N19.13 [Arabidopsis thaliana]                                                                                                                                                                                      | 313  | 633  | 2.00E-60 | 202.2 | 40.3 | 50.8 | F23N19.13                                                                                         | gbpln | Arabidopsis thaliana | #                                                                                                                                                                                                                                                                                                                                                                                                                                                             | #    | #   | #        | #     | #    |      |
| Rsa1.0_00732.1.g18737.t1 | ref NP_187216.1  receptor like protein 32 [Arabidopsis thaliana] gi 6714445 gb AAF26132.1 AC011620.8 putative disease resistance protein [Arabidopsis thaliana] gi 332640751 gb AEE74272.1  receptor like protein 32 [Arabidopsis thaliana]     | 105  | 868  | 5.00E-32 | 826.7 | 67.6 | 76.2 | receptor like protein 32                                                                          | gbpln | Arabidopsis thaliana | AT3G05650.1   Symbols:   AtRLP32, RLP32   receptor like protein 32   chr3:1645884-1646490 REVERSE LENGTH=868                                                                                                                                                                                                                                                                                                                                                  | 105  | 868 | 7.00E-35 | 826.7 | 67.6 | 76.2 |
| Rsa1.0_00733.1.g18738.t1 | #                                                                                                                                                                                                                                               | #    | #    | #        | #     | #    | #    | -                                                                                                 | ----  | ----                 | #                                                                                                                                                                                                                                                                                                                                                                                                                                                             | #    | #   | #        | #     | #    |      |
| Rsa1.0_00733.1.g18739.t1 | dbj BAD95789.1  LSD-One-Like 1 [Brassica rapa]                                                                                                                                                                                                  | 155  | 155  | 1.00E-70 | 100.0 | 96.8 | 97.4 | LSD-One-Like 1                                                                                    | gbpln | Brassica rapa        | AT1G32540.3   Symbols:   LOL1   lsd one like 1   chr1:11768043-11769591 FORWARD LENGTH=154                                                                                                                                                                                                                                                                                                                                                                    | 155  | 154 | 1.00E-67 | 99.4  | 80.0 | 82.6 |
| Rsa1.0_00733.1.g18740.t2 | gb AAF67369.1  Hypothetical protein T15F17.a [Arabidopsis thaliana]                                                                                                                                                                             | 277  | 703  | 3.00E-31 | 253.8 | 27.8 | 40.1 | Hypothetical protein T15F17.a                                                                     | gbpln | Arabidopsis thaliana | #                                                                                                                                                                                                                                                                                                                                                                                                                                                             | #    | #   | #        | #     | #    |      |

|                          |                                                                                                                                                                                                                                                                                                                                                                                                                                                                                                                                                                                                                                                                                                                                                                                                                                                                                                                       |      |      |          |       |      |      |                                              |       |                      |                                                                                                                                                                                                                                                                                                                                                       |      |      |          |       |      |      |
|--------------------------|-----------------------------------------------------------------------------------------------------------------------------------------------------------------------------------------------------------------------------------------------------------------------------------------------------------------------------------------------------------------------------------------------------------------------------------------------------------------------------------------------------------------------------------------------------------------------------------------------------------------------------------------------------------------------------------------------------------------------------------------------------------------------------------------------------------------------------------------------------------------------------------------------------------------------|------|------|----------|-------|------|------|----------------------------------------------|-------|----------------------|-------------------------------------------------------------------------------------------------------------------------------------------------------------------------------------------------------------------------------------------------------------------------------------------------------------------------------------------------------|------|------|----------|-------|------|------|
| Rsa1.0_00733.1.g18741.t1 | gb AAG51783.1 AC079679.3 reverse transcriptase, putative; 16838-20266 [Arabidopsis thaliana]                                                                                                                                                                                                                                                                                                                                                                                                                                                                                                                                                                                                                                                                                                                                                                                                                          | 270  | 1142 | 3.00E-13 | 423.0 | 13.7 | 19.3 | reverse transcriptase, putative; 16838-20266 | gbpln | Arabidopsis thaliana | #                                                                                                                                                                                                                                                                                                                                                     | #    | #    | #        | #     | #    |      |
| Rsa1.0_00733.1.g18742.t1 | ref XP_002893492.1  hypothetical protein ARALYDRAFT_890322 [Arabidopsis lyrata subsp. lyrata] gi 29733934 gb EFH69751.1  hypothetical protein ARALYDRAFT_890322 [Arabidopsis lyrata subsp. lyrata]                                                                                                                                                                                                                                                                                                                                                                                                                                                                                                                                                                                                                                                                                                                    | 392  | 322  | 2.00E-43 | 82.1  | 29.3 | 39.5 | hypothetical protein ARALYDRAFT_890322       | gbpln | Arabidopsis lyrata   | AT1G61470.1   Symbols:   Polynucleotidyl transferase, ribonuclease H-like superfamily protein   chr1:22678185-22679021 FORWARD LENGTH=278                                                                                                                                                                                                             | 392  | 278  | 4.00E-37 | 70.9  | 23.5 | 29.6 |
| Rsa1.0_00733.1.g18743.t2 | gb AAG51783.1 AC079679.3 reverse transcriptase, putative; 16838-20266 [Arabidopsis thaliana]                                                                                                                                                                                                                                                                                                                                                                                                                                                                                                                                                                                                                                                                                                                                                                                                                          | 358  | 1142 | 1.00E-32 | 319.0 | 20.4 | 27.7 | reverse transcriptase, putative; 16838-20266 | gbpln | Arabidopsis thaliana | AT2G22440.1   Symbols:   BEST Arabidopsis thaliana protein match is: Ribonuclease H-like superfamily protein (TAIR:AT4G29090.1); Has 208 Blast hits to 191 proteins in 10 species: Archaea - 0; Bacteria - 0; Metazoa - 0; Fungi - 0; Plants - 208; Viruses - 0; Other Eukaryotes - 0 (source: NCBI BLink).   chr2:9528910-9529917 FORWARD LENGTH=256 | 358  | 256  | 2.00E-18 | 71.5  | 20.7 | 30.7 |
| Rsa1.0_00733.1.g18744.t1 | ref NP_564404.1  protein ABCI7 [Arabidopsis thaliana] gi 75180162 sp Q9LQK7.1 AB7L_ARATH RecName: Full=Protein ABCI7, chloroplastic; AltName: Full=ABC transporter I family member 7; Short=ABC transporter ABCI7; Short=AtABCI7; AltName: Full=Non-intrinsic ABC protein 6; AltName: Full=Plastid SufD-like protein; Flags: Precursor gi 8920626 gb AAF81348.1 AC007767_28 Contains an uncharacterized protein family (UPF0051) domain PF01458 [Arabidopsis thaliana] gi 11564672 gb ABJ17094.1  At1g32500 [Arabidopsis thaliana] gi 332193373 gb AEE31494.1  protein ABCI7 [Arabidopsis thaliana]                                                                                                                                                                                                                                                                                                                   | 626  | 475  | 0        | 75.9  | 62.3 | 66.0 | protein ABCI7                                | gbpln | Arabidopsis thaliana | AT1G32500.1   Symbols: ATNAP6, NAP6   non-intrinsic ABC protein 6   chr1:11750091-11751994 REVERSE LENGTH=475                                                                                                                                                                                                                                         | 626  | 475  | 0        | 75.9  | 62.3 | 66.0 |
| Rsa1.0_00733.1.g18745.t2 | gb EOA36424.1  hypothetical protein CARUB_v10010941mg [Capsella rubella]                                                                                                                                                                                                                                                                                                                                                                                                                                                                                                                                                                                                                                                                                                                                                                                                                                              | 1044 | 1045 | 0        | 100.1 | 92.9 | 96.7 | hypothetical protein CARUB_v10010941mg       | gbpln | Capsella rubella     | AT1G32490.1   Symbols: EMB2733, ESP3   RNA helicase family protein   chr1:11742356-11749286 REVERSE LENGTH=1044                                                                                                                                                                                                                                       | 1044 | 1044 | 0        | 100.0 | 92.1 | 96.4 |
| Rsa1.0_00733.1.g18746.t1 | ref NP_174525.1  glycine cleavage system H protein [Arabidopsis thaliana] gi 12644523 sp Q9LQL0.1 GC SH3_ARATH RecName: Full=Glycine cleavage system H protein 3, mitochondrial; Flags: Precursor gi 8920623 gb AAF81345.1 AC007767_25 Identical to a glycine cleavage system H-protein precursor from Arabidopsis thaliana gb P25855. It contains a glycine cleavage H-protein domain PF01597. ESTs gb R90208, gb A1994794, gb AA605324, gb N38240, gb AV533336, gb AV534187, gb AA597419 and gb AA597515 come from this gene [Arabidopsis thaliana] gi 12083338 gb AAG48828.1 AF332465.1 putative glycine cleavage system H protein precursor [Arabidopsis thaliana] gi 14326572 gb AAK60330.1 AF385740.1 At1g32470/F5D14.10 [Arabidopsis thaliana] gi 18700238 gb AAL7729.1  At1g32470/F5D14.10 [Arabidopsis thaliana] gi 332193369 gb AEE31490.1  glycine decarboxylase complex protein H3 [Arabidopsis thaliana] | 166  | 166  | 2.00E-79 | 100.0 | 94.6 | 97.6 | glycine cleavage system H protein            | gbpln | Arabidopsis thaliana | AT1G32470.1   Symbols:   Single hybrid motif superfamily protein   chr1:11739479-11740246 REVERSE LENGTH=166                                                                                                                                                                                                                                          | 166  | 166  | 7.00E-82 | 100.0 | 94.6 | 97.6 |

|                          |                                                                                                                                                                                                                                                                                                                                                                                                                                                                                                                                                                                                                                                                                                                                                                                                                                                                                                                                                                                                                     |      |      |          |       |      |      |                                          |       |                      |                                                                                                                                                                                                                                                                                                                                                                                    |      |      |          |       |      |      |
|--------------------------|---------------------------------------------------------------------------------------------------------------------------------------------------------------------------------------------------------------------------------------------------------------------------------------------------------------------------------------------------------------------------------------------------------------------------------------------------------------------------------------------------------------------------------------------------------------------------------------------------------------------------------------------------------------------------------------------------------------------------------------------------------------------------------------------------------------------------------------------------------------------------------------------------------------------------------------------------------------------------------------------------------------------|------|------|----------|-------|------|------|------------------------------------------|-------|----------------------|------------------------------------------------------------------------------------------------------------------------------------------------------------------------------------------------------------------------------------------------------------------------------------------------------------------------------------------------------------------------------------|------|------|----------|-------|------|------|
| Rsa1.0_00733.1.g18747.t1 | ref[NP_564403.1] uncharacterized protein [Arabidopsis thaliana] gi 8920622 gb AAF81344.1 AC007767_24 EST gb AV442603 comes from this gene [Arabidopsis thaliana] gi 12247989 gb AG50086.1 AF334380.1 unknown protein [Arabidopsis thaliana] gi 19310544 gb AAL85005.1  unknown protein [Arabidopsis thaliana] gi 21280909 gb AAM45075.1  unknown protein [Arabidopsis thaliana] gi 21618055 gb AAM67105.1  unknown [Arabidopsis thaliana] gi 110743194 dbj BAE99488.1  hypothetical protein [Arabidopsis thaliana] gi 332193368 gb AEE31489.1  uncharacterized protein AT1G32460 [Arabidopsis thaliana] ref[XP_002890178.1] transcriptional factor B3 family protein [Arabidopsis lyrata subsp. lyrata] gi 297336020 gb EFH66437.1  transcriptional factor B3 family protein [Arabidopsis lyrata subsp. lyrata] ref[XP_002890180.1] hypothetical protein ARALYDRAFT_471863 [Arabidopsis lyrata subsp. lyrata] gi 297336022 gb EFH66439.1  hypothetical protein ARALYDRAFT_471863 [Arabidopsis lyrata subsp. lyrata] | 87   | 92   | 9.00E-22 | 105.7 | 71.3 | 81.6 | uncharacterized protein                  | gbpln | Arabidopsis thaliana | AT1G32460.1   Symbols:   unknown protein; Has 19 Blast hits to 19 proteins in 8 species: Archae - 0; Bacteria - 0; Metazoa - 0; Fungi - 0; Plants - 19; Viruses - 0; Other Eukaryotes - 0 (source: NCBI BLink).   chr1:11738859-11739137 FORWARD LENGTH=92                                                                                                                         | 87   | 92   | 2.00E-24 | 105.7 | 71.3 | 81.6 |
| Rsa1.0_00734.1.g18748.t9 | ref[XP_002890178.1] transcriptional factor B3 family protein [Arabidopsis lyrata subsp. lyrata] gi 297336020 gb EFH66437.1  transcriptional factor B3 family protein [Arabidopsis lyrata subsp. lyrata] ref[XP_002890180.1] hypothetical protein ARALYDRAFT_471863 [Arabidopsis lyrata subsp. lyrata] gi 297336022 gb EFH66439.1  hypothetical protein ARALYDRAFT_471863 [Arabidopsis lyrata subsp. lyrata]                                                                                                                                                                                                                                                                                                                                                                                                                                                                                                                                                                                                         | 127  | 133  | 3.00E-42 | 104.7 | 66.9 | 76.4 | transcriptional factor B3 family protein | gbpln | Arabidopsis lyrata   | AT1G16640.1   Symbols:   AP2/B3-like transcriptional factor family protein   chr1:5686763-5687533 FORWARD LENGTH=134                                                                                                                                                                                                                                                               | 127  | 134  | 3.00E-44 | 105.5 | 64.6 | 74.8 |
| Rsa1.0_00734.1.g18749.t1 | ref[XP_002890180.1] hypothetical protein ARALYDRAFT_471863 [Arabidopsis lyrata subsp. lyrata] gi 297336022 gb EFH66439.1  hypothetical protein ARALYDRAFT_471863 [Arabidopsis lyrata subsp. lyrata]                                                                                                                                                                                                                                                                                                                                                                                                                                                                                                                                                                                                                                                                                                                                                                                                                 | 391  | 391  | 0        | 100.0 | 85.7 | 93.6 | hypothetical protein ARALYDRAFT_471863   | gbpln | Arabidopsis lyrata   | AT1G16670.1   Symbols:   Protein kinase superfamily protein   chr1:5697846-5699492 FORWARD LENGTH=390                                                                                                                                                                                                                                                                              | 391  | 390  | 0        | 99.7  | 85.2 | 92.3 |
| Rsa1.0_00734.1.g18750.t2 | gb EOA40059.1  hypothetical protein CARUB_v10008751mg [Capsella rubella] ref[XP_002890184.1] predicted protein [Arabidopsis lyrata subsp. lyrata] gi 297336026 gb EFH66443.1  predicted protein [Arabidopsis lyrata subsp. lyrata]                                                                                                                                                                                                                                                                                                                                                                                                                                                                                                                                                                                                                                                                                                                                                                                  | 803  | 554  | 0        | 69.0  | 59.4 | 62.3 | hypothetical protein CARUB_v10008751mg   | gbpln | Capsella rubella     | AT1G16680.1   Symbols:   Chaperone DnaJ-domain superfamily protein   chr1:5702930-5705537 FORWARD LENGTH=554                                                                                                                                                                                                                                                                       | 803  | 554  | 0        | 69.0  | 57.8 | 61.1 |
| Rsa1.0_00734.1.g18751.t1 | ref[XP_002890184.1] predicted protein [Arabidopsis lyrata subsp. lyrata] gi 297336026 gb EFH66443.1  predicted protein [Arabidopsis lyrata subsp. lyrata]                                                                                                                                                                                                                                                                                                                                                                                                                                                                                                                                                                                                                                                                                                                                                                                                                                                           | 2056 | 1685 | 0        | 82.0  | 45.4 | 49.8 | predicted protein                        | gbpln | Arabidopsis lyrata   | AT1G16710.2   Symbols:   HAC12   histone acetyltransferase of the CBP family 12   chr1:5714692-5721782 FORWARD LENGTH=1677                                                                                                                                                                                                                                                         | 2056 | 1677 | 0        | 81.6  | 45.1 | 49.4 |
| Rsa1.0_00734.1.g18752.t1 | ref[NP_173118.1] Ribosomal protein L20 [Arabidopsis thaliana] gi 21554397 gb AAM63502.1  ribosomal protein L20, putative [Arabidopsis thaliana] gi 88011169 gb ABD38912.1  At1g16740 [Arabidopsis thaliana] gi 332191370 gb AEE29491.1  Ribosomal protein L20 [Arabidopsis thaliana] gi 482574488 gb EOA38875.1  hypothetical protein CARUB_v10010647mg [Capsella rubella]                                                                                                                                                                                                                                                                                                                                                                                                                                                                                                                                                                                                                                          | 163  | 126  | 9.00E-60 | 77.3  | 75.5 | 75.5 | Ribosomal protein L20                    | gbpln | Arabidopsis thaliana | AT1G16740.1   Symbols:   Ribosomal protein L20   chr1:5727773-5728950 FORWARD LENGTH=126                                                                                                                                                                                                                                                                                           | 163  | 126  | 3.00E-62 | 77.3  | 75.5 | 75.5 |
| Rsa1.0_00734.1.g18753.t1 | ref[XP_002890187.1] kinase family protein [Arabidopsis lyrata subsp. lyrata] gi 297336029 gb EFH66446.1  kinase family protein [Arabidopsis lyrata subsp. lyrata]                                                                                                                                                                                                                                                                                                                                                                                                                                                                                                                                                                                                                                                                                                                                                                                                                                                   | 768  | 757  | 0        | 98.6  | 84.2 | 89.7 | kinase family protein                    | gbpln | Arabidopsis lyrata   | AT1G16760.1   Symbols:   Protein kinase protein with adenine nucleotide alpha hydrolases-like domain   chr1:5734234-5737307 FORWARD LENGTH=758                                                                                                                                                                                                                                     | 768  | 758  | 0        | 98.7  | 82.4 | 89.2 |
| Rsa1.0_00734.1.g18754.t1 | gb EOA36658.1  hypothetical protein CARUB_v10011947mg [Capsella rubella] ref[XP_002890187.1] kinase family protein [Arabidopsis lyrata subsp. lyrata] gi 297336029 gb EFH66446.1  kinase family protein [Arabidopsis lyrata subsp. lyrata]                                                                                                                                                                                                                                                                                                                                                                                                                                                                                                                                                                                                                                                                                                                                                                          | 149  | 144  | 1.00E-56 | 96.6  | 79.2 | 84.6 | hypothetical protein CARUB_v10011947mg   | gbpln | Capsella rubella     | AT1G16790.1   Symbols:   ribosomal protein-related   chr1:5744638-5745072 FORWARD LENGTH=144                                                                                                                                                                                                                                                                                       | 149  | 144  | 3.00E-56 | 96.6  | 77.9 | 84.6 |
| Rsa1.0_00734.1.g18755.t1 | gb EOA36775.1  hypothetical protein CARUB_v10012679mg [Capsella rubella] ref[XP_002890187.1] kinase family protein [Arabidopsis lyrata subsp. lyrata] gi 297336029 gb EFH66446.1  kinase family protein [Arabidopsis lyrata subsp. lyrata]                                                                                                                                                                                                                                                                                                                                                                                                                                                                                                                                                                                                                                                                                                                                                                          | 137  | 141  | 3.00E-52 | 102.9 | 89.8 | 93.4 | hypothetical protein CARUB_v10012679mg   | gbpln | Capsella rubella     | AT1G16810.2   Symbols:   unknown protein; CONTAINS InterPro DOMAIN/s. Protein of unknown function DUF1754, eukaryotic (InterPro:IPR013865); Has 35333 Blast hits to 34131 proteins in 2444 species: Archae - 798; Bacteria - 22429; Metazoa - 974; Fungi - 991; Plants - 531; Viruses - 0; Other Eukaryotes - 9610 (source: NCBI BLink).   chr1:5756150-5756694 FORWARD LENGTH=144 | 137  | 144  | 1.00E-53 | 105.1 | 89.1 | 92.0 |
| Rsa1.0_00734.1.g18756.t1 | ref[NP_001154345.1] reticulon-like protein [Arabidopsis thaliana] gi 229891661 sp POC941.1 RTNLU_ARA TH RecName: Full=Reticulon-like protein B23; Short=ATRNLB23 gi 332191382 gb AEE29503.1  reticulon-like protein B23 [Arabidopsis thaliana]                                                                                                                                                                                                                                                                                                                                                                                                                                                                                                                                                                                                                                                                                                                                                                      | 182  | 155  | 1.00E-17 | 85.2  | 35.7 | 40.1 | reticulon-like protein                   | gbpln | Arabidopsis thaliana | AT1G16825.1   Symbols:   Reticulon family protein   chr1:5758877-5760340 FORWARD LENGTH=155                                                                                                                                                                                                                                                                                        | 182  | 155  | 4.00E-20 | 85.2  | 35.7 | 40.1 |
| Rsa1.0_00734.1.g18757.t1 | gb EOA36834.1  hypothetical protein CARUB_v10008619mg [Capsella rubella] ref[NP_001154345.1] reticulon-like protein [Arabidopsis thaliana] gi 229891661 sp POC941.1 RTNLU_ARA TH RecName: Full=Reticulon-like protein B23; Short=ATRNLB23 gi 332191382 gb AEE29503.1  reticulon-like protein B23 [Arabidopsis thaliana]                                                                                                                                                                                                                                                                                                                                                                                                                                                                                                                                                                                                                                                                                             | 606  | 607  | 0        | 100.2 | 67.0 | 79.2 | hypothetical protein CARUB_v10008619mg   | gbpln | Capsella rubella     | AT1G16830.1   Symbols:   Pentatricopeptide repeat (PPR) superfamily protein   chr1:5760793-5762619 FORWARD LENGTH=608                                                                                                                                                                                                                                                              | 606  | 608  | 0        | 100.3 | 68.0 | 79.7 |



|                          |                                                                                                                                                                                                                                                                                                                                                                                                                                                                                                                                                                                                                                                        |     |     |           |       |      |      |                                                      |       |                      |                                                                                                                                                                                                                                                                                                                                            |     |     |           |       |      |      |
|--------------------------|--------------------------------------------------------------------------------------------------------------------------------------------------------------------------------------------------------------------------------------------------------------------------------------------------------------------------------------------------------------------------------------------------------------------------------------------------------------------------------------------------------------------------------------------------------------------------------------------------------------------------------------------------------|-----|-----|-----------|-------|------|------|------------------------------------------------------|-------|----------------------|--------------------------------------------------------------------------------------------------------------------------------------------------------------------------------------------------------------------------------------------------------------------------------------------------------------------------------------------|-----|-----|-----------|-------|------|------|
| Rsa1.0_00734.1.g18758.t1 | ref NP_564007.1  uncharacterized protein [Arabidopsis thaliana]   gi 30685032 ref NP_849677.1  uncharacterized protein [Arabidopsis thaliana]   gi 42571511 ref NP_973846.1  uncharacterized protein [Arabidopsis thaliana]   gi 9802780 gb AAF99849.1 AC051629_16 Unknown protein [Arabidopsis thaliana]   gi 15450363 gb AAK96475.1  At1g16840/F17F16.27 [Arabidopsis thaliana]   gi 332191384 gb AEE29505.1  uncharacterized protein AT1G16840 [Arabidopsis thaliana]   gi 332191386 gb AEE29507.1  uncharacterized protein AT1G16840 [Arabidopsis thaliana]   gi 332191387 gb AEE29508.1  uncharacterized protein AT1G16840 [Arabidopsis thaliana] | 316 | 161 | 1.00E-55  | 50.9  | 33.9 | 36.4 | uncharacterized protein                              | gbpln | Arabidopsis thaliana | AT1G16840.1   Symbols:   unknown protein; BEST Arabidopsis thaliana protein match is: unknown protein (TAIR:AT1G78890.1). Has 71 Blast hits to 71 proteins in 12 species: Archae - 0; Bacteria - 0; Metazoa - 0; Fungi - 0; Plants - 71; Viruses - 0; Other Eukaryotes - 0 (source: NCBI BLink).   chr1:5763111-5763984 REVERSE LENGTH=161 | 316 | 161 | 3.00E-58  | 50.9  | 33.9 | 36.4 |
| Rsa1.0_00734.1.g18759.t1 | gb EOA40305.1  hypothetical protein CARUB_v10009033mg [Capsella rubella]                                                                                                                                                                                                                                                                                                                                                                                                                                                                                                                                                                               | 469 | 474 | 0         | 101.1 | 89.8 | 95.1 | hypothetical protein CARUB_v10009033mg               | gbpln | Capsella rubella     | AT1G16880.1   Symbols:   Ubiquitin-specific protease family C19-related protein   chr1:5768280-5770183 FORWARD LENGTH=474                                                                                                                                                                                                                  | 469 | 474 | 0         | 101.1 | 89.1 | 94.5 |
| Rsa1.0_00734.1.g18760.t1 | ref NP_173131.1  mitochondrial 28S ribosomal protein S29-like protein [Arabidopsis thaliana]   gi 17064866 gb AAL32587.1  Unknown protein [Arabidopsis thaliana]   gi 20259906 gb AAM13300.1  unknown protein [Arabidopsis thaliana]   gi 332191391 gb AEE29512.1  mitochondrial 28S ribosomal protein S29-like protein [Arabidopsis thaliana]                                                                                                                                                                                                                                                                                                         | 463 | 480 | 0         | 103.7 | 86.4 | 92.9 | mitochondrial 28S ribosomal protein S29-like protein | gbpln | Arabidopsis thaliana | AT1G16870.1   Symbols:   mitochondrial 28S ribosomal protein S29-related   chr1:5770964-5773157 REVERSE LENGTH=480                                                                                                                                                                                                                         | 463 | 480 | 0         | 103.7 | 86.4 | 92.9 |
| Rsa1.0_00734.1.g18761.t1 | ref XP_002890192.1  hypothetical protein ARALYDRAFT_471888 [Arabidopsis lyrata subsp. lyrata]   gi 297336034 gb EFH66451.1  hypothetical protein ARALYDRAFT_471888 [Arabidopsis lyrata subsp. lyrata]                                                                                                                                                                                                                                                                                                                                                                                                                                                  | 288 | 290 | 1.00E-149 | 100.7 | 92.0 | 96.5 | hypothetical protein ARALYDRAFT_471888               | gbpln | Arabidopsis lyrata   | AT1G16880.1   Symbols:   uridylyltransferase-related   chr1:5773796-5776125 FORWARD LENGTH=290                                                                                                                                                                                                                                             | 288 | 290 | 1.00E-151 | 100.7 | 91.0 | 96.5 |
| Rsa1.0_00734.1.g18762.t1 | ref NP_173134.2  alpha-1,2-mannosyltransferase [Arabidopsis thaliana]   gi 75173357 sp Q9FZ49.1 ALG9_ARATH RecName: Full=Dol-P-Man:Man(6)GlcNAc(2)-PP-Dol alpha-1,2-mannosyltransferase; AltName: Full=Alpha-1,2-mannosyltransferase ALG9; AltName: Full=Asparagine-linked glycosylation protein 9; AltName: Full=Dol-P-Man:Man(6)GlcNAc(2)-PP-Dol alpha-1,2-mannosyltransferase [Arabidopsis thaliana]                                                                                                                                                                                                                                                | 702 | 570 | 0         | 81.2  | 74.1 | 77.2 | alpha-1,2-mannosyltransferase                        | gbpln | Arabidopsis thaliana | AT1G16900.1   Symbols:   Alg9-like mannosyltransferase family   chr1:5779262-5782303 REVERSE LENGTH=570                                                                                                                                                                                                                                    | 702 | 570 | 0         | 81.2  | 74.1 | 77.2 |
| Rsa1.0_00734.1.g18763.t1 | gb EOA38457.1  hypothetical protein CARUB_v10010133mg, partial [Capsella rubella]                                                                                                                                                                                                                                                                                                                                                                                                                                                                                                                                                                      | 232 | 243 | 1.00E-118 | 104.7 | 91.4 | 92.2 | hypothetical protein CARUB_v10010133mg, partial      | gbpln | Capsella rubella     | AT1G16920.1   Symbols: RAB11, ATRABA1B, RABA1b   RAB GTPase homolog A1B   chr1:5787489-5789147 REVERSE LENGTH=216                                                                                                                                                                                                                          | 232 | 216 | 1.00E-120 | 93.1  | 90.9 | 92.2 |
| Rsa1.0_00734.1.g18764.t1 | ref NP_173137.1  F-box/RNI-like/FBD-like domains-containing protein [Arabidopsis thaliana]   gi 75263252 sp Q9FZ52.1 FDL3_ARATH RecName: Full=F-box/FBD/LRR-repeat protein At1g16930   gi 9802769 gb AAF99838.1 AC051629_5 Hypothetical protein [Arabidopsis thaliana]   gi 332191402 gb AEE29523.1  F-box/RNI-like/FBD-like domains-containing protein [Arabidopsis thaliana]                                                                                                                                                                                                                                                                         | 178 | 449 | 4.00E-20  | 252.2 | 37.1 | 43.3 | F-box/RNI-like/FBD-like domains-containing protein   | gbpln | Arabidopsis thaliana | AT1G16930.1   Symbols:   F-box/RNI-like/FBD-like domains-containing protein   chr1:5789987-5791534 FORWARD LENGTH=449                                                                                                                                                                                                                      | 178 | 449 | 2.00E-22  | 252.2 | 37.1 | 43.3 |
| Rsa1.0_00735.1.g18765.t5 | #                                                                                                                                                                                                                                                                                                                                                                                                                                                                                                                                                                                                                                                      | #   | #   | #         | #     | #    | -    | ---                                                  | ---   | #                    | #                                                                                                                                                                                                                                                                                                                                          | #   | #   | #         | #     | #    |      |

|                          |                                                                                                                                                                                                                                                                                                                                                                                                                                          |      |      |           |       |      |      |                                                                                |       |                      |                                                                                                                                                                                                                                                                                                                                                                                                                                                                                                                                                                                                   |      |      |           |       |      |      |
|--------------------------|------------------------------------------------------------------------------------------------------------------------------------------------------------------------------------------------------------------------------------------------------------------------------------------------------------------------------------------------------------------------------------------------------------------------------------------|------|------|-----------|-------|------|------|--------------------------------------------------------------------------------|-------|----------------------|---------------------------------------------------------------------------------------------------------------------------------------------------------------------------------------------------------------------------------------------------------------------------------------------------------------------------------------------------------------------------------------------------------------------------------------------------------------------------------------------------------------------------------------------------------------------------------------------------|------|------|-----------|-------|------|------|
| Rsa1.0_00735.1.g18766.t1 | refXP_002877589.1   zinc finger family protein [Arabidopsis lyrata subsp. lyrata] gi 297323427 gb EFH53848.1   zinc finger family protein [Arabidopsis lyrata subsp. lyrata]                                                                                                                                                                                                                                                             | 402  | 358  | 1.00E-180 | 89.1  | 82.1 | 84.8 | zinc finger family protein                                                     | gbpln | Arabidopsis lyrata   | AT3G47990.1   Symbols: SIS3   SUGAR-INSENSITIVE 3   chr3:17713367-17716051 REVERSE LENGTH=358                                                                                                                                                                                                                                                                                                                                                                                                                                                                                                     | 402  | 358  | 1.00E-180 | 89.1  | 81.1 | 84.6 |
| Rsa1.0_00735.1.g18767.t1 | refXP_002875873.1   integral membrane HPP family protein [Arabidopsis lyrata subsp. lyrata] gi 297321711 gb EFH52132.1   integral membrane HPP family protein [Arabidopsis lyrata subsp. lyrata]                                                                                                                                                                                                                                         | 284  | 252  | 6.00E-78  | 88.7  | 55.6 | 63.7 | integral membrane HPP family protein                                           | gbpln | Arabidopsis lyrata   | AT3G47980.1   Symbols:   Integral membrane HPP family protein   chr3:17710477-17712631 FORWARD LENGTH=252                                                                                                                                                                                                                                                                                                                                                                                                                                                                                         | 284  | 252  | 9.00E-76  | 88.7  | 58.1 | 63.7 |
| Rsa1.0_00735.1.g18768.t1 | gb EOA16415.1   hypothetical protein CARUB_v10004569mg [Capsella rubella]                                                                                                                                                                                                                                                                                                                                                                | 128  | 530  | 1.00E-11  | 414.1 | 28.1 | 37.5 | hypothetical protein CARUB_v10004569mg                                         | gbpln | Capsella rubella     | AT5G41480.1   Symbols: EMB9, GLA1, ATDFA, DFA   Foly polyglutamate synthetase family protein   chr5:16595967-16598523 FORWARD LENGTH=530                                                                                                                                                                                                                                                                                                                                                                                                                                                          | 128  | 530  | 6.00E-14  | 414.1 | 28.9 | 37.5 |
| Rsa1.0_00735.1.g18769.t5 | gb AAC28189.1   contains similarity to Arabidopsis thaliana retrotransposon Athila (GB:X81801) [Arabidopsis thaliana]                                                                                                                                                                                                                                                                                                                    | 327  | 940  | 5.00E-11  | 287.5 | 10.1 | 17.7 | contains similarity to Arabidopsis thaliana retrotransposon Athila (GB:X81801) | gbpln | Arabidopsis thaliana | #                                                                                                                                                                                                                                                                                                                                                                                                                                                                                                                                                                                                 | #    | #    | #         | #     | #    | #    |
| Rsa1.0_00735.1.g18770.t1 | dbj BAJ34570.1   unnamed protein product [Thellungiella halophila]                                                                                                                                                                                                                                                                                                                                                                       | 153  | 623  | 2.00E-59  | 407.2 | 74.5 | 83.7 | unnamed protein product                                                        | ----  | ----                 | AT3G47960.1   Symbols:   Major facilitator superfamily protein   chr3:17698126-17700771 REVERSE LENGTH=636                                                                                                                                                                                                                                                                                                                                                                                                                                                                                        | 153  | 636  | 5.00E-60  | 415.7 | 73.9 | 83.0 |
| Rsa1.0_00735.1.g18771.t1 | gb EOA24281.1   hypothetical protein CARUB_v10017521mg [Capsella rubella]                                                                                                                                                                                                                                                                                                                                                                | 341  | 356  | 1.00E-151 | 104.4 | 85.6 | 92.4 | hypothetical protein CARUB_v10017521mg                                         | gbpln | Capsella rubella     | AT3G47940.1   Symbols:   DNAJ heat shock family protein   chr3:17688232-17689402 REVERSE LENGTH=350                                                                                                                                                                                                                                                                                                                                                                                                                                                                                               | 341  | 350  | 1.00E-153 | 102.6 | 81.8 | 89.7 |
| Rsa1.0_00735.1.g18772.t1 | ref NP_190372.3   Ubiquitin carboxyl-terminal hydrolase-related protein [Arabidopsis thaliana] gi 332644822 gb AE78343.1   Ubiquitin carboxyl-terminal hydrolase-related protein [Arabidopsis thaliana]                                                                                                                                                                                                                                  | 1449 | 1568 | 0         | 108.2 | 49.6 | 54.8 | Ubiquitin carboxyl-terminal hydrolase-related protein                          | gbpln | Arabidopsis thaliana | AT3G47890.1   Symbols:   Ubiquitin carboxyl-terminal hydrolase-related protein   chr3:17667172-17673530 REVERSE LENGTH=1568                                                                                                                                                                                                                                                                                                                                                                                                                                                                       | 1449 | 1568 | 0         | 108.2 | 49.6 | 54.8 |
| Rsa1.0_00735.1.g18773.t1 | gb ABD65035.1   hypothetical protein 26.t00052 [Brassica oleracea]                                                                                                                                                                                                                                                                                                                                                                       | 1079 | 695  | 1.00E-165 | 64.4  | 33.8 | 41.4 | hypothetical protein 26.t00052                                                 | gbpln | Brassica oleracea    | AT1G51172.1   Symbols:   unknown protein; FUNCTIONS IN: molecular_function unknown; INVOLVED IN: biological_process unknown; LOCATED IN: cellular_component unknown; CONTAINS InterPro DOMAIN/s: Protein of unknown function: DUF601 (InterPro:IPR006736); BEST Arabidopsis thaliana protein match is: Protein of unknown function, DUF601 (TAIR:AT1G46896.1); Has 1849 Blast hits to 1554 proteins in 272 species: Archae - 15; Bacteria - 116; Metazoa - 677; Fungi - 267; Plants - 154; Viruses - 11; Other Eukaryotes - 609 (source: NCBI BLINK).   chr1:18963205-18965571 FORWARD LENGTH=681 | 1079 | 681  | 1.00E-12  | 63.1  | 3.3  | 5.1  |
| Rsa1.0_00735.1.g18774.t1 | gb EOA25068.1   hypothetical protein CARUB_v10018376mg [Capsella rubella]                                                                                                                                                                                                                                                                                                                                                                | 328  | 364  | 1.00E-125 | 111.0 | 74.1 | 84.8 | hypothetical protein CARUB_v10018376mg                                         | gbpln | Capsella rubella     | AT3G47870.1   Symbols: SCP, LBD27   LOB domain-containing protein 27   chr3:17660021-17661007 REVERSE LENGTH=328                                                                                                                                                                                                                                                                                                                                                                                                                                                                                  | 328  | 328  | 1.00E-100 | 100.0 | 64.3 | 72.0 |
| Rsa1.0_00736.1.g18775.t3 | dbj BAJ34286.1   unnamed protein product [Thellungiella halophila]                                                                                                                                                                                                                                                                                                                                                                       | 161  | 358  | 7.00E-19  | 222.4 | 37.9 | 44.1 | unnamed protein product                                                        | ----  | ----                 | AT5G60360.1   Symbols: SAG2, AALP, ALP   aleurain-like protease   chr5:24280044-24282152 FORWARD LENGTH=358                                                                                                                                                                                                                                                                                                                                                                                                                                                                                       | 161  | 358  | 4.00E-18  | 222.4 | 30.4 | 36.6 |
| Rsa1.0_00736.1.g18776.t1 | gb EOA31566.1   hypothetical protein CARUB_v10014758mg [Capsella rubella]                                                                                                                                                                                                                                                                                                                                                                | 177  | 177  | 3.00E-76  | 100.0 | 78.0 | 92.7 | hypothetical protein CARUB_v10014758mg                                         | gbpln | Capsella rubella     | AT5G60340.1   Symbols:   P-loop containing nucleoside triphosphate hydrolases superfamily protein   chr5:24275098-24275891 REVERSE LENGTH=178                                                                                                                                                                                                                                                                                                                                                                                                                                                     | 177  | 178  | 2.00E-75  | 100.6 | 72.9 | 87.6 |
| Rsa1.0_00736.1.g18777.t1 | gb EOA15011.1   hypothetical protein CARUB_v10028361mg [Capsella rubella]                                                                                                                                                                                                                                                                                                                                                                | 165  | 166  | 7.00E-77  | 100.6 | 85.5 | 90.3 | hypothetical protein CARUB_v10028361mg                                         | gbpln | Capsella rubella     | AT5G60335.1   Symbols:   Thioesterase superfamily protein   chr5:24273879-24274551 REVERSE LENGTH=166                                                                                                                                                                                                                                                                                                                                                                                                                                                                                             | 165  | 166  | 9.00E-77  | 100.6 | 84.2 | 89.1 |
| Rsa1.0_00736.1.g18778.t1 | ref NP_179007.1   cysteine/histidine-rich C1 domain-containing protein [Arabidopsis thaliana] gi 20197610 gb AAM15153.1   hypothetical protein [Arabidopsis thaliana] gi 29725844 gb AAO89210.1   hypothetical protein [Arabidopsis thaliana] gi 60547703 gb AAX23815.1   hypothetical protein At2g13900 [Arabidopsis thaliana] gi 330251172 gb AEC06266.1   cysteine/histidine-rich C1 domain-containing protein [Arabidopsis thaliana] | 702  | 661  | 0         | 94.2  | 52.4 | 66.2 | cysteine/histidine-rich C1 domain-containing protein                           | gbpln | Arabidopsis thaliana | AT2G13900.1   Symbols:   Cysteine/Histidine-rich C1 domain family protein   chr2:5833102-5835087 FORWARD LENGTH=661                                                                                                                                                                                                                                                                                                                                                                                                                                                                               | 702  | 661  | 0         | 94.2  | 52.4 | 66.2 |
| Rsa1.0_00736.1.g18779.t2 | gb ABF18679.1   cysteine protease [Medicago sativa]                                                                                                                                                                                                                                                                                                                                                                                      | 338  | 350  | 4.00E-54  | 103.6 | 34.0 | 45.9 | cysteine protease                                                              | gbpln | Medicago sativa      | AT5G60360.2   Symbols: AALP, ALP   aleurain-like protease   chr5:24280044-24282152 FORWARD LENGTH=357                                                                                                                                                                                                                                                                                                                                                                                                                                                                                             | 338  | 357  | 3.00E-56  | 105.6 | 34.0 | 44.1 |

|                          |                                                                                                                                                                                                                                                                                                                                                                                                                                                                                                                                                                                                                                                                                                                                                                                                                                                                                                                                                                                                                                                                                                                                                                                                                                                                                         |      |      |           |       |      |      |                                                |       |                      |                                                                                                                               |      |     |           |       |      |      |
|--------------------------|-----------------------------------------------------------------------------------------------------------------------------------------------------------------------------------------------------------------------------------------------------------------------------------------------------------------------------------------------------------------------------------------------------------------------------------------------------------------------------------------------------------------------------------------------------------------------------------------------------------------------------------------------------------------------------------------------------------------------------------------------------------------------------------------------------------------------------------------------------------------------------------------------------------------------------------------------------------------------------------------------------------------------------------------------------------------------------------------------------------------------------------------------------------------------------------------------------------------------------------------------------------------------------------------|------|------|-----------|-------|------|------|------------------------------------------------|-------|----------------------|-------------------------------------------------------------------------------------------------------------------------------|------|-----|-----------|-------|------|------|
| Rsa1.0_00736.1.g18780.t1 | dbj BAJ34286.1  unnamed protein product [Theilungiella halophila]                                                                                                                                                                                                                                                                                                                                                                                                                                                                                                                                                                                                                                                                                                                                                                                                                                                                                                                                                                                                                                                                                                                                                                                                                       | 343  | 358  | 3.00E-36  | 104.4 | 23.0 | 25.4 | unnamed protein product                        | ----  | ----                 | AT3G45310.2   Symbols:   Cysteine proteinases superfamily protein   chr3:16628704-16630473 REVERSE LENGTH=357                 | 343  | 357 | 5.00E-31  | 104.1 | 19.0 | 24.8 |
| Rsa1.0_00736.1.g18781.t1 | ref NP_200840.1  concanavalin A-like lectin kinase-like protein [Arabidopsis thaliana]<br>gi 75333953 sp Q9FJ14.1 LK111_ARATH RecName: Full=Putative L-type lectin-domain containing receptor kinase I.11; Short=LecRK-L1.1; Flags: Precursor gi 10177723 dbj BAB10969.1  receptor-like protein kinase [Arabidopsis thaliana] gi 332009925 gb AED97308.1  concanavalin A-like lectin kinase-like protein [Arabidopsis thaliana] emb CAB39638.1  RNA-directed DNA polymerase-like protein [Arabidopsis thaliana] gi 7267666 emb CAB78094.1  RNA-directed DNA polymerase-like protein [Arabidopsis thaliana]                                                                                                                                                                                                                                                                                                                                                                                                                                                                                                                                                                                                                                                                              | 702  | 675  | 0         | 96.2  | 77.9 | 84.2 | concanavalin A-like lectin kinase-like protein | gbpln | Arabidopsis thaliana | AT5G60320.1   Symbols:   Concanavalin A-like lectin protein kinase family protein   chr5:24270808-24272835 FORWARD LENGTH=675 | 702  | 675 | 0         | 96.2  | 77.9 | 84.2 |
| Rsa1.0_00736.1.g18782.t2 | ref NP_001078773.1  concanavalin A-like lectin kinase-like protein [Arabidopsis thaliana] gi 317411743 sp Q9LSR8.2 LRK19_ARATH RecName: Full=L-type lectin-domain containing receptor kinase I.9; Short=LecRK-I.9; Short=LecRK7.9; Flags: Precursor gi 332009923 gb AED97306.1  concanavalin A-like lectin kinase-like protein [Arabidopsis thaliana] ref NP_200835.1  concanavalin A-like lectin kinase-like protein [Arabidopsis thaliana] gi 75335418 sp Q9LSS0.1 LRK17_ARATH RecName: Full=L-type lectin-domain containing receptor kinase L.7; Short=LecRK-L.7; Flags: Precursor gi 8885577 dbj BAA97507.1  receptor-like protein kinase [Arabidopsis thaliana] gi 51969170 dbj BAD43277.1  receptor like protein kinase [Arabidopsis thaliana] gi 332009918 gb AED97301.1  concanavalin A-like lectin kinase-like protein [Arabidopsis thaliana] ref XP_002864676.1  lectin protein kinase family protein [Arabidopsis lyrata subsp. lyrata] gi 297310511 gb EFH40935.1  lectin protein kinase family protein [Arabidopsis lyrata subsp. lyrata] ref NP_200833.1  C3H4 type zinc finger protein [Arabidopsis thaliana] gi 8885575 dbj BAA97505.1  unnamed protein product [Arabidopsis thaliana] gi 332009916 gb AED97299.1  C3H4 type zinc finger protein [Arabidopsis thaliana] | 1907 | 1274 | 0         | 66.8  | 31.3 | 43.0 | RNA-directed DNA polymerase-like protein       | gbpln | Arabidopsis thaliana | AT4G29090.1   Symbols:   Ribonuclease H-like superfamily protein   chr4:14333528-14335255 FORWARD LENGTH=575                  | 1907 | 575 | 2.00E-63  | 30.2  | 8.8  | 14.1 |
| Rsa1.0_00736.1.g18783.t1 | ref NP_001078773.1  concanavalin A-like lectin kinase-like protein [Arabidopsis thaliana] gi 317411743 sp Q9LSR8.2 LRK19_ARATH RecName: Full=L-type lectin-domain containing receptor kinase I.9; Short=LecRK-I.9; Short=LecRK7.9; Flags: Precursor gi 332009923 gb AED97306.1  concanavalin A-like lectin kinase-like protein [Arabidopsis thaliana] ref NP_200835.1  concanavalin A-like lectin kinase-like protein [Arabidopsis thaliana] gi 75335418 sp Q9LSS0.1 LRK17_ARATH RecName: Full=L-type lectin-domain containing receptor kinase L.7; Short=LecRK-L.7; Flags: Precursor gi 8885577 dbj BAA97507.1  receptor-like protein kinase [Arabidopsis thaliana] gi 51969170 dbj BAD43277.1  receptor like protein kinase [Arabidopsis thaliana] gi 332009918 gb AED97301.1  concanavalin A-like lectin kinase-like protein [Arabidopsis thaliana] ref XP_002864676.1  lectin protein kinase family protein [Arabidopsis lyrata subsp. lyrata] gi 297310511 gb EFH40935.1  lectin protein kinase family protein [Arabidopsis lyrata subsp. lyrata] ref NP_200833.1  C3H4 type zinc finger protein [Arabidopsis thaliana] gi 8885575 dbj BAA97505.1  unnamed protein product [Arabidopsis thaliana] gi 332009916 gb AED97299.1  C3H4 type zinc finger protein [Arabidopsis thaliana] | 721  | 766  | 0         | 106.2 | 77.9 | 86.1 | concanavalin A-like lectin kinase-like protein | gbpln | Arabidopsis thaliana | AT5G60300.3   Symbols:   Concanavalin A-like lectin protein kinase family protein   chr5:24264862-24267973 FORWARD LENGTH=766 | 721  | 766 | 0         | 106.2 | 77.9 | 86.1 |
| Rsa1.0_00736.1.g18784.t1 | ref NP_001078773.1  concanavalin A-like lectin kinase-like protein [Arabidopsis thaliana] gi 317411743 sp Q9LSR8.2 LRK19_ARATH RecName: Full=L-type lectin-domain containing receptor kinase L.7; Short=LecRK-L.7; Flags: Precursor gi 8885577 dbj BAA97507.1  receptor-like protein kinase [Arabidopsis thaliana] gi 51969170 dbj BAD43277.1  receptor like protein kinase [Arabidopsis thaliana] gi 332009918 gb AED97301.1  concanavalin A-like lectin kinase-like protein [Arabidopsis thaliana] ref XP_002864676.1  lectin protein kinase family protein [Arabidopsis lyrata subsp. lyrata] gi 297310511 gb EFH40935.1  lectin protein kinase family protein [Arabidopsis lyrata subsp. lyrata] ref NP_200833.1  C3H4 type zinc finger protein [Arabidopsis thaliana] gi 8885575 dbj BAA97505.1  unnamed protein product [Arabidopsis thaliana] gi 332009916 gb AED97299.1  C3H4 type zinc finger protein [Arabidopsis thaliana]                                                                                                                                                                                                                                                                                                                                                   | 639  | 668  | 0         | 104.5 | 78.2 | 88.3 | concanavalin A-like lectin kinase-like protein | gbpln | Arabidopsis thaliana | AT5G60270.1   Symbols:   Concanavalin A-like lectin protein kinase family protein   chr5:24257761-24259767 FORWARD LENGTH=668 | 639  | 668 | 0         | 104.5 | 78.2 | 88.3 |
| Rsa1.0_00736.1.g18785.t1 | ref NP_001078773.1  concanavalin A-like lectin kinase-like protein [Arabidopsis thaliana] gi 317411743 sp Q9LSR8.2 LRK19_ARATH RecName: Full=L-type lectin-domain containing receptor kinase L.7; Short=LecRK-L.7; Flags: Precursor gi 8885577 dbj BAA97507.1  receptor-like protein kinase [Arabidopsis thaliana] gi 51969170 dbj BAD43277.1  receptor like protein kinase [Arabidopsis thaliana] gi 332009918 gb AED97301.1  concanavalin A-like lectin kinase-like protein [Arabidopsis thaliana] ref XP_002864676.1  lectin protein kinase family protein [Arabidopsis lyrata subsp. lyrata] gi 297310511 gb EFH40935.1  lectin protein kinase family protein [Arabidopsis lyrata subsp. lyrata] ref NP_200833.1  C3H4 type zinc finger protein [Arabidopsis thaliana] gi 8885575 dbj BAA97505.1  unnamed protein product [Arabidopsis thaliana] gi 332009916 gb AED97299.1  C3H4 type zinc finger protein [Arabidopsis thaliana]                                                                                                                                                                                                                                                                                                                                                   | 669  | 668  | 0         | 99.9  | 77.9 | 87.6 | lectin protein kinase family protein           | gbpln | Arabidopsis lyrata   | AT5G60270.1   Symbols:   Concanavalin A-like lectin protein kinase family protein   chr5:24257761-24259767 FORWARD LENGTH=668 | 669  | 668 | 0         | 99.9  | 77.7 | 87.6 |
| Rsa1.0_00736.1.g18786.t1 | ref NP_001078773.1  concanavalin A-like lectin kinase-like protein [Arabidopsis thaliana] gi 317411743 sp Q9LSR8.2 LRK19_ARATH RecName: Full=L-type lectin-domain containing receptor kinase L.7; Short=LecRK-L.7; Flags: Precursor gi 8885577 dbj BAA97507.1  receptor-like protein kinase [Arabidopsis thaliana] gi 51969170 dbj BAD43277.1  receptor like protein kinase [Arabidopsis thaliana] gi 332009918 gb AED97301.1  concanavalin A-like lectin kinase-like protein [Arabidopsis thaliana] ref XP_002864676.1  lectin protein kinase family protein [Arabidopsis lyrata subsp. lyrata] gi 297310511 gb EFH40935.1  lectin protein kinase family protein [Arabidopsis lyrata subsp. lyrata] ref NP_200833.1  C3H4 type zinc finger protein [Arabidopsis thaliana] gi 8885575 dbj BAA97505.1  unnamed protein product [Arabidopsis thaliana] gi 332009916 gb AED97299.1  C3H4 type zinc finger protein [Arabidopsis thaliana]                                                                                                                                                                                                                                                                                                                                                   | 638  | 655  | 0         | 102.7 | 61.0 | 71.3 | C3H4 type zinc finger protein                  | gbpln | Arabidopsis thaliana | AT5G60250.1   Symbols:   zinc finger (C3HC4-type RING finger) family protein   chr5:24252226-24254710 FORWARD LENGTH=655      | 638  | 655 | 0         | 102.7 | 61.0 | 71.3 |
| Rsa1.0_00736.1.g18787.t1 | gb EOA14477.1  hypothetical protein CARUB_v10027691mg [Capsella rubella] ref XP_002864674.1  hypothetical protein ARALYDRAFT_358240 [Arabidopsis lyrata subsp. lyrata] gi 297310509 gb EFH40933.1  hypothetical protein ARALYDRAFT_358240 [Arabidopsis lyrata subsp. lyrata]                                                                                                                                                                                                                                                                                                                                                                                                                                                                                                                                                                                                                                                                                                                                                                                                                                                                                                                                                                                                            | 251  | 255  | 1.00E-120 | 101.6 | 84.1 | 91.2 | hypothetical protein CARUB_v10027691mg         | gbpln | Capsella rubella     | AT5G60230.2   Symbols: SEN2, ATSEN2   splicing endonuclease 2   chr5:24250185-24250952 REVERSE LENGTH=255                     | 251  | 255 | 1.00E-121 | 101.6 | 84.1 | 91.6 |
| Rsa1.0_00736.1.g18788.t1 | ref XP_002864674.1  hypothetical protein ARALYDRAFT_358240 [Arabidopsis lyrata subsp. lyrata] gi 297310509 gb EFH40933.1  hypothetical protein ARALYDRAFT_358240 [Arabidopsis lyrata subsp. lyrata]                                                                                                                                                                                                                                                                                                                                                                                                                                                                                                                                                                                                                                                                                                                                                                                                                                                                                                                                                                                                                                                                                     | 285  | 285  | 1.00E-149 | 100.0 | 88.8 | 95.8 | hypothetical protein ARALYDRAFT_358240         | gbpln | Arabidopsis lyrata   | AT3G45600.1   Symbols: TET3   tetraspanin3   chr3:16733973-16735854 REVERSE LENGTH=285                                        | 285  | 285 | 1.00E-141 | 100.0 | 83.2 | 90.9 |

|                          |                                                                                                                                                                                                                                                                                                                                                                                                                                                                                                                                                                                                                                                                                                                                                                                                                                                                                                                                                                                                                                                                                                                                                                                                                                                                                                                                                                                                                                                                                                                                                                                                                                                                                                               |     |     |          |       |       |       |                                                 |       |                      |                                                                                                                    |     |     |           |       |       |       |
|--------------------------|---------------------------------------------------------------------------------------------------------------------------------------------------------------------------------------------------------------------------------------------------------------------------------------------------------------------------------------------------------------------------------------------------------------------------------------------------------------------------------------------------------------------------------------------------------------------------------------------------------------------------------------------------------------------------------------------------------------------------------------------------------------------------------------------------------------------------------------------------------------------------------------------------------------------------------------------------------------------------------------------------------------------------------------------------------------------------------------------------------------------------------------------------------------------------------------------------------------------------------------------------------------------------------------------------------------------------------------------------------------------------------------------------------------------------------------------------------------------------------------------------------------------------------------------------------------------------------------------------------------------------------------------------------------------------------------------------------------|-----|-----|----------|-------|-------|-------|-------------------------------------------------|-------|----------------------|--------------------------------------------------------------------------------------------------------------------|-----|-----|-----------|-------|-------|-------|
| Rsa1.0_00736.1.g18789.t1 | ref[NP_200829.5] interactor of constitutive active ROPs 3 [Arabidopsis thaliana]<br>gi 334188518 ref[NP_001190579.1] interactor of constitutive active ROPs 3 [Arabidopsis thaliana]<br>gi 75180396 sp Q9LSS5.1 ICR3_ARATH RecName: Full=Interactor of constitutive active ROPs 3<br>gi 8885572 dbj BA097502.1  myosin heavy chain-like [Arabidopsis thaliana]<br>gi 332009910 gb AED97293.1  interactor of constitutive active ROPs 3 [Arabidopsis thaliana]<br>gi 332009911 gb AED97294.1  interactor of constitutive active ROPs 3 [Arabidopsis thaliana]                                                                                                                                                                                                                                                                                                                                                                                                                                                                                                                                                                                                                                                                                                                                                                                                                                                                                                                                                                                                                                                                                                                                                  | 519 | 564 | 0        | 108.7 | 85.7  | 93.1  | interactor of constitutive active ROPs 3        | gbpln | Arabidopsis thaliana | AT5G60210.2   Symbols: RIP5   ROP interactive partner 5   chr5:24243529-24245889 REVERSE LENGTH=564                | 519 | 564 | 0         | 108.7 | 85.7  | 93.1  |
| Rsa1.0_00736.1.g18790.t1 | gb EOA13642.1  hypothetical protein CARUB_v10026713mg [Capsella rubella]                                                                                                                                                                                                                                                                                                                                                                                                                                                                                                                                                                                                                                                                                                                                                                                                                                                                                                                                                                                                                                                                                                                                                                                                                                                                                                                                                                                                                                                                                                                                                                                                                                      | 227 | 344 | 2.00E-99 | 151.5 | 84.6  | 93.0  | hypothetical protein CARUB_v10026713mg          | gbpln | Capsella rubella     | AT5G60200.1   Symbols: TMO6   TARGET OF MONOPTEROS 6   chr5:24241078-24241951 FORWARD LENGTH=257                   | 227 | 257 | 1.00E-101 | 113.2 | 81.9  | 90.7  |
| Rsa1.0_00736.1.g18791.t1 | #                                                                                                                                                                                                                                                                                                                                                                                                                                                                                                                                                                                                                                                                                                                                                                                                                                                                                                                                                                                                                                                                                                                                                                                                                                                                                                                                                                                                                                                                                                                                                                                                                                                                                                             | #   | #   | #        | #     | #     | -     | -                                               | ----  | ----                 | #                                                                                                                  | #   | #   | #         | #     | #     | #     |
| Rsa1.0_00736.1.g18792.t1 | #                                                                                                                                                                                                                                                                                                                                                                                                                                                                                                                                                                                                                                                                                                                                                                                                                                                                                                                                                                                                                                                                                                                                                                                                                                                                                                                                                                                                                                                                                                                                                                                                                                                                                                             | #   | #   | #        | #     | #     | -     | -                                               | ----  | ----                 | #                                                                                                                  | #   | #   | #         | #     | #     | #     |
| Rsa1.0_00737.1.g18793.t1 | ref XP_002876829.1  hypothetical protein ARALYDRAFT_484186 [Arabidopsis lyrata subsp. lyrata]<br>gi 297322667 gb EFH53088.1  hypothetical protein ARALYDRAFT_484186 [Arabidopsis lyrata subsp. lyrata]                                                                                                                                                                                                                                                                                                                                                                                                                                                                                                                                                                                                                                                                                                                                                                                                                                                                                                                                                                                                                                                                                                                                                                                                                                                                                                                                                                                                                                                                                                        | 451 | 426 | 0        | 94.5  | 88.2  | 91.1  | hypothetical protein ARALYDRAFT_484186          | gbpln | Arabidopsis lyrata   | AT2G02800.2   Symbols: APK2B   protein kinase 2B   chr2:796889-799250 REVERSE LENGTH=426                           | 451 | 426 | 0         | 94.5  | 87.8  | 91.1  |
| Rsa1.0_00737.1.g18794.t1 | #                                                                                                                                                                                                                                                                                                                                                                                                                                                                                                                                                                                                                                                                                                                                                                                                                                                                                                                                                                                                                                                                                                                                                                                                                                                                                                                                                                                                                                                                                                                                                                                                                                                                                                             | #   | #   | #        | #     | #     | -     | -                                               | ----  | ----                 | #                                                                                                                  | #   | #   | #         | #     | #     | #     |
| Rsa1.0_00737.1.g18795.t1 | ref NP_178381.3  leucine-rich repeat protein kinase-like protein [Arabidopsis thaliana]<br>gi 264664503 sp COLGJ9.1 Y2278_ARATH RecName: Full=Probable LRR receptor-like serine/threonine-protein kinase AT2G02780; Flags: Precursor<br>gi 224589501 gb ACN59284.1  leucine-rich repeat receptor-like protein kinase [Arabidopsis thaliana]<br>gi 330250529 gb AEC05623.1  probable LRR receptor-like serine/threonine-protein kinase [Arabidopsis thaliana]<br>ref NP_350289.1  ubiquitin-conjugating enzyme E2 A [Arabidopsis thaliana]<br>gi 297814522 ref XP_002875144.1  ubiquitin-conjugating enzyme 2 [Arabidopsis lyrata subsp. lyrata]<br>gi 1174844 sp P42745.1 UBC2_ARATH RecName: Full=Ubiquitin-conjugating enzyme E2 2; AltName: Full=Ubiquitin carrier protein 2; AltName: Full=Ubiquitin-conjugating enzyme E2-17 kDa 2; AltName: Full=Ubiquitin-protein ligase 2<br>gi 13899127 gb AAK48985.1 AF370558.1 putative ubiquitin-conjugating enzyme E2 [Arabidopsis thaliana]<br>gi 431264 gb AAA32899.1  ubiquitin conjugating enzyme [Arabidopsis thaliana]<br>gi 2689243 emb CAA73476.1  ubiquitin conjugating enzyme [Arabidopsis thaliana]<br>gi 2947065 gb AAC05346.1  E2 ubiquitin-conjugating enzyme 2 (UBC2) [Arabidopsis thaliana]<br>gi 18377456 gb AAL66894.1  putative ubiquitin-conjugating enzyme E2 [Arabidopsis thaliana]<br>gi 66354400 gb AAI44843.1  ubiquitinating enzyme [Arabidopsis thaliana]<br>gi 118197458 gb ABK78692.1  ubiquitin conjugating enzyme [Brassica rapa]<br>gi 297320982 gb EFH51403.1  ubiquitin-conjugating enzyme 2 [Arabidopsis lyrata subsp. lyrata]<br>gi 192915964 gb A19299.1  ubiquitin-conjugating enzyme 2 [Arabidopsis lyrata subsp. lyrata] | 725 | 742 | 0        | 102.3 | 83.4  | 90.9  | leucine-rich repeat protein kinase-like protein | gbpln | Arabidopsis thaliana | AT2G02780.1   Symbols:   Leucine-rich repeat protein kinase family protein   chr2:781932-784646 REVERSE LENGTH=742 | 725 | 742 | 0         | 102.3 | 83.4  | 90.9  |
| Rsa1.0_00737.1.g18796.t1 | gi 431264 gb AAA32899.1  ubiquitin conjugating enzyme [Arabidopsis thaliana]<br>gi 2689243 emb CAA73476.1  ubiquitin conjugating enzyme [Arabidopsis thaliana]<br>gi 2947065 gb AAC05346.1  E2 ubiquitin-conjugating enzyme 2 (UBC2) [Arabidopsis thaliana]<br>gi 18377456 gb AAL66894.1  putative ubiquitin-conjugating enzyme E2 [Arabidopsis thaliana]<br>gi 66354400 gb AAI44843.1  ubiquitinating enzyme [Arabidopsis thaliana]<br>gi 118197458 gb ABK78692.1  ubiquitin conjugating enzyme [Brassica rapa]<br>gi 297320982 gb EFH51403.1  ubiquitin-conjugating enzyme 2 [Arabidopsis lyrata subsp. lyrata]<br>gi 192915964 gb A19299.1  ubiquitin-conjugating enzyme 2 [Arabidopsis lyrata subsp. lyrata]                                                                                                                                                                                                                                                                                                                                                                                                                                                                                                                                                                                                                                                                                                                                                                                                                                                                                                                                                                                              | 152 | 152 | 1.00E-84 | 100.0 | 100.0 | 100.0 | ubiquitin-conjugating enzyme E2 A               | gbpln | Arabidopsis lyrata   | AT2G02760.1   Symbols: ATUBC2, UBC2   ubiquitin-conjugating enzyme 2   chr2:774271-775149 FORWARD LENGTH=152       | 152 | 152 | 3.00E-87  | 100.0 | 100.0 | 100.0 |

|                          |                                                                                                                                                                                                                                                                                                                                                                                                                                                                                                                                                                                                                                                                                                                                                                                                                                                |      |      |           |       |      |      |                                                     |       |                      |                                                                                                                                                   |      |      |           |       |      |      |
|--------------------------|------------------------------------------------------------------------------------------------------------------------------------------------------------------------------------------------------------------------------------------------------------------------------------------------------------------------------------------------------------------------------------------------------------------------------------------------------------------------------------------------------------------------------------------------------------------------------------------------------------------------------------------------------------------------------------------------------------------------------------------------------------------------------------------------------------------------------------------------|------|------|-----------|-------|------|------|-----------------------------------------------------|-------|----------------------|---------------------------------------------------------------------------------------------------------------------------------------------------|------|------|-----------|-------|------|------|
| Rsa1.0_00737.1.g18797.t1 | ref[NP_178377.2] ssDNA-binding transcriptional regulator [Arabidopsis thaliana]<br>gi 75115367 sp Q66GR6.1 WHY3_ARATH<br>RecName: Full=Single-stranded DNA-binding protein WHY3, chloroplastic;<br>AltName: Full=Protein PLASTID TRANSCRIPTIONALLY ACTIVE 11;<br>AltName: Full=Protein WHIRLY 3;<br>Short=AtWHY3; Flags: Precursor<br>gi 51536442 gb AAU05459.1  At2g02740 [Arabidopsis thaliana]<br>gi 51972072 gb AAU15140.1  At2g02740 [Arabidopsis thaliana]<br>gi 330250524 gb AEC05618.1  ssDNA-binding transcriptional regulator [Arabidopsis thaliana]<br>ref[NP_178376.1] uncharacterized protein [Arabidopsis thaliana]<br>gi 42570657 ref NP_973402.1  uncharacterized protein [Arabidopsis thaliana] gi 20196955 gb AAC05349.2  expressed protein [Arabidopsis thaliana] gi 21618010 gb AAM67060.1  unknown [Arabidopsis thaliana] | 172  | 268  | 1.00E-62  | 155.8 | 77.3 | 84.3 | ssDNA-binding transcriptional regulator             | gbpln | Arabidopsis thaliana | AT2G02740.1   Symbols: ATWHY3, PTAC11, WHY3   ssDNA-binding transcriptional regulator   chr2:769389-770993 FORWARD LENGTH=268                     | 172  | 268  | 5.00E-65  | 155.8 | 77.3 | 84.3 |
| Rsa1.0_00737.1.g18798.t2 | gi 26453164 dbj BAC43658.1  unknown protein [Arabidopsis thaliana]<br>gi 28950835 gb AAO63341.1  At2g02730 [Arabidopsis thaliana]<br>gi 330250522 gb AEC05616.1  uncharacterized protein AT2G02730 [Arabidopsis thaliana]<br>gi 330250523 gb AEC05617.1  uncharacterized protein AT2G02730 [Arabidopsis thaliana]<br>ref[XP_002875142.1] pectate lyase family protein [Arabidopsis lyrata subsp. lyrata] gi 297320980 gb EFH51401.1  pectate lyase family protein [Arabidopsis lyrata subsp. lyrata]<br>ref[XP_002876825.1] pac motif-containing protein [Arabidopsis lyrata subsp. lyrata]<br>gi 297322663 gb EFH53084.1  pac motif-containing protein [Arabidopsis lyrata subsp. lyrata]                                                                                                                                                     | 288  | 276  | 1.00E-124 | 95.8  | 77.1 | 87.2 | uncharacterized protein                             | gbpln | Arabidopsis thaliana | AT2G02730.2   Symbols:   Protein of unknown function (DUF1664)   chr2:765280-767336 REVERSE LENGTH=276                                            | 288  | 276  | 1.00E-127 | 95.8  | 77.1 | 87.2 |
| Rsa1.0_00737.1.g18799.t1 | ref[XP_002875142.1] pectate lyase family protein [Arabidopsis lyrata subsp. lyrata] gi 297320980 gb EFH51401.1  pectate lyase family protein [Arabidopsis lyrata subsp. lyrata]<br>ref[XP_002876825.1] pac motif-containing protein [Arabidopsis lyrata subsp. lyrata]<br>gi 297322663 gb EFH53084.1  pac motif-containing protein [Arabidopsis lyrata subsp. lyrata]                                                                                                                                                                                                                                                                                                                                                                                                                                                                          | 459  | 455  | 0         | 99.1  | 83.7 | 90.0 | pectate lyase family protein                        | gbpln | Arabidopsis lyrata   | AT2G02720.1   Symbols:   Pectate lyase family protein   chr2:763173-764834 FORWARD LENGTH=455                                                     | 459  | 455  | 0         | 99.1  | 82.8 | 89.3 |
| Rsa1.0_00737.1.g18800.t1 | ref[XP_002876825.1] pac motif-containing protein [Arabidopsis lyrata subsp. lyrata]<br>gi 297322663 gb EFH53084.1  pac motif-containing protein [Arabidopsis lyrata subsp. lyrata]                                                                                                                                                                                                                                                                                                                                                                                                                                                                                                                                                                                                                                                             | 400  | 386  | 1.00E-177 | 96.5  | 80.5 | 86.5 | pac motif-containing protein                        | gbpln | Arabidopsis lyrata   | AT2G02710.1   Symbols: PLP, PLPB   PAS/LOV protein B   chr2:758812-760608 REVERSE LENGTH=399                                                      | 400  | 399  | 1.00E-177 | 99.8  | 81.0 | 88.8 |
| Rsa1.0_00737.1.g18801.t1 | # # # # # # # # - ----                                                                                                                                                                                                                                                                                                                                                                                                                                                                                                                                                                                                                                                                                                                                                                                                                         | #    | #    | #         | #     | #    | #    | -                                                   | ----  | ----                 | #                                                                                                                                                 | #    | #    | #         | #     | #    |      |
| Rsa1.0_00737.1.g18802.t2 | ref[NP_178361.2] survival of motor neuron-related-splicing factor 30 [Arabidopsis thaliana]<br>gi 30678012 ref NP_849927.1  survival of motor neuron-related-splicing factor 30 [Arabidopsis thaliana]<br>gi 145328250 ref NP_001077871.1  survival of motor neuron-related-splicing factor 30 [Arabidopsis thaliana]<br>gi 27754612 gb AAO22752.1  unknown protein [Arabidopsis thaliana]<br>gi 28393903 gb AAO42359.1  unknown protein [Arabidopsis thaliana]<br>gi 330250503 gb AEC05597.1  survival of motor neuron-related-splicing factor 30 [Arabidopsis thaliana]<br>gi 330250504 gb AEC05598.1  survival of motor neuron-related-splicing factor 30 [Arabidopsis thaliana]<br>gi 330250506 gb AEC05600.1  survival of motor neuron-related-splicing factor 30 [Arabidopsis thaliana]                                                  | 341  | 300  | 1.00E-136 | 88.0  | 73.9 | 81.2 | survival of motor neuron-related-splicing factor 30 | gbpln | Arabidopsis thaliana | AT2G02570.4   Symbols:   nucleic acid binding:RNA binding   chr2:698361-700794 REVERSE LENGTH=300                                                 | 341  | 300  | 1.00E-139 | 88.0  | 73.9 | 81.2 |
| Rsa1.0_00737.1.g18803.t1 | gb EOA23151.1  hypothetical protein CARUB_v10016592mg [Capsella rubella]                                                                                                                                                                                                                                                                                                                                                                                                                                                                                                                                                                                                                                                                                                                                                                       | 1239 | 1217 | 0         | 98.2  | 94.1 | 96.3 | hypothetical protein CARUB_v10016592mg              | gbpln | Capsella rubella     | AT2G02560.2   Symbols: CAND1, ATCAND1, ETA2, TIP120, HVE   cullin-associated and neddylation dissociated   chr2:690345-697342 FORWARD LENGTH=1217 | 1239 | 1217 | 0         | 98.2  | 93.5 | 96.1 |
| Rsa1.0_00737.1.g18804.t1 | # # # # # # # # - ----                                                                                                                                                                                                                                                                                                                                                                                                                                                                                                                                                                                                                                                                                                                                                                                                                         | #    | #    | #         | #     | #    | #    | -                                                   | ----  | ----                 | #                                                                                                                                                 | #    | #    | #         | #     | #    |      |
| Rsa1.0_00737.1.g18805.t1 | gb EOA24407.1  hypothetical protein CARUB_v10017657mg [Capsella rubella]                                                                                                                                                                                                                                                                                                                                                                                                                                                                                                                                                                                                                                                                                                                                                                       | 311  | 320  | 1.00E-112 | 102.9 | 74.6 | 84.2 | hypothetical protein CARUB_v10017657mg              | gbpln | Capsella rubella     | AT2G02540.1   Symbols: ATHB21, ZFHD4, HB21, ZHD3   homeobox protein 21   chr2:684302-685234 FORWARD LENGTH=310                                    | 311  | 310  | 1.00E-112 | 99.7  | 75.6 | 83.3 |

|                          |                                                                                                                                                                                                                                                                                                                                                                                                                                                                                                                                                                                                                                                                                                                                                                                                                                                                                                                                                                                                                  |      |      |           |       |      |      |                                                     |       |                      |                                                                                                                                                                                                                                                                                                                                                                 |      |      |           |       |      |      |
|--------------------------|------------------------------------------------------------------------------------------------------------------------------------------------------------------------------------------------------------------------------------------------------------------------------------------------------------------------------------------------------------------------------------------------------------------------------------------------------------------------------------------------------------------------------------------------------------------------------------------------------------------------------------------------------------------------------------------------------------------------------------------------------------------------------------------------------------------------------------------------------------------------------------------------------------------------------------------------------------------------------------------------------------------|------|------|-----------|-------|------|------|-----------------------------------------------------|-------|----------------------|-----------------------------------------------------------------------------------------------------------------------------------------------------------------------------------------------------------------------------------------------------------------------------------------------------------------------------------------------------------------|------|------|-----------|-------|------|------|
| Rsa1.0_00737.1.g18806.t1 | ref NP_565285.1  AAA-type ATPase-like protein [Arabidopsis thaliana] gi 8980710 gb AAF82285.1 AF264023.1 STICHEL [Arabidopsis thaliana] gi 20197093 gb AAC18938.2  similar to prokaryotic DNA polymerase III gamma subunit [Arabidopsis thaliana] gi 33025049 gb AEC05585.1  AAA-type ATPase-like protein [Arabidopsis thaliana] ref NP_178351.1  protein alfin-like 6 [Arabidopsis thaliana] gi 75248014 sp Q8S8M9.1 ALFL6_ARAT H RecName: Full=PHD finger protein ALFIN-LIKE 6; Short=Protein AL6 gi 20197338 gb AAM15031.1  putative PHD-type zinc finger protein [Arabidopsis thaliana] gi 28393037 gb AAO41953.1  putative PHD-type zinc finger protein [Arabidopsis thaliana] gi 28827386 gb AAO50537.1  putative PHD-type zinc finger protein [Arabidopsis thaliana] gi 330250489 gb AEC05583.1  protein alfin-like 6 [Arabidopsis thaliana] dbj BAB01217.1  Ta11 non-LTR retroelement protein-like [Arabidopsis thaliana] gi 67633664 gb AAY78756.1  putative zinc finger protein [Arabidopsis thaliana] | 1237 | 1218 | 0         | 98.5  | 86.6 | 91.6 | AAA-type ATPase-like protein                        | gbpln | Arabidopsis thaliana | AT2G02480.1   Symbols: STI   AAA-type ATPase family protein   chr2:661093-665337 FORWARD LENGTH=1218                                                                                                                                                                                                                                                            | 1237 | 1218 | 0         | 98.5  | 86.6 | 91.6 |
| Rsa1.0_00737.1.g18807.t1 | [Arabidopsis thaliana] gi 28393037 gb AAO41953.1  putative PHD-type zinc finger protein [Arabidopsis thaliana] gi 28827386 gb AAO50537.1  putative PHD-type zinc finger protein [Arabidopsis thaliana] gi 330250489 gb AEC05583.1  protein alfin-like 6 [Arabidopsis thaliana] dbj BAB01217.1  Ta11 non-LTR retroelement protein-like [Arabidopsis thaliana] gi 67633664 gb AAY78756.1  putative zinc finger protein [Arabidopsis thaliana]                                                                                                                                                                                                                                                                                                                                                                                                                                                                                                                                                                      | 245  | 256  | 1.00E-107 | 104.5 | 87.3 | 93.1 | protein alfin-like 6                                | gbpln | Arabidopsis thaliana | AT2G02470.1   Symbols: AL6   alfin-like 6   chr2:652837-654621 FORWARD LENGTH=256                                                                                                                                                                                                                                                                               | 245  | 256  | 1.00E-109 | 104.5 | 87.3 | 93.1 |
| Rsa1.0_00737.1.g18808.t1 | dbj BAB01217.1  Ta11 non-LTR retroelement protein-like [Arabidopsis thaliana] gi 67633664 gb AAY78756.1  putative zinc finger protein [Arabidopsis thaliana]                                                                                                                                                                                                                                                                                                                                                                                                                                                                                                                                                                                                                                                                                                                                                                                                                                                     | 449  | 487  | 2.00E-96  | 108.5 | 44.1 | 62.8 | Ta11 non-LTR retroelement protein-like              | gbpln | Arabidopsis thaliana | AT5G36228.1   Symbols:   nucleic acid binding:zinc ion binding   chr5:14271691-14272776 FORWARD LENGTH=361                                                                                                                                                                                                                                                      | 449  | 361  | 4.00E-27  | 80.4  | 14.5 | 24.3 |
| Rsa1.0_00738.1.g18809.t1 | #                                                                                                                                                                                                                                                                                                                                                                                                                                                                                                                                                                                                                                                                                                                                                                                                                                                                                                                                                                                                                | #    | #    | #         | #     | #    | #    | -                                                   | ----  | ----                 | #                                                                                                                                                                                                                                                                                                                                                               | #    | #    | #         | #     | #    |      |
| Rsa1.0_00738.1.g18810.t2 | gb AAC95175.1  putative non-LTR retroelement reverse transcriptase [Arabidopsis thaliana]                                                                                                                                                                                                                                                                                                                                                                                                                                                                                                                                                                                                                                                                                                                                                                                                                                                                                                                        | 741  | 1352 | 1.00E-127 | 182.5 | 35.6 | 47.5 | putative non-LTR retroelement reverse transcriptase | gbpln | Arabidopsis thaliana | AT3G24255.1   Symbols:   RNA-directed DNA polymerase (reverse transcriptase)-related family protein   chr3:8789471-8793208 FORWARD LENGTH=746                                                                                                                                                                                                                   | 741  | 746  | 2.00E-96  | 100.7 | 16.7 | 23.3 |
| Rsa1.0_00738.1.g18811.t1 | gb AAF69169.1 AC007915.21 F27F5.21 [Arabidopsis thaliana]                                                                                                                                                                                                                                                                                                                                                                                                                                                                                                                                                                                                                                                                                                                                                                                                                                                                                                                                                        | 560  | 1023 | 1.00E-164 | 182.7 | 53.4 | 68.4 | F27F5.21                                            | gbpln | Arabidopsis thaliana | AT4G29090.1   Symbols:   Ribonuclease H-like superfamily protein   chr4:14333528-14335255 FORWARD LENGTH=575                                                                                                                                                                                                                                                    | 560  | 575  | 1.00E-37  | 102.7 | 17.0 | 27.3 |
| Rsa1.0_00738.1.g18812.t1 | gb EOA31014.1  hypothetical protein CARUB_v10014159mg [Capsella rubella]                                                                                                                                                                                                                                                                                                                                                                                                                                                                                                                                                                                                                                                                                                                                                                                                                                                                                                                                         | 369  | 330  | 4.00E-58  | 89.4  | 47.2 | 55.6 | hypothetical protein CARUB_v10014159mg              | gbpln | Capsella rubella     | AT2G17787.1   Symbols:   unknown protein; BEST Arabidopsis thaliana protein match is: unknown protein (TAIR:AT4G35940.2); Has 35333 Blast hits to 34131 proteins in 2444 species: Archae - 798; Bacteria - 22429; Metazoa - 974; Fungi - 991; Plants - 531; Viruses - 0; Other Eukaryotes - 9610 (source: NCBI BLINK)   chr2:7731374-7732853 FORWARD LENGTH=324 | 369  | 324  | 1.00E-59  | 87.8  | 46.1 | 57.5 |
| Rsa1.0_00738.1.g18813.t2 | gb EOA32604.1  hypothetical protein CARUB_v10015897mg [Capsella rubella]                                                                                                                                                                                                                                                                                                                                                                                                                                                                                                                                                                                                                                                                                                                                                                                                                                                                                                                                         | 804  | 788  | 0         | 98.0  | 89.7 | 93.7 | hypothetical protein CARUB_v10015897mg              | gbpln | Capsella rubella     | AT2G17790.1   Symbols: VPS35A, ZIP3   VPS35 homolog A   chr2:7733685-7739344 FORWARD LENGTH=787                                                                                                                                                                                                                                                                 | 804  | 787  | 0         | 97.9  | 89.8 | 93.7 |
| Rsa1.0_00738.1.g18814.t3 | ref XP_004233565.1  PREDICTED: rac-like GTP-binding protein ARAC1-like [Solanum lycopersicum]                                                                                                                                                                                                                                                                                                                                                                                                                                                                                                                                                                                                                                                                                                                                                                                                                                                                                                                    | 616  | 197  | 4.00E-86  | 32.0  | 27.4 | 27.9 | PREDICTED: rac-like GTP-binding protein ARAC1-like  | gbpln | Solanum lycopersicum | AT2G17800.2   Symbols: ARAC1, ATGP2, ATRAG1, ROP3, ATROP3   Arabidopsis RAC-like 1   chr2:7740313-7741942 FORWARD LENGTH=197                                                                                                                                                                                                                                    | 616  | 197  | 1.00E-84  | 32.0  | 27.8 | 27.9 |
| Rsa1.0_00738.1.g18815.t1 | ref NP_192092.1  ABC transporter B family member 5 [Arabidopsis thaliana] gi 75337855 sp Q9SY13.1 AB5B_ARATH RecName: Full=ABC transporter B family member 5; Short=ABC transporter ABCB.5; Short=AtABCB5; AltName: Full=P-glycoprotein 5; AltName: Full=Putative multidrug resistance protein 5 gi 4558552 gb AAD22645.1 AC007138.9 putative P-glycoprotein-like protein [Arabidopsis thaliana] gi 7268567 emb CAB80676.1  putative P-glycoprotein-like protein [Arabidopsis thaliana] gi 332656682 gb AEE82082.1  ABC transporter B family member 5 [Arabidopsis thaliana]                                                                                                                                                                                                                                                                                                                                                                                                                                     | 1257 | 1230 | 0         | 97.9  | 82.0 | 90.2 | ABC transporter B family member 5                   | gbpln | Arabidopsis thaliana | AT4G01830.1   Symbols: PGP5   P-glycoprotein 5   chr4:785683-790447 REVERSE LENGTH=1230                                                                                                                                                                                                                                                                         | 1257 | 1230 | 0         | 97.9  | 82.0 | 90.2 |
| Rsa1.0_00738.1.g18816.t1 | gb EOA29746.1  hypothetical protein CARUB_v10012835mg [Capsella rubella]                                                                                                                                                                                                                                                                                                                                                                                                                                                                                                                                                                                                                                                                                                                                                                                                                                                                                                                                         | 1196 | 1201 | 0         | 100.4 | 89.4 | 93.9 | hypothetical protein CARUB_v10012835mg              | gbpln | Capsella rubella     | AT2G17820.1   Symbols: ATHK1, AHK1, HK1   histidine kinase 1   chr2:7743133-7748013 REVERSE LENGTH=1207                                                                                                                                                                                                                                                         | 1196 | 1207 | 0         | 100.9 | 88.5 | 93.6 |
| Rsa1.0_00738.1.g18817.t1 | gb EOA34012.1  hypothetical protein CARUB_v10021508mg, partial [Capsella rubella]                                                                                                                                                                                                                                                                                                                                                                                                                                                                                                                                                                                                                                                                                                                                                                                                                                                                                                                                | 156  | 105  | 1.00E-11  | 67.3  | 28.8 | 38.5 | hypothetical protein CARUB_v10021508mg, partial     | gbpln | Capsella rubella     | AT4G09490.1   Symbols:   Polynucleotidyl transferase, ribonuclease H-like superfamily protein   chr4:6015583-6016575 REVERSE LENGTH=170                                                                                                                                                                                                                         | 156  | 170  | 1.00E-11  | 109.0 | 24.4 | 34.0 |
| Rsa1.0_00739.1.g18818.t1 | #                                                                                                                                                                                                                                                                                                                                                                                                                                                                                                                                                                                                                                                                                                                                                                                                                                                                                                                                                                                                                | #    | #    | #         | #     | #    | #    | -                                                   | ----  | ----                 | #                                                                                                                                                                                                                                                                                                                                                               | #    | #    | #         | #     | #    |      |

|                          |                                                                                                                                                                                                                                                                                                                                                                                                                                                                                                                                                                                                                                                                                                                                                                                      |      |      |          |       |      |      |                                                      |       |                      |                                                                                                                                                                        |      |      |          |       |      |      |
|--------------------------|--------------------------------------------------------------------------------------------------------------------------------------------------------------------------------------------------------------------------------------------------------------------------------------------------------------------------------------------------------------------------------------------------------------------------------------------------------------------------------------------------------------------------------------------------------------------------------------------------------------------------------------------------------------------------------------------------------------------------------------------------------------------------------------|------|------|----------|-------|------|------|------------------------------------------------------|-------|----------------------|------------------------------------------------------------------------------------------------------------------------------------------------------------------------|------|------|----------|-------|------|------|
| Rsa1.0_00739.1.g18819.t1 | gb EOA20649.1  hypothetical protein CARUB_v10000962mg [Capsella rubella]                                                                                                                                                                                                                                                                                                                                                                                                                                                                                                                                                                                                                                                                                                             | 359  | 444  | 4.00E-80 | 123.7 | 44.6 | 47.6 | hypothetical protein CARUB_v10000962mg               | gbpln | Capsella rubella     | AT5G19380.2   Symbols: CLT1   CRT (chloroquine-resistance transporter)-like transporter 1   chr5:6527017-6530445 REVERSE LENGTH=507                                    | 359  | 507  | 1.00E-81 | 141.2 | 43.7 | 47.4 |
| Rsa1.0_00739.1.g18820.t1 | #                                                                                                                                                                                                                                                                                                                                                                                                                                                                                                                                                                                                                                                                                                                                                                                    | #    | #    | #        | #     | #    | -    | ----                                                 | ----  | #                    | #                                                                                                                                                                      | #    | #    | #        | #     | #    | #    |
| Rsa1.0_00739.1.g18821.t1 | ref XP_002871882.1  hypothetical protein ARALYDRAFT_488825 [Arabidopsis lyrata subsp. lyrata] gi 297317719 gb EFH48141.1  hypothetical protein ARALYDRAFT_488825 [Arabidopsis lyrata subsp. lyrata]                                                                                                                                                                                                                                                                                                                                                                                                                                                                                                                                                                                  | 851  | 870  | 0        | 102.2 | 87.1 | 91.9 | hypothetical protein ARALYDRAFT_488825               | gbpln | Arabidopsis lyrata   | AT5G19390.2   Symbols:   Rho GTPase activation protein (RhoGAP) with PH domain   chr5:6531906-6538206 FORWARD LENGTH=870                                               | 851  | 870  | 0        | 102.2 | 86.5 | 91.7 |
| Rsa1.0_00739.1.g18822.t1 | gb EOA19874.1  hypothetical protein CARUB_v10000123mg [Capsella rubella]                                                                                                                                                                                                                                                                                                                                                                                                                                                                                                                                                                                                                                                                                                             | 1077 | 1026 | 0        | 95.3  | 72.3 | 80.2 | hypothetical protein CARUB_v10000123mg               | gbpln | Capsella rubella     | AT5G19400.2   Symbols: SMG7   Telomerase activating protein Est1   chr5:6540603-6544262 FORWARD LENGTH=1059                                                            | 1077 | 1059 | 0        | 98.3  | 70.2 | 79.5 |
| Rsa1.0_00739.1.g18823.t1 | gb EOA37750.1  hypothetical protein CARUB_v10012565mg [Capsella rubella]                                                                                                                                                                                                                                                                                                                                                                                                                                                                                                                                                                                                                                                                                                             | 252  | 679  | 5.00E-43 | 269.4 | 46.8 | 67.1 | hypothetical protein CARUB_v10012565mg               | gbpln | Capsella rubella     | #                                                                                                                                                                      | #    | #    | #        | #     | #    | #    |
| Rsa1.0_00739.1.g18824.t1 | gb AAG51783.1 AC079679.3 reverse transcriptase, putative: 16838-20266 [Arabidopsis thaliana] ref NP_197446.1  calcium-dependent protein kinase 19 [Arabidopsis thaliana] gi 30687323 ref NP_850853.1  calcium-dependent protein kinase 19 [Arabidopsis thaliana] gi 75319668 sp Q42438.1 CDPK8_ARATH RecName: Full=Calcium-dependent protein kinase 8; AltName: Full=Calcium-dependent protein kinase isoform CDPK19; Short=AtCDPK19 gi 836942 gb AAA67655.1  calcium-dependent protein kinase [Arabidopsis thaliana] gi 836948 gb AAA67658.1  calcium-dependent protein kinase [Arabidopsis thaliana] gi 332005325 gb AED92708.1  calcium-dependent protein kinase 19 [Arabidopsis thaliana] gi 332005326 gb AED92709.1  calcium-dependent protein kinase 19 [Arabidopsis thaliana] | 310  | 1142 | 3.00E-97 | 368.4 | 58.4 | 72.3 | reverse transcriptase, putative: 16838-20266         | gbpln | Arabidopsis thaliana | AT429090.1   Symbols:   Ribonuclease H-like superfamily protein   chr4:14333528-14335255 FORWARD LENGTH=575                                                            | 310  | 575  | 9.00E-27 | 185.5 | 25.8 | 36.5 |
| Rsa1.0_00739.1.g18825.t2 | gb E0A37750.1  hypothetical protein CARUB_v10012565mg [Capsella rubella]                                                                                                                                                                                                                                                                                                                                                                                                                                                                                                                                                                                                                                                                                                             | 536  | 533  | 0        | 99.4  | 94.8 | 97.4 | calcium-dependent protein kinase 19                  | gbpln | Arabidopsis thaliana | AT5G19450.2   Symbols: CDPK19, CPK8   calcium-dependent protein kinase 19   chr5:6558672-6561471 REVERSE LENGTH=533                                                    | 536  | 533  | 0        | 99.4  | 94.8 | 97.4 |
| Rsa1.0_00739.1.g18826.t1 | gb EOA20537.1  hypothetical protein CARUB_v10000850mg, partial [Capsella rubella]                                                                                                                                                                                                                                                                                                                                                                                                                                                                                                                                                                                                                                                                                                    | 452  | 481  | 0        | 106.4 | 92.0 | 95.8 | hypothetical protein CARUB_v10000850mg, partial      | gbpln | Capsella rubella     | AT5G19485.1   Symbols:   transferases:nucleotidyltransferases   chr5:6573907-6576352 REVERSE LENGTH=456                                                                | 452  | 456  | 0        | 100.9 | 91.4 | 95.6 |
| Rsa1.0_00739.1.g18827.t1 | ref NP_197450.2  histone 2A domain-containing protein [Arabidopsis thaliana] gi 332005334 gb AED92717.1  histone 2A domain-containing protein [Arabidopsis thaliana] ref XP_002871890.1  tryptophan/tyrosine permease family protein [Arabidopsis lyrata subsp. lyrata] gi 297317727 gb EFH48149.1  tryptophan/tyrosine permease family protein [Arabidopsis lyrata subsp. lyrata]                                                                                                                                                                                                                                                                                                                                                                                                   | 256  | 264  | 5.00E-86 | 103.1 | 73.8 | 83.2 | histone 2A domain-containing protein                 | gbpln | Arabidopsis thaliana | AT5G19490.1   Symbols:   Histone superfamily protein   chr5:6576769-6578273 REVERSE LENGTH=264                                                                         | 256  | 264  | 1.00E-88 | 103.1 | 73.8 | 83.2 |
| Rsa1.0_00739.1.g18828.t1 | tryptophan/tyrosine permease family protein [Arabidopsis lyrata subsp. lyrata] gi 297317727 gb EFH48149.1  tryptophan/tyrosine permease family protein [Arabidopsis lyrata subsp. lyrata]                                                                                                                                                                                                                                                                                                                                                                                                                                                                                                                                                                                            | 496  | 504  | 0        | 101.6 | 85.5 | 91.7 | tryptophan/tyrosine permease family protein          | gbpln | Arabidopsis lyrata   | AT5G19500.1   Symbols:   Tryptophan/tyrosine permease   chr5:6579019-6581699 FORWARD LENGTH=505                                                                        | 496  | 505  | 0        | 101.8 | 85.7 | 92.1 |
| Rsa1.0_00739.1.g18829.t1 | gb EOA19454.1  hypothetical protein CARUB_v10001845mg, partial [Capsella rubella]                                                                                                                                                                                                                                                                                                                                                                                                                                                                                                                                                                                                                                                                                                    | 225  | 240  | 1.00E-96 | 106.7 | 81.3 | 89.3 | hypothetical protein CARUB_v10001845mg, partial      | gbpln | Capsella rubella     | AT5G12110.1   Symbols:   Glutathione S-transferase, C-terminal-like, Translation elongation factor EF1B/ribosomal protein S6   chr5:3914483-3915732 FORWARD LENGTH=228 | 225  | 228  | 1.00E-94 | 101.3 | 84.0 | 91.1 |
| Rsa1.0_00739.1.g18830.t2 | ref NP_197453.1  mechanosensitive channel of small conductance-like 9 [Arabidopsis thaliana] gi 75147155 sp Q84M97.1 MSL9_ARATH RecName: Full=Mechanosensitive ion channel protein 9; AltName: Full=Mechanosensitive channel of small conductance-like 9; AltName: Full=MscS-Like protein 9; Short=AtMSL9 gi 30102694 gb AAP21265.1  At5g19520 [Arabidopsis thaliana] gi 110736360 dbj BAF00149.1  hypothetical protein [Arabidopsis thaliana] gi 332005337 gb AED92720.1  mechanosensitive channel of small conductance-like 9 [Arabidopsis thaliana]                                                                                                                                                                                                                               | 745  | 742  | 0        | 99.6  | 72.9 | 85.4 | mechanosensitive channel of small conductance-like 9 | gbpln | Arabidopsis thaliana | AT5G19520.1   Symbols: MSL9, ATMSL9   mechanosensitive channel of small conductance-like 9   chr5:6586079-6588771 FORWARD LENGTH=742                                   | 745  | 742  | 0        | 99.6  | 72.9 | 85.4 |

|                          |                                                                                                                                                                                                                                                                                                                                                                                                                                                        |     |     |           |       |      |      |                                                                                                                                                                                                                                                                                                                                                                         |       |                      |                                                                                                                                                  |     |     |           |       |      |      |
|--------------------------|--------------------------------------------------------------------------------------------------------------------------------------------------------------------------------------------------------------------------------------------------------------------------------------------------------------------------------------------------------------------------------------------------------------------------------------------------------|-----|-----|-----------|-------|------|------|-------------------------------------------------------------------------------------------------------------------------------------------------------------------------------------------------------------------------------------------------------------------------------------------------------------------------------------------------------------------------|-------|----------------------|--------------------------------------------------------------------------------------------------------------------------------------------------|-----|-----|-----------|-------|------|------|
| Rsa1.0_00739.1.g18831.t1 | dbj BAB83654.1  spermine synthase [Arabidopsis halleri subsp. gemmifera]                                                                                                                                                                                                                                                                                                                                                                               | 339 | 339 | 0         | 100.0 | 95.0 | 97.9 | spermine synthase                                                                                                                                                                                                                                                                                                                                                       | gbpln | Arabidopsis halleri  | AT5G19530.1   Symbols: ACL5   S-adenosyl-L-methionine-dependent methyltransferases superfamily protein   chr5:6589176-6591091 REVERSE LENGTH=339 | 339 | 339 | 0         | 100.0 | 93.8 | 97.1 |
| Rsa1.0_00740.1.g18832.t1 | sp Q39290.1 RPAB5_BRANA RecName: Full=DNA-directed RNA polymerases I, II, and III subunit RPABC5; Short=RNA polymerases I, II, and III subunit ABC5; AltName: Full=ABC10; AltName: Full=DNA-directed RNA polymerase III subunit L; AltName: Full=RPB10 homolog gi 533690 gb AA21279.1  RNA polymerase II subunit RPB10 homolog; similar to yeast RNA polymerase II subunit RPB10. Swiss-Prot Accession Number P22139 [Brassica napus]                  | 77  | 71  | 8.00E-22  | 92.2  | 68.8 | 70.1 | RecName: Full=DNA-directed RNA polymerases I, II, and III subunit RPABC5; Short=RNA polymerases I, II, and III subunit ABC5; AltName: Full=DNA-directed RNA polymerase III subunit L; AltName: Full=RPB10 homolog gi 533690 gb AA21279.1  RNA polymerase II subunit RPB10 homolog; similar to yeast RNA polymerase II subunit RPB10. Swiss-Prot Accession Number P22139 | gbpln | Brassica napus       | AT1G11475.1   Symbols: NRPB10, NRPD10, NRPE10   RNA polymerases N / 8 kDa subunit   chr1:3862520-3863805 FORWARD LENGTH=71                       | 77  | 71  | 1.00E-23  | 92.2  | 66.2 | 67.5 |
| Rsa1.0_00740.1.g18833.t1 | gb EOA39997.1  hypothetical protein CARUB_v10008685mg [Capsella rubella]                                                                                                                                                                                                                                                                                                                                                                               | 607 | 581 | 0         | 95.7  | 72.0 | 80.2 | hypothetical protein CARUB_v10008685mg                                                                                                                                                                                                                                                                                                                                  | gbpln | Capsella rubella     | AT1G11480.1   Symbols:   eukaryotic translation initiation factor-related   chr1:3864368-3866750 REVERSE LENGTH=578                              | 607 | 578 | 0         | 95.2  | 68.9 | 76.1 |
| Rsa1.0_00740.1.g18834.t1 | ref XP_002892647.1  zinc finger family protein [Arabidopsis lyrata subsp. lyrata] gi 297338489 gb EFH68906.1  zinc finger family protein [Arabidopsis lyrata subsp. lyrata]                                                                                                                                                                                                                                                                            | 364 | 362 | 1.00E-147 | 99.5  | 75.3 | 84.6 | zinc finger family protein                                                                                                                                                                                                                                                                                                                                              | gbpln | Arabidopsis lyrata   | AT1G11490.1   Symbols:   zinc finger (C2H2 type) family protein   chr1:3868884-3870065 REVERSE LENGTH=365                                        | 364 | 365 | 1.00E-147 | 100.3 | 74.7 | 83.2 |
| Rsa1.0_00740.1.g18835.t1 | ref XP_002889872.1  At1g11500 [Arabidopsis lyrata subsp. lyrata] gi 297335714 gb EFH66131.1  At1g11500 [Arabidopsis lyrata subsp. lyrata]                                                                                                                                                                                                                                                                                                              | 185 | 184 | 2.00E-76  | 99.5  | 82.2 | 87.6 | At1g11500                                                                                                                                                                                                                                                                                                                                                               | gbpln | Arabidopsis lyrata   | AT1G11500.1   Symbols:   Protein of unknown function (DUF218)   chr1:3870833-3871570 FORWARD LENGTH=184                                          | 185 | 184 | 1.00E-76  | 99.5  | 78.9 | 83.2 |
| Rsa1.0_00740.1.g18836.t1 | gb EOA36119.1  hypothetical protein CARUB_v10011873mg [Capsella rubella]                                                                                                                                                                                                                                                                                                                                                                               | 409 | 378 | 2.00E-67  | 92.4  | 48.4 | 61.4 | hypothetical protein CARUB_v10011873mg                                                                                                                                                                                                                                                                                                                                  | gbpln | Capsella rubella     | AT1G11510.1   Symbols:   DNA-binding storekeeper protein-related transcriptional regulator   chr1:3871778-3872836 REVERSE LENGTH=352             | 409 | 352 | 7.00E-66  | 86.1  | 45.5 | 58.2 |
| Rsa1.0_00740.1.g18837.t1 | ref NP_563892.1  xyloglucan:xyloglucosyl transferase [Arabidopsis thaliana] gi 334302869 sp Q8L9A9.2 XTH8_ARAT H RecName: Full=Probable xyloglucan endotransglucosylase/hydrolase protein 8; Short=At-XTH8; Short=XTH-8; Flags: Precursor gi 110736799 dbj BAF00360.1  endo-xyloglucan transferase like protein [Arabidopsis thaliana] gi 332190629 gb AEE28750.1  probable xyloglucan endotransglucosylase/hydrolase protein 8 [Arabidopsis thaliana] | 299 | 305 | 1.00E-169 | 102.0 | 93.0 | 96.7 | xyloglucan:xyloglucosyl transferase                                                                                                                                                                                                                                                                                                                                     | gbpln | Arabidopsis thaliana | AT1G11545.1   Symbols: XTH8   xyloglucan endotransglucosylase/hydrolase 8   chr1:3878889-3880286 REVERSE LENGTH=305                              | 299 | 305 | 1.00E-171 | 102.0 | 93.0 | 96.7 |
| Rsa1.0_00740.1.g18838.t1 | ref XP_002889875.1  hypothetical protein ARALYDRAFT_888463 [Arabidopsis lyrata subsp. lyrata] gi 297335717 gb EFH66134.1  hypothetical protein ARALYDRAFT_888463 [Arabidopsis lyrata subsp. lyrata]                                                                                                                                                                                                                                                    | 92  | 89  | 5.00E-38  | 96.7  | 88.0 | 93.5 | hypothetical protein ARALYDRAFT_888463                                                                                                                                                                                                                                                                                                                                  | gbpln | Arabidopsis lyrata   | AT1G11572.1   Symbols:   Plant thionin family protein   chr1:3884455-3884724 FORWARD LENGTH=89                                                   | 92  | 89  | 3.00E-38  | 96.7  | 81.5 | 91.3 |
| Rsa1.0_00740.1.g18839.t3 | ref XP_002874731.1  predicted protein [Arabidopsis lyrata subsp. lyrata] gi 297320568 gb EFH50990.1  predicted protein [Arabidopsis lyrata subsp. lyrata]                                                                                                                                                                                                                                                                                              | 830 | 806 | 0         | 97.1  | 62.9 | 73.7 | predicted protein                                                                                                                                                                                                                                                                                                                                                       | gbpln | Arabidopsis lyrata   | AT4G11900.1   Symbols:   S-locus lectin protein kinase family protein   chr4:7150241-7153542 REVERSE LENGTH=849                                  | 830 | 849 | 0         | 102.3 | 61.3 | 72.8 |
| Rsa1.0_00740.1.g18840.t1 | ref XP_002892652.1  pentatricopeptide repeat-containing protein [Arabidopsis lyrata subsp. lyrata] gi 297338494 gb EFH68911.1  pentatricopeptide repeat-containing protein [Arabidopsis lyrata subsp. lyrata]                                                                                                                                                                                                                                          | 403 | 403 | 1.00E-170 | 100.0 | 71.2 | 84.9 | pentatricopeptide repeat-containing protein                                                                                                                                                                                                                                                                                                                             | gbpln | Arabidopsis lyrata   | AT1G11630.1   Symbols:   Tetratricopeptide repeat (TPR)-like superfamily protein   chr1:3913168-3914385 REVERSE LENGTH=405                       | 403 | 405 | 1.00E-166 | 100.5 | 70.7 | 84.1 |
| Rsa1.0_00740.1.g18841.t1 | #                                                                                                                                                                                                                                                                                                                                                                                                                                                      | #   | #   | #         | #     | #    | -    | ----                                                                                                                                                                                                                                                                                                                                                                    | ----  | ----                 | #                                                                                                                                                | #   | #   | #         | #     | #    |      |



|                          |                                                                                                                                                                                                                                                                                                                                                                                                                                                                                                                                                                                                                                                                                                                                                                                      |      |      |          |       |      |      |                                                    |       |                      |                                                                                                                                                                                                                                                                                                                                                              |      |      |          |       |      |      |
|--------------------------|--------------------------------------------------------------------------------------------------------------------------------------------------------------------------------------------------------------------------------------------------------------------------------------------------------------------------------------------------------------------------------------------------------------------------------------------------------------------------------------------------------------------------------------------------------------------------------------------------------------------------------------------------------------------------------------------------------------------------------------------------------------------------------------|------|------|----------|-------|------|------|----------------------------------------------------|-------|----------------------|--------------------------------------------------------------------------------------------------------------------------------------------------------------------------------------------------------------------------------------------------------------------------------------------------------------------------------------------------------------|------|------|----------|-------|------|------|
| Rsa1.0_00740.1.g18842.t1 | refNP_683299.1  uncharacterized protein [Arabidopsis thaliana] gi 28466815 gb AAO4401.6.1  At1g11655 [Arabidopsis thaliana] gi 110743478 dbj BAE99625.1  hypothetical protein [Arabidopsis thaliana] gi 332190645 gb AEE28766.1  uncharacterized protein AT1G11655 [Arabidopsis thaliana] refNP_172631.2  heat shock protein 70 (Hsp 70) family protein [Arabidopsis thaliana] gi 75313135 sp Q9SAB1.1 HSP7Q_ARAT H RecName: Full=Heat shock 70 kDa protein 16; AltName: Full=Heat shock protein 70-16; Short=AtHsp70-16                                                                                                                                                                                                                                                             | 114  | 113  | 1.00E-41 | 99.1  | 74.6 | 86.0 | uncharacterized protein                            | gbpln | Arabidopsis thaliana | AT1G11655.1   Symbols:   unknown protein; BEST Arabidopsis thaliana protein match is: unknown protein (TAIR:AT4G21902.1); Has 22 Blast hits to 22 proteins in 6 species: Archae - 0; Bacteria - 0; Metazoa - 0; Fungi - 0; Plants - 22; Viruses - 0; Other Eukaryotes - 0 (source: NCBI BLINK).   chr1:3919338-3919679 FORWARD LENGTH=113                    | 114  | 113  | 2.00E-44 | 99.1  | 74.6 | 86.0 |
| Rsa1.0_00740.1.g18843.t1 | gi 4835791 gb AAD30257.1 AC007296_18 Strong similarity to gb Z70314 heat-shock protein from Arabidopsis thaliana and is a member of the PF 00012 Hsp70 protein family [Arabidopsis thaliana] gi 332190646 gb AEE28767.1  heat shock protein 70 (Hsp 70) family protein [Arabidopsis thaliana] refNP_172635.1  cytochrome P450, family 51 (sterol 14-demethylase) [Arabidopsis thaliana] gi 75313134 sp Q9SAA9.1 CP511_ARAT H RecName: Full=Sterol 14-demethylase; AltName: Full=Cytochrome P450 51A2; AltName: Full=Cytochrome P450 51G1; Short=AtCYP51; AltName: Full=Obtusifolol 14-demethylase; AltName: Full=Protein EMBRYO DEFECTIVE 1738                                                                                                                                       | 755  | 763  | 0        | 101.1 | 90.6 | 94.4 | heat shock protein 70 (Hsp 70) family protein      | gbpln | Arabidopsis thaliana | AT1G11660.1   Symbols:   heat shock protein 70 (Hsp 70) family protein   chr1:3921056-3924347 FORWARD LENGTH=763                                                                                                                                                                                                                                             | 755  | 763  | 0        | 101.1 | 90.6 | 94.4 |
| Rsa1.0_00740.1.g18844.t1 | gi 4835788 gb AAD30254.1 AC007296_15 Strong similarity to gb U74319 obtusifolol 14-alpha demethylase (CYP51) from Sorghum bicolor and is a member of the PF 00067 cytochrome P450 family. ESTs gb AA72030. gb N65031 and gb AA651059 come from this gene [Arabidopsis thaliana] gi 15294294 gb AAK95324.1 AF410338_1 At1g11680/F25C20.17 [Arabidopsis thaliana] gi 14624983 dbj BAB61873.1  obtusifolol 14-demethylase [Arabidopsis thaliana] gi 15292853 gb AAK92797.1  putative obtusifolol 14-alpha demethylase [Arabidopsis thaliana] gi 20258897 gb AAM14142.1  putative obtusifolol 14-alpha demethylase [Arabidopsis thaliana] gi 21536753 gb AAM61085.1  putative obtusifolol 14-alpha demethylase [Arabidopsis thaliana]                                                    | 490  | 488  | 0        | 99.6  | 92.4 | 97.6 | cytochrome P450, family 51 (sterol 14-demethylase) | gbpln | Arabidopsis thaliana | AT1G11680.1   Symbols: CYP51G1, EMB1738, CYP51A2, CYP51   CYTOCHROME P450 51G1   chr1:3938925-3940585 FORWARD LENGTH=488                                                                                                                                                                                                                                     | 490  | 488  | 0        | 99.6  | 92.4 | 97.6 |
| Rsa1.0_00740.1.g18845.t1 | refNP_172634.1  uncharacterized protein [Arabidopsis thaliana] gi 4835790 gb AAD30256.1 AC007296_17 F25C20.16 [Arabidopsis thaliana] gi 225897912 dbj BAH30288.1  hypothetical protein [Arabidopsis thaliana] gi 332190650 gb AEE28771.1  uncharacterized protein AT1G11690 [Arabidopsis thaliana] refNP_172635.1  uncharacterized protein [Arabidopsis thaliana] gi 4835787 gb AAD30253.1 AC007296_14 ESTs gb R65381 and gb T44635 come from this gene [Arabidopsis thaliana] gi 13194780 gb AAK15552.1 AF348581_1 unknown protein [Arabidopsis thaliana] gi 27808534 gb AAO24547.1  At1g11700 [Arabidopsis thaliana] gi 110743662 dbj BAE99668.1  hypothetical protein [Arabidopsis thaliana] gi 332190651 gb AEE28772.1  uncharacterized protein AT1G11700 [Arabidopsis thaliana] | 216  | 247  | 2.00E-73 | 114.4 | 69.4 | 82.9 | uncharacterized protein                            | gbpln | Arabidopsis thaliana | AT1G11690.1   Symbols:   unknown protein; BEST Arabidopsis thaliana protein match is: unknown protein (TAIR:AT3G20350.1); Has 5959 Blast hits to 4807 proteins in 476 species: Archae - 156; Bacteria - 436; Metazoa - 2789; Fungi - 309; Plants - 336; Viruses - 9; Other Eukaryotes - 1924 (source: NCBI BLINK).   chr1:3941469-3942212 FORWARD LENGTH=247 | 216  | 247  | 5.00E-76 | 114.4 | 69.4 | 82.9 |
| Rsa1.0_00740.1.g18846.t1 | gi 13194780 gb AAK15552.1 AF348581_1 unknown protein [Arabidopsis thaliana] gi 27808534 gb AAO24547.1  At1g11700 [Arabidopsis thaliana] gi 110743662 dbj BAE99668.1  hypothetical protein [Arabidopsis thaliana] gi 332190651 gb AEE28772.1  uncharacterized protein AT1G11700 [Arabidopsis thaliana]                                                                                                                                                                                                                                                                                                                                                                                                                                                                                | 212  | 201  | 4.00E-76 | 94.8  | 82.5 | 88.7 | uncharacterized protein                            | gbpln | Arabidopsis thaliana | AT1G11700.1   Symbols:   Protein of unknown function, DUF584   chr1:3945852-3946457 FORWARD LENGTH=201                                                                                                                                                                                                                                                       | 212  | 201  | 1.00E-78 | 94.8  | 82.5 | 88.7 |
| Rsa1.0_00740.1.g18847.t1 | gb EOA37371.1  hypothetical protein CARUB_v10011175mg [Capsella rubella]                                                                                                                                                                                                                                                                                                                                                                                                                                                                                                                                                                                                                                                                                                             | 1745 | 1093 | 0        | 62.6  | 53.0 | 56.5 | hypothetical protein CARUB_v10011175mg             | gbpln | Capsella rubella     | AT1G11720.2   Symbols: SS3   starch synthase 3   chr1:3951597-3956840 FORWARD LENGTH=1094                                                                                                                                                                                                                                                                    | 1745 | 1094 | 0        | 62.7  | 52.1 | 56.0 |

|                          |                                                                                                                                                                                                                                                                                                                                                                                                                                                                                                       |      |      |           |       |      |      |                                             |       |                      |                                                                                                                                                                                                                                                                                                                            |      |      |           |       |      |      |
|--------------------------|-------------------------------------------------------------------------------------------------------------------------------------------------------------------------------------------------------------------------------------------------------------------------------------------------------------------------------------------------------------------------------------------------------------------------------------------------------------------------------------------------------|------|------|-----------|-------|------|------|---------------------------------------------|-------|----------------------|----------------------------------------------------------------------------------------------------------------------------------------------------------------------------------------------------------------------------------------------------------------------------------------------------------------------------|------|------|-----------|-------|------|------|
| Rsa1.0_00740.1.g18848.t1 | refNP_172638.1  putative beta-1,3-galactosyltransferase 1 [Arabidopsis thaliana]<br>gi 221222634 sp Q9SAA4.2 B3GT1_ARA TH RecName: Full=Probable beta-1,3-galactosyltransferase 1<br>gi 332190655 gb AEE28776.1  putative beta-1,3-galactosyltransferase 1 [Arabidopsis thaliana]                                                                                                                                                                                                                     | 408  | 384  | 0         | 94.1  | 79.9 | 86.3 | putative beta-1,3-galactosyltransferase 1   | gbpln | Arabidopsis thaliana | AT1G11730.1   Symbols:   Galactosyltransferase family protein   chr1:3957473-3960113 FORWARD LENGTH=384                                                                                                                                                                                                                    | 408  | 384  | 0         | 94.1  | 79.9 | 86.3 |
| Rsa1.0_00740.1.g18849.t1 | dbj BAA97099.1  retroelement pol polyprotein-like [Arabidopsis thaliana]                                                                                                                                                                                                                                                                                                                                                                                                                              | 450  | 1098 | 1.00E-126 | 244.0 | 54.0 | 67.8 | retroelement pol polyprotein-like           | gbpln | Arabidopsis thaliana | AT1G21280.1   Symbols:   CONTAINS InterPro DOMAIN/s: Retrotransposon gag protein (InterPro:IPR005162); Has 707 Blast hits to 705 proteins in 25 species: Archae - 0; Bacteria - 0; Metazoa - 4; Fungi - 0; Plants - 703; Viruses - 0; Other Eukaryotes - 0 (source: NCBI BLink).   chr1:7447690-7448403 REVERSE LENGTH=237 | 450  | 237  | 3.00E-28  | 52.7  | 15.1 | 25.3 |
| Rsa1.0_00740.1.g18850.t1 | dbj BAA97287.1  retroelement pol polyprotein-like [Arabidopsis thaliana]                                                                                                                                                                                                                                                                                                                                                                                                                              | 1336 | 1491 | 0         | 111.6 | 58.2 | 72.4 | retroelement pol polyprotein-like           | gbpln | Arabidopsis thaliana | AT4G23160.1   Symbols: CRK8   cysteine-rich RLK (RECEPTOR-like protein kinase) 8   chr4:12129485-12134086 FORWARD LENGTH=1262                                                                                                                                                                                              | 1336 | 1262 | 1.00E-127 | 94.5  | 17.8 | 26.3 |
| Rsa1.0_00740.1.g18851.t1 | refNP_563925.1  putative galacturonosyltransferase-like 3 [Arabidopsis thaliana]<br>gi 12223578 sp Q0V7R1.1 GATL3_ARA TH RecName: Full=Probable galacturonosyltransferase-like 3<br>gi 111074486 gb ABH04616.1  At1g13250 [Arabidopsis thaliana]<br>gi 332190869 gb AEE28990.1  putative galacturonosyltransferase-like 3 [Arabidopsis thaliana]                                                                                                                                                      | 345  | 345  | 1.00E-169 | 100.0 | 87.8 | 89.6 | putative galacturonosyltransferase-like 3   | gbpln | Arabidopsis thaliana | AT1G13250.1   Symbols: GATL3   galacturonosyltransferase-like 3   chr1:4528965-4530002 REVERSE LENGTH=345                                                                                                                                                                                                                  | 345  | 345  | 1.00E-172 | 100.0 | 87.8 | 89.6 |
| Rsa1.0_00740.1.g18852.t2 | #                                                                                                                                                                                                                                                                                                                                                                                                                                                                                                     | #    | #    | #         | #     | #    | -    | ----                                        | ----  | #                    | #                                                                                                                                                                                                                                                                                                                          | #    | #    | #         | #     | #    |      |
| Rsa1.0_00740.1.g18853.t9 | #                                                                                                                                                                                                                                                                                                                                                                                                                                                                                                     | #    | #    | #         | #     | #    | -    | ----                                        | ----  | #                    | #                                                                                                                                                                                                                                                                                                                          | #    | #    | #         | #     | #    |      |
| Rsa1.0_00740.1.g18854.t1 | refNP_172782.2  Piriformospora indica-insensitive protein 2 [Arabidopsis thaliana]<br>gi 75321275 sp Q5PP26.1 PII2_ARATH RecName: Full=Piriformospora indica-insensitive protein 2; Flags: Precursor<br>gi 56236072 gb AAV84492.1  At1g13230 [Arabidopsis thaliana]<br>gi 332190867 gb AEE28988.1  Piriformospora indica-insensitive protein 2 [Arabidopsis thaliana]                                                                                                                                 | 421  | 424  | 0         | 100.7 | 80.3 | 87.6 | Piriformospora indica-insensitive protein 2 | gbpln | Arabidopsis thaliana | AT1G13230.1   Symbols:   Leucine-rich repeat (LRR) family protein   chr1:4520679-4522439 FORWARD LENGTH=424                                                                                                                                                                                                                | 421  | 424  | 0         | 100.7 | 80.3 | 87.6 |
| Rsa1.0_00740.1.g18855.t1 | gb EOA39033.1  hypothetical protein CARUB_v10011605mg [Capsella rubella]                                                                                                                                                                                                                                                                                                                                                                                                                              | 1161 | 1169 | 0         | 100.7 | 80.4 | 87.3 | hypothetical protein CARUB_v10011605mg      | gbpln | Capsella rubella     | AT1G13220.2   Symbols: LINC2   nuclear matrix constituent protein-related   chr1:4515699-4520071 FORWARD LENGTH=1128                                                                                                                                                                                                       | 1161 | 1128 | 0         | 97.2  | 76.4 | 83.8 |
| Rsa1.0_00740.1.g18856.t1 | gb EOA36037.1  hypothetical protein CARUB_v10008116mg [Capsella rubella]                                                                                                                                                                                                                                                                                                                                                                                                                              | 1217 | 1204 | 0         | 98.9  | 88.8 | 93.7 | hypothetical protein CARUB_v10008116mg      | gbpln | Capsella rubella     | AT1G13210.1   Symbols: ACA   autoinhibited Ca2+/ATPase II   chr1:4509252-4513774 REVERSE LENGTH=1203                                                                                                                                                                                                                       | 1217 | 1203 | 0         | 98.8  | 87.8 | 92.9 |
| Rsa1.0_00740.1.g18857.t1 | refNP_563922.1  RING/U-box domain-containing protein [Arabidopsis thaliana]<br>gi 4850408 gb AAD31078.1 AC007357.27 Contains PF 00097 Zinc finger (C3HC4) ring finger motif [Arabidopsis thaliana]<br>gi 21593124 gb AAM65073.1  unknown [Arabidopsis thaliana]<br>gi 87116602 gb ABD19665.1  At1g13195 [Arabidopsis thaliana]<br>gi 110742119 dbj BAE98989.1  hypothetical protein [Arabidopsis thaliana]<br>gi 332190861 gb AEE28982.1  RING/U-box domain-containing protein [Arabidopsis thaliana] | 258  | 260  | 1.00E-136 | 100.8 | 93.0 | 96.9 | RING/U-box domain-containing protein        | gbpln | Arabidopsis thaliana | AT1G13195.1   Symbols:   RING/U-box superfamily protein   chr1:4501778-4503347 REVERSE LENGTH=260                                                                                                                                                                                                                          | 258  | 260  | 1.00E-139 | 100.8 | 93.0 | 96.9 |

|                          |                                                                                                                                                                                                                                                                                                                                                                                                                                                                                                                  |      |      |           |        |      |      |                                               |       |                      |                                                                                                                                                                                                                                                             |      |      |           |        |      |      |
|--------------------------|------------------------------------------------------------------------------------------------------------------------------------------------------------------------------------------------------------------------------------------------------------------------------------------------------------------------------------------------------------------------------------------------------------------------------------------------------------------------------------------------------------------|------|------|-----------|--------|------|------|-----------------------------------------------|-------|----------------------|-------------------------------------------------------------------------------------------------------------------------------------------------------------------------------------------------------------------------------------------------------------|------|------|-----------|--------|------|------|
| Rsa1.0_00740.1.g18858.t1 | refNP_172778.1  RNA recognition motif-containing protein [Arabidopsis thaliana]<br>gi 4850402 gb AAD31072.1 AC007357.21<br>Contains similarity to gb Y12424 SGRP-1 protein from Solanum commersonii and contains a PF 00076 RNA recognition motif [Arabidopsis thaliana]<br>gi 17064902 gb AAL32605.1  Unknown protein [Arabidopsis thaliana]<br>gi 27311939 gb AAO0935.1  Unknown protein [Arabidopsis thaliana]<br>gi 332190860 gb AEE28981.1  RNA recognition motif-containing protein [Arabidopsis thaliana] | 591  | 573  | 0         | 97.0   | 80.9 | 86.8 | RNA recognition motif-containing protein      | gbpln | Arabidopsis thaliana | AT1G13190.1   Symbols:   RNA-binding (RRM/RBD/RNP motifs) family protein   chr1:449833-4501354 FORWARD LENGTH=573                                                                                                                                           | 591  | 573  | 0         | 97.0   | 80.9 | 86.8 |
| Rsa1.0_00741.1.g18859.t1 | gb ABD64941.1  Ulp1 protease family protein [Brassica oleracea]                                                                                                                                                                                                                                                                                                                                                                                                                                                  | 950  | 871  | 1.00E-87  | 91.7   | 29.3 | 47.6 | Ulp1 protease family protein                  | gbpln | Brassica oleracea    | AT2G07240.1   Symbols:   cysteine-type peptidases:cysteine-type peptidases   chr2:3007102-3011701 REVERSE LENGTH=874                                                                                                                                        | 950  | 874  | 1.00E-27  | 92.0   | 9.7  | 14.2 |
| Rsa1.0_00741.1.g18860.t3 | gb AAC79133.1  putative Mutator-like transposase, 3' partial [Arabidopsis thaliana]                                                                                                                                                                                                                                                                                                                                                                                                                              | 712  | 792  | 1.00E-112 | 111.2  | 36.2 | 53.8 | putative Mutator-like transposase, 3' partial | gbpln | Arabidopsis thaliana | AT1G64260.1   Symbols:   MuDR family transposase   chr1:2384756-23849915 FORWARD LENGTH=719                                                                                                                                                                 | 712  | 719  | 1.00E-21  | 101.0  | 12.9 | 23.7 |
| Rsa1.0_00741.1.g18861.t1 | gb EOA29059.1  hypothetical protein CARUB_v10025314mg [Capsella rubella]                                                                                                                                                                                                                                                                                                                                                                                                                                         | 177  | 587  | 8.00E-26  | 331.6  | 36.2 | 40.7 | hypothetical protein CARUB_v10025314mg        | gbpln | Capsella rubella     | AT2G38910.1   Symbols: CPK20   calcium-dependent protein kinase 20   chr2:16245214-16247483 REVERSE LENGTH=583                                                                                                                                              | 177  | 583  | 3.00E-27  | 329.4  | 35.0 | 40.7 |
| Rsa1.0_00741.1.g18862.t1 | db BAJ34334.1  unnamed protein product [Theillungiella halophila]                                                                                                                                                                                                                                                                                                                                                                                                                                                | 145  | 141  | 7.00E-71  | 97.2   | 93.1 | 93.8 | unnamed protein product                       | ----  | ----                 | AT2G38890.3   Symbols: NF-YB1   nuclear factor Y, subunit B1   chr2:1623865-16240225 FORWARD LENGTH=140                                                                                                                                                     | 145  | 140  | 3.00E-72  | 96.6   | 91.0 | 93.1 |
| Rsa1.0_00741.1.g18863.t1 | gb EEE62437.1  hypothetical protein OsJ_17229 [Oryza sativa Japonica Group]                                                                                                                                                                                                                                                                                                                                                                                                                                      | 142  | 2504 | 3.00E-43  | 1763.4 | 62.7 | 75.4 | hypothetical protein OsJ_17229                | gbpln | Oryza sativa         | AT1G80070.1   Symbols: SUS2, EMB33, EMB177, EMB14   Pre-mRNA-processing-splicing factor   chr1:30118052-30127574 FORWARD LENGTH=2359                                                                                                                        | 142  | 2359 | 2.00E-45  | 1661.3 | 62.7 | 75.4 |
| Rsa1.0_00741.1.g18864.t1 | refNP_178124.2  Pre-mRNA-processing-splicing factor [Arabidopsis thaliana]<br>gi 5902365 gb AAD55467.1 AC009322.7<br>Putative splicing factor Prp8 [Arabidopsis thaliana]<br>gi 332198232 gb AEE36353.1  Pre-mRNA-processing-splicing factor [Arabidopsis thaliana]                                                                                                                                                                                                                                              | 2336 | 2359 | 0         | 101.0  | 89.8 | 94.6 | Pre-mRNA-processing-splicing factor           | gbpln | Arabidopsis thaliana | AT1G80070.1   Symbols: SUS2, EMB33, EMB177, EMB14   Pre-mRNA-processing-splicing factor   chr1:30118052-30127574 FORWARD LENGTH=2359                                                                                                                        | 2336 | 2359 | 0         | 101.0  | 89.8 | 94.6 |
| Rsa1.0_00741.1.g18865.t1 | gb EOA28115.1  hypothetical protein CARUB_v10024299mg [Capsella rubella]                                                                                                                                                                                                                                                                                                                                                                                                                                         | 82   | 134  | 1.00E-29  | 163.4  | 78.0 | 82.9 | hypothetical protein CARUB_v10024299mg        | gbpln | Capsella rubella     | AT2G38810.2   Symbols: HTA8   histone H2A 8   chr2:16219444-16220679 REVERSE LENGTH=136                                                                                                                                                                     | 82   | 136  | 2.00E-32  | 165.9  | 78.0 | 82.9 |
| Rsa1.0_00741.1.g18866.t1 | refXP_002879765.1  hypothetical protein ARALYDRAFT_482892 [Arabidopsis lyrata subsp. lyrata]<br>gi 297325604 gb EFH56024.1  hypothetical protein ARALYDRAFT_482892 [Arabidopsis lyrata subsp. lyrata]                                                                                                                                                                                                                                                                                                            | 520  | 620  | 0         | 119.2  | 72.1 | 83.1 | hypothetical protein ARALYDRAFT_482892        | gbpln | Arabidopsis lyrata   | AT2G38800.1   Symbols:   Plant calmodulin-binding protein-related   chr2:16216999-16218837 FORWARD LENGTH=612                                                                                                                                               | 520  | 612  | 1.00E-172 | 117.7  | 69.4 | 80.8 |
| Rsa1.0_00741.1.g18867.t1 | refXP_002881617.1  hypothetical protein ARALYDRAFT_482891 [Arabidopsis lyrata subsp. lyrata]<br>gi 297327456 gb EFH57876.1  hypothetical protein ARALYDRAFT_482891 [Arabidopsis lyrata subsp. lyrata]                                                                                                                                                                                                                                                                                                            | 202  | 203  | 7.00E-58  | 100.5  | 62.9 | 72.8 | hypothetical protein ARALYDRAFT_482891        | gbpln | Arabidopsis lyrata   | AT2G38790.1   Symbols:   unknown protein; Has 21 Blast hits to 21 proteins in 5 species: Archae - 0; Bacteria - 0; Metazoa - 0; Fungi - 0; Plants - 19; Viruses - 0; Other Eukaryotes - 2 (source: NCBI BLink).   chr2:16214546-16215160 REVERSE LENGTH=204 | 202  | 204  | 3.00E-57  | 101.0  | 61.9 | 69.8 |
| Rsa1.0_00741.1.g18868.t1 | refXP_002878163.1  F-box family protein [Arabidopsis lyrata subsp. lyrata]<br>gi 297324001 gb EFH54422.1  F-box family protein [Arabidopsis lyrata subsp. lyrata]                                                                                                                                                                                                                                                                                                                                                | 365  | 401  | 5.00E-90  | 109.9  | 52.6 | 63.3 | F-box family protein                          | gbpln | Arabidopsis lyrata   | AT3G57590.1   Symbols:   F-box and associated interaction domains-containing protein   chr3:21330182-21331396 REVERSE LENGTH=404                                                                                                                            | 365  | 404  | 3.00E-92  | 110.7  | 52.9 | 63.0 |
| Rsa1.0_00741.1.g18869.t1 | refXP_002881616.1  hypothetical protein ARALYDRAFT_482889 [Arabidopsis lyrata subsp. lyrata]<br>gi 297327455 gb EFH57875.1  hypothetical protein ARALYDRAFT_482889 [Arabidopsis lyrata subsp. lyrata]                                                                                                                                                                                                                                                                                                            | 1546 | 1512 | 0         | 97.8   | 91.2 | 94.4 | hypothetical protein ARALYDRAFT_482889        | gbpln | Arabidopsis lyrata   | AT2G38770.1   Symbols: EMB2765   P-loop containing nucleoside triphosphate hydrolases superfamily protein   chr2:16203185-16210253 REVERSE LENGTH=1509                                                                                                      | 1546 | 1509 | 0         | 97.6   | 90.9 | 93.9 |
| Rsa1.0_00741.1.g18870.t1 | db BAJ33731.1  unnamed protein product [Theillungiella halophila]                                                                                                                                                                                                                                                                                                                                                                                                                                                | 409  | 412  | 0         | 100.7  | 89.5 | 93.9 | unnamed protein product                       | ----  | ----                 | AT2G26900.1   Symbols:   Sodium Bile acid symporter family   chr2:11475156-11477870 REVERSE LENGTH=409                                                                                                                                                      | 409  | 409  | 0         | 100.0  | 88.3 | 92.9 |

|                          |                                                                                                                                                                                                                                                                                                                                                                                                                                                                                                                                                                                        |      |      |           |       |      |      |                                             |       |                      |                                                                                                                                                                                                                                                                                                                                            |      |     |           |       |      |      |
|--------------------------|----------------------------------------------------------------------------------------------------------------------------------------------------------------------------------------------------------------------------------------------------------------------------------------------------------------------------------------------------------------------------------------------------------------------------------------------------------------------------------------------------------------------------------------------------------------------------------------|------|------|-----------|-------|------|------|---------------------------------------------|-------|----------------------|--------------------------------------------------------------------------------------------------------------------------------------------------------------------------------------------------------------------------------------------------------------------------------------------------------------------------------------------|------|-----|-----------|-------|------|------|
| Rsa1.0_00741.1.g18871.t1 | ref NP_181407.1  peptidyl-prolyl isomerase H (cyclophilin H) [Arabidopsis thaliana] gi 3785999 gb AAC67345.1 putative peptidyl-prolyl cis-trans isomerase [Arabidopsis thaliana] gi 25083102 gb AAN72042.1 putative peptidyl-prolyl cis-trans isomerase [Arabidopsis thaliana] gi 3010291 gb AAP21373.1  At2g38730 [Arabidopsis thaliana] gi 45680872 gb AAS75305.1  single domain cyclophilin type peptidyl-prolyl cis-trans isomerase [Arabidopsis thaliana] gi 330254484 gb AEC09578.1  cyclophilin-like peptidyl-prolyl cis-trans isomerase family protein [Arabidopsis thaliana]  | 205  | 199  | 1.00E-106 | 97.1  | 90.7 | 95.6 | peptidyl-prolyl isomerase H (cyclophilin H) | gbpln | Arabidopsis thaliana | AT2G38730.1   Symbols:   Cyclophilin-like peptidyl-prolyl cis-trans isomerase family protein   chr2:16192579-16194038 REVERSE LENGTH=199                                                                                                                                                                                                   | 205  | 199 | 1.00E-108 | 97.1  | 90.7 | 95.6 |
| Rsa1.0_00741.1.g18872.t1 | ref NP_181403.2  uncharacterized protein [Arabidopsis thaliana] gi 330254476 gb AEC09570.1  uncharacterized protein AT2G38690 [Arabidopsis thaliana]                                                                                                                                                                                                                                                                                                                                                                                                                                   | 217  | 191  | 2.00E-43  | 88.0  | 56.7 | 66.8 | uncharacterized protein                     | gbpln | Arabidopsis thaliana | AT2G38690.1   Symbols:   unknown protein; Has 9 Blast hits to 7 proteins in 5 species: Archae - 0; Bacteria - 0; Metazoa - 4; Fungi - 2; Plants - 3; Viruses - 0; Other Eukaryotes - 0 (source: NCBI BLink).   chr2:16176905-16177669 REVERSE LENGTH=191                                                                                   | 217  | 191 | 6.00E-46  | 88.0  | 56.7 | 66.8 |
| Rsa1.0_00741.1.g18873.t1 | ref XP_002879759.1  hypothetical protein ARALYDRAFT_903103 [Arabidopsis lyrata subsp. lyrata] gi 297325598 gb EFH56018.1  hypothetical protein ARALYDRAFT_903103 [Arabidopsis lyrata subsp. lyrata]                                                                                                                                                                                                                                                                                                                                                                                    | 422  | 421  | 0         | 99.8  | 88.6 | 93.4 | hypothetical protein ARALYDRAFT_903103      | gbpln | Arabidopsis lyrata   | AT2G38670.1   Symbols: PECT1   phosphorylethanolamine cytidyltransferase 1   chr2:16168979-16171680 FORWARD LENGTH=421                                                                                                                                                                                                                     | 422  | 421 | 0         | 99.8  | 88.6 | 93.6 |
| Rsa1.0_00741.1.g18874.t2 | ref XP_002881608.1  GAUT7/LGT7 [Arabidopsis lyrata subsp. lyrata] gi 297327447 gb EFH57867.1  GAUT7/LGT7 [Arabidopsis lyrata subsp. lyrata]                                                                                                                                                                                                                                                                                                                                                                                                                                            | 630  | 617  | 0         | 97.9  | 81.3 | 88.6 | GAUT7/LGT7                                  | gbpln | Arabidopsis lyrata   | AT2G38650.2   Symbols: GAUT7   galacturonosyltransferase 7   chr2:16161856-16165523 REVERSE LENGTH=619                                                                                                                                                                                                                                     | 630  | 619 | 0         | 98.3  | 80.8 | 87.6 |
| Rsa1.0_00741.1.g18875.t1 | ref XP_002881606.1  hypothetical protein ARALYDRAFT_482873 [Arabidopsis lyrata subsp. lyrata] gi 297327445 gb EFH57865.1  hypothetical protein ARALYDRAFT_482873 [Arabidopsis lyrata subsp. lyrata]                                                                                                                                                                                                                                                                                                                                                                                    | 195  | 196  | 9.00E-98  | 100.5 | 87.7 | 93.3 | hypothetical protein ARALYDRAFT_482873      | gbpln | Arabidopsis lyrata   | AT2G38640.1   Symbols:   Protein of unknown function (DUF567)   chr2:16157725-16158474 REVERSE LENGTH=196                                                                                                                                                                                                                                  | 195  | 196 | 7.00E-99  | 100.5 | 85.6 | 93.8 |
| Rsa1.0_00742.1.g18876.t1 | # # # # # # # - ---- # # # # # #                                                                                                                                                                                                                                                                                                                                                                                                                                                                                                                                                       |      |      |           |       |      |      |                                             |       |                      |                                                                                                                                                                                                                                                                                                                                            |      |     |           |       |      |      |
| Rsa1.0_00742.1.g18877.t1 | ref NP_564515.1  uncharacterized protein [Arabidopsis thaliana] gi 30694176 ref NP_849781.1  uncharacterized protein [Arabidopsis thaliana] gi 9802603 gb AAF99805.1 AC012463.22 T2E6.7 [Arabidopsis thaliana] gi 17380814 gb AAL36094.1  unknown protein [Arabidopsis thaliana] gi 20465323 gb AAM20065.1  unknown protein [Arabidopsis thaliana] gi 21555584 gb AAM63891.1  unknown [Arabidopsis thaliana] gi 332194097 gb AEE32218.1  uncharacterized protein AT1G47820 [Arabidopsis thaliana] gi 332194098 gb AEE32219.1  uncharacterized protein AT1G47820 [Arabidopsis thaliana] | 92   | 96   | 1.00E-24  | 104.3 | 76.1 | 88.0 | uncharacterized protein                     | gbpln | Arabidopsis thaliana | AT1G47820.2   Symbols:   unknown protein; BEST Arabidopsis thaliana protein match is: unknown protein (TAIR:AT1G47813.1); Has 29 Blast hits to 29 proteins in 9 species: Archae - 0; Bacteria - 0; Metazoa - 0; Fungi - 0; Plants - 29; Viruses - 0; Other Eukaryotes - 0 (source: NCBI BLink).   chr1:17612114-17612404 FORWARD LENGTH=96 | 92   | 96  | 2.00E-27  | 104.3 | 76.1 | 88.0 |
| Rsa1.0_00742.1.g18878.t1 | gb EOA38658.1  hypothetical protein CARUB_v10010593mg [Capsella rubella]                                                                                                                                                                                                                                                                                                                                                                                                                                                                                                               | 142  | 142  | 1.00E-74  | 100.0 | 99.3 | 99.3 | hypothetical protein CARUB_v10010593mg      | gbpln | Capsella rubella     | AT1G47830.1   Symbols:   SNARE-like superfamily protein   chr1:17613346-17614784 REVERSE LENGTH=142                                                                                                                                                                                                                                        | 142  | 142 | 6.00E-77  | 100.0 | 98.6 | 99.3 |
| Rsa1.0_00742.1.g18879.t1 | gb AAC67205.1  putative retroelement pol polyprotein [Arabidopsis thaliana]                                                                                                                                                                                                                                                                                                                                                                                                                                                                                                            | 1046 | 1413 | 0         | 135.1 | 52.2 | 67.7 | putative retroelement pol polyprotein       | gbpln | Arabidopsis thaliana | AT1G21280.1   Symbols:   CONTAINS InterPro DOMAIN/s: Retrotransposon gag protein (InterPro:IPR005162); Has 707 Blast hits to 705 proteins in 25 species: Archae - 0; Bacteria - 0; Metazoa - 4; Fungi - 0; Plants - 703; Viruses - 0; Other Eukaryotes - 0 (source: NCBI BLink).   chr1:7447690-7448403 REVERSE LENGTH=237                 | 1046 | 237 | 5.00E-32  | 22.7  | 8.0  | 11.6 |
| Rsa1.0_00742.1.g18880.t2 | ref XP_002894073.1  hypothetical protein ARALYDRAFT_314227 [Arabidopsis lyrata subsp. lyrata] gi 297339915 gb EFH70332.1  hypothetical protein ARALYDRAFT_314227 [Arabidopsis lyrata subsp. lyrata]                                                                                                                                                                                                                                                                                                                                                                                    | 515  | 491  | 0         | 95.3  | 79.2 | 87.6 | hypothetical protein ARALYDRAFT_314227      | gbpln | Arabidopsis lyrata   | AT1G47840.1   Symbols: HXK3   hexokinase 3   chr1:17616243-17618859 REVERSE LENGTH=493                                                                                                                                                                                                                                                     | 515  | 493 | 0         | 95.7  | 78.4 | 86.4 |

|                          |                                                                                                                                                                                                                                                                                                                             |      |      |           |       |      |      |                                                     |       |                      |                                                                                                                                                                                                                                                                                                                                                                                                                                                                                                                                                                    |      |      |           |       |      |      |
|--------------------------|-----------------------------------------------------------------------------------------------------------------------------------------------------------------------------------------------------------------------------------------------------------------------------------------------------------------------------|------|------|-----------|-------|------|------|-----------------------------------------------------|-------|----------------------|--------------------------------------------------------------------------------------------------------------------------------------------------------------------------------------------------------------------------------------------------------------------------------------------------------------------------------------------------------------------------------------------------------------------------------------------------------------------------------------------------------------------------------------------------------------------|------|------|-----------|-------|------|------|
| Rsa1.0_00742.1.g18881.t1 | gb ABK28413.1  unknown [Arabidopsis thaliana]                                                                                                                                                                                                                                                                               | 318  | 294  | 2.00E-81  | 92.5  | 52.8 | 63.2 | unknown                                             | gbpln | Arabidopsis thaliana | AT1G24380.1   Symbols:   unknown protein; BEST Arabidopsis thaliana protein match is: unknown protein (TAIR:AT4G10230.1); Has 252 Blast hits to 250 proteins in 33 species: Archae - 0; Bacteria - 4; Metazoa - 16; Fungi - 6; Plants - 180; Viruses - 2; Other Eukaryotes - 44 (source: NCBI BLINK).   chr1:8646625-8647609 FORWARD LENGTH=293                                                                                                                                                                                                                    | 318  | 293  | 3.00E-83  | 92.1  | 52.5 | 62.9 |
| Rsa1.0_00742.1.g18882.t1 | gb AAD28316.1  hypothetical protein [Arabidopsis thaliana]                                                                                                                                                                                                                                                                  | 191  | 244  | 6.00E-54  | 127.7 | 64.9 | 70.7 | hypothetical protein                                | gbpln | Arabidopsis thaliana | AT2G13770.1   Symbols:   CONTAINS InterPro DOMAIN/s: Putative harbinger transposase-derived nuclease (InterPro:IPR006912); Has 451 Blast hits to 352 proteins in 33 species: Archae - 0; Bacteria - 0; Metazoa - 28; Fungi - 8; Plants - 388; Viruses - 0; Other Eukaryotes - 27 (source: NCBI BLINK).   chr2:5736603-5737847 FORWARD LENGTH=343                                                                                                                                                                                                                   | 191  | 343  | 3.00E-54  | 179.6 | 58.6 | 66.0 |
| Rsa1.0_00742.1.g18883.t1 | gb AAF99784.1 AC012463.1 T2E6.3 [Arabidopsis thaliana]<br>gi 110737661 dbj BAF00770.1  hypothetical protein [Arabidopsis thaliana]                                                                                                                                                                                          | 417  | 419  | 0         | 100.5 | 87.5 | 92.1 | T2E6.3                                              | gbpln | Arabidopsis thaliana | AT1G75710.1   Symbols:   C2H2-like zinc finger protein   chr1:28428806-28431128 FORWARD LENGTH=462                                                                                                                                                                                                                                                                                                                                                                                                                                                                 | 417  | 462  | 1.00E-130 | 110.8 | 65.5 | 75.5 |
| Rsa1.0_00742.1.g18884.t4 | gb AAD15377.1  putative non-LTR retroelement reverse transcriptase [Arabidopsis thaliana]                                                                                                                                                                                                                                   | 578  | 1044 | 7.00E-63  | 180.6 | 28.4 | 37.0 | putative non-LTR retroelement reverse transcriptase | gbpln | Arabidopsis thaliana | ATMG01250.1   Symbols: ORF102   RNA-directed DNA polymerase (reverse transcriptase)   chrM:310514-310882 FORWARD LENGTH=122                                                                                                                                                                                                                                                                                                                                                                                                                                        | 578  | 122  | 8.00E-13  | 21.1  | 5.4  | 6.4  |
| Rsa1.0_00742.1.g18885.t1 | #                                                                                                                                                                                                                                                                                                                           | #    | #    | #         | #     | #    | #    | -                                                   | ----  | ----                 | #                                                                                                                                                                                                                                                                                                                                                                                                                                                                                                                                                                  | #    | #    | #         | #     | #    |      |
| Rsa1.0_00742.1.g18886.t1 | gb AAD20433.1  putative retroelement pol polyprotein [Arabidopsis thaliana]                                                                                                                                                                                                                                                 | 414  | 889  | 2.00E-46  | 214.7 | 24.9 | 30.0 | putative retroelement pol polyprotein               | gbpln | Arabidopsis thaliana | #                                                                                                                                                                                                                                                                                                                                                                                                                                                                                                                                                                  | #    | #    | #         | #     | #    |      |
| Rsa1.0_00742.1.g18887.t2 | emb CAN79683.1  hypothetical protein VITISV_011289 [Vitis vinifera]                                                                                                                                                                                                                                                         | 565  | 926  | 1.00E-108 | 163.9 | 41.6 | 58.9 | hypothetical protein VITISV_011289                  | gbpln | Vitis vinifera       | #                                                                                                                                                                                                                                                                                                                                                                                                                                                                                                                                                                  | #    | #    | #         | #     | #    |      |
| Rsa1.0_00743.1.g18888.t1 | gb EOA28112.1  hypothetical protein CARUB_v10024308mg [Capsella rubella]                                                                                                                                                                                                                                                    | 128  | 131  | 7.00E-60  | 102.3 | 89.1 | 89.8 | hypothetical protein CARUB_v10024308mg              | gbpln | Capsella rubella     | AT2G40590.1   Symbols:   Ribosomal protein S26e family protein   chr2:16945215-16946345 REVERSE LENGTH=131                                                                                                                                                                                                                                                                                                                                                                                                                                                         | 128  | 131  | 9.00E-62  | 102.3 | 87.5 | 88.3 |
| Rsa1.0_00743.1.g18889.t1 | ref NP_181580.2  uncharacterized protein [Arabidopsis thaliana]<br>gi 75111145 sp O5XVC7.1 Y2048_ARAT H RecName: Full=WEB family protein At2g40480 gi 52354289 gb AAU44465.1  hypothetical protein AT2G40480 [Arabidopsis thaliana]<br>gi 330254742 gb AEC09836.1  uncharacterized protein AT2G40480 [Arabidopsis thaliana] | 457  | 518  | 1.00E-178 | 113.3 | 79.6 | 89.5 | uncharacterized protein                             | gbpln | Arabidopsis thaliana | AT2G40480.1   Symbols:   Plant protein of unknown function (DUF827)   chr2:16910425-16912444 FORWARD LENGTH=518                                                                                                                                                                                                                                                                                                                                                                                                                                                    | 457  | 518  | 1.00E-180 | 113.3 | 79.6 | 89.5 |
| Rsa1.0_00743.1.g18890.t1 | ref XP_002881725.1  hypothetical protein ARALYDRAFT_903340 [Arabidopsis lyrata subsp. lyrata]<br>gi 297327564 gb EFH57984.1  hypothetical protein ARALYDRAFT_903340 [Arabidopsis lyrata subsp. lyrata]                                                                                                                      | 195  | 192  | 4.00E-59  | 98.5  | 79.0 | 84.6 | hypothetical protein ARALYDRAFT_903340              | gbpln | Arabidopsis lyrata   | AT2G40475.1   Symbols:   unknown protein; BEST Arabidopsis thaliana protein match is: unknown protein (TAIR:AT3G56260.2); Has 477 Blast hits to 219 proteins in 41 species: Archae - 0; Bacteria - 4; Metazoa - 91; Fungi - 61; Plants - 144; Viruses - 0; Other Eukaryotes - 177 (source: NCBI BLINK).   chr2:16907222-16907803 REVERSE LENGTH=193                                                                                                                                                                                                                | 195  | 193  | 3.00E-54  | 99.0  | 75.9 | 81.0 |
| Rsa1.0_00743.1.g18891.t2 | ref NP_191076.2  uncharacterized protein [Arabidopsis thaliana]<br>gi 32645826 gb AEI79347.1  uncharacterized protein AT3G55160 [Arabidopsis thaliana]                                                                                                                                                                      | 2112 | 2130 | 0         | 100.9 | 84.7 | 91.0 | uncharacterized protein                             | gbpln | Arabidopsis thaliana | AT3G55160.1   Symbols:   unknown protein; EXPRESSED IN: 11 plant structures; EXPRESSED DURING: 4 anthesis, F mature embryo stage, petal differentiation and expansion stage, E expanded cotyledon stage, D bilateral stage; CONTAINS InterPro DOMAIN/s: Protein of unknown function DUF2428, death-receptor-like (InterPro:IPR019442); Has 357 Blast hits to 330 proteins in 163 species: Archae - 0; Bacteria - 0; Metazoa - 144; Fungi - 118; Plants - 50; Viruses - 0; Other Eukaryotes - 45 (source: NCBI BLINK).   chr3:20445629-20452400 REVERSE LENGTH=2130 | 2112 | 2130 | 0         | 100.9 | 84.7 | 91.0 |
| Rsa1.0_00743.1.g18892.t1 | gb AAG50652.1 AC073433.4 transposase, putative [Arabidopsis thaliana]                                                                                                                                                                                                                                                       | 309  | 659  | 5.00E-93  | 213.3 | 57.6 | 76.1 | transposase, putative                               | gbpln | Arabidopsis thaliana | AT3G42170.1   Symbols:   BED zinc finger hAT family dimerisation domain   chr3:14321838-14323928 FORWARD LENGTH=696                                                                                                                                                                                                                                                                                                                                                                                                                                                | 309  | 696  | 9.00E-38  | 225.2 | 29.1 | 50.5 |
| Rsa1.0_00743.1.g18893.t1 | ref XP_002881723.1  hypothetical protein ARALYDRAFT_345842 [Arabidopsis lyrata subsp. lyrata]<br>gi 297327562 gb EFH57982.1  hypothetical protein ARALYDRAFT_345842 [Arabidopsis lyrata subsp. lyrata]                                                                                                                      | 208  | 208  | 3.00E-73  | 100.0 | 72.1 | 83.2 | hypothetical protein ARALYDRAFT_345842              | gbpln | Arabidopsis lyrata   | AT2G40450.1   Symbols:   BTB/POZ domain-containing protein   chr2:16892024-16892790 REVERSE LENGTH=209                                                                                                                                                                                                                                                                                                                                                                                                                                                             | 208  | 209  | 1.00E-71  | 100.5 | 73.1 | 82.2 |
| Rsa1.0_00743.1.g18894.t1 | #                                                                                                                                                                                                                                                                                                                           | #    | #    | #         | #     | #    | #    | -                                                   | ----  | ----                 | #                                                                                                                                                                                                                                                                                                                                                                                                                                                                                                                                                                  | #    | #    | #         | #     | #    |      |

|                          |                                                                                               |      |      |           |        |      |      |                                                     |       |                      |                                                                                                                                               |      |      |           |       |      |      |
|--------------------------|-----------------------------------------------------------------------------------------------|------|------|-----------|--------|------|------|-----------------------------------------------------|-------|----------------------|-----------------------------------------------------------------------------------------------------------------------------------------------|------|------|-----------|-------|------|------|
| Rsa1.0_00743.1.g18895.t2 | refXP_002881642.1   predicted protein [Arabidopsis lyrata subsp. lyrata]                      | 418  | 405  | 6.00E-98  | 96.9   | 51.0 | 64.4 | predicted protein                                   | gbpln | Arabidopsis lyrata   | AT1G49790.1   Symbols:   F-box associated ubiquitination effector family protein   chr1:18436137-18437068 REVERSE LENGTH=283                  | 418  | 283  | 1.00E-74  | 67.7  | 38.0 | 48.8 |
| Rsa1.0_00743.1.g18896.t1 | refXP_002881723.1   hypothetical protein ARALYDRAFT_345842 [Arabidopsis lyrata subsp. lyrata] | 77   | 208  | 4.00E-20  | 270.1  | 68.8 | 77.9 | hypothetical protein ARALYDRAFT_345842              | gbpln | Arabidopsis lyrata   | AT2G40450.1   Symbols:   BTB/POZ domain-containing protein   chr2:16892024-16892790 REVERSE LENGTH=209                                        | 77   | 209  | 7.00E-23  | 271.4 | 70.1 | 76.6 |
| Rsa1.0_00743.1.g18897.t2 | refXP_002881723.1   hypothetical protein ARALYDRAFT_345842 [Arabidopsis lyrata subsp. lyrata] | 251  | 208  | 3.00E-67  | 82.9   | 56.2 | 66.1 | hypothetical protein ARALYDRAFT_345842              | gbpln | Arabidopsis lyrata   | AT2G40450.1   Symbols:   BTB/POZ domain-containing protein   chr2:16892024-16892790 REVERSE LENGTH=209                                        | 251  | 209  | 2.00E-62  | 83.3  | 56.6 | 65.3 |
| Rsa1.0_00743.1.g18898.t1 | refXP_002881715.1   bet v I allergen family protein [Arabidopsis lyrata subsp. lyrata]        | 215  | 215  | 1.00E-101 | 100.0  | 85.1 | 93.0 | bet v I allergen family protein                     | gbpln | Arabidopsis lyrata   | AT2G40330.1   Symbols:   PYL6, RCAR9   PYR1-like 6   chr2:16845177-16845824 REVERSE LENGTH=215                                                | 215  | 215  | 1.00E-103 | 100.0 | 85.1 | 91.2 |
| Rsa1.0_00743.1.g18899.t1 | refXP_002879863.1   predicted protein [Arabidopsis lyrata subsp. lyrata]                      | 509  | 404  | 0         | 79.4   | 65.4 | 69.9 | predicted protein                                   | gbpln | Arabidopsis lyrata   | AT1G43080.1   Symbols:   Pectin lyase-like superfamily protein   chr1:16213995-16215828 REVERSE LENGTH=404                                    | 509  | 404  | 0         | 79.4  | 65.0 | 69.9 |
| Rsa1.0_00743.1.g18900.t1 | gb AAD24652.1   putative non-LTR retroelement reverse transcriptase [Arabidopsis thaliana]    | 138  | 977  | 5.00E-35  | 708.0  | 52.9 | 70.3 | putative non-LTR retroelement reverse transcriptase | gbpln | Arabidopsis thaliana | AT3G24255.1   Symbols:   RNA-directed DNA polymerase (reverse transcriptase)-related family protein   chr3:8789471-8793208 FORWARD LENGTH=746 | 138  | 746  | 7.00E-32  | 540.6 | 46.4 | 62.3 |
| Rsa1.0_00743.1.g18901.t1 | refXP_002893940.1   predicted protein [Arabidopsis lyrata subsp. lyrata]                      | 403  | 404  | 0         | 100.2  | 84.6 | 91.1 | predicted protein                                   | gbpln | Arabidopsis lyrata   | AT1G43080.1   Symbols:   Pectin lyase-like superfamily protein   chr1:16213995-16215828 REVERSE LENGTH=404                                    | 403  | 404  | 0         | 100.2 | 83.9 | 90.1 |
| Rsa1.0_00743.1.g18902.t1 | refXP_002881712.1   hypothetical protein ARALYDRAFT_483081 [Arabidopsis lyrata subsp. lyrata] | 343  | 344  | 1.00E-174 | 100.3  | 93.9 | 96.8 | hypothetical protein ARALYDRAFT_483081              | gbpln | Arabidopsis lyrata   | AT2G40290.1   Symbols:   Eukaryotic translation initiation factor 2 subunit 1   chr2:16829030-16830889 REVERSE LENGTH=344                     | 343  | 344  | 1.00E-175 | 100.3 | 92.7 | 96.5 |
| Rsa1.0_00743.1.g18903.t1 | refXP_002876102.1   hypothetical protein ARALYDRAFT_485528 [Arabidopsis lyrata subsp. lyrata] | 358  | 832  | 8.00E-44  | 232.4  | 26.0 | 27.7 | hypothetical protein ARALYDRAFT_485528              | gbpln | Arabidopsis lyrata   | AT3G51740.1   Symbols:   IMK2   inflorescence meristem receptor-like kinase 2   chr3:19189248-19191842 FORWARD LENGTH=836                     | 358  | 836  | 4.00E-43  | 233.5 | 23.7 | 24.9 |
| Rsa1.0_00743.1.g18904.t1 | gb EOA26738.1   hypothetical protein CARUB_v10022824mg, partial [Capsella rubella]            | 581  | 626  | 0         | 107.7  | 86.4 | 91.7 | hypothetical protein CARUB_v10022824mg, partial     | gbpln | Capsella rubella     | AT2G40280.1   Symbols:   S-adenosyl-L-methionine-dependent methyltransferases superfamily protein   chr2:16825707-16828300 REVERSE LENGTH=589 | 581  | 589  | 0         | 101.4 | 87.3 | 92.1 |
| Rsa1.0_00744.1.g18905.t1 | refXP_002869436.1   hypothetical protein ARALYDRAFT_913570 [Arabidopsis lyrata subsp. lyrata] | 401  | 386  | 5.00E-98  | 96.3   | 56.1 | 68.1 | hypothetical protein ARALYDRAFT_913570              | gbpln | Arabidopsis lyrata   | AT5G39560.1   Symbols:   Galactose oxidase/kech repeat superfamily protein   chr5:15841885-15843096 REVERSE LENGTH=403                        | 401  | 403  | 3.00E-68  | 100.5 | 45.6 | 60.6 |
| Rsa1.0_00744.1.g18906.t2 | emb CAA18194.1   putative protein [Arabidopsis thaliana]                                      | 255  | 2895 | 8.00E-65  | 1135.3 | 51.0 | 55.3 | putative protein                                    | gbpln | Arabidopsis thaliana | AT4G30996.1   Symbols:   Protein of unknown function (DUF1068)   chr4:15101464-15102461 FORWARD LENGTH=172                                    | 255  | 172  | 5.00E-66  | 67.5  | 51.0 | 55.3 |
| Rsa1.0_00744.1.g18907.t1 | refXP_002869433.1   kinase family protein [Arabidopsis lyrata subsp. lyrata]                  | 1486 | 1494 | 0         | 100.5  | 92.5 | 96.1 | kinase family protein                               | gbpln | Arabidopsis lyrata   | AT4G29380.1   Symbols:   protein kinase family protein / WD-40 repeat family protein   chr4:14458822-14464692 FORWARD LENGTH=1494             | 1486 | 1494 | 0         | 100.5 | 92.6 | 95.8 |

|                          |                                                                                                                                                                                                                                                                                                                                                                                                                                                                                                                                                                                                                                                                                                                                                                                                                                                                                                                                                                                                                                                                                                                                                                         |     |     |           |       |       |       |                                        |       |                    |                                                                                                                         |     |     |           |       |       |       |
|--------------------------|-------------------------------------------------------------------------------------------------------------------------------------------------------------------------------------------------------------------------------------------------------------------------------------------------------------------------------------------------------------------------------------------------------------------------------------------------------------------------------------------------------------------------------------------------------------------------------------------------------------------------------------------------------------------------------------------------------------------------------------------------------------------------------------------------------------------------------------------------------------------------------------------------------------------------------------------------------------------------------------------------------------------------------------------------------------------------------------------------------------------------------------------------------------------------|-----|-----|-----------|-------|-------|-------|----------------------------------------|-------|--------------------|-------------------------------------------------------------------------------------------------------------------------|-----|-----|-----------|-------|-------|-------|
| Rsa1.0_00744.1.g18908.t1 | ref NP_194668.1  40S ribosomal protein S30 [Arabidopsis thaliana]<br>gi 15241895 ref NP_200478.1  40S ribosomal protein S30 [Arabidopsis thaliana]<br>gi 18399137 ref NP_565458.1  40S ribosomal protein S30 [Arabidopsis thaliana]<br>gi 297796551 ref XP_002866160.1  40S ribosomal protein S30 [Arabidopsis lyrata subsp. lyrata]<br>gi 297799054 ref XP_002867411.1  predicted protein [Arabidopsis lyrata subsp. lyrata]<br>gi 297836282 ref XP_002896023.1  40S ribosomal protein S30 [Arabidopsis lyrata subsp. lyrata]<br>gi 22096379 sp P49689.3 RS30_ARATH RecName: Full=40S ribosomal protein S30 gi 7269837 emb CAB79697.1  RIBOSOMAL PROTEIN S30 homolog [Arabidopsis thaliana]<br>gi 10176771 dbj BAB09885.1  40S ribosomal protein S30 homolog [Arabidopsis thaliana]<br>gi 15450480 gb AAK96533.1  At2g19750/F6F22.22 [Arabidopsis thaliana]<br>gi 16974467 gb AAL31237.1  At2g19750/F6F22.22 [Arabidopsis thaliana]<br>gi 20197294 gb AAC62141.2  40S ribosomal protein S30 [Arabidopsis thaliana]<br>gi 21618031 gb AAM67081.1  40S ribosomal protein S30 [Arabidopsis thaliana]<br>gi 22135964 gb AAM91564.1  40S ribosomal protein S30-like protein | 62  | 62  | 5.00E-26  | 100.0 | 100.0 | 100.0 | 40S ribosomal protein S30              | gbpln | Arabidopsis lyrata | AT5G56670.1   Symbols:   Ribosomal protein S30 family protein   chr5:22935413-22935981 REVERSE LENGTH=62                | 62  | 62  | 8.00E-29  | 100.0 | 100.0 | 100.0 |
| Rsa1.0_00744.1.g18909.t1 | gb EOA17123.1  hypothetical protein CARUB_v10005384mg [Capsella rubella]                                                                                                                                                                                                                                                                                                                                                                                                                                                                                                                                                                                                                                                                                                                                                                                                                                                                                                                                                                                                                                                                                                | 297 | 294 | 1.00E-135 | 99.0  | 80.8  | 89.6  | hypothetical protein CARUB_v10005384mg | gbpln | Capsella rubella   | AT4G29400.1   Symbols:   Protein of unknown function (DUF3531)   chr4:14466350-14467980 FORWARD LENGTH=302              | 297 | 302 | 1.00E-132 | 101.7 | 79.5  | 87.5  |
| Rsa1.0_00744.1.g18910.t1 | ref XP_002867410.1  60S ribosomal protein L28 [Arabidopsis lyrata subsp. lyrata]<br>gi 297313246 gb EFH43669.1  60S ribosomal protein L28 [Arabidopsis lyrata subsp. lyrata]                                                                                                                                                                                                                                                                                                                                                                                                                                                                                                                                                                                                                                                                                                                                                                                                                                                                                                                                                                                            | 143 | 143 | 5.00E-72  | 100.0 | 93.0  | 96.5  | 60S ribosomal protein L28              | gbpln | Arabidopsis lyrata | AT4G29410.2   Symbols:   Ribosomal L28e protein family   chr4:14468439-14469964 REVERSE LENGTH=143                      | 143 | 143 | 1.00E-72  | 100.0 | 90.9  | 95.1  |
| Rsa1.0_00744.1.g18911.t1 | gb EOA16627.1  hypothetical protein CARUB_v10004800mg [Capsella rubella]                                                                                                                                                                                                                                                                                                                                                                                                                                                                                                                                                                                                                                                                                                                                                                                                                                                                                                                                                                                                                                                                                                | 190 | 448 | 5.00E-64  | 235.8 | 71.1  | 81.6  | hypothetical protein CARUB_v10004800mg | gbpln | Capsella rubella   | AT4G29420.1   Symbols:   F-box/RNI-like superfamily protein   chr4:14470715-14472204 REVERSE LENGTH=446                 | 190 | 446 | 1.00E-61  | 234.7 | 68.9  | 80.0  |
| Rsa1.0_00744.1.g18912.t1 | ref XP_002866962.1  hypothetical protein ARALYDRAFT_912622 [Arabidopsis lyrata subsp. lyrata]<br>gi 297312788 gb EFH43221.1  hypothetical protein ARALYDRAFT_912622 [Arabidopsis lyrata subsp. lyrata]                                                                                                                                                                                                                                                                                                                                                                                                                                                                                                                                                                                                                                                                                                                                                                                                                                                                                                                                                                  | 415 | 542 | 2.00E-89  | 130.6 | 44.3  | 61.0  | hypothetical protein ARALYDRAFT_912622 | gbpln | Arabidopsis lyrata | AT5G49000.2   Symbols:   Galactose oxidase/keich repeat superfamily protein   chr5:19864527-19865645 FORWARD LENGTH=372 | 415 | 372 | 2.00E-51  | 89.6  | 30.6  | 41.9  |
| Rsa1.0_00744.1.g18913.t1 | ref XP_002867409.1  F-box family protein [Arabidopsis lyrata subsp. lyrata]<br>gi 297313245 gb EFH43668.1  F-box family protein [Arabidopsis lyrata subsp. lyrata]                                                                                                                                                                                                                                                                                                                                                                                                                                                                                                                                                                                                                                                                                                                                                                                                                                                                                                                                                                                                      | 445 | 445 | 0         | 100.0 | 77.5  | 88.1  | F-box family protein                   | gbpln | Arabidopsis lyrata | AT4G29420.1   Symbols:   F-box/RNI-like superfamily protein   chr4:14470715-14472204 REVERSE LENGTH=446                 | 445 | 446 | 0         | 100.2 | 76.6  | 87.4  |
| Rsa1.0_00744.1.g18914.t1 | ref NP_194672.1  40S ribosomal protein S15a-5 [Arabidopsis thaliana]<br>gi 297803094 ref XP_002869431.1  RPS15AE [Arabidopsis lyrata subsp. lyrata]<br>gi 75311751 sp Q9M0E0.1 R15A5_ARATH RecName: Full=40S ribosomal protein S15a-5 gi 7269842 emb CAB79701.1  ribosomal protein S15a homolog [Arabidopsis thaliana]<br>gi 21553914 gb AAM62997.1  ribosomal protein S15a homolog [Arabidopsis thaliana]<br>gi 110737866 dbj BAF00871.1  ribosomal protein S15a homolog [Arabidopsis thaliana]<br>gi 111074474 gb ABH04610.1  At4g29430 [Arabidopsis thaliana]<br>gi 297315267 gb EFH45690.1  RPS15AE [Arabidopsis lyrata subsp. lyrata]<br>gi 332660230 gb AEE85630.1  40S ribosomal protein S15a-5 [Arabidopsis thaliana]<br>gi 482553463 gb EOA17656.1  hypothetical protein CARUB_v10006023mg [Capsella rubella]                                                                                                                                                                                                                                                                                                                                                  | 129 | 129 | 8.00E-69  | 100.0 | 97.7  | 99.2  | 40S ribosomal protein S15a-5           | gbpln | Arabidopsis lyrata | AT4G29430.1   Symbols:   rps15ae   ribosomal protein S15A E   chr4:14472440-14473383 FORWARD LENGTH=129                 | 129 | 129 | 2.00E-71  | 100.0 | 97.7  | 99.2  |

|                          |                                                                                                                                                                                                                                                                                                                                                                                                                                                                                                                                                                                                                             |     |      |           |       |      |      |                                                                    |       |                      |                                                                                                                                       |     |      |           |       |      |      |
|--------------------------|-----------------------------------------------------------------------------------------------------------------------------------------------------------------------------------------------------------------------------------------------------------------------------------------------------------------------------------------------------------------------------------------------------------------------------------------------------------------------------------------------------------------------------------------------------------------------------------------------------------------------------|-----|------|-----------|-------|------|------|--------------------------------------------------------------------|-------|----------------------|---------------------------------------------------------------------------------------------------------------------------------------|-----|------|-----------|-------|------|------|
| Rsa1.0_00744.1.g18915.t1 | gb EOA15950.1  hypothetical protein CARUB_v10004047mg [Capsella rubella]                                                                                                                                                                                                                                                                                                                                                                                                                                                                                                                                                    | 940 | 1043 | 0         | 111.0 | 72.4 | 82.9 | hypothetical protein CARUB_v10004047mg                             | gbpln | Capsella rubella     | AT4G29440.1   Symbols:   Regulator of Vps4 activity in the MVB pathway protein   chr4:14473942-14477721 REVERSE LENGTH=1090           | 940 | 1090 | 0         | 116.0 | 68.3 | 78.4 |
| Rsa1.0_00744.1.g18916.t1 | ref NP_194675.1  Phospholipase A2 family protein [Arabidopsis thaliana] gi 75264514 sp Q9MOD7.1 PLA2C_ARAT H RecName: Full=Phospholipase A2-gamma; AltName: Full=Secretory phospholipase A2-gamma; Short=AtsPLA2-gamma; Flags: Precursor gi 7269845 emb CAB79704.1  phospholipase A2-like protein [Arabidopsis thaliana] gi 26006457 gb AAN63044.1  phospholipase A2 gamma [Arabidopsis thaliana] gi 332660234 gb AEE85634.1  phospholipase A2-gamma [Arabidopsis thaliana]                                                                                                                                                 | 194 | 187  | 7.00E-82  | 96.4  | 76.3 | 82.0 | Phospholipase A2 family protein                                    | gbpln | Arabidopsis thaliana | AT4G29460.1   Symbols:   Phospholipase A2 family protein   chr4:14483066-14483930 REVERSE LENGTH=187                                  | 194 | 187  | 3.00E-84  | 96.4  | 76.3 | 82.0 |
| Rsa1.0_00744.1.g18917.t1 | ref NP_194677.1  ATP synthase subunit G protein [Arabidopsis thaliana] gi 11908084 gb AAG41471.1 AF326889.1 unknown protein [Arabidopsis thaliana] gi 12642892 gb AAK00388.1 AF339706.1 unknown protein [Arabidopsis thaliana] gi 7269847 emb CAB79706.1  putative protein [Arabidopsis thaliana] gi 14517504 gb AAK62642.1  AT4g29480/F17A13.300 [Arabidopsis thaliana] gi 15809754 gb AAL06805.1  AT4g29480/F17A13.300 [Arabidopsis thaliana] gi 21594744 gb AAM66039.1  copia-like retroelement pol polyprotein [Arabidopsis thaliana] gi 332660236 gb AEE85636.1  ATP synthase subunit G protein [Arabidopsis thaliana] | 122 | 122  | 3.00E-63  | 100.0 | 95.9 | 97.5 | ATP synthase subunit G protein                                     | gbpln | Arabidopsis thaliana | AT4G29480.1   Symbols:   Mitochondrial ATP synthase subunit G protein   chr4:14486265-14487257 REVERSE LENGTH=122                     | 122 | 122  | 5.00E-66  | 100.0 | 95.9 | 97.5 |
| Rsa1.0_00744.1.g18918.t1 | gb EOA15795.1  hypothetical protein CARUB_v10007150mg, partial [Capsella rubella]                                                                                                                                                                                                                                                                                                                                                                                                                                                                                                                                           | 493 | 513  | 0         | 104.1 | 91.7 | 95.3 | hypothetical protein CARUB_v10007150mg, partial                    | gbpln | Capsella rubella     | AT4G29490.1   Symbols:   Metallopeptidase M24 family protein   chr4:14487943-14491321 FORWARD LENGTH=486                              | 493 | 486  | 0         | 98.6  | 89.9 | 93.9 |
| Rsa1.0_00744.1.g18919.t1 | gb EOA18714.1  hypothetical protein CARUB_v10007292mg [Capsella rubella]                                                                                                                                                                                                                                                                                                                                                                                                                                                                                                                                                    | 388 | 386  | 0         | 99.5  | 93.6 | 96.1 | hypothetical protein CARUB_v10007292mg                             | gbpln | Capsella rubella     | AT4G29510.1   Symbols: ATPRMT11, PRMT11, ATPRMT1B, PRMT1B   arginine methyltransferase 11   chr4:14491739-14493752 FORWARD LENGTH=390 | 388 | 390  | 0         | 100.5 | 93.3 | 96.4 |
| Rsa1.0_00744.1.g18920.t1 | ref XP_002869428.1  2,3-diketo-5-methylthio-1-phosphopentane phosphatase family [Arabidopsis lyrata subsp. lyrata] gi 297315264 gb EFH45687.1  2,3-diketo-5-methylthio-1-phosphopentane phosphatase family [Arabidopsis lyrata subsp. lyrata]                                                                                                                                                                                                                                                                                                                                                                               | 230 | 242  | 1.00E-105 | 105.2 | 83.5 | 90.0 | 2,3-diketo-5-methylthio-1-phosphopentane phosphatase family        | gbpln | Arabidopsis lyrata   | AT4G29530.1   Symbols:   Pyridoxal phosphate phosphatase-related protein   chr4:14496164-14497310 FORWARD LENGTH=245                  | 230 | 245  | 1.00E-107 | 106.5 | 83.0 | 90.4 |
| Rsa1.0_00744.1.g18921.t1 | gb EOA17904.1  hypothetical protein CARUB_v10006313mg [Capsella rubella]                                                                                                                                                                                                                                                                                                                                                                                                                                                                                                                                                    | 193 | 183  | 1.00E-66  | 94.8  | 74.1 | 85.5 | hypothetical protein CARUB_v10006313mg                             | gbpln | Capsella rubella     | AT4G29658.1   Symbols: PRA1.C   prenylated RAB acceptor 1.C   chr4:14533447-14533830 REVERSE LENGTH=127                               | 193 | 127  | 1.00E-39  | 65.8  | 49.2 | 54.9 |
| Rsa1.0_00744.1.g18922.t1 | ref NP_567830.1  protein embryo defective 2752 [Arabidopsis thaliana] gi 75166388 sp Q94K18.1 Y4966_ARATH RecName: Full=Uncharacterized protein At4g29660; AltName: Full=Protein EMBRYO DEFECTIVE 2752 gi 13877545 gb AAK43850.1 AF370473.1 putative protein [Arabidopsis thaliana] gi 17978761 gb AAL47374.1  putative protein [Arabidopsis thaliana] gi 21537375 gb AAM61716.1  unknown [Arabidopsis thaliana] gi 332660258 gb AEE85658.1  protein embryo defective 2752 [Arabidopsis thaliana]                                                                                                                           | 106 | 103  | 6.00E-51  | 97.2  | 92.5 | 93.4 | protein embryo defective 2752                                      | gbpln | Arabidopsis thaliana | AT4G29660.1   Symbols: EMB2752   embryo defective 2752   chr4:14534495-14535171 REVERSE LENGTH=103                                    | 106 | 103  | 1.00E-53  | 97.2  | 92.5 | 93.4 |
| Rsa1.0_00744.1.g18923.t1 | ref XP_002867396.1  type I phosphodiesterase/nucleotide pyrophosphatase family protein [Arabidopsis lyrata subsp. lyrata] gi 297313232 gb EFH43655.1  type I phosphodiesterase/nucleotide pyrophosphatase family protein [Arabidopsis lyrata subsp. lyrata]                                                                                                                                                                                                                                                                                                                                                                 | 486 | 496  | 0         | 102.1 | 86.2 | 93.2 | type I phosphodiesterase/nucleotide pyrophosphatase family protein | gbpln | Arabidopsis lyrata   | AT4G29680.1   Symbols:   Alkaline-phosphatase-like family protein   chr4:14538067-14539557 REVERSE LENGTH=496                         | 486 | 496  | 0         | 102.1 | 85.8 | 93.4 |



|                          |                                                                                                                                                                                                                                                                                                                                                                                        |      |      |           |       |      |      |                                        |       |                      |                                                                                                                                                                                                                                                                                                                                                                     |      |      |           |       |      |      |
|--------------------------|----------------------------------------------------------------------------------------------------------------------------------------------------------------------------------------------------------------------------------------------------------------------------------------------------------------------------------------------------------------------------------------|------|------|-----------|-------|------|------|----------------------------------------|-------|----------------------|---------------------------------------------------------------------------------------------------------------------------------------------------------------------------------------------------------------------------------------------------------------------------------------------------------------------------------------------------------------------|------|------|-----------|-------|------|------|
| Rsa1.0_00744.1.g18924.t1 | gb EOA16623.1  hypothetical protein CARUB_v10004793mg [Capsella rubella]                                                                                                                                                                                                                                                                                                               | 454  | 451  | 0         | 99.3  | 82.6 | 88.5 | hypothetical protein CARUB_v10004793mg | gbpln | Capsella rubella     | AT4G29690.1   Symbols:   Alkaline-phosphatase-like family protein   chr4:14541084-14542457 REVERSE LENGTH=457                                                                                                                                                                                                                                                       | 454  | 457  | 0         | 100.7 | 81.7 | 87.9 |
| Rsa1.0_00744.1.g18925.t1 | gb EOA16607.1  hypothetical protein CARUB_v10004780mg [Capsella rubella]                                                                                                                                                                                                                                                                                                               | 313  | 454  | 1.00E-148 | 145.0 | 78.6 | 90.1 | hypothetical protein CARUB_v10004780mg | gbpln | Capsella rubella     | AT4G29700.1   Symbols:   Alkaline-phosphatase-like family protein   chr4:14543739-14545124 REVERSE LENGTH=461                                                                                                                                                                                                                                                       | 313  | 461  | 2.33E-156 | 147.3 | 77.3 | 88.8 |
| Rsa1.0_00745.1.g18926.t1 | gb ABQ50546.1  hypothetical protein [Brassica rapa]                                                                                                                                                                                                                                                                                                                                    | 624  | 650  | 0         | 104.2 | 77.6 | 89.3 | hypothetical protein                   | gbpln | Brassica rapa        | AT1G12300.1   Symbols:   Tetratricopeptide repeat (TPR)-like superfamily protein   chr1:4184163-4186076 REVERSE LENGTH=637                                                                                                                                                                                                                                          | 624  | 637  | 0         | 102.1 | 71.0 | 83.8 |
| Rsa1.0_00745.1.g18927.t1 | ref NP_001184959.1  uncharacterized protein [Arabidopsis thaliana] gi 332190568 gb AEE28689.1  uncharacterized protein AT1G11125 [Arabidopsis thaliana]                                                                                                                                                                                                                                | 259  | 265  | 8.00E-78  | 102.3 | 68.7 | 77.2 | uncharacterized protein                | gbpln | Arabidopsis thaliana | AT1G1125.1   Symbols:   unknown protein; BEST Arabidopsis thaliana protein match is: unknown protein (TAIR:AT1G61170.1).   chr1:3718846-3719643 FORWARD LENGTH=265                                                                                                                                                                                                  | 259  | 265  | 2.00E-80  | 102.3 | 68.7 | 77.2 |
| Rsa1.0_00745.1.g18928.t2 | ref NP_172574.5  uncharacterized protein [Arabidopsis thaliana] gi 332190558 gb AEE28679.1  uncharacterized protein AT1G11070 [Arabidopsis thaliana]                                                                                                                                                                                                                                   | 700  | 763  | 0         | 109.0 | 67.7 | 78.0 | uncharacterized protein                | gbpln | Arabidopsis thaliana | AT1G11070.1   Symbols:   BEST Arabidopsis thaliana protein match is: Hydroxyproline-rich glycoprotein family protein (TAIR:AT1G61080.1); Has 579 Blast hits to 567 proteins in 152 species: Archae - 0; Bacteria - 68; Metazoa - 159; Fungi - 113; Plants - 172; Viruses - 0; Other Eukaryotes - 67 (source: NCBI BLINK).   chr1:3690406-3693648 REVERSE LENGTH=763 | 700  | 763  | 0         | 109.0 | 67.7 | 78.0 |
| Rsa1.0_00745.1.g18929.t1 | gb EOA36046.1  hypothetical protein CARUB_v10008277mg [Capsella rubella]                                                                                                                                                                                                                                                                                                               | 858  | 870  | 0         | 101.4 | 85.0 | 91.5 | hypothetical protein CARUB_v10008277mg | gbpln | Capsella rubella     | AT1G11060.1   Symbols:   WAPL (Wings apart-like protein regulation of heterochromatin) protein   chr1:3684568-3689537 FORWARD LENGTH=930                                                                                                                                                                                                                            | 858  | 930  | 0         | 108.4 | 85.2 | 90.9 |
| Rsa1.0_00745.1.g18930.t1 | ref NP_172572.1  putative receptor-like protein kinase [Arabidopsis thaliana] gi 75317752 sp O04086.1 Y1105_ARATH RecName: Full=Probable receptor-like protein kinase At1g11050; Flags: Precursor gi 1931642 gb AAB65477.1  Ser/Thr protein kinase isolog; 46094-44217 [Arabidopsis thaliana] gi 332190556 gb AEE28677.1  putative receptor-like protein kinase [Arabidopsis thaliana] | 624  | 625  | 0         | 100.2 | 85.3 | 90.1 | putative receptor-like protein kinase  | gbpln | Arabidopsis thaliana | AT1G11050.1   Symbols:   Protein kinase superfamily protein   chr1:3681892-3683769 FORWARD LENGTH=625                                                                                                                                                                                                                                                               | 624  | 625  | 0         | 100.2 | 85.3 | 90.1 |
| Rsa1.0_00745.1.g18931.t1 | gb AAB65494.1  hypothetical protein; 51018-49636 [Arabidopsis thaliana]                                                                                                                                                                                                                                                                                                                | 273  | 281  | 1.00E-91  | 102.9 | 71.4 | 76.6 | hypothetical protein; 51018-49636      | gbpln | Arabidopsis thaliana | AT1G11020.1   Symbols:   RING/FYVE/PHD zinc finger superfamily protein   chr1:3676968-3678350 FORWARD LENGTH=321                                                                                                                                                                                                                                                    | 273  | 321  | 1.00E-92  | 117.6 | 72.2 | 79.1 |
| Rsa1.0_00745.1.g18932.t1 | dbj BAJ34386.1  unnamed protein product [Thellungiella halophila]                                                                                                                                                                                                                                                                                                                      | 570  | 574  | 0         | 100.7 | 95.1 | 97.7 | unnamed protein product                | ----  | ----                 | AT1G11000.1   Symbols: MLO4, ATML04   Seven transmembrane MLO family protein   chr1:3671935-3675909 REVERSE LENGTH=573                                                                                                                                                                                                                                              | 570  | 573  | 0         | 100.5 | 92.8 | 96.5 |
| Rsa1.0_00745.1.g18933.t1 | gb EOA40564.1  hypothetical protein CARUB_v10009291mg [Capsella rubella]                                                                                                                                                                                                                                                                                                               | 388  | 414  | 1.00E-179 | 106.7 | 88.1 | 93.0 | hypothetical protein CARUB_v10009291mg | gbpln | Capsella rubella     | AT1G10970.1   Symbols: ZIP4, ATZIP4   zinc transporter 4 precursor   chr1:3665201-3666933 REVERSE LENGTH=408                                                                                                                                                                                                                                                        | 388  | 408  | 1.00E-173 | 105.2 | 86.6 | 91.8 |
| Rsa1.0_00745.1.g18934.t1 | gb EOA37821.1  hypothetical protein CARUB_v10011995mg [Capsella rubella]                                                                                                                                                                                                                                                                                                               | 583  | 589  | 0         | 101.0 | 96.1 | 97.4 | hypothetical protein CARUB_v10011995mg | gbpln | Capsella rubella     | AT1G10950.1   Symbols: TMN1, AtTMN1   transmembrane nine 1   chr1:3659322-3663622 FORWARD LENGTH=589                                                                                                                                                                                                                                                                | 583  | 589  | 0         | 101.0 | 94.7 | 96.9 |
| Rsa1.0_00745.1.g18935.t2 | gb AAA33003.1  serine/threonine protein kinase [Brassica napus] gi 1097353 prf 2113401A protein kinase                                                                                                                                                                                                                                                                                 | 359  | 359  | 0         | 100.0 | 95.3 | 97.5 | serine/threonine protein kinase        | gbpln | Brassica napus       | AT1G10940.1   Symbols: ASK1, SNRK2-4, SNRK2.4, SRK2A   Protein kinase superfamily protein   chr1:3656050-3658170 REVERSE LENGTH=363                                                                                                                                                                                                                                 | 359  | 363  | 0         | 101.1 | 94.4 | 97.5 |
| Rsa1.0_00745.1.g18936.t2 | emb CAC14868.1  DNA Helicase [Arabidopsis thaliana]                                                                                                                                                                                                                                                                                                                                    | 1196 | 1182 | 0         | 98.8  | 82.5 | 88.3 | DNA Helicase                           | gbpln | Arabidopsis thaliana | AT1G10930.1   Symbols: ATSGS1, RECO4A, ATRECO4A   DNA helicase (RECO4A)   chr1:3648032-3654997 REVERSE LENGTH=1188                                                                                                                                                                                                                                                  | 1196 | 1188 | 0         | 99.3  | 82.5 | 88.3 |

|                          |                                                                                                                                                                                                                                                                                                                                                                                                                                                                                                                                                                                                                                                                                                          |      |      |           |       |      |      |                                             |       |                      |                                                                                                                                                            |      |      |           |       |      |      |
|--------------------------|----------------------------------------------------------------------------------------------------------------------------------------------------------------------------------------------------------------------------------------------------------------------------------------------------------------------------------------------------------------------------------------------------------------------------------------------------------------------------------------------------------------------------------------------------------------------------------------------------------------------------------------------------------------------------------------------------------|------|------|-----------|-------|------|------|---------------------------------------------|-------|----------------------|------------------------------------------------------------------------------------------------------------------------------------------------------------|------|------|-----------|-------|------|------|
| Rsa1.0_00745.1.g18937.t1 | ref[NP_172559.2] 1-phosphatidylinositol-4-phosphate 5-kinase [Arabidopsis thaliana]<br>gi 75208667 sp Q9SUI2.1 PI5K7_ARATH<br>RecName: Full=Phosphatidylinositol 4-phosphate 5-kinase 7; Short=AtPIP5K7;<br>AltName: Full=1-phosphatidylinositol 4-phosphate kinase 7; AltName: Full=Diphosphoinositide kinase 7; Short=AtPK2; AltName: Full=PtdIns(4)P-5-kinase 7<br>gi 5777366 emb CAB53377.1  phosphatidylinositol-4-phosphate 5-kinase [Arabidopsis thaliana]<br>gi 17065284 gb AAAL32796.1  Unknown protein [Arabidopsis thaliana]<br>gi 34098805 gb AAQ56785.1  At1g10900 [Arabidopsis thaliana]<br>gi 332190540 gb AAE28661.1  phosphatidylinositol 4-phosphate 5-kinase 7 [Arabidopsis thaliana] | 706  | 754  | 0         | 106.8 | 85.6 | 89.9 | 1-phosphatidylinositol-4-phosphate 5-kinase | gbpln | Arabidopsis thaliana | AT1G10900.1   Symbols:   Phosphatidylinositol-4-phosphate 5-kinase family protein   chr1:3632396-3636416 REVERSE LENGTH=754                                | 706  | 754  | 0         | 106.8 | 85.6 | 89.9 |
| Rsa1.0_00746.1.g18938.t1 | #                                                                                                                                                                                                                                                                                                                                                                                                                                                                                                                                                                                                                                                                                                        | #    | #    | #         | #     | #    | #    | -                                           | ----  | ----                 | #                                                                                                                                                          | #    | #    | #         | #     | #    |      |
| Rsa1.0_00746.1.g18939.t1 | #                                                                                                                                                                                                                                                                                                                                                                                                                                                                                                                                                                                                                                                                                                        | #    | #    | #         | #     | #    | #    | -                                           | ----  | ----                 | #                                                                                                                                                          | #    | #    | #         | #     | #    |      |
| Rsa1.0_00746.1.g18940.t1 | gb ACN73535.1  1433-2 [Brassica napus]                                                                                                                                                                                                                                                                                                                                                                                                                                                                                                                                                                                                                                                                   | 263  | 262  | 1.00E-144 | 99.6  | 97.0 | 97.3 | 1433-2                                      | gbpln | Brassica napus       | AT2G42590.3   Symbols: GRF9, GF14 MU   general regulatory factor 9   chr2:17732164-17733775 REVERSE LENGTH=276                                             | 263  | 276  | 1.00E-143 | 104.9 | 92.8 | 97.0 |
| Rsa1.0_00746.1.g18941.t1 | ref XP_002879994.1  hypothetical protein ARALYDRAFT_483352 [Arabidopsis lyrata subsp. lyrata]<br>gi 297325833 gb EFH56253.1  hypothetical protein ARALYDRAFT_483352 [Arabidopsis lyrata subsp. lyrata]                                                                                                                                                                                                                                                                                                                                                                                                                                                                                                   | 668  | 688  | 0         | 103.0 | 87.7 | 92.4 | hypothetical protein ARALYDRAFT_483352      | gbpln | Arabidopsis lyrata   | AT2G42580.1   Symbols: TTL3, VIT   tetratricopeptide-repeat thioredoxin-like 3   chr2:17728855-17731461 FORWARD LENGTH=691                                 | 668  | 691  | 0         | 103.4 | 86.7 | 91.0 |
| Rsa1.0_00746.1.g18942.t1 | #                                                                                                                                                                                                                                                                                                                                                                                                                                                                                                                                                                                                                                                                                                        | #    | #    | #         | #     | #    | #    | -                                           | ----  | ----                 | #                                                                                                                                                          | #    | #    | #         | #     | #    |      |
| Rsa1.0_00746.1.g18943.t1 | gb EOA28713.1  hypothetical protein CARUB_v10024941mg [Capsella rubella]                                                                                                                                                                                                                                                                                                                                                                                                                                                                                                                                                                                                                                 | 227  | 653  | 6.00E-51  | 287.7 | 62.6 | 69.6 | hypothetical protein CARUB_v10024941mg      | gbpln | Capsella rubella     | AT2G42560.1   Symbols:   late embryogenesis abundant domain-containing protein / LEA domain-containing protein   chr2:17714813-17716821 REVERSE LENGTH=635 | 227  | 635  | 1.00E-45  | 279.7 | 59.5 | 67.0 |
| Rsa1.0_00746.1.g18944.t1 | gb ABA01003.2  cold-regulated protein [Brassica rapa subsp. chinensis]                                                                                                                                                                                                                                                                                                                                                                                                                                                                                                                                                                                                                                   | 521  | 129  | 4.00E-51  | 24.8  | 20.3 | 21.1 | cold-regulated protein                      | gbpln | Brassica rapa        | AT2G42530.1   Symbols: COR15B   cold regulated 15b   chr2:17709191-17709873 REVERSE LENGTH=141                                                             | 521  | 141  | 6.00E-43  | 27.1  | 17.5 | 19.8 |
| Rsa1.0_00746.1.g18945.t4 | #                                                                                                                                                                                                                                                                                                                                                                                                                                                                                                                                                                                                                                                                                                        | #    | #    | #         | #     | #    | #    | -                                           | ----  | ----                 | AT1G20850.1   Symbols: XCP2   xylem cysteine peptidase 2   chr1:7252208-7253537 FORWARD LENGTH=356                                                         | 206  | 356  | 7.00E-13  | 172.8 | 18.9 | 22.8 |
| Rsa1.0_00746.1.g18946.t1 | gb AAS16843.1  cold-regulated protein [Brassica napus]                                                                                                                                                                                                                                                                                                                                                                                                                                                                                                                                                                                                                                                   | 66   | 129  | 7.00E-27  | 195.5 | 92.4 | 95.5 | cold-regulated protein                      | gbpln | Brassica napus       | AT2G42530.1   Symbols: COR15B   cold regulated 15b   chr2:17709191-17709873 REVERSE LENGTH=141                                                             | 66   | 141  | 4.00E-23  | 213.6 | 80.3 | 84.8 |
| Rsa1.0_00747.1.g18947.t1 | gb AAF67380.1  Hypothetical protein T15F17.1 [Arabidopsis thaliana]                                                                                                                                                                                                                                                                                                                                                                                                                                                                                                                                                                                                                                      | 432  | 1141 | 1.00E-44  | 264.1 | 20.1 | 22.7 | Hypothetical protein T15F17.1               | gbpln | Arabidopsis thaliana | #                                                                                                                                                          | #    | #    | #         | #     | #    |      |
| Rsa1.0_00747.1.g18948.t2 | ref XP_002865249.1  sodium:solute symporter family protein [Arabidopsis lyrata subsp. lyrata]<br>gi 297311084 gb EFH41508.1  sodium:solute symporter family protein [Arabidopsis lyrata subsp. lyrata]                                                                                                                                                                                                                                                                                                                                                                                                                                                                                                   | 233  | 702  | 1.00E-115 | 301.3 | 87.6 | 90.6 | sodium:solute symporter family protein      | gbpln | Arabidopsis lyrata   | AT5G45380.1   Symbols: ATDUR3, DUR3   solute:sodium symporters:urea transmembrane transporters   chr5:18391337-18395696 FORWARD LENGTH=704                 | 233  | 704  | 1.00E-116 | 302.1 | 88.4 | 90.6 |
| Rsa1.0_00747.1.g18949.t1 | gb AAC02664.1  polyprotein [Arabidopsis thaliana]                                                                                                                                                                                                                                                                                                                                                                                                                                                                                                                                                                                                                                                        | 1390 | 1451 | 0         | 104.4 | 66.4 | 78.2 | polyprotein                                 | gbpln | Arabidopsis thaliana | AT4G23160.1   Symbols: CRK8   cysteine-rich RLK (RECEPTOR-like protein kinase) 8   chr4:12129485-12134086 FORWARD LENGTH=1262                              | 1390 | 1262 | 1.00E-110 | 90.8  | 14.7 | 22.4 |
| Rsa1.0_00747.1.g18950.t1 | gb EOA12996.1  hypothetical protein CARUB_v10025985mg [Capsella rubella]                                                                                                                                                                                                                                                                                                                                                                                                                                                                                                                                                                                                                                 | 504  | 705  | 0         | 139.9 | 81.3 | 87.7 | hypothetical protein CARUB_v10025985mg      | gbpln | Capsella rubella     | AT5G45380.1   Symbols: ATDUR3, DUR3   solute:sodium symporters:urea transmembrane transporters   chr5:18391337-18395696 FORWARD LENGTH=704                 | 504  | 704  | 0         | 139.7 | 81.7 | 88.9 |
| Rsa1.0_00747.1.g18951.t1 | gb EOA14703.1  hypothetical protein CARUB_v10027980mg [Capsella rubella]                                                                                                                                                                                                                                                                                                                                                                                                                                                                                                                                                                                                                                 | 832  | 842  | 0         | 101.2 | 70.2 | 80.9 | hypothetical protein CARUB_v10027980mg      | gbpln | Capsella rubella     | AT5G45400.1   Symbols: RPA70C, ATRPA70C   Replication factor-A protein 1-related   chr5:18398990-18401644 FORWARD LENGTH=853                               | 832  | 853  | 0         | 102.5 | 69.7 | 80.3 |

|                          |                                                                                                                                                                                                                                                                                                                                                                                                                                                               |     |     |           |       |      |      |                                                      |       |                      |                                                                                                                                                                                                                                                                                                                                                                                                                                                                                                                                                   |     |     |           |       |      |      |
|--------------------------|---------------------------------------------------------------------------------------------------------------------------------------------------------------------------------------------------------------------------------------------------------------------------------------------------------------------------------------------------------------------------------------------------------------------------------------------------------------|-----|-----|-----------|-------|------|------|------------------------------------------------------|-------|----------------------|---------------------------------------------------------------------------------------------------------------------------------------------------------------------------------------------------------------------------------------------------------------------------------------------------------------------------------------------------------------------------------------------------------------------------------------------------------------------------------------------------------------------------------------------------|-----|-----|-----------|-------|------|------|
| Rsa1.0_00747.1.g18952.t1 | gb EOA13618.1  hypothetical protein CARUB_v10026685mg [Capsella rubella] gi 482549425 gb EOA13619.1  hypothetical protein CARUB_v10026685mg [Capsella rubella]                                                                                                                                                                                                                                                                                                | 346 | 353 | 1.00E-153 | 102.0 | 85.8 | 90.8 | hypothetical protein CARUB_v10026685mg               | gbpln | Capsella rubella     | AT5G45410.3   Symbols:   unknown protein; FUNCTIONS IN: molecular_function unknown; INVOLVED IN: biological_process unknown; LOCATED IN: cellular_component unknown; EXPRESSED IN: 24 plant structures; EXPRESSED DURING: 15 growth stages; BEST Arabidopsis thaliana protein match is: unknown protein (TAIR:AT4G25030.2); Has 124 Blast hits to 124 proteins in 34 species: Archae - 2; Bacteria - 31; Metazoa - 0; Fungi - 0; Plants - 91; Viruses - 0; Other Eukaryotes - 0 (source: NCBI BLink).   chr5:18402071-18403282 REVERSE LENGTH=342 | 346 | 342 | 1.00E-141 | 98.8  | 81.2 | 87.3 |
| Rsa1.0_00747.1.g18953.t1 | #                                                                                                                                                                                                                                                                                                                                                                                                                                                             | #   | #   | #         | #     | #    | #    | -                                                    | ----  | ----                 | #                                                                                                                                                                                                                                                                                                                                                                                                                                                                                                                                                 | #   | #   | #         | #     | #    |      |
| Rsa1.0_00747.1.g18954.t1 | #                                                                                                                                                                                                                                                                                                                                                                                                                                                             | #   | #   | #         | #     | #    | #    | -                                                    | ----  | ----                 | #                                                                                                                                                                                                                                                                                                                                                                                                                                                                                                                                                 | #   | #   | #         | #     | #    |      |
| Rsa1.0_00748.1.g18955.t1 | ref XP_002875393.1  hypothetical protein ARALYDRAFT_905015 [Arabidopsis lyrata subsp. lyrata] gi 297321231 gb EFH51652.1  hypothetical protein ARALYDRAFT_905015 [Arabidopsis lyrata subsp. lyrata]                                                                                                                                                                                                                                                           | 505 | 538 | 0         | 106.5 | 88.1 | 92.5 | hypothetical protein ARALYDRAFT_905015               | gbpln | Arabidopsis lyrata   | AT3G27640.1   Symbols:   Transducin/WD40 repeat-like superfamily protein   chr3:10232307-10235467 FORWARD LENGTH=535                                                                                                                                                                                                                                                                                                                                                                                                                              | 505 | 535 | 0         | 105.9 | 88.3 | 92.5 |
| Rsa1.0_00748.1.g18956.t2 | ref XP_002877065.1  hypothetical protein ARALYDRAFT_905014 [Arabidopsis lyrata subsp. lyrata] gi 297322903 gb EFH53324.1  hypothetical protein ARALYDRAFT_905014 [Arabidopsis lyrata subsp. lyrata]                                                                                                                                                                                                                                                           | 222 | 106 | 1.00E-35  | 47.7  | 33.3 | 42.3 | hypothetical protein ARALYDRAFT_905014               | gbpln | Arabidopsis lyrata   | AT5G40460.1   Symbols:   unknown protein; BEST Arabidopsis thaliana protein match is: unknown protein (TAIR:AT3G27630.1); Has 87 Blast hits to 87 proteins in 12 species: Archae - 0; Bacteria - 0; Metazoa - 0; Fungi - 0; Plants - 87; Viruses - 0; Other Eukaryotes - 0 (source: NCBI BLink).   chr5:16202465-16202803 FORWARD LENGTH=112                                                                                                                                                                                                      | 222 | 112 | 7.00E-34  | 50.5  | 34.7 | 37.4 |
| Rsa1.0_00748.1.g18957.t1 | gb EOA25560.1  hypothetical protein CARUB_v10018904mg [Capsella rubella]                                                                                                                                                                                                                                                                                                                                                                                      | 175 | 198 | 2.00E-49  | 113.1 | 64.0 | 75.4 | hypothetical protein CARUB_v10018904mg               | gbpln | Capsella rubella     | AT3G27520.1   Symbols:   unknown protein; Has 28 Blast hits to 28 proteins in 10 species: Archae - 0; Bacteria - 0; Metazoa - 0; Fungi - 0; Plants - 28; Viruses - 0; Other Eukaryotes - 0 (source: NCBI BLink).   chr3:10192484-10193159 FORWARD LENGTH=198                                                                                                                                                                                                                                                                                      | 175 | 198 | 8.00E-48  | 113.1 | 61.7 | 70.9 |
| Rsa1.0_00748.1.g18958.t1 | ref NP_189384.1  cysteine/histidine-rich C1 domain-containing protein [Arabidopsis thaliana] gi 11994636 dbj BAA95723.2  CHP-rich zinc finger protein-like [Arabidopsis thaliana] gi 332643805 gb AEE77326.1  cysteine/histidine-rich C1 domain-containing protein [Arabidopsis thaliana]                                                                                                                                                                     | 668 | 662 | 0         | 99.1  | 62.6 | 74.3 | cysteine/histidine-rich C1 domain-containing protein | gbpln | Arabidopsis thaliana | AT3G27473.1   Symbols:   Cysteine/Histidine-rich C1 domain family protein   chr3:10169242-10171230 REVERSE LENGTH=662                                                                                                                                                                                                                                                                                                                                                                                                                             | 668 | 662 | 0         | 99.1  | 62.6 | 74.3 |
| Rsa1.0_00748.1.g18959.t1 | ref NP_189383.2  uncharacterized protein [Arabidopsis thaliana] gi 145332703 ref NP_001078217.1  uncharacterized protein [Arabidopsis thaliana] gi 19698931 gb AAL91201.1  unknown protein [Arabidopsis thaliana] gi 27311907 gb AA000919.1  unknown protein [Arabidopsis thaliana] gi 332643803 gb AEE77324.1  uncharacterized protein AT3G27470 [Arabidopsis thaliana] gi 332643804 gb AEE77325.1  uncharacterized protein AT3G27470 [Arabidopsis thaliana] | 399 | 398 | 0         | 99.7  | 91.2 | 95.2 | uncharacterized protein                              | gbpln | Arabidopsis thaliana | AT3G27470.2   Symbols:   Protein of unknown function (DUF707)   chr3:10163947-10166550 FORWARD LENGTH=398                                                                                                                                                                                                                                                                                                                                                                                                                                         | 399 | 398 | 0         | 99.7  | 91.2 | 95.2 |
| Rsa1.0_00748.1.g18960.t1 | ref XP_002875388.1  predicted protein [Arabidopsis lyrata subsp. lyrata] gi 297321226 gb EFH51647.1  predicted protein [Arabidopsis lyrata subsp. lyrata]                                                                                                                                                                                                                                                                                                     | 456 | 464 | 0         | 101.8 | 91.7 | 95.2 | predicted protein                                    | gbpln | Arabidopsis lyrata   | AT3G27440.1   Symbols: UKL5   uridine kinase-like 5   chr3:10155555-10157931 FORWARD LENGTH=465                                                                                                                                                                                                                                                                                                                                                                                                                                                   | 456 | 465 | 0         | 102.0 | 90.6 | 95.0 |
| Rsa1.0_00748.1.g18961.t1 | ref NP_001118720.1  uncharacterized protein [Arabidopsis thaliana] gi 332643794 gb AEE77315.1  uncharacterized protein AT3G27416 [Arabidopsis thaliana]                                                                                                                                                                                                                                                                                                       | 171 | 171 | 6.00E-12  | 100.0 | 53.2 | 63.7 | uncharacterized protein                              | gbpln | Arabidopsis thaliana | AT3G27416.1   Symbols:   unknown protein; FUNCTIONS IN: molecular_function unknown; INVOLVED IN: biological_process unknown; LOCATED IN: cellular_component unknown; Has 30201 Blast hits to 17322 proteins in 780 species: Archae - 12; Bacteria - 1396; Metazoa - 17338; Fungi - 3422; Plants - 5037; Viruses - 0; Other Eukaryotes - 2996 (source: NCBI BLink).   chr3:10147371-10147886 REVERSE LENGTH=171                                                                                                                                    | 171 | 171 | 2.00E-14  | 100.0 | 53.2 | 63.7 |

|                          |                                                                                                                                                                                                                                                                                                                                                                                                                         |     |     |           |       |      |      |                                           |       |                      |                                                                                                                                                                                                                                                                                                                                                                                                                                                                                                                                           |     |     |           |       |      |      |
|--------------------------|-------------------------------------------------------------------------------------------------------------------------------------------------------------------------------------------------------------------------------------------------------------------------------------------------------------------------------------------------------------------------------------------------------------------------|-----|-----|-----------|-------|------|------|-------------------------------------------|-------|----------------------|-------------------------------------------------------------------------------------------------------------------------------------------------------------------------------------------------------------------------------------------------------------------------------------------------------------------------------------------------------------------------------------------------------------------------------------------------------------------------------------------------------------------------------------------|-----|-----|-----------|-------|------|------|
| Rsa1.0_00748.1.g18962.t1 | ref XP_002875382.1  predicted protein [Arabidopsis lyrata subsp. lyrata]   gi 297321220 gb EFH51641.1  predicted protein [Arabidopsis lyrata subsp. lyrata]                                                                                                                                                                                                                                                             | 412 | 412 | 0         | 100.0 | 89.6 | 95.4 | predicted protein                         | gbpln | Arabidopsis lyrata   | AT3G27400.1   Symbols:   Pectin lyase-like superfamily protein   chr3:10140323-10143023 FORWARD LENGTH=412                                                                                                                                                                                                                                                                                                                                                                                                                                | 412 | 412 | 0         | 100.0 | 89.8 | 95.1 |
| Rsa1.0_00748.1.g18963.t1 | dbj BAJ34353.1  unnamed protein product [Theellungiella halophila]                                                                                                                                                                                                                                                                                                                                                      | 283 | 279 | 1.00E-145 | 98.6  | 90.5 | 94.7 | unnamed protein product                   | ----  | ----                 | AT3G27380.2   Symbols: SDH2-1   succinate dehydrogenase 2-1   chr3:10131209-10132673 REVERSE LENGTH=279                                                                                                                                                                                                                                                                                                                                                                                                                                   | 283 | 279 | 1.00E-148 | 98.6  | 88.7 | 92.6 |
| Rsa1.0_00748.1.g18964.t1 | gb EOA23814.1  hypothetical protein CARUB_v10017030mg [Capsella rubella]                                                                                                                                                                                                                                                                                                                                                | 527 | 516 | 0         | 97.9  | 93.2 | 96.4 | hypothetical protein CARUB_v10017030mg    | gbpln | Capsella rubella     | AT3G27300.3   Symbols: G6PD5   glucose-6-phosphate dehydrogenase 5   chr3:10083318-10086288 REVERSE LENGTH=516                                                                                                                                                                                                                                                                                                                                                                                                                            | 527 | 516 | 0         | 97.9  | 92.2 | 96.8 |
| Rsa1.0_00748.1.g18965.t1 | gb EOA23946.1  hypothetical protein CARUB_v10017162mg [Capsella rubella]                                                                                                                                                                                                                                                                                                                                                | 417 | 472 | 1.00E-123 | 113.2 | 65.2 | 76.3 | hypothetical protein CARUB_v10017162mg    | gbpln | Capsella rubella     | AT3G27290.1   Symbols:   RNI-like superfamily protein   chr3:10080038-10081265 REVERSE LENGTH=382                                                                                                                                                                                                                                                                                                                                                                                                                                         | 417 | 382 | 1.00E-115 | 91.6  | 55.9 | 65.5 |
| Rsa1.0_00748.1.g18966.t1 | ref NP_189364.1  prohibitin 4 [Arabidopsis thaliana]   gi 42572547 ref NP_974369.1  prohibitin 4 [Arabidopsis thaliana]   gi 75273705 sp Q9LK25.1 PHB4_ARATH RecName: Full=Prohibitin-4, mitochondrial; Short=Atpbh4   gi 9294221 dbj BAB02123.1  prohibitin [Arabidopsis thaliana]   gi 332643766 gb AEE77287.1  prohibitin 4 [Arabidopsis thaliana]   gi 332643767 gb AEE77288.1  prohibitin 4 [Arabidopsis thaliana] | 278 | 279 | 2.33E-156 | 100.4 | 93.5 | 96.4 | prohibitin 4                              | gbpln | Arabidopsis thaliana | AT3G27280.1   Symbols: ATPBH4, PHB4   prohibitin 4   chr3:10076904-10078051 FORWARD LENGTH=279                                                                                                                                                                                                                                                                                                                                                                                                                                            | 278 | 279 | 1.00E-149 | 100.4 | 93.5 | 96.4 |
| Rsa1.0_00748.1.g18967.t1 | gb EOA25372.1  hypothetical protein CARUB_v10018703mg [Capsella rubella]                                                                                                                                                                                                                                                                                                                                                | 410 | 433 | 0         | 105.6 | 93.2 | 97.1 | hypothetical protein CARUB_v10018703mg    | gbpln | Capsella rubella     | AT5G40780.1   Symbols: LHT1   lysine histidine transporter 1   chr5:16323823-16327082 FORWARD LENGTH=446                                                                                                                                                                                                                                                                                                                                                                                                                                  | 410 | 446 | 0         | 108.8 | 88.3 | 96.1 |
| Rsa1.0_00748.1.g18968.t2 | ref XP_002875368.1  hypothetical protein ARALYDRAFT_484508 [Arabidopsis lyrata subsp. lyrata]   gi 297321206 gb EFH51627.1  hypothetical protein ARALYDRAFT_484508 [Arabidopsis lyrata subsp. lyrata]                                                                                                                                                                                                                   | 687 | 814 | 0         | 118.5 | 80.8 | 87.8 | hypothetical protein ARALYDRAFT_484508    | gbpln | Arabidopsis lyrata   | AT3G27260.1   Symbols: GTE8   global transcription factor group E8   chr3:10068411-10072403 FORWARD LENGTH=813                                                                                                                                                                                                                                                                                                                                                                                                                            | 687 | 813 | 0         | 118.3 | 80.8 | 88.1 |
| Rsa1.0_00748.1.g18969.t1 | ref XP_002877032.1  AT3g27240/K17E12.6 [Arabidopsis lyrata subsp. lyrata]   gi 297322870 gb EFH53291.1  AT3g27240/K17E12.6 [Arabidopsis lyrata subsp. lyrata]                                                                                                                                                                                                                                                           | 304 | 307 | 1.00E-141 | 101.0 | 83.9 | 86.8 | AT3g27240/K17E12.6                        | gbpln | Arabidopsis lyrata   | AT3G27240.1   Symbols:   Cytochrome C1 family   chr3:10056144-10058370 REVERSE LENGTH=307                                                                                                                                                                                                                                                                                                                                                                                                                                                 | 304 | 307 | 1.00E-144 | 101.0 | 84.5 | 86.8 |
| Rsa1.0_00748.1.g18970.t1 | ref XP_002875365.1  hypothetical protein ARALYDRAFT_904944 [Arabidopsis lyrata subsp. lyrata]   gi 297321203 gb EFH51624.1  hypothetical protein ARALYDRAFT_904944 [Arabidopsis lyrata subsp. lyrata]                                                                                                                                                                                                                   | 415 | 410 | 0         | 98.8  | 87.5 | 92.8 | hypothetical protein ARALYDRAFT_904944    | gbpln | Arabidopsis lyrata   | AT3G27230.1   Symbols:   S-adenosyl-L-methionine-dependent methyltransferases superfamily protein   chr3:10054224-10055456 FORWARD LENGTH=410                                                                                                                                                                                                                                                                                                                                                                                             | 415 | 410 | 0         | 98.8  | 88.2 | 91.8 |
| Rsa1.0_00748.1.g18971.t1 | gb EOA23280.1  hypothetical protein CARUB_v10018089mg [Capsella rubella]                                                                                                                                                                                                                                                                                                                                                | 190 | 183 | 1.00E-75  | 96.3  | 84.7 | 89.5 | hypothetical protein CARUB_v10018089mg    | gbpln | Capsella rubella     | AT3G27160.1   Symbols: GHS1   Ribosomal protein S21 family protein   chr3:10017531-10018854 FORWARD LENGTH=183                                                                                                                                                                                                                                                                                                                                                                                                                            | 190 | 183 | 3.00E-70  | 96.3  | 86.3 | 90.0 |
| Rsa1.0_00748.1.g18972.t1 | ref NP_189346.2  enhancer of yellow 2 transcription factor [Arabidopsis thaliana]   gi 37202032 gb AAQ89631.1  At3g27100 [Arabidopsis thaliana]   gi 51969380 dbj BAD43362.1  hypothetical protein [Arabidopsis thaliana]   gi 332643745 gb AEE77266.1  enhancer of yellow 2 transcription factor [Arabidopsis thaliana]                                                                                                | 139 | 115 | 1.00E-46  | 82.7  | 69.8 | 74.8 | enhancer of yellow 2 transcription factor | gbpln | Arabidopsis thaliana | AT3G27100.1   Symbols:   FUNCTIONS IN: molecular_function unknown; INVOLVED IN: biological_process unknown; LOCATED IN: chloroplast envelope; EXPRESSED IN: 23 plant structures; EXPRESSED DURING: 13 growth stages; CONTAINS InterPro DOMAIN/s: Transcription factor; enhancer of yellow 2 (InterPro:IPR018783); Has 288 Blast hits to 288 proteins in 94 species: Archaee - 0; Bacteria - 0; Metazoa - 197; Fungi - 20; Plants - 51; Viruses - 0; Other Eukaryotes - 20 (source: NCBI BLINK);   chr3:9994743-9995923 REVERSE LENGTH=115 | 139 | 115 | 3.00E-49  | 82.7  | 69.8 | 74.8 |

|                          |                                                                                                                                                                                                                                                                                                                                                                                                                                                                                                                                                                                                                                         |     |     |           |       |      |      |                                                     |       |                      |                                                                                                                                                                                                                                                                                                                                                                                                                                                                                       |     |     |           |       |      |      |
|--------------------------|-----------------------------------------------------------------------------------------------------------------------------------------------------------------------------------------------------------------------------------------------------------------------------------------------------------------------------------------------------------------------------------------------------------------------------------------------------------------------------------------------------------------------------------------------------------------------------------------------------------------------------------------|-----|-----|-----------|-------|------|------|-----------------------------------------------------|-------|----------------------|---------------------------------------------------------------------------------------------------------------------------------------------------------------------------------------------------------------------------------------------------------------------------------------------------------------------------------------------------------------------------------------------------------------------------------------------------------------------------------------|-----|-----|-----------|-------|------|------|
| Rsa1.0_00749.1.g18973.t1 | ref[NP_188169.1] NAC domain-containing protein 55 [Arabidopsis thaliana] gi 75273159 sp Q9LDY8.1 NAC55_ARAT H RecName: Full=NAC domain-containing protein 55; Short=ANAC055; AltName: Full=NAC domain-containing protein 3; Short=ATNAC3 gi 7021735 gb AAF35416.1  putative jasmonic acid regulatory protein [Arabidopsis thaliana] gi 12060424 dbj BAB20599.1  AtNAC3 [Arabidopsis thaliana] gi 15795115 dbj BAB02379.1  jasmonic acid regulatory protein-like [Arabidopsis thaliana] gi 105830298 gb ABF74720.1  At3g15500 [Arabidopsis thaliana] gi 332642162 gb AEE75683.1  NAC domain-containing protein 55 [Arabidopsis thaliana] | 317 | 317 | 1.00E-140 | 100.0 | 81.7 | 86.4 | NAC domain-containing protein 55                    | gbpln | Arabidopsis thaliana | AT3G15500.1   Symbols: ATNAC3, ANAC055, NAC055, NAC3   NAC domain containing protein 3   chr3:5234731-5235882 FORWARD LENGTH=317                                                                                                                                                                                                                                                                                                                                                      | 317 | 317 | 1.00E-142 | 100.0 | 81.7 | 86.4 |
| Rsa1.0_00749.1.g18974.t1 | ref[XP_002882945.1] hypothetical protein ARALYDRAFT_318329 [Arabidopsis lyrata subsp. lyrata] gi 297328785 gb EFH59204.1  hypothetical protein ARALYDRAFT_318329 [Arabidopsis lyrata subsp. lyrata]                                                                                                                                                                                                                                                                                                                                                                                                                                     | 273 | 271 | 2.00E-79  | 99.3  | 57.1 | 71.1 | hypothetical protein ARALYDRAFT_318329              | gbpln | Arabidopsis lyrata   | AT3G15490.1   Symbols:   Regulator of Vps4 activity in the MVB pathway protein   chr3:5229785-5230646 FORWARD LENGTH=211                                                                                                                                                                                                                                                                                                                                                              | 273 | 211 | 4.00E-58  | 77.3  | 43.2 | 55.7 |
| Rsa1.0_00749.1.g18975.t1 | #                                                                                                                                                                                                                                                                                                                                                                                                                                                                                                                                                                                                                                       | #   | #   | #         | #     | #    | #    | -                                                   | ----  | ----                 | #                                                                                                                                                                                                                                                                                                                                                                                                                                                                                     | #   | #   | #         | #     | #    |      |
| Rsa1.0_00749.1.g18976.t1 | gb[EOA32735.1] hypothetical protein CARUB_v10016040mg [Capsella rubella]                                                                                                                                                                                                                                                                                                                                                                                                                                                                                                                                                                | 317 | 317 | 1.00E-174 | 100.0 | 92.1 | 96.2 | hypothetical protein CARUB_v10016040mg              | gbpln | Capsella rubella     | AT3G15460.1   Symbols:   Ribosomal RNA processing Brix domain protein   chr3:5214279-5216188 REVERSE LENGTH=315                                                                                                                                                                                                                                                                                                                                                                       | 317 | 315 | 1.00E-169 | 99.4  | 89.3 | 93.1 |
| Rsa1.0_00749.1.g18977.t1 | gb[EOA31283.1] hypothetical protein CARUB_v10014455mg [Capsella rubella]                                                                                                                                                                                                                                                                                                                                                                                                                                                                                                                                                                | 246 | 253 | 1.00E-105 | 102.8 | 78.9 | 86.2 | hypothetical protein CARUB_v10014455mg              | gbpln | Capsella rubella     | AT3G15450.1   Symbols:   Aluminium induced protein with YGL and LRDR motifs   chr3:5213050-5213998 FORWARD LENGTH=253                                                                                                                                                                                                                                                                                                                                                                 | 246 | 253 | 1.00E-107 | 102.8 | 77.6 | 86.2 |
| Rsa1.0_00749.1.g18978.t1 | ref[XP_002882943.1] regulator of chromosome condensation family protein [Arabidopsis lyrata subsp. lyrata] gi 297328783 gb EFH59202.1  regulator of chromosome condensation family protein [Arabidopsis lyrata subsp. lyrata]                                                                                                                                                                                                                                                                                                                                                                                                           | 491 | 488 | 0         | 99.4  | 88.4 | 93.7 | regulator of chromosome condensation family protein | gbpln | Arabidopsis lyrata   | AT3G15430.2   Symbols:   Regulator of chromosome condensation (RCC1) family protein   chr3:5209408-5211562 FORWARD LENGTH=488                                                                                                                                                                                                                                                                                                                                                         | 491 | 488 | 0         | 99.4  | 88.6 | 93.5 |
| Rsa1.0_00749.1.g18979.t1 | gb[AEJ33660.1] ATA20 [Brassica napus]                                                                                                                                                                                                                                                                                                                                                                                                                                                                                                                                                                                                   | 421 | 462 | 6.00E-85  | 109.7 | 40.9 | 42.5 | ATA20                                               | gbpln | Brassica napus       | AT3G15400.1   Symbols: ATA20   anther 20   chr3:5201678-5202928 FORWARD LENGTH=416                                                                                                                                                                                                                                                                                                                                                                                                    | 421 | 416 | 1.00E-38  | 98.8  | 21.4 | 23.5 |
| Rsa1.0_00749.1.g18980.t2 | ref[NP_188158.4] protein silencing defective 5 [Arabidopsis thaliana] gi 15795104 dbj BAB02368.1  unnamed protein product [Arabidopsis thaliana] gi 33264214 gb AEE75662.1  protein silencing defective 5 [Arabidopsis thaliana]                                                                                                                                                                                                                                                                                                                                                                                                        | 503 | 490 | 0         | 97.4  | 71.0 | 81.3 | protein silencing defective 5                       | gbpln | Arabidopsis thaliana | AT3G15390.1   Symbols: SDE5   silencing defective 5   chr3:5196689-5199531 REVERSE LENGTH=490                                                                                                                                                                                                                                                                                                                                                                                         | 503 | 490 | 0         | 97.4  | 71.0 | 81.3 |
| Rsa1.0_00749.1.g18981.t1 | ref[XP_002882934.1] ubiquitin-conjugating enzyme 23 [Arabidopsis lyrata subsp. lyrata] gi 297328774 gb EFH59193.1  ubiquitin-conjugating enzyme 23 [Arabidopsis lyrata subsp. lyrata]                                                                                                                                                                                                                                                                                                                                                                                                                                                   | 591 | 605 | 0         | 102.4 | 66.2 | 75.6 | ubiquitin-conjugating enzyme 23                     | gbpln | Arabidopsis lyrata   | AT3G15355.1   Symbols: UBC25, PFU1   ubiquitin-conjugating enzyme 25   chr3:5183858-5186669 FORWARD LENGTH=609                                                                                                                                                                                                                                                                                                                                                                        | 591 | 609 | 0         | 103.0 | 63.8 | 72.6 |
| Rsa1.0_00749.1.g18982.t1 | dbj BAC42437.1  putative ubiquitin-conjugating enzyme [Arabidopsis thaliana] gi 29028949 gb AAO64853.1  At1g53020 [Arabidopsis thaliana]                                                                                                                                                                                                                                                                                                                                                                                                                                                                                                | 428 | 543 | 1.00E-162 | 126.9 | 72.0 | 82.5 | putative ubiquitin-conjugating enzyme               | gbpln | Arabidopsis thaliana | AT1G53025.1   Symbols:   Ubiquitin-conjugating enzyme family protein   chr1:19757072-19759474 REVERSE LENGTH=543                                                                                                                                                                                                                                                                                                                                                                      | 428 | 543 | 1.00E-164 | 126.9 | 72.0 | 82.5 |
| Rsa1.0_00749.1.g18983.t1 | ref[XP_002882932.1] hypothetical protein ARALYDRAFT_897817 [Arabidopsis lyrata subsp. lyrata] gi 297328772 gb EFH59191.1  hypothetical protein ARALYDRAFT_897817 [Arabidopsis lyrata subsp. lyrata]                                                                                                                                                                                                                                                                                                                                                                                                                                     | 144 | 144 | 1.00E-74  | 100.0 | 93.8 | 97.9 | hypothetical protein ARALYDRAFT_897817              | gbpln | Arabidopsis lyrata   | AT3G15358.1   Symbols:   unknown protein; FUNCTIONS IN: molecular function unknown; INVOLVED IN: biological process unknown; LOCATED IN: endomembrane system; BEST Arabidopsis thaliana protein match is: unknown protein (TAIR:AT1G53035.1); Has 35333 Blast hits to 34131 proteins in 2444 species: Archaea - 798; Bacteria - 22429; Metazoa - 974; Fungi - 991; Plants - 531; Viruses - 0; Other Eukaryotes - 9610 (source: NCBI BLINK).   chr3:5178205-5178639 FORWARD LENGTH=144 | 144 | 144 | 2.00E-76  | 100.0 | 93.8 | 97.9 |

|                          |                                                                                                                                                                                                                                                                                                                                                                      |      |      |           |       |      |      |                                                     |       |                      |                                                                                                                                                                                                                                                                                                                                                                                                                                                                   |      |      |          |       |      |      |
|--------------------------|----------------------------------------------------------------------------------------------------------------------------------------------------------------------------------------------------------------------------------------------------------------------------------------------------------------------------------------------------------------------|------|------|-----------|-------|------|------|-----------------------------------------------------|-------|----------------------|-------------------------------------------------------------------------------------------------------------------------------------------------------------------------------------------------------------------------------------------------------------------------------------------------------------------------------------------------------------------------------------------------------------------------------------------------------------------|------|------|----------|-------|------|------|
| Rsa1.0_00749.1.g18984.t1 | gb AAO22669.1  unknown protein [Arabidopsis thaliana]                                                                                                                                                                                                                                                                                                                | 170  | 165  | 7.00E-72  | 97.1  | 76.5 | 85.3 | unknown protein                                     | gbpln | Arabidopsis thaliana | AT3G15351.1   Symbols:   unknown protein; Has 50 Blast hits to 50 proteins in 16 species: Archae - 0; Bacteria - 0; Metazoa - 7; Fungi - 0; Plants - 43; Viruses - 0; Other Eukaryotes - 0 (source: NCBI BLink).   chr3:5176726-5177531 FORWARD LENGTH=165                                                                                                                                                                                                        | 170  | 165  | 3.00E-74 | 97.1  | 76.5 | 85.3 |
| Rsa1.0_00749.1.g18985.t2 | dbj BAJ33836.1  unnamed protein product [Thellungiella halophila]                                                                                                                                                                                                                                                                                                    | 583  | 424  | 0         | 72.7  | 61.9 | 65.7 | unnamed protein product                             | ----  | ----                 | AT3G15350.2   Symbols:   Core-2/1-branching beta-1.6-N-acetylglucosaminyltransferase family protein   chr3:5167250-5168822 FORWARD LENGTH=424                                                                                                                                                                                                                                                                                                                     | 583  | 424  | 0        | 72.7  | 59.3 | 64.5 |
| Rsa1.0_00749.1.g18986.t1 | dbj BAB02162.1  unnamed protein product [Arabidopsis thaliana]                                                                                                                                                                                                                                                                                                       | 294  | 288  | 5.00E-92  | 98.0  | 59.2 | 69.4 | unnamed protein product                             | gbpln | Arabidopsis thaliana | AT2G04930.1   Symbols:   Haloacid dehalogenase-like hydrolase (HAD) superfamily protein   chr2:1733638-1734471 REVERSE LENGTH=277                                                                                                                                                                                                                                                                                                                                 | 294  | 277  | 6.00E-75 | 94.2  | 48.6 | 62.9 |
| Rsa1.0_00749.1.g18987.t1 | ref XP_002882925.1  hypothetical protein ARALYDRAFT_897805 [Arabidopsis lyrata subsp. lyrata] gi 297328765 gb EFH59184.1  hypothetical protein ARALYDRAFT_897805 [Arabidopsis lyrata subsp. lyrata]                                                                                                                                                                  | 155  | 166  | 5.00E-69  | 107.1 | 83.9 | 91.0 | hypothetical protein ARALYDRAFT_897805              | gbpln | Arabidopsis lyrata   | AT1G53130.1   Symbols: GRI   Stigma-specific StigI family protein   chr1:1979497-19795453 REVERSE LENGTH=168                                                                                                                                                                                                                                                                                                                                                      | 155  | 168  | 3.00E-65 | 108.4 | 74.2 | 88.4 |
| Rsa1.0_00749.1.g18988.t1 | ref NP_188148.1  VQ motif-containing protein [Arabidopsis thaliana] gi 9294257 dbj BAB02159.1  unnamed protein product [Arabidopsis thaliana] gi 38454098 gb AAR20743.1  At3g15300 [Arabidopsis thaliana] gi 41349916 gb AAS00343.1  At3g15300 [Arabidopsis thaliana] gi 33264212 gb AEE75642.1  VQ motif-containing protein [Arabidopsis thaliana]                  | 227  | 219  | 7.00E-81  | 96.5  | 80.2 | 85.9 | VQ motif-containing protein                         | gbpln | Arabidopsis thaliana | AT3G15300.1   Symbols:   VQ motif-containing protein   chr3:5147551-5148210 REVERSE LENGTH=219                                                                                                                                                                                                                                                                                                                                                                    | 227  | 219  | 2.00E-83 | 96.5  | 80.2 | 85.9 |
| Rsa1.0_00749.1.g18989.t1 | ref NP_566504.1  uncharacterized protein [Arabidopsis thaliana] gi 9294255 dbj BAB02157.1  unnamed protein product [Arabidopsis thaliana] gi 16974611 gb AAL31208.1  AT3g15280/K7L4.8 [Arabidopsis thaliana] gi 21928105 gb AAM78081.1  AT3g15280/K7L4.8 [Arabidopsis thaliana] gi 332642119 gb AEE75640.1  uncharacterized protein AT3G15280 [Arabidopsis thaliana] | 120  | 150  | 5.00E-12  | 125.0 | 31.7 | 33.3 | uncharacterized protein                             | gbpln | Arabidopsis thaliana | AT3G15280.1   Symbols:   unknown protein; FUNCTIONS IN: molecular function unknown; LOCATED IN: mitochondrion; EXPRESSED IN: 8 plant structures; EXPRESSED DURING: L mature pollen stage, 4 anthesis, petal differentiation and expansion stage; Has 36 Blast hits to 36 proteins in 15 species: Archae - 0; Bacteria - 0; Metazoa - 1; Fungi - 2; Plants - 33; Viruses - 0; Other Eukaryotes - 0 (source: NCBI BLink).   chr3:5144144-5144670 REVERSE LENGTH=150 | 120  | 150  | 9.00E-15 | 125.0 | 31.7 | 33.3 |
| Rsa1.0_00750.1.g18990.t1 | ref XP_002891530.1  phospholipase C [Arabidopsis lyrata subsp. lyrata] gi 297337372 gb EFH67789.1  phospholipase C [Arabidopsis lyrata subsp. lyrata]                                                                                                                                                                                                                | 358  | 359  | 0         | 100.3 | 84.9 | 89.4 | phospholipase C                                     | gbpln | Arabidopsis lyrata   | AT1G49740.1   Symbols:   PLC-like phosphodiesterases superfamily protein   chr1:18407728-18409468 FORWARD LENGTH=359                                                                                                                                                                                                                                                                                                                                              | 358  | 359  | 0        | 100.3 | 84.6 | 89.4 |
| Rsa1.0_00750.1.g18991.t1 | #                                                                                                                                                                                                                                                                                                                                                                    | #    | #    | #         | #     | #    | #    | -                                                   | ----  | ----                 | #                                                                                                                                                                                                                                                                                                                                                                                                                                                                 | #    | #    | #        | #     | #    |      |
| Rsa1.0_00750.1.g18992.t1 | ref XP_002891531.1  PAB8 binding protein 8 [Arabidopsis lyrata subsp. lyrata] gi 297337373 gb EFH67790.1  PAB8 binding protein 8 [Arabidopsis lyrata subsp. lyrata]                                                                                                                                                                                                  | 654  | 669  | 0         | 102.3 | 89.9 | 93.9 | PAB8 binding protein 8                              | gbpln | Arabidopsis lyrata   | AT1G49760.2   Symbols: PAB8   poly(A) binding protein 8   chr1:18416740-18419753 FORWARD LENGTH=671                                                                                                                                                                                                                                                                                                                                                               | 654  | 671  | 0        | 102.6 | 88.8 | 93.0 |
| Rsa1.0_00750.1.g18993.t1 | #                                                                                                                                                                                                                                                                                                                                                                    | #    | #    | #         | #     | #    | #    | -                                                   | ----  | ----                 | #                                                                                                                                                                                                                                                                                                                                                                                                                                                                 | #    | #    | #        | #     | #    |      |
| Rsa1.0_00750.1.g18994.t1 | gb EOA39304.1  hypothetical protein CARUB_v10012321mg [Capsella rubella]                                                                                                                                                                                                                                                                                             | 210  | 180  | 1.00E-21  | 85.7  | 38.1 | 47.1 | hypothetical protein CARUB_v10012321mg              | gbpln | Capsella rubella     | AT1G49420.1   Symbols:   Heavy metal transport/detoxification superfamily protein   chr1:18287859-18288650 REVERSE LENGTH=189                                                                                                                                                                                                                                                                                                                                     | 210  | 189  | 7.00E-24 | 90.0  | 25.7 | 30.0 |
| Rsa1.0_00750.1.g18995.t1 | gb EOA32409.1  hypothetical protein CARUB_v10015681mg [Capsella rubella]                                                                                                                                                                                                                                                                                             | 135  | 131  | 3.00E-42  | 97.0  | 64.4 | 74.1 | hypothetical protein CARUB_v10015681mg              | gbpln | Capsella rubella     | AT3G03410.1   Symbols:   EF hand calcium-binding protein family   chr3:811324-811719 REVERSE LENGTH=131                                                                                                                                                                                                                                                                                                                                                           | 135  | 131  | 2.00E-41 | 97.0  | 60.0 | 71.9 |
| Rsa1.0_00750.1.g18996.t1 | dbj BAA77394.1  SAE1-S9-protein [Brassica rapa]                                                                                                                                                                                                                                                                                                                      | 150  | 255  | 5.00E-23  | 170.0 | 36.7 | 45.3 | SAE1-S9-protein                                     | gbpln | Brassica rapa        | AT5G18880.1   Symbols:   RNA-directed DNA polymerase (reverse transcriptase)-related family protein   chr5:6300535-6301422 REVERSE LENGTH=295                                                                                                                                                                                                                                                                                                                     | 150  | 295  | 7.00E-25 | 196.7 | 39.3 | 54.7 |
| Rsa1.0_00750.1.g18997.t1 | gb AAC32803.2  phosphatidylinositol 4-kinase [Arabidopsis thaliana]                                                                                                                                                                                                                                                                                                  | 2015 | 2028 | 0         | 100.6 | 94.1 | 97.3 | phosphatidylinositol 4-kinase                       | gbpln | Arabidopsis thaliana | AT1G49340.1   Symbols: ATP4K ALPHA   Phosphatidylinositol 3- and 4-kinase family protein   chr1:18252355-18263967 FORWARD LENGTH=2028                                                                                                                                                                                                                                                                                                                             | 2015 | 2028 | 0        | 100.6 | 94.1 | 97.3 |
| Rsa1.0_00750.1.g18998.t1 | #                                                                                                                                                                                                                                                                                                                                                                    | #    | #    | #         | #     | #    | #    | -                                                   | ----  | ----                 | #                                                                                                                                                                                                                                                                                                                                                                                                                                                                 | #    | #    | #        | #     | #    |      |
| Rsa1.0_00750.1.g18999.t1 | gb AAC33226.1  putative non-LTR retroelement reverse transcriptase [Arabidopsis thaliana]                                                                                                                                                                                                                                                                            | 502  | 1529 | 1.00E-165 | 304.6 | 57.4 | 72.1 | putative non-LTR retroelement reverse transcriptase | gbpln | Arabidopsis thaliana | AT3G24255.1   Symbols:   RNA-directed DNA polymerase (reverse transcriptase)-related family protein   chr3:8789471-8793208 FORWARD LENGTH=746                                                                                                                                                                                                                                                                                                                     | 502  | 746  | 4.00E-87 | 148.6 | 34.9 | 43.8 |

|                          |                                                                                                                                                                                                                                                                                                                                                                                                                                                                                                                                                                                                                                                    |      |      |           |       |      |      |                                                   |       |                      |                                                                                                                                                           |      |      |           |       |      |      |
|--------------------------|----------------------------------------------------------------------------------------------------------------------------------------------------------------------------------------------------------------------------------------------------------------------------------------------------------------------------------------------------------------------------------------------------------------------------------------------------------------------------------------------------------------------------------------------------------------------------------------------------------------------------------------------------|------|------|-----------|-------|------|------|---------------------------------------------------|-------|----------------------|-----------------------------------------------------------------------------------------------------------------------------------------------------------|------|------|-----------|-------|------|------|
| Rsa1.0_00750.1.g19000.t1 | gb ACO54862.1 BURP domain protein [Brassica napus]<br>gi 226427147 gb ACO54863.1 BURP domain protein [Brassica napus]                                                                                                                                                                                                                                                                                                                                                                                                                                                                                                                              | 279  | 281  | 1.00E-140 | 100.7 | 86.0 | 91.8 | BURP domain protein                               | gbpln | Brassica napus       | AT1G49320.1   Symbols: ATUSPL1, USPL1   unknown seed protein like 1   chr1:18246441-18247817 FORWARD LENGTH=280                                           | 279  | 280  | 1.00E-134 | 100.4 | 78.1 | 89.6 |
| Rsa1.0_00751.1.g19001.t2 | emb CAB91581.1 putative protein [Arabidopsis thaliana]                                                                                                                                                                                                                                                                                                                                                                                                                                                                                                                                                                                             | 2087 | 1752 | 0         | 83.9  | 43.8 | 54.8 | putative protein                                  | gbpln | Arabidopsis thaliana | AT1G52950.1   Symbols:   Nucleic acid-binding, OB-fold-like protein   chr1:19725483-19728007 FORWARD LENGTH=566                                           | 2087 | 566  | 1.00E-83  | 27.1  | 8.8  | 14.9 |
| Rsa1.0_00751.1.g19002.t3 | #                                                                                                                                                                                                                                                                                                                                                                                                                                                                                                                                                                                                                                                  | #    | #    | #         | #     | #    | -    | ----                                              | ----  | #                    | #                                                                                                                                                         | #    | #    | #         | #     | #    | #    |
| Rsa1.0_00751.1.g19003.t1 | ref NP_188868.2 Endoplasmic reticulum vesicle transporter protein [Arabidopsis thaliana]<br>gi 13877821 gb AAK43988.1 AF370173.1 unknown protein [Arabidopsis thaliana]<br>gi 51969000 dbj BAD43192.1  unknown protein [Arabidopsis thaliana]<br>gi 51970108 dbj BAD43746.1  unknown protein [Arabidopsis thaliana]<br>gi 51970556 dbj BAD43970.1  unknown protein [Arabidopsis thaliana]<br>gi 51970734 dbj BAD44059.1  unknown protein [Arabidopsis thaliana]<br>gi 82319967 dbj BAD94071.1  hypothetical protein [Arabidopsis thaliana]<br>gi 332643097 gb AEE76618.1  Endoplasmic reticulum vesicle transporter protein [Arabidopsis thaliana] | 353  | 354  | 0         | 100.3 | 94.6 | 97.2 | Endoplasmic reticulum vesicle transporter protein | gbpln | Arabidopsis thaliana | AT3G22290.1   Symbols:   Endoplasmic reticulum vesicle transporter protein   chr3:7882082-7885260 FORWARD LENGTH=354                                      | 353  | 354  | 0         | 100.3 | 94.6 | 97.2 |
| Rsa1.0_00751.1.g19004.t1 | ref XP_002885498.1 ATRPABC24.3 [Arabidopsis lyrata subsp. lyrata]<br>gi 297331338 gb EFH61757.1  ATRPABC24.3 [Arabidopsis lyrata subsp. lyrata]                                                                                                                                                                                                                                                                                                                                                                                                                                                                                                    | 206  | 205  | 1.00E-110 | 99.5  | 94.7 | 97.6 | ATRPABC24.3                                       | gbpln | Arabidopsis lyrata   | AT3G22320.1   Symbols: ATRPABC24.3, RPB5A, NRPB5, NRPD5   Eukaryotic rpb5 RNA polymerase subunit family protein   chr3:7891045-7892094 REVERSE LENGTH=205 | 206  | 205  | 1.00E-112 | 99.5  | 93.7 | 98.1 |
| Rsa1.0_00751.1.g19005.t1 | gb AEB00555.1 mitochondrial alternative oxidase 1a [Brassica juncea]                                                                                                                                                                                                                                                                                                                                                                                                                                                                                                                                                                               | 342  | 360  | 1.00E-176 | 105.3 | 90.6 | 94.4 | mitochondrial alternative oxidase 1a              | gbpln | Brassica juncea      | AT3G22370.1   Symbols: AOX1A, ATAOX1A   alternative oxidase 1A   chr3:7906890-7908416 FORWARD LENGTH=354                                                  | 342  | 354  | 1.00E-171 | 103.5 | 86.5 | 92.4 |
| Rsa1.0_00751.1.g19006.t1 | ref XP_002883360.1 time for coffee [Arabidopsis lyrata subsp. lyrata]<br>gi 297329200 gb EFH59619.1 time for coffee [Arabidopsis lyrata subsp. lyrata]                                                                                                                                                                                                                                                                                                                                                                                                                                                                                             | 1281 | 1550 | 0         | 121.0 | 42.2 | 46.4 | time for coffee                                   | gbpln | Arabidopsis lyrata   | AT3G22380.2   Symbols: TIC   time for coffee   chr3:7913181-7918967 FORWARD LENGTH=1555                                                                   | 1281 | 1555 | 0         | 121.4 | 42.6 | 47.2 |
| Rsa1.0_00752.1.g19007.t1 | ref XP_002879526.1 hypothetical protein ARALYDRAFT_321210 [Arabidopsis lyrata subsp. lyrata]<br>gi 297325365 gb EFH55785.1  hypothetical protein ARALYDRAFT_321210 [Arabidopsis lyrata subsp. lyrata]                                                                                                                                                                                                                                                                                                                                                                                                                                              | 642  | 619  | 0         | 96.4  | 80.2 | 86.8 | hypothetical protein ARALYDRAFT_321210            | gbpln | Arabidopsis lyrata   | AT2G34940.1   Symbols: VSR5, VSR3.2, BP80-3.2   VACUOLAR SORTING RECEPTOR 5   chr2:14740497-14743314 FORWARD LENGTH=618                                   | 642  | 618  | 0         | 96.3  | 78.3 | 86.1 |
| Rsa1.0_00752.1.g19008.t1 | ref NP_181041.1 cationic amino acid transporter 5 [Arabidopsis thaliana]<br>gi 75278307 sp O64759.1 CAAT5_ARAT H RecName: Full=Cationic amino acid transporter 5<br>gi 3033391 gb AAC12835.1 putative amino acid transporter [Arabidopsis thaliana]<br>gi 330253949 gb AEC09043.1  cationic amino acid transporter 5 [Arabidopsis thaliana]                                                                                                                                                                                                                                                                                                        | 572  | 569  | 0         | 99.5  | 90.2 | 94.2 | cationic amino acid transporter 5                 | gbpln | Arabidopsis thaliana | AT2G34960.1   Symbols: CAT5   cationic amino acid transporter 5   chr2:14744175-14745884 REVERSE LENGTH=569                                               | 572  | 569  | 0         | 99.5  | 90.2 | 94.2 |
| Rsa1.0_00752.1.g19009.t1 | ref NP_181046.1 thioredoxin O1 [Arabidopsis thaliana]<br>gi 145330362 ref NP_001078006.1 thioredoxin O1 [Arabidopsis thaliana]<br>gi 75099186 sp O64764.1 TRXO1_ARAT H RecName: Full=Thioredoxin O1 mitochondrial; Short=ATTxo1; Flags: Precursor<br>gi 3033396 gb AAC12840.1 putative thioredoxin [Arabidopsis thaliana]<br>gi 107738216 gb ABF83663.1 At2g35010 [Arabidopsis thaliana]<br>gi 330253954 gb AEC09048.1 thioredoxin O1 [Arabidopsis thaliana]<br>gi 330253955 gb AEC09049.1 thioredoxin O1 [Arabidopsis thaliana]                                                                                                                   | 194  | 194  | 3.00E-74  | 100.0 | 73.2 | 84.5 | thioredoxin O1                                    | gbpln | Arabidopsis thaliana | AT2G35010.2   Symbols: ATO1, TO1   thioredoxin O1   chr2:14754398-14755888 FORWARD LENGTH=194                                                             | 194  | 194  | 1.00E-76  | 100.0 | 73.2 | 84.5 |
| Rsa1.0_00752.1.g19010.t1 | #                                                                                                                                                                                                                                                                                                                                                                                                                                                                                                                                                                                                                                                  | #    | #    | #         | #     | #    | -    | ----                                              | ----  | ----                 | AT2G35040.2   Symbols:   AICARFT/IMPChase bienzyme family protein   chr2:14765347-14768023 REVERSE LENGTH=545                                             | 66   | 545  | 1.00E-12  | 825.8 | 50.0 | 59.1 |
| Rsa1.0_00752.1.g19011.t1 | ref XP_002879531.1 kinase family protein [Arabidopsis lyrata subsp. lyrata]<br>gi 297325370 gb EFH55790.1 kinase family protein [Arabidopsis lyrata subsp. lyrata]                                                                                                                                                                                                                                                                                                                                                                                                                                                                                 | 1255 | 1254 | 0         | 99.9  | 80.9 | 87.9 | kinase family protein                             | gbpln | Arabidopsis lyrata   | AT2G35050.1   Symbols:   Protein kinase superfamily protein with octicosapeptide/Phox/Bem1p domain   chr2:14769708-14774796 FORWARD LENGTH=1257           | 1255 | 1257 | 0         | 100.2 | 80.7 | 87.3 |

|                          |                                                                                               |     |     |           |       |      |      |                                                 |       |                      |                                                                                                                                                                                                                                                                                                                                                                                                                                                                           |     |     |           |       |      |      |
|--------------------------|-----------------------------------------------------------------------------------------------|-----|-----|-----------|-------|------|------|-------------------------------------------------|-------|----------------------|---------------------------------------------------------------------------------------------------------------------------------------------------------------------------------------------------------------------------------------------------------------------------------------------------------------------------------------------------------------------------------------------------------------------------------------------------------------------------|-----|-----|-----------|-------|------|------|
| Rsa1.0_00752.1.g19012.t1 | gb EOA37473.1  hypothetical protein CARUB_v10011614mg, partial [Capsella rubella]             | 113 | 287 | 6.00E-19  | 254.0 | 38.1 | 46.0 | hypothetical protein CARUB_v10011614mg, partial | gbpln | Capsella rubella     | AT4G19970.1   Symbols:   CONTAINS InterPro DOMAIN/s: Nucleotide-diphospho-sugar transferase, predicted (InterPro:IPR005069); BEST Arabidopsis thaliana protein match is: Nucleotide-diphospho-sugar transferase family protein (TAIR:AT5G44820.1); Has 801 Blast hits to 466 proteins in 35 species: Archae - 0; Bacteria - 0; Metazoa - 2; Fungi - 0; Plants - 750; Viruses - 0; Other Eukaryotes - 49 (source: NCBI BLink).   chr4:10818242-10825343 FORWARD LENGTH=715 | 113 | 715 | 8.00E-18  | 632.7 | 32.7 | 41.6 |
| Rsa1.0_00752.1.g19013.t1 | gb EMJ11865.1  hypothetical protein PRUPE_ppa022462mg [Prunus persica]                        | 259 | 606 | 5.00E-38  | 234.0 | 30.9 | 44.8 | hypothetical protein PRUPE_ppa022462mg          | gbpln | Prunus persica       | #                                                                                                                                                                                                                                                                                                                                                                                                                                                                         | #   | #   | #         | #     | #    |      |
| Rsa1.0_00752.1.g19014.t1 | ref XP_002881376.1  hypothetical protein ARALYDRAFT_482477 [Arabidopsis lyrata subsp. lyrata] | 179 | 156 | 3.00E-61  | 87.2  | 65.9 | 69.3 | hypothetical protein ARALYDRAFT_482477          | gbpln | Arabidopsis lyrata   | AT2G35120.1   Symbols:   Single hybrid motif superfamily protein   chr2:14805913-14807274 REVERSE LENGTH=156                                                                                                                                                                                                                                                                                                                                                              | 179 | 156 | 4.00E-63  | 87.2  | 65.4 | 68.7 |
| Rsa1.0_00752.1.g19015.t1 | gb EOA27710.1  hypothetical protein CARUB_v10023864mg [Capsella rubella]                      | 264 | 263 | 1.00E-134 | 99.6  | 95.5 | 98.9 | hypothetical protein CARUB_v10023864mg          | gbpln | Capsella rubella     | AT2G35190.1   Symbols: NPSN11, ATNPSN11, NSPN11   novel plant snare 11   chr2:14831087-14832979 FORWARD LENGTH=265                                                                                                                                                                                                                                                                                                                                                        | 264 | 265 | 1.00E-135 | 100.4 | 95.5 | 98.9 |
| Rsa1.0_00752.1.g19016.t1 | ref XP_002879538.1  AGD10/MEE28 [Arabidopsis lyrata subsp. lyrata]                            | 397 | 399 | 1.00E-170 | 100.5 | 82.4 | 88.7 | AGD10/MEE28                                     | gbpln | Arabidopsis lyrata   | AT2G35210.1   Symbols: RPA, AGD10, MEE28   root and pollen arfgap   chr2:14836206-14837946 FORWARD LENGTH=395                                                                                                                                                                                                                                                                                                                                                             | 397 | 395 | 1.00E-171 | 99.5  | 81.6 | 87.7 |
| Rsa1.0_00752.1.g19017.t1 | ref XP_002879539.1  hypothetical protein ARALYDRAFT_902620 [Arabidopsis lyrata subsp. lyrata] | 100 | 106 | 4.00E-34  | 106.0 | 73.0 | 81.0 | hypothetical protein ARALYDRAFT_902620          | gbpln | Arabidopsis lyrata   | AT2G35215.1   Symbols:   unknown protein; BEST Arabidopsis thaliana protein match is: unknown protein (TAIR:AT5G46770.1); Has 19 Blast hits to 19 proteins in 6 species: Archae - 0; Bacteria - 0; Metazoa - 0; Fungi - 0; Plants - 19; Viruses - 0; Other Eukaryotes - 0 (source: NCBI BLink).   chr2:14839296-14839616 FORWARD LENGTH=106                                                                                                                               | 100 | 106 | 4.00E-36  | 106.0 | 70.0 | 82.0 |
| Rsa1.0_00752.1.g19018.t1 | ref NP_181066.1  VQ motif-containing protein [Arabidopsis thaliana]                           | 358 | 402 | 1.00E-107 | 112.3 | 70.9 | 78.5 | VQ motif-containing protein                     | gbpln | Arabidopsis thaliana | AT2G35230.1   Symbols: IKU1   VQ motif-containing protein   chr2:14842871-14844079 FORWARD LENGTH=402                                                                                                                                                                                                                                                                                                                                                                     | 358 | 402 | 1.00E-110 | 112.3 | 70.9 | 78.5 |
| Rsa1.0_00752.1.g19019.t1 | gb EOA27681.1  hypothetical protein CARUB_v10023834mg, partial [Capsella rubella]             | 231 | 273 | 1.00E-109 | 118.2 | 84.8 | 91.3 | hypothetical protein CARUB_v10023834mg, partial | gbpln | Capsella rubella     | AT2G35240.1   Symbols:   plastid developmental protein DAG, putative   chr2:14845099-14846262 REVERSE LENGTH=232                                                                                                                                                                                                                                                                                                                                                          | 231 | 232 | 1.00E-108 | 100.4 | 83.1 | 89.6 |
| Rsa1.0_00752.1.g19020.t1 | ref XP_002879544.1  hypothetical protein ARALYDRAFT_482492 [Arabidopsis lyrata subsp. lyrata] | 281 | 287 | 1.00E-111 | 102.1 | 90.4 | 94.7 | hypothetical protein ARALYDRAFT_482492          | gbpln | Arabidopsis lyrata   | AT2G35270.1   Symbols: GIK   Predicted AT-hook DNA-binding family protein   chr2:14857021-14857878 FORWARD LENGTH=285                                                                                                                                                                                                                                                                                                                                                     | 281 | 285 | 1.00E-113 | 101.4 | 89.7 | 94.0 |
| Rsa1.0_00752.1.g19021.t1 | ref XP_002881386.1  hypothetical protein ARALYDRAFT_482493 [Arabidopsis lyrata subsp. lyrata] | 122 | 121 | 8.00E-54  | 99.2  | 84.4 | 91.8 | hypothetical protein ARALYDRAFT_482493          | gbpln | Arabidopsis lyrata   | AT2G35290.1   Symbols:   unknown protein; Has 39 Blast hits to 39 proteins in 10 species: Archae - 0; Bacteria - 0; Metazoa - 0; Fungi - 0; Plants - 39; Viruses - 0; Other Eukaryotes - 0 (source: NCBI BLink).   chr2:14861635-14862000 REVERSE LENGTH=121                                                                                                                                                                                                              | 122 | 121 | 1.00E-55  | 99.2  | 82.8 | 90.2 |
| Rsa1.0_00752.1.g19022.t1 | ref NP_181078.2  protein phosphatase 2C 29 [Arabidopsis thaliana]                             | 750 | 783 | 0         | 104.4 | 84.1 | 89.5 | protein phosphatase 2C 29                       | gbpln | Arabidopsis thaliana | AT2G35350.1   Symbols: PLL1   poltergeist like 1   chr2:14881360-14884116 REVERSE LENGTH=783                                                                                                                                                                                                                                                                                                                                                                              | 750 | 783 | 0         | 104.4 | 84.1 | 89.5 |



|                          |                                                                                                                                                                                                                                                                                                                                                                                                                                 |     |     |           |       |      |      |                                                                         |       |                      |                                                                                                                                                                                                                                                                                                                                                                                                                |     |     |           |       |      |      |
|--------------------------|---------------------------------------------------------------------------------------------------------------------------------------------------------------------------------------------------------------------------------------------------------------------------------------------------------------------------------------------------------------------------------------------------------------------------------|-----|-----|-----------|-------|------|------|-------------------------------------------------------------------------|-------|----------------------|----------------------------------------------------------------------------------------------------------------------------------------------------------------------------------------------------------------------------------------------------------------------------------------------------------------------------------------------------------------------------------------------------------------|-----|-----|-----------|-------|------|------|
| Rsa1.0_00753.1.g19023.t1 | gb EOA21202.1  hypothetical protein CARUB_v10001549mg [Capsella rubella]                                                                                                                                                                                                                                                                                                                                                        | 300 | 306 | 1.00E-135 | 102.0 | 86.7 | 90.7 | hypothetical protein CARUB_v10001549mg                                  | gbpln | Capsella rubella     | AT5G24490.1   Symbols:   30S ribosomal protein, putative   chr5:8365690-8367178 FORWARD LENGTH=308                                                                                                                                                                                                                                                                                                             | 300 | 308 | 1.00E-136 | 102.7 | 87.0 | 91.7 |
| Rsa1.0_00753.1.g19024.t1 | gb AFK38951.1  unknown [Lotus japonicus]                                                                                                                                                                                                                                                                                                                                                                                        | 223 | 250 | 1.00E-24  | 112.1 | 30.5 | 49.8 | unknown                                                                 | gbpln | Lotus japonicus      | AT5G43830.1   Symbols:   Aluminium induced protein with YGL and LRDR motifs   chr5:17622593-17624239 REVERSE LENGTH=251                                                                                                                                                                                                                                                                                        | 223 | 251 | 3.00E-24  | 112.6 | 30.5 | 48.0 |
| Rsa1.0_00753.1.g19025.t4 | gb EOA26149.1  hypothetical protein CARUB_v10019585mg [Capsella rubella]                                                                                                                                                                                                                                                                                                                                                        | 730 | 423 | 1.00E-124 | 57.9  | 35.1 | 41.5 | hypothetical protein CARUB_v10019585mg                                  | gbpln | Capsella rubella     | AT3G52680.2   Symbols:   F-box/RNI-like/FBD-like domains-containing protein   chr3:19527075-19528838 FORWARD LENGTH=456                                                                                                                                                                                                                                                                                        | 730 | 456 | 1.00E-106 | 62.5  | 31.8 | 39.7 |
| Rsa1.0_00753.1.g19026.t1 | pir  T00910 coproporphyrinogen oxidase (EC 1.3.3.3) F21B7.24 - Arabidopsis thaliana                                                                                                                                                                                                                                                                                                                                             | 128 | 362 | 3.00E-35  | 282.8 | 62.5 | 67.2 | coproporphyrinogen oxidase (EC 1.3.3.3) F21B7.24 - Arabidopsis thaliana | ----- | -----                | AT1G03475.1   Symbols: LIN2, HEMF1, ATCPO-1   Coproporphyrinogen III oxidase   chr1:869302-871175 REVERSE LENGTH=386                                                                                                                                                                                                                                                                                           | 128 | 386 | 7.00E-38  | 301.6 | 62.5 | 67.2 |
| Rsa1.0_00753.1.g19027.t2 | gb ADA58341.1  pseudo-response regulator 5a [Brassica rapa]                                                                                                                                                                                                                                                                                                                                                                     | 378 | 497 | 1.00E-113 | 131.5 | 60.8 | 63.0 | pseudo-response regulator 5a                                            | gbpln | Brassica rapa        | AT5G24470.1   Symbols: APRR5, PRR5   pseudo-response regulator 5   chr5:8356204-8358873 REVERSE LENGTH=667                                                                                                                                                                                                                                                                                                     | 378 | 667 | 6.00E-83  | 176.5 | 38.6 | 40.7 |
| Rsa1.0_00753.1.g19028.t1 | ref XP_002872115.1  hypothetical protein ARALYDRAFT_489310 [Arabidopsis lyrata subsp. lyrata] gi 297317952 gb EFH48374.1  hypothetical protein ARALYDRAFT_489310 [Arabidopsis lyrata subsp. lyrata]                                                                                                                                                                                                                             | 227 | 295 | 1.00E-102 | 130.0 | 87.7 | 93.8 | hypothetical protein ARALYDRAFT_489310                                  | gbpln | Arabidopsis lyrata   | AT5G24460.1   Symbols:   unknown protein; INVOLVED IN: biological process unknown; LOCATED IN: cell wall; EXPRESSED IN: 24 plant structures; EXPRESSED DURING: 15 growth stages; Has 1807 Blast hits to 1807 proteins in 277 species: Archaee - 0; Bacteria - 0; Metazoa - 736; Fungi - 347; Plants - 385; Viruses - 0; Other Eukaryotes - 339 (source: NCBI BLink).   chr5:8354815-8355717 FORWARD LENGTH=300 | 227 | 300 | 1.00E-101 | 132.2 | 85.0 | 93.0 |
| Rsa1.0_00753.1.g19029.t2 | gb EOA19681.1  hypothetical protein CARUB_v10003348mg [Capsella rubella]                                                                                                                                                                                                                                                                                                                                                        | 332 | 321 | 1.00E-112 | 96.7  | 63.9 | 74.1 | hypothetical protein CARUB_v10003348mg                                  | gbpln | Capsella rubella     | AT5G24440.1   Symbols: CID13   CTC-interacting domain 13   chr5:8345402-8347776 REVERSE LENGTH=320                                                                                                                                                                                                                                                                                                             | 332 | 320 | 1.00E-110 | 96.4  | 63.0 | 73.8 |
| Rsa1.0_00753.1.g19030.t1 | ref NP_190693.1  Senescence/dehydration-associated protein-like protein [Arabidopsis thaliana] gi 6562277 emb CAB62647.1  putative protein [Arabidopsis thaliana] gi 15215688 gb AAK91390.1  AT3g51250/F24M12_290 [Arabidopsis thaliana] gi 21464565 gb AAM52237.1  AT3g51250/F24M12_290 [Arabidopsis thaliana] gi 332645247 gb AEE78768.1  Senescence/dehydration-associated protein-like protein [Arabidopsis thaliana]       | 142 | 463 | 2.00E-45  | 326.1 | 67.6 | 72.5 | Senescence/dehydration-associated protein-like protein                  | gbpln | Arabidopsis thaliana | AT3G51250.1   Symbols:   Senescence/dehydration-associated protein-related   chr3:19028227-19030442 FORWARD LENGTH=463                                                                                                                                                                                                                                                                                         | 142 | 463 | 4.00E-48  | 326.1 | 67.6 | 72.5 |
| Rsa1.0_00753.1.g19031.t3 | ref NP_197831.3  calcium dependent protein kinase-like protein [Arabidopsis thaliana] gi 75333922 sp O9FIM9.1 CAMK4_ARAT H RecName: Full=CDPK-related kinase 4; Short=AtCRK4; AltName: Full=Calcium/calmodulin-dependent protein kinase CRK4 gi 10177904 dbj BAB11236.1  calcium dependent protein kinase-like protein [Arabidopsis thaliana] gi 332005927 gb AED93310.1  CDPK-related kinase 4 (AtCRK4) [Arabidopsis thaliana] | 636 | 594 | 0         | 93.4  | 84.9 | 86.6 | calcium dependent protein kinase-like protein                           | gbpln | Arabidopsis thaliana | AT5G24430.1   Symbols:   Calcium-dependent protein kinase (CDPK) family protein   chr5:8339390-8342913 REVERSE LENGTH=594                                                                                                                                                                                                                                                                                      | 636 | 594 | 0         | 93.4  | 84.9 | 86.6 |
| Rsa1.0_00753.1.g19032.t1 | ref XP_002874195.1  EMB2024 [Arabidopsis lyrata subsp. lyrata] gi 297320032 gb EFH50454.1  EMB2024 [Arabidopsis lyrata subsp. lyrata]                                                                                                                                                                                                                                                                                           | 252 | 327 | 1.00E-124 | 129.8 | 86.5 | 94.4 | EMB2024                                                                 | gbpln | Arabidopsis lyrata   | AT5G24400.1   Symbols: EMB2024, PGL3   NagB/RpA/CoA transferase-like superfamily protein   chr5:8330532-8331784 REVERSE LENGTH=325                                                                                                                                                                                                                                                                             | 252 | 325 | 1.00E-126 | 129.0 | 85.7 | 94.0 |
| Rsa1.0_00753.1.g19033.t1 | ref NP_001031936.1  O-Glycosyl hydrolases family 17 protein [Arabidopsis thaliana] gi 332005907 gb AED93290.1  O-Glycosyl hydrolases family 17 protein [Arabidopsis thaliana]                                                                                                                                                                                                                                                   | 509 | 458 | 0         | 90.0  | 69.2 | 77.2 | O-Glycosyl hydrolases family 17 protein                                 | gbpln | Arabidopsis thaliana | AT5G24318.1   Symbols:   O-Glycosyl hydrolases family 17 protein   chr5:8282285-8283956 REVERSE LENGTH=458                                                                                                                                                                                                                                                                                                     | 509 | 458 | 0         | 90.0  | 69.2 | 77.2 |
| Rsa1.0_00753.1.g19034.t1 | gb EOA20023.1  hypothetical protein CARUB_v10000297mg [Capsella rubella]                                                                                                                                                                                                                                                                                                                                                        | 969 | 749 | 0         | 77.3  | 66.3 | 71.2 | hypothetical protein CARUB_v10000297mg                                  | gbpln | Capsella rubella     | AT5G24260.1   Symbols:   prolyl oligopeptidase family protein   chr5:8234865-8237810 REVERSE LENGTH=746                                                                                                                                                                                                                                                                                                        | 969 | 746 | 0         | 77.0  | 66.2 | 71.5 |

|                           |                                                                                                                                                                                                                                                                                                                                                                                                                                                                                                                                                                                                                                                                                                                                                                                                                                                  |     |     |           |        |      |      |                                                                                                 |       |                      |                                                                                                                                    |     |     |           |        |      |      |
|---------------------------|--------------------------------------------------------------------------------------------------------------------------------------------------------------------------------------------------------------------------------------------------------------------------------------------------------------------------------------------------------------------------------------------------------------------------------------------------------------------------------------------------------------------------------------------------------------------------------------------------------------------------------------------------------------------------------------------------------------------------------------------------------------------------------------------------------------------------------------------------|-----|-----|-----------|--------|------|------|-------------------------------------------------------------------------------------------------|-------|----------------------|------------------------------------------------------------------------------------------------------------------------------------|-----|-----|-----------|--------|------|------|
| Rsa1.0_00753.1.g19035.t13 | refNP_193778.2  putative LRR receptor-like serine/threonine-protein kinase [Arabidopsis thaliana] gi 26466449 sp COLGQ7.1 Y4245 ARAT H RecName: Full=Probable LRR receptor-like serine/threonine-protein kinase At4g20450; Flags: Precursor gi 224589618 gb ACN59342.1  leucine-rich repeat receptor-like protein kinase [Arabidopsis thaliana] gi 332658934 gb AEE84334.1  putative LRR receptor-like serine/threonine-protein kinase [Arabidopsis thaliana] refNP_197812.1  phosphatidylinositol 3- and 4-kinase family protein / ubiquitin family protein [Arabidopsis thaliana] gi 10177083 dbj BAB10389.1  ubiquitin [Arabidopsis thaliana] gi 110741569 dbj BAE98733.1  ubiquitin [Arabidopsis thaliana] gi 332005891 gb AED93274.1  phosphatidylinositol 3- and 4-kinase family protein / ubiquitin family protein [Arabidopsis thaliana] | 884 | 898 | 0         | 101.6  | 61.2 | 75.0 | putative LRR receptor-like serine/threonine-protein kinase                                      | gbpln | Arabidopsis thaliana | AT4G20450.1   Symbols:   Leucine-rich repeat protein kinase family protein   chr4:11024054-11029008 REVERSE LENGTH=898             | 884 | 898 | 0         | 101.6  | 61.2 | 75.0 |
| Rsa1.0_00753.1.g19036.t1  | gi 110741569 dbj BAE98733.1  ubiquitin [Arabidopsis thaliana] gi 332005891 gb AED93274.1  phosphatidylinositol 3- and 4-kinase family protein / ubiquitin family protein [Arabidopsis thaliana]                                                                                                                                                                                                                                                                                                                                                                                                                                                                                                                                                                                                                                                  | 521 | 574 | 0         | 110.2  | 83.5 | 91.0 | phosphatidylinositol 3- and 4-kinase family protein / ubiquitin family protein                  | gbpln | Arabidopsis thaliana | AT5G24240.1   Symbols:   Phosphatidylinositol 3- and 4-kinase ; Ubiquitin family protein   chr5:8231110-8232925 REVERSE LENGTH=574 | 521 | 574 | 0         | 110.2  | 83.5 | 91.0 |
| Rsa1.0_00753.1.g19037.t1  | gb EOA20957.1  hypothetical protein CARUB_v10001289mg [Capsella rubella]                                                                                                                                                                                                                                                                                                                                                                                                                                                                                                                                                                                                                                                                                                                                                                         | 337 | 353 | 2.00E-76  | 104.7  | 49.3 | 63.8 | hypothetical protein CARUB_v10001289mg                                                          | gbpln | Capsella rubella     | AT5G24220.1   Symbols:   Lipase class 3-related protein   chr5:8225861-8227551 FORWARD LENGTH=376                                  | 337 | 376 | 3.00E-75  | 111.6  | 46.0 | 64.4 |
| Rsa1.0_00754.1.g19038.t1  | refXP_002880752.1  hypothetical protein ARALYDRAFT_901326 [Arabidopsis lyrata subsp. lyrata] gi 297326591 gb EFH57011.1  hypothetical protein ARALYDRAFT_901326 [Arabidopsis lyrata subsp. lyrata]                                                                                                                                                                                                                                                                                                                                                                                                                                                                                                                                                                                                                                               | 250 | 378 | 5.00E-77  | 151.2  | 61.6 | 74.8 | hypothetical protein ARALYDRAFT_901326                                                          | gbpln | Arabidopsis lyrata   | AT1G64840.1   Symbols:   Protein of unknown function (DUF295)   chr1:24094010-24095164 FORWARD LENGTH=384                          | 250 | 384 | 3.00E-70  | 153.6  | 57.2 | 70.8 |
| Rsa1.0_00754.1.g19039.t1  | #                                                                                                                                                                                                                                                                                                                                                                                                                                                                                                                                                                                                                                                                                                                                                                                                                                                | #   | #   | #         | #      | #    | -    | ----                                                                                            | ----  | #                    | #                                                                                                                                  | #   | #   | #         | #      | #    |      |
| Rsa1.0_00754.1.g19040.t1  | #                                                                                                                                                                                                                                                                                                                                                                                                                                                                                                                                                                                                                                                                                                                                                                                                                                                | #   | #   | #         | #      | #    | -    | ----                                                                                            | ----  | #                    | #                                                                                                                                  | #   | #   | #         | #      | #    |      |
| Rsa1.0_00754.1.g19041.t1  | refXP_002880759.1  hypothetical protein ARALYDRAFT_901333 [Arabidopsis lyrata subsp. lyrata] gi 297326598 gb EFH57018.1  hypothetical protein ARALYDRAFT_901333 [Arabidopsis lyrata subsp. lyrata]                                                                                                                                                                                                                                                                                                                                                                                                                                                                                                                                                                                                                                               | 396 | 529 | 1.00E-121 | 133.6  | 62.4 | 73.2 | hypothetical protein ARALYDRAFT_901333                                                          | gbpln | Arabidopsis lyrata   | AT1G64840.1   Symbols:   Protein of unknown function (DUF295)   chr1:24094010-24095164 FORWARD LENGTH=384                          | 396 | 384 | 1.00E-100 | 97.0   | 52.0 | 64.6 |
| Rsa1.0_00754.1.g19042.t3  | refXP_002880759.1  hypothetical protein ARALYDRAFT_901333 [Arabidopsis lyrata subsp. lyrata] gi 297326598 gb EFH57018.1  hypothetical protein ARALYDRAFT_901333 [Arabidopsis lyrata subsp. lyrata]                                                                                                                                                                                                                                                                                                                                                                                                                                                                                                                                                                                                                                               | 972 | 529 | 1.00E-124 | 54.4   | 25.1 | 30.0 | hypothetical protein ARALYDRAFT_901333                                                          | gbpln | Arabidopsis lyrata   | AT1G64840.1   Symbols:   Protein of unknown function (DUF295)   chr1:24094010-24095164 FORWARD LENGTH=384                          | 972 | 384 | 1.00E-105 | 39.5   | 22.1 | 27.5 |
| Rsa1.0_00754.1.g19043.t1  | #                                                                                                                                                                                                                                                                                                                                                                                                                                                                                                                                                                                                                                                                                                                                                                                                                                                | #   | #   | #         | #      | #    | -    | ----                                                                                            | ----  | #                    | #                                                                                                                                  | #   | #   | #         | #      | #    |      |
| Rsa1.0_00754.1.g19044.t1  | refXP_002880759.1  hypothetical protein ARALYDRAFT_901333 [Arabidopsis lyrata subsp. lyrata] gi 297326598 gb EFH57018.1  hypothetical protein ARALYDRAFT_901333 [Arabidopsis lyrata subsp. lyrata]                                                                                                                                                                                                                                                                                                                                                                                                                                                                                                                                                                                                                                               | 399 | 529 | 1.00E-118 | 132.6  | 61.4 | 72.4 | hypothetical protein ARALYDRAFT_901333                                                          | gbpln | Arabidopsis lyrata   | AT1G64840.1   Symbols:   Protein of unknown function (DUF295)   chr1:24094010-24095164 FORWARD LENGTH=384                          | 399 | 384 | 2.00E-96  | 96.2   | 51.6 | 64.2 |
| Rsa1.0_00754.1.g19045.t1  | gb EOA28645.1  hypothetical protein CARUB_v10024867mg [Capsella rubella]                                                                                                                                                                                                                                                                                                                                                                                                                                                                                                                                                                                                                                                                                                                                                                         | 275 | 346 | 3.00E-53  | 125.8  | 50.5 | 66.2 | hypothetical protein CARUB_v10024867mg                                                          | gbpln | Capsella rubella     | AT1G64840.1   Symbols:   Protein of unknown function (DUF295)   chr1:24094010-24095164 FORWARD LENGTH=384                          | 275 | 384 | 4.00E-33  | 139.6  | 30.5 | 36.0 |
| Rsa1.0_00754.1.g19046.t1  | gb EOA28454.1  hypothetical protein CARUB_v10024663mg [Capsella rubella]                                                                                                                                                                                                                                                                                                                                                                                                                                                                                                                                                                                                                                                                                                                                                                         | 88  | 933 | 2.00E-24  | 1060.2 | 64.8 | 68.2 | hypothetical protein CARUB_v10024663mg                                                          | gbpln | Capsella rubella     | AT2G24720.1   Symbols:   ATGLR2.2, GLR2.2   glutamate receptor 2.2   chr2:10522783-10525840 REVERSE LENGTH=920                     | 88  | 920 | 5.00E-23  | 1045.5 | 54.5 | 63.6 |
| Rsa1.0_00754.1.g19047.t1  | #                                                                                                                                                                                                                                                                                                                                                                                                                                                                                                                                                                                                                                                                                                                                                                                                                                                | #   | #   | #         | #      | #    | -    | ----                                                                                            | ----  | #                    | #                                                                                                                                  | #   | #   | #         | #      | #    |      |
| Rsa1.0_00754.1.g19048.t1  | gb EOA28454.1  hypothetical protein CARUB_v10024663mg [Capsella rubella]                                                                                                                                                                                                                                                                                                                                                                                                                                                                                                                                                                                                                                                                                                                                                                         | 806 | 933 | 0         | 115.8  | 81.1 | 90.0 | hypothetical protein CARUB_v10024663mg                                                          | gbpln | Capsella rubella     | AT2G24720.1   Symbols:   ATGLR2.2, GLR2.2   glutamate receptor 2.2   chr2:10522783-10525840 REVERSE LENGTH=920                     | 806 | 920 | 0         | 114.1  | 75.2 | 87.0 |
| Rsa1.0_00754.1.g19049.t7  | sp Q96361.3 ARF1 BRARP RecName: Full=ADP-ribosylation factor 1 gi 1654142 gb AAB17725.1  small GTP-binding protein ARF [Brassica rapa subsp. oleifera] gi 482563782 gb EOA27972.1  hypothetical protein CARUB_v10024146mg [Capsella rubella]                                                                                                                                                                                                                                                                                                                                                                                                                                                                                                                                                                                                     | 374 | 182 | 5.00E-96  | 48.7   | 46.3 | 46.3 | RecName: Full=ADP-ribosylation factor 1 gi 1654142 gb AAB17725.1  small GTP-binding protein ARF | gbpln | Brassica rapa        | AT2G24765.1   Symbols:   ARF3, ARL1, ATARL1   ADP-ribosylation factor 3   chr2:10562822-10564961 FORWARD LENGTH=182                | 374 | 182 | 4.00E-98  | 48.7   | 46.0 | 46.3 |

|                           |                                                                                                                                                                                                     |      |      |           |       |      |      |                                                         |       |                      |                                                                                                                                                 |      |      |           |       |      |      |
|---------------------------|-----------------------------------------------------------------------------------------------------------------------------------------------------------------------------------------------------|------|------|-----------|-------|------|------|---------------------------------------------------------|-------|----------------------|-------------------------------------------------------------------------------------------------------------------------------------------------|------|------|-----------|-------|------|------|
| Rsa1.0_00754.1.g19050.t1  | gb AAC35496.1  CONSTANS-like 1 protein [Raphanus sativus]                                                                                                                                           | 307  | 307  | 1.00E-179 | 100.0 | 99.3 | 99.7 | CONSTANS-like 1 protein                                 | gbpln | Raphanus sativus     | AT2G24790.1   Symbols: COL3, ATCOL3   CONSTANS-like 3   chr2:10566959-10567946 FORWARD LENGTH=294                                               | 307  | 294  | 1.00E-115 | 95.8  | 72.3 | 79.5 |
| Rsa1.0_00754.1.g19051.t1  | ref XP_002890900.1  hypothetical protein ARALYDRAFT_473311 [Arabidopsis lyrata subsp. lyrata] gi 297336742 gb EFH67159.1  hypothetical protein ARALYDRAFT_473311 [Arabidopsis lyrata subsp. lyrata] | 221  | 235  | 1.00E-72  | 106.3 | 70.1 | 81.9 | hypothetical protein ARALYDRAFT_473311                  | gbpln | Arabidopsis lyrata   | AT1G30800.1   Symbols:   Fasciclin-like arabinogalactan family protein   chr1:10936995-10937714 FORWARD LENGTH=239                              | 221  | 239  | 2.00E-68  | 108.1 | 68.8 | 79.6 |
| Rsa1.0_00754.1.g19052.t1  | ref NP_001032158.1  NEP1-interacting protein-like 1 [Arabidopsis thaliana] gi 332010773 gb AED98156.1  NEP1-interacting protein-like 1 [Arabidopsis thaliana]                                       | 83   | 245  | 7.00E-29  | 295.2 | 78.3 | 86.7 | NEP1-interacting protein-like 1                         | gbpln | Arabidopsis thaliana | AT5G66070.2   Symbols:   RING/U-box superfamily protein   chr5:26421923-26423033 FORWARD LENGTH=245                                             | 83   | 245  | 1.00E-31  | 295.2 | 78.3 | 86.7 |
| Rsa1.0_00755.1.g19053.t1  | gb EOA15125.1  hypothetical protein CARUB_v10028500mg [Capsella rubella]                                                                                                                            | 319  | 982  | 1.00E-152 | 307.8 | 84.3 | 91.2 | hypothetical protein CARUB_v10028500mg                  | gbpln | Capsella rubella     | AT5G57320.1   Symbols: VLN5   villin, putative   chr5:23212690-23217549 FORWARD LENGTH=962                                                      | 319  | 962  | 1.00E-147 | 301.6 | 82.1 | 89.7 |
| Rsa1.0_00755.1.g19054.t1  | #                                                                                                                                                                                                   | #    | #    | #         | #     | #    | #    | -                                                       | ----  | ----                 | #                                                                                                                                               | #    | #    | #         | #     | #    | #    |
| Rsa1.0_00755.1.g19055.t1  | gb AAC19278.1  T14P8.10 [Arabidopsis thaliana] gi 7269009 emb CAB80742.1  AT4g02490 [Arabidopsis thaliana]                                                                                          | 404  | 657  | 1.00E-128 | 162.6 | 54.2 | 68.8 | T14P8.10                                                | gbpln | Arabidopsis thaliana | AT3G24255.1   Symbols:   RNA-directed DNA polymerase (reverse transcriptase)-related family protein   chr3:8789471-8793208 FORWARD LENGTH=746   | 404  | 746  | 3.00E-70  | 184.7 | 34.7 | 49.0 |
| Rsa1.0_00755.1.g19056.t1  | gb EOA13587.1  hypothetical protein CARUB_v10026653mg [Capsella rubella]                                                                                                                            | 346  | 361  | 1.00E-164 | 104.3 | 88.2 | 94.2 | hypothetical protein CARUB_v10026653mg                  | gbpln | Capsella rubella     | AT5G57660.1   Symbols: ATCOL5, COL5   CONSTANS-like 5   chr5:2335573-23356729 FORWARD LENGTH=355                                                | 346  | 355  | 1.00E-160 | 102.6 | 84.7 | 93.1 |
| Rsa1.0_00755.1.g19057.t1  | ref XP_002866222.1  ATP binding protein [Arabidopsis lyrata subsp. lyrata] gi 297312057 gb EFH42481.1  ATP binding protein [Arabidopsis lyrata subsp. lyrata]                                       | 579  | 569  | 0         | 98.3  | 87.2 | 91.7 | ATP binding protein                                     | gbpln | Arabidopsis lyrata   | AT5G57670.2   Symbols:   Protein kinase superfamily protein   chr5:23360531-23363694 REVERSE LENGTH=579                                         | 579  | 579  | 0         | 100.0 | 88.4 | 94.0 |
| Rsa1.0_00755.1.g19058.t1  | ref XP_002866223.1  hypothetical protein ARALYDRAFT_495865 [Arabidopsis lyrata subsp. lyrata] gi 297312058 gb EFH42482.1  hypothetical protein ARALYDRAFT_495865 [Arabidopsis lyrata subsp. lyrata] | 123  | 148  | 5.00E-51  | 120.3 | 84.6 | 91.9 | hypothetical protein ARALYDRAFT_495865                  | gbpln | Arabidopsis lyrata   | AT5G57685.1   Symbols: ATGDU3, GDU3, LSB1   glutamine dumper 3   chr5:23366356-23366802 REVERSE LENGTH=148                                      | 123  | 148  | 5.00E-51  | 120.3 | 82.1 | 90.2 |
| Rsa1.0_00755.1.g19059.t1  | #                                                                                                                                                                                                   | #    | #    | #         | #     | #    | #    | -                                                       | ----  | ----                 | #                                                                                                                                               | #    | #    | #         | #     | #    | #    |
| Rsa1.0_00755.1.g19060.t1  | dbj BAB09379.1  non-LTR retroelement reverse transcriptase-like protein [Arabidopsis thaliana]                                                                                                      | 1141 | 1223 | 0         | 107.2 | 53.4 | 70.3 | non-LTR retroelement reverse transcriptase-like protein | gbpln | Arabidopsis thaliana | AT3G24255.1   Symbols:   RNA-directed DNA polymerase (reverse transcriptase)-related family protein   chr3:8789471-8793208 FORWARD LENGTH=746   | 1141 | 746  | 1.00E-110 | 65.4  | 17.9 | 23.8 |
| Rsa1.0_00755.1.g19061.t3  | #                                                                                                                                                                                                   | #    | #    | #         | #     | #    | #    | -                                                       | ----  | ----                 | #                                                                                                                                               | #    | #    | #         | #     | #    | #    |
| Rsa1.0_00755.1.g19062.t2  | #                                                                                                                                                                                                   | #    | #    | #         | #     | #    | #    | -                                                       | ----  | ----                 | #                                                                                                                                               | #    | #    | #         | #     | #    | #    |
| Rsa1.0_00755.1.g19063.t1  | gb AAZ66942.1  117M18_23 [Brassica rapa]                                                                                                                                                            | 119  | 518  | 2.00E-33  | 435.3 | 66.4 | 77.3 | 117M18_23                                               | gbpln | Brassica rapa        | AT5G44050.1   Symbols:   MATE efflux family protein   chr5:17722484-17726209 FORWARD LENGTH=491                                                 | 119  | 491  | 1.00E-33  | 412.6 | 63.0 | 75.6 |
| Rsa1.0_00755.1.g19064.t1  | #                                                                                                                                                                                                   | #    | #    | #         | #     | #    | #    | -                                                       | ----  | ----                 | #                                                                                                                                               | #    | #    | #         | #     | #    | #    |
| Rsa1.0_00756.1.g19065.t1  | #                                                                                                                                                                                                   | #    | #    | #         | #     | #    | #    | -                                                       | ----  | ----                 | #                                                                                                                                               | #    | #    | #         | #     | #    | #    |
| Rsa1.0_00756.1.g19066.t12 | gb AAD25621.1 AC005287_23 Hypothetical protein [Arabidopsis thaliana]                                                                                                                               | 599  | 1250 | 3.00E-42  | 208.7 | 16.5 | 22.7 | Hypothetical protein                                    | gbpln | Arabidopsis thaliana | #                                                                                                                                               | #    | #    | #         | #     | #    | #    |
| Rsa1.0_00756.1.g19067.t1  | gb AAF19226.1 AC007505_2 Highly similar to Ta1-3 polyprotein [Arabidopsis thaliana]                                                                                                                 | 1243 | 1356 | 0         | 109.1 | 48.5 | 66.8 | Highly similar to Ta1-3 polyprotein                     | gbpln | Arabidopsis thaliana | AT4G23160.1   Symbols: CRK8   cysteine-rich RLK (RECEPTOR-like protein kinase) 8   chr4:12129485-12134086 FORWARD LENGTH=1262                   | 1243 | 1262 | 2.00E-64  | 101.5 | 12.5 | 20.0 |
| Rsa1.0_00756.1.g19068.t1  | gb AAF18630.1 AC006228_1 F5J5.1 [Arabidopsis thaliana]                                                                                                                                              | 161  | 1463 | 2.00E-20  | 908.7 | 36.6 | 52.2 | F5J5.1                                                  | gbpln | Arabidopsis thaliana | #                                                                                                                                               | #    | #    | #         | #     | #    | #    |
| Rsa1.0_00756.1.g19069.t1  | gb AAF18641.1 AC006228_12 F5J5.16 [Arabidopsis thaliana]                                                                                                                                            | 387  | 1024 | 5.00E-38  | 264.6 | 24.8 | 30.2 | F5J5.16                                                 | gbpln | Arabidopsis thaliana | #                                                                                                                                               | #    | #    | #         | #     | #    | #    |
| Rsa1.0_00756.1.g19070.t3  | emb CAN83506.1  hypothetical protein VITISV_027576 [Vitis vinifera]                                                                                                                                 | 911  | 1172 | 0         | 128.6 | 44.5 | 55.8 | hypothetical protein VITISV_027576                      | gbpln | Vitis vinifera       | AT4G23160.1   Symbols: CRK8   cysteine-rich RLK (RECEPTOR-like protein kinase) 8   chr4:12129485-12134086 FORWARD LENGTH=1262                   | 911  | 1262 | 2.00E-72  | 138.5 | 14.7 | 22.2 |
| Rsa1.0_00756.1.g19071.t1  | gb AAF98181.1 AC000107.4 F17F8.5 [Arabidopsis thaliana]                                                                                                                                             | 479  | 872  | 1.00E-129 | 182.0 | 51.4 | 68.9 | F17F8.5                                                 | gbpln | Arabidopsis thaliana | AT3G24255.1   Symbols:   RNA-directed DNA polymerase (reverse transcriptase)-related family protein   chr3:8789471-8793208 FORWARD LENGTH=746   | 479  | 746  | 8.00E-55  | 155.7 | 25.1 | 34.4 |
| Rsa1.0_00756.1.g19072.t1  | dbj BAE98403.1  putative non-LTR reverse transcriptase [Arabidopsis thaliana]                                                                                                                       | 143  | 278  | 8.00E-28  | 194.4 | 39.9 | 62.9 | putative non-LTR reverse transcriptase                  | gbpln | Arabidopsis thaliana | AT1G43730.1   Symbols:   RNA-directed DNA polymerase (reverse transcriptase)-related family protein   chr1:16508723-16509784 REVERSE LENGTH=320 | 143  | 320  | 4.00E-14  | 223.8 | 30.8 | 46.9 |

|                          |                                                                                                                                                                                                                                                                                                                                                                                                                                                                                                                                                                                                 |      |      |           |       |       |       |                                          |             |                      |                                                                                                                                                                                                                                                                                                                 |      |     |          |       |       |       |
|--------------------------|-------------------------------------------------------------------------------------------------------------------------------------------------------------------------------------------------------------------------------------------------------------------------------------------------------------------------------------------------------------------------------------------------------------------------------------------------------------------------------------------------------------------------------------------------------------------------------------------------|------|------|-----------|-------|-------|-------|------------------------------------------|-------------|----------------------|-----------------------------------------------------------------------------------------------------------------------------------------------------------------------------------------------------------------------------------------------------------------------------------------------------------------|------|-----|----------|-------|-------|-------|
| Rsa1.0_00756.1.g19073.t1 | gb ACQ90230.1  virus-resistance protein [Brassica rapa subsp. chinensis]                                                                                                                                                                                                                                                                                                                                                                                                                                                                                                                        | 181  | 249  | 1.00E-100 | 137.6 | 95.0  | 97.2  | virus-resistance protein                 | gbpln       | Brassica rapa        | AT5G38430.1   Symbols:   Ribulose biphosphate carboxylase (small chain) family protein   chr5:15384350-15385155 REVERSE LENGTH=181                                                                                                                                                                              | 181  | 181 | 3.00E-99 | 100.0 | 92.3  | 94.5  |
| Rsa1.0_00756.1.g19074.t1 | emb CAB39638.1  RNA-directed DNA polymerase-like protein [Arabidopsis thaliana] gi 7267666 emb CAB78094.1  RNA-directed DNA polymerase-like protein [Arabidopsis thaliana]                                                                                                                                                                                                                                                                                                                                                                                                                      | 618  | 1274 | 4.00E-80  | 206.1 | 29.6  | 44.7  | RNA-directed DNA polymerase-like protein | gbpln       | Arabidopsis thaliana | AT4G29090.1   Symbols:   Ribonuclease H-like superfamily protein   chr4:14333528-14335255 FORWARD LENGTH=575                                                                                                                                                                                                    | 618  | 575 | 8.00E-57 | 93.0  | 26.5  | 42.4  |
| Rsa1.0_00756.1.g19075.t1 | #                                                                                                                                                                                                                                                                                                                                                                                                                                                                                                                                                                                               | #    | #    | #         | #     | #     | #     | -                                        | ----        | ----                 | #                                                                                                                                                                                                                                                                                                               | #    | #   | #        | #     | #     |       |
| Rsa1.0_00757.1.g19076.t1 | #                                                                                                                                                                                                                                                                                                                                                                                                                                                                                                                                                                                               | #    | #    | #         | #     | #     | #     | -                                        | ----        | ----                 | #                                                                                                                                                                                                                                                                                                               | #    | #   | #        | #     | #     |       |
| Rsa1.0_00757.1.g19077.t1 | gb AAG50806.1 AC079281_8 unknown protein [Arabidopsis thaliana]                                                                                                                                                                                                                                                                                                                                                                                                                                                                                                                                 | 1768 | 1213 | 0         | 68.6  | 24.5  | 38.1  | unknown protein                          | gbpln       | Arabidopsis thaliana | AT1G43760.1   Symbols:   DNase I-like superfamily protein   chr1:16528880-16531065 REVERSE LENGTH=626                                                                                                                                                                                                           | 1768 | 626 | 6.00E-62 | 35.4  | 7.5   | 12.2  |
| Rsa1.0_00757.1.g19078.t1 | ref XP_002866375.1  APUM18 [Arabidopsis lyrata subsp. lyrata] gi 297312210 gb EFH42634.1  APUM18 [Arabidopsis lyrata subsp. lyrata] ref NP_190227.1  uncharacterized protein [Arabidopsis thaliana] gi 22327975 ref NP_680457.1  uncharacterized protein [Arabidopsis thaliana] gi 334188494 ref NP_001190570.1  uncharacterized protein [Arabidopsis thaliana] gi 297796915 ref XP_002866342.1  hypothetical protein ARALYDRAFT_496097 [Arabidopsis lyrata subsp. lyrata] gi 297815794 ref XP_002875780.1  hypothetical protein ARALYDRAFT_485014 [Arabidopsis lyrata subsp. lyrata]           | 343  | 328  | 1.00E-79  | 95.6  | 49.0  | 61.2  | APUM18                                   | gbpln       | Arabidopsis lyrata   | AT1G21620.1   Symbols: APUM20, PUM20   pumilio 20   chr1:7579129-7580171 FORWARD LENGTH=308                                                                                                                                                                                                                     | 343  | 308 | 7.00E-76 | 89.8  | 49.3  | 59.2  |
| Rsa1.0_00757.1.g19079.t1 | gi 6522622 emb CAB62034.1  putative protein [Arabidopsis thaliana] gi 17065520 gb AAL32914.1  Unknown protein [Arabidopsis thaliana] gi 17381284 gb AAL36060.1  AT3g46430/F18L15_150 [Arabidopsis thaliana] gi 2014946 gb AAM10121.1  unknown protein [Arabidopsis thaliana] gi 20453375 gb AAM19926.1  AT3g46430/F18L15_150 [Arabidopsis thaliana] gi 26450436 dbj BAC42332.1  unknown protein [Arabidopsis thaliana] gi 26451867 dbj BAC43026.1  unknown protein [Arabidopsis thaliana] gi 297312177 gb EFH42601.1  hypothetical protein ARALYDRAFT_496097 [Arabidopsis lyrata subsp. lyrata] | 121  | 55   | 2.00E-15  | 45.5  | 33.1  | 35.5  | uncharacterized protein                  | gbpln       | Arabidopsis lyrata   | AT5G59613.2   Symbols:   unknown protein; FUNCTIONS IN: molecular_function unknown; INVOLVED IN: biological_process unknown; LOCATED IN: mitochondrial respiratory chain complex II; BEST Arabidopsis thaliana protein match is: unknown protein (TAIR:AT3G46430.1).   chr5:24015726-24016500 REVERSE LENGTH=55 | 121  | 55  | 3.00E-18 | 45.5  | 33.1  | 35.5  |
| Rsa1.0_00757.1.g19080.t1 | gb EOA12886.1  hypothetical protein CARUB_v10025859mg [Capsella rubella]                                                                                                                                                                                                                                                                                                                                                                                                                                                                                                                        | 864  | 887  | 0         | 102.7 | 65.3  | 78.2  | hypothetical protein CARUB_v10025859mg   | gbpln       | Capsella rubella     | AT5G59670.1   Symbols:   Leucine-rich repeat protein kinase family protein   chr5:24041538-24045478 FORWARD LENGTH=868                                                                                                                                                                                          | 864  | 868 | 0        | 100.5 | 65.6  | 76.6  |
| Rsa1.0_00757.1.g19081.t1 | gb EOA12886.1  hypothetical protein CARUB_v10025859mg [Capsella rubella]                                                                                                                                                                                                                                                                                                                                                                                                                                                                                                                        | 899  | 887  | 0         | 98.7  | 77.4  | 85.0  | hypothetical protein CARUB_v10025859mg   | gbpln       | Capsella rubella     | AT5G59680.1   Symbols:   Leucine-rich repeat protein kinase family protein   chr5:24046792-24050801 FORWARD LENGTH=887                                                                                                                                                                                          | 899  | 887 | 0        | 98.7  | 76.4  | 83.4  |
| Rsa1.0_00757.1.g19082.t1 | tpg DAA40122.1  TPA: histone H4.3 [Zea mays]                                                                                                                                                                                                                                                                                                                                                                                                                                                                                                                                                    | 103  | 248  | 3.00E-52  | 240.8 | 100.0 | 100.0 | TPA: histone H4.3                        | gbenv/gbpln | Zea mays             | AT5G59970.1   Symbols:   Histone superfamily protein   chr5:24146352-24146663 REVERSE LENGTH=103                                                                                                                                                                                                                | 103  | 103 | 2.00E-52 | 100.0 | 100.0 | 100.0 |
| Rsa1.0_00757.1.g19083.t1 | ref XP_002864648.1  hypothetical protein ARALYDRAFT_496103 [Arabidopsis lyrata subsp. lyrata] gi 297310483 gb EFH40907.1  hypothetical protein ARALYDRAFT_496103 [Arabidopsis lyrata subsp. lyrata]                                                                                                                                                                                                                                                                                                                                                                                             | 608  | 615  | 0         | 101.2 | 87.8  | 95.1  | hypothetical protein ARALYDRAFT_496103   | gbpln       | Arabidopsis lyrata   | AT5G59710.1   Symbols: VIP2, AtVIP2   VIRE2 interacting protein 2   chr5:24058157-24061736 FORWARD LENGTH=614                                                                                                                                                                                                   | 608  | 614 | 0        | 101.0 | 87.3  | 94.1  |

|                          |                                                                                                                                                                                                                                                                                                                                                                                                                                                                                                                                                                         |      |      |           |       |      |      |                                                |       |                      |                                                                                                                                 |      |     |           |       |      |      |
|--------------------------|-------------------------------------------------------------------------------------------------------------------------------------------------------------------------------------------------------------------------------------------------------------------------------------------------------------------------------------------------------------------------------------------------------------------------------------------------------------------------------------------------------------------------------------------------------------------------|------|------|-----------|-------|------|------|------------------------------------------------|-------|----------------------|---------------------------------------------------------------------------------------------------------------------------------|------|-----|-----------|-------|------|------|
| Rsa1.0_00757.1.g19084.t1 | gb AAF78436.1 AC018748_15 Contains similarity to 17.6 KD class I heat shock protein from Arabidopsis thaliana gi P13853 and contains Hsp20/alpha crystallin PF 00011 and signal peptidase I PF 00461 domains. ESTs gb A1988650, gb AW004417, gb A1988904 come from this gene [Arabidopsis thaliana]                                                                                                                                                                                                                                                                     | 152  | 403  | 9.00E-70  | 265.1 | 82.9 | 92.8 | hypothetical protein CARUB_v10028285mg         | gbpln | Arabidopsis thaliana | AT5G59720.1   Symbols: HSP18.2   heat shock protein 18.2   chr5:24062632-24063117 FORWARD LENGTH=161                            | 152  | 161 | 1.00E-71  | 105.9 | 92.8 | 97.4 |
| Rsa1.0_00757.1.g19085.t1 | gb EOA14941.1  hypothetical protein CARUB_v10028285mg [Capsella rubella]                                                                                                                                                                                                                                                                                                                                                                                                                                                                                                | 612  | 637  | 0         | 104.1 | 74.2 | 83.3 | hypothetical protein CARUB_v10028285mg         | gbpln | Capsella rubella     | AT5G59730.2   Symbols: ATEXO70H7, EXO70H7   exocyst subunit exo70 family protein H7   chr5:24064096-24066004 REVERSE LENGTH=632 | 612  | 632 | 0         | 103.3 | 75.0 | 83.8 |
| Rsa1.0_00757.1.g19086.t1 | ref XP_002866345.1  hypothetical protein ARALYDRAFT_332244 [Arabidopsis lyrata subsp. lyrata] gi 297312180 gb EFH42604.1  hypothetical protein ARALYDRAFT_332244 [Arabidopsis lyrata subsp. lyrata]                                                                                                                                                                                                                                                                                                                                                                     | 322  | 344  | 1.00E-170 | 106.8 | 93.5 | 96.0 | hypothetical protein ARALYDRAFT_332244         | gbpln | Arabidopsis lyrata   | AT5G59740.1   Symbols:   UDP-N-acetylglucosamine (UAA) transporter family   chr5:24070310-24072747 REVERSE LENGTH=344           | 322  | 344 | 1.00E-172 | 106.8 | 94.1 | 95.7 |
| Rsa1.0_00757.1.g19087.t3 | gb ABD65170.1  hypothetical protein 40.t00057 [Brassica oleracea]                                                                                                                                                                                                                                                                                                                                                                                                                                                                                                       | 182  | 255  | 1.00E-46  | 140.1 | 57.7 | 67.6 | hypothetical protein 40.t00057                 | gbpln | Brassica oleracea    | AT3G47680.1   Symbols:   DNA binding   chr3:17577483-17578391 REVERSE LENGTH=302                                                | 182  | 302 | 2.00E-39  | 165.9 | 46.2 | 61.0 |
| Rsa1.0_00758.1.g19088.t1 | gb EOA15843.1  hypothetical protein CARUB_v10007508mg [Capsella rubella]                                                                                                                                                                                                                                                                                                                                                                                                                                                                                                | 502  | 500  | 0         | 99.6  | 89.2 | 93.8 | hypothetical protein CARUB_v10007508mg         | gbpln | Capsella rubella     | AT4G38500.1   Symbols:   Protein of unknown function (DUF161)   chr4:18008418-18010693 FORWARD LENGTH=499                       | 502  | 499 | 0         | 99.4  | 88.6 | 93.4 |
| Rsa1.0_00758.1.g19089.t2 | ref NP_195564.2  putative protein phosphatase 2C 64 [Arabidopsis thaliana] gi 42573223 ref NP_974708.1  putative protein phosphatase 2C 64 [Arabidopsis thaliana] gi 75251246 sp Q5PNS9.1 P2C64_ARAT H RecName: Full=Probable protein phosphatase 2C 64; Short=AtPP2C64 gi 56382008 gb AAV85723.1 At4g38520 [Arabidopsis thaliana] gi 59958308 gb AAX12864.1 At4g38520 [Arabidopsis thaliana] gi 33266154 gb AEE86941.1  putative protein phosphatase 2C 64 [Arabidopsis thaliana] gi 33266154 gb AEE86942.1  putative protein phosphatase 2C 64 [Arabidopsis thaliana] | 389  | 400  | 0         | 102.8 | 85.9 | 91.0 | putative protein phosphatase 2C 64             | gbpln | Arabidopsis thaliana | AT4G38520.2   Symbols:   Protein phosphatase 2C family protein   chr4:18015999-18017514 REVERSE LENGTH=400                      | 389  | 400 | 0         | 102.8 | 85.9 | 91.0 |
| Rsa1.0_00758.1.g19090.t1 | ref XP_002866805.1  ATPLC1 [Arabidopsis lyrata subsp. lyrata] gi 29731264 gb EFH43064.1  ATPLC1 [Arabidopsis lyrata subsp. lyrata]                                                                                                                                                                                                                                                                                                                                                                                                                                      | 578  | 575  | 0         | 99.5  | 84.9 | 92.4 | ATPLC1                                         | gbpln | Arabidopsis lyrata   | AT4G38530.1   Symbols: ATPLC1, PLC1   phospholipase C1   chr4:18020708-18022898 FORWARD LENGTH=564                              | 578  | 564 | 0         | 97.6  | 83.0 | 89.4 |
| Rsa1.0_00758.1.g19091.t1 | ref XP_002866806.1  hypothetical protein ARALYDRAFT_490619 [Arabidopsis lyrata subsp. lyrata] gi 297312642 gb EFH43065.1  hypothetical protein ARALYDRAFT_490619 [Arabidopsis lyrata subsp. lyrata]                                                                                                                                                                                                                                                                                                                                                                     | 402  | 404  | 0         | 100.5 | 85.1 | 92.3 | hypothetical protein ARALYDRAFT_490619         | gbpln | Arabidopsis lyrata   | AT4G38540.1   Symbols:   FAD/NAD(P)-binding oxidoreductase family protein   chr4:18023187-18024827 FORWARD LENGTH=407           | 402  | 407 | 0         | 101.2 | 85.6 | 92.5 |
| Rsa1.0_00758.1.g19092.t1 | ref XP_002880351.1  hypothetical protein ARALYDRAFT_900506 [Arabidopsis lyrata subsp. lyrata] gi 297326190 gb EFH56610.1  hypothetical protein ARALYDRAFT_900506 [Arabidopsis lyrata subsp. lyrata]                                                                                                                                                                                                                                                                                                                                                                     | 141  | 140  | 4.00E-65  | 99.3  | 86.5 | 92.9 | hypothetical protein ARALYDRAFT_900506         | gbpln | Arabidopsis lyrata   | AT2G20930.1   Symbols:   SNARE-like superfamily protein   chr2:9000790-9001656 REVERSE LENGTH=140                               | 141  | 140 | 3.00E-67  | 99.3  | 85.8 | 92.9 |
| Rsa1.0_00758.1.g19093.t2 | emb CAB64750.1  putative beta-galactosidase [Arabidopsis thaliana]                                                                                                                                                                                                                                                                                                                                                                                                                                                                                                      | 825  | 887  | 0         | 107.5 | 78.4 | 85.6 | putative beta-galactosidase                    | gbpln | Arabidopsis thaliana | AT4G38590.1   Symbols: BGAL14   beta-galactosidase 14   chr4:18036395-18040928 FORWARD LENGTH=988                               | 825  | 988 | 0         | 119.8 | 78.2 | 85.3 |
| Rsa1.0_00758.1.g19094.t1 | gb ABQ81932.1  transcription factor MYB4 [Brassica rapa subsp. chinensis] gi 328631152 gb ADZ98868.1  MYB domain protein 12 [Brassica rapa subsp. rapa]                                                                                                                                                                                                                                                                                                                                                                                                                 | 293  | 294  | 1.00E-156 | 100.3 | 95.2 | 96.6 | transcription factor MYB4                      | gbpln | Brassica rapa        | AT4G38620.1   Symbols: ATMYP4, MYB4   myb domain protein 4   chr4:18053866-18054876 FORWARD LENGTH=282                          | 293  | 282 | 1.00E-145 | 96.2  | 87.4 | 90.1 |
| Rsa1.0_00758.1.g19095.t1 | gb AAG51754.1 AC068667_33 reverse transcriptase, putative: 100033-105622 [Arabidopsis thaliana]                                                                                                                                                                                                                                                                                                                                                                                                                                                                         | 1631 | 1557 | 0         | 95.5  | 41.6 | 55.7 | reverse transcriptase, putative: 100033-105622 | gbpln | Arabidopsis thaliana | AT4G29090.1   Symbols:   Ribonuclease H-like superfamily protein   chr4:14333528-14335255 FORWARD LENGTH=575                    | 1631 | 575 | 8.00E-77  | 35.3  | 9.3  | 13.8 |

|                           |                                                                                                                                                                                                                                                                                                                                                                                                                                                                                                                                                                                                                                                                                                                                                                                                                                                                                                                                                                                                                                                                                            |      |      |           |       |      |      |                                                 |       |                      |                                                                                                                                                    |      |      |           |       |      |      |
|---------------------------|--------------------------------------------------------------------------------------------------------------------------------------------------------------------------------------------------------------------------------------------------------------------------------------------------------------------------------------------------------------------------------------------------------------------------------------------------------------------------------------------------------------------------------------------------------------------------------------------------------------------------------------------------------------------------------------------------------------------------------------------------------------------------------------------------------------------------------------------------------------------------------------------------------------------------------------------------------------------------------------------------------------------------------------------------------------------------------------------|------|------|-----------|-------|------|------|-------------------------------------------------|-------|----------------------|----------------------------------------------------------------------------------------------------------------------------------------------------|------|------|-----------|-------|------|------|
| Rsa1.0_00758.1.g19096.t1  | ref NP_195575.1  26S proteasome non-ATPase regulatory subunit 4 [Arabidopsis thaliana]<br>gi 1709794 sp P55034.1 PSMD4_ARATH<br>RecName: Full=26S proteasome non-ATPase regulatory subunit 4; AltName: Full=26S proteasome regulatory subunit RPN10; AltName: Full=26S proteasome regulatory subunit S5A; AltName: Full=Multiubiquitin chain-binding protein 1; Short=AtMCB1; AltName: Full=Protein REGULATORY PARTICLE NON-ATPASE 10<br>gi 13430814 gb AAK26029.1 AF360319.1 putative multiubiquitin chain binding protein MBP1 [Arabidopsis thaliana]<br>gi 1165206 gb AAA85583.1  MBP1 [Arabidopsis thaliana]<br>gi 4467150 emb CAB37519.1  multiubiquitin chain binding protein (MBP1) [Arabidopsis thaliana]<br>gi 7270846 emb CAB80527.1  multiubiquitin chain binding protein (MBP1) [Arabidopsis thaliana]<br>gi 21281020 gb AAM44937.1  putative multiubiquitin chain binding protein MBP1 [Arabidopsis thaliana]<br>gi 110735112 gb ABG89126.1  RPN10 [synthetic construct]<br>gi 332661556 gb AEE86956.1  26S proteasome non-ATPase regulatory subunit 4 [Arabidopsis thaliana] | 385  | 386  | 0         | 100.3 | 94.8 | 97.9 | 26S proteasome non-ATPase regulatory subunit 4  | gbpln | Arabidopsis thaliana | AT4G38630.1   Symbols: RPN10, MCB1, ATMCB1, MBP1   regulatory particle non-ATPase 10   chr4:18057357-18059459 REVERSE LENGTH=386                   | 385  | 386  | 0         | 100.3 | 94.8 | 97.9 |
| Rsa1.0_00758.1.g19097.t1  | gb EOA15636.1  hypothetical protein CARUB_v10005879mg [Capsella rubella]                                                                                                                                                                                                                                                                                                                                                                                                                                                                                                                                                                                                                                                                                                                                                                                                                                                                                                                                                                                                                   | 172  | 173  | 1.00E-87  | 100.6 | 91.9 | 95.9 | hypothetical protein CARUB_v10005879mg          | gbpln | Capsella rubella     | AT4G38740.1   Symbols: ROC1   rotamase CYP 1   chr4:18083620-18084138 REVERSE LENGTH=172                                                           | 172  | 172  | 3.00E-89  | 100.0 | 90.7 | 95.3 |
| Rsa1.0_00758.1.g19098.t27 | ref NP_195587.5  uncharacterized protein [Arabidopsis thaliana]<br>gi 332661571 gb AEE86971.1  uncharacterized protein AT4G38760 [Arabidopsis thaliana]                                                                                                                                                                                                                                                                                                                                                                                                                                                                                                                                                                                                                                                                                                                                                                                                                                                                                                                                    | 1971 | 1965 | 0         | 99.7  | 81.8 | 89.9 | uncharacterized protein                         | gbpln | Arabidopsis thaliana | AT4G38760.1   Symbols:   Protein of unknown function (DUF3414)   chr4:18085033-18096166 REVERSE LENGTH=1965                                        | 1971 | 1965 | 0         | 99.7  | 81.8 | 89.9 |
| Rsa1.0_00758.1.g19099.t1  | gb EOA17208.1  hypothetical protein CARUB_v10005480mg [Capsella rubella]                                                                                                                                                                                                                                                                                                                                                                                                                                                                                                                                                                                                                                                                                                                                                                                                                                                                                                                                                                                                                   | 273  | 273  | 1.00E-152 | 100.0 | 96.3 | 98.5 | hypothetical protein CARUB_v10005480mg          | gbpln | Capsella rubella     | AT4G38790.1   Symbols:   ER lumen protein retaining receptor family protein   chr4:18111426-18112977 FORWARD LENGTH=273                            | 273  | 273  | 1.00E-151 | 100.0 | 94.5 | 96.3 |
| Rsa1.0_00758.1.g19100.t1  | ref XP_002868864.1  ATMTN1 [Arabidopsis lyrata subsp. lyrata]<br>gi 297314700 gb EFH45123.1  ATMTN1 [Arabidopsis lyrata subsp. lyrata]                                                                                                                                                                                                                                                                                                                                                                                                                                                                                                                                                                                                                                                                                                                                                                                                                                                                                                                                                     | 244  | 266  | 1.00E-107 | 109.0 | 82.8 | 88.5 | ATMTN1                                          | gbpln | Arabidopsis lyrata   | AT4G38800.1   Symbols: ATMTN1, ATMTAN1, MTN1, MTAN1   methylthioadenosine nucleosidase 1   chr4:18113355-18114996 REVERSE LENGTH=267               | 244  | 267  | 1.00E-107 | 109.4 | 80.7 | 87.7 |
| Rsa1.0_00758.1.g19101.t1  | ref XP_002868865.1  calcium-binding EF hand family protein [Arabidopsis lyrata subsp. lyrata]<br>gi 297314701 gb EFH45124.1  calcium-binding EF hand family protein [Arabidopsis lyrata subsp. lyrata]<br>ref NP_195594.1  cysteine-rich receptor-like protein kinase 26 [Arabidopsis thaliana]<br>gi 75337951 sp O910J1.1 CRK26_ARATH<br>RecName: Full=Cysteine-rich receptor-like protein kinase 26; Short=Cysteine-rich RPK26; Flags: Precursor<br>gi 4490335 emb CAB38617.1  receptor-like protein kinase-like protein [Arabidopsis thaliana]<br>gi 7270866 emb CAB80546.1  receptor-like protein kinase-like protein [Arabidopsis thaliana]<br>gi 332661581 gb AEE86981.1  cysteine-rich receptor-like protein kinase 26 [Arabidopsis thaliana]                                                                                                                                                                                                                                                                                                                                       | 378  | 373  | 0         | 98.7  | 91.0 | 94.4 | calcium-binding EF hand family protein          | gbpln | Arabidopsis lyrata   | AT4G38810.2   Symbols:   Calcium-binding EF-hand family protein   chr4:18115607-18118860 REVERSE LENGTH=375                                        | 378  | 375  | 0         | 99.2  | 90.5 | 93.7 |
| Rsa1.0_00758.1.g19102.t5  | ref XP_002868819.1  SAUR-AC1 [Arabidopsis lyrata subsp. lyrata]<br>gi 297312655 gb EFH43078.1  SAUR-AC1 [Arabidopsis lyrata subsp. lyrata]                                                                                                                                                                                                                                                                                                                                                                                                                                                                                                                                                                                                                                                                                                                                                                                                                                                                                                                                                 | 658  | 665  | 0         | 101.1 | 84.3 | 91.6 | cysteine-rich receptor-like protein kinase 26   | gbpln | Arabidopsis thaliana | AT4G38830.1   Symbols: CRK26   cysteine-rich RLK (RECEPTOR-like protein kinase) 26   chr4:18122339-18124943 FORWARD LENGTH=665                     | 658  | 665  | 0         | 101.1 | 84.3 | 91.6 |
| Rsa1.0_00758.1.g19103.t1  | gb EOA18006.1  hypothetical protein CARUB_v10006441mg [Capsella rubella]                                                                                                                                                                                                                                                                                                                                                                                                                                                                                                                                                                                                                                                                                                                                                                                                                                                                                                                                                                                                                   | 99   | 98   | 5.00E-41  | 99.0  | 88.9 | 97.0 | hypothetical protein CARUB_v10006441mg          | gbpln | Capsella rubella     | AT4G38840.1   Symbols:   SAUR-like auxin-responsive protein family   chr4:18125174-18125473 REVERSE LENGTH=99                                      | 99   | 99   | 3.00E-41  | 100.0 | 82.8 | 94.9 |
| Rsa1.0_00758.1.g19104.t1  | ref XP_002868819.1  SAUR-AC1 [Arabidopsis lyrata subsp. lyrata]<br>gi 297312655 gb EFH43078.1  SAUR-AC1 [Arabidopsis lyrata subsp. lyrata]                                                                                                                                                                                                                                                                                                                                                                                                                                                                                                                                                                                                                                                                                                                                                                                                                                                                                                                                                 | 80   | 89   | 4.00E-33  | 111.3 | 85.0 | 88.8 | SAUR-AC1                                        | gbpln | Arabidopsis lyrata   | AT4G38850.1   Symbols: SAUR-AC1, ATSAUR15, SAUR15, SAUR-AC1   SAUR-like auxin-responsive protein family   chr4:18126257-18126526 FORWARD LENGTH=89 | 80   | 89   | 4.00E-35  | 111.3 | 82.5 | 88.8 |
| Rsa1.0_00759.1.g19105.t2  | gb EOA39965.1  hypothetical protein CARUB_v10008653mg, partial [Capsella rubella]                                                                                                                                                                                                                                                                                                                                                                                                                                                                                                                                                                                                                                                                                                                                                                                                                                                                                                                                                                                                          | 506  | 593  | 0         | 117.2 | 77.1 | 84.2 | hypothetical protein CARUB_v10008653mg, partial | gbpln | Capsella rubella     | AT1G45207.2   Symbols:   Remorin family protein   chr1:17130703-17133548 REVERSE LENGTH=555                                                        | 506  | 555  | 0         | 109.7 | 74.9 | 82.6 |

|                          |                                                                                                                                                                                                                                                                                                                                                                                                                                                                                                                                                                                                                                                                                              |      |      |           |       |      |       |                                                                  |       |                      |                                                                                                                                                           |      |      |           |       |      |      |
|--------------------------|----------------------------------------------------------------------------------------------------------------------------------------------------------------------------------------------------------------------------------------------------------------------------------------------------------------------------------------------------------------------------------------------------------------------------------------------------------------------------------------------------------------------------------------------------------------------------------------------------------------------------------------------------------------------------------------------|------|------|-----------|-------|------|-------|------------------------------------------------------------------|-------|----------------------|-----------------------------------------------------------------------------------------------------------------------------------------------------------|------|------|-----------|-------|------|------|
| Rsa1.0_00759.1.g19106.t1 | ref NP_564493.1  ubiquitin-conjugating enzyme 15 [Arabidopsis thaliana] gi 26454674 sp P42743.2 UBC15_ARATH RecName: Full=Ubiquitin-conjugating enzyme 15; AltName: Full=PM42; AltName: Full=Ubiquitin carrier protein; AltName: Full=Ubiquitin-conjugating enzyme E2-18 kDa 15; AltName: Full=Ubiquitin-protein ligase gi 2801442 gb AAC39324.1  ubiquitin-conjugating enzyme 15 [Arabidopsis thaliana] gi 5197171 dbj BAD44520.1  At g45050 [Arabidopsis thaliana] gi 66354440 gb AAY44855.1  ubiquitinating enzyme [Arabidopsis thaliana] gi 109946565 gb ABG48461.1  At g45050 [Arabidopsis thaliana] gi 332193956 gb AEE32077.1  ubiquitin-conjugating enzyme 15 [Arabidopsis thaliana] | 148  | 161  | 1.00E-71  | 108.8 | 96.6 | 98.6  | ubiquitin-conjugating enzyme 15                                  | gbpln | Arabidopsis thaliana | AT1G45050.1   Symbols: ATUBC2-1, UBC15   Ubiquitin-conjugating enzyme family protein   chr1:17031337-17032967 FORWARD LENGTH=161                          | 148  | 161  | 3.00E-74  | 108.8 | 96.6 | 98.6 |
| Rsa1.0_00759.1.g19107.t1 | gb AAD32898.1  putative retroelement pol polyprotein [Arabidopsis thaliana]                                                                                                                                                                                                                                                                                                                                                                                                                                                                                                                                                                                                                  | 1298 | 1307 | 0         | 100.7 | 58.6 | 72.3  | putative retroelement pol polyprotein                            | gbpln | Arabidopsis thaliana | AT4G23160.1   Symbols: CRK8   cysteine-rich RLK (RECEPTOR-like protein kinase) 8   chr4:12129485-12134086 FORWARD LENGTH=1262                             | 1298 | 1262 | 1.00E-104 | 97.2  | 14.3 | 23.0 |
| Rsa1.0_00759.1.g19108.t2 | gb EOA37881.1  hypothetical protein CARUB_v10009347mg [Capsella rubella]                                                                                                                                                                                                                                                                                                                                                                                                                                                                                                                                                                                                                     | 92   | 399  | 3.00E-34  | 433.7 | 85.9 | 87.0  | hypothetical protein CARUB_v10009347mg                           | gbpln | Capsella rubella     | AT1G45000.1   Symbols:   AAA-type ATPase family protein   chr1:17009220-17011607 FORWARD LENGTH=399                                                       | 92   | 399  | 6.00E-37  | 433.7 | 85.9 | 87.0 |
| Rsa1.0_00759.1.g19109.t1 | ref XP_002888606.1  ALDH3H1 [Arabidopsis lyrata subsp. lyrata] gi 297334447 gb EFH64865.1  ALDH3H1 [Arabidopsis lyrata subsp. lyrata]                                                                                                                                                                                                                                                                                                                                                                                                                                                                                                                                                        | 482  | 484  | 0         | 100.4 | 87.6 | 94.8  | ALDH3H1                                                          | gbpln | Arabidopsis lyrata   | AT1G44170.2   Symbols: ALDH3H1, ALDH4   aldehyde dehydrogenase 3H1   chr1:16796564-16800031 REVERSE LENGTH=484                                            | 482  | 484  | 0         | 100.4 | 85.7 | 94.6 |
| Rsa1.0_00759.1.g19110.t1 | ref XP_002891286.1  DNAJ chaperone C-terminal domain-containing protein [Arabidopsis lyrata subsp. lyrata] gi 297337128 gb EFH67545.1  DNAJ chaperone C-terminal domain-containing protein [Arabidopsis lyrata subsp. lyrata]                                                                                                                                                                                                                                                                                                                                                                                                                                                                | 230  | 356  | 1.00E-105 | 154.8 | 84.8 | 88.7  | DNAJ chaperone C-terminal domain-containing protein              | gbpln | Arabidopsis lyrata   | AT1G44160.1   Symbols:   HSP40/DnaJ peptide-binding protein   chr1:16795032-16796276 FORWARD LENGTH=357                                                   | 230  | 357  | 1.00E-102 | 155.2 | 83.9 | 88.3 |
| Rsa1.0_00759.1.g19111.t2 | dbj BAB02146.1  copia retroelement pol polyprotein-like [Arabidopsis thaliana]                                                                                                                                                                                                                                                                                                                                                                                                                                                                                                                                                                                                               | 490  | 526  | 3.00E-46  | 107.3 | 18.6 | 23.5  | copia retroelement pol polyprotein-like                          | gbpln | Arabidopsis thaliana | # # # # # #                                                                                                                                               | #    | #    | #         | #     | #    | #    |
| Rsa1.0_00759.1.g19112.t1 | # # # # # # # #                                                                                                                                                                                                                                                                                                                                                                                                                                                                                                                                                                                                                                                                              | #    | #    | #         | #     | #    | #     | -                                                                | ----  | ----                 | AT1G44160.1   Symbols:   HSP40/DnaJ peptide-binding protein   chr1:16795032-16796276 FORWARD LENGTH=357                                                   | 77   | 357  | 4.00E-11  | 463.6 | 37.7 | 39.0 |
| Rsa1.0_00759.1.g19113.t1 | ref XP_002891285.1  C2 domain-containing protein [Arabidopsis lyrata subsp. lyrata] gi 297337127 gb EFH67544.1  C2 domain-containing protein [Arabidopsis lyrata subsp. lyrata]                                                                                                                                                                                                                                                                                                                                                                                                                                                                                                              | 2135 | 2110 | 0         | 98.8  | 81.4 | 88.7  | C2 domain-containing protein                                     | gbpln | Arabidopsis lyrata   | AT1G44120.1   Symbols:   Armadillo/beta-catenin-like repeat ; C2 calcium/lipid-binding domain (CaLB) protein   chr1:16780610-16787414 FORWARD LENGTH=2114 | 2135 | 2114 | 0         | 99.0  | 80.4 | 88.2 |
| Rsa1.0_00759.1.g19114.t1 | ref XP_002893979.1  CYCA1_1 [Arabidopsis lyrata subsp. lyrata] gi 297339821 gb EFH70238.1  CYCA1_1 [Arabidopsis lyrata subsp. lyrata]                                                                                                                                                                                                                                                                                                                                                                                                                                                                                                                                                        | 406  | 467  | 0         | 115.0 | 82.0 | 86.9  | CYCA1_1                                                          | gbpln | Arabidopsis lyrata   | AT1G44110.1   Symbols: CYCA1:1   Cyclin A1:1   chr1:16775035-16777182 REVERSE LENGTH=460                                                                  | 406  | 460  | 0         | 113.3 | 80.8 | 86.2 |
| Rsa1.0_00759.1.g19115.t1 | gb EOA40281.1  hypothetical protein CARUB_v10009009mg [Capsella rubella]                                                                                                                                                                                                                                                                                                                                                                                                                                                                                                                                                                                                                     | 487  | 480  | 0         | 98.6  | 88.1 | 94.7  | hypothetical protein CARUB_v10009009mg                           | gbpln | Capsella rubella     | AT1G44100.1   Symbols: AAP5   amino acid permease 5   chr1:16764651-16767223 REVERSE LENGTH=480                                                           | 487  | 480  | 0         | 98.6  | 84.2 | 92.6 |
| Rsa1.0_00759.1.g19116.t1 | ref NP_175058.1  P-loop containing nucleoside triphosphate hydrolase-like protein [Arabidopsis thaliana] gi 8778680 gb AAF79688.1 AC022314.29 F9C16.7 [Arabidopsis thaliana] gi 332193886 gb AEE32007.1  P-loop containing nucleoside triphosphate hydrolase-like protein [Arabidopsis thaliana]                                                                                                                                                                                                                                                                                                                                                                                             | 460  | 475  | 0         | 103.3 | 72.4 | 82.0  | P-loop containing nucleoside triphosphate hydrolase-like protein | gbpln | Arabidopsis thaliana | AT1G43910.1   Symbols:   P-loop containing nucleoside triphosphate hydrolases superfamily protein   chr1:16656050-16657628 REVERSE LENGTH=475             | 460  | 475  | 0         | 103.3 | 72.4 | 82.0 |
| Rsa1.0_00759.1.g19117.t1 | ref XP_002893966.1  hypothetical protein ARALYDRAFT_473785 [Arabidopsis lyrata subsp. lyrata] gi 297339808 gb EFH70225.1  hypothetical protein ARALYDRAFT_473785 [Arabidopsis lyrata subsp. lyrata]                                                                                                                                                                                                                                                                                                                                                                                                                                                                                          | 212  | 212  | 1.00E-119 | 100.0 | 99.5 | 100.0 | hypothetical protein ARALYDRAFT_473785                           | gbpln | Arabidopsis lyrata   | AT1G43890.3   Symbols: ATRAB18, ATRABC1, RAB18-1, RABC1, ATRAB-C1, RAB18   RAB GTPASE HOMOLOG B18   chr1:16646934-16648395 FORWARD LENGTH=212             | 212  | 212  | 1.00E-120 | 100.0 | 98.6 | 99.5 |
| Rsa1.0_00759.1.g19118.t1 | gb EOA38019.1  hypothetical protein CARUB_v10009490mg [Capsella rubella]                                                                                                                                                                                                                                                                                                                                                                                                                                                                                                                                                                                                                     | 362  | 370  | 0         | 102.2 | 89.8 | 96.4  | hypothetical protein CARUB_v10009490mg                           | gbpln | Capsella rubella     | AT1G43860.1   Symbols:   sequence-specific DNA binding transcription factors   chr1:16622244-16624385 REVERSE LENGTH=370                                  | 362  | 370  | 0         | 102.2 | 90.3 | 95.3 |

|                          |                                                                                                                                                                                                                                                                                                                                                                                                                                                                                                                                                                                                                                                                                                                                                                                                                                                                                                                                                                                                                                   |     |     |           |       |      |      |                                         |       |                      |                                                                                                                                                                                                                                                                                                                                          |     |     |           |       |      |      |
|--------------------------|-----------------------------------------------------------------------------------------------------------------------------------------------------------------------------------------------------------------------------------------------------------------------------------------------------------------------------------------------------------------------------------------------------------------------------------------------------------------------------------------------------------------------------------------------------------------------------------------------------------------------------------------------------------------------------------------------------------------------------------------------------------------------------------------------------------------------------------------------------------------------------------------------------------------------------------------------------------------------------------------------------------------------------------|-----|-----|-----------|-------|------|------|-----------------------------------------|-------|----------------------|------------------------------------------------------------------------------------------------------------------------------------------------------------------------------------------------------------------------------------------------------------------------------------------------------------------------------------------|-----|-----|-----------|-------|------|------|
| Rsa1.0_00760.1.g19119.t1 | ref NP_171740.3  uncharacterized protein [Arabidopsis thaliana]<br>gi 9857534 gb AAG00889.1 AC064879.7<br>Hypothetical protein [Arabidopsis thaliana] gi 332189301 gb AEE27422.1  uncharacterized protein AT1G02380 [Arabidopsis thaliana]                                                                                                                                                                                                                                                                                                                                                                                                                                                                                                                                                                                                                                                                                                                                                                                        | 225 | 231 | 8.00E-75  | 102.7 | 67.1 | 81.3 | uncharacterized protein                 | gbpln | Arabidopsis thaliana | AT1G02380.1   Symbols:   unknown protein; BEST Arabidopsis thaliana protein match is: unknown protein (TAIR:AT4G01960.1); Has 66 Blast hits to 66 proteins in 11 species: Archae - 0; Bacteria - 0; Metazoa - 0; Fungi - 0; Plants - 66; Viruses - 0; Other Eukaryotes - 0 (source: NCBI BLink).   chr1:477814-478850 FORWARD LENGTH=231 | 225 | 231 | 3.00E-77  | 102.7 | 67.1 | 81.3 |
| Rsa1.0_00760.1.g19120.t1 | ref XP_002892103.1  expressed protein [Arabidopsis lyrata subsp. lyrata]<br>gi 297337945 gb EFH68362.1  expressed protein [Arabidopsis lyrata subsp. lyrata]<br>ref NP_563650.1  transcription factor HFR1 [Arabidopsis thaliana]<br>gi 20532238 sp Q9FE22.1 HFR1_ARATH<br>RecName: Full=Transcription factor HFR1; AltName: Full=Basic helix-loop-helix protein 26; Short=AtbHLH26; Short=bHLH 26; AltName: Full=Protein LONG HYPOCOTYL IN FAR-RED 1; AltName: Full=Protein REDUCED PHYTOCHROME SIGNALING; AltName: Full=Reduced sensitivity to far-red light; AltName: Full=Transcription factor EN 68; AltName: Full=bHLH transcription factor bHLH026<br>gi 11870115 gb AAG40617.1 AF324245.1 bHLH-like protein HFR1 [Arabidopsis thaliana]<br>gi 12025106 gb AAG45733.1 AF288287.1 reduced phytochrome signaling 1 [Arabidopsis thaliana]<br>gi 13183644 gb AAK15282.1 AF323182.1 basic helix-loop-helix FBI1 protein [Arabidopsis thaliana]<br>gi 332189297 gb AEE27418.1  transcription factor HFR1 [Arabidopsis thaliana] | 73  | 69  | 6.00E-11  | 94.5  | 71.2 | 78.1 | expressed protein                       | gbpln | Arabidopsis lyrata   | #                                                                                                                                                                                                                                                                                                                                        | #   | #   | #         | #     | #    | #    |
| Rsa1.0_00760.1.g19121.t1 | gi 12025106 gb AAG45733.1 AF288287.1 reduced phytochrome signaling 1 [Arabidopsis thaliana]<br>gi 13183644 gb AAK15282.1 AF323182.1 basic helix-loop-helix FBI1 protein [Arabidopsis thaliana]<br>gi 332189297 gb AEE27418.1  transcription factor HFR1 [Arabidopsis thaliana]                                                                                                                                                                                                                                                                                                                                                                                                                                                                                                                                                                                                                                                                                                                                                    | 268 | 292 | 5.00E-94  | 109.0 | 68.3 | 79.5 | transcription factor HFR1               | gbpln | Arabidopsis thaliana | AT1G02340.1   Symbols: HFR1, RSF1, FBI1, REP1   basic helix-loop-helix (bHLH) DNA-binding superfamily protein   chr1:465933-467685 REVERSE LENGTH=292                                                                                                                                                                                    | 268 | 292 | 2.00E-96  | 109.0 | 68.3 | 79.5 |
| Rsa1.0_00760.1.g19122.t1 | gb AAQ17548.1  TOC33 [Brassica napus]                                                                                                                                                                                                                                                                                                                                                                                                                                                                                                                                                                                                                                                                                                                                                                                                                                                                                                                                                                                             | 297 | 297 | 1.00E-160 | 100.0 | 97.0 | 98.7 | TOC33                                   | gbpln | Brassica napus       | AT1G02280.2   Symbols: TOC33, ATTOC33, PPI1   translocon at the outer envelope membrane of chloroplasts 33   chr1:448665-450246 REVERSE LENGTH=297                                                                                                                                                                                       | 297 | 297 | 1.00E-162 | 100.0 | 91.9 | 96.6 |
| Rsa1.0_00760.1.g19123.t1 | gb AAM61631.1  aspartyl aminopeptidase-like protein [Arabidopsis thaliana]                                                                                                                                                                                                                                                                                                                                                                                                                                                                                                                                                                                                                                                                                                                                                                                                                                                                                                                                                        | 207 | 477 | 3.00E-47  | 230.4 | 42.0 | 42.5 | aspartyl aminopeptidase-like protein    | gbpln | Arabidopsis thaliana | AT5G60160.1   Symbols:   Zn-dependent exopeptidases superfamily protein   chr5:24223897-24226783 REVERSE LENGTH=477                                                                                                                                                                                                                      | 207 | 477 | 9.00E-50  | 230.4 | 42.0 | 42.5 |
| Rsa1.0_00760.1.g19124.t1 | ref NP_563646.1  uncharacterized calcium-binding protein [Arabidopsis thaliana]<br>gi 148887024 sp O81916.2 YC22_ARATH<br>RecName: Full=Uncharacterized calcium-binding protein At1g02270<br>gi 15450673 gb AAK96608.1  At1g02270/T6A9.9 [Arabidopsis thaliana] gi 17380606 gb AAL36066.1  At1g02270/T6A9.9 [Arabidopsis thaliana] gi 332189287 gb AEE27408.1  uncharacterized calcium-binding protein [Arabidopsis thaliana]                                                                                                                                                                                                                                                                                                                                                                                                                                                                                                                                                                                                     | 386 | 484 | 1.00E-174 | 125.4 | 80.1 | 88.1 | uncharacterized calcium-binding protein | gbpln | Arabidopsis thaliana | AT1G02270.1   Symbols:   Calcium-binding endonuclease/exonuclease/phosphatase family   chr1:443301-446197 REVERSE LENGTH=484                                                                                                                                                                                                             | 386 | 484 | 1.00E-176 | 125.4 | 80.1 | 88.1 |
| Rsa1.0_00760.1.g19125.t1 | gb EOA36878.1  hypothetical protein CARUB_v10008913mg [Capsella rubella]                                                                                                                                                                                                                                                                                                                                                                                                                                                                                                                                                                                                                                                                                                                                                                                                                                                                                                                                                          | 501 | 504 | 0         | 100.6 | 89.0 | 92.4 | hypothetical protein CARUB_v10008913mg  | gbpln | Capsella rubella     | AT1G02260.1   Symbols:   Divalent ion symporter   chr1:440757-442459 REVERSE LENGTH=502                                                                                                                                                                                                                                                  | 501 | 502 | 0         | 100.2 | 88.4 | 91.4 |
| Rsa1.0_00760.1.g19126.t1 | gb AAC24383.1  Hypothetical protein [Arabidopsis thaliana]                                                                                                                                                                                                                                                                                                                                                                                                                                                                                                                                                                                                                                                                                                                                                                                                                                                                                                                                                                        | 299 | 345 | 1.00E-48  | 115.4 | 35.8 | 42.5 | Hypothetical protein                    | gbpln | Arabidopsis thaliana | AT1G02230.1   Symbols: ANAC004, NAC004   NAC domain containing protein 4   chr1:435174-436775 REVERSE LENGTH=359                                                                                                                                                                                                                         | 299 | 359 | 2.00E-47  | 120.1 | 33.8 | 39.8 |



|                          |                                                                                                                                                                                                                                                                                                                                                                                                                                                                                                                                                                                                                                                                                                                                                                                                                                                                                                                                                                                     |      |      |           |       |      |      |                                                                  |       |                      |                                                                                                                           |      |      |           |       |      |      |
|--------------------------|-------------------------------------------------------------------------------------------------------------------------------------------------------------------------------------------------------------------------------------------------------------------------------------------------------------------------------------------------------------------------------------------------------------------------------------------------------------------------------------------------------------------------------------------------------------------------------------------------------------------------------------------------------------------------------------------------------------------------------------------------------------------------------------------------------------------------------------------------------------------------------------------------------------------------------------------------------------------------------------|------|------|-----------|-------|------|------|------------------------------------------------------------------|-------|----------------------|---------------------------------------------------------------------------------------------------------------------------|------|------|-----------|-------|------|------|
| Rsa1.0_00760.1.g19127.t1 | refNP_171613.1  inorganic pyrophosphatase [Arabidopsis thaliana] gi 297843016 ref XP_002889389.1  predicted protein [Arabidopsis lyrata subsp. lyrata] gi 15450699 gb AAK96621.1  At1g01050/T25K16.5 [Arabidopsis thaliana] gi 16323129 gb AAL15299.1  At1g01050/T25K16.5 [Arabidopsis thaliana] gi 17473935 gb AAL38377.1  putative inorganic pyrophosphatase [Arabidopsis thaliana] gi 20148453 gb AAM10117.1  putative inorganic pyrophosphatase [Arabidopsis thaliana] gi 21537232 gb AAM61573.1  soluble inorganic pyrophosphatase, putative [Arabidopsis thaliana] gi 24797046 gb AAN64535.1  At1g01050/T25K16.5 [Arabidopsis thaliana] gi 110741975 dbj BAE98927.1  putative soluble inorganic pyrophosphatase [Arabidopsis thaliana] gi 225897848 dbj BAH30256.1  hypothetical protein [Arabidopsis thaliana] gi 297335231 gb EFH65648.1  predicted protein [Arabidopsis lyrata subsp. lyrata] gi 332189101 gb AEE27222.1  inorganic pyrophosphatase [Arabidopsis thaliana] | 211  | 212  | 1.00E-115 | 100.5 | 96.7 | 98.1 | inorganic pyrophosphatase                                        | gbpln | Arabidopsis lyrata   | AT1G01050.1   Symbols: AtPPa1, PPa1   pyrophosphorylase 1   chr1:31382-32670 REVERSE LENGTH=212                           | 211  | 212  | 1.00E-118 | 100.5 | 96.7 | 98.1 |
| Rsa1.0_00760.1.g19128.t1 | #                                                                                                                                                                                                                                                                                                                                                                                                                                                                                                                                                                                                                                                                                                                                                                                                                                                                                                                                                                                   | #    | #    | #         | #     | #    | -    | ----                                                             | ----  | #                    | #                                                                                                                         | #    | #    | #         | #     | #    |      |
| Rsa1.0_00760.1.g19129.t1 | ref XP_002889387.1  nodulin MtN21 family protein [Arabidopsis lyrata subsp. lyrata] gi 297335229 gb EFH65646.1  nodulin MtN21 family protein [Arabidopsis lyrata subsp. lyrata]                                                                                                                                                                                                                                                                                                                                                                                                                                                                                                                                                                                                                                                                                                                                                                                                     | 354  | 361  | 1.00E-168 | 102.0 | 81.4 | 89.3 | nodulin MtN21 family protein                                     | gbpln | Arabidopsis lyrata   | AT1G01070.1   Symbols:   nodulin MtN21 /EamA-like transporter family protein   chr1:38898-40877 REVERSE LENGTH=365        | 354  | 365  | 1.00E-168 | 103.1 | 80.8 | 88.7 |
| Rsa1.0_00761.1.g19130.t1 | #                                                                                                                                                                                                                                                                                                                                                                                                                                                                                                                                                                                                                                                                                                                                                                                                                                                                                                                                                                                   | #    | #    | #         | #     | #    | -    | ----                                                             | ----  | #                    | #                                                                                                                         | #    | #    | #         | #     | #    |      |
| Rsa1.0_00761.1.g19131.t1 | #                                                                                                                                                                                                                                                                                                                                                                                                                                                                                                                                                                                                                                                                                                                                                                                                                                                                                                                                                                                   | #    | #    | #         | #     | #    | -    | ----                                                             | ----  | #                    | #                                                                                                                         | #    | #    | #         | #     | #    |      |
| Rsa1.0_00761.1.g19132.t1 | gb AD298865.1  MYB domain protein 111 [Brassica rapa subsp. rapa]                                                                                                                                                                                                                                                                                                                                                                                                                                                                                                                                                                                                                                                                                                                                                                                                                                                                                                                   | 343  | 343  | 1.00E-176 | 100.0 | 91.8 | 94.5 | MYB domain protein 111                                           | gbpln | Brassica rapa        | AT5G49330.1   Symbols: MYB111, ATMYB111, PFG3   myb domain protein 111   chr5:1999147-20001293 REVERSE LENGTH=342         | 343  | 342  | 1.00E-149 | 99.7  | 77.8 | 85.1 |
| Rsa1.0_00761.1.g19133.t2 | ref XP_002865732.1  beta-xylosidase 1 [Arabidopsis lyrata subsp. lyrata] gi 297311567 gb EFH41991.1  beta-xylosidase 1 [Arabidopsis lyrata subsp. lyrata]                                                                                                                                                                                                                                                                                                                                                                                                                                                                                                                                                                                                                                                                                                                                                                                                                           | 1031 | 774  | 0         | 75.1  | 66.2 | 68.9 | beta-xylosidase 1                                                | gbpln | Arabidopsis lyrata   | AT5G49360.1   Symbols: BXL1, ATBXL1   beta-xylosidase 1   chr5:20012179-20016659 REVERSE LENGTH=774                       | 1031 | 774  | 0         | 75.1  | 66.1 | 68.4 |
| Rsa1.0_00761.1.g19134.t1 | #                                                                                                                                                                                                                                                                                                                                                                                                                                                                                                                                                                                                                                                                                                                                                                                                                                                                                                                                                                                   | #    | #    | #         | #     | #    | -    | ----                                                             | ----  | #                    | #                                                                                                                         | #    | #    | #         | #     | #    |      |
| Rsa1.0_00761.1.g19135.t1 | ref XP_002314930.1  predicted protein [Populus trichocarpa] gi 222863970 gb EEF01101.1  predicted protein [Populus trichocarpa]                                                                                                                                                                                                                                                                                                                                                                                                                                                                                                                                                                                                                                                                                                                                                                                                                                                     | 283  | 258  | 2.00E-63  | 91.2  | 48.8 | 55.8 | predicted protein                                                | gbpln | Populus trichocarpa  | AT5G49400.1   Symbols:   zinc knuckle (CCHC-type) family protein   chr5:20031154-20031981 FORWARD LENGTH=275              | 283  | 275  | 5.00E-55  | 97.2  | 43.8 | 45.9 |
| Rsa1.0_00761.1.g19136.t1 | ref NP_199754.2  WD40/YVTN repeat and Bromo-WDR9-I-like domain-containing protein [Arabidopsis thaliana] gi 332008427 gb AED95810.1  WD40/YVTN repeat and Bromo-WDR9-I-like domain-containing protein [Arabidopsis thaliana]                                                                                                                                                                                                                                                                                                                                                                                                                                                                                                                                                                                                                                                                                                                                                        | 1681 | 1677 | 0         | 99.8  | 86.4 | 91.8 | WD40/YVTN repeat and Bromo-WDR9-I-like domain-containing protein | gbpln | Arabidopsis thaliana | AT5G49430.1   Symbols:   WD40/YVTN repeat-like-containing domain:Bromodomain   chr5:20037339-20045454 REVERSE LENGTH=1677 | 1681 | 1677 | 0         | 99.8  | 86.4 | 91.8 |
| Rsa1.0_00761.1.g19137.t1 | ref XP_002863984.1  ATP-citrate lyase B-2 [Arabidopsis lyrata subsp. lyrata] gi 297309819 gb EFH40243.1  ATP-citrate lyase B-2 [Arabidopsis lyrata subsp. lyrata]                                                                                                                                                                                                                                                                                                                                                                                                                                                                                                                                                                                                                                                                                                                                                                                                                   | 104  | 608  | 3.00E-12  | 584.6 | 34.6 | 37.5 | ATP-citrate lyase B-2                                            | gbpln | Arabidopsis lyrata   | AT5G49460.1   Symbols: ACLB-2   ATP citrate lyase subunit B 2   chr5:20055048-20058195 FORWARD LENGTH=608                 | 104  | 608  | 5.00E-15  | 584.6 | 34.6 | 37.5 |
| Rsa1.0_00761.1.g19138.t1 | dbj BAJ33845.1  unnamed protein product [Thellungiella halophila]                                                                                                                                                                                                                                                                                                                                                                                                                                                                                                                                                                                                                                                                                                                                                                                                                                                                                                                   | 139  | 141  | 1.00E-56  | 101.4 | 82.7 | 89.9 | unnamed protein product                                          | ----  | ----                 | AT5G49450.1   Symbols: AtbZIP1, bZIP1   basic leucine-zipper 1   chr5:20052145-20052582 FORWARD LENGTH=145                | 139  | 145  | 5.00E-55  | 104.3 | 79.9 | 89.2 |
| Rsa1.0_00761.1.g19139.t1 | ref XP_002863989.1  hypothetical protein ARALYDRAFT_495010 [Arabidopsis lyrata subsp. lyrata] gi 297309824 gb EFH40248.1  hypothetical protein ARALYDRAFT_495010 [Arabidopsis lyrata subsp. lyrata]                                                                                                                                                                                                                                                                                                                                                                                                                                                                                                                                                                                                                                                                                                                                                                                 | 240  | 195  | 1.00E-89  | 81.3  | 73.3 | 75.0 | hypothetical protein ARALYDRAFT_495010                           | gbpln | Arabidopsis lyrata   | AT5G49510.2   Symbols: PFD3   prefoldin 3   chr5:20080729-20082456 FORWARD LENGTH=195                                     | 240  | 195  | 3.00E-91  | 81.3  | 72.5 | 74.6 |

|                          |                                                                                                                                                                                                                                                                                                                                                                                                                                                                                                                                                                                                                                                                                                                           |     |     |           |       |      |      |                                                 |       |                      |                                                                                                                                                              |     |     |           |       |      |      |
|--------------------------|---------------------------------------------------------------------------------------------------------------------------------------------------------------------------------------------------------------------------------------------------------------------------------------------------------------------------------------------------------------------------------------------------------------------------------------------------------------------------------------------------------------------------------------------------------------------------------------------------------------------------------------------------------------------------------------------------------------------------|-----|-----|-----------|-------|------|------|-------------------------------------------------|-------|----------------------|--------------------------------------------------------------------------------------------------------------------------------------------------------------|-----|-----|-----------|-------|------|------|
| Rsa1.0_00762.1.g19140.t1 | refNP_199378.1  subtilase family protein [Arabidopsis thaliana] gi 9758669 dbj BAB09208.1  subtilisin-like protease [Arabidopsis thaliana] gi 26451161 dbj BAC42684.1  putative subtilisin-like protease [Arabidopsis thaliana] gi 28973549 gb AAO64099.1  putative subtilisin [Arabidopsis thaliana] gi 332007897 gb AED95280.1  subtilase family protein [Arabidopsis thaliana]                                                                                                                                                                                                                                                                                                                                         | 794 | 791 | 0         | 99.6  | 86.6 | 93.1 | subtilase family protein                        | gbpln | Arabidopsis thaliana | AT5G45650.1   Symbols:   subtilase family protein   chr5:18513520-18518790 REVERSE LENGTH=791                                                                | 794 | 791 | 0         | 99.6  | 86.6 | 93.1 |
| Rsa1.0_00762.1.g19141.t1 | gb ABD85056.1  hypothetical protein 27.t00122 [Brassica oleracea]                                                                                                                                                                                                                                                                                                                                                                                                                                                                                                                                                                                                                                                         | 207 | 239 | 3.00E-28  | 115.5 | 32.4 | 43.5 | hypothetical protein 27.t00122                  | gbpln | Brassica oleracea    | AT4G2090.1   Symbols:   Ribonuclease H-like superfamily protein   chr4:14333528-14335255 FORWARD LENGTH=575                                                  | 207 | 575 | 5.00E-14  | 277.8 | 28.0 | 48.8 |
| Rsa1.0_00762.1.g19142.t1 | refNP_199379.1  GDSL esterase/lipase [Arabidopsis thaliana] gi 75171192 sp Q9FK75.1 GDL82_ARAT H RecName: Full=GDSL esterase/lipase At5g45670; AltName: Full=Extracellular lipase At5g45670; Flags: Precursor gi 17933312 gb AAL48238.1 AF446366.1 AT5g45670/MRA19.6 [Arabidopsis thaliana] gi 9758670 dbj BAB09209.1  GDSL-motif lipase/hydrolase-like protein [Arabidopsis thaliana] gi 20453403 gb AAM19940.1  AT5g45670/MRA19.6 [Arabidopsis thaliana] gi 332007899 gb AED95282.1  GDSL esterase/lipase [Arabidopsis thaliana]                                                                                                                                                                                        | 361 | 362 | 0         | 100.3 | 90.0 | 96.7 | GDSL esterase/lipase                            | gbpln | Arabidopsis thaliana | AT5G45670.1   Symbols:   GDSL-like Lipase/Acylhydrolase superfamily protein   chr5:18528600-18530164 FORWARD LENGTH=362                                      | 361 | 362 | 0         | 100.3 | 90.0 | 96.7 |
| Rsa1.0_00762.1.g19143.t1 | refNP_199380.1  FKBP-type peptidyl-prolyl cis-trans isomerase 3 [Arabidopsis thaliana] gi 21542069 sp Q9SCY2.2 FKB13_ARAT H RecName: Full=Peptidyl-prolyl cis-trans isomerase FKBP13, chloroplastic; Short=PP1ase FKBP13; AltName: Full=FK506-binding protein 1; AltName: Full=FK506-binding protein 13; Short=AtFKBP13; AltName: Full=Immunophilin FKBP13; AltName: Full=Rotamase; Flags: Precursor gi 9758671 dbj BAB09210.1  unnamed protein product [Arabidopsis thaliana] gi 18086457 gb AAL57682.1  AT5g45680/MRA19.7 [Arabidopsis thaliana] gi 20147125 gb AAM10279.1  AT5g45680/MRA19.7 [Arabidopsis thaliana] gi 332007900 gb AED95283.1  FKBP-type peptidyl-prolyl cis-trans isomerase 3 [Arabidopsis thaliana] | 207 | 208 | 1.00E-99  | 100.5 | 87.9 | 94.2 | FKBP-type peptidyl-prolyl cis-trans isomerase 3 | gbpln | Arabidopsis thaliana | AT5G45680.1   Symbols:   ATFKBP13, FKBP13   FK506-binding protein 13   chr5:18530894-18532128 FORWARD LENGTH=208                                             | 207 | 208 | 1.00E-102 | 100.5 | 87.9 | 94.2 |
| Rsa1.0_00762.1.g19144.t1 | refXP_002891072.1  alliinase family protein [Arabidopsis lyrata subsp. lyrata] gi 297336914 gb EFH67331.1  alliinase family protein [Arabidopsis lyrata subsp. lyrata]                                                                                                                                                                                                                                                                                                                                                                                                                                                                                                                                                    | 468 | 460 | 0         | 98.3  | 75.9 | 86.1 | alliinase family protein                        | gbpln | Arabidopsis lyrata   | AT1G34060.1   Symbols:   Pyridoxal phosphate (PLP)-dependent transferases superfamily protein   chr1:12396561-12398299 REVERSE LENGTH=463                    | 468 | 463 | 0         | 98.9  | 73.3 | 84.2 |
| Rsa1.0_00762.1.g19145.t1 | dbj BAJ34615.1  unnamed protein product [Thellungiella halophila]                                                                                                                                                                                                                                                                                                                                                                                                                                                                                                                                                                                                                                                         | 340 | 345 | 1.00E-152 | 101.5 | 84.1 | 92.1 | unnamed protein product                         | ----  | ----                 | AT5G45710.1   Symbols:   AT-HSFA4C, RHA1, HSF4A4C   winged-helix DNA-binding transcription factor family protein   chr5:18541576-18542706 FORWARD LENGTH=345 | 340 | 345 | 2.33E-156 | 101.5 | 79.4 | 87.6 |
| Rsa1.0_00762.1.g19146.t1 | refXP_002863460.1  ATP binding protein [Arabidopsis lyrata subsp. lyrata] gi 297309295 gb EFH39719.1  ATP binding protein [Arabidopsis lyrata subsp. lyrata]                                                                                                                                                                                                                                                                                                                                                                                                                                                                                                                                                              | 926 | 970 | 0         | 104.8 | 71.2 | 80.3 | ATP binding protein                             | gbpln | Arabidopsis lyrata   | AT5G45720.1   Symbols:   AAA-type ATPase family protein   chr5:18543338-18546629 REVERSE LENGTH=966                                                          | 926 | 966 | 0         | 104.3 | 71.5 | 79.8 |
| Rsa1.0_00762.1.g19147.t1 | refNP_199386.2  Ubiquitin domain-containing protein [Arabidopsis thaliana] gi 332007908 gb AED95291.1  Ubiquitin domain-containing protein [Arabidopsis thaliana]                                                                                                                                                                                                                                                                                                                                                                                                                                                                                                                                                         | 118 | 118 | 3.00E-57  | 100.0 | 90.7 | 95.8 | Ubiquitin domain-containing protein             | gbpln | Arabidopsis thaliana | AT5G45740.1   Symbols:   Ubiquitin domain-containing protein   chr5:18556975-18558097 REVERSE LENGTH=118                                                     | 118 | 118 | 5.00E-60  | 100.0 | 90.7 | 95.8 |
| Rsa1.0_00762.1.g19148.t1 | refXP_002865226.1  transducin family protein [Arabidopsis lyrata subsp. lyrata] gi 297311061 gb EFH41485.1  transducin family protein [Arabidopsis lyrata subsp. lyrata]                                                                                                                                                                                                                                                                                                                                                                                                                                                                                                                                                  | 350 | 358 | 1.00E-172 | 102.3 | 88.3 | 93.7 | transducin family protein                       | gbpln | Arabidopsis lyrata   | AT5G45760.1   Symbols:   Transducin/WD40 repeat-like superfamily protein   chr5:18561121-18563005 FORWARD LENGTH=360                                         | 350 | 360 | 1.00E-171 | 102.9 | 87.7 | 93.4 |
| Rsa1.0_00762.1.g19149.t1 | gb EOA16660.1  hypothetical protein CARUB_v10004846mg [Capsella rubella]                                                                                                                                                                                                                                                                                                                                                                                                                                                                                                                                                                                                                                                  | 419 | 434 | 1.00E-121 | 103.6 | 62.1 | 75.4 | hypothetical protein CARUB_v10004846mg          | gbpln | Capsella rubella     | AT5G45770.1   Symbols:   AtRLP55, RLP55   receptor like protein 55   chr5:18563568-18564845 FORWARD LENGTH=425                                               | 419 | 425 | 1.00E-123 | 101.4 | 61.8 | 73.7 |

|                           |                                                                                                                                                                                                                                                                                                                                                                                                                                                                                                                                                                                                                                                                                                                                                                                                                                                                                                                 |      |      |           |       |      |       |                                                                                                     |       |                      |                                                                                                                                                                                                                                                                                                                                                                                                                                                                                                                                                                                                  |      |      |           |       |      |       |
|---------------------------|-----------------------------------------------------------------------------------------------------------------------------------------------------------------------------------------------------------------------------------------------------------------------------------------------------------------------------------------------------------------------------------------------------------------------------------------------------------------------------------------------------------------------------------------------------------------------------------------------------------------------------------------------------------------------------------------------------------------------------------------------------------------------------------------------------------------------------------------------------------------------------------------------------------------|------|------|-----------|-------|------|-------|-----------------------------------------------------------------------------------------------------|-------|----------------------|--------------------------------------------------------------------------------------------------------------------------------------------------------------------------------------------------------------------------------------------------------------------------------------------------------------------------------------------------------------------------------------------------------------------------------------------------------------------------------------------------------------------------------------------------------------------------------------------------|------|------|-----------|-------|------|-------|
| Rsa1.0_00762.1.g19150.t1  | ref NP_850376.2  60S ribosomal protein L11-1 [Arabidopsis thaliana]<br>gi 297791141 ref XP_002863455.1  60S ribosomal protein L11 [Arabidopsis lyrata subsp. lyrata]<br>gi 297804282 ref XP_002870025.1  60S ribosomal protein L11 [Arabidopsis lyrata subsp. lyrata]<br>gi 21542441 sp P42795.2 RL111_ARATH RecName: Full=60S ribosomal protein L11-1; AltName: Full=L16A<br>gi 110737006 dbj BAF00458.1  60S ribosomal protein L11B [Arabidopsis thaliana] gi 297309290 gb EFH39714.1  60S ribosomal protein L11 [Arabidopsis lyrata subsp. lyrata]<br>gi 297315861 gb EFH46284.1  60S ribosomal protein L11 [Arabidopsis lyrata subsp. lyrata]<br>gi 330255069 gb AEC10163.1  60S ribosomal protein L11-1 [Arabidopsis thaliana] gi 482549880 gb EOA14074.1  hypothetical protein CARUB_v10027211mg [Capsella rubella] gi 482560618 gb EOA24809.1  hypothetical protein CARUB_v10018095mg [Capsella rubella] | 182  | 182  | 1.00E-102 | 100.0 | 99.5 | 100.0 | 60S ribosomal protein L11-1                                                                         | gbpln | Arabidopsis lyrata   | AT2G42740.1   Symbols: RPL16A   ribosomal protein large subunit 16A   chr2:17791794-17792946 FORWARD LENGTH=182                                                                                                                                                                                                                                                                                                                                                                                                                                                                                  | 182  | 182  | 1.00E-104 | 100.0 | 99.5 | 100.0 |
| Rsa1.0_00762.1.g19151.t1  | gb ACV41802.1  delay of germination 1, partial [Brassica rapa subsp. pekinensis]                                                                                                                                                                                                                                                                                                                                                                                                                                                                                                                                                                                                                                                                                                                                                                                                                                | 280  | 258  | 1.00E-130 | 92.1  | 80.4 | 86.1  | delay of germination 1, partial                                                                     | gbpln | Brassica rapa        | AT5G45830.1   Symbols: DOG1, GSQ5, ATDOG1   delay of germination 1   chr5:18589669-18591400 REVERSE LENGTH=291                                                                                                                                                                                                                                                                                                                                                                                                                                                                                   | 280  | 291  | 1.00E-112 | 103.9 | 74.3 | 83.9  |
| Rsa1.0_00763.1.g19152.t1  | #                                                                                                                                                                                                                                                                                                                                                                                                                                                                                                                                                                                                                                                                                                                                                                                                                                                                                                               | #    | #    | #         | #     | #    | #     | -                                                                                                   | ----  | ----                 | #                                                                                                                                                                                                                                                                                                                                                                                                                                                                                                                                                                                                | #    | #    | #         | #     | #    |       |
| Rsa1.0_00763.1.g19153.t1  | gb ABD65035.1  hypothetical protein 26.t00052 [Brassica oleracea]                                                                                                                                                                                                                                                                                                                                                                                                                                                                                                                                                                                                                                                                                                                                                                                                                                               | 606  | 695  | 1.00E-143 | 114.7 | 54.3 | 66.5  | hypothetical protein 26.t00052                                                                      | gbpln | Brassica oleracea    | AT1G51172.1   Symbols:   unknown protein; FUNCTIONS IN: molecular function unknown; INVOLVED IN: biological process unknown; LOCATED IN: cellular component unknown; CONTAINS InterPro DOMAIN/s: Protein of unknown function DUF601 (InterPro:IPR006736); BEST Arabidopsis thaliana protein match is: Protein of unknown function, DUF601 (TAIR:AT1G46696.1); Has 1849 Blast hits to 1554 proteins in 272 species: Archae - 15; Bacteria - 116; Metazoa - 677; Fungi - 267; Plants - 154; Viruses - 11; Other Eukaryotes - 609 (source: NCBI BLINK),   chr1:18963205-18965571 FORWARD LENGTH=681 | 606  | 681  | 5.00E-16  | 112.4 | 6.4  | 10.2  |
| Rsa1.0_00763.1.g19154.t4  | gb EOA29246.1  hypothetical protein CARUB_v10025520mg [Capsella rubella]                                                                                                                                                                                                                                                                                                                                                                                                                                                                                                                                                                                                                                                                                                                                                                                                                                        | 650  | 141  | 6.00E-61  | 21.7  | 17.1 | 19.2  | hypothetical protein CARUB_v10025520mg                                                              | gbpln | Capsella rubella     | AT2G21045.1   Symbols:   Rhodanese/Cell cycle control phosphatase superfamily protein   chr2:9027858-9028805 FORWARD LENGTH=169                                                                                                                                                                                                                                                                                                                                                                                                                                                                  | 650  | 169  | 3.00E-62  | 26.0  | 17.2 | 19.8  |
| Rsa1.0_00763.1.g19155.t12 | ref XP_002884055.1  ARID/BRIGHT DNA-binding domain-containing protein [Arabidopsis lyrata subsp. lyrata]<br>gi 297329895 gb EFH60314.1  ARID/BRIGHT DNA-binding domain-containing protein [Arabidopsis lyrata subsp. lyrata]                                                                                                                                                                                                                                                                                                                                                                                                                                                                                                                                                                                                                                                                                    | 1005 | 796  | 0         | 79.2  | 47.9 | 53.2  | ARID/BRIGHT DNA-binding domain-containing protein                                                   | gbpln | Arabidopsis lyrata   | AT2G17410.1   Symbols:   ARID/BRIGHT DNA-binding domain-containing protein   chr2:7559869-7563474 FORWARD LENGTH=786                                                                                                                                                                                                                                                                                                                                                                                                                                                                             | 1005 | 786  | 0         | 78.2  | 45.3 | 51.8  |
| Rsa1.0_00763.1.g19156.t2  | #                                                                                                                                                                                                                                                                                                                                                                                                                                                                                                                                                                                                                                                                                                                                                                                                                                                                                                               | #    | #    | #         | #     | #    | #     | -                                                                                                   | ----  | ----                 | #                                                                                                                                                                                                                                                                                                                                                                                                                                                                                                                                                                                                | #    | #    | #         | #     | #    |       |
| Rsa1.0_00763.1.g19157.t1  | sp Q9FMV0.1 FBL91_ARATH RecName: Full=F-box/LRR-repeat protein At5g63520 gi 9758293 dbj BAB08817.1  unnamed protein product [Arabidopsis thaliana]                                                                                                                                                                                                                                                                                                                                                                                                                                                                                                                                                                                                                                                                                                                                                              | 510  | 529  | 0         | 103.7 | 66.1 | 79.2  | RecName: Full=F-box/LRR-repeat protein At5g63520 gi 9758293 dbj BAB08817.1  unnamed protein product | gbpln | Arabidopsis thaliana | AT5G63520.1   Symbols:   CONTAINS InterPro DOMAIN/s: F-box domain, Skp2-like (InterPro:IPR022364), FIST C domain (InterPro:IPR019494), FIST domain, N-terminal (InterPro:IPR013702); Has 137 Blast hits to 137 proteins in 56 species: Archae - 0; Bacteria - 88; Metazoa - 6; Fungi - 0; Plants - 32; Viruses - 0; Other Eukaryotes - 11 (source: NCBI BLINK),   chr5:25426300-25429093 REVERSE LENGTH=519                                                                                                                                                                                      | 510  | 519  | 0         | 101.8 | 66.1 | 79.2  |
| Rsa1.0_00763.1.g19158.t1  | #                                                                                                                                                                                                                                                                                                                                                                                                                                                                                                                                                                                                                                                                                                                                                                                                                                                                                                               | #    | #    | #         | #     | #    | #     | -                                                                                                   | ----  | ----                 | #                                                                                                                                                                                                                                                                                                                                                                                                                                                                                                                                                                                                | #    | #    | #         | #     | #    |       |
| Rsa1.0_00763.1.g19159.t3  | ref NP_191905.3  protein transport protein SEC31 [Arabidopsis thaliana] gi 332646966 gb AEH80487.1  protein transport protein SEC31 [Arabidopsis thaliana]                                                                                                                                                                                                                                                                                                                                                                                                                                                                                                                                                                                                                                                                                                                                                      | 259  | 1102 | 4.00E-21  | 425.5 | 38.6 | 43.2  | protein transport protein SEC31                                                                     | gbpln | Arabidopsis thaliana | AT3G63460.2   Symbols:   transducin family protein / WD-40 repeat family protein   chr3:23431009-23437241 REVERSE LENGTH=1102                                                                                                                                                                                                                                                                                                                                                                                                                                                                    | 259  | 1102 | 1.00E-23  | 425.5 | 38.6 | 43.2  |

|                          |                                                                                                                                                                                                                      |     |      |           |       |      |      |                                                 |       |                      |                                                                                                                                                                                                                                                                                                                                                 |     |      |           |       |      |      |
|--------------------------|----------------------------------------------------------------------------------------------------------------------------------------------------------------------------------------------------------------------|-----|------|-----------|-------|------|------|-------------------------------------------------|-------|----------------------|-------------------------------------------------------------------------------------------------------------------------------------------------------------------------------------------------------------------------------------------------------------------------------------------------------------------------------------------------|-----|------|-----------|-------|------|------|
| Rsa1.0_00763.1.g19160.t1 | refXP_002870533.1   hypothetical protein ARALYDRAFT_915876 [Arabidopsis lyrata subsp. lyrata]   g1297316369 gb EFH46792.1   hypothetical protein ARALYDRAFT_915876 [Arabidopsis lyrata subsp. lyrata]                | 599 | 631  | 1.00E-161 | 105.3 | 52.8 | 69.6 | hypothetical protein ARALYDRAFT_915876          | gbpln | Arabidopsis lyrata   | AT5G37470.1   Symbols:   Family of unknown function (DU577)   chr1:14861503-14863392 REVERSE LENGTH=629                                                                                                                                                                                                                                         | 599 | 629  | 1.00E-161 | 105.0 | 52.6 | 68.9 |
| Rsa1.0_00763.1.g19161.t2 | ref NP_179331.1  ankyrin repeat-containing 2B [Arabidopsis thaliana]   g189000957 gb ABD59068.1   At2g17390 [Arabidopsis thaliana]   g1330251526 gb AEC06620.1   ankyrin repeat-containing 2B [Arabidopsis thaliana] | 360 | 344  | 1.00E-144 | 95.6  | 78.1 | 83.9 | ankyrin repeat-containing 2B                    | gbpln | Arabidopsis thaliana | AT2G17390.1   Symbols: AKR2B   ankyrin repeat-containing 2B   chr2:7555870-7557743 FORWARD LENGTH=344                                                                                                                                                                                                                                           | 360 | 344  | 1.00E-147 | 95.6  | 78.1 | 83.9 |
| Rsa1.0_00763.1.g19162.t1 | gb AAG10812.1 AC018460_6 Putative retroelement polyprotein [Arabidopsis thaliana]                                                                                                                                    | 153 | 1404 | 3.00E-64  | 917.6 | 75.2 | 84.3 | Putative retroelement polyprotein               | gbpln | Arabidopsis thaliana | AT4G23160.1   Symbols: CRK8   cysteine-rich RLK (RECEPTOR-like protein kinase) 8   chr4:12129485-12134086 FORWARD LENGTH=1262                                                                                                                                                                                                                   | 153 | 1262 | 4.00E-33  | 824.8 | 46.4 | 60.1 |
| Rsa1.0_00764.1.g19163.t1 | dbj BAB01217.1  Ta11 non-LTR retroelement protein-like [Arabidopsis thaliana]   g167633664 gb AA78756.1   putative zinc finger protein [Arabidopsis thaliana]                                                        | 411 | 487  | 1.00E-62  | 118.5 | 34.3 | 48.2 | Ta11 non-LTR retroelement protein-like          | gbpln | Arabidopsis thaliana | AT2G41590.1   Symbols:   unknown protein; BEST Arabidopsis thaliana protein match is: unknown protein (TAIR:AT5G25200.1); Has 221 Blast hits to 217 proteins in 10 species: Archae - 0; Bacteria - 0; Metazoa - 0; Fungi - 0; Plants - 221; Viruses - 0; Other Eukaryotes - 0 (source: NCBI BLink).   chr2:17343600-17344703 FORWARD LENGTH=367 | 411 | 367  | 2.00E-13  | 89.3  | 10.7 | 20.0 |
| Rsa1.0_00764.1.g19164.t2 | dbj BAB11196.1  mutator-like transposase [Arabidopsis thaliana]                                                                                                                                                      | 488 | 797  | 1.00E-78  | 163.3 | 34.2 | 48.2 | mutator-like transposase                        | gbpln | Arabidopsis thaliana | AT1G64260.1   Symbols:   MuDR family transposase   chr1:23847566-23849915 FORWARD LENGTH=719                                                                                                                                                                                                                                                    | 488 | 719  | 7.00E-18  | 147.3 | 16.8 | 28.3 |
| Rsa1.0_00764.1.g19165.t3 | gb AAF69717.1 AC016041_22 F27J15.14 [Arabidopsis thaliana]                                                                                                                                                           | 427 | 1526 | 1.00E-58  | 357.4 | 30.9 | 41.2 | F27J15.14                                       | gbpln | Arabidopsis thaliana | #                                                                                                                                                                                                                                                                                                                                               | #   | #    | #         | #     | #    | #    |
| Rsa1.0_00764.1.g19166.t1 | refXP_002868443.1   predicted protein [Arabidopsis lyrata subsp. lyrata]   g1297314279 gb EFH44702.1   predicted protein [Arabidopsis lyrata subsp. lyrata]                                                          | 349 | 145  | 2.00E-34  | 41.5  | 23.8 | 31.8 | predicted protein                               | gbpln | Arabidopsis lyrata   | AT5G45570.1   Symbols:   Ulp1 protease family protein   chr5:18472301-18475574 FORWARD LENGTH=921                                                                                                                                                                                                                                               | 349 | 921  | 2.00E-14  | 263.9 | 15.5 | 24.4 |
| Rsa1.0_00764.1.g19167.t1 | refXP_002893993.1   hypothetical protein ARALYDRAFT_473819 [Arabidopsis lyrata subsp. lyrata]   g1297339835 gb EFH70252.1   hypothetical protein ARALYDRAFT_473819 [Arabidopsis lyrata subsp. lyrata]                | 275 | 271  | 1.00E-137 | 98.5  | 90.2 | 94.5 | hypothetical protein ARALYDRAFT_473819          | gbpln | Arabidopsis lyrata   | AT1G44770.1   Symbols:   unknown protein; BEST Arabidopsis thaliana protein match is: unknown protein (TAIR:AT5G49710.3); Has 81 Blast hits to 81 proteins in 17 species: Archae - 0; Bacteria - 0; Metazoa - 0; Fungi - 0; Plants - 81; Viruses - 0; Other Eukaryotes - 0 (source: NCBI BLink).   chr1:16907834-16909409 REVERSE LENGTH=271    | 275 | 271  | 1.00E-138 | 98.5  | 88.7 | 94.2 |
| Rsa1.0_00764.1.g19168.t1 | #                                                                                                                                                                                                                    | #   | #    | #         | #     | #    | #    | -                                               | ----  | ----                 | #                                                                                                                                                                                                                                                                                                                                               | #   | #    | #         | #     | #    | #    |
| Rsa1.0_00764.1.g19169.t1 | gb ABV89614.1  universal stress protein family protein [Brassica rapa]                                                                                                                                               | 215 | 215  | 1.00E-120 | 100.0 | 98.6 | 98.6 | universal stress protein family protein         | gbpln | Brassica rapa        | AT1G44760.1   Symbols:   Adenine nucleotide alpha hydrolases-like superfamily protein   chr1:16896894-16898427 REVERSE LENGTH=213                                                                                                                                                                                                               | 215 | 213  | 1.00E-113 | 99.1  | 92.1 | 94.4 |
| Rsa1.0_00764.1.g19170.t1 | gb AAG51228.1 AC035249_3 Tam3-like transposon protein: 93317-95488 [Arabidopsis thaliana]   g112323055 gb AAG51515.1 AC068324_3 hAT-element transposase, putative [Arabidopsis thaliana]                             | 595 | 723  | 1.00E-165 | 121.5 | 50.1 | 65.4 | Tam3-like transposon protein: 93317-95488       | gbpln | Arabidopsis thaliana | AT3G42170.1   Symbols:   BED zinc finger hAT family dimerisation domain   chr3:14321838-14323928 FORWARD LENGTH=696                                                                                                                                                                                                                             | 595 | 696  | 2.00E-32  | 117.0 | 19.5 | 37.1 |
| Rsa1.0_00764.1.g19171.t1 | gb EOA38028.1  hypothetical protein CARUB_v10009499mg [Capsella rubella]                                                                                                                                             | 444 | 369  | 1.00E-178 | 83.1  | 75.9 | 78.4 | hypothetical protein CARUB_v10009499mg          | gbpln | Capsella rubella     | AT1G44750.2   Symbols: ATPUP11, PUP11   purine permease 11   chr1:16893825-16895168 FORWARD LENGTH=367                                                                                                                                                                                                                                          | 444 | 367  | 1.00E-174 | 82.7  | 75.7 | 78.6 |
| Rsa1.0_00764.1.g19172.t1 | #                                                                                                                                                                                                                    | #   | #    | #         | #     | #    | #    | -                                               | ----  | ----                 | #                                                                                                                                                                                                                                                                                                                                               | #   | #    | #         | #     | #    | #    |
| Rsa1.0_00765.1.g19173.t1 | #                                                                                                                                                                                                                    | #   | #    | #         | #     | #    | #    | -                                               | ----  | ----                 | #                                                                                                                                                                                                                                                                                                                                               | #   | #    | #         | #     | #    | #    |
| Rsa1.0_00765.1.g19174.t1 | gb EOA40579.1  hypothetical protein CARUB_v10009309mg, partial [Capsella rubella]                                                                                                                                    | 369 | 409  | 1.00E-174 | 110.8 | 87.8 | 91.6 | hypothetical protein CARUB_v10009309mg, partial | gbpln | Capsella rubella     | AT1G21890.1   Symbols:   nodulin MtN21 /EamA-like transporter family protein   chr1:7682808-7685581 REVERSE LENGTH=389                                                                                                                                                                                                                          | 369 | 389  | 1.00E-171 | 105.4 | 87.5 | 91.3 |
| Rsa1.0_00765.1.g19175.t1 | ref NP_173604.1  SKU5 similar 7 protein [Arabidopsis thaliana]   g1652744 gb AAF16543.1 AC013482_17 T26F1.7.7 [Arabidopsis thaliana]   g1332192042 gb AEE30163.1  SKU5 similar 7 protein [Arabidopsis thaliana]      | 274 | 538  | 6.00E-32  | 196.4 | 28.8 | 32.5 | SKU5 similar 7 protein                          | gbpln | Arabidopsis thaliana | AT1G21860.1   Symbols: sks7   SKU5 similar 7   chr1:7671028-7674215 REVERSE LENGTH=538                                                                                                                                                                                                                                                          | 274 | 538  | 2.00E-34  | 196.4 | 28.8 | 32.5 |

|                          |                                                                                                                                                                                                                                                                                                                                                                                                                                                                                                                                                                                                                                                                                                                                                                                       |     |      |           |       |      |       |                                                                                |       |                      |                                                                                                                                                                                                                                                                                                                                                                                                                                                                                                                                                                 |     |     |           |       |      |       |   |
|--------------------------|---------------------------------------------------------------------------------------------------------------------------------------------------------------------------------------------------------------------------------------------------------------------------------------------------------------------------------------------------------------------------------------------------------------------------------------------------------------------------------------------------------------------------------------------------------------------------------------------------------------------------------------------------------------------------------------------------------------------------------------------------------------------------------------|-----|------|-----------|-------|------|-------|--------------------------------------------------------------------------------|-------|----------------------|-----------------------------------------------------------------------------------------------------------------------------------------------------------------------------------------------------------------------------------------------------------------------------------------------------------------------------------------------------------------------------------------------------------------------------------------------------------------------------------------------------------------------------------------------------------------|-----|-----|-----------|-------|------|-------|---|
| Rsa1.0_00765.1.g19176.t1 | ref[NP_564149.1] proteasome subunit beta type-3-A [Arabidopsis thaliana] gi 288558823 sp Q9X105.2 PSB3A_ARAT H RecName: Full=Proteasome subunit beta type-3-A; AltName: Full=20S proteasome beta subunit C-1; AltName: Full=Proteasome component T gi 17473525 gb AAL38246.1] proteasome subunit [Arabidopsis thaliana] gi 21387087 gb AAM47947.1] proteasome subunit [Arabidopsis thaliana] gi 110740894 dbj BAE98543.1] 20S proteasome beta subunit PBC2 like protein [Arabidopsis thaliana] gi 332192025 gb AEE30146.1] proteasome subunit beta type-3-A [Arabidopsis thaliana] ref[XP_002890454.1] hypothetical protein ARALYDRAFT_472409 [Arabidopsis lyrata subsp. lyrata] gi 297336296 gb EFH6713.1] hypothetical protein ARALYDRAFT_472409 [Arabidopsis lyrata subsp. lyrata] | 204 | 204  | 1.00E-115 | 100.0 | 98.5 | 100.0 | proteasome subunit beta type-3-A                                               | gbpln | Arabidopsis thaliana | AT1G21720.1   Symbols: PBC1   proteasome beta subunit C1   chr1:7626394-7628070 FORWARD LENGTH=204                                                                                                                                                                                                                                                                                                                                                                                                                                                              | 204 | 204 | 1.00E-118 | 100.0 | 98.5 | 100.0 |   |
| Rsa1.0_00765.1.g19177.t1 | ref[XP_002890454.1] hypothetical protein ARALYDRAFT_472409 [Arabidopsis lyrata subsp. lyrata] gi 297336296 gb EFH6713.1] hypothetical protein ARALYDRAFT_472409 [Arabidopsis lyrata subsp. lyrata] ref[XP_002890450.1] heat shock protein binding protein [Arabidopsis lyrata subsp. lyrata] gi 297336292 gb EFH66709.1] heat shock protein binding protein [Arabidopsis lyrata subsp. lyrata]                                                                                                                                                                                                                                                                                                                                                                                        | 304 | 205  | 2.00E-22  | 67.4  | 33.6 | 39.5  | hypothetical protein ARALYDRAFT_472409                                         | gbpln | Arabidopsis lyrata   | AT1G21695.1   Symbols:   hydroxyproline-rich glycoprotein family protein   chr1:7619132-7619785 FORWARD LENGTH=217                                                                                                                                                                                                                                                                                                                                                                                                                                              | 304 | 217 | 1.00E-18  | 71.4  | 31.3 | 35.9  |   |
| Rsa1.0_00765.1.g19178.t1 | ref[XP_002890450.1] heat shock protein binding protein [Arabidopsis lyrata subsp. lyrata] gi 297336292 gb EFH66709.1] heat shock protein binding protein [Arabidopsis lyrata subsp. lyrata]                                                                                                                                                                                                                                                                                                                                                                                                                                                                                                                                                                                           | 497 | 522  | 0         | 105.0 | 76.5 | 82.7  | heat shock protein binding protein                                             | gbpln | Arabidopsis lyrata   | AT1G21660.1   Symbols:   Chaperone DnaJ-domain superfamily protein   chr1:7605924-7608835 FORWARD LENGTH=523                                                                                                                                                                                                                                                                                                                                                                                                                                                    | 497 | 523 | 1.00E-177 | 105.2 | 75.1 | 82.1  |   |
| Rsa1.0_00765.1.g19179.t2 | gb EOA29965.1] hypothetical protein CARUB_v10013068mg [Capsella rubella]                                                                                                                                                                                                                                                                                                                                                                                                                                                                                                                                                                                                                                                                                                              | 115 | 722  | 1.00E-14  | 627.8 | 44.3 | 55.7  | hypothetical protein CARUB_v10013068mg                                         | gbpln | Capsella rubella     | AT3G16000.1   Symbols: MFP1   MAR binding filament-like protein 1   chr3:5431041-5433613 REVERSE LENGTH=726                                                                                                                                                                                                                                                                                                                                                                                                                                                     | 115 | 726 | 1.00E-16  | 631.3 | 45.2 | 54.8  |   |
| Rsa1.0_00765.1.g19180.t1 | ref[XP_002887678.1] hypothetical protein ARALYDRAFT_316646 [Arabidopsis lyrata subsp. lyrata] gi 297333519 gb EFH63937.1] hypothetical protein ARALYDRAFT_316646 [Arabidopsis lyrata subsp. lyrata]                                                                                                                                                                                                                                                                                                                                                                                                                                                                                                                                                                                   | 396 | 122  | 1.00E-26  | 30.8  | 16.7 | 18.4  | hypothetical protein ARALYDRAFT_316646                                         | gbpln | Arabidopsis lyrata   | AT1G77350.2   Symbols:   unknown protein; FUNCTIONS IN: molecular_function unknown; INVOLVED IN: biological_process unknown; LOCATED IN: endomembrane system; EXPRESSED IN: 23 plant structures; EXPRESSED DURING: 13 growth stages; CONTAINS INTERDOMAIN/s: Protein of unknown function KRTCAP2 (InterPro:IPRO18614); Has 35333 Blast hits to 34131 proteins in 2444 species: Archae - 798; Bacteria - 22429; Metazoa - 974; Fungi - 991; Plants - 531; Viruses - 0; Other Eukaryotes - 9610 (source: NCBI BLINK).   chr1:29070497-29071545 FORWARD LENGTH=122 | 396 | 122 | 9.00E-29  | 30.8  | 16.4 | 18.4  |   |
| Rsa1.0_00765.1.g19181.t1 | ref[XP_002893172.1] hypothetical protein ARALYDRAFT_472389 [Arabidopsis lyrata subsp. lyrata] gi 297339014 gb EFH69431.1] hypothetical protein ARALYDRAFT_472389 [Arabidopsis lyrata subsp. lyrata]                                                                                                                                                                                                                                                                                                                                                                                                                                                                                                                                                                                   | 70  | 71   | 1.00E-18  | 101.4 | 71.4 | 77.1  | hypothetical protein ARALYDRAFT_472389                                         | gbpln | Arabidopsis lyrata   | # # # # # # #                                                                                                                                                                                                                                                                                                                                                                                                                                                                                                                                                   | #   | #   | #         | #     | #    | #     | # |
| Rsa1.0_00765.1.g19182.t1 | pir  T00833 RNA-directed DNA polymerase homolog T13L16.7 - Arabidopsis thaliana (fragment)                                                                                                                                                                                                                                                                                                                                                                                                                                                                                                                                                                                                                                                                                            | 474 | 1365 | 7.00E-81  | 288.0 | 35.2 | 51.7  | RNA-directed DNA polymerase homolog T13L16.7 - Arabidopsis thaliana (fragment) | ----  | ----                 | AT4G29090.1   Symbols:   Ribonuclease H-like superfamily protein   chr4:14333528-14335255 FORWARD LENGTH=575                                                                                                                                                                                                                                                                                                                                                                                                                                                    | 474 | 575 | 6.00E-56  | 121.3 | 27.4 | 46.8  |   |
| Rsa1.0_00765.1.g19183.t1 | ref[XP_002893172.1] hypothetical protein ARALYDRAFT_472389 [Arabidopsis lyrata subsp. lyrata] gi 297339014 gb EFH69431.1] hypothetical protein ARALYDRAFT_472389 [Arabidopsis lyrata subsp. lyrata]                                                                                                                                                                                                                                                                                                                                                                                                                                                                                                                                                                                   | 65  | 71   | 6.00E-15  | 109.2 | 75.4 | 81.5  | hypothetical protein ARALYDRAFT_472389                                         | gbpln | Arabidopsis lyrata   | # # # # # # #                                                                                                                                                                                                                                                                                                                                                                                                                                                                                                                                                   | #   | #   | #         | #     | #    | #     |   |
| Rsa1.0_00766.1.g19184.t1 | gb EOA36857.1] hypothetical protein CARUB_v10008803mg [Capsella rubella]                                                                                                                                                                                                                                                                                                                                                                                                                                                                                                                                                                                                                                                                                                              | 495 | 536  | 3.00E-87  | 108.3 | 37.8 | 52.9  | hypothetical protein CARUB_v10008803mg                                         | gbpln | Capsella rubella     | AT2G07760.1   Symbols:   Zinc knuckle (CCHC-type) family protein   chr2:3584420-3586278 REVERSE LENGTH=530                                                                                                                                                                                                                                                                                                                                                                                                                                                      | 495 | 530 | 2.00E-49  | 107.1 | 17.0 | 21.2  |   |

|                          |                                                                                                                                                                                                                                                                                                                                                                                        |      |      |           |       |      |      |                                        |       |                      |                                                                                                                                                                                                                                                                                                                                              |      |     |           |       |      |      |
|--------------------------|----------------------------------------------------------------------------------------------------------------------------------------------------------------------------------------------------------------------------------------------------------------------------------------------------------------------------------------------------------------------------------------|------|------|-----------|-------|------|------|----------------------------------------|-------|----------------------|----------------------------------------------------------------------------------------------------------------------------------------------------------------------------------------------------------------------------------------------------------------------------------------------------------------------------------------------|------|-----|-----------|-------|------|------|
| Rsa1.0_00766.1.g19185.t1 | refNP_175346.1   RING-H2 finger protein ATL75 [Arabidopsis thaliana] gi 88565250 sp Q94BY6.1 ATL75.ARAT H RecName: Full=RING-H2 finger protein ATL75<br>gi 14517432 gb AAK62606.1   At1g49200/F27J15.35 [Arabidopsis thaliana] gi 20147327 gb AAM10377.1   At1g49200/F27J15.35 [Arabidopsis thaliana] gi 332194283 gb AEE32404.1   RING-H2 finger protein ATL75 [Arabidopsis thaliana] | 288  | 226  | 1.00E-108 | 78.5  | 64.9 | 70.1 | RING-H2 finger protein ATL75           | gbpln | Arabidopsis thaliana | AT1G49200.1   Symbols:   RING/U-box superfamily protein   chr1:18198298-18198978 FORWARD LENGTH=226                                                                                                                                                                                                                                          | 288  | 226 | 1.00E-110 | 78.5  | 64.9 | 70.1 |
| Rsa1.0_00766.1.g19186.t1 | refXP_002891481.1   zinc finger family protein [Arabidopsis lyrata subsp. lyrata] gi 297337323 gb EFH67740.1   zinc finger family protein [Arabidopsis lyrata subsp. lyrata]                                                                                                                                                                                                           | 225  | 226  | 3.00E-99  | 100.4 | 78.7 | 88.4 | zinc finger family protein             | gbpln | Arabidopsis lyrata   | AT1G49200.1   Symbols:   RING/U-box superfamily protein   chr1:18198298-18198978 FORWARD LENGTH=226                                                                                                                                                                                                                                          | 225  | 226 | 1.00E-101 | 100.4 | 78.7 | 88.0 |
| Rsa1.0_00766.1.g19187.t2 | #                                                                                                                                                                                                                                                                                                                                                                                      | #    | #    | #         | #     | #    | #    | -                                      | ----  | ----                 | #                                                                                                                                                                                                                                                                                                                                            | #    | #   | #         | #     | #    | #    |
| Rsa1.0_00766.1.g19188.t1 | gb EOA38874.1   hypothetical protein CARUB_v10011239mg [Capsella rubella]                                                                                                                                                                                                                                                                                                              | 148  | 216  | 7.00E-59  | 145.9 | 77.7 | 87.8 | hypothetical protein CARUB_v10011239mg | gbpln | Capsella rubella     | AT1G49230.1   Symbols:   RING/U-box superfamily protein   chr1:18209320-18209979 FORWARD LENGTH=219                                                                                                                                                                                                                                          | 148  | 219 | 9.00E-56  | 148.0 | 70.9 | 81.1 |
| Rsa1.0_00766.1.g19189.t2 | #                                                                                                                                                                                                                                                                                                                                                                                      | #    | #    | #         | #     | #    | #    | -                                      | ----  | ----                 | #                                                                                                                                                                                                                                                                                                                                            | #    | #   | #         | #     | #    | #    |
| Rsa1.0_00766.1.g19190.t1 | gb EOA37340.1   hypothetical protein CARUB_v10011065mg [Capsella rubella]                                                                                                                                                                                                                                                                                                              | 692  | 691  | 0         | 99.9  | 71.7 | 75.1 | hypothetical protein CARUB_v10011065mg | gbpln | Capsella rubella     | AT1G49270.1   Symbols:   Protein kinase superfamily protein   chr1:18227334-18230227 REVERSE LENGTH=699                                                                                                                                                                                                                                      | 692  | 699 | 0         | 101.0 | 70.7 | 74.1 |
| Rsa1.0_00766.1.g19191.t1 | refXP_002894166.1   hypothetical protein ARALYDRAFT_891775 [Arabidopsis lyrata subsp. lyrata] gi 297340008 gb EFH70425.1   hypothetical protein ARALYDRAFT_891775 [Arabidopsis lyrata subsp. lyrata]                                                                                                                                                                                   | 419  | 333  | 8.00E-58  | 79.5  | 26.0 | 34.6 | hypothetical protein ARALYDRAFT_891775 | gbpln | Arabidopsis lyrata   | AT1G49290.1   Symbols:   unknown protein; BEST Arabidopsis thaliana protein match is: unknown protein (TAIR:AT5G13620.1). Has 99 Blast hits to 93 proteins in 11 species: Archae - 0; Bacteria - 0; Metazoa - 2; Fungi - 0; Plants - 97; Viruses - 0; Other Eukaryotes - 0 (source: NCBI BLink).   chr1:18232608-18233624 REVERSE LENGTH=338 | 419  | 338 | 5.00E-56  | 80.7  | 23.9 | 32.9 |
| Rsa1.0_00767.1.g19192.t1 | dbj BAB02492.1   unnamed protein product [Arabidopsis thaliana]                                                                                                                                                                                                                                                                                                                        | 80   | 540  | 2.00E-18  | 675.0 | 67.5 | 72.5 | unnamed protein product                | gbpln | Arabidopsis thaliana | AT3G20840.1   Symbols:   PLT1   Integrase-type DNA-binding superfamily protein   chr3:7300764-7303370 FORWARD LENGTH=574                                                                                                                                                                                                                     | 80   | 574 | 4.00E-21  | 717.5 | 67.5 | 72.5 |
| Rsa1.0_00767.1.g19193.t2 | gb AAF18630.1   AC006228.1 F5J5.1 [Arabidopsis thaliana]                                                                                                                                                                                                                                                                                                                               | 331  | 1463 | 1.00E-49  | 442.0 | 29.0 | 43.2 | F5J5.1                                 | gbpln | Arabidopsis thaliana | #                                                                                                                                                                                                                                                                                                                                            | #    | #   | #         | #     | #    | #    |
| Rsa1.0_00767.1.g19194.t1 | #                                                                                                                                                                                                                                                                                                                                                                                      | #    | #    | #         | #     | #    | #    | -                                      | ----  | ----                 | #                                                                                                                                                                                                                                                                                                                                            | #    | #   | #         | #     | #    | #    |
| Rsa1.0_00767.1.g19195.t1 | refNP_188722.1   NIMA-related kinase 5 [Arabidopsis thaliana] gi 33264291.1   gb AEE76432.1   NIMA-related kinase 5 [Arabidopsis thaliana]                                                                                                                                                                                                                                             | 434  | 427  | 0         | 98.4  | 91.2 | 95.6 | NIMA-related kinase 5                  | gbpln | Arabidopsis thaliana | AT3G20860.1   Symbols:   ATNEK5, NEK5   NIMA-related kinase 5   chr3:7306147-7308434 FORWARD LENGTH=427                                                                                                                                                                                                                                      | 434  | 427 | 0         | 98.4  | 91.2 | 95.6 |
| Rsa1.0_00767.1.g19196.t1 | refXP_002885407.1   hypothetical protein ARALYDRAFT_898522 [Arabidopsis lyrata subsp. lyrata] gi 297331247 gb EFH61666.1   hypothetical protein ARALYDRAFT_898522 [Arabidopsis lyrata subsp. lyrata]                                                                                                                                                                                   | 63   | 64   | 5.00E-12  | 101.6 | 63.5 | 71.4 | hypothetical protein ARALYDRAFT_898522 | gbpln | Arabidopsis lyrata   | AT3G20865.1   Symbols:   AGP40   arabinogalactan protein 40   chr3:7308699-7308887 REVERSE LENGTH=62                                                                                                                                                                                                                                         | 63   | 62  | 8.00E-13  | 98.4  | 61.9 | 71.4 |
| Rsa1.0_00767.1.g19197.t1 | refXP_002885408.1   metal transporter family protein [Arabidopsis lyrata subsp. lyrata] gi 297331248 gb EFH61667.1   metal transporter family protein [Arabidopsis lyrata subsp. lyrata]                                                                                                                                                                                               | 270  | 276  | 1.00E-143 | 102.2 | 95.6 | 98.1 | metal transporter family protein       | gbpln | Arabidopsis lyrata   | AT3G20870.1   Symbols:   ZTP29   ZIP metal ion transporter family   chr3:7309499-7312476 REVERSE LENGTH=276                                                                                                                                                                                                                                  | 270  | 276 | 1.00E-145 | 102.2 | 95.2 | 97.4 |
| Rsa1.0_00767.1.g19198.t1 | refXP_002885409.1   hypothetical protein ARALYDRAFT_318837 [Arabidopsis lyrata subsp. lyrata] gi 297331249 gb EFH61668.1   hypothetical protein ARALYDRAFT_318837 [Arabidopsis lyrata subsp. lyrata]                                                                                                                                                                                   | 354  | 353  | 1.00E-147 | 99.7  | 79.7 | 85.9 | hypothetical protein ARALYDRAFT_318837 | gbpln | Arabidopsis lyrata   | AT3G20880.1   Symbols:   WIP4   WIP domain protein 4   chr3:7313759-7315792 REVERSE LENGTH=412                                                                                                                                                                                                                                               | 354  | 412 | 1.00E-149 | 116.4 | 78.8 | 85.0 |
| Rsa1.0_00767.1.g19199.t1 | gb EOA30963.1   hypothetical protein CARUB_v10014109mg [Capsella rubella]                                                                                                                                                                                                                                                                                                              | 279  | 342  | 1.00E-124 | 122.6 | 87.5 | 91.8 | hypothetical protein CARUB_v10014109mg | gbpln | Capsella rubella     | AT3G20890.1   Symbols:   RNA-binding (RRM/RBD/RNP motifs) family protein   chr3:7319939-7321054 FORWARD LENGTH=292                                                                                                                                                                                                                           | 279  | 292 | 1.00E-118 | 104.7 | 84.6 | 88.5 |
| Rsa1.0_00767.1.g19200.t1 | gb AAG50806.1   AC079281.8 unknown protein [Arabidopsis thaliana]                                                                                                                                                                                                                                                                                                                      | 1773 | 1213 | 0         | 68.4  | 25.1 | 38.0 | unknown protein                        | gbpln | Arabidopsis thaliana | AT1G43760.1   Symbols:   DNase I-like superfamily protein   chr1:16528890-16531065 REVERSE LENGTH=626                                                                                                                                                                                                                                        | 1773 | 626 | 1.00E-63  | 35.3  | 7.4  | 12.5 |

|                          |                                                                                                                                                                                                                                                                                                                                                                                                                                                                                                                                                                                                           |     |      |           |       |      |      |                                                 |             |                      |                                                                                                                                                                                                                                                                                                                                           |     |      |           |       |      |      |
|--------------------------|-----------------------------------------------------------------------------------------------------------------------------------------------------------------------------------------------------------------------------------------------------------------------------------------------------------------------------------------------------------------------------------------------------------------------------------------------------------------------------------------------------------------------------------------------------------------------------------------------------------|-----|------|-----------|-------|------|------|-------------------------------------------------|-------------|----------------------|-------------------------------------------------------------------------------------------------------------------------------------------------------------------------------------------------------------------------------------------------------------------------------------------------------------------------------------------|-----|------|-----------|-------|------|------|
| Rsa1.0_00767.1.g19201.t1 | ref[XP_002868166.1] hypothetical protein ARALYDRAFT_915171 [Arabidopsis lyrata subsp. lyrata] gi 297314002 gb EFH44425.1] hypothetical protein ARALYDRAFT_915171 [Arabidopsis lyrata subsp. lyrata]                                                                                                                                                                                                                                                                                                                                                                                                       | 135 | 135  | 2.00E-50  | 100.0 | 72.6 | 81.5 | hypothetical protein ARALYDRAFT_915171          | gbpln       | Arabidopsis lyrata   | AT4G15990.1   Symbols:   unknown protein; BEST Arabidopsis thaliana protein match is: unknown protein (TAIR:AT4G16024.1); Has 14 Blast hits to 14 proteins in 2 species: Archae - 0; Bacteria - 0; Metazoa - 0; Fungi - 0; Plants - 14; Viruses - 0; Other Eukaryotes - 0 (source: NCBI BLink).   chr4:9061269-9061676 REVERSE LENGTH=135 | 135 | 135  | 2.00E-52  | 100.0 | 71.1 | 83.7 |
| Rsa1.0_00767.1.g19202.t1 | #                                                                                                                                                                                                                                                                                                                                                                                                                                                                                                                                                                                                         | #   | #    | #         | #     | #    | #    | -                                               | ----        | ----                 | #                                                                                                                                                                                                                                                                                                                                         | #   | #    | #         | #     | #    |      |
| Rsa1.0_00767.1.g19203.t2 | ref[NP_180058.1] tyrosine aminotransferase 3 [Arabidopsis thaliana] gi 75206385 sp Q9SK47.1 TAT3_ARATH RecName: Full=Probable aminotransferase TAT3; AltName: Full=Tyrosine aminotransferase 3 gi 4559366 gb AAD23027.1] putative tyrosine aminotransferase [Arabidopsis thaliana] gi 297311739 gb AAO00835.1] putative tyrosine aminotransferase [Arabidopsis thaliana] gi 30387543 gb AAP31937.1] At2g24850 [Arabidopsis thaliana] gi 110740890 db BAE98541.1] putative tyrosine aminotransferase [Arabidopsis thaliana] gi 330252542 gb AEC07636.1] tyrosine aminotransferase 3 [Arabidopsis thaliana] | 189 | 445  | 9.00E-69  | 235.4 | 76.2 | 85.7 | tyrosine aminotransferase 3                     | gbpln       | Arabidopsis thaliana | AT2G24850.1   Symbols: TAT3, TAT   tyrosine aminotransferase 3   chr2:10583070-10585152 REVERSE LENGTH=445                                                                                                                                                                                                                                | 189 | 445  | 3.00E-71  | 235.4 | 76.2 | 85.7 |
| Rsa1.0_00768.1.g19204.t1 | #                                                                                                                                                                                                                                                                                                                                                                                                                                                                                                                                                                                                         | #   | #    | #         | #     | #    | #    | -                                               | ----        | ----                 | #                                                                                                                                                                                                                                                                                                                                         | #   | #    | #         | #     | #    |      |
| Rsa1.0_00768.1.g19205.t1 | ref[XP_002889493.1] hypothetical protein ARALYDRAFT_887579 [Arabidopsis lyrata subsp. lyrata] gi 297335335 gb EFH6752.1] hypothetical protein ARALYDRAFT_887579 [Arabidopsis lyrata subsp. lyrata]                                                                                                                                                                                                                                                                                                                                                                                                        | 707 | 1500 | 0         | 212.2 | 60.7 | 63.4 | hypothetical protein ARALYDRAFT_887579          | gbpln       | Arabidopsis lyrata   | AT1G04160.1   Symbols: XIB, ATXIB, XI-8, XI-B   myosin XI.B   chr1:1086495-1096146 FORWARD LENGTH=1500                                                                                                                                                                                                                                    | 707 | 1500 | 0         | 212.2 | 60.5 | 63.4 |
| Rsa1.0_00768.1.g19206.t1 | #                                                                                                                                                                                                                                                                                                                                                                                                                                                                                                                                                                                                         | #   | #    | #         | #     | #    | #    | -                                               | ----        | ----                 | #                                                                                                                                                                                                                                                                                                                                         | #   | #    | #         | #     | #    |      |
| Rsa1.0_00768.1.g19207.t1 | ref[XP_002884885.1] hypothetical protein ARALYDRAFT_341336 [Arabidopsis lyrata subsp. lyrata] gi 297330725 gb EFH61144.1] hypothetical protein ARALYDRAFT_341336 [Arabidopsis lyrata subsp. lyrata]                                                                                                                                                                                                                                                                                                                                                                                                       | 389 | 431  | 4.00E-67  | 110.8 | 41.9 | 54.8 | hypothetical protein ARALYDRAFT_341336          | gbpln       | Arabidopsis lyrata   | AT1G50920.1   Symbols:   Nucleolar GTP-binding protein   chr1:18870555-18872570 FORWARD LENGTH=671                                                                                                                                                                                                                                        | 389 | 671  | 7.00E-51  | 172.5 | 33.4 | 46.5 |
| Rsa1.0_00768.1.g19208.t2 | gb EOA29401.1] hypothetical protein CARUB_v10025690mg [Capsella rubella]                                                                                                                                                                                                                                                                                                                                                                                                                                                                                                                                  | 215 | 665  | 3.00E-27  | 309.3 | 38.6 | 55.8 | hypothetical protein CARUB_v10025690mg          | gbpln       | Capsella rubella     | AT2G42470.1   Symbols:   TRAF-like family protein   chr2:17679887-17685187 REVERSE LENGTH=898                                                                                                                                                                                                                                             | 215 | 898  | 2.00E-24  | 417.7 | 35.3 | 55.3 |
| Rsa1.0_00768.1.g19209.t1 | gb EOA38824.1] hypothetical protein CARUB_v10011153mg [Capsella rubella]                                                                                                                                                                                                                                                                                                                                                                                                                                                                                                                                  | 362 | 636  | 1.00E-151 | 175.7 | 74.3 | 81.8 | hypothetical protein CARUB_v10011153mg          | gbpln       | Capsella rubella     | AT1G04945.2   Symbols:   HIT-type Zinc finger family protein   chr1:1400969-1402651 FORWARD LENGTH=392                                                                                                                                                                                                                                    | 362 | 392  | 1.00E-147 | 108.3 | 74.6 | 81.5 |
| Rsa1.0_00768.1.g19210.t1 | ref[XP_002870720.1] hypothetical protein ARALYDRAFT_493970 [Arabidopsis lyrata subsp. lyrata] gi 297316556 gb EFH46979.1] hypothetical protein ARALYDRAFT_493970 [Arabidopsis lyrata subsp. lyrata]                                                                                                                                                                                                                                                                                                                                                                                                       | 781 | 793  | 0         | 101.5 | 57.2 | 70.2 | hypothetical protein ARALYDRAFT_493970          | gbpln       | Arabidopsis lyrata   | AT5G40170.1   Symbols: AtRLP54, RLP54   receptor like protein 54   chr5:16065179-16067557 REVERSE LENGTH=792                                                                                                                                                                                                                              | 781 | 792  | 0         | 101.4 | 56.3 | 69.3 |
| Rsa1.0_00768.1.g19211.t1 | #                                                                                                                                                                                                                                                                                                                                                                                                                                                                                                                                                                                                         | #   | #    | #         | #     | #    | #    | -                                               | ----        | ----                 | #                                                                                                                                                                                                                                                                                                                                         | #   | #    | #         | #     | #    |      |
| Rsa1.0_00768.1.g19212.t1 | gb ABD65089.1] zinc knuckle containing protein [Brassica oleracea]                                                                                                                                                                                                                                                                                                                                                                                                                                                                                                                                        | 327 | 333  | 1.00E-104 | 101.8 | 66.7 | 73.7 | zinc knuckle containing protein                 | gbpln       | Brassica oleracea    | #                                                                                                                                                                                                                                                                                                                                         | #   | #    | #         | #     | #    |      |
| Rsa1.0_00768.1.g19213.t1 | gb EOA38824.1] hypothetical protein CARUB_v10011153mg [Capsella rubella]                                                                                                                                                                                                                                                                                                                                                                                                                                                                                                                                  | 185 | 636  | 3.00E-41  | 343.8 | 56.2 | 64.9 | hypothetical protein CARUB_v10011153mg          | gbpln       | Capsella rubella     | AT1G04945.2   Symbols:   HIT-type Zinc finger family protein   chr1:1400969-1402651 FORWARD LENGTH=392                                                                                                                                                                                                                                    | 185 | 392  | 2.00E-39  | 211.9 | 53.5 | 60.5 |
| Rsa1.0_00768.1.g19214.t1 | ref[NP_683276.1] CLAVATA3/ESR-related protein 20 [Arabidopsis thaliana] gi 122215645 sp Q3ED16.1 CLE20_ARATH RecName: Full=CLAVATA3/ESR (CLE)-related protein 20; Contains: RecName: Full=CLE20p; Flags: Precursor gi 332189665 gb AEE27786.1] CLAVATA3/ESR-related protein 20 [Arabidopsis thaliana]                                                                                                                                                                                                                                                                                                     | 76  | 83   | 4.00E-20  | 109.2 | 75.0 | 82.9 | CLAVATA3/ESR-related protein 20                 | gbpln       | Arabidopsis thaliana | AT1G05065.1   Symbols: CLE20   CLAVATA3/ESR-RELATED 20   chr1:1454969-1455220 REVERSE LENGTH=83                                                                                                                                                                                                                                           | 76  | 83   | 6.00E-23  | 109.2 | 75.0 | 82.9 |
| Rsa1.0_00768.1.g19215.t1 | ref[XP_003540892.1] PREDICTED: uncharacterized protein LOC100793937 [Glycine max]                                                                                                                                                                                                                                                                                                                                                                                                                                                                                                                         | 768 | 817  | 1.00E-112 | 106.4 | 27.0 | 33.7 | PREDICTED: uncharacterized protein LOC100793937 | gbenv/gbpln | Glycine max          | AT1G40087.1   Symbols:   Plant transposase (PttA/En/Spm family)   chr1:14999762-15001868 REVERSE LENGTH=390                                                                                                                                                                                                                               | 768 | 390  | 2.00E-17  | 50.8  | 6.6  | 10.3 |
| Rsa1.0_00768.1.g19216.t1 | #                                                                                                                                                                                                                                                                                                                                                                                                                                                                                                                                                                                                         | #   | #    | #         | #     | #    | #    | -                                               | ----        | ----                 | #                                                                                                                                                                                                                                                                                                                                         | #   | #    | #         | #     | #    |      |

|                          |                                                                                                                                                                                                                                                                                                                                                                                                                                                                                                                                                                                                                                                                                                                                                       |     |     |          |       |      |      |                                        |       |                      |                                                                                                                                                                                                                                                                                                                                                                                                                                                                    |     |     |          |       |      |      |
|--------------------------|-------------------------------------------------------------------------------------------------------------------------------------------------------------------------------------------------------------------------------------------------------------------------------------------------------------------------------------------------------------------------------------------------------------------------------------------------------------------------------------------------------------------------------------------------------------------------------------------------------------------------------------------------------------------------------------------------------------------------------------------------------|-----|-----|----------|-------|------|------|----------------------------------------|-------|----------------------|--------------------------------------------------------------------------------------------------------------------------------------------------------------------------------------------------------------------------------------------------------------------------------------------------------------------------------------------------------------------------------------------------------------------------------------------------------------------|-----|-----|----------|-------|------|------|
| Rsa1.0_00768.1.g19217.t1 | gb ABV89645.1  auxin resistant 1 [Brassica rapa]                                                                                                                                                                                                                                                                                                                                                                                                                                                                                                                                                                                                                                                                                                      | 667 | 522 | 0        | 78.3  | 71.5 | 74.5 | auxin resistant 1                      | gbpln | Brassica rapa        | AT1G05180.1   Symbols: AXR1   NAD(P)-binding Rossmann-fold superfamily protein   chr1:1498357-1501775 REVERSE LENGTH=540                                                                                                                                                                                                                                                                                                                                           | 667 | 540 | 0        | 81.0  | 69.6 | 74.5 |
| Rsa1.0_00768.1.g19218.t1 | dbj BAJ34158.1  unnamed protein product [Theellungiella halophila]                                                                                                                                                                                                                                                                                                                                                                                                                                                                                                                                                                                                                                                                                    | 945 | 954 | 0        | 101.0 | 88.3 | 94.0 | unnamed protein product                | ----  | ----                 | AT1G05200.2   Symbols: ATGLR3.4, GLR3.4, GLUR3   glutamate receptor 3.4   chr1:1505642-1509002 FORWARD LENGTH=959                                                                                                                                                                                                                                                                                                                                                  | 945 | 959 | 0        | 101.5 | 87.2 | 93.4 |
| Rsa1.0_00768.1.g19219.t1 | ref XP_002892274.1  hypothetical protein ARALYDRAFT_470515 [Arabidopsis lyrata subsp. lyrata] gi 2973381 6 gb EFH68533.1  hypothetical protein ARALYDRAFT_470515 [Arabidopsis lyrata subsp. lyrata] ref NP_172015.1  homeobox-leucine zipper protein HDG2 [Arabidopsis thaliana] gi 30679181 ref NP_849596.1  homeobox-leucine zipper protein HDG2 [Arabidopsis thaliana] gi 334182300 ref NP_001184911.1  homeobox-leucine zipper protein HDG2 [Arabidopsis thaliana] gi 75332091 sp Q94C37.1 HDG2_ARATH RecName: Full=Homeobox-leucine zipper protein HDG2; AltName: Full=HD-ZIP protein HDG2; AltName: Full=Homeodomain GLABRA 2-like protein 2; AltName: Full=Homeodomain transcription factor HDG2; AltName: Full=Protein HOMEODOMAIN GLABROUS 2 | 87  | 91  | 3.00E-42 | 104.6 | 98.9 | 98.9 | hypothetical protein ARALYDRAFT_470515 | gbpln | Arabidopsis lyrata   | AT1G05205.1   Symbols:   unknown protein; Has 44 Blast hits to 44 proteins in 16 species: Archae - 0; Bacteria - 0; Metazoa - 0; Fungi - 0; Plants - 44; Viruses - 0; Other Eukaryotes - 0 (source: NCBI BLink).   chr1:1509352-1510249 REVERSE LENGTH=91                                                                                                                                                                                                          | 87  | 91  | 2.00E-44 | 104.6 | 96.6 | 97.7 |
| Rsa1.0_00768.1.g19220.t1 | gi 14334996 gb AAK59762.1  At1g05230/YUP8H12.16 [Arabidopsis thaliana] gi 20147145 gb AAM10289.1  At1g05230/YUP8H12.16 [Arabidopsis thaliana] gi 222423025 dbj BAH19495.1  AT1G05230 [Arabidopsis thaliana] gi 332189688 gb AEE27809.1  homeobox-leucine zipper protein HDG2 [Arabidopsis thaliana] gi 332189689 gb AEE27810.1  homeobox-leucine zipper protein HDG2 [Arabidopsis thaliana] gi 332189691 gb AEE27812.1  homeobox-leucine zipper protein HDG2 [Arabidopsis thaliana]                                                                                                                                                                                                                                                                   | 534 | 721 | 0        | 135.0 | 91.8 | 95.3 | homeobox-leucine zipper protein HDG2   | gbpln | Arabidopsis thaliana | AT1G05230.4   Symbols: HDG2   homeodomain GLABROUS 2   chr1:1513388-1517024 REVERSE LENGTH=721                                                                                                                                                                                                                                                                                                                                                                     | 534 | 721 | 0        | 135.0 | 91.8 | 95.3 |
| Rsa1.0_00769.1.g19221.t1 | gb EOA36208.1  hypothetical protein CARUB_v10010124mg [Capsella rubella]                                                                                                                                                                                                                                                                                                                                                                                                                                                                                                                                                                                                                                                                              | 113 | 245 | 4.00E-13 | 216.8 | 49.6 | 59.3 | hypothetical protein CARUB_v10010124mg | gbpln | Capsella rubella     | AT1G49590.1   Symbols:   C2H2 and C2HC zinc fingers superfamily protein   chr1:18354997-18356409 FORWARD LENGTH=242                                                                                                                                                                                                                                                                                                                                                | 113 | 242 | 4.00E-15 | 214.2 | 48.7 | 56.6 |
| Rsa1.0_00769.1.g19222.t1 | dbj BAB09912.1  MADS-box protein-like [Arabidopsis thaliana]                                                                                                                                                                                                                                                                                                                                                                                                                                                                                                                                                                                                                                                                                          | 291 | 368 | 4.00E-46 | 126.5 | 31.3 | 38.1 | MADS-box protein-like                  | gbpln | Arabidopsis thaliana | AT5G49420.1   Symbols:   MADS-box transcription factor family protein   chr5:20035166-20036170 REVERSE LENGTH=334                                                                                                                                                                                                                                                                                                                                                  | 291 | 334 | 2.00E-48 | 114.8 | 31.3 | 38.1 |
| Rsa1.0_00769.1.g19223.t1 | #                                                                                                                                                                                                                                                                                                                                                                                                                                                                                                                                                                                                                                                                                                                                                     | #   | #   | #        | #     | #    | #    | -                                      | ----  | ----                 | #                                                                                                                                                                                                                                                                                                                                                                                                                                                                  | #   | #   | #        | #     | #    | #    |
| Rsa1.0_00769.1.g19224.t1 | ref XP_002891616.1  hypothetical protein ARALYDRAFT_474225 [Arabidopsis lyrata subsp. lyrata] gi 297337458 gb EFH67875.1  hypothetical protein ARALYDRAFT_474225 [Arabidopsis lyrata subsp. lyrata]                                                                                                                                                                                                                                                                                                                                                                                                                                                                                                                                                   | 203 | 211 | 7.00E-92 | 103.9 | 85.2 | 91.1 | hypothetical protein ARALYDRAFT_474225 | gbpln | Arabidopsis lyrata   | AT1G51100.1   Symbols:   unknown protein; FUNCTIONS IN: molecular_function unknown; INVOLVED IN: biological_process unknown; LOCATED IN: chloroplast, chloroplast stroma; EXPRESSED IN: 22 plant structures; EXPRESSED DURING: 13 growth stages; Has 26 Blast hits to 26 proteins in 9 species: Archae - 0; Bacteria - 0; Metazoa - 0; Fungi - 0; Plants - 26; Viruses - 0; Other Eukaryotes - 0 (source: NCBI BLink).   chr1:18934342-18934977 FORWARD LENGTH=211 | 203 | 211 | 4.00E-93 | 103.9 | 82.3 | 89.2 |



|                          |                                                                                                                                                                                                                                                                                                                                                                                                                                                                                                                                                                                                                                                                                                                                                                                                |     |     |           |       |      |      |                                              |       |                      |                                                                                                                                      |     |     |           |       |      |      |
|--------------------------|------------------------------------------------------------------------------------------------------------------------------------------------------------------------------------------------------------------------------------------------------------------------------------------------------------------------------------------------------------------------------------------------------------------------------------------------------------------------------------------------------------------------------------------------------------------------------------------------------------------------------------------------------------------------------------------------------------------------------------------------------------------------------------------------|-----|-----|-----------|-------|------|------|----------------------------------------------|-------|----------------------|--------------------------------------------------------------------------------------------------------------------------------------|-----|-----|-----------|-------|------|------|
| Rsa1.0_00769.1.g19225.t1 | ref[NP_175522.2] putative plastid-lipid-associated protein 12 [Arabidopsis thaliana]<br>gi 75154826 sp G8LAP6.1 PAP12_ARAT H RecName: Full=Probable plastid-lipid-associated protein 12, chloroplast; AltName: Full=Fibrillin-12; Flags: Precursor gi 21593276 gb IAM65225.1  unknown [Arabidopsis thaliana] gi 26452116 dbj BAC43147.1  unknown protein [Arabidopsis thaliana] gi 28950975 gb AAO63411.1  At1g51115 [Arabidopsis thaliana] gi 332194502 gb AEE32623.1  putative plastid-lipid-associated protein 12 [Arabidopsis thaliana]                                                                                                                                                                                                                                                    | 407 | 409 | 0         | 100.5 | 87.0 | 93.6 | putative plastid-lipid-associated protein 12 | gbpln | Arabidopsis thaliana | AT1G51110.1   Symbols:   Plastid-lipid associated protein PAP / fibrillin family protein   chr1:18935380-18937484 FORWARD LENGTH=409 | 407 | 409 | 0         | 100.5 | 87.0 | 93.6 |
| Rsa1.0_00769.1.g19226.t1 | ref[XP_002891618.1] hypothetical protein ARALYDRAFT_474227 [Arabidopsis lyrata subsp. lyrata] gi 297337460 gb EFH67877.1  hypothetical protein ARALYDRAFT_474227 [Arabidopsis lyrata subsp. lyrata]                                                                                                                                                                                                                                                                                                                                                                                                                                                                                                                                                                                            | 336 | 353 | 1.00E-130 | 105.1 | 71.4 | 81.5 | hypothetical protein ARALYDRAFT_474227       | gbpln | Arabidopsis lyrata   | AT1G51120.1   Symbols:   AP2/B3 transcription factor family protein   chr1:18938091-18939149 FORWARD LENGTH=352                      | 336 | 352 | 1.00E-130 | 104.8 | 70.8 | 80.7 |
| Rsa1.0_00769.1.g19227.t1 | gb[EOA40599.1] hypothetical protein CARUB_v10009330mg [Capsella rubella]                                                                                                                                                                                                                                                                                                                                                                                                                                                                                                                                                                                                                                                                                                                       | 404 | 402 | 1.00E-177 | 99.5  | 79.2 | 86.6 | hypothetical protein CARUB_v10009330mg       | gbpln | Capsella rubella     | AT1G51130.1   Symbols:   Nse4, component of Smc5/6 DNA repair complex   chr1:18939480-18941560 REVERSE LENGTH=403                    | 404 | 403 | 1.00E-170 | 99.8  | 75.2 | 84.9 |
| Rsa1.0_00769.1.g19228.t1 | #                                                                                                                                                                                                                                                                                                                                                                                                                                                                                                                                                                                                                                                                                                                                                                                              | #   | #   | #         | #     | #    | -    | ----                                         | ----  | ----                 | #                                                                                                                                    | #   | #   | #         | #     | #    |      |
| Rsa1.0_00769.1.g19229.t1 | ref[XP_002894296.1] basic helix-loop-helix family protein [Arabidopsis lyrata subsp. lyrata] gi 297340138 gb EFH70555.1  basic helix-loop-helix family protein [Arabidopsis lyrata subsp. lyrata]                                                                                                                                                                                                                                                                                                                                                                                                                                                                                                                                                                                              | 372 | 378 | 1.00E-169 | 101.6 | 87.9 | 90.9 | basic helix-loop-helix family protein        | gbpln | Arabidopsis lyrata   | AT1G51140.1   Symbols:   basic helix-loop-helix (bHLH) DNA-binding superfamily protein   chr1:18943802-18945613 REVERSE LENGTH=379   | 372 | 379 | 1.00E-168 | 101.9 | 86.8 | 89.8 |
| Rsa1.0_00769.1.g19230.t1 | #                                                                                                                                                                                                                                                                                                                                                                                                                                                                                                                                                                                                                                                                                                                                                                                              | #   | #   | #         | #     | #    | -    | ----                                         | ----  | ----                 | #                                                                                                                                    | #   | #   | #         | #     | #    |      |
| Rsa1.0_00769.1.g19231.t1 | ref[NP_175528.1] SNARE-like protein [Arabidopsis thaliana] gi 78319655 ref[NP_001031168.1] SNARE-like protein [Arabidopsis thaliana] gi 297847478 ref[XP_002891620.1] hypothetical protein ARALYDRAFT_892078 [Arabidopsis lyrata subsp. lyrata] gi 4836927 gb AAD30629.1 AC006085.2 Unknown protein [Arabidopsis thaliana] gi 12320789 gb AAG50544.1 AC079828.15 unknown protein [Arabidopsis thaliana] gi 28466907 gb AAO44062.1  At1g51160 [Arabidopsis thaliana] gi 110743933 dbj BAE99800.1  hypothetical protein [Arabidopsis thaliana] gi 297337462 gb EFH67879.1  hypothetical protein ARALYDRAFT_892078 [Arabidopsis lyrata subsp. lyrata] gi 332194507 gb AEE32628.1  SNARE-like protein [Arabidopsis thaliana] gi 332194508 gb AEE32629.1  SNARE-like protein [Arabidopsis thaliana] | 169 | 169 | 4.00E-94  | 100.0 | 98.8 | 98.8 | SNARE-like protein                           | gbpln | Arabidopsis lyrata   | AT1G51160.2   Symbols:   SNARE-like superfamily protein   chr1:18950057-18951560 FORWARD LENGTH=169                                  | 169 | 169 | 2.00E-96  | 100.0 | 98.8 | 98.8 |
| Rsa1.0_00769.1.g19232.t1 | ref[NP_564584.1] protein kinase domain-containing protein [Arabidopsis thaliana] gi 4836928 gb AAD30630.1 AC006085.3 Similar to protein kinases [Arabidopsis thaliana] gi 12320780 gb AAG50535.1 AC079828.6 serine/threonine protein kinase, putative [Arabidopsis thaliana] gi 110738644 dbj BAF01247.1  putative serine/threonine protein kinase [Arabidopsis thaliana] gi 115311465 gb ABI93913.1  At1g51170 [Arabidopsis thaliana] gi 332194509 gb AEE32630.1  protein kinase domain-containing protein [Arabidopsis thaliana]                                                                                                                                                                                                                                                             | 381 | 404 | 0         | 106.0 | 87.9 | 93.2 | protein kinase domain-containing protein     | gbpln | Arabidopsis thaliana | AT1G51170.1   Symbols:   Protein kinase superfamily protein   chr1:18953625-18954839 REVERSE LENGTH=404                              | 381 | 404 | 0         | 106.0 | 87.9 | 93.2 |

|                          |                                                                                                                                                                                                                                                                                                                                                                                                                                   |     |      |           |        |      |      |                                                |       |                      |                                                                                                                                         |     |     |           |       |      |      |
|--------------------------|-----------------------------------------------------------------------------------------------------------------------------------------------------------------------------------------------------------------------------------------------------------------------------------------------------------------------------------------------------------------------------------------------------------------------------------|-----|------|-----------|--------|------|------|------------------------------------------------|-------|----------------------|-----------------------------------------------------------------------------------------------------------------------------------------|-----|-----|-----------|-------|------|------|
| Rsa1.0_00769.1.g19233.t1 | refXP_002892480.1  hypothetical protein ARALYDRAFT_311954 [Arabidopsis lyrata subsp. lyrata] gi 297338322 gb EFH68739.1                                                                                                                                                                                                                                                                                                           | 248 | 646  | 8.00E-19  | 260.5  | 27.4 | 31.5 | hypothetical protein ARALYDRAFT_311954         | gbpln | Arabidopsis lyrata   | AT1G09080.1   Symbols: BIP3   Heat shock protein 70 (Hsp 70) family protein   chr1:2929268-2931804 REVERSE LENGTH=675                   | 248 | 675 | 7.00E-21  | 272.2 | 27.0 | 31.0 |
| Rsa1.0_00769.1.g19234.t1 | hypothetical protein ARALYDRAFT_311954 [Arabidopsis lyrata subsp. lyrata] gb AAG51754.1 AC068667.33 reverse transcriptase, putative: 100033-105622 [Arabidopsis thaliana]                                                                                                                                                                                                                                                         | 690 | 1557 | 1.00E-151 | 225.7  | 45.2 | 62.6 | reverse transcriptase, putative: 100033-105622 | gbpln | Arabidopsis thaliana | AT5G36228.1   Symbols:   nucleic acid binding-zinc ion binding   chr5:14271691-14272776 FORWARD LENGTH=361                              | 690 | 361 | 8.00E-31  | 52.3  | 10.4 | 16.7 |
| Rsa1.0_00770.1.g19235.t1 | gb AAF16534.1 AC013482.8 T26F17.17 [Arabidopsis thaliana]                                                                                                                                                                                                                                                                                                                                                                         | 81  | 1291 | 1.00E-33  | 1593.8 | 87.7 | 92.6 | T26F17.17                                      | gbpln | Arabidopsis thaliana | #                                                                                                                                       | #   | #   | #         | #     | #    | #    |
| Rsa1.0_00770.1.g19236.t1 | gb EOA18959.1  hypothetical protein CARUB_v10007594mg [Capsella rubella]                                                                                                                                                                                                                                                                                                                                                          | 547 | 454  | 0         | 83.0   | 72.8 | 77.0 | hypothetical protein CARUB_v10007594mg         | gbpln | Capsella rubella     | AT4G21250.1   Symbols:   Sulfite exporter TauE/SafE family protein   chr4:11325030-11326637 FORWARD LENGTH=449                          | 547 | 449 | 0         | 82.1  | 71.1 | 76.8 |
| Rsa1.0_00770.1.g19237.t1 | dbj BAF81515.1  oxygen-evolving enhancer protein 3-2 [Brassica rapa]                                                                                                                                                                                                                                                                                                                                                              | 227 | 227  | 1.00E-123 | 100.0  | 98.2 | 99.1 | oxygen-evolving enhancer protein 3-2           | gbpln | Brassica rapa        | AT4G21280.1   Symbols: PSBQ, PSBQA, PSBQ-1   photosystem II subunit QA   chr4:11334446-11335587 FORWARD LENGTH=223                      | 227 | 223 | 1.00E-102 | 98.2  | 83.3 | 89.4 |
| Rsa1.0_00770.1.g19238.t1 | ref NP_193861.1  pentatricopeptide repeat-containing protein [Arabidopsis thaliana] gi 75207660 sp Q9STE1.1 PP333 ARAT H RecName: Full=Pentatricopeptide repeat-containing protein At4g21300 gi 3402749 emb CAA20195.1  putative protein [Arabidopsis thaliana] gi 7268926 emb CAB79129.1  putative protein [Arabidopsis thaliana] gi 332659037 gb AEE84437.1  pentatricopeptide repeat-containing protein [Arabidopsis thaliana] | 842 | 857  | 0         | 101.8  | 82.1 | 90.1 | pentatricopeptide repeat-containing protein    | gbpln | Arabidopsis thaliana | AT4G21300.1   Symbols:   Tetratricopeptide repeat (TPR)-like superfamily protein   chr4:11336479-11339052 FORWARD LENGTH=857            | 842 | 857 | 0         | 101.8 | 82.1 | 90.1 |
| Rsa1.0_00770.1.g19239.t1 | ref NP_193862.1  uncharacterized protein [Arabidopsis thaliana] gi 3402750 emb CAA20196.1  putative protein [Arabidopsis thaliana] gi 7268927 emb CAB79130.1  putative protein [Arabidopsis thaliana] gi 48310105 gb AAT41754.1  At4g21310 [Arabidopsis thaliana] gi 50198867 gb AAT70460.1  At4g21310 [Arabidopsis thaliana] gi 332659038 gb AEE84438.1  uncharacterized protein AT4G21310 [Arabidopsis thaliana]                | 168 | 168  | 1.00E-86  | 100.0  | 92.9 | 97.0 | uncharacterized protein                        | gbpln | Arabidopsis thaliana | AT4G21310.1   Symbols:   Protein of unknown function (DUF218)   chr4:11339134-11339787 REVERSE LENGTH=168                               | 168 | 168 | 6.00E-89  | 100.0 | 92.9 | 97.0 |
| Rsa1.0_00770.1.g19240.t1 | ref NP_567624.1  Subtilase family protein [Arabidopsis thaliana] gi 332659040 gb AEE84440.1  Subtilase family protein [Arabidopsis thaliana]                                                                                                                                                                                                                                                                                      | 799 | 803  | 0         | 100.5  | 74.5 | 83.9 | Subtilase family protein                       | gbpln | Arabidopsis thaliana | AT4G21323.1   Symbols:   Subtilase family protein   chr4:11342494-11345632 FORWARD LENGTH=803                                           | 799 | 803 | 0         | 100.5 | 74.5 | 83.9 |
| Rsa1.0_00770.1.g19241.t1 | emb CC161494.1  unnamed protein product [Arabidopsis halleri]                                                                                                                                                                                                                                                                                                                                                                     | 755 | 756  | 0         | 100.1  | 70.7 | 82.0 | unnamed protein product                        | gbpln | Arabidopsis halleri  | AT4G21326.1   Symbols: ATSBT3.12, SBT3.12   subtilase 3.12   chr4:11346685-11349653 FORWARD LENGTH=754                                  | 755 | 754 | 0         | 99.9  | 69.5 | 81.1 |
| Rsa1.0_00770.1.g19242.t1 | gb ADQ37369.1  unknown [Arabidopsis lyrata]                                                                                                                                                                                                                                                                                                                                                                                       | 216 | 208  | 6.00E-93  | 96.3   | 81.0 | 87.5 | unknown                                        | gbpln | Arabidopsis lyrata   | AT4G21330.1   Symbols: DYT1   basic helix-loop-helix (bHLH) DNA-binding superfamily protein   chr4:11349922-11350694 FORWARD LENGTH=207 | 216 | 207 | 1.00E-91  | 95.8  | 79.2 | 86.1 |
| Rsa1.0_00770.1.g19243.t1 | gb ADQ37380.1  unknown [Arabidopsis lyrata]                                                                                                                                                                                                                                                                                                                                                                                       | 286 | 301  | 7.00E-99  | 105.2  | 69.2 | 80.4 | unknown                                        | gbpln | Arabidopsis lyrata   | AT4G21340.1   Symbols: B70   basic helix-loop-helix (bHLH) DNA-binding superfamily protein   chr4:11353064-11354628 FORWARD LENGTH=301  | 286 | 301 | 1.00E-100 | 105.2 | 69.2 | 80.4 |
| Rsa1.0_00770.1.g19244.t1 | gb ADQ37381.1  unknown [Arabidopsis lyrata]                                                                                                                                                                                                                                                                                                                                                                                       | 370 | 374  | 0         | 101.1  | 91.1 | 95.7 | unknown                                        | gbpln | Arabidopsis lyrata   | AT4G21350.1   Symbols: B80, PUB8   plant U-box 8   chr4:11356143-11357267 REVERSE LENGTH=374                                            | 370 | 374 | 0         | 101.1 | 90.0 | 94.9 |
| Rsa1.0_00770.1.g19245.t1 | emb CAA67145.1  receptor-like kinase [Brassica oleracea var. viridis]                                                                                                                                                                                                                                                                                                                                                             | 846 | 847  | 0         | 100.1  | 93.9 | 97.2 | receptor-like kinase                           | gbpln | Brassica oleracea    | AT4G21380.1   Symbols: ARK3, RK3   receptor kinase 3   chr4:11389219-11393090 REVERSE LENGTH=850                                        | 846 | 850 | 0         | 100.5 | 82.2 | 88.7 |
| Rsa1.0_00770.1.g19246.t1 | emb CAA73134.1  serine/threonine kinase [Brassica oleracea]                                                                                                                                                                                                                                                                                                                                                                       | 856 | 850  | 0         | 99.3   | 93.6 | 96.6 | serine/threonine kinase                        | gbpln | Brassica oleracea    | AT4G21390.1   Symbols: B120   S-locus lectin protein kinase family protein   chr4:11394458-11397474 REVERSE LENGTH=849                  | 856 | 849 | 0         | 99.2  | 86.3 | 92.3 |
| Rsa1.0_00770.1.g19247.t1 | #                                                                                                                                                                                                                                                                                                                                                                                                                                 | #   | #    | #         | #      | #    | -    | ----                                           | ----  | ----                 | #                                                                                                                                       | #   | #   | #         | #     | #    | #    |
| Rsa1.0_00770.1.g19248.t1 | gb ADQ37395.1  unknown [Capsella rubella]                                                                                                                                                                                                                                                                                                                                                                                         | 680 | 689  | 0         | 101.3  | 86.9 | 92.4 | unknown                                        | gbpln | Capsella rubella     | AT4G21410.1   Symbols: CRK29   cysteine-rich RLK (RECEPTOR-like protein kinase) 29   chr4:11402463-11405025 REVERSE LENGTH=679          | 680 | 679 | 0         | 99.9  | 85.3 | 91.5 |

|                          |                                                                                                                                                                                                                                                                                                                                                                                                                                                                                                                                                                                                                                                                                                                                                                                                                                                                                                                                                                                                                                                                                                                                                                                                                                                         |      |      |          |       |      |      |                                                                                                    |       |                      |                                                                                                                                                         |      |      |           |       |      |      |
|--------------------------|---------------------------------------------------------------------------------------------------------------------------------------------------------------------------------------------------------------------------------------------------------------------------------------------------------------------------------------------------------------------------------------------------------------------------------------------------------------------------------------------------------------------------------------------------------------------------------------------------------------------------------------------------------------------------------------------------------------------------------------------------------------------------------------------------------------------------------------------------------------------------------------------------------------------------------------------------------------------------------------------------------------------------------------------------------------------------------------------------------------------------------------------------------------------------------------------------------------------------------------------------------|------|------|----------|-------|------|------|----------------------------------------------------------------------------------------------------|-------|----------------------|---------------------------------------------------------------------------------------------------------------------------------------------------------|------|------|-----------|-------|------|------|
| Rsa1.0_00770.1.g19249.t1 | ref[XP_002869889.1] At4g21420 [Arabidopsis lyrata subsp. lyrata] gi 297315725 gb EFH46148.1  At4g21420 [Arabidopsis lyrata subsp. lyrata]                                                                                                                                                                                                                                                                                                                                                                                                                                                                                                                                                                                                                                                                                                                                                                                                                                                                                                                                                                                                                                                                                                               | 200  | 201  | 6.00E-98 | 100.5 | 85.0 | 94.0 | At4g21420                                                                                          | gbpln | Arabidopsis lyrata   | #                                                                                                                                                       | #    | #    | #         | #     | #    | #    |
| Rsa1.0_00770.1.g19250.t1 | emb CCl61488.1  unnamed protein product [Arabidopsis halleri]                                                                                                                                                                                                                                                                                                                                                                                                                                                                                                                                                                                                                                                                                                                                                                                                                                                                                                                                                                                                                                                                                                                                                                                           | 968  | 936  | 0        | 96.7  | 70.5 | 78.9 | unnamed protein product                                                                            | gbpln | Arabidopsis halleri  | AT4G21430.1   Symbols: B160   Zinc finger, RING-type:Transcription factor jumonji/asparlyl beta-hydroxylase   chr4:11407835-11412159 REVERSE LENGTH=927 | 968  | 927  | 0         | 95.8  | 68.7 | 77.3 |
| Rsa1.0_00771.1.g19251.t1 | ref[NP_188645.1] cytochrome P450, family 705, subfamily A, polypeptide 19 [Arabidopsis thaliana] gi 9293967 dbj BAB01870.1  cytochrome P450-like protein [Arabidopsis thaliana] gi 15215772 gb AAK91431.1  AT3g20100/MAL21.14 [Arabidopsis thaliana] gi 27764974 gb AAO23608.1  At3g20100/MAL21.14 [Arabidopsis thaliana] gi 332642812 gb AEE76333.1  cytochrome P450, family 705, subfamily A, polypeptide 19 [Arabidopsis thaliana] ref[NP_188649.1] cytochrome P450, family 705, subfamily A, polypeptide 23 [Arabidopsis thaliana] gi 9293971 dbj BAB01874.1  cytochrome P450-like protein [Arabidopsis thaliana] gi 91806443 gb ABE65949.1  cytochrome P450 family protein [Arabidopsis thaliana] gi 332642818 gb AEE76339.1  cytochrome P450, family 705, subfamily A, polypeptide 23 [Arabidopsis thaliana] ref[NP_188648.1] cytochrome P450, family 705, subfamily A, polypeptide 22 [Arabidopsis thaliana] gi 9293970 dbj BAB01873.1  cytochrome P450-like protein [Arabidopsis thaliana] gi 30102724 gb AAP21280.1  AT3g20130 [Arabidopsis thaliana] gi 110736609 dbj BAF00269.1  putative cytochrome P450 [Arabidopsis thaliana] gi 332642816 gb AEE76337.1  cytochrome P450, family 705, subfamily A, polypeptide 22 [Arabidopsis thaliana] | 465  | 513  | 0        | 110.3 | 68.2 | 81.3 | cytochrome P450, family 705, subfamily A, polypeptide 19                                           | gbpln | Arabidopsis thaliana | AT3G20100.1   Symbols: CYP705A19   cytochrome P450, family 705, subfamily A, polypeptide 19   chr3:7019014-7020649 FORWARD LENGTH=513                   | 465  | 513  | 0         | 110.3 | 68.2 | 81.3 |
| Rsa1.0_00771.1.g19252.t1 | ref[NP_188649.1] cytochrome P450, family 705, subfamily A, polypeptide 23 [Arabidopsis thaliana] gi 9293971 dbj BAB01874.1  cytochrome P450-like protein [Arabidopsis thaliana] gi 91806443 gb ABE65949.1  cytochrome P450 family protein [Arabidopsis thaliana] gi 332642818 gb AEE76339.1  cytochrome P450, family 705, subfamily A, polypeptide 23 [Arabidopsis thaliana] ref[NP_188648.1] cytochrome P450, family 705, subfamily A, polypeptide 22 [Arabidopsis thaliana] gi 9293970 dbj BAB01873.1  cytochrome P450-like protein [Arabidopsis thaliana] gi 30102724 gb AAP21280.1  AT3g20130 [Arabidopsis thaliana] gi 110736609 dbj BAF00269.1  putative cytochrome P450 [Arabidopsis thaliana] gi 332642816 gb AEE76337.1  cytochrome P450, family 705, subfamily A, polypeptide 22 [Arabidopsis thaliana]                                                                                                                                                                                                                                                                                                                                                                                                                                       | 517  | 510  | 0        | 98.6  | 73.3 | 81.2 | cytochrome P450, family 705, subfamily A, polypeptide 23                                           | gbpln | Arabidopsis thaliana | AT3G20140.1   Symbols: CYP705A23   cytochrome P450, family 705, subfamily A, polypeptide 23   chr3:7029175-7030787 FORWARD LENGTH=510                   | 517  | 510  | 0         | 98.6  | 73.3 | 81.2 |
| Rsa1.0_00771.1.g19253.t1 | ref[NP_188649.1] cytochrome P450, family 705, subfamily A, polypeptide 23 [Arabidopsis thaliana] gi 9293971 dbj BAB01874.1  cytochrome P450-like protein [Arabidopsis thaliana] gi 91806443 gb ABE65949.1  cytochrome P450 family protein [Arabidopsis thaliana] gi 332642818 gb AEE76339.1  cytochrome P450, family 705, subfamily A, polypeptide 23 [Arabidopsis thaliana] ref[NP_188648.1] cytochrome P450, family 705, subfamily A, polypeptide 22 [Arabidopsis thaliana] gi 9293970 dbj BAB01873.1  cytochrome P450-like protein [Arabidopsis thaliana] gi 30102724 gb AAP21280.1  AT3g20130 [Arabidopsis thaliana] gi 110736609 dbj BAF00269.1  putative cytochrome P450 [Arabidopsis thaliana] gi 332642816 gb AEE76337.1  cytochrome P450, family 705, subfamily A, polypeptide 22 [Arabidopsis thaliana]                                                                                                                                                                                                                                                                                                                                                                                                                                       | 517  | 515  | 0        | 99.6  | 72.1 | 85.3 | cytochrome P450, family 705, subfamily A, polypeptide 22                                           | gbpln | Arabidopsis thaliana | AT3G20130.1   Symbols: CYP705A22   cytochrome P450, family 705, subfamily A, polypeptide 22   chr3:7026982-7028613 FORWARD LENGTH=515                   | 517  | 515  | 0         | 99.6  | 72.1 | 85.3 |
| Rsa1.0_00771.1.g19254.t1 | #                                                                                                                                                                                                                                                                                                                                                                                                                                                                                                                                                                                                                                                                                                                                                                                                                                                                                                                                                                                                                                                                                                                                                                                                                                                       | #    | #    | #        | #     | #    | -    | ----                                                                                               | ----  | #                    | #                                                                                                                                                       | #    | #    | #         | #     | #    |      |
| Rsa1.0_00771.1.g19255.t1 | #                                                                                                                                                                                                                                                                                                                                                                                                                                                                                                                                                                                                                                                                                                                                                                                                                                                                                                                                                                                                                                                                                                                                                                                                                                                       | #    | #    | #        | #     | #    | -    | ----                                                                                               | ----  | #                    | #                                                                                                                                                       | #    | #    | #         | #     | #    |      |
| Rsa1.0_00771.1.g19256.t1 | ref[XP_002868209.1] hypothetical protein ARALYDRAFT_493357 [Arabidopsis lyrata subsp. lyrata] gi 297314045 gb EFH44468.1  hypothetical protein ARALYDRAFT_493357 [Arabidopsis lyrata subsp. lyrata]                                                                                                                                                                                                                                                                                                                                                                                                                                                                                                                                                                                                                                                                                                                                                                                                                                                                                                                                                                                                                                                     | 140  | 757  | 4.00E-56 | 540.7 | 72.9 | 83.6 | hypothetical protein ARALYDRAFT_493357                                                             | gbpln | Arabidopsis lyrata   | AT4G15370.1   Symbols: BARS1, PEN2   barool synthase 1   chr4:8773786-8779685 REVERSE LENGTH=759                                                        | 140  | 759  | 1.00E-58  | 542.1 | 73.6 | 82.9 |
| Rsa1.0_00771.1.g19257.t1 | gb EOA18520.1  hypothetical protein CARUB_v10007073mg [Capsella rubella]                                                                                                                                                                                                                                                                                                                                                                                                                                                                                                                                                                                                                                                                                                                                                                                                                                                                                                                                                                                                                                                                                                                                                                                | 556  | 763  | 0        | 137.2 | 79.0 | 90.5 | hypothetical protein CARUB_v10007073mg                                                             | gbpln | Capsella rubella     | AT1G78500.1   Symbols:   Terpenoid cyclases family protein   chr1:29531646-29535177 FORWARD LENGTH=767                                                  | 556  | 767  | 0         | 137.9 | 72.7 | 86.7 |
| Rsa1.0_00771.1.g19258.t1 | gb EOA30474.1  hypothetical protein CARUB_v10013599mg [Capsella rubella]                                                                                                                                                                                                                                                                                                                                                                                                                                                                                                                                                                                                                                                                                                                                                                                                                                                                                                                                                                                                                                                                                                                                                                                | 249  | 477  | 8.00E-66 | 191.6 | 54.6 | 60.6 | hypothetical protein CARUB_v10013599mg                                                             | gbpln | Capsella rubella     | AT3G20170.1   Symbols:   ARM repeat superfamily protein   chr3:7041780-7043207 FORWARD LENGTH=475                                                       | 249  | 475  | 7.00E-67  | 190.8 | 54.2 | 58.6 |
| Rsa1.0_00771.1.g19259.t1 | gb EOA32511.1  hypothetical protein CARUB_v10015791mg [Capsella rubella]                                                                                                                                                                                                                                                                                                                                                                                                                                                                                                                                                                                                                                                                                                                                                                                                                                                                                                                                                                                                                                                                                                                                                                                | 146  | 121  | 7.00E-33 | 82.9  | 54.1 | 65.8 | hypothetical protein CARUB_v10015791mg                                                             | gbpln | Capsella rubella     | AT3G20180.1   Symbols:   Copper transport protein family   chr3:7043385-7043841 REVERSE LENGTH=118                                                      | 146  | 118  | 1.00E-32  | 80.8  | 49.3 | 64.4 |
| Rsa1.0_00771.1.g19260.t1 | emb CAC37623.1  copia-like polyprotein [Arabidopsis thaliana]                                                                                                                                                                                                                                                                                                                                                                                                                                                                                                                                                                                                                                                                                                                                                                                                                                                                                                                                                                                                                                                                                                                                                                                           | 1628 | 1466 | 0        | 90.0  | 58.2 | 69.8 | copia-like polyprotein                                                                             | gbpln | Arabidopsis thaliana | AT4G23160.1   Symbols: CRK8   cysteine-rich RLK (RECEPTOR-like protein kinase) 8   chr4:12129485-12134086 FORWARD LENGTH=1262                           | 1628 | 1262 | 1.00E-103 | 77.5  | 11.0 | 16.6 |
| Rsa1.0_00771.1.g19261.t1 | ref[XP_002883963.1] RNA-dependent RNA polymerase family protein [Arabidopsis lyrata subsp. lyrata] gi 297329803 gb EFH60222.1  RNA-dependent RNA polymerase family protein [Arabidopsis lyrata subsp. lyrata]                                                                                                                                                                                                                                                                                                                                                                                                                                                                                                                                                                                                                                                                                                                                                                                                                                                                                                                                                                                                                                           | 735  | 981  | 0        | 133.5 | 69.7 | 78.4 | RNA-dependent RNA polymerase family protein                                                        | gbpln | Arabidopsis lyrata   | AT2G19930.1   Symbols:   RNA-dependent RNA polymerase family protein   chr2:8607533-8612441 REVERSE LENGTH=977                                          | 735  | 977  | 0         | 132.9 | 68.4 | 77.7 |
| Rsa1.0_00771.1.g19262.t1 | sp O81776.2 GLR24_ARATH RecName: Full=Glutamate receptor 2.4; AltName: Full=Ligand-gated ion channel 2.4; Flags: Precursor                                                                                                                                                                                                                                                                                                                                                                                                                                                                                                                                                                                                                                                                                                                                                                                                                                                                                                                                                                                                                                                                                                                              | 913  | 896  | 0        | 98.1  | 80.8 | 89.0 | RecName: Full=Glutamate receptor 2.4; AltName: Full=Ligand-gated ion channel 2.4; Flags: Precursor | ----  | ----                 | AT4G31710.1   Symbols: ATGLR2.4, GLR2.4   glutamate receptor 2.4   chr4:15349121-15352962 FORWARD LENGTH=898                                            | 913  | 898  | 0         | 98.4  | 78.5 | 86.6 |

|                          |                                                                                                                                                                                                                                                                                                              |      |      |           |       |      |      |                                                         |       |                      |                                                                                                                                                                                                                                                                                                                                                                                                                                                                               |      |      |           |       |      |      |
|--------------------------|--------------------------------------------------------------------------------------------------------------------------------------------------------------------------------------------------------------------------------------------------------------------------------------------------------------|------|------|-----------|-------|------|------|---------------------------------------------------------|-------|----------------------|-------------------------------------------------------------------------------------------------------------------------------------------------------------------------------------------------------------------------------------------------------------------------------------------------------------------------------------------------------------------------------------------------------------------------------------------------------------------------------|------|------|-----------|-------|------|------|
| Rsa1.0_00771.1.g19263.t1 | gb EOA29917.1  hypothetical protein CARUB_v10013010mg [Capsella rubella]                                                                                                                                                                                                                                     | 798  | 793  | 0         | 99.4  | 85.2 | 91.5 | hypothetical protein CARUB_v10013010mg                  | gbpln | Capsella rubella     | AT3G20200.1   Symbols:   Protein kinase protein with adenine nucleotide alpha hydrolases-like domain   chr3:7047895-7051145 FORWARD LENGTH=780                                                                                                                                                                                                                                                                                                                                | 798  | 780  | 0         | 97.7  | 84.7 | 90.7 |
| Rsa1.0_00771.1.g19264.t6 | # # # # # # # # # # # # # # # # # # # # # # #                                                                                                                                                                                                                                                                |      |      |           |       |      |      |                                                         |       |                      |                                                                                                                                                                                                                                                                                                                                                                                                                                                                               |      |      |           |       |      |      |
| Rsa1.0_00772.1.g19265.t1 | dbj BAB09379.1  non-LTR retroelement reverse transcriptase-like protein [Arabidopsis thaliana]                                                                                                                                                                                                               | 1190 | 1223 | 0         | 102.8 | 44.6 | 63.1 | non-LTR retroelement reverse transcriptase-like protein | gbpln | Arabidopsis thaliana | AT3G24255.1   Symbols:   RNA-directed DNA polymerase (reverse transcriptase)-related family protein   chr3:8789471-8793208 FORWARD LENGTH=746                                                                                                                                                                                                                                                                                                                                 | 1190 | 746  | 5.00E-88  | 62.7  | 14.7 | 20.0 |
| Rsa1.0_00772.1.g19266.t1 | ref XP_002873852.1  hypothetical protein ARALYDRAFT_909780 [Arabidopsis lyrata subsp. lyrata] gi 297319689 gb EFH50111.1  hypothetical protein ARALYDRAFT_909780 [Arabidopsis lyrata subsp. lyrata]                                                                                                          | 281  | 281  | 1.00E-152 | 100.0 | 92.5 | 96.8 | hypothetical protein ARALYDRAFT_909780                  | gbpln | Arabidopsis lyrata   | AT5G17770.1   Symbols: ATCBR, CBR1, CBR   NADH:cytochrome B5 reductase 1   chr5:5864543-5866495 REVERSE LENGTH=281                                                                                                                                                                                                                                                                                                                                                            | 281  | 281  | 1.00E-150 | 100.0 | 93.2 | 97.2 |
| Rsa1.0_00772.1.g19267.t1 | gb EOA20461.1  hypothetical protein CARUB_v10000774mg [Capsella rubella]                                                                                                                                                                                                                                     | 480  | 505  | 0         | 105.2 | 89.8 | 95.0 | hypothetical protein CARUB_v10000774mg                  | gbpln | Capsella rubella     | AT5G17760.1   Symbols:   P-loop containing nucleoside triphosphate hydrolases superfamily protein   chr5:5860591-5862301 REVERSE LENGTH=505                                                                                                                                                                                                                                                                                                                                   | 480  | 505  | 0         | 105.2 | 88.8 | 94.6 |
| Rsa1.0_00772.1.g19268.t1 | gb AAB84340.1  putative non-LTR retroelement reverse transcriptase [Arabidopsis thaliana]                                                                                                                                                                                                                    | 803  | 1094 | 0         | 136.2 | 46.5 | 64.4 | putative non-LTR retroelement reverse transcriptase     | gbpln | Arabidopsis thaliana | AT4G29090.1   Symbols:   Ribonuclease H-like superfamily protein   chr4:14333528-14335255 FORWARD LENGTH=575                                                                                                                                                                                                                                                                                                                                                                  | 803  | 575  | 8.00E-71  | 71.6  | 19.4 | 31.6 |
| Rsa1.0_00772.1.g19269.t1 | gb EOA21102.1  hypothetical protein CARUB_v10001443mg [Capsella rubella]                                                                                                                                                                                                                                     | 325  | 326  | 1.00E-148 | 100.3 | 89.2 | 93.8 | hypothetical protein CARUB_v10001443mg                  | gbpln | Capsella rubella     | AT5G17710.2   Symbols: EMB1241   Co-chaperone GrpE family protein   chr5:5839560-5841639 REVERSE LENGTH=326                                                                                                                                                                                                                                                                                                                                                                   | 325  | 326  | 1.00E-148 | 100.3 | 87.7 | 91.4 |
| Rsa1.0_00772.1.g19270.t1 | ref NP_197272.2  mate efflux domain-containing protein [Arabidopsis thaliana] gi 20466400 gb AAM20517.1  putative protein [Arabidopsis thaliana] gi 23198102 gb AAN15578.1  putative protein [Arabidopsis thaliana] gi 332005074 gb AED92457.1  mate efflux domain-containing protein [Arabidopsis thaliana] | 498  | 497  | 0         | 99.8  | 87.8 | 93.6 | mate efflux domain-containing protein                   | gbpln | Arabidopsis thaliana | AT5G17700.1   Symbols:   MATE efflux family protein   chr5:5831025-5833415 REVERSE LENGTH=497                                                                                                                                                                                                                                                                                                                                                                                 | 498  | 497  | 0         | 99.8  | 87.8 | 93.6 |
| Rsa1.0_00772.1.g19271.t1 | gb EOA20620.1  hypothetical protein CARUB_v10000932mg [Capsella rubella]                                                                                                                                                                                                                                     | 382  | 455  | 1.00E-122 | 119.1 | 70.2 | 81.2 | hypothetical protein CARUB_v10000932mg                  | gbpln | Capsella rubella     | AT5G17690.1   Symbols: TFL2, LHP1   like heterochromatin protein (LHP1)   chr5:5827504-5829537 REVERSE LENGTH=445                                                                                                                                                                                                                                                                                                                                                             | 382  | 445  | 1.00E-113 | 116.5 | 71.7 | 81.4 |
| Rsa1.0_00772.1.g19272.t1 | ref XP_002871778.1  hypothetical protein ARALYDRAFT_488633 [Arabidopsis lyrata subsp. lyrata] gi 29731761 gb EFH48037.1  hypothetical protein ARALYDRAFT_488633 [Arabidopsis lyrata subsp. lyrata]                                                                                                           | 1569 | 1281 | 0         | 81.6  | 63.0 | 69.6 | hypothetical protein ARALYDRAFT_488633                  | gbpln | Arabidopsis lyrata   | AT5G17680.1   Symbols:   disease resistance protein (TIR-NBS-LRR class), putative   chr5:5822999-5827153 FORWARD LENGTH=1294                                                                                                                                                                                                                                                                                                                                                  | 1569 | 1294 | 0         | 82.5  | 62.5 | 68.4 |
| Rsa1.0_00772.1.g19273.t1 | gb AAM64307.1  nuclear matrix protein 1 [Arabidopsis thaliana]                                                                                                                                                                                                                                               | 329  | 329  | 0         | 100.0 | 97.9 | 98.8 | nuclear matrix protein 1                                | gbpln | Arabidopsis thaliana | AT5G17620.1   Symbols:   CONTAINS InterPro DOMAIN/s: Plant nuclear matrix 1 (InterPro:IPR010604); Has 30201 Blast hits to 17322 proteins in 780 species: Archaea - 12; Bacteria - 1396; Metazoa - 17338; Fungi - 3422; Plants - 5037; Viruses - 0; Other Eukaryotes - 2996 (source: NCBI BLINK).   chr5:5805934-5808455 REVERSE LENGTH=329                                                                                                                                    | 329  | 329  | 0         | 100.0 | 97.9 | 98.8 |
| Rsa1.0_00772.1.g19274.t1 | ref XP_002871775.1  hypothetical protein ARALYDRAFT_488628 [Arabidopsis lyrata subsp. lyrata] gi 297317612 gb EFH48034.1  hypothetical protein ARALYDRAFT_488628 [Arabidopsis lyrata subsp. lyrata]                                                                                                          | 122  | 120  | 9.00E-50  | 98.4  | 82.8 | 90.2 | hypothetical protein ARALYDRAFT_488628                  | gbpln | Arabidopsis lyrata   | AT5G17610.1   Symbols:   unknown protein; FUNCTIONS IN: molecular function unknown; INVOLVED IN: biological process unknown; LOCATED IN: endomembrane system; EXPRESSED IN: 23 plant structures; EXPRESSED DURING: 15 growth stages; Has 30201 Blast hits to 17322 proteins in 780 species: Archaea - 12; Bacteria - 1396; Metazoa - 17338; Fungi - 3422; Plants - 5037; Viruses - 0; Other Eukaryotes - 2996 (source: NCBI BLINK).   chr5:5804011-5805045 FORWARD LENGTH=121 | 122  | 121  | 3.00E-50  | 99.2  | 81.1 | 87.7 |
| Rsa1.0_00772.1.g19275.t1 | gb EOA22487.1  hypothetical protein CARUB_v10003140mg [Capsella rubella]                                                                                                                                                                                                                                     | 138  | 193  | 9.00E-39  | 139.9 | 76.8 | 89.1 | hypothetical protein CARUB_v10003140mg                  | gbpln | Capsella rubella     | AT5G17590.1   Symbols:   Putative membrane lipoprotein   chr5:5797371-5797949 REVERSE LENGTH=192                                                                                                                                                                                                                                                                                                                                                                              | 138  | 192  | 5.00E-41  | 139.1 | 71.0 | 82.6 |
| Rsa1.0_00772.1.g19276.t1 | emb CAB39638.1  RNA-directed DNA polymerase-like protein [Arabidopsis thaliana] gi 7267666 emb CAB78094.1  RNA-directed DNA polymerase-like protein [Arabidopsis thaliana]                                                                                                                                   | 1880 | 1274 | 0         | 67.8  | 36.9 | 46.9 | RNA-directed DNA polymerase-like protein                | gbpln | Arabidopsis thaliana | AT4G29090.1   Symbols:   Ribonuclease H-like superfamily protein   chr4:14333528-14335255 FORWARD LENGTH=575                                                                                                                                                                                                                                                                                                                                                                  | 1880 | 575  | 3.00E-68  | 30.6  | 9.7  | 14.5 |

|                          |                                                                                                                                                                                                                                                                                                                                                                                                                                                                                                                                                                                                                                                                                                                                              |     |     |           |       |      |      |                                             |       |                      |                                                                                                                                  |     |     |           |       |      |      |
|--------------------------|----------------------------------------------------------------------------------------------------------------------------------------------------------------------------------------------------------------------------------------------------------------------------------------------------------------------------------------------------------------------------------------------------------------------------------------------------------------------------------------------------------------------------------------------------------------------------------------------------------------------------------------------------------------------------------------------------------------------------------------------|-----|-----|-----------|-------|------|------|---------------------------------------------|-------|----------------------|----------------------------------------------------------------------------------------------------------------------------------|-----|-----|-----------|-------|------|------|
| Rsa1.0_00773.1.g19277.t1 | ref[XP_002892324.1] basic helix-loop-helix family protein [Arabidopsis lyrata subsp. lyrata] gi 297338166 gb EFH68583.1  basic helix-loop-helix family protein [Arabidopsis lyrata subsp. lyrata] ref[NP_172108.1] myb proto-oncogene protein [Arabidopsis thaliana] gi 8844123 gb AAF80215.1 AC025290_4 Identical to the myb protein from Arabidopsis thaliana gb Z50869 and contains a myb-like DNA binding PF00249 domain [Arabidopsis thaliana] gi 41619084 gb AAS10020.1  MYB transcription factor [Arabidopsis thaliana] gi 92856632 gb ABE77411.1  At1g06180 [Arabidopsis thaliana] gi 225897886 dbj BAH30275.1  hypothetical protein [Arabidopsis thaliana] gi 332189834 gb AEE27955.1  myb domain protein 13 [Arabidopsis thaliana] | 428 | 421 | 0         | 98.4  | 82.7 | 90.0 | basic helix-loop-helix family protein       | gbpln | Arabidopsis lyrata   | AT1G06170.2   Symbols:   basic helix-loop-helix (bHLH) DNA-binding superfamily protein   chr1:1885146-1886564 REVERSE LENGTH=420 | 428 | 420 | 0         | 98.1  | 80.8 | 90.0 |
| Rsa1.0_00773.1.g19278.t1 | gi 41619084 gb AAS10020.1  MYB transcription factor [Arabidopsis thaliana] gi 92856632 gb ABE77411.1  At1g06180 [Arabidopsis thaliana] gi 225897886 dbj BAH30275.1  hypothetical protein [Arabidopsis thaliana] gi 332189834 gb AEE27955.1  myb domain protein 13 [Arabidopsis thaliana]                                                                                                                                                                                                                                                                                                                                                                                                                                                     | 253 | 246 | 3.00E-98  | 97.2  | 74.7 | 83.8 | myb proto-oncogene protein                  | gbpln | Arabidopsis thaliana | AT1G06180.1   Symbols: ATMYB13, ATMYBLFGN, MYB13   myb domain protein 13   chr1:1889510-1891089 FORWARD LENGTH=246               | 253 | 246 | 1.00E-101 | 97.2  | 74.7 | 83.8 |
| Rsa1.0_00773.1.g19279.t3 | gb EOA39379.1  hypothetical protein CARUB_v10012464mg [Capsella rubella]                                                                                                                                                                                                                                                                                                                                                                                                                                                                                                                                                                                                                                                                     | 205 | 206 | 1.00E-105 | 100.5 | 88.8 | 97.1 | hypothetical protein CARUB_v10012464mg      | gbpln | Capsella rubella     | AT1G06200.1   Symbols:   Peptidase S24/S26A/S26B/S26C family protein   chr1:1894604-1896852 REVERSE LENGTH=206                   | 205 | 206 | 1.00E-107 | 100.5 | 87.3 | 96.6 |
| Rsa1.0_00773.1.g19280.t1 | gb EOA37974.1  hypothetical protein CARUB_v10009444mg [Capsella rubella]                                                                                                                                                                                                                                                                                                                                                                                                                                                                                                                                                                                                                                                                     | 383 | 381 | 1.00E-173 | 99.5  | 82.8 | 90.1 | hypothetical protein CARUB_v10009444mg      | gbpln | Capsella rubella     | AT1G06210.1   Symbols:   ENTH/VHS/GAT family protein   chr1:1897567-1898986 FORWARD LENGTH=383                                   | 383 | 383 | 1.00E-175 | 100.0 | 83.3 | 90.3 |
| Rsa1.0_00773.1.g19281.t1 | gb EOA38987.1  hypothetical protein CARUB_v10011516mg [Capsella rubella]                                                                                                                                                                                                                                                                                                                                                                                                                                                                                                                                                                                                                                                                     | 83  | 81  | 6.00E-24  | 97.6  | 69.9 | 79.5 | hypothetical protein CARUB_v10011516mg      | gbpln | Capsella rubella     | AT1G06225.1   Symbols: CLE3   CLAVATA3/ESR-RELATED 3   chr1:1905975-1906226 FORWARD LENGTH=83                                    | 83  | 83  | 2.00E-23  | 100.0 | 60.2 | 63.9 |
| Rsa1.0_00773.1.g19282.t1 | gb EOA39708.1  hypothetical protein CARUB_v10008353mg [Capsella rubella]                                                                                                                                                                                                                                                                                                                                                                                                                                                                                                                                                                                                                                                                     | 767 | 784 | 0         | 102.2 | 76.7 | 82.5 | hypothetical protein CARUB_v10008353mg      | gbpln | Capsella rubella     | AT1G06230.3   Symbols: GTE4   global transcription factor group E4   chr1:1907626-1910183 FORWARD LENGTH=766                     | 767 | 766 | 0         | 99.9  | 76.4 | 80.8 |
| Rsa1.0_00773.1.g19283.t1 | gb EOA39214.1  hypothetical protein CARUB_v10012192mg [Capsella rubella]                                                                                                                                                                                                                                                                                                                                                                                                                                                                                                                                                                                                                                                                     | 402 | 423 | 0         | 105.2 | 81.3 | 90.0 | hypothetical protein CARUB_v10012192mg      | gbpln | Capsella rubella     | AT1G06250.1   Symbols:   alpha/beta-Hydrolases superfamily protein   chr1:1913339-1914850 REVERSE LENGTH=423                     | 402 | 423 | 0         | 105.2 | 79.6 | 90.3 |
| Rsa1.0_00773.1.g19284.t1 | ref[XP_002889596.1] hypothetical protein ARALYDRAFT_887827 [Arabidopsis lyrata subsp. lyrata] gi 297335438 gb EFH68585.1  hypothetical protein ARALYDRAFT_887827 [Arabidopsis lyrata subsp. lyrata] ref[XP_002892331.1] pentatricopeptide repeat-containing protein [Arabidopsis lyrata subsp. lyrata] gi 297338173 gb EFH68590.1  pentatricopeptide repeat-containing protein [Arabidopsis lyrata subsp. lyrata]                                                                                                                                                                                                                                                                                                                            | 345 | 343 | 1.00E-157 | 99.4  | 76.5 | 86.7 | hypothetical protein ARALYDRAFT_887827      | gbpln | Arabidopsis lyrata   | AT1G06260.1   Symbols:   Cysteine proteinases superfamily protein   chr1:1916449-1917585 FORWARD LENGTH=343                      | 345 | 343 | 1.00E-158 | 99.4  | 75.9 | 86.1 |
| Rsa1.0_00773.1.g19285.t1 | ref[XP_002892331.1] pentatricopeptide repeat-containing protein [Arabidopsis lyrata subsp. lyrata] gi 297338173 gb EFH68590.1  pentatricopeptide repeat-containing protein [Arabidopsis lyrata subsp. lyrata]                                                                                                                                                                                                                                                                                                                                                                                                                                                                                                                                | 340 | 343 | 0         | 100.9 | 92.1 | 95.6 | pentatricopeptide repeat-containing protein | gbpln | Arabidopsis lyrata   | AT1G06270.1   Symbols:   Pentatricopeptide repeat (PPR) superfamily protein   chr1:1918242-1919273 REVERSE LENGTH=343            | 340 | 343 | 0         | 100.9 | 90.9 | 95.9 |
| Rsa1.0_00773.1.g19286.t1 | gb EOA39249.1  hypothetical protein CARUB_v10012245mg [Capsella rubella]                                                                                                                                                                                                                                                                                                                                                                                                                                                                                                                                                                                                                                                                     | 677 | 675 | 0         | 99.7  | 91.3 | 96.0 | hypothetical protein CARUB_v10012245mg      | gbpln | Capsella rubella     | AT1G06290.1   Symbols: ACX3, ATACX3   acyl-CoA oxidase 3   chr1:1922423-1926002 FORWARD LENGTH=675                               | 677 | 675 | 0         | 99.7  | 91.3 | 96.8 |
| Rsa1.0_00773.1.g19287.t1 | ref[XP_002892336.1] fatty acid desaturase family protein [Arabidopsis lyrata subsp. lyrata] gi 297338178 gb EFH68595.1  fatty acid desaturase family protein [Arabidopsis lyrata subsp. lyrata] ref[NP_172120.2] acyl-CoA oxidase [Arabidopsis thaliana] gi 62286635 sp Q9LM17.1 ACO32_ARAT H RecName: Full=Putative acyl-coenzyme A oxidase 3.2, peroxisomal; Flags: Precursor gi 8927669 gb AAF82160.1 AC068143.2 Contains similarity to an acyl-CoA oxidase (ASX2) mRNA from Arabidopsis thaliana gb AF057043 and contains an acyl-CoA oxidase PF01756 domain [Arabidopsis thaliana] gi 332189852 gb AEE27973.1  acyl-CoA oxidase [Arabidopsis thaliana]                                                                                  | 300 | 299 | 1.00E-134 | 99.7  | 79.0 | 87.0 | fatty acid desaturase family protein        | gbpln | Arabidopsis lyrata   | AT1G06350.1   Symbols:   Fatty acid desaturase family protein   chr1:1935510-1936789 REVERSE LENGTH=300                          | 300 | 300 | 1.00E-136 | 100.0 | 78.0 | 88.0 |
| Rsa1.0_00773.1.g19288.t1 | gi 8927669 gb AAF82160.1 AC068143.2 Contains similarity to an acyl-CoA oxidase (ASX2) mRNA from Arabidopsis thaliana gb AF057043 and contains an acyl-CoA oxidase PF01756 domain [Arabidopsis thaliana] gi 332189852 gb AEE27973.1  acyl-CoA oxidase [Arabidopsis thaliana]                                                                                                                                                                                                                                                                                                                                                                                                                                                                  | 675 | 675 | 0         | 100.0 | 86.1 | 93.0 | acyl-CoA oxidase                            | gbpln | Arabidopsis thaliana | AT1G06310.1   Symbols: ACX6   acyl-CoA oxidase 6   chr1:1926802-1930227 FORWARD LENGTH=675                                       | 675 | 675 | 0         | 100.0 | 86.1 | 93.0 |

|                          |                                                                                                                                                                                                                                                                   |     |      |           |       |      |      |                                              |       |                      |                                                                                                                                                                                                                                                                                 |     |      |           |       |      |      |
|--------------------------|-------------------------------------------------------------------------------------------------------------------------------------------------------------------------------------------------------------------------------------------------------------------|-----|------|-----------|-------|------|------|----------------------------------------------|-------|----------------------|---------------------------------------------------------------------------------------------------------------------------------------------------------------------------------------------------------------------------------------------------------------------------------|-----|------|-----------|-------|------|------|
| Rsa1.0_00773.1.g19289.t1 | refXP_002892337.1  fatty acid desaturase family protein [Arabidopsis lyrata subsp. lyrata] gi 297338179 gb EFH68596.1  fatty acid desaturase family protein [Arabidopsis lyrata subsp. lyrata]                                                                    | 299 | 299  | 1.00E-151 | 100.0 | 89.0 | 94.0 | fatty acid desaturase family protein         | gbpln | Arabidopsis lyrata   | AT1G06360.1   Symbols:   Fatty acid desaturase family protein   chr1:1939173-1940417 REVERSE LENGTH=299                                                                                                                                                                         | 299 | 299  | 1.00E-152 | 100.0 | 88.3 | 92.6 |
| Rsa1.0_00773.1.g19290.t1 | refXP_002889602.1  hypothetical protein ARALYDRAFT_470660 [Arabidopsis lyrata subsp. lyrata] gi 297335444 gb EFH65861.1  hypothetical protein ARALYDRAFT_470660 [Arabidopsis lyrata subsp. lyrata]                                                                | 848 | 851  | 0         | 100.4 | 88.4 | 94.2 | hypothetical protein ARALYDRAFT_470660       | gbpln | Arabidopsis lyrata   | AT1G06410.1   Symbols: ATTPS7, TPS7, ATTPSA   trehalose-phosphatase/synthase 7   chr1:1955413-1958153 FORWARD LENGTH=851                                                                                                                                                        | 848 | 851  | 0         | 100.4 | 88.2 | 94.0 |
| Rsa1.0_00773.1.g19291.t1 | gb EOA38492.1  hypothetical protein CARUB_v10010258mg [Capsella rubella]                                                                                                                                                                                          | 241 | 219  | 2.00E-29  | 99.9  | 46.5 | 56.0 | hypothetical protein CARUB_v10010258mg       | gbpln | Capsella rubella     | AT1G06420.1   Symbols:   unknown protein; Has 1017 Blast hits to 654 proteins in 124 species: Archae - 0; Bacteria - 39; Metazoa - 232; Fungi - 69; Plants - 40; Viruses - 0; Other Eukaryotes - 637 (source: NCBI BLink).   chr1:1958987-1959652 FORWARD LENGTH=221            | 241 | 221  | 4.00E-17  | 91.7  | 39.4 | 51.0 |
| Rsa1.0_00773.1.g19292.t1 | dbj BAJ33891.1  unnamed protein product [Theilungiella halophila]                                                                                                                                                                                                 | 694 | 693  | 0         | 99.9  | 97.1 | 98.4 | unnamed protein product                      | ----  | ----                 | AT1G06430.1   Symbols: FTSH8   FTSH protease 8   chr1:1960214-1962525 REVERSE LENGTH=885                                                                                                                                                                                        | 694 | 685  | 0         | 98.7  | 91.8 | 93.9 |
| Rsa1.0_00773.1.g19293.t1 | gb EOA37683.1  hypothetical protein CARUB_v10012333mg [Capsella rubella]                                                                                                                                                                                          | 386 | 390  | 0         | 101.0 | 89.4 | 94.3 | hypothetical protein CARUB_v10012333mg       | gbpln | Capsella rubella     | AT1G06440.1   Symbols:   Ubiquitin carboxyl-terminal hydrolase family protein   chr1:1963733-1964905 REVERSE LENGTH=390                                                                                                                                                         | 386 | 390  | 0         | 101.0 | 89.4 | 94.6 |
| Rsa1.0_00773.1.g19294.t1 | gb ABV89635.1  peroxisomal small heat shock protein ACD31.2 [Brassica rapa]                                                                                                                                                                                       | 298 | 291  | 1.00E-134 | 97.7  | 81.2 | 86.6 | peroxisomal small heat shock protein ACD31.2 | gbpln | Brassica rapa        | AT1G06460.1   Symbols: ACD32.1, ACD31.2   alpha-crystallin domain 32.1   chr1:1967308-1969414 REVERSE LENGTH=285                                                                                                                                                                | 298 | 285  | 1.00E-109 | 95.6  | 73.8 | 79.2 |
| Rsa1.0_00773.1.g19295.t4 | refXP_002889605.1  hypothetical protein ARALYDRAFT_887850 [Arabidopsis lyrata subsp. lyrata] gi 297335447 gb EFH65864.1  hypothetical protein ARALYDRAFT_887850 [Arabidopsis lyrata subsp. lyrata]                                                                | 399 | 414  | 0         | 103.8 | 92.2 | 95.0 | hypothetical protein ARALYDRAFT_887850       | gbpln | Arabidopsis lyrata   | AT1G06470.2   Symbols:   Nucleotide/sugar transporter family protein   chr1:1970726-1973540 FORWARD LENGTH=414                                                                                                                                                                  | 399 | 414  | 0         | 103.8 | 90.2 | 93.5 |
| Rsa1.0_00773.1.g19296.t1 | refXP_002892344.1  hypothetical protein ARALYDRAFT_470668 [Arabidopsis lyrata subsp. lyrata] gi 297338186 gb EFH68603.1  hypothetical protein ARALYDRAFT_470668 [Arabidopsis lyrata subsp. lyrata]                                                                | 87  | 86   | 2.00E-26  | 98.9  | 70.1 | 82.8 | hypothetical protein ARALYDRAFT_470668       | gbpln | Arabidopsis lyrata   | AT1G06475.1   Symbols:   unknown protein; Has 35333 Blast hits to 34131 proteins in 2444 species: Archae - 798; Bacteria - 22429; Metazoa - 974; Fungi - 991; Plants - 531; Viruses - 0; Other Eukaryotes - 9610 (source: NCBI BLink).   chr1:1973992-1974273 REVERSE LENGTH=93 | 87  | 93   | 1.00E-21  | 106.9 | 63.2 | 72.4 |
| Rsa1.0_00774.1.g19297.t2 | ref NP_199688.1  TIR-NBS-LRR class disease resistance protein [Arabidopsis thaliana] gi 9758876 dbj BAB09430.1  disease resistance protein [Arabidopsis thaliana] gi 332008339 gb AED95722.1  TIR-NBS-LRR class disease resistance protein [Arabidopsis thaliana] | 853 | 1190 | 1.00E-117 | 139.5 | 28.6 | 39.7 | TIR-NBS-LRR class disease resistance protein | gbpln | Arabidopsis thaliana | AT5G48770.1   Symbols:   Disease resistance protein (TIR-NBS-LRR class) family   chr5:19773277-19777242 REVERSE LENGTH=1190                                                                                                                                                     | 853 | 1190 | 1.00E-120 | 139.5 | 28.6 | 39.7 |
| Rsa1.0_00774.1.g19298.t1 | ref NP_177427.2  TIR-NBS-LRR class disease resistance protein [Arabidopsis thaliana] gi 110737528 dbj BAF00706.1  hypothetical protein [Arabidopsis thaliana] gi 332197259 gb AEE35380.1  TIR-NBS-LRR class disease resistance protein [Arabidopsis thaliana]     | 164 | 1042 | 5.00E-32  | 635.4 | 50.0 | 66.5 | TIR-NBS-LRR class disease resistance protein | gbpln | Arabidopsis thaliana | AT1G72840.1   Symbols:   Disease resistance protein (TIR-NBS-LRR class)   chr1:27410020-27413485 REVERSE LENGTH=1042                                                                                                                                                            | 164 | 1042 | 2.00E-34  | 635.4 | 50.0 | 66.5 |
| Rsa1.0_00774.1.g19299.t2 | gb ABW81058.1  atlantys transposase [Arabidopsis lyrata subsp. lyrata]                                                                                                                                                                                            | 632 | 777  | 4.00E-24  | 122.9 | 11.1 | 17.6 | atlantys transposase                         | gbpln | Arabidopsis lyrata   | AT4G03830.1   Symbols:   Protein of unknown function, DUF601   chr4:1790440-1792458 FORWARD LENGTH=578                                                                                                                                                                          | 632 | 578  | 9.00E-25  | 91.5  | 10.4 | 16.3 |
| Rsa1.0_00774.1.g19300.t1 | gb AAD28663.1  hypothetical protein [Arabidopsis thaliana]                                                                                                                                                                                                        | 329 | 356  | 1.00E-12  | 108.2 | 12.5 | 19.1 | hypothetical protein                         | gbpln | Arabidopsis thaliana | #                                                                                                                                                                                                                                                                               | #   | #    | #         | #     | #    | #    |
| Rsa1.0_00774.1.g19301.t1 | gb AAC28207.1  T24H24.13 gene product [Arabidopsis thaliana] gi 726716 emb CAB77873.1  putative transposon protein [Arabidopsis thaliana]                                                                                                                         | 471 | 681  | 2.00E-34  | 144.6 | 18.5 | 27.0 | T24H24.13 gene product                       | gbpln | Arabidopsis thaliana | #                                                                                                                                                                                                                                                                               | #   | #    | #         | #     | #    | #    |
| Rsa1.0_00774.1.g19302.t1 | #                                                                                                                                                                                                                                                                 | #   | #    | #         | #     | #    | -    | ----                                         | ----  | ----                 | #                                                                                                                                                                                                                                                                               | #   | #    | #         | #     | #    | #    |
| Rsa1.0_00774.1.g19303.t1 | gb AAG51783.1 AC079679.3 reverse transcriptase, putative; 16838-20266 [Arabidopsis thaliana]                                                                                                                                                                      | 201 | 1142 | 6.00E-23  | 568.2 | 33.8 | 52.2 | reverse transcriptase, putative; 16838-20266 | gbpln | Arabidopsis thaliana | AT2G34320.1   Symbols:   Polynucleotidyl transferase, ribonuclease H-like superfamily protein   chr2:14484959-14485837 FORWARD LENGTH=292                                                                                                                                       | 201 | 292  | 4.00E-16  | 145.3 | 26.9 | 47.8 |
| Rsa1.0_00774.1.g19304.t1 | ref XP_004309249.1  PREDICTED: TMV resistance protein N-like [Fragaria vesca subsp. vesca]                                                                                                                                                                        | 164 | 416  | 2.00E-25  | 253.7 | 37.8 | 59.8 | PREDICTED: TMV resistance protein N-like     | gbpln | Fragaria vesca       | AT1G65850.1   Symbols:   Disease resistance protein (TIR-NBS-LRR class) family   chr1:24494734-24498485 FORWARD LENGTH=1036                                                                                                                                                     | 164 | 1036 | 9.00E-28  | 631.7 | 40.9 | 57.9 |

|                          |                                                                                                                                                                                                                                                                                                                                                                                                                                                                                                                                                                                                                                                                                                                                                                                                                 |     |      |           |       |      |      |                                                         |       |                      |                                                                                                                                          |     |     |           |       |      |      |
|--------------------------|-----------------------------------------------------------------------------------------------------------------------------------------------------------------------------------------------------------------------------------------------------------------------------------------------------------------------------------------------------------------------------------------------------------------------------------------------------------------------------------------------------------------------------------------------------------------------------------------------------------------------------------------------------------------------------------------------------------------------------------------------------------------------------------------------------------------|-----|------|-----------|-------|------|------|---------------------------------------------------------|-------|----------------------|------------------------------------------------------------------------------------------------------------------------------------------|-----|-----|-----------|-------|------|------|
| Rsa1.0_00774.1.g19305.t1 | ref XP_002868674.1  hypothetical protein ARALYDRAFT_493978 [Arabidopsis lyrata subsp. lyrata] gi 297314510 gb EFH44933.1  hypothetical protein ARALYDRAFT_493978 [Arabidopsis lyrata subsp. lyrata]                                                                                                                                                                                                                                                                                                                                                                                                                                                                                                                                                                                                             | 392 | 434  | 2.00E-42  | 110.7 | 27.6 | 44.1 | hypothetical protein ARALYDRAFT_493978                  | gbpln | Arabidopsis lyrata   | AT4G09420.1   Symbols: Disease resistance protein (TIR-NBS class)   chr4:5962319-5963776 REVERSE LENGTH=457                              | 392 | 457 | 3.00E-44  | 116.6 | 29.1 | 44.6 |
| Rsa1.0_00774.1.g19306.t1 | dbj BAB09567.1  disease resistance protein-like [Arabidopsis thaliana]                                                                                                                                                                                                                                                                                                                                                                                                                                                                                                                                                                                                                                                                                                                                          | 505 | 1295 | 9.00E-66  | 256.4 | 32.3 | 51.7 | disease resistance protein-like                         | gbpln | Arabidopsis thaliana | AT1G72870.1   Symbols: Disease resistance protein (TIR-NBS class)   chr1:27421086-27422999 FORWARD LENGTH=512                            | 505 | 512 | 2.00E-67  | 101.4 | 35.4 | 53.5 |
| Rsa1.0_00774.1.g19307.t1 | # # # # # # # # - ---- ---- # # # # # #                                                                                                                                                                                                                                                                                                                                                                                                                                                                                                                                                                                                                                                                                                                                                                         |     |      |           |       |      |      |                                                         |       |                      |                                                                                                                                          |     |     |           |       |      |      |
| Rsa1.0_00775.1.g19308.t1 | ref NP_193284.1  UDP-glycosyltransferase-like protein [Arabidopsis thaliana] gi 75277384 sp O23401.1 U84A3_ARATH RecName: Full=UDP-glycosyltransferase 84A3; AltName: Full=Hydroxycinnamate glucosyltransferase 3; Short=AtHCACT3 gi 2244906 emb CAB10327.1  indole-3-acetate beta-glucosyltransferase like protein [Arabidopsis thaliana] gi 268296 emb CAB78591.1  indole-3-acetate beta-glucosyltransferase like protein [Arabidopsis thaliana] gi 16323085 gb AAL15277.1  AT4g15490/di3785c [Arabidopsis thaliana] gi 1837777 gb AAL67035.1  putative indole-3-acetate beta-glucosyltransferase [Arabidopsis thaliana] gi 23296972 gb AAN13214.1  putative indole-3-acetate beta-glucosyltransferase [Arabidopsis thaliana] gi 332658210 gb AEE83610.1  UDP-glycosyltransferase 84A3 [Arabidopsis thaliana] | 284 | 479  | 3.00E-70  | 168.7 | 45.1 | 49.3 | UDP-glycosyltransferase-like protein                    | gbpln | Arabidopsis thaliana | AT4G15490.1   Symbols: UGT84A3   UDP-Glycosyltransferase superfamily protein   chr4:8852864-8854303 REVERSE LENGTH=479                   | 284 | 479 | 7.00E-73  | 168.7 | 45.1 | 49.3 |
| Rsa1.0_00775.1.g19309.t1 | emb CAJ77651.1  UDP glucosyltransferase related [Brassica napus]                                                                                                                                                                                                                                                                                                                                                                                                                                                                                                                                                                                                                                                                                                                                                | 193 | 476  | 4.00E-21  | 246.6 | 28.0 | 31.1 | UDP glucosyltransferase related                         | gbpln | Brassica napus       | AT4G15480.1   Symbols: UGT84A1   UDP-Glycosyltransferase superfamily protein   chr4:8849000-8850472 REVERSE LENGTH=490                   | 193 | 490 | 1.00E-19  | 253.9 | 22.3 | 25.9 |
| Rsa1.0_00775.1.g19310.t1 | ref XP_002870237.1  predicted protein [Arabidopsis lyrata subsp. lyrata] gi 297316073 gb EFH46496.1  predicted protein [Arabidopsis lyrata subsp. lyrata]                                                                                                                                                                                                                                                                                                                                                                                                                                                                                                                                                                                                                                                       | 321 | 374  | 1.00E-152 | 116.5 | 85.4 | 90.3 | predicted protein                                       | gbpln | Arabidopsis lyrata   | AT4G15450.1   Symbols: Senescence/dehydration-associated protein-related   chr4:8839437-8841162 FORWARD LENGTH=381                       | 321 | 381 | 1.00E-154 | 118.7 | 85.4 | 91.0 |
| Rsa1.0_00775.1.g19311.t1 | gb EOA18436.1  hypothetical protein CARUB_v10006979mg [Capsella rubella]                                                                                                                                                                                                                                                                                                                                                                                                                                                                                                                                                                                                                                                                                                                                        | 655 | 801  | 0         | 122.3 | 66.9 | 80.8 | hypothetical protein CARUB_v10006979mg                  | gbpln | Capsella rubella     | AT1G62670.1   Symbols: RPF2   rna processing factor 2   chr1:23204773-23206665 REVERSE LENGTH=630                                        | 655 | 630 | 9.00E-78  | 96.2  | 25.3 | 44.0 |
| Rsa1.0_00775.1.g19312.t4 | ref XP_002870239.1  hypothetical protein ARALYDRAFT_493346 [Arabidopsis lyrata subsp. lyrata] gi 297316075 gb EFH46498.1  hypothetical protein ARALYDRAFT_493346 [Arabidopsis lyrata subsp. lyrata]                                                                                                                                                                                                                                                                                                                                                                                                                                                                                                                                                                                                             | 760 | 761  | 0         | 100.1 | 87.6 | 92.1 | hypothetical protein ARALYDRAFT_493346                  | gbpln | Arabidopsis lyrata   | AT4G15430.2   Symbols: ERD (early-responsive to dehydration stress) family protein   chr4:8828214-8831354 FORWARD LENGTH=760             | 760 | 760 | 0         | 100.0 | 86.7 | 91.1 |
| Rsa1.0_00775.1.g19313.t1 | gb EOA16124.1  hypothetical protein CARUB_v10004257mg [Capsella rubella]                                                                                                                                                                                                                                                                                                                                                                                                                                                                                                                                                                                                                                                                                                                                        | 109 | 706  | 1.00E-19  | 647.7 | 48.6 | 53.2 | hypothetical protein CARUB_v10004257mg                  | gbpln | Capsella rubella     | AT4G15420.1   Symbols: Ubiquitin fusion degradation UFD1 family protein   chr4:8823822-8825949 FORWARD LENGTH=561                        | 109 | 561 | 2.00E-21  | 514.7 | 47.2 | 51.4 |
| Rsa1.0_00775.1.g19314.t1 | gb EOA18385.1  hypothetical protein CARUB_v10006915mg [Capsella rubella]                                                                                                                                                                                                                                                                                                                                                                                                                                                                                                                                                                                                                                                                                                                                        | 385 | 393  | 1.00E-114 | 102.1 | 56.6 | 70.6 | hypothetical protein CARUB_v10006915mg                  | gbpln | Capsella rubella     | AT5G39560.1   Symbols: Galactose oxidase/kelch repeat superfamily protein   chr5:15841895-15843096 REVERSE LENGTH=403                    | 385 | 403 | 2.00E-76  | 104.7 | 49.4 | 62.9 |
| Rsa1.0_00775.1.g19315.t1 | gb EOA18892.1  hypothetical protein CARUB_v10007521mg [Capsella rubella]                                                                                                                                                                                                                                                                                                                                                                                                                                                                                                                                                                                                                                                                                                                                        | 283 | 284  | 2.00E-79  | 100.4 | 57.2 | 72.8 | hypothetical protein CARUB_v10007521mg                  | gbpln | Capsella rubella     | AT4G15417.1   Symbols: ATRTL1, RTL1   RNase II-like 1   chr4:8817759-8822991 FORWARD LENGTH=264                                          | 283 | 264 | 2.00E-79  | 93.3  | 53.4 | 66.8 |
| Rsa1.0_00775.1.g19316.t1 | ref XP_002870241.1  hypothetical protein ARALYDRAFT_329973 [Arabidopsis lyrata subsp. lyrata] gi 297316077 gb EFH46500.1  hypothetical protein ARALYDRAFT_329973 [Arabidopsis lyrata subsp. lyrata]                                                                                                                                                                                                                                                                                                                                                                                                                                                                                                                                                                                                             | 492 | 948  | 0         | 192.7 | 88.4 | 93.5 | hypothetical protein ARALYDRAFT_329973                  | gbpln | Arabidopsis lyrata   | AT4G15415.1   Symbols: ATB' GAMMA   Protein phosphatase 2A regulatory B subunit family protein   chr4:8817707-8819349 FORWARD LENGTH=522 | 492 | 522 | 0         | 106.1 | 88.6 | 93.7 |
| Rsa1.0_00775.1.g19317.t2 | ref NP_680696.2  cytochrome P450, family 702, subfamily A, polypeptide 6 [Arabidopsis thaliana] gi 332658195 gb AEE83595.1  cytochrome P450, family 702, subfamily A, polypeptide 6 [Arabidopsis thaliana]                                                                                                                                                                                                                                                                                                                                                                                                                                                                                                                                                                                                      | 564 | 475  | 0         | 84.2  | 64.7 | 73.8 | cytochrome P450, family 702, subfamily A, polypeptide 6 | gbpln | Arabidopsis thaliana | AT4G15396.1   Symbols: CYP702A6   cytochrome P450, family 702, subfamily A, polypeptide 6   chr4:8807574-8810419 FORWARD LENGTH=475      | 564 | 475 | 0         | 84.2  | 64.7 | 73.8 |

|                          |                                                                                                                                                                                                                                                                                                                                                                                                                                                                                                                                                                                                                                                                                                                                                                                                                                                                                                                                                                                                                                                                                                                                                                                                                                                                                                                              |     |      |           |       |      |      |                                           |       |                      |                                                                                                                                           |     |     |           |       |      |      |
|--------------------------|------------------------------------------------------------------------------------------------------------------------------------------------------------------------------------------------------------------------------------------------------------------------------------------------------------------------------------------------------------------------------------------------------------------------------------------------------------------------------------------------------------------------------------------------------------------------------------------------------------------------------------------------------------------------------------------------------------------------------------------------------------------------------------------------------------------------------------------------------------------------------------------------------------------------------------------------------------------------------------------------------------------------------------------------------------------------------------------------------------------------------------------------------------------------------------------------------------------------------------------------------------------------------------------------------------------------------|-----|------|-----------|-------|------|------|-------------------------------------------|-------|----------------------|-------------------------------------------------------------------------------------------------------------------------------------------|-----|-----|-----------|-------|------|------|
| Rsa1.0_00775.1.g19318.t1 | ref[XP_002885880.1] hypothetical protein ARALYDRAFT_899583 [Arabidopsis lyrata subsp. lyrata] gi 297331720 gb EFH62139.1  hypothetical protein ARALYDRAFT_899583 [Arabidopsis lyrata subsp. lyrata]                                                                                                                                                                                                                                                                                                                                                                                                                                                                                                                                                                                                                                                                                                                                                                                                                                                                                                                                                                                                                                                                                                                          | 183 | 183  | 1.00E-13  | 100.0 | 30.6 | 45.4 | hypothetical protein ARALYDRAFT_899583    | gbpln | Arabidopsis lyrata   | AT5G33330.1   Symbols:   Polynucleotidyl transferase, ribonuclease H-like superfamily protein   chr5:12591754-12592896 REVERSE LENGTH=183 | 183 | 183 | 1.00E-14  | 100.0 | 27.3 | 38.8 |
| Rsa1.0_00775.1.g19319.t1 | gb EOA15505.1  hypothetical protein CARUB_v10004825mg [Capsella rubella]                                                                                                                                                                                                                                                                                                                                                                                                                                                                                                                                                                                                                                                                                                                                                                                                                                                                                                                                                                                                                                                                                                                                                                                                                                                     | 445 | 441  | 0         | 99.1  | 76.9 | 87.0 | hypothetical protein CARUB_v10004825mg    | gbpln | Capsella rubella     | AT4G15390.1   Symbols:   HXXXD-type acyl-transferase family protein   chr4:8792941-8794281 REVERSE LENGTH=446                             | 445 | 446 | 0         | 100.2 | 74.6 | 85.4 |
| Rsa1.0_00775.1.g19320.t1 | ref[NP_199609.1] BAHD acyltransferase [Arabidopsis thaliana] gi 75170749 sp Q9FI40.1 BAHD1_ARATH RecName: Full=BAHD acyltransferase At5g47980 gi 10177749 dbj BAB11062.1  acetyl-CoA:benzylalcohol acetyltransferase-like protein [Arabidopsis thaliana] gi 29028772 gb AA064765.1  At5g47980 [Arabidopsis thaliana] gi 110742843 dbj BAE99320.1  acetyl-CoA:benzylalcohol acetyltransferase-like protein [Arabidopsis thaliana] gi 332008219 gb AED95602.1  BAHD acyltransferase [Arabidopsis thaliana] ref[NP_193263.1] UDP-glucosyl transferase 71B5 [Arabidopsis thaliana] gi 75277377 sp O23382.1 U71B5_ARATH RecName: Full=UDP-glucosyltransferase 71B5 gi 2244886 emb CAB10307.1  UTP-glucose glucosyltransferase [Arabidopsis thaliana] gi 7268275 emb CAB78570.1  UTP-glucose glucosyltransferase [Arabidopsis thaliana] gi 332658180 gb AEE83580.1  UDP-glucosyl transferase 71B5 [Arabidopsis thaliana] ref[NP_193263.1] UDP-glucosyl transferase 71B5 [Arabidopsis thaliana] gi 75277377 sp O23382.1 U71B5_ARATH RecName: Full=UDP-glucosyltransferase 71B5 gi 2244886 emb CAB10307.1  UTP-glucose glucosyltransferase [Arabidopsis thaliana] gi 7268275 emb CAB78570.1  UTP-glucose glucosyltransferase [Arabidopsis thaliana] gi 332658180 gb AEE83580.1  UDP-glucosyl transferase 71B5 [Arabidopsis thaliana] | 447 | 443  | 1.00E-147 | 99.1  | 57.5 | 75.2 | BAHD acyltransferase                      | gbpln | Arabidopsis thaliana | AT5G47980.1   Symbols:   HXXXD-type acyl-transferase family protein   chr5:19428970-19430301 FORWARD LENGTH=443                           | 447 | 443 | 1.00E-149 | 99.1  | 57.5 | 75.2 |
| Rsa1.0_00775.1.g19321.t1 | ref[NP_193263.1] UDP-glucosyl transferase 71B5 [Arabidopsis thaliana] gi 75277377 sp O23382.1 U71B5_ARATH RecName: Full=UDP-glucosyltransferase 71B5 gi 2244886 emb CAB10307.1  UTP-glucose glucosyltransferase [Arabidopsis thaliana] gi 7268275 emb CAB78570.1  UTP-glucose glucosyltransferase [Arabidopsis thaliana] gi 332658180 gb AEE83580.1  UDP-glucosyl transferase 71B5 [Arabidopsis thaliana]                                                                                                                                                                                                                                                                                                                                                                                                                                                                                                                                                                                                                                                                                                                                                                                                                                                                                                                    | 476 | 478  | 0         | 100.4 | 74.8 | 84.0 | UDP-glucosyl transferase 71B5             | gbpln | Arabidopsis thaliana | AT4G15280.1   Symbols: UGT71B5   UDP-glucosyl transferase 71B5   chr4:8719182-8720618 FORWARD LENGTH=478                                  | 476 | 478 | 0         | 100.4 | 74.8 | 84.0 |
| Rsa1.0_00775.1.g19322.t1 | ref[NP_193263.1] UDP-glucosyl transferase 71B5 [Arabidopsis thaliana] gi 75277377 sp O23382.1 U71B5_ARATH RecName: Full=UDP-glucosyltransferase 71B5 gi 2244886 emb CAB10307.1  UTP-glucose glucosyltransferase [Arabidopsis thaliana] gi 7268275 emb CAB78570.1  UTP-glucose glucosyltransferase [Arabidopsis thaliana] gi 332658180 gb AEE83580.1  UDP-glucosyl transferase 71B5 [Arabidopsis thaliana]                                                                                                                                                                                                                                                                                                                                                                                                                                                                                                                                                                                                                                                                                                                                                                                                                                                                                                                    | 458 | 478  | 0         | 104.4 | 71.8 | 82.8 | UDP-glucosyl transferase 71B5             | gbpln | Arabidopsis thaliana | AT4G15280.1   Symbols: UGT71B5   UDP-glucosyl transferase 71B5   chr4:8719182-8720618 FORWARD LENGTH=478                                  | 458 | 478 | 0         | 104.4 | 71.8 | 82.8 |
| Rsa1.0_00775.1.g19323.t1 | ref[NP_001031645.1] B-box type zinc finger-containing protein [Arabidopsis thaliana] gi 98962119 gb ABF58389.1  unknown protein [Arabidopsis thaliana] gi 332658176 gb AEE83576.1  B-box type zinc finger-containing protein [Arabidopsis thaliana] emb CAB40035.1  retrotransposon like protein [Arabidopsis thaliana] gi 726767 emb CAB81170.1  retrotransposon like protein [Arabidopsis thaliana]                                                                                                                                                                                                                                                                                                                                                                                                                                                                                                                                                                                                                                                                                                                                                                                                                                                                                                                        | 97  | 117  | 2.00E-36  | 120.6 | 80.4 | 88.7 | B-box type zinc finger-containing protein | gbpln | Arabidopsis thaliana | AT4G15248.1   Symbols:   B-box type zinc finger family protein   chr4:8708881-8709234 FORWARD LENGTH=117                                  | 97  | 117 | 4.00E-39  | 120.6 | 80.4 | 88.7 |
| Rsa1.0_00775.1.g19324.t1 | emb CAB40035.1  retrotransposon like protein [Arabidopsis thaliana] gi 726767 emb CAB81170.1  retrotransposon like protein [Arabidopsis thaliana]                                                                                                                                                                                                                                                                                                                                                                                                                                                                                                                                                                                                                                                                                                                                                                                                                                                                                                                                                                                                                                                                                                                                                                            | 414 | 1515 | 1.00E-141 | 365.9 | 60.1 | 75.6 | retrotransposon like protein              | gbpln | Arabidopsis thaliana | #                                                                                                                                         | #   | #   | #         | #     | #    |      |
| Rsa1.0_00776.1.g19325.t1 | ref[NP_974536.1] protein kinase family protein [Arabidopsis thaliana] gi 332657684 gb AEE83064.1  protein kinase family protein [Arabidopsis thaliana]                                                                                                                                                                                                                                                                                                                                                                                                                                                                                                                                                                                                                                                                                                                                                                                                                                                                                                                                                                                                                                                                                                                                                                       | 361 | 354  | 1.00E-149 | 98.1  | 71.7 | 83.1 | protein kinase family protein             | gbpln | Arabidopsis thaliana | AT4G11890.3   Symbols:   Protein kinase superfamily protein   chr4:7148269-7149772 FORWARD LENGTH=354                                     | 361 | 354 | 1.00E-151 | 98.1  | 71.7 | 83.1 |



|                          |                                                                                                                                                                                                                                                                                                                                                                                                                                                                                                                           |      |      |           |       |      |      |                                                     |       |                      |                                                                                                                                                                                                                                                                                                                                                                                                                                                 |      |     |           |       |      |      |
|--------------------------|---------------------------------------------------------------------------------------------------------------------------------------------------------------------------------------------------------------------------------------------------------------------------------------------------------------------------------------------------------------------------------------------------------------------------------------------------------------------------------------------------------------------------|------|------|-----------|-------|------|------|-----------------------------------------------------|-------|----------------------|-------------------------------------------------------------------------------------------------------------------------------------------------------------------------------------------------------------------------------------------------------------------------------------------------------------------------------------------------------------------------------------------------------------------------------------------------|------|-----|-----------|-------|------|------|
| Rsa1.0_00776.1.g19326.t1 | ref XP_002866474.1  hypothetical protein ARALYDRAFT_496390 [Arabidopsis lyrata subsp. lyrata] gi 297312309 gb EFH42733.1  hypothetical protein ARALYDRAFT_496390 [Arabidopsis lyrata subsp. lyrata]                                                                                                                                                                                                                                                                                                                       | 46   | 238  | 2.00E-14  | 517.4 | 82.6 | 91.3 | hypothetical protein ARALYDRAFT_496390              | gbpln | Arabidopsis lyrata   | AT5G62140.1   Symbols:   unknown protein; FUNCTIONS IN: molecular_function unknown; INVOLVED IN: biological_process unknown; LOCATED IN: chloroplast; EXPRESSED IN: 19 plant structures; EXPRESSED DURING: 13 growth stages; Has 60 Blast hits to 60 proteins in 24 species: Archae - 0; Bacteria - 14; Metazoa - 0; Fungi - 0; Plants - 45; Viruses - 0; Other Eukaryotes - 1 (source: NCBI BLINK)   chr5:24954563-24955376 REVERSE LENGTH=241 | 46   | 241 | 9.00E-16  | 523.9 | 76.1 | 89.1 |
| Rsa1.0_00776.1.g19327.t1 | #                                                                                                                                                                                                                                                                                                                                                                                                                                                                                                                         | #    | #    | #         | #     | #    | #    | -                                                   | ----  | ----                 | #                                                                                                                                                                                                                                                                                                                                                                                                                                               | #    | #   | #         | #     | #    |      |
| Rsa1.0_00776.1.g19328.t1 | gb AAP03023.1  acyl-activating enzyme 12 [Arabidopsis thaliana]                                                                                                                                                                                                                                                                                                                                                                                                                                                           | 585  | 578  | 0         | 98.8  | 79.1 | 87.5 | acyl-activating enzyme 12                           | gbpln | Arabidopsis thaliana | AT1G65890.1   Symbols: AAE12   acyl activating enzyme 12   chr1:24512598-24514611 REVERSE LENGTH=578                                                                                                                                                                                                                                                                                                                                            | 585  | 578 | 0         | 98.8  | 78.8 | 87.2 |
| Rsa1.0_00776.1.g19329.t1 | gb AAF79483.1 AC022492_27 F1L3.20 [Arabidopsis thaliana]                                                                                                                                                                                                                                                                                                                                                                                                                                                                  | 270  | 1188 | 2.00E-45  | 440.0 | 44.1 | 53.7 | F1L3.20                                             | gbpln | Arabidopsis thaliana | #                                                                                                                                                                                                                                                                                                                                                                                                                                               | #    | #   | #         | #     | #    |      |
| Rsa1.0_00776.1.g19330.t1 | ref XP_002874729.1  hypothetical protein ARALYDRAFT_490003 [Arabidopsis lyrata subsp. lyrata] gi 297320566 gb EFH50988.1  hypothetical protein ARALYDRAFT_490003 [Arabidopsis lyrata subsp. lyrata]                                                                                                                                                                                                                                                                                                                       | 140  | 687  | 1.00E-19  | 490.7 | 45.7 | 57.9 | hypothetical protein ARALYDRAFT_490003              | gbpln | Arabidopsis lyrata   | AT4G11860.1   Symbols:   Protein of unknown function (DUF544)   chr4:7134237-7138361 REVERSE LENGTH=682                                                                                                                                                                                                                                                                                                                                         | 140  | 682 | 9.00E-22  | 487.1 | 44.3 | 57.9 |
| Rsa1.0_00776.1.g19331.t1 | #                                                                                                                                                                                                                                                                                                                                                                                                                                                                                                                         | #    | #    | #         | #     | #    | #    | -                                                   | ----  | ----                 | #                                                                                                                                                                                                                                                                                                                                                                                                                                               | #    | #   | #         | #     | #    |      |
| Rsa1.0_00776.1.g19332.t1 | gb AAG51783.1 AC079679.3 reverse transcriptase, putative; 16838-20266 [Arabidopsis thaliana]                                                                                                                                                                                                                                                                                                                                                                                                                              | 1090 | 1142 | 0         | 104.8 | 39.3 | 56.1 | reverse transcriptase, putative; 16838-20266        | gbpln | Arabidopsis thaliana | AT4G29090.1   Symbols:   Ribonuclease H-like superfamily protein   chr4:14333528-14335255 FORWARD LENGTH=575                                                                                                                                                                                                                                                                                                                                    | 1090 | 575 | 2.00E-84  | 52.8  | 16.0 | 26.5 |
| Rsa1.0_00776.1.g19333.t1 | gb ACB98704.1  phospholipase D gamma 1 [Brassica oleracea var. capitata]                                                                                                                                                                                                                                                                                                                                                                                                                                                  | 817  | 859  | 0         | 105.1 | 78.6 | 86.2 | phospholipase D gamma 1                             | gbpln | Brassica oleracea    | AT4G11850.1   Symbols: PLDGAMMA1, MEE54   phospholipase D gamma 1   chr4:7129352-7132937 REVERSE LENGTH=858                                                                                                                                                                                                                                                                                                                                     | 817  | 858 | 0         | 105.0 | 78.6 | 86.7 |
| Rsa1.0_00776.1.g19334.t1 | gb AAD29058.1  putative non-LTR retroelement reverse transcriptase [Arabidopsis thaliana]                                                                                                                                                                                                                                                                                                                                                                                                                                 | 166  | 1229 | 6.00E-56  | 740.4 | 61.4 | 77.1 | putative non-LTR retroelement reverse transcriptase | gbpln | Arabidopsis thaliana | AT1G43760.1   Symbols:   DNase I-like superfamily protein   chr1:16528880-16531065 REVERSE LENGTH=626                                                                                                                                                                                                                                                                                                                                           | 166  | 626 | 4.00E-17  | 377.1 | 24.1 | 34.3 |
| Rsa1.0_00776.1.g19335.t1 | emb CAB39638.1  RNA-directed DNA polymerase-like protein [Arabidopsis thaliana] gi 7267666 emb CAB78094.1  RNA-directed DNA polymerase-like protein [Arabidopsis thaliana]                                                                                                                                                                                                                                                                                                                                                | 414  | 1274 | 2.00E-64  | 307.7 | 39.4 | 53.1 | RNA-directed DNA polymerase-like protein            | gbpln | Arabidopsis thaliana | AT1G10000.1   Symbols:   Ribonuclease H-like superfamily protein   chr1:3263877-3264788 REVERSE LENGTH=303                                                                                                                                                                                                                                                                                                                                      | 414  | 303 | 4.00E-33  | 73.2  | 21.7 | 31.4 |
| Rsa1.0_00777.1.g19336.t1 | ref XP_002867087.1  O-methyltransferase family 2 protein [Arabidopsis lyrata subsp. lyrata] gi 297312923 gb EFH43346.1  O-methyltransferase family 2 protein [Arabidopsis lyrata subsp. lyrata]                                                                                                                                                                                                                                                                                                                           | 367  | 368  | 0         | 100.3 | 82.3 | 90.7 | O-methyltransferase family 2 protein                | gbpln | Arabidopsis lyrata   | AT4G35160.1   Symbols:   O-methyltransferase family protein   chr4:16730989-16732808 REVERSE LENGTH=382                                                                                                                                                                                                                                                                                                                                         | 367  | 382 | 1.00E-177 | 104.1 | 81.7 | 91.8 |
| Rsa1.0_00777.1.g19337.t1 | ref XP_002867087.1  O-methyltransferase family 2 protein [Arabidopsis lyrata subsp. lyrata] gi 297312923 gb EFH43346.1  O-methyltransferase family 2 protein [Arabidopsis lyrata subsp. lyrata]                                                                                                                                                                                                                                                                                                                           | 367  | 368  | 1.00E-175 | 100.3 | 79.8 | 89.6 | O-methyltransferase family 2 protein                | gbpln | Arabidopsis lyrata   | AT4G35160.1   Symbols:   O-methyltransferase family protein   chr4:16730989-16732808 REVERSE LENGTH=382                                                                                                                                                                                                                                                                                                                                         | 367  | 382 | 1.00E-172 | 104.1 | 79.3 | 90.7 |
| Rsa1.0_00777.1.g19338.t1 | gb EOA18110.1  hypothetical protein CARUB_v10006571mg [Capsella rubella]                                                                                                                                                                                                                                                                                                                                                                                                                                                  | 446  | 457  | 1.00E-180 | 102.5 | 72.9 | 82.5 | hypothetical protein CARUB_v10006571mg              | gbpln | Capsella rubella     | AT4G15740.1   Symbols:   Calcium-dependent lipid-binding (CaLB domain) family protein   chr4:8964912-8966318 REVERSE LENGTH=468                                                                                                                                                                                                                                                                                                                 | 446  | 468 | 1.00E-180 | 104.9 | 71.5 | 81.2 |
| Rsa1.0_00777.1.g19339.t1 | #                                                                                                                                                                                                                                                                                                                                                                                                                                                                                                                         | #    | #    | #         | #     | #    | #    | -                                                   | ----  | ----                 | #                                                                                                                                                                                                                                                                                                                                                                                                                                               | #    | #   | #         | #     | #    |      |
| Rsa1.0_00777.1.g19340.t1 | ref NP_567468.1  PsbP domain-containing protein 1 [Arabidopsis thaliana] gi 13959580 sp O23403.1 PPD1_ARATH RecName: Full=PsbP domain-containing protein 1, chloroplastic; AltName: Full=OEC23-like protein 3; AltName: Full=PsbP-related thylakoid luminal protein 1; Flags: Precursor gi 2244908 emb CAB10329.1  hypothetical protein [Arabidopsis thaliana] gi 7268298 emb CAB78593.1  hypothetical protein [Arabidopsis thaliana] gi 332658213 gb AEE83613.1  PsbP domain-containing protein 1 [Arabidopsis thaliana] | 207  | 287  | 1.00E-100 | 138.6 | 89.9 | 94.7 | PsbP domain-containing protein 1                    | gbpln | Arabidopsis thaliana | AT4G15510.1   Symbols:   Photosystem II reaction center PsbP family protein   chr4:8860701-8862529 FORWARD LENGTH=287                                                                                                                                                                                                                                                                                                                           | 207  | 287 | 1.00E-103 | 138.6 | 89.9 | 94.7 |

|                          |                                                                                                                                                                                                                                                                                                                                                                                                                                                                                                                                                                                                                              |      |      |           |       |      |      |                                                     |       |                      |                                                                                                                                                           |      |      |           |       |      |      |
|--------------------------|------------------------------------------------------------------------------------------------------------------------------------------------------------------------------------------------------------------------------------------------------------------------------------------------------------------------------------------------------------------------------------------------------------------------------------------------------------------------------------------------------------------------------------------------------------------------------------------------------------------------------|------|------|-----------|-------|------|------|-----------------------------------------------------|-------|----------------------|-----------------------------------------------------------------------------------------------------------------------------------------------------------|------|------|-----------|-------|------|------|
| Rsa1.0_00777.1.g19341.t2 | refXP_002870236.1  hypothetical protein ARALYDRAFT_493344 [Arabidopsis lyrata subsp. lyrata] gi 297316072 gb EFH46495.1                                                                                                                                                                                                                                                                                                                                                                                                                                                                                                      | 281  | 256  | 1.00E-134 | 91.1  | 86.1 | 90.4 | hypothetical protein ARALYDRAFT_493344              | gbpln | Arabidopsis lyrata   | AT4G15470.1   Symbols:   Bax inhibitor-1 family protein   chr4:8843661-8845505 FORWARD LENGTH=256                                                         | 281  | 256  | 1.00E-135 | 91.1  | 85.8 | 90.0 |
| Rsa1.0_00777.1.g19342.t1 | gb EOA18595.1  hypothetical protein CARUB_v10007167mg [Capsella rubella]                                                                                                                                                                                                                                                                                                                                                                                                                                                                                                                                                     | 751  | 763  | 0         | 101.6 | 91.2 | 95.2 | hypothetical protein CARUB_v10007167mg              | gbpln | Capsella rubella     | AT4G15430.2   Symbols:   ERD (early-responsive to dehydration stress) family protein   chr4:8828214-8831354 FORWARD LENGTH=760                            | 751  | 760  | 0         | 101.2 | 90.1 | 94.4 |
| Rsa1.0_00777.1.g19343.t1 | gb AAG31651.1  PRL1-interacting factor K [Arabidopsis thaliana]                                                                                                                                                                                                                                                                                                                                                                                                                                                                                                                                                              | 561  | 574  | 0         | 102.3 | 90.6 | 95.5 | PRL1-interacting factor K                           | gbpln | Arabidopsis thaliana | AT4G15420.1   Symbols:   Ubiquitin fusion degradation UFD1 family protein   chr4:8823822-8825949 FORWARD LENGTH=561                                       | 561  | 561  | 0         | 100.0 | 90.6 | 95.5 |
| Rsa1.0_00777.1.g19344.t1 | gb AAD21778.1  putative non-LTR retroelement reverse transcriptase [Arabidopsis thaliana]                                                                                                                                                                                                                                                                                                                                                                                                                                                                                                                                    | 1036 | 1715 | 1.00E-154 | 165.5 | 30.2 | 43.6 | putative non-LTR retroelement reverse transcriptase | gbpln | Arabidopsis thaliana | AT1G04625.1   Symbols:   Polynucleotidyl transferase, ribonuclease H-like superfamily protein   chr1:1287831-1289820 REVERSE LENGTH=257                   | 1036 | 257  | 4.00E-36  | 24.8  | 6.8  | 9.7  |
| Rsa1.0_00777.1.g19345.t1 | refXP_002871263.1  hypothetical protein ARALYDRAFT_487555 [Arabidopsis lyrata subsp. lyrata] gi 297317100 gb EFH47522.1                                                                                                                                                                                                                                                                                                                                                                                                                                                                                                      | 173  | 587  | 9.00E-22  | 339.3 | 36.4 | 40.5 | hypothetical protein ARALYDRAFT_487555              | gbpln | Arabidopsis lyrata   | AT5G07300.1   Symbols:   BON2   Calcium-dependent phospholipid-binding Copine family protein   chr5:2299996-2303040 FORWARD LENGTH=586                    | 173  | 586  | 8.00E-24  | 338.7 | 34.1 | 37.6 |
| Rsa1.0_00777.1.g19346.t1 | gb EOA16678.1  hypothetical protein CARUB_v10004870mg [Capsella rubella]                                                                                                                                                                                                                                                                                                                                                                                                                                                                                                                                                     | 364  | 427  | 1.00E-136 | 117.3 | 77.7 | 84.9 | hypothetical protein CARUB_v10004870mg              | gbpln | Capsella rubella     | AT4G15410.1   Symbols:   PUX5   serine/threonine protein phosphatase 2A 55 kDa regulatory subunit B prime gamma   chr4:8814868-8816596 FORWARD LENGTH=421 | 364  | 421  | 1.00E-135 | 115.7 | 75.0 | 84.1 |
| Rsa1.0_00777.1.g19347.t1 | dbj BAH20736.1  beta-amylase [Raphanus sativus]                                                                                                                                                                                                                                                                                                                                                                                                                                                                                                                                                                              | 498  | 498  | 0         | 100.0 | 97.8 | 99.6 | beta-amylase                                        | gbpln | Raphanus sativus     | AT4G15210.1   Symbols:   ATBETA-AMY, AT-BETA-AMY, RAM1, BMY1, BAM5   beta-amylase 5   chr4:8666734-8669357 REVERSE LENGTH=498                             | 498  | 498  | 0         | 100.0 | 91.4 | 97.0 |
| Rsa1.0_00777.1.g19348.t1 | refNP_567460.1  beta-amylase 5 [Arabidopsis thaliana] gi 113782 sp P25853.1 BAM5_ARATH RecName: Full=Beta-amylase 5; Short=AtBeta-Amy; AltName: Full=1,4-alpha-D-glucan maltohydrolase; AltName: Full=Protein REDUCED BETA AMYLASE 1 gi 15983398 gb AAL11567.1 AF424573.1 unknown protein [Arabidopsis thaliana] gi 166602 gb AAA32737.1  beta-amylase [Arabidopsis thaliana] gi 22655392 gb AAM98288.1  At4g15210/At4g15210 [Arabidopsis thaliana] gi 110740808 dbj BAE98501.1  beta-amylase [Arabidopsis thaliana] gi 3326581 86 gb AAEE83568.1  beta-amylase 5 [Arabidopsis thaliana] gi 228699 orf11808329A beta amylase | 520  | 498  | 0         | 95.8  | 80.6 | 88.7 | beta-amylase 5                                      | gbpln | Arabidopsis thaliana | AT4G15210.1   Symbols:   ATBETA-AMY, AT-BETA-AMY, RAM1, BMY1, BAM5   beta-amylase 5   chr4:8666734-8669357 REVERSE LENGTH=498                             | 520  | 498  | 0         | 95.8  | 80.6 | 88.7 |
| Rsa1.0_00778.1.g19349.t1 | #                                                                                                                                                                                                                                                                                                                                                                                                                                                                                                                                                                                                                            | #    | #    | #         | #     | #    | -    | ----                                                | ----  | ----                 | #                                                                                                                                                         | #    | #    | #         | #     | #    |      |
| Rsa1.0_00778.1.g19350.t1 | gb AAD29774.1 AF074021.6 putative polyprotein [Arabidopsis thaliana] gi 7267218 emb CAB80825.1  putative polyprotein [Arabidopsis thaliana]                                                                                                                                                                                                                                                                                                                                                                                                                                                                                  | 292  | 922  | 3.00E-55  | 315.8 | 45.2 | 63.4 | putative polyprotein                                | gbpln | Arabidopsis thaliana | #                                                                                                                                                         | #    | #    | #         | #     | #    |      |
| Rsa1.0_00778.1.g19351.t1 | gb EOA29337.1  hypothetical protein CARUB_v10025619mg [Capsella rubella]                                                                                                                                                                                                                                                                                                                                                                                                                                                                                                                                                     | 343  | 357  | 1.00E-159 | 104.1 | 78.7 | 86.9 | hypothetical protein CARUB_v10025619mg              | gbpln | Capsella rubella     | AT2G25710.2   Symbols:   HCS1   holocarboxylase synthase 1   chr2:10952719-10955061 FORWARD LENGTH=367                                                    | 343  | 367  | 1.00E-161 | 107.0 | 79.6 | 86.6 |
| Rsa1.0_00778.1.g19352.t2 | refXP_002888457.1  predicted protein [Arabidopsis lyrata subsp. lyrata] gi 297334298 gb EFH64716.1  predicted protein [Arabidopsis lyrata subsp. lyrata]                                                                                                                                                                                                                                                                                                                                                                                                                                                                     | 345  | 1058 | 9.00E-42  | 306.7 | 24.1 | 27.2 | predicted protein                                   | gbpln | Arabidopsis lyrata   | AT1G65810.2   Symbols:   P-loop containing nucleoside triphosphate hydrolases superfamily protein   chr1:24477043-24480728 REVERSE LENGTH=1016            | 345  | 1016 | 6.00E-44  | 294.5 | 23.5 | 27.2 |
| Rsa1.0_00778.1.g19353.t1 | refXP_002873062.1  hypothetical protein ARALYDRAFT_908126 [Arabidopsis lyrata subsp. lyrata] gi 297318899 gb EFH49321.1                                                                                                                                                                                                                                                                                                                                                                                                                                                                                                      | 241  | 99   | 2.00E-31  | 41.1  | 29.0 | 32.8 | hypothetical protein ARALYDRAFT_908126              | gbpln | Arabidopsis lyrata   | #                                                                                                                                                         | #    | #    | #         | #     | #    |      |
| Rsa1.0_00778.1.g19354.t4 | gb AAC33226.1  putative non-LTR retroelement reverse transcriptase [Arabidopsis thaliana]                                                                                                                                                                                                                                                                                                                                                                                                                                                                                                                                    | 1096 | 1529 | 1.00E-102 | 139.5 | 22.8 | 34.9 | putative non-LTR retroelement reverse transcriptase | gbpln | Arabidopsis thaliana | AT1G43760.1   Symbols:   DNase I-like superfamily protein   chr1:16528880-16531065 REVERSE LENGTH=626                                                     | 1096 | 626  | 2.00E-28  | 57.1  | 6.6  | 10.8 |
| Rsa1.0_00778.1.g19355.t1 | #                                                                                                                                                                                                                                                                                                                                                                                                                                                                                                                                                                                                                            | #    | #    | #         | #     | #    | -    | ----                                                | ----  | ----                 | #                                                                                                                                                         | #    | #    | #         | #     | #    |      |

| Rsa1.0_00778.1.g19356.t1 | #                                                                                                                                                                                                                                                                                                                                                                                     | #    | #    | #        | #     | #    | #    | -                                                                           | ----  | ----                 | #                                                                                                                                                                                                                                                                                                                                | #    | #    | #        | #     | #    |      |
|--------------------------|---------------------------------------------------------------------------------------------------------------------------------------------------------------------------------------------------------------------------------------------------------------------------------------------------------------------------------------------------------------------------------------|------|------|----------|-------|------|------|-----------------------------------------------------------------------------|-------|----------------------|----------------------------------------------------------------------------------------------------------------------------------------------------------------------------------------------------------------------------------------------------------------------------------------------------------------------------------|------|------|----------|-------|------|------|
| Rsa1.0_00778.1.g19357.t1 | ref[NP_181490.5] uncharacterized protein [Arabidopsis thaliana] gi 330254602 gb AEC09696.1  uncharacterized protein ATG39580 [Arabidopsis thaliana]                                                                                                                                                                                                                                   | 254  | 1577 | 3.00E-49 | 620.9 | 39.4 | 41.7 | uncharacterized protein                                                     | gbpln | Arabidopsis thaliana | AT2G39580.1   Symbols:   CONTAINS InterPro DOMAIN/s: Putative zinc-finger domain (InterPro:IPRO19607); Has 249 Blast hits to 219 proteins in 85 species: Archae - 0; Bacteria - 144; Metazoa - 29; Fungi - 8; Plants - 50; Viruses - 0; Other Eukaryotes - 18 (source: NCBI BLINK).   chr2:16510540-16516948 FORWARD LENGTH=1577 | 254  | 1577 | 1.00E-51 | 620.9 | 39.4 | 41.7 |
| Rsa1.0_00778.1.g19358.t1 | gb EOA39403.1  hypothetical protein CARUB_v10012493mg [Capsella rubella]                                                                                                                                                                                                                                                                                                              | 183  | 307  | 4.00E-46 | 167.8 | 63.4 | 73.8 | hypothetical protein CARUB_v10012493mg                                      | gbpln | Capsella rubella     | AT3G19950.1   Symbols:   RING/U-box superfamily protein   chr3:6942853-6943839 FORWARD LENGTH=328                                                                                                                                                                                                                                | 183  | 328  | 6.00E-38 | 179.2 | 43.7 | 56.8 |
| Rsa1.0_00778.1.g19359.t1 | ref[XP_002891568.1] hypothetical protein ARALYDRAFT.474163 [Arabidopsis lyrata subsp. lyrata] gi 297337410 gb EFH67827.1  hypothetical protein ARALYDRAFT.474163 [Arabidopsis lyrata subsp. lyrata]                                                                                                                                                                                   | 1211 | 1153 | 0        | 95.2  | 85.5 | 89.7 | hypothetical protein ARALYDRAFT.474163                                      | gbpln | Arabidopsis lyrata   | AT1G50360.1   Symbols: VIII A, ATVIII A   P-loop containing nucleoside triphosphate hydrolases superfamily protein   chr1:18650688-18657106 FORWARD LENGTH=1153                                                                                                                                                                  | 1211 | 1153 | 0        | 95.2  | 85.0 | 89.8 |
| Rsa1.0_00778.1.g19361.t1 | ref[NP_564567.1] oligopeptidase B [Arabidopsis thaliana] gi 5734786 gb AAD50051.1 AC007980_16 Similar to oligopeptidases [Arabidopsis thaliana] gi 19310465 gb AAL84967.1  At1g50380/F14I3.27 [Arabidopsis thaliana] gi 332194421 gb AEE32542.1  prolyl oligopeptidase family protein [Arabidopsis thaliana]                                                                          | 710  | 710  | 0        | 100.0 | 91.5 | 95.9 | oligopeptidase B                                                            | gbpln | Arabidopsis thaliana | AT1G50380.1   Symbols:   Prolyl oligopeptidase family protein   chr1:18662480-18666185 FORWARD LENGTH=710                                                                                                                                                                                                                        | 710  | 710  | 0        | 100.0 | 91.5 | 95.9 |
| Rsa1.0_00778.1.g19362.t1 | gb EOA39090.1  hypothetical protein CARUB_v10011822mg [Capsella rubella]                                                                                                                                                                                                                                                                                                              | 1038 | 997  | 0        | 96.1  | 72.4 | 79.6 | hypothetical protein CARUB_v10011822mg                                      | gbpln | Capsella rubella     | AT1G50410.1   Symbols:   SNF2 domain-containing protein / helicase domain-containing protein / zinc finger protein-related   chr1:18672828-18677365 FORWARD LENGTH=981                                                                                                                                                           | 1038 | 981  | 0        | 94.5  | 71.5 | 79.0 |
| Rsa1.0_00778.1.g19363.t1 | gb EOA40271.1  hypothetical protein CARUB_v10008999mg [Capsella rubella] gi 482576065 gb EOA40272.1  hypothetical protein CARUB_v10008999mg [Capsella rubella]                                                                                                                                                                                                                        | 444  | 482  | 0        | 108.6 | 91.0 | 94.4 | hypothetical protein CARUB_v10008999mg                                      | gbpln | Capsella rubella     | AT1G50420.1   Symbols: SCL3, SCL-3   scarecrow-like 3   chr1:18678177-18679625 REVERSE LENGTH=482                                                                                                                                                                                                                                | 444  | 482  | 0        | 108.6 | 90.5 | 94.8 |
| Rsa1.0_00778.1.g19364.t3 | ref[XP_002894253.1] hypothetical protein ARALYDRAFT.474174 [Arabidopsis lyrata subsp. lyrata] gi 297340095 gb EFH70512.1  hypothetical protein ARALYDRAFT.474174 [Arabidopsis lyrata subsp. lyrata]                                                                                                                                                                                   | 422  | 428  | 0        | 101.4 | 90.0 | 95.0 | hypothetical protein ARALYDRAFT.474174                                      | gbpln | Arabidopsis lyrata   | AT1G50450.1   Symbols:   Saccharopine dehydrogenase   chr1:18687902-18690348 REVERSE LENGTH=428                                                                                                                                                                                                                                  | 422  | 428  | 0        | 101.4 | 88.9 | 94.3 |
| Rsa1.0_00778.1.g19365.t3 | ref[NP_181316.1] cysteine/histidine-rich C1 domain-containing protein [Arabidopsis thaliana] gi 330254358 gb AEC09452.1  cysteine/histidine-rich C1 domain-containing protein [Arabidopsis thaliana]                                                                                                                                                                                  | 297  | 396  | 1.00E-39 | 133.3 | 27.9 | 33.3 | cysteine/histidine-rich C1 domain-containing protein                        | gbpln | Arabidopsis thaliana | AT2G37800.1   Symbols:   Cysteine/Histidine-rich C1 domain family protein   chr2:15841039-15843610 REVERSE LENGTH=396                                                                                                                                                                                                            | 297  | 396  | 4.00E-42 | 133.3 | 27.9 | 33.3 |
| Rsa1.0_00778.1.g19366.t1 | ref[NP_565872.1] protease inhibitor/seed storage/lipid transfer protein (LTP) family protein [Arabidopsis thaliana] gi 15451110 gb AAK96826.1  Unknown protein [Arabidopsis thaliana] gi 18377478 gb AL66904.1  unknown protein [Arabidopsis thaliana] gi 330254366 gb AEC09460.1  protease inhibitor/seed storage/lipid transfer protein (LTP) family protein [Arabidopsis thaliana] | 115  | 115  | 2.00E-50 | 100.0 | 89.6 | 93.9 | protease inhibitor/seed storage/lipid transfer protein (LTP) family protein | gbpln | Arabidopsis thaliana | AT2G37870.1   Symbols:   Bifunctional inhibitor/lipid-transfer protein/seed storage 2S albumin superfamily protein   chr2:15859290-15859723 FORWARD LENGTH=115                                                                                                                                                                   | 115  | 115  | 3.00E-53 | 100.0 | 89.6 | 93.9 |
| Rsa1.0_00779.1.g19367.t1 | gb EMJ03944.1  hypothetical protein PRUPE_ppa013206mg [Prunus persica]                                                                                                                                                                                                                                                                                                                | 143  | 135  | 1.00E-20 | 94.4  | 38.5 | 44.8 | hypothetical protein PRUPE_ppa013206mg                                      | gbpln | Prunus persica       | AT3G54560.1   Symbols: HTA11   histone H2A 11   chr3:20196532-20197466 FORWARD LENGTH=136                                                                                                                                                                                                                                        | 143  | 136  | 2.00E-22 | 95.1  | 37.1 | 41.3 |
| Rsa1.0_00779.1.g19368.t1 | #                                                                                                                                                                                                                                                                                                                                                                                     | #    | #    | #        | #     | #    | #    | -                                                                           | ----  | ----                 | #                                                                                                                                                                                                                                                                                                                                | #    | #    | #        | #     | #    |      |

|                          |                                                                                                                                                                                                                                                                                                                                                                                                                                                                                                                                              |      |      |           |       |      |      |                                                                             |       |                      |                                                                                                                                                                |      |     |           |       |      |      |
|--------------------------|----------------------------------------------------------------------------------------------------------------------------------------------------------------------------------------------------------------------------------------------------------------------------------------------------------------------------------------------------------------------------------------------------------------------------------------------------------------------------------------------------------------------------------------------|------|------|-----------|-------|------|------|-----------------------------------------------------------------------------|-------|----------------------|----------------------------------------------------------------------------------------------------------------------------------------------------------------|------|-----|-----------|-------|------|------|
| Rsa1.0_00779.1.g19369.t1 | refNP_565872.1  protease inhibitor/seed storage/lipid transfer protein (LTP) family protein [Arabidopsis thaliana] gi15451110 gb AAK96826.1  Unknown protein [Arabidopsis thaliana] gi18377476 gb AAL66904.1  unknown protein [Arabidopsis thaliana] gi330254366 gb AEC09460.1  protease inhibitor/seed storage/lipid transfer protein (LTP) family protein [Arabidopsis thaliana]                                                                                                                                                           | 117  | 115  | 4.00E-50  | 98.3  | 91.5 | 93.2 | protease inhibitor/seed storage/lipid transfer protein (LTP) family protein | gbpln | Arabidopsis thaliana | AT2G37870.1   Symbols:   Bifunctional inhibitor/lipid-transfer protein/seed storage 2S albumin superfamily protein   chr2:15859280-15859723 FORWARD LENGTH=115 | 117  | 115 | 6.00E-53  | 98.3  | 91.5 | 93.2 |
| Rsa1.0_00779.1.g19370.t1 | gb ABK28527.1  unknown [Arabidopsis thaliana]                                                                                                                                                                                                                                                                                                                                                                                                                                                                                                | 251  | 248  | 1.00E-111 | 98.8  | 85.7 | 90.8 | unknown                                                                     | gbpln | Arabidopsis thaliana | AT2G37880.1   Symbols:   Protein of unknown function, DUF617   chr2:15860705-15861448 FORWARD LENGTH=247                                                       | 251  | 247 | 1.00E-113 | 98.4  | 85.7 | 90.8 |
| Rsa1.0_00779.1.g19371.t1 | refNP_181325.2  Mitochondrial substrate carrier family protein [Arabidopsis thaliana] gi22135876 gb AAM91520.1  putative mitochondrial carrier protein [Arabidopsis thaliana] gi23197668 gb AAN15361.1  putative mitochondrial carrier protein [Arabidopsis thaliana] gi5196841 db BAD42901.1  mitochondrial carrier like protein [Arabidopsis thaliana] gi5196868 db BAD43026.1  mitochondrial carrier like protein [Arabidopsis thaliana] gi330254368 gb AEC09462.1  Mitochondrial substrate carrier family protein [Arabidopsis thaliana] | 347  | 337  | 1.00E-150 | 97.1  | 74.9 | 85.0 | Mitochondrial substrate carrier family protein                              | gbpln | Arabidopsis thaliana | AT2G37890.1   Symbols:   Mitochondrial substrate carrier family protein   chr2:15862017-15863849 REVERSE LENGTH=337                                            | 347  | 337 | 1.00E-152 | 97.1  | 74.9 | 85.0 |
| Rsa1.0_00779.1.g19372.t1 | #                                                                                                                                                                                                                                                                                                                                                                                                                                                                                                                                            | #    | #    | #         | #     | #    | -    | ---                                                                         | ---   | #                    | #                                                                                                                                                              | #    | #   | #         | #     | #    |      |
| Rsa1.0_00779.1.g19373.t1 | gb EOA26770.1  hypothetical protein CARUB_v10022857mg [Capsella rubella] gi49256258 gb EOA26771.1  hypothetical protein CARUB_v10022857mg [Capsella rubella]                                                                                                                                                                                                                                                                                                                                                                                 | 475  | 597  | 1.00E-137 | 125.7 | 58.7 | 67.8 | hypothetical protein CARUB_v10022857mg                                      | gbpln | Capsella rubella     | AT2G37930.1   Symbols:   Protein of unknown function (DUF3527)   chr2:15873284-15874770 FORWARD LENGTH=467                                                     | 475  | 467 | 1.00E-138 | 98.3  | 61.5 | 72.8 |
| Rsa1.0_00779.1.g19374.t1 | refXP_002879716.1  hypothetical protein ARALYDRAFT_482800 [Arabidopsis lyrata subsp. lyrata] gi297325555 gb EFH55975.1  hypothetical protein ARALYDRAFT_482800 [Arabidopsis lyrata subsp. lyrata]                                                                                                                                                                                                                                                                                                                                            | 304  | 305  | 1.00E-168 | 100.3 | 94.7 | 98.4 | hypothetical protein ARALYDRAFT_482800                                      | gbpln | Arabidopsis lyrata   | AT2G37940.1   Symbols:   AtIPCS2   Arabidopsis inositol phosphoceramide synthase 2   chr2:15877169-15879411 FORWARD LENGTH=305                                 | 304  | 305 | 1.00E-171 | 100.3 | 94.4 | 98.4 |
| Rsa1.0_00779.1.g19375.t1 | refXP_002879861.1  hypothetical protein ARALYDRAFT_345820 [Arabidopsis lyrata subsp. lyrata] gi297325700 gb EFH56120.1  hypothetical protein ARALYDRAFT_345820 [Arabidopsis lyrata subsp. lyrata]                                                                                                                                                                                                                                                                                                                                            | 298  | 305  | 1.00E-80  | 102.3 | 54.7 | 67.8 | hypothetical protein ARALYDRAFT_345820                                      | gbpln | Arabidopsis lyrata   | AT2G20620.1   Symbols:   Protein of unknown function (DUF626)   chr2:8891929-8893244 REVERSE LENGTH=286                                                        | 298  | 286 | 3.00E-58  | 96.0  | 38.3 | 58.1 |
| Rsa1.0_00779.1.g19376.t1 | emb CAB39638.1  RNA-directed DNA polymerase-like protein [Arabidopsis thaliana] gi7267666 emb CAB78094.1  RNA-directed DNA polymerase-like protein [Arabidopsis thaliana]                                                                                                                                                                                                                                                                                                                                                                    | 1902 | 1274 | 0         | 67.0  | 36.2 | 46.2 | RNA-directed DNA polymerase-like protein                                    | gbpln | Arabidopsis thaliana | AT1G10000.1   Symbols:   Ribonuclease H-like superfamily protein   chr1:3263877-3264788 REVERSE LENGTH=303                                                     | 1902 | 303 | 2.00E-45  | 15.9  | 6.0  | 8.3  |
| Rsa1.0_00779.1.g19377.t1 | refXP_002881708.1  predicted protein [Arabidopsis lyrata subsp. lyrata] gi297327547 gb EFH57967.1  predicted protein [Arabidopsis lyrata subsp. lyrata]                                                                                                                                                                                                                                                                                                                                                                                      | 174  | 164  | 1.00E-39  | 94.3  | 48.3 | 64.9 | predicted protein                                                           | gbpln | Arabidopsis lyrata   | AT1G22080.2   Symbols:   Cysteine proteinases superfamily protein   chr1:7792404-7794089 REVERSE LENGTH=332                                                    | 174  | 332 | 2.00E-18  | 190.8 | 30.5 | 45.4 |
| Rsa1.0_00779.1.g19378.t1 | refXP_002879859.1  hypothetical protein ARALYDRAFT_903307 [Arabidopsis lyrata subsp. lyrata] gi297325698 gb EFH56118.1  hypothetical protein ARALYDRAFT_903307 [Arabidopsis lyrata subsp. lyrata]                                                                                                                                                                                                                                                                                                                                            | 306  | 304  | 1.00E-79  | 99.3  | 53.3 | 66.3 | hypothetical protein ARALYDRAFT_903307                                      | gbpln | Arabidopsis lyrata   | AT2G20620.1   Symbols:   Protein of unknown function (DUF626)   chr2:8891929-8893244 REVERSE LENGTH=286                                                        | 306  | 286 | 2.00E-53  | 93.5  | 37.3 | 54.9 |
| Rsa1.0_00779.1.g19379.t1 | refXP_002889340.1  hypothetical protein ARALYDRAFT_333453 [Arabidopsis lyrata subsp. lyrata] gi297335182 gb EFH65599.1  hypothetical protein ARALYDRAFT_333453 [Arabidopsis lyrata subsp. lyrata]                                                                                                                                                                                                                                                                                                                                            | 229  | 264  | 3.00E-77  | 115.3 | 81.7 | 87.8 | hypothetical protein ARALYDRAFT_333453                                      | gbpln | Arabidopsis lyrata   | AT1G02040.1   Symbols:   C2H2-type zinc finger family protein   chr1:358104-359078 REVERSE LENGTH=324                                                          | 229  | 324 | 7.00E-79  | 141.5 | 81.2 | 87.3 |

|                          |                                                                                                                                                                                                                                                                                                                                                                                                         |      |      |           |       |      |      |                                          |       |                      |                                                                                                                                                                                                                                                                                                                                                                                                                                                                                               |      |     |           |       |      |      |
|--------------------------|---------------------------------------------------------------------------------------------------------------------------------------------------------------------------------------------------------------------------------------------------------------------------------------------------------------------------------------------------------------------------------------------------------|------|------|-----------|-------|------|------|------------------------------------------|-------|----------------------|-----------------------------------------------------------------------------------------------------------------------------------------------------------------------------------------------------------------------------------------------------------------------------------------------------------------------------------------------------------------------------------------------------------------------------------------------------------------------------------------------|------|-----|-----------|-------|------|------|
| Rsa1.0_00779.1.g19380.t1 | gb ADF43044.1  chalcone synthase 3 protein [Brassica rapa subsp. rapa]                                                                                                                                                                                                                                                                                                                                  | 391  | 393  | 0         | 100.5 | 96.2 | 98.0 | chalcone synthase 3 protein              | gbpln | Brassica rapa        | AT1G02050.1   Symbols: LAP6   Chalcone and stilbene synthase family protein   chr1:359164-360441 REVERSE LENGTH=395                                                                                                                                                                                                                                                                                                                                                                           | 391  | 395 | 0         | 101.0 | 92.8 | 96.2 |
| Rsa1.0_00779.1.g19381.t1 | ref XP_002881555.1  hypothetical protein ARALYDRAFT_902985 [Arabidopsis lyrata subsp. lyrata] gi 297327394 gb EFH57814.1  hypothetical protein ARALYDRAFT_902985 [Arabidopsis lyrata subsp. lyrata]                                                                                                                                                                                                     | 494  | 483  | 1.00E-154 | 97.8  | 65.2 | 75.3 | hypothetical protein ARALYDRAFT_902985   | gbpln | Arabidopsis lyrata   | AT2G37960.2   Symbols:   unknown protein; FUNCTIONS IN: molecular_function unknown; INVOLVED IN: biological_process unknown; LOCATED IN: cellular_component unknown; BEST Arabidopsis thaliana protein match is: unknown protein (TAIR:AT3G54060.2); Has 30201 Blast hits to 17322 proteins in 780 species: Archae - 12; Bacteria - 1396; Metazoa - 17338; Fungi - 3422; Plants - 5037; Viruses - 0; Other Eukaryotes - 2996 (source: NCBI BLINK).   chr2:1586962-15889180 REVERSE LENGTH=480 | 494  | 480 | 1.00E-154 | 97.2  | 64.2 | 74.9 |
| Rsa1.0_00779.1.g19382.t1 | ref XP_002879719.1  soul heme-binding family protein [Arabidopsis lyrata subsp. lyrata] gi 297325558 gb EFH55978.1  soul heme-binding family protein [Arabidopsis lyrata subsp. lyrata]                                                                                                                                                                                                                 | 245  | 224  | 1.00E-100 | 91.4  | 78.0 | 84.9 | soul heme-binding family protein         | gbpln | Arabidopsis lyrata   | AT2G37970.1   Symbols: SOUL-1   SOUL heme-binding family protein   chr2:15891027-15891704 FORWARD LENGTH=225                                                                                                                                                                                                                                                                                                                                                                                  | 245  | 225 | 1.00E-101 | 91.8  | 76.3 | 84.1 |
| Rsa1.0_00779.1.g19383.t1 | ref NP_181334.1  O-fucosyltransferase-like protein [Arabidopsis thaliana] gi 13430694 gb AAK25969.1 AF360259.1 putative axi 1 protein from Nicotiana tabacum [Arabidopsis thaliana] gi 25054996 gb AAN71964.1  putative axi 1 protein from Nicotiana tabacum [Arabidopsis thaliana] gi 330254380 gb AEC09474.1  O-fucosyltransferase-like protein [Arabidopsis thaliana]                                | 625  | 638  | 0         | 102.1 | 84.5 | 90.1 | O-fucosyltransferase-like protein        | gbpln | Arabidopsis thaliana | AT2G37980.1   Symbols:   O-fucosyltransferase family protein   chr2:15894162-15897452 REVERSE LENGTH=638                                                                                                                                                                                                                                                                                                                                                                                      | 625  | 638 | 0         | 102.1 | 84.5 | 90.1 |
| Rsa1.0_00780.1.g19384.t1 | #                                                                                                                                                                                                                                                                                                                                                                                                       | #    | #    | #         | #     | #    | -    | ----                                     | ----  | #                    | #                                                                                                                                                                                                                                                                                                                                                                                                                                                                                             | #    | #   | #         | #     | #    |      |
| Rsa1.0_00780.1.g19385.t1 | emb CAB39638.1  RNA-directed DNA polymerase-like protein [Arabidopsis thaliana] gi 7267666 emb CAB78094.1  RNA-directed DNA polymerase-like protein [Arabidopsis thaliana]                                                                                                                                                                                                                              | 2069 | 1274 | 0         | 61.6  | 26.4 | 34.7 | RNA-directed DNA polymerase-like protein | gbpln | Arabidopsis thaliana | AT1G51410.1   Symbols:   NAD(P)-binding Rossmann-fold superfamily protein   chr1:19059885-19061424 FORWARD LENGTH=325                                                                                                                                                                                                                                                                                                                                                                         | 2069 | 325 | 1.00E-152 | 15.7  | 12.5 | 13.0 |
| Rsa1.0_00780.1.g19386.t1 | emb CAA16721.1  MuDR transposable element - like protein [Arabidopsis thaliana] gi 7268634 emb CAB78843.1  MuDR transposable element-like protein [Arabidopsis thaliana]                                                                                                                                                                                                                                | 156  | 633  | 3.00E-31  | 405.8 | 46.2 | 61.5 | MuDR transposable element - like protein | gbpln | Arabidopsis thaliana | AT3G30370.1   Symbols:   CONTAINS InterPro DOMAIN/s: Transposase, MuDR, plant (InterPro:IPR004332); BEST Arabidopsis thaliana protein match is: SWAP (Suppressor-of-White-Apicolet)/surp RNA-binding domain-containing protein (TAIR:AT1G18050.1); Has 35 Blast hits to 35 proteins in 4 species: Archae - 0; Bacteria - 0; Metazoa - 0; Fungi - 0; Plants - 35; Viruses - 0; Other Eukaryotes - 0 (source: NCBI BLINK).   chr3:11965180-11965719 REVERSE LENGTH=179                          | 156  | 179 | 2.00E-24  | 114.7 | 37.2 | 54.5 |
| Rsa1.0_00780.1.g19387.t2 | ref NP_174483.1  uncharacterized protein [Arabidopsis thaliana] gi 75169198 sp Q9C6X0.1 Y1203_ARATH RecName: Full=B3 domain-containing protein At1g32030 gi 12321462 gb AAG50787.1 AC074309.4 hypothetical protein [Arabidopsis thaliana] gi 225897992 dbj BAH30328.1  hypothetical protein [Arabidopsis thaliana] gi 332193307 gb AEE31428.1  uncharacterized protein AT1G32030 [Arabidopsis thaliana] | 315  | 333  | 1.00E-65  | 105.7 | 50.5 | 64.4 | uncharacterized protein                  | gbpln | Arabidopsis thaliana | AT1G32030.1   Symbols:   Domain of unknown function (DUF313)   chr1:11514594-11515595 FORWARD LENGTH=333                                                                                                                                                                                                                                                                                                                                                                                      | 315  | 333 | 3.00E-68  | 105.7 | 50.5 | 64.4 |
| Rsa1.0_00780.1.g19388.t1 | ref XP_002890959.1  predicted protein [Arabidopsis lyrata subsp. lyrata] gi 297336801 gb EFH67218.1  predicted protein [Arabidopsis lyrata subsp. lyrata]                                                                                                                                                                                                                                               | 526  | 539  | 0         | 102.5 | 89.4 | 94.7 | predicted protein                        | gbpln | Arabidopsis lyrata   | AT1G31970.1   Symbols: STRS1   DEAD(H)-box RNA helicase family protein   chr1:11479921-11482707 FORWARD LENGTH=537                                                                                                                                                                                                                                                                                                                                                                            | 526  | 537 | 0         | 102.1 | 88.6 | 93.3 |
| Rsa1.0_00780.1.g19389.t1 | #                                                                                                                                                                                                                                                                                                                                                                                                       | #    | #    | #         | #     | #    | -    | ----                                     | ----  | #                    | #                                                                                                                                                                                                                                                                                                                                                                                                                                                                                             | #    | #   | #         | #     | #    |      |
| Rsa1.0_00780.1.g19390.t1 | #                                                                                                                                                                                                                                                                                                                                                                                                       | #    | #    | #         | #     | #    | -    | ----                                     | ----  | #                    | #                                                                                                                                                                                                                                                                                                                                                                                                                                                                                             | #    | #   | #         | #     | #    |      |
| Rsa1.0_00780.1.g19391.t1 | dbj BAJ34269.1  unnamed protein product [Thellungiella halophila]                                                                                                                                                                                                                                                                                                                                       | 360  | 472  | 1.00E-93  | 131.1 | 63.6 | 70.6 | unnamed protein product                  | ----  | ----                 | AT1G14580.2   Symbols:   C2H2-like zinc finger protein   chr1:4990070-4992442 FORWARD LENGTH=467                                                                                                                                                                                                                                                                                                                                                                                              | 360  | 467 | 7.00E-96  | 129.7 | 62.8 | 69.4 |
| Rsa1.0_00780.1.g19392.t1 | gb AEV40788.1  heme oxygenase 1 [Brassica rapa subsp. pekinensis]                                                                                                                                                                                                                                                                                                                                       | 235  | 281  | 1.00E-117 | 119.6 | 90.6 | 94.9 | heme oxygenase 1                         | gbpln | Brassica rapa        | AT2G26670.1   Symbols: HY1, ATHO1, HO1, TED4, GUN2, HY6   Plant haem oxygenase (decyclizing) family protein   chr2:11341816-11343394 FORWARD LENGTH=282                                                                                                                                                                                                                                                                                                                                       | 235  | 282 | 1.00E-111 | 120.0 | 83.4 | 93.2 |

|                          |                                                                                                                                                                                                                                                                                                                                                                                                              |      |      |           |        |      |      |                                                                           |       |                      |                                                                                                                                                                                                                                                                          |      |      |           |       |      |      |
|--------------------------|--------------------------------------------------------------------------------------------------------------------------------------------------------------------------------------------------------------------------------------------------------------------------------------------------------------------------------------------------------------------------------------------------------------|------|------|-----------|--------|------|------|---------------------------------------------------------------------------|-------|----------------------|--------------------------------------------------------------------------------------------------------------------------------------------------------------------------------------------------------------------------------------------------------------------------|------|------|-----------|-------|------|------|
| Rsa1.0_00780.1.g19393.t1 | gb AAD19784.1  putative retroelement pol polyprotein [Arabidopsis thaliana]                                                                                                                                                                                                                                                                                                                                  | 1462 | 1501 | 0         | 102.7  | 51.6 | 66.3 | putative retroelement pol polyprotein                                     | gbpln | Arabidopsis thaliana | AT4G23160.1   Symbols: CRK8   cysteine-rich RLK (RECEPTOR-like protein kinase) 8   chr4:12129485-12134086 FORWARD LENGTH=1262                                                                                                                                            | 1462 | 1262 | 2.00E-75  | 86.3  | 10.3 | 14.1 |
| Rsa1.0_00780.1.g19394.t1 | gb EOA19843.1  hypothetical protein CARUB_v10000089mg [Capsella rubella]                                                                                                                                                                                                                                                                                                                                     | 441  | 1102 | 3.00E-43  | 249.9  | 31.1 | 41.5 | hypothetical protein CARUB_v10000089mg                                    | gbpln | Capsella rubella     | AT4G00630.1   Symbols: KEA2, ATKEA2   K+ efflux antiporter 2   chr4:261655-267789 REVERSE LENGTH=1174                                                                                                                                                                    | 441  | 1174 | 6.00E-44  | 266.2 | 30.4 | 39.0 |
| Rsa1.0_00780.1.g19395.t1 | ref NP_174471.2  protein BREVIS RADIX [Arabidopsis thaliana]<br>gi 22962171.1 sp Q17715.2 BRX_ARATH RecName: Full=Protein BREVIS RADIX; Short=AIBFX<br>gi 27754447 gb AAO22671.1  putative major intrinsic protein [Arabidopsis thaliana]<br>gi 28393953 gb AAO42384.1  putative major intrinsic protein [Arabidopsis thaliana]<br>gi 332193291 gb AEE31412.1  protein BREVIS RADIX [Arabidopsis thaliana]   | 342  | 344  | 0         | 100.6  | 91.8 | 96.5 | protein BREVIS RADIX                                                      | gbpln | Arabidopsis thaliana | AT1G31880.1   Symbols: NLM9, BRX   DZC (Disease resistance/zinc finger/chromosome condensation-like region) domain containing protein   chr1:11447804-11450053 FORWARD LENGTH=344                                                                                        | 342  | 344  | 0         | 100.6 | 91.8 | 96.5 |
| Rsa1.0_00781.1.g19396.t1 | #                                                                                                                                                                                                                                                                                                                                                                                                            | #    | #    | #         | #      | #    | #    | -                                                                         | ----  | ----                 | #                                                                                                                                                                                                                                                                        | #    | #    | #         | #     | #    | #    |
| Rsa1.0_00781.1.g19397.t2 | ref XP_002868543.1  hypothetical protein ARALYDRAFT_330314 [Arabidopsis lyrata subsp. lyrata]<br>gi 297314379 gb EFH44802.1  hypothetical protein ARALYDRAFT_330314 [Arabidopsis lyrata subsp. lyrata]                                                                                                                                                                                                       | 442  | 283  | 1.00E-139 | 64.0   | 53.4 | 60.0 | hypothetical protein ARALYDRAFT_330314                                    | gbpln | Arabidopsis lyrata   | AT5G37810.1   Symbols: NIP4.1, NLM4   NOD26-like intrinsic protein 4.1   chr5:15045232-15047807 FORWARD LENGTH=283                                                                                                                                                       | 442  | 283  | 1.00E-140 | 64.0  | 52.7 | 59.5 |
| Rsa1.0_00781.1.g19398.t1 | #                                                                                                                                                                                                                                                                                                                                                                                                            | #    | #    | #         | #      | #    | #    | -                                                                         | ----  | ----                 | #                                                                                                                                                                                                                                                                        | #    | #    | #         | #     | #    | #    |
| Rsa1.0_00781.1.g19399.t1 | gb ABD85099.1  hypothetical protein 31.t00074 [Brassica oleracea]                                                                                                                                                                                                                                                                                                                                            | 253  | 258  | 2.00E-74  | 102.0  | 60.5 | 73.9 | hypothetical protein 31.t00074                                            | gbpln | Brassica oleracea    | AT3G47680.1   Symbols:   DNA binding   chr3:17577483-17578391 REVERSE LENGTH=302                                                                                                                                                                                         | 253  | 302  | 2.00E-50  | 119.4 | 47.4 | 68.4 |
| Rsa1.0_00781.1.g19400.t1 | gb ABD85112.1  hypothetical protein 31.t00014 [Brassica oleracea]                                                                                                                                                                                                                                                                                                                                            | 119  | 122  | 3.00E-34  | 102.5  | 63.0 | 81.5 | hypothetical protein 31.t00014                                            | gbpln | Brassica oleracea    | #                                                                                                                                                                                                                                                                        | #    | #    | #         | #     | #    | #    |
| Rsa1.0_00781.1.g19401.t1 | gb AAC26250.1  contains similarity to reverse transcriptase (Pfam: rvt.hmm, score 19.29) [Arabidopsis thaliana]<br>gi 7267136 emb CAB80804.1  putative retrotransposon protein [Arabidopsis thaliana]                                                                                                                                                                                                        | 61   | 964  | 2.00E-13  | 1580.3 | 60.7 | 73.8 | contains similarity to reverse transcriptase (Pfam: rvt.hmm, score 19.29) | gbpln | Arabidopsis thaliana | #                                                                                                                                                                                                                                                                        | #    | #    | #         | #     | #    | #    |
| Rsa1.0_00781.1.g19402.t3 | gb AAG51783.1 AC079679_3 reverse transcriptase, putative; 16838-20266 [Arabidopsis thaliana]                                                                                                                                                                                                                                                                                                                 | 1776 | 1142 | 0         | 64.3   | 24.2 | 33.3 | reverse transcriptase, putative; 16838-20266                              | gbpln | Arabidopsis thaliana | AT4G29090.1   Symbols:   Ribonuclease H-like superfamily protein   chr4:14333528-14335255 FORWARD LENGTH=575                                                                                                                                                             | 1776 | 575  | 7.00E-51  | 32.4  | 6.1  | 10.0 |
| Rsa1.0_00782.1.g19403.t2 | gb EOA12827.1  hypothetical protein CARUB_v10025787mg [Capsella rubella]                                                                                                                                                                                                                                                                                                                                     | 995  | 1055 | 0         | 106.0  | 87.7 | 91.9 | hypothetical protein CARUB_v10025787mg                                    | gbpln | Capsella rubella     | AT5G64220.2   Symbols:   Calmodulin-binding transcription activator protein with CG-1 and Ankyrin domains   chr5:25686434-25691903 FORWARD LENGTH=1050                                                                                                                   | 995  | 1050 | 0         | 105.5 | 86.7 | 91.6 |
| Rsa1.0_00782.1.g19404.t1 | #                                                                                                                                                                                                                                                                                                                                                                                                            | #    | #    | #         | #      | #    | #    | -                                                                         | ----  | ----                 | #                                                                                                                                                                                                                                                                        | #    | #    | #         | #     | #    | #    |
| Rsa1.0_00782.1.g19405.t1 | gb EOA13614.1  hypothetical protein CARUB_v10026681mg [Capsella rubella]                                                                                                                                                                                                                                                                                                                                     | 316  | 354  | 1.00E-138 | 112.0  | 81.0 | 85.8 | hypothetical protein CARUB_v10026681mg                                    | gbpln | Capsella rubella     | AT5G64210.1   Symbols: AOX2   alternative oxidase 2   chr5:25683965-25685664 REVERSE LENGTH=353                                                                                                                                                                          | 316  | 353  | 1.00E-139 | 111.7 | 80.7 | 85.4 |
| Rsa1.0_00782.1.g19406.t1 | ref NP_201223.1  uncharacterized protein [Arabidopsis thaliana]<br>gi 9759394 db BAB09949.1  unnamed protein product [Arabidopsis thaliana]<br>gi 15810363 gb AAL07069.1  unknown protein [Arabidopsis thaliana]<br>gi 21280975 gb AAM45070.1  unknown protein [Arabidopsis thaliana]<br>gi 332010468 gb AED97851.1  uncharacterized protein AT5G64180 [Arabidopsis thaliana]                                | 155  | 158  | 1.00E-65  | 101.9  | 90.3 | 94.2 | uncharacterized protein                                                   | gbpln | Arabidopsis thaliana | AT5G64180.1   Symbols:   unknown protein; Has 1807 Blast hits to 1807 proteins in 277 species: Archae - 0; Bacteria - 0; Metazoa - 736; Fungi - 347; Plants - 385; Viruses - 0; Other Eukaryotes - 339 (source: NCBI BLINK).   chr5:25677163-25678204 FORWARD LENGTH=158 | 155  | 158  | 5.00E-68  | 101.9 | 90.3 | 94.2 |
| Rsa1.0_00782.1.g19407.t1 | ref NP_568985.1  cAMP-regulated phosphoprotein 19-related protein [Arabidopsis thaliana]<br>gi 16648718 gb AAL25551.1  AT5G64130/MHJ24.11 [Arabidopsis thaliana]<br>gi 20453353 gb AAM19915.1  AT5G64130/MHJ24.11 [Arabidopsis thaliana]<br>gi 21618212 gb AAM67262.1  unknown [Arabidopsis thaliana]<br>gi 332010460 gb AED97843.1  cAMP-regulated phosphoprotein 19-related protein [Arabidopsis thaliana] | 261  | 115  | 1.00E-50  | 44.1   | 36.8 | 38.3 | cAMP-regulated phosphoprotein 19-related protein                          | gbpln | Arabidopsis thaliana | AT5G64130.1   Symbols:   cAMP-regulated phosphoprotein 19-related protein   chr5:25664547-25665339 REVERSE LENGTH=115                                                                                                                                                    | 261  | 115  | 4.00E-53  | 44.1  | 36.8 | 38.3 |

|                          |                                                                                                                                                                                                                                                                                                                                                                                                                                         |     |     |           |       |      |      |                                                                                                                                      |       |                      |                                                                                                                                                                                                                                                                                                                                                                                                                                                                                                                                                                                         |     |     |           |       |      |      |
|--------------------------|-----------------------------------------------------------------------------------------------------------------------------------------------------------------------------------------------------------------------------------------------------------------------------------------------------------------------------------------------------------------------------------------------------------------------------------------|-----|-----|-----------|-------|------|------|--------------------------------------------------------------------------------------------------------------------------------------|-------|----------------------|-----------------------------------------------------------------------------------------------------------------------------------------------------------------------------------------------------------------------------------------------------------------------------------------------------------------------------------------------------------------------------------------------------------------------------------------------------------------------------------------------------------------------------------------------------------------------------------------|-----|-----|-----------|-------|------|------|
| Rsa1.0_00782.1.g19408.t1 | gb EOA13363.1  hypothetical protein CARUB_v10026400mg [Capsella rubella]                                                                                                                                                                                                                                                                                                                                                                | 414 | 445 | 1.00E-167 | 107.5 | 77.3 | 84.3 | hypothetical protein CARUB_v10026400mg                                                                                               | gbpln | Capsella rubella     | AT5G64090.1   Symbols:   FUNCTIONS IN: molecular_function unknown; INVOLVED IN: biological_process unknown; LOCATED IN: plasma membrane; EXPRESSED IN: 23 plant structures; EXPRESSED DURING: 13 growth stages; CONTAINS InterPro DOMAIN/s: Hyccin (InterPro:IPR018619); BEST Arabidopsis thaliana protein match is: unknown protein (TAIR:AT5G21050.1); Has 1807 Blast hits to 1807 proteins in 277 species: Archae - 0; Bacteria - 0; Metazoa - 736; Fungi - 347; Plants - 385; Viruses - 0; Other Eukaryotes - 339 (source: NCBI BLink).   chr5:25648069-25649415 FORWARD LENGTH=448 | 414 | 448 | 1.00E-165 | 108.2 | 77.8 | 83.6 |
| Rsa1.0_00782.1.g19409.t1 | ref XP_002866588.1  photosystem I reaction center subunit psi-N [Arabidopsis lyrata subsp. lyrata] gi 297312423 gb EFH42847.1  photosystem I reaction center subunit psi-N [Arabidopsis lyrata subsp. lyrata] ref NP_201203.2  inositol polyphosphate 1-phosphatase [Arabidopsis thaliana] gi 332010442 gb AED97825.1  bifunctional 3'(2'),5'-bisphosphate nucleotidase and inositol polyphosphate 1-phosphatase [Arabidopsis thaliana] | 187 | 171 | 2.00E-71  | 91.4  | 78.1 | 81.8 | photosystem I reaction center subunit psi-N                                                                                          | gbpln | Arabidopsis lyrata   | AT5G64040.1   Symbols: PSAN   photosystem I reaction center subunit PSI-N, chloroplast, putative / PSI-N, putative (PSAN)   chr5:25628724-25629409 REVERSE LENGTH=171                                                                                                                                                                                                                                                                                                                                                                                                                   | 187 | 171 | 1.00E-73  | 91.4  | 77.5 | 81.3 |
| Rsa1.0_00782.1.g19410.t1 | ref NP_201203.2  inositol polyphosphate 1-phosphatase [Arabidopsis thaliana] gi 332010442 gb AED97825.1  bifunctional 3'(2'),5'-bisphosphate nucleotidase and inositol polyphosphate 1-phosphatase [Arabidopsis thaliana]                                                                                                                                                                                                               | 360 | 407 | 1.00E-177 | 113.1 | 90.0 | 93.6 | inositol polyphosphate 1-phosphatase                                                                                                 | gbpln | Arabidopsis thaliana | AT5G63990.1   Symbols: SAL1, ALX8, ATSALL1, HOS2, FRY1, RON1   Inositol monophosphatase family protein   chr5:25609840-25611802 FORWARD LENGTH=407                                                                                                                                                                                                                                                                                                                                                                                                                                      | 360 | 407 | 1.00E-180 | 113.1 | 90.0 | 93.6 |
| Rsa1.0_00782.1.g19411.t1 | ref XP_002866582.1  hypothetical protein ARALYDRAFT_919691 [Arabidopsis lyrata subsp. lyrata] gi 297312417 gb EFH41133.1  hypothetical protein ARALYDRAFT_919691 [Arabidopsis lyrata subsp. lyrata]                                                                                                                                                                                                                                     | 76  | 76  | 2.00E-18  | 100.0 | 85.5 | 90.8 | hypothetical protein ARALYDRAFT_919691                                                                                               | gbpln | Arabidopsis lyrata   | AT5G63905.1   Symbols:   unknown protein; FUNCTIONS IN: molecular_function unknown; INVOLVED IN: N-terminal protein myristoylation; LOCATED IN: cellular_component unknown; EXPRESSED IN: 20 plant structures; EXPRESSED DURING: 12 growth stages; Has 30201 Blast hits to 17322 proteins in 780 species: Archae - 12; Bacteria - 1396; Metazoa - 17338; Fungi - 3422; Plants - 5037; Viruses - 0; Other Eukaryotes - 2996 (source: NCBI BLink).   chr5:25571055-25571503 REVERSE LENGTH=76                                                                                             | 76  | 76  | 7.00E-16  | 100.0 | 86.8 | 93.4 |
| Rsa1.0_00782.1.g19412.t1 | ref XP_002864874.1  PHD finger family protein [Arabidopsis lyrata subsp. lyrata] gi 297310709 gb EFH41133.1  PHD finger family protein [Arabidopsis lyrata subsp. lyrata]                                                                                                                                                                                                                                                               | 568 | 555 | 1.00E-172 | 97.7  | 61.4 | 73.6 | PHD finger family protein                                                                                                            | gbpln | Arabidopsis lyrata   | AT5G63900.1   Symbols:   Acyl-CoA N-acyltransferase with RING/FYVE/PHD-type zinc finger domain   chr5:25568698-25570371 FORWARD LENGTH=557                                                                                                                                                                                                                                                                                                                                                                                                                                              | 568 | 557 | 1.00E-174 | 98.1  | 60.0 | 73.9 |
| Rsa1.0_00782.1.g19413.t1 | sp P24226.1 HISX_BRAOC RecName: Full=Histidinol dehydrogenase, chloroplastic; Short=HDH; Flags: Precursor gi 167142 gb AAA32991.1  histidinol dehydrogenase [Brassica oleracea]                                                                                                                                                                                                                                                         | 473 | 469 | 0         | 99.2  | 94.1 | 95.8 | RecName: Full=Histidinol dehydrogenase, chloroplastic; Short=HDH; Flags: Precursor gi 167142 gb AAA32991.1  histidinol dehydrogenase | gbpln | Brassica oleracea    | AT5G63890.2   Symbols: ATHDH, HISN8, HDH   histidinol dehydrogenase   chr5:25565600-25566104 REVERSE LENGTH=466                                                                                                                                                                                                                                                                                                                                                                                                                                                                         | 473 | 466 | 0         | 98.5  | 89.9 | 92.6 |
| Rsa1.0_00782.1.g19414.t1 | gb EOA13450.1  hypothetical protein CARUB_v10026492mg [Capsella rubella]                                                                                                                                                                                                                                                                                                                                                                | 413 | 412 | 0         | 99.8  | 90.3 | 94.9 | hypothetical protein CARUB_v10026492mg                                                                                               | gbpln | Capsella rubella     | AT5G63870.1   Symbols: PP7, ATPP7   serine/threonine phosphatase 7   chr5:25561336-25562908 REVERSE LENGTH=413                                                                                                                                                                                                                                                                                                                                                                                                                                                                          | 413 | 413 | 0         | 100.0 | 88.1 | 94.2 |
| Rsa1.0_00782.1.g19415.t1 | dbj BAJ33982.1  unnamed protein product [Thellungiella halophila]                                                                                                                                                                                                                                                                                                                                                                       | 416 | 440 | 0         | 105.8 | 93.5 | 96.4 | unnamed protein product                                                                                                              | ----  | ----                 | AT5G63860.1   Symbols: UVR8   Regulator of chromosome condensation (RCC1) family protein   chr5:25554821-25558587 REVERSE LENGTH=440                                                                                                                                                                                                                                                                                                                                                                                                                                                    | 416 | 440 | 0         | 105.8 | 91.8 | 95.2 |
| Rsa1.0_00782.1.g19416.t1 | ref NP_201189.1  alpha 1,3-glucosidase [Arabidopsis thaliana] gi 10177672 dbj BAB11032.1  glucosidase II alpha subunit [Arabidopsis thaliana] gi 332010420 gb AED97803.1  alpha 1,3-glucosidase [Arabidopsis thaliana]                                                                                                                                                                                                                  | 96  | 921 | 1.00E-29  | 959.4 | 66.7 | 68.8 | alpha 1,3-glucosidase                                                                                                                | gbpln | Arabidopsis thaliana | AT5G63840.1   Symbols: RSW3, PSL5   Glycosyl hydrolases family 31 protein   chr5:25545056-25548922 FORWARD LENGTH=921                                                                                                                                                                                                                                                                                                                                                                                                                                                                   | 96  | 921 | 2.00E-32  | 959.4 | 66.7 | 68.8 |
| Rsa1.0_00782.1.g19417.t1 | ref XP_002864866.1  zinc finger family protein [Arabidopsis lyrata subsp. lyrata] gi 297310701 gb EFH41125.1  zinc finger family protein [Arabidopsis lyrata subsp. lyrata]                                                                                                                                                                                                                                                             | 336 | 368 | 1.00E-144 | 109.5 | 83.9 | 87.8 | zinc finger family protein                                                                                                           | gbpln | Arabidopsis lyrata   | AT5G63780.1   Symbols: SHA1   RING/FYVE/PHD zinc finger superfamily protein   chr5:25525160-25526446 FORWARD LENGTH=367                                                                                                                                                                                                                                                                                                                                                                                                                                                                 | 336 | 367 | 1.00E-142 | 109.2 | 81.0 | 85.4 |
| Rsa1.0_00782.1.g19418.t1 | ref NP_201177.1  protein kokopelli [Arabidopsis thaliana] gi 10177053 dbj BAB10465.1  unnamed protein product [Arabidopsis thaliana] gi 332010406 gb AED9789.1  protein kokopelli [Arabidopsis thaliana]                                                                                                                                                                                                                                | 476 | 492 | 1.00E-74  | 103.4 | 49.2 | 63.2 | protein kokopelli                                                                                                                    | gbpln | Arabidopsis thaliana | AT5G63720.1   Symbols: KPL   kokopelli   chr5:25506349-25508017 FORWARD LENGTH=492                                                                                                                                                                                                                                                                                                                                                                                                                                                                                                      | 476 | 492 | 3.00E-77  | 103.4 | 49.2 | 63.2 |

|                          |                                                                                                                                                                                                                                                                                                                                                                                                                          |      |      |           |       |      |      |                                                 |       |                      |                                                                                                                                                                                                                                                                                                                                                                                                                        |      |      |           |       |      |      |
|--------------------------|--------------------------------------------------------------------------------------------------------------------------------------------------------------------------------------------------------------------------------------------------------------------------------------------------------------------------------------------------------------------------------------------------------------------------|------|------|-----------|-------|------|------|-------------------------------------------------|-------|----------------------|------------------------------------------------------------------------------------------------------------------------------------------------------------------------------------------------------------------------------------------------------------------------------------------------------------------------------------------------------------------------------------------------------------------------|------|------|-----------|-------|------|------|
| Rsa1.0_00782.1.g19419.t1 | gb EOA12496.1  hypothetical protein CARUB_v10026111mg, partial [Capsella rubella]                                                                                                                                                                                                                                                                                                                                        | 566  | 604  | 0         | 106.7 | 66.1 | 78.4 | hypothetical protein CARUB_v10026111mg, partial | gbpln | Capsella rubella     | AT5G63700.1   Symbols:   zinc ion binding DNA binding   chr5:25493934-25497632 REVERSE LENGTH=602                                                                                                                                                                                                                                                                                                                      | 566  | 602  | 0         | 106.4 | 65.0 | 76.5 |
| Rsa1.0_00782.1.g19420.t1 | ref XP_002864862.1  hypothetical protein ARALYDRAFT_919664 [Arabidopsis lyrata subsp. lyrata] gi 297310697 gb EFH41121.1  hypothetical protein ARALYDRAFT_919664 [Arabidopsis lyrata subsp. lyrata]                                                                                                                                                                                                                      | 510  | 510  | 0         | 100.0 | 96.1 | 98.8 | hypothetical protein ARALYDRAFT_919664          | gbpln | Arabidopsis lyrata   | AT5G63680.1   Symbols:   Pyruvate kinase family protein   chr5:25490507-25492530 FORWARD LENGTH=510                                                                                                                                                                                                                                                                                                                    | 510  | 510  | 0         | 100.0 | 96.1 | 98.6 |
| Rsa1.0_00782.1.g19421.t1 | dbj BAJ33958.1  unnamed protein product [Theiliungella halophila]                                                                                                                                                                                                                                                                                                                                                        | 384  | 472  | 1.00E-157 | 122.9 | 72.4 | 75.0 | unnamed protein product                         | ----  | ----                 | AT5G63610.1   Symbols: HEN3, CDKE1, ATCDK8   cyclin-dependent kinase E.1   chr5:25463645-25465057 REVERSE LENGTH=470                                                                                                                                                                                                                                                                                                   | 384  | 470  | 1.00E-158 | 122.4 | 71.1 | 74.2 |
| Rsa1.0_00782.1.g19422.t1 | gb EOA21042.1  hypothetical protein CARUB_v10001381mg [Capsella rubella]                                                                                                                                                                                                                                                                                                                                                 | 332  | 336  | 1.00E-98  | 101.2 | 55.1 | 69.6 | hypothetical protein CARUB_v10001381mg          | gbpln | Capsella rubella     | AT5G08640.2   Symbols: FLS1   flavonol synthase 1   chr5:2804009-2805175 FORWARD LENGTH=336                                                                                                                                                                                                                                                                                                                            | 332  | 336  | 1.00E-101 | 101.2 | 55.1 | 69.6 |
| Rsa1.0_00782.1.g19423.t1 | gb EOA13644.1  hypothetical protein CARUB_v10026716mg [Capsella rubella]                                                                                                                                                                                                                                                                                                                                                 | 169  | 343  | 8.00E-24  | 203.0 | 33.1 | 40.2 | hypothetical protein CARUB_v10026716mg          | gbpln | Capsella rubella     | AT5G43935.1   Symbols: FLS6, ATFLS6   flavonol synthase 6   chr5:17682179-17683446 FORWARD LENGTH=293                                                                                                                                                                                                                                                                                                                  | 169  | 293  | 4.00E-26  | 173.4 | 34.3 | 41.4 |
| Rsa1.0_00782.1.g19424.t1 | gb EOA13644.1  hypothetical protein CARUB_v10026716mg [Capsella rubella]                                                                                                                                                                                                                                                                                                                                                 | 111  | 343  | 2.00E-36  | 309.0 | 66.7 | 82.0 | hypothetical protein CARUB_v10026716mg          | gbpln | Capsella rubella     | AT5G08640.2   Symbols: FLS1   flavonol synthase 1   chr5:2804009-2805175 FORWARD LENGTH=336                                                                                                                                                                                                                                                                                                                            | 111  | 336  | 1.00E-33  | 302.7 | 60.4 | 71.2 |
| Rsa1.0_00782.1.g19425.t1 | emb CAC37623.1  copia-like polyprotein [Arabidopsis thaliana]                                                                                                                                                                                                                                                                                                                                                            | 409  | 1466 | 1.00E-153 | 358.4 | 64.5 | 77.3 | copia-like polyprotein                          | gbpln | Arabidopsis thaliana | AT5G48050.1   Symbols:   CONTAINS InterPro DOMAIN/s: Retrotransposon gag protein (InterPro:IPR005162); BEST Arabidopsis thaliana protein match is: unknown protein (TAIR:AT1G34070.1); Has 1807 Blast hits to 1807 proteins in 277 species: Archaea - 0; Bacteria - 0; Metazoa - 736; Fungi - 347; Plants - 385; Viruses - 0; Other Eukaryotes - 339 (source: NCBI BLINK).   chr5:19472661-19473770 REVERSE LENGTH=369 | 409  | 369  | 4.00E-22  | 90.2  | 18.6 | 30.6 |
| Rsa1.0_00783.1.g19426.t1 | ref XP_002863741.1  hypothetical protein ARALYDRAFT_917455 [Arabidopsis lyrata subsp. lyrata] gi 297309576 gb EFH40000.1  hypothetical protein ARALYDRAFT_917455 [Arabidopsis lyrata subsp. lyrata]                                                                                                                                                                                                                      | 353  | 390  | 3.00E-63  | 110.5 | 39.9 | 53.0 | hypothetical protein ARALYDRAFT_917455          | gbpln | Arabidopsis lyrata   | AT1G43730.1   Symbols:   RNA-directed DNA polymerase (reverse transcriptase)-related family protein   chr1:16508723-16509784 REVERSE LENGTH=320                                                                                                                                                                                                                                                                        | 353  | 320  | 1.00E-32  | 90.7  | 25.2 | 40.2 |
| Rsa1.0_00783.1.g19427.t1 | ref XP_002887115.1  zinc finger family protein [Arabidopsis lyrata subsp. lyrata] gi 297332956 gb EFH63374.1  zinc finger family protein [Arabidopsis lyrata subsp. lyrata]                                                                                                                                                                                                                                              | 354  | 375  | 1.00E-158 | 105.9 | 79.7 | 85.9 | zinc finger family protein                      | gbpln | Arabidopsis lyrata   | AT1G67340.1   Symbols:   HCP-like superfamily protein with MYND-type zinc finger   chr1:25230323-25231622 FORWARD LENGTH=379                                                                                                                                                                                                                                                                                           | 354  | 379  | 1.00E-154 | 107.1 | 77.7 | 84.7 |
| Rsa1.0_00783.1.g19428.t1 | gb AAG51783.1 AC079679_3 reverse transcriptase, putative; 16838-20266 [Arabidopsis thaliana]                                                                                                                                                                                                                                                                                                                             | 155  | 1142 | 9.00E-23  | 736.8 | 41.3 | 60.0 | reverse transcriptase, putative; 16838-20266    | gbpln | Arabidopsis thaliana | AT2G34320.1   Symbols:   Polynucleotidyl transferase, ribonuclease H-like superfamily protein   chr2:14484959-14485837 FORWARD LENGTH=292                                                                                                                                                                                                                                                                              | 155  | 292  | 1.00E-10  | 188.4 | 26.5 | 45.8 |
| Rsa1.0_00783.1.g19429.t1 | ref NP_176901.1  uncharacterized protein [Arabidopsis thaliana] gi 9828617 gb AAG00240.1 AC002130_5 F1N21.15 [Arabidopsis thaliana] gi 40823166 gb AAR92263.1  At1g67330 [Arabidopsis thaliana] gi 45752704 gb AAS76250.1  At1g67330 [Arabidopsis thaliana] gi 110742847 dbj BAE99322.1  hypothetical protein [Arabidopsis thaliana] gi 33219651 gb AEE34632.1  uncharacterized protein AT1G67330 [Arabidopsis thaliana] | 288  | 291  | 1.00E-149 | 101.0 | 86.8 | 92.0 | uncharacterized protein                         | gbpln | Arabidopsis thaliana | AT1G67330.1   Symbols:   Protein of unknown function (DUF579)   chr1:25214118-25214993 FORWARD LENGTH=291                                                                                                                                                                                                                                                                                                              | 288  | 291  | 1.00E-152 | 101.0 | 86.8 | 92.0 |
| Rsa1.0_00783.1.g19430.t1 | #                                                                                                                                                                                                                                                                                                                                                                                                                        | #    | #    | #         | #     | #    | -    | ----                                            | ----  | ----                 | #                                                                                                                                                                                                                                                                                                                                                                                                                      | #    | #    | #         | #     | #    | #    |
| Rsa1.0_00783.1.g19431.t1 | emb CAN65591.1  hypothetical protein VITISV_042091 [Vitis vinifera]                                                                                                                                                                                                                                                                                                                                                      | 1111 | 1427 | 1.00E-152 | 128.4 | 29.8 | 40.5 | hypothetical protein VITISV_042091              | gbpln | Vitis vinifera       | AT4G23160.1   Symbols: CRK8   cysteine-rich RLK (RECEPTOR-like protein kinase) 8   chr4:12129485-12134086 FORWARD LENGTH=1262                                                                                                                                                                                                                                                                                          | 1111 | 1262 | 5.00E-41  | 113.6 | 7.3  | 11.7 |
| Rsa1.0_00783.1.g19432.t1 | gb ADP76651.1  MYB2 [Brassica oleracea var. botrytis]                                                                                                                                                                                                                                                                                                                                                                    | 185  | 247  | 3.00E-61  | 133.5 | 64.3 | 75.1 | MYB2                                            | gbpln | Brassica oleracea    | AT1G66370.1   Symbols: MYB113, AtMYB113   myb domain protein 113   chr1:24753634-24754604 FORWARD LENGTH=246                                                                                                                                                                                                                                                                                                           | 185  | 246  | 1.00E-53  | 133.0 | 59.5 | 73.0 |
| Rsa1.0_00783.1.g19433.t1 | #                                                                                                                                                                                                                                                                                                                                                                                                                        | #    | #    | #         | #     | #    | -    | ----                                            | ----  | ----                 | #                                                                                                                                                                                                                                                                                                                                                                                                                      | #    | #    | #         | #     | #    | #    |
| Rsa1.0_00783.1.g19434.t1 | #                                                                                                                                                                                                                                                                                                                                                                                                                        | #    | #    | #         | #     | #    | -    | ----                                            | ----  | ----                 | #                                                                                                                                                                                                                                                                                                                                                                                                                      | #    | #    | #         | #     | #    | #    |
| Rsa1.0_00783.1.g19435.t1 | ref XP_004154771.1  PREDICTED: kanadapitin-like [Cucumis sativus]                                                                                                                                                                                                                                                                                                                                                        | 249  | 962  | 3.00E-41  | 386.3 | 40.2 | 52.6 | PREDICTED: kanadapitin-like                     | gbpln | Cucumis sativus      | #                                                                                                                                                                                                                                                                                                                                                                                                                      | #    | #    | #         | #     | #    | #    |
| Rsa1.0_00783.1.g19436.t2 | #                                                                                                                                                                                                                                                                                                                                                                                                                        | #    | #    | #         | #     | #    | -    | ----                                            | ----  | ----                 | #                                                                                                                                                                                                                                                                                                                                                                                                                      | #    | #    | #         | #     | #    | #    |



|                          |                                                                                                                                                                                                                                                                                                                                                                                                                                                                                                                                                                                                                                                                                                                                                                                                         |     |     |           |       |      |      |                                                      |       |                      |                                                                                                                                          |     |     |           |       |      |      |
|--------------------------|---------------------------------------------------------------------------------------------------------------------------------------------------------------------------------------------------------------------------------------------------------------------------------------------------------------------------------------------------------------------------------------------------------------------------------------------------------------------------------------------------------------------------------------------------------------------------------------------------------------------------------------------------------------------------------------------------------------------------------------------------------------------------------------------------------|-----|-----|-----------|-------|------|------|------------------------------------------------------|-------|----------------------|------------------------------------------------------------------------------------------------------------------------------------------|-----|-----|-----------|-------|------|------|
| Rsa1.0_00783.1.g19437.t1 | gb ADP76651.1  MYB2 [Brassica oleracea var. botrytis]                                                                                                                                                                                                                                                                                                                                                                                                                                                                                                                                                                                                                                                                                                                                                   | 190 | 247 | 4.00E-45  | 130.0 | 58.4 | 73.2 | MYB2                                                 | gbpln | Brassica oleracea    | AT1G56650.1   Symbols: PAP1, MYB75, SIAA1, ATM7B75   production of anthocyanin pigment   chr1:21233714-21235089 REVERSE LENGTH=248       | 190 | 248 | 4.00E-42  | 130.5 | 55.8 | 68.9 |
| Rsa1.0_00784.1.g19438.t1 | ref XP_002884844.1  AHG3/ATPP2CA [Arabidopsis lyrata subsp. lyrata] gi 297330684 gb EFH61103.1  AHG3/ATPP2CA [Arabidopsis lyrata subsp. lyrata] ref NP_187747.1  translation initiation factor eIF-3 subunit 4 [Arabidopsis thaliana] gi 12322907 gb AAG51445.1 AC008153_18 putative eukaryotic translation initiation factor 3 subunit; 21071-22901 [Arabidopsis thaliana] gi 16226341 gb AAL16140.1 AF428308_1 AT3g11400/F24K9.7 [Arabidopsis thaliana] gi 9755847 emb CAC01929.1  translation initiation factor 3, subunit g (eIF3g) [Arabidopsis thaliana] gi 18377870 gb AAL67121.1  AT3g11400/F24K9.7 [Arabidopsis thaliana] gi 22137220 gb AAM91455.1  AT3g11400/F24K9.7 [Arabidopsis thaliana] gi 332641520 gb AEE75041.1  translation initiation factor eIF-3 subunit 4 [Arabidopsis thaliana] | 391 | 396 | 1.00E-165 | 101.3 | 83.4 | 89.8 | AHG3/ATPP2CA                                         | gbpln | Arabidopsis lyrata   | AT3G11410.1   Symbols: ATPP2CA, AHG3, PP2CA   protein phosphatase 2CA   chr3:3584181-3585649 REVERSE LENGTH=399                          | 391 | 399 | 1.00E-167 | 102.0 | 83.4 | 90.0 |
| Rsa1.0_00784.1.g19439.t1 | ref NP_001189860.1  cysteine/histidine-rich C1 domain-containing protein [Arabidopsis thaliana] gi 332641518 gb AEE75039.1  cysteine/histidine-rich C1 domain-containing protein [Arabidopsis thaliana]                                                                                                                                                                                                                                                                                                                                                                                                                                                                                                                                                                                                 | 291 | 294 | 1.00E-144 | 101.0 | 87.6 | 91.4 | translation initiation factor eIF-3 subunit 4        | gbpln | Arabidopsis thaliana | AT3G11400.1   Symbols: EIF3G1, ATEIF3G1   eukaryotic translation initiation factor 3G1   chr3:3578536-3580366 FORWARD LENGTH=294         | 291 | 294 | 2.33E-156 | 101.0 | 87.6 | 91.4 |
| Rsa1.0_00784.1.g19440.t1 | ref NP_001189860.1  cysteine/histidine-rich C1 domain-containing protein [Arabidopsis thaliana] gi 332641518 gb AEE75039.1  cysteine/histidine-rich C1 domain-containing protein [Arabidopsis thaliana]                                                                                                                                                                                                                                                                                                                                                                                                                                                                                                                                                                                                 | 225 | 910 | 2.00E-95  | 404.4 | 75.1 | 78.2 | cysteine/histidine-rich C1 domain-containing protein | gbpln | Arabidopsis thaliana | AT3G11402.2   Symbols: Cysteine/Histidine-rich C1 domain family protein   chr3:3573516-357765 FORWARD LENGTH=910                         | 225 | 910 | 5.00E-98  | 404.4 | 75.1 | 78.2 |
| Rsa1.0_00784.1.g19441.t1 | ref XP_002871192.1  transducin family protein [Arabidopsis lyrata subsp. lyrata] gi 297317029 gb EFH47451.1  transducin family protein [Arabidopsis lyrata subsp. lyrata]                                                                                                                                                                                                                                                                                                                                                                                                                                                                                                                                                                                                                               | 775 | 780 | 0         | 100.6 | 76.0 | 85.5 | transducin family protein                            | gbpln | Arabidopsis lyrata   | AT5G05970.1   Symbols: NEDD1   Transducin/WD40 repeat-like superfamily protein   chr5:1795464-1799313 FORWARD LENGTH=781                 | 775 | 781 | 0         | 100.8 | 75.0 | 85.0 |
| Rsa1.0_00784.1.g19442.t1 | gb EOA30568.1  hypothetical protein CARUB_v10013696mg [Capsella rubella]                                                                                                                                                                                                                                                                                                                                                                                                                                                                                                                                                                                                                                                                                                                                | 456 | 447 | 0         | 98.0  | 75.9 | 83.8 | hypothetical protein CARUB_v10013696mg               | gbpln | Capsella rubella     | AT3G11340.1   Symbols: UDP-Glycosyltransferase superfamily protein   chr3:3556728-3558149 FORWARD LENGTH=447                             | 456 | 447 | 0         | 98.0  | 75.4 | 82.9 |
| Rsa1.0_00784.1.g19443.t1 | ref NP_187741.2  ras group-related LRR 9 protein [Arabidopsis thaliana] gi 18175638 gb AAL59901.1  unknown protein [Arabidopsis thaliana] gi 21689861 gb AAM67491.1  unknown protein [Arabidopsis thaliana] gi 57868160 gb AAW57418.1  plant intracellular Ras-group-related LRR protein 9 [Arabidopsis thaliana] gi 332641510 gb AEE75031.1  ras group-related LRR 9 protein [Arabidopsis thaliana]                                                                                                                                                                                                                                                                                                                                                                                                    | 496 | 499 | 0         | 100.6 | 81.0 | 88.9 | ras group-related LRR 9 protein                      | gbpln | Arabidopsis thaliana | AT3G11330.1   Symbols: PIRL9   plant intracellular ras group-related LRR 9   chr3:3552330-3554695 REVERSE LENGTH=499                     | 496 | 499 | 0         | 100.6 | 81.0 | 88.9 |
| Rsa1.0_00784.1.g19444.t1 | ref XP_002884840.1  organic anion transporter [Arabidopsis lyrata subsp. lyrata] gi 297330680 gb EFH61099.1  organic anion transporter [Arabidopsis lyrata subsp. lyrata]                                                                                                                                                                                                                                                                                                                                                                                                                                                                                                                                                                                                                               | 309 | 308 | 1.00E-167 | 99.7  | 95.1 | 97.7 | organic anion transporter                            | gbpln | Arabidopsis lyrata   | AT3G11320.1   Symbols: Nucleotide-sugar transporter family protein   chr3:3547017-3548539 REVERSE LENGTH=308                             | 309 | 308 | 1.00E-169 | 99.7  | 94.8 | 97.4 |
| Rsa1.0_00784.1.g19445.t1 | gb EOA32960.1  hypothetical protein CARUB_v10016290mg [Capsella rubella]                                                                                                                                                                                                                                                                                                                                                                                                                                                                                                                                                                                                                                                                                                                                | 559 | 548 | 0         | 98.0  | 86.9 | 91.1 | hypothetical protein CARUB_v10016290mg               | gbpln | Capsella rubella     | AT2G38080.1   Symbols: IRX12, LAC4, ATLMCO4, LMCO4   Laccase/Diphenol oxidase family protein   chr2:15934540-15937352 FORWARD LENGTH=558 | 559 | 558 | 0         | 99.8  | 62.1 | 78.2 |
| Rsa1.0_00784.1.g19446.t1 | ref XP_002884839.1  myb family transcription factor [Arabidopsis lyrata subsp. lyrata] gi 297330679 gb EFH61098.1  myb family transcription factor [Arabidopsis lyrata subsp. lyrata]                                                                                                                                                                                                                                                                                                                                                                                                                                                                                                                                                                                                                   | 254 | 264 | 1.00E-119 | 103.9 | 86.2 | 90.9 | myb family transcription factor                      | gbpln | Arabidopsis lyrata   | AT3G11280.2   Symbols: Duplicated homeodomain-like superfamily protein   chr3:3533477-3534393 REVERSE LENGTH=263                         | 254 | 263 | 1.00E-122 | 103.5 | 86.6 | 91.3 |
| Rsa1.0_00784.1.g19447.t9 | gb AAG50976.1 AC073395_18 hypothetical protein; 64772-65429 [Arabidopsis thaliana]                                                                                                                                                                                                                                                                                                                                                                                                                                                                                                                                                                                                                                                                                                                      | 146 | 165 | 7.00E-57  | 113.0 | 81.5 | 91.8 | hypothetical protein; 64772-65429                    | gbpln | Arabidopsis thaliana | AT3G11260.1   Symbols: WOX5   WUSCHEL related homeobox 5   chr3:3527606-3528263 FORWARD LENGTH=182                                       | 146 | 182 | 1.00E-57  | 124.7 | 81.5 | 91.8 |
| Rsa1.0_00784.1.g19448.t1 | #                                                                                                                                                                                                                                                                                                                                                                                                                                                                                                                                                                                                                                                                                                                                                                                                       | #   | #   | #         | #     | #    | #    | -                                                    | ----  | ----                 | #                                                                                                                                        | #   | #   | #         | #     | #    | #    |

|                          |                                                                                                                                                                                                                                                                                                                                                                                                               |     |     |           |       |      |      |                                             |       |                      |                                                                                                                                                                                                                                                                                                                                                                         |     |     |           |       |      |      |
|--------------------------|---------------------------------------------------------------------------------------------------------------------------------------------------------------------------------------------------------------------------------------------------------------------------------------------------------------------------------------------------------------------------------------------------------------|-----|-----|-----------|-------|------|------|---------------------------------------------|-------|----------------------|-------------------------------------------------------------------------------------------------------------------------------------------------------------------------------------------------------------------------------------------------------------------------------------------------------------------------------------------------------------------------|-----|-----|-----------|-------|------|------|
| Rsa1.0_00784.1.g19449.t1 | ref[XP_002884838.1] hypothetical protein ARALYDRAFT_478464 [Arabidopsis lyrata subsp. lyrata] gi 297330678 gb EFH61097.1                                                                                                                                                                                                                                                                                      | 582 | 602 | 0         | 103.4 | 79.4 | 88.1 | hypothetical protein ARALYDRAFT_478464      | gbpln | Arabidopsis lyrata   | AT3G11240.1   Symbols: ATE2, ATATE2   arginine-tRNA protein transferase 2   chr3:3518665-3521092 REVERSE LENGTH=605                                                                                                                                                                                                                                                     | 582 | 605 | 0         | 104.0 | 77.7 | 86.6 |
| Rsa1.0_00784.1.g19450.t1 | ref[NP_001078135.1] yippee-like protein [Arabidopsis thaliana] gi 332641497 gb AE75018.1  yippee-like protein [Arabidopsis thaliana]                                                                                                                                                                                                                                                                          | 130 | 162 | 1.00E-65  | 124.6 | 93.1 | 96.9 | yippee-like protein                         | gbpln | Arabidopsis thaliana | AT3G11230.2   Symbols:   Yippee family putative zinc-binding protein   chr3:3516683-3518193 FORWARD LENGTH=162                                                                                                                                                                                                                                                          | 130 | 162 | 2.00E-68  | 124.6 | 93.1 | 96.9 |
| Rsa1.0_00784.1.g19451.t3 | #                                                                                                                                                                                                                                                                                                                                                                                                             | #   | #   | #         | #     | #    | -    | ----                                        | ----  | ----                 | #                                                                                                                                                                                                                                                                                                                                                                       | #   | #   | #         | #     | #    | #    |
| Rsa1.0_00785.1.g19452.t1 | emb CAN84021.1  hypothetical protein VITISV_032575 [Vitis vinifera]                                                                                                                                                                                                                                                                                                                                           | 484 | 962 | 2.00E-95  | 198.8 | 36.8 | 48.6 | hypothetical protein VITISV_032575          | gbpln | Vitis vinifera       | #                                                                                                                                                                                                                                                                                                                                                                       | #   | #   | #         | #     | #    | #    |
| Rsa1.0_00785.1.g19453.t2 | #                                                                                                                                                                                                                                                                                                                                                                                                             | #   | #   | #         | #     | #    | -    | ----                                        | ----  | ----                 | #                                                                                                                                                                                                                                                                                                                                                                       | #   | #   | #         | #     | #    | #    |
| Rsa1.0_00785.1.g19454.t1 | #                                                                                                                                                                                                                                                                                                                                                                                                             | #   | #   | #         | #     | #    | -    | ----                                        | ----  | ----                 | #                                                                                                                                                                                                                                                                                                                                                                       | #   | #   | #         | #     | #    | #    |
| Rsa1.0_00785.1.g19455.t1 | ref[XP_002883906.1] hypothetical protein ARALYDRAFT_899777 [Arabidopsis lyrata subsp. lyrata] gi 297329746 gb EFH60165.1  hypothetical protein ARALYDRAFT_899777 [Arabidopsis lyrata subsp. lyrata]                                                                                                                                                                                                           | 589 | 585 | 0         | 99.3  | 92.7 | 96.1 | hypothetical protein ARALYDRAFT_899777      | gbpln | Arabidopsis lyrata   | AT2G15620.1   Symbols: NIR1, NIR, ATHNIR   nitrite reductase 1   chr2:6810552-6812666 FORWARD LENGTH=586                                                                                                                                                                                                                                                                | 589 | 586 | 0         | 99.5  | 92.7 | 96.3 |
| Rsa1.0_00785.1.g19456.t1 | ref[NP_179165.1] pentatricopeptide repeat-containing protein [Arabidopsis thaliana] gi 75216226 sp Q9ZQF1.1 PP152_ARAT H RecName: Full=Pentatricopeptide repeat-containing protein At2g15630, mitochondrial; Flags: Precursor gi 4335729 gb AAD17407.1  putative salt-inducible protein [Arabidopsis thaliana] gi 330251331 gb AEC06425.1  pentatricopeptide repeat-containing protein [Arabidopsis thaliana] | 634 | 627 | 0         | 98.9  | 80.6 | 89.1 | pentatricopeptide repeat-containing protein | gbpln | Arabidopsis thaliana | AT2G15630.1   Symbols:   Pentatricopeptide repeat (PPR) superfamily protein   chr2:6814521-6816404 FORWARD LENGTH=627                                                                                                                                                                                                                                                   | 634 | 627 | 0         | 98.9  | 80.6 | 89.1 |
| Rsa1.0_00785.1.g19457.t1 | ref[XP_002885975.1] hypothetical protein ARALYDRAFT_899795 [Arabidopsis lyrata subsp. lyrata] gi 297331815 gb EFH62234.1  hypothetical protein ARALYDRAFT_899795 [Arabidopsis lyrata subsp. lyrata]                                                                                                                                                                                                           | 407 | 420 | 0         | 103.2 | 90.2 | 95.1 | hypothetical protein ARALYDRAFT_899795      | gbpln | Arabidopsis lyrata   | AT2G15695.1   Symbols:   Protein of unknown function DUF829, transmembrane 53   chr2:6834194-6836336 REVERSE LENGTH=420                                                                                                                                                                                                                                                 | 407 | 420 | 0         | 103.2 | 89.4 | 94.1 |
| Rsa1.0_00785.1.g19458.t1 | gb EOA30954.1  hypothetical protein CARUB_v10014100mg [Capsella rubella]                                                                                                                                                                                                                                                                                                                                      | 345 | 344 | 0         | 99.7  | 93.6 | 97.1 | hypothetical protein CARUB_v10014100mg      | gbpln | Capsella rubella     | AT2G15730.1   Symbols:   P-loop containing nucleoside triphosphate hydrolases superfamily protein   chr2:6849797-6851881 FORWARD LENGTH=344                                                                                                                                                                                                                             | 345 | 344 | 0         | 99.7  | 92.2 | 95.9 |
| Rsa1.0_00785.1.g19459.t1 | ref[NP_198536.1] RING/U-box domain-containing protein [Arabidopsis thaliana] gi 10178231 dbj BAB11642.1  unnamed protein product [Arabidopsis thaliana] gi 332006769 gb AED94152.1  RING/U-box domain-containing protein [Arabidopsis thaliana]                                                                                                                                                               | 213 | 217 | 5.00E-38  | 101.9 | 51.2 | 63.8 | RING/U-box domain-containing protein        | gbpln | Arabidopsis thaliana | AT5G37200.1   Symbols:   RING/U-box superfamily protein   chr5:14727832-14728485 FORWARD LENGTH=217                                                                                                                                                                                                                                                                     | 213 | 217 | 2.00E-40  | 101.9 | 51.2 | 63.8 |
| Rsa1.0_00785.1.g19460.t1 | ref[XP_002885977.1] calmodulin-binding protein [Arabidopsis lyrata subsp. lyrata] gi 297331817 gb EFH62236.1  calmodulin-binding protein [Arabidopsis lyrata subsp. lyrata]                                                                                                                                                                                                                                   | 308 | 317 | 1.00E-124 | 102.9 | 84.7 | 89.9 | calmodulin-binding protein                  | gbpln | Arabidopsis lyrata   | AT2G15760.1   Symbols:   Protein of unknown function (DUF1645)   chr2:6865807-6866754 REVERSE LENGTH=315                                                                                                                                                                                                                                                                | 308 | 315 | 1.00E-118 | 102.3 | 82.1 | 87.3 |
| Rsa1.0_00785.1.g19461.t1 | gb AAF79747.1 AC009317.6 T30E16.9 [Arabidopsis thaliana]                                                                                                                                                                                                                                                                                                                                                      | 242 | 888 | 4.00E-49  | 366.9 | 51.2 | 64.0 | T30E16.9                                    | gbpln | Arabidopsis thaliana | AT1G59540.1   Symbols: ZCF125   P-loop containing nucleoside triphosphate hydrolases superfamily protein   chr1:21874083-21879382 FORWARD LENGTH=823                                                                                                                                                                                                                    | 242 | 823 | 4.00E-50  | 340.1 | 49.2 | 61.2 |
| Rsa1.0_00785.1.g19462.t1 | #                                                                                                                                                                                                                                                                                                                                                                                                             | #   | #   | #         | #     | #    | -    | ----                                        | ----  | ----                 | #                                                                                                                                                                                                                                                                                                                                                                       | #   | #   | #         | #     | #    | #    |
| Rsa1.0_00785.1.g19463.t1 | #                                                                                                                                                                                                                                                                                                                                                                                                             | #   | #   | #         | #     | #    | -    | ----                                        | ----  | ----                 | #                                                                                                                                                                                                                                                                                                                                                                       | #   | #   | #         | #     | #    | #    |
| Rsa1.0_00785.1.g19464.t1 | #                                                                                                                                                                                                                                                                                                                                                                                                             | #   | #   | #         | #     | #    | -    | ----                                        | ----  | ----                 | #                                                                                                                                                                                                                                                                                                                                                                       | #   | #   | #         | #     | #    | #    |
| Rsa1.0_00786.1.g19465.t1 | #                                                                                                                                                                                                                                                                                                                                                                                                             | #   | #   | #         | #     | #    | -    | ----                                        | ----  | ----                 | #                                                                                                                                                                                                                                                                                                                                                                       | #   | #   | #         | #     | #    | #    |
| Rsa1.0_00786.1.g19466.t1 | #                                                                                                                                                                                                                                                                                                                                                                                                             | #   | #   | #         | #     | #    | -    | ----                                        | ----  | ----                 | AT3G51650.1   Symbols:   unknown protein; BEST Arabidopsis thaliana protein match is: unknown protein (TAIR:AT3G51640.1); Has 27645 Blast hits to 15097 proteins in 1246 species: Archae - 44; Bacteria - 3367; Metazoa - 10036; Fungi - 2690; Plants - 1205; Viruses - 196; Other Eukaryotes - 10107 (source: NCBI BLINK).   chr3:19159449-19162267 FORWARD LENGTH=842 | 144 | 842 | 1.00E-12  | 584.7 | 29.9 | 37.5 |

|                          |                                                                                                                                                                                                                                                                                                                                                                                                                                                                                                                                                                                                                                                                                                  |      |      |          |       |      |      |                                                       |       |                      |                                                                                                                                                                                                                                                                                        |      |     |          |       |      |      |
|--------------------------|--------------------------------------------------------------------------------------------------------------------------------------------------------------------------------------------------------------------------------------------------------------------------------------------------------------------------------------------------------------------------------------------------------------------------------------------------------------------------------------------------------------------------------------------------------------------------------------------------------------------------------------------------------------------------------------------------|------|------|----------|-------|------|------|-------------------------------------------------------|-------|----------------------|----------------------------------------------------------------------------------------------------------------------------------------------------------------------------------------------------------------------------------------------------------------------------------------|------|-----|----------|-------|------|------|
| Rsa1.0_00786.1.g19467.t1 | ref NP_566955.1  macrophage migration inhibitory factor family protein [Arabidopsis thaliana] gi 297819864 ref XP_002877815.1  macrophage migration inhibitory factor family protein [Arabidopsis lyrata subsp. lyrata] gi 21536646 gb AAM60978.1  LS1-like protein [Arabidopsis thaliana] gi 26450314 dbj BAC42273.1  putative LS1 [Arabidopsis thaliana] gi 28827214 gb AAO50451.1  putative macrophage migration inhibitory factor (MIF) [Arabidopsis thaliana] gi 297323653 gb EFH54074.1  macrophage migration inhibitory factor family protein [Arabidopsis lyrata subsp. lyrata] gi 332645303 gb AEE78824.1  macrophage migration inhibitory factor family protein [Arabidopsis thaliana] | 112  | 112  | 1.00E-55 | 100.0 | 94.6 | 97.3 | macrophage migration inhibitory factor family protein | gbpln | Arabidopsis lyrata   | AT3G51660.1   Symbols:   Tautomerase/MIF superfamily protein   chr3:19164229-19165076 REVERSE LENGTH=112                                                                                                                                                                               | 112  | 112 | 2.00E-58 | 100.0 | 94.6 | 97.3 |
| Rsa1.0_00786.1.g19468.t3 | dbj BAJ34003.1  unnamed protein product [Theillungiella halophila]                                                                                                                                                                                                                                                                                                                                                                                                                                                                                                                                                                                                                               | 186  | 560  | 2.00E-25 | 301.1 | 40.3 | 46.8 | unnamed protein product                               | ----  | ----                 | AT4G26640.2   Symbols: WRKY20, AWRKY20   WRKY family transcription factor family protein   chr4:13437298-13440693 REVERSE LENGTH=557                                                                                                                                                   | 186  | 557 | 3.00E-26 | 299.5 | 38.7 | 46.2 |
| Rsa1.0_00786.1.g19469.t1 | ref XP_002876098.1  SEC14 cytosolic factor family protein [Arabidopsis lyrata subsp. lyrata] gi 297321936 gb EFH52357.1  SEC14 cytosolic factor family protein [Arabidopsis lyrata subsp. lyrata]                                                                                                                                                                                                                                                                                                                                                                                                                                                                                                | 438  | 409  | 0        | 93.4  | 81.5 | 85.8 | SEC14 cytosolic factor family protein                 | gbpln | Arabidopsis lyrata   | AT3G51670.1   Symbols:   SEC14 cytosolic factor family protein / phosphoglyceride transfer family protein   chr3:19168912-19170848 FORWARD LENGTH=409                                                                                                                                  | 438  | 409 | 0        | 93.4  | 80.8 | 85.8 |
| Rsa1.0_00786.1.g19470.t1 | ref XP_002877816.1  short-chain dehydrogenase/reductase family protein [Arabidopsis lyrata subsp. lyrata] gi 297323654 gb EFH54075.1  short-chain dehydrogenase/reductase family protein [Arabidopsis lyrata subsp. lyrata]                                                                                                                                                                                                                                                                                                                                                                                                                                                                      | 235  | 302  | 3.00E-87 | 128.5 | 84.3 | 89.4 | short-chain dehydrogenase/reductase family protein    | gbpln | Arabidopsis lyrata   | AT3G51680.1   Symbols:   NAD(P)-binding Rossmann-fold superfamily protein   chr3:19173622-19174667 REVERSE LENGTH=303                                                                                                                                                                  | 235  | 303 | 1.00E-58 | 128.9 | 51.5 | 51.9 |
| Rsa1.0_00786.1.g19471.t1 | ref XP_002876099.1  hypothetical protein ARALYDRAFT_323720 [Arabidopsis lyrata subsp. lyrata] gi 297321937 gb EFH52358.1  hypothetical protein ARALYDRAFT_323720 [Arabidopsis lyrata subsp. lyrata]                                                                                                                                                                                                                                                                                                                                                                                                                                                                                              | 467  | 472  | 0        | 101.1 | 79.4 | 88.9 | hypothetical protein ARALYDRAFT_323720                | gbpln | Arabidopsis lyrata   | AT3G51710.1   Symbols:   D-mannose binding lectin protein with Apple-like carbohydrate-binding domain   chr3:19182484-19183996 FORWARD LENGTH=476                                                                                                                                      | 467  | 476 | 0        | 101.9 | 79.7 | 88.4 |
| Rsa1.0_00786.1.g19472.t1 | emb CAB39638.1  RNA-directed DNA polymerase-like protein [Arabidopsis thaliana] gi 7267666 emb CAB78094.1  RNA-directed DNA polymerase-like protein [Arabidopsis thaliana]                                                                                                                                                                                                                                                                                                                                                                                                                                                                                                                       | 1686 | 1274 | 0        | 75.6  | 34.5 | 45.9 | RNA-directed DNA polymerase-like protein              | gbpln | Arabidopsis thaliana | AT4G29090.1   Symbols:   Ribonuclease H-like superfamily protein   chr4:14333528-14335255 FORWARD LENGTH=575                                                                                                                                                                           | 1686 | 575 | 2.00E-62 | 34.1  | 8.7  | 12.6 |
| Rsa1.0_00786.1.g19473.t1 | dbj BAJ33968.1  unnamed protein product [Theillungiella halophila]                                                                                                                                                                                                                                                                                                                                                                                                                                                                                                                                                                                                                               | 217  | 213  | 1.00E-92 | 98.2  | 83.9 | 87.6 | unnamed protein product                               | ----  | ----                 | AT3G51730.1   Symbols:   saposin B domain-containing protein   chr3:19186970-19188436 FORWARD LENGTH=213                                                                                                                                                                               | 217  | 213 | 7.00E-92 | 98.2  | 77.9 | 87.6 |
| Rsa1.0_00786.1.g19474.t1 | ref XP_002877820.1  hypothetical protein ARALYDRAFT_348272 [Arabidopsis lyrata subsp. lyrata] gi 297323658 gb EFH54079.1  hypothetical protein ARALYDRAFT_348272 [Arabidopsis lyrata subsp. lyrata]                                                                                                                                                                                                                                                                                                                                                                                                                                                                                              | 101  | 113  | 2.00E-16 | 111.9 | 55.4 | 73.3 | hypothetical protein ARALYDRAFT_348272                | gbpln | Arabidopsis lyrata   | AT3G51750.3   Symbols:   unknown protein; FUNCTIONS IN: molecular_function unknown; INVOLVED IN: biological_process unknown; LOCATED IN: cellular_component unknown; EXPRESSED IN: 12 plant structures; EXPRESSED DURING: 9 growth stages.   chr3:19196706-19197307 REVERSE LENGTH=110 | 101  | 110 | 2.00E-16 | 108.9 | 55.4 | 71.3 |
| Rsa1.0_00786.1.g19475.t1 | dbj BAJ34198.1  unnamed protein product [Theillungiella halophila]                                                                                                                                                                                                                                                                                                                                                                                                                                                                                                                                                                                                                               | 899  | 958  | 0        | 106.6 | 91.1 | 94.3 | unnamed protein product                               | ----  | ----                 | AT3G51770.2   Symbols: ETO1   tetratricopeptide repeat (TPR)-containing protein   chr3:19200328-19203998 REVERSE LENGTH=959                                                                                                                                                            | 899  | 959 | 0        | 106.7 | 87.8 | 92.1 |
| Rsa1.0_00786.1.g19476.t1 | ref XP_002877823.1  hypothetical protein ARALYDRAFT_485533 [Arabidopsis lyrata subsp. lyrata] gi 297323661 gb EFH54082.1  hypothetical protein ARALYDRAFT_485533 [Arabidopsis lyrata subsp. lyrata]                                                                                                                                                                                                                                                                                                                                                                                                                                                                                              | 237  | 271  | 7.00E-74 | 114.3 | 65.0 | 77.6 | hypothetical protein ARALYDRAFT_485533                | gbpln | Arabidopsis lyrata   | AT3G51780.1   Symbols: ATBAG4, BAG4   BCL-2-associated athanogene 4   chr3:19207029-19208178 REVERSE LENGTH=269                                                                                                                                                                        | 237  | 269 | 1.00E-74 | 113.5 | 65.8 | 78.5 |
| Rsa1.0_00786.1.g19477.t3 | ref NP_001190060.1  metalloproteinase M24 domain-containing protein [Arabidopsis thaliana] gi 332645325 gb AEE78846.1  metalloproteinase M24 domain-containing protein [Arabidopsis thaliana]                                                                                                                                                                                                                                                                                                                                                                                                                                                                                                    | 424  | 385  | 0        | 90.8  | 77.4 | 83.0 | metalloproteinase M24 domain-containing protein       | gbpln | Arabidopsis thaliana | AT3G51800.3   Symbols: ATG2   metalloproteinase M24 family protein   chr3:19211261-19213568 REVERSE LENGTH=385                                                                                                                                                                         | 424  | 385 | 0        | 90.8  | 77.4 | 83.0 |

|                           |                                                                                                                                                                                                                                                                                                                                                                           |     |      |           |        |      |      |                                                 |       |                      |                                                                                                                                                                                                                                                                                                                                                                                                                                                                                                                                                                                                                                                                    |     |      |           |        |      |      |
|---------------------------|---------------------------------------------------------------------------------------------------------------------------------------------------------------------------------------------------------------------------------------------------------------------------------------------------------------------------------------------------------------------------|-----|------|-----------|--------|------|------|-------------------------------------------------|-------|----------------------|--------------------------------------------------------------------------------------------------------------------------------------------------------------------------------------------------------------------------------------------------------------------------------------------------------------------------------------------------------------------------------------------------------------------------------------------------------------------------------------------------------------------------------------------------------------------------------------------------------------------------------------------------------------------|-----|------|-----------|--------|------|------|
| Rsa1.0_00786.1.g19478.t1  | refXP_002876106.1   calcium-dependent protein kinase 13 [Arabidopsis lyrata subsp. lyrata] gi 297321944 gb EFH52365.1   calcium-dependent protein kinase 13 [Arabidopsis lyrata subsp. lyrata]                                                                                                                                                                            | 575 | 528  | 0         | 91.8   | 88.3 | 90.4 | calcium-dependent protein kinase 13             | gbpln | Arabidopsis lyrata   | AT3G51850.1   Symbols: CPK13   calcium-dependent protein kinase 13   chr3:19232667-19235262 FORWARD LENGTH=528                                                                                                                                                                                                                                                                                                                                                                                                                                                                                                                                                     | 575 | 528  | 0         | 91.8   | 88.2 | 90.4 |
| Rsa1.0_00787.1.g19479.t1  | # # # # # # # # # # # # # # # #                                                                                                                                                                                                                                                                                                                                           | #   | #    | #         | #      | #    | #    | -                                               | ----  | ----                 | #                                                                                                                                                                                                                                                                                                                                                                                                                                                                                                                                                                                                                                                                  | #   | #    | #         | #      | #    | #    |
| Rsa1.0_00787.1.g19480.t22 | gb AAF99763.1 AC003981_13 F22O13.21 [Arabidopsis thaliana] gi 9293930 dbj BAB01833.1  Mutator-like transposase [Arabidopsis thaliana] gi 10177478 dbj BAB10869.1  mutator-like transposase [Arabidopsis thaliana] emb CAB87198.1  putative protein [Arabidopsis thaliana]                                                                                                 | 958 | 915  | 1.00E-143 | 95.5   | 25.7 | 37.3 | F22O13.21                                       | gbpln | Arabidopsis thaliana | AT1G64260.1   Symbols:   MuDR family transposase   chr1:23847756-23849915 FORWARD LENGTH=719                                                                                                                                                                                                                                                                                                                                                                                                                                                                                                                                                                       | 958 | 719  | 2.00E-27  | 75.1   | 11.8 | 22.0 |
| Rsa1.0_00787.1.g19481.t1  | gi 91806512 gb ABE65983.1  hypothetical protein At3g42810 [Arabidopsis thaliana]                                                                                                                                                                                                                                                                                          | 157 | 154  | 7.00E-28  | 98.1   | 41.4 | 58.0 | putative protein                                | gbpln | Arabidopsis thaliana | AT4G04775.1   Symbols:   zinc ion binding   chr4:2431120-2431695 FORWARD LENGTH=150                                                                                                                                                                                                                                                                                                                                                                                                                                                                                                                                                                                | 157 | 150  | 2.00E-18  | 95.5   | 24.8 | 33.8 |
| Rsa1.0_00787.1.g19482.t14 | gb ABD64941.1  Ulp1 protease family protein [Brassica oleracea]                                                                                                                                                                                                                                                                                                           | 940 | 871  | 6.00E-90  | 92.7   | 22.3 | 29.6 | Ulp1 protease family protein                    | gbpln | Brassica oleracea    | AT1G31150.1   Symbols:   Domain of unknown function (DUF1985)   chr1:11120097-11122412 FORWARD LENGTH=673                                                                                                                                                                                                                                                                                                                                                                                                                                                                                                                                                          | 940 | 673  | 1.00E-31  | 71.6   | 11.5 | 17.3 |
| Rsa1.0_00787.1.g19483.t1  | refNP_176729.1   uncharacterized protein [Arabidopsis thaliana] gi 50253548 gb AAT71976.1  At1g65510 [Arabidopsis thaliana] gi 332196270 gb AEE34391.1   uncharacterized protein AT1G65510 [Arabidopsis thaliana]                                                                                                                                                         | 80  | 80   | 1.00E-20  | 100.0  | 77.5 | 90.0 | uncharacterized protein                         | gbpln | Arabidopsis thaliana | AT1G65510.1   Symbols:   unknown protein; FUNCTIONS IN: molecular, function unknown; INVOLVED IN: N-terminal protein myristoylation; LOCATED IN: endomembrane system; EXPRESSED IN: 9 plant structures; EXPRESSED DURING: LP.06 six leaves visible, LP.04 four leaves visible, 4 anthesis, petal differentiation and expansion stage, LP.08 eight leaves visible; BEST Arabidopsis thaliana protein match is: unknown protein (TAIR:AT1G65486.1); Has 22 Blast hits to 22 proteins in 2 species: Archae - 0; Bacteria - 0; Metazoa - 0; Fungi - 0; Plants - 22; Viruses - 0; Other Eukaryotes - 0 (source: NCBI BLINK).   chr1:24359456-24359847 FORWARD LENGTH=80 | 80  | 80   | 2.00E-23  | 100.0  | 77.5 | 90.0 |
| Rsa1.0_00787.1.g19484.t1  | gb EOA35650.1  hypothetical protein CARUB_v10020872mg [Capsella rubella]                                                                                                                                                                                                                                                                                                  | 239 | 240  | 1.00E-106 | 100.4  | 79.9 | 90.8 | hypothetical protein CARUB_v10020872mg          | gbpln | Capsella rubella     | AT1G65520.1   Symbols: ATEC11, ECI1, EHC1, PEC11   delta(3), delta(2)-enoyl CoA isomerase 1   chr1:24361171-24361893 REVERSE LENGTH=240                                                                                                                                                                                                                                                                                                                                                                                                                                                                                                                            | 239 | 240  | 1.00E-109 | 100.4  | 80.3 | 90.4 |
| Rsa1.0_00787.1.g19485.t1  | # # # # # # # # # # # # # # # #                                                                                                                                                                                                                                                                                                                                           | #   | #    | #         | #      | #    | #    | -                                               | ----  | ----                 | #                                                                                                                                                                                                                                                                                                                                                                                                                                                                                                                                                                                                                                                                  | #   | #    | #         | #      | #    | #    |
| Rsa1.0_00787.1.g19486.t1  | # # # # # # # # # # # # # # # #                                                                                                                                                                                                                                                                                                                                           | #   | #    | #         | #      | #    | #    | -                                               | ----  | ----                 | #                                                                                                                                                                                                                                                                                                                                                                                                                                                                                                                                                                                                                                                                  | #   | #    | #         | #      | #    | #    |
| Rsa1.0_00787.1.g19487.t1  | refXP_004295592.1   PREDICTED: uncharacterized protein LOC101291324 [Fragaria vesca subsp. vesca]                                                                                                                                                                                                                                                                         | 172 | 2122 | 3.00E-59  | 1233.7 | 61.0 | 74.4 | PREDICTED: uncharacterized protein LOC101291324 | gbpln | Fragaria vesca       | #                                                                                                                                                                                                                                                                                                                                                                                                                                                                                                                                                                                                                                                                  | #   | #    | #         | #      | #    | #    |
| Rsa1.0_00787.1.g19488.t1  | refXP_002888424.1   hypothetical protein ARALYDRAFT_894134 [Arabidopsis lyrata subsp. lyrata] gi 297334265 gb EFH64683.1   hypothetical protein ARALYDRAFT_894134 [Arabidopsis lyrata subsp. lyrata]                                                                                                                                                                      | 350 | 350  | 1.00E-175 | 100.0  | 89.7 | 94.6 | hypothetical protein ARALYDRAFT_894134          | gbpln | Arabidopsis lyrata   | AT1G65560.1   Symbols:   Zinc-binding dehydrogenase family protein   chr1:24371608-24373673 REVERSE LENGTH=350                                                                                                                                                                                                                                                                                                                                                                                                                                                                                                                                                     | 350 | 350  | 1.00E-177 | 100.0  | 88.0 | 94.6 |
| Rsa1.0_00787.1.g19489.t1  | refXP_002875882.1   hypothetical protein ARALYDRAFT_323420 [Arabidopsis lyrata subsp. lyrata] gi 297321720 gb EFH52141.1   hypothetical protein ARALYDRAFT_323420 [Arabidopsis lyrata subsp. lyrata]                                                                                                                                                                      | 127 | 3832 | 3.00E-32  | 3017.3 | 61.4 | 70.9 | hypothetical protein ARALYDRAFT_323420          | gbpln | Arabidopsis lyrata   | AT3G48190.1   Symbols: ATM, ATATM   ataxia-telangiectasia mutated   chr3:17797628-17828361 FORWARD LENGTH=3845                                                                                                                                                                                                                                                                                                                                                                                                                                                                                                                                                     | 127 | 3845 | 4.00E-34  | 3027.6 | 59.8 | 70.9 |
| Rsa1.0_00787.1.g19490.t1  | # # # # # # # # # # # # # # # #                                                                                                                                                                                                                                                                                                                                           | #   | #    | #         | #      | #    | #    | -                                               | ----  | ----                 | #                                                                                                                                                                                                                                                                                                                                                                                                                                                                                                                                                                                                                                                                  | #   | #    | #         | #      | #    | #    |
| Rsa1.0_00787.1.g19491.t1  | refNP_176738.1   endoglucanase 7 [Arabidopsis thaliana] gi 75218974 sp O04478.1 GUN7_ARATH RecName: Full=Endoglucanase 7; AltName: Full=Endo-1,4-beta glucanase 7 gi 2190558 gb AAB60922.1  F5114.14 [Arabidopsis thaliana] gi 110738678 dbj BAF01264.1   hypothetical protein [Arabidopsis thaliana] gi 332196279 gb AEE34400.1   endoglucanase 7 [Arabidopsis thaliana] | 630 | 623  | 0         | 98.9   | 88.4 | 94.6 | endoglucanase 7                                 | gbpln | Arabidopsis thaliana | AT1G65610.1   Symbols: ATGH9A2, KOR2   Six-hairpin glycosidases superfamily protein   chr1:24391823-24395261 REVERSE LENGTH=623                                                                                                                                                                                                                                                                                                                                                                                                                                                                                                                                    | 630 | 623  | 0         | 98.9   | 88.4 | 94.6 |
| Rsa1.0_00788.1.g19492.t1  | refXP_002881491.1   peroxidase 21 [Arabidopsis lyrata subsp. lyrata] gi 297327330 gb EFH57750.1   peroxidase 21 [Arabidopsis lyrata subsp. lyrata]                                                                                                                                                                                                                        | 328 | 327  | 1.00E-175 | 99.7   | 89.0 | 92.4 | peroxidase 21                                   | gbpln | Arabidopsis lyrata   | AT2G37130.1   Symbols:   Peroxidase superfamily protein   chr2:15598225-15600004 REVERSE LENGTH=327                                                                                                                                                                                                                                                                                                                                                                                                                                                                                                                                                                | 328 | 327  | 1.00E-171 | 99.7   | 86.0 | 89.6 |

|                          |                                                                                                                                                                                                                                                                                                                                                                                       |     |      |           |       |      |      |                                               |       |                      |                                                                                                                                                                                                                                                                                                                                                           |     |      |           |       |      |      |
|--------------------------|---------------------------------------------------------------------------------------------------------------------------------------------------------------------------------------------------------------------------------------------------------------------------------------------------------------------------------------------------------------------------------------|-----|------|-----------|-------|------|------|-----------------------------------------------|-------|----------------------|-----------------------------------------------------------------------------------------------------------------------------------------------------------------------------------------------------------------------------------------------------------------------------------------------------------------------------------------------------------|-----|------|-----------|-------|------|------|
| Rsa1.0_00788.1.g19493.t1 | gb[EOA27785.1] hypothetical protein CARUB_v10023937mg [Capsella rubella]                                                                                                                                                                                                                                                                                                              | 233 | 244  | 1.00E-118 | 104.7 | 91.8 | 96.6 | hypothetical protein CARUB_v10023937mg        | gbpln | Capsella rubella     | AT2G37110.1   Symbols:   PLAC8 family protein   chr2:15592689-15593726 FORWARD LENGTH=242                                                                                                                                                                                                                                                                 | 233 | 242  | 1.00E-119 | 103.9 | 90.1 | 94.4 |
| Rsa1.0_00788.1.g19494.t1 | gb[EOA26847.1] hypothetical protein CARUB_v10022940mg [Capsella rubella]                                                                                                                                                                                                                                                                                                              | 487 | 546  | 5.00E-95  | 112.1 | 60.6 | 71.9 | hypothetical protein CARUB_v10022940mg        | gbpln | Capsella rubella     | AT2G37070.1   Symbols:   unknown protein; BEST Arabidopsis thaliana protein match is: unknown protein (TAIR:AT3G53320.1); Has 1323 Blast hits to 775 proteins in 176 species: Archae - 0; Bacteria - 113; Metazoa - 351; Fungi - 175; Plants - 115; Viruses - 13; Other Eukaryotes - 556 (source: NCBI BLINK)   chr2:15578415-15581125 FORWARD LENGTH=530 | 487 | 530  | 5.00E-92  | 108.8 | 57.5 | 68.2 |
| Rsa1.0_00788.1.g19495.t1 | gb[ABC69916.1] phenylalanine ammonia-lyase [Brassica napus]                                                                                                                                                                                                                                                                                                                           | 685 | 722  | 0         | 105.4 | 97.2 | 98.5 | phenylalanine ammonia-lyase                   | gbpln | Brassica napus       | AT2G37040.1   Symbols: PAL1, ATPAL1   PHE ammonia lyase 1   chr2:15557602-15560237 REVERSE LENGTH=725                                                                                                                                                                                                                                                     | 685 | 725  | 0         | 105.8 | 94.5 | 97.7 |
| Rsa1.0_00788.1.g19496.t1 | #                                                                                                                                                                                                                                                                                                                                                                                     | #   | #    | #         | #     | #    | #    | -                                             | ----  | ----                 | #                                                                                                                                                                                                                                                                                                                                                         | #   | #    | #         | #     | #    |      |
| Rsa1.0_00788.1.g19497.t1 | ref[XP_002879646.1] auxin-responsive family protein [Arabidopsis lyrata subsp. lyrata] gi 297325485 gb EFH55905.1  auxin-responsive family protein [Arabidopsis lyrata subsp. lyrata] ref[NP_568884.4] dehydrodichyl diphosphate synthase 5 [Arabidopsis thaliana] gi 83305680 sp Q570Q8.2 DDPS5_ARAT H RecName: Full=Dehydrodichyl diphosphate synthase 5; Short=Dedol-PP synthase 5 | 120 | 124  | 3.00E-51  | 103.3 | 81.7 | 90.0 | auxin-responsive family protein               | gbpln | Arabidopsis lyrata   | AT2G37030.1   Symbols:   SAUR-like auxin-responsive protein family   chr2:15553732-15554106 FORWARD LENGTH=124                                                                                                                                                                                                                                            | 120 | 124  | 8.00E-54  | 103.3 | 80.8 | 89.2 |
| Rsa1.0_00788.1.g19498.t1 | gi 8843800 dbj BAA97348.1  cis-prenyltransferase homolog-like; undecaprenyl phosphate synthetase-like [Arabidopsis thaliana] gi 332009716 gb AED97099.1  dehydrodichyl diphosphate synthase 5 [Arabidopsis thaliana]                                                                                                                                                                  | 245 | 302  | 4.00E-64  | 123.3 | 55.5 | 69.4 | dehydrodichyl diphosphate synthase 5          | gbpln | Arabidopsis thaliana | AT5G58784.1   Symbols:   Undecaprenyl pyrophosphate synthetase family protein   chr5:23739950-23741267 REVERSE LENGTH=302                                                                                                                                                                                                                                 | 245 | 302  | 1.00E-66  | 123.3 | 55.5 | 69.4 |
| Rsa1.0_00788.1.g19499.t1 | dbj BAJ34201.1  unnamed protein product [Thellungiella halophila]                                                                                                                                                                                                                                                                                                                     | 542 | 547  | 0         | 100.9 | 87.5 | 91.9 | unnamed protein product                       | ----  | ----                 | AT2G36990.1   Symbols: SIGF, SIG6, ATSIG6, SOLDAT8   RNAPolymerase sigma-subunit F   chr2:15537502-15540016 REVERSE LENGTH=547                                                                                                                                                                                                                            | 542 | 547  | 0         | 100.9 | 85.6 | 91.0 |
| Rsa1.0_00788.1.g19500.t1 | #                                                                                                                                                                                                                                                                                                                                                                                     | #   | #    | #         | #     | #    | #    | -                                             | ----  | ----                 | #                                                                                                                                                                                                                                                                                                                                                         | #   | #    | #         | #     | #    |      |
| Rsa1.0_00788.1.g19501.t1 | ref[XP_002879635.1] tsl-kinase interacting protein 1 [Arabidopsis lyrata subsp. lyrata] gi 297325474 gb EFH55894.1  tsl-kinase interacting protein 1 [Arabidopsis lyrata subsp. lyrata]                                                                                                                                                                                               | 164 | 740  | 7.00E-11  | 451.2 | 25.0 | 29.3 | tsl-kinase interacting protein 1              | gbpln | Arabidopsis lyrata   | AT2G36960.3   Symbols: TKI1   TSL-kinase interacting protein 1   chr2:15523552-15527245 FORWARD LENGTH=744                                                                                                                                                                                                                                                | 164 | 744  | 1.00E-10  | 453.7 | 23.2 | 28.7 |
| Rsa1.0_00788.1.g19502.t1 | #                                                                                                                                                                                                                                                                                                                                                                                     | #   | #    | #         | #     | #    | #    | -                                             | ----  | ----                 | #                                                                                                                                                                                                                                                                                                                                                         | #   | #    | #         | #     | #    |      |
| Rsa1.0_00788.1.g19503.t2 | ref[XP_002879634.1] hypothetical protein ARALYDRAFT_482676 [Arabidopsis lyrata subsp. lyrata] gi 297325473 gb EFH55893.1  hypothetical protein ARALYDRAFT_482676 [Arabidopsis lyrata subsp. lyrata]                                                                                                                                                                                   | 397 | 388  | 1.00E-136 | 97.7  | 77.6 | 82.9 | hypothetical protein ARALYDRAFT_482676        | gbpln | Arabidopsis lyrata   | AT2G36950.1   Symbols:   Heavy metal transport/detoxification superfamily protein   chr2:15515216-15516754 FORWARD LENGTH=386                                                                                                                                                                                                                             | 397 | 386  | 1.00E-137 | 97.2  | 75.8 | 81.4 |
| Rsa1.0_00789.1.g19504.t1 | gb[EOA31271.1] hypothetical protein CARUB_v10014443mg [Capsella rubella]                                                                                                                                                                                                                                                                                                              | 252 | 258  | 1.00E-103 | 102.4 | 78.2 | 84.5 | hypothetical protein CARUB_v10014443mg        | gbpln | Capsella rubella     | AT3G13540.1   Symbols: ATMYB5, MYB5   myb domain protein 5   chr3:4420239-4421443 FORWARD LENGTH=249                                                                                                                                                                                                                                                      | 252 | 249  | 1.00E-104 | 98.8  | 78.6 | 84.5 |
| Rsa1.0_00789.1.g19505.t2 | gb[AAC28197.1] contains similarity to reverse transcriptases [Arabidopsis thaliana] gi 7267156 emb CAB77868.1  putative reverse transcriptase [Arabidopsis thaliana]                                                                                                                                                                                                                  | 989 | 1077 | 1.00E-137 | 108.9 | 30.5 | 39.4 | contains similarity to reverse transcriptases | gbpln | Arabidopsis thaliana | AT3G13530.1   Symbols: MAPKKK7, MAP3KE1   mitogen-activated protein kinase kinase kinase 7   chr3:4411934-4419320 REVERSE LENGTH=1368                                                                                                                                                                                                                     | 989 | 1368 | 6.00E-23  | 138.3 | 5.1  | 5.8  |

|                          |                                                                                                                                                                                                                                                                                                                                                                                                                                                                                                                                                                                                                                  |     |     |           |       |      |      |                                        |             |                      |                                                                                                                                                                                                                                                                                                                                                                                                                                                                                                                                                             |     |     |           |       |      |      |
|--------------------------|----------------------------------------------------------------------------------------------------------------------------------------------------------------------------------------------------------------------------------------------------------------------------------------------------------------------------------------------------------------------------------------------------------------------------------------------------------------------------------------------------------------------------------------------------------------------------------------------------------------------------------|-----|-----|-----------|-------|------|------|----------------------------------------|-------------|----------------------|-------------------------------------------------------------------------------------------------------------------------------------------------------------------------------------------------------------------------------------------------------------------------------------------------------------------------------------------------------------------------------------------------------------------------------------------------------------------------------------------------------------------------------------------------------------|-----|-----|-----------|-------|------|------|
| Rsa1.0_00789.1.g19506.t1 | ref[NP_566458.1] arabinogalactan protein 12 [Arabidopsis thaliana] gi 75273536 sp Q9LJD9.1 AGP12_ARAT H RecName: Full=Arabinogalactan peptide 12; Short=AG-peptide 12; Flags: Precursor gi 10880501 gb AAG24280.1 AF195893.1 arabinogalactan protein [Arabidopsis thaliana] gi 9280304 dbj BAB01759.1 unnamed protein product [Arabidopsis thaliana] gi 16649109 gb AAL24406.1  Unknown protein [Arabidopsis thaliana] gi 20148539 gb AAM10160.1  unknown protein [Arabidopsis thaliana] gi 21554170 gb AAM63249.1  unknown [Arabidopsis thaliana] gi 332641846 gb AEE75367.1  arabinogalactan protein 12 [Arabidopsis thaliana] | 61  | 60  | 1.00E-18  | 98.4  | 88.5 | 91.8 | arabinogalactan protein 12             | gbpln       | Arabidopsis thaliana | AT3G13520.1   Symbols: AGP12, ATAGP12   arabinogalactan protein 12   chr3:4409087-4409269 FORWARD LENGTH=60                                                                                                                                                                                                                                                                                                                                                                                                                                                 | 61  | 60  | 2.00E-21  | 98.4  | 88.5 | 91.8 |
| Rsa1.0_00789.1.g19507.t2 | dbj BAB01757.1  unnamed protein product [Arabidopsis thaliana]                                                                                                                                                                                                                                                                                                                                                                                                                                                                                                                                                                   | 93  | 117 | 3.00E-12  | 125.8 | 35.5 | 45.2 | unnamed protein product                | gbpln       | Arabidopsis thaliana | AT3G13500.1   Symbols:   unknown protein; BEST Arabidopsis thaliana protein match is: unknown protein (TAIR:AT1G55365.1); Has 2761 Blast hits to 655 proteins in 118 species: Archae - 5; Bacteria - 503; Metazoa - 856; Fungi - 159; Plants - 239; Viruses - 11; Other Eukaryotes - 988 (source: NCBI BLINK).   chr3:4399974-4400306 FORWARD LENGTH=110                                                                                                                                                                                                    | 93  | 110 | 9.00E-13  | 118.3 | 30.1 | 39.8 |
| Rsa1.0_00789.1.g19508.t1 | ref[XP_002884969.1] hypothetical protein ARALYDRAFT_478735 [Arabidopsis lyrata subsp. lyrata] gi 297330809 gb EFH61228.1  hypothetical protein ARALYDRAFT_478735 [Arabidopsis lyrata subsp. lyrata]                                                                                                                                                                                                                                                                                                                                                                                                                              | 603 | 603 | 0         | 100.0 | 91.4 | 95.2 | hypothetical protein ARALYDRAFT_478735 | gbpln       | Arabidopsis lyrata   | AT3G13490.1   Symbols: OVA5, ATKRS-2   Lysyl-tRNA synthetase, class II   chr3:4395984-4399302 REVERSE LENGTH=602                                                                                                                                                                                                                                                                                                                                                                                                                                            | 603 | 602 | 0         | 99.8  | 91.0 | 95.0 |
| Rsa1.0_00789.1.g19509.t1 | gb EOA33066.1  hypothetical protein CARUB_v10016399mg [Capsella rubella]                                                                                                                                                                                                                                                                                                                                                                                                                                                                                                                                                         | 155 | 158 | 5.00E-49  | 101.9 | 71.0 | 79.4 | hypothetical protein CARUB_v10016399mg | gbpln       | Capsella rubella     | AT3G13480.1   Symbols:   unknown protein; FUNCTIONS IN: molecular_function unknown; INVOLVED IN: biological_process unknown; LOCATED IN: endomembrane system; EXPRESSED IN: 23 plant structures; EXPRESSED DURING: 13 growth stages; BEST Arabidopsis thaliana protein match is: unknown protein (TAIR:AT1G55475.1). Has 30201 Blast hits to 17322 proteins in 780 species: Archae - 12; Bacteria - 1396; Metazoa - 1738; Fungi - 3422; Plants - 5037; Viruses - 0; Other Eukaryotes - 2996 (source: NCBI BLINK).   chr3:4393184-4393848 REVERSE LENGTH=172 | 155 | 172 | 2.00E-44  | 111.0 | 69.7 | 77.4 |
| Rsa1.0_00789.1.g19510.t1 | ref[NP_187956.1] TCP-1/cpn60 chaperonin family protein [Arabidopsis thaliana] gi 75311214 sp Q9LJE4.1 CPNB2_ARAT H RecName: Full=Chaperonin 60 subunit beta 2, chloroplastic; Short=CPN-60 beta 2; Flags: Precursor gi 9280299 dbj BAB01754.1  GloEL protein; chaperonin, 60 kDa [Arabidopsis thaliana] gi 332641841 gb AEE75362.1  TCP-1/cpn60 chaperonin family protein [Arabidopsis thaliana]                                                                                                                                                                                                                                 | 442 | 596 | 1.00E-164 | 134.8 | 75.3 | 84.6 | TCP-1/cpn60 chaperonin family protein  | gbpln       | Arabidopsis thaliana | AT3G13470.1   Symbols:   TCP-1/cpn60 chaperonin family protein   chr3:4389685-4392624 FORWARD LENGTH=596                                                                                                                                                                                                                                                                                                                                                                                                                                                    | 442 | 596 | 1.00E-167 | 134.8 | 75.3 | 84.6 |
| Rsa1.0_00789.1.g19511.t1 | ref[XP_002884968.1] hypothetical protein ARALYDRAFT_478733 [Arabidopsis lyrata subsp. lyrata] gi 297330808 gb EFH61227.1  hypothetical protein ARALYDRAFT_478733 [Arabidopsis lyrata subsp. lyrata]                                                                                                                                                                                                                                                                                                                                                                                                                              | 647 | 677 | 0         | 104.6 | 83.6 | 90.9 | hypothetical protein ARALYDRAFT_478733 | gbpln       | Arabidopsis lyrata   | AT3G13460.1   Symbols: ECT2   evolutionarily conserved C-terminal region 2   chr3:4385274-4388220 REVERSE LENGTH=667                                                                                                                                                                                                                                                                                                                                                                                                                                        | 647 | 667 | 0         | 103.1 | 83.2 | 90.6 |
| Rsa1.0_00789.1.g19512.t1 | # # # # # # # # - ----                                                                                                                                                                                                                                                                                                                                                                                                                                                                                                                                                                                                           |     |     |           |       |      |      |                                        |             |                      |                                                                                                                                                                                                                                                                                                                                                                                                                                                                                                                                                             |     |     |           |       |      |      |
| Rsa1.0_00789.1.g19513.t1 | gb EOA31490.1  hypothetical protein CARUB_v10014676mg [Capsella rubella]                                                                                                                                                                                                                                                                                                                                                                                                                                                                                                                                                         | 200 | 200 | 1.00E-110 | 100.0 | 97.5 | 98.5 | hypothetical protein CARUB_v10014676mg | gbpln       | Capsella rubella     | AT3G13445.1   Symbols: TBP1, TFID-1   TATA binding protein 1   chr3:4380317-4381869 FORWARD LENGTH=200                                                                                                                                                                                                                                                                                                                                                                                                                                                      | 200 | 200 | 1.00E-112 | 100.0 | 97.5 | 99.0 |
| Rsa1.0_00789.1.g19514.t1 | ref[NP_001142677.1] uncharacterized protein LOC100274972 [Zea mays] gi 195608106 gb ACG25883.1  hypothetical protein [Zea mays]                                                                                                                                                                                                                                                                                                                                                                                                                                                                                                  | 252 | 249 | 1.00E-124 | 98.8  | 89.7 | 95.6 | uncharacterized protein LOC100274972   | gbenv/gbpln | Zea mays             | AT3G13440.1   Symbols:   S-adenosyl-L-methionine-dependent methyltransferases superfamily protein   chr3:4378338-4379347 FORWARD LENGTH=278                                                                                                                                                                                                                                                                                                                                                                                                                 | 252 | 278 | 1.00E-111 | 110.3 | 80.2 | 88.9 |

|                          |                                                                                                                                                                                                                                                                                                                                                                                                                                                                                                                                                                                                                                                                                  |     |     |           |       |      |      |                                         |       |                      |                                                                                                                                                                                                                                                                                                                                                                                                                                                                                                                                         |     |     |           |       |      |      |
|--------------------------|----------------------------------------------------------------------------------------------------------------------------------------------------------------------------------------------------------------------------------------------------------------------------------------------------------------------------------------------------------------------------------------------------------------------------------------------------------------------------------------------------------------------------------------------------------------------------------------------------------------------------------------------------------------------------------|-----|-----|-----------|-------|------|------|-----------------------------------------|-------|----------------------|-----------------------------------------------------------------------------------------------------------------------------------------------------------------------------------------------------------------------------------------------------------------------------------------------------------------------------------------------------------------------------------------------------------------------------------------------------------------------------------------------------------------------------------------|-----|-----|-----------|-------|------|------|
| Rsa1.0_00789.1.g19515.t2 | gb EOA31242.1  hypothetical protein CARUB_v10014412mg [Capsella rubella]                                                                                                                                                                                                                                                                                                                                                                                                                                                                                                                                                                                                         | 286 | 264 | 1.00E-102 | 92.3  | 68.5 | 79.4 | hypothetical protein CARUB_v10014412mg  | gbpln | Capsella rubella     | AT3G13420.1   Symbols:   unknown protein; BEST Arabidopsis thaliana protein match is: unknown protein (TAIR:AT1G55535.1); Has 66 Blast hits to 66 proteins in 16 species: Archae - 0; Bacteria - 0; Metazoa - 0; Fungi - 0; Plants - 66; Viruses - 0; Other Eukaryotes - 0 (source: NCBI BLink).   chr3:4364723-4365892 FORWARD LENGTH=242                                                                                                                                                                                              | 286 | 242 | 5.00E-92  | 84.6  | 60.5 | 70.3 |
| Rsa1.0_00789.1.g19516.t3 | gb AAN60225.1  unknown [Arabidopsis thaliana]                                                                                                                                                                                                                                                                                                                                                                                                                                                                                                                                                                                                                                    | 347 | 321 | 1.00E-156 | 92.5  | 81.0 | 85.3 | unknown                                 | gbpln | Arabidopsis thaliana | AT3G13410.1   Symbols:   unknown protein; FUNCTIONS IN: molecular function unknown; INVOLVED IN: biological process unknown; LOCATED IN: endoplasmic reticulum; EXPRESSED IN: 25 plant structures; EXPRESSED DURING: 15 growth stages; BEST Arabidopsis thaliana protein match is: unknown protein (TAIR:AT1G55546.1); Has 49 Blast hits to 49 proteins in 14 species: Archae - 0; Bacteria - 0; Metazoa - 0; Fungi - 0; Plants - 48; Viruses - 0; Other Eukaryotes - 1 (source: NCBI BLink).   chr3:4362149-4364032 REVERSE LENGTH=321 | 347 | 321 | 1.00E-158 | 92.5  | 80.7 | 84.7 |
| Rsa1.0_00789.1.g19517.t1 | #                                                                                                                                                                                                                                                                                                                                                                                                                                                                                                                                                                                                                                                                                | #   | #   | #         | #     | #    | -    | ----                                    | ----  | #                    | #                                                                                                                                                                                                                                                                                                                                                                                                                                                                                                                                       | #   | #   | #         | #     | #    |      |
| Rsa1.0_00790.1.g19518.t1 | ref XP_002885398.1  predicted protein [Arabidopsis lyrata subsp. lyrata] gi 297331236 gb EFH61657.1  predicted protein [Arabidopsis lyrata subsp. lyrata]                                                                                                                                                                                                                                                                                                                                                                                                                                                                                                                        | 369 | 366 | 2.00E-67  | 99.2  | 47.2 | 62.9 | predicted protein                       | gbpln | Arabidopsis lyrata   | AT3G20710.1   Symbols:   F-box family protein   chr3:7237911-7238999 REVERSE LENGTH=362                                                                                                                                                                                                                                                                                                                                                                                                                                                 | 369 | 362 | 3.00E-68  | 98.1  | 45.8 | 60.4 |
| Rsa1.0_00790.1.g19519.t1 | #                                                                                                                                                                                                                                                                                                                                                                                                                                                                                                                                                                                                                                                                                | #   | #   | #         | #     | #    | -    | ----                                    | ----  | #                    | #                                                                                                                                                                                                                                                                                                                                                                                                                                                                                                                                       | #   | #   | #         | #     | #    |      |
| Rsa1.0_00790.1.g19520.t2 | ref XP_002885396.1  predicted protein [Arabidopsis lyrata subsp. lyrata] gi 297331236 gb EFH61655.1  predicted protein [Arabidopsis lyrata subsp. lyrata]                                                                                                                                                                                                                                                                                                                                                                                                                                                                                                                        | 367 | 347 | 8.00E-74  | 94.6  | 47.7 | 59.4 | predicted protein                       | gbpln | Arabidopsis lyrata   | AT3G20710.1   Symbols:   F-box family protein   chr3:7237911-7238999 REVERSE LENGTH=362                                                                                                                                                                                                                                                                                                                                                                                                                                                 | 367 | 362 | 1.00E-70  | 98.6  | 46.3 | 61.9 |
| Rsa1.0_00790.1.g19521.t1 | ref XP_002885396.1  predicted protein [Arabidopsis lyrata subsp. lyrata] gi 297331236 gb EFH61655.1  predicted protein [Arabidopsis lyrata subsp. lyrata]                                                                                                                                                                                                                                                                                                                                                                                                                                                                                                                        | 366 | 347 | 2.00E-73  | 94.8  | 48.9 | 61.5 | predicted protein                       | gbpln | Arabidopsis lyrata   | AT3G20710.1   Symbols:   F-box family protein   chr3:7237911-7238999 REVERSE LENGTH=362                                                                                                                                                                                                                                                                                                                                                                                                                                                 | 366 | 362 | 1.00E-72  | 98.9  | 46.2 | 63.4 |
| Rsa1.0_00790.1.g19522.t1 | ref NP_188707.1  F-box protein [Arabidopsis thaliana] gi 75273302 sp Q9LHQ0.1 FBK64_ARAT H RecName: Full=Putative F-box/kelch-repeat protein At3g20710 gi 9294351 dbj BAB02248.1  unnamed protein product [Arabidopsis thaliana] gi 332642893 gb AEE76414.1  F-box protein [Arabidopsis thaliana]                                                                                                                                                                                                                                                                                                                                                                                | 251 | 362 | 9.00E-52  | 144.2 | 45.8 | 62.2 | F-box protein                           | gbpln | Arabidopsis thaliana | AT3G20710.1   Symbols:   F-box family protein   chr3:7237911-7238999 REVERSE LENGTH=362                                                                                                                                                                                                                                                                                                                                                                                                                                                 | 251 | 362 | 2.00E-54  | 144.2 | 45.8 | 62.2 |
| Rsa1.0_00790.1.g19523.t1 | ref XP_002885395.1  hypothetical protein ARALYDRAFT_479594 [Arabidopsis lyrata subsp. lyrata] gi 297331235 gb EFH61654.1  hypothetical protein ARALYDRAFT_479594 [Arabidopsis lyrata subsp. lyrata]                                                                                                                                                                                                                                                                                                                                                                                                                                                                              | 343 | 337 | 1.00E-139 | 98.3  | 79.9 | 88.0 | hypothetical protein ARALYDRAFT_479594  | gbpln | Arabidopsis lyrata   | AT3G20680.1   Symbols:   Domain of unknown function (DUF1995)   chr3:7230147-7231163 REVERSE LENGTH=338                                                                                                                                                                                                                                                                                                                                                                                                                                 | 343 | 338 | 1.00E-138 | 98.5  | 77.8 | 86.3 |
| Rsa1.0_00790.1.g19524.t1 | gb EOA29533.1  hypothetical protein CARUB_v10014905mg [Capsella rubella] ref NP_188701.2  mRNA cap guanine-N7 methyltransferase 1 [Arabidopsis thaliana] gi 75273308 sp Q9LHQ7.1 MCES1_ARAT H RecName: Full=mRNA cap guanine-N7 methyltransferase 1; AltName: Full=mRNA (guanine-N(7))-methyltransferase 1; AltName: Full=mRNA cap methyltransferase 1 gi 9294344 dbj BAB02241.1  mRNA cap methyltransferase-like protein [Arabidopsis thaliana]                                                                                                                                                                                                                                 | 134 | 132 | 5.00E-66  | 98.5  | 97.0 | 97.8 | hypothetical protein CARUB_v10014905mg  | gbpln | Capsella rubella     | AT3G20670.1   Symbols: HTA13   histone H2A 13   chr3:7229472-7229963 FORWARD LENGTH=132                                                                                                                                                                                                                                                                                                                                                                                                                                                 | 134 | 132 | 4.00E-67  | 98.5  | 94.8 | 97.0 |
| Rsa1.0_00790.1.g19525.t1 | ref NP_188701.2  mRNA cap guanine-N7 methyltransferase 1 [Arabidopsis thaliana] gi 75273308 sp Q9LHQ7.1 MCES1_ARAT H RecName: Full=mRNA cap guanine-N7 methyltransferase 1; AltName: Full=mRNA (guanine-N(7))-methyltransferase 1; AltName: Full=mRNA cap methyltransferase 1 gi 9294344 dbj BAB02241.1  mRNA cap methyltransferase-like protein [Arabidopsis thaliana] gi 28973781 gb AAC064206.1  unknown protein [Arabidopsis thaliana] gi 29824183 gb AAP04052.1  unknown protein [Arabidopsis thaliana] gi 110736712 dbj BAF00319.1  hypothetical protein [Arabidopsis thaliana] gi 332642886 gb AEE76407.1  mRNA cap guanine-N7 methyltransferase 1 [Arabidopsis thaliana] | 374 | 370 | 0         | 98.9  | 93.3 | 97.1 | mRNA cap guanine-N7 methyltransferase 1 | gbpln | Arabidopsis thaliana | AT3G20650.1   Symbols:   mRNA capping enzyme family protein   chr3:7221168-7223939 REVERSE LENGTH=370                                                                                                                                                                                                                                                                                                                                                                                                                                   | 374 | 370 | 0         | 98.9  | 93.3 | 97.1 |

| Rsa1.0_00790.1.g19526.t1                                                                                                                                                                                                                                                                                                            | #   | #   | #         | #     | #    | #    | #                                      | #     | -                    | ----                                                                                                                                                                                                                                                                                                                                                            | ---- | #   | #         | #     | #    | #    | # |
|-------------------------------------------------------------------------------------------------------------------------------------------------------------------------------------------------------------------------------------------------------------------------------------------------------------------------------------|-----|-----|-----------|-------|------|------|----------------------------------------|-------|----------------------|-----------------------------------------------------------------------------------------------------------------------------------------------------------------------------------------------------------------------------------------------------------------------------------------------------------------------------------------------------------------|------|-----|-----------|-------|------|------|---|
| ref[NP_188700.1] transcription factor bHLH123 [Arabidopsis thaliana] gi 75299591 sp O3GX73.1 BHLH123_ARATH RecName: Full=Transcription factor bHLH123; AltName: Full=Basic helix-loop-helix protein 123; Short=AtbHLH123; Short=bHLH 123; AltName: Full=Transcription factor EN 63; AltName: Full=bHLH transcription factor bHLH123 |     |     |           |       |      |      |                                        |       |                      |                                                                                                                                                                                                                                                                                                                                                                 |      |     |           |       |      |      |   |
| Rsa1.0_00790.1.g19527.t1                                                                                                                                                                                                                                                                                                            | 420 | 454 | 1.00E-169 | 108.1 | 85.5 | 88.6 | transcription factor bHLH123           | gbpln | Arabidopsis thaliana | AT3G20640.1   Symbols:   basic helix-loop-helix (bHLH) DNA-binding superfamily protein   chr3:7210654-7213199 REVERSE LENGTH=454                                                                                                                                                                                                                                | 420  | 454 | 1.00E-171 | 108.1 | 85.5 | 88.6 |   |
| Rsa1.0_00790.1.g19528.t1                                                                                                                                                                                                                                                                                                            | 212 | 219 | 5.00E-92  | 103.3 | 79.2 | 88.2 | non-race specific disease resistance 1 | gbpln | Arabidopsis thaliana | AT3G20600.1   Symbols: NDR1   Late embryogenesis abundant (LEA) hydroxyproline-rich glycoprotein family   chr3:7194877-7195536 FORWARD LENGTH=219                                                                                                                                                                                                               | 212  | 219 | 6.00E-93  | 103.3 | 77.8 | 87.7 |   |
| Rsa1.0_00790.1.g19529.t1                                                                                                                                                                                                                                                                                                            | 672 | 671 | 0         | 99.9  | 88.5 | 94.6 | hypothetical protein ARALYDRAFT_479584 | gbpln | Arabidopsis lyrata   | AT3G20580.1   Symbols: COBL10   COBRA-like protein 10 precursor   chr3:7188063-7190416 REVERSE LENGTH=672                                                                                                                                                                                                                                                       | 672  | 672 | 0         | 100.0 | 87.9 | 93.9 |   |
| Rsa1.0_00790.1.g19530.t1                                                                                                                                                                                                                                                                                                            | 183 | 204 | 1.00E-76  | 111.5 | 82.5 | 88.0 | unknown                                | gbpln | Brassica rapa        | AT3G20570.1   Symbols: ENODL9, AENODL9   early nodulin-like protein 9   chr3:7186754-7187453 REVERSE LENGTH=203                                                                                                                                                                                                                                                 | 183  | 203 | 1.00E-66  | 110.9 | 78.7 | 87.4 |   |
| Rsa1.0_00790.1.g19531.t1                                                                                                                                                                                                                                                                                                            | 131 | 130 | 2.00E-53  | 99.2  | 80.2 | 87.8 | hypothetical protein ARALYDRAFT_898483 | gbpln | Arabidopsis lyrata   | AT3G20557.1   Symbols:   unknown protein; BEST Arabidopsis thaliana protein match is: unknown protein (TAIR:AT1G50930.1); Has 35333 Blast hits to 34131 proteins in 2444 species: Archae - 798; Bacteria - 22429; Metazoa - 974; Fungi - 991; Plants - 531; Viruses - 0; Other Eukaryotes - 9610 (source: NCBI BLINK)   chr3:7180140-7180731 FORWARD LENGTH=130 | 131  | 130 | 3.00E-54  | 99.2  | 79.4 | 85.5 |   |
| Rsa1.0_00790.1.g19532.t1                                                                                                                                                                                                                                                                                                            | 385 | 383 | 0         | 99.5  | 88.3 | 92.2 | kinase family protein                  | gbpln | Arabidopsis lyrata   | AT3G20530.1   Symbols:   Protein kinase superfamily protein   chr3:7166318-7167806 FORWARD LENGTH=386                                                                                                                                                                                                                                                           | 385  | 386 | 0         | 100.3 | 87.3 | 91.4 |   |
| Rsa1.0_00790.1.g19533.t2                                                                                                                                                                                                                                                                                                            | #   | #   | #         | #     | #    | #    | #                                      | #     | -                    | ----                                                                                                                                                                                                                                                                                                                                                            | ---- | #   | #         | #     | #    | #    | # |



|                          |                                                                                                                                                                                                                                                                                                                                                                                                                                                                                                                                                                                                                                                                                                                                                                                                                  |      |      |           |       |      |      |                                        |       |                      |                                                                                                                                                                                                                                                                                                                                                       |      |      |           |       |      |      |
|--------------------------|------------------------------------------------------------------------------------------------------------------------------------------------------------------------------------------------------------------------------------------------------------------------------------------------------------------------------------------------------------------------------------------------------------------------------------------------------------------------------------------------------------------------------------------------------------------------------------------------------------------------------------------------------------------------------------------------------------------------------------------------------------------------------------------------------------------|------|------|-----------|-------|------|------|----------------------------------------|-------|----------------------|-------------------------------------------------------------------------------------------------------------------------------------------------------------------------------------------------------------------------------------------------------------------------------------------------------------------------------------------------------|------|------|-----------|-------|------|------|
| Rsa1.0_00790.1.g19534.t1 | dbj BAB01869.1  cytochrome P450-like protein [Arabidopsis thaliana]                                                                                                                                                                                                                                                                                                                                                                                                                                                                                                                                                                                                                                                                                                                                              | 513  | 524  | 0         | 102.1 | 79.3 | 88.1 | cytochrome P450-like protein           | gbpln | Arabidopsis thaliana | AT4G15360.1   Symbols: CYP705A3   cytochrome P450, family 705, subfamily A, polypeptide 3   chr4:8770185-8771852 FORWARD LENGTH=527                                                                                                                                                                                                                   | 513  | 527  | 0         | 102.7 | 72.7 | 82.8 |
| Rsa1.0_00790.1.g19535.t1 | ref XP_002885355.1  ubiquitin-conjugating enzyme 19 [Arabidopsis lyrata subsp. lyrata]   g 297331195 gb EFH61614.1  ubiquitin-conjugating enzyme 19 [Arabidopsis lyrata subsp. lyrata]                                                                                                                                                                                                                                                                                                                                                                                                                                                                                                                                                                                                                           | 181  | 181  | 1.00E-96  | 100.0 | 92.8 | 95.6 | ubiquitin-conjugating enzyme 19        | gbpln | Arabidopsis lyrata   | AT3G20060.1   Symbols: UBC19   ubiquitin-conjugating enzyme 19   chr3:7002927-7004283 REVERSE LENGTH=181                                                                                                                                                                                                                                              | 181  | 181  | 8.00E-92  | 100.0 | 91.7 | 94.5 |
| Rsa1.0_00790.1.g19536.t1 | emb CAB89229.1  putative protein [Arabidopsis thaliana]                                                                                                                                                                                                                                                                                                                                                                                                                                                                                                                                                                                                                                                                                                                                                          | 392  | 451  | 1.00E-107 | 115.1 | 57.1 | 74.5 | putative protein                       | gbpln | Arabidopsis thaliana | AT3G52680.2   Symbols:   F-box/RNI-like/FBD-like domains-containing protein   chr3:19527075-19528838 FORWARD LENGTH=456                                                                                                                                                                                                                               | 392  | 456  | 1.00E-110 | 116.3 | 57.1 | 74.5 |
| Rsa1.0_00790.1.g19537.t1 | gb EOA32274.1  hypothetical protein CARUB_v10015535mg [Capsella rubella]                                                                                                                                                                                                                                                                                                                                                                                                                                                                                                                                                                                                                                                                                                                                         | 529  | 545  | 0         | 103.0 | 90.0 | 92.8 | hypothetical protein CARUB_v10015535mg | gbpln | Capsella rubella     | AT3G20050.1   Symbols: ATTCP-1, TCP-1   T-complex protein 1 alpha subunit   chr3:6998544-7002266 REVERSE LENGTH=545                                                                                                                                                                                                                                   | 529  | 545  | 0         | 103.0 | 89.8 | 92.6 |
| Rsa1.0_00790.1.g19538.t1 | #                                                                                                                                                                                                                                                                                                                                                                                                                                                                                                                                                                                                                                                                                                                                                                                                                | #    | #    | #         | #     | #    | -    | ----                                   | ----  | ----                 | #                                                                                                                                                                                                                                                                                                                                                     | #    | #    | #         | #     | #    |      |
| Rsa1.0_00791.1.g19539.t1 | ref XP_002894122.1  hypothetical protein ARALYDRAFT_474002 [Arabidopsis lyrata subsp. lyrata]   g 297339964 gb EFH70381.1  hypothetical protein ARALYDRAFT_474002 [Arabidopsis lyrata subsp. lyrata]                                                                                                                                                                                                                                                                                                                                                                                                                                                                                                                                                                                                             | 246  | 326  | 2.00E-76  | 132.5 | 63.8 | 72.0 | hypothetical protein ARALYDRAFT_474002 | gbpln | Arabidopsis lyrata   | AT1G48630.1   Symbols: RACK1B_AT   receptor for activated G kinase 1B   chr1:17981977-17983268 REVERSE LENGTH=326                                                                                                                                                                                                                                     | 246  | 326  | 2.00E-78  | 132.5 | 63.8 | 72.0 |
| Rsa1.0_00791.1.g19540.t1 | gb EOA32275.1  hypothetical protein CARUB_v10015536mg [Capsella rubella]                                                                                                                                                                                                                                                                                                                                                                                                                                                                                                                                                                                                                                                                                                                                         | 160  | 483  | 1.00E-22  | 301.9 | 33.8 | 40.0 | hypothetical protein CARUB_v10015536mg | gbpln | Capsella rubella     | AT1G47350.1   Symbols:   F-box associated ubiquitination effector family protein   chr1:17358447-17360722 REVERSE LENGTH=528                                                                                                                                                                                                                          | 160  | 528  | 2.00E-22  | 330.0 | 31.9 | 37.5 |
| Rsa1.0_00791.1.g19541.t1 | gb ABK78696.1  DNA binding protein [Brassica rapa]                                                                                                                                                                                                                                                                                                                                                                                                                                                                                                                                                                                                                                                                                                                                                               | 197  | 185  | 2.00E-36  | 93.9  | 57.9 | 64.0 | DNA binding protein                    | gbpln | Brassica rapa        | AT1G48610.1   Symbols:   AT hook motif-containing protein   chr1:17971027-17972798 REVERSE LENGTH=212                                                                                                                                                                                                                                                 | 197  | 212  | 1.00E-37  | 107.6 | 62.4 | 71.6 |
| Rsa1.0_00791.1.g19542.t2 | gb AAF97969.1 AC000103.19 F21J9.30 [Arabidopsis thaliana]                                                                                                                                                                                                                                                                                                                                                                                                                                                                                                                                                                                                                                                                                                                                                        | 2302 | 1270 | 0         | 55.2  | 25.3 | 33.1 | F21J9.30                               | gbpln | Arabidopsis thaliana | AT4G29090.1   Symbols:   Ribonuclease H-like superfamily protein   chr4:14333528-14335255 FORWARD LENGTH=575                                                                                                                                                                                                                                          | 2302 | 575  | 9.00E-46  | 25.0  | 5.8  | 9.1  |
| Rsa1.0_00791.1.g19543.t1 | ref XP_002891444.1  C2 domain-containing protein [Arabidopsis lyrata subsp. lyrata]   g 297337286 gb EFH67703.1  C2 domain-containing protein [Arabidopsis lyrata subsp. lyrata]                                                                                                                                                                                                                                                                                                                                                                                                                                                                                                                                                                                                                                 | 179  | 170  | 3.00E-85  | 95.0  | 84.9 | 90.5 | C2 domain-containing protein           | gbpln | Arabidopsis lyrata   | AT1G48590.2   Symbols:   Calcium-dependent lipid-binding (CaLB domain) family protein   chr1:17962886-17964274 FORWARD LENGTH=200                                                                                                                                                                                                                     | 179  | 200  | 2.00E-85  | 111.7 | 83.8 | 89.4 |
| Rsa1.0_00791.1.g19544.t1 | gb AAF69169.1 AC0007915.21 F27F5.21 [Arabidopsis thaliana]                                                                                                                                                                                                                                                                                                                                                                                                                                                                                                                                                                                                                                                                                                                                                       | 326  | 1023 | 8.00E-27  | 313.8 | 26.7 | 41.7 | F27F5.21                               | gbpln | Arabidopsis thaliana | AT2G22440.1   Symbols:   BEST Arabidopsis thaliana protein match is: Ribonuclease H-like superfamily protein (TAIR:AT4G29090.1); Has 208 Blast hits to 191 proteins in 10 species: Archaea - 0; Bacteria - 0; Metazoa - 0; Fungi - 0; Plants - 208; Viruses - 0; Other Eukaryotes - 0 (source: NCBI BLINK).   chr2:9528910-9529917 FORWARD LENGTH=256 | 326  | 256  | 2.00E-20  | 78.5  | 18.4 | 26.7 |
| Rsa1.0_00791.1.g19545.t1 | gb ADQ37383.1  unknown [Arabidopsis lyrata]                                                                                                                                                                                                                                                                                                                                                                                                                                                                                                                                                                                                                                                                                                                                                                      | 510  | 850  | 0         | 166.7 | 76.5 | 84.7 | unknown                                | gbpln | Arabidopsis lyrata   | AT4G21380.1   Symbols: ARK3, RK3   receptor kinase 3   chr4:11389219-11393090 REVERSE LENGTH=850                                                                                                                                                                                                                                                      | 510  | 850  | 0         | 166.7 | 74.5 | 83.3 |
| Rsa1.0_00791.1.g19546.t1 | #                                                                                                                                                                                                                                                                                                                                                                                                                                                                                                                                                                                                                                                                                                                                                                                                                | #    | #    | #         | #     | #    | -    | ----                                   | ----  | ----                 | #                                                                                                                                                                                                                                                                                                                                                     | #    | #    | #         | #     | #    |      |
| Rsa1.0_00791.1.g19547.t3 | ref XP_002894115.1  T1N15.10 [Arabidopsis lyrata subsp. lyrata]   g 297339957 gb EFH70374.1  T1N15.10 [Arabidopsis lyrata subsp. lyrata]   ref NP_564528.1  receptor-like kinase 1 [Arabidopsis thaliana]   g 75335279 sp Q9LPT77.1 Y1848_ARATH RecName: Full=Probable inactive receptor kinase At1g48480; Flags: Precursor   g 8778688 gb AAF79696.1 AC020889.4 T1N15.9 [Arabidopsis thaliana]   g 209529789 gb ACI49789.1  At1g48480 [Arabidopsis thaliana]   g 224589420 gb ACN59244.1  leucine-rich repeat receptor-like protein kinase [Arabidopsis thaliana]   g 332194177 gb AEE32298.1  receptor-like kinase 1 [Arabidopsis thaliana]   ref XP_002866925.1  glycine-rich protein [Arabidopsis lyrata subsp. lyrata]   g 297312761 gb EFH43184.1  glycine-rich protein [Arabidopsis lyrata subsp. lyrata] | 1226 | 1259 | 0         | 102.7 | 73.1 | 81.6 | T1N15.10                               | gbpln | Arabidopsis lyrata   | AT1G48490.3   Symbols:   Protein kinase superfamily protein   chr1:17922345-17928597 REVERSE LENGTH=1235                                                                                                                                                                                                                                              | 1226 | 1235 | 0         | 100.7 | 71.5 | 80.9 |
| Rsa1.0_00791.1.g19548.t1 | g 8778688 gb AAF79696.1 AC020889.4 T1N15.9 [Arabidopsis thaliana]   g 209529789 gb ACI49789.1  At1g48480 [Arabidopsis thaliana]   g 224589420 gb ACN59244.1  leucine-rich repeat receptor-like protein kinase [Arabidopsis thaliana]   g 332194177 gb AEE32298.1  receptor-like kinase 1 [Arabidopsis thaliana]   ref XP_002866925.1  glycine-rich protein [Arabidopsis lyrata subsp. lyrata]   g 297312761 gb EFH43184.1  glycine-rich protein [Arabidopsis lyrata subsp. lyrata]                                                                                                                                                                                                                                                                                                                               | 643  | 655  | 0         | 101.9 | 87.1 | 92.7 | receptor-like kinase 1                 | gbpln | Arabidopsis thaliana | AT1G48480.1   Symbols: RKL1   receptor-like kinase 1   chr1:17918475-17920743 FORWARD LENGTH=655                                                                                                                                                                                                                                                      | 643  | 655  | 0         | 101.9 | 87.1 | 92.7 |
| Rsa1.0_00792.1.g19549.t1 | ref XP_002866925.1  glycine-rich protein [Arabidopsis lyrata subsp. lyrata]   g 297312761 gb EFH43184.1  glycine-rich protein [Arabidopsis lyrata subsp. lyrata]                                                                                                                                                                                                                                                                                                                                                                                                                                                                                                                                                                                                                                                 | 782  | 787  | 0         | 100.6 | 72.3 | 78.8 | glycine-rich protein                   | gbpln | Arabidopsis lyrata   | AT4G37900.1   Symbols:   Protein of unknown function (duplicated DUF1399)   chr4:17821737-17824445 REVERSE LENGTH=787                                                                                                                                                                                                                                 | 782  | 787  | 0         | 100.6 | 71.4 | 78.8 |

|                          |                                                                                                                                                                                                                                                                                                                                                       |      |      |           |       |      |      |                                                                 |       |                      |                                                                                                                                                                                                                                                                                                                                                                                                                                                                                       |      |      |           |       |      |      |
|--------------------------|-------------------------------------------------------------------------------------------------------------------------------------------------------------------------------------------------------------------------------------------------------------------------------------------------------------------------------------------------------|------|------|-----------|-------|------|------|-----------------------------------------------------------------|-------|----------------------|---------------------------------------------------------------------------------------------------------------------------------------------------------------------------------------------------------------------------------------------------------------------------------------------------------------------------------------------------------------------------------------------------------------------------------------------------------------------------------------|------|------|-----------|-------|------|------|
| Rsa1.0_00792.1.g19550.t1 | gb[EOA16807.1] hypothetical protein CARUB_v10005028mg [Capsella rubella] gi 482552615 gb[EOA16808.1] hypothetical protein CARUB_v10005028mg [Capsella rubella]                                                                                                                                                                                        | 325  | 385  | 1.00E-126 | 118.5 | 73.5 | 86.8 | hypothetical protein CARUB_v10005028mg                          | gbpln | Capsella rubella     | AT2G22690.2   Symbols:   zinc ion binding   chr2:9649820-9650965 REVERSE LENGTH=381                                                                                                                                                                                                                                                                                                                                                                                                   | 325  | 381  | 1.00E-104 | 117.2 | 60.3 | 80.9 |
| Rsa1.0_00792.1.g19551.t1 | gb[EOA17720.1] hypothetical protein CARUB_v10006101mg [Capsella rubella]                                                                                                                                                                                                                                                                              | 102  | 102  | 5.00E-51  | 100.0 | 97.1 | 97.1 | hypothetical protein CARUB_v10006101mg                          | gbpln | Capsella rubella     | AT4G37830.1   Symbols:   cytochrome c oxidase-related   chr4:17787672-17788762 REVERSE LENGTH=102<br>AT2G22795.1   Symbols:   unknown protein; BEST Arabidopsis thaliana protein match is: unknown protein (TAIR:AT4G37820.1); Has 799554 Blast hits to 188815 proteins in 4452 species: Archae - 4529; Bacteria - 144236; Metazoa - 287749; Fungi - 87083; Plants - 43826; Viruses - 3662; Other Eukaryotes - 228769 (source: NCBI BLink).   chr2:9697380-9699584 REVERSE LENGTH=734 | 102  | 102  | 1.00E-50  | 100.0 | 91.2 | 94.1 |
| Rsa1.0_00792.1.g19552.t1 | gb[EOA28316.1] hypothetical protein CARUB_v10024517mg [Capsella rubella]                                                                                                                                                                                                                                                                              | 514  | 740  | 4.00E-22  | 144.0 | 9.1  | 10.9 | hypothetical protein CARUB_v10024517mg                          | gbpln | Capsella rubella     | AT4G37810.1   Symbols:   unknown protein; FUNCTIONS IN: molecular.function unknown; INVOLVED IN: biological.process unknown; LOCATED IN: endomembrane system; BEST Arabidopsis thaliana protein match is: unknown protein (TAIR:AT5G10310.1); Has 149 Blast hits to 149 proteins in 15 species: Archae - 0; Bacteria - 0; Metazoa - 0; Fungi - 0; Plants - 149; Viruses - 0; Other Eukaryotes - 0 (source: NCBI BLink).   chr4:17780970-17781544 FORWARD LENGTH=128                   | 514  | 734  | 4.00E-22  | 142.8 | 9.1  | 10.3 |
| Rsa1.0_00792.1.g19553.t1 | ref[XP_002868962.1] hypothetical protein ARALYDRAFT_353057 [Arabidopsis lyrata subsp. lyrata] gi 297314798 gb[EFH45221.1] hypothetical protein ARALYDRAFT_353057 [Arabidopsis lyrata subsp. lyrata]                                                                                                                                                   | 134  | 126  | 5.00E-50  | 94.0  | 79.1 | 84.3 | hypothetical protein ARALYDRAFT_353057                          | gbpln | Arabidopsis lyrata   | AT1G60720.1   Symbols:   RNA-directed DNA polymerase (reverse transcriptase)-related family protein   chr1:22357072-22357941 FORWARD LENGTH=289                                                                                                                                                                                                                                                                                                                                       | 134  | 128  | 1.00E-48  | 95.5  | 78.4 | 82.1 |
| Rsa1.0_00792.1.g19554.t1 | gb[AAQ50806.1]ACQ79281.8 unknown protein [Arabidopsis thaliana]                                                                                                                                                                                                                                                                                       | 576  | 1213 | 1.00E-178 | 210.6 | 54.0 | 68.4 | unknown protein                                                 | gbpln | Arabidopsis thaliana | AT4G37790.1   Symbols: HAT22   Homeobox-leucine zipper protein family   chr4:17768241-17769272 FORWARD LENGTH=278                                                                                                                                                                                                                                                                                                                                                                     | 576  | 289  | 8.00E-73  | 50.2  | 23.3 | 31.3 |
| Rsa1.0_00792.1.g19555.t1 | ref[XP_002868963.1] homeobox-leucine zipper protein 22 [Arabidopsis lyrata subsp. lyrata] gi 297314799 gb[EFH45222.1] homeobox-leucine zipper protein 22 [Arabidopsis lyrata subsp. lyrata]                                                                                                                                                           | 544  | 283  | 1.00E-113 | 52.0  | 43.8 | 46.5 | homeobox-leucine zipper protein 22                              | gbpln | Arabidopsis lyrata   | AT4G37750.1   Symbols: ANT, DRG, CKC, CKC1   Integrase-type DNA-binding superfamily protein   chr4:17739782-17742189 FORWARD LENGTH=555                                                                                                                                                                                                                                                                                                                                               | 544  | 278  | 1.00E-115 | 51.1  | 42.6 | 45.8 |
| Rsa1.0_00792.1.g19556.t1 | gb[ABA42147.1] aintegumenta 2 [Brassica napus]                                                                                                                                                                                                                                                                                                        | 631  | 562  | 0         | 89.1  | 78.3 | 81.3 | aintegumenta 2                                                  | gbpln | Brassica napus       | AT3G24255.1   Symbols:   RNA-directed DNA polymerase (reverse transcriptase)-related family protein   chr3:8789471-8793208 FORWARD LENGTH=746                                                                                                                                                                                                                                                                                                                                         | 631  | 555  | 0         | 88.0  | 74.2 | 77.0 |
| Rsa1.0_00792.1.g19557.t1 | #                                                                                                                                                                                                                                                                                                                                                     | #    | #    | #         | #     | #    | #    | -                                                               | ----  | ----                 | #                                                                                                                                                                                                                                                                                                                                                                                                                                                                                     | #    | #    | #         | #     | #    | #    |
| Rsa1.0_00792.1.g19558.t1 | gb[AAC28221.1] similar to reverse transcriptases (PFam: rvt.hmm, score: 60.13) [Arabidopsis thaliana]                                                                                                                                                                                                                                                 | 244  | 1164 | 4.00E-53  | 477.0 | 46.3 | 56.1 | similar to reverse transcriptases (PFam: rvt.hmm, score: 60.13) | gbpln | Arabidopsis thaliana | AT4G37710.1   Symbols:   VQ motif-containing protein   chr4:17718234-17718605 FORWARD LENGTH=123                                                                                                                                                                                                                                                                                                                                                                                      | 244  | 746  | 2.00E-40  | 305.7 | 32.4 | 46.3 |
| Rsa1.0_00792.1.g19559.t1 | ref[NP_195485.1] VQ motif-containing protein [Arabidopsis thaliana] gi 4468996 emb[CAB38310.1] putative protein [Arabidopsis thaliana] gi 7270754 emb[CAB80436.1] putative protein [Arabidopsis thaliana] gi 117168075 gb[ABK32120.1] At4g37710 [Arabidopsis thaliana] gi 332661430 gb[AEE86830.1] VQ motif-containing protein [Arabidopsis thaliana] | 122  | 123  | 2.00E-45  | 100.8 | 79.5 | 84.4 | VQ motif-containing protein                                     | gbpln | Arabidopsis thaliana | AT4G23160.1   Symbols: CRK8   cysteine-rich RLK (RECEPTOR-like protein kinase) 8   chr4:12129485-12134086 FORWARD LENGTH=1262                                                                                                                                                                                                                                                                                                                                                         | 122  | 123  | 3.00E-48  | 100.8 | 79.5 | 84.4 |
| Rsa1.0_00792.1.g19560.t1 | emb[CAB40035.1] retrotransposon like protein [Arabidopsis thaliana] gi 7267767 emb[CAB81170.1] retrotransposon like protein [Arabidopsis thaliana]                                                                                                                                                                                                    | 1454 | 1515 | 0         | 104.2 | 56.2 | 70.5 | retrotransposon like protein                                    | gbpln | Arabidopsis thaliana | AT4G37650.1   Symbols: SHR, SGR7   GRAS family transcription factor   chr4:17691871-17693466 FORWARD LENGTH=531                                                                                                                                                                                                                                                                                                                                                                       | 1454 | 1262 | 1.00E-117 | 86.8  | 14.0 | 20.8 |
| Rsa1.0_00792.1.g19561.t1 | ref[XP_002868978.1] hypothetical protein ARALYDRAFT_912572 [Arabidopsis lyrata subsp. lyrata] gi 297314814 gb[EFH45237.1] hypothetical protein ARALYDRAFT_912572 [Arabidopsis lyrata subsp. lyrata]                                                                                                                                                   | 224  | 531  | 1.00E-111 | 237.1 | 88.8 | 92.4 | hypothetical protein ARALYDRAFT_912572                          | gbpln | Arabidopsis lyrata   | AT3G06550.2   Symbols:   O-acetyltransferase family protein   chr3:2039408-2042664 REVERSE LENGTH=568                                                                                                                                                                                                                                                                                                                                                                                 | 224  | 531  | 1.00E-112 | 237.1 | 87.5 | 91.5 |
| Rsa1.0_00793.1.g19562.t1 | ref[XP_002884591.1] hypothetical protein ARALYDRAFT_477961 [Arabidopsis lyrata subsp. lyrata] gi 297330431 gb[EFH60850.1] hypothetical protein ARALYDRAFT_477961 [Arabidopsis lyrata subsp. lyrata]                                                                                                                                                   | 543  | 545  | 0         | 100.4 | 85.3 | 87.7 | hypothetical protein ARALYDRAFT_477961                          | gbpln | Arabidopsis lyrata   |                                                                                                                                                                                                                                                                                                                                                                                                                                                                                       | 543  | 568  | 0         | 104.6 | 85.5 | 89.0 |

|                          |                                                                                                                                                                                                                                                                                                                                                                                                                                                                                                                                                                                                                                                                                                                                                                         |     |     |           |       |      |      |                                                                     |       |                      |                                                                                                                                                                                                                                                                                                                                                                                                                                                                                    |     |     |           |       |      |      |
|--------------------------|-------------------------------------------------------------------------------------------------------------------------------------------------------------------------------------------------------------------------------------------------------------------------------------------------------------------------------------------------------------------------------------------------------------------------------------------------------------------------------------------------------------------------------------------------------------------------------------------------------------------------------------------------------------------------------------------------------------------------------------------------------------------------|-----|-----|-----------|-------|------|------|---------------------------------------------------------------------|-------|----------------------|------------------------------------------------------------------------------------------------------------------------------------------------------------------------------------------------------------------------------------------------------------------------------------------------------------------------------------------------------------------------------------------------------------------------------------------------------------------------------------|-----|-----|-----------|-------|------|------|
| Rsa1.0_00793.1.g19563.t1 | ref[XP_002882480.1] polynucleotide adenyllyltransferase [Arabidopsis lyrata subsp. lyrata] gi 297328320 gb EFH58739.1                                                                                                                                                                                                                                                                                                                                                                                                                                                                                                                                                                                                                                                   | 501 | 507 | 0         | 101.2 | 78.2 | 87.8 | polynucleotide adenyllyltransferase                                 | gbpln | Arabidopsis lyrata   | AT3G06560.1   Symbols: PAPS3   poly(A) polymerase 3   chr3:2044443-2047034 FORWARD LENGTH=507                                                                                                                                                                                                                                                                                                                                                                                      | 501 | 507 | 0         | 101.2 | 78.2 | 88.6 |
| Rsa1.0_00793.1.g19564.t1 | polynucleotide adenyllyltransferase [Arabidopsis lyrata subsp. lyrata] ref[XP_002884593.1] hypothetical protein ARALYDRAFT_896791 [Arabidopsis lyrata subsp. lyrata] gi 297330433 gb EFH60852.1                                                                                                                                                                                                                                                                                                                                                                                                                                                                                                                                                                         | 496 | 496 | 0         | 100.0 | 91.1 | 95.4 | hypothetical protein ARALYDRAFT_896791                              | gbpln | Arabidopsis lyrata   | AT3G06580.1   Symbols: GAL1, GALK   Mevalonate/galactokinase family protein   chr3:2049141-2051867 REVERSE LENGTH=496                                                                                                                                                                                                                                                                                                                                                              | 496 | 496 | 0         | 100.0 | 90.3 | 95.0 |
| Rsa1.0_00793.1.g19565.t1 | hypothetical protein ARALYDRAFT_896791 [Arabidopsis lyrata subsp. lyrata] ref[XP_002884594.1] hypothetical protein ARALYDRAFT_477966 [Arabidopsis lyrata subsp. lyrata] gi 297330434 gb EFH60853.1                                                                                                                                                                                                                                                                                                                                                                                                                                                                                                                                                                      | 230 | 217 | 2.00E-66  | 94.3  | 68.7 | 77.4 | hypothetical protein ARALYDRAFT_477966                              | gbpln | Arabidopsis lyrata   | AT3G06590.2   Symbols:   basic helix-loop-helix (bHLH) DNA-binding superfamily protein   chr3:2054647-2055312 REVERSE LENGTH=221                                                                                                                                                                                                                                                                                                                                                   | 230 | 221 | 6.00E-63  | 96.1  | 59.6 | 66.5 |
| Rsa1.0_00793.1.g19566.t1 | hypothetical protein [Arabidopsis thaliana] ref[NP_187312.1] uncharacterized protein [Arabidopsis thaliana] gi 186509849 ref[NP_00118593.1] uncharacterized protein [Arabidopsis thaliana] gi 12322684 gb AAG51336.1 AC020580.16 hypothetical protein; 25909-26809 [Arabidopsis thaliana] gi 49660141 gb AAT68361.1                                                                                                                                                                                                                                                                                                                                                                                                                                                     | 183 | 193 | 7.00E-48  | 105.5 | 63.4 | 77.0 | uncharacterized protein                                             | gbpln | Arabidopsis thaliana | AT3G06600.2   Symbols:   unknown protein; FUNCTIONS IN: molecular function unknown; INVOLVED IN: biological process unknown; LOCATED IN: cellular component unknown; EXPRESSED IN: 15 plant structures; EXPRESSED DURING: 7 growth stages; Has 30201 Blast hits to 17322 proteins in 780 species: Archae - 12; Bacteria - 1396; Metazoa - 17338; Fungi - 3422; Plants - 5037; Viruses - 0; Other Eukaryotes - 2996 (source: NCBI BLink).   chr3:2059558-2060458 REVERSE LENGTH=193 | 183 | 193 | 3.00E-50  | 105.5 | 63.4 | 77.0 |
| Rsa1.0_00793.1.g19567.t1 | hypothetical protein AT3g06600 [Arabidopsis thaliana] gi 50058941 gb AAT69215.1  hypothetical protein AT3g06600 [Arabidopsis thaliana] gi 332640899 gb AEE74420.1  uncharacterized protein AT3G06600 [Arabidopsis thaliana] gi 332640900 gb AEE74421.1  uncharacterized protein AT3G06600 [Arabidopsis thaliana] ref[NP_566288.1] DNA-binding enhancer-like protein [Arabidopsis thaliana] gi 12322682 gb AAG51334.1 AC020580.14 unknown protein; 25530-24522 [Arabidopsis thaliana] gi 18252855 gb AAL62354.1  unknown protein [Arabidopsis thaliana] gi 21389699 gb AAM48048.1  unknown protein [Arabidopsis thaliana] gi 21593830 gb AAM65797.1  unknown [Arabidopsis thaliana] gi 332640901 gb AEE74422.1  DNA-binding enhancer-like protein [Arabidopsis thaliana] | 115 | 115 | 3.00E-53  | 100.0 | 92.2 | 95.7 | DNA-binding enhancer-like protein                                   | gbpln | Arabidopsis thaliana | AT3G06610.1   Symbols:   DNA-binding enhancer protein-related   chr3:2060837-2061845 FORWARD LENGTH=115                                                                                                                                                                                                                                                                                                                                                                            | 115 | 115 | 5.00E-56  | 100.0 | 92.2 | 95.7 |
| Rsa1.0_00793.1.g19568.t1 | gb EOA29935.1  hypothetical protein CARUB_v10013028mg [Capsella rubella]                                                                                                                                                                                                                                                                                                                                                                                                                                                                                                                                                                                                                                                                                                | 758 | 769 | 0         | 101.5 | 83.6 | 90.4 | hypothetical protein CARUB_v10013028mg                              | gbpln | Capsella rubella     | AT3G06620.1   Symbols:   PAS domain-containing protein tyrosine kinase family protein   chr3:2062833-2067138 REVERSE LENGTH=773                                                                                                                                                                                                                                                                                                                                                    | 758 | 773 | 0         | 102.0 | 83.8 | 90.6 |
| Rsa1.0_00793.1.g19569.t1 | gb EOA29935.1  hypothetical protein CARUB_v10013028mg [Capsella rubella]                                                                                                                                                                                                                                                                                                                                                                                                                                                                                                                                                                                                                                                                                                | 759 | 769 | 0         | 101.3 | 67.6 | 77.9 | hypothetical protein CARUB_v10013028mg                              | gbpln | Capsella rubella     | AT3G06620.1   Symbols:   PAS domain-containing protein tyrosine kinase family protein   chr3:2062833-2067138 REVERSE LENGTH=773                                                                                                                                                                                                                                                                                                                                                    | 759 | 773 | 0         | 101.8 | 67.3 | 78.0 |
| Rsa1.0_00793.1.g19570.t1 | ref[XP_002882485.1] peptidyl-prolyl cis-trans isomerase cyclophilin-type family protein [Arabidopsis lyrata subsp. lyrata] gi 297328329 gb EFH58744.1  peptidyl-prolyl cis-trans isomerase cyclophilin-type family protein [Arabidopsis lyrata subsp. lyrata]                                                                                                                                                                                                                                                                                                                                                                                                                                                                                                           | 235 | 236 | 1.00E-115 | 100.4 | 87.2 | 91.1 | peptidyl-prolyl cis-trans isomerase cyclophilin-type family protein | gbpln | Arabidopsis lyrata   | AT3G66654.2   Symbols:   Cyclophilin-like peptidyl-prolyl cis-trans isomerase family protein   chr3:2088694-2090297 FORWARD LENGTH=236                                                                                                                                                                                                                                                                                                                                             | 235 | 236 | 1.00E-117 | 100.4 | 87.2 | 91.5 |

|                          |                                                                                                                                                                                                                                                                                                                                                                                                        |      |      |           |       |      |      |                                                                                |       |                      |                                                                                                                                        |      |     |           |       |      |      |
|--------------------------|--------------------------------------------------------------------------------------------------------------------------------------------------------------------------------------------------------------------------------------------------------------------------------------------------------------------------------------------------------------------------------------------------------|------|------|-----------|-------|------|------|--------------------------------------------------------------------------------|-------|----------------------|----------------------------------------------------------------------------------------------------------------------------------------|------|-----|-----------|-------|------|------|
| Rsa1.0_00793.1.g19571.t1 | ref NP_974242.1  aldehyde dehydrogenase 22A1 [Arabidopsis thaliana] gi 118595572 sp QOWSF1.2 AL221_ARATH RecName: Full=Aldehyde dehydrogenase 22A1; AltName: Full=Novel aldehyde dehydrogenase family 22 member A1; Flags: Precursor gi 42406419 emb CAE48165.1  putative aldehyde dehydrogenase [Arabidopsis thaliana] gi 332640912 gb AEE74433.1  aldehyde dehydrogenase 22A1 [Arabidopsis thaliana] | 628  | 596  | 0         | 94.9  | 91.7 | 93.6 | aldehyde dehydrogenase 22A1                                                    | gbpln | Arabidopsis thaliana | AT3G66658.2   Symbols: ALDH22A1   aldehyde dehydrogenase 22A1   chr3:2095341-2099013 REVERSE LENGTH=596                                | 628  | 596 | 0         | 94.9  | 91.7 | 93.6 |
| Rsa1.0_00793.1.g19572.t1 | ref XP_002884603.1  hypothetical protein ARALYDRAFT_896807 [Arabidopsis lyrata subsp. lyrata] gi 297330443 gb EFH60862.1  hypothetical protein ARALYDRAFT_896807 [Arabidopsis lyrata subsp. lyrata]                                                                                                                                                                                                    | 859  | 948  | 0         | 110.4 | 66.9 | 78.8 | hypothetical protein ARALYDRAFT_896807                                         | gbpln | Arabidopsis lyrata   | AT4G32670.1   Symbols:   RING/FYVE/PHD zinc finger superfamily protein   chr4:15759527-15762847 REVERSE LENGTH=860                     | 859  | 860 | 0         | 100.1 | 47.6 | 63.2 |
| Rsa1.0_00793.1.g19573.t1 | ref NP_187323.2  component of IIS longevity pathway SMK-1 domain-containing protein [Arabidopsis thaliana] gi 20453090 gb AAM19788.1  At3g06670.T8E24.10 [Arabidopsis thaliana] gi 27764910 gb AAO23576.1  At3g06670.T8E24.10 [Arabidopsis thaliana] gi 332640916 gb AEE74437.1  component of IIS longevity pathway SMK-1 domain-containing protein [Arabidopsis thaliana]                             | 866  | 865  | 0         | 99.9  | 89.1 | 93.4 | component of IIS longevity pathway SMK-1 domain-containing protein             | gbpln | Arabidopsis thaliana | AT3G06670.1   Symbols:   binding   chr3:2105908-2113136 REVERSE LENGTH=865                                                             | 866  | 865 | 0         | 99.9  | 89.1 | 93.4 |
| Rsa1.0_00793.1.g19574.t1 | ref NP_187324.2  60S ribosomal protein L29-2 [Arabidopsis thaliana] gi 332640918 gb AEE74439.1  60S ribosomal protein L29-2 [Arabidopsis thaliana]                                                                                                                                                                                                                                                     | 61   | 83   | 8.00E-26  | 136.1 | 95.1 | 96.7 | 60S ribosomal protein L29-2                                                    | gbpln | Arabidopsis thaliana | AT3G06680.1   Symbols:   Ribosomal L29e protein family   chr3:2114402-2114877 REVERSE LENGTH=83                                        | 61   | 83  | 1.00E-28  | 136.1 | 95.1 | 96.7 |
| Rsa1.0_00793.1.g19575.t4 | ref XP_002882489.1  hypothetical protein ARALYDRAFT_477988 [Arabidopsis lyrata subsp. lyrata] gi 297328329 gb EFH5748.1  hypothetical protein ARALYDRAFT_477988 [Arabidopsis lyrata subsp. lyrata]                                                                                                                                                                                                     | 229  | 183  | 6.00E-85  | 79.9  | 72.9 | 76.0 | hypothetical protein ARALYDRAFT_477988                                         | gbpln | Arabidopsis lyrata   | AT3G06730.1   Symbols: TRX P, TRX z   Thioredoxin z   chr3:2124276-2125845 FORWARD LENGTH=183                                          | 229  | 183 | 9.00E-87  | 79.9  | 71.6 | 75.5 |
| Rsa1.0_00794.1.g19576.t1 | #                                                                                                                                                                                                                                                                                                                                                                                                      | #    | #    | #         | #     | #    | #    | -                                                                              | ----  | ----                 | #                                                                                                                                      | #    | #   | #         | #     | #    |      |
| Rsa1.0_00794.1.g19577.t1 | pir [T00833 RNA-directed DNA polymerase homolog T13L16.7 - Arabidopsis thaliana (fragment)]                                                                                                                                                                                                                                                                                                            | 1620 | 1365 | 0         | 84.3  | 30.9 | 43.0 | RNA-directed DNA polymerase homolog T13L16.7 - Arabidopsis thaliana (fragment) | ----  | ----                 | AT4G29090.1   Symbols:   Ribonuclease H-like superfamily protein   chr4:14333528-14335255 FORWARD LENGTH=575                           | 1620 | 575 | 1.00E-60  | 35.5  | 9.1  | 14.3 |
| Rsa1.0_00794.1.g19578.t1 | ref NP_174390.2  PLATZ transcription factor family protein [Arabidopsis thaliana] gi 332193187 gb AEE31308.1  PLATZ transcription factor family protein [Arabidopsis thaliana]                                                                                                                                                                                                                         | 239  | 243  | 1.00E-108 | 101.7 | 86.6 | 94.6 | PLATZ transcription factor family protein                                      | gbpln | Arabidopsis thaliana | AT1G31040.1   Symbols:   PLATZ transcription factor family protein   chr1:11069793-11072182 REVERSE LENGTH=243                         | 239  | 243 | 1.00E-110 | 101.7 | 86.6 | 94.6 |
| Rsa1.0_00794.1.g19579.t1 | ref NP_199996.1  fructokinase [Arabidopsis thaliana] gi 13878053 gb AAK44104.1 AF370289.1 putative fructokinase 1 [Arabidopsis thaliana] gi 10177882 db BAB11252.1  fructokinase 1 [Arabidopsis thaliana] gi 17104645 gb AAL34211.1  putative fructokinase 1 [Arabidopsis thaliana] gi 332008749 gb AED96132.1  pfkB-like carbohydrate kinase family protein [Arabidopsis thaliana]                    | 124  | 343  | 2.00E-13  | 276.6 | 37.1 | 38.7 | fructokinase                                                                   | gbpln | Arabidopsis thaliana | AT5G51830.1   Symbols:   pfkB-like carbohydrate kinase family protein   chr5:21069709-21071450 FORWARD LENGTH=343                      | 124  | 343 | 3.00E-16  | 276.6 | 37.1 | 38.7 |
| Rsa1.0_00794.1.g19580.t1 | #                                                                                                                                                                                                                                                                                                                                                                                                      | #    | #    | #         | #     | #    | #    | -                                                                              | ----  | ----                 | #                                                                                                                                      | #    | #   | #         | #     | #    |      |
| Rsa1.0_00794.1.g19581.t1 | ref NP_174391.5  basic helix-loop-helix domain-containing protein [Arabidopsis thaliana] gi 332193188 gb AEE31309.1  transcription factor bHLH111 [Arabidopsis thaliana]                                                                                                                                                                                                                               | 298  | 434  | 1.00E-104 | 145.6 | 73.8 | 81.2 | basic helix-loop-helix domain-containing protein                               | gbpln | Arabidopsis thaliana | AT1G31050.1   Symbols:   basic helix-loop-helix (bHLH) DNA-binding superfamily protein   chr1:11075720-11079140 REVERSE LENGTH=434     | 298  | 434 | 1.00E-106 | 145.6 | 73.8 | 81.2 |
| Rsa1.0_00794.1.g19582.t1 | #                                                                                                                                                                                                                                                                                                                                                                                                      | #    | #    | #         | #     | #    | #    | -                                                                              | ----  | ----                 | #                                                                                                                                      | #    | #   | #         | #     | #    |      |
| Rsa1.0_00794.1.g19583.t2 | gb ADF80194.1  UTP-N-acetylglucosamine-1-P uridylyltransferase-1 [synthetic construct]                                                                                                                                                                                                                                                                                                                 | 136  | 505  | 4.00E-42  | 371.3 | 73.5 | 78.7 | UTP-N-acetylglucosamine-1-P uridylyltransferase-1                              | gbenv | synthetic construct  | AT1G31070.2   Symbols: GlcNAc1pUT1   N-acetylglucosamine-1-phosphate uridylyltransferase 1   chr1:11084951-11088361 FORWARD LENGTH=505 | 136  | 505 | 1.00E-44  | 371.3 | 73.5 | 78.7 |
| Rsa1.0_00795.1.g19584.t1 | #                                                                                                                                                                                                                                                                                                                                                                                                      | #    | #    | #         | #     | #    | #    | -                                                                              | ----  | ----                 | #                                                                                                                                      | #    | #   | #         | #     | #    |      |
| Rsa1.0_00795.1.g19585.t1 | gb ABD65073.1  hypothetical protein 27.t00059 [Brassica oleracea]                                                                                                                                                                                                                                                                                                                                      | 287  | 341  | 7.00E-45  | 118.8 | 37.6 | 42.2 | hypothetical protein 27.t00059                                                 | gbpln | Brassica oleracea    | #                                                                                                                                      | #    | #   | #         | #     | #    |      |

|                          |                                                                                                                                                                                                                                                                                                                                            |     |      |           |       |      |      |                                                                 |       |                      |                                                                                                                          |     |     |           |       |      |      |
|--------------------------|--------------------------------------------------------------------------------------------------------------------------------------------------------------------------------------------------------------------------------------------------------------------------------------------------------------------------------------------|-----|------|-----------|-------|------|------|-----------------------------------------------------------------|-------|----------------------|--------------------------------------------------------------------------------------------------------------------------|-----|-----|-----------|-------|------|------|
| Rsa1.0_00795.1.g19586.t1 | gb AAF79374.1 AC007887.33 F15O4.30 [Arabidopsis thaliana]                                                                                                                                                                                                                                                                                  | 262 | 1180 | 2.00E-38  | 450.4 | 44.3 | 61.8 | F15O4.30                                                        | gbpln | Arabidopsis thaliana | #                                                                                                                        | #   | #   | #         | #     | #    |      |
| Rsa1.0_00795.1.g19587.t1 | gb EOA16131.1  hypothetical protein CARUB.v10004266mg [Capsella rubella]                                                                                                                                                                                                                                                                   | 688 | 699  | 0         | 101.6 | 84.4 | 89.5 | hypothetical protein CARUB.v10004266mg                          | gbpln | Capsella rubella     | AT2G05230.1   Symbols:   DNAJ heat shock N-terminal domain-containing protein   chr2:1899818-1901938 REVERSE LENGTH=706  | 688 | 706 | 0         | 102.6 | 72.5 | 80.4 |
| Rsa1.0_00795.1.g19588.t2 | gb AAG51783.1 AC079679.3 reverse transcriptase, putative; 16838-20266 [Arabidopsis thaliana]                                                                                                                                                                                                                                               | 502 | 1142 | 6.00E-35  | 227.5 | 23.3 | 35.3 | reverse transcriptase, putative; 16838-20266                    | gbpln | Arabidopsis thaliana | AT4G29090.1   Symbols:   Ribonuclease H-like superfamily protein   chr4:14333528-14335255 FORWARD LENGTH=575             | 502 | 575 | 6.00E-18  | 114.5 | 16.1 | 26.3 |
| Rsa1.0_00795.1.g19589.t1 | gb AAC28207.1  T24H24.13 gene product [Arabidopsis thaliana] gi 7267161 emb CAB77873.1  putative transposon protein [Arabidopsis thaliana]                                                                                                                                                                                                 | 458 | 681  | 5.00E-56  | 148.7 | 25.3 | 35.4 | T24H24.13 gene product                                          | gbpln | Arabidopsis thaliana | #                                                                                                                        | #   | #   | #         | #     | #    |      |
| Rsa1.0_00795.1.g19590.t2 | gb AAD28663.1  hypothetical protein [Arabidopsis thaliana]                                                                                                                                                                                                                                                                                 | 353 | 356  | 2.00E-19  | 100.8 | 20.1 | 34.6 | hypothetical protein                                            | gbpln | Arabidopsis thaliana | #                                                                                                                        | #   | #   | #         | #     | #    |      |
| Rsa1.0_00795.1.g19591.t1 | ref XP_002876899.1  nonsense-mediated mRNA decay NMD3 family protein [Arabidopsis lyrata subsp. lyrata] gi 297322737 gb EFH53158.1  nonsense-mediated mRNA decay NMD3 family protein [Arabidopsis lyrata subsp. lyrata]                                                                                                                    | 90  | 516  | 3.00E-11  | 573.3 | 41.1 | 43.3 | nonsense-mediated mRNA decay NMD3 family protein                | gbpln | Arabidopsis lyrata   | AT2G03820.1   Symbols:   nonsense-mediated mRNA decay NMD3 family protein   chr2:1165149-1166699 REVERSE LENGTH=516      | 90  | 516 | 8.00E-14  | 573.3 | 40.0 | 43.3 |
| Rsa1.0_00795.1.g19592.t1 | ref XP_002870448.1  predicted protein [Arabidopsis lyrata subsp. lyrata] gi 297316284 gb EFH46707.1  predicted protein [Arabidopsis lyrata subsp. lyrata]                                                                                                                                                                                  | 376 | 449  | 0         | 119.4 | 89.1 | 93.4 | predicted protein                                               | gbpln | Arabidopsis lyrata   | AT5G35770.1   Symbols: SAP   Transducin/WD40 repeat-like superfamily protein   chr5:13936457-13940786 REVERSE LENGTH=446 | 376 | 446 | 0         | 118.6 | 88.6 | 93.6 |
| Rsa1.0_00795.1.g19593.t1 | ref NP_198426.1  transcriptional regulator STERILE APETALA [Arabidopsis thaliana] gi 30580503 sp Q9FKH1.1 SAP_ARATH RecName: Full=Transcriptional regulator STERILE APETALA gi 9758652 dbj BAB09276.1  sterile apetala [Arabidopsis thaliana] gi 332006634 gb AED94017.1  transcriptional regulator STERILE APETALA [Arabidopsis thaliana] | 82  | 446  | 6.00E-15  | 543.9 | 73.2 | 79.3 | transcriptional regulator STERILE APETALA                       | gbpln | Arabidopsis thaliana | AT5G35770.1   Symbols: SAP   Transducin/WD40 repeat-like superfamily protein   chr5:13936457-13940786 REVERSE LENGTH=446 | 82  | 446 | 1.00E-17  | 543.9 | 73.2 | 79.3 |
| Rsa1.0_00795.1.g19594.t1 | #                                                                                                                                                                                                                                                                                                                                          | #   | #    | #         | #     | #    | -    | ----                                                            | ----  | #                    | #                                                                                                                        | #   | #   | #         | #     | #    |      |
| Rsa1.0_00795.1.g19595.t1 | gb EOA32454.1  hypothetical protein CARUB.v10015730mg [Capsella rubella]                                                                                                                                                                                                                                                                   | 187 | 543  | 2.00E-28  | 290.4 | 33.7 | 51.9 | hypothetical protein CARUB.v10015730mg                          | gbpln | Capsella rubella     | AT1G52950.1   Symbols:   Nucleic acid-binding, OB-fold-like protein   chr1:19725483-19728007 FORWARD LENGTH=566          | 187 | 566 | 7.00E-25  | 302.7 | 29.9 | 54.0 |
| Rsa1.0_00795.1.g19596.t1 | gb AAF18641.1 AC006228.12 F5J5.16 [Arabidopsis thaliana]                                                                                                                                                                                                                                                                                   | 981 | 1024 | 2.00E-90  | 104.4 | 24.5 | 33.5 | F5J5.16                                                         | gbpln | Arabidopsis thaliana | #                                                                                                                        | #   | #   | #         | #     | #    |      |
| Rsa1.0_00795.1.g19597.t1 | #                                                                                                                                                                                                                                                                                                                                          | #   | #    | #         | #     | #    | -    | ----                                                            | ----  | #                    | #                                                                                                                        | #   | #   | #         | #     | #    |      |
| Rsa1.0_00795.1.g19598.t1 | #                                                                                                                                                                                                                                                                                                                                          | #   | #    | #         | #     | #    | -    | ----                                                            | ----  | #                    | #                                                                                                                        | #   | #   | #         | #     | #    |      |
| Rsa1.0_00796.1.g19599.t1 | ref XP_002874165.1  peroxidase family protein [Arabidopsis lyrata subsp. lyrata] gi 297320002 gb EFH50424.1  peroxidase family protein [Arabidopsis lyrata subsp. lyrata]                                                                                                                                                                  | 341 | 341  | 0         | 100.0 | 92.1 | 97.7 | peroxidase family protein                                       | gbpln | Arabidopsis lyrata   | AT5G24070.1   Symbols:   Peroxidase superfamily protein   chr5:8134301-8135991 REVERSE LENGTH=340                        | 341 | 340 | 0         | 99.7  | 90.9 | 95.9 |
| Rsa1.0_00796.1.g19600.t1 | gb AAC28221.1  similar to reverse transcriptases (PFam: rvt.hmm, score: 60.13) [Arabidopsis thaliana]                                                                                                                                                                                                                                      | 888 | 1164 | 0         | 131.1 | 53.2 | 67.5 | similar to reverse transcriptases (PFam: rvt.hmm, score: 60.13) | gbpln | Arabidopsis thaliana | AT1G43760.1   Symbols:   DNase I-like superfamily protein   chr1:16528880-16531065 REVERSE LENGTH=626                    | 888 | 626 | 6.00E-67  | 70.5  | 15.2 | 24.3 |
| Rsa1.0_00796.1.g19601.t1 | ref XP_002890732.1  hypothetical protein ARALYDRAFT_890279 [Arabidopsis lyrata subsp. lyrata] gi 297336574 gb EFH66991.1  hypothetical protein ARALYDRAFT_890279 [Arabidopsis lyrata subsp. lyrata]                                                                                                                                        | 312 | 311  | 4.00E-71  | 99.7  | 44.6 | 62.5 | hypothetical protein ARALYDRAFT_890279                          | gbpln | Arabidopsis lyrata   | AT1G27570.1   Symbols:   phosphatidylinositol 3- and 4-kinase family protein   chr1:9575538-9582376 FORWARD LENGTH=649   | 312 | 649 | 6.00E-73  | 208.0 | 46.5 | 63.1 |
| Rsa1.0_00796.1.g19602.t1 | ref NP_174074.1  uncharacterized protein [Arabidopsis thaliana] gi 5668765 gb AAD45992.1 AC005916.4 T17H3.4 [Arabidopsis thaliana] gi 332192722 gb AEE30843.1  uncharacterized protein AT1G27540 [Arabidopsis thaliana]                                                                                                                    | 392 | 413  | 1.00E-100 | 105.4 | 52.6 | 65.6 | uncharacterized protein                                         | gbpln | Arabidopsis thaliana | AT1G27540.1   Symbols:   Protein of unknown function (DUF295)   chr1:9566608-9567849 REVERSE LENGTH=413                  | 392 | 413 | 1.00E-102 | 105.4 | 52.6 | 65.6 |
| Rsa1.0_00796.1.g19603.t1 | gb EOA19255.1  hypothetical protein CARUB.v10000189mg, partial [Capsella rubella]                                                                                                                                                                                                                                                          | 880 | 883  | 0         | 100.3 | 88.6 | 93.6 | hypothetical protein CARUB.v10000189mg, partial                 | gbpln | Capsella rubella     | AT5G24080.1   Symbols:   Protein kinase superfamily protein   chr5:8139334-8141014 REVERSE LENGTH=470                    | 880 | 470 | 0         | 53.4  | 48.9 | 51.9 |
| Rsa1.0_00796.1.g19604.t2 | dbj BAA21873.1  acidic endochitinase [Arabidopsis thaliana]                                                                                                                                                                                                                                                                                | 263 | 302  | 1.00E-117 | 114.8 | 77.6 | 82.5 | acidic endochitinase                                            | gbpln | Arabidopsis thaliana | AT5G24090.1   Symbols: ATCHIA, CHIA   chitinase A   chr5:8143805-8145153 REVERSE LENGTH=302                              | 263 | 302 | 1.00E-119 | 114.8 | 76.4 | 82.1 |

|                          |                                                                                                                                                                                                                                                                                                                                                                                                                                                                                                                                            |     |     |           |       |      |      |                                                                                                                                                      |       |                      |                                                                                                                                                                                                                                                                                                                                                                                                                                                                                                                                                    |     |     |           |       |      |      |
|--------------------------|--------------------------------------------------------------------------------------------------------------------------------------------------------------------------------------------------------------------------------------------------------------------------------------------------------------------------------------------------------------------------------------------------------------------------------------------------------------------------------------------------------------------------------------------|-----|-----|-----------|-------|------|------|------------------------------------------------------------------------------------------------------------------------------------------------------|-------|----------------------|----------------------------------------------------------------------------------------------------------------------------------------------------------------------------------------------------------------------------------------------------------------------------------------------------------------------------------------------------------------------------------------------------------------------------------------------------------------------------------------------------------------------------------------------------|-----|-----|-----------|-------|------|------|
| Rsa1.0_00796.1.g19605.t2 | refXP_002874169.1  hypothetical protein ARALYDRAFT_489268 [Arabidopsis lyrata subsp. lyrata] gi 297320006 gb EFH50428.1                                                                                                                                                                                                                                                                                                                                                                                                                    | 302 | 304 | 1.00E-126 | 100.7 | 78.5 | 84.8 | hypothetical protein ARALYDRAFT_489268                                                                                                               | gbpln | Arabidopsis lyrata   | AT5G24110.1   Symbols: WRKY30, ATWRKY30   WRKY DNA-binding protein 30   chr5:8153416-8154633 REVERSE LENGTH=303                                                                                                                                                                                                                                                                                                                                                                                                                                    | 302 | 303 | 1.00E-119 | 100.3 | 71.9 | 83.4 |
| Rsa1.0_00796.1.g19606.t1 | hypothetical protein ARALYDRAFT_489268 [Arabidopsis lyrata subsp. lyrata]<br>refXP_002874170.1  hypothetical protein ARALYDRAFT_489269 [Arabidopsis lyrata subsp. lyrata] gi 297320007 gb EFH50429.1                                                                                                                                                                                                                                                                                                                                       | 539 | 517 | 0         | 95.9  | 82.0 | 87.2 | hypothetical protein ARALYDRAFT_489269                                                                                                               | gbpln | Arabidopsis lyrata   | AT5G24120.1   Symbols: SIGE, SIG5, ATSIG5   sigma factor E   chr5:8157794-8159746 REVERSE LENGTH=517                                                                                                                                                                                                                                                                                                                                                                                                                                               | 539 | 517 | 0         | 95.9  | 79.8 | 86.1 |
| Rsa1.0_00796.1.g19607.t1 | refXP_002872093.1  hypothetical protein ARALYDRAFT_489270 [Arabidopsis lyrata subsp. lyrata] gi 297317930 gb EFH48352.1                                                                                                                                                                                                                                                                                                                                                                                                                    | 315 | 315 | 1.00E-155 | 100.0 | 88.3 | 94.3 | hypothetical protein ARALYDRAFT_489270                                                                                                               | gbpln | Arabidopsis lyrata   | AT5G24130.1   Symbols:   unknown protein; FUNCTIONS IN: molecular_function unknown; INVOLVED IN: biological_process unknown; LOCATED IN: mitochondrion; EXPRESSED IN: petal, leaf whorl, flower; EXPRESSED DURING: 4 anthesis, petal differentiation and expansion stage; Has 1807 Blast hits to 1807 proteins in 277 species: Archae - 0; Bacteria - 0; Metazoa - 736; Fungi - 347; Plants - 385; Viruses - 0; Other Eukaryotes - 339 (source: NCBI BLINK)   chr5:8162247-8163825 FORWARD LENGTH=316                                              | 315 | 316 | 1.00E-153 | 100.3 | 87.3 | 93.7 |
| Rsa1.0_00796.1.g19608.t1 | hypothetical protein ARALYDRAFT_489270 [Arabidopsis lyrata subsp. lyrata]<br>refNP_197802.1  Squalene monooxygenase 2 [Arabidopsis thaliana] gi 6685408 sp O65403.1 ERG13_ARATH RecName: Full=Squalene monooxygenase 2; AltName: Full=Squalene epoxidase 2; Short=SE 2 gi 3123329 emb CAA06771.1  squalene epoxidase homologue [Arabidopsis thaliana] gi 10178162 bj BAB11574.1  squalene monooxygenase 2 (squalene epoxidase 2) (SE 2) [Arabidopsis thaliana] gi 332005878 gb AED93261.1  Squalene monooxygenase 2 [Arabidopsis thaliana] | 518 | 516 | 0         | 99.6  | 80.5 | 88.4 | Squalene monooxygenase 2                                                                                                                             | gbpln | Arabidopsis thaliana | AT5G24140.1   Symbols: SQP2   squalene monooxygenase 2   chr5:8164547-8167669 REVERSE LENGTH=516                                                                                                                                                                                                                                                                                                                                                                                                                                                   | 518 | 516 | 0         | 99.6  | 80.5 | 88.4 |
| Rsa1.0_00796.1.g19609.t1 | sp O65726.1 ERG12_BRANA RecName: Full=Squalene monooxygenase 1.2; AltName: Full=Squalene epoxidase 1.2; Short=SE 1.2 gi 3123352 emb CAA06770.1  squalene epoxidase homologue [Brassica napus]                                                                                                                                                                                                                                                                                                                                              | 514 | 518 | 0         | 100.8 | 88.1 | 91.2 | RecName: Full=Squalene monooxygenase 1.2; AltName: Full=Squalene epoxidase 1.2; Short=SE 1.2 gi 3123352 emb CAA06770.1  squalene epoxidase homologue | gbpln | Brassica napus       | AT5G24150.1   Symbols: SQP1, SQE5   FAD/NAD(P)-binding oxidoreductase family protein   chr5:8172594-8175395 REVERSE LENGTH=516                                                                                                                                                                                                                                                                                                                                                                                                                     | 514 | 516 | 0         | 100.4 | 74.3 | 85.6 |
| Rsa1.0_00796.1.g19610.t1 | gb EOA21899.1  hypothetical protein CARUB_v10002380mg [Capsella rubella]                                                                                                                                                                                                                                                                                                                                                                                                                                                                   | 107 | 75  | 4.00E-28  | 70.1  | 61.7 | 63.6 | hypothetical protein CARUB_v10002380mg                                                                                                               | gbpln | Capsella rubella     | AT5G24165.1   Symbols:   unknown protein; FUNCTIONS IN: molecular_function unknown; INVOLVED IN: biological_process unknown; LOCATED IN: chloroplast; EXPRESSED IN: 22 plant structures; EXPRESSED DURING: 13 growth stages; BEST Arabidopsis thaliana protein match is: unknown protein (TAIR:AT4G23885.1); Has 30201 Blast hits to 17322 proteins in 780 species: Archae - 12; Bacteria - 1396; Metazoa - 17338; Fungi - 3422; Plants - 5037; Viruses - 0; Other Eukaryotes - 2996 (source: NCBI BLINK)   chr5:8188622-8189087 FORWARD LENGTH=75 | 107 | 75  | 5.00E-29  | 70.1  | 58.9 | 62.6 |
| Rsa1.0_00796.1.g19611.t1 | refXP_002874175.1  hypothetical protein ARALYDRAFT_489277 [Arabidopsis lyrata subsp. lyrata] gi 297320012 gb EFH50434.1                                                                                                                                                                                                                                                                                                                                                                                                                    | 164 | 163 | 2.00E-75  | 99.4  | 87.2 | 92.1 | hypothetical protein ARALYDRAFT_489277                                                                                                               | gbpln | Arabidopsis lyrata   | AT5G24170.1   Symbols:   Got1/Sft2-like vesicle transport protein family   chr5:8189744-8191355 REVERSE LENGTH=163                                                                                                                                                                                                                                                                                                                                                                                                                                 | 164 | 163 | 1.00E-70  | 99.4  | 84.8 | 89.6 |

|                          |                                                                                                                                                                                                                                                                                                                                                                                                                                                                                                                                                                       |      |      |           |       |      |       |                                                                                      |             |                      |                                                                                                                                                        |      |     |          |       |      |      |
|--------------------------|-----------------------------------------------------------------------------------------------------------------------------------------------------------------------------------------------------------------------------------------------------------------------------------------------------------------------------------------------------------------------------------------------------------------------------------------------------------------------------------------------------------------------------------------------------------------------|------|------|-----------|-------|------|-------|--------------------------------------------------------------------------------------|-------------|----------------------|--------------------------------------------------------------------------------------------------------------------------------------------------------|------|-----|----------|-------|------|------|
| Rsa1.0_00797.1.g19612.t1 | refNP_566914.1   RNA polymerase III subunit RPC82 family protein [Arabidopsis thaliana] gi 20466336 gb AAM20485.1   RNA polymerase III subunit-like protein [Arabidopsis thaliana] gi 34098883 gb AAQ56824.1   At3g49000 [Arabidopsis thaliana] gi 332644960 gb AEE78481.1   RNA polymerase III subunit RPC82 family protein [Arabidopsis thaliana] ref XP_002877640.1   AMP-dependent synthetase and ligase family protein [Arabidopsis thaliana] gi 297323478 gb EFH53899.1   AMP-dependent synthetase and ligase family protein [Arabidopsis lyrata subsp. lyrata] | 182  | 523  | 8.00E-74  | 287.4 | 72.5 | 87.9  | RNA polymerase III subunit RPC82 family protein                                      | gbpln       | Arabidopsis thaliana | AT3G49000.1   Symbols:   RNA polymerase III subunit RPC82 family protein   chr3:18162903-18165846 FORWARD LENGTH=523                                   | 182  | 523 | 3.00E-76 | 287.4 | 72.5 | 87.9 |
| Rsa1.0_00797.1.g19613.t1 | ref XP_002877640.1   AMP-dependent synthetase and ligase family protein [Arabidopsis thaliana] gi 297323478 gb EFH53899.1   AMP-dependent synthetase and ligase family protein [Arabidopsis lyrata subsp. lyrata]                                                                                                                                                                                                                                                                                                                                                     | 514  | 514  | 0         | 100.0 | 95.9 | 98.1  | AMP-dependent synthetase and ligase family protein                                   | gbpln       | Arabidopsis lyrata   | AT3G48990.1   Symbols:   AMP-dependent synthetase and ligase family protein   chr3:18159031-18161294 REVERSE LENGTH=514                                | 514  | 514 | 0        | 100.0 | 95.5 | 97.5 |
| Rsa1.0_00797.1.g19614.t1 | ref XP_002875936.1   hypothetical protein ARALYDRAFT_485256 [Arabidopsis lyrata subsp. lyrata] gi 297321774 gb EFH52195.1   hypothetical protein ARALYDRAFT_485256 [Arabidopsis lyrata subsp. lyrata]                                                                                                                                                                                                                                                                                                                                                                 | 548  | 539  | 0         | 98.4  | 86.5 | 90.3  | hypothetical protein ARALYDRAFT_485256                                               | gbpln       | Arabidopsis lyrata   | AT3G48980.1   Symbols:   Arabidopsis thaliana protein of unknown function (DJF821)   chr3:18155416-18158222 FORWARD LENGTH=539                         | 548  | 539 | 0        | 98.4  | 85.6 | 89.6 |
| Rsa1.0_00797.1.g19615.t1 | gb EOA24919.1   hypothetical protein CARUB_v10018210mg [Capsella rubella]                                                                                                                                                                                                                                                                                                                                                                                                                                                                                             | 140  | 140  | 1.00E-70  | 100.0 | 96.4 | 100.0 | hypothetical protein CARUB_v10018210mg                                               | gbpln       | Capsella rubella     | AT3G48970.1   Symbols:   Heavy metal transport/detoxification superfamily protein   chr3:18152408-18153296 REVERSE LENGTH=140                          | 140  | 140 | 7.00E-66 | 100.0 | 96.4 | 98.6 |
| Rsa1.0_00797.1.g19616.t1 | refNP_190464.1   glycoside hydrolase family 28 protein / polygalacturonase (pectinase) family protein [Arabidopsis thaliana] gi 6522571 emb CAB62015.1   endo-polygalacturonase-like protein [Arabidopsis thaliana] gi 67633678 gb AA78763.1   glycoside hydrolase family 28 protein [Arabidopsis thaliana] gi 332644955 gb AEE78476.1   glycoside hydrolase family 28 protein / polygalacturonase (pectinase) family protein [Arabidopsis thaliana]                                                                                                                  | 464  | 469  | 0         | 101.1 | 86.6 | 94.0  | glycoside hydrolase family 28 protein / polygalacturonase (pectinase) family protein | gbpln       | Arabidopsis thaliana | AT3G48950.1   Symbols:   Pectin lyase-like superfamily protein   chr3:18148017-18149987 FORWARD LENGTH=469                                             | 464  | 469 | 0        | 101.1 | 86.6 | 94.0 |
| Rsa1.0_00797.1.g19617.t1 | gb AAC33226.1   putative non-LTR retroelement reverse transcriptase [Arabidopsis thaliana]                                                                                                                                                                                                                                                                                                                                                                                                                                                                            | 1524 | 1529 | 0         | 100.3 | 39.5 | 55.8  | putative non-LTR retroelement reverse transcriptase                                  | gbpln       | Arabidopsis thaliana | AT3G24255.1   Symbols:   RNA-directed DNA polymerase (reverse transcriptase)-related family protein   chr3:8789471-8793208 FORWARD LENGTH=746          | 1524 | 746 | 5.00E-88 | 49.0  | 11.2 | 15.5 |
| Rsa1.0_00797.1.g19618.t1 | ref XP_002877638.1   remorin family protein [Arabidopsis lyrata subsp. lyrata] gi 297323476 gb EFH53897.1   remorin family protein [Arabidopsis lyrata subsp. lyrata]                                                                                                                                                                                                                                                                                                                                                                                                 | 84   | 175  | 4.00E-25  | 208.3 | 77.4 | 88.1  | remorin family protein                                                               | gbpln       | Arabidopsis lyrata   | AT3G48940.1   Symbols:   Remorin family protein   chr3:18142863-18144163 REVERSE LENGTH=175                                                            | 84   | 175 | 4.00E-25 | 208.3 | 72.6 | 83.3 |
| Rsa1.0_00797.1.g19619.t1 | # # # # # # # -                                                                                                                                                                                                                                                                                                                                                                                                                                                                                                                                                       |      |      |           |       |      |       |                                                                                      | ----        | ----                 | #                                                                                                                                                      |      |     |          |       |      |      |
| Rsa1.0_00797.1.g19620.t1 | ref XP_002869362.1   40S ribosomal protein S11 [Arabidopsis lyrata subsp. lyrata] gi 297315198 gb EFH45621.1   40S ribosomal protein S11 [Arabidopsis lyrata subsp. lyrata]                                                                                                                                                                                                                                                                                                                                                                                           | 159  | 159  | 1.00E-79  | 100.0 | 90.6 | 94.3  | 40S ribosomal protein S11                                                            | gbpln       | Arabidopsis lyrata   | AT5G23740.1   Symbols:   RPS11-BETA   ribosomal protein S11-beta   chr5:8008251-8009330 REVERSE LENGTH=159                                             | 159  | 159 | 2.00E-79 | 100.0 | 96.2 | 96.9 |
| Rsa1.0_00797.1.g19621.t1 | ref XP_003536473.1   PREDICTED: membrane steroid-binding protein 1-like [Glycine max]                                                                                                                                                                                                                                                                                                                                                                                                                                                                                 | 79   | 235  | 3.00E-14  | 297.5 | 48.1 | 49.4  | PREDICTED: membrane steroid-binding protein 1-like                                   | gbenv/gbpln | Glycine max          | AT5G52240.1   Symbols:   MSBP1, ATMP1, AtMAPR5   membrane steroid binding protein 1   chr5:21213121-21214557 FORWARD LENGTH=220                        | 79   | 220 | 3.00E-16 | 278.5 | 45.6 | 48.1 |
| Rsa1.0_00797.1.g19622.t1 | ref XP_002875931.1   membrane-associated progesterone binding protein 3 [Arabidopsis lyrata subsp. lyrata] gi 297321769 gb EFH52190.1   membrane-associated progesterone binding protein 3 [Arabidopsis lyrata subsp. lyrata]                                                                                                                                                                                                                                                                                                                                         | 224  | 232  | 1.00E-101 | 103.6 | 85.7 | 90.2  | membrane-associated progesterone binding protein 3                                   | gbpln       | Arabidopsis lyrata   | AT3G48890.1   Symbols:   ATMP2, ATMAPP3, MSBP2, MAPR3   membrane-associated progesterone binding protein 3   chr3:18129669-18131353 FORWARD LENGTH=233 | 224  | 233 | 3.00E-99 | 104.0 | 80.8 | 84.4 |
| Rsa1.0_00797.1.g19623.t1 | # # # # # # # -                                                                                                                                                                                                                                                                                                                                                                                                                                                                                                                                                       |      |      |           |       |      |       |                                                                                      | ----        | ----                 | #                                                                                                                                                      |      |     |          |       |      |      |
| Rsa1.0_00797.1.g19624.t1 | gb EOA23157.1   hypothetical protein CARUB_v10016640mg [Capsella rubella]                                                                                                                                                                                                                                                                                                                                                                                                                                                                                             | 930  | 977  | 0         | 105.1 | 92.5 | 95.4  | hypothetical protein CARUB_v10016640mg                                               | gbpln       | Capsella rubella     | AT3G48870.2   Symbols:   HSP93-III   Clp ATPase   chr3:18122363-18125915 REVERSE LENGTH=921                                                            | 930  | 921 | 0        | 99.0  | 90.8 | 93.8 |

|                          |                                                                                                                                                                                                                                                                                                                                                                                                                                                                                                                                                                                                                                                                                            |      |      |           |       |      |      |                                                                            |       |                      |                                                                                                                                                                                                                                                                                                                                                                                                                                                                                                                                                                                                                                                                          |      |     |           |       |      |      |
|--------------------------|--------------------------------------------------------------------------------------------------------------------------------------------------------------------------------------------------------------------------------------------------------------------------------------------------------------------------------------------------------------------------------------------------------------------------------------------------------------------------------------------------------------------------------------------------------------------------------------------------------------------------------------------------------------------------------------------|------|------|-----------|-------|------|------|----------------------------------------------------------------------------|-------|----------------------|--------------------------------------------------------------------------------------------------------------------------------------------------------------------------------------------------------------------------------------------------------------------------------------------------------------------------------------------------------------------------------------------------------------------------------------------------------------------------------------------------------------------------------------------------------------------------------------------------------------------------------------------------------------------------|------|-----|-----------|-------|------|------|
| Rsa1.0_00797.1.g19625.t1 | gb EOA25124.1  hypothetical protein CARUB_v10018432mg [Capsella rubella]                                                                                                                                                                                                                                                                                                                                                                                                                                                                                                                                                                                                                   | 296  | 574  | 1.00E-129 | 193.9 | 82.1 | 87.8 | hypothetical protein CARUB_v10018432mg                                     | gbpln | Capsella rubella     | AT3G48860.2   Symbols:   unknown protein; INVOLVED IN: biological_process unknown; LOCATED IN: plasma membrane; EXPRESSED IN: 22 plant structures; EXPRESSED DURING: 13 growth stages; BEST Arabidopsis thaliana protein match is: unknown protein (TAIR:AT5G23700.1); Has 12429 Blast hits to 9751 proteins in 897 species: Archae - 180; Bacteria - 1190; Metazoa - 6552; Fungi - 1361; Plants - 886; Viruses - 50; Other Eukaryotes - 2210 (source: NCBI BLink).   chr3:18117619-18121853 FORWARD LENGTH=577                                                                                                                                                          | 296  | 577 | 1.00E-130 | 194.9 | 81.4 | 86.8 |
| Rsa1.0_00798.1.g19626.t1 | ref XP_002892523.1  hypothetical protein ARALYDRAFT_334257 [Arabidopsis lyrata subsp. lyrata] gi 297338365 gb EFH68782.1  hypothetical protein ARALYDRAFT_334257 [Arabidopsis lyrata subsp. lyrata]                                                                                                                                                                                                                                                                                                                                                                                                                                                                                        | 282  | 305  | 3.00E-45  | 108.2 | 44.3 | 60.3 | hypothetical protein ARALYDRAFT_334257                                     | gbpln | Arabidopsis lyrata   | AT2G42470.1   Symbols:   TRAF-like family protein   chr2:17679887-17685187 REVERSE LENGTH=898                                                                                                                                                                                                                                                                                                                                                                                                                                                                                                                                                                            | 282  | 898 | 1.00E-41  | 318.4 | 39.7 | 58.5 |
| Rsa1.0_00798.1.g19627.t7 | gb AAC13599.1  similar to reverse transcriptase (Pfam: transcript_fact.hmm, score: 72.31) [Arabidopsis thaliana]                                                                                                                                                                                                                                                                                                                                                                                                                                                                                                                                                                           | 1585 | 928  | 1.00E-163 | 58.5  | 19.4 | 25.1 | similar to reverse transcriptase (Pfam: transcript_fact.hmm, score: 72.31) | gbpln | Arabidopsis thaliana | AT1G02580.1   Symbols: MEA, EMB173, FIS1, SDG5   SET domain-containing protein   chr1:544796-548994 FORWARD LENGTH=689                                                                                                                                                                                                                                                                                                                                                                                                                                                                                                                                                   | 1585 | 689 | 2.00E-79  | 43.5  | 11.4 | 15.5 |
| Rsa1.0_00798.1.g19628.t1 | gb EOA36475.1  hypothetical protein CARUB_v10011093mg [Capsella rubella]                                                                                                                                                                                                                                                                                                                                                                                                                                                                                                                                                                                                                   | 698  | 716  | 0         | 102.6 | 82.1 | 89.3 | hypothetical protein CARUB_v10011093mg                                     | gbpln | Capsella rubella     | AT1G02660.1   Symbols:   alpha/beta-Hydrolases superfamily protein   chr1:572187-574746 REVERSE LENGTH=713                                                                                                                                                                                                                                                                                                                                                                                                                                                                                                                                                               | 698  | 713 | 0         | 102.1 | 82.2 | 89.1 |
| Rsa1.0_00798.1.g19629.t1 | ref NP_198686.2  uncharacterized protein [Arabidopsis thaliana] gi 62318737 dbj BAD93759.1  putative protein [Arabidopsis thaliana] gi 332006968 gb AED94351.1  uncharacterized protein AT5G38700 [Arabidopsis thaliana]                                                                                                                                                                                                                                                                                                                                                                                                                                                                   | 159  | 182  | 2.00E-71  | 114.5 | 84.9 | 90.6 | uncharacterized protein                                                    | gbpln | Arabidopsis thaliana | AT5G38700.1   Symbols:   unknown protein; FUNCTIONS IN: molecular_function unknown; INVOLVED IN: biological_process unknown; LOCATED IN: mitochondrion; EXPRESSED IN: 10 plant structures; EXPRESSED DURING: LP.04 four leaves visible, LP.10 ten leaves visible, petal differentiation and expansion stage, LP.08 eight leaves visible, LP.12 twelve leaves visible; BEST Arabidopsis thaliana protein match is: unknown protein (TAIR:AT4G02170.1); Has 64 Blast hits to 64 proteins in 13 species: Archae - 0; Bacteria - 0; Metazoa - 0; Fungi - 0; Plants - 64; Viruses - 0; Other Eukaryotes - 0 (source: NCBI BLink).   chr5:15489690-15490238 FORWARD LENGTH=182 | 159  | 182 | 8.00E-74  | 114.5 | 84.9 | 90.6 |
| Rsa1.0_00798.1.g19630.t1 | gb ACP30609.1  disease resistance protein [Brassica rapa subsp. pekinensis]                                                                                                                                                                                                                                                                                                                                                                                                                                                                                                                                                                                                                | 1389 | 2726 | 0         | 196.3 | 50.7 | 68.8 | disease resistance protein                                                 | gbpln | Brassica rapa        | ATMG00860.1   Symbols: ORF158   DNA/RNA polymerases superfamily protein   chrM:235916-236392 FORWARD LENGTH=158                                                                                                                                                                                                                                                                                                                                                                                                                                                                                                                                                          | 1389 | 158 | 3.00E-30  | 11.4  | 4.3  | 5.2  |
| Rsa1.0_00798.1.g19631.t1 | ref NP_171772.1  galacturonosyltransferase 5 [Arabidopsis thaliana] gi 42571307 ref NP_973744.1  galacturonosyltransferase 5 [Arabidopsis thaliana] gi 75172933 sp Q9FWY9.1 GATL5_ARAT H RecName: Full=Probable galacturonosyltransferase-like 5 gi 9972380 gb AAG10630.1 AC022521.8 Unknown protein [Arabidopsis thaliana] gi 25033419 gb AAN72073.1  Unknown protein [Arabidopsis thaliana] gi 26452192 dbj BAC43184.1  unknown protein [Arabidopsis thaliana] gi 31711862 gb AAP68287.1  At1g02720 [Arabidopsis thaliana] gi 332189341 gb AEE27462.1  galacturonosyltransferase 5 [Arabidopsis thaliana] gi 332189342 gb AEE27463.1  galacturonosyltransferase 5 [Arabidopsis thaliana] | 364  | 361  | 1.00E-167 | 99.2  | 79.9 | 87.6 | galacturonosyltransferase 5                                                | gbpln | Arabidopsis thaliana | AT1G02720.2   Symbols: GATL5   galacturonosyltransferase 5   chr1:592115-593200 FORWARD LENGTH=361                                                                                                                                                                                                                                                                                                                                                                                                                                                                                                                                                                       | 364  | 361 | 1.00E-169 | 99.2  | 79.9 | 87.6 |
| Rsa1.0_00798.1.g19632.t1 | ref NP_171774.2  mortality factor 4-like protein 1 [Arabidopsis thaliana] gi 66792606 gb AA56405.1  At1g02740 [Arabidopsis thaliana] gi 332189344 gb AEE27465.1  MRG family protein [Arabidopsis thaliana]                                                                                                                                                                                                                                                                                                                                                                                                                                                                                 | 329  | 327  | 1.00E-133 | 99.4  | 74.2 | 84.2 | mortality factor 4-like protein 1                                          | gbpln | Arabidopsis thaliana | AT1G02740.1   Symbols:   MRG family protein   chr1:599734-602021 REVERSE LENGTH=327                                                                                                                                                                                                                                                                                                                                                                                                                                                                                                                                                                                      | 329  | 327 | 1.00E-136 | 99.4  | 74.2 | 84.2 |
| Rsa1.0_00798.1.g19633.t4 | dbj BAJ33794.1  unnamed protein product [Thellungiella halophila] gi 312281899 dbj BAJ33815.1  unnamed protein product [Thellungiella halophila]                                                                                                                                                                                                                                                                                                                                                                                                                                                                                                                                           | 237  | 220  | 7.00E-67  | 92.8  | 67.5 | 79.7 | unnamed protein product                                                    | ----  | ----                 | AT1G02750.1   Symbols:   Drought-responsive family protein   chr1:602673-604134 FORWARD LENGTH=221                                                                                                                                                                                                                                                                                                                                                                                                                                                                                                                                                                       | 237  | 221 | 2.00E-59  | 93.2  | 59.1 | 70.0 |



|                          |                                                                                                                                                                                                                                                                                                                                                                                                                                              |     |     |           |       |      |      |                                                 |       |                      |                                                                                                                                              |     |     |           |       |      |      |
|--------------------------|----------------------------------------------------------------------------------------------------------------------------------------------------------------------------------------------------------------------------------------------------------------------------------------------------------------------------------------------------------------------------------------------------------------------------------------------|-----|-----|-----------|-------|------|------|-------------------------------------------------|-------|----------------------|----------------------------------------------------------------------------------------------------------------------------------------------|-----|-----|-----------|-------|------|------|
| Rsa1.0_00798.1.g19634.t1 | gb EOA31438.1  hypothetical protein CARUB_v10014622mg [Capsella rubella]                                                                                                                                                                                                                                                                                                                                                                     | 217 | 210 | 2.00E-96  | 96.8  | 84.3 | 87.6 | hypothetical protein CARUB_v10014622mg          | gbpln | Capsella rubella     | AT3G16780.1   Symbols:   Ribosomal protein L19e family protein   chr3:5708982-5710249 FORWARD LENGTH=209                                     | 217 | 209 | 2.00E-97  | 96.3  | 82.9 | 86.6 |
| Rsa1.0_00798.1.g19635.t1 | ref XP_002892124.1  hypothetical protein ARALYDRAFT_887420 [Arabidopsis lyrata subsp. lyrata] gi 297337966 gb EFH68383.1  hypothetical protein ARALYDRAFT_887420 [Arabidopsis lyrata subsp. lyrata]                                                                                                                                                                                                                                          | 418 | 422 | 0         | 101.0 | 80.4 | 90.9 | hypothetical protein ARALYDRAFT_887420          | gbpln | Arabidopsis lyrata   | AT1G02790.1   Symbols: PGA4   polygalacturonase 4   chr1:610681-612225 REVERSE LENGTH=422                                                    | 418 | 422 | 0         | 101.0 | 80.4 | 90.2 |
| Rsa1.0_00798.1.g19636.t1 | gb EOA37572.1  hypothetical protein CARUB_v10011914mg [Capsella rubella]                                                                                                                                                                                                                                                                                                                                                                     | 511 | 501 | 0         | 98.0  | 85.1 | 88.8 | hypothetical protein CARUB_v10011914mg          | gbpln | Capsella rubella     | AT1G02800.1   Symbols: ATCEL2, CEL2   cellulase 2   chr1:613386-616103 REVERSE LENGTH=501                                                    | 511 | 501 | 0         | 98.0  | 89.2 | 92.8 |
| Rsa1.0_00798.1.g19637.t1 | gb EOA38526.1  hypothetical protein CARUB_v10010322mg, partial [Capsella rubella]                                                                                                                                                                                                                                                                                                                                                            | 172 | 203 | 1.00E-73  | 118.0 | 82.0 | 86.0 | hypothetical protein CARUB_v10010322mg, partial | gbpln | Capsella rubella     | AT1G02816.1   Symbols:   Protein of unknown function, DUF538   chr1:621637-622137 FORWARD LENGTH=166                                         | 172 | 166 | 1.00E-73  | 96.5  | 79.1 | 83.1 |
| Rsa1.0_00798.1.g19638.t1 | dbj BAJ34418.1  unnamed protein product [Theillungiella halophila]                                                                                                                                                                                                                                                                                                                                                                           | 123 | 124 | 1.00E-41  | 100.8 | 78.0 | 87.0 | unnamed protein product                         | ----  | ----                 | AT3G05560.3   Symbols:   Ribosomal L22e protein family   chr3:1614641-1615204 FORWARD LENGTH=124                                             | 123 | 124 | 8.00E-44  | 100.8 | 77.2 | 87.8 |
| Rsa1.0_00799.1.g19639.t1 | #                                                                                                                                                                                                                                                                                                                                                                                                                                            | #   | #   | #         | #     | #    | #    | -                                               | ----  | ----                 | #                                                                                                                                            | #   | #   | #         | #     | #    | #    |
| Rsa1.0_00799.1.g19640.t1 | #                                                                                                                                                                                                                                                                                                                                                                                                                                            | #   | #   | #         | #     | #    | #    | -                                               | ----  | ----                 | #                                                                                                                                            | #   | #   | #         | #     | #    | #    |
| Rsa1.0_00799.1.g19641.t1 | gb EOA17311.1  hypothetical protein CARUB_v10005590mg [Capsella rubella]                                                                                                                                                                                                                                                                                                                                                                     | 85  | 249 | 1.00E-14  | 292.9 | 51.8 | 64.7 | hypothetical protein CARUB_v10005590mg          | gbpln | Capsella rubella     | AT4G30550.1   Symbols:   Class I glutamine amidotransferase-like superfamily protein   chr4:14925618-14926713 FORWARD LENGTH=249             | 85  | 249 | 2.00E-16  | 292.9 | 51.8 | 62.4 |
| Rsa1.0_00799.1.g19642.t1 | gb EOA15566.1  hypothetical protein CARUB_v10005224mg [Capsella rubella]                                                                                                                                                                                                                                                                                                                                                                     | 388 | 329 | 4.00E-49  | 84.8  | 30.7 | 36.3 | hypothetical protein CARUB_v10005224mg          | gbpln | Capsella rubella     | AT4G28430.1   Symbols:   Reticulon family protein   chr4:14057846-14059772 FORWARD LENGTH=457                                                | 388 | 457 | 9.00E-51  | 117.8 | 30.7 | 36.3 |
| Rsa1.0_00799.1.g19643.t1 | gb ABD64950.1  GRF zinc finger containing protein [Brassica oleracea]                                                                                                                                                                                                                                                                                                                                                                        | 80  | 180 | 1.00E-20  | 225.0 | 58.8 | 61.3 | GRF zinc finger containing protein              | gbpln | Brassica oleracea    | #                                                                                                                                            | #   | #   | #         | #     | #    | #    |
| Rsa1.0_00799.1.g19644.t1 | gb EOA39134.1  hypothetical protein CARUB_v10012056mg [Capsella rubella]                                                                                                                                                                                                                                                                                                                                                                     | 413 | 435 | 9.00E-99  | 105.3 | 50.1 | 64.2 | hypothetical protein CARUB_v10012056mg          | gbpln | Capsella rubella     | AT1G32660.1   Symbols:   F-box and associated interaction domains-containing protein   chr1:11811040-11812380 FORWARD LENGTH=446             | 413 | 446 | 2.00E-94  | 108.0 | 53.3 | 65.6 |
| Rsa1.0_00799.1.g19645.t1 | #                                                                                                                                                                                                                                                                                                                                                                                                                                            | #   | #   | #         | #     | #    | #    | -                                               | ----  | ----                 | #                                                                                                                                            | #   | #   | #         | #     | #    | #    |
| Rsa1.0_00800.1.g19646.t2 | #                                                                                                                                                                                                                                                                                                                                                                                                                                            | #   | #   | #         | #     | #    | #    | -                                               | ----  | ----                 | #                                                                                                                                            | #   | #   | #         | #     | #    | #    |
| Rsa1.0_00800.1.g19647.t1 | gb EOA27921.1  hypothetical protein CARUB_v10024094mg [Capsella rubella]                                                                                                                                                                                                                                                                                                                                                                     | 200 | 199 | 1.00E-99  | 99.5  | 92.0 | 94.5 | hypothetical protein CARUB_v10024094mg          | gbpln | Capsella rubella     | AT2G44740.1   Symbols: CYCP4.1   cyclin p4.1   chr2:18442287-18443304 REVERSE LENGTH=202                                                     | 200 | 202 | 2.00E-98  | 101.0 | 87.5 | 91.0 |
| Rsa1.0_00800.1.g19648.t1 | gb EOA26431.1  hypothetical protein CARUB_v10025047mg [Capsella rubella]                                                                                                                                                                                                                                                                                                                                                                     | 354 | 395 | 1.00E-128 | 111.6 | 75.7 | 83.1 | hypothetical protein CARUB_v10025047mg          | gbpln | Capsella rubella     | AT2G44730.1   Symbols:   Alcohol dehydrogenase transcription factor Myb/SANT-like family protein   chr2:18437447-18438565 REVERSE LENGTH=372 | 354 | 372 | 1.00E-123 | 105.1 | 72.0 | 79.4 |
| Rsa1.0_00800.1.g19649.t1 | #                                                                                                                                                                                                                                                                                                                                                                                                                                            | #   | #   | #         | #     | #    | #    | -                                               | ----  | ----                 | #                                                                                                                                            | #   | #   | #         | #     | #    | #    |
| Rsa1.0_00800.1.g19650.t1 | ref XP_002881976.1  hypothetical protein ARALYDRAFT_483599 [Arabidopsis lyrata subsp. lyrata] gi 297327815 gb EFH58235.1  hypothetical protein ARALYDRAFT_483599 [Arabidopsis lyrata subsp. lyrata] ref NP_566023.1  uncharacterized protein [Arabidopsis thaliana] gi 13272435 gb AAK17156.1 AF325088.1 unknown protein [Arabidopsis thaliana] gi 3341687 gb AAC27469.1  expressed protein [Arabidopsis thaliana] gi 15081775 gb AAK82542.1 | 281 | 283 | 1.00E-125 | 100.7 | 82.6 | 89.0 | hypothetical protein ARALYDRAFT_483599          | gbpln | Arabidopsis lyrata   | AT2G44680.1   Symbols: CKB4   casein kinase II beta subunit 4   chr2:18426898-18428166 REVERSE LENGTH=283                                    | 281 | 283 | 1.00E-127 | 100.7 | 82.6 | 89.0 |
| Rsa1.0_00800.1.g19651.t1 | At2g44670/F16B22.16 [Arabidopsis thaliana] gi 21593625 gb AAM65592.1  unknown [Arabidopsis thaliana] gi 24797042 gb AAN64533.1  At2g44670/F16B22.16 [Arabidopsis thaliana] gi 110736091 dbj BAF00018.1  hypothetical protein [Arabidopsis thaliana] gi 330255359 gb AEC10453.1  uncharacterized protein AT2G44670 [Arabidopsis thaliana]                                                                                                     | 94  | 93  | 7.00E-38  | 98.9  | 85.1 | 87.2 | uncharacterized protein                         | gbpln | Arabidopsis thaliana | AT2G44670.1   Symbols:   Protein of unknown function (DUF581)   chr2:18425279-18425673 FORWARD LENGTH=93                                     | 94  | 93  | 1.00E-40  | 98.9  | 85.1 | 87.2 |

|                          |                                                                                                                                                                                                                                                                                                                                                                                                                                                                                                                                                                                                                                                                                                                                                                                                                                                                                                                                                                                                                                                                                                                                                                                                                                      |     |     |           |       |       |       |                                                         |       |                      |                                                                                                                                                                                                                                                                                                                                                                                                                                                                                                                                                                                                                                                                           |     |     |           |       |       |       |
|--------------------------|--------------------------------------------------------------------------------------------------------------------------------------------------------------------------------------------------------------------------------------------------------------------------------------------------------------------------------------------------------------------------------------------------------------------------------------------------------------------------------------------------------------------------------------------------------------------------------------------------------------------------------------------------------------------------------------------------------------------------------------------------------------------------------------------------------------------------------------------------------------------------------------------------------------------------------------------------------------------------------------------------------------------------------------------------------------------------------------------------------------------------------------------------------------------------------------------------------------------------------------|-----|-----|-----------|-------|-------|-------|---------------------------------------------------------|-------|----------------------|---------------------------------------------------------------------------------------------------------------------------------------------------------------------------------------------------------------------------------------------------------------------------------------------------------------------------------------------------------------------------------------------------------------------------------------------------------------------------------------------------------------------------------------------------------------------------------------------------------------------------------------------------------------------------|-----|-----|-----------|-------|-------|-------|
| Rsa1.0_00800.1.g19652.t1 | gb EOA27088.1  hypothetical protein CARUB_v10023185mg [Capsella rubella]                                                                                                                                                                                                                                                                                                                                                                                                                                                                                                                                                                                                                                                                                                                                                                                                                                                                                                                                                                                                                                                                                                                                                             | 484 | 455 | 0         | 94.0  | 78.5  | 85.5  | hypothetical protein CARUB_v10023185mg                  | gbpln | Capsella rubella     | AT2G44640.1   Symbols:   FUNCTIONS IN: molecular function unknown; INVOLVED IN: biological_process unknown; LOCATED IN: mitochondrion, chloroplast, plasma membrane, plastid, chloroplast envelope; EXPRESSED IN: 23 plant structures; EXPRESSED DURING: 13 growth stages; CONTAINS InterPro DOMAIN/s: Protein of unknown function DUF3769 (InterPro:IPR022244); BEST Arabidopsis thaliana protein match is: pigment defective 320 (TAIR:AT3G06960.1); Has 49 Blast hits to 48 proteins in 15 species: Archae - 0; Bacteria - 0; Metazoa - 0; Fungi - 0; Plants - 48; Viruses - 0; Other Eukaryotes - 1 (source: NCBI BLINK).   chr2:18417286-18419063 FORWARD LENGTH=451 | 484 | 451 | 0         | 93.2  | 77.5  | 84.7  |
| Rsa1.0_00800.1.g19653.t1 | ref XP_002880126.1  mtACP-1 [Arabidopsis lyrata subsp. lyrata] gi 297325965 gb EFH56385.1  mtACP-1 [Arabidopsis lyrata subsp. lyrata] ref NP_181989.1  Ras-related protein RABH1B [Arabidopsis thaliana] gi 297828175 ref XP_002881970.1  hypothetical protein ARALYDRAFT_903887 [Arabidopsis lyrata subsp. lyrata] gi 75318653 sp O80501.1 RAH1B_ARAT H RecName: Full=Ras-related protein RABH1b; Short=AtRABH1b; AltName: Full=Ras-related protein Rab6A; Short=AtRab6A gi 3341681 gb AAC27463.1  putative small GTP-binding protein [Arabidopsis thaliana] gi 21593488 gb AAM65455.1  putative small GTP-binding protein [Arabidopsis thaliana] gi 107738267 gb ABF83670.1  AT2g44610 [Arabidopsis thaliana] gi 110742258 dbj BAE99055.1  putative small GTP-binding protein [Arabidopsis thaliana] gi 297327809 gb EFH58229.1  hypothetical protein ARALYDRAFT_903887 [Arabidopsis lyrata subsp. lyrata] gi 330255353 gb AEC10447.1  Ras-related protein RABH1B [Arabidopsis thaliana] gi 741994 prf  2008312A GTP-binding protein ref XP_002881965.1  glycosyl hydrolase family 9 protein [Arabidopsis lyrata subsp. lyrata] gi 297327804 gb EFH58224.1  glycosyl hydrolase family 9 protein [Arabidopsis lyrata subsp. lyrata] | 120 | 122 | 9.00E-55  | 101.7 | 89.2  | 94.2  | mtACP-1                                                 | gbpln | Arabidopsis lyrata   | AT2G44620.1   Symbols: MTACP-1, MTACP1   mitochondrial acyl carrier protein 1   chr2:18414320-18415065 FORWARD LENGTH=122                                                                                                                                                                                                                                                                                                                                                                                                                                                                                                                                                 | 120 | 122 | 1.00E-56  | 101.7 | 87.5  | 94.2  |
| Rsa1.0_00800.1.g19654.t1 | gi 3341681 gb AAC27463.1  putative small GTP-binding protein [Arabidopsis thaliana] gi 21593488 gb AAM65455.1  putative small GTP-binding protein [Arabidopsis thaliana] gi 107738267 gb ABF83670.1  AT2g44610 [Arabidopsis thaliana] gi 110742258 dbj BAE99055.1  putative small GTP-binding protein [Arabidopsis thaliana] gi 297327809 gb EFH58229.1  hypothetical protein ARALYDRAFT_903887 [Arabidopsis lyrata subsp. lyrata] gi 330255353 gb AEC10447.1  Ras-related protein RABH1B [Arabidopsis thaliana] gi 741994 prf  2008312A GTP-binding protein ref XP_002881965.1  glycosyl hydrolase family 9 protein [Arabidopsis lyrata subsp. lyrata] gi 297327804 gb EFH58224.1  glycosyl hydrolase family 9 protein [Arabidopsis lyrata subsp. lyrata]                                                                                                                                                                                                                                                                                                                                                                                                                                                                           | 208 | 208 | 1.00E-117 | 100.0 | 100.0 | 100.0 | Ras-related protein RABH1B                              | gbpln | Arabidopsis lyrata   | AT2G44610.1   Symbols: RAB6, ATRABH1B, ATRAB6A, RAB6A   Ras-related small GTP-binding family protein   chr2:18411778-18413883 REVERSE LENGTH=208                                                                                                                                                                                                                                                                                                                                                                                                                                                                                                                          | 208 | 208 | 1.00E-120 | 100.0 | 100.0 | 100.0 |
| Rsa1.0_00800.1.g19655.t1 | ref XP_002881965.1  glycosyl hydrolase family 9 protein [Arabidopsis lyrata subsp. lyrata] gi 297327804 gb EFH58224.1  glycosyl hydrolase family 9 protein [Arabidopsis lyrata subsp. lyrata]                                                                                                                                                                                                                                                                                                                                                                                                                                                                                                                                                                                                                                                                                                                                                                                                                                                                                                                                                                                                                                        | 486 | 494 | 0         | 101.6 | 81.7  | 87.7  | glycosyl hydrolase family 9 protein                     | gbpln | Arabidopsis lyrata   | AT2G44570.1   Symbols: AtGH9B12, GH9B12   glycosyl hydrolase 9B12   chr2:18394425-18396268 REVERSE LENGTH=492                                                                                                                                                                                                                                                                                                                                                                                                                                                                                                                                                             | 486 | 492 | 0         | 101.2 | 81.1  | 87.0  |
| Rsa1.0_00800.1.g19656.t1 | gb EOA27499.1  hypothetical protein CARUB_v10023636mg [Capsella rubella]                                                                                                                                                                                                                                                                                                                                                                                                                                                                                                                                                                                                                                                                                                                                                                                                                                                                                                                                                                                                                                                                                                                                                             | 130 | 324 | 2.00E-25  | 249.2 | 72.3  | 80.0  | hypothetical protein CARUB_v10023636mg                  | gbpln | Capsella rubella     | AT2G44510.1   Symbols:   CDK inhibitor P21 binding protein   chr2:18377411-18379030 FORWARD LENGTH=326                                                                                                                                                                                                                                                                                                                                                                                                                                                                                                                                                                    | 130 | 326 | 1.00E-26  | 250.8 | 69.2  | 80.0  |
| Rsa1.0_00800.1.g19657.t1 | sp Q9LJF9.3 FDL44_ARATH RecName: Full=F-box/FBD/LRR-repeat protein At3g26920                                                                                                                                                                                                                                                                                                                                                                                                                                                                                                                                                                                                                                                                                                                                                                                                                                                                                                                                                                                                                                                                                                                                                         | 425 | 434 | 1.00E-73  | 102.1 | 45.6  | 60.5  | RecName: Full=F-box/FBD/LRR-repeat protein At3g26920    | ----  | ----                 | AT1G55030.1   Symbols:   RNI-like superfamily protein   chr1:20530417-20531768 REVERSE LENGTH=422                                                                                                                                                                                                                                                                                                                                                                                                                                                                                                                                                                         | 425 | 422 | 2.00E-67  | 99.3  | 42.6  | 60.2  |
| Rsa1.0_00800.1.g19658.t1 | gb EOA26134.1  hypothetical protein CARUB_v10019567mg [Capsella rubella]                                                                                                                                                                                                                                                                                                                                                                                                                                                                                                                                                                                                                                                                                                                                                                                                                                                                                                                                                                                                                                                                                                                                                             | 227 | 381 | 5.00E-16  | 167.8 | 25.1  | 34.4  | hypothetical protein CARUB_v10019567mg                  | gbpln | Capsella rubella     | AT3G26930.1   Symbols:   Protein with RNI-like/FBD-like domains   chr3:3925931-9927351 FORWARD LENGTH=409                                                                                                                                                                                                                                                                                                                                                                                                                                                                                                                                                                 | 227 | 409 | 4.00E-18  | 180.2 | 26.4  | 37.4  |
| Rsa1.0_00800.1.g19659.t1 | sp Q9LJF9.3 FDL44_ARATH RecName: Full=F-box/FBD/LRR-repeat protein At3g26920                                                                                                                                                                                                                                                                                                                                                                                                                                                                                                                                                                                                                                                                                                                                                                                                                                                                                                                                                                                                                                                                                                                                                         | 441 | 434 | 6.00E-71  | 98.4  | 43.8  | 58.0  | RecName: Full=F-box/FBD/LRR-repeat protein At3g26920    | ----  | ----                 | AT4G00160.1   Symbols:   F-box/RNI-like/FBD-like domains-containing protein   chr4:63465-65365 FORWARD LENGTH=453                                                                                                                                                                                                                                                                                                                                                                                                                                                                                                                                                         | 441 | 453 | 2.00E-67  | 102.7 | 42.9  | 55.6  |
| Rsa1.0_00800.1.g19660.t1 | ref NP_001154649.1  leucine rich repeat and F-box domain-containing protein [Arabidopsis thaliana] gi 143015252 sp Q9LJF8.2 FBL47_ARAT H RecName: Full=F-box/LRR-repeat protein At3g26922 gi 33264372 gb AEE77242.1  leucine rich repeat and F-box domain-containing protein [Arabidopsis thaliana]                                                                                                                                                                                                                                                                                                                                                                                                                                                                                                                                                                                                                                                                                                                                                                                                                                                                                                                                  | 209 | 306 | 7.00E-21  | 146.4 | 40.7  | 56.0  | leucine rich repeat and F-box domain-containing protein | gbpln | Arabidopsis thaliana | AT3G26922.1   Symbols:   F-box/RNI-like superfamily protein   chr3:9922858-9923891 FORWARD LENGTH=306                                                                                                                                                                                                                                                                                                                                                                                                                                                                                                                                                                     | 209 | 306 | 2.00E-23  | 146.4 | 40.7  | 56.0  |
| Rsa1.0_00800.1.g19661.t1 | #                                                                                                                                                                                                                                                                                                                                                                                                                                                                                                                                                                                                                                                                                                                                                                                                                                                                                                                                                                                                                                                                                                                                                                                                                                    | #   | #   | #         | #     | #     | -     | ----                                                    | ----  | ----                 | #                                                                                                                                                                                                                                                                                                                                                                                                                                                                                                                                                                                                                                                                         | #   | #   | #         | #     | #     |       |
| Rsa1.0_00800.1.g19662.t1 | sp Q9LJF9.3 FDL44_ARATH RecName: Full=F-box/FBD/LRR-repeat protein At3g26920                                                                                                                                                                                                                                                                                                                                                                                                                                                                                                                                                                                                                                                                                                                                                                                                                                                                                                                                                                                                                                                                                                                                                         | 294 | 434 | 5.00E-44  | 147.6 | 36.1  | 48.6  | RecName: Full=F-box/FBD/LRR-repeat protein At3g26920    | ----  | ----                 | AT3G26922.1   Symbols:   F-box/RNI-like superfamily protein   chr3:9922858-9923891 FORWARD LENGTH=306                                                                                                                                                                                                                                                                                                                                                                                                                                                                                                                                                                     | 294 | 306 | 3.00E-39  | 104.1 | 35.4  | 45.2  |

|                          |                                                                                                                                                                                                                                                                                                                                                                                                                                                                                                                             |      |      |           |       |      |      |                                                      |       |                            |                                                                                                                                      |      |      |           |       |      |      |
|--------------------------|-----------------------------------------------------------------------------------------------------------------------------------------------------------------------------------------------------------------------------------------------------------------------------------------------------------------------------------------------------------------------------------------------------------------------------------------------------------------------------------------------------------------------------|------|------|-----------|-------|------|------|------------------------------------------------------|-------|----------------------------|--------------------------------------------------------------------------------------------------------------------------------------|------|------|-----------|-------|------|------|
| Rsa1.0_00800.1.g19663.t1 | #                                                                                                                                                                                                                                                                                                                                                                                                                                                                                                                           | #    | #    | #         | #     | #    | #    | -                                                    | ----  | ----                       | #                                                                                                                                    | #    | #    | #         | #     | #    |      |
| Rsa1.0_00800.1.g19664.t1 | sp Q9LJF9.3 FDL44_ARATH RecName: Full=F-box/FBD/LRR-repeat protein At3g26920                                                                                                                                                                                                                                                                                                                                                                                                                                                | 417  | 434  | 3.00E-65  | 104.1 | 42.4 | 58.8 | RecName: Full=F-box/FBD/LRR-repeat protein At3g26920 | ----  | ----                       | AT3G52680.2   Symbols:   F-box/RNI-like/FBD-like domains-containing protein   chr3:19527075-19528838 FORWARD LENGTH=456              | 417  | 456  | 8.00E-65  | 109.4 | 42.7 | 58.5 |
| Rsa1.0_00800.1.g19665.t1 | ref XP_002993757.1  hypothetical protein SELMODRAFT_431804 [Selaginella moellendorffii] gi 300138407 gb EFJ05176.1  hypothetical protein SELMODRAFT_431804 [Selaginella moellendorffii]                                                                                                                                                                                                                                                                                                                                     | 151  | 276  | 7.00E-22  | 182.8 | 43.7 | 64.9 | hypothetical protein SELMODRAFT_431804               | gbpln | Selaginella moellendorffii | AT2G44510.1   Symbols:   GDK inhibitor P21 binding protein   chr2:18377411-18379030 FORWARD LENGTH=326                               | 151  | 326  | 2.00E-23  | 215.9 | 34.4 | 39.1 |
| Rsa1.0_00800.1.g19666.t9 | ref XP_002874089.1  hypothetical protein ARALYDRAFT_910273 [Arabidopsis lyrata subsp. lyrata] gi 297319926 gb EFH50348.1  hypothetical protein ARALYDRAFT_910273 [Arabidopsis lyrata subsp. lyrata]                                                                                                                                                                                                                                                                                                                         | 377  | 393  | 1.00E-104 | 104.2 | 57.0 | 69.2 | hypothetical protein ARALYDRAFT_910273               | gbpln | Arabidopsis lyrata         | AT5G22791.2   Symbols:   F-box family protein   chr5:7603579-7604771 REVERSE LENGTH=355                                              | 377  | 355  | 1.00E-75  | 94.2  | 45.9 | 57.6 |
| Rsa1.0_00801.1.g19667.t2 | #                                                                                                                                                                                                                                                                                                                                                                                                                                                                                                                           | #    | #    | #         | #     | #    | #    | -                                                    | ----  | ----                       | #                                                                                                                                    | #    | #    | #         | #     | #    |      |
| Rsa1.0_00801.1.g19668.t1 | ref XP_002876427.1  hypothetical protein ARALYDRAFT_907231 [Arabidopsis lyrata subsp. lyrata] gi 297322265 gb EFH52686.1  hypothetical protein ARALYDRAFT_907231 [Arabidopsis lyrata subsp. lyrata]                                                                                                                                                                                                                                                                                                                         | 551  | 547  | 0         | 99.3  | 83.8 | 91.8 | hypothetical protein ARALYDRAFT_907231               | gbpln | Arabidopsis lyrata         | AT3G57620.1   Symbols:   glyoxal oxidase-related protein   chr3:21337564-21339207 FORWARD LENGTH=547                                 | 551  | 547  | 0         | 99.3  | 82.6 | 91.5 |
| Rsa1.0_00801.1.g19669.t1 | gb ACH99803.1  WRKY2 transcription factor [Brassica napus]                                                                                                                                                                                                                                                                                                                                                                                                                                                                  | 676  | 624  | 0         | 92.3  | 85.4 | 87.6 | WRKY2 transcription factor                           | gbpln | Brassica napus             | AT5G56270.1   Symbols: WRKY2, ATWRKY2   WRKY DNA-binding protein 2   chr5:22780816-22783137 FORWARD LENGTH=687                       | 676  | 687  | 0         | 101.6 | 82.1 | 89.6 |
| Rsa1.0_00801.1.g19670.t1 | gb EOA12550.1  hypothetical protein CARUB_v10026800mg [Capsella rubella]                                                                                                                                                                                                                                                                                                                                                                                                                                                    | 320  | 317  | 1.00E-172 | 99.1  | 92.2 | 95.6 | hypothetical protein CARUB_v10026800mg               | gbpln | Capsella rubella           | AT5G56280.1   Symbols: CSN6A   COP9 signalosome subunit 6A   chr5:22783617-22785530 REVERSE LENGTH=317                               | 320  | 317  | 1.00E-173 | 99.1  | 91.9 | 95.0 |
| Rsa1.0_00801.1.g19671.t1 | #                                                                                                                                                                                                                                                                                                                                                                                                                                                                                                                           | #    | #    | #         | #     | #    | #    | -                                                    | ----  | ----                       | #                                                                                                                                    | #    | #    | #         | #     | #    |      |
| Rsa1.0_00801.1.g19672.t1 | dbj BAB10503.1  retroelement pol polyprotein-like [Arabidopsis thaliana]                                                                                                                                                                                                                                                                                                                                                                                                                                                    | 1455 | 1475 | 0         | 101.4 | 61.2 | 76.4 | retroelement pol polyprotein-like                    | gbpln | Arabidopsis thaliana       | AT4G23160.1   Symbols: CRK8   cysteine-rich RLK (RECEPTOR-like protein kinase) 8   chr4:12129485-12134086 FORWARD LENGTH=1262        | 1455 | 1262 | 0         | 86.7  | 22.3 | 28.1 |
| Rsa1.0_00801.1.g19673.t4 | gb ABB92565.1  peroxisomal import receptor PTS1 [Brassica napus]                                                                                                                                                                                                                                                                                                                                                                                                                                                            | 324  | 731  | 2.00E-66  | 225.6 | 42.9 | 47.2 | peroxisomal import receptor PTS1                     | gbpln | Brassica napus             | AT5G56290.1   Symbols: PEX5, ATPEX5   peroxin 5   chr5:22786655-22791972 FORWARD LENGTH=728                                          | 324  | 728  | 4.00E-67  | 224.7 | 41.7 | 46.6 |
| Rsa1.0_00801.1.g19674.t1 | ref NP_175953.1  protein SKU5 similar 12 [Arabidopsis thaliana] gi 13605853 gb AAK32912.1 AF367325.1 At1g55570/T5A14.1 [Arabidopsis thaliana] gi 4204257 gb AAD10638.1 putative pollen specific protein [Arabidopsis thaliana] gi 22137174 gb AAM91432.1 At1g55570/T5A14.1 [Arabidopsis thaliana] gi 332195146 gb AEE33267.1 protein SKU5 similar 12 [Arabidopsis thaliana]                                                                                                                                                 | 554  | 555  | 0         | 100.2 | 73.6 | 84.1 | protein SKU5 similar 12                              | gbpln | Arabidopsis thaliana       | AT1G55570.1   Symbols: sks12   SKU5 similar 12   chr1:20757882-20759771 FORWARD LENGTH=555                                           | 554  | 555  | 0         | 100.2 | 73.6 | 84.1 |
| Rsa1.0_00801.1.g19675.t1 | ref NP_200443.1  expansin A14 [Arabidopsis thaliana] gi 20137960 sp Q9FMA0.1 EXP14_ARATH RecName: Full=Expansin-A14; Short=AtEXPA14; AltName: Full=Alpha-expansin-14; Short=At-EXP14; Short=AtEx14; AltName: Full=AtH-ExpAlpha-1.5; Flags: Precursor gi 10177830 dbj BAB11259.1  expansin [Arabidopsis thaliana] gi 110740362 dbj BAF02076.1  Expansin [Arabidopsis thaliana] gi 332009365 gb AED96748.1  expansin A14 [Arabidopsis thaliana] ref NP_564398.1  putative FBD-associated F-box protein [Arabidopsis thaliana] | 271  | 255  | 1.00E-134 | 94.1  | 84.5 | 90.4 | expansin A14                                         | gbpln | Arabidopsis thaliana       | AT5G56320.1   Symbols: ATEXPA14, EXP14, ATEXP14, ATHEXP ALPHA 1.5, EXPA14   expansin A14   chr5:22808854-22809906 FORWARD LENGTH=255 | 271  | 255  | 1.00E-136 | 94.1  | 84.5 | 90.4 |
| Rsa1.0_00801.1.g19676.t1 | gi 302425238 sp Q9LQM1.2 FBD39_ARATH RecName: Full=Probable FBD-associated F-box protein At1g32375 gi 332193353 gb AEE31474.1  putative FBD-associated F-box protein [Arabidopsis thaliana]                                                                                                                                                                                                                                                                                                                                 | 425  | 422  | 1.00E-111 | 99.3  | 54.1 | 68.7 | putative FBD-associated F-box protein                | gbpln | Arabidopsis thaliana       | AT1G32375.1   Symbols:   F-box/RNI-like/FBD-like domains-containing protein   chr1:11679230-11680679 FORWARD LENGTH=422              | 425  | 422  | 1.00E-113 | 99.3  | 54.1 | 68.7 |

|                          |                                                                                                                                                                                                                                                                                                                                                                    |     |      |           |       |      |      |                                                 |       |                      |                                                                                                                                  |     |      |           |       |      |      |
|--------------------------|--------------------------------------------------------------------------------------------------------------------------------------------------------------------------------------------------------------------------------------------------------------------------------------------------------------------------------------------------------------------|-----|------|-----------|-------|------|------|-------------------------------------------------|-------|----------------------|----------------------------------------------------------------------------------------------------------------------------------|-----|------|-----------|-------|------|------|
| Rsa1.0_00801.1.g19677.t1 | ref XP_002864451.1  zinc finger family protein [Arabidopsis lyrata subsp. lyrata] gi 297310286 gb EFH40710.1  zinc finger family protein [Arabidopsis lyrata subsp. lyrata]                                                                                                                                                                                        | 350 | 395  | 1.00E-133 | 112.9 | 74.9 | 85.4 | zinc finger family protein                      | gbpln | Arabidopsis lyrata   | AT5G56340.1   Symbols: ATCRT1   RING/U-box superfamily protein   chr5:22818254-22819444 FORWARD LENGTH=396                       | 350 | 396  | 1.00E-133 | 113.1 | 73.4 | 82.0 |
| Rsa1.0_00801.1.g19678.t1 | gb EOA13135.1  hypothetical protein CARUB_v10026152mg, partial [Capsella rubella]                                                                                                                                                                                                                                                                                  | 244 | 575  | 1.00E-136 | 235.7 | 98.0 | 99.2 | hypothetical protein CARUB_v10026152mg, partial | gbpln | Capsella rubella     | AT5G56350.1   Symbols:   Pyruvate kinase family protein   chr5:22820254-22822529 REVERSE LENGTH=498                              | 244 | 498  | 1.00E-138 | 204.1 | 97.5 | 98.8 |
| Rsa1.0_00802.1.g19679.t1 | ref NP_851107.1  uncharacterized protein [Arabidopsis thaliana] gi 10177977 dbj BAB11383.1  unnamed protein product [Arabidopsis thaliana] gi 17979201 gb AAL49839.1  unknown protein [Arabidopsis thaliana] gi 21436077 gb AAM51239.1  unknown protein [Arabidopsis thaliana] gi 33200709 gb AED94474.1  uncharacterized protein AT5G39785 [Arabidopsis thaliana] | 685 | 606  | 0         | 88.5  | 66.6 | 72.3 | uncharacterized protein                         | gbpln | Arabidopsis thaliana | AT5G39785.1   Symbols:   Protein of unknown function (DUF1666)   chr5:15932215 FORWARD LENGTH=606                                | 685 | 606  | 0         | 88.5  | 66.6 | 72.3 |
| Rsa1.0_00802.1.g19680.t2 | gb EOA17166.1  hypothetical protein CARUB_v10005433mg [Capsella rubella]                                                                                                                                                                                                                                                                                           | 300 | 282  | 1.00E-119 | 94.0  | 75.0 | 81.7 | hypothetical protein CARUB_v10005433mg          | gbpln | Capsella rubella     | AT5G39790.1   Symbols:   5'-AMP-activated protein kinase-related   chr5:15932884-15935121 REVERSE LENGTH=273                     | 300 | 273  | 1.00E-116 | 91.0  | 73.3 | 79.3 |
| Rsa1.0_00802.1.g19681.t1 | ref XP_002870753.1  hypothetical protein ARALYDRAFT_494007 [Arabidopsis lyrata subsp. lyrata] gi 297316589 gb EFH47012.1  hypothetical protein ARALYDRAFT_494007 [Arabidopsis lyrata subsp. lyrata]                                                                                                                                                                | 445 | 448  | 0         | 100.7 | 93.0 | 96.2 | hypothetical protein ARALYDRAFT_494007          | gbpln | Arabidopsis lyrata   | AT5G39830.1   Symbols: DEGP8, DEG8   Trypsin family protein with PDZ domain   chr5:15942883-15945676 FORWARD LENGTH=448          | 445 | 448  | 0         | 100.7 | 92.4 | 96.0 |
| Rsa1.0_00802.1.g19682.t1 | dbj BAB11679.1  unnamed protein product [Arabidopsis thaliana]                                                                                                                                                                                                                                                                                                     | 457 | 457  | 1.00E-103 | 100.0 | 51.6 | 63.9 | unnamed protein product                         | gbpln | Arabidopsis thaliana | AT5G22730.1   Symbols:   F-box/RNI-like/FBD-like domains-containing protein   chr5:7551632-7553219 REVERSE LENGTH=466            | 457 | 466  | 1.00E-105 | 102.0 | 51.6 | 63.9 |
| Rsa1.0_00802.1.g19683.t1 | #                                                                                                                                                                                                                                                                                                                                                                  | #   | #    | #         | #     | #    | #    | -                                               | ----  | ----                 | #                                                                                                                                | #   | #    | #         | #     | #    |      |
| Rsa1.0_00802.1.g19684.t1 | gb EOA15626.1  hypothetical protein CARUB_v10005777mg [Capsella rubella]                                                                                                                                                                                                                                                                                           | 198 | 198  | 9.00E-99  | 100.0 | 89.4 | 92.4 | hypothetical protein CARUB_v10005777mg          | gbpln | Capsella rubella     | AT5G39850.1   Symbols:   Ribosomal protein S4   chr5:15950053-15951171 FORWARD LENGTH=197                                        | 198 | 197  | 1.00E-101 | 99.5  | 88.9 | 91.9 |
| Rsa1.0_00802.1.g19685.t1 | gb EOA30606.1  hypothetical protein CARUB_v10013737mg [Capsella rubella]                                                                                                                                                                                                                                                                                           | 441 | 437  | 0         | 99.1  | 71.9 | 77.6 | hypothetical protein CARUB_v10013737mg          | gbpln | Capsella rubella     | AT3G10450.1   Symbols: SCPL7   serine carboxypeptidase-like 7   chr3:3249544-3252320 FORWARD LENGTH=437                          | 441 | 437  | 0         | 99.1  | 73.0 | 81.2 |
| Rsa1.0_00802.1.g19686.t3 | ref XP_002865185.1  predicted protein [Arabidopsis lyrata subsp. lyrata] gi 297311020 gb EFH41444.1  predicted protein [Arabidopsis lyrata subsp. lyrata]                                                                                                                                                                                                          | 972 | 1185 | 0         | 121.9 | 41.5 | 53.4 | predicted protein                               | gbpln | Arabidopsis lyrata   | AT5G22690.1   Symbols:   Disease resistance protein (TIR-NBS-LRR class) family   chr5:7541369-7544888 FORWARD LENGTH=1008        | 972 | 1008 | 0         | 103.7 | 42.7 | 55.6 |
| Rsa1.0_00802.1.g19687.t1 | ref XP_002868691.1  glutaredoxin family protein [Arabidopsis lyrata subsp. lyrata] gi 297314527 gb EFH44950.1  glutaredoxin family protein [Arabidopsis lyrata subsp. lyrata]                                                                                                                                                                                      | 405 | 414  | 1.00E-152 | 102.2 | 71.6 | 84.0 | glutaredoxin family protein                     | gbpln | Arabidopsis lyrata   | AT5G39865.1   Symbols:   Glutaredoxin family protein   chr5:15965560-15966732 REVERSE LENGTH=390                                 | 405 | 390  | 1.00E-150 | 96.3  | 68.1 | 79.3 |
| Rsa1.0_00802.1.g19688.t1 | #                                                                                                                                                                                                                                                                                                                                                                  | #   | #    | #         | #     | #    | #    | -                                               | ----  | ----                 | #                                                                                                                                | #   | #    | #         | #     | #    |      |
| Rsa1.0_00802.1.g19689.t1 | ref XP_002868690.1  hypothetical protein ARALYDRAFT_493997 [Arabidopsis lyrata subsp. lyrata] gi 297314526 gb EFH44949.1  hypothetical protein ARALYDRAFT_493997 [Arabidopsis lyrata subsp. lyrata]                                                                                                                                                                | 320 | 263  | 2.00E-70  | 82.2  | 43.1 | 51.9 | hypothetical protein ARALYDRAFT_493997          | gbpln | Arabidopsis lyrata   | AT5G39870.1   Symbols:   Protein of unknown function (DUF1216)   chr5:15968622-15970011 REVERSE LENGTH=290                       | 320 | 290  | 2.00E-70  | 90.6  | 41.6 | 51.6 |
| Rsa1.0_00802.1.g19690.t1 | gb EOA17162.1  hypothetical protein CARUB_v10005430mg [Capsella rubella]                                                                                                                                                                                                                                                                                           | 279 | 285  | 1.00E-129 | 102.2 | 82.8 | 86.0 | hypothetical protein CARUB_v10005430mg          | gbpln | Capsella rubella     | AT5G39890.1   Symbols:   Protein of unknown function (DUF1637)   chr5:15974543-15976013 FORWARD LENGTH=276                       | 279 | 276  | 1.00E-130 | 98.9  | 81.7 | 86.4 |
| Rsa1.0_00802.1.g19691.t1 | gb AAM67109.1  putative DNA-binding protein [Arabidopsis thaliana]                                                                                                                                                                                                                                                                                                 | 140 | 125  | 2.00E-17  | 89.3  | 42.1 | 60.0 | putative DNA-binding protein                    | gbpln | Arabidopsis thaliana | AT1G77570.1   Symbols:   Winged helix-turn-helix transcription repressor DNA-binding   chr1:29143350-29143793 FORWARD LENGTH=147 | 140 | 147  | 8.00E-20  | 105.0 | 42.1 | 60.0 |
| Rsa1.0_00802.1.g19692.t1 | ref XP_002868701.1  predicted protein [Arabidopsis lyrata subsp. lyrata] gi 297314537 gb EFH44960.1  predicted protein [Arabidopsis lyrata subsp. lyrata]                                                                                                                                                                                                          | 338 | 395  | 2.00E-65  | 116.9 | 49.1 | 59.8 | predicted protein                               | gbpln | Arabidopsis lyrata   | AT5G41200.1   Symbols: AGL75   AGAMOUS-like 75   chr5:16490544-16491536 FORWARD LENGTH=330                                       | 338 | 330  | 2.00E-63  | 97.6  | 44.7 | 54.1 |
| Rsa1.0_00803.1.g19693.t1 | #                                                                                                                                                                                                                                                                                                                                                                  | #   | #    | #         | #     | #    | #    | -                                               | ----  | ----                 | AT1G20930.1   Symbols: CDKB2.2   cyclin-dependent kinase B2.2   chr1:7292752-7294664 REVERSE LENGTH=315                          | 74  | 315  | 1.00E-10  | 425.7 | 55.4 | 63.5 |

|                          |                                                                                                                                                                                                                                                                                                                                                                                                                                                                                                                                                                                                                                                                                                                                       |      |      |           |       |      |      |                                        |       |                      |                                                                                                                                                                                                                                                                                                                                                                                                                                                                                                                                       |      |      |           |       |      |      |
|--------------------------|---------------------------------------------------------------------------------------------------------------------------------------------------------------------------------------------------------------------------------------------------------------------------------------------------------------------------------------------------------------------------------------------------------------------------------------------------------------------------------------------------------------------------------------------------------------------------------------------------------------------------------------------------------------------------------------------------------------------------------------|------|------|-----------|-------|------|------|----------------------------------------|-------|----------------------|---------------------------------------------------------------------------------------------------------------------------------------------------------------------------------------------------------------------------------------------------------------------------------------------------------------------------------------------------------------------------------------------------------------------------------------------------------------------------------------------------------------------------------------|------|------|-----------|-------|------|------|
| Rsa1.0_00803.1.g19694.t1 | ref[XP_002890416.1] auxin efflux carrier family protein [Arabidopsis lyrata subsp. lyrata] gi 297336258 gb EFH66675.1  auxin efflux carrier family protein [Arabidopsis lyrata subsp. lyrata]                                                                                                                                                                                                                                                                                                                                                                                                                                                                                                                                         | 383  | 386  | 0         | 100.8 | 86.2 | 93.2 | auxin efflux carrier family protein    | gbpln | Arabidopsis lyrata   | AT1G20925.1   Symbols:   Auxin efflux carrier family protein   chr1:7289973-7292507 FORWARD LENGTH=472                                                                                                                                                                                                                                                                                                                                                                                                                                | 383  | 472  | 0         | 123.2 | 85.6 | 93.2 |
| Rsa1.0_00803.1.g19695.t1 | gb[EOA39511.1] hypothetical protein CARUB_v10008128mg [Capsella rubella] gi 482575325 gb EOA39512.1  hypothetical protein CARUB_v10008128mg [Capsella rubella] gi 482575326 gb EOA39513.1  hypothetical protein CARUB_v10008128mg [Capsella rubella]                                                                                                                                                                                                                                                                                                                                                                                                                                                                                  | 1172 | 1171 | 0         | 99.9  | 72.1 | 76.9 | hypothetical protein CARUB_v10008128mg | gbpln | Capsella rubella     | AT1G20920.1   Symbols:   P-loop containing nucleoside triphosphate hydrolases superfamily protein   chr1:7285342-7288842 FORWARD LENGTH=1166                                                                                                                                                                                                                                                                                                                                                                                          | 1172 | 1166 | 0         | 99.5  | 72.1 | 76.8 |
| Rsa1.0_00803.1.g19696.t1 | gb[EOA40571.1] hypothetical protein CARUB_v10009301mg [Capsella rubella]                                                                                                                                                                                                                                                                                                                                                                                                                                                                                                                                                                                                                                                              | 389  | 410  | 1.00E-135 | 105.4 | 65.0 | 74.3 | hypothetical protein CARUB_v10009301mg | gbpln | Capsella rubella     | AT1G20910.1   Symbols:   ARID/BRIGHT DNA-binding domain-containing protein   chr1:7277209-7280635 REVERSE LENGTH=398                                                                                                                                                                                                                                                                                                                                                                                                                  | 389  | 398  | 1.00E-132 | 102.3 | 67.9 | 78.4 |
| Rsa1.0_00803.1.g19697.t1 | ref[NP_173514.1] putative DNA-binding protein ESCAROLA [Arabidopsis thaliana] gi 20532086 sp Q9S7C9.1 ESCA_ARATH RecName: Full=Putative DNA-binding protein ESCAROLA gi 4836899 gb AAD30602.1 AC007369_12 Unknown protein [Arabidopsis thaliana] gi 6319180 gb AAAF07197.1 AF194974_1 ESCAROLA [Arabidopsis thaliana] gi 30102700 gb AAP21268.1  At1g20900 [Arabidopsis thaliana] gi 110736549 db BAF00240.1  putative DNA-binding protein [Arabidopsis thaliana] gi 119657398 tpd FAA00298.1  TPA: AT-hook motif nuclear localized protein 27 [Arabidopsis thaliana] gi 225897950 db BAH30307.1  hypothetical protein [Arabidopsis thaliana] gi 33219191 gb AEE30038.1  putative DNA-binding protein ESCAROLA [Arabidopsis thaliana] | 313  | 311  | 1.00E-118 | 99.4  | 92.0 | 93.0 | putative DNA-binding protein ESCAROLA  | gbpln | Arabidopsis thaliana | AT1G20900.1   Symbols: ESC, ORE7, AHL27   Predicted AT-hook DNA-binding family protein   chr1:7273024-7273959 FORWARD LENGTH=311                                                                                                                                                                                                                                                                                                                                                                                                      | 313  | 311  | 1.00E-121 | 99.4  | 92.0 | 93.0 |
| Rsa1.0_00803.1.g19698.t1 | #                                                                                                                                                                                                                                                                                                                                                                                                                                                                                                                                                                                                                                                                                                                                     | #    | #    | #         | #     | #    | #    | -                                      | ---   | ---                  | #                                                                                                                                                                                                                                                                                                                                                                                                                                                                                                                                     | #    | #    | #         | #     | #    | #    |
| Rsa1.0_00803.1.g19699.t1 | gb[EOA36255.1] hypothetical protein CARUB_v10010341mg [Capsella rubella]                                                                                                                                                                                                                                                                                                                                                                                                                                                                                                                                                                                                                                                              | 158  | 197  | 7.00E-62  | 124.7 | 74.1 | 81.6 | hypothetical protein CARUB_v10010341mg | gbpln | Capsella rubella     | AT1G20890.1   Symbols:   unknown protein; FUNCTIONS IN: molecular_function unknown; INVOLVED IN: biological_process unknown; LOCATED IN: endomembrane system; EXPRESSED IN: 24 plant structures; EXPRESSED DURING: 14 growth stages; BEST Arabidopsis thaliana protein match is: unknown protein (TAIR:AT1G76480.2); Has 33 Blast hits to 33 proteins in 11 species: Archae - 0; Bacteria - 0; Metazoa - 2; Fungi - 0; Plants - 31; Viruses - 0; Other Eukaryotes - 0 (source: NCBI BLink).   chr1:7266088-7267060 REVERSE LENGTH=197 | 158  | 197  | 2.00E-58  | 124.7 | 70.9 | 79.1 |
| Rsa1.0_00803.1.g19700.t1 | gb[EOA35544.1] hypothetical protein CARUB_v10020749mg [Capsella rubella]                                                                                                                                                                                                                                                                                                                                                                                                                                                                                                                                                                                                                                                              | 296  | 285  | 1.00E-112 | 96.3  | 73.0 | 79.1 | hypothetical protein CARUB_v10020749mg | gbpln | Capsella rubella     | AT1G76460.1   Symbols:   RNA-binding (RRM/RBD/RNP motifs) family protein   chr1:28686932-28688506 REVERSE LENGTH=285                                                                                                                                                                                                                                                                                                                                                                                                                  | 296  | 285  | 1.00E-111 | 96.3  | 71.3 | 78.4 |
| Rsa1.0_00803.1.g19701.t2 | ref[XP_002893135.1] hypothetical protein ARALYDRAFT_472323 [Arabidopsis lyrata subsp. lyrata] gi 297338977 gb EFH69394.1  hypothetical protein ARALYDRAFT_472323 [Arabidopsis lyrata subsp. lyrata]                                                                                                                                                                                                                                                                                                                                                                                                                                                                                                                                   | 358  | 465  | 2.00E-81  | 129.9 | 46.4 | 53.6 | hypothetical protein ARALYDRAFT_472323 | gbpln | Arabidopsis lyrata   | AT1G20870.1   Symbols:   HSP20-like chaperones superfamily protein   chr1:7259287-7260775 REVERSE LENGTH=463                                                                                                                                                                                                                                                                                                                                                                                                                          | 358  | 463  | 4.00E-79  | 129.3 | 45.0 | 52.0 |
| Rsa1.0_00803.1.g19702.t2 | ref[XP_002890413.1] hypothetical protein ARALYDRAFT_472321 [Arabidopsis lyrata subsp. lyrata] gi 297336255 gb EFH66672.1  hypothetical protein ARALYDRAFT_472321 [Arabidopsis lyrata subsp. lyrata]                                                                                                                                                                                                                                                                                                                                                                                                                                                                                                                                   | 201  | 357  | 8.00E-16  | 177.6 | 20.9 | 21.9 | hypothetical protein ARALYDRAFT_472321 | gbpln | Arabidopsis lyrata   | AT1G20850.1   Symbols: XCP2   xylem cysteine peptidase 2   chr1:7252208-7253537 FORWARD LENGTH=356                                                                                                                                                                                                                                                                                                                                                                                                                                    | 201  | 356  | 1.00E-17  | 177.1 | 20.4 | 21.4 |

|                          |                                                                                                                                                                                                                                                                                                                                                                                                                                       |     |     |           |       |      |      |                                        |       |                      |                                                                                                                                                         |     |     |           |       |      |      |
|--------------------------|---------------------------------------------------------------------------------------------------------------------------------------------------------------------------------------------------------------------------------------------------------------------------------------------------------------------------------------------------------------------------------------------------------------------------------------|-----|-----|-----------|-------|------|------|----------------------------------------|-------|----------------------|---------------------------------------------------------------------------------------------------------------------------------------------------------|-----|-----|-----------|-------|------|------|
| Rsa1.0_00803.1.g19703.t1 | gb[EOA39766.1] hypothetical protein CARUB_v10008415mg [Capsella rubella] gi482575580 gb[EOA39767.1] hypothetical protein CARUB_v10008415mg [Capsella rubella] gi482575581 gb[EOA39768.1] hypothetical protein CARUB_v10008415mg [Capsella rubella]                                                                                                                                                                                    | 718 | 736 | 0         | 102.5 | 88.2 | 92.8 | hypothetical protein CARUB_v10008415mg | gbpln | Capsella rubella     | AT1G20840.1   Symbols: TMT1   tonoplast monosaccharide transporter1   chr1:7245107-7247674 REVERSE LENGTH=734                                           | 718 | 734 | 0         | 102.2 | 90.0 | 94.6 |
| Rsa1.0_00803.1.g19704.t1 | ref[XP_002890412.1] hypothetical protein ARALYDRAFT_472319 [Arabidopsis lyrata subsp. lyrata] gi297336254 gb[EFH66671.1] hypothetical protein ARALYDRAFT_472319 [Arabidopsis lyrata subsp. lyrata]                                                                                                                                                                                                                                    | 368 | 351 | 1.00E-152 | 95.4  | 73.1 | 83.7 | hypothetical protein ARALYDRAFT_472319 | gbpln | Arabidopsis lyrata   | AT1G20830.1   Symbols: MCD1   multiple chloroplast division site 1   chr1:7242933-7244736 FORWARD LENGTH=349                                            | 368 | 349 | 1.00E-153 | 94.8  | 74.2 | 82.9 |
| Rsa1.0_00803.1.g19705.t1 | gb[ABK56013.1] zinc finger protein [Brassica rapa]                                                                                                                                                                                                                                                                                                                                                                                    | 206 | 196 | 1.00E-85  | 95.1  | 77.7 | 84.5 | zinc finger protein                    | gbpln | Brassica rapa        | AT1G20823.1   Symbols:   RING/U-box superfamily protein   chr1:7238880-7239473 FORWARD LENGTH=197                                                       | 206 | 197 | 1.00E-83  | 95.6  | 83.0 | 87.4 |
| Rsa1.0_00803.1.g19706.t1 | gb[EOA16678.1] hypothetical protein CARUB_v10004870mg [Capsella rubella]                                                                                                                                                                                                                                                                                                                                                              | 168 | 427 | 2.00E-36  | 254.2 | 54.8 | 60.1 | hypothetical protein CARUB_v10004870mg | gbpln | Capsella rubella     | AT4G15410.1   Symbols: PUX5   serine/threonine protein phosphatase 2A 55 kDa regulatory subunit B prime gamma   chr4:8814868-8816596 FORWARD LENGTH=421 | 168 | 421 | 4.00E-35  | 250.6 | 44.0 | 50.0 |
| Rsa1.0_00803.1.g19707.t1 | ref[NP_173489.2] protein kinase-like protein [Arabidopsis thaliana] gi8778594 gb[AAF79602.1] AC027665.3 F5M15.3 [Arabidopsis thaliana] gi8896951 gb[AAF60637.1] AC069251_30 F2D10.13 [Arabidopsis thaliana] gi51971194 db[BA044289.1] unknown protein [Arabidopsis thaliana] gi332191880 gb[AEE30001.1] protein kinase-like protein [Arabidopsis thaliana]                                                                            | 377 | 381 | 0         | 101.1 | 92.3 | 95.2 | protein kinase-like protein            | gbpln | Arabidopsis thaliana | AT1G20650.1   Symbols:   Protein kinase superfamily protein   chr1:7158422-7160022 REVERSE LENGTH=381                                                   | 377 | 381 | 0         | 101.1 | 92.3 | 95.2 |
| Rsa1.0_00803.1.g19708.t1 | gb[EOA39657.1] hypothetical protein CARUB_v10008300mg [Capsella rubella]                                                                                                                                                                                                                                                                                                                                                              | 824 | 844 | 0         | 102.4 | 86.8 | 92.5 | hypothetical protein CARUB_v10008300mg | gbpln | Capsella rubella     | AT1G20640.2   Symbols:   Plant regulator RWP-RK family protein   chr1:7155201-7157986 FORWARD LENGTH=844                                                | 824 | 844 | 0         | 102.4 | 88.7 | 93.6 |
| Rsa1.0_00804.1.g19709.t1 | gb[EOA27773.1] hypothetical protein CARUB_v10023927mg [Capsella rubella]                                                                                                                                                                                                                                                                                                                                                              | 325 | 246 | 1.00E-134 | 75.7  | 70.2 | 73.8 | hypothetical protein CARUB_v10023927mg | gbpln | Capsella rubella     | AT2G45790.1   Symbols: ATPMM, PMM   phosphomannomutase   chr2:18855876-18857753 FORWARD LENGTH=246                                                      | 325 | 246 | 1.00E-134 | 75.7  | 69.2 | 73.2 |
| Rsa1.0_00804.1.g19710.t1 | ref[XP_002882034.1] LIM domain-containing protein [Arabidopsis lyrata subsp. lyrata] gi297327873 gb[EFH58293.1] LIM domain-containing protein [Arabidopsis lyrata subsp. lyrata]                                                                                                                                                                                                                                                      | 228 | 225 | 1.00E-110 | 98.7  | 84.2 | 90.4 | LIM domain-containing protein          | gbpln | Arabidopsis lyrata   | AT2G45800.1   Symbols:   GATA type zinc finger transcription factor family protein   chr2:18858153-18859007 REVERSE LENGTH=226                          | 228 | 226 | 1.00E-104 | 99.1  | 76.3 | 82.5 |
| Rsa1.0_00804.1.g19711.t1 | ref[XP_002880201.1] hypothetical protein ARALYDRAFT_483719 [Arabidopsis lyrata subsp. lyrata] gi297326040 gb[EFH56460.1] hypothetical protein ARALYDRAFT_483719 [Arabidopsis lyrata subsp. lyrata]                                                                                                                                                                                                                                    | 529 | 521 | 0         | 98.5  | 80.2 | 83.0 | hypothetical protein ARALYDRAFT_483719 | gbpln | Arabidopsis lyrata   | AT2G45810.1   Symbols:   DEA(D/H)-box RNA helicase family protein   chr2:18859836-18862318 FORWARD LENGTH=528                                           | 529 | 528 | 0         | 99.8  | 79.6 | 82.8 |
| Rsa1.0_00804.1.g19712.t2 | ref[NP_182081.1] cytochrome P450 76C2 [Arabidopsis thaliana] gi5915832 sp O64637.1 C76C2_ARATH RecName: Full=Cytochrome P450 76C2 gi2979549 gb AAC06158.1  putative cytochrome P450 [Arabidopsis thaliana] gi17065048 gb AAL32678.1  putative cytochrome P450 [Arabidopsis thaliana] gi21387151 gb AAM47979.1  putative cytochrome P450 [Arabidopsis thaliana] gi330255478 gb AEC10572.1  cytochrome P450 76C2 [Arabidopsis thaliana] | 358 | 512 | 1.00E-147 | 143.0 | 73.5 | 84.1 | cytochrome P450 76C2                   | gbpln | Arabidopsis thaliana | AT2G45570.1   Symbols: CYP76C2   cytochrome P450, family 76, subfamily C, polypeptide 2   chr2:18779935-18781922 REVERSE LENGTH=512                     | 358 | 512 | 1.00E-150 | 143.0 | 73.5 | 84.1 |
| Rsa1.0_00804.1.g19713.t1 | ref[XP_002880201.1] hypothetical protein ARALYDRAFT_483719 [Arabidopsis lyrata subsp. lyrata] gi297326040 gb[EFH56460.1] hypothetical protein ARALYDRAFT_483719 [Arabidopsis lyrata subsp. lyrata]                                                                                                                                                                                                                                    | 884 | 521 | 0         | 58.9  | 49.7 | 50.7 | hypothetical protein ARALYDRAFT_483719 | gbpln | Arabidopsis lyrata   | AT2G45810.1   Symbols:   DEA(D/H)-box RNA helicase family protein   chr2:18859836-18862318 FORWARD LENGTH=528                                           | 884 | 528 | 0         | 59.7  | 49.7 | 51.0 |

|                          |                                                                                                                                                                                                                                                                                                                                                                                                                                                      |     |     |           |       |      |      |                                                    |       |                      |                                                                                                                                                                                                                                                                                                                                                                       |     |     |           |       |      |      |
|--------------------------|------------------------------------------------------------------------------------------------------------------------------------------------------------------------------------------------------------------------------------------------------------------------------------------------------------------------------------------------------------------------------------------------------------------------------------------------------|-----|-----|-----------|-------|------|------|----------------------------------------------------|-------|----------------------|-----------------------------------------------------------------------------------------------------------------------------------------------------------------------------------------------------------------------------------------------------------------------------------------------------------------------------------------------------------------------|-----|-----|-----------|-------|------|------|
| Rsa1.0_00804.1.g19714.t1 | refNP_182106.1  Remorin [Arabidopsis thaliana]<br>gi 75099946 sp O80837.1 REMO_ARATH<br>RecName: Full=Remorin; AltName:<br>Full=DNA-binding protein<br>gi 3386612 gb AAC28542.1  remorin<br>[Arabidopsis thaliana]<br>gi 15028387 gb AAK76670.1  putative<br>remorin protein [Arabidopsis thaliana]<br>gi 19310659 gb AAL85060.1  putative<br>remorin protein [Arabidopsis thaliana]<br>gi 33025551 gb AEC10605.1  Remorin<br>[Arabidopsis thaliana] | 195 | 190 | 2.00E-79  | 97.4  | 86.7 | 92.8 | Remorin                                            | gbpln | Arabidopsis thaliana | AT2G45820.1   Symbols:   Remorin family protein   chr2:18863147-18864576 REVERSE LENGTH=190                                                                                                                                                                                                                                                                           | 195 | 190 | 5.00E-82  | 97.4  | 86.7 | 92.8 |
| Rsa1.0_00804.1.g19715.t3 | refXP_002880202.1  hypothetical protein ARALYDRAFT_483721<br>[Arabidopsis lyrata subsp. lyrata]<br>gi 297326041 gb EFH56461.1 <br>hypothetical protein<br>ARALYDRAFT_483721 [Arabidopsis lyrata subsp. lyrata]                                                                                                                                                                                                                                       | 512 | 520 | 0         | 101.6 | 78.1 | 84.4 | hypothetical protein ARALYDRAFT_483721             | gbpln | Arabidopsis lyrata   | AT2G45830.1   Symbols: DTA2   downstream target of AGL15 2   chr2:18866324-18868344 FORWARD LENGTH=523                                                                                                                                                                                                                                                                | 512 | 523 | 0         | 102.1 | 79.7 | 86.5 |
| Rsa1.0_00804.1.g19716.t1 | refXP_002882036.1  DNA-binding family protein [Arabidopsis lyrata subsp. lyrata]<br>gi 297327875 gb EFH58295.1 <br>DNA-binding family protein [Arabidopsis lyrata subsp. lyrata]                                                                                                                                                                                                                                                                     | 313 | 340 | 1.00E-123 | 108.6 | 79.2 | 85.0 | DNA-binding family protein                         | gbpln | Arabidopsis lyrata   | AT2G45850.2   Symbols:   AT hook motif DNA-binding family protein   chr2:18871901-18873457 REVERSE LENGTH=348                                                                                                                                                                                                                                                         | 313 | 348 | 1.00E-122 | 111.2 | 81.5 | 87.5 |
| Rsa1.0_00804.1.g19717.t1 | refNP_182110.1  uncharacterized protein [Arabidopsis thaliana]<br>gi 3386608 gb AAC28538.1  hypothetical protein [Arabidopsis thaliana]<br>gi 38566524 gb AAR24152.1  At2g45860<br>[Arabidopsis thaliana]<br>gi 40823665 gb AAR92297.1  At2g45860<br>[Arabidopsis thaliana]<br>gi 330255517 gb AEC10611.1 <br>uncharacterized protein AT2G45860<br>[Arabidopsis thaliana]                                                                            | 78  | 79  | 4.00E-15  | 101.3 | 94.9 | 97.4 | uncharacterized protein                            | gbpln | Arabidopsis thaliana | AT2G45860.1   Symbols:   unknown protein; Has 32 Blast hits to 32 proteins in 13 species: Archae - 0; Bacteria - 0; Metazoa - 0; Fungi - 0; Plants - 32; Viruses - 0; Other Eukaryotes - 0 (source: NCBI BLink).   chr2:18874913-18875568 REVERSE LENGTH=79                                                                                                           | 78  | 79  | 6.00E-18  | 101.3 | 94.9 | 97.4 |
| Rsa1.0_00804.1.g19718.t1 | refNP_182111.1  Bestrophin-like protein [Arabidopsis thaliana]<br>gi 20140947 sp O80832.1 YU87_ARATH<br>RecName: Full=UPF0187 protein<br>At2g45870. chloroplast; Flags:<br>Precursor gi 3386607 gb AAC28537.1 <br>hypothetical protein [Arabidopsis thaliana] gi 18491251 gb AAL69450.1 <br>At2g45870/F4118.15 [Arabidopsis thaliana] gi 330255518 gb AEC10612.1 <br>Bestrophin-like protein [Arabidopsis thaliana]                                  | 416 | 410 | 0         | 98.6  | 86.1 | 90.6 | Bestrophin-like protein                            | gbpln | Arabidopsis thaliana | AT2G45870.1   Symbols:   Bestrophin-like protein   chr2:18875928-18877440 FORWARD LENGTH=410                                                                                                                                                                                                                                                                          | 416 | 410 | 0         | 98.6  | 86.1 | 90.6 |
| Rsa1.0_00804.1.g19719.t4 | gb EOA26641.1  hypothetical protein<br>CARUB_v10022705mg [Capsella rubella]                                                                                                                                                                                                                                                                                                                                                                          | 661 | 745 | 0         | 112.7 | 70.7 | 80.8 | hypothetical protein<br>CARUB_v10022705mg          | gbpln | Capsella rubella     | AT2G45900.1   Symbols:   Phosphatidylinositol N-acetylglucosaminyltransferase subunit P-related   chr2:18886069-18888674 REVERSE LENGTH=720                                                                                                                                                                                                                           | 661 | 720 | 0         | 108.9 | 70.0 | 78.4 |
| Rsa1.0_00804.1.g19720.t1 | gb EOA26573.1  hypothetical protein<br>CARUB_v10022633mg [Capsella rubella]<br>gi 482562384 gb EOA26574.1 <br>hypothetical protein<br>CARUB_v10022633mg [Capsella rubella]                                                                                                                                                                                                                                                                           | 828 | 839 | 0         | 101.3 | 77.8 | 84.1 | hypothetical protein<br>CARUB_v10022633mg          | gbpln | Capsella rubella     | AT2G45910.1   Symbols:   U-box domain-containing protein kinase family protein   chr2:18894520-18898212 FORWARD LENGTH=834                                                                                                                                                                                                                                            | 828 | 834 | 0         | 100.7 | 76.1 | 83.2 |
| Rsa1.0_00804.1.g19721.t1 | gb AAC28534.1  putative protein kinase<br>[Arabidopsis thaliana]                                                                                                                                                                                                                                                                                                                                                                                     | 630 | 799 | 4.00E-62  | 126.8 | 20.5 | 21.0 | putative protein kinase                            | gbpln | Arabidopsis thaliana | AT2G45910.1   Symbols:   U-box domain-containing protein kinase family protein   chr2:18894520-18898212 FORWARD LENGTH=834                                                                                                                                                                                                                                            | 630 | 834 | 1.00E-64  | 132.4 | 20.5 | 21.0 |
| Rsa1.0_00804.1.g19722.t1 | gb EOA27556.1  hypothetical protein<br>CARUB_v10023694mg, partial [Capsella rubella]                                                                                                                                                                                                                                                                                                                                                                 | 271 | 307 | 1.00E-105 | 113.3 | 71.2 | 77.1 | hypothetical protein<br>CARUB_v10023694mg, partial | gbpln | Capsella rubella     | AT3G61410.1   Symbols:   BEST Arabidopsis thaliana protein match is: U-box domain-containing protein kinase family protein (TAIR:AT2G45910.1); Has 232 Blast hits to 229 proteins in 13 species: Archae - 0; Bacteria - 0; Metazoa - 13; Fungi - 0; Plants - 218; Viruses - 0; Other Eukaryotes - 1 (source: NCBI BLink).   chr3:22721112-22722452 FORWARD LENGTH=294 | 271 | 294 | 1.00E-77  | 108.5 | 50.6 | 60.9 |
| Rsa1.0_00804.1.g19723.t1 | refNP_180705.1  F-box protein DOR<br>[Arabidopsis thaliana]<br>gi 229807544 sp Q5BPS3.2 DOR_ARATH<br>RecName: Full=F-box protein DOR;<br>AltName: Full=Protein DROUGHT<br>TOLERANCE REPRESSOR<br>gi 4589954 gb AAD26472.1  hypothetical<br>protein [Arabidopsis thaliana]<br>gi 330253458 gb AEC08552.1  F-box<br>protein DOR [Arabidopsis thaliana]                                                                                                 | 110 | 387 | 8.00E-12  | 351.8 | 46.4 | 64.5 | F-box protein DOR                                  | gbpln | Arabidopsis thaliana | AT2G31470.1   Symbols: DOR   F-box and associated interaction domains-containing protein   chr2:13407492-13408655 REVERSE LENGTH=387                                                                                                                                                                                                                                  | 110 | 387 | 1.00E-14  | 351.8 | 46.4 | 64.5 |

|                          |                                                                                                                                                                                                                                                                                                                                                        |     |      |           |       |      |      |                                                                                                                                                                  |       |                      |                                                                                                                                                                                                                                                                                                                                                                                                                                                                                                                                               |     |      |           |       |      |      |
|--------------------------|--------------------------------------------------------------------------------------------------------------------------------------------------------------------------------------------------------------------------------------------------------------------------------------------------------------------------------------------------------|-----|------|-----------|-------|------|------|------------------------------------------------------------------------------------------------------------------------------------------------------------------|-------|----------------------|-----------------------------------------------------------------------------------------------------------------------------------------------------------------------------------------------------------------------------------------------------------------------------------------------------------------------------------------------------------------------------------------------------------------------------------------------------------------------------------------------------------------------------------------------|-----|------|-----------|-------|------|------|
| Rsa1.0_00804.1.g19724.t1 | emb CAA64896.1  transmembrane channel protein [Brassica oleracea] gi 7209558 db BAA92259.1  plasma membrane aquaporin 1c [Raphanus sativus] gi 90019596 gb ABD84431.1  aquaporin PIP1 [Nocceae caerulescens]                                                                                                                                           | 288 | 286  | 1.00E-152 | 99.3  | 93.8 | 95.1 | transmembrane channel protein                                                                                                                                    | gbpln | Brassica oleracea    | AT2G45960.1   Symbols: PIP1B, TMP-A, ATHH2, PIP1.2   plasma membrane intrinsic protein 1B   chr2:18910450-18911703 FORWARD LENGTH=286                                                                                                                                                                                                                                                                                                                                                                                                         | 288 | 286  | 1.00E-153 | 99.3  | 92.7 | 94.8 |
| Rsa1.0_00804.1.g19725.t1 | ref XP_002882044.1  hypothetical protein ARALYDRAFT_904051 [Arabidopsis lyrata subsp. lyrata] gi 297327883 gb EFH58303.1  hypothetical protein ARALYDRAFT_904051 [Arabidopsis lyrata subsp. lyrata]                                                                                                                                                    | 233 | 265  | 3.00E-84  | 113.7 | 73.4 | 87.6 | hypothetical protein ARALYDRAFT_904051                                                                                                                           | gbpln | Arabidopsis lyrata   | AT2G45980.1   Symbols:   unknown protein; FUNCTIONS IN: molecular_function unknown; INVOLVED IN: biological_process unknown; LOCATED IN: cellular_component unknown; EXPRESSED IN: 25 plant structures; EXPRESSED DURING: 15 growth stages; BEST Arabidopsis thaliana protein match is: unknown protein (TAIRAT4G00355.2); Has 93 Blast hits to 90 proteins in 15 species: Archae - 0; Bacteria - 0; Metazoa - 0; Fungi - 0; Plants - 93; Viruses - 0; Other Eukaryotes - 0 (source: NCBI BLink).   chr2:18917680-18918569 REVERSE LENGTH=256 | 233 | 256  | 3.00E-85  | 109.9 | 71.2 | 85.0 |
| Rsa1.0_00804.1.g19726.t1 | ref NP_973671.1  uncharacterized protein [Arabidopsis thaliana] gi 29028790 gb AAO64774.1  At2g42395 [Arabidopsis thaliana] gi 110743081 db BAE99433.1  hypothetical protein [Arabidopsis thaliana] gi 330255022 gb AEC10116.1  uncharacterized protein AT2G42395 [Arabidopsis thaliana]                                                               | 133 | 104  | 4.00E-21  | 78.2  | 33.8 | 45.9 | uncharacterized protein                                                                                                                                          | gbpln | Arabidopsis thaliana | AT2G42395.1   Symbols:   unknown protein; Has 35333 Blast hits to 34131 proteins in 2444 species: Archae - 798; Bacteria - 22429; Metazoa - 974; Fungi - 991; Plants - 531; Viruses - 0; Other Eukaryotes - 9610 (source: NCBI BLink).   chr2:17653566-17653980 REVERSE LENGTH=104                                                                                                                                                                                                                                                            | 133 | 104  | 8.00E-24  | 78.2  | 33.8 | 45.9 |
| Rsa1.0_00804.1.g19727.t1 | ref XP_002882045.1  hypothetical protein ARALYDRAFT_483745 [Arabidopsis lyrata subsp. lyrata] gi 297327884 gb EFH58304.1  hypothetical protein ARALYDRAFT_483745 [Arabidopsis lyrata subsp. lyrata]                                                                                                                                                    | 214 | 206  | 6.00E-85  | 96.3  | 77.1 | 87.9 | hypothetical protein ARALYDRAFT_483745                                                                                                                           | gbpln | Arabidopsis lyrata   | AT2G46000.1   Symbols:   FUNCTIONS IN: molecular_function unknown; INVOLVED IN: biological_process unknown; LOCATED IN: endomembrane system; EXPRESSED IN: 24 plant structures; EXPRESSED DURING: 15 growth stages; CONTAINS InterPro DOMAIN/s: Mesoderm development candidate 2 (InterPro:IPR019330); Has 31 Blast hits to 31 proteins in 13 species: Archae - 0; Bacteria - 0; Metazoa - 5; Fungi - 0; Plants - 26; Viruses - 0; Other Eukaryotes - 0 (source: NCBI BLink).   chr2:18921194-18922047 REVERSE LENGTH=208                     | 214 | 208  | 1.00E-75  | 97.2  | 72.4 | 79.0 |
| Rsa1.0_00804.1.g19728.t1 | ref XP_002880213.1  ATBRM/CHR2 [Arabidopsis lyrata subsp. lyrata] gi 297326052 gb EFH56472.1  ATBRM/CHR2 [Arabidopsis lyrata subsp. lyrata]                                                                                                                                                                                                            | 611 | 2186 | 0         | 357.8 | 78.9 | 84.8 | ATBRM/CHR2                                                                                                                                                       | gbpln | Arabidopsis lyrata   | AT2G46020.1   Symbols: CHR2, ATBRM, BRM, CHA2   transcription regulatory protein SNF2, putative   chr2:18923304-18931769 FORWARD LENGTH=2192                                                                                                                                                                                                                                                                                                                                                                                                  | 611 | 2192 | 0         | 358.8 | 78.7 | 84.3 |
| Rsa1.0_00805.1.g19729.t1 | #                                                                                                                                                                                                                                                                                                                                                      | #   | #    | #         | #     | #    | #    | -                                                                                                                                                                | ----  | ----                 | #                                                                                                                                                                                                                                                                                                                                                                                                                                                                                                                                             | #   | #    | #         | #     | #    |      |
| Rsa1.0_00805.1.g19730.t6 | gb AAF79900.1 AC022472.9 Contains a strong similarity to Anther-specific proline-rich protein APG precursor from Arabidopsis thaliana gi 728867 and contains a Lipase/Acylhydrolase domain with GDSL-like motif PF 00657. ESTs gb AV531882, gb AV533240, gb AV534374, gb AV533394, gb AV532582, gb AV533541 come from this gene [Arabidopsis thaliana] | 854 | 1137 | 0         | 133.1 | 51.2 | 59.3 | Lipase/Acylhydrolase domain with GDSL-like motif PF 00657. ESTs gb AV531882, gb AV533240, gb AV534374, gb AV533394, gb AV532582, gb AV533541 come from this gene | gbpln | Arabidopsis thaliana | AT1G20132.1   Symbols:   GDSL-like Lipase/Acylhydrolase superfamily protein   chr1:6981358-6983495 FORWARD LENGTH=383                                                                                                                                                                                                                                                                                                                                                                                                                         | 854 | 383  | 1.00E-135 | 44.8  | 28.0 | 32.1 |
| Rsa1.0_00805.1.g19731.t1 | ref XP_002880415.1  hypothetical protein ARALYDRAFT_481069 [Arabidopsis lyrata subsp. lyrata] gi 297326254 gb EFH56674.1  hypothetical protein ARALYDRAFT_481069 [Arabidopsis lyrata subsp. lyrata]                                                                                                                                                    | 161 | 161  | 1.00E-70  | 100.0 | 82.0 | 87.6 | hypothetical protein ARALYDRAFT_481069                                                                                                                           | gbpln | Arabidopsis lyrata   | AT1G20140.1   Symbols: ASK4, SK4   SKP1-like 4   chr1:6986430-6987079 FORWARD LENGTH=163                                                                                                                                                                                                                                                                                                                                                                                                                                                      | 161 | 163  | 4.00E-72  | 101.2 | 79.5 | 86.3 |
| Rsa1.0_00805.1.g19732.t1 | gb EOA39722.1  hypothetical protein CARUB_v10008367mg [Capsella rubella]                                                                                                                                                                                                                                                                               | 751 | 770  | 0         | 102.5 | 88.1 | 94.1 | hypothetical protein CARUB_v10008367mg                                                                                                                           | gbpln | Capsella rubella     | AT1G20160.1   Symbols: ATSBT5.2   Subtilisin-like serine endopeptidase family protein   chr1:6990852-6993854 REVERSE LENGTH=769                                                                                                                                                                                                                                                                                                                                                                                                               | 751 | 769  | 0         | 102.4 | 88.7 | 94.4 |



|                           |                                                                                                                                                                                                                                                                                                   |      |      |           |       |      |      |                                                       |       |                      |                                                                                                                                                                                                                                                                                                                                                                                                                                                                                                                              |      |      |           |       |      |      |
|---------------------------|---------------------------------------------------------------------------------------------------------------------------------------------------------------------------------------------------------------------------------------------------------------------------------------------------|------|------|-----------|-------|------|------|-------------------------------------------------------|-------|----------------------|------------------------------------------------------------------------------------------------------------------------------------------------------------------------------------------------------------------------------------------------------------------------------------------------------------------------------------------------------------------------------------------------------------------------------------------------------------------------------------------------------------------------------|------|------|-----------|-------|------|------|
| Rsa1.0_00805.1.g19733.t1  | refNP_175654.1  Ubiquitin carboxyl-terminal hydrolase-related protein [Arabidopsis thaliana]<br>gi 5903057 gb AAD55616.1 AC008016.26 F6D8.33 [Arabidopsis thaliana]<br>gi 332194687 gb AEE32808.1  Ubiquitin carboxyl-terminal hydrolase-related protein [Arabidopsis thaliana]                   | 261  | 1136 | 4.00E-37  | 435.2 | 40.6 | 57.9 | Ubiquitin carboxyl-terminal hydrolase-related protein | gbpln | Arabidopsis thaliana | AT1G52450.1   Symbols:   Ubiquitin carboxyl-terminal hydrolase-related protein   chr1:19541684-19546266 REVERSE LENGTH=1136                                                                                                                                                                                                                                                                                                                                                                                                  | 261  | 1136 | 1.00E-39  | 435.2 | 40.6 | 57.9 |
| Rsa1.0_00805.1.g19734.t1  | # # # # # # # #                                                                                                                                                                                                                                                                                   | #    | #    | #         | #     | #    | -    |                                                       | ----  | ----                 | #                                                                                                                                                                                                                                                                                                                                                                                                                                                                                                                            | #    | #    | #         | #     | #    | #    |
| Rsa1.0_00805.1.g19735.t1  | gb AAZ23752.1  hypothetical protein At1g20180 [Arabidopsis thaliana]                                                                                                                                                                                                                              | 323  | 359  | 1.00E-120 | 111.1 | 76.5 | 85.4 | hypothetical protein At1g20180                        | gbpln | Arabidopsis thaliana | AT1G20180.2   Symbols:   Protein of unknown function (DUF677)   chr1:6996354-6997779 FORWARD LENGTH=359                                                                                                                                                                                                                                                                                                                                                                                                                      | 323  | 359  | 1.00E-122 | 111.1 | 76.5 | 85.1 |
| Rsa1.0_00805.1.g19736.t1  | refXP_002893092.1  Alpha-expansin 11 precursor [Arabidopsis lyrata subsp. lyrata]<br>gi 297338934 gb EFH69351.1  Alpha-expansin 11 precursor [Arabidopsis lyrata subsp. lyrata]                                                                                                                   | 252  | 252  | 1.00E-137 | 100.0 | 94.0 | 97.2 | Alpha-expansin 11 precursor                           | gbpln | Arabidopsis lyrata   | AT1G20190.1   Symbols:   ATEXPA11, EXP11, ATEXP11, ATEXP ALPHA 1.14, EXPA11   chr1:6998762-6999710 REVERSE LENGTH=252                                                                                                                                                                                                                                                                                                                                                                                                        | 252  | 252  | 1.00E-134 | 100.0 | 94.8 | 97.6 |
| Rsa1.0_00805.1.g19737.t1  | refXP_002893094.1  hypothetical protein ARALYDRAFT_312946 [Arabidopsis lyrata subsp. lyrata]<br>gi 297338936 gb EFH69353.1  hypothetical protein ARALYDRAFT_312946 [Arabidopsis lyrata subsp. lyrata]                                                                                             | 338  | 529  | 8.00E-76  | 156.5 | 56.8 | 60.7 | hypothetical protein ARALYDRAFT_312946                | gbpln | Arabidopsis lyrata   | AT1G76010.1   Symbols:   Alba DNA/RNA-binding protein   chr1:28528505-28530488 REVERSE LENGTH=350                                                                                                                                                                                                                                                                                                                                                                                                                            | 338  | 350  | 7.00E-76  | 103.6 | 65.4 | 73.4 |
| Rsa1.0_00805.1.g19738.t1  | gb EOA38448.1  hypothetical protein CARUB_v10010092mg, partial [Capsella rubella]                                                                                                                                                                                                                 | 232  | 252  | 1.00E-106 | 108.6 | 81.0 | 90.1 | hypothetical protein CARUB_v10010092mg, partial       | gbpln | Capsella rubella     | AT1G20225.1   Symbols:   Thioredoxin superfamily protein   chr1:7007966-7009318 REVERSE LENGTH=233                                                                                                                                                                                                                                                                                                                                                                                                                           | 232  | 233  | 1.00E-108 | 100.4 | 81.0 | 90.1 |
| Rsa1.0_00805.1.g19739.t1  | refNP_173449.1  pentatricopeptide repeat-containing protein [Arabidopsis thaliana]<br>gi 193806503 sp Q9LNU6.2 PPR53_ARA TH RecName: Full=Pentatricopeptide repeat-containing protein At1g20230<br>gi 332191832 gb AEE29953.1  pentatricopeptide repeat-containing protein [Arabidopsis thaliana] | 760  | 760  | 0         | 100.0 | 87.8 | 94.9 | pentatricopeptide repeat-containing protein           | gbpln | Arabidopsis thaliana | AT1G20230.1   Symbols:   Pentatricopeptide repeat (PPR) superfamily protein   chr1:7009570-7011852 FORWARD LENGTH=760                                                                                                                                                                                                                                                                                                                                                                                                        | 760  | 760  | 0         | 100.0 | 87.8 | 94.9 |
| Rsa1.0_00805.1.g19740.t1  | refXP_002890376.1  hypothetical protein ARALYDRAFT_472256 [Arabidopsis lyrata subsp. lyrata]<br>gi 297336218 gb EFH66635.1  hypothetical protein ARALYDRAFT_472256 [Arabidopsis lyrata subsp. lyrata]                                                                                             | 486  | 487  | 0         | 100.2 | 98.1 | 99.0 | hypothetical protein ARALYDRAFT_472256                | gbpln | Arabidopsis lyrata   | AT1G20260.1   Symbols:   ATPase, V1 complex, subunit B protein   chr1:7016971-7020290 FORWARD LENGTH=487                                                                                                                                                                                                                                                                                                                                                                                                                     | 486  | 487  | 0         | 100.2 | 97.9 | 98.8 |
| Rsa1.0_00805.1.g19741.t1  | gb EOA38379.1  hypothetical protein CARUB_v10009921mg [Capsella rubella]                                                                                                                                                                                                                          | 291  | 287  | 1.00E-161 | 98.6  | 95.2 | 97.6 | hypothetical protein CARUB_v10009921mg                | gbpln | Capsella rubella     | AT1G20270.1   Symbols:   2-oxoglutarate (2OG) and Fe(II)-dependent oxygenase superfamily protein   chr1:7021383-7022923 REVERSE LENGTH=287                                                                                                                                                                                                                                                                                                                                                                                   | 291  | 287  | 1.00E-163 | 98.6  | 95.2 | 97.3 |
| Rsa1.0_00805.1.g19742.t1  | # # # # # # # #                                                                                                                                                                                                                                                                                   | #    | #    | #         | #     | #    | -    |                                                       | ----  | ----                 | #                                                                                                                                                                                                                                                                                                                                                                                                                                                                                                                            | #    | #    | #         | #     | #    | #    |
| Rsa1.0_00805.1.g19743.t1  | gb EOA38982.1  hypothetical protein CARUB_v10011494mg [Capsella rubella]                                                                                                                                                                                                                          | 537  | 532  | 0         | 99.1  | 86.0 | 92.0 | hypothetical protein CARUB_v10011494mg                | gbpln | Capsella rubella     | AT1G20300.1   Symbols:   Pentatricopeptide repeat (PPR) superfamily protein   chr1:7029701-7031314 FORWARD LENGTH=537                                                                                                                                                                                                                                                                                                                                                                                                        | 537  | 537  | 0         | 100.0 | 86.0 | 92.2 |
| Rsa1.0_00805.1.g19744.t1  | refXP_002890378.1  hypothetical protein ARALYDRAFT_472259 [Arabidopsis lyrata subsp. lyrata]<br>gi 297336220 gb EFH66637.1  hypothetical protein ARALYDRAFT_472259 [Arabidopsis lyrata subsp. lyrata]                                                                                             | 261  | 236  | 2.00E-73  | 90.4  | 64.4 | 70.9 | hypothetical protein ARALYDRAFT_472259                | gbpln | Arabidopsis lyrata   | AT1G20310.1   Symbols:   unknown protein; FUNCTIONS IN: molecular function unknown; INVOLVED IN: biological process unknown; LOCATED IN: chloroplast; EXPRESSED IN: 16 plant structures; EXPRESSED DURING: 9 growth stages; BEST Arabidopsis thaliana protein match is: unknown protein (TAIR:AT1G76070.1); Has 46 Blast hits to 46 proteins in 12 species: Archae - 0; Bacteria - 0; Metazoa - 0; Fungi - 0; Plants - 46; Viruses - 0; Other Eukaryotes - 0 (source: NCBI BLINK).   chr1:7032308-7033030 FORWARD LENGTH=240 | 261  | 240  | 1.00E-75  | 92.0  | 62.1 | 71.6 |
| Rsa1.0_00805.1.g19745.t1  | gb EOA39020.1  hypothetical protein CARUB_v10011566mg [Capsella rubella]                                                                                                                                                                                                                          | 269  | 366  | 1.00E-144 | 136.1 | 91.1 | 95.5 | hypothetical protein CARUB_v10011566mg                | gbpln | Capsella rubella     | AT1G20330.1   Symbols:   SMT2, CVP1, FRL1   sterol methyltransferase 2   chr1:7038968-7040053 REVERSE LENGTH=361                                                                                                                                                                                                                                                                                                                                                                                                             | 269  | 361  | 1.00E-145 | 134.2 | 91.1 | 94.8 |
| Rsa1.0_00806.1.g19746.t10 | gb AFK13856.1  Ty3/gypsy retrotransposon protein [Beta vulgaris subsp. vulgaris]                                                                                                                                                                                                                  | 2381 | 1631 | 0         | 68.5  | 32.0 | 41.7 | Ty3/gypsy retrotransposon protein                     | gbpln | Beta vulgaris        | AT2G35060.1   Symbols:   KUP11   K+ uptake permease 11   chr2:14775184-14778184 REVERSE LENGTH=792                                                                                                                                                                                                                                                                                                                                                                                                                           | 2381 | 792  | 0         | 33.3  | 31.5 | 32.3 |
| Rsa1.0_00806.1.g19747.t1  | refXP_002879531.1  kinase family protein [Arabidopsis lyrata subsp. lyrata]<br>gi 297325370 gb EFH55790.1  kinase family protein [Arabidopsis lyrata subsp. lyrata]                                                                                                                               | 1197 | 1254 | 0         | 104.8 | 81.2 | 87.6 | kinase family protein                                 | gbpln | Arabidopsis lyrata   | AT2G35050.1   Symbols:   Protein kinase superfamily protein with octicosapeptide/Phox/Bem1p domain   chr2:14769708-14774796 FORWARD LENGTH=1257                                                                                                                                                                                                                                                                                                                                                                              | 1197 | 1257 | 0         | 105.0 | 80.9 | 87.4 |

|                          |                                                                                                                                                                                                                                                                                |     |     |           |       |      |      |                                                                 |       |                      |                                                                                                                                                                                                                                                                                                                                  |     |     |           |       |      |      |
|--------------------------|--------------------------------------------------------------------------------------------------------------------------------------------------------------------------------------------------------------------------------------------------------------------------------|-----|-----|-----------|-------|------|------|-----------------------------------------------------------------|-------|----------------------|----------------------------------------------------------------------------------------------------------------------------------------------------------------------------------------------------------------------------------------------------------------------------------------------------------------------------------|-----|-----|-----------|-------|------|------|
| Rsa1.0_00806.1.g19748.t1 | refNP_850240.1   phosphoribosylaminoimidazolecarboxamide formyltransferase / IMP [Arabidopsis thaliana] gi 20268737 gb AAM14072.1   putative phosphoribosylaminoimidazolecarboxamide formyltransferase [Arabidopsis thaliana] gi 22136684 gb AAM91661.1                        | 621 | 596 | 0         | 96.0  | 90.3 | 92.4 | phosphoribosylaminoimidazolecarboxamide formyltransferase / IMP | gbpln | Arabidopsis thaliana | AT2G35040.1   Symbols:   AICARFT   IMPase family protein   chr2:14765347-14768269 REVERSE LENGTH=596                                                                                                                                                                                                                             | 621 | 596 | 0         | 96.0  | 90.3 | 92.4 |
| Rsa1.0_00806.1.g19749.t1 | refNP_850239.1   urease accessory protein D [Arabidopsis thaliana] gi 31096381 emb CAC85462.1   putative urease accessory protein D [Arabidopsis thaliana] gi 330253960 gb AEC09054.1   phosphoribosylaminoimidazolecarboxamide formyltransferase / IMP [Arabidopsis thaliana] | 294 | 294 | 1.00E-155 | 100.0 | 88.4 | 94.6 | urease accessory protein D                                      | gbpln | Arabidopsis thaliana | AT2G35035.1   Symbols: URED   urease accessory protein D   chr2:14763387-14765045 REVERSE LENGTH=294                                                                                                                                                                                                                             | 294 | 294 | 1.00E-157 | 100.0 | 88.4 | 94.6 |
| Rsa1.0_00806.1.g19750.t1 | refXP_002881370.1   pentatricopeptide repeat-containing protein [Arabidopsis lyrata subsp. lyrata] gi 297327209 gb EFH57629.1   pentatricopeptide repeat-containing protein [Arabidopsis lyrata subsp. lyrata]                                                                 | 635 | 627 | 0         | 98.7  | 79.7 | 89.4 | pentatricopeptide repeat-containing protein                     | gbpln | Arabidopsis lyrata   | AT2G35030.1   Symbols:   Pentatricopeptide repeat (PPR) superfamily protein   chr2:14761080-14762963 REVERSE LENGTH=627                                                                                                                                                                                                          | 635 | 627 | 0         | 98.7  | 79.2 | 88.5 |
| Rsa1.0_00806.1.g19751.t2 | gb EOA28336.1   hypothetical protein CARUB_v10024537mg [Capsella rubella]                                                                                                                                                                                                      | 503 | 501 | 0         | 99.6  | 89.9 | 94.2 | hypothetical protein CARUB_v10024537mg                          | gbpln | Capsella rubella     | AT2G35020.1   Symbols: GlcNAc1pUT2   N-acetylglucosamine-1-phosphate uridylyltransferase 2   chr2:14756803-14760477 FORWARD LENGTH=502                                                                                                                                                                                           | 503 | 502 | 0         | 99.8  | 90.9 | 94.8 |
| Rsa1.0_00806.1.g19752.t1 | gb EOA27336.1   hypothetical protein CARUB_v10023452mg [Capsella rubella]                                                                                                                                                                                                      | 371 | 374 | 1.00E-137 | 100.8 | 75.5 | 83.0 | hypothetical protein CARUB_v10023452mg                          | gbpln | Capsella rubella     | AT2G35000.1   Symbols:   RING/U-box superfamily protein   chr2:14751809-14752945 REVERSE LENGTH=378                                                                                                                                                                                                                              | 371 | 378 | 1.00E-127 | 101.9 | 72.8 | 83.0 |
| Rsa1.0_00806.1.g19753.t1 | gb EOA29001.1   hypothetical protein CARUB_v10025254mg [Capsella rubella]                                                                                                                                                                                                      | 313 | 311 | 4.00E-75  | 99.4  | 54.0 | 68.1 | hypothetical protein CARUB_v10025254mg                          | gbpln | Capsella rubella     | AT2G34990.1   Symbols:   RING/U-box superfamily protein   chr2:14750260-14751168 REVERSE LENGTH=302                                                                                                                                                                                                                              | 313 | 302 | 3.00E-72  | 96.5  | 53.0 | 64.2 |
| Rsa1.0_00806.1.g19754.t1 | refNP_181043.1   phosphatidylinositol glycan, class C [Arabidopsis thaliana] gi 3033393 gb AAC12837.1   putative phosphatidylinositol-glycan synthase [Arabidopsis thaliana] gi 330253951 gb AEC09045.1   phosphatidylinositol glycan, class C [Arabidopsis thaliana]          | 307 | 303 | 1.00E-125 | 98.7  | 87.9 | 94.5 | phosphatidylinositol glycan, class C                            | gbpln | Arabidopsis thaliana | AT2G34980.1   Symbols: SETH1   phosphatidylinositolglycan synthase family protein   chr2:14748967-14749878 FORWARD LENGTH=303                                                                                                                                                                                                    | 307 | 303 | 1.00E-128 | 98.7  | 87.9 | 94.5 |
| Rsa1.0_00806.1.g19755.t1 | refXP_002879527.1   eIF4-gamma/eIF5/eIF2-epsilon domain-containing protein [Arabidopsis lyrata subsp. lyrata] gi 297325366 gb EFH55786.1   eIF4-gamma/eIF5/eIF2-epsilon domain-containing protein [Arabidopsis lyrata subsp. lyrata]                                           | 725 | 726 | 0         | 100.1 | 86.6 | 92.7 | eIF4-gamma/eIF5/eIF2-epsilon domain-containing protein          | gbpln | Arabidopsis lyrata   | AT2G34970.1   Symbols:   Trimeric LpxA-like enzyme   chr2:14746340-14748532 FORWARD LENGTH=730                                                                                                                                                                                                                                   | 725 | 730 | 0         | 100.7 | 85.0 | 92.3 |
| Rsa1.0_00806.1.g19756.t1 | db BAJ34318.1   unnamed protein product [Thellungiella halophila]                                                                                                                                                                                                              | 911 | 911 | 0         | 100.0 | 86.3 | 92.0 | unnamed protein product                                         | ----  | ----                 | AT2G34930.1   Symbols:   disease resistance family protein / LRR family protein   chr2:14737169-14739886 REVERSE LENGTH=905                                                                                                                                                                                                      | 911 | 905 | 0         | 99.3  | 82.3 | 89.7 |
| Rsa1.0_00806.1.g19757.t1 | refNP_181038.2   embryo sac development arrest 18 protein [Arabidopsis thaliana] gi 330253945 gb AEC09039.1   embryo sac development arrest 18 protein [Arabidopsis thaliana]                                                                                                  | 654 | 652 | 0         | 99.7  | 66.8 | 76.5 | embryo sac development arrest 18 protein                        | gbpln | Arabidopsis thaliana | AT2G34920.1   Symbols: EDA18   RING/U-box superfamily protein   chr2:14728375-14730816 REVERSE LENGTH=652                                                                                                                                                                                                                        | 654 | 652 | 0         | 99.7  | 66.8 | 76.5 |
| Rsa1.0_00806.1.g19758.t1 | refXP_002879524.1   hypothetical protein ARALYDRAFT_902587 [Arabidopsis lyrata subsp. lyrata] gi 297325363 gb EFH55783.1   hypothetical protein ARALYDRAFT_902587 [Arabidopsis lyrata subsp. lyrata]                                                                           | 297 | 288 | 1.00E-109 | 97.0  | 75.4 | 79.8 | hypothetical protein ARALYDRAFT_902587                          | gbpln | Arabidopsis lyrata   | AT2G34910.1   Symbols:   BEST Arabidopsis thaliana protein match is: root hair specific 4 (TAIR.AT1G30850.1); Has 43 Blast hits to 43 proteins in 9 species: Archaea - 0; Bacteria - 0; Metazoa - 0; Fungi - 0; Plants - 43; Viruses - 0; Other Eukaryotes - 0 (source: NCBI BLINK).   chr2:14726900-14727766 FORWARD LENGTH=288 | 297 | 288 | 1.00E-110 | 97.0  | 74.7 | 80.5 |
| Rsa1.0_00807.1.g19759.t1 | gb EOA16741.1   hypothetical protein CARUB_v10004942mg [Capsella rubella]                                                                                                                                                                                                      | 406 | 409 | 0         | 100.7 | 94.6 | 98.3 | hypothetical protein CARUB_v10004942mg                          | gbpln | Capsella rubella     | AT4G24780.2   Symbols:   Pectin lyase-like superfamily protein   chr4:12770631-12772227 REVERSE LENGTH=408                                                                                                                                                                                                                       | 406 | 408 | 0         | 100.5 | 93.8 | 97.5 |

|                           |                                                                                                                                                                                                                                                                                                                                                                                                                                                                                      |      |     |   |       |      |      |                                        |       |                      |                                                                                                                                                                                                                                                                                                                                                                                                                                                                                                                                            |      |     |   |       |      |      |
|---------------------------|--------------------------------------------------------------------------------------------------------------------------------------------------------------------------------------------------------------------------------------------------------------------------------------------------------------------------------------------------------------------------------------------------------------------------------------------------------------------------------------|------|-----|---|-------|------|------|----------------------------------------|-------|----------------------|--------------------------------------------------------------------------------------------------------------------------------------------------------------------------------------------------------------------------------------------------------------------------------------------------------------------------------------------------------------------------------------------------------------------------------------------------------------------------------------------------------------------------------------------|------|-----|---|-------|------|------|
| Rsa1.0_00807.1.g19760.t1  | ref[NP_194210.2] AAA-type ATPase family protein [Arabidopsis thaliana] gi 186513264 ref[NP_001119046.1] AAA-type ATPase family protein [Arabidopsis thaliana] gi 332659557 gb AEE84957.1  AAA-type ATPase family protein [Arabidopsis thaliana] gi 332659558 gb AEE84958.1  AAA-type ATPase family protein [Arabidopsis thaliana]                                                                                                                                                    | 845  | 857 | 0 | 101.4 | 83.6 | 88.6 | AAA-type ATPase family protein         | gbpln | Arabidopsis thaliana | AT4G24790.2   Symbols:   AAA-type ATPase family protein   chr4:12778222-12781345 FORWARD LENGTH=857                                                                                                                                                                                                                                                                                                                                                                                                                                        | 845  | 857 | 0 | 101.4 | 83.6 | 88.6 |
| Rsa1.0_00807.1.g19761.t2  | ref[XP_002867642.1] hypothetical protein ARALYDRAFT_492356 [Arabidopsis lyrata subsp. lyrata] gi 297313478 gb EFH43901.1  hypothetical protein ARALYDRAFT_492356 [Arabidopsis lyrata subsp. lyrata]                                                                                                                                                                                                                                                                                  | 403  | 387 | 0 | 96.0  | 92.6 | 94.5 | hypothetical protein ARALYDRAFT_492356 | gbpln | Arabidopsis lyrata   | AT4G24820.2   Symbols:   26S proteasome, regulatory subunit Rpn7:Proteasome component (PCI) domain   chr4:12790471-12792599 REVERSE LENGTH=387                                                                                                                                                                                                                                                                                                                                                                                             | 403  | 387 | 0 | 96.0  | 91.8 | 94.0 |
| Rsa1.0_00807.1.g19762.t1  | ref[NP_194214.2] argininosuccinate synthase [Arabidopsis thaliana] gi 78099761 sp Q9SZX3.3 ASSY_ARATH RecName: Full=Argininosuccinate synthase, chloroplastic; AltName: Full=Citrulline--aspartate ligase; Flags: Precursor gi 17529036 gb AAL38728.1  putative argininosuccinate synthase [Arabidopsis thaliana] gi 20259085 gb AM14258.1  putative argininosuccinate synthase [Arabidopsis thaliana] gi 332659568 gb AEE84968.1  argininosuccinate synthase [Arabidopsis thaliana] | 510  | 494 | 0 | 96.9  | 88.4 | 92.7 | argininosuccinate synthase             | gbpln | Arabidopsis thaliana | AT4G24830.1   Symbols:   argininosuccinate synthase family   chr4:12793085-12795857 REVERSE LENGTH=494                                                                                                                                                                                                                                                                                                                                                                                                                                     | 510  | 494 | 0 | 96.9  | 88.4 | 92.7 |
| Rsa1.0_00807.1.g19763.t12 | gb EOA16079.1  hypothetical protein CARUB_v10004211mg [Capsella rubella]                                                                                                                                                                                                                                                                                                                                                                                                             | 1482 | 754 | 0 | 50.9  | 44.0 | 47.1 | hypothetical protein CARUB_v10004211mg | gbpln | Capsella rubella     | AT4G24840.1   Symbols:   FUNCTIONS IN: molecular_function unknown; INVOLVED IN: protein transport, Golgi organization; LOCATED IN: vacuole; EXPRESSED IN: 23 plant structures; EXPRESSED DURING: 13 growth stages; CONTAINS InterPro DOMAIN/s: COG complex component, COG2 (InterPro:IPR009316); Has 30201 Blast hits to 17322 proteins in 780 species: Archae - 12; Bacteria - 1396; Metazoa - 17338; Fungi - 3422; Plants - 5037; Viruses - 0; Other Eukaryotes - 2996 (source: NCBI ELink).   chr4:12796525-12800926 REVERSE LENGTH=756 | 1482 | 756 | 0 | 51.0  | 43.8 | 47.1 |
| Rsa1.0_00807.1.g19764.t1  | gb EOA16710.1  hypothetical protein CARUB_v10004911mg [Capsella rubella]                                                                                                                                                                                                                                                                                                                                                                                                             | 642  | 418 | 0 | 65.1  | 53.3 | 56.7 | hypothetical protein CARUB_v10004911mg | gbpln | Capsella rubella     | AT4G24880.1   Symbols:   unknown protein; Has 30201 Blast hits to 17322 proteins in 780 species: Archae - 12; Bacteria - 1396; Metazoa - 17338; Fungi - 3422; Plants - 5037; Viruses - 0; Other Eukaryotes - 2996 (source: NCBI ELink).   chr4:12808593-12811218 FORWARD LENGTH=417                                                                                                                                                                                                                                                        | 642  | 417 | 0 | 65.0  | 53.1 | 56.9 |

|                          |                                                                                                                                                                                                                                                                                                                                                                                                                                                                                                                                                                                                                                                                                                                                                                                                                                                                                                                                                                                                                                                                                                                                                                                                                                                                                                                                                                                                                                                                                                                                                                                                                                                                                                                                                                                                                                                                                                                                                                                                                                                                                                                                                     |     |      |           |       |       |       |                                              |                                                 |                      |                                                                                                                                                                                                                                                                                                                                                                    |                                                                                                                |     |           |          |       |       |       |
|--------------------------|-----------------------------------------------------------------------------------------------------------------------------------------------------------------------------------------------------------------------------------------------------------------------------------------------------------------------------------------------------------------------------------------------------------------------------------------------------------------------------------------------------------------------------------------------------------------------------------------------------------------------------------------------------------------------------------------------------------------------------------------------------------------------------------------------------------------------------------------------------------------------------------------------------------------------------------------------------------------------------------------------------------------------------------------------------------------------------------------------------------------------------------------------------------------------------------------------------------------------------------------------------------------------------------------------------------------------------------------------------------------------------------------------------------------------------------------------------------------------------------------------------------------------------------------------------------------------------------------------------------------------------------------------------------------------------------------------------------------------------------------------------------------------------------------------------------------------------------------------------------------------------------------------------------------------------------------------------------------------------------------------------------------------------------------------------------------------------------------------------------------------------------------------------|-----|------|-----------|-------|-------|-------|----------------------------------------------|-------------------------------------------------|----------------------|--------------------------------------------------------------------------------------------------------------------------------------------------------------------------------------------------------------------------------------------------------------------------------------------------------------------------------------------------------------------|----------------------------------------------------------------------------------------------------------------|-----|-----------|----------|-------|-------|-------|
| Rsa1.0_00807.1.g19765.t1 | ref[NP_194222.1] protein transport protein sec61 subunit gamma-1 [Arabidopsis thaliana] gi 18423153 ref[NP_568728.1] protein transport protein sec61 subunit gamma-1 [Arabidopsis thaliana] gi 297795847 ref[XP_002865808.1] hypothetical protein ARALYDRAFT_495113 [Arabidopsis lyrata subsp. lyrata] gi 297799504 ref[XP_002867636.1] hypothetical protein ARALYDRAFT_492346 [Arabidopsis lyrata subsp. lyrata] gi 408407782 sp PODI74.1 S61G1_ARAT H RecName: Full=Protein transport protein Sec61 subunit gamma-1 gi 408407783 sp PODI75.1 S61G2_ARAT H RecName: Full=Protein transport protein Sec61 subunit gamma-2 gi 13877813 gb AAK43984.1 AF370169.1 putative protein translocation complex Sec61 gamma chain [Arabidopsis thaliana] gi 4455235 emb CAB36734.1  PROTEIN TRANSPORT PROTEIN SEC61 GAMMA SUBUNIT-like [Arabidopsis thaliana] gi 7269342 emb CAB79401.1  PROTEIN TRANSPORT PROTEIN SEC61 GAMMA SUBUNIT-like [Arabidopsis thaliana] gi 9758755 dbj BAB09131.1  protein translocation complex Sec61 gamma chain [Arabidopsis thaliana] ref[XP_002878483.1] 60S ribosomal protein L7A [Arabidopsis lyrata subsp. lyrata] gi 29732432 gb EFH54742.1  60S ribosomal protein L7A [Arabidopsis lyrata subsp. lyrata] gb ACJ09230.1  HVA22d [Arabidopsis thaliana] gi 210148663 gb ACJ09237.1  HVA22d [Arabidopsis thaliana] gi 210148671 gb ACJ09241.1  HVA22d [Arabidopsis thaliana] gi 210148687 gb ACJ09249.1  HVA22d [Arabidopsis thaliana] gi 21014871 gb ACJ09261.1  HVA22d [Arabidopsis thaliana] ref[XP_002869696.1] hypothetical protein ARALYDRAFT_492340 [Arabidopsis lyrata subsp. lyrata] gi 297315532 gb EFH45955.1  hypothetical protein ARALYDRAFT_492340 [Arabidopsis lyrata subsp. lyrata] ref[XP_002867630.1] nodulin MtN3 family protein [Arabidopsis lyrata subsp. lyrata] gi 297313466 gb EFH43889.1  nodulin MtN3 family protein [Arabidopsis lyrata subsp. lyrata] ref[XP_002869693.1] hypothetical protein ARALYDRAFT_492335 [Arabidopsis lyrata subsp. lyrata] gi 297315529 gb EFH45952.1  hypothetical protein ARALYDRAFT_492335 [Arabidopsis lyrata subsp. lyrata] # # # # # # # - - - - # # # # # # # # | 69  | 69   | 1.00E-30  | 100.0 | 100.0 | 100.0 | 100.0                                        | protein transport protein sec61 subunit gamma-1 | gbpln                | Arabidopsis lyrata                                                                                                                                                                                                                                                                                                                                                 | AT5G50460.1   Symbols:   secE/sec61-gamma protein transport protein   chr5:20552168-20552509 REVERSE LENGTH=69 | 69  | 69        | 2.00E-33 | 100.0 | 100.0 | 100.0 |
| Rsa1.0_00807.1.g19766.t1 | ref[XP_002878483.1] 60S ribosomal protein L7A [Arabidopsis lyrata subsp. lyrata] gi 29732432 gb EFH54742.1  60S ribosomal protein L7A [Arabidopsis lyrata subsp. lyrata] gb ACJ09230.1  HVA22d [Arabidopsis thaliana] gi 210148663 gb ACJ09237.1  HVA22d [Arabidopsis thaliana] gi 210148671 gb ACJ09241.1  HVA22d [Arabidopsis thaliana] gi 210148687 gb ACJ09249.1  HVA22d [Arabidopsis thaliana] gi 21014871 gb ACJ09261.1  HVA22d [Arabidopsis thaliana] ref[XP_002869696.1] hypothetical protein ARALYDRAFT_492340 [Arabidopsis lyrata subsp. lyrata] gi 297315532 gb EFH45955.1  hypothetical protein ARALYDRAFT_492340 [Arabidopsis lyrata subsp. lyrata] ref[XP_002867630.1] nodulin MtN3 family protein [Arabidopsis lyrata subsp. lyrata] gi 297313466 gb EFH43889.1  nodulin MtN3 family protein [Arabidopsis lyrata subsp. lyrata] ref[XP_002869693.1] hypothetical protein ARALYDRAFT_492335 [Arabidopsis lyrata subsp. lyrata] gi 297315529 gb EFH45952.1  hypothetical protein ARALYDRAFT_492335 [Arabidopsis lyrata subsp. lyrata] # # # # # # # - - - - # # # # # # # #                                                                                                                                                                                                                                                                                                                                                                                                                                                                                                                                                                                                                                                                                                                                                                                                                                                                                                                                                                                                                                                            | 421 | 256  | 1.00E-138 | 60.8  | 57.2  | 59.6  | 60S ribosomal protein L7A                    | gbpln                                           | Arabidopsis lyrata   | AT3G62870.1   Symbols:   Ribosomal protein L7Ae/L30e/S12e/Gadd45 family protein   chr3:23242862-23244273 REVERSE LENGTH=256                                                                                                                                                                                                                                        | 421                                                                                                            | 256 | 1.00E-140 | 60.8     | 57.2  | 59.4  |       |
| Rsa1.0_00807.1.g19767.t1 | ref[XP_002869696.1] hypothetical protein ARALYDRAFT_492340 [Arabidopsis lyrata subsp. lyrata] gi 297315532 gb EFH45955.1  hypothetical protein ARALYDRAFT_492340 [Arabidopsis lyrata subsp. lyrata] ref[XP_002867630.1] nodulin MtN3 family protein [Arabidopsis lyrata subsp. lyrata] gi 297313466 gb EFH43889.1  nodulin MtN3 family protein [Arabidopsis lyrata subsp. lyrata] ref[XP_002869693.1] hypothetical protein ARALYDRAFT_492335 [Arabidopsis lyrata subsp. lyrata] gi 297315529 gb EFH45952.1  hypothetical protein ARALYDRAFT_492335 [Arabidopsis lyrata subsp. lyrata] # # # # # # # - - - - # # # # # # # #                                                                                                                                                                                                                                                                                                                                                                                                                                                                                                                                                                                                                                                                                                                                                                                                                                                                                                                                                                                                                                                                                                                                                                                                                                                                                                                                                                                                                                                                                                                         | 135 | 135  | 5.00E-62  | 100.0 | 83.7  | 91.1  | HVA22d                                       | gbpln                                           | Arabidopsis thaliana | AT4G24960.1   Symbols:   ATHVA22D, HVA22D   HVA22 homologue D   chr4:12828060-12828982 FORWARD LENGTH=135                                                                                                                                                                                                                                                          | 135                                                                                                            | 135 | 2.00E-64  | 100.0    | 83.7  | 91.9  |       |
| Rsa1.0_00807.1.g19768.t1 | ref[XP_002869696.1] hypothetical protein ARALYDRAFT_492340 [Arabidopsis lyrata subsp. lyrata] gi 297315532 gb EFH45955.1  hypothetical protein ARALYDRAFT_492340 [Arabidopsis lyrata subsp. lyrata] ref[XP_002867630.1] nodulin MtN3 family protein [Arabidopsis lyrata subsp. lyrata] gi 297313466 gb EFH43889.1  nodulin MtN3 family protein [Arabidopsis lyrata subsp. lyrata] ref[XP_002869693.1] hypothetical protein ARALYDRAFT_492335 [Arabidopsis lyrata subsp. lyrata] gi 297315529 gb EFH45952.1  hypothetical protein ARALYDRAFT_492335 [Arabidopsis lyrata subsp. lyrata] # # # # # # # - - - - # # # # # # # #                                                                                                                                                                                                                                                                                                                                                                                                                                                                                                                                                                                                                                                                                                                                                                                                                                                                                                                                                                                                                                                                                                                                                                                                                                                                                                                                                                                                                                                                                                                         | 699 | 709  | 0         | 101.4 | 82.5  | 89.6  | hypothetical protein ARALYDRAFT_492340       | gbpln                                           | Arabidopsis lyrata   | AT4G24970.1   Symbols:   Histidine kinase-, DNA gyrase B-, and HSP90-like ATPase family protein   chr4:12831125-12835449 FORWARD LENGTH=707                                                                                                                                                                                                                        | 699                                                                                                            | 707 | 0         | 101.1    | 80.4  | 86.8  |       |
| Rsa1.0_00807.1.g19769.t1 | ref[XP_002869696.1] hypothetical protein ARALYDRAFT_492340 [Arabidopsis lyrata subsp. lyrata] gi 297315532 gb EFH45955.1  hypothetical protein ARALYDRAFT_492340 [Arabidopsis lyrata subsp. lyrata] ref[XP_002867630.1] nodulin MtN3 family protein [Arabidopsis lyrata subsp. lyrata] gi 297313466 gb EFH43889.1  nodulin MtN3 family protein [Arabidopsis lyrata subsp. lyrata] ref[XP_002869693.1] hypothetical protein ARALYDRAFT_492335 [Arabidopsis lyrata subsp. lyrata] gi 297315529 gb EFH45952.1  hypothetical protein ARALYDRAFT_492335 [Arabidopsis lyrata subsp. lyrata] # # # # # # # - - - - # # # # # # # #                                                                                                                                                                                                                                                                                                                                                                                                                                                                                                                                                                                                                                                                                                                                                                                                                                                                                                                                                                                                                                                                                                                                                                                                                                                                                                                                                                                                                                                                                                                         | 274 | 280  | 1.00E-132 | 102.2 | 88.0  | 93.1  | nodulin MtN3 family protein                  | gbpln                                           | Arabidopsis lyrata   | AT4G25010.1   Symbols:   SWEET14, AtSWEET14   Nodulin MtN3 family protein   chr4:12854630-12856351 REVERSE LENGTH=281                                                                                                                                                                                                                                              | 274                                                                                                            | 281 | 1.00E-133 | 102.6    | 87.2  | 91.6  |       |
| Rsa1.0_00807.1.g19770.t1 | ref[XP_002869696.1] hypothetical protein ARALYDRAFT_492340 [Arabidopsis lyrata subsp. lyrata] gi 297315532 gb EFH45955.1  hypothetical protein ARALYDRAFT_492340 [Arabidopsis lyrata subsp. lyrata] ref[XP_002867630.1] nodulin MtN3 family protein [Arabidopsis lyrata subsp. lyrata] gi 297313466 gb EFH43889.1  nodulin MtN3 family protein [Arabidopsis lyrata subsp. lyrata] ref[XP_002869693.1] hypothetical protein ARALYDRAFT_492335 [Arabidopsis lyrata subsp. lyrata] gi 297315529 gb EFH45952.1  hypothetical protein ARALYDRAFT_492335 [Arabidopsis lyrata subsp. lyrata] # # # # # # # - - - - # # # # # # # #                                                                                                                                                                                                                                                                                                                                                                                                                                                                                                                                                                                                                                                                                                                                                                                                                                                                                                                                                                                                                                                                                                                                                                                                                                                                                                                                                                                                                                                                                                                         | 352 | 344  | 1.00E-164 | 97.7  | 82.4  | 90.1  | hypothetical protein ARALYDRAFT_492335       | gbpln                                           | Arabidopsis lyrata   | AT4G25030.2   Symbols:   unknown protein; BEST Arabidopsis thaliana protein match is: unknown protein (TAIR:AT5G45410.3); Has 35333 Blast hits to 34131 proteins in 2444 species: Archae - 798; Bacteria - 22429; Metazoa - 974; Fungi - 991; Plants - 531; Viruses - 0; Other Eukaryotes - 9610 (source: NCBI BLINK).   chr4:12865336-12866638 FORWARD LENGTH=344 | 352                                                                                                            | 344 | 1.00E-162 | 97.7     | 83.8  | 90.6  |       |
| Rsa1.0_00808.1.g19771.t1 | # # # # # # # - - - - # # # # # # # #                                                                                                                                                                                                                                                                                                                                                                                                                                                                                                                                                                                                                                                                                                                                                                                                                                                                                                                                                                                                                                                                                                                                                                                                                                                                                                                                                                                                                                                                                                                                                                                                                                                                                                                                                                                                                                                                                                                                                                                                                                                                                                               | #   | #    | #         | #     | #     | #     | -                                            | -                                               | -                    | # # # # # # # #                                                                                                                                                                                                                                                                                                                                                    | #                                                                                                              | #   | #         | #        | #     | #     |       |
| Rsa1.0_00808.1.g19772.t1 | # # # # # # # - - - - # # # # # # # #                                                                                                                                                                                                                                                                                                                                                                                                                                                                                                                                                                                                                                                                                                                                                                                                                                                                                                                                                                                                                                                                                                                                                                                                                                                                                                                                                                                                                                                                                                                                                                                                                                                                                                                                                                                                                                                                                                                                                                                                                                                                                                               | #   | #    | #         | #     | #     | #     | -                                            | -                                               | -                    | # # # # # # # #                                                                                                                                                                                                                                                                                                                                                    | #                                                                                                              | #   | #         | #        | #     | #     |       |
| Rsa1.0_00808.1.g19773.t1 | ref[XP_002869696.1] hypothetical protein ARALYDRAFT_492340 [Arabidopsis lyrata subsp. lyrata] gi 297315532 gb EFH45955.1  hypothetical protein ARALYDRAFT_492340 [Arabidopsis lyrata subsp. lyrata] ref[XP_002867630.1] nodulin MtN3 family protein [Arabidopsis lyrata subsp. lyrata] gi 297313466 gb EFH43889.1  nodulin MtN3 family protein [Arabidopsis lyrata subsp. lyrata] ref[XP_002869693.1] hypothetical protein ARALYDRAFT_492335 [Arabidopsis lyrata subsp. lyrata] gi 297315529 gb EFH45952.1  hypothetical protein ARALYDRAFT_492335 [Arabidopsis lyrata subsp. lyrata] # # # # # # # - - - - # # # # # # # #                                                                                                                                                                                                                                                                                                                                                                                                                                                                                                                                                                                                                                                                                                                                                                                                                                                                                                                                                                                                                                                                                                                                                                                                                                                                                                                                                                                                                                                                                                                         | 365 | 368  | 1.00E-166 | 100.8 | 83.0  | 88.2  | hypothetical protein CARUB_v10011900mg       | gbpln                                           | Capsella rubella     | AT1G32770.1   Symbols:   ANAC012, SND1, NST3, NAC012   NAC domain containing protein 12   chr1:11865343-11866950 REVERSE LENGTH=358                                                                                                                                                                                                                                | 365                                                                                                            | 358 | 1.00E-164 | 98.1     | 81.4  | 87.4  |       |
| Rsa1.0_00808.1.g19774.t1 | ref[XP_002869696.1] hypothetical protein ARALYDRAFT_492340 [Arabidopsis lyrata subsp. lyrata] gi 297315532 gb EFH45955.1  hypothetical protein ARALYDRAFT_492340 [Arabidopsis lyrata subsp. lyrata] ref[XP_002867630.1] nodulin MtN3 family protein [Arabidopsis lyrata subsp. lyrata] gi 297313466 gb EFH43889.1  nodulin MtN3 family protein [Arabidopsis lyrata subsp. lyrata] ref[XP_002869693.1] hypothetical protein ARALYDRAFT_492335 [Arabidopsis lyrata subsp. lyrata] gi 297315529 gb EFH45952.1  hypothetical protein ARALYDRAFT_492335 [Arabidopsis lyrata subsp. lyrata] # # # # # # # - - - - # # # # # # # #                                                                                                                                                                                                                                                                                                                                                                                                                                                                                                                                                                                                                                                                                                                                                                                                                                                                                                                                                                                                                                                                                                                                                                                                                                                                                                                                                                                                                                                                                                                         | 153 | 1142 | 4.00E-30  | 746.4 | 42.5  | 56.9  | reverse transcriptase, putative: 16838-20266 | gbpln                                           | Arabidopsis thaliana | AT4G29090.1   Symbols:   Ribonuclease H-like superfamily protein   chr4:14333528-14335255 FORWARD LENGTH=575                                                                                                                                                                                                                                                       | 153                                                                                                            | 575 | 3.00E-13  | 375.8    | 24.2  | 41.2  |       |

|                           |                                                                                                                                                                                                                                                                                                                                                                                                                    |      |      |           |       |      |      |                                                     |       |                         |                                                                                                                                                                                                                                                                                                                                                                                                                                                         |      |      |           |       |      |      |
|---------------------------|--------------------------------------------------------------------------------------------------------------------------------------------------------------------------------------------------------------------------------------------------------------------------------------------------------------------------------------------------------------------------------------------------------------------|------|------|-----------|-------|------|------|-----------------------------------------------------|-------|-------------------------|---------------------------------------------------------------------------------------------------------------------------------------------------------------------------------------------------------------------------------------------------------------------------------------------------------------------------------------------------------------------------------------------------------------------------------------------------------|------|------|-----------|-------|------|------|
| Rsa1.0_00808.1.g19775.t1  | ref XP_002874639.1  glutaredoxin family protein [Arabidopsis lyrata subsp. lyrata] gi 297320476 gb EFH50898.1  glutaredoxin family protein [Arabidopsis lyrata subsp. lyrata]                                                                                                                                                                                                                                      | 306  | 325  | 1.00E-103 | 106.2 | 68.3 | 78.8 | glutaredoxin family protein                         | gbpln | Arabidopsis lyrata      | AT1G32760.1   Symbols:   Glutaredoxin family protein   chr1:11858251-11859195 FORWARD LENGTH=314                                                                                                                                                                                                                                                                                                                                                        | 306  | 314  | 1.00E-102 | 102.6 | 72.2 | 79.4 |
| Rsa1.0_00808.1.g19776.t1  | gb EOA27611.1  hypothetical protein CARUB_v10023752mg [Capsella rubella]                                                                                                                                                                                                                                                                                                                                           | 237  | 295  | 1.00E-101 | 124.5 | 78.1 | 91.1 | hypothetical protein CARUB_v10023752mg              | gbpln | Capsella rubella        | AT2G26550.2   Symbols: HO2   heme oxygenase 2   chr2:11291584-11293426 REVERSE LENGTH=299                                                                                                                                                                                                                                                                                                                                                               | 237  | 299  | 1.00E-102 | 126.2 | 78.5 | 88.6 |
| Rsa1.0_00808.1.g19777.t1  | ref NP_564407.1  uncharacterized protein [Arabidopsis thaliana] gi 6714274 gb AAF25970.1 AC017118.7 F6N18.11 [Arabidopsis thaliana] gi 21536980 gb AAM61321.1  unknown [Arabidopsis thaliana] gi 225897996 dbj BAH30330.1  hypothetical protein [Arabidopsis thaliana] gi 332193401 gb AEE31522.1  uncharacterized protein AT1G32730 [Arabidopsis thaliana]                                                        | 348  | 327  | 1.00E-123 | 94.0  | 69.3 | 77.3 | uncharacterized protein                             | gbpln | Arabidopsis thaliana    | AT1G32730.1   Symbols:   unknown protein; LOCATED IN: chloroplast; EXPRESSED DURING: 6 plant structures; EXPRESSED DURING: 6 growth stages; CONTAINS InterPro DOMAIN/s: Protein of unknown function DUF702 (InterPro:IPR007818); Has 120 Blast hits to 118 proteins in 39 species: Archae - 0; Bacteria - 8; Metazoa - 63; Fungi - 4; Plants - 33; Viruses - 0; Other Eukaryotes - 12 (source: NCBI BLINK).   chr1:11841077-11842956 FORWARD LENGTH=327 | 348  | 327  | 1.00E-126 | 94.0  | 69.3 | 77.3 |
| Rsa1.0_00808.1.g19778.t1  | dbj BAB02990.1  retroelement pol polyprotein-like [Arabidopsis thaliana]                                                                                                                                                                                                                                                                                                                                           | 646  | 1250 | 0         | 193.5 | 61.1 | 75.2 | retroelement pol polyprotein-like                   | gbpln | Arabidopsis thaliana    | AT4G23160.1   Symbols: CRK8   cysteine-rich RLK (RECEPTOR-like protein kinase) 8   chr4:12129485-12134086 FORWARD LENGTH=1262                                                                                                                                                                                                                                                                                                                           | 646  | 1262 | 4.00E-95  | 195.4 | 29.4 | 46.3 |
| Rsa1.0_00808.1.g19779.t1  | dbj BAA97156.1  unnamed protein product [Arabidopsis thaliana]                                                                                                                                                                                                                                                                                                                                                     | 254  | 329  | 2.00E-36  | 129.5 | 33.9 | 44.9 | unnamed protein product                             | gbpln | Arabidopsis thaliana    | AT4G29090.1   Symbols:   Ribonuclease H-like superfamily protein   chr4:1433528-14335255 FORWARD LENGTH=575                                                                                                                                                                                                                                                                                                                                             | 254  | 575  | 1.00E-18  | 226.4 | 20.9 | 36.2 |
| Rsa1.0_00808.1.g19780.t1  | gb AAF25968.1 AC017118.5 F6N18.8 [Arabidopsis thaliana]                                                                                                                                                                                                                                                                                                                                                            | 208  | 270  | 1.00E-103 | 129.8 | 91.8 | 95.2 | F6N18.8                                             | gbpln | Arabidopsis thaliana    | AT1G32700.1   Symbols:   PLATZ transcription factor family protein   chr1:11827588-11829444 FORWARD LENGTH=213                                                                                                                                                                                                                                                                                                                                          | 208  | 213  | 1.00E-105 | 102.4 | 91.8 | 95.2 |
| Rsa1.0_00809.1.g19781.t1  | #                                                                                                                                                                                                                                                                                                                                                                                                                  | #    | #    | #         | #     | #    | -    | ----                                                | ----  | ----                    | #                                                                                                                                                                                                                                                                                                                                                                                                                                                       | #    | #    | #         | #     | #    |      |
| Rsa1.0_00809.1.g19782.t14 | ref NP_179075.1  myosin heavy chain-related protein [Arabidopsis thaliana] gi 334184229 ref NP_001189526.1  myosin heavy chain-related protein [Arabidopsis thaliana] gi 3810592 gb AAC69374.1  unknown protein [Arabidopsis thaliana] gi 330251225 gb AEC06319.1  myosin heavy chain-related protein [Arabidopsis thaliana] gi 330251227 gb AEC06321.1  myosin heavy chain-related protein [Arabidopsis thaliana] | 172  | 629  | 2.00E-80  | 365.7 | 87.2 | 94.8 | myosin heavy chain-related protein                  | gbpln | Arabidopsis thaliana    | AT2G14680.3   Symbols: MEE13   myosin heavy chain-related   chr2:6278256-6283766 FORWARD LENGTH=629                                                                                                                                                                                                                                                                                                                                                     | 172  | 629  | 9.00E-83  | 365.7 | 87.2 | 94.8 |
| Rsa1.0_00809.1.g19783.t1  | #                                                                                                                                                                                                                                                                                                                                                                                                                  | #    | #    | #         | #     | #    | -    | ----                                                | ----  | ----                    | #                                                                                                                                                                                                                                                                                                                                                                                                                                                       | #    | #    | #         | #     | #    |      |
| Rsa1.0_00809.1.g19784.t2  | gb AAC33226.1  putative non-LTR retroelement reverse transcriptase [Arabidopsis thaliana]                                                                                                                                                                                                                                                                                                                          | 777  | 1529 | 0         | 196.8 | 57.7 | 74.4 | putative non-LTR retroelement reverse transcriptase | gbpln | Arabidopsis thaliana    | AT3G24255.1   Symbols:   RNA-directed DNA polymerase (reverse transcriptase)-related family protein   chr3:8789471-8793208 FORWARD LENGTH=746                                                                                                                                                                                                                                                                                                           | 777  | 746  | 1.00E-121 | 96.0  | 29.0 | 36.2 |
| Rsa1.0_00809.1.g19785.t12 | gb AAF18641.1 AC006228.12 F5J5.16 [Arabidopsis thaliana]                                                                                                                                                                                                                                                                                                                                                           | 1181 | 1024 | 2.00E-66  | 86.7  | 14.4 | 19.9 | F5J5.16                                             | gbpln | Arabidopsis thaliana    | #                                                                                                                                                                                                                                                                                                                                                                                                                                                       | #    | #    | #         | #     | #    |      |
| Rsa1.0_00809.1.g19786.t7  | gb ABD65057.1  hypothetical protein 27.t00123 [Brassica oleracea]                                                                                                                                                                                                                                                                                                                                                  | 1000 | 190  | 1.00E-32  | 19.0  | 8.1  | 9.7  | hypothetical protein 27.t00123                      | gbpln | Brassica oleracea       | #                                                                                                                                                                                                                                                                                                                                                                                                                                                       | #    | #    | #         | #     | #    |      |
| Rsa1.0_00809.1.g19787.t1  | dbj BAB02259.1  retroelement pol polyprotein-like [Arabidopsis thaliana]                                                                                                                                                                                                                                                                                                                                           | 418  | 777  | 2.00E-17  | 185.9 | 12.4 | 17.7 | retroelement pol polyprotein-like                   | gbpln | Arabidopsis thaliana    | #                                                                                                                                                                                                                                                                                                                                                                                                                                                       | #    | #    | #         | #     | #    |      |
| Rsa1.0_00809.1.g19788.t1  | gb AAD19782.1  putative Athila retroelement ORF1 protein [Arabidopsis thaliana]                                                                                                                                                                                                                                                                                                                                    | 266  | 616  | 4.00E-19  | 231.6 | 26.3 | 38.7 | putative Athila retroelement ORF1 protein           | gbpln | Arabidopsis thaliana    | #                                                                                                                                                                                                                                                                                                                                                                                                                                                       | #    | #    | #         | #     | #    |      |
| Rsa1.0_00809.1.g19789.t1  | #                                                                                                                                                                                                                                                                                                                                                                                                                  | #    | #    | #         | #     | #    | -    | ----                                                | ----  | ----                    | #                                                                                                                                                                                                                                                                                                                                                                                                                                                       | #    | #    | #         | #     | #    |      |
| Rsa1.0_00809.1.g19790.t1  | #                                                                                                                                                                                                                                                                                                                                                                                                                  | #    | #    | #         | #     | #    | -    | ----                                                | ----  | ----                    | #                                                                                                                                                                                                                                                                                                                                                                                                                                                       | #    | #    | #         | #     | #    |      |
| Rsa1.0_00809.1.g19791.t2  | ref XP_003566116.1  PREDICTED: uncharacterized protein LOC100833674 [Brachypodium distachyon]                                                                                                                                                                                                                                                                                                                      | 1729 | 1225 | 1.00E-148 | 70.9  | 19.5 | 27.7 | PREDICTED: uncharacterized protein LOC100833674     | gbpln | Brachypodium distachyon | AT3G30820.1   Symbols:   Arabidopsis retrotransposon ORF-1 protein   chr3:12529843-12531235 FORWARD LENGTH=405                                                                                                                                                                                                                                                                                                                                          | 1729 | 405  | 3.00E-16  | 23.4  | 4.8  | 8.1  |
| Rsa1.0_00809.1.g19792.t1  | #                                                                                                                                                                                                                                                                                                                                                                                                                  | #    | #    | #         | #     | #    | -    | ----                                                | ----  | ----                    | #                                                                                                                                                                                                                                                                                                                                                                                                                                                       | #    | #    | #         | #     | #    |      |
| Rsa1.0_00809.1.g19793.t1  | emb CAN73649.1  hypothetical protein VITISV_036843 [Vitis vinifera]                                                                                                                                                                                                                                                                                                                                                | 1305 | 996  | 1.00E-173 | 76.3  | 26.9 | 36.9 | hypothetical protein VITISV_036843                  | gbpln | Vitis vinifera          | #                                                                                                                                                                                                                                                                                                                                                                                                                                                       | #    | #    | #         | #     | #    |      |
| Rsa1.0_00810.1.g19794.t1  | ref XP_002872139.1  predicted protein [Arabidopsis lyrata subsp. lyrata] gi 297317976 gb EFH48398.1  predicted protein [Arabidopsis lyrata subsp. lyrata]                                                                                                                                                                                                                                                          | 509  | 515  | 0         | 101.2 | 85.3 | 90.8 | predicted protein                                   | gbpln | Arabidopsis lyrata      | #                                                                                                                                                                                                                                                                                                                                                                                                                                                       | #    | #    | #         | #     | #    |      |
| Rsa1.0_00810.1.g19795.t1  | gb EOA21643.1  hypothetical protein CARUB_v10002061mg [Capsella rubella]                                                                                                                                                                                                                                                                                                                                           | 191  | 184  | 4.00E-71  | 96.3  | 75.9 | 82.2 | hypothetical protein CARUB_v10002061mg              | gbpln | Capsella rubella        | AT5G25090.1   Symbols: ENODL13, ATENODL13   early nodulin-like protein 13   chr5:8647117-8647755 REVERSE LENGTH=186                                                                                                                                                                                                                                                                                                                                     | 191  | 186  | 2.00E-66  | 97.4  | 70.2 | 78.5 |

|                          |                                                                                                                                                                                                                                                                                                                                                                    |     |      |           |       |      |      |                                        |       |                      |                                                                                                                                                                                                                                                                                                                                                                                                                                                                                                                                                          |     |      |           |       |      |      |
|--------------------------|--------------------------------------------------------------------------------------------------------------------------------------------------------------------------------------------------------------------------------------------------------------------------------------------------------------------------------------------------------------------|-----|------|-----------|-------|------|------|----------------------------------------|-------|----------------------|----------------------------------------------------------------------------------------------------------------------------------------------------------------------------------------------------------------------------------------------------------------------------------------------------------------------------------------------------------------------------------------------------------------------------------------------------------------------------------------------------------------------------------------------------------|-----|------|-----------|-------|------|------|
| Rsa1.0_00810.1.g19796.t1 | refNP_197890.1  Sas10/Utp3/C1D family protein [Arabidopsis thaliana] gi 14190385 gb AAK55673.1 AF378870_1 AT5g25080/T11H3.90 [Arabidopsis thaliana] gi 15215877 gb AAK91482.1 AT5g25080/T11H3.90 [Arabidopsis thaliana] gi 21593008 gb AAM64957.1  unknown [Arabidopsis thaliana] gi 332006014 gb AED93397.1  Sas10/Utp3/C1D family protein [Arabidopsis thaliana] | 223 | 217  | 6.00E-92  | 97.3  | 72.6 | 85.7 | Sas10/Utp3/C1D family protein          | gbpln | Arabidopsis thaliana | AT5G25080.1   Symbols:   Sas10/Utp3/C1D family   chr5:8643782-8646306 FORWARD LENGTH=217                                                                                                                                                                                                                                                                                                                                                                                                                                                                 | 223 | 217  | 2.00E-94  | 97.3  | 72.6 | 85.7 |
| Rsa1.0_00810.1.g19797.t1 | refNP_197887.1  major facilitator protein [Arabidopsis thaliana] gi 75104998 sp Q5FV41.1 FBT2_ARATH RecName: Full=Probable folate-biopterin transporter 2 gi 58331763 gb AAW70379.1  At5g25050 [Arabidopsis thaliana] gi 332006011 gb AED93394.1  probable folate-biopterin transporter 2 [Arabidopsis thaliana]                                                   | 498 | 499  | 0         | 100.2 | 90.0 | 94.2 | major facilitator protein              | gbpln | Arabidopsis thaliana | AT5G25050.1   Symbols:   Major facilitator superfamily protein   chr5:8632022-8633828 FORWARD LENGTH=499                                                                                                                                                                                                                                                                                                                                                                                                                                                 | 498 | 499  | 0         | 100.2 | 90.0 | 94.2 |
| Rsa1.0_00810.1.g19798.t1 | refXP_002872135.1  hypothetical protein ARALYDRAFT_910545 [Arabidopsis lyrata subsp. lyrata] gi 297317972 gb EFH48394.1  hypothetical protein ARALYDRAFT_910545 [Arabidopsis lyrata subsp. lyrata]                                                                                                                                                                 | 294 | 296  | 1.00E-107 | 100.7 | 63.9 | 80.3 | hypothetical protein ARALYDRAFT_910545 | gbpln | Arabidopsis lyrata   | AT5G24990.1   Symbols:   Protein of unknown function (DUF336)   chr5:8610591-8611475 FORWARD LENGTH=294                                                                                                                                                                                                                                                                                                                                                                                                                                                  | 294 | 294  | 1.00E-106 | 100.0 | 62.9 | 77.6 |
| Rsa1.0_00810.1.g19799.t8 | refXP_002874233.1  hypothetical protein ARALYDRAFT_489354 [Arabidopsis lyrata subsp. lyrata] gi 297320070 gb EFH50492.1  hypothetical protein ARALYDRAFT_489354 [Arabidopsis lyrata subsp. lyrata]                                                                                                                                                                 | 431 | 446  | 1.00E-176 | 103.5 | 75.4 | 81.7 | hypothetical protein ARALYDRAFT_489354 | gbpln | Arabidopsis lyrata   | AT5G24940.1   Symbols:   Protein phosphatase 2C family protein   chr5:8591407-8593601 REVERSE LENGTH=447                                                                                                                                                                                                                                                                                                                                                                                                                                                 | 431 | 447  | 1.00E-173 | 103.7 | 74.0 | 82.4 |
| Rsa1.0_00810.1.g19800.t1 | refNP_197875.2  protein CONSTANS-like 4 [Arabidopsis thaliana] gi 332005996 gb AED93379.1  zinc finger protein CONSTANS-LIKE 4 [Arabidopsis thaliana]                                                                                                                                                                                                              | 351 | 406  | 1.00E-166 | 115.7 | 91.7 | 94.6 | protein CONSTANS-like 4                | gbpln | Arabidopsis thaliana | AT5G24930.1   Symbols:   ATCOL4, COL4   CONSTANS-like 4   chr5:8589325-8590949 FORWARD LENGTH=406                                                                                                                                                                                                                                                                                                                                                                                                                                                        | 351 | 406  | 1.00E-169 | 115.7 | 91.7 | 94.6 |
| Rsa1.0_00810.1.g19801.t1 | gb EOA21783.1  hypothetical protein CARUB_v10002244mg [Capsella rubella]                                                                                                                                                                                                                                                                                           | 130 | 133  | 2.00E-41  | 102.3 | 66.9 | 71.5 | hypothetical protein CARUB_v10002244mg | gbpln | Capsella rubella     | AT5G24920.1   Symbols:   AtGDU5, GDU5   glutamine dumper 5   chr5:8584665-8585060 FORWARD LENGTH=131                                                                                                                                                                                                                                                                                                                                                                                                                                                     | 130 | 131  | 7.00E-38  | 100.8 | 68.5 | 73.8 |
| Rsa1.0_00810.1.g19802.t1 | gb EOA20382.1  hypothetical protein CARUB_v10000695mg [Capsella rubella]                                                                                                                                                                                                                                                                                           | 533 | 529  | 0         | 99.2  | 90.6 | 95.5 | hypothetical protein CARUB_v10000695mg | gbpln | Capsella rubella     | AT5G24910.1   Symbols:   CYP714A1   cytochrome P450, family 714, subfamily A, polypeptide 1   chr5:8567674-8570260 REVERSE LENGTH=532                                                                                                                                                                                                                                                                                                                                                                                                                    | 533 | 532  | 0         | 99.8  | 90.2 | 94.0 |
| Rsa1.0_00810.1.g19803.t1 | gb AAO42013.1  unknown protein [Arabidopsis thaliana]                                                                                                                                                                                                                                                                                                              | 219 | 240  | 1.00E-62  | 109.6 | 72.6 | 79.9 | unknown protein                        | gbpln | Arabidopsis thaliana | AT5G24890.1   Symbols:   unknown protein; FUNCTIONS IN: molecular function unknown; INVOLVED IN: biological process unknown; LOCATED IN: cellular component unknown; EXPRESSED IN: 24 plant structures; EXPRESSED DURING: 13 growth stages; BEST Arabidopsis thaliana protein match is: unknown protein (TAIR:AT2G24550.1). Has 1807 Blast hits to 1807 proteins in 277 species: Archae - 0; Bacteria - 0; Metazoa - 736; Fungi - 347; Plants - 385; Viruses - 0; Other Eukaryotes - 339 (source: NCBI BLINK).   chr5:8558357-8559172 REVERSE LENGTH=240 | 219 | 240  | 4.00E-65  | 109.6 | 72.6 | 79.9 |
| Rsa1.0_00810.1.g19804.t1 | gb EOA22360.1  hypothetical protein CARUB_v10002989mg [Capsella rubella]                                                                                                                                                                                                                                                                                           | 417 | 421  | 8.00E-98  | 101.0 | 66.2 | 77.2 | hypothetical protein CARUB_v10002989mg | gbpln | Capsella rubella     | AT5G10660.1   Symbols:   calmodulin-binding protein-related   chr5:3370553-3371776 FORWARD LENGTH=407                                                                                                                                                                                                                                                                                                                                                                                                                                                    | 417 | 407  | 3.00E-71  | 97.6  | 52.5 | 64.7 |
| Rsa1.0_00811.1.g19805.t1 | gb AAK51235.1 AF287471.1 polyprotein [Arabidopsis thaliana]                                                                                                                                                                                                                                                                                                        | 910 | 1453 | 0         | 159.7 | 47.3 | 59.7 | polyprotein                            | gbpln | Arabidopsis thaliana | AT4G23160.1   Symbols:   CRK8   cysteine-rich RLK (RECEPTOR-like protein kinase) 8   chr4:12129485-12134086 FORWARD LENGTH=1262                                                                                                                                                                                                                                                                                                                                                                                                                          | 910 | 1262 | 1.00E-87  | 138.7 | 18.6 | 28.7 |
| Rsa1.0_00811.1.g19806.t1 | #                                                                                                                                                                                                                                                                                                                                                                  | #   | #    | #         | #     | #    | #    | -                                      | ----  | ----                 | #                                                                                                                                                                                                                                                                                                                                                                                                                                                                                                                                                        | #   | #    | #         | #     | #    |      |

|                          |                                                                                                                                                                                                                                                                                                                                                                                                                                                                                                                                                   |      |      |           |       |      |      |                                                 |                      |                                                                                                                                |      |      |           |       |      |       |  |  |  |
|--------------------------|---------------------------------------------------------------------------------------------------------------------------------------------------------------------------------------------------------------------------------------------------------------------------------------------------------------------------------------------------------------------------------------------------------------------------------------------------------------------------------------------------------------------------------------------------|------|------|-----------|-------|------|------|-------------------------------------------------|----------------------|--------------------------------------------------------------------------------------------------------------------------------|------|------|-----------|-------|------|-------|--|--|--|
|                          | refNP_190805.1 fasciclin-like arabinogalactan protein 15 [Arabidopsis thaliana]<br>gi 75172383 sp Q9FT45.1 FLA15_ARATH<br>RecName: Full=Fasciclin-like arabinogalactan protein 15; Flags: Precursor                                                                                                                                                                                                                                                                                                                                               |      |      |           |       |      |      |                                                 |                      |                                                                                                                                |      |      |           |       |      |       |  |  |  |
| Rsa1.0_00811.1.g19807.t1 | gi 10045570 emb CAC07928.1 putative protein [Arabidopsis thaliana]<br>gi 26450296 dbj BAC42264.1 GPI-anchored protein [Arabidopsis thaliana]<br>gi 109946609 gb ABG48483.1 At3g52370 [Arabidopsis thaliana]<br>gi 332645418 gb AEE78939.1 fasciclin-like arabinogalactan protein 15 [Arabidopsis thaliana]                                                                                                                                                                                                                                        | 436  | 436  | 0         | 100.0 | 85.3 | 89.4 | fasciclin-like arabinogalactan protein gbpln 15 | Arabidopsis thaliana | AT3G52370.1   Symbols: FLA15   FASCICLIN-like arabinogalactan protein 15 precursor   chr3:19417549-19419549 FORWARD LENGTH=436 | 436  | 436  | 0         | 100.0 | 85.3 | 89.4  |  |  |  |
| Rsa1.0_00811.1.g19808.t1 | refXP_002876141.1 RNA-binding protein cp33 [Arabidopsis lyrata subsp. lyrata]<br>gi 297321978 gb EFH52400.1 RNA-binding protein cp33 [Arabidopsis lyrata subsp. lyrata]                                                                                                                                                                                                                                                                                                                                                                           | 310  | 330  | 1.00E-118 | 106.5 | 73.5 | 81.0 | RNA-binding protein cp33                        | Arabidopsis lyrata   | AT3G52380.1   Symbols: CP33, PDE322   chloroplast RNA-binding protein 33   chr3:19421619-19422855 FORWARD LENGTH=329           | 310  | 329  | 1.00E-119 | 106.1 | 74.2 | 81.9  |  |  |  |
| Rsa1.0_00811.1.g19809.t1 | gb EOA24396.1 hypothetical protein CARUB_v10017645mg [Capsella rubella]                                                                                                                                                                                                                                                                                                                                                                                                                                                                           | 302  | 323  | 1.00E-165 | 107.0 | 90.4 | 94.7 | hypothetical protein CARUB_v10017645mg          | Capsella rubella     | AT3G52390.2   Symbols:   TatD related DNase   chr3:19423105-19425183 REVERSE LENGTH=323                                        | 302  | 323  | 1.00E-165 | 107.0 | 89.7 | 94.0  |  |  |  |
| Rsa1.0_00811.1.g19810.t1 | dbj BAJ33859.1 unnamed protein product [Theilingiella halophila]                                                                                                                                                                                                                                                                                                                                                                                                                                                                                  | 345  | 343  | 1.00E-159 | 99.4  | 87.8 | 93.9 | unnamed protein product                         | ----                 | AT3G52400.1   Symbols: SYP122, AT5YP122   syntxin of plants 122   chr3:19425835-19427032 REVERSE LENGTH=341                    | 345  | 341  | 1.00E-144 | 98.8  | 81.7 | 90.1  |  |  |  |
| Rsa1.0_00811.1.g19811.t1 | refXP_002876143.1 phytoalexin deficient 4 [Arabidopsis lyrata subsp. lyrata]<br>gi 297321981 gb EFH52400.1 phytoalexin deficient 4 [Arabidopsis lyrata subsp. lyrata]                                                                                                                                                                                                                                                                                                                                                                             | 433  | 542  | 1.00E-164 | 125.2 | 69.7 | 77.8 | phytoalexin deficient 4                         | gbpln                | AT3G52430.1   Symbols: PAD4, ATPAD4   alpha/beta-Hydrolases superfamily protein   chr3:19431566-19434292 FORWARD LENGTH=541    | 433  | 541  | 1.00E-164 | 124.9 | 69.3 | 76.9  |  |  |  |
| Rsa1.0_00811.1.g19812.t1 | gb AAD19784.1 putative retroelement pol polyprotein [Arabidopsis thaliana]                                                                                                                                                                                                                                                                                                                                                                                                                                                                        | 209  | 1501 | 2.00E-55  | 718.2 | 51.7 | 65.1 | putative retroelement pol polyprotein           | gbpln                | AT4G23160.1   Symbols: CRK8   cysteine-rich RLK (RECEPTOR-like protein kinase) 8   chr4:12129485-12134086 FORWARD LENGTH=1262  | 209  | 1262 | 8.00E-26  | 603.8 | 23.9 | 40.7  |  |  |  |
| Rsa1.0_00811.1.g19813.t1 | dbj BAJ34414.1 unnamed protein product [Theilingiella halophila]                                                                                                                                                                                                                                                                                                                                                                                                                                                                                  | 424  | 435  | 0         | 102.6 | 91.3 | 96.0 | unnamed protein product                         | ----                 | AT3G52450.1   Symbols: PUB22   plant U-box 22   chr3:19440943-19442250 REVERSE LENGTH=435                                      | 424  | 435  | 0         | 102.6 | 88.0 | 94.1  |  |  |  |
| Rsa1.0_00812.1.g19814.t1 | emb CAA79989.2 myrosinase, thioglucoside glucohydrolase [Brassica napus]                                                                                                                                                                                                                                                                                                                                                                                                                                                                          | 522  | 527  | 0         | 101.0 | 79.5 | 86.2 | myrosinase, thioglucoside glucohydrolase        | gbpln                | AT5G26000.1   Symbols: TGG1, BGLU38   thioglucoside glucohydrolase 1   chr5:9079678-9082347 REVERSE LENGTH=541                 | 522  | 541  | 0         | 103.6 | 68.2 | 78.2  |  |  |  |
| Rsa1.0_00812.1.g19815.t1 | gb EOA30088.1 hypothetical protein CARUB_v10013195mg [Capsella rubella]                                                                                                                                                                                                                                                                                                                                                                                                                                                                           | 607  | 636  | 0         | 104.8 | 72.7 | 76.1 | hypothetical protein CARUB_v10013195mg          | gbpln                | AT3G22330.1   Symbols: PMH2, ATRH53   putative mitochondrial RNA helicase 2   chr3:7892641-7895145 FORWARD LENGTH=616          | 607  | 616  | 0         | 101.5 | 81.1 | 86.8  |  |  |  |
| Rsa1.0_00812.1.g19816.t1 | refNP_188875.1 alternative oxidase 1B [Arabidopsis thaliana]<br>gi 3913143 sp O23913.1 AOX1B_ARATH<br>RecName: Full=Ubiquinol oxidase 1b, mitochondrial; AltName: Full=Alternative oxidase 1b; Flags: Precursor<br>gi 2506082 dbj BAA22624.1 alternative oxidase [Arabidopsis thaliana]<br>gi 9293871 dbj BAB01774.1 alternative oxidase 1b precursor [Arabidopsis thaliana]<br>gi 67633654 gb AAAY7875.1 mitochondrial alternative oxidase 1b [Arabidopsis thaliana]<br>gi 332643105 gb AEE76626.1 alternative oxidase 1B [Arabidopsis thaliana] | 332  | 325  | 1.00E-165 | 97.9  | 87.3 | 90.7 | alternative oxidase 1B                          | gbpln                | AT3G22360.1   Symbols: AOX1B   alternative oxidase 1B   chr3:7904156-7905384 FORWARD LENGTH=325                                | 332  | 325  | 1.00E-167 | 97.9  | 87.3 | 90.7  |  |  |  |
| Rsa1.0_00812.1.g19817.t1 | gb ABA96452.1 GRF zinc finger family protein [Oryza sativa Japonica Group]                                                                                                                                                                                                                                                                                                                                                                                                                                                                        | 73   | 278  | 4.00E-35  | 380.8 | 97.3 | 98.6 | GRF zinc finger family protein                  | gbpln                | AT5G42300.1   Symbols: UBL5   ubiquitin-like protein 5   chr5:16913611-16913832 REVERSE LENGTH=73                              | 73   | 73   | 2.00E-36  | 100.0 | 98.6 | 100.0 |  |  |  |
| Rsa1.0_00812.1.g19818.t1 | #                                                                                                                                                                                                                                                                                                                                                                                                                                                                                                                                                 | #    | #    | #         | #     | #    | -    | ----                                            | ----                 | #                                                                                                                              | #    | #    | #         | #     | #    | #     |  |  |  |
| Rsa1.0_00812.1.g19819.t1 | #                                                                                                                                                                                                                                                                                                                                                                                                                                                                                                                                                 | #    | #    | #         | #     | #    | -    | ----                                            | ----                 | #                                                                                                                              | #    | #    | #         | #     | #    | #     |  |  |  |
| Rsa1.0_00812.1.g19820.t1 | refXP_002883360.1 time for coffee [Arabidopsis lyrata subsp. lyrata]<br>gi 297329200 gb EFH59619.1 time for coffee [Arabidopsis lyrata subsp. lyrata]                                                                                                                                                                                                                                                                                                                                                                                             | 1509 | 1550 | 0         | 102.7 | 76.0 | 82.7 | time for coffee                                 | gbpln                | AT3G22380.1   Symbols: TIC   time for coffee   chr3:7913181-7918879 FORWARD LENGTH=1550                                        | 1509 | 1550 | 0         | 102.7 | 75.7 | 82.9  |  |  |  |

|                          |                                                                                                                                                                                                                                                                                                                                                                                                                                                                                                                                                                                                                                                                                                                                                                                                                                                                                                      |      |      |          |       |      |      |                                                                           |       |                      |                                                                                                                                                                                                                                                                                                                                                                                                                                                                                                                                                                  |      |      |          |       |      |      |
|--------------------------|------------------------------------------------------------------------------------------------------------------------------------------------------------------------------------------------------------------------------------------------------------------------------------------------------------------------------------------------------------------------------------------------------------------------------------------------------------------------------------------------------------------------------------------------------------------------------------------------------------------------------------------------------------------------------------------------------------------------------------------------------------------------------------------------------------------------------------------------------------------------------------------------------|------|------|----------|-------|------|------|---------------------------------------------------------------------------|-------|----------------------|------------------------------------------------------------------------------------------------------------------------------------------------------------------------------------------------------------------------------------------------------------------------------------------------------------------------------------------------------------------------------------------------------------------------------------------------------------------------------------------------------------------------------------------------------------------|------|------|----------|-------|------|------|
| Rsa1.0_00812.1.g19821.t1 | refNP_188879.2   lipoxigenase 5 [Arabidopsis thaliana]   g 254810223 sp Q9LUW0.2 LOX5_ARAT H RecName: Full=Lipoate 9S-lipoxygenase 5, chloroplastic; AltName: Full=Lipoxygenase 5; Short=AtLOX5   g 332643109 gb AEE76630.1   lipoxigenase 5 [Arabidopsis thaliana]                                                                                                                                                                                                                                                                                                                                                                                                                                                                                                                                                                                                                                  | 765  | 886  | 0        | 115.8 | 92.4 | 96.5 | lipoxigenase 5                                                            | gbpln | Arabidopsis thaliana | AT3G22400.1   Symbols: LOX5   PLAT/LH2 domain-containing lipoxigenase family protein   chr3:7927011-7931167 FORWARD LENGTH=886                                                                                                                                                                                                                                                                                                                                                                                                                                   | 765  | 886  | 0        | 115.8 | 92.4 | 96.5 |
| Rsa1.0_00812.1.g19822.t1 | refXP_002885501.1   hypothetical protein ARALYDRAFT_479753 [Arabidopsis lyrata subsp. lyrata]   g 297331341 gb EFH61760.1   hypothetical protein ARALYDRAFT_479753 [Arabidopsis lyrata subsp. lyrata]                                                                                                                                                                                                                                                                                                                                                                                                                                                                                                                                                                                                                                                                                                | 399  | 400  | 0        | 100.3 | 81.5 | 89.7 | hypothetical protein ARALYDRAFT_479753                                    | gbpln | Arabidopsis lyrata   | AT3G22410.1   Symbols:   Sec14p-like phosphatidylinositol transfer family protein   chr3:7933328-7935664 REVERSE LENGTH=400                                                                                                                                                                                                                                                                                                                                                                                                                                      | 399  | 400  | 0        | 100.3 | 81.7 | 89.2 |
| Rsa1.0_00813.1.g19823.t1 | gb AAD32898.1   putative retroelement pol polyprotein [Arabidopsis thaliana]                                                                                                                                                                                                                                                                                                                                                                                                                                                                                                                                                                                                                                                                                                                                                                                                                         | 1352 | 1307 | 0        | 96.7  | 60.9 | 75.1 | putative retroelement pol polyprotein                                     | gbpln | Arabidopsis thaliana | AT4G23160.1   Symbols: CRK8   cysteine-rich RLK (RECEPTOR-like protein kinase) 8   chr4:12129485-12134086 FORWARD LENGTH=1262                                                                                                                                                                                                                                                                                                                                                                                                                                    | 1352 | 1262 | 1.00E-97 | 93.3  | 13.7 | 22.1 |
| Rsa1.0_00813.1.g19824.t1 | gb EOA38591.1   hypothetical protein CARUB_v10010434mg [Capsella rubella]                                                                                                                                                                                                                                                                                                                                                                                                                                                                                                                                                                                                                                                                                                                                                                                                                            | 176  | 177  | 1.00E-62 | 100.6 | 65.3 | 75.0 | hypothetical protein CARUB_v10010434mg                                    | gbpln | Capsella rubella     | AT1G09370.1   Symbols:   Plant invertase/pectin methylesterase inhibitor superfamily protein   chr1:3024901-3025425 FORWARD LENGTH=174                                                                                                                                                                                                                                                                                                                                                                                                                           | 176  | 174  | 2.00E-62 | 98.9  | 61.9 | 76.1 |
| Rsa1.0_00813.1.g19825.t1 | ref NP_172407.1   plant invertase/pectin methylesterase inhibitor domain-containing protein [Arabidopsis thaliana]   g 348291.1   gb AAC33196.1   Hypothetical protein [Arabidopsis thaliana]   g 332190312   gb AEE28433.1   plant invertase/pectin methylesterase inhibitor domain-containing protein [Arabidopsis thaliana]                                                                                                                                                                                                                                                                                                                                                                                                                                                                                                                                                                       | 138  | 188  | 2.00E-23 | 136.2 | 41.3 | 53.6 | plant invertase/pectin methylesterase inhibitor domain-containing protein | gbpln | Arabidopsis thaliana | AT1G09360.1   Symbols:   Plant invertase/pectin methylesterase inhibitor superfamily protein   chr1:3021802-3022368 FORWARD LENGTH=188                                                                                                                                                                                                                                                                                                                                                                                                                           | 138  | 188  | 6.00E-26 | 136.2 | 41.3 | 53.6 |
| Rsa1.0_00813.1.g19826.t1 | dbj BAJ33886.1   unnamed protein product [Theilungiella halophila]                                                                                                                                                                                                                                                                                                                                                                                                                                                                                                                                                                                                                                                                                                                                                                                                                                   | 378  | 379  | 0        | 100.3 | 97.9 | 99.5 | unnamed protein product                                                   | ----  | ----                 | AT1G09340.1   Symbols: CRB, CSP41B, HIP1.3   chloroplast RNA binding   chr1:3015473-3018035 FORWARD LENGTH=378                                                                                                                                                                                                                                                                                                                                                                                                                                                   | 378  | 378  | 0        | 100.0 | 97.1 | 98.7 |
| Rsa1.0_00813.1.g19827.t2 | gb EOA39357.1   hypothetical protein CARUB_v10012409mg [Capsella rubella]                                                                                                                                                                                                                                                                                                                                                                                                                                                                                                                                                                                                                                                                                                                                                                                                                            | 183  | 185  | 6.00E-97 | 101.1 | 98.4 | 98.9 | hypothetical protein CARUB_v10012409mg                                    | gbpln | Capsella rubella     | AT1G09330.1   Symbols:   unknown protein; FUNCTIONS IN: molecular_function unknown; INVOLVED IN: biological_process unknown; LOCATED IN: integral to membrane; EXPRESSED IN: 24 plant structures; EXPRESSED DURING: 15 growth stages; CONTAINS InterPro DOMAIN/s: Protein of unknown function DUF846, eukaryotic (InterPro:IPR008564); Has 518 Blast hits to 518 proteins in 206 species: Archae - 0; Bacteria - 0; Metazoa - 193; Fungi - 145; Plants - 73; Viruses - 0; Other Eukaryotes - 107 (source: NCBI BLINK).   chr1:3013003-3014903 REVERSE LENGTH=186 | 183  | 186  | 3.00E-99 | 101.6 | 98.4 | 98.9 |
| Rsa1.0_00813.1.g19828.t1 | refXP_002892499.1   agenet domain-containing protein [Arabidopsis lyrata subsp. lyrata]   g 297338341   gb EFH68758.1   agenet domain-containing protein [Arabidopsis lyrata subsp. lyrata]   ref NP_563841.1   uncharacterized protein [Arabidopsis thaliana]   g 13194796   gb AAK15560.1   AF348589.1 unknown protein [Arabidopsis thaliana]   g 4337175   gb AAD18096.1   ESTs   gb T20589. gb T04648. gb AA597906. gb T04111. gb R84180. gb R65428. gb T44439. gb T76570. gb R90004. gb T45020. gb T42457. gb T20921. gb AA042762 and gb AA720210 come from this gene [Arabidopsis thaliana]   g 15028183   gb AAK76588.1   unknown protein [Arabidopsis thaliana]   g 19310813   gb AAL85137.1   unknown protein [Arabidopsis thaliana]   g 21536763   gb AAM61095.1   unknown [Arabidopsis thaliana]   g 332190307   gb AEE28428.1   uncharacterized protein AT1G09310 [Arabidopsis thaliana] | 516  | 518  | 0        | 100.4 | 71.3 | 83.3 | agenet domain-containing protein                                          | gbpln | Arabidopsis lyrata   | AT1G09320.1   Symbols:   agenet domain-containing protein   chr1:3010270-3012228 REVERSE LENGTH=517                                                                                                                                                                                                                                                                                                                                                                                                                                                              | 516  | 517  | 0        | 100.2 | 69.6 | 82.8 |
| Rsa1.0_00813.1.g19829.t1 | gb AA042762 and gb AA720210 come from this gene [Arabidopsis thaliana]   g 15028183   gb AAK76588.1   unknown protein [Arabidopsis thaliana]   g 19310813   gb AAL85137.1   unknown protein [Arabidopsis thaliana]   g 21536763   gb AAM61095.1   unknown [Arabidopsis thaliana]   g 332190307   gb AEE28428.1   uncharacterized protein AT1G09310 [Arabidopsis thaliana]                                                                                                                                                                                                                                                                                                                                                                                                                                                                                                                            | 184  | 179  | 2.00E-73 | 97.3  | 82.6 | 88.6 | uncharacterized protein                                                   | gbpln | Arabidopsis thaliana | AT1G09310.1   Symbols:   Protein of unknown function, DUF538   chr1:3009109-3009648 FORWARD LENGTH=179                                                                                                                                                                                                                                                                                                                                                                                                                                                           | 184  | 179  | 7.00E-76 | 97.3  | 82.6 | 88.6 |



|                          |                                                                                                                                                                                                                                                                                                                                                                                                                                                                                                                                                 |     |     |           |       |      |      |                                                        |       |                      |                                                                                                                                                                                                                                                                                                                                                                                                                                                                                                 |     |     |           |       |      |      |
|--------------------------|-------------------------------------------------------------------------------------------------------------------------------------------------------------------------------------------------------------------------------------------------------------------------------------------------------------------------------------------------------------------------------------------------------------------------------------------------------------------------------------------------------------------------------------------------|-----|-----|-----------|-------|------|------|--------------------------------------------------------|-------|----------------------|-------------------------------------------------------------------------------------------------------------------------------------------------------------------------------------------------------------------------------------------------------------------------------------------------------------------------------------------------------------------------------------------------------------------------------------------------------------------------------------------------|-----|-----|-----------|-------|------|------|
| Rsa1.0_00813.1.g19830.t1 | ref NP_563840.1  uncharacterized protein [Arabidopsis thaliana] gi 75164945 sp Q94AC1.1 STR6 ARATH RecName: Full=Rhodanese-like domain-containing protein 6; AltName: Full=Sulfurtransferase 6; Short=AtStr6 gi 15081791 gb AAK82550.1  At1g09280/T12M4.1 [Arabidopsis thaliana] gi 133778874 gb ABO38777.1  At1g09280 [Arabidopsis thaliana] gi 332190303 gb AEE28424.1  uncharacterized protein AT1G09280 [Arabidopsis thaliana]                                                                                                              | 593 | 581 | 0         | 98.0  | 88.9 | 92.9 | uncharacterized protein                                | gbpln | Arabidopsis thaliana | AT1G09280.1   Symbols:   CONTAINS InterPro DOMAIN/s: Rhodanese-like (InterPro:IPR001763), Serine hydrolase (InterPro:IPR005645); BEST Arabidopsis thaliana protein match is: Rhodanese/Cell cycle control phosphatase superfamily protein (TAIR:AT2G40760.1); Has 5925 Blast hits to 5912 proteins in 1592 species: Archae - 0; Bacteria - 2946; Metazoa - 156; Fungi - 408; Plants - 229; Viruses - 0; Other Eukaryotes - 2186 (source: NCBI ELink).   chr1:2998209-3001253 REVERSE LENGTH=581 | 593 | 581 | 0         | 98.0  | 88.9 | 92.9 |
| Rsa1.0_00813.1.g19831.t1 | gb ABO21639.1  importin alpha-like protein [Brassica napus] gi 126572504 gb ABO21640.1  importin alpha-like protein [Brassica napus] ref NP_172397.1  Chaperone DnaJ-domain-containing protein [Arabidopsis thaliana] gi 3249097 gb AAC24080.1  Contains similarity to DnaJ homologue gb D84222 from Thermus thermophilus [Arabidopsis thaliana] gi 332190299 gb AEE28420.1  Chaperone DnaJ-domain-containing protein [Arabidopsis thaliana]                                                                                                    | 538 | 542 | 0         | 100.7 | 97.2 | 98.9 | importin alpha-like protein                            | gbpln | Brassica napus       | AT1G09270.2   Symbols: IMPA-4   importin alpha isoform 4   chr1:2994506-2997833 FORWARD LENGTH=538                                                                                                                                                                                                                                                                                                                                                                                              | 538 | 538 | 0         | 100.0 | 93.3 | 96.5 |
| Rsa1.0_00813.1.g19832.t1 | ref NP_172397.1  Chaperone DnaJ-domain-containing protein [Arabidopsis thaliana] gi 3249097 gb AAC24080.1  Contains similarity to DnaJ homologue gb D84222 from Thermus thermophilus [Arabidopsis thaliana] gi 332190299 gb AEE28420.1  Chaperone DnaJ-domain-containing protein [Arabidopsis thaliana]                                                                                                                                                                                                                                         | 169 | 138 | 8.00E-25  | 81.7  | 37.9 | 53.8 | Chaperone DnaJ-domain-containing protein               | gbpln | Arabidopsis thaliana | AT1G09260.1   Symbols:   Chaperone DnaJ-domain superfamily protein   chr1:2993404-2993820 FORWARD LENGTH=138                                                                                                                                                                                                                                                                                                                                                                                    | 169 | 138 | 3.00E-27  | 81.7  | 37.9 | 53.8 |
| Rsa1.0_00813.1.g19833.t1 | #                                                                                                                                                                                                                                                                                                                                                                                                                                                                                                                                               | #   | #   | #         | #     | #    | #    | -                                                      | ----  | ----                 | #                                                                                                                                                                                                                                                                                                                                                                                                                                                                                               | #   | #   | #         | #     | #    |      |
| Rsa1.0_00813.1.g19834.t1 | ref NP_567745.1  antitermination NusB domain-containing protein [Arabidopsis thaliana] gi 15450968 gb AAK96755.1  putative protein [Arabidopsis thaliana] gi 30984514 gb AAP42720.1  At4g26370 [Arabidopsis thaliana] gi 332659789 gb AEE85189.1  antitermination NusB domain-containing protein [Arabidopsis thaliana]                                                                                                                                                                                                                         | 175 | 301 | 4.00E-51  | 172.0 | 68.0 | 72.6 | antitermination NusB domain-containing protein         | gbpln | Arabidopsis thaliana | AT4G26370.1   Symbols:   antitermination NusB domain-containing protein   chr4:13334099-13336153 REVERSE LENGTH=301                                                                                                                                                                                                                                                                                                                                                                             | 175 | 301 | 2.00E-53  | 172.0 | 68.0 | 72.6 |
| Rsa1.0_00813.1.g19835.t1 | ref XP_002889739.1  hypothetical protein ARALYDRAFT.471014 [Arabidopsis lyrata subsp. lyrata] gi 297335581 gb EFH65998.1  hypothetical protein ARALYDRAFT.471014 [Arabidopsis lyrata subsp. lyrata]                                                                                                                                                                                                                                                                                                                                             | 121 | 198 | 3.00E-20  | 163.6 | 56.2 | 59.5 | hypothetical protein ARALYDRAFT.471014                 | gbpln | Arabidopsis lyrata   | AT1G09250.1   Symbols:   basic helix-loop-helix (bHLH) DNA-binding superfamily protein   chr1:2995909-2990132 FORWARD LENGTH=207                                                                                                                                                                                                                                                                                                                                                                | 121 | 207 | 1.00E-22  | 171.1 | 56.2 | 59.5 |
| Rsa1.0_00813.1.g19836.t1 | emb CAC82913.1  nicotianamine synthase [Noccaea caerulescens]                                                                                                                                                                                                                                                                                                                                                                                                                                                                                   | 322 | 321 | 1.00E-164 | 99.7  | 89.1 | 93.8 | nicotianamine synthase                                 | gbpln | Noccaea caerulescens | AT1G09240.1   Symbols: NAS3, ATNAS3   nicotianamine synthase 3   chr1:2984950-2985912 FORWARD LENGTH=320                                                                                                                                                                                                                                                                                                                                                                                        | 322 | 320 | 1.00E-160 | 99.4  | 85.7 | 91.0 |
| Rsa1.0_00813.1.g19837.t1 | ref NP_172394.1  U11/U12 small nuclear ribonucleoprotein 65 kDa protein [Arabidopsis thaliana] gi 20258828 gb AAM13896.1  unknown protein [Arabidopsis thaliana] gi 21689717 gb AAM67480.1  unknown protein [Arabidopsis thaliana] gi 332190295 gb AEE28416.1  RNA-binding (RRM/RBD/RNP motifs) family protein [Arabidopsis thaliana] gb AAM63796.1  putative calcium-binding protein, calreticulin [Arabidopsis thaliana]                                                                                                                      | 448 | 442 | 0         | 98.7  | 85.3 | 90.2 | U11/U12 small nuclear ribonucleoprotein 65 kDa protein | gbpln | Arabidopsis thaliana | AT1G09230.1   Symbols:   RNA-binding (RRM/RBD/RNP motifs) family protein   chr1:2979637-2982563 REVERSE LENGTH=442                                                                                                                                                                                                                                                                                                                                                                              | 448 | 442 | 0         | 98.7  | 85.3 | 90.2 |
| Rsa1.0_00813.1.g19838.t1 | gb EAO34021.1  hypothetical protein CARUB_v10021517mg, partial [Capsella rubella]                                                                                                                                                                                                                                                                                                                                                                                                                                                               | 193 | 205 | 1.00E-104 | 106.2 | 95.3 | 97.4 | hypothetical protein CARUB_v10021517mg, partial        | gbpln | Capsella rubella     | AT1G09210.1   Symbols: CRT1b, AtCRT1b   calreticulin 1b   chr1:2973217-2976655 REVERSE LENGTH=424                                                                                                                                                                                                                                                                                                                                                                                               | 423 | 424 | 0         | 100.2 | 92.4 | 95.0 |
| Rsa1.0_00813.1.g19839.t1 | gb EAO34021.1  hypothetical protein CARUB_v10021517mg, partial [Capsella rubella]                                                                                                                                                                                                                                                                                                                                                                                                                                                               | 193 | 205 | 1.00E-104 | 106.2 | 95.3 | 97.4 | hypothetical protein CARUB_v10021517mg, partial        | gbpln | Capsella rubella     | AT1G56330.1   Symbols: SAR1, ATSAR1, ATSARA1B, ATSAR1B, SAR1B   secretion-associated RAS 1B   chr1:21086845-21088478 REVERSE LENGTH=193                                                                                                                                                                                                                                                                                                                                                         | 193 | 193 | 1.00E-106 | 100.0 | 95.3 | 97.4 |
| Rsa1.0_00813.1.g19840.t1 | ref NP_172391.2  pentatricopeptide repeat-containing protein [Arabidopsis thaliana] gi 75099767 sp O80488.1 PPR23 ARATH RecName: Full=Pentatricopeptide repeat-containing protein At1g09190 gi 3249103 gb AAC24086.1  Contains similarity to membrane-associated salt-inducible protein homolog TM021B04.10 gb 2191192 from A. thaliana BAC gb AF007271 [Arabidopsis thaliana] gi 28393182 gb AAO42022.1  unknown protein [Arabidopsis thaliana] gi 332190289 gb AEE28410.1  pentatricopeptide repeat-containing protein [Arabidopsis thaliana] | 685 | 484 | 0         | 70.7  | 62.0 | 66.4 | pentatricopeptide repeat-containing protein            | gbpln | Arabidopsis thaliana | AT1G09190.1   Symbols:   Tetratricopeptide repeat (TPR)-like superfamily protein   chr1:2966263-2967717 REVERSE LENGTH=484                                                                                                                                                                                                                                                                                                                                                                      | 685 | 484 | 0         | 70.7  | 62.0 | 66.4 |

|                          |                                                                                                                                                                                                                                                                                                             |      |      |           |       |      |      |                                                         |       |                      |                                                                                                                                                                       |      |      |          |       |      |      |
|--------------------------|-------------------------------------------------------------------------------------------------------------------------------------------------------------------------------------------------------------------------------------------------------------------------------------------------------------|------|------|-----------|-------|------|------|---------------------------------------------------------|-------|----------------------|-----------------------------------------------------------------------------------------------------------------------------------------------------------------------|------|------|----------|-------|------|------|
| Rsa1.0_00813.1.g19841.t1 | ref XP_002892485.1  phloem protein 2-B15 [Arabidopsis lyrata subsp. lyrata] gi 297338327 gb EFH68744.1  phloem protein 2-B15 [Arabidopsis lyrata subsp. lyrata]                                                                                                                                             | 58   | 289  | 4.00E-19  | 498.3 | 75.9 | 82.8 | phloem protein 2-B15                                    | gbpln | Arabidopsis lyrata   | AT1G09155.1   Symbols: AtPP2-B15, PP2-B15   phloem protein 2-B15   chr1:2949831-2950842 REVERSE LENGTH=289                                                            | 58   | 289  | 1.00E-20 | 498.3 | 72.4 | 79.3 |
| Rsa1.0_00814.1.g19842.t1 | ref XP_002865861.1  hypothetical protein ARALYDRAFT_495214 [Arabidopsis lyrata subsp. lyrata] gi 297311696 gb EFH42120.1  hypothetical protein ARALYDRAFT_495214 [Arabidopsis lyrata subsp. lyrata]                                                                                                         | 787  | 836  | 0         | 106.2 | 94.8 | 97.7 | hypothetical protein ARALYDRAFT_495214                  | gbpln | Arabidopsis lyrata   | AT5G51430.1   Symbols: EYE   conserved oligomeric Golgi complex component-related / COG complex component-related   chr5:20887044-20890795 REVERSE LENGTH=836         | 787  | 836  | 0        | 106.2 | 94.8 | 97.5 |
| Rsa1.0_00814.1.g19843.t1 | #                                                                                                                                                                                                                                                                                                           | #    | #    | #         | #     | #    | -    | ----                                                    | ----  | #                    | #                                                                                                                                                                     | #    | #    | #        | #     | #    | #    |
| Rsa1.0_00814.1.g19844.t1 | #                                                                                                                                                                                                                                                                                                           | #    | #    | #         | #     | #    | -    | ----                                                    | ----  | #                    | #                                                                                                                                                                     | #    | #    | #        | #     | #    | #    |
| Rsa1.0_00814.1.g19845.t1 | #                                                                                                                                                                                                                                                                                                           | #    | #    | #         | #     | #    | -    | ----                                                    | ----  | #                    | #                                                                                                                                                                     | #    | #    | #        | #     | #    | #    |
| Rsa1.0_00814.1.g19846.t1 | gb AAG10817.1 AC011808_5 Putative retroelement polyprotein [Arabidopsis thaliana]                                                                                                                                                                                                                           | 1171 | 1413 | 0         | 120.7 | 49.4 | 65.8 | Putative retroelement polyprotein                       | gbpln | Arabidopsis thaliana | AT4G23160.1   Symbols: CRK8   cysteine-rich RLK (RECEPTOR-like protein kinase) 8   chr4:12129485-12134086 FORWARD LENGTH=1262                                         | 1171 | 1262 | 1.00E-96 | 107.8 | 15.5 | 21.5 |
| Rsa1.0_00814.1.g19847.t3 | dbj BAB09379.1  non-LTR retroelement reverse transcriptase-like protein [Arabidopsis thaliana]                                                                                                                                                                                                              | 1354 | 1223 | 0         | 90.3  | 38.8 | 52.2 | non-LTR retroelement reverse transcriptase-like protein | gbpln | Arabidopsis thaliana | AT3G24255.1   Symbols:   RNA-directed DNA polymerase (reverse transcriptase)-related family protein   chr3:8789471-8793208 FORWARD LENGTH=746                         | 1354 | 746  | 2.00E-90 | 55.1  | 12.7 | 17.4 |
| Rsa1.0_00814.1.g19848.t3 | ref NP_174400.1  uncharacterized protein [Arabidopsis thaliana] gi 4512629 gb AAD21698.1  EST gb Z33866 comes from this gene [Arabidopsis thaliana] gi 332193197 gb AEE31318.1  uncharacterized protein AT1G31150 [Arabidopsis thaliana]                                                                    | 547  | 673  | 5.00E-53  | 123.0 | 23.2 | 32.2 | uncharacterized protein                                 | gbpln | Arabidopsis thaliana | AT1G31150.1   Symbols:   Domain of unknown function (DUF1985)   chr1:11120097-11122412 FORWARD LENGTH=673                                                             | 547  | 673  | 1.00E-55 | 123.0 | 23.2 | 32.2 |
| Rsa1.0_00814.1.g19849.t1 | #                                                                                                                                                                                                                                                                                                           | #    | #    | #         | #     | #    | -    | ----                                                    | ----  | #                    | #                                                                                                                                                                     | #    | #    | #        | #     | #    | #    |
| Rsa1.0_00814.1.g19850.t1 | #                                                                                                                                                                                                                                                                                                           | #    | #    | #         | #     | #    | -    | ----                                                    | ----  | #                    | #                                                                                                                                                                     | #    | #    | #        | #     | #    | #    |
| Rsa1.0_00815.1.g19851.t1 | #                                                                                                                                                                                                                                                                                                           | #    | #    | #         | #     | #    | -    | ----                                                    | ----  | #                    | #                                                                                                                                                                     | #    | #    | #        | #     | #    | #    |
| Rsa1.0_00815.1.g19852.t1 | ref XP_002863741.1  hypothetical protein ARALYDRAFT_917455 [Arabidopsis lyrata subsp. lyrata] gi 297309576 gb EFH40000.1  hypothetical protein ARALYDRAFT_917455 [Arabidopsis lyrata subsp. lyrata]                                                                                                         | 239  | 390  | 5.00E-28  | 163.2 | 34.3 | 49.4 | hypothetical protein ARALYDRAFT_917455                  | gbpln | Arabidopsis lyrata   | AT1G43730.1   Symbols:   RNA-directed DNA polymerase (reverse transcriptase)-related family protein   chr1:16508723-16509784 REVERSE LENGTH=320                       | 239  | 320  | 2.00E-19 | 133.9 | 30.5 | 49.4 |
| Rsa1.0_00815.1.g19853.t1 | gb ABS11038.1  MYC [Brassica oleracea var. gemmifera]                                                                                                                                                                                                                                                       | 568  | 610  | 0         | 107.4 | 85.0 | 90.7 | MYC                                                     | gbpln | Brassica oleracea    | AT1G32640.1   Symbols: ATMYC2, RD22BP1, JAI1, JIN1, MYC2, ZBF1   Basic helix-loop-helix (bHLH) DNA-binding family protein   chr1:11799042-11800913 REVERSE LENGTH=623 | 568  | 623  | 0        | 109.7 | 83.3 | 89.1 |
| Rsa1.0_00815.1.g19854.t1 | gb AAG51783.1 AC079679_3 reverse transcriptase, putative; 16838-20266 [Arabidopsis thaliana]                                                                                                                                                                                                                | 808  | 1142 | 1.00E-164 | 141.3 | 34.9 | 42.6 | reverse transcriptase, putative; 16838-20266            | gbpln | Arabidopsis thaliana | AT4G29090.1   Symbols:   Ribonuclease H-like superfamily protein   chr4:14333528-14335255 FORWARD LENGTH=575                                                          | 808  | 575  | 1.00E-39 | 71.2  | 13.9 | 23.6 |
| Rsa1.0_00815.1.g19855.t1 | #                                                                                                                                                                                                                                                                                                           | #    | #    | #         | #     | #    | -    | ----                                                    | ----  | #                    | #                                                                                                                                                                     | #    | #    | #        | #     | #    | #    |
| Rsa1.0_00815.1.g19856.t1 | #                                                                                                                                                                                                                                                                                                           | #    | #    | #         | #     | #    | -    | ----                                                    | ----  | #                    | #                                                                                                                                                                     | #    | #    | #        | #     | #    | #    |
| Rsa1.0_00815.1.g19857.t1 | ref XP_002893730.1  hypothetical protein ARALYDRAFT_890836 [Arabidopsis lyrata subsp. lyrata] gi 297339572 gb EFH69989.1  hypothetical protein ARALYDRAFT_890836 [Arabidopsis lyrata subsp. lyrata]                                                                                                         | 221  | 219  | 3.00E-50  | 99.1  | 57.9 | 67.4 | hypothetical protein ARALYDRAFT_890836                  | gbpln | Arabidopsis lyrata   | AT1G32585.1   Symbols:   VQ motif-containing protein-related   chr1:11788515-11789177 REVERSE LENGTH=220                                                              | 221  | 220  | 1.00E-44 | 99.5  | 53.8 | 63.8 |
| Rsa1.0_00815.1.g19858.t1 | ref NP_187030.1  syntaxin 1B/2/3 [Arabidopsis thaliana] gi 28380139 sp Q9SRV7.1 SY131_ARAT H RecName: Full=Putative syntaxin-131; Short=ASYP131 gi 6006872 gb AAF00648.1 AC009540_25 s-syntaxin-like protein [Arabidopsis thaliana] gi 33264047 gb AEE73995.1  putative syntaxin-131 [Arabidopsis thaliana] | 109  | 306  | 4.00E-24  | 280.7 | 69.7 | 73.4 | syntaxin 1B/2/3                                         | gbpln | Arabidopsis thaliana | AT3G03800.1   Symbols: SYP131, ATSYP131   syntaxin of plants 131   chr3:969314-971460 FORWARD LENGTH=306                                                              | 109  | 306  | 7.00E-27 | 280.7 | 69.7 | 73.4 |
| Rsa1.0_00815.1.g19859.t1 | gb EOA22467.1  hypothetical protein CARUB_v10003115mg [Capsella rubella]                                                                                                                                                                                                                                    | 102  | 515  | 7.00E-15  | 504.9 | 39.2 | 40.2 | hypothetical protein CARUB_v10003115mg                  | gbpln | Capsella rubella     | AT5G01710.1   Symbols:   methyltransferases   chr5:263709-265250 REVERSE LENGTH=513                                                                                   | 102  | 513  | 2.00E-17 | 502.9 | 39.2 | 40.2 |
| Rsa1.0_00815.1.g19860.t1 | dbj BAB08713.1  unnamed protein product [Arabidopsis thaliana]                                                                                                                                                                                                                                              | 511  | 439  | 1.00E-55  | 85.9  | 18.6 | 25.4 | unnamed protein product                                 | gbpln | Arabidopsis thaliana | AT5G36228.1   Symbols:   nucleic acid binding-zinc ion binding   chr5:14271691-14272776 FORWARD LENGTH=361                                                            | 511  | 361  | 2.00E-17 | 70.6  | 10.8 | 17.4 |

|                          |                                                                                                                                                                                                                                                                                                                                                                                                                                                                                                                                                             |     |     |           |       |      |      |                                                 |       |                      |                                                                                                                                                                                                                                                                                                                                                                                                                                                         |     |     |           |       |      |      |
|--------------------------|-------------------------------------------------------------------------------------------------------------------------------------------------------------------------------------------------------------------------------------------------------------------------------------------------------------------------------------------------------------------------------------------------------------------------------------------------------------------------------------------------------------------------------------------------------------|-----|-----|-----------|-------|------|------|-------------------------------------------------|-------|----------------------|---------------------------------------------------------------------------------------------------------------------------------------------------------------------------------------------------------------------------------------------------------------------------------------------------------------------------------------------------------------------------------------------------------------------------------------------------------|-----|-----|-----------|-------|------|------|
| Rsa1.0_00815.1.g19861.t1 | refNP_174529.2   NAC domain containing protein 11 [Arabidopsis thaliana]<br>gi 8920628 gb AAF81350.1 AC007767.30<br>Contains similarity to a hypothetical protein T6K21.160 gi 7487769 from Arabidopsis thaliana BAC T6K21 gb AL021889 [Arabidopsis thaliana] gi 332193374 gb AEE31495.1   NAC domain containing protein 11 [Arabidopsis thaliana]<br>ref XP_002871263.1   hypothetical protein ARALYDRAFT.487555 [Arabidopsis lyrata subsp. lyrata] gi 297317100 gb EFH47522.1   hypothetical protein ARALYDRAFT.487555 [Arabidopsis lyrata subsp. lyrata] | 326 | 283 | 1.00E-121 | 86.8  | 66.6 | 74.5 | NAC domain containing protein 11                | gbpln | Arabidopsis thaliana | AT1G32510.1   Symbols: ANAC011, NAC011   NAC domain containing protein 11   chr1:11757000-11758118 FORWARD LENGTH=283                                                                                                                                                                                                                                                                                                                                   | 326 | 283 | 1.00E-123 | 86.8  | 66.6 | 74.5 |
| Rsa1.0_00816.1.g19862.t1 | ref XP_002871263.1   hypothetical protein ARALYDRAFT.487555 [Arabidopsis lyrata subsp. lyrata] gi 297317100 gb EFH47522.1   hypothetical protein ARALYDRAFT.487555 [Arabidopsis lyrata subsp. lyrata]                                                                                                                                                                                                                                                                                                                                                       | 588 | 587 | 0         | 99.8  | 85.5 | 92.5 | hypothetical protein ARALYDRAFT.487555          | gbpln | Arabidopsis lyrata   | AT5G07300.1   Symbols: BON2   Calcium-dependent phospholipid-binding Copine family protein   chr5:2299996-2303040 FORWARD LENGTH=586                                                                                                                                                                                                                                                                                                                    | 588 | 586 | 0         | 99.7  | 84.9 | 92.2 |
| Rsa1.0_00816.1.g19863.t1 | gb ABK28684.1   unknown [Arabidopsis thaliana]                                                                                                                                                                                                                                                                                                                                                                                                                                                                                                              | 262 | 264 | 1.00E-106 | 100.8 | 87.0 | 90.1 | unknown                                         | gbpln | Arabidopsis thaliana | AT5G07310.1   Symbols:   Integrase-type DNA-binding superfamily protein   chr5:2305684-2306660 FORWARD LENGTH=263                                                                                                                                                                                                                                                                                                                                       | 262 | 263 | 1.00E-108 | 100.4 | 87.0 | 90.1 |
| Rsa1.0_00816.1.g19864.t1 | dbj BAJ34421.1   unnamed protein product [Theillungiella halophila]                                                                                                                                                                                                                                                                                                                                                                                                                                                                                         | 320 | 355 | 1.00E-132 | 110.9 | 77.8 | 86.3 | unnamed protein product                         | ----  | ----                 | AT5G07690.1   Symbols: MYB29, ATMYB29, PMG2   myb domain protein 29   chr5:2447090-2448285 FORWARD LENGTH=336                                                                                                                                                                                                                                                                                                                                           | 320 | 336 | 1.00E-119 | 105.0 | 70.9 | 80.9 |
| Rsa1.0_00816.1.g19865.t1 | ref XP_002866432.1   hypothetical protein ARALYDRAFT.919384 [Arabidopsis lyrata subsp. lyrata] gi 297312267 gb EFH42691.1   hypothetical protein ARALYDRAFT.919384 [Arabidopsis lyrata subsp. lyrata]                                                                                                                                                                                                                                                                                                                                                       | 317 | 281 | 1.00E-140 | 88.6  | 79.5 | 82.0 | hypothetical protein ARALYDRAFT.919384          | gbpln | Arabidopsis lyrata   | AT5G61410.2   Symbols: RPE   D-ribulose-5-phosphate-3-epimerase   chr5:24684085-24685836 REVERSE LENGTH=281                                                                                                                                                                                                                                                                                                                                             | 317 | 281 | 1.00E-142 | 88.6  | 78.9 | 81.7 |
| Rsa1.0_00816.1.g19866.t1 | ref NP_196388.1   exonuclease family protein [Arabidopsis thaliana] gi 9759593 dbj BAB11450.1   exonuclease-like protein [Arabidopsis thaliana] gi 332003813 gb AED91196.1   exonuclease family protein [Arabidopsis thaliana]                                                                                                                                                                                                                                                                                                                              | 474 | 468 | 0         | 98.7  | 83.5 | 89.7 | exonuclease family protein                      | gbpln | Arabidopsis thaliana | AT5G07710.1   Symbols:   Polynucleotidyl transferase, ribonuclease H-like superfamily protein   chr5:2453310-2455357 FORWARD LENGTH=468                                                                                                                                                                                                                                                                                                                 | 474 | 468 | 0         | 98.7  | 83.5 | 89.7 |
| Rsa1.0_00816.1.g19867.t1 | dbj BAJ34211.1   unnamed protein product [Theillungiella halophila]                                                                                                                                                                                                                                                                                                                                                                                                                                                                                         | 339 | 330 | 1.00E-153 | 97.3  | 85.8 | 90.6 | unnamed protein product                         | ----  | ----                 | AT3G12250.2   Symbols: TGA6, BZIP45   TGACG motif-binding factor 6   chr3:3906351-3908583 FORWARD LENGTH=330                                                                                                                                                                                                                                                                                                                                            | 339 | 330 | 1.00E-150 | 97.3  | 84.1 | 89.4 |
| Rsa1.0_00816.1.g19868.t1 | gb EOA19919.1   hypothetical protein CARUB_v10000169mg, partial [Capsella rubella]                                                                                                                                                                                                                                                                                                                                                                                                                                                                          | 863 | 908 | 0         | 105.2 | 82.7 | 90.0 | hypothetical protein CARUB_v10000169mg, partial | gbpln | Capsella rubella     | AT5G06940.1   Symbols:   Leucine-rich repeat receptor-like protein kinase family protein   chr5:2148078-2150771 REVERSE LENGTH=872                                                                                                                                                                                                                                                                                                                      | 863 | 872 | 0         | 101.0 | 81.5 | 88.6 |
| Rsa1.0_00816.1.g19869.t1 | ref XP_002871241.1   hypothetical protein ARALYDRAFT.487508 [Arabidopsis lyrata subsp. lyrata] gi 297317078 gb EFH47500.1   hypothetical protein ARALYDRAFT.487508 [Arabidopsis lyrata subsp. lyrata]                                                                                                                                                                                                                                                                                                                                                       | 716 | 725 | 0         | 101.3 | 77.1 | 85.3 | hypothetical protein ARALYDRAFT.487508          | gbpln | Arabidopsis lyrata   | AT5G06930.1   Symbols:   LOCATED IN: chloroplast; EXPRESSED IN: 15 plant structures; EXPRESSED DURING: 7 growth stages; BEST Arabidopsis thaliana protein match is: nucleolar protein gar2-related (TAIR:AT2G42320.2); Has 3369 Blast hits to 1526 proteins in 313 species: Archae - 2; Bacteria - 910; Metazoa - 754; Fungi - 336; Plants - 137; Viruses - 11; Other Eukaryotes - 1219 (source: NCBI BLINK).   chr5:2145139-2147849 FORWARD LENGTH=723 | 716 | 723 | 0         | 101.0 | 74.0 | 82.5 |
| Rsa1.0_00816.1.g19870.t2 | gb ABX46555.1   polygalacturonase inhibitor protein 9 [Brassica napus] gi 227345518 gb ACP28177.1   polygalacturonase-inhibiting protein 5 [Brassica rapa subsp. pekinensis] gb AAx68500.1   polygalacturonase inhibiting protein [Brassica rapa subsp. pekinensis]                                                                                                                                                                                                                                                                                         | 325 | 336 | 1.00E-108 | 103.4 | 60.0 | 63.7 | polygalacturonase inhibitor protein 9           | gbpln | Brassica napus       | AT5G06860.1   Symbols: PGIP1, ATPGIP1   polygalacturonase inhibiting protein 1   chr5:2132373-2133434 FORWARD LENGTH=330                                                                                                                                                                                                                                                                                                                                | 325 | 330 | 2.00E-86  | 101.5 | 46.8 | 52.6 |
| Rsa1.0_00816.1.g19871.t1 | gi 160693712 gb ABX46554.1   polygalacturonase inhibitor protein 8 [Brassica napus]                                                                                                                                                                                                                                                                                                                                                                                                                                                                         | 331 | 332 | 1.00E-160 | 100.3 | 84.6 | 88.2 | polygalacturonase inhibiting protein            | gbpln | Brassica napus       | AT5G06860.1   Symbols: PGIP1, ATPGIP1   polygalacturonase inhibiting protein 1   chr5:2132373-2133434 FORWARD LENGTH=330                                                                                                                                                                                                                                                                                                                                | 331 | 330 | 1.00E-140 | 99.7  | 71.3 | 81.6 |
| Rsa1.0_00816.1.g19872.t1 | gb ABX46555.1   polygalacturonase inhibitor protein 9 [Brassica napus] gi 227345518 gb ACP28177.1   polygalacturonase-inhibiting protein 5 [Brassica rapa subsp. pekinensis]                                                                                                                                                                                                                                                                                                                                                                                | 335 | 336 | 1.00E-170 | 100.3 | 88.7 | 93.4 | polygalacturonase inhibitor protein 9           | gbpln | Brassica napus       | AT5G06860.1   Symbols: PGIP1, ATPGIP1   polygalacturonase inhibiting protein 1   chr5:2132373-2133434 FORWARD LENGTH=330                                                                                                                                                                                                                                                                                                                                | 335 | 330 | 1.00E-136 | 98.5  | 69.0 | 79.4 |
| Rsa1.0_00816.1.g19873.t1 | gb ACP28179.1   polygalacturonase-inhibiting protein 4 [Brassica rapa subsp. pekinensis]                                                                                                                                                                                                                                                                                                                                                                                                                                                                    | 334 | 334 | 1.00E-168 | 100.0 | 88.9 | 93.1 | polygalacturonase-inhibiting protein 4          | gbpln | Brassica rapa        | AT5G06860.1   Symbols: PGIP1, ATPGIP1   polygalacturonase inhibiting protein 1   chr5:2132373-2133434 FORWARD LENGTH=330                                                                                                                                                                                                                                                                                                                                | 334 | 330 | 1.00E-144 | 98.8  | 72.8 | 81.4 |

|                          |                                                                                                                                                                                                                                                                                                                                                     |     |      |           |       |      |      |                                                       |       |                      |                                                                                                                                                                                                                                                                                                                                                        |     |      |           |       |      |      |
|--------------------------|-----------------------------------------------------------------------------------------------------------------------------------------------------------------------------------------------------------------------------------------------------------------------------------------------------------------------------------------------------|-----|------|-----------|-------|------|------|-------------------------------------------------------|-------|----------------------|--------------------------------------------------------------------------------------------------------------------------------------------------------------------------------------------------------------------------------------------------------------------------------------------------------------------------------------------------------|-----|------|-----------|-------|------|------|
| Rsa1.0_00816.1.g19874.t1 | gb ABX46551.1  polygalacturonase inhibitor protein 5, partial [Brassica napus]                                                                                                                                                                                                                                                                      | 467 | 331  | 1.00E-179 | 70.9  | 68.5 | 70.0 | polygalacturonase inhibitor protein 5, partial        | gbpln | Brassica napus       | AT5G06860.1   Symbols: PGIP1, ATPGIP1   polygalacturonase inhibiting protein 1   chr5:2132373-2133434 FORWARD LENGTH=330                                                                                                                                                                                                                               | 467 | 330  | 1.00E-160 | 70.7  | 57.0 | 61.9 |
| Rsa1.0_00816.1.g19875.t2 | ref NP_001190244.1  bZIP transcription factor-like protein [Arabidopsis thaliana]   gi 309952051 gb ADO95299.1  bZIP65 [Arabidopsis thaliana]   gi 332003691 gb AED91074.1  bZIP transcription factor-like protein [Arabidopsis thaliana]                                                                                                           | 449 | 460  | 0         | 102.4 | 89.3 | 91.5 | bZIP transcription factor-like protein                | gbpln | Arabidopsis thaliana | AT5G06839.3   Symbols: TGA10, bZIP65   bZIP transcription factor family protein   chr5:2120911-2126217 FORWARD LENGTH=460                                                                                                                                                                                                                              | 449 | 460  | 0         | 102.4 | 89.3 | 91.5 |
| Rsa1.0_00816.1.g19876.t1 | gb EOA22632.1  hypothetical protein CARUB_v10003302mg [Capsella rubella]                                                                                                                                                                                                                                                                            | 547 | 549  | 0         | 100.4 | 89.9 | 94.5 | hypothetical protein CARUB_v10003302mg                | gbpln | Capsella rubella     | AT5G06830.1   Symbols:   unknown protein; CONTAINS InterPro DOMAIN/s: Protein of unknown function DUF773 (InterPro:IPR008491). Has 365 Blast hits to 359 proteins in 109 species: Archae - 9; Bacteria - 13; Metazoa - 209; Fungi - 7; Plants - 47; Viruses - 0; Other Eukaryotes - 80 (source: NCBI BLINK).   chr5:2116882-2119559 REVERSE LENGTH=549 | 547 | 549  | 0         | 100.4 | 89.6 | 94.3 |
| Rsa1.0_00816.1.g19877.t1 | gb EOA20038.1  hypothetical protein CARUB_v10000312mg [Capsella rubella]                                                                                                                                                                                                                                                                            | 754 | 733  | 0         | 97.2  | 84.9 | 90.7 | hypothetical protein CARUB_v10000312mg                | gbpln | Capsella rubella     | AT5G06820.1   Symbols: SRF2   STRUBBELIG-receptor family 2   chr5:2112994-2116663 FORWARD LENGTH=735                                                                                                                                                                                                                                                   | 754 | 735  | 0         | 97.5  | 85.1 | 91.0 |
| Rsa1.0_00816.1.g19878.t1 | ref XP_002871231.1  predicted protein [Arabidopsis lyrata subsp. lyrata]   gi 297317068 gb EFH47490.1  predicted protein [Arabidopsis lyrata subsp. lyrata]                                                                                                                                                                                         | 534 | 1144 | 0         | 214.2 | 71.2 | 83.1 | predicted protein                                     | gbpln | Arabidopsis lyrata   | AT5G06810.1   Symbols:   Mitochondrial transcription termination factor family protein   chr5:2108493-2112256 FORWARD LENGTH=1141                                                                                                                                                                                                                      | 534 | 1141 | 0         | 213.7 | 70.2 | 83.5 |
| Rsa1.0_00816.1.g19879.t2 | ref XP_002873276.1  hypothetical protein ARALYDRAFT_487487 [Arabidopsis lyrata subsp. lyrata]   gi 297319113 gb EFH49535.1  hypothetical protein ARALYDRAFT_487487 [Arabidopsis lyrata subsp. lyrata]                                                                                                                                               | 357 | 374  | 1.00E-180 | 104.8 | 87.4 | 91.9 | hypothetical protein ARALYDRAFT_487487                | gbpln | Arabidopsis lyrata   | AT5G06750.3   Symbols:   Protein phosphatase 2C family protein   chr5:2086403-2088245 REVERSE LENGTH=393                                                                                                                                                                                                                                               | 357 | 393  | 0         | 110.1 | 87.1 | 91.9 |
| Rsa1.0_00816.1.g19880.t1 | ref XP_002871229.1  predicted protein [Arabidopsis lyrata subsp. lyrata]   gi 297317068 gb EFH47488.1  predicted protein [Arabidopsis lyrata subsp. lyrata]                                                                                                                                                                                         | 651 | 654  | 0         | 100.5 | 87.9 | 93.4 | predicted protein                                     | gbpln | Arabidopsis lyrata   | AT5G06740.1   Symbols:   Concanavalin A-like lectin protein kinase family protein   chr5:2084094-2086052 FORWARD LENGTH=652                                                                                                                                                                                                                            | 651 | 652  | 0         | 100.2 | 86.5 | 92.8 |
| Rsa1.0_00816.1.g19881.t1 | ref XP_002272597.2  PREDICTED: double-stranded RNA-binding protein 4-like [Vitis vinifera]   gi 296087161 emb CB133535.3  unnamed protein product [Vitis vinifera]                                                                                                                                                                                  | 455 | 333  | 1.00E-26  | 73.2  | 18.2 | 25.3 | PREDICTED: double-stranded RNA-binding protein 4-like | gbpln | Vitis vinifera #     | # # # # # # #                                                                                                                                                                                                                                                                                                                                          |     |      |           |       |      |      |
| Rsa1.0_00816.1.g19882.t1 | emb CCJ34833.1  horseradish peroxidase isoenzyme HRP_4663 [Armoracia rusticana]                                                                                                                                                                                                                                                                     | 359 | 358  | 1.00E-171 | 99.7  | 84.7 | 90.0 | horseradish peroxidase isoenzyme HRP_4663             | gbpln | Armoracia rusticana  | AT5G06730.1   Symbols:   Peroxidase superfamily protein   chr5:2080207-2081621 REVERSE LENGTH=358                                                                                                                                                                                                                                                      | 359 | 358  | 1.00E-171 | 99.7  | 85.0 | 89.7 |
| Rsa1.0_00816.1.g19883.t1 | emb CCJ34825.1  horseradish peroxidase isoenzyme HRP_A2A [Armoracia rusticana]                                                                                                                                                                                                                                                                      | 338 | 336  | 1.00E-174 | 99.4  | 90.5 | 95.9 | horseradish peroxidase isoenzyme HRP_A2A              | gbpln | Armoracia rusticana  | AT5G06720.1   Symbols: ATPA2, PA2   peroxidase 2   chr5:2077567-2078857 REVERSE LENGTH=335                                                                                                                                                                                                                                                             | 338 | 335  | 1.00E-172 | 99.1  | 88.5 | 95.0 |
| Rsa1.0_00816.1.g19884.t1 | ref XP_002873274.1  homeobox-leucine zipper protein 14 [Arabidopsis lyrata subsp. lyrata]   gi 297319111 gb EFH49533.1  homeobox-leucine zipper protein 14 [Arabidopsis lyrata subsp. lyrata]                                                                                                                                                       | 340 | 343  | 1.00E-140 | 100.9 | 82.4 | 87.6 | homeobox-leucine zipper protein 14                    | gbpln | Arabidopsis lyrata   | AT5G06710.1   Symbols: HAT14   homeobox from Arabidopsis thaliana   chr5:2068305-2070284 REVERSE LENGTH=336                                                                                                                                                                                                                                            | 340 | 336  | 1.00E-141 | 98.8  | 84.7 | 87.9 |
| Rsa1.0_00816.1.g19885.t1 | gb EOA20195.1  hypothetical protein CARUB_v10000490mg [Capsella rubella]                                                                                                                                                                                                                                                                            | 601 | 613  | 0         | 102.0 | 81.9 | 88.2 | hypothetical protein CARUB_v10000490mg                | gbpln | Capsella rubella     | AT5G06700.1   Symbols: TBR   Plant protein of unknown function (DUF829)   chr5:2063638-2065810 FORWARD LENGTH=608                                                                                                                                                                                                                                      | 601 | 608  | 0         | 101.2 | 81.5 | 87.7 |
| Rsa1.0_00816.1.g19886.t1 | ref NP_568172.1  thioredoxin-like 3-1 [Arabidopsis thaliana]   gi 29828689 sp Q9FG36.3 TRL31_ARAT_H RecName: Full=Thioredoxin-like 3-1, chloroplastic; AltName: Full=Thioredoxin WCRKC-1; Flags: Precursor   gi 117958721 gb ABK59676.1  At5g06680 [Arabidopsis thaliana]   gi 332003667 gb AED91050.1  thioredoxin-like 3-1 [Arabidopsis thaliana] | 346 | 210  | 4.00E-86  | 60.7  | 44.5 | 47.4 | thioredoxin-like 3-1                                  | gbpln | Arabidopsis thaliana | AT5G06690.1   Symbols: WCRKC1   WCRKC thioredoxin 1   chr5:2060651-2061956 REVERSE LENGTH=210                                                                                                                                                                                                                                                          | 346 | 210  | 1.00E-88  | 60.7  | 44.5 | 47.4 |
| Rsa1.0_00816.1.g19887.t4 | gb EOA21499.1  hypothetical protein CARUB_v10001894mg [Capsella rubella]                                                                                                                                                                                                                                                                            | 195 | 227  | 3.00E-22  | 116.4 | 40.0 | 53.8 | hypothetical protein CARUB_v10001894mg                | gbpln | Capsella rubella     | AT5G03480.1   Symbols:   RNA-binding (RRM/RBD/RNP motifs) family protein   chr5:869208-870855 REVERSE LENGTH=321                                                                                                                                                                                                                                       | 195 | 321  | 3.00E-23  | 164.6 | 35.9 | 51.8 |

|                          |                                                                                                                                                                                                                                                                                                                                                                                                                               |      |      |           |       |      |      |                                             |       |                      |                                                                                                                                                                                                                                                                                                                                                                                  |      |      |           |       |      |      |
|--------------------------|-------------------------------------------------------------------------------------------------------------------------------------------------------------------------------------------------------------------------------------------------------------------------------------------------------------------------------------------------------------------------------------------------------------------------------|------|------|-----------|-------|------|------|---------------------------------------------|-------|----------------------|----------------------------------------------------------------------------------------------------------------------------------------------------------------------------------------------------------------------------------------------------------------------------------------------------------------------------------------------------------------------------------|------|------|-----------|-------|------|------|
| Rsa1.0_00816.1.g19888.t1 | gb EOA21499.1  hypothetical protein CARUB_v10001894mg [Capsella rubella]                                                                                                                                                                                                                                                                                                                                                      | 217  | 227  | 1.00E-34  | 104.6 | 42.9 | 55.8 | hypothetical protein CARUB_v10001894mg      | gbpln | Capsella rubella     | AT5G03480.1   Symbols:   RNA-binding (RRM/RBD/RNP motifs) family protein   chr5:869208-870855 REVERSE LENGTH=321                                                                                                                                                                                                                                                                 | 217  | 321  | 8.00E-30  | 147.9 | 36.9 | 51.2 |
| Rsa1.0_00816.1.g19889.t1 | ref XP_002873256.1  hypothetical protein ARALYDRAFT_487451 [Arabidopsis lyrata subsp. lyrata]   gi 297319083 gb EFH49515.1  hypothetical protein ARALYDRAFT_487451 [Arabidopsis lyrata subsp. lyrata]                                                                                                                                                                                                                         | 492  | 480  | 0         | 97.6  | 73.8 | 84.8 | hypothetical protein ARALYDRAFT_487451      | gbpln | Arabidopsis lyrata   | AT5G06440.3   Symbols:   BEST Arabidopsis thaliana protein match is: Polyketide cyclase/dehydrase and lipid transport superfamily protein (TAIRAT3G11720.3); Has 157 Blast hits to 155 proteins in 41 species: Archae - 0; Bacteria - 6; Metazoa - 5; Fungi - 6; Plants - 99; Viruses - 0; Other Eukaryotes - 41 (source: NCBI BLINK).   chr5:1964641-1968807 REVERSE LENGTH=479 | 492  | 479  | 0         | 97.4  | 73.4 | 85.0 |
| Rsa1.0_00816.1.g19890.t1 | ref XP_002871235.1  predicted protein [Arabidopsis lyrata subsp. lyrata]   gi 297317072 gb EFH47494.1  predicted protein [Arabidopsis lyrata subsp. lyrata]                                                                                                                                                                                                                                                                   | 198  | 194  | 1.00E-86  | 98.0  | 81.3 | 88.9 | predicted protein                           | gbpln | Arabidopsis lyrata   | AT5G06430.1   Symbols:   Thioredoxin superfamily protein   chr5:1963580-1964251 REVERSE LENGTH=194                                                                                                                                                                                                                                                                               | 198  | 194  | 3.00E-86  | 98.0  | 82.8 | 89.9 |
| Rsa1.0_00816.1.g19891.t1 | # # # # # # # # - ----                                                                                                                                                                                                                                                                                                                                                                                                        |      |      |           |       |      |      |                                             |       |                      |                                                                                                                                                                                                                                                                                                                                                                                  |      |      |           |       |      |      |
| Rsa1.0_00816.1.g19892.t1 | ref XP_002884859.1  hypothetical protein ARALYDRAFT_478516 [Arabidopsis lyrata subsp. lyrata]   gi 297330699 gb EFH61118.1  hypothetical protein ARALYDRAFT_478516 [Arabidopsis lyrata subsp. lyrata]                                                                                                                                                                                                                         | 557  | 625  | 0         | 112.2 | 74.5 | 83.7 | hypothetical protein ARALYDRAFT_478516      | gbpln | Arabidopsis lyrata   | AT3G11710.1   Symbols:   ATKRS-1   lysyl-tRNA synthetase 1   chr3:3702359-3705613 REVERSE LENGTH=626                                                                                                                                                                                                                                                                             | 557  | 626  | 0         | 112.4 | 71.8 | 83.3 |
| Rsa1.0_00816.1.g19893.t1 | ref XP_002873254.1  hypothetical protein ARALYDRAFT_487450 [Arabidopsis lyrata subsp. lyrata]   gi 297319081 gb EFH49513.1  hypothetical protein ARALYDRAFT_487450 [Arabidopsis lyrata subsp. lyrata]                                                                                                                                                                                                                         | 271  | 255  | 1.00E-105 | 94.1  | 73.4 | 81.9 | hypothetical protein ARALYDRAFT_487450      | gbpln | Arabidopsis lyrata   | AT5G06410.1   Symbols:   DNAJ heat shock N-terminal domain-containing protein   chr5:1959719-1961132 REVERSE LENGTH=252                                                                                                                                                                                                                                                          | 271  | 252  | 1.00E-106 | 93.0  | 73.1 | 81.5 |
| Rsa1.0_00816.1.g19894.t1 | ref XP_002871218.1  pentatricopeptide repeat-containing protein [Arabidopsis lyrata subsp. lyrata]   gi 297317055 gb EFH47477.1  pentatricopeptide repeat-containing protein [Arabidopsis lyrata subsp. lyrata]                                                                                                                                                                                                               | 1028 | 1029 | 0         | 100.1 | 81.2 | 90.5 | pentatricopeptide repeat-containing protein | gbpln | Arabidopsis lyrata   | AT5G06400.1   Symbols:   Pentatricopeptide repeat (PPR) superfamily protein   chr5:1955959-1959051 FORWARD LENGTH=1030                                                                                                                                                                                                                                                           | 1028 | 1030 | 0         | 100.2 | 80.9 | 89.9 |
| Rsa1.0_00816.1.g19895.t1 | ref NP_196257.2  fasciclin-like arabinogalactan protein 17 [Arabidopsis thaliana]   gi 75115364 sp Q66GR0.1 FLA17_ARAT H RecName: Full=Fasciclin-like arabinogalactan protein 17; Flags: Precursor   gi 51536454 gb AAU05465.1  At5g06390 [Arabidopsis thaliana]   gi 56121932 gb AAV74247.1  At5g06390 [Arabidopsis thaliana]   gi 332003626 gb AED91009.1  fasciclin-like arabinogalactan protein 17 [Arabidopsis thaliana] | 502  | 458  | 0         | 91.2  | 80.3 | 82.5 | fasciclin-like arabinogalactan protein 17   | gbpln | Arabidopsis thaliana | AT5G06390.1   Symbols:   FLA17   FASCICLIN-like arabinogalactan protein 17 precursor   chr5:1952939-1955047 FORWARD LENGTH=458                                                                                                                                                                                                                                                   | 502  | 458  | 0         | 91.2  | 80.3 | 82.5 |
| Rsa1.0_00816.1.g19896.t1 | gb EOA22748.1  hypothetical protein CARUB_v10003460mg [Capsella rubella]                                                                                                                                                                                                                                                                                                                                                      | 162  | 154  | 6.00E-33  | 95.1  | 62.3 | 72.2 | hypothetical protein CARUB_v10003460mg      | gbpln | Capsella rubella     | AT5G06380.1   Symbols:   unknown protein; BEST Arabidopsis thaliana protein match is: unknown protein (TAIRAT3G11690.1); Has 1807 Blast hits to 1807 proteins in 277 species: Archae - 0; Bacteria - 0; Metazoa - 736; Fungi - 347; Plants - 385; Viruses - 0; Other Eukaryotes - 339 (source: NCBI BLINK).   chr5:1949632-1950072 FORWARD LENGTH=146                            | 162  | 146  | 1.00E-30  | 90.1  | 55.6 | 66.0 |
| Rsa1.0_00816.1.g19897.t1 | ref XP_002871214.1  ribosomal protein S8e family protein [Arabidopsis lyrata subsp. lyrata]   gi 297317051 gb EFH47473.1  ribosomal protein S8e family protein [Arabidopsis lyrata subsp. lyrata]                                                                                                                                                                                                                             | 260  | 260  | 1.00E-140 | 100.0 | 93.5 | 96.2 | ribosomal protein S8e family protein        | gbpln | Arabidopsis lyrata   | AT5G06360.1   Symbols:   Ribosomal protein S8e family protein   chr5:1944835-1946512 FORWARD LENGTH=260                                                                                                                                                                                                                                                                          | 260  | 260  | 1.00E-142 | 100.0 | 93.1 | 96.2 |
| Rsa1.0_00816.1.g19898.t3 | gb EOA19939.1  hypothetical protein CARUB_v10000191mg [Capsella rubella]                                                                                                                                                                                                                                                                                                                                                      | 909  | 877  | 0         | 96.5  | 75.8 | 84.8 | hypothetical protein CARUB_v10000191mg      | gbpln | Capsella rubella     | AT5G06350.1   Symbols:   ARM repeat superfamily protein   chr5:1938781-1944197 FORWARD LENGTH=877                                                                                                                                                                                                                                                                                | 909  | 877  | 0         | 96.5  | 74.5 | 84.2 |
| Rsa1.0_00816.1.g19899.t1 | gb ABL97947.1  bis(5'-nucleosyl)-tetraphosphatase [Brassica rapa]                                                                                                                                                                                                                                                                                                                                                             | 210  | 228  | 1.00E-105 | 108.6 | 92.4 | 96.2 | bis(5'-nucleosyl)-tetraphosphatase          | gbpln | Brassica rapa        | AT5G06340.1   Symbols:   ATNUDX27, NUDX27   nudix hydrolase homolog 27   chr5:1936467-1937911 FORWARD LENGTH=227                                                                                                                                                                                                                                                                 | 210  | 227  | 1.00E-102 | 108.1 | 88.6 | 92.9 |
| Rsa1.0_00816.1.g19900.t1 | dbj BAJ34098.1  unnamed protein product [Theilingiella halophila]                                                                                                                                                                                                                                                                                                                                                             | 236  | 235  | 1.00E-102 | 99.6  | 83.5 | 90.7 | unnamed protein product                     | ----  | ----                 | AT5G06320.1   Symbols:   NHL3   NDR1/HIN1-like 3   chr5:1931016-1931711 REVERSE LENGTH=231                                                                                                                                                                                                                                                                                       | 236  | 231  | 9.00E-97  | 97.9  | 79.7 | 88.1 |

|                          |                                                                                                                                                                                                                                                                                                                                                                                                                                                                                                                                                                           |     |     |           |       |      |      |                                                                                           |       |                      |                                                                                                                                                  |     |     |           |       |      |      |  |
|--------------------------|---------------------------------------------------------------------------------------------------------------------------------------------------------------------------------------------------------------------------------------------------------------------------------------------------------------------------------------------------------------------------------------------------------------------------------------------------------------------------------------------------------------------------------------------------------------------------|-----|-----|-----------|-------|------|------|-------------------------------------------------------------------------------------------|-------|----------------------|--------------------------------------------------------------------------------------------------------------------------------------------------|-----|-----|-----------|-------|------|------|--|
| Rsa1.0_00816.1.g19901.t1 | refXP_002875949.1   hypothetical protein ARALYDRAFT_906172 [Arabidopsis lyrata subsp. lyrata] gi 297321787 gb EFH52208.1   hypothetical protein ARALYDRAFT_906172 [Arabidopsis lyrata subsp. lyrata]                                                                                                                                                                                                                                                                                                                                                                      | 569 | 967 | 1.00E-41  | 169.9 | 29.3 | 42.2 | hypothetical protein ARALYDRAFT_906172                                                    | gbpln | Arabidopsis lyrata   | AT5G12280.1   Symbols:   SWAP (Suppressor-of-White-Apricot)/surp RNA-binding domain-containing protein   chr5:3972014-3973636 REVERSE LENGTH=419 | 569 | 419 | 1.00E-31  | 73.6  | 18.3 | 26.2 |  |
| Rsa1.0_00816.1.g19902.t1 | gb ACJ49162.1   protection of telomeres 1b protein [Brassica oleracea]                                                                                                                                                                                                                                                                                                                                                                                                                                                                                                    | 451 | 450 | 0         | 99.8  | 84.7 | 92.7 | protection of telomeres 1b protein                                                        | gbpln | Brassica oleracea    | AT5G06310.1   Symbols: AtPOT1b   Nucleic acid-binding, OB-fold-like protein   chr5:1928468-1930795 FORWARD LENGTH=454                            | 451 | 454 | 0         | 100.7 | 79.2 | 89.4 |  |
| Rsa1.0_00817.1.g19903.t1 | gb AAL49921.1   unknown protein [Arabidopsis thaliana]                                                                                                                                                                                                                                                                                                                                                                                                                                                                                                                    | 442 | 439 | 1.00E-163 | 99.3  | 64.0 | 77.1 | unknown protein                                                                           | gbpln | Arabidopsis thaliana | AT3G12700.1   Symbols:   Eukaryotic aspartyl protease family protein   chr3:4037136-4039043 FORWARD LENGTH=461                                   | 442 | 461 | 1.00E-166 | 104.3 | 64.0 | 77.1 |  |
| Rsa1.0_00817.1.g19904.t1 | refXP_002884920.1   hypothetical protein ARALYDRAFT_478629 [Arabidopsis lyrata subsp. lyrata] gi 297330760 gb EFH61179.1   hypothetical protein ARALYDRAFT_478629 [Arabidopsis lyrata subsp. lyrata]                                                                                                                                                                                                                                                                                                                                                                      | 572 | 578 | 0         | 101.0 | 86.7 | 90.9 | hypothetical protein ARALYDRAFT_478629                                                    | gbpln | Arabidopsis lyrata   | AT3G12690.3   Symbols: AGC1.5   AGC kinase 1.5   chr3:4030596-4032400 REVERSE LENGTH=577                                                         | 572 | 577 | 0         | 100.9 | 86.7 | 90.7 |  |
| Rsa1.0_00817.1.g19905.t1 | gb EOA30328.1   hypothetical protein CARUB_v10013453mg [Capsella rubella]                                                                                                                                                                                                                                                                                                                                                                                                                                                                                                 | 528 | 523 | 0         | 99.1  | 76.1 | 82.4 | hypothetical protein CARUB_v10013453mg                                                    | gbpln | Capsella rubella     | AT3G12680.1   Symbols: HUA1   floral homeotic protein (HUA1)   chr3:4025276-4028999 REVERSE LENGTH=524                                           | 528 | 524 | 0         | 99.2  | 80.3 | 87.3 |  |
| Rsa1.0_00817.1.g19906.t1 | gb EOA30178.1   hypothetical protein CARUB_v10013294mg [Capsella rubella]                                                                                                                                                                                                                                                                                                                                                                                                                                                                                                 | 592 | 592 | 0         | 100.0 | 93.2 | 96.5 | hypothetical protein CARUB_v10013294mg                                                    | gbpln | Capsella rubella     | AT3G12670.1   Symbols: emb2742   CTP synthase family protein   chr3:4020351-4024086 REVERSE LENGTH=591                                           | 592 | 591 | 0         | 99.8  | 92.7 | 96.5 |  |
| Rsa1.0_00817.1.g19907.t1 | ref NP_187872.1   fasciclin-like arabinogalactan protein 14 [Arabidopsis thaliana] gi 75274151 sp Q9LTW9.1 FLA14_ARAT H RecName: Full=Fasciclin-like arabinogalactan protein 14; Flags: Precursor gi 12321976 gb AAG51033.1 AC069474.32 hypothetical protein; 8734-7967 [Arabidopsis thaliana] gi 11994407 dbj BAB02409.1   unnamed protein product [Arabidopsis thaliana] gi 91806417 gb ABE65936.1   fasciclin-like arabinogalactan family protein [Arabidopsis thaliana] gi 332641708 gb AAE75229.1   fasciclin-like arabinogalactan protein 14 [Arabidopsis thaliana] | 262 | 255 | 1.00E-58  | 97.3  | 56.5 | 69.1 | fasciclin-like arabinogalactan protein 14                                                 | gbpln | Arabidopsis thaliana | AT3G12660.1   Symbols: FLA14   FASCICLIN-like arabinogalactan protein 14 precursor   chr3:4019060-4019827 FORWARD LENGTH=255                     | 262 | 255 | 4.00E-61  | 97.3  | 56.5 | 69.1 |  |
| Rsa1.0_00817.1.g19908.t1 | gb EOA31605.1   hypothetical protein CARUB_v10014801mg [Capsella rubella]                                                                                                                                                                                                                                                                                                                                                                                                                                                                                                 | 157 | 163 | 3.00E-66  | 103.8 | 85.4 | 91.7 | hypothetical protein CARUB_v10014801mg                                                    | gbpln | Capsella rubella     | AT3G12630.1   Symbols:   A20/ANI-like zinc finger family protein   chr3:4012707-4013189 FORWARD LENGTH=160                                       | 157 | 160 | 4.00E-67  | 101.9 | 90.4 | 96.2 |  |
| Rsa1.0_00817.1.g19909.t2 | dbj BAJ34487.1   unnamed protein product [Theilingiella halophila]                                                                                                                                                                                                                                                                                                                                                                                                                                                                                                        | 387 | 387 | 0         | 100.0 | 94.1 | 97.2 | unnamed protein product                                                                   | ----  | ----                 | AT3G12620.2   Symbols:   Protein phosphatase 2C family protein   chr3:4009510-4010993 REVERSE LENGTH=385                                         | 387 | 385 | 0         | 99.5  | 92.5 | 96.4 |  |
| Rsa1.0_00817.1.g19910.t1 | refXP_002882782.1   hypothetical protein ARALYDRAFT_478618 [Arabidopsis lyrata subsp. lyrata] gi 297328622 gb EFH59041.1   hypothetical protein ARALYDRAFT_478618 [Arabidopsis lyrata subsp. lyrata]                                                                                                                                                                                                                                                                                                                                                                      | 174 | 180 | 2.00E-87  | 103.4 | 89.7 | 94.3 | hypothetical protein ARALYDRAFT_478618                                                    | gbpln | Arabidopsis lyrata   | AT3G12600.1   Symbols: atnudt16, NUDT16   nudix hydrolase homolog 16   chr3:4004809-4005995 FORWARD LENGTH=180                                   | 174 | 180 | 3.00E-80  | 103.4 | 87.4 | 92.5 |  |
| Rsa1.0_00817.1.g19911.t1 | dbj BAJ34614.1   unnamed protein product [Theilingiella halophila]                                                                                                                                                                                                                                                                                                                                                                                                                                                                                                        | 605 | 637 | 0         | 105.3 | 82.6 | 89.6 | unnamed protein product                                                                   | ----  | ----                 | AT3G12560.1   Symbols: TRFL9, ATTPB2   TRF-like 9   chr3:3982272-3984848 REVERSE LENGTH=619                                                      | 605 | 619 | 0         | 102.3 | 80.2 | 87.8 |  |
| Rsa1.0_00817.1.g19912.t1 | refXP_002882779.1   hypothetical protein ARALYDRAFT_318024 [Arabidopsis lyrata subsp. lyrata] gi 297328619 gb EFH59038.1   hypothetical protein ARALYDRAFT_318024 [Arabidopsis lyrata subsp. lyrata]                                                                                                                                                                                                                                                                                                                                                                      | 639 | 651 | 0         | 101.9 | 82.0 | 91.2 | hypothetical protein ARALYDRAFT_318024                                                    | gbpln | Arabidopsis lyrata   | AT3G12550.2   Symbols:   XH/XS domain-containing protein   chr3:3978669-3981372 FORWARD LENGTH=638                                               | 639 | 638 | 0         | 99.8  | 79.8 | 88.9 |  |
| Rsa1.0_00817.1.g19913.t2 | dbj BAB02264.1   unnamed protein product [Arabidopsis thaliana]                                                                                                                                                                                                                                                                                                                                                                                                                                                                                                           | 685 | 572 | 0         | 83.5  | 64.1 | 69.3 | unnamed protein product                                                                   | gbpln | Arabidopsis thaliana | AT3G12540.1   Symbols:   Protein of unknown function, DUF547   chr3:3975246-3977247 FORWARD LENGTH=505                                           | 685 | 505 | 0         | 73.7  | 59.6 | 63.9 |  |
| Rsa1.0_00817.1.g19914.t1 | # # # # # # # # -                                                                                                                                                                                                                                                                                                                                                                                                                                                                                                                                                         |     |     |           |       |      |      |                                                                                           | ----  | ----                 | # # # # # # # #                                                                                                                                  |     |     |           |       |      |      |  |
| Rsa1.0_00817.1.g19915.t1 | sp Q09023.1 CHI2_BRANA RecName: Full=Endochitinase CH25; Flags: Precursor gi 167130 gb AA32986.1   endochitinase [Brassica napus]                                                                                                                                                                                                                                                                                                                                                                                                                                         | 322 | 322 | 1.00E-172 | 100.0 | 95.3 | 97.2 | RecName: Full=Endochitinase CH25; Flags: Precursor gi 167130 gb AA32986.1   endochitinase | gbpln | Brassica napus       | AT3G12500.1   Symbols: ATHCHIB, PR3, PR-3, CHI-B, B-CHI, HCHIB   basic chitinase   chr3:3962501-3963984 REVERSE LENGTH=335                       | 322 | 335 | 1.00E-158 | 104.0 | 83.9 | 86.3 |  |

|                          |                                                                                                                                                                                                                                                                                                                                                                                                                                                               |     |      |           |        |      |      |                                        |       |                      |                                                                                                                                                                                                                                                                                                                                                                     |     |      |           |        |      |      |
|--------------------------|---------------------------------------------------------------------------------------------------------------------------------------------------------------------------------------------------------------------------------------------------------------------------------------------------------------------------------------------------------------------------------------------------------------------------------------------------------------|-----|------|-----------|--------|------|------|----------------------------------------|-------|----------------------|---------------------------------------------------------------------------------------------------------------------------------------------------------------------------------------------------------------------------------------------------------------------------------------------------------------------------------------------------------------------|-----|------|-----------|--------|------|------|
| Rsa1.0_00817.1.g19916.t1 | gb EOA31478.1  hypothetical protein CARUB_v10014664mg [Capsella rubella]                                                                                                                                                                                                                                                                                                                                                                                      | 202 | 203  | 5.00E-81  | 100.5  | 90.1 | 96.0 | hypothetical protein CARUB_v10014664mg | gbpln | Capsella rubella     | AT3G12390.1   Symbols:   Nascent polypeptide-associated complex (NAC). alpha subunit family protein   chr3:3942344-3943595 FORWARD LENGTH=203                                                                                                                                                                                                                       | 202 | 203  | 3.00E-75  | 100.5  | 84.2 | 90.6 |
| Rsa1.0_00817.1.g19917.t1 | ref NP_566422.4  actin-related protein 5 [Arabidopsis thaliana]<br>gi 334302767 sp Q940Z2.2 ARP5_ARAT H RecName: Full=Actin-related protein 5 gi 15795157 dbj BAB03145.1  actin-like protein [Arabidopsis thaliana]<br>gi 257228981 gb ACV53017.1  actin-related protein 5 [Arabidopsis thaliana]<br>gi 257228983 gb ACV53018.1  actin-related protein 5 [Arabidopsis thaliana]<br>gi 332641669 gb AEE75190.1  actin-related protein 5 [Arabidopsis thaliana] | 723 | 724  | 0         | 100.1  | 85.2 | 92.3 | actin-related protein 5                | gbpln | Arabidopsis thaliana | AT3G12380.1   Symbols: ATARP5, ARP5   actin-related protein 5   chr3:3938309-3941785 REVERSE LENGTH=724                                                                                                                                                                                                                                                             | 723 | 724  | 0         | 100.1  | 85.2 | 92.3 |
| Rsa1.0_00818.1.g19918.t1 | emb CB122963.3  unnamed protein product [Vitis vinifera]                                                                                                                                                                                                                                                                                                                                                                                                      | 409 | 405  | 1.00E-100 | 99.0   | 45.0 | 61.6 | unnamed protein product                | gbpln | Vitis vinifera       | AT1G02790.1   Symbols: PGA4   polygalacturonase 4   chr1:610681-612225 REVERSE LENGTH=422                                                                                                                                                                                                                                                                           | 409 | 422  | 6.00E-74  | 103.2  | 39.4 | 56.5 |
| Rsa1.0_00818.1.g19919.t1 | ref XP_002865717.1  hypothetical protein ARALYDRAFT_494980 [Arabidopsis lyrata subsp. lyrata]<br>gi 297311552 gb EFH41976.1  hypothetical protein ARALYDRAFT_494980 [Arabidopsis lyrata subsp. lyrata]                                                                                                                                                                                                                                                        | 807 | 807  | 0         | 100.0  | 94.8 | 97.9 | hypothetical protein ARALYDRAFT_494980 | gbpln | Arabidopsis lyrata   | AT5G49190.1   Symbols: SUS2, SSA, ATSUS2   sucrose synthase 2   chr5:19943369-19947189 REVERSE LENGTH=807                                                                                                                                                                                                                                                           | 807 | 807  | 0         | 100.0  | 94.3 | 97.4 |
| Rsa1.0_00818.1.g19920.t1 | ref NP_199728.1  uncharacterized protein [Arabidopsis thaliana]<br>gi 110737324 dbj BAF00608.1  hypothetical protein [Arabidopsis thaliana]<br>gi 332008395 gb AED95778.1  uncharacterized protein AT5G49170 [Arabidopsis thaliana]                                                                                                                                                                                                                           | 195 | 185  | 1.00E-58  | 94.9   | 66.7 | 72.8 | uncharacterized protein                | gbpln | Arabidopsis thaliana | AT5G49170.1   Symbols:   unknown protein; BEST Arabidopsis thaliana protein match is: unknown protein (TAIR:AT3G06840.1). Has 1807 Blast hits to 1807 proteins in 277 species: Archae - 0; Bacteria - 0; Metazoa - 736; Fungi - 347; Plants - 385; Viruses - 0; Other Eukaryotes - 339 (source: NCBI BLINK).   chr5:19938839-19939482 REVERSE LENGTH=185            | 195 | 185  | 4.00E-61  | 94.9   | 66.7 | 72.8 |
| Rsa1.0_00818.1.g19921.t1 | gb EOA14799.1  hypothetical protein CARUB_v10028105mg [Capsella rubella]                                                                                                                                                                                                                                                                                                                                                                                      | 270 | 329  | 2.00E-58  | 121.9  | 53.0 | 70.4 | hypothetical protein CARUB_v10028105mg | gbpln | Capsella rubella     | AT5G49420.1   Symbols:   MADS-box transcription factor family protein   chr5:20035166-20036170 REVERSE LENGTH=334                                                                                                                                                                                                                                                   | 270 | 334  | 4.00E-60  | 123.7  | 45.9 | 60.0 |
| Rsa1.0_00818.1.g19922.t1 | ref XP_002863963.1  hypothetical protein ARALYDRAFT_917882 [Arabidopsis lyrata subsp. lyrata]<br>gi 297309798 gb EFH40222.1  hypothetical protein ARALYDRAFT_917882 [Arabidopsis lyrata subsp. lyrata]                                                                                                                                                                                                                                                        | 70  | 921  | 1.00E-16  | 1315.7 | 82.9 | 85.7 | hypothetical protein ARALYDRAFT_917882 | gbpln | Arabidopsis lyrata   | AT5G49150.1   Symbols: ATGEX2, GEX2   gamete expressed 2   chr5:19924760-19928527 FORWARD LENGTH=914                                                                                                                                                                                                                                                                | 70  | 914  | 1.00E-16  | 1305.7 | 77.1 | 82.9 |
| Rsa1.0_00818.1.g19923.t1 | ref NP_199724.1  mate efflux domain-containing protein [Arabidopsis thaliana]<br>gi 29468188 gb AAO85438.1 AF488694.1 putative transporter NIC3 [Arabidopsis thaliana]<br>gi 10176946 dbj BAB10095.1  unnamed protein product [Arabidopsis thaliana]<br>gi 332008391 gb AED95774.1  mate efflux domain-containing protein [Arabidopsis thaliana]                                                                                                              | 499 | 502  | 0         | 100.6  | 89.4 | 94.6 | mate efflux domain-containing protein  | gbpln | Arabidopsis thaliana | AT5G49130.1   Symbols:   MATE efflux family protein   chr5:19915904-19917525 FORWARD LENGTH=502                                                                                                                                                                                                                                                                     | 499 | 502  | 0         | 100.6  | 89.4 | 94.6 |
| Rsa1.0_00818.1.g19924.t1 | ref NP_199723.1  uncharacterized protein [Arabidopsis thaliana]<br>gi 10176945 dbj BAB10094.1  unnamed protein product [Arabidopsis thaliana]<br>gi 332008390 gb AED95773.1  uncharacterized protein AT5G49120 [Arabidopsis thaliana]                                                                                                                                                                                                                         | 134 | 150  | 2.00E-33  | 111.9  | 69.4 | 73.9 | uncharacterized protein                | gbpln | Arabidopsis thaliana | AT5G49120.1   Symbols:   Protein of unknown function (DUF581)   chr5:19908800-19909332 REVERSE LENGTH=150                                                                                                                                                                                                                                                           | 134 | 150  | 5.00E-36  | 111.9  | 69.4 | 73.9 |
| Rsa1.0_00818.1.g19925.t1 | gb ABO36622.1  copia LTR rider [Solanum lycopersicum]<br>gi 133711819 gb ABO36636.1  copia LTR rider [Solanum lycopersicum]                                                                                                                                                                                                                                                                                                                                   | 513 | 1307 | 2.00E-52  | 254.8  | 19.5 | 20.3 | copia LTR rider                        | gbpln | Solanum lycopersicum | AT4G23160.1   Symbols: CRK8   cysteine-rich RLK (RECEPTOR-like protein kinase) 8   chr4:12129485-12134086 FORWARD LENGTH=1262                                                                                                                                                                                                                                       | 513 | 1262 | 9.00E-17  | 246.0  | 8.8  | 12.1 |
| Rsa1.0_00818.1.g19926.t1 | ref NP_568706.1  uncharacterized protein [Arabidopsis thaliana]<br>gi 10176943 dbj BAB10092.1  unnamed protein product [Arabidopsis thaliana]<br>gi 18377646 gb AAL66973.1  unknown protein [Arabidopsis thaliana]<br>gi 22136864 gb AAM91776.1  unknown protein [Arabidopsis thaliana]<br>gi 332008387 gb AED95770.1  uncharacterized protein AT5G49100 [Arabidopsis thaliana]                                                                               | 403 | 396  | 1.00E-115 | 98.3   | 72.2 | 78.9 | uncharacterized protein                | gbpln | Arabidopsis thaliana | AT5G49100.1   Symbols:   unknown protein; BEST Arabidopsis thaliana protein match is: unknown protein (TAIR:AT3G06868.1). Has 30201 Blast hits to 17322 proteins in 780 species: Archae - 12; Bacteria - 1396; Metazoa - 17338; Fungi - 3422; Plants - 5037; Viruses - 0; Other Eukaryotes - 2996 (source: NCBI BLINK).   chr5:19897700-19898890 REVERSE LENGTH=396 | 403 | 396  | 1.00E-117 | 98.3   | 72.2 | 78.9 |

|                          |                                                                                                                                                                                                                                                                                                                                                                                                                                                                                                                                                                                                                                                                                                             |      |      |           |       |      |      |                                                                                                                                                     |       |                      |                                                                                                                                                                                                                                                                                                                                                  |      |      |           |       |      |      |
|--------------------------|-------------------------------------------------------------------------------------------------------------------------------------------------------------------------------------------------------------------------------------------------------------------------------------------------------------------------------------------------------------------------------------------------------------------------------------------------------------------------------------------------------------------------------------------------------------------------------------------------------------------------------------------------------------------------------------------------------------|------|------|-----------|-------|------|------|-----------------------------------------------------------------------------------------------------------------------------------------------------|-------|----------------------|--------------------------------------------------------------------------------------------------------------------------------------------------------------------------------------------------------------------------------------------------------------------------------------------------------------------------------------------------|------|------|-----------|-------|------|------|
| Rsa1.0_00818.1.g19927.t1 | dbj BAB10088.1  DNAJ-like protein [Arabidopsis thaliana]                                                                                                                                                                                                                                                                                                                                                                                                                                                                                                                                                                                                                                                    | 451  | 350  | 1.00E-135 | 77.6  | 59.4 | 67.2 | DNAJ-like protein                                                                                                                                   | gbpln | Arabidopsis thaliana | AT5G49060.1   Symbols:   Heat shock protein DnaJ, N-terminal with domain of unknown function (DUF1977)   chr5:19886764-19888136 FORWARD LENGTH=354                                                                                                                                                                                               | 451  | 354  | 1.00E-138 | 78.5  | 59.4 | 67.2 |
| Rsa1.0_00818.1.g19928.t1 | ref NP_001190497.1  isoleucyl-tRNA synthetase [Arabidopsis thaliana] gi 332008381 gb AED95764.1  isoleucyl-tRNA synthetase [Arabidopsis thaliana] ref NP_199713.2  histone-arginine methyltransferase CARM1 [Arabidopsis thaliana] gi 152013379 sp A3KPF2.1 ANM14_ARA TH RecName: Full=Probable histone-arginine methyltransferase 1.4; Short=AtPRMT14; AltName: Full=Coactivator-associated methyltransferase 1B; AltName: Full=Protein arginine N-methyltransferase 4A; Short=AtPRMT4A gi 126352276 gb ABO09883.1  At5g49020 [Arabidopsis thaliana] gi 126352282 gb ABO09886.1  At5g49020 [Arabidopsis thaliana] gi 332008378 gb AED95761.1  protein arginine methyltransferase 4A [Arabidopsis thaliana] | 1091 | 1279 | 0         | 117.2 | 94.0 | 97.4 | isoleucyl-tRNA synthetase                                                                                                                           | gbpln | Arabidopsis thaliana | AT5G49030.3   Symbols: OVA2   tRNA synthetase class I (L, L, M and V) family protein   chr5:19875091-19883251 REVERSE LENGTH=1279                                                                                                                                                                                                                | 1091 | 1279 | 0         | 117.2 | 94.0 | 97.4 |
| Rsa1.0_00818.1.g19929.t1 | gb EOA13912.1  hypothetical protein CARUB_v10027029mg, partial [Capsella rubella] ref XP_002865696.1  hypothetical protein ARALYDRAFT_917838 [Arabidopsis lyrata subsp. lyrata] gi 297311531 gb EFH41955.1  hypothetical protein ARALYDRAFT_917838 [Arabidopsis lyrata subsp. lyrata] ref XP_002865695.1  mitochondrial substrate carrier family protein [Arabidopsis lyrata subsp. lyrata] gi 297311530 gb EFH41954.1  mitochondrial substrate carrier family protein [Arabidopsis lyrata subsp. lyrata]                                                                                                                                                                                                   | 656  | 528  | 0         | 80.5  | 66.6 | 69.8 | histone-arginine methyltransferase CARM1                                                                                                            | gbpln | Arabidopsis thaliana | AT5G49020.1   Symbols: ATPRMT4A, PRMT4A   protein arginine methyltransferase 4A   chr5:19871341-19874683 FORWARD LENGTH=528                                                                                                                                                                                                                      | 656  | 528  | 0         | 80.5  | 66.6 | 69.8 |
| Rsa1.0_00818.1.g19930.t1 | gb EOA13912.1  hypothetical protein CARUB_v10027029mg, partial [Capsella rubella]                                                                                                                                                                                                                                                                                                                                                                                                                                                                                                                                                                                                                           | 219  | 239  | 2.00E-95  | 109.1 | 79.5 | 90.0 | hypothetical protein CARUB_v10027029mg, partial                                                                                                     | gbpln | Capsella rubella     | AT5G49010.1   Symbols: SLD5   DNA replication protein-related   chr5:19866464-19868074 FORWARD LENGTH=220                                                                                                                                                                                                                                        | 219  | 220  | 8.00E-97  | 100.5 | 79.0 | 89.0 |
| Rsa1.0_00818.1.g19931.t1 | ref XP_002865696.1  hypothetical protein ARALYDRAFT_917838 [Arabidopsis lyrata subsp. lyrata] gi 297311531 gb EFH41955.1  hypothetical protein ARALYDRAFT_917838 [Arabidopsis lyrata subsp. lyrata] ref XP_002865695.1  mitochondrial substrate carrier family protein [Arabidopsis lyrata subsp. lyrata] gi 297311530 gb EFH41954.1  mitochondrial substrate carrier family protein [Arabidopsis lyrata subsp. lyrata]                                                                                                                                                                                                                                                                                     | 108  | 107  | 4.00E-51  | 99.1  | 90.7 | 95.4 | hypothetical protein ARALYDRAFT_917838                                                                                                              | gbpln | Arabidopsis lyrata   | AT5G24860.1   Symbols: PFP1, ATPPF1   flowering promoting factor 1   chr5:8541822-8542154 FORWARD LENGTH=110                                                                                                                                                                                                                                     | 108  | 110  | 9.00E-33  | 101.9 | 63.0 | 80.6 |
| Rsa1.0_00818.1.g19932.t1 | ref XP_002865695.1  mitochondrial substrate carrier family protein [Arabidopsis lyrata subsp. lyrata] gi 297311530 gb EFH41954.1  mitochondrial substrate carrier family protein [Arabidopsis lyrata subsp. lyrata]                                                                                                                                                                                                                                                                                                                                                                                                                                                                                         | 337  | 338  | 0         | 100.3 | 93.5 | 97.0 | mitochondrial substrate carrier family protein                                                                                                      | gbpln | Arabidopsis lyrata   | AT5G48970.1   Symbols:   Mitochondrial substrate carrier family protein   chr5:19857028-19859374 REVERSE LENGTH=339                                                                                                                                                                                                                              | 337  | 339  | 0         | 100.6 | 92.3 | 96.1 |
| Rsa1.0_00819.1.g19933.t1 | gb ABD64939.1  hypothetical protein 24.t00017 [Brassica oleracea]                                                                                                                                                                                                                                                                                                                                                                                                                                                                                                                                                                                                                                           | 389  | 442  | 1.00E-155 | 113.6 | 68.6 | 78.1 | hypothetical protein 24.t00017                                                                                                                      | gbpln | Brassica oleracea    | AT2G13770.1   Symbols:   CONTAINS InterPro DOMAIN/s: Putative harbinger transposase-derived nuclease (InterPro:IPR006912); Has 451 Blast hits to 352 proteins in 33 species: Archae - 0; Bacteria - 0; Metazoa - 28; Fungi - 8; Plants - 388; Viruses - 0; Other Eukaryotes - 27 (source: NCBI BLINK).   chr2:5736603-5737847 FORWARD LENGTH=343 | 389  | 343  | 3.00E-30  | 88.2  | 14.7 | 19.8 |
| Rsa1.0_00819.1.g19934.t2 | ref XP_002876021.1  transferase family protein [Arabidopsis lyrata subsp. lyrata] gi 297321859 gb EFH52280.1  transferase family protein [Arabidopsis lyrata subsp. lyrata] ref XP_002885656.1  hypothetical protein ARALYDRAFT_479971 [Arabidopsis lyrata subsp. lyrata] gi 297331496 gb EFH61915.1  hypothetical protein ARALYDRAFT_479971 [Arabidopsis lyrata subsp. lyrata]                                                                                                                                                                                                                                                                                                                             | 408  | 445  | 1.00E-149 | 109.1 | 67.9 | 79.4 | transferase family protein                                                                                                                          | gbpln | Arabidopsis lyrata   | AT3G50280.1   Symbols:   HXXXD-type acyl-transferase family protein   chr3:18637854-18639185 FORWARD LENGTH=443                                                                                                                                                                                                                                  | 408  | 443  | 1.00E-150 | 108.6 | 67.9 | 78.7 |
| Rsa1.0_00819.1.g19935.t1 | ref XP_002885656.1  hypothetical protein ARALYDRAFT_479971 [Arabidopsis lyrata subsp. lyrata] gi 297331496 gb EFH61915.1  hypothetical protein ARALYDRAFT_479971 [Arabidopsis lyrata subsp. lyrata]                                                                                                                                                                                                                                                                                                                                                                                                                                                                                                         | 244  | 225  | 3.00E-87  | 92.2  | 64.3 | 67.6 | hypothetical protein ARALYDRAFT_479971                                                                                                              | gbpln | Arabidopsis lyrata   | AT3G24570.1   Symbols:   Peroxisomal membrane 22 kDa (Mpv17/PMP22) family protein   chr3:8966675-8968530 REVERSE LENGTH=235                                                                                                                                                                                                                      | 244  | 235  | 2.00E-86  | 96.3  | 63.5 | 67.6 |
| Rsa1.0_00819.1.g19936.t1 | pir  S65812 RNA-directed DNA polymerase (EC 2.7.7.49) (clone DW15) - Arabidopsis thaliana retrotransposon Ta11-1 gi 976278 gb AAA75254.1  reverse transcriptase [Arabidopsis thaliana]                                                                                                                                                                                                                                                                                                                                                                                                                                                                                                                      | 1820 | 1333 | 0         | 73.2  | 35.5 | 47.0 | RNA-directed DNA polymerase (EC 2.7.7.49) (clone DW15) - Arabidopsis thaliana retrotransposon Ta11-1 gi 976278 gb AAA75254.1  reverse transcriptase | gbpln | Arabidopsis thaliana | AT4G29090.1   Symbols:   Ribonuclease H-like superfamily protein   chr4:14333528-14335255 FORWARD LENGTH=575                                                                                                                                                                                                                                     | 1820 | 575  | 1.00E-102 | 31.6  | 11.1 | 17.3 |



|                          |                                                                                                                                                                                                                                                                                                                                                                     |      |      |           |       |      |      |                                                     |       |                      |                                                                                                                                                                                                                                                                                                                                                      |      |     |           |       |      |      |  |
|--------------------------|---------------------------------------------------------------------------------------------------------------------------------------------------------------------------------------------------------------------------------------------------------------------------------------------------------------------------------------------------------------------|------|------|-----------|-------|------|------|-----------------------------------------------------|-------|----------------------|------------------------------------------------------------------------------------------------------------------------------------------------------------------------------------------------------------------------------------------------------------------------------------------------------------------------------------------------------|------|-----|-----------|-------|------|------|--|
| Rsa1.0_00819.1.g19937.t1 | ref NP_189102.2  chloroplast processing peptidase [Arabidopsis thaliana] gi 160419231 sp Q8HOW1.2 PLSP1_ARA TH RecName: Full=Chloroplast processing peptidase; AltName: Full=Signal peptidase 1-3; Flags: Precursor gi 51536582 gb AAU05529.1  At1g05140 [Arabidopsis thaliana] gi 332643406 gb AEE76927.1  chloroplast processing peptidase [Arabidopsis thaliana] | 302  | 291  | 1.00E-122 | 96.4  | 79.5 | 83.1 | chloroplast processing peptidase                    | gbpln | Arabidopsis thaliana | AT3G24590.1   Symbols: PLSP1   plastidic type i signal peptidase 1   chr3:8970694-8972020 FORWARD LENGTH=291                                                                                                                                                                                                                                         | 302  | 291 | 1.00E-125 | 96.4  | 79.5 | 83.1 |  |
| Rsa1.0_00819.1.g19938.t1 | dbj BAB02012.1  unnamed protein product [Arabidopsis thaliana]                                                                                                                                                                                                                                                                                                      | 300  | 306  | 1.00E-129 | 102.0 | 84.0 | 90.3 | unnamed protein product                             | gbpln | Arabidopsis thaliana | AT3G24600.1   Symbols:   Late embryogenesis abundant protein, group 2   chr3:8972195-8974867 REVERSE LENGTH=906                                                                                                                                                                                                                                      | 300  | 506 | 1.00E-106 | 168.7 | 69.0 | 74.7 |  |
| Rsa1.0_00819.1.g19939.t1 | gb ABD65099.1  hypothetical protein 31.t00074 [Brassica oleracea]                                                                                                                                                                                                                                                                                                   | 328  | 258  | 2.00E-46  | 78.7  | 34.1 | 43.0 | hypothetical protein 31.t00074                      | gbpln | Brassica oleracea    | AT3G47680.1   Symbols:   DNA binding   chr3:17577483-17578391 REVERSE LENGTH=302                                                                                                                                                                                                                                                                     | 328  | 302 | 1.00E-41  | 92.1  | 31.4 | 43.0 |  |
| Rsa1.0_00819.1.g19940.t1 | gb ABD64939.1  hypothetical protein 24.t00017 [Brassica oleracea]                                                                                                                                                                                                                                                                                                   | 358  | 442  | 1.00E-95  | 123.5 | 45.8 | 50.0 | hypothetical protein 24.t00017                      | gbpln | Brassica oleracea    | AT2G13770.1   Symbols:   CONTAINS InterPro DOMAIN/s: Putative harbinger transposase-derived nuclease (InterPro:IPR006912); Has 451 Blast hits to 352 proteins in 33 species: Archae - 0; Bacteria - 0; Metazoa - 28; Fungi - 8; Plants - 388; Viruses - 0; Other Eukaryotes - 27 (source: NCBI BLINK).   chr2:5736603-5737847 FORWARD LENGTH=343     | 358  | 343 | 6.00E-26  | 95.8  | 15.6 | 19.6 |  |
| Rsa1.0_00819.1.g19941.t1 | ref XP_002868541.1  hypothetical protein ARALYDRAFT_915930 [Arabidopsis lyrata subsp. lyrata] gi 297314377 gb EFH44800.1  hypothetical protein ARALYDRAFT_915930 [Arabidopsis lyrata subsp. lyrata]                                                                                                                                                                 | 229  | 167  | 9.00E-28  | 72.9  | 27.1 | 32.3 | hypothetical protein ARALYDRAFT_915930              | gbpln | Arabidopsis lyrata   | AT2G22440.1   Symbols:   BEST Arabidopsis thaliana protein match is: Ribonuclease H-like superfamily protein (TAIR:AT4G29090.1); Has 208 Blast hits to 191 proteins in 10 species: Archae - 0; Bacteria - 0; Metazoa - 0; Fungi - 0; Plants - 208; Viruses - 0; Other Eukaryotes - 0 (source: NCBI BLINK).   chr2:9528910-9529917 FORWARD LENGTH=256 | 229  | 256 | 3.00E-11  | 111.8 | 18.8 | 27.9 |  |
| Rsa1.0_00819.1.g19942.t1 | gb EOA31239.1  hypothetical protein CARUB_v10014410mg [Capsella rubella]                                                                                                                                                                                                                                                                                            | 226  | 264  | 1.00E-115 | 116.8 | 89.4 | 91.6 | hypothetical protein CARUB_v10014410mg              | gbpln | Capsella rubella     | AT2G20120.1   Symbols: GOV1   Protein of unknown function (DUF502)   chr2:8687568-8689321 REVERSE LENGTH=268                                                                                                                                                                                                                                         | 226  | 268 | 1.00E-105 | 118.6 | 80.1 | 85.8 |  |
| Rsa1.0_00819.1.g19943.t2 | # # # # # # # # - ----                                                                                                                                                                                                                                                                                                                                              |      |      |           |       |      |      |                                                     |       |                      |                                                                                                                                                                                                                                                                                                                                                      |      |     |           |       |      |      |  |
| Rsa1.0_00819.1.g19944.t1 | ref XP_002885662.1  hypothetical protein ARALYDRAFT_319167 [Arabidopsis lyrata subsp. lyrata] gi 297331502 gb EFH61921.1  hypothetical protein ARALYDRAFT_319167 [Arabidopsis lyrata subsp. lyrata]                                                                                                                                                                 | 521  | 524  | 0         | 100.6 | 92.1 | 95.6 | hypothetical protein ARALYDRAFT_319167              | gbpln | Arabidopsis lyrata   | AT3G24620.1   Symbols: ATROPGEF8, ROPGEF8   RHO guanyl-nucleotide exchange factor 8   chr3:8980695-8982793 REVERSE LENGTH=523                                                                                                                                                                                                                        | 521  | 523 | 0         | 100.4 | 91.9 | 95.4 |  |
| Rsa1.0_00820.1.g19945.t1 | ref XP_002883416.1  hypothetical protein ARALYDRAFT_319045 [Arabidopsis lyrata subsp. lyrata] gi 297329256 gb EFH59675.1  hypothetical protein ARALYDRAFT_319045 [Arabidopsis lyrata subsp. lyrata]                                                                                                                                                                 | 364  | 342  | 3.00E-62  | 94.0  | 46.2 | 59.3 | hypothetical protein ARALYDRAFT_319045              | gbpln | Arabidopsis lyrata   | AT3G23260.1   Symbols:   F-box and associated interaction domains-containing protein   chr3:8313334-8314422 FORWARD LENGTH=362                                                                                                                                                                                                                       | 364  | 362 | 3.00E-61  | 99.5  | 46.4 | 58.8 |  |
| Rsa1.0_00820.1.g19946.t1 | gb AAC33226.1  putative non-LTR retroelement reverse transcriptase [Arabidopsis thaliana]                                                                                                                                                                                                                                                                           | 1742 | 1529 | 0         | 87.8  | 41.5 | 58.9 | putative non-LTR retroelement reverse transcriptase | gbpln | Arabidopsis thaliana | AT3G24255.1   Symbols:   RNA-directed DNA polymerase (reverse transcriptase)-related family protein   chr3:8789471-8793208 FORWARD LENGTH=746                                                                                                                                                                                                        | 1742 | 746 | 1.00E-112 | 42.8  | 11.8 | 15.4 |  |

|                          |                                                                                                                                                                                                                                                                                                                                                                                                                                                                                                                                                                                                                                                                                                                                                                                                                                                                                                                                                                                                                                                                                                                                                                                      |     |      |           |       |      |      |                                                         |       |                      |                                                                                                                                                                                                                                                                                                                                           |     |     |           |       |      |      |
|--------------------------|--------------------------------------------------------------------------------------------------------------------------------------------------------------------------------------------------------------------------------------------------------------------------------------------------------------------------------------------------------------------------------------------------------------------------------------------------------------------------------------------------------------------------------------------------------------------------------------------------------------------------------------------------------------------------------------------------------------------------------------------------------------------------------------------------------------------------------------------------------------------------------------------------------------------------------------------------------------------------------------------------------------------------------------------------------------------------------------------------------------------------------------------------------------------------------------|-----|------|-----------|-------|------|------|---------------------------------------------------------|-------|----------------------|-------------------------------------------------------------------------------------------------------------------------------------------------------------------------------------------------------------------------------------------------------------------------------------------------------------------------------------------|-----|-----|-----------|-------|------|------|
| Rsa1.0_00820.1.g19947.t1 | ref NP_567604.1  cysteine-rich repeat secretory protein 54 [Arabidopsis thaliana] gi 18415520 ref NP_567604.1  cysteine-rich repeat secretory protein 53 [Arabidopsis thaliana] gi 18415540 ref NP_567613.1  cysteine-rich repeat secretory protein 44 [Arabidopsis thaliana] gi 5262176 emb CAB45819.1  putative protein [Arabidopsis thaliana] gi 5262177 emb CAB45820.1  putative protein [Arabidopsis thaliana] gi 5262178 emb CAB45821.1  putative protein [Arabidopsis thaliana] gi 5262179 emb CAB45822.1  putative protein [Arabidopsis thaliana] gi 5262180 emb CAB45823.1  putative protein [Arabidopsis thaliana] gi 5262181 emb CAB45824.1  putative protein [Arabidopsis thaliana] gi 5262182 emb CAB45825.1  putative protein [Arabidopsis thaliana] gi 5262183 emb CAB45826.1  putative protein [Arabidopsis thaliana] gi 5262184 emb CAB45827.1  putative protein [Arabidopsis thaliana] gi 5262185 emb CAB45828.1  putative protein [Arabidopsis thaliana] gi 5262186 emb CAB45829.1  putative protein [Arabidopsis thaliana] gi 5262187 emb CAB45830.1  putative protein [Arabidopsis thaliana] gi 7268849 emb CAB79053.1  putative protein [Arabidopsis thaliana] | 100 | 468  | 3.00E-17  | 468.0 | 46.0 | 59.0 | cysteine-rich repeat secretory protein 54               | gbpln | Arabidopsis thaliana | AT4G20530.1   Symbols:   Protein with domains of unknown function (DUF26 and DUF1204)   chr4:11048627-11050975 FORWARD LENGTH=468                                                                                                                                                                                                         | 100 | 468 | 5.00E-20  | 468.0 | 46.0 | 59.0 |
| Rsa1.0_00820.1.g19948.t2 | dbj BAB09379.1  non-LTR retroelement reverse transcriptase-like protein [Arabidopsis thaliana]                                                                                                                                                                                                                                                                                                                                                                                                                                                                                                                                                                                                                                                                                                                                                                                                                                                                                                                                                                                                                                                                                       | 321 | 1223 | 9.00E-69  | 381.0 | 50.2 | 68.5 | non-LTR retroelement reverse transcriptase-like protein | gbpln | Arabidopsis thaliana | AT3G24255.1   Symbols:   RNA-directed DNA polymerase (reverse transcriptase)-related family protein   chr3:8789471-8793208 FORWARD LENGTH=746                                                                                                                                                                                             | 321 | 746 | 6.00E-38  | 232.4 | 29.9 | 42.1 |
| Rsa1.0_00820.1.g19949.t1 | #                                                                                                                                                                                                                                                                                                                                                                                                                                                                                                                                                                                                                                                                                                                                                                                                                                                                                                                                                                                                                                                                                                                                                                                    | #   | #    | #         | #     | #    | #    | -                                                       | ----  | ----                 | #                                                                                                                                                                                                                                                                                                                                         | #   | #   | #         | #     | #    | #    |
| Rsa1.0_00820.1.g19950.t1 | #                                                                                                                                                                                                                                                                                                                                                                                                                                                                                                                                                                                                                                                                                                                                                                                                                                                                                                                                                                                                                                                                                                                                                                                    | #   | #    | #         | #     | #    | #    | -                                                       | ----  | ----                 | #                                                                                                                                                                                                                                                                                                                                         | #   | #   | #         | #     | #    | #    |
| Rsa1.0_00820.1.g19951.t1 | ref NP_188957.2  uncharacterized protein [Arabidopsis thaliana] gi 7939524 dbj BAA95727.1  unnamed protein product [Arabidopsis thaliana] gi 332643204 gb AEE76725.1  uncharacterized protein AT3G23160 [Arabidopsis thaliana]                                                                                                                                                                                                                                                                                                                                                                                                                                                                                                                                                                                                                                                                                                                                                                                                                                                                                                                                                       | 492 | 531  | 0         | 107.9 | 88.6 | 94.7 | uncharacterized protein                                 | gbpln | Arabidopsis thaliana | AT3G23160.1   Symbols:   Protein of unknown function (DUF668)   chr3:8260059-8261654 REVERSE LENGTH=531                                                                                                                                                                                                                                   | 492 | 531 | 0         | 107.9 | 88.6 | 94.7 |
| Rsa1.0_00820.1.g19952.t1 | gb AAM67024.1  unknown [Arabidopsis thaliana]                                                                                                                                                                                                                                                                                                                                                                                                                                                                                                                                                                                                                                                                                                                                                                                                                                                                                                                                                                                                                                                                                                                                        | 129 | 107  | 6.00E-31  | 82.9  | 61.2 | 66.7 | unknown                                                 | gbpln | Arabidopsis thaliana | AT3G23170.1   Symbols:   unknown protein; BEST Arabidopsis thaliana protein match is: unknown protein (TAIR:AT4G14450.1). Has 74 Blast hits to 74 proteins in 6 species: Archae - 0; Bacteria - 0; Metazoa - 0; Fungi - 0; Plants - 74; Viruses - 0; Other Eukaryotes - 0 (source: NCBI BLINK).   chr3:8268265-8268588 REVERSE LENGTH=107 | 129 | 107 | 8.00E-33  | 82.9  | 60.5 | 65.9 |
| Rsa1.0_00820.1.g19953.t1 | #                                                                                                                                                                                                                                                                                                                                                                                                                                                                                                                                                                                                                                                                                                                                                                                                                                                                                                                                                                                                                                                                                                                                                                                    | #   | #    | #         | #     | #    | #    | -                                                       | ----  | ----                 | #                                                                                                                                                                                                                                                                                                                                         | #   | #   | #         | #     | #    | #    |
| Rsa1.0_00820.1.g19954.t1 | gb EOA32854.1  hypothetical protein CARUB_v10016168mg [Capsella rubella]                                                                                                                                                                                                                                                                                                                                                                                                                                                                                                                                                                                                                                                                                                                                                                                                                                                                                                                                                                                                                                                                                                             | 177 | 180  | 5.00E-82  | 101.7 | 84.7 | 93.2 | hypothetical protein CARUB_v10016168mg                  | gbpln | Capsella rubella     | AT3G23175.1   Symbols:   HR-like lesion-inducing protein-related   chr3:8274202-8274973 REVERSE LENGTH=169                                                                                                                                                                                                                                | 177 | 169 | 2.00E-76  | 95.5  | 74.0 | 86.4 |
| Rsa1.0_00820.1.g19955.t1 | ref NP_188959.3  HR-like lesion-inducing protein-like protein [Arabidopsis thaliana] gi 7939528 dbj BAA95731.1  HR-like lesion-inducing protein [Arabidopsis thaliana] gi 332643211 gb AEE76732.1  HR-like lesion-inducing protein-like protein [Arabidopsis thaliana]                                                                                                                                                                                                                                                                                                                                                                                                                                                                                                                                                                                                                                                                                                                                                                                                                                                                                                               | 217 | 217  | 1.00E-100 | 100.0 | 79.3 | 88.9 | HR-like lesion-inducing protein-like protein            | gbpln | Arabidopsis thaliana | AT3G23180.1   Symbols:   HR-like lesion-inducing protein-related   chr3:8277131-8278396 FORWARD LENGTH=217                                                                                                                                                                                                                                | 217 | 217 | 1.00E-102 | 100.0 | 79.3 | 88.9 |
| Rsa1.0_00820.1.g19956.t1 | gb EOA12359.1  hypothetical protein CARUB_v10016511mg [Capsella rubella]                                                                                                                                                                                                                                                                                                                                                                                                                                                                                                                                                                                                                                                                                                                                                                                                                                                                                                                                                                                                                                                                                                             | 348 | 356  | 4.00E-65  | 102.3 | 38.5 | 48.0 | hypothetical protein CARUB_v10016511mg                  | gbpln | Capsella rubella     | AT4G10190.1   Symbols:   F-box and associated interaction domains-containing protein   chr4:6350928-6352031 FORWARD LENGTH=367                                                                                                                                                                                                            | 348 | 367 | 2.00E-52  | 105.5 | 33.6 | 41.4 |
| Rsa1.0_00820.1.g19957.t1 | ref XP_002883411.1  hypothetical protein ARALYDRAFT_898831 [Arabidopsis lyrata subsp. lyrata] gi 297329251 gb EFH59670.1  hypothetical protein ARALYDRAFT_898831 [Arabidopsis lyrata subsp. lyrata]                                                                                                                                                                                                                                                                                                                                                                                                                                                                                                                                                                                                                                                                                                                                                                                                                                                                                                                                                                                  | 154 | 152  | 6.00E-68  | 98.7  | 84.4 | 92.9 | hypothetical protein ARALYDRAFT_898831                  | gbpln | Arabidopsis lyrata   | AT3G23200.1   Symbols:   Uncharacterised protein family (UPF0497)   chr3:8281659-8282603 FORWARD LENGTH=152                                                                                                                                                                                                                               | 154 | 152 | 3.00E-70  | 98.7  | 83.8 | 92.9 |

|                          |                                                                                                                                                                                                                                                                                                                                                                                                                                                                                                                                                                                                                                                                                                                         |     |     |           |       |      |      |                                               |       |                      |                                                                                                                                         |     |     |           |       |      |       |
|--------------------------|-------------------------------------------------------------------------------------------------------------------------------------------------------------------------------------------------------------------------------------------------------------------------------------------------------------------------------------------------------------------------------------------------------------------------------------------------------------------------------------------------------------------------------------------------------------------------------------------------------------------------------------------------------------------------------------------------------------------------|-----|-----|-----------|-------|------|------|-----------------------------------------------|-------|----------------------|-----------------------------------------------------------------------------------------------------------------------------------------|-----|-----|-----------|-------|------|-------|
| Rsa1.0_00820.1.g19958.t1 | gb AAM10939.1 AF488573.1 putative bHLH transcription factor [Arabidopsis thaliana]                                                                                                                                                                                                                                                                                                                                                                                                                                                                                                                                                                                                                                      | 214 | 291 | 4.00E-75  | 136.0 | 71.5 | 77.1 | putative bHLH transcription factor            | gbpln | Arabidopsis thaliana | AT3G23210.1   Symbols: bHLH34   basic helix-loop-helix (bHLH) DNA-binding superfamily protein   chr3:8283255-8284915 REVERSE LENGTH=320 | 214 | 320 | 2.00E-77  | 149.5 | 71.5 | 77.1  |
| Rsa1.0_00821.1.g19959.t1 | #                                                                                                                                                                                                                                                                                                                                                                                                                                                                                                                                                                                                                                                                                                                       | #   | #   | #         | #     | #    | -    |                                               | ----  | ----                 | #                                                                                                                                       | #   | #   | #         | #     | #    | #     |
| Rsa1.0_00821.1.g19960.t1 | gb EMT31378.1  Zinc finger CCOH domain-containing protein 30 [Aegilops tauschii]                                                                                                                                                                                                                                                                                                                                                                                                                                                                                                                                                                                                                                        | 110 | 671 | 4.00E-60  | 610.0 | 92.7 | 94.5 | Zinc finger CCOH domain-containing protein 30 | gbpln | Aegilops tauschii    | AT2G30000.1   Symbols:   PHF5-like protein   chr2:12804042-12804374 REVERSE LENGTH=110                                                  | 110 | 110 | 3.00E-59  | 100.0 | 99.1 | 100.0 |
| Rsa1.0_00821.1.g19961.t1 | ref NP_172196.1  putative protein phosphatase 2C 2 [Arabidopsis thaliana] gi 75303253 sp Q8RX37.1 P2C02_ARAT_H RecName: Full=Probable protein phosphatase 2C 2; Short=AtPP2C02; AltName: Full=Protein phosphatase AP2C2 gi 20258780 gb AAM13912.1  putative protein phosphatase 2C [Arabidopsis thaliana] gi 332189963 gb AEE28084.1  putative protein phosphatase 2C 2 [Arabidopsis thaliana] gi 333891315 gb AEG21042.1  PP2C-type phosphatase AP2C2 [Arabidopsis thaliana]                                                                                                                                                                                                                                           | 380 | 380 | 1.00E-155 | 100.0 | 76.8 | 85.0 | putative protein phosphatase 2C 2             | gbpln | Arabidopsis thaliana | AT1G07160.1   Symbols:   Protein phosphatase 2C family protein   chr1:2198155-2199678 REVERSE LENGTH=380                                | 380 | 380 | 1.00E-158 | 100.0 | 76.8 | 85.0  |
| Rsa1.0_00821.1.g19962.t1 | gb EOA40139.1  hypothetical protein CARUB_v10008850mg [Capsella rubella]                                                                                                                                                                                                                                                                                                                                                                                                                                                                                                                                                                                                                                                | 398 | 523 | 1.00E-152 | 131.4 | 70.6 | 80.7 | hypothetical protein CARUB_v10008850mg        | gbpln | Capsella rubella     | AT1G07150.2   Symbols: MAPKKK13   mitogen-activated protein kinase kinase 13   chr1:2193983-2195736 REVERSE LENGTH=493                  | 398 | 493 | 1.00E-153 | 123.9 | 69.3 | 79.1  |
| Rsa1.0_00821.1.g19963.t1 | ref XP_002887117.1  predicted protein [Arabidopsis lyrata subsp. lyrata] gi 297332958 gb EFH63376.1  predicted protein [Arabidopsis lyrata subsp. lyrata]                                                                                                                                                                                                                                                                                                                                                                                                                                                                                                                                                               | 470 | 479 | 1.00E-100 | 101.9 | 46.8 | 62.6 | predicted protein                             | gbpln | Arabidopsis lyrata   | AT1G67390.1   Symbols:   F-box family protein   chr1:25244690-25247139 FORWARD LENGTH=479                                               | 470 | 479 | 1.00E-101 | 101.9 | 45.7 | 62.1  |
| Rsa1.0_00821.1.g19964.t1 | gb ABB97039.1  unknown [Brassica rapa]                                                                                                                                                                                                                                                                                                                                                                                                                                                                                                                                                                                                                                                                                  | 163 | 225 | 2.00E-70  | 138.0 | 79.1 | 80.4 | unknown                                       | gbpln | Brassica rapa        | AT1G07140.1   Symbols: SIRANBP   Pleckstrin homology (PH) domain superfamily protein   chr1:2192360-2193688 REVERSE LENGTH=228          | 163 | 228 | 5.00E-71  | 139.9 | 77.3 | 79.1  |
| Rsa1.0_00821.1.g19965.t1 | #                                                                                                                                                                                                                                                                                                                                                                                                                                                                                                                                                                                                                                                                                                                       | #   | #   | #         | #     | #    | -    |                                               | ----  | ----                 | #                                                                                                                                       | #   | #   | #         | #     | #    | #     |
| Rsa1.0_00821.1.g19966.t1 | ref XP_002892382.1  hypothetical protein ARALYDRAFT_470734 [Arabidopsis lyrata subsp. lyrata] gi 297338224 gb EFH68641.1  hypothetical protein ARALYDRAFT_470734 [Arabidopsis lyrata subsp. lyrata]                                                                                                                                                                                                                                                                                                                                                                                                                                                                                                                     | 172 | 145 | 8.00E-16  | 84.3  | 23.8 | 29.7 | hypothetical protein ARALYDRAFT_470734        | gbpln | Arabidopsis lyrata   | AT1G07135.1   Symbols:   glycine-rich protein   chr1:2190157-2190624 REVERSE LENGTH=155                                                 | 172 | 155 | 5.00E-13  | 90.1  | 24.4 | 30.2  |
| Rsa1.0_00821.1.g19967.t1 | ref XP_002892380.1  hypothetical protein ARALYDRAFT_470732 [Arabidopsis lyrata subsp. lyrata] gi 297338222 gb EFH68639.1  hypothetical protein ARALYDRAFT_470732 [Arabidopsis lyrata subsp. lyrata]                                                                                                                                                                                                                                                                                                                                                                                                                                                                                                                     | 784 | 743 | 0         | 94.8  | 84.9 | 89.3 | hypothetical protein ARALYDRAFT_470732        | gbpln | Arabidopsis lyrata   | AT1G07110.1   Symbols: F2KP, ATF2KP, FKFBP   fructose-2,6-bisphosphatase   chr1:2178363-2183980 REVERSE LENGTH=744                      | 784 | 744 | 0         | 94.9  | 84.7 | 89.2  |
| Rsa1.0_00821.1.g19968.t1 | ref NP_563780.1  uncharacterized protein [Arabidopsis thaliana] gi 8954037 gb AAF82211.1 AC067971_19 Strong similarity to an unknown protein At2g31160 gi 3746060 from Arabidopsis thaliana BAC F7F1 gb AC005311. EST gb AI998165 comes from this gene [Arabidopsis thaliana] gi 21555695 gb AAM63916.1  unknown [Arabidopsis thaliana] gi 28392914 gb AAO41893.1  unknown protein [Arabidopsis thaliana] gi 56236136 gb AAV84524.1  At1g07090 [Arabidopsis thaliana] gi 88193786 gb ABD42982.1  At1g07090 [Arabidopsis thaliana] gi 332189955 gb AEE28076.1  uncharacterized protein AT1G07090 [Arabidopsis thaliana] ref NP_563779.1  GILT domain-containing protein [Arabidopsis thaliana] gi 15146334 gb AAK83650.1 | 198 | 196 | 3.00E-90  | 99.0  | 85.9 | 90.4 | uncharacterized protein                       | gbpln | Arabidopsis thaliana | AT1G07090.1   Symbols: LSH6   Protein of unknown function (DUF640)   chr1:2174202-2174792 REVERSE LENGTH=196                            | 198 | 196 | 9.00E-93  | 99.0  | 85.9 | 90.4  |
| Rsa1.0_00821.1.g19969.t1 | At1g07080/F10K1_15 [Arabidopsis thaliana] gi 15809756 gb AAL06806.1  At1g07080/F10K1_15 [Arabidopsis thaliana] gi 332189954 gb AEE28075.1  GILT domain-containing protein [Arabidopsis thaliana]                                                                                                                                                                                                                                                                                                                                                                                                                                                                                                                        | 262 | 265 | 1.00E-119 | 101.1 | 80.5 | 87.8 | GILT domain-containing protein                | gbpln | Arabidopsis thaliana | AT1G07080.1   Symbols:   Thioredoxin superfamily protein   chr1:2170069-2171861 FORWARD LENGTH=265                                      | 262 | 265 | 1.00E-121 | 101.1 | 80.5 | 87.8  |

|                          |                                                                                                                                                                                                                                                                                                                                                                                                                     |     |     |           |        |      |      |                                                   |       |                         |                                                                                                                                                                                                                                                                                                                                                                                                                                                                                                                              |     |     |           |        |      |      |
|--------------------------|---------------------------------------------------------------------------------------------------------------------------------------------------------------------------------------------------------------------------------------------------------------------------------------------------------------------------------------------------------------------------------------------------------------------|-----|-----|-----------|--------|------|------|---------------------------------------------------|-------|-------------------------|------------------------------------------------------------------------------------------------------------------------------------------------------------------------------------------------------------------------------------------------------------------------------------------------------------------------------------------------------------------------------------------------------------------------------------------------------------------------------------------------------------------------------|-----|-----|-----------|--------|------|------|
| Rsa1.0_00821.1.g19970.t1 | ref[XP_002892378.1] F10K1.23<br>[Arabidopsis lyrata subsp. lyrata]<br>gi 297338220 gb EFH68637.1  F10K1.23<br>[Arabidopsis lyrata subsp. lyrata]                                                                                                                                                                                                                                                                    | 253 | 251 | 1.00E-109 | 99.2   | 78.7 | 87.0 | F10K1.23                                          | gbpln | Arabidopsis<br>lyrata   | AT1G07060.1   Symbols:   unknown protein;<br>Has 30 Blast hits to 30 proteins in 10<br>species: Archae - 0; Bacteria - 0; Metazoa -<br>0; Fungi - 0; Plants - 30; Viruses - 0; Other<br>Eukaryotes - 0 (source: NCBI BLink).  <br>chr1:2167138-2168397 REVERSE<br>LENGTH=233                                                                                                                                                                                                                                                 | 253 | 233 | 7.00E-80  | 92.1   | 58.5 | 65.2 |
| Rsa1.0_00821.1.g19971.t2 | ref[XP_002892377.1] predicted protein<br>[Arabidopsis lyrata subsp. lyrata]<br>gi 297338219 gb EFH68636.1  predicted<br>protein [Arabidopsis lyrata subsp.<br>lyrata]                                                                                                                                                                                                                                               | 211 | 194 | 3.00E-69  | 91.9   | 67.8 | 77.7 | predicted protein                                 | gbpln | Arabidopsis<br>lyrata   | AT1G07050.1   Symbols:   CCT motif family<br>protein   chr1:2164327-2165133 REVERSE<br>LENGTH=195                                                                                                                                                                                                                                                                                                                                                                                                                            | 211 | 195 | 1.00E-66  | 92.4   | 65.4 | 77.7 |
| Rsa1.0_00821.1.g19972.t1 | ref[XP_002892376.1] hypothetical<br>protein ARALYDRAFT_887913<br>[Arabidopsis lyrata subsp. lyrata]<br>gi 297338218 gb EFH68635.1 <br>hypothetical protein<br>ARALYDRAFT_887913 [Arabidopsis<br>lyrata subsp. lyrata]                                                                                                                                                                                               | 370 | 371 | 1.00E-178 | 100.3  | 85.7 | 89.5 | hypothetical protein<br>ARALYDRAFT_887913         | gbpln | Arabidopsis<br>lyrata   | AT1G07040.1   Symbols:   unknown protein;<br>INVOLVED IN: biological process unknown;<br>LOCATED IN: chloroplast; EXPRESSED IN:<br>24 plant structures; EXPRESSED DURING:<br>14 growth stages; BEST Arabidopsis thaliana<br>protein match is: unknown protein<br>(TAIR:AT1G27030.1); Has 540 Blast hits to<br>538 proteins in 187 species: Archae - 0;<br>Bacteria - 333; Metazoa - 0; Fungi - 0;<br>Plants - 67; Viruses - 0; Other Eukaryotes -<br>140 (source: NCBI BLink).   chr1:2161225-<br>2163035 REVERSE LENGTH=371 | 370 | 371 | 1.00E-176 | 100.3  | 85.1 | 90.0 |
| Rsa1.0_00821.1.g19973.t1 | ref[XP_002892375.1] mitochondrial<br>substrate carrier family protein<br>[Arabidopsis lyrata subsp. lyrata]<br>gi 297338217 gb EFH68634.1 <br>mitochondrial substrate carrier family<br>protein [Arabidopsis lyrata subsp.<br>lyrata]                                                                                                                                                                               | 330 | 326 | 1.00E-165 | 98.8   | 89.1 | 94.2 | mitochondrial substrate<br>carrier family protein | gbpln | Arabidopsis<br>lyrata   | AT1G07030.1   Symbols:   Mitochondrial<br>substrate carrier family protein  <br>chr1:2158631-2160524 REVERSE<br>LENGTH=326                                                                                                                                                                                                                                                                                                                                                                                                   | 330 | 326 | 1.00E-165 | 98.8   | 87.9 | 93.3 |
| Rsa1.0_00821.1.g19974.t1 | gb AFY13519.1  cyclophilin 1<br>[Aeschynomene evenia]<br>gi 426207762 gb AFY13520.1  cyclophilin<br>1 [Aeschynomene evenia]<br>gi 426207764 gb AFY13521.1  cyclophilin<br>1 [Aeschynomene evenia]<br>gi 426207766 gb AFY13522.1  cyclophilin<br>1 [Aeschynomene evenia]<br>gi 426207768 gb AFY13523.1  cyclophilin<br>1 [Aeschynomene evenia]<br>gi 426207770 gb AFY13524.1  cyclophilin<br>1 [Aeschynomene evenia] | 282 | 172 | 1.00E-43  | 61.0   | 33.3 | 40.1 | cyclophilin 1                                     | gbpln | Aeschynome<br>ne evenia | AT2G16600.1   Symbols: ROC3   rotamase<br>CYP 3   chr2:7200862-7201383 FORWARD<br>LENGTH=173                                                                                                                                                                                                                                                                                                                                                                                                                                 | 282 | 173 | 7.00E-46  | 61.3   | 33.0 | 40.4 |
| Rsa1.0_00821.1.g19975.t1 | ref[XP_002889629.1] hypothetical<br>protein ARALYDRAFT_470724<br>[Arabidopsis lyrata subsp. lyrata]<br>gi 297335471 gb EFH68888.1 <br>hypothetical protein<br>ARALYDRAFT_470724 [Arabidopsis<br>lyrata subsp. lyrata]                                                                                                                                                                                               | 371 | 392 | 0         | 105.7  | 87.6 | 94.9 | hypothetical protein<br>ARALYDRAFT_470724         | gbpln | Arabidopsis<br>lyrata   | AT1G07010.1   Symbols:   Calcineurin-like<br>metallo-phosphoesterase superfamily protein<br>  chr1:2152949-2154968 FORWARD<br>LENGTH=389                                                                                                                                                                                                                                                                                                                                                                                     | 371 | 389 | 0         | 104.9  | 89.2 | 95.1 |
| Rsa1.0_00821.1.g19976.t1 | ref[XP_002892371.1] ATEXO70B2<br>[Arabidopsis lyrata subsp. lyrata]<br>gi 297338213 gb EFH68630.1 <br>ATEXO70B2 [Arabidopsis lyrata subsp.<br>lyrata]                                                                                                                                                                                                                                                               | 603 | 599 | 0         | 99.3   | 86.9 | 92.9 | ATEXO70B2                                         | gbpln | Arabidopsis<br>lyrata   | AT1G07000.1   Symbols: ATEXO70B2,<br>EXO70B2   exocyst subunit exo70 family<br>protein B2   chr1:2150398-2152305<br>REVERSE LENGTH=599                                                                                                                                                                                                                                                                                                                                                                                       | 603 | 599 | 0         | 99.3   | 85.4 | 92.2 |
| Rsa1.0_00822.1.g19977.t1 | gb ADZ98867.1  MYB domain protein 12<br>[Brassica rapa subsp. rapa]                                                                                                                                                                                                                                                                                                                                                 | 377 | 381 | 1.00E-148 | 101.1  | 76.1 | 83.6 | MYB domain protein 12                             | gbpln | Brassica<br>rapa        | AT2G47460.1   Symbols: MYB12, ATMYP12,<br>PFG1   myb domain protein 12  <br>chr2:19476438-19479242 FORWARD<br>LENGTH=371                                                                                                                                                                                                                                                                                                                                                                                                     | 377 | 371 | 1.00E-142 | 98.4   | 74.3 | 82.0 |
| Rsa1.0_00822.1.g19978.t1 | #                                                                                                                                                                                                                                                                                                                                                                                                                   | #   | #   | #         | #      | #    | #    | -                                                 | ----  | ----                    | #                                                                                                                                                                                                                                                                                                                                                                                                                                                                                                                            | #   | #   | #         | #      | #    |      |
| Rsa1.0_00822.1.g19979.t1 | #                                                                                                                                                                                                                                                                                                                                                                                                                   | #   | #   | #         | #      | #    | #    | -                                                 | ----  | ----                    | #                                                                                                                                                                                                                                                                                                                                                                                                                                                                                                                            | #   | #   | #         | #      | #    |      |
| Rsa1.0_00822.1.g19980.t1 | gb ACG60672.1  unknown protein<br>[Brassica oleracea var. aboglabra]                                                                                                                                                                                                                                                                                                                                                | 607 | 288 | 1.00E-34  | 47.4   | 14.8 | 20.8 | unknown protein                                   | gbpln | Brassica<br>oleracea    | #                                                                                                                                                                                                                                                                                                                                                                                                                                                                                                                            | #   | #   | #         | #      | #    |      |
| Rsa1.0_00822.1.g19981.t1 | #                                                                                                                                                                                                                                                                                                                                                                                                                   | #   | #   | #         | #      | #    | #    | -                                                 | ----  | ----                    | #                                                                                                                                                                                                                                                                                                                                                                                                                                                                                                                            | #   | #   | #         | #      | #    |      |
| Rsa1.0_00822.1.g19982.t1 | ref[XP_002880305.1] hypothetical<br>protein ARALYDRAFT_904222<br>[Arabidopsis lyrata subsp. lyrata]<br>gi 297326144 gb EFH56564.1 <br>hypothetical protein<br>ARALYDRAFT_904222 [Arabidopsis<br>lyrata subsp. lyrata]                                                                                                                                                                                               | 362 | 361 | 0         | 99.7   | 93.6 | 96.1 | hypothetical protein<br>ARALYDRAFT_904222         | gbpln | Arabidopsis<br>lyrata   | AT2G47470.1   Symbols: ATPDIL2-1, UNE5,<br>MEE30, PDI11, ATPD11   thioredoxin family<br>protein   chr2:19481503-19483683<br>FORWARD LENGTH=361                                                                                                                                                                                                                                                                                                                                                                               | 362 | 361 | 0         | 99.7   | 92.8 | 95.3 |
| Rsa1.0_00822.1.g19983.t1 | ref[XP_002891574.1] SNF2 domain-<br>containing protein [Arabidopsis lyrata<br>subsp. lyrata]<br>gi 297337416 gb EFH67833.1  SNF2<br>domain-containing protein [Arabidopsis<br>lyrata subsp. lyrata]                                                                                                                                                                                                                 | 92  | 980 | 2.00E-38  | 1065.2 | 82.6 | 92.4 | SNF2 domain-<br>containing protein                | gbpln | Arabidopsis<br>lyrata   | AT1G50410.1   Symbols:   SNF2 domain-<br>containing protein / helicase domain-<br>containing protein / zinc finger protein-<br>related   chr1:18672828-18677365<br>FORWARD LENGTH=981                                                                                                                                                                                                                                                                                                                                        | 92  | 981 | 2.00E-40  | 1066.3 | 81.5 | 92.4 |

|                          |                                                                                                                                                                                                                                                              |      |      |           |       |      |      |                                                     |       |                      |                                                                                                                                                                                                                                                                                                                                                                                                                                                                     |      |     |           |       |      |      |
|--------------------------|--------------------------------------------------------------------------------------------------------------------------------------------------------------------------------------------------------------------------------------------------------------|------|------|-----------|-------|------|------|-----------------------------------------------------|-------|----------------------|---------------------------------------------------------------------------------------------------------------------------------------------------------------------------------------------------------------------------------------------------------------------------------------------------------------------------------------------------------------------------------------------------------------------------------------------------------------------|------|-----|-----------|-------|------|------|
| Rsa1.0_00822.1.g19984.t1 | refNP_850547.1   RING/U-box domain-containing protein [Arabidopsis thaliana]   g1332641290   gb AE7481.1   RING/U-box domain-containing protein [Arabidopsis thaliana]                                                                                       | 103  | 341  | 6.00E-11  | 331.1 | 30.1 | 35.9 | RING/U-box domain-containing protein                | gbpln | Arabidopsis thaliana | AT3G09770.2   Symbols:   RING/U-box superfamily protein   chr3:2996629-2997835 REVERSE LENGTH=341                                                                                                                                                                                                                                                                                                                                                                   | 103  | 341 | 1.00E-13  | 331.1 | 30.1 | 35.9 |
| Rsa1.0_00822.1.g19985.t1 | #                                                                                                                                                                                                                                                            | #    | #    | #         | #     | #    | #    | -                                                   | ----  | ----                 | #                                                                                                                                                                                                                                                                                                                                                                                                                                                                   | #    | #   | #         | #     | #    |      |
| Rsa1.0_00822.1.g19986.t2 | gb EOA27436.1   hypothetical protein CARUB_v10023573mg [Capsella rubella]                                                                                                                                                                                    | 256  | 338  | 1.00E-140 | 132.0 | 96.5 | 98.8 | hypothetical protein CARUB_v10023573mg              | gbpln | Capsella rubella     | AT3G62870.1   Symbols:   Ribosomal protein L7Ae/L30e/S12e/Gadd45 family protein   chr3:23242862-23244273 REVERSE LENGTH=256                                                                                                                                                                                                                                                                                                                                         | 256  | 256 | 1.00E-142 | 100.0 | 96.5 | 98.4 |
| Rsa1.0_00822.1.g19987.t1 | refXP_002880821.1   kinase family protein [Arabidopsis lyrata subsp. lyrata]   g1297326660   gb EFH57080.1   kinase family protein [Arabidopsis lyrata subsp. lyrata]                                                                                        | 328  | 318  | 1.00E-102 | 97.0  | 58.2 | 66.8 | kinase family protein                               | gbpln | Arabidopsis lyrata   | AT2G41920.1   Symbols:   Protein kinase superfamily protein   chr2:17499448-17500404 FORWARD LENGTH=318                                                                                                                                                                                                                                                                                                                                                             | 328  | 318 | 2.00E-97  | 97.0  | 54.6 | 66.2 |
| Rsa1.0_00822.1.g19988.t1 | #                                                                                                                                                                                                                                                            | #    | #    | #         | #     | #    | #    | -                                                   | ----  | ----                 | #                                                                                                                                                                                                                                                                                                                                                                                                                                                                   | #    | #   | #         | #     | #    |      |
| Rsa1.0_00823.1.g19989.t1 | gb AAG51783.1   AC079679_3 reverse transcriptase, putative; 16838-20266 [Arabidopsis thaliana]                                                                                                                                                               | 319  | 1142 | 5.00E-60  | 358.0 | 39.2 | 51.7 | reverse transcriptase, putative; 16838-20266        | gbpln | Arabidopsis thaliana | AT2G34320.1   Symbols:   Polynucleotidyl transferase, ribonuclease H-like superfamily protein   chr2:14484959-14485837 FORWARD LENGTH=292                                                                                                                                                                                                                                                                                                                           | 319  | 292 | 6.00E-29  | 91.5  | 27.0 | 43.9 |
| Rsa1.0_00823.1.g19990.t1 | ref NP_177231.2   protein kinase domain-containing protein [Arabidopsis thaliana]   g1193870477   gb ACF22895.1   At1g20740 [Arabidopsis thaliana]   g1332196987   gb AE35108.1   protein kinase domain-containing protein [Arabidopsis thaliana]            | 418  | 425  | 0         | 101.7 | 86.4 | 91.9 | protein kinase domain-containing protein            | gbpln | Arabidopsis thaliana | AT1G70740.1   Symbols:   Protein kinase superfamily protein   chr1:26673847-26675687 REVERSE LENGTH=425                                                                                                                                                                                                                                                                                                                                                             | 418  | 425 | 0         | 101.7 | 86.4 | 91.9 |
| Rsa1.0_00823.1.g19991.t1 | #                                                                                                                                                                                                                                                            | #    | #    | #         | #     | #    | #    | -                                                   | ----  | ----                 | #                                                                                                                                                                                                                                                                                                                                                                                                                                                                   | #    | #   | #         | #     | #    |      |
| Rsa1.0_00823.1.g19992.t1 | gb AAD21778.1   putative non-LTR retroelement reverse transcriptase [Arabidopsis thaliana]                                                                                                                                                                   | 1339 | 1715 | 0         | 128.1 | 31.9 | 44.4 | putative non-LTR retroelement reverse transcriptase | gbpln | Arabidopsis thaliana | AT3G31430.1   Symbols:   unknown protein; FUNCTIONS IN: molecular_function unknown; INVOLVED IN: biological_process unknown; LOCATED IN: endomembrane system; BEST Arabidopsis thaliana protein match is: unknown protein (TAIR:AT5G18636.1); Has 295 Blast hits to 291 proteins in 12 species: Archae - 0; Bacteria - 0; Metazoa - 0; Fungi - 0; Plants - 295; Viruses - 0; Other Eukaryotes - 0 (source: NCBI BLINK).   chr3:12795861-12796871 REVERSE LENGTH=336 | 1339 | 336 | 5.00E-87  | 25.1  | 10.9 | 13.5 |
| Rsa1.0_00823.1.g19993.t1 | gb AAM63352.1   unknown [Arabidopsis thaliana]                                                                                                                                                                                                               | 207  | 200  | 1.00E-76  | 96.6  | 72.5 | 83.1 | unknown                                             | gbpln | Arabidopsis thaliana | AT1G70720.1   Symbols:   Plant invertase/pectin methyltransferase inhibitor superfamily protein   chr1:26666427-26667029 FORWARD LENGTH=200                                                                                                                                                                                                                                                                                                                         | 207  | 200 | 1.00E-73  | 96.6  | 72.5 | 83.1 |
| Rsa1.0_00823.1.g19994.t1 | #                                                                                                                                                                                                                                                            | #    | #    | #         | #     | #    | #    | -                                                   | ----  | ----                 | #                                                                                                                                                                                                                                                                                                                                                                                                                                                                   | #    | #   | #         | #     | #    |      |
| Rsa1.0_00823.1.g19995.t1 | ref NP_177227.5   protein TIFY 7 [Arabidopsis thaliana]   g1342187044   sp Q8W4J8.2   TIF7_ARATH RecName: Full=Protein TIFY 7; AltName: Full=Jasmonate ZIM domain-containing protein 9   g1332196980   gb AEE35101.1   protein TIFY 7 [Arabidopsis thaliana] | 277  | 267  | 1.00E-100 | 96.4  | 73.6 | 79.8 | protein TIFY 7                                      | gbpln | Arabidopsis thaliana | AT1G70700.1   Symbols: JAZ9, TIFY7   TIFY domain/Divergent CCT motif family protein   chr1:26654951-26656804 FORWARD LENGTH=267                                                                                                                                                                                                                                                                                                                                     | 277  | 267 | 1.00E-103 | 96.4  | 73.6 | 79.8 |
| Rsa1.0_00823.1.g19996.t1 | #                                                                                                                                                                                                                                                            | #    | #    | #         | #     | #    | #    | -                                                   | ----  | ----                 | #                                                                                                                                                                                                                                                                                                                                                                                                                                                                   | #    | #   | #         | #     | #    |      |
| Rsa1.0_00823.1.g19997.t1 | ref XP_002887324.1   hypothetical protein ARALYDRAFT_476197 [Arabidopsis lyrata subsp. lyrata]   g1297333165   gb EFH63583.1   hypothetical protein ARALYDRAFT_476197 [Arabidopsis lyrata subsp. lyrata]                                                     | 262  | 300  | 6.00E-96  | 114.5 | 66.4 | 77.1 | hypothetical protein ARALYDRAFT_476197              | gbpln | Arabidopsis lyrata   | AT1G70690.1   Symbols: HWI1, PDLP5   Receptor-like protein kinase-related family protein   chr1:26652099-26653381 FORWARD LENGTH=299                                                                                                                                                                                                                                                                                                                                | 262  | 299 | 9.00E-97  | 114.1 | 65.3 | 77.5 |
| Rsa1.0_00823.1.g19998.t1 | ref XP_002887322.1   hypothetical protein ARALYDRAFT_894884 [Arabidopsis lyrata subsp. lyrata]   g1297333163   gb EFH63581.1   hypothetical protein ARALYDRAFT_894884 [Arabidopsis lyrata subsp. lyrata]                                                     | 189  | 195  | 2.00E-91  | 103.2 | 85.2 | 91.5 | hypothetical protein ARALYDRAFT_894884              | gbpln | Arabidopsis lyrata   | AT1G70670.1   Symbols:   Caleosin-related family protein   chr1:26644830-26645970 FORWARD LENGTH=195                                                                                                                                                                                                                                                                                                                                                                | 189  | 195 | 1.00E-93  | 103.2 | 84.1 | 91.5 |
| Rsa1.0_00823.1.g19999.t1 | gb AAZ67609.1   90A08_24 [Brassica rapa subsp. pekinensis]                                                                                                                                                                                                   | 207  | 475  | 3.00E-26  | 229.5 | 37.2 | 40.6 | 80A08_24                                            | gbpln | Brassica rapa        | #                                                                                                                                                                                                                                                                                                                                                                                                                                                                   | #    | #   | #         | #     | #    |      |
| Rsa1.0_00823.1.g20000.t1 | ref XP_002887321.1   hypothetical protein ARALYDRAFT_476195 [Arabidopsis lyrata subsp. lyrata]   g1297333162   gb EFH63580.1   hypothetical protein ARALYDRAFT_476195 [Arabidopsis lyrata subsp. lyrata]                                                     | 177  | 159  | 5.00E-73  | 89.8  | 77.4 | 81.9 | hypothetical protein ARALYDRAFT_476195              | gbpln | Arabidopsis lyrata   | AT1G70680.1   Symbols: MMZ2, UEV1B   MMS ZWEI homologue 2   chr1:26640755-26641949 FORWARD LENGTH=159                                                                                                                                                                                                                                                                                                                                                               | 177  | 159 | 3.00E-74  | 89.8  | 75.7 | 81.9 |

|                          |                                                                                                                                                                                                                                                                                                                                                          |      |      |           |        |      |      |                                                               |       |                      |                                                                                                                              |      |     |           |       |      |      |
|--------------------------|----------------------------------------------------------------------------------------------------------------------------------------------------------------------------------------------------------------------------------------------------------------------------------------------------------------------------------------------------------|------|------|-----------|--------|------|------|---------------------------------------------------------------|-------|----------------------|------------------------------------------------------------------------------------------------------------------------------|------|-----|-----------|-------|------|------|
| Rsa1.0_00824.1.g20001.t1 | gb AAD30632.1 AC006085.5<br>Hypothetical protein [Arabidopsis thaliana]                                                                                                                                                                                                                                                                                  | 1194 | 1295 | 1.00E-101 | 108.5  | 20.4 | 27.8 | Hypothetical protein                                          | gbpln | Arabidopsis thaliana | #                                                                                                                            | #    | #   | #         | #     | #    | #    |
| Rsa1.0_00824.1.g20002.t2 | dbj BAB10790.1  retroelement pol polyprotein-like [Arabidopsis thaliana]                                                                                                                                                                                                                                                                                 | 805  | 1864 | 1.00E-127 | 231.6  | 27.7 | 33.9 | retroelement pol polyprotein-like                             | gbpln | Arabidopsis thaliana | ATMG00750.1   Symbols: ORF119   GAG/POL/ENV polyprotein   chrM:220830-221189 FORWARD LENGTH=119                              | 805  | 119 | 9.00E-18  | 14.8  | 5.0  | 5.5  |
| Rsa1.0_00824.1.g20003.t1 | ref NP_974372.1  basic helix-loop-helix (bHLH) DNA-binding family protein [Arabidopsis thaliana]   gi 9294226 dbj BAB02128.1  DNA-binding protein-like [Arabidopsis thaliana]   gi 88900306 gb ABD57465.1  At3g28857 [Arabidopsis thaliana]   gi 33264397 gb AEH77497.1  basic helix-loop-helix (bHLH) DNA-binding family protein [Arabidopsis thaliana] | 92   | 92   | 1.00E-35  | 100.0  | 82.6 | 94.6 | basic helix-loop-helix (bHLH) DNA-binding family protein      | gbpln | Arabidopsis thaliana | AT3G28857.1   Symbols:   basic helix-loop-helix (bHLH) DNA-binding family protein   chr3:10855781-10856313 REVERSE LENGTH=92 | 92   | 92  | 2.00E-38  | 100.0 | 82.6 | 94.6 |
| Rsa1.0_00824.1.g20004.t4 | gb AAG51754.1 AC068667.33 reverse transcriptase, putative; 100033-105622 [Arabidopsis thaliana]                                                                                                                                                                                                                                                          | 1563 | 1557 | 0         | 99.6   | 42.3 | 59.1 | reverse transcriptase, putative; 100033-105622                | gbpln | Arabidopsis thaliana | AT4G29090.1   Symbols:   Ribonuclease H-like superfamily protein   chr4:14333528-14335255 FORWARD LENGTH=575                 | 1563 | 575 | 5.00E-76  | 36.8  | 11.0 | 18.0 |
| Rsa1.0_00824.1.g20005.t1 | gb AAD22283.1  putative retroelement pol polyprotein [Arabidopsis thaliana]                                                                                                                                                                                                                                                                              | 96   | 1787 | 1.00E-25  | 1861.5 | 56.3 | 76.0 | putative retroelement pol polyprotein                         | gbpln | Arabidopsis thaliana | #                                                                                                                            | #    | #   | #         | #     | #    |      |
| Rsa1.0_00824.1.g20006.t2 | gb AAD20646.1  putative TNP2-like transposon protein [Arabidopsis thaliana]                                                                                                                                                                                                                                                                              | 692  | 1040 | 5.00E-57  | 150.3  | 16.5 | 19.8 | putative TNP2-like transposon protein                         | gbpln | Arabidopsis thaliana | #                                                                                                                            | #    | #   | #         | #     | #    |      |
| Rsa1.0_00824.1.g20007.t1 | #                                                                                                                                                                                                                                                                                                                                                        | #    | #    | #         | #      | #    | #    | -                                                             | ----  | ----                 | #                                                                                                                            | #    | #   | #         | #     | #    |      |
| Rsa1.0_00824.1.g20008.t1 | ref XP_002527588.1  hypothetical protein RCOM_1568080 [Ricinus communis]   gi 223533034 gb EEF34796.1  hypothetical protein RCOM_1568080 [Ricinus communis]                                                                                                                                                                                              | 295  | 136  | 2.00E-17  | 46.1   | 14.2 | 19.7 | hypothetical protein RCOM_1568080                             | gbpln | Ricinus communis     | #                                                                                                                            | #    | #   | #         | #     | #    |      |
| Rsa1.0_00824.1.g20009.t1 | #                                                                                                                                                                                                                                                                                                                                                        | #    | #    | #         | #      | #    | #    | -                                                             | ----  | ----                 | #                                                                                                                            | #    | #   | #         | #     | #    |      |
| Rsa1.0_00824.1.g20010.t1 | ref XP_002870781.1  hypothetical protein ARALYDRAFT_330553 [Arabidopsis lyrata subsp. lyrata]   gi 297316617 gb EFH47040.1  hypothetical protein ARALYDRAFT_330553 [Arabidopsis lyrata subsp. lyrata]                                                                                                                                                    | 412  | 412  | 0         | 100.0  | 89.8 | 93.4 | hypothetical protein ARALYDRAFT_330553                        | gbpln | Arabidopsis lyrata   | AT5G39400.1   Symbols: ATPTEN1, PTEN1   Calcium/lipid-binding (CaLB) phosphatase   chr5:15768251-15767922 FORWARD LENGTH=412 | 412  | 412 | 0         | 100.0 | 89.6 | 93.0 |
| Rsa1.0_00824.1.g20011.t1 | #                                                                                                                                                                                                                                                                                                                                                        | #    | #    | #         | #      | #    | #    | -                                                             | ----  | ----                 | #                                                                                                                            | #    | #   | #         | #     | #    |      |
| Rsa1.0_00824.1.g20012.t2 | #                                                                                                                                                                                                                                                                                                                                                        | #    | #    | #         | #      | #    | #    | -                                                             | ----  | ----                 | #                                                                                                                            | #    | #   | #         | #     | #    |      |
| Rsa1.0_00824.1.g20013.t1 | #                                                                                                                                                                                                                                                                                                                                                        | #    | #    | #         | #      | #    | #    | -                                                             | ----  | ----                 | #                                                                                                                            | #    | #   | #         | #     | #    |      |
| Rsa1.0_00824.1.g20014.t1 | gb EOA16478.1  hypothetical protein CARUB_v10004632mg, partial [Capsella rubella]                                                                                                                                                                                                                                                                        | 480  | 502  | 0         | 104.6  | 98.3 | 99.4 | hypothetical protein CARUB_v10004632mg, partial               | gbpln | Capsella rubella     | AT5G39320.1   Symbols:   UDP-glucose 6-dehydrogenase family protein   chr5:15743254-15744696 FORWARD LENGTH=480              | 480  | 480 | 0         | 100.0 | 97.3 | 98.8 |
| Rsa1.0_00824.1.g20015.t1 | gb AAG51783.1 AC079679.3 reverse transcriptase, putative; 16838-20266 [Arabidopsis thaliana]                                                                                                                                                                                                                                                             | 192  | 1142 | 1.00E-55  | 594.8  | 55.2 | 66.7 | reverse transcriptase, putative; 16838-20266                  | gbpln | Arabidopsis thaliana | AT1G43760.1   Symbols:   DNAse I-like superfamily protein   chr1:16528880-16531065 REVERSE LENGTH=626                        | 192  | 626 | 3.00E-11  | 326.0 | 15.6 | 25.0 |
| Rsa1.0_00824.1.g20016.t1 | dbj BAB01350.1  Mutator-like transposase [Arabidopsis thaliana]                                                                                                                                                                                                                                                                                          | 547  | 811  | 3.00E-92  | 148.3  | 38.8 | 50.6 | Mutator-like transposase                                      | gbpln | Arabidopsis thaliana | AT1G64260.1   Symbols:   MuDR family transposase   chr1:23847756-23849915 FORWARD LENGTH=719                                 | 547  | 719 | 8.00E-19  | 131.4 | 13.3 | 20.3 |
| Rsa1.0_00824.1.g20017.t4 | gb AAB61080.1  contains similarity to T. cruzi 3' end fragment (PID:g161956) [Arabidopsis thaliana]                                                                                                                                                                                                                                                      | 870  | 707  | 6.00E-34  | 81.3   | 12.4 | 17.2 | contains similarity to T. cruzi 3' end fragment (PID:g161956) | gbpln | Arabidopsis thaliana | #                                                                                                                            | #    | #   | #         | #     | #    |      |
| Rsa1.0_00824.1.g20018.t1 | #                                                                                                                                                                                                                                                                                                                                                        | #    | #    | #         | #      | #    | #    | -                                                             | ----  | ----                 | #                                                                                                                            | #    | #   | #         | #     | #    |      |
| Rsa1.0_00824.1.g20019.t1 | #                                                                                                                                                                                                                                                                                                                                                        | #    | #    | #         | #      | #    | #    | -                                                             | ----  | ----                 | #                                                                                                                            | #    | #   | #         | #     | #    |      |
| Rsa1.0_00824.1.g20020.t6 | gb AAD15329.1  putative transposon protein [Arabidopsis thaliana]   gi 7270696 emb CAB77858.1  putative transposon protein [Arabidopsis thaliana]                                                                                                                                                                                                        | 756  | 696  | 1.00E-178 | 92.1   | 43.5 | 52.6 | putative transposon protein                                   | gbpln | Arabidopsis thaliana | #                                                                                                                            | #    | #   | #         | #     | #    |      |
| Rsa1.0_00825.1.g20021.t1 | gb AAM62702.1  unknown [Arabidopsis thaliana]                                                                                                                                                                                                                                                                                                            | 458  | 459  | 1.00E-133 | 100.2  | 57.0 | 71.0 | unknown                                                       | gbpln | Arabidopsis thaliana | AT5G27750.1   Symbols:   F-box/FBD-like domains containing protein   chr5:9828430-9829981 FORWARD LENGTH=459                 | 458  | 459 | 1.00E-135 | 100.2 | 56.6 | 70.7 |
| Rsa1.0_00825.1.g20022.t1 | ref XP_002874348.1  hypothetical protein ARALYDRAFT_489554 [Arabidopsis lyrata subsp. lyrata]   gi 297320185 gb EFH50607.1  hypothetical protein ARALYDRAFT_489554 [Arabidopsis lyrata subsp. lyrata]                                                                                                                                                    | 456  | 457  | 1.00E-128 | 100.2  | 57.7 | 70.6 | hypothetical protein ARALYDRAFT_489554                        | gbpln | Arabidopsis lyrata   | AT5G27750.1   Symbols:   F-box/FBD-like domains containing protein   chr5:9828430-9829981 FORWARD LENGTH=459                 | 456  | 459 | 1.00E-128 | 100.7 | 55.5 | 69.5 |

|                          |                                                                                                                                                                                                                                                                                                      |     |     |           |       |      |      |                                             |       |                      |                                                                                                                                                                                                                                                                                                                                                                                                                                                                                                                           |     |     |           |       |      |      |
|--------------------------|------------------------------------------------------------------------------------------------------------------------------------------------------------------------------------------------------------------------------------------------------------------------------------------------------|-----|-----|-----------|-------|------|------|---------------------------------------------|-------|----------------------|---------------------------------------------------------------------------------------------------------------------------------------------------------------------------------------------------------------------------------------------------------------------------------------------------------------------------------------------------------------------------------------------------------------------------------------------------------------------------------------------------------------------------|-----|-----|-----------|-------|------|------|
| Rsa1.0_00825.1.g20023.t1 | refXP_002874348.1   hypothetical protein ARALYDRAFT_489554 [Arabidopsis lyrata subsp. lyrata] gi 297320185 gb EFH50607.1                                                                                                                                                                             | 453 | 457 | 1.00E-129 | 100.9 | 59.2 | 71.3 | hypothetical protein ARALYDRAFT_489554      | gbpln | Arabidopsis lyrata   | AT5G27750.1   Symbols:   F-box/FBD-like domains containing protein   chr5:9828430-9829981 FORWARD LENGTH=459                                                                                                                                                                                                                                                                                                                                                                                                              | 453 | 459 | 1.00E-129 | 101.3 | 57.8 | 71.1 |
| Rsa1.0_00825.1.g20024.t1 | hypothetical protein ARALYDRAFT_489554 [Arabidopsis lyrata subsp. lyrata] refXP_002892774.1   pentatricopeptide repeat-containing protein [Arabidopsis lyrata subsp. lyrata] gi 297338616 gb EFH69033.1                                                                                              | 885 | 883 | 0         | 99.8  | 59.3 | 72.5 | pentatricopeptide repeat-containing protein | gbpln | Arabidopsis lyrata   | AT1G13800.1   Symbols:   Tetratricopeptide repeat (TPR)-like superfamily protein   chr1:4731056-4733707 REVERSE LENGTH=883                                                                                                                                                                                                                                                                                                                                                                                                | 885 | 883 | 0         | 99.8  | 58.2 | 72.3 |
| Rsa1.0_00825.1.g20025.t1 | refNP_172837.1   alpha/beta-hydrolase-like protein [Arabidopsis thaliana] gi 46518397 gb AAS9680.1   At1g13820 [Arabidopsis thaliana] gi 48310456 gb AAT41824.1   At1g13820 [Arabidopsis thaliana] gi 110738455 dbj BAF01153.1                                                                       | 340 | 339 | 1.00E-177 | 99.7  | 87.9 | 92.6 | alpha/beta-hydrolase-like protein           | gbpln | Arabidopsis thaliana | AT1G13820.1   Symbols:   alpha/beta-Hydrolases superfamily protein   chr1:4735622-4737617 FORWARD LENGTH=339                                                                                                                                                                                                                                                                                                                                                                                                              | 340 | 339 | 1.00E-180 | 99.7  | 87.9 | 92.6 |
| Rsa1.0_00825.1.g20026.t1 | hypothetical protein [Arabidopsis thaliana] gi 332190951 gb AEE29072.1   alpha/beta-hydrolase-like protein [Arabidopsis thaliana] refXP_002892776.1   hypothetical protein ARALYDRAFT_471542 [Arabidopsis lyrata subsp. lyrata] gi 297338618 gb EFH69035.1                                           | 189 | 199 | 5.00E-50  | 105.3 | 69.3 | 73.0 | hypothetical protein ARALYDRAFT_471542      | gbpln | Arabidopsis lyrata   | AT1G13830.1   Symbols:   Carbohydrate-binding X8 domain superfamily protein   chr1:4739999-4740926 REVERSE LENGTH=197                                                                                                                                                                                                                                                                                                                                                                                                     | 189 | 197 | 1.00E-42  | 104.2 | 69.3 | 73.5 |
| Rsa1.0_00825.1.g20027.t1 | refNP_172843.1   putative inactive purple acid phosphatase 2 [Arabidopsis thaliana] gi 75264030 sp O9LMG7.1 PPA2_ARATH ResName: Full=Probable inactive purple acid phosphatase 2; Flags: Precursor gi 8778406 gb AAAF79414.1 AC068197_24 F16A14.11 [Arabidopsis thaliana] gi 332190960 gb AEE29081.1 | 680 | 656 | 0         | 96.5  | 75.6 | 86.5 | putative inactive purple acid phosphatase 2 | gbpln | Arabidopsis thaliana | AT1G13900.1   Symbols:   Purple acid phosphatases superfamily protein   chr1:4753494-4755554 REVERSE LENGTH=656                                                                                                                                                                                                                                                                                                                                                                                                           | 680 | 656 | 0         | 96.5  | 75.6 | 86.5 |
| Rsa1.0_00825.1.g20028.t1 | refXP_002890028.1   remorin family protein [Arabidopsis lyrata subsp. lyrata] gi 297335870 gb EFH66287.1                                                                                                                                                                                             | 316 | 345 | 1.00E-107 | 109.2 | 78.5 | 86.4 | remorin family protein                      | gbpln | Arabidopsis lyrata   | AT1G13920.1   Symbols:   Remorin family protein   chr1:4758188-4759754 FORWARD LENGTH=345                                                                                                                                                                                                                                                                                                                                                                                                                                 | 316 | 345 | 1.00E-104 | 109.2 | 76.3 | 84.5 |
| Rsa1.0_00825.1.g20029.t1 | #                                                                                                                                                                                                                                                                                                    | #   | #   | #         | #     | #    | #    | -                                           | ----  | ----                 | #                                                                                                                                                                                                                                                                                                                                                                                                                                                                                                                         | #   | #   | #         | #     | #    | #    |
| Rsa1.0_00825.1.g20030.t1 | #                                                                                                                                                                                                                                                                                                    | #   | #   | #         | #     | #    | #    | -                                           | ----  | ----                 | #                                                                                                                                                                                                                                                                                                                                                                                                                                                                                                                         | #   | #   | #         | #     | #    | #    |
| Rsa1.0_00825.1.g20031.t1 | refXP_002892784.1   hypothetical protein ARALYDRAFT_334698 [Arabidopsis lyrata subsp. lyrata] gi 297338626 gb EFH69043.1                                                                                                                                                                             | 66  | 261 | 1.00E-14  | 395.5 | 63.6 | 78.8 | hypothetical protein ARALYDRAFT_334698      | gbpln | Arabidopsis lyrata   | #                                                                                                                                                                                                                                                                                                                                                                                                                                                                                                                         | #   | #   | #         | #     | #    | #    |
| Rsa1.0_00825.1.g20032.t1 | gb EOA13293.1   hypothetical protein CARUB_v10026322mg [Capsella rubella]                                                                                                                                                                                                                            | 146 | 478 | 2.00E-24  | 327.4 | 37.0 | 37.0 | hypothetical protein CARUB_v10026322mg      | gbpln | Capsella rubella     | AT5G62790.1   Symbols:   DXR, PDE129   1-deoxy-D-xylulose 5-phosphate reductoisomerase   chr5:25214358-25217292 REVERSE LENGTH=477                                                                                                                                                                                                                                                                                                                                                                                        | 146 | 477 | 6.00E-27  | 326.7 | 37.0 | 37.0 |
| Rsa1.0_00825.1.g20033.t1 | refXP_002892784.1   hypothetical protein ARALYDRAFT_334698 [Arabidopsis lyrata subsp. lyrata] gi 297338626 gb EFH69043.1                                                                                                                                                                             | 181 | 261 | 6.00E-31  | 144.2 | 40.9 | 59.7 | hypothetical protein ARALYDRAFT_334698      | gbpln | Arabidopsis lyrata   | AT1G23201.1   Symbols:   FUNCTIONS IN: molecular_function unknown; INVOLVED IN: biological_process unknown; LOCATED IN: cellular_component unknown; CONTAINS InterPro DOMAIN/s: GCK (InterPro:IPR012891); BEST Arabidopsis thaliana protein match is: GCK domain-containing protein (TAIR:AT5G02210.1); Has 106 Blast hits to 71 proteins in 9 species: Archae - 0; Bacteria - 0; Metazoa - 0; Fungi - 0; Plants - 106; Viruses - 0; Other Eukaryotes - 0 (source: NCBI BLINK).   chr1:8230209-8230775 FORWARD LENGTH=188 | 181 | 188 | 5.00E-11  | 103.9 | 27.1 | 45.9 |
| Rsa1.0_00825.1.g20034.t1 | gb AC114399.1   WRKY4-1 transcription factor [Brassica napus]                                                                                                                                                                                                                                        | 483 | 475 | 0         | 98.3  | 84.1 | 87.2 | WRKY4-1 transcription factor                | gbpln | Brassica napus       | AT1G13960.1   Symbols:   WRKY DNA-binding protein 4   chr1:4776622-4779043 FORWARD LENGTH=514                                                                                                                                                                                                                                                                                                                                                                                                                             | 483 | 514 | 0         | 106.4 | 83.9 | 89.4 |

|                          |                                                                                                                                                                                                                                                                                                                                                                      |      |      |           |       |      |      |                                        |       |                      |                                                                                                                                                                                                                                                                                                                                                                                                                                                                                                                                    |      |      |           |       |      |      |
|--------------------------|----------------------------------------------------------------------------------------------------------------------------------------------------------------------------------------------------------------------------------------------------------------------------------------------------------------------------------------------------------------------|------|------|-----------|-------|------|------|----------------------------------------|-------|----------------------|------------------------------------------------------------------------------------------------------------------------------------------------------------------------------------------------------------------------------------------------------------------------------------------------------------------------------------------------------------------------------------------------------------------------------------------------------------------------------------------------------------------------------------|------|------|-----------|-------|------|------|
| Rsa1.0_00825.1.g20035.t1 | gb EOA36877.1  hypothetical protein CARUB_v10008911mg [Capsella rubella]                                                                                                                                                                                                                                                                                             | 503  | 504  | 0         | 100.2 | 92.2 | 96.0 | hypothetical protein CARUB_v10008911mg | gbpln | Capsella rubella     | AT1G13970.1   Symbols:   Protein of unknown function (DUF1336)   chr1:479742-478182 REVERSE LENGTH=504                                                                                                                                                                                                                                                                                                                                                                                                                             | 503  | 504  | 0         | 100.2 | 91.3 | 95.0 |
| Rsa1.0_00825.1.g20036.t1 | ref XP_002890033.1  hypothetical protein ARALYDRAFT_471559 [Arabidopsis lyrata subsp. lyrata] gi 297335875 gb EFH66292.1  hypothetical protein ARALYDRAFT_471559 [Arabidopsis lyrata subsp. lyrata]                                                                                                                                                                  | 1406 | 1454 | 0         | 103.4 | 95.3 | 98.1 | hypothetical protein ARALYDRAFT_471559 | gbpln | Arabidopsis lyrata   | AT1G13980.2   Symbols: GN   sec7 domain-containing protein   chr1:4789587-4794397 FORWARD LENGTH=1451                                                                                                                                                                                                                                                                                                                                                                                                                              | 1406 | 1451 | 0         | 103.2 | 95.1 | 97.9 |
| Rsa1.0_00825.1.g20037.t1 | ref NP_563935.1  uncharacterized protein [Arabidopsis thaliana] gi 14326541 gb AAK60315.1 AF385724.1 At g13990/F16A14.28 [Arabidopsis thaliana] gi 21617995 gb AAM67045.1  unknown [Arabidopsis thaliana] gi 22137314 gb AAM91502.1  AT4g27310/M4122_120 [Arabidopsis thaliana] gi 332190973 gb AEE29094.1  uncharacterized protein AT1G13990 [Arabidopsis thaliana] | 278  | 277  | 1.00E-117 | 99.6  | 87.4 | 89.2 | uncharacterized protein                | gbpln | Arabidopsis thaliana | AT1G13990.1   Symbols:   unknown protein; FUNCTIONS IN: molecular_function unknown; INVOLVED IN: biological_process unknown; LOCATED IN: chloroplast; EXPRESSED IN: 23 plant structures; EXPRESSED DURING: 13 growth stages; CONTAINS InterPro DOMAIN/s: Protein of unknown function DUF3110 (InterPro:IPRO21503); Has 25 Blast hits to 25 proteins in 8 species: Archae - 0; Bacteria - 0; Metazoa - 0; Fungi - 0; Plants - 25; Viruses - 0; Other Eukaryotes - 0 (source: NCBI BLINK).   chr1:4794810-4796476 FORWARD LENGTH=277 | 278  | 277  | 1.00E-120 | 99.6  | 87.4 | 89.2 |
| Rsa1.0_00825.1.g20038.t1 | ref NP_172853.1  VH1-interacting kinase [Arabidopsis thaliana] gi 5080776 gb AAD39286.1 AC007576.9 Similar to protein kinases [Arabidopsis thaliana] gi 111074450 gb ABH04598.1  AT1g14000 [Arabidopsis thaliana] gi 332190976 gb AEE29097.1  VH1-interacting kinase [Arabidopsis thaliana]                                                                          | 434  | 438  | 0         | 100.9 | 96.5 | 98.8 | VH1-interacting kinase                 | gbpln | Arabidopsis thaliana | AT1G14000.1   Symbols: VIK   VH1-interacting kinase   chr1:4797606-4800043 FORWARD LENGTH=438                                                                                                                                                                                                                                                                                                                                                                                                                                      | 434  | 438  | 0         | 100.9 | 96.5 | 98.8 |
| Rsa1.0_00825.1.g20039.t1 | #                                                                                                                                                                                                                                                                                                                                                                    | #    | #    | #         | #     | #    | #    | -                                      | ----  | ----                 | #                                                                                                                                                                                                                                                                                                                                                                                                                                                                                                                                  | #    | #    | #         | #     | #    |      |
| Rsa1.0_00825.1.g20040.t1 | gb AAF79407.1 AC068197_17 F16A14.26 [Arabidopsis thaliana]                                                                                                                                                                                                                                                                                                           | 222  | 841  | 9.00E-89  | 378.8 | 78.8 | 85.1 | F16A14.26                              | gbpln | Arabidopsis thaliana | AT1G14040.1   Symbols:   EXS (ERD1/XPRI/SYG1) family protein   chr1:4810488-4814543 FORWARD LENGTH=813                                                                                                                                                                                                                                                                                                                                                                                                                             | 222  | 813  | 3.00E-91  | 366.2 | 78.8 | 85.1 |
| Rsa1.0_00826.1.g20041.t1 | dbj BAH19457.1  AT3G18140 [Arabidopsis thaliana]                                                                                                                                                                                                                                                                                                                     | 82   | 305  | 1.00E-31  | 372.0 | 78.0 | 86.6 | AT3G18140                              | gbpln | Arabidopsis thaliana | AT3G18140.1   Symbols:   Transducin/WD40 repeat-like superfamily protein   chr3:6212743-6214567 REVERSE LENGTH=305                                                                                                                                                                                                                                                                                                                                                                                                                 | 82   | 305  | 2.00E-34  | 372.0 | 78.0 | 86.6 |
| Rsa1.0_00826.1.g20042.t1 | ref XP_002880413.1  zinc finger family protein [Arabidopsis lyrata subsp. lyrata] gi 297326252 gb EFH56672.1  zinc finger family protein [Arabidopsis lyrata subsp. lyrata]                                                                                                                                                                                          | 1276 | 1276 | 0         | 100.0 | 90.8 | 95.4 | zinc finger family protein             | gbpln | Arabidopsis lyrata   | AT2G22010.1   Symbols: RKP   related to KPC1   chr2:9363946-9368828 REVERSE LENGTH=1280                                                                                                                                                                                                                                                                                                                                                                                                                                            | 1276 | 1280 | 0         | 100.3 | 90.1 | 94.7 |
| Rsa1.0_00826.1.g20043.t1 | gb EOA28183.1  hypothetical protein CARUB_v10024374mg [Capsella rubella]                                                                                                                                                                                                                                                                                             | 95   | 107  | 8.00E-20  | 112.6 | 72.6 | 80.0 | hypothetical protein CARUB_v10024374mg | gbpln | Capsella rubella     | AT2G22000.1   Symbols: PROPEP6   elicitor peptide 6 precursor   chr2:9362408-9363002 FORWARD LENGTH=104                                                                                                                                                                                                                                                                                                                                                                                                                            | 95   | 104  | 2.00E-14  | 109.5 | 60.0 | 65.3 |
| Rsa1.0_00826.1.g20044.t1 | gb ABD64930.1  hypothetical protein 24.t00076 [Brassica oleracea]                                                                                                                                                                                                                                                                                                    | 442  | 407  | 3.00E-70  | 92.1  | 36.4 | 42.8 | hypothetical protein 24.t00076         | gbpln | Brassica oleracea    | #                                                                                                                                                                                                                                                                                                                                                                                                                                                                                                                                  | #    | #    | #         | #     | #    |      |
| Rsa1.0_00826.1.g20045.t1 | gb EOA18842.1  hypothetical protein CARUB_v10007464mg [Capsella rubella]                                                                                                                                                                                                                                                                                             | 730  | 666  | 0         | 91.2  | 60.8 | 69.7 | hypothetical protein CARUB_v10007464mg | gbpln | Capsella rubella     | AT4G23160.1   Symbols: CRK8   cysteine-rich RLK (RECEPTOR-like protein kinase) 8   chr4:12129485-12134086 FORWARD LENGTH=1262                                                                                                                                                                                                                                                                                                                                                                                                      | 730  | 1262 | 0         | 172.9 | 57.7 | 66.4 |
| Rsa1.0_00826.1.g20046.t1 | ref XP_002880432.1  lipid-associated family protein [Arabidopsis lyrata subsp. lyrata] gi 297328271 gb EFH56691.1  lipid-associated family protein [Arabidopsis lyrata subsp. lyrata]                                                                                                                                                                                | 182  | 183  | 2.00E-92  | 100.5 | 89.6 | 95.6 | lipid-associated family protein        | gbpln | Arabidopsis lyrata   | AT2G22170.1   Symbols:   Lipase/lipoxygenase, PLAT/LH2 family protein   chr2:9427010-9427742 REVERSE LENGTH=183                                                                                                                                                                                                                                                                                                                                                                                                                    | 182  | 183  | 5.00E-94  | 100.5 | 88.5 | 94.5 |
| Rsa1.0_00826.1.g20047.t2 | gb ABD65076.1  SLL3 ORF2 protein, putative [Brassica oleracea]                                                                                                                                                                                                                                                                                                       | 264  | 443  | 3.00E-38  | 167.8 | 34.1 | 44.3 | SLL3 ORF2 protein, putative            | gbpln | Brassica oleracea    | #                                                                                                                                                                                                                                                                                                                                                                                                                                                                                                                                  | #    | #    | #         | #     | #    |      |
| Rsa1.0_00826.1.g20048.t1 | gb EOA26319.1  hypothetical protein CARUB_v10025210mg [Capsella rubella]                                                                                                                                                                                                                                                                                             | 288  | 292  | 1.00E-126 | 101.4 | 81.3 | 88.9 | hypothetical protein CARUB_v10025210mg | gbpln | Capsella rubella     | AT2G22180.1   Symbols:   hydroxyproline-rich glycoprotein family protein   chr2:9428969-9429844 FORWARD LENGTH=291                                                                                                                                                                                                                                                                                                                                                                                                                 | 288  | 291  | 1.00E-125 | 101.0 | 83.7 | 88.5 |
| Rsa1.0_00826.1.g20049.t1 | ref XP_002878603.1  hypothetical protein ARALYDRAFT_481086 [Arabidopsis lyrata subsp. lyrata] gi 297324442 gb EFH54862.1  hypothetical protein ARALYDRAFT_481086 [Arabidopsis lyrata subsp. lyrata]                                                                                                                                                                  | 224  | 224  | 1.00E-101 | 100.0 | 87.9 | 92.0 | hypothetical protein ARALYDRAFT_481086 | gbpln | Arabidopsis lyrata   | AT2G22230.1   Symbols:   Thioesterase superfamily protein   chr2:9450042-9451427 FORWARD LENGTH=220                                                                                                                                                                                                                                                                                                                                                                                                                                | 224  | 220  | 1.00E-101 | 98.2  | 83.5 | 87.9 |



|                          |                                                                                                                                                                                                                                                                                                                                                                                                                                                                                                                                                                                                                                                                                                                                                                                                                                                                                                      |     |      |           |       |      |      |                                        |       |                      |                                                                                                                               |     |      |           |       |      |      |
|--------------------------|------------------------------------------------------------------------------------------------------------------------------------------------------------------------------------------------------------------------------------------------------------------------------------------------------------------------------------------------------------------------------------------------------------------------------------------------------------------------------------------------------------------------------------------------------------------------------------------------------------------------------------------------------------------------------------------------------------------------------------------------------------------------------------------------------------------------------------------------------------------------------------------------------|-----|------|-----------|-------|------|------|----------------------------------------|-------|----------------------|-------------------------------------------------------------------------------------------------------------------------------|-----|------|-----------|-------|------|------|
| Rsa1.0_00826.1.g20050.t1 | sp Q9S7U0.1 INO1.WHEAT RecName: Full=Inositol-3-phosphate synthase; Short=MIP synthase; AltName: Full=Myo-inositol 1-phosphate synthase; Short=IPS; Short=MI-1-P synthase<br>gi 4589062 gb AAD26330.1 AF120146.1 myo-inositol 1-phosphate synthase [Triticum aestivum]<br>gi 4589064 gb AAD26331.1 AF120147.1 myo-inositol 1-phosphate synthase [Triticum aestivum]<br>gi 4589066 gb AAD26332.1 AF120148.1 myo-inositol 1-phosphate synthase [Triticum aestivum]                                                                                                                                                                                                                                                                                                                                                                                                                                     | 510 | 510  | 0         | 100.0 | 99.0 | 99.2 | hypothetical protein CARUB_v10017886mg | gbpln | Triticum aestivum    | AT2G22240.1   Symbols: ATMIPS2, MIP52, ATIPS2   myo-inositol-1-phosphate synthase 2   chr2:9451901-9453938 REVERSE LENGTH=510 | 510 | 510  | 0         | 100.0 | 96.7 | 98.8 |
| Rsa1.0_00826.1.g20051.t1 | gb EOA24618.1  hypothetical protein CARUB_v10017886mg [Capsella rubella]                                                                                                                                                                                                                                                                                                                                                                                                                                                                                                                                                                                                                                                                                                                                                                                                                             | 88  | 255  | 4.00E-23  | 289.8 | 63.6 | 80.7 | hypothetical protein CARUB_v10017886mg | gbpln | Capsella rubella     | AT3G57390.1   Symbols: AGL18   AGAMOUS-like 18   chr3:21233910-21235735 FORWARD LENGTH=256                                    | 88  | 256  | 2.00E-25  | 290.9 | 60.2 | 77.3 |
| Rsa1.0_00826.1.g20052.t1 | #                                                                                                                                                                                                                                                                                                                                                                                                                                                                                                                                                                                                                                                                                                                                                                                                                                                                                                    | #   | #    | #         | #     | #    | #    | -                                      | ----  | ----                 | #                                                                                                                             | #   | #    | #         | #     | #    |      |
| Rsa1.0_00826.1.g20053.t1 | #                                                                                                                                                                                                                                                                                                                                                                                                                                                                                                                                                                                                                                                                                                                                                                                                                                                                                                    | #   | #    | #         | #     | #    | #    | -                                      | ----  | ----                 | #                                                                                                                             | #   | #    | #         | #     | #    |      |
| Rsa1.0_00826.1.g20054.t1 | ref NP_565529.1  aspartate aminotransferase [Arabidopsis thaliana]<br>gi 79322722 ref NP_001031394.1  aspartate aminotransferase [Arabidopsis thaliana]<br>gi 75206080 sp Q9SIE1.2 PAT_ARATH RecName: Full=Bifunctional aspartate aminotransferase and glutamate/aspartate-prephenate aminotransferase; Short=ATAAT; Short=AtPPA-AT; AltName: Full=Protein MATERNAL EFFECT EMBRYO ARREST 17; Flags: Precursor<br>gi 17381280 gb AAL36058.1  At2g22250/T26C19.9 [Arabidopsis thaliana] gi 20198151 gb AAD23617.2  putative aspartate aminotransferase [Arabidopsis thaliana]<br>gi 21700793 gb AAM70520.1  At2g22250/T26C19.9 [Arabidopsis thaliana] gi 305855255 gb ADM67558.1  prephenate aminotransferase [Arabidopsis thaliana]<br>gi 330252190 gb AEC07284.1  aspartate aminotransferase [Arabidopsis thaliana]<br>gi 330252191 gb AEC07285.1  aspartate aminotransferase [Arabidopsis thaliana] | 436 | 475  | 0         | 108.9 | 86.7 | 91.7 | aspartate aminotransferase             | gbpln | Arabidopsis thaliana | AT2G22250.3   Symbols: ATAAT, AAT, MEE17   aspartate aminotransferase   chr2:9458011-9460297 REVERSE LENGTH=475               | 436 | 475  | 0         | 108.9 | 86.7 | 91.7 |
| Rsa1.0_00826.1.g20055.t1 | gb EOA28324.1  hypothetical protein CARUB_v10024523mg [Capsella rubella]                                                                                                                                                                                                                                                                                                                                                                                                                                                                                                                                                                                                                                                                                                                                                                                                                             | 290 | 308  | 1.00E-124 | 106.2 | 80.0 | 87.6 | hypothetical protein CARUB_v10024523mg | gbpln | Capsella rubella     | AT2G22260.1   Symbols:   oxidoreductase, 20G-Fe(II) oxygenase family protein   chr2:9461342-9463053 FORWARD LENGTH=314        | 290 | 314  | 1.00E-122 | 108.3 | 78.3 | 86.2 |
| Rsa1.0_00826.1.g20056.t1 | ref XP_002878608.1  hypothetical protein ARALYDRAFT_481093 [Arabidopsis lyrata subsp. lyrata]<br>gi 297324447 gb EFH54867.1  hypothetical protein ARALYDRAFT_481093 [Arabidopsis lyrata subsp. lyrata]                                                                                                                                                                                                                                                                                                                                                                                                                                                                                                                                                                                                                                                                                               | 950 | 1031 | 0         | 108.5 | 85.3 | 90.9 | hypothetical protein ARALYDRAFT_481093 | gbpln | Arabidopsis lyrata   | AT2G22300.2   Symbols: CAMTA3, SR1   signal responsive 1   chr2:9471599-9476472 FORWARD LENGTH=1032                           | 950 | 1032 | 0         | 108.6 | 84.0 | 90.3 |
| Rsa1.0_00827.1.g20057.t1 | #                                                                                                                                                                                                                                                                                                                                                                                                                                                                                                                                                                                                                                                                                                                                                                                                                                                                                                    | #   | #    | #         | #     | #    | #    | -                                      | ----  | ----                 | #                                                                                                                             | #   | #    | #         | #     | #    |      |
| Rsa1.0_00827.1.g20058.t1 | ref XP_002875475.1  glutaredoxin family protein [Arabidopsis lyrata subsp. lyrata]<br>gi 297321313 gb EFH51734.1  glutaredoxin family protein [Arabidopsis lyrata subsp. lyrata]                                                                                                                                                                                                                                                                                                                                                                                                                                                                                                                                                                                                                                                                                                                     | 415 | 435  | 1.00E-156 | 104.8 | 75.2 | 86.5 | glutaredoxin family protein            | gbpln | Arabidopsis lyrata   | AT3G28850.1   Symbols:   Glutaredoxin family protein   chr3:10848669-10849955 FORWARD LENGTH=428                              | 415 | 428  | 1.00E-153 | 103.1 | 74.5 | 84.1 |
| Rsa1.0_00827.1.g20059.t1 | ref XP_002875474.1  hypothetical protein ARALYDRAFT_484654 [Arabidopsis lyrata subsp. lyrata]<br>gi 297321312 gb EFH51733.1  hypothetical protein ARALYDRAFT_484654 [Arabidopsis lyrata subsp. lyrata]                                                                                                                                                                                                                                                                                                                                                                                                                                                                                                                                                                                                                                                                                               | 310 | 388  | 3.00E-60  | 125.2 | 40.3 | 52.3 | hypothetical protein ARALYDRAFT_484654 | gbpln | Arabidopsis lyrata   | AT3G28840.1   Symbols:   Protein of unknown function (DUF1216)   chr3:10838469-10839734 FORWARD LENGTH=391                    | 310 | 391  | 6.00E-62  | 126.1 | 34.8 | 45.2 |
| Rsa1.0_00827.1.g20060.t1 | ref XP_002875472.1  hypothetical protein ARALYDRAFT_484653 [Arabidopsis lyrata subsp. lyrata]<br>gi 297321310 gb EFH51731.1  hypothetical protein ARALYDRAFT_484653 [Arabidopsis lyrata subsp. lyrata]                                                                                                                                                                                                                                                                                                                                                                                                                                                                                                                                                                                                                                                                                               | 661 | 518  | 4.00E-65  | 78.4  | 19.5 | 25.0 | hypothetical protein ARALYDRAFT_484653 | gbpln | Arabidopsis lyrata   | AT3G28830.1   Symbols:   Protein of unknown function (DUF1216)   chr3:10831233-10833020 FORWARD LENGTH=539                    | 661 | 539  | 8.00E-66  | 81.5  | 17.9 | 22.5 |
| Rsa1.0_00827.1.g20061.t1 | #                                                                                                                                                                                                                                                                                                                                                                                                                                                                                                                                                                                                                                                                                                                                                                                                                                                                                                    | #   | #    | #         | #     | #    | #    | -                                      | ----  | ----                 | #                                                                                                                             | #   | #    | #         | #     | #    |      |

|                          |                                                                                                                                                                                                                                                                                                                                                                                                                                     |     |     |          |       |      |      |                                                           |       |                      |                                                                                                                                                                                                                                                                                                                                                                                                                                                                                                                                                                                                                                                    |     |     |          |       |      |      |
|--------------------------|-------------------------------------------------------------------------------------------------------------------------------------------------------------------------------------------------------------------------------------------------------------------------------------------------------------------------------------------------------------------------------------------------------------------------------------|-----|-----|----------|-------|------|------|-----------------------------------------------------------|-------|----------------------|----------------------------------------------------------------------------------------------------------------------------------------------------------------------------------------------------------------------------------------------------------------------------------------------------------------------------------------------------------------------------------------------------------------------------------------------------------------------------------------------------------------------------------------------------------------------------------------------------------------------------------------------------|-----|-----|----------|-------|------|------|
| Rsa1.0_00827.1.g20062.t1 | dbj BAB03175.1  unnamed protein product [Arabidopsis thaliana]                                                                                                                                                                                                                                                                                                                                                                      | 497 | 614 | 4.00E-34 | 123.5 | 13.3 | 16.5 | unnamed protein product                                   | gbpln | Arabidopsis thaliana | AT3G28780.1   Symbols:   Protein of unknown function (DUF1216)   chr3:10806131-10808369 REVERSE LENGTH=674                                                                                                                                                                                                                                                                                                                                                                                                                                                                                                                                         | 497 | 674 | 2.00E-35 | 135.6 | 13.5 | 16.7 |
| Rsa1.0_00827.1.g20063.t2 | ref NP_189518.2  uncharacterized protein [Arabidopsis thaliana]   gi 27754381 gb AAO22639.1  unknown protein [Arabidopsis thaliana]   gi 28973463 gb AAO64056.1  unknown protein [Arabidopsis thaliana]   gi 332643966 gb AEE77487.1  uncharacterized protein AT3G28760 [Arabidopsis thaliana]                                                                                                                                      | 425 | 422 | 0        | 99.3  | 83.5 | 89.9 | uncharacterized protein                                   | gbpln | Arabidopsis thaliana | AT3G28760.1   Symbols:   FUNCTIONS IN: molecular.function unknown; INVOLVED IN: biological.process unknown; LOCATED IN: chloroplast; EXPRESSED IN: 20 plant structures; EXPRESSED DURING: 13 growth stages; CONTAINS InterPro DOMAIN/s: 3-dehydroquinase synthase, prokaryotic-type (InterPro:IPR002812); Has 390 Blast hits to 390 proteins in 131 species: Archae - 144; Bacteria - 105; Metazoa - 0; Fungi - 0; Plants - 54; Viruses - 0; Other Eukaryotes - 87 (source: NCBI BLINK).   chr3:10793126-10795304 REVERSE LENGTH=422                                                                                                               | 425 | 422 | 0        | 99.3  | 83.5 | 89.9 |
| Rsa1.0_00827.1.g20064.t1 | ref XP_002877129.1  hypothetical protein ARALYDRAFT_484650 [Arabidopsis lyrata subsp. lyrata]   gi 297322967 gb EFH53388.1  hypothetical protein ARALYDRAFT_484650 [Arabidopsis lyrata subsp. lyrata]                                                                                                                                                                                                                               | 493 | 346 | 8.00E-65 | 70.2  | 32.7 | 42.2 | hypothetical protein ARALYDRAFT_484650                    | gbpln | Arabidopsis lyrata   | AT3G28750.1   Symbols:   unknown protein; LOCATED IN: endomembrane system; EXPRESSED IN: 12 plant structures; EXPRESSED DURING: L mature pollen stage, M germinated pollen stage, 4 anthesis, C globular stage, petal differentiation and expansion stage; CONTAINS InterPro DOMAIN/s: Protein of unknown function DUF1216 (InterPro:IPR009605); BEST Arabidopsis thaliana protein match is: unknown protein (TAIR:AT5G39880.1); Has 37 Blast hits to 31 proteins in 5 species: Archae - 0; Bacteria - 0; Metazoa - 0; Fungi - 0; Plants - 28; Viruses - 0; Other Eukaryotes - 9 (source: NCBI BLINK).   chr3:10791772-10792773 REVERSE LENGTH=333 | 493 | 333 | 1.00E-60 | 67.5  | 24.1 | 33.9 |
| Rsa1.0_00827.1.g20065.t1 | ref XP_002877127.1  cytochrome P450 family protein [Arabidopsis lyrata subsp. lyrata]   gi 297322965 gb EFH53386.1  cytochrome P450 family protein [Arabidopsis lyrata subsp. lyrata]                                                                                                                                                                                                                                               | 472 | 501 | 0        | 106.1 | 77.8 | 84.7 | cytochrome P450 family protein                            | gbpln | Arabidopsis lyrata   | AT3G28740.1   Symbols: CYP81D1   Cytochrome P450 superfamily protein   chr3:10788764-10790552 REVERSE LENGTH=509                                                                                                                                                                                                                                                                                                                                                                                                                                                                                                                                   | 472 | 509 | 0        | 107.8 | 76.3 | 85.6 |
| Rsa1.0_00827.1.g20066.t1 | gb EOA23621.1  hypothetical protein CARUB_v10016819mg [Capsella rubella]                                                                                                                                                                                                                                                                                                                                                            | 642 | 647 | 0        | 100.8 | 88.3 | 92.8 | hypothetical protein CARUB_v10016819mg                    | gbpln | Capsella rubella     | AT3G28730.1   Symbols: ATHMG, SSRP1, NFD, HMG   high mobility group   chr3:10784954-10788498 FORWARD LENGTH=646                                                                                                                                                                                                                                                                                                                                                                                                                                                                                                                                    | 642 | 646 | 0        | 100.6 | 87.7 | 93.0 |
| Rsa1.0_00827.1.g20067.t1 | ref NP_189514.1  uncharacterized protein [Arabidopsis thaliana]   gi 11994779 dbj BAB03189.1  unnamed protein product [Arabidopsis thaliana]   gi 332643962 gb AEE77483.1  uncharacterized protein AT3G28720 [Arabidopsis thaliana]                                                                                                                                                                                                 | 976 | 687 | 0        | 70.4  | 51.6 | 56.4 | uncharacterized protein                                   | gbpln | Arabidopsis thaliana | AT3G28720.1   Symbols:   unknown protein; FUNCTIONS IN: molecular.function unknown; INVOLVED IN: biological.process unknown; LOCATED IN: cellular.component unknown; EXPRESSED IN: 25 plant structures; EXPRESSED DURING: 13 growth stages; BEST Arabidopsis thaliana protein match is: unknown protein (TAIR:AT5G58100.1); Has 1610 Blast hits to 344 proteins in 85 species: Archae - 0; Bacteria - 567; Metazoa - 95; Fungi - 71; Plants - 145; Viruses - 0; Other Eukaryotes - 732 (source: NCBI BLINK).   chr3:10782276-10784339 FORWARD LENGTH=687                                                                                           | 976 | 687 | 0        | 70.4  | 51.6 | 56.4 |
| Rsa1.0_00827.1.g20068.t1 | ref NP_189511.2  uncharacterized protein [Arabidopsis thaliana]   gi 95147286 gb ABF57276.1  At3g28700 [Arabidopsis thaliana]   gi 332643957 gb AEE77478.1  uncharacterized protein AT3G28700 [Arabidopsis thaliana]                                                                                                                                                                                                                | 479 | 471 | 0        | 98.3  | 86.6 | 93.3 | uncharacterized protein                                   | gbpln | Arabidopsis thaliana | AT3G28700.1   Symbols:   Protein of unknown function (DUF185)   chr3:10759580-10761834 FORWARD LENGTH=471                                                                                                                                                                                                                                                                                                                                                                                                                                                                                                                                          | 479 | 471 | 0        | 98.3  | 86.6 | 93.3 |
| Rsa1.0_00827.1.g20069.t1 | ref NP_566839.1  oxidoreductase, zinc-binding dehydrogenase family protein [Arabidopsis thaliana]   gi 15983368 gb AAL11552.1 AF424558.1 AT3g28670/MZN14.13 [Arabidopsis thaliana]   gi 20260470 gb AAM13133.1  unknown protein [Arabidopsis thaliana]   gi 34365729 gb AAQ65176.1  At3g28670 [Arabidopsis thaliana]   gi 332643951 gb AEE77472.1  oxidoreductase, zinc-binding dehydrogenase family protein [Arabidopsis thaliana] | 485 | 491 | 0        | 101.2 | 81.0 | 91.5 | oxidoreductase, zinc-binding dehydrogenase family protein | gbpln | Arabidopsis thaliana | AT3G28670.1   Symbols:   oxidoreductase, zinc-binding dehydrogenase family protein   chr3:10744183-10746983 FORWARD LENGTH=491                                                                                                                                                                                                                                                                                                                                                                                                                                                                                                                     | 485 | 491 | 0        | 101.2 | 81.0 | 91.5 |
| Rsa1.0_00827.1.g20070.t1 | gb EOA23836.1  hypothetical protein CARUB_v10017051mg [Capsella rubella]                                                                                                                                                                                                                                                                                                                                                            | 505 | 507 | 0        | 100.4 | 79.4 | 88.5 | hypothetical protein CARUB_v10017051mg                    | gbpln | Capsella rubella     | AT3G28640.1   Symbols:   Tetratricopeptide repeat (TPR)-like superfamily protein   chr3:10731518-10733032 REVERSE LENGTH=504                                                                                                                                                                                                                                                                                                                                                                                                                                                                                                                       | 505 | 504 | 0        | 99.8  | 78.0 | 88.5 |

|                          |                                                                                                                                                                                                                                                                                                                                                                                                                                                                                                                                                                                                                                           |     |     |           |       |      |      |                                               |       |                      |                                                                                                               |     |     |           |       |      |      |
|--------------------------|-------------------------------------------------------------------------------------------------------------------------------------------------------------------------------------------------------------------------------------------------------------------------------------------------------------------------------------------------------------------------------------------------------------------------------------------------------------------------------------------------------------------------------------------------------------------------------------------------------------------------------------------|-----|-----|-----------|-------|------|------|-----------------------------------------------|-------|----------------------|---------------------------------------------------------------------------------------------------------------|-----|-----|-----------|-------|------|------|
| Rsa1.0_00828.1.g20071.t1 | ref[XP_002864231.1] AGP22/ATAGP22 [Arabidopsis lyrata subsp. lyrata] gi 297310066 gb EFH40490.1                                                                                                                                                                                                                                                                                                                                                                                                                                                                                                                                           | 99  | 63  | 9.00E-25  | 63.6  | 59.6 | 62.6 | AGP22/ATAGP22                                 | gbpln | Arabidopsis lyrata   | AT5G53250.1   Symbols: AGP22, ATAGP22   arabinogalactan protein 22   chr5:21603715-21604007 FORWARD LENGTH=63 | 99  | 63  | 1.00E-25  | 63.6  | 56.6 | 60.6 |
| Rsa1.0_00828.1.g20072.t1 | #                                                                                                                                                                                                                                                                                                                                                                                                                                                                                                                                                                                                                                         | #   | #   | #         | #     | #    | #    | -                                             | ----  | ----                 | #                                                                                                             | #   | #   | #         | #     | #    |      |
| Rsa1.0_00828.1.g20073.t1 | ref[NP_200138.1] Seed maturation protein [Arabidopsis thaliana] gi 9759173 dbj BAB09788.1   unnamed protein product [Arabidopsis thaliana] gi 332008947 gb AED96330.1   Seed maturation protein [Arabidopsis thaliana]                                                                                                                                                                                                                                                                                                                                                                                                                    | 177 | 176 | 5.00E-67  | 99.4  | 77.4 | 85.3 | Seed maturation protein                       | gbpln | Arabidopsis thaliana | AT5G53260.1   Symbols:   Seed maturation protein   chr5:21604662-21605674 REVERSE LENGTH=176                  | 177 | 176 | 2.00E-69  | 99.4  | 77.4 | 85.3 |
| Rsa1.0_00828.1.g20074.t1 | ref[XP_002864232.1] hypothetical protein ARALYDRAFT_495401 [Arabidopsis lyrata subsp. lyrata] gi 297310067 gb EFH40491.1   hypothetical protein ARALYDRAFT_495401 [Arabidopsis lyrata subsp. lyrata]                                                                                                                                                                                                                                                                                                                                                                                                                                      | 246 | 269 | 1.00E-93  | 109.3 | 77.6 | 85.8 | hypothetical protein ARALYDRAFT_495401        | gbpln | Arabidopsis lyrata   | AT5G53280.1   Symbols: PDV1   plastid division1   chr5:21607586-21609080 FORWARD LENGTH=272                   | 246 | 272 | 4.00E-91  | 110.6 | 73.6 | 84.1 |
| Rsa1.0_00828.1.g20075.t1 | ref[XP_002873035.1] mitochondrial glycoprotein family protein [Arabidopsis lyrata subsp. lyrata] gi 297318872 gb EFH49294.1   mitochondrial glycoprotein family protein [Arabidopsis lyrata subsp. lyrata]                                                                                                                                                                                                                                                                                                                                                                                                                                | 237 | 264 | 2.00E-51  | 111.4 | 54.4 | 70.0 | mitochondrial glycoprotein family protein     | gbpln | Arabidopsis lyrata   | AT5G02050.1   Symbols:   Mitochondrial glycoprotein family protein   chr5:403239-404244 REVERSE LENGTH=267    | 237 | 267 | 1.00E-48  | 112.7 | 50.6 | 67.1 |
| Rsa1.0_00828.1.g20076.t1 | #                                                                                                                                                                                                                                                                                                                                                                                                                                                                                                                                                                                                                                         | #   | #   | #         | #     | #    | #    | -                                             | ----  | ----                 | #                                                                                                             | #   | #   | #         | #     | #    |      |
| Rsa1.0_00828.1.g20077.t1 | ref[XP_002864232.1] hypothetical protein ARALYDRAFT_495401 [Arabidopsis lyrata subsp. lyrata] gi 297310067 gb EFH40491.1   hypothetical protein ARALYDRAFT_495401 [Arabidopsis lyrata subsp. lyrata]                                                                                                                                                                                                                                                                                                                                                                                                                                      | 266 | 269 | 1.00E-109 | 101.1 | 78.9 | 86.5 | hypothetical protein ARALYDRAFT_495401        | gbpln | Arabidopsis lyrata   | AT5G53280.1   Symbols: PDV1   plastid division1   chr5:21607586-21609080 FORWARD LENGTH=272                   | 266 | 272 | 1.00E-107 | 102.3 | 75.2 | 85.0 |
| Rsa1.0_00828.1.g20078.t1 | ref[NP_200141.1] ethylene-responsive transcription factor CRF3 [Arabidopsis thaliana] gi 75262588 sp Q9FK12.1 CRF3_ARATH RecName: Full=Ethylene-responsive transcription factor CRF3; AltName: Full=Protein CYTOKININ RESPONSE FACTOR 3 gi 9759176 dbj BAB09791.1   unnamed protein product [Arabidopsis thaliana] gi 48479348 gb AAT44945.1   putative AP2/EREBP transcription factor [Arabidopsis thaliana] gi 56121914 gb AAV74238.1   At5g53290 [Arabidopsis thaliana] gi 60543347 gb AAX22271.1   At5g53290 [Arabidopsis thaliana] gi 332008950 gb AED96333.1   ethylene-responsive transcription factor CRF3 [Arabidopsis thaliana] | 348 | 354 | 1.00E-103 | 101.7 | 63.5 | 76.4 | ethylene-responsive transcription factor CRF3 | gbpln | Arabidopsis thaliana | AT5G53290.1   Symbols: CRF3   cytokinin response factor 3   chr5:21617961-21619025 REVERSE LENGTH=354         | 348 | 354 | 1.00E-105 | 101.7 | 63.5 | 76.4 |
| Rsa1.0_00828.1.g20079.t1 | #                                                                                                                                                                                                                                                                                                                                                                                                                                                                                                                                                                                                                                         | #   | #   | #         | #     | #    | #    | -                                             | ----  | ----                 | #                                                                                                             | #   | #   | #         | #     | #    |      |
| Rsa1.0_00828.1.g20080.t1 | #                                                                                                                                                                                                                                                                                                                                                                                                                                                                                                                                                                                                                                         | #   | #   | #         | #     | #    | #    | -                                             | ----  | ----                 | #                                                                                                             | #   | #   | #         | #     | #    |      |

|                          |                                                                                                                                                                                                                                                                                                                                                                                                                                                                                                                                                                                                                                                                                                                                                                                                                                                                                                                                                                                                                                                                                                                                                                                                                         |      |      |          |       |      |       |                                                     |       |                      |                                                                                                                                               |      |     |           |       |      |       |
|--------------------------|-------------------------------------------------------------------------------------------------------------------------------------------------------------------------------------------------------------------------------------------------------------------------------------------------------------------------------------------------------------------------------------------------------------------------------------------------------------------------------------------------------------------------------------------------------------------------------------------------------------------------------------------------------------------------------------------------------------------------------------------------------------------------------------------------------------------------------------------------------------------------------------------------------------------------------------------------------------------------------------------------------------------------------------------------------------------------------------------------------------------------------------------------------------------------------------------------------------------------|------|------|----------|-------|------|-------|-----------------------------------------------------|-------|----------------------|-----------------------------------------------------------------------------------------------------------------------------------------------|------|-----|-----------|-------|------|-------|
| Rsa1.0_00828.1.g20081.t1 | ref NP_568788.1  ubiquitin-conjugating enzyme E2 10 [Arabidopsis thaliana]<br>gi 30696309 ref NP_851181.1  ubiquitin-conjugating enzyme E2 10 [Arabidopsis thaliana]<br>gi 334188360 ref NP_001190528.1  ubiquitin-conjugating enzyme E2 10 [Arabidopsis thaliana]<br>gi 297796167 ref XP_002865968.1  ubiquitin-conjugating enzyme 10 [Arabidopsis lyrata subsp. lyrata]<br>gi 464987 sp P35133.1 UBC10_ARATH<br>RecName: Full=Ubiquitin-conjugating enzyme E2 10; AltName: Full=Ubiquitin carrier protein 10/12; AltName: Full=Ubiquitin-conjugating enzyme E2-17 kDa 10/12; AltName: Full=Ubiquitin-protein ligase 10/12<br>gi 11692932 gb AAG40069.1 AF324718.1 AT5g53300 [Arabidopsis thaliana]<br>gi 11762158 gb AAG40357.1 AF325005.1 AT5g53300 [Arabidopsis thaliana]<br>gi 11908050 gb AAG41454.1 AF326872.1 putative E2, ubiquitin-conjugating enzyme UBC10 [Arabidopsis thaliana]<br>gi 297878 emb CAA78715.1  ubiquitin conjugating enzyme [Arabidopsis thaliana]<br>gi 349213 gb AA32895.1  ubiquitin conjugating enzyme [Arabidopsis thaliana]<br>gi 9759177 dbj BAB09792.1  ubiquitin-conjugating enzyme E2-17 kD 10 (ubiquitin-protein ligase 10) (ubiquitin carrier protein 10) [Arabidopsis thaliana] | 148  | 148  | 6.00E-82 | 100.0 | 99.3 | 100.0 | ubiquitin-conjugating enzyme E2 10                  | gbpln | Arabidopsis lyrata   | AT5G53300.4   Symbols: UBC10   ubiquitin-conjugating enzyme 10   chr5:21632802-21633989 REVERSE LENGTH=148                                    | 148  | 148 | 2.00E-84  | 100.0 | 99.3 | 100.0 |
| Rsa1.0_00828.1.g20082.t1 | gb EOA13102.1  hypothetical protein CARUB_v10026109mg [Capsella rubella]                                                                                                                                                                                                                                                                                                                                                                                                                                                                                                                                                                                                                                                                                                                                                                                                                                                                                                                                                                                                                                                                                                                                                | 609  | 604  | 0        | 99.2  | 83.6 | 90.5  | hypothetical protein CARUB_v10026109mg              | gbpln | Capsella rubella     | AT5G53320.1   Symbols:   Leucine-rich repeat protein kinase family protein   chr5:21636453-21638337 REVERSE LENGTH=601                        | 609  | 601 | 0         | 98.7  | 80.3 | 90.0  |
| Rsa1.0_00828.1.g20083.t1 | ref XP_002864236.1  hypothetical protein ARALYDRAFT_918411 [Arabidopsis lyrata subsp. lyrata]<br>gi 297310071 gb EFH40495.1  hypothetical protein ARALYDRAFT_918411 [Arabidopsis lyrata subsp. lyrata]<br>ref XP_002865972.1  hypothetical protein ARALYDRAFT_918418 [Arabidopsis lyrata subsp. lyrata]<br>gi 297311807 gb EFH42231.1  hypothetical protein ARALYDRAFT_918418 [Arabidopsis lyrata subsp. lyrata]                                                                                                                                                                                                                                                                                                                                                                                                                                                                                                                                                                                                                                                                                                                                                                                                        | 221  | 221  | 3.00E-79 | 100.0 | 77.8 | 82.8  | hypothetical protein ARALYDRAFT_918411              | gbpln | Arabidopsis lyrata   | AT5G53330.1   Symbols:   Ubiquitin-associated/translation elongation factor EF1B protein   chr5:21639236-21640716 FORWARD LENGTH=221          | 221  | 221 | 6.00E-80  | 100.0 | 75.1 | 81.4  |
| Rsa1.0_00828.1.g20084.t1 | gb EOA35903.1  hypothetical protein CARUB_v10021160mg, partial [Capsella rubella]                                                                                                                                                                                                                                                                                                                                                                                                                                                                                                                                                                                                                                                                                                                                                                                                                                                                                                                                                                                                                                                                                                                                       | 454  | 488  | 0        | 107.5 | 88.8 | 96.0  | hypothetical protein ARALYDRAFT_918418              | gbpln | Arabidopsis lyrata   | AT5G53390.1   Symbols:   O-acyltransferase (WSD1-like) family protein   chr5:21656951-21659207 REVERSE LENGTH=486                             | 454  | 486 | 0         | 107.0 | 88.3 | 95.8  |
| Rsa1.0_00829.1.g20085.t1 | gb EOA12028.1  putative non-LTR retroelement reverse transcriptase [Arabidopsis thaliana]                                                                                                                                                                                                                                                                                                                                                                                                                                                                                                                                                                                                                                                                                                                                                                                                                                                                                                                                                                                                                                                                                                                               | 119  | 121  | 2.00E-22 | 101.7 | 48.7 | 52.1  | hypothetical protein CARUB_v10021160mg, partial     | gbpln | Capsella rubella     | AT1G69325.1   Symbols:   Remorin family protein   chr1:26063205-26063736 FORWARD LENGTH=120                                                   | 119  | 120 | 7.00E-23  | 100.8 | 42.0 | 44.5  |
| Rsa1.0_00829.1.g20086.t1 | gb AAD12028.1  putative non-LTR retroelement reverse transcriptase [Arabidopsis thaliana]                                                                                                                                                                                                                                                                                                                                                                                                                                                                                                                                                                                                                                                                                                                                                                                                                                                                                                                                                                                                                                                                                                                               | 1158 | 1447 | 0        | 125.0 | 44.8 | 60.8  | putative non-LTR retroelement reverse transcriptase | gbpln | Arabidopsis thaliana | AT3G24255.1   Symbols:   RNA-directed DNA polymerase (reverse transcriptase)-related family protein   chr3:8789471-8793208 FORWARD LENGTH=746 | 1158 | 746 | 1.00E-105 | 64.4  | 17.2 | 22.1  |
| Rsa1.0_00829.1.g20087.t1 | dbj BAJ34500.1  unnamed protein product [Theleungiella halophila]                                                                                                                                                                                                                                                                                                                                                                                                                                                                                                                                                                                                                                                                                                                                                                                                                                                                                                                                                                                                                                                                                                                                                       | 296  | 281  | 9.00E-99 | 94.9  | 76.4 | 81.4  | unnamed protein product                             | ----  | ----                 | AT1G69310.2   Symbols: WRKY57, ATWRKY57   WRKY DNA-binding protein 57   chr1:26056118-26057909 REVERSE LENGTH=287                             | 296  | 287 | 1.00E-101 | 97.0  | 74.0 | 80.7  |
| Rsa1.0_00829.1.g20088.t1 | #                                                                                                                                                                                                                                                                                                                                                                                                                                                                                                                                                                                                                                                                                                                                                                                                                                                                                                                                                                                                                                                                                                                                                                                                                       | #    | #    | #        | #     | #    | -     | -                                                   | ----  | ----                 | #                                                                                                                                             | #    | #   | #         | #     | #    | #     |
| Rsa1.0_00829.1.g20089.t1 | gb EOA35673.1  hypothetical protein CARUB_v10020897mg [Capsella rubella]                                                                                                                                                                                                                                                                                                                                                                                                                                                                                                                                                                                                                                                                                                                                                                                                                                                                                                                                                                                                                                                                                                                                                | 216  | 228  | 9.00E-60 | 105.6 | 75.0 | 84.7  | hypothetical protein CARUB_v10020897mg              | gbpln | Capsella rubella     | AT1G69295.1   Symbols: PDCB4   plasmodesmata callose-binding protein 4   chr1:26050492-26051843 REVERSE LENGTH=222                            | 216  | 222 | 6.00E-49  | 102.8 | 40.3 | 44.4  |
| Rsa1.0_00829.1.g20090.t1 | ref NP_177089.2  pentatricopeptide repeat-containing protein [Arabidopsis thaliana]<br>gi 193806277 sp P0C7R4.1 PP110_ARATH<br>H RecName: Full=Pentatricopeptide repeat-containing protein At1g69290<br>gi 332196785 gb AEE34906.1  pentatricopeptide repeat-containing protein [Arabidopsis thaliana]                                                                                                                                                                                                                                                                                                                                                                                                                                                                                                                                                                                                                                                                                                                                                                                                                                                                                                                  | 675  | 658  | 0        | 97.5  | 77.9 | 85.6  | pentatricopeptide repeat-containing protein         | gbpln | Arabidopsis thaliana | AT1G69290.1   Symbols:   Pentatricopeptide repeat (PPR) superfamily protein   chr1:26047372-26049348 REVERSE LENGTH=658                       | 675  | 658 | 0         | 97.5  | 77.9 | 85.6  |

|                           |                                                                                                                                                                                                                                                                                                                                                                                                                                           |     |     |           |       |      |      |                                                                         |       |                      |                                                                                                                                                                       |     |     |           |       |      |      |
|---------------------------|-------------------------------------------------------------------------------------------------------------------------------------------------------------------------------------------------------------------------------------------------------------------------------------------------------------------------------------------------------------------------------------------------------------------------------------------|-----|-----|-----------|-------|------|------|-------------------------------------------------------------------------|-------|----------------------|-----------------------------------------------------------------------------------------------------------------------------------------------------------------------|-----|-----|-----------|-------|------|------|
| Rsa1.0_00829.1.g20091.t1  | refXP_002888711.1  hypothetical protein ARALYDRAFT_476053 [Arabidopsis lyrata subsp. lyrata] gi 29733452 gb EFH64970.1                                                                                                                                                                                                                                                                                                                    | 474 | 537 | 0         | 113.3 | 78.3 | 85.0 | hypothetical protein ARALYDRAFT_476053                                  | gbpln | Arabidopsis lyrata   | AT1G69270.1   Symbols: RPK1   receptor-like protein kinase 1   chr1:26040877-26042499 REVERSE LENGTH=540                                                              | 474 | 540 | 0         | 113.9 | 78.3 | 85.0 |
| Rsa1.0_00829.1.g20092.t3  | hypothetical protein ARALYDRAFT_476053 [Arabidopsis lyrata subsp. lyrata] ref NP_175971.3  transcription initiation factor TFIIH subunit H1 [Arabidopsis thaliana] gi 122215373 sp Q3ECP0.1 TFB1A ARATH RecName: Full=Probable RNA polymerase II transcription factor B subunit 1-1; AltName: Full=General transcription and DNA repair factor III subunit TFB1-1; Short=AtTFB1-1; Short=TFIIH subunit TFB1-1 gi 110741140 dbj BAE98663.1 | 698 | 591 | 0         | 84.7  | 73.2 | 77.8 | transcription initiation factor TFIIH subunit H1                        | gbpln | Arabidopsis thaliana | AT1G55750.1   Symbols:   BSD domain (BTF2-like transcription factors, Synapse-associated proteins and DOS2-like proteins)   chr1:20840449-20845135 REVERSE LENGTH=591 | 698 | 591 | 0         | 84.7  | 73.2 | 77.8 |
| Rsa1.0_00829.1.g20093.t1  | probable RNA polymerase II transcription factor B subunit 1-1 [Arabidopsis thaliana]                                                                                                                                                                                                                                                                                                                                                      | #   | #   | #         | #     | #    | #    | -                                                                       | ----  | ----                 | #                                                                                                                                                                     | #   | #   | #         | #     | #    | #    |
| Rsa1.0_00829.1.g20094.t1  | ref NP_001031095.1  self-incompatibility protein S1-like protein [Arabidopsis thaliana] gi 332192618 gb AEE30739.1  self-incompatibility protein S1-like protein [Arabidopsis thaliana]                                                                                                                                                                                                                                                   | 143 | 151 | 1.00E-58  | 105.6 | 79.0 | 86.0 | self-incompatibility protein S1-like protein                            | gbpln | Arabidopsis thaliana | AT1G26796.1   Symbols:   Plant self-incompatibility protein S1 family   chr1:9278958-9279413 FORWARD LENGTH=151                                                       | 143 | 151 | 4.00E-61  | 105.6 | 79.0 | 86.0 |
| Rsa1.0_00829.1.g20095.t1  | ref NP_177085.1  nuclear transport factor 2 and RNA recognition motif-containing protein [Arabidopsis thaliana] gi 6730639 gb AAF27060.1 AC008262_9 F4N2.20 [Arabidopsis thaliana] gi 12325079 gb AG52488.1 AC018364_6 putative RNA-binding protein, 63745-61607 [Arabidopsis thaliana] gi 300117247 gb AAP12857.1  At1g69250 [Arabidopsis thaliana] gi 332196781 gb AEE34902.1                                                           | 474 | 427 | 1.00E-116 | 90.1  | 54.0 | 66.7 | nuclear transport factor 2 and RNA recognition motif-containing protein | gbpln | Arabidopsis thaliana | AT1G69250.1   Symbols:   Nuclear transport factor 2 (NTF2) family protein with RNA binding (RRM-RBD-RNP motifs) domain   chr1:26033163-26035301 FORWARD LENGTH=427    | 474 | 427 | 1.00E-118 | 90.1  | 54.0 | 66.7 |
| Rsa1.0_00829.1.g20096.t1  | nuclear transport factor 2 and RNA recognition motif-containing protein [Arabidopsis thaliana]                                                                                                                                                                                                                                                                                                                                            | 470 | 444 | 0         | 94.5  | 81.3 | 87.0 | F4N2.19                                                                 | gbpln | Arabidopsis thaliana | AT1G69240.1   Symbols: ATMES15, MES15, RHS9   methyl esterase 15   chr1:26028115-26030218 REVERSE LENGTH=444                                                          | 470 | 444 | 0         | 94.5  | 81.3 | 87.0 |
| Rsa1.0_00829.1.g20097.t1  | gb AAF27064.1 AC008262_13 F4N2.19 [Arabidopsis thaliana]                                                                                                                                                                                                                                                                                                                                                                                  | 470 | 444 | 0         | 94.5  | 81.3 | 87.0 | F4N2.19                                                                 | gbpln | Arabidopsis thaliana | AT1G26355.1   Symbols: SP1L1   SPIRAL1-like 1   chr1:9117950-9118611 REVERSE LENGTH=113                                                                               | 470 | 444 | 0         | 94.5  | 81.3 | 87.0 |
| Rsa1.0_00829.1.g20097.t1  | dbj BAJ33884.1  unnamed protein product [Thellungiella halophila]                                                                                                                                                                                                                                                                                                                                                                         | 108 | 113 | 2.00E-39  | 104.6 | 75.9 | 87.0 | unnamed protein product                                                 | ----  | ----                 | AT1G26355.1   Symbols: SP1L1   SPIRAL1-like 1   chr1:9117950-9118611 REVERSE LENGTH=113                                                                               | 108 | 113 | 2.00E-39  | 104.6 | 75.9 | 87.0 |
| Rsa1.0_00829.1.g20098.t12 | ref NP_564954.1  uncharacterized protein [Arabidopsis thaliana] gi 13937141 gb AAK50064.1 AF372924_1 At1g69210/F4N2.11 [Arabidopsis thaliana] gi 22137004 gb AAM91347.1  At1g69210/F4N2.11 [Arabidopsis thaliana] gi 332196773 gb AEE34894.1  uncharacterized protein AT1G69210 [Arabidopsis thaliana]                                                                                                                                    | 289 | 305 | 3.00E-97  | 105.5 | 75.1 | 84.8 | uncharacterized protein                                                 | gbpln | Arabidopsis thaliana | AT1G69210.1   Symbols:   Uncharacterised protein family UPF0090   chr1:26018583-26020058 REVERSE LENGTH=305                                                           | 289 | 305 | 1.00E-100 | 105.5 | 75.1 | 84.8 |
| Rsa1.0_00829.1.g20099.t1  | #                                                                                                                                                                                                                                                                                                                                                                                                                                         | #   | #   | #         | #     | #    | #    | -                                                                       | ----  | ----                 | #                                                                                                                                                                     | #   | #   | #         | #     | #    | #    |
| Rsa1.0_00829.1.g20100.t1  | #                                                                                                                                                                                                                                                                                                                                                                                                                                         | #   | #   | #         | #     | #    | #    | -                                                                       | ----  | ----                 | #                                                                                                                                                                     | #   | #   | #         | #     | #    | #    |
| Rsa1.0_00829.1.g20101.t1  | ref XP_002864030.1  invertase/pectin methylesterase inhibitor family protein [Arabidopsis lyrata subsp. lyrata] gi 297309865 gb EFH40289.1  invertase/pectin methylesterase inhibitor family protein [Arabidopsis lyrata subsp. lyrata]                                                                                                                                                                                                   | 154 | 183 | 1.00E-21  | 118.8 | 39.0 | 55.8 | invertase/pectin methylesterase inhibitor family protein                | gbpln | Arabidopsis lyrata   | AT5G50070.1   Symbols:   Plant invertase/pectin methylesterase inhibitor superfamily protein   chr5:20364556-20365429 FORWARD LENGTH=183                              | 154 | 183 | 1.00E-21  | 118.8 | 39.0 | 55.8 |
| Rsa1.0_00829.1.g20102.t2  | #                                                                                                                                                                                                                                                                                                                                                                                                                                         | #   | #   | #         | #     | #    | #    | -                                                                       | ----  | ----                 | #                                                                                                                                                                     | #   | #   | #         | #     | #    | #    |

|                          |                                                                                                                                                                                                                                                                                                                                                                                                                                                                                                                                                                                                                                                                                                                                                          |      |      |           |       |      |      |                                          |       |                      |                                                                                                                                                                                                                                                                                                                                                   |     |      |           |       |      |      |
|--------------------------|----------------------------------------------------------------------------------------------------------------------------------------------------------------------------------------------------------------------------------------------------------------------------------------------------------------------------------------------------------------------------------------------------------------------------------------------------------------------------------------------------------------------------------------------------------------------------------------------------------------------------------------------------------------------------------------------------------------------------------------------------------|------|------|-----------|-------|------|------|------------------------------------------|-------|----------------------|---------------------------------------------------------------------------------------------------------------------------------------------------------------------------------------------------------------------------------------------------------------------------------------------------------------------------------------------------|-----|------|-----------|-------|------|------|
| Rsa1.0_00829.1.g20103.t1 | refNP_177077.3  squamosa promoter-binding-like protein 6 [Arabidopsis thaliana]<br>gi 67461542 sp Q94JW8.2 SPL6_ARATH RecName: Full=Squamosa promoter-binding-like protein 6<br>gi 12325078 gb AAG52487.1 AC018364.5 squamosa promoter binding protein-like 6; 91282-89867 [Arabidopsis thaliana] gi 5931683 emb CAB56595.1  squamosa promoter binding protein-like 6 [Arabidopsis thaliana]<br>gi 5931685 emb CAB56596.1  squamosa promoter binding protein-like 6 [Arabidopsis thaliana]<br>gi 30102652 gb AAP21244.1  At1g69170 [Arabidopsis thaliana]<br>gi 110735912 dbj BAE99931.1  squamosa promoter binding protein-like 6 [Arabidopsis thaliana]<br>gi 332196769 gb AEE34890.1  squamosa promoter-binding-like protein 6 [Arabidopsis thaliana] | 339  | 405  | 1.00E-109 | 119.5 | 70.8 | 79.9 | squamosa promoter-binding-like protein 6 | gbpln | Arabidopsis thaliana | AT1G69170.1   Symbols:   Squamosa promoter-binding protein-like (SBP domain) transcription factor family protein   chr1:26005626-26007041 FORWARD LENGTH=405                                                                                                                                                                                      | 339 | 405  | 1.00E-111 | 119.5 | 70.8 | 79.9 |
| Rsa1.0_00829.1.g20104.t1 | #                                                                                                                                                                                                                                                                                                                                                                                                                                                                                                                                                                                                                                                                                                                                                        | #    | #    | #         | #     | #    | #    | -                                        | ----  | ----                 | #                                                                                                                                                                                                                                                                                                                                                 | #   | #    | #         | #     | #    |      |
| Rsa1.0_00829.1.g20105.t1 | gb ACG60677.1  hypothetical protein BoB028L01.120 [Brassica oleracea var. alboglabra]                                                                                                                                                                                                                                                                                                                                                                                                                                                                                                                                                                                                                                                                    | 313  | 322  | 1.00E-124 | 102.9 | 81.8 | 87.9 | hypothetical protein BoB028L01.120       | gbpln | Brassica oleracea    | AT1G69160.1   Symbols:   unknown protein; BEST Arabidopsis thaliana protein match is: unknown protein (TAIR:AT3G13980.1); Has 173 Blast hits to 172 proteins in 54 species: Archae - 0; Bacteria - 0; Metazoa - 25; Fungi - 33; Plants - 84; Viruses - 2; Other Eukaryotes - 29 (source: NCBI BLINK).   chr1:26000315-26001280 FORWARD LENGTH=321 | 313 | 321  | 1.00E-103 | 102.6 | 76.7 | 82.4 |
| Rsa1.0_00829.1.g20106.t1 | #                                                                                                                                                                                                                                                                                                                                                                                                                                                                                                                                                                                                                                                                                                                                                        | #    | #    | #         | #     | #    | #    | -                                        | ----  | ----                 | #                                                                                                                                                                                                                                                                                                                                                 | #   | #    | #         | #     | #    |      |
| Rsa1.0_00830.1.g20107.t7 | gb AAD20658.1  putative retroelement pol polyprotein [Arabidopsis thaliana]                                                                                                                                                                                                                                                                                                                                                                                                                                                                                                                                                                                                                                                                              | 1581 | 1611 | 0         | 101.9 | 25.1 | 31.8 | putative retroelement pol polyprotein    | gbpln | Arabidopsis thaliana | #                                                                                                                                                                                                                                                                                                                                                 | #   | #    | #         | #     | #    |      |
| Rsa1.0_00830.1.g20108.t1 | gb ACA61613.1  hypothetical protein AP2_E11.1 [Arabidopsis lyrata subsp. petraea]                                                                                                                                                                                                                                                                                                                                                                                                                                                                                                                                                                                                                                                                        | 390  | 471  | 1.00E-165 | 120.8 | 70.0 | 84.4 | hypothetical protein AP2_E11.1           | gbpln | Arabidopsis lyrata   | AT4G23160.1   Symbols: CRK8   cysteine-rich RLK (RECEPTOR-like protein kinase) 8   chr4:12129485-12134086 FORWARD LENGTH=1262                                                                                                                                                                                                                     | 390 | 1262 | 6.00E-76  | 323.6 | 34.9 | 53.1 |
| Rsa1.0_00830.1.g20109.t1 | gb AAF79692.1 AC022314_33 F9C16.1 [Arabidopsis thaliana]                                                                                                                                                                                                                                                                                                                                                                                                                                                                                                                                                                                                                                                                                                 | 244  | 820  | 3.00E-30  | 336.1 | 33.6 | 45.1 | F9C16.1                                  | gbpln | Arabidopsis thaliana | ATMG00820.1   Symbols: ORF170   Reverse transcriptase (RNA-dependent DNA polymerase)   chrM:228573-229085 REVERSE LENGTH=170                                                                                                                                                                                                                      | 244 | 170  | 1.00E-18  | 69.7  | 24.2 | 32.0 |
| Rsa1.0_00830.1.g20110.t7 | gb EOA25562.1  hypothetical protein CARUB_v10018906mg [Capsella rubella]                                                                                                                                                                                                                                                                                                                                                                                                                                                                                                                                                                                                                                                                                 | 282  | 300  | 9.00E-86  | 106.4 | 62.1 | 76.2 | hypothetical protein CARUB_v10018906mg   | gbpln | Capsella rubella     | AT3G58360.1   Symbols:   TRAF-like family protein   chr3:21593505-21594866 REVERSE LENGTH=298                                                                                                                                                                                                                                                     | 282 | 298  | 6.00E-88  | 105.7 | 59.9 | 72.3 |
| Rsa1.0_00830.1.g20111.t1 | refNP_191395.1  TRAF-like family protein [Arabidopsis thaliana]<br>gi 6735348 emb CAB68174.1  putative protein [Arabidopsis thaliana]<br>gi 332646252 gb AEE79773.1  TRAF-like family protein [Arabidopsis thaliana]                                                                                                                                                                                                                                                                                                                                                                                                                                                                                                                                     | 287  | 298  | 5.00E-91  | 103.8 | 61.7 | 74.6 | TRAF-like family protein                 | gbpln | Arabidopsis thaliana | AT3G58360.1   Symbols:   TRAF-like family protein   chr3:21593505-21594866 REVERSE LENGTH=298                                                                                                                                                                                                                                                     | 287 | 298  | 1.00E-93  | 103.8 | 61.7 | 74.6 |
| Rsa1.0_00830.1.g20112.t1 | gb EOA23339.1  hypothetical protein CARUB_v10019412mg [Capsella rubella]                                                                                                                                                                                                                                                                                                                                                                                                                                                                                                                                                                                                                                                                                 | 233  | 287  | 2.00E-60  | 123.2 | 54.9 | 72.1 | hypothetical protein CARUB_v10019412mg   | gbpln | Capsella rubella     | AT3G58410.1   Symbols:   TRAF-like family protein   chr3:21604871-21606229 REVERSE LENGTH=328                                                                                                                                                                                                                                                     | 233 | 328  | 1.00E-60  | 140.8 | 55.4 | 70.8 |
| Rsa1.0_00830.1.g20113.t1 | #                                                                                                                                                                                                                                                                                                                                                                                                                                                                                                                                                                                                                                                                                                                                                        | #    | #    | #         | #     | #    | #    | -                                        | ----  | ----                 | #                                                                                                                                                                                                                                                                                                                                                 | #   | #    | #         | #     | #    |      |
| Rsa1.0_00830.1.g20114.t1 | refNP_191395.1  TRAF-like family protein [Arabidopsis thaliana]<br>gi 6735348 emb CAB68174.1  putative protein [Arabidopsis thaliana]<br>gi 332646252 gb AEE79773.1  TRAF-like family protein [Arabidopsis thaliana]<br>refXP_002878217.1  hypothetical protein ARALYDRAFT_907320 [Arabidopsis lyrata subsp. lyrata]                                                                                                                                                                                                                                                                                                                                                                                                                                     | 298  | 298  | 1.00E-118 | 100.0 | 68.5 | 84.2 | TRAF-like family protein                 | gbpln | Arabidopsis thaliana | AT3G58360.1   Symbols:   TRAF-like family protein   chr3:21593505-21594866 REVERSE LENGTH=298                                                                                                                                                                                                                                                     | 298 | 298  | 1.00E-120 | 100.0 | 68.5 | 84.2 |
| Rsa1.0_00830.1.g20115.t1 | gi 297324055 gb EFH54476.1  hypothetical protein ARALYDRAFT_907320 [Arabidopsis lyrata subsp. lyrata]                                                                                                                                                                                                                                                                                                                                                                                                                                                                                                                                                                                                                                                    | 502  | 426  | 3.00E-89  | 84.9  | 36.1 | 39.8 | hypothetical protein ARALYDRAFT_907320   | gbpln | Arabidopsis lyrata   | AT3G58440.1   Symbols:   TRAF-like superfamily protein   chr3:21618446-21621249 REVERSE LENGTH=601                                                                                                                                                                                                                                                | 502 | 601  | 2.00E-69  | 119.7 | 39.4 | 55.2 |
| Rsa1.0_00830.1.g20116.t1 | refNP_191400.1  TRAF-like family protein [Arabidopsis thaliana]<br>gi 6735353 emb CAB68179.1  putative protein [Arabidopsis thaliana]<br>gi 332646257 gb AEE79778.1  TRAF-like family protein [Arabidopsis thaliana]                                                                                                                                                                                                                                                                                                                                                                                                                                                                                                                                     | 349  | 328  | 7.00E-72  | 94.0  | 48.7 | 61.6 | TRAF-like family protein                 | gbpln | Arabidopsis thaliana | AT3G58410.1   Symbols:   TRAF-like family protein   chr3:21604871-21606229 REVERSE LENGTH=328                                                                                                                                                                                                                                                     | 349 | 328  | 2.00E-74  | 94.0  | 48.7 | 61.6 |

|                          |                                                                                                                                                                                                      |      |      |           |       |      |      |                                                 |       |                      |                                                                                                                                                                                                                                                                                                                                                       |      |      |           |       |      |      |
|--------------------------|------------------------------------------------------------------------------------------------------------------------------------------------------------------------------------------------------|------|------|-----------|-------|------|------|-------------------------------------------------|-------|----------------------|-------------------------------------------------------------------------------------------------------------------------------------------------------------------------------------------------------------------------------------------------------------------------------------------------------------------------------------------------------|------|------|-----------|-------|------|------|
| Rsa1.0_00830.1.g20117.t1 | refXP_002878217.1   hypothetical protein ARALYDRAFT_907320 [Arabidopsis lyrata subsp. lyrata] gi 297324055 gb EFH54476.1   hypothetical protein ARALYDRAFT_907320 [Arabidopsis lyrata subsp. lyrata] | 351  | 426  | 3.00E-76  | 121.4 | 53.6 | 67.8 | hypothetical protein ARALYDRAFT_907320          | gbpln | Arabidopsis lyrata   | AT3G58320.1   Symbols:   Ubiquitin-specific protease family C19-related protein   chr3:21585567-21586328 REVERSE LENGTH=224                                                                                                                                                                                                                           | 351  | 224  | 4.00E-52  | 63.8  | 28.5 | 34.2 |
| Rsa1.0_00830.1.g20118.t1 | refXP_002876542.1   hypothetical protein ARALYDRAFT_907545 [Arabidopsis lyrata subsp. lyrata] gi 297322390 gb EFH52801.1   hypothetical protein ARALYDRAFT_907545 [Arabidopsis lyrata subsp. lyrata] | 478  | 1733 | 1.00E-114 | 362.6 | 44.1 | 48.3 | hypothetical protein ARALYDRAFT_907545          | gbpln | Arabidopsis lyrata   | AT3G60240.4   Symbols: EIF4G, CUM2   eukaryotic translation initiation factor 4G   chr3:22261842-22268295 FORWARD LENGTH=1727                                                                                                                                                                                                                         | 478  | 1727 | 1.00E-111 | 361.3 | 43.7 | 47.9 |
| Rsa1.0_00830.1.g20119.t1 | dbj BAA97290.1   non-LTR retroelement reverse transcriptase-like [Arabidopsis thaliana]                                                                                                              | 1325 | 1072 | 0         | 80.9  | 36.2 | 47.3 | non-LTR retroelement reverse transcriptase-like | gbpln | Arabidopsis thaliana | AT3G58440.1   Symbols:   TRAF-like superfamily protein   chr3:21618446-21621249 REVERSE LENGTH=601                                                                                                                                                                                                                                                    | 1325 | 601  | 1.00E-80  | 45.4  | 15.5 | 20.4 |
| Rsa1.0_00831.1.g20120.t1 | gb EOA20056.1   hypothetical protein CARUB_v10000332mg [Capsella rubella]                                                                                                                            | 572  | 619  | 8.00E-76  | 108.2 | 32.5 | 44.8 | hypothetical protein CARUB_v10000332mg          | gbpln | Capsella rubella     | AT5G27640.2   Symbols: TIF3B1, EIF3B, ATEIF3B-1, EIF3B-1, ATTIF3B1   translation initiation factor 3B1   chr5:9781207-9784759 REVERSE LENGTH=738                                                                                                                                                                                                      | 572  | 738  | 5.00E-78  | 129.0 | 31.8 | 44.6 |
| Rsa1.0_00831.1.g20121.t1 | gb EOA24181.1   hypothetical protein CARUB_v10017418mg [Capsella rubella]                                                                                                                            | 375  | 390  | 1.00E-177 | 104.0 | 86.1 | 91.7 | hypothetical protein CARUB_v10017418mg          | gbpln | Capsella rubella     | AT2G03590.1   Symbols: ATUPS1, UPS1   ureide permease 1   chr2:1095129-1096711 FORWARD LENGTH=390                                                                                                                                                                                                                                                     | 375  | 390  | 1.00E-178 | 104.0 | 85.3 | 91.5 |
| Rsa1.0_00831.1.g20122.t1 | refXP_002870855.1   hypothetical protein ARALYDRAFT_494155 [Arabidopsis lyrata subsp. lyrata] gi 297316691 gb EFH47114.1   hypothetical protein ARALYDRAFT_494155 [Arabidopsis lyrata subsp. lyrata] | 398  | 411  | 1.00E-100 | 103.3 | 55.0 | 68.3 | hypothetical protein ARALYDRAFT_494155          | gbpln | Arabidopsis lyrata   | AT2G04810.1   Symbols:   Protein of unknown function (DUF295)   chr2:1688773-1689966 FORWARD LENGTH=397                                                                                                                                                                                                                                               | 398  | 397  | 1.00E-100 | 99.7  | 54.8 | 66.1 |
| Rsa1.0_00831.1.g20123.t4 | refXP_002875213.1   hypothetical protein ARALYDRAFT_484264 [Arabidopsis lyrata subsp. lyrata] gi 297321051 gb EFH51472.1   hypothetical protein ARALYDRAFT_484264 [Arabidopsis lyrata subsp. lyrata] | 491  | 313  | 1.00E-130 | 63.7  | 46.2 | 54.2 | hypothetical protein ARALYDRAFT_484264          | gbpln | Arabidopsis lyrata   | AT2G03550.1   Symbols:   alpha/beta-Hydrolases superfamily protein   chr2:1077080-1078018 FORWARD LENGTH=312                                                                                                                                                                                                                                          | 491  | 312  | 1.00E-129 | 63.5  | 45.6 | 52.7 |
| Rsa1.0_00831.1.g20124.t1 | gb EOA12340.1   hypothetical protein CARUB_v10007908mg [Capsella rubella]                                                                                                                            | 170  | 323  | 2.00E-41  | 190.0 | 65.3 | 77.1 | hypothetical protein CARUB_v10007908mg          | gbpln | Capsella rubella     | AT5G27260.1   Symbols:   unknown protein; BEST Arabidopsis thaliana protein match is: unknown protein (TAIR:AT2G9880.1); Has 1807 Blast hits to 1807 proteins in 277 species: Archae - 0; Bacteria - 0; Metazoa - 736; Fungi - 347; Plants - 385; Viruses - 0; Other Eukaryotes - 339 (source: NCBI BLINK).   chr5:9603943-9604930 FORWARD LENGTH=303 | 170  | 303  | 2.00E-25  | 178.2 | 43.5 | 67.6 |
| Rsa1.0_00831.1.g20125.t1 | refXP_002875208.1   hypothetical protein ARALYDRAFT_904630 [Arabidopsis lyrata subsp. lyrata] gi 297321046 gb EFH51467.1   hypothetical protein ARALYDRAFT_904630 [Arabidopsis lyrata subsp. lyrata] | 162  | 166  | 2.00E-58  | 102.5 | 79.0 | 85.2 | hypothetical protein ARALYDRAFT_904630          | gbpln | Arabidopsis lyrata   | AT2G03505.1   Symbols:   Carbohydrate-binding X8 domain superfamily protein   chr2:1064317-1065094 FORWARD LENGTH=168                                                                                                                                                                                                                                 | 162  | 168  | 3.00E-57  | 103.7 | 75.3 | 82.7 |
| Rsa1.0_00831.1.g20126.t1 | gb ABD64939.1   hypothetical protein 24.t00017 [Brassica oleracea]                                                                                                                                   | 287  | 442  | 4.00E-93  | 154.0 | 64.1 | 74.9 | hypothetical protein 24.t00017                  | gbpln | Brassica oleracea    | AT2G13770.1   Symbols:   CONTAINS InterPro DOMAIN/s: Putative harbinger transposase-derived nuclease (InterPro:IPR006912); Has 451 Blast hits to 352 proteins in 33 species: Archae - 0; Bacteria - 0; Metazoa - 28; Fungi - 8; Plants - 388; Viruses - 0; Other Eukaryotes - 27 (source: NCBI BLINK).   chr2:5736603-5737847 FORWARD LENGTH=343      | 287  | 343  | 4.00E-60  | 119.5 | 38.3 | 50.9 |
| Rsa1.0_00831.1.g20127.t1 | gb ABD65170.1   hypothetical protein 40.t00057 [Brassica oleracea]                                                                                                                                   | 283  | 255  | 2.00E-64  | 90.1  | 48.8 | 62.9 | hypothetical protein 40.t00057                  | gbpln | Brassica oleracea    | AT3G47680.1   Symbols:   DNA binding   chr3:17577483-17578391 REVERSE LENGTH=302                                                                                                                                                                                                                                                                      | 283  | 302  | 3.00E-40  | 106.7 | 37.8 | 56.5 |
| Rsa1.0_00831.1.g20128.t2 | #                                                                                                                                                                                                    | #    | #    | #         | #     | #    | #    | -                                               | ----  | ----                 | #                                                                                                                                                                                                                                                                                                                                                     | #    | #    | #         | #     | #    | #    |
| Rsa1.0_00831.1.g20129.t1 | refXP_002875207.1   myb family transcription factor [Arabidopsis lyrata subsp. lyrata] gi 297321045 gb EFH51466.1   myb family transcription factor [Arabidopsis lyrata subsp. lyrata]               | 314  | 432  | 1.00E-136 | 137.6 | 86.3 | 89.5 | myb family transcription factor                 | gbpln | Arabidopsis lyrata   | AT2G03500.1   Symbols:   Homeodomain-like superfamily protein   chr2:1059926-1062259 FORWARD LENGTH=432                                                                                                                                                                                                                                               | 314  | 432  | 1.00E-130 | 137.6 | 85.4 | 89.2 |
| Rsa1.0_00831.1.g20130.t1 | dbj BAF00918.1   putative reverse transcriptase [Arabidopsis thaliana]                                                                                                                               | 1620 | 910  | 0         | 56.2  | 28.6 | 37.6 | putative reverse transcriptase                  | gbpln | Arabidopsis thaliana | AT1G43760.1   Symbols:   DNase I-like superfamily protein   chr1:16528890-16531065 REVERSE LENGTH=626                                                                                                                                                                                                                                                 | 1620 | 626  | 1.00E-101 | 38.6  | 11.7 | 17.3 |

|                           |                                                                                                                                                                                                                                                                                                                                                                                                                                                                                                                                                                                                                                                                                                                                                                                                                |     |      |           |       |      |      |                                            |       |                      |                                                                                                                         |     |      |           |       |      |      |
|---------------------------|----------------------------------------------------------------------------------------------------------------------------------------------------------------------------------------------------------------------------------------------------------------------------------------------------------------------------------------------------------------------------------------------------------------------------------------------------------------------------------------------------------------------------------------------------------------------------------------------------------------------------------------------------------------------------------------------------------------------------------------------------------------------------------------------------------------|-----|------|-----------|-------|------|------|--------------------------------------------|-------|----------------------|-------------------------------------------------------------------------------------------------------------------------|-----|------|-----------|-------|------|------|
| Rsa1.0_00831.1.g20131.t1  | emb[CAB39638.1] RNA-directed DNA polymerase-like protein [Arabidopsis thaliana] gi 7267666 emb[CAB78094.1] RNA-directed DNA polymerase-like protein [Arabidopsis thaliana]<br>ref XP_002875206.1  predicted protein [Arabidopsis lyrata subsp. lyrata]                                                                                                                                                                                                                                                                                                                                                                                                                                                                                                                                                         | 430 | 1274 | 1.00E-62  | 296.3 | 34.4 | 51.6 | RNA-directed DNA polymerase-like protein   | gbpln | Arabidopsis thaliana | AT4G29090.1   Symbols:   Ribonuclease H-like superfamily protein   chr4:14333528-14335255 FORWARD LENGTH=575            | 430 | 575  | 7.00E-38  | 133.7 | 28.4 | 44.7 |
| Rsa1.0_00831.1.g20132.t1  | gi 297321044 gb EFH51465.1  predicted protein [Arabidopsis lyrata subsp. lyrata]<br>ref XP_002889677.1  SIT4 phosphatase-associated family protein [Arabidopsis lyrata subsp. lyrata]                                                                                                                                                                                                                                                                                                                                                                                                                                                                                                                                                                                                                          | 626 | 619  | 0         | 98.9  | 91.4 | 96.5 | predicted protein                          | gbpln | Arabidopsis lyrata   | AT2G03480.1   Symbols: QUL2   QUASIMOD2 LIKE 2   chr2:1051509-1054090 FORWARD LENGTH=606                                | 626 | 606  | 0         | 96.8  | 90.3 | 94.4 |
| Rsa1.0_00832.1.g20133.t1  | gi 297335519 gb EFH65936.1  SIT4 phosphatase-associated family protein [Arabidopsis lyrata subsp. lyrata]<br>ref NP_172279.1  GATA transcription factor 11 [Arabidopsis thaliana] gi 145323792 ref NP_001077485.1  GATA transcription factor 11 [Arabidopsis thaliana] gi 71660879 sp Q6DBP8.1 GAT11_ARAT H RecName: Full=GATA transcription factor 11 gi 50198783 gb AAT70425.1  At1g08010 [Arabidopsis thaliana] gi 52421283 gb AAU45211.1  At1g08010 [Arabidopsis thaliana] gi 110738607 db BAF01229.1  putative GATA transcription factor 3 [Arabidopsis thaliana] gi 225897894 db BAH30279.1  hypothetical protein [Arabidopsis thaliana] gi 332190107 gb AEE28228.1  GATA transcription factor 11 [Arabidopsis thaliana] gi 332190108 gb AEE28229.1  GATA transcription factor 11 [Arabidopsis thaliana] | 793 | 805  | 0         | 101.5 | 86.5 | 91.7 | SIT4 phosphatase-associated family protein | gbpln | Arabidopsis lyrata   | AT1G07990.1   Symbols:   SIT4 phosphatase-associated family protein   chr1:2477413-2482898 FORWARD LENGTH=802           | 793 | 802  | 0         | 101.1 | 85.4 | 90.9 |
| Rsa1.0_00832.1.g20134.t1  | #                                                                                                                                                                                                                                                                                                                                                                                                                                                                                                                                                                                                                                                                                                                                                                                                              | #   | #    | #         | #     | #    | #    | -                                          | ----  | ----                 | #                                                                                                                       | #   | #    | #         | #     | #    |      |
| Rsa1.0_00832.1.g20135.t1  | gb EOA36903.1  hypothetical protein CARUB_v10011453mg [Capsella rubella]<br>ref NP_172279.1  GATA transcription factor 11 [Arabidopsis thaliana] gi 145323792 ref NP_001077485.1  GATA transcription factor 11 [Arabidopsis thaliana] gi 71660879 sp Q6DBP8.1 GAT11_ARAT H RecName: Full=GATA transcription factor 11 gi 50198783 gb AAT70425.1  At1g08010 [Arabidopsis thaliana] gi 52421283 gb AAU45211.1  At1g08010 [Arabidopsis thaliana] gi 110738607 db BAF01229.1  putative GATA transcription factor 3 [Arabidopsis thaliana] gi 225897894 db BAH30279.1  hypothetical protein [Arabidopsis thaliana] gi 332190107 gb AEE28228.1  GATA transcription factor 11 [Arabidopsis thaliana] gi 332190108 gb AEE28229.1  GATA transcription factor 11 [Arabidopsis thaliana]                                  | 498 | 499  | 0         | 100.2 | 83.9 | 90.8 | hypothetical protein CARUB_v10011453mg     | gbpln | Capsella rubella     | AT1G08030.1   Symbols: TPST   tyrosylprotein sulfotransferase   chr1:2489575-2492741 REVERSE LENGTH=500                 | 498 | 500  | 0         | 100.4 | 83.5 | 89.2 |
| Rsa1.0_00832.1.g20136.t1  | ref NP_172279.1  GATA transcription factor 11 [Arabidopsis thaliana] gi 145323792 ref NP_001077485.1  GATA transcription factor 11 [Arabidopsis thaliana] gi 71660879 sp Q6DBP8.1 GAT11_ARAT H RecName: Full=GATA transcription factor 11 gi 50198783 gb AAT70425.1  At1g08010 [Arabidopsis thaliana] gi 52421283 gb AAU45211.1  At1g08010 [Arabidopsis thaliana] gi 110738607 db BAF01229.1  putative GATA transcription factor 3 [Arabidopsis thaliana] gi 225897894 db BAH30279.1  hypothetical protein [Arabidopsis thaliana] gi 332190107 gb AEE28228.1  GATA transcription factor 11 [Arabidopsis thaliana] gi 332190108 gb AEE28229.1  GATA transcription factor 11 [Arabidopsis thaliana]                                                                                                              | 287 | 303  | 1.00E-102 | 105.6 | 69.0 | 80.8 | GATA transcription factor 11               | gbpln | Arabidopsis thaliana | AT1G08010.2   Symbols: GATA11   GATA transcription factor 11   chr1:2486202-2487402 REVERSE LENGTH=303                  | 287 | 303  | 1.00E-105 | 105.6 | 69.0 | 80.8 |
| Rsa1.0_00832.1.g20137.t1  | ref XP_002889677.1  SIT4 phosphatase-associated family protein [Arabidopsis lyrata subsp. lyrata] gi 297335519 gb EFH65936.1  SIT4 phosphatase-associated family protein [Arabidopsis lyrata subsp. lyrata]                                                                                                                                                                                                                                                                                                                                                                                                                                                                                                                                                                                                    | 788 | 805  | 0         | 102.2 | 87.3 | 92.3 | SIT4 phosphatase-associated family protein | gbpln | Arabidopsis lyrata   | AT1G07990.1   Symbols:   SIT4 phosphatase-associated family protein   chr1:2477413-2482898 FORWARD LENGTH=802           | 788 | 802  | 0         | 101.8 | 86.5 | 92.0 |
| Rsa1.0_00832.1.g20138.t1  | gb EOA38222.1  hypothetical protein CARUB_v10009702mg [Capsella rubella]<br>db BAF00898.1  hypothetical protein [Arabidopsis thaliana] gi 110738408 db BAF011130.1  hypothetical protein [Arabidopsis thaliana]                                                                                                                                                                                                                                                                                                                                                                                                                                                                                                                                                                                                | 144 | 330  | 3.00E-38  | 229.2 | 80.6 | 86.1 | hypothetical protein CARUB_v10009702mg     | gbpln | Capsella rubella     | AT1G07985.1   Symbols:   Expressed protein   chr1:2475508-2475942 FORWARD LENGTH=144                                    | 144 | 144  | 9.00E-39  | 100.0 | 80.6 | 86.1 |
| Rsa1.0_00832.1.g20139.t2  | db BAF00898.1  hypothetical protein [Arabidopsis thaliana] gi 110738408 db BAF011130.1  hypothetical protein [Arabidopsis thaliana]                                                                                                                                                                                                                                                                                                                                                                                                                                                                                                                                                                                                                                                                            | 245 | 206  | 9.00E-48  | 84.1  | 44.5 | 47.3 | hypothetical protein                       | gbpln | Arabidopsis thaliana | AT1G07980.1   Symbols: NF-YC10   nuclear factor Y, subunit C10   chr1:2473523-2474910 REVERSE LENGTH=206                | 245 | 206  | 2.00E-48  | 84.1  | 36.7 | 39.2 |
| Rsa1.0_00832.1.g20140.t1  | gb AAF79822.1 AC026875.2 T6D22.2 [Arabidopsis thaliana]                                                                                                                                                                                                                                                                                                                                                                                                                                                                                                                                                                                                                                                                                                                                                        | 471 | 967  | 0         | 205.3 | 97.0 | 98.3 | T6D22.2                                    | gbpln | Arabidopsis thaliana | AT5G60390.3   Symbols:   GTP binding Elongation factor Tu family protein   chr5:24289226-24290675 FORWARD LENGTH=449    | 471 | 449  | 0         | 95.3  | 94.3 | 95.1 |
| Rsa1.0_00832.1.g20141.t1  | gb EOA35617.1  hypothetical protein CARUB_v10020841mg [Capsella rubella] gi 482571430 gb EOA35618.1  hypothetical protein CARUB_v10020841mg [Capsella rubella]                                                                                                                                                                                                                                                                                                                                                                                                                                                                                                                                                                                                                                                 | 250 | 252  | 1.00E-117 | 100.8 | 85.2 | 90.4 | hypothetical protein CARUB_v10020841mg     | gbpln | Capsella rubella     | AT1G62350.1   Symbols:   Pentatricopeptide repeat (PPR) superfamily protein   chr1:23056653-23057935 FORWARD LENGTH=196 | 250 | 196  | 4.00E-99  | 78.4  | 69.6 | 75.2 |
| Rsa1.0_00832.1.g20142.t1  | gb EOA38652.1  hypothetical protein CARUB_v10010571mg [Capsella rubella]                                                                                                                                                                                                                                                                                                                                                                                                                                                                                                                                                                                                                                                                                                                                       | 144 | 147  | 4.00E-65  | 102.1 | 85.4 | 91.7 | hypothetical protein CARUB_v10010571mg     | gbpln | Capsella rubella     | AT1G07960.1   Symbols: ATPDIL5-1, PDIL5-1   PDI-like 5-1   chr1:2467681-2468831 FORWARD LENGTH=146                      | 144 | 146  | 5.00E-67  | 101.4 | 84.0 | 91.7 |
| Rsa1.0_00832.1.g20143.t13 | ref NP_172269.2  RNA ligase [Arabidopsis thaliana] gi 238478403 ref NP_001154320.1  RNA ligase [Arabidopsis thaliana] gi 110740464 db BAF02126.1  translation elongation factor EF-1 alpha [Arabidopsis thaliana] gi 332190089 gb AEE28210.1  RNA ligase [Arabidopsis thaliana] gi 332190090 gb AEE28211.1  RNA ligase [Arabidopsis thaliana]                                                                                                                                                                                                                                                                                                                                                                                                                                                                  | 547 | 1104 | 0         | 201.8 | 65.6 | 71.8 | RNA ligase                                 | gbpln | Arabidopsis thaliana | AT1G07910.2   Symbols: ATRNL, RNLA, ATRLG1   RNALigase   chr1:2446712-2454386 FORWARD LENGTH=1104                       | 547 | 1104 | 0         | 201.8 | 65.6 | 71.8 |





|                           |                                                                                                                                                                                                                                                                                                                               |      |      |           |       |      |      |                                                     |       |                      |                                                                                                                                                                                                                                                                                                                                                      |      |      |           |       |      |      |  |
|---------------------------|-------------------------------------------------------------------------------------------------------------------------------------------------------------------------------------------------------------------------------------------------------------------------------------------------------------------------------|------|------|-----------|-------|------|------|-----------------------------------------------------|-------|----------------------|------------------------------------------------------------------------------------------------------------------------------------------------------------------------------------------------------------------------------------------------------------------------------------------------------------------------------------------------------|------|------|-----------|-------|------|------|--|
| Rsa1.0_00833.1.g20153.t1  | ref[XP_002882324.1] esterase/lipase/thioesterase family protein [Arabidopsis lyrata subsp. lyrata] gi 297328164 gb EFH58584.1                                                                                                                                                                                                 | 267  | 267  | 1.00E-148 | 100.0 | 95.5 | 97.4 | esterase/lipase/thioesterase family protein         | gbpln | Arabidopsis lyrata   | AT3G03990.1   Symbols:   alpha/beta-Hydrolases superfamily protein   chr3:1033788-10364591 FORWARD LENGTH=267                                                                                                                                                                                                                                        | 267  | 267  | 1.00E-150 | 100.0 | 95.5 | 97.4 |  |
| Rsa1.0_00833.1.g20154.t1  | ref[XP_002882325.1] short-chain dehydrogenase/reductase family protein [Arabidopsis lyrata subsp. lyrata] gi 297328164 gb EFH58584.1 short-chain dehydrogenase/reductase family protein [Arabidopsis lyrata subsp. lyrata]                                                                                                    | 235  | 274  | 1.00E-108 | 116.6 | 85.5 | 91.5 | short-chain dehydrogenase/reductase family protein  | gbpln | Arabidopsis lyrata   | AT3G04000.1   Symbols:   NAD(P)-binding Rossmann-fold superfamily protein   chr3:1035500-1036435 FORWARD LENGTH=272                                                                                                                                                                                                                                  | 235  | 272  | 1.00E-106 | 115.7 | 83.4 | 90.6 |  |
| Rsa1.0_00833.1.g20155.t1  | ref[NP_187051.3] O-Glycosyl hydrolases family 17 protein [Arabidopsis thaliana] gi 6223646 gb AAF05860.1 AC011698_11 putative beta-1,3-glucanase [Arabidopsis thaliana] gi 116325948 gb ABJ98575.1 At3g04010 [Arabidopsis thaliana] gi 332640504 gb AEE74025.1 O-Glycosyl hydrolases family 17 protein [Arabidopsis thaliana] | 490  | 491  | 0         | 100.2 | 90.0 | 94.1 | O-Glycosyl hydrolases family 17 protein             | gbpln | Arabidopsis thaliana | AT3G04010.1   Symbols:   O-Glycosyl hydrolases family 17 protein   chr3:1036879-1039263 REVERSE LENGTH=491                                                                                                                                                                                                                                           | 490  | 491  | 0         | 100.2 | 90.0 | 94.1 |  |
| Rsa1.0_00833.1.g20156.t1  | gb EOA31100.1  hypothetical protein CARUB_v10014253mg [Capsella rubella]                                                                                                                                                                                                                                                      | 304  | 304  | 1.00E-148 | 100.0 | 85.9 | 92.4 | hypothetical protein CARUB_v10014253mg              | gbpln | Capsella rubella     | AT3G04020.1   Symbols:   unknown protein; Has 26 Blast hits to 25 proteins in 10 species: Archae - 0; Bacteria - 0; Metazoa - 0; Fungi - 0; Plants - 23; Viruses - 0; Other Eukaryotes - 3 (source: NCBI BLink).   chr3:1040548-1042377 FORWARD LENGTH=304                                                                                           | 304  | 304  | 1.00E-150 | 100.0 | 84.9 | 93.4 |  |
| Rsa1.0_00833.1.g20157.t1  | ref[NP_001118567.1] myb family transcription factor [Arabidopsis thaliana] gi 6223653 gb AAF05867.1 AC011698_18 transfactor-like [Arabidopsis thaliana] gi 332640508 gb AEE74029.1  myb family transcription factor [Arabidopsis thaliana]                                                                                    | 401  | 394  | 0         | 98.3  | 87.5 | 92.3 | myb family transcription factor                     | gbpln | Arabidopsis thaliana | AT3G04030.3   Symbols:   Homeodomain-like superfamily protein   chr3:1042920-1044574 REVERSE LENGTH=394                                                                                                                                                                                                                                              | 401  | 394  | 0         | 98.3  | 87.5 | 92.3 |  |
| Rsa1.0_00833.1.g20158.t1  | ref[XP_002882328.1] hypothetical protein ARALYDRAFT_340564 [Arabidopsis lyrata subsp. lyrata] gi 297328168 gb EFH58587.1  hypothetical protein ARALYDRAFT_340564 [Arabidopsis lyrata subsp. lyrata]                                                                                                                           | 493  | 510  | 0         | 103.4 | 80.5 | 87.8 | hypothetical protein ARALYDRAFT_340564              | gbpln | Arabidopsis lyrata   | AT3G04050.1   Symbols:   Pyruvate kinase family protein   chr3:1049795-1051522 FORWARD LENGTH=510                                                                                                                                                                                                                                                    | 493  | 510  | 0         | 103.4 | 80.1 | 87.6 |  |
| Rsa1.0_00833.1.g20159.t2  | gb AAG50806.1 AC079281_8 unknown protein [Arabidopsis thaliana]                                                                                                                                                                                                                                                               | 1768 | 1213 | 0         | 68.6  | 33.3 | 44.5 | unknown protein                                     | gbpln | Arabidopsis thaliana | AT1G43760.1   Symbols:   DNase I-like superfamily protein   chr1:16528880-16531065 REVERSE LENGTH=626                                                                                                                                                                                                                                                | 1768 | 626  | 2.00E-86  | 35.4  | 9.8  | 14.8 |  |
| Rsa1.0_00834.1.g20160.t7  | gb AAF79618.1 AC027665_19 F5M15.26 [Arabidopsis thaliana]                                                                                                                                                                                                                                                                     | 1940 | 1838 | 0         | 94.7  | 33.1 | 41.8 | F5M15.26                                            | gbpln | Arabidopsis thaliana | AT4G20520.1   Symbols:   RNA binding:RNA-directed DNA polymerases   chr4:11045912-11047716 FORWARD LENGTH=376                                                                                                                                                                                                                                        | 1940 | 376  | 4.00E-12  | 19.4  | 1.6  | 2.6  |  |
| Rsa1.0_00834.1.g20161.t2  | gb AAQ82842.1  At4g20730 [Arabidopsis thaliana] gi 51970840 dbj BAD44112.1  putative protein [Arabidopsis thaliana]                                                                                                                                                                                                           | 875  | 800  | 1.00E-27  | 91.4  | 8.6  | 13.3 | At4g20730                                           | gbpln | Arabidopsis thaliana | AT4G32200.1   Symbols: ASY2   DNA-binding HORMA family protein   chr4:15548840-15554962 FORWARD LENGTH=1399                                                                                                                                                                                                                                          | 875  | 1399 | 8.00E-29  | 159.9 | 9.0  | 14.2 |  |
| Rsa1.0_00834.1.g20162.t2  | gb AAD14492.1  Hypothetical protein [Arabidopsis thaliana]                                                                                                                                                                                                                                                                    | 300  | 240  | 1.00E-35  | 80.0  | 30.0 | 39.3 | Hypothetical protein                                | gbpln | Arabidopsis thaliana | AT2G22440.1   Symbols:   BEST Arabidopsis thaliana protein match is: Ribonuclease H-like superfamily protein (TAIR:AT4G29090.1); Has 208 Blast hits to 191 proteins in 10 species: Archae - 0; Bacteria - 0; Metazoa - 0; Fungi - 0; Plants - 208; Viruses - 0; Other Eukaryotes - 0 (source: NCBI BLink).   chr2:9528910-9529917 FORWARD LENGTH=256 | 300  | 256  | 2.00E-12  | 85.3  | 24.3 | 35.3 |  |
| Rsa1.0_00834.1.g20163.t4  | gb AAD15377.1  putative non-LTR retroelement reverse transcriptase [Arabidopsis thaliana]                                                                                                                                                                                                                                     | 1707 | 1044 | 0         | 61.2  | 27.7 | 37.9 | putative non-LTR retroelement reverse transcriptase | gbpln | Arabidopsis thaliana | AT1G43760.1   Symbols:   DNase I-like superfamily protein   chr1:16528880-16531065 REVERSE LENGTH=626                                                                                                                                                                                                                                                | 1707 | 626  | 8.00E-31  | 36.7  | 6.2  | 10.1 |  |
| Rsa1.0_00834.1.g20164.t3  | dbj BAH57285.1  AT5G26850 [Arabidopsis thaliana]                                                                                                                                                                                                                                                                              | 216  | 896  | 2.00E-60  | 414.8 | 52.3 | 58.8 | AT5G26850                                           | gbpln | Arabidopsis thaliana | AT5G26850.4   Symbols:   Uncharacterized protein   chr5:9445950-9450584 FORWARD LENGTH=983                                                                                                                                                                                                                                                           | 216  | 983  | 1.00E-62  | 455.1 | 52.3 | 58.8 |  |
| Rsa1.0_00834.1.g20165.t1  | # # # # # # # # # # # # # # # # # # # # # #                                                                                                                                                                                                                                                                                   |      |      |           |       |      |      |                                                     |       |                      |                                                                                                                                                                                                                                                                                                                                                      |      |      |           |       |      |      |  |
| Rsa1.0_00834.1.g20166.t16 | ref[XP_002888226.1] helicase domain-containing protein [Arabidopsis lyrata subsp. lyrata] gi 297334087 gb EFH64485.1  helicase domain-containing protein [Arabidopsis lyrata subsp. lyrata]                                                                                                                                   | 1483 | 1458 | 0         | 98.3  | 72.8 | 81.5 | helicase domain-containing protein                  | gbpln | Arabidopsis lyrata   | AT1G58060.1   Symbols:   RNA helicase family protein   chr1:21489480-21501775 REVERSE LENGTH=1459                                                                                                                                                                                                                                                    | 1483 | 1459 | 0         | 98.4  | 72.6 | 81.5 |  |

|                          |                                                                                                                                                                                                                                                                                                                                                                                                                                                                                  |      |      |          |       |      |      |                                                 |       |                      |                                                                                                                                                                                                                                                                                                                                                                                                                                                                                                                                                         |                                                                                                               |      |          |          |       |      |      |  |
|--------------------------|----------------------------------------------------------------------------------------------------------------------------------------------------------------------------------------------------------------------------------------------------------------------------------------------------------------------------------------------------------------------------------------------------------------------------------------------------------------------------------|------|------|----------|-------|------|------|-------------------------------------------------|-------|----------------------|---------------------------------------------------------------------------------------------------------------------------------------------------------------------------------------------------------------------------------------------------------------------------------------------------------------------------------------------------------------------------------------------------------------------------------------------------------------------------------------------------------------------------------------------------------|---------------------------------------------------------------------------------------------------------------|------|----------|----------|-------|------|------|--|
| Rsa1.0_00834.1.g20167.t1 | #                                                                                                                                                                                                                                                                                                                                                                                                                                                                                | #    | #    | #        | #     | #    | #    | #                                               | -     | ----                 | ----                                                                                                                                                                                                                                                                                                                                                                                                                                                                                                                                                    | AT2G33620.4   Symbols:   AT hook motif DNA-binding family protein   chr2:14234749-14236563 FORWARD LENGTH=351 | 110  | 351      | 2.00E-12 | 319.1 | 41.8 | 47.3 |  |
| Rsa1.0_00834.1.g20168.t1 | #                                                                                                                                                                                                                                                                                                                                                                                                                                                                                | #    | #    | #        | #     | #    | #    | #                                               | -     | ----                 | ----                                                                                                                                                                                                                                                                                                                                                                                                                                                                                                                                                    | #                                                                                                             | #    | #        | #        | #     | #    | #    |  |
| Rsa1.0_00835.1.g20169.t1 | gb[EOA23804.1] hypothetical protein CARUB_v10017017mg, partial [Capsella rubella]                                                                                                                                                                                                                                                                                                                                                                                                | 385  | 521  | 1.00E-13 | 135.3 | 12.2 | 16.1 | hypothetical protein CARUB_v10017017mg, partial | gbpln | Capsella rubella     | #                                                                                                                                                                                                                                                                                                                                                                                                                                                                                                                                                       | #                                                                                                             | #    | #        | #        | #     | #    | #    |  |
| Rsa1.0_00835.1.g20170.t1 | ref[XP_002886639.1] xanthine/uracil permease family protein [Arabidopsis lyrata subsp. lyrata] gi 297332480 gb EFH62898.1  xanthine/uracil permease family protein [Arabidopsis lyrata subsp. lyrata]                                                                                                                                                                                                                                                                            | 537  | 537  | 0        | 100.0 | 90.1 | 95.3 | xanthine/uracil permease family protein         | gbpln | Arabidopsis lyrata   | AT1G60030.1   Symbols: ATNAT7, NAT7   nucleobase-ascorbate transporter 7   chr1:22113993-22116648 REVERSE LENGTH=538                                                                                                                                                                                                                                                                                                                                                                                                                                    | 537                                                                                                           | 538  | 0        | 100.2    | 88.6  | 95.2 |      |  |
| Rsa1.0_00835.1.g20171.t1 | #                                                                                                                                                                                                                                                                                                                                                                                                                                                                                | #    | #    | #        | #     | #    | #    | -                                               | ----  | ----                 | #                                                                                                                                                                                                                                                                                                                                                                                                                                                                                                                                                       | #                                                                                                             | #    | #        | #        | #     | #    | #    |  |
| Rsa1.0_00835.1.g20172.t1 | ref[NP_564752.1] uncharacterized protein [Arabidopsis thaliana] gi 4249380 gb AAD14477.1  ESTs gb Z37637.gb AA042498 and gb AA042269 come from this gene [Arabidopsis thaliana] gi 26450481 dbj BAC42354.1  unknown protein [Arabidopsis thaliana] gi 28827334 gb AAO50511.1  unknown protein [Arabidopsis thaliana] gi 332195529 gb AEE33650.1  uncharacterized protein AT1G60010 [Arabidopsis thaliana]                                                                        | 175  | 173  | 1.00E-72 | 98.9  | 81.7 | 92.0 | uncharacterized protein                         | gbpln | Arabidopsis thaliana | AT1G60010.1   Symbols:   unknown protein; FUNCTIONS IN: molecular function unknown; INVOLVED IN: N-terminal protein myristoylation; LOCATED IN: cellular component unknown; EXPRESSED IN: 22 plant structures; EXPRESSED DURING: 13 growth stages; BEST Arabidopsis thaliana protein match is: unknown protein (TAIR:AT1G0530.1); Has 185 Blast hits to 185 proteins in 18 species: Archae - 0; Bacteria - 0; Metazoa - 0; Fungi - 3; Plants - 180; Viruses - 0; Other Eukaryotes - 2 (source: NCBI BLink).   chr1:22095660-22096434 REVERSE LENGTH=173 | 175                                                                                                           | 173  | 4.00E-75 | 98.9     | 81.7  | 92.0 |      |  |
| Rsa1.0_00835.1.g20173.t1 | #                                                                                                                                                                                                                                                                                                                                                                                                                                                                                | #    | #    | #        | #     | #    | #    | -                                               | ----  | ----                 | AT1G60000.1   Symbols:   RNA-binding (RRM/RBD/RNP motifs) family protein   chr1:22093678-22094540 REVERSE LENGTH=258                                                                                                                                                                                                                                                                                                                                                                                                                                    | 58                                                                                                            | 258  | 2.00E-11 | 444.8    | 58.6  | 62.1 |      |  |
| Rsa1.0_00835.1.g20174.t1 | ref[XP_004239004.1] PREDICTED: uncharacterized protein LOC101252686 [Solanum lycopersicum]                                                                                                                                                                                                                                                                                                                                                                                       | 245  | 210  | 4.00E-38 | 85.7  | 38.0 | 50.6 | PREDICTED: uncharacterized protein LOC101252686 | gbpln | Solanum lycopersicum | AT1G20000.1   Symbols: TAF11b   TBP-associated factor 11b   chr1:6936898-6937666 REVERSE LENGTH=204                                                                                                                                                                                                                                                                                                                                                                                                                                                     | 245                                                                                                           | 204  | 4.00E-38 | 83.3     | 38.4  | 48.2 |      |  |
| Rsa1.0_00835.1.g20175.t1 | emb CCD74528.1  NAC domain containing protein 23 [Arabidopsis halleri subsp. halleri]                                                                                                                                                                                                                                                                                                                                                                                            | 325  | 334  | 5.00E-94 | 102.8 | 56.3 | 69.5 | NAC domain containing protein 23                | gbpln | Arabidopsis halleri  | AT1G60280.1   Symbols: ANAC023, NAC023   NAC domain containing protein 23   chr1:22228885-22227928 REVERSE LENGTH=347                                                                                                                                                                                                                                                                                                                                                                                                                                   | 325                                                                                                           | 347  | 1.00E-93 | 106.8    | 54.2  | 68.9 |      |  |
| Rsa1.0_00835.1.g20176.t1 | gb[EOA33233.1] hypothetical protein CARUB_v10021279mg [Capsella rubella]                                                                                                                                                                                                                                                                                                                                                                                                         | 595  | 583  | 0        | 98.0  | 84.0 | 90.1 | hypothetical protein CARUB_v10021279mg          | gbpln | Capsella rubella     | AT1G59990.1   Symbols:   DEA(D/H)-box RNA helicase family protein   chr1:22093369-22092885 REVERSE LENGTH=581                                                                                                                                                                                                                                                                                                                                                                                                                                           | 595                                                                                                           | 581  | 0        | 97.6     | 83.0  | 88.7 |      |  |
| Rsa1.0_00835.1.g20177.t1 | #                                                                                                                                                                                                                                                                                                                                                                                                                                                                                | #    | #    | #        | #     | #    | #    | -                                               | ----  | ----                 | #                                                                                                                                                                                                                                                                                                                                                                                                                                                                                                                                                       | #                                                                                                             | #    | #        | #        | #     | #    | #    |  |
| Rsa1.0_00835.1.g20178.t1 | gb[EOA40155.1] hypothetical protein CARUB_v10008872mg [Capsella rubella]                                                                                                                                                                                                                                                                                                                                                                                                         | 105  | 516  | 1.00E-48 | 491.4 | 85.7 | 93.3 | hypothetical protein CARUB_v10008872mg          | gbpln | Capsella rubella     | AT1G13710.1   Symbols: CYP78A5, KLU   cytochrome P450, family 78, subfamily A, polypeptide 5   chr1:4702932-4704592 REVERSE LENGTH=517                                                                                                                                                                                                                                                                                                                                                                                                                  | 105                                                                                                           | 517  | 5.00E-49 | 492.4    | 84.8  | 90.5 |      |  |
| Rsa1.0_00835.1.g20179.t1 | gb[EOA34331.1] hypothetical protein CARUB_v10021851mg [Capsella rubella]                                                                                                                                                                                                                                                                                                                                                                                                         | 459  | 496  | 0        | 108.1 | 79.1 | 85.8 | hypothetical protein CARUB_v10021851mg          | gbpln | Capsella rubella     | AT1G59850.1   Symbols:   ARM repeat superfamily protein   chr1:22028509-22030207 REVERSE LENGTH=498                                                                                                                                                                                                                                                                                                                                                                                                                                                     | 459                                                                                                           | 498  | 0        | 108.5    | 78.9  | 85.6 |      |  |
| Rsa1.0_00835.1.g20180.t1 | gb[EOA34536.1] hypothetical protein CARUB_v10022081mg [Capsella rubella]                                                                                                                                                                                                                                                                                                                                                                                                         | 225  | 297  | 2.00E-97 | 132.0 | 77.3 | 83.6 | hypothetical protein CARUB_v10022081mg          | gbpln | Capsella rubella     | AT1G59840.2   Symbols: CCB4   cofactor assembly of complex C1   chr1:22028569-22028174 FORWARD LENGTH=297                                                                                                                                                                                                                                                                                                                                                                                                                                               | 225                                                                                                           | 297  | 2.00E-99 | 132.0    | 77.3  | 83.6 |      |  |
| Rsa1.0_00835.1.g20181.t1 | ref[NP_176191.1] phospholipid-transporting ATPase 3 [Arabidopsis thaliana] gi 30316321 ssp O9XIE6.2 ALA3_ARATH RecName: Full=Phospholipid-transporting ATPase 3; Short=ATLA3; AltName: Full=Aminophospholipid ATPase 3; AltName: Full=Aminophospholipid flippase 3; AltName: Full=Protein IRREGULAR TRICHOME BRANCH 2 gi 20147219 gb AM10325.1  At1g59820/F23H11.14 [Arabidopsis thaliana] gi 332195500 gb AEE33621.1  phospholipid-transporting ATPase 3 [Arabidopsis thaliana] | 1216 | 1213 | 0        | 99.8  | 95.1 | 97.8 | phospholipid-transporting ATPase 3              | gbpln | Arabidopsis thaliana | AT1G59820.1   Symbols: ALA3   aminophospholipid ATPase 3   chr1:22011599-22020023 FORWARD LENGTH=1213                                                                                                                                                                                                                                                                                                                                                                                                                                                   | 1216                                                                                                          | 1213 | 0        | 99.8     | 95.1  | 97.8 |      |  |
| Rsa1.0_00835.1.g20182.t1 | gb[EOA33686.1] hypothetical protein CARUB_v10019869mg [Capsella rubella]                                                                                                                                                                                                                                                                                                                                                                                                         | 619  | 725  | 0        | 117.1 | 66.1 | 75.8 | hypothetical protein CARUB_v10019869mg          | gbpln | Capsella rubella     | AT1G59620.1   Symbols: CW9   Disease resistance protein (CC-NBS-LRR class) family   chr1:21902627-21905527 FORWARD LENGTH=842                                                                                                                                                                                                                                                                                                                                                                                                                           | 619                                                                                                           | 842  | 0        | 136.0    | 58.3  | 68.0 |      |  |

|                          |                                                                                                                                                                                                                                                                                                                                                                                                                                                                         |      |      |           |       |      |      |                                       |       |                      |                                                                                                                                                                  |      |      |           |       |      |      |
|--------------------------|-------------------------------------------------------------------------------------------------------------------------------------------------------------------------------------------------------------------------------------------------------------------------------------------------------------------------------------------------------------------------------------------------------------------------------------------------------------------------|------|------|-----------|-------|------|------|---------------------------------------|-------|----------------------|------------------------------------------------------------------------------------------------------------------------------------------------------------------|------|------|-----------|-------|------|------|
| Rsa1.0_00835.1.g20183.t1 | ref[XP_002872057.1] NLI interacting factor family protein [Arabidopsis lyrata subsp. lyrata]<br>gi 297317894 gb EFH48316.1  NLI interacting factor family protein [Arabidopsis lyrata subsp. lyrata]                                                                                                                                                                                                                                                                    | 305  | 302  | 4.00E-85  | 99.0  | 57.7 | 68.5 | NLI interacting factor family protein | gbpln | Arabidopsis lyrata   | AT2G02290.1   Symbols:   Haloacid dehalogenase-like hydrolase (HAD) superfamily protein   chr2:604453-605361 FORWARD LENGTH=302                                  | 305  | 302  | 3.00E-86  | 99.0  | 58.7 | 70.8 |
| Rsa1.0_00835.1.g20184.t2 | gb AFD01292.1  auxin response factor 1 [Brassica rapa subsp. pekinensis]                                                                                                                                                                                                                                                                                                                                                                                                | 656  | 665  | 0         | 101.4 | 97.9 | 98.6 | auxin response factor 1               | gbpln | Brassica rapa        | AT1G59750.2   Symbols: ARF1   auxin response factor 1   chr1:21980414-21984193 FORWARD LENGTH=662                                                                | 656  | 662  | 0         | 100.9 | 94.2 | 96.2 |
| Rsa1.0_00835.1.g20185.t3 | ref[NP_176183.1] putative peptide/nitrate transporter [Arabidopsis thaliana]<br>gi 75305727 sp Q93VV5.1 PTR16_ARAT H RecName: Full=Probable peptide/nitrate transporter At1g59740 gi 14334728 gb AAK59542.1  putative oligopeptide transporter protein [Arabidopsis thaliana]<br>gi 15293215 gb AAK93718.1  putative oligopeptide transporter protein [Arabidopsis thaliana]<br>gi 332195490 gb AEE33611.1  probable peptide/nitrate transporter [Arabidopsis thaliana] | 491  | 591  | 0         | 120.4 | 90.6 | 96.1 | putative peptide/nitrate transporter  | gbpln | Arabidopsis thaliana | AT1G59740.1   Symbols:   Major facilitator superfamily protein   chr1:21968227-21972312 FORWARD LENGTH=591                                                       | 491  | 591  | 0         | 120.4 | 90.6 | 96.1 |
| Rsa1.0_00835.1.g20186.t1 | dbj BAJ33912.1  unnamed protein product [Thellungiella halophila]                                                                                                                                                                                                                                                                                                                                                                                                       | 541  | 539  | 0         | 99.6  | 91.7 | 94.6 | unnamed protein product               | ----  | ----                 | AT1G58290.1   Symbols: HEMA1   Glutamyl-tRNA reductase family protein   chr1:21624028-21626051 REVERSE LENGTH=543                                                | 541  | 543  | 0         | 100.4 | 88.4 | 93.2 |
| Rsa1.0_00835.1.g20187.t1 | #                                                                                                                                                                                                                                                                                                                                                                                                                                                                       | #    | #    | #         | #     | #    | -    | -                                     | ----  | ----                 | #                                                                                                                                                                | #    | #    | #         | #     | #    | #    |
| Rsa1.0_00835.1.g20188.t1 | emb CAN69058.1  hypothetical protein VITISV_022968 [Vitis vinifera]                                                                                                                                                                                                                                                                                                                                                                                                     | 1066 | 830  | 1.00E-114 | 77.9  | 21.3 | 28.0 | hypothetical protein VITISV_022968    | gbpln | Vitis vinifera       | #                                                                                                                                                                | #    | #    | #         | #     | #    | #    |
| Rsa1.0_00836.1.g20189.t1 | ref[XP_002876336.1] sedoheptulose-bisphosphatase [Arabidopsis lyrata subsp. lyrata]<br>gi 297322174 gb EFH52595.1  sedoheptulose-bisphosphatase [Arabidopsis lyrata subsp. lyrata]                                                                                                                                                                                                                                                                                      | 289  | 393  | 1.00E-128 | 136.0 | 80.3 | 82.0 | sedoheptulose-bisphosphatase          | gbpln | Arabidopsis lyrata   | AT3G5800.1   Symbols: SBPASE   sedoheptulose-bisphosphatase   chr3:20709640-20711421 FORWARD LENGTH=393                                                          | 289  | 393  | 1.00E-130 | 136.0 | 79.2 | 82.0 |
| Rsa1.0_00836.1.g20190.t2 | #                                                                                                                                                                                                                                                                                                                                                                                                                                                                       | #    | #    | #         | #     | #    | -    | -                                     | ----  | ----                 | #                                                                                                                                                                | #    | #    | #         | #     | #    | #    |
| Rsa1.0_00836.1.g20191.t1 | #                                                                                                                                                                                                                                                                                                                                                                                                                                                                       | #    | #    | #         | #     | #    | -    | -                                     | ----  | ----                 | #                                                                                                                                                                | #    | #    | #         | #     | #    | #    |
| Rsa1.0_00836.1.g20192.t1 | ref[NP_175500.1] putative F-box protein [Arabidopsis thaliana]<br>gi 75268203 sp Q9C6J3.1 FB52_ARATH RecName: Full=Putative F-box protein At1g50870<br>gi 12321805 gb AA650947.1 AC079284_22 hypothetical protein [Arabidopsis thaliana]<br>gi 332194475 gb AEE32596.1  putative F-box protein [Arabidopsis thaliana]                                                                                                                                                   | 404  | 396  | 3.00E-91  | 98.0  | 47.8 | 65.1 | putative F-box protein                | gbpln | Arabidopsis thaliana | AT1G50870.1   Symbols:   F-box and associated interaction domains-containing protein   chr1:18855147-18856337 FORWARD LENGTH=396                                 | 404  | 396  | 7.00E-94  | 98.0  | 47.8 | 65.1 |
| Rsa1.0_00836.1.g20193.t1 | ref[NP_567027.2] amidohydrolase family protein [Arabidopsis thaliana]<br>gi 332645927 gb AEE79448.1  amidohydrolase family protein [Arabidopsis thaliana]                                                                                                                                                                                                                                                                                                               | 593  | 576  | 0         | 97.1  | 84.5 | 89.7 | amidohydrolase family protein         | gbpln | Arabidopsis thaliana | AT3G55850.1   Symbols: LAF3, LAF3 ISF2   Amidohydrolase family   chr3:20721866-20725489 REVERSE LENGTH=576                                                       | 593  | 576  | 0         | 97.1  | 84.5 | 89.7 |
| Rsa1.0_00836.1.g20194.t1 | ref[XP_003599996.1] hypothetical protein MTR_3g050240 [Medicago truncatula]<br>gi 359489044 gb AES70247.1  hypothetical protein MTR_3g050240 [Medicago truncatula]                                                                                                                                                                                                                                                                                                      | 669  | 496  | 6.00E-19  | 74.1  | 14.8 | 24.2 | hypothetical protein MTR_3g050240     | gbpln | Medicago truncatula  | AT3G62210.1   Symbols: EDA32   Putative endonuclease or glycosyl hydrolase   chr3:23026910-23028113 REVERSE LENGTH=279                                           | 669  | 279  | 2.00E-19  | 41.7  | 8.7  | 12.6 |
| Rsa1.0_00836.1.g20195.t1 | ref[XP_002877981.1] skp1-interacting partner 5 [Arabidopsis lyrata subsp. lyrata]<br>gi 297323818 gb EFH54240.1  skp1-interacting partner 5 [Arabidopsis lyrata subsp. lyrata]                                                                                                                                                                                                                                                                                          | 245  | 274  | 1.00E-105 | 111.8 | 78.8 | 83.3 | skp1-interacting partner 5            | gbpln | Arabidopsis lyrata   | AT3G54480.1   Symbols: SKIP5, SKP5   SKP1/ASK-interacting protein 5   chr3:20170883-20173325 REVERSE LENGTH=274                                                  | 245  | 274  | 1.00E-103 | 111.8 | 77.1 | 82.4 |
| Rsa1.0_00836.1.g20196.t1 | ref[XP_002877980.1] ump synthase [Arabidopsis lyrata subsp. lyrata]<br>gi 297323818 gb EFH54239.1  ump synthase [Arabidopsis lyrata subsp. lyrata]                                                                                                                                                                                                                                                                                                                      | 477  | 476  | 0         | 99.8  | 88.7 | 93.9 | ump synthase                          | gbpln | Arabidopsis lyrata   | AT3G54470.1   Symbols:   uridine 5'-monophosphate synthase / UMP synthase (PYRE-F) (UMPS)   chr3:20168285-20170245 REVERSE LENGTH=476                            | 477  | 476  | 0         | 99.8  | 88.7 | 93.5 |
| Rsa1.0_00836.1.g20197.t1 | ref[XP_002877979.1] SNF2 domain-containing protein [Arabidopsis lyrata subsp. lyrata]<br>gi 297323817 gb EFH54238.1  SNF2 domain-containing protein [Arabidopsis lyrata subsp. lyrata]                                                                                                                                                                                                                                                                                  | 1346 | 1370 | 0         | 101.8 | 79.7 | 86.8 | SNF2 domain-containing protein        | gbpln | Arabidopsis lyrata   | AT3G54460.1   Symbols:   SNF2 domain-containing protein / helicase domain-containing protein / F-box family protein   chr3:20162050-20167186 REVERSE LENGTH=1378 | 1346 | 1378 | 0         | 102.4 | 79.5 | 86.3 |

|                          |                                                                                                                                                                                                                                                                                                                                                                                                                                                                                                                                                                                                                                                 |      |      |           |       |      |      |                                             |       |                      |                                                                                                                                     |      |      |           |       |      |      |
|--------------------------|-------------------------------------------------------------------------------------------------------------------------------------------------------------------------------------------------------------------------------------------------------------------------------------------------------------------------------------------------------------------------------------------------------------------------------------------------------------------------------------------------------------------------------------------------------------------------------------------------------------------------------------------------|------|------|-----------|-------|------|------|---------------------------------------------|-------|----------------------|-------------------------------------------------------------------------------------------------------------------------------------|------|------|-----------|-------|------|------|
| Rsa1.0_00836.1.g20198.t1 | ref NP_001030858.1  beta-galactosidase [Arabidopsis thaliana] gi 332645710 gb AE79231.1  glycoside hydrolase family 2 protein [Arabidopsis thaliana]                                                                                                                                                                                                                                                                                                                                                                                                                                                                                            | 684  | 1108 | 0         | 162.0 | 90.4 | 93.7 | beta-galactosidase                          | gbpln | Arabidopsis thaliana | AT3G54440.2   Symbols:   glycoside hydrolase family 2 protein   chr3:20148494-20157019 REVERSE LENGTH=1108                          | 684  | 1108 | 0         | 162.0 | 90.4 | 93.7 |
| Rsa1.0_00836.1.g20199.t1 | # # # # # # # # - ----                                                                                                                                                                                                                                                                                                                                                                                                                                                                                                                                                                                                                          |      |      |           |       |      |      |                                             |       |                      | # # # # # # # #                                                                                                                     |      |      |           |       |      |      |
| Rsa1.0_00836.1.g20200.t1 | ref XP_002877978.1  hydrolase, hydrolyzing O-glycosyl compounds [Arabidopsis lyrata subsp. lyrata] gi 297323816 gb EFH54237.1  hydrolase, hydrolyzing O-glycosyl compounds [Arabidopsis lyrata subsp. lyrata] ref NP_566867.1  putative cysteine proteinase [Arabidopsis thaliana] gi 30315950 sp Q9LXW3.1 CPR2_ARATH RecName: Full=Probable cysteine proteinase At3g43960; Flags: Precursor gi 7594557 emb CAB88124.1  cysteine proteinase-like protein [Arabidopsis thaliana] gi 26452289 dbj BAC43231.1  putative cysteine proteinase [Arabidopsis thaliana] gi 332644328 gb AEE77849.1  putative cysteine proteinase [Arabidopsis thaliana] | 713  | 1107 | 0         | 155.3 | 49.1 | 53.0 | hydrolase, hydrolyzing O-glycosyl compounds | gbpln | Arabidopsis lyrata   | AT3G54440.3   Symbols:   glycoside hydrolase family 2 protein   chr3:20148494-20157019 REVERSE LENGTH=1120                          | 713  | 1120 | 0         | 157.1 | 48.9 | 52.6 |
| Rsa1.0_00836.1.g20201.t1 | ref NP_191010.1  chitinase [Arabidopsis thaliana] gi 7288020 emb CAB81807.1  class IV chitinase (CHIV) [Arabidopsis thaliana] gi 34146830 gb AAQ62423.1  At3g54420 [Arabidopsis thaliana] gi 51971118 dbj BAD44251.1  class IV chitinase (CHIV) [Arabidopsis thaliana] gi 332645707 gb AEE79228.1  chitinase class IV [Arabidopsis thaliana]                                                                                                                                                                                                                                                                                                    | 385  | 376  | 1.00E-128 | 97.7  | 59.2 | 70.4 | putative cysteine proteinase                | gbpln | Arabidopsis thaliana | AT3G43960.1   Symbols:   Cysteine proteinases superfamily protein   chr3:15774122-15775628 REVERSE LENGTH=376                       | 385  | 376  | 1.00E-131 | 97.7  | 59.2 | 70.4 |
| Rsa1.0_00836.1.g20202.t1 | gb ABD65073.1  hypothetical protein 27.t00059 [Brassica oleracea] ref NP_191010.1  chitinase [Arabidopsis thaliana] gi 7288020 emb CAB81807.1  class IV chitinase (CHIV) [Arabidopsis thaliana] gi 34146830 gb AAQ62423.1  At3g54420 [Arabidopsis thaliana] gi 51971118 dbj BAD44251.1  class IV chitinase (CHIV) [Arabidopsis thaliana] gi 332645707 gb AEE79228.1  chitinase class IV [Arabidopsis thaliana]                                                                                                                                                                                                                                  | 172  | 341  | 4.00E-46  | 198.3 | 51.7 | 61.6 | hypothetical protein 27.t00059              | gbpln | Brassica oleracea    | # # # # # # # #                                                                                                                     |      |      |           |       |      |      |
| Rsa1.0_00836.1.g20203.t1 | ref NP_191010.1  chitinase [Arabidopsis thaliana] gi 7288020 emb CAB81807.1  class IV chitinase (CHIV) [Arabidopsis thaliana] gi 34146830 gb AAQ62423.1  At3g54420 [Arabidopsis thaliana] gi 51971118 dbj BAD44251.1  class IV chitinase (CHIV) [Arabidopsis thaliana] gi 332645707 gb AEE79228.1  chitinase class IV [Arabidopsis thaliana]                                                                                                                                                                                                                                                                                                    | 91   | 273  | 8.00E-12  | 300.0 | 39.6 | 41.8 | chitinase                                   | gbpln | Arabidopsis thaliana | AT3G54420.1   Symbols: ATEP3, ATCHITIV, CHIV, EP3   homolog of carrot EP3-3 chitinase   chr3:20145935-20147034 FORWARD LENGTH=273   | 91   | 273  | 1.00E-14  | 300.0 | 39.6 | 41.8 |
| Rsa1.0_00836.1.g20204.t1 | dbj BAJ34532.1  unnamed protein product [Theilungiella halophila]                                                                                                                                                                                                                                                                                                                                                                                                                                                                                                                                                                               | 428  | 428  | 0         | 100.0 | 92.1 | 96.5 | unnamed protein product                     | ----  | ----                 | AT3G54400.1   Symbols:   Eukaryotic aspartyl protease family protein   chr3:20140291-20142599 REVERSE LENGTH=425                    | 428  | 425  | 0         | 99.3  | 88.6 | 93.5 |
| Rsa1.0_00837.1.g20205.t1 | gb EOA22110.1  hypothetical protein CARUB_v10002660mg [Capsella rubella]                                                                                                                                                                                                                                                                                                                                                                                                                                                                                                                                                                        | 260  | 262  | 1.00E-120 | 100.8 | 78.8 | 90.4 | hypothetical protein CARUB_v10002660mg      | gbpln | Capsella rubella     | AT5G24410.1   Symbols: PGL4   6-phosphogluconolactonase 4   chr5:8332690-8333984 REVERSE LENGTH=261                                 | 260  | 261  | 1.00E-119 | 100.4 | 77.3 | 88.5 |
| Rsa1.0_00837.1.g20206.t1 | gb AAM63366.1  6-phosphogluconolactonase-like protein [Arabidopsis thaliana]                                                                                                                                                                                                                                                                                                                                                                                                                                                                                                                                                                    | 313  | 325  | 1.00E-138 | 103.8 | 82.7 | 89.8 | 6-phosphogluconolactonase-like protein      | gbpln | Arabidopsis thaliana | AT5G24400.1   Symbols: EMB2024, PGL3   NagB/RpiA/CoA transferase-like superfamily protein   chr5:8330532-8331784 REVERSE LENGTH=325 | 313  | 325  | 1.00E-140 | 103.8 | 83.7 | 89.8 |
| Rsa1.0_00837.1.g20207.t1 | ref XP_002874194.1  RabGAP/TBC domain-containing protein [Arabidopsis lyrata subsp. lyrata] gi 297320031 gb EFH50453.1  RabGAP/TBC domain-containing protein [Arabidopsis lyrata subsp. lyrata]                                                                                                                                                                                                                                                                                                                                                                                                                                                 | 541  | 528  | 0         | 97.6  | 77.1 | 86.5 | RabGAP/TBC domain-containing protein        | gbpln | Arabidopsis lyrata   | AT5G24390.1   Symbols:   Ypt/Rab-GAP domain of gyp1p superfamily protein   chr5:8327004-8329238 REVERSE LENGTH=528                  | 541  | 528  | 0         | 97.6  | 75.8 | 85.2 |
| Rsa1.0_00837.1.g20208.t1 | ref XP_002872112.1  hypothetical protein ARALYDRAFT_489303 [Arabidopsis lyrata subsp. lyrata] gi 297317949 gb EFH48371.1  hypothetical protein ARALYDRAFT_489303 [Arabidopsis lyrata subsp. lyrata]                                                                                                                                                                                                                                                                                                                                                                                                                                             | 665  | 664  | 0         | 99.8  | 91.1 | 95.5 | hypothetical protein ARALYDRAFT_489303      | gbpln | Arabidopsis lyrata   | AT5G24380.1   Symbols: YSL2, ATYSL2   YELLOW STRIPE like 2   chr5:8324098-8326525 FORWARD LENGTH=664                                | 665  | 664  | 0         | 99.8  | 90.4 | 95.2 |
| Rsa1.0_00837.1.g20209.t2 | ref XP_002872110.1  hypothetical protein ARALYDRAFT_489300 [Arabidopsis lyrata subsp. lyrata] gi 297317947 gb EFH48369.1  hypothetical protein ARALYDRAFT_489300 [Arabidopsis lyrata subsp. lyrata]                                                                                                                                                                                                                                                                                                                                                                                                                                             | 1173 | 871  | 0         | 74.3  | 56.2 | 61.9 | hypothetical protein ARALYDRAFT_489300      | gbpln | Arabidopsis lyrata   | AT5G24360.1   Symbols: ATJRE1-1, IRE1-1   inositol requiring 1-1   chr5:8316627-8319827 FORWARD LENGTH=881                          | 1173 | 881  | 0         | 75.1  | 56.1 | 62.3 |
| Rsa1.0_00837.1.g20210.t1 | ref XP_002874190.1  hypothetical protein ARALYDRAFT_489297 [Arabidopsis lyrata subsp. lyrata] gi 297320027 gb EFH50449.1  hypothetical protein ARALYDRAFT_489297 [Arabidopsis lyrata subsp. lyrata]                                                                                                                                                                                                                                                                                                                                                                                                                                             | 347  | 349  | 1.00E-175 | 100.6 | 87.3 | 92.2 | hypothetical protein ARALYDRAFT_489297      | gbpln | Arabidopsis lyrata   | AT5G24330.1   Symbols: ATXR6, SDG34   ARABIDOPSIS TRITHORAX-RELATED PROTEIN 6   chr5:8295245-8296997 REVERSE LENGTH=349             | 347  | 349  | 1.00E-173 | 100.6 | 87.6 | 92.8 |
| Rsa1.0_00837.1.g20211.t1 | ref XP_002874189.1  predicted protein [Arabidopsis lyrata subsp. lyrata] gi 297320026 gb EFH50448.1  predicted protein [Arabidopsis lyrata subsp. lyrata]                                                                                                                                                                                                                                                                                                                                                                                                                                                                                       | 690  | 703  | 0         | 101.9 | 78.8 | 86.8 | predicted protein                           | gbpln | Arabidopsis lyrata   | AT5G24320.1   Symbols:   Transducin/WD40 repeat-like superfamily protein   chr5:8284858-8287651 REVERSE LENGTH=694                  | 690  | 694  | 0         | 100.6 | 79.9 | 87.1 |

|                          |                                                                                                                                                                                                                                                                                                                                                                                                                                                                                                                                                                                                                                                                                                                                                           |     |     |           |       |      |      |                                                    |       |                      |                                                                                                                                                                                                                                                                                                                                                                                                      |     |     |           |       |      |      |
|--------------------------|-----------------------------------------------------------------------------------------------------------------------------------------------------------------------------------------------------------------------------------------------------------------------------------------------------------------------------------------------------------------------------------------------------------------------------------------------------------------------------------------------------------------------------------------------------------------------------------------------------------------------------------------------------------------------------------------------------------------------------------------------------------|-----|-----|-----------|-------|------|------|----------------------------------------------------|-------|----------------------|------------------------------------------------------------------------------------------------------------------------------------------------------------------------------------------------------------------------------------------------------------------------------------------------------------------------------------------------------------------------------------------------------|-----|-----|-----------|-------|------|------|
| Rsa1.0_00837.1.g20212.t1 | refXP_002872105.1   PDE225/PTAC7 [Arabidopsis lyrata subsp. lyrata] gi 297317942 gb EFH48364.1   PDE225/PTAC7 [Arabidopsis lyrata subsp. lyrata]                                                                                                                                                                                                                                                                                                                                                                                                                                                                                                                                                                                                          | 165 | 161 | 4.00E-76  | 97.6  | 84.8 | 89.7 | PDE225/PTAC7                                       | gbpln | Arabidopsis lyrata   | AT5G24314.1   Symbols: PDE225, PTAC7   plastid transcriptionally active7   chr5:8277750-8279099 FORWARD LENGTH=161                                                                                                                                                                                                                                                                                   | 165 | 161 | 3.00E-78  | 97.6  | 84.2 | 89.7 |
| Rsa1.0_00837.1.g20213.t1 | refXP_002874186.1   hypothetical protein ARALYDRAFT_489292 [Arabidopsis lyrata subsp. lyrata] gi 297320023 gb EFH50445.1   hypothetical protein ARALYDRAFT_489292 [Arabidopsis lyrata subsp. lyrata]                                                                                                                                                                                                                                                                                                                                                                                                                                                                                                                                                      | 77  | 83  | 1.00E-14  | 107.8 | 66.2 | 72.7 | hypothetical protein ARALYDRAFT_489292             | gbpln | Arabidopsis lyrata   | AT5G24313.1   Symbols:   unknown protein; FUNCTIONS IN: molecular_function unknown; INVOLVED IN: biological_process unknown; LOCATED IN: endomembrane system; Has 30201 Blast hits to 17322 proteins in 780 species: Archae - 12; Bacteria - 1396; Metazoa - 17338; Fungi - 3422; Plants - 5037; Viruses - 0; Other Eukaryotes - 2996 (source: NCBI BLINK).   chr5:8277106-8277351 REVERSE LENGTH=81 | 77  | 81  | 1.00E-15  | 105.2 | 61.0 | 71.4 |
| Rsa1.0_00837.1.g20214.t1 | refNP_197819.2   protein ABIL3 [Arabidopsis thaliana] gi 75127037 sp Q6NMC6.1 ABIL3_ARAT H RecName: Full=Protein ABIL3; AltName: Full=Abl interactor-like protein 3; Short=AtABIL3 gi 44917545 gb AAS4909.1   At5g24310 [Arabidopsis thaliana] gi 57240096 gb AAW49258.1   Abl interactor-like protein-3 [Arabidopsis thaliana] gi 62321758 dbj BAD95383.1   hypothetical protein [Arabidopsis thaliana] gi 110737536 dbj BAF00710.1   hypothetical protein [Arabidopsis thaliana] gi 332005902 gb AED93285.1   protein ABIL3 [Arabidopsis thaliana] refXP_002872103.1   hypothetical protein ARALYDRAFT_489289 [Arabidopsis lyrata subsp. lyrata] gi 297317940 gb EFH48362.1   hypothetical protein ARALYDRAFT_489289 [Arabidopsis lyrata subsp. lyrata] | 324 | 321 | 1.00E-161 | 99.1  | 88.0 | 92.6 | protein ABIL3                                      | gbpln | Arabidopsis thaliana | AT5G24310.1   Symbols: ABIL3   ABL interactor-like protein 3   chr5:8274637-8276325 FORWARD LENGTH=321                                                                                                                                                                                                                                                                                               | 324 | 321 | 1.00E-163 | 99.1  | 88.0 | 92.6 |
| Rsa1.0_00837.1.g20215.t1 | refXP_002872103.1   hypothetical protein ARALYDRAFT_489289 [Arabidopsis lyrata subsp. lyrata] gi 297317940 gb EFH48362.1   hypothetical protein ARALYDRAFT_489289 [Arabidopsis lyrata subsp. lyrata]                                                                                                                                                                                                                                                                                                                                                                                                                                                                                                                                                      | 657 | 655 | 0         | 99.7  | 87.2 | 91.6 | hypothetical protein ARALYDRAFT_489289             | gbpln | Arabidopsis lyrata   | AT5G24300.2   Symbols: SSI1   Glycogen/starch synthases, ADP-glucose type   chr5:8266934-8270860 FORWARD LENGTH=652                                                                                                                                                                                                                                                                                  | 657 | 652 | 0         | 99.2  | 87.2 | 91.5 |
| Rsa1.0_00837.1.g20216.t1 | refNP_851067.1   vacuolar iron transporter-like protein [Arabidopsis thaliana] gi 332005898 gb AED93281.1   vacuolar iron transporter-like protein [Arabidopsis thaliana]                                                                                                                                                                                                                                                                                                                                                                                                                                                                                                                                                                                 | 531 | 550 | 2.33E-156 | 103.6 | 61.8 | 74.2 | vacuolar iron transporter-like protein             | gbpln | Arabidopsis thaliana | AT5G24290.1   Symbols:   Vacuolar iron transporter (VIT) family protein   chr5:8263271-8265618 REVERSE LENGTH=550                                                                                                                                                                                                                                                                                    | 531 | 550 | 1.00E-148 | 103.6 | 61.8 | 74.2 |
| Rsa1.0_00838.1.g20217.t1 | gb AC114387.1   WRKY20-1 transcription factor [Brassica napus]                                                                                                                                                                                                                                                                                                                                                                                                                                                                                                                                                                                                                                                                                            | 529 | 532 | 0         | 100.6 | 84.1 | 87.3 | WRKY20-1 transcription factor                      | gbpln | Brassica napus       | AT4G26640.2   Symbols: WRKY20, AtWRKY20   WRKY family transcription factor family protein   chr4:13437298-13440693 REVERSE LENGTH=557                                                                                                                                                                                                                                                                | 529 | 557 | 0         | 105.3 | 79.2 | 86.2 |
| Rsa1.0_00838.1.g20218.t1 | refNP_194393.3   DEK domain-containing chromatin associated protein [Arabidopsis thaliana] gi 79325273 refNP_001031724.1   DEK domain-containing chromatin associated protein [Arabidopsis thaliana] gi 4938501   emb CAB43859.1   putative protein [Arabidopsis thaliana] gi 7269515   emb CAB79518.1   putative protein [Arabidopsis thaliana] gi 332659828   gb AEE85228.1   DEK domain-containing chromatin associated protein [Arabidopsis thaliana] gi 332659829   gb AEE85229.1   DEK domain-containing chromatin associated protein [Arabidopsis thaliana]                                                                                                                                                                                        | 840 | 763 | 0         | 90.8  | 62.5 | 71.1 | DEK domain-containing chromatin associated protein | gbpln | Arabidopsis thaliana | AT4G26630.2   Symbols:   DEK domain-containing chromatin associated protein   chr4:13430873-13434877 REVERSE LENGTH=763                                                                                                                                                                                                                                                                              | 840 | 763 | 0         | 90.8  | 62.5 | 71.1 |
| Rsa1.0_00838.1.g20219.t1 | refXP_002867555.1   hypothetical protein ARALYDRAFT_492146 [Arabidopsis lyrata subsp. lyrata] gi 297313391   gb EFH43814.1   hypothetical protein ARALYDRAFT_492146 [Arabidopsis lyrata subsp. lyrata]                                                                                                                                                                                                                                                                                                                                                                                                                                                                                                                                                    | 441 | 440 | 0         | 99.8  | 89.3 | 93.7 | hypothetical protein ARALYDRAFT_492146             | gbpln | Arabidopsis lyrata   | AT4G26620.1   Symbols:   Sucrase/ferredoxin-like family protein   chr4:13427599-13429877 REVERSE LENGTH=443                                                                                                                                                                                                                                                                                          | 441 | 443 | 0         | 100.5 | 90.0 | 94.6 |
| Rsa1.0_00838.1.g20220.t1 | refXP_002869601.1   hypothetical protein ARALYDRAFT_492147 [Arabidopsis lyrata subsp. lyrata] gi 297315437   gb EFH45860.1   hypothetical protein ARALYDRAFT_492147 [Arabidopsis lyrata subsp. lyrata]                                                                                                                                                                                                                                                                                                                                                                                                                                                                                                                                                    | 511 | 510 | 0         | 99.8  | 89.2 | 93.3 | hypothetical protein ARALYDRAFT_492147             | gbpln | Arabidopsis lyrata   | AT4G26610.1   Symbols: D6PKL1, AGC1-2   D6 protein kinase like 1   chr4:13425568-13427188 FORWARD LENGTH=506                                                                                                                                                                                                                                                                                         | 511 | 506 | 0         | 99.0  | 86.9 | 91.8 |

|                          |                                                                                                                                                                                                                                                                                                                                                                                                                                                                                                                   |      |      |           |       |      |      |                                                                  |       |                      |                                                                                                                                                |      |      |           |       |      |      |
|--------------------------|-------------------------------------------------------------------------------------------------------------------------------------------------------------------------------------------------------------------------------------------------------------------------------------------------------------------------------------------------------------------------------------------------------------------------------------------------------------------------------------------------------------------|------|------|-----------|-------|------|------|------------------------------------------------------------------|-------|----------------------|------------------------------------------------------------------------------------------------------------------------------------------------|------|------|-----------|-------|------|------|
| Rsa1.0_00838.1.g20221.t1 | refNP_194390.2  S-adenosyl-L-methionine-dependent methyltransferase-like protein [Arabidopsis thaliana] gi 17979390 gb AAL49920.1  unknown protein [Arabidopsis thaliana] gi 22136852 gb AAM91770.1  unknown protein [Arabidopsis thaliana] gi 332659825 gb AEE85225.1  S-adenosyl-L-methionine-dependent methyltransferase-like protein [Arabidopsis thaliana]                                                                                                                                                   | 627  | 671  | 0         | 107.0 | 77.8 | 87.6 | S-adenosyl-L-methionine-dependent methyltransferase-like protein | gbpln | Arabidopsis thaliana | AT4G26600.1   Symbols:   S-adenosyl-L-methionine-dependent methyltransferases superfamily protein   chr4:13419629-13423418 FORWARD LENGTH=671  | 627  | 671  | 0         | 107.0 | 77.8 | 87.6 |
| Rsa1.0_00838.1.g20222.t1 | refXP_002867556.1  ATOPT5 [Arabidopsis lyrata subsp. lyrata] gi 297313392 gb EFH43815.1  ATOPT5 [Arabidopsis lyrata subsp. lyrata]                                                                                                                                                                                                                                                                                                                                                                                | 720  | 753  | 0         | 104.6 | 86.6 | 92.9 | ATOPT5                                                           | gbpln | Arabidopsis lyrata   | AT4G26590.1   Symbols: ATOPT5, OPT5   oligopeptide transporter 5   chr4:13414134-13416850 REVERSE LENGTH=753                                   | 720  | 753  | 0         | 104.6 | 86.7 | 92.4 |
| Rsa1.0_00838.1.g20223.t1 | emb CAB43854.1  putative protein [Arabidopsis thaliana] gi 7269510 emb CAB79513.1  putative protein [Arabidopsis thaliana]                                                                                                                                                                                                                                                                                                                                                                                        | 343  | 464  | 1.00E-155 | 135.3 | 83.4 | 88.3 | putative protein                                                 | gbpln | Arabidopsis thaliana | AT4G26580.2   Symbols:   RING/U-box superfamily protein   chr4:13411705-13412889 REVERSE LENGTH=335                                            | 343  | 335  | 1.00E-157 | 97.7  | 83.7 | 88.3 |
| Rsa1.0_00838.1.g20224.t1 | dbj BAJ33834.1  unnamed protein product [Theellungiella halophila]                                                                                                                                                                                                                                                                                                                                                                                                                                                | 534  | 226  | 1.00E-118 | 42.3  | 39.1 | 40.4 | unnamed protein product                                          | ----  | ----                 | AT4G26570.1   Symbols: ATCBL3, CBL3   calcineurin B-like 3   chr4:13408608-13409998 REVERSE LENGTH=226                                         | 534  | 226  | 1.00E-120 | 42.3  | 39.0 | 40.4 |
| Rsa1.0_00838.1.g20225.t1 | refNP_567749.1  Got1/Sft2-like vesicle transport protein [Arabidopsis thaliana] gi 88196739 gb ABD43012.1  At4g26550 [Arabidopsis thaliana] gi 332659817 gb AEE85217.1  Got1/Sft2-like vesicle transport protein [Arabidopsis thaliana]                                                                                                                                                                                                                                                                           | 227  | 225  | 1.00E-111 | 99.1  | 92.1 | 94.3 | Got1/Sft2-like vesicle transport protein                         | gbpln | Arabidopsis thaliana | AT4G26550.1   Symbols:   Got1/Sft2-like vesicle transport protein family   chr4:13402755-13404208 REVERSE LENGTH=225                           | 227  | 225  | 1.00E-113 | 99.1  | 92.1 | 94.3 |
| Rsa1.0_00838.1.g20226.t1 | refXP_002867561.1  kinase family protein [Arabidopsis lyrata subsp. lyrata] gi 297313397 gb EFH43820.1  kinase family protein [Arabidopsis lyrata subsp. lyrata]                                                                                                                                                                                                                                                                                                                                                  | 1094 | 1091 | 0         | 99.7  | 85.9 | 92.4 | kinase family protein                                            | gbpln | Arabidopsis lyrata   | AT4G26540.1   Symbols:   Leucine-rich repeat receptor-like protein kinase family protein   chr4:13394673-13398028 REVERSE LENGTH=1091          | 1094 | 1091 | 0         | 99.7  | 85.8 | 92.4 |
| Rsa1.0_00838.1.g20227.t1 | gb EOA16898.1  hypothetical protein CARUB_v10005122mg [Capsella rubella]                                                                                                                                                                                                                                                                                                                                                                                                                                          | 358  | 358  | 0         | 100.0 | 95.0 | 96.6 | hypothetical protein CARUB_v10005122mg                           | gbpln | Capsella rubella     | AT4G26530.2   Symbols:   Aldolase superfamily protein   chr4:13391566-13392937 FORWARD LENGTH=358                                              | 358  | 358  | 0         | 100.0 | 94.4 | 96.1 |
| Rsa1.0_00838.1.g20228.t1 | refNP_567747.4  putative uracil phosphoribosyltransferase [Arabidopsis thaliana] gi 240256079 refNP_849448.4  putative uracil phosphoribosyltransferase [Arabidopsis thaliana] gi 298286881 sp O65583.2 UKL4_ARATH RecName: Full=Uridine kinase-like protein 4, Includes: RecName: Full=Uridine kinase; Short=UK; Includes: RecName: Full=Putative uracil phosphoribosyltransferase; Short=UPRTase; AltName: Full=UMP pyrophosphorylase                                                                           | 469  | 469  | 0         | 100.0 | 93.6 | 97.9 | putative uracil phosphoribosyltransferase                        | gbpln | Arabidopsis thaliana | AT4G26510.2   Symbols: UKL4   uridine kinase-like 4   chr4:13384503-13387920 FORWARD LENGTH=469                                                | 469  | 469  | 0         | 100.0 | 93.6 | 97.9 |
| Rsa1.0_00838.1.g20229.t1 | gi 21554263 gb AAM63338.1  putative uracil phosphoribosyl transferase [Arabidopsis thaliana] gi 63003884 gb AAY25471.1  At4g26510 [Arabidopsis thaliana] gi 332659811 gb AEE85211.1  putative uracil phosphoribosyltransferase [Arabidopsis thaliana] gi 332659812 gb AEE85212.1  putative uracil phosphoribosyltransferase [Arabidopsis thaliana] refXP_002867562.1  ATSUF/CPUSUF/EMB1374 [Arabidopsis lyrata subsp. lyrata] gi 297313398 gb EFH43821.1  ATSUF/CPUSUF/EMB1374 [Arabidopsis lyrata subsp. lyrata] | 353  | 368  | 1.00E-143 | 104.2 | 79.9 | 88.4 | ATSUF/CPUSUF/EMB1374                                             | gbpln | Arabidopsis lyrata   | AT4G26500.1   Symbols: EMB1374, CPUSUF, ATSUF, SUFE1   chloroplast sulfur E   chr4:13382456-13383571 REVERSE LENGTH=371                        | 353  | 371  | 1.00E-143 | 105.1 | 77.6 | 85.8 |
| Rsa1.0_00838.1.g20230.t1 | refXP_002869608.1  hypothetical protein ARALYDRAFT_913911 [Arabidopsis lyrata subsp. lyrata] gi 297315444 gb EFH43827.1  hypothetical protein ARALYDRAFT_913911 [Arabidopsis lyrata subsp. lyrata]                                                                                                                                                                                                                                                                                                                | 269  | 269  | 1.00E-116 | 100.0 | 74.0 | 83.3 | hypothetical protein ARALYDRAFT_913911                           | gbpln | Arabidopsis lyrata   | AT4G26490.1   Symbols:   Late embryogenesis abundant (LEA) hydroxyproline-rich glycoprotein family   chr4:13380425-13381231 FORWARD LENGTH=268 | 269  | 268  | 1.00E-115 | 99.6  | 72.1 | 81.8 |
| Rsa1.0_00838.1.g20231.t1 | #                                                                                                                                                                                                                                                                                                                                                                                                                                                                                                                 | #    | #    | #         | #     | #    | -    | ----                                                             | ----  | ----                 | #                                                                                                                                              | #    | #    | #         | #     | #    | #    |

|                          |                                                                                                                                                                                                                                                                                                                                                                                                                                                                                                  |     |     |           |       |      |      |                                                           |       |                      |                                                                                                                                  |     |     |           |       |      |      |
|--------------------------|--------------------------------------------------------------------------------------------------------------------------------------------------------------------------------------------------------------------------------------------------------------------------------------------------------------------------------------------------------------------------------------------------------------------------------------------------------------------------------------------------|-----|-----|-----------|-------|------|------|-----------------------------------------------------------|-------|----------------------|----------------------------------------------------------------------------------------------------------------------------------|-----|-----|-----------|-------|------|------|
| Rsa1.0_00838.1.g20232.t1 | ref NP_567742.1  6-phosphofructokinase 3 [Arabidopsis thaliana]<br>gi 75164938 sp Q94AA4.1 K6PF3_ARAT H RecName: Full=6-phosphofructokinase 3; AltName: Full=Phosphofructokinase 3; AltName: Full=Phosphohexokinase 3<br>AT4g26270/T25K17.90 [Arabidopsis thaliana] gi 15146206 gb AAK83587.1<br>AT4g26270/T25K17.90 [Arabidopsis thaliana] gi 19689124 gb AAL90928.1<br>AT4g26270/T25K17.90 [Arabidopsis thaliana] gi 332659778 gb AEE85178.1<br>6-phosphofructokinase 3 [Arabidopsis thaliana] | 489 | 489 | 0         | 100.0 | 95.9 | 98.0 | 6-phosphofructokinase 3                                   | gbpln | Arabidopsis thaliana | AT4G26270.1   Symbols: PFK3   phosphofructokinase 3   chr4:13301094-13304030 REVERSE LENGTH=489                                  | 489 | 489 | 0         | 100.0 | 95.9 | 98.0 |
| Rsa1.0_00838.1.g20233.t2 | gb EOA18432.1  hypothetical protein CARUB_v10006975mg [Capsella rubella]                                                                                                                                                                                                                                                                                                                                                                                                                         | 114 | 489 | 4.00E-55  | 428.9 | 88.6 | 93.0 | hypothetical protein CARUB_v10006975mg                    | gbpln | Capsella rubella     | AT4G26270.1   Symbols: PFK3   phosphofructokinase 3   chr4:13301094-13304030 REVERSE LENGTH=489                                  | 114 | 489 | 1.00E-57  | 428.9 | 88.6 | 92.1 |
| Rsa1.0_00838.1.g20234.t3 | gb EOA17998.1  hypothetical protein CARUB_v10006433mg [Capsella rubella]                                                                                                                                                                                                                                                                                                                                                                                                                         | 119 | 119 | 5.00E-61  | 100.0 | 99.2 | 99.2 | hypothetical protein CARUB_v10006433mg                    | gbpln | Capsella rubella     | AT5G56710.1   Symbols:   Ribosomal protein L31e family protein   chr5:22944003-22944767 REVERSE LENGTH=119                       | 119 | 119 | 5.00E-63  | 100.0 | 97.5 | 99.2 |
| Rsa1.0_00838.1.g20235.t2 | ref XP_002869622.1  mitochondrial ATP synthase g subunit family protein [Arabidopsis lyrata subsp. lyrata]<br>gi 297315458 gb EFH45881.1  mitochondrial ATP synthase g subunit family protein [Arabidopsis lyrata subsp. lyrata]                                                                                                                                                                                                                                                                 | 173 | 122 | 2.00E-56  | 70.5  | 68.8 | 69.4 | mitochondrial ATP synthase g subunit family protein       | gbpln | Arabidopsis lyrata   | AT4G26210.2   Symbols:   Mitochondrial ATP synthase subunit G protein   chr4:13282370-13283118 FORWARD LENGTH=122                | 173 | 122 | 4.00E-57  | 70.5  | 66.5 | 68.8 |
| Rsa1.0_00838.1.g20236.t1 | ref NP_850902.1  putative galactinol synthase [Arabidopsis thaliana]<br>gi 403399402 sp F4KED2.1 GOLSA_ARA TH RecName: Full=Galactinol synthase 10; Short=AtGolS10; Short=GolS-10<br>gi 332006493 gb AED93876.1  galactinol synthase 10 [Arabidopsis thaliana]                                                                                                                                                                                                                                   | 61  | 328 | 7.00E-18  | 537.7 | 77.0 | 85.2 | putative galactinol synthase                              | gbpln | Arabidopsis thaliana | AT5G30500.1   Symbols:   Nucleotide-diphospho-sugar transferases superfamily protein   chr5:11615345-11616926 FORWARD LENGTH=328 | 61  | 328 | 1.00E-20  | 537.7 | 77.0 | 85.2 |
| Rsa1.0_00839.1.g20237.t1 | ref XP_002868185.1  predicted protein [Arabidopsis lyrata subsp. lyrata]<br>gi 297314021 gb EFH44444.1  predicted protein [Arabidopsis lyrata subsp. lyrata]                                                                                                                                                                                                                                                                                                                                     | 216 | 276 | 2.00E-58  | 127.8 | 60.2 | 68.1 | predicted protein                                         | gbpln | Arabidopsis lyrata   | AT3G16510.1   Symbols:   Calcium-dependent lipid-binding (CaLB domain) family protein   chr3:5617112-5618194 REVERSE LENGTH=360  | 216 | 360 | 2.00E-37  | 166.7 | 38.0 | 48.1 |
| Rsa1.0_00839.1.g20238.t1 | ref NP_193309.1  calcium-dependent lipid-binding domain-containing protein [Arabidopsis thaliana]<br>gi 2244930 emb CAB10352.1  hypothetical protein [Arabidopsis thaliana] gi 7268322 emb CAB78616.1  hypothetical protein [Arabidopsis thaliana] gi 332658244 gb AEE83644.1  calcium-dependent lipid-binding domain-containing protein [Arabidopsis thaliana]                                                                                                                                  | 283 | 468 | 3.00E-36  | 165.4 | 30.4 | 36.4 | calcium-dependent lipid-binding domain-containing protein | gbpln | Arabidopsis thaliana | AT4G15740.1   Symbols:   Calcium-dependent lipid-binding (CaLB domain) family protein   chr4:8964912-8966318 REVERSE LENGTH=468  | 283 | 468 | 7.00E-39  | 165.4 | 30.4 | 36.4 |
| Rsa1.0_00839.1.g20239.t1 | ref NP_193309.1  calcium-dependent lipid-binding domain-containing protein [Arabidopsis thaliana]<br>gi 2244930 emb CAB10352.1  hypothetical protein [Arabidopsis thaliana] gi 7268322 emb CAB78616.1  hypothetical protein [Arabidopsis thaliana] gi 332658244 gb AEE83644.1  calcium-dependent lipid-binding domain-containing protein [Arabidopsis thaliana]                                                                                                                                  | 424 | 468 | 1.00E-162 | 110.4 | 70.0 | 81.1 | calcium-dependent lipid-binding domain-containing protein | gbpln | Arabidopsis thaliana | AT4G15740.1   Symbols:   Calcium-dependent lipid-binding (CaLB domain) family protein   chr4:8964912-8966318 REVERSE LENGTH=468  | 424 | 468 | 1.00E-164 | 110.4 | 70.0 | 81.1 |
| Rsa1.0_00839.1.g20240.t1 | ref XP_002870213.1  pentatricopeptide repeat-containing protein [Arabidopsis lyrata subsp. lyrata]<br>gi 297316049 gb EFH46472.1  pentatricopeptide repeat-containing protein [Arabidopsis lyrata subsp. lyrata]                                                                                                                                                                                                                                                                                 | 614 | 608 | 0         | 99.0  | 85.2 | 92.0 | pentatricopeptide repeat-containing protein               | gbpln | Arabidopsis lyrata   | AT4G15720.1   Symbols:   Tetratricopeptide repeat (TPR)-like superfamily protein   chr4:8949569-8951419 FORWARD LENGTH=616       | 614 | 616 | 0         | 100.3 | 84.7 | 91.5 |
| Rsa1.0_00839.1.g20241.t1 | ref XP_002870217.1  glutaredoxin family protein [Arabidopsis lyrata subsp. lyrata]<br>gi 297316053 gb EFH46476.1  glutaredoxin family protein [Arabidopsis lyrata subsp. lyrata]                                                                                                                                                                                                                                                                                                                 | 102 | 102 | 5.00E-50  | 100.0 | 94.1 | 97.1 | glutaredoxin family protein                               | gbpln | Arabidopsis lyrata   | AT4G15680.1   Symbols:   Thioredoxin superfamily protein   chr4:8931813-8932121 FORWARD LENGTH=102                               | 102 | 102 | 2.00E-52  | 100.0 | 92.2 | 98.0 |



|                          |                                                                                                                                                                                                                                                                                                                                                                                                                                                   |      |      |           |        |      |      |                                                     |       |                      |                                                                                                                                                                                                                                                                                                                                                                                                                                                                                                                                                      |      |     |           |        |      |      |
|--------------------------|---------------------------------------------------------------------------------------------------------------------------------------------------------------------------------------------------------------------------------------------------------------------------------------------------------------------------------------------------------------------------------------------------------------------------------------------------|------|------|-----------|--------|------|------|-----------------------------------------------------|-------|----------------------|------------------------------------------------------------------------------------------------------------------------------------------------------------------------------------------------------------------------------------------------------------------------------------------------------------------------------------------------------------------------------------------------------------------------------------------------------------------------------------------------------------------------------------------------------|------|-----|-----------|--------|------|------|
| Rsa1.0_00839.1.g20242.t1 | ref[NP_193300.2] uncharacterized protein [Arabidopsis thaliana] gi 332658232 gb AEE83632.1  uncharacterized protein AT4G15650 [Arabidopsis thaliana]                                                                                                                                                                                                                                                                                              | 218  | 261  | 1.00E-48  | 119.7  | 62.4 | 74.3 | uncharacterized protein                             | gbpln | Arabidopsis thaliana | AT4G15650.1   Symbols:   unknown protein; FUNCTIONS IN: molecular function unknown; INVOLVED IN: N-terminal protein myristoylation; LOCATED IN: cellular_component unknown; EXPRESSED IN: male gametophyte, flower, pollen tube; EXPRESSED DURING: L mature pollen stage, M germinated pollen stage, 4 anthesis; Has 5184 Blast hits to 3451 proteins in 562 species: Archae - 30; Bacteria - 838; Metazoa - 1576; Fungi - 798; Plants - 319; Viruses - 111; Other Eukaryotes - 1512 (source: NCBI BLINK).   chr4:8922632-8923815 FORWARD LENGTH=261 | 218  | 261 | 3.00E-51  | 119.7  | 62.4 | 74.3 |
| Rsa1.0_00839.1.g20243.t1 | #                                                                                                                                                                                                                                                                                                                                                                                                                                                 | #    | #    | #         | #      | #    | #    | -                                                   | ----  | ----                 | #                                                                                                                                                                                                                                                                                                                                                                                                                                                                                                                                                    | #    | #   | #         | #      | #    |      |
| Rsa1.0_00839.1.g20244.t3 | #                                                                                                                                                                                                                                                                                                                                                                                                                                                 | #    | #    | #         | #      | #    | #    | -                                                   | ----  | ----                 | #                                                                                                                                                                                                                                                                                                                                                                                                                                                                                                                                                    | #    | #   | #         | #      | #    |      |
| Rsa1.0_00839.1.g20245.t1 | gb EOA17464.1  hypothetical protein CARUB_v10005787mg [Capsella rubella]                                                                                                                                                                                                                                                                                                                                                                          | 193  | 195  | 3.00E-69  | 101.0  | 83.9 | 89.1 | hypothetical protein CARUB_v10005787mg              | gbpln | Capsella rubella     | AT4G15610.1   Symbols:   Uncharacterised protein family (UPF0497)   chr4:8909162-8910641 FORWARD LENGTH=193                                                                                                                                                                                                                                                                                                                                                                                                                                          | 193  | 193 | 1.00E-66  | 100.0  | 77.2 | 84.5 |
| Rsa1.0_00839.1.g20246.t1 | gb AAC33226.1  putative non-LTR retroelement reverse transcriptase [Arabidopsis thaliana]                                                                                                                                                                                                                                                                                                                                                         | 1703 | 1529 | 0         | 89.8   | 22.4 | 33.6 | putative non-LTR retroelement reverse transcriptase | gbpln | Arabidopsis thaliana | AT3G24255.1   Symbols:   RNA-directed DNA polymerase (reverse transcriptase)-related family protein   chr3:8789471-8793208 FORWARD LENGTH=746                                                                                                                                                                                                                                                                                                                                                                                                        | 1703 | 746 | 8.00E-54  | 43.8   | 8.5  | 12.4 |
| Rsa1.0_00839.1.g20247.t1 | #                                                                                                                                                                                                                                                                                                                                                                                                                                                 | #    | #    | #         | #      | #    | #    | -                                                   | ----  | ----                 | #                                                                                                                                                                                                                                                                                                                                                                                                                                                                                                                                                    | #    | #   | #         | #      | #    |      |
| Rsa1.0_00839.1.g20248.t1 | pir [D171420] hypothetical protein - Arabidopsis thaliana                                                                                                                                                                                                                                                                                                                                                                                         | 684  | 703  | 0         | 102.8  | 94.7 | 96.8 | hypothetical protein - Arabidopsis thaliana         | ----  | ----                 | AT4G15560.1   Symbols: CLA1, DEF, CLA, DXS, DXP2   Deoxyxylulose-5-phosphate synthase   chr4:8884218-8887254 FORWARD LENGTH=717                                                                                                                                                                                                                                                                                                                                                                                                                      | 684  | 717 | 0         | 104.8  | 96.3 | 98.5 |
| Rsa1.0_00839.1.g20249.t1 | emb CAB91608.1  farnesyltransferase subunit A (FTA) [Arabidopsis thaliana]                                                                                                                                                                                                                                                                                                                                                                        | 218  | 340  | 2.00E-39  | 156.0  | 36.2 | 42.2 | farnesyltransferase subunit A (FTA)                 | gbpln | Arabidopsis thaliana | AT3G59380.1   Symbols: FTA, PLP, ATFTA, PFT/PGGT-ALPHA   farnesyltransferase A   chr3:21944209-21945781 FORWARD LENGTH=326                                                                                                                                                                                                                                                                                                                                                                                                                           | 218  | 326 | 9.00E-42  | 149.5  | 36.2 | 42.2 |
| Rsa1.0_00839.1.g20250.t1 | gb ABO36622.1  copia LTR rider [Solanum lycopersicum] gi 133711819 gb ABO36636.1  copia LTR rider [Solanum lycopersicum]                                                                                                                                                                                                                                                                                                                          | 427  | 1307 | 3.00E-68  | 306.1  | 43.6 | 54.8 | copia LTR rider                                     | gbpln | Solanum lycopersicum | #                                                                                                                                                                                                                                                                                                                                                                                                                                                                                                                                                    | #    | #   | #         | #      | #    |      |
| Rsa1.0_00839.1.g20251.t1 | ref[NP_849391.2] pyruvate, phosphate dikinase 1 [Arabidopsis thaliana] gi 145333150 ref[NP_001078395.1] pyruvate, phosphate dikinase 1 [Arabidopsis thaliana] gi 222423813 dbj BAH19872.1  AT4G15530 [Arabidopsis thaliana] gi 332658217 gb AEE83617.1  pyruvate, phosphate dikinase 1 [Arabidopsis thaliana] gi 332659219 gb AEE83619.1  pyruvate, phosphate dikinase 1 [Arabidopsis thaliana]                                                   | 86   | 956  | 3.00E-29  | 1111.6 | 73.3 | 84.9 | pyruvate, phosphate dikinase 1                      | gbpln | Arabidopsis thaliana | AT4G15530.4   Symbols: PPKDK   pyruvate orthophosphate dikinase   chr4:8864828-8870727 REVERSE LENGTH=956                                                                                                                                                                                                                                                                                                                                                                                                                                            | 86   | 956 | 5.00E-32  | 1111.6 | 73.3 | 84.9 |
| Rsa1.0_00839.1.g20252.t1 | ref[NP_193288.2] pyruvate, phosphate dikinase 1 [Arabidopsis thaliana] gi 222424574 dbj BAH20242.1  AT4G15530 [Arabidopsis thaliana] gi 332658216 gb AEE83616.1  pyruvate, phosphate dikinase 1 [Arabidopsis thaliana]                                                                                                                                                                                                                            | 569  | 875  | 0         | 153.8  | 95.3 | 97.7 | pyruvate, phosphate dikinase 1                      | gbpln | Arabidopsis thaliana | AT4G15530.2   Symbols: PPKDK   pyruvate orthophosphate dikinase   chr4:8864828-8869183 REVERSE LENGTH=875                                                                                                                                                                                                                                                                                                                                                                                                                                            | 569  | 875 | 0         | 153.8  | 95.3 | 97.7 |
| Rsa1.0_00840.1.g20253.t1 | #                                                                                                                                                                                                                                                                                                                                                                                                                                                 | #    | #    | #         | #      | #    | #    | -                                                   | ----  | ----                 | #                                                                                                                                                                                                                                                                                                                                                                                                                                                                                                                                                    | #    | #   | #         | #      | #    |      |
| Rsa1.0_00840.1.g20254.t1 | ref[XP_002876267.1] hypothetical protein ARALYDRAFT_324005 [Arabidopsis lyrata subsp. lyrata] gi 297322105 gb EFH52526.1  hypothetical protein ARALYDRAFT_324005 [Arabidopsis lyrata subsp. lyrata] ref[NP_191029.1] sugar isomerase domain-containing protein [Arabidopsis thaliana] gi 75182157 sp Q9M1T1.1 SETH3_ARAT H RecName: Full=Probable arabinose 5-phosphate isomerase; Short=API; AltName: Full=CBS domain-containing protein CBSSIS1 | 411  | 436  | 1.00E-175 | 106.1  | 81.0 | 86.6 | hypothetical protein ARALYDRAFT_324005              | gbpln | Arabidopsis lyrata   | AT3G54740.2   Symbols:   Protein of unknown function, DUF593   chr3:20262949-20264466 FORWARD LENGTH=438                                                                                                                                                                                                                                                                                                                                                                                                                                             | 411  | 438 | 1.00E-173 | 106.6  | 81.0 | 86.4 |
| Rsa1.0_00840.1.g20255.t1 | gi 7258373 emb CAB7589.1  sugar-phosphate isomerase-like protein [Arabidopsis thaliana] gi 110742297 dbj BAE99073.1  sugar-phosphate isomerase - like protein [Arabidopsis thaliana] gi 332645746 gb AEE79267.1  probable arabinose 5-phosphate isomerase [Arabidopsis thaliana]                                                                                                                                                                  | 337  | 350  | 1.00E-171 | 103.9  | 93.5 | 96.7 | sugar isomerase domain-containing protein           | gbpln | Arabidopsis thaliana | AT3G54690.1   Symbols:   Sugar isomerase (SIS) family protein   chr3:20246586-20247810 FORWARD LENGTH=350                                                                                                                                                                                                                                                                                                                                                                                                                                            | 337  | 350 | 1.00E-174 | 103.9  | 93.5 | 96.7 |

|                          |                                                                                                                                                                                                                                                                                                                                                                                                                        |      |      |           |       |      |      |                                                              |       |                      |                                                                                                                                                                                                                                                                                                                                                      |      |     |           |       |      |      |
|--------------------------|------------------------------------------------------------------------------------------------------------------------------------------------------------------------------------------------------------------------------------------------------------------------------------------------------------------------------------------------------------------------------------------------------------------------|------|------|-----------|-------|------|------|--------------------------------------------------------------|-------|----------------------|------------------------------------------------------------------------------------------------------------------------------------------------------------------------------------------------------------------------------------------------------------------------------------------------------------------------------------------------------|------|-----|-----------|-------|------|------|
| Rsa1.0_00840.1.g20256.t1 | gb EOA24747.1  hypothetical protein CARUB_v10018024mg [Capsella rubella]                                                                                                                                                                                                                                                                                                                                               | 201  | 210  | 3.00E-59  | 104.5 | 70.1 | 76.1 | hypothetical protein CARUB_v10018024mg                       | gbpln | Capsella rubella     | AT3G54680.1   Symbols:   proteophosphoglycan-related   chr3:20244568-20245689 FORWARD LENGTH=211                                                                                                                                                                                                                                                     | 201  | 211 | 5.00E-51  | 105.0 | 70.1 | 79.1 |
| Rsa1.0_00840.1.g20257.t1 | #                                                                                                                                                                                                                                                                                                                                                                                                                      | #    | #    | #         | #     | #    | #    | -                                                            | ----  | ----                 | #                                                                                                                                                                                                                                                                                                                                                    | #    | #   | #         | #     | #    | #    |
| Rsa1.0_00840.1.g20258.t1 | #                                                                                                                                                                                                                                                                                                                                                                                                                      | #    | #    | #         | #     | #    | #    | -                                                            | ----  | ----                 | #                                                                                                                                                                                                                                                                                                                                                    | #    | #   | #         | #     | #    | #    |
| Rsa1.0_00840.1.g20259.t1 | ref XP_002877991.1  kinetochore protein [Arabidopsis lyrata subsp. lyrata] gi 297323829 gb EFH54250.1  kinetochore protein [Arabidopsis lyrata subsp. lyrata]                                                                                                                                                                                                                                                          | 570  | 567  | 0         | 99.5  | 73.3 | 83.2 | kinetochore protein                                          | gbpln | Arabidopsis lyrata   | AT3G54630.1   Symbols:   CONTAINS InterPro DOMAIN/s: Kinetochore protein Ndc80 (InterPro:IPRO05550); Has 24780 Blast hits to 15608 proteins in 1321 species: Archae - 545; Bacteria - 2969; Metazoa - 12597; Fungi - 2181; Plants - 1581; Viruses - 39; Other Eukaryotes - 4868 (source: NCBI BLINK).   chr3:20221195-20222901 REVERSE LENGTH=568    | 570  | 568 | 0         | 99.6  | 72.5 | 82.6 |
| Rsa1.0_00840.1.g20260.t1 | ref NP_191023.1  class I glutamine amidotransferase domain-containing protein [Arabidopsis thaliana] gi 7258363 emb CAB77580.1  putative protein [Arabidopsis thaliana] gi 20466235 gb AAM20435.1  putative protein [Arabidopsis thaliana] gi 30725650 gb AAP37847.1  At3g54600 [Arabidopsis thaliana] gi 332645733 gb AEE79254.1  class I glutamine amidotransferase domain-containing protein [Arabidopsis thaliana] | 447  | 399  | 0         | 89.3  | 78.3 | 83.2 | class I glutamine amidotransferase domain-containing protein | gbpln | Arabidopsis thaliana | AT3G54600.1   Symbols:   Class I glutamine amidotransferase-like superfamily protein   chr3:20211048-20212876 FORWARD LENGTH=399                                                                                                                                                                                                                     | 447  | 399 | 0         | 89.3  | 78.3 | 83.2 |
| Rsa1.0_00840.1.g20261.t2 | gb AAG51783.1 AC079679.3 reverse transcriptase, putative: 16838-20266 [Arabidopsis thaliana]                                                                                                                                                                                                                                                                                                                           | 497  | 1142 | 2.00E-44  | 229.8 | 19.5 | 27.6 | reverse transcriptase, putative: 16838-20266                 | gbpln | Arabidopsis thaliana | AT2G22440.1   Symbols:   BEST Arabidopsis thaliana protein match is: Ribonuclease H-like superfamily protein (TAIR:AT4G29090.1); Has 208 Blast hits to 191 proteins in 10 species: Archae - 0; Bacteria - 0; Metazoa - 0; Fungi - 0; Plants - 208; Viruses - 0; Other Eukaryotes - 0 (source: NCBI BLINK).   chr2:9528910-9529917 FORWARD LENGTH=256 | 497  | 256 | 6.00E-25  | 51.5  | 14.5 | 20.1 |
| Rsa1.0_00840.1.g20262.t1 | #                                                                                                                                                                                                                                                                                                                                                                                                                      | #    | #    | #         | #     | #    | #    | -                                                            | ----  | ----                 | #                                                                                                                                                                                                                                                                                                                                                    | #    | #   | #         | #     | #    | #    |
| Rsa1.0_00840.1.g20263.t1 | #                                                                                                                                                                                                                                                                                                                                                                                                                      | #    | #    | #         | #     | #    | #    | -                                                            | ----  | ----                 | #                                                                                                                                                                                                                                                                                                                                                    | #    | #   | #         | #     | #    | #    |
| Rsa1.0_00840.1.g20264.t1 | gb AFJ66186.1  hypothetical protein 11M19.5 [Arabidopsis halleri]                                                                                                                                                                                                                                                                                                                                                      | 1371 | 1557 | 0         | 113.6 | 64.3 | 77.3 | hypothetical protein 11M19.5                                 | gbpln | Arabidopsis halleri  | ATMG00860.1   Symbols:   ORF158   DNA/RNA polymerases superfamily protein   chrM:235916-236392 FORWARD LENGTH=158                                                                                                                                                                                                                                    | 1371 | 158 | 4.00E-29  | 11.5  | 4.7  | 5.9  |
| Rsa1.0_00840.1.g20265.t1 | #                                                                                                                                                                                                                                                                                                                                                                                                                      | #    | #    | #         | #     | #    | #    | -                                                            | ----  | ----                 | #                                                                                                                                                                                                                                                                                                                                                    | #    | #   | #         | #     | #    | #    |
| Rsa1.0_00841.1.g20266.t1 | ref XP_002886185.1  hypothetical protein ARALYDRAFT_343491 [Arabidopsis lyrata subsp. lyrata] gi 297332025 gb EFH62444.1  hypothetical protein ARALYDRAFT_343491 [Arabidopsis lyrata subsp. lyrata]                                                                                                                                                                                                                    | 184  | 185  | 4.00E-93  | 100.5 | 89.1 | 95.7 | hypothetical protein ARALYDRAFT_343491                       | gbpln | Arabidopsis lyrata   | AT4G36800.2   Symbols:   RCE1   RUB1 conjugating enzyme 1   chr4:17341237-17342148 REVERSE LENGTH=184                                                                                                                                                                                                                                                | 184  | 184 | 2.00E-95  | 100.0 | 88.0 | 93.5 |
| Rsa1.0_00841.1.g20267.t1 | ref NP_179453.2  uncharacterized protein [Arabidopsis thaliana] gi 334302873 sp Q56XQ0.3 U496L_ARAT H RecName: Full=UPF0496 protein At2g18630 gi 62320594 dbj BAD95236.1  hypothetical protein [Arabidopsis thaliana] gi 330251693 gb AEC06787.1  uncharacterized protein AT2G18630 [Arabidopsis thaliana]                                                                                                             | 349  | 393  | 1.00E-134 | 112.6 | 74.5 | 87.4 | uncharacterized protein                                      | gbpln | Arabidopsis thaliana | AT2G18630.1   Symbols:   Protein of unknown function (DUF677)   chr2:8081154-8082496 FORWARD LENGTH=393                                                                                                                                                                                                                                              | 349  | 393 | 1.00E-137 | 112.6 | 74.5 | 87.4 |
| Rsa1.0_00841.1.g20268.t1 | ref XP_002886186.1  hypothetical protein ARALYDRAFT_480767 [Arabidopsis lyrata subsp. lyrata] gi 297332026 gb EFH62445.1  hypothetical protein ARALYDRAFT_480767 [Arabidopsis lyrata subsp. lyrata]                                                                                                                                                                                                                    | 372  | 372  | 1.00E-179 | 100.0 | 81.7 | 91.9 | hypothetical protein ARALYDRAFT_480767                       | gbpln | Arabidopsis lyrata   | AT2G18640.1   Symbols:   GGPS4   geranylgeranyl pyrophosphate synthase 4   chr2:8083754-8084872 REVERSE LENGTH=372                                                                                                                                                                                                                                   | 372  | 372 | 0         | 100.0 | 81.5 | 92.2 |
| Rsa1.0_00841.1.g20269.t1 | ref XP_002886188.1  hypothetical protein ARALYDRAFT_480768 [Arabidopsis lyrata subsp. lyrata] gi 297332028 gb EFH62447.1  hypothetical protein ARALYDRAFT_480768 [Arabidopsis lyrata subsp. lyrata]                                                                                                                                                                                                                    | 416  | 413  | 1.00E-150 | 99.3  | 74.5 | 80.0 | hypothetical protein ARALYDRAFT_480768                       | gbpln | Arabidopsis lyrata   | AT2G18650.1   Symbols:   MEE16   RING/U-box superfamily protein   chr2:8086860-8088131 REVERSE LENGTH=423                                                                                                                                                                                                                                            | 416  | 423 | 1.00E-148 | 101.7 | 73.1 | 79.3 |

|                          |                                                                                                                                                                                                                       |      |      |           |       |      |      |                                                 |       |                      |                                                                                                                                                                                                                                                                                                                                                                                                                                                                                                                                                                                                        |      |      |           |       |      |      |
|--------------------------|-----------------------------------------------------------------------------------------------------------------------------------------------------------------------------------------------------------------------|------|------|-----------|-------|------|------|-------------------------------------------------|-------|----------------------|--------------------------------------------------------------------------------------------------------------------------------------------------------------------------------------------------------------------------------------------------------------------------------------------------------------------------------------------------------------------------------------------------------------------------------------------------------------------------------------------------------------------------------------------------------------------------------------------------------|------|------|-----------|-------|------|------|
| Rsa1.0_00841.1.g20270.t1 | ref[XP_002873943.1] calcium-dependent protein kinase 34 [Arabidopsis lyrata subsp. lyrata]<br>gi 297319780 gb EFH50202.1  calcium-dependent protein kinase 34 [Arabidopsis lyrata subsp. lyrata]                      | 148  | 525  | 2.00E-17  | 354.7 | 27.7 | 30.4 | calcium-dependent protein kinase 34             | gbpln | Arabidopsis lyrata   | AT5G19360.1   Symbols: CPK34   calcium-dependent protein kinase 34   chr5:6521716-6523780 REVERSE LENGTH=523                                                                                                                                                                                                                                                                                                                                                                                                                                                                                           | 148  | 523  | 6.00E-20  | 353.4 | 27.7 | 30.4 |
| Rsa1.0_00841.1.g20271.t1 | gb EOA32326.1  hypothetical protein CARUB_v10015598mg [Capsella rubella]                                                                                                                                              | 319  | 315  | 1.00E-119 | 98.7  | 69.9 | 79.9 | hypothetical protein CARUB_v10015598mg          | gbpln | Capsella rubella     | AT2G18680.1   Symbols:   unknown protein; FUNCTIONS IN: molecular_function unknown; INVOLVED IN: biological_process unknown; LOCATED IN: endomembrane system; EXPRESSED IN: male gametophyte, pollen tube; EXPRESSED DURING: L mature pollen stage, M germinated pollen stage; BEST Arabidopsis thaliana protein match is: unknown protein (TAIR:AT2G18690.1); Has 30201 Blast hits to 17322 proteins in 780 species: Archae - 12; Bacteria - 1396; Metazoa - 17338; Fungi - 3422; Plants - 5037; Viruses - 0; Other Eukaryotes - 2996 (source: NCBI BLINK).   chr2:8094780-8095643 FORWARD LENGTH=287 | 319  | 287  | 1.00E-110 | 90.0  | 66.5 | 77.1 |
| Rsa1.0_00841.1.g20272.t1 | emb CAB39638.1  RNA-directed DNA polymerase-like protein [Arabidopsis thaliana] gi 7267666 emb CAB78094.1  RNA-directed DNA polymerase-like protein [Arabidopsis thaliana]                                            | 1939 | 1274 | 0         | 65.7  | 31.7 | 43.6 | RNA-directed DNA polymerase-like protein        | gbpln | Arabidopsis thaliana | AT4G29090.1   Symbols:   Ribonuclease H-like superfamily protein   chr4:14333528-14335255 FORWARD LENGTH=575                                                                                                                                                                                                                                                                                                                                                                                                                                                                                           | 1939 | 575  | 1.00E-69  | 29.7  | 8.9  | 13.9 |
| Rsa1.0_00841.1.g20273.t1 | #                                                                                                                                                                                                                     | #    | #    | #         | #     | #    | -    | -                                               | ----  | ----                 | #                                                                                                                                                                                                                                                                                                                                                                                                                                                                                                                                                                                                      | #    | #    | #         | #     | #    | #    |
| Rsa1.0_00841.1.g20274.t2 | #                                                                                                                                                                                                                     | #    | #    | #         | #     | #    | #    | -                                               | ----  | ----                 | #                                                                                                                                                                                                                                                                                                                                                                                                                                                                                                                                                                                                      | #    | #    | #         | #     | #    | #    |
| Rsa1.0_00841.1.g20275.t1 | ref[XP_002884153.1] predicted protein [Arabidopsis lyrata subsp. lyrata] gi 297329993 gb EFH60412.1  predicted protein [Arabidopsis lyrata subsp. lyrata]                                                             | 863  | 871  | 0         | 100.9 | 90.8 | 95.1 | predicted protein                               | gbpln | Arabidopsis lyrata   | AT2G18700.1   Symbols: ATTPS11, TPS11, ATTPSB   trehalose phosphatase/synthase 11   chr2:8109043-8111799 FORWARD LENGTH=862                                                                                                                                                                                                                                                                                                                                                                                                                                                                            | 863  | 862  | 0         | 99.9  | 89.5 | 94.0 |
| Rsa1.0_00841.1.g20276.t1 | gb EOA30430.1  hypothetical protein CARUB_v10013554mg [Capsella rubella]                                                                                                                                              | 484  | 488  | 0         | 100.8 | 89.9 | 93.0 | hypothetical protein CARUB_v10013554mg          | gbpln | Capsella rubella     | AT2G18730.1   Symbols: ATDGK3, DGK3   diacylglycerol kinase 3   chr2:8118976-8121689 FORWARD LENGTH=488                                                                                                                                                                                                                                                                                                                                                                                                                                                                                                | 484  | 488  | 0         | 100.8 | 88.8 | 92.4 |
| Rsa1.0_00841.1.g20277.t1 | gb EOA18429.1  hypothetical protein CARUB_v10006973mg [Capsella rubella]                                                                                                                                              | 426  | 411  | 1.00E-115 | 96.5  | 54.7 | 70.2 | hypothetical protein CARUB_v10006973mg          | gbpln | Capsella rubella     | AT1G22000.1   Symbols:   FBD, F-box and Leucine Rich Repeat domains containing protein   chr1:7744189-7747123 FORWARD LENGTH=717                                                                                                                                                                                                                                                                                                                                                                                                                                                                       | 426  | 717  | 5.00E-92  | 168.3 | 48.8 | 62.7 |
| Rsa1.0_00841.1.g20278.t1 | gb ABA96411.1  retrotransposon protein, putative, unclassified [Oryza sativa Japonica Group]                                                                                                                          | 171  | 256  | 4.00E-71  | 149.7 | 73.1 | 86.5 | retrotransposon protein, putative, unclassified | gbpln | Oryza sativa         | AT4G23160.1   Symbols: CRK8   cysteine-rich RLK (RECEPTOR-like protein kinase) 8   chr4:12129485-12134086 FORWARD LENGTH=1262                                                                                                                                                                                                                                                                                                                                                                                                                                                                          | 171  | 1262 | 1.00E-31  | 738.0 | 32.7 | 49.1 |
| Rsa1.0_00841.1.g20279.t1 | ref[NP_179490.2] transducin/WD-40 repeat-containing protein [Arabidopsis thaliana] gi 330251729 gb AEC06823.1  transducin/WD-40 repeat-containing protein [Arabidopsis thaliana]                                      | 175  | 804  | 3.00E-44  | 459.4 | 57.1 | 60.0 | transducin/WD-40 repeat-containing protein      | gbpln | Arabidopsis thaliana | AT2G18900.1   Symbols:   Transducin/WD40 repeat-like superfamily protein   chr2:8188491-8192409 REVERSE LENGTH=804                                                                                                                                                                                                                                                                                                                                                                                                                                                                                     | 175  | 804  | 1.00E-46  | 459.4 | 57.1 | 60.0 |
| Rsa1.0_00841.1.g20280.t1 | ref[XP_002884186.1] hydroxyproline-rich glycoprotein family protein [Arabidopsis lyrata subsp. lyrata] gi 297330026 gb EFH60445.1  hydroxyproline-rich glycoprotein family protein [Arabidopsis lyrata subsp. lyrata] | 202  | 131  | 3.00E-58  | 64.9  | 55.4 | 58.4 | hydroxyproline-rich glycoprotein family protein | gbpln | Arabidopsis lyrata   | AT2G18910.1   Symbols:   hydroxyproline-rich glycoprotein family protein   chr2:8193016-8194131 REVERSE LENGTH=131                                                                                                                                                                                                                                                                                                                                                                                                                                                                                     | 202  | 131  | 8.00E-60  | 64.9  | 54.5 | 58.4 |
| Rsa1.0_00841.1.g20281.t1 | gb AAG51783.1 AC079679.3 reverse transcriptase, putative; 16838-20266 [Arabidopsis thaliana]                                                                                                                          | 282  | 1142 | 5.00E-46  | 405.0 | 37.6 | 48.2 | reverse transcriptase, putative; 16838-20266    | gbpln | Arabidopsis thaliana | AT4G29090.1   Symbols:   Ribonuclease H-like superfamily protein   chr4:14333528-14335255 FORWARD LENGTH=575                                                                                                                                                                                                                                                                                                                                                                                                                                                                                           | 282  | 575  | 7.00E-17  | 203.9 | 20.6 | 32.6 |

|                          |                                                                                                                                                                                                                                                                                                                                                                                                                                                                                                                                                                                                                                                                                                                                                                                                                                                                                                                                                                                                                                                                                                                                                                    |     |     |           |       |      |      |                                                 |       |                      |                                                                                                                                             |     |     |           |       |      |      |
|--------------------------|--------------------------------------------------------------------------------------------------------------------------------------------------------------------------------------------------------------------------------------------------------------------------------------------------------------------------------------------------------------------------------------------------------------------------------------------------------------------------------------------------------------------------------------------------------------------------------------------------------------------------------------------------------------------------------------------------------------------------------------------------------------------------------------------------------------------------------------------------------------------------------------------------------------------------------------------------------------------------------------------------------------------------------------------------------------------------------------------------------------------------------------------------------------------|-----|-----|-----------|-------|------|------|-------------------------------------------------|-------|----------------------|---------------------------------------------------------------------------------------------------------------------------------------------|-----|-----|-----------|-------|------|------|
| Rsa1.0_00842.1.g20282.t1 | <p>ref NP_198097.1  mevalonate kinase [Arabidopsis thaliana] gi 30690651 ref NP_851084.1  mevalonate kinase [Arabidopsis thaliana] gi 334187979 ref NP_001190411.1  mevalonate kinase [Arabidopsis thaliana] gi 1170660 sp P46086.1 KIME_ARATH RecName: Full=Mevalonate kinase; Short=MK gi 4883990 gb AAD31719.1 AF141853.1 mevalonate kinase [Arabidopsis thaliana] gi 456614 emb CAA54820.1  mevalonate kinase [Arabidopsis thaliana] gi 20260532 gb AAM13164.1  mevalonate kinase [Arabidopsis thaliana] gi 21536564 gb AAM60916.1  mevalonate kinase [Arabidopsis thaliana] gi 25083757 gb AAN72115.1  mevalonate kinase [Arabidopsis thaliana] gi 332006305 gb AED93688.1  mevalonate kinase [Arabidopsis thaliana] gi 332006306 gb AED93689.1  mevalonate kinase [Arabidopsis thaliana] gi 332006307 gb AED93690.1  mevalonate kinase [Arabidopsis thaliana] ref NP_198098.1  pentatricopeptide repeat-containing protein [Arabidopsis thaliana] gi 122214236 sp Q3E91.1 PP400_ARATH RecName: Full=Pentatricopeptide repeat-containing protein At5g27460 gi 332006308 gb AED93691.1  pentatricopeptide repeat-containing protein [Arabidopsis thaliana]</p> | 376 | 378 | 0         | 100.5 | 88.3 | 94.1 | mevalonate kinase                               | gbpln | Arabidopsis thaliana | AT5G27450.3   Symbols: MK   mevalonate kinase   chr5:9691051-9692975 FORWARD LENGTH=378                                                     | 376 | 378 | 0         | 100.5 | 88.3 | 94.1 |
| Rsa1.0_00842.1.g20283.t1 | <p>gi 122214236 sp Q3E91.1 PP400_ARATH RecName: Full=Pentatricopeptide repeat-containing protein At5g27460 gi 332006308 gb AED93691.1  pentatricopeptide repeat-containing protein [Arabidopsis thaliana]</p>                                                                                                                                                                                                                                                                                                                                                                                                                                                                                                                                                                                                                                                                                                                                                                                                                                                                                                                                                      | 482 | 491 | 0         | 101.9 | 76.8 | 85.3 | pentatricopeptide repeat-containing protein     | gbpln | Arabidopsis thaliana | AT5G27460.1   Symbols:   Tetratricopeptide repeat (TPR)-like superfamily protein   chr5:9693262-9694815 REVERSE LENGTH=491                  | 482 | 491 | 0         | 101.9 | 76.8 | 85.3 |
| Rsa1.0_00842.1.g20284.t3 | <p>gb EOA20124.1  hypothetical protein CARUB_v10000404mg, partial [Capsella rubella]</p>                                                                                                                                                                                                                                                                                                                                                                                                                                                                                                                                                                                                                                                                                                                                                                                                                                                                                                                                                                                                                                                                           | 758 | 664 | 0         | 87.6  | 70.3 | 76.1 | hypothetical protein CARUB_v10000404mg, partial | gbpln | Capsella rubella     | AT5G27540.2   Symbols: MIRO1   MIRO-related GTP-ase 1   chr5:9722816-9727112 FORWARD LENGTH=648                                             | 758 | 648 | 0         | 85.5  | 69.7 | 76.1 |
| Rsa1.0_00842.1.g20285.t1 | <p>ref XP_002893912.1  hypothetical protein ARALYDRAFT_314052 [Arabidopsis lyrata subsp. lyrata] gi 297339754 gb EFH70171.1  hypothetical protein ARALYDRAFT_314052 [Arabidopsis lyrata subsp. lyrata]</p>                                                                                                                                                                                                                                                                                                                                                                                                                                                                                                                                                                                                                                                                                                                                                                                                                                                                                                                                                         | 393 | 441 | 7.00E-97  | 112.2 | 49.1 | 55.7 | hypothetical protein ARALYDRAFT_314052          | gbpln | Arabidopsis lyrata   | AT5G27470.1   Symbols:   seryl-tRNA synthetase / serine-tRNA ligase   chr5:9695087-9697154 FORWARD LENGTH=451                               | 393 | 451 | 3.00E-91  | 114.8 | 41.7 | 46.8 |
| Rsa1.0_00842.1.g20286.t1 | <p>ref NP_198104.1  peroxisomal adenine nucleotide carrier 2 [Arabidopsis thaliana] gi 75304483 sp Q8VZS0.1 PNC2_ARATH RecName: Full=Peroxisomal adenine nucleotide carrier 2 gi 17380872 gb AAL36248.1  unknown protein [Arabidopsis thaliana] gi 21689661 gb AAM67452.1  unknown protein [Arabidopsis thaliana] gi 332006313 gb AED93696.1  peroxisomal adenine nucleotide carrier 2 [Arabidopsis thaliana]</p>                                                                                                                                                                                                                                                                                                                                                                                                                                                                                                                                                                                                                                                                                                                                                  | 316 | 321 | 1.00E-155 | 101.6 | 84.8 | 94.9 | peroxisomal adenine nucleotide carrier 2        | gbpln | Arabidopsis thaliana | AT5G27520.1   Symbols: PNC2   peroxisomal adenine nucleotide carrier 2   chr5:9714664-9716244 REVERSE LENGTH=321                            | 316 | 321 | 1.00E-158 | 101.6 | 84.8 | 94.9 |
| Rsa1.0_00842.1.g20287.t1 | <p>ref NP_198106.1  MIRO-related GTP-ase 1 [Arabidopsis thaliana] gi 79328825 ref NP_001031953.1  MIRO-related GTP-ase 1 [Arabidopsis thaliana] gi 19698867 gb AAL91169.1  unknown protein [Arabidopsis thaliana] gi 28058938 gb AAO29970.1  unknown protein [Arabidopsis thaliana] gi 332006315 gb AED93698.1  MIRO-related GTP-ase 1 [Arabidopsis thaliana] gi 332006316 gb AED93699.1  MIRO-related GTP-ase 1 [Arabidopsis thaliana]</p>                                                                                                                                                                                                                                                                                                                                                                                                                                                                                                                                                                                                                                                                                                                        | 721 | 648 | 0         | 89.9  | 74.5 | 80.7 | MIRO-related GTP-ase 1                          | gbpln | Arabidopsis thaliana | AT5G27540.2   Symbols: MIRO1   MIRO-related GTP-ase 1   chr5:9722816-9727112 FORWARD LENGTH=648                                             | 721 | 648 | 0         | 89.9  | 74.5 | 80.7 |
| Rsa1.0_00842.1.g20288.t1 | <p>gb EOA19994.1  hypothetical protein CARUB_v10000259mg [Capsella rubella]</p>                                                                                                                                                                                                                                                                                                                                                                                                                                                                                                                                                                                                                                                                                                                                                                                                                                                                                                                                                                                                                                                                                    | 775 | 793 | 0         | 102.3 | 84.6 | 90.8 | hypothetical protein CARUB_v10000259mg          | gbpln | Capsella rubella     | AT5G27550.1   Symbols:   P-loop containing nucleoside triphosphate hydrolases superfamily protein   chr5:9727634-9731323 REVERSE LENGTH=765 | 775 | 765 | 0         | 98.7  | 83.4 | 89.8 |

|                           |                                                                                                                                                                                                                                                                                                                                                                                      |      |      |           |       |      |      |                                                                                                                                                                           |       |                      |                                                                                                                                                                                                                                                            |      |      |           |       |      |      |
|---------------------------|--------------------------------------------------------------------------------------------------------------------------------------------------------------------------------------------------------------------------------------------------------------------------------------------------------------------------------------------------------------------------------------|------|------|-----------|-------|------|------|---------------------------------------------------------------------------------------------------------------------------------------------------------------------------|-------|----------------------|------------------------------------------------------------------------------------------------------------------------------------------------------------------------------------------------------------------------------------------------------------|------|------|-----------|-------|------|------|
| Rsa1.0_00842.1.g20289.t1  | refNP_198114.2  cyclin H;1 [Arabidopsis thaliana]<br>gi 75162701 sp Q8W5S1.1 CCH1_ARAT H RecName: Full=Cyclin-H1-1; Short=CycH1;1<br>gi 17026115 dbj BAE72144.1  cyclin H [Arabidopsis thaliana]<br>gi 26452432 dbj BAC43301.1  putative cyclin H AtCycH1 [Arabidopsis thaliana]<br>gi 332006324 gb AED93707.1  cyclin H;1 [Arabidopsis thaliana]                                    | 723  | 336  | 1.00E-172 | 46.5  | 41.4 | 43.2 | cyclin H;1                                                                                                                                                                | gbpln | Arabidopsis thaliana | AT5G27620.1   Symbols: CYCH;1   cyclin H;1   chr5:9771762-9774684 FORWARD LENGTH=336                                                                                                                                                                       | 723  | 336  | 1.00E-175 | 46.5  | 41.4 | 43.2 |
| Rsa1.0_00842.1.g20290.t1  | refNP_198117.2  PWWP domain-containing protein [Arabidopsis thaliana]<br>gi 332006328 gb AED93711.1  PWWP domain-containing protein [Arabidopsis thaliana]                                                                                                                                                                                                                           | 1045 | 1072 | 0         | 102.6 | 73.1 | 81.3 | PWWP domain-containing protein                                                                                                                                            | gbpln | Arabidopsis thaliana | AT5G27650.1   Symbols:   Tudor/PWWP/MBT superfamily protein   chr5:9785511-9789094 FORWARD LENGTH=1072                                                                                                                                                     | 1045 | 1072 | 0         | 102.6 | 73.1 | 81.3 |
| Rsa1.0_00842.1.g20291.t1  | refNP_198119.1  histone H2A 7 [Arabidopsis thaliana]<br>gi 75306451 sp Q94F49.1 H2A5_ARATH RecName: Full=Probable histone H2A.5; AltName: Full=HTA7<br>gi 1432651 gb AAK60303.1 AF385711.1 AT5g27670/F15A18_130 [Arabidopsis thaliana]<br>gi 18700220 gb AAL77720.1  AT5g27670/F15A18_130 [Arabidopsis thaliana]<br>gi 332006330 gb AED93713.1  histone H2A 7 [Arabidopsis thaliana] | 152  | 150  | 5.00E-65  | 98.7  | 84.2 | 91.4 | histone H2A 7                                                                                                                                                             | gbpln | Arabidopsis thaliana | AT5G27670.1   Symbols: HTA7   histone H2A 7   chr5:9792807-9793365 REVERSE LENGTH=150                                                                                                                                                                      | 152  | 150  | 1.00E-67  | 98.7  | 84.2 | 91.4 |
| Rsa1.0_00842.1.g20292.t1  | gb EOA21887.1  hypothetical protein CARUB_v10002364mg [Capsella rubella]                                                                                                                                                                                                                                                                                                             | 82   | 82   | 3.00E-40  | 100.0 | 93.9 | 98.8 | hypothetical protein CARUB_v10002364mg                                                                                                                                    | gbpln | Capsella rubella     | AT5G27700.1   Symbols:   Ribosomal protein S21e   chr5:9807541-9808048 REVERSE LENGTH=82                                                                                                                                                                   | 82   | 82   | 1.00E-42  | 100.0 | 92.7 | 98.8 |
| Rsa1.0_00842.1.g20293.t6  | refNP_198123.2  uncharacterized protein [Arabidopsis thaliana]<br>gi 40823291 gb AAR92273.1  At5g27710 [Arabidopsis thaliana]<br>gi 45275716 gb AAS76256.1  At5g27710 [Arabidopsis thaliana]<br>gi 332006334 gb AED93717.1  uncharacterized protein AT5G27710 [Arabidopsis thaliana]                                                                                                 | 1200 | 335  | 1.00E-141 | 27.9  | 21.7 | 23.9 | uncharacterized protein                                                                                                                                                   | gbpln | Arabidopsis thaliana | AT5G27710.1   Symbols:   unknown protein; Has 49 Blast hits to 49 proteins in 17 species: Archae - 0; Bacteria - 0; Metazoa - 0; Fungi - 0; Plants - 48; Viruses - 0; Other Eukaryotes - 1 (source: NCBI BLINK).   chr5:9813069-9815018 FORWARD LENGTH=335 | 1200 | 335  | 1.00E-144 | 27.9  | 21.7 | 23.9 |
| Rsa1.0_00842.1.g20294.t1  | sp Q43582.1 LSM4_TOBAC RecName: Full=Probable U6 snRNA-associated Sm-like protein Lsm4; AltName: Full=Glycine-rich protein 10; Short=GRP 10<br>gi 790473 emb CAA58702.1  unnamed protein product [Nicotiana tabacum]                                                                                                                                                                 | 129  | 146  | 1.00E-51  | 113.2 | 77.5 | 79.1 | RecName: Full=Probable U6 snRNA-associated Sm-like protein Lsm4; AltName: Full=Glycine-rich protein 10; Short=GRP 10<br>gi 790473 emb CAA58702.1  unnamed protein product | gbpln | Nicotiana tabacum    | AT5G27720.1   Symbols: emb1644   Small nuclear ribonucleoprotein family protein   chr5:9815904-9817304 FORWARD LENGTH=129                                                                                                                                  | 129  | 129  | 5.00E-51  | 100.0 | 70.5 | 70.5 |
| Rsa1.0_00842.1.g20295.t11 | refXP_002874350.1  nucleoside-triphosphatase/ nucleotide binding protein [Arabidopsis lyrata subsp. lyrata]<br>gi 297320187 gb EFH50609.1  nucleoside-triphosphatase/ nucleotide binding protein [Arabidopsis lyrata subsp. lyrata]                                                                                                                                                  | 448  | 359  | 1.00E-109 | 80.1  | 49.6 | 56.3 | nucleoside-triphosphatase/ nucleotide binding protein                                                                                                                     | gbpln | Arabidopsis lyrata   | AT5G27740.1   Symbols: EMB161, EMB2775, EMB251, RFC3   ATPase family associated with various cellular activities (AAA)   chr5:9823831-9826869 FORWARD LENGTH=354                                                                                           | 448  | 354  | 1.00E-111 | 79.0  | 49.1 | 56.0 |
| Rsa1.0_00843.1.g20296.t1  | #                                                                                                                                                                                                                                                                                                                                                                                    | #    | #    | #         | #     | #    | #    | -                                                                                                                                                                         | ----  | ----                 | #                                                                                                                                                                                                                                                          | #    | #    | #         | #     | #    | #    |
| Rsa1.0_00843.1.g20297.t1  | gb AAD15359.1  putative Athila retroelement ORF1 protein [Arabidopsis thaliana]                                                                                                                                                                                                                                                                                                      | 272  | 532  | 6.00E-21  | 195.6 | 25.4 | 39.0 | putative Athila retroelement ORF1 protein                                                                                                                                 | gbpln | Arabidopsis thaliana | #                                                                                                                                                                                                                                                          | #    | #    | #         | #     | #    | #    |
| Rsa1.0_00843.1.g20298.t1  | #                                                                                                                                                                                                                                                                                                                                                                                    | #    | #    | #         | #     | #    | #    | -                                                                                                                                                                         | ----  | ----                 | #                                                                                                                                                                                                                                                          | #    | #    | #         | #     | #    | #    |
| Rsa1.0_00843.1.g20299.t1  | gb AAG51783.1 AC079679_3 reverse transcriptase, putative; 16838-20266 [Arabidopsis thaliana]                                                                                                                                                                                                                                                                                         | 206  | 1142 | 2.00E-19  | 554.4 | 34.0 | 47.1 | reverse transcriptase, putative; 16838-20266                                                                                                                              | gbpln | Arabidopsis thaliana | #                                                                                                                                                                                                                                                          | #    | #    | #         | #     | #    | #    |
| Rsa1.0_00843.1.g20300.t1  | #                                                                                                                                                                                                                                                                                                                                                                                    | #    | #    | #         | #     | #    | #    | -                                                                                                                                                                         | ----  | ----                 | #                                                                                                                                                                                                                                                          | #    | #    | #         | #     | #    | #    |
| Rsa1.0_00843.1.g20301.t2  | gb AAD36943.1 AF069441_3 putative polyprotein [Arabidopsis thaliana]<br>gi 7267195 emb CAB77906.1  putative polyprotein [Arabidopsis thaliana]                                                                                                                                                                                                                                       | 950  | 778  | 5.00E-58  | 81.9  | 16.3 | 23.8 | putative polyprotein                                                                                                                                                      | gbpln | Arabidopsis thaliana | ATMG00300.1   Symbols: ORF145A   Gag-Pol-related retrotransposon family protein   chrM:89617-90054 REVERSE LENGTH=145                                                                                                                                      | 950  | 145  | 1.00E-19  | 15.3  | 4.5  | 6.9  |
| Rsa1.0_00843.1.g20302.t1  | gb AAD17398.1  putative non-LTR retroelement reverse transcriptase [Arabidopsis thaliana]                                                                                                                                                                                                                                                                                            | 210  | 1225 | 9.00E-37  | 583.3 | 39.0 | 59.0 | putative non-LTR retroelement reverse transcriptase                                                                                                                       | gbpln | Arabidopsis thaliana | #                                                                                                                                                                                                                                                          | #    | #    | #         | #     | #    | #    |
| Rsa1.0_00843.1.g20303.t1  | gb AAG51783.1 AC079679_3 reverse transcriptase, putative; 16838-20266 [Arabidopsis thaliana]                                                                                                                                                                                                                                                                                         | 367  | 1142 | 2.00E-91  | 311.2 | 45.8 | 61.0 | reverse transcriptase, putative; 16838-20266                                                                                                                              | gbpln | Arabidopsis thaliana | AT4G29090.1   Symbols:   Ribonuclease H-like superfamily protein   chr4:14333528-14335255 FORWARD LENGTH=575                                                                                                                                               | 367  | 575  | 5.00E-43  | 156.7 | 32.2 | 50.7 |

|                          |                                                                                                                                                                                                                                                                                                                                                                     |      |      |           |       |      |      |                                                     |       |                      |                                                                                                                                                                                                                                                                                                                                               |      |     |           |       |      |      |
|--------------------------|---------------------------------------------------------------------------------------------------------------------------------------------------------------------------------------------------------------------------------------------------------------------------------------------------------------------------------------------------------------------|------|------|-----------|-------|------|------|-----------------------------------------------------|-------|----------------------|-----------------------------------------------------------------------------------------------------------------------------------------------------------------------------------------------------------------------------------------------------------------------------------------------------------------------------------------------|------|-----|-----------|-------|------|------|
| Rsa1.0_00843.1.g20304.t1 | gb[EOA37712.1] hypothetical protein CARUB_v10012448mg [Capsella rubella]                                                                                                                                                                                                                                                                                            | 97   | 95   | 6.00E-26  | 97.9  | 61.9 | 78.4 | hypothetical protein CARUB_v10012448mg              | gbpln | Capsella rubella     | AT1G48750.1   Symbols:   Bifunctional inhibitor/lipid-transfer protein/seed storage 2S albumin superfamily protein   chr1:18038019-18038303 FORWARD LENGTH=94                                                                                                                                                                                 | 97   | 94  | 1.00E-28  | 96.9  | 68.0 | 85.6 |
| Rsa1.0_00843.1.g20305.t1 | dbj[BAJ33786.1] unnamed protein product [Thellungiella halophila]                                                                                                                                                                                                                                                                                                   | 122  | 308  | 3.00E-41  | 252.5 | 73.8 | 77.9 | unnamed protein product                             | ----  | ----                 | AT3G63520.1   Symbols:   CCD1, ATCCD1, ATNCD1, NCD1   carotenoid cleavage dioxygenase 1   chr3:23452940-23455896 FORWARD LENGTH=538                                                                                                                                                                                                           | 122  | 538 | 3.00E-43  | 441.0 | 73.8 | 77.0 |
| Rsa1.0_00843.1.g20306.t1 | gb[EOA38518.1] hypothetical protein CARUB_v10010307mg, partial [Capsella rubella]                                                                                                                                                                                                                                                                                   | 162  | 206  | 2.00E-41  | 127.2 | 71.0 | 80.9 | hypothetical protein CARUB_v10010307mg, partial     | gbpln | Capsella rubella     | AT3G18295.1   Symbols:   Protein of unknown function (DUF1639)   chr3:6281268-6282000 FORWARD LENGTH=216                                                                                                                                                                                                                                      | 162  | 216 | 2.00E-41  | 133.3 | 67.9 | 81.5 |
| Rsa1.0_00843.1.g20307.t2 | ref[XP_002894133.1] mov34 family protein [Arabidopsis lyrata subsp. lyrata] gi 297339975 gb EFH70392.1  mov34 family protein [Arabidopsis lyrata subsp. lyrata]                                                                                                                                                                                                     | 530  | 507  | 0         | 95.7  | 81.1 | 85.3 | mov34 family protein                                | gbpln | Arabidopsis lyrata   | AT1G48790.1   Symbols:   AMSH1   associated molecule with the SH3 domain of STAM 1   chr1:18043925-18047427 REVERSE LENGTH=507                                                                                                                                                                                                                | 530  | 507 | 0         | 95.7  | 80.8 | 85.1 |
| Rsa1.0_00843.1.g20308.t4 | gb[AAD17398.1] putative non-LTR retroelement reverse transcriptase [Arabidopsis thaliana]                                                                                                                                                                                                                                                                           | 1122 | 1225 | 0         | 109.2 | 36.5 | 48.7 | putative non-LTR retroelement reverse transcriptase | gbpln | Arabidopsis thaliana | AT4G29090.1   Symbols:   Ribonuclease H-like superfamily protein   chr4:14333528-14335255 FORWARD LENGTH=575                                                                                                                                                                                                                                  | 1122 | 575 | 2.00E-42  | 51.2  | 7.8  | 12.3 |
| Rsa1.0_00844.1.g20309.t1 | ref[XP_002892284.1] thiF family protein [Arabidopsis lyrata subsp. lyrata] gi 297338126 gb EFH68543.1  thiF family protein [Arabidopsis lyrata subsp. lyrata]                                                                                                                                                                                                       | 106  | 447  | 8.00E-17  | 421.7 | 50.0 | 55.7 | thiF family protein                                 | gbpln | Arabidopsis lyrata   | AT1G05350.1   Symbols:   NAD(P)-binding Rossmann-fold superfamily protein   chr1:1560891-1564005 REVERSE LENGTH=431                                                                                                                                                                                                                           | 106  | 431 | 4.00E-19  | 406.6 | 49.1 | 54.7 |
| Rsa1.0_00844.1.g20310.t2 | gb[AAD25596.1] putative helicase [Arabidopsis thaliana]                                                                                                                                                                                                                                                                                                             | 1371 | 1219 | 0         | 88.9  | 26.0 | 34.1 | putative helicase                                   | gbpln | Arabidopsis thaliana | AT3G51690.1   Symbols:   PIF1 helicase   chr3:19176731-19178107 REVERSE LENGTH=331                                                                                                                                                                                                                                                            | 1371 | 331 | 2.00E-67  | 24.1  | 9.9  | 13.6 |
| Rsa1.0_00844.1.g20311.t1 | gb[EOA28640.1] hypothetical protein CARUB_v10024862mg, partial [Capsella rubella]                                                                                                                                                                                                                                                                                   | 511  | 490  | 2.00E-80  | 95.9  | 32.7 | 55.6 | hypothetical protein CARUB_v10024862mg, partial     | gbpln | Capsella rubella     | AT1G52950.1   Symbols:   Nucleic acid-binding, OB-fold-like protein   chr1:19725483-19728007 FORWARD LENGTH=566                                                                                                                                                                                                                               | 511  | 566 | 8.00E-83  | 110.8 | 33.3 | 57.7 |
| Rsa1.0_00844.1.g20312.t1 | gb[EOA17284.1] hypothetical protein CARUB_v10005554mg [Capsella rubella]                                                                                                                                                                                                                                                                                            | 238  | 255  | 1.00E-102 | 107.1 | 80.3 | 80.7 | hypothetical protein CARUB_v10005554mg              | gbpln | Capsella rubella     | AT4G23470.1   Symbols:   PLAC8 family protein   chr4:12249289-12251079 FORWARD LENGTH=255                                                                                                                                                                                                                                                     | 238  | 255 | 1.00E-101 | 107.1 | 76.5 | 79.8 |
| Rsa1.0_00844.1.g20313.t1 | gb[ACC91275.1] fringe-related protein [Capsella rubella] gi 482552213 gb EOA16406.1  hypothetical protein CARUB_v10004561mg [Capsella rubella]                                                                                                                                                                                                                      | 536  | 534  | 0         | 99.6  | 88.6 | 92.7 | fringe-related protein                              | gbpln | Capsella rubella     | AT4G23490.1   Symbols:   Protein of unknown function (DUF604)   chr4:12251580-12253973 REVERSE LENGTH=526                                                                                                                                                                                                                                     | 536  | 526 | 0         | 98.1  | 88.2 | 92.2 |
| Rsa1.0_00844.1.g20314.t1 | ref[NP_563972.1] uncharacterized protein [Arabidopsis thaliana] gi 30684315 ref[NP_849667.1] uncharacterized protein [Arabidopsis thaliana] gi 21617951 gb AAM67001.1  unknown [Arabidopsis thaliana] gi 110742955 dbj BAE99372.1  hypothetical protein [Arabidopsis thaliana] gi 332191186 gb AEE29307.1  uncharacterized protein AT1G15350 [Arabidopsis thaliana] | 126  | 154  | 1.00E-39  | 122.2 | 67.5 | 73.0 | uncharacterized protein                             | gbpln | Arabidopsis thaliana | AT1G15350.1   Symbols:   unknown protein; BEST Arabidopsis thaliana protein match is: unknown protein (TAIR:AT3G15770.2); Has 148 Blast hits to 148 proteins in 25 species: Archae - 0; Bacteria - 0; Metazoa - 0; Fungi - 0; Plants - 141; Viruses - 0; Other Eukaryotes - 7 (source: NCBI BLINK).   chr1:5278481-5279486 REVERSE LENGTH=154 | 126  | 154 | 2.00E-42  | 122.2 | 67.5 | 73.0 |
| Rsa1.0_00844.1.g20315.t1 | ref[XP_002867705.1] hypothetical protein ARALYDRAFT_492522 [Arabidopsis lyrata subsp. lyrata] gi 297313541 gb EFH43964.1  hypothetical protein ARALYDRAFT_492522 [Arabidopsis lyrata subsp. lyrata] ref[XP_002869777.1] glycoside hydrolase family 28 protein [Arabidopsis lyrata subsp. lyrata]                                                                    | 255  | 86   | 3.00E-27  | 33.7  | 23.1 | 28.2 | hypothetical protein ARALYDRAFT_492522              | gbpln | Arabidopsis lyrata   | AT4G23493.1   Symbols:   unknown protein; Has 30201 Blast hits to 17322 proteins in 780 species: Archae - 12; Bacteria - 1396; Metazoa - 1738; Fungi - 342; Plants - 5037; Viruses - 0; Other Eukaryotes - 2996 (source: NCBI BLINK).   chr4:12256327-12256693 REVERSE LENGTH=87                                                              | 255  | 87  | 6.00E-29  | 34.1  | 23.5 | 28.2 |
| Rsa1.0_00844.1.g20316.t1 | gi 297315613 gb EFH46036.1  glycoside hydrolase family 28 protein [Arabidopsis lyrata subsp. lyrata] ref[XP_002890732.1] hypothetical protein ARALYDRAFT_890279 [Arabidopsis lyrata subsp. lyrata]                                                                                                                                                                  | 542  | 494  | 0         | 91.1  | 85.2 | 87.3 | glycoside hydrolase family 28 protein               | gbpln | Arabidopsis lyrata   | AT4G23500.1   Symbols:   Pectin lyase-like superfamily protein   chr4:12264640-12267074 FORWARD LENGTH=495                                                                                                                                                                                                                                    | 542  | 495 | 0         | 91.3  | 83.4 | 85.4 |
| Rsa1.0_00844.1.g20317.t1 | gi 297336574 gb EFH66991.1  hypothetical protein ARALYDRAFT_890279 [Arabidopsis lyrata subsp. lyrata]                                                                                                                                                                                                                                                               | 207  | 311  | 3.00E-24  | 150.2 | 36.7 | 52.7 | hypothetical protein ARALYDRAFT_890279              | gbpln | Arabidopsis lyrata   | AT3G43950.1   Symbols:   Protein kinase superfamily protein   chr3:15766361-15767014 FORWARD LENGTH=217                                                                                                                                                                                                                                       | 207  | 217 | 6.00E-22  | 104.8 | 30.0 | 45.9 |
| Rsa1.0_00844.1.g20318.t1 | gb[EOA15864.1] hypothetical protein CARUB_v10007726mg [Capsella rubella]                                                                                                                                                                                                                                                                                            | 293  | 366  | 8.00E-49  | 124.9 | 37.9 | 51.5 | hypothetical protein CARUB_v10007726mg              | gbpln | Capsella rubella     | AT4G23515.1   Symbols:   Toll-Interleukin-Resistance (TIR) domain family protein   chr4:12271382-12272842 REVERSE LENGTH=331                                                                                                                                                                                                                  | 293  | 331 | 2.00E-44  | 113.0 | 36.9 | 50.5 |

|                          |                                                                                                                                                                                                                                                                                                                                                                                                                                                                                                                                                                      |     |      |           |       |      |      |                                                                                                                                                       |       |                      |                                                                                                                                             |     |     |           |       |      |      |
|--------------------------|----------------------------------------------------------------------------------------------------------------------------------------------------------------------------------------------------------------------------------------------------------------------------------------------------------------------------------------------------------------------------------------------------------------------------------------------------------------------------------------------------------------------------------------------------------------------|-----|------|-----------|-------|------|------|-------------------------------------------------------------------------------------------------------------------------------------------------------|-------|----------------------|---------------------------------------------------------------------------------------------------------------------------------------------|-----|-----|-----------|-------|------|------|
| Rsa1.0_00844.1.g20319.t1 | gb AAG28902.1 AC008113.18<br>F12A21.21 [Arabidopsis thaliana]                                                                                                                                                                                                                                                                                                                                                                                                                                                                                                        | 364 | 341  | 1.00E-104 | 93.7  | 59.6 | 67.3 | F12A21.21                                                                                                                                             | gbpln | Arabidopsis thaliana | AT5G25290.1   Symbols:   F-box family protein with a domain of unknown function (DUF295)   chr5:8778592-8779785 FORWARD LENGTH=397          | 364 | 397 | 4.00E-65  | 109.1 | 43.7 | 57.1 |
| Rsa1.0_00844.1.g20320.t2 | #                                                                                                                                                                                                                                                                                                                                                                                                                                                                                                                                                                    | #   | #    | #         | #     | #    | #    | -                                                                                                                                                     | ----  | ----                 | AT4G29060.1   Symbols: emb2726   elongation factor Ts family protein   chr4:14317744-14321315 FORWARD LENGTH=953                            | 264 | 953 | 9.00E-12  | 361.0 | 19.3 | 22.7 |
| Rsa1.0_00844.1.g20321.t1 | gb EOA21337.1  hypothetical protein CARUB_v10001699mg [Capsella rubella]                                                                                                                                                                                                                                                                                                                                                                                                                                                                                             | 300 | 272  | 7.00E-17  | 90.7  | 22.7 | 36.7 | hypothetical protein CARUB_v10001699mg                                                                                                                | gbpln | Capsella rubella     | AT3G62850.1   Symbols:   zinc finger protein-related   chr3:23237487-23239155 REVERSE LENGTH=472                                            | 300 | 472 | 2.00E-13  | 157.3 | 16.3 | 29.3 |
| Rsa1.0_00844.1.g20322.t1 | ref XP_002879675.1  hypothetical protein ARALYDRAFT_345479 [Arabidopsis lyrata subsp. lyrata]   gi 297325514 gb EFH55934.1  hypothetical protein ARALYDRAFT_345479 [Arabidopsis lyrata subsp. lyrata]                                                                                                                                                                                                                                                                                                                                                                | 139 | 160  | 4.00E-19  | 115.1 | 37.4 | 45.3 | hypothetical protein ARALYDRAFT_345479                                                                                                                | gbpln | Arabidopsis lyrata   | AT4G23510.1   Symbols:   Disease resistance protein (TIR-NBS-LRR class) family   chr4:12267516-12270526 REVERSE LENGTH=635                  | 139 | 635 | 9.00E-12  | 456.8 | 25.9 | 30.9 |
| Rsa1.0_00844.1.g20323.t1 | gb EOA18048.1  hypothetical protein CARUB_v10006494mg [Capsella rubella]                                                                                                                                                                                                                                                                                                                                                                                                                                                                                             | 328 | 351  | 1.00E-135 | 107.0 | 72.3 | 85.1 | hypothetical protein CARUB_v10006494mg                                                                                                                | gbpln | Capsella rubella     | AT4G23520.1   Symbols:   Cysteine proteinases superfamily protein   chr4:12274457-12276219 REVERSE LENGTH=356                               | 328 | 356 | 1.00E-134 | 108.5 | 69.8 | 82.3 |
| Rsa1.0_00845.1.g20324.t1 | pir [S65812 RNA-directed DNA polymerase (EC 2.7.7.49) (clone DW15) - Arabidopsis thaliana retrotransposon Ta11-1   gi 976278 gb AAA75254.1  reverse transcriptase [Arabidopsis thaliana]                                                                                                                                                                                                                                                                                                                                                                             | 240 | 1333 | 4.00E-51  | 555.4 | 42.1 | 54.2 | RNA-directed DNA polymerase (EC 2.7.7.49) (clone DW15) - Arabidopsis thaliana retrotransposon Ta11-1   gi 976278 gb AAA75254.1  reverse transcriptase | gbpln | Arabidopsis thaliana | AT4G29090.1   Symbols:   Ribonuclease H-like superfamily protein   chr4:14333528-14335255 FORWARD LENGTH=575                                | 240 | 575 | 5.00E-37  | 239.6 | 31.3 | 50.0 |
| Rsa1.0_00845.1.g20325.t1 | gb AAD20434.1  putative Athila retroelement ORF1 protein [Arabidopsis thaliana]   ref NP_566824.1  carbamoyl phosphate synthetase A [Arabidopsis thaliana]   gi 9294479 dbj BAB02698.1  carbamoyl-phosphate synthetase small subunit [Arabidopsis thaliana]   gi 15028109 gb AAK76678.1  putative carbamoyl phosphate synthetase small subunit [Arabidopsis thaliana]   gi 19310631 gb AL85046.1  putative carbamoyl phosphate synthetase small subunit [Arabidopsis thaliana]   gi 332643837 gb AEE77358.1  carbamoyl phosphate synthetase A [Arabidopsis thaliana] | 96  | 507  | 2.00E-14  | 528.1 | 45.8 | 58.3 | putative Athila retroelement ORF1 protein                                                                                                             | gbpln | Arabidopsis thaliana | #                                                                                                                                           | #   | #   | #         | #     | #    | #    |
| Rsa1.0_00845.1.g20326.t1 | gb AAD20434.1  putative Athila retroelement ORF1 protein [Arabidopsis thaliana]   ref NP_566824.1  carbamoyl phosphate synthetase A [Arabidopsis thaliana]   gi 9294479 dbj BAB02698.1  carbamoyl-phosphate synthetase small subunit [Arabidopsis thaliana]   gi 15028109 gb AAK76678.1  putative carbamoyl phosphate synthetase small subunit [Arabidopsis thaliana]   gi 19310631 gb AL85046.1  putative carbamoyl phosphate synthetase small subunit [Arabidopsis thaliana]   gi 332643837 gb AEE77358.1  carbamoyl phosphate synthetase A [Arabidopsis thaliana] | 425 | 430  | 0         | 101.2 | 90.8 | 94.8 | carbamoyl phosphate synthetase A                                                                                                                      | gbpln | Arabidopsis thaliana | AT3G27740.1   Symbols: CARA   carbamoyl phosphate synthetase A   chr3:10281470-10283792 REVERSE LENGTH=430                                  | 425 | 430 | 0         | 101.2 | 90.8 | 94.8 |
| Rsa1.0_00845.1.g20327.t3 | sp P04796.2 G3PC_SINAL RecName: Full=Glyceraldehyde-3-phosphate dehydrogenase, cytosolic   gi 21143 emb CAA27844.1  unnamed protein product. [Sinapis alba]                                                                                                                                                                                                                                                                                                                                                                                                          | 203 | 338  | 3.00E-29  | 166.5 | 33.5 | 35.0 | RecName: Full=Glyceraldehyde-3-phosphate dehydrogenase, cytosolic   gi 21143 emb CAA27844.1  unnamed protein product                                  | gbpln | Sinapis alba         | AT3G04120.1   Symbols: GAPC, GAPC-1, GAPC1   glyceraldehyde-3-phosphate dehydrogenase C subunit 1   chr3:1081077-1083131 FORWARD LENGTH=338 | 203 | 338 | 1.00E-30  | 166.5 | 32.0 | 35.0 |
| Rsa1.0_00845.1.g20328.t1 | #                                                                                                                                                                                                                                                                                                                                                                                                                                                                                                                                                                    | #   | #    | #         | #     | #    | #    | -                                                                                                                                                     | ----  | ----                 | #                                                                                                                                           | #   | #   | #         | #     | #    | #    |
| Rsa1.0_00845.1.g20329.t1 | gb AAF24605.1 AC021046.3 transfactor, putative; 28697-27224 [Arabidopsis thaliana]   gi 119360087 gb ABL66772.1  At1g69580 [Arabidopsis thaliana]                                                                                                                                                                                                                                                                                                                                                                                                                    | 328 | 332  | 1.00E-130 | 101.2 | 78.4 | 86.6 | transfactor, putative; 28697-27224                                                                                                                    | gbpln | Arabidopsis thaliana | AT1G69580.1   Symbols:   Homeodomain-like superfamily protein   chr1:26172127-26173612 FORWARD LENGTH=336                                   | 328 | 336 | 1.00E-133 | 102.4 | 78.4 | 86.6 |
| Rsa1.0_00845.1.g20330.t1 | #                                                                                                                                                                                                                                                                                                                                                                                                                                                                                                                                                                    | #   | #    | #         | #     | #    | #    | -                                                                                                                                                     | ----  | ----                 | #                                                                                                                                           | #   | #   | #         | #     | #    | #    |
| Rsa1.0_00845.1.g20331.t1 | gb EOA33235.1  hypothetical protein CARUB_v10021295mg [Capsella rubella]                                                                                                                                                                                                                                                                                                                                                                                                                                                                                             | 119 | 124  | 2.00E-35  | 104.2 | 66.4 | 78.2 | hypothetical protein CARUB_v10021295mg                                                                                                                | gbpln | Capsella rubella     | AT1G69588.1   Symbols: CLE45   CLAVATA3/ESR-RELATED 45   chr1:26178150-26178524 FORWARD LENGTH=124                                          | 119 | 124 | 2.00E-37  | 104.2 | 62.2 | 80.7 |
| Rsa1.0_00845.1.g20332.t1 | #                                                                                                                                                                                                                                                                                                                                                                                                                                                                                                                                                                    | #   | #    | #         | #     | #    | #    | -                                                                                                                                                     | ----  | ----                 | #                                                                                                                                           | #   | #   | #         | #     | #    | #    |
| Rsa1.0_00845.1.g20333.t1 | gb EOA35643.1  hypothetical protein CARUB_v10020860mg [Capsella rubella]                                                                                                                                                                                                                                                                                                                                                                                                                                                                                             | 231 | 245  | 2.00E-97  | 106.1 | 81.0 | 85.7 | hypothetical protein CARUB_v10020860mg                                                                                                                | gbpln | Capsella rubella     | AT1G69600.1   Symbols: ZFHD1, ATHB29, ZHD11   zinc finger homeodomain 1   chr1:26182470-26183198 FORWARD LENGTH=242                         | 231 | 242 | 3.00E-98  | 104.8 | 77.1 | 81.8 |
| Rsa1.0_00845.1.g20334.t1 | #                                                                                                                                                                                                                                                                                                                                                                                                                                                                                                                                                                    | #   | #    | #         | #     | #    | #    | -                                                                                                                                                     | ----  | ----                 | #                                                                                                                                           | #   | #   | #         | #     | #    | #    |

|                          |                                                                                                                                                                                                                                                                                                                                                                                                                                                 |      |      |           |       |      |      |                                                     |       |                      |                                                                                                                                                                                                                                                                                                                                                                   |      |      |           |       |      |      |
|--------------------------|-------------------------------------------------------------------------------------------------------------------------------------------------------------------------------------------------------------------------------------------------------------------------------------------------------------------------------------------------------------------------------------------------------------------------------------------------|------|------|-----------|-------|------|------|-----------------------------------------------------|-------|----------------------|-------------------------------------------------------------------------------------------------------------------------------------------------------------------------------------------------------------------------------------------------------------------------------------------------------------------------------------------------------------------|------|------|-----------|-------|------|------|
| Rsa1.0_00845.1.g20335.t1 | ref[XP_002887247.1] hypothetical protein ARALYDRAFT_476096 [Arabidopsis lyrata subsp. lyrata] gi 297333038 gb EFH63506.1                                                                                                                                                                                                                                                                                                                        | 117  | 630  | 2.00E-18  | 538.5 | 57.3 | 65.0 | hypothetical protein ARALYDRAFT_476096              | gbpln | Arabidopsis lyrata   | AT1G69610.1   Symbols:   Protein of unknown function (DUF1666)   chr1:26186954-26189349 FORWARD LENGTH=636                                                                                                                                                                                                                                                        | 117  | 636  | 1.00E-17  | 543.6 | 47.0 | 55.6 |
| Rsa1.0_00846.1.g20336.t1 | hypothetical protein ARALYDRAFT_476096 [Arabidopsis lyrata subsp. lyrata]                                                                                                                                                                                                                                                                                                                                                                       | #    | #    | #         | #     | #    | #    | -                                                   | ----  | ----                 | #                                                                                                                                                                                                                                                                                                                                                                 | #    | #    | #         | #     | #    |      |
| Rsa1.0_00846.1.g20337.t3 | gb AAD36950.1 AF069441_10 putative transposon protein [Arabidopsis thaliana] gi 7267183 emb CAB77899.1  putative transposon protein [Arabidopsis thaliana]                                                                                                                                                                                                                                                                                      | 682  | 1011 | 3.00E-19  | 148.2 | 7.8  | 11.3 | putative transposon protein                         | gbpln | Arabidopsis thaliana | AT4G07350.1   Symbols:   unknown protein; BEST Arabidopsis thaliana protein match is: unknown protein (TAIR:AT1G40129.1); Has 30201 Blast hits to 17322 proteins in 780 species: Archae - 12; Bacteria - 1396; Metazoa - 17338; Fungi - 3422; Plants - 5037; Viruses - 0; Other Eukaryotes - 2996 (source: NCBI BLINK).   chr4:4172609-4175227 REVERSE LENGTH=330 | 682  | 330  | 2.00E-19  | 48.4  | 5.6  | 7.5  |
| Rsa1.0_00846.1.g20338.t1 | #                                                                                                                                                                                                                                                                                                                                                                                                                                               | #    | #    | #         | #     | #    | #    | -                                                   | ----  | ----                 | #                                                                                                                                                                                                                                                                                                                                                                 | #    | #    | #         | #     | #    |      |
| Rsa1.0_00846.1.g20339.t1 | gb EOA29932.1  hypothetical protein CARUB_v10013024mg. partial [Capsella rubella]                                                                                                                                                                                                                                                                                                                                                               | 739  | 774  | 0         | 104.7 | 93.1 | 95.5 | hypothetical protein CARUB_v10013024mg. partial     | gbpln | Capsella rubella     | AT2G20000.1   Symbols: HBT, CDC27b   CDC27 family protein   chr2:8632324-8636900 REVERSE LENGTH=744                                                                                                                                                                                                                                                               | 739  | 744  | 0         | 100.7 | 93.1 | 95.4 |
| Rsa1.0_00846.1.g20340.t1 | gb AAD28689.1  putative TNP1-like transposon protein [Arabidopsis thaliana]                                                                                                                                                                                                                                                                                                                                                                     | 280  | 984  | 5.00E-55  | 351.4 | 46.8 | 59.3 | putative TNP1-like transposon protein               | gbpln | Arabidopsis thaliana | #                                                                                                                                                                                                                                                                                                                                                                 | #    | #    | #         | #     | #    |      |
| Rsa1.0_00846.1.g20341.t1 | ref[NP_001077922.1] uncharacterized protein [Arabidopsis thaliana] gi 4580471 gb AAD24395.1  unknown protein [Arabidopsis thaliana] gi 110737370 dbj BAF00630.1  hypothetical protein [Arabidopsis thaliana] gi 330251861 gb AEC06955.1  uncharacterized protein AT2G20010 [Arabidopsis thaliana]                                                                                                                                               | 953  | 952  | 0         | 99.9  | 91.1 | 95.5 | uncharacterized protein                             | gbpln | Arabidopsis thaliana | AT2G20010.2   Symbols:   Protein of unknown function (DUF1810)   chr2:8637977-8641184 REVERSE LENGTH=952                                                                                                                                                                                                                                                          | 953  | 952  | 0         | 99.9  | 91.1 | 95.5 |
| Rsa1.0_00846.1.g20342.t1 | ref[XP_002886005.1] hypothetical protein ARALYDRAFT_480467 [Arabidopsis lyrata subsp. lyrata] gi 297331845 gb EFH62264.1                                                                                                                                                                                                                                                                                                                        | 740  | 700  | 0         | 94.6  | 79.7 | 85.3 | hypothetical protein ARALYDRAFT_480467              | gbpln | Arabidopsis lyrata   | AT2G20020.1   Symbols: CAF1, ATCAF1   RNA-binding CRS1 / YhbY (GRM) domain-containing protein   chr2:8644464-8647090 FORWARD LENGTH=701                                                                                                                                                                                                                           | 740  | 701  | 0         | 94.7  | 77.8 | 83.9 |
| Rsa1.0_00846.1.g20343.t1 | hypothetical protein ARALYDRAFT_480467 [Arabidopsis lyrata subsp. lyrata] ref[NP_179593.1] putative RING-H2 finger protein ATL12 [Arabidopsis thaliana] gi 68565334 sp Q9SL78.1 ATL12, ARAT H RecName: Full=Putative RING-H2 finger protein ATL12; Flags: Precursor gi 4580469 gb AAD24393.1  putative RING zinc finger protein [Arabidopsis thaliana] gi 330251863 gb AEC06957.1  putative RING-H2 finger protein ATL12 [Arabidopsis thaliana] | 390  | 390  | 1.00E-123 | 100.0 | 63.8 | 74.6 | putative RING-H2 finger protein ATL12               | gbpln | Arabidopsis thaliana | AT2G20030.1   Symbols:   RING/U-box superfamily protein   chr2:8647813-8648985 FORWARD LENGTH=390                                                                                                                                                                                                                                                                 | 390  | 390  | 1.00E-125 | 100.0 | 63.8 | 74.6 |
| Rsa1.0_00846.1.g20344.t4 | gb EOA32925.1  hypothetical protein CARUB_v10016251mg [Capsella rubella]                                                                                                                                                                                                                                                                                                                                                                        | 1111 | 1101 | 0         | 99.1  | 88.7 | 92.9 | hypothetical protein CARUB_v10016251mg              | gbpln | Capsella rubella     | AT2G20050.1   Symbols:   protein serine/threonine phosphatases;protein kinases;catalytics;cAMP-dependent protein kinase regulators;ATP binding;protein serine/threonine phosphatases   chr2:8649779-8654193 REVERSE LENGTH=1094                                                                                                                                   | 1111 | 1094 | 0         | 98.5  | 88.0 | 92.5 |
| Rsa1.0_00846.1.g20345.t4 | gb AAC67331.1  putative non-LTR retroelement reverse transcriptase [Arabidopsis thaliana]                                                                                                                                                                                                                                                                                                                                                       | 1564 | 1449 | 5.00E-94  | 92.6  | 16.2 | 25.0 | putative non-LTR retroelement reverse transcriptase | gbpln | Arabidopsis thaliana | AT1G43760.1   Symbols:   DNase I-like superfamily protein   chr1:16528880-16531065 REVERSE LENGTH=626                                                                                                                                                                                                                                                             | 1564 | 626  | 6.00E-60  | 40.0  | 7.7  | 12.9 |
| Rsa1.0_00847.1.g20346.t1 | gb EOA24459.1  hypothetical protein CARUB_v10017716mg [Capsella rubella]                                                                                                                                                                                                                                                                                                                                                                        | 314  | 303  | 8.00E-61  | 96.5  | 52.9 | 64.6 | hypothetical protein CARUB_v10017716mg              | gbpln | Capsella rubella     | AT3G55690.1   Symbols:   unknown protein; BEST Arabidopsis thaliana protein match is: unknown protein (TAIR:AT2G39870.1); Has 76 Blast hits to 69 proteins in 15 species: Archae - 0; Bacteria - 0; Metazoa - 4; Fungi - 3; Plants - 69; Viruses - 0; Other Eukaryotes - 0 (source: NCBI BLINK).   chr3:20667035-20668204 FORWARD LENGTH=293                      | 314  | 293  | 2.00E-56  | 93.3  | 51.0 | 60.5 |
| Rsa1.0_00847.1.g20347.t2 | #                                                                                                                                                                                                                                                                                                                                                                                                                                               | #    | #    | #         | #     | #    | #    | -                                                   | ----  | ----                 | #                                                                                                                                                                                                                                                                                                                                                                 | #    | #    | #         | #     | #    |      |
| Rsa1.0_00847.1.g20348.t1 | ref[XP_002876329.1] hypothetical protein ARALYDRAFT_486006 [Arabidopsis lyrata subsp. lyrata] gi 297322197 gb EFH52588.1  hypothetical protein ARALYDRAFT_486006 [Arabidopsis lyrata subsp. lyrata]                                                                                                                                                                                                                                             | 426  | 438  | 0         | 102.8 | 86.9 | 93.0 | hypothetical protein ARALYDRAFT_486006              | gbpln | Arabidopsis lyrata   | AT3G55720.1   Symbols:   Protein of unknown function (DUF620)   chr3:20679893-20681338 FORWARD LENGTH=438                                                                                                                                                                                                                                                         | 426  | 438  | 0         | 102.8 | 85.0 | 92.5 |



|                          |                                                                                                                                                                                                                                                                                                                                                                                                                                                                                                                                     |     |      |           |       |      |      |                                                                    |             |                      |                                                                                                                                                                                                                                                                                                                                                                                                                                                                                                                                          |     |     |           |       |      |      |
|--------------------------|-------------------------------------------------------------------------------------------------------------------------------------------------------------------------------------------------------------------------------------------------------------------------------------------------------------------------------------------------------------------------------------------------------------------------------------------------------------------------------------------------------------------------------------|-----|------|-----------|-------|------|------|--------------------------------------------------------------------|-------------|----------------------|------------------------------------------------------------------------------------------------------------------------------------------------------------------------------------------------------------------------------------------------------------------------------------------------------------------------------------------------------------------------------------------------------------------------------------------------------------------------------------------------------------------------------------------|-----|-----|-----------|-------|------|------|
| Rsa1.0_00847.1.g20349.t1 | ref NP_180874.1  glycosyl hydrolase and polygalacturonase domain-containing protein [Arabidopsis thaliana]<br>gi 2924778 gb AAC04907.1  putative polygalacturonase [Arabidopsis thaliana]<br>gi 330253698 gb AEC08792.1  glycosyl hydrolase and polygalacturonase domain-containing protein [Arabidopsis thaliana]                                                                                                                                                                                                                  | 155 | 664  | 1.00E-35  | 428.4 | 43.2 | 61.9 | glycosyl hydrolase and polygalacturonase domain-containing protein | gbpln       | Arabidopsis thaliana | AT2G33160.1   Symbols:   glycoside hydrolase family 28 protein / polygalacturonase (pectinase) family protein   chr2:14053404-14056246 FORWARD LENGTH=664                                                                                                                                                                                                                                                                                                                                                                                | 155 | 664 | 4.00E-38  | 428.4 | 43.2 | 61.9 |
| Rsa1.0_00847.1.g20350.t1 | ref NP_191133.1  proline transporter 2 [Arabidopsis thaliana]<br>gi 75220395 sp P92962.1 PROT2_ARATH RecName: Full=Proline transporter 2; Short=AtPROT2<br>gi 1769903 emb CAA65053.1  proline transporter 2 [Arabidopsis thaliana]<br>gi 7263562 emb CAB81599.1  proline transporter 2 [Arabidopsis thaliana]<br>gi 19698891 gb AAL91181.1  proline transporter 2 [Arabidopsis thaliana]<br>gi 31376371 gb AAP49512.1  At3g55740 [Arabidopsis thaliana]<br>gi 332645907 gb AEE79428.1  proline transporter 2 [Arabidopsis thaliana] | 439 | 439  | 0         | 100.0 | 94.1 | 98.4 | proline transporter 2                                              | gbpln       | Arabidopsis thaliana | AT3G55740.1   Symbols: PROT2, ATPROT2   proline transporter 2   chr3:20695786-20698157 FORWARD LENGTH=439                                                                                                                                                                                                                                                                                                                                                                                                                                | 439 | 439 | 0         | 100.0 | 94.1 | 98.4 |
| Rsa1.0_00847.1.g20351.t1 | gb EOA24978.1  hypothetical protein CARUB_v10018275mg [Capsella rubella]                                                                                                                                                                                                                                                                                                                                                                                                                                                            | 111 | 111  | 2.00E-56  | 100.0 | 96.4 | 98.2 | hypothetical protein CARUB_v10018275mg                             | gbpln       | Capsella rubella     | AT1G07070.1   Symbols:   Ribosomal protein L35Ae family protein   chr1:2168652-2169703 FORWARD LENGTH=112                                                                                                                                                                                                                                                                                                                                                                                                                                | 111 | 112 | 1.00E-58  | 100.9 | 93.7 | 99.1 |
| Rsa1.0_00847.1.g20352.t1 | ref XP_003555037.1  PREDICTED: uncharacterized protein LOC100798506 [Glycine max]                                                                                                                                                                                                                                                                                                                                                                                                                                                   | 831 | 1010 | 0         | 121.5 | 53.4 | 67.4 | PREDICTED: uncharacterized protein LOC100798506                    | gbenv/gbpln | Glycine max          | #                                                                                                                                                                                                                                                                                                                                                                                                                                                                                                                                        | #   | #   | #         | #     | #    | #    |
| Rsa1.0_00848.1.g20353.t1 | #                                                                                                                                                                                                                                                                                                                                                                                                                                                                                                                                   | #   | #    | #         | #     | #    | -    | ----                                                               | ----        | #                    | #                                                                                                                                                                                                                                                                                                                                                                                                                                                                                                                                        | #   | #   | #         | #     | #    | #    |
| Rsa1.0_00848.1.g20354.t1 | ref XP_002877042.1  zinc finger family protein [Arabidopsis lyrata subsp. lyrata]<br>gi 297322880 gb EFH53301.1  zinc finger family protein [Arabidopsis lyrata subsp. lyrata]                                                                                                                                                                                                                                                                                                                                                      | 347 | 917  | 1.00E-117 | 264.3 | 78.1 | 85.3 | zinc finger family protein                                         | gbpln       | Arabidopsis lyrata   | AT3G27330.1   Symbols:   zinc finger (C3HC4-type RING finger) family protein   chr3:10116950-10120516 REVERSE LENGTH=913                                                                                                                                                                                                                                                                                                                                                                                                                 | 347 | 913 | 1.00E-119 | 263.1 | 76.7 | 85.3 |
| Rsa1.0_00848.1.g20355.t1 | ref XP_002877042.1  zinc finger family protein [Arabidopsis lyrata subsp. lyrata]<br>gi 297322880 gb EFH53301.1  zinc finger family protein [Arabidopsis lyrata subsp. lyrata]                                                                                                                                                                                                                                                                                                                                                      | 543 | 917  | 0         | 168.9 | 82.9 | 92.3 | zinc finger family protein                                         | gbpln       | Arabidopsis lyrata   | AT3G27330.1   Symbols:   zinc finger (C3HC4-type RING finger) family protein   chr3:10116950-10120516 REVERSE LENGTH=913                                                                                                                                                                                                                                                                                                                                                                                                                 | 543 | 913 | 0         | 168.1 | 82.3 | 91.5 |
| Rsa1.0_00848.1.g20356.t1 | gb EOA24915.1  hypothetical protein CARUB_v10018206mg [Capsella rubella]                                                                                                                                                                                                                                                                                                                                                                                                                                                            | 141 | 142  | 5.00E-65  | 100.7 | 86.5 | 91.5 | hypothetical protein CARUB_v10018206mg                             | gbpln       | Capsella rubella     | AT3G27340.1   Symbols:   FUNCTIONS IN: molecular.function unknown; INVOLVED IN: oxidation reduction; EXPRESSED IN: 23 plant structures; EXPRESSED DURING: 15 growth stages; CONTAINS InterPro DOMAIN/s: Gamma-butYROBETAINE dioxygenase/Trimethyllysine dioxygenase, N-terminal (InterPro:IPR010376); Has 1035 Blast hits to 1035 proteins in 399 species: Archae - 0; Bacteria - 765; Metazoa - 0; Fungi - 0; Plants - 39; Viruses - 0; Other Eukaryotes - 231 (source: NCBI BLINK).   chr3:10121303-10122692 FORWARD LENGTH=141        | 141 | 141 | 3.00E-67  | 100.0 | 86.5 | 92.2 |
| Rsa1.0_00848.1.g20357.t1 | ref NP_566816.1  uncharacterized protein [Arabidopsis thaliana]<br>gi 7939507 dbj BAA95710.1  unnamed protein product [Arabidopsis thaliana]<br>gi 19423986 gb AAL87277.1  unknown protein [Arabidopsis thaliana]<br>gi 21281155 gb AAM45003.1  unknown protein [Arabidopsis thaliana]<br>gi 332643784 gb AEE77305.1  uncharacterized protein AT3G27350 [Arabidopsis thaliana]                                                                                                                                                      | 282 | 274  | 1.00E-83  | 97.2  | 64.9 | 73.4 | uncharacterized protein                                            | gbpln       | Arabidopsis thaliana | AT3G27350.1   Symbols:   unknown protein; FUNCTIONS IN: molecular.function unknown; INVOLVED IN: biological.process unknown; LOCATED IN: plasma membrane; EXPRESSED IN: 24 plant structures; EXPRESSED DURING: 15 growth stages; BEST Arabidopsis thaliana protein match is: unknown protein (TAIR:AT5G40700.1); Has 230 Blast hits to 202 proteins in 35 species: Archae - 0; Bacteria - 3; Metazoa - 77; Fungi - 4; Plants - 130; Viruses - 0; Other Eukaryotes - 16 (source: NCBI BLINK).   chr3:10126238-10127600 FORWARD LENGTH=274 | 282 | 274 | 3.00E-86  | 97.2  | 64.9 | 73.4 |
| Rsa1.0_00848.1.g20358.t1 | dbj BAJ34353.1  unnamed protein product [Theilungiella halophila]                                                                                                                                                                                                                                                                                                                                                                                                                                                                   | 223 | 279  | 3.00E-67  | 125.1 | 64.6 | 69.1 | unnamed protein product                                            | ----        | ----                 | AT3G27380.2   Symbols: SDH2-1   succinate dehydrogenase 2-1   chr3:10131209-10132673 REVERSE LENGTH=279                                                                                                                                                                                                                                                                                                                                                                                                                                  | 223 | 279 | 2.00E-68  | 125.1 | 63.7 | 69.5 |

|                          |                                                                                                                                                                                                                                                                                          |     |     |           |       |      |      |                                                 |       |                      |                                                                                                                                                                                                                                                                                                                                                                                                                                                                                                                                       |     |     |           |       |      |      |
|--------------------------|------------------------------------------------------------------------------------------------------------------------------------------------------------------------------------------------------------------------------------------------------------------------------------------|-----|-----|-----------|-------|------|------|-------------------------------------------------|-------|----------------------|---------------------------------------------------------------------------------------------------------------------------------------------------------------------------------------------------------------------------------------------------------------------------------------------------------------------------------------------------------------------------------------------------------------------------------------------------------------------------------------------------------------------------------------|-----|-----|-----------|-------|------|------|
| Rsa1.0_00848.1.g20359.t1 | refNP_189375.2  uncharacterized protein [Arabidopsis thaliana] gi 332278120 sp Q8GUM4.2 Y3739_ARA TH RecName: Full=Uncharacterized membrane protein At3g27390 gi 332643790 gb AAE77311.1  uncharacterized protein AT3G27390 [Arabidopsis thaliana]                                       | 602 | 588 | 0         | 97.7  | 72.8 | 82.4 | uncharacterized protein                         | gbpln | Arabidopsis thaliana | AT3G27390.1   Symbols:   unknown protein; FUNCTIONS IN: molecular_function unknown; INVOLVED IN: biological_process unknown; LOCATED IN: plasma membrane; EXPRESSED IN: 23 plant structures; EXPRESSED DURING: 13 growth stages; BEST Arabidopsis thaliana protein match is: unknown protein (TAIR:AT5G40640.1); Has 101 Blast hits to 99 proteins in 12 species: Archae - 0; Bacteria - 0; Metazoa - 0; Fungi - 0; Plants - 101; Viruses - 0; Other Eukaryotes - 0 (source: NCBI BLink).   chr3:10133372-10136111 REVERSE LENGTH=588 | 602 | 588 | 0         | 97.7  | 72.8 | 82.4 |
| Rsa1.0_00848.1.g20360.t1 | refNP_189376.1  pectate lyase [Arabidopsis thaliana] gi 378405210 sp Q9LTZ0.2 PLY11_ARAT H RecName: Full=Putative pectate lyase 11; Flags: Precursor gi 332643791 gb AAE77312.1  putative pectate lyase 11 [Arabidopsis thaliana]                                                        | 412 | 412 | 0         | 100.0 | 92.7 | 95.9 | pectate lyase                                   | gbpln | Arabidopsis thaliana | AT3G27400.1   Symbols:   Pectin lyase-like superfamily protein   chr3:10140323-10143023 FORWARD LENGTH=412                                                                                                                                                                                                                                                                                                                                                                                                                            | 412 | 412 | 0         | 100.0 | 92.7 | 95.9 |
| Rsa1.0_00848.1.g20361.t1 | refNP_189377.1  uncharacterized protein [Arabidopsis thaliana] gi 7939513 dbj BAA95716.1  unnamed protein product [Arabidopsis thaliana] gi 67633670 gb AAAY78759.1  unknown [Arabidopsis thaliana] gi 332643792 gb AAE77313.1  uncharacterized protein AT3G27410 [Arabidopsis thaliana] | 125 | 132 | 2.00E-22  | 105.6 | 61.6 | 71.2 | uncharacterized protein                         | gbpln | Arabidopsis thaliana | AT3G27410.1   Symbols:   unknown protein; Has 10 Blast hits to 10 proteins in 2 species: Archae - 0; Bacteria - 0; Metazoa - 0; Fungi - 0; Plants - 10; Viruses - 0; Other Eukaryotes - 0 (source: NCBI BLink).   chr3:10145244-10145642 REVERSE LENGTH=132                                                                                                                                                                                                                                                                           | 125 | 132 | 3.00E-25  | 105.6 | 61.6 | 71.2 |
| Rsa1.0_00848.1.g20362.t1 | refXP_002875383.1  hypothetical protein ARALYDRAFT_484531 [Arabidopsis lyrata subsp. lyrata] gi 297321221 gb EFH51642.1  hypothetical protein ARALYDRAFT_484531 [Arabidopsis lyrata subsp. lyrata]                                                                                       | 205 | 177 | 9.00E-37  | 86.3  | 63.4 | 68.3 | hypothetical protein ARALYDRAFT_484531          | gbpln | Arabidopsis lyrata   | AT3G27415.1   Symbols:   unknown protein; FUNCTIONS IN: molecular_function unknown; INVOLVED IN: biological_process unknown; LOCATED IN: cellular_component unknown; Has 30201 Blast hits to 17322 proteins in 780 species: Archae - 12; Bacteria - 1396; Metazoa - 17338; Fungi - 3422; Plants - 5037; Viruses - 0; Other Eukaryotes - 2996 (source: NCBI BLink).   chr3:10147375-10147902 FORWARD LENGTH=175                                                                                                                        | 205 | 175 | 2.00E-37  | 85.4  | 60.0 | 66.8 |
| Rsa1.0_00848.1.g20363.t1 | refXP_002875384.1  hypothetical protein ARALYDRAFT_322871 [Arabidopsis lyrata subsp. lyrata] gi 297321222 gb EFH51643.1  hypothetical protein ARALYDRAFT_322871 [Arabidopsis lyrata subsp. lyrata]                                                                                       | 242 | 243 | 2.00E-71  | 100.4 | 63.2 | 77.3 | hypothetical protein ARALYDRAFT_322871          | gbpln | Arabidopsis lyrata   | AT3G27420.1   Symbols:   unknown protein; BEST Arabidopsis thaliana protein match is: unknown protein (TAIR:AT5G40600.1); Has 43 Blast hits to 43 proteins in 15 species: Archae - 0; Bacteria - 0; Metazoa - 3; Fungi - 0; Plants - 39; Viruses - 0; Other Eukaryotes - 1 (source: NCBI BLink).   chr3:10148949-10150139 FORWARD LENGTH=244                                                                                                                                                                                          | 242 | 244 | 6.00E-68  | 100.8 | 57.9 | 74.0 |
| Rsa1.0_00848.1.g20364.t1 | refXP_002875387.1  hypothetical protein ARALYDRAFT_904988 [Arabidopsis lyrata subsp. lyrata] gi 297321225 gb EFH51646.1  hypothetical protein ARALYDRAFT_904988 [Arabidopsis lyrata subsp. lyrata]                                                                                       | 273 | 273 | 1.00E-154 | 100.0 | 96.3 | 98.5 | hypothetical protein ARALYDRAFT_904988          | gbpln | Arabidopsis lyrata   | AT3G27430.2   Symbols: PBB1   N-terminal nucleophile aminohydrolases (Ntn hydrolases) superfamily protein   chr3:10152910-10155052 FORWARD LENGTH=273                                                                                                                                                                                                                                                                                                                                                                                 | 273 | 273 | 1.00E-156 | 100.0 | 96.0 | 98.5 |
| Rsa1.0_00848.1.g20365.t2 | refXP_002882056.1  TGF-beta receptor interacting protein 1 [Arabidopsis lyrata subsp. lyrata] gi 297327895 gb EFH58315.1  TGF-beta receptor interacting protein 1 [Arabidopsis lyrata subsp. lyrata]                                                                                     | 343 | 328 | 1.00E-167 | 95.6  | 82.8 | 90.1 | TGF-beta receptor interacting protein 1         | gbpln | Arabidopsis lyrata   | AT2G46290.1   Symbols:   Transducin/WD40 repeat-like superfamily protein   chr2:19005910-19007797 REVERSE LENGTH=355                                                                                                                                                                                                                                                                                                                                                                                                                  | 343 | 355 | 1.00E-167 | 103.5 | 81.6 | 90.4 |
| Rsa1.0_00848.1.g20366.t1 | refXP_002877057.1  hypothetical protein ARALYDRAFT_484543 [Arabidopsis lyrata subsp. lyrata] gi 297322895 gb EFH53316.1  hypothetical protein ARALYDRAFT_484543 [Arabidopsis lyrata subsp. lyrata]                                                                                       | 917 | 914 | 0         | 99.7  | 88.7 | 94.0 | hypothetical protein ARALYDRAFT_484543          | gbpln | Arabidopsis lyrata   | AT3G27530.1   Symbols: GC6, MAG4   golgin candidate 6   chr3:10193778-10199659 REVERSE LENGTH=914                                                                                                                                                                                                                                                                                                                                                                                                                                     | 917 | 914 | 0         | 99.7  | 88.3 | 93.5 |
| Rsa1.0_00848.1.g20367.t1 | gb EOA23738.1  hypothetical protein CARUB_v10016951mg, partial [Capsella rubella]                                                                                                                                                                                                        | 533 | 556 | 0         | 104.3 | 86.1 | 90.1 | hypothetical protein CARUB_v10016951mg, partial | gbpln | Capsella rubella     | AT3G27550.1   Symbols:   RNA-binding CRS1 / YhbY (CRM) domain protein   chr3:10208010-10209899 REVERSE LENGTH=491                                                                                                                                                                                                                                                                                                                                                                                                                     | 533 | 491 | 0         | 92.1  | 77.1 | 80.7 |
| Rsa1.0_00848.1.g20368.t1 | refXP_002877060.1  AT3g27570/MMJ24.12 [Arabidopsis lyrata subsp. lyrata] gi 297322898 gb EFH53319.1  AT3g27570/MMJ24.12 [Arabidopsis lyrata subsp. lyrata]                                                                                                                               | 365 | 339 | 1.00E-159 | 92.9  | 79.7 | 84.9 | AT3g27570/MMJ24.12                              | gbpln | Arabidopsis lyrata   | AT3G27570.1   Symbols:   Sucrase/ferredoxin-like family protein   chr3:10214276-10216681 REVERSE LENGTH=379                                                                                                                                                                                                                                                                                                                                                                                                                           | 365 | 379 | 1.00E-157 | 103.8 | 79.7 | 84.7 |

|                           |                                                                                                                                                                                                                                                                                                                                                                                                                                                            |      |      |           |       |      |      |                                                              |       |                      |                                                                                                                                      |      |      |           |       |      |      |
|---------------------------|------------------------------------------------------------------------------------------------------------------------------------------------------------------------------------------------------------------------------------------------------------------------------------------------------------------------------------------------------------------------------------------------------------------------------------------------------------|------|------|-----------|-------|------|------|--------------------------------------------------------------|-------|----------------------|--------------------------------------------------------------------------------------------------------------------------------------|------|------|-----------|-------|------|------|
| Rsa1.0_00848.1.g20369.t13 | ref XP_002519722.1  hypothetical protein RCOM_0633850 [Ricinus communis] gi 223541139 gb IEEF42695.1  hypothetical protein RCOM_0633850 [Ricinus communis]                                                                                                                                                                                                                                                                                                 | 198  | 216  | 1.00E-12  | 109.1 | 21.2 | 28.3 | hypothetical protein RCOM_0633850                            | gbpln | Ricinus communis     | AT1G78520.1   Symbols:   Carbohydrate-binding X8 domain superfamily protein   chr1:29537976-29538656 REVERSE LENGTH=115              | 198  | 115  | 9.00E-12  | 58.1  | 17.2 | 23.7 |
| Rsa1.0_00848.1.g20370.t1  | gb EOA11936.1  hypothetical protein CARUB_v10016547mg, partial [Capsella rubella]                                                                                                                                                                                                                                                                                                                                                                          | 110  | 149  | 1.00E-20  | 135.5 | 40.9 | 61.8 | hypothetical protein CARUB_v10016547mg, partial              | gbpln | Capsella rubella     | #                                                                                                                                    | #    | #    | #         | #     | #    | #    |
| Rsa1.0_00848.1.g20371.t1  | gb EOA25550.1  hypothetical protein CARUB_v10018895mg [Capsella rubella]                                                                                                                                                                                                                                                                                                                                                                                   | 408  | 362  | 0         | 88.7  | 75.2 | 79.2 | hypothetical protein CARUB_v10018895mg                       | gbpln | Capsella rubella     | AT3G27950.1   Symbols:   GDSL-like Lipase/Acylhydrolase superfamily protein   chr3:10378048-10379771 FORWARD LENGTH=361              | 408  | 361  | 1.00E-180 | 88.5  | 74.3 | 77.5 |
| Rsa1.0_00848.1.g20372.t1  | #                                                                                                                                                                                                                                                                                                                                                                                                                                                          | #    | #    | #         | #     | #    | -    | ----                                                         | ----  | ----                 | #                                                                                                                                    | #    | #    | #         | #     | #    | #    |
| Rsa1.0_00848.1.g20373.t1  | gb AAD32898.1  putative retroelement pol polyprotein [Arabidopsis thaliana]                                                                                                                                                                                                                                                                                                                                                                                | 1355 | 1307 | 0         | 96.5  | 61.9 | 75.1 | putative retroelement pol polyprotein                        | gbpln | Arabidopsis thaliana | AT4G23160.1   Symbols: CRK8   cysteine-rich RLK (RECEPTOR-like protein kinase) 8   chr4:12129485-12134086 FORWARD LENGTH=1262        | 1355 | 1262 | 1.00E-102 | 93.1  | 14.5 | 22.7 |
| Rsa1.0_00849.1.g20374.t1  | #                                                                                                                                                                                                                                                                                                                                                                                                                                                          | #    | #    | #         | #     | #    | -    | ----                                                         | ----  | ----                 | #                                                                                                                                    | #    | #    | #         | #     | #    | #    |
| Rsa1.0_00849.1.g20375.t1  | #                                                                                                                                                                                                                                                                                                                                                                                                                                                          | #    | #    | #         | #     | #    | -    | ----                                                         | ----  | ----                 | #                                                                                                                                    | #    | #    | #         | #     | #    | #    |
| Rsa1.0_00849.1.g20376.t1  | gb AAD17414.1  copia-like retroelement pol polyprotein [Arabidopsis thaliana]                                                                                                                                                                                                                                                                                                                                                                              | 557  | 1166 | 1.00E-168 | 209.3 | 54.8 | 67.1 | copia-like retroelement pol polyprotein                      | gbpln | Arabidopsis thaliana | AT4G23160.1   Symbols: CRK8   cysteine-rich RLK (RECEPTOR-like protein kinase) 8   chr4:12129485-12134086 FORWARD LENGTH=1262        | 557  | 1262 | 1.00E-49  | 226.6 | 20.1 | 30.3 |
| Rsa1.0_00849.1.g20377.t1  | ref NP_567451.1  membrane-associated progesterone binding protein 4 [Arabidopsis thaliana] gi 87116572 gb ABD19650.1  At4g14965 [Arabidopsis thaliana] gi 110738784 dbj BAF01315.1  hypothetical protein [Arabidopsis thaliana] gi 332658131 gb AEE83531.1  membrane-associated progesterone binding protein 4 [Arabidopsis thaliana]                                                                                                                      | 346  | 245  | 1.00E-118 | 70.8  | 59.5 | 62.1 | membrane-associated progesterone binding protein 4           | gbpln | Arabidopsis thaliana | AT4G14965.1   Symbols: AtMAPR4, MAPR4   membrane-associated progesterone binding protein 4   chr4:8551356-8553368 FORWARD LENGTH=245 | 346  | 245  | 1.00E-120 | 70.8  | 59.5 | 62.1 |
| Rsa1.0_00849.1.g20378.t1  | gb EOA20910.1  hypothetical protein CARUB_v10001245mg [Capsella rubella]                                                                                                                                                                                                                                                                                                                                                                                   | 123  | 361  | 1.00E-22  | 293.5 | 46.3 | 52.0 | hypothetical protein CARUB_v10001245mg                       | gbpln | Capsella rubella     | AT5G01160.1   Symbols:   RING/U-box superfamily protein   chr5:54280-55727 FORWARD LENGTH=360                                        | 123  | 360  | 8.00E-25  | 292.7 | 45.5 | 53.7 |
| Rsa1.0_00849.1.g20379.t1  | ref NP_187840.7  FKBP-like peptidyl-prolyl cis-trans isomerase family protein [Arabidopsis thaliana] gi 380876925 sp F4J9Q6.1 FKB43_ARAT H RecName: Full=Peptidyl-prolyl cis-trans isomerase FKBP43; Short=PPase FKBP43; AltName: Full=FK506-binding protein 43; Short=AtFKBP43; AltName: Full=Immunophilin FKBP43; AltName: Full=Rotamase gi 332641663 gb AEE75184.1  FKBP-like peptidyl-prolyl cis-trans isomerase family protein [Arabidopsis thaliana] | 444  | 499  | 1.00E-123 | 112.4 | 64.9 | 77.9 | FKBP-like peptidyl-prolyl cis-trans isomerase family protein | gbpln | Arabidopsis thaliana | AT3G12340.1   Symbols:   FKBP-like peptidyl-prolyl cis-trans isomerase family protein   chr3:3925720-3929346 REVERSE LENGTH=499      | 444  | 499  | 1.00E-126 | 112.4 | 64.9 | 77.9 |
| Rsa1.0_00849.1.g20380.t1  | #                                                                                                                                                                                                                                                                                                                                                                                                                                                          | #    | #    | #         | #     | #    | -    | ----                                                         | ----  | ----                 | #                                                                                                                                    | #    | #    | #         | #     | #    | #    |
| Rsa1.0_00849.1.g20381.t1  | gb EOA33021.1  hypothetical protein CARUB_v10016352mg, partial [Capsella rubella]                                                                                                                                                                                                                                                                                                                                                                          | 790  | 886  | 1.00E-101 | 112.2 | 22.9 | 32.2 | hypothetical protein CARUB_v10016352mg, partial              | gbpln | Capsella rubella     | AT1G64260.1   Symbols:   MuDR family transposase   chr1:23847756-23849915 FORWARD LENGTH=719                                         | 790  | 719  | 1.00E-28  | 91.0  | 12.7 | 22.0 |
| Rsa1.0_00849.1.g20382.t1  | gb EOA13348.1  hypothetical protein CARUB_v10026382mg [Capsella rubella]                                                                                                                                                                                                                                                                                                                                                                                   | 271  | 453  | 2.00E-12  | 167.2 | 22.5 | 38.0 | hypothetical protein CARUB_v10026382mg                       | gbpln | Capsella rubella     | #                                                                                                                                    | #    | #    | #         | #     | #    | #    |
| Rsa1.0_00849.1.g20383.t1  | #                                                                                                                                                                                                                                                                                                                                                                                                                                                          | #    | #    | #         | #     | #    | -    | ----                                                         | ----  | ----                 | #                                                                                                                                    | #    | #    | #         | #     | #    | #    |
| Rsa1.0_00849.1.g20384.t1  | #                                                                                                                                                                                                                                                                                                                                                                                                                                                          | #    | #    | #         | #     | #    | -    | ----                                                         | ----  | ----                 | #                                                                                                                                    | #    | #    | #         | #     | #    | #    |
| Rsa1.0_00849.1.g20385.t3  | #                                                                                                                                                                                                                                                                                                                                                                                                                                                          | #    | #    | #         | #     | #    | -    | ----                                                         | ----  | ----                 | #                                                                                                                                    | #    | #    | #         | #     | #    | #    |
| Rsa1.0_00849.1.g20386.t1  | #                                                                                                                                                                                                                                                                                                                                                                                                                                                          | #    | #    | #         | #     | #    | -    | ----                                                         | ----  | ----                 | #                                                                                                                                    | #    | #    | #         | #     | #    | #    |
| Rsa1.0_00849.1.g20387.t1  | gb ABD65162.1  hypothetical protein 40.t00047 [Brassica oleracea]                                                                                                                                                                                                                                                                                                                                                                                          | 165  | 203  | 2.00E-45  | 123.0 | 55.2 | 67.3 | hypothetical protein 40.t00047                               | gbpln | Brassica oleracea    | #                                                                                                                                    | #    | #    | #         | #     | #    | #    |
| Rsa1.0_00849.1.g20388.t1  | #                                                                                                                                                                                                                                                                                                                                                                                                                                                          | #    | #    | #         | #     | #    | -    | ----                                                         | ----  | ----                 | #                                                                                                                                    | #    | #    | #         | #     | #    | #    |
| Rsa1.0_00849.1.g20389.t1  | #                                                                                                                                                                                                                                                                                                                                                                                                                                                          | #    | #    | #         | #     | #    | -    | ----                                                         | ----  | ----                 | #                                                                                                                                    | #    | #    | #         | #     | #    | #    |
| Rsa1.0_00849.1.g20390.t6  | emb CCD74471.1  myosin heavy chain-like protein [Arabidopsis halleri subsp. halleri]                                                                                                                                                                                                                                                                                                                                                                       | 511  | 788  | 2.00E-22  | 154.2 | 11.7 | 18.2 | myosin heavy chain-like protein                              | gbpln | Arabidopsis halleri  | AT4G03830.1   Symbols:   Protein of unknown function, DUF601   chr4:1790440-1792458 FORWARD LENGTH=578                               | 511  | 578  | 5.00E-22  | 113.1 | 11.5 | 17.6 |
| Rsa1.0_00849.1.g20391.t1  | gb AAD28663.1  hypothetical protein [Arabidopsis thaliana]                                                                                                                                                                                                                                                                                                                                                                                                 | 318  | 356  | 7.00E-18  | 111.9 | 27.0 | 42.8 | hypothetical protein                                         | gbpln | Arabidopsis thaliana | #                                                                                                                                    | #    | #    | #         | #     | #    | #    |
| Rsa1.0_00849.1.g20392.t1  | gb ABW81018.1  gag-pol polymerase [Arabidopsis lyrata subsp. lyrata]                                                                                                                                                                                                                                                                                                                                                                                       | 700  | 672  | 6.00E-51  | 96.0  | 19.9 | 32.9 | gag-pol polymerase                                           | gbpln | Arabidopsis lyrata   | #                                                                                                                                    | #    | #    | #         | #     | #    | #    |
| Rsa1.0_00849.1.g20393.t1  | gb AAF79618.1 AC027665_19 F5M15.26 [Arabidopsis thaliana]                                                                                                                                                                                                                                                                                                                                                                                                  | 630  | 1838 | 9.00E-76  | 291.7 | 24.0 | 30.3 | F5M15.26                                                     | gbpln | Arabidopsis thaliana | #                                                                                                                                    | #    | #    | #         | #     | #    | #    |
| Rsa1.0_00849.1.g20394.t1  | #                                                                                                                                                                                                                                                                                                                                                                                                                                                          | #    | #    | #         | #     | #    | -    | ----                                                         | ----  | ----                 | #                                                                                                                                    | #    | #    | #         | #     | #    | #    |

|                           |                                                                                                                                                                                                                                                                                                                                      |      |      |           |       |      |      |                                                     |       |                      |                                                                                                                                                                                                                                                                                                                                                                                                                           |      |      |           |       |      |      |
|---------------------------|--------------------------------------------------------------------------------------------------------------------------------------------------------------------------------------------------------------------------------------------------------------------------------------------------------------------------------------|------|------|-----------|-------|------|------|-----------------------------------------------------|-------|----------------------|---------------------------------------------------------------------------------------------------------------------------------------------------------------------------------------------------------------------------------------------------------------------------------------------------------------------------------------------------------------------------------------------------------------------------|------|------|-----------|-------|------|------|
| Rsa1.0_00850.1.g20395.t1  | dbj BAB02259.1  retroelement pol polyprotein-like [Arabidopsis thaliana]                                                                                                                                                                                                                                                             | 397  | 777  | 9.00E-58  | 195.7 | 34.3 | 45.1 | retroelement pol polyprotein-like                   | gbpln | Arabidopsis thaliana | #                                                                                                                                                                                                                                                                                                                                                                                                                         | #    | #    | #         | #     | #    |      |
| Rsa1.0_00850.1.g20396.t1  | #                                                                                                                                                                                                                                                                                                                                    | #    | #    | #         | #     | #    | -    | -                                                   | ----  | ----                 | #                                                                                                                                                                                                                                                                                                                                                                                                                         | #    | #    | #         | #     | #    |      |
| Rsa1.0_00850.1.g20397.t13 | gb AAD21778.1  putative non-LTR retroelement reverse transcriptase [Arabidopsis thaliana]                                                                                                                                                                                                                                            | 214  | 1715 | 1.00E-40  | 801.4 | 37.9 | 58.4 | putative non-LTR retroelement reverse transcriptase | gbpln | Arabidopsis thaliana | AT2G02650.1   Symbols:   Ribonuclease H-like superfamily protein   chr2:735411-736546 FORWARD LENGTH=365                                                                                                                                                                                                                                                                                                                  | 214  | 365  | 8.00E-39  | 170.6 | 37.4 | 55.6 |
| Rsa1.0_00850.1.g20398.t2  | ref NP_198930.1  Myosin heavy chain-related protein [Arabidopsis thaliana] gi 9759160 dbj BAB09716.1  unnamed protein product [Arabidopsis thaliana] gi 332007262 gb AED94645.1  Myosin heavy chain-related protein [Arabidopsis thaliana]                                                                                           | 873  | 983  | 0         | 112.6 | 78.4 | 88.3 | Myosin heavy chain-related protein                  | gbpln | Arabidopsis thaliana | AT5G41140.1   Symbols:   Myosin heavy chain-related protein   chr5:16468726-16472546 FORWARD LENGTH=983                                                                                                                                                                                                                                                                                                                   | 873  | 983  | 0         | 112.6 | 78.4 | 88.3 |
| Rsa1.0_00850.1.g20399.t1  | #                                                                                                                                                                                                                                                                                                                                    | #    | #    | #         | #     | #    | -    | -                                                   | ----  | ----                 | #                                                                                                                                                                                                                                                                                                                                                                                                                         | #    | #    | #         | #     | #    |      |
| Rsa1.0_00850.1.g20400.t1  | emb CAB46043.1  retrotransposon like protein [Arabidopsis thaliana] gi 7268438 emb CAB80958.1  retrotransposon like protein [Arabidopsis thaliana]                                                                                                                                                                                   | 1372 | 1474 | 0         | 107.4 | 56.6 | 70.3 | retrotransposon like protein                        | gbpln | Arabidopsis thaliana | AT4G23160.1   Symbols: CRK8   cysteine-rich RLK (RECEPTOR-like protein kinase) 8   chr4:12129485-12134086 FORWARD LENGTH=1262                                                                                                                                                                                                                                                                                             | 1372 | 1262 | 2.00E-83  | 92.0  | 11.1 | 16.0 |
| Rsa1.0_00850.1.g20401.t1  | ref NP_198929.2  Esterase/lipase/thioesterase-containing protein [Arabidopsis thaliana] gi 110737476 dbj BAF00681.1  hypothetical protein [Arabidopsis thaliana] gi 332007260 gb AED94643.1  Esterase/lipase/thioesterase-containing protein [Arabidopsis thaliana]                                                                  | 689  | 688  | 0         | 99.9  | 78.7 | 86.2 | Esterase/lipase/thioesterase-containing protein     | gbpln | Arabidopsis thaliana | AT5G41130.1   Symbols:   Esterase/lipase/thioesterase family protein   chr5:16459714-16463241 REVERSE LENGTH=688                                                                                                                                                                                                                                                                                                          | 689  | 688  | 0         | 99.9  | 78.7 | 86.2 |
| Rsa1.0_00850.1.g20402.t2  | ref NP_198927.1  uncharacterized protein [Arabidopsis thaliana] gi 9759157 dbj BAB09713.1  unnamed protein product [Arabidopsis thaliana] gi 332007257 gb AED94640.1  uncharacterized protein AT5G41110 [Arabidopsis thaliana]                                                                                                       | 962  | 621  | 0         | 64.6  | 41.2 | 45.7 | uncharacterized protein                             | gbpln | Arabidopsis thaliana | AT5G41110.1   Symbols:   unknown protein; INVOLVED IN: biological process unknown; LOCATED IN: chloroplast; BEST Arabidopsis thaliana protein match is: unknown protein (TAIRAT3G26890.5); Has 1807 Blast hits to 1807 proteins in 277 species: Archae - 0; Bacteria - 0; Metazoa - 736; Fungi - 347; Plants - 385; Viruses - 0; Other Eukaryotes - 339 (source: NCBI BLINK).   chr5:16452598-16454989 FORWARD LENGTH=621 | 962  | 621  | 0         | 64.6  | 41.2 | 45.7 |
| Rsa1.0_00851.1.g20403.t1  | ref XP_002874617.1  hypothetical protein ARALYDRAFT_911322 [Arabidopsis lyrata subsp. lyrata] gi 297320454 gb EFH50876.1  hypothetical protein ARALYDRAFT_911322 [Arabidopsis lyrata subsp. lyrata]                                                                                                                                  | 138  | 140  | 2.00E-55  | 101.4 | 84.8 | 92.0 | hypothetical protein ARALYDRAFT_911322              | gbpln | Arabidopsis lyrata   | AT4G10280.1   Symbols:   RmlC-like cupins superfamily protein   chr4:6375220-6375996 REVERSE LENGTH=140                                                                                                                                                                                                                                                                                                                   | 138  | 140  | 6.00E-58  | 101.4 | 85.5 | 91.3 |
| Rsa1.0_00851.1.g20404.t1  | ref XP_002874614.1  predicted protein [Arabidopsis lyrata subsp. lyrata] gi 297320451 gb EFH50873.1  predicted protein [Arabidopsis lyrata subsp. lyrata]                                                                                                                                                                            | 323  | 324  | 1.00E-179 | 100.3 | 95.7 | 98.1 | predicted protein                                   | gbpln | Arabidopsis lyrata   | AT4G10260.1   Symbols:   pfkB-like carbohydrate kinase family protein   chr4:6371486-6372770 REVERSE LENGTH=324                                                                                                                                                                                                                                                                                                           | 323  | 324  | 0         | 100.3 | 95.0 | 97.8 |
| Rsa1.0_00851.1.g20405.t1  | gb AEL00035.1  HSP22 [Raphanus sativus]                                                                                                                                                                                                                                                                                              | 197  | 197  | 1.00E-104 | 100.0 | 97.0 | 98.5 | HSP22                                               | gbpln | Raphanus sativus     | AT4G10250.1   Symbols: ATHSP22.0   HSP20-like chaperones superfamily protein   chr4:6370637-6371124 FORWARD LENGTH=195                                                                                                                                                                                                                                                                                                    | 197  | 195  | 3.00E-95  | 99.0  | 89.8 | 92.9 |
| Rsa1.0_00851.1.g20406.t1  | gb EOA22704.1  hypothetical protein CARUB_v10003410mg [Capsella rubella]                                                                                                                                                                                                                                                             | 564  | 539  | 0         | 95.6  | 85.3 | 90.6 | hypothetical protein CARUB_v10003410mg              | gbpln | Capsella rubella     | AT4G10180.1   Symbols: DET1, FUS2, ATDET1   light-mediated development protein 1 / deetiolated1 (DET1)   chr4:6346543-6349146 FORWARD LENGTH=543                                                                                                                                                                                                                                                                          | 564  | 543  | 0         | 96.3  | 85.6 | 91.0 |
| Rsa1.0_00851.1.g20407.t1  | gb EOA21398.1  hypothetical protein CARUB_v10001766mg [Capsella rubella] gi 482557207 gb EOA21399.1  hypothetical protein CARUB_v10001766mg [Capsella rubella]                                                                                                                                                                       | 248  | 257  | 1.00E-105 | 103.6 | 81.5 | 89.9 | hypothetical protein CARUB_v10001766mg              | gbpln | Capsella rubella     | AT4G10170.2   Symbols:   SNARE-like superfamily protein   chr4:6344587-6345351 FORWARD LENGTH=254                                                                                                                                                                                                                                                                                                                         | 248  | 254  | 1.00E-102 | 102.4 | 77.4 | 86.7 |
| Rsa1.0_00851.1.g20408.t1  | gb EOA11936.1  hypothetical protein CARUB_v10016547mg, partial [Capsella rubella]                                                                                                                                                                                                                                                    | 116  | 149  | 2.00E-24  | 128.4 | 43.1 | 62.1 | hypothetical protein CARUB_v10016547mg, partial     | gbpln | Capsella rubella     | AT2G34320.1   Symbols:   Polynucleotidyl transferase, ribonuclease H-like superfamily protein   chr2:14484959-14485837 FORWARD LENGTH=292                                                                                                                                                                                                                                                                                 | 116  | 292  | 4.00E-11  | 251.7 | 31.0 | 49.1 |
| Rsa1.0_00851.1.g20409.t1  | ref NP_567350.1  protein phosphatase methyltransferase 1 [Arabidopsis thaliana] gi 14423412 gb AAK62388.1 AF386943.1 lipase-like protein [Arabidopsis thaliana] gi 20148343 gb AAM10062.1  lipase-like protein [Arabidopsis thaliana] gi 332657433 gb AEE82833.1  esterase/lipase/thioesterase family protein [Arabidopsis thaliana] | 368  | 350  | 1.00E-178 | 95.1  | 85.1 | 89.7 | protein phosphatase methyltransferase 1             | gbpln | Arabidopsis thaliana | AT4G10050.1   Symbols:   esterase/lipase/thioesterase family protein   chr4:6284620-6287186 REVERSE LENGTH=350                                                                                                                                                                                                                                                                                                            | 368  | 350  | 0         | 95.1  | 85.1 | 89.7 |

|                          |                                                                                                                                                                                                                                                                                                                                                                                                                                                                                                                                                                                                                                                                                                                                                                                                                               |      |      |           |       |      |      |                                                         |       |                      |                                                                                                                                             |      |      |           |       |      |      |
|--------------------------|-------------------------------------------------------------------------------------------------------------------------------------------------------------------------------------------------------------------------------------------------------------------------------------------------------------------------------------------------------------------------------------------------------------------------------------------------------------------------------------------------------------------------------------------------------------------------------------------------------------------------------------------------------------------------------------------------------------------------------------------------------------------------------------------------------------------------------|------|------|-----------|-------|------|------|---------------------------------------------------------|-------|----------------------|---------------------------------------------------------------------------------------------------------------------------------------------|------|------|-----------|-------|------|------|
| Rsa1.0_00851.1.g20410.t1 | ref NP_192742.1  cytochrome c-2 [Arabidopsis thaliana] gi 297809203 ref XP_002872485.1  cytochrome C-2 [Arabidopsis lyrata subsp. lyrata] gi 27734261 sp Q9T0G2.1 CYC3_ARATH RecName: Full=Probable cytochrome c At4g10040 gi 4539007 emb CAB39628.1  cytochrome c [Arabidopsis thaliana] gi 7267700 emb CAB78127.1  cytochrome c [Arabidopsis thaliana] gi 15028283 gb AAK76618.1  putative cytochrome c protein [Arabidopsis thaliana] gi 19310747 gb AAL85104.1  putative cytochrome c protein [Arabidopsis thaliana] gi 21592668 gb AAM64617.1  cytochrome c [Arabidopsis thaliana] gi 297318322 gb EFH48744.1  cytochrome C-2 [Arabidopsis lyrata subsp. lyrata] gi 332657432 gb AEE82832.1  cytochrome c-2 [Arabidopsis thaliana] gi 482557632 gb EOA21824.1  hypothetical protein CARUB_v10002289mg [Capsella rubella] | 112  | 112  | 3.00E-58  | 100.0 | 97.3 | 99.1 | cytochrome c-2                                          | gbpln | Arabidopsis lyrata   | AT4G10040.1   Symbols: CYTC-2   cytochrome c-2   chr4:6277083-6278281 FORWARD LENGTH=112                                                    | 112  | 112  | 4.00E-61  | 100.0 | 97.3 | 99.1 |
| Rsa1.0_00851.1.g20411.t1 | ref NP_192741.1  hydrolase, alpha/beta fold family protein [Arabidopsis thaliana] gi 4539006 emb CAB39627.1  putative protein [Arabidopsis thaliana] gi 7267699 emb CAB78126.1  putative protein [Arabidopsis thaliana] gi 21594223 gb AAM65982.1  unknown [Arabidopsis thaliana] gi 332657431 gb AEE82831.1  hydrolase, alpha/beta fold family protein [Arabidopsis thaliana]                                                                                                                                                                                                                                                                                                                                                                                                                                                | 96   | 380  | 6.00E-29  | 395.8 | 65.6 | 66.7 | hydrolase, alpha/beta fold family protein               | gbpln | Arabidopsis thaliana | AT4G10030.1   Symbols:   alpha/beta-Hydrolases superfamily protein   chr4:6270490-6273098 REVERSE LENGTH=380                                | 96   | 380  | 1.00E-31  | 395.8 | 65.6 | 66.7 |
| Rsa1.0_00851.1.g20412.t1 | gb ACG69526.1  steroleosin SLO2-2 [Brassica napus]                                                                                                                                                                                                                                                                                                                                                                                                                                                                                                                                                                                                                                                                                                                                                                            | 454  | 461  | 0         | 101.5 | 94.7 | 97.4 | steroleosin SLO2-2                                      | gbpln | Brassica napus       | AT4G10020.1   Symbols: AtHSD5, HSD5   hydroxysteroid dehydrogenase 5   chr4:6268363-6270179 FORWARD LENGTH=389                              | 454  | 389  | 0         | 85.7  | 76.0 | 79.5 |
| Rsa1.0_00851.1.g20413.t1 | ref NP_849351.1  agamous-like MADS-box protein AGL11 [Arabidopsis thaliana] gi 17529110 gb AAL38765.1  putative MADS-box protein AGL11 [Arabidopsis thaliana] gi 22136706 gb AAM91672.1  putative MADS-box protein AGL11 [Arabidopsis thaliana] gi 332657416 gb AEE82816.1  agamous-like MADS-box protein AGL11 [Arabidopsis thaliana]                                                                                                                                                                                                                                                                                                                                                                                                                                                                                        | 217  | 216  | 1.00E-101 | 99.5  | 89.4 | 95.9 | agamous-like MADS-box protein AGL11                     | gbpln | Arabidopsis thaliana | AT4G09960.2   Symbols: STK, AGL11   K-box region and MADS-box transcription factor family protein   chr4:6236713-6239409 REVERSE LENGTH=216 | 217  | 216  | 1.00E-104 | 99.5  | 89.4 | 95.9 |
| Rsa1.0_00851.1.g20414.t1 | #                                                                                                                                                                                                                                                                                                                                                                                                                                                                                                                                                                                                                                                                                                                                                                                                                             | #    | #    | #         | #     | #    | #    | -                                                       | ----  | ----                 | #                                                                                                                                           | #    | #    | #         | #     | #    |      |
| Rsa1.0_00851.1.g20415.t1 | ref XP_002891747.1  hypothetical protein ARALYDRAFT_892371 [Arabidopsis lyrata subsp. lyrata] gi 297337589 gb EFH68006.1  hypothetical protein ARALYDRAFT_892371 [Arabidopsis lyrata subsp. lyrata] ref XP_002881925.1  hypothetical protein ARALYDRAFT_903775 [Arabidopsis lyrata subsp. lyrata] gi 297327764 gb EFH58184.1  hypothetical protein ARALYDRAFT_903775 [Arabidopsis lyrata subsp. lyrata]                                                                                                                                                                                                                                                                                                                                                                                                                       | 909  | 905  | 0         | 99.6  | 74.4 | 82.8 | hypothetical protein ARALYDRAFT_892371                  | gbpln | Arabidopsis lyrata   | AT1G53350.1   Symbols:   Disease resistance protein (CC-NBS-LRR class) family   chr1:19903899-19907515 FORWARD LENGTH=927                   | 909  | 927  | 0         | 102.0 | 74.8 | 82.6 |
| Rsa1.0_00852.1.g20416.t1 | ref XP_002881925.1  hypothetical protein ARALYDRAFT_903775 [Arabidopsis lyrata subsp. lyrata] gi 297327764 gb EFH58184.1  hypothetical protein ARALYDRAFT_903775 [Arabidopsis lyrata subsp. lyrata]                                                                                                                                                                                                                                                                                                                                                                                                                                                                                                                                                                                                                           | 142  | 170  | 8.00E-20  | 119.7 | 39.4 | 54.2 | hypothetical protein ARALYDRAFT_903775                  | gbpln | Arabidopsis lyrata   | AT2G43730.1   Symbols:   Mannose-binding lectin superfamily protein   chr2:18124821-18125669 REVERSE LENGTH=224                             | 142  | 224  | 2.00E-13  | 157.7 | 31.7 | 43.0 |
| Rsa1.0_00852.1.g20417.t4 | gb AAF19226.1 AC007505.2 Highly similar to Ta1-3 polyprotein [Arabidopsis thaliana]                                                                                                                                                                                                                                                                                                                                                                                                                                                                                                                                                                                                                                                                                                                                           | 1423 | 1356 | 0         | 95.3  | 48.2 | 63.7 | Highly similar to Ta1-3 polyprotein                     | gbpln | Arabidopsis thaliana | AT4G23160.1   Symbols: CRK8   cysteine-rich RLK (RECEPTOR-like protein kinase) 8   chr4:12129485-12134086 FORWARD LENGTH=1262               | 1423 | 1262 | 6.00E-65  | 88.7  | 10.6 | 17.2 |
| Rsa1.0_00852.1.g20418.t1 | dbj BAB09379.1  non-LTR retroelement reverse transcriptase-like protein [Arabidopsis thaliana]                                                                                                                                                                                                                                                                                                                                                                                                                                                                                                                                                                                                                                                                                                                                | 528  | 1223 | 2.00E-81  | 231.6 | 33.7 | 52.5 | non-LTR retroelement reverse transcriptase-like protein | gbpln | Arabidopsis thaliana | AT1G43760.1   Symbols:   DNase I-like superfamily protein   chr1:16528880-16531065 REVERSE LENGTH=626                                       | 528  | 626  | 7.00E-36  | 118.6 | 23.9 | 37.1 |
| Rsa1.0_00852.1.g20419.t1 | dbj BAF00918.1  putative reverse transcriptase [Arabidopsis thaliana]                                                                                                                                                                                                                                                                                                                                                                                                                                                                                                                                                                                                                                                                                                                                                         | 1712 | 910  | 0         | 53.2  | 29.3 | 38.0 | putative reverse transcriptase                          | gbpln | Arabidopsis thaliana | AT1G43760.1   Symbols:   DNase I-like superfamily protein   chr1:16528880-16531065 REVERSE LENGTH=626                                       | 1712 | 626  | 1.00E-128 | 36.6  | 12.7 | 18.5 |

|                          |                                                                                                                                                                                                                                                                                                                                                                                                                                                                                                                                                                                                                                                                                    |      |      |           |       |      |      |                                                     |       |                      |                                                                                                                                                                                                                                                                                                                                                                                               |      |     |           |       |      |      |
|--------------------------|------------------------------------------------------------------------------------------------------------------------------------------------------------------------------------------------------------------------------------------------------------------------------------------------------------------------------------------------------------------------------------------------------------------------------------------------------------------------------------------------------------------------------------------------------------------------------------------------------------------------------------------------------------------------------------|------|------|-----------|-------|------|------|-----------------------------------------------------|-------|----------------------|-----------------------------------------------------------------------------------------------------------------------------------------------------------------------------------------------------------------------------------------------------------------------------------------------------------------------------------------------------------------------------------------------|------|-----|-----------|-------|------|------|
| Rsa1.0_00852.1.g20420.t1 | gb EOA35535.1  hypothetical protein CARUB_v10020742mg [Capsella rubella]                                                                                                                                                                                                                                                                                                                                                                                                                                                                                                                                                                                                           | 308  | 288  | 1.00E-128 | 93.5  | 76.3 | 83.4 | hypothetical protein CARUB_v10020742mg              | gbpln | Capsella rubella     | AT1G57610.2   Symbols:   Protein of unknown function (DUF607)   chr1:21337449-21338412 REVERSE LENGTH=293                                                                                                                                                                                                                                                                                     | 308  | 293 | 1.00E-129 | 95.1  | 75.3 | 84.7 |
| Rsa1.0_00852.1.g20421.t1 | gb ABD65636.1  hypothetical protein Z3.t00055 [Brassica oleracea]                                                                                                                                                                                                                                                                                                                                                                                                                                                                                                                                                                                                                  | 266  | 414  | 3.00E-31  | 155.6 | 30.1 | 35.0 | hypothetical protein Z3.t00055                      | gbpln | Brassica oleracea    | #                                                                                                                                                                                                                                                                                                                                                                                             | #    | #   | #         | #     | #    | #    |
| Rsa1.0_00852.1.g20422.t3 | gb ACG60682.1  transposon-like ORF [Brassica oleracea var. albobolabra]                                                                                                                                                                                                                                                                                                                                                                                                                                                                                                                                                                                                            | 728  | 704  | 2.00E-95  | 96.7  | 24.2 | 27.5 | transposon-like ORF                                 | gbpln | Brassica oleracea    | #                                                                                                                                                                                                                                                                                                                                                                                             | #    | #   | #         | #     | #    | #    |
| Rsa1.0_00852.1.g20423.t1 | #                                                                                                                                                                                                                                                                                                                                                                                                                                                                                                                                                                                                                                                                                  | #    | #    | #         | #     | #    | #    | -                                                   | ----  | ----                 | #                                                                                                                                                                                                                                                                                                                                                                                             | #    | #   | #         | #     | #    | #    |
| Rsa1.0_00852.1.g20424.t1 | gb EOA35193.1  hypothetical protein CARUB_v10020343mg [Capsella rubella]                                                                                                                                                                                                                                                                                                                                                                                                                                                                                                                                                                                                           | 421  | 425  | 0         | 101.0 | 88.1 | 93.3 | hypothetical protein CARUB_v10020343mg              | gbpln | Capsella rubella     | AT1G57590.1   Symbols:   Pectinacetyltransferase family protein   chr1:21327458-21329707 REVERSE LENGTH=444                                                                                                                                                                                                                                                                                   | 421  | 444 | 0         | 105.5 | 86.7 | 93.1 |
| Rsa1.0_00852.1.g20425.t1 | #                                                                                                                                                                                                                                                                                                                                                                                                                                                                                                                                                                                                                                                                                  | #    | #    | #         | #     | #    | #    | -                                                   | ----  | ----                 | #                                                                                                                                                                                                                                                                                                                                                                                             | #    | #   | #         | #     | #    | #    |
| Rsa1.0_00852.1.g20426.t1 | gb AAC33226.1  putative non-LTR retroelement reverse transcriptase [Arabidopsis thaliana]                                                                                                                                                                                                                                                                                                                                                                                                                                                                                                                                                                                          | 1508 | 1529 | 0         | 101.4 | 43.5 | 61.5 | putative non-LTR retroelement reverse transcriptase | gbpln | Arabidopsis thaliana | AT3G24255.1   Symbols:   RNA-directed DNA polymerase (reverse transcriptase)-related family protein   chr3:8789471-8793208 FORWARD LENGTH=746                                                                                                                                                                                                                                                 | 1508 | 746 | 4.00E-75  | 49.5  | 9.5  | 12.1 |
| Rsa1.0_00852.1.g20427.t1 | #                                                                                                                                                                                                                                                                                                                                                                                                                                                                                                                                                                                                                                                                                  | #    | #    | #         | #     | #    | #    | -                                                   | ----  | ----                 | #                                                                                                                                                                                                                                                                                                                                                                                             | #    | #   | #         | #     | #    | #    |
| Rsa1.0_00853.1.g20428.t1 | #                                                                                                                                                                                                                                                                                                                                                                                                                                                                                                                                                                                                                                                                                  | #    | #    | #         | #     | #    | #    | -                                                   | ----  | ----                 | #                                                                                                                                                                                                                                                                                                                                                                                             | #    | #   | #         | #     | #    | #    |
| Rsa1.0_00853.1.g20429.t1 | ref NP_182191.1  homeobox-leucine zipper protein ATHB-7 [Arabidopsis thaliana]<br>gi 21431751 sp P46897.2 ATHB7_ARATH RecName: Full=Homeobox-leucine zipper protein ATHB-7; AltName: Full=HD-ZIP protein ATHB-7; AltName: Full=Homeodomain transcription factor ATHB-7 gi 3831442 gb AAC69925.1  homeodomain transcription factor (ATHB-7) [Arabidopsis thaliana]<br>gi 15027939 gb AAK76500.1  putative homeodomain transcription factor ATHB-7 [Arabidopsis thaliana]<br>gi 20259175 gb AAM14303.1  putative homeodomain transcription factor protein ATHB-7 [Arabidopsis thaliana]<br>gi 330255645 gb AEC10739.1  homeobox-leucine zipper protein ATHB-7 [Arabidopsis thaliana] | 235  | 258  | 2.00E-99  | 109.8 | 80.0 | 86.8 | homeobox-leucine zipper protein ATHB-7              | gbpln | Arabidopsis thaliana | AT2G46680.1   Symbols: ATHB-7, ATHB7, HB-7   homeobox 7   chr2:19165777-19166773 REVERSE LENGTH=258                                                                                                                                                                                                                                                                                           | 235  | 258 | 1.00E-102 | 109.8 | 80.0 | 86.8 |
| Rsa1.0_00853.1.g20430.t1 | ref XP_002882080.1  CYP78A6 [Arabidopsis lyrata subsp. lyrata]<br>gi 297327919 gb EFH58339.1  CYP78A6 [Arabidopsis lyrata subsp. lyrata]                                                                                                                                                                                                                                                                                                                                                                                                                                                                                                                                           | 527  | 530  | 0         | 100.6 | 88.4 | 93.9 | CYP78A6                                             | gbpln | Arabidopsis lyrata   | AT2G46660.1   Symbols: CYP78A6   cytochrome P450, family 78, subfamily A, polypeptide 6   chr2:19153602-19155417 REVERSE LENGTH=530                                                                                                                                                                                                                                                           | 527  | 530 | 0         | 100.6 | 87.9 | 93.2 |
| Rsa1.0_00853.1.g20431.t1 | ref XP_002880257.1  B5 #1 [Arabidopsis lyrata subsp. lyrata]<br>gi 297326096 gb EFH56516.1  B5 #1 [Arabidopsis lyrata subsp. lyrata]                                                                                                                                                                                                                                                                                                                                                                                                                                                                                                                                               | 135  | 132  | 6.00E-61  | 97.8  | 84.4 | 89.6 | B5 #1                                               | gbpln | Arabidopsis lyrata   | AT2G46650.1   Symbols: B5 #1, ATCB5-C, CB5-C   cytochrome B5 isoform C   chr2:19151807-19152394 FORWARD LENGTH=132                                                                                                                                                                                                                                                                            | 135  | 132 | 4.00E-57  | 97.8  | 84.4 | 90.4 |
| Rsa1.0_00853.1.g20432.t1 | gb EOA27153.1  hypothetical protein CARUB_v10023250mg [Capsella rubella]                                                                                                                                                                                                                                                                                                                                                                                                                                                                                                                                                                                                           | 389  | 433  | 8.00E-99  | 111.3 | 70.7 | 79.2 | hypothetical protein CARUB_v10023250mg              | gbpln | Capsella rubella     | AT2G46630.1   Symbols:   unknown protein; LOCATED IN: chloroplast; EXPRESSED IN: 22 plant structures; EXPRESSED DURING: 13 growth stages; Has 110095 Blast hits to 59224 proteins in 2216 species: Archae - 177; Bacteria - 15429; Metazoa - 38345; Fungi - 18843; Plants - 13341; Viruses - 3084; Other Eukaryotes - 20876 (source: NCBI BLink).   chr2:19145529-19146713 FORWARD LENGTH=394 | 389  | 394 | 1.00E-100 | 101.3 | 72.2 | 78.7 |

|                          |                                                                                                                                                                                                                                                                                                                                                                                                                                                                                                                                                                                                                                                                                                                                                                               |     |      |           |       |      |      |                                            |       |                      |                                                                                                                                                                                                                                                                                                                                            |     |     |           |       |      |      |
|--------------------------|-------------------------------------------------------------------------------------------------------------------------------------------------------------------------------------------------------------------------------------------------------------------------------------------------------------------------------------------------------------------------------------------------------------------------------------------------------------------------------------------------------------------------------------------------------------------------------------------------------------------------------------------------------------------------------------------------------------------------------------------------------------------------------|-----|------|-----------|-------|------|------|--------------------------------------------|-------|----------------------|--------------------------------------------------------------------------------------------------------------------------------------------------------------------------------------------------------------------------------------------------------------------------------------------------------------------------------------------|-----|-----|-----------|-------|------|------|
| Rsa1.0_00853.1.g20433.t1 | ref[NP_566082.1] calcium-binding EF-hand-containing protein [Arabidopsis thaliana]<br>gi 75338835 sp Q9ZPX9.2 KIC.ARATH<br>RecName: Full=Calcium-binding protein KIC; AltName: Full=KCBP-interacting calcium-binding protein<br>gi 237824052 pdb 3H4S E Chain E, Structure Of The Complex Of A Mitotic Kinesin With Its Calcium Binding Regulator<br>gi 15294244 gb AAK95299.1 AF410313.1<br>At2g46600/F13A10.13 [Arabidopsis thaliana] gi 20147271 gb AAM10349.1 <br>At2g46600/F13A10.13 [Arabidopsis thaliana] gi 20197776 gb AAD20170.2  putative caltractin [Arabidopsis thaliana] gi 38325077 gb AAR17001.1  KCBP interacting Ca <sup>2+</sup> -binding protein [Arabidopsis thaliana]<br>gi 330255633 gb AEC10727.1  calcium-binding protein KIC [Arabidopsis thaliana] | 137 | 135  | 9.00E-61  | 98.5  | 84.7 | 92.7 | calcium-binding EF-hand-containing protein | gbpln | Arabidopsis thaliana | AT2G46600.1   Symbols: Calcium-binding EF-hand family protein   chr2:19136070-19136477 FORWARD LENGTH=135                                                                                                                                                                                                                                  | 137 | 135 | 2.00E-63  | 98.5  | 84.7 | 92.7 |
| Rsa1.0_00853.1.g20434.t1 | gb EOA27345.1  hypothetical protein CARUB_v10023459mg [Capsella rubella]                                                                                                                                                                                                                                                                                                                                                                                                                                                                                                                                                                                                                                                                                                      | 360 | 372  | 1.00E-167 | 103.3 | 90.6 | 94.4 | hypothetical protein CARUB_v10023459mg     | gbpln | Capsella rubella     | AT2G46590.2   Symbols: DAG2   Dof-type zinc finger DNA-binding family protein   chr2:19133166-19134905 FORWARD LENGTH=369                                                                                                                                                                                                                  | 360 | 369 | 1.00E-149 | 102.5 | 90.0 | 92.8 |
| Rsa1.0_00853.1.g20435.t1 | gb EOA29206.1  hypothetical protein CARUB_v10025480mg [Capsella rubella]                                                                                                                                                                                                                                                                                                                                                                                                                                                                                                                                                                                                                                                                                                      | 199 | 213  | 2.00E-99  | 107.0 | 85.9 | 92.0 | hypothetical protein CARUB_v10025480mg     | gbpln | Capsella rubella     | AT2G46580.1   Symbols: Pyridoxamine 5'-phosphate oxidase family protein   chr2:19129409-19130513 REVERSE LENGTH=198                                                                                                                                                                                                                        | 199 | 198 | 1.00E-100 | 99.5  | 84.4 | 91.5 |
| Rsa1.0_00853.1.g20436.t1 | ref[XP_002880252.1] predicted protein [Arabidopsis lyrata subsp. lyrata]<br>gi 297326091 gb EFH56511.1  predicted protein [Arabidopsis lyrata subsp. lyrata]                                                                                                                                                                                                                                                                                                                                                                                                                                                                                                                                                                                                                  | 569 | 569  | 0         | 100.0 | 89.1 | 94.6 | predicted protein                          | gbpln | Arabidopsis lyrata   | AT2G46570.1   Symbols: LAC6   laccase 6   chr2:19126872-19129069 FORWARD LENGTH=569                                                                                                                                                                                                                                                        | 569 | 569 | 0         | 100.0 | 89.1 | 94.4 |
| Rsa1.0_00853.1.g20437.t1 | #                                                                                                                                                                                                                                                                                                                                                                                                                                                                                                                                                                                                                                                                                                                                                                             | #   | #    | #         | #     | #    | #    | -                                          | ----  | ----                 | AT2G46550.1   Symbols: unknown protein; BEST Arabidopsis thaliana protein match is: unknown protein (TAIR:AT1G01240.3); Has 72 Blast hits to 68 proteins in 13 species: Archae - 0; Bacteria - 0; Metazoa - 1; Fungi - 0; Plants - 71; Viruses - 0; Other Eukaryotes - 0 (source: NCBI BLink).   chr2:19112264-19113457 REVERSE LENGTH=397 | 99  | 397 | 1.00E-10  | 401.0 | 44.4 | 49.5 |
| Rsa1.0_00853.1.g20438.t1 | gb ACP30591.1  disease resistance protein [Brassica rapa subsp. pekinensis]                                                                                                                                                                                                                                                                                                                                                                                                                                                                                                                                                                                                                                                                                                   | 318 | 1555 | 5.00E-63  | 489.0 | 39.0 | 54.4 | disease resistance protein                 | gbpln | Brassica rapa        | AT1G10000.1   Symbols: Ribonuclease H-like superfamily protein   chr1:3263877-3264788 REVERSE LENGTH=303                                                                                                                                                                                                                                   | 318 | 303 | 8.00E-42  | 95.3  | 33.3 | 48.4 |
| Rsa1.0_00854.1.g20439.t7 | ref[XP_002877348.1] predicted protein [Arabidopsis lyrata subsp. lyrata]<br>gi 297323186 gb EFH53607.1  predicted protein [Arabidopsis lyrata subsp. lyrata]                                                                                                                                                                                                                                                                                                                                                                                                                                                                                                                                                                                                                  | 583 | 982  | 3.00E-85  | 168.4 | 33.3 | 42.7 | predicted protein                          | gbpln | Arabidopsis lyrata   | AT1G57650.1   Symbols: ATP binding   chr1:21351291-21354311 FORWARD LENGTH=709                                                                                                                                                                                                                                                             | 583 | 709 | 1.00E-62  | 121.6 | 31.0 | 42.9 |
| Rsa1.0_00854.1.g20440.t1 | emb CAB40035.1  retrotransposon like protein [Arabidopsis thaliana]<br>gi 7267767 emb CAB81170.1  retrotransposon like protein [Arabidopsis thaliana]                                                                                                                                                                                                                                                                                                                                                                                                                                                                                                                                                                                                                         | 225 | 1515 | 1.00E-48  | 673.3 | 56.4 | 68.0 | retrotransposon like protein               | gbpln | Arabidopsis thaliana | ATMG00810.1   Symbols: ORF240B   DNA/RNA polymerases superfamily protein   chrM:227709-228431 REVERSE LENGTH=240                                                                                                                                                                                                                           | 225 | 240 | 1.00E-25  | 106.7 | 32.0 | 41.8 |
| Rsa1.0_00854.1.g20441.t1 | gb EOA16859.1  hypothetical protein CARUB_v10005083mg [Capsella rubella]                                                                                                                                                                                                                                                                                                                                                                                                                                                                                                                                                                                                                                                                                                      | 345 | 369  | 1.00E-116 | 107.0 | 78.0 | 83.5 | hypothetical protein CARUB_v10005083mg     | gbpln | Capsella rubella     | AT4G36930.1   Symbols: SPT   basic helix-loop-helix (bHLH) DNA-binding superfamily protein   chr4:17414167-17415945 FORWARD LENGTH=373                                                                                                                                                                                                     | 345 | 373 | 1.00E-114 | 108.1 | 80.0 | 83.8 |
| Rsa1.0_00854.1.g20442.t1 | gb ABE65413.1  hypothetical protein At1g62890 [Arabidopsis thaliana]                                                                                                                                                                                                                                                                                                                                                                                                                                                                                                                                                                                                                                                                                                          | 119 | 195  | 8.00E-20  | 163.9 | 40.3 | 59.7 | hypothetical protein At1g62890             | gbpln | Arabidopsis thaliana | #                                                                                                                                                                                                                                                                                                                                          | #   | #   | #         | #     | #    |      |
| Rsa1.0_00854.1.g20443.t1 | gb EOA16840.1  hypothetical protein CARUB_v10005061mg [Capsella rubella]                                                                                                                                                                                                                                                                                                                                                                                                                                                                                                                                                                                                                                                                                                      | 374 | 376  | 0         | 100.5 | 82.6 | 88.2 | hypothetical protein CARUB_v10005061mg     | gbpln | Capsella rubella     | AT4G36880.1   Symbols: CP1   cysteine proteinase1   chr4:17374692-17376180 REVERSE LENGTH=376                                                                                                                                                                                                                                              | 374 | 376 | 0         | 100.5 | 88.0 | 92.2 |
| Rsa1.0_00854.1.g20444.t1 | #                                                                                                                                                                                                                                                                                                                                                                                                                                                                                                                                                                                                                                                                                                                                                                             | #   | #    | #         | #     | #    | #    | -                                          | ----  | ----                 | #                                                                                                                                                                                                                                                                                                                                          | #   | #   | #         | #     | #    |      |
| Rsa1.0_00854.1.g20445.t1 | #                                                                                                                                                                                                                                                                                                                                                                                                                                                                                                                                                                                                                                                                                                                                                                             | #   | #    | #         | #     | #    | #    | -                                          | ----  | ----                 | #                                                                                                                                                                                                                                                                                                                                          | #   | #   | #         | #     | #    |      |

|                          |                                                                                                                                                                                                                                                                                                                                                                                                                                                                                                                             |     |     |           |       |      |      |                                                        |       |                      |                                                                                                                                                                                                                                                                                                                                                                                                                                                                                                                                                                         |     |     |           |       |      |      |
|--------------------------|-----------------------------------------------------------------------------------------------------------------------------------------------------------------------------------------------------------------------------------------------------------------------------------------------------------------------------------------------------------------------------------------------------------------------------------------------------------------------------------------------------------------------------|-----|-----|-----------|-------|------|------|--------------------------------------------------------|-------|----------------------|-------------------------------------------------------------------------------------------------------------------------------------------------------------------------------------------------------------------------------------------------------------------------------------------------------------------------------------------------------------------------------------------------------------------------------------------------------------------------------------------------------------------------------------------------------------------------|-----|-----|-----------|-------|------|------|
| Rsa1.0_00854.1.g20446.t1 | ref[NP_195443.1] myb domain protein 73 [Arabidopsis thaliana] gi 2464855 emb CAB16756.1  myb-related protein [Arabidopsis thaliana] gi 7270709 emb CAB80392.1  myb-related protein [Arabidopsis thaliana] gi 17380912 gb AAL36268.1  putative myb-related protein [Arabidopsis thaliana] gi 20258981 gb AAM14206.1  putative myb-related protein [Arabidopsis thaliana] gi 41619352 gb AAS10083.1  MYB transcription factor [Arabidopsis thaliana] gi 332661374 gb AEE86774.1  myb domain protein 73 [Arabidopsis thaliana] | 283 | 320 | 1.00E-116 | 113.1 | 84.1 | 90.1 | myb domain protein 73                                  | gbpln | Arabidopsis thaliana | AT4G37260.1   Symbols: MYB73, ATMYB73   myb domain protein 73   chr4:17540602-17541564 FORWARD LENGTH=320                                                                                                                                                                                                                                                                                                                                                                                                                                                               | 283 | 320 | 1.00E-118 | 113.1 | 84.1 | 90.1 |
| Rsa1.0_00854.1.g20447.t1 | gb EOA18862.1  hypothetical protein CARUB_v10007485mg [Capsella rubella]                                                                                                                                                                                                                                                                                                                                                                                                                                                    | 85  | 86  | 1.00E-33  | 101.2 | 84.7 | 89.4 | hypothetical protein CARUB_v10007485mg                 | gbpln | Capsella rubella     | AT4G37290.1   Symbols:   unknown protein; FUNCTIONS IN: molecular_function unknown; INVOLVED IN: response to karrikin; LOCATED IN: endomembrane system; EXPRESSED IN: cotyledon, hypocotyl, leaf; EXPRESSED DURING: LP.04 four leaves visible; BEST Arabidopsis thaliana protein match is: unknown protein (TAIR:AT2G23270.1); Has 30201 Blast hits to 17322 proteins in 780 species: Archae - 12; Bacteria - 1396; Metazoa - 17338; Fungi - 3422; Plants - 5037; Viruses - 0; Other Eukaryotes - 2996 (source: NCBI BLink).   chr4:17549929-17550183 REVERSE LENGTH=84 | 85  | 84  | 1.00E-32  | 98.8  | 81.2 | 85.9 |
| Rsa1.0_00854.1.g20448.t1 | gb EOA18685.1  hypothetical protein CARUB_v10007260mg [Capsella rubella]                                                                                                                                                                                                                                                                                                                                                                                                                                                    | 86  | 86  | 6.00E-33  | 100.0 | 79.1 | 89.5 | hypothetical protein CARUB_v10007260mg                 | gbpln | Capsella rubella     | AT4G37295.1   Symbols:   unknown protein; FUNCTIONS IN: molecular_function unknown; INVOLVED IN: biological_process unknown; LOCATED IN: endomembrane system; EXPRESSED IN: stem, root, leaf; EXPRESSED DURING: LP.06 six leaves visible, LP.04 four leaves visible; Has 30201 Blast hits to 17322 proteins in 780 species: Archae - 12; Bacteria - 1396; Metazoa - 17338; Fungi - 3422; Plants - 5037; Viruses - 0; Other Eukaryotes - 2996 (source: NCBI BLink).   chr4:17553628-17553888 FORWARD LENGTH=86                                                           | 86  | 86  | 1.00E-34  | 100.0 | 79.1 | 88.4 |
| Rsa1.0_00854.1.g20449.t1 | ref[NP_195450.1] cytochrome P450, family 81, subfamily D, polypeptide 4 [Arabidopsis thaliana] gi 2464850 emb CAB16753.1  cytochrome P450-like protein [Arabidopsis thaliana] gi 7270716 emb CAB80399.1  cytochrome P450-like protein [Arabidopsis thaliana] gi 145651786 gb ABP88118.1  At4g37330 [Arabidopsis thaliana] gi 332661382 gb AEE86782.1  cytochrome P450, family 81, subfamily D, polypeptide 4 [Arabidopsis thaliana] ref[XP_002866956.1] CYP81D5                                                             | 481 | 492 | 0         | 102.3 | 68.8 | 81.9 | cytochrome P450, family 81, subfamily D, polypeptide 4 | gbpln | Arabidopsis thaliana | AT4G37330.1   Symbols: CYP81D4   cytochrome P450, family 81, subfamily D, polypeptide 4   chr4:17562547-17564569 REVERSE LENGTH=492                                                                                                                                                                                                                                                                                                                                                                                                                                     | 481 | 492 | 0         | 102.3 | 68.8 | 81.9 |
| Rsa1.0_00854.1.g20450.t1 | [Arabidopsis lyrata subsp. lyrata] gi 297312792 gb EFH43215.1  CYP81D5 [Arabidopsis lyrata subsp. lyrata]                                                                                                                                                                                                                                                                                                                                                                                                                   | 183 | 495 | 2.00E-79  | 270.5 | 76.0 | 86.3 | CYP81D5                                                | gbpln | Arabidopsis lyrata   | AT4G37320.1   Symbols: CYP81D5   cytochrome P450, family 81, subfamily D, polypeptide 5   chr4:17559742-17561690 REVERSE LENGTH=495                                                                                                                                                                                                                                                                                                                                                                                                                                     | 183 | 495 | 2.00E-81  | 270.5 | 75.4 | 85.8 |
| Rsa1.0_00855.1.g20451.t2 | ref[XP_002872517.1] hypothetical protein ARALYDRAFT_911351 [Arabidopsis lyrata subsp. lyrata] gi 297318354 gb EFH43776.1  hypothetical protein ARALYDRAFT_911351 [Arabidopsis lyrata subsp. lyrata]                                                                                                                                                                                                                                                                                                                         | 554 | 603 | 2.00E-83  | 108.8 | 44.6 | 59.0 | hypothetical protein ARALYDRAFT_911351                 | gbpln | Arabidopsis lyrata   | AT1G33050.4   Symbols:   unknown protein; FUNCTIONS IN: molecular_function unknown; INVOLVED IN: biological_process unknown; LOCATED IN: cellular_component unknown; EXPRESSED IN: 24 plant structures; EXPRESSED DURING: 15 growth stages; BEST Arabidopsis thaliana protein match is: unknown protein (TAIR:AT4G10470.1).   chr1:11968361-11970890 REVERSE LENGTH=693                                                                                                                                                                                                 | 554 | 693 | 5.00E-69  | 125.1 | 44.2 | 58.8 |



|                          |                                                                                                                                                                                                                                                                                                                                                                                                                                                                                                                                                                                                                                                                                                                                                                                                                                                                                                                      |     |     |           |       |      |      |                                                                   |       |                      |                                                                                                                                             |     |     |           |       |      |      |
|--------------------------|----------------------------------------------------------------------------------------------------------------------------------------------------------------------------------------------------------------------------------------------------------------------------------------------------------------------------------------------------------------------------------------------------------------------------------------------------------------------------------------------------------------------------------------------------------------------------------------------------------------------------------------------------------------------------------------------------------------------------------------------------------------------------------------------------------------------------------------------------------------------------------------------------------------------|-----|-----|-----------|-------|------|------|-------------------------------------------------------------------|-------|----------------------|---------------------------------------------------------------------------------------------------------------------------------------------|-----|-----|-----------|-------|------|------|
| Rsa1.0_00855.1.g20452.t1 | ref NP_192783.1  60S ribosomal protein L9-2 [Arabidopsis thaliana]<br>gi 75314149 sp Q9S2X9.1 RL92_ARATH RecName: Full=60S ribosomal protein L9-2 gi 4539405 emb CAB40038.1  putative ribosomal protein L9, cytosolic [Arabidopsis thaliana]<br>gi 7267742 emb CAB78168.1  putative ribosomal protein L9, cytosolic [Arabidopsis thaliana]<br>gi 17529050 gb AL38735.1  putative ribosomal protein L9 [Arabidopsis thaliana]<br>gi 21436441 gb AAM51421.1  putative ribosomal protein L9 [Arabidopsis thaliana]<br>gi 21554221 gb AAM63297.1  putative ribosomal protein L9, cytosolic [Arabidopsis thaliana]<br>gi 332657484 gb AEE82884.1  60S ribosomal protein L9-2 [Arabidopsis thaliana]                                                                                                                                                                                                                       | 194 | 194 | 1.00E-100 | 100.0 | 93.3 | 95.9 | 60S ribosomal protein L9-2                                        | gbpln | Arabidopsis thaliana | AT4G10450.1   Symbols:   Ribosomal protein L6 family   chr4:6463201-6464458 REVERSE LENGTH=194                                              | 194 | 194 | 1.00E-103 | 100.0 | 93.3 | 95.9 |
| Rsa1.0_00855.1.g20453.t1 | ref XP_002874627.1  dehydration-responsive family protein [Arabidopsis lyrata subsp. lyrata]<br>gi 297320464 gb EFH50886.1  dehydration-responsive family protein [Arabidopsis lyrata subsp. lyrata]<br>ref NP_567356.1  TMPIT-like protein [Arabidopsis thaliana]<br>gi 42572865 ref NP_974529.1  TMPIT-like protein [Arabidopsis thaliana]<br>gi 16648995 gb AAL24349.1  putative protein [Arabidopsis thaliana]<br>gi 202598956 gb AAM13325.1  putative protein [Arabidopsis thaliana]<br>gi 332657481 gb AEE82881.1  TMPIT-like protein [Arabidopsis thaliana]<br>gi 332657482 gb AEE82882.1  TMPIT-like protein [Arabidopsis thaliana]                                                                                                                                                                                                                                                                          | 633 | 633 | 0         | 99.7  | 91.5 | 95.9 | dehydration-responsive family protein                             | gbpln | Arabidopsis lyrata   | AT4G10440.1   Symbols:   S-adenosyl-L-methionine-dependent methyltransferases superfamily protein   chr4:6459728-6461932 REVERSE LENGTH=633 | 633 | 633 | 0         | 100.0 | 90.5 | 95.1 |
| Rsa1.0_00855.1.g20454.t3 | ref NP_192777.1  protein kinase family protein [Arabidopsis thaliana]<br>gi 75313924 sp Q9SV83.1 Y4103_ARATH RecName: Full=Probable receptor-like protein kinase At4g10390<br>gi 4538968 emb CAB39792.1  putative protein kinase [Arabidopsis thaliana]<br>gi 7267736 emb CAB78162.1  putative protein kinase [Arabidopsis thaliana]<br>gi 20260592 gb AAM13194.1  putative protein kinase [Arabidopsis thaliana]<br>gi 23198076 gb AAN15565.1  putative protein kinase [Arabidopsis thaliana]<br>gi 332657475 gb AEE82875.1  probable receptor-like protein kinase [Arabidopsis thaliana]                                                                                                                                                                                                                                                                                                                           | 336 | 347 | 1.00E-155 | 103.3 | 84.2 | 91.1 | TMPIT-like protein                                                | gbpln | Arabidopsis thaliana | AT4G10430.3   Symbols:   TMPIT-like protein   chr4:6455110-6457996 REVERSE LENGTH=347                                                       | 336 | 347 | 1.00E-157 | 103.3 | 84.2 | 91.1 |
| Rsa1.0_00855.1.g20455.t1 | ref NP_192777.1  protein kinase family protein [Arabidopsis thaliana]<br>gi 75313924 sp Q9SV83.1 Y4103_ARATH RecName: Full=Probable receptor-like protein kinase At4g10390<br>gi 4538968 emb CAB39792.1  putative protein kinase [Arabidopsis thaliana]<br>gi 7267736 emb CAB78162.1  putative protein kinase [Arabidopsis thaliana]<br>gi 20260592 gb AAM13194.1  putative protein kinase [Arabidopsis thaliana]<br>gi 23198076 gb AAN15565.1  putative protein kinase [Arabidopsis thaliana]<br>gi 332657475 gb AEE82875.1  probable receptor-like protein kinase [Arabidopsis thaliana]                                                                                                                                                                                                                                                                                                                           | 408 | 342 | 1.00E-163 | 83.8  | 70.8 | 75.7 | protein kinase family protein                                     | gbpln | Arabidopsis thaliana | AT4G10390.1   Symbols:   Protein kinase superfamily protein   chr4:6441949-6443161 REVERSE LENGTH=342                                       | 408 | 342 | 1.00E-165 | 83.8  | 70.8 | 75.7 |
| Rsa1.0_00855.1.g20456.t1 | #                                                                                                                                                                                                                                                                                                                                                                                                                                                                                                                                                                                                                                                                                                                                                                                                                                                                                                                    | #   | #   | #         | #     | #    | #    | -                                                                 | ----  | ----                 | #                                                                                                                                           | #   | #   | #         | #     | #    |      |
| Rsa1.0_00855.1.g20457.t1 | ref XP_002874623.1  hypothetical protein ARALYDRAFT_911337 [Arabidopsis lyrata subsp. lyrata]<br>gi 297320460 gb EFH50882.1  hypothetical protein ARALYDRAFT_911337 [Arabidopsis lyrata subsp. lyrata]<br>ref NP_567355.1  TRAM, LAG1 and CLN8 (TLC) lipid-sensing domain containing protein [Arabidopsis thaliana]<br>gi 79325051 ref NP_001031610.1  TRAM, LAG1 and CLN8 (TLC) lipid-sensing domain containing protein [Arabidopsis thaliana]<br>gi 18323149 gb AAL15309.1  AT4g10360/F24G24.160 [Arabidopsis thaliana]<br>gi 21436011 gb AAM51583.1  AT4g10360/F24G24.160 [Arabidopsis thaliana]<br>gi 222424213 dbj BAH20065.1  AT4G10360 [Arabidopsis thaliana]<br>gi 332657471 gb AEE82871.1  TRAM, LAG1 and CLN8 (TLC) lipid-sensing domain containing protein [Arabidopsis thaliana]<br>gi 332657472 gb AEE82872.1  TRAM, LAG1 and CLN8 (TLC) lipid-sensing domain containing protein [Arabidopsis thaliana] | 301 | 304 | 1.00E-151 | 101.0 | 94.0 | 95.7 | hypothetical protein ARALYDRAFT_911337                            | gbpln | Arabidopsis lyrata   | AT4G10380.1   Symbols:   NIP5;1, NLM6, NLM8   NOD26-like intrinsic protein 5;1   chr4:6431530-6434510 REVERSE LENGTH=304                    | 301 | 304 | 1.00E-153 | 101.0 | 94.0 | 95.7 |
| Rsa1.0_00855.1.g20458.t1 | ref NP_567355.1  TRAM, LAG1 and CLN8 (TLC) lipid-sensing domain containing protein [Arabidopsis thaliana]<br>gi 79325051 ref NP_001031610.1  TRAM, LAG1 and CLN8 (TLC) lipid-sensing domain containing protein [Arabidopsis thaliana]<br>gi 18323149 gb AAL15309.1  AT4g10360/F24G24.160 [Arabidopsis thaliana]<br>gi 21436011 gb AAM51583.1  AT4g10360/F24G24.160 [Arabidopsis thaliana]<br>gi 222424213 dbj BAH20065.1  AT4G10360 [Arabidopsis thaliana]<br>gi 332657471 gb AEE82871.1  TRAM, LAG1 and CLN8 (TLC) lipid-sensing domain containing protein [Arabidopsis thaliana]<br>gi 332657472 gb AEE82872.1  TRAM, LAG1 and CLN8 (TLC) lipid-sensing domain containing protein [Arabidopsis thaliana]                                                                                                                                                                                                           | 261 | 266 | 1.00E-127 | 101.9 | 86.6 | 93.5 | TRAM, LAG1 and CLN8 (TLC) lipid-sensing domain containing protein | gbpln | Arabidopsis thaliana | AT4G10360.2   Symbols:   TRAM, LAG1 and CLN8 (TLC) lipid-sensing domain containing protein   chr4:6420679-6422108 FORWARD LENGTH=266        | 261 | 266 | 1.00E-130 | 101.9 | 86.6 | 93.5 |

|                          |                                                                                                                                                                                                                                                                                                                                                                                                                                                                   |     |      |          |       |      |      |                                           |       |                      |                                                                                                                                         |     |      |          |       |      |      |
|--------------------------|-------------------------------------------------------------------------------------------------------------------------------------------------------------------------------------------------------------------------------------------------------------------------------------------------------------------------------------------------------------------------------------------------------------------------------------------------------------------|-----|------|----------|-------|------|------|-------------------------------------------|-------|----------------------|-----------------------------------------------------------------------------------------------------------------------------------------|-----|------|----------|-------|------|------|
| Rsa1.0_00855.1.g20459.t1 | gb ABD65086.1  hypothetical protein 27.t00104 [Brassica oleracea]                                                                                                                                                                                                                                                                                                                                                                                                 | 706 | 1172 | 9.00E-42 | 166.0 | 14.6 | 17.4 | hypothetical protein 27.t00104            | gbpln | Brassica oleracea    | #                                                                                                                                       | #   | #    | #        | #     | #    |      |
| Rsa1.0_00856.1.g20460.t1 | #                                                                                                                                                                                                                                                                                                                                                                                                                                                                 | #   | #    | #        | #     | #    | -    | -                                         | ----  | ----                 | #                                                                                                                                       | #   | #    | #        | #     | #    |      |
| Rsa1.0_00856.1.g20461.t1 | ref XP_002862875.1  hypothetical protein ARALYDRAFT_920182 [Arabidopsis lyrata subsp. lyrata] gi 297308637 gb EFH39134.1  hypothetical protein ARALYDRAFT_920182 [Arabidopsis lyrata subsp. lyrata]                                                                                                                                                                                                                                                               | 326 | 315  | 4.00E-62 | 96.6  | 41.7 | 53.4 | hypothetical protein ARALYDRAFT_920182    | gbpln | Arabidopsis lyrata   | AT3G19520.2   Symbols:   Protein of unknown function (DUF626)   chr3:6772773-6774209 FORWARD LENGTH=312                                 | 326 | 312  | 6.00E-39 | 95.7  | 31.0 | 45.7 |
| Rsa1.0_00856.1.g20462.t6 | ref XP_002894257.1  heat-intolerant 1 [Arabidopsis lyrata subsp. lyrata] gi 297340099 gb EFH70516.1  heat-intolerant 1 [Arabidopsis lyrata subsp. lyrata]                                                                                                                                                                                                                                                                                                         | 895 | 828  | 0        | 92.5  | 86.3 | 88.9 | heat-intolerant 1                         | gbpln | Arabidopsis lyrata   | AT1G50500.1   Symbols: HIT1, ATPVPS53, VPS53   Membrane trafficking VPS53 family protein   chr1:18708217-18715597 REVERSE LENGTH=828    | 895 | 828  | 0        | 92.5  | 85.7 | 88.8 |
| Rsa1.0_00856.1.g20463.t7 | gb EOA36131.1  hypothetical protein CARUB_v10012430mg [Capsella rubella]                                                                                                                                                                                                                                                                                                                                                                                          | 156 | 517  | 1.00E-33 | 331.4 | 46.2 | 53.2 | hypothetical protein CARUB_v10012430mg    | gbpln | Capsella rubella     | AT1G50520.1   Symbols: CYP705A27   cytochrome P450, family 705, subfamily A, polypeptide 27   chr1:18719381-18721070 FORWARD LENGTH=533 | 156 | 533  | 2.00E-33 | 341.7 | 43.6 | 51.9 |
| Rsa1.0_00856.1.g20464.t3 | ref XP_002878993.1  hypothetical protein ARALYDRAFT_901441 [Arabidopsis lyrata subsp. lyrata] gi 297324832 gb EFH55252.1  hypothetical protein ARALYDRAFT_901441 [Arabidopsis lyrata subsp. lyrata]                                                                                                                                                                                                                                                               | 797 | 872  | 0        | 109.4 | 67.8 | 76.0 | hypothetical protein ARALYDRAFT_901441    | gbpln | Arabidopsis lyrata   | AT5G27010.1   Symbols:   ARM repeat superfamily protein   chr5:9503315-9507569 REVERSE LENGTH=863                                       | 797 | 863  | 0        | 108.3 | 62.0 | 71.5 |
| Rsa1.0_00856.1.g20465.t1 | ref XP_002870581.1  hypothetical protein ARALYDRAFT_915958 [Arabidopsis lyrata subsp. lyrata] gi 297316417 gb EFH46840.1  hypothetical protein ARALYDRAFT_915958 [Arabidopsis lyrata subsp. lyrata]                                                                                                                                                                                                                                                               | 123 | 269  | 3.00E-28 | 218.7 | 53.7 | 69.1 | hypothetical protein ARALYDRAFT_915958    | gbpln | Arabidopsis lyrata   | AT5G37870.1   Symbols:   Protein with RING/U-box and TRAF-like domains   chr5:15073764-15074851 REVERSE LENGTH=281                      | 123 | 281  | 1.00E-27 | 228.5 | 48.0 | 61.0 |
| Rsa1.0_00856.1.g20466.t1 | dbj BAJ33810.1  unnamed protein product [Thellungiella halophila]                                                                                                                                                                                                                                                                                                                                                                                                 | 513 | 533  | 0        | 103.9 | 89.1 | 93.6 | unnamed protein product                   | ----  | ----                 | AT1G50600.1   Symbols: SCL5   scarecrow-like 5   chr1:18737398-18739547 REVERSE LENGTH=597                                              | 513 | 597  | 0        | 116.4 | 85.8 | 91.8 |
| Rsa1.0_00856.1.g20467.t1 | gb EOA37472.1  hypothetical protein CARUB_v10011600mg [Capsella rubella]                                                                                                                                                                                                                                                                                                                                                                                          | 685 | 689  | 0        | 100.6 | 81.6 | 89.1 | hypothetical protein CARUB_v10011600mg    | gbpln | Capsella rubella     | AT1G50610.1   Symbols:   Leucine-rich repeat protein kinase family protein   chr1:18742171-18744501 FORWARD LENGTH=686                  | 685 | 686  | 0        | 100.1 | 80.4 | 88.8 |
| Rsa1.0_00856.1.g20468.t1 | gb EOA39831.1  hypothetical protein CARUB_v10008502mg [Capsella rubella]                                                                                                                                                                                                                                                                                                                                                                                          | 657 | 673  | 0        | 102.4 | 67.6 | 77.3 | hypothetical protein CARUB_v10008502mg    | gbpln | Capsella rubella     | AT1G50620.1   Symbols:   RING/FYVE/PHD zinc finger superfamily protein   chr1:18748537-18751005 FORWARD LENGTH=629                      | 657 | 629  | 0        | 95.7  | 66.4 | 74.4 |
| Rsa1.0_00856.1.g20469.t1 | ref NP_171844.6  serine/threonine-protein phosphatase BSU1 [Arabidopsis thaliana] gi 45476981 sp Q9LR78.2 BSU1_ARATH RecName: Full=Serine/threonine-protein phosphatase BSU1; AltName: Full=Bri1 suppressor protein 1 gi 38425331 gb AAR19789.1  BSU1 Ser/Thr phosphatase [Arabidopsis thaliana] gi 332189451 gb AEE27572.1  serine/threonine-protein phosphatase BSU1 [Arabidopsis thaliana]                                                                     | 717 | 793  | 0        | 110.6 | 54.4 | 68.3 | serine/threonine-protein phosphatase BSU1 | gbpln | Arabidopsis thaliana | AT1G03445.1   Symbols: BSU1   Serine/threonine protein phosphatase family protein   chr1:854653-859599 REVERSE LENGTH=793               | 717 | 793  | 0        | 110.6 | 54.4 | 68.3 |
| Rsa1.0_00856.1.g20470.t1 | ref NP_175483.1  RAV-like factor [Arabidopsis thaliana] gi 75268209 sp Q9C6P5.1 RAVL2_ARATH RecName: Full=AP2/ERF and B3 domain-containing transcription factor At1g50680; AltName: Full=RAV1-like ethylene-responsive transcription factor At1g50680 gi 12322330 gb AAG51186.1 AC079279_7 RAV-like DNA-binding protein, putative [Arabidopsis thaliana] gi 332194457 gb AEE32578.1  AP2/ERF and B3 domain-containing transcription factor [Arabidopsis thaliana] | 260 | 337  | 8.00E-88 | 129.6 | 68.5 | 80.4 | RAV-like factor                           | gbpln | Arabidopsis thaliana | AT1G50680.1   Symbols:   AP2/B3 transcription factor family protein   chr1:18777601-18778614 REVERSE LENGTH=337                         | 260 | 337  | 2.00E-90 | 129.6 | 68.5 | 80.4 |
| Rsa1.0_00856.1.g20471.t1 | gb AAQ82842.1  At4g20730 [Arabidopsis thaliana] gi 51970840 dbj BAD44112.1  putative protein [Arabidopsis thaliana]                                                                                                                                                                                                                                                                                                                                               | 893 | 800  | 2.00E-29 | 89.6  | 7.6  | 12.4 | At4g20730                                 | gbpln | Arabidopsis thaliana | AT4G32200.1   Symbols: ASY2   DNA-binding HORMA family protein   chr4:15548840-15554962 FORWARD LENGTH=1399                             | 893 | 1399 | 7.00E-31 | 156.7 | 8.0  | 12.4 |
| Rsa1.0_00856.1.g20472.t1 | gb AAD20101.1  putative retroelement pol polyprotein [Arabidopsis thaliana]                                                                                                                                                                                                                                                                                                                                                                                       | 568 | 764  | 7.00E-28 | 134.5 | 11.4 | 17.6 | putative retroelement pol polyprotein     | gbpln | Arabidopsis thaliana | #                                                                                                                                       | #   | #    | #        | #     | #    |      |

|                          |                                                                                                                                                                                                                                                                                                                                                                                       |      |      |           |       |      |      |                                          |       |                      |                                                                                                                                                                                                                                                                                                                                              |      |     |           |       |      |      |
|--------------------------|---------------------------------------------------------------------------------------------------------------------------------------------------------------------------------------------------------------------------------------------------------------------------------------------------------------------------------------------------------------------------------------|------|------|-----------|-------|------|------|------------------------------------------|-------|----------------------|----------------------------------------------------------------------------------------------------------------------------------------------------------------------------------------------------------------------------------------------------------------------------------------------------------------------------------------------|------|-----|-----------|-------|------|------|
| Rsa1.0_00857.1.g20473.t1 | gb ABV89659.1  dehydration-responsive protein-related [Brassica rapa]                                                                                                                                                                                                                                                                                                                 | 687  | 662  | 0         | 96.4  | 82.1 | 88.1 | dehydration-responsive protein-related   | gbpln | Brassica rapa        | AT1G78240.2   Symbols: TSD2, QUA2   S-adenosyl-L-methionine-dependent methyltransferases superfamily protein   chr1:29433173-29433815 REVERSE LENGTH=684                                                                                                                                                                                     | 687  | 684 | 0         | 99.6  | 78.6 | 86.6 |
| Rsa1.0_00857.1.g20474.t1 | ref XP_002887730.1  hypothetical protein ARALYDRAFT_476991 [Arabidopsis lyrata subsp. lyrata] gi 297333571 gb EFH63989.1  hypothetical protein ARALYDRAFT_476991 [Arabidopsis lyrata subsp. lyrata]                                                                                                                                                                                   | 553  | 584  | 0         | 105.6 | 77.4 | 84.8 | hypothetical protein ARALYDRAFT_476991   | gbpln | Arabidopsis lyrata   | AT1G78230.1   Symbols:   Outer arm dynein light chain 1 protein   chr1:29430226-29432516 FORWARD LENGTH=681                                                                                                                                                                                                                                  | 553  | 681 | 0         | 123.1 | 76.5 | 81.6 |
| Rsa1.0_00857.1.g20475.t1 | #                                                                                                                                                                                                                                                                                                                                                                                     | #    | #    | #         | #     | #    | #    | -                                        | ----  | ----                 | #                                                                                                                                                                                                                                                                                                                                            | #    | #   | #         | #     | #    |      |
| Rsa1.0_00857.1.g20476.t1 | gb EOA35470.1  hypothetical protein CARUB_v10020680mg [Capsella rubella]                                                                                                                                                                                                                                                                                                              | 313  | 315  | 1.00E-160 | 100.6 | 85.6 | 95.2 | hypothetical protein CARUB_v10020680mg   | gbpln | Capsella rubella     | AT1G78210.1   Symbols:   alpha/beta-Hydrolases superfamily protein   chr1:29422820-29424294 REVERSE LENGTH=314                                                                                                                                                                                                                               | 313  | 314 | 1.00E-161 | 100.3 | 86.3 | 94.9 |
| Rsa1.0_00857.1.g20477.t1 | db BAJ34008.1  unnamed protein product [Thellungiella halophila]                                                                                                                                                                                                                                                                                                                      | 282  | 283  | 1.00E-129 | 100.4 | 80.9 | 89.7 | unnamed protein product                  | ----  | ----                 | AT1G78200.2   Symbols:   Protein phosphatase 2C family protein   chr1:29420483-29421650 FORWARD LENGTH=283                                                                                                                                                                                                                                   | 282  | 283 | 1.00E-125 | 100.4 | 76.6 | 86.5 |
| Rsa1.0_00857.1.g20478.t1 | ref NP_177943.1  Trm1.2-like protein [Arabidopsis thaliana] gi 47606209 sp Q9C9R3.1 T112B_ARAT H RecName: Full=TRM112-like protein At1g78190 gi 12324252 gb AAG52099.1 AC012680.10 unknown protein; 53758-53384 [Arabidopsis thaliana] gi 332197958 gb AEE36079.1  Trm1.2-like protein [Arabidopsis thaliana]                                                                         | 122  | 124  | 5.00E-51  | 101.6 | 82.8 | 90.2 | Trm1.2-like protein                      | gbpln | Arabidopsis thaliana | AT1G78190.1   Symbols:   Trm112p-like protein   chr1:29418620-29418994 REVERSE LENGTH=124                                                                                                                                                                                                                                                    | 122  | 124 | 9.00E-54  | 101.6 | 82.8 | 90.2 |
| Rsa1.0_00857.1.g20479.t1 | gb ABO69625.1  synaptonemal complex protein ZYP1 [Brassica oleracea]                                                                                                                                                                                                                                                                                                                  | 878  | 876  | 0         | 99.8  | 90.9 | 94.9 | synaptonemal complex protein ZYP1        | gbpln | Brassica oleracea    | AT1G22260.1   Symbols: ZYP1a, ZYP1   Myosin heavy chain-related protein   chr1:7860160-7865142 REVERSE LENGTH=871                                                                                                                                                                                                                            | 878  | 871 | 0         | 99.2  | 67.4 | 81.2 |
| Rsa1.0_00857.1.g20480.t3 | ref NP_173321.4  Isochorismate synthase 2 [Arabidopsis thaliana] gi 205830866 sp Q9M9V6.2 CS2_ARAT H RecName: Full=Isochorismate synthase 2, chloroplastic; Short=Atlcs2; AltName: Full=menF-like protein 2; Flags: Precursor gi 183229349 gb ACC60228.1  isochorismate synthase 2 [Arabidopsis thaliana] gi 332191652 gb AEE29773.1  Isochorismate synthase 2 [Arabidopsis thaliana] | 309  | 562  | 8.00E-50  | 181.9 | 41.4 | 51.5 | Isochorismate synthase 2                 | gbpln | Arabidopsis thaliana | AT1G18870.1   Symbols: ICS2, ATICS2   isochorismate synthase 2   chr1:6515486-6519176 FORWARD LENGTH=562                                                                                                                                                                                                                                     | 309  | 562 | 2.00E-52  | 181.9 | 41.4 | 51.5 |
| Rsa1.0_00857.1.g20481.t1 | ref NP_177941.2  uncharacterized protein [Arabidopsis thaliana] gi 28393122 gb AAO41994.1  unknown protein [Arabidopsis thaliana] gi 28827468 gb AAO50578.1  unknown protein [Arabidopsis thaliana] gi 332197955 gb AEE36076.1  uncharacterized protein AT1G78170 [Arabidopsis thaliana]                                                                                              | 229  | 221  | 2.00E-82  | 96.5  | 71.6 | 78.2 | uncharacterized protein                  | gbpln | Arabidopsis thaliana | AT1G78170.1   Symbols:   unknown protein; BEST Arabidopsis thaliana protein match is: unknown protein (TAIR:AT1G22250.1); Has 66 Blast hits to 66 proteins in 11 species: Archae - 0; Bacteria - 0; Metazoa - 0; Fungi - 0; Plants - 66; Viruses - 0; Other Eukaryotes - 0 (source: NCBI BLINK).   chr1:29414160-29414941 FORWARD LENGTH=221 | 229  | 221 | 7.00E-85  | 96.5  | 71.6 | 78.2 |
| Rsa1.0_00857.1.g20482.t1 | gb AAM63644.1  putative 60S acidic ribosomal protein P0 [Arabidopsis thaliana]                                                                                                                                                                                                                                                                                                        | 190  | 320  | 1.00E-12  | 168.4 | 18.4 | 22.1 | putative 60S acidic ribosomal protein P0 | gbpln | Arabidopsis thaliana | AT3G09200.1   Symbols:   Ribosomal protein L10 family protein   chr3:2823364-2825020 REVERSE LENGTH=320                                                                                                                                                                                                                                      | 190  | 320 | 5.00E-15  | 168.4 | 18.4 | 22.1 |
| Rsa1.0_00857.1.g20483.t1 | gb EOA34555.1  hypothetical protein CARUB_v10022107mg [Capsella rubella]                                                                                                                                                                                                                                                                                                              | 608  | 665  | 0         | 109.4 | 80.9 | 87.8 | hypothetical protein CARUB_v10022107mg   | gbpln | Capsella rubella     | AT1G78160.1   Symbols: APUM7, PUM7   pumilio 7   chr1:29407900-29410184 FORWARD LENGTH=650                                                                                                                                                                                                                                                   | 608  | 650 | 0         | 106.9 | 79.9 | 85.7 |
| Rsa1.0_00858.1.g20484.t2 | gb AAD17414.1  copia-like retroelement pol polyprotein [Arabidopsis thaliana]                                                                                                                                                                                                                                                                                                         | 1839 | 1166 | 0         | 63.4  | 41.2 | 49.4 | copia-like retroelement pol polyprotein  | gbpln | Arabidopsis thaliana | AT2G41800.1   Symbols:   Protein of unknown function, DUF642   chr2:17436671-17438005 REVERSE LENGTH=370                                                                                                                                                                                                                                     | 1839 | 370 | 1.00E-179 | 20.1  | 16.2 | 17.2 |
| Rsa1.0_00858.1.g20485.t1 | ref NP_181710.1  insulin [Arabidopsis thaliana] gi 75097648 sp Q22941.1 PXM16_ARAT H RecName: Full=Zinc-metalloproteinase, peroxisomal; AltName: Full=Peroxisomal M16 protease gi 2335108 gb AAC02769.1  putative zinc protease [Arabidopsis thaliana] gi 330254939 gb AEC10033.1  zinc-metalloproteinase PXM16 [Arabidopsis thaliana]                                                | 940  | 970  | 0         | 103.2 | 92.1 | 96.6 | insulin                                  | gbpln | Arabidopsis thaliana | AT2G41790.1   Symbols:   Insulinase (Peptidase family M16) family protein   chr2:17429453-17436110 REVERSE LENGTH=970                                                                                                                                                                                                                        | 940  | 970 | 0         | 103.2 | 92.1 | 96.6 |

|                          |                                                                                                                                                                                                                                                                                                                                                                                                                                                                                                       |      |      |           |       |      |      |                                                       |       |                      |                                                                                                                                                                                                                                                                                                                                             |      |      |           |       |      |      |
|--------------------------|-------------------------------------------------------------------------------------------------------------------------------------------------------------------------------------------------------------------------------------------------------------------------------------------------------------------------------------------------------------------------------------------------------------------------------------------------------------------------------------------------------|------|------|-----------|-------|------|------|-------------------------------------------------------|-------|----------------------|---------------------------------------------------------------------------------------------------------------------------------------------------------------------------------------------------------------------------------------------------------------------------------------------------------------------------------------------|------|------|-----------|-------|------|------|
| Rsa1.0_00858.1.g20486.t1 | ref NP_565960.1  uncharacterized protein [Arabidopsis thaliana]   g 2335100 gb AAC02770.1  expressed protein [Arabidopsis thaliana]   g 15810461 gb AAL07118.1  unknown protein [Arabidopsis thaliana]   g 330254936 gb AEC10030.1  uncharacterized protein AT2G41770 [Arabidopsis thaliana]                                                                                                                                                                                                          | 1039 | 771  | 0         | 74.2  | 67.8 | 70.5 | uncharacterized protein                               | gbpln | Arabidopsis thaliana | AT2G41770.1   Symbols:   Protein of unknown function (DUF288)   chr2:17424549-17427042 REVERSE LENGTH=771                                                                                                                                                                                                                                   | 1039 | 771  | 0         | 74.2  | 67.8 | 70.5 |
| Rsa1.0_00858.1.g20487.t1 | gb EOA28874.1  hypothetical protein CARUB_v10025119mg [Capsella rubella]                                                                                                                                                                                                                                                                                                                                                                                                                              | 973  | 973  | 0         | 100.0 | 90.6 | 95.4 | hypothetical protein CARUB_v10025119mg                | gbpln | Capsella rubella     | AT2G41740.1   Symbols: VLN2, ATVLN2   villin 2   chr2:17410962-17416878 REVERSE LENGTH=976                                                                                                                                                                                                                                                  | 973  | 976  | 0         | 100.3 | 89.6 | 95.1 |
| Rsa1.0_00858.1.g20488.t1 | ref NP_181704.1  uncharacterized protein [Arabidopsis thaliana]   g 2335105 gb AAC02775.1  hypothetical protein [Arabidopsis thaliana]   g 26450207 dbj BAC42222.1  unknown protein [Arabidopsis thaliana]   g 30793799 gb AAP40352.1  unknown protein [Arabidopsis thaliana]   g 330254932 gb AEC10026.1  uncharacterized protein AT2G41730 [Arabidopsis thaliana]                                                                                                                                   | 130  | 119  | 3.00E-39  | 91.5  | 63.8 | 73.8 | uncharacterized protein                               | gbpln | Arabidopsis thaliana | AT2G41730.1   Symbols:   unknown protein; BEST Arabidopsis thaliana protein match is: unknown protein (TAIR:AT5G24640.1). Has 25 Blast hits to 25 proteins in 5 species: Archae - 0; Bacteria - 0; Metazoa - 0; Fungi - 0; Plants - 25; Viruses - 0; Other Eukaryotes - 0 (source: NCBI BLINK).   chr2:17409488-17409847 FORWARD LENGTH=119 | 130  | 119  | 5.00E-42  | 91.5  | 63.8 | 73.8 |
| Rsa1.0_00858.1.g20489.t1 | ref XP_002881793.1  EMB2654 [Arabidopsis lyrata subsp. lyrata]   g 297327632 gb EFH58052.1  EMB2654 [Arabidopsis lyrata subsp. lyrata]                                                                                                                                                                                                                                                                                                                                                                | 1275 | 822  | 0         | 64.5  | 57.3 | 60.5 | EMB2654                                               | gbpln | Arabidopsis lyrata   | AT2G41720.1   Symbols: EMB2654   Tetratricopeptide repeat (TPR)-like superfamily protein   chr2:17403744-17407127 REVERSE LENGTH=822                                                                                                                                                                                                        | 1275 | 822  | 0         | 64.5  | 57.0 | 60.2 |
| Rsa1.0_00858.1.g20490.t1 | ref NP_565956.1  camphor resistance CrcB-like protein [Arabidopsis thaliana]   g 238479528 ref NP_001154568.1  camphor resistance CrcB-like protein [Arabidopsis thaliana]   g 20196897 gb AAM14827.1  Expressed protein [Arabidopsis thaliana]   g 26453266 dbj BAC43706.1  unknown protein [Arabidopsis thaliana]   g 330254925 gb AEC10019.1  camphor resistance CrcB-like protein [Arabidopsis thaliana]   g 330254926 gb AEC10020.1  camphor resistance CrcB-like protein [Arabidopsis thaliana] | 422  | 461  | 1.00E-160 | 109.2 | 76.1 | 85.1 | camphor resistance CrcB-like protein                  | gbpln | Arabidopsis thaliana | AT2G41705.2   Symbols:   camphor resistance CrcB family protein   chr2:17398083-17399910 FORWARD LENGTH=461                                                                                                                                                                                                                                 | 422  | 461  | 1.00E-163 | 109.2 | 76.1 | 85.1 |
| Rsa1.0_00858.1.g20491.t1 | gb EOA26894.1  hypothetical protein CARUB_v10022987mg [Capsella rubella]                                                                                                                                                                                                                                                                                                                                                                                                                              | 525  | 528  | 0         | 100.6 | 95.0 | 97.3 | hypothetical protein CARUB_v10022987mg                | gbpln | Capsella rubella     | AT2G41680.1   Symbols: NTRC   NADPH-dependent thioredoxin reductase C   chr2:17376349-17379028 REVERSE LENGTH=529                                                                                                                                                                                                                           | 525  | 529  | 0         | 100.8 | 93.7 | 96.8 |
| Rsa1.0_00858.1.g20492.t2 | ref XP_002879947.1  GTP-binding family protein [Arabidopsis lyrata subsp. lyrata]   g 297325786 gb EFH56206.1  GTP-binding family protein [Arabidopsis lyrata subsp. lyrata]                                                                                                                                                                                                                                                                                                                          | 381  | 386  | 0         | 101.3 | 89.5 | 92.9 | GTP-binding family protein                            | gbpln | Arabidopsis lyrata   | AT2G41670.1   Symbols:   P-loop containing nucleoside triphosphate hydrolases superfamily protein   chr2:17374118-17376177 FORWARD LENGTH=386                                                                                                                                                                                               | 381  | 386  | 0         | 101.3 | 89.0 | 92.7 |
| Rsa1.0_00858.1.g20493.t1 | gb EOA27590.1  hypothetical protein CARUB_v10023729mg [Capsella rubella]                                                                                                                                                                                                                                                                                                                                                                                                                              | 293  | 300  | 1.00E-122 | 102.4 | 85.3 | 92.2 | hypothetical protein CARUB_v10023729mg                | gbpln | Capsella rubella     | AT2G41660.1   Symbols: MIZ1   Protein of unknown function. DUF617   chr2:17367945-17368838 FORWARD LENGTH=297                                                                                                                                                                                                                               | 293  | 297  | 1.00E-121 | 101.4 | 82.3 | 88.7 |
| Rsa1.0_00859.1.g20494.t1 | gb AAF99860.1 AC015448_10 Putative protein kinase [Arabidopsis thaliana]                                                                                                                                                                                                                                                                                                                                                                                                                              | 854  | 879  | 0         | 102.9 | 75.2 | 85.4 | Putative protein kinase                               | gbpln | Arabidopsis thaliana | AT1G51910.1   Symbols:   Leucine-rich repeat protein kinase family protein   chr1:19284277-19288385 REVERSE LENGTH=876                                                                                                                                                                                                                      | 854  | 876  | 0         | 102.6 | 74.9 | 85.1 |
| Rsa1.0_00859.1.g20495.t3 | ref NP_179090.1  Regulator of Vps4 activity in the MVB pathway protein [Arabidopsis thaliana]   g 3252806 gb AAC24176.1  hypothetical protein [Arabidopsis thaliana]   g 330251243 gb AEC06337.1  Regulator of Vps4 activity in the MVB pathway protein [Arabidopsis thaliana]                                                                                                                                                                                                                        | 364  | 454  | 1.00E-79  | 124.7 | 51.4 | 67.6 | Regulator of Vps4 activity in the MVB pathway protein | gbpln | Arabidopsis thaliana | AT2G14830.1   Symbols:   Regulator of Vps4 activity in the MVB pathway protein   chr2:6362524-6365818 FORWARD LENGTH=454                                                                                                                                                                                                                    | 364  | 454  | 3.00E-82  | 124.7 | 51.4 | 67.6 |
| Rsa1.0_00859.1.g20496.t2 | emb CAB40067.1  putative retrotransposon polyprotein [Arabidopsis thaliana]   g 726779 emb CAB81200.1  putative retrotransposon polyprotein [Arabidopsis thaliana]                                                                                                                                                                                                                                                                                                                                    | 1325 | 1203 | 0         | 90.8  | 34.3 | 47.1 | putative retrotransposon polyprotein                  | gbpln | Arabidopsis thaliana | AT4G23160.1   Symbols: CRK8   cysteine-rich RLK (RECEPTOR-like protein kinase) 8   chr4:12129485-12134086 FORWARD LENGTH=1262                                                                                                                                                                                                               | 1325 | 1262 | 1.00E-167 | 95.2  | 21.1 | 28.5 |
| Rsa1.0_00859.1.g20497.t1 | gb EOA37370.1  hypothetical protein CARUB_v10011168mg [Capsella rubella]                                                                                                                                                                                                                                                                                                                                                                                                                              | 208  | 884  | 2.00E-83  | 425.0 | 69.7 | 82.2 | hypothetical protein CARUB_v10011168mg                | gbpln | Capsella rubella     | AT1G51880.1   Symbols: RHS6   root hair specific 6   chr1:19270193-19274068 REVERSE LENGTH=880                                                                                                                                                                                                                                              | 208  | 880  | 5.00E-82  | 423.1 | 68.8 | 79.8 |

|                          |                                                                                                                                                                                                                                                                                                                                                                                                                                                                                                                                                                                                                                                                                                                                                                                                                                                                                                                                                                                                                                                                                                                                                         |      |     |          |       |      |      |                                                                                                                                                                   |       |                      |                                                                                                                                                 |      |     |          |       |      |      |
|--------------------------|---------------------------------------------------------------------------------------------------------------------------------------------------------------------------------------------------------------------------------------------------------------------------------------------------------------------------------------------------------------------------------------------------------------------------------------------------------------------------------------------------------------------------------------------------------------------------------------------------------------------------------------------------------------------------------------------------------------------------------------------------------------------------------------------------------------------------------------------------------------------------------------------------------------------------------------------------------------------------------------------------------------------------------------------------------------------------------------------------------------------------------------------------------|------|-----|----------|-------|------|------|-------------------------------------------------------------------------------------------------------------------------------------------------------------------|-------|----------------------|-------------------------------------------------------------------------------------------------------------------------------------------------|------|-----|----------|-------|------|------|
| Rsa1.0_00859.1.g20498.t4 | sp Q9FZB1.1 Y5188_ARATH RecName: Full=Probable LRR receptor-like serine/threonine-protein kinase At1g51880; Flags: Precursor gi 9802789 gb AAAF99858.1 AC015448.8 Putative protein kinase [Arabidopsis thaliana] gi 224589432 gb ACN59250.1  leucine-rich repeat receptor-like protein kinase [Arabidopsis thaliana]                                                                                                                                                                                                                                                                                                                                                                                                                                                                                                                                                                                                                                                                                                                                                                                                                                    | 625  | 872 | 0        | 139.5 | 74.6 | 83.5 | RecName: Full=Probable LRR receptor-like serine/threonine-protein kinase At1g51880; Flags: Precursor gi 9802789 gb AAAF99858.1 AC015448.8 Putative protein kinase | gbpln | Arabidopsis thaliana | AT1G51880.1   Symbols: RHS6   root hair specific 6   chr1:19270193-19274068 REVERSE LENGTH=880                                                  | 625  | 880 | 0        | 140.8 | 74.6 | 83.5 |
| Rsa1.0_00859.1.g20499.t1 | ref NP_175598.1  putative LRR receptor-like serine/threonine-protein kinase [Arabidopsis thaliana] gi 281185489 sp COLGG4.2 Y1518_ARATH RecName: Full=Probable LRR receptor-like serine/threonine-protein kinase At1g51860; Flags: Precursor gi 332194605 gb AEE32726.1  putative LRR receptor-like serine/threonine-protein kinase [Arabidopsis thaliana]                                                                                                                                                                                                                                                                                                                                                                                                                                                                                                                                                                                                                                                                                                                                                                                              | 1036 | 890 | 0        | 85.9  | 70.1 | 76.9 | putative LRR receptor-like serine/threonine-protein kinase                                                                                                        | gbpln | Arabidopsis thaliana | AT1G51860.1   Symbols:   Leucine-rich repeat protein kinase family protein   chr1:19252964-19261479 REVERSE LENGTH=890                          | 1036 | 890 | 0        | 85.9  | 70.1 | 76.9 |
| Rsa1.0_00859.1.g20500.t1 | gb AAAF99864.1 AC015448.14 Putative protein kinase [Arabidopsis thaliana]                                                                                                                                                                                                                                                                                                                                                                                                                                                                                                                                                                                                                                                                                                                                                                                                                                                                                                                                                                                                                                                                               | 851  | 875 | 0        | 102.8 | 79.0 | 87.8 | Putative protein kinase                                                                                                                                           | gbpln | Arabidopsis thaliana | AT1G51850.1   Symbols:   Leucine-rich repeat protein kinase family protein   chr1:19252964-19256783 REVERSE LENGTH=865                          | 851  | 865 | 0        | 101.6 | 77.2 | 85.7 |
| Rsa1.0_00859.1.g20501.t1 | ref XP_002891661.1  hypothetical protein ARALYDRAFT_337332 [Arabidopsis lyrata subsp. lyrata] gi 297337503 gb EFH67920.1  hypothetical protein ARALYDRAFT_337332 [Arabidopsis lyrata subsp. lyrata]                                                                                                                                                                                                                                                                                                                                                                                                                                                                                                                                                                                                                                                                                                                                                                                                                                                                                                                                                     | 88   | 403 | 1.00E-12 | 458.0 | 39.8 | 47.7 | hypothetical protein ARALYDRAFT_337332                                                                                                                            | gbpln | Arabidopsis lyrata   | AT1G51770.1   Symbols:   Core-2/1-branching beta-1,6-N-acetylglucosaminyltransferase family protein   chr1:19201919-19203224 FORWARD LENGTH=406 | 88   | 406 | 5.00E-14 | 461.4 | 37.5 | 45.5 |
| Rsa1.0_00859.1.g20502.t1 | gb ABB60091.1  IAA-amino acid hydrolase 3 [Brassica rapa]                                                                                                                                                                                                                                                                                                                                                                                                                                                                                                                                                                                                                                                                                                                                                                                                                                                                                                                                                                                                                                                                                               | 442  | 444 | 0        | 100.5 | 93.4 | 98.2 | IAA-amino acid hydrolase 3                                                                                                                                        | gbpln | Brassica rapa        | AT1G51760.1   Symbols: IAR3, JR3   peptidase M20/M25/M40 family protein   chr1:19199562-19201424 FORWARD LENGTH=440                             | 442  | 440 | 0        | 99.5  | 86.9 | 94.1 |
| Rsa1.0_00860.1.g20503.t1 | ref NP_200637.1  regulatory particle triple-A ATPase 3 [Arabidopsis thaliana] gi 297793353 ref XP_002864561.1  hypothetical protein ARALYDRAFT_495939 [Arabidopsis lyrata subsp. lyrata] gi 28558168 sp Q9SEI4.1 PRSEB_ARATH RecName: Full=26S protease regulatory subunit 6B homolog; AltName: Full=26S protease subunit 6B homolog; AltName: Full=26S proteasome AAA-ATPase subunit RPT3; AltName: Full=Protein BMAA insensitive morphology 409; AltName: Full=Regulatory particle triple-A ATPase subunit 3 gi 6652882 gb AAAF22523.1 AF123392.1 26S proteasome AAA-ATPase subunit RPT3 [Arabidopsis thaliana] gi 8777330 dbj BAA96920.1  26S proteasome AAA-ATPase subunit RPT3 [Arabidopsis thaliana] gi 17979231 gb AAL49932.1  AT4g10340/F24G24.140 [Arabidopsis thaliana] gi 56382019 gb AAV85728.1  At5g58290 [Arabidopsis thaliana] gi 297310396 gb EFH40820.1  hypothetical protein ARALYDRAFT_495939 [Arabidopsis lyrata subsp. lyrata] gi 332009646 gb AED97029.1  regulatory particle triple-A ATPase 3 [Arabidopsis thaliana] gi 297793353 ref XP_002864561.1  hypothetical protein ARALYDRAFT_495939 [Arabidopsis lyrata subsp. lyrata] | 391  | 408 | 0        | 104.3 | 96.7 | 98.0 | regulatory particle triple-A ATPase 3                                                                                                                             | gbpln | Arabidopsis lyrata   | AT5G58290.1   Symbols: RPT3   regulatory particle triple-A ATPase 3   chr5:23569155-23571116 FORWARD LENGTH=408                                 | 391  | 408 | 0        | 104.3 | 96.7 | 98.0 |

|                          |                                                                                                                                                                                                                                                                                                                                                                                                                                                                                                                                                                                                                                                                                                                                                                                                                                                                                              |      |      |           |       |      |      |                                               |             |                      |                                                                                                                        |      |     |           |       |      |      |
|--------------------------|----------------------------------------------------------------------------------------------------------------------------------------------------------------------------------------------------------------------------------------------------------------------------------------------------------------------------------------------------------------------------------------------------------------------------------------------------------------------------------------------------------------------------------------------------------------------------------------------------------------------------------------------------------------------------------------------------------------------------------------------------------------------------------------------------------------------------------------------------------------------------------------------|------|------|-----------|-------|------|------|-----------------------------------------------|-------------|----------------------|------------------------------------------------------------------------------------------------------------------------|------|-----|-----------|-------|------|------|
| Rsa1.0_00860.1.g20504.t1 | ref NP_200638.1  putative inactive receptor kinase [Arabidopsis thaliana] gi 186532563 ref NP_001119458.1  putative inactive receptor kinase [Arabidopsis thaliana] gi 75335557 sp Q9LVM0.1 Y5830_ARAT H RecName: Full=Probable inactive receptor kinase At5g58300; Flags: Precursor gi 8777331 dbj BAA96921.1  receptor-like protein kinase [Arabidopsis thaliana] gi 18086391 gb AL57654.1  unknown protein [Arabidopsis thaliana] gi 24797034 gb AAN64529.1  At5g58299/At5g58299 [Arabidopsis thaliana] gi 224589729 gb ACN59396.1  leucine-rich repeat receptor-like protein kinase [Arabidopsis thaliana] gi 332009647 gb AED97030.1  putative inactive receptor kinase [Arabidopsis thaliana] gi 332009648 gb AED97031.1  putative inactive receptor kinase [Arabidopsis thaliana] ref NP_001147011.1  esterase PIR7B [Zea mays] gi 195606450 gb ACG25055.1  esterase PIR7B [Zea mays] | 659  | 654  | 0         | 99.2  | 84.4 | 90.3 | putative inactive receptor kinase             | gbpln       | Arabidopsis thaliana | AT5G58300.2   Symbols:   Leucine-rich repeat protein kinase family protein   chr5:23572821-23574871 FORWARD LENGTH=654 | 659  | 654 | 0         | 99.2  | 84.4 | 90.3 |
| Rsa1.0_00860.1.g20505.t2 | ref NP_001147011.1  esterase PIR7B [Zea mays] gi 195606450 gb ACG25055.1  esterase PIR7B [Zea mays]                                                                                                                                                                                                                                                                                                                                                                                                                                                                                                                                                                                                                                                                                                                                                                                          | 278  | 264  | 1.00E-142 | 95.0  | 86.3 | 89.6 | esterase PIR7B                                | gbenv/gbpln | Zea mays             | AT5G58310.1   Symbols: ATMES18, MES18   methyl esterase 18   chr5:23575127-23576007 REVERSE LENGTH=263                 | 278  | 263 | 1.00E-123 | 94.6  | 73.7 | 82.0 |
| Rsa1.0_00860.1.g20506.t1 | gb EOA14841.1  hypothetical protein CARUB_v10028155mg [Capsella rubella]                                                                                                                                                                                                                                                                                                                                                                                                                                                                                                                                                                                                                                                                                                                                                                                                                     | 482  | 556  | 0         | 115.4 | 75.7 | 86.1 | hypothetical protein CARUB_v10028155mg        | gbpln       | Capsella rubella     | AT5G58320.2   Symbols:   Kinase interacting (KIP1-like) family protein   chr5:23577728-23579641 FORWARD LENGTH=558     | 482  | 558 | 1.00E-178 | 115.8 | 73.0 | 85.3 |
| Rsa1.0_00860.1.g20507.t1 | ref NP_851214.1  lactate/malate dehydrogenase family protein [Arabidopsis thaliana] gi 23297668 gb AAN13004.1  NADP-dependent malate dehydrogenase [Arabidopsis thaliana] gi 110740830 dbj BAE98512.1  NADP-dependent malate dehydrogenase [Arabidopsis thaliana] gi 332009655 gb AED97038.1  lactate/malate dehydrogenase family protein [Arabidopsis thaliana] ref XP_002864565.1  hypothetical protein ARALYDRAFT_495950 [Arabidopsis lyrata subsp. lyrata] gi 297310400 gb EFH40824.1  hypothetical protein ARALYDRAFT_495950 [Arabidopsis lyrata subsp. lyrata]                                                                                                                                                                                                                                                                                                                         | 443  | 443  | 0         | 100.0 | 92.6 | 95.5 | lactate/malate dehydrogenase family protein   | gbpln       | Arabidopsis thaliana | AT5G58330.1   Symbols:   lactate/malate dehydrogenase family protein   chr5:23580010-23582287 REVERSE LENGTH=443       | 443  | 443 | 0         | 100.0 | 92.6 | 95.5 |
| Rsa1.0_00860.1.g20508.t1 | ref NP_200644.1  ovate family protein 3 [Arabidopsis thaliana] gi 8777337 dbj BAA96927.1  unnamed protein product [Arabidopsis thaliana] gi 67833890 gb AA778869.1  ovate family protein [Arabidopsis thaliana] gi 332009659 gb AED97042.1  ovate family protein 3 [Arabidopsis thaliana] ref NP_173961.3  helicase associated domain-containing protein [Arabidopsis thaliana] gi 332192562 gb AEE30683.1  helicase associated domain-containing protein [Arabidopsis thaliana] ref NP_200647.1  peroxidase 67 [Arabidopsis thaliana] gi 26397866 sp Q9LVL2.1 PER67_ARAT H RecName: Full=Peroxidase 67; Short=Atperox P67; AltName: Full=ATP44; Flags: Precursor gi 8777340 dbj BAA96930.1  peroxidase [Arabidopsis thaliana] gi 332009664 gb AED97047.1  peroxidase 67 [Arabidopsis thaliana]                                                                                              | 560  | 571  | 0         | 102.0 | 83.9 | 90.2 | hypothetical protein ARALYDRAFT_495950        | gbpln       | Arabidopsis lyrata   | AT5G58350.1   Symbols: WNK4, ZIK2   with no lysine (K) kinase 4   chr5:23585505-23587681 FORWARD LENGTH=571            | 560  | 571 | 0         | 102.0 | 82.7 | 89.5 |
| Rsa1.0_00860.1.g20509.t1 | ref NP_200644.1  ovate family protein 3 [Arabidopsis thaliana] gi 8777337 dbj BAA96927.1  unnamed protein product [Arabidopsis thaliana] gi 67833890 gb AA778869.1  ovate family protein [Arabidopsis thaliana] gi 332009659 gb AED97042.1  ovate family protein 3 [Arabidopsis thaliana] ref NP_173961.3  helicase associated domain-containing protein [Arabidopsis thaliana] gi 332192562 gb AEE30683.1  helicase associated domain-containing protein [Arabidopsis thaliana] ref NP_200647.1  peroxidase 67 [Arabidopsis thaliana] gi 26397866 sp Q9LVL2.1 PER67_ARAT H RecName: Full=Peroxidase 67; Short=Atperox P67; AltName: Full=ATP44; Flags: Precursor gi 8777340 dbj BAA96930.1  peroxidase [Arabidopsis thaliana] gi 332009664 gb AED97047.1  peroxidase 67 [Arabidopsis thaliana]                                                                                              | 401  | 296  | 2.00E-73  | 73.8  | 44.9 | 49.9 | ovate family protein 3                        | gbpln       | Arabidopsis thaliana | AT5G58360.1   Symbols: ATOFP3, OFFP3   ovate family protein 3   chr5:23590079-23590969 REVERSE LENGTH=296              | 401  | 296 | 6.00E-76  | 73.8  | 44.9 | 49.9 |
| Rsa1.0_00860.1.g20510.t1 | ref NP_200644.1  ovate family protein 3 [Arabidopsis thaliana] gi 8777337 dbj BAA96927.1  unnamed protein product [Arabidopsis thaliana] gi 67833890 gb AA778869.1  ovate family protein [Arabidopsis thaliana] gi 332009659 gb AED97042.1  ovate family protein 3 [Arabidopsis thaliana] ref NP_173961.3  helicase associated domain-containing protein [Arabidopsis thaliana] gi 332192562 gb AEE30683.1  helicase associated domain-containing protein [Arabidopsis thaliana] ref NP_200647.1  peroxidase 67 [Arabidopsis thaliana] gi 26397866 sp Q9LVL2.1 PER67_ARAT H RecName: Full=Peroxidase 67; Short=Atperox P67; AltName: Full=ATP44; Flags: Precursor gi 8777340 dbj BAA96930.1  peroxidase [Arabidopsis thaliana] gi 332009664 gb AED97047.1  peroxidase 67 [Arabidopsis thaliana]                                                                                              | 758  | 717  | 0         | 94.6  | 68.3 | 76.6 | helicase associated domain-containing protein | gbpln       | Arabidopsis thaliana | AT1G26370.1   Symbols:   RNA helicase family protein   chr1:9122030-9125368 REVERSE LENGTH=717                         | 758  | 717 | 0         | 94.6  | 68.3 | 76.6 |
| Rsa1.0_00860.1.g20511.t1 | ref NP_200647.1  peroxidase 67 [Arabidopsis thaliana] gi 26397866 sp Q9LVL2.1 PER67_ARAT H RecName: Full=Peroxidase 67; Short=Atperox P67; AltName: Full=ATP44; Flags: Precursor gi 8777340 dbj BAA96930.1  peroxidase [Arabidopsis thaliana] gi 332009664 gb AED97047.1  peroxidase 67 [Arabidopsis thaliana]                                                                                                                                                                                                                                                                                                                                                                                                                                                                                                                                                                               | 326  | 316  | 1.00E-139 | 96.9  | 75.8 | 85.9 | peroxidase 67                                 | gbpln       | Arabidopsis thaliana | AT5G58390.1   Symbols:   Peroxidase superfamily protein   chr5:23599755-23601244 REVERSE LENGTH=316                    | 326  | 316 | 1.00E-142 | 96.9  | 75.8 | 85.9 |
| Rsa1.0_00860.1.g20512.t1 | #                                                                                                                                                                                                                                                                                                                                                                                                                                                                                                                                                                                                                                                                                                                                                                                                                                                                                            | #    | #    | #         | #     | #    | -    | ----                                          | ----        | #                    | #                                                                                                                      | #    | #   | #         | #     | #    |      |
| Rsa1.0_00860.1.g20513.t1 | gb AAG50806.1 AC079281.8 unknown protein [Arabidopsis thaliana]                                                                                                                                                                                                                                                                                                                                                                                                                                                                                                                                                                                                                                                                                                                                                                                                                              | 1116 | 1213 | 0         | 108.7 | 53.7 | 70.2 | unknown protein                               | gbpln       | Arabidopsis thaliana | AT1G43760.1   Symbols:   DNase I-like superfamily protein   chr1:16528880-16531065 REVERSE LENGTH=626                  | 1116 | 626 | 7.00E-70  | 56.1  | 12.9 | 20.2 |
| Rsa1.0_00860.1.g20514.t3 | gb EOA31247.1  hypothetical protein CARUB_v10014418mg [Capsella rubella]                                                                                                                                                                                                                                                                                                                                                                                                                                                                                                                                                                                                                                                                                                                                                                                                                     | 264  | 262  | 1.00E-144 | 99.2  | 93.9 | 97.3 | hypothetical protein CARUB_v10014418mg        | gbpln       | Capsella rubella     | AT2G17360.1   Symbols:   Ribosomal protein S4 (RPS4A) family protein   chr2:7546598-7548138 FORWARD LENGTH=261         | 264  | 261 | 1.00E-145 | 98.9  | 93.2 | 97.0 |

|                           |                                                                                                                                                                                                                                                                                                                                                                                                                                                                            |      |      |           |       |      |      |                                                                                |       |                      |                                                                                                                                                                                |      |      |           |       |      |      |
|---------------------------|----------------------------------------------------------------------------------------------------------------------------------------------------------------------------------------------------------------------------------------------------------------------------------------------------------------------------------------------------------------------------------------------------------------------------------------------------------------------------|------|------|-----------|-------|------|------|--------------------------------------------------------------------------------|-------|----------------------|--------------------------------------------------------------------------------------------------------------------------------------------------------------------------------|------|------|-----------|-------|------|------|
| Rsa1.0_00860.1.g20515.t1  | gb EOA15234.1  hypothetical protein CARUB_v10028631mg [Capsella rubella]                                                                                                                                                                                                                                                                                                                                                                                                   | 621  | 624  | 0         | 100.5 | 86.2 | 93.6 | hypothetical protein CARUB_v10028631mg                                         | gbpln | Capsella rubella     | AT5G58430.1   Symbols: ATEXO70B1, EXO70B1   exocyst subunit exo70 family protein B1   chr5:23621460-23623334 REVERSE LENGTH=624                                                | 621  | 624  | 0         | 100.5 | 86.3 | 93.7 |
| Rsa1.0_00860.1.g20516.t1  | ref XP_002868499.1  ATCHX24 [Arabidopsis lyrata subsp. lyrata] gi 297314335 gb EFH44758.1  ATCHX24 [Arabidopsis lyrata subsp. lyrata]                                                                                                                                                                                                                                                                                                                                      | 841  | 861  | 0         | 102.4 | 74.0 | 86.7 | ATCHX24                                                                        | gbpln | Arabidopsis lyrata   | AT5G37060.1   Symbols: ATCHX24, CHX24   cation/H <sup>+</sup> exchanger 24   chr5:14642741-14645414 REVERSE LENGTH=859                                                         | 841  | 859  | 0         | 102.1 | 72.4 | 86.1 |
| Rsa1.0_00860.1.g20517.t1  | gb EOA14774.1  hypothetical protein CARUB_v10028073mg, partial [Capsella rubella]                                                                                                                                                                                                                                                                                                                                                                                          | 376  | 918  | 7.00E-97  | 244.1 | 67.0 | 70.7 | hypothetical protein CARUB_v10028073mg, partial                                | gbpln | Capsella rubella     | AT5G58470.2   Symbols: TAF15b   TBP-associated factor 15b   chr5:23638566-23640854 REVERSE LENGTH=422                                                                          | 376  | 422  | 3.00E-93  | 112.2 | 63.6 | 66.5 |
| Rsa1.0_00860.1.g20518.t1  | ref NP_200658.1  uncharacterized protein [Arabidopsis thaliana] gi 10177027 dbj BAB10265.1  unnamed protein product [Arabidopsis thaliana] gi 34098923 gb AAQ56844.1  At5g58500 [Arabidopsis thaliana] gi 332009677 gb AED97060.1  uncharacterized protein AT5G58500 [Arabidopsis thaliana]                                                                                                                                                                                | 181  | 182  | 5.00E-81  | 100.6 | 86.7 | 92.8 | uncharacterized protein                                                        | gbpln | Arabidopsis thaliana | AT5G58500.1   Symbols: LSH5   Protein of unknown function (DUF640)   chr5:23645535-23646083 REVERSE LENGTH=182                                                                 | 181  | 182  | 2.00E-83  | 100.6 | 86.7 | 92.8 |
| Rsa1.0_00861.1.g20519.t2  | gb AAF19226.1  A AC007505.2 Highly similar to Ta1-3 polyprotein [Arabidopsis thaliana]                                                                                                                                                                                                                                                                                                                                                                                     | 1055 | 1356 | 0         | 128.5 | 45.2 | 59.9 | Highly similar to Ta1-3 polyprotein                                            | gbpln | Arabidopsis thaliana | AT4G23160.1   Symbols: CRK8   cysteine-rich RLK (RECEPTOR-like protein kinase) 8   chr4:12129485-12134086 FORWARD LENGTH=1262                                                  | 1055 | 1262 | 2.00E-72  | 119.6 | 15.5 | 22.9 |
| Rsa1.0_00861.1.g20520.t1  | gb ADD25169.1  putative dof zinc finger protein [Brassica napus]                                                                                                                                                                                                                                                                                                                                                                                                           | 435  | 427  | 0         | 98.2  | 85.1 | 89.0 | putative dof zinc finger protein                                               | gbpln | Brassica napus       | AT3G47500.1   Symbols: CDF3   cycling DOF factor 3   chr3:17504276-17505964 REVERSE LENGTH=448                                                                                 | 435  | 448  | 1.00E-176 | 103.0 | 81.4 | 88.3 |
| Rsa1.0_00861.1.g20521.t1  | ref NP_001190027.1  HNH endonuclease [Arabidopsis thaliana] gi 332644768 gb AEE78289.1  HNH endonuclease [Arabidopsis thaliana]                                                                                                                                                                                                                                                                                                                                            | 210  | 215  | 8.00E-91  | 102.4 | 82.4 | 86.7 | HNH endonuclease                                                               | gbpln | Arabidopsis thaliana | AT3G47490.3   Symbols:   HNH endonuclease   chr3:17498454-17500731 FORWARD LENGTH=215                                                                                          | 210  | 215  | 3.00E-93  | 102.4 | 82.4 | 86.7 |
| Rsa1.0_00861.1.g20522.t1  | gb EOA25559.1  hypothetical protein CARUB_v10018903mg [Capsella rubella]                                                                                                                                                                                                                                                                                                                                                                                                   | 183  | 183  | 1.00E-75  | 100.0 | 77.6 | 87.4 | hypothetical protein CARUB_v10018903mg                                         | gbpln | Capsella rubella     | AT3G47480.1   Symbols:   Calcium-binding EF-hand family protein   chr3:17496354-17496905 REVERSE LENGTH=183                                                                    | 183  | 183  | 3.00E-74  | 100.0 | 79.2 | 89.1 |
| Rsa1.0_00861.1.g20523.t1  | #                                                                                                                                                                                                                                                                                                                                                                                                                                                                          | #    | #    | #         | #     | #    | #    | -                                                                              | ----  | ----                 | #                                                                                                                                                                              | #    | #    | #         | #     | #    |      |
| Rsa1.0_00861.1.g20524.t1  | dbj BAJ33651.1  unnamed protein product [Thellungiella halophila]                                                                                                                                                                                                                                                                                                                                                                                                          | 250  | 251  | 1.00E-140 | 100.4 | 98.0 | 99.2 | unnamed protein product                                                        | ----  | ----                 | AT3G47470.1   Symbols: LHCA4, CAB4   light-harvesting chlorophyll-protein complex I subunit A4   chr3:17493622-17494773 REVERSE LENGTH=251                                     | 250  | 251  | 1.00E-138 | 100.4 | 95.2 | 96.8 |
| Rsa1.0_00861.1.g20525.t1  | ref NP_190330.1  structural maintenance of chromosomes protein 2-2 [Arabidopsis thaliana] gi 75337454 sp Q9SN90.1 SMC22_ARAT H RecName: Full=Structural maintenance of chromosomes protein 2-2; Short=AtSMC2-2; AltName: Full=Chromosome-associated protein E-2; Short=AtCAP-E2 gi 6522529 emb CAB61972.1  chromosome assembly protein homolog [Arabidopsis thaliana] gi 332644763 gb AEE78284.1  structural maintenance of chromosomes protein 2-2 [Arabidopsis thaliana] | 1131 | 1171 | 0         | 103.5 | 89.7 | 95.4 | structural maintenance of chromosomes protein 2-2                              | gbpln | Arabidopsis thaliana | AT3G47460.1   Symbols: ATSMC2   Structural maintenance of chromosomes (SMC) family protein   chr3:17486765-17493178 FORWARD LENGTH=1171                                        | 1131 | 1171 | 0         | 103.5 | 89.7 | 95.4 |
| Rsa1.0_00861.1.g20526.t1  | #                                                                                                                                                                                                                                                                                                                                                                                                                                                                          | #    | #    | #         | #     | #    | #    | -                                                                              | ----  | ----                 | #                                                                                                                                                                              | #    | #    | #         | #     | #    |      |
| Rsa1.0_00861.1.g20527.t1  | gb ACX61572.1  GTPase [Brassica juncea]                                                                                                                                                                                                                                                                                                                                                                                                                                    | 309  | 555  | 1.00E-129 | 179.6 | 82.2 | 87.4 | GTPase                                                                         | gbpln | Brassica juncea      | AT3G47450.2   Symbols: ATNOS1, NOS1, ATNOA1, NOA1, RIF1   P-loop containing nucleoside triphosphate hydrolases superfamily protein   chr3:17483195-17486249 REVERSE LENGTH=561 | 309  | 561  | 1.00E-124 | 181.6 | 77.3 | 83.2 |
| Rsa1.0_00861.1.g20528.t1  | gb EOA24694.1  hypothetical protein CARUB_v10017971mg [Capsella rubella]                                                                                                                                                                                                                                                                                                                                                                                                   | 226  | 228  | 1.00E-110 | 100.9 | 89.4 | 96.5 | hypothetical protein CARUB_v10017971mg                                         | gbpln | Capsella rubella     | AT3G47430.1   Symbols: PEX11B   peroxin 11B   chr3:17480798-17481692 FORWARD LENGTH=227                                                                                        | 226  | 227  | 1.00E-111 | 100.4 | 88.9 | 96.5 |
| Rsa1.0_00862.1.g20529.t1  | gb AAC26241.1  F9D12.15 gene product [Arabidopsis thaliana]                                                                                                                                                                                                                                                                                                                                                                                                                | 624  | 850  | 3.00E-35  | 136.2 | 20.7 | 33.5 | F9D12.15 gene product                                                          | gbpln | Arabidopsis thaliana | #                                                                                                                                                                              | #    | #    | #         | #     | #    |      |
| Rsa1.0_00862.1.g20530.t1  | gb AAF67366.1  Hypothetical protein T32B20.i [Arabidopsis thaliana]                                                                                                                                                                                                                                                                                                                                                                                                        | 239  | 724  | 5.00E-59  | 302.9 | 47.7 | 64.0 | Hypothetical protein T32B20.i                                                  | gbpln | Arabidopsis thaliana | #                                                                                                                                                                              | #    | #    | #         | #     | #    |      |
| Rsa1.0_00862.1.g20531.t1  | gb EOA14193.1  hypothetical protein CARUB_v10027345mg, partial [Capsella rubella]                                                                                                                                                                                                                                                                                                                                                                                          | 101  | 137  | 9.00E-21  | 135.6 | 50.5 | 64.4 | hypothetical protein CARUB_v10027345mg, partial                                | gbpln | Capsella rubella     | AT5G47550.1   Symbols:   Cystatin/monellin superfamily protein   chr5:19286596-19286964 REVERSE LENGTH=122                                                                     | 101  | 122  | 7.00E-19  | 120.8 | 44.6 | 59.4 |
| Rsa1.0_00862.1.g20532.t19 | pir  T00833 RNA-directed DNA polymerase homolog T13L16.7 - Arabidopsis thaliana (fragment)                                                                                                                                                                                                                                                                                                                                                                                 | 1165 | 1365 | 1.00E-129 | 117.2 | 24.2 | 31.8 | RNA-directed DNA polymerase homolog T13L16.7 - Arabidopsis thaliana (fragment) | ----  | ----                 | AT4G29090.1   Symbols:   Ribonuclease H-like superfamily protein   chr4:14333528-14335255 FORWARD LENGTH=575                                                                   | 1165 | 575  | 5.00E-44  | 49.4  | 11.2 | 17.9 |

|                          |                                                                                                                                                                                                                                                                                                                                                                                                                                                                                                                                                                                                                                                                  |      |      |           |       |      |      |                                                                                    |       |                      |                                                                                                                                                                                                                                                                                                                                                                                                                                                              |      |      |          |       |      |      |
|--------------------------|------------------------------------------------------------------------------------------------------------------------------------------------------------------------------------------------------------------------------------------------------------------------------------------------------------------------------------------------------------------------------------------------------------------------------------------------------------------------------------------------------------------------------------------------------------------------------------------------------------------------------------------------------------------|------|------|-----------|-------|------|------|------------------------------------------------------------------------------------|-------|----------------------|--------------------------------------------------------------------------------------------------------------------------------------------------------------------------------------------------------------------------------------------------------------------------------------------------------------------------------------------------------------------------------------------------------------------------------------------------------------|------|------|----------|-------|------|------|
| Rsa1.0_00862.1.g20533.t1 | ref NP_192985.1  bifunctional inhibitor/lipid-transfer protein/seed storage 2S albumin-like protein [Arabidopsis thaliana] gi 15724342 gb AAL06564.1 AF412111.1 AT4g12480/T1P17_70 [Arabidopsis thaliana] gi 871780 gb AAC37471.1  pEARLI 1 [Arabidopsis thaliana] gi 4725947 emb CAB41718.1  pEARLI 1 [Arabidopsis thaliana] gi 7267950 emb CAB78291.1  pEARLI 1 [Arabidopsis thaliana] gi 22137278 gb AAM91484.1  AT4g12480/T1P17_70 [Arabidopsis thaliana] gi 110740320 dbj BAF02055.1  pEARLI 1 [Arabidopsis thaliana] gi 332657738 gb AEE83138.1  bifunctional inhibitor/lipid-transfer protein/seed storage 2S albumin-like protein [Arabidopsis thaliana] | 269  | 168  | 7.00E-22  | 62.5  | 18.6 | 21.6 | bifunctional inhibitor/lipid-transfer protein/seed storage 2S albumin-like protein | gbpln | Arabidopsis thaliana | AT4G12480.1   Symbols: pEARLI 1   Bifunctional inhibitor/lipid-transfer protein/seed storage 2S albumin superfamily protein   chr4:7406371-7406877 REVERSE LENGTH=168                                                                                                                                                                                                                                                                                        | 269  | 168  | 2.00E-24 | 62.5  | 18.6 | 21.6 |
| Rsa1.0_00862.1.g20534.t1 | #                                                                                                                                                                                                                                                                                                                                                                                                                                                                                                                                                                                                                                                                | #    | #    | #         | #     | #    | #    | -                                                                                  | ----  | ----                 | #                                                                                                                                                                                                                                                                                                                                                                                                                                                            | #    | #    | #        | #     | #    |      |
| Rsa1.0_00862.1.g20535.t1 | gb EOA36857.1  hypothetical protein CARUB_v10008803mg [Capsella rubella]                                                                                                                                                                                                                                                                                                                                                                                                                                                                                                                                                                                         | 598  | 536  | 6.00E-93  | 89.6  | 36.5 | 49.7 | hypothetical protein CARUB_v10008803mg                                             | gbpln | Capsella rubella     | AT2G07760.1   Symbols:   Zinc knuckle (CCHC-type) family protein   chr2:3584420-3586278 REVERSE LENGTH=530                                                                                                                                                                                                                                                                                                                                                   | 598  | 530  | 7.00E-51 | 88.6  | 14.5 | 17.7 |
| Rsa1.0_00862.1.g20536.t9 | dbj BAB02990.1  retroelement pol polyprotein-like [Arabidopsis thaliana]                                                                                                                                                                                                                                                                                                                                                                                                                                                                                                                                                                                         | 1072 | 1250 | 0         | 116.6 | 41.3 | 53.5 | retroelement pol polyprotein-like                                                  | gbpln | Arabidopsis thaliana | AT4G23160.1   Symbols: CRK8   cysteine-rich RLK (RECEPTOR-like protein kinase) 8   chr4:12129485-12134086 FORWARD LENGTH=1262                                                                                                                                                                                                                                                                                                                                | 1072 | 1262 | 1.00E-35 | 117.7 | 12.1 | 20.1 |
| Rsa1.0_00862.1.g20537.t1 | #                                                                                                                                                                                                                                                                                                                                                                                                                                                                                                                                                                                                                                                                | #    | #    | #         | #     | #    | #    | -                                                                                  | ----  | ----                 | #                                                                                                                                                                                                                                                                                                                                                                                                                                                            | #    | #    | #        | #     | #    |      |
| Rsa1.0_00862.1.g20538.t1 | ref XP_002874777.1  hypothetical protein ARALYDRAFT_911650 [Arabidopsis lyrata subsp. lyrata] gi 297320614 gb EFH51036.1  hypothetical protein ARALYDRAFT_911650 [Arabidopsis lyrata subsp. lyrata]                                                                                                                                                                                                                                                                                                                                                                                                                                                              | 169  | 150  | 3.00E-55  | 88.8  | 69.8 | 78.1 | hypothetical protein ARALYDRAFT_911650                                             | gbpln | Arabidopsis lyrata   | AT4G12490.1   Symbols:   Bifunctional inhibitor/lipid-transfer protein/seed storage 2S albumin superfamily protein   chr4:7409830-7410378 REVERSE LENGTH=182                                                                                                                                                                                                                                                                                                 | 169  | 182  | 5.00E-57 | 107.7 | 72.8 | 81.1 |
| Rsa1.0_00863.1.g20539.t1 | ref XP_002889580.1  predicted protein [Arabidopsis lyrata subsp. lyrata] gi 297335422 gb EFH65839.1  predicted protein [Arabidopsis lyrata subsp. lyrata]                                                                                                                                                                                                                                                                                                                                                                                                                                                                                                        | 76   | 79   | 7.00E-28  | 103.9 | 84.2 | 93.4 | predicted protein                                                                  | gbpln | Arabidopsis lyrata   | AT1G06101.1   Symbols:   unknown protein; Has 25 Blast hits to 25 proteins in 9 species: Archae - 0; Bacteria - 0; Metazoa - 0; Fungi - 0; Plants - 25; Viruses - 0; Other Eukaryotes - 0 (source: NCBI BLink).   chr1:1823347-1823670 FORWARD LENGTH=78                                                                                                                                                                                                     | 76   | 78   | 4.00E-28 | 102.6 | 81.6 | 89.5 |
| Rsa1.0_00863.1.g20540.t1 | gb AEW46252.1  salt tolerance protein [Brassica napus] gi 363990306 gb AEW46253.1  salt tolerance protein [Brassica napus]                                                                                                                                                                                                                                                                                                                                                                                                                                                                                                                                       | 244  | 241  | 1.00E-101 | 98.8  | 78.3 | 85.7 | salt tolerance protein                                                             | gbpln | Brassica napus       | AT1G06040.1   Symbols: STO   B-box zinc finger family protein   chr1:1828662-1829659 REVERSE LENGTH=248                                                                                                                                                                                                                                                                                                                                                      | 244  | 248  | 3.00E-96 | 101.6 | 75.8 | 84.4 |
| Rsa1.0_00863.1.g20541.t1 | #                                                                                                                                                                                                                                                                                                                                                                                                                                                                                                                                                                                                                                                                | #    | #    | #         | #     | #    | #    | -                                                                                  | ----  | ----                 | #                                                                                                                                                                                                                                                                                                                                                                                                                                                            | #    | #    | #        | #     | #    |      |
| Rsa1.0_00863.1.g20542.t1 | ref XP_002889607.1  hypothetical protein ARALYDRAFT_887853 [Arabidopsis lyrata subsp. lyrata] gi 297335449 gb EFH65866.1  hypothetical protein ARALYDRAFT_887853 [Arabidopsis lyrata subsp. lyrata]                                                                                                                                                                                                                                                                                                                                                                                                                                                              | 137  | 139  | 4.00E-45  | 101.5 | 74.5 | 81.8 | hypothetical protein ARALYDRAFT_887853                                             | gbpln | Arabidopsis lyrata   | AT1G06500.4   Symbols:   unknown protein; FUNCTIONS IN: molecular function unknown; INVOLVED IN: biological process unknown; LOCATED IN: cellular component unknown; EXPRESSED IN: 22 plant structures; EXPRESSED DURING: 13 growth stages; Has 25 Blast hits to 25 proteins in 10 species: Archae - 0; Bacteria - 0; Metazoa - 0; Fungi - 0; Plants - 25; Viruses - 0; Other Eukaryotes - 0 (source: NCBI BLink).   chr1:1990176-1990586 FORWARD LENGTH=136 | 137  | 136  | 3.00E-44 | 99.3  | 69.3 | 78.8 |
| Rsa1.0_00863.1.g20543.t1 | gb AFB74218.1  4-hydroxyphenylpyruvate dioxygenase [Brassica napus]                                                                                                                                                                                                                                                                                                                                                                                                                                                                                                                                                                                              | 1000 | 440  | 0         | 44.0  | 41.9 | 42.8 | 4-hydroxyphenylpyruvate dioxygenase                                                | gbpln | Brassica napus       | AT1G06570.1   Symbols: PDS1, HPD   phytoene desaturation 1   chr1:2012015-2013543 REVERSE LENGTH=473                                                                                                                                                                                                                                                                                                                                                         | 1000 | 473  | 0        | 47.3  | 40.6 | 42.3 |
| Rsa1.0_00863.1.g20544.t1 | gb AAF24811.1 AC007592.4 F12K11.7 [Arabidopsis thaliana]                                                                                                                                                                                                                                                                                                                                                                                                                                                                                                                                                                                                         | 105  | 819  | 2.00E-12  | 780.0 | 33.3 | 38.1 | F12K11.7                                                                           | gbpln | Arabidopsis thaliana | AT1G06590.1   Symbols:   unknown protein; Has 380 Blast hits to 268 proteins in 109 species: Archae - 0; Bacteria - 0; Metazoa - 245; Fungi - 73; Plants - 49; Viruses - 0; Other Eukaryotes - 13 (source: NCBI BLink).   chr1:2016504-2024505 REVERSE LENGTH=916                                                                                                                                                                                            | 105  | 916  | 3.00E-15 | 872.4 | 33.3 | 38.1 |
| Rsa1.0_00863.1.g20545.t1 | gb AAM82604.1 AF525305.2 putative AP endonuclease/reverse transcriptase [Brassica napus]                                                                                                                                                                                                                                                                                                                                                                                                                                                                                                                                                                         | 1786 | 1214 | 0         | 68.0  | 25.3 | 38.0 | putative AP endonuclease/reverse transcriptase                                     | gbpln | Brassica napus       | AT1G43760.1   Symbols:   DNase I-like superfamily protein   chr1:16528880-16531065 REVERSE LENGTH=626                                                                                                                                                                                                                                                                                                                                                        | 1786 | 626  | 2.00E-83 | 35.1  | 9.4  | 14.3 |
| Rsa1.0_00863.1.g20546.t1 | #                                                                                                                                                                                                                                                                                                                                                                                                                                                                                                                                                                                                                                                                | #    | #    | #         | #     | #    | #    | -                                                                                  | ----  | ----                 | #                                                                                                                                                                                                                                                                                                                                                                                                                                                            | #    | #    | #        | #     | #    |      |



|                          |                                                                                                                                                                                                                                                                                                        |     |     |           |       |      |      |                                        |       |                      |                                                                                                                                                                                                                                                                                                                                                                                                                                                                                                                                                |     |     |           |       |      |      |
|--------------------------|--------------------------------------------------------------------------------------------------------------------------------------------------------------------------------------------------------------------------------------------------------------------------------------------------------|-----|-----|-----------|-------|------|------|----------------------------------------|-------|----------------------|------------------------------------------------------------------------------------------------------------------------------------------------------------------------------------------------------------------------------------------------------------------------------------------------------------------------------------------------------------------------------------------------------------------------------------------------------------------------------------------------------------------------------------------------|-----|-----|-----------|-------|------|------|
| Rsa1.0_00863.1.g20547.t1 | refXP_002899612.1   hypothetical protein ARALYDRAFT_470684 [Arabidopsis lyrata subsp. lyrata] gi 297335454 gb EFH65871.1   hypothetical protein ARALYDRAFT_470684 [Arabidopsis lyrata subsp. lyrata]                                                                                                   | 368 | 369 | 0         | 100.3 | 84.5 | 91.8 | hypothetical protein ARALYDRAFT_470684 | gbpln | Arabidopsis lyrata   | AT1G06650.2   Symbols:   2-oxoglutarate (2OG) and Fe(II)-dependent oxygenase superfamily protein   chr1:2035909-2037186 FORWARD LENGTH=369                                                                                                                                                                                                                                                                                                                                                                                                     | 368 | 369 | 0         | 100.3 | 81.5 | 90.2 |
| Rsa1.0_00863.1.g20548.t1 | refXP_002899612.1   hypothetical protein ARALYDRAFT_470684 [Arabidopsis lyrata subsp. lyrata] gi 297335454 gb EFH65871.1   hypothetical protein ARALYDRAFT_470684 [Arabidopsis lyrata subsp. lyrata]                                                                                                   | 366 | 369 | 0         | 100.8 | 83.9 | 92.1 | hypothetical protein ARALYDRAFT_470684 | gbpln | Arabidopsis lyrata   | AT1G06650.2   Symbols:   2-oxoglutarate (2OG) and Fe(II)-dependent oxygenase superfamily protein   chr1:2035909-2037186 FORWARD LENGTH=369                                                                                                                                                                                                                                                                                                                                                                                                     | 366 | 369 | 0         | 100.8 | 81.4 | 90.7 |
| Rsa1.0_00863.1.g20549.t1 | refXP_002892370.1   hypothetical protein ARALYDRAFT_470720 [Arabidopsis lyrata subsp. lyrata] gi 297338212 gb EFH68629.1   hypothetical protein ARALYDRAFT_470720 [Arabidopsis lyrata subsp. lyrata]                                                                                                   | 164 | 168 | 1.00E-66  | 102.4 | 88.4 | 92.1 | hypothetical protein ARALYDRAFT_470720 | gbpln | Arabidopsis lyrata   | AT1G06980.1   Symbols:   unknown protein; FUNCTIONS IN: molecular_function unknown; INVOLVED IN: biological_process unknown; LOCATED IN: endomembrane system; EXPRESSED IN: sepal, male gametophyte, carpel; EXPRESSED DURING: 4 anthesis; BEST Arabidopsis thaliana protein match is: unknown protein (TAIR:AT2G30230.1); Has 159 Blast hits to 159 proteins in 13 species: Archae - 0; Bacteria - 0; Metazoa - 0; Fungi - 0; Plants - 159; Viruses - 0; Other Eukaryotes - 0 (source: NCBI BLINK).   chr1:2143248-2143757 REVERSE LENGTH=169 | 164 | 169 | 9.00E-68  | 103.0 | 87.2 | 91.5 |
| Rsa1.0_00863.1.g20550.t1 | #                                                                                                                                                                                                                                                                                                      | #   | #   | #         | #     | #    | #    | -                                      | ----  | ----                 | #                                                                                                                                                                                                                                                                                                                                                                                                                                                                                                                                              | #   | #   | #         | #     | #    |      |
| Rsa1.0_00863.1.g20551.t1 | gb EOA37828.1   hypothetical protein CARUB_v10012021mg [Capsella rubella]                                                                                                                                                                                                                              | 327 | 349 | 1.00E-170 | 106.7 | 86.5 | 92.7 | hypothetical protein CARUB_v10012021mg | gbpln | Capsella rubella     | AT1G06990.1   Symbols:   GDSL-like Lipase/Acylhydrolase superfamily protein   chr1:2148393-2150009 FORWARD LENGTH=360                                                                                                                                                                                                                                                                                                                                                                                                                          | 327 | 360 | 1.00E-168 | 110.1 | 84.1 | 91.7 |
| Rsa1.0_00863.1.g20552.t1 | ref NP_563779.1   GILT domain-containing protein [Arabidopsis thaliana] gi 15146334 gb AAK83650.1   At1g07080/F10K1.15 [Arabidopsis thaliana] gi 15809756 gb AAL06806.1   At1g07080/F10K1.15 [Arabidopsis thaliana] gi 332189954 gb AEE28075.1   GILT domain-containing protein [Arabidopsis thaliana] | 265 | 265 | 1.00E-117 | 100.0 | 81.1 | 86.8 | GILT domain-containing protein         | gbpln | Arabidopsis thaliana | AT1G07080.1   Symbols:   Thioredoxin superfamily protein   chr1:2170069-2171861 FORWARD LENGTH=265                                                                                                                                                                                                                                                                                                                                                                                                                                             | 265 | 265 | 1.00E-119 | 100.0 | 81.1 | 86.8 |
| Rsa1.0_00863.1.g20553.t1 | refXP_002892379.1   hypothetical protein ARALYDRAFT_887918 [Arabidopsis lyrata subsp. lyrata] gi 297338221 gb EFH68638.1   hypothetical protein ARALYDRAFT_887918 [Arabidopsis lyrata subsp. lyrata]                                                                                                   | 197 | 198 | 4.00E-93  | 100.5 | 85.8 | 89.8 | hypothetical protein ARALYDRAFT_887918 | gbpln | Arabidopsis lyrata   | AT1G07090.1   Symbols: LSH6   Protein of unknown function (DUF640)   chr1:2174202-2174792 REVERSE LENGTH=196                                                                                                                                                                                                                                                                                                                                                                                                                                   | 197 | 196 | 8.00E-94  | 99.5  | 84.8 | 88.8 |
| Rsa1.0_00863.1.g20554.t2 | refXP_002892380.1   hypothetical protein ARALYDRAFT_470732 [Arabidopsis lyrata subsp. lyrata] gi 297338222 gb EFH68639.1   hypothetical protein ARALYDRAFT_470732 [Arabidopsis lyrata subsp. lyrata]                                                                                                   | 300 | 743 | 2.00E-30  | 247.7 | 21.7 | 21.7 | hypothetical protein ARALYDRAFT_470732 | gbpln | Arabidopsis lyrata   | AT1G07110.1   Symbols: F2KP, ATF2KP, FKFBP   fructose-2,6-bisphosphatase   chr1:2178363-2183980 REVERSE LENGTH=744                                                                                                                                                                                                                                                                                                                                                                                                                             | 300 | 744 | 6.00E-33  | 248.0 | 21.7 | 21.7 |
| Rsa1.0_00863.1.g20555.t3 | gb EOA37624.1   hypothetical protein CARUB_v10012057mg [Capsella rubella]                                                                                                                                                                                                                              | 685 | 743 | 0         | 108.5 | 87.0 | 90.5 | hypothetical protein CARUB_v10012057mg | gbpln | Capsella rubella     | AT1G07110.1   Symbols: F2KP, ATF2KP, FKFBP   fructose-2,6-bisphosphatase   chr1:2178363-2183980 REVERSE LENGTH=744                                                                                                                                                                                                                                                                                                                                                                                                                             | 685 | 744 | 0         | 108.6 | 86.7 | 90.4 |
| Rsa1.0_00863.1.g20556.t1 | refXP_002892380.1   hypothetical protein ARALYDRAFT_470732 [Arabidopsis lyrata subsp. lyrata] gi 297338222 gb EFH68639.1   hypothetical protein ARALYDRAFT_470732 [Arabidopsis lyrata subsp. lyrata]                                                                                                   | 99  | 743 | 3.00E-27  | 750.5 | 69.7 | 76.8 | hypothetical protein ARALYDRAFT_470732 | gbpln | Arabidopsis lyrata   | AT1G07110.1   Symbols: F2KP, ATF2KP, FKFBP   fructose-2,6-bisphosphatase   chr1:2178363-2183980 REVERSE LENGTH=744                                                                                                                                                                                                                                                                                                                                                                                                                             | 99  | 744 | 1.00E-29  | 751.5 | 69.7 | 75.8 |
| Rsa1.0_00863.1.g20557.t1 | refXP_002892382.1   hypothetical protein ARALYDRAFT_470734 [Arabidopsis lyrata subsp. lyrata] gi 297338224 gb EFH68641.1   hypothetical protein ARALYDRAFT_470734 [Arabidopsis lyrata subsp. lyrata]                                                                                                   | 126 | 145 | 2.00E-20  | 115.1 | 61.9 | 69.0 | hypothetical protein ARALYDRAFT_470734 | gbpln | Arabidopsis lyrata   | AT1G07135.1   Symbols:   glycine-rich protein   chr1:2190157-2190624 REVERSE LENGTH=155                                                                                                                                                                                                                                                                                                                                                                                                                                                        | 126 | 155 | 1.00E-18  | 123.0 | 63.5 | 72.2 |
| Rsa1.0_00863.1.g20558.t1 | gb ABB97039.1   unknown [Brassica rapa]                                                                                                                                                                                                                                                                | 225 | 225 | 1.00E-113 | 100.0 | 96.9 | 98.2 | unknown                                | gbpln | Brassica rapa        | AT1G07140.1   Symbols: SIRANBP   Pleckstrin homology (PH) domain superfamily protein   chr1:2192360-2193688 REVERSE LENGTH=228                                                                                                                                                                                                                                                                                                                                                                                                                 | 225 | 228 | 4.00E-95  | 101.3 | 87.1 | 91.6 |
| Rsa1.0_00864.1.g20559.t1 | dbj BAJ34469.1   unnamed protein product [Thellungiella halophila]                                                                                                                                                                                                                                     | 654 | 661 | 0         | 101.1 | 81.5 | 88.2 | unnamed protein product                | ----  | ----                 | AT1G17170.1   Symbols:   DNase I-like superfamily protein   chr1:26973796-26976774 REVERSE LENGTH=664                                                                                                                                                                                                                                                                                                                                                                                                                                          | 654 | 664 | 0         | 101.5 | 81.7 | 88.4 |

|                          |                                                                                                                                                                                                                                                                                                                                                                                                                                                                                                                      |      |      |           |       |      |      |                                          |       |                      |                                                                                                                                                                                                                                                                                                                                                                                                                                                                                                                                                                           |      |      |           |       |      |      |
|--------------------------|----------------------------------------------------------------------------------------------------------------------------------------------------------------------------------------------------------------------------------------------------------------------------------------------------------------------------------------------------------------------------------------------------------------------------------------------------------------------------------------------------------------------|------|------|-----------|-------|------|------|------------------------------------------|-------|----------------------|---------------------------------------------------------------------------------------------------------------------------------------------------------------------------------------------------------------------------------------------------------------------------------------------------------------------------------------------------------------------------------------------------------------------------------------------------------------------------------------------------------------------------------------------------------------------------|------|------|-----------|-------|------|------|
| Rsa1.0_00864.1.g20560.t1 | ref[XP_002887382.1] predicted protein [Arabidopsis lyrata subsp. lyrata] gi 297333223 gb EFH63641.1  predicted protein [Arabidopsis lyrata subsp. lyrata]                                                                                                                                                                                                                                                                                                                                                            | 489  | 491  | 0         | 100.4 | 84.0 | 87.9 | predicted protein                        | gbpln | Arabidopsis lyrata   | AT1G71696.2   Symbols: SOL1   carboxypeptidase D, putative   chr1:26966996-26970364 FORWARD LENGTH=491                                                                                                                                                                                                                                                                                                                                                                                                                                                                    | 489  | 491  | 0         | 100.4 | 82.2 | 86.7 |
| Rsa1.0_00864.1.g20561.t1 | #                                                                                                                                                                                                                                                                                                                                                                                                                                                                                                                    | #    | #    | #         | #     | #    | -    | ----                                     | ----  | #                    | #                                                                                                                                                                                                                                                                                                                                                                                                                                                                                                                                                                         | #    | #    | #         | #     | #    |      |
| Rsa1.0_00864.1.g20562.t1 | #                                                                                                                                                                                                                                                                                                                                                                                                                                                                                                                    | #    | #    | #         | #     | #    | -    | ----                                     | ----  | #                    | #                                                                                                                                                                                                                                                                                                                                                                                                                                                                                                                                                                         | #    | #    | #         | #     | #    |      |
| Rsa1.0_00864.1.g20563.t1 | gb EOA33450.1  hypothetical protein CARUB_v10020947mg [Capsella rubella]                                                                                                                                                                                                                                                                                                                                                                                                                                             | 226  | 211  | 1.00E-101 | 93.4  | 85.4 | 90.7 | hypothetical protein CARUB_v10020947mg   | gbpln | Capsella rubella     | AT1G71692.1   Symbols: AGL12, XAL1   AGAMOUS-like 12   chr1:26952903-26954939 REVERSE LENGTH=211                                                                                                                                                                                                                                                                                                                                                                                                                                                                          | 226  | 211  | 1.00E-104 | 93.4  | 85.8 | 90.3 |
| Rsa1.0_00864.1.g20564.t2 | gb EOA33727.1  hypothetical protein CARUB_v10019921mg [Capsella rubella]                                                                                                                                                                                                                                                                                                                                                                                                                                             | 659  | 658  | 0         | 99.8  | 86.2 | 91.7 | hypothetical protein CARUB_v10019921mg   | gbpln | Capsella rubella     | AT1G71530.1   Symbols:   Protein kinase superfamily protein   chr1:26939766-26942306 FORWARD LENGTH=655                                                                                                                                                                                                                                                                                                                                                                                                                                                                   | 659  | 655  | 0         | 99.4  | 85.0 | 90.6 |
| Rsa1.0_00864.1.g20565.t1 | gb EOA34833.1  hypothetical protein CARUB_v10022408mg [Capsella rubella]                                                                                                                                                                                                                                                                                                                                                                                                                                             | 147  | 150  | 1.00E-58  | 102.0 | 78.2 | 85.7 | hypothetical protein CARUB_v10022408mg   | gbpln | Capsella rubella     | AT1G71520.1   Symbols:   Integrase-type DNA-binding superfamily protein   chr1:26938612-26939043 FORWARD LENGTH=143                                                                                                                                                                                                                                                                                                                                                                                                                                                       | 147  | 143  | 9.00E-61  | 97.3  | 78.2 | 83.7 |
| Rsa1.0_00864.1.g20566.t1 | gb EOA34774.1  hypothetical protein CARUB_v10022349mg [Capsella rubella]                                                                                                                                                                                                                                                                                                                                                                                                                                             | 183  | 182  | 4.00E-83  | 99.5  | 83.6 | 90.2 | hypothetical protein CARUB_v10022349mg   | gbpln | Capsella rubella     | AT1G71450.1   Symbols:   Integrase-type DNA-binding superfamily protein   chr1:26927088-26927639 FORWARD LENGTH=183                                                                                                                                                                                                                                                                                                                                                                                                                                                       | 183  | 183  | 4.00E-81  | 100.0 | 80.3 | 86.9 |
| Rsa1.0_00864.1.g20567.t1 | dbj BAB09923.1  copia-like retrotransposable element [Arabidopsis thaliana]                                                                                                                                                                                                                                                                                                                                                                                                                                          | 1551 | 1342 | 0         | 86.5  | 42.5 | 58.2 | copia-like retrotransposable element     | gbpln | Arabidopsis thaliana | AT4G23160.1   Symbols: CRK8   cysteine-rich RLK (RECEPTOR-like protein kinase) 8   chr4:12129485-12134086 FORWARD LENGTH=1262                                                                                                                                                                                                                                                                                                                                                                                                                                             | 1551 | 1262 | 2.00E-82  | 81.4  | 11.7 | 18.2 |
| Rsa1.0_00864.1.g20568.t1 | #                                                                                                                                                                                                                                                                                                                                                                                                                                                                                                                    | #    | #    | #         | #     | #    | -    | ----                                     | ----  | #                    | #                                                                                                                                                                                                                                                                                                                                                                                                                                                                                                                                                                         | #    | #    | #         | #     | #    |      |
| Rsa1.0_00865.1.g20569.t1 | ref[NP_190926.1] diaminopimelate epimerase [Arabidopsis thaliana] gi 75263858 sp Q9LFG2.1 DAPF_ARATH RecName: Full=Diaminopimelate epimerase, chloroplastic; Short=DAP epimerase; Flags: Precursor gi 6729509 emb CAB67665.1  diaminopimelate epimerase-like protein [Arabidopsis thaliana] gi 22022530 gb AAM83223.1  AT3g53580/F4P12.280 [Arabidopsis thaliana] gi 23505901 gb AAN28810.1  At3g53580/F4P12.280 [Arabidopsis thaliana] gi 332645592 gb AEE79113.1  diaminopimelate epimerase [Arabidopsis thaliana] | 359  | 362  | 1.00E-178 | 100.8 | 84.1 | 90.3 | diaminopimelate epimerase                | gbpln | Arabidopsis thaliana | AT3G53580.1   Symbols:   diaminopimelate epimerase family protein   chr3:19864784-19866907 FORWARD LENGTH=362                                                                                                                                                                                                                                                                                                                                                                                                                                                             | 359  | 362  | 1.00E-180 | 100.8 | 84.1 | 90.3 |
| Rsa1.0_00865.1.g20570.t1 | gb ABL97987.1  protein translocase [Brassica rapa]                                                                                                                                                                                                                                                                                                                                                                                                                                                                   | 231  | 220  | 6.00E-94  | 95.2  | 78.8 | 85.3 | protein translocase                      | gbpln | Brassica rapa        | AT2G37410.2   Symbols: ATTIM17-2, TIM17, TIM17-2   translocase inner membrane subunit 17-2   chr2:15698119-15698850 REVERSE LENGTH=243                                                                                                                                                                                                                                                                                                                                                                                                                                    | 231  | 243  | 2.00E-81  | 105.2 | 72.7 | 81.4 |
| Rsa1.0_00865.1.g20571.t1 | ref[NP_190922.3] uncharacterized protein [Arabidopsis thaliana] gi 332645585 gb AEE79106.1  uncharacterized protein AT3G53540 [Arabidopsis thaliana]                                                                                                                                                                                                                                                                                                                                                                 | 707  | 924  | 1.00E-153 | 130.7 | 56.0 | 70.3 | uncharacterized protein                  | gbpln | Arabidopsis thaliana | AT3G53540.1   Symbols:   unknown protein; LOCATED IN: plasma membrane; EXPRESSED IN: 24 plant structures; EXPRESSED DURING: 14 growth stages; CONTAINS InterPro DOMAIN/s: Protein of unknown function DUF3741 (InterPro:IPR022212); BEST Arabidopsis thaliana protein match is: Protein of unknown function (DUF3741) (TAIR:AT4G28760.2); Has 1710 Blast hits to 868 proteins in 206 species: Archae - 2; Bacteria - 409; Metazoa - 304; Fungi - 204; Plants - 304; Viruses - 2; Other Eukaryotes - 485 (source: NCBI BLINK).   chr3:19846805-19850670 REVERSE LENGTH=924 | 707  | 924  | 1.00E-156 | 130.7 | 56.0 | 70.3 |
| Rsa1.0_00865.1.g20572.t1 | gb EOA28993.1  hypothetical protein CARUB_v10025244mg [Capsella rubella]                                                                                                                                                                                                                                                                                                                                                                                                                                             | 278  | 262  | 1.00E-98  | 94.2  | 71.9 | 80.2 | hypothetical protein CARUB_v10025244mg   | gbpln | Capsella rubella     | AT2G37390.1   Symbols: NAKR2   Chloroplast-targeted copper chaperone protein   chr2:15694300-15695461 FORWARD LENGTH=259                                                                                                                                                                                                                                                                                                                                                                                                                                                  | 278  | 259  | 1.00E-101 | 93.2  | 72.3 | 82.0 |
| Rsa1.0_00865.1.g20573.t1 | emb CAB39638.1  RNA-directed DNA polymerase-like protein [Arabidopsis thaliana] gi 7267666 emb CAB78094.1  RNA-directed DNA polymerase-like protein [Arabidopsis thaliana]                                                                                                                                                                                                                                                                                                                                           | 226  | 1274 | 7.00E-30  | 563.7 | 37.2 | 49.6 | RNA-directed DNA polymerase-like protein | gbpln | Arabidopsis thaliana | AT2G06845.1   Symbols:   Beta-galactosidase related protein   chr2:2754666-2756008 FORWARD LENGTH=315                                                                                                                                                                                                                                                                                                                                                                                                                                                                     | 226  | 315  | 1.00E-31  | 139.4 | 34.5 | 45.6 |
| Rsa1.0_00865.1.g20574.t1 | dbj BAE98854.1  hypothetical protein [Arabidopsis thaliana]                                                                                                                                                                                                                                                                                                                                                                                                                                                          | 302  | 321  | 6.00E-91  | 106.3 | 78.5 | 84.8 | hypothetical protein                     | gbpln | Arabidopsis thaliana | AT2G37380.1   Symbols:   unknown protein; BEST Arabidopsis thaliana protein match is: unknown protein (TAIR:AT2G39370.1); Has 1284 Blast hits to 422 proteins in 114 species: Archae - 0; Bacteria - 90; Metazoa - 125; Fungi - 151; Plants - 136; Viruses - 0; Other Eukaryotes - 782 (source: NCBI BLINK).   chr2:15686828-15687793 FORWARD LENGTH=321                                                                                                                                                                                                                  | 302  | 321  | 6.00E-93  | 106.3 | 78.1 | 84.4 |

| Rsa1.0_00865.1.g20575.t1  | #                                                                                                                                                                                                                                                                                                                                                                                                                                                       | #    | #    | #         | #     | #    | #    | -                                                   | ----  | ----                 | #                                                                                                                                                                                                                                                                                                                                                                   | #    | #    | #         | #     | #    |      |
|---------------------------|---------------------------------------------------------------------------------------------------------------------------------------------------------------------------------------------------------------------------------------------------------------------------------------------------------------------------------------------------------------------------------------------------------------------------------------------------------|------|------|-----------|-------|------|------|-----------------------------------------------------|-------|----------------------|---------------------------------------------------------------------------------------------------------------------------------------------------------------------------------------------------------------------------------------------------------------------------------------------------------------------------------------------------------------------|------|------|-----------|-------|------|------|
| Rsa1.0_00865.1.g20576.t2  | gb EOA29128.1  hypothetical protein CARUB_v10025396mg [Capsella rubella]                                                                                                                                                                                                                                                                                                                                                                                | 670  | 679  | 0         | 101.3 | 83.3 | 89.9 | hypothetical protein CARUB_v10025396mg              | gbpln | Capsella rubella     | AT2G37370.1   Symbols:   unknown protein; BEST Arabidopsis thaliana protein match is: unknown protein (TAIR:AT5G13560.1); Has 30201 Blast hits to 17322 proteins in 780 species: Archae - 12; Bacteria - 1396; Metazoa - 17338; Fungi - 3422; Plants - 5037; Viruses - 0; Other Eukaryotes - 2996 (source: NCBI BLINK).   chr2:15679273-15682932 FORWARD LENGTH=669 | 670  | 669  | 0         | 99.9  | 81.9 | 88.2 |
| Rsa1.0_00865.1.g20577.t1  | gb EOA27537.1  hypothetical protein CARUB_v10023676mg, partial [Capsella rubella]                                                                                                                                                                                                                                                                                                                                                                       | 254  | 313  | 1.00E-119 | 123.2 | 89.8 | 91.7 | hypothetical protein CARUB_v10023676mg, partial     | gbpln | Capsella rubella     | AT2G37330.1   Symbols: ALS3   aluminum sensitive 3   chr2:15669190-15670172 FORWARD LENGTH=273                                                                                                                                                                                                                                                                      | 254  | 273  | 1.00E-119 | 107.5 | 87.0 | 90.9 |
| Rsa1.0_00865.1.g20578.t1  | ref XP_002879661.1  pentatricopeptide repeat-containing protein [Arabidopsis lyrata subsp. lyrata]<br>gi 297325500 gb EFH55920.1  pentatricopeptide repeat-containing protein [Arabidopsis lyrata subsp. lyrata]                                                                                                                                                                                                                                        | 481  | 500  | 0         | 104.0 | 82.5 | 91.9 | pentatricopeptide repeat-containing protein         | gbpln | Arabidopsis lyrata   | AT2G37320.1   Symbols:   Tetratricopeptide repeat (TPR)-like superfamily protein   chr2:15667223-15668725 FORWARD LENGTH=500                                                                                                                                                                                                                                        | 481  | 500  | 0         | 104.0 | 83.0 | 91.5 |
| Rsa1.0_00865.1.g20579.t23 | ref NP_001189697.1  RabGAP/TBC domain-containing protein [Arabidopsis thaliana] gi 330254285 gb AEC09379.1  RabGAP/TBC domain-containing protein [Arabidopsis thaliana]<br>ref NP_181265.1  ABC transporter G family member 33 [Arabidopsis thaliana] gi 75339056 sp Q9ZUT8.1 AB33G_ARAT H RecName: Full=ABC transporter G family member 33; Short=ABC transporter ABCG33; Short=AtABCG33; AltName: Full=Probable pleiotropic drug resistance protein 5 | 1075 | 916  | 0         | 85.2  | 58.4 | 64.7 | RabGAP/TBC domain-containing protein                | gbpln | Arabidopsis thaliana | AT2G37290.2   Symbols:   Ypt/Rab-GAP domain of gyp1p superfamily protein   chr2:15656935-15661335 REVERSE LENGTH=916                                                                                                                                                                                                                                                | 1075 | 916  | 0         | 85.2  | 58.4 | 64.7 |
| Rsa1.0_00865.1.g20580.t1  | gi 4059492 gb AAC80048.1  putative ABC transporter [Arabidopsis thaliana] gi 28144327 sp DAA00973.1 TPA_exp_PDR5 ABC transporter [Arabidopsis thaliana] gi 330254283 gb AEC09377.1  ABC transporter G family member 33 [Arabidopsis thaliana]<br>ref XP_002879660.1  predicted protein [Arabidopsis lyrata subsp. lyrata]                                                                                                                               | 1423 | 1413 | 0         | 99.3  | 85.6 | 92.4 | ABC transporter G family member 33                  | gbpln | Arabidopsis thaliana | AT2G37280.1   Symbols: PDR5, ATPDR5   pleiotropic drug resistance 5   chr2:15650400-15656417 FORWARD LENGTH=1413                                                                                                                                                                                                                                                    | 1423 | 1413 | 0         | 99.3  | 85.6 | 92.4 |
| Rsa1.0_00865.1.g20581.t1  | gi 297325499 gb EFH55919.1  predicted protein [Arabidopsis lyrata subsp. lyrata]                                                                                                                                                                                                                                                                                                                                                                        | 1383 | 1424 | 0         | 103.0 | 86.0 | 93.3 | predicted protein                                   | gbpln | Arabidopsis lyrata   | AT2G37280.1   Symbols: PDR5, ATPDR5   pleiotropic drug resistance 5   chr2:15650400-15656417 FORWARD LENGTH=1413                                                                                                                                                                                                                                                    | 1383 | 1413 | 0         | 102.2 | 85.0 | 92.1 |
| Rsa1.0_00866.1.g20582.t1  | gb AAC95175.1  putative non-LTR retroelement reverse transcriptase [Arabidopsis thaliana]<br>ref XP_002886433.1  phloem protein 2-A11 [Arabidopsis lyrata subsp. lyrata]                                                                                                                                                                                                                                                                                | 827  | 1352 | 1.00E-154 | 163.5 | 35.2 | 49.9 | putative non-LTR retroelement reverse transcriptase | gbpln | Arabidopsis thaliana | AT1G43760.1   Symbols:   DNase I-like superfamily protein   chr1:16528890-16531065 REVERSE LENGTH=626                                                                                                                                                                                                                                                               | 827  | 626  | 1.00E-43  | 75.7  | 13.5 | 21.9 |
| Rsa1.0_00866.1.g20583.t1  | gi 297332274 gb EFH62692.1  phloem protein 2-A11 [Arabidopsis lyrata subsp. lyrata]<br>ref NP_850282.2  Cystatin/monellin domain-containing protein [Arabidopsis thaliana] gi 61742651 gb AAX55146.1  hypothetical protein At2g37435 [Arabidopsis thaliana] gi 330254304 gb AEC09398.1  Cystatin/monellin domain-containing protein [Arabidopsis thaliana]                                                                                              | 152  | 287  | 3.00E-63  | 188.8 | 79.6 | 85.5 | phloem protein 2-A11                                | gbpln | Arabidopsis lyrata   | AT1G63090.1   Symbols: AtPP2-A11, PP2-A11   phloem protein 2-A11   chr1:23391283-23392609 REVERSE LENGTH=289                                                                                                                                                                                                                                                        | 152  | 289  | 2.00E-63  | 190.1 | 77.0 | 83.6 |
| Rsa1.0_00866.1.g20584.t1  | gi 330254304 gb AEC09398.1  Cystatin/monellin domain-containing protein [Arabidopsis thaliana]                                                                                                                                                                                                                                                                                                                                                          | 197  | 171  | 2.00E-42  | 86.8  | 46.7 | 62.4 | Cystatin/monellin domain-containing protein         | gbpln | Arabidopsis thaliana | AT2G37435.1   Symbols:   Cystatin/monellin superfamily protein   chr2:15709823-15710528 FORWARD LENGTH=171                                                                                                                                                                                                                                                          | 197  | 171  | 6.00E-45  | 86.8  | 46.7 | 62.4 |
| Rsa1.0_00866.1.g20585.t1  | ref NP_176498.1  scarecrow-like protein 28 [Arabidopsis thaliana] gi 75169917 sp Q9CAN3.1 SCL28_ARAT H RecName: Full=Scarecrow-like protein 28; Short=AtSCL28; AltName: Full=GRAS family protein 8; Short=AtGRAS-8                                                                                                                                                                                                                                      | #    | #    | #         | #     | #    | #    | -                                                   | ----  | ----                 | #                                                                                                                                                                                                                                                                                                                                                                   | #    | #    | #         | #     | #    |      |
| Rsa1.0_00866.1.g20586.t1  | gi 12323248 gb AAG51600.1 AC010795_4 transcription factor SCARECROW, putative; 52594-50618 [Arabidopsis thaliana] gi 332195932 gb AEE34053.1  scarecrow-like protein 28 [Arabidopsis thaliana]                                                                                                                                                                                                                                                          | 650  | 658  | 0         | 101.2 | 79.2 | 86.8 | scarecrow-like protein 28                           | gbpln | Arabidopsis thaliana | AT1G63100.1   Symbols:   GRAS family transcription factor   chr1:23399391-23401367 REVERSE LENGTH=658                                                                                                                                                                                                                                                               | 650  | 658  | 0         | 101.2 | 79.2 | 86.8 |

|                          |                                                                                                                                                                                                                                                                                                                                                                                                                                                                             |     |     |           |       |      |      |                                        |       |                      |                                                                                                                                                                                                                                                                                                                                            |     |     |           |       |      |      |
|--------------------------|-----------------------------------------------------------------------------------------------------------------------------------------------------------------------------------------------------------------------------------------------------------------------------------------------------------------------------------------------------------------------------------------------------------------------------------------------------------------------------|-----|-----|-----------|-------|------|------|----------------------------------------|-------|----------------------|--------------------------------------------------------------------------------------------------------------------------------------------------------------------------------------------------------------------------------------------------------------------------------------------------------------------------------------------|-----|-----|-----------|-------|------|------|
| Rsa1.0_00866.1.g20587.t1 | ref NP_850969.2  GPI transamidase subunit PIG-U [Arabidopsis thaliana] gi 332195934 gb AAE34055.1  GPI transamidase subunit PIG-U [Arabidopsis thaliana]                                                                                                                                                                                                                                                                                                                    | 686 | 469 | 0         | 68.4  | 60.5 | 64.3 | GPI transamidase subunit PIG-U         | gbpln | Arabidopsis thaliana | AT1G63110.1   Symbols:   GPI transamidase subunit PIG-U   chr1:23404870-23407757 FORWARD LENGTH=469                                                                                                                                                                                                                                        | 686 | 469 | 0         | 68.4  | 60.5 | 64.3 |
| Rsa1.0_00866.1.g20588.t1 | ref NP_176500.1  rhomboid -like 2 [Arabidopsis thaliana] gi 12323258 gb AAG51610.1 AC010795_14 membrane protein, putative; 61952-60281 [Arabidopsis thaliana] gi 28393358 gb AAO42103.1  putative membrane protein [Arabidopsis thaliana] gi 28827620 gb AAO50654.1  putative membrane protein [Arabidopsis thaliana] gi 77999980 dbj BAE46871.1  Rhomboid family protein AtRBL2 [Arabidopsis thaliana] gi 332195937 gb AAE34058.1  rhomboid -like 2 [Arabidopsis thaliana] | 318 | 317 | 1.00E-158 | 99.7  | 91.5 | 95.6 | rhomboid -like 2                       | gbpln | Arabidopsis thaliana | AT1G63120.1   Symbols: ATRBL2, RBL2   RHOMBOID-like 2   chr1:23409054-23410725 REVERSE LENGTH=317                                                                                                                                                                                                                                          | 318 | 317 | 1.00E-160 | 99.7  | 91.5 | 95.6 |
| Rsa1.0_00866.1.g20589.t1 | gb EOA33411.1  hypothetical protein CARUB_v10020496mg [Capsella rubella]                                                                                                                                                                                                                                                                                                                                                                                                    | 367 | 370 | 1.00E-158 | 100.8 | 73.8 | 83.7 | hypothetical protein CARUB_v10020496mg | gbpln | Capsella rubella     | AT1G77520.1   Symbols:   O-methyltransferase family protein   chr1:29130557-29132007 FORWARD LENGTH=381                                                                                                                                                                                                                                    | 367 | 381 | 1.00E-158 | 103.8 | 71.9 | 83.1 |
| Rsa1.0_00866.1.g20590.t1 | gb AAO24573.1  At1g77520 [Arabidopsis thaliana] gi 110736212 dbj BAF00077.1  caffeic acid 3-O-methyltransferase like protein [Arabidopsis thaliana]                                                                                                                                                                                                                                                                                                                         | 341 | 381 | 1.00E-134 | 111.7 | 70.1 | 81.8 | At1g77520                              | gbpln | Arabidopsis thaliana | AT1G77520.1   Symbols:   O-methyltransferase family protein   chr1:29130557-29132007 FORWARD LENGTH=381                                                                                                                                                                                                                                    | 341 | 381 | 1.00E-136 | 111.7 | 69.8 | 81.5 |
| Rsa1.0_00866.1.g20591.t1 | ref XP_002894649.1  hypothetical protein ARALYDRAFT_892826 [Arabidopsis lyrata subsp. lyrata] gi 297340491 gb EFH70908.1  hypothetical protein ARALYDRAFT_892826 [Arabidopsis lyrata subsp. lyrata]                                                                                                                                                                                                                                                                         | 338 | 352 | 1.00E-137 | 104.1 | 68.9 | 82.5 | hypothetical protein ARALYDRAFT_892826 | gbpln | Arabidopsis lyrata   | AT2G19150.1   Symbols:   Pectin lyase-like superfamily protein   chr2:8305100-8307444 FORWARD LENGTH=339                                                                                                                                                                                                                                   | 338 | 339 | 7.00E-67  | 100.3 | 40.5 | 53.0 |
| Rsa1.0_00866.1.g20592.t1 | ref XP_002879672.1  hypothetical protein ARALYDRAFT_345475 [Arabidopsis lyrata subsp. lyrata] gi 29732551 gb EFH55931.1  hypothetical protein ARALYDRAFT_345475 [Arabidopsis lyrata subsp. lyrata]                                                                                                                                                                                                                                                                          | 212 | 232 | 3.00E-32  | 109.4 | 41.0 | 53.3 | hypothetical protein ARALYDRAFT_345475 | gbpln | Arabidopsis lyrata   | AT2G37435.1   Symbols:   Cystatin/monellin superfamily protein   chr2:15709823-15710528 FORWARD LENGTH=171                                                                                                                                                                                                                                 | 212 | 171 | 2.00E-28  | 80.7  | 34.4 | 46.2 |
| Rsa1.0_00866.1.g20593.t1 | gb EOA33460.1  hypothetical protein CARUB_v10021114mg [Capsella rubella]                                                                                                                                                                                                                                                                                                                                                                                                    | 147 | 147 | 2.00E-73  | 100.0 | 90.5 | 95.2 | hypothetical protein CARUB_v10021114mg | gbpln | Capsella rubella     | AT1G63220.1   Symbols:   Calcium-dependent lipid-binding (CaLB domain) family protein   chr1:23449017-23450244 FORWARD LENGTH=147                                                                                                                                                                                                          | 147 | 147 | 3.00E-75  | 100.0 | 89.1 | 93.9 |
| Rsa1.0_00866.1.g20594.t1 | ref NP_564812.1  uncharacterized protein [Arabidopsis thaliana] gi 15292765 gb AAK92751.1  unknown protein [Arabidopsis thaliana] gi 21281038 gb AAM45128.1  unknown protein [Arabidopsis thaliana] gi 332195953 gb AAE34074.1  uncharacterized protein AT1G63240 [Arabidopsis thaliana]                                                                                                                                                                                    | 583 | 548 | 1.00E-112 | 94.0  | 46.8 | 58.3 | uncharacterized protein                | gbpln | Arabidopsis thaliana | AT1G63240.1   Symbols:   unknown protein; Has 460 Blast hits to 413 proteins in 106 species: Archae - 5; Bacteria - 12; Metazoa - 152; Fungi - 46; Plants - 43; Viruses - 2; Other Eukaryotes - 200 (source: NCBI BLink).   chr1:23456188-23458550 REVERSE LENGTH=548                                                                      | 583 | 548 | 1.00E-115 | 94.0  | 46.8 | 58.3 |
| Rsa1.0_00867.1.g20595.t1 | ref XP_002899771.1  hypothetical protein ARALYDRAFT_334263 [Arabidopsis lyrata subsp. lyrata] gi 297335613 gb EFH66030.1  hypothetical protein ARALYDRAFT_334263 [Arabidopsis lyrata subsp. lyrata]                                                                                                                                                                                                                                                                         | 131 | 128 | 2.00E-54  | 97.7  | 84.7 | 93.1 | hypothetical protein ARALYDRAFT_334263 | gbpln | Arabidopsis lyrata   | AT1G09812.1   Symbols:   unknown protein; BEST Arabidopsis thaliana protein match is: unknown protein (TAIR:AT1G58007.2). Has 93 Blast hits to 93 proteins in 13 species: Archae - 0; Bacteria - 0; Metazoa - 0; Fungi - 0; Plants - 93; Viruses - 0; Other Eukaryotes - 0 (source: NCBI BLink).   chr1:3187817-3188580 FORWARD LENGTH=128 | 131 | 128 | 1.00E-53  | 97.7  | 83.2 | 92.4 |
| Rsa1.0_00867.1.g20596.t1 | gb EOA37326.1  hypothetical protein CARUB_v10011018mg [Capsella rubella]                                                                                                                                                                                                                                                                                                                                                                                                    | 573 | 532 | 1.00E-173 | 92.8  | 60.6 | 66.7 | hypothetical protein CARUB_v10011018mg | gbpln | Capsella rubella     | AT1G09810.1   Symbols: ECT11   evolutionarily conserved C-terminal region 11   chr1:3181138-3183354 REVERSE LENGTH=470                                                                                                                                                                                                                     | 573 | 470 | 1.00E-173 | 82.0  | 61.1 | 67.5 |
| Rsa1.0_00867.1.g20597.t1 | ref XP_002879092.1  hypothetical protein ARALYDRAFT_481654 [Arabidopsis lyrata subsp. lyrata] gi 297324931 gb EFH55351.1  hypothetical protein ARALYDRAFT_481654 [Arabidopsis lyrata subsp. lyrata]                                                                                                                                                                                                                                                                         | 318 | 330 | 2.00E-49  | 103.8 | 45.0 | 56.3 | hypothetical protein ARALYDRAFT_481654 | gbpln | Arabidopsis lyrata   | AT2G27505.1   Symbols:   FBD-like domain family protein   chr2:11756746-11757829 FORWARD LENGTH=298                                                                                                                                                                                                                                        | 318 | 298 | 2.00E-41  | 93.7  | 40.3 | 54.1 |

|                          |                                                                                                                                                                                                                                                                                                                                                                                                                                                                                                                                                                                                              |      |     |           |       |      |       |                                                  |       |                      |                                                                                                                                 |      |     |           |       |      |      |
|--------------------------|--------------------------------------------------------------------------------------------------------------------------------------------------------------------------------------------------------------------------------------------------------------------------------------------------------------------------------------------------------------------------------------------------------------------------------------------------------------------------------------------------------------------------------------------------------------------------------------------------------------|------|-----|-----------|-------|------|-------|--------------------------------------------------|-------|----------------------|---------------------------------------------------------------------------------------------------------------------------------|------|-----|-----------|-------|------|------|
| Rsa1.0_00867.1.g20598.t1 | refXP_002892526.1  hypothetical protein ARALYDRAFT_471082 [Arabidopsis lyrata subsp. lyrata] gi 297338368 gb EFH68785.1  hypothetical protein ARALYDRAFT_471082 [Arabidopsis lyrata subsp. lyrata]                                                                                                                                                                                                                                                                                                                                                                                                           | 373  | 373 | 0         | 100.0 | 83.9 | 91.4  | hypothetical protein ARALYDRAFT_471082           | gbpln | Arabidopsis lyrata   | AT1G09800.1   Symbols:   Pseudouridine synthase family protein   chr1:3177121-3180336 REVERSE LENGTH=372                        | 373  | 372 | 0         | 99.7  | 83.9 | 90.9 |
| Rsa1.0_00867.1.g20599.t1 | gb EOA39069.1  hypothetical protein CARUB_v10011733mg [Capsella rubella]                                                                                                                                                                                                                                                                                                                                                                                                                                                                                                                                     | 407  | 409 | 0         | 100.5 | 88.0 | 92.9  | hypothetical protein CARUB_v10011733mg           | gbpln | Capsella rubella     | AT1G09795.1   Symbols: ATATP-PRT2, HIS1B, ATP-PRT2   ATP phosphoribosyl transferase 2   chr1:3173588-3176690 FORWARD LENGTH=413 | 407  | 413 | 0         | 101.5 | 87.5 | 91.6 |
| Rsa1.0_00867.1.g20600.t1 | ref NP_001184952.1  Cox19 family protein (CHCH motif) [Arabidopsis thaliana] gi 332190372 gb AEE28493.1  Cox19 family protein (CHCH motif) [Arabidopsis thaliana]                                                                                                                                                                                                                                                                                                                                                                                                                                            | 63   | 63  | 1.00E-25  | 100.0 | 95.2 | 95.2  | Cox19 family protein (CHCH motif)                | gbpln | Arabidopsis thaliana | AT1G09794.1   Symbols:   Cox19 family protein (CHCH motif)   chr1:3172196-3173321 FORWARD LENGTH=63                             | 63   | 63  | 2.00E-28  | 100.0 | 95.2 | 95.2 |
| Rsa1.0_00867.1.g20601.t2 | gb EOA38932.1  hypothetical protein CARUB_v10011331mg [Capsella rubella]                                                                                                                                                                                                                                                                                                                                                                                                                                                                                                                                     | 439  | 442 | 0         | 100.7 | 83.8 | 90.7  | hypothetical protein CARUB_v10011331mg           | gbpln | Capsella rubella     | AT1G09790.1   Symbols: COBL6   COBRA-like protein 6 precursor   chr1:3168568-3170819 REVERSE LENGTH=454                         | 439  | 454 | 0         | 103.4 | 80.6 | 86.6 |
| Rsa1.0_00867.1.g20602.t1 | db BAA09598.1  Myb-like DNA binding protein [Arabidopsis thaliana]                                                                                                                                                                                                                                                                                                                                                                                                                                                                                                                                           | 803  | 844 | 0         | 105.1 | 88.3 | 93.9  | Myb-like DNA binding protein                     | gbpln | Arabidopsis thaliana | AT1G09770.1   Symbols: ATCDC5, CDC5, ATMYBCDC5   cell division cycle 5   chr1:3162002-3165122 FORWARD LENGTH=844                | 803  | 844 | 0         | 105.1 | 88.3 | 93.9 |
| Rsa1.0_00867.1.g20603.t5 | ref NP_172447.1  U2 small nuclear ribonucleoprotein A' [Arabidopsis thaliana] gi 19884091 sp P43333.2 RU2A_ARATH RecName: Full=U2 small nuclear ribonucleoprotein A'; Short=U2 snRNP A' gi 2160183 gb AAB60746.1  Identical to A. thaliana U2 SnRNP-specific A' protein (gbX69137). ESTs gb ATTS0705, gb ATTS0339 come from this gene [Arabidopsis thaliana] gi 16949065 gb ALZ4384.1  SnRNP-specific A' protein [Arabidopsis thaliana] gi 23197870 gb AAN15462.1  SnRNP-specific A' protein [Arabidopsis thaliana] gi 332190368 gb AEE28489.1  U2 small nuclear ribonucleoprotein A' [Arabidopsis thaliana] | 868  | 249 | 1.00E-124 | 28.7  | 26.0 | 27.1  | U2 small nuclear ribonucleoprotein A'            | gbpln | Arabidopsis thaliana | AT1G09760.1   Symbols: U2A'   U2 small nuclear ribonucleoprotein A'   chr1:3159476-3161603 REVERSE LENGTH=249                   | 868  | 249 | 1.00E-126 | 28.7  | 26.0 | 27.1 |
| Rsa1.0_00867.1.g20604.t1 | ref NP_172445.2  adenine nucleotide alpha hydrolases-like protein [Arabidopsis thaliana] gi 29028798 gb AAO64778.1  At1g09740 [Arabidopsis thaliana] gi 110736422 db BAF00178.1  putative ER6 protein [Arabidopsis thaliana] gi 332190366 gb AEE28487.1  adenine nucleotide alpha hydrolases-like protein [Arabidopsis thaliana]                                                                                                                                                                                                                                                                             | 81   | 171 | 4.00E-32  | 211.1 | 80.2 | 90.1  | adenine nucleotide alpha hydrolases-like protein | gbpln | Arabidopsis thaliana | AT1G09740.1   Symbols:   Adenine nucleotide alpha hydrolases-like superfamily protein   chr1:3154603-3155834 FORWARD LENGTH=171 | 81   | 171 | 7.00E-35  | 211.1 | 80.2 | 90.1 |
| Rsa1.0_00867.1.g20605.t1 | gb EOA38618.1  hypothetical protein CARUB_v10010470mg [Capsella rubella]                                                                                                                                                                                                                                                                                                                                                                                                                                                                                                                                     | 68   | 171 | 5.00E-25  | 251.5 | 97.1 | 100.0 | hypothetical protein CARUB_v10010470mg           | gbpln | Capsella rubella     | AT1G09740.1   Symbols:   Adenine nucleotide alpha hydrolases-like superfamily protein   chr1:3154603-3155834 FORWARD LENGTH=171 | 68   | 171 | 4.00E-27  | 251.5 | 94.1 | 97.1 |
| Rsa1.0_00867.1.g20606.t2 | ref XP_002892520.1  Ulp1 protease family protein [Arabidopsis lyrata subsp. lyrata] gi 297338362 gb EFH68779.1  Ulp1 protease family protein [Arabidopsis lyrata subsp. lyrata]                                                                                                                                                                                                                                                                                                                                                                                                                              | 1015 | 970 | 0         | 95.6  | 70.0 | 75.9  | Ulp1 protease family protein                     | gbpln | Arabidopsis lyrata   | AT1G09730.2   Symbols:   Cysteine proteinases superfamily protein   chr1:3148017-3154236 REVERSE LENGTH=931                     | 1015 | 931 | 0         | 91.7  | 68.2 | 74.8 |
| Rsa1.0_00867.1.g20607.t1 | ref XP_002892519.1  kinase interacting family protein [Arabidopsis lyrata subsp. lyrata] gi 297338361 gb EFH68778.1  kinase interacting family protein [Arabidopsis lyrata subsp. lyrata]                                                                                                                                                                                                                                                                                                                                                                                                                    | 840  | 927 | 0         | 110.4 | 82.4 | 89.5  | kinase interacting family protein                | gbpln | Arabidopsis lyrata   | AT1G09720.1   Symbols:   Kinase interacting (KIP)-like family protein   chr1:3144438-3147303 REVERSE LENGTH=928                 | 840  | 928 | 0         | 110.5 | 77.7 | 87.0 |
| Rsa1.0_00867.1.g20608.t1 | ref XP_002889766.1  DNA binding protein [Arabidopsis lyrata subsp. lyrata] gi 297335608 gb EFH66025.1  DNA binding protein [Arabidopsis lyrata subsp. lyrata]                                                                                                                                                                                                                                                                                                                                                                                                                                                | 593  | 626 | 0         | 105.6 | 70.0 | 79.6  | DNA binding protein                              | gbpln | Arabidopsis lyrata   | AT1G09710.1   Symbols:   Homeodomain-like superfamily protein   chr1:3141119-3144232 FORWARD LENGTH=610                         | 593  | 610 | 0         | 102.9 | 65.9 | 76.6 |
| Rsa1.0_00867.1.g20609.t1 | gb AAT77416.1  dsRNA-binding protein LH1 [Brassica oleracea var. capitata]                                                                                                                                                                                                                                                                                                                                                                                                                                                                                                                                   | 258  | 283 | 1.00E-127 | 109.7 | 91.1 | 95.7  | dsRNA-binding protein LH1                        | gbpln | Brassica oleracea    | AT1G09700.1   Symbols: HYL1, DRB1   dsRNA-binding domain-like superfamily protein   chr1:3137960-3140118 REVERSE LENGTH=419     | 258  | 419 | 1.00E-106 | 162.4 | 77.1 | 86.8 |
| Rsa1.0_00867.1.g20610.t1 | ref XP_002889760.1  60S ribosomal protein L21 [Arabidopsis lyrata subsp. lyrata] gi 297335602 gb EFH66019.1  60S ribosomal protein L21 [Arabidopsis lyrata subsp. lyrata]                                                                                                                                                                                                                                                                                                                                                                                                                                    | 80   | 164 | 1.00E-37  | 205.0 | 96.3 | 97.5  | 60S ribosomal protein L21                        | gbpln | Arabidopsis lyrata   | AT1G09690.1   Symbols:   Translation protein SH3-like family protein   chr1:3136407-3137430 REVERSE LENGTH=164                  | 80   | 164 | 2.00E-40  | 205.0 | 95.0 | 97.5 |

|                          |                                                                                                                                                                                                                                                                                                                         |      |      |           |       |      |      |                                                                           |       |                      |                                                                                                                                                                                                                                                                                                                                                   |      |      |           |       |      |      |
|--------------------------|-------------------------------------------------------------------------------------------------------------------------------------------------------------------------------------------------------------------------------------------------------------------------------------------------------------------------|------|------|-----------|-------|------|------|---------------------------------------------------------------------------|-------|----------------------|---------------------------------------------------------------------------------------------------------------------------------------------------------------------------------------------------------------------------------------------------------------------------------------------------------------------------------------------------|------|------|-----------|-------|------|------|
| Rsa1.0_00868.1.g20611.t1 | refXP_002881646.1  jacalin lectin family protein [Arabidopsis lyrata subsp. lyrata] gi 297327485 gb EFH57905.1  jacalin lectin family protein [Arabidopsis lyrata subsp. lyrata]                                                                                                                                        | 155  | 458  | 5.00E-43  | 295.5 | 67.1 | 79.4 | jacalin lectin family protein                                             | gbpln | Arabidopsis lyrata   | AT2G39310.3   Symbols:   jacalin-related lectin 22   chr2:16414262-16416323 REVERSE LENGTH=458                                                                                                                                                                                                                                                    | 155  | 458  | 2.00E-45  | 295.5 | 67.7 | 78.7 |
| Rsa1.0_00868.1.g20612.t1 | ref NP_181466.2  SAC3/GANP/Nin1/mts3/eIF-3 p25-family protein [Arabidopsis thaliana] gi 330254569 gb AEC09663.1  SAC3/GANP/Nin1/mts3/eIF-3 p25-family protein [Arabidopsis thaliana]                                                                                                                                    | 1002 | 1006 | 0         | 100.4 | 79.7 | 86.7 | SAC3/GANP/Nin1/mts3/eIF-3 p25-family protein                              | gbpln | Arabidopsis thaliana | AT2G39340.1   Symbols:   SAC3/GANP/Nin1/mts3/eIF-3 p25 family   chr2:16424043-16429771 FORWARD LENGTH=1006                                                                                                                                                                                                                                        | 1002 | 1006 | 0         | 100.4 | 79.7 | 86.7 |
| Rsa1.0_00868.1.g20613.t1 | ref NP_181469.1  uncharacterized protein [Arabidopsis thaliana] gi 75099835 sp O80624.1 MAKR4_ARATH RecName: Full=Probable membrane-associated kinase regulator 4 gi 3355466 gb AAC27828.1  unknown protein [Arabidopsis thaliana] gi 330254572 gb AEC09666.1  uncharacterized protein AT2G39370 [Arabidopsis thaliana] | 310  | 328  | 1.00E-112 | 105.8 | 81.0 | 87.1 | uncharacterized protein                                                   | gbpln | Arabidopsis thaliana | AT2G39370.1   Symbols:   unknown protein; BEST Arabidopsis thaliana protein match is: unknown protein (TAIR:AT2G37380.1); Has 184 Blast hits to 178 proteins in 53 species: Archae - 0; Bacteria - 58; Metazoa - 9; Fungi - 0; Plants - 103; Viruses - 0; Other Eukaryotes - 14 (source: NCBI BLink).   chr2:16444280-16445266 REVERSE LENGTH=328 | 310  | 328  | 1.00E-114 | 105.8 | 81.0 | 87.1 |
| Rsa1.0_00868.1.g20614.t1 | refXP_002881653.1  Os04g0376000 [Arabidopsis lyrata subsp. lyrata] gi 297327492 gb EFH57912.1  Os04g0376000 [Arabidopsis lyrata subsp. lyrata]                                                                                                                                                                          | 111  | 123  | 2.00E-45  | 110.8 | 85.6 | 91.0 | Os04g0376000                                                              | gbpln | Arabidopsis lyrata   | AT2G39390.1   Symbols:   Ribosomal L29 family protein   chr2:16450803-16451762 REVERSE LENGTH=123                                                                                                                                                                                                                                                 | 111  | 123  | 4.00E-48  | 110.8 | 85.6 | 90.1 |
| Rsa1.0_00868.1.g20615.t1 | gb EOA27527.1  hypothetical protein CARUB_v10023666mg [Capsella rubella]                                                                                                                                                                                                                                                | 626  | 317  | 1.00E-167 | 50.6  | 45.0 | 47.8 | hypothetical protein CARUB_v10023666mg                                    | gbpln | Capsella rubella     | AT2G39410.2   Symbols:   alpha/beta-Hydrolases superfamily protein   chr2:16455667-16458217 FORWARD LENGTH=317                                                                                                                                                                                                                                    | 626  | 317  | 1.00E-165 | 50.6  | 43.8 | 46.8 |
| Rsa1.0_00868.1.g20616.t1 | refXP_002879795.1  esterase/lipase/thioesterase family protein [Arabidopsis lyrata subsp. lyrata] gi 297325634 gb EFH56054.1  esterase/lipase/thioesterase family protein [Arabidopsis lyrata subsp. lyrata]                                                                                                            | 317  | 317  | 1.00E-171 | 100.0 | 90.2 | 95.0 | esterase/lipase/thioesterase family protein                               | gbpln | Arabidopsis lyrata   | AT2G39420.1   Symbols:   alpha/beta-Hydrolases superfamily protein   chr2:16460442-16462872 FORWARD LENGTH=317                                                                                                                                                                                                                                    | 317  | 317  | 1.00E-171 | 100.0 | 88.6 | 94.0 |
| Rsa1.0_00868.1.g20617.t1 | ref NP_001118477.4  Phosphatidylinositol N-acetylglucosaminyltransferase, GPI19/PIG-P subunit [Arabidopsis thaliana] gi 330254584 gb AEC09678.1  Phosphatidylinositol N-acetylglucosaminyltransferase, GPI19/PIG-P subunit [Arabidopsis thaliana]                                                                       | 123  | 181  | 2.00E-36  | 147.2 | 65.0 | 73.2 | Phosphatidylinositol N-acetylglucosaminyltransferase, GPI19/PIG-P subunit | gbpln | Arabidopsis thaliana | AT2G39445.1   Symbols:   Phosphatidylinositol N-acetylglucosaminyltransferase, GPI19/PIG-P subunit   chr2:16470025-16471125 REVERSE LENGTH=181                                                                                                                                                                                                    | 123  | 181  | 3.00E-39  | 147.2 | 65.0 | 73.2 |
| Rsa1.0_00868.1.g20618.t1 | refXP_002862450.1  cation efflux family protein [Arabidopsis lyrata subsp. lyrata] gi 297307975 gb EFH38708.1  cation efflux family protein [Arabidopsis lyrata subsp. lyrata]                                                                                                                                          | 372  | 394  | 1.00E-173 | 105.9 | 89.5 | 94.1 | cation efflux family protein                                              | gbpln | Arabidopsis lyrata   | AT2G39450.1   Symbols: MTP11, ATMT11   Cation efflux family protein   chr2:16471744-16473735 REVERSE LENGTH=394                                                                                                                                                                                                                                   | 372  | 394  | 1.00E-175 | 105.9 | 89.8 | 94.1 |
| Rsa1.0_00868.1.g20619.t2 | dbj BAJ33853.1  unnamed protein product [Thellungiella halophila]                                                                                                                                                                                                                                                       | 263  | 154  | 2.00E-77  | 58.6  | 56.3 | 56.7 | unnamed protein product                                                   | ----  | ----                 | AT3G55280.2   Symbols: RPL23AB   ribosomal protein L23AB   chr3:20500667-20501519 FORWARD LENGTH=154                                                                                                                                                                                                                                              | 263  | 154  | 2.00E-96  | 58.6  | 45.2 | 45.6 |
| Rsa1.0_00868.1.g20620.t4 | ref NP_181490.5  uncharacterized protein [Arabidopsis thaliana] gi 330254602 gb AEC09696.1  uncharacterized protein AT2G39580 [Arabidopsis thaliana]                                                                                                                                                                    | 430  | 1577 | 8.00E-41  | 366.7 | 29.5 | 35.3 | uncharacterized protein                                                   | gbpln | Arabidopsis thaliana | AT2G39580.1   Symbols:   CONTAINS InterPro DOMAIN/s: Putative zinc-finger domain (InterPro:IPR019607); Has 249 Blast hits to 219 proteins in 85 species: Archae - 0; Bacteria - 144; Metazoa - 29; Fungi - 8; Plants - 50; Viruses - 0; Other Eukaryotes - 18 (source: NCBI BLink).   chr2:16510540-16516948 FORWARD LENGTH=1577                  | 430  | 1577 | 2.00E-43  | 366.7 | 29.5 | 35.3 |
| Rsa1.0_00868.1.g20621.t1 | #                                                                                                                                                                                                                                                                                                                       | #    | #    | #         | #     | #    | #    | -                                                                         | ----  | ----                 | #                                                                                                                                                                                                                                                                                                                                                 | #    | #    | #         | #     | #    |      |
| Rsa1.0_00869.1.g20622.t1 | gb AAD32866.1 AC005489.4_F14N23.4 [Arabidopsis thaliana]                                                                                                                                                                                                                                                                | 326  | 1161 | 2.00E-54  | 356.1 | 34.7 | 51.5 | F14N23.4                                                                  | gbpln | Arabidopsis thaliana | AT4G04650.1   Symbols:   RNA-directed DNA polymerase (reverse transcriptase)-related family protein   chr4:2353989-2355213 REVERSE LENGTH=332                                                                                                                                                                                                     | 326  | 332  | 1.00E-54  | 101.8 | 33.7 | 48.5 |

|                          |                                                                                                                                                                                                                                                                                                                                                                                                                                                                                                                                                                                                                                                                                                                                                                                                                                                                                                                                                                                                                                                                                                                                                                                                                                                                                                |     |     |           |       |      |      |                                             |       |                      |                                                                                                                                                                                                                                                                                  |     |     |           |       |      |      |
|--------------------------|------------------------------------------------------------------------------------------------------------------------------------------------------------------------------------------------------------------------------------------------------------------------------------------------------------------------------------------------------------------------------------------------------------------------------------------------------------------------------------------------------------------------------------------------------------------------------------------------------------------------------------------------------------------------------------------------------------------------------------------------------------------------------------------------------------------------------------------------------------------------------------------------------------------------------------------------------------------------------------------------------------------------------------------------------------------------------------------------------------------------------------------------------------------------------------------------------------------------------------------------------------------------------------------------|-----|-----|-----------|-------|------|------|---------------------------------------------|-------|----------------------|----------------------------------------------------------------------------------------------------------------------------------------------------------------------------------------------------------------------------------------------------------------------------------|-----|-----|-----------|-------|------|------|
| Rsa1.0_00869.1.g20623.t1 | ref NP_568335.1  glutamine synthetase cytosolic isozyme 1-4 [Arabidopsis thaliana]<br>gi 75309209 sp Q9FMD9.1 GLN14_ARAT<br>H RecName: Full=Glutamine synthetase cytosolic isozyme 1-4; AltName: Full=Glutamate--ammonia ligase<br>GLN14; Short=GLN1;4<br>gi 10176966 dbj BAB10184.1  glutamine synthetase [Arabidopsis thaliana]<br>gi 16649125 gb AAL24414.1  glutamine synthetase [Arabidopsis thaliana]<br>gi 22136142 gb AAM91149.1  glutamine synthetase [Arabidopsis thaliana]<br>gi 332004929 gb AED92312.1  glutamine synthetase cytosolic isozyme 1-4 [Arabidopsis thaliana]<br>ref NP_197162.1  putative inactive receptor kinase [Arabidopsis thaliana]<br>gi 75171650 sp Q9FMD7.1 Y5659_ARAT<br>H RecName: Full=Probable inactive receptor kinase At5g16590; Flags: Precursor<br>gi 10176966 dbj BAB10186.1  receptor-like protein kinase [Arabidopsis thaliana]<br>gi 44917459 gb AAS49054.1  At5g16590 [Arabidopsis thaliana]<br>gi 45773906 gb AAS76757.1  At5g16590 [Arabidopsis thaliana]<br>gi 110737672 dbj BAF00775.1  receptor like protein kinase [Arabidopsis thaliana]<br>gi 224589675 gb ACN59369.1  leucine-rich repeat receptor-like protein kinase [Arabidopsis thaliana]<br>gi 332004931 gb AED92314.1  putative inactive receptor kinase [Arabidopsis thaliana] | 356 | 356 | 0         | 100.0 | 96.6 | 99.2 | glutamine synthetase cytosolic isozyme 1-4  | gbpln | Arabidopsis thaliana | AT5G16570.1   Symbols: GLN1;4   glutamine synthetase 1;4   chr5:5421898-5424523 REVERSE LENGTH=356                                                                                                                                                                               | 356 | 356 | 0         | 100.0 | 96.6 | 99.2 |
| Rsa1.0_00869.1.g20624.t1 | ref NP_197163.1  myb domain protein 43 [Arabidopsis thaliana]<br>gi 5823313 gb AAD53095.1 AF175990.1 putative transcription factor [Arabidopsis thaliana]<br>gi 10176969 dbj BAB10187.1  transcription factor [Arabidopsis thaliana]<br>gi 27754274 gb AAO22590.1  unknown protein [Arabidopsis thaliana]<br>gi 41619406 gb AAS10095.1  MYB transcription factor [Arabidopsis thaliana]<br>gi 332004932 gb AED92315.1  myb domain protein 43 [Arabidopsis thaliana]                                                                                                                                                                                                                                                                                                                                                                                                                                                                                                                                                                                                                                                                                                                                                                                                                            | 611 | 625 | 0         | 102.3 | 86.1 | 90.8 | putative inactive receptor kinase           | gbpln | Arabidopsis thaliana | AT5G16590.1   Symbols: LRR1   Leucine-rich repeat protein kinase family protein   chr5:5431862-5433921 FORWARD LENGTH=625                                                                                                                                                        | 611 | 625 | 0         | 102.3 | 86.1 | 90.8 |
| Rsa1.0_00869.1.g20625.t1 | ref XP_002873786.1  hypothetical protein ARALYDRAFT_488520 [Arabidopsis lyrata subsp. lyrata]<br>gi 297319623 gb EFH50045.1  hypothetical protein ARALYDRAFT_488520 [Arabidopsis lyrata subsp. lyrata]                                                                                                                                                                                                                                                                                                                                                                                                                                                                                                                                                                                                                                                                                                                                                                                                                                                                                                                                                                                                                                                                                         | 318 | 327 | 1.00E-121 | 102.8 | 78.6 | 88.1 | myb domain protein 43                       | gbpln | Arabidopsis thaliana | AT5G16600.1   Symbols: MYB43, AtMYB43   myb domain protein 43   chr5:5438291-5440214 FORWARD LENGTH=327                                                                                                                                                                          | 318 | 327 | 1.00E-123 | 102.8 | 78.6 | 88.1 |
| Rsa1.0_00869.1.g20626.t2 | gb EOA30606.1  hypothetical protein CARUB_v10013737mg [Capsella rubella]                                                                                                                                                                                                                                                                                                                                                                                                                                                                                                                                                                                                                                                                                                                                                                                                                                                                                                                                                                                                                                                                                                                                                                                                                       | 460 | 437 | 1.00E-171 | 95.0  | 62.4 | 75.9 | hypothetical protein CARUB_v10013737mg      | gbpln | Capsella rubella     | AT5G16610.2   Symbols:   unknown protein; Has 35333 Blast hits to 34131 proteins in 2444 species: Archae - 798; Bacteria - 22429; Metazoa - 974; Fungi - 991; Plants - 531; Viruses - 0; Other Eukaryotes - 9610 (source: NCBI BLINK);   chr5:5445068-5447945 REVERSE LENGTH=673 | 460 | 437 | 1.00E-173 | 95.0  | 61.5 | 75.7 |
| Rsa1.0_00869.1.g20628.t1 | ref NP_197167.1  pentatricopeptide repeat-containing protein [Arabidopsis thaliana]<br>gi 75171647 sp Q9FMD3.1 PP389_ARAT<br>H RecName: Full=Pentatricopeptide repeat-containing protein At5g16640; mitochondrial; Flags: Precursor<br>gi 10176973 dbj BAB10191.1  unnamed protein product [Arabidopsis thaliana]<br>gi 110737318 dbj BAF00605.1  hypothetical protein [Arabidopsis thaliana]<br>gi 332004938 gb AED92321.1  pentatricopeptide repeat-containing protein [Arabidopsis thaliana]                                                                                                                                                                                                                                                                                                                                                                                                                                                                                                                                                                                                                                                                                                                                                                                                | 489 | 504 | 0         | 103.1 | 79.3 | 87.3 | pentatricopeptide repeat-containing protein | gbpln | Arabidopsis thaliana | AT5G16640.1   Symbols:   Pentatricopeptide repeat (PPR) superfamily protein   chr5:5461031-5462545 FORWARD LENGTH=504                                                                                                                                                            | 489 | 504 | 0         | 103.1 | 79.3 | 87.3 |
| Rsa1.0_00869.1.g20629.t1 | gb EOA21789.1  hypothetical protein CARUB_v10002253mg [Capsella rubella]                                                                                                                                                                                                                                                                                                                                                                                                                                                                                                                                                                                                                                                                                                                                                                                                                                                                                                                                                                                                                                                                                                                                                                                                                       | 127 | 128 | 2.00E-55  | 100.8 | 81.9 | 85.8 | hypothetical protein CARUB_v10002253mg      | gbpln | Capsella rubella     | AT5G16650.1   Symbols:   Chaperone DnaJ-domain superfamily protein   chr5:5463446-5465075 REVERSE LENGTH=128                                                                                                                                                                     | 127 | 128 | 9.00E-58  | 100.8 | 81.1 | 85.8 |

|                          |                                                                                                                                                                                                                                                                                                                                                                                                                                                                                                                                                          |      |      |           |       |      |      |                                                 |       |                      |                                                                                                                                                                                                                                                                                                                                                                                                                                                                                                                                                                                                                      |      |      |           |       |      |      |
|--------------------------|----------------------------------------------------------------------------------------------------------------------------------------------------------------------------------------------------------------------------------------------------------------------------------------------------------------------------------------------------------------------------------------------------------------------------------------------------------------------------------------------------------------------------------------------------------|------|------|-----------|-------|------|------|-------------------------------------------------|-------|----------------------|----------------------------------------------------------------------------------------------------------------------------------------------------------------------------------------------------------------------------------------------------------------------------------------------------------------------------------------------------------------------------------------------------------------------------------------------------------------------------------------------------------------------------------------------------------------------------------------------------------------------|------|------|-----------|-------|------|------|
| Rsa1.0_00869.1.g20630.t1 | ref[XP_002873788.1] predicted protein [Arabidopsis lyrata subsp. lyrata] gi 297319625 gb EFH50047.1  predicted protein [Arabidopsis lyrata subsp. lyrata]                                                                                                                                                                                                                                                                                                                                                                                                | 165  | 167  | 6.00E-65  | 101.2 | 78.8 | 86.1 | predicted protein                               | gbpln | Arabidopsis lyrata   | AT5G16660.1   Symbols:   unknown protein; FUNCTIONS IN: molecular.function unknown; INVOLVED IN: biological.process unknown; LOCATED IN: chloroplast thylakoid membrane, chloroplast, membrane, chloroplast envelope; EXPRESSED IN: 23 plant structures; EXPRESSED DURING: 14 growth stages; BEST Arabidopsis thaliana protein match is: unknown protein (TAIR:AT3G02900.1); Has 30201 Blast hits to 17322 proteins in 780 species: Archae - 12; Bacteria - 1396; Metazoa - 17338; Fungi - 3422; Plants - 5037; Viruses - 0; Other Eukaryotes - 2996 (source: NCBI BLink).   chr5:5465699-5467006 REVERSE LENGTH=168 | 165  | 168  | 2.00E-64  | 101.8 | 77.0 | 86.1 |
| Rsa1.0_00869.1.g20631.t1 | ref[NP_197171.2] origin recognition complex subunit 3 [Arabidopsis thaliana] gi 47681285 gb AAT37463.1  origin recognition complex protein 3 [Arabidopsis thaliana] gi 332004943 gb AED92326.1  origin recognition complex subunit 3 [Arabidopsis thaliana]                                                                                                                                                                                                                                                                                              | 727  | 734  | 0         | 101.0 | 86.1 | 91.9 | origin recognition complex subunit 3            | gbpln | Arabidopsis thaliana | AT5G16690.1   Symbols: ORC3, ATORC3   origin recognition complex subunit 3   chr5:5474410-5479878 FORWARD LENGTH=734                                                                                                                                                                                                                                                                                                                                                                                                                                                                                                 | 727  | 734  | 0         | 101.0 | 86.1 | 91.9 |
| Rsa1.0_00869.1.g20632.t1 | ref[XP_002871731.1] glycosyl hydrolase family 5 protein [Arabidopsis lyrata subsp. lyrata] gi 297317568 gb EFH47990.1  glycosyl hydrolase family 5 protein [Arabidopsis lyrata subsp. lyrata]                                                                                                                                                                                                                                                                                                                                                            | 193  | 488  | 3.00E-91  | 252.8 | 82.9 | 87.6 | glycosyl hydrolase family 5 protein             | gbpln | Arabidopsis lyrata   | AT5G16700.1   Symbols:   Glycosyl hydrolase superfamily protein   chr5:5480763-5483045 FORWARD LENGTH=488                                                                                                                                                                                                                                                                                                                                                                                                                                                                                                            | 193  | 488  | 4.00E-92  | 252.8 | 80.8 | 88.1 |
| Rsa1.0_00870.1.g20633.t1 | #                                                                                                                                                                                                                                                                                                                                                                                                                                                                                                                                                        | #    | #    | #         | #     | #    | -    | ----                                            | ----  | #                    | #                                                                                                                                                                                                                                                                                                                                                                                                                                                                                                                                                                                                                    | #    | #    | #         | #     | #    |      |
| Rsa1.0_00870.1.g20634.t1 | ref[NP_197953.1] ethylene-responsive transcription factor TINY [Arabidopsis thaliana] gi 48428609 sp Q39127.1 TINY_ARATH RecName: Full=Ethylene-responsive transcription factor TINY gi 1246403 emb CAA64359.1  TINY [Arabidopsis thaliana] gi 3406035 gb AAC29139.1  TINY [Arabidopsis thaliana] gi 48479302 gb AAT44922.1  putative AP2/EREBP transcription factor [Arabidopsis thaliana] gi 90569018 gb ABD94079.1  At5g25810 [Arabidopsis thaliana] gi 332006107 gb AED93490.1  ethylene-responsive transcription factor TINY [Arabidopsis thaliana] | 223  | 218  | 2.00E-80  | 97.8  | 80.3 | 85.2 | ethylene-responsive transcription factor TINY   | gbpln | Arabidopsis thaliana | AT5G25810.1   Symbols: try   Integrase-type DNA-binding superfamily protein   chr5:58986976-8987632 REVERSE LENGTH=218                                                                                                                                                                                                                                                                                                                                                                                                                                                                                               | 223  | 218  | 6.00E-83  | 97.8  | 80.3 | 85.2 |
| Rsa1.0_00870.1.g20635.t1 | #                                                                                                                                                                                                                                                                                                                                                                                                                                                                                                                                                        | #    | #    | #         | #     | #    | -    | ----                                            | ----  | #                    | #                                                                                                                                                                                                                                                                                                                                                                                                                                                                                                                                                                                                                    | #    | #    | #         | #     | #    |      |
| Rsa1.0_00870.1.g20636.t1 | ref[XP_002871479.1] predicted protein [Arabidopsis lyrata subsp. lyrata] gi 297317316 gb EFH47738.1  predicted protein [Arabidopsis lyrata subsp. lyrata]                                                                                                                                                                                                                                                                                                                                                                                                | 1011 | 1102 | 0         | 109.0 | 51.2 | 63.8 | predicted protein                               | gbpln | Arabidopsis lyrata   | AT5G11530.1   Symbols: EMF1   embryonic flower 1 (EMF1)   chr5:3697140-3700930 FORWARD LENGTH=1096                                                                                                                                                                                                                                                                                                                                                                                                                                                                                                                   | 1011 | 1096 | 0         | 108.4 | 49.7 | 62.5 |
| Rsa1.0_00870.1.g20637.t1 | ref[NP_197952.2] small RNA degrading nuclease 5 [Arabidopsis thaliana] gi 215274964 sp Q8L7M4.2 SDN5_ARATH RecName: Full=Small RNA degrading nuclease 5 gi 332006106 gb AED93489.1  small RNA degrading nuclease 5 [Arabidopsis thaliana]                                                                                                                                                                                                                                                                                                                | 561  | 567  | 0         | 101.1 | 81.6 | 89.8 | small RNA degrading nuclease 5                  | gbpln | Arabidopsis thaliana | AT5G25800.1   Symbols:   Polynucleotidyl transferase, ribonuclease H-like superfamily protein   chr5:8979761-8982724 REVERSE LENGTH=567                                                                                                                                                                                                                                                                                                                                                                                                                                                                              | 561  | 567  | 0         | 101.1 | 81.6 | 89.8 |
| Rsa1.0_00870.1.g20638.t1 | gb EOA20503.1  hypothetical protein CARUB_v10000816mg, partial [Capsella rubella]                                                                                                                                                                                                                                                                                                                                                                                                                                                                        | 502  | 491  | 1.00E-156 | 97.8  | 59.0 | 68.7 | hypothetical protein CARUB_v10000816mg, partial | gbpln | Capsella rubella     | AT5G25790.1   Symbols:   Tesmin/TSO1-like CXC domain-containing protein   chr5:8977233-8979181 REVERSE LENGTH=459                                                                                                                                                                                                                                                                                                                                                                                                                                                                                                    | 502  | 459  | 1.00E-158 | 91.4  | 57.8 | 67.5 |
| Rsa1.0_00870.1.g20639.t1 | ref[XP_002872181.1] predicted protein [Arabidopsis lyrata subsp. lyrata] gi 297836036 ref[XP_002885900.1] hypothetical protein ARALYDRAFT_899617 [Arabidopsis lyrata subsp. lyrata] gi 297318018 gb EFH448440.1  predicted protein [Arabidopsis lyrata subsp. lyrata] gi 297331740 gb EFH62159.1  hypothetical protein ARALYDRAFT_899617 [Arabidopsis lyrata subsp. lyrata]                                                                                                                                                                              | 157  | 157  | 9.00E-88  | 100.0 | 98.7 | 98.7 | predicted protein                               | gbpln | Arabidopsis lyrata   | AT5G25760.2   Symbols: PEX4   peroxin4   chr5:8967983-8969173 FORWARD LENGTH=157                                                                                                                                                                                                                                                                                                                                                                                                                                                                                                                                     | 157  | 157  | 3.00E-89  | 100.0 | 96.8 | 98.7 |



|                          |                                                                                                                                                                                                                                                                                                                                                                                                                                                                            |      |      |          |       |      |      |                                                          |       |                      |                                                                                                                                                                       |      |      |           |       |      |      |
|--------------------------|----------------------------------------------------------------------------------------------------------------------------------------------------------------------------------------------------------------------------------------------------------------------------------------------------------------------------------------------------------------------------------------------------------------------------------------------------------------------------|------|------|----------|-------|------|------|----------------------------------------------------------|-------|----------------------|-----------------------------------------------------------------------------------------------------------------------------------------------------------------------|------|------|-----------|-------|------|------|
| Rsa1.0_00870.1.g20640.t1 | gb EOA20339.1  hypothetical protein CARUB_v10000647mg, partial [Capsella rubella]                                                                                                                                                                                                                                                                                                                                                                                          | 523  | 544  | 0        | 104.0 | 90.4 | 96.0 | hypothetical protein CARUB_v10000647mg, gbpln partial    | gbpln | Capsella rubella     | AT5G25757.1   Symbols:   RNA polymerase I-associated factor PAF67   chr5:8965515-8967460 REVERSE LENGTH=514                                                           | 523  | 514  | 0         | 98.3  | 89.7 | 94.6 |
| Rsa1.0_00870.1.g20641.t1 | gb EOA20666.1  hypothetical protein CARUB_v10000978mg, partial [Capsella rubella]                                                                                                                                                                                                                                                                                                                                                                                          | 426  | 439  | 0        | 103.1 | 86.6 | 92.3 | hypothetical protein CARUB_v10000978mg, gbpln partial    | gbpln | Capsella rubella     | AT5G25620.2   Symbols: YUC6   Flavin-binding monooxygenase family protein   chr5:8935312-8938200 REVERSE LENGTH=426                                                   | 426  | 426  | 0         | 100.0 | 87.3 | 92.0 |
| Rsa1.0_00870.1.g20642.t1 | emb CAB39638.1  RNA-directed DNA polymerase-like protein [Arabidopsis thaliana] gi 7267666 emb CAB78094.1  RNA-directed DNA polymerase-like protein [Arabidopsis thaliana]                                                                                                                                                                                                                                                                                                 | 847  | 1274 | 0        | 150.4 | 48.5 | 64.9 | RNA-directed DNA polymerase-like protein                 | gbpln | Arabidopsis thaliana | AT4G29090.1   Symbols:   Ribonuclease H-like superfamily protein   chr4:1433528-14335255 FORWARD LENGTH=575                                                           | 847  | 575  | 9.00E-58  | 67.9  | 19.5 | 31.1 |
| Rsa1.0_00870.1.g20643.t1 | #                                                                                                                                                                                                                                                                                                                                                                                                                                                                          | #    | #    | #        | #     | #    | #    | -                                                        | ----  | ----                 | #                                                                                                                                                                     | #    | #    | #         | #     | #    |      |
| Rsa1.0_00871.1.g20644.t1 | ref NP_188642.2  protein titan9 [Arabidopsis thaliana] gi 42572493 ref NP_974342.1  protein titan9 [Arabidopsis thaliana] gi 9293961 dbj BAB01864.1  unnamed protein product [Arabidopsis thaliana] gi 17380796 gb AL36085.1  unknown protein [Arabidopsis thaliana] gi 21689809 gb AAM67548.1  unknown protein [Arabidopsis thaliana] gi 332642806 gb AEE76327.1  protein titan9 [Arabidopsis thaliana] gi 332642807 gb AEE76328.1  protein titan9 [Arabidopsis thaliana] | 276  | 282  | 3.00E-81 | 102.2 | 62.7 | 74.6 | protein titan9                                           | gbpln | Arabidopsis thaliana | AT3G20070.2   Symbols: TTN9   titan9   chr3:7004950-7006625 REVERSE LENGTH=282                                                                                        | 276  | 282  | 9.00E-84  | 102.2 | 62.7 | 74.6 |
| Rsa1.0_00871.1.g20645.t1 | ref NP_001078193.1  cytochrome P450, family 705, subfamily A, polypeptide 22 [Arabidopsis thaliana] gi 332642817 gb AEE76338.1  cytochrome P450, family 705, subfamily A, polypeptide 22 [Arabidopsis thaliana] ref XP_002885355.1  ubiquitin-conjugating enzyme 19 [Arabidopsis lyrata subsp. lyrata] gi 297331195 gb EFH61614.1  ubiquitin-conjugating enzyme 19 [Arabidopsis lyrata subsp. lyrata]                                                                      | 128  | 487  | 2.00E-41 | 380.5 | 60.2 | 75.8 | cytochrome P450, family 705, subfamily A, polypeptide 22 | gbpln | Arabidopsis thaliana | AT3G20130.2   Symbols: CYP705A22   cytochrome P450, family 705, subfamily A, polypeptide 22   chr3:7026982-7028613 FORWARD LENGTH=487                                 | 128  | 487  | 4.00E-44  | 380.5 | 60.2 | 75.8 |
| Rsa1.0_00871.1.g20646.t1 | ref XP_002885355.1  ubiquitin-conjugating enzyme 19 [Arabidopsis lyrata subsp. lyrata] gi 297331195 gb EFH61614.1  ubiquitin-conjugating enzyme 19 [Arabidopsis lyrata subsp. lyrata]                                                                                                                                                                                                                                                                                      | 181  | 181  | 4.00E-99 | 100.0 | 95.6 | 96.1 | ubiquitin-conjugating enzyme 19                          | gbpln | Arabidopsis lyrata   | AT3G20060.1   Symbols: UBC19   ubiquitin-conjugating enzyme19   chr3:7002927-7004283 REVERSE LENGTH=181                                                               | 181  | 181  | 3.00E-94  | 100.0 | 94.5 | 95.0 |
| Rsa1.0_00871.1.g20647.t1 | gb EOA32274.1  hypothetical protein CARUB_v10015535mg [Capsella rubella]                                                                                                                                                                                                                                                                                                                                                                                                   | 545  | 545  | 0        | 100.0 | 98.0 | 99.8 | hypothetical protein CARUB_v10015535mg                   | gbpln | Capsella rubella     | AT3G20050.1   Symbols: ATTCP-1, TCP-1   T-complex protein 1 alpha subunit   chr3:6988544-7002266 REVERSE LENGTH=545                                                   | 545  | 545  | 0         | 100.0 | 97.6 | 99.6 |
| Rsa1.0_00871.1.g20648.t1 | ref XP_002883225.1  hexokinase [Arabidopsis lyrata subsp. lyrata] gi 297329065 gb EFH59484.1  hexokinase [Arabidopsis lyrata subsp. lyrata]                                                                                                                                                                                                                                                                                                                                | 505  | 502  | 0        | 99.4  | 86.5 | 93.5 | hexokinase                                               | gbpln | Arabidopsis lyrata   | AT3G20040.1   Symbols: ATHXK4, HKL2   Hexokinase   chr3:6995317-6998064 FORWARD LENGTH=502                                                                            | 505  | 502  | 0         | 99.4  | 87.3 | 94.1 |
| Rsa1.0_00871.1.g20649.t1 | ref XP_002885352.1  arginine N-methyltransferase family protein [Arabidopsis lyrata subsp. lyrata] gi 297331192 gb EFH61611.1  arginine N-methyltransferase family protein [Arabidopsis lyrata subsp. lyrata]                                                                                                                                                                                                                                                              | 428  | 435  | 0        | 101.6 | 92.5 | 94.9 | arginine N-methyltransferase family protein              | gbpln | Arabidopsis lyrata   | AT3G20020.1   Symbols: ATPRMT6, PRMT6   protein arginine methyltransferase 6   chr3:6984055-6987945 REVERSE LENGTH=435                                                | 428  | 435  | 0         | 101.6 | 91.1 | 94.4 |
| Rsa1.0_00871.1.g20650.t1 | ref NP_188636.2  aspartyl protease family protein [Arabidopsis thaliana] gi 75273243 sp Q9LHE3.1 ASPG2_ARAT H RecName: Full=Protein ASPARTIC PROTEASE IN GUARD CELL 2; Short=AtASPG2; Flags: Precursor gi 11994777 dbj BAB03167.1  nucleoid chloroplast DNA-binding protein-like [Arabidopsis thaliana] gi 28392860 gb AAO41867.1  unknown protein [Arabidopsis thaliana] gi 332642798 gb AEE76319.1  protein aspartic protease in guard cell 2 [Arabidopsis thaliana]     | 466  | 470  | 0        | 100.9 | 89.1 | 91.8 | aspartyl protease family protein                         | gbpln | Arabidopsis thaliana | AT3G20015.1   Symbols:   Eukaryotic aspartyl protease family protein   chr3:6978746-6980158 REVERSE LENGTH=470                                                        | 466  | 470  | 0         | 100.9 | 89.1 | 91.8 |
| Rsa1.0_00871.1.g20651.t1 | ref XP_002883222.1  SNF2 domain-containing protein [Arabidopsis lyrata subsp. lyrata] gi 297329062 gb EFH59481.1  SNF2 domain-containing protein [Arabidopsis lyrata subsp. lyrata]                                                                                                                                                                                                                                                                                        | 1118 | 1046 | 0        | 93.6  | 67.1 | 75.2 | SNF2 domain-containing protein                           | gbpln | Arabidopsis lyrata   | AT3G20010.1   Symbols:   SNF2 domain-containing protein / helicase domain-containing protein / zinc finger protein-related   chr3:6971352-6976340 FORWARD LENGTH=1047 | 1118 | 1047 | 0         | 93.6  | 66.4 | 74.4 |
| Rsa1.0_00871.1.g20652.t1 | #                                                                                                                                                                                                                                                                                                                                                                                                                                                                          | #    | #    | #        | #     | #    | #    | -                                                        | ----  | ----                 | #                                                                                                                                                                     | #    | #    | #         | #     | #    |      |
| Rsa1.0_00872.1.g20653.t1 | gb EOA19038.1  hypothetical protein CARUB_v10007695mg [Capsella rubella]                                                                                                                                                                                                                                                                                                                                                                                                   | 399  | 403  | 0        | 101.0 | 84.5 | 90.5 | hypothetical protein CARUB_v10007695mg                   | gbpln | Capsella rubella     | AT1G65570.1   Symbols:   Pectin lyase-like superfamily protein   chr1:24374098-24375846 REVERSE LENGTH=397                                                            | 399  | 397  | 1.00E-147 | 99.5  | 62.2 | 75.9 |

|                          |                                                                                                                                                                                                                                                                                                                                                                                                                                                                                       |      |      |           |        |      |      |                                                                   |       |                      |                                                                                                                                                                                                                                                                          |      |      |           |       |      |      |
|--------------------------|---------------------------------------------------------------------------------------------------------------------------------------------------------------------------------------------------------------------------------------------------------------------------------------------------------------------------------------------------------------------------------------------------------------------------------------------------------------------------------------|------|------|-----------|--------|------|------|-------------------------------------------------------------------|-------|----------------------|--------------------------------------------------------------------------------------------------------------------------------------------------------------------------------------------------------------------------------------------------------------------------|------|------|-----------|-------|------|------|
| Rsa1.0_00872.1.g20654.t2 | gb AAG51046.1 AC069473.8 gypsy/Ty-3 retroelement polyprotein; 69905-74404 [Arabidopsis thaliana] gi 10998138 dbj BAB03109.1 retroelement pol polyprotein [Arabidopsis thaliana]                                                                                                                                                                                                                                                                                                       | 1294 | 1499 | 0         | 115.8  | 62.9 | 78.5 | gypsy/Ty-3 retroelement polyprotein; 69905-74404                  | gbpln | Arabidopsis thaliana | ATMG00860.1   Symbols: ORF158   DNA/RNA polymerases superfamily protein   chrM:2359158-236392 FORWARD LENGTH=158                                                                                                                                                         | 1294 | 158  | 2.00E-23  | 12.2  | 3.9  | 5.2  |
| Rsa1.0_00872.1.g20655.t1 | # # # # # # # #                                                                                                                                                                                                                                                                                                                                                                                                                                                                       | #    | #    | #         | #      | #    | -    |                                                                   | ----  | ----                 | #                                                                                                                                                                                                                                                                        | #    | #    | #         | #     | #    | #    |
| Rsa1.0_00872.1.g20656.t1 | ref NP_568543.1 protease Do-like 10 [Arabidopsis thaliana] gi 75262529 sp Q9FTV6.1 DGP10_ARATH RecName: Full=Protease Do-like 10, mitochondrial; Flags: Precursor gi 10178214 dbj BAB11638.1 serine protease-like protein [Arabidopsis thaliana] gi 17978951 gb AAL47441.1 AT5g36950/MLF18.70 [Arabidopsis thaliana] gi 50897262 gb AAT85770.1 AT5g36950 [Arabidopsis thaliana] gi 332006748 gb AED94131.1 protease Do-like 10 [Arabidopsis thaliana]                                 | 586  | 586  | 0         | 100.0  | 81.4 | 88.7 | protease Do-like 10                                               | gbpln | Arabidopsis thaliana | AT5G36950.1   Symbols: DegP10   DegP protease 10   chr5:14594992-14598216 FORWARD LENGTH=586                                                                                                                                                                             | 586  | 586  | 0         | 100.0 | 81.4 | 88.7 |
| Rsa1.0_00872.1.g20657.t1 | ref NP_198512.1 uncharacterized protein [Arabidopsis thaliana] gi 10178215 dbj BAB11639.1 unnamed protein product [Arabidopsis thaliana] gi 91806934 gb ABE66194.1 unknown [Arabidopsis thaliana] gi 332006749 gb AED94132.1 uncharacterized protein AT5G36960 [Arabidopsis thaliana]                                                                                                                                                                                                 | 136  | 137  | 1.00E-52  | 100.7  | 78.7 | 86.8 | uncharacterized protein                                           | gbpln | Arabidopsis thaliana | AT5G36960.1   Symbols:   unknown protein; Has 1807 Blast hits to 1807 proteins in 277 species: Archae - 0; Bacteria - 0; Metazoa - 736; Fungi - 347; Plants - 385; Viruses - 0; Other Eukaryotes - 339 (source: NCBI BLink).   chr5:14598745-14599729 FORWARD LENGTH=137 | 136  | 137  | 3.00E-55  | 100.7 | 78.7 | 86.8 |
| Rsa1.0_00872.1.g20658.t1 | ref NP_198513.1 NDR1/HIN1-like 25 [Arabidopsis thaliana] gi 332006750 gb AED94133.1 NDR1/HIN1-like 25 [Arabidopsis thaliana]                                                                                                                                                                                                                                                                                                                                                          | 323  | 248  | 1.00E-102 | 76.8   | 62.8 | 66.9 | NDR1/HIN1-like 25                                                 | gbpln | Arabidopsis thaliana | AT5G36970.1   Symbols: NHL25   NDR1/HIN1-like 25   chr5:14604367-14605194 REVERSE LENGTH=248                                                                                                                                                                             | 323  | 248  | 1.00E-105 | 76.8  | 62.8 | 66.9 |
| Rsa1.0_00872.1.g20659.t1 | # # # # # # # #                                                                                                                                                                                                                                                                                                                                                                                                                                                                       | #    | #    | #         | #      | #    | -    |                                                                   | ----  | ----                 | #                                                                                                                                                                                                                                                                        | #    | #    | #         | #     | #    | #    |
| Rsa1.0_00872.1.g20660.t1 | gb AAC63678.1 putative non-LTR retroelement reverse transcriptase [Arabidopsis thaliana]                                                                                                                                                                                                                                                                                                                                                                                              | 110  | 1216 | 9.00E-23  | 1105.5 | 45.5 | 60.0 | putative non-LTR retroelement reverse transcriptase               | gbpln | Arabidopsis thaliana | #                                                                                                                                                                                                                                                                        | #    | #    | #         | #     | #    | #    |
| Rsa1.0_00872.1.g20661.t1 | dbj BAB08970.1 unnamed protein product [Arabidopsis thaliana]                                                                                                                                                                                                                                                                                                                                                                                                                         | 540  | 559  | 0         | 103.5  | 78.0 | 86.7 | unnamed protein product                                           | gbpln | Arabidopsis thaliana | AT5G37000.1   Symbols:   Exostoin family protein   chr5:14618107-14620282 FORWARD LENGTH=547                                                                                                                                                                             | 540  | 547  | 0         | 101.3 | 74.8 | 82.4 |
| Rsa1.0_00872.1.g20662.t1 | ref NP_176815.1 DNA-binding storekeeper protein-related transcriptional regulator [Arabidopsis thaliana] gi 12322267 gb AAG51162.1 AC074025.12 hypothetical protein [Arabidopsis thaliana] gi 12324403 gb AAG52170.1 AC020665.15 hypothetical protein; 78831-79679 [Arabidopsis thaliana] gi 225898052 dbj BAH30358.1 hypothetical protein [Arabidopsis thaliana] gi 332196386 gb AEE34507.1 DNA-binding storekeeper protein-related transcriptional regulator [Arabidopsis thaliana] | 219  | 282  | 1.00E-22  | 128.8  | 34.2 | 45.2 | DNA-binding storekeeper protein-related transcriptional regulator | gbpln | Arabidopsis thaliana | AT1G66420.1   Symbols:   DNA-binding storekeeper protein-related transcriptional regulator   chr1:24777184-24778032 FORWARD LENGTH=282                                                                                                                                   | 219  | 282  | 4.00E-25  | 128.8 | 34.2 | 45.2 |
| Rsa1.0_00872.1.g20663.t2 | dbj BAB10503.1 retroelement pol polyprotein-like [Arabidopsis thaliana]                                                                                                                                                                                                                                                                                                                                                                                                               | 1330 | 1475 | 0         | 110.9  | 56.4 | 72.3 | retroelement pol polyprotein-like                                 | gbpln | Arabidopsis thaliana | AT4G23160.1   Symbols: CRK8   cysteine-rich RLK (RECEPTOR-like protein kinase) 8   chr4:12129485-12134086 FORWARD LENGTH=1262                                                                                                                                            | 1330 | 1262 | 1.00E-174 | 94.9  | 22.3 | 28.6 |
| Rsa1.0_00872.1.g20664.t1 | dbj BAJ33985.1 unnamed protein product [Thellungiella halophila]                                                                                                                                                                                                                                                                                                                                                                                                                      | 475  | 478  | 0         | 100.6  | 84.0 | 89.3 | unnamed protein product                                           | ----  | ----                 | AT2G38400.1   Symbols: AGT3   alanine:glyoxylate aminotransferase 3   chr2:16083779-16085974 FORWARD LENGTH=477                                                                                                                                                          | 475  | 477  | 0         | 100.4 | 82.3 | 88.2 |
| Rsa1.0_00872.1.g20665.t1 | # # # # # # # #                                                                                                                                                                                                                                                                                                                                                                                                                                                                       | #    | #    | #         | #      | #    | -    |                                                                   | ----  | ----                 | #                                                                                                                                                                                                                                                                        | #    | #    | #         | #     | #    | #    |
| Rsa1.0_00873.1.g20666.t1 | gb AFZ41789.1 putative progesterone 5-beta-reductase [Raphanus sativus]                                                                                                                                                                                                                                                                                                                                                                                                               | 103  | 390  | 2.00E-31  | 378.6  | 62.1 | 65.0 | putative progesterone 5-beta-reductase                            | gbpln | Raphanus sativus     | AT4G24220.2   Symbols: VEP1, AWI31   NAD(P)-binding Rossmann-fold superfamily protein   chr4:12565219-12566474 FORWARD LENGTH=387                                                                                                                                        | 103  | 387  | 1.00E-33  | 375.7 | 60.2 | 65.0 |
| Rsa1.0_00873.1.g20667.t3 | ref XP_002864331.1 hypothetical protein ARALYDRAFT_495522 [Arabidopsis lyrata subsp. lyrata] gi 29731016 gb EFH40590.1 hypothetical protein ARALYDRAFT_495522 [Arabidopsis lyrata subsp. lyrata]                                                                                                                                                                                                                                                                                      | 145  | 369  | 1.00E-38  | 254.5  | 51.7 | 59.3 | hypothetical protein ARALYDRAFT_495522                            | gbpln | Arabidopsis lyrata   | AT5G54320.1   Symbols:   Protein of unknown function (DUF295)   chr5:22062805-22063914 FORWARD LENGTH=369                                                                                                                                                                | 145  | 369  | 2.00E-40  | 254.5 | 51.0 | 58.6 |

|                          |                                                                                                                                                                                                                                                                                                                                                                                                                                                                                                                                                                                                                                                                                                                                                                                                                                                                               |     |     |           |       |      |      |                                                                                   |       |                      |                                                                                                                                                                                                                                                            |     |     |           |       |      |      |
|--------------------------|-------------------------------------------------------------------------------------------------------------------------------------------------------------------------------------------------------------------------------------------------------------------------------------------------------------------------------------------------------------------------------------------------------------------------------------------------------------------------------------------------------------------------------------------------------------------------------------------------------------------------------------------------------------------------------------------------------------------------------------------------------------------------------------------------------------------------------------------------------------------------------|-----|-----|-----------|-------|------|------|-----------------------------------------------------------------------------------|-------|----------------------|------------------------------------------------------------------------------------------------------------------------------------------------------------------------------------------------------------------------------------------------------------|-----|-----|-----------|-------|------|------|
| Rsa1.0_00873.1.g20668.t1 | gb EOA39198.1  hypothetical protein CARUB_v10012166mg [Capsella rubella]                                                                                                                                                                                                                                                                                                                                                                                                                                                                                                                                                                                                                                                                                                                                                                                                      | 240 | 250 | 2.00E-76  | 104.2 | 70.0 | 78.3 | hypothetical protein CARUB_v10012166mg                                            | gbpln | Capsella rubella     | AT1G30800.1   Symbols:   Fasciclin-like arabinogalactan family protein   chr1:10936995-10937714 FORWARD LENGTH=239                                                                                                                                         | 240 | 239 | 2.00E-76  | 99.6  | 75.0 | 82.1 |
| Rsa1.0_00873.1.g20669.t1 | ref NP_174367.6  transcription factor jumonji and C5HC2 type zinc finger domain-containing protein [Arabidopsis thaliana]<br>gi 334182965 ref NP_001185118.1  transcription factor jumonji and C5HC2 type zinc finger domain-containing protein [Arabidopsis thaliana]<br>gi 332193153 gb AEE31274.1  transcription factor jumonji and C5HC2 type zinc finger domain-containing protein [Arabidopsis thaliana]<br>gi 332193154 gb AEE31275.1  transcription factor jumonji and C5HC2 type zinc finger domain-containing protein [Arabidopsis thaliana]<br>ref NP_174370.1  protein root hair specific 4 [Arabidopsis thaliana]<br>gi 4926832 gb AAD32942.1 AC004135_17 T17H7.17 [Arabidopsis thaliana]<br>gi 55740513 gb AAV63849.1  hypothetical protein At1g30850 [Arabidopsis thaliana]<br>gi 332193164 gb AEE31285.1  protein root hair specific 4 [Arabidopsis thaliana] | 784 | 819 | 0         | 104.5 | 86.0 | 92.6 | transcription factor jumonji and C5HC2 type zinc finger domain-containing protein | gbpln | Arabidopsis thaliana | AT1G30810.2   Symbols:   Transcription factor jumonji (jm) family protein / zinc finger (C5HC2 type) family protein   chr1:10938139-10941505 REVERSE LENGTH=819                                                                                            | 784 | 819 | 0         | 104.5 | 86.0 | 92.6 |
| Rsa1.0_00873.1.g20670.t1 | ref NP_174370.1  protein root hair specific 4 [Arabidopsis thaliana]<br>gi 4926832 gb AAD32942.1 AC004135_17 T17H7.17 [Arabidopsis thaliana]<br>gi 55740513 gb AAV63849.1  hypothetical protein At1g30850 [Arabidopsis thaliana]<br>gi 332193164 gb AEE31285.1  protein root hair specific 4 [Arabidopsis thaliana]<br>ref XP_002893652.1  protein binding protein [Arabidopsis lyrata subsp. lyrata] gi 297339494 gb EFH69911.1  protein binding protein [Arabidopsis lyrata subsp. lyrata]                                                                                                                                                                                                                                                                                                                                                                                  | 250 | 300 | 2.00E-73  | 120.0 | 64.0 | 76.0 | protein root hair specific 4                                                      | gbpln | Arabidopsis thaliana | AT1G30850.1   Symbols: RSH4   root hair specific 4   chr1:10985116-10986018 FORWARD LENGTH=300                                                                                                                                                             | 250 | 300 | 5.00E-76  | 120.0 | 64.0 | 76.0 |
| Rsa1.0_00873.1.g20671.t1 | ref XP_002893652.1  protein binding protein [Arabidopsis lyrata subsp. lyrata] gi 297339494 gb EFH69911.1  protein binding protein [Arabidopsis lyrata subsp. lyrata]                                                                                                                                                                                                                                                                                                                                                                                                                                                                                                                                                                                                                                                                                                         | 708 | 725 | 0         | 102.4 | 68.4 | 78.2 | protein binding protein                                                           | gbpln | Arabidopsis lyrata   | AT1G30860.1   Symbols:   RING/U-box superfamily protein   chr1:10986696-10989246 REVERSE LENGTH=730                                                                                                                                                        | 708 | 730 | 0         | 103.1 | 66.8 | 76.6 |
| Rsa1.0_00873.1.g20672.t1 | gb EOA36410.1  hypothetical protein CARUB_v10010885mg [Capsella rubella]                                                                                                                                                                                                                                                                                                                                                                                                                                                                                                                                                                                                                                                                                                                                                                                                      | 343 | 352 | 1.00E-164 | 102.6 | 82.8 | 88.0 | hypothetical protein CARUB_v10010885mg                                            | gbpln | Capsella rubella     | AT1G30870.1   Symbols:   Peroxidase superfamily protein   chr1:10991535-10992885 FORWARD LENGTH=349                                                                                                                                                        | 343 | 349 | 1.00E-160 | 101.7 | 82.8 | 90.7 |
| Rsa1.0_00873.1.g20673.t1 | gb EOA36340.1  hypothetical protein CARUB_v10010686mg [Capsella rubella]                                                                                                                                                                                                                                                                                                                                                                                                                                                                                                                                                                                                                                                                                                                                                                                                      | 122 | 118 | 3.00E-41  | 96.7  | 82.8 | 85.2 | hypothetical protein CARUB_v10010686mg                                            | gbpln | Capsella rubella     | AT1G30880.1   Symbols:   unknown protein; Has 24 Blast hits to 24 proteins in 8 species: Archa - 0; Bacteria - 0; Metazoa - 2; Fungi - 0; Plants - 22; Viruses - 0; Other Eukaryotes - 0 (source: NCBI BLINK).   chr1:10993379-10994056 REVERSE LENGTH=120 | 122 | 120 | 2.00E-31  | 98.4  | 85.2 | 87.7 |
| Rsa1.0_00873.1.g20674.t1 | ref NP_564367.1  integral membrane HRF1-like protein [Arabidopsis thaliana]<br>gi 145324009 ref NP_001077633.1  integral membrane HRF1-like protein [Arabidopsis thaliana]<br>gi 14532658 gb AAK64057.1  unknown protein [Arabidopsis thaliana]<br>gi 21280943 gb AAM44952.1  unknown protein [Arabidopsis thaliana]<br>gi 21554340 gb AAM63447.1  unknown [Arabidopsis thaliana]<br>gi 332193168 gb AEE31289.1  integral membrane HRF1-like protein [Arabidopsis thaliana]<br>gi 332193169 gb AEE31290.1  integral membrane HRF1-like protein [Arabidopsis thaliana]                                                                                                                                                                                                                                                                                                         | 271 | 269 | 2.33E-156 | 99.3  | 94.1 | 96.7 | integral membrane HRF1-like protein                                               | gbpln | Arabidopsis thaliana | AT1G30890.2   Symbols:   Integral membrane HRF1 family protein   chr1:10994890-10995999 FORWARD LENGTH=269                                                                                                                                                 | 271 | 269 | 1.00E-149 | 99.3  | 94.1 | 96.7 |
| Rsa1.0_00873.1.g20675.t1 | ref NP_174578.1  F-box and associated interaction domain-containing protein [Arabidopsis thaliana]<br>gi 378405165 sp Q9MAP1.2 FB33_ARAT H RecName: Full=Putative F-box protein At1g33020<br>gi 332193429 gb AEE31550.1  F-box and associated interaction domain-containing protein [Arabidopsis thaliana]                                                                                                                                                                                                                                                                                                                                                                                                                                                                                                                                                                    | 367 | 548 | 6.00E-80  | 149.3 | 50.7 | 64.0 | F-box and associated interaction domain-containing protein                        | gbpln | Arabidopsis thaliana | AT1G33020.1   Symbols:   F-box and associated interaction domains-containing protein   chr1:11962746-11964832 FORWARD LENGTH=548                                                                                                                           | 367 | 548 | 2.00E-82  | 149.3 | 50.7 | 64.0 |
| Rsa1.0_00873.1.g20676.t2 | gb EOA39891.1  hypothetical protein CARUB_v10008569mg [Capsella rubella]                                                                                                                                                                                                                                                                                                                                                                                                                                                                                                                                                                                                                                                                                                                                                                                                      | 180 | 631 | 7.00E-32  | 350.6 | 48.3 | 52.8 | hypothetical protein CARUB_v10008569mg                                            | gbpln | Capsella rubella     | AT1G30900.1   Symbols: VSR6, VSR3.3, BP80-3.3   VACUOLAR SORTING RECEPTOR 6   chr1:10997275-11000543 FORWARD LENGTH=631                                                                                                                                    | 180 | 631 | 3.00E-33  | 350.6 | 46.7 | 52.2 |
| Rsa1.0_00873.1.g20677.t1 | #                                                                                                                                                                                                                                                                                                                                                                                                                                                                                                                                                                                                                                                                                                                                                                                                                                                                             | #   | #   | #         | #     | #    | -    | ----                                                                              | ----  | #                    | #                                                                                                                                                                                                                                                          | #   | #   | #         | #     | #    |      |

|                          |                                                                                                                                                                                                                                                                                                                                                                                                                                                                                                                                                                     |      |      |           |       |      |      |                                                   |       |                      |                                                                                                                                 |      |      |           |       |      |      |
|--------------------------|---------------------------------------------------------------------------------------------------------------------------------------------------------------------------------------------------------------------------------------------------------------------------------------------------------------------------------------------------------------------------------------------------------------------------------------------------------------------------------------------------------------------------------------------------------------------|------|------|-----------|-------|------|------|---------------------------------------------------|-------|----------------------|---------------------------------------------------------------------------------------------------------------------------------|------|------|-----------|-------|------|------|
| Rsa1.0_00874.1.g20678.t1 | dbj BAJ34022.1  unnamed protein product [Theellungiella halophila]                                                                                                                                                                                                                                                                                                                                                                                                                                                                                                  | 352  | 395  | 1.00E-154 | 112.2 | 85.8 | 90.9 | unnamed protein product                           | ----  | ----                 | AT2G30020.1   Symbols:   Protein phosphatase 2C family protein   chr2:12814437-12815904 FORWARD LENGTH=396                      | 352  | 396  | 1.00E-151 | 112.5 | 82.7 | 89.2 |
| Rsa1.0_00874.1.g20679.t1 | ref NP_180565.1  mitogen-activated protein kinase kinase kinase 14 [Arabidopsis thaliana]<br>gi 3420047 gb AAC31848.1  putative protein kinase [Arabidopsis thaliana]<br>gi 24030256 gb AAN41303.1  putative protein kinase [Arabidopsis thaliana]<br>gi 330253244 gb AEC08338.1  mitogen-activated protein kinase kinase kinase 14 [Arabidopsis thaliana]                                                                                                                                                                                                          | 434  | 463  | 1.00E-150 | 106.7 | 65.4 | 73.7 | mitogen-activated protein kinase kinase kinase 14 | gbpln | Arabidopsis thaliana | AT2G30040.1   Symbols: MAPKKK14   mitogen-activated protein kinase kinase kinase 14   chr2:12821747-12823138 FORWARD LENGTH=463 | 434  | 463  | 1.00E-153 | 106.7 | 65.4 | 73.7 |
| Rsa1.0_00874.1.g20680.t1 | ref XP_002879246.1  transducin family protein [Arabidopsis lyrata subsp. lyrata] gi 297325085 gb EFH55505.1  transducin family protein [Arabidopsis lyrata subsp. lyrata]                                                                                                                                                                                                                                                                                                                                                                                           | 302  | 302  | 1.00E-161 | 100.0 | 91.7 | 96.0 | transducin family protein                         | gbpln | Arabidopsis lyrata   | AT2G30050.1   Symbols:   transducin family protein / WD-40 repeat family protein   chr2:12825540-12826448 FORWARD LENGTH=302    | 302  | 302  | 1.00E-163 | 100.0 | 90.7 | 96.4 |
| Rsa1.0_00874.1.g20681.t1 | gb AAD32898.1  putative retroelement pol polyprotein [Arabidopsis thaliana]                                                                                                                                                                                                                                                                                                                                                                                                                                                                                         | 1391 | 1307 | 0         | 94.0  | 58.6 | 73.1 | putative retroelement pol polyprotein             | gbpln | Arabidopsis thaliana | AT4G23160.1   Symbols: CRK8   cysteine-rich RLK (RECEPTOR-like protein kinase) 8   chr4:12129485-12134086 FORWARD LENGTH=1262   | 1391 | 1262 | 1.00E-97  | 90.7  | 13.7 | 21.4 |
| Rsa1.0_00874.1.g20682.t1 | gb AAC49844.1  putative potassium transporter AtKT1p [Arabidopsis thaliana]                                                                                                                                                                                                                                                                                                                                                                                                                                                                                         | 732  | 712  | 0         | 97.3  | 89.1 | 93.3 | putative potassium transporter AtKT1p             | gbpln | Arabidopsis thaliana | AT2G30070.1   Symbols: ATKT1, ATKT1P, ATKUP1, KUP1, KT1   potassium transporter 1   chr2:12835097-12838466 FORWARD LENGTH=712   | 732  | 712  | 0         | 97.3  | 89.6 | 93.9 |
| Rsa1.0_00874.1.g20683.t1 | ref NP_180569.1  zinc transporter 6 [Arabidopsis thaliana]<br>gi 37090161 sp O64738.1 ZIP6_ARATH<br>RecName: Full=Zinc transporter 6, chloroplastic; AltName: Full=ZRT/IRT-like protein 6; Flags: Precursor<br>gi 17385786 gb AAL38433.1 AF369910.1<br>putative metal transporter ZIP6 [Arabidopsis thaliana]<br>gi 3150412 gb AAC16964.1  putative Fe(II) transport protein [Arabidopsis thaliana]<br>gi 20197229 gb AAM14983.1  putative Fe(II) transport protein [Arabidopsis thaliana]<br>gi 330253248 gb AEC08342.1  zinc transporter 6 [Arabidopsis thaliana] | 340  | 341  | 1.00E-173 | 100.3 | 92.4 | 96.5 | zinc transporter 6                                | gbpln | Arabidopsis thaliana | AT2G30080.1   Symbols: ZIP6, ATZIP6   ZIP metal ion transporter family   chr4:12838730-12840112 REVERSE LENGTH=341              | 340  | 341  | 1.00E-176 | 100.3 | 92.4 | 96.5 |
| Rsa1.0_00874.1.g20684.t1 | gb EOA29295.1  hypothetical protein CARUB_v10025573mg [Capsella rubella]                                                                                                                                                                                                                                                                                                                                                                                                                                                                                            | 390  | 392  | 1.00E-164 | 100.5 | 73.8 | 84.6 | hypothetical protein CARUB_v10025573mg            | gbpln | Capsella rubella     | AT2G30090.1   Symbols:   Acyl-CoA N-acyltransferases (NAT) superfamily protein   chr2:12843583-12845597 REVERSE LENGTH=386      | 390  | 386  | 1.00E-163 | 99.0  | 75.6 | 84.4 |
| Rsa1.0_00874.1.g20685.t1 | gb EOA14519.1  hypothetical protein CARUB_v10027748mg [Capsella rubella]                                                                                                                                                                                                                                                                                                                                                                                                                                                                                            | 274  | 368  | 3.00E-52  | 134.3 | 43.8 | 56.6 | hypothetical protein CARUB_v10027748mg            | gbpln | Capsella rubella     | AT4G38940.1   Symbols:   Galactose oxidase/kelch repeat superfamily protein   chr4:18152848-18153960 FORWARD LENGTH=370         | 274  | 370  | 2.00E-52  | 135.0 | 42.3 | 56.6 |
| Rsa1.0_00874.1.g20686.t1 | gb EOA14519.1  hypothetical protein CARUB_v10027748mg [Capsella rubella]                                                                                                                                                                                                                                                                                                                                                                                                                                                                                            | 346  | 368  | 5.00E-74  | 106.4 | 49.1 | 61.3 | hypothetical protein CARUB_v10027748mg            | gbpln | Capsella rubella     | AT4G38940.1   Symbols:   Galactose oxidase/kelch repeat superfamily protein   chr4:18152848-18153960 FORWARD LENGTH=370         | 346  | 370  | 3.00E-65  | 106.9 | 43.6 | 61.3 |
| Rsa1.0_00874.1.g20687.t1 | gb EOA14519.1  hypothetical protein CARUB_v10027748mg [Capsella rubella]                                                                                                                                                                                                                                                                                                                                                                                                                                                                                            | 366  | 368  | 4.00E-75  | 100.5 | 45.9 | 62.0 | hypothetical protein CARUB_v10027748mg            | gbpln | Capsella rubella     | AT4G38940.1   Symbols:   Galactose oxidase/kelch repeat superfamily protein   chr4:18152848-18153960 FORWARD LENGTH=370         | 366  | 370  | 1.00E-66  | 101.1 | 41.8 | 58.7 |
| Rsa1.0_00874.1.g20688.t1 | ref NP_180585.1  U2 small nuclear ribonucleoprotein B'' [Arabidopsis thaliana]<br>gi 75318049 sp O22922.1 RU2B1_ARATH<br>RecName: Full=U2 small nuclear ribonucleoprotein B''; Short=U2 snRNP B''<br>gi 2347192 gb AAC16931.1  putative small nuclear ribonucleoprotein U2B [Arabidopsis thaliana]<br>gi 27165024 gb AAC23633.1  At2g30260 [Arabidopsis thaliana]<br>gi 110743429 dbj BAE99600.1  putative small nuclear ribonucleoprotein U2B [Arabidopsis thaliana]<br>gi 330253269 gb AEC08363.1  U2 small nuclear ribonucleoprotein B'' [Arabidopsis thaliana]  | 115  | 232  | 3.00E-53  | 201.7 | 86.1 | 92.2 | U2 small nuclear ribonucleoprotein B''            | gbpln | Arabidopsis thaliana | AT2G30260.1   Symbols: U2B''   U2 small nuclear ribonucleoprotein B   chr2:12905557-12907434 REVERSE LENGTH=232                 | 115  | 232  | 4.00E-56  | 201.7 | 86.1 | 92.2 |

|                          |                                                                                                                                                                                                                                                                                                                                                                                                                              |     |      |           |       |      |      |                                             |       |                      |                                                                                                                                                                                                                                                                                                                                                                                                                                                                                                                                  |     |     |           |       |      |      |
|--------------------------|------------------------------------------------------------------------------------------------------------------------------------------------------------------------------------------------------------------------------------------------------------------------------------------------------------------------------------------------------------------------------------------------------------------------------|-----|------|-----------|-------|------|------|---------------------------------------------|-------|----------------------|----------------------------------------------------------------------------------------------------------------------------------------------------------------------------------------------------------------------------------------------------------------------------------------------------------------------------------------------------------------------------------------------------------------------------------------------------------------------------------------------------------------------------------|-----|-----|-----------|-------|------|------|
| Rsa1.0_00875.1.g20689.t1 | gb EOA20700.1  hypothetical protein CARUB_v10001014mg [Capsella rubella]                                                                                                                                                                                                                                                                                                                                                     | 283 | 429  | 4.00E-70  | 151.6 | 49.5 | 54.1 | hypothetical protein CARUB_v10001014mg      | gbpln | Capsella rubella     | AT4G02720.1   Symbols:   unknown protein; FUNCTIONS IN: molecular_function unknown; INVOLVED IN: biological_process unknown; EXPRESSED IN: 25 plant structures; EXPRESSED DURING: 14 growth stages; CONTAINS InterPro DOMAIN/s: Protein of unknown function DUF926 (InterPro:IPR009269); Has 30201 Blast hits to 17322 proteins in 780 species: Archae - 12; Bacteria - 1396; Metazoa - 17338; Fungi - 3422; Plants - 5037; Viruses - 0; Other Eukaryotes - 2996 (source: NCBI BLINK).   chr4:1204545-1205813 REVERSE LENGTH=422 | 283 | 422 | 8.00E-67  | 149.1 | 45.2 | 49.1 |
| Rsa1.0_00875.1.g20690.t1 | #                                                                                                                                                                                                                                                                                                                                                                                                                            | #   | #    | #         | #     | #    | #    | -                                           | ----  | ----                 | #                                                                                                                                                                                                                                                                                                                                                                                                                                                                                                                                | #   | #   | #         | #     | #    |      |
| Rsa1.0_00875.1.g20691.t1 | dbj BAA19578.2  water-soluble chlorophyll protein precursor [Lepidium virginicum]                                                                                                                                                                                                                                                                                                                                            | 222 | 223  | 2.00E-67  | 100.5 | 59.9 | 74.8 | water-soluble chlorophyll protein precursor | gbpln | Lepidium virginicum  | AT1G72290.1   Symbols:   Kunitz family trypsin and protease inhibitor protein   chr1:27215852-27216499 FORWARD LENGTH=215                                                                                                                                                                                                                                                                                                                                                                                                        | 222 | 215 | 4.00E-34  | 96.8  | 44.1 | 59.5 |
| Rsa1.0_00875.1.g20692.t1 | ref NP_176586.1  serpin-Z1 [Arabidopsis thaliana]<br>gi 189029934 sp Q9SH52.2 SPZ1_ARAT H RecName: Full=Serpin-Z1; AltName: Full=ArathZ1<br>gi 332196061 gb AEE34182.1  serpin-Z1 [Arabidopsis thaliana]<br>ref NP_174170.1  glutaredoxin-C9 [Arabidopsis thaliana]<br>gi 75204928 sp Q9SGP6.1 GRXC9_ARAT H RecName: Full=Glutaredoxin-C9; Short=AtGrxC9; AltName: Full=Protein ROXY 19                                      | 396 | 385  | 1.00E-127 | 97.2  | 60.4 | 74.2 | serpin-Z1                                   | gbpln | Arabidopsis thaliana | AT1G64030.1   Symbols:   ATSRP3, SRP3   serpin 3   chr1:2375273-23754348 REVERSE LENGTH=385                                                                                                                                                                                                                                                                                                                                                                                                                                      | 396 | 385 | 1.00E-129 | 97.2  | 60.4 | 74.2 |
| Rsa1.0_00875.1.g20693.t1 | gi 6560751 gb AAF16751.1 AC010155.4 F3M18.8 [Arabidopsis thaliana]<br>gi 11762208 gb AA40382.1 AF325030.1 At1g28480 [Arabidopsis thaliana]<br>gi 110738613 dbj BAF01232.1  hypothetical protein [Arabidopsis thaliana] gi 117168135 gb ABK32150.1  At1g28480 [Arabidopsis thaliana]<br>gi 226348214 gb ACO50423.1  glutaredoxin [Arabidopsis thaliana]<br>gi 332192860 gb AEE30981.1  glutaredoxin-C9 [Arabidopsis thaliana] | 125 | 137  | 2.00E-47  | 109.6 | 79.2 | 86.4 | glutaredoxin-C9                             | gbpln | Arabidopsis thaliana | AT1G28480.1   Symbols:   GRX480, roxy19   Thioredoxin superfamily protein   chr1:10013634-10014047 REVERSE LENGTH=137                                                                                                                                                                                                                                                                                                                                                                                                            | 125 | 137 | 4.00E-50  | 109.6 | 79.2 | 86.4 |
| Rsa1.0_00875.1.g20694.t1 | #                                                                                                                                                                                                                                                                                                                                                                                                                            | #   | #    | #         | #     | #    | #    | -                                           | ----  | ----                 | #                                                                                                                                                                                                                                                                                                                                                                                                                                                                                                                                | #   | #   | #         | #     | #    |      |
| Rsa1.0_00875.1.g20695.t1 | ref NP_564310.1  syntaxin-61 [Arabidopsis thaliana]<br>gi 297845794 ref XP_002890778.1  hypothetical protein ARALYDRAFT_473066 [Arabidopsis lyrata subsp. lyrata]<br>gi 28380156 sp Q946Y7.1 SYP61_ARATH RecName: Full=Syntaxin-61; Short=AtSYP61; AltName: Full=Osmotic stress-sensitive mutant 1                                                                                                                           | 287 | 245  | 1.00E-127 | 85.4  | 77.4 | 81.2 | syntaxin-61                                 | gbpln | Arabidopsis lyrata   | AT1G28490.1   Symbols:   SYP61, ATYP61, OSM1   syntaxin of plants 61   chr1:10016433-10017842 FORWARD LENGTH=245                                                                                                                                                                                                                                                                                                                                                                                                                 | 287 | 245 | 1.00E-129 | 85.4  | 77.4 | 81.2 |
| Rsa1.0_00875.1.g20696.t1 | gi 16041650 gb AAK40222.2 AF355754.1 syntaxin of plants 61 [Arabidopsis thaliana] gi 23297416 gb AANI2965.1  unknown protein [Arabidopsis thaliana] gi 297336620 gb EFH67037.1  hypothetical protein ARALYDRAFT_473066 [Arabidopsis lyrata subsp. lyrata]<br>gi 332192861 gb AEE30982.1  syntaxin-61 [Arabidopsis thaliana]                                                                                                  | 334 | 1404 | 1.00E-34  | 420.4 | 25.4 | 31.1 | Putative retroelement polyprotein           | gbpln | Arabidopsis thaliana | AT5G61220.1   Symbols:   LYR family of Fe/S cluster biogenesis protein   chr5:24626057-24626320 REVERSE LENGTH=87                                                                                                                                                                                                                                                                                                                                                                                                                | 334 | 87  | 5.00E-11  | 26.0  | 9.6  | 10.8 |
| Rsa1.0_00875.1.g20697.t1 | gb AAG10812.1 AC018460.6 Putative retroelement polyprotein [Arabidopsis thaliana]<br>ref XP_002871867.1  hypothetical protein ARALYDRAFT_326316 [Arabidopsis lyrata subsp. lyrata] gi 297317704 gb EFH48126.1  hypothetical protein ARALYDRAFT_326316 [Arabidopsis lyrata subsp. lyrata]                                                                                                                                     | 90  | 390  | 4.00E-18  | 433.3 | 47.8 | 67.8 | hypothetical protein ARALYDRAFT_326316      | gbpln | Arabidopsis lyrata   | AT5G19170.1   Symbols:   Protein of Unknown Function (DUF239)   chr5:6445245-6447305 FORWARD LENGTH=391                                                                                                                                                                                                                                                                                                                                                                                                                          | 90  | 391 | 5.00E-19  | 434.4 | 48.9 | 68.9 |
| Rsa1.0_00875.1.g20698.t1 | gb EOA36887.1  hypothetical protein CARUB_v10008982mg [Capsella rubella]                                                                                                                                                                                                                                                                                                                                                     | 477 | 486  | 0         | 101.9 | 90.1 | 92.5 | hypothetical protein CARUB_v10008982mg      | gbpln | Capsella rubella     | AT1G28520.2   Symbols:   VOZ1   vascular plant one zinc finger protein   chr1:10029713-10031479 FORWARD LENGTH=486                                                                                                                                                                                                                                                                                                                                                                                                               | 477 | 486 | 0         | 101.9 | 90.1 | 92.5 |

|                          |                                                                                                                                                                                                                                                                                                                                                                                                                                                                                                                                                                                                                                                                                                                                                                                                                                                                                                                                                                                                                                              |     |     |           |       |      |      |                                        |       |                      |                                                                                                                                  |     |     |           |       |      |      |
|--------------------------|----------------------------------------------------------------------------------------------------------------------------------------------------------------------------------------------------------------------------------------------------------------------------------------------------------------------------------------------------------------------------------------------------------------------------------------------------------------------------------------------------------------------------------------------------------------------------------------------------------------------------------------------------------------------------------------------------------------------------------------------------------------------------------------------------------------------------------------------------------------------------------------------------------------------------------------------------------------------------------------------------------------------------------------------|-----|-----|-----------|-------|------|------|----------------------------------------|-------|----------------------|----------------------------------------------------------------------------------------------------------------------------------|-----|-----|-----------|-------|------|------|
| Rsa1.0_00875.1.g20699.t1 | refNP_174177.1  RAB GTPase-like protein A11 [Arabidopsis thaliana] gi 75336857 sp Q9S810.1 RAA1 ARATH RecName: Full=Ras-related protein RABA1; Short=AtRABA1; gi 6560749 gb AAAF16749.1 AC010155.2 F3M18.2 [Arabidopsis thaliana] gi 67633399 gb AAAY78624.1  putative Ras-related GTP-binding protein [Arabidopsis thaliana] gi 332192870 gb AEE30991.1  ras-related protein RABA1 [Arabidopsis thaliana]                                                                                                                                                                                                                                                                                                                                                                                                                                                                                                                                                                                                                                   | 218 | 218 | 1.00E-122 | 100.0 | 97.2 | 99.5 | RAB GTPase-like protein A11            | gbpln | Arabidopsis thaliana | AT1G28550.1   Symbols: AtRABA1, RABA1   RAB GTPase homolog A11   chr1:10036966-10037698 REVERSE LENGTH=218                       | 218 | 218 | 1.00E-124 | 100.0 | 97.2 | 99.5 |
| Rsa1.0_00875.1.g20700.t1 | refNP_174180.1  GDSL esterase/lipase [Arabidopsis thaliana] gi 75173088 sp Q9FXJ2.1 GDL7_ARATH RecName: Full=GDSL esterase/lipase At1g28580; AltName: Full=Extracellular lipase At1g28580; Flags: Precursor gi 10764859 gb AAG22836.1 AC007508_13 F1K23.18 [Arabidopsis thaliana] gi 13605565 gb AAK32776.1 AF361608.1 At1g28580/F1K23.7 [Arabidopsis thaliana] gi 15027915 gb AAK76488.1  putative lipase [Arabidopsis thaliana] gi 18491141 gb AL69539.1  At1g28580/F1K23.7 [Arabidopsis thaliana] gi 1931079 gb AAL85126.1  putative lipase [Arabidopsis thaliana] gi 332192875 gb AEE30996.1  GDSL esterase/lipase [Arabidopsis thaliana] ref XP_002881592.1  hypothetical protein ARALYDRAFT_903069 [Arabidopsis lyrata subsp. lyrata] gi 297327431 gb EFH57851.1  hypothetical protein ARALYDRAFT_903069 [Arabidopsis lyrata subsp. lyrata]                                                                                                                                                                                            | 463 | 390 | 1.00E-157 | 84.2  | 56.4 | 67.4 | GDSL esterase/lipase                   | gbpln | Arabidopsis thaliana | AT1G28580.1   Symbols:   GDSL-like Lipase/Acylhydrolase superfamily protein   chr1:10044603-10046379 REVERSE LENGTH=390          | 463 | 390 | 1.00E-159 | 84.2  | 56.4 | 67.4 |
| Rsa1.0_00875.1.g20701.t1 | refNP_174180.1  GDSL esterase/lipase [Arabidopsis thaliana] gi 75173088 sp Q9FXJ2.1 GDL7_ARATH RecName: Full=GDSL esterase/lipase At1g28580; AltName: Full=Extracellular lipase At1g28580; Flags: Precursor gi 10764859 gb AAG22836.1 AC007508_13 F1K23.18 [Arabidopsis thaliana] gi 13605565 gb AAK32776.1 AF361608.1 At1g28580/F1K23.7 [Arabidopsis thaliana] gi 15027915 gb AAK76488.1  putative lipase [Arabidopsis thaliana] gi 18491141 gb AL69539.1  At1g28580/F1K23.7 [Arabidopsis thaliana] gi 1931079 gb AAL85126.1  putative lipase [Arabidopsis thaliana] gi 332192875 gb AEE30996.1  GDSL esterase/lipase [Arabidopsis thaliana] ref XP_002881592.1  hypothetical protein ARALYDRAFT_903069 [Arabidopsis lyrata subsp. lyrata] gi 297327431 gb EFH57851.1  hypothetical protein ARALYDRAFT_903069 [Arabidopsis lyrata subsp. lyrata]                                                                                                                                                                                            | 429 | 411 | 1.00E-119 | 95.8  | 55.9 | 71.1 | hypothetical protein ARALYDRAFT_903069 | gbpln | Arabidopsis lyrata   | AT2G38590.1   Symbols:   F-box and associated interaction domains-containing protein   chr2:16142897-16144171 FORWARD LENGTH=424 | 429 | 424 | 1.00E-114 | 98.8  | 54.8 | 68.1 |
| Rsa1.0_00875.1.g20702.t1 | gb EOA32347.1  hypothetical protein CARUB_v10015614mg [Capsella rubella]                                                                                                                                                                                                                                                                                                                                                                                                                                                                                                                                                                                                                                                                                                                                                                                                                                                                                                                                                                     | 57  | 97  | 1.00E-21  | 170.2 | 94.7 | 96.5 | hypothetical protein CARUB_v10015614mg | gbpln | Capsella rubella     | AT5G18790.1   Symbols:   Ribosomal protein L33 family protein   chr5:6266324-6266500 REVERSE LENGTH=58                           | 57  | 58  | 3.00E-24  | 101.8 | 94.7 | 96.5 |
| Rsa1.0_00875.1.g20703.t1 | # # # # # # # # #                                                                                                                                                                                                                                                                                                                                                                                                                                                                                                                                                                                                                                                                                                                                                                                                                                                                                                                                                                                                                            | #   | #   | #         | #     | #    | -    | ----                                   | ----  | #                    | #                                                                                                                                | #   | #   | #         | #     | #    |      |
| Rsa1.0_00875.1.g20704.t1 | ref XP_002884509.1  hypothetical protein ARALYDRAFT_477824 [Arabidopsis lyrata subsp. lyrata] gi 297330349 gb EFH60768.1  hypothetical protein ARALYDRAFT_477824 [Arabidopsis lyrata subsp. lyrata]                                                                                                                                                                                                                                                                                                                                                                                                                                                                                                                                                                                                                                                                                                                                                                                                                                          | 714 | 786 | 0         | 110.1 | 60.5 | 72.1 | hypothetical protein ARALYDRAFT_477824 | gbpln | Arabidopsis lyrata   | AT3G05360.1   Symbols: AtRLP30, RLP30   receptor like protein 30   chr3:1530900-1533260 REVERSE LENGTH=786                       | 714 | 786 | 0         | 110.1 | 59.8 | 71.8 |
| Rsa1.0_00875.1.g20705.t1 | refNP_174180.1  GDSL esterase/lipase [Arabidopsis thaliana] gi 75173088 sp Q9FXJ2.1 GDL7_ARATH RecName: Full=GDSL esterase/lipase At1g28580; AltName: Full=Extracellular lipase At1g28580; Flags: Precursor gi 10764859 gb AAG22836.1 AC007508_13 F1K23.18 [Arabidopsis thaliana] gi 13605565 gb AAK32776.1 AF361608.1 At1g28580/F1K23.7 [Arabidopsis thaliana] gi 15027915 gb AAK76488.1  putative lipase [Arabidopsis thaliana] gi 18491141 gb AL69539.1  At1g28580/F1K23.7 [Arabidopsis thaliana] gi 1931079 gb AAL85126.1  putative lipase [Arabidopsis thaliana] gi 332192875 gb AEE30996.1  GDSL esterase/lipase [Arabidopsis thaliana] ref NP_173411.1  SAUR-like auxin-responsive protein [Arabidopsis thaliana] gi 10086504 gb AAG12564.1 AC007797_24 Similar to auxin-induced proteins [Arabidopsis thaliana] gi 26450872 dbj BAC42543.1  unknown protein [Arabidopsis thaliana] gi 28416847 gb AAO42954.1  At1g19830 [Arabidopsis thaliana] gi 332191781 gb AEE29902.1  SAUR-like auxin-responsive protein [Arabidopsis thaliana] | 397 | 390 | 0         | 98.2  | 79.3 | 86.9 | GDSL esterase/lipase                   | gbpln | Arabidopsis thaliana | AT1G28580.1   Symbols:   GDSL-like Lipase/Acylhydrolase superfamily protein   chr1:10044603-10046379 REVERSE LENGTH=390          | 397 | 390 | 0         | 98.2  | 79.3 | 86.9 |
| Rsa1.0_00876.1.g20706.t1 | refNP_173411.1  SAUR-like auxin-responsive protein [Arabidopsis thaliana] gi 10086504 gb AAG12564.1 AC007797_24 Similar to auxin-induced proteins [Arabidopsis thaliana] gi 26450872 dbj BAC42543.1  unknown protein [Arabidopsis thaliana] gi 28416847 gb AAO42954.1  At1g19830 [Arabidopsis thaliana] gi 332191781 gb AEE29902.1  SAUR-like auxin-responsive protein [Arabidopsis thaliana]                                                                                                                                                                                                                                                                                                                                                                                                                                                                                                                                                                                                                                                | 114 | 117 | 9.00E-51  | 102.6 | 84.2 | 90.4 | SAUR-like auxin-responsive protein     | gbpln | Arabidopsis thaliana | AT1G19830.1   Symbols:   SAUR-like auxin-responsive protein family   chr1:6852230-6852583 FORWARD LENGTH=117                     | 114 | 117 | 1.00E-53  | 102.6 | 84.2 | 90.4 |

|                          |                                                                                                                                                                                                                                                                                                                                                                                                                                                                                                                                                                                                                                                                                                                                                                                                                                                                                                                                                                                              |     |      |           |       |      |      |                                                                                                  |       |                      |                                                                                                                                               |     |     |           |       |      |      |
|--------------------------|----------------------------------------------------------------------------------------------------------------------------------------------------------------------------------------------------------------------------------------------------------------------------------------------------------------------------------------------------------------------------------------------------------------------------------------------------------------------------------------------------------------------------------------------------------------------------------------------------------------------------------------------------------------------------------------------------------------------------------------------------------------------------------------------------------------------------------------------------------------------------------------------------------------------------------------------------------------------------------------------|-----|------|-----------|-------|------|------|--------------------------------------------------------------------------------------------------|-------|----------------------|-----------------------------------------------------------------------------------------------------------------------------------------------|-----|-----|-----------|-------|------|------|
| Rsa1.0_00876.1.g20707.t1 | dbj BAA97290.1  non-LTR retroelement reverse transcriptase-like [Arabidopsis thaliana]                                                                                                                                                                                                                                                                                                                                                                                                                                                                                                                                                                                                                                                                                                                                                                                                                                                                                                       | 696 | 1072 | 0         | 154.0 | 49.7 | 68.1 | non-LTR retroelement reverse transcriptase-like                                                  | gbpln | Arabidopsis thaliana | AT3G24255.1   Symbols:   RNA-directed DNA polymerase (reverse transcriptase)-related family protein   chr3:8789471-8793208 FORWARD LENGTH=746 | 696 | 746 | 5.00E-55  | 107.2 | 20.0 | 27.4 |
| Rsa1.0_00876.1.g20708.t1 | ref NP_173410.1  trigalactosyldiacylglycerol 1 [Arabidopsis thaliana] gi 42571555 ref NP_973868.1  trigalactosyldiacylglycerol 1 [Arabidopsis thaliana] gi 42571557 ref NP_973869.1  trigalactosyldiacylglycerol 1 [Arabidopsis thaliana] gi 75153743 sp Q8L4R0.1 TGD1_ARATH RecName: Full=Protein TRIGALACTOSYLDIACYLGLYCEROL 1, chloroplastic; AltName: Full=ABC transporter I family member 14; Short=ABC transporter ABCI14; Short=AtABC14; Flags: Precursor gi 20465620 gb AAM20141.1  unknown protein [Arabidopsis thaliana] gi 21281062 gb AAM45069.1  unknown protein [Arabidopsis thaliana] gi 45680900 gb AAS75319.1  permease-like protein [Arabidopsis thaliana] gi 22424205 dbj BAH20061.1  AT1G19800 [Arabidopsis thaliana] gi 332191778 gb AEE29899.1  trigalactosyldiacylglycerol 1 [Arabidopsis thaliana] gi 332191779 gb AEE29900.1  trigalactosyldiacylglycerol 1 [Arabidopsis thaliana] gi 332191780 gb AEE29901.1  trigalactosyldiacylglycerol 1 [Arabidopsis thaliana] | 417 | 350  | 1.00E-177 | 83.9  | 75.3 | 76.5 | trigalactosyldiacylglycerol 1                                                                    | gbpln | Arabidopsis thaliana | AT1G19800.1   Symbols: TGD1   trigalactosyldiacylglycerol 1   chr1:6846812-6847954 FORWARD LENGTH=350                                         | 417 | 350 | 1.00E-179 | 83.9  | 75.3 | 76.5 |
| Rsa1.0_00876.1.g20709.t1 | gb ADA60977.1  short intron related sequence 7 [Brassica rapa subsp. pekinensis]                                                                                                                                                                                                                                                                                                                                                                                                                                                                                                                                                                                                                                                                                                                                                                                                                                                                                                             | 347 | 346  | 1.00E-164 | 99.7  | 93.7 | 96.0 | short intron related sequence 7                                                                  | gbpln | Brassica rapa        | AT1G19790.2   Symbols: SRS7   SHI-related sequence 7   chr1:6838400-6839831 REVERSE LENGTH=345                                                | 347 | 345 | 1.00E-142 | 99.4  | 78.4 | 83.6 |
| Rsa1.0_00876.1.g20710.t1 | ref XP_002510468.1  Transcription initiation factor IIF subunit beta, putative [Ricinus communis] gi 223551169 gb EEF52655.1  Transcription initiation factor IIF subunit beta, putative [Ricinus communis]                                                                                                                                                                                                                                                                                                                                                                                                                                                                                                                                                                                                                                                                                                                                                                                  | 272 | 257  | 8.00E-52  | 94.5  | 43.0 | 55.5 | Transcription initiation factor IIF subunit beta, putative                                       | gbpln | Ricinus communis     | AT1G75510.1   Symbols:   Transcription initiation factor IIF, beta subunit   chr1:28347254-28348629 REVERSE LENGTH=261                        | 272 | 261 | 2.00E-50  | 96.0  | 43.0 | 55.9 |
| Rsa1.0_00876.1.g20711.t1 | gb EOA38008.1  hypothetical protein CARUB_v10009477mg [Capsella rubella]                                                                                                                                                                                                                                                                                                                                                                                                                                                                                                                                                                                                                                                                                                                                                                                                                                                                                                                     | 374 | 373  | 1.00E-134 | 99.7  | 69.8 | 79.7 | hypothetical protein CARUB_v10009477mg                                                           | gbpln | Capsella rubella     | AT1G19770.1   Symbols: ATPUP14, PUP14   purine permease 14   chr1:6832426-6833702 FORWARD LENGTH=393                                          | 374 | 393 | 1.00E-124 | 105.1 | 66.6 | 77.5 |
| Rsa1.0_00876.1.g20712.t1 | ref NP_173404.1  ATP-dependent protease La domain-containing protein [Arabidopsis thaliana] gi 10086494 gb AAG12554.1 AC007797.14 Unknown Protein [Arabidopsis thaliana] gi 22136024 gb AAM91594.1  unknown protein [Arabidopsis thaliana] gi 23197842 gb AAN15448.1  unknown protein [Arabidopsis thaliana] gi 332191772 gb AEE29893.1  ATP-dependent protease La domain-containing protein [Arabidopsis thaliana]                                                                                                                                                                                                                                                                                                                                                                                                                                                                                                                                                                          | 290 | 278  | 1.00E-114 | 95.9  | 83.4 | 88.6 | ATP-dependent protease La domain-containing protein                                              | gbpln | Arabidopsis thaliana | AT1G19740.1   Symbols:   ATP-dependent protease La (LON) domain protein   chr1:6824396-6825232 FORWARD LENGTH=278                             | 290 | 278 | 1.00E-117 | 95.9  | 83.4 | 88.6 |
| Rsa1.0_00876.1.g20713.t1 | sp Q39362.1 TRXH2_BRANA RecName: Full=Thioredoxin H-type 2; Short=Trx-H-2 gi 1403711 gb AAB53695.1  thioredoxin-h-like-2 [Brassica napus]                                                                                                                                                                                                                                                                                                                                                                                                                                                                                                                                                                                                                                                                                                                                                                                                                                                    | 119 | 119  | 8.00E-59  | 100.0 | 93.3 | 97.5 | RecName: Full=Thioredoxin H-type 2; Short=Trx-H-2 gi 1403711 gb AAB53695.1  thioredoxin-h-like-2 | gbpln | Brassica napus       | AT1G19730.1   Symbols: ATTRX4, ATH4   Thioredoxin superfamily protein   chr1:6823163-6824020 REVERSE LENGTH=119                               | 119 | 119 | 3.00E-57  | 100.0 | 86.6 | 91.6 |
| Rsa1.0_00876.1.g20714.t1 | gb EOA38972.1  hypothetical protein CARUB_v10011399mg [Capsella rubella]                                                                                                                                                                                                                                                                                                                                                                                                                                                                                                                                                                                                                                                                                                                                                                                                                                                                                                                     | 478 | 482  | 0         | 100.8 | 88.3 | 93.3 | hypothetical protein CARUB_v10011399mg                                                           | gbpln | Capsella rubella     | AT1G19710.1   Symbols:   UDP-Glycosyltransferase superfamily protein   chr1:6814920-6816716 FORWARD LENGTH=479                                | 478 | 479 | 0         | 100.2 | 87.7 | 93.1 |
| Rsa1.0_00876.1.g20715.t1 | gb EOA40106.1  hypothetical protein CARUB_v10008805mg [Capsella rubella]                                                                                                                                                                                                                                                                                                                                                                                                                                                                                                                                                                                                                                                                                                                                                                                                                                                                                                                     | 813 | 536  | 1.00E-170 | 65.9  | 43.7 | 48.1 | hypothetical protein CARUB_v10008805mg                                                           | gbpln | Capsella rubella     | AT1G19700.3   Symbols: BEL10   BEL1-like homeodomain 10   chr1:6809958-6811854 REVERSE LENGTH=536                                             | 813 | 538 | 1.00E-167 | 66.2  | 43.9 | 48.3 |
| Rsa1.0_00876.1.g20716.t1 | gb AAN51933.1 AF337544.1 chlorophyllase 1 [Brassica oleracea]                                                                                                                                                                                                                                                                                                                                                                                                                                                                                                                                                                                                                                                                                                                                                                                                                                                                                                                                | 324 | 324  | 1.00E-176 | 100.0 | 92.6 | 96.0 | chlorophyllase 1                                                                                 | gbpln | Brassica oleracea    | AT1G19670.1   Symbols: ATOLH1, COR11, ATHCOR1, CLH1   chlorophyllase 1   chr1:6803796-6804923 REVERSE LENGTH=324                              | 324 | 324 | 1.00E-158 | 100.0 | 82.7 | 88.6 |

|                          |                                                                                                                                                                                                                                                                                                                                                                                                                                                                                                                                                                                                                                                                                                                                                                                                                                                                                        |      |      |           |       |      |      |                                                       |       |                      |                                                                                                                                                            |      |      |           |       |      |      |
|--------------------------|----------------------------------------------------------------------------------------------------------------------------------------------------------------------------------------------------------------------------------------------------------------------------------------------------------------------------------------------------------------------------------------------------------------------------------------------------------------------------------------------------------------------------------------------------------------------------------------------------------------------------------------------------------------------------------------------------------------------------------------------------------------------------------------------------------------------------------------------------------------------------------------|------|------|-----------|-------|------|------|-------------------------------------------------------|-------|----------------------|------------------------------------------------------------------------------------------------------------------------------------------------------------|------|------|-----------|-------|------|------|
| Rsa1.0_00876.1.g20717.t1 | gb EOA39420.1  hypothetical protein CARUB_v10012529mg [Capsella rubella]                                                                                                                                                                                                                                                                                                                                                                                                                                                                                                                                                                                                                                                                                                                                                                                                               | 328  | 329  | 1.00E-173 | 100.3 | 88.4 | 96.6 | hypothetical protein CARUB_v10012529mg                | gbpln | Capsella rubella     | AT1G19660.2   Symbols:   Wound-responsive family protein   chr1:6800361-6802240 REVERSE LENGTH=329                                                         | 328  | 329  | 1.00E-171 | 100.3 | 86.6 | 94.8 |
| Rsa1.0_00876.1.g20718.t1 | ref XP_002893058.1  hypothetical protein ARALYDRAFT_472189 [Arabidopsis lyrata subsp. lyrata] gi 297338900 gb EFH69317.1  hypothetical protein ARALYDRAFT_472189 [Arabidopsis lyrata subsp. lyrata] ref NP_851207.1  MIF4G domain and MA3 domain-containing protein [Arabidopsis thaliana] gi 75163823 sp Q93ZT6.1  F4G1_ARATH RecName: Full=Eukaryotic translation initiation factor isoform 4G-1; Short=IF(iso)4G-1 gi 15810455 gb AAL07115.1  putative eukaryotic initiation factor eIF4 [Arabidopsis thaliana] gi 20258963 gb AAM14197.1  putative eukaryotic initiation factor 4 [Arabidopsis thaliana] gi 332009581 gb AED96964.1  MIF4G domain and MA3 domain-containing protein [Arabidopsis thaliana] ref XP_002864532.1  ubiquitin family protein [Arabidopsis lyrata subsp. lyrata] gi 297310367 gb EFH40791.1  ubiquitin family protein [Arabidopsis lyrata subsp. lyrata] | 623  | 613  | 0         | 98.4  | 81.4 | 89.7 | hypothetical protein ARALYDRAFT_472189                | gbpln | Arabidopsis lyrata   | AT1G19650.1   Symbols:   Sec14p-like phosphatidylinositol transfer family protein   chr1:6796431-6799537 REVERSE LENGTH=608                                | 623  | 608  | 0         | 97.6  | 80.7 | 87.6 |
| Rsa1.0_00877.1.g20719.t1 | gi 15810455 gb AAL07115.1  putative eukaryotic initiation factor eIF4 [Arabidopsis thaliana] gi 20258963 gb AAM14197.1  putative eukaryotic initiation factor 4 [Arabidopsis thaliana] gi 332009581 gb AED96964.1  MIF4G domain and MA3 domain-containing protein [Arabidopsis thaliana] ref XP_002864532.1  ubiquitin family protein [Arabidopsis lyrata subsp. lyrata] gi 297310367 gb EFH40791.1  ubiquitin family protein [Arabidopsis lyrata subsp. lyrata]                                                                                                                                                                                                                                                                                                                                                                                                                       | 775  | 780  | 0         | 100.6 | 87.9 | 94.1 | MIF4G domain and MA3 domain-containing protein        | gbpln | Arabidopsis thaliana | AT5G57870.1   Symbols: eIFiso4G1   MIF4G domain-containing protein / MA3 domain-containing protein   chr5:23439755-23443433 FORWARD LENGTH=780             | 775  | 780  | 0         | 100.6 | 87.9 | 94.1 |
| Rsa1.0_00877.1.g20720.t1 | ref XP_002864532.1  ubiquitin family protein [Arabidopsis lyrata subsp. lyrata] gi 297310367 gb EFH40791.1  ubiquitin family protein [Arabidopsis lyrata subsp. lyrata]                                                                                                                                                                                                                                                                                                                                                                                                                                                                                                                                                                                                                                                                                                                | 113  | 95   | 1.00E-34  | 84.1  | 71.7 | 75.2 | ubiquitin family protein                              | gbpln | Arabidopsis lyrata   | AT5G57860.2   Symbols:   Ubiquitin-like superfamily protein   chr5:23437991-23439087 FORWARD LENGTH=95                                                     | 113  | 95   | 7.00E-37  | 84.1  | 70.8 | 75.2 |
| Rsa1.0_00877.1.g20721.t1 | ref XP_002866233.1  hypothetical protein ARALYDRAFT_495879 [Arabidopsis lyrata subsp. lyrata] gi 297312068 gb EFH42492.1  hypothetical protein ARALYDRAFT_495879 [Arabidopsis lyrata subsp. lyrata]                                                                                                                                                                                                                                                                                                                                                                                                                                                                                                                                                                                                                                                                                    | 362  | 385  | 1.00E-139 | 106.4 | 78.5 | 87.3 | hypothetical protein ARALYDRAFT_495879                | gbpln | Arabidopsis lyrata   | AT5G57830.1   Symbols:   Protein of unknown function, DUF593   chr5:23429406-23430860 REVERSE LENGTH=387                                                   | 362  | 387  | 1.00E-140 | 106.9 | 79.6 | 88.4 |
| Rsa1.0_00877.1.g20722.t1 | gb EOA15016.1  hypothetical protein CARUB_v10028373mg [Capsella rubella]                                                                                                                                                                                                                                                                                                                                                                                                                                                                                                                                                                                                                                                                                                                                                                                                               | 137  | 154  | 2.00E-38  | 112.4 | 64.2 | 76.6 | hypothetical protein CARUB_v10028373mg                | gbpln | Capsella rubella     | AT5G57820.1   Symbols:   zinc ion binding   chr5:23428601-23429165 FORWARD LENGTH=161                                                                      | 137  | 161  | 4.00E-38  | 117.5 | 62.8 | 75.2 |
| Rsa1.0_00877.1.g20723.t2 | gb EOA12639.1  hypothetical protein CARUB_v10027573mg [Capsella rubella]                                                                                                                                                                                                                                                                                                                                                                                                                                                                                                                                                                                                                                                                                                                                                                                                               | 297  | 320  | 1.00E-103 | 107.7 | 71.0 | 74.4 | hypothetical protein CARUB_v10027573mg                | gbpln | Capsella rubella     | AT5G57810.1   Symbols: TET15   tetraspanin 15   chr5:23424466-23425589 REVERSE LENGTH=317                                                                  | 297  | 317  | 1.00E-101 | 106.7 | 70.0 | 74.1 |
| Rsa1.0_00877.1.g20724.t1 | ref XP_002864528.1  hypothetical protein ARALYDRAFT_495876 [Arabidopsis lyrata subsp. lyrata] gi 297310363 gb EFH40787.1  hypothetical protein ARALYDRAFT_495876 [Arabidopsis lyrata subsp. lyrata]                                                                                                                                                                                                                                                                                                                                                                                                                                                                                                                                                                                                                                                                                    | 630  | 632  | 0         | 100.3 | 89.8 | 95.4 | hypothetical protein ARALYDRAFT_495876                | gbpln | Arabidopsis lyrata   | AT5G57800.1   Symbols: FLP1, YRE, CER3, WAX2   Fatty acid hydroxylase superfamily   chr5:23420589-23423832 FORWARD LENGTH=632                              | 630  | 632  | 0         | 100.3 | 89.2 | 94.8 |
| Rsa1.0_00877.1.g20725.t1 | gb AAK51235.1 AF287471_1 polyprotein [Arabidopsis thaliana]                                                                                                                                                                                                                                                                                                                                                                                                                                                                                                                                                                                                                                                                                                                                                                                                                            | 360  | 1453 | 4.00E-90  | 403.6 | 48.6 | 55.0 | polyprotein                                           | gbpln | Arabidopsis thaliana | ATMG00810.1   Symbols: ORF240B   DNA/RNA polymerases superfamily protein   chrM:227709-228431 REVERSE LENGTH=240                                           | 360  | 240  | 3.00E-38  | 66.7  | 21.1 | 27.2 |
| Rsa1.0_00877.1.g20726.t1 | gb EOA14948.1  hypothetical protein CARUB_v10028294mg [Capsella rubella]                                                                                                                                                                                                                                                                                                                                                                                                                                                                                                                                                                                                                                                                                                                                                                                                               | 414  | 404  | 0         | 97.6  | 88.6 | 91.8 | hypothetical protein CARUB_v10028294mg                | gbpln | Capsella rubella     | AT5G57770.1   Symbols:   Plant protein of unknown function (DUF828) with plant pleckstrin homology-like region   chr5:23401094-23403112 REVERSE LENGTH=406 | 414  | 406  | 0         | 98.1  | 89.6 | 92.0 |
| Rsa1.0_00877.1.g20727.t1 | #                                                                                                                                                                                                                                                                                                                                                                                                                                                                                                                                                                                                                                                                                                                                                                                                                                                                                      | #    | #    | #         | #     | #    | #    | -                                                     | ----  | ----                 | #                                                                                                                                                          | #    | #    | #         | #     | #    |      |
| Rsa1.0_00877.1.g20728.t1 | #                                                                                                                                                                                                                                                                                                                                                                                                                                                                                                                                                                                                                                                                                                                                                                                                                                                                                      | #    | #    | #         | #     | #    | #    | -                                                     | ----  | ----                 | #                                                                                                                                                          | #    | #    | #         | #     | #    |      |
| Rsa1.0_00877.1.g20729.t1 | gb AAC02672.1  polyprotein [Arabidopsis arenosa]                                                                                                                                                                                                                                                                                                                                                                                                                                                                                                                                                                                                                                                                                                                                                                                                                                       | 621  | 1390 | 1.00E-49  | 223.8 | 15.3 | 19.3 | polyprotein                                           | gbpln | Arabidopsis arenosa  | AT5G57720.1   Symbols:   AP2/B3-like transcriptional factor family protein   chr5:23389927-23391526 REVERSE LENGTH=300                                     | 621  | 300  | 4.00E-49  | 48.3  | 17.2 | 21.1 |
| Rsa1.0_00878.1.g20730.t2 | #                                                                                                                                                                                                                                                                                                                                                                                                                                                                                                                                                                                                                                                                                                                                                                                                                                                                                      | #    | #    | #         | #     | #    | #    | -                                                     | ----  | ----                 | #                                                                                                                                                          | #    | #    | #         | #     | #    |      |
| Rsa1.0_00878.1.g20731.t1 | ref NP_001154354.1  nucleic acid/nucleotide binding protein [Arabidopsis thaliana] gi 332191964 gb AEE30085.1  nucleic acid/nucleotide binding protein [Arabidopsis thaliana]                                                                                                                                                                                                                                                                                                                                                                                                                                                                                                                                                                                                                                                                                                          | 242  | 253  | 6.00E-92  | 104.5 | 73.1 | 82.6 | nucleic acid/nucleotide binding protein               | gbpln | Arabidopsis thaliana | AT1G21320.2   Symbols:   nucleotide binding/nucleic acid binding   chr1:7462834-7466164 REVERSE LENGTH=253                                                 | 242  | 253  | 2.00E-94  | 104.5 | 73.1 | 82.6 |
| Rsa1.0_00878.1.g20732.t1 | gb ABA95266.1  retrotransposon protein, putative, Ty1-copia subclass [Oryza sativa Japonica Group]                                                                                                                                                                                                                                                                                                                                                                                                                                                                                                                                                                                                                                                                                                                                                                                     | 1099 | 1388 | 0         | 126.3 | 41.9 | 61.4 | retrotransposon protein, putative, Ty1-copia subclass | gbpln | Oryza sativa         | AT4G23160.1   Symbols: CRK8   cysteine-rich RLK (RECEPTOR-like protein kinase) 8   chr4:12129485-12134086 FORWARD LENGTH=1262                              | 1099 | 1262 | 3.00E-80  | 114.8 | 14.3 | 22.9 |



|                          |                                                                                                                                                                                                                                                                                                                                                                                                                                                                                                                                                     |      |      |           |       |      |      |                                                           |             |                      |                                                                                                                                                                                                                                                            |      |      |          |       |      |      |
|--------------------------|-----------------------------------------------------------------------------------------------------------------------------------------------------------------------------------------------------------------------------------------------------------------------------------------------------------------------------------------------------------------------------------------------------------------------------------------------------------------------------------------------------------------------------------------------------|------|------|-----------|-------|------|------|-----------------------------------------------------------|-------------|----------------------|------------------------------------------------------------------------------------------------------------------------------------------------------------------------------------------------------------------------------------------------------------|------|------|----------|-------|------|------|
| Rsa1.0_00878.1.g20733.t1 | gb[EOA36400.1] hypothetical protein CARUB_v10010842mg [Capsella rubella]                                                                                                                                                                                                                                                                                                                                                                                                                                                                            | 234  | 237  | 5.00E-63  | 101.3 | 65.4 | 76.1 | hypothetical protein CARUB_v10010842mg                    | gbpln       | Capsella rubella     | AT1G21326.1   Symbols:   VQ motif-containing protein   chr1:7469002-7469721 REVERSE LENGTH=239                                                                                                                                                             | 234  | 239  | 1.00E-57 | 102.1 | 64.1 | 73.9 |
| Rsa1.0_00878.1.g20734.t2 | gb[AAC19278.1] T14P8.10 [Arabidopsis thaliana] gi 7269009 emb CAB80742.1  AT4g02490 [Arabidopsis thaliana]                                                                                                                                                                                                                                                                                                                                                                                                                                          | 799  | 657  | 1.00E-110 | 82.2  | 23.8 | 30.0 | T14P8.10                                                  | gbpln       | Arabidopsis thaliana | AT4G04650.1   Symbols:   RNA-directed DNA polymerase (reverse transcriptase)-related family protein   chr4:2353989-2355213 REVERSE LENGTH=332                                                                                                              | 799  | 332  | 2.00E-65 | 41.6  | 15.4 | 20.0 |
| Rsa1.0_00878.1.g20735.t2 | ref NP_177488.2  protein kinase domain-containing protein [Arabidopsis thaliana] gi 332197342 gb AE35463.1  protein kinase domain-containing protein [Arabidopsis thaliana]                                                                                                                                                                                                                                                                                                                                                                         | 162  | 1169 | 2.00E-12  | 721.6 | 24.7 | 27.2 | protein kinase domain-containing protein                  | gbpln       | Arabidopsis thaliana | AT1G73460.1   Symbols:   Protein kinase superfamily protein   chr1:27620122-27624899 FORWARD LENGTH=1169                                                                                                                                                   | 162  | 1169 | 8.00E-15 | 721.6 | 24.7 | 27.2 |
| Rsa1.0_00878.1.g20736.t1 | #                                                                                                                                                                                                                                                                                                                                                                                                                                                                                                                                                   | #    | #    | #         | #     | #    | #    | -                                                         | ----        | ----                 | #                                                                                                                                                                                                                                                          | #    | #    | #        | #     | #    | #    |
| Rsa1.0_00878.1.g20737.t1 | gb[EJP69747.1] hypothetical protein BBA_01712 [Beauveria bassiana ARSEF 2860]                                                                                                                                                                                                                                                                                                                                                                                                                                                                       | 251  | 318  | 4.00E-65  | 126.7 | 47.0 | 66.9 | hypothetical protein BBA_01712                            | gbenv/gbpln | Beauveria bassiana   | #                                                                                                                                                                                                                                                          | #    | #    | #        | #     | #    | #    |
| Rsa1.0_00878.1.g20738.t1 | #                                                                                                                                                                                                                                                                                                                                                                                                                                                                                                                                                   | #    | #    | #         | #     | #    | #    | -                                                         | ----        | ----                 | #                                                                                                                                                                                                                                                          | #    | #    | #        | #     | #    | #    |
| Rsa1.0_00878.1.g20739.t1 | #                                                                                                                                                                                                                                                                                                                                                                                                                                                                                                                                                   | #    | #    | #         | #     | #    | #    | -                                                         | ----        | ----                 | #                                                                                                                                                                                                                                                          | #    | #    | #        | #     | #    | #    |
| Rsa1.0_00878.1.g20740.t1 | dbj BAJ33657.1  unnamed protein product [Theilungiella halophila]                                                                                                                                                                                                                                                                                                                                                                                                                                                                                   | 535  | 595  | 0         | 111.2 | 86.0 | 93.8 | unnamed protein product                                   | ----        | ----                 | AT1G21450.1   Symbols: SCL1   SCARECROW-like 1   chr1:7509721-7511502 FORWARD LENGTH=593                                                                                                                                                                   | 535  | 593  | 0        | 110.8 | 84.9 | 94.0 |
| Rsa1.0_00878.1.g20741.t1 | #                                                                                                                                                                                                                                                                                                                                                                                                                                                                                                                                                   | #    | #    | #         | #     | #    | #    | -                                                         | ----        | ----                 | #                                                                                                                                                                                                                                                          | #    | #    | #        | #     | #    | #    |
| Rsa1.0_00878.1.g20742.t1 | ref NP_201166.1  cyclin-dependent kinase E-1 [Arabidopsis thaliana] gi 152013387 sp Q84TI6.2 CDKE1_ARATH RecName: Full=Cyclin-dependent kinase E-1; Short=CDKE1; AltName: Full=Cyclin-dependent kinase 8; AltName: Full=Protein HUA ENHANCER 3 gi 10177042 dbj BAB10454.1  cdc2-like protein kinase-like protein [Arabidopsis thaliana] gi 47607488 gb AAT36644.1  HUA enhancer 3 [Arabidopsis thaliana] gi 56382025 gb AAV85731.1  At5g63610 [Arabidopsis thaliana] gi 332010393 gb AED97776.1  cyclin-dependent kinase E-1 [Arabidopsis thaliana] | 132  | 470  | 2.00E-45  | 356.1 | 68.2 | 72.0 | cyclin-dependent kinase E-1                               | gbpln       | Arabidopsis thaliana | AT5G63610.1   Symbols: HEN3, CDKE1, ATCDK8   cyclin-dependent kinase E:1   chr5:25463645-25465057 REVERSE LENGTH=470                                                                                                                                       | 132  | 470  | 4.00E-48 | 356.1 | 68.2 | 72.0 |
| Rsa1.0_00878.1.g20743.t1 | ref XP_002886961.1  hypothetical protein ARALYDRAFT_894161 [Arabidopsis lyrata subsp. lyrata] gi 297332802 gb EFH63220.1  hypothetical protein ARALYDRAFT_894161 [Arabidopsis lyrata subsp. lyrata]                                                                                                                                                                                                                                                                                                                                                 | 406  | 299  | 2.00E-39  | 73.6  | 25.9 | 35.7 | hypothetical protein ARALYDRAFT_894161                    | gbpln       | Arabidopsis lyrata   | AT1G19060.1   Symbols:   Protein of unknown function (DUF626)   chr1:6582066-6583601 REVERSE LENGTH=287                                                                                                                                                    | 406  | 287  | 1.00E-31 | 70.7  | 23.2 | 31.8 |
| Rsa1.0_00878.1.g20744.t1 | ref XP_002893169.1  hypothetical protein ARALYDRAFT_472386 [Arabidopsis lyrata subsp. lyrata] gi 29733901 gb EFH69428.1  hypothetical protein ARALYDRAFT_472386 [Arabidopsis lyrata subsp. lyrata]                                                                                                                                                                                                                                                                                                                                                  | 171  | 126  | 1.00E-29  | 73.7  | 54.4 | 59.6 | hypothetical protein ARALYDRAFT_472386                    | gbpln       | Arabidopsis lyrata   | AT1G21500.1   Symbols:   unknown protein; Has 29 Blast hits to 29 proteins in 12 species: Archae - 0; Bacteria - 0; Metazoa - 0; Fungi - 2; Plants - 27; Viruses - 0; Other Eukaryotes - 0 (source: NCBI BLink).   chr1:7530047-7530954 REVERSE LENGTH=126 | 171  | 126  | 9.00E-31 | 73.7  | 53.8 | 59.6 |
| Rsa1.0_00878.1.g20745.t1 | gb[AAB87099.1] putative retroelement pol polyprotein [Arabidopsis thaliana]                                                                                                                                                                                                                                                                                                                                                                                                                                                                         | 1295 | 1496 | 0         | 115.5 | 46.2 | 59.9 | putative retroelement pol polyprotein                     | gbpln       | Arabidopsis thaliana | AT4G23160.1   Symbols: CRK8   cysteine-rich RLK (RECEPTOR-like protein kinase) 8   chr4:12129485-12134086 FORWARD LENGTH=1262                                                                                                                              | 1295 | 1262 | 1.00E-34 | 97.5  | 6.1  | 8.6  |
| Rsa1.0_00878.1.g20746.t1 | ref XP_002877467.1  predicted protein [Arabidopsis lyrata subsp. lyrata] gi 297323305 gb EFH53726.1  predicted protein [Arabidopsis lyrata subsp. lyrata]                                                                                                                                                                                                                                                                                                                                                                                           | 107  | 186  | 2.00E-17  | 173.8 | 44.9 | 61.7 | predicted protein                                         | gbpln       | Arabidopsis lyrata   | #                                                                                                                                                                                                                                                          | #    | #    | #        | #     | #    | #    |
| Rsa1.0_00878.1.g20747.t1 | gb AAD15534.1  putative retroelement pol polyprotein [Arabidopsis thaliana]                                                                                                                                                                                                                                                                                                                                                                                                                                                                         | 439  | 1664 | 6.00E-67  | 379.0 | 30.3 | 37.6 | putative retroelement pol polyprotein                     | gbpln       | Arabidopsis thaliana | #                                                                                                                                                                                                                                                          | #    | #    | #        | #     | #    | #    |
| Rsa1.0_00878.1.g20748.t1 | #                                                                                                                                                                                                                                                                                                                                                                                                                                                                                                                                                   | #    | #    | #         | #     | #    | #    | -                                                         | ----        | ----                 | #                                                                                                                                                                                                                                                          | #    | #    | #        | #     | #    | #    |
| Rsa1.0_00878.1.g20749.t2 | #                                                                                                                                                                                                                                                                                                                                                                                                                                                                                                                                                   | #    | #    | #         | #     | #    | #    | -                                                         | ----        | ----                 | #                                                                                                                                                                                                                                                          | #    | #    | #        | #     | #    | #    |
| Rsa1.0_00878.1.g20750.t9 | ref NP_173360.1  TTF-type zinc finger protein with HAT dimerization domain [Arabidopsis thaliana] gi 332191703 gb AE29824.1  TTF-type zinc finger protein with HAT dimerization domain [Arabidopsis thaliana]                                                                                                                                                                                                                                                                                                                                       | 1004 | 769  | 0         | 76.6  | 37.0 | 44.8 | TTF-type zinc finger protein with HAT dimerization domain | gbpln       | Arabidopsis thaliana | AT1G19260.1   Symbols:   TTF-type zinc finger protein with HAT dimerisation domain   chr1:6657260-6659569 REVERSE LENGTH=769                                                                                                                               | 1004 | 769  | 0        | 76.6  | 37.0 | 44.8 |
| Rsa1.0_00878.1.g20751.t8 | #                                                                                                                                                                                                                                                                                                                                                                                                                                                                                                                                                   | #    | #    | #         | #     | #    | #    | -                                                         | ----        | ----                 | #                                                                                                                                                                                                                                                          | #    | #    | #        | #     | #    | #    |
| Rsa1.0_00878.1.g20752.t1 | #                                                                                                                                                                                                                                                                                                                                                                                                                                                                                                                                                   | #    | #    | #         | #     | #    | #    | -                                                         | ----        | ----                 | #                                                                                                                                                                                                                                                          | #    | #    | #        | #     | #    | #    |
| Rsa1.0_00878.1.g20753.t1 | #                                                                                                                                                                                                                                                                                                                                                                                                                                                                                                                                                   | #    | #    | #         | #     | #    | #    | -                                                         | ----        | ----                 | #                                                                                                                                                                                                                                                          | #    | #    | #        | #     | #    | #    |

|                          |                                                                                                                                                                                                                                                                                                                                                                                                                                                                                                                                                                                                                                                                                                                                                                                                                  |      |      |           |       |      |      |                                          |       |                      |                                                                                                                                      |      |      |           |       |      |      |
|--------------------------|------------------------------------------------------------------------------------------------------------------------------------------------------------------------------------------------------------------------------------------------------------------------------------------------------------------------------------------------------------------------------------------------------------------------------------------------------------------------------------------------------------------------------------------------------------------------------------------------------------------------------------------------------------------------------------------------------------------------------------------------------------------------------------------------------------------|------|------|-----------|-------|------|------|------------------------------------------|-------|----------------------|--------------------------------------------------------------------------------------------------------------------------------------|------|------|-----------|-------|------|------|
| Rsa1.0_00878.1.g20754.t3 | emb[CAA73042.1] polyprotein [Ananas comosus]                                                                                                                                                                                                                                                                                                                                                                                                                                                                                                                                                                                                                                                                                                                                                                     | 308  | 871  | 1.00E-14  | 282.8 | 16.6 | 24.4 | polyprotein                              | gbpln | Ananas comosus       | #                                                                                                                                    | #    | #    | #         | #     | #    |      |
| Rsa1.0_00878.1.g20755.t2 | gb ADF91045.1  LEC1-2 transcription factor [Brassica napus]                                                                                                                                                                                                                                                                                                                                                                                                                                                                                                                                                                                                                                                                                                                                                      | 896  | 230  | 2.00E-96  | 25.7  | 20.3 | 20.8 | LEC1-2 transcription factor              | gbpln | Brassica napus       | AT1G21970.1   Symbols: LEC1, EMB 212, EMB212, NF-YB9   Histone superfamily protein   chr1:7727750-7729571 REVERSE LENGTH=238         | 896  | 238  | 5.00E-82  | 26.6  | 17.9 | 19.0 |
| Rsa1.0_00878.1.g20756.t1 | #                                                                                                                                                                                                                                                                                                                                                                                                                                                                                                                                                                                                                                                                                                                                                                                                                | #    | #    | #         | #     | #    | #    | -                                        | ----  | ----                 | #                                                                                                                                    | #    | #    | #         | #     | #    |      |
| Rsa1.0_00878.1.g20757.t2 | gb EOA36900.1  hypothetical protein CARUB_v10011446mg [Capsella rubella]                                                                                                                                                                                                                                                                                                                                                                                                                                                                                                                                                                                                                                                                                                                                         | 388  | 396  | 0         | 102.1 | 82.2 | 88.7 | hypothetical protein CARUB_v10011446mg   | gbpln | Capsella rubella     | AT1G22015.1   Symbols: DD46   Galactosyltransferase family protein   chr1:7751225-7753425 REVERSE LENGTH=398                         | 388  | 398  | 1.00E-180 | 102.6 | 81.2 | 87.1 |
| Rsa1.0_00878.1.g20758.t8 | ref NP_563645.1  COP9 signalosome complex subunit 7 [Arabidopsis thaliana]<br>gi 55976565 sp Q94JU3.1 CSN7_ARATH RecName: Full=COP9 signalosome complex subunit 7; Short=CSN complex subunit 7; AltName: Full=Protein FUSCA 5<br>gi 13937161 gb AAK50074.1 AF372934.1 At g02090/T7123_24 [Arabidopsis thaliana]<br>gi 18056671 gb AAL58109.1 AF395066.1 CSN complex subunit 7i [Arabidopsis thaliana] gi 21593551 gb AAM65518.1 FUS5 [Arabidopsis thaliana] gi 22137006 gb AAM91348.1 At g02090/T7123_24 [Arabidopsis thaliana] gi 332189259 gb AEE27380.1 COP9 signalosome complex subunit 7 [Arabidopsis thaliana]                                                                                                                                                                                             | 368  | 260  | 1.00E-124 | 70.7  | 58.4 | 65.2 | COP9 signalosome complex subunit 7       | gbpln | Arabidopsis thaliana | AT1G02090.1   Symbols: FUS5, CSN7, COP15, ATCSN7   Proteasome component (PC1) domain protein   chr1:387479-389568 REVERSE LENGTH=260 | 368  | 260  | 1.00E-127 | 70.7  | 58.4 | 65.2 |
| Rsa1.0_00879.1.g20759.t2 | emb CAB39638.1  RNA-directed DNA polymerase-like protein [Arabidopsis thaliana] gi 7267668 emb CAB78094.1 RNA-directed DNA polymerase-like protein [Arabidopsis thaliana]<br>ref NP_566458.1  arabinogalactan protein 12 [Arabidopsis thaliana] gi 75273536 sp Q9LJD9.1 AGP12_ARATH RecName: Full=Arabinogalactan peptide 12; Short=AG-peptide 12; Flags: Precursor<br>gi 10880501 gb AAG24280.1 AF195893.1 arabinogalactan protein [Arabidopsis thaliana] gi 9280304 dbj BAB01759.1  unnamed protein product [Arabidopsis thaliana] gi 16649109 gb AAL24406.1  Unknown protein [Arabidopsis thaliana] gi 20148539 gb AAM10160.1  unknown protein [Arabidopsis thaliana] gi 21554170 gb AAM63249.1  unknown [Arabidopsis thaliana] gi 332641846 gb AEE75367.1  arabinogalactan protein 12 [Arabidopsis thaliana] | 899  | 1274 | 0         | 141.7 | 46.9 | 64.0 | RNA-directed DNA polymerase-like protein | gbpln | Arabidopsis thaliana | AT4G29090.1   Symbols:   Ribonuclease H-like superfamily protein   chr4:14333528-14335255 FORWARD LENGTH=575                         | 899  | 575  | 3.00E-56  | 64.0  | 18.2 | 27.7 |
| Rsa1.0_00879.1.g20760.t1 | ref NP_566458.1  arabinogalactan protein 12 [Arabidopsis thaliana] gi 75273536 sp Q9LJD9.1 AGP12_ARATH RecName: Full=Arabinogalactan peptide 12; Short=AG-peptide 12; Flags: Precursor<br>gi 10880501 gb AAG24280.1 AF195893.1 arabinogalactan protein [Arabidopsis thaliana] gi 9280304 dbj BAB01759.1  unnamed protein product [Arabidopsis thaliana] gi 16649109 gb AAL24406.1  Unknown protein [Arabidopsis thaliana] gi 20148539 gb AAM10160.1  unknown protein [Arabidopsis thaliana] gi 21554170 gb AAM63249.1  unknown [Arabidopsis thaliana] gi 332641846 gb AEE75367.1  arabinogalactan protein 12 [Arabidopsis thaliana]                                                                                                                                                                              | 58   | 60   | 9.00E-13  | 103.4 | 75.9 | 84.5 | arabinogalactan protein 12               | gbpln | Arabidopsis thaliana | AT3G13520.1   Symbols: AGP12, ATAGP12   arabinogalactan protein 12   chr3:4409087-4409269 FORWARD LENGTH=60                          | 58   | 60   | 2.00E-15  | 103.4 | 75.9 | 84.5 |
| Rsa1.0_00879.1.g20761.t1 | ref NP_001185237.1  RNA polymerase II transcription mediator [Arabidopsis thaliana] gi 332195107 gb AEE33228.1  RNA polymerase II transcription mediator [Arabidopsis thaliana]                                                                                                                                                                                                                                                                                                                                                                                                                                                                                                                                                                                                                                  | 1885 | 2001 | 0         | 106.2 | 89.8 | 93.7 | RNA polymerase II transcription mediator | gbpln | Arabidopsis thaliana | AT1G55325.2   Symbols: GCT   RNA polymerase II transcription mediators   chr1:20637594-20647714 FORWARD LENGTH=2001                  | 1885 | 2001 | 0         | 106.2 | 89.8 | 93.7 |
| Rsa1.0_00879.1.g20762.t1 | #                                                                                                                                                                                                                                                                                                                                                                                                                                                                                                                                                                                                                                                                                                                                                                                                                | #    | #    | #         | #     | #    | #    | -                                        | ----  | ----                 | #                                                                                                                                    | #    | #    | #         | #     | #    |      |
| Rsa1.0_00879.1.g20763.t4 | ref NP_175929.3  acyl-activating enzyme 18 [Arabidopsis thaliana] gi 75297963 sp Q84P17.1 AEE18_ARATH RecName: Full=Probable acyl-activating enzyme 18, peroxisomal<br>gi 29893268 gb AAP03028.1  acyl-activating enzyme 18 [Arabidopsis thaliana] gi 332195104 gb AEE33225.1  acyl-activating enzyme 18 [Arabidopsis thaliana]                                                                                                                                                                                                                                                                                                                                                                                                                                                                                  | 695  | 727  | 0         | 104.6 | 87.1 | 93.2 | acyl-activating enzyme 18                | gbpln | Arabidopsis thaliana | AT1G55320.1   Symbols: AAE18   acyl-activating enzyme 18   chr1:20633371-20636659 FORWARD LENGTH=727                                 | 695  | 727  | 0         | 104.6 | 87.1 | 93.2 |
| Rsa1.0_00879.1.g20764.t2 | ref XP_002891828.1  hypothetical protein ARALYDRAFT_892527 [Arabidopsis lyrata subsp. lyrata] gi 297337670 gb EFH68087.1  hypothetical protein ARALYDRAFT_892527 [Arabidopsis lyrata subsp. lyrata]                                                                                                                                                                                                                                                                                                                                                                                                                                                                                                                                                                                                              | 290  | 289  | 4.00E-72  | 99.7  | 72.8 | 77.9 | hypothetical protein ARALYDRAFT_892527   | gbpln | Arabidopsis lyrata   | AT1G55310.3   Symbols: SR33, SCL33, At-SCL33   SC35-like splicing factor 33   chr1:20630676-20632695 FORWARD LENGTH=300              | 290  | 300  | 1.00E-71  | 103.4 | 55.9 | 60.7 |

|                          |                                                                                                                                                                                                                                                                                                                                                                                                                                                                                                                                                                                                                                                                           |     |     |          |       |      |      |                                                                       |       |                      |                                                                                                                                                                                                                                                                                                                                                                                                                                                                                 |     |     |          |       |      |      |
|--------------------------|---------------------------------------------------------------------------------------------------------------------------------------------------------------------------------------------------------------------------------------------------------------------------------------------------------------------------------------------------------------------------------------------------------------------------------------------------------------------------------------------------------------------------------------------------------------------------------------------------------------------------------------------------------------------------|-----|-----|----------|-------|------|------|-----------------------------------------------------------------------|-------|----------------------|---------------------------------------------------------------------------------------------------------------------------------------------------------------------------------------------------------------------------------------------------------------------------------------------------------------------------------------------------------------------------------------------------------------------------------------------------------------------------------|-----|-----|----------|-------|------|------|
| Rsa1.0_00879.1.g20765.t2 | refXP_002894499.1 hypothetical protein ARALYDRAFT_474587 [Arabidopsis lyrata subsp. lyrata] gi 297340341 gb EFH70758.1                                                                                                                                                                                                                                                                                                                                                                                                                                                                                                                                                    | 250 | 202 | 1.00E-80 | 80.8  | 64.4 | 67.6 | hypothetical protein ARALYDRAFT_474587                                | gbpln | Arabidopsis lyrata   | AT1G55300.1   Symbols: TAF7   TBP-associated factor 7   chr1:20628170-20629490 REVERSE LENGTH=203                                                                                                                                                                                                                                                                                                                                                                               | 250 | 203 | 8.00E-82 | 81.2  | 63.6 | 67.6 |
| Rsa1.0_00879.1.g20766.t1 | hypothetical protein ARALYDRAFT_474587 [Arabidopsis lyrata subsp. lyrata] refXP_002891826.1 protease inhibitor/seed storage/lipid transfer protein family protein [Arabidopsis lyrata subsp. lyrata] gi 297337668 gb EFH68085.1 protease inhibitor/seed storage/lipid transfer protein family protein [Arabidopsis lyrata subsp. lyrata] refNP_176964.1 heat stress transcription factor A-8 [Arabidopsis thaliana] gi 11386850 sp Q9S7U5.1 HSFA8_ARAT H RecName: Full=Heat stress transcription factor A-8; Short=AtHsfA8; AltName: Full=AtHsf-03; AltName: Full=Heat shock factor protein 5; Short=HSF 5; AltName: Full=Heat shock transcription factor 5; Short=HSTF 5 | 196 | 190 | 1.00E-77 | 96.9  | 71.9 | 81.1 | protease inhibitor/seed storage/lipid transfer protein family protein | gbpln | Arabidopsis lyrata   | AT1G55260.1   Symbols:   Bifunctional inhibitor/lipid-transfer protein/seed storage 2S albumin superfamily protein   chr1:20614663-20616158 FORWARD LENGTH=227                                                                                                                                                                                                                                                                                                                  | 196 | 227 | 6.00E-76 | 115.8 | 68.9 | 79.1 |
| Rsa1.0_00879.1.g20767.t1 | gi 12324064 gb AAG51992.1 AC012563_2 putative heat shock transcription factor: 58077-59546 [Arabidopsis thaliana] gi 6624614 emb CAB63801.1 heat shock factor 5 [Arabidopsis thaliana] gi 20453060 gb AAM19775.1 Atlg67970/T23K23.18 [Arabidopsis thaliana] gi 332196609 gb AEE34730.1 heat stress transcription factor A-8 [Arabidopsis thaliana]                                                                                                                                                                                                                                                                                                                        | 223 | 374 | 1.00E-35 | 167.7 | 36.3 | 40.4 | heat stress transcription factor A-8                                  | gbpln | Arabidopsis thaliana | AT1G67970.1   Symbols: AT-HSFA8, HSFA8   heat shock transcription factor A8   chr1:25484844-25486313 REVERSE LENGTH=374                                                                                                                                                                                                                                                                                                                                                         | 223 | 374 | 3.00E-38 | 167.7 | 36.3 | 40.4 |
| Rsa1.0_00879.1.g20768.t1 | #                                                                                                                                                                                                                                                                                                                                                                                                                                                                                                                                                                                                                                                                         | #   | #   | #        | #     | #    | #    | -                                                                     | ----  | ----                 | #                                                                                                                                                                                                                                                                                                                                                                                                                                                                               | #   | #   | #        | #     | #    |      |
| Rsa1.0_00879.1.g20769.t1 | dbj BAJ34575.1 unnamed protein product [Thellungiella halophila]                                                                                                                                                                                                                                                                                                                                                                                                                                                                                                                                                                                                          | 125 | 188 | 6.00E-61 | 150.4 | 91.2 | 94.4 | unnamed protein product                                               | ----  | ----                 | AT1G55210.2   Symbols:   Disease resistance-responsive (dirigent-like protein) family protein   chr1:20598057-20598620 REVERSE LENGTH=187                                                                                                                                                                                                                                                                                                                                       | 125 | 187 | 6.00E-63 | 149.6 | 90.4 | 93.6 |
| Rsa1.0_00879.1.g20770.t1 | gb EOA36362.1 hypothetical protein CARUB_v10010738mg [Capsella rubella]                                                                                                                                                                                                                                                                                                                                                                                                                                                                                                                                                                                                   | 127 | 97  | 2.00E-27 | 76.4  | 52.8 | 61.4 | hypothetical protein CARUB_v10010738mg                                | gbpln | Capsella rubella     | AT1G55205.2   Symbols:   unknown protein; FUNCTIONS IN: molecular_function unknown; INVOLVED IN: biological_process unknown; LOCATED IN: chloroplast; BEST Arabidopsis thaliana protein match is: unknown protein (TAIR:AT3G13674.1); Has 30201 Blast hits to 17322 proteins in 780 species: Archae - 12; Bacteria - 1396; Metazoa - 17338; Fungi - 3422; Plants - 5037; Viruses - 0; Other Eukaryotes - 2996 (source: NCBI BLINK).   chr1:20594584-20595094 FORWARD LENGTH=103 | 127 | 103 | 2.00E-25 | 81.1  | 54.3 | 63.0 |
| Rsa1.0_00879.1.g20771.t1 | #                                                                                                                                                                                                                                                                                                                                                                                                                                                                                                                                                                                                                                                                         | #   | #   | #        | #     | #    | #    | -                                                                     | ----  | ----                 | #                                                                                                                                                                                                                                                                                                                                                                                                                                                                               | #   | #   | #        | #     | #    |      |
| Rsa1.0_00879.1.g20772.t1 | refNP_564679.1 PRA1 family protein F2 [Arabidopsis thaliana] gi 75169467 sp Q9C889.1 PR1F2_ARAT H RecName: Full=PRA1 family protein F2; Short=AtPRA1.F2 gi 12323168 gb AAG51564.1 AC027034_10 hypothetical protein: 89971-89402 [Arabidopsis thaliana] gi 21554296 gb AAM63371.1 unknown [Arabidopsis thaliana] gi 28393384 gb AAO42116.1 unknown protein [Arabidopsis thaliana] gi 28827574 gb AAO50631.1 unknown protein [Arabidopsis thaliana] gi 332195079 gb AEE33200.1 PRA1 family protein F2 [Arabidopsis thaliana]                                                                                                                                                | 187 | 189 | 7.00E-87 | 101.1 | 84.0 | 93.0 | PRA1 family protein F2                                                | gbpln | Arabidopsis thaliana | AT1G55190.1   Symbols: PRA1.F2, PRA7   PRA1 (Prenylated rab acceptor) family protein   chr1:20588450-20589019 FORWARD LENGTH=189                                                                                                                                                                                                                                                                                                                                                | 187 | 189 | 2.00E-89 | 101.1 | 84.0 | 93.0 |
| Rsa1.0_00880.1.g20773.t1 | refXP_002532644.1 conserved hypothetical protein [Ricinus communis] gi 223527635 gb EEF29747.1 conserved hypothetical protein [Ricinus communis]                                                                                                                                                                                                                                                                                                                                                                                                                                                                                                                          | 338 | 462 | 3.00E-28 | 136.7 | 19.5 | 30.8 | conserved hypothetical protein                                        | gbpln | Ricinus communis     | #                                                                                                                                                                                                                                                                                                                                                                                                                                                                               | #   | #   | #        | #     | #    |      |

|                          |                                                                                                                                                                                                                   |     |      |           |        |      |      |                                                 |       |                      |                                                                                                                                                                                                                                                                                                                                                                                                                                                                                                                                                                                                                                       |     |      |           |       |      |      |
|--------------------------|-------------------------------------------------------------------------------------------------------------------------------------------------------------------------------------------------------------------|-----|------|-----------|--------|------|------|-------------------------------------------------|-------|----------------------|---------------------------------------------------------------------------------------------------------------------------------------------------------------------------------------------------------------------------------------------------------------------------------------------------------------------------------------------------------------------------------------------------------------------------------------------------------------------------------------------------------------------------------------------------------------------------------------------------------------------------------------|-----|------|-----------|-------|------|------|
| Rsa1.0_00880.1.g20774.t1 | refXP_002890827.1   pentatricopeptide repeat-containing protein [Arabidopsis lyrata subsp. lyrata]<br>gi 297336669 gb EFH67086.1   pentatricopeptide repeat-containing protein [Arabidopsis lyrata subsp. lyrata] | 425 | 471  | 1.00E-150 | 110.8  | 63.5 | 79.3 | pentatricopeptide repeat-containing protein     | gbpln | Arabidopsis lyrata   | AT1G29710.1   Symbols:   Tetratricopeptide repeat (TPR)-like superfamily protein   chr1:10387673-10389100 FORWARD LENGTH=475                                                                                                                                                                                                                                                                                                                                                                                                                                                                                                          | 425 | 475  | 1.00E-143 | 111.8 | 60.7 | 76.7 |
| Rsa1.0_00880.1.g20775.t3 | gb EOA34048.1   hypothetical protein CARUB_v10021547mg, partial [Capsella rubella]                                                                                                                                | 640 | 626  | 0         | 97.8   | 66.4 | 76.9 | hypothetical protein CARUB_v10021547mg, partial | gbpln | Capsella rubella     | AT1G66910.1   Symbols:   Protein kinase superfamily protein   chr1:24961634-24963941 REVERSE LENGTH=666<br>AT1G66890.1   Symbols:   FUNCTIONS IN: molecular_function unknown; INVOLVED IN: biological_process unknown; LOCATED IN: chloroplast; EXPRESSED IN: 22 plant structures; EXPRESSED DURING: 13 growth stages; BEST Arabidopsis thaliana protein match is: 50S ribosomal protein-related (TAIRAT5G16200.1); Has 36 Blast hits to 36 proteins in 7 species: Archae - 0; Bacteria - 0; Metazoa - 0; Fungi - 0; Plants - 36; Viruses - 0; Other Eukaryotes - 0 (source: NCBI BLINK).   chr1:24957614-24958090 FORWARD LENGTH=158 | 640 | 666  | 0         | 104.1 | 63.0 | 74.8 |
| Rsa1.0_00880.1.g20776.t1 | gb AAM66042.1   unknown [Arabidopsis thaliana]                                                                                                                                                                    | 164 | 158  | 2.00E-44  | 96.3   | 71.3 | 76.2 | unknown                                         | gbpln | Arabidopsis thaliana | AT1G66880.1   Symbols:   Protein kinase superfamily protein   chr1:24946928-24955438 FORWARD LENGTH=1296                                                                                                                                                                                                                                                                                                                                                                                                                                                                                                                              | 164 | 158  | 7.00E-47  | 96.3  | 70.7 | 75.6 |
| Rsa1.0_00880.1.g20777.t1 | dbj BAF02226.1   wall-associated kinase like protein [Arabidopsis thaliana]                                                                                                                                       | 625 | 705  | 0         | 112.8  | 73.1 | 83.2 | wall-associated kinase like protein             | gbpln | Arabidopsis thaliana | AT1G66880.1   Symbols:   Protein kinase superfamily protein   chr1:24946928-24955438 FORWARD LENGTH=1296                                                                                                                                                                                                                                                                                                                                                                                                                                                                                                                              | 625 | 1296 | 0         | 207.4 | 71.4 | 81.0 |
| Rsa1.0_00880.1.g20778.t1 | gb ABW81051.1   tn7 reverse transcriptase [Arabidopsis lyrata subsp. lyrata]                                                                                                                                      | 278 | 441  | 4.00E-31  | 158.6  | 33.1 | 46.8 | tn7 reverse transcriptase                       | gbpln | Arabidopsis lyrata   | AT3G24255.1   Symbols:   RNA-directed DNA polymerase (reverse transcriptase)-related family protein   chr3:8789471-8793208 FORWARD LENGTH=746                                                                                                                                                                                                                                                                                                                                                                                                                                                                                         | 278 | 746  | 3.00E-16  | 268.3 | 14.0 | 19.1 |
| Rsa1.0_00880.1.g20779.t1 | dbj BAF02226.1   wall-associated kinase like protein [Arabidopsis thaliana]                                                                                                                                       | 699 | 705  | 0         | 100.9  | 69.5 | 79.5 | wall-associated kinase like protein             | gbpln | Arabidopsis thaliana | AT1G66880.1   Symbols:   Protein kinase superfamily protein   chr1:24946928-24955438 FORWARD LENGTH=1296                                                                                                                                                                                                                                                                                                                                                                                                                                                                                                                              | 699 | 1296 | 0         | 185.4 | 67.0 | 76.5 |
| Rsa1.0_00880.1.g20780.t2 | gb ACP30617.1   disease resistance protein [Brassica rapa subsp. pekinensis]                                                                                                                                      | 105 | 1297 | 6.00E-30  | 1235.2 | 65.7 | 71.4 | disease resistance protein                      | gbpln | Brassica rapa        | #                                                                                                                                                                                                                                                                                                                                                                                                                                                                                                                                                                                                                                     | #   | #    | #         | #     | #    | #    |
| Rsa1.0_00880.1.g20781.t1 | dbj BAA25680.1   Lipid transfer protein [Brassica rapa]                                                                                                                                                           | 98  | 86   | 6.00E-34  | 87.8   | 73.5 | 77.6 | Lipid transfer protein                          | gbpln | Brassica rapa        | AT1G66850.1   Symbols:   Bifunctional inhibitor/lipid-transfer protein/seed storage 2S albumin superfamily protein   chr1:24936985-24937293 FORWARD LENGTH=102                                                                                                                                                                                                                                                                                                                                                                                                                                                                        | 98  | 102  | 3.00E-35  | 104.1 | 73.5 | 81.6 |
| Rsa1.0_00880.1.g20782.t1 | gb EOA33752.1   hypothetical protein CARUB_v10019946mg [Capsella rubella]                                                                                                                                         | 602 | 639  | 0         | 106.1  | 72.9 | 85.9 | hypothetical protein CARUB_v10019946mg          | gbpln | Capsella rubella     | AT1G66840.1   Symbols:   PMI2, WEB2   Plant protein of unknown function (DUF827)   chr1:24933998-24936116 REVERSE LENGTH=607                                                                                                                                                                                                                                                                                                                                                                                                                                                                                                          | 602 | 607  | 0         | 100.8 | 70.4 | 82.7 |
| Rsa1.0_00880.1.g20783.t1 | #                                                                                                                                                                                                                 | #   | #    | #         | #      | #    | -    | ----                                            | ----  | ----                 | #                                                                                                                                                                                                                                                                                                                                                                                                                                                                                                                                                                                                                                     | #   | #    | #         | #     | #    | #    |
| Rsa1.0_00880.1.g20784.t1 | refXP_002888549.1   hypothetical protein ARALYDRAFT_475779 [Arabidopsis lyrata subsp. lyrata]<br>gi 297334390 gb EFH64808.1   hypothetical protein ARALYDRAFT_475779 [Arabidopsis lyrata subsp. lyrata]           | 670 | 681  | 0         | 101.6  | 83.6 | 90.9 | hypothetical protein ARALYDRAFT_475779          | gbpln | Arabidopsis lyrata   | AT1G66830.1   Symbols:   Leucine-rich repeat protein kinase family protein   chr1:24930700-24932834 REVERSE LENGTH=685                                                                                                                                                                                                                                                                                                                                                                                                                                                                                                                | 670 | 685  | 0         | 102.2 | 83.3 | 91.3 |
| Rsa1.0_00880.1.g20785.t1 | refXP_002887079.1   hypothetical protein ARALYDRAFT_894384 [Arabidopsis lyrata subsp. lyrata]<br>gi 297332920 gb EFH63338.1   hypothetical protein ARALYDRAFT_894384 [Arabidopsis lyrata subsp. lyrata]           | 125 | 109  | 6.00E-11  | 87.2   | 62.4 | 70.4 | hypothetical protein ARALYDRAFT_894384          | gbpln | Arabidopsis lyrata   | AT1G66820.1   Symbols:   glycine-rich protein   chr1:24930093-24930422 FORWARD LENGTH=109                                                                                                                                                                                                                                                                                                                                                                                                                                                                                                                                             | 125 | 109  | 2.00E-11  | 87.2  | 59.2 | 70.4 |
| Rsa1.0_00880.1.g20786.t1 | refXP_002888548.1   hypothetical protein ARALYDRAFT_475777 [Arabidopsis lyrata subsp. lyrata]<br>gi 297334389 gb EFH64807.1   hypothetical protein ARALYDRAFT_475777 [Arabidopsis lyrata subsp. lyrata]           | 330 | 327  | 1.00E-109 | 99.1   | 73.6 | 82.4 | hypothetical protein ARALYDRAFT_475777          | gbpln | Arabidopsis lyrata   | AT1G66810.1   Symbols:   Zinc finger C-x8-C-x5-C-x3-H type family protein   chr1:24927613-24928619 REVERSE LENGTH=310                                                                                                                                                                                                                                                                                                                                                                                                                                                                                                                 | 330 | 310  | 1.00E-101 | 93.9  | 67.3 | 76.1 |
| Rsa1.0_00881.1.g20787.t1 | gb EOA25154.1   hypothetical protein CARUB_v10018465mg [Capsella rubella]                                                                                                                                         | 385 | 469  | 1.00E-157 | 121.8  | 73.5 | 83.4 | hypothetical protein CARUB_v10018465mg          | gbpln | Capsella rubella     | AT2G01760.1   Symbols:   ARR14, RR14   response regulator 14   chr2:333041-334514 FORWARD LENGTH=382                                                                                                                                                                                                                                                                                                                                                                                                                                                                                                                                  | 385 | 382  | 1.00E-143 | 99.2  | 71.7 | 81.8 |
| Rsa1.0_00881.1.g20788.t1 | #                                                                                                                                                                                                                 | #   | #    | #         | #      | #    | -    | ----                                            | ----  | ----                 | #                                                                                                                                                                                                                                                                                                                                                                                                                                                                                                                                                                                                                                     | #   | #    | #         | #     | #    | #    |
| Rsa1.0_00881.1.g20789.t1 | #                                                                                                                                                                                                                 | #   | #    | #         | #      | #    | -    | ----                                            | ----  | ----                 | #                                                                                                                                                                                                                                                                                                                                                                                                                                                                                                                                                                                                                                     | #   | #    | #         | #     | #    | #    |

|                          |                                                                                                                                                                                                                                                                                                                                                                                                                                                                                                                                                                                                                                             |      |      |           |       |      |      |                                                                             |       |                      |                                                                                                                                                                  |      |      |           |       |      |      |
|--------------------------|---------------------------------------------------------------------------------------------------------------------------------------------------------------------------------------------------------------------------------------------------------------------------------------------------------------------------------------------------------------------------------------------------------------------------------------------------------------------------------------------------------------------------------------------------------------------------------------------------------------------------------------------|------|------|-----------|-------|------|------|-----------------------------------------------------------------------------|-------|----------------------|------------------------------------------------------------------------------------------------------------------------------------------------------------------|------|------|-----------|-------|------|------|
| Rsa1.0_00881.1.g20790.t1 | ref[NP_178282.2] cleavage and polyadenylation specificity factor subunit 3-II [Arabidopsis thaliana] gi 332278175 sp Q8GUU3.2 CPSP3B_ARATH RecName: Full=Cleavage and polyadenylation specificity factor subunit 3-II; AltName: Full=Cleavage and polyadenylation specificity factor 73 kDa subunit II; Short=AtCPSF73-II; Short=CPSF 73 kDa subunit II; AltName: Full=Protein EMBRYO SAC DEVELOPMENT ARREST 26 gi 62320470 dbj BAD94982.1  putative cleavage and polyadenylation specificity factor [Arabidopsis thaliana] gi 330250395 gb AEC05489.1  cleavage and polyadenylation specificity factor subunit 3-II [Arabidopsis thaliana] | 613  | 613  | 0         | 100.0 | 89.7 | 94.6 | cleavage and polyadenylation specificity factor subunit 3-II                | gbpln | Arabidopsis thaliana | AT2G01730.1   Symbols: ATCPSF73-II, EDA26, CPSF73-II   cleavage and polyadenylation specificity factor 73 kDa subunit-II   chr2:320597-323845 FORWARD LENGTH=613 | 613  | 613  | 0         | 100.0 | 89.7 | 94.6 |
| Rsa1.0_00881.1.g20791.t1 | dbj BAB02990.1  retroelement pol polyprotein-like [Arabidopsis thaliana]                                                                                                                                                                                                                                                                                                                                                                                                                                                                                                                                                                    | 231  | 1250 | 6.00E-46  | 541.1 | 51.9 | 64.9 | retroelement pol polyprotein-like                                           | gbpln | Arabidopsis thaliana | AT4G23160.1   Symbols: CRK8   cysteine-rich RLK (RECEPTOR-like protein kinase) 8   chr4:12129485-12134086 FORWARD LENGTH=1262                                    | 231  | 1262 | 1.00E-23  | 546.3 | 22.1 | 31.6 |
| Rsa1.0_00881.1.g20792.t1 | ref XP_002881850.1  predicted protein [Arabidopsis lyrata subsp. lyrata] gi 297327689 gb EFH58109.1  predicted protein [Arabidopsis lyrata subsp. lyrata]                                                                                                                                                                                                                                                                                                                                                                                                                                                                                   | 153  | 308  | 4.00E-13  | 201.3 | 29.4 | 43.1 | predicted protein                                                           | gbpln | Arabidopsis lyrata   | AT2G42480.1   Symbols:   TRAF-like family protein   chr2:17685805-17689851 REVERSE LENGTH=743                                                                    | 153  | 743  | 2.00E-14  | 485.6 | 26.8 | 39.2 |
| Rsa1.0_00881.1.g20793.t1 | gb EOA23970.1  hypothetical protein CARUB_v10017190mg [Capsella rubella]                                                                                                                                                                                                                                                                                                                                                                                                                                                                                                                                                                    | 467  | 464  | 0         | 99.4  | 89.5 | 95.3 | hypothetical protein CARUB_v10017190mg                                      | gbpln | Capsella rubella     | AT2G01720.1   Symbols:   Ribophorin 1   chr2:317193-320016 REVERSE LENGTH=464                                                                                    | 467  | 464  | 0         | 99.4  | 88.9 | 94.9 |
| Rsa1.0_00881.1.g20794.t1 | gb EOA24403.1  hypothetical protein CARUB_v10017653mg [Capsella rubella] gi 482560213 gb EOA24404.1  hypothetical protein CARUB_v10017653mg [Capsella rubella]                                                                                                                                                                                                                                                                                                                                                                                                                                                                              | 306  | 321  | 1.00E-134 | 104.9 | 78.4 | 86.9 | hypothetical protein CARUB_v10017653mg                                      | gbpln | Capsella rubella     | AT2G01710.1   Symbols:   Chaperone DnaJ-domain superfamily protein   chr2:315836-316771 FORWARD LENGTH=311                                                       | 306  | 311  | 1.00E-132 | 101.6 | 79.7 | 86.3 |
| Rsa1.0_00881.1.g20795.t1 | # # # # # # # # -                                                                                                                                                                                                                                                                                                                                                                                                                                                                                                                                                                                                                           | #    | #    | #         | #     | #    | #    | ----                                                                        | ----  | #                    | #                                                                                                                                                                | #    | #    | #         | #     | #    | #    |
| Rsa1.0_00881.1.g20796.t1 | ref NP_565275.1  uncharacterized protein [Arabidopsis thaliana] gi 75268025 sp Q9ZU97.2 VAC14_H RecName: Full=Protein VAC14_H homolog gi 20197548 gb AAD12702.2  expressed protein [Arabidopsis thaliana] gi 330250391 gb AEC05485.1  uncharacterized protein AT2G01690 [Arabidopsis thaliana]                                                                                                                                                                                                                                                                                                                                              | 702  | 743  | 0         | 105.8 | 90.5 | 93.4 | uncharacterized protein                                                     | gbpln | Arabidopsis thaliana | AT2G01690.1   Symbols:   ARM repeat superfamily protein   chr2:309144-313499 REVERSE LENGTH=743                                                                  | 702  | 743  | 0         | 105.8 | 90.5 | 93.4 |
| Rsa1.0_00881.1.g20797.t4 | emb CAN64427.1  hypothetical protein VITISV_029384 [Vitis vinifera]                                                                                                                                                                                                                                                                                                                                                                                                                                                                                                                                                                         | 1140 | 1392 | 1.00E-161 | 122.1 | 29.3 | 41.6 | hypothetical protein VITISV_029384                                          | gbpln | Vitis vinifera       | ATMG00860.1   Symbols: ORF158   DNA/RNA polymerases superfamily protein   chrM:235916-236392 FORWARD LENGTH=158                                                  | 1140 | 158  | 7.00E-20  | 13.9  | 3.9  | 5.9  |
| Rsa1.0_00881.1.g20798.t1 | gb AAF79618.1 AC027665_19 F5M15.26 [Arabidopsis thaliana]                                                                                                                                                                                                                                                                                                                                                                                                                                                                                                                                                                                   | 1649 | 1838 | 0         | 111.5 | 45.9 | 56.8 | F5M15.26                                                                    | gbpln | Arabidopsis thaliana | #                                                                                                                                                                | #    | #    | #         | #     | #    |      |
| Rsa1.0_00881.1.g20799.t2 | gb AAQ82842.1  At4g20730 [Arabidopsis thaliana] gi 51970840 dbj BAD44112.1  putative protein [Arabidopsis thaliana]                                                                                                                                                                                                                                                                                                                                                                                                                                                                                                                         | 994  | 800  | 9.00E-27  | 80.5  | 7.6  | 11.1 | At4g20730                                                                   | gbpln | Arabidopsis thaliana | AT4G32200.1   Symbols: ASY2   DNA-binding HORMA family protein   chr4:15548840-15554962 FORWARD LENGTH=1399                                                      | 994  | 1399 | 1.00E-27  | 140.7 | 6.9  | 9.5  |
| Rsa1.0_00882.1.g20800.t1 | gb AAC33963.1  contains similarity to reverse transcriptases (Pfam; rvt.hmm, score: 11.19) [Arabidopsis thaliana]                                                                                                                                                                                                                                                                                                                                                                                                                                                                                                                           | 523  | 1633 | 2.33E-156 | 312.2 | 50.9 | 69.0 | contains similarity to reverse transcriptases (Pfam; rvt.hmm, score: 11.19) | gbpln | Arabidopsis thaliana | AT4G23160.1   Symbols: CRK8   cysteine-rich RLK (RECEPTOR-like protein kinase) 8   chr4:12129485-12134086 FORWARD LENGTH=1262                                    | 523  | 1262 | 4.00E-98  | 241.3 | 32.7 | 44.0 |
| Rsa1.0_00882.1.g20801.t1 | ref XP_002879261.1  GDSL-motif lipase/hydrolase family protein [Arabidopsis lyrata subsp. lyrata] gi 2973295100 gb EFH55520.1  GDSL-motif lipase/hydrolase family protein [Arabidopsis lyrata subsp. lyrata]                                                                                                                                                                                                                                                                                                                                                                                                                                | 359  | 359  | 0         | 100.0 | 86.9 | 92.8 | GDSL-motif lipase/hydrolase family protein                                  | gbpln | Arabidopsis lyrata   | AT2G30310.1   Symbols:   GDSL-like Lipase/Acylhydrolase family protein   chr2:12923055-12924371 FORWARD LENGTH=359                                               | 359  | 359  | 0         | 100.0 | 85.8 | 92.2 |
| Rsa1.0_00882.1.g20802.t1 | ref XP_002883443.1  hypothetical protein ARALYDRAFT_342502 [Arabidopsis lyrata subsp. lyrata] gi 297329283 gb EFH59702.1  hypothetical protein ARALYDRAFT_342502 [Arabidopsis lyrata subsp. lyrata]                                                                                                                                                                                                                                                                                                                                                                                                                                         | 496  | 454  | 0         | 91.5  | 66.5 | 72.4 | hypothetical protein ARALYDRAFT_342502                                      | gbpln | Arabidopsis lyrata   | AT3G62850.1   Symbols:   zinc finger protein-related   chr3:23237487-23239155 REVERSE LENGTH=472                                                                 | 496  | 472  | 5.00E-84  | 95.2  | 38.3 | 51.0 |
| Rsa1.0_00882.1.g20803.t1 | gb EOA28478.1  hypothetical protein CARUB_v10024687mg [Capsella rubella]                                                                                                                                                                                                                                                                                                                                                                                                                                                                                                                                                                    | 361  | 390  | 1.00E-156 | 108.0 | 85.6 | 90.9 | hypothetical protein CARUB_v10024687mg                                      | gbpln | Capsella rubella     | AT2G30250.1   Symbols: WRKY25, ATWRKY25   WRKY DNA-binding protein 25   chr2:12903553-12905089 REVERSE LENGTH=393                                                | 361  | 393  | 1.00E-149 | 108.9 | 84.2 | 90.6 |

|                          |                                                                                                                                                                                                                                           |     |     |           |       |      |      |                                                       |       |                         |                                                                                                                                                                                                                                                                                                                                                                                                                                                                                                      |     |     |           |       |      |      |
|--------------------------|-------------------------------------------------------------------------------------------------------------------------------------------------------------------------------------------------------------------------------------------|-----|-----|-----------|-------|------|------|-------------------------------------------------------|-------|-------------------------|------------------------------------------------------------------------------------------------------------------------------------------------------------------------------------------------------------------------------------------------------------------------------------------------------------------------------------------------------------------------------------------------------------------------------------------------------------------------------------------------------|-----|-----|-----------|-------|------|------|
| Rsa1.0_00882.1.g20804.t1 | refXP_002881092.1  ATCHX13<br>[Arabidopsis lyrata subsp. lyrata]<br>gi 297326931 gb EFH57351.1  ATCHX13<br>[Arabidopsis lyrata subsp. lyrata]                                                                                             | 832 | 830 | 0         | 99.8  | 83.5 | 91.6 | ATCHX13                                               | gbpln | Arabidopsis<br>lyrata   | AT2G30240.1   Symbols: ATCHX13, CHX13  <br>Cation/hydrogen exchanger family protein  <br>chr2:12899907-12902779 REVERSE<br>LENGTH=831                                                                                                                                                                                                                                                                                                                                                                | 832 | 831 | 0         | 99.9  | 82.7 | 91.7 |
| Rsa1.0_00882.1.g20805.t1 | #                                                                                                                                                                                                                                         | #   | #   | #         | #     | #    | -    |                                                       | ----  | ----                    | #                                                                                                                                                                                                                                                                                                                                                                                                                                                                                                    | #   | #   | #         | #     | #    |      |
| Rsa1.0_00882.1.g20806.t1 | refXP_002879258.1  hypothetical<br>protein ARALYDRAFT_481935<br>[Arabidopsis lyrata subsp. lyrata]<br>gi 297325097 gb EFH55517.1 <br>hypothetical protein<br>ARALYDRAFT_481935 [Arabidopsis<br>lyrata subsp. lyrata]                      | 179 | 177 | 1.00E-75  | 98.9  | 84.9 | 90.5 | hypothetical protein<br>ARALYDRAFT_481935             | gbpln | Arabidopsis<br>lyrata   | AT2G30230.1   Symbols:   unknown protein;<br>FUNCTIONS IN: molecular_function unknown;<br>INVOLVED IN: biological_process unknown;<br>LOCATED IN: endomembrane system; BEST<br>Arabidopsis thaliana protein match is:<br>unknown protein (TAIR:AT1G06980.1); Has<br>167 Blast hits to 167 proteins in 14 species:<br>Archae - 0; Bacteria - 0; Metazoa - 0; Fungi<br>- 0; Plants - 167; Viruses - 0; Other<br>Eukaryotes - 0 (source: NCBI BLINK).  <br>chr2:12897156-12897689 FORWARD<br>LENGTH=177 | 179 | 177 | 4.00E-77  | 98.9  | 83.8 | 89.9 |
| Rsa1.0_00882.1.g20807.t1 | refXP_002881090.1  hypothetical<br>protein ARALYDRAFT_481932<br>[Arabidopsis lyrata subsp. lyrata]<br>gi 297326929 gb EFH57349.1 <br>hypothetical protein<br>ARALYDRAFT_481932 [Arabidopsis<br>lyrata subsp. lyrata]                      | 570 | 570 | 0         | 100.0 | 94.9 | 97.0 | hypothetical protein<br>ARALYDRAFT_481932             | gbpln | Arabidopsis<br>lyrata   | AT2G30210.1   Symbols: LAC3   laccase 3  <br>chr2:12887735-12889827 REVERSE<br>LENGTH=570                                                                                                                                                                                                                                                                                                                                                                                                            | 570 | 570 | 0         | 100.0 | 93.5 | 96.5 |
| Rsa1.0_00882.1.g20808.t1 | emb CAB45522.1  [acyl-carrier protein]<br>S-malonyltransferase [Brassica napus]                                                                                                                                                           | 370 | 349 | 1.00E-176 | 94.3  | 86.8 | 90.8 |                                                       | gbpln | Brassica<br>napus       | AT2G30200.1   Symbols:  <br>catalytic;transferases;[acyl-carrier-protein]<br>S-malonyltransferases;binding  <br>chr2:12883162-12885482 REVERSE<br>LENGTH=393                                                                                                                                                                                                                                                                                                                                         | 370 | 393 | 1.00E-174 | 106.2 | 85.1 | 88.9 |
| Rsa1.0_00882.1.g20809.t1 | gb AAC68670.1  RING-H2 finger protein<br>RHA1b [Arabidopsis thaliana]<br>gi 21593210 gb AAM65159.1  RING-H2<br>finger protein RHA1b [Arabidopsis<br>thaliana]                                                                             | 159 | 157 | 9.00E-50  | 98.7  | 64.8 | 75.5 | RING-H2 finger protein<br>RHA1b                       | gbpln | Arabidopsis<br>thaliana | AT4G11360.1   Symbols: RHA1B   RING-H2<br>finger A1B   chr4:690066-6906539<br>FORWARD LENGTH=157                                                                                                                                                                                                                                                                                                                                                                                                     | 159 | 157 | 1.00E-51  | 98.7  | 64.2 | 74.8 |
| Rsa1.0_00882.1.g20810.t1 | gb AAM62642.1  putative mitochondrial<br>carrier protein [Arabidopsis thaliana]                                                                                                                                                           | 324 | 331 | 1.00E-159 | 102.2 | 88.0 | 94.1 | putative mitochondrial<br>carrier protein             | gbpln | Arabidopsis<br>thaliana | AT2G30160.1   Symbols:   Mitochondrial<br>substrate carrier family protein  <br>chr2:12878016-12879377 FORWARD<br>LENGTH=331                                                                                                                                                                                                                                                                                                                                                                         | 324 | 331 | 1.00E-161 | 102.2 | 87.7 | 93.8 |
| Rsa1.0_00883.1.g20811.t1 | gb EOA22249.1  hypothetical protein<br>CARUB_v10002838mg [Capsella rubella]                                                                                                                                                               | 214 | 358 | 1.00E-43  | 167.3 | 45.8 | 59.8 | hypothetical protein<br>CARUB_v10002838mg             | gbpln | Capsella<br>rubella     | AT5G22160.1   Symbols:   unknown protein;<br>BEST Arabidopsis thaliana protein match is:<br>unknown protein (TAIR:AT5G22150.1); Has<br>30201 Blast hits to 17322 proteins in 780<br>species: Archae - 12; Bacteria - 1396;<br>Metazoa - 17338; Fungi - 3422; Plants -<br>5037; Viruses - 0; Other Eukaryotes - 2996<br>(source: NCBI BLINK).   chr5:7346944-<br>7349255 FORWARD LENGTH=353                                                                                                           | 214 | 353 | 5.00E-45  | 165.0 | 45.8 | 58.9 |
| Rsa1.0_00883.1.g20812.t1 | gb EOA22505.1  hypothetical protein<br>CARUB_v10003160mg, partial [Capsella<br>rubella]                                                                                                                                                   | 206 | 213 | 2.00E-35  | 103.4 | 43.2 | 60.7 | hypothetical protein<br>CARUB_v10003160mg,<br>partial | gbpln | Capsella<br>rubella     | AT5G22150.1   Symbols:   unknown protein;<br>BEST Arabidopsis thaliana protein match is:<br>unknown protein (TAIR:AT5G22160.1); Has<br>30201 Blast hits to 17322 proteins in 780<br>species: Archae - 12; Bacteria - 1396;<br>Metazoa - 17338; Fungi - 3422; Plants -<br>5037; Viruses - 0; Other Eukaryotes - 2996<br>(source: NCBI BLINK).   chr5:7342567-<br>7345956 FORWARD LENGTH=330                                                                                                           | 206 | 330 | 2.00E-30  | 160.2 | 35.4 | 49.5 |
| Rsa1.0_00883.1.g20813.t1 | ref NP_680202.1  uncharacterized<br>protein [Arabidopsis thaliana]<br>gi 13374875 emb CAC34509.1  putative<br>protein [Arabidopsis thaliana]<br>gi 332005608 gb AED9299.1 <br>uncharacterized protein AT5G22160<br>[Arabidopsis thaliana] | 174 | 353 | 7.00E-24  | 202.9 | 40.8 | 52.9 | uncharacterized<br>protein                            | gbpln | Arabidopsis<br>thaliana | AT5G22160.1   Symbols:   unknown protein;<br>BEST Arabidopsis thaliana protein match is:<br>unknown protein (TAIR:AT5G22150.1); Has<br>30201 Blast hits to 17322 proteins in 780<br>species: Archae - 12; Bacteria - 1396;<br>Metazoa - 17338; Fungi - 3422; Plants -<br>5037; Viruses - 0; Other Eukaryotes - 2996<br>(source: NCBI BLINK).   chr5:7346944-<br>7349255 FORWARD LENGTH=353                                                                                                           | 174 | 353 | 3.00E-26  | 202.9 | 40.8 | 52.9 |
| Rsa1.0_00883.1.g20814.t1 | gb EOA22193.1  hypothetical protein<br>CARUB_v10002765mg [Capsella rubella]                                                                                                                                                               | 143 | 329 | 6.00E-11  | 230.1 | 28.7 | 42.7 | hypothetical protein<br>CARUB_v10002765mg             | gbpln | Capsella<br>rubella     | #                                                                                                                                                                                                                                                                                                                                                                                                                                                                                                    | #   | #   | #         | #     | #    |      |
| Rsa1.0_00883.1.g20815.t1 | refXP_002871995.1  hypothetical<br>protein ARALYDRAFT_489072<br>[Arabidopsis lyrata subsp. lyrata]<br>gi 297317832 gb EFH48254.1 <br>hypothetical protein<br>ARALYDRAFT_489072 [Arabidopsis<br>lyrata subsp. lyrata]                      | 476 | 457 | 0         | 96.0  | 78.4 | 84.7 | hypothetical protein<br>ARALYDRAFT_489072             | gbpln | Arabidopsis<br>lyrata   | AT5G22220.2   Symbols: E2F1, E2FB,<br>ATE2FB   E2F transcription factor 1  <br>chr5:7360749-7364120 FORWARD<br>LENGTH=469                                                                                                                                                                                                                                                                                                                                                                            | 476 | 469 | 0         | 98.5  | 77.9 | 84.5 |

|                          |                                                                                                                                                                                                                                                                                                                                                                                                                                                                                                                                               |      |      |           |       |      |      |                                          |       |                      |                                                                                                                                                                                                                                                                                                                                                                                                                                                                                                                                       |      |     |           |       |      |      |
|--------------------------|-----------------------------------------------------------------------------------------------------------------------------------------------------------------------------------------------------------------------------------------------------------------------------------------------------------------------------------------------------------------------------------------------------------------------------------------------------------------------------------------------------------------------------------------------|------|------|-----------|-------|------|------|------------------------------------------|-------|----------------------|---------------------------------------------------------------------------------------------------------------------------------------------------------------------------------------------------------------------------------------------------------------------------------------------------------------------------------------------------------------------------------------------------------------------------------------------------------------------------------------------------------------------------------------|------|-----|-----------|-------|------|------|
| Rsa1.0_00883.1.g20816.t1 | ref[NP_197617.1] putative CCR4-associated factor 1-11 [Arabidopsis thaliana]<br>gi 75334084 sp Q9FMS6.1 CAF1K_ARAT H RecName: Full=Probable CCR4-associated factor 1 homolog 11<br>gi 9757805 dbj BAB08323.1  CCR4-associated factor-like protein [Arabidopsis thaliana]<br>gi 17381058 gb AAL36341.1  putative CCR4-associated factor [Arabidopsis thaliana]<br>gi 25054979 gb AAN71961.1  putative CCR4-associated factor [Arabidopsis thaliana]<br>gi 332005618 gb AED93001.1  putative CCR4-associated factor 1-11 [Arabidopsis thaliana] | 283  | 278  | 1.00E-130 | 98.2  | 82.0 | 89.4 | putative CCR4-associated factor 1-11     | gbpln | Arabidopsis thaliana | AT5G22250.1   Symbols:   Polynucleotidyl transferase, ribonuclease H-like superfamily protein   chr5:7365605-7366441 REVERSE LENGTH=278                                                                                                                                                                                                                                                                                                                                                                                               | 283  | 278 | 1.00E-133 | 98.2  | 82.0 | 89.4 |
| Rsa1.0_00883.1.g20817.t1 | gb EOA2197.1  hypothetical protein CARUB_v10002769mg [Capsella rubella]                                                                                                                                                                                                                                                                                                                                                                                                                                                                       | 92   | 93   | 2.00E-16  | 101.1 | 62.0 | 66.3 | hypothetical protein CARUB_v10002769mg   | gbpln | Capsella rubella     | AT5G22270.1   Symbols:   unknown protein; BEST Arabidopsis thaliana protein match is: unknown protein (TAIR:AT3G11600.1); Has 136 Blast hits to 136 proteins in 15 species: Archae - 0; Bacteria - 0; Metazoa - 0; Fungi - 0; Plants - 136; Viruses - 0; Other Eukaryotes - 0 (source: NCBI BLink).   chr5:7372487-7372768 REVERSE LENGTH=93                                                                                                                                                                                          | 92   | 93  | 2.00E-15  | 101.1 | 76.1 | 82.6 |
| Rsa1.0_00883.1.g20818.t1 | emb CAB39638.1  RNA-directed DNA polymerase-like protein [Arabidopsis thaliana]<br>gi 7267666 emb CAB78094.1  RNA-directed DNA polymerase-like protein [Arabidopsis thaliana]                                                                                                                                                                                                                                                                                                                                                                 | 1364 | 1274 | 0         | 93.4  | 44.9 | 62.0 | RNA-directed DNA polymerase-like protein | gbpln | Arabidopsis thaliana | AT4G29090.1   Symbols:   Ribonuclease H-like superfamily protein   chr4:14333528-14335255 FORWARD LENGTH=575                                                                                                                                                                                                                                                                                                                                                                                                                          | 1364 | 575 | 4.00E-68  | 42.2  | 12.8 | 19.6 |
| Rsa1.0_00883.1.g20819.t1 | ref XP_002874058.1  hypothetical protein ARALYDRAFT_489079 [Arabidopsis lyrata subsp. lyrata]<br>gi 297319895 gb EFH50317.1  hypothetical protein ARALYDRAFT_489079 [Arabidopsis lyrata subsp. lyrata]                                                                                                                                                                                                                                                                                                                                        | 110  | 108  | 7.00E-48  | 98.2  | 91.8 | 96.4 | hypothetical protein ARALYDRAFT_489079   | gbpln | Arabidopsis lyrata   | AT5G22280.1   Symbols:   unknown protein; FUNCTIONS IN: molecular_function unknown; INVOLVED IN: biological_process unknown; LOCATED IN: endomembrane system; EXPRESSED IN: 22 plant structures; EXPRESSED DURING: 13 growth stages; BEST Arabidopsis thaliana protein match is: unknown protein (TAIR:AT3G44280.1); Has 82 Blast hits to 82 proteins in 13 species: Archae - 0; Bacteria - 0; Metazoa - 0; Fungi - 0; Plants - 82; Viruses - 0; Other Eukaryotes - 0 (source: NCBI BLink).   chr5:7374211-7375112 REVERSE LENGTH=108 | 110  | 108 | 7.00E-50  | 98.2  | 90.9 | 95.5 |
| Rsa1.0_00883.1.g20820.t1 | gb EOA21023.1  hypothetical protein CARUB_v10001357mg [Capsella rubella]                                                                                                                                                                                                                                                                                                                                                                                                                                                                      | 335  | 340  | 1.00E-157 | 101.5 | 81.2 | 89.0 | hypothetical protein CARUB_v10001357mg   | gbpln | Capsella rubella     | AT5G22290.1   Symbols: anac089, NAC089   NAC domain containing protein 89   chr5:7376044-7377498 REVERSE LENGTH=340                                                                                                                                                                                                                                                                                                                                                                                                                   | 335  | 340 | 1.00E-158 | 101.5 | 80.0 | 88.4 |
| Rsa1.0_00883.1.g20821.t1 | ref XP_002874061.1  hypothetical protein ARALYDRAFT_489082 [Arabidopsis lyrata subsp. lyrata]<br>gi 297319898 gb EFH50320.1  hypothetical protein ARALYDRAFT_489082 [Arabidopsis lyrata subsp. lyrata]                                                                                                                                                                                                                                                                                                                                        | 466  | 492  | 0         | 105.6 | 80.5 | 88.6 | hypothetical protein ARALYDRAFT_489082   | gbpln | Arabidopsis lyrata   | AT5G22310.1   Symbols:   unknown protein; BEST Arabidopsis thaliana protein match is: unknown protein (TAIR:AT3G11590.1); Has 30201 Blast hits to 17322 proteins in 780 species: Archae - 12; Bacteria - 1396; Metazoa - 17338; Fungi - 3422; Plants - 5037; Viruses - 0; Other Eukaryotes - 2996 (source: NCBI BLink).   chr5:7383742-7385345 REVERSE LENGTH=481                                                                                                                                                                     | 466  | 481 | 0         | 103.2 | 79.0 | 87.8 |
| Rsa1.0_00883.1.g20822.t1 | #                                                                                                                                                                                                                                                                                                                                                                                                                                                                                                                                             | #    | #    | #         | #     | #    | -    | ----                                     | ----  | ----                 | #                                                                                                                                                                                                                                                                                                                                                                                                                                                                                                                                     | #    | #   | #         | #     | #    |      |
| Rsa1.0_00883.1.g20823.t1 | gb EOA20612.1  hypothetical protein CARUB_v10000923mg [Capsella rubella]                                                                                                                                                                                                                                                                                                                                                                                                                                                                      | 457  | 458  | 0         | 100.2 | 91.2 | 94.1 | hypothetical protein CARUB_v10000923mg   | gbpln | Capsella rubella     | AT5G22330.1   Symbols: ATTIP49A, RIN1   P-loop containing nucleoside triphosphate hydrolases superfamily protein   chr5:7391026-7394071 REVERSE LENGTH=458                                                                                                                                                                                                                                                                                                                                                                            | 457  | 458 | 0         | 100.2 | 91.2 | 93.9 |
| Rsa1.0_00883.1.g20824.t3 | ref NP_197626.2  uncharacterized protein [Arabidopsis thaliana]<br>gi 29028856 gb AAO64807.1  At5g22340 [Arabidopsis thaliana]<br>gi 110736593 dbj BAF00262.1  hypothetical protein [Arabidopsis thaliana]<br>gi 332005630 gb AED83013.1  uncharacterized protein AT5G22340 [Arabidopsis thaliana]                                                                                                                                                                                                                                            | 541  | 323  | 1.00E-152 | 59.7  | 50.8 | 54.7 | uncharacterized protein                  | gbpln | Arabidopsis thaliana | AT5G22340.1   Symbols:   unknown protein; FUNCTIONS IN: molecular_function unknown; INVOLVED IN: biological_process unknown; LOCATED IN: chloroplast; EXPRESSED IN: 22 plant structures; EXPRESSED DURING: 13 growth stages; Has 58 Blast hits to 58 proteins in 20 species: Archae - 0; Bacteria - 0; Metazoa - 0; Fungi - 0; Plants - 57; Viruses - 0; Other Eukaryotes - 1 (source: NCBI BLink).   chr5:7394509-7396554 FORWARD LENGTH=323                                                                                         | 541  | 323 | 1.00E-154 | 59.7  | 50.8 | 54.7 |
| Rsa1.0_00883.1.g20825.t1 | ref XP_002874066.1  vesicle-associated membrane protein 714 [Arabidopsis lyrata subsp. lyrata]<br>gi 297319903 gb EFH50325.1  vesicle-associated membrane protein 714 [Arabidopsis lyrata subsp. lyrata]                                                                                                                                                                                                                                                                                                                                      | 193  | 221  | 1.00E-104 | 114.5 | 94.8 | 96.9 | vesicle-associated membrane protein 714  | gbpln | Arabidopsis lyrata   | AT5G22360.1   Symbols: ATVAMP714, VAMP714   vesicle-associated membrane protein 714   chr5:7404379-7405654 REVERSE LENGTH=221                                                                                                                                                                                                                                                                                                                                                                                                         | 193  | 221 | 1.00E-105 | 114.5 | 93.8 | 97.4 |

|                          |                                                                                                                                                                                                                                                                                                                        |      |      |           |       |      |      |                                                                           |       |                      |                                                                                                                                               |      |      |           |       |      |      |
|--------------------------|------------------------------------------------------------------------------------------------------------------------------------------------------------------------------------------------------------------------------------------------------------------------------------------------------------------------|------|------|-----------|-------|------|------|---------------------------------------------------------------------------|-------|----------------------|-----------------------------------------------------------------------------------------------------------------------------------------------|------|------|-----------|-------|------|------|
| Rsa1.0_00883.1.g20826.t1 | ref[XP_002874067.1] ANAC090 [Arabidopsis lyrata subsp. lyrata] g[297319904]gb[EFH50326.1] ANAC090 [Arabidopsis lyrata subsp. lyrata]                                                                                                                                                                                   | 234  | 235  | 1.00E-114 | 100.4 | 84.2 | 91.9 | ANAC090                                                                   | gbpln | Arabidopsis lyrata   | AT5G22380.1   Symbols: anac090, NAC090   NAC domain containing protein 90   chr5:7408924-7410038 REVERSE LENGTH=235                           | 234  | 235  | 1.00E-113 | 100.4 | 81.6 | 90.6 |
| Rsa1.0_00884.1.g20827.t1 | #                                                                                                                                                                                                                                                                                                                      | #    | #    | #         | #     | #    | #    | -                                                                         | ----  | ----                 | #                                                                                                                                             | #    | #    | #         | #     | #    | #    |
| Rsa1.0_00884.1.g20828.t1 | gb AAG52026.1 AC022456.7 polyprotein, putative; 77260-80472 [Arabidopsis thaliana]                                                                                                                                                                                                                                     | 590  | 884  | 1.00E-107 | 149.8 | 39.5 | 51.7 | polyprotein, putative; 77260-80472                                        | gbpln | Arabidopsis thaliana | #                                                                                                                                             | #    | #    | #         | #     | #    | #    |
| Rsa1.0_00884.1.g20829.t1 | gb AAD24567.1 AF120335.1 putative transposase [Arabidopsis thaliana]                                                                                                                                                                                                                                                   | 245  | 577  | 6.00E-66  | 235.5 | 49.4 | 61.2 | putative transposase                                                      | gbpln | Arabidopsis thaliana | AT3G42170.1   Symbols:   BED zinc finger ;hAT family dimerisation domain   chr3:14321838-14323928 FORWARD LENGTH=696                          | 245  | 696  | 8.00E-19  | 284.1 | 22.0 | 38.4 |
| Rsa1.0_00884.1.g20830.t1 | ref[XP_002876127.1] tetratricopeptide repeat-containing protein [Arabidopsis lyrata subsp. lyrata] g[297321965]gb[EFH52386.1] tetratricopeptide repeat-containing protein [Arabidopsis lyrata subsp. lyrata]                                                                                                           | 1371 | 1386 | 0         | 101.1 | 86.1 | 91.4 | tetratricopeptide repeat-containing protein                               | gbpln | Arabidopsis lyrata   | AT3G52140.1   Symbols:   tetratricopeptide repeat (TPR)-containing protein   chr3:19333232-19341295 FORWARD LENGTH=1403                       | 1371 | 1403 | 0         | 102.3 | 84.9 | 90.7 |
| Rsa1.0_00884.1.g20831.t1 | ref[XP_002865992.1] hypothetical protein ARALYDRAFT_918470 [Arabidopsis lyrata subsp. lyrata] g[297311827]gb[EFH42251.1] hypothetical protein ARALYDRAFT_918470 [Arabidopsis lyrata subsp. lyrata]                                                                                                                     | 345  | 422  | 1.00E-124 | 122.3 | 64.1 | 75.9 | hypothetical protein ARALYDRAFT_918470                                    | gbpln | Arabidopsis lyrata   | AT5G53780.1   Symbols:   Protein of unknown function (DUF295)   chr5:21839818-21841977 REVERSE LENGTH=376                                     | 345  | 376  | 1.00E-117 | 109.0 | 60.6 | 71.9 |
| Rsa1.0_00884.1.g20832.t1 | ref[XP_002864282.1] hypothetical protein ARALYDRAFT_918479 [Arabidopsis lyrata subsp. lyrata] g[297310117]gb[EFH40541.1] hypothetical protein ARALYDRAFT_918479 [Arabidopsis lyrata subsp. lyrata]                                                                                                                     | 411  | 371  | 1.00E-82  | 90.3  | 39.7 | 46.5 | hypothetical protein ARALYDRAFT_918479                                    | gbpln | Arabidopsis lyrata   | AT5G53790.1   Symbols:   Protein of unknown function (DUF295)   chr5:21843501-21845261 FORWARD LENGTH=380                                     | 411  | 380  | 3.00E-74  | 92.5  | 36.7 | 43.3 |
| Rsa1.0_00884.1.g20833.t1 | #                                                                                                                                                                                                                                                                                                                      | #    | #    | #         | #     | #    | #    | -                                                                         | ----  | ----                 | #                                                                                                                                             | #    | #    | #         | #     | #    | #    |
| Rsa1.0_00884.1.g20834.t1 | #                                                                                                                                                                                                                                                                                                                      | #    | #    | #         | #     | #    | #    | -                                                                         | ----  | ----                 | #                                                                                                                                             | #    | #    | #         | #     | #    | #    |
| Rsa1.0_00884.1.g20835.t1 | gb EOA14424.1  hypothetical protein CARUB_v10027626mg [Capsella rubella]                                                                                                                                                                                                                                               | 191  | 186  | 1.00E-42  | 97.4  | 47.1 | 66.0 | hypothetical protein CARUB_v10027626mg                                    | gbpln | Capsella rubella     | AT5G46990.1   Symbols:   Plant invertase/pectin methylesterase inhibitor superfamily protein   chr5:19067692-19068255 REVERSE LENGTH=187      | 191  | 187  | 5.00E-45  | 97.9  | 48.2 | 62.8 |
| Rsa1.0_00884.1.g20836.t1 | ref[NP_199510.1] plant invertase/pectin methylesterase inhibitor domain-containing protein [Arabidopsis thaliana] g[9759441]dbj BAB10238.1  unnamed protein product [Arabidopsis thaliana] g[332008072]gb AED95455.1  plant invertase/pectin methylesterase inhibitor domain-containing protein [Arabidopsis thaliana] | 183  | 187  | 1.00E-41  | 102.2 | 49.2 | 65.6 | plant invertase/pectin methylesterase inhibitor domain-containing protein | gbpln | Arabidopsis thaliana | AT5G46990.1   Symbols:   Plant invertase/pectin methylesterase inhibitor superfamily protein   chr5:19067692-19068255 REVERSE LENGTH=187      | 183  | 187  | 5.00E-44  | 102.2 | 49.2 | 65.6 |
| Rsa1.0_00884.1.g20837.t1 | #                                                                                                                                                                                                                                                                                                                      | #    | #    | #         | #     | #    | #    | -                                                                         | ----  | ----                 | #                                                                                                                                             | #    | #    | #         | #     | #    | #    |
| Rsa1.0_00885.1.g20838.t1 | ref[NP_001077646.1] RING/FYVE/PHD zinc finger protein [Arabidopsis thaliana] g[6910567]gb AAF31272.1 AC006424.1 Location of EST 206121T7, gb N37185 [Arabidopsis thaliana] g[332193410]gb AEE31531.1 RING/FYVE/PHD zinc finger protein [Arabidopsis thaliana]                                                          | 984  | 1068 | 0         | 108.5 | 76.2 | 84.1 | RING/FYVE/PHD zinc finger protein                                         | gbpln | Arabidopsis thaliana | AT1G32810.2   Symbols:   RING/FYVE/PHD zinc finger superfamily protein   chr1:11881810-11885843 FORWARD LENGTH=1088                           | 984  | 1068 | 0         | 108.5 | 76.2 | 84.1 |
| Rsa1.0_00885.1.g20839.t1 | ref[XP_002865907.1] CYP96A4 [Arabidopsis lyrata subsp. lyrata] g[297311742]gb EFH42166.1  CYP96A4 [Arabidopsis lyrata subsp. lyrata]                                                                                                                                                                                   | 497  | 503  | 0         | 101.2 | 80.3 | 89.3 | CYP96A4                                                                   | gbpln | Arabidopsis lyrata   | AT5G52320.1   Symbols: CYP96A4   cytochrome P450, family 96, subfamily A, polypeptide 4   chr5:21245111-21246619 REVERSE LENGTH=502           | 497  | 502  | 0         | 101.0 | 79.7 | 88.3 |
| Rsa1.0_00885.1.g20840.t4 | gb AAD15534.1  putative retroelement pol polyprotein [Arabidopsis thaliana]                                                                                                                                                                                                                                            | 804  | 1664 | 1.00E-168 | 207.0 | 44.7 | 58.5 | putative retroelement pol polyprotein                                     | gbpln | Arabidopsis thaliana | #                                                                                                                                             | #    | #    | #         | #     | #    | #    |
| Rsa1.0_00885.1.g20841.t2 | gb ABD65624.1  hypothetical protein Z3.t00036 [Brassica oleracea]                                                                                                                                                                                                                                                      | 842  | 842  | 1.00E-73  | 100.0 | 25.2 | 36.8 | hypothetical protein Z3.t00036                                            | gbpln | Brassica oleracea    | AT1G31150.1   Symbols:   Domain of unknown function (DUF195)   chr1:1120097-1122412 FORWARD LENGTH=673                                        | 842  | 673  | 6.00E-21  | 79.9  | 6.7  | 9.5  |
| Rsa1.0_00885.1.g20842.t1 | gb EOA12319.1  hypothetical protein CARUB_v10007958mg, partial [Capsella rubella]                                                                                                                                                                                                                                      | 842  | 673  | 1.00E-141 | 79.9  | 28.9 | 39.7 | hypothetical protein CARUB_v10007958mg, partial                           | gbpln | Capsella rubella     | AT1G64260.1   Symbols:   MuDR family transposase   chr1:23847756-23849915 FORWARD LENGTH=719                                                  | 842  | 719  | 2.00E-33  | 85.4  | 14.6 | 26.5 |
| Rsa1.0_00885.1.g20843.t1 | #                                                                                                                                                                                                                                                                                                                      | #    | #    | #         | #     | #    | #    | -                                                                         | ----  | ----                 | #                                                                                                                                             | #    | #    | #         | #     | #    | #    |
| Rsa1.0_00885.1.g20844.t1 | gb AAC33226.1  putative non-LTR retroelement reverse transcriptase [Arabidopsis thaliana]                                                                                                                                                                                                                              | 1550 | 1529 | 0         | 98.6  | 44.7 | 61.4 | putative non-LTR retroelement reverse transcriptase                       | gbpln | Arabidopsis thaliana | AT3G24255.1   Symbols:   RNA-directed DNA polymerase (reverse transcriptase)-related family protein   chr3:8789471-8793208 FORWARD LENGTH=746 | 1550 | 746  | 5.00E-92  | 48.1  | 11.7 | 15.6 |



|                           |                                                                                                                                                                                                                                                                                                                                                                                                       |     |      |           |       |      |      |                                                                                                                             |       |                      |                                                                                                                                      |     |      |           |       |      |      |
|---------------------------|-------------------------------------------------------------------------------------------------------------------------------------------------------------------------------------------------------------------------------------------------------------------------------------------------------------------------------------------------------------------------------------------------------|-----|------|-----------|-------|------|------|-----------------------------------------------------------------------------------------------------------------------------|-------|----------------------|--------------------------------------------------------------------------------------------------------------------------------------|-----|------|-----------|-------|------|------|
| Rsa1.0_00886.1.g20845.t1  | ref[XP_002876943.1] F-box family protein [Arabidopsis lyrata subsp. lyrata] gi 297322781 gb EFH53202.1  F-box family protein [Arabidopsis lyrata subsp. lyrata]                                                                                                                                                                                                                                       | 408 | 451  | 1.00E-163 | 110.5 | 75.5 | 82.6 | F-box family protein                                                                                                        | gbpln | Arabidopsis lyrata   | AT3G26000.1   Symbols:   Ribonuclease inhibitor   chr3:9507042-9508542 REVERSE LENGTH=453                                            | 408 | 453  | 1.00E-153 | 111.0 | 69.6 | 79.2 |
| Rsa1.0_00886.1.g20846.t3  | ref[NP_189224.1] TRAM, LAG1 and CLN8 (TLC) lipid-sensing domain containing protein [Arabidopsis thaliana] gi 49660177 gb AAT88379.1  hypothetical protein At3g25950 [Arabidopsis thaliana] gi 50058971 gb AAT69230.1  hypothetical protein At3g25950 [Arabidopsis thaliana] gi 332643573 gb AEE77094.1  TRAM, LAG1 and CLN8 (TLC) lipid-sensing domain containing protein [Arabidopsis thaliana]      | 565 | 251  | 1.00E-108 | 44.4  | 35.4 | 38.6 | TRAM, LAG1 and CLN8 (TLC) lipid-sensing domain containing protein                                                           | gbpln | Arabidopsis thaliana | AT3G25950.1   Symbols:   TRAM, LAG1 and CLN8 (TLC) lipid-sensing domain containing protein   chr3:9496356-9497111 FORWARD LENGTH=251 | 565 | 251  | 1.00E-111 | 44.4  | 35.4 | 38.6 |
| Rsa1.0_00886.1.g20847.t2  | ref[NP_566785.1] universal stress protein (USP) family protein [Arabidopsis thaliana] gi 9279598 dbj BAB01056.1  unnamed protein product [Arabidopsis thaliana] gi 28466901 gb AAO44059.1  At3g25930 [Arabidopsis thaliana] gi 110743893 dbj BAE99781.1  hypothetical protein [Arabidopsis thaliana] gi 332643571 gb AEE77092.1  universal stress protein (USP) family protein [Arabidopsis thaliana] | 138 | 154  | 6.00E-48  | 111.6 | 73.9 | 83.3 | universal stress protein (USP) family protein                                                                               | gbpln | Arabidopsis thaliana | AT3G25930.1   Symbols:   Adenine nucleotide alpha hydrolases-like superfamily protein   chr3:9493032-9493871 REVERSE LENGTH=154      | 138 | 154  | 1.00E-50  | 111.6 | 73.9 | 83.3 |
| Rsa1.0_00886.1.g20848.t1  | gb EOA24563.1  hypothetical protein CARUB_v10017825mg [Capsella rubella]                                                                                                                                                                                                                                                                                                                              | 273 | 273  | 1.00E-121 | 100.0 | 83.2 | 89.0 | hypothetical protein CARUB_v10017825mg                                                                                      | gbpln | Capsella rubella     | AT3G25920.1   Symbols: RPL15   ribosomal protein L15   chr3:9491268-9492558 REVERSE LENGTH=277                                       | 273 | 277  | 1.00E-116 | 101.5 | 77.7 | 83.5 |
| Rsa1.0_00886.1.g20849.t1  | gb EOA25813.1  hypothetical protein CARUB_v10019181mg [Capsella rubella]                                                                                                                                                                                                                                                                                                                              | 334 | 358  | 1.00E-121 | 107.2 | 74.6 | 80.5 | hypothetical protein CARUB_v10019181mg                                                                                      | gbpln | Capsella rubella     | AT3G25910.1   Symbols:   Protein of unknown function (DUF1644)   chr3:9489836-9490954 FORWARD LENGTH=372                             | 334 | 372  | 1.00E-108 | 111.4 | 70.1 | 76.6 |
| Rsa1.0_00886.1.g20850.t1  | #                                                                                                                                                                                                                                                                                                                                                                                                     | #   | #    | #         | #     | #    | #    | -                                                                                                                           | ----  | ----                 | #                                                                                                                                    | #   | #    | #         | #     | #    | #    |
| Rsa1.0_00886.1.g20851.t1  | ref[XP_002876938.1] hypothetical protein ARALYDRAFT_484357 [Arabidopsis lyrata subsp. lyrata] gi 297322776 gb EFH53197.1  hypothetical protein ARALYDRAFT_484357 [Arabidopsis lyrata subsp. lyrata]                                                                                                                                                                                                   | 94  | 90   | 6.00E-21  | 95.7  | 60.6 | 69.1 | hypothetical protein ARALYDRAFT_484357                                                                                      | gbpln | Arabidopsis lyrata   | AT3G25905.1   Symbols: CLE27   CLAVATA3/ESR-RELATED 27   chr3:9486348-9486623 REVERSE LENGTH=91                                      | 94  | 91   | 4.00E-23  | 96.8  | 57.4 | 70.2 |
| Rsa1.0_00886.1.g20852.t1  | sp A4ZGQ8.1 HMT1_BRAOT RecName: Full=Homocysteine S-methyltransferase 1; Short=BoHMT1 gi 110468086 gb ABG74913.1  homocysteine methyltransferase 1 [Brassica oleracea var. italica]                                                                                                                                                                                                                   | 306 | 326  | 1.00E-170 | 106.5 | 97.1 | 99.3 | RecName: Full=Homocysteine S-methyltransferase 1; Short=BoHMT1 gi 110468086 gb ABG74913.1  homocysteine methyltransferase 1 | gbpln | Brassica oleracea    | AT3G25900.3   Symbols: HMT-1   Homocysteine S-methyltransferase family protein   chr3:9480964-9482684 FORWARD LENGTH=306             | 306 | 306  | 1.00E-167 | 100.0 | 92.5 | 96.1 |
| Rsa1.0_00886.1.g20853.t1  | dbj BAJ34405.1  unnamed protein product [Theilungiella halophila]                                                                                                                                                                                                                                                                                                                                     | 317 | 341  | 1.00E-131 | 107.6 | 80.4 | 86.8 | unnamed protein product                                                                                                     | ----  | ----                 | AT3G25890.2   Symbols:   Integrase-type DNA-binding superfamily protein   chr3:9476052-9477050 FORWARD LENGTH=332                    | 317 | 332  | 1.00E-121 | 104.7 | 77.6 | 86.8 |
| Rsa1.0_00886.1.g20854.t1  | ref[XP_002876936.1] nim1-interacting 2 [Arabidopsis lyrata subsp. lyrata] gi 297322774 gb EFH53195.1  nim1-interacting 2 [Arabidopsis lyrata subsp. lyrata]                                                                                                                                                                                                                                           | 156 | 117  | 7.00E-40  | 75.0  | 56.4 | 62.8 | nim1-interacting 2                                                                                                          | gbpln | Arabidopsis lyrata   | AT3G25882.1   Symbols: NIMIN-2   NIM1-interacting 2   chr3:9470521-9470889 REVERSE LENGTH=122                                        | 156 | 122  | 3.00E-41  | 78.2  | 55.8 | 61.5 |
| Rsa1.0_00886.1.g20855.t1  | gb AAF19226.1 AC007505.2 Highly similar to Ta1-3 polyprotein [Arabidopsis thaliana]                                                                                                                                                                                                                                                                                                                   | 897 | 1356 | 0         | 151.2 | 53.6 | 70.9 | Highly similar to Ta1-3 polyprotein                                                                                         | gbpln | Arabidopsis thaliana | AT4G23160.1   Symbols: CRK8   cysteine-rich RLK (RECEPTOR-like protein kinase) 8   chr4:12129485-12134086 FORWARD LENGTH=1262        | 897 | 1262 | 2.00E-71  | 140.7 | 17.9 | 26.4 |
| Rsa1.0_00886.1.g20856.t3  | dbj BAF01550.1  terpene synthase-related protein [Arabidopsis thaliana] gi 227206462 dbj BAH57286.1  AT3G25820 [Arabidopsis thaliana] ref[XP_002876929.1] hypothetical protein ARALYDRAFT_904748 [Arabidopsis lyrata subsp. lyrata] gi 297322767 gb EFH53188.1  hypothetical protein ARALYDRAFT_904748 [Arabidopsis lyrata subsp. lyrata]                                                             | 362 | 395  | 1.00E-163 | 109.1 | 78.5 | 89.2 | terpene synthase-related protein                                                                                            | gbpln | Arabidopsis thaliana | AT3G25830.1   Symbols: ATTPS-CIN, TPS-CIN   terpene synthase-like sequence-1.8-cineole   chr3:9447545-9450316 FORWARD LENGTH=600     | 362 | 600  | 1.00E-165 | 165.7 | 78.2 | 89.0 |
| Rsa1.0_00886.1.g20857.t11 | ref[XP_002876929.1] hypothetical protein ARALYDRAFT_904748 [Arabidopsis lyrata subsp. lyrata] gi 297322767 gb EFH53188.1  hypothetical protein ARALYDRAFT_904748 [Arabidopsis lyrata subsp. lyrata]                                                                                                                                                                                                   | 997 | 587  | 0         | 58.9  | 54.7 | 56.7 | hypothetical protein ARALYDRAFT_904748                                                                                      | gbpln | Arabidopsis lyrata   | AT3G25800.1   Symbols: PDF1, PR 65, PP2AA2   protein phosphatase 2A subunit A2   chr3:9422822-9425783 REVERSE LENGTH=587             | 997 | 587  | 0         | 58.9  | 54.4 | 56.6 |
| Rsa1.0_00886.1.g20858.t1  | gb AAM62792.1  unknown [Arabidopsis thaliana]                                                                                                                                                                                                                                                                                                                                                         | 369 | 351  | 1.00E-134 | 95.1  | 69.1 | 78.3 | unknown                                                                                                                     | gbpln | Arabidopsis thaliana | AT3G25790.1   Symbols:   myb-like transcription factor family protein   chr3:9413196-9414951 FORWARD LENGTH=357                      | 369 | 357  | 1.00E-135 | 96.7  | 68.0 | 77.8 |

|                          |                                                                                                                                                                                                                                                                                                                                                                                                                                                                                                                                                                        |      |      |           |       |       |       |                                              |       |                      |                                                                                                                                                                                                                                                              |      |      |           |       |      |      |
|--------------------------|------------------------------------------------------------------------------------------------------------------------------------------------------------------------------------------------------------------------------------------------------------------------------------------------------------------------------------------------------------------------------------------------------------------------------------------------------------------------------------------------------------------------------------------------------------------------|------|------|-----------|-------|-------|-------|----------------------------------------------|-------|----------------------|--------------------------------------------------------------------------------------------------------------------------------------------------------------------------------------------------------------------------------------------------------------|------|------|-----------|-------|------|------|
| Rsa1.0_00886.1.g20859.t1 | gb[EOA24619.1] hypothetical protein CARUB_v10017888mg [Capsella rubella]                                                                                                                                                                                                                                                                                                                                                                                                                                                                                               | 252  | 254  | 1.00E-126 | 100.8 | 89.3  | 93.3  | hypothetical protein CARUB_v10017888mg       | gbpln | Capsella rubella     | AT3G25770.1   Symbols: AOC2   allene oxide cyclase 2   chr3:9406975-9407839 FORWARD LENGTH=253                                                                                                                                                               | 252  | 253  | 1.00E-123 | 100.4 | 86.9 | 90.5 |
| Rsa1.0_00886.1.g20860.t1 | gb[EOA25834.1] hypothetical protein CARUB_v10019207mg [Capsella rubella]                                                                                                                                                                                                                                                                                                                                                                                                                                                                                               | 681  | 681  | 0         | 100.0 | 78.4  | 85.9  | hypothetical protein CARUB_v10019207mg       | gbpln | Capsella rubella     | AT3G25740.1   Symbols: MAP1B, MAP1C   methionine aminopeptidase 1C   chr3:9397606-9399653 FORWARD LENGTH=344                                                                                                                                                 | 681  | 344  | 1.00E-159 | 50.5  | 39.8 | 43.5 |
| Rsa1.0_00887.1.g20861.t6 | ref[NP_001154409.1] protein kinase domain-containing protein [Arabidopsis thaliana] gi[240254233]ref[NP_564529.4] protein kinase domain-containing protein [Arabidopsis thaliana] gi[240254235]ref[NP_001031155.4] protein kinase domain-containing protein [Arabidopsis thaliana] gi[332194179]gb[AEE32299.1] protein kinase domain-containing protein [Arabidopsis thaliana] gi[332194179]gb[AEE32300.1] protein kinase domain-containing protein [Arabidopsis thaliana] gi[332194180]gb[AEE32301.1] protein kinase domain-containing protein [Arabidopsis thaliana] | 999  | 1235 | 0         | 123.6 | 36.3  | 41.9  | protein kinase domain-containing protein     | gbpln | Arabidopsis thaliana | AT1G48490.3   Symbols:   Protein kinase superfamily protein   chr1:17922345-17928597 REVERSE LENGTH=1235                                                                                                                                                     | 999  | 1235 | 0         | 123.6 | 36.3 | 41.9 |
| Rsa1.0_00887.1.g20862.t9 | emb[CAN79325.1] hypothetical protein VITISV_003642 [Vitis vinifera]                                                                                                                                                                                                                                                                                                                                                                                                                                                                                                    | 1385 | 1783 | 0         | 128.7 | 31.7  | 49.4  | hypothetical protein VITISV_003642           | gbpln | Vitis vinifera       | AT1G40087.1   Symbols:   Plant transposase (Pta/En/Spm family)   chr1:14999762-15001868 REVERSE LENGTH=390                                                                                                                                                   | 1385 | 390  | 1.00E-131 | 28.2  | 16.7 | 19.4 |
| Rsa1.0_00887.1.g20863.t1 | gb[EOA39019.1] hypothetical protein CARUB_v10011565mg [Capsella rubella]                                                                                                                                                                                                                                                                                                                                                                                                                                                                                               | 352  | 354  | 0         | 100.6 | 94.0  | 98.3  | hypothetical protein CARUB_v10011565mg       | gbpln | Capsella rubella     | AT1G48470.1   Symbols: GLN1.5   glutamine synthetase 1.5   chr1:17913784-17915926 FORWARD LENGTH=353                                                                                                                                                         | 352  | 353  | 0         | 100.3 | 91.8 | 94.3 |
| Rsa1.0_00887.1.g20864.t1 | gb[EOA24075.1] hypothetical protein CARUB_v10017303mg [Capsella rubella]                                                                                                                                                                                                                                                                                                                                                                                                                                                                                               | 120  | 430  | 4.00E-27  | 358.3 | 59.2  | 65.8  | hypothetical protein CARUB_v10017303mg       | gbpln | Capsella rubella     | AT3G58140.1   Symbols:   phenylalanyl-tRNA synthetase class IIc family protein   chr3:21529988-21532386 REVERSE LENGTH=429                                                                                                                                   | 120  | 429  | 3.00E-28  | 357.5 | 57.5 | 64.2 |
| Rsa1.0_00887.1.g20865.t1 | gb[AAG51783.1]AC079679_3 reverse transcriptase, putative; 16838-20266 [Arabidopsis thaliana]                                                                                                                                                                                                                                                                                                                                                                                                                                                                           | 309  | 1142 | 5.00E-79  | 369.6 | 47.9  | 61.8  | reverse transcriptase, putative; 16838-20266 | gbpln | Arabidopsis thaliana | AT1G43760.1   Symbols:   DNase I-like superfamily protein   chr1:16528880-16531065 REVERSE LENGTH=626                                                                                                                                                        | 309  | 626  | 8.00E-21  | 202.6 | 26.2 | 45.3 |
| Rsa1.0_00887.1.g20866.t1 | gb[EOA37329.1] hypothetical protein CARUB_v10011025mg [Capsella rubella]                                                                                                                                                                                                                                                                                                                                                                                                                                                                                               | 420  | 641  | 3.00E-73  | 152.6 | 36.4  | 41.7  | hypothetical protein CARUB_v10011025mg       | gbpln | Capsella rubella     | AT1G48560.1   Symbols:   unknown protein; Has 75 Blast hits to 71 proteins in 10 species: Archae - 0; Bacteria - 0; Metazoa - 4; Fungi - 0; Plants - 69; Viruses - 0; Other Eukaryotes - 2 (source: NCBI BLink).   chr1:17952935-17955108 FORWARD LENGTH=643 | 420  | 643  | 4.00E-67  | 153.1 | 33.3 | 39.0 |
| Rsa1.0_00887.1.g20867.t1 | dbj[BAB09912.1] MADS-box protein-like [Arabidopsis thaliana]                                                                                                                                                                                                                                                                                                                                                                                                                                                                                                           | 308  | 368  | 2.00E-44  | 119.5 | 29.9  | 40.9  | MADS-box protein-like                        | gbpln | Arabidopsis thaliana | AT5G49420.1   Symbols:   MADS-box transcription factor family protein   chr5:20035166-20036170 REVERSE LENGTH=334                                                                                                                                            | 308  | 334  | 8.00E-47  | 108.4 | 29.9 | 40.9 |
| Rsa1.0_00887.1.g20868.t3 | ref[NP_175275.3] D-cysteine desulfhydrase [Arabidopsis thaliana] gi[332194169]gb[AEE32290.1] D-cysteine desulfhydrase [Arabidopsis thaliana]                                                                                                                                                                                                                                                                                                                                                                                                                           | 379  | 401  | 0         | 105.8 | 90.8  | 95.3  | D-cysteine desulfhydrase                     | gbpln | Arabidopsis thaliana | AT1G48420.1   Symbols: D-CDES, ATACD1, ACD1   D-cysteine desulfhydrase   chr1:17896767-17898803 REVERSE LENGTH=401                                                                                                                                           | 379  | 401  | 0         | 105.8 | 90.8 | 95.3 |
| Rsa1.0_00887.1.g20869.t1 | gb[EOA20132.1] hypothetical protein CARUB_v10000420mg [Capsella rubella]                                                                                                                                                                                                                                                                                                                                                                                                                                                                                               | 615  | 651  | 0         | 105.9 | 88.8  | 94.8  | hypothetical protein CARUB_v10000420mg       | gbpln | Capsella rubella     | AT5G02500.1   Symbols: HSC70-1, HSP70-1, AT-HSC70-1, HSC70   heat shock cognate protein 70-1   chr5:554055-556334 REVERSE LENGTH=651                                                                                                                         | 615  | 651  | 0         | 105.9 | 88.3 | 94.5 |
| Rsa1.0_00888.1.g20870.t1 | ref[XP_002885281.1] ATPLT5 [Arabidopsis lyrata subsp. lyrata] gi[297331121]gb[EFH61540.1] ATPLT5 [Arabidopsis lyrata subsp. lyrata]                                                                                                                                                                                                                                                                                                                                                                                                                                    | 528  | 538  | 0         | 101.9 | 87.7  | 94.1  | ATPLT5                                       | gbpln | Arabidopsis lyrata   | AT3G18830.1   Symbols: ATPLT5, PMT5, ATPMT5   polyol/monosaccharide transporter 5   chr3:6489000-6491209 REVERSE LENGTH=539                                                                                                                                  | 528  | 539  | 0         | 102.1 | 87.3 | 93.9 |
| Rsa1.0_00888.1.g20871.t1 | #                                                                                                                                                                                                                                                                                                                                                                                                                                                                                                                                                                      | #    | #    | #         | #     | #     | #     | -                                            | ----  | ----                 | AT3G18940.1   Symbols:   clast3-related   chr3:6527081-6529050 REVERSE LENGTH=281                                                                                                                                                                            | 89   | 281  | 2.00E-11  | 315.7 | 31.5 | 38.2 |
| Rsa1.0_00888.1.g20872.t1 | ref[XP_002883153.1] hypothetical protein ARALYDRAFT_898258 [Arabidopsis lyrata subsp. lyrata] gi[297328993]gb[EFH59412.1] hypothetical protein ARALYDRAFT_898258 [Arabidopsis lyrata subsp. lyrata]                                                                                                                                                                                                                                                                                                                                                                    | 197  | 206  | 1.00E-110 | 104.6 | 100.0 | 100.0 | hypothetical protein ARALYDRAFT_898258       | gbpln | Arabidopsis lyrata   | AT3G18820.1   Symbols: ATRABG3F, ATRAB7B, RAB71, RABG3F, RAB7B   RAB GTPase homolog G3F   chr3:6484266-6486005 FORWARD LENGTH=206                                                                                                                            | 197  | 206  | 1.00E-110 | 104.6 | 98.5 | 99.0 |
| Rsa1.0_00888.1.g20873.t1 | ref[XP_002885280.1] hypothetical protein ARALYDRAFT_898257 [Arabidopsis lyrata subsp. lyrata] gi[297331120]gb[EFH61539.1] hypothetical protein ARALYDRAFT_898257 [Arabidopsis lyrata subsp. lyrata]                                                                                                                                                                                                                                                                                                                                                                    | 693  | 696  | 0         | 100.4 | 68.0  | 71.9  | hypothetical protein ARALYDRAFT_898257       | gbpln | Arabidopsis lyrata   | AT3G18810.1   Symbols:   Protein kinase superfamily protein   chr3:6480701-6483593 REVERSE LENGTH=700                                                                                                                                                        | 693  | 700  | 0         | 101.0 | 67.2 | 71.7 |

|                          |                                                                                                                                                                                                                                                                                                                                                                                                                                                                                                                                                                                                                                                                                                                                                                                                                                                                                                                                                                                                                                    |     |     |          |       |       |       |                                                 |       |                      |                                                                                                                                                                                                                                                                                                                                                                                                                                                                                                               |     |     |          |       |       |       |
|--------------------------|------------------------------------------------------------------------------------------------------------------------------------------------------------------------------------------------------------------------------------------------------------------------------------------------------------------------------------------------------------------------------------------------------------------------------------------------------------------------------------------------------------------------------------------------------------------------------------------------------------------------------------------------------------------------------------------------------------------------------------------------------------------------------------------------------------------------------------------------------------------------------------------------------------------------------------------------------------------------------------------------------------------------------------|-----|-----|----------|-------|-------|-------|-------------------------------------------------|-------|----------------------|---------------------------------------------------------------------------------------------------------------------------------------------------------------------------------------------------------------------------------------------------------------------------------------------------------------------------------------------------------------------------------------------------------------------------------------------------------------------------------------------------------------|-----|-----|----------|-------|-------|-------|
| Rsa1.0_00888.1.g20874.t1 | gb[EOA31115.1] hypothetical protein CARUB_v10014275mg [Capsella rubella] gi 482566927 gb EOA31116.1  hypothetical protein CARUB_v10014275mg [Capsella rubella]                                                                                                                                                                                                                                                                                                                                                                                                                                                                                                                                                                                                                                                                                                                                                                                                                                                                     | 178 | 300 | 7.00E-36 | 168.5 | 42.7  | 44.9  | hypothetical protein CARUB_v10014275mg          | gbpln | Capsella rubella     | AT3G18790.1   Symbols:   FUNCTIONS IN: molecular_function unknown; INVOLVED IN: biological_process unknown; LOCATED IN: chloroplast; EXPRESSED DURING: 22 plant structures; EXPRESSED IN: 13 growth stages; CONTAINS InterPro DOMAIN/s: Isy1-like splicing (InterPro:IPR009360); Has 1147 Blast hits to 965 proteins in 236 species: Archae - 12; Bacteria - 13; Metazoa - 351; Fungi - 230; Plants - 49; Viruses - 9; Other Eukaryotes - 483 (source: NCBI BLink).   chr3:6477853-6478755 FORWARD LENGTH=300 | 178 | 300 | 1.00E-32 | 168.5 | 39.3  | 43.3  |
| Rsa1.0_00888.1.g20875.t1 | ref NP_188508.1  actin 2 [Arabidopsis thaliana] gi 297830536 ref XP_002883150.1  hypothetical protein ARALYDRAFT_342019 [Arabidopsis lyrata subsp. lyrata] gi 297847210 ref XP_002891486.1  hypothetical protein ARALYDRAFT_474065 [Arabidopsis lyrata subsp. lyrata] gi 25452790 sp Q96292.1 ACT2_ARATH RecName: Full=Actin-2 gi 16226780 gb AAL16260.1 AF428330_1 AT3g18780/MVE11.16 [Arabidopsis thaliana] gi 1669387 gb AAB37098.1  actin 2 [Arabidopsis thaliana] gi 9293903 db BAB01806.1  actin 2 [Arabidopsis thaliana] gi 17381174 gb AAL36399.1  putative actin 2 protein [Arabidopsis thaliana] gi 20465835 gb AAM20022.1  putative actin 2 protein [Arabidopsis thaliana] gi 21593338 gb AAM65287.1  actin 2 [Arabidopsis thaliana] gi 110740435 db BAF02112.1  actin 2 [Arabidopsis thaliana] gi 22242404 db BAH19981.1  AT3G18780 [Arabidopsis thaliana] gi 241740080 gb ACS68188.1  actin2.2 [Brassica napus] gi 297328990 gb EFH59409.1  hypothetical protein ARALYDRAFT_342019 [Arabidopsis lyrata subsp. lyrata] | 377 | 377 | 0        | 100.0 | 100.0 | 100.0 | actin 2                                         | gbpln | Arabidopsis lyrata   | AT3G18780.2   Symbols: ACT2, DER1, LSR2, ENL2   actin 2   chr3:6475535-6476832 FORWARD LENGTH=377                                                                                                                                                                                                                                                                                                                                                                                                             | 377 | 377 | 0        | 100.0 | 100.0 | 100.0 |
| Rsa1.0_00888.1.g20876.t1 | db BAB01805.1  unnamed protein product [Arabidopsis thaliana]                                                                                                                                                                                                                                                                                                                                                                                                                                                                                                                                                                                                                                                                                                                                                                                                                                                                                                                                                                      | 224 | 222 | 4.00E-97 | 99.1  | 78.1  | 85.7  | unnamed protein product                         | gbpln | Arabidopsis thaliana | AT1G49230.1   Symbols:   RING/U-box superfamily protein   chr1:18209320-18209979 FORWARD LENGTH=219                                                                                                                                                                                                                                                                                                                                                                                                           | 224 | 219 | 6.00E-75 | 97.8  | 63.4  | 72.3  |
| Rsa1.0_00888.1.g20877.t1 | db BAJ33918.1  unnamed protein product [Theilungiella halophila]                                                                                                                                                                                                                                                                                                                                                                                                                                                                                                                                                                                                                                                                                                                                                                                                                                                                                                                                                                   | 214 | 225 | 7.00E-95 | 105.1 | 81.3  | 88.8  | unnamed protein product                         | ----  | ----                 | AT3G18773.1   Symbols:   RING/U-box superfamily protein   chr3:6466304-6466966 FORWARD LENGTH=220                                                                                                                                                                                                                                                                                                                                                                                                             | 214 | 220 | 2.00E-94 | 102.8 | 75.2  | 86.9  |
| Rsa1.0_00888.1.g20878.t1 | # # # # # # # # # #                                                                                                                                                                                                                                                                                                                                                                                                                                                                                                                                                                                                                                                                                                                                                                                                                                                                                                                                                                                                                |     |     |          |       |       |       |                                                 | ----  | ----                 | # # # # # # # #                                                                                                                                                                                                                                                                                                                                                                                                                                                                                               |     |     |          |       |       |       |
| Rsa1.0_00888.1.g20879.t1 | gb[EOA28769.1] hypothetical protein CARUB_v10025001mg, partial [Capsella rubella]                                                                                                                                                                                                                                                                                                                                                                                                                                                                                                                                                                                                                                                                                                                                                                                                                                                                                                                                                  | 587 | 389 | 2.00E-81 | 66.3  | 30.5  | 44.3  | hypothetical protein CARUB_v10025001mg, partial | gbpln | Capsella rubella     | AT3G17530.1   Symbols:   F-box and associated interaction domains-containing protein   chr3:6000860-6002026 FORWARD LENGTH=388                                                                                                                                                                                                                                                                                                                                                                                | 587 | 388 | 5.00E-84 | 66.1  | 29.6  | 41.4  |
| Rsa1.0_00888.1.g20880.t1 | gb[EOA30097.1] hypothetical protein CARUB_v10013207mg [Capsella rubella]                                                                                                                                                                                                                                                                                                                                                                                                                                                                                                                                                                                                                                                                                                                                                                                                                                                                                                                                                           | 575 | 629 | 0        | 109.4 | 80.7  | 88.3  | hypothetical protein CARUB_v10013207mg          | gbpln | Capsella rubella     | AT3G18770.1   Symbols:   Autophagy-related protein 13   chr3:6460026-6462510 REVERSE LENGTH=625                                                                                                                                                                                                                                                                                                                                                                                                               | 575 | 625 | 0        | 108.7 | 80.0  | 87.0  |
| Rsa1.0_00888.1.g20881.t1 | ref XP_002885277.1  hypothetical protein ARALYDRAFT_318635 [Arabidopsis lyrata subsp. lyrata] gi 297331117 gb EFH61536.1  hypothetical protein ARALYDRAFT_318635 [Arabidopsis lyrata subsp. lyrata] ref XP_002883147.1  60S ribosomal protein L30 [Arabidopsis lyrata subsp. lyrata] gi 297846666 ref XP_002891214.1  60S ribosomal protein L30 [Arabidopsis lyrata subsp. lyrata] gi 297328987 gb EFH59406.1  60S ribosomal protein L30 [Arabidopsis lyrata subsp. lyrata] gi 297337056 gb EFH67473.1  60S ribosomal protein L30 [Arabidopsis lyrata subsp. lyrata]                                                                                                                                                                                                                                                                                                                                                                                                                                                               | 561 | 571 | 0        | 101.8 | 89.8  | 93.2  | hypothetical protein ARALYDRAFT_318635          | gbpln | Arabidopsis lyrata   | AT3G18750.3   Symbols: WNK6   with no lysine (K) kinase 6   chr3:6454307-6456830 REVERSE LENGTH=567                                                                                                                                                                                                                                                                                                                                                                                                           | 561 | 567 | 0        | 101.1 | 88.2  | 92.5  |
| Rsa1.0_00888.1.g20882.t1 | ref XP_002885277.1  hypothetical protein ARALYDRAFT_318635 [Arabidopsis lyrata subsp. lyrata] gi 297331117 gb EFH61536.1  hypothetical protein ARALYDRAFT_318635 [Arabidopsis lyrata subsp. lyrata] ref XP_002883147.1  60S ribosomal protein L30 [Arabidopsis lyrata subsp. lyrata] gi 297846666 ref XP_002891214.1  60S ribosomal protein L30 [Arabidopsis lyrata subsp. lyrata] gi 297328987 gb EFH59406.1  60S ribosomal protein L30 [Arabidopsis lyrata subsp. lyrata] gi 297337056 gb EFH67473.1  60S ribosomal protein L30 [Arabidopsis lyrata subsp. lyrata]                                                                                                                                                                                                                                                                                                                                                                                                                                                               | 112 | 112 | 1.00E-57 | 100.0 | 99.1  | 100.0 | 60S ribosomal protein L30                       | gbpln | Arabidopsis lyrata   | AT1G36240.1   Symbols:   Ribosomal protein L7Ae/L30e/S12e/Gadd45 family protein   chr1:13614890-13616233 FORWARD LENGTH=112                                                                                                                                                                                                                                                                                                                                                                                   | 112 | 112 | 1.00E-59 | 100.0 | 99.1  | 99.1  |

|                          |                                                                                                                                                                                                                                                                                                                                                                                                                                                                                                                                                         |      |      |           |        |      |      |                                                     |       |                      |                                                                                                                                               |      |     |           |       |      |      |
|--------------------------|---------------------------------------------------------------------------------------------------------------------------------------------------------------------------------------------------------------------------------------------------------------------------------------------------------------------------------------------------------------------------------------------------------------------------------------------------------------------------------------------------------------------------------------------------------|------|------|-----------|--------|------|------|-----------------------------------------------------|-------|----------------------|-----------------------------------------------------------------------------------------------------------------------------------------------|------|-----|-----------|-------|------|------|
| Rsa1.0_00889.1.g20883.t1 | refXP_002864981.1  hypothetical protein ARALYDRAFT_496816 [Arabidopsis lyrata subsp. lyrata] gi 297310816 gb EFH41240.1                                                                                                                                                                                                                                                                                                                                                                                                                                 | 374  | 374  | 1.00E-176 | 100.0  | 89.0 | 93.3 | hypothetical protein ARALYDRAFT_496816              | gbpln | Arabidopsis lyrata   | AT5G65790.1   Symbols: ATMYB68, MYB68   myb domain protein 68   chr5:26323035-26324385 FORWARD LENGTH=374                                     | 374  | 374 | 1.00E-172 | 100.0 | 89.8 | 93.9 |
| Rsa1.0_00889.1.g20884.t1 | ref NP_680468.1  phosphoenolpyruvate carboxykinase 2 [Arabidopsis thaliana] gi 209529795 gb ACI4972.1  At5g65690 [Arabidopsis thaliana] gi 332010704 gb AED98087.1  phosphoenolpyruvate carboxykinase 2 [Arabidopsis thaliana]                                                                                                                                                                                                                                                                                                                          | 667  | 670  | 0         | 100.4  | 92.2 | 96.6 | phosphoenolpyruvate carboxykinase 2                 | gbpln | Arabidopsis thaliana | AT5G65690.1   Symbols: PCK2, PEPCK   phosphoenolpyruvate carboxykinase 2   chr5:26266477-26269486 FORWARD LENGTH=670                          | 667  | 670 | 0         | 100.4 | 92.2 | 96.6 |
| Rsa1.0_00889.1.g20885.t1 | gb EOA12985.1  hypothetical protein CARUB_v10025970mg [Capsella rubella]                                                                                                                                                                                                                                                                                                                                                                                                                                                                                | 707  | 720  | 0         | 101.8  | 79.3 | 88.0 | hypothetical protein CARUB_v10025970mg              | gbpln | Capsella rubella     | AT5G65683.1   Symbols:   Zinc finger (C3HC4-type RING finger) family protein   chr5:26261472-26263704 FORWARD LENGTH=717                      | 707  | 717 | 0         | 101.4 | 77.1 | 87.0 |
| Rsa1.0_00889.1.g20886.t1 | #                                                                                                                                                                                                                                                                                                                                                                                                                                                                                                                                                       | #    | #    | #         | #      | #    | -    | ----                                                | ----  | ----                 | #                                                                                                                                             | #    | #   | #         | #     | #    |      |
| Rsa1.0_00889.1.g20887.t1 | ref NP_569016.1  hydroxyproline-rich glycoprotein family protein [Arabidopsis thaliana] gi 75180377 sp Q9LSK9.1 Y5566_ARATH RecName: Full=Uncharacterized protein At5g65660 gi 8978294 dbj BAA98185.1  unnamed protein product [Arabidopsis thaliana] gi 21554387 gb AAM63494.1  unknown [Arabidopsis thaliana] gi 30102568 gb AAP21202.1  At5g65660 [Arabidopsis thaliana] gi 110743764 dbj BAE99718.1  hypothetical protein [Arabidopsis thaliana] gi 332010700 gb AED98083.1  hydroxyproline-rich glycoprotein family protein [Arabidopsis thaliana] | 123  | 136  | 7.00E-54  | 110.6  | 87.8 | 94.3 | hydroxyproline-rich glycoprotein family protein     | gbpln | Arabidopsis thaliana | AT5G65660.1   Symbols:   hydroxyproline-rich glycoprotein family protein   chr5:26245444-26246245 REVERSE LENGTH=136                          | 123  | 136 | 1.00E-56  | 110.6 | 87.8 | 94.3 |
| Rsa1.0_00889.1.g20888.t1 | gb AAM61687.1  unknown [Arabidopsis thaliana]                                                                                                                                                                                                                                                                                                                                                                                                                                                                                                           | 354  | 351  | 2.33E-156 | 99.2   | 84.5 | 89.5 | unknown                                             | gbpln | Arabidopsis thaliana | AT5G65640.1   Symbols: bHLH093   beta HLH protein 93   chr5:26237137-26238904 FORWARD LENGTH=351                                              | 354  | 351 | 1.00E-148 | 99.2  | 84.5 | 89.3 |
| Rsa1.0_00890.1.g20889.t1 | #                                                                                                                                                                                                                                                                                                                                                                                                                                                                                                                                                       | #    | #    | #         | #      | #    | -    | ----                                                | ----  | ----                 | #                                                                                                                                             | #    | #   | #         | #     | #    |      |
| Rsa1.0_00890.1.g20890.t1 | gb AAF97297.1 AC010164_19 Hypothetical protein [Arabidopsis thaliana]                                                                                                                                                                                                                                                                                                                                                                                                                                                                                   | 143  | 308  | 2.00E-42  | 215.4  | 55.9 | 70.6 | Hypothetical protein                                | gbpln | Arabidopsis thaliana | #                                                                                                                                             | #    | #   | #         | #     | #    |      |
| Rsa1.0_00890.1.g20891.t1 | gb AAC08049.1  myrosinase-binding protein [Brassica napus]                                                                                                                                                                                                                                                                                                                                                                                                                                                                                              | 360  | 634  | 1.00E-90  | 176.1  | 56.4 | 68.6 | myrosinase-binding protein                          | gbpln | Brassica napus       | AT1G52030.1   Symbols: MBP2, MBP1.2, F-ATMBP   myrosinase-binding protein 2   chr1:19346090-19348282 REVERSE LENGTH=642                       | 360  | 642 | 3.00E-56  | 178.3 | 43.3 | 56.7 |
| Rsa1.0_00890.1.g20892.t1 | gb AAD15471.1  putative non-LTR retroelement reverse transcriptase [Arabidopsis thaliana]                                                                                                                                                                                                                                                                                                                                                                                                                                                               | 121  | 1277 | 2.00E-11  | 1055.4 | 33.1 | 47.9 | putative non-LTR retroelement reverse transcriptase | gbpln | Arabidopsis thaliana | #                                                                                                                                             | #    | #   | #         | #     | #    |      |
| Rsa1.0_00890.1.g20893.t1 | gb AAC95175.1  putative non-LTR retroelement reverse transcriptase [Arabidopsis thaliana]                                                                                                                                                                                                                                                                                                                                                                                                                                                               | 1253 | 1352 | 0         | 107.9  | 39.0 | 55.0 | putative non-LTR retroelement reverse transcriptase | gbpln | Arabidopsis thaliana | AT3G24255.1   Symbols:   RNA-directed DNA polymerase (reverse transcriptase)-related family protein   chr3:8789471-8793208 FORWARD LENGTH=746 | 1253 | 746 | 5.00E-66  | 59.5  | 12.0 | 16.6 |
| Rsa1.0_00890.1.g20894.t1 | gb EOA39049.1  hypothetical protein CARUB_v10011659mg [Capsella rubella]                                                                                                                                                                                                                                                                                                                                                                                                                                                                                | 930  | 829  | 0         | 89.1   | 49.0 | 60.4 | hypothetical protein CARUB_v10011659mg              | gbpln | Capsella rubella     | AT3G16410.1   Symbols: NSP4   nitrile specifier protein 4   chr3:5572145-5574359 FORWARD LENGTH=619                                           | 930  | 619 | 0         | 66.6  | 35.9 | 46.8 |
| Rsa1.0_00890.1.g20895.t1 | gb EOA27653.1  hypothetical protein CARUB_v10023800mg [Capsella rubella]                                                                                                                                                                                                                                                                                                                                                                                                                                                                                | 93   | 283  | 5.00E-18  | 304.3  | 48.4 | 48.4 | hypothetical protein CARUB_v10023800mg              | gbpln | Capsella rubella     | AT1G58684.1   Symbols:   Ribosomal protein S5 family protein   chr1:21770021-21771217 REVERSE LENGTH=284                                      | 93   | 284 | 2.00E-20  | 305.4 | 47.3 | 48.4 |
| Rsa1.0_00890.1.g20896.t1 | dbj BAL48824.1  lectin [Arabidopsis thaliana] gi 374346926 dbj BAL48825.1  lectin [Arabidopsis thaliana] gi 374346930 dbj BAL48827.1  lectin [Arabidopsis thaliana]                                                                                                                                                                                                                                                                                                                                                                                     | 149  | 157  | 4.00E-53  | 105.4  | 73.8 | 78.5 | lectin                                              | gbpln | Arabidopsis thaliana | AT1G58160.1   Symbols:   Mannose-binding lectin superfamily protein   chr1:21533757-21534440 FORWARD LENGTH=120                               | 149  | 120 | 2.00E-42  | 80.5  | 55.7 | 59.7 |
| Rsa1.0_00890.1.g20897.t1 | ref XP_002894363.1  hypothetical protein ARALYDRAFT_892219 [Arabidopsis lyrata subsp. lyrata] gi 297340205 gb EFH70622.1  hypothetical protein ARALYDRAFT_892219 [Arabidopsis lyrata subsp. lyrata]                                                                                                                                                                                                                                                                                                                                                     | 190  | 188  | 2.00E-89  | 98.9   | 82.6 | 91.6 | hypothetical protein ARALYDRAFT_892219              | gbpln | Arabidopsis lyrata   | AT1G52200.1   Symbols:   PLAC8 family protein   chr1:19442271-19443407 REVERSE LENGTH=190                                                     | 190  | 190 | 2.00E-89  | 100.0 | 78.9 | 88.4 |

|                          |                                                                                                                                                                                                                                                                                                                                                                                                                                                                                                                                                                                                                                                                                                                                                                                                                                                                                                   |     |     |          |       |      |      |                                                                                                                                                                                                       |       |                      |                                                                                                                                                                                                                                                                                                                                                                                                                                                                                                                                                            |     |     |          |       |      |      |
|--------------------------|---------------------------------------------------------------------------------------------------------------------------------------------------------------------------------------------------------------------------------------------------------------------------------------------------------------------------------------------------------------------------------------------------------------------------------------------------------------------------------------------------------------------------------------------------------------------------------------------------------------------------------------------------------------------------------------------------------------------------------------------------------------------------------------------------------------------------------------------------------------------------------------------------|-----|-----|----------|-------|------|------|-------------------------------------------------------------------------------------------------------------------------------------------------------------------------------------------------------|-------|----------------------|------------------------------------------------------------------------------------------------------------------------------------------------------------------------------------------------------------------------------------------------------------------------------------------------------------------------------------------------------------------------------------------------------------------------------------------------------------------------------------------------------------------------------------------------------------|-----|-----|----------|-------|------|------|
| Rsa1.0_00890.1.g20898.t1 | ref NP_564603.1  uncharacterized protein [Arabidopsis thaliana] gi 6850346 gb AAF29409.1 AC022354_8 unknown protein [Arabidopsis thaliana] gi 15294156 gb AAK95255.1 AF410269.1 At1g52220.F915.10 [Arabidopsis thaliana] gi 20453285 gb AAM19881.1  At1g52220.F915.10 [Arabidopsis thaliana] gi 332194648 gb AEE32769.1  uncharacterized protein AT1G52220 [Arabidopsis thaliana]                                                                                                                                                                                                                                                                                                                                                                                                                                                                                                                 | 146 | 156 | 8.00E-61 | 106.8 | 82.2 | 92.5 | uncharacterized protein                                                                                                                                                                               | gbpln | Arabidopsis thaliana | AT1G52220.1   Symbols:   FUNCTIONS IN: molecular function unknown; INVOLVED IN: biological process unknown; LOCATED IN: chloroplast thylakoid membrane, chloroplast; EXPRESSED IN: 23 plant structures; EXPRESSED DURING: 13 growth stages; BEST Arabidopsis thaliana protein match is: photosystem I P subunit (TAIR:AT2G46820.2); Has 291 Blast hits to 291 proteins in 50 species: Archae - 0; Bacteria - 90; Metazoa - 0; Fungi - 0; Plants - 200; Viruses - 0; Other Eukaryotes - 1 (source: NCBI BLINK).   chr1:19453770-19454605 REVERSE LENGTH=156 | 146 | 156 | 2.00E-63 | 106.8 | 82.2 | 92.5 |
| Rsa1.0_00890.1.g20899.t1 | sp O04006.1 PSAH_BRARA RecName: Full=Photosystem I reaction center subunit VI, chloroplastic; Short=PSI-H; AltName: Full=Light-harvesting complex I 11 kDa protein; Flags: Precursor gi 1916350 gb AAB51159.1  PSI-H subunit [Brassica rapa]                                                                                                                                                                                                                                                                                                                                                                                                                                                                                                                                                                                                                                                      | 145 | 145 | 2.00E-74 | 100.0 | 98.6 | 99.3 | RecName: Full=Photosystem I reaction center subunit VI, chloroplastic; Short=PSI-H; AltName: Full=Light-harvesting complex I 11 kDa protein; Flags: Precursor gi 1916350 gb AAB51159.1  PSI-H subunit | gbpln | Brassica rapa        | AT1G52230.1   Symbols: PSAH2, PSAH-2, PSI-H   photosystem I subunit H2   chr1:19454902-19455508 FORWARD LENGTH=145                                                                                                                                                                                                                                                                                                                                                                                                                                         | 145 | 145 | 1.00E-74 | 100.0 | 95.2 | 97.9 |
| Rsa1.0_00890.1.g20900.t1 | ref XP_002894368.1  hypothetical protein ARALYDRAFT_337379 [Arabidopsis lyrata subsp. lyrata] gi 297340210 gb EFH70627.1  hypothetical protein ARALYDRAFT_337379 [Arabidopsis lyrata subsp. lyrata] ref NP_001154419.1  RHO guanyl-nucleotide exchange factor 11 [Arabidopsis thaliana] gi 6850349 gb AAF29412.1 AC022354_11 dynein light chain, putative [Arabidopsis thaliana] gi 12323118 gb AAG51538.1 AC037424_3 unknown protein; 73838-74229 [Arabidopsis thaliana] gi 38454092 gb AAR20740.1  At1g52250 [Arabidopsis thaliana] gi 46402458 gb AAS92331.1  At1g52250 [Arabidopsis thaliana] gi 332194653 gb AEE32774.1  RHO guanyl-nucleotide exchange factor 11 [Arabidopsis thaliana] ref XP_002891684.1  hypothetical protein ARALYDRAFT_337380 [Arabidopsis lyrata subsp. lyrata] gi 297337526 gb EFH67943.1  hypothetical protein ARALYDRAFT_337380 [Arabidopsis lyrata subsp. lyrata] | 534 | 538 | 0        | 100.7 | 89.9 | 94.4 | hypothetical protein ARALYDRAFT_337379                                                                                                                                                                | gbpln | Arabidopsis lyrata   | AT1G52240.1   Symbols: ATROPGEF11, ROPGEF11, PIRF1   RHO guanyl-nucleotide exchange factor 11   chr1:19455766-19459235 REVERSE LENGTH=607                                                                                                                                                                                                                                                                                                                                                                                                                  | 534 | 607 | 0        | 113.7 | 87.6 | 92.1 |
| Rsa1.0_00890.1.g20901.t1 | ref XP_002891684.1  hypothetical protein ARALYDRAFT_337380 [Arabidopsis lyrata subsp. lyrata] gi 297337526 gb EFH67943.1  hypothetical protein ARALYDRAFT_337380 [Arabidopsis lyrata subsp. lyrata]                                                                                                                                                                                                                                                                                                                                                                                                                                                                                                                                                                                                                                                                                               | 94  | 94  | 1.00E-45 | 100.0 | 93.6 | 96.8 | RHO guanyl-nucleotide exchange factor 11                                                                                                                                                              | gbpln | Arabidopsis thaliana | AT1G52240.2   Symbols: ATROPGEF11, ROPGEF11, PIRF1   RHO guanyl-nucleotide exchange factor 11   chr1:19458844-19459235 REVERSE LENGTH=94                                                                                                                                                                                                                                                                                                                                                                                                                   | 94  | 94  | 2.00E-48 | 100.0 | 93.6 | 96.8 |
| Rsa1.0_00890.1.g20902.t1 | ref XP_002891684.1  hypothetical protein ARALYDRAFT_337380 [Arabidopsis lyrata subsp. lyrata] gi 297337526 gb EFH67943.1  hypothetical protein ARALYDRAFT_337380 [Arabidopsis lyrata subsp. lyrata]                                                                                                                                                                                                                                                                                                                                                                                                                                                                                                                                                                                                                                                                                               | 553 | 536 | 0        | 96.9  | 78.8 | 86.4 | hypothetical protein ARALYDRAFT_337380                                                                                                                                                                | gbpln | Arabidopsis lyrata   | AT1G52260.1   Symbols: ATPDIL1-5, ATPDIL3, PDIL3, PDIL1-5   PDI-like 1-5   chr1:19460694-19463346 FORWARD LENGTH=537                                                                                                                                                                                                                                                                                                                                                                                                                                       | 553 | 537 | 0        | 97.1  | 78.3 | 86.3 |

|                          |                                                                                                                                                                                                                                                                                                                                                                                                                                                                                                                                                                                                                                                                                                                                                                                                                                                                   |     |      |           |       |       |                                        |                                              |                  |                                                                                       |                                                                                                                                                                                                                                                                                                                                                                                                                                                                                                                                                                                                                                                                                        |     |           |           |       |       |      |
|--------------------------|-------------------------------------------------------------------------------------------------------------------------------------------------------------------------------------------------------------------------------------------------------------------------------------------------------------------------------------------------------------------------------------------------------------------------------------------------------------------------------------------------------------------------------------------------------------------------------------------------------------------------------------------------------------------------------------------------------------------------------------------------------------------------------------------------------------------------------------------------------------------|-----|------|-----------|-------|-------|----------------------------------------|----------------------------------------------|------------------|---------------------------------------------------------------------------------------|----------------------------------------------------------------------------------------------------------------------------------------------------------------------------------------------------------------------------------------------------------------------------------------------------------------------------------------------------------------------------------------------------------------------------------------------------------------------------------------------------------------------------------------------------------------------------------------------------------------------------------------------------------------------------------------|-----|-----------|-----------|-------|-------|------|
| Rsa1.0_00890.1.g20903.t1 | ref NP_175638.1  RAB GTPase homolog G3D [Arabidopsis thaliana] gi 297852978 ref XP_002894370.1  hypothetical protein ARALYDRAFT_474344 [Arabidopsis lyrata subsp. lyrata] gi 75169431 sp Q9C820.1 RAG3D_ARAT H RecName: Full=Ras-related protein RABG3d; Short=AtRABG3d; AltName: Full=Ras-related protein Rab72; Short=AtRab72 gi 12323132 gb AAG51552.1 AC037424_17 GTP-binding protein RAB7D, putative; 63624-64923 [Arabidopsis thaliana] gi 15718410 dbj BAB68372.1  AtRab72 [Arabidopsis thaliana] gi 18389228 gb AAL67057.1  putative GTP-binding protein RAB7D [Arabidopsis thaliana] gi 20465985 gb AM20047.1  putative GTP-binding protein RAB7D [Arabidopsis thaliana] gi 297340212 gb EFH70629.1  hypothetical protein ARALYDRAFT_474344 [Arabidopsis lyrata subsp. lyrata] gi 332194656 gb AEE32777.1  RAB GTPase homolog G3D [Arabidopsis thaliana] | 206 | 206  | 1.00E-116 | 100.0 | 98.5  | 99.5                                   | RAB GTPase homolog G3D                       | gbpln            | Arabidopsis lyrata                                                                    | AT1G52280.1   Symbols: AtRABG3d, RABG3d   RAB GTPase homolog G3D   chr1:19468150-19469449 REVERSE LENGTH=206                                                                                                                                                                                                                                                                                                                                                                                                                                                                                                                                                                           | 206 | 206       | 1.00E-118 | 100.0 | 98.5  | 99.5 |
| Rsa1.0_00890.1.g20904.t1 | gb EOA21197.1  hypothetical protein CARUB_v10001544mg [Capsella rubella]                                                                                                                                                                                                                                                                                                                                                                                                                                                                                                                                                                                                                                                                                                                                                                                          | 230 | 230  | 1.00E-127 | 100.0 | 100.0 | hypothetical protein CARUB_v10001544mg | gbpln                                        | Capsella rubella | AT5G03240.3   Symbols: UBQ3   polyubiquitin 3   chr5:771976-772896 REVERSE LENGTH=306 | 230                                                                                                                                                                                                                                                                                                                                                                                                                                                                                                                                                                                                                                                                                    | 306 | 1.00E-129 | 133.0     | 100.0 | 100.0 |      |
| Rsa1.0_00890.1.g20905.t1 | ref NP_175640.1  60S ribosomal protein L37-2 [Arabidopsis thaliana] gi 20143906 sp Q43292.2 RL372_ARATH RecName: Full=60S ribosomal protein L37-2 gi 12323122 gb AAG51542.1 AC037424_7 60S ribosomal protein L37, putative; 56921-57860 [Arabidopsis thaliana] gi 13877907 gb AAK44031.1 AF370216.1 putative 60S ribosomal protein L37 [Arabidopsis thaliana] gi 21280805 gb AM44969.1  putative 60S ribosomal protein L37 [Arabidopsis thaliana] gi 222423584 dbj BAH19761.1  AT1G52300 [Arabidopsis thaliana] gi 332194658 gb AEE32779.1  60S ribosomal protein L37-2 [Arabidopsis thaliana]                                                                                                                                                                                                                                                                    | 95  | 95   | 2.00E-46  | 100.0 | 98.9  | 98.9                                   | 60S ribosomal protein L37-2                  | gbpln            | Arabidopsis thaliana                                                                  | AT1G52300.1   Symbols:   Zinc-binding ribosomal protein family protein   chr1:19475213-19476152 REVERSE LENGTH=95                                                                                                                                                                                                                                                                                                                                                                                                                                                                                                                                                                      | 95  | 95        | 4.00E-49  | 100.0 | 98.9  | 98.9 |
| Rsa1.0_00890.1.g20906.t1 | ref XP_002874584.1  oxidoreductase family protein [Arabidopsis lyrata subsp. lyrata] gi 297320421 gb EFH50843.1  oxidoreductase family protein [Arabidopsis lyrata subsp. lyrata] ref XP_002891686.1  hypothetical protein ARALYDRAFT_337384 [Arabidopsis lyrata subsp. lyrata] gi 297337528 gb EFH67945.1  hypothetical protein ARALYDRAFT_337384 [Arabidopsis lyrata subsp. lyrata]                                                                                                                                                                                                                                                                                                                                                                                                                                                                             | 362 | 362  | 1.00E-170 | 100.0 | 79.0  | 87.8                                   | oxidoreductase family protein                | gbpln            | Arabidopsis lyrata                                                                    | AT4G09670.1   Symbols:   Oxidoreductase family protein   chr4:6107382-6109049 REVERSE LENGTH=362                                                                                                                                                                                                                                                                                                                                                                                                                                                                                                                                                                                       | 362 | 362       | 1.00E-172 | 100.0 | 78.7  | 87.6 |
| Rsa1.0_00890.1.g20907.t1 | ref XP_002891686.1  hypothetical protein ARALYDRAFT_337384 [Arabidopsis lyrata subsp. lyrata] gi 297337528 gb EFH67945.1  hypothetical protein ARALYDRAFT_337384 [Arabidopsis lyrata subsp. lyrata]                                                                                                                                                                                                                                                                                                                                                                                                                                                                                                                                                                                                                                                               | 338 | 343  | 1.00E-124 | 101.5 | 74.3  | 82.8                                   | hypothetical protein ARALYDRAFT_337384       | gbpln            | Arabidopsis lyrata                                                                    | AT1G52315.1   Symbols:   Regulator of Vps4 activity in the MVB pathway protein   chr1:19481212-19482674 FORWARD LENGTH=347                                                                                                                                                                                                                                                                                                                                                                                                                                                                                                                                                             | 338 | 347       | 1.00E-118 | 102.7 | 72.8  | 83.4 |
| Rsa1.0_00890.1.g20908.t1 | ref XP_002891687.1  hypothetical protein ARALYDRAFT_474348 [Arabidopsis lyrata subsp. lyrata] gi 297337529 gb EFH67946.1  hypothetical protein ARALYDRAFT_474348 [Arabidopsis lyrata subsp. lyrata]                                                                                                                                                                                                                                                                                                                                                                                                                                                                                                                                                                                                                                                               | 743 | 800  | 0         | 107.7 | 79.3  | 85.2                                   | hypothetical protein ARALYDRAFT_474348       | gbpln            | Arabidopsis lyrata                                                                    | AT1G52320.4   Symbols:   unknown protein; FUNCTIONS IN: molecular_function unknown; INVOLVED IN: N-terminal protein myristoylation; LOCATED IN: plasma membrane; EXPRESSED IN: 23 plant structures; EXPRESSED DURING: 14 growth stages; CONTAINS InterPro DOMAIN/s: Protein of unknown function DUF632 (InterPro:IPR006867); BEST Arabidopsis thaliana protein match is: Protein of unknown function (DUF630 and DUF632) (TAIR:AT5G25590.1); Has 30201 Blast hits to 17322 proteins in 780 species: Archae - 12; Bacteria - 1396; Metazoa - 17338; Fungi - 3422; Plants - 5037; Viruses - 0; Other Eukaryotes - 2996 (source: NCBI ELink).   chr1:19485399-19487204 FORWARD LENGTH=472 | 743 | 472       | 0         | 63.5  | 56.8  | 59.9 |
| Rsa1.0_00890.1.g20909.t1 | gb AAG51783.1 AC079679.3 reverse transcriptase, putative; 16838-20266 [Arabidopsis thaliana]                                                                                                                                                                                                                                                                                                                                                                                                                                                                                                                                                                                                                                                                                                                                                                      | 603 | 1142 | 1.00E-120 | 189.4 | 41.3  | 58.7                                   | reverse transcriptase, putative; 16838-20266 | gbpln            | Arabidopsis thaliana                                                                  | AT4G29090.1   Symbols:   Ribonuclease H-like superfamily protein   chr4:14333528-14335255 FORWARD LENGTH=575                                                                                                                                                                                                                                                                                                                                                                                                                                                                                                                                                                           | 603 | 575       | 4.00E-70  | 95.4  | 26.4  | 45.6 |

|                          |                                                                                                                                                                                                                                                                                                                                                                                                                                                                                                                                                       |     |     |           |       |      |      |                                                 |       |                      |                                                                                                                                                                                                                                                                                                                                                                                                                                                                                        |     |     |           |       |      |      |
|--------------------------|-------------------------------------------------------------------------------------------------------------------------------------------------------------------------------------------------------------------------------------------------------------------------------------------------------------------------------------------------------------------------------------------------------------------------------------------------------------------------------------------------------------------------------------------------------|-----|-----|-----------|-------|------|------|-------------------------------------------------|-------|----------------------|----------------------------------------------------------------------------------------------------------------------------------------------------------------------------------------------------------------------------------------------------------------------------------------------------------------------------------------------------------------------------------------------------------------------------------------------------------------------------------------|-----|-----|-----------|-------|------|------|
| Rsa1.0_00890.1.g20910.t1 | ref[XP_002894375.1] hypothetical protein ARALYDRAFT_474354 [Arabidopsis lyrata subsp. lyrata] gi 297340217 gb EFH70634.1                                                                                                                                                                                                                                                                                                                                                                                                                              | 284 | 285 | 1.00E-134 | 100.4 | 83.5 | 90.5 | hypothetical protein ARALYDRAFT_474354          | gbpln | Arabidopsis lyrata   | AT1G52340.1   Symbols: ABA2, SIS4, GIN1, SDR1, IS4, SRE1, ATABA2, ATSDR1   NAD(P)-binding Rossmann-fold superfamily protein   chr1:1948997-19491527 REVERSE LENGTH=285                                                                                                                                                                                                                                                                                                                 | 284 | 285 | 1.00E-126 | 100.4 | 83.1 | 90.1 |
| Rsa1.0_00890.1.g20911.t1 | ref[XP_002894377.1] predicted protein [Arabidopsis lyrata subsp. lyrata] gi 297340219 gb EFH70636.1  predicted protein [Arabidopsis lyrata subsp. lyrata]                                                                                                                                                                                                                                                                                                                                                                                             | 234 | 249 | 1.00E-97  | 106.4 | 83.3 | 88.9 | predicted protein                               | gbpln | Arabidopsis lyrata   | AT1G52343.1   Symbols:   unknown protein; BEST Arabidopsis thaliana protein match is: unknown protein (TAIR:AT4G2680.1); Has 30201 Blast hits to 17322 proteins in 780 species: Archae - 12; Bacteria - 1396; Metazoa - 17338; Fungi - 3422; Plants - 5037; Viruses - 0; Other Eukaryotes - 2996 (source: NCBI BLINK).   chr1:19494226-19495718 REVERSE LENGTH=249                                                                                                                     | 234 | 249 | 4.00E-99  | 106.4 | 82.5 | 88.0 |
| Rsa1.0_00890.1.g20912.t1 | ref[NP_175645.1] coatomer subunit beta'-2 [Arabidopsis thaliana] gi 75169434 sp Q9C827.1 COB22_ARAT H RecName: Full=Coatomer subunit beta'-2; AltName: Full=Beta'-coat protein 2; Short=Beta'-COP 2 gi 12323125 gb AAG51545.1 AC037424.10 coatomer complex subunit, putative; 33791-27676 [Arabidopsis thaliana] gi 332194671 gb AEE32792.1  coatomer subunit beta'-2 [Arabidopsis thaliana] ref[NP_564606.1] nucleoporin 50 protein [Arabidopsis thaliana] gi 12323129 gb AAG51549.1 AC037424.14 unknown protein; 23094-21772 [Arabidopsis thaliana] | 948 | 926 | 0         | 97.7  | 91.5 | 95.3 | coatomer subunit beta'-2                        | gbpln | Arabidopsis thaliana | AT1G52360.1   Symbols:   Coatomer, beta' subunit   chr1:19499282-19505397 FORWARD LENGTH=926                                                                                                                                                                                                                                                                                                                                                                                           | 948 | 926 | 0         | 97.7  | 91.5 | 95.3 |
| Rsa1.0_00890.1.g20913.t1 | gi 14335002 gb AAK59765.1  At1g52380/F19K6.4 [Arabidopsis thaliana] gi 16323322 gb AAL15374.1  At1g52380/F19K6.4 [Arabidopsis thaliana] gi 332194676 gb AEE32797.1  nucleoporin 50 protein [Arabidopsis thaliana]                                                                                                                                                                                                                                                                                                                                     | 413 | 440 | 1.00E-156 | 106.5 | 77.7 | 86.0 | nucleoporin 50 protein                          | gbpln | Arabidopsis thaliana | AT1G52380.1   Symbols:   NUP50 (Nucleoporin 50 kDa) protein   chr1:1950979-19511301 FORWARD LENGTH=440                                                                                                                                                                                                                                                                                                                                                                                 | 413 | 440 | 1.00E-159 | 106.5 | 77.7 | 86.0 |
| Rsa1.0_00890.1.g20914.t1 | gb EOA13214.1  hypothetical protein CARUB_v10026239mg [Capsella rubella]                                                                                                                                                                                                                                                                                                                                                                                                                                                                              | 215 | 514 | 1.00E-71  | 239.1 | 73.5 | 83.3 | hypothetical protein CARUB_v10026239mg          | gbpln | Capsella rubella     | AT5G51670.1   Symbols:   Protein of unknown function (DUF668)   chr5:20993560-20995096 FORWARD LENGTH=474                                                                                                                                                                                                                                                                                                                                                                              | 215 | 474 | 5.00E-68  | 220.5 | 71.6 | 80.5 |
| Rsa1.0_00890.1.g20915.t1 | ref[XP_002894386.1] hypothetical protein ARALYDRAFT_337410 [Arabidopsis lyrata subsp. lyrata] gi 297340228 gb EFH70645.1  hypothetical protein ARALYDRAFT_337410 [Arabidopsis lyrata subsp. lyrata]                                                                                                                                                                                                                                                                                                                                                   | 132 | 131 | 2.00E-53  | 99.2  | 85.6 | 90.2 | hypothetical protein ARALYDRAFT_337410          | gbpln | Arabidopsis lyrata   | AT1G52565.1   Symbols:   unknown protein; FUNCTIONS IN: molecular.function unknown; INVOLVED IN: biological.process unknown; LOCATED IN: endomembrane system; BEST Arabidopsis thaliana protein match is: unknown protein (TAIR:AT3G15760.1); Has 35333 Blast hits to 34131 proteins in 2444 species: Archae - 798; Bacteria - 22429; Metazoa - 974; Fungi - 991; Plants - 531; Viruses - 0; Other Eukaryotes - 9610 (source: NCBI BLINK).   chr1:19580061-19580511 REVERSE LENGTH=129 | 132 | 129 | 2.00E-54  | 97.7  | 86.4 | 89.4 |
| Rsa1.0_00890.1.g20916.t1 | ref[NP_175667.1] RHOMBOID-like protein 5 [Arabidopsis thaliana] gi 5903047 gb AAD55606.1 AC008016_16 F6D8.20 [Arabidopsis thaliana] gi 332194705 gb AEE32826.1  RHOMBOID-like protein 5 [Arabidopsis thaliana]                                                                                                                                                                                                                                                                                                                                        | 314 | 309 | 1.00E-160 | 98.4  | 88.2 | 94.6 | RHOMBOID-like protein 5                         | gbpln | Arabidopsis thaliana | AT1G52580.1   Symbols: ATRBL5, RBL5   RHOMBOID-like protein 5   chr1:19587637-19588958 FORWARD LENGTH=309                                                                                                                                                                                                                                                                                                                                                                              | 314 | 309 | 1.00E-163 | 98.4  | 88.2 | 94.6 |
| Rsa1.0_00890.1.g20917.t1 | gb EOA28769.1  hypothetical protein CARUB_v10025001mg, partial [Capsella rubella]                                                                                                                                                                                                                                                                                                                                                                                                                                                                     | 265 | 389 | 3.00E-40  | 146.8 | 37.7 | 43.4 | hypothetical protein CARUB_v10025001mg, partial | gbpln | Capsella rubella     | AT3G17540.1   Symbols:   F-box and associated interaction domains-containing protein   chr3:6002783-6003973 FORWARD LENGTH=396                                                                                                                                                                                                                                                                                                                                                         | 265 | 396 | 1.00E-40  | 149.4 | 34.0 | 41.5 |

|                          |                                                                                                                                                                                                                                                                                                                                                                                                                                                                                                                                                                                                                                                                                                                                                                                                                                                                                                                                                                                                                                                                                   |      |      |          |       |      |      |                                                 |       |                      |                                                                                                                                               |      |     |          |       |      |      |
|--------------------------|-----------------------------------------------------------------------------------------------------------------------------------------------------------------------------------------------------------------------------------------------------------------------------------------------------------------------------------------------------------------------------------------------------------------------------------------------------------------------------------------------------------------------------------------------------------------------------------------------------------------------------------------------------------------------------------------------------------------------------------------------------------------------------------------------------------------------------------------------------------------------------------------------------------------------------------------------------------------------------------------------------------------------------------------------------------------------------------|------|------|----------|-------|------|------|-------------------------------------------------|-------|----------------------|-----------------------------------------------------------------------------------------------------------------------------------------------|------|-----|----------|-------|------|------|
| Rsa1.0_00890.1.g20918.t1 | ref[NP_175669.1] signal peptidase, endoplasmic reticulum-type [Arabidopsis thaliana] gi 297847646 ref[XP_002891704.1] hypothetical protein ARALYDRAFT_474386 [Arabidopsis lyrata subsp. lyrata] gi 5903045 gb AAD55604.1 AC008016_14 Similar to gb AF108945 signal peptidase 18 kDa subunit from Homo sapiens. ESTs gb H76629, gb H76949 and gb H76216 come from this gene [Arabidopsis thaliana] gi 17381152 gb AAL36388.1  putative signal peptidase subunit [Arabidopsis thaliana] gi 20465737 gb AAM20337.1  putative signal peptidase subunit [Arabidopsis thaliana] gi 21536563 gb AAM60895.1  signal peptidase subunit, putative [Arabidopsis thaliana] gi 297337546 gb EFH67963.1  hypothetical protein ARALYDRAFT_474386 [Arabidopsis lyrata subsp. lyrata] gi 332194707 gb AEE32828.1  Peptidase S24/S26A/S26B/S26C family protein [Arabidopsis thaliana] ref[XP_002891705.1] pentatricopeptide repeat-containing protein [Arabidopsis lyrata subsp. lyrata] gi 297337547 gb EFH67964.1  pentatricopeptide repeat-containing protein [Arabidopsis lyrata subsp. lyrata] | 180  | 180  | 3.00E-96 | 100.0 | 97.2 | 98.9 | signal peptidase, endoplasmic reticulum-type    | gbpln | Arabidopsis lyrata   | AT1G52600.1   Symbols:   Peptidase S24/S26A/S26B/S26C family protein   chr1:19590612-19592486 FORWARD LENGTH=180                              | 180  | 180 | 1.00E-98 | 100.0 | 97.2 | 98.9 |
| Rsa1.0_00890.1.g20919.t1 | ref[XP_002891705.1] pentatricopeptide repeat-containing protein [Arabidopsis lyrata subsp. lyrata] gi 297337547 gb EFH67964.1  pentatricopeptide repeat-containing protein [Arabidopsis lyrata subsp. lyrata]                                                                                                                                                                                                                                                                                                                                                                                                                                                                                                                                                                                                                                                                                                                                                                                                                                                                     | 801  | 823  | 0        | 102.7 | 77.8 | 87.3 | pentatricopeptide repeat-containing protein     | gbpln | Arabidopsis lyrata   | AT1G52620.1   Symbols:   Pentatricopeptide repeat (PPR) superfamily protein   chr1:19603828-19606287 FORWARD LENGTH=819                       | 801  | 819 | 0        | 102.2 | 77.0 | 86.9 |
| Rsa1.0_00890.1.g20920.t1 | gb EOA40269.1  hypothetical protein CARUB_v10008996mg, partial [Capsella rubella]                                                                                                                                                                                                                                                                                                                                                                                                                                                                                                                                                                                                                                                                                                                                                                                                                                                                                                                                                                                                 | 441  | 482  | 0        | 109.3 | 91.4 | 95.7 | hypothetical protein CARUB_v10008996mg, partial | gbpln | Capsella rubella     | AT1G52630.1   Symbols:   O-fucosyltransferase family protein   chr1:1960470-19608526 REVERSE LENGTH=439                                       | 441  | 439 | 0        | 99.5  | 90.5 | 94.8 |
| Rsa1.0_00890.1.g20921.t1 | ref[XP_002894392.1] pentatricopeptide repeat-containing protein [Arabidopsis lyrata subsp. lyrata] gi 297340234 gb EFH70651.1  pentatricopeptide repeat-containing protein [Arabidopsis lyrata subsp. lyrata]                                                                                                                                                                                                                                                                                                                                                                                                                                                                                                                                                                                                                                                                                                                                                                                                                                                                     | 529  | 525  | 0        | 99.2  | 85.4 | 91.3 | pentatricopeptide repeat-containing protein     | gbpln | Arabidopsis lyrata   | AT1G52640.1   Symbols:   Pentatricopeptide repeat (PPR) superfamily protein   chr1:19608857-19610428 REVERSE LENGTH=523                       | 529  | 523 | 0        | 98.9  | 85.3 | 91.1 |
| Rsa1.0_00890.1.g20922.t1 | ref[XP_002891706.1] hypothetical protein ARALYDRAFT_337420 [Arabidopsis lyrata subsp. lyrata] gi 297337548 gb EFH67965.1  hypothetical protein ARALYDRAFT_337420 [Arabidopsis lyrata subsp. lyrata]                                                                                                                                                                                                                                                                                                                                                                                                                                                                                                                                                                                                                                                                                                                                                                                                                                                                               | 373  | 379  | 0        | 101.6 | 91.7 | 96.0 | hypothetical protein ARALYDRAFT_337420          | gbpln | Arabidopsis lyrata   | AT1G52660.1   Symbols:   P-loop containing nucleoside triphosphate hydrolases superfamily protein   chr1:19613475-19614796 FORWARD LENGTH=379 | 373  | 379 | 0        | 101.6 | 90.6 | 96.0 |
| Rsa1.0_00891.1.g20923.t1 | dbj BAA97087.1  copia-type pol polyprotein-like [Arabidopsis thaliana]                                                                                                                                                                                                                                                                                                                                                                                                                                                                                                                                                                                                                                                                                                                                                                                                                                                                                                                                                                                                            | 165  | 1123 | 4.00E-28 | 680.6 | 36.4 | 46.1 | copia-type pol polyprotein-like                 | gbpln | Arabidopsis thaliana | #                                                                                                                                             | #    | #   | #        | #     | #    | #    |
| Rsa1.0_00891.1.g20924.t1 | #                                                                                                                                                                                                                                                                                                                                                                                                                                                                                                                                                                                                                                                                                                                                                                                                                                                                                                                                                                                                                                                                                 | #    | #    | #        | #     | #    | #    | -                                               | ----  | ----                 | #                                                                                                                                             | #    | #   | #        | #     | #    | #    |
| Rsa1.0_00891.1.g20925.t1 | ref[XP_002883963.1] RNA-dependent RNA polymerase family protein [Arabidopsis lyrata subsp. lyrata] gi 297329803 gb EFH60222.1  RNA-dependent RNA polymerase family protein [Arabidopsis lyrata subsp. lyrata]                                                                                                                                                                                                                                                                                                                                                                                                                                                                                                                                                                                                                                                                                                                                                                                                                                                                     | 941  | 981  | 0        | 104.3 | 74.3 | 83.6 | RNA-dependent RNA polymerase family protein     | gbpln | Arabidopsis lyrata   | AT2G19930.1   Symbols:   RNA-dependent RNA polymerase family protein   chr2:8607533-8612441 REVERSE LENGTH=977                                | 941  | 977 | 0        | 103.8 | 73.0 | 83.0 |
| Rsa1.0_00891.1.g20926.t3 | ref[XP_002883963.1] RNA-dependent RNA polymerase family protein [Arabidopsis lyrata subsp. lyrata] gi 297329803 gb EFH60222.1  RNA-dependent RNA polymerase family protein [Arabidopsis lyrata subsp. lyrata]                                                                                                                                                                                                                                                                                                                                                                                                                                                                                                                                                                                                                                                                                                                                                                                                                                                                     | 1679 | 981  | 0        | 58.4  | 43.3 | 48.2 | RNA-dependent RNA polymerase family protein     | gbpln | Arabidopsis lyrata   | AT2G19930.1   Symbols:   RNA-dependent RNA polymerase family protein   chr2:8607533-8612441 REVERSE LENGTH=977                                | 1679 | 977 | 0        | 58.2  | 42.6 | 47.5 |
| Rsa1.0_00891.1.g20927.t1 | ref[XP_002886016.1] hypothetical protein ARALYDRAFT_319569 [Arabidopsis lyrata subsp. lyrata] gi 297331856 gb EFH62275.1  hypothetical protein ARALYDRAFT_319569 [Arabidopsis lyrata subsp. lyrata]                                                                                                                                                                                                                                                                                                                                                                                                                                                                                                                                                                                                                                                                                                                                                                                                                                                                               | 521  | 521  | 0        | 100.0 | 92.1 | 95.8 | hypothetical protein ARALYDRAFT_319569          | gbpln | Arabidopsis lyrata   | AT2G19880.2   Symbols:   Nucleotide-diphospho-sugar transferases superfamily protein   chr2:8581578-8585118 FORWARD LENGTH=520                | 521  | 520 | 0        | 99.8  | 91.6 | 95.6 |
| Rsa1.0_00891.1.g20928.t1 | gb AAM63049.1  unknown [Arabidopsis thaliana]                                                                                                                                                                                                                                                                                                                                                                                                                                                                                                                                                                                                                                                                                                                                                                                                                                                                                                                                                                                                                                     | 183  | 457  | 5.00E-33 | 249.7 | 48.1 | 55.2 | unknown                                         | gbpln | Arabidopsis thaliana | AT4G28430.1   Symbols:   Reticulon family protein   chr4:14057846-14059772 FORWARD LENGTH=457                                                 | 183  | 457 | 2.00E-35 | 249.7 | 48.1 | 55.2 |



|                          |                                                                                                                                                                                                                                                                                                                                                                                                                                                                                                                                                                                     |      |      |           |       |      |      |                                                       |       |                      |                                                                                                                                                |      |      |           |       |      |      |  |
|--------------------------|-------------------------------------------------------------------------------------------------------------------------------------------------------------------------------------------------------------------------------------------------------------------------------------------------------------------------------------------------------------------------------------------------------------------------------------------------------------------------------------------------------------------------------------------------------------------------------------|------|------|-----------|-------|------|------|-------------------------------------------------------|-------|----------------------|------------------------------------------------------------------------------------------------------------------------------------------------|------|------|-----------|-------|------|------|--|
| Rsa1.0_00891.1.g20929.t1 | refNP_187044.1  protein kinase-like protein [Arabidopsis thaliana] gi 6223639 gb AAF05853.1 AC011698.4 putative casein kinase [Arabidopsis thaliana] gi 332640493 gb AEE74014.1  protein kinase-like protein [Arabidopsis thaliana]                                                                                                                                                                                                                                                                                                                                                 | 107  | 701  | 6.00E-21  | 655.1 | 50.5 | 53.3 | protein kinase-like protein                           | gbpln | Arabidopsis thaliana | AT3G03940.1   Symbols:   Protein kinase family protein   chr3:1014412-1018244 REVERSE LENGTH=701                                               | 107  | 701  | 9.00E-24  | 655.1 | 50.5 | 53.3 |  |
| Rsa1.0_00891.1.g20930.t1 | gb EOA30187.1  hypothetical protein CARUB_v10013304mg [Capsella rubella]                                                                                                                                                                                                                                                                                                                                                                                                                                                                                                            | 564  | 587  | 0         | 104.1 | 79.6 | 87.1 | hypothetical protein CARUB_v10013304mg                | gbpln | Capsella rubella     | AT2G19870.1   Symbols:   tRNA/rRNA methyltransferase (SpoU) family protein   chr2:8576034-8577803 FORWARD LENGTH=589                           | 564  | 589  | 0         | 104.4 | 77.5 | 84.4 |  |
| Rsa1.0_00891.1.g20931.t1 | gb AAL60584.1 AF454962.1 hexokinase [Brassica oleracea]                                                                                                                                                                                                                                                                                                                                                                                                                                                                                                                             | 499  | 499  | 0         | 100.0 | 96.8 | 98.6 | hexokinase                                            | gbpln | Brassica oleracea    | AT4G29130.1   Symbols: ATHXK1, GIN2, HXK1   hexokinase 1   chr4:14352338-14354065 REVERSE LENGTH=496                                           | 499  | 496  | 0         | 99.4  | 88.8 | 93.4 |  |
| Rsa1.0_00892.1.g20932.t1 | emb CAB10225.1  retrovirus-related like polyprotein [Arabidopsis thaliana] gi 7268152 emb CAB78488.1  retrovirus-related like polyprotein [Arabidopsis thaliana]                                                                                                                                                                                                                                                                                                                                                                                                                    | 1548 | 1489 | 0         | 96.2  | 52.8 | 68.9 | retrovirus-related like polyprotein                   | gbpln | Arabidopsis thaliana | AT4G23160.1   Symbols: CRK8   cysteine-rich RLK (RECEPTOR-like protein kinase) 8   chr4:12129485-12134086 FORWARD LENGTH=1262                  | 1548 | 1262 | 1.00E-178 | 81.5  | 18.7 | 25.1 |  |
| Rsa1.0_00892.1.g20933.t1 | # # # # # # # # - ---- ---- # # # # # # #                                                                                                                                                                                                                                                                                                                                                                                                                                                                                                                                           |      |      |           |       |      |      |                                                       |       |                      |                                                                                                                                                |      |      |           |       |      |      |  |
| Rsa1.0_00892.1.g20934.t1 | refNP_177396.1  lipoxigenase 4 [Arabidopsis thaliana] gi 75309247 sp Q9FMX8.1 LOX4 ARATH RecName: Full=Lipoxigenase 4, chloroplastic; Short=AtLOX4; AltName: Full=LOX3-like protein; Flags: Precursor gi 12325264 gb AAG52571.1 AC016529_2 putative lipoxigenase; 4618-640 [Arabidopsis thaliana] gi 11967675 emb CAC19364.1  lipoxigenase [Arabidopsis thaliana] gi 15810255 gb AAL07015.1  putative lipoxigenase [Arabidopsis thaliana] gi 20259579 gb AAM14132.1  putative lipoxigenase [Arabidopsis thaliana] gi 332197213 gb AEE35334.1  lipoxigenase 4 [Arabidopsis thaliana] | 863  | 926  | 0         | 107.3 | 90.8 | 95.6 | lipoxigenase 4                                        | gbpln | Arabidopsis thaliana | AT1G72520.1   Symbols: LOX4   PLAT/LH2 domain-containing lipoxigenase family protein   chr1:27308611-27312589 FORWARD LENGTH=926               | 863  | 926  | 0         | 107.3 | 90.8 | 95.6 |  |
| Rsa1.0_00892.1.g20935.t1 | gb EOA34366.1  hypothetical protein CARUB_v10021890mg [Capsella rubella]                                                                                                                                                                                                                                                                                                                                                                                                                                                                                                            | 442  | 448  | 0         | 101.4 | 86.4 | 93.0 | hypothetical protein CARUB_v10021890mg                | gbpln | Capsella rubella     | AT1G72540.1   Symbols:   Protein kinase superfamily protein   chr1:27314932-27316669 REVERSE LENGTH=450                                        | 442  | 450  | 0         | 101.8 | 88.0 | 93.0 |  |
| Rsa1.0_00892.1.g20936.t1 | gb AAG51860.1 AC010926.23 putative AP2 domain transcription factor; 79136-76819 [Arabidopsis thaliana]                                                                                                                                                                                                                                                                                                                                                                                                                                                                              | 446  | 425  | 0         | 95.3  | 74.9 | 83.9 | putative AP2 domain transcription factor; 79136-76819 | gbpln | Arabidopsis thaliana | AT1G72570.1   Symbols:   Integrase-type DNA-binding superfamily protein   chr1:27331381-27333698 FORWARD LENGTH=415                            | 446  | 415  | 0         | 93.0  | 73.3 | 81.8 |  |
| Rsa1.0_00892.1.g20937.t1 | gb AAx35339.1  oxalic acid oxidase [Brassica napus]                                                                                                                                                                                                                                                                                                                                                                                                                                                                                                                                 | 208  | 207  | 3.00E-96  | 99.5  | 92.3 | 93.8 | oxalic acid oxidase                                   | gbpln | Brassica napus       | AT1G72610.1   Symbols: GLP1, ATGER1, GER1   germin-like protein 1   chr1:27339302-27339928 REVERSE LENGTH=208                                  | 208  | 208  | 3.00E-98  | 100.0 | 89.9 | 93.3 |  |
| Rsa1.0_00892.1.g20938.t1 | gb EOA35867.1  hypothetical protein CARUB_v10021108mg [Capsella rubella]                                                                                                                                                                                                                                                                                                                                                                                                                                                                                                            | 119  | 148  | 7.00E-56  | 124.4 | 91.6 | 94.1 | hypothetical protein CARUB_v10021108mg                | gbpln | Capsella rubella     | AT1G72630.1   Symbols: ELF4-L2   ELF4-like 2   chr1:27344988-27345347 FORWARD LENGTH=119                                                       | 119  | 119  | 3.00E-58  | 100.0 | 90.8 | 95.0 |  |
| Rsa1.0_00892.1.g20939.t1 | # # # # # # # # - ---- ---- # # # # # # #                                                                                                                                                                                                                                                                                                                                                                                                                                                                                                                                           |      |      |           |       |      |      |                                                       |       |                      |                                                                                                                                                |      |      |           |       |      |      |  |
| Rsa1.0_00893.1.g20940.t1 | refNP_196626.2  RING/U-box domain-containing protein [Arabidopsis thaliana] gi 79327651 refNP_001031869.1  RING/U-box domain-containing protein [Arabidopsis thaliana] gi 53850555 gb AAU95454.1  At5g10650 [Arabidopsis thaliana] gi 58652060 gb AAW80855.1  At5g10650 [Arabidopsis thaliana] gi 332004193 gb AED91576.1  RING/U-box domain-containing protein [Arabidopsis thaliana] gi 332004194 gb AED91577.1  RING/U-box domain-containing protein [Arabidopsis thaliana]                                                                                                      | 456  | 525  | 1.00E-138 | 115.1 | 69.3 | 80.3 | RING/U-box domain-containing protein                  | gbpln | Arabidopsis thaliana | AT5G10650.2   Symbols:   RING/U-box superfamily protein   chr5:3365237-3367263 REVERSE LENGTH=525                                              | 456  | 525  | 1.00E-140 | 115.1 | 69.3 | 80.3 |  |
| Rsa1.0_00893.1.g20941.t1 | gb EOA20030.1  hypothetical protein CARUB_v10000304mg [Capsella rubella]                                                                                                                                                                                                                                                                                                                                                                                                                                                                                                            | 715  | 741  | 0         | 103.6 | 81.8 | 87.1 | hypothetical protein CARUB_v10000304mg                | gbpln | Capsella rubella     | AT5G10630.1   Symbols:   Translation elongation factor E1A/initiation factor IF2gamma family protein   chr5:3360561-3364414 FORWARD LENGTH=667 | 715  | 667  | 0         | 93.3  | 80.4 | 86.2 |  |
| Rsa1.0_00893.1.g20942.t1 | gb EOA21978.1  hypothetical protein CARUB_v10002483mg [Capsella rubella]                                                                                                                                                                                                                                                                                                                                                                                                                                                                                                            | 247  | 247  | 1.00E-127 | 100.0 | 92.3 | 95.5 | hypothetical protein CARUB_v10002483mg                | gbpln | Capsella rubella     | AT5G10580.1   Symbols:   Protein of unknown function, DUF599   chr5:3347511-3348657 FORWARD LENGTH=246                                         | 247  | 246  | 1.00E-128 | 99.6  | 90.7 | 94.3 |  |

|                          |                                                                                                                                                                                                                                                                                                                                                                                                                                                                                               |      |      |           |       |      |      |                                                         |       |                      |                                                                                                                                                                                                                                                                                                                                                                                                                                                                                                                                                                                                      |      |     |           |       |      |      |
|--------------------------|-----------------------------------------------------------------------------------------------------------------------------------------------------------------------------------------------------------------------------------------------------------------------------------------------------------------------------------------------------------------------------------------------------------------------------------------------------------------------------------------------|------|------|-----------|-------|------|------|---------------------------------------------------------|-------|----------------------|------------------------------------------------------------------------------------------------------------------------------------------------------------------------------------------------------------------------------------------------------------------------------------------------------------------------------------------------------------------------------------------------------------------------------------------------------------------------------------------------------------------------------------------------------------------------------------------------------|------|-----|-----------|-------|------|------|
| Rsa1.0_00893.1.g20943.t1 | refNP_196615.1  concanavalin A-like lectin kinase-like protein [Arabidopsis thaliana] gi 75335609 sp Q9LXA5.1 LRK91_ARAT H RecName: Full=L-type lectin-domain containing receptor kinase IX.1; Short=LecRK-IX.1; Flags: Precursor gi 7671450 emb CA889390.1  lectin-like protein kinase-like [Arabidopsis thaliana] gi 91806848 gb ABE66151.1  lectin protein kinase [Arabidopsis thaliana] gi 332004177 gb AED91560.1  concanavalin A-like lectin kinase-like protein [Arabidopsis thaliana] | 653  | 651  | 0         | 99.7  | 83.8 | 91.0 | concanavalin A-like lectin kinase-like protein          | gbpln | Arabidopsis thaliana | AT5G10530.1   Symbols:   Concanavalin A-like lectin protein kinase family protein   chr5:3324978-3326933 REVERSE LENGTH=651                                                                                                                                                                                                                                                                                                                                                                                                                                                                          | 653  | 651 | 0         | 99.7  | 83.8 | 91.0 |
| Rsa1.0_00893.1.g20944.t1 | gb EOA20560.1  hypothetical protein CARUB_v10000873mg [Capsella rubella]                                                                                                                                                                                                                                                                                                                                                                                                                      | 482  | 474  | 0         | 98.3  | 82.4 | 88.6 | hypothetical protein CARUB_v10000873mg                  | gbpln | Capsella rubella     | AT5G10520.1   Symbols: RBK1   ROP binding protein kinases 1   chr5:3320584-3322649 REVERSE LENGTH=467                                                                                                                                                                                                                                                                                                                                                                                                                                                                                                | 482  | 467 | 0         | 96.9  | 75.7 | 84.2 |
| Rsa1.0_00893.1.g20945.t1 | refXP_002871424.1  hypothetical protein ARALYDRAFT_909007 [Arabidopsis lyrata subsp. lyrata] gi 297317261 gb EFH47683.1  hypothetical protein ARALYDRAFT_909007 [Arabidopsis lyrata subsp. lyrata]                                                                                                                                                                                                                                                                                            | 574  | 576  | 0         | 100.3 | 89.4 | 92.3 | hypothetical protein ARALYDRAFT_909007                  | gbpln | Arabidopsis lyrata   | AT5G10510.2   Symbols: AIL6   AINTEGUMENTA-like 6   chr5:3315991-3320008 FORWARD LENGTH=581                                                                                                                                                                                                                                                                                                                                                                                                                                                                                                          | 574  | 581 | 0         | 101.2 | 89.0 | 92.9 |
| Rsa1.0_00893.1.g20946.t1 | #                                                                                                                                                                                                                                                                                                                                                                                                                                                                                             | #    | #    | #         | #     | #    | -    | ----                                                    | ----  | #                    | #                                                                                                                                                                                                                                                                                                                                                                                                                                                                                                                                                                                                    | #    | #   | #         | #     | #    |      |
| Rsa1.0_00893.1.g20947.t1 | #                                                                                                                                                                                                                                                                                                                                                                                                                                                                                             | #    | #    | #         | #     | #    | -    | ----                                                    | ----  | #                    | #                                                                                                                                                                                                                                                                                                                                                                                                                                                                                                                                                                                                    | #    | #   | #         | #     | #    |      |
| Rsa1.0_00893.1.g20948.t1 | gb AAL85008.1  unknown protein [Arabidopsis thaliana]                                                                                                                                                                                                                                                                                                                                                                                                                                         | 453  | 316  | 1.00E-161 | 69.8  | 61.6 | 64.5 | unknown protein                                         | gbpln | Arabidopsis thaliana | AT5G10460.1   Symbols:   Haloacid dehalogenase-like hydrolase (HAD) superfamily protein   chr5:3287822-3289844 FORWARD LENGTH=306                                                                                                                                                                                                                                                                                                                                                                                                                                                                    | 453  | 306 | 1.00E-163 | 67.5  | 61.6 | 64.5 |
| Rsa1.0_00893.1.g20949.t1 | gb ADO95308.1  14-3-3-like protein GF14 Lambda [Eutrema salsugineum]                                                                                                                                                                                                                                                                                                                                                                                                                          | 248  | 248  | 1.00E-137 | 100.0 | 96.0 | 98.0 | 14-3-3-like protein GF14 Lambda                         | gbpln | Eutrema salsugineum  | AT5G10450.1   Symbols: GRF6, AFT1, 14-3-3lambda   G-box regulating factor 6   chr5:3284452-3286261 REVERSE LENGTH=248                                                                                                                                                                                                                                                                                                                                                                                                                                                                                | 248  | 248 | 1.00E-138 | 100.0 | 94.8 | 97.6 |
| Rsa1.0_00893.1.g20950.t1 | #                                                                                                                                                                                                                                                                                                                                                                                                                                                                                             | #    | #    | #         | #     | #    | -    | ----                                                    | ----  | #                    | #                                                                                                                                                                                                                                                                                                                                                                                                                                                                                                                                                                                                    | #    | #   | #         | #     | #    |      |
| Rsa1.0_00893.1.g20951.t2 | gb AAZ66942.1  117M18.23 [Brassica rapa]                                                                                                                                                                                                                                                                                                                                                                                                                                                      | 342  | 518  | 1.00E-142 | 151.5 | 76.9 | 84.2 | 117M18.23                                               | gbpln | Brassica rapa        | AT5G44050.1   Symbols:   MATE efflux family protein   chr5:1722484-17726209 FORWARD LENGTH=491                                                                                                                                                                                                                                                                                                                                                                                                                                                                                                       | 342  | 491 | 1.00E-138 | 143.6 | 72.8 | 81.6 |
| Rsa1.0_00894.1.g20952.t1 | emb CAA58285.1  cyclin delta-1 [Arabidopsis thaliana]                                                                                                                                                                                                                                                                                                                                                                                                                                         | 347  | 335  | 2.33E-156 | 96.5  | 77.8 | 81.8 | cyclin delta-1                                          | gbpln | Arabidopsis thaliana | AT1G70210.1   Symbols: CYCD1.1, ATCYCD1.1   CYCLIN D1.1   chr1:26440015-26441980 FORWARD LENGTH=339                                                                                                                                                                                                                                                                                                                                                                                                                                                                                                  | 347  | 339 | 2.33E-156 | 97.7  | 78.4 | 82.1 |
| Rsa1.0_00894.1.g20953.t1 | dbj BAB08714.1  non-LTR retroelement reverse transcriptase-like protein [Arabidopsis thaliana]                                                                                                                                                                                                                                                                                                                                                                                                | 1834 | 1197 | 0         | 65.3  | 24.8 | 35.1 | non-LTR retroelement reverse transcriptase-like protein | gbpln | Arabidopsis thaliana | AT4G29090.1   Symbols:   Ribonuclease H-like superfamily protein   chr4:14333528-14335255 FORWARD LENGTH=575                                                                                                                                                                                                                                                                                                                                                                                                                                                                                         | 1834 | 575 | 5.00E-66  | 31.4  | 9.1  | 14.6 |
| Rsa1.0_00894.1.g20954.t1 | refXP_002887532.1  hypothetical protein ARALYDRAFT_476560 [Arabidopsis lyrata subsp. lyrata] gi 297333373 gb EFH63791.1  hypothetical protein ARALYDRAFT_476560 [Arabidopsis lyrata subsp. lyrata]                                                                                                                                                                                                                                                                                            | 210  | 292  | 2.00E-39  | 139.0 | 41.4 | 47.1 | hypothetical protein ARALYDRAFT_476560                  | gbpln | Arabidopsis lyrata   | AT1G74230.1   Symbols: GR-RBP5   glycine-rich RNA-binding protein 5   chr1:27915346-27916857 FORWARD LENGTH=289                                                                                                                                                                                                                                                                                                                                                                                                                                                                                      | 210  | 289 | 1.00E-41  | 137.6 | 41.0 | 47.1 |
| Rsa1.0_00894.1.g20955.t1 | refNP_177562.1  uncharacterized protein [Arabidopsis thaliana] gi 12324902 gb AAG52404.1 AC020579.6 hypothetical protein; 38821-39856 [Arabidopsis thaliana] gi 332197446 gb AE335567.1  uncharacterized protein AT1G74220 [Arabidopsis thaliana]                                                                                                                                                                                                                                             | 161  | 316  | 1.00E-19  | 196.3 | 46.6 | 50.9 | uncharacterized protein                                 | gbpln | Arabidopsis thaliana | AT1G74220.1   Symbols:   unknown protein; FUNCTIONS IN: molecular function unknown; INVOLVED IN: biological process unknown; LOCATED IN: chloroplast; EXPRESSED IN: male gametophyte, flower, pollen tube; EXPRESSED DURING: L mature pollen stage, M germinated pollen stage, 4 anthesis; BEST Arabidopsis thaliana protein match is: unknown protein (TAIR:AT2G03630.1); Has 383 Blast hits to 347 proteins in 86 species: Archae - 0; Bacteria - 17; Metazoa - 87; Fungi - 65; Plants - 76; Viruses - 2; Other Eukaryotes - 136 (source: NCBI BLINK).   chr1:27913099-27914134 REVERSE LENGTH=316 | 161  | 316 | 3.00E-22  | 196.3 | 46.6 | 50.9 |
| Rsa1.0_00894.1.g20956.t1 | gb EOA35749.1  hypothetical protein CARUB_v10020982mg [Capsella rubella]                                                                                                                                                                                                                                                                                                                                                                                                                      | 136  | 196  | 2.00E-25  | 144.1 | 53.7 | 66.9 | hypothetical protein CARUB_v10020982mg                  | gbpln | Capsella rubella     | AT1G24050.1   Symbols:   RNA-processing, Lsm domain   chr1:8507057-8508439 FORWARD LENGTH=188                                                                                                                                                                                                                                                                                                                                                                                                                                                                                                        | 136  | 188 | 6.00E-26  | 138.2 | 50.7 | 64.0 |
| Rsa1.0_00894.1.g20957.t1 | gb EOA11936.1  hypothetical protein CARUB_v10016547mg, partial [Capsella rubella]                                                                                                                                                                                                                                                                                                                                                                                                             | 116  | 149  | 7.00E-21  | 128.4 | 41.4 | 58.6 | hypothetical protein CARUB_v10016547mg, partial         | gbpln | Capsella rubella     | #                                                                                                                                                                                                                                                                                                                                                                                                                                                                                                                                                                                                    | #    | #   | #         | #     | #    |      |
| Rsa1.0_00894.1.g20958.t1 | gb AAF69169.1 AC007915.21 F27F5.21 [Arabidopsis thaliana]                                                                                                                                                                                                                                                                                                                                                                                                                                     | 503  | 1023 | 4.00E-93  | 203.4 | 34.2 | 43.9 | F27F5.21                                                | gbpln | Arabidopsis thaliana | AT4G29090.1   Symbols:   Ribonuclease H-like superfamily protein   chr4:14333528-14335255 FORWARD LENGTH=575                                                                                                                                                                                                                                                                                                                                                                                                                                                                                         | 503  | 575 | 3.00E-24  | 114.3 | 8.5  | 12.5 |

|                          |                                                                                                                                                                                                                                                                                                                                                                                                                                                               |      |      |           |       |      |      |                                          |       |                      |                                                                                                                                                                                                                                                              |      |      |           |       |      |      |
|--------------------------|---------------------------------------------------------------------------------------------------------------------------------------------------------------------------------------------------------------------------------------------------------------------------------------------------------------------------------------------------------------------------------------------------------------------------------------------------------------|------|------|-----------|-------|------|------|------------------------------------------|-------|----------------------|--------------------------------------------------------------------------------------------------------------------------------------------------------------------------------------------------------------------------------------------------------------|------|------|-----------|-------|------|------|
| Rsa1.0_00894.1.g20959.t1 | ref[XP_002894562.1] leucine-rich repeat family protein [Arabidopsis lyrata subsp. lyrata] gi 297340404 gb EFH70821.1  leucine-rich repeat family protein [Arabidopsis lyrata subsp. lyrata]<br>ref[XP_002898765.1] hypothetical protein ARALYDRAFT_894830 [Arabidopsis lyrata subsp. lyrata] gi 297334606 gb EFH65024.1  hypothetical protein ARALYDRAFT_894830 [Arabidopsis lyrata subsp. lyrata]                                                            | 1139 | 1031 | 0         | 90.5  | 71.8 | 78.7 | leucine-rich repeat family protein       | gbpln | Arabidopsis lyrata   | AT1G56130.1   Symbols:   Leucine-rich repeat transmembrane protein kinase   chr1:20994931-21000887 REVERSE LENGTH=1032                                                                                                                                       | 1139 | 1032 | 0         | 90.6  | 70.9 | 78.7 |
| Rsa1.0_00894.1.g20960.t1 | ref[XP_002894566.1] thioredoxin reductase [Arabidopsis lyrata subsp. lyrata] gi 297329896 gb EFH60315.1  thioredoxin reductase [Arabidopsis lyrata subsp. lyrata]                                                                                                                                                                                                                                                                                             | 772  | 783  | 0         | 101.4 | 89.6 | 94.2 | hypothetical protein ARALYDRAFT_894830   | gbpln | Arabidopsis lyrata   | AT1G70300.1   Symbols: KUP6   K+ uptake permease 6   chr1:26477993-26481233 REVERSE LENGTH=782                                                                                                                                                               | 772  | 782  | 0         | 101.3 | 89.4 | 94.4 |
| Rsa1.0_00894.1.g20961.t1 | ref[XP_002894056.1] thioredoxin reductase [Arabidopsis lyrata subsp. lyrata] gi 297329896 gb EFH60315.1  thioredoxin reductase [Arabidopsis lyrata subsp. lyrata]                                                                                                                                                                                                                                                                                             | 99   | 381  | 1.00E-11  | 384.8 | 35.4 | 36.4 | thioredoxin reductase                    | gbpln | Arabidopsis lyrata   | AT2G17420.1   Symbols: NTRA, ATNTRA, NTR2   NADPH-dependent thioredoxin reductase A   chr2:7564357-7566219 FORWARD LENGTH=378                                                                                                                                | 99   | 378  | 2.00E-14  | 381.8 | 35.4 | 36.4 |
| Rsa1.0_00894.1.g20962.t1 | ref[NP_564987.2] equilibrative nucleotide transporter 1 [Arabidopsis thaliana] gi 75161382 sp Q8VXY7.1 ENT1_ARATH RecName: Full=Equilibrative nucleotide transporter 1; Short=ATENT1; AltName: Full=Nucleoside transporter ENT1 gi 18377783 gb AAL67041.1  unknown protein [Arabidopsis thaliana] gi 27754746 gb AAO22816.1  unknown protein [Arabidopsis thaliana] gi 332196925 gb AEE35046.1  equilibrative nucleotide transporter 1 [Arabidopsis thaliana] | 457  | 450  | 0         | 98.5  | 76.4 | 83.6 | equilibrative nucleotide transporter 1   | gbpln | Arabidopsis thaliana | AT1G70330.1   Symbols: ENT1.AT, ENT1   equilibrative nucleotide transporter 1   chr1:26502920-26504360 FORWARD LENGTH=450                                                                                                                                    | 457  | 450  | 0         | 98.5  | 76.4 | 83.6 |
| Rsa1.0_00894.1.g20963.t1 | ref[NP_177192.2] uncharacterized protein [Arabidopsis thaliana] gi 34365593 gb AAQ65108.1  At1g70350 [Arabidopsis thaliana] gi 51969322 dbj BAD43353.1  hypothetical protein [Arabidopsis thaliana] gi 51971609 dbj BAD44469.1  hypothetical protein [Arabidopsis thaliana] gi 332196927 gb AEE35048.1  uncharacterized protein AT1G70350 [Arabidopsis thaliana]                                                                                              | 109  | 105  | 9.00E-26  | 96.3  | 77.1 | 86.2 | uncharacterized protein                  | gbpln | Arabidopsis thaliana | AT1G70350.1   Symbols:   unknown protein; Has 98 Blast hits to 98 proteins in 11 species: Archae - 0; Bacteria - 0; Metazoa - 0; Fungi - 0; Plants - 98; Viruses - 0; Other Eukaryotes - 0 (source: NCBI BLink).   chr1:26507341-26508262 REVERSE LENGTH=105 | 109  | 105  | 1.00E-28  | 96.3  | 77.1 | 86.2 |
| Rsa1.0_00894.1.g20964.t1 | ref[XP_002888778.1] hypothetical protein ARALYDRAFT_476161 [Arabidopsis lyrata subsp. lyrata] gi 297334619 gb EFH65037.1  hypothetical protein ARALYDRAFT_476161 [Arabidopsis lyrata subsp. lyrata]                                                                                                                                                                                                                                                           | 258  | 280  | 1.00E-137 | 108.5 | 91.5 | 95.7 | hypothetical protein ARALYDRAFT_476161   | gbpln | Arabidopsis lyrata   | AT1G70410.1   Symbols: ATBCA4, BCA4, CA4   beta carbonic anhydrase 4   chr1:26534167-26538505 REVERSE LENGTH=258                                                                                                                                             | 258  | 258  | 1.00E-140 | 100.0 | 91.1 | 94.6 |
| Rsa1.0_00894.1.g20965.t3 | ref[XP_002877546.1] hypothetical protein ARALYDRAFT_347817 [Arabidopsis lyrata subsp. lyrata] gi 297323384 gb EFH53805.1  hypothetical protein ARALYDRAFT_347817 [Arabidopsis lyrata subsp. lyrata]                                                                                                                                                                                                                                                           | 1441 | 1022 | 0         | 70.9  | 35.2 | 45.7 | hypothetical protein ARALYDRAFT_347817   | gbpln | Arabidopsis lyrata   | AT3G47090.1   Symbols:   Leucine-rich repeat protein kinase family protein   chr3:17341512-17344645 REVERSE LENGTH=1009                                                                                                                                      | 1441 | 1009 | 0         | 70.0  | 34.1 | 45.0 |
| Rsa1.0_00894.1.g20966.t1 | ref[XP_002890193.1] F-box family protein [Arabidopsis lyrata subsp. lyrata] gi 297336035 gb EFH66452.1  F-box family protein [Arabidopsis lyrata subsp. lyrata]                                                                                                                                                                                                                                                                                               | 201  | 452  | 2.00E-33  | 224.9 | 55.2 | 64.7 | F-box family protein                     | gbpln | Arabidopsis lyrata   | AT1G16930.1   Symbols:   F-box/RNI-like/FBD-like domains-containing protein   chr1:5789987-5791534 FORWARD LENGTH=449                                                                                                                                        | 201  | 449  | 4.00E-35  | 223.4 | 52.7 | 64.7 |
| Rsa1.0_00894.1.g20967.t6 | emb[CAB39638.1] RNA-directed DNA polymerase-like protein [Arabidopsis thaliana] gi 7267666 emb CAB78094.1  RNA-directed DNA polymerase-like protein [Arabidopsis thaliana]                                                                                                                                                                                                                                                                                    | 1786 | 1274 | 0         | 71.3  | 28.1 | 37.7 | RNA-directed DNA polymerase-like protein | gbpln | Arabidopsis thaliana | AT4G2090.1   Symbols:   Ribonuclease H-like superfamily protein   chr4:14333528-14335255 FORWARD LENGTH=575                                                                                                                                                  | 1786 | 575  | 4.00E-42  | 32.2  | 5.4  | 8.5  |
| Rsa1.0_00894.1.g20968.t1 | pir [A96729] homeotic protein (ATK1), 26548-32058 [imported] - Arabidopsis thaliana gi 12325041 gb AAG52468.1 AC010796_7 homeotic protein (ATK1); 26548-32058 [Arabidopsis thaliana]                                                                                                                                                                                                                                                                          | 195  | 311  | 3.00E-73  | 159.5 | 72.8 | 81.5 | homeotic protein (ATK1), 26548-32058     | gbpln | Arabidopsis thaliana | AT1G70510.1   Symbols: KNAT2, ATK1   KNOTTED-like from Arabidopsis thaliana 2   chr1:26578635-26582145 FORWARD LENGTH=310                                                                                                                                    | 195  | 310  | 1.00E-75  | 159.0 | 72.8 | 81.5 |
| Rsa1.0_00894.1.g20969.t1 | emb[CAA57122.1] ATK1 [Arabidopsis thaliana] gi 984048 emb CAA57121.1  ATK1 [Arabidopsis thaliana]                                                                                                                                                                                                                                                                                                                                                             | 299  | 311  | 3.00E-60  | 104.0 | 40.1 | 41.1 | ATK1                                     | gbpln | Arabidopsis thaliana | AT1G70510.1   Symbols: KNAT2, ATK1   KNOTTED-like from Arabidopsis thaliana 2   chr1:26578635-26582145 FORWARD LENGTH=310                                                                                                                                    | 299  | 310  | 2.00E-62  | 103.7 | 39.8 | 41.1 |
| Rsa1.0_00894.1.g20970.t1 | gb [EOA33736.1] hypothetical protein CARUB_v10019929mg [Capsella rubella]                                                                                                                                                                                                                                                                                                                                                                                     | 638  | 649  | 0         | 101.7 | 77.1 | 87.6 | hypothetical protein CARUB_v10019929mg   | gbpln | Capsella rubella     | AT1G0520.1   Symbols: CRK2   cysteine-rich RLK (RECEPTOR-like protein kinase) 2   chr1:26584888-26587334 REVERSE LENGTH=649                                                                                                                                  | 638  | 649  | 0         | 101.7 | 75.7 | 87.3 |

|                          |                                                                                                                                                                                                                                                                                                                                      |      |      |           |        |      |      |                                        |       |                      |                                                                                                                                                                        |      |      |           |        |      |      |
|--------------------------|--------------------------------------------------------------------------------------------------------------------------------------------------------------------------------------------------------------------------------------------------------------------------------------------------------------------------------------|------|------|-----------|--------|------|------|----------------------------------------|-------|----------------------|------------------------------------------------------------------------------------------------------------------------------------------------------------------------|------|------|-----------|--------|------|------|
| Rsa1.0_00894.1.g20971.t1 | emb[CAA18463.1] putative protein [Arabidopsis thaliana]<br>gi 7269163 emb[CAB79271.1] putative protein [Arabidopsis thaliana]                                                                                                                                                                                                        | 240  | 1240 | 2.00E-51  | 516.7  | 44.2 | 55.8 | putative protein                       | gbpln | Arabidopsis thaliana | AT4G23160.1   Symbols: CRK8   cysteine-rich RLK (RECEPTOR-like protein kinase) 8   chr4:12129485-12134086 FORWARD LENGTH=1262                                          | 240  | 1262 | 7.00E-54  | 525.8  | 44.2 | 55.8 |
| Rsa1.0_00895.1.g20972.t1 | ref XP_002873800.1  predicted protein [Arabidopsis lyrata subsp. lyrata]<br>gi 297319637 gb EFH50059.1  predicted protein [Arabidopsis lyrata subsp. lyrata]                                                                                                                                                                         | 415  | 346  | 1.00E-142 | 83.4   | 62.4 | 66.3 | predicted protein                      | gbpln | Arabidopsis lyrata   | AT5G16960.1   Symbols:   Zinc-binding dehydrogenase family protein   chr5:5574537-5575884 REVERSE LENGTH=346                                                           | 415  | 346  | 1.00E-140 | 83.4   | 60.0 | 64.1 |
| Rsa1.0_00895.1.g20973.t1 | gb AAB87099.1  putative retroelement pol polyprotein [Arabidopsis thaliana]                                                                                                                                                                                                                                                          | 1509 | 1496 | 0         | 99.1   | 59.1 | 70.7 | putative retroelement pol polyprotein  | gbpln | Arabidopsis thaliana | AT4G23160.1   Symbols: CRK8   cysteine-rich RLK (RECEPTOR-like protein kinase) 8   chr4:12129485-12134086 FORWARD LENGTH=1262                                          | 1509 | 1262 | 1.00E-142 | 83.6   | 16.0 | 22.1 |
| Rsa1.0_00895.1.g20974.t2 | gb EOA20473.1  hypothetical protein CARUB_v10000784mg [Capsella rubella]                                                                                                                                                                                                                                                             | 343  | 502  | 1.00E-139 | 146.4  | 79.3 | 82.2 | hypothetical protein CARUB_v10000784mg | gbpln | Capsella rubella     | AT5G17010.3   Symbols:   Major facilitator superfamily protein   chr5:5587851-5592332 REVERSE LENGTH=503                                                               | 343  | 503  | 1.00E-140 | 146.6  | 79.0 | 81.6 |
| Rsa1.0_00895.1.g20975.t1 | #                                                                                                                                                                                                                                                                                                                                    | #    | #    | #         | #      | #    | #    | -                                      | ----  | ----                 | #                                                                                                                                                                      | #    | #    | #         | #      | #    | #    |
| Rsa1.0_00895.1.g20976.t1 | ref XP_002871746.1  hypothetical protein ARALYDRAFT_909689 [Arabidopsis lyrata subsp. lyrata]<br>gi 297317583 gb EFH48005.1  hypothetical protein ARALYDRAFT_909689 [Arabidopsis lyrata subsp. lyrata]                                                                                                                               | 192  | 1076 | 6.00E-70  | 560.4  | 73.4 | 75.5 | hypothetical protein ARALYDRAFT_909689 | gbpln | Arabidopsis lyrata   | AT5G17020.1   Symbols: XPO1A, ATORM1, ATXPO1, XPO1, HIT2   exportin 1A   chr5:5594904-5602467 FORWARD LENGTH=1075                                                      | 192  | 1075 | 2.00E-71  | 559.9  | 72.4 | 75.0 |
| Rsa1.0_00895.1.g20977.t1 | ref XP_002866055.1  GAUT12/IRX8/LGT6 [Arabidopsis lyrata subsp. lyrata]<br>gi 297311890 gb EFH42314.1  GAUT12/IRX8/LGT6 [Arabidopsis lyrata subsp. lyrata]                                                                                                                                                                           | 180  | 535  | 1.00E-57  | 297.2  | 56.7 | 58.3 | GAUT12/IRX8/LGT6                       | gbpln | Arabidopsis lyrata   | AT5G54690.1   Symbols: GAUT12, LGT6, IRX8   galacturonosyltransferase 12   chr5:22219435-22221769 REVERSE LENGTH=535                                                   | 180  | 535  | 2.00E-59  | 297.2  | 56.1 | 58.3 |
| Rsa1.0_00895.1.g20978.t1 | ref NP_200284.1  autophagy 18F-like protein [Arabidopsis thaliana]<br>gi 75333833 sp Q9FH32.1 AT18F ARAT H RecName: Full=Autophagy-related protein 18F. Short=AtATG18F<br>gi 10176800 db BAB09939.1  unnamed protein product [Arabidopsis thaliana]<br>gi 332009148 gb AED96531.1  autophagy 18F-like protein [Arabidopsis thaliana] | 685  | 763  | 0         | 111.4  | 61.8 | 72.6 | autophagy 18F-like protein             | gbpln | Arabidopsis thaliana | AT5G54730.1   Symbols: ATATG18F, ATG18F, G18F   homolog of yeast autophagy 18 (ATG18) F   chr5:22233977-22236804 REVERSE LENGTH=763                                    | 685  | 763  | 0         | 111.4  | 61.8 | 72.6 |
| Rsa1.0_00895.1.g20979.t1 | gb EOA13973.1  hypothetical protein CARUB_v10027102mg [Capsella rubella]                                                                                                                                                                                                                                                             | 184  | 219  | 6.00E-61  | 119.0  | 71.7 | 76.6 | hypothetical protein CARUB_v10027102mg | gbpln | Capsella rubella     | AT5G52240.1   Symbols: MSBP1, ATMP1, AtMAPR5   membrane steroid binding protein 1   chr5:21213121-21214557 FORWARD LENGTH=220                                          | 184  | 220  | 3.00E-58  | 119.6  | 66.8 | 75.0 |
| Rsa1.0_00895.1.g20980.t2 | ref XP_002864354.1  hypothetical protein ARALYDRAFT_918614 [Arabidopsis lyrata subsp. lyrata]<br>gi 297310189 gb EFH40613.1  hypothetical protein ARALYDRAFT_918614 [Arabidopsis lyrata subsp. lyrata]                                                                                                                               | 340  | 352  | 0         | 103.5  | 93.8 | 97.4 | hypothetical protein ARALYDRAFT_918614 | gbpln | Arabidopsis lyrata   | AT5G54770.1   Symbols: THI1, TZ, TH14   thiazole biosynthetic enzyme, chloroplast (ARA6) (THI1) (TH14)   chr5:22246634-22247891 FORWARD LENGTH=349                     | 340  | 349  | 0         | 102.6  | 92.6 | 96.2 |
| Rsa1.0_00895.1.g20981.t1 | gb EOA13391.1  hypothetical protein CARUB_v10026437mg [Capsella rubella]                                                                                                                                                                                                                                                             | 404  | 432  | 0         | 106.9  | 93.3 | 96.5 | hypothetical protein CARUB_v10026437mg | gbpln | Capsella rubella     | AT5G54780.1   Symbols:   Ypt/Rab-GAP domain of gyp1p superfamily protein   chr5:22248696-22251692 REVERSE LENGTH=432                                                   | 404  | 432  | 0         | 106.9  | 92.3 | 96.3 |
| Rsa1.0_00895.1.g20982.t1 | gb EOA39662.1  hypothetical protein CARUB_v10008304mg [Capsella rubella]                                                                                                                                                                                                                                                             | 79   | 840  | 1.00E-14  | 1063.3 | 51.9 | 58.2 | hypothetical protein CARUB_v10008304mg | gbpln | Capsella rubella     | AT1G30490.1   Symbols: PHV, ATHB9   Homeobox-leucine zipper family protein / lipid-binding START domain-containing protein   chr1:10796328-10800744 REVERSE LENGTH=841 | 79   | 841  | 4.00E-17  | 1064.6 | 51.9 | 58.2 |
| Rsa1.0_00895.1.g20983.t1 | #                                                                                                                                                                                                                                                                                                                                    | #    | #    | #         | #      | #    | #    | -                                      | ----  | ----                 | #                                                                                                                                                                      | #    | #    | #         | #      | #    | #    |
| Rsa1.0_00895.1.g20984.t1 | #                                                                                                                                                                                                                                                                                                                                    | #    | #    | #         | #      | #    | #    | -                                      | ----  | ----                 | #                                                                                                                                                                      | #    | #    | #         | #      | #    | #    |
| Rsa1.0_00896.1.g20985.t1 | gb AAC28216.1  T24M8.9 gene product [Arabidopsis thaliana]<br>gi 7267147 emb[CAB80815.1] putative protein [Arabidopsis thaliana]                                                                                                                                                                                                     | 476  | 463  | 4.00E-74  | 97.3   | 26.3 | 31.3 | T24M8.9 gene product                   | gbpln | Arabidopsis thaliana | AT2G07760.1   Symbols:   Zinc knuckle (CCHC-type) family protein   chr2:3584420-3586278 REVERSE LENGTH=530                                                             | 476  | 530  | 4.00E-14  | 111.3  | 7.8  | 14.7 |
| Rsa1.0_00896.1.g20986.t1 | gb AAF23228.1 AC013454_15 putative transcriptional regulator [Arabidopsis thaliana]                                                                                                                                                                                                                                                  | 1064 | 1132 | 0         | 106.4  | 89.4 | 92.9 | putative transcriptional regulator     | gbpln | Arabidopsis thaliana | AT3G06010.1   Symbols: ATCHR12   Homeotic gene regulator   chr3:1802435-1807284 REVERSE LENGTH=1102                                                                    | 1064 | 1102 | 0         | 103.6  | 88.9 | 92.4 |

|                          |                                                                                                                                                                                                                                                                                                                                                                                             |     |     |           |        |      |      |                                        |       |                      |                                                                                                                                                                                                                                                                                                                                                 |     |     |           |       |      |      |
|--------------------------|---------------------------------------------------------------------------------------------------------------------------------------------------------------------------------------------------------------------------------------------------------------------------------------------------------------------------------------------------------------------------------------------|-----|-----|-----------|--------|------|------|----------------------------------------|-------|----------------------|-------------------------------------------------------------------------------------------------------------------------------------------------------------------------------------------------------------------------------------------------------------------------------------------------------------------------------------------------|-----|-----|-----------|-------|------|------|
| Rsa1.0_00896.1.g20987.t1 | ref NP_187250.1  leucine-rich repeat-containing protein [Arabidopsis thaliana] gi 6671958 gb AAF23217.1 AC013454.4 hypothetical protein [Arabidopsis thaliana] gi 30102730 gb AAP21283.1 At3g05990 [Arabidopsis thaliana] gi 110743247 dbj BAE99514.1  hypothetical protein [Arabidopsis thaliana] gi 33264006 gb AEE74327.1  leucine-rich repeat-containing protein [Arabidopsis thaliana] | 534 | 517 | 0         | 96.8   | 76.0 | 83.7 | leucine-rich repeat-containing protein | gbpln | Arabidopsis thaliana | AT3G05990.1   Symbols:   Leucine-rich repeat (LRR) family protein   chr3:1797116-1799732 REVERSE LENGTH=517                                                                                                                                                                                                                                     | 534 | 517 | 0         | 96.8  | 76.0 | 83.7 |
| Rsa1.0_00896.1.g20988.t1 | ref XP_002882443.1  hypothetical protein ARALYDRAFT_896702 [Arabidopsis lyrata subsp. lyrata] gi 297328283 gb EFH58702.1  hypothetical protein ARALYDRAFT_896702 [Arabidopsis lyrata subsp. lyrata]                                                                                                                                                                                         | 234 | 248 | 1.00E-76  | 106.0  | 79.5 | 87.2 | hypothetical protein ARALYDRAFT_896702 | gbpln | Arabidopsis lyrata   | AT3G05980.1   Symbols:   unknown protein; BEST Arabidopsis thaliana protein match is: unknown protein (TAIR:AT5G19340.1); Has 202 Blast hits to 202 proteins in 28 species: Archae - 0; Bacteria - 0; Metazoa - 39; Fungi - 4; Plants - 148; Viruses - 0; Other Eukaryotes - 11 (source: NCBI BLINK).   chr3:1795514-1796251 FORWARD LENGTH=245 | 234 | 245 | 5.00E-71  | 104.7 | 70.1 | 80.8 |
| Rsa1.0_00896.1.g20989.t1 | ref XP_002884549.1  hypothetical protein ARALYDRAFT_896701 [Arabidopsis lyrata subsp. lyrata] gi 297330389 gb EFH60808.1  hypothetical protein ARALYDRAFT_896701 [Arabidopsis lyrata subsp. lyrata]                                                                                                                                                                                         | 190 | 189 | 1.00E-74  | 99.5   | 73.7 | 84.7 | hypothetical protein ARALYDRAFT_896701 | gbpln | Arabidopsis lyrata   | AT3G05975.1   Symbols:   Late embryogenesis abundant (LEA) hydroxyproline-rich glycoprotein family   chr3:1792145-1792714 REVERSE LENGTH=189                                                                                                                                                                                                    | 190 | 189 | 1.00E-76  | 99.5  | 73.2 | 85.8 |
| Rsa1.0_00896.1.g20990.t1 | ref XP_002884547.1  hypothetical protein ARALYDRAFT_317457 [Arabidopsis lyrata subsp. lyrata] gi 297330387 gb EFH60806.1  hypothetical protein ARALYDRAFT_317457 [Arabidopsis lyrata subsp. lyrata]                                                                                                                                                                                         | 505 | 507 | 0         | 100.4  | 91.1 | 96.2 | hypothetical protein ARALYDRAFT_317457 | gbpln | Arabidopsis lyrata   | AT3G05960.1   Symbols: ATSTP6, STP6   sugar transporter 6   chr3:1783587-1785334 REVERSE LENGTH=507                                                                                                                                                                                                                                             | 505 | 507 | 0         | 100.4 | 90.9 | 96.2 |
| Rsa1.0_00896.1.g20991.t2 | ref XP_002874310.1  hypothetical protein ARALYDRAFT_489475 [Arabidopsis lyrata subsp. lyrata] gi 297320147 gb EFH50569.1  hypothetical protein ARALYDRAFT_489475 [Arabidopsis lyrata subsp. lyrata]                                                                                                                                                                                         | 573 | 555 | 0         | 96.9   | 93.0 | 95.8 | hypothetical protein ARALYDRAFT_489475 | gbpln | Arabidopsis lyrata   | AT5G26360.1   Symbols:   TCP-1/cpn60 chaperonin family protein   chr5:9255561-9258891 REVERSE LENGTH=555                                                                                                                                                                                                                                        | 573 | 555 | 0         | 96.9  | 93.0 | 95.8 |
| Rsa1.0_00896.1.g20992.t1 | gb EOA31863.1  hypothetical protein CARUB_v10015090mg [Capsella rubella]                                                                                                                                                                                                                                                                                                                    | 229 | 229 | 1.00E-122 | 100.0  | 94.3 | 97.4 | hypothetical protein CARUB_v10015090mg | gbpln | Capsella rubella     | AT3G05950.1   Symbols:   RmlC-like cupins superfamily protein   chr3:1781130-1781964 REVERSE LENGTH=229                                                                                                                                                                                                                                         | 229 | 229 | 1.00E-122 | 100.0 | 92.6 | 96.1 |
| Rsa1.0_00896.1.g20993.t1 | #                                                                                                                                                                                                                                                                                                                                                                                           | #   | #   | #         | #      | #    | #    | -                                      | ----  | ----                 | #                                                                                                                                                                                                                                                                                                                                               | #   | #   | #         | #     | #    |      |
| Rsa1.0_00896.1.g20994.t1 | #                                                                                                                                                                                                                                                                                                                                                                                           | #   | #   | #         | #      | #    | #    | -                                      | ----  | ----                 | #                                                                                                                                                                                                                                                                                                                                               | #   | #   | #         | #     | #    |      |
| Rsa1.0_00896.1.g20995.t1 | ref XP_002882441.1  hypothetical protein ARALYDRAFT_896692 [Arabidopsis lyrata subsp. lyrata] gi 297328281 gb EFH58700.1  hypothetical protein ARALYDRAFT_896692 [Arabidopsis lyrata subsp. lyrata]                                                                                                                                                                                         | 218 | 219 | 1.00E-97  | 100.5  | 80.7 | 90.4 | hypothetical protein ARALYDRAFT_896692 | gbpln | Arabidopsis lyrata   | AT3G05930.1   Symbols: GLP8   germin-like protein 8   chr3:1770377-1771183 FORWARD LENGTH=219                                                                                                                                                                                                                                                   | 218 | 219 | 3.00E-98  | 100.5 | 79.8 | 89.4 |
| Rsa1.0_00896.1.g20996.t1 | gb AAM61454.1  unknown [Arabidopsis thaliana]                                                                                                                                                                                                                                                                                                                                               | 126 | 126 | 4.00E-28  | 100.0  | 76.2 | 79.4 | unknown                                | gbpln | Arabidopsis thaliana | AT3G05920.1   Symbols:   Heavy metal transport/detoxification superfamily protein   chr3:1768991-1769522 REVERSE LENGTH=126                                                                                                                                                                                                                     | 126 | 126 | 8.00E-31  | 100.0 | 76.2 | 79.4 |
| Rsa1.0_00896.1.g20997.t1 | gb AAF23226.1 AC013454_13 unknown protein [Arabidopsis thaliana] gi 6714403 gb AAF26092.1 AC012393_18 unknown protein [Arabidopsis thaliana]                                                                                                                                                                                                                                                | 366 | 660 | 1.00E-45  | 180.3  | 31.7 | 35.8 | unknown protein                        | gbpln | Arabidopsis thaliana | AT3G05900.1   Symbols:   neurofilament protein-related   chr3:1761408-1763854 REVERSE LENGTH=673                                                                                                                                                                                                                                                | 366 | 673 | 4.00E-48  | 183.9 | 31.7 | 35.8 |
| Rsa1.0_00896.1.g20998.t1 | gb AFC41201.1  PM-YC3.6-Lti6b [Binary expression vector PM-YC3.6-LTi6b]                                                                                                                                                                                                                                                                                                                     | 55  | 726 | 4.00E-23  | 1320.0 | 92.7 | 96.4 | PM-YC3.6-Lti6b                         | ----  | ----                 | AT3G05890.1   Symbols: RCI2B   Low temperature and salt responsive protein family   chr3:1758179-1758452 REVERSE LENGTH=54                                                                                                                                                                                                                      | 55  | 54  | 4.00E-22  | 98.2  | 92.7 | 96.4 |
| Rsa1.0_00896.1.g20999.t1 | ref NP_180438.2  protein agamous-like 46 [Arabidopsis thaliana] gi 330253067 gb AEC08161.1  protein agamous-like 46 [Arabidopsis thaliana]                                                                                                                                                                                                                                                  | 415 | 329 | 7.00E-58  | 79.3   | 30.4 | 42.7 | protein agamous-like 46                | gbpln | Arabidopsis thaliana | AT2G28700.1   Symbols: AGL46   AGAMOUS-like 46   chr2:12317384-12318724 REVERSE LENGTH=329                                                                                                                                                                                                                                                      | 415 | 329 | 2.00E-60  | 79.3  | 30.4 | 42.7 |
| Rsa1.0_00897.1.g21000.t1 | ref NP_172471.1  Ribonuclease H-like protein [Arabidopsis thaliana] gi 332190406 gb AEE28527.1  Ribonuclease H-like protein [Arabidopsis thaliana]                                                                                                                                                                                                                                          | 334 | 303 | 2.00E-44  | 90.7   | 34.4 | 46.4 | Ribonuclease H-like protein            | gbpln | Arabidopsis thaliana | AT1G10000.1   Symbols:   Ribonuclease H-like superfamily protein   chr1:3263877-3264788 REVERSE LENGTH=303                                                                                                                                                                                                                                      | 334 | 303 | 6.00E-47  | 90.7  | 34.4 | 46.4 |

|                          |                                                                                                                                                                                                                                                                                                                                                                                                                                                                                                                                                                                                                                                                                                                                                                                                                                                                                                                                                                                                                                                                                                                                                                                                                                                                                                                                                  |     |     |           |       |      |      |                                                            |       |                      |                                                                                                                                                                                                                                                                                                                                                                                                                                                                            |     |     |           |       |      |      |
|--------------------------|--------------------------------------------------------------------------------------------------------------------------------------------------------------------------------------------------------------------------------------------------------------------------------------------------------------------------------------------------------------------------------------------------------------------------------------------------------------------------------------------------------------------------------------------------------------------------------------------------------------------------------------------------------------------------------------------------------------------------------------------------------------------------------------------------------------------------------------------------------------------------------------------------------------------------------------------------------------------------------------------------------------------------------------------------------------------------------------------------------------------------------------------------------------------------------------------------------------------------------------------------------------------------------------------------------------------------------------------------|-----|-----|-----------|-------|------|------|------------------------------------------------------------|-------|----------------------|----------------------------------------------------------------------------------------------------------------------------------------------------------------------------------------------------------------------------------------------------------------------------------------------------------------------------------------------------------------------------------------------------------------------------------------------------------------------------|-----|-----|-----------|-------|------|------|
| Rsa1.0_00897.1.g21001.t2 | <p>ref NP_194722.2  transcription factor bHLH27 [Arabidopsis thaliana]</p> <p>gi 26450533 dbj BAC42379.1  putative bHLH transcription factor bHLH027 [Arabidopsis thaliana]</p> <p>gi 29028850 gb AAO64804.1  At4g29930 [Arabidopsis thaliana]</p> <p>gi 51970544 dbj BAD43964.1  bHLH transcription factor (bHLH027) - like protein [Arabidopsis thaliana]</p> <p>gi 51970694 dbj BAD44039.1  bHLH transcription factor (bHLH027) - like protein [Arabidopsis thaliana]</p> <p>gi 110736372 dbj BAF00155.1  bHLH transcription factor (bHLH027) - like protein [Arabidopsis thaliana]</p> <p>gi 332660294 gb AEE85694.1  transcription factor bHLH27 [Arabidopsis thaliana]</p> <p>ref NP_194723.1  Pathogenesis-related homeodomain protein [Arabidopsis thaliana]</p> <p>gi 1346790 sp P48785.1 PRH_ARATH RecName: Full=Pathogenesis-related homeodomain protein; Short=PRHA</p> <p>gi 507220 gb AAA32843.1  homeodomain protein [Arabidopsis thaliana]</p> <p>gi 2501810 gb AAC49836.1  PRHA [Arabidopsis thaliana]</p> <p>gi 4914418 emb CAB43669.1  pathogenesis related homeodomain protein (PRHA) [Arabidopsis thaliana]</p> <p>gi 7269893 emb CAB79752.1  pathogenesis related homeodomain protein (PRHA) [Arabidopsis thaliana]</p> <p>gi 332660298 gb AEE85698.1  Pathogenesis-related homeodomain protein [Arabidopsis thaliana]</p> | 206 | 254 | 1.00E-69  | 123.3 | 73.3 | 79.1 | transcription factor bHLH27                                | gbpln | Arabidopsis thaliana | AT4G29930.1   Symbols:   basic helix-loop-helix (bHLH) DNA-binding superfamily protein   chr4:14644108-14647449 FORWARD LENGTH=254                                                                                                                                                                                                                                                                                                                                         | 206 | 254 | 5.00E-72  | 123.3 | 73.3 | 79.1 |
| Rsa1.0_00897.1.g21002.t1 | <p>dbj BAJ34590.1  unnamed protein product [Theilingiella halophila]</p>                                                                                                                                                                                                                                                                                                                                                                                                                                                                                                                                                                                                                                                                                                                                                                                                                                                                                                                                                                                                                                                                                                                                                                                                                                                                         | 854 | 796 | 0         | 93.2  | 60.3 | 70.6 | Pathogenesis-related homeodomain protein                   | gbpln | Arabidopsis thaliana | AT4G29940.1   Symbols: PRHA   pathogenesis related homeodomain protein A   chr4:14648346-14652710 REVERSE LENGTH=796                                                                                                                                                                                                                                                                                                                                                       | 854 | 796 | 0         | 93.2  | 60.3 | 70.6 |
| Rsa1.0_00897.1.g21003.t1 | <p>ref NP_567837.1  uncharacterized protein [Arabidopsis thaliana]</p> <p>gi 4914420 emb CAB43671.1  hypothetical protein [Arabidopsis thaliana]</p> <p>gi 7269895 emb CAB79754.1  hypothetical protein [Arabidopsis thaliana]</p> <p>gi 20466466 gb AAM20550.1  unknown protein [Arabidopsis thaliana]</p> <p>gi 21537007 gb AAM61348.1  unknown [Arabidopsis thaliana]</p> <p>gi 22136434 gb AAM91295.1  unknown protein [Arabidopsis thaliana]</p> <p>gi 332660302 gb AEE85702.1  uncharacterized protein AT4G29960 [Arabidopsis thaliana]</p> <p>ref NP_194729.1  Dihydropterin pyrophosphokinase / Dihydropteroate synthase [Arabidopsis thaliana]</p> <p>gi 4938476 emb CAB43835.1  dihydropteroate synthase-like protein [Arabidopsis thaliana]</p> <p>gi 7269900 emb CAB80993.1  dihydropteroate synthase-like protein [Arabidopsis thaliana]</p> <p>gi 192807342 gb ACF06123.1  At4g30000 [Arabidopsis thaliana]</p> <p>gi 332660306 gb AEE85708.1  Dihydropterin pyrophosphokinase / Dihydropteroate synthase [Arabidopsis thaliana]</p>                                                                                                                                                                                                                                                                                               | 828 | 842 | 0         | 101.7 | 84.9 | 91.1 | unnamed protein product                                    | ----  | ----                 | AT4G29950.1   Symbols:   Ypt/Rab-GAP domain of gyp1p superfamily protein   chr4:14657464-14660370 FORWARD LENGTH=828                                                                                                                                                                                                                                                                                                                                                       | 828 | 828 | 0         | 100.0 | 80.0 | 86.4 |
| Rsa1.0_00897.1.g21004.t1 | <p>ref NP_194729.1  Dihydropterin pyrophosphokinase / Dihydropteroate synthase [Arabidopsis thaliana]</p> <p>gi 4938476 emb CAB43835.1  dihydropteroate synthase-like protein [Arabidopsis thaliana]</p> <p>gi 7269900 emb CAB80993.1  dihydropteroate synthase-like protein [Arabidopsis thaliana]</p> <p>gi 192807342 gb ACF06123.1  At4g30000 [Arabidopsis thaliana]</p> <p>gi 332660306 gb AEE85708.1  Dihydropterin pyrophosphokinase / Dihydropteroate synthase [Arabidopsis thaliana]</p>                                                                                                                                                                                                                                                                                                                                                                                                                                                                                                                                                                                                                                                                                                                                                                                                                                                 | 269 | 291 | 1.00E-101 | 108.2 | 80.3 | 85.1 | uncharacterized protein                                    | gbpln | Arabidopsis thaliana | AT4G29960.1   Symbols:   unknown protein; FUNCTIONS IN: molecular_function unknown; INVOLVED IN: biological_process unknown; LOCATED IN: plasma membrane; EXPRESSED IN: 23 plant structures; EXPRESSED DURING: 15 growth stages; Has 30201 Blast hits to 17322 proteins in 780 species: Archae - 12; Bacteria - 1396; Metazoa - 17338; Fungi - 3422; Plants - 5037; Viruses - 0; Other Eukaryotes - 2996 (source: NCBI BLINK).   chr4:14660753-14662274 REVERSE LENGTH=291 | 269 | 291 | 1.00E-103 | 108.2 | 80.3 | 85.1 |
| Rsa1.0_00897.1.g21005.t1 | <p>ref NP_194729.1  Dihydropterin pyrophosphokinase / Dihydropteroate synthase [Arabidopsis thaliana]</p> <p>gi 4938476 emb CAB43835.1  dihydropteroate synthase-like protein [Arabidopsis thaliana]</p> <p>gi 7269900 emb CAB80993.1  dihydropteroate synthase-like protein [Arabidopsis thaliana]</p> <p>gi 192807342 gb ACF06123.1  At4g30000 [Arabidopsis thaliana]</p> <p>gi 332660306 gb AEE85708.1  Dihydropterin pyrophosphokinase / Dihydropteroate synthase [Arabidopsis thaliana]</p>                                                                                                                                                                                                                                                                                                                                                                                                                                                                                                                                                                                                                                                                                                                                                                                                                                                 | 539 | 554 | 0         | 102.8 | 87.4 | 93.5 | Dihydropterin pyrophosphokinase / Dihydropteroate synthase | gbpln | Arabidopsis thaliana | AT4G30000.1   Symbols:   Dihydropterin pyrophosphokinase / Dihydropteroate synthase   chr4:14670524-14672397 REVERSE LENGTH=554                                                                                                                                                                                                                                                                                                                                            | 539 | 554 | 0         | 102.8 | 87.4 | 93.5 |

|                          |                                                                                                                                                                                                                                                                                                                                                                                                                                                                                                                                                                 |      |      |           |       |      |      |                                                 |       |                      |                                                                                                                                                                |      |      |           |       |      |      |
|--------------------------|-----------------------------------------------------------------------------------------------------------------------------------------------------------------------------------------------------------------------------------------------------------------------------------------------------------------------------------------------------------------------------------------------------------------------------------------------------------------------------------------------------------------------------------------------------------------|------|------|-----------|-------|------|------|-------------------------------------------------|-------|----------------------|----------------------------------------------------------------------------------------------------------------------------------------------------------------|------|------|-----------|-------|------|------|
| Rsa1.0_00897.1.g21006.t1 | refNP_180139.1   molybdate transporter 1 [Arabidopsis thaliana]   gi 75206638 sp Q9SL95.1 MOT1_ARATH RecName: Full=Molybdate transporter 1; AltName: Full=Sulfate transporter like protein 5.2  gi 4874306 gb AAD31368.1   hypothetical protein [Arabidopsis thaliana]   gi 62320536 dbj BAD95122.1   hypothetical protein [Arabidopsis thaliana]   gi 330252640 gb AEC07734.1   molybdate transporter 1 [Arabidopsis thaliana]                                                                                                                                 | 457  | 456  | 0         | 99.8  | 87.7 | 93.4 | molybdate transporter 1                         | gbpln | Arabidopsis thaliana | AT2G25680.1   Symbols: MOT1   molybdate transporter 1   chr2:10933167-10934537 REVERSE LENGTH=456                                                              | 457  | 456  | 0         | 99.8  | 87.7 | 93.4 |
| Rsa1.0_00897.1.g21007.t1 | refNP_567839.1   PA-domain containing subtilase family protein [Arabidopsis thaliana]   gi 4938478 emb CAB43837.1   proteinase-like protein [Arabidopsis thaliana]   gi 7269902 emb CAB80995.1   AT4g30020 [Arabidopsis thaliana]   gi 22655014 gb AAM98098.1   AT4g30020/F6G3_50 [Arabidopsis thaliana]   gi 29028756 gb AAO64757.1   AT4g30020/F6G3_50 [Arabidopsis thaliana]   gi 110740572 dbj BAE98391.1   hypothetical protein [Arabidopsis thaliana]   gi 332660309 gb AEE85709.1   PA-domain containing subtilase family protein [Arabidopsis thaliana] | 816  | 816  | 0         | 100.0 | 94.2 | 97.9 | PA-domain containing subtilase family protein   | gbpln | Arabidopsis thaliana | AT4G30020.1   Symbols:   PA-domain containing subtilase family protein   chr4:14678251-14681762 FORWARD LENGTH=816                                             | 816  | 816  | 0         | 100.0 | 94.2 | 97.9 |
| Rsa1.0_00897.1.g21008.t1 | gb EOA17964.1   hypothetical protein CARUB_v10006379mg [Capsella rubella]                                                                                                                                                                                                                                                                                                                                                                                                                                                                                       | 433  | 435  | 0         | 100.5 | 76.7 | 85.0 | hypothetical protein CARUB_v10006379mg          | gbpln | Capsella rubella     | AT4G30030.1   Symbols:   Eukaryotic aspartyl protease family protein   chr4:14682210-14683484 REVERSE LENGTH=424                                               | 433  | 424  | 0         | 97.9  | 75.3 | 84.1 |
| Rsa1.0_00897.1.g21009.t1 | #                                                                                                                                                                                                                                                                                                                                                                                                                                                                                                                                                               | #    | #    | #         | #     | #    | #    | -                                               | ----  | ----                 | #                                                                                                                                                              | #    | #    | #         | #     | #    |      |
| Rsa1.0_00897.1.g21010.t2 | gb AFD01311.1   auxin response factor 16-1 [Brassica rapa subsp. pekinensis]                                                                                                                                                                                                                                                                                                                                                                                                                                                                                    | 632  | 647  | 0         | 102.4 | 90.8 | 94.1 | auxin response factor 16-1                      | gbpln | Brassica rapa        | AT4G30080.1   Symbols: ARF16   auxin response factor 16   chr4:14703369-14705564 REVERSE LENGTH=670                                                            | 632  | 670  | 0         | 106.0 | 90.3 | 93.8 |
| Rsa1.0_00897.1.g21011.t1 | refNP_194738.4   protein embryo defective 1353 [Arabidopsis thaliana]   gi 332660319 gb AEE85719.1   protein embryo defective 1353 [Arabidopsis thaliana]                                                                                                                                                                                                                                                                                                                                                                                                       | 435  | 388  | 1.00E-153 | 89.2  | 61.8 | 69.0 | protein embryo defective 1353                   | gbpln | Arabidopsis thaliana | AT4G30090.1   Symbols: emb1353   embryo defective 1353   chr4:14709135-14711612 REVERSE LENGTH=388                                                             | 435  | 388  | 1.00E-156 | 89.2  | 61.8 | 69.0 |
| Rsa1.0_00897.1.g21012.t1 | gb EOA18178.1   hypothetical protein CARUB_v10006656mg [Capsella rubella]                                                                                                                                                                                                                                                                                                                                                                                                                                                                                       | 1046 | 1320 | 0         | 126.2 | 80.8 | 85.0 | hypothetical protein CARUB_v10006656mg          | gbpln | Capsella rubella     | AT4G30100.1   Symbols:   P-loop containing nucleoside triphosphate hydrolases superfamily protein   chr4:14714191-14719335 FORWARD LENGTH=1311                 | 1046 | 1311 | 0         | 125.3 | 80.4 | 85.3 |
| Rsa1.0_00898.1.g21013.t1 | ref XP_002887483.1   predicted protein [Arabidopsis lyrata subsp. lyrata]   gi 297333324 gb EFH63742.1   predicted protein [Arabidopsis lyrata subsp. lyrata]                                                                                                                                                                                                                                                                                                                                                                                                   | 229  | 243  | 1.00E-106 | 106.1 | 87.3 | 93.9 | predicted protein                               | gbpln | Arabidopsis lyrata   | AT1G73410.1   Symbols: ATMYB54, MYB54   myb domain protein 54   chr1:27601852-27603038 FORWARD LENGTH=243                                                      | 229  | 243  | 1.00E-108 | 106.1 | 86.5 | 93.4 |
| Rsa1.0_00898.1.g21014.t2 | ref XP_002887484.1   hypothetical protein ARALYDRAFT_895203 [Arabidopsis lyrata subsp. lyrata]   gi 297333325 gb EFH63743.1   hypothetical protein ARALYDRAFT_895203 [Arabidopsis lyrata subsp. lyrata]                                                                                                                                                                                                                                                                                                                                                         | 823  | 784  | 0         | 95.3  | 86.8 | 90.2 | hypothetical protein ARALYDRAFT_895203          | gbpln | Arabidopsis lyrata   | AT1G73430.2   Symbols:   sec34-like family protein   chr1:27604096-27610829 FORWARD LENGTH=784                                                                 | 823  | 784  | 0         | 95.3  | 86.5 | 89.7 |
| Rsa1.0_00898.1.g21015.t1 | emb CAB39638.1   RNA-directed DNA polymerase-like protein [Arabidopsis thaliana]   gi 267666 emb CAB78094.1   RNA-directed DNA polymerase-like protein [Arabidopsis thaliana]                                                                                                                                                                                                                                                                                                                                                                                   | 1790 | 1274 | 0         | 71.2  | 38.4 | 47.8 | RNA-directed DNA polymerase-like protein        | gbpln | Arabidopsis thaliana | AT4G29090.1   Symbols:   Ribonuclease H-like superfamily protein   chr4:14333528-14335255 FORWARD LENGTH=575                                                   | 1790 | 575  | 2.00E-60  | 32.1  | 9.1  | 14.1 |
| Rsa1.0_00898.1.g21016.t1 | ref XP_002887485.1   kinase family protein [Arabidopsis lyrata subsp. lyrata]   gi 297333326 gb EFH63744.1   kinase family protein [Arabidopsis lyrata subsp. lyrata]                                                                                                                                                                                                                                                                                                                                                                                           | 1108 | 1161 | 0         | 104.8 | 85.1 | 91.2 | kinase family protein                           | gbpln | Arabidopsis lyrata   | AT1G73460.1   Symbols:   Protein kinase superfamily protein   chr1:27620122-27624899 FORWARD LENGTH=1169                                                       | 1108 | 1169 | 0         | 105.5 | 85.4 | 91.2 |
| Rsa1.0_00898.1.g21017.t2 | gb EOA35116.1   hypothetical protein CARUB_v10020236mg [Capsella rubella]                                                                                                                                                                                                                                                                                                                                                                                                                                                                                       | 396  | 468  | 0         | 118.2 | 86.6 | 91.7 | hypothetical protein CARUB_v10020236mg          | gbpln | Capsella rubella     | AT1G73480.1   Symbols:   alpha/beta-Hydrolases superfamily protein   chr1:27629266-27632486 FORWARD LENGTH=463                                                 | 396  | 463  | 0         | 116.9 | 85.9 | 91.7 |
| Rsa1.0_00898.1.g21018.t1 | #                                                                                                                                                                                                                                                                                                                                                                                                                                                                                                                                                               | #    | #    | #         | #     | #    | #    | -                                               | ----  | ----                 | #                                                                                                                                                              | #    | #    | #         | #     | #    |      |
| Rsa1.0_00898.1.g21019.t1 | gb EOA35604.1   hypothetical protein CARUB_v10020817mg, partial [Capsella rubella]                                                                                                                                                                                                                                                                                                                                                                                                                                                                              | 174  | 261  | 1.00E-78  | 150.0 | 82.2 | 93.7 | hypothetical protein CARUB_v10020817mg, partial | gbpln | Capsella rubella     | AT1G73540.1   Symbols: atnudt21, NUDT21   nudix hydrolase homolog 21   chr1:27645880-27646571 REVERSE LENGTH=198                                               | 174  | 198  | 6.00E-77  | 113.8 | 80.5 | 88.5 |
| Rsa1.0_00898.1.g21020.t1 | ref XP_002888933.1   lipid binding protein [Arabidopsis lyrata subsp. lyrata]   gi 297334774 gb EFH65192.1   lipid binding protein [Arabidopsis lyrata subsp. lyrata]                                                                                                                                                                                                                                                                                                                                                                                           | 151  | 155  | 2.00E-38  | 102.6 | 53.6 | 74.2 | lipid binding protein                           | gbpln | Arabidopsis lyrata   | AT1G73550.1   Symbols:   Bifunctional inhibitor/lipid-transfer protein/seed storage 2S albumin superfamily protein   chr1:27647806-27648536 REVERSE LENGTH=152 | 151  | 152  | 2.00E-35  | 100.7 | 47.7 | 65.6 |

|                          |                                                                                                                                                                                                                                                                                                                                                                                                                                  |     |     |           |       |      |      |                                                                                    |       |                      |                                                                                                                                                               |     |     |           |       |      |      |
|--------------------------|----------------------------------------------------------------------------------------------------------------------------------------------------------------------------------------------------------------------------------------------------------------------------------------------------------------------------------------------------------------------------------------------------------------------------------|-----|-----|-----------|-------|------|------|------------------------------------------------------------------------------------|-------|----------------------|---------------------------------------------------------------------------------------------------------------------------------------------------------------|-----|-----|-----------|-------|------|------|
| Rsa1.0_00898.1.g21021.t1 | gb ACH91863.1  PIN-FORMED1 [Cardamine hirsuta]                                                                                                                                                                                                                                                                                                                                                                                   | 620 | 623 | 0         | 100.5 | 90.8 | 93.9 | PIN-FORMED1                                                                        | gbpln | Cardamine hirsuta    | AT1G73590.1   Symbols: PIN1, ATPIN1   Auxin efflux carrier family protein   chr1:27659772-27662876 FORWARD LENGTH=622                                         | 620 | 622 | 0         | 100.3 | 92.1 | 94.8 |
| Rsa1.0_00898.1.g21022.t1 | #                                                                                                                                                                                                                                                                                                                                                                                                                                | #   | #   | #         | #     | #    | -    |                                                                                    | ----  | ----                 | #                                                                                                                                                             | #   | #   | #         | #     | #    |      |
| Rsa1.0_00898.1.g21023.t1 | gb ABK28243.1  unknown [Arabidopsis thaliana]                                                                                                                                                                                                                                                                                                                                                                                    | 260 | 297 | 6.00E-61  | 114.2 | 41.9 | 65.8 | unknown                                                                            | gbpln | Arabidopsis thaliana | AT4G04650.1   Symbols:   RNA-directed DNA polymerase (reverse transcriptase)-related family protein   chr4:2353989-2355213 REVERSE LENGTH=332                 | 260 | 332 | 1.00E-61  | 127.7 | 40.8 | 64.6 |
| Rsa1.0_00898.1.g21024.t3 | ref XP_002887501.1  transducin family protein [Arabidopsis lyrata subsp. lyrata]   gi 297333342 gb EFH63760.1  transducin family protein [Arabidopsis lyrata subsp. lyrata]                                                                                                                                                                                                                                                      | 555 | 512 | 0         | 92.3  | 84.0 | 87.7 | transducin family protein                                                          | gbpln | Arabidopsis lyrata   | AT1G73720.1   Symbols: SMU1   transducin family protein / WD-40 repeat family protein   chr1:27725059-27729722 FORWARD LENGTH=511                             | 555 | 511 | 0         | 92.1  | 83.1 | 87.7 |
| Rsa1.0_00898.1.g21025.t1 | dbj BAJ34331.1  unnamed protein product [Theilungiella halophila]                                                                                                                                                                                                                                                                                                                                                                | 578 | 585 | 0         | 101.2 | 89.8 | 95.2 | unnamed protein product                                                            | ----  | ----                 | AT1G73730.1   Symbols: EIL3, SLIM1, ATSLIM, AtEIL3   ETHYLENE-INSENSITIVE3-like 3   chr1:27730434-27732363 REVERSE LENGTH=567                                 | 578 | 567 | 0         | 98.1  | 85.3 | 90.3 |
| Rsa1.0_00898.1.g21026.t1 | ref XP_002887503.1  glycosyl transferase family 28 protein [Arabidopsis lyrata subsp. lyrata]   gi 297333344 gb EFH63762.1  glycosyl transferase family 28 protein [Arabidopsis lyrata subsp. lyrata]                                                                                                                                                                                                                            | 436 | 435 | 0         | 99.8  | 83.9 | 92.7 | glycosyl transferase family 28 protein                                             | gbpln | Arabidopsis lyrata   | AT1G73740.1   Symbols:   UDP-Glycosyltransferase superfamily protein   chr1:27734451-27736008 FORWARD LENGTH=431                                              | 436 | 431 | 0         | 98.9  | 83.9 | 91.3 |
| Rsa1.0_00898.1.g21027.t1 | ref NP_565071.1  esterase/lipase domain-containing protein [Arabidopsis thaliana]   gi 16930505 gb AAL31938.1 AF419606_1 At1g73750/F25P22.17 [Arabidopsis thaliana]   gi 21360473 gb AAM47352.1  At1g73750/F25P22.17 [Arabidopsis thaliana]   gi 332197383 gb AEE35504.1  esterase/lipase domain-containing protein [Arabidopsis thaliana]                                                                                       | 450 | 452 | 0         | 100.4 | 80.7 | 89.3 | esterase/lipase domain-containing protein                                          | gbpln | Arabidopsis thaliana | AT1G73750.1   Symbols:   Uncharacterised conserved protein UCPO31088, alpha/beta hydrolase   chr1:27736659-27738887 FORWARD LENGTH=452                        | 450 | 452 | 0         | 100.4 | 80.7 | 89.3 |
| Rsa1.0_00898.1.g21028.t4 | ref XP_002877484.1  predicted protein [Arabidopsis lyrata subsp. lyrata]   gi 297323322 gb EFH53743.1  predicted protein [Arabidopsis lyrata subsp. lyrata]                                                                                                                                                                                                                                                                      | 277 | 494 | 4.00E-37  | 178.3 | 32.1 | 36.5 | predicted protein                                                                  | gbpln | Arabidopsis lyrata   | AT3G46450.1   Symbols:   SEC14 cytosolic factor family protein / phosphoglyceride transfer family protein   chr3:17093297-17095319 REVERSE LENGTH=486         | 277 | 486 | 1.00E-36  | 175.5 | 29.6 | 33.9 |
| Rsa1.0_00898.1.g21029.t1 | gb ADK63390.1  C3HC4 type zinc finger protein [Brassica rapa]                                                                                                                                                                                                                                                                                                                                                                    | 362 | 346 | 1.00E-140 | 95.6  | 72.7 | 79.8 | C3HC4 type zinc finger protein                                                     | gbpln | Brassica rapa        | AT1G73760.1   Symbols:   RING/U-box superfamily protein   chr1:27739366-27741161 REVERSE LENGTH=367                                                           | 362 | 367 | 1.00E-134 | 101.4 | 68.5 | 81.8 |
| Rsa1.0_00898.1.g21030.t1 | ref NP_177519.1  bifunctional inhibitor/lipid-transfer protein/seed storage 2S albumin-like protein [Arabidopsis thaliana]   gi 12324219 gb AAG52085.1 AC012679_23 putative lipid transfer protein; 71816-72112 [Arabidopsis thaliana]   gi 332197387 gb AEE35508.1  bifunctional inhibitor/lipid-transfer protein/seed storage 2S albumin-like protein [Arabidopsis thaliana]                                                   | 98  | 98  | 1.00E-35  | 100.0 | 73.5 | 82.7 | bifunctional inhibitor/lipid-transfer protein/seed storage 2S albumin-like protein | gbpln | Arabidopsis thaliana | AT1G73780.1   Symbols:   Bifunctional inhibitor/lipid-transfer protein/seed storage 2S albumin superfamily protein   chr1:27743872-27744168 FORWARD LENGTH=98 | 98  | 98  | 2.00E-38  | 100.0 | 73.5 | 82.7 |
| Rsa1.0_00898.1.g21031.t1 | ref XP_004235364.1  PREDICTED: mitotic-spindle organizing protein 1B-like [Solanum lycopersicum]                                                                                                                                                                                                                                                                                                                                 | 70  | 76  | 1.00E-21  | 108.6 | 72.9 | 85.7 | PREDICTED: mitotic-spindle organizing protein 1B-like                              | gbpln | Solanum lycopersicum | AT1G73790.1   Symbols:   Protein of unknown function (DUF3743)   chr1:27745019-27745222 FORWARD LENGTH=67                                                     | 70  | 67  | 3.00E-24  | 95.7  | 72.9 | 81.4 |
| Rsa1.0_00898.1.g21032.t1 | ref XP_002888946.1  hypothetical protein ARALYDRAFT_895244 [Arabidopsis lyrata subsp. lyrata]   gi 297334787 gb EFH65205.1  hypothetical protein ARALYDRAFT_895244 [Arabidopsis lyrata subsp. lyrata]                                                                                                                                                                                                                            | 460 | 449 | 0         | 97.6  | 73.7 | 83.9 | hypothetical protein ARALYDRAFT_895244                                             | gbpln | Arabidopsis lyrata   | AT1G73805.1   Symbols:   Calmodulin binding protein-like   chr1:27745761-27749178 REVERSE LENGTH=451                                                          | 460 | 451 | 0         | 98.0  | 73.3 | 83.3 |
| Rsa1.0_00898.1.g21033.t3 | ref NP_197803.1  Squalene monooxygenase 1.1 [Arabidopsis thaliana]   gi 11467948 sp O65404.2 ERG11_ARATH RecName: Full=Squalene monooxygenase 1.1; AltName: Full=Squalene epoxidase 1.1; Short=SE 1.1   gi 9757924 dbj BA808406.1  squalene monooxygenase [Arabidopsis thaliana]   gi 222422883 dbj BAH19428.1  AT5G24150 [Arabidopsis thaliana]   gi 332005879 gb AED93262.1  Squalene monooxygenase 1.1 [Arabidopsis thaliana] | 475 | 516 | 0         | 108.6 | 69.3 | 83.8 | Squalene monooxygenase 1.1                                                         | gbpln | Arabidopsis thaliana | AT5G24150.1   Symbols: SQP1, SQE5   FAD/NAD(P)-binding oxidoreductase family protein   chr5:8172594-8175395 REVERSE LENGTH=516                                | 475 | 516 | 0         | 108.6 | 69.3 | 83.8 |



|                          |                                                                                                                                                                                                                                                                                       |     |     |           |       |      |      |                                                                                                    |       |                      |                                                                                                                                                                                                                                                                                                                                                                                                                                                                                               |     |      |           |       |      |      |
|--------------------------|---------------------------------------------------------------------------------------------------------------------------------------------------------------------------------------------------------------------------------------------------------------------------------------|-----|-----|-----------|-------|------|------|----------------------------------------------------------------------------------------------------|-------|----------------------|-----------------------------------------------------------------------------------------------------------------------------------------------------------------------------------------------------------------------------------------------------------------------------------------------------------------------------------------------------------------------------------------------------------------------------------------------------------------------------------------------|-----|------|-----------|-------|------|------|
| Rsa1.0_00899.1.g21034.t1 | refNP_179633.2  ROP-interactive CRIB motif-containing protein 6 [Arabidopsis thaliana] gi 91806212 gb ABE65834.1  p21-rho-binding domain-containing protein [Arabidopsis thaliana] gi 330251912 gb AEC07006.1  ROP-interactive CRIB motif-containing protein 6 [Arabidopsis thaliana] | 203 | 212 | 3.00E-76  | 104.4 | 79.3 | 87.2 | ROP-interactive CRIB motif-containing protein 6                                                    | gbpln | Arabidopsis thaliana | AT2G20430.1   Symbols: RIC6   ROP-interactive CRIB motif-containing protein 6   chr2:8808667-8809781 REVERSE LENGTH=212                                                                                                                                                                                                                                                                                                                                                                       | 203 | 212  | 1.00E-78  | 104.4 | 79.3 | 87.2 |
| Rsa1.0_00899.1.g21035.t1 | refXP_002884197.1  hypothetical protein ARALYDRAFT_480864 [Arabidopsis lyrata subsp. lyrata] gi 297330037 gb EFH60456.1  hypothetical protein ARALYDRAFT_480864 [Arabidopsis lyrata subsp. lyrata]                                                                                    | 128 | 127 | 1.00E-50  | 99.2  | 76.6 | 85.9 | hypothetical protein ARALYDRAFT_480864                                                             | gbpln | Arabidopsis lyrata   | AT2G20362.1   Symbols:   unknown protein; FUNCTIONS IN: molecular_function unknown; INVOLVED IN: biological_process unknown; LOCATED IN: cellular_component unknown; BEST Arabidopsis thaliana protein match is: unknown protein (TAIR:AT1G63310.1); Has 30201 Blast hits to 17322 proteins in 780 species: Archaea - 12; Bacteria - 1396; Metazoa - 17338; Fungi - 3422; Plants - 5037; Viruses - 0; Other Eukaryotes - 2996 (source: NCBI BLINK).   chr2:8789772-8790155 FORWARD LENGTH=127 | 128 | 127  | 6.00E-53  | 99.2  | 75.8 | 86.7 |
| Rsa1.0_00899.1.g21036.t1 | refXP_002884196.1  catalytic/coenzyme binding protein [Arabidopsis lyrata subsp. lyrata] gi 297330036 gb EFH60455.1  catalytic/coenzyme binding protein [Arabidopsis lyrata subsp. lyrata]                                                                                            | 403 | 402 | 0         | 99.8  | 94.0 | 96.8 | catalytic/coenzyme binding protein                                                                 | gbpln | Arabidopsis lyrata   | AT2G20360.1   Symbols:   NAD(P)-binding Rossmann-fold superfamily protein   chr2:8786070-8789098 FORWARD LENGTH=402                                                                                                                                                                                                                                                                                                                                                                           | 403 | 402  | 0         | 99.8  | 93.8 | 96.5 |
| Rsa1.0_00899.1.g21037.t1 | refXP_002884194.1  hypothetical protein ARALYDRAFT_900384 [Arabidopsis lyrata subsp. lyrata] gi 297330034 gb EFH60453.1  hypothetical protein ARALYDRAFT_900384 [Arabidopsis lyrata subsp. lyrata]                                                                                    | 220 | 479 | 9.00E-71  | 217.7 | 56.8 | 60.5 | hypothetical protein ARALYDRAFT_900384                                                             | gbpln | Arabidopsis lyrata   | AT2G20340.1   Symbols:   Pyridoxal phosphate (PLP)-dependent transferases superfamily protein   chr2:8779804-8782490 FORWARD LENGTH=490                                                                                                                                                                                                                                                                                                                                                       | 220 | 490  | 8.00E-72  | 222.7 | 55.9 | 60.0 |
| Rsa1.0_00899.1.g21038.t1 | #                                                                                                                                                                                                                                                                                     | #   | #   | #         | #     | #    | #    | -                                                                                                  | ----  | ----                 | #                                                                                                                                                                                                                                                                                                                                                                                                                                                                                             | #   | #    | #         | #     | #    |      |
| Rsa1.0_00899.1.g21039.t1 | refXP_002886272.1  kinase family protein [Arabidopsis lyrata subsp. lyrata] gi 297332112 gb EFH62531.1  kinase family protein [Arabidopsis lyrata subsp. lyrata]                                                                                                                      | 340 | 743 | 1.00E-150 | 218.5 | 75.9 | 78.5 | kinase family protein                                                                              | gbpln | Arabidopsis lyrata   | AT2G20300.1   Symbols: ALE2   Protein kinase superfamily protein   chr2:8756475-8759845 REVERSE LENGTH=744                                                                                                                                                                                                                                                                                                                                                                                    | 340 | 744  | 1.00E-153 | 218.8 | 75.9 | 78.2 |
| Rsa1.0_00899.1.g21040.t1 | gb EOA30837.1  hypothetical protein CARUB_v10013982mg [Capsella rubella]                                                                                                                                                                                                              | 426 | 370 | 1.00E-155 | 86.9  | 64.8 | 66.4 | hypothetical protein CARUB_v10013982mg                                                             | gbpln | Capsella rubella     | AT2G20280.1   Symbols:   Zinc finger C-x8-C-x5-C-x3-H type family protein   chr2:8740054-8742349 REVERSE LENGTH=371                                                                                                                                                                                                                                                                                                                                                                           | 426 | 371  | 1.00E-157 | 87.1  | 64.3 | 66.2 |
| Rsa1.0_00899.1.g21041.t1 | refXP_002873362.1  hypothetical protein ARALYDRAFT_908808 [Arabidopsis lyrata subsp. lyrata] gi 297319199 gb EFH49621.1  hypothetical protein ARALYDRAFT_908808 [Arabidopsis lyrata subsp. lyrata]                                                                                    | 751 | 726 | 0         | 96.7  | 51.9 | 68.6 | hypothetical protein ARALYDRAFT_908808                                                             | gbpln | Arabidopsis lyrata   | AT4G12570.1   Symbols: UPL5   ubiquitin protein ligase 5   chr4:7445585-7448819 FORWARD LENGTH=873                                                                                                                                                                                                                                                                                                                                                                                            | 751 | 873  | 1.00E-123 | 116.2 | 37.8 | 58.2 |
| Rsa1.0_00899.1.g21042.t1 | #                                                                                                                                                                                                                                                                                     | #   | #   | #         | #     | #    | #    | -                                                                                                  | ----  | ----                 | #                                                                                                                                                                                                                                                                                                                                                                                                                                                                                             | #   | #    | #         | #     | #    |      |
| Rsa1.0_00899.1.g21043.t1 | refXP_002871344.1  hypothetical protein ARALYDRAFT_908827 [Arabidopsis lyrata subsp. lyrata] gi 297317181 gb EFH47603.1  hypothetical protein ARALYDRAFT_908827 [Arabidopsis lyrata subsp. lyrata]                                                                                    | 277 | 630 | 2.00E-71  | 227.4 | 55.6 | 68.6 | hypothetical protein ARALYDRAFT_908827                                                             | gbpln | Arabidopsis lyrata   | AT1G76810.1   Symbols:   eukaryotic translation initiation factor 2 (eIF-2) family protein   chr1:28831366-28836310 REVERSE LENGTH=1294                                                                                                                                                                                                                                                                                                                                                       | 277 | 1294 | 2.00E-51  | 467.1 | 43.7 | 63.2 |
| Rsa1.0_00900.1.g21044.t1 | #                                                                                                                                                                                                                                                                                     | #   | #   | #         | #     | #    | #    | -                                                                                                  | ----  | ----                 | #                                                                                                                                                                                                                                                                                                                                                                                                                                                                                             | #   | #    | #         | #     | #    |      |
| Rsa1.0_00900.1.g21045.t1 | #                                                                                                                                                                                                                                                                                     | #   | #   | #         | #     | #    | #    | -                                                                                                  | ----  | ----                 | #                                                                                                                                                                                                                                                                                                                                                                                                                                                                                             | #   | #    | #         | #     | #    |      |
| Rsa1.0_00900.1.g21046.t1 | gb AAM63624.1  DnaJ protein, putative [Arabidopsis thaliana]                                                                                                                                                                                                                          | 154 | 156 | 3.00E-71  | 101.3 | 90.9 | 94.2 | DnaJ protein, putative                                                                             | gbpln | Arabidopsis thaliana | AT1G56300.1   Symbols:   Chaperone DnaJ-domain superfamily protein   chr1:21079022-21080168 REVERSE LENGTH=156                                                                                                                                                                                                                                                                                                                                                                                | 154 | 156  | 2.00E-72  | 101.3 | 89.6 | 93.5 |
| Rsa1.0_00900.1.g21047.t2 | refXP_002894636.1  hypothetical protein ARALYDRAFT_337810 [Arabidopsis lyrata subsp. lyrata] gi 297340478 gb EFH70895.1  hypothetical protein ARALYDRAFT_337810 [Arabidopsis lyrata subsp. lyrata]                                                                                    | 252 | 163 | 1.00E-52  | 64.7  | 42.9 | 46.8 | hypothetical protein ARALYDRAFT_337810                                                             | gbpln | Arabidopsis lyrata   | AT1G56320.1   Symbols:   BEST Arabidopsis thaliana protein match is: Glycine-rich protein family (TAIR:AT5G49350.2); Has 60 Blast hits to 60 proteins in 12 species: Archaea - 0; Bacteria - 0; Metazoa - 0; Fungi - 0; Plants - 60; Viruses - 0; Other Eukaryotes - 0 (source: NCBI BLINK).   chr1:21085722-21086459 REVERSE LENGTH=163                                                                                                                                                      | 252 | 163  | 2.00E-53  | 64.7  | 42.9 | 46.0 |
| Rsa1.0_00900.1.g21048.t1 | sp O04267.1 SAR1B_BRAOM RecName: Full=GTP-binding protein SAR1B gi 2108347 gb AAC49717.1  small GTP-binding protein Bsar1b [Brassica rapa subsp. oleifera]                                                                                                                            | 195 | 195 | 1.00E-108 | 100.0 | 97.9 | 99.5 | RecName: Full=GTP-binding protein SAR1B gi 2108347 gb AAC49717.1  small GTP-binding protein Bsar1b | gbpln | Brassica rapa        | AT1G56330.1   Symbols: SARI, ATSARI, ATSA1B, ATSAR1B, SAR1B   secretion-associated RAS 1B   chr1:21086845-21086478 REVERSE LENGTH=193                                                                                                                                                                                                                                                                                                                                                         | 195 | 193  | 1.00E-109 | 99.0  | 97.4 | 98.5 |

|                          |                                                                                                                                                                                                                                                                                                                                                                                   |      |      |           |       |      |      |                                                           |       |                      |                                                                                                                                                                                                                                                                                                                                             |      |      |           |       |      |      |
|--------------------------|-----------------------------------------------------------------------------------------------------------------------------------------------------------------------------------------------------------------------------------------------------------------------------------------------------------------------------------------------------------------------------------|------|------|-----------|-------|------|------|-----------------------------------------------------------|-------|----------------------|---------------------------------------------------------------------------------------------------------------------------------------------------------------------------------------------------------------------------------------------------------------------------------------------------------------------------------------------|------|------|-----------|-------|------|------|
| Rsa1.0_00900.1.g21049.t1 | emb CCD74507.1  hypothetical protein [Arabidopsis halleri subsp. halleri]                                                                                                                                                                                                                                                                                                         | 193  | 185  | 3.00E-70  | 95.9  | 76.7 | 80.3 | hypothetical protein                                      | gbpln | Arabidopsis halleri  | AT1G56420.1   Symbols:   unknown protein; BEST Arabidopsis thaliana protein match is: unknown protein (TAIR:AT1G2530.1). Has 58 Blast hits to 58 proteins in 16 species: Archae - 0; Bacteria - 2; Metazoa - 0; Fungi - 0; Plants - 54; Viruses - 0; Other Eukaryotes - 2 (source: NCBI BLINK).   chr1:21122772-21124234 REVERSE LENGTH=183 | 193  | 183  | 7.00E-69  | 94.8  | 74.1 | 78.8 |
| Rsa1.0_00900.1.g21050.t1 | #                                                                                                                                                                                                                                                                                                                                                                                 | #    | #    | #         | #     | #    | #    | -                                                         | ----  | ----                 | #                                                                                                                                                                                                                                                                                                                                           | #    | #    | #         | #     | #    |      |
| Rsa1.0_00900.1.g21051.t5 | ref XP_002894647.1  hypothetical protein ARALYDRAFT_474807 [Arabidopsis lyrata subsp. lyrata]   g 297340459 g EFH70906.1  hypothetical protein ARALYDRAFT_474907 [Arabidopsis lyrata subsp. lyrata]                                                                                                                                                                               | 608  | 472  | 0         | 77.6  | 56.1 | 62.3 | hypothetical protein ARALYDRAFT_474807                    | gbpln | Arabidopsis lyrata   | AT1G56440.1   Symbols: TPR5   Tetratricopeptide repeat (TPR)-like superfamily protein   chr1:21138765-21141482 REVERSE LENGTH=476                                                                                                                                                                                                           | 608  | 476  | 0         | 78.3  | 57.6 | 63.2 |
| Rsa1.0_00900.1.g21052.t1 | gb EOA35645.1  hypothetical protein CARUB_v10020862mg [Capsella rubella]                                                                                                                                                                                                                                                                                                          | 256  | 245  | 1.00E-133 | 95.7  | 89.8 | 94.5 | hypothetical protein CARUB_v10020862mg                    | gbpln | Capsella rubella     | AT1G56450.1   Symbols: PBG1   20S proteasome beta subunit G1   chr1:21141970-21144166 FORWARD LENGTH=246                                                                                                                                                                                                                                    | 256  | 246  | 1.00E-132 | 96.1  | 87.9 | 93.4 |
| Rsa1.0_00900.1.g21053.t1 | gb AAG51247.1 AC055769.6 copia-type polyprotein, putative; 28768-32772 [Arabidopsis thaliana]                                                                                                                                                                                                                                                                                     | 1340 | 1334 | 0         | 99.6  | 69.0 | 82.5 | copia-type polyprotein, putative; 28768-32772             | gbpln | Arabidopsis thaliana | AT4G23160.1   Symbols: CRK8   cysteine-rich RLK (RECEPTOR-like protein kinase) 8   chr4:12129485-12134086 FORWARD LENGTH=1262                                                                                                                                                                                                               | 1340 | 1262 | 1.00E-104 | 94.2  | 14.0 | 22.7 |
| Rsa1.0_00900.1.g21054.t1 | ref NP_176041.2  HIT zinc finger and PAPA-1-like domain-containing protein [Arabidopsis thaliana]   g 26450456 dbj BAC42342.1  unknown protein [Arabidopsis thaliana]   g 332195277 gb AEE33398.1  HIT zinc finger and PAPA-1-like domain-containing protein [Arabidopsis thaliana]                                                                                               | 447  | 502  | 1.00E-164 | 112.3 | 81.0 | 87.9 | HIT zinc finger and PAPA-1-like domain-containing protein | gbpln | Arabidopsis thaliana | AT1G56460.1   Symbols:   HIT zinc finger ;PAPA-1-like conserved region   chr1:21146765-21149468 FORWARD LENGTH=502                                                                                                                                                                                                                          | 447  | 502  | 1.00E-166 | 112.3 | 81.0 | 87.9 |
| Rsa1.0_00900.1.g21055.t1 | emb CCD74494.1  hypothetical protein [Arabidopsis halleri subsp. halleri]                                                                                                                                                                                                                                                                                                         | 169  | 352  | 5.00E-61  | 208.3 | 69.2 | 81.1 | hypothetical protein                                      | gbpln | Arabidopsis halleri  | AT3G24130.1   Symbols:   Pectin lyase-like superfamily protein   chr3:8711663-8713361 REVERSE LENGTH=335                                                                                                                                                                                                                                    | 169  | 335  | 4.00E-36  | 198.2 | 44.4 | 63.9 |
| Rsa1.0_00900.1.g21056.t1 | ref NP_564720.1  uncharacterized protein [Arabidopsis thaliana]   g 9954754 gb AAG09105.1 AC009323.1 6 Unknown protein [Arabidopsis thaliana]   g 16648669 gb AAL25527.1  At1g56580/F25P12.18 [Arabidopsis thaliana]   g 20856239 gb AAM26655.1  At1g56580/F25P12.18 [Arabidopsis thaliana]   g 332195290 gb AEE33411.1  uncharacterized protein AT1G56580 [Arabidopsis thaliana] | 166  | 166  | 5.00E-82  | 100.0 | 92.2 | 94.6 | uncharacterized protein                                   | gbpln | Arabidopsis thaliana | AT1G56580.1   Symbols: SVB   Protein of unknown function, DUF538   chr1:21198402-21198902 REVERSE LENGTH=166                                                                                                                                                                                                                                | 166  | 166  | 2.00E-84  | 100.0 | 92.2 | 94.6 |
| Rsa1.0_00901.1.g21057.t1 | gb AAD32866.1 AC005489.4 F14N23.4 [Arabidopsis thaliana]                                                                                                                                                                                                                                                                                                                          | 255  | 1161 | 2.00E-65  | 455.3 | 45.5 | 64.3 | F14N23.4                                                  | gbpln | Arabidopsis thaliana | AT4G04650.1   Symbols:   RNA-directed DNA polymerase (reverse transcriptase)-related family protein   chr4:2353989-2355213 REVERSE LENGTH=332                                                                                                                                                                                               | 255  | 332  | 3.00E-67  | 130.2 | 43.9 | 62.0 |
| Rsa1.0_00901.1.g21058.t1 | gb EOA22775.1  hypothetical protein CARUB_v10003489mg [Capsella rubella]                                                                                                                                                                                                                                                                                                          | 262  | 365  | 1.00E-126 | 139.3 | 84.0 | 90.5 | hypothetical protein CARUB_v10003489mg                    | gbpln | Capsella rubella     | AT4G01430.1   Symbols:   nodulin MtN21 /EamA-like transporter family protein   chr4:585707-587846 FORWARD LENGTH=365                                                                                                                                                                                                                        | 262  | 365  | 1.00E-125 | 139.3 | 84.0 | 90.5 |
| Rsa1.0_00901.1.g21059.t1 | gb AAC67205.1  putative retroelement pol polyprotein [Arabidopsis thaliana]                                                                                                                                                                                                                                                                                                       | 2545 | 1413 | 0         | 55.5  | 27.8 | 34.9 | putative retroelement pol polyprotein                     | gbpln | Arabidopsis thaliana | AT4G23160.1   Symbols: CRK8   cysteine-rich RLK (RECEPTOR-like protein kinase) 8   chr4:12129485-12134086 FORWARD LENGTH=1262                                                                                                                                                                                                               | 2545 | 1262 | 6.00E-31  | 49.6  | 3.1  | 4.6  |
| Rsa1.0_00901.1.g21060.t1 | gb ABD65034.1  Ulp1 protease family protein [Brassica oleracea]                                                                                                                                                                                                                                                                                                                   | 366  | 863  | 2.00E-39  | 235.8 | 21.3 | 26.5 | Ulp1 protease family protein                              | gbpln | Brassica oleracea    | AT5G45570.1   Symbols:   Ulp1 protease family protein   chr5:18472301-18475574 FORWARD LENGTH=921                                                                                                                                                                                                                                           | 366  | 921  | 2.00E-23  | 251.6 | 12.8 | 20.5 |
| Rsa1.0_00901.1.g21061.t1 | gb ABD65034.1  Ulp1 protease family protein [Brassica oleracea]                                                                                                                                                                                                                                                                                                                   | 117  | 863  | 3.00E-18  | 737.6 | 38.5 | 47.0 | Ulp1 protease family protein                              | gbpln | Brassica oleracea    | #                                                                                                                                                                                                                                                                                                                                           | #    | #    | #         | #     | #    |      |
| Rsa1.0_00901.1.g21062.t1 | dbj BAB11196.1  mutator-like transposase [Arabidopsis thaliana]                                                                                                                                                                                                                                                                                                                   | 143  | 797  | 9.00E-13  | 557.3 | 35.0 | 53.8 | mutator-like transposase                                  | gbpln | Arabidopsis thaliana | #                                                                                                                                                                                                                                                                                                                                           | #    | #    | #         | #     | #    |      |
| Rsa1.0_00901.1.g21063.t1 | #                                                                                                                                                                                                                                                                                                                                                                                 | #    | #    | #         | #     | #    | #    | -                                                         | ----  | ----                 | #                                                                                                                                                                                                                                                                                                                                           | #    | #    | #         | #     | #    |      |
| Rsa1.0_00901.1.g21064.t1 | dbj BAB01350.1  Mutator-like transposase [Arabidopsis thaliana]                                                                                                                                                                                                                                                                                                                   | 756  | 811  | 1.00E-141 | 107.3 | 40.5 | 56.7 | Mutator-like transposase                                  | gbpln | Arabidopsis thaliana | AT1G49920.1   Symbols:   MuDR family transposase   chr1:18481798-18484233 REVERSE LENGTH=785                                                                                                                                                                                                                                                | 756  | 785  | 2.00E-19  | 103.8 | 13.4 | 22.1 |
| Rsa1.0_00901.1.g21065.t1 | emb CAB43910.1  putative protein [Arabidopsis thaliana]   g 7269794 emb CAB79654.1  putative protein [Arabidopsis thaliana]                                                                                                                                                                                                                                                       | 673  | 493  | 2.00E-35  | 73.3  | 13.5 | 21.2 | putative protein                                          | gbpln | Arabidopsis thaliana | AT2G06420.1   Symbols:   Domain of unknown function (DUF1955)   chr2:2539083-2539985 FORWARD LENGTH=249                                                                                                                                                                                                                                     | 673  | 249  | 1.00E-18  | 37.0  | 9.1  | 11.3 |

|                          |                                                                                                                                                                                                                  |      |      |           |       |      |      |                                             |       |                      |                                                                                                                                                                                                                                                                                                                                                                                                                                                                                                                    |      |      |           |       |      |      |
|--------------------------|------------------------------------------------------------------------------------------------------------------------------------------------------------------------------------------------------------------|------|------|-----------|-------|------|------|---------------------------------------------|-------|----------------------|--------------------------------------------------------------------------------------------------------------------------------------------------------------------------------------------------------------------------------------------------------------------------------------------------------------------------------------------------------------------------------------------------------------------------------------------------------------------------------------------------------------------|------|------|-----------|-------|------|------|
| Rsa1.0_00901.1.g21066.t1 | ref[XP_002872894.1] pentatricopeptide repeat-containing protein [Arabidopsis lyrata subsp. lyrata]<br>gi 297318731 gb EFH49153.1  pentatricopeptide repeat-containing protein [Arabidopsis lyrata subsp. lyrata] | 130  | 1162 | 8.00E-32  | 893.8 | 54.6 | 57.7 | pentatricopeptide repeat-containing protein | gbpln | Arabidopsis lyrata   | AT4G01400.2   Symbols:   FUNCTIONS IN: molecular_function unknown; INVOLVED IN: biological_process unknown; LOCATED IN: cellular_component unknown; EXPRESSED IN: 23 plant structures; EXPRESSED DURING: 15 growth stages; CONTAINS InterPro DOMAIN/s: COG4 transport (InterPro:IPR013167); Has 465 Blast hits to 425 proteins in 199 species: Archae - 0; Bacteria - 3; Metazoa - 153; Fungi - 166; Plants - 45; Viruses - 0; Other Eukaryotes - 98 (source: NCBI BLINK).   chr4:573098-575648 REVERSE LENGTH=738 | 130  | 738  | 5.00E-32  | 567.7 | 51.5 | 55.4 |
| Rsa1.0_00902.1.g21067.t4 | dbj BAJ33974.1  unnamed protein product [Theillungiella halophila]                                                                                                                                               | 556  | 622  | 0         | 111.9 | 89.7 | 95.5 | unnamed protein product                     | ----  | ----                 | AT1G69870.1   Symbols: NRT1.7   nitrate transporter 1.7   chr1:26316208-26320097 FORWARD LENGTH=620                                                                                                                                                                                                                                                                                                                                                                                                                | 556  | 620  | 0         | 111.5 | 85.8 | 93.0 |
| Rsa1.0_00902.1.g21068.t1 | ref[XP_002863112.1] thioredoxin H-type 8 [Arabidopsis lyrata subsp. lyrata]<br>gi 297308934 gb EFH39371.1  thioredoxin H-type 8 [Arabidopsis lyrata subsp. lyrata]                                               | 147  | 148  | 2.00E-52  | 100.7 | 70.7 | 81.0 | thioredoxin H-type 8                        | gbpln | Arabidopsis lyrata   | AT1G69880.1   Symbols: ATH8, TH8   thioredoxin H-type 8   chr1:26321540-26322794 FORWARD LENGTH=148                                                                                                                                                                                                                                                                                                                                                                                                                | 147  | 148  | 1.00E-52  | 100.7 | 69.4 | 79.6 |
| Rsa1.0_00902.1.g21069.t1 | ref[XP_002863112.1] thioredoxin H-type 8 [Arabidopsis lyrata subsp. lyrata]<br>gi 297308934 gb EFH39371.1  thioredoxin H-type 8 [Arabidopsis lyrata subsp. lyrata]                                               | 140  | 148  | 1.00E-50  | 105.7 | 70.0 | 83.6 | thioredoxin H-type 8                        | gbpln | Arabidopsis lyrata   | AT1G69880.1   Symbols: ATH8, TH8   thioredoxin H-type 8   chr1:26321540-26322794 FORWARD LENGTH=148                                                                                                                                                                                                                                                                                                                                                                                                                | 140  | 148  | 2.00E-51  | 105.7 | 70.7 | 83.6 |
| Rsa1.0_00902.1.g21070.t1 | ref[XP_002863106.1] hypothetical protein ARALYDRAFT_920363 [Arabidopsis lyrata subsp. lyrata]<br>gi 297308928 gb EFH39365.1  hypothetical protein ARALYDRAFT_920363 [Arabidopsis lyrata subsp. lyrata]           | 295  | 284  | 1.00E-127 | 96.3  | 81.7 | 87.5 | hypothetical protein ARALYDRAFT_920363      | gbpln | Arabidopsis lyrata   | AT1G69890.1   Symbols:   Protein of unknown function (DUF569)   chr1:26323426-26324527 REVERSE LENGTH=279                                                                                                                                                                                                                                                                                                                                                                                                          | 295  | 279  | 1.00E-128 | 94.6  | 80.7 | 87.5 |
| Rsa1.0_00902.1.g21071.t1 | gb AAD32898.1  putative retroelement pol polyprotein [Arabidopsis thaliana]                                                                                                                                      | 1378 | 1307 | 0         | 94.8  | 59.1 | 73.4 | putative retroelement pol polyprotein       | gbpln | Arabidopsis thaliana | AT4G23160.1   Symbols: CRK8   cysteine-rich RLK (RECEPTOR-like protein kinase) 8   chr4:12129485-12134086 FORWARD LENGTH=1262                                                                                                                                                                                                                                                                                                                                                                                      | 1378 | 1262 | 1.00E-105 | 91.6  | 14.9 | 23.8 |
| Rsa1.0_00902.1.g21072.t1 | gb AAG52555.1 AC010675.3 putative protein kinase: 23181-21271 [Arabidopsis thaliana]                                                                                                                             | 625  | 625  | 0         | 100.0 | 83.0 | 89.4 | putative protein kinase: 23181-21271        | gbpln | Arabidopsis thaliana | AT1G69910.1   Symbols:   Protein kinase superfamily protein   chr1:26330166-26332076 FORWARD LENGTH=636                                                                                                                                                                                                                                                                                                                                                                                                            | 625  | 636  | 0         | 101.8 | 84.0 | 90.4 |
| Rsa1.0_00902.1.g21073.t1 | ref[XP_002879929.1] hypothetical protein ARALYDRAFT_483212 [Arabidopsis lyrata subsp. lyrata]<br>gi 297325768 gb EFH56188.1  hypothetical protein ARALYDRAFT_483212 [Arabidopsis lyrata subsp. lyrata]           | 169  | 148  | 2.00E-39  | 87.6  | 52.7 | 64.5 | hypothetical protein ARALYDRAFT_483212      | gbpln | Arabidopsis lyrata   | AT2G41390.1   Symbols:   Pollen Ole e 1 allergen and extensin family protein   chr2:17257416-17257862 FORWARD LENGTH=148                                                                                                                                                                                                                                                                                                                                                                                           | 169  | 148  | 1.00E-39  | 87.6  | 50.9 | 61.5 |
| Rsa1.0_00902.1.g21074.t1 | ref[XP_002863104.1] hypothetical protein ARALYDRAFT_920359 [Arabidopsis lyrata subsp. lyrata]<br>gi 297308926 gb EFH39363.1  hypothetical protein ARALYDRAFT_920359 [Arabidopsis lyrata subsp. lyrata]           | 230  | 254  | 1.00E-108 | 110.4 | 80.4 | 89.1 | hypothetical protein ARALYDRAFT_920359      | gbpln | Arabidopsis lyrata   | AT1G69920.1   Symbols: ATGSTU12, GSTU12   glutathione S-transferase TAU 12   chr1:26334395-26335537 REVERSE LENGTH=254                                                                                                                                                                                                                                                                                                                                                                                             | 230  | 254  | 1.00E-109 | 110.4 | 79.1 | 89.1 |
| Rsa1.0_00902.1.g21075.t1 | ref[XP_002863103.1] hypothetical protein ARALYDRAFT_497157 [Arabidopsis lyrata subsp. lyrata]<br>gi 297308925 gb EFH39362.1  hypothetical protein ARALYDRAFT_497157 [Arabidopsis lyrata subsp. lyrata]           | 234  | 234  | 1.00E-129 | 100.0 | 95.3 | 98.3 | hypothetical protein ARALYDRAFT_497157      | gbpln | Arabidopsis lyrata   | AT1G69930.1   Symbols: ATGSTU11, GSTU11   glutathione S-transferase TAU 11   chr1:26337735-26338690 REVERSE LENGTH=234                                                                                                                                                                                                                                                                                                                                                                                             | 234  | 234  | 1.00E-129 | 100.0 | 93.6 | 96.2 |
| Rsa1.0_00902.1.g21076.t1 | gb AAC19278.1 T14P8.10 [Arabidopsis thaliana] gi 7269009 emb CAB80742.1 AT4g02490 [Arabidopsis thaliana]                                                                                                         | 626  | 657  | 0         | 105.0 | 53.4 | 67.3 | T14P8.10                                    | gbpln | Arabidopsis thaliana | AT3G24255.1   Symbols:   RNA-directed DNA polymerase (reverse transcriptase)-related family protein   chr3:8789471-8793208 FORWARD LENGTH=746                                                                                                                                                                                                                                                                                                                                                                      | 626  | 746  | 2.00E-65  | 119.2 | 21.9 | 31.2 |

|                          |                                                                                                                                                                                                                                                                                                                                                                                                                                                                                                                                                                                                                                                                                                                   |     |     |           |       |      |      |                                            |       |                      |                                                                                                                                                                                                                                                                                                                                               |     |     |           |       |      |      |
|--------------------------|-------------------------------------------------------------------------------------------------------------------------------------------------------------------------------------------------------------------------------------------------------------------------------------------------------------------------------------------------------------------------------------------------------------------------------------------------------------------------------------------------------------------------------------------------------------------------------------------------------------------------------------------------------------------------------------------------------------------|-----|-----|-----------|-------|------|------|--------------------------------------------|-------|----------------------|-----------------------------------------------------------------------------------------------------------------------------------------------------------------------------------------------------------------------------------------------------------------------------------------------------------------------------------------------|-----|-----|-----------|-------|------|------|
| Rsa1.0_00902.1.g21077.t1 | ref[NP_177158.1] myb-like transcription factor-like protein [Arabidopsis thaliana]<br>gi 334183796 ref[NP_001185359.1] myb-like transcription factor-like protein [Arabidopsis thaliana]<br>gi 2194137 gb AAB61112.1  ESTs<br>gb R29947.gb H76702 come from this gene [Arabidopsis thaliana]<br>gi 30102606 gb AAP21221.1  At1g70000 [Arabidopsis thaliana]<br>gi 41618912 gb AAS09979.1  MYB transcription factor [Arabidopsis thaliana] gi 110743721 dbj BAE99697.1  hypothetical protein [Arabidopsis thaliana] gi 332196886 gb AEE35007.1  myb-like transcription factor-like protein [Arabidopsis thaliana]<br>gi 332196887 gb AEE35008.1  myb-like transcription factor-like protein [Arabidopsis thaliana] | 244 | 261 | 3.00E-85  | 107.0 | 80.7 | 86.1 | myb-like transcription factor-like protein | gbpln | Arabidopsis thaliana | AT1G70000.2   Symbols:   myb-like transcription factor family protein   chr1:26363674-26364635 REVERSE LENGTH=261                                                                                                                                                                                                                             | 244 | 261 | 1.00E-87  | 107.0 | 80.7 | 86.1 |
| Rsa1.0_00903.1.g21078.t1 | gb AAAS1659.1  cyclin [Brassica napus]                                                                                                                                                                                                                                                                                                                                                                                                                                                                                                                                                                                                                                                                            | 430 | 434 | 0         | 100.9 | 90.9 | 94.4 | cyclin                                     | gbpln | Brassica napus       | AT1G15570.1   Symbols: CYGA2.3   CYCLIN A2.3   chr1:5363034-5365218 FORWARD LENGTH=450                                                                                                                                                                                                                                                        | 430 | 450 | 0         | 104.7 | 83.7 | 89.3 |
| Rsa1.0_00903.1.g21079.t1 | ref[NP_178156.1] RING/U-box domain-containing protein [Arabidopsis thaliana]<br>gi 12324974 gb AAG52430.1 AC018848_1 putative RING zinc finger protein; 53384-54880 [Arabidopsis thaliana]<br>gi 17065538 gb AAL32923.1  putative RING zinc finger protein [Arabidopsis thaliana] gi 23197724 gb AAN15389.1  putative RING zinc finger protein [Arabidopsis thaliana]<br>gi 222423453 dbj BAH19697.1  AT1G80400 [Arabidopsis thaliana]<br>gi 332198277 gb AEE36398.1  RING/U-box domain-containing protein [Arabidopsis thaliana]                                                                                                                                                                                 | 256 | 407 | 1.00E-34  | 159.0 | 38.3 | 55.1 | RING/U-box domain-containing protein       | gbpln | Arabidopsis thaliana | AT1G80400.1   Symbols:   RING/U-box superfamily protein   chr1:30225864-30227360 FORWARD LENGTH=407                                                                                                                                                                                                                                           | 256 | 407 | 3.00E-37  | 159.0 | 38.3 | 55.1 |
| Rsa1.0_00903.1.g21080.t1 | ref[NP_173013.1] uncharacterized protein [Arabidopsis thaliana]<br>gi 8072399 gb AAF71987.1 AC013453_12 Hypothetical protein [Arabidopsis thaliana] gi 60547563 gb AAX23745.1  hypothetical protein At1g15600 [Arabidopsis thaliana]<br>gi 71905403 gb AAZ52679.1  hypothetical protein At1g15600 [Arabidopsis thaliana]<br>gi 332191219 gb AEE29340.1  uncharacterized protein AT1G15600 [Arabidopsis thaliana]                                                                                                                                                                                                                                                                                                  | 218 | 220 | 1.00E-59  | 100.9 | 60.6 | 74.3 | uncharacterized protein                    | gbpln | Arabidopsis thaliana | AT1G15600.1   Symbols:   unknown protein; BEST Arabidopsis thaliana protein match is: unknown protein (TAIR:AT1G15620.1); Has 227 Blast hits to 227 proteins in 15 species: Archae - 0; Bacteria - 0; Metazoa - 0; Fungi - 0; Plants - 227; Viruses - 0; Other Eukaryotes - 0 (source: NCBI BLink).   chr1:5368923-5369761 FORWARD LENGTH=220 | 218 | 220 | 4.00E-62  | 100.9 | 60.6 | 74.3 |
| Rsa1.0_00903.1.g21081.t1 | ref[XP_002890116.1] CENP-C [Arabidopsis lyrata subsp. lyrata]<br>gi 297335958 gb EFH66375.1  CENP-C [Arabidopsis lyrata subsp. lyrata]                                                                                                                                                                                                                                                                                                                                                                                                                                                                                                                                                                            | 735 | 708 | 0         | 96.3  | 61.2 | 71.2 | CENP-C                                     | gbpln | Arabidopsis lyrata   | AT1G15660.1   Symbols: CENP-C   centromere protein C   chr1:5381230-5385057 FORWARD LENGTH=705                                                                                                                                                                                                                                                | 735 | 705 | 0         | 95.9  | 59.7 | 70.3 |
| Rsa1.0_00903.1.g21082.t1 | #                                                                                                                                                                                                                                                                                                                                                                                                                                                                                                                                                                                                                                                                                                                 | #   | #   | #         | #     | #    | -    | -                                          | ----  | ----                 | #                                                                                                                                                                                                                                                                                                                                             | #   | #   | #         | #     | #    |      |
| Rsa1.0_00903.1.g21083.t1 | gb EOA38066.1  hypothetical protein CARUB_v10009534mg [Capsella rubella]                                                                                                                                                                                                                                                                                                                                                                                                                                                                                                                                                                                                                                          | 359 | 361 | 1.00E-171 | 100.6 | 82.2 | 90.0 | hypothetical protein CARUB_v10009534mg     | gbpln | Capsella rubella     | AT1G15670.1   Symbols:   Galactose oxidase/kelch repeat superfamily protein   chr1:5390119-5391198 FORWARD LENGTH=359                                                                                                                                                                                                                         | 359 | 359 | 1.00E-169 | 100.0 | 79.9 | 87.5 |
| Rsa1.0_00903.1.g21084.t1 | #                                                                                                                                                                                                                                                                                                                                                                                                                                                                                                                                                                                                                                                                                                                 | #   | #   | #         | #     | #    | -    | -                                          | ----  | ----                 | #                                                                                                                                                                                                                                                                                                                                             | #   | #   | #         | #     | #    |      |
| Rsa1.0_00903.1.g21085.t1 | gb AET95910.1  AVP1-1 [Brassica rapa]                                                                                                                                                                                                                                                                                                                                                                                                                                                                                                                                                                                                                                                                             | 809 | 769 | 0         | 95.1  | 93.4 | 94.3 | AVP1-1                                     | gbpln | Brassica rapa        | AT1G15690.1   Symbols: AVP1, ATAVP3, AVP-3, AtVHP1;1   Inorganic H pyrophosphatase family protein   chr1:5399115-5402185 FORWARD LENGTH=770                                                                                                                                                                                                   | 809 | 770 | 0         | 95.2  | 91.0 | 94.1 |

|                          |                                                                                                                                                                                                                                                                                                                                                                                                                                                                                                                                                                                                                                                                                                                                                                                                |      |      |           |       |      |       |                                          |       |                      |                                                                                                                                                                                                                                                                                                                                                                                                                                                                                                                                                        |      |      |           |       |      |      |
|--------------------------|------------------------------------------------------------------------------------------------------------------------------------------------------------------------------------------------------------------------------------------------------------------------------------------------------------------------------------------------------------------------------------------------------------------------------------------------------------------------------------------------------------------------------------------------------------------------------------------------------------------------------------------------------------------------------------------------------------------------------------------------------------------------------------------------|------|------|-----------|-------|------|-------|------------------------------------------|-------|----------------------|--------------------------------------------------------------------------------------------------------------------------------------------------------------------------------------------------------------------------------------------------------------------------------------------------------------------------------------------------------------------------------------------------------------------------------------------------------------------------------------------------------------------------------------------------------|------|------|-----------|-------|------|------|
| Rsa1.0_00903.1.g21086.t1 | refNP_173025.1  Cobalamin biosynthesis CobW-like protein [Arabidopsis thaliana] gi 8927652 gb AAF82143.1 AC034256.7 Contains similarity to COBW-like protein from Homo sapiens gb AF257330 and contains a Viral (Superfamily 1) RNA helicase PF101443 domain. EST gb A199777 comes from this gene [Arabidopsis thaliana] gi 1419411 gb AAK56250.1 AF367261_1 At1g15730/F7H2.7 [Arabidopsis thaliana] gi 20334730 gb AAM16226.1  At1g15730/F7H2.7 [Arabidopsis thaliana] gi 23397243 gb AAN31903.1  putative PRLI-interacting factor L [Arabidopsis thaliana] gi 332191233 gb AEE29354.1  Cobalamin biosynthesis CobW-like protein [Arabidopsis thaliana]                                                                                                                                       | 457  | 448  | 0         | 98.0  | 80.7 | 96.4  | Cobalamin biosynthesis CobW-like protein | gbpln | Arabidopsis thaliana | AT1G15730.1   Symbols:   Cobalamin biosynthesis CobW-like protein   chr1:5407535-5409937 REVERSE LENGTH=448                                                                                                                                                                                                                                                                                                                                                                                                                                            | 457  | 448  | 0         | 98.0  | 80.7 | 96.4 |
| Rsa1.0_00903.1.g21087.t1 | gb EOA38743.1  hypothetical protein CARUB_v10010899mg [Capsella rubella]                                                                                                                                                                                                                                                                                                                                                                                                                                                                                                                                                                                                                                                                                                                       | 579  | 585  | 0         | 101.0 | 91.5 | 96.0  | hypothetical protein CARUB_v10010899mg   | gbpln | Capsella rubella     | AT1G15740.1   Symbols:   Leucine-rich repeat family protein   chr1:5411509-5414544 FORWARD LENGTH=585                                                                                                                                                                                                                                                                                                                                                                                                                                                  | 579  | 585  | 0         | 101.0 | 93.6 | 96.4 |
| Rsa1.0_00903.1.g21088.t1 | refNP_563981.1  protein TOPLESS [Arabidopsis thaliana] gi 30684518 refNP_849672.1  protein TOPLESS [Arabidopsis thaliana] gi 79318004 refNP_001031050.1  protein TOPLESS [Arabidopsis thaliana] gi 79318012 refNP_001031051.1  protein TOPLESS [Arabidopsis thaliana] gi 75332047 sp Q94A17.1 TPL_ARATH RecName: Full=Protein TOPLESS; AltName: Full=WUS-interacting protein 1 gi 15028127 gb AAK76687.1  unknown protein [Arabidopsis thaliana] gi 23296857 gb AAN13188.1  unknown protein [Arabidopsis thaliana] gi 332191235 gb AEE29356.1  protein TOPLESS [Arabidopsis thaliana] gi 332191236 gb AEE29357.1  protein TOPLESS [Arabidopsis thaliana] gi 332191237 gb AEE29358.1  protein TOPLESS [Arabidopsis thaliana] gi 332191238 gb AEE29359.1  protein TOPLESS [Arabidopsis thaliana] | 1129 | 1131 | 0         | 100.2 | 97.0 | 98.6  | protein TOPLESS                          | gbpln | Arabidopsis thaliana | AT1G15750.4   Symbols: WSIP1, TPL   Transducin family protein / WD-40 repeat family protein   chr1:5415086-5420359 REVERSE LENGTH=1131                                                                                                                                                                                                                                                                                                                                                                                                                 | 1129 | 1131 | 0         | 100.2 | 97.0 | 98.6 |
| Rsa1.0_00904.1.g21089.t1 | refNP_564510.1  Dof zinc finger protein DOF1.6 [Arabidopsis thaliana] gi 55584006 sp Q9SX97.1 DOF16_ARATH RecName: Full=Dof zinc finger protein DOF1.6; Short=AtDOF1.6 gi 5668794 gb AAD46020.1 AC007519.5 Similar to gb U82230 prolamin box binding factor (PBF) from Zea mays [Arabidopsis thaliana] gi 225898016 dbj BAH30340.1  hypothetical protein [Arabidopsis thaliana] gi 332194076 gb AEE32197.1  Dof zinc finger protein DOF1.6 [Arabidopsis thaliana]                                                                                                                                                                                                                                                                                                                              | 223  | 209  | 9.00E-61  | 93.7  | 70.9 | 75.8  | Dof zinc finger protein DOF1.6           | gbpln | Arabidopsis thaliana | AT1G47655.1   Symbols:   Dof-type zinc finger DNA-binding family protein   chr1:17525437-17526066 FORWARD LENGTH=209                                                                                                                                                                                                                                                                                                                                                                                                                                   | 223  | 209  | 3.00E-63  | 93.7  | 70.9 | 75.8 |
| Rsa1.0_00904.1.g21090.t1 | refXP_002894064.1  hypothetical protein ARALYDRAFT_891562 [Arabidopsis lyrata subsp. lyrata] gi 297339906 gb EFH70323.1  hypothetical protein ARALYDRAFT_891562 [Arabidopsis lyrata subsp. lyrata]                                                                                                                                                                                                                                                                                                                                                                                                                                                                                                                                                                                             | 228  | 228  | 1.00E-128 | 100.0 | 97.4 | 100.0 | hypothetical protein ARALYDRAFT_891562   | gbpln | Arabidopsis lyrata   | AT1G47640.1   Symbols:   unknown protein; FUNCTIONS IN: molecular_function unknown; INVOLVED IN: biological_process unknown; LOCATED IN: mitochondrion; EXPRESSED IN: 23 plant structures; EXPRESSED DURING: 13 growth stages; CONTAINS InterPro DOMAIN/s: Protein of unknown function DJF2053, membrane (InterPro:IPR019164); Has 204 Blast hits to 204 proteins in 84 species: Archae - 0; Bacteria - 0; Metazoa - 127; Fungi - 0; Plants - 50; Viruses - 0; Other Eukaryotes - 27 (source: NCBI BLINK).   chr1:17518409-17519998 REVERSE LENGTH=228 | 228  | 228  | 1.00E-130 | 100.0 | 96.9 | 99.1 |
| Rsa1.0_00904.1.g21091.t1 | gb ABD64994.1  hypothetical protein 26.t00013 [Brassica oleracea]                                                                                                                                                                                                                                                                                                                                                                                                                                                                                                                                                                                                                                                                                                                              | 121  | 103  | 2.00E-14  | 85.1  | 34.7 | 43.8  | hypothetical protein 26.t00013           | gbpln | Brassica oleracea    | #                                                                                                                                                                                                                                                                                                                                                                                                                                                                                                                                                      | #    | #    | #         | #     | #    |      |
| Rsa1.0_00904.1.g21092.t1 | #                                                                                                                                                                                                                                                                                                                                                                                                                                                                                                                                                                                                                                                                                                                                                                                              | #    | #    | #         | #     | #    | -     | ----                                     | ----  | ----                 | #                                                                                                                                                                                                                                                                                                                                                                                                                                                                                                                                                      | #    | #    | #         | #     | #    |      |

|                          |                                                                                                                                                                                                                                                                                                                                                                                                                                                                                                                                                                                                                               |     |      |           |       |      |      |                                                          |       |                      |                                                                                                                                                                                                                                                                                                                                                                                                                                                                      |     |      |           |       |      |      |
|--------------------------|-------------------------------------------------------------------------------------------------------------------------------------------------------------------------------------------------------------------------------------------------------------------------------------------------------------------------------------------------------------------------------------------------------------------------------------------------------------------------------------------------------------------------------------------------------------------------------------------------------------------------------|-----|------|-----------|-------|------|------|----------------------------------------------------------|-------|----------------------|----------------------------------------------------------------------------------------------------------------------------------------------------------------------------------------------------------------------------------------------------------------------------------------------------------------------------------------------------------------------------------------------------------------------------------------------------------------------|-----|------|-----------|-------|------|------|
| Rsa1.0_00904.1.g21093.t1 | refNP_191125.1   ROP (rho of plants) guanine nucleotide exchange factor 6 [Arabidopsis thaliana] gi 7263554 emb CAB81591.1  putative protein [Arabidopsis thaliana] gi 56236088 gb AAV84500.1   At3g55660 [Arabidopsis thaliana] gi 59958354 gb AAAX12887.1   At3g55660 [Arabidopsis thaliana] gi 332645896 gb AEE79417.1   ROP (rho of plants) guanine nucleotide exchange factor 6 [Arabidopsis thaliana]                                                                                                                                                                                                                   | 161 | 579  | 5.00E-29  | 359.6 | 47.8 | 55.9 | ROP (rho of plants) guanine nucleotide exchange factor 6 | gbpln | Arabidopsis thaliana | AT3G55660.1   Symbols: ATROPGEF6, ROPGEF6   ROP (rho of plants) guanine nucleotide exchange factor 6   chr:3:20649051-20651290 REVERSE LENGTH=579                                                                                                                                                                                                                                                                                                                    | 161 | 579  | 2.00E-31  | 359.6 | 47.8 | 55.9 |
| Rsa1.0_00904.1.g21094.t1 | #                                                                                                                                                                                                                                                                                                                                                                                                                                                                                                                                                                                                                             | #   | #    | #         | #     | #    | #    | -                                                        | ----  | ----                 | #                                                                                                                                                                                                                                                                                                                                                                                                                                                                    | #   | #    | #         | #     | #    |      |
| Rsa1.0_00904.1.g21095.t1 | dbj BAF01332.1  hypothetical protein [Arabidopsis thaliana]                                                                                                                                                                                                                                                                                                                                                                                                                                                                                                                                                                   | 713 | 478  | 1.00E-10  | 67.0  | 14.2 | 22.9 | hypothetical protein                                     | gbpln | Arabidopsis thaliana | AT4G32200.1   Symbols: ASY2   DNA-binding HORMA family protein   chr:4:15548840-15554962 FORWARD LENGTH=1399                                                                                                                                                                                                                                                                                                                                                         | 713 | 1399 | 4.00E-13  | 196.2 | 14.2 | 22.7 |
| Rsa1.0_00904.1.g21096.t1 | gb ABW81060.1  GagPol3 [Arabidopsis lyrata subsp. lyrata]                                                                                                                                                                                                                                                                                                                                                                                                                                                                                                                                                                     | 665 | 1103 | 2.00E-97  | 165.9 | 27.4 | 31.7 | GagPol3                                                  | gbpln | Arabidopsis lyrata   | #                                                                                                                                                                                                                                                                                                                                                                                                                                                                    | #   | #    | #         | #     | #    |      |
| Rsa1.0_00904.1.g21097.t1 | ref XP_002891365.1  hypothetical protein ARALYDRAFT_473896 [Arabidopsis lyrata subsp. lyrata] gi 297337207 gb EFH67624.1  hypothetical protein ARALYDRAFT_473896 [Arabidopsis lyrata subsp. lyrata]                                                                                                                                                                                                                                                                                                                                                                                                                           | 484 | 484  | 0         | 100.0 | 94.4 | 98.1 | hypothetical protein ARALYDRAFT_473896                   | gbpln | Arabidopsis lyrata   | AT1G47530.1   Symbols:   MATE efflux family protein   chr:1:17451724-17454110 FORWARD LENGTH=484                                                                                                                                                                                                                                                                                                                                                                     | 484 | 484  | 0         | 100.0 | 94.0 | 98.1 |
| Rsa1.0_00904.1.g21098.t1 | gb AAG51783.1 AC079679_3 reverse transcriptase, putative; 16838-20266 [Arabidopsis thaliana]                                                                                                                                                                                                                                                                                                                                                                                                                                                                                                                                  | 277 | 1142 | 3.00E-31  | 412.3 | 23.8 | 31.8 | reverse transcriptase, putative; 16838-20266             | gbpln | Arabidopsis thaliana | #                                                                                                                                                                                                                                                                                                                                                                                                                                                                    | #   | #    | #         | #     | #    |      |
| Rsa1.0_00904.1.g21099.t1 | gb AAC62785.1  F1104.11 [Arabidopsis thaliana] gi 7268192 emb CAB77719.1  putative transposon protein [Arabidopsis thaliana]                                                                                                                                                                                                                                                                                                                                                                                                                                                                                                  | 178 | 577  | 2.00E-38  | 324.2 | 41.6 | 57.3 | F1104.11                                                 | gbpln | Arabidopsis thaliana | AT3G31430.1   Symbols:   unknown protein; FUNCTIONS IN: molecular_function unknown; INVOLVED IN: biological_process unknown; LOCATED IN: endomembrane system; BEST Arabidopsis thaliana protein match is: unknown protein (TAIR:AT5G18636.1); Has 295 Blast hits to 291 proteins in 12 species: Archae - 0; Bacteria - 0; Metazoa - 0; Fungi - 0; Plants - 295; Viruses - 0; Other Eukaryotes - 0 (source: NCBI BLINK).   chr:3:12795861-12796871 REVERSE LENGTH=336 | 178 | 336  | 1.00E-17  | 188.8 | 25.3 | 40.4 |
| Rsa1.0_00904.1.g21100.t3 | gb AAD29754.1 AF076243_1 putative transposon protein [Arabidopsis thaliana] gi 7267199 emb CAB77910.1  putative transposon protein [Arabidopsis thaliana] ref XP_002894051.1  endonuclease/exonuclease/phosphatase family protein [Arabidopsis lyrata subsp. lyrata] gi 297339893 gb EFH70310.1  endonuclease/exonuclease/phosphatase family protein [Arabidopsis lyrata subsp. lyrata]                                                                                                                                                                                                                                       | 677 | 1008 | 8.00E-26  | 148.9 | 21.1 | 35.3 | putative transposon protein                              | gbpln | Arabidopsis thaliana | #                                                                                                                                                                                                                                                                                                                                                                                                                                                                    | #   | #    | #         | #     | #    |      |
| Rsa1.0_00904.1.g21101.t1 | ref XP_002866099.1  protein translocase [Arabidopsis lyrata subsp. lyrata] gi 297311934 gb EFH42358.1  protein translocase [Arabidopsis lyrata subsp. lyrata]                                                                                                                                                                                                                                                                                                                                                                                                                                                                 | 329 | 334  | 1.00E-164 | 101.5 | 85.7 | 91.5 | endonuclease/exonuclease/phosphatase family protein      | gbpln | Arabidopsis lyrata   | AT1G47510.1   Symbols: AT5PTASE11, 5PTASE11   inositol polyphosphate 5-phosphatase 1   chr:1:17435991-17438296 REVERSE LENGTH=334                                                                                                                                                                                                                                                                                                                                    | 329 | 334  | 1.00E-165 | 101.5 | 85.7 | 90.6 |
| Rsa1.0_00904.1.g21102.t1 | #                                                                                                                                                                                                                                                                                                                                                                                                                                                                                                                                                                                                                             | #   | #    | #         | #     | #    | #    | -                                                        | ----  | ----                 | #                                                                                                                                                                                                                                                                                                                                                                                                                                                                    | #   | #    | #         | #     | #    |      |
| Rsa1.0_00905.1.g21103.t1 | ref XP_002866099.1  protein translocase [Arabidopsis lyrata subsp. lyrata] gi 297311934 gb EFH42358.1  protein translocase [Arabidopsis lyrata subsp. lyrata]                                                                                                                                                                                                                                                                                                                                                                                                                                                                 | 211 | 213  | 2.00E-93  | 100.9 | 82.9 | 91.0 | protein translocase                                      | gbpln | Arabidopsis lyrata   | AT5G55510.1   Symbols:   Mitochondrial import inner membrane translocase subunit Tim17/Tim22/Tim23 family protein   chr:5:22486525-22487916 REVERSE LENGTH=214                                                                                                                                                                                                                                                                                                       | 211 | 214  | 6.00E-92  | 101.4 | 82.5 | 90.0 |
| Rsa1.0_00905.1.g21104.t1 | ref NP_568825.1  beta-(1,2)-xylosyltransferase [Arabidopsis thaliana] gi 17369167 sp Q9LDH0.1 XYLT_ARATH RecName: Full=Beta-(1,2)-xylosyltransferase gi 15724166 gb AAL06475.1 AF411785_1 AT5g55500/MTE17.21 [Arabidopsis thaliana] gi 7671513 emb CAB89489.1  beta1,2-Xylosyltransferase [Arabidopsis thaliana] gi 7768105 emb CAB90610.1  beta1,2-xylosyltransferase [Arabidopsis thaliana] gi 9758182 dbj BAB08567.1  unnamed protein product [Arabidopsis thaliana] gi 23505973 gb AAN28846.1  At5g55500/MTE17.21 [Arabidopsis thaliana] gi 332009252 gb AED96635.1  beta-(1,2)-xylosyltransferase [Arabidopsis thaliana] | 529 | 534  | 0         | 100.9 | 85.1 | 90.9 | beta-(1,2)-xylosyltransferase                            | gbpln | Arabidopsis thaliana | AT5G55500.1   Symbols: ATXYLT, XYLT   beta-1,2-xylosyltransferase   chr:5:22482386-22484417 FORWARD LENGTH=534                                                                                                                                                                                                                                                                                                                                                       | 529 | 534  | 0         | 100.9 | 85.1 | 90.9 |

|                          |                                                                                                                                                                                                                                                                         |      |      |           |       |      |      |                                                   |       |                      |                                                                                                                                                                                                                                                                                                                                                                                                                                                                                                                                             |     |     |           |       |      |      |
|--------------------------|-------------------------------------------------------------------------------------------------------------------------------------------------------------------------------------------------------------------------------------------------------------------------|------|------|-----------|-------|------|------|---------------------------------------------------|-------|----------------------|---------------------------------------------------------------------------------------------------------------------------------------------------------------------------------------------------------------------------------------------------------------------------------------------------------------------------------------------------------------------------------------------------------------------------------------------------------------------------------------------------------------------------------------------|-----|-----|-----------|-------|------|------|
| Rsa1.0_00905.1.g21105.t1 | gb EOA13111.1  hypothetical protein CARUB_v10026121mg [Capsella rubella]                                                                                                                                                                                                | 594  | 598  | 0         | 100.7 | 75.1 | 87.0 | hypothetical protein CARUB_v10026121mg            | gbpln | Capsella rubella     | AT5G55490.1   Symbols: ATGEX1, GEX1   gamete expressed protein   chr5:22478822-22481071 REVERSE LENGTH=593                                                                                                                                                                                                                                                                                                                                                                                                                                  | 594 | 593 | 0         | 99.8  | 71.0 | 82.3 |
| Rsa1.0_00905.1.g21106.t1 | gb EMJ25132.1  hypothetical protein PRUPE_ppa014266mg [Prunus persica]                                                                                                                                                                                                  | 125  | 77   | 2.00E-17  | 61.6  | 37.6 | 46.4 | hypothetical protein PRUPE_ppa014266mg            | gbpln | Prunus persica       | AT2G30580.1   Symbols: DRIP2   DREB2A-interacting protein 2   chr2:13028444-13030363 FORWARD LENGTH=420                                                                                                                                                                                                                                                                                                                                                                                                                                     | 125 | 420 | 1.00E-12  | 336.0 | 23.2 | 24.8 |
| Rsa1.0_00905.1.g21107.t1 | ref NP_198699.1  cysteinyl-tRNA synthetase [Arabidopsis thaliana]  g 192807340 gb ACF06122.1  At5g38830 [Arabidopsis thaliana]  g 332006981 gb AED94364.1  cysteinyl-tRNA synthetase [Arabidopsis thaliana]                                                             | 482  | 511  | 0         | 106.0 | 73.4 | 84.2 | cysteinyl-tRNA synthetase                         | gbpln | Arabidopsis thaliana | AT5G38830.1   Symbols:   Cysteinyl-tRNA synthetase, class Ia family protein   chr5:15545764-15548094 REVERSE LENGTH=511                                                                                                                                                                                                                                                                                                                                                                                                                     | 482 | 511 | 0         | 106.0 | 73.4 | 84.2 |
| Rsa1.0_00905.1.g21108.t1 | gb EOA14613.1  hypothetical protein CARUB_v10027865mg [Capsella rubella]                                                                                                                                                                                                | 67   | 108  | 3.00E-26  | 161.2 | 83.6 | 94.0 | hypothetical protein CARUB_v10027865mg            | gbpln | Capsella rubella     | AT5G55410.2   Symbols:   Bifunctional inhibitor/lipid-transfer protein/seed storage 2S albumin superfamily protein   chr5:22460677-22461009 FORWARD LENGTH=110                                                                                                                                                                                                                                                                                                                                                                              | 67  | 110 | 3.00E-27  | 164.2 | 77.6 | 89.6 |
| Rsa1.0_00905.1.g21109.t2 | gb EOA12998.1  hypothetical protein CARUB_v10025988mg [Capsella rubella]                                                                                                                                                                                                | 680  | 702  | 0         | 103.2 | 90.6 | 95.1 | hypothetical protein CARUB_v10025988mg            | gbpln | Capsella rubella     | AT5G55400.1   Symbols:   Actin binding Calponin homology (CH) domain-containing protein   chr5:22455535-22458950 REVERSE LENGTH=714                                                                                                                                                                                                                                                                                                                                                                                                         | 680 | 714 | 0         | 105.0 | 89.7 | 95.1 |
| Rsa1.0_00905.1.g21110.t6 | gb EOA12998.1  hypothetical protein CARUB_v10025988mg [Capsella rubella]                                                                                                                                                                                                | 563  | 702  | 0         | 124.7 | 80.5 | 88.5 | hypothetical protein CARUB_v10025988mg            | gbpln | Capsella rubella     | AT5G55400.1   Symbols:   Actin binding Calponin homology (CH) domain-containing protein   chr5:22455535-22458950 REVERSE LENGTH=714                                                                                                                                                                                                                                                                                                                                                                                                         | 563 | 714 | 0         | 126.8 | 80.6 | 88.8 |
| Rsa1.0_00905.1.g21111.t1 | gb AAF79268.1 AC023279.17 F12K21.19 [Arabidopsis thaliana]                                                                                                                                                                                                              | 431  | 621  | 1.00E-133 | 144.1 | 56.6 | 74.0 | F12K21.19                                         | gbpln | Arabidopsis thaliana | AT5G55350.1   Symbols:   MBOAT (membrane bound O-acyl transferase) family protein   chr5:22442356-22443393 REVERSE LENGTH=345                                                                                                                                                                                                                                                                                                                                                                                                               | 431 | 345 | 1.00E-100 | 80.0  | 43.2 | 53.6 |
| Rsa1.0_00905.1.g21112.t1 | gb EOA13123.1  hypothetical protein CARUB_v10026142mg [Capsella rubella]                                                                                                                                                                                                | 116  | 584  | 3.00E-43  | 503.4 | 88.8 | 93.1 | hypothetical protein CARUB_v10026142mg            | gbpln | Capsella rubella     | AT5G55230.2   Symbols: MAP65-1   microtubule-associated proteins 65-1   chr5:22402716-22405182 FORWARD LENGTH=616                                                                                                                                                                                                                                                                                                                                                                                                                           | 116 | 616 | 2.00E-45  | 531.0 | 88.8 | 93.1 |
| Rsa1.0_00905.1.g21113.t1 | ref XP_002866082.1  hypothetical protein ARALYDRAFT_331859 [Arabidopsis lyrata subsp. lyrata]  g 297311917 gb EFH42341.1  hypothetical protein ARALYDRAFT_331859 [Arabidopsis lyrata subsp. lyrata]                                                                     | 166  | 167  | 3.00E-55  | 100.6 | 73.5 | 83.7 | hypothetical protein ARALYDRAFT_331859            | gbpln | Arabidopsis lyrata   | AT5G55210.1   Symbols:   unknown protein; FUNCTIONS IN: molecular function unknown; INVOLVED IN: biological process unknown; LOCATED IN: chloroplast; EXPRESSED IN: 23 plant structures; EXPRESSED DURING: 13 growth stages; BEST Arabidopsis thaliana protein match is: unknown protein (TAIR:AT4G22320.1); Has 1807 Blast hits to 1807 proteins in 277 species: Archae - 0; Bacteria - 0; Metazoa - 736; Fungi - 347; Plants - 385; Viruses - 0; Other Eukaryotes - 339 (source: NCBI BLINK).   chr5:22396707-22397374 REVERSE LENGTH=168 | 166 | 168 | 4.00E-57  | 101.2 | 74.1 | 83.1 |
| Rsa1.0_00905.1.g21114.t1 | ref XP_002864380.1  glycosyl hydrolase family 17 protein [Arabidopsis lyrata subsp. lyrata]  g 297310215 gb EFH40639.1  glycosyl hydrolase family 17 protein [Arabidopsis lyrata subsp. lyrata]                                                                         | 466  | 461  | 0         | 98.9  | 85.2 | 90.8 | glycosyl hydrolase family 17 protein              | gbpln | Arabidopsis lyrata   | AT5G55180.1   Symbols:   O-Glycosyl hydrolases family 17 protein   chr5:22388834-22390550 FORWARD LENGTH=460                                                                                                                                                                                                                                                                                                                                                                                                                                | 466 | 460 | 0         | 98.7  | 87.3 | 93.3 |
| Rsa1.0_00905.1.g21115.t1 | gb AFP65785.1  SUMO peptide [Gossypium hirsutum]                                                                                                                                                                                                                        | 95   | 96   | 2.00E-24  | 101.1 | 62.1 | 71.6 | SUMO peptide                                      | gbpln | Gossypium hirsutum   | AT4G26840.1   Symbols: SUM1, SUMO 1, SUMO1, ATSUMO1   small ubiquitin-like modifier 1   chr4:13497466-13498458 FORWARD LENGTH=100                                                                                                                                                                                                                                                                                                                                                                                                           | 95  | 100 | 3.00E-26  | 105.3 | 63.2 | 71.6 |
| Rsa1.0_00905.1.g21116.t1 | ref NP_200320.1  mitogen-activated protein kinase kinase kinase 15 [Arabidopsis thaliana]  g 9758106 db BAB08578.1  unnamed protein product [Arabidopsis thaliana]  g 332009196 gb AED96579.1  mitogen-activated protein kinase kinase kinase 15 [Arabidopsis thaliana] | 166  | 448  | 9.00E-75  | 269.9 | 82.5 | 89.8 | mitogen-activated protein kinase kinase kinase 15 | gbpln | Arabidopsis thaliana | AT5G55090.1   Symbols: MAPKKK15   mitogen-activated protein kinase kinase kinase 15   chr5:22356852-22358198 REVERSE LENGTH=448                                                                                                                                                                                                                                                                                                                                                                                                             | 166 | 448 | 3.00E-77  | 269.9 | 82.5 | 89.8 |
| Rsa1.0_00906.1.g21117.t1 | gb AAF79374.1 AC007887.33 F15O4.30 [Arabidopsis thaliana]                                                                                                                                                                                                               | 1032 | 1180 | 0         | 114.3 | 75.1 | 86.4 | F15O4.30                                          | gbpln | Arabidopsis thaliana | #                                                                                                                                                                                                                                                                                                                                                                                                                                                                                                                                           | #   | #   | #         | #     | #    | #    |
| Rsa1.0_00906.1.g21118.t1 | #                                                                                                                                                                                                                                                                       | #    | #    | #         | #     | #    | -    | ----                                              | ----  | ----                 | #                                                                                                                                                                                                                                                                                                                                                                                                                                                                                                                                           | #   | #   | #         | #     | #    | #    |

|                          |                                                                                                                                                                                                       |      |      |           |       |      |      |                                                 |       |                      |                                                                                                                                                                                                                                                                                                                                                                                                                                                                                                                                                                                                  |     |      |           |       |      |      |
|--------------------------|-------------------------------------------------------------------------------------------------------------------------------------------------------------------------------------------------------|------|------|-----------|-------|------|------|-------------------------------------------------|-------|----------------------|--------------------------------------------------------------------------------------------------------------------------------------------------------------------------------------------------------------------------------------------------------------------------------------------------------------------------------------------------------------------------------------------------------------------------------------------------------------------------------------------------------------------------------------------------------------------------------------------------|-----|------|-----------|-------|------|------|
| Rsa1.0_00906.1.g21119.t1 | gb ABD65035.1  hypothetical protein 26.t00052 [Brassica oleracea]                                                                                                                                     | 675  | 695  | 0         | 103.0 | 58.7 | 71.6 | hypothetical protein 26.t00052                  | gbpln | Brassica oleracea    | AT1G51172.1   Symbols:   unknown protein; FUNCTIONS IN: molecular_function unknown; INVOLVED IN: biological_process unknown; LOCATED IN: cellular_component unknown; CONTAINS InterPro DOMAIN/s: Protein of unknown function DUF601 (InterPro:IPR006736). BEST Arabidopsis thaliana protein match is: Protein of unknown function, DUF601 (TAIR:AT1G46896.1); Has 1849 Blast hits to 1554 proteins in 272 species: Archae - 15; Bacteria - 116; Metazoa - 677; Fungi - 267; Plants - 154; Viruses - 11; Other Eukaryotes - 609 (source: NCBI BLINK).   chr1:18963205-18965571 FORWARD LENGTH=681 | 675 | 681  | 1.00E-12  | 100.9 | 5.0  | 8.7  |
| Rsa1.0_00906.1.g21120.t1 | gb ABW81060.1  GagPol3 [Arabidopsis lyrata subsp. lyrata]                                                                                                                                             | 1454 | 1103 | 0         | 75.9  | 28.9 | 36.0 | GagPol3                                         | gbpln | Arabidopsis lyrata   | #                                                                                                                                                                                                                                                                                                                                                                                                                                                                                                                                                                                                | #   | #    | #         | #     | #    |      |
| Rsa1.0_00906.1.g21121.t1 | gb AAG51783.1 AC079679_3 reverse transcriptase, putative: 16838-20266 [Arabidopsis thaliana]                                                                                                          | 244  | 1142 | 3.00E-57  | 468.0 | 51.2 | 64.3 | reverse transcriptase, putative: 16838-20266    | gbpln | Arabidopsis thaliana | AT2G34320.1   Symbols:   Polynucleotidyl transferase, ribonuclease H-like superfamily protein   chr2:14484959-14485837 FORWARD LENGTH=292                                                                                                                                                                                                                                                                                                                                                                                                                                                        | 244 | 292  | 2.00E-19  | 119.7 | 29.9 | 48.0 |
| Rsa1.0_00906.1.g21122.t1 | gb EOA30318.1  hypothetical protein CARUB_v10013445mg [Capsella rubella]                                                                                                                              | 329  | 526  | 4.00E-36  | 159.9 | 27.7 | 31.9 | hypothetical protein CARUB_v10013445mg          | gbpln | Capsella rubella     | AT3G10440.1   Symbols:   Shugoshin C terminus   chr3:3245376-3248987 FORWARD LENGTH=572                                                                                                                                                                                                                                                                                                                                                                                                                                                                                                          | 329 | 572  | 1.00E-37  | 173.9 | 30.7 | 36.2 |
| Rsa1.0_00906.1.g21123.t1 | gb EOA19642.1  hypothetical protein CARUB_v10003012mg [Capsella rubella]                                                                                                                              | 363  | 390  | 9.00E-71  | 107.4 | 47.4 | 63.4 | hypothetical protein CARUB_v10003012mg          | gbpln | Capsella rubella     | AT4G04690.1   Symbols:   F-box and associated interaction domains-containing protein   chr4:2373999-2375135 REVERSE LENGTH=378                                                                                                                                                                                                                                                                                                                                                                                                                                                                   | 363 | 378  | 2.00E-72  | 104.1 | 45.5 | 61.2 |
| Rsa1.0_00906.1.g21124.t1 | ref XP_002868461.1  hypothetical protein ARALYDRAFT_493662 [Arabidopsis lyrata subsp. lyrata]   gi 297314297 gb EFH44720.1  hypothetical protein ARALYDRAFT_493662 [Arabidopsis lyrata subsp. lyrata] | 536  | 447  | 0         | 83.4  | 69.0 | 72.6 | hypothetical protein ARALYDRAFT_493662          | gbpln | Arabidopsis lyrata   | AT5G36250.1   Symbols:   Protein phosphatase 2C family protein   chr5:14282590-14284376 FORWARD LENGTH=448                                                                                                                                                                                                                                                                                                                                                                                                                                                                                       | 536 | 448  | 0         | 83.6  | 68.8 | 72.6 |
| Rsa1.0_00906.1.g21125.t1 | ref XP_002870475.1  predicted protein [Arabidopsis lyrata subsp. lyrata]   gi 297316311 gb EFH46734.1  predicted protein [Arabidopsis lyrata subsp. lyrata]                                           | 468  | 480  | 0         | 102.6 | 84.0 | 92.9 | predicted protein                               | gbpln | Arabidopsis lyrata   | AT5G36260.1   Symbols:   Eukaryotic aspartyl protease family protein   chr5:14285068-14288179 REVERSE LENGTH=482                                                                                                                                                                                                                                                                                                                                                                                                                                                                                 | 468 | 482  | 0         | 103.0 | 82.7 | 92.5 |
| Rsa1.0_00906.1.g21126.t6 | ref XP_002329057.1  predicted protein [Populus trichocarpa]   gi 222839728 gb EEE78051.1  predicted protein [Populus trichocarpa]                                                                     | 371  | 1462 | 3.00E-27  | 394.1 | 16.2 | 19.9 | predicted protein                               | gbpln | Populus trichocarpa  | AT1G17580.1   Symbols:   MYA1, ATMYA1, XI-1   myosin 1   chr1:6039453-6049309 FORWARD LENGTH=1520                                                                                                                                                                                                                                                                                                                                                                                                                                                                                                | 371 | 1520 | 1.00E-29  | 409.7 | 16.2 | 19.7 |
| Rsa1.0_00906.1.g21127.t2 | gb AAD48963.1 AF147263_5 contains similarity to transposases [Arabidopsis thaliana]   gi 7267311 emb CAB81093.1  AT4g05510 [Arabidopsis thaliana]                                                     | 475  | 604  | 1.00E-127 | 127.2 | 56.2 | 66.9 | contains similarity to transposases             | gbpln | Arabidopsis thaliana | AT3G42170.1   Symbols:   BED zinc finger :hAT family dimerisation domain   chr3:14321838-14323928 FORWARD LENGTH=696                                                                                                                                                                                                                                                                                                                                                                                                                                                                             | 475 | 696  | 1.00E-22  | 146.5 | 14.7 | 24.8 |
| Rsa1.0_00906.1.g21128.t1 | #                                                                                                                                                                                                     | #    | #    | #         | #     | #    | -    | ----                                            | ----  | #                    | #                                                                                                                                                                                                                                                                                                                                                                                                                                                                                                                                                                                                | #   | #    | #         | #     | #    |      |
| Rsa1.0_00906.1.g21129.t1 | #                                                                                                                                                                                                     | #    | #    | #         | #     | #    | -    | ----                                            | ----  | #                    | #                                                                                                                                                                                                                                                                                                                                                                                                                                                                                                                                                                                                | #   | #    | #         | #     | #    |      |
| Rsa1.0_00906.1.g21130.t2 | gb AAD32756.1  putative replication protein A1 [Arabidopsis thaliana]                                                                                                                                 | 381  | 458  | 1.00E-49  | 120.2 | 33.3 | 55.4 | putative replication protein A1                 | gbpln | Arabidopsis thaliana | AT1G52950.1   Symbols:   Nucleic acid-binding, OB-fold-like protein   chr1:19725483-19728007 FORWARD LENGTH=566                                                                                                                                                                                                                                                                                                                                                                                                                                                                                  | 381 | 566  | 4.00E-43  | 148.6 | 31.5 | 56.2 |
| Rsa1.0_00906.1.g21131.t4 | gb EOA28640.1  hypothetical protein CARUB_v10024862mg, partial [Capsella rubella]                                                                                                                     | 393  | 490  | 9.00E-36  | 124.7 | 30.3 | 49.4 | hypothetical protein CARUB_v10024862mg, partial | gbpln | Capsella rubella     | AT1G52950.1   Symbols:   Nucleic acid-binding, OB-fold-like protein   chr1:19725483-19728007 FORWARD LENGTH=566                                                                                                                                                                                                                                                                                                                                                                                                                                                                                  | 393 | 566  | 2.00E-32  | 144.0 | 29.3 | 51.7 |
| Rsa1.0_00906.1.g21132.t1 | #                                                                                                                                                                                                     | #    | #    | #         | #     | #    | -    | ----                                            | ----  | #                    | #                                                                                                                                                                                                                                                                                                                                                                                                                                                                                                                                                                                                | #   | #    | #         | #     | #    |      |
| Rsa1.0_00907.1.g21133.t1 | gb EOA21434.1  hypothetical protein CARUB_v10001809mg [Capsella rubella]                                                                                                                              | 252  | 248  | 1.00E-132 | 98.4  | 91.7 | 95.6 | hypothetical protein CARUB_v10001809mg          | gbpln | Capsella rubella     | AT5G10450.1   Symbols:   GRF6, AFT1, 14-3-3lambda   G-box regulating factor 6   chr5:3284452-3286261 REVERSE LENGTH=248                                                                                                                                                                                                                                                                                                                                                                                                                                                                          | 252 | 248  | 1.00E-134 | 98.4  | 91.7 | 95.6 |
| Rsa1.0_00907.1.g21134.t1 | ref XP_002871421.1  hypothetical protein ARALYDRAFT_909001 [Arabidopsis lyrata subsp. lyrata]   gi 297317258 gb EFH47680.1  hypothetical protein ARALYDRAFT_909001 [Arabidopsis lyrata subsp. lyrata] | 929  | 992  | 0         | 106.8 | 73.8 | 83.4 | hypothetical protein ARALYDRAFT_909001          | gbpln | Arabidopsis lyrata   | AT5G65440.1   Symbols:   unknown protein; INVOLVED IN: biological_process unknown; LOCATED IN: plasma membrane; EXPRESSED IN: 22 plant structures; EXPRESSED DURING: 13 growth stages; BEST Arabidopsis thaliana protein match is: unknown protein (TAIR:AT4G24610.1); Has 30201 Blast hits to 17322 proteins in 780 species: Archae - 12; Bacteria - 1396; Metazoa - 17338; Fungi - 3422; Plants - 5037; Viruses - 0; Other Eukaryotes - 2996 (source: NCBI BLINK).   chr5:26152015-26156896 FORWARD LENGTH=1050                                                                                | 929 | 1050 | 0         | 113.0 | 65.9 | 78.4 |



|                          |                                                                                                                                                                                                                                                                                                                                                                                                                                                                                                |      |     |           |       |      |      |                                                          |       |                      |                                                                                                                                  |      |     |           |       |      |      |
|--------------------------|------------------------------------------------------------------------------------------------------------------------------------------------------------------------------------------------------------------------------------------------------------------------------------------------------------------------------------------------------------------------------------------------------------------------------------------------------------------------------------------------|------|-----|-----------|-------|------|------|----------------------------------------------------------|-------|----------------------|----------------------------------------------------------------------------------------------------------------------------------|------|-----|-----------|-------|------|------|
| Rsa1.0_00907.1.g21135.t1 | gb ACC78512.1  PASTICCINO 2 [Brassica rapa subsp. pekinensis]                                                                                                                                                                                                                                                                                                                                                                                                                                  | 192  | 229 | 1.00E-100 | 119.3 | 94.8 | 96.4 | PASTICCINO 2                                             | gbpln | Brassica rapa        | AT5G10480.1   Symbols: PAS2, PEP   Protein-tyrosine phosphatase-like, PTPLA   chr5:3298047-3300048 REVERSE LENGTH=221            | 192  | 221 | 1.00E-101 | 115.1 | 92.7 | 96.9 |
| Rsa1.0_00907.1.g21136.t1 | gb EOA22375.1  hypothetical protein CARUB_v10003006mg [Capsella rubella]                                                                                                                                                                                                                                                                                                                                                                                                                       | 683  | 676 | 0         | 99.0  | 84.2 | 88.6 | hypothetical protein CARUB_v10003006mg                   | gbpln | Capsella rubella     | AT5G10490.1   Symbols: MSL2   MSCS-like 2   chr5:3300376-3304005 REVERSE LENGTH=673                                              | 683  | 673 | 0         | 98.5  | 81.6 | 86.8 |
| Rsa1.0_00907.1.g21137.t1 | ref NP_196612.2  kinase interacting-like protein [Arabidopsis thaliana] gi 20453212 gb AAM19845.1 AT5g10500/F12B17_150 [Arabidopsis thaliana] gi 25090455 gb AAN72306.1 At5g10500/F12B17_150 [Arabidopsis thaliana] gi 332004171 gb AED91554.1 kinase interacting-like protein [Arabidopsis thaliana]                                                                                                                                                                                          | 894  | 848 | 0         | 94.9  | 69.6 | 79.2 | kinase interacting-like protein                          | gbpln | Arabidopsis thaliana | AT5G10500.1   Symbols:   Kinase interacting (KIP1-like) family protein   chr5:3305418-3308039 FORWARD LENGTH=848                 | 894  | 848 | 0         | 94.9  | 69.6 | 79.2 |
| Rsa1.0_00907.1.g21138.t1 | ref XP_002871424.1  hypothetical protein ARALYDRAFT_909007 [Arabidopsis lyrata subsp. lyrata] gi 297317261 gb EFH47683.1  hypothetical protein ARALYDRAFT_909007 [Arabidopsis lyrata subsp. lyrata]                                                                                                                                                                                                                                                                                            | 560  | 576 | 0         | 102.9 | 86.6 | 91.8 | hypothetical protein ARALYDRAFT_909007                   | gbpln | Arabidopsis lyrata   | AT5G10510.2   Symbols: AIL6   ANTEGUMENTA-like 6   chr5:3315991-3320008 FORWARD LENGTH=581                                       | 560  | 581 | 0         | 103.8 | 83.6 | 89.1 |
| Rsa1.0_00907.1.g21139.t1 | ref XP_002873463.1  hypothetical protein ARALYDRAFT_487885 [Arabidopsis lyrata subsp. lyrata] gi 297319300 gb EFH49722.1  hypothetical protein ARALYDRAFT_487885 [Arabidopsis lyrata subsp. lyrata]                                                                                                                                                                                                                                                                                            | 490  | 467 | 0         | 95.3  | 79.8 | 85.7 | hypothetical protein ARALYDRAFT_487885                   | gbpln | Arabidopsis lyrata   | AT5G10520.1   Symbols: RBK1   ROP binding protein kinases 1   chr5:3320584-3322649 REVERSE LENGTH=467                            | 490  | 467 | 0         | 95.3  | 78.4 | 84.9 |
| Rsa1.0_00907.1.g21140.t1 | ref NP_196615.1  concanavalin A-like lectin kinase-like protein [Arabidopsis thaliana] gi 75335609 sp O9LXA5.1 LRK91_ARAT H RecName: Full=L-type lectin-domain containing receptor kinase IX.1; Short=LecRK-IX.1; Flags: Precursor gi 7671450 emb CAB88390.1  lectin-like protein kinase-like [Arabidopsis thaliana] gi 91806848 gb ABE66151.1  lectin protein kinase [Arabidopsis thaliana] gi 332004177 gb AED91560.1  concanavalin A-like lectin kinase-like protein [Arabidopsis thaliana] | 122  | 651 | 8.00E-25  | 533.6 | 51.6 | 55.7 | concanavalin A-like lectin kinase-like protein           | gbpln | Arabidopsis thaliana | AT5G10530.1   Symbols:   Concanavalin A-like lectin protein kinase family protein   chr5:3324978-3326933 REVERSE LENGTH=651      | 122  | 651 | 1.00E-27  | 533.6 | 51.6 | 55.7 |
| Rsa1.0_00907.1.g21141.t1 | ref XP_002873465.1  glycosyl hydrolase family 3 protein [Arabidopsis lyrata subsp. lyrata] gi 297319302 gb EFH49724.1  glycosyl hydrolase family 3 protein [Arabidopsis lyrata subsp. lyrata]                                                                                                                                                                                                                                                                                                  | 782  | 796 | 0         | 101.8 | 87.0 | 93.2 | glycosyl hydrolase family 3 protein                      | gbpln | Arabidopsis lyrata   | AT5G10560.1   Symbols:   Glycosyl hydrolase family protein   chr5:3336335-3339351 REVERSE LENGTH=792                             | 782  | 792 | 0         | 101.3 | 86.7 | 92.7 |
| Rsa1.0_00907.1.g21142.t1 | ref XP_002871426.1  basic helix-loop-helix family protein [Arabidopsis lyrata subsp. lyrata] gi 297317263 gb EFH47685.1  basic helix-loop-helix family protein [Arabidopsis lyrata subsp. lyrata]                                                                                                                                                                                                                                                                                              | 326  | 314 | 7.00E-84  | 96.3  | 64.7 | 73.3 | basic helix-loop-helix family protein                    | gbpln | Arabidopsis lyrata   | AT5G10570.1   Symbols:   basic helix-loop-helix (bHLH) DNA-binding superfamily protein   chr5:3341357-3342877 FORWARD LENGTH=315 | 326  | 315 | 1.00E-85  | 96.6  | 66.0 | 75.2 |
| Rsa1.0_00907.1.g21143.t1 | #                                                                                                                                                                                                                                                                                                                                                                                                                                                                                              | #    | #   | #         | #     | #    | #    | -                                                        | ----  | ----                 | #                                                                                                                                | #    | #   | #         | #     | #    |      |
| Rsa1.0_00908.1.g21144.t1 | ref XP_002883637.1  hypothetical protein ARALYDRAFT_480086 [Arabidopsis lyrata subsp. lyrata] gi 297329477 gb EFH59896.1  hypothetical protein ARALYDRAFT_480086 [Arabidopsis lyrata subsp. lyrata]                                                                                                                                                                                                                                                                                            | 397  | 402 | 0         | 101.3 | 85.6 | 92.2 | hypothetical protein ARALYDRAFT_480086                   | gbpln | Arabidopsis lyrata   | AT2G04400.1   Symbols:   Aldolase-type TIM barrel family protein   chr2:1531208-1533578 FORWARD LENGTH=402                       | 397  | 402 | 0         | 101.3 | 85.6 | 91.9 |
| Rsa1.0_00908.1.g21145.t2 | #                                                                                                                                                                                                                                                                                                                                                                                                                                                                                              | #    | #   | #         | #     | #    | #    | -                                                        | ----  | ----                 | #                                                                                                                                | #    | #   | #         | #     | #    |      |
| Rsa1.0_00908.1.g21146.t1 | gb EOA39894.1  hypothetical protein CARUB_v10008573mg [Capsella rubella]                                                                                                                                                                                                                                                                                                                                                                                                                       | 1014 | 630 | 5.00E-73  | 62.1  | 17.2 | 24.7 | hypothetical protein CARUB_v10008573mg                   | gbpln | Capsella rubella     | AT1G31150.1   Symbols:   Domain of unknown function (DUF1985)   chr1:11120097-11122412 FORWARD LENGTH=673                        | 1014 | 673 | 9.00E-50  | 66.4  | 12.3 | 17.9 |
| Rsa1.0_00908.1.g21147.t1 | #                                                                                                                                                                                                                                                                                                                                                                                                                                                                                              | #    | #   | #         | #     | #    | #    | -                                                        | ----  | ----                 | AT5G15690.1   Symbols:   zinc ion binding   chr5:5113823-5114402 REVERSE LENGTH=169                                              | 99   | 169 | 1.00E-10  | 170.7 | 36.4 | 55.6 |
| Rsa1.0_00908.1.g21148.t1 | gb AAD49098.1 AF177535.2 contains similarity to maize transposon MuDR (GB.M76978) [Arabidopsis thaliana]                                                                                                                                                                                                                                                                                                                                                                                       | 738  | 872 | 1.00E-106 | 118.2 | 38.1 | 55.6 | contains similarity to maize transposon MuDR (GB.M76978) | gbpln | Arabidopsis thaliana | #                                                                                                                                | #    | #   | #         | #     | #    |      |

|                          |                                                                                                                                                                                                                                                                                                                                                                                                                                                                                                                                                                                                                        |     |      |           |       |      |      |                                                                                              |       |                      |                                                                                                                                                                                                                                                                                                                                            |     |     |           |       |      |      |
|--------------------------|------------------------------------------------------------------------------------------------------------------------------------------------------------------------------------------------------------------------------------------------------------------------------------------------------------------------------------------------------------------------------------------------------------------------------------------------------------------------------------------------------------------------------------------------------------------------------------------------------------------------|-----|------|-----------|-------|------|------|----------------------------------------------------------------------------------------------|-------|----------------------|--------------------------------------------------------------------------------------------------------------------------------------------------------------------------------------------------------------------------------------------------------------------------------------------------------------------------------------------|-----|-----|-----------|-------|------|------|
| Rsa1.0_00908.1.g21149.t1 | ref[XP_002885758.1] hypothetical protein ARALYDRAFT_480089 [Arabidopsis lyrata subsp. lyrata] gi 297331598 gb EFH62017.1  hypothetical protein ARALYDRAFT_480089 [Arabidopsis lyrata subsp. lyrata]                                                                                                                                                                                                                                                                                                                                                                                                                    | 178 | 261  | 4.00E-56  | 146.6 | 73.6 | 79.2 | hypothetical protein ARALYDRAFT_480089                                                       | gbpln | Arabidopsis lyrata   | AT2G04480.1   Symbols:   unknown protein; BEST Arabidopsis thaliana protein match is: unknown protein (TAIR:AT5G35870.1); Has 38 Blast hits to 38 proteins in 9 species: Archae - 0; Bacteria - 0; Metazoa - 0; Fungi - 0; Plants - 38; Viruses - 0; Other Eukaryotes - 0 (source: NCBI BLink).   chr2:1554282-1555514 REVERSE LENGTH=247  | 178 | 247 | 6.00E-58  | 138.8 | 69.1 | 77.5 |
| Rsa1.0_00908.1.g21150.t1 | gb AAG51783.1 AC079679.3 reverse transcriptase, putative; 16838-20266 [Arabidopsis thaliana]                                                                                                                                                                                                                                                                                                                                                                                                                                                                                                                           | 805 | 1142 | 0         | 141.9 | 48.0 | 63.6 | reverse transcriptase, putative; 16838-20266                                                 | gbpln | Arabidopsis thaliana | AT4G29090.1   Symbols:   Ribonuclease H-like superfamily protein   chr4:14333528-14335255 FORWARD LENGTH=575                                                                                                                                                                                                                               | 805 | 575 | 2.00E-70  | 71.4  | 18.6 | 29.3 |
| Rsa1.0_00908.1.g21151.t1 | dbj BAAS5462.1  transposon-like ORF [Brassica rapa]                                                                                                                                                                                                                                                                                                                                                                                                                                                                                                                                                                    | 445 | 703  | 8.00E-52  | 158.0 | 23.1 | 27.9 | transposon-like ORF                                                                          | gbpln | Brassica rapa        | #                                                                                                                                                                                                                                                                                                                                          | #   | #   | #         | #     | #    |      |
| Rsa1.0_00908.1.g21152.t2 | gb ABD65636.1  hypothetical protein 23.t00055 [Brassica oleracea]                                                                                                                                                                                                                                                                                                                                                                                                                                                                                                                                                      | 401 | 414  | 2.00E-30  | 103.2 | 21.7 | 29.7 | hypothetical protein 23.t00055                                                               | gbpln | Brassica oleracea    | #                                                                                                                                                                                                                                                                                                                                          | #   | #   | #         | #     | #    |      |
| Rsa1.0_00908.1.g21153.t2 | #                                                                                                                                                                                                                                                                                                                                                                                                                                                                                                                                                                                                                      | #   | #    | #         | #     | #    | -    | ----                                                                                         | ----  | #                    | #                                                                                                                                                                                                                                                                                                                                          | #   | #   | #         | #     | #    |      |
| Rsa1.0_00908.1.g21154.t1 | #                                                                                                                                                                                                                                                                                                                                                                                                                                                                                                                                                                                                                      | #   | #    | #         | #     | #    | -    | ----                                                                                         | ----  | #                    | #                                                                                                                                                                                                                                                                                                                                          | #   | #   | #         | #     | #    |      |
| Rsa1.0_00908.1.g21155.t1 | #                                                                                                                                                                                                                                                                                                                                                                                                                                                                                                                                                                                                                      | #   | #    | #         | #     | #    | -    | ----                                                                                         | ----  | #                    | #                                                                                                                                                                                                                                                                                                                                          | #   | #   | #         | #     | #    |      |
| Rsa1.0_00909.1.g21156.t3 | ref[NP_188424.2] translocon at the outer membrane of chloroplasts 64-III [Arabidopsis thaliana] gi 75335547 sp Q9LVH5.1 OE64C_ARAT H RecName: Full=Outer envelope protein 64, chloroplastic; AltName: Full=Translocon at the outer membrane of chloroplasts 64-III [Arabidopsis thaliana] gi 9294499 dbj BAB02718.1  unnamed protein product [Arabidopsis thaliana] gi 332642509 gb AEE76030.1  translocon at the outer membrane of chloroplasts 64-III [Arabidopsis thaliana]                                                                                                                                         | 545 | 589  | 0         | 108.1 | 84.4 | 90.3 | translocon at the outer membrane of chloroplasts 64-III                                      | gbpln | Arabidopsis thaliana | AT3G17970.1   Symbols:   Toc64-III, TOC64-III   translocon at the outer membrane of chloroplasts 64-III   chr3:6148030-6151794 FORWARD LENGTH=589                                                                                                                                                                                          | 545 | 589 | 0         | 108.1 | 84.4 | 90.3 |
| Rsa1.0_00909.1.g21157.t1 | ref[NP_188425.2] calcium-dependent lipid-binding domain-containing protein [Arabidopsis thaliana] gi 297830434 ref[XP_002883099.1] C2 domain-containing protein [Arabidopsis lyrata subsp. lyrata] gi 9294500 dbj BAB02719.1  GTPase activating protein-like [Arabidopsis thaliana] gi 62867625 gb AAAY17416.1  At3g17980 [Arabidopsis thaliana] gi 149944327 gb ABR46206.1  At3g17980 [Arabidopsis thaliana] gi 297328939 gb EFH59358.1  C2 domain-containing protein [Arabidopsis lyrata subsp. lyrata] gi 332642510 gb AEE76031.1  calcium-dependent lipid-binding domain-containing protein [Arabidopsis thaliana] | 273 | 177  | 9.00E-89  | 64.8  | 59.0 | 63.0 | calcium-dependent lipid-binding domain-containing protein                                    | gbpln | Arabidopsis lyrata   | AT3G17980.1   Symbols:   Calcium-dependent lipid-binding (CaLB domain) family protein   chr3:6152417-6153115 FORWARD LENGTH=177                                                                                                                                                                                                            | 273 | 177 | 3.00E-91  | 64.8  | 59.0 | 63.0 |
| Rsa1.0_00909.1.g21158.t1 | ref[XP_002862807.1] WOX1 protein [Arabidopsis lyrata subsp. lyrata] gi 297308541 gb EFH39065.1  WOX1 protein [Arabidopsis lyrata subsp. lyrata]                                                                                                                                                                                                                                                                                                                                                                                                                                                                        | 345 | 348  | 1.00E-156 | 100.9 | 82.3 | 87.0 | WOX1 protein                                                                                 | gbpln | Arabidopsis lyrata   | AT3G18010.1   Symbols:   WOX1   WUSCHEL related homeobox 1   chr3:6161155-6163183 REVERSE LENGTH=350                                                                                                                                                                                                                                       | 345 | 350 | 1.00E-150 | 101.4 | 81.2 | 85.8 |
| Rsa1.0_00909.1.g21159.t1 | ref[XP_002885238.1] hypothetical protein ARALYDRAFT_479291 [Arabidopsis lyrata subsp. lyrata] gi 297331078 gb EFH61497.1  hypothetical protein ARALYDRAFT_479291 [Arabidopsis lyrata subsp. lyrata]                                                                                                                                                                                                                                                                                                                                                                                                                    | 621 | 480  | 9.00E-57  | 77.3  | 30.6 | 37.0 | hypothetical protein ARALYDRAFT_479291                                                       | gbpln | Arabidopsis lyrata   | AT3G18035.1   Symbols:   HON4   winged-helix DNA-binding transcription factor family protein   chr3:6169384-6171558 REVERSE LENGTH=480                                                                                                                                                                                                     | 621 | 480 | 2.00E-54  | 77.3  | 28.8 | 35.4 |
| Rsa1.0_00909.1.g21160.t2 | ref[NP_566596.1] uncharacterized protein [Arabidopsis thaliana] gi 9294060 dbj BAB02017.1  unnamed protein product [Arabidopsis thaliana] gi 15451206 gb AAK96874.1  Unknown protein [Arabidopsis thaliana] gi 23197698 gb AAN15376.1  Unknown protein [Arabidopsis thaliana] gi 332642519 gb AEE76040.1  uncharacterized protein AT3G18050 [Arabidopsis thaliana]                                                                                                                                                                                                                                                     | 335 | 335  | 1.00E-142 | 100.0 | 77.6 | 85.1 | uncharacterized protein                                                                      | gbpln | Arabidopsis thaliana | AT3G18050.1   Symbols:   unknown protein; BEST Arabidopsis thaliana protein match is: unknown protein (TAIR:AT4G28100.1); Has 67 Blast hits to 66 proteins in 12 species: Archae - 0; Bacteria - 0; Metazoa - 0; Fungi - 0; Plants - 67; Viruses - 0; Other Eukaryotes - 0 (source: NCBI BLink).   chr3:6180931-6182593 FORWARD LENGTH=335 | 335 | 335 | 1.00E-145 | 100.0 | 77.6 | 85.1 |
| Rsa1.0_00909.1.g21161.t1 | sp Q9LV20.1 WTR17_ARATH RecName: Full=WAT1-related protein At3g18200 gi 9294076 dbj BAB02033.1  nodulin-like protein [Arabidopsis thaliana]                                                                                                                                                                                                                                                                                                                                                                                                                                                                            | 304 | 383  | 1.00E-143 | 126.0 | 89.8 | 93.1 | RecName: Full=WAT1-related protein At3g18200 gi 9294076 dbj BAB02033.1  nodulin-like protein | gbpln | Arabidopsis thaliana | AT3G18200.1   Symbols:   nodulin MtN21 /EamA-like transporter family protein   chr3:6234509-6236059 REVERSE LENGTH=360                                                                                                                                                                                                                     | 304 | 360 | 2.33E-156 | 118.4 | 89.8 | 93.1 |

|                          |                                                                                                                                                                                                                                                                                                                                                            |      |      |           |       |      |      |                                                      |       |                      |                                                                                                                                                                                                                                                              |      |     |           |       |      |      |
|--------------------------|------------------------------------------------------------------------------------------------------------------------------------------------------------------------------------------------------------------------------------------------------------------------------------------------------------------------------------------------------------|------|------|-----------|-------|------|------|------------------------------------------------------|-------|----------------------|--------------------------------------------------------------------------------------------------------------------------------------------------------------------------------------------------------------------------------------------------------------|------|-----|-----------|-------|------|------|
| Rsa1.0_00909.1.g21162.t1 | gb EOA30759.1  hypothetical protein CARUB_v10013901mg [Capsella rubella]                                                                                                                                                                                                                                                                                   | 380  | 392  | 0         | 103.2 | 82.4 | 91.6 | hypothetical protein CARUB_v10013901mg               | gbpln | Capsella rubella     | AT3G18210.2   Symbols:   2-oxoglutarate (2OG) and Fe(II)-dependent oxygenase superfamily protein   chr3:6238264-6240396 REVERSE LENGTH=394                                                                                                                   | 380  | 394 | 0         | 103.7 | 82.4 | 91.8 |
| Rsa1.0_00909.1.g21163.t1 | gb EOA29837.1  hypothetical protein CARUB_v10012930mg, partial [Capsella rubella]                                                                                                                                                                                                                                                                          | 890  | 910  | 0         | 102.2 | 80.4 | 87.1 | hypothetical protein CARUB_v10012930mg, partial      | gbpln | Capsella rubella     | AT3G18390.1   Symbols: EMB1865   CRS1 / YhbY (CRM) domain-containing protein   chr3:6313572-6317584 FORWARD LENGTH=848                                                                                                                                       | 890  | 848 | 0         | 95.3  | 79.1 | 86.1 |
| Rsa1.0_00909.1.g21164.t1 | ref NP_188469.1  NAC domain containing protein 58 [Arabidopsis thaliana] gi 11994103 dbj BAB01106.1  unnamed protein product [Arabidopsis thaliana] gi 332642571 gb AEE76092.1  NAC domain containing protein 58 [Arabidopsis thaliana]                                                                                                                    | 55   | 314  | 3.00E-22  | 570.9 | 87.3 | 87.3 | NAC domain containing protein 58                     | gbpln | Arabidopsis thaliana | AT3G18400.1   Symbols: anac058, NAC058   NAC domain containing protein 58   chr3:6318745-6320593 REVERSE LENGTH=314                                                                                                                                          | 55   | 314 | 4.00E-25  | 570.9 | 87.3 | 87.3 |
| Rsa1.0_00909.1.g21165.t1 | gb EOA30252.1  hypothetical protein CARUB_v10013374mg [Capsella rubella]                                                                                                                                                                                                                                                                                   | 621  | 556  | 1.00E-130 | 89.5  | 40.6 | 43.2 | hypothetical protein CARUB_v10013374mg               | gbpln | Capsella rubella     | AT3G18520.2   Symbols: HDA15, ATHDA15   histone deacetylase 15   chr3:6361605-6365399 FORWARD LENGTH=564                                                                                                                                                     | 621  | 564 | 1.00E-130 | 90.8  | 39.9 | 44.4 |
| Rsa1.0_00909.1.g21166.t1 | gb EOA29821.1  hypothetical protein CARUB_v10012916mg [Capsella rubella]                                                                                                                                                                                                                                                                                   | 858  | 937  | 0         | 109.2 | 91.3 | 96.6 | hypothetical protein CARUB_v10012916mg               | gbpln | Capsella rubella     | AT3G18524.1   Symbols: MSH2, ATMSH2   MUTS homolog 2   chr3:6368151-6372409 REVERSE LENGTH=937                                                                                                                                                               | 858  | 937 | 0         | 109.2 | 91.3 | 96.4 |
| Rsa1.0_00910.1.g21167.t1 | ref XP_002880115.1  glycosyl hydrolase family 1 protein [Arabidopsis lyrata subsp. lyrata] gi 297325954 gb EFH56374.1  glycosyl hydrolase family 1 protein [Arabidopsis lyrata subsp. lyrata]                                                                                                                                                              | 170  | 579  | 2.00E-83  | 340.6 | 86.5 | 94.1 | glycosyl hydrolase family 1 protein                  | gbpln | Arabidopsis lyrata   | AT2G44460.1   Symbols: BGLU28   beta glucosidase 28   chr2:18346500-18349826 FORWARD LENGTH=582                                                                                                                                                              | 170  | 582 | 1.00E-85  | 342.4 | 85.9 | 92.9 |
| Rsa1.0_00910.1.g21168.t1 | emb CAB39638.1  RNA-directed DNA polymerase-like protein [Arabidopsis thaliana] gi 7267666 emb CAB78094.1  RNA-directed DNA polymerase-like protein [Arabidopsis thaliana]                                                                                                                                                                                 | 1910 | 1274 | 0         | 66.7  | 30.0 | 41.5 | RNA-directed DNA polymerase-like protein             | gbpln | Arabidopsis thaliana | AT4G29090.1   Symbols:   Ribonuclease H-like superfamily protein   chr4:14333528-14335255 FORWARD LENGTH=575                                                                                                                                                 | 1910 | 575 | 3.00E-73  | 30.1  | 9.2  | 14.5 |
| Rsa1.0_00910.1.g21169.t1 | ref NP_181973.1  beta glucosidase 15 [Arabidopsis thaliana] gi 75278312 sp O64879.1 BGL15_ARATH RecName: Full=Beta-glucosidase 15; Short=AtBGLU15; Flags: Precursor gi 3128187 gb AAC16091.1  putative beta-glucosidase [Arabidopsis thaliana] gi 330255327 gb AEC10421.1  beta glucosidase 15 [Arabidopsis thaliana]                                      | 507  | 506  | 0         | 99.8  | 93.9 | 97.4 | beta glucosidase 15                                  | gbpln | Arabidopsis thaliana | AT2G44450.1   Symbols: BGLU15   beta glucosidase 15   chr2:18340966-18343744 FORWARD LENGTH=506                                                                                                                                                              | 507  | 506 | 0         | 99.8  | 93.9 | 97.4 |
| Rsa1.0_00910.1.g21170.t1 | gb EOA27225.1  hypothetical protein CARUB_v10023334mg [Capsella rubella] gi 48256303 gb EOA27226.1  hypothetical protein CARUB_v10023334mg [Capsella rubella]                                                                                                                                                                                              | 312  | 407  | 8.00E-92  | 130.4 | 70.2 | 78.5 | hypothetical protein CARUB_v10023334mg               | gbpln | Capsella rubella     | AT2G44410.1   Symbols:   RING/U-box superfamily protein   chr2:18328873-18330114 FORWARD LENGTH=413                                                                                                                                                          | 312  | 413 | 2.00E-82  | 132.4 | 71.8 | 81.4 |
| Rsa1.0_00910.1.g21171.t1 | gb EOA27519.1  hypothetical protein CARUB_v10023658mg [Capsella rubella]                                                                                                                                                                                                                                                                                   | 422  | 320  | 1.00E-108 | 75.8  | 54.7 | 60.0 | hypothetical protein CARUB_v10023658mg               | gbpln | Capsella rubella     | AT2G44400.1   Symbols:   Cysteine/Histidine-rich C1 domain family protein   chr2:18327096-18327536 FORWARD LENGTH=146                                                                                                                                        | 422  | 146 | 2.00E-67  | 34.6  | 29.1 | 31.8 |
| Rsa1.0_00910.1.g21172.t1 | ref NP_180394.1  cysteine/histidine-rich C1 domain-containing protein [Arabidopsis thaliana] gi 4803954 gb AAD29826.1  unknown protein [Arabidopsis thaliana] gi 330253004 gb AEC08098.1  cysteine/histidine-rich C1 domain-containing protein [Arabidopsis thaliana]                                                                                      | 247  | 248  | 1.00E-102 | 100.4 | 75.7 | 84.2 | cysteine/histidine-rich C1 domain-containing protein | gbpln | Arabidopsis thaliana | AT2G28270.1   Symbols:   Cysteine/Histidine-rich C1 domain family protein   chr2:12053652-12054398 FORWARD LENGTH=248                                                                                                                                        | 247  | 248 | 1.00E-104 | 100.4 | 75.7 | 84.2 |
| Rsa1.0_00910.1.g21173.t1 | ref NP_181964.1  uncharacterized protein [Arabidopsis thaliana] gi 3128181 gb AAC16085.1  unknown protein [Arabidopsis thaliana] gi 26452605 dbj BAC43386.1  unknown protein [Arabidopsis thaliana] gi 28973513 gb AAO64081.1  unknown protein [Arabidopsis thaliana] gi 330255318 gb AEC10412.1  uncharacterized protein AT2G44360 [Arabidopsis thaliana] | 137  | 135  | 3.00E-57  | 98.5  | 83.2 | 88.3 | uncharacterized protein                              | gbpln | Arabidopsis thaliana | AT2G44360.1   Symbols:   unknown protein; Has 23 Blast hits to 23 proteins in 10 species: Archae - 0; Bacteria - 0; Metazoa - 0; Fungi - 0; Plants - 23; Viruses - 0; Other Eukaryotes - 0 (source: NCBI BLink).   chr2:18320855-18321584 REVERSE LENGTH=135 | 137  | 135 | 7.00E-60  | 98.5  | 83.2 | 88.3 |
| Rsa1.0_00910.1.g21174.t1 | ref NP_566016.1  citrate synthase 4 [Arabidopsis thaliana] gi 14423562 gb AAK62463.1 AF387018.1 citrate synthase [Arabidopsis thaliana] gi 20197191 gb AAC16084.2  citrate synthase [Arabidopsis thaliana] gi 30387583 gb AAP31957.1  At2g44350 [Arabidopsis thaliana] gi 330255316 gb AEC10410.1  citrate synthase 4 [Arabidopsis thaliana]               | 473  | 473  | 0         | 100.0 | 97.0 | 99.2 | citrate synthase 4                                   | gbpln | Arabidopsis thaliana | AT2G44350.1   Symbols: ATCS, CSY4   Citrate synthase family protein   chr2:18316673-18320524 FORWARD LENGTH=473                                                                                                                                              | 473  | 473 | 0         | 100.0 | 97.0 | 99.2 |

|                          |                                                                                                                                                                                                                                                                                                                                                                                                                                                                                                                              |      |      |           |       |      |      |                                         |       |                      |                                                                                                                             |      |      |           |       |      |      |
|--------------------------|------------------------------------------------------------------------------------------------------------------------------------------------------------------------------------------------------------------------------------------------------------------------------------------------------------------------------------------------------------------------------------------------------------------------------------------------------------------------------------------------------------------------------|------|------|-----------|-------|------|------|-----------------------------------------|-------|----------------------|-----------------------------------------------------------------------------------------------------------------------------|------|------|-----------|-------|------|------|
| Rsa1.0_00910.1.g21175.t1 | ref XP_002880106.1  VQ motif-containing protein [Arabidopsis lyrata subsp. lyrata] gi 297325945 gb EFH56365.1  VQ motif-containing protein [Arabidopsis lyrata subsp. lyrata]                                                                                                                                                                                                                                                                                                                                                | 180  | 169  | 9.00E-67  | 93.9  | 73.9 | 79.4 | VQ motif-containing protein             | gbpln | Arabidopsis lyrata   | AT2G44340.1   Symbols:   VQ motif-containing protein   chr2:18314279-18314845 FORWARD LENGTH=188                            | 180  | 188  | 7.00E-66  | 104.4 | 78.9 | 84.4 |
| Rsa1.0_00910.1.g21176.t1 | gb EOA28472.1  hypothetical protein CARUB_v10024679mg [Capsella rubella]                                                                                                                                                                                                                                                                                                                                                                                                                                                     | 530  | 552  | 0         | 104.2 | 84.3 | 90.9 | hypothetical protein CARUB_v10024679mg  | gbpln | Capsella rubella     | AT2G44260.1   Symbols:   Plant protein of unknown function (DUF946)   chr2:18295988-18297739 FORWARD LENGTH=553             | 530  | 553  | 0         | 104.3 | 83.4 | 90.4 |
| Rsa1.0_00910.1.g21177.t1 | gb EOA26437.1  hypothetical protein CARUB_v10025447mg [Capsella rubella]                                                                                                                                                                                                                                                                                                                                                                                                                                                     | 83   | 394  | 3.00E-20  | 474.7 | 62.7 | 71.1 | hypothetical protein CARUB_v10025447mg  | gbpln | Capsella rubella     | AT2G44220.1   Symbols:   Protein of Unknown Function (DUF239)   chr2:18283803-18285690 FORWARD LENGTH=403                   | 83   | 403  | 1.00E-22  | 485.5 | 62.7 | 71.1 |
| Rsa1.0_00910.1.g21178.t1 | ref NP_030959.1  uncharacterized protein [Arabidopsis thaliana] gi 3128168 gb AAC16072.1  expressed protein [Arabidopsis thaliana] gi 15081719 gb AAK82514.1  At2g44210/F411.2 [Arabidopsis thaliana] gi 21593455 gb AAM65422.1  unknown [Arabidopsis thaliana] gi 22137094 gb AAM91392.1  At2g44210/F411.2 [Arabidopsis thaliana] gi 330255297 gb AEC10391.1  uncharacterized protein AT2G44210 [Arabidopsis thaliana]                                                                                                      | 417  | 415  | 0         | 99.5  | 91.1 | 94.0 | uncharacterized protein                 | gbpln | Arabidopsis thaliana | AT2G44210.1   Symbols:   Protein of Unknown Function (DUF239)   chr2:18280809-18282591 FORWARD LENGTH=415                   | 417  | 415  | 0         | 99.5  | 91.1 | 94.0 |
| Rsa1.0_00910.1.g21179.t2 | ref NP_197310.1  AP2/B3 domain-containing protein [Arabidopsis thaliana] gi 75171182 sp Q9FK61.1 Y5809_ARATH RecName: Full=B3 domain-containing protein At5g18090 gi 9758891 db BAB09467.1  unnamed protein product [Arabidopsis thaliana] gi 21618285 gb AAM67335.1  unknown [Arabidopsis thaliana] gi 28393402 gb AAC42124.1  unknown protein [Arabidopsis thaliana] gi 28973297 gb AAO63973.1  unknown protein [Arabidopsis thaliana] gi 332005122 gb AED92505.1  AP2/B3 domain-containing protein [Arabidopsis thaliana] | 259  | 301  | 2.00E-48  | 116.2 | 46.7 | 61.4 | AP2/B3 domain-containing protein        | gbpln | Arabidopsis thaliana | AT5G18090.1   Symbols:   AP2/B3-like transcriptional factor family protein   chr5:5985467-5986925 FORWARD LENGTH=301        | 259  | 301  | 5.00E-51  | 116.2 | 46.7 | 61.4 |
| Rsa1.0_00910.1.g21180.t1 | gb EOA26778.1  hypothetical protein CARUB_v10022865mg [Capsella rubella]                                                                                                                                                                                                                                                                                                                                                                                                                                                     | 583  | 594  | 0         | 101.9 | 91.4 | 96.2 | hypothetical protein CARUB_v10022865mg  | gbpln | Capsella rubella     | AT2G44160.1   Symbols: MTHFR2   methylenetetrahydrofolate reductase 2   chr2:18262301-18265185 FORWARD LENGTH=594           | 583  | 594  | 0         | 101.9 | 91.3 | 96.2 |
| Rsa1.0_00910.1.g21181.t1 | ref XP_002862275.1  60S ribosomal protein L7 [Arabidopsis lyrata subsp. lyrata] gi 297307611 gb EFH38533.1  60S ribosomal protein L7 [Arabidopsis lyrata subsp. lyrata] gi 482563601 gb EOA27791.1  hypothetical protein CARUB_v10023943mg [Capsella rubella]                                                                                                                                                                                                                                                                | 120  | 242  | 2.00E-51  | 201.7 | 87.5 | 90.8 | 60S ribosomal protein L7                | gbpln | Arabidopsis lyrata   | AT2G44120.2   Symbols:   Ribosomal protein L30/L7 family protein   chr2:18249227-18250417 REVERSE LENGTH=247                | 120  | 247  | 1.00E-53  | 205.8 | 87.5 | 90.0 |
| Rsa1.0_00911.1.g21182.t1 | gb AAF79236.1 AC006917_21 F10B6.25 [Arabidopsis thaliana]                                                                                                                                                                                                                                                                                                                                                                                                                                                                    | 1425 | 1475 | 0         | 103.5 | 91.3 | 95.4 | F10B6.25                                | gbpln | Arabidopsis thaliana | AT1G14850.1   Symbols: NUP155   nucleoporin 155   chr1:5116921-5123259 REVERSE LENGTH=1464                                  | 1425 | 1464 | 0         | 102.7 | 91.1 | 95.4 |
| Rsa1.0_00911.1.g21183.t1 | ref XP_002892833.1  atmap70-4 [Arabidopsis lyrata subsp. lyrata] gi 297338675 gb EFH69092.1  atmap70-4 [Arabidopsis lyrata subsp. lyrata]                                                                                                                                                                                                                                                                                                                                                                                    | 605  | 603  | 0         | 99.7  | 90.2 | 93.9 | atmap70-4                               | gbpln | Arabidopsis lyrata   | AT1G14840.1   Symbols: ATMAP70-4, MAP70-4   microtubule-associated proteins 70-4   chr1:5112415-5115299 REVERSE LENGTH=604  | 605  | 604  | 0         | 99.8  | 89.3 | 94.0 |
| Rsa1.0_00911.1.g21184.t1 | gb EOA37031.1  hypothetical protein CARUB_v10010095mg [Capsella rubella]                                                                                                                                                                                                                                                                                                                                                                                                                                                     | 245  | 251  | 1.00E-119 | 102.4 | 83.3 | 91.8 | hypothetical protein CARUB_v10010095mg  | gbpln | Capsella rubella     | AT1G14820.3   Symbols:   Sec14p-like phosphatidylinositol transfer family protein   chr1:5105237-5106793 REVERSE LENGTH=252 | 245  | 252  | 1.00E-122 | 102.9 | 85.3 | 91.0 |
| Rsa1.0_00911.1.g21185.t1 | ref NP_172934.1  semialdehyde dehydrogenase-like protein [Arabidopsis thaliana] gi 17979524 gb AAL50097.1  At1g14810/F10B6.6 [Arabidopsis thaliana] gi 20856224 gb AAM26654.1  At1g14810/F10B6.6 [Arabidopsis thaliana] gi 21536731 gb AAM61063.1  aspartate-semialdehyde dehydrogenase, putative [Arabidopsis thaliana] gi 332191107 gb AEE29228.1  semialdehyde dehydrogenase-like protein [Arabidopsis thaliana]                                                                                                          | 375  | 375  | 0         | 100.0 | 93.6 | 97.3 | semialdehyde dehydrogenase-like protein | gbpln | Arabidopsis thaliana | AT1G14810.1   Symbols:   semialdehyde dehydrogenase family protein   chr1:5102684-5104633 REVERSE LENGTH=375                | 375  | 375  | 0         | 100.0 | 93.6 | 97.3 |

|                          |                                                                                                                                                                                                                                                                                                                                                                                                                                                                                                                                                                                                                                                                                                                                                                                                                                   |      |      |           |       |      |      |                                                             |       |                      |                                                                                                                                  |      |      |           |       |      |      |
|--------------------------|-----------------------------------------------------------------------------------------------------------------------------------------------------------------------------------------------------------------------------------------------------------------------------------------------------------------------------------------------------------------------------------------------------------------------------------------------------------------------------------------------------------------------------------------------------------------------------------------------------------------------------------------------------------------------------------------------------------------------------------------------------------------------------------------------------------------------------------|------|------|-----------|-------|------|------|-------------------------------------------------------------|-------|----------------------|----------------------------------------------------------------------------------------------------------------------------------|------|------|-----------|-------|------|------|
| Rsa1.0_00911.1.g21186.t1 | gb EOA39524.1  hypothetical protein CARUB_v10008144mg [Capsella rubella]                                                                                                                                                                                                                                                                                                                                                                                                                                                                                                                                                                                                                                                                                                                                                          | 1110 | 1107 | 0         | 99.7  | 86.1 | 91.8 | hypothetical protein CARUB_v10008144mg                      | gbpln | Capsella rubella     | AT1G14790.1   Symbols: RDR1, ATRDRP1   RNA-dependent RNA polymerase 1   chr1:5094317-5097817 REVERSE LENGTH=1107                 | 1110 | 1107 | 0         | 99.7  | 86.2 | 91.1 |
| Rsa1.0_00911.1.g21187.t2 | ref NP_172931.1  MAC/Perforin domain-containing protein [Arabidopsis thaliana]<br>gi 75153917 sp Q8L612.1 MACP1_ARAT H RecName: Full=MACPF domain-containing protein At1g14780<br>gi 20466444 gb AAM20539.1  unknown protein [Arabidopsis thaliana]<br>gi 27311987 gb AA000959.1  unknown protein [Arabidopsis thaliana]<br>gi 332191104 gb AEE29225.1  MAC/Perforin domain-containing protein [Arabidopsis thaliana]<br>ref XP_002892829.1  hypothetical protein ARALYDRAFT.471666 [Arabidopsis lyrata subsp. lyrata]<br>gi 29733867 gb EFH69088.1  hypothetical protein ARALYDRAFT.471666 [Arabidopsis lyrata subsp. lyrata]                                                                                                                                                                                                    | 624  | 627  | 0         | 100.5 | 86.4 | 92.5 | MAC/Perforin domain-containing protein                      | gbpln | Arabidopsis thaliana | AT1G14780.1   Symbols:   MAC/Perforin domain-containing protein   chr1:5091020-5093873 FORWARD LENGTH=627                        | 624  | 627  | 0         | 100.5 | 86.4 | 92.5 |
| Rsa1.0_00911.1.g21188.t3 | ref XP_002892829.1  hypothetical protein ARALYDRAFT.471666 [Arabidopsis lyrata subsp. lyrata]<br>gi 29733867 gb EFH69088.1  hypothetical protein ARALYDRAFT.471666 [Arabidopsis lyrata subsp. lyrata]<br>ref NP_001154340.1  protein KNATM [Arabidopsis thaliana]<br>gi 332191100 gb AEE29221.1  protein KNATM [Arabidopsis thaliana]<br>ref XP_002892827.1  hypothetical protein ARALYDRAFT.471662 [Arabidopsis lyrata subsp. lyrata]<br>gi 297338669 gb EFH69086.1  hypothetical protein ARALYDRAFT.471662 [Arabidopsis lyrata subsp. lyrata]                                                                                                                                                                                                                                                                                   | 603  | 412  | 1.00E-129 | 68.3  | 41.1 | 45.4 | hypothetical protein ARALYDRAFT.471666                      | gbpln | Arabidopsis lyrata   | AT1G14770.2   Symbols:   RING/FYVE/PHD zinc finger superfamily protein   chr1:5086867-5088437 REVERSE LENGTH=429                 | 603  | 429  | 1.00E-122 | 71.1  | 40.5 | 44.6 |
| Rsa1.0_00911.1.g21189.t1 | ref NP_001154340.1  protein KNATM [Arabidopsis thaliana]<br>gi 332191100 gb AEE29221.1  protein KNATM [Arabidopsis thaliana]<br>ref XP_002892827.1  hypothetical protein ARALYDRAFT.471662 [Arabidopsis lyrata subsp. lyrata]<br>gi 297338669 gb EFH69086.1  hypothetical protein ARALYDRAFT.471662 [Arabidopsis lyrata subsp. lyrata]                                                                                                                                                                                                                                                                                                                                                                                                                                                                                            | 139  | 138  | 2.00E-53  | 99.3  | 81.3 | 89.2 | protein KNATM                                               | gbpln | Arabidopsis thaliana | AT1G14760.2   Symbols: KNATM   KNOX Arabidopsis thaliana meinox   chr1:5084530-5085213 REVERSE LENGTH=138                        | 139  | 138  | 5.00E-56  | 99.3  | 81.3 | 89.2 |
| Rsa1.0_00911.1.g21190.t1 | ref XP_002892827.1  hypothetical protein ARALYDRAFT.471662 [Arabidopsis lyrata subsp. lyrata]<br>gi 297338669 gb EFH69086.1  hypothetical protein ARALYDRAFT.471662 [Arabidopsis lyrata subsp. lyrata]                                                                                                                                                                                                                                                                                                                                                                                                                                                                                                                                                                                                                            | 564  | 581  | 0         | 103.0 | 77.0 | 84.4 | hypothetical protein ARALYDRAFT.471662                      | gbpln | Arabidopsis lyrata   | AT1G14750.1   Symbols: SDS   Cyclin family protein   chr1:5079674-5082423 REVERSE LENGTH=578                                     | 564  | 578  | 0         | 102.5 | 77.1 | 84.4 |
| Rsa1.0_00911.1.g21191.t1 | gb EOA39780.1  hypothetical protein CARUB_v10008407mg [Capsella rubella]                                                                                                                                                                                                                                                                                                                                                                                                                                                                                                                                                                                                                                                                                                                                                          | 741  | 738  | 0         | 99.6  | 85.3 | 90.3 | hypothetical protein CARUB_v10008407mg                      | gbpln | Capsella rubella     | AT1G14740.1   Symbols:   Protein of unknown function (DUF1423)   chr1:5075450-5077732 REVERSE LENGTH=733                         | 741  | 733  | 0         | 98.9  | 85.0 | 90.0 |
| Rsa1.0_00911.1.g21192.t1 | ref NP_172926.2  Cytochrome b561/ferric reductase transmembrane-like protein [Arabidopsis thaliana]<br>gi 75116658 sp Q67ZF6.1 ACFR3_ARAT H RecName: Full=Probable transmembrane ascorbate ferrereductase 3; AltName: Full=Artb561-3<br>gi 51970464 dbj BAD43924.1  putative cytochrome B561 [Arabidopsis thaliana]<br>gi 332191094 gb AEE29215.1  probable transmembrane ascorbate ferrereductase 3 [Arabidopsis thaliana]<br>ref NP_563957.1  hydroxyproline-rich glycoprotein-like protein [Arabidopsis thaliana]<br>gi 30683962 ref NP_849663.1  hydroxyproline-rich glycoprotein-like protein [Arabidopsis thaliana]<br>gi 332191091 gb AEE29212.1  hydroxyproline-rich glycoprotein-like protein [Arabidopsis thaliana]<br>gi 332191092 gb AEE29213.1  hydroxyproline-rich glycoprotein-like protein [Arabidopsis thaliana] | 221  | 224  | 1.00E-114 | 101.4 | 92.8 | 96.4 | Cytochrome b561/ferric reductase transmembrane-like protein | gbpln | Arabidopsis thaliana | AT1G14730.1   Symbols:   Cytochrome b561/ferric reductase transmembrane protein family   chr1:5073244-5074568 FORWARD LENGTH=224 | 221  | 224  | 1.00E-116 | 101.4 | 92.8 | 96.4 |
| Rsa1.0_00911.1.g21193.t2 | ref NP_563957.1  hydroxyproline-rich glycoprotein-like protein [Arabidopsis thaliana]<br>gi 30683962 ref NP_849663.1  hydroxyproline-rich glycoprotein-like protein [Arabidopsis thaliana]<br>gi 332191091 gb AEE29212.1  hydroxyproline-rich glycoprotein-like protein [Arabidopsis thaliana]<br>gi 332191092 gb AEE29213.1  hydroxyproline-rich glycoprotein-like protein [Arabidopsis thaliana]                                                                                                                                                                                                                                                                                                                                                                                                                                | 595  | 601  | 0         | 101.0 | 68.7 | 78.0 | hydroxyproline-rich glycoprotein-like protein               | gbpln | Arabidopsis thaliana | AT1G14710.2   Symbols:   hydroxyproline-rich glycoprotein family protein   chr1:5062168-5064697 REVERSE LENGTH=601               | 595  | 601  | 0         | 101.0 | 68.7 | 78.0 |
| Rsa1.0_00911.1.g21194.t1 | gb AAG09097.1 AC009323.8 Putative retroelement polyprotein [Arabidopsis thaliana]<br>ref NP_683306.1  putative clathrin assembly protein [Arabidopsis thaliana]<br>gi 46396002 sp Q9LQW4.1 CAP15_ARAT H RecName: Full=Putative clathrin assembly protein At1g14686<br>gi 8778241 gb AAF79250.1 AC006917_35 F10B6.6 [Arabidopsis thaliana]<br>gi 332191084 gb AEE29205.1  putative clathrin assembly protein [Arabidopsis thaliana]                                                                                                                                                                                                                                                                                                                                                                                                | 573  | 1486 | 1.00E-157 | 259.3 | 48.5 | 67.7 | Putative retroelement polyprotein                           | gbpln | Arabidopsis thaliana | # # # # # # #                                                                                                                    | #    | #    | #         | #     | #    | #    |
| Rsa1.0_00911.1.g21195.t1 | ref NP_683306.1  putative clathrin assembly protein [Arabidopsis thaliana]<br>gi 46396002 sp Q9LQW4.1 CAP15_ARAT H RecName: Full=Putative clathrin assembly protein At1g14686<br>gi 8778241 gb AAF79250.1 AC006917_35 F10B6.6 [Arabidopsis thaliana]<br>gi 332191084 gb AEE29205.1  putative clathrin assembly protein [Arabidopsis thaliana]                                                                                                                                                                                                                                                                                                                                                                                                                                                                                     | 365  | 339  | 1.00E-127 | 92.9  | 68.5 | 78.6 | putative clathrin assembly protein                          | gbpln | Arabidopsis thaliana | AT1G14686.1   Symbols:   ENTH/ANTH/VHS superfamily protein   chr1:5045781-5046800 REVERSE LENGTH=339                             | 365  | 339  | 1.00E-129 | 92.9  | 68.5 | 78.6 |

|                          |                                                                                                                                                                                                                                                                                                                                           |     |      |           |        |      |      |                                                 |       |                      |                                                                                                                                                                                                                                                                                                                                                                                                                                                                         |     |      |           |        |      |      |
|--------------------------|-------------------------------------------------------------------------------------------------------------------------------------------------------------------------------------------------------------------------------------------------------------------------------------------------------------------------------------------|-----|------|-----------|--------|------|------|-------------------------------------------------|-------|----------------------|-------------------------------------------------------------------------------------------------------------------------------------------------------------------------------------------------------------------------------------------------------------------------------------------------------------------------------------------------------------------------------------------------------------------------------------------------------------------------|-----|------|-----------|--------|------|------|
| Rsa1.0_00911.1.g21196.t1 | gb ABC25625.1  GAGA-binding transcriptional activator [Capsella rubella] gi 83616242 gb ABC25626.1  GAGA-binding transcriptional activator [Capsella rubella] gi 482574222 gb EOA38409.1  hypothetical protein CARUB_v10009978mg [Capsella rubella] gi 482574223 gb EOA38410.1  hypothetical protein CARUB_v10009978mg [Capsella rubella] | 279 | 277  | 1.00E-128 | 99.3   | 85.3 | 91.0 | GAGA-binding transcriptional activator          | gbpln | Capsella rubella     | AT1G14685.1   Symbols: BPC2, BBR/BPC2, ATBPC2   basic pentacysteine 2   chr1:5043086-5043925 FORWARD LENGTH=279                                                                                                                                                                                                                                                                                                                                                         | 279 | 279  | 1.00E-124 | 100.0  | 84.6 | 90.0 |
| Rsa1.0_00911.1.g21197.t1 | ref XP_002890069.1  hypothetical protein ARALYDRAFT_888850 [Arabidopsis lyrata subsp. lyrata] gi 297335911 gb EFH66328.1  hypothetical protein ARALYDRAFT_888850 [Arabidopsis lyrata subsp. lyrata]                                                                                                                                       | 285 | 289  | 1.00E-101 | 101.4  | 70.2 | 82.5 | hypothetical protein ARALYDRAFT_888850          | gbpln | Arabidopsis lyrata   | AT1G14680.1   Symbols:   unknown protein; BEST Arabidopsis thaliana protein match is: unknown protein (TAIR:AT4G09060.1); Has 8132 Blast hits to 6366 proteins in 685 species: Archae - 171; Bacteria - 671; Metazoa - 4046; Fungi - 445; Plants - 318; Viruses - 23; Other Eukaryotes - 2458 (source: NCBI BLINK).   chr1:5040861-5041733 FORWARD LENGTH=290                                                                                                           | 285 | 290  | 1.00E-100 | 101.8  | 68.1 | 81.4 |
| Rsa1.0_00912.1.g21198.t1 | ref XP_002876873.1  predicted protein [Arabidopsis lyrata subsp. lyrata] gi 297322711 gb EFH53132.1  predicted protein [Arabidopsis lyrata subsp. lyrata]                                                                                                                                                                                 | 267 | 203  | 9.00E-77  | 76.0   | 53.2 | 60.3 | predicted protein                               | gbpln | Arabidopsis lyrata   | AT2G03300.1   Symbols:   Toll-Interleukin-Resistance (TIR) domain family protein   chr2:1003468-1004222 REVERSE LENGTH=203                                                                                                                                                                                                                                                                                                                                              | 267 | 203  | 8.00E-78  | 76.0   | 52.8 | 59.6 |
| Rsa1.0_00912.1.g21199.t1 | gb AAF99727.1 AC004557_6 F17L21.7 [Arabidopsis thaliana]                                                                                                                                                                                                                                                                                  | 804 | 1534 | 1.00E-173 | 190.8  | 38.2 | 47.4 | F17L21.7                                        | gbpln | Arabidopsis thaliana | AT1G14010.1   Symbols:   emp24/gp25L/p24 family/GOLD family protein   chr1:4800385-4801790 REVERSE LENGTH=212                                                                                                                                                                                                                                                                                                                                                           | 804 | 212  | 9.00E-83  | 26.4   | 17.3 | 21.4 |
| Rsa1.0_00912.1.g21200.t1 | ref NP_178423.5  phosphate transporter PHO1-5 [Arabidopsis thaliana] gi 306756300 sp Q6R8G5.2 PHO15_ATH RecName: Full=Phosphate transporter PHO1 homolog 5; AltName: Full=Protein PHO1 homolog 5; Short=AtPHO1;H5 gi 330250584 gb AEC05678.1  phosphate transporter PHO1-5 [Arabidopsis thaliana]                                         | 815 | 823  | 0         | 101.0  | 85.2 | 92.0 | phosphate transporter PHO1-5                    | gbpln | Arabidopsis thaliana | AT2G03240.1   Symbols:   EXS (ERD1/XPR1/SYG1) family protein   chr2:973693-977337 REVERSE LENGTH=823                                                                                                                                                                                                                                                                                                                                                                    | 815 | 823  | 0         | 101.0  | 85.2 | 92.0 |
| Rsa1.0_00912.1.g21201.t9 | ref XP_002875191.1  EMB1579 [Arabidopsis lyrata subsp. lyrata] gi 297321029 gb EFH51450.1  EMB1579 [Arabidopsis lyrata subsp. lyrata]                                                                                                                                                                                                     | 404 | 1333 | 3.00E-45  | 330.0  | 25.5 | 28.7 | EMB1579                                         | gbpln | Arabidopsis lyrata   | AT2G03150.1   Symbols: emb1579   ATP/GTP-binding protein family   chr2:952313-959004 FORWARD LENGTH=1340                                                                                                                                                                                                                                                                                                                                                                | 404 | 1340 | 6.00E-47  | 331.7  | 25.0 | 28.5 |
| Rsa1.0_00912.1.g21202.t4 | ref NP_178414.2  ATP/GTP-binding protein-like protein [Arabidopsis thaliana] gi 330250575 gb AEC05669.1  ATP/GTP-binding protein-like protein [Arabidopsis thaliana]                                                                                                                                                                      | 110 | 1340 | 2.00E-22  | 1218.2 | 48.2 | 50.0 | ATP/GTP-binding protein-like protein            | gbpln | Arabidopsis thaliana | AT2G03150.1   Symbols: emb1579   ATP/GTP-binding protein family   chr2:952313-959004 FORWARD LENGTH=1340                                                                                                                                                                                                                                                                                                                                                                | 110 | 1340 | 3.00E-25  | 1218.2 | 48.2 | 50.0 |
| Rsa1.0_00912.1.g21203.t1 | gb EOA24555.1  hypothetical protein CARUB_v10017813mg, partial [Capsella rubella]                                                                                                                                                                                                                                                         | 248 | 275  | 1.00E-138 | 110.9  | 96.8 | 98.4 | hypothetical protein CARUB_v10017813mg, partial | gbpln | Capsella rubella     | AT2G03090.1   Symbols: ATEXPA15, EXP15, ATEXP15, ATEXP ALPHA 1.3, EXPA15   expansin A15   chr2:917361-918554 REVERSE LENGTH=253                                                                                                                                                                                                                                                                                                                                         | 248 | 253  | 1.00E-138 | 102.0  | 95.2 | 96.8 |
| Rsa1.0_00912.1.g21204.t1 | gb EOA24693.1  hypothetical protein CARUB_v10017969mg [Capsella rubella]                                                                                                                                                                                                                                                                  | 229 | 230  | 1.00E-118 | 100.4  | 88.2 | 95.6 | hypothetical protein CARUB_v10017969mg          | gbpln | Capsella rubella     | AT2G02990.1   Symbols: RNS1, ATRNS1   ribonuclease 1   chr2:873714-874667 FORWARD LENGTH=230                                                                                                                                                                                                                                                                                                                                                                            | 229 | 230  | 1.00E-118 | 100.4  | 89.1 | 96.1 |
| Rsa1.0_00912.1.g21205.t1 | gb EOA24693.1  hypothetical protein CARUB_v10017969mg [Capsella rubella]                                                                                                                                                                                                                                                                  | 341 | 230  | 1.00E-106 | 67.4   | 53.1 | 58.1 | hypothetical protein CARUB_v10017969mg          | gbpln | Capsella rubella     | AT2G02990.1   Symbols: RNS1, ATRNS1   ribonuclease 1   chr2:873714-874667 FORWARD LENGTH=230                                                                                                                                                                                                                                                                                                                                                                            | 341 | 230  | 1.00E-107 | 67.4   | 54.5 | 58.7 |
| Rsa1.0_00912.1.g21206.t1 | # # # # # # # #                                                                                                                                                                                                                                                                                                                           | #   | #    | #         | #      | #    | #    | -                                               | ----  | ----                 | #                                                                                                                                                                                                                                                                                                                                                                                                                                                                       | #   | #    | #         | #      | #    | #    |
| Rsa1.0_00913.1.g21207.t1 | gb EOA13229.1  hypothetical protein CARUB_v10026255mg [Capsella rubella]                                                                                                                                                                                                                                                                  | 512 | 509  | 0         | 99.4   | 84.0 | 91.0 | hypothetical protein CARUB_v10026255mg          | gbpln | Capsella rubella     | AT5G62570.2   Symbols:   Calmodulin binding protein-like   chr5:25114934-25116967 FORWARD LENGTH=494                                                                                                                                                                                                                                                                                                                                                                    | 512 | 494  | 0         | 96.5   | 78.1 | 85.2 |
| Rsa1.0_00913.1.g21208.t1 | ref XP_002866498.1  hypothetical protein ARALYDRAFT_358455 [Arabidopsis lyrata subsp. lyrata] gi 297312333 gb EFH42757.1  hypothetical protein ARALYDRAFT_358455 [Arabidopsis lyrata subsp. lyrata]                                                                                                                                       | 429 | 438  | 1.00E-140 | 102.1  | 73.0 | 81.8 | hypothetical protein ARALYDRAFT_358455          | gbpln | Arabidopsis lyrata   | AT5G62550.1   Symbols:   unknown protein; FUNCTIONS IN: molecular_function unknown; INVOLVED IN: biological_process unknown; LOCATED IN: plasma membrane; EXPRESSED IN: 17 plant structures; EXPRESSED DURING: 9 growth stages; Has 14949 Blast hits to 9947 proteins in 971 species: Archae - 43; Bacteria - 3248; Metazoa - 4424; Fungi - 1542; Plants - 562; Viruses - 55; Other Eukaryotes - 5075 (source: NCBI BLINK).   chr5:25105839-25107875 REVERSE LENGTH=487 | 429 | 487  | 1.00E-142 | 113.5  | 73.4 | 82.5 |

|                          |                                                                                                                                                                                                                                                                                                                                                                                                                                                                                                                                                                                                                                                                                                                                                                                                                                                                    |     |     |           |       |      |      |                                        |       |                      |                                                                                                                                    |     |     |           |       |      |      |
|--------------------------|--------------------------------------------------------------------------------------------------------------------------------------------------------------------------------------------------------------------------------------------------------------------------------------------------------------------------------------------------------------------------------------------------------------------------------------------------------------------------------------------------------------------------------------------------------------------------------------------------------------------------------------------------------------------------------------------------------------------------------------------------------------------------------------------------------------------------------------------------------------------|-----|-----|-----------|-------|------|------|----------------------------------------|-------|----------------------|------------------------------------------------------------------------------------------------------------------------------------|-----|-----|-----------|-------|------|------|
| Rsa1.0_00913.1.g21209.t2 | refNP_001051522.1   Os03g0791800 [Oryza sativa Japonica Group] gi 18844990 dbj BAB85469.1   Rad6 [Oryza sativa Japonica Group] gi 28269456 gb AAO37999.1   ubiquitin carrier protein [Oryza sativa Japonica Group] gi 108711497 gb ABF99292.1   Ubiquitin-conjugating enzyme E2-17 kDa, putative, expressed [Oryza sativa Japonica Group] gi 113549993 dbj BAF13436.1   Os03g0791800 [Oryza sativa Japonica Group] gi 125546000 gb EAY92139.1   hypothetical protein OsL13850 [Oryza sativa Indica Group] gi 125588203 gb EAZ28867.1   hypothetical protein OsJ_12905 [Oryza sativa Japonica Group] gi 215695359 dbj BAG90550.1   unnamed protein product [Oryza sativa Japonica Group] gi 215767706 dbj BAG99936.1   unnamed protein product [Oryza sativa Japonica Group] gi 341870591 gb AEK99335.1   ubiquitin conjugated enzyme [Oryza sativa Japonica Group] | 71  | 152 | 1.00E-22  | 214.1 | 69.0 | 70.4 | Os03g0791800                           | gbpln | Oryza sativa         | AT5G62540.1   Symbols: UBC3   ubiquitin-conjugating enzyme 3   chr5:25104679-25105465 FORWARD LENGTH=150                           | 71  | 150 | 1.00E-24  | 211.3 | 66.2 | 69.0 |
| Rsa1.0_00913.1.g21210.t1 | dbj BAJ34440.1   unnamed protein product [Thellungiella halophila]                                                                                                                                                                                                                                                                                                                                                                                                                                                                                                                                                                                                                                                                                                                                                                                                 | 547 | 557 | 0         | 101.8 | 94.5 | 98.0 | unnamed protein product                | ----  | ----                 | AT5G62530.1   Symbols: ALDH12A1, ATP5CDH, P5CDH   aldehyde dehydrogenase 12A1   chr5:25099768-25103159 REVERSE LENGTH=556          | 547 | 556 | 0         | 101.6 | 93.6 | 97.1 |
| Rsa1.0_00913.1.g21211.t1 | gb EOA14515.1   hypothetical protein CARUB_v10027743mg [Capsella rubella]                                                                                                                                                                                                                                                                                                                                                                                                                                                                                                                                                                                                                                                                                                                                                                                          | 330 | 316 | 1.00E-131 | 95.8  | 72.1 | 82.1 | hypothetical protein CARUB_v10027743mg | gbpln | Capsella rubella     | AT5G62520.1   Symbols: SRO5   similar to RD one 5   chr5:25098071-25099264 FORWARD LENGTH=309                                      | 330 | 309 | 1.00E-130 | 93.6  | 71.5 | 82.1 |
| Rsa1.0_00913.1.g21212.t1 | ref XP_002864798.1   ATEB1B [Arabidopsis lyrata subsp. lyrata] gi 297310633 gb EFH41057.1   ATEB1B [Arabidopsis lyrata subsp. lyrata]                                                                                                                                                                                                                                                                                                                                                                                                                                                                                                                                                                                                                                                                                                                              | 292 | 288 | 1.00E-142 | 98.6  | 83.2 | 87.3 | ATEB1B                                 | gbpln | Arabidopsis lyrata   | AT5G62500.1   Symbols: ATEB1B, ATEB1, EB1B   end binding protein 1B   chr5:25092929-250995006 FORWARD LENGTH=293                   | 292 | 293 | 1.00E-145 | 100.3 | 83.6 | 86.3 |
| Rsa1.0_00913.1.g21213.t1 | ref NP_851249.1   glutathione S-transferase tau 9 [Arabidopsis thaliana] gi 75263010 sp Q9FUT0.1   GSTU9_ARAT H RecName: Full=Glutathione S-transferase U9; Short=AtGSTU9; AltName: Full=GST class-tau member 9; AltName: Full=Glutathione S-transferase 14 gi 11095992 gb AAG30128.1   AF288179.1 glutathione S-transferase [Arabidopsis thaliana] gi 51970564 dbj BAD43974.1   glutathione S-transferase (GST14) [Arabidopsis thaliana] gi 332010229 gb AED97612.1   glutathione S-transferase tau 9 [Arabidopsis thaliana]                                                                                                                                                                                                                                                                                                                                      | 234 | 240 | 1.00E-113 | 102.6 | 82.5 | 92.7 | glutathione S-transferase tau 9        | gbpln | Arabidopsis thaliana | AT5G62480.1   Symbols: ATGSTU9, GST14, GST14B, GSTU9   glutathione S-transferase tau 9   chr5:25088775-25089566 REVERSE LENGTH=240 | 234 | 240 | 1.00E-115 | 102.6 | 82.5 | 92.7 |
| Rsa1.0_00913.1.g21214.t1 | gb EOA17213.1   hypothetical protein CARUB_v10005487mg [Capsella rubella]                                                                                                                                                                                                                                                                                                                                                                                                                                                                                                                                                                                                                                                                                                                                                                                          | 272 | 271 | 1.00E-122 | 99.6  | 82.0 | 90.8 | hypothetical protein CARUB_v10005487mg | gbpln | Capsella rubella     | AT4G28360.1   Symbols:   Ribosomal protein L22a/L17e family protein   chr4:14029294-14030926 REVERSE LENGTH=271                    | 272 | 271 | 1.00E-122 | 99.6  | 80.1 | 91.9 |
| Rsa1.0_00913.1.g21215.t1 | ref NP_568954.2   glutathione S-transferase tau 9 [Arabidopsis thaliana] gi 11095994 gb AAG30129.1   AF288180.1 glutathione S-transferase [Arabidopsis thaliana] gi 10178079 dbj BAB11498.1   glutathione S-transferase-like protein [Arabidopsis thaliana] gi 332010230 gb AED97613.1   glutathione S-transferase tau 9 [Arabidopsis thaliana]                                                                                                                                                                                                                                                                                                                                                                                                                                                                                                                    | 191 | 214 | 1.00E-83  | 112.0 | 80.6 | 91.6 | glutathione S-transferase tau 9        | gbpln | Arabidopsis thaliana | AT5G62480.2   Symbols: ATGSTU9, GST14, GST14B, GSTU9   glutathione S-transferase tau 9   chr5:25088775-25089566 REVERSE LENGTH=214 | 191 | 214 | 4.00E-86  | 112.0 | 80.6 | 91.6 |
| Rsa1.0_00913.1.g21216.t1 | gb EOA17213.1   hypothetical protein CARUB_v10005487mg [Capsella rubella]                                                                                                                                                                                                                                                                                                                                                                                                                                                                                                                                                                                                                                                                                                                                                                                          | 220 | 271 | 1.00E-89  | 123.2 | 79.5 | 89.1 | hypothetical protein CARUB_v10005487mg | gbpln | Capsella rubella     | AT4G28360.1   Symbols:   Ribosomal protein L22a/L17e family protein   chr4:14029294-14030926 REVERSE LENGTH=271                    | 220 | 271 | 9.00E-90  | 123.2 | 77.7 | 90.0 |
| Rsa1.0_00913.1.g21217.t1 | dbj BAJ34253.1   unnamed protein product [Thellungiella halophila]                                                                                                                                                                                                                                                                                                                                                                                                                                                                                                                                                                                                                                                                                                                                                                                                 | 348 | 355 | 1.00E-169 | 102.0 | 87.4 | 92.2 | unnamed protein product                | ----  | ----                 | AT5G62470.2   Symbols: MYB86   myb domain protein 96   chr5:25079434-25080858 REVERSE LENGTH=352                                   | 348 | 352 | 1.00E-166 | 101.1 | 88.5 | 91.4 |
| Rsa1.0_00913.1.g21218.t1 | gb EOA13766.1   hypothetical protein CARUB_v10026858mg [Capsella rubella]                                                                                                                                                                                                                                                                                                                                                                                                                                                                                                                                                                                                                                                                                                                                                                                          | 308 | 303 | 1.00E-113 | 98.4  | 83.4 | 88.6 | hypothetical protein CARUB_v10026858mg | gbpln | Capsella rubella     | AT5G62460.1   Symbols:   RING/FYVE/PHD zinc finger superfamily protein   chr5:25075545-25077072 FORWARD LENGTH=307                 | 308 | 307 | 1.00E-112 | 99.7  | 83.4 | 88.0 |

|                          |                                                                                                                                                                                                                                                                                                                                                                                                                                                                                                                                                                           |     |     |           |       |      |      |                                                 |       |                      |                                                                                                                                                                                                                                                                                                                                                                                                                              |     |     |           |       |      |      |
|--------------------------|---------------------------------------------------------------------------------------------------------------------------------------------------------------------------------------------------------------------------------------------------------------------------------------------------------------------------------------------------------------------------------------------------------------------------------------------------------------------------------------------------------------------------------------------------------------------------|-----|-----|-----------|-------|------|------|-------------------------------------------------|-------|----------------------|------------------------------------------------------------------------------------------------------------------------------------------------------------------------------------------------------------------------------------------------------------------------------------------------------------------------------------------------------------------------------------------------------------------------------|-----|-----|-----------|-------|------|------|
| Rsa1.0_00913.1.g21219.t1 | ref[NP_201050.2] uncharacterized protein [Arabidopsis thaliana] gi 20385491 gb AAM21312.1 AF371327_1 EMB514 [Arabidopsis thaliana] gi 21593438 gb AAM65405.1  unknown [Arabidopsis thaliana] gi 30793885 gb AAP40395.1  unknown protein [Arabidopsis thaliana] gi 30794104 gb AAP40494.1  unknown protein [Arabidopsis thaliana] gi 51968752 dbj BAD43068.1  unnamed protein product [Arabidopsis thaliana] gi 110739286 dbj BAF01556.1  hypothetical protein [Arabidopsis thaliana] gi 332010225 gb AED97608.1  uncharacterized protein AT5G62440 [Arabidopsis thaliana] | 203 | 202 | 4.00E-65  | 99.5  | 67.5 | 73.9 | uncharacterized protein                         | gbpln | Arabidopsis thaliana | AT5G62440.1   Symbols:   Protein of unknown function (DUF3223)   chr5:25072620-25073917 REVERSE LENGTH=202                                                                                                                                                                                                                                                                                                                   | 203 | 202 | 1.00E-67  | 99.5  | 67.5 | 73.9 |
| Rsa1.0_00914.1.g21220.t1 | #                                                                                                                                                                                                                                                                                                                                                                                                                                                                                                                                                                         | #   | #   | #         | #     | #    | #    | -                                               | ----  | ----                 | #                                                                                                                                                                                                                                                                                                                                                                                                                            | #   | #   | #         | #     | #    |      |
| Rsa1.0_00914.1.g21221.t1 | gb AAM60966.1  unknown [Arabidopsis thaliana]                                                                                                                                                                                                                                                                                                                                                                                                                                                                                                                             | 303 | 306 | 1.00E-154 | 101.0 | 88.4 | 94.1 | unknown                                         | gbpln | Arabidopsis thaliana | AT1G28120.1   Symbols:   CONTAINS InterPro DOMAIN/s: Ovarian tumour, otubain (InterPro:IPR003323), Ubiquitin thioesterase Otubain (InterPro:IPR016615), Peptidase C65, otubain (InterPro:IPR019400); Has 413 Blast hits to 411 proteins in 139 species: Archae - 0; Bacteria - 0; Metazoa - 184; Fungi - 83; Plants - 88; Viruses - 0; Other Eukaryotes - 58 (source: NCBI BLink).   chr1:9813219-9815143 REVERSE LENGTH=306 | 303 | 306 | 1.00E-155 | 101.0 | 88.1 | 93.7 |
| Rsa1.0_00914.1.g21222.t1 | gb EOA39179.1  hypothetical protein CARUB_v10012143mg [Capsella rubella]                                                                                                                                                                                                                                                                                                                                                                                                                                                                                                  | 240 | 244 | 1.00E-100 | 101.7 | 75.0 | 80.0 | hypothetical protein CARUB_v10012143mg          | gbpln | Capsella rubella     | AT1G28160.1   Symbols:   Integrase-type DNA-binding superfamily protein   chr1:9839387-9840124 FORWARD LENGTH=245                                                                                                                                                                                                                                                                                                            | 240 | 245 | 1.00E-101 | 102.1 | 82.9 | 88.3 |
| Rsa1.0_00914.1.g21223.t1 | gb EOA36914.1  hypothetical protein CARUB_v10009741mg [Capsella rubella]                                                                                                                                                                                                                                                                                                                                                                                                                                                                                                  | 326 | 324 | 1.00E-139 | 99.4  | 72.7 | 88.0 | hypothetical protein CARUB_v10009741mg          | gbpln | Capsella rubella     | AT1G28170.1   Symbols: SOT7   sulphotransferase 7   chr1:9841332-9842312 FORWARD LENGTH=326                                                                                                                                                                                                                                                                                                                                  | 326 | 326 | 1.00E-140 | 100.0 | 76.7 | 87.1 |
| Rsa1.0_00914.1.g21224.t1 | ref XP_002893509.1  hypothetical protein ARALYDRAFT_890355 [Arabidopsis lyrata subsp. lyrata] gi 297339351 gb EFH69768.1  hypothetical protein ARALYDRAFT_890355 [Arabidopsis lyrata subsp. lyrata]                                                                                                                                                                                                                                                                                                                                                                       | 267 | 263 | 2.00E-91  | 98.5  | 76.0 | 82.4 | hypothetical protein ARALYDRAFT_890355          | gbpln | Arabidopsis lyrata   | AT1G28190.1   Symbols:   unknown protein; BEST Arabidopsis thaliana protein match is: unknown protein (TAIR:AT5G12340.1); Has 166 Blast hits to 162 proteins in 36 species: Archae - 0; Bacteria - 2; Metazoa - 15; Fungi - 5; Plants - 124; Viruses - 0; Other Eukaryotes - 20 (source: NCBI BLink).   chr1:9847015-9847815 REVERSE LENGTH=266                                                                              | 267 | 266 | 2.00E-88  | 99.6  | 63.7 | 68.5 |
| Rsa1.0_00914.1.g21225.t1 | gb EOA38389.1  hypothetical protein CARUB_v10009952mg, partial [Capsella rubella]                                                                                                                                                                                                                                                                                                                                                                                                                                                                                         | 258 | 281 | 1.00E-120 | 108.9 | 83.3 | 89.1 | hypothetical protein CARUB_v10009952mg, partial | gbpln | Capsella rubella     | AT1G28200.1   Symbols: FIP1   FH interacting protein 1   chr1:9850395-9852300 REVERSE LENGTH=259                                                                                                                                                                                                                                                                                                                             | 258 | 259 | 1.00E-118 | 100.4 | 84.1 | 89.9 |
| Rsa1.0_00914.1.g21226.t1 | gb EOA22230.1  hypothetical protein CARUB_v10002817mg [Capsella rubella]                                                                                                                                                                                                                                                                                                                                                                                                                                                                                                  | 384 | 390 | 3.00E-87  | 101.6 | 51.6 | 66.7 | hypothetical protein CARUB_v10002817mg          | gbpln | Capsella rubella     | AT5G18160.1   Symbols:   F-box and associated interaction domains-containing protein   chr5:6002770-6003909 FORWARD LENGTH=379                                                                                                                                                                                                                                                                                               | 384 | 379 | 3.00E-58  | 98.7  | 39.8 | 53.6 |
| Rsa1.0_00914.1.g21227.t1 | ref XP_002873866.1  hypothetical protein ARALYDRAFT_909803 [Arabidopsis lyrata subsp. lyrata] gi 297319703 gb EFH50125.1  hypothetical protein ARALYDRAFT_909803 [Arabidopsis lyrata subsp. lyrata]                                                                                                                                                                                                                                                                                                                                                                       | 394 | 384 | 4.00E-77  | 97.5  | 47.0 | 61.7 | hypothetical protein ARALYDRAFT_909803          | gbpln | Arabidopsis lyrata   | AT1G50870.1   Symbols:   F-box and associated interaction domains-containing protein   chr1:18855147-18856337 FORWARD LENGTH=396                                                                                                                                                                                                                                                                                             | 394 | 396 | 1.00E-51  | 100.5 | 36.5 | 51.5 |
| Rsa1.0_00914.1.g21228.t1 | #                                                                                                                                                                                                                                                                                                                                                                                                                                                                                                                                                                         | #   | #   | #         | #     | #    | #    | -                                               | ----  | ----                 | #                                                                                                                                                                                                                                                                                                                                                                                                                            | #   | #   | #         | #     | #    |      |
| Rsa1.0_00914.1.g21229.t1 | ref XP_002873866.1  hypothetical protein ARALYDRAFT_909803 [Arabidopsis lyrata subsp. lyrata] gi 297319703 gb EFH50125.1  hypothetical protein ARALYDRAFT_909803 [Arabidopsis lyrata subsp. lyrata]                                                                                                                                                                                                                                                                                                                                                                       | 396 | 384 | 3.00E-79  | 97.0  | 48.0 | 62.6 | hypothetical protein ARALYDRAFT_909803          | gbpln | Arabidopsis lyrata   | AT5G18160.1   Symbols:   F-box and associated interaction domains-containing protein   chr5:6002770-6003909 FORWARD LENGTH=379                                                                                                                                                                                                                                                                                               | 396 | 379 | 3.00E-57  | 95.7  | 38.4 | 54.0 |
| Rsa1.0_00914.1.g21230.t1 | ref XP_002873866.1  hypothetical protein ARALYDRAFT_909803 [Arabidopsis lyrata subsp. lyrata] gi 297319703 gb EFH50125.1  hypothetical protein ARALYDRAFT_909803 [Arabidopsis lyrata subsp. lyrata]                                                                                                                                                                                                                                                                                                                                                                       | 398 | 384 | 5.00E-80  | 96.5  | 48.0 | 62.1 | hypothetical protein ARALYDRAFT_909803          | gbpln | Arabidopsis lyrata   | AT1G50870.1   Symbols:   F-box and associated interaction domains-containing protein   chr1:18855147-18856337 FORWARD LENGTH=396                                                                                                                                                                                                                                                                                             | 398 | 396 | 2.00E-63  | 99.5  | 41.2 | 59.0 |



|                          |                                                                                                                                                                                                                                                                                                                                                                                                                                                                                        |      |      |           |       |      |      |                                                     |       |                      |                                                                                                                                                                                                                                                                                                                                                                                                                                                        |      |      |           |       |      |      |
|--------------------------|----------------------------------------------------------------------------------------------------------------------------------------------------------------------------------------------------------------------------------------------------------------------------------------------------------------------------------------------------------------------------------------------------------------------------------------------------------------------------------------|------|------|-----------|-------|------|------|-----------------------------------------------------|-------|----------------------|--------------------------------------------------------------------------------------------------------------------------------------------------------------------------------------------------------------------------------------------------------------------------------------------------------------------------------------------------------------------------------------------------------------------------------------------------------|------|------|-----------|-------|------|------|
| Rsa1.0_00914.1.g21231.t5 | refXP_002890765.1   hypothetical protein ARALYDRAFT_473029 [Arabidopsis lyrata subsp. lyrata] gi 297336607 gb EFH67024.1                                                                                                                                                                                                                                                                                                                                                               | 438  | 427  | 0         | 97.5  | 77.2 | 83.8 | hypothetical protein ARALYDRAFT_473029              | gbpln | Arabidopsis lyrata   | AT1G28210.1   Symbols: ATJ1   DNAJ heat shock family protein   chr1:9854598-9859884 FORWARD LENGTH=408                                                                                                                                                                                                                                                                                                                                                 | 438  | 408  | 0         | 93.2  | 76.5 | 84.0 |
| Rsa1.0_00914.1.g21232.t1 | hypothetical protein ARALYDRAFT_473029 [Arabidopsis lyrata subsp. lyrata] gb AAK43485.1 AC084807.10 polyprotein, putative [Arabidopsis thaliana] gi 22589800 db BAH300336.1                                                                                                                                                                                                                                                                                                            | 1456 | 1459 | 0         | 100.2 | 60.4 | 74.2 | polyprotein, putative                               | gbpln | Arabidopsis thaliana | AT4G23160.1   Symbols: CRK8   cysteine-rich RLK (RECEPTOR-like protein kinase) 8   chr4:12129485-12134086 FORWARD LENGTH=1262                                                                                                                                                                                                                                                                                                                          | 1456 | 1262 | 1.00E-106 | 86.7  | 12.7 | 19.1 |
| Rsa1.0_00914.1.g21233.t1 | gb EOA38101.1   hypothetical protein CARUB_v10009570mg [Capsella rubella]                                                                                                                                                                                                                                                                                                                                                                                                              | 339  | 355  | 1.00E-151 | 104.7 | 79.1 | 86.7 | hypothetical protein CARUB_v10009570mg              | gbpln | Capsella rubella     | AT1G28230.1   Symbols: PUP1, ATPUP1   purine permease 1   chr1:9862200-9864554 REVERSE LENGTH=356                                                                                                                                                                                                                                                                                                                                                      | 339  | 356  | 1.00E-147 | 105.0 | 79.4 | 86.4 |
| Rsa1.0_00914.1.g21234.t1 | gb EOA38101.1   hypothetical protein CARUB_v10009570mg [Capsella rubella]                                                                                                                                                                                                                                                                                                                                                                                                              | 352  | 355  | 1.00E-164 | 100.9 | 83.0 | 89.8 | hypothetical protein CARUB_v10009570mg              | gbpln | Capsella rubella     | AT1G28230.1   Symbols: PUP1, ATPUP1   purine permease 1   chr1:9862200-9864554 REVERSE LENGTH=356                                                                                                                                                                                                                                                                                                                                                      | 352  | 356  | 1.00E-163 | 101.1 | 86.1 | 92.0 |
| Rsa1.0_00914.1.g21235.t1 | emb CAB40067.1   putative retrotransposon polyprotein [Arabidopsis thaliana] gi 7267797 emb CAB81200.1   putative retrotransposon polyprotein [Arabidopsis thaliana]                                                                                                                                                                                                                                                                                                                   | 1063 | 1203 | 0         | 113.2 | 35.3 | 42.6 | putative retrotransposon polyprotein                | gbpln | Arabidopsis thaliana | AT4G23160.1   Symbols: CRK8   cysteine-rich RLK (RECEPTOR-like protein kinase) 8   chr4:12129485-12134086 FORWARD LENGTH=1262                                                                                                                                                                                                                                                                                                                          | 1063 | 1262 | 1.00E-167 | 118.7 | 27.1 | 37.3 |
| Rsa1.0_00915.1.g21236.t1 | refXP_002864698.1   hypothetical protein ARALYDRAFT_496218 [Arabidopsis lyrata subsp. lyrata] gi 297310533 gb EFH40957.1   hypothetical protein ARALYDRAFT_496218 [Arabidopsis lyrata subsp. lyrata]                                                                                                                                                                                                                                                                                   | 851  | 844  | 0         | 99.2  | 95.9 | 98.5 | hypothetical protein ARALYDRAFT_496218              | gbpln | Arabidopsis lyrata   | AT5G60690.1   Symbols: REV, IFL, IFL   Homeobox-leucine zipper family protein / lipid-binding START domain-containing protein   chr5:24397734-24401933 FORWARD LENGTH=842                                                                                                                                                                                                                                                                              | 851  | 842  | 0         | 98.9  | 96.2 | 98.4 |
| Rsa1.0_00915.1.g21237.t1 | dbj BAB09843.1   unnamed protein product [Arabidopsis thaliana]                                                                                                                                                                                                                                                                                                                                                                                                                        | 933  | 932  | 0         | 99.9  | 95.4 | 97.5 | unnamed protein product                             | gbpln | Arabidopsis thaliana | AT5G60700.1   Symbols:   glycosyltransferase family protein 2   chr5:24402329-24404729 REVERSE LENGTH=668                                                                                                                                                                                                                                                                                                                                              | 933  | 668  | 0         | 71.6  | 69.1 | 70.5 |
| Rsa1.0_00915.1.g21238.t1 | gb AAC95175.1   putative non-LTR retroelement reverse transcriptase [Arabidopsis thaliana]                                                                                                                                                                                                                                                                                                                                                                                             | 1873 | 1352 | 0         | 72.2  | 37.4 | 49.1 | putative non-LTR retroelement reverse transcriptase | gbpln | Arabidopsis thaliana | AT3G24255.1   Symbols:   RNA-directed DNA polymerase (reverse transcriptase)-related family protein   chr3:8789471-8793208 FORWARD LENGTH=746                                                                                                                                                                                                                                                                                                          | 1873 | 746  | 1.00E-116 | 39.8  | 11.3 | 14.5 |
| Rsa1.0_00915.1.g21239.t1 | refXP_002882535.1   F-box family protein [Arabidopsis lyrata subsp. lyrata] gi 297328375 gb EFH58794.1   F-box family protein [Arabidopsis lyrata subsp. lyrata]                                                                                                                                                                                                                                                                                                                       | 393  | 394  | 1.00E-180 | 100.3 | 80.9 | 91.6 | F-box family protein                                | gbpln | Arabidopsis lyrata   | AT3G07550.2   Symbols:   RNI-like superfamily protein   chr3:2409946-2411133 FORWARD LENGTH=395                                                                                                                                                                                                                                                                                                                                                        | 393  | 395  | 0         | 100.5 | 80.7 | 91.3 |
| Rsa1.0_00915.1.g21240.t1 | ref NP_566311.1   formin-like protein 10 [Arabidopsis thaliana] gi 75207382 sp Q9SRR2.1 FH10_ARATH RecName: Full=Formin-like protein 10; Short=AtFH10; Flags: Precursor gi 6041849 gb AAF02158.1 AC009853_18 hypothetical protein [Arabidopsis thaliana] gi 17386106 gb AAL38599.1 AF446866.1 AT3g07540/F21O3.25 [Arabidopsis thaliana] gi 15215734 gb AAK91412.1 AT3g07540/F21O3.25 [Arabidopsis thaliana] gi 332641037 gb AEE74558.1   formin-like protein 10 [Arabidopsis thaliana] | 980  | 841  | 1.00E-176 | 85.8  | 46.0 | 55.3 | formin-like protein 10                              | gbpln | Arabidopsis thaliana | AT3G07540.1   Symbols:   Actin-binding FH2 (formin homology 2) family protein   chr3:2404763-2407464 REVERSE LENGTH=841                                                                                                                                                                                                                                                                                                                                | 980  | 841  | 1.00E-179 | 85.8  | 46.0 | 55.3 |
| Rsa1.0_00915.1.g21241.t1 | refXP_002882534.1   hypothetical protein ARALYDRAFT_896920 [Arabidopsis lyrata subsp. lyrata] gi 297328374 gb EFH58793.1   hypothetical protein ARALYDRAFT_896920 [Arabidopsis lyrata subsp. lyrata]                                                                                                                                                                                                                                                                                   | 695  | 699  | 0         | 100.6 | 80.7 | 88.9 | hypothetical protein ARALYDRAFT_896920              | gbpln | Arabidopsis lyrata   | AT3G07530.1   Symbols:   CONTAINS InterPro DOMAIN/s: Beta-Casp domain (InterPro:IPR022712). BEST Arabidopsis thaliana protein match is: cleavage and polyadenylation specificity factor 73 kDa subunit-II (TAIR:AT2G01730.1); Has 624 Blast hits to 615 proteins in 160 species: Archae - 54; Bacteria - 6; Metazoa - 333; Fungi - 44; Plants - 93; Viruses - 0; Other Eukaryotes - 94 (source: NCBI BLINK).   chr3:2400793-2404280 FORWARD LENGTH=699 | 695  | 699  | 0         | 100.6 | 81.6 | 88.8 |
| Rsa1.0_00915.1.g21242.t1 | ref NP_850532.1   autophagy-associated family protein [Arabidopsis thaliana] gi 17529020 gb AAL38720.1   unknown protein [Arabidopsis thaliana] gi 23296729 gb AAN13156.1   unknown protein [Arabidopsis thaliana] gi 332641035 gb AEE74556.1   autophagy-associated family protein [Arabidopsis thaliana]                                                                                                                                                                             | 223  | 225  | 2.00E-85  | 100.9 | 72.2 | 86.1 | autophagy-associated family protein                 | gbpln | Arabidopsis thaliana | AT3G07525.1   Symbols: ATG10, ATATG10   autophagy-associated family protein   chr3:2399277-2400380 REVERSE LENGTH=225                                                                                                                                                                                                                                                                                                                                  | 223  | 225  | 5.00E-88  | 100.9 | 72.2 | 86.1 |

|                          |                                                                                                                                                                                                                                                                                                                                                                                                                                                                                                                                                                                                                                                                                            |     |     |          |       |      |      |                                        |       |                      |                                                                                                                                                                                                                                                                                                                                                                                                                                                                                                                                                 |     |     |          |       |      |      |
|--------------------------|--------------------------------------------------------------------------------------------------------------------------------------------------------------------------------------------------------------------------------------------------------------------------------------------------------------------------------------------------------------------------------------------------------------------------------------------------------------------------------------------------------------------------------------------------------------------------------------------------------------------------------------------------------------------------------------------|-----|-----|----------|-------|------|------|----------------------------------------|-------|----------------------|-------------------------------------------------------------------------------------------------------------------------------------------------------------------------------------------------------------------------------------------------------------------------------------------------------------------------------------------------------------------------------------------------------------------------------------------------------------------------------------------------------------------------------------------------|-----|-----|----------|-------|------|------|
| Rsa1.0_00915.1.g21243.t1 | ref NP_566310.1  uncharacterized protein [Arabidopsis thaliana]<br>gi 145331996 ref NP_001078120.1  uncharacterized protein [Arabidopsis thaliana]<br>gi 13877549 gb AAK43852.1 AF370475.1 Unknown protein [Arabidopsis thaliana]<br>gi 20148735 gb AAM10258.1  unknown protein [Arabidopsis thaliana]<br>gi 332641030 gb AEE74551.1  uncharacterized protein AT3G07510 [Arabidopsis thaliana]<br>gi 332641031 gb AEE74552.1  uncharacterized protein AT3G07510 [Arabidopsis thaliana]                                                                                                                                                                                                     | 177 | 189 | 1.00E-76 | 106.8 | 92.7 | 96.6 | uncharacterized protein                | gbpln | Arabidopsis thaliana | AT3G07510.2   Symbols:   unknown protein; FUNCTIONS IN: molecular_function unknown; INVOLVED IN: biological_process unknown; LOCATED IN: cellular_component unknown; EXPRESSED IN: 22 plant structures; EXPRESSED DURING: 13 growth stages; BEST Arabidopsis thaliana protein match is: unknown protein (TAIR:AT2G01580.1). Has 133 Blast hits to 133 proteins in 14 species: Archae - 0; Bacteria - 4; Metazoa - 0; Fungi - 0; Plants - 129; Viruses - 0; Other Eukaryotes - 0 (source: NCBI BLINK).   chr3:2393895-2394464 REVERSE LENGTH=189 | 177 | 189 | 4.00E-79 | 106.8 | 92.7 | 96.6 |
| Rsa1.0_00915.1.g21244.t1 | gb EOA29636.1  hypothetical protein CARUB_v10014621mg [Capsella rubella]                                                                                                                                                                                                                                                                                                                                                                                                                                                                                                                                                                                                                   | 203 | 211 | 3.00E-84 | 103.9 | 79.8 | 83.7 | hypothetical protein CARUB_v10014621mg | gbpln | Capsella rubella     | AT3G07500.1   Symbols:   Far-red impaired responsive (FAR1) family protein   chr3:2392387-2393709 FORWARD LENGTH=217                                                                                                                                                                                                                                                                                                                                                                                                                            | 203 | 217 | 2.00E-83 | 106.9 | 80.3 | 86.2 |
| Rsa1.0_00915.1.g21245.t1 | ref NP_187405.1  calmodulin-like protein 3 [Arabidopsis thaliana]<br>gi 297829300 ref XP_002882532.1  ARF-GAP domain 11 [Arabidopsis lyrata subsp. lyrata]<br>gi 75337571 sp Q9SRR7.1 CML3_ARATH RecName: Full=Calmodulin-like protein 3<br>gi 6041859 gb AAF02168.1 AC009853_28 putative calmodulin [Arabidopsis thaliana]<br>gi 297328372 gb EFH58791.1  ARF-GAP domain 11 [Arabidopsis lyrata subsp. lyrata]<br>gi 332641028 gb AEE74549.1  calmodulin-like protein 3 [Arabidopsis thaliana]                                                                                                                                                                                            | 153 | 153 | 6.00E-70 | 100.0 | 94.8 | 99.3 | calmodulin-like protein 3              | gbpln | Arabidopsis lyrata   | AT3G07490.1   Symbols: AGD11   ARF-GAP domain 11   chr3:2391189-2391650 FORWARD LENGTH=153                                                                                                                                                                                                                                                                                                                                                                                                                                                      | 153 | 153 | 2.00E-72 | 100.0 | 94.8 | 99.3 |
| Rsa1.0_00915.1.g21246.t1 | ref NP_566309.1  2Fe-2S ferredoxin-like protein [Arabidopsis thaliana]<br>gi 297829298 ref XP_002882531.1  electron carrier/ iron ion binding protein [Arabidopsis lyrata subsp. lyrata]<br>gi 6041858 gb AAF02167.1 AC009853_27 unknown protein [Arabidopsis thaliana]<br>gi 14423424 gb AAK62394.1 AF386949.1 Unknown protein [Arabidopsis thaliana]<br>gi 20148369 gb AAM10075.1  unknown protein [Arabidopsis thaliana]<br>gi 21555779 gb AAM63932.1  unknown [Arabidopsis thaliana]<br>gi 297328371 gb EFH58790.1  electron carrier/ iron ion binding protein [Arabidopsis lyrata subsp. lyrata]<br>gi 332641027 gb AEE74548.1  2Fe-2S ferredoxin-like protein [Arabidopsis thaliana] | 157 | 159 | 3.00E-73 | 101.3 | 88.5 | 93.0 | 2Fe-2S ferredoxin-like protein         | gbpln | Arabidopsis lyrata   | AT3G07480.1   Symbols:   2Fe-2S ferredoxin-like superfamily protein   chr3:2389026-2389505 FORWARD LENGTH=159                                                                                                                                                                                                                                                                                                                                                                                                                                   | 157 | 159 | 9.00E-76 | 101.3 | 88.5 | 93.0 |
| Rsa1.0_00915.1.g21247.t1 | gb AAF02163.1 AC009853_23 unknown protein [Arabidopsis thaliana]                                                                                                                                                                                                                                                                                                                                                                                                                                                                                                                                                                                                                           | 186 | 160 | 1.00E-64 | 86.0  | 66.1 | 71.5 | unknown protein                        | gbpln | Arabidopsis thaliana | AT3G07470.1   Symbols:   Protein of unknown function, DUF538   chr3:2387291-2388343 REVERSE LENGTH=169                                                                                                                                                                                                                                                                                                                                                                                                                                          | 186 | 169 | 5.00E-67 | 90.9  | 66.1 | 71.5 |
| Rsa1.0_00915.1.g21248.t1 | gb EOA32947.1  hypothetical protein CARUB_v10016275mg [Capsella rubella]                                                                                                                                                                                                                                                                                                                                                                                                                                                                                                                                                                                                                   | 103 | 113 | 8.00E-40 | 109.7 | 78.6 | 84.5 | hypothetical protein CARUB_v10016275mg | gbpln | Capsella rubella     | AT3G07450.1   Symbols:   Bifunctional inhibitor/lipid-transfer protein/seed storage 2S albumin superfamily protein   chr3:2383610-2383930 REVERSE LENGTH=106                                                                                                                                                                                                                                                                                                                                                                                    | 103 | 106 | 3.00E-42 | 102.9 | 79.6 | 84.5 |
| Rsa1.0_00915.1.g21249.t1 | ref NP_974247.1  uncharacterized protein [Arabidopsis thaliana]<br>gi 332641020 gb AEE74541.1  uncharacterized protein AT3G07425 [Arabidopsis thaliana]                                                                                                                                                                                                                                                                                                                                                                                                                                                                                                                                    | 98  | 98  | 6.00E-43 | 100.0 | 89.8 | 94.9 | uncharacterized protein                | gbpln | Arabidopsis thaliana | AT3G07425.1   Symbols:   unknown protein; Has 3533 Blast hits to 34131 proteins in 2444 species: Archae - 798; Bacteria - 22429; Metazoa - 974; Fungi - 991; Plants - 531; Viruses - 0; Other Eukaryotes - 9610 (source: NCBI BLINK).   chr3:2378350-2378646 FORWARD LENGTH=98                                                                                                                                                                                                                                                                  | 98  | 98  | 1.00E-45 | 100.0 | 89.8 | 94.9 |
| Rsa1.0_00915.1.g21250.t1 | ref NP_178368.1  RNase H domain-containing protein [Arabidopsis thaliana]<br>gi 3184275 gb AAC18922.1  putative reverse transcriptase [Arabidopsis thaliana]<br>gi 330250513 gb AEC05607.1  RNase H domain-containing protein [Arabidopsis thaliana]                                                                                                                                                                                                                                                                                                                                                                                                                                       | 352 | 365 | 1.00E-82 | 103.7 | 45.2 | 63.1 | RNase H domain-containing protein      | gbpln | Arabidopsis thaliana | AT2G02650.1   Symbols:   Ribonuclease H-like superfamily protein   chr2:735411-736546 FORWARD LENGTH=365                                                                                                                                                                                                                                                                                                                                                                                                                                        | 352 | 365 | 3.00E-85 | 103.7 | 45.2 | 63.1 |

|                          |                                                                                                                                                                                                                                                                                                                                                                                                                                                                                                                                                                                                                                              |     |      |           |       |      |      |                                                            |       |                      |                                                                                                                                                                                                                                                                             |     |      |           |       |      |      |
|--------------------------|----------------------------------------------------------------------------------------------------------------------------------------------------------------------------------------------------------------------------------------------------------------------------------------------------------------------------------------------------------------------------------------------------------------------------------------------------------------------------------------------------------------------------------------------------------------------------------------------------------------------------------------------|-----|------|-----------|-------|------|------|------------------------------------------------------------|-------|----------------------|-----------------------------------------------------------------------------------------------------------------------------------------------------------------------------------------------------------------------------------------------------------------------------|-----|------|-----------|-------|------|------|
| Rsa1.0_00915.1.g21251.t1 | refNP_187398.1  asparaginyl-tRNA synthetase, cytoplasmic 2 [Arabidopsis thaliana]<br>gi 20140328 sp Q9SW95.2 SYNC2_ARAT_H<br>RecName: Full=Asparagine--tRNA ligase, cytoplasmic 2; AltName: Full=Asparaginyl-tRNA synthetase 2; Short=AsnRS 2<br>gi 6041857 gb AAF02166.1 AC009853_26<br>putative asparaginyl-tRNA synthetase [Arabidopsis thaliana]<br>gi 332641019 gb AEE74540.1  asparaginyl-tRNA synthetase, cytoplasmic 2 [Arabidopsis thaliana]<br>refXP_002882526.1  lipase class 3 family protein [Arabidopsis lyrata subsp. lyrata]<br>gi 297328366 gb EFH58785.1  lipase class 3 family protein [Arabidopsis lyrata subsp. lyrata] | 636 | 638  | 0         | 100.3 | 79.9 | 87.7 | asparaginyl-tRNA synthetase, cytoplasmic 2                 | gbpln | Arabidopsis thaliana | AT3G07420.1   Symbols: NS2, ATNS2, SYNC2_ARATH, SYNC2   asparaginyl-tRNA synthetase 2   chr3:2374179-2376644<br>REVERSE LENGTH=638                                                                                                                                          | 636 | 638  | 0         | 100.3 | 79.9 | 87.7 |
| Rsa1.0_00915.1.g21252.t1 | refXP_002882526.1  lipase class 3 family protein [Arabidopsis lyrata subsp. lyrata]<br>gi 297328366 gb EFH58785.1  lipase class 3 family protein [Arabidopsis lyrata subsp. lyrata]                                                                                                                                                                                                                                                                                                                                                                                                                                                          | 983 | 1003 | 0         | 102.0 | 90.9 | 94.9 | lipase class 3 family protein                              | gbpln | Arabidopsis lyrata   | AT3G07400.1   Symbols:   lipase class 3 family protein   chr3:2367456-2372238<br>FORWARD LENGTH=1003                                                                                                                                                                        | 983 | 1003 | 0         | 102.0 | 90.7 | 94.3 |
| Rsa1.0_00915.1.g21253.t1 | #                                                                                                                                                                                                                                                                                                                                                                                                                                                                                                                                                                                                                                            | #   | #    | #         | #     | #    | #    | -                                                          | ----  | ----                 | #                                                                                                                                                                                                                                                                           | #   | #    | #         | #     | #    | #    |
| Rsa1.0_00915.1.g21254.t1 | refXP_002884644.1  predicted protein [Arabidopsis lyrata subsp. lyrata]<br>gi 297330484 gb EFH60903.1  predicted protein [Arabidopsis lyrata subsp. lyrata]                                                                                                                                                                                                                                                                                                                                                                                                                                                                                  | 440 | 456  | 1.00E-150 | 103.6 | 71.1 | 78.6 | predicted protein                                          | gbpln | Arabidopsis lyrata   | AT3G07340.1   Symbols:   basic helix-loop-helix (bHLH) DNA-binding superfamily protein   chr3:2341188-2343288<br>REVERSE LENGTH=456                                                                                                                                         | 440 | 456  | 1.00E-151 | 103.6 | 70.7 | 78.6 |
| Rsa1.0_00915.1.g21255.t1 | refXP_002884642.1  glycosyl hydrolase family 17 protein [Arabidopsis lyrata subsp. lyrata]<br>gi 297330482 gb EFH60901.1  glycosyl hydrolase family 17 protein [Arabidopsis lyrata subsp. lyrata]                                                                                                                                                                                                                                                                                                                                                                                                                                            | 460 | 460  | 0         | 100.0 | 87.4 | 92.4 | glycosyl hydrolase family 17 protein                       | gbpln | Arabidopsis lyrata   | AT3G07320.1   Symbols:   O-Glycosyl hydrolases family 17 protein   chr3:2332324-2333925<br>REVERSE LENGTH=460                                                                                                                                                               | 460 | 460  | 0         | 100.0 | 86.1 | 91.5 |
| Rsa1.0_00915.1.g21256.t1 | refNP_566302.1  uncharacterized protein [Arabidopsis thaliana]<br>gi 6041833 gb AAF02142.1 AC009853_2<br>unknown protein [Arabidopsis thaliana]<br>gi 6642634 gb AAF20215.1 AC012395_2<br>unknown protein [Arabidopsis thaliana]<br>gi 14596187 gb AAK6821.1  Unknown protein [Arabidopsis thaliana]<br>gi 21593217 gb AAM65166.1  unknown [Arabidopsis thaliana]<br>gi 22136074 gb AAM91115.1  unknown protein [Arabidopsis thaliana]<br>gi 332641006 gb AEE74527.1  uncharacterized protein AT3G07310 [Arabidopsis thaliana]                                                                                                               | 368 | 368  | 0         | 100.0 | 85.1 | 92.7 | uncharacterized protein                                    | gbpln | Arabidopsis thaliana | AT3G07310.1   Symbols:   Protein of unknown function (DUF760)   chr3:2328057-2329677<br>REVERSE LENGTH=368                                                                                                                                                                  | 368 | 368  | 0         | 100.0 | 85.1 | 92.7 |
| Rsa1.0_00915.1.g21257.t3 | refXP_002884640.1  eukaryotic translation initiation factor 2B family protein [Arabidopsis lyrata subsp. lyrata]<br>gi 297330480 gb EFH60899.1  eukaryotic translation initiation factor 2B family protein [Arabidopsis lyrata subsp. lyrata]                                                                                                                                                                                                                                                                                                                                                                                                | 522 | 407  | 0         | 78.0  | 73.0 | 75.3 | eukaryotic translation initiation factor 2B family protein | gbpln | Arabidopsis lyrata   | AT3G07300.2   Symbols:   NagB/RpIA/CoA transferase-like superfamily protein   chr3:2324967-2327380<br>REVERSE LENGTH=407                                                                                                                                                    | 522 | 407  | 0         | 78.0  | 72.6 | 75.1 |
| Rsa1.0_00915.1.g21258.t1 | refXP_002871678.1  F-box family protein [Arabidopsis lyrata subsp. lyrata]<br>gi 297317515 gb EFH47937.1  F-box family protein [Arabidopsis lyrata subsp. lyrata]                                                                                                                                                                                                                                                                                                                                                                                                                                                                            | 375 | 430  | 4.00E-36  | 114.7 | 31.2 | 46.4 | F-box family protein                                       | gbpln | Arabidopsis lyrata   | AT4G11590.1   Symbols:   F-box associated ubiquitination effector family protein   chr4:7008603-7009796<br>FORWARD LENGTH=397                                                                                                                                               | 375 | 397  | 4.00E-38  | 105.9 | 36.3 | 52.0 |
| Rsa1.0_00915.1.g21259.t1 | gi AAF20218.1 AC012395_5 unknown protein [Arabidopsis thaliana]                                                                                                                                                                                                                                                                                                                                                                                                                                                                                                                                                                              | 442 | 481  | 4.00E-47  | 108.8 | 24.2 | 27.1 | unknown protein                                            | gbpln | Arabidopsis thaliana | AT5G43490.1   Symbols:   unknown protein; Has 1807 Blast hits to 1807 proteins in 277 species: Archae - 0; Bacteria - 0; Metazoa - 736; Fungi - 347; Plants - 385; Viruses - 0; Other Eukaryotes - 339 (source: NCBI BLink).   chr5:17468471-17469256<br>REVERSE LENGTH=185 | 442 | 185  | 4.00E-37  | 41.9  | 20.4 | 25.8 |
| Rsa1.0_00915.1.g21260.t1 | #                                                                                                                                                                                                                                                                                                                                                                                                                                                                                                                                                                                                                                            | #   | #    | #         | #     | #    | #    | -                                                          | ----  | ----                 | #                                                                                                                                                                                                                                                                           | #   | #    | #         | #     | #    | #    |
| Rsa1.0_00915.1.g21261.t1 | refXP_002882520.1  GTP cyclohydrolase I [Arabidopsis lyrata subsp. lyrata]<br>gi 297328360 gb EFH58779.1  GTP cyclohydrolase I [Arabidopsis lyrata subsp. lyrata]                                                                                                                                                                                                                                                                                                                                                                                                                                                                            | 121 | 466  | 8.00E-27  | 385.1 | 62.0 | 71.9 | GTP cyclohydrolase I                                       | gbpln | Arabidopsis lyrata   | AT3G07270.2   Symbols:   GTP cyclohydrolase I   chr3:2314005-2317059<br>FORWARD LENGTH=466                                                                                                                                                                                  | 121 | 466  | 3.00E-29  | 385.1 | 50.4 | 57.9 |
| Rsa1.0_00915.1.g21262.t1 | refXP_002862662.1  hypothetical protein ARALYDRAFT_920411 [Arabidopsis lyrata subsp. lyrata]<br>gi 297308316 gb EFH38920.1  hypothetical protein ARALYDRAFT_920411 [Arabidopsis lyrata subsp. lyrata]                                                                                                                                                                                                                                                                                                                                                                                                                                        | 191 | 224  | 2.00E-34  | 117.3 | 43.5 | 58.6 | hypothetical protein ARALYDRAFT_920411                     | gbpln | Arabidopsis lyrata   | AT5G40260.1   Symbols: SWEET8, AT5WEET8   Nodulin MtN3 family protein   chr5:16089842-16091527<br>FORWARD LENGTH=239                                                                                                                                                        | 191 | 239  | 7.00E-28  | 125.1 | 36.6 | 51.8 |

|                          |                                                                                                                                                                                                                                                                                                                                                                                                                                                                                                                                                                                                                                     |      |      |           |       |       |       |                                                                                 |       |                      |                                                                                                                                                    |      |     |           |       |      |      |
|--------------------------|-------------------------------------------------------------------------------------------------------------------------------------------------------------------------------------------------------------------------------------------------------------------------------------------------------------------------------------------------------------------------------------------------------------------------------------------------------------------------------------------------------------------------------------------------------------------------------------------------------------------------------------|------|------|-----------|-------|-------|-------|---------------------------------------------------------------------------------|-------|----------------------|----------------------------------------------------------------------------------------------------------------------------------------------------|------|-----|-----------|-------|------|------|
| Rsa1.0_00915.1.g21263.t1 | ref NP_187383.1  GTP cyclohydrolase I [Arabidopsis thaliana] gi 6642638 gb AAF20219.1 AC012395.6 GTP cyclohydrolase I [Arabidopsis thaliana] gi 20466832 gb AAM20733.1  GTP cyclohydrolase I [Arabidopsis thaliana] gi 30387557 gb AAP31944.1  AT3g07270 [Arabidopsis thaliana] gi 332640999 gb AEE74520.1  GTP cyclohydrolase I [Arabidopsis thaliana]                                                                                                                                                                                                                                                                             | 459  | 466  | 0         | 101.5 | 84.5  | 91.5  | GTP cyclohydrolase I                                                            | gbpln | Arabidopsis thaliana | AT3G07270.1   Symbols:   GTP cyclohydrolase I   chr3:2315451-2317059 FORWARD LENGTH=466                                                            | 459  | 466 | 0         | 101.5 | 84.5 | 91.5 |
| Rsa1.0_00915.1.g21264.t1 | #                                                                                                                                                                                                                                                                                                                                                                                                                                                                                                                                                                                                                                   | #    | #    | #         | #     | #     | -     |                                                                                 | ----  | ----                 | #                                                                                                                                                  | #    | #   | #         | #     | #    |      |
| Rsa1.0_00915.1.g21265.t1 | gb AAG51783.1 AC079679.3 reverse transcriptase, putative; 16838-20266 [Arabidopsis thaliana]                                                                                                                                                                                                                                                                                                                                                                                                                                                                                                                                        | 2030 | 1142 | 0         | 56.3  | 28.7  | 38.3  | reverse transcriptase, putative; 16838-20266                                    | gbpln | Arabidopsis thaliana | AT4G29090.1   Symbols:   Ribonuclease H-like superfamily protein   chr4:14333528-14335255 FORWARD LENGTH=575                                       | 2030 | 575 | 6.00E-99  | 28.3  | 9.6  | 14.8 |
| Rsa1.0_00916.1.g21266.t1 | ref NP_001078388.1  AGC (cAMP-dependent, cGMP-dependent and protein kinase C) kinase family protein [Arabidopsis thaliana] gi 332658025 gb AEE83425.1  AGC (cAMP-dependent, cGMP-dependent and protein kinase C) kinase family protein [Arabidopsis thaliana]                                                                                                                                                                                                                                                                                                                                                                       | 555  | 548  | 0         | 98.7  | 94.1  | 96.9  | AGC (cAMP-dependent, cGMP-dependent and protein kinase C) kinase family protein | gbpln | Arabidopsis thaliana | AT4G14350.3   Symbols:   AGC (cAMP-dependent, cGMP-dependent and protein kinase C) kinase family protein   chr4:8256353-8259934 REVERSE LENGTH=548 | 555  | 548 | 0         | 98.7  | 94.1 | 96.9 |
| Rsa1.0_00916.1.g21267.t1 | #                                                                                                                                                                                                                                                                                                                                                                                                                                                                                                                                                                                                                                   | #    | #    | #         | #     | #     | -     |                                                                                 | ----  | ----                 | #                                                                                                                                                  | #    | #   | #         | #     | #    |      |
| Rsa1.0_00916.1.g21268.t1 | ref XP_004245305.1  PREDICTED: uncharacterized protein At3g23325-like [Solanum lycopersicum]                                                                                                                                                                                                                                                                                                                                                                                                                                                                                                                                        | 87   | 87   | 5.00E-45  | 100.0 | 97.7  | 100.0 | PREDICTED: uncharacterized protein At3g23325-like                               | gbpln | Solanum lycopersicum | AT3G23325.1   Symbols:   Splicing factor 3B subunit 5/RDS3 complex subunit 10   chr3:8345808-8346856 FORWARD LENGTH=87                             | 87   | 87  | 6.00E-47  | 100.0 | 96.6 | 98.9 |
| Rsa1.0_00916.1.g21269.t1 | ref NP_193170.1  casein kinase I [Arabidopsis thaliana] gi 9965745 gb AAG10149.1 AF250343.1 casein kinase I [Arabidopsis thaliana] gi 1103318 emb CAA55395.1  casein kinase I [Arabidopsis thaliana] gi 2244791 emb CAB10213.1  casein kinase I [Arabidopsis thaliana] gi 7268139 emb CAB78476.1  casein kinase I [Arabidopsis thaliana] gi 15450525 gb AAK96555.1  AT4g14340/di3210c [Arabidopsis thaliana] gi 16974431 gb AAL31141.1  AT4g14340/di3210c [Arabidopsis thaliana] gi 62996992 gb AA24540.1  casein kinase 1-like protein 11 [Arabidopsis thaliana] gi 33265802 gb AEE83421.1  casein kinase I [Arabidopsis thaliana] | 460  | 457  | 0         | 99.3  | 88.9  | 92.6  | casein kinase I                                                                 | gbpln | Arabidopsis thaliana | AT4G14340.1   Symbols: CKI1, CKL11   casein kinase I   chr4:8248532-8251668 REVERSE LENGTH=457                                                     | 460  | 457 | 0         | 99.3  | 88.9 | 92.6 |
| Rsa1.0_00916.1.g21270.t1 | ref XP_002870320.1  hypothetical protein ARALYDRAFT_493473 [Arabidopsis lyrata subsp. lyrata] gi 297316156 gb EFH46579.1  hypothetical protein ARALYDRAFT_493473 [Arabidopsis lyrata subsp. lyrata]                                                                                                                                                                                                                                                                                                                                                                                                                                 | 870  | 869  | 0         | 99.9  | 88.2  | 93.1  | hypothetical protein ARALYDRAFT_493473                                          | gbpln | Arabidopsis lyrata   | AT4G14330.1   Symbols:   P-loop containing nucleoside triphosphate hydrolases superfamily protein   chr4:8244228-8247286 FORWARD LENGTH=869        | 870  | 869 | 0         | 99.9  | 87.0 | 92.2 |
| Rsa1.0_00916.1.g21271.t1 | gb AAK94425.1 AF398144.1 60S ribosomal protein L144 [Brassica rapa subsp. pekinensis]                                                                                                                                                                                                                                                                                                                                                                                                                                                                                                                                               | 105  | 119  | 2.00E-52  | 113.3 | 100.0 | 100.0 | 60S ribosomal protein L144                                                      | gbpln | Brassica rapa        | AT4G14320.1   Symbols:   Zinc-binding ribosomal protein family protein   chr4:8242684-8243805 REVERSE LENGTH=105                                   | 105  | 105 | 4.00E-53  | 100.0 | 96.2 | 97.1 |
| Rsa1.0_00916.1.g21272.t1 | ref NP_172808.1  uncharacterized protein [Arabidopsis thaliana] gi 17381056 gb AAL36340.1  unknown protein [Arabidopsis thaliana] gi 20465869 gb AAM20039.1  unknown protein [Arabidopsis thaliana] gi 332190907 gb AEE29028.1  uncharacterized protein AT1G13510 [Arabidopsis thaliana]                                                                                                                                                                                                                                                                                                                                            | 161  | 380  | 3.00E-47  | 236.0 | 70.2  | 79.5  | uncharacterized protein                                                         | gbpln | Arabidopsis thaliana | AT1G13510.1   Symbols:   Protein of unknown function (DUF1262)   chr1:4629459-4630687 REVERSE LENGTH=380                                           | 161  | 380 | 1.00E-49  | 236.0 | 70.2 | 79.5 |
| Rsa1.0_00916.1.g21273.t1 | gb AAF18630.1 AC006228.1 F5J5.1 [Arabidopsis thaliana]                                                                                                                                                                                                                                                                                                                                                                                                                                                                                                                                                                              | 521  | 1463 | 2.00E-23  | 280.8 | 15.9  | 25.3  | F5J5.1                                                                          | gbpln | Arabidopsis thaliana | #                                                                                                                                                  | #    | #   | #         | #     | #    |      |
| Rsa1.0_00916.1.g21274.t1 | ref XP_002892681.1  F5O11.3 [Arabidopsis lyrata subsp. lyrata] gi 297338523 gb EFH68940.1  F5O11.3 [Arabidopsis lyrata subsp. lyrata] ref XP_002892756.1  hypothetical protein ARALYDRAFT_312360 [Arabidopsis lyrata subsp. lyrata] gi 297338598 gb EFH69015.1  hypothetical protein ARALYDRAFT_312360 [Arabidopsis lyrata subsp. lyrata]                                                                                                                                                                                                                                                                                           | 472  | 1713 | 1.00E-107 | 362.9 | 46.2  | 51.9  | F5O11.3                                                                         | gbpln | Arabidopsis lyrata   | AT1G12280.1   Symbols:   LRR and NB-ARC domains-containing disease resistance protein   chr1:4174875-4177559 REVERSE LENGTH=894                    | 472  | 894 | 1.00E-105 | 189.4 | 46.0 | 52.3 |
| Rsa1.0_00916.1.g21275.t1 | ref XP_002892756.1  hypothetical protein ARALYDRAFT_312360 [Arabidopsis lyrata subsp. lyrata] gi 297338598 gb EFH69015.1  hypothetical protein ARALYDRAFT_312360 [Arabidopsis lyrata subsp. lyrata]                                                                                                                                                                                                                                                                                                                                                                                                                                 | 325  | 772  | 1.00E-133 | 237.5 | 74.5  | 84.3  | hypothetical protein ARALYDRAFT_312360                                          | gbpln | Arabidopsis lyrata   | AT1G13520.1   Symbols:   Protein of unknown function (DUF1262)   chr1:4631857-4633223 REVERSE LENGTH=387                                           | 325  | 387 | 1.00E-130 | 119.1 | 76.0 | 84.0 |

|                          |                                                                                                                                                                                                                                                                                                                                                                                                                                                                                         |      |      |           |       |      |      |                                                       |       |                      |                                                                                                                                                          |      |      |           |       |      |      |
|--------------------------|-----------------------------------------------------------------------------------------------------------------------------------------------------------------------------------------------------------------------------------------------------------------------------------------------------------------------------------------------------------------------------------------------------------------------------------------------------------------------------------------|------|------|-----------|-------|------|------|-------------------------------------------------------|-------|----------------------|----------------------------------------------------------------------------------------------------------------------------------------------------------|------|------|-----------|-------|------|------|
| Rsa1.0_00916.1.g21276.t1 | gb EOA36691.1  hypothetical protein CARUB_v10012096mg [Capsella rubella]                                                                                                                                                                                                                                                                                                                                                                                                                | 328  | 327  | 1.00E-126 | 99.7  | 66.5 | 81.1 | hypothetical protein CARUB_v10012096mg                | gbpln | Capsella rubella     | AT5G43690.1   Symbols:   P-loop containing nucleoside triphosphate hydrolases superfamily protein   chr5:17546273-17547268 FORWARD LENGTH=331            | 328  | 331  | 1.00E-128 | 100.9 | 67.7 | 81.4 |
| Rsa1.0_00917.1.g21277.t1 | #                                                                                                                                                                                                                                                                                                                                                                                                                                                                                       | #    | #    | #         | #     | #    | -    | ----                                                  | ----  | ----                 | #                                                                                                                                                        | #    | #    | #         | #     | #    | #    |
| Rsa1.0_00917.1.g21278.t1 | db BAJ33984.1  unnamed protein product [Thellungiella halophila]                                                                                                                                                                                                                                                                                                                                                                                                                        | 278  | 699  | 1.00E-123 | 251.4 | 89.2 | 91.7 | unnamed protein product                               | ----  | ----                 | AT5G56000.1   Symbols: Hsp81.4, AHsp90.4   HEAT SHOCK PROTEIN 81.4   chr5:22677602-22680067 REVERSE LENGTH=699                                           | 278  | 699  | 1.00E-124 | 251.4 | 86.7 | 91.4 |
| Rsa1.0_00917.1.g21279.t1 | db BAJ33916.1  unnamed protein product [Thellungiella halophila]                                                                                                                                                                                                                                                                                                                                                                                                                        | 492  | 578  | 0         | 117.5 | 81.5 | 87.6 | unnamed protein product                               | ----  | ----                 | AT1G32230.1   Symbols: RCD1, CEO, CEO1, ATP8, AtRCD1   WWE protein-protein interaction domain protein family   chr1:11613427-11615894 FORWARD LENGTH=589 | 492  | 589  | 0         | 119.7 | 78.0 | 85.0 |
| Rsa1.0_00917.1.g21280.t1 | ref NP_199827.2  ferric reduction oxidase 8 [Arabidopsis thaliana] gi 75161398 sp Q8VY13.1 FRO8_ARATH RecName: Full=Ferric reduction oxidase 8, mitochondrial; Short=AtFRO8; AltName: Full=Ferric-chelate reductase 8; Flags: Precursor gi 18377668 gb AAL66984.1  putative FRO1 and FRO2 protein [Arabidopsis thaliana] gi 27754744 gb AAO22815.1  putative FRO1 and FRO2 protein [Arabidopsis thaliana] gi 332008522 gb AED95905.1  ferric reduction oxidase 8 [Arabidopsis thaliana] | 715  | 728  | 0         | 101.8 | 79.6 | 89.2 | ferric reduction oxidase 8                            | gbpln | Arabidopsis thaliana | AT5G50160.1   Symbols: ATFRO8, FRO8   ferric reduction oxidase 8   chr5:20415832-20418582 FORWARD LENGTH=728                                             | 715  | 728  | 0         | 101.8 | 79.6 | 89.2 |
| Rsa1.0_00917.1.g21281.t1 | ref XP_002893700.1  hypothetical protein ARALYDRAFT_473393 [Arabidopsis lyrata subsp. lyrata] gi 297339542 gb EFH69959.1  hypothetical protein ARALYDRAFT_473393 [Arabidopsis lyrata subsp. lyrata]                                                                                                                                                                                                                                                                                     | 313  | 317  | 1.00E-164 | 101.3 | 90.1 | 94.9 | hypothetical protein ARALYDRAFT_473393                | gbpln | Arabidopsis lyrata   | AT1G32100.1   Symbols: ATPRR1, PRR1   pinoresinol reductase 1   chr1:11546472-11547953 REVERSE LENGTH=317                                                | 313  | 317  | 1.00E-167 | 101.3 | 90.1 | 94.6 |
| Rsa1.0_00917.1.g21282.t1 | gb EOA40160.1  hypothetical protein CARUB_v10008878mg [Capsella rubella]                                                                                                                                                                                                                                                                                                                                                                                                                | 514  | 514  | 0         | 100.0 | 91.4 | 94.2 | hypothetical protein CARUB_v10008878mg                | gbpln | Capsella rubella     | AT1G32080.1   Symbols:   membrane protein, putative   chr1:11537572-11539756 REVERSE LENGTH=512                                                          | 514  | 512  | 0         | 99.6  | 91.2 | 94.2 |
| Rsa1.0_00917.1.g21283.t1 | emb CAB40035.1  retrotransposon like protein [Arabidopsis thaliana] gi 7267767 emb CAB81170.1  retrotransposon like protein [Arabidopsis thaliana]                                                                                                                                                                                                                                                                                                                                      | 1403 | 1515 | 0         | 108.0 | 58.4 | 73.3 | retrotransposon like protein                          | gbpln | Arabidopsis thaliana | AT4G23160.1   Symbols: CRK8   cysteine-rich RLK (RECEPTOR-like protein kinase) 8   chr4:12129485-12134086 FORWARD LENGTH=1262                            | 1403 | 1262 | 1.00E-115 | 90.0  | 13.7 | 20.8 |
| Rsa1.0_00917.1.g21284.t1 | ref XP_002890967.1  hypothetical protein ARALYDRAFT_890765 [Arabidopsis lyrata subsp. lyrata] gi 297336809 gb EFH67226.1  hypothetical protein ARALYDRAFT_890765 [Arabidopsis lyrata subsp. lyrata]                                                                                                                                                                                                                                                                                     | 400  | 395  | 0         | 98.8  | 93.3 | 95.8 | hypothetical protein ARALYDRAFT_890765                | gbpln | Arabidopsis lyrata   | AT1G32060.1   Symbols: PRK   phosphoribulokinase   chr1:11532668-11534406 FORWARD LENGTH=395                                                             | 400  | 395  | 0         | 98.8  | 93.3 | 95.8 |
| Rsa1.0_00917.1.g21285.t2 | ref XP_002868268.1  hypothetical protein ARALYDRAFT_355334 [Arabidopsis lyrata subsp. lyrata] gi 297314104 gb EFH44527.1  hypothetical protein ARALYDRAFT_355334 [Arabidopsis lyrata subsp. lyrata]                                                                                                                                                                                                                                                                                     | 162  | 237  | 1.00E-18  | 146.3 | 31.5 | 44.4 | hypothetical protein ARALYDRAFT_355334                | gbpln | Arabidopsis lyrata   | #                                                                                                                                                        | #    | #    | #         | #     | #    | #    |
| Rsa1.0_00918.1.g21286.t1 | ref NP_974140.1  uncharacterized protein [Arabidopsis thaliana] gi 329197370 gb AE35491.1  uncharacterized protein AT1G73650 [Arabidopsis thaliana]                                                                                                                                                                                                                                                                                                                                     | 310  | 302  | 1.00E-143 | 97.4  | 85.2 | 90.3 | uncharacterized protein                               | gbpln | Arabidopsis thaliana | AT1G73650.3   Symbols:   Protein of unknown function (DUF1295)   chr1:27688409-27690165 REVERSE LENGTH=302                                               | 310  | 302  | 2.33E-156 | 97.4  | 85.2 | 90.3 |
| Rsa1.0_00918.1.g21287.t1 | db BAJ33800.1  unnamed protein product [Thellungiella halophila]                                                                                                                                                                                                                                                                                                                                                                                                                        | 631  | 631  | 0         | 100.0 | 92.4 | 96.4 | unnamed protein product                               | ----  | ----                 | AT1G73680.1   Symbols: ALPHA DOX2   alpha dioxygenase   chr1:27704221-27707417 REVERSE LENGTH=631                                                        | 631  | 631  | 0         | 100.0 | 88.7 | 94.8 |
| Rsa1.0_00918.1.g21288.t1 | #                                                                                                                                                                                                                                                                                                                                                                                                                                                                                       | #    | #    | #         | #     | #    | -    | ----                                                  | ----  | ----                 | #                                                                                                                                                        | #    | #    | #         | #     | #    | #    |
| Rsa1.0_00918.1.g21289.t1 | gb AAF18538.1 AC006551.24 Very similar to retrotransposon reverse transcriptase [Arabidopsis thaliana]                                                                                                                                                                                                                                                                                                                                                                                  | 438  | 1231 | 1.00E-32  | 281.1 | 21.2 | 29.7 | Very similar to retrotransposon reverse transcriptase | gbpln | Arabidopsis thaliana | AT2G34320.1   Symbols:   Polynucleotidyl transferase, ribonuclease H-like superfamily protein   chr2:14484959-14485837 FORWARD LENGTH=292                | 438  | 292  | 2.00E-23  | 66.7  | 17.1 | 26.0 |
| Rsa1.0_00918.1.g21290.t1 | #                                                                                                                                                                                                                                                                                                                                                                                                                                                                                       | #    | #    | #         | #     | #    | -    | ----                                                  | ----  | ----                 | #                                                                                                                                                        | #    | #    | #         | #     | #    | #    |
| Rsa1.0_00918.1.g21291.t1 | ref XP_002868325.1  hypothetical protein ARALYDRAFT_915512 [Arabidopsis lyrata subsp. lyrata] gi 297314161 gb EFH44584.1  hypothetical protein ARALYDRAFT_915512 [Arabidopsis lyrata subsp. lyrata]                                                                                                                                                                                                                                                                                     | 543  | 366  | 1.00E-110 | 67.4  | 41.6 | 48.4 | hypothetical protein ARALYDRAFT_915512                | gbpln | Arabidopsis lyrata   | AT4G36840.1   Symbols:   Galactose oxidase/kelch repeat superfamily protein   chr4:17352166-17352882 FORWARD LENGTH=238                                  | 543  | 238  | 1.00E-54  | 43.8  | 22.1 | 27.3 |

|                          |                                                                                                                                                                                                                                                                                            |      |      |           |       |      |      |                                                                                |       |                      |                                                                                                                                           |      |     |           |       |      |      |
|--------------------------|--------------------------------------------------------------------------------------------------------------------------------------------------------------------------------------------------------------------------------------------------------------------------------------------|------|------|-----------|-------|------|------|--------------------------------------------------------------------------------|-------|----------------------|-------------------------------------------------------------------------------------------------------------------------------------------|------|-----|-----------|-------|------|------|
| Rsa1.0_00918.1.g21292.t1 | refXP_002868325.1   hypothetical protein ARALYDRAFT_915512 [Arabidopsis lyrata subsp. lyrata] gi 297314161 gb EFH44584.1   hypothetical protein ARALYDRAFT_915512 [Arabidopsis lyrata subsp. lyrata]                                                                                       | 370  | 366  | 1.00E-105 | 98.9  | 60.0 | 70.0 | hypothetical protein ARALYDRAFT_915512                                         | gbpln | Arabidopsis lyrata   | AT4G36840.1   Symbols:   Galactose oxidase/kelch repeat superfamily protein   chr4:17352166-17352882 FORWARD LENGTH=238                   | 370  | 238 | 1.00E-48  | 64.3  | 31.4 | 39.2 |
| Rsa1.0_00918.1.g21293.t1 | gb EOA28675.1   hypothetical protein CARUB_v10024899mg.partial [Capsella rubella]                                                                                                                                                                                                          | 522  | 451  | 1.00E-131 | 86.4  | 46.9 | 60.5 | hypothetical protein CARUB_v10024899mg.partial                                 | gbpln | Capsella rubella     | AT2G01050.1   Symbols:   zinc ion binding/nucleic acid binding   chr2:68337-69884 REVERSE LENGTH=515                                      | 522  | 515 | 1.00E-126 | 98.7  | 47.9 | 65.3 |
| Rsa1.0_00918.1.g21294.t1 | gb AAC63844.1   putative non-LTR retroelement reverse transcriptase [Arabidopsis thaliana]                                                                                                                                                                                                 | 1348 | 1231 | 0         | 91.3  | 56.3 | 68.9 | putative non-LTR retroelement reverse transcriptase                            | gbpln | Arabidopsis thaliana | AT5G42905.1   Symbols:   Polynucleotidyl transferase, ribonuclease H-like superfamily protein   chr5:17201414-17202323 REVERSE LENGTH=258 | 1348 | 258 | 6.00E-92  | 19.1  | 11.6 | 14.1 |
| Rsa1.0_00919.1.g21295.t1 | #                                                                                                                                                                                                                                                                                          | #    | #    | #         | #     | #    | -    | ----                                                                           | ----  | ----                 | #                                                                                                                                         | #    | #   | #         | #     | #    | #    |
| Rsa1.0_00919.1.g21296.t1 | #                                                                                                                                                                                                                                                                                          | #    | #    | #         | #     | #    | #    | -                                                                              | ----  | ----                 | #                                                                                                                                         | #    | #   | #         | #     | #    | #    |
| Rsa1.0_00919.1.g21297.t1 | gb AAN62481.1   phosphatidylinositol 3-kinase [Brassica napus]                                                                                                                                                                                                                             | 807  | 813  | 0         | 100.7 | 93.6 | 97.3 | phosphatidylinositol 3-kinase                                                  | gbpln | Brassica napus       | AT1G60490.1   Symbols:   ATPVPS34, VPS34, PI3K   vacuolar protein sorting 34   chr1:22285792-22290190 REVERSE LENGTH=814                  | 807  | 814 | 0         | 100.9 | 91.7 | 96.7 |
| Rsa1.0_00919.1.g21298.t1 | #                                                                                                                                                                                                                                                                                          | #    | #    | #         | #     | #    | #    | -                                                                              | ----  | ----                 | #                                                                                                                                         | #    | #   | #         | #     | #    | #    |
| Rsa1.0_00919.1.g21299.t1 | #                                                                                                                                                                                                                                                                                          | #    | #    | #         | #     | #    | #    | -                                                                              | ----  | ----                 | #                                                                                                                                         | #    | #   | #         | #     | #    | #    |
| Rsa1.0_00919.1.g21300.t1 | gb EOA15129.1   hypothetical protein CARUB_v10028504mg [Capsella rubella]                                                                                                                                                                                                                  | 351  | 317  | 1.00E-168 | 90.3  | 78.6 | 85.5 | hypothetical protein CARUB_v10028504mg                                         | gbpln | Capsella rubella     | AT5G42180.1   Symbols:   Peroxidase superfamily protein   chr5:16852702-16854021 FORWARD LENGTH=317                                       | 351  | 317 | 1.00E-168 | 90.3  | 77.2 | 84.0 |
| Rsa1.0_00919.1.g21301.t1 | #                                                                                                                                                                                                                                                                                          | #    | #    | #         | #     | #    | #    | -                                                                              | ----  | ----                 | #                                                                                                                                         | #    | #   | #         | #     | #    | #    |
| Rsa1.0_00919.1.g21302.t1 | #                                                                                                                                                                                                                                                                                          | #    | #    | #         | #     | #    | #    | -                                                                              | ----  | ----                 | #                                                                                                                                         | #    | #   | #         | #     | #    | #    |
| Rsa1.0_00919.1.g21303.t1 | gb AAG51783.1   AC079679.3 reverse transcriptase, putative: 16838-20266 [Arabidopsis thaliana]                                                                                                                                                                                             | 351  | 1142 | 8.00E-60  | 325.4 | 34.8 | 49.9 | reverse transcriptase, putative: 16838-20266                                   | gbpln | Arabidopsis thaliana | AT4G2090.1   Symbols:   Ribonuclease H-like superfamily protein   chr4:14333528-14335255 FORWARD LENGTH=575                               | 351  | 575 | 2.00E-22  | 163.8 | 23.1 | 41.6 |
| Rsa1.0_00919.1.g21304.t1 | emb CAN77045.1   hypothetical protein VITISV_035256 [Vitis vinifera]                                                                                                                                                                                                                       | 265  | 665  | 9.00E-78  | 250.9 | 51.7 | 66.8 | hypothetical protein VITISV_035256                                             | gbpln | Vitis vinifera       | #                                                                                                                                         | #    | #   | #         | #     | #    | #    |
| Rsa1.0_00919.1.g21305.t2 | gb ABD65112.1   hypothetical protein 31.t00014 [Brassica oleracea]                                                                                                                                                                                                                         | 121  | 122  | 2.00E-33  | 100.8 | 62.8 | 74.4 | hypothetical protein 31.t00014                                                 | gbpln | Brassica oleracea    | #                                                                                                                                         | #    | #   | #         | #     | #    | #    |
| Rsa1.0_00919.1.g21306.t1 | #                                                                                                                                                                                                                                                                                          | #    | #    | #         | #     | #    | #    | -                                                                              | ----  | ----                 | AT1G17920.1   Symbols:   HDG12   homeodomain GLABROUS 12   chr1:6162214-6165033 REVERSE LENGTH=687                                        | 111  | 687 | 1.00E-10  | 618.9 | 29.7 | 42.3 |
| Rsa1.0_00920.1.g21307.t1 | gb AAC28189.1   contains similarity to Arabidopsis thaliana retrotransposon Athila (GB:X81801) [Arabidopsis thaliana]                                                                                                                                                                      | 210  | 940  | 4.00E-14  | 447.6 | 25.7 | 43.3 | contains similarity to Arabidopsis thaliana retrotransposon Athila (GB:X81801) | gbpln | Arabidopsis thaliana | #                                                                                                                                         | #    | #   | #         | #     | #    | #    |
| Rsa1.0_00920.1.g21308.t1 | refXP_002889171.1   hypothetical protein ARALYDRAFT_476964 [Arabidopsis lyrata subsp. lyrata] gi 297335012 gb EFH65430.1   hypothetical protein ARALYDRAFT_476964 [Arabidopsis lyrata subsp. lyrata]                                                                                       | 154  | 162  | 2.00E-60  | 105.2 | 82.5 | 88.3 | hypothetical protein ARALYDRAFT_476964                                         | gbpln | Arabidopsis lyrata   | AT1G78020.1   Symbols:   Protein of unknown function (DUF581)   chr1:29338787-29339491 FORWARD LENGTH=162                                 | 154  | 162 | 6.00E-63  | 105.2 | 81.8 | 87.7 |
| Rsa1.0_00920.1.g21309.t1 | ref NP_177924.3   putative tRNA modification GTPase [Arabidopsis thaliana] gi 51536472 gb AAU05474.1   At1g78010 [Arabidopsis thaliana] gi 52421301 gb AAU45220.1   At1g78010 [Arabidopsis thaliana] gi 332197936 gb AEE36057.1   putative tRNA modification GTPase [Arabidopsis thaliana] | 580  | 560  | 0         | 96.6  | 79.8 | 86.4 | putative tRNA modification GTPase                                              | gbpln | Arabidopsis thaliana | AT1G78010.1   Symbols:   tRNA modification GTPase, putative   chr1:29333535-29336297 FORWARD LENGTH=560                                   | 580  | 560 | 0         | 96.6  | 79.8 | 86.4 |
| Rsa1.0_00920.1.g21310.t1 | #                                                                                                                                                                                                                                                                                          | #    | #    | #         | #     | #    | #    | -                                                                              | ----  | ----                 | #                                                                                                                                         | #    | #   | #         | #     | #    | #    |
| Rsa1.0_00920.1.g21311.t1 | gb AFX60923.1   high-affinity sulfate transporter 1:2a [Brassica juncea]                                                                                                                                                                                                                   | 655  | 655  | 0         | 100.0 | 96.2 | 98.3 | high-affinity sulfate transporter 1:2a                                         | gbpln | Brassica juncea      | AT1G78000.2   Symbols:   SULTR1.2, SEL1   sulfate transporter 1:2   chr1:29329889-29332877 FORWARD LENGTH=653                             | 655  | 653 | 0         | 99.7  | 93.3 | 96.9 |
| Rsa1.0_00920.1.g21312.t2 | gb AAZ08077.2   putative low affinity sulfate transporter [Brassica napus]                                                                                                                                                                                                                 | 660  | 653  | 0         | 98.9  | 93.6 | 95.8 | putative low affinity sulfate transporter                                      | gbpln | Brassica napus       | AT1G77990.1   Symbols:   AST56, SULTR2.2   STAS domain / Sulfate transporter family   chr1:29317965-29323249 REVERSE LENGTH=677           | 660  | 677 | 0         | 102.6 | 87.7 | 93.5 |
| Rsa1.0_00920.1.g21313.t1 | #                                                                                                                                                                                                                                                                                          | #    | #    | #         | #     | #    | #    | -                                                                              | ----  | ----                 | #                                                                                                                                         | #    | #   | #         | #     | #    | #    |
| Rsa1.0_00920.1.g21314.t1 | refXP_002889327.1   transcription factor [Arabidopsis lyrata subsp. lyrata] gi 297335168 gb EFH65586.1   transcription factor [Arabidopsis lyrata subsp. lyrata]                                                                                                                           | 170  | 252  | 1.00E-58  | 148.2 | 71.8 | 81.2 | transcription factor                                                           | gbpln | Arabidopsis lyrata   | AT1G77950.2   Symbols:   AGL67   AGAMOUS-like 67   chr1:29307029-29309667 FORWARD LENGTH=252                                              | 170  | 252 | 2.00E-55  | 148.2 | 68.2 | 78.2 |
| Rsa1.0_00920.1.g21315.t1 | gb EOA35848.1   hypothetical protein CARUB_v10021089mg [Capsella rubella]                                                                                                                                                                                                                  | 343  | 154  | 7.00E-72  | 44.9  | 39.4 | 40.8 | hypothetical protein CARUB_v10021089mg                                         | gbpln | Capsella rubella     | AT1G77750.1   Symbols:   Ribosomal protein S13/S18 family   chr1:29230346-29231490 REVERSE LENGTH=154                                     | 343  | 154 | 4.00E-74  | 44.9  | 39.4 | 40.8 |

|                          |                                                                                                                                                                                                                                                                                    |     |      |           |       |      |      |                                                       |       |                      |                                                                                                                                                                                                                                                                                                                                                                    |     |     |           |       |      |      |
|--------------------------|------------------------------------------------------------------------------------------------------------------------------------------------------------------------------------------------------------------------------------------------------------------------------------|-----|------|-----------|-------|------|------|-------------------------------------------------------|-------|----------------------|--------------------------------------------------------------------------------------------------------------------------------------------------------------------------------------------------------------------------------------------------------------------------------------------------------------------------------------------------------------------|-----|-----|-----------|-------|------|------|
| Rsa1.0_00920.1.g21316.t1 | ref[XP_002887697.1] kinase family protein [Arabidopsis lyrata subsp. lyrata] gi 297333538 gb EFH63956.1  kinase family protein [Arabidopsis lyrata subsp. lyrata]                                                                                                                  | 614 | 786  | 0         | 128.0 | 80.6 | 85.5 | kinase family protein                                 | gbpln | Arabidopsis lyrata   | AT1G77720.1   Symbols: PPK1   putative protein kinase 1   chr1:29210730-29213877 FORWARD LENGTH=777                                                                                                                                                                                                                                                                | 614 | 777 | 0         | 126.5 | 80.6 | 86.0 |
| Rsa1.0_00920.1.g21317.t1 | ref[NP_177893.1] pathogenesis-related thaumatin-like protein [Arabidopsis thaliana] gi 12323299 gb AAG51631.1 AC012193.13 thaumatin-like protein; 12104-13574 [Arabidopsis thaliana] gi 332197890 gb AE36011.1  pathogenesis-related thaumatin-like protein [Arabidopsis thaliana] | 245 | 356  | 1.00E-108 | 145.3 | 75.9 | 82.9 | pathogenesis-related thaumatin-like protein           | gbpln | Arabidopsis thaliana | AT1G77700.1   Symbols:   Pathogenesis-related thaumatin superfamily protein   chr1:29204747-29206217 FORWARD LENGTH=356                                                                                                                                                                                                                                            | 245 | 356 | 1.00E-111 | 145.3 | 75.9 | 82.9 |
| Rsa1.0_00920.1.g21318.t1 | gb AAF18538.1 AC006551.24 Very similar to retrotransposon reverse transcriptase [Arabidopsis thaliana]                                                                                                                                                                             | 153 | 1231 | 2.00E-30  | 804.6 | 44.4 | 62.1 | Very similar to retrotransposon reverse transcriptase | gbpln | Arabidopsis thaliana | AT5G19270.1   Symbols:   unknown protein; BEST Arabidopsis thaliana protein match is: unknown protein (TAIR:AT4G03566.1); Has 30201 Blast hits to 17322 proteins in 780 species: Archaea - 12; Bacteria - 1396; Metazoa - 17338; Fungi - 3422; Plants - 5037; Viruses - 0; Other Eukaryotes - 2996 (source: NCBI BLINK).   chr5:6485617-6487009 REVERSE LENGTH=365 | 153 | 365 | 3.00E-13  | 238.6 | 26.1 | 45.1 |
| Rsa1.0_00920.1.g21319.t1 | gb ABK28471.1  unknown [Arabidopsis thaliana]                                                                                                                                                                                                                                      | 233 | 245  | 5.00E-79  | 105.2 | 83.7 | 89.3 | unknown                                               | gbpln | Arabidopsis thaliana | AT1G77200.1   Symbols:   Integrase-type DNA-binding superfamily protein   chr1:29004357-29005091 REVERSE LENGTH=244                                                                                                                                                                                                                                                | 233 | 244 | 2.00E-81  | 104.7 | 83.7 | 89.3 |
| Rsa1.0_00920.1.g21320.t2 | ref[XP_002889128.1] hypothetical protein ARALYDRAFT.476882 [Arabidopsis lyrata subsp. lyrata] gi 297334969 gb EFH65387.1  hypothetical protein ARALYDRAFT.476882 [Arabidopsis lyrata subsp. lyrata]                                                                                | 613 | 610  | 0         | 99.5  | 89.1 | 93.8 | hypothetical protein ARALYDRAFT.476882                | gbpln | Arabidopsis lyrata   | AT1G77180.2   Symbols: SKIP   chromatin protein family   chr1:28999791-29001632 REVERSE LENGTH=613                                                                                                                                                                                                                                                                 | 613 | 613 | 0         | 100.0 | 86.5 | 92.8 |
| Rsa1.0_00920.1.g21321.t1 | ref[XP_002889126.1] hypothetical protein ARALYDRAFT.476879 [Arabidopsis lyrata subsp. lyrata] gi 297334967 gb EFH65385.1  hypothetical protein ARALYDRAFT.476879 [Arabidopsis lyrata subsp. lyrata]                                                                                | 260 | 261  | 2.00E-95  | 100.4 | 68.1 | 82.3 | hypothetical protein ARALYDRAFT.476879                | gbpln | Arabidopsis lyrata   | AT1G77145.1   Symbols:   Protein of unknown function (DUF506)   chr1:28990178-28991290 REVERSE LENGTH=260                                                                                                                                                                                                                                                          | 260 | 260 | 3.00E-89  | 100.0 | 66.2 | 80.8 |
| Rsa1.0_00920.1.g21322.t1 | # # # # # # # # -                                                                                                                                                                                                                                                                  |     |      |           |       |      |      |                                                       | ----  | ----                 | #                                                                                                                                                                                                                                                                                                                                                                  | #   | #   | #         | #     | #    | #    |
| Rsa1.0_00920.1.g21323.t1 | ref[XP_002887165.1] zinc finger family protein [Arabidopsis lyrata subsp. lyrata] gi 297333006 gb EFH63424.1  zinc finger family protein [Arabidopsis lyrata subsp. lyrata]                                                                                                        | 248 | 248  | 1.00E-110 | 100.0 | 77.4 | 87.9 | zinc finger family protein                            | gbpln | Arabidopsis lyrata   | AT1G68180.1   Symbols:   RING/U-box superfamily protein   chr1:25554816-25555562 FORWARD LENGTH=248                                                                                                                                                                                                                                                                | 248 | 248 | 1.00E-110 | 100.0 | 74.6 | 86.7 |
| Rsa1.0_00920.1.g21324.t1 | gb EOA35456.1  hypothetical protein CARUB_v10020665mg [Capsella rubella]                                                                                                                                                                                                           | 323 | 320  | 1.00E-121 | 99.1  | 73.4 | 81.7 | hypothetical protein CARUB_v10020665mg                | gbpln | Capsella rubella     | AT1G68200.1   Symbols:   Zinc finger C-x8-C-x5-C-x3-H type family protein   chr1:25562118-25563948 FORWARD LENGTH=308                                                                                                                                                                                                                                              | 323 | 308 | 1.00E-110 | 95.4  | 73.4 | 82.7 |
| Rsa1.0_00920.1.g21325.t1 | gb EOA34580.1  hypothetical protein CARUB_v10022138mg, partial [Capsella rubella]                                                                                                                                                                                                  | 565 | 681  | 1.00E-104 | 120.5 | 48.3 | 65.7 | hypothetical protein CARUB_v10022138mg, partial       | gbpln | Capsella rubella     | AT1G68210.1   Symbols: APRR6, PRR6   pseudo-response regulator 6   chr1:25565983-25569302 FORWARD LENGTH=755                                                                                                                                                                                                                                                       | 565 | 755 | 2.00E-91  | 133.6 | 40.7 | 57.3 |
| Rsa1.0_00920.1.g21326.t1 | # # # # # # # # -                                                                                                                                                                                                                                                                  |     |      |           |       |      |      |                                                       | ----  | ----                 | #                                                                                                                                                                                                                                                                                                                                                                  | #   | #   | #         | #     | #    | #    |
| Rsa1.0_00920.1.g21327.t1 | gb EOA35646.1  hypothetical protein CARUB_v10020863mg, partial [Capsella rubella]                                                                                                                                                                                                  | 204 | 244  | 4.00E-90  | 119.6 | 82.8 | 88.7 | hypothetical protein CARUB_v10020863mg, partial       | gbpln | Capsella rubella     | AT1G68220.1   Symbols:   Protein of unknown function (DUF1218)   chr1:25570322-25571562 FORWARD LENGTH=201                                                                                                                                                                                                                                                         | 204 | 201 | 1.00E-91  | 98.5  | 82.4 | 88.7 |
| Rsa1.0_00920.1.g21328.t1 | gb EOA35712.1  hypothetical protein CARUB_v10020939mg [Capsella rubella]                                                                                                                                                                                                           | 188 | 215  | 9.00E-86  | 114.4 | 83.5 | 91.0 | hypothetical protein CARUB_v10020939mg                | gbpln | Capsella rubella     | AT1G68230.2   Symbols:   Reticulon family protein   chr1:25572185-25572921 FORWARD LENGTH=162                                                                                                                                                                                                                                                                      | 188 | 162 | 1.00E-84  | 86.2  | 59.0 | 63.8 |
| Rsa1.0_00920.1.g21329.t1 | gb AAM63843.1  unknown [Arabidopsis thaliana]                                                                                                                                                                                                                                      | 294 | 439  | 7.00E-78  | 149.3 | 51.4 | 51.7 | unknown                                               | gbpln | Arabidopsis thaliana | AT5G42090.1   Symbols:   Lung seven transmembrane receptor family protein   chr5:16826830-16828149 FORWARD LENGTH=439                                                                                                                                                                                                                                              | 294 | 439 | 1.00E-79  | 149.3 | 51.0 | 51.4 |
| Rsa1.0_00920.1.g21330.t1 | gb EOA35757.1  hypothetical protein CARUB_v10020989mg [Capsella rubella]                                                                                                                                                                                                           | 200 | 191  | 5.00E-84  | 95.5  | 77.5 | 83.0 | hypothetical protein CARUB_v10020989mg                | gbpln | Capsella rubella     | AT1G68260.1   Symbols:   Thioesterase superfamily protein   chr1:25585976-25587601 REVERSE LENGTH=190                                                                                                                                                                                                                                                              | 200 | 190 | 1.00E-84  | 95.0  | 76.0 | 82.5 |
| Rsa1.0_00920.1.g21331.t2 | gb EOA34326.1  hypothetical protein CARUB_v10021846mg [Capsella rubella]                                                                                                                                                                                                           | 296 | 291  | 1.00E-151 | 98.3  | 87.2 | 92.2 | hypothetical protein CARUB_v10021846mg                | gbpln | Capsella rubella     | AT1G68290.1   Symbols: ENDO 2   endonuclease 2   chr1:25596718-25598264 FORWARD LENGTH=290                                                                                                                                                                                                                                                                         | 296 | 290 | 1.00E-150 | 98.0  | 84.5 | 90.2 |

|                          |                                                                                                                                                                                                                                                                                                                                                                                                                                                                                                                                                                                                                                                                                   |  |  |  |  |  |  |  |  |                                                    |       |                      |                                                                                                                                                                                                                                                                                                                                                  |     |      |           |       |      |      |     |     |           |       |      |      |  |  |
|--------------------------|-----------------------------------------------------------------------------------------------------------------------------------------------------------------------------------------------------------------------------------------------------------------------------------------------------------------------------------------------------------------------------------------------------------------------------------------------------------------------------------------------------------------------------------------------------------------------------------------------------------------------------------------------------------------------------------|--|--|--|--|--|--|--|--|----------------------------------------------------|-------|----------------------|--------------------------------------------------------------------------------------------------------------------------------------------------------------------------------------------------------------------------------------------------------------------------------------------------------------------------------------------------|-----|------|-----------|-------|------|------|-----|-----|-----------|-------|------|------|--|--|
|                          | ref NP_564927.1  universal stress protein domain-containing protein [Arabidopsis thaliana] gi 12325313 gb AAG52594.1 AC016447.3 unknown protein; 44604-45347 [Arabidopsis thaliana] gi 21555126 gb AM653782.1  unknown [Arabidopsis thaliana] gi 28950695 gb AA063271.1  At1g68300 [Arabidopsis thaliana] gi 110736101 db BAF00023.1  hypothetical protein [Arabidopsis thaliana] gi 332196657 gb AEE34778.1  universal stress protein domain-containing protein [Arabidopsis thaliana]                                                                                                                                                                                           |  |  |  |  |  |  |  |  | universal stress protein domain-containing protein | gbpln | Arabidopsis thaliana | AT1G68300.1   Symbols:   Adenine nucleotide alpha hydrolases-like superfamily protein   chr1:25598518-25599261 REVERSE LENGTH=160                                                                                                                                                                                                                | 161 | 160  | 2.00E-75  | 99.4  | 84.5 | 93.8 | 161 | 160 | 9.00E-78  | 99.4  | 84.5 | 93.8 |  |  |
| Rsa1.0_00920.1.g21332.t1 |                                                                                                                                                                                                                                                                                                                                                                                                                                                                                                                                                                                                                                                                                   |  |  |  |  |  |  |  |  |                                                    |       |                      |                                                                                                                                                                                                                                                                                                                                                  |     |      |           |       |      |      |     |     |           |       |      |      |  |  |
|                          | ref XP_002303444.1  predicted protein [Populus trichocarpa] gi 222840876 gb EEE78423.1  predicted protein [Populus trichocarpa] ref XP_002887176.1  hypothetical protein ARALYDRAFT_339072 [Arabidopsis lyrata subsp. lyrata] gi 297333017 gb EFEH63435.1  hypothetical protein ARALYDRAFT_339072 [Arabidopsis lyrata subsp. lyrata]                                                                                                                                                                                                                                                                                                                                              |  |  |  |  |  |  |  |  |                                                    |       |                      |                                                                                                                                                                                                                                                                                                                                                  |     |      |           |       |      |      |     |     |           |       |      |      |  |  |
| Rsa1.0_00920.1.g21333.t1 |                                                                                                                                                                                                                                                                                                                                                                                                                                                                                                                                                                                                                                                                                   |  |  |  |  |  |  |  |  |                                                    |       | Populus trichocarpa  | AT1G68310.2   Symbols: AE7   Protein of unknown function (DUF59)   chr1:25599812-25601239 FORWARD LENGTH=157                                                                                                                                                                                                                                     | 186 | 159  | 3.00E-63  | 85.5  | 66.7 | 78.0 | 186 | 157 | 5.00E-63  | 84.4  | 66.7 | 75.3 |  |  |
|                          |                                                                                                                                                                                                                                                                                                                                                                                                                                                                                                                                                                                                                                                                                   |  |  |  |  |  |  |  |  |                                                    |       |                      |                                                                                                                                                                                                                                                                                                                                                  |     |      |           |       |      |      |     |     |           |       |      |      |  |  |
|                          | ref XP_002887177.1  hypothetical protein ARALYDRAFT_475952 [Arabidopsis lyrata subsp. lyrata] gi 297333018 gb EFEH63436.1  hypothetical protein ARALYDRAFT_475952 [Arabidopsis lyrata subsp. lyrata]                                                                                                                                                                                                                                                                                                                                                                                                                                                                              |  |  |  |  |  |  |  |  |                                                    |       |                      |                                                                                                                                                                                                                                                                                                                                                  |     |      |           |       |      |      |     |     |           |       |      |      |  |  |
| Rsa1.0_00920.1.g21334.t1 |                                                                                                                                                                                                                                                                                                                                                                                                                                                                                                                                                                                                                                                                                   |  |  |  |  |  |  |  |  |                                                    |       | Arabidopsis lyrata   | AT1G68320.1   Symbols: MYB62, AtMYB62, BW62B, BW62C   myb domain protein 62   chr1:25603842-25604884 FORWARD LENGTH=286                                                                                                                                                                                                                          | 289 | 285  | 1.00E-117 | 98.6  | 79.6 | 85.1 | 289 | 286 | 1.00E-118 | 99.0  | 78.2 | 83.7 |  |  |
|                          |                                                                                                                                                                                                                                                                                                                                                                                                                                                                                                                                                                                                                                                                                   |  |  |  |  |  |  |  |  |                                                    |       |                      |                                                                                                                                                                                                                                                                                                                                                  |     |      |           |       |      |      |     |     |           |       |      |      |  |  |
|                          | ref XP_002887177.1  hypothetical protein ARALYDRAFT_475952 [Arabidopsis lyrata subsp. lyrata] gi 297333018 gb EFEH63436.1  hypothetical protein ARALYDRAFT_475952 [Arabidopsis lyrata subsp. lyrata]                                                                                                                                                                                                                                                                                                                                                                                                                                                                              |  |  |  |  |  |  |  |  |                                                    |       |                      |                                                                                                                                                                                                                                                                                                                                                  |     |      |           |       |      |      |     |     |           |       |      |      |  |  |
| Rsa1.0_00920.1.g21335.t1 |                                                                                                                                                                                                                                                                                                                                                                                                                                                                                                                                                                                                                                                                                   |  |  |  |  |  |  |  |  |                                                    |       | Arabidopsis lyrata   | AT1G68330.1   Symbols:   unknown protein; BEST Arabidopsis thaliana protein match is: unknown protein (TAIR:AT1G48780.1); Has 155 Blast hits to 147 proteins in 23 species: Archae - 0; Bacteria - 0; Metazoa - 19; Fungi - 3; Plants - 126; Viruses - 0; Other Eukaryotes - 7 (source: NCBI BLink).   chr1:25611242-25612048 FORWARD LENGTH=268 | 266 | 267  | 6.00E-92  | 100.4 | 80.5 | 84.2 | 266 | 268 | 1.00E-93  | 100.8 | 80.8 | 84.6 |  |  |
|                          |                                                                                                                                                                                                                                                                                                                                                                                                                                                                                                                                                                                                                                                                                   |  |  |  |  |  |  |  |  |                                                    |       |                      |                                                                                                                                                                                                                                                                                                                                                  |     |      |           |       |      |      |     |     |           |       |      |      |  |  |
|                          | gb EOA36988.1  hypothetical protein CARUB_v10009968mg [Capsella rubella]                                                                                                                                                                                                                                                                                                                                                                                                                                                                                                                                                                                                          |  |  |  |  |  |  |  |  |                                                    |       |                      |                                                                                                                                                                                                                                                                                                                                                  |     |      |           |       |      |      |     |     |           |       |      |      |  |  |
| Rsa1.0_00920.1.g21336.t1 |                                                                                                                                                                                                                                                                                                                                                                                                                                                                                                                                                                                                                                                                                   |  |  |  |  |  |  |  |  |                                                    |       | Capsella rubella     | AT1G25370.1   Symbols:   Protein of unknown function (DUF1639)   chr1:8898046-8898934 REVERSE LENGTH=263                                                                                                                                                                                                                                         | 201 | 278  | 3.00E-28  | 138.3 | 48.8 | 61.7 | 201 | 263 | 4.00E-29  | 130.8 | 47.8 | 63.2 |  |  |
|                          |                                                                                                                                                                                                                                                                                                                                                                                                                                                                                                                                                                                                                                                                                   |  |  |  |  |  |  |  |  |                                                    |       |                      |                                                                                                                                                                                                                                                                                                                                                  |     |      |           |       |      |      |     |     |           |       |      |      |  |  |
|                          | ref XP_002888657.1  hypothetical protein ARALYDRAFT_894600 [Arabidopsis lyrata subsp. lyrata] gi 297334498 gb EFEH64916.1  hypothetical protein ARALYDRAFT_894600 [Arabidopsis lyrata subsp. lyrata]                                                                                                                                                                                                                                                                                                                                                                                                                                                                              |  |  |  |  |  |  |  |  |                                                    |       |                      |                                                                                                                                                                                                                                                                                                                                                  |     |      |           |       |      |      |     |     |           |       |      |      |  |  |
| Rsa1.0_00920.1.g21337.t1 |                                                                                                                                                                                                                                                                                                                                                                                                                                                                                                                                                                                                                                                                                   |  |  |  |  |  |  |  |  |                                                    |       | Arabidopsis lyrata   | AT1G68360.1   Symbols:   C2H2 and C2HC zinc fingers superfamily protein   chr1:25621678-25622412 REVERSE LENGTH=244                                                                                                                                                                                                                              | 238 | 244  | 2.00E-90  | 102.5 | 81.5 | 87.0 | 238 | 244 | 4.00E-92  | 102.5 | 82.8 | 87.0 |  |  |
|                          |                                                                                                                                                                                                                                                                                                                                                                                                                                                                                                                                                                                                                                                                                   |  |  |  |  |  |  |  |  |                                                    |       |                      |                                                                                                                                                                                                                                                                                                                                                  |     |      |           |       |      |      |     |     |           |       |      |      |  |  |
|                          | dbj BAA97290.1  non-LTR retroelement reverse transcriptase-like [Arabidopsis thaliana]                                                                                                                                                                                                                                                                                                                                                                                                                                                                                                                                                                                            |  |  |  |  |  |  |  |  |                                                    |       |                      |                                                                                                                                                                                                                                                                                                                                                  |     |      |           |       |      |      |     |     |           |       |      |      |  |  |
| Rsa1.0_00920.1.g21338.t1 |                                                                                                                                                                                                                                                                                                                                                                                                                                                                                                                                                                                                                                                                                   |  |  |  |  |  |  |  |  |                                                    |       | Arabidopsis thaliana | AT1G60720.1   Symbols:   RNA-directed DNA polymerase (reverse transcriptase)-related family protein   chr1:22357072-22357941 FORWARD LENGTH=289                                                                                                                                                                                                  | 127 | 1072 | 9.00E-29  | 844.1 | 47.2 | 70.9 | 127 | 289 | 2.00E-31  | 227.6 | 45.7 | 72.4 |  |  |
|                          |                                                                                                                                                                                                                                                                                                                                                                                                                                                                                                                                                                                                                                                                                   |  |  |  |  |  |  |  |  |                                                    |       |                      |                                                                                                                                                                                                                                                                                                                                                  |     |      |           |       |      |      |     |     |           |       |      |      |  |  |
|                          | ref XP_002888672.1  alpha-xylosidase precursor [Arabidopsis lyrata subsp. lyrata] gi 297334513 gb EFH64931.1  alpha-xylosidase precursor [Arabidopsis lyrata subsp. lyrata]                                                                                                                                                                                                                                                                                                                                                                                                                                                                                                       |  |  |  |  |  |  |  |  |                                                    |       |                      |                                                                                                                                                                                                                                                                                                                                                  |     |      |           |       |      |      |     |     |           |       |      |      |  |  |
| Rsa1.0_00920.1.g21339.t1 |                                                                                                                                                                                                                                                                                                                                                                                                                                                                                                                                                                                                                                                                                   |  |  |  |  |  |  |  |  |                                                    |       | Arabidopsis lyrata   | AT1G68560.1   Symbols: ATXYL1, XYL1, TRG1   alpha-xylosidase 1   chr1:25734435-25737897 REVERSE LENGTH=915                                                                                                                                                                                                                                       | 923 | 916  | 0         | 99.2  | 88.9 | 94.1 | 923 | 915 | 0         | 99.1  | 88.6 | 93.9 |  |  |
|                          |                                                                                                                                                                                                                                                                                                                                                                                                                                                                                                                                                                                                                                                                                   |  |  |  |  |  |  |  |  |                                                    |       |                      |                                                                                                                                                                                                                                                                                                                                                  |     |      |           |       |      |      |     |     |           |       |      |      |  |  |
|                          | ref NP_190652.1  cold-regulated 413-plasma membrane 2 [Arabidopsis thaliana] gi 75212080 sp Q9SVL6.1 CRPM2_ARAT H RecName: Full=Cold-regulated 413 plasma membrane protein 2; Short=AICOR413-PM2 gi 10121843 gb AA13394.1 AF283005.1 cold acclimation protein WCOR413-like protein beta form [Arabidopsis thaliana] gi 13430786 gb AAK26015.1 AF360305.1 putative cold acclimation protein [Arabidopsis thaliana] gi 4835234 emb CAB42912.1  putative cold acclimation protein [Arabidopsis thaliana] gi 15810635 gb AAL07242.1  putative cold acclimation protein [Arabidopsis thaliana] gi 332645194 gb AEE78715.1  cold-regulated 413-plasma membrane 2 [Arabidopsis thaliana] |  |  |  |  |  |  |  |  |                                                    |       |                      |                                                                                                                                                                                                                                                                                                                                                  |     |      |           |       |      |      |     |     |           |       |      |      |  |  |
| Rsa1.0_00921.1.g21340.t1 |                                                                                                                                                                                                                                                                                                                                                                                                                                                                                                                                                                                                                                                                                   |  |  |  |  |  |  |  |  |                                                    |       | Arabidopsis thaliana | AT3G50830.1   Symbols: COR413-PM2, ATCOR413-PM2   cold-regulated 413-plasma membrane 2   chr3:18894109-18895355 REVERSE LENGTH=203                                                                                                                                                                                                               | 284 | 203  | 1.00E-98  | 71.5  | 63.4 | 68.0 | 284 | 203 | 1.00E-101 | 71.5  | 63.4 | 68.0 |  |  |



|                          |                                                                                                                                                                                                                                                                                                                                                                                                                                                                                                                                                                                                                                                                |     |      |          |       |      |      |                                                     |       |                      |                                                                                                                                                                                                                                                                                                                                                   |     |     |          |       |      |      |
|--------------------------|----------------------------------------------------------------------------------------------------------------------------------------------------------------------------------------------------------------------------------------------------------------------------------------------------------------------------------------------------------------------------------------------------------------------------------------------------------------------------------------------------------------------------------------------------------------------------------------------------------------------------------------------------------------|-----|------|----------|-------|------|------|-----------------------------------------------------|-------|----------------------|---------------------------------------------------------------------------------------------------------------------------------------------------------------------------------------------------------------------------------------------------------------------------------------------------------------------------------------------------|-----|-----|----------|-------|------|------|
| Rsa1.0_00921.1.g21341.t3 | ref[XP_002874843.1] hypothetical protein ARALYDRAFT_911810 [Arabidopsis lyrata subsp. lyrata] gi 297320680 gb EFH51102.1                                                                                                                                                                                                                                                                                                                                                                                                                                                                                                                                       | 482 | 610  | 2.00E-66 | 126.6 | 28.8 | 34.4 | hypothetical protein ARALYDRAFT_911810              | gbpln | Arabidopsis lyrata   | AT4G05460.1   Symbols:   RNI-like superfamily protein   chr4:2761106-2762400 REVERSE LENGTH=302                                                                                                                                                                                                                                                   | 482 | 302 | 2.00E-61 | 62.7  | 26.1 | 32.6 |
| Rsa1.0_00921.1.g21342.t1 | hypothetical protein ARALYDRAFT_911810 [Arabidopsis lyrata subsp. lyrata] ref[NP_001154670.1] PLATZ transcription factor family protein [Arabidopsis thaliana] gi 254801606 sp POCB19.1 Y3081.ARAT H RecName: Full=Uncharacterized protein At3g50808 gi 332645191 gb AEE78712.1  PLATZ transcription factor family protein [Arabidopsis thaliana]                                                                                                                                                                                                                                                                                                              | 178 | 110  | 7.00E-30 | 61.8  | 36.5 | 48.9 | PLATZ transcription factor family protein           | gbpln | Arabidopsis thaliana | AT3G50808.1   Symbols:   PLATZ transcription factor family protein   chr3:18887614-18888047 REVERSE LENGTH=110                                                                                                                                                                                                                                    | 178 | 110 | 3.00E-32 | 61.8  | 36.5 | 48.9 |
| Rsa1.0_00921.1.g21343.t1 | gb AAC33226.1  putative non-LTR retroelement reverse transcriptase [Arabidopsis thaliana]                                                                                                                                                                                                                                                                                                                                                                                                                                                                                                                                                                      | 376 | 1529 | 4.00E-31 | 406.6 | 17.6 | 24.5 | putative non-LTR retroelement reverse transcriptase | gbpln | Arabidopsis thaliana | AT5G18880.1   Symbols:   RNA-directed DNA polymerase (reverse transcriptase)-related family protein   chr5:6300535-6301422 REVERSE LENGTH=295                                                                                                                                                                                                     | 376 | 295 | 2.00E-20 | 78.5  | 16.2 | 22.9 |
| Rsa1.0_00921.1.g21344.t1 | ref[XP_002877771.1] hypothetical protein ARALYDRAFT_485427 [Arabidopsis lyrata subsp. lyrata] gi 297323609 gb EFH54030.1  hypothetical protein ARALYDRAFT_485427 [Arabidopsis lyrata subsp. lyrata] ref[NP_190647.1] uncharacterized protein [Arabidopsis thaliana] gi 75212286 sp Q9SVM0.1 Y3078.ARAT H RecName: Full=BTB/POZ domain-containing protein At3g50780 gi 4835229 emb CAB42907.1  putative protein [Arabidopsis thaliana] gi 27754671 gb AAO22779.1  unknown protein [Arabidopsis thaliana] gi 28827604 gb AAO50646.1  unknown protein [Arabidopsis thaliana] gi 332645188 gb AEE78709.1  uncharacterized protein AT3G50780 [Arabidopsis thaliana] | 565 | 410  | 0        | 72.6  | 64.1 | 68.0 | hypothetical protein ARALYDRAFT_485427              | gbpln | Arabidopsis lyrata   | AT3G50790.1   Symbols:   esterase/lipase/thioesterase family protein   chr3:18880074-18881940 REVERSE LENGTH=408                                                                                                                                                                                                                                  | 565 | 408 | 0        | 72.2  | 63.0 | 67.4 |
| Rsa1.0_00921.1.g21345.t1 | ref[NP_190647.1] uncharacterized protein [Arabidopsis thaliana] gi 75212286 sp Q9SVM0.1 Y3078.ARAT H RecName: Full=BTB/POZ domain-containing protein At3g50780 gi 4835229 emb CAB42907.1  putative protein [Arabidopsis thaliana] gi 27754671 gb AAO22779.1  unknown protein [Arabidopsis thaliana] gi 28827604 gb AAO50646.1  unknown protein [Arabidopsis thaliana] gi 332645188 gb AEE78709.1  uncharacterized protein AT3G50780 [Arabidopsis thaliana]                                                                                                                                                                                                     | 521 | 520  | 0        | 99.8  | 85.8 | 91.6 | uncharacterized protein                             | gbpln | Arabidopsis thaliana | AT3G50780.1   Symbols:   BEST Arabidopsis thaliana protein match is: BTB/POZ domain-containing protein (TAIR:AT1G63850.1); Has 298 Blast hits to 298 proteins in 22 species: Archae - 0; Bacteria - 0; Metazoa - 10; Fungi - 0; Plants - 287; Viruses - 0; Other Eukaryotes - 1 (source: NCBI BLINK).   chr3:18875662-18877341 REVERSE LENGTH=520 | 521 | 520 | 0        | 99.8  | 85.8 | 91.6 |
| Rsa1.0_00921.1.g21346.t1 | #                                                                                                                                                                                                                                                                                                                                                                                                                                                                                                                                                                                                                                                              | #   | #    | #        | #     | #    | -    | ----                                                | ----  | #                    | #                                                                                                                                                                                                                                                                                                                                                 | #   | #   | #        | #     | #    |      |
| Rsa1.0_00921.1.g21347.t1 | gb EOA28767.1  hypothetical protein CARUB_v10024999mg [Capsella rubella]                                                                                                                                                                                                                                                                                                                                                                                                                                                                                                                                                                                       | 574 | 834  | 6.00E-60 | 145.3 | 21.4 | 28.2 | hypothetical protein CARUB_v10024999mg              | gbpln | Capsella rubella     | #                                                                                                                                                                                                                                                                                                                                                 | #   | #   | #        | #     | #    |      |
| Rsa1.0_00921.1.g21348.t1 | gb EOA25245.1  hypothetical protein CARUB_v10018559mg [Capsella rubella]                                                                                                                                                                                                                                                                                                                                                                                                                                                                                                                                                                                       | 233 | 380  | 2.00E-73 | 163.1 | 64.8 | 77.3 | hypothetical protein CARUB_v10018559mg              | gbpln | Capsella rubella     | AT1G11620.1   Symbols:   F-box and associated interaction domains-containing protein   chr1:3910833-3911924 FORWARD LENGTH=363                                                                                                                                                                                                                    | 233 | 363 | 6.00E-23 | 155.8 | 33.5 | 52.4 |
| Rsa1.0_00921.1.g21349.t1 | #                                                                                                                                                                                                                                                                                                                                                                                                                                                                                                                                                                                                                                                              | #   | #    | #        | #     | #    | -    | ----                                                | ----  | #                    | #                                                                                                                                                                                                                                                                                                                                                 | #   | #   | #        | #     | #    |      |
| Rsa1.0_00921.1.g21350.t3 | ref[XP_002877763.1] hypothetical protein ARALYDRAFT_323632 [Arabidopsis lyrata subsp. lyrata] gi 297323601 gb EFH54022.1  hypothetical protein ARALYDRAFT_323632 [Arabidopsis lyrata subsp. lyrata]                                                                                                                                                                                                                                                                                                                                                                                                                                                            | 84  | 375  | 1.00E-14 | 446.4 | 46.4 | 63.1 | hypothetical protein ARALYDRAFT_323632              | gbpln | Arabidopsis lyrata   | AT3G50720.1   Symbols:   Protein kinase superfamily protein   chr3:18847519-18849430 REVERSE LENGTH=377                                                                                                                                                                                                                                           | 84  | 377 | 3.00E-15 | 448.8 | 41.7 | 52.4 |
| Rsa1.0_00921.1.g21351.t1 | #                                                                                                                                                                                                                                                                                                                                                                                                                                                                                                                                                                                                                                                              | #   | #    | #        | #     | #    | -    | ----                                                | ----  | #                    | #                                                                                                                                                                                                                                                                                                                                                 | #   | #   | #        | #     | #    |      |
| Rsa1.0_00921.1.g21352.t1 | gb EOA23993.1  hypothetical protein CARUB_v10017209mg [Capsella rubella]                                                                                                                                                                                                                                                                                                                                                                                                                                                                                                                                                                                       | 456 | 458  | 0        | 100.4 | 82.9 | 87.3 | hypothetical protein CARUB_v10017209mg              | gbpln | Capsella rubella     | AT3G50700.1   Symbols:   AtIDD2, IDD2   indeterminate(D)-domain 2   chr3:18840945-18842829 FORWARD LENGTH=452                                                                                                                                                                                                                                     | 456 | 452 | 0        | 99.1  | 80.5 | 85.5 |
| Rsa1.0_00922.1.g21353.t1 | #                                                                                                                                                                                                                                                                                                                                                                                                                                                                                                                                                                                                                                                              | #   | #    | #        | #     | #    | -    | ----                                                | ----  | #                    | #                                                                                                                                                                                                                                                                                                                                                 | #   | #   | #        | #     | #    |      |
| Rsa1.0_00922.1.g21354.t1 | #                                                                                                                                                                                                                                                                                                                                                                                                                                                                                                                                                                                                                                                              | #   | #    | #        | #     | #    | -    | ----                                                | ----  | #                    | #                                                                                                                                                                                                                                                                                                                                                 | #   | #   | #        | #     | #    |      |
| Rsa1.0_00922.1.g21355.t1 | #                                                                                                                                                                                                                                                                                                                                                                                                                                                                                                                                                                                                                                                              | #   | #    | #        | #     | #    | -    | ----                                                | ----  | #                    | #                                                                                                                                                                                                                                                                                                                                                 | #   | #   | #        | #     | #    |      |
| Rsa1.0_00922.1.g21356.t1 | gb AAG51783.1 AC079679.3 reverse transcriptase, putative; 16838-20266 [Arabidopsis thaliana]                                                                                                                                                                                                                                                                                                                                                                                                                                                                                                                                                                   | 558 | 1142 | 2.00E-84 | 204.7 | 29.4 | 36.7 | reverse transcriptase, putative; 16838-20266        | gbpln | Arabidopsis thaliana | AT4G29090.1   Symbols:   Ribonuclease H-like superfamily protein   chr4:14333528-14335255 FORWARD LENGTH=575                                                                                                                                                                                                                                      | 558 | 575 | 2.00E-16 | 103.0 | 8.8  | 12.2 |
| Rsa1.0_00922.1.g21357.t8 | #                                                                                                                                                                                                                                                                                                                                                                                                                                                                                                                                                                                                                                                              | #   | #    | #        | #     | #    | -    | ----                                                | ----  | #                    | #                                                                                                                                                                                                                                                                                                                                                 | #   | #   | #        | #     | #    |      |
| Rsa1.0_00922.1.g21358.t1 | #                                                                                                                                                                                                                                                                                                                                                                                                                                                                                                                                                                                                                                                              | #   | #    | #        | #     | #    | -    | ----                                                | ----  | #                    | #                                                                                                                                                                                                                                                                                                                                                 | #   | #   | #        | #     | #    |      |

|                          |                                                                                                                                                                                                                                                                                                                                                                                                                                                                                                                                                  |     |      |           |       |      |      |                                             |       |                      |                                                                                                                               |     |      |           |       |      |      |
|--------------------------|--------------------------------------------------------------------------------------------------------------------------------------------------------------------------------------------------------------------------------------------------------------------------------------------------------------------------------------------------------------------------------------------------------------------------------------------------------------------------------------------------------------------------------------------------|-----|------|-----------|-------|------|------|---------------------------------------------|-------|----------------------|-------------------------------------------------------------------------------------------------------------------------------|-----|------|-----------|-------|------|------|
| Rsa1.0_00922.1.g21359.t1 | ref[XP_002870468.1] hypothetical protein ARALYDRAFT_493654 [Arabidopsis lyrata subsp. lyrata] gi 297316304 gb EFH46727.1                                                                                                                                                                                                                                                                                                                                                                                                                         | 175 | 176  | 9.00E-73  | 100.6 | 80.6 | 87.4 | hypothetical protein ARALYDRAFT_493654      | gbpln | Arabidopsis lyrata   | AT5G36120.1   Symbols: CCB3, YLMG3, atylmg3   cofactor assembly, complex C (B6F)   chr5:14198679-14199203 REVERSE LENGTH=174  | 175 | 174  | 4.00E-73  | 99.4  | 79.4 | 86.3 |
| Rsa1.0_00922.1.g21360.t1 | gb AAD19784.1  putative retroelement pol polyprotein [Arabidopsis thaliana]                                                                                                                                                                                                                                                                                                                                                                                                                                                                      | 195 | 1501 | 2.00E-77  | 769.7 | 69.2 | 83.1 | putative retroelement pol polyprotein       | gbpln | Arabidopsis thaliana | AT4G23160.1   Symbols: CRK8   cysteine-rich RLK (RECEPTOR-like protein kinase) 8   chr4:12129485-12134086 FORWARD LENGTH=1262 | 195 | 1262 | 9.00E-44  | 647.2 | 43.1 | 64.1 |
| Rsa1.0_00922.1.g21361.t1 | #                                                                                                                                                                                                                                                                                                                                                                                                                                                                                                                                                | #   | #    | #         | #     | #    | #    | -                                           | ----  | ----                 | #                                                                                                                             | #   | #    | #         | #     | #    | #    |
| Rsa1.0_00922.1.g21362.t1 | gb EOA19172.1  hypothetical protein CARUB_v10007851mg [Capsella rubella]                                                                                                                                                                                                                                                                                                                                                                                                                                                                         | 931 | 955  | 0         | 102.6 | 87.0 | 91.9 | hypothetical protein CARUB_v10007851mg      | gbpln | Capsella rubella     | AT5G35980.1   Symbols: YAK1   yeast YAK1-related gene 1   chr5:14128551-14135984 FORWARD LENGTH=956                           | 931 | 956  | 0         | 102.7 | 86.3 | 91.6 |
| Rsa1.0_00923.1.g21363.t1 | #                                                                                                                                                                                                                                                                                                                                                                                                                                                                                                                                                | #   | #    | #         | #     | #    | #    | -                                           | ----  | ----                 | #                                                                                                                             | #   | #    | #         | #     | #    | #    |
| Rsa1.0_00923.1.g21364.t1 | gb EOA36548.1  hypothetical protein CARUB_v10011649mg [Capsella rubella]                                                                                                                                                                                                                                                                                                                                                                                                                                                                         | 199 | 261  | 1.00E-26  | 131.2 | 33.7 | 51.3 | hypothetical protein CARUB_v10011649mg      | gbpln | Capsella rubella     | AT2G06845.1   Symbols:   Beta-galactosidase related protein   chr2:2754666-2756008 FORWARD LENGTH=315                         | 199 | 315  | 3.00E-28  | 158.3 | 34.2 | 51.8 |
| Rsa1.0_00923.1.g21365.t1 | ref[XP_002865614.1] hypothetical protein ARALYDRAFT_494871 [Arabidopsis lyrata subsp. lyrata] gi 297311449 gb EFH41873.1                                                                                                                                                                                                                                                                                                                                                                                                                         | 149 | 156  | 1.00E-72  | 104.7 | 90.6 | 94.6 | hypothetical protein ARALYDRAFT_494871      | gbpln | Arabidopsis lyrata   | AT5G48170.1   Symbols: SLY2   F-box family protein   chr5:19532729-19533202 REVERSE LENGTH=157                                | 149 | 157  | 5.00E-74  | 105.4 | 89.3 | 94.0 |
| Rsa1.0_00923.1.g21366.t1 | #                                                                                                                                                                                                                                                                                                                                                                                                                                                                                                                                                | #   | #    | #         | #     | #    | #    | -                                           | ----  | ----                 | #                                                                                                                             | #   | #    | #         | #     | #    | #    |
| Rsa1.0_00923.1.g21367.t1 | ref[XP_002873217.1] signal recognition particle binding protein [Arabidopsis lyrata subsp. lyrata] gi 297319054 gb EFH49476.1                                                                                                                                                                                                                                                                                                                                                                                                                    | 222 | 260  | 1.00E-106 | 117.1 | 91.9 | 96.4 | signal recognition particle binding protein | gbpln | Arabidopsis lyrata   | AT5G05670.1   Symbols:   signal recognition particle binding   chr5:1695916-1697534 REVERSE LENGTH=260                        | 222 | 260  | 1.00E-107 | 117.1 | 89.6 | 95.9 |
| Rsa1.0_00923.1.g21368.t1 | dbj BAJ34265.1  unnamed protein product [Thellungiella halophila]                                                                                                                                                                                                                                                                                                                                                                                                                                                                                | 324 | 324  | 1.00E-171 | 100.0 | 89.8 | 95.4 | unnamed protein product                     | ----  | ----                 | AT5G48180.1   Symbols: NSP5   nitrile specifier protein 5   chr5:19541283-19542358 REVERSE LENGTH=326                         | 324 | 326  | 1.00E-163 | 100.6 | 84.9 | 92.9 |
| Rsa1.0_00923.1.g21369.t1 | ref[NP_568693.1] uncharacterized protein [Arabidopsis thaliana] gi 8777411 dbj BAA97001.1  unnamed protein product [Arabidopsis thaliana] gi 21536545 gb AAM60877.1  unknown [Arabidopsis thaliana] gi 332008251 gb AED95634.1  uncharacterized protein AT5G48210 [Arabidopsis thaliana]                                                                                                                                                                                                                                                         | 101 | 103  | 2.00E-27  | 102.0 | 61.4 | 76.2 | uncharacterized protein                     | gbpln | Arabidopsis thaliana | AT5G48210.1   Symbols:   Protein of unknown function (DUF1278)   chr5:19548459-19548770 FORWARD LENGTH=103                    | 101 | 103  | 3.00E-30  | 102.0 | 61.4 | 76.2 |
| Rsa1.0_00923.1.g21370.t1 | ref[XP_002863880.1] hypothetical protein ARALYDRAFT_494873 [Arabidopsis lyrata subsp. lyrata] gi 297309715 gb EFH40139.1                                                                                                                                                                                                                                                                                                                                                                                                                         | 317 | 375  | 1.00E-171 | 118.3 | 92.4 | 97.2 | hypothetical protein ARALYDRAFT_494873      | gbpln | Arabidopsis lyrata   | AT5G48220.1   Symbols:   Aldolase-type TIM barrel family protein   chr5:19549930-19552046 FORWARD LENGTH=379                  | 317 | 379  | 1.00E-173 | 119.6 | 92.1 | 97.2 |
| Rsa1.0_00923.1.g21371.t1 | ref[NP_568694.2] acetyl-CoA acetyltransferase, cytosolic 1 [Arabidopsis thaliana] gi 73919863 sp Q8S4Y1.1 THIC1_ARATH RecName: Full=Acetyl-CoA acetyltransferase, cytosolic 1; AltName: Full=Cytosolic acetoacetyl-CoA thiolase 1; Short=Thiolase 1; AltName: Full=Protein EMBRYO DEFECTIVE 1276 gi 19880269 gb AAM00280.1 AF364059.1 acetoacetyl-CoA thiolase [Arabidopsis thaliana] gi 222423909 dbj BAH19918.1  AT5G48230 [Arabidopsis thaliana] gi 332008255 gb AED95638.1  acetyl-CoA acetyltransferase, cytosolic 1 [Arabidopsis thaliana] | 428 | 403  | 0         | 94.2  | 90.2 | 92.3 | acetyl-CoA acetyltransferase, cytosolic 1   | gbpln | Arabidopsis thaliana | AT5G48230.2   Symbols: EMB1276, ACAT2   acetoacetyl-CoA thiolase 2   chr5:19552570-19555122 REVERSE LENGTH=403                | 428 | 403  | 0         | 94.2  | 90.2 | 92.3 |

|                          |                                                                                                                                                                                                                                                                                                                                                                                                                                                                            |     |     |           |       |      |      |                                                 |       |                      |                                                                                                                                                                                                                                                                                                                                                                                                                                                                                                   |     |     |           |       |      |      |
|--------------------------|----------------------------------------------------------------------------------------------------------------------------------------------------------------------------------------------------------------------------------------------------------------------------------------------------------------------------------------------------------------------------------------------------------------------------------------------------------------------------|-----|-----|-----------|-------|------|------|-------------------------------------------------|-------|----------------------|---------------------------------------------------------------------------------------------------------------------------------------------------------------------------------------------------------------------------------------------------------------------------------------------------------------------------------------------------------------------------------------------------------------------------------------------------------------------------------------------------|-----|-----|-----------|-------|------|------|
| Rsa1.0_00923.1.g21372.t1 | refNP_199635.2  uncharacterized protein [Arabidopsis thaliana] gi 332008257 gb AED95640.1  uncharacterized protein AT5G48240 [Arabidopsis thaliana]                                                                                                                                                                                                                                                                                                                        | 311 | 309 | 1.00E-121 | 99.4  | 77.8 | 87.8 | uncharacterized protein                         | gbpln | Arabidopsis thaliana | AT5G48240.1   Symbols:   unknown protein; FUNCTIONS IN: molecular_function unknown; INVOLVED IN: biological_process unknown; LOCATED IN: nucleolus; EXPRESSED IN: cultured cell; CONTAINS InterPro DOMAIN/s: Protein of unknown function DUF1665 (InterPro:IPRO12459); Has 402 Blast hits to 382 proteins in 162 species: Archae - 0; Bacteria - 4; Metazoa - 139; Fungi - 111; Plants - 54; Viruses - 1; Other Eukaryotes - 93 (source: NCBI BLINK).   chr5:19559301-19561153 FORWARD LENGTH=309 | 311 | 309 | 1.00E-123 | 99.4  | 77.8 | 87.8 |
| Rsa1.0_00923.1.g21373.t1 | refNP_199636.1  zinc finger protein CONSTANS-LIKE 10 [Arabidopsis thaliana] gi 17433067 sp Q9LUA9.1 COL10_ARAT H RecName: Full=Zinc finger protein CONSTANS-LIKE 10 gi 8777415 dbj BAA97005.1  unnamed protein product [Arabidopsis thaliana] gi 14532666 gb AAK64061.1  unknown protein [Arabidopsis thaliana] gi 23296810 gb AAAN13176.1  unknown protein [Arabidopsis thaliana] gi 332008260 gb AED95643.1  zinc finger protein CONSTANS-LIKE 10 [Arabidopsis thaliana] | 401 | 373 | 1.00E-161 | 93.0  | 73.6 | 81.5 | zinc finger protein CONSTANS-LIKE 10            | gbpln | Arabidopsis thaliana | AT5G48250.1   Symbols:   B-box type zinc finger protein with CCT domain   chr5:19561719-19563113 REVERSE LENGTH=373                                                                                                                                                                                                                                                                                                                                                                               | 401 | 373 | 1.00E-164 | 93.0  | 73.6 | 81.5 |
| Rsa1.0_00923.1.g21374.t1 | refXP_002865625.1  hypothetical protein ARALYDRAFT_917720 [Arabidopsis lyrata subsp. lyrata] gi 297311460 gb EFH41884.1  hypothetical protein ARALYDRAFT_917720 [Arabidopsis lyrata subsp. lyrata]                                                                                                                                                                                                                                                                         | 324 | 322 | 1.00E-173 | 99.4  | 90.1 | 94.4 | hypothetical protein ARALYDRAFT_917720          | gbpln | Arabidopsis lyrata   | AT5G48270.1   Symbols:   Plant protein of unknown function (DUF868)   chr5:19564744-19565712 REVERSE LENGTH=322                                                                                                                                                                                                                                                                                                                                                                                   | 324 | 322 | 1.00E-174 | 99.4  | 89.2 | 94.8 |
| Rsa1.0_00923.1.g21375.t1 | dbj BAA98186.1  ATFP4-like [Arabidopsis thaliana]                                                                                                                                                                                                                                                                                                                                                                                                                          | 211 | 157 | 3.00E-39  | 74.4  | 54.5 | 59.2 | ATFP4-like                                      | gbpln | Arabidopsis thaliana | AT5G48290.1   Symbols:   Heavy metal transport/detoxification superfamily protein   chr5:19568980-19569658 FORWARD LENGTH=181                                                                                                                                                                                                                                                                                                                                                                     | 211 | 181 | 4.00E-41  | 85.8  | 57.8 | 62.6 |
| Rsa1.0_00923.1.g21376.t1 | gb AAM95647.1  polygalacturonase inhibitory protein [Brassica napus] gi 160693704 gb ABX46550.1  polygalacturonase inhibitor protein 3 [Brassica napus]                                                                                                                                                                                                                                                                                                                    | 302 | 331 | 1.00E-109 | 109.6 | 65.9 | 75.2 | polygalacturonase inhibitory protein            | gbpln | Brassica napus       | AT5G06860.1   Symbols: PGIP1, ATPGIP1   polygalacturonase inhibiting protein 1   chr5:2132373-2133434 FORWARD LENGTH=330                                                                                                                                                                                                                                                                                                                                                                          | 302 | 330 | 4.00E-92  | 109.3 | 55.6 | 65.9 |
| Rsa1.0_00923.1.g21377.t1 | dbj BAJ33704.1  unnamed protein product [Thellungiella halophila]                                                                                                                                                                                                                                                                                                                                                                                                          | 516 | 523 | 0         | 101.4 | 96.7 | 97.3 | unnamed protein product                         | ----  | ----                 | AT5G48300.1   Symbols: ADG1, APS1   ADP glucose pyrophosphorylase 1   chr5:19570326-19572557 FORWARD LENGTH=520                                                                                                                                                                                                                                                                                                                                                                                   | 516 | 520 | 0         | 100.8 | 92.6 | 96.5 |
| Rsa1.0_00923.1.g21378.t1 | gb EOA20463.1  hypothetical protein CARUB_v1000077mg, partial [Capsella rubella]                                                                                                                                                                                                                                                                                                                                                                                           | 385 | 503 | 2.00E-97  | 130.6 | 59.2 | 73.5 | hypothetical protein CARUB_v1000077mg, partial  | gbpln | Capsella rubella     | AT5G03780.1   Symbols: TRFL10   TRF-like 10   chr5:999266-1000947 REVERSE LENGTH=420                                                                                                                                                                                                                                                                                                                                                                                                              | 385 | 420 | 7.00E-80  | 109.1 | 50.9 | 63.9 |
| Rsa1.0_00923.1.g21379.t1 | gb EOA30157.1  hypothetical protein CARUB_v10013272mg [Capsella rubella]                                                                                                                                                                                                                                                                                                                                                                                                   | 330 | 600 | 8.00E-93  | 181.8 | 67.9 | 78.2 | hypothetical protein CARUB_v10013272mg          | gbpln | Capsella rubella     | AT3G09360.1   Symbols:   Cyclin/Brf1-like TBP-binding protein   chr3:2873796-2878432 FORWARD LENGTH=604                                                                                                                                                                                                                                                                                                                                                                                           | 330 | 604 | 2.00E-93  | 183.0 | 67.9 | 78.5 |
| Rsa1.0_00923.1.g21380.t1 | gb EOA30255.1  hypothetical protein CARUB_v10013377mg, partial [Capsella rubella]                                                                                                                                                                                                                                                                                                                                                                                          | 462 | 553 | 1.00E-153 | 119.7 | 66.0 | 75.3 | hypothetical protein CARUB_v10013377mg, partial | gbpln | Capsella rubella     | AT3G09370.2   Symbols: MYB3R-3   myb domain protein 3r-3   chr3:2879534-2882128 FORWARD LENGTH=510                                                                                                                                                                                                                                                                                                                                                                                                | 462 | 510 | 1.00E-153 | 110.4 | 66.7 | 77.7 |
| Rsa1.0_00923.1.g21381.t1 | emb CAO82943.1  putative pre-mRNA-splicing factor cwc-22 [Oryza sativa Japonica Group]                                                                                                                                                                                                                                                                                                                                                                                     | 250 | 615 | 4.00E-85  | 246.0 | 63.2 | 77.2 | putative pre-mRNA-splicing factor cwc-22        | gbpln | Oryza sativa         | AT1G80930.1   Symbols:   MIF4G domain-containing protein / MA3 domain-containing protein   chr1:30405774-30409499 REVERSE LENGTH=900                                                                                                                                                                                                                                                                                                                                                              | 250 | 900 | 1.00E-86  | 360.0 | 61.6 | 78.8 |
| Rsa1.0_00923.1.g21382.t1 | dbj BAA11391.1  metallothionein-like protein [Brassica rapa]                                                                                                                                                                                                                                                                                                                                                                                                               | 75  | 80  | 2.00E-19  | 106.7 | 68.0 | 70.7 | metallothionein-like protein                    | gbpln | Brassica rapa        | AT3G09390.1   Symbols: MT2A, ATMT-K, ATMT-1   metallothionein 2A   chr3:2889737-2890188 REVERSE LENGTH=81                                                                                                                                                                                                                                                                                                                                                                                         | 75  | 81  | 7.00E-22  | 108.0 | 69.3 | 70.7 |

|                          |                                                                                                                                                                                                                                                                                                                                                                                                                                                                                                                                                                                                                                                                                                                                                                                                                                                                                                                                                                                                                                                                                                                                                                                                                                                                                                                                                                                                                                                                                                                                                                                                                                                                                |      |      |          |       |      |      |                                                 |       |                      |                                                                                                                                                                                                                                                                                                                                                                                                                                                                                         |      |      |          |       |      |      |
|--------------------------|--------------------------------------------------------------------------------------------------------------------------------------------------------------------------------------------------------------------------------------------------------------------------------------------------------------------------------------------------------------------------------------------------------------------------------------------------------------------------------------------------------------------------------------------------------------------------------------------------------------------------------------------------------------------------------------------------------------------------------------------------------------------------------------------------------------------------------------------------------------------------------------------------------------------------------------------------------------------------------------------------------------------------------------------------------------------------------------------------------------------------------------------------------------------------------------------------------------------------------------------------------------------------------------------------------------------------------------------------------------------------------------------------------------------------------------------------------------------------------------------------------------------------------------------------------------------------------------------------------------------------------------------------------------------------------|------|------|----------|-------|------|------|-------------------------------------------------|-------|----------------------|-----------------------------------------------------------------------------------------------------------------------------------------------------------------------------------------------------------------------------------------------------------------------------------------------------------------------------------------------------------------------------------------------------------------------------------------------------------------------------------------|------|------|----------|-------|------|------|
| Rsa1.0_00924.1.g21383.t1 | <p>ref NP_194222.1  protein transport protein sec61 subunit gamma-1 [Arabidopsis thaliana] gi 18423153 ref NP_568728.1  protein transport protein sec61 subunit gamma-1 [Arabidopsis thaliana] gi 297795847 ref XP_002865808.1  hypothetical protein ARALYDRAFT_495113 [Arabidopsis lyrata subsp. lyrata] gi 297799504 ref XP_002867636.1  hypothetical protein ARALYDRAFT_492346 [Arabidopsis lyrata subsp. lyrata] gi 408407782 sp PODI74.1 S61G1.ARAT H RecName: Full=Protein transport protein Sec61 subunit gamma-1 gi 408407783 sp PODI75.1 S61G2.ARAT H RecName: Full=Protein transport protein Sec61 subunit gamma-2 gi 13877813 gb AAK43984.1 AF370169.1 putative protein translocation complex Sec61 gamma chain [Arabidopsis thaliana] gi 4455235 emb CAB36734.1  PROTEIN TRANSPORT PROTEIN SEC61 GAMMA SUBUNIT-like [Arabidopsis thaliana] gi 7269342 emb CAB79401.1  PROTEIN TRANSPORT PROTEIN SEC61 GAMMA SUBUNIT-like [Arabidopsis thaliana] gi 9758755 dbj BAB09131.1  protein translocation complex Sec61 gamma chain [Arabidopsis thaliana] -11452974061AA11522711... ref NP_199659.1  nuclear transcription factor Y subunit C-6 [Arabidopsis thaliana] gi 75262449 sp Q9FGP7.1 NFYC6.ARAT H RecName: Full=Nuclear transcription factor Y subunit C-6; Short=AtNF-YC-6 gi 9758757 dbj BAB09133.1  transcription factor Hsp5a-like [Arabidopsis thaliana] gi 48310164 gb AAT41766.1  At5g50480 [Arabidopsis thaliana] gi 50198859 gb AAT70457.1  At5g50480 [Arabidopsis thaliana] gi 225879106 dbj BAH30623.1  hypothetical protein [Arabidopsis thaliana] gi 332008567 gb AED95950.1  nuclear transcription factor Y subunit C-6 [Arabidopsis thaliana]</p> | 69   | 69   | 2.00E-29 | 100.0 | 97.1 | 98.6 | protein transport protein sec61 subunit gamma-1 | gbpln | Arabidopsis lyrata   | AT5G50460.1   Symbols:   secE/sec61-gamma protein transport protein   chr5:20552168-20552509 REVERSE LENGTH=69                                                                                                                                                                                                                                                                                                                                                                          | 69   | 69   | 3.00E-32 | 100.0 | 97.1 | 98.6 |
| Rsa1.0_00924.1.g21384.t1 | <p>ref NP_199659.1  nuclear transcription factor Y subunit C-6 [Arabidopsis thaliana] gi 75262449 sp Q9FGP7.1 NFYC6.ARAT H RecName: Full=Nuclear transcription factor Y subunit C-6; Short=AtNF-YC-6 gi 9758757 dbj BAB09133.1  transcription factor Hsp5a-like [Arabidopsis thaliana] gi 48310164 gb AAT41766.1  At5g50480 [Arabidopsis thaliana] gi 50198859 gb AAT70457.1  At5g50480 [Arabidopsis thaliana] gi 225879106 dbj BAH30623.1  hypothetical protein [Arabidopsis thaliana] gi 332008567 gb AED95950.1  nuclear transcription factor Y subunit C-6 [Arabidopsis thaliana]</p>                                                                                                                                                                                                                                                                                                                                                                                                                                                                                                                                                                                                                                                                                                                                                                                                                                                                                                                                                                                                                                                                                      | 155  | 202  | 9.00E-22 | 130.3 | 43.2 | 59.4 | nuclear transcription factor Y subunit C-6      | gbpln | Arabidopsis thaliana | AT5G50480.1   Symbols: NF-YC6   nuclear factor Y, subunit C6   chr5:20557856-20558464 REVERSE LENGTH=202                                                                                                                                                                                                                                                                                                                                                                                | 155  | 202  | 3.00E-24 | 130.3 | 43.2 | 59.4 |
| Rsa1.0_00924.1.g21385.t1 | <p>gb EOA12730.1  hypothetical protein CARUB_v10028175mg [Capsella rubella]</p>                                                                                                                                                                                                                                                                                                                                                                                                                                                                                                                                                                                                                                                                                                                                                                                                                                                                                                                                                                                                                                                                                                                                                                                                                                                                                                                                                                                                                                                                                                                                                                                                | 264  | 709  | 1.00E-23 | 268.6 | 25.0 | 34.5 | hypothetical protein CARUB_v10028175mg          | gbpln | Capsella rubella     | AT5G50115.1   Symbols:   CONTAINS InterPro DOMAIN/s: Molecular chaperone, heat shock protein, Hsp40, DnaJ (InterPro:IPR015609); BEST Arabidopsis thaliana protein match is: Molecular chaperone Hsp40/DnaJ family protein (TAIR:AT5G50510.1); Has 30201 Blast hits to 17322 proteins in 780 species: Archae - 12; Bacteria - 1396; Metazoa - 17338; Fungi - 3422; Plants - 5037; Viruses - 0; Other Eukaryotes - 2996 (source: NCBI BLINK).   chr5:20379489-20381036 FORWARD LENGTH=485 | 264  | 485  | 4.00E-20 | 183.7 | 19.7 | 26.9 |
| Rsa1.0_00924.1.g21386.t1 | <p>gb AAD32898.1  putative retroelement pol polyprotein [Arabidopsis thaliana]</p>                                                                                                                                                                                                                                                                                                                                                                                                                                                                                                                                                                                                                                                                                                                                                                                                                                                                                                                                                                                                                                                                                                                                                                                                                                                                                                                                                                                                                                                                                                                                                                                             | 1277 | 1307 | 0        | 102.3 | 58.6 | 73.1 | putative retroelement pol polyprotein           | gbpln | Arabidopsis thaliana | AT4G23160.1   Symbols: CRK8   cysteine-rich RLK (RECEPTOR-like protein kinase) 8   chr4:12129485-12134086 FORWARD LENGTH=1262                                                                                                                                                                                                                                                                                                                                                           | 1277 | 1262 | 2.00E-81 | 98.8  | 14.0 | 21.6 |

|                          |                                                                                                                                                                                                                                                                                                                                                                                                                                                                                                                                                                                                                                                                                                                                                                                                                                                                                                                                                                                                                                                                                                                                                                                                                                                                                                                                                                        |     |      |           |       |      |      |                                        |       |                      |                                                                                                                                      |     |      |           |       |      |      |
|--------------------------|------------------------------------------------------------------------------------------------------------------------------------------------------------------------------------------------------------------------------------------------------------------------------------------------------------------------------------------------------------------------------------------------------------------------------------------------------------------------------------------------------------------------------------------------------------------------------------------------------------------------------------------------------------------------------------------------------------------------------------------------------------------------------------------------------------------------------------------------------------------------------------------------------------------------------------------------------------------------------------------------------------------------------------------------------------------------------------------------------------------------------------------------------------------------------------------------------------------------------------------------------------------------------------------------------------------------------------------------------------------------|-----|------|-----------|-------|------|------|----------------------------------------|-------|----------------------|--------------------------------------------------------------------------------------------------------------------------------------|-----|------|-----------|-------|------|------|
| Rsa1.0_00924.1.g21387.t2 | ref[NP_568730.1] major facilitator protein [Arabidopsis thaliana] gi 18423171 ref[NP_568735.1] major facilitator protein [Arabidopsis thaliana] gi 8777386 dbj BAA96976.1  nodulin-like protein [Arabidopsis thaliana] gi 9758761 dbj BAB09137.1  nodulin-like protein [Arabidopsis thaliana] gi 14532600 gb AAK64028.1  putative nodulin protein [Arabidopsis thaliana] gi 23297529 gb AANI2888.1  putative nodulin protein [Arabidopsis thaliana] gi 332008571 gb AED95954.1  major facilitator protein [Arabidopsis thaliana] gi 332008587 gb AED95970.1  major facilitator protein [Arabidopsis thaliana]                                                                                                                                                                                                                                                                                                                                                                                                                                                                                                                                                                                                                                                                                                                                                          | 566 | 540  | 0         | 95.4  | 79.0 | 82.7 | major facilitator protein              | gbpln | Arabidopsis thaliana | AT5G50520.1   Symbols: Major facilitator superfamily protein   chr5:20569880-20571587 REVERSE LENGTH=540                             | 566 | 540  | 0         | 95.4  | 79.0 | 82.7 |
| Rsa1.0_00924.1.g21388.t1 | #                                                                                                                                                                                                                                                                                                                                                                                                                                                                                                                                                                                                                                                                                                                                                                                                                                                                                                                                                                                                                                                                                                                                                                                                                                                                                                                                                                      | #   | #    | #         | #     | #    | -    | ----                                   | ----  | #                    | #                                                                                                                                    | #   | #    | #         | #     | #    |      |
| Rsa1.0_00924.1.g21389.t1 | gb EOA22672.1  hypothetical protein CARUB_v10003375mg [Capsella rubella]                                                                                                                                                                                                                                                                                                                                                                                                                                                                                                                                                                                                                                                                                                                                                                                                                                                                                                                                                                                                                                                                                                                                                                                                                                                                                               | 401 | 738  | 1.00E-163 | 184.0 | 68.1 | 81.3 | hypothetical protein CARUB_v10003375mg | gbpln | Capsella rubella     | AT4G02570.4   Symbols: CUL1   cullin 1   chr4:1129315-1133435 FORWARD LENGTH=738                                                     | 401 | 738  | 1.00E-163 | 184.0 | 67.3 | 80.8 |
| Rsa1.0_00924.1.g21390.t1 | ref[XP_002865817.1] CBS domain-containing protein [Arabidopsis lyrata subsp. lyrata] gi 297311652 gb EFH42076.1  CBS domain-containing protein [Arabidopsis lyrata subsp. lyrata]                                                                                                                                                                                                                                                                                                                                                                                                                                                                                                                                                                                                                                                                                                                                                                                                                                                                                                                                                                                                                                                                                                                                                                                      | 545 | 548  | 0         | 100.6 | 89.9 | 93.9 | CBS domain-containing protein          | gbpln | Arabidopsis lyrata   | AT5G50530.1   Symbols: CBS / octicosapeptide/Phox/Bemp1 (PB1) domains-containing protein   chr5:20571876-20574922 REVERSE LENGTH=548 | 545 | 548  | 0         | 100.6 | 89.7 | 93.9 |
| Rsa1.0_00924.1.g21391.t1 | ref[XP_002887537.1] hypothetical protein ARALYDRAFT_895304 [Arabidopsis lyrata subsp. lyrata] gi 297333378 gb EFH63796.1  hypothetical protein ARALYDRAFT_895304 [Arabidopsis lyrata subsp. lyrata]                                                                                                                                                                                                                                                                                                                                                                                                                                                                                                                                                                                                                                                                                                                                                                                                                                                                                                                                                                                                                                                                                                                                                                    | 758 | 1103 | 0         | 145.5 | 70.2 | 78.9 | hypothetical protein ARALYDRAFT_895304 | gbpln | Arabidopsis lyrata   | AT1G74360.1   Symbols:   Leucine-rich repeat protein kinase family protein   chr1:27954299-27957911 FORWARD LENGTH=1106              | 758 | 1106 | 0         | 145.9 | 69.7 | 78.5 |
| Rsa1.0_00924.1.g21392.t1 | #                                                                                                                                                                                                                                                                                                                                                                                                                                                                                                                                                                                                                                                                                                                                                                                                                                                                                                                                                                                                                                                                                                                                                                                                                                                                                                                                                                      | #   | #    | #         | #     | #    | -    | ----                                   | ----  | #                    | #                                                                                                                                    | #   | #    | #         | #     | #    |      |
| Rsa1.0_00925.1.g21393.t1 | ref[XP_002882700.1] hypothetical protein ARALYDRAFT_897277 [Arabidopsis lyrata subsp. lyrata] gi 297328540 gb EFH58959.1  hypothetical protein ARALYDRAFT_897277 [Arabidopsis lyrata subsp. lyrata] ref[NP_181684.1] phosphoglycerate kinase 1 [Arabidopsis thaliana] gi 75273138 sp Q9LD57.1 PGKH1_ARAT H RecName: Full=Phosphoglycerate kinase 1, chloroplastic; Flags: Precursor gi 7839389 gb AAF70258.1 AF247558.1 phosphoglycerate kinase [Arabidopsis thaliana] gi 13430644 gb AAK25944.1 AF360234.1 putative phosphoglycerate kinase [Arabidopsis thaliana] gi 16226508 gb AAL16186.1 AF428418.1 AT3g12780/MBK21.14 [Arabidopsis thaliana] gi 11994421 dbj BAB02423.1  phosphoglycerate kinase [Arabidopsis thaliana] gi 15010644 gb AAK73981.1  AT3g12780/MBK21.14 [Arabidopsis thaliana] gi 16648943 gb AAL24323.1  phosphoglycerate kinase [Arabidopsis thaliana] gi 17065610 gb AAL33785.1  putative phosphoglycerate kinase [Arabidopsis thaliana] gi 20334796 gb AAM16259.1  AT3g12780/MBK21.14 [Arabidopsis thaliana] gi 21387107 gb AAM47957.1  phosphoglycerate kinase [Arabidopsis thaliana] gi 22022520 gb AAM83218.1  AT3g12780/MBK21.14 [Arabidopsis thaliana] gi 110742702 dbj BAE99262.1  phosphoglycerate kinase like protein [Arabidopsis thaliana] gi 222423303 dbj BAH19627.1  AT3G12780 [Arabidopsis thaliana] - 2229641796 dbj BAE75946.1 | 223 | 260  | 9.00E-26  | 116.6 | 38.1 | 59.6 | hypothetical protein ARALYDRAFT_897277 | gbpln | Arabidopsis lyrata   | AT1G50920.1   Symbols:   Nucleolar GTP-binding protein   chr1:18870555-18872570 FORWARD LENGTH=671                                   | 223 | 671  | 7.00E-19  | 300.9 | 24.7 | 39.5 |
| Rsa1.0_00925.1.g21394.t1 | AT3g12780/MBK21.14 [Arabidopsis thaliana] gi 110742702 dbj BAE99262.1  phosphoglycerate kinase like protein [Arabidopsis thaliana] gi 222423303 dbj BAH19627.1  AT3G12780 [Arabidopsis thaliana] - 2229641796 dbj BAE75946.1                                                                                                                                                                                                                                                                                                                                                                                                                                                                                                                                                                                                                                                                                                                                                                                                                                                                                                                                                                                                                                                                                                                                           | 503 | 481  | 0         | 95.6  | 88.7 | 90.9 | phosphoglycerate kinase 1              | gbpln | Arabidopsis thaliana | AT3G12780.1   Symbols: PGK1   phosphoglycerate kinase 1   chr3:4061127-4063140 REVERSE LENGTH=481                                    | 503 | 481  | 0         | 95.6  | 88.7 | 90.9 |

|                          |                                                                                                                                                                                                                                                                                                                                                                                                                                                                                                                                                                        |     |     |           |       |      |      |                                           |       |                      |                                                                                                                                                                                                                                                                                                                                                                                                                                                                                                                                          |     |     |           |       |      |      |
|--------------------------|------------------------------------------------------------------------------------------------------------------------------------------------------------------------------------------------------------------------------------------------------------------------------------------------------------------------------------------------------------------------------------------------------------------------------------------------------------------------------------------------------------------------------------------------------------------------|-----|-----|-----------|-------|------|------|-------------------------------------------|-------|----------------------|------------------------------------------------------------------------------------------------------------------------------------------------------------------------------------------------------------------------------------------------------------------------------------------------------------------------------------------------------------------------------------------------------------------------------------------------------------------------------------------------------------------------------------------|-----|-----|-----------|-------|------|------|
| Rsa1.0_00925.1.g21395.t1 | gb AAK93603.1  unknown protein [Arabidopsis thaliana]                                                                                                                                                                                                                                                                                                                                                                                                                                                                                                                  | 141 | 250 | 1.00E-60  | 177.3 | 85.8 | 87.2 | unknown protein                           | gbpln | Arabidopsis thaliana | AT3G12760.1   Symbols:   CONTAINS InterPro DOMAIN/s: Defective-in-cullin neddylation protein (InterPro:IPR014764), Protein of unknown function DUF298 (InterPro:IPR005176), UBA-like (InterPro:IPR009060); BEST Arabidopsis thaliana protein match is: Domain of unknown function (DUF298) (TAIR:AT1G15860.2); Has 857 Blast hits to 855 proteins in 202 species: Archae - 0; Bacteria - 0; Metazoa - 482; Fungi - 154; Plants - 139; Viruses - 0; Other Eukaryotes - 82 (source: NCBI BLINK).   chr3:4054963-4056826 FORWARD LENGTH=250 | 141 | 250 | 4.00E-63  | 177.3 | 85.8 | 87.2 |
| Rsa1.0_00925.1.g21396.t1 | ref NP_187879.2  myb family transcription factor [Arabidopsis thaliana] gi 17979533 gb AAL50101.1  AT3g12730/MBK21.9 [Arabidopsis thaliana] gi 23505991 gb AAN28855.1  At3g12730/MBK21.9 [Arabidopsis thaliana] gi 332641719 gb AEE75240.1  myb family transcription factor [Arabidopsis thaliana]                                                                                                                                                                                                                                                                     | 234 | 235 | 1.00E-111 | 100.4 | 84.6 | 88.5 | myb family transcription factor           | gbpln | Arabidopsis thaliana | AT3G12730.1   Symbols:   Homeodomain-like superfamily protein   chr3:4047234-4048356 REVERSE LENGTH=235                                                                                                                                                                                                                                                                                                                                                                                                                                  | 234 | 235 | 1.00E-113 | 100.4 | 84.6 | 88.5 |
| Rsa1.0_00925.1.g21397.t1 | ref XP_002884922.1  hypothetical protein ARALYDRAFT_897482 [Arabidopsis lyrata subsp. lyrata] gi 297330762 gb EFH61181.1  hypothetical protein ARALYDRAFT_897482 [Arabidopsis lyrata subsp. lyrata]                                                                                                                                                                                                                                                                                                                                                                    | 294 | 294 | 1.00E-139 | 100.0 | 84.4 | 91.8 | hypothetical protein ARALYDRAFT_897482    | gbpln | Arabidopsis lyrata   | AT3G12720.1   Symbols: ATY53, ATMYB67, MYB67   myb domain protein 67   chr3:4043407-4044522 REVERSE LENGTH=307                                                                                                                                                                                                                                                                                                                                                                                                                           | 294 | 307 | 1.00E-134 | 104.4 | 84.7 | 92.2 |
| Rsa1.0_00925.1.g21398.t1 | ref XP_002884921.1  methyladenine glycosylase family protein [Arabidopsis lyrata subsp. lyrata] gi 297330761 gb EFH61180.1  methyladenine glycosylase family protein [Arabidopsis lyrata subsp. lyrata]                                                                                                                                                                                                                                                                                                                                                                | 312 | 312 | 1.00E-157 | 100.0 | 85.9 | 93.9 | methyladenine glycosylase family protein  | gbpln | Arabidopsis lyrata   | AT3G12710.1   Symbols:   DNA glycosylase superfamily protein   chr3:4040572-4041828 REVERSE LENGTH=312                                                                                                                                                                                                                                                                                                                                                                                                                                   | 312 | 312 | 1.00E-158 | 100.0 | 85.9 | 93.3 |
| Rsa1.0_00925.1.g21399.t1 | ref NP_187876.2  aspartyl protease family protein [Arabidopsis thaliana] gi 11994412 dbj BAB02414.1  chloroplast nucleoid DNA binding protein-like [Arabidopsis thaliana] gi 332641715 gb AEE75236.1  aspartyl protease family protein [Arabidopsis thaliana]                                                                                                                                                                                                                                                                                                          | 445 | 461 | 0         | 103.6 | 75.3 | 85.2 | aspartyl protease family protein          | gbpln | Arabidopsis thaliana | AT3G12700.1   Symbols:   Eukaryotic aspartyl protease family protein   chr3:4037136-4039043 FORWARD LENGTH=461                                                                                                                                                                                                                                                                                                                                                                                                                           | 445 | 461 | 0         | 103.6 | 75.3 | 85.2 |
| Rsa1.0_00925.1.g21400.t1 | gb EOA31965.1  hypothetical protein CARUB_v10015207mg [Capsella rubella]                                                                                                                                                                                                                                                                                                                                                                                                                                                                                               | 572 | 578 | 0         | 101.0 | 89.5 | 92.8 | hypothetical protein CARUB_v10015207mg    | gbpln | Capsella rubella     | AT3G12690.3   Symbols: AGC1.5   AGC kinase 1.5   chr3:4030596-4032400 REVERSE LENGTH=577                                                                                                                                                                                                                                                                                                                                                                                                                                                 | 572 | 577 | 0         | 100.9 | 89.0 | 92.3 |
| Rsa1.0_00925.1.g21401.t1 | gb EOA30178.1  hypothetical protein CARUB_v10013294mg [Capsella rubella]                                                                                                                                                                                                                                                                                                                                                                                                                                                                                               | 826 | 592 | 0         | 71.7  | 66.8 | 68.9 | hypothetical protein CARUB_v10013294mg    | gbpln | Capsella rubella     | AT3G12670.1   Symbols: emb2742   CTP synthase family protein   chr3:4020351-4024086 REVERSE LENGTH=591                                                                                                                                                                                                                                                                                                                                                                                                                                   | 826 | 591 | 0         | 71.5  | 66.6 | 69.0 |
| Rsa1.0_00925.1.g21402.t1 | ref NP_187872.1  fasciclin-like arabinogalactan protein 14 [Arabidopsis thaliana] gi 75274151 sp Q9L7W9.1 FLA14, ARAT H RecName: Full=Fasciclin-like arabinogalactan protein 14; Flags: Precursor gi 12321976 gb AAG51033.1 AC069474.32 hypothetical protein; 8734-7967 [Arabidopsis thaliana] gi 11994407 dbj BAB02409.1  unnamed protein product [Arabidopsis thaliana] gi 91806417 gb ABE65936.1  fasciclin-like arabinogalactan family protein [Arabidopsis thaliana] gi 332641708 gb AEE75229.1  fasciclin-like arabinogalactan protein 14 [Arabidopsis thaliana] | 534 | 255 | 6.00E-57  | 47.8  | 26.0 | 32.0 | fasciclin-like arabinogalactan protein 14 | gbpln | Arabidopsis thaliana | AT3G12660.1   Symbols: FLA14   FASCICLIN-like arabinogalactan protein 14 precursor   chr3:4019060-4019827 FORWARD LENGTH=255                                                                                                                                                                                                                                                                                                                                                                                                             | 534 | 255 | 1.00E-59  | 47.8  | 26.0 | 32.0 |
| Rsa1.0_00925.1.g21403.t1 | gb AAG51005.1 AC069474.4 unknown protein; 13339-10119 [Arabidopsis thaliana]                                                                                                                                                                                                                                                                                                                                                                                                                                                                                           | 678 | 674 | 0         | 99.4  | 69.8 | 78.0 | unknown protein; 13339-10119              | gbpln | Arabidopsis thaliana | AT3G12640.1   Symbols:   RNA binding (RRM/RBD/RNP motifs) family protein   chr3:4014455-4017675 FORWARD LENGTH=638                                                                                                                                                                                                                                                                                                                                                                                                                       | 678 | 638 | 0         | 94.1  | 51.8 | 56.0 |
| Rsa1.0_00925.1.g21404.t1 | gb EOA31605.1  hypothetical protein CARUB_v10014801mg [Capsella rubella]                                                                                                                                                                                                                                                                                                                                                                                                                                                                                               | 155 | 163 | 3.00E-64  | 105.2 | 85.8 | 91.0 | hypothetical protein CARUB_v10014801mg    | gbpln | Capsella rubella     | AT3G12630.1   Symbols:   A20/AN1-like zinc finger family protein   chr3:4012707-4013189 FORWARD LENGTH=160                                                                                                                                                                                                                                                                                                                                                                                                                               | 155 | 160 | 2.00E-63  | 103.2 | 83.9 | 89.7 |
| Rsa1.0_00925.1.g21405.t1 | dbj BAJ34487.1  unnamed protein product [Thellungiella halophila]                                                                                                                                                                                                                                                                                                                                                                                                                                                                                                      | 388 | 387 | 0         | 99.7  | 93.0 | 95.4 | unnamed protein product                   | ----  | ----                 | AT3G12620.2   Symbols:   Protein phosphatase 2C family protein   chr3:4009510-4010993 REVERSE LENGTH=385                                                                                                                                                                                                                                                                                                                                                                                                                                 | 388 | 385 | 0         | 99.2  | 92.3 | 94.6 |
| Rsa1.0_00926.1.g21406.t1 | #                                                                                                                                                                                                                                                                                                                                                                                                                                                                                                                                                                      | #   | #   | #         | #     | #    | -    | ----                                      | ----  | ----                 | #                                                                                                                                                                                                                                                                                                                                                                                                                                                                                                                                        | #   | #   | #         | #     | #    |      |

| Rsa1.0_00926.1.g21407.t1                                                                                                                                                                                                                                                                                                                                                                                                                                                                                                             | # | #    | #    | #         | #     | #    | #    | -                                                        | ----  | ----                 | #                                                                                                                                                                                                                                                                                                                                                                                                                            | #    | #    | #         | #     | #    |      |
|--------------------------------------------------------------------------------------------------------------------------------------------------------------------------------------------------------------------------------------------------------------------------------------------------------------------------------------------------------------------------------------------------------------------------------------------------------------------------------------------------------------------------------------|---|------|------|-----------|-------|------|------|----------------------------------------------------------|-------|----------------------|------------------------------------------------------------------------------------------------------------------------------------------------------------------------------------------------------------------------------------------------------------------------------------------------------------------------------------------------------------------------------------------------------------------------------|------|------|-----------|-------|------|------|
| ref XP_002879847.1  hypothetical protein ARALYDRAFT_321705 [Arabidopsis lyrata subsp. lyrata] gi 297325686 gb EFH56106.1  hypothetical protein ARALYDRAFT_321705 [Arabidopsis lyrata subsp. lyrata]                                                                                                                                                                                                                                                                                                                                  |   | 260  | 189  | 1.00E-34  | 72.7  | 27.3 | 37.3 | hypothetical protein ARALYDRAFT_321705                   | gbpln | Arabidopsis lyrata   | AT4G03160.1   Symbols:   BEST Arabidopsis thaliana protein match is: AP2/B3-like transcriptional factor family protein (TAIR:AT4G03170.1); Has 46 Blast hits to 46 proteins in 13 species: Archae - 0; Bacteria - 0; Metazoa - 0; Fungi - 4; Plants - 29; Viruses - 0; Other Eukaryotes - 5 (source: NCBI BLink).   chr4:1397979-1398685 FORWARD LENGTH=192                                                                  | 260  | 192  | 7.00E-35  | 73.8  | 28.5 | 36.2 |
| ref XP_002879846.1  phosphoinositide-specific phospholipase C family protein [Arabidopsis lyrata subsp. lyrata] gi 297325685 gb EFH56105.1  phosphoinositide-specific phospholipase C family protein [Arabidopsis lyrata subsp. lyrata]                                                                                                                                                                                                                                                                                              |   | 603  | 618  | 0         | 102.5 | 92.7 | 96.5 | phosphoinositide-specific phospholipase C family protein | gbpln | Arabidopsis lyrata   | AT2G40116.1   Symbols:   Phosphoinositide-specific phospholipase C family protein   chr2:16751782-16754311 FORWARD LENGTH=613                                                                                                                                                                                                                                                                                                | 603  | 613  | 0         | 101.7 | 91.9 | 96.2 |
| ref NP_567772.1  uncharacterized protein [Arabidopsis thaliana] gi 14423404 gb AAK62384.1 AF386939.1 putative protein [Arabidopsis thaliana] gi 14335172 gb AAK59866.1  AT4g27390/M4122.200 [Arabidopsis thaliana] gi 15529163 gb AAK97676.1  AT4g27390/M4122.200 [Arabidopsis thaliana] gi 16974363 gb AAL31107.1  AT4g27390/M4122.200 [Arabidopsis thaliana] gi 332659931 gb AEE85331.1  uncharacterized protein AT4G27390 [Arabidopsis thaliana]                                                                                  |   | 197  | 235  | 8.00E-13  | 119.3 | 18.8 | 19.8 | uncharacterized protein                                  | gbpln | Arabidopsis thaliana | AT4G27390.1   Symbols:   unknown protein; INVOLVED IN: biological process unknown; LOCATED IN: chloroplast; EXPRESSED IN: 22 plant structures; EXPRESSED DURING: 13 growth stages; Has 30201 Blast hits to 17322 proteins in 780 species: Archae - 12; Bacteria - 1396; Metazoa - 17338; Fungi - 3422; Plants - 5037; Viruses - 0; Other Eukaryotes - 2996 (source: NCBI BLink).   chr4:13703417-13704655 REVERSE LENGTH=235 | 197  | 235  | 3.00E-15  | 119.3 | 18.8 | 19.8 |
| gb EOA27891.1  hypothetical protein CARUB_v10024065mg [Capsella rubella]                                                                                                                                                                                                                                                                                                                                                                                                                                                             |   | 223  | 208  | 1.00E-106 | 93.3  | 85.2 | 87.9 | hypothetical protein CARUB_v10024065mg                   | gbpln | Capsella rubella     | AT2G40095.1   Symbols:   Alpha/beta hydrolase related protein   chr2:16743107-16744455 FORWARD LENGTH=209                                                                                                                                                                                                                                                                                                                    | 223  | 209  | 1.00E-107 | 93.7  | 83.0 | 87.4 |
| dbj BAA97290.1  non-LTR retroelement reverse transcriptase-like [Arabidopsis thaliana]                                                                                                                                                                                                                                                                                                                                                                                                                                               |   | 252  | 1072 | 1.00E-42  | 425.4 | 37.7 | 46.8 | non-LTR retroelement reverse transcriptase-like          | gbpln | Arabidopsis thaliana | AT1G60720.1   Symbols:   RNA-directed DNA polymerase (reverse transcriptase)-related family protein   chr1:22357072-22357941 FORWARD LENGTH=289                                                                                                                                                                                                                                                                              | 252  | 289  | 2.00E-35  | 114.7 | 32.9 | 39.3 |
| gb EOA28219.1  hypothetical protein CARUB_v10024408mg [Capsella rubella]                                                                                                                                                                                                                                                                                                                                                                                                                                                             |   | 91   | 93   | 1.00E-11  | 102.2 | 73.6 | 79.1 | hypothetical protein CARUB_v10024408mg                   | gbpln | Capsella rubella     | AT2G40085.1   Symbols:   unknown protein; Has 35333 Blast hits to 34131 proteins in 2444 species: Archae - 798; Bacteria - 22429; Metazoa - 974; Fungi - 991; Plants - 531; Viruses - 0; Other Eukaryotes - 8610 (source: NCBI BLink).   chr2:16736534-16736892 REVERSE LENGTH=93                                                                                                                                            | 91   | 93   | 4.00E-14  | 102.2 | 74.7 | 80.2 |
| ref NP_565922.1  uncharacterized protein [Arabidopsis thaliana] gi 75096964 sp O04211.1 ELF4_ARATH RecName: Full=Protein EARLY FLOWERING 4; AltName: Full=Protein ARRHYTHMIC 44 gi 2088659 gb AAB95293.1  expressed protein [Arabidopsis thaliana] gi 14334558 gb AAK59687.1  unknown protein [Arabidopsis thaliana] gi 17065630 gb AAL33809.1  unknown protein [Arabidopsis thaliana] gi 21618014 gb AM67064.1  unknown [Arabidopsis thaliana] gi 330254679 gb AEC09773.1  uncharacterized protein AT2G40080 [Arabidopsis thaliana] |   | 89   | 111  | 2.00E-31  | 124.7 | 85.4 | 89.9 | uncharacterized protein                                  | gbpln | Arabidopsis thaliana | AT2G40080.1   Symbols:   ELF4   Protein of unknown function (DUF1313)   chr2:16734545-16734880 REVERSE LENGTH=111                                                                                                                                                                                                                                                                                                            | 89   | 111  | 3.00E-34  | 124.7 | 85.4 | 89.9 |
| gb EOA26753.1  hypothetical protein CARUB_v10022840mg [Capsella rubella]                                                                                                                                                                                                                                                                                                                                                                                                                                                             |   | 613  | 607  | 0         | 99.0  | 86.3 | 90.5 | hypothetical protein CARUB_v10022840mg                   | gbpln | Capsella rubella     | AT2G40070.1   Symbols:   BEST Arabidopsis thaliana protein match is: proline-rich family protein (TAIR:AT3G09000.1); Has 35333 Blast hits to 34131 proteins in 2444 species: Archae - 798; Bacteria - 22429; Metazoa - 974; Fungi - 991; Plants - 531; Viruses - 0; Other Eukaryotes - 8610 (source: NCBI BLink).   chr2:16728378-16731160 REVERSE LENGTH=607                                                                | 613  | 607  | 0         | 99.0  | 86.1 | 90.7 |
| gb AAM65809.1  unknown [Arabidopsis thaliana]                                                                                                                                                                                                                                                                                                                                                                                                                                                                                        |   | 259  | 258  | 1.00E-109 | 99.6  | 81.5 | 88.0 | unknown                                                  | gbpln | Arabidopsis thaliana | AT2G40060.1   Symbols:   Clathrin light chain protein   chr2:16726564-16728001 FORWARD LENGTH=258                                                                                                                                                                                                                                                                                                                            | 259  | 258  | 1.00E-111 | 99.6  | 81.5 | 88.0 |
| gb EOA26451.1  hypothetical protein CARUB_v10022497mg [Capsella rubella]                                                                                                                                                                                                                                                                                                                                                                                                                                                             |   | 2074 | 1959 | 0         | 94.5  | 64.9 | 70.7 | hypothetical protein CARUB_v10022497mg                   | gbpln | Capsella rubella     | AT2G40030.1   Symbols:   NRPD1B, DRD3, ATNRPD1B, DMS5, NRPE1   nuclear RNA polymerase D1B   chr2:16715089-16723406 FORWARD LENGTH=1976                                                                                                                                                                                                                                                                                       | 2074 | 1976 | 0         | 95.3  | 64.0 | 69.7 |
| Rsa1.0_00926.1.g21418.t2                                                                                                                                                                                                                                                                                                                                                                                                                                                                                                             | # | #    | #    | #         | #     | #    | #    | -                                                        | ----  | ----                 | #                                                                                                                                                                                                                                                                                                                                                                                                                            | #    | #    | #         | #     | #    |      |

|                           |                                                                                                                                                                                                                                                                                                           |      |      |           |       |      |      |                                                  |       |                      |                                                                                                                               |      |      |           |       |      |      |
|---------------------------|-----------------------------------------------------------------------------------------------------------------------------------------------------------------------------------------------------------------------------------------------------------------------------------------------------------|------|------|-----------|-------|------|------|--------------------------------------------------|-------|----------------------|-------------------------------------------------------------------------------------------------------------------------------|------|------|-----------|-------|------|------|
| Rsa1.0_00926.1.g21419.t2  | emb[CAB39638.1] RNA-directed DNA polymerase-like protein [Arabidopsis thaliana] gi 7267666 emb[CAB78094.1] RNA-directed DNA polymerase-like protein [Arabidopsis thaliana]                                                                                                                                | 1046 | 1274 | 1.00E-119 | 121.8 | 21.7 | 29.4 | RNA-directed DNA polymerase-like protein         | gbpln | Arabidopsis thaliana | AT2G17920.1   Symbols:   nucleic acid binding:zinc ion binding   chr2:7782808-7783731 FORWARD LENGTH=307                      | 1046 | 307  | 6.00E-28  | 29.3  | 7.1  | 11.2 |
| Rsa1.0_00926.1.g21420.t1  | #                                                                                                                                                                                                                                                                                                         | #    | #    | #         | #     | #    | #    | -                                                | ----  | ----                 | #                                                                                                                             | #    | #    | #         | #     | #    | #    |
| Rsa1.0_00926.1.g21421.t2  | #                                                                                                                                                                                                                                                                                                         | #    | #    | #         | #     | #    | #    | -                                                | ----  | ----                 | #                                                                                                                             | #    | #    | #         | #     | #    | #    |
| Rsa1.0_00926.1.g21422.t1  | gb EOA26579.1  hypothetical protein CARUB.v100226838mg [Capsella rubella]                                                                                                                                                                                                                                 | 444  | 837  | 1.00E-117 | 188.5 | 52.5 | 67.6 | hypothetical protein CARUB.v100226838mg          | gbpln | Capsella rubella     | AT3G27900.1   Symbols:   Protein of unknown function (DUF1184)   chr3:10352905-10353639 REVERSE LENGTH=244                    | 444  | 244  | 2.00E-26  | 55.0  | 18.9 | 26.8 |
| Rsa1.0_00926.1.g21423.t1  | ref XP_002892834.1  predicted protein [Arabidopsis lyrata subsp. lyrata] gi 297338676 gb EFH69093.1  predicted protein [Arabidopsis lyrata subsp. lyrata]                                                                                                                                                 | 147  | 152  | 2.00E-50  | 103.4 | 65.3 | 76.9 | predicted protein                                | gbpln | Arabidopsis lyrata   | AT1G14870.1   Symbols: PCR2   PLANT CADMIUM RESISTANCE 2   chr1:5128591-5129458 REVERSE LENGTH=152                            | 147  | 152  | 9.00E-53  | 103.4 | 65.3 | 76.9 |
| Rsa1.0_00926.1.g21424.t1  | #                                                                                                                                                                                                                                                                                                         | #    | #    | #         | #     | #    | #    | -                                                | ----  | ----                 | #                                                                                                                             | #    | #    | #         | #     | #    | #    |
| Rsa1.0_00926.1.g21425.t1  | #                                                                                                                                                                                                                                                                                                         | #    | #    | #         | #     | #    | #    | -                                                | ----  | ----                 | #                                                                                                                             | #    | #    | #         | #     | #    | #    |
| Rsa1.0_00926.1.g21426.t1  | gb EOA26624.1  hypothetical protein CARUB.v100226888mg [Capsella rubella]                                                                                                                                                                                                                                 | 759  | 768  | 0         | 101.2 | 69.2 | 78.5 | hypothetical protein CARUB.v100226888mg          | gbpln | Capsella rubella     | AT2G38850.1   Symbols:   Subtilisin-like serine endopeptidase family protein   chr2:16630626-16634100 FORWARD LENGTH=775      | 759  | 775  | 0         | 102.1 | 68.9 | 78.5 |
| Rsa1.0_00926.1.g21427.t1  | dbj BAJ34276.1  unnamed protein product [Theilungiella halophila]                                                                                                                                                                                                                                         | 330  | 318  | 0         | 96.4  | 94.5 | 94.8 | unnamed protein product                          | ----  | ----                 | AT2G38840.1   Symbols: TOPP4   type one serine/threonine protein phosphatase 4   chr2:16627430-16628789 FORWARD LENGTH=321    | 330  | 321  | 1.00E-179 | 97.3  | 91.8 | 92.7 |
| Rsa1.0_00926.1.g21428.t1  | ref NP_181513.3  DA1-related protein 2 [Arabidopsis thaliana] gi 122236286 sp QOWSN2.1 DAR2_ARAT H RecName: Full=Protein DA1-related 2 gi 110735778 dbj BAE99866.1  hypothetical protein [Arabidopsis thaliana] gi 330254642 gb AEC09736.1  DA1-related protein 2 [Arabidopsis thaliana]                  | 511  | 528  | 0         | 103.3 | 89.2 | 93.5 | DA1-related protein 2                            | gbpln | Arabidopsis thaliana | AT2G39830.1   Symbols: DAR2   DA1-related protein 2   chr2:16619950-16623658 REVERSE LENGTH=528                               | 511  | 528  | 0         | 103.3 | 89.2 | 93.5 |
| Rsa1.0_00926.1.g21429.t1  | dbj BAB09923.1  copia-like retrotransposable element [Arabidopsis thaliana]                                                                                                                                                                                                                               | 1360 | 1342 | 0         | 98.7  | 61.5 | 76.5 | copia-like retrotransposable element             | gbpln | Arabidopsis thaliana | AT4G23160.1   Symbols: CRK8   cysteine-rich RLK (RECEPTOR-like protein kinase) 8   chr4:12129485-12134086 FORWARD LENGTH=1262 | 1360 | 1262 | 1.00E-89  | 92.8  | 13.4 | 20.0 |
| Rsa1.0_00926.1.g21430.t1  | ref NP_850322.1  Integral membrane Yip1 family protein [Arabidopsis thaliana] gi 19424015 gb AAL87303.1  unknown protein [Arabidopsis thaliana] gi 24030452 gb AN41379.1  unknown protein [Arabidopsis thaliana] gi 330254638 gb AEC09732.1  Integral membrane Yip1 family protein [Arabidopsis thaliana] | 123  | 275  | 7.00E-53  | 223.6 | 85.4 | 93.5 | Integral membrane Yip1 family protein            | gbpln | Arabidopsis thaliana | AT2G39805.1   Symbols:   Integral membrane Yip1 family protein   chr2:16610216-16612353 REVERSE LENGTH=275                    | 123  | 275  | 1.00E-55  | 223.6 | 85.4 | 93.5 |
| Rsa1.0_00927.1.g21431.t1  | gb AAX94977.1  retrotransposon protein, putative, unclassified [Oryza sativa Japonica Group] gi 77505040 gb ABA93337.1  retrotransposon protein, putative, unclassified [Oryza sativa Japonica Group]                                                                                                     | 351  | 428  | 1.00E-29  | 121.9 | 21.1 | 31.3 | retrotransposon protein, putative, unclassified  | gbpln | Oryza sativa         | #                                                                                                                             | #    | #    | #         | #     | #    | #    |
| Rsa1.0_00927.1.g21432.t1  | #                                                                                                                                                                                                                                                                                                         | #    | #    | #         | #     | #    | #    | -                                                | ----  | ----                 | #                                                                                                                             | #    | #    | #         | #     | #    | #    |
| Rsa1.0_00927.1.g21433.t6  | #                                                                                                                                                                                                                                                                                                         | #    | #    | #         | #     | #    | #    | -                                                | ----  | ----                 | #                                                                                                                             | #    | #    | #         | #     | #    | #    |
| Rsa1.0_00927.1.g21434.t1  | #                                                                                                                                                                                                                                                                                                         | #    | #    | #         | #     | #    | #    | -                                                | ----  | ----                 | #                                                                                                                             | #    | #    | #         | #     | #    | #    |
| Rsa1.0_00927.1.g21435.t1  | #                                                                                                                                                                                                                                                                                                         | #    | #    | #         | #     | #    | #    | -                                                | ----  | ----                 | #                                                                                                                             | #    | #    | #         | #     | #    | #    |
| Rsa1.0_00927.1.g21436.t1  | gb ABH07409.1  putative pol polyprotein [Brassica oleracea var. botrytis]                                                                                                                                                                                                                                 | 473  | 1239 | 7.00E-51  | 261.9 | 20.1 | 23.5 | putative pol polyprotein                         | gbpln | Brassica oleracea    | AT4G23160.1   Symbols: CRK8   cysteine-rich RLK (RECEPTOR-like protein kinase) 8   chr4:12129485-12134086 FORWARD LENGTH=1262 | 473  | 1262 | 8.00E-15  | 266.8 | 9.5  | 14.6 |
| Rsa1.0_00927.1.g21437.t13 | gb AAG51046.1 AC069473.8 gypsy/Ty-3 retroelement polyprotein; 69905-74404 [Arabidopsis thaliana] gi 10998138 dbj BAB03109.1  retroelement pol polyprotein [Arabidopsis thaliana]                                                                                                                          | 1037 | 1499 | 0         | 144.6 | 44.4 | 53.7 | gypsy/Ty-3 retroelement polyprotein; 69905-74404 | gbpln | Arabidopsis thaliana | ATMG00860.1   Symbols: ORF158   DNA/RNA polymerases superfamily protein   chrM:235916-236392 FORWARD LENGTH=158               | 1037 | 158  | 3.00E-15  | 15.2  | 4.6  | 6.5  |
| Rsa1.0_00927.1.g21438.t1  | dbj BAB02146.1  copia retroelement pol polyprotein-like [Arabidopsis thaliana]                                                                                                                                                                                                                            | 632  | 526  | 5.00E-76  | 83.2  | 27.4 | 36.7 | copia retroelement pol polyprotein-like          | gbpln | Arabidopsis thaliana | #                                                                                                                             | #    | #    | #         | #     | #    | #    |
| Rsa1.0_00927.1.g21439.t1  | #                                                                                                                                                                                                                                                                                                         | #    | #    | #         | #     | #    | #    | -                                                | ----  | ----                 | #                                                                                                                             | #    | #    | #         | #     | #    | #    |
| Rsa1.0_00927.1.g21440.t5  | gb AFD01292.1  auxin response factor 1 [Brassica rapa subsp. pekinensis]                                                                                                                                                                                                                                  | 659  | 665  | 0         | 100.9 | 89.7 | 92.7 | auxin response factor 1                          | gbpln | Brassica rapa        | AT1G59750.3   Symbols: ARF1   auxin response factor 1   chr1:21980414-21984193 FORWARD LENGTH=665                             | 659  | 665  | 0         | 100.9 | 88.3 | 90.9 |



|                          |                                                                                                                                                                                                                                                                                                                          |      |      |           |       |      |      |                                                     |       |                      |                                                                                                                                                                                                                                                                                                                                              |      |      |           |       |      |      |
|--------------------------|--------------------------------------------------------------------------------------------------------------------------------------------------------------------------------------------------------------------------------------------------------------------------------------------------------------------------|------|------|-----------|-------|------|------|-----------------------------------------------------|-------|----------------------|----------------------------------------------------------------------------------------------------------------------------------------------------------------------------------------------------------------------------------------------------------------------------------------------------------------------------------------------|------|------|-----------|-------|------|------|
| Rsa1.0_00927.1.g21441.t2 | gb AAC33226.1  putative non-LTR retroelement reverse transcriptase [Arabidopsis thaliana]                                                                                                                                                                                                                                | 628  | 1529 | 1.00E-122 | 243.5 | 40.8 | 59.1 | putative non-LTR retroelement reverse transcriptase | gbpln | Arabidopsis thaliana | AT3G24255.1   Symbols:   RNA-directed DNA polymerase (reverse transcriptase)-related family protein   chr3:8789471-8793208 FORWARD LENGTH=746                                                                                                                                                                                                | 628  | 746  | 3.00E-34  | 118.8 | 16.7 | 26.3 |
| Rsa1.0_00928.1.g21442.t1 | gb EOA39638.1  hypothetical protein CARUB_v10008272mg [Capsella rubella]                                                                                                                                                                                                                                                 | 867  | 880  | 0         | 101.5 | 78.5 | 85.9 | hypothetical protein CARUB_v10008272mg              | gbpln | Capsella rubella     | AT1G53470.1   Symbols: MSL4   mechanosensitive channel of small conductance-like 4   chr1:19958587-19961578 FORWARD LENGTH=881                                                                                                                                                                                                               | 867  | 881  | 0         | 101.6 | 77.5 | 85.1 |
| Rsa1.0_00928.1.g21443.t1 | ref NP_175754.2  RING/U-box domain-containing protein [Arabidopsis thaliana]   g 332194827 gb AEE32948.1  RING/U-box domain-containing protein [Arabidopsis thaliana]                                                                                                                                                    | 332  | 304  | 1.00E-152 | 91.6  | 80.7 | 84.3 | RING/U-box domain-containing protein                | gbpln | Arabidopsis thaliana | AT1G53490.1   Symbols:   RING/U-box superfamily protein   chr1:19965146-19966811 FORWARD LENGTH=304                                                                                                                                                                                                                                          | 332  | 304  | 1.00E-155 | 91.6  | 80.7 | 84.3 |
| Rsa1.0_00928.1.g21444.t1 | ref XP_002894444.1  mucilage-modified 4 [Arabidopsis lyrata subsp. lyrata]   g 297340286 gb EFH70703.1  mucilage-modified 4 [Arabidopsis lyrata subsp. lyrata]                                                                                                                                                           | 668  | 668  | 0         | 100.0 | 94.5 | 96.9 | mucilage-modified 4                                 | gbpln | Arabidopsis lyrata   | AT1G53500.1   Symbols: MUM4, RHM2, ATRHM2, ATMUM4   NAD-dependent epimerase/dehydratase family protein   chr1:19967157-19969239 REVERSE LENGTH=667                                                                                                                                                                                           | 668  | 667  | 0         | 99.9  | 94.0 | 96.7 |
| Rsa1.0_00928.1.g21445.t1 | ref NP_175756.2  mitogen-activated protein kinase 18 [Arabidopsis thaliana]   g 334302931 sp Q9C5C0.4 MPK18_ARATH RecName: Full=Mitogen-activated protein kinase 18; Short=MAP kinase 18   g 332194829 gb AEE32950.1  mitogen-activated protein kinase 18 [Arabidopsis thaliana]                                         | 595  | 615  | 0         | 103.4 | 85.2 | 90.6 | mitogen-activated protein kinase 18                 | gbpln | Arabidopsis thaliana | AT1G53510.1   Symbols: ATPK18, MPK18   mitogen-activated protein kinase 18   chr1:19970961-19974158 REVERSE LENGTH=615                                                                                                                                                                                                                       | 595  | 615  | 0         | 103.4 | 85.2 | 90.6 |
| Rsa1.0_00928.1.g21446.t1 | gb EOA38373.1  hypothetical protein CARUB_v10009906mg [Capsella rubella]                                                                                                                                                                                                                                                 | 284  | 291  | 1.00E-115 | 102.5 | 79.6 | 87.0 | hypothetical protein CARUB_v10009906mg              | gbpln | Capsella rubella     | AT1G53520.1   Symbols:   Chalcone-flavanone isomerase family protein   chr1:19976485-19977915 REVERSE LENGTH=287                                                                                                                                                                                                                             | 284  | 287  | 1.00E-114 | 101.1 | 78.2 | 84.5 |
| Rsa1.0_00928.1.g21447.t2 | gb EOA19968.1  hypothetical protein CARUB_v10000229mg [Capsella rubella]                                                                                                                                                                                                                                                 | 836  | 828  | 0         | 99.0  | 88.0 | 93.8 | hypothetical protein CARUB_v10000229mg              | gbpln | Capsella rubella     | AT1G79930.1   Symbols: HSP91   heat shock protein 91   chr1:30063781-30067067 REVERSE LENGTH=831                                                                                                                                                                                                                                             | 836  | 831  | 0         | 99.4  | 88.2 | 93.2 |
| Rsa1.0_00928.1.g21448.t1 | emb CAA22150.1  hypothetical protein [Arabidopsis thaliana]   g 7269091 emb CAB79200.1  hypothetical protein [Arabidopsis thaliana]                                                                                                                                                                                      | 327  | 457  | 1.00E-14  | 139.8 | 14.7 | 20.2 | hypothetical protein                                | gbpln | Arabidopsis thaliana | #                                                                                                                                                                                                                                                                                                                                            | #    | #    | #         | #     | #    | #    |
| Rsa1.0_00928.1.g21449.t1 | ref XP_002894447.1  hypothetical protein ARALYDRAFT_474484 [Arabidopsis lyrata subsp. lyrata]   g 297340289 gb EFH70706.1  hypothetical protein ARALYDRAFT_474484 [Arabidopsis lyrata subsp. lyrata]                                                                                                                     | 153  | 153  | 2.00E-55  | 100.0 | 75.8 | 85.0 | hypothetical protein ARALYDRAFT_474484              | gbpln | Arabidopsis lyrata   | AT1G53560.1   Symbols:   Ribosomal protein L18ae family   chr1:19984908-19985960 REVERSE LENGTH=153                                                                                                                                                                                                                                          | 153  | 153  | 4.00E-51  | 100.0 | 74.5 | 85.6 |
| Rsa1.0_00928.1.g21450.t1 | dbj BAJ34342.1  unnamed protein product [Thellungiella halophila]                                                                                                                                                                                                                                                        | 289  | 286  | 1.00E-129 | 99.0  | 83.7 | 88.2 | unnamed protein product                             | ----  | ----                 | AT1G53580.1   Symbols: GLX2-3, ETHE1, GLY3   glyoxalase II 3   chr1:19991542-19993250 REVERSE LENGTH=294                                                                                                                                                                                                                                     | 289  | 294  | 1.00E-124 | 101.7 | 79.6 | 84.4 |
| Rsa1.0_00928.1.g21451.t1 | ref XP_002891763.1  hypothetical protein ARALYDRAFT_314676 [Arabidopsis lyrata subsp. lyrata]   g 297337605 gb EFH68022.1  hypothetical protein ARALYDRAFT_314676 [Arabidopsis lyrata subsp. lyrata]                                                                                                                     | 725  | 828  | 0         | 114.2 | 81.1 | 88.3 | hypothetical protein ARALYDRAFT_314676              | gbpln | Arabidopsis lyrata   | AT1G53600.1   Symbols:   Tetratricopeptide repeat (TPR)-like superfamily protein   chr1:20001263-20003416 FORWARD LENGTH=717                                                                                                                                                                                                                 | 725  | 717  | 0         | 98.9  | 80.0 | 88.1 |
| Rsa1.0_00928.1.g21452.t1 | #                                                                                                                                                                                                                                                                                                                        | #    | #    | #         | #     | #    | -    | ----                                                | ----  | ----                 | #                                                                                                                                                                                                                                                                                                                                            | #    | #    | #         | #     | #    | #    |
| Rsa1.0_00928.1.g21453.t1 | #                                                                                                                                                                                                                                                                                                                        | #    | #    | #         | #     | #    | -    | ----                                                | ----  | ----                 | #                                                                                                                                                                                                                                                                                                                                            | #    | #    | #         | #     | #    | #    |
| Rsa1.0_00928.1.g21454.t2 | gb AAG52949.1  gag/pol polyprotein [Arabidopsis thaliana]                                                                                                                                                                                                                                                                | 1799 | 1643 | 0         | 91.3  | 36.4 | 48.5 | gag/pol polyprotein                                 | gbpln | Arabidopsis thaliana | AT4G23160.1   Symbols: CRK8   cysteine-rich RLK (RECEPTOR-like protein kinase) 8   chr4:12129485-12134086 FORWARD LENGTH=1262                                                                                                                                                                                                                | 1799 | 1262 | 1.00E-94  | 70.2  | 9.8  | 14.7 |
| Rsa1.0_00929.1.g21455.t1 | gb EOA13662.1  hypothetical protein CARUB_v10026733mg [Capsella rubella]                                                                                                                                                                                                                                                 | 343  | 339  | 1.00E-145 | 98.8  | 81.3 | 86.6 | hypothetical protein CARUB_v10026733mg              | gbpln | Capsella rubella     | AT5G66350.1   Symbols: SHI   Lateral root primordium (LRP) protein-related   chr5:26504714-26506143 REVERSE LENGTH=331                                                                                                                                                                                                                       | 343  | 331  | 1.00E-139 | 96.5  | 79.3 | 86.0 |
| Rsa1.0_00929.1.g21456.t1 | ref NP_191279.3  uncharacterized protein [Arabidopsis thaliana]   g 52354345 gb AAU44483.1  hypothetical protein AT3G57200 [Arabidopsis thaliana]   g 61742717 gb AA55179.1  hypothetical protein At3g57200 [Arabidopsis thaliana]   g 332646105 gb AEE79626.1  uncharacterized protein AT3G57200 [Arabidopsis thaliana] | 116  | 514  | 5.00E-30  | 443.1 | 51.7 | 57.8 | uncharacterized protein                             | gbpln | Arabidopsis thaliana | AT3G57200.1   Symbols:   unknown protein; BEST Arabidopsis thaliana protein match is: unknown protein (TAIR:AT2G41451.1). Has 94 Blast hits to 94 proteins in 31 species: Archae - 0; Bacteria - 12; Metazoa - 0; Fungi - 0; Plants - 77; Viruses - 0; Other Eukaryotes - 5 (source: NCBI BLINK)   chr3:21169413-21172103 FORWARD LENGTH=514 | 116  | 514  | 8.00E-33  | 443.1 | 51.7 | 57.8 |

|                          |                                                                                                                                                                                                     |      |      |           |       |      |      |                                                     |       |                      |                                                                                                                                                                                                                                                                                                                                                                                                                                                                                                                         |      |     |          |       |      |      |
|--------------------------|-----------------------------------------------------------------------------------------------------------------------------------------------------------------------------------------------------|------|------|-----------|-------|------|------|-----------------------------------------------------|-------|----------------------|-------------------------------------------------------------------------------------------------------------------------------------------------------------------------------------------------------------------------------------------------------------------------------------------------------------------------------------------------------------------------------------------------------------------------------------------------------------------------------------------------------------------------|------|-----|----------|-------|------|------|
| Rsa1.0_00929.1.g21457.t1 | gb AAG51783.1 AC079679.3 reverse transcriptase, putative; 16838-20266 [Arabidopsis thaliana]                                                                                                        | 292  | 1142 | 2.00E-52  | 391.1 | 38.7 | 50.7 | reverse transcriptase, putative; 16838-20266        | gbpln | Arabidopsis thaliana | AT2G34320.1   Symbols:   Polynucleotidyl transferase, ribonuclease H-like superfamily protein   chr2:14484959-14485837 FORWARD LENGTH=292                                                                                                                                                                                                                                                                                                                                                                               | 292  | 292 | 1.00E-20 | 100.0 | 24.0 | 41.4 |
| Rsa1.0_00929.1.g21458.t1 | ref XP_002879014.1  EMB1187 [Arabidopsis lyrata subsp. lyrata] gi 297324853 gb EFH55273.1  EMB1187 [Arabidopsis lyrata subsp. lyrata]                                                               | 411  | 374  | 1.00E-179 | 91.0  | 74.0 | 78.8 | EMB1187                                             | gbpln | Arabidopsis lyrata   | AT2G26830.1   Symbols: emb1187   Protein kinase superfamily protein   chr2:11443599-11446958 FORWARD LENGTH=374                                                                                                                                                                                                                                                                                                                                                                                                         | 411  | 374 | 0        | 91.0  | 73.5 | 78.8 |
| Rsa1.0_00929.1.g21459.t1 | gb AAD15377.1  putative non-LTR retroelement reverse transcriptase [Arabidopsis thaliana]                                                                                                           | 1020 | 1044 | 9.00E-85  | 102.4 | 16.0 | 20.1 | putative non-LTR retroelement reverse transcriptase | gbpln | Arabidopsis thaliana | AT1G43760.1   Symbols:   DNase I-like superfamily protein   chr1:1652880-16531065 REVERSE LENGTH=626                                                                                                                                                                                                                                                                                                                                                                                                                    | 1020 | 626 | 3.00E-30 | 61.4  | 9.6  | 13.9 |
| Rsa1.0_00929.1.g21460.t1 | gb AAB95304.1  putative second messenger-dependent protein kinase [Arabidopsis thaliana]                                                                                                            | 163  | 676  | 2.00E-77  | 414.7 | 80.4 | 82.2 | putative second messenger-dependent protein kinase  | gbpln | Arabidopsis thaliana | AT2G26695.1   Symbols:   Ran BP2/NZF zinc finger-like superfamily protein   chr2:11365275-11365789 FORWARD LENGTH=138                                                                                                                                                                                                                                                                                                                                                                                                   | 163  | 138 | 9.00E-76 | 84.7  | 80.4 | 82.2 |
| Rsa1.0_00929.1.g21461.t1 | #                                                                                                                                                                                                   | #    | #    | #         | #     | #    | #    | -                                                   | ----  | ----                 | #                                                                                                                                                                                                                                                                                                                                                                                                                                                                                                                       | #    | #   | #        | #     | #    | #    |
| Rsa1.0_00929.1.g21462.t1 | #                                                                                                                                                                                                   | #    | #    | #         | #     | #    | #    | -                                                   | ----  | ----                 | #                                                                                                                                                                                                                                                                                                                                                                                                                                                                                                                       | #    | #   | #        | #     | #    | #    |
| Rsa1.0_00929.1.g21463.t1 | ref XP_002879001.1  hypothetical protein ARALYDRAFT_901457 [Arabidopsis lyrata subsp. lyrata] gi 297324840 gb EFH55260.1  hypothetical protein ARALYDRAFT_901457 [Arabidopsis lyrata subsp. lyrata] | 522  | 521  | 0         | 99.8  | 91.8 | 95.4 | hypothetical protein ARALYDRAFT_901457              | gbpln | Arabidopsis lyrata   | AT2G26710.1   Symbols: BAS1, CYP734A1, CYP72B1   Cytochrome P450 superfamily protein   chr2:11380700-11383413 FORWARD LENGTH=520                                                                                                                                                                                                                                                                                                                                                                                        | 522  | 520 | 0        | 99.6  | 91.4 | 95.2 |
| Rsa1.0_00930.1.g21464.t1 | ref XP_002883034.1  hypothetical protein ARALYDRAFT_341831 [Arabidopsis lyrata subsp. lyrata] gi 297328874 gb EFH59293.1  hypothetical protein ARALYDRAFT_341831 [Arabidopsis lyrata subsp. lyrata] | 356  | 401  | 4.00E-98  | 112.6 | 54.2 | 68.8 | hypothetical protein ARALYDRAFT_341831              | gbpln | Arabidopsis lyrata   | AT5G19170.1   Symbols:   Protein of Unknown Function (DUF239)   chr5:6445245-6447305 FORWARD LENGTH=391                                                                                                                                                                                                                                                                                                                                                                                                                 | 356  | 391 | 1.00E-68 | 109.8 | 43.5 | 57.6 |
| Rsa1.0_00930.1.g21465.t1 | gb EOA20755.1  hypothetical protein CARUB_v10001083mg [Capsella rubella]                                                                                                                            | 405  | 411  | 0         | 101.5 | 87.9 | 91.9 | hypothetical protein CARUB_v10001083mg              | gbpln | Capsella rubella     | AT5G26960.1   Symbols:   Galactose oxidase/kelch repeat superfamily protein   chr5:9484908-9486149 REVERSE LENGTH=413                                                                                                                                                                                                                                                                                                                                                                                                   | 405  | 413 | 0        | 102.0 | 88.1 | 91.9 |
| Rsa1.0_00930.1.g21466.t3 | gb EOA22421.1  hypothetical protein CARUB_v10003065mg [Capsella rubella]                                                                                                                            | 104  | 125  | 1.00E-31  | 120.2 | 77.9 | 87.5 | hypothetical protein CARUB_v10003065mg              | gbpln | Capsella rubella     | AT5G26930.1   Symbols: GATA23   GATA transcription factor 23   chr5:9479592-9480061 FORWARD LENGTH=120                                                                                                                                                                                                                                                                                                                                                                                                                  | 104  | 120 | 6.00E-29 | 115.4 | 64.4 | 72.1 |
| Rsa1.0_00930.1.g21467.t2 | ref XP_002874326.1  hypothetical protein ARALYDRAFT_489520 [Arabidopsis lyrata subsp. lyrata] gi 297320163 gb EFH50585.1  hypothetical protein ARALYDRAFT_489520 [Arabidopsis lyrata subsp. lyrata] | 809  | 842  | 0         | 104.1 | 78.4 | 84.2 | hypothetical protein ARALYDRAFT_489520              | gbpln | Arabidopsis lyrata   | AT5G26910.1   Symbols:   unknown protein; BEST Arabidopsis thaliana protein match is: unknown protein (TAIR:AT3G58650.1); Has 1322 Blast hits to 684 proteins in 162 species: Archae - 4; Bacteria - 497; Metazoa - 157; Fungi - 101; Plants - 155; Viruses - 0; Other Eukaryotes - 408 (source: NCBI BLink).   chr5:9466169-9469523 REVERSE LENGTH=853                                                                                                                                                                 | 809  | 853 | 0        | 105.4 | 77.1 | 84.2 |
| Rsa1.0_00930.1.g21468.t1 | ref XP_002872241.1  hypothetical protein ARALYDRAFT_489516 [Arabidopsis lyrata subsp. lyrata] gi 297318078 gb EFH48500.1  hypothetical protein ARALYDRAFT_489516 [Arabidopsis lyrata subsp. lyrata] | 984  | 983  | 0         | 99.9  | 91.0 | 94.4 | hypothetical protein ARALYDRAFT_489516              | gbpln | Arabidopsis lyrata   | AT5G26850.4   Symbols:   Uncharacterized protein   chr5:9445950-9450584 FORWARD LENGTH=983                                                                                                                                                                                                                                                                                                                                                                                                                              | 984  | 983 | 0        | 99.9  | 90.8 | 94.5 |
| Rsa1.0_00930.1.g21469.t1 | gb EOA19297.1  hypothetical protein CARUB_v10002232mg, partial [Capsella rubella]                                                                                                                   | 111  | 137  | 5.00E-48  | 123.4 | 84.7 | 90.1 | hypothetical protein CARUB_v10002232mg, partial     | gbpln | Capsella rubella     | AT5G26800.1   Symbols:   FUNCTIONS IN: molecular_function unknown; INVOLVED IN: biological_process unknown; LOCATED IN: mitochondrion; CONTAINS InterPro DOMAIN/s: IGR protein motif (InterPro:IPR019083); BEST Arabidopsis thaliana protein match is: unknown protein (TAIR:AT3G05810.1); Has 1807 Blast hits to 1807 proteins in 277 species: Archae - 0; Bacteria - 0; Metazoa - 736; Fungi - 347; Plants - 385; Viruses - 0; Other Eukaryotes - 339 (source: NCBI BLink).   chr5:9425224-9426485 FORWARD LENGTH=112 | 111  | 112 | 1.00E-48 | 100.9 | 84.7 | 89.2 |

|                          |                                                                                                                                                                                                                                                                                                                                                                                                                                                                                                                                                                                                                                                                        |     |     |           |       |      |      |                                                                |       |                      |                                                                                                                                                                                                                                                                                |     |     |           |       |      |      |
|--------------------------|------------------------------------------------------------------------------------------------------------------------------------------------------------------------------------------------------------------------------------------------------------------------------------------------------------------------------------------------------------------------------------------------------------------------------------------------------------------------------------------------------------------------------------------------------------------------------------------------------------------------------------------------------------------------|-----|-----|-----------|-------|------|------|----------------------------------------------------------------|-------|----------------------|--------------------------------------------------------------------------------------------------------------------------------------------------------------------------------------------------------------------------------------------------------------------------------|-----|-----|-----------|-------|------|------|
| Rsa1.0_00930.1.g21470.t1 | ref NP_568486.1  Shaggy-related protein kinase alpha [Arabidopsis thaliana] gi 27735207 sp P43288.3 KSG1_ARATH RecName: Full=Shaggy-related protein kinase alpha; AltName: Full=ASK-alpha [Arabidopsis thaliana] gi 16226768 gb AAL16257.1 AF428327.1 AT5g26750/F2P16.10 [Arabidopsis thaliana] gi 15028149 gb AAK76698.1  putative shaggy kinase alpha [Arabidopsis thaliana] gi 23296760 gb AANI13164.1  putative shaggy kinase alpha [Arabidopsis thaliana] gi 332006213 gb AED93596.1  Shaggy-related protein kinase alpha [Arabidopsis thaliana]                                                                                                                  | 405 | 405 | 0         | 100.0 | 95.8 | 97.3 | Shaggy-related protein kinase alpha                            | gbpln | Arabidopsis thaliana | AT5G26751.1   Symbols: ATSK11, SK 11   shaggy-related kinase 11   chr5:9399582-9401839 REVERSE LENGTH=405                                                                                                                                                                      | 405 | 405 | 0         | 100.0 | 95.8 | 97.3 |
| Rsa1.0_00930.1.g21471.t1 | ref NP_001154741.1  nucleic acid binding / zinc ion binding protein [Arabidopsis thaliana] gi 332006211 gb AED93594.1  nucleic acid binding / zinc ion binding protein [Arabidopsis thaliana]                                                                                                                                                                                                                                                                                                                                                                                                                                                                          | 147 | 147 | 6.00E-58  | 100.0 | 78.9 | 85.0 | nucleic acid binding / zinc ion binding protein                | gbpln | Arabidopsis thaliana | AT5G26749.1   Symbols:   C2H2 and C2HC zinc fingers superfamily protein   chr5:9398285-9399239 REVERSE LENGTH=147                                                                                                                                                              | 147 | 147 | 2.00E-60  | 100.0 | 78.9 | 85.0 |
| Rsa1.0_00930.1.g21472.t1 | ref XP_002872231.1  D111/G-patch domain-containing protein [Arabidopsis lyrata subsp. lyrata] gi 297318068 gb EFH48490.1  D111/G-patch domain-containing protein [Arabidopsis lyrata subsp. lyrata]                                                                                                                                                                                                                                                                                                                                                                                                                                                                    | 299 | 301 | 1.00E-144 | 100.7 | 89.6 | 93.6 | D111/G-patch domain-containing protein                         | gbpln | Arabidopsis lyrata   | AT5G26610.3   Symbols:   D111/G-patch domain-containing protein   chr5:9375456-9376991 FORWARD LENGTH=301                                                                                                                                                                      | 299 | 301 | 1.00E-141 | 100.7 | 89.0 | 93.3 |
| Rsa1.0_00931.1.g21473.t3 | ref XP_002870965.1  EMB2730 [Arabidopsis lyrata subsp. lyrata] gi 297316802 gb EFH47224.1  EMB2730 [Arabidopsis lyrata subsp. lyrata]                                                                                                                                                                                                                                                                                                                                                                                                                                                                                                                                  | 796 | 803 | 0         | 100.9 | 90.3 | 94.8 | EMB2730                                                        | gbpln | Arabidopsis lyrata   | AT5G02250.1   Symbols: EMB2730, RNR1, ATMTRNASEII   Ribonuclease II/R family protein   chr5:454902-459063 FORWARD LENGTH=803                                                                                                                                                   | 796 | 803 | 0         | 100.9 | 89.8 | 94.7 |
| Rsa1.0_00931.1.g21474.t1 | ref NP_568098.1  NAD(P)-binding Rossmann-fold containing protein [Arabidopsis thaliana] gi 73921137 sp Q94EG6.1 Y5224_ARATH RecName: Full=Uncharacterized protein At5g02240 gi 15294290 gb AAK95322.1 AF410336.1 AT5g02240/T7H20.290 [Arabidopsis thaliana] gi 22655434 gb AAM98309.1 AT5g02240/T7H20.290 [Arabidopsis thaliana] gi 23397218 gb AAN31891.1  unknown protein [Arabidopsis thaliana] gi 62320775 dbj BAD95439.1  hypothetical protein [Arabidopsis thaliana] gi 332003066 gb AED90449.1  NAD(P)-binding Rossmann-fold containing protein [Arabidopsis thaliana]                                                                                          | 253 | 253 | 1.00E-135 | 100.0 | 94.5 | 96.8 | NAD(P)-binding Rossmann-fold containing protein                | gbpln | Arabidopsis thaliana | AT5G02240.1   Symbols:   NAD(P)-binding Rossmann-fold superfamily protein   chr5:451502-452984 FORWARD LENGTH=253                                                                                                                                                              | 253 | 253 | 1.00E-137 | 100.0 | 94.5 | 96.8 |
| Rsa1.0_00931.1.g21475.t1 | ref NP_195843.1  haloacid dehalogenase-like hydrolase domain-containing protein [Arabidopsis thaliana] gi 30679562 ref NP_850754.1  haloacid dehalogenase-like hydrolase domain-containing protein [Arabidopsis thaliana] gi 7340697 emb CAB82996.1  putative protein [Arabidopsis thaliana] gi 107738426 gb ABF83695.1  At5g02230 [Arabidopsis thaliana] gi 110738717 dbj BAF01283.1  hypothetical protein [Arabidopsis thaliana] gi 332003064 gb AED90447.1  haloacid dehalogenase-like hydrolase domain-containing protein [Arabidopsis thaliana] gi 332003065 gb AED90448.1  haloacid dehalogenase-like hydrolase domain-containing protein [Arabidopsis thaliana] | 280 | 280 | 1.00E-137 | 100.0 | 88.2 | 93.6 | haloacid dehalogenase-like hydrolase domain-containing protein | gbpln | Arabidopsis thaliana | AT5G02230.2   Symbols:   Haloacid dehalogenase-like hydrolase (HAD) superfamily protein   chr5:449132-450507 FORWARD LENGTH=280                                                                                                                                                | 280 | 280 | 1.00E-139 | 100.0 | 88.2 | 93.6 |
| Rsa1.0_00931.1.g21476.t1 | gb EOA21900.1  hypothetical protein CARUB_v10002381mg [Capsella rubella]                                                                                                                                                                                                                                                                                                                                                                                                                                                                                                                                                                                               | 74  | 74  | 1.00E-28  | 100.0 | 82.4 | 91.9 | hypothetical protein CARUB_v10002381mg                         | gbpln | Capsella rubella     | AT5G02220.1   Symbols:   unknown protein; Has 30201 Blast hits to 17322 proteins in 780 species: Archae - 12; Bacteria - 1396; Metazoa - 17338; Fungi - 3422; Plants - 5037; Viruses - 0; Other Eukaryotes - 2996 (source: NCBI BLINK);   chr5:441884-442102 REVERSE LENGTH=72 | 74  | 72  | 9.00E-31  | 97.3  | 83.8 | 89.2 |
| Rsa1.0_00931.1.g21477.t1 | ref XP_002870961.1  hypothetical protein ARALYDRAFT_486997 [Arabidopsis lyrata subsp. lyrata] gi 297316798 gb EFH47220.1  hypothetical protein ARALYDRAFT_486997 [Arabidopsis lyrata subsp. lyrata]                                                                                                                                                                                                                                                                                                                                                                                                                                                                    | 180 | 181 | 2.00E-36  | 100.6 | 64.4 | 71.7 | hypothetical protein ARALYDRAFT_486997                         | gbpln | Arabidopsis lyrata   | AT5G02200.1   Symbols: FHL   far-red-elongated hypocotyl1-like   chr5:438221-438852 FORWARD LENGTH=181                                                                                                                                                                         | 180 | 181 | 3.00E-35  | 100.6 | 60.0 | 70.0 |

|                          |                                                                                                                                                                                                                                                                                                                                                                                                          |      |      |           |       |      |      |                                                 |       |                      |                                                                                                                                                                                                                                                                                                                                                                                                                                                                   |      |     |           |       |      |      |
|--------------------------|----------------------------------------------------------------------------------------------------------------------------------------------------------------------------------------------------------------------------------------------------------------------------------------------------------------------------------------------------------------------------------------------------------|------|------|-----------|-------|------|------|-------------------------------------------------|-------|----------------------|-------------------------------------------------------------------------------------------------------------------------------------------------------------------------------------------------------------------------------------------------------------------------------------------------------------------------------------------------------------------------------------------------------------------------------------------------------------------|------|-----|-----------|-------|------|------|
| Rsa1.0_00931.1.g21478.t1 | ref[XP_002870959.1] amino acid transporter family protein [Arabidopsis lyrata subsp. lyrata] gi 297316796 gb EFH47218.1  amino acid transporter family protein [Arabidopsis lyrata subsp. lyrata]                                                                                                                                                                                                        | 539  | 543  | 0         | 100.7 | 87.2 | 93.1 | amino acid transporter family protein           | gbpln | Arabidopsis lyrata   | AT5G02180.1   Symbols:   Transmembrane amino acid transporter family protein   chr5:431034-433544 FORWARD LENGTH=550                                                                                                                                                                                                                                                                                                                                              | 539  | 550 | 0         | 102.0 | 86.5 | 92.8 |
| Rsa1.0_00931.1.g21479.t1 | gb EOA21784.1  hypothetical protein CARUB_v10002245mg [Capsella rubella]                                                                                                                                                                                                                                                                                                                                 | 119  | 132  | 9.00E-48  | 110.9 | 85.7 | 91.6 | hypothetical protein CARUB_v10002245mg          | gbpln | Capsella rubella     | AT5G02160.1   Symbols:   unknown protein; FUNCTIONS IN: molecular.function unknown; INVOLVED IN: biological.process unknown; LOCATED IN: chloroplast thylakoid membrane; EXPRESSED IN: 23 plant structures; EXPRESSED DURING: 13 growth stages; Has 121 Blast hits to 121 proteins in 17 species: Archae - 0; Bacteria - 0; Metazoa - 0; Fungi - 0; Plants - 121; Viruses - 0; Other Eukaryotes - 0 (source: NCBI BLink).   chr5:426392-427024 FORWARD LENGTH=129 | 119  | 129 | 1.00E-48  | 108.4 | 85.7 | 89.1 |
| Rsa1.0_00931.1.g21480.t1 | gb EOA22838.1  hypothetical protein CARUB_v10003562mg, partial [Capsella rubella]                                                                                                                                                                                                                                                                                                                        | 219  | 259  | 1.00E-106 | 118.3 | 90.9 | 95.0 | hypothetical protein CARUB_v10003562mg, partial | gbpln | Capsella rubella     | AT5G02140.1   Symbols:   Pathogenesis-related thaumatin superfamily protein   chr5:423384-424437 FORWARD LENGTH=294                                                                                                                                                                                                                                                                                                                                               | 219  | 294 | 1.00E-104 | 134.2 | 87.2 | 92.2 |
| Rsa1.0_00931.1.g21481.t1 | ref[NP_195833.1] kinesin light chain-like protein [Arabidopsis thaliana] gi 7340687 emb CAB82986.1  putative protein [Arabidopsis thaliana] gi 98961125 gb ABF59046.1  At5g02130 [Arabidopsis thaliana] gi 332003051 gb AED90434.1  kinesin light chain-like protein [Arabidopsis thaliana]                                                                                                              | 304  | 420  | 8.00E-99  | 138.2 | 75.7 | 85.5 | kinesin light chain-like protein                | gbpln | Arabidopsis thaliana | AT5G02130.1   Symbols: NDP   Tetratricopeptide repeat (TPR)-like superfamily protein   chr5:419747-421958 REVERSE LENGTH=420                                                                                                                                                                                                                                                                                                                                      | 304  | 420 | 1.00E-101 | 138.2 | 75.7 | 85.5 |
| Rsa1.0_00931.1.g21482.t1 | gb AAG50806.1 AC079281.8 unknown protein [Arabidopsis thaliana]                                                                                                                                                                                                                                                                                                                                          | 1735 | 1213 | 0         | 69.9  | 25.0 | 36.4 | unknown protein                                 | gbpln | Arabidopsis thaliana | AT3G24255.1   Symbols:   RNA-directed DNA polymerase (reverse transcriptase)-related family protein   chr3:8789471-8793208 FORWARD LENGTH=746                                                                                                                                                                                                                                                                                                                     | 1735 | 746 | 6.00E-69  | 43.0  | 9.2  | 12.4 |
| Rsa1.0_00931.1.g21483.t1 | ref[XP_002870954.1] CYCD7.1 [Arabidopsis lyrata subsp. lyrata] gi 297316791 gb EFH47213.1  CYCD7.1 [Arabidopsis lyrata subsp. lyrata] ref[NP_195830.1] Oxysterol-binding family protein [Arabidopsis thaliana] gi 75264475 sp Q9LZM1.1 ORP3A, ARAT H RecName: Full=Oxysterol-binding protein-related protein 3A; AltName: Full=OSBP-related protein 3A; AltName: Full=Protein UNFERTILIZED EMBRYO SAC 18 | 344  | 341  | 1.00E-119 | 99.1  | 65.4 | 78.5 | CYCD7.1                                         | gbpln | Arabidopsis lyrata   | AT5G02110.1   Symbols: CYCD7.1, CYCD7   CYCLIN D7;1   chr5:417087-418553 FORWARD LENGTH=341                                                                                                                                                                                                                                                                                                                                                                       | 344  | 341 | 1.00E-121 | 99.1  | 64.5 | 77.9 |
| Rsa1.0_00931.1.g21484.t2 | gi 7340684 emb CAB82983.1  putative protein [Arabidopsis thaliana] gi 15292811 gb AAK92774.1  unknown protein [Arabidopsis thaliana] gi 20258867 gb AAM14105.1  putative oxysterol-binding protein [Arabidopsis thaliana] gi 332003048 gb AED90431.1  Oxysterol-binding family protein [Arabidopsis thaliana]                                                                                            | 451  | 453  | 0         | 100.4 | 86.5 | 92.2 | Oxysterol-binding family protein                | gbpln | Arabidopsis thaliana | AT5G02100.1   Symbols: UNE18, ORP3A   Oxysterol-binding family protein   chr5:413639-416016 FORWARD LENGTH=453                                                                                                                                                                                                                                                                                                                                                    | 451  | 453 | 0         | 100.4 | 86.5 | 92.2 |
| Rsa1.0_00931.1.g21485.t1 | ref[NP_195829.1] uncharacterized protein [Arabidopsis thaliana] gi 7340683 emb CAB82982.1  putative protein [Arabidopsis thaliana] gi 26451474 dbj BA042836.1  unknown protein [Arabidopsis thaliana] gi 28973153 gb AAO63901.1  unknown protein [Arabidopsis thaliana] gi 332003047 gb AED90430.1  uncharacterized protein AT5G02090 [Arabidopsis thaliana]                                             | 84   | 85   | 8.00E-32  | 101.2 | 84.5 | 90.5 | uncharacterized protein                         | gbpln | Arabidopsis thaliana | AT5G02090.1   Symbols:   unknown protein; Has 30 Blast hits to 30 proteins in 10 species: Archae - 0; Bacteria - 0; Metazoa - 0; Fungi - 0; Plants - 30; Viruses - 0; Other Eukaryotes - 0 (source: NCBI BLink).   chr5:412350-412607 REVERSE LENGTH=85                                                                                                                                                                                                           | 84   | 85  | 1.00E-34  | 101.2 | 84.5 | 90.5 |
| Rsa1.0_00931.1.g21486.t1 | ref[XP_002889929.1] predicted protein [Arabidopsis lyrata subsp. lyrata] gi 297335771 gb EFH6188.1  predicted protein [Arabidopsis lyrata subsp. lyrata]                                                                                                                                                                                                                                                 | 303  | 317  | 1.00E-144 | 104.6 | 88.8 | 92.4 | predicted protein                               | gbpln | Arabidopsis lyrata   | AT1G12350.1   Symbols: ATCOAB, COAB   4-phospho-panto-thenoylcysteine synthetase   chr1:4198870-4200633 FORWARD LENGTH=317                                                                                                                                                                                                                                                                                                                                        | 303  | 317 | 1.00E-144 | 104.6 | 88.1 | 92.1 |
| Rsa1.0_00931.1.g21487.t1 | gb EOA22834.1  hypothetical protein CARUB_v10003558mg [Capsella rubella]                                                                                                                                                                                                                                                                                                                                 | 666  | 657  | 0         | 98.6  | 88.1 | 92.9 | hypothetical protein CARUB_v10003558mg          | gbpln | Capsella rubella     | AT5G02070.1   Symbols:   Protein kinase family protein   chr5:405895-408220 REVERSE LENGTH=657                                                                                                                                                                                                                                                                                                                                                                    | 666  | 657 | 0         | 98.6  | 88.7 | 94.0 |

|                          |                                                                                                                                                                                                              |      |      |           |       |      |      |                                           |       |                      |                                                                                                                                                                                                                                                                                                                                                                                                                                                                                                                                         |      |      |           |       |      |      |
|--------------------------|--------------------------------------------------------------------------------------------------------------------------------------------------------------------------------------------------------------|------|------|-----------|-------|------|------|-------------------------------------------|-------|----------------------|-----------------------------------------------------------------------------------------------------------------------------------------------------------------------------------------------------------------------------------------------------------------------------------------------------------------------------------------------------------------------------------------------------------------------------------------------------------------------------------------------------------------------------------------|------|------|-----------|-------|------|------|
| Rsa1.0_00931.1.g21488.t1 | ref[XP_002873035.1] mitochondrial glycoprotein family protein [Arabidopsis lyrata subsp. lyrata]<br>gi 297318872 gb EFH49294.1  mitochondrial glycoprotein family protein [Arabidopsis lyrata subsp. lyrata] | 266  | 264  | 2.00E-98  | 99.2  | 73.7 | 83.1 | mitochondrial glycoprotein family protein | gbpln | Arabidopsis lyrata   | AT5G02050.1   Symbols:   Mitochondrial glycoprotein family protein   chr5:403239-404244 REVERSE LENGTH=267                                                                                                                                                                                                                                                                                                                                                                                                                              | 266  | 267  | 4.00E-98  | 100.4 | 74.8 | 83.5 |
| Rsa1.0_00932.1.g21489.t1 | ref[XP_002870475.1] predicted protein [Arabidopsis lyrata subsp. lyrata]<br>gi 297316311 gb EFH46734.1  predicted protein [Arabidopsis lyrata subsp. lyrata]                                                 | 470  | 480  | 0         | 102.1 | 83.0 | 91.7 | predicted protein                         | gbpln | Arabidopsis lyrata   | AT5G36260.1   Symbols:   Eukaryotic aspartyl protease family protein   chr5:14285068-14288179 REVERSE LENGTH=482                                                                                                                                                                                                                                                                                                                                                                                                                        | 470  | 482  | 0         | 102.6 | 82.1 | 91.7 |
| Rsa1.0_00932.1.g21490.t1 | #                                                                                                                                                                                                            | #    | #    | #         | #     | #    | -    |                                           | ----  | ----                 | #                                                                                                                                                                                                                                                                                                                                                                                                                                                                                                                                       | #    | #    | #         | #     | #    | #    |
| Rsa1.0_00932.1.g21491.t1 | #                                                                                                                                                                                                            | #    | #    | #         | #     | #    | -    |                                           | ----  | ----                 | #                                                                                                                                                                                                                                                                                                                                                                                                                                                                                                                                       | #    | #    | #         | #     | #    | #    |
| Rsa1.0_00932.1.g21492.t4 | gb EOA28483.1  hypothetical protein CARUB_v10024693mg [Capsella rubella]                                                                                                                                     | 1088 | 676  | 1.00E-27  | 62.1  | 7.4  | 8.5  | hypothetical protein CARUB_v10024693mg    | gbpln | Capsella rubella     | AT2G33580.1   Symbols:   Protein kinase superfamily protein   chr2:14219848-14221842 REVERSE LENGTH=664                                                                                                                                                                                                                                                                                                                                                                                                                                 | 1088 | 664  | 3.00E-30  | 61.0  | 7.1  | 8.5  |
| Rsa1.0_00932.1.g21493.t1 | ref[XP_002879622.1] hypothetical protein ARALYDRAFT_902789 [Arabidopsis lyrata subsp. lyrata]<br>gi 297325461 gb EFH55881.1  hypothetical protein ARALYDRAFT_902789 [Arabidopsis lyrata subsp. lyrata]       | 90   | 91   | 1.00E-18  | 101.1 | 61.1 | 72.2 | hypothetical protein ARALYDRAFT_902789    | gbpln | Arabidopsis lyrata   | AT2G36695.1   Symbols:   unknown protein; FUNCTIONS IN: molecular_function unknown; INVOLVED IN: biological_process unknown; LOCATED IN: endomembrane system; Has 35333 Blast hits to 34131 proteins in 2444 species: Archae - 798; Bacteria - 22429; Metazoa - 974; Fungi - 991; Plants - 531; Viruses - 0; Other Eukaryotes - 9610 (source: NCBI BLINK).   chr2:15382702-15383298 FORWARD LENGTH=117                                                                                                                                  | 90   | 117  | 5.00E-19  | 130.0 | 54.4 | 63.3 |
| Rsa1.0_00932.1.g21494.t1 | gb EOA38189.1  hypothetical protein CARUB_v10009666mg [Capsella rubella]                                                                                                                                     | 130  | 337  | 5.00E-31  | 259.2 | 51.5 | 53.1 | hypothetical protein CARUB_v10009666mg    | gbpln | Capsella rubella     | AT1G48460.1   Symbols:   unknown protein; FUNCTIONS IN: molecular_function unknown; INVOLVED IN: biological_process unknown; LOCATED IN: chloroplast envelope; EXPRESSED IN: 21 plant structures; EXPRESSED DURING: 13 growth stages; BEST Arabidopsis thaliana protein match is: unknown protein (TAIR:AT5G3040.1); Has 60 Blast hits to 60 proteins in 14 species: Archae - 0; Bacteria - 0; Metazoa - 0; Fungi - 0; Plants - 60; Viruses - 0; Other Eukaryotes - 0 (source: NCBI BLINK).   chr1:17911469-17913149 FORWARD LENGTH=340 | 130  | 340  | 3.00E-33  | 261.5 | 50.8 | 52.3 |
| Rsa1.0_00932.1.g21495.t1 | ref[XP_002307432.1] predicted protein [Populus trichocarpa]<br>gi 118483791 gb ABK93788.1  unknown [Populus trichocarpa]<br>gi 222856881 gb EEE94428.1  predicted protein [Populus trichocarpa]              | 361  | 342  | 3.00E-26  | 94.7  | 17.7 | 18.6 | predicted protein                         | gbpln | Populus trichocarpa  | AT1G77610.1   Symbols:   EamA-like transporter family protein   chr1:29165489-29167486 FORWARD LENGTH=336                                                                                                                                                                                                                                                                                                                                                                                                                               | 361  | 336  | 8.00E-29  | 93.1  | 17.7 | 18.6 |
| Rsa1.0_00932.1.g21496.t1 | #                                                                                                                                                                                                            | #    | #    | #         | #     | #    | -    |                                           | ----  | ----                 | #                                                                                                                                                                                                                                                                                                                                                                                                                                                                                                                                       | #    | #    | #         | #     | #    | #    |
| Rsa1.0_00932.1.g21497.t1 | ref[NP_198513.1] NDR1/HIN1-like 25 [Arabidopsis thaliana]<br>gi 332006750 gb AED94133.1  NDR1/HIN1-like 25 [Arabidopsis thaliana]                                                                            | 251  | 248  | 1.00E-114 | 98.8  | 86.9 | 92.8 | NDR1/HIN1-like 25                         | gbpln | Arabidopsis thaliana | AT5G36970.1   Symbols:   NHL25   NDR1/HIN1-like 25   chr5:14604367-14605194 REVERSE LENGTH=248                                                                                                                                                                                                                                                                                                                                                                                                                                          | 251  | 248  | 1.00E-116 | 98.8  | 86.9 | 92.8 |
| Rsa1.0_00932.1.g21498.t1 | emb CAN73567.1  hypothetical protein VITISV_003451 [Vitis vinifera]                                                                                                                                          | 895  | 1277 | 1.00E-141 | 142.7 | 30.4 | 37.7 | hypothetical protein VITISV_003451        | gbpln | Vitis vinifera       | AT4G23160.1   Symbols:   CRK8   cysteine-rich RLK (RECEPTOR-like protein kinase) 8   chr4:12129485-12134086 FORWARD LENGTH=1262                                                                                                                                                                                                                                                                                                                                                                                                         | 895  | 1262 | 4.00E-53  | 141.0 | 12.5 | 20.6 |
| Rsa1.0_00932.1.g21499.t1 | #                                                                                                                                                                                                            | #    | #    | #         | #     | #    | -    |                                           | ----  | ----                 | #                                                                                                                                                                                                                                                                                                                                                                                                                                                                                                                                       | #    | #    | #         | #     | #    | #    |
| Rsa1.0_00933.1.g21500.t1 | gb EOA38212.1  hypothetical protein CARUB_v10009694mg [Capsella rubella]                                                                                                                                     | 459  | 332  | 1.00E-169 | 72.3  | 65.4 | 68.4 | hypothetical protein CARUB_v10009694mg    | gbpln | Capsella rubella     | AT1G35190.1   Symbols:   2-oxoglutarate (2OG) and Fe(II)-dependent oxygenase superfamily protein   chr1:12890544-12892632 FORWARD LENGTH=329                                                                                                                                                                                                                                                                                                                                                                                            | 459  | 329  | 1.00E-166 | 71.7  | 62.7 | 66.9 |
| Rsa1.0_00933.1.g21501.t1 | #                                                                                                                                                                                                            | #    | #    | #         | #     | #    | -    |                                           | ----  | ----                 | #                                                                                                                                                                                                                                                                                                                                                                                                                                                                                                                                       | #    | #    | #         | #     | #    | #    |
| Rsa1.0_00933.1.g21502.t1 | dbj BAB09923.1  copia-like retrotransposable element [Arabidopsis thaliana]                                                                                                                                  | 617  | 1342 | 1.00E-135 | 217.5 | 39.5 | 51.9 | copia-like retrotransposable element      | gbpln | Arabidopsis thaliana | AT4G23160.1   Symbols:   CRK8   cysteine-rich RLK (RECEPTOR-like protein kinase) 8   chr4:12129485-12134086 FORWARD LENGTH=1262                                                                                                                                                                                                                                                                                                                                                                                                         | 617  | 1262 | 6.00E-54  | 204.5 | 22.5 | 34.8 |

|                          |                                                                                                                                                                                                                                                                                                                                                                                                                                                                                                                                                                                                                                                                                                                           |      |      |           |       |      |      |                                              |       |                      |                                                                                                                                                                                                                                                                                                                                                                                                                                                                                                                                                                                                                     |      |      |           |       |      |      |
|--------------------------|---------------------------------------------------------------------------------------------------------------------------------------------------------------------------------------------------------------------------------------------------------------------------------------------------------------------------------------------------------------------------------------------------------------------------------------------------------------------------------------------------------------------------------------------------------------------------------------------------------------------------------------------------------------------------------------------------------------------------|------|------|-----------|-------|------|------|----------------------------------------------|-------|----------------------|---------------------------------------------------------------------------------------------------------------------------------------------------------------------------------------------------------------------------------------------------------------------------------------------------------------------------------------------------------------------------------------------------------------------------------------------------------------------------------------------------------------------------------------------------------------------------------------------------------------------|------|------|-----------|-------|------|------|
| Rsa1.0_00933.1.g21503.t1 | dbj BAC42513.1  unknown protein [Arabidopsis thaliana] gi 28372862 gb AA039913.1  At1g35210 [Arabidopsis thaliana]                                                                                                                                                                                                                                                                                                                                                                                                                                                                                                                                                                                                        | 144  | 163  | 9.00E-27  | 113.2 | 61.8 | 71.5 | unknown protein                              | gbpln | Arabidopsis thaliana | AT1G35210.1   Symbols:   unknown protein; FUNCTIONS IN: molecular function unknown; INVOLVED IN: biological process unknown; LOCATED IN: chloroplast; EXPRESSED IN: 14 plant structures; EXPRESSED DURING: 9 growth stages; CONTAINS InterPro DOMAIN/s: Protein of unknown function DUF740 (InterPro:IPR008004); BEST Arabidopsis thaliana protein match is: unknown protein (TAIR:AT1G22470.1); Has 83 Blast hits to 83 proteins in 12 species: Archae - 0; Bacteria - 0; Metazoa - 0; Fungi - 0; Plants - 81; Viruses - 0; Other Eukaryotes - 2 (source: NCBI BLink).   chr1:12896914-12897384 REVERSE LENGTH=156 | 144  | 156  | 3.00E-29  | 108.3 | 61.8 | 71.5 |
| Rsa1.0_00933.1.g21504.t1 | gb AAG51783.1 AC079679.3 reverse transcriptase, putative; 16838-20266 [Arabidopsis thaliana]                                                                                                                                                                                                                                                                                                                                                                                                                                                                                                                                                                                                                              | 395  | 1142 | 1.00E-107 | 289.1 | 50.9 | 65.1 | reverse transcriptase, putative; 16838-20266 | gbpln | Arabidopsis thaliana | AT4G29090.1   Symbols:   Ribonuclease H-like superfamily protein   chr4:14333528-14335255 FORWARD LENGTH=575                                                                                                                                                                                                                                                                                                                                                                                                                                                                                                        | 395  | 575  | 2.00E-37  | 145.6 | 29.6 | 47.8 |
| Rsa1.0_00933.1.g21505.t1 | ref NP_174759.1  thioesterase family protein [Arabidopsis thaliana] gi 12322944 gb AAG51460.1 AC069160.6 unknown protein [Arabidopsis thaliana] gi 89111888 gb ABD60716.1  At1g35250 [Arabidopsis thaliana] gi 332193652 gb AEE31773.1  thioesterase family protein [Arabidopsis thaliana]                                                                                                                                                                                                                                                                                                                                                                                                                                | 100  | 188  | 1.00E-23  | 188.0 | 51.0 | 60.0 | thioesterase family protein                  | gbpln | Arabidopsis thaliana | AT1G35250.1   Symbols:   Thioesterase superfamily protein   chr1:12933046-12934465 REVERSE LENGTH=188                                                                                                                                                                                                                                                                                                                                                                                                                                                                                                               | 100  | 188  | 2.00E-26  | 188.0 | 51.0 | 60.0 |
| Rsa1.0_00933.1.g21506.t1 | ref XP_002893877.1  cyclin family protein [Arabidopsis lyrata subsp. lyrata] gi 297339719 gb EFH70136.1  cyclin family protein [Arabidopsis lyrata subsp. lyrata]                                                                                                                                                                                                                                                                                                                                                                                                                                                                                                                                                         | 297  | 250  | 1.00E-109 | 84.2  | 64.0 | 72.7 | cyclin family protein                        | gbpln | Arabidopsis lyrata   | AT1G35440.1   Symbols: CYCT1;1   cyclin T1;1   chr1:13035294-13036037 REVERSE LENGTH=247                                                                                                                                                                                                                                                                                                                                                                                                                                                                                                                            | 297  | 247  | 1.00E-103 | 83.2  | 59.9 | 70.4 |
| Rsa1.0_00933.1.g21507.t1 | gb EOA36180.1  hypothetical protein CARUB_v10010050mg [Capsella rubella]                                                                                                                                                                                                                                                                                                                                                                                                                                                                                                                                                                                                                                                  | 248  | 260  | 2.00E-91  | 104.8 | 81.0 | 88.7 | hypothetical protein CARUB_v10010050mg       | gbpln | Capsella rubella     | AT1G35460.1   Symbols:   basic helix-loop-helix (bHLH) DNA-binding superfamily protein   chr1:13040092-13041907 FORWARD LENGTH=259                                                                                                                                                                                                                                                                                                                                                                                                                                                                                  | 248  | 259  | 8.00E-91  | 104.4 | 75.0 | 83.9 |
| Rsa1.0_00933.1.g21508.t1 | gb EOA40293.1  hypothetical protein CARUB_v10009024mg [Capsella rubella]                                                                                                                                                                                                                                                                                                                                                                                                                                                                                                                                                                                                                                                  | 461  | 476  | 0         | 103.3 | 79.4 | 86.8 | hypothetical protein CARUB_v10009024mg       | gbpln | Capsella rubella     | AT1G35470.2   Symbols:   SPLA/Ryanodine receptor (SPRY) domain-containing protein   chr1:13051636-13054922 REVERSE LENGTH=467                                                                                                                                                                                                                                                                                                                                                                                                                                                                                       | 461  | 467  | 0         | 101.3 | 77.4 | 83.3 |
| Rsa1.0_00933.1.g21509.t1 | gb EOA39492.1  hypothetical protein CARUB_v10008097mg [Capsella rubella]                                                                                                                                                                                                                                                                                                                                                                                                                                                                                                                                                                                                                                                  | 1325 | 1343 | 0         | 101.4 | 79.9 | 87.9 | hypothetical protein CARUB_v10008097mg       | gbpln | Capsella rubella     | AT1G35530.2   Symbols:   DEAD/DEAH box RNA helicase family protein   chr1:13089994-13097078 FORWARD LENGTH=1390                                                                                                                                                                                                                                                                                                                                                                                                                                                                                                     | 1325 | 1390 | 0         | 104.9 | 80.8 | 88.4 |
| Rsa1.0_00933.1.g21510.t1 | ref NP_174791.2  cytosolic invertase 1 [Arabidopsis thaliana] gi 30693225 ref NP_849750.1  cytosolic invertase 1 [Arabidopsis thaliana] gi 75264169 sp Q9LQF2.1 CINV1_ARAT H RecName: Full=Alkaline/neutral invertase CINV1; AltName: Full=Cytosolic invertase 1; Short=AtCYT-INV1 gi 8778348 gb AAF79356.1 AC007887_15 F15O4.33 [Arabidopsis thaliana] gi 17529026 gb AAL38723.1  putative invertase [Arabidopsis thaliana] gi 23296907 gb AANI3200.1  putative invertase [Arabidopsis thaliana] gi 88193450 emb CAJ76698.1  putative invertase [Arabidopsis thaliana] gi 332193691 gb AEE31812.1  cytosolic invertase 1 [Arabidopsis thaliana] gi 332193692 gb AEE31813.1  cytosolic invertase 1 [Arabidopsis thaliana] | 543  | 551  | 0         | 101.5 | 95.2 | 97.2 | cytosolic invertase 1                        | gbpln | Arabidopsis thaliana | AT1G35580.2   Symbols: CINV1   cytosolic invertase 1   chr1:13122460-13124808 REVERSE LENGTH=551                                                                                                                                                                                                                                                                                                                                                                                                                                                                                                                    | 543  | 551  | 0         | 101.5 | 95.2 | 97.2 |
| Rsa1.0_00934.1.g21511.t1 | gb AAG51783.1 AC079679.3 reverse transcriptase, putative; 16838-20266 [Arabidopsis thaliana]                                                                                                                                                                                                                                                                                                                                                                                                                                                                                                                                                                                                                              | 1681 | 1142 | 0         | 67.9  | 27.1 | 36.8 | reverse transcriptase, putative; 16838-20266 | gbpln | Arabidopsis thaliana | AT4G29090.1   Symbols:   Ribonuclease H-like superfamily protein   chr4:14333528-14335255 FORWARD LENGTH=575                                                                                                                                                                                                                                                                                                                                                                                                                                                                                                        | 1681 | 575  | 2.00E-61  | 34.2  | 8.4  | 12.7 |
| Rsa1.0_00934.1.g21512.t2 | #                                                                                                                                                                                                                                                                                                                                                                                                                                                                                                                                                                                                                                                                                                                         | #    | #    | #         | #     | #    | -    | ----                                         | ----  | #                    | #                                                                                                                                                                                                                                                                                                                                                                                                                                                                                                                                                                                                                   | #    | #    | #         | #     | #    |      |
| Rsa1.0_00934.1.g21513.t1 | #                                                                                                                                                                                                                                                                                                                                                                                                                                                                                                                                                                                                                                                                                                                         | #    | #    | #         | #     | #    | -    | ----                                         | ----  | #                    | #                                                                                                                                                                                                                                                                                                                                                                                                                                                                                                                                                                                                                   | #    | #    | #         | #     | #    |      |
| Rsa1.0_00934.1.g21514.t1 | #                                                                                                                                                                                                                                                                                                                                                                                                                                                                                                                                                                                                                                                                                                                         | #    | #    | #         | #     | #    | -    | ----                                         | ----  | #                    | #                                                                                                                                                                                                                                                                                                                                                                                                                                                                                                                                                                                                                   | #    | #    | #         | #     | #    |      |

|                          |                                                                                                                                                                                                                                                                      |      |      |           |       |      |      |                                                                                     |       |                      |                                                                                                                                                                                                                                                                                                                                                                                                                                                                                                                           |      |      |           |       |      |      |
|--------------------------|----------------------------------------------------------------------------------------------------------------------------------------------------------------------------------------------------------------------------------------------------------------------|------|------|-----------|-------|------|------|-------------------------------------------------------------------------------------|-------|----------------------|---------------------------------------------------------------------------------------------------------------------------------------------------------------------------------------------------------------------------------------------------------------------------------------------------------------------------------------------------------------------------------------------------------------------------------------------------------------------------------------------------------------------------|------|------|-----------|-------|------|------|
| Rsa1.0_00934.1.g21515.t1 | ref[XP_002882045.1] hypothetical protein ARALYDRAFT_483745 [Arabidopsis lyrata subsp. lyrata] gi 297327884 gb EFH58304.1 hypothetical protein ARALYDRAFT_483745 [Arabidopsis lyrata subsp. lyrata]                                                                   | 129  | 206  | 3.00E-14  | 159.7 | 28.7 | 31.8 | hypothetical protein ARALYDRAFT_483745                                              | gbpln | Arabidopsis lyrata   | AT2G46000.1   Symbols:   FUNCTIONS IN: molecular function unknown; INVOLVED IN: biological process unknown; LOCATED IN: endomembrane system; EXPRESSED IN: 24 plant structures; EXPRESSED DURING: 15 growth stages; CONTAINS InterPro DOMAIN/s: Mesoderm development candidate 2 (InterPro:IPRO19330); Has 31 Blast hits to 31 proteins in 13 species: Archae - 0; Bacteria - 0; Metazoa - 5; Fungi - 0; Plants - 26; Viruses - 0; Other Eukaryotes - 0 (source: NCBI BLINK).   chr2:18921194-18922047 REVERSE LENGTH=208 | 129  | 208  | 1.00E-16  | 161.2 | 29.5 | 31.0 |
| Rsa1.0_00934.1.g21516.t3 | gb[AAC28189.1] contains similarity to Arabidopsis thaliana retrotransposon Athila (GB:X81801) [Arabidopsis thaliana]                                                                                                                                                 | 1208 | 940  | 3.00E-47  | 77.8  | 8.9  | 11.8 | contains similarity to Arabidopsis thaliana retrotransposon Athila (GB:X81801)      | gbpln | Arabidopsis thaliana | #                                                                                                                                                                                                                                                                                                                                                                                                                                                                                                                         | #    | #    | #         | #     | #    |      |
| Rsa1.0_00934.1.g21517.t1 | gb[ABD65118.1] hypothetical protein 31.t00031 [Brassica oleracea]                                                                                                                                                                                                    | 174  | 467  | 3.00E-19  | 268.4 | 32.8 | 43.1 | hypothetical protein 31.t00031                                                      | gbpln | Brassica oleracea    | AT1G52950.1   Symbols:   Nucleic acid-binding, OB-fold-like protein   chr1:19725483-19728007 FORWARD LENGTH=566                                                                                                                                                                                                                                                                                                                                                                                                           | 174  | 566  | 1.00E-14  | 325.3 | 33.9 | 57.5 |
| Rsa1.0_00934.1.g21518.t1 | ref[XP_002875611.1] hypothetical protein ARALYDRAFT_323091 [Arabidopsis lyrata subsp. lyrata] gi 297321449 gb EFH51870.1 hypothetical protein ARALYDRAFT_323091 [Arabidopsis lyrata subsp. lyrata]                                                                   | 508  | 556  | 2.00E-21  | 109.4 | 20.3 | 27.8 | hypothetical protein ARALYDRAFT_323091                                              | gbpln | Arabidopsis lyrata   | AT3G43590.1   Symbols:   zinc knuckle (GCHC-type) family protein   chr3:15509753-15512255 FORWARD LENGTH=551                                                                                                                                                                                                                                                                                                                                                                                                              | 508  | 551  | 1.00E-18  | 108.5 | 19.3 | 26.8 |
| Rsa1.0_00934.1.g21519.t1 | gb[AFQ22737.1] growth-regulating factor 1, partial [Brassica rapa subsp. pekinensis]                                                                                                                                                                                 | 517  | 518  | 0         | 100.2 | 94.4 | 96.3 | growth-regulating factor 1, partial                                                 | gbpln | Brassica rapa        | AT2G22840.1   Symbols: AtGRF1, GRF1   growth-regulating factor 1   chr2:9728841-9731141 FORWARD LENGTH=530                                                                                                                                                                                                                                                                                                                                                                                                                | 517  | 530  | 0         | 102.5 | 87.6 | 92.8 |
| Rsa1.0_00934.1.g21520.t1 | ref[XP_002878667.1] hypothetical protein ARALYDRAFT_481192 [Arabidopsis lyrata subsp. lyrata] gi 297324506 gb EFH54926.1 hypothetical protein ARALYDRAFT_481192 [Arabidopsis lyrata subsp. lyrata]                                                                   | 827  | 828  | 0         | 100.1 | 71.7 | 80.3 | hypothetical protein ARALYDRAFT_481192                                              | gbpln | Arabidopsis lyrata   | AT2G23200.1   Symbols:   Protein kinase superfamily protein   chr2:9879351-9881855 FORWARD LENGTH=834                                                                                                                                                                                                                                                                                                                                                                                                                     | 827  | 834  | 0         | 100.8 | 71.3 | 80.2 |
| Rsa1.0_00934.1.g21521.t1 | ref[XP_002863767.1] hypothetical protein ARALYDRAFT_917496 [Arabidopsis lyrata subsp. lyrata] gi 297309602 gb EFH40026.1 hypothetical protein ARALYDRAFT_917496 [Arabidopsis lyrata subsp. lyrata]                                                                   | 264  | 343  | 6.00E-76  | 129.9 | 60.2 | 70.1 | hypothetical protein ARALYDRAFT_917496                                              | gbpln | Arabidopsis lyrata   | AT1G36675.1   Symbols:   glycine-rich protein   chr1:13867568-13869490 FORWARD LENGTH=268                                                                                                                                                                                                                                                                                                                                                                                                                                 | 264  | 268  | 9.00E-31  | 101.5 | 34.8 | 41.7 |
| Rsa1.0_00934.1.g21522.t1 | gb[ABD32665.1] Terpenoid cyclases/protein prenyltransferase alpha-alpha toroid; Bacterial adhesion [Medicago truncatula]                                                                                                                                             | 247  | 426  | 1.00E-114 | 172.5 | 79.8 | 83.0 | Terpenoid cyclases/protein prenyltransferase alpha-alpha toroid; Bacterial adhesion | gbpln | Medicago truncatula  | AT2G13770.1   Symbols:   CONTAINS InterPro DOMAIN/s: Putative harbinger transposase-derived nuclease (InterPro:IPRO06912); Has 451 Blast hits to 352 proteins in 33 species: Archae - 0; Bacteria - 0; Metazoa - 28; Fungi - 8; Plants - 388; Viruses - 0; Other Eukaryotes - 27 (source: NCBI BLINK).   chr2:5736603-5737847 FORWARD LENGTH=343                                                                                                                                                                          | 247  | 343  | 2.00E-18  | 138.9 | 16.6 | 22.3 |
| Rsa1.0_00934.1.g21523.t1 | #                                                                                                                                                                                                                                                                    | #    | #    | #         | #     | #    | #    | -                                                                                   | ----  | ----                 | #                                                                                                                                                                                                                                                                                                                                                                                                                                                                                                                         | #    | #    | #         | #     | #    |      |
| Rsa1.0_00934.1.g21524.t1 | ref[NP_190352.1] DNA binding protein [Arabidopsis thaliana] gi 4741185 emb CAB41851.1 hypothetical protein [Arabidopsis thaliana] gi 189303599 gb ACD85799.1 At3g47680 [Arabidopsis thaliana] gi 332644797 gb AEE78318.1] DNA binding protein [Arabidopsis thaliana] | 251  | 302  | 3.00E-16  | 120.3 | 27.5 | 32.7 | DNA binding protein                                                                 | gbpln | Arabidopsis thaliana | AT3G47680.1   Symbols:   DNA binding   chr3:17577483-17578391 REVERSE LENGTH=302                                                                                                                                                                                                                                                                                                                                                                                                                                          | 251  | 302  | 8.00E-19  | 120.3 | 27.5 | 32.7 |
| Rsa1.0_00934.1.g21525.t1 | ref[XP_002880529.1] hypothetical protein ARALYDRAFT_481243 [Arabidopsis lyrata subsp. lyrata] gi 297326368 gb EFH56788.1] hypothetical protein ARALYDRAFT_481243 [Arabidopsis lyrata subsp. lyrata]                                                                  | 270  | 273  | 1.00E-133 | 101.1 | 85.6 | 93.0 | hypothetical protein ARALYDRAFT_481243                                              | gbpln | Arabidopsis lyrata   | AT2G23810.1   Symbols: TET8   tetraspanin8   chr2:10135859-10137352 REVERSE LENGTH=273                                                                                                                                                                                                                                                                                                                                                                                                                                    | 270  | 273  | 1.00E-129 | 101.1 | 83.7 | 90.7 |
| Rsa1.0_00934.1.g21526.t1 | emb[CAN65331.1] hypothetical protein VITISV_018654 [Vitis vinifera]                                                                                                                                                                                                  | 1034 | 1218 | 0         | 117.8 | 55.0 | 68.5 | hypothetical protein VITISV_018654                                                  | gbpln | Vitis vinifera       | AT4G23160.1   Symbols: CRK8   cysteine-rich RLK (RECEPTOR-like protein kinase) 8   chr4:12129485-12134086 FORWARD LENGTH=1262                                                                                                                                                                                                                                                                                                                                                                                             | 1034 | 1262 | 2.00E-52  | 122.1 | 11.3 | 17.9 |
| Rsa1.0_00934.1.g21527.t1 | gb[ACP30609.1] disease resistance protein [Brassica rapa subsp. pekinensis]                                                                                                                                                                                          | 1561 | 2726 | 0         | 174.6 | 52.0 | 70.1 | disease resistance protein                                                          | gbpln | Brassica rapa        | ATMG00860.1   Symbols: ORF158   DNA/RNA polymerases superfamily protein   chrM:235916-236392 FORWARD LENGTH=158                                                                                                                                                                                                                                                                                                                                                                                                           | 1561 | 158  | 3.00E-36  | 10.1  | 4.5  | 6.1  |

|                          |                                                                                                                                                                                                                                                                                                                                                                                                                                                                                                                                                                                                                                                                                                                                                                                                                                                                                                                                                                                                                                                                                                                                                                                                                                                                                                                                                                                                                                                                                                                                                                                                                                                                                                                                                                                                                                                                                                                                                                                                                                     |     |      |           |       |      |      |                                               |       |                      |                                                                                                                                                                |     |      |           |       |      |      |
|--------------------------|-------------------------------------------------------------------------------------------------------------------------------------------------------------------------------------------------------------------------------------------------------------------------------------------------------------------------------------------------------------------------------------------------------------------------------------------------------------------------------------------------------------------------------------------------------------------------------------------------------------------------------------------------------------------------------------------------------------------------------------------------------------------------------------------------------------------------------------------------------------------------------------------------------------------------------------------------------------------------------------------------------------------------------------------------------------------------------------------------------------------------------------------------------------------------------------------------------------------------------------------------------------------------------------------------------------------------------------------------------------------------------------------------------------------------------------------------------------------------------------------------------------------------------------------------------------------------------------------------------------------------------------------------------------------------------------------------------------------------------------------------------------------------------------------------------------------------------------------------------------------------------------------------------------------------------------------------------------------------------------------------------------------------------------|-----|------|-----------|-------|------|------|-----------------------------------------------|-------|----------------------|----------------------------------------------------------------------------------------------------------------------------------------------------------------|-----|------|-----------|-------|------|------|
| Rsa1.0_00934.1.g21528.t1 | gb AAG51783.1 AC079679.3 reverse transcriptase, putative; 16838-20266 [Arabidopsis thaliana]                                                                                                                                                                                                                                                                                                                                                                                                                                                                                                                                                                                                                                                                                                                                                                                                                                                                                                                                                                                                                                                                                                                                                                                                                                                                                                                                                                                                                                                                                                                                                                                                                                                                                                                                                                                                                                                                                                                                        | 519 | 1142 | 8.00E-62  | 220.0 | 24.1 | 33.1 | reverse transcriptase, putative; 16838-20266  | gbpln | Arabidopsis thaliana | AT1G43760.1   Symbols:   DNase I-like superfamily protein   chr1:16528880-16531065 REVERSE LENGTH=626                                                          | 519 | 626  | 2.00E-18  | 120.6 | 17.5 | 30.8 |
| Rsa1.0_00935.1.g21529.t1 | ref NP_181552.1  HXXXD-type acyl-transferase-like protein [Arabidopsis thaliana]<br>gi 4587997 gb AAD25938.1 AF085279_11 hypothetical protein [Arabidopsis thaliana] gi 21536614 gb AAM60946.1  putative anthranilate N-hydroxycinnamoyl/benzoyltransferase [Arabidopsis thaliana] gi 330254705 gb AEC09799.1  HXXXD-type acyl-transferase-like protein [Arabidopsis thaliana]<br>ref NP_181551.1  ethylene-responsive transcription factor ABI4 [Arabidopsis thaliana]<br>gi 156630458 sp A0MES8.2 ABI4_ARATH RecName: Full=Ethylene-responsive transcription factor ABI4; Short=ERF ABI4; AltName: Full=Protein ABSCISIC ACID INSENSITIVE 4; AltName: Full=Protein GLUCOSE INSENSITIVE 6; AltName: Full=Protein IMPAIRED SUCROSE INDUCTION 3; AltName: Full=Protein SALOBRENO 5; AltName: Full=Protein SUCROSE UNCOUPLED 6; AltName: Full=Protein SUGAR INSENSITIVE 5<br>gi 4587996 gb AAD25937.1 AF085279_10 ABI4 [Arabidopsis thaliana]<br>gi 3282693 gb AAC39489.1  AP2 domain family transcription factor homolog [Arabidopsis thaliana]<br>gi 91806337 gb ABE65896.1  abscisic acid-insensitive 4 [Arabidopsis thaliana] gi 330254704 gb AEC09798.1  ethylene-responsive transcription factor ABI4 [Arabidopsis thaliana]<br>ref NP_181549.1  transcription factor bHLH51 [Arabidopsis thaliana] gi 75315012 sp Q9XEFO.1 BH051_ARATH RecName: Full=Transcription factor bHLH51; AltName: Full=Basic helix-loop-helix protein 51; Short=AtbHLH51; Short=bHLH 51; AltName: Full=Transcription factor EN 57; AltName: Full=bHLH transcription factor bHLH051<br>gi 4587994 gb AAD25935.1 AF085279_8 hypothetical protein [Arabidopsis thaliana] gi 20127047 gb AAM10943.1 AF488586_1 putative bHLH transcription factor [Arabidopsis thaliana] gi 124300966 gb ABN04735.1  At2g40200 [Arabidopsis thaliana] gi 124301074 gb ABN04789.1  At2g40200 [Arabidopsis thaliana] gi 22389858 dbj BAH30421.1  hypothetical protein [Arabidopsis thaliana] gi 330254701 gb AEC09795.1  transcription factor bHLH51 [Arabidopsis thaliana] | 428 | 433  | 0         | 101.2 | 89.3 | 95.8 | HXXXD-type acyl-transferase-like protein      | gbpln | Arabidopsis thaliana | AT2G40230.1   Symbols:   HXXXD-type acyl-transferase family protein   chr2:16803285-16804586 REVERSE LENGTH=433                                                | 428 | 433  | 0         | 101.2 | 89.3 | 95.8 |
| Rsa1.0_00935.1.g21530.t1 | gi 4587996 gb AAD25937.1 AF085279_10 ABI4 [Arabidopsis thaliana]<br>gi 3282693 gb AAC39489.1  AP2 domain family transcription factor homolog [Arabidopsis thaliana]<br>gi 91806337 gb ABE65896.1  abscisic acid-insensitive 4 [Arabidopsis thaliana] gi 330254704 gb AEC09798.1  ethylene-responsive transcription factor ABI4 [Arabidopsis thaliana]<br>ref NP_181549.1  transcription factor bHLH51 [Arabidopsis thaliana] gi 75315012 sp Q9XEFO.1 BH051_ARATH RecName: Full=Transcription factor bHLH51; AltName: Full=Basic helix-loop-helix protein 51; Short=AtbHLH51; Short=bHLH 51; AltName: Full=Transcription factor EN 57; AltName: Full=bHLH transcription factor bHLH051<br>gi 4587994 gb AAD25935.1 AF085279_8 hypothetical protein [Arabidopsis thaliana] gi 20127047 gb AAM10943.1 AF488586_1 putative bHLH transcription factor [Arabidopsis thaliana] gi 124300966 gb ABN04735.1  At2g40200 [Arabidopsis thaliana] gi 124301074 gb ABN04789.1  At2g40200 [Arabidopsis thaliana] gi 22389858 dbj BAH30421.1  hypothetical protein [Arabidopsis thaliana] gi 330254701 gb AEC09795.1  transcription factor bHLH51 [Arabidopsis thaliana]                                                                                                                                                                                                                                                                                                                                                                                                                                                                                                                                                                                                                                                                                                                                                                                                                                                                            | 327 | 328  | 1.00E-105 | 100.3 | 76.5 | 85.3 | ethylene-responsive transcription factor ABI4 | gbpln | Arabidopsis thaliana | AT2G40220.1   Symbols: ABI4, SUN6, SIS5, ISI3, GIN6, SAN5, ATAB14   Integrase-type DNA-binding superfamily protein   chr2:16796599-16797585 REVERSE LENGTH=328 | 327 | 328  | 1.00E-107 | 100.3 | 76.5 | 85.3 |
| Rsa1.0_00935.1.g21531.t1 | gi 4587994 gb AAD25935.1 AF085279_8 hypothetical protein [Arabidopsis thaliana] gi 20127047 gb AAM10943.1 AF488586_1 putative bHLH transcription factor [Arabidopsis thaliana] gi 124300966 gb ABN04735.1  At2g40200 [Arabidopsis thaliana] gi 124301074 gb ABN04789.1  At2g40200 [Arabidopsis thaliana] gi 22389858 dbj BAH30421.1  hypothetical protein [Arabidopsis thaliana] gi 330254701 gb AEC09795.1  transcription factor bHLH51 [Arabidopsis thaliana]                                                                                                                                                                                                                                                                                                                                                                                                                                                                                                                                                                                                                                                                                                                                                                                                                                                                                                                                                                                                                                                                                                                                                                                                                                                                                                                                                                                                                                                                                                                                                                     | 241 | 254  | 6.00E-85  | 105.4 | 76.3 | 86.3 | transcription factor bHLH51                   | gbpln | Arabidopsis thaliana | AT2G40200.1   Symbols:   basic helix-loop-helix (bHLH) DNA-binding superfamily protein   chr2:16791098-16792027 FORWARD LENGTH=254                             | 241 | 254  | 2.00E-87  | 105.4 | 76.3 | 86.3 |
| Rsa1.0_00935.1.g21532.t1 | gb AAF99727.1 AC004557.6 F17L21.7 [Arabidopsis thaliana]                                                                                                                                                                                                                                                                                                                                                                                                                                                                                                                                                                                                                                                                                                                                                                                                                                                                                                                                                                                                                                                                                                                                                                                                                                                                                                                                                                                                                                                                                                                                                                                                                                                                                                                                                                                                                                                                                                                                                                            | 387 | 1534 | 1.00E-100 | 396.4 | 49.4 | 58.7 | F17L21.7                                      | gbpln | Arabidopsis thaliana | AT4G23160.1   Symbols: CRK8   cysteine-rich RLK (RECEPTOR-like protein kinase) 8   chr4:12129485-12134086 FORWARD LENGTH=1262                                  | 387 | 1262 | 5.00E-39  | 326.1 | 27.9 | 48.3 |
| Rsa1.0_00935.1.g21533.t1 | ref XP_002879887.1  hypothetical protein ARALYDRAFT_903365 [Arabidopsis lyrata subsp. lyrata] gi 297325726 gb EFH56146.1  hypothetical protein ARALYDRAFT_903365 [Arabidopsis lyrata subsp. lyrata]<br>ref XP_002879851.1  predicted protein [Arabidopsis lyrata subsp. lyrata] gi 297325690 gb EFH56110.1  predicted protein [Arabidopsis lyrata subsp. lyrata]                                                                                                                                                                                                                                                                                                                                                                                                                                                                                                                                                                                                                                                                                                                                                                                                                                                                                                                                                                                                                                                                                                                                                                                                                                                                                                                                                                                                                                                                                                                                                                                                                                                                    | 626 | 1359 | 1.00E-101 | 217.1 | 36.3 | 49.7 | hypothetical protein ARALYDRAFT_903365        | gbpln | Arabidopsis lyrata   | AT3G03360.1   Symbols:   F-box/RNI-like superfamily protein   chr3:795218-796918 FORWARD LENGTH=481                                                            | 626 | 481  | 8.00E-96  | 76.8  | 34.8 | 45.5 |
| Rsa1.0_00935.1.g21534.t2 | ref XP_002879851.1  predicted protein [Arabidopsis lyrata subsp. lyrata] gi 297325690 gb EFH56110.1  predicted protein [Arabidopsis lyrata subsp. lyrata]                                                                                                                                                                                                                                                                                                                                                                                                                                                                                                                                                                                                                                                                                                                                                                                                                                                                                                                                                                                                                                                                                                                                                                                                                                                                                                                                                                                                                                                                                                                                                                                                                                                                                                                                                                                                                                                                           | 380 | 392  | 1.00E-180 | 103.2 | 84.2 | 90.3 | predicted protein                             | gbpln | Arabidopsis lyrata   | AT2G40180.1   Symbols: ATHPP2C5, PP2C5   phosphatase 2C5   chr2:16782522-16784014 FORWARD LENGTH=390                                                           | 380 | 390  | 1.00E-177 | 102.6 | 83.4 | 89.5 |



|                          |                                                                                                                                                                                                                                                                                                                       |     |      |           |       |       |       |                                        |       |                      |                                                                                                                                                                                                                                                                                                                                                                                                                                                                                           |     |     |           |       |      |      |
|--------------------------|-----------------------------------------------------------------------------------------------------------------------------------------------------------------------------------------------------------------------------------------------------------------------------------------------------------------------|-----|------|-----------|-------|-------|-------|----------------------------------------|-------|----------------------|-------------------------------------------------------------------------------------------------------------------------------------------------------------------------------------------------------------------------------------------------------------------------------------------------------------------------------------------------------------------------------------------------------------------------------------------------------------------------------------------|-----|-----|-----------|-------|------|------|
| Rsa1.0_00935.1.g21535.t1 | refXP_002881700.1  early methionine-labelled 6 [Arabidopsis lyrata subsp. lyrata] gi 297327539 gb EFH57959.1  early methionine-labelled 6 [Arabidopsis lyrata subsp. lyrata]                                                                                                                                          | 91  | 92   | 4.00E-31  | 101.1 | 83.5  | 89.0  | early methionine-labelled 6            | gbpln | Arabidopsis lyrata   | AT2G40170.1   Symbols: ATEM6, GEA6, EM6   Stress induced protein   chr2:16779792-16780167 REVERSE LENGTH=92                                                                                                                                                                                                                                                                                                                                                                               | 91  | 92  | 2.00E-33  | 101.1 | 83.5 | 87.9 |
| Rsa1.0_00935.1.g21536.t1 | refXP_002879850.1  hypothetical protein ARALYDRAFT_483062 [Arabidopsis lyrata subsp. lyrata] gi 297325689 gb EFH56109.1  hypothetical protein ARALYDRAFT_483062 [Arabidopsis lyrata subsp. lyrata]                                                                                                                    | 437 | 427  | 0         | 97.7  | 78.7  | 87.6  | hypothetical protein ARALYDRAFT_483062 | gbpln | Arabidopsis lyrata   | AT2G40160.1   Symbols: TBL30   Plant protein of unknown function (DUF828)   chr2:16777448-16779063 FORWARD LENGTH=427                                                                                                                                                                                                                                                                                                                                                                     | 437 | 427 | 0         | 97.7  | 77.3 | 87.0 |
| Rsa1.0_00935.1.g21537.t1 | refNP_030560.1  trichome birefringence-like 28 protein [Arabidopsis thaliana] gi 13877599 gb AAK43877.1 AF370500.1 Unknown protein [Arabidopsis thaliana] gi 28059703 gb AAO30085.1  Unknown protein [Arabidopsis thaliana] gi 330254695 gb AEC09789.1  trichome birefringence-like 28 protein [Arabidopsis thaliana] | 433 | 424  | 0         | 97.9  | 83.4  | 88.7  | trichome birefringence-like 28 protein | gbpln | Arabidopsis thaliana | AT2G40150.1   Symbols: TBL28   TRICHOME BIREFRINGENCE-LIKE 28   chr2:16775511-16777141 FORWARD LENGTH=424                                                                                                                                                                                                                                                                                                                                                                                 | 433 | 424 | 0         | 97.9  | 83.4 | 88.7 |
| Rsa1.0_00936.1.g21538.t1 | gb AAF79576.1 AC022464_34 F22G5.13 [Arabidopsis thaliana]                                                                                                                                                                                                                                                             | 91  | 126  | 6.00E-21  | 138.5 | 63.7  | 72.5  | F22G5.13                               | gbpln | Arabidopsis thaliana | AT1G07485.1   Symbols:   unknown protein; FUNCTIONS IN: molecular_function unknown; INVOLVED IN: biological_process unknown; LOCATED IN: cellular_component unknown; EXPRESSED IN: shoot apex, embryo, leaf whorl, pedicel; EXPRESSED DURING: 4 anthesis, D bilateral stage; Has 5 Blast hits to 5 proteins in 3 species: Archae - 0; Bacteria - 0; Metazoa - 0; Fungi - 0; Plants - 5; Viruses - 0; Other Eukaryotes - 0 (source: NCBI BLink).   chr1:2301505-2301892 FORWARD LENGTH=100 | 91  | 100 | 6.00E-18  | 109.9 | 50.5 | 59.3 |
| Rsa1.0_00936.1.g21539.t1 | gb EOA39018.1  hypothetical protein CARUB_v10011564mg [Capsella rubella]                                                                                                                                                                                                                                              | 86  | 78   | 1.00E-16  | 90.7  | 60.5  | 68.6  | hypothetical protein CARUB_v10011564mg | gbpln | Capsella rubella     | #                                                                                                                                                                                                                                                                                                                                                                                                                                                                                         | #   | #   | #         | #     | #    | #    |
| Rsa1.0_00936.1.g21540.t1 | refXP_002892404.1  predicted protein [Arabidopsis lyrata subsp. lyrata] gi 297338246 gb EFH68663.1  predicted protein [Arabidopsis lyrata subsp. lyrata]                                                                                                                                                              | 722 | 1493 | 0         | 206.8 | 76.9  | 85.0  | predicted protein                      | gbpln | Arabidopsis lyrata   | AT1G07520.1   Symbols:   GRAS family transcription factor   chr1:2309718-2311805 REVERSE LENGTH=695                                                                                                                                                                                                                                                                                                                                                                                       | 722 | 695 | 0         | 96.3  | 74.8 | 82.7 |
| Rsa1.0_00936.1.g21541.t1 | gb AAF79547.1 AC022464_5 F22G5.8 [Arabidopsis thaliana]                                                                                                                                                                                                                                                               | 87  | 707  | 1.00E-42  | 812.6 | 92.0  | 95.4  | F22G5.8                                | gbpln | Arabidopsis thaliana | AT1G07540.1   Symbols: TRFL2   TRF-like 2   chr1:2318433-2321048 REVERSE LENGTH=630                                                                                                                                                                                                                                                                                                                                                                                                       | 87  | 630 | 2.00E-41  | 724.1 | 87.4 | 88.5 |
| Rsa1.0_00936.1.g21542.t1 | db BAJ34037.1  unnamed protein product [Thellungiella halophila]                                                                                                                                                                                                                                                      | 335 | 341  | 1.00E-171 | 101.8 | 85.4  | 92.8  | unnamed protein product                | ----  | ----                 | AT3G44290.1   Symbols: anac060, NAC060   NAC domain containing protein 60   chr3:15972909-15975019 REVERSE LENGTH=335                                                                                                                                                                                                                                                                                                                                                                     | 335 | 335 | 1.00E-170 | 100.0 | 85.4 | 91.3 |
| Rsa1.0_00936.1.g21543.t1 | refNP_172234.2  telomere repeat-binding protein 5 [Arabidopsis thaliana] gi 296439813 sp Q6R0E3.2 TRP5_ARAT H RecName: Full=Telomere repeat-binding protein 5; AltName: Full=Protein TRF-LIKE 2 gi 332190019 gb AEE28140.1  telomere repeat-binding protein 5 [Arabidopsis thaliana]                                  | 612 | 630  | 0         | 102.9 | 80.1  | 86.6  | telomere repeat-binding protein 5      | gbpln | Arabidopsis thaliana | AT1G07540.1   Symbols: TRFL2   TRF-like 2   chr1:2318433-2321048 REVERSE LENGTH=630                                                                                                                                                                                                                                                                                                                                                                                                       | 612 | 630 | 0         | 102.9 | 80.1 | 86.6 |
| Rsa1.0_00936.1.g21544.t1 | #                                                                                                                                                                                                                                                                                                                     | #   | #    | #         | #     | #     | #     | -                                      | ----  | ----                 | AT4G05460.1   Symbols:   RNI-like superfamily protein   chr4:2761106-2762400 REVERSE LENGTH=302                                                                                                                                                                                                                                                                                                                                                                                           | 77  | 302 | 6.00E-11  | 392.2 | 35.1 | 42.9 |
| Rsa1.0_00936.1.g21545.t1 | gb EOA37565.1  hypothetical protein CARUB_v10011886mg [Capsella rubella]                                                                                                                                                                                                                                              | 870 | 870  | 0         | 100.0 | 71.7  | 83.3  | hypothetical protein CARUB_v10011886mg | gbpln | Capsella rubella     | AT2G14510.1   Symbols:   Leucine-rich repeat protein kinase family protein   chr2:6171133-6175052 REVERSE LENGTH=868                                                                                                                                                                                                                                                                                                                                                                      | 870 | 868 | 0         | 99.8  | 72.0 | 83.1 |
| Rsa1.0_00936.1.g21546.t1 | gb ADP37975.1  metallothionein-like protein [Brassica napus]                                                                                                                                                                                                                                                          | 45  | 45   | 3.00E-13  | 100.0 | 100.0 | 100.0 | metallothionein-like protein           | gbpln | Brassica napus       | AT1G07610.1   Symbols: MT1C   metallothionein 1C   chr1:2341603-2341865 FORWARD LENGTH=45                                                                                                                                                                                                                                                                                                                                                                                                 | 45  | 45  | 5.00E-14  | 100.0 | 91.1 | 95.6 |
| Rsa1.0_00936.1.g21547.t1 | gb EOA40013.1  hypothetical protein CARUB_v10008702mg [Capsella rubella]                                                                                                                                                                                                                                              | 643 | 557  | 0         | 86.6  | 57.2  | 68.6  | hypothetical protein CARUB_v10008702mg | gbpln | Capsella rubella     | AT1G07620.1   Symbols: ATOBGM   GTP-binding protein Obz/CgtA   chr1:2344556-2346374 REVERSE LENGTH=552                                                                                                                                                                                                                                                                                                                                                                                    | 643 | 552 | 0         | 85.8  | 59.7 | 67.8 |

|                          |                                                                                                                                                                                                                                                                                                                                                                                                                                                                                                                                                                |      |      |           |       |      |      |                                                                     |       |                      |                                                                                                                                                                                                                                                                                                                                            |      |      |           |       |      |      |
|--------------------------|----------------------------------------------------------------------------------------------------------------------------------------------------------------------------------------------------------------------------------------------------------------------------------------------------------------------------------------------------------------------------------------------------------------------------------------------------------------------------------------------------------------------------------------------------------------|------|------|-----------|-------|------|------|---------------------------------------------------------------------|-------|----------------------|--------------------------------------------------------------------------------------------------------------------------------------------------------------------------------------------------------------------------------------------------------------------------------------------------------------------------------------------|------|------|-----------|-------|------|------|
| Rsa1.0_00936.1.g21548.t2 | ref NP_563791.1  putative protein phosphatase 2C 4 [Arabidopsis thaliana] gi 75180175 sp g9LQN6.1 P2C04_ARAT H RecName: Full=Probable protein phosphatase 2C 4; Short=AAPP2C04; AltName: Full=Protein POLTERGEIST-LIKE 5; AltName: Full=Protein phosphatase 2C PLL5; Short=PP2C PLL5 gi 8439909 gb AAAF75095.1 AC007583.31 It contains protein phosphatase 2C domain PF00481. ESTs gb H36120 and gb 36519 come from this gene [Arabidopsis thaliana] gi 332190030 gb AEE28151.1  putative protein phosphatase 2C 4 [Arabidopsis thaliana]                      | 634  | 662  | 0         | 104.4 | 80.9 | 96.8 | putative protein phosphatase 2C 4                                   | gbpln | Arabidopsis thaliana | AT1G07630.1   Symbols: PLL5   pol-like 5   chr1:2349189-2351437 FORWARD LENGTH=662                                                                                                                                                                                                                                                         | 634  | 662  | 0         | 104.4 | 80.9 | 86.8 |
| Rsa1.0_00936.1.g21549.t1 | gb EOA38961.1  hypothetical protein CARUB_v10011378mg [Capsella rubella]                                                                                                                                                                                                                                                                                                                                                                                                                                                                                       | 323  | 337  | 1.00E-125 | 104.3 | 77.4 | 83.0 | hypothetical protein CARUB_v10011378mg                              | gbpln | Capsella rubella     | AT1G07640.2   Symbols: OBP2   Dof-type zinc finger DNA-binding family protein   chr1:2354707-2355798 REVERSE LENGTH=331                                                                                                                                                                                                                    | 323  | 331  | 1.00E-126 | 102.5 | 78.0 | 85.1 |
| Rsa1.0_00936.1.g21550.t1 | gb AAL65634.1  transaldolase-like protein [Arabidopsis thaliana] gi 22497334 gb AAL65636.1  transaldolase-like protein [Arabidopsis thaliana]                                                                                                                                                                                                                                                                                                                                                                                                                  | 69   | 375  | 1.00E-11  | 543.5 | 66.7 | 76.8 | transaldolase-like protein                                          | gbpln | Arabidopsis thaliana | AT1G12230.1   Symbols:   Aldolase superfamily protein   chr1:4148050-4150708 FORWARD LENGTH=405                                                                                                                                                                                                                                            | 69   | 405  | 6.00E-14  | 587.0 | 65.2 | 76.8 |
| Rsa1.0_00936.1.g21551.t1 | ref NP_172244.2  putative LRR receptor-like serine/threonine-protein kinase [Arabidopsis thaliana] gi 264664462 sp COLGE0.1 Y1765_ARAT H RecName: Full=Probable LRR receptor-like serine/threonine-protein kinase At1g07650; Flags: Precursor gi 224589382 gb ACN59225.1  leucine-rich repeat receptor-like protein kinase [Arabidopsis thaliana] gi 332190034 gb AEE28155.1  putative LRR receptor-like serine/threonine-protein kinase [Arabidopsis thaliana] ref XP_002892412.1  lactoylglutathione lyase family protein [Arabidopsis lyrata subsp. lyrata] | 1013 | 1014 | 0         | 100.1 | 86.1 | 91.5 | putative LRR receptor-like serine/threonine-protein kinase          | gbpln | Arabidopsis thaliana | AT1G07650.1   Symbols:   Leucine-rich repeat transmembrane protein kinase   chr1:2359817-2366423 REVERSE LENGTH=1014                                                                                                                                                                                                                       | 1013 | 1014 | 0         | 100.1 | 86.1 | 91.5 |
| Rsa1.0_00936.1.g21552.t1 | gi 297338254 gb EFH68671.1  lactoylglutathione lyase family protein [Arabidopsis lyrata subsp. lyrata]                                                                                                                                                                                                                                                                                                                                                                                                                                                         | 58   | 137  | 7.00E-19  | 236.2 | 81.0 | 81.0 | lactoylglutathione lyase family protein                             | gbpln | Arabidopsis lyrata   | AT1G07645.1   Symbols: ATDS1-1VOC, DSI-1VOC   desiccation-induced 1VOC superfamily protein   chr1:2367612-2368349 REVERSE LENGTH=137                                                                                                                                                                                                       | 58   | 137  | 8.00E-21  | 236.2 | 79.3 | 81.0 |
| Rsa1.0_00937.1.g21553.t1 | gb EOA30106.1  hypothetical protein CARUB_v10013217mg [Capsella rubella]                                                                                                                                                                                                                                                                                                                                                                                                                                                                                       | 625  | 626  | 0         | 100.2 | 85.4 | 92.8 | hypothetical protein CARUB_v10013217mg                              | gbpln | Capsella rubella     | AT3G10160.1   Symbols: ATDFC, DFC, FPGS2   DHFS-FPGS homolog C   chr3:3139588-3143949 REVERSE LENGTH=625                                                                                                                                                                                                                                   | 625  | 625  | 0         | 100.0 | 86.4 | 92.8 |
| Rsa1.0_00937.1.g21554.t1 | ref NP_187623.2  uncharacterized protein [Arabidopsis thaliana] gi 26450718 dbj BAC42468.1  unknown protein [Arabidopsis thaliana] gi 28372890 gb AAO39927.1  At3g10120 [Arabidopsis thaliana] gi 332641341 gb AEE74862.1  uncharacterized protein AT3G10120 [Arabidopsis thaliana]                                                                                                                                                                                                                                                                            | 171  | 173  | 1.00E-65  | 101.2 | 77.2 | 88.3 | uncharacterized protein                                             | gbpln | Arabidopsis thaliana | AT3G10120.1   Symbols:   unknown protein; BEST Arabidopsis thaliana protein match is: unknown protein (TAIR:AT5G03890.1); Has 57 Blast hits to 57 proteins in 10 species: Archae - 0; Bacteria - 0; Metazoa - 0; Fungi - 0; Plants - 57; Viruses - 0; Other Eukaryotes - 0 (source: NCBI BLINK).   chr3:3130155-3130676 FORWARD LENGTH=173 | 171  | 173  | 5.00E-68  | 101.2 | 77.2 | 88.3 |
| Rsa1.0_00937.1.g21555.t1 | gb AAF18538.1 AC006551_24 Very similar to retrotransposon reverse transcriptase [Arabidopsis thaliana] ref NP_189068.2  RNA-directed DNA polymerase (reverse transcriptase)-related protein [Arabidopsis thaliana]                                                                                                                                                                                                                                                                                                                                             | 170  | 1231 | 9.00E-27  | 724.1 | 35.9 | 55.9 | Very similar to retrotransposon reverse transcriptase               | gbpln | Arabidopsis thaliana | #                                                                                                                                                                                                                                                                                                                                          | #    | #    | #         | #     | #    |      |
| Rsa1.0_00937.1.g21556.t1 | ref NP_189068.2  RNA-directed DNA polymerase (reverse transcriptase)-related protein [Arabidopsis thaliana] gi 332643359 gb AEE76880.1  RNA-directed DNA polymerase (reverse transcriptase)-related protein [Arabidopsis thaliana]                                                                                                                                                                                                                                                                                                                             | 270  | 746  | 5.00E-55  | 276.3 | 37.0 | 51.5 | RNA-directed DNA polymerase (reverse transcriptase)-related protein | gbpln | Arabidopsis thaliana | AT3G24255.1   Symbols:   RNA-directed DNA polymerase (reverse transcriptase)-related family protein   chr3:8789471-8793208 FORWARD LENGTH=746                                                                                                                                                                                              | 270  | 746  | 1.00E-57  | 276.3 | 37.0 | 51.5 |
| Rsa1.0_00937.1.g21557.t1 | gb EOA32236.1  hypothetical protein CARUB_v10015494mg [Capsella rubella]                                                                                                                                                                                                                                                                                                                                                                                                                                                                                       | 226  | 227  | 1.00E-107 | 100.4 | 87.6 | 94.2 | hypothetical protein CARUB_v10015494mg                              | gbpln | Capsella rubella     | AT3G10080.1   Symbols:   RmC-like cupins superfamily protein   chr3:3107476-3108159 REVERSE LENGTH=227                                                                                                                                                                                                                                     | 226  | 227  | 1.00E-107 | 100.4 | 86.7 | 94.7 |
| Rsa1.0_00937.1.g21558.t1 | ref XP_002884774.1  L-O-methylthreonine resistant 1 [Arabidopsis lyrata subsp. lyrata] gi 297330614 gb EFH61033.1  L-O-methylthreonine resistant 1 [Arabidopsis lyrata subsp. lyrata]                                                                                                                                                                                                                                                                                                                                                                          | 615  | 591  | 0         | 96.1  | 83.3 | 89.9 | L-O-methylthreonine resistant 1                                     | gbpln | Arabidopsis lyrata   | AT3G10050.1   Symbols: OMR1   L-O-methylthreonine resistant 1   chr3:3099164-3101741 REVERSE LENGTH=592                                                                                                                                                                                                                                    | 615  | 592  | 0         | 96.3  | 82.0 | 88.6 |

|                          |                                                                                                                                                                                                                                                                                                                                                                                                                                                                                                                                                                                                                                                                                                                                                                                                          |     |      |           |       |      |      |                                          |       |                      |                                                                                                                                                  |     |      |           |       |      |      |
|--------------------------|----------------------------------------------------------------------------------------------------------------------------------------------------------------------------------------------------------------------------------------------------------------------------------------------------------------------------------------------------------------------------------------------------------------------------------------------------------------------------------------------------------------------------------------------------------------------------------------------------------------------------------------------------------------------------------------------------------------------------------------------------------------------------------------------------------|-----|------|-----------|-------|------|------|------------------------------------------|-------|----------------------|--------------------------------------------------------------------------------------------------------------------------------------------------|-----|------|-----------|-------|------|------|
| Rsa1.0_00937.1.g21559.t1 | refNP_187595.1   cell division control protein 48-A [Arabidopsis thaliana]   gi1705677   spP54609.1   CD48A_ARATH RecName: Full=Cell division control protein 48 homolog A; Short=AtCDC48a   gi6681343   gbAAF23260.1   AC015985_18 putative transitional endoplasmic reticulum ATPase [Arabidopsis thaliana]   gi1019904   gbAAC49120.1   cell division cycle protein [Arabidopsis thaliana]   gi17473551   gb AL38252.1   putative transitional endoplasmic reticulum ATPase [Arabidopsis thaliana]   gi20453130   gb AAM19807.1   AT3g09840/F8A24.1.1 [Arabidopsis thaliana]   gi110735114   gb ABG89127.1   CDC48a [synthetic construct]   gi222424942   dbj BAH20422.1   AT3G09840 [Arabidopsis thaliana]   gi332641299   gb AEE74820.1   cell division control protein 48-A [Arabidopsis thaliana] | 810 | 809  | 0         | 99.9  | 98.6 | 99.3 | cell division control protein 48-A       | gbpln | Arabidopsis thaliana | AT3G09840.1   Symbols: CDC48, ATCDC48, CDC48A   cell division cycle 48   chr3:3019494-3022832 FORWARD LENGTH=809                                 | 810 | 809  | 0         | 99.9  | 98.6 | 99.3 |
| Rsa1.0_00937.1.g21560.t1 | gb EOA30956.1   hypothetical protein CARUB_v10014102mg [Capsella rubella]                                                                                                                                                                                                                                                                                                                                                                                                                                                                                                                                                                                                                                                                                                                                | 186 | 344  | 1.00E-104 | 184.9 | 96.8 | 98.9 | hypothetical protein CARUB_v10014102mg   | gbpln | Capsella rubella     | AT3G09820.1   Symbols: ADK1, ATADK1   adenosine kinase 1   chr3:3012122-3014624 FORWARD LENGTH=344                                               | 186 | 344  | 1.00E-106 | 184.9 | 96.8 | 98.9 |
| Rsa1.0_00938.1.g21561.t1 | ref XP_002882792.1   hypothetical protein ARALYDRAFT_478649 [Arabidopsis lyrata subsp. lyrata]   gi297328632   gb EFH59051.1   hypothetical protein ARALYDRAFT_478649 [Arabidopsis lyrata subsp. lyrata]                                                                                                                                                                                                                                                                                                                                                                                                                                                                                                                                                                                                 | 177 | 175  | 4.00E-64  | 98.9  | 65.5 | 74.6 | hypothetical protein ARALYDRAFT_478649   | gbpln | Arabidopsis lyrata   | AT3G12880.1   Symbols:   Plant invertase/pectin methyltransferase inhibitor superfamily protein   chr3:4095563-4096102 FORWARD LENGTH=179        | 177 | 179  | 5.00E-65  | 101.1 | 63.8 | 72.3 |
| Rsa1.0_00938.1.g21562.t1 | #                                                                                                                                                                                                                                                                                                                                                                                                                                                                                                                                                                                                                                                                                                                                                                                                        | #   | #    | #         | #     | #    | #    | -                                        | ----  | ----                 | #                                                                                                                                                | #   | #    | #         | #     | #    |      |
| Rsa1.0_00938.1.g21563.t1 | ref XP_002882793.1   hypothetical protein ARALYDRAFT_478650 [Arabidopsis lyrata subsp. lyrata]   gi297328633   gb EFH59052.1   hypothetical protein ARALYDRAFT_478650 [Arabidopsis lyrata subsp. lyrata]                                                                                                                                                                                                                                                                                                                                                                                                                                                                                                                                                                                                 | 243 | 251  | 1.00E-116 | 103.3 | 86.0 | 90.9 | hypothetical protein ARALYDRAFT_478650   | gbpln | Arabidopsis lyrata   | AT3G12890.1   Symbols: ASML2   activator of spomin; LUC2   chr3:4099223-4100277 FORWARD LENGTH=251                                               | 243 | 251  | 1.00E-117 | 103.3 | 84.8 | 89.7 |
| Rsa1.0_00938.1.g21564.t1 | emb CAB39638.1   RNA-directed DNA polymerase-like protein [Arabidopsis thaliana]   gi7267666   emb CAB78094.1   RNA-directed DNA polymerase-like protein [Arabidopsis thaliana]                                                                                                                                                                                                                                                                                                                                                                                                                                                                                                                                                                                                                          | 704 | 1274 | 0         | 181.0 | 54.4 | 67.2 | RNA-directed DNA polymerase-like protein | gbpln | Arabidopsis thaliana | AT4G20900.1   Symbols:   Ribonuclease H-like superfamily protein   chr4:14333528-14335255 FORWARD LENGTH=575                                     | 704 | 575  | 2.00E-64  | 81.7  | 25.3 | 37.6 |
| Rsa1.0_00938.1.g21565.t2 | gb ABK28555.1   unknown [Arabidopsis thaliana]                                                                                                                                                                                                                                                                                                                                                                                                                                                                                                                                                                                                                                                                                                                                                           | 102 | 358  | 1.00E-23  | 351.0 | 67.6 | 78.4 | unknown                                  | gbpln | Arabidopsis thaliana | AT3G12900.1   Symbols:   2-oxoglutarate (2OG) and Fe(II)-dependent oxygenase superfamily protein   chr3:4104576-4106112 FORWARD LENGTH=357       | 102 | 357  | 2.00E-26  | 350.0 | 67.6 | 78.4 |
| Rsa1.0_00938.1.g21566.t1 | ref XP_002882795.1   transcription factor [Arabidopsis lyrata subsp. lyrata]   gi297328635   gb EFH59054.1   transcription factor [Arabidopsis lyrata subsp. lyrata]                                                                                                                                                                                                                                                                                                                                                                                                                                                                                                                                                                                                                                     | 311 | 303  | 1.00E-132 | 97.4  | 75.2 | 84.6 | transcription factor                     | gbpln | Arabidopsis lyrata   | AT3G12910.1   Symbols:   NAC (No Apical Meristem) domain transcriptional regulator superfamily protein   chr3:4109417-4110648 FORWARD LENGTH=303 | 311 | 303  | 1.00E-127 | 97.4  | 74.0 | 83.3 |
| Rsa1.0_00938.1.g21567.t1 | #                                                                                                                                                                                                                                                                                                                                                                                                                                                                                                                                                                                                                                                                                                                                                                                                        | #   | #    | #         | #     | #    | #    | -                                        | ----  | ----                 | #                                                                                                                                                | #   | #    | #         | #     | #    |      |
| Rsa1.0_00938.1.g21568.t1 | ref NP_566438.1   S-ribonuclease binding protein [Arabidopsis thaliana]   gi15795121   dbj BAB02499.1   unnamed protein product [Arabidopsis thaliana]   gi26451940   dbj BAC43062.1   unknown protein [Arabidopsis thaliana]   gi30017303   gb AAP12885.1   At3g12920 [Arabidopsis thaliana]   gi332641741   gb AEE75262.1   S-ribonuclease binding protein [Arabidopsis thaliana]                                                                                                                                                                                                                                                                                                                                                                                                                      | 443 | 335  | 1.00E-127 | 75.6  | 51.7 | 59.6 | S-ribonuclease binding protein           | gbpln | Arabidopsis thaliana | AT3G12920.1   Symbols:   SBP (S-ribonuclease binding protein) family protein   chr3:4122127-4123323 REVERSE LENGTH=335                           | 443 | 335  | 1.00E-130 | 75.6  | 51.7 | 59.6 |
| Rsa1.0_00938.1.g21569.t1 | gb AAC19278.1   T14P8.10 [Arabidopsis thaliana]   gi7269009   emb CAB80742.1   AT4g02490 [Arabidopsis thaliana]                                                                                                                                                                                                                                                                                                                                                                                                                                                                                                                                                                                                                                                                                          | 728 | 657  | 1.00E-171 | 90.2  | 40.5 | 53.3 | T14P8.10                                 | gbpln | Arabidopsis thaliana | AT3G24255.1   Symbols:   RNA-directed DNA polymerase (reverse transcriptase)-related family protein   chr3:8789471-8793208 FORWARD LENGTH=746    | 728 | 746  | 3.00E-54  | 102.5 | 18.4 | 27.9 |
| Rsa1.0_00938.1.g21570.t1 | ref NP_187937.2   varicose-related protein [Arabidopsis thaliana]   gi75335477   sp Q9LTT9.1   VCR_ARATH RecName: Full=Varicose-related protein   gi9294535   dbj BAB02798.1   unnamed protein product [Arabidopsis thaliana]   gi332641808   gb AEE75329.1   varicose-related protein [Arabidopsis thaliana]                                                                                                                                                                                                                                                                                                                                                                                                                                                                                            | 593 | 1340 | 0         | 226.0 | 73.2 | 82.5 | varicose-related protein                 | gbpln | Arabidopsis thaliana | AT3G13290.1   Symbols: VCR   varicose-related   chr3:4297529-4303113 FORWARD LENGTH=1340                                                         | 593 | 1340 | 0         | 226.0 | 73.2 | 82.5 |

|                          |                                                                                                                                                                                                                                                                                                                                                                                                                                                                                                                                                                                                                                                                 |      |      |           |       |      |      |                                                      |       |                      |                                                                                                                               |      |      |           |       |      |      |
|--------------------------|-----------------------------------------------------------------------------------------------------------------------------------------------------------------------------------------------------------------------------------------------------------------------------------------------------------------------------------------------------------------------------------------------------------------------------------------------------------------------------------------------------------------------------------------------------------------------------------------------------------------------------------------------------------------|------|------|-----------|-------|------|------|------------------------------------------------------|-------|----------------------|-------------------------------------------------------------------------------------------------------------------------------|------|------|-----------|-------|------|------|
| Rsa1.0_00938.1.g21571.t1 | ref[XP_002884960.1] DNAJ heat shock N-terminal domain-containing protein [Arabidopsis lyrata subsp. lyrata] gi 297330800 gb EFH61219.1  DNAJ heat shock N-terminal domain-containing protein [Arabidopsis lyrata subsp. lyrata]                                                                                                                                                                                                                                                                                                                                                                                                                                 | 157  | 157  | 8.00E-58  | 100.0 | 77.1 | 83.4 | DNAJ heat shock N-terminal domain-containing protein | gbpln | Arabidopsis lyrata   | AT3G13310.1   Symbols:   Chaperone DnaJ-domain superfamily protein   chr3:4310827-4311300 REVERSE LENGTH=157                  | 157  | 157  | 1.00E-59  | 100.0 | 77.1 | 83.4 |
| Rsa1.0_00938.1.g21572.t1 | #                                                                                                                                                                                                                                                                                                                                                                                                                                                                                                                                                                                                                                                               | #    | #    | #         | #     | #    | #    | -                                                    | ----  | ----                 | #                                                                                                                             | #    | #    | #         | #     | #    | #    |
| Rsa1.0_00938.1.g21573.t1 | ref[NP_566450.1] RNA-binding protein PNO1 [Arabidopsis thaliana] gi 9294528 dbj BAB02791.1  unnamed protein product [Arabidopsis thaliana] gi 50897250 gb AT95764.1  At3g13230 [Arabidopsis thaliana] gi 110738874 dbj BAF01359.1  hypothetical protein [Arabidopsis thaliana] gi 332641801 gb AEE75322.1  RNA-binding KH domain-containing protein [Arabidopsis thaliana]                                                                                                                                                                                                                                                                                      | 217  | 215  | 1.00E-110 | 99.1  | 90.3 | 95.4 | RNA-binding protein PNO1                             | gbpln | Arabidopsis thaliana | AT3G13230.1   Symbols:   RNA-binding KH domain-containing protein   chr3:4270423-4271070 FORWARD LENGTH=215                   | 217  | 215  | 1.00E-112 | 99.1  | 90.3 | 95.4 |
| Rsa1.0_00938.1.g21574.t1 | dbj BAF02082.1  hypothetical protein [Arabidopsis thaliana]                                                                                                                                                                                                                                                                                                                                                                                                                                                                                                                                                                                                     | 1141 | 774  | 0         | 67.8  | 43.8 | 49.0 | hypothetical protein                                 | gbpln | Arabidopsis thaliana | AT3G13300.1   Symbols: VCS   Transducin/WD40 repeat-like superfamily protein   chr3:4304085-4309949 FORWARD LENGTH=1344       | 1141 | 1344 | 0         | 117.8 | 43.8 | 49.0 |
| Rsa1.0_00938.1.g21575.t1 | ref[NP_187939.1] chaperone DnaJ-domain containing protein [Arabidopsis thaliana] gi 9294537 dbj BAB02800.1  DnaJ-like protein [Arabidopsis thaliana] gi 21592683 gb AAM6432.1  DnaJ protein, putative [Arabidopsis thaliana] gi 32815917 gb AAP89343.1  At3g13310 [Arabidopsis thaliana] gi 332641811 gb AEE75332.1  chaperone DnaJ-domain containing protein [Arabidopsis thaliana]                                                                                                                                                                                                                                                                            | 120  | 157  | 2.00E-36  | 130.8 | 71.7 | 75.8 | chaperone DnaJ-domain containing protein             | gbpln | Arabidopsis thaliana | AT3G13310.1   Symbols:   Chaperone DnaJ-domain superfamily protein   chr3:4310827-4311300 REVERSE LENGTH=157                  | 120  | 157  | 3.00E-39  | 130.8 | 71.7 | 75.8 |
| Rsa1.0_00938.1.g21576.t1 | #                                                                                                                                                                                                                                                                                                                                                                                                                                                                                                                                                                                                                                                               | #    | #    | #         | #     | #    | #    | -                                                    | ----  | ----                 | #                                                                                                                             | #    | #    | #         | #     | #    | #    |
| Rsa1.0_00938.1.g21577.t1 | #                                                                                                                                                                                                                                                                                                                                                                                                                                                                                                                                                                                                                                                               | #    | #    | #         | #     | #    | #    | -                                                    | ----  | ----                 | #                                                                                                                             | #    | #    | #         | #     | #    | #    |
| Rsa1.0_00939.1.g21578.t1 | dbj BAB09923.1  copia-like retrotransposable element [Arabidopsis thaliana]                                                                                                                                                                                                                                                                                                                                                                                                                                                                                                                                                                                     | 1531 | 1342 | 0         | 87.7  | 43.4 | 59.8 | copia-like retrotransposable element                 | gbpln | Arabidopsis thaliana | AT4G23160.1   Symbols: CRK8   cysteine-rich RLK (RECEPTOR-like protein kinase) 8   chr4:12129485-12134086 FORWARD LENGTH=1262 | 1531 | 1262 | 5.00E-83  | 82.4  | 11.3 | 17.8 |
| Rsa1.0_00939.1.g21579.t1 | ref[NP_564729.1] TRAF-like protein [Arabidopsis thaliana] gi 8979946 gb AAF62260.1 AC009051_11 identical to gene ZW9 from Arabidopsis thaliana gb AB028194 and contains two MATH PF 00917 domains. ESTs gb AI096327. gb AI997139. gb AA712716. gb BE037713. gb BE037714. gb F14095. gb F14009. gb N38170. gb T44357. gb T45202 come from this gene [Arabidopsis thaliana] gi 12083246 gb AAG48782.1 AF332419.1 unknown protein [Arabidopsis thaliana] gi 16930453 gb AAL31912.1 AF419580.1 At1g58270/F19C14.8 [Arabidopsis thaliana] gi 6520139 dbj BAA87936.1  ZW9 [Arabidopsis thaliana] gi 332195406 gb AEE33527.1  TRAF-like protein [Arabidopsis thaliana] | 176  | 396  | 6.00E-63  | 225.0 | 73.3 | 86.9 | TRAF-like protein                                    | gbpln | Arabidopsis thaliana | AT1G58270.1   Symbols: ZW9   TRAF-like family protein   chr1:21612394-21614089 REVERSE LENGTH=396                             | 176  | 396  | 2.00E-65  | 225.0 | 73.3 | 86.9 |
| Rsa1.0_00939.1.g21580.t1 | gb EOA31343.1  hypothetical protein CARUB_v10014517mg [Capsella rubella]                                                                                                                                                                                                                                                                                                                                                                                                                                                                                                                                                                                        | 170  | 238  | 5.00E-25  | 140.0 | 31.2 | 35.9 | hypothetical protein CARUB_v10014517mg               | gbpln | Capsella rubella     | AT3G07800.1   Symbols:   Thymidine kinase   chr3:2489944-2490935 REVERSE LENGTH=238                                           | 170  | 238  | 3.00E-26  | 140.0 | 30.0 | 34.7 |
| Rsa1.0_00939.1.g21581.t1 | gb EOA34484.1  hypothetical protein CARUB_v10022025mg [Capsella rubella]                                                                                                                                                                                                                                                                                                                                                                                                                                                                                                                                                                                        | 339  | 348  | 1.00E-166 | 102.7 | 84.7 | 92.0 | hypothetical protein CARUB_v10022025mg               | gbpln | Capsella rubella     | AT1G73610.1   Symbols:   GDSL-like Lipase/Acylhydrolase superfamily protein   chr1:27678377-27679807 FORWARD LENGTH=344       | 339  | 344  | 1.00E-158 | 101.5 | 79.9 | 88.2 |
| Rsa1.0_00939.1.g21582.t1 | gb ABV89611.1  thaumatin-like protein [Brassica rapa]                                                                                                                                                                                                                                                                                                                                                                                                                                                                                                                                                                                                           | 265  | 245  | 1.00E-140 | 92.5  | 91.7 | 92.5 | thaumatin-like protein                               | gbpln | Brassica rapa        | AT1G73620.1   Symbols:   Pathogenesis-related thaumatin superfamily protein   chr1:27681432-27682954 FORWARD LENGTH=264       | 265  | 264  | 1.00E-130 | 99.6  | 90.2 | 93.6 |
| Rsa1.0_00939.1.g21583.t1 | gb EOA35826.1  hypothetical protein CARUB_v10021066mg [Capsella rubella]                                                                                                                                                                                                                                                                                                                                                                                                                                                                                                                                                                                        | 160  | 162  | 6.00E-71  | 101.3 | 81.9 | 90.0 | hypothetical protein CARUB_v10021066mg               | gbpln | Capsella rubella     | AT1G73630.1   Symbols:   EF hand calcium-binding protein family   chr1:27684748-27685239 FORWARD LENGTH=163                   | 160  | 163  | 9.00E-73  | 101.9 | 83.1 | 90.0 |

|                          |                                                                                                                                                                                                                                                                                                                                                                               |      |      |           |       |      |      |                                                     |       |                      |                                                                                                                                                  |      |      |           |       |      |      |
|--------------------------|-------------------------------------------------------------------------------------------------------------------------------------------------------------------------------------------------------------------------------------------------------------------------------------------------------------------------------------------------------------------------------|------|------|-----------|-------|------|------|-----------------------------------------------------|-------|----------------------|--------------------------------------------------------------------------------------------------------------------------------------------------|------|------|-----------|-------|------|------|
| Rsa1.0_00939.1.g21584.t1 | refXP_002887496.1   hypothetical protein ARALYDRAFT_476500 [Arabidopsis lyrata subsp. lyrata] gi 297333337 gb EFH63755.1   hypothetical protein ARALYDRAFT_476500 [Arabidopsis lyrata subsp. lyrata]                                                                                                                                                                          | 232  | 232  | 1.00E-116 | 100.0 | 90.5 | 95.3 | hypothetical protein ARALYDRAFT_476500              | gbpln | Arabidopsis lyrata   | AT1G73640.1   Symbols: AtRABA6a, RABA6a   RAB GTPase homolog A6A   chr1:27687033-27687987 FORWARD LENGTH=233                                     | 232  | 233  | 1.00E-116 | 100.4 | 89.7 | 95.3 |
| Rsa1.0_00939.1.g21585.t1 | refNP_565068.1   uncharacterized protein [Arabidopsis thaliana] gi 222422963 dbj BAH19466.1   AT1G73650 [Arabidopsis thaliana] gi 332197389 gb AE35490.1   uncharacterized protein AT1G73650 [Arabidopsis thaliana]                                                                                                                                                           | 293  | 291  | 1.00E-143 | 99.3  | 88.4 | 94.5 | uncharacterized protein                             | gbpln | Arabidopsis thaliana | AT1G73650.2   Symbols:   Protein of unknown function (DUF1295)   chr1:27688549-27690165 REVERSE LENGTH=291                                       | 293  | 291  | 2.33E-156 | 99.3  | 88.4 | 94.5 |
| Rsa1.0_00939.1.g21586.t1 | gb AAP86285.1   CTR1-like kinase kinase kinase [Brassica juncea] gi 32527768 gb AAP86286.1   CTR1-like kinase kinase kinase [Brassica juncea]                                                                                                                                                                                                                                 | 1000 | 970  | 0         | 97.0  | 89.6 | 91.7 | CTR1-like kinase kinase kinase                      | gbpln | Brassica juncea      | AT1G73660.1   Symbols:   protein tyrosine kinase family protein   chr1:27692247-27696718 REVERSE LENGTH=1030                                     | 1000 | 1030 | 0         | 103.0 | 85.0 | 90.0 |
| Rsa1.0_00939.1.g21587.t1 | dbj BAJ33800.1   unnamed protein product [Theilungiella halophila]                                                                                                                                                                                                                                                                                                            | 631  | 631  | 0         | 100.0 | 94.0 | 97.8 | unnamed protein product                             | ----  | ----                 | AT1G73680.1   Symbols: ALPHA DOX2   alpha dioxygenase   chr1:27704221-27707417 REVERSE LENGTH=631                                                | 631  | 631  | 0         | 100.0 | 90.0 | 95.4 |
| Rsa1.0_00939.1.g21588.t1 | gb EOA35150.1   hypothetical protein CARUB_v10020289mg, partial [Capsella rubella]                                                                                                                                                                                                                                                                                            | 406  | 449  | 1.00E-173 | 110.6 | 76.1 | 85.2 | hypothetical protein CARUB_v10020289mg, partial     | gbpln | Capsella rubella     | AT1G73810.1   Symbols:   Core-2/-1-branching beta-1,6-N-acetylglucosaminyltransferase family protein   chr1:27752506-27755208 REVERSE LENGTH=418 | 406  | 418  | 1.00E-172 | 103.0 | 75.4 | 84.0 |
| Rsa1.0_00939.1.g21589.t1 | gb AAD17398.1   putative non-LTR retroelement reverse transcriptase [Arabidopsis thaliana]                                                                                                                                                                                                                                                                                    | 294  | 1225 | 1.00E-57  | 416.7 | 41.2 | 55.4 | putative non-LTR retroelement reverse transcriptase | gbpln | Arabidopsis thaliana | AT4G29090.1   Symbols:   Ribonuclease H-like superfamily protein   chr4:14333528-14335255 FORWARD LENGTH=575                                     | 294  | 575  | 3.00E-39  | 195.6 | 34.7 | 53.1 |
| Rsa1.0_00939.1.g21590.t1 | refXP_002888948.1   hypothetical protein ARALYDRAFT_895246 [Arabidopsis lyrata subsp. lyrata] gi 297334789 gb EFH65207.1   hypothetical protein ARALYDRAFT_895246 [Arabidopsis lyrata subsp. lyrata]                                                                                                                                                                          | 80   | 193  | 2.00E-11  | 241.3 | 66.3 | 77.5 | hypothetical protein ARALYDRAFT_895246              | gbpln | Arabidopsis lyrata   | AT1G73820.1   Symbols:   Ssu72-like family protein   chr1:27755740-27757158 REVERSE LENGTH=193                                                   | 80   | 193  | 4.00E-14  | 241.3 | 66.3 | 76.3 |
| Rsa1.0_00939.1.g21591.t1 | gb EOA33262.1   hypothetical protein CARUB_v10022206mg [Capsella rubella]                                                                                                                                                                                                                                                                                                     | 398  | 388  | 0         | 97.5  | 84.7 | 88.7 | hypothetical protein CARUB_v10022206mg              | gbpln | Capsella rubella     | AT4G23180.1   Symbols: CRK10, RLK4   cysteine-rich RLK (RECEPTOR-like protein kinase) 10   chr4:12138171-12140780 FORWARD LENGTH=669             | 398  | 669  | 2.00E-97  | 168.1 | 43.0 | 56.8 |
| Rsa1.0_00939.1.g21592.t1 | refXP_002887509.1   hypothetical protein ARALYDRAFT_476520 [Arabidopsis lyrata subsp. lyrata] gi 297333350 gb EFH63768.1   hypothetical protein ARALYDRAFT_476520 [Arabidopsis lyrata subsp. lyrata]                                                                                                                                                                          | 444  | 263  | 1.00E-104 | 59.2  | 43.9 | 47.5 | hypothetical protein ARALYDRAFT_476520              | gbpln | Arabidopsis lyrata   | AT1G73830.2   Symbols: BEE3   BR enhanced expression 3   chr1:27760027-27761346 FORWARD LENGTH=260                                               | 444  | 260  | 1.00E-101 | 58.6  | 43.5 | 47.3 |
| Rsa1.0_00939.1.g21593.t1 | refNP_177525.2   hydroxyproline-rich glycoprotein-like protein [Arabidopsis thaliana] gi 17979388 gb AAL49919.1   putative proline-rich protein precursor [Arabidopsis thaliana] gi 20465539 gb AAM20252.1   putative proline-rich protein precursor [Arabidopsis thaliana] gi 332197394 gb AEE35515.1   hydroxyproline-rich glycoprotein-like protein [Arabidopsis thaliana] | 412  | 388  | 1.00E-108 | 94.2  | 57.5 | 60.9 | hydroxyproline-rich glycoprotein-like protein       | gbpln | Arabidopsis thaliana | AT1G73840.1   Symbols: ESP1   hydroxyproline-rich glycoprotein family protein   chr1:27763937-27766328 REVERSE LENGTH=388                        | 412  | 388  | 1.00E-110 | 94.2  | 57.5 | 60.9 |
| Rsa1.0_00939.1.g21594.t1 | gb AAG52080.1   AC012679_18 unknown protein; 95319-98330 [Arabidopsis thaliana]                                                                                                                                                                                                                                                                                               | 631  | 651  | 0         | 103.2 | 81.9 | 88.9 | unknown protein; 95319-98330                        | gbpln | Arabidopsis thaliana | AT1G73850.1   Symbols:   Protein of unknown function (DUF1666)   chr1:27767375-27770386 FORWARD LENGTH=635                                       | 631  | 635  | 0         | 100.6 | 82.9 | 89.5 |
| Rsa1.0_00939.1.g21595.t1 | refNP_177527.3   putative Kinesin motor protein-related protein [Arabidopsis thaliana] gi 110739024 dbj BAF01431.1   kinesin-related protein [Arabidopsis thaliana] gi 332197396 gb AEE35517.1   putative Kinesin motor protein-related protein [Arabidopsis thaliana]                                                                                                        | 1036 | 1025 | 0         | 98.9  | 85.3 | 92.5 | putative Kinesin motor protein-related protein      | gbpln | Arabidopsis thaliana | AT1G73860.1   Symbols:   P-loop containing nucleoside triphosphate hydrolases superfamily protein   chr1:27771188-27775977 REVERSE LENGTH=1025   | 1036 | 1025 | 0         | 98.9  | 85.3 | 92.5 |

|                          |                                                                                                                                                                                                                                                                                                                                                                                                                                                                           |     |     |           |       |      |      |                                                |       |                      |                                                                                                                                                 |     |     |           |       |      |      |
|--------------------------|---------------------------------------------------------------------------------------------------------------------------------------------------------------------------------------------------------------------------------------------------------------------------------------------------------------------------------------------------------------------------------------------------------------------------------------------------------------------------|-----|-----|-----------|-------|------|------|------------------------------------------------|-------|----------------------|-------------------------------------------------------------------------------------------------------------------------------------------------|-----|-----|-----------|-------|------|------|
| Rsa1.0_00940.1.g21596.t1 | ref[NP_568161.1] putative transcriptional regulator RABBIT EARS [Arabidopsis thaliana]<br>gi 41688606 sp Q9LHS9.2 RBE_ARATH<br>RecName: Full=Probable transcriptional regulator RABBIT EARS<br>gi 37514920 dbj BAC98433.1  one finger-type zinc finger protein for RABBIT EARS [Arabidopsis thaliana]<br>gi 94442519 gb ABF19047.1  At5g06070 [Arabidopsis thaliana]<br>gi 332003578 gb AED90961.1  putative transcriptional regulator RABBIT EARS [Arabidopsis thaliana] | 216 | 226 | 4.00E-91  | 104.6 | 77.8 | 87.5 | putative transcriptional regulator RABBIT EARS | gbpln | Arabidopsis thaliana | AT5G06070.1   Symbols: RBE, RAB   C2H2 and C2HC zinc fingers superfamily protein   chr5:1828426-1829106 REVERSE LENGTH=226                      | 216 | 226 | 1.00E-93  | 104.6 | 77.8 | 87.5 |
| Rsa1.0_00940.1.g21597.t1 | gb EOA20121.1  hypothetical protein CARUB_v10000399mg [Capsella rubella]                                                                                                                                                                                                                                                                                                                                                                                                  | 486 | 667 | 1.00E-176 | 137.2 | 73.9 | 81.7 | hypothetical protein CARUB_v10000399mg         | gbpln | Capsella rubella     | AT5G06110.2   Symbols:   DnaJ domain   Myb-like DNA-binding domain   chr5:1841009-1843000 REVERSE LENGTH=663                                    | 486 | 663 | 1.00E-176 | 136.4 | 73.9 | 81.7 |
| Rsa1.0_00940.1.g21598.t1 | gb EOA20121.1  hypothetical protein CARUB_v10000399mg [Capsella rubella]                                                                                                                                                                                                                                                                                                                                                                                                  | 485 | 667 | 1.00E-173 | 137.5 | 73.6 | 82.1 | hypothetical protein CARUB_v10000399mg         | gbpln | Capsella rubella     | AT5G06110.2   Symbols:   DnaJ domain   Myb-like DNA-binding domain   chr5:1841009-1843000 REVERSE LENGTH=663                                    | 485 | 663 | 1.00E-175 | 136.7 | 74.0 | 82.3 |
| Rsa1.0_00940.1.g21599.t1 | gb EOA36691.1  hypothetical protein CARUB_v10012096mg [Capsella rubella]                                                                                                                                                                                                                                                                                                                                                                                                  | 323 | 327 | 1.00E-136 | 101.2 | 71.2 | 84.5 | hypothetical protein CARUB_v10012096mg         | gbpln | Capsella rubella     | AT5G43690.1   Symbols:   P-loop containing nucleoside triphosphate hydrolases superfamily protein   chr5:17546273-17547268 FORWARD LENGTH=331   | 323 | 331 | 1.00E-136 | 102.5 | 71.5 | 82.7 |
| Rsa1.0_00940.1.g21600.t1 | ref[XP_002873241.1] CYC1BAT [Arabidopsis lyrata subsp. lyrata]<br>gi 297319078 gb EFH49500.1  CYC1BAT [Arabidopsis lyrata subsp. lyrata]<br>ref[XP_002882139.1] hypothetical protein ARALYDRAFT_904276 [Arabidopsis lyrata subsp. lyrata]<br>gi 297327978 gb EFH58398.1  hypothetical protein ARALYDRAFT_904276 [Arabidopsis lyrata subsp. lyrata]                                                                                                                        | 452 | 445 | 0         | 98.5  | 83.0 | 88.7 | CYC1BAT                                        | gbpln | Arabidopsis lyrata   | AT5G06150.1   Symbols: CYC1BAT, CYCB1.2   Cyclin family protein   chr5:1859542-1861570 REVERSE LENGTH=445                                       | 452 | 445 | 0         | 98.5  | 81.9 | 88.5 |
| Rsa1.0_00940.1.g21601.t1 | ref[XP_002873242.1] hypothetical protein ARALYDRAFT_487419 [Arabidopsis lyrata subsp. lyrata]<br>gi 297319079 gb EFH49501.1  hypothetical protein ARALYDRAFT_487419 [Arabidopsis lyrata subsp. lyrata]                                                                                                                                                                                                                                                                    | 514 | 529 | 0         | 102.9 | 83.5 | 90.9 | hypothetical protein ARALYDRAFT_904276         | gbpln | Arabidopsis lyrata   | AT2G47990.1   Symbols: SWA1, EDA13, EDA19   transducin family protein / WD-40 repeat family protein   chr2:19637010-19638602 REVERSE LENGTH=530 | 514 | 530 | 0         | 103.1 | 83.3 | 91.2 |
| Rsa1.0_00940.1.g21602.t1 | ref[XP_002873242.1] hypothetical protein ARALYDRAFT_487419 [Arabidopsis lyrata subsp. lyrata]<br>gi 297319079 gb EFH49501.1  hypothetical protein ARALYDRAFT_487419 [Arabidopsis lyrata subsp. lyrata]                                                                                                                                                                                                                                                                    | 537 | 508 | 0         | 94.6  | 76.5 | 84.4 | hypothetical protein ARALYDRAFT_487419         | gbpln | Arabidopsis lyrata   | AT5G06160.1   Symbols: ATO   splicing factor-related   chr5:1862623-1866298 REVERSE LENGTH=504                                                  | 537 | 504 | 0         | 93.9  | 74.9 | 83.2 |
| Rsa1.0_00940.1.g21603.t1 | gb EOA35047.1  hypothetical protein CARUB_v10020153mg [Capsella rubella]                                                                                                                                                                                                                                                                                                                                                                                                  | 434 | 514 | 0         | 118.4 | 77.2 | 86.4 | hypothetical protein CARUB_v10020153mg         | gbpln | Capsella rubella     | AT1G71880.1   Symbols: SUC1, ATSUC1   sucrose-proton symporter 1   chr1:27054334-27056100 FORWARD LENGTH=513                                    | 434 | 513 | 1.00E-180 | 118.2 | 77.4 | 86.6 |
| Rsa1.0_00940.1.g21604.t1 | gb EOA35047.1  hypothetical protein CARUB_v10020153mg [Capsella rubella]                                                                                                                                                                                                                                                                                                                                                                                                  | 432 | 514 | 1.00E-148 | 119.0 | 57.9 | 65.0 | hypothetical protein CARUB_v10020153mg         | gbpln | Capsella rubella     | AT1G71880.1   Symbols: SUC1, ATSUC1   sucrose-proton symporter 1   chr1:27054334-27056100 FORWARD LENGTH=513                                    | 432 | 513 | 1.00E-149 | 118.8 | 57.9 | 64.6 |
| Rsa1.0_00940.1.g21605.t1 | gb EOA19925.1  hypothetical protein CARUB_v10000175mg [Capsella rubella]                                                                                                                                                                                                                                                                                                                                                                                                  | 866 | 896 | 0         | 103.5 | 87.3 | 93.0 | hypothetical protein CARUB_v10000175mg         | gbpln | Capsella rubella     | AT5G06220.2   Symbols:   LETM1-like protein   chr5:1880049-1885366 FORWARD LENGTH=909                                                           | 866 | 909 | 0         | 105.0 | 84.6 | 90.3 |
| Rsa1.0_00940.1.g21606.t1 | ref[NP_001119177.1] AP2/B3 domain-containing protein [Arabidopsis thaliana]<br>gi 75171862 sp Q9FN13.1 Y5625_ARATH<br>RecName: Full=B3 domain-containing protein At5g06250<br>gi 9758405 dbj BAB08947.1  unnamed protein product [Arabidopsis thaliana]<br>gi 332003608 gb AED90991.1  AP2/B3 domain-containing protein [Arabidopsis thaliana]                                                                                                                            | 283 | 282 | 4.00E-97  | 99.6  | 76.3 | 80.2 | AP2/B3 domain-containing protein               | gbpln | Arabidopsis thaliana | AT5G06250.2   Symbols:   AP2/B3-like transcriptional factor family protein   chr5:1892714-1894058 REVERSE LENGTH=282                            | 283 | 282 | 1.00E-99  | 99.6  | 76.3 | 80.2 |
| Rsa1.0_00940.1.g21607.t1 | gb EOA19710.1  hypothetical protein CARUB_v10003649mg [Capsella rubella]                                                                                                                                                                                                                                                                                                                                                                                                  | 137 | 139 | 2.00E-69  | 101.5 | 96.4 | 99.3 | hypothetical protein CARUB_v10003649mg         | gbpln | Capsella rubella     | AT5G04800.4   Symbols:   Ribosomal S17 family protein   chr5:1389217-1389642 FORWARD LENGTH=141                                                 | 137 | 141 | 2.00E-65  | 102.9 | 88.3 | 93.4 |

|                          |                                                                                                                                                                                                                                                                                                                                                                                                                                            |     |     |           |       |      |      |                                          |       |                      |                                                                                                                                                                                                                                                                                                                                                                                                                                                                                                                                           |     |     |           |       |      |      |
|--------------------------|--------------------------------------------------------------------------------------------------------------------------------------------------------------------------------------------------------------------------------------------------------------------------------------------------------------------------------------------------------------------------------------------------------------------------------------------|-----|-----|-----------|-------|------|------|------------------------------------------|-------|----------------------|-------------------------------------------------------------------------------------------------------------------------------------------------------------------------------------------------------------------------------------------------------------------------------------------------------------------------------------------------------------------------------------------------------------------------------------------------------------------------------------------------------------------------------------------|-----|-----|-----------|-------|------|------|
| Rsa1.0_00940.1.g21608.t1 | ref NP_196245.1  uncharacterized protein [Arabidopsis thaliana] gi 9758407 dbj BAB08949.1  unnamed protein product [Arabidopsis thaliana] gi 21536580 gb AAM60912.1  unknown [Arabidopsis thaliana] gi 28392887 gb AA041880.1  putative B-type cyclin [Arabidopsis thaliana] gi 28827636 gb AA050662.1  putative B-type cyclin [Arabidopsis thaliana] gi 332003613 gb AED90996.1  uncharacterized protein AT5G06270 [Arabidopsis thaliana] | 121 | 122 | 2.00E-37  | 100.8 | 83.5 | 88.4 | uncharacterized protein                  | gbpln | Arabidopsis thaliana | AT5G06270.1   Symbols:   unknown protein; FUNCTIONS IN: molecular_function unknown; INVOLVED IN: biological_process unknown; LOCATED IN: chloroplast; EXPRESSED IN: 21 plant structures; EXPRESSED DURING: 11 growth stages; BEST Arabidopsis thaliana protein match is: unknown protein (TAIR:AT3G11600.1); Has 1807 Blast hits to 1807 proteins in 277 species; Archae = 0; Bacteria = 0; Metazoa = 736; Fungi = 347; Plants = 385; Viruses = 0; Other Eukaryotes = 339 (source: NCBI BLINK).   chr5:1912895-1913263 FORWARD LENGTH=122 | 121 | 122 | 4.00E-40  | 100.8 | 83.5 | 88.4 |
| Rsa1.0_00940.1.g21609.t1 | gb AAM95647.1  polygalacturonase inhibitory protein [Brassica napus] gi 160693704 gb ABX46550.1  polygalacturonase inhibitor protein 3 [Brassica napus]                                                                                                                                                                                                                                                                                    | 163 | 331 | 2.00E-56  | 203.1 | 70.6 | 73.6 | polygalacturonase inhibitory protein     | gbpln | Brassica napus       | AT5G06860.1   Symbols: PGIP1, ATPGIP1   polygalacturonase inhibiting protein 1   chr5:2132373-2133434 FORWARD LENGTH=330                                                                                                                                                                                                                                                                                                                                                                                                                  | 163 | 330 | 1.00E-44  | 202.5 | 57.1 | 63.8 |
| Rsa1.0_00940.1.g21610.t1 | gb EOA22207.1  hypothetical protein CARUB_v10002795mg [Capsella rubella]                                                                                                                                                                                                                                                                                                                                                                   | 362 | 352 | 1.00E-139 | 97.2  | 74.0 | 81.2 | hypothetical protein CARUB_v10002795mg   | gbpln | Capsella rubella     | AT5G06920.1   Symbols: FLA21   FASCIOLIN-like arabinogalactan protein 21 precursor   chr5:2142858-2143919 FORWARD LENGTH=353                                                                                                                                                                                                                                                                                                                                                                                                              | 362 | 353 | 1.00E-140 | 97.5  | 73.5 | 79.6 |
| Rsa1.0_00940.1.g21611.t1 | #                                                                                                                                                                                                                                                                                                                                                                                                                                          | #   | #   | #         | #     | #    | #    | -                                        | ----  | ----                 | AT3G49130.1   Symbols:   SWAP (Suppressor-of-White-Pricot)/surp RNA-binding domain-containing protein   chr3:18210453-18211708 FORWARD LENGTH=307                                                                                                                                                                                                                                                                                                                                                                                         | 193 | 307 | 2.00E-11  | 159.1 | 22.8 | 32.1 |
| Rsa1.0_00940.1.g21612.t2 | ref NP_001190233.1  26S proteasome regulatory subunit N8 [Arabidopsis thaliana] gi 332003541 gb AED90924.1  probable 26S proteasome non-ATPase regulatory subunit 7 [Arabidopsis thaliana]                                                                                                                                                                                                                                                 | 260 | 305 | 2.00E-55  | 117.3 | 47.3 | 53.1 | 26S proteasome regulatory subunit N8     | gbpln | Arabidopsis thaliana | AT5G05780.2   Symbols: RPN8A   RP non-ATPase subunit 8A   chr5:1735862-1738176 FORWARD LENGTH=305                                                                                                                                                                                                                                                                                                                                                                                                                                         | 260 | 305 | 7.00E-58  | 117.3 | 47.3 | 53.1 |
| Rsa1.0_00940.1.g21613.t1 | dbj BAJ33600.1  unnamed protein product [Thellungiella halophila]                                                                                                                                                                                                                                                                                                                                                                          | 63  | 286 | 4.00E-21  | 454.0 | 79.4 | 82.5 | unnamed protein product                  | ----  | ----                 | AT5G06980.2   Symbols:   unknown protein; BEST Arabidopsis thaliana protein match is: unknown protein (TAIR:AT3G12320.1). Has 30 Blast hits to 29 proteins in 7 species; Archae = 0; Bacteria = 0; Metazoa = 2; Fungi = 0; Plants = 28; Viruses = 0; Other Eukaryotes = 0 (source: NCBI BLINK).   chr5:2167799-2169133 FORWARD LENGTH=274                                                                                                                                                                                                 | 63  | 274 | 1.00E-22  | 434.9 | 79.4 | 87.3 |
| Rsa1.0_00940.1.g21614.t1 | gb EOA22792.1  hypothetical protein CARUB_v10003509mg [Capsella rubella]                                                                                                                                                                                                                                                                                                                                                                   | 359 | 360 | 1.00E-170 | 100.3 | 83.0 | 90.5 | hypothetical protein CARUB_v10003509mg   | gbpln | Capsella rubella     | AT5G07010.1   Symbols: ATST2A, ST2A   sulfotransferase 2A   chr5:2174960-2176039 REVERSE LENGTH=359                                                                                                                                                                                                                                                                                                                                                                                                                                       | 359 | 359 | 1.00E-172 | 100.0 | 81.6 | 90.5 |
| Rsa1.0_00940.1.g21615.t1 | dbj BAB11161.1  nucleoid DNA-binding-like protein [Arabidopsis thaliana] gi 21553652 gb AAM62745.1  nucleoid DNA-binding-like protein [Arabidopsis thaliana] gi 109134179 gb ABG25087.1  At5g07030 [Arabidopsis thaliana]                                                                                                                                                                                                                  | 439 | 439 | 0         | 100.0 | 89.5 | 94.8 | nucleoid DNA-binding-like protein        | gbpln | Arabidopsis thaliana | AT5G07030.1   Symbols:   Eukaryotic aspartyl protease family protein   chr5:2183600-2185717 REVERSE LENGTH=455                                                                                                                                                                                                                                                                                                                                                                                                                            | 439 | 455 | 0         | 103.6 | 89.5 | 94.8 |
| Rsa1.0_00940.1.g21616.t1 | gb EOA13870.1  hypothetical protein CARUB_v10026972mg [Capsella rubella]                                                                                                                                                                                                                                                                                                                                                                   | 341 | 262 | 1.00E-148 | 76.8  | 74.5 | 76.0 | hypothetical protein CARUB_v10026972mg   | gbpln | Capsella rubella     | AT5G07090.1   Symbols:   Ribosomal protein S4 (RPS4A) family protein   chr5:2202410-2203805 FORWARD LENGTH=262                                                                                                                                                                                                                                                                                                                                                                                                                            | 341 | 262 | 1.00E-150 | 76.8  | 73.9 | 76.0 |
| Rsa1.0_00940.1.g21617.t1 | ref NP_196329.2  sorting nexin 2B [Arabidopsis thaliana] gi 36380555 sp B9DFS6.1 SNX2B_ARA TH RecName: Full=Sorting nexin 2B gi 222423233 dbj BAH19593.1  AT5G07120 [Arabidopsis thaliana] gi 332003729 gb AED91112.1  sorting nexin 2B [Arabidopsis thaliana]                                                                                                                                                                             | 530 | 572 | 0         | 107.9 | 81.1 | 90.0 | sorting nexin 2B                         | gbpln | Arabidopsis thaliana | AT5G07120.1   Symbols: SNX2b   sorting nexin 2B   chr5:2207065-2209355 REVERSE LENGTH=572                                                                                                                                                                                                                                                                                                                                                                                                                                                 | 530 | 572 | 0         | 107.9 | 81.1 | 90.0 |
| Rsa1.0_00941.1.g21618.t2 | gb AAC61291.1  Ac-like transposase [Arabidopsis thaliana]                                                                                                                                                                                                                                                                                                                                                                                  | 461 | 730 | 2.00E-64  | 158.4 | 28.4 | 39.9 | Ac-like transposase                      | gbpln | Arabidopsis thaliana | AT3G42170.1   Symbols:   BED zinc finger hAT family dimerisation domain   chr3:14321838-14323928 FORWARD LENGTH=696                                                                                                                                                                                                                                                                                                                                                                                                                       | 461 | 696 | 2.00E-12  | 151.0 | 11.7 | 20.6 |
| Rsa1.0_00941.1.g21619.t1 | ref XP_002869250.1  RNA recognition motif-containing protein [Arabidopsis lyrata subsp. lyrata] gi 297315086 gb EFH45509.1  RNA recognition motif-containing protein [Arabidopsis lyrata subsp. lyrata]                                                                                                                                                                                                                                    | 401 | 433 | 1.00E-170 | 108.0 | 83.5 | 91.5 | RNA recognition motif-containing protein | gbpln | Arabidopsis lyrata   | AT4G32720.1   Symbols: AtLa1, La1   La protein 1   chr4:15787313-15789683 FORWARD LENGTH=433                                                                                                                                                                                                                                                                                                                                                                                                                                              | 401 | 433 | 1.00E-170 | 108.0 | 82.5 | 91.0 |
| Rsa1.0_00941.1.g21620.t1 | ref XP_002869249.1  PC-MYB1 [Arabidopsis lyrata subsp. lyrata] gi 297315085 gb EFH45508.1  PC-MYB1 [Arabidopsis lyrata subsp. lyrata]                                                                                                                                                                                                                                                                                                      | 916 | 995 | 0         | 108.6 | 78.6 | 85.6 | PC-MYB1                                  | gbpln | Arabidopsis lyrata   | AT4G32730.2   Symbols: PC-MYB1, MYB3R-1, ATMYB3R-1, ATMYB3R1   Homeodomain-like protein   chr4:15791039-15795643 FORWARD LENGTH=995                                                                                                                                                                                                                                                                                                                                                                                                       | 916 | 995 | 0         | 108.6 | 77.7 | 84.9 |

|                          |                                                                                                                                                                                                                                                                                                                                                                                                                                                                                                                                                                                                                                                                                                      |      |      |           |       |      |      |                                        |       |                      |                                                                                                                                                                                                                                                                                                                                                                                                                                                                                                                                        |      |      |           |       |      |      |
|--------------------------|------------------------------------------------------------------------------------------------------------------------------------------------------------------------------------------------------------------------------------------------------------------------------------------------------------------------------------------------------------------------------------------------------------------------------------------------------------------------------------------------------------------------------------------------------------------------------------------------------------------------------------------------------------------------------------------------------|------|------|-----------|-------|------|------|----------------------------------------|-------|----------------------|----------------------------------------------------------------------------------------------------------------------------------------------------------------------------------------------------------------------------------------------------------------------------------------------------------------------------------------------------------------------------------------------------------------------------------------------------------------------------------------------------------------------------------------|------|------|-----------|-------|------|------|
| Rsa1.0_00941.1.g21621.t1 | ref NP_567905.1  uncharacterized protein [Arabidopsis thaliana] gi 21593653 gb AAM65620.1  unknown [Arabidopsis thaliana] gi 51968854 dbj BAD43119.1  unknown protein [Arabidopsis thaliana] gi 51970976 dbj BAD44180.1  unknown protein [Arabidopsis thaliana] gi 109946475 gb ABG48416.1  At4g32750 [Arabidopsis thaliana] gi 332660713 gb AEE86113.1  uncharacterized protein AT4G32750 [Arabidopsis thaliana] ref NP_195005.1  Exostosin family protein [Arabidopsis thaliana] gi 3063691 emb CAA18582.1  putative protein [Arabidopsis thaliana] gi 7270226 emb CAB79996.1  putative protein [Arabidopsis thaliana] gi 332660719 gb AEE86119.1  Exostosin family protein [Arabidopsis thaliana] | 106  | 293  | 1.00E-49  | 276.4 | 89.6 | 94.3 | uncharacterized protein                | gbpln | Arabidopsis thaliana | AT4G32750.1   Symbols:   unknown protein; Has 30201 Blast hits to 17322 proteins in 780 species: Archae - 12; Bacteria - 1396; Metazoa - 17338; Fungi - 3422; Plants - 5037; Viruses - 0; Other Eukaryotes - 2996 (source: NCBI BLINK).   chr4:15796415-15798091 REVERSE LENGTH=293                                                                                                                                                                                                                                                    | 106  | 293  | 2.00E-52  | 276.4 | 89.6 | 94.3 |
| Rsa1.0_00941.1.g21622.t1 | ref NP_195005.1  Exostosin family protein [Arabidopsis thaliana] gi 3063691 emb CAA18582.1  putative protein [Arabidopsis thaliana] gi 7270226 emb CAB79996.1  putative protein [Arabidopsis thaliana] gi 332660719 gb AEE86119.1  Exostosin family protein [Arabidopsis thaliana]                                                                                                                                                                                                                                                                                                                                                                                                                   | 609  | 593  | 0         | 97.4  | 76.0 | 81.6 | Exostosin family protein               | gbpln | Arabidopsis thaliana | AT4G32790.1   Symbols:   Exostosin family protein   chr4:15812566-15814908 FORWARD LENGTH=593                                                                                                                                                                                                                                                                                                                                                                                                                                          | 609  | 593  | 0         | 97.4  | 76.0 | 81.6 |
| Rsa1.0_00941.1.g21623.t1 | gb EOA15715.1  hypothetical protein CARUB_v10006567mg [Capsella rubella]                                                                                                                                                                                                                                                                                                                                                                                                                                                                                                                                                                                                                             | 225  | 228  | 3.00E-74  | 101.3 | 66.7 | 75.6 | hypothetical protein CARUB_v10006567mg | gbpln | Capsella rubella     | AT4G32800.1   Symbols:   Integrase-type DNA-binding superfamily protein   chr4:15819812-15820477 FORWARD LENGTH=221                                                                                                                                                                                                                                                                                                                                                                                                                    | 225  | 221  | 8.00E-76  | 98.2  | 68.0 | 78.7 |
| Rsa1.0_00941.1.g21624.t1 | #                                                                                                                                                                                                                                                                                                                                                                                                                                                                                                                                                                                                                                                                                                    | #    | #    | #         | #     | #    | #    | -                                      | ----  | ----                 | #                                                                                                                                                                                                                                                                                                                                                                                                                                                                                                                                      | #    | #    | #         | #     | #    |      |
| Rsa1.0_00941.1.g21625.t1 | ref XP_002869240.1  hypothetical protein ARALYDRAFT_913154 [Arabidopsis lyrata subsp. lyrata] gi 297315076 gb EFH45499.1  hypothetical protein ARALYDRAFT_913154 [Arabidopsis lyrata subsp. lyrata]                                                                                                                                                                                                                                                                                                                                                                                                                                                                                                  | 317  | 290  | 1.00E-158 | 91.5  | 84.5 | 85.8 | hypothetical protein ARALYDRAFT_913154 | gbpln | Arabidopsis lyrata   | AT4G32830.1   Symbols: AtAUR1, AUR1   ataurora1   chr4:15842557-15844354 FORWARD LENGTH=294                                                                                                                                                                                                                                                                                                                                                                                                                                            | 317  | 294  | 1.00E-158 | 92.7  | 83.0 | 85.2 |
| Rsa1.0_00941.1.g21626.t1 | emb CAB80003.1  putative protein [Arabidopsis thaliana]                                                                                                                                                                                                                                                                                                                                                                                                                                                                                                                                                                                                                                              | 239  | 193  | 8.00E-85  | 80.8  | 67.4 | 71.1 | putative protein                       | gbpln | Arabidopsis thaliana | AT4G32860.1   Symbols:   unknown protein; Has 46 Blast hits to 46 proteins in 10 species: Archae - 0; Bacteria - 0; Metazoa - 0; Fungi - 0; Plants - 46; Viruses - 0; Other Eukaryotes - 0 (source: NCBI BLINK).   chr4:15856710-15857309 REVERSE LENGTH=199                                                                                                                                                                                                                                                                           | 239  | 199  | 3.00E-87  | 83.3  | 67.4 | 71.1 |
| Rsa1.0_00941.1.g21627.t2 | gb AAD32898.1  putative retroelement pol polyprotein [Arabidopsis thaliana]                                                                                                                                                                                                                                                                                                                                                                                                                                                                                                                                                                                                                          | 1232 | 1307 | 0         | 106.1 | 58.9 | 72.9 | putative retroelement pol polyprotein  | gbpln | Arabidopsis thaliana | AT4G23160.1   Symbols: CRK8   cysteine-rich RLK (RECEPTOR-like protein kinase) 8   chr4:12129485-12134086 FORWARD LENGTH=1262                                                                                                                                                                                                                                                                                                                                                                                                          | 1232 | 1262 | 3.00E-81  | 102.4 | 13.1 | 20.5 |
| Rsa1.0_00941.1.g21628.t1 | ref XP_002878905.1  predicted protein [Arabidopsis lyrata subsp. lyrata] gi 297324744 gb EFH55164.1  predicted protein [Arabidopsis lyrata subsp. lyrata]                                                                                                                                                                                                                                                                                                                                                                                                                                                                                                                                            | 493  | 480  | 6.00E-42  | 97.4  | 25.2 | 43.6 | predicted protein                      | gbpln | Arabidopsis lyrata   | AT1G14800.1   Symbols:   Nucleic acid-binding, OB-fold-like protein   chr1:5099572-5102558 FORWARD LENGTH=384                                                                                                                                                                                                                                                                                                                                                                                                                          | 493  | 384  | 2.00E-27  | 77.9  | 14.2 | 21.5 |
| Rsa1.0_00942.1.g21629.t1 | gb EOA21216.1  hypothetical protein CARUB_v10001564mg [Capsella rubella]                                                                                                                                                                                                                                                                                                                                                                                                                                                                                                                                                                                                                             | 272  | 302  | 1.00E-133 | 111.0 | 83.5 | 90.1 | hypothetical protein CARUB_v10001564mg | gbpln | Capsella rubella     | AT5G27830.1   Symbols:   FUNCTIONS IN: molecular function unknown; INVOLVED IN: response to oxidative stress; LOCATED IN: endomembrane system; EXPRESSED IN: 22 plant structures; EXPRESSED DURING: 13 growth stages; CONTAINS InterPro DOMAIN/s: Folate receptor, conserved region (InterPro:IPR018143); Has 1807 Blast hits to 1807 proteins in 277 species: Archae - 0; Bacteria - 0; Metazoa - 736; Fungi - 347; Plants - 385; Viruses - 0; Other Eukaryotes - 339 (source: NCBI BLINK).   chr5:9861344-9862742 FORWARD LENGTH=300 | 272  | 300  | 1.00E-126 | 110.3 | 82.0 | 89.3 |
| Rsa1.0_00942.1.g21630.t1 | ref NP_187210.1  60S ribosomal protein L18-2 [Arabidopsis thaliana] gi 21431838 sp P42791.2 RL182_ARATH RecName: Full=60S ribosomal protein L18-2 gi 6714451 gb AAF26138.1 AC011620_14 putative 60S ribosomal protein L18 [Arabidopsis thaliana] gi 14335090 gb AAK59824.1  AT3g05590/F18C1_14 [Arabidopsis thaliana] gi 16974509 gb AAL31164.1  AT3g05590/F18C1_14 [Arabidopsis thaliana] gi 332640742 gb AEE74263.1  60S ribosomal protein L18-2 [Arabidopsis thaliana]                                                                                                                                                                                                                            | 187  | 187  | 4.00E-96  | 100.0 | 94.1 | 96.8 | 60S ribosomal protein L18-2            | gbpln | Arabidopsis thaliana | AT3G05590.1   Symbols: RPL18   ribosomal protein L18   chr3:1621511-1622775 FORWARD LENGTH=187                                                                                                                                                                                                                                                                                                                                                                                                                                         | 187  | 187  | 2.00E-98  | 100.0 | 94.1 | 96.8 |



|                          |                                                                                                                                                                                                                                                                                                                                                                                                                                                         |     |      |          |       |      |      |                                                     |       |                      |                                                                                                                                               |     |      |          |        |      |      |
|--------------------------|---------------------------------------------------------------------------------------------------------------------------------------------------------------------------------------------------------------------------------------------------------------------------------------------------------------------------------------------------------------------------------------------------------------------------------------------------------|-----|------|----------|-------|------|------|-----------------------------------------------------|-------|----------------------|-----------------------------------------------------------------------------------------------------------------------------------------------|-----|------|----------|--------|------|------|
| Rsa1.0_00942.1.g21631.t1 | ref NP_198139.1 pectinesterase 28 [Arabidopsis thaliana] gi 122214224 sp Q3E8Z8.1 PME28_ARATH RecName: Full=Putative pectinesterase/pectinesterase inhibitor 28; Includes: RecName: Full=Pectinesterase inhibitor 28; AltName: Full=Pectin methylsterase inhibitor 28; Includes: RecName: Full=Pectinesterase 28; Short=PE 28; AltName: Full=Pectin methylsterase 28; Short=AtPME28 gi 332006356 gb AED93740.1 pectinesterase 28 [Arabidopsis thaliana] | 759 | 732  | 0        | 96.4  | 68.2 | 76.7 | pectinesterase 28                                   | gbpln | Arabidopsis thaliana | AT5G27870.1   Symbols:   Plant invertase/pectin methylsterase inhibitor superfamily   chr5:9878991-9881806 REVERSE LENGTH=732                 | 759 | 732  | 0        | 96.4   | 68.2 | 76.7 |
| Rsa1.0_00942.1.g21632.t1 | ref NP_198140.1 C2H2 and C2HC zinc finger-containing protein [Arabidopsis thaliana] gi 332006357 gb AED93740.1 C2H2 and C2HC zinc finger-containing protein [Arabidopsis thaliana]                                                                                                                                                                                                                                                                      | 404 | 278  | 1.00E-64 | 68.8  | 37.9 | 45.0 | C2H2 and C2HC zinc finger-containing protein        | gbpln | Arabidopsis thaliana | AT5G27880.1   Symbols:   C2H2 and C2HC zinc fingers superfamily protein   chr5:9885908-9886744 FORWARD LENGTH=278                             | 404 | 278  | 3.00E-67 | 68.8   | 37.9 | 45.0 |
| Rsa1.0_00942.1.g21633.t1 | #                                                                                                                                                                                                                                                                                                                                                                                                                                                       | #   | #    | #        | #     | #    | #    | -                                                   | ----  | ----                 | #                                                                                                                                             | #   | #    | #        | #      | #    |      |
| Rsa1.0_00942.1.g21634.t1 | ref XP_002874341.1 zinc finger family protein [Arabidopsis lyrata subsp. lyrata] gi 297320178 gb EFH50600.1 zinc finger family protein [Arabidopsis lyrata subsp. lyrata]                                                                                                                                                                                                                                                                               | 266 | 285  | 8.00E-48 | 107.1 | 47.7 | 61.7 | zinc finger family protein                          | gbpln | Arabidopsis lyrata   | AT5G27880.1   Symbols:   C2H2 and C2HC zinc fingers superfamily protein   chr5:9885908-9886744 FORWARD LENGTH=278                             | 266 | 278  | 2.00E-49 | 104.5  | 47.7 | 60.2 |
| Rsa1.0_00942.1.g21635.t1 | ref XP_002872252.1 F-box family protein [Arabidopsis lyrata subsp. lyrata] gi 297318089 gb EFH48511.1 F-box family protein [Arabidopsis lyrata subsp. lyrata]                                                                                                                                                                                                                                                                                           | 640 | 642  | 0        | 100.3 | 85.0 | 91.7 | F-box family protein                                | gbpln | Arabidopsis lyrata   | AT5G27920.1   Symbols:   F-box family protein   chr5:9942063-9944507 REVERSE LENGTH=642                                                       | 640 | 642  | 0        | 100.3  | 83.3 | 90.9 |
| Rsa1.0_00942.1.g21636.t1 | dbj BAJ33753.1 unnamed protein product [Theellungiella halophila]                                                                                                                                                                                                                                                                                                                                                                                       | 501 | 376  | 0        | 75.0  | 69.3 | 72.1 | unnamed protein product                             | ----  | ----                 | AT5G27930.2   Symbols:   Protein phosphatase 2C family protein   chr5:9958199-9960219 REVERSE LENGTH=373                                      | 501 | 373  | 0        | 74.5   | 63.1 | 66.3 |
| Rsa1.0_00942.1.g21637.t1 | #                                                                                                                                                                                                                                                                                                                                                                                                                                                       | #   | #    | #        | #     | #    | #    | -                                                   | ----  | ----                 | #                                                                                                                                             | #   | #    | #        | #      | #    |      |
| Rsa1.0_00942.1.g21638.t1 | #                                                                                                                                                                                                                                                                                                                                                                                                                                                       | #   | #    | #        | #     | #    | #    | -                                                   | ----  | ----                 | #                                                                                                                                             | #   | #    | #        | #      | #    |      |
| Rsa1.0_00942.1.g21639.t1 | ref XP_002872249.1 hypothetical protein ARALYDRAFT_489530 [Arabidopsis lyrata subsp. lyrata] gi 297318086 gb EFH48508.1 hypothetical protein ARALYDRAFT_489530 [Arabidopsis lyrata subsp. lyrata]                                                                                                                                                                                                                                                       | 929 | 987  | 0        | 106.2 | 85.9 | 91.3 | hypothetical protein ARALYDRAFT_489530              | gbpln | Arabidopsis lyrata   | AT5G27000.1   Symbols:   ATK4, KATD   kinesin 4   chr5:9488099-9502951 FORWARD LENGTH=987                                                     | 929 | 987  | 0        | 106.2  | 85.7 | 90.9 |
| Rsa1.0_00942.1.g21640.t1 | gb AAD22286.1 putative non-LTR retroelement reverse transcriptase [Arabidopsis thaliana]                                                                                                                                                                                                                                                                                                                                                                | 149 | 1311 | 1.00E-18 | 879.9 | 37.6 | 50.3 | putative non-LTR retroelement reverse transcriptase | gbpln | Arabidopsis thaliana | AT4G09490.1   Symbols:   Polynucleotidyl transferase, ribonuclease H-like superfamily protein   chr4:6015583-6016575 REVERSE LENGTH=170       | 149 | 170  | 4.00E-17 | 114.1  | 33.6 | 46.3 |
| Rsa1.0_00943.1.g21641.t1 | #                                                                                                                                                                                                                                                                                                                                                                                                                                                       | #   | #    | #        | #     | #    | #    | -                                                   | ----  | ----                 | AT3G01460.1   Symbols:   MBD9, ATMDB9   methyl-CPG-binding domain 9   chr3:173316-182038 FORWARD LENGTH=2176                                  | 89  | 2176 | 6.00E-12 | 2444.9 | 33.7 | 38.2 |
| Rsa1.0_00943.1.g21642.t1 | gb AAC67331.1 putative non-LTR retroelement reverse transcriptase [Arabidopsis thaliana]                                                                                                                                                                                                                                                                                                                                                                | 309 | 1449 | 3.00E-51 | 468.9 | 33.3 | 50.2 | putative non-LTR retroelement reverse transcriptase | gbpln | Arabidopsis thaliana | AT3G24255.1   Symbols:   RNA-directed DNA polymerase (reverse transcriptase)-related family protein   chr3:8789471-8793208 FORWARD LENGTH=746 | 309 | 746  | 4.00E-34 | 241.4  | 23.9 | 36.6 |
| Rsa1.0_00943.1.g21643.t1 | ref NP_189427.1 NADPH:quinone oxidoreductase [Arabidopsis thaliana] gi 75273736 sp Q9LK88.1 NQR_ARATH RecName: Full=NADPH:quinone oxidoreductase gi 11994494 dbj BAB02535.1 NADPH:quinone oxidoreductase [Arabidopsis thaliana] gi 88193780 gb ABD42979.1 At3g27890 [Arabidopsis thaliana] gi 332643855 gb AEE77376.1 NADPH:quinone oxidoreductase [Arabidopsis thaliana]                                                                               | 197 | 196  | 2.00E-92 | 99.5  | 87.3 | 92.9 | NADPH:quinone oxidoreductase                        | gbpln | Arabidopsis thaliana | AT3G27890.1   Symbols:   NQR   NADPH:quinone oxidoreductase   chr3:10350807-10351938 REVERSE LENGTH=196                                       | 197 | 196  | 8.00E-95 | 99.5   | 87.3 | 92.9 |
| Rsa1.0_00943.1.g21644.t1 | #                                                                                                                                                                                                                                                                                                                                                                                                                                                       | #   | #    | #        | #     | #    | #    | -                                                   | ----  | ----                 | #                                                                                                                                             | #   | #    | #        | #      | #    |      |
| Rsa1.0_00943.1.g21645.t1 | #                                                                                                                                                                                                                                                                                                                                                                                                                                                       | #   | #    | #        | #     | #    | #    | -                                                   | ----  | ----                 | #                                                                                                                                             | #   | #    | #        | #      | #    |      |
| Rsa1.0_00943.1.g21646.t1 | gb EOA14700.1 hypothetical protein CARUB_v10027975mg [Capsella rubella]                                                                                                                                                                                                                                                                                                                                                                                 | 405 | 766  | 4.00E-66 | 189.1 | 29.9 | 36.0 | hypothetical protein CARUB_v10027975mg              | gbpln | Capsella rubella     | AT3G29765.1   Symbols:   General transcription factor 2-related zinc finger protein   chr3:11595467-11597077 REVERSE LENGTH=536               | 405 | 536  | 4.00E-66 | 132.3  | 29.6 | 35.6 |

|                          |                                                                                                                                                                                                                                                                                                                                                                                                                                |      |      |           |       |       |       |                                                     |       |                      |                                                                                                                                                                                                                                                              |      |      |           |       |       |       |
|--------------------------|--------------------------------------------------------------------------------------------------------------------------------------------------------------------------------------------------------------------------------------------------------------------------------------------------------------------------------------------------------------------------------------------------------------------------------|------|------|-----------|-------|-------|-------|-----------------------------------------------------|-------|----------------------|--------------------------------------------------------------------------------------------------------------------------------------------------------------------------------------------------------------------------------------------------------------|------|------|-----------|-------|-------|-------|
| Rsa1.0_00943.1.g21647.t1 | ref XP_002891027.1  mate efflux family protein [Arabidopsis lyrata subsp. lyrata] gi 297336869 gb EFH67286.1  mate efflux family protein [Arabidopsis lyrata subsp. lyrata]                                                                                                                                                                                                                                                    | 401  | 493  | 0         | 122.9 | 87.5  | 94.5  | mate efflux family protein                          | gbpln | Arabidopsis lyrata   | AT1G33080.1   Symbols:   MATE efflux family protein   chr1:11985752-11990327 FORWARD LENGTH=494                                                                                                                                                              | 401  | 494  | 0         | 123.2 | 86.5  | 93.3  |
| Rsa1.0_00943.1.g21648.t1 | gb AAC62785.1  F1104.11 [Arabidopsis thaliana] gi 7268192 emb CAB77719.1  putative transposon protein [Arabidopsis thaliana]                                                                                                                                                                                                                                                                                                   | 742  | 577  | 6.00E-70  | 77.8  | 15.0  | 20.5  | F1104.11                                            | gbpln | Arabidopsis thaliana | AT5G36228.1   Symbols:   nucleic acid binding/zinc ion binding   chr5:14271691-14272776 FORWARD LENGTH=361                                                                                                                                                   | 742  | 361  | 9.00E-26  | 48.7  | 9.6   | 13.3  |
| Rsa1.0_00943.1.g21649.t1 | gb AAD15377.1  putative non-LTR retroelement reverse transcriptase [Arabidopsis thaliana]                                                                                                                                                                                                                                                                                                                                      | 947  | 1044 | 0         | 110.2 | 35.3  | 44.4  | putative non-LTR retroelement reverse transcriptase | gbpln | Arabidopsis thaliana | AT1G10000.1   Symbols:   Ribonuclease H-like superfamily protein   chr1:3263877-3264788 REVERSE LENGTH=303                                                                                                                                                   | 947  | 303  | 2.00E-46  | 32.0  | 11.4  | 16.4  |
| Rsa1.0_00943.1.g21650.t1 | gb EOA40413.1  hypothetical protein CARUB_v10009139mg [Capsella rubella]                                                                                                                                                                                                                                                                                                                                                       | 294  | 444  | 1.00E-124 | 151.0 | 73.8  | 84.0  | hypothetical protein CARUB_v10009139mg              | gbpln | Capsella rubella     | AT1G33110.2   Symbols:   MATE efflux family protein   chr1:12005084-12008040 FORWARD LENGTH=404                                                                                                                                                              | 294  | 404  | 1.00E-126 | 137.4 | 73.8  | 84.4  |
| Rsa1.0_00944.1.g21651.t1 | gb EOA19105.1  hypothetical protein CARUB_v10007773mg [Capsella rubella]                                                                                                                                                                                                                                                                                                                                                       | 818  | 819  | 0         | 100.1 | 94.6  | 97.9  | hypothetical protein CARUB_v10007773mg              | gbpln | Capsella rubella     | AT4G39080.1   Symbols:   VHA-A3   vacuolar proton ATPase A3   chr4:18209513-18214752 FORWARD LENGTH=821                                                                                                                                                      | 818  | 821  | 0         | 100.4 | 93.0  | 96.8  |
| Rsa1.0_00944.1.g21652.t1 | # # # # # # # #                                                                                                                                                                                                                                                                                                                                                                                                                | #    | #    | #         | #     | #     | #     | -                                                   | ----  | ----                 | #                                                                                                                                                                                                                                                            | #    | #    | #         | #     | #     | #     |
| Rsa1.0_00944.1.g21653.t2 | ref NP_195618.2  B-box type zinc finger-containing protein [Arabidopsis thaliana] gi 122221559 sp Q0IGM7.1 BBX20_ARATH RecName: Full=B-box zinc finger protein 20; AltName: Full=Protein SALT TOLERANCE HOMOLOG 7 gi 114050581 gb ABI9440.1  At4g39070 [Arabidopsis thaliana] gi 332661614 gb AEE87014.1  putative zinc finger transcription factor BZS1 [Arabidopsis thaliana]                                                | 264  | 242  | 1.00E-109 | 91.7  | 82.2  | 86.0  | B-box type zinc finger-containing protein           | gbpln | Arabidopsis thaliana | AT4G39070.1   Symbols:   B-box zinc finger family protein   chr4:18205061-18206421 REVERSE LENGTH=242                                                                                                                                                        | 264  | 242  | 1.00E-112 | 91.7  | 82.2  | 86.0  |
| Rsa1.0_00944.1.g21654.t1 | ref XP_002866829.1  hypothetical protein ARALYDRAFT_327857 [Arabidopsis lyrata subsp. lyrata] gi 297312665 gb EFH43088.1  hypothetical protein ARALYDRAFT_327857 [Arabidopsis lyrata subsp. lyrata]                                                                                                                                                                                                                            | 1054 | 1055 | 0         | 100.1 | 89.1  | 93.3  | hypothetical protein ARALYDRAFT_327857              | gbpln | Arabidopsis lyrata   | AT4G39050.1   Symbols:   Kinesin motor family protein   chr4:18193462-18200148 FORWARD LENGTH=1055                                                                                                                                                           | 1054 | 1055 | 0         | 100.1 | 89.1  | 93.3  |
| Rsa1.0_00944.1.g21655.t1 | ref XP_002866827.1  hypothetical protein ARALYDRAFT_327853 [Arabidopsis lyrata subsp. lyrata] gi 297312663 gb EFH43086.1  hypothetical protein ARALYDRAFT_327853 [Arabidopsis lyrata subsp. lyrata]                                                                                                                                                                                                                            | 375  | 373  | 0         | 99.5  | 89.1  | 94.4  | hypothetical protein ARALYDRAFT_327853              | gbpln | Arabidopsis lyrata   | AT4G34660.1   Symbols:   SH3 domain-containing protein   chr4:16545595-16548294 REVERSE LENGTH=368                                                                                                                                                           | 375  | 368  | 1.00E-155 | 98.1  | 72.3  | 86.1  |
| Rsa1.0_00944.1.g21656.t1 | ref NP_195609.1  uncharacterized protein [Arabidopsis thaliana] gi 4539317 emb CAB38818.1  putative protein [Arabidopsis thaliana] gi 7270881 emb CAB80561.1  putative protein [Arabidopsis thaliana] gi 19423914 gb AAL87343.1  unknown protein [Arabidopsis thaliana] gi 22136964 gb AAM91711.1  unknown protein [Arabidopsis thaliana] gi 332661604 gb AEE87004.1  uncharacterized protein AT4G38980 [Arabidopsis thaliana] | 264  | 280  | 8.00E-89  | 106.1 | 68.9  | 83.0  | uncharacterized protein                             | gbpln | Arabidopsis thaliana | AT4G38980.1   Symbols:   unknown protein; Has 44 Blast hits to 44 proteins in 19 species: Archae - 0; Bacteria - 2; Metazoa - 2; Fungi - 8; Plants - 24; Viruses - 0; Other Eukaryotes - 8 (source: NCBI BLINK).   chr4:18166898-18167740 REVERSE LENGTH=280 | 264  | 280  | 2.00E-91  | 106.1 | 68.9  | 83.0  |
| Rsa1.0_00944.1.g21657.t1 | ref XP_002868874.1  hypothetical protein ARALYDRAFT_490667 [Arabidopsis lyrata subsp. lyrata] gi 297314710 gb EFH45133.1  hypothetical protein ARALYDRAFT_490667 [Arabidopsis lyrata subsp. lyrata]                                                                                                                                                                                                                            | 393  | 393  | 0         | 100.0 | 96.7  | 99.0  | hypothetical protein ARALYDRAFT_490667              | gbpln | Arabidopsis lyrata   | AT4G38970.1   Symbols:   FBA2   fructose-bisphosphate aldolase 2   chr4:18163714-18165659 REVERSE LENGTH=398                                                                                                                                                 | 393  | 398  | 0         | 101.3 | 97.2  | 99.2  |
| Rsa1.0_00944.1.g21658.t1 | ref XP_002866825.1  kelch repeat-containing F-box family protein [Arabidopsis lyrata subsp. lyrata] gi 297312661 gb EFH43084.1  kelch repeat-containing F-box family protein [Arabidopsis lyrata subsp. lyrata]                                                                                                                                                                                                                | 334  | 368  | 1.00E-105 | 110.2 | 61.7  | 72.2  | kelch repeat-containing F-box family protein        | gbpln | Arabidopsis lyrata   | AT4G38940.1   Symbols:   Galactose oxidase/kelch repeat superfamily protein   chr4:18152848-18153960 FORWARD LENGTH=370                                                                                                                                      | 334  | 370  | 1.00E-104 | 110.8 | 58.7  | 71.6  |
| Rsa1.0_00944.1.g21659.t1 | gb EOA17498.1  hypothetical protein CARUB_v10005832mg [Capsella rubella]                                                                                                                                                                                                                                                                                                                                                       | 180  | 183  | 4.00E-96  | 101.7 | 96.1  | 98.3  | hypothetical protein CARUB_v10005832mg              | gbpln | Capsella rubella     | AT4G38960.1   Symbols:   B-box type zinc finger family protein   chr4:18161576-18163045 FORWARD LENGTH=183                                                                                                                                                   | 180  | 183  | 2.00E-96  | 101.7 | 95.0  | 96.1  |
| Rsa1.0_00944.1.g21660.t1 | ref XP_002313006.1  predicted protein [Populus trichocarpa] gi 222849414 gb EEE86961.1  predicted protein [Populus trichocarpa]                                                                                                                                                                                                                                                                                                | 164  | 207  | 6.00E-85  | 126.2 | 100.0 | 100.0 | predicted protein                                   | gbpln | Populus trichocarpa  | AT4G34720.1   Symbols:   AVA-P1, VHA-C1, ATVHA-C1   ATPase, FO/VO complex, subunit C protein   chr4:16588223-16569165 REVERSE LENGTH=164                                                                                                                     | 164  | 164  | 4.00E-87  | 100.0 | 100.0 | 100.0 |

|                           |                                                                                                                                                                                                                                                                                                                                                                                                                                                                                      |      |      |           |       |      |      |                                                       |       |                      |                                                                                                                                                                                                                                                                                                                                                                                                                                                                                                                                                                                                                        |      |      |           |       |      |      |
|---------------------------|--------------------------------------------------------------------------------------------------------------------------------------------------------------------------------------------------------------------------------------------------------------------------------------------------------------------------------------------------------------------------------------------------------------------------------------------------------------------------------------|------|------|-----------|-------|------|------|-------------------------------------------------------|-------|----------------------|------------------------------------------------------------------------------------------------------------------------------------------------------------------------------------------------------------------------------------------------------------------------------------------------------------------------------------------------------------------------------------------------------------------------------------------------------------------------------------------------------------------------------------------------------------------------------------------------------------------------|------|------|-----------|-------|------|------|
| Rsa1.0_00944.1.g21661.t1  | gb ABU63290.1  GAGA-motif binding transcriptional activator, partial [Arabidopsis thaliana]                                                                                                                                                                                                                                                                                                                                                                                          | 277  | 297  | 1.00E-123 | 107.2 | 83.0 | 92.1 | GAGA-motif binding transcriptional activator, partial | gbpln | Arabidopsis thaliana | AT4G38910.2   Symbols: BPC5   basic pentacysteine 5   chr4:18145478-18146429 REVERSE LENGTH=283                                                                                                                                                                                                                                                                                                                                                                                                                                                                                                                        | 277  | 283  | 1.00E-125 | 102.2 | 83.0 | 92.1 |
| Rsa1.0_00944.1.g21662.t1  | ref XP_002886677.1  hypothetical protein ARALYDRAFT_893631 [Arabidopsis lyrata subsp. lyrata] gi 297332518 gb EFH62936.1  hypothetical protein ARALYDRAFT_893631 [Arabidopsis lyrata subsp. lyrata]                                                                                                                                                                                                                                                                                  | 183  | 175  | 2.00E-45  | 95.6  | 54.1 | 66.7 | hypothetical protein ARALYDRAFT_893631                | gbpln | Arabidopsis lyrata   | AT2G21237.1   Symbols:   unknown protein; Has 10 Blast hits to 10 proteins in 2 species: Archae - 0; Bacteria - 0; Metazoa - 0; Fungi - 0; Plants - 10; Viruses - 0; Other Eukaryotes - 0 (source: NCBI BLINK).   chr2:9100684-9101184 REVERSE LENGTH=166                                                                                                                                                                                                                                                                                                                                                              | 183  | 166  | 5.00E-29  | 90.7  | 38.8 | 52.5 |
| Rsa1.0_00944.1.g21663.t1  | gb AAL87314.1  unknown protein [Arabidopsis thaliana]                                                                                                                                                                                                                                                                                                                                                                                                                                | 448  | 547  | 1.00E-149 | 122.1 | 77.5 | 83.9 | unknown protein                                       | gbpln | Arabidopsis thaliana | AT4G38900.3   Symbols:   Basic-leucine zipper (bZIP) transcription factor family protein   chr4:18139564-18141520 REVERSE LENGTH=547                                                                                                                                                                                                                                                                                                                                                                                                                                                                                   | 448  | 547  | 1.00E-152 | 122.1 | 77.5 | 83.9 |
| Rsa1.0_00944.1.g21664.t13 | gb EOA22764.1  hypothetical protein CARUB_v10003477mg, partial [Capsella rubella]                                                                                                                                                                                                                                                                                                                                                                                                    | 331  | 166  | 2.00E-16  | 50.2  | 17.2 | 22.4 | hypothetical protein CARUB_v10003477mg, partial       | gbpln | Capsella rubella     | AT1G73490.2   Symbols:   RNA-binding (RRM/RBD/RNP motifs) family protein   chr1:27633496-27634867 REVERSE LENGTH=260                                                                                                                                                                                                                                                                                                                                                                                                                                                                                                   | 331  | 260  | 1.00E-13  | 78.5  | 13.9 | 20.2 |
| Rsa1.0_00945.1.g21665.t1  | dbj BAB10164.1  unnamed protein product [Arabidopsis thaliana]                                                                                                                                                                                                                                                                                                                                                                                                                       | 453  | 468  | 0         | 103.3 | 85.4 | 90.3 | unnamed protein product                               | gbpln | Arabidopsis thaliana | AT5G62030.1   Symbols:   diphthamide synthesis DPH2 family protein   chr5:24919046-24920407 FORWARD LENGTH=453                                                                                                                                                                                                                                                                                                                                                                                                                                                                                                         | 453  | 453  | 0         | 100.0 | 85.4 | 90.3 |
| Rsa1.0_00945.1.g21666.t1  | ref XP_002864765.1  hypothetical protein ARALYDRAFT_919451 [Arabidopsis lyrata subsp. lyrata] gi 297310600 gb EFH41024.1  hypothetical protein ARALYDRAFT_919451 [Arabidopsis lyrata subsp. lyrata]                                                                                                                                                                                                                                                                                  | 290  | 299  | 1.00E-106 | 103.1 | 75.2 | 79.7 | hypothetical protein ARALYDRAFT_919451                | gbpln | Arabidopsis lyrata   | AT5G62020.1   Symbols: AT-HSFB2A, HSFB2A   heat shock transcription factor B2A   chr5:24916212-24917194 FORWARD LENGTH=299                                                                                                                                                                                                                                                                                                                                                                                                                                                                                             | 290  | 299  | 1.00E-108 | 103.1 | 75.5 | 80.3 |
| Rsa1.0_00945.1.g21667.t1  | gb AFD01294.1  auxin response factor 2-2 [Brassica rapa subsp. pekinensis]                                                                                                                                                                                                                                                                                                                                                                                                           | 852  | 851  | 0         | 99.9  | 94.0 | 95.5 | auxin response factor 2-2                             | gbpln | Brassica rapa        | AT5G62000.3   Symbols: ARF2, ARF1-BP, HSS, ORE14   auxin response factor 2   chr5:24910859-24914680 FORWARD LENGTH=859                                                                                                                                                                                                                                                                                                                                                                                                                                                                                                 | 852  | 859  | 0         | 100.8 | 87.1 | 91.8 |
| Rsa1.0_00945.1.g21668.t1  | #                                                                                                                                                                                                                                                                                                                                                                                                                                                                                    | #    | #    | #         | #     | #    | #    | -                                                     | ----  | ----                 | #                                                                                                                                                                                                                                                                                                                                                                                                                                                                                                                                                                                                                      | #    | #    | #         | #     | #    | #    |
| Rsa1.0_00945.1.g21669.t1  | gb EOA12847.1  hypothetical protein CARUB_v10025815mg [Capsella rubella]                                                                                                                                                                                                                                                                                                                                                                                                             | 970  | 988  | 0         | 101.9 | 77.8 | 87.3 | hypothetical protein CARUB_v10025815mg                | gbpln | Capsella rubella     | AT5G61990.1   Symbols:   Pentatricopeptide repeat (PPR) superfamily protein   chr5:24900196-24903110 REVERSE LENGTH=974                                                                                                                                                                                                                                                                                                                                                                                                                                                                                                | 970  | 974  | 0         | 100.4 | 73.7 | 84.4 |
| Rsa1.0_00945.1.g21670.t2  | ref XP_002864762.1  hypothetical protein ARALYDRAFT_496370 [Arabidopsis lyrata subsp. lyrata] gi 297310597 gb EFH41021.1  hypothetical protein ARALYDRAFT_496370 [Arabidopsis lyrata subsp. lyrata]                                                                                                                                                                                                                                                                                  | 624  | 608  | 0         | 97.4  | 86.2 | 91.0 | hypothetical protein ARALYDRAFT_496370                | gbpln | Arabidopsis lyrata   | AT5G61970.1   Symbols:   signal recognition particle-related   SRP-related   chr5:24888920-24893079 FORWARD LENGTH=605                                                                                                                                                                                                                                                                                                                                                                                                                                                                                                 | 624  | 605  | 0         | 97.0  | 85.4 | 90.2 |
| Rsa1.0_00945.1.g21671.t1  | #                                                                                                                                                                                                                                                                                                                                                                                                                                                                                    | #    | #    | #         | #     | #    | #    | -                                                     | ----  | ----                 | #                                                                                                                                                                                                                                                                                                                                                                                                                                                                                                                                                                                                                      | #    | #    | #         | #     | #    | #    |
| Rsa1.0_00945.1.g21672.t1  | #                                                                                                                                                                                                                                                                                                                                                                                                                                                                                    | #    | #    | #         | #     | #    | #    | -                                                     | ----  | ----                 | #                                                                                                                                                                                                                                                                                                                                                                                                                                                                                                                                                                                                                      | #    | #    | #         | #     | #    | #    |
| Rsa1.0_00945.1.g21673.t5  | gb EOA12879.1  hypothetical protein CARUB_v10025852mg [Capsella rubella]                                                                                                                                                                                                                                                                                                                                                                                                             | 954  | 908  | 0         | 95.2  | 76.0 | 83.4 | hypothetical protein CARUB_v10025852mg                | gbpln | Capsella rubella     | AT5G61960.2   Symbols: AML1, ML1   MEI2-like protein 1   chr5:24879001-24883483 REVERSE LENGTH=915                                                                                                                                                                                                                                                                                                                                                                                                                                                                                                                     | 954  | 915  | 0         | 95.9  | 77.0 | 83.6 |
| Rsa1.0_00945.1.g21674.t1  | ref NP_200998.1  uncharacterized protein [Arabidopsis thaliana] gi 186532652 ref NP_001119474.1  uncharacterized protein [Arabidopsis thaliana] gi 9758391 dtj BAB08878.1  unnamed protein product [Arabidopsis thaliana] gi 91807090 gb ABE68272.1  hypothetical protein AT5g61920 [Arabidopsis thaliana] gi 332010153 gb AED97536.1  uncharacterized protein AT5G61920 [Arabidopsis thaliana] gi 332010154 gb AED97537.1  uncharacterized protein AT5G61920 [Arabidopsis thaliana] | 225  | 238  | 2.00E-82  | 105.8 | 77.8 | 88.9 | uncharacterized protein                               | gbpln | Arabidopsis thaliana | AT5G61920.2   Symbols:   unknown protein; INVOLVED IN: biological process unknown; LOCATED IN: chloroplast; EXPRESSED IN: 6 plant structures; EXPRESSED DURING: 4 anthesis, F mature embryo stage, petal differentiation and expansion stage, E expanded cotyledon stage, D bilateral stage; BEST Arabidopsis thaliana protein match is: unknown protein (TAIR:AT1G67170.1); Has 30201 Blast hits to 17322 proteins in 780 species: Archae - 12; Bacteria - 1396; Metazoa - 17338; Fungi - 3422; Plants - 5037; Viruses - 0; Other Eukaryotes - 2996 (source: NCBI BLINK).   chr5:24864830-24865628 FORWARD LENGTH=238 | 225  | 238  | 7.00E-85  | 105.8 | 77.8 | 88.9 |
| Rsa1.0_00945.1.g21675.t1  | #                                                                                                                                                                                                                                                                                                                                                                                                                                                                                    | #    | #    | #         | #     | #    | #    | -                                                     | ----  | ----                 | #                                                                                                                                                                                                                                                                                                                                                                                                                                                                                                                                                                                                                      | #    | #    | #         | #     | #    | #    |
| Rsa1.0_00945.1.g21676.t1  | gb EOA12798.1  hypothetical protein CARUB_v10025752mg [Capsella rubella]                                                                                                                                                                                                                                                                                                                                                                                                             | 402  | 1270 | 0         | 315.9 | 90.3 | 95.0 | hypothetical protein CARUB_v10025752mg                | gbpln | Capsella rubella     | AT5G61910.4   Symbols:   DCD (Development and Cell Death) domain protein   chr5:24855908-24863729 REVERSE LENGTH=1346                                                                                                                                                                                                                                                                                                                                                                                                                                                                                                  | 402  | 1346 | 0         | 334.8 | 89.1 | 94.8 |
| Rsa1.0_00946.1.g21677.t1  | gb ABK28778.1  unknown [Arabidopsis thaliana]                                                                                                                                                                                                                                                                                                                                                                                                                                        | 206  | 206  | 1.00E-52  | 100.0 | 68.0 | 74.3 | unknown                                               | gbpln | Arabidopsis thaliana | AT1G05450.2   Symbols:   Bifunctional inhibitor/lipid-transfer protein/seed storage 2S albumin superfamily protein   chr1:1600004-1601086 FORWARD LENGTH=205                                                                                                                                                                                                                                                                                                                                                                                                                                                           | 206  | 205  | 4.00E-55  | 99.5  | 68.0 | 74.3 |
| Rsa1.0_00946.1.g21678.t1  | gb AAD19784.1  putative retroelement pol polyprotein [Arabidopsis thaliana]                                                                                                                                                                                                                                                                                                                                                                                                          | 1285 | 1501 | 0         | 116.8 | 38.4 | 48.8 | putative retroelement pol polyprotein                 | gbpln | Arabidopsis thaliana | AT4G23160.1   Symbols: CRK8   cysteine-rich RLK (RECEPTOR-like protein kinase) 8   chr4:12129485-12134086 FORWARD LENGTH=1262                                                                                                                                                                                                                                                                                                                                                                                                                                                                                          | 1285 | 1262 | 1.00E-132 | 98.2  | 18.0 | 26.6 |

|                          |                                                                                                                                                                                                                                                                                                                             |     |     |           |       |      |      |                                                         |       |                      |                                                                                                                                                                                                                                                                                                                                                                                                                                                                                                                                                                                                                                                                                                |     |     |           |       |      |      |
|--------------------------|-----------------------------------------------------------------------------------------------------------------------------------------------------------------------------------------------------------------------------------------------------------------------------------------------------------------------------|-----|-----|-----------|-------|------|------|---------------------------------------------------------|-------|----------------------|------------------------------------------------------------------------------------------------------------------------------------------------------------------------------------------------------------------------------------------------------------------------------------------------------------------------------------------------------------------------------------------------------------------------------------------------------------------------------------------------------------------------------------------------------------------------------------------------------------------------------------------------------------------------------------------------|-----|-----|-----------|-------|------|------|
| Rsa1.0_00946.1.g21679.t1 | gb[EOA37272.1] hypothetical protein CARUB_v10010861mg [Capsella rubella]                                                                                                                                                                                                                                                    | 229 | 234 | 2.00E-73  | 102.2 | 76.4 | 82.1 | hypothetical protein CARUB_v10010861mg                  | gbpln | Capsella rubella     | AT1G05420.1   Symbols: ATOFP12, OFP12   ovate family protein 12   chr1:1590073-1590753 FORWARD LENGTH=226                                                                                                                                                                                                                                                                                                                                                                                                                                                                                                                                                                                      | 229 | 226 | 6.00E-73  | 98.7  | 72.9 | 79.5 |
| Rsa1.0_00946.1.g21680.t1 | #                                                                                                                                                                                                                                                                                                                           | #   | #   | #         | #     | #    | #    | -                                                       | ----  | ----                 | #                                                                                                                                                                                                                                                                                                                                                                                                                                                                                                                                                                                                                                                                                              | #   | #   | #         | #     | #    |      |
| Rsa1.0_00946.1.g21681.t1 | #                                                                                                                                                                                                                                                                                                                           | #   | #   | #         | #     | #    | #    | -                                                       | ----  | ----                 | #                                                                                                                                                                                                                                                                                                                                                                                                                                                                                                                                                                                                                                                                                              | #   | #   | #         | #     | #    |      |
| Rsa1.0_00946.1.g21682.t1 | #                                                                                                                                                                                                                                                                                                                           | #   | #   | #         | #     | #    | #    | -                                                       | ----  | ----                 | #                                                                                                                                                                                                                                                                                                                                                                                                                                                                                                                                                                                                                                                                                              | #   | #   | #         | #     | #    |      |
| Rsa1.0_00946.1.g21683.t1 | ref[NP_172029.2] Sec.4-like phosphatidylinositol transfer family protein [Arabidopsis thaliana]<br>gi 332189709 gb AE27830.1  Sec.4-like phosphatidylinositol transfer family protein [Arabidopsis thaliana]                                                                                                                | 415 | 417 | 0         | 100.5 | 91.1 | 94.2 | Sec.4-like phosphatidylinositol transfer family protein | gbpln | Arabidopsis thaliana | AT1G05370.1   Symbols:   Sec14p-like phosphatidylinositol transfer family protein   chr1:1569418-1572280 REVERSE LENGTH=417                                                                                                                                                                                                                                                                                                                                                                                                                                                                                                                                                                    | 415 | 417 | 0         | 100.5 | 91.1 | 94.2 |
| Rsa1.0_00946.1.g21684.t1 | ref[XP_002899546.1] hypothetical protein ARALYDRAFT_887721 [Arabidopsis lyrata subsp. lyrata]<br>gi 297335388 gb EFH65805.1  hypothetical protein ARALYDRAFT_887721 [Arabidopsis lyrata subsp. lyrata]                                                                                                                      | 418 | 416 | 0         | 99.5  | 87.1 | 90.0 | hypothetical protein ARALYDRAFT_887721                  | gbpln | Arabidopsis lyrata   | AT1G05360.1   Symbols:   BEST Arabidopsis thaliana protein match is: SNARE associated Golgi protein family (TAIR:AT4G14950.1); Has 332 Blast hits to 326 proteins in 115 species: Archae - 0; Bacteria - 11; Metazoa - 174; Fungi - 0; Plants - 74; Viruses - 0; Other Eukaryotes - 73 (source: NCBI BLink).   chr1:1564816-1567278 FORWARD LENGTH=416                                                                                                                                                                                                                                                                                                                                         | 418 | 416 | 0         | 99.5  | 86.1 | 90.0 |
| Rsa1.0_00946.1.g21685.t1 | ref[NP_172027.2] ubiquitin-like modifier-activating enzyme 5 [Arabidopsis thaliana]<br>gi 290463407 sp O23034.2 UBA5_ARAT H RecName: Full=Ubiquitin-like modifier-activating enzyme 5; Short=Ubiquitin-activating enzyme 5<br>gi 332189707 gb AE27828.1  ubiquitin-like modifier-activating enzyme 5 [Arabidopsis thaliana] | 429 | 431 | 0         | 100.5 | 93.7 | 95.8 | ubiquitin-like modifier-activating enzyme 5             | gbpln | Arabidopsis thaliana | AT1G05350.1   Symbols:   NAD(P)-binding Rossmann-fold superfamily protein   chr1:1560891-1564005 REVERSE LENGTH=431                                                                                                                                                                                                                                                                                                                                                                                                                                                                                                                                                                            | 429 | 431 | 0         | 100.5 | 93.7 | 95.8 |
| Rsa1.0_00946.1.g21686.t1 | gb[EOA37878.1] hypothetical protein CARUB_v10011474mg [Capsella rubella]                                                                                                                                                                                                                                                    | 524 | 864 | 1.00E-132 | 164.9 | 51.5 | 58.8 | hypothetical protein CARUB_v10011474mg                  | gbpln | Capsella rubella     | AT1G05320.3   Symbols:   FUNCTIONS IN: molecular_function unknown; INVOLVED IN: biological_process unknown; LOCATED IN: cellular_component unknown; EXPRESSED IN: fruit, egg cell; CONTAINS InterPro DOMAIN/s: Prefoldin (InterPro:IPR009053); BEST Arabidopsis thaliana protein match is: unknown protein (TAIR:AT2G32240.1); Has 267444 Blast hits to 119656 proteins in 3886 species: Archae - 3699; Bacteria - 62432; Metazoa - 106542; Fungi - 19875; Plants - 13918; Viruses - 1288; Other Eukaryotes - 59690 (source: NCBI BLink).   chr1:1554856-1557658 FORWARD LENGTH=790                                                                                                            | 524 | 790 | 1.00E-131 | 150.8 | 50.4 | 59.2 |
| Rsa1.0_00947.1.g21687.t1 | ref[XP_002894222.1] ring-H2 finger protein RHY1a [Arabidopsis lyrata subsp. lyrata]<br>gi 297340064 gb EFH70481.1  ring-H2 finger protein RHY1a [Arabidopsis lyrata subsp. lyrata]                                                                                                                                          | 244 | 248 | 2.00E-81  | 101.6 | 77.0 | 85.7 | ring-H2 finger protein RHY1a                            | gbpln | Arabidopsis lyrata   | AT1G49850.1   Symbols:   RING/U-box superfamily protein   chr1:18455326-18456444 REVERSE LENGTH=250                                                                                                                                                                                                                                                                                                                                                                                                                                                                                                                                                                                            | 244 | 250 | 2.00E-72  | 102.5 | 76.6 | 85.7 |
| Rsa1.0_00947.1.g21688.t1 | gb[EOA39699.1] hypothetical protein CARUB_v10008343mg [Capsella rubella]                                                                                                                                                                                                                                                    | 824 | 792 | 0         | 96.1  | 80.7 | 88.6 | hypothetical protein CARUB_v10008343mg                  | gbpln | Capsella rubella     | AT1G42440.1   Symbols:   FUNCTIONS IN: molecular_function unknown; INVOLVED IN: ribosome biogenesis; LOCATED IN: nucleus; EXPRESSED IN: 22 plant structures; EXPRESSED DURING: 13 growth stages; CONTAINS InterPro DOMAIN/s: AARP2CN (InterPro:IPR012948), Protein of unknown function DUF663 (InterPro:IPR007034); BEST Arabidopsis thaliana protein match is: P-loop containing nucleoside triphosphate hydrolases superfamily protein (TAIR:AT1G06720.1); Has 2741 Blast hits to 2088 proteins in 291 species: Archae - 2; Bacteria - 131; Metazoa - 833; Fungi - 650; Plants - 171; Viruses - 49; Other Eukaryotes - 905 (source: NCBI BLink).   chr1:15895528-15899939 REVERSE LENGTH=793 | 824 | 793 | 0         | 96.2  | 80.5 | 88.6 |
| Rsa1.0_00947.1.g21689.t1 | ref[XP_002894219.1] hypothetical protein ARALYDRAFT_474111 [Arabidopsis lyrata subsp. lyrata]<br>gi 297340061 gb EFH70478.1  hypothetical protein ARALYDRAFT_474111 [Arabidopsis lyrata subsp. lyrata]                                                                                                                      | 86  | 102 | 5.00E-24  | 118.6 | 67.4 | 77.9 | hypothetical protein ARALYDRAFT_474111                  | gbpln | Arabidopsis lyrata   | AT1G49800.1   Symbols:   unknown protein; FUNCTIONS IN: molecular_function unknown; INVOLVED IN: biological_process unknown; LOCATED IN: endomembrane system; EXPRESSED IN: sepal, male gametophyte, stamen; EXPRESSED DURING: 4 anthesis; Has 12 Blast hits to 12 proteins in 5 species: Archae - 0; Bacteria - 0; Metazoa - 0; Fungi - 0; Plants - 12; Viruses - 0; Other Eukaryotes - 0 (source: NCBI BLink).   chr1:18438550-18438876 REVERSE LENGTH=108                                                                                                                                                                                                                                   | 86  | 108 | 2.00E-20  | 125.6 | 66.3 | 80.2 |

|                          |                                                                                                                                                                                                                                                                                                                                                                                                                                                               |     |     |           |       |      |      |                                                  |       |                      |                                                                                                                                                                                                                                                                                                                                                                      |     |     |           |       |      |      |
|--------------------------|---------------------------------------------------------------------------------------------------------------------------------------------------------------------------------------------------------------------------------------------------------------------------------------------------------------------------------------------------------------------------------------------------------------------------------------------------------------|-----|-----|-----------|-------|------|------|--------------------------------------------------|-------|----------------------|----------------------------------------------------------------------------------------------------------------------------------------------------------------------------------------------------------------------------------------------------------------------------------------------------------------------------------------------------------------------|-----|-----|-----------|-------|------|------|
| Rsa1.0_00947.1.g21690.t1 | refNP_175399.2  transcription factor bHLH95 [Arabidopsis thaliana] gi218563532 sp Q9FXA3.2 BH095_ARA TH RecName: Full=Transcription factor bHLH95; AltName: Full=Basic helix-loop-helix protein 95; Short=AtbHLH95; Short=bHLH 95; AltName: Full=Protein RETARDED GROWTH OF EMBRYO 1; AltName: Full=Transcription factor EN 21; AltName: Full=bHLH transcription factor bHLH095 gi332194353 gb AEE32474.1  transcription factor bHLH95 [Arabidopsis thaliana] | 313 | 308 | 1.00E-116 | 98.4  | 71.9 | 80.2 | transcription factor bHLH95                      | gbpln | Arabidopsis thaliana | AT1G49770.1   Symbols: RGE1, ZOU   basic helix-loop-helix (bHLH) DNA-binding superfamily protein   chr1:18424578-18426531 FORWARD LENGTH=308                                                                                                                                                                                                                         | 313 | 308 | 1.00E-119 | 98.4  | 71.9 | 80.2 |
| Rsa1.0_00947.1.g21691.t1 | #                                                                                                                                                                                                                                                                                                                                                                                                                                                             | #   | #   | #         | #     | #    | #    | -                                                | ----  | ----                 | #                                                                                                                                                                                                                                                                                                                                                                    | #   | #   | #         | #     | #    |      |
| Rsa1.0_00947.1.g21692.t1 | refXP_002894215.1  hypothetical protein ARALYDRAFT_474107 [Arabidopsis lyrata subsp. lyrata] gi297340057 gb EFH70474.1  hypothetical protein ARALYDRAFT_474107 [Arabidopsis lyrata subsp. lyrata]                                                                                                                                                                                                                                                             | 538 | 478 | 1.00E-163 | 88.8  | 53.9 | 58.6 | hypothetical protein ARALYDRAFT_474107           | gbpln | Arabidopsis lyrata   | AT4G06744.1   Symbols:   Leucine-rich repeat (LRR) family protein   chr4:4070870-4072084 REVERSE LENGTH=404                                                                                                                                                                                                                                                          | 538 | 404 | 7.00E-88  | 75.1  | 31.4 | 42.0 |
| Rsa1.0_00947.1.g21693.t1 | gb EOA37582.1  hypothetical protein CARUB_v10011932mg [Capsella rubella]                                                                                                                                                                                                                                                                                                                                                                                      | 324 | 321 | 1.00E-139 | 99.1  | 73.8 | 84.3 | hypothetical protein CARUB_v10011932mg           | gbpln | Capsella rubella     | AT1G49660.1   Symbols: AtCXE5, CXE5   carboxyesterase 5   chr1:18378777-18379736 REVERSE LENGTH=319                                                                                                                                                                                                                                                                  | 324 | 319 | 1.00E-136 | 98.5  | 74.1 | 84.3 |
| Rsa1.0_00947.1.g21694.t2 | refNP_175438.2  Cysteine/Histidine-rich C1 domain family protein [Arabidopsis thaliana] gi332194402 gb AEE32523.1  Cysteine/Histidine-rich C1 domain family protein [Arabidopsis thaliana]                                                                                                                                                                                                                                                                    | 578 | 619 | 1.00E-173 | 107.1 | 57.1 | 67.5 | Cysteine/Histidine-rich C1 domain family protein | gbpln | Arabidopsis thaliana | AT1G50190.1   Symbols:   Cysteine/Histidine-rich C1 domain family protein   chr1:18588229-18590799 REVERSE LENGTH=619                                                                                                                                                                                                                                                | 578 | 619 | 1.00E-176 | 107.1 | 57.1 | 67.5 |
| Rsa1.0_00947.1.g21695.t1 | refXP_002894197.1  hypothetical protein ARALYDRAFT_474095 [Arabidopsis lyrata subsp. lyrata] gi297340059 gb EFH70456.1  hypothetical protein ARALYDRAFT_474095 [Arabidopsis lyrata subsp. lyrata]                                                                                                                                                                                                                                                             | 423 | 450 | 1.00E-179 | 106.4 | 83.9 | 88.9 | hypothetical protein ARALYDRAFT_474095           | gbpln | Arabidopsis lyrata   | AT1G49600.1   Symbols: ATRBP47A, RBP47A   RNA-binding protein 47A   chr1:18357236-18360150 REVERSE LENGTH=445                                                                                                                                                                                                                                                        | 423 | 445 | 0         | 105.2 | 76.4 | 80.9 |
| Rsa1.0_00947.1.g21696.t2 | refNP_564549.1  myb family transcription factor [Arabidopsis thaliana] gi10120417 gb AAG13042.1 AC011807.1  Hypothetical protein [Arabidopsis thaliana] gi62320610 gb BAD95259.1  hypothetical protein [Arabidopsis thaliana] gi332194321 gb AEE32442.1  myb family transcription factor [Arabidopsis thaliana]                                                                                                                                               | 312 | 333 | 8.00E-94  | 106.7 | 70.5 | 80.1 | myb family transcription factor                  | gbpln | Arabidopsis thaliana | AT1G49560.1   Symbols:   Homeodomain-like superfamily protein   chr1:18342725-18344101 FORWARD LENGTH=333                                                                                                                                                                                                                                                            | 312 | 333 | 2.00E-96  | 106.7 | 70.5 | 80.1 |
| Rsa1.0_00947.1.g21697.t1 | refNP_001185180.1  elongator protein 2 [Arabidopsis thaliana] gi332194320 gb AEE32441.1  elongator protein 2 [Arabidopsis thaliana]                                                                                                                                                                                                                                                                                                                           | 144 | 840 | 1.00E-15  | 583.3 | 32.6 | 37.5 | elongator protein 2                              | gbpln | Arabidopsis thaliana | AT1G49540.2   Symbols: ELP2, AtELP2   elongator protein 2   chr1:18333767-18337382 REVERSE LENGTH=840                                                                                                                                                                                                                                                                | 144 | 840 | 4.00E-18  | 583.3 | 32.6 | 37.5 |
| Rsa1.0_00947.1.g21698.t1 | gb EOA37055.1  hypothetical protein CARUB_v10010157mg [Capsella rubella]                                                                                                                                                                                                                                                                                                                                                                                      | 228 | 238 | 9.00E-88  | 104.4 | 66.2 | 71.9 | hypothetical protein CARUB_v10010157mg           | gbpln | Capsella rubella     | AT1G49510.1   Symbols: emb1273   embryo defective 1273   chr1:18327026-18328147 FORWARD LENGTH=240                                                                                                                                                                                                                                                                   | 228 | 240 | 1.00E-87  | 105.3 | 66.2 | 70.6 |
| Rsa1.0_00948.1.g21699.t1 | gb EOA28482.1  hypothetical protein CARUB_v10024692mg, partial [Capsella rubella]                                                                                                                                                                                                                                                                                                                                                                             | 270 | 328 | 1.00E-114 | 121.5 | 80.0 | 86.7 | hypothetical protein CARUB_v10024692mg, partial  | gbpln | Capsella rubella     | AT2G33990.1   Symbols: iqd9   IQ-domain 9   chr2:14360502-14361630 REVERSE LENGTH=263                                                                                                                                                                                                                                                                                | 270 | 263 | 1.00E-106 | 97.4  | 75.2 | 81.5 |
| Rsa1.0_00948.1.g21700.t2 | dbj BAF01443.1  hypothetical protein [Arabidopsis thaliana]                                                                                                                                                                                                                                                                                                                                                                                                   | 250 | 259 | 2.00E-93  | 103.6 | 72.8 | 80.4 | hypothetical protein                             | gbpln | Arabidopsis thaliana | AT2G33980.1   Symbols: atnudt22, NUDT22   nudix hydrolase homolog 22   chr2:14356786-14359840 REVERSE LENGTH=302                                                                                                                                                                                                                                                     | 250 | 302 | 8.00E-96  | 120.8 | 72.8 | 80.4 |
| Rsa1.0_00948.1.g21701.t1 | gb EOA28972.1  hypothetical protein CARUB_v1002524mg, partial [Capsella rubella]                                                                                                                                                                                                                                                                                                                                                                              | 393 | 408 | 1.00E-156 | 103.8 | 84.0 | 87.8 | hypothetical protein CARUB_v1002524mg, partial   | gbpln | Capsella rubella     | AT2G33880.1   Symbols: WOX9, HB-3, STIP   homeobox-3   chr2:14341639-14343597 REVERSE LENGTH=378                                                                                                                                                                                                                                                                     | 393 | 378 | 1.00E-154 | 96.2  | 79.4 | 83.0 |
| Rsa1.0_00948.1.g21702.t1 | gb AFD01296.1  auxin response factor 3-1 [Brassica rapa subsp. pekinensis]                                                                                                                                                                                                                                                                                                                                                                                    | 620 | 605 | 0         | 97.6  | 83.4 | 85.6 | auxin response factor 3-1                        | gbpln | Brassica rapa        | AT2G33860.1   Symbols: ETT, ARF3   Transcriptional factor B3 family protein / auxin-responsive factor AUX/IAA-related   chr2:14325444-14328613 REVERSE LENGTH=608                                                                                                                                                                                                    | 620 | 608 | 0         | 98.1  | 82.1 | 87.6 |
| Rsa1.0_00948.1.g21703.t2 | refNP_001078001.1  uncharacterized protein [Arabidopsis thaliana] gi1898961761 gb ABF59210.1  unknown protein [Arabidopsis thaliana] gi330253802 gb AEC08896.1  uncharacterized protein AT2G33847 [Arabidopsis thaliana]                                                                                                                                                                                                                                      | 105 | 93  | 6.00E-29  | 88.6  | 66.7 | 71.4 | uncharacterized protein                          | gbpln | Arabidopsis thaliana | AT2G33847.1   Symbols:   unknown protein; LOCATED IN: chloroplast; BEST Arabidopsis thaliana protein match is: unknown protein (TAIRAT1G28395.4); Has 74 Blast hits to 74 proteins in 10 species: Arcaeae - 0; Bacteria - 0; Metazoa - 0; Fungi - 0; Plants - 74; Viruses - 0; Other Eukaryotes - 0 (source: NCBI BLINK).   chr2:14319280-14320522 REVERSE LENGTH=93 | 105 | 93  | 9.00E-32  | 88.6  | 66.7 | 71.4 |

|                          |                                                                                                                                                                                                                                                                                                                                                                                           |      |      |           |       |      |      |                                                     |       |                      |                                                                                                                                         |      |      |           |       |      |      |
|--------------------------|-------------------------------------------------------------------------------------------------------------------------------------------------------------------------------------------------------------------------------------------------------------------------------------------------------------------------------------------------------------------------------------------|------|------|-----------|-------|------|------|-----------------------------------------------------|-------|----------------------|-----------------------------------------------------------------------------------------------------------------------------------------|------|------|-----------|-------|------|------|
| Rsa1.0_00948.1.g21704.t1 | ref XP_002879475.1  hypothetical protein ARALYDRAFT_482340 [Arabidopsis lyrata subsp. lyrata] gi 297325314 gb EFH57534.1                                                                                                                                                                                                                                                                  | 181  | 181  | 6.00E-77  | 100.0 | 81.2 | 84.0 | hypothetical protein ARALYDRAFT_482340              | gbpln | Arabidopsis lyrata   | AT2G33845.1   Symbols:   Nucleic acid-binding, OB-fold-like protein   chr2:14317781-14318712 FORWARD LENGTH=182                         | 181  | 182  | 1.00E-78  | 100.6 | 80.7 | 82.9 |
| Rsa1.0_00948.1.g21705.t2 | ref XP_002881309.1  frigida-essential 1 [Arabidopsis lyrata subsp. lyrata] gi 297327148 gb EFH57568.1  frigida-essential 1 [Arabidopsis lyrata subsp. lyrata]                                                                                                                                                                                                                             | 634  | 590  | 0         | 93.1  | 59.0 | 68.1 | frigida-essential 1                                 | gbpln | Arabidopsis lyrata   | AT2G33835.1   Symbols: FES1   Zinc finger C-x8-C-x5-C-x3-H type family protein   chr2:14312145-14314566 REVERSE LENGTH=587              | 634  | 587  | 0         | 92.6  | 57.9 | 66.6 |
| Rsa1.0_00948.1.g21706.t1 | gb EOA28182.1  hypothetical protein CARUB_v10024372mg [Capsella rubella]                                                                                                                                                                                                                                                                                                                  | 107  | 108  | 1.00E-52  | 100.9 | 96.3 | 99.1 | hypothetical protein CARUB_v10024372mg              | gbpln | Capsella rubella     | AT2G33830.2   Symbols:   Dormancy/auxin associated family protein   chr2:14309766-14310286 REVERSE LENGTH=108                           | 107  | 108  | 2.00E-54  | 100.9 | 95.3 | 97.2 |
| Rsa1.0_00948.1.g21707.t1 | ref XP_002879473.1  hypothetical protein ARALYDRAFT_482334 [Arabidopsis lyrata subsp. lyrata] gi 297325312 gb EFH57532.1                                                                                                                                                                                                                                                                  | 122  | 130  | 2.00E-43  | 106.6 | 84.4 | 87.7 | hypothetical protein ARALYDRAFT_482334              | gbpln | Arabidopsis lyrata   | AT2G33810.1   Symbols: SPL3   squamosa promoter binding protein-like 3   chr2:14305342-14305828 FORWARD LENGTH=131                      | 122  | 131  | 4.00E-45  | 107.4 | 83.6 | 87.7 |
| Rsa1.0_00948.1.g21708.t1 | dbj BAB09923.1  copia-like retrotransposable element [Arabidopsis thaliana]                                                                                                                                                                                                                                                                                                               | 1359 | 1342 | 0         | 98.7  | 70.9 | 83.9 | copia-like retrotransposable element                | gbpln | Arabidopsis thaliana | AT4G23160.1   Symbols: CRK8   cysteine-rich RLK (RECEPTOR-like protein kinase) 8   chr4:12129485-12134086 FORWARD LENGTH=1262           | 1359 | 1262 | 2.00E-85  | 92.9  | 13.0 | 20.3 |
| Rsa1.0_00949.1.g21709.t1 | emb CAB72476.1  putative protein [Arabidopsis thaliana]                                                                                                                                                                                                                                                                                                                                   | 179  | 661  | 6.00E-37  | 369.3 | 45.3 | 60.9 | putative protein                                    | gbpln | Arabidopsis thaliana | #                                                                                                                                       | #    | #    | #         | #     | #    | #    |
| Rsa1.0_00949.1.g21710.t1 | ref NP_171622.1  CBL-interacting serine/threonine-protein kinase 9 [Arabidopsis thaliana] gi 259016207 sp Q9MAM1.2 CIPK9_ARA TH RecName: Full=CBL-interacting serine/threonine-protein kinase 9; AltName: Full=SNF1-related kinase 3.12; AltName: Full=SOS2-like protein kinase PKS6 gi 332189123 gb AAE27244.1  CBL-interacting serine/threonine-protein kinase 9 [Arabidopsis thaliana] | 465  | 447  | 0         | 96.1  | 89.7 | 92.9 | CBL-interacting serine/threonine-protein kinase 9   | gbpln | Arabidopsis thaliana | AT1G01140.1   Symbols: CIPK9, SnRK3.12, PKS6   CBL-interacting protein kinase 9   chr1:64398-67512 REVERSE LENGTH=447                   | 465  | 447  | 0         | 96.1  | 89.7 | 92.9 |
| Rsa1.0_00949.1.g21711.t1 | gb EOA38549.1  hypothetical protein CARUB_v10010354mg [Capsella rubella]                                                                                                                                                                                                                                                                                                                  | 216  | 195  | 5.00E-64  | 90.3  | 80.6 | 81.5 | hypothetical protein CARUB_v10010354mg              | gbpln | Capsella rubella     | AT1G01160.1   Symbols: GIF2   GRF1-interacting factor 2   chr1:72583-73883 FORWARD LENGTH=195                                           | 216  | 195  | 1.00E-59  | 90.3  | 76.9 | 79.6 |
| Rsa1.0_00949.1.g21712.t1 | gb ACF23030.1  ST103-2 [Eutrema halophilum]                                                                                                                                                                                                                                                                                                                                               | 54   | 85   | 9.00E-21  | 157.4 | 88.9 | 90.7 | ST103-2                                             | gbpln | Eutrema halophilum   | AT1G01170.2   Symbols:   Protein of unknown function (DUF1138)   chr1:74105-74443 REVERSE LENGTH=83                                     | 54   | 83   | 2.00E-22  | 153.7 | 85.2 | 88.9 |
| Rsa1.0_00949.1.g21713.t1 | gb EOA38333.1  hypothetical protein CARUB_v10009834mg [Capsella rubella]                                                                                                                                                                                                                                                                                                                  | 314  | 308  | 1.00E-151 | 98.1  | 81.5 | 89.2 | hypothetical protein CARUB_v10009834mg              | gbpln | Capsella rubella     | AT1G01180.1   Symbols:   S-adenosyl-L-methionine-dependent methyltransferases superfamily protein   chr1:75633-76556 FORWARD LENGTH=307 | 314  | 307  | 1.00E-151 | 97.8  | 81.2 | 89.2 |
| Rsa1.0_00949.1.g21714.t1 | gb AEX20385.1  cytochrome P450 family 78 subfamily A polypeptide 8 [Brassica napus]                                                                                                                                                                                                                                                                                                       | 539  | 534  | 0         | 99.1  | 95.4 | 97.6 | cytochrome P450 family 78 subfamily A polypeptide 8 | gbpln | Brassica napus       | AT1G01190.1   Symbols: CYP78A8   cytochrome P450, family 78, subfamily A, polypeptide 8   chr1:83045-84864 REVERSE LENGTH=535           | 539  | 535  | 0         | 99.3  | 88.1 | 93.7 |
| Rsa1.0_00949.1.g21715.t1 | ref XP_002889376.1  hypothetical protein ARALYDRAFT_470156 [Arabidopsis lyrata subsp. lyrata] gi 297335218 gb EFH65635.1                                                                                                                                                                                                                                                                  | 235  | 237  | 1.00E-117 | 100.9 | 90.2 | 94.0 | hypothetical protein ARALYDRAFT_470156              | gbpln | Arabidopsis lyrata   | AT1G01200.1   Symbols: ATRABA3, ATRAB-A3, RABA3   RAB GTPase homolog A3   chr1:86715-88145 REVERSE LENGTH=237                           | 235  | 237  | 1.00E-117 | 100.9 | 88.5 | 92.8 |
| Rsa1.0_00949.1.g21716.t1 | ref XP_002892079.1  ORMDL family protein [Arabidopsis lyrata subsp. lyrata] gi 297337921 gb EFH68338.1  ORMDL family protein [Arabidopsis lyrata subsp. lyrata]                                                                                                                                                                                                                           | 421  | 157  | 1.00E-86  | 37.3  | 35.9 | 36.6 | ORMDL family protein                                | gbpln | Arabidopsis lyrata   | AT1G01230.1   Symbols:   ORMDL family protein   chr1:97620-99046 FORWARD LENGTH=157                                                     | 421  | 157  | 8.00E-89  | 37.3  | 35.6 | 36.6 |
| Rsa1.0_00949.1.g21717.t1 | dbj BAJ34192.1  unnamed protein product [Theilungiella halophila]                                                                                                                                                                                                                                                                                                                         | 188  | 197  | 2.00E-83  | 104.8 | 90.4 | 93.1 | unnamed protein product                             | ----  | ----                 | AT1G01250.1   Symbols:   Integrase-type DNA-binding superfamily protein   chr1:104731-105309 REVERSE LENGTH=192                         | 188  | 192  | 2.00E-82  | 102.1 | 86.7 | 91.5 |

|                          |                                                                                                                                                                                                                                                                                                                                                                                                                                                                                                                                                                                                                                                                                                                                                                                                                                                                                                                                                                                                                                                                    |      |     |          |       |      |      |                                                         |       |                      |                                                                                                                                                                                                                                                                                                                                            |      |     |           |       |      |      |
|--------------------------|--------------------------------------------------------------------------------------------------------------------------------------------------------------------------------------------------------------------------------------------------------------------------------------------------------------------------------------------------------------------------------------------------------------------------------------------------------------------------------------------------------------------------------------------------------------------------------------------------------------------------------------------------------------------------------------------------------------------------------------------------------------------------------------------------------------------------------------------------------------------------------------------------------------------------------------------------------------------------------------------------------------------------------------------------------------------|------|-----|----------|-------|------|------|---------------------------------------------------------|-------|----------------------|--------------------------------------------------------------------------------------------------------------------------------------------------------------------------------------------------------------------------------------------------------------------------------------------------------------------------------------------|------|-----|-----------|-------|------|------|
| Rsa1.0_00949.1.g21718.t1 | ref NP_11634.1  transcription factor bHLH13 [Arabidopsis thaliana] gi 145323702 ref NP_001077440.1  transcription factor bHLH13 [Arabidopsis thaliana] gi 334182212 ref NP_001184883.1  transcription factor bHLH13 [Arabidopsis thaliana] gi 75311402 sp G9LNJ5.1 BH013_ARAT H RecName: Full=Transcription factor bHLH13; AltName: Full=Basic helix-loop-helix protein 13; Short=AtbHLH13; Short=bHLH 13; AltName: Full=Transcription factor EN 39; AltName: Full=bHLH transcription factor bHLH013 gi 9665138 gb AAF97322.1 AC023628.3 Similar to transcription factors [Arabidopsis thaliana] gi 18026974 gb AAL55720.1 AF251698.1 putative transcription factor BHLH13 [Arabidopsis thaliana] gi 19310467 gb AAL84968.1 At1g01260/F6F3_25 [Arabidopsis thaliana] gi 21539515 gb AAM53310.1 transcription factor MYC7E, putative [Arabidopsis thaliana] gi 28416465 gb AAO42763.1 At1g01260/F6F3_25 [Arabidopsis thaliana] gi 332189141 gb AEE27262.1 transcription factor bHLH13 [Arabidopsis thaliana] gi 332189142 gb AEE27263.1 transcription factor bHLH13 | 580  | 590 | 0        | 101.7 | 79.8 | 87.2 | transcription factor bHLH13                             | gbpln | Arabidopsis thaliana | AT1G01260.3   Symbols:   basic helix-loop-helix (bHLH) DNA-binding superfamily protein   chr1:109595-111367 FORWARD LENGTH=590                                                                                                                                                                                                             | 580  | 590 | 0         | 101.7 | 79.8 | 87.2 |
| Rsa1.0_00949.1.g21719.t1 | gb EOA38917.1  hypothetical protein CARUB_v10011315mg [Capsella rubella]                                                                                                                                                                                                                                                                                                                                                                                                                                                                                                                                                                                                                                                                                                                                                                                                                                                                                                                                                                                           | 514  | 510 | 0        | 99.2  | 88.5 | 94.2 | hypothetical protein CARUB_v10011315mg                  | gbpln | Capsella rubella     | AT1G01280.1   Symbols: CYP703A2, CYP703   cytochrome P450, family 703, subfamily A, polypeptide 2   chr1:112290-113905 FORWARD LENGTH=510                                                                                                                                                                                                  | 514  | 510 | 0         | 99.2  | 88.1 | 94.4 |
| Rsa1.0_00949.1.g21720.t1 | ref XP_002892074.1  aspartyl protease family protein [Arabidopsis lyrata subsp. lyrata] gi 297337916 gb EFH68333.1  aspartyl protease family protein [Arabidopsis lyrata subsp. lyrata]                                                                                                                                                                                                                                                                                                                                                                                                                                                                                                                                                                                                                                                                                                                                                                                                                                                                            | 486  | 485 | 0        | 99.8  | 90.9 | 94.9 | aspartyl protease family protein                        | gbpln | Arabidopsis lyrata   | AT1G01300.1   Symbols:   Eukaryotic aspartyl protease family protein   chr1:117065-118522 FORWARD LENGTH=485                                                                                                                                                                                                                               | 486  | 485 | 0         | 99.8  | 85.6 | 89.5 |
| Rsa1.0_00950.1.g21721.t1 | #                                                                                                                                                                                                                                                                                                                                                                                                                                                                                                                                                                                                                                                                                                                                                                                                                                                                                                                                                                                                                                                                  | #    | #   | #        | #     | #    | -    | -                                                       | ----  | ----                 | #                                                                                                                                                                                                                                                                                                                                          | #    | #   | #         | #     | #    |      |
| Rsa1.0_00950.1.g21722.t2 | dbj BAF00918.1  putative reverse transcriptase [Arabidopsis thaliana]                                                                                                                                                                                                                                                                                                                                                                                                                                                                                                                                                                                                                                                                                                                                                                                                                                                                                                                                                                                              | 1455 | 910 | 0        | 62.5  | 34.0 | 43.2 | putative reverse transcriptase                          | gbpln | Arabidopsis thaliana | AT1G43760.1   Symbols:   DNase I-like superfamily protein   chr1:16528880-16531065 REVERSE LENGTH=626                                                                                                                                                                                                                                      | 1455 | 626 | 1.00E-136 | 43.0  | 15.5 | 22.3 |
| Rsa1.0_00950.1.g21723.t1 | #                                                                                                                                                                                                                                                                                                                                                                                                                                                                                                                                                                                                                                                                                                                                                                                                                                                                                                                                                                                                                                                                  | #    | #   | #        | #     | #    | -    | -                                                       | ----  | ----                 | #                                                                                                                                                                                                                                                                                                                                          | #    | #   | #         | #     | #    |      |
| Rsa1.0_00950.1.g21724.t1 | gb EOA32454.1  hypothetical protein CARUB_v10015730mg [Capsella rubella]                                                                                                                                                                                                                                                                                                                                                                                                                                                                                                                                                                                                                                                                                                                                                                                                                                                                                                                                                                                           | 408  | 543 | 8.00E-65 | 133.1 | 34.1 | 50.5 | hypothetical protein CARUB_v10015730mg                  | gbpln | Capsella rubella     | AT1G52950.1   Symbols:   Nucleic acid-binding, OB-fold-like protein   chr1:19725483-19728007 FORWARD LENGTH=566                                                                                                                                                                                                                            | 408  | 566 | 5.00E-55  | 138.7 | 31.1 | 49.3 |
| Rsa1.0_00950.1.g21725.t1 | gb EOA24857.1  hypothetical protein CARUB_v10018148mg [Capsella rubella]                                                                                                                                                                                                                                                                                                                                                                                                                                                                                                                                                                                                                                                                                                                                                                                                                                                                                                                                                                                           | 175  | 163 | 8.00E-59 | 93.1  | 73.7 | 81.7 | hypothetical protein CARUB_v10018148mg                  | gbpln | Capsella rubella     | AT3G25870.1   Symbols:   unknown protein; BEST Arabidopsis thaliana protein match is: unknown protein (TAIR:AT1G13360.1); Has 50 Blast hits to 50 proteins in 12 species: Archae - 0; Bacteria - 0; Metazoa - 0; Fungi - 0; Plants - 50; Viruses - 0; Other Eukaryotes - 0 (source: NCBI BLink).   chr3:9463665-9464177 REVERSE LENGTH=170 | 175  | 170 | 9.00E-57  | 97.1  | 75.4 | 82.3 |
| Rsa1.0_00950.1.g21726.t1 | ref NP_189215.1  2-oxoacid dehydrogenases acyltransferase family protein [Arabidopsis thaliana] gi 5881963 gb AAD55139.1 AF066079.1 dihydrolipoamide S-acetyltransferase [Arabidopsis thaliana] gi 14335166 gb AAK59863.1 AT3g25860/MPE11.1 [Arabidopsis thaliana] gi 26983848 gb AAN86176.1  putative dihydrolipoamide S-acetyltransferase [Arabidopsis thaliana] gi 332643559 gb AEE77080.1  pyruvate decarboxylase E2 subunit [Arabidopsis thaliana]                                                                                                                                                                                                                                                                                                                                                                                                                                                                                                                                                                                                            | 480  | 480 | 0        | 100.0 | 90.2 | 93.3 | 2-oxoacid dehydrogenases acyltransferase family protein | gbpln | Arabidopsis thaliana | AT3G25860.1   Symbols: LTA2, PLE2   2-oxoacid dehydrogenases acyltransferase family protein   chr3:9460632-9462585 FORWARD LENGTH=480                                                                                                                                                                                                      | 480  | 480 | 0         | 100.0 | 90.2 | 93.3 |

|                          |                                                                                                                                                                                                                                                                                                                                                                                                                                                                                                                                                                                                                                                                                   |     |     |          |       |      |      |                                        |       |                      |                                                                                                                    |     |     |          |       |      |      |
|--------------------------|-----------------------------------------------------------------------------------------------------------------------------------------------------------------------------------------------------------------------------------------------------------------------------------------------------------------------------------------------------------------------------------------------------------------------------------------------------------------------------------------------------------------------------------------------------------------------------------------------------------------------------------------------------------------------------------|-----|-----|----------|-------|------|------|----------------------------------------|-------|----------------------|--------------------------------------------------------------------------------------------------------------------|-----|-----|----------|-------|------|------|
| Rsa1.0_00950.1.g21727.t1 | refNP_566781.1  Copper transport protein family [Arabidopsis thaliana] gi 21592740 gb AM64689.1  unknown [Arabidopsis thaliana] gi 88900374 gb ABD57499.1  At3g25855 [Arabidopsis thaliana] gi 332643558 gb AEE77079.1  Copper transport protein family [Arabidopsis thaliana]                                                                                                                                                                                                                                                                                                                                                                                                    | 118 | 112 | 2.00E-41 | 94.9  | 74.6 | 83.9 | Copper transport protein family        | gbpln | Arabidopsis thaliana | AT3G25855.1   Symbols:   Copper transport protein family   chr3:9459608-9460267 REVERSE LENGTH=112                 | 118 | 112 | 3.00E-44 | 94.9  | 74.6 | 83.9 |
| Rsa1.0_00950.1.g21728.t1 | gb EOA23468.1  hypothetical protein CARUB_v10016659mg [Capsella rubella]                                                                                                                                                                                                                                                                                                                                                                                                                                                                                                                                                                                                          | 891 | 916 | 0        | 102.8 | 75.3 | 81.7 | hypothetical protein CARUB_v10016659mg | gbpln | Capsella rubella     | AT3G25840.1   Symbols:   Protein kinase superfamily protein   chr3:9452993-9457446 REVERSE LENGTH=935              | 891 | 935 | 0        | 104.9 | 73.3 | 79.9 |
| Rsa1.0_00950.1.g21729.t1 | #                                                                                                                                                                                                                                                                                                                                                                                                                                                                                                                                                                                                                                                                                 | #   | #   | #        | #     | #    | #    | -                                      | ----  | ----                 | #                                                                                                                  | #   | #   | #        | #     | #    | #    |
| Rsa1.0_00950.1.g21730.t1 | refXP_002873785.1  glycosyl hydrolase family 1 protein [Arabidopsis lyrata subsp. lyrata] gi 297319622 gb EFH50044.1  glycosyl hydrolase family 1 protein [Arabidopsis lyrata subsp. lyrata]                                                                                                                                                                                                                                                                                                                                                                                                                                                                                      | 161 | 503 | 1.00E-71 | 312.4 | 77.6 | 88.2 | glycosyl hydrolase family 1 protein    | gbpln | Arabidopsis lyrata   | AT4G22100.1   Symbols: BGLU3   beta glucosidase 2   chr4:11707370-11709932 REVERSE LENGTH=507                      | 161 | 507 | 3.00E-71 | 314.9 | 77.0 | 85.7 |
| Rsa1.0_00950.1.g21731.t1 | gb EOA18953.1  hypothetical protein CARUB_v10007587mg [Capsella rubella]                                                                                                                                                                                                                                                                                                                                                                                                                                                                                                                                                                                                          | 379 | 527 | 7.00E-19 | 139.1 | 14.2 | 20.1 | hypothetical protein CARUB_v10007587mg | gbpln | Capsella rubella     | AT2G07760.1   Symbols:   Zinc knuckle (CCHC-type) family protein   chr2:3584420-3586278 REVERSE LENGTH=530         | 379 | 530 | 2.00E-20 | 139.8 | 11.1 | 15.0 |
| Rsa1.0_00951.1.g21732.t1 | refNP_187692.1  pectinesterase 24 [Arabidopsis thaliana] gi 75313421 sp Q9SG77.1 PME24_ARAT H RecName: Full=Putative pectinesterase/pectinesterase inhibitor 24; Includes: RecName: Full=Pectinesterase inhibitor 24; AltName: Full=Pectin methyltransferase inhibitor 24; Includes: RecName: Full=Pectinesterase 24; Short=PE 24; AltName: Full=Pectin methyltransferase 24; Short=AtPME24 gi 6630559 gb AAF19578.1 AC011708.21 putative pectinesterase [Arabidopsis thaliana] gi 332641424 gb AEE74945.1  pectinesterase 24 [Arabidopsis thaliana]                                                                                                                              | 559 | 561 | 0        | 100.4 | 85.3 | 92.1 | pectinesterase 24                      | gbpln | Arabidopsis thaliana | AT3G10710.1   Symbols: RHS12   root hair specific 12   chr3:3352289-3354237 FORWARD LENGTH=561                     | 559 | 561 | 0        | 100.4 | 85.3 | 92.1 |
| Rsa1.0_00951.1.g21733.t1 | #                                                                                                                                                                                                                                                                                                                                                                                                                                                                                                                                                                                                                                                                                 | #   | #   | #        | #     | #    | #    | -                                      | ----  | ----                 | #                                                                                                                  | #   | #   | #        | #     | #    | #    |
| Rsa1.0_00951.1.g21734.t1 | refXP_002884802.1  glycosyl transferase family 1 protein [Arabidopsis lyrata subsp. lyrata] gi 297330642 gb EFH61061.1  glycosyl transferase family 1 protein [Arabidopsis lyrata subsp. lyrata]                                                                                                                                                                                                                                                                                                                                                                                                                                                                                  | 483 | 490 | 0        | 101.4 | 83.6 | 89.4 | glycosyl transferase family 1 protein  | gbpln | Arabidopsis lyrata   | AT3G10630.1   Symbols:   UDP-Glycosyltransferase superfamily protein   chr3:3321722-3323185 REVERSE LENGTH=487     | 483 | 487 | 0        | 100.8 | 81.6 | 87.8 |
| Rsa1.0_00951.1.g21735.t1 | gb AFK34779.1  unknown [Medicago truncatula]                                                                                                                                                                                                                                                                                                                                                                                                                                                                                                                                                                                                                                      | 424 | 454 | 8.00E-65 | 107.1 | 40.3 | 56.6 | unknown                                | gbpln | Medicago truncatula  | AT5G19100.1   Symbols:   Eukaryotic aspartyl protease family protein   chr5:6408242-6409417 REVERSE LENGTH=391     | 424 | 391 | 1.00E-52 | 92.2  | 37.3 | 50.2 |
| Rsa1.0_00951.1.g21736.t1 | refXP_002873929.1  hypothetical protein ARALYDRAFT_909934 [Arabidopsis lyrata subsp. lyrata] gi 297319766 gb EFH50188.1  hypothetical protein ARALYDRAFT_909934 [Arabidopsis lyrata subsp. lyrata] refNP_187671.1  cationic amino acid transporter 7 [Arabidopsis thaliana] gi 75313793 sp Q9SQZ0.1 CAAT7_ARAT H RecName: Full=Cationic amino acid transporter 7, chloroplastic; Flags: Precursor gi 12322779 gb AAG51376.1 AC011560.8 putative amino acid transporter; 33388-30195 [Arabidopsis thaliana] gi 8567793 gb AAF76365.1  amino acid transporter, putative [Arabidopsis thaliana] gi 332641412 gb AEE74933.1  cationic amino acid transporter 7 [Arabidopsis thaliana] | 326 | 407 | 1.00E-35 | 124.8 | 41.4 | 53.4 | hypothetical protein ARALYDRAFT_909934 | gbpln | Arabidopsis lyrata   | AT5G19100.1   Symbols:   Eukaryotic aspartyl protease family protein   chr5:6408242-6409417 REVERSE LENGTH=391     | 326 | 391 | 1.00E-35 | 119.9 | 41.7 | 54.3 |
| Rsa1.0_00951.1.g21737.t1 | gi 12322779 gb AAG51376.1 AC011560.8 putative amino acid transporter; 33388-30195 [Arabidopsis thaliana] gi 8567793 gb AAF76365.1  amino acid transporter, putative [Arabidopsis thaliana] gi 332641412 gb AEE74933.1  cationic amino acid transporter 7 [Arabidopsis thaliana]                                                                                                                                                                                                                                                                                                                                                                                                   | 581 | 584 | 0        | 100.5 | 92.1 | 96.0 | cationic amino acid transporter 7      | gbpln | Arabidopsis thaliana | AT3G10600.1   Symbols: CAT7   cationic amino acid transporter 7   chr3:3313969-3317162 FORWARD LENGTH=584          | 581 | 584 | 0        | 100.5 | 92.1 | 96.0 |
| Rsa1.0_00951.1.g21738.t1 | refXP_002884801.1  predicted protein [Arabidopsis lyrata subsp. lyrata] gi 297330641 gb EFH61060.1  predicted protein [Arabidopsis lyrata subsp. lyrata]                                                                                                                                                                                                                                                                                                                                                                                                                                                                                                                          | 221 | 205 | 3.00E-46 | 92.8  | 45.7 | 60.6 | predicted protein                      | gbpln | Arabidopsis lyrata   | AT3G10595.1   Symbols:   Duplicated homeodomain-like superfamily protein   chr3:3311905-3312815 REVERSE LENGTH=183 | 221 | 183 | 1.00E-38 | 82.8  | 41.2 | 56.1 |
| Rsa1.0_00951.1.g21739.t1 | refXP_002884801.1  predicted protein [Arabidopsis lyrata subsp. lyrata] gi 297330641 gb EFH61060.1  predicted protein [Arabidopsis lyrata subsp. lyrata]                                                                                                                                                                                                                                                                                                                                                                                                                                                                                                                          | 206 | 205 | 2.00E-50 | 99.5  | 52.9 | 67.0 | predicted protein                      | gbpln | Arabidopsis lyrata   | AT3G10595.1   Symbols:   Duplicated homeodomain-like superfamily protein   chr3:3311905-3312815 REVERSE LENGTH=183 | 206 | 183 | 7.00E-43 | 88.8  | 42.7 | 57.8 |



|                           |                                                                                                                                                                                                                                                                                                                                                                                                                                                                                                                                                                                                                                                                                                                                                                     |     |      |           |       |      |      |                                                                                                                                                   |       |                      |                                                                                                                               |     |     |           |       |      |      |
|---------------------------|---------------------------------------------------------------------------------------------------------------------------------------------------------------------------------------------------------------------------------------------------------------------------------------------------------------------------------------------------------------------------------------------------------------------------------------------------------------------------------------------------------------------------------------------------------------------------------------------------------------------------------------------------------------------------------------------------------------------------------------------------------------------|-----|------|-----------|-------|------|------|---------------------------------------------------------------------------------------------------------------------------------------------------|-------|----------------------|-------------------------------------------------------------------------------------------------------------------------------|-----|-----|-----------|-------|------|------|
| Rsa1.0_00951.1.g21740.t1  | ref NP_187669.1  myb family transcription factor [Arabidopsis thaliana]<br>gi 12322787 gb AAG51384.1 AC011560_16 hypothetical protein; 39127-40274 [Arabidopsis thaliana]<br>gi 8567789 gb AAF76361.1  t-box binding factor, putative [Arabidopsis thaliana]<br>gi 332641407 gb AEE74928.1  myb family transcription factor [Arabidopsis thaliana]<br>gb AAK82552.1  AT5g04590/T32M21_190 [Arabidopsis thaliana] gi 23308385 gb AAN18162.1  AT5g04590/T32M21_190 [Arabidopsis thaliana]                                                                                                                                                                                                                                                                             | 198 | 287  | 5.00E-42  | 144.9 | 50.0 | 62.1 | myb family transcription factor                                                                                                                   | gbpln | Arabidopsis thaliana | AT3G10580.1   Symbols:   Homeodomain-like superfamily protein   chr3:3307083-3308230 REVERSE LENGTH=287                       | 198 | 287 | 2.00E-44  | 144.9 | 50.0 | 62.1 |
| Rsa1.0_00951.1.g21741.t1  | emb CAB39638.1  RNA-directed DNA polymerase-like protein [Arabidopsis thaliana] gi 7267666 emb CAB78094.1  RNA-directed DNA polymerase-like protein [Arabidopsis thaliana]<br>ref NP_187666.5  Myotubularin-like phosphatases II-like protein [Arabidopsis thaliana]<br>gi 332641403 gb AEE74924.1  Myotubularin-like phosphatases II-like protein [Arabidopsis thaliana]<br>ref XP_002882680.1  hypothetical protein ARALYDRAFT_897238 [Arabidopsis lyrata subsp. lyrata]<br>gi 297328520 gb EFH58939.1  hypothetical protein ARALYDRAFT_897238 [Arabidopsis lyrata subsp. lyrata]<br>ref XP_002882679.1  transducin family protein [Arabidopsis lyrata subsp. lyrata]<br>gi 297328519 gb EFH58938.1  transducin family protein [Arabidopsis lyrata subsp. lyrata] | 370 | 416  | 3.00E-36  | 112.4 | 24.1 | 26.8 | AT5g04590/T32M21_90                                                                                                                               | gbpln | Arabidopsis thaliana | AT5G04590.1   Symbols: SIR   sulfite reductase   chr5:1319404-1322298 FORWARD LENGTH=642                                      | 370 | 642 | 4.00E-38  | 173.5 | 23.5 | 26.2 |
| Rsa1.0_00951.1.g21742.t1  | emb CAB39638.1  RNA-directed DNA polymerase-like protein [Arabidopsis thaliana] gi 7267666 emb CAB78094.1  RNA-directed DNA polymerase-like protein [Arabidopsis thaliana]<br>ref NP_187666.5  Myotubularin-like phosphatases II-like protein [Arabidopsis thaliana]<br>gi 332641403 gb AEE74924.1  Myotubularin-like phosphatases II-like protein [Arabidopsis thaliana]<br>ref XP_002882680.1  hypothetical protein ARALYDRAFT_897238 [Arabidopsis lyrata subsp. lyrata]<br>gi 297328520 gb EFH58939.1  hypothetical protein ARALYDRAFT_897238 [Arabidopsis lyrata subsp. lyrata]<br>ref XP_002882679.1  transducin family protein [Arabidopsis lyrata subsp. lyrata]<br>gi 297328519 gb EFH58938.1  transducin family protein [Arabidopsis lyrata subsp. lyrata] | 516 | 1274 | 1.00E-111 | 246.9 | 44.2 | 59.5 | RNA-directed DNA polymerase-like protein                                                                                                          | gbpln | Arabidopsis thaliana | AT4G29090.1   Symbols:   Ribonuclease H-like superfamily protein   chr4:14333528-14335255 FORWARD LENGTH=575                  | 516 | 575 | 6.00E-55  | 111.4 | 32.9 | 47.1 |
| Rsa1.0_00951.1.g21743.t1  | ref NP_187666.5  Myotubularin-like phosphatases II-like protein [Arabidopsis thaliana]<br>gi 332641403 gb AEE74924.1  Myotubularin-like phosphatases II-like protein [Arabidopsis thaliana]<br>ref XP_002882680.1  hypothetical protein ARALYDRAFT_897238 [Arabidopsis lyrata subsp. lyrata]<br>gi 297328520 gb EFH58939.1  hypothetical protein ARALYDRAFT_897238 [Arabidopsis lyrata subsp. lyrata]<br>ref XP_002882679.1  transducin family protein [Arabidopsis lyrata subsp. lyrata]<br>gi 297328519 gb EFH58938.1  transducin family protein [Arabidopsis lyrata subsp. lyrata]                                                                                                                                                                               | 851 | 840  | 0         | 98.7  | 88.1 | 92.1 | Myotubularin-like phosphatases II-like protein                                                                                                    | gbpln | Arabidopsis thaliana | AT3G10550.1   Symbols: MTM1, AtMTM1   Myotubularin-like phosphatases II superfamily   chr3:3293210-3298452 REVERSE LENGTH=840 | 851 | 840 | 0         | 98.7  | 88.1 | 92.1 |
| Rsa1.0_00951.1.g21744.t1  | ref XP_002882680.1  hypothetical protein ARALYDRAFT_897238 [Arabidopsis lyrata subsp. lyrata]<br>gi 297328520 gb EFH58939.1  hypothetical protein ARALYDRAFT_897238 [Arabidopsis lyrata subsp. lyrata]<br>ref XP_002882679.1  transducin family protein [Arabidopsis lyrata subsp. lyrata]<br>gi 297328519 gb EFH58938.1  transducin family protein [Arabidopsis lyrata subsp. lyrata]                                                                                                                                                                                                                                                                                                                                                                              | 483 | 486  | 0         | 100.6 | 94.4 | 97.7 | hypothetical protein ARALYDRAFT_897238                                                                                                            | gbpln | Arabidopsis lyrata   | AT3G10540.1   Symbols:   3-phosphoinositide-dependent protein kinase   chr3:3289916-3292429 FORWARD LENGTH=486                | 483 | 486 | 0         | 100.6 | 93.8 | 97.1 |
| Rsa1.0_00951.1.g21745.t1  | ref XP_002882679.1  transducin family protein [Arabidopsis lyrata subsp. lyrata]<br>gi 297328519 gb EFH58938.1  transducin family protein [Arabidopsis lyrata subsp. lyrata]                                                                                                                                                                                                                                                                                                                                                                                                                                                                                                                                                                                        | 533 | 536  | 0         | 100.6 | 90.6 | 95.5 | transducin family protein                                                                                                                         | gbpln | Arabidopsis lyrata   | AT3G10530.1   Symbols:   Transducin/WD40 repeat-like superfamily protein   chr3:3286277-3288670 FORWARD LENGTH=536            | 533 | 536 | 0         | 100.6 | 90.8 | 95.1 |
| Rsa1.0_00951.1.g21746.t1  | sp Q941Q2.1 HBL2.BRANA RecName: Full=Non-symbiotic hemoglobin 2; AltName: Full=BRANA GLB2; AltName: Full=Hb2 gi 15809392 gb AAK07741.1  class 2 non-symbiotic hemoglobin [Brassica napus]                                                                                                                                                                                                                                                                                                                                                                                                                                                                                                                                                                           | 161 | 161  | 1.00E-87  | 100.0 | 98.1 | 98.8 | RecName: Full=Non-symbiotic hemoglobin 2; AltName: Full=BRANA GLB2; AltName: Full=Hb2 gi 15809392 gb AAK07741.1  class 2 non-symbiotic hemoglobin | gbpln | Brassica napus       | AT3G10520.1   Symbols: AHB2, GLB2, ARATH GLB2, NSHB2, ATGLB2, HB2   haemoglobin 2   chr3:3276516-3277765 REVERSE LENGTH=158   | 161 | 158 | 3.00E-85  | 98.1  | 92.5 | 96.9 |
| Rsa1.0_00951.1.g21747.t1  | ref XP_002871095.1  protein binding protein [Arabidopsis lyrata subsp. lyrata] gi 297316932 gb EFH47354.1  protein binding protein [Arabidopsis lyrata subsp. lyrata]                                                                                                                                                                                                                                                                                                                                                                                                                                                                                                                                                                                               | 813 | 860  | 0         | 105.8 | 65.3 | 75.2 | protein binding protein                                                                                                                           | gbpln | Arabidopsis lyrata   | AT5G04460.3   Symbols:   RING/U-box superfamily protein   chr5:1260009-1263695 FORWARD LENGTH=863                             | 813 | 863 | 0         | 106.2 | 64.5 | 74.7 |
| Rsa1.0_00951.1.g21748.t1  | gb EOA30249.1  hypothetical protein CARUB_v10013370mg [Capsella rubella]                                                                                                                                                                                                                                                                                                                                                                                                                                                                                                                                                                                                                                                                                            | 535 | 558  | 0         | 104.3 | 75.1 | 82.8 | hypothetical protein CARUB_v10013370mg                                                                                                            | gbpln | Capsella rubella     | AT3G10500.1   Symbols: anac053, NAC053   NAC domain containing protein 53   chr3:3271718-3273887 FORWARD LENGTH=549           | 535 | 549 | 0         | 102.6 | 75.0 | 81.5 |
| Rsa1.0_00951.1.g21749.t1  | gb EOA30567.1  hypothetical protein CARUB_v10013694mg [Capsella rubella]                                                                                                                                                                                                                                                                                                                                                                                                                                                                                                                                                                                                                                                                                            | 443 | 447  | 0         | 100.9 | 81.7 | 89.4 | hypothetical protein CARUB_v10013694mg                                                                                                            | gbpln | Capsella rubella     | AT3G10490.2   Symbols: ANAC052, NAC052   NAC domain containing protein 52   chr3:3268075-3270608 FORWARD LENGTH=451           | 443 | 451 | 0         | 101.8 | 82.4 | 88.7 |
| Rsa1.0_00951.1.g21750.t3  | gb EOA30567.1  hypothetical protein CARUB_v10013694mg [Capsella rubella]                                                                                                                                                                                                                                                                                                                                                                                                                                                                                                                                                                                                                                                                                            | 448 | 447  | 0         | 99.8  | 78.1 | 86.4 | hypothetical protein CARUB_v10013694mg                                                                                                            | gbpln | Capsella rubella     | AT3G10490.2   Symbols: ANAC052, NAC052   NAC domain containing protein 52   chr3:3268075-3270608 FORWARD LENGTH=451           | 448 | 451 | 0         | 100.7 | 76.6 | 84.2 |
| Rsa1.0_00951.1.g21751.t1  | gb EOA32729.1  hypothetical protein CARUB_v10016033mg [Capsella rubella]                                                                                                                                                                                                                                                                                                                                                                                                                                                                                                                                                                                                                                                                                            | 385 | 395  | 1.00E-142 | 102.6 | 79.0 | 84.4 | hypothetical protein CARUB_v10016033mg                                                                                                            | gbpln | Capsella rubella     | AT3G10470.1   Symbols:   C2H2-type zinc finger family protein   chr3:3260424-3261620 FORWARD LENGTH=398                       | 385 | 398 | 1.00E-142 | 103.4 | 80.0 | 86.0 |
| Rsa1.0_00951.1.g21752.t12 | gb EOA30606.1  hypothetical protein CARUB_v10013737mg [Capsella rubella]                                                                                                                                                                                                                                                                                                                                                                                                                                                                                                                                                                                                                                                                                            | 539 | 437  | 0         | 81.1  | 62.0 | 68.1 | hypothetical protein CARUB_v10013737mg                                                                                                            | gbpln | Capsella rubella     | AT3G10450.1   Symbols: SCPL7   serine carboxypeptidase-like 7   chr3:3249544-3252320 FORWARD LENGTH=437                       | 539 | 437 | 0         | 81.1  | 60.5 | 67.0 |
| Rsa1.0_00951.1.g21753.t1  | ref NP_187655.2  shugoshin-like protein [Arabidopsis thaliana]<br>gi 332641396 gb AEE74907.1  shugoshin-like protein [Arabidopsis thaliana]                                                                                                                                                                                                                                                                                                                                                                                                                                                                                                                                                                                                                         | 403 | 572  | 3.00E-56  | 141.9 | 33.3 | 38.5 | shugoshin-like protein                                                                                                                            | gbpln | Arabidopsis thaliana | AT3G10440.1   Symbols:   Shugoshin C terminus   chr3:3245376-3248987 FORWARD LENGTH=572                                       | 403 | 572 | 7.00E-59  | 141.9 | 33.3 | 38.5 |

|                          |                                                                                                                                                                                                                                                                                                                                                                                                                                                                             |     |     |           |       |      |      |                                        |       |                      |                                                                                                                                 |     |     |           |       |      |      |
|--------------------------|-----------------------------------------------------------------------------------------------------------------------------------------------------------------------------------------------------------------------------------------------------------------------------------------------------------------------------------------------------------------------------------------------------------------------------------------------------------------------------|-----|-----|-----------|-------|------|------|----------------------------------------|-------|----------------------|---------------------------------------------------------------------------------------------------------------------------------|-----|-----|-----------|-------|------|------|
| Rsa1.0_00951.1.g21754.t1 | ref NP_567270.1  putative F-box only protein 15 [Arabidopsis thaliana]<br>gi 75265492 sp Q9S9V1.1 FBX15_ARAT<br>H RecName: Full=Putative F-box only protein 15<br>gi 5732058 gb AAD48957.1 AF149414.6 contains similarity to Pfam family PF00646 (F-box domain); score=11/3, E=0.23, N=1 [Arabidopsis thaliana]<br>gi 7267227 emb CAB80834.1 AT4g04690 [Arabidopsis thaliana]<br>gi 332657012 gb AEE82412.1  putative F-box only protein 15 [Arabidopsis thaliana]          | 388 | 378 | 2.00E-96  | 97.4  | 53.6 | 67.8 | putative F-box only protein 15         | gbpln | Arabidopsis thaliana | AT4G04690.1   Symbols:   F-box and associated interaction domains-containing protein   chr4:2373999-2375135 REVERSE LENGTH=378  | 388 | 378 | 5.00E-99  | 97.4  | 53.6 | 67.8 |
| Rsa1.0_00951.1.g21755.t1 | gb EOA19642.1  hypothetical protein CARUB_v10003012mg [Capsella rubella]                                                                                                                                                                                                                                                                                                                                                                                                    | 361 | 390 | 4.00E-66  | 108.0 | 46.5 | 61.5 | hypothetical protein CARUB_v10003012mg | gbpln | Capsella rubella     | AT4G04690.1   Symbols:   F-box and associated interaction domains-containing protein   chr4:2373999-2375135 REVERSE LENGTH=378  | 361 | 378 | 1.00E-68  | 104.7 | 44.0 | 60.7 |
| Rsa1.0_00951.1.g21756.t1 | gb EOA19642.1  hypothetical protein CARUB_v10003012mg [Capsella rubella]                                                                                                                                                                                                                                                                                                                                                                                                    | 392 | 390 | 5.00E-83  | 99.5  | 48.5 | 63.8 | hypothetical protein CARUB_v10003012mg | gbpln | Capsella rubella     | AT4G04690.1   Symbols:   F-box and associated interaction domains-containing protein   chr4:2373999-2375135 REVERSE LENGTH=378  | 392 | 378 | 3.00E-82  | 96.4  | 46.4 | 61.5 |
| Rsa1.0_00952.1.g21757.t1 | gb EOA35235.1  hypothetical protein CARUB_v10020395mg [Capsella rubella]<br>gi 482571048 gb EOA35236.1  hypothetical protein CARUB_v10020395mg [Capsella rubella]                                                                                                                                                                                                                                                                                                           | 477 | 406 | 1.00E-170 | 85.1  | 68.1 | 73.0 | hypothetical protein CARUB_v10020395mg | gbpln | Capsella rubella     | AT1G78420.2   Symbols:   RING/U-box superfamily protein   chr1:29505278-29507272 FORWARD LENGTH=401                             | 477 | 401 | 1.00E-163 | 84.1  | 66.9 | 72.1 |
| Rsa1.0_00952.1.g21758.t1 | ref NP_565179.1  VQ motif-containing protein [Arabidopsis thaliana]<br>gi 17979514 gb AAL50092.1 At1g78410/F3F9_27 [Arabidopsis thaliana]<br>gi 20857141 gb AAM26702.1 At1g78410/F3F9_27 [Arabidopsis thaliana]<br>gi 21618255 gb AAM67305.1  unknown [Arabidopsis thaliana]<br>gi 55982672 gb AAV69753.1  tobacco rattle virus-induced protein variant 1 [Arabidopsis thaliana]<br>gi 332197981 gb AEE36102.1  VQ motif-containing protein [Arabidopsis thaliana]          | 102 | 108 | 7.00E-34  | 105.9 | 83.3 | 88.2 | VQ motif-containing protein            | gbpln | Arabidopsis thaliana | AT1G78410.1   Symbols:   VQ motif-containing protein   chr1:29502728-29503054 FORWARD LENGTH=108                                | 102 | 108 | 1.00E-36  | 105.9 | 83.3 | 88.2 |
| Rsa1.0_00952.1.g21759.t1 | # # # # # # # # - ---- # # # # # #                                                                                                                                                                                                                                                                                                                                                                                                                                          |     |     |           |       |      |      |                                        |       |                      |                                                                                                                                 |     |     |           |       |      |      |
| Rsa1.0_00952.1.g21760.t1 | ref XP_002862994.1  nine-cis-epoxycarotenoid dioxygenase 9 [Arabidopsis lyrata subsp. lyrata]<br>gi 297308788 gb EFH39253.1  nine-cis-epoxycarotenoid dioxygenase 9 [Arabidopsis lyrata subsp. lyrata]<br>ref NP_565178.1  glutathione S-transferase TAU 19 [Arabidopsis thaliana]<br>gi 75338923 sp Q9ZRW8.1 GSTUJ_ARAT<br>H RecName: Full=Glutathione S-transferase U19; Short=AtGSTU19; AltName: Full=GST class-tau member 19; AltName: Full=Glutathione S-transferase 8 | 571 | 606 | 0         | 106.1 | 82.5 | 90.0 | nine-cis-epoxycarotenoid dioxygenase 9 | gbpln | Arabidopsis lyrata   | AT1G78390.1   Symbols: NCED9, ATNCED9   nine-cis-epoxycarotenoid dioxygenase 9   chr1:29490895-29492868 REVERSE LENGTH=657      | 571 | 657 | 0         | 115.1 | 82.7 | 89.8 |
| Rsa1.0_00952.1.g21761.t1 | gi 14326477 gb AAK60284.1 AF385691_1<br>At1g78380/F3F9_11 [Arabidopsis thaliana]<br>gi 4006934 emb CAA10060.1  glutathione transferase [Arabidopsis thaliana]<br>gi 18700206 gb AAL7713.1 At1g78380/F3F9_11 [Arabidopsis thaliana]<br>gi 332197978 gb AEE36099.1  glutathione S-transferase TAU 19 [Arabidopsis thaliana]                                                                                                                                                   | 219 | 219 | 1.00E-105 | 100.0 | 83.1 | 90.0 | glutathione S-transferase TAU 19       | gbpln | Arabidopsis thaliana | AT1G78380.1   Symbols: ATGSTU19, GST8, GSTU19   glutathione S-transferase TAU 19   chr1:29486659-29487819 REVERSE LENGTH=219    | 219 | 219 | 1.00E-107 | 100.0 | 83.1 | 90.0 |
| Rsa1.0_00952.1.g21762.t1 | ref XP_002889184.1  hypothetical protein ARALYDRAFT_476999 [Arabidopsis lyrata subsp. lyrata]<br>gi 297335025 gb EFH65443.1  hypothetical protein ARALYDRAFT_476999 [Arabidopsis lyrata subsp. lyrata]                                                                                                                                                                                                                                                                      | 206 | 302 | 2.00E-42  | 146.6 | 62.6 | 68.4 | hypothetical protein ARALYDRAFT_476999 | gbpln | Arabidopsis lyrata   | AT1G78310.1   Symbols:   VQ motif-containing protein   chr1:29464003-29464938 REVERSE LENGTH=311                                | 206 | 311 | 1.00E-40  | 151.0 | 60.7 | 66.0 |
| Rsa1.0_00952.1.g21763.t1 | gb AAK26634.1 AF342780_1 GF14 omega [Brassica napus]                                                                                                                                                                                                                                                                                                                                                                                                                        | 258 | 260 | 1.00E-137 | 100.8 | 93.4 | 95.7 | GF14 omega                             | gbpln | Brassica napus       | AT1G78300.1   Symbols: GRF2, 14-3-3 OMEGA, GF14 OMEGA   general regulatory factor 2   chr1:29461883-29463052 FORWARD LENGTH=259 | 258 | 259 | 1.00E-137 | 100.4 | 91.1 | 95.7 |

|                          |                                                                                                                                                                                                                                                                                                                                                                                             |      |      |           |       |      |      |                                          |       |                      |                                                                                                                               |      |      |           |       |      |      |
|--------------------------|---------------------------------------------------------------------------------------------------------------------------------------------------------------------------------------------------------------------------------------------------------------------------------------------------------------------------------------------------------------------------------------------|------|------|-----------|-------|------|------|------------------------------------------|-------|----------------------|-------------------------------------------------------------------------------------------------------------------------------|------|------|-----------|-------|------|------|
| Rsa1.0_00952.1.g21764.t2 | gb EOA33589.1  hypothetical protein CARUB_v10019734mg [Capsella rubella]                                                                                                                                                                                                                                                                                                                    | 230  | 944  | 4.00E-67  | 410.4 | 64.3 | 75.2 | hypothetical protein CARUB_v10019734mg   | gbpln | Capsella rubella     | AT1G78280.1   Symbols:   transferases, transferring glycosyl groups   chr1:29452623-29457118 FORWARD LENGTH=943               | 230  | 943  | 2.00E-69  | 410.0 | 63.5 | 76.1 |
| Rsa1.0_00952.1.g21765.t2 | ref XP_002899182.1  hypothetical protein ARALYDRAFT_476994 [Arabidopsis lyrata subsp. lyrata] gi 297335023 gb EFH65441.1  hypothetical protein ARALYDRAFT_476994 [Arabidopsis lyrata subsp. lyrata]                                                                                                                                                                                         | 598  | 474  | 6.00E-86  | 79.3  | 25.1 | 27.3 | hypothetical protein ARALYDRAFT_476994   | gbpln | Arabidopsis lyrata   | AT1G78270.1   Symbols: AtUGT85A4, UGT85A4   UDP-glucosyl transferase 85A4   chr1:29450691-29452223 REVERSE LENGTH=489         | 598  | 489  | 2.00E-88  | 81.8  | 24.9 | 27.3 |
| Rsa1.0_00953.1.g21766.t1 | gb AAF69169.1 AC007915_21 F27F5.21 [Arabidopsis thaliana]                                                                                                                                                                                                                                                                                                                                   | 157  | 1023 | 9.00E-16  | 651.6 | 38.2 | 54.1 | F27F5.21                                 | gbpln | Arabidopsis thaliana | #                                                                                                                             | #    | #    | #         | #     | #    | #    |
| Rsa1.0_00953.1.g21767.t1 | #                                                                                                                                                                                                                                                                                                                                                                                           | #    | #    | #         | #     | #    | -    | ----                                     | ----  | ----                 | #                                                                                                                             | #    | #    | #         | #     | #    | #    |
| Rsa1.0_00953.1.g21768.t1 | ref NP_192696.3  SNARE associated Golgi protein [Arabidopsis thaliana] gi 75153817 sp Q8L586.1 Y4958_ARATH RecName: Full=Uncharacterized membrane protein At4g09580 gi 20465630 gb AAM20146.1  unknown protein [Arabidopsis thaliana] gi 21281237 gb AAM45090.1  unknown protein [Arabidopsis thaliana] gi 332657367 gb AEE82767.1  uncharacterized membrane protein [Arabidopsis thaliana] | 275  | 287  | 1.00E-139 | 104.4 | 92.0 | 94.9 | SNARE associated Golgi protein           | gbpln | Arabidopsis thaliana | AT4G09580.1   Symbols:   SNARE associated Golgi protein family   chr4:6052721-6054313 REVERSE LENGTH=287                      | 275  | 287  | 1.00E-141 | 104.4 | 92.0 | 94.9 |
| Rsa1.0_00953.1.g21769.t1 | gb AAD19784.1  putative retroelement pol polyprotein [Arabidopsis thaliana]                                                                                                                                                                                                                                                                                                                 | 1363 | 1501 | 0         | 110.1 | 58.8 | 74.2 | putative retroelement pol polyprotein    | gbpln | Arabidopsis thaliana | AT4G23160.1   Symbols: CRK8   cysteine-rich RLK (RECEPTOR-like protein kinase) 8   chr4:12129485-12134086 FORWARD LENGTH=1262 | 1363 | 1262 | 1.00E-120 | 92.6  | 15.8 | 22.5 |
| Rsa1.0_00953.1.g21770.t1 | ref NP_192673.1  chaperone DnaJ-domain containing protein [Arabidopsis thaliana] gi 5881780 emb CAB55698.1  putative protein [Arabidopsis thaliana] gi 7267577 emb CAM78058.1  putative protein [Arabidopsis thaliana] gi 332657344 gb AEE82744.1  chaperone DnaJ-domain containing protein [Arabidopsis thaliana]                                                                          | 224  | 249  | 1.00E-106 | 111.2 | 83.5 | 90.6 | chaperone DnaJ-domain containing protein | gbpln | Arabidopsis thaliana | AT4G09350.1   Symbols:   Chaperone DnaJ-domain superfamily protein   chr4:5931317-5932152 REVERSE LENGTH=249                  | 224  | 249  | 1.00E-109 | 111.2 | 83.5 | 90.6 |
| Rsa1.0_00953.1.g21771.t1 | #                                                                                                                                                                                                                                                                                                                                                                                           | #    | #    | #         | #     | #    | -    | ----                                     | ----  | ----                 | #                                                                                                                             | #    | #    | #         | #     | #    | #    |
| Rsa1.0_00953.1.g21772.t1 | #                                                                                                                                                                                                                                                                                                                                                                                           | #    | #    | #         | #     | #    | -    | ----                                     | ----  | ----                 | #                                                                                                                             | #    | #    | #         | #     | #    | #    |
| Rsa1.0_00953.1.g21773.t1 | gb EOA21830.1  hypothetical protein CARUB_v10002296mg [Capsella rubella]                                                                                                                                                                                                                                                                                                                    | 87   | 110  | 8.00E-39  | 126.4 | 88.5 | 95.4 | hypothetical protein CARUB_v10002296mg   | gbpln | Capsella rubella     | #                                                                                                                             | #    | #    | #         | #     | #    | #    |
| Rsa1.0_00953.1.g21774.t1 | ref NP_001190693.1  T-complex protein 11 [Arabidopsis thaliana] gi 332657328 gb AEE82728.1  T-complex protein 11 [Arabidopsis thaliana]                                                                                                                                                                                                                                                     | 1079 | 1098 | 0         | 101.8 | 84.5 | 90.5 | T-complex protein 11                     | gbpln | Arabidopsis thaliana | AT4G09150.2   Symbols:   T-complex protein 11   chr4:5828753-5833475 FORWARD LENGTH=1098                                      | 1079 | 1098 | 0         | 101.8 | 84.5 | 90.5 |
| Rsa1.0_00953.1.g21775.t1 | gb ABD64941.1  Ulp1 protease family protein [Brassica oleracea]                                                                                                                                                                                                                                                                                                                             | 745  | 871  | 8.00E-46  | 116.9 | 15.3 | 20.7 | Ulp1 protease family protein             | gbpln | Brassica oleracea    | AT2G07240.1   Symbols:   cysteine-type peptidases:cysteine-type peptidases   chr2:3007102-3011701 REVERSE LENGTH=874          | 745  | 874  | 3.00E-17  | 117.3 | 7.9  | 11.4 |
| Rsa1.0_00953.1.g21776.t1 | ref XP_002863253.1  predicted protein [Arabidopsis lyrata subsp. lyrata] gi 297309087 gb EFH39512.1  predicted protein [Arabidopsis lyrata subsp. lyrata]                                                                                                                                                                                                                                   | 161  | 165  | 1.00E-13  | 102.5 | 28.0 | 39.1 | predicted protein                        | gbpln | Arabidopsis lyrata   | #                                                                                                                             | #    | #    | #         | #     | #    | #    |
| Rsa1.0_00953.1.g21777.t1 | gb AAF99763.1 AC003981_13 F22O13.21 [Arabidopsis thaliana] gi 9293930 dbj BAB01833.1  Mutator-like transposase [Arabidopsis thaliana] gi 10177478 dbj BAB10869.1  mutator-like transposase [Arabidopsis thaliana]                                                                                                                                                                           | 901  | 915  | 1.00E-101 | 101.6 | 23.8 | 35.4 | F22O13.21                                | gbpln | Arabidopsis thaliana | AT1G64260.1   Symbols:   MuDR family transposase   chr1:23847756-23849915 FORWARD LENGTH=719                                  | 901  | 719  | 1.00E-15  | 79.8  | 5.9  | 9.5  |
| Rsa1.0_00953.1.g21778.t1 | dbj BAA97086.1  unnamed protein product [Arabidopsis thaliana]                                                                                                                                                                                                                                                                                                                              | 383  | 341  | 4.00E-61  | 89.0  | 30.3 | 36.8 | unnamed protein product                  | gbpln | Arabidopsis thaliana | #                                                                                                                             | #    | #    | #         | #     | #    | #    |
| Rsa1.0_00953.1.g21779.t1 | ref XP_002872426.1  zinc finger family protein [Arabidopsis lyrata subsp. lyrata] gi 297318263 gb EFH48685.1  zinc finger family protein [Arabidopsis lyrata subsp. lyrata]                                                                                                                                                                                                                 | 138  | 133  | 2.00E-50  | 96.4  | 70.3 | 78.3 | zinc finger family protein               | gbpln | Arabidopsis lyrata   | AT4G09100.1   Symbols:   RING/U-box superfamily protein   chr4:5811256-5811654 FORWARD LENGTH=132                             | 138  | 132  | 9.00E-48  | 95.7  | 70.3 | 76.8 |
| Rsa1.0_00953.1.g21780.t8 | emb CAN76698.1  hypothetical protein VITISV_011792 [Vitis vinifera]                                                                                                                                                                                                                                                                                                                         | 1004 | 1084 | 0         | 108.0 | 43.3 | 59.8 | hypothetical protein VITISV_011792       | gbpln | Vitis vinifera       | AT4G23160.1   Symbols: CRK8   cysteine-rich RLK (RECEPTOR-like protein kinase) 8   chr4:12129485-12134086 FORWARD LENGTH=1262 | 1004 | 1262 | 4.00E-52  | 125.7 | 13.6 | 22.9 |

|                          |                                                                                                                                                                                                                                                                                                                                                                                                                                                                                                                                                                               |      |      |          |       |      |      |                                            |       |                      |                                                                                                                                                                                                                                                                                                                                                                                                         |      |      |          |       |      |      |
|--------------------------|-------------------------------------------------------------------------------------------------------------------------------------------------------------------------------------------------------------------------------------------------------------------------------------------------------------------------------------------------------------------------------------------------------------------------------------------------------------------------------------------------------------------------------------------------------------------------------|------|------|----------|-------|------|------|--------------------------------------------|-------|----------------------|---------------------------------------------------------------------------------------------------------------------------------------------------------------------------------------------------------------------------------------------------------------------------------------------------------------------------------------------------------------------------------------------------------|------|------|----------|-------|------|------|
| Rsa1.0_00953.1.g21781.t1 | gb EOA20988.1  hypothetical protein CARUB_v10001320mg [Capsella rubella]                                                                                                                                                                                                                                                                                                                                                                                                                                                                                                      | 184  | 346  | 5.00E-30 | 188.0 | 54.9 | 66.3 | hypothetical protein CARUB_v10001320mg     | gbpln | Capsella rubella     | AT4G09060.1   Symbols:   unknown protein; LOCATED IN: membrane; EXPRESSED IN: leaf; BEST Arabidopsis thaliana protein match is: unknown protein (TAIR:AT1G14680.1); Has 8168 Blast hits to 6036 proteins in 601 species: Archae - 151; Bacteria - 570; Metazoa - 4684; Fungi - 544; Plants - 345; Viruses - 91; Other Eukaryotes - 1783 (source: NCBI BLink).   chr4:5797781-5800253 REVERSE LENGTH=341 | 184  | 341  | 2.00E-30 | 185.3 | 55.4 | 66.3 |
| Rsa1.0_00953.1.g21782.t1 | gb ADP20180.1  mutant gag-pol polyprotein [Pisum sativum]                                                                                                                                                                                                                                                                                                                                                                                                                                                                                                                     | 238  | 1004 | 6.00E-11 | 421.8 | 18.5 | 32.8 | mutant gag-pol polyprotein                 | gbpln | Pisum sativum        | #                                                                                                                                                                                                                                                                                                                                                                                                       | #    | #    | #        | #     | #    |      |
| Rsa1.0_00954.1.g21783.t1 | ref XP_002883801.1  hypothetical protein ARALYDRAFT_480310 [Arabidopsis lyrata subsp. lyrata] gi 297329641 gb EFH60060.1  hypothetical protein ARALYDRAFT_480310 [Arabidopsis lyrata subsp. lyrata] ref NP_178981.1  nuclear transcription factor Y subunit B-7 [Arabidopsis thaliana] gi 75265909 sp Q9SIT9.1 NFYB7_ARATH RecName: Full=Nuclear transcription factor Y subunit B-7; Short=AtNF-YB-7 gi 4558662 gb AAD22680.1  putative CCAAT-box binding transcription factor [Arabidopsis thaliana]                                                                         | 618  | 622  | 0        | 100.6 | 92.9 | 97.6 | hypothetical protein ARALYDRAFT_480310     | gbpln | Arabidopsis lyrata   | AT2G13560.1   Symbols: NAD-ME1   NAD-dependent malic enzyme 1   chr2:5650089-5655103 FORWARD LENGTH=623                                                                                                                                                                                                                                                                                                 | 618  | 623  | 0        | 100.8 | 92.2 | 96.9 |
| Rsa1.0_00954.1.g21784.t1 | gi 91806156 gb ABE65807.1  CCAAT-box binding transcription factor [Arabidopsis thaliana] gi 9442483 gb ABF19029.1  At2g13570 [Arabidopsis thaliana] gi 225898106 dbj BAH30385.1  hypothetical protein [Arabidopsis thaliana] gi 330251149 gb AEC06243.1  nuclear transcription factor Y subunit B-7 [Arabidopsis thaliana] ref NP_175075.1  gibberellin 20-oxidase 5 [Arabidopsis thaliana]                                                                                                                                                                                   | 208  | 215  | 9.00E-86 | 103.4 | 82.7 | 88.5 | nuclear transcription factor Y subunit B-7 | gbpln | Arabidopsis thaliana | AT2G13570.1   Symbols: NF-YB7   nuclear factor Y, subunit B7   chr2:5655842-5656489 REVERSE LENGTH=215                                                                                                                                                                                                                                                                                                  | 208  | 215  | 3.00E-88 | 103.4 | 82.7 | 88.5 |
| Rsa1.0_00954.1.g21785.t1 | gi 67633434 gb AAAY78641.1  gibberellin 20-oxidase family protein [Arabidopsis thaliana] gi 332193897 gb AEE32018.1  gibberellin 20-oxidase 5 [Arabidopsis thaliana] ref XP_002883804.1  hypothetical protein ARALYDRAFT_480314 [Arabidopsis lyrata subsp. lyrata] gi 297329644 gb EFH60063.1  hypothetical protein ARALYDRAFT_480314 [Arabidopsis lyrata subsp. lyrata]                                                                                                                                                                                                      | 357  | 385  | 0        | 107.8 | 84.3 | 91.9 | gibberellin 20-oxidase 5                   | gbpln | Arabidopsis thaliana | AT1G44090.1   Symbols: ATGA20OX5, GA20OX5   gibberellin 20-oxidase 5   chr1:16760677-16762486 REVERSE LENGTH=385                                                                                                                                                                                                                                                                                        | 357  | 385  | 0        | 107.8 | 84.3 | 91.9 |
| Rsa1.0_00954.1.g21786.t1 | ref XP_002877500.1  predicted protein [Arabidopsis lyrata subsp. lyrata] gi 297323338 gb EFH53759.1  predicted protein [Arabidopsis lyrata subsp. lyrata] ref XP_002883808.1  hypothetical protein ARALYDRAFT_899601 [Arabidopsis lyrata subsp. lyrata] gi 297329648 gb EFH60067.1  hypothetical protein ARALYDRAFT_899601 [Arabidopsis lyrata subsp. lyrata]                                                                                                                                                                                                                 | 807  | 823  | 0        | 102.0 | 91.9 | 96.5 | hypothetical protein ARALYDRAFT_480314     | gbpln | Arabidopsis lyrata   | AT2G13620.1   Symbols: ATCHX15, CHX15   cation/hydrogen exchanger 15   chr2:5678006-5680621 FORWARD LENGTH=821                                                                                                                                                                                                                                                                                          | 807  | 821  | 0        | 101.7 | 91.8 | 96.5 |
| Rsa1.0_00954.1.g21787.t1 | ref XP_002883808.1  hypothetical protein ARALYDRAFT_899601 [Arabidopsis lyrata subsp. lyrata] gi 297323338 gb EFH53759.1  predicted protein [Arabidopsis lyrata subsp. lyrata] ref XP_002883808.1  hypothetical protein ARALYDRAFT_899601 [Arabidopsis lyrata subsp. lyrata] gi 297329648 gb EFH60067.1  hypothetical protein ARALYDRAFT_899601 [Arabidopsis lyrata subsp. lyrata] ref NP_001190233.1  26S proteasome regulatory subunit N8 [Arabidopsis thaliana] gi 332003541 gb AED90924.1  probable 26S proteasome non-ATPase regulatory subunit 7 [Arabidopsis thaliana] | 140  | 136  | 5.00E-30 | 97.1  | 45.7 | 60.7 | predicted protein                          | gbpln | Arabidopsis lyrata   | AT1G43730.1   Symbols:   RNA-directed DNA polymerase (reverse transcriptase)-related family protein   chr1:16508723-16509784 REVERSE LENGTH=320                                                                                                                                                                                                                                                         | 140  | 320  | 7.00E-15 | 228.6 | 31.4 | 42.1 |
| Rsa1.0_00954.1.g21788.t1 | ref XP_002883808.1  hypothetical protein ARALYDRAFT_899601 [Arabidopsis lyrata subsp. lyrata] gi 297329648 gb EFH60067.1  hypothetical protein ARALYDRAFT_899601 [Arabidopsis lyrata subsp. lyrata] ref NP_001190233.1  26S proteasome regulatory subunit N8 [Arabidopsis thaliana] gi 332003541 gb AED90924.1  probable 26S proteasome non-ATPase regulatory subunit 7 [Arabidopsis thaliana]                                                                                                                                                                                | 1906 | 1923 | 0        | 100.9 | 94.4 | 97.0 | hypothetical protein ARALYDRAFT_899601     | gbpln | Arabidopsis lyrata   | AT2G13680.1   Symbols: CALS5, GLS2, ATGSL02   callose synthase 5   chr2:5695124-5706134 FORWARD LENGTH=1923                                                                                                                                                                                                                                                                                             | 1906 | 1923 | 0        | 100.9 | 94.1 | 96.5 |
| Rsa1.0_00954.1.g21789.t3 | ref NP_001190233.1  26S proteasome regulatory subunit N8 [Arabidopsis thaliana] gi 332003541 gb AED90924.1  probable 26S proteasome non-ATPase regulatory subunit 7 [Arabidopsis thaliana]                                                                                                                                                                                                                                                                                                                                                                                    | 218  | 305  | 1.00E-18 | 139.9 | 20.6 | 26.6 | 26S proteasome regulatory subunit N8       | gbpln | Arabidopsis thaliana | AT5G05780.2   Symbols: RPN8A   RP non-ATPase subunit 8A   chr5:1735862-1738176 FORWARD LENGTH=305                                                                                                                                                                                                                                                                                                       | 218  | 305  | 4.00E-21 | 139.9 | 20.6 | 26.6 |

|                          |                                                                                                                                                                                                                                                                                                                                                                                                                                                                                                                                                                                                                                                          |      |      |           |       |      |      |                                                 |       |                      |                                                                                                                                                 |      |      |           |       |      |      |
|--------------------------|----------------------------------------------------------------------------------------------------------------------------------------------------------------------------------------------------------------------------------------------------------------------------------------------------------------------------------------------------------------------------------------------------------------------------------------------------------------------------------------------------------------------------------------------------------------------------------------------------------------------------------------------------------|------|------|-----------|-------|------|------|-------------------------------------------------|-------|----------------------|-------------------------------------------------------------------------------------------------------------------------------------------------|------|------|-----------|-------|------|------|
| Rsa1.0_00954.1.g21790.t1 | ref NP_973453.2  putative S-acyltransferase [Arabidopsis thaliana]<br>gi 223635847 sp Q3EC11.2 ZDHC2_ARA TH RecName: Full=Probable S-acyltransferase At2g14255; AltName: Full=Probable palmitoyltransferase At2g14255; AltName: Full=Zinc finger DHHC domain-containing protein At2g14255<br>gi 330251198 gb AEC06292.1  putative S-acyltransferase [Arabidopsis thaliana]                                                                                                                                                                                                                                                                               | 558  | 536  | 0         | 96.1  | 80.1 | 86.6 | putative S-acyltransferase                      | gbpln | Arabidopsis thaliana | AT2G14255.1   Symbols:   Ankyrin repeat family protein with DHHC zinc finger domain   chr2:6036974-6040892 FORWARD LENGTH=536                   | 558  | 536  | 0         | 96.1  | 80.1 | 86.6 |
| Rsa1.0_00954.1.g21791.t1 | ref NP_850652.1  peroxidase 32 [Arabidopsis thaliana]<br>gi 166898075 sp Q9LHB9.3 PER32_ARA TH RecName: Full=Peroxidase 32; Short=Atperox P32; AltName: Full=ATP16a; AltName: Full=PRXR3; Flags: Precursor<br>gi 9884625 dbj BAB02631.1  peroxidase [Arabidopsis thaliana]<br>gi 19347733 gb AAL86292.1  unknown protein [Arabidopsis thaliana]<br>gi 22136690 gb AAM91664.1  unknown protein [Arabidopsis thaliana]<br>gi 22424403 dbj BAH20157.1  AT3G32980 [Arabidopsis thaliana]<br>gi 332644196 gb AE77707.1  peroxidase 32 [Arabidopsis thaliana]<br>ref XP_002885951.1  hypothetical protein ARALYDRAFT_899735 [Arabidopsis lyrata subsp. lyrata] | 88   | 352  | 8.00E-28  | 400.0 | 71.6 | 76.1 | peroxidase 32                                   | gbpln | Arabidopsis thaliana | AT3G32980.1   Symbols:   Peroxidase superfamily protein   chr3:13526404-13529949 REVERSE LENGTH=352                                             | 88   | 352  | 1.00E-30  | 400.0 | 71.6 | 76.1 |
| Rsa1.0_00954.1.g21792.t2 | ref NP_179134.1  leucine-rich repeat-containing protein [Arabidopsis thaliana]<br>gi 4662629 gb AAD26901.1  putative leucine-rich repeat disease resistance protein [Arabidopsis thaliana]<br>gi 15292805 gb AAK92771.1  putative leucine-rich repeat disease resistance protein [Arabidopsis thaliana]<br>gi 20258661 gb AAM14102.1  putative leucine-rich repeat disease resistance protein [Arabidopsis thaliana]<br>gi 330251293 gb AEC06387.1  leucine-rich repeat-containing protein [Arabidopsis thaliana]                                                                                                                                        | 258  | 252  | 1.00E-123 | 97.7  | 91.5 | 93.4 | hypothetical protein ARALYDRAFT_899735          | gbpln | Arabidopsis lyrata   | AT2G15240.1   Symbols:   UNC-50 family protein   chr2:6615980-6618862 REVERSE LENGTH=252                                                        | 258  | 252  | 1.00E-120 | 97.7  | 90.3 | 92.2 |
| Rsa1.0_00954.1.g21793.t1 | gb ADY76580.1  translocon at inner membrane of chloroplasts 21 [Brassica napus]                                                                                                                                                                                                                                                                                                                                                                                                                                                                                                                                                                          | 292  | 294  | 1.00E-130 | 100.7 | 84.9 | 89.0 | translocon at inner membrane of chloroplasts 21 | gbpln | Brassica napus       | AT2G15290.1   Symbols:   ATTIC21, TIC21, CIA5, PIC1   translocon at inner membrane of chloroplasts 21   chr2:6642512-6644011 REVERSE LENGTH=296 | 292  | 296  | 1.00E-128 | 101.4 | 83.2 | 88.4 |
| Rsa1.0_00954.1.g21794.t1 | ref XP_002885951.1  hypothetical protein ARALYDRAFT_480399 [Arabidopsis lyrata subsp. lyrata]<br>gi 297329730 gb EFH60149.1  hypothetical protein ARALYDRAFT_480399 [Arabidopsis lyrata subsp. lyrata]                                                                                                                                                                                                                                                                                                                                                                                                                                                   | 739  | 744  | 0         | 100.7 | 71.4 | 80.0 | hypothetical protein ARALYDRAFT_480399          | gbpln | Arabidopsis lyrata   | AT2G15300.1   Symbols:   Leucine-rich repeat protein kinase family protein   chr2:6649630-6652010 FORWARD LENGTH=744                            | 739  | 744  | 0         | 100.7 | 71.6 | 79.7 |
| Rsa1.0_00954.1.g21795.t1 | ref NP_179134.1  leucine-rich repeat-containing protein [Arabidopsis thaliana]<br>gi 4662629 gb AAD26901.1  putative leucine-rich repeat disease resistance protein [Arabidopsis thaliana]<br>gi 15292805 gb AAK92771.1  putative leucine-rich repeat disease resistance protein [Arabidopsis thaliana]<br>gi 20258661 gb AAM14102.1  putative leucine-rich repeat disease resistance protein [Arabidopsis thaliana]<br>gi 330251293 gb AEC06387.1  leucine-rich repeat-containing protein [Arabidopsis thaliana]                                                                                                                                        | 387  | 382  | 0         | 98.7  | 82.4 | 91.2 | leucine-rich repeat-containing protein          | gbpln | Arabidopsis thaliana | AT2G15320.1   Symbols:   Leucine-rich repeat (LRR) family protein   chr2:6666527-6667675 REVERSE LENGTH=382                                     | 387  | 382  | 0         | 98.7  | 82.4 | 91.2 |
| Rsa1.0_00954.1.g21796.t1 | #                                                                                                                                                                                                                                                                                                                                                                                                                                                                                                                                                                                                                                                        | #    | #    | #         | #     | #    | -    | ----                                            | ----  | #                    | #                                                                                                                                               | #    | #    | #         | #     | #    |      |
| Rsa1.0_00954.1.g21797.t1 | #                                                                                                                                                                                                                                                                                                                                                                                                                                                                                                                                                                                                                                                        | #    | #    | #         | #     | #    | -    | ----                                            | ----  | #                    | #                                                                                                                                               | #    | #    | #         | #     | #    |      |
| Rsa1.0_00954.1.g21798.t2 | ref XP_002885958.1  predicted protein [Arabidopsis lyrata subsp. lyrata]<br>gi 297331798 gb EFH62217.1  predicted protein [Arabidopsis lyrata subsp. lyrata]                                                                                                                                                                                                                                                                                                                                                                                                                                                                                             | 513  | 534  | 0         | 104.1 | 75.0 | 85.8 | predicted protein                               | gbpln | Arabidopsis lyrata   | AT1G14080.1   Symbols:   FUT6, ATFUT6   fucosyltransferase 6   chr1:4822580-4824218 FORWARD LENGTH=519                                          | 513  | 519  | 0         | 101.2 | 74.7 | 86.7 |
| Rsa1.0_00955.1.g21799.t1 | #                                                                                                                                                                                                                                                                                                                                                                                                                                                                                                                                                                                                                                                        | #    | #    | #         | #     | #    | -    | ----                                            | ----  | #                    | #                                                                                                                                               | #    | #    | #         | #     | #    |      |
| Rsa1.0_00955.1.g21800.t1 | gb EOA40138.1  hypothetical protein CARUB_v10008849mg, partial [Capsella rubella]                                                                                                                                                                                                                                                                                                                                                                                                                                                                                                                                                                        | 465  | 523  | 0         | 112.5 | 97.8 | 99.1 | hypothetical protein CARUB_v10008849mg, partial | gbpln | Capsella rubella     | AT1G04170.1   Symbols:   EIF2 GAMMA   eukaryotic translation initiation factor 2 gamma subunit   chr1:1097423-1099702 FORWARD LENGTH=465        | 465  | 465  | 0         | 100.0 | 97.4 | 98.9 |
| Rsa1.0_00955.1.g21801.t2 | gb EOA36034.1  hypothetical protein CARUB_v10008089mg [Capsella rubella]                                                                                                                                                                                                                                                                                                                                                                                                                                                                                                                                                                                 | 1377 | 1499 | 0         | 108.9 | 85.0 | 90.7 | hypothetical protein CARUB_v10008089mg          | gbpln | Capsella rubella     | AT1G04160.1   Symbols:   XIB, ATXIB, XI-8, XI-B   myosin XI B   chr1:1086495-1096146 FORWARD LENGTH=1500                                        | 1377 | 1500 | 0         | 108.9 | 84.0 | 90.0 |

|                          |                                                                                                                                                                                                                                                                                                                                                                    |     |      |           |       |      |      |                                             |       |                      |                                                                                                                                                                                                                                                                                                                                                                                                                                                                                                                |     |      |           |       |      |      |
|--------------------------|--------------------------------------------------------------------------------------------------------------------------------------------------------------------------------------------------------------------------------------------------------------------------------------------------------------------------------------------------------------------|-----|------|-----------|-------|------|------|---------------------------------------------|-------|----------------------|----------------------------------------------------------------------------------------------------------------------------------------------------------------------------------------------------------------------------------------------------------------------------------------------------------------------------------------------------------------------------------------------------------------------------------------------------------------------------------------------------------------|-----|------|-----------|-------|------|------|
| Rsa1.0_00955.1.g21802.t1 | ref NP_171911.1  C2 domain-containing protein [Arabidopsis thaliana]   g 3142295 gb AAC16746.1  Strong similarity to phosphoribosylanthranilate transferase gb D86180 from Pisum sativum [Arabidopsis thaliana]   g 332189542 gb AEE27663.1  C2 domain-containing protein [Arabidopsis thaliana]                                                                   | 992 | 1012 | 0         | 102.0 | 84.4 | 92.1 | C2 domain-containing protein                | gbpln | Arabidopsis thaliana | AT1G04150.1   Symbols:   C2 calcium/lipid-binding plant phosphoribosyltransferase family protein   chr1:1081208-1084246 REVERSE LENGTH=1012                                                                                                                                                                                                                                                                                                                                                                    | 992 | 1012 | 0         | 102.0 | 84.4 | 92.1 |
| Rsa1.0_00955.1.g21803.t1 | gb EOA37524.1  hypothetical protein CARUB_v10011722mg [Capsella rubella]                                                                                                                                                                                                                                                                                           | 801 | 790  | 0         | 98.6  | 84.5 | 90.0 | hypothetical protein CARUB_v10011722mg      | gbpln | Capsella rubella     | AT1G04140.1   Symbols:   Transducin family protein / WD-40 repeat family protein   chr1:1075984-1080321 REVERSE LENGTH=790                                                                                                                                                                                                                                                                                                                                                                                     | 801 | 790  | 0         | 98.6  | 83.0 | 88.9 |
| Rsa1.0_00955.1.g21804.t1 | ref XP_002899492.1  binding protein [Arabidopsis lyrata subsp. lyrata]   g 297335334 gb EFH65751.1  binding protein [Arabidopsis lyrata subsp. lyrata]                                                                                                                                                                                                             | 359 | 360  | 0         | 100.3 | 85.5 | 94.2 | binding protein                             | gbpln | Arabidopsis lyrata   | AT1G04130.1   Symbols: TPR2, AtTPR2   Tetratricopeptide repeat (TPR)-like superfamily protein   chr1:1073465-1075374 FORWARD LENGTH=360                                                                                                                                                                                                                                                                                                                                                                        | 359 | 360  | 1.00E-180 | 100.3 | 84.4 | 92.5 |
| Rsa1.0_00955.1.g21805.t1 | gb EOA23557.1  hypothetical protein CARUB_v10016751mg [Capsella rubella]                                                                                                                                                                                                                                                                                           | 742 | 719  | 0         | 96.9  | 54.2 | 64.3 | hypothetical protein CARUB_v10016751mg      | gbpln | Capsella rubella     | AT2G02955.1   Symbols: MEE12   maternal effect embryo arrest 12   chr2:859592-861772 FORWARD LENGTH=666                                                                                                                                                                                                                                                                                                                                                                                                        | 742 | 666  | 0         | 89.8  | 49.7 | 61.7 |
| Rsa1.0_00955.1.g21806.t1 | gb EOA29382.1  hypothetical protein CARUB_v10025669mg [Capsella rubella]                                                                                                                                                                                                                                                                                           | 584 | 377  | 1.00E-165 | 64.6  | 51.2 | 56.5 | hypothetical protein CARUB_v10025669mg      | gbpln | Capsella rubella     | AT2G35580.1   Symbols:   Serine protease inhibitor (SERPIN) family protein   chr2:14933828-14935482 REVERSE LENGTH=374                                                                                                                                                                                                                                                                                                                                                                                         | 584 | 374  | 1.00E-131 | 64.0  | 43.2 | 49.1 |
| Rsa1.0_00955.1.g21807.t1 | ref XP_002881405.1  hypothetical protein ARALYDRAFT_902667 [Arabidopsis lyrata subsp. lyrata]   g 297327244 gb EFH57664.1  hypothetical protein ARALYDRAFT_902667 [Arabidopsis lyrata subsp. lyrata]                                                                                                                                                               | 86  | 86   | 7.00E-37  | 100.0 | 84.9 | 91.9 | hypothetical protein ARALYDRAFT_902667      | gbpln | Arabidopsis lyrata   | AT2G35612.1   Symbols:   FUNCTIONS IN: molecular_function unknown; INVOLVED IN: biological_process unknown; LOCATED IN: endomembrane system; EXPRESSED IN: flower; BEST Arabidopsis thaliana protein match is: Copper amine oxidase family protein (TAIR:AT1G31670.1); Has 35333 Blast hits to 34131 proteins in 2444 species: Archae - 798; Bacteria - 22429; Metazoa - 974; Fungi - 991; Plants - 531; Viruses - 0; Other Eukaryotes - 9610 (source: NCBI BLink).   chr2:14955241-14955501 REVERSE LENGTH=86 | 86  | 86   | 5.00E-39  | 100.0 | 83.7 | 90.7 |
| Rsa1.0_00955.1.g21808.t1 | #                                                                                                                                                                                                                                                                                                                                                                  | #   | #    | #         | #     | #    | #    | -                                           | ----  | ----                 | #                                                                                                                                                                                                                                                                                                                                                                                                                                                                                                              | #   | #    | #         | #     | #    |      |
| Rsa1.0_00956.1.g21809.t1 | gb AAM63070.1  VirE2-interacting protein VIP1 [Arabidopsis thaliana]                                                                                                                                                                                                                                                                                               | 333 | 341  | 1.00E-127 | 102.4 | 77.2 | 83.2 | VirE2-interacting protein VIP1              | gbpln | Arabidopsis thaliana | AT1G43700.1   Symbols: VIP1, SUE3   VIRE2-interacting protein   chr1:16484352-16486017 FORWARD LENGTH=341                                                                                                                                                                                                                                                                                                                                                                                                      | 333 | 341  | 1.00E-129 | 102.4 | 76.9 | 82.9 |
| Rsa1.0_00956.1.g21810.t1 | #                                                                                                                                                                                                                                                                                                                                                                  | #   | #    | #         | #     | #    | #    | -                                           | ----  | ----                 | #                                                                                                                                                                                                                                                                                                                                                                                                                                                                                                              | #   | #    | #         | #     | #    |      |
| Rsa1.0_00956.1.g21811.t1 | #                                                                                                                                                                                                                                                                                                                                                                  | #   | #    | #         | #     | #    | #    | -                                           | ----  | ----                 | #                                                                                                                                                                                                                                                                                                                                                                                                                                                                                                              | #   | #    | #         | #     | #    |      |
| Rsa1.0_00956.1.g21812.t1 | #                                                                                                                                                                                                                                                                                                                                                                  | #   | #    | #         | #     | #    | #    | -                                           | ----  | ----                 | #                                                                                                                                                                                                                                                                                                                                                                                                                                                                                                              | #   | #    | #         | #     | #    |      |
| Rsa1.0_00956.1.g21813.t2 | emb CAB40024.1  putative reverse-transcriptase-like protein [Arabidopsis thaliana]   g 7267755 emb CAB78181.1  putative reverse-transcriptase-like protein [Arabidopsis thaliana]   ref NP_175046.1  serine carboxypeptidase-like 44 [Arabidopsis thaliana]   g 75192450 sp Q9MAR8.1 SCP44, ARAT H RecName: Full=Serine carboxypeptidase-like 44; Flags: Precursor | 886 | 1240 | 7.00E-27  | 140.0 | 9.8  | 13.1 | putative reverse-transcriptase-like protein | gbpln | Arabidopsis thaliana | #                                                                                                                                                                                                                                                                                                                                                                                                                                                                                                              | #   | #    | #         | #     | #    |      |
| Rsa1.0_00956.1.g21814.t1 | g 7523661 gb AAF63101.1 AC006423.2 Putative serine carboxypeptidases [Arabidopsis thaliana]   g 332193875 gb AEE31996.1  serine carboxypeptidase-like 44 [Arabidopsis thaliana]                                                                                                                                                                                    | 478 | 479  | 0         | 100.2 | 85.6 | 93.3 | serine carboxypeptidase-like 44             | gbpln | Arabidopsis thaliana | AT1G43780.1   Symbols: scpl44   serine carboxypeptidase-like 44   chr1:16563811-16567399 FORWARD LENGTH=479                                                                                                                                                                                                                                                                                                                                                                                                    | 478 | 479  | 0         | 100.2 | 85.6 | 93.3 |
| Rsa1.0_00956.1.g21815.t1 | #                                                                                                                                                                                                                                                                                                                                                                  | #   | #    | #         | #     | #    | #    | -                                           | ----  | ----                 | #                                                                                                                                                                                                                                                                                                                                                                                                                                                                                                              | #   | #    | #         | #     | #    |      |
| Rsa1.0_00956.1.g21816.t1 | ref XP_002887198.1  hypothetical protein ARALYDRAFT_315886 [Arabidopsis lyrata subsp. lyrata]   g 297330309 gb EFH63457.1  hypothetical protein ARALYDRAFT_315886 [Arabidopsis lyrata subsp. lyrata]                                                                                                                                                               | 173 | 75   | 2.00E-18  | 43.4  | 27.7 | 29.5 | hypothetical protein ARALYDRAFT_315886      | gbpln | Arabidopsis lyrata   | AT1G68680.1   Symbols:   unknown protein; FUNCTIONS IN: molecular_function unknown; INVOLVED IN: biological_process unknown; LOCATED IN: chloroplast; EXPRESSED IN: 23 plant structures; EXPRESSED DURING: 16 growth stages; Has 20 Blast hits to 20 proteins in 11 species: Archae - 0; Bacteria - 0; Metazoa - 0; Fungi - 0; Plants - 20; Viruses - 0; Other Eukaryotes - 0 (source: NCBI BLink).   chr1:25785627-25786622 FORWARD LENGTH=75                                                                 | 173 | 75   | 1.00E-19  | 43.4  | 26.6 | 28.3 |

|                          |                                                                                                                                                                                                     |      |      |           |       |      |      |                                                     |       |                      |                                                                                                                                                                                                                                                                                                                                                   |      |      |          |       |      |      |
|--------------------------|-----------------------------------------------------------------------------------------------------------------------------------------------------------------------------------------------------|------|------|-----------|-------|------|------|-----------------------------------------------------|-------|----------------------|---------------------------------------------------------------------------------------------------------------------------------------------------------------------------------------------------------------------------------------------------------------------------------------------------------------------------------------------------|------|------|----------|-------|------|------|
| Rsa1.0_00956.1.g21819.t2 | gb AAG51783.1 AC079679.3 reverse transcriptase, putative; 16838-20266 [Arabidopsis thaliana]                                                                                                        | 1155 | 1142 | 1.00E-120 | 98.9  | 18.3 | 21.1 | reverse transcriptase, putative; 16838-20266        | gbpln | Arabidopsis thaliana | AT4G29090.1   Symbols:   Ribonuclease H-like superfamily protein   chr4:14333528-14335255 FORWARD LENGTH=575                                                                                                                                                                                                                                      | 1155 | 575  | 8.00E-39 | 49.8  | 9.0  | 16.1 |
| Rsa1.0_00956.1.g21818.t1 | ref XP_002893975.1  hypothetical protein ARALYDRAFT_891373 [Arabidopsis lyrata subsp. lyrata] gi 297339817 gb EFH70234.1  hypothetical protein ARALYDRAFT_891373 [Arabidopsis lyrata subsp. lyrata] | 605  | 258  | 3.00E-70  | 42.6  | 21.7 | 23.3 | hypothetical protein ARALYDRAFT_891373              | gbpln | Arabidopsis lyrata   | AT1G44000.1   Symbols:   unknown protein; BEST Arabidopsis thaliana protein match is: unknown protein (TAIR:AT4G11911.1). Has 216 Blast hits to 212 proteins in 76 species: Archaea - 0; Bacteria - 96; Metazoa - 0; Fungi - 0; Plants - 118; Viruses - 0; Other Eukaryotes - 2 (source: NCBI BLINK).   chr1:16708201-16709521 REVERSE LENGTH=260 | 605  | 260  | 2.00E-67 | 43.0  | 20.3 | 22.0 |
| Rsa1.0_00956.1.g21819.t1 | gb EOA32818.1  hypothetical protein CARUB_v10016129mg [Capsella rubella]                                                                                                                            | 204  | 849  | 2.00E-21  | 416.2 | 27.0 | 32.8 | hypothetical protein CARUB_v10016129mg              | gbpln | Capsella rubella     | AT2G16730.1   Symbols: BGAL13   glycosyl hydrolase family 35 protein   chr2:7261986-7266105 REVERSE LENGTH=848                                                                                                                                                                                                                                    | 204  | 848  | 7.00E-23 | 415.7 | 26.0 | 34.3 |
| Rsa1.0_00957.1.g21820.t1 | gb AAF18641.1 AC006228_12 F5J5.16 [Arabidopsis thaliana]                                                                                                                                            | 904  | 1024 | 2.00E-67  | 113.3 | 14.6 | 18.7 | F5J5.16                                             | gbpln | Arabidopsis thaliana | #                                                                                                                                                                                                                                                                                                                                                 | #    | #    | #        | #     | #    | #    |
| Rsa1.0_00957.1.g21821.t1 | dbj BAB10385.1  unnamed protein product [Arabidopsis thaliana]                                                                                                                                      | 856  | 733  | 0         | 85.6  | 61.8 | 71.7 | unnamed protein product                             | gbpln | Arabidopsis thaliana | AT1G49920.1   Symbols:   MuDR family transposase   chr1:18481798-18484233 REVERSE LENGTH=785                                                                                                                                                                                                                                                      | 856  | 785  | 7.00E-15 | 91.7  | 13.1 | 23.9 |
| Rsa1.0_00957.1.g21822.t3 | gb AAF79483.1 AC022492_27 F1L3.20 [Arabidopsis thaliana]                                                                                                                                            | 1197 | 1188 | 0         | 99.2  | 50.0 | 66.2 | F1L3.20                                             | gbpln | Arabidopsis thaliana | AT4G23160.1   Symbols: CRK8   cysteine-rich RLK (RECEPTOR-like protein kinase) 8   chr4:12129485-12134086 FORWARD LENGTH=1262                                                                                                                                                                                                                     | 1197 | 1262 | 2.00E-62 | 105.4 | 11.5 | 18.3 |
| Rsa1.0_00957.1.g21823.t1 | gb AAD17398.1  putative non-LTR retroelement reverse transcriptase [Arabidopsis thaliana]                                                                                                           | 407  | 1225 | 8.00E-68  | 301.0 | 34.6 | 48.4 | putative non-LTR retroelement reverse transcriptase | gbpln | Arabidopsis thaliana | AT4G29090.1   Symbols:   Ribonuclease H-like superfamily protein   chr4:14333528-14335255 FORWARD LENGTH=575                                                                                                                                                                                                                                      | 407  | 575  | 1.00E-38 | 141.3 | 25.3 | 42.5 |
| Rsa1.0_00958.1.g21824.t1 | dbj BAJ34204.1  unnamed protein product [Theillungiella halophila]                                                                                                                                  | 507  | 507  | 0         | 100.0 | 97.6 | 99.0 | unnamed protein product                             | ----  | ----                 | AT1G48030.2   Symbols: mLPD1   mitochondrial lipamide dehydrogenase 1   chr1:17717432-17719141 REVERSE LENGTH=507                                                                                                                                                                                                                                 | 507  | 507  | 0        | 100.0 | 94.9 | 98.4 |
| Rsa1.0_00958.1.g21825.t1 | dbj BAJ34104.1  unnamed protein product [Theillungiella halophila]                                                                                                                                  | 373  | 383  | 0         | 102.7 | 91.2 | 95.4 | unnamed protein product                             | ----  | ----                 | AT1G48040.1   Symbols:   Protein phosphatase 2C family protein   chr1:17720064-17721698 REVERSE LENGTH=383                                                                                                                                                                                                                                        | 373  | 383  | 0        | 102.7 | 86.3 | 92.8 |
| Rsa1.0_00958.1.g21826.t1 | #                                                                                                                                                                                                   | #    | #    | #         | #     | #    | #    | -                                                   | ----  | ----                 | #                                                                                                                                                                                                                                                                                                                                                 | #    | #    | #        | #     | #    | #    |
| Rsa1.0_00958.1.g21827.t3 | emb CAA54683.1  acetyl-CoA carboxylase [Brassica napus]                                                                                                                                             | 2368 | 2304 | 0         | 97.3  | 89.9 | 93.2 | acetyl-CoA carboxylase                              | gbpln | Brassica napus       | AT1G36160.2   Symbols: ACC1   acetyl-CoA carboxylase 1   chr1:13534196-13543773 FORWARD LENGTH=2254                                                                                                                                                                                                                                               | 2368 | 2254 | 0        | 95.2  | 80.1 | 85.7 |
| Rsa1.0_00958.1.g21828.t4 | ref NP_175242.7  calcium-dependent lipid-binding-like protein [Arabidopsis thaliana] gi 332194125 gb AEE32246.1  calcium-dependent lipid-binding-like protein [Arabidopsis thaliana]                | 4227 | 4146 | 0         | 98.1  | 89.1 | 92.8 | calcium-dependent lipid-binding-like protein        | gbpln | Arabidopsis thaliana | AT1G48090.1   Symbols:   calcium-dependent lipid-binding family protein   chr1:17732582-17758194 REVERSE LENGTH=4146                                                                                                                                                                                                                              | 4227 | 4146 | 0        | 98.1  | 89.1 | 92.8 |
| Rsa1.0_00958.1.g21829.t1 | gb AAG51783.1 AC079679.3 reverse transcriptase, putative; 16838-20266 [Arabidopsis thaliana]                                                                                                        | 980  | 1142 | 0         | 116.5 | 55.8 | 71.6 | reverse transcriptase, putative; 16838-20266        | gbpln | Arabidopsis thaliana | AT4G29090.1   Symbols:   Ribonuclease H-like superfamily protein   chr4:14333528-14335255 FORWARD LENGTH=575                                                                                                                                                                                                                                      | 980  | 575  | 4.00E-30 | 58.7  | 5.6  | 8.1  |
| Rsa1.0_00959.1.g21830.t1 | ref XP_002873645.1  mitochondrial phosphate transporter [Arabidopsis lyrata subsp. lyrata] gi 297319482 gb EFH49904.1  mitochondrial phosphate transporter [Arabidopsis lyrata subsp. lyrata]       | 357  | 374  | 0         | 104.8 | 96.1 | 98.0 | mitochondrial phosphate transporter                 | gbpln | Arabidopsis lyrata   | AT5G14040.1   Symbols: PHT3.1   phosphate transporter 3;1   chr5:4531059-4532965 REVERSE LENGTH=375                                                                                                                                                                                                                                               | 357  | 375  | 0        | 105.0 | 93.3 | 95.8 |

|                          |                                                                                                                                                                                                                                                                                                                                                                                                                                                                                                                                                                                                                                                                                                                                                                                                                                                                                                                                                                                                           |     |     |           |       |      |      |                                            |       |                      |                                                                                                                                                                                                                                                                                                                                                                                                                                                                                                                                                    |     |     |           |       |      |      |
|--------------------------|-----------------------------------------------------------------------------------------------------------------------------------------------------------------------------------------------------------------------------------------------------------------------------------------------------------------------------------------------------------------------------------------------------------------------------------------------------------------------------------------------------------------------------------------------------------------------------------------------------------------------------------------------------------------------------------------------------------------------------------------------------------------------------------------------------------------------------------------------------------------------------------------------------------------------------------------------------------------------------------------------------------|-----|-----|-----------|-------|------|------|--------------------------------------------|-------|----------------------|----------------------------------------------------------------------------------------------------------------------------------------------------------------------------------------------------------------------------------------------------------------------------------------------------------------------------------------------------------------------------------------------------------------------------------------------------------------------------------------------------------------------------------------------------|-----|-----|-----------|-------|------|------|
| Rsa1.0_00959.1.g21831.t1 | refNP_568293.1  translocon-associated protein subunit beta [Arabidopsis thaliana]<br>gi 186522719 refNP_001119221.1  translocon-associated protein subunit beta [Arabidopsis thaliana]<br>gi 186522723 refNP_001119222.1  translocon-associated protein subunit beta [Arabidopsis thaliana]<br>gi 186522727 refNP_001119223.1  translocon-associated protein subunit beta [Arabidopsis thaliana]<br>gi 14517446 gb AAK62613.1  AT5g14030/MUA22.2 [Arabidopsis thaliana] gi 21553748 gb AAM62841.1  unknown [Arabidopsis thaliana]<br>gi 22136544 gb AAM91058.1  AT5g14030/MUA22.2 [Arabidopsis thaliana] gi 332004593 gb AED91976.1  translocon-associated protein subunit beta [Arabidopsis thaliana]<br>gi 332004594 gb AED91977.1  translocon-associated protein subunit beta [Arabidopsis thaliana]<br>gi 332004595 gb AED91978.1  translocon-associated protein subunit beta [Arabidopsis thaliana]<br>gi 332004596 gb AED91979.1  translocon-associated protein subunit beta [Arabidopsis thaliana] | 196 | 195 | 4.00E-87  | 99.5  | 81.6 | 91.3 | translocon-associated protein subunit beta | gbpln | Arabidopsis thaliana | AT5G14030.4   Symbols:   translocon-associated protein beta (TRAPB) family protein   chr5:4526878-4528253 FORWARD LENGTH=195                                                                                                                                                                                                                                                                                                                                                                                                                       | 196 | 195 | 1.00E-89  | 99.5  | 81.6 | 91.3 |
| Rsa1.0_00959.1.g21832.t1 | gb EOA19740.1  hypothetical protein CARUB_v10003842mg [Capsella rubella]                                                                                                                                                                                                                                                                                                                                                                                                                                                                                                                                                                                                                                                                                                                                                                                                                                                                                                                                  | 407 | 426 | 0         | 104.7 | 76.7 | 85.7 | hypothetical protein CARUB_v10003842mg     | gbpln | Capsella rubella     | AT5G14020.1   Symbols:   Endosomal targeting BRO1-like domain-containing protein   chr5:4523730-4525819 REVERSE LENGTH=401                                                                                                                                                                                                                                                                                                                                                                                                                         | 407 | 401 | 0         | 98.5  | 76.2 | 86.0 |
| Rsa1.0_00959.1.g21833.t1 | refNP_568292.1  NAC domain containing protein 84 [Arabidopsis thaliana] gi 10177666 dbj BAB11128.1  unnamed protein product [Arabidopsis thaliana] gi 20466338 gb AAM20486.1  unknown protein [Arabidopsis thaliana] gi 30023658 gb AAP13362.1  At5g14000 [Arabidopsis thaliana]<br>gi 332004589 gb AED91972.1  NAC domain containing protein 84 [Arabidopsis thaliana]<br>refNP_196903.1  exocyst complex component 7 [Arabidopsis thaliana] gi 10177665 dbj BAB11127.1  leucine zipper protein-like [Arabidopsis thaliana] gi 28392955 gb AAO41913.1  putative leucine zipper protein [Arabidopsis thaliana]<br>gi 29824345 gb AAP04133.1  putative leucine zipper protein [Arabidopsis thaliana] gi 332004588 gb AED91971.1  exocyst subunit exo70 family protein C2 [Arabidopsis thaliana]                                                                                                                                                                                                            | 212 | 206 | 1.00E-91  | 97.2  | 83.0 | 89.2 | NAC domain containing protein 84           | gbpln | Arabidopsis thaliana | AT5G14000.1   Symbols:   anac084, NAC084   NAC domain containing protein 84   chr5:4518177-4519034 FORWARD LENGTH=206                                                                                                                                                                                                                                                                                                                                                                                                                              | 212 | 206 | 4.00E-94  | 97.2  | 83.0 | 89.2 |
| Rsa1.0_00959.1.g21834.t1 | refNP_196903.1  exocyst complex component 7 [Arabidopsis thaliana] gi 10177665 dbj BAB11127.1  leucine zipper protein-like [Arabidopsis thaliana] gi 28392955 gb AAO41913.1  putative leucine zipper protein [Arabidopsis thaliana]<br>gi 29824345 gb AAP04133.1  putative leucine zipper protein [Arabidopsis thaliana] gi 332004588 gb AED91971.1  exocyst subunit exo70 family protein C2 [Arabidopsis thaliana]                                                                                                                                                                                                                                                                                                                                                                                                                                                                                                                                                                                       | 682 | 695 | 0         | 101.9 | 84.9 | 90.3 | exocyst complex component 7                | gbpln | Arabidopsis thaliana | AT5G13990.1   Symbols:   ATEXO70C2, EXO70C2   exocyst subunit exo70 family protein C2   chr5:4514680-4516767 REVERSE LENGTH=695                                                                                                                                                                                                                                                                                                                                                                                                                    | 682 | 695 | 0         | 101.9 | 84.9 | 90.3 |
| Rsa1.0_00959.1.g21835.t1 | refNP_196901.1  uncharacterized protein [Arabidopsis thaliana] gi 10177663 dbj BAB11125.1  unnamed protein product [Arabidopsis thaliana] gi 19310486 gb AAL84977.1  AT5g13970/MAC12.6 [Arabidopsis thaliana] gi 28416455 gb AAO42758.1  At5g13970/MAC12.6 [Arabidopsis thaliana] gi 332004584 gb AED91967.1  uncharacterized protein AT5G13970 [Arabidopsis thaliana]                                                                                                                                                                                                                                                                                                                                                                                                                                                                                                                                                                                                                                    | 387 | 404 | 1.00E-121 | 104.4 | 68.2 | 81.9 | uncharacterized protein                    | gbpln | Arabidopsis thaliana | AT5G13970.1   Symbols:   unknown protein; FUNCTIONS IN: molecular_function unknown; INVOLVED IN: biological_process unknown; LOCATED IN: endomembrane system; EXPRESSED IN: 23 plant structures; EXPRESSED DURING: 13 growth stages; BEST Arabidopsis thaliana protein match is: unknown protein (TAIR:AT5G13310.1); Has 1807 Blast hits to 1807 proteins in 277 species: Archaea - 0; Bacteria - 0; Metazoa - 736; Fungi - 347; Plants - 385; Viruses - 0; Other Eukaryotes - 339 (source: NCBI BLINK).   chr5:4506383-4507804 REVERSE LENGTH=404 | 387 | 404 | 1.00E-124 | 104.4 | 68.2 | 81.9 |



|                          |                                                                                                                                                                                                                                                                                                                                                                                                                                                                                                                                                                                                                                                                                                   |     |     |           |       |      |      |                                                 |       |                      |                                                                                                                                                                                                                                                                                                                                                                                                                                                                                                                                                 |     |     |           |       |      |      |
|--------------------------|---------------------------------------------------------------------------------------------------------------------------------------------------------------------------------------------------------------------------------------------------------------------------------------------------------------------------------------------------------------------------------------------------------------------------------------------------------------------------------------------------------------------------------------------------------------------------------------------------------------------------------------------------------------------------------------------------|-----|-----|-----------|-------|------|------|-------------------------------------------------|-------|----------------------|-------------------------------------------------------------------------------------------------------------------------------------------------------------------------------------------------------------------------------------------------------------------------------------------------------------------------------------------------------------------------------------------------------------------------------------------------------------------------------------------------------------------------------------------------|-----|-----|-----------|-------|------|------|
| Rsa1.0_00959.1.g21836.t1 | gb EOA19908.1  hypothetical protein CARUB_v10000158mg [Capsella rubella]                                                                                                                                                                                                                                                                                                                                                                                                                                                                                                                                                                                                                          | 906 | 946 | 0         | 104.4 | 74.8 | 84.5 | hypothetical protein CARUB_v10000158mg          | gbpln | Capsella rubella     | AT5G13950.2   Symbols:   unknown protein; FUNCTIONS IN: molecular_function unknown; INVOLVED IN: biological_process unknown; LOCATED IN: cellular_component unknown; EXPRESSED IN: 23 plant structures; EXPRESSED DURING: 13 growth stages; BEST Arabidopsis thaliana protein match is: unknown protein (TAIR:AT1G02290.1); Has 147 Blast hits to 145 proteins in 44 species: Archae - 0; Bacteria - 2; Metazoa - 56; Fungi - 6; Plants - 81; Viruses - 0; Other Eukaryotes - 2 (source: NCBI BLINK).   chr5:4496196-4500206 REVERSE LENGTH=939 | 906 | 939 | 0         | 103.6 | 74.9 | 82.8 |
| Rsa1.0_00959.1.g21837.t1 | gb ABO21005.1  chalcone synthase [Brassica rapa subsp. chinensis] gi 148610280 gb ABQ95959.1  chalcone synthase [Brassica rapa var. purpuraria] gi 148610294 gb ABQ95966.1  chalcone synthase [Brassica rapa subsp. rapa]                                                                                                                                                                                                                                                                                                                                                                                                                                                                         | 395 | 395 | 0         | 100.0 | 98.7 | 99.0 | chalcone synthase                               | gbpln | Brassica rapa        | AT5G13930.1   Symbols: CHS, TT4, ATCHS   Chalcone and stilbene synthase family protein   chr5:4488762-4490035 FORWARD LENGTH=395                                                                                                                                                                                                                                                                                                                                                                                                                | 395 | 395 | 0         | 100.0 | 95.7 | 97.2 |
| Rsa1.0_00959.1.g21838.t2 | gb EOA33077.1  hypothetical protein CARUB_v10016414mg, partial [Capsella rubella]                                                                                                                                                                                                                                                                                                                                                                                                                                                                                                                                                                                                                 | 78  | 531 | 1.00E-27  | 680.8 | 75.6 | 76.9 | hypothetical protein CARUB_v10016414mg, partial | gbpln | Capsella rubella     | AT3G16950.2   Symbols: LPD1, ptlpd1   lipoamide dehydrogenase 1   chr3:5786508-5790383 REVERSE LENGTH=623                                                                                                                                                                                                                                                                                                                                                                                                                                       | 78  | 623 | 5.00E-30  | 798.7 | 74.4 | 76.9 |
| Rsa1.0_00959.1.g21839.t1 | gb EOA21975.1  hypothetical protein CARUB_v10002480mg [Capsella rubella]                                                                                                                                                                                                                                                                                                                                                                                                                                                                                                                                                                                                                          | 328 | 211 | 1.00E-67  | 64.3  | 48.5 | 50.3 | hypothetical protein CARUB_v10002480mg          | gbpln | Capsella rubella     | AT5G13910.1   Symbols: LEP   Integrase-type DNA-binding superfamily protein   chr5:4482450-4483085 REVERSE LENGTH=211                                                                                                                                                                                                                                                                                                                                                                                                                           | 328 | 211 | 2.00E-68  | 64.3  | 47.9 | 50.3 |
| Rsa1.0_00959.1.g21840.t1 | ref NP_196893.1  uncharacterized protein [Arabidopsis thaliana] gi 30684647 ref NP_850816.1  uncharacterized protein [Arabidopsis thaliana] gi 30684651 ref NP_850817.1  uncharacterized protein [Arabidopsis thaliana] gi 10177655 dbj BAB11117.1  unnamed protein product [Arabidopsis thaliana] gi 51968634 dbj BAD43009.1  unknown protein [Arabidopsis thaliana] gi 108385354 gb ABF85775.1  At5g13890 [Arabidopsis thaliana] gi 332004571 gb AED91954.1  uncharacterized protein AT5G13890 [Arabidopsis thaliana] gi 332004572 gb AED91955.1  uncharacterized protein AT5G13890 [Arabidopsis thaliana] gi 332004573 gb AED91956.1  uncharacterized protein AT5G13890 [Arabidopsis thaliana] | 304 | 310 | 1.00E-124 | 102.0 | 88.5 | 93.8 | uncharacterized protein                         | gbpln | Arabidopsis thaliana | AT5G13890.3   Symbols:   Family of unknown function (DUF716)   chr5:4479940-4480872 REVERSE LENGTH=310                                                                                                                                                                                                                                                                                                                                                                                                                                          | 304 | 310 | 1.00E-127 | 102.0 | 88.5 | 93.8 |
| Rsa1.0_00959.1.g21841.t1 | gb EOA22297.1  hypothetical protein CARUB_v10002898mg [Capsella rubella]                                                                                                                                                                                                                                                                                                                                                                                                                                                                                                                                                                                                                          | 174 | 188 | 5.00E-63  | 108.0 | 79.3 | 86.2 | hypothetical protein CARUB_v10002898mg          | gbpln | Capsella rubella     | AT5G13880.1   Symbols:   unknown protein; BEST Arabidopsis thaliana protein match is: unknown protein (TAIR:AT5G47920.1); Has 30201 Blast hits to 17322 proteins in 780 species: Archae - 12; Bacteria - 1396; Metazoa - 17338; Fungi - 3422; Plants - 5037; Viruses - 0; Other Eukaryotes - 2996 (source: NCBI BLINK).   chr5:4477477-4478043 REVERSE LENGTH=188                                                                                                                                                                               | 174 | 188 | 2.00E-62  | 108.0 | 75.9 | 84.5 |
| Rsa1.0_00959.1.g21842.t1 | gb EOA21255.1  hypothetical protein CARUB_v10001606mg [Capsella rubella] gi 482557064 gb EOA21256.1  hypothetical protein CARUB_v10001606mg [Capsella rubella]                                                                                                                                                                                                                                                                                                                                                                                                                                                                                                                                    | 294 | 293 | 1.00E-165 | 99.7  | 94.9 | 96.3 | hypothetical protein CARUB_v10001606mg          | gbpln | Capsella rubella     | AT5G13870.1   Symbols: EXGT-A4, XTH5   xyloglucan endotransglucosylase/hydrolase 5   chr5:4475089-4476217 REVERSE LENGTH=293                                                                                                                                                                                                                                                                                                                                                                                                                    | 294 | 293 | 1.00E-167 | 99.7  | 93.9 | 96.3 |
| Rsa1.0_00959.1.g21843.t1 | gb EOA21404.1  hypothetical protein CARUB_v10001777mg [Capsella rubella]                                                                                                                                                                                                                                                                                                                                                                                                                                                                                                                                                                                                                          | 374 | 255 | 3.00E-87  | 68.2  | 44.7 | 47.6 | hypothetical protein CARUB_v10001777mg          | gbpln | Capsella rubella     | AT5G13830.1   Symbols:   FtsJ-like methyltransferase family protein   chr5:4467363-4468487 FORWARD LENGTH=224                                                                                                                                                                                                                                                                                                                                                                                                                                   | 374 | 224 | 1.00E-88  | 59.9  | 43.9 | 46.8 |
| Rsa1.0_00959.1.g21844.t1 | ref XP_002873629.1  predicted protein [Arabidopsis lyrata subsp. lyrata] gi 297319466 gb EFH49888.1  predicted protein [Arabidopsis lyrata subsp. lyrata]                                                                                                                                                                                                                                                                                                                                                                                                                                                                                                                                         | 132 | 124 | 2.00E-20  | 93.9  | 43.9 | 59.8 | predicted protein                               | gbpln | Arabidopsis lyrata   | AT5G13825.1   Symbols:   unknown protein; Has 30201 Blast hits to 17322 proteins in 780 species: Archae - 12; Bacteria - 1396; Metazoa - 17338; Fungi - 3422; Plants - 5037; Viruses - 0; Other Eukaryotes - 2996 (source: NCBI BLINK).   chr5:4465089-4465969 REVERSE LENGTH=124                                                                                                                                                                                                                                                               | 132 | 124 | 2.00E-22  | 93.9  | 42.4 | 60.6 |

|                          |                                                                                                                                                                                                                                                                                                                                                                                                                                                                                                                                                                                                                              |      |      |           |       |      |      |                                                 |       |                      |                                                                                                                                               |      |      |           |       |      |       |
|--------------------------|------------------------------------------------------------------------------------------------------------------------------------------------------------------------------------------------------------------------------------------------------------------------------------------------------------------------------------------------------------------------------------------------------------------------------------------------------------------------------------------------------------------------------------------------------------------------------------------------------------------------------|------|------|-----------|-------|------|------|-------------------------------------------------|-------|----------------------|-----------------------------------------------------------------------------------------------------------------------------------------------|------|------|-----------|-------|------|-------|
| Rsa1.0_00959.1.g21845.t1 | refNP_196886.1  Telomere repeat-binding protein 4 [Arabidopsis thaliana] gi 7533778 sp Q9FFY9.1 TRP4_ARATH RecName: Full=Telomere repeat-binding protein 4; AltName: Full=H-protein promoter binding factor-1; Short=AtTBP1; AltName: Full=Telomeric DNA-binding protein 1 [Arabidopsis thaliana] gi 10177648 dbj BAE11110.1  H-protein promoter binding factor-1 [Arabidopsis thaliana] gi 13641340 gb AAK31590.1  telomeric DNA-binding protein 1 [Arabidopsis thaliana] gi 209529761 gb ACI49775.1  At5g13820 [Arabidopsis thaliana] gi 332004562 gb AED91945.1  Telomere repeat-binding protein 4 [Arabidopsis thaliana] | 591  | 640  | 0         | 108.3 | 70.6 | 77.8 | Telomere repeat-binding protein 4               | gbpln | Arabidopsis thaliana | AT5G13820.1   Symbols: TBP1, ATBP-1, ATBP1, ATTBP1, HPPBF-   telomeric DNA binding protein 1   chr5:4461694-4464355 FORWARD LENGTH=640        | 591  | 640  | 0         | 108.3 | 70.6 | 77.8  |
| Rsa1.0_00959.1.g21846.t1 | emb CAB39638.1  RNA-directed DNA polymerase-like protein [Arabidopsis thaliana] gi 7267666 emb CAB78094.1  RNA-directed DNA polymerase-like protein [Arabidopsis thaliana]                                                                                                                                                                                                                                                                                                                                                                                                                                                   | 378  | 1274 | 2.00E-50  | 337.0 | 31.5 | 51.6 | RNA-directed DNA polymerase-like protein        | gbpln | Arabidopsis thaliana | AT1G10000.1   Symbols:   Ribonuclease H-like superfamily protein   chr1:3263877-3264788 REVERSE LENGTH=303                                    | 378  | 303  | 1.00E-46  | 80.2  | 28.3 | 41.3  |
| Rsa1.0_00960.1.g21847.t1 | refNP_174673.3  leucine-rich receptor-like protein kinase [Arabidopsis thaliana] gi 263549150 sp COLGF5.2 Y1341_ARAT H RecName: Full=Probable LRR receptor-like serine/threonine-protein kinase At1g34110; Flags: Precursor gi 332193550 gb AEE31671.1  leucine-rich receptor-like protein kinase [Arabidopsis thaliana]                                                                                                                                                                                                                                                                                                     | 1105 | 1072 | 0         | 97.0  | 87.1 | 91.7 | leucine-rich receptor-like protein kinase       | gbpln | Arabidopsis thaliana | AT1G34110.1   Symbols:   Leucine-rich receptor-like protein kinase family protein   chr1:12417331-12421246 REVERSE LENGTH=1072                | 1105 | 1072 | 0         | 97.0  | 87.1 | 91.7  |
| Rsa1.0_00960.1.g21848.t1 | gb EOA21645.1  hypothetical protein CARUB_v10002063mg, partial [Capsella rubella]                                                                                                                                                                                                                                                                                                                                                                                                                                                                                                                                            | 152  | 183  | 7.00E-83  | 120.4 | 98.0 | 99.3 | hypothetical protein CARUB_v10002063mg, partial | gbpln | Capsella rubella     | AT4G09800.1   Symbols: RPS18C   S18 ribosomal protein   chr4:6173818-6174963 FORWARD LENGTH=152                                               | 152  | 152  | 2.00E-85  | 100.0 | 98.7 | 100.0 |
| Rsa1.0_00960.1.g21849.t1 | refXP_002891071.1  hypothetical protein ARALYDRAFT_473556 [Arabidopsis lyrata subsp. lyrata] gi 297336913 gb EFH67330.1  hypothetical protein ARALYDRAFT_473556 [Arabidopsis lyrata subsp. lyrata]                                                                                                                                                                                                                                                                                                                                                                                                                           | 346  | 335  | 1.00E-140 | 96.8  | 80.3 | 85.3 | hypothetical protein ARALYDRAFT_473556          | gbpln | Arabidopsis lyrata   | AT1G34020.1   Symbols:   Nucleotide-sugar transporter family protein   chr1:12367359-12368965 FORWARD LENGTH=335                              | 346  | 335  | 1.00E-142 | 96.8  | 80.1 | 85.3  |
| Rsa1.0_00960.1.g21850.t1 | dbj BAJ33748.1  unnamed protein product [Thellungiella halophila]                                                                                                                                                                                                                                                                                                                                                                                                                                                                                                                                                            | 402  | 177  | 2.00E-54  | 44.0  | 31.3 | 32.8 | unnamed protein product                         | ----  | ----                 | AT1G34000.1   Symbols: OHP2   one-helix protein 2   chr1:12358151-12358902 REVERSE LENGTH=172                                                 | 402  | 172  | 5.00E-56  | 42.8  | 32.1 | 33.1  |
| Rsa1.0_00960.1.g21851.t1 | refXP_002891069.1  ATUPF3/UPF3 [Arabidopsis lyrata subsp. lyrata] gi 297336911 gb EFH67328.1  ATUPF3/UPF3 [Arabidopsis lyrata subsp. lyrata]                                                                                                                                                                                                                                                                                                                                                                                                                                                                                 | 487  | 486  | 0         | 99.8  | 77.4 | 83.6 | ATUPF3/UPF3                                     | gbpln | Arabidopsis lyrata   | AT1G33980.1   Symbols: ATUPF3, UPF3   Smg-4/UPF3 family protein   chr1:12351719-12354401 FORWARD LENGTH=482                                   | 487  | 482  | 0         | 99.0  | 76.6 | 83.8  |
| Rsa1.0_00960.1.g21852.t1 | dbj BAJ34639.1  unnamed protein product [Thellungiella halophila]                                                                                                                                                                                                                                                                                                                                                                                                                                                                                                                                                            | 343  | 343  | 1.00E-160 | 100.0 | 84.3 | 93.6 | unnamed protein product                         | ----  | ----                 | AT1G33970.5   Symbols:   P-loop containing nucleoside triphosphate hydrolases superfamily protein   chr1:12349614-12350960 REVERSE LENGTH=342 | 343  | 342  | 1.00E-157 | 99.7  | 82.2 | 92.7  |
| Rsa1.0_00960.1.g21853.t1 | refNP_564430.1  GDSL esterase/lipase [Arabidopsis thaliana] gi 75153901 sp Q8L5Z1.1 GD17_ARAT H RecName: Full=GDSL esterase/lipase At1g33811; AltName: Full=Extracellular lipase At1g33811; Flags: Precursor gi 20466732 gb AAM20683.1  unknown protein [Arabidopsis thaliana] gi 23198228 gb AANI5641.1  unknown protein [Arabidopsis thaliana] gi 332193507 gb AEE31628.1  GDSL esterase/lipase [Arabidopsis thaliana]                                                                                                                                                                                                     | 370  | 370  | 0         | 100.0 | 90.0 | 94.6 | GDSL esterase/lipase                            | gbpln | Arabidopsis thaliana | AT1G33811.1   Symbols:   GDSL-like Lipase/Acylhydrolase superfamily protein   chr1:12267918-12269690 FORWARD LENGTH=370                       | 370  | 370  | 0         | 100.0 | 90.0 | 94.6  |
| Rsa1.0_00960.1.g21854.t1 | emb CAA31653.1  polyprotein [Arabidopsis thaliana]                                                                                                                                                                                                                                                                                                                                                                                                                                                                                                                                                                           | 700  | 1291 | 0         | 184.4 | 52.9 | 71.4 | polyprotein                                     | gbpln | Arabidopsis thaliana | ATMG00300.1   Symbols: ORF145A   Gag-Pol-related retrotransposon family protein   chrM:89617-90054 REVERSE LENGTH=145                         | 700  | 145  | 7.00E-21  | 20.7  | 7.3  | 10.1  |
| Rsa1.0_00960.1.g21855.t1 | gb EOA36221.1  hypothetical protein CARUB_v10010170mg [Capsella rubella]                                                                                                                                                                                                                                                                                                                                                                                                                                                                                                                                                     | 234  | 236  | 1.00E-110 | 100.9 | 84.2 | 91.0 | hypothetical protein CARUB_v10010170mg          | gbpln | Capsella rubella     | AT1G24735.1   Symbols:   S-adenosyl-L-methionine-dependent methyltransferases superfamily protein   chr1:8757977-8759448 FORWARD LENGTH=240   | 234  | 240  | 1.00E-106 | 102.6 | 76.9 | 87.2  |

|                          |                                                                                                                                                                                                                                                                                                                                                                                                                                                                                                                                                                                                                                                                                             |     |     |           |       |      |      |                                                 |       |                      |                                                                                                                                                                                                                                                                                                                                                                                                                                                                                                                                          |     |     |           |       |      |      |
|--------------------------|---------------------------------------------------------------------------------------------------------------------------------------------------------------------------------------------------------------------------------------------------------------------------------------------------------------------------------------------------------------------------------------------------------------------------------------------------------------------------------------------------------------------------------------------------------------------------------------------------------------------------------------------------------------------------------------------|-----|-----|-----------|-------|------|------|-------------------------------------------------|-------|----------------------|------------------------------------------------------------------------------------------------------------------------------------------------------------------------------------------------------------------------------------------------------------------------------------------------------------------------------------------------------------------------------------------------------------------------------------------------------------------------------------------------------------------------------------------|-----|-----|-----------|-------|------|------|
| Rsa1.0_00960.1.g21856.t1 | ref[NP_176973.1] microtubule-associated proteins 70-1 [Arabidopsis thaliana]<br>gi 75169797 sp Q9C9X0.1 MP701_ARAT<br>H RecName: Full=Microtubule-associated protein 70-1;<br>Short=AtMAP70-1; AltName: Full=70 kDa microtubule-associated protein 1<br>gi 12324091 gb AA52019.1 AC012563.29<br>unknown protein; 30164-32998 [Arabidopsis thaliana]<br>gi 18377700 gb AAL67000.1  unknown protein [Arabidopsis thaliana]<br>gi 20465647 gb AAM20292.1  unknown protein [Arabidopsis thaliana]<br>gi 76058012 emb CAJ31078.1  70 kDa microtubule associated protein Type 1 [Arabidopsis thaliana]<br>gi 332196621 gb AEE34742.1  microtubule-associated proteins 70-1 [Arabidopsis thaliana] | 75  | 622 | 5.00E-27  | 829.3 | 84.0 | 92.0 | microtubule-associated proteins 70-1            | gbpln | Arabidopsis thaliana | AT1G68060.1   Symbols: ATMAP70-1, MAP70-1   microtubule-associated proteins 70-1   chr1:25511392-25514226 REVERSE LENGTH=622                                                                                                                                                                                                                                                                                                                                                                                                             | 75  | 622 | 8.00E-30  | 829.3 | 84.0 | 92.0 |
| Rsa1.0_00960.1.g21857.t5 | gb EOA38356.1  hypothetical protein CARUB_v10009876mg [Capsella rubella]                                                                                                                                                                                                                                                                                                                                                                                                                                                                                                                                                                                                                    | 295 | 299 | 1.00E-152 | 101.4 | 92.9 | 95.6 | hypothetical protein CARUB_v10009876mg          | gbpln | Capsella rubella     | AT1G33800.1   Symbols:   Protein of unknown function (DUF79)   chr1:12261480-12262456 FORWARD LENGTH=297                                                                                                                                                                                                                                                                                                                                                                                                                                 | 295 | 297 | 1.00E-149 | 100.7 | 91.2 | 95.6 |
| Rsa1.0_00960.1.g21858.t1 | gb EOA39920.1  hypothetical protein CARUB_v10008607mg [Capsella rubella]                                                                                                                                                                                                                                                                                                                                                                                                                                                                                                                                                                                                                    | 633 | 616 | 0         | 97.3  | 86.3 | 91.8 | hypothetical protein CARUB_v10008607mg          | gbpln | Capsella rubella     | AT1G33770.1   Symbols:   Protein kinase superfamily protein   chr1:12242126-12244462 FORWARD LENGTH=614                                                                                                                                                                                                                                                                                                                                                                                                                                  | 633 | 614 | 0         | 97.0  | 86.9 | 91.2 |
| Rsa1.0_00961.1.g21859.t1 | gb EOA20271.1  hypothetical protein CARUB_v10000575mg [Capsella rubella]                                                                                                                                                                                                                                                                                                                                                                                                                                                                                                                                                                                                                    | 569 | 574 | 0         | 100.9 | 84.4 | 92.3 | hypothetical protein CARUB_v10000575mg          | gbpln | Capsella rubella     | AT5G13320.1   Symbols: PBS3, GDG1, WIN3, GH3.12   Auxin-responsive GH3 family protein   chr5:4268902-4270896 FORWARD LENGTH=575                                                                                                                                                                                                                                                                                                                                                                                                          | 569 | 575 | 0         | 101.1 | 83.8 | 91.7 |
| Rsa1.0_00961.1.g21860.t1 | ref[NP_196835.1] uncharacterized protein [Arabidopsis thaliana]<br>gi 7529286 emb CAB86638.1  putative protein [Arabidopsis thaliana]<br>gi 21593209 gb AAM65158.1  unknown [Arabidopsis thaliana]<br>gi 28393126 gb AA041996.1  unknown protein [Arabidopsis thaliana]<br>gi 28827470 gb AA050579.1  unknown protein [Arabidopsis thaliana]<br>gi 332004496 gb AED91879.1  uncharacterized protein AT5G13310 [Arabidopsis thaliana]                                                                                                                                                                                                                                                        | 383 | 370 | 1.00E-111 | 96.6  | 64.5 | 77.0 | uncharacterized protein                         | gbpln | Arabidopsis thaliana | AT5G13310.1   Symbols:   unknown protein; FUNCTIONS IN: molecular function unknown; INVOLVED IN: biological process unknown; LOCATED IN: chloroplast; EXPRESSED IN: 13 plant structures; EXPRESSED DURING: 7 growth stages; BEST Arabidopsis thaliana protein match is: unknown protein (TAIR:AT5G13970.1); Has 1807 Blast hits to 1807 proteins in 277 species: Archae - 0; Bacteria - 0; Metazoa - 736; Fungi - 347; Plants - 385; Viruses - 0; Other Eukaryotes - 339 (source: NCBI BLINK).   chr5:4263561-4264989 FORWARD LENGTH=370 | 383 | 370 | 1.00E-113 | 96.6  | 64.5 | 77.0 |
| Rsa1.0_00961.1.g21861.t2 | ref[XP_002873607.1] hypothetical protein ARALYDRAFT_488148 [Arabidopsis lyrata subsp. lyrata]<br>gi 297319444 gb EFH49866.1  hypothetical protein ARALYDRAFT_488148 [Arabidopsis lyrata subsp. lyrata]                                                                                                                                                                                                                                                                                                                                                                                                                                                                                      | 844 | 828 | 0         | 98.1  | 91.9 | 95.1 | hypothetical protein ARALYDRAFT_488148          | gbpln | Arabidopsis lyrata   | AT5G13300.1   Symbols: SFC, VAN3, AGD3   ARF GTPase-activating protein   chr5:4255923-4262018 REVERSE LENGTH=827                                                                                                                                                                                                                                                                                                                                                                                                                         | 844 | 827 | 0         | 98.0  | 91.0 | 94.0 |
| Rsa1.0_00961.1.g21862.t1 | ref[XP_002873606.1] predicted protein [Arabidopsis lyrata subsp. lyrata]<br>gi 297319443 gb EFH49865.1  predicted protein [Arabidopsis lyrata subsp. lyrata]                                                                                                                                                                                                                                                                                                                                                                                                                                                                                                                                | 393 | 402 | 0         | 102.3 | 85.2 | 88.8 | predicted protein                               | gbpln | Arabidopsis lyrata   | AT5G13290.2   Symbols: SOL2, CRN   Protein kinase superfamily protein   chr5:4252924-4254215 REVERSE LENGTH=401                                                                                                                                                                                                                                                                                                                                                                                                                          | 393 | 401 | 0         | 102.0 | 84.7 | 88.8 |
| Rsa1.0_00961.1.g21863.t1 | ref[XP_002871558.1] AK-LYS1 [Arabidopsis lyrata subsp. lyrata]<br>gi 297317395 gb EFH47817.1  AK-LYS1 [Arabidopsis lyrata subsp. lyrata]                                                                                                                                                                                                                                                                                                                                                                                                                                                                                                                                                    | 549 | 570 | 0         | 103.8 | 89.1 | 93.6 | AK-LYS1                                         | gbpln | Arabidopsis lyrata   | AT5G13280.1   Symbols: AK-LYS1, AK1, AK   aspartate kinase   chr5:4249516-4252654 FORWARD LENGTH=569                                                                                                                                                                                                                                                                                                                                                                                                                                     | 549 | 569 | 0         | 103.6 | 88.5 | 93.1 |
| Rsa1.0_00961.1.g21864.t1 | ref[XP_002873605.1] pentatricopeptide repeat-containing protein [Arabidopsis lyrata subsp. lyrata]<br>gi 297319442 gb EFH49864.1  pentatricopeptide repeat-containing protein [Arabidopsis lyrata subsp. lyrata]                                                                                                                                                                                                                                                                                                                                                                                                                                                                            | 752 | 750 | 0         | 99.7  | 88.0 | 93.8 | pentatricopeptide repeat-containing protein     | gbpln | Arabidopsis lyrata   | AT5G13270.1   Symbols: RARE1   Pentatricopeptide repeat (PPR) superfamily protein   chr5:4246954-4249212 REVERSE LENGTH=752                                                                                                                                                                                                                                                                                                                                                                                                              | 752 | 752 | 0         | 100.0 | 87.2 | 92.8 |
| Rsa1.0_00961.1.g21865.t1 | gb EOA19674.1  hypothetical protein CARUB_v10003326mg [Capsella rubella]                                                                                                                                                                                                                                                                                                                                                                                                                                                                                                                                                                                                                    | 542 | 542 | 0         | 100.0 | 87.8 | 93.0 | hypothetical protein CARUB_v10003326mg          | gbpln | Capsella rubella     | AT5G13260.1   Symbols:   unknown protein; BEST Arabidopsis thaliana protein match is: unknown protein (TAIR:AT3G48860.2); Has 30201 Blast hits to 17322 proteins in 780 species: Archae - 12; Bacteria - 1396; Metazoa - 17338; Fungi - 3422; Plants - 5037; Viruses - 0; Other Eukaryotes - 2996 (source: NCBI BLINK).   chr5:4243164-4246677 FORWARD LENGTH=537                                                                                                                                                                        | 542 | 537 | 0         | 99.1  | 85.1 | 89.7 |
| Rsa1.0_00961.1.g21866.t1 | gb EOA22755.1  hypothetical protein CARUB_v10003467mg, partial [Capsella rubella]                                                                                                                                                                                                                                                                                                                                                                                                                                                                                                                                                                                                           | 321 | 325 | 1.00E-124 | 101.2 | 76.0 | 82.6 | hypothetical protein CARUB_v10003467mg, partial | gbpln | Capsella rubella     | AT5G13250.1   Symbols:   RING finger protein   chr5:4234486-4241615 FORWARD LENGTH=387                                                                                                                                                                                                                                                                                                                                                                                                                                                   | 321 | 387 | 1.00E-119 | 120.6 | 76.0 | 81.9 |

|                          |                                                                                                                                                                                                                                                                                                                                                                                                                                                                                                                  |      |     |           |       |      |      |                                                          |       |                      |                                                                                                                            |      |     |           |       |      |      |
|--------------------------|------------------------------------------------------------------------------------------------------------------------------------------------------------------------------------------------------------------------------------------------------------------------------------------------------------------------------------------------------------------------------------------------------------------------------------------------------------------------------------------------------------------|------|-----|-----------|-------|------|------|----------------------------------------------------------|-------|----------------------|----------------------------------------------------------------------------------------------------------------------------|------|-----|-----------|-------|------|------|
| Rsa1.0_00961.1.g21867.t1 | gb[EOA21464.1] hypothetical protein CARUB_v10001854mg [Capsella rubella]                                                                                                                                                                                                                                                                                                                                                                                                                                         | 224  | 237 | 1.00E-123 | 105.8 | 95.5 | 97.3 | hypothetical protein CARUB_v10001854mg                   | gbpln | Capsella rubella     | AT5G13240.1   Symbols:   transcription regulators   chr5:4225261-4227152 REVERSE LENGTH=224                                | 224  | 224 | 1.00E-123 | 100.0 | 93.8 | 96.4 |
| Rsa1.0_00961.1.g21868.t1 | ref[XP_002871555.1] pentatricopeptide repeat-containing protein [Arabidopsis lyrata subsp. lyrata] gi 297317392 gb EFH47814.1  pentatricopeptide repeat-containing protein [Arabidopsis lyrata subsp. lyrata]                                                                                                                                                                                                                                                                                                    | 820  | 822 | 0         | 100.2 | 81.7 | 89.5 | pentatricopeptide repeat-containing protein              | gbpln | Arabidopsis lyrata   | AT5G13230.1   Symbols:   Tetratricopeptide repeat (TPR)-like superfamily protein   chr5:4222514-4224982 FORWARD LENGTH=822 | 820  | 822 | 0         | 100.2 | 81.7 | 89.1 |
| Rsa1.0_00961.1.g21869.t1 | ref[XP_002871554.1] hypothetical protein ARALYDRAFT_488138 [Arabidopsis lyrata subsp. lyrata] gi 297317391 gb EFH47813.1  hypothetical protein ARALYDRAFT_488138 [Arabidopsis lyrata subsp. lyrata]                                                                                                                                                                                                                                                                                                              | 196  | 198 | 1.00E-83  | 101.0 | 81.1 | 88.8 | hypothetical protein ARALYDRAFT_488138                   | gbpln | Arabidopsis lyrata   | AT5G13220.1   Symbols: JAZ10, TIFY9, JAS1   jasmonate-zim-domain protein 10   chr5:4219001-4220502 FORWARD LENGTH=197      | 196  | 197 | 7.00E-85  | 100.5 | 80.1 | 86.7 |
| Rsa1.0_00961.1.g21870.t1 | ref[XP_002871553.1] hypothetical protein ARALYDRAFT_488135 [Arabidopsis lyrata subsp. lyrata] gi 297317390 gb EFH47812.1  hypothetical protein ARALYDRAFT_488135 [Arabidopsis lyrata subsp. lyrata]                                                                                                                                                                                                                                                                                                              | 639  | 668 | 0         | 104.5 | 76.7 | 87.8 | hypothetical protein ARALYDRAFT_488135                   | gbpln | Arabidopsis lyrata   | AT5G13210.1   Symbols:   Uncharacterised conserved protein UCP015417, vWA   chr5:4214567-4216588 FORWARD LENGTH=673        | 639  | 673 | 0         | 105.3 | 74.6 | 85.8 |
| Rsa1.0_00962.1.g21871.t1 | ref[XP_004253404.1] PREDICTED: uncharacterized protein LOC101249447, partial [Solanum lycopersicum]                                                                                                                                                                                                                                                                                                                                                                                                              | 1175 | 485 | 1.00E-45  | 41.3  | 10.2 | 11.5 | PREDICTED: uncharacterized protein LOC101249447, partial | gbpln | Solanum lycopersicum | # # # # # #                                                                                                                | #    | #   | #         | #     | #    | #    |
| Rsa1.0_00962.1.g21872.t1 | ref[NP_850386.1] clathrin interactor EPSIN 2 [Arabidopsis thaliana] gi 30689274 ref[NP_850387.1] clathrin interactor EPSIN 2 [Arabidopsis thaliana] gi 42571203 ref[NP_973675.1] clathrin interactor EPSIN 2 [Arabidopsis thaliana] gi 75116590 sp Q67Y19.1 EPN2_ARATH RecName: Full=Clathrin interactor EPSIN 2; AltName: Full=EPSIN-related 2 gi 51970954 dbj BAD44169.1  unknown protein [Arabidopsis thaliana] gi 51971100 dbj BAD44242.1  unknown protein [Arabidopsis thaliana] gi 62319865 dbj BAD93910.1 | 1007 | 895 | 0         | 88.9  | 75.5 | 78.9 | clathrin interactor EPSIN 2                              | gbpln | Arabidopsis thaliana | AT2G43160.1   Symbols:   ENTH/VHS family protein   chr2:17948884-17953267 FORWARD LENGTH=895                               | 1007 | 895 | 0         | 88.9  | 75.5 | 78.9 |
| Rsa1.0_00962.1.g21873.t1 | ref[XP_002880031.1] UBX domain-containing protein [Arabidopsis lyrata subsp. lyrata] gi 297325870 gb EFH56290.1  UBX domain-containing protein [Arabidopsis lyrata subsp. lyrata]                                                                                                                                                                                                                                                                                                                                | 793  | 531 | 0         | 67.0  | 46.9 | 52.2 | UBX domain-containing protein                            | gbpln | Arabidopsis lyrata   | AT2G43210.2   Symbols:   Ubiquitin-like superfamily protein   chr2:17960942-17963560 FORWARD LENGTH=531                    | 793  | 531 | 0         | 67.0  | 46.0 | 51.6 |
| Rsa1.0_00962.1.g21874.t1 | ref[NP_181851.1] cysteine/histidine-rich C1 domain-containing protein [Arabidopsis thaliana] gi 3763931 gb AAC64311.1  hypothetical protein [Arabidopsis thaliana] gi 61742677 gb AAX55159.1  hypothetical protein At2g43220 [Arabidopsis thaliana] gi 330255137 gb AEC10231.1  cysteine/histidine-rich C1 domain-containing protein [Arabidopsis thaliana]                                                                                                                                                      | 544  | 538 | 0         | 98.9  | 62.5 | 74.6 | cysteine/histidine-rich C1 domain-containing protein     | gbpln | Arabidopsis thaliana | AT2G43220.1   Symbols:   Cysteine/Histidine-rich C1 domain family protein   chr2:17964340-17965956 FORWARD LENGTH=538      | 544  | 538 | 0         | 98.9  | 62.5 | 74.6 |
| Rsa1.0_00962.1.g21875.t1 | ref[XP_002880033.1] hypothetical protein ARALYDRAFT_483429 [Arabidopsis lyrata subsp. lyrata] gi 297325872 gb EFH56292.1  hypothetical protein ARALYDRAFT_483429 [Arabidopsis lyrata subsp. lyrata]                                                                                                                                                                                                                                                                                                              | 410  | 406 | 0         | 99.0  | 89.3 | 93.9 | hypothetical protein ARALYDRAFT_483429                   | gbpln | Arabidopsis lyrata   | AT2G43230.1   Symbols:   Protein kinase superfamily protein   chr2:17966475-17968446 FORWARD LENGTH=406                    | 410  | 406 | 0         | 99.0  | 89.3 | 93.7 |

|                          |                                                                                                                                                                                                                                                                                                                                                                                                                                                                                                                                                                                                                                                                                                                                                                                                              |      |      |          |       |      |      |                                            |       |                      |                                                                                                                                                                                                                                                              |      |      |          |       |      |      |
|--------------------------|--------------------------------------------------------------------------------------------------------------------------------------------------------------------------------------------------------------------------------------------------------------------------------------------------------------------------------------------------------------------------------------------------------------------------------------------------------------------------------------------------------------------------------------------------------------------------------------------------------------------------------------------------------------------------------------------------------------------------------------------------------------------------------------------------------------|------|------|----------|-------|------|------|--------------------------------------------|-------|----------------------|--------------------------------------------------------------------------------------------------------------------------------------------------------------------------------------------------------------------------------------------------------------|------|------|----------|-------|------|------|
| Rsa1.0_00962.1.g21876.t1 | refNP_181853.3  nucleotide-sugar transporter [Arabidopsis thaliana] gi 75151390 sp Q8GY97.1 CSTR2_ARAT H RecName: Full=CMP-sialic acid transporter 2; Short=CMP-SA-Tr 2; Short=CMP-Sia-Tr 2 gi 26450627 dbj BA042425.1  unknown protein [Arabidopsis thaliana] gi 51971655 dbj BAD44492.1  unnamed protein product [Arabidopsis thaliana] gi 330255141 gb AEC10235.1  nucleotide-sugar transporter [Arabidopsis thaliana]                                                                                                                                                                                                                                                                                                                                                                                    | 439  | 406  | 0        | 92.5  | 86.3 | 89.1 | nucleotide-sugar transporter               | gbpln | Arabidopsis thaliana | AT2G43240.1   Symbols:   Nucleotide-sugar transporter family protein   chr2:17971280-17975300 REVERSE LENGTH=406                                                                                                                                             | 439  | 406  | 0        | 92.5  | 86.3 | 89.1 |
| Rsa1.0_00962.1.g21877.t1 | refXP_002880034.1  hypothetical protein ARALYDRAFT_483433 [Arabidopsis lyrata subsp. lyrata] gi 297325873 gb EFH56293.1  hypothetical protein ARALYDRAFT_483433 [Arabidopsis lyrata subsp. lyrata]                                                                                                                                                                                                                                                                                                                                                                                                                                                                                                                                                                                                           | 619  | 625  | 0        | 101.0 | 80.9 | 89.8 | hypothetical protein ARALYDRAFT_483433     | gbpln | Arabidopsis lyrata   | AT2G43250.1   Symbols:   unknown protein; Has 32 Blast hits to 32 proteins in 11 species: Archae - 0; Bacteria - 0; Metazoa - 0; Fungi - 0; Plants - 32; Viruses - 0; Other Eukaryotes - 0 (source: NCBI BLink).   chr2:17977619-17979496 FORWARD LENGTH=625 | 619  | 625  | 0        | 101.0 | 80.1 | 89.5 |
| Rsa1.0_00962.1.g21878.t1 | refNP_181857.2  far-red impaired responsive 1-like protein [Arabidopsis thaliana] gi 27754520 gb AAO22707.1  unknown protein [Arabidopsis thaliana] gi 28393991 gb AAO42403.1  unknown protein [Arabidopsis thaliana] gi 330255153 gb AEC10247.1  far-red impaired responsive 1-like protein [Arabidopsis thaliana]                                                                                                                                                                                                                                                                                                                                                                                                                                                                                          | 198  | 206  | 7.00E-88 | 104.0 | 80.3 | 87.9 | far-red impaired responsive 1-like protein | gbpln | Arabidopsis thaliana | AT2G43280.1   Symbols:   Far-red impaired responsive (FAR1) family protein   chr2:17989739-17990861 FORWARD LENGTH=206                                                                                                                                       | 198  | 206  | 3.00E-90 | 104.0 | 80.3 | 87.9 |
| Rsa1.0_00962.1.g21879.t1 | refNP_565996.1  calmodulin-like protein 5 [Arabidopsis thaliana] gi 75318037 sp O22845.2 CML5_ARATH RecName: Full=Calmodulin-like protein 5; AltName: Full=Protein MULTICOPY SUPPRESSORS OF SNF4 DEFICIENCY IN YEAST 3 gi 9965747 gb AAG10150.1 AF250344.1 calmodulin-like MSS3 [Arabidopsis thaliana] gi 17065478 gb AAL32893.1  putative Ca2+-binding protein [Arabidopsis thaliana] gi 20148491 gb AAM10136.1  putative Ca2+-binding protein [Arabidopsis thaliana] gi 20198862 gb AAB64310.2  putative calcium binding protein [Arabidopsis thaliana] gi 20197147 gb AAM14938.1  putative calcium binding protein [Arabidopsis thaliana] gi 21592699 gb AAM64648.1  putative calcium binding protein [Arabidopsis thaliana] gi 330255154 gb AEC10248.1  calmodulin-like protein 5 [Arabidopsis thaliana] | 171  | 215  | 5.00E-80 | 125.7 | 86.0 | 87.7 | calmodulin-like protein 5                  | gbpln | Arabidopsis thaliana | AT2G43290.1   Symbols: MSS3   Calcium-binding EF-hand family protein   chr2:17991308-17991955 REVERSE LENGTH=215                                                                                                                                             | 171  | 215  | 2.00E-82 | 125.7 | 86.0 | 87.7 |
| Rsa1.0_00962.1.g21880.t1 | refXP_002876435.1  kinase family protein [Arabidopsis lyrata subsp. lyrata] gi 297322273 gb EFH52694.1  kinase family protein [Arabidopsis lyrata subsp. lyrata]                                                                                                                                                                                                                                                                                                                                                                                                                                                                                                                                                                                                                                             | 398  | 358  | 4.00E-69 | 89.9  | 35.2 | 44.0 | kinase family protein                      | gbpln | Arabidopsis lyrata   | AT3G57740.1   Symbols:   Protein kinase superfamily protein   chr3:21392671-21393744 FORWARD LENGTH=357                                                                                                                                                      | 398  | 357  | 6.00E-71 | 89.7  | 34.7 | 44.2 |
| Rsa1.0_00962.1.g21881.t1 | refXP_002888869.1  APUM23 [Arabidopsis lyrata subsp. lyrata] gi 297334710 gb EFH65128.1  APUM23 [Arabidopsis lyrata subsp. lyrata]                                                                                                                                                                                                                                                                                                                                                                                                                                                                                                                                                                                                                                                                           | 80   | 753  | 3.00E-25 | 941.3 | 75.0 | 81.3 | APUM23                                     | gbpln | Arabidopsis lyrata   | AT1G72320.1   Symbols: APUM23, PUM23   pumilio 23   chr1:27228984-27232580 REVERSE LENGTH=753                                                                                                                                                                | 80   | 753  | 6.00E-25 | 941.3 | 68.8 | 77.5 |
| Rsa1.0_00963.1.g21882.t1 | #                                                                                                                                                                                                                                                                                                                                                                                                                                                                                                                                                                                                                                                                                                                                                                                                            | #    | #    | #        | #     | #    | -    | ----                                       | ----  | #                    | #                                                                                                                                                                                                                                                            | #    | #    | #        | #     | #    |      |
| Rsa1.0_00963.1.g21883.t2 | #                                                                                                                                                                                                                                                                                                                                                                                                                                                                                                                                                                                                                                                                                                                                                                                                            | #    | #    | #        | #     | #    | -    | ----                                       | ----  | #                    | AT2G04115.1   Symbols:   Plant self-incompatibility protein S1 family   chr2:1385449-1385904 FORWARD LENGTH=151                                                                                                                                              | 336  | 151  | 2.00E-12 | 44.9  | 10.4 | 16.1 |
| Rsa1.0_00963.1.g21884.t1 | refNP_178040.5  uncharacterized protein [Arabidopsis thaliana] gi 332198092 gb AEE36213.1  uncharacterized protein AT1G79190 [Arabidopsis thaliana]                                                                                                                                                                                                                                                                                                                                                                                                                                                                                                                                                                                                                                                          | 1299 | 1335 | 0        | 102.8 | 84.4 | 90.9 | uncharacterized protein                    | gbpln | Arabidopsis thaliana | AT1G79190.1   Symbols:   ARM repeat superfamily protein   chr1:29788639-29794116 FORWARD LENGTH=1335                                                                                                                                                         | 1299 | 1335 | 0        | 102.8 | 84.4 | 90.9 |

|                          |                                                                                                                                                                                                                                                                                                                                                                                                                                                                                                                                                                                                                                                                                                                                                                                                                                                                                                                                                                                                                                                                                                                                                 |     |     |           |       |       |       |                                              |                                   |                      |                                                                                                                                                                                                                                                                                                                                                         |                                                                                                 |     |          |           |       |       |       |
|--------------------------|-------------------------------------------------------------------------------------------------------------------------------------------------------------------------------------------------------------------------------------------------------------------------------------------------------------------------------------------------------------------------------------------------------------------------------------------------------------------------------------------------------------------------------------------------------------------------------------------------------------------------------------------------------------------------------------------------------------------------------------------------------------------------------------------------------------------------------------------------------------------------------------------------------------------------------------------------------------------------------------------------------------------------------------------------------------------------------------------------------------------------------------------------|-----|-----|-----------|-------|-------|-------|----------------------------------------------|-----------------------------------|----------------------|---------------------------------------------------------------------------------------------------------------------------------------------------------------------------------------------------------------------------------------------------------------------------------------------------------------------------------------------------------|-------------------------------------------------------------------------------------------------|-----|----------|-----------|-------|-------|-------|
|                          | ref NP_173096.1  proteasome subunit alpha type-2-A [Arabidopsis thaliana]<br>gi 79318062 ref NP_001031057.1  proteasome subunit alpha type-2-A [Arabidopsis thaliana]<br>gi 6093778 sp O23708.1 PSA2A_ARATH<br>RecName: Full=Proteasome subunit alpha type-2-A; AltName: Full=20S proteasome alpha subunit B; AltName: Full=Proteasome component 3<br>gi 4966368 gb AAD34699.1 AC006341_27<br>Identical to gb Y13176 Arabidopsis thaliana mRNA for proteasome subunit prc3. ESTs: gb H96972, gb T22551 and gb T13800 come from this gene [Arabidopsis thaliana]<br>gi 12083342 gb AAG48830.1 AF332467.1 putative multicatalytic endopeptidase [Arabidopsis thaliana]<br>gi 2511574 emb CAA73619.1  multicatalytic endopeptidase [Arabidopsis thaliana]<br>gi 3421075 gb AAC32056.1  20S proteasome subunit PAB1 [Arabidopsis thaliana] gi 21617900 gb AAM66950.1  multicatalytic endopeptidase [Arabidopsis thaliana]<br>gi 222423615 dbj BAH19776.1  AT1G16470 [Arabidopsis thaliana]<br>gi 222424243 dbj BAH20079.1  AT1G16470 [Arabidopsis thaliana]<br>gi 332191336 gb AAE29457.1  proteasome subunit alpha type-2-A [Arabidopsis thaliana] | 235 | 235 | 1.00E-133 | 100.0 | 100.0 | 100.0 | 100.0                                        | proteasome subunit alpha type-2-A | gbpln                | Arabidopsis thaliana                                                                                                                                                                                                                                                                                                                                    | AT1G16470.2   Symbols: PAB1   proteasome subunit PAB1   chr1:5623122-5625439 FORWARD LENGTH=235 | 235 | 235      | 1.00E-136 | 100.0 | 100.0 | 100.0 |
| Rsa1.0_00963.1.g21885.t1 |                                                                                                                                                                                                                                                                                                                                                                                                                                                                                                                                                                                                                                                                                                                                                                                                                                                                                                                                                                                                                                                                                                                                                 | #   | #   | #         | #     | #     | #     | #                                            | -                                 | ----                 | ----                                                                                                                                                                                                                                                                                                                                                    | #                                                                                               | #   | #        | #         | #     | #     |       |
| Rsa1.0_00963.1.g21887.t1 |                                                                                                                                                                                                                                                                                                                                                                                                                                                                                                                                                                                                                                                                                                                                                                                                                                                                                                                                                                                                                                                                                                                                                 | #   | #   | #         | #     | #     | #     | #                                            | -                                 | ----                 | ----                                                                                                                                                                                                                                                                                                                                                    | #                                                                                               | #   | #        | #         | #     | #     |       |
| Rsa1.0_00963.1.g21888.t2 |                                                                                                                                                                                                                                                                                                                                                                                                                                                                                                                                                                                                                                                                                                                                                                                                                                                                                                                                                                                                                                                                                                                                                 | #   | #   | #         | #     | #     | #     | #                                            | -                                 | ----                 | ----                                                                                                                                                                                                                                                                                                                                                    | #                                                                                               | #   | #        | #         | #     | #     |       |
| Rsa1.0_00963.1.g21889.t1 |                                                                                                                                                                                                                                                                                                                                                                                                                                                                                                                                                                                                                                                                                                                                                                                                                                                                                                                                                                                                                                                                                                                                                 | #   | #   | #         | #     | #     | #     | #                                            | -                                 | ----                 | ----                                                                                                                                                                                                                                                                                                                                                    | #                                                                                               | #   | #        | #         | #     | #     |       |
| Rsa1.0_00963.1.g21890.t1 | ref XP_002889239.1  hypothetical protein ARALYDRAFT_316818 [Arabidopsis lyrata subsp. lyrata]<br>gi 297335080 gb EFH65498.1  hypothetical protein ARALYDRAFT_316818 [Arabidopsis lyrata subsp. lyrata]                                                                                                                                                                                                                                                                                                                                                                                                                                                                                                                                                                                                                                                                                                                                                                                                                                                                                                                                          | 640 | 558 | 0         | 87.2  | 67.2  | 71.1  | hypothetical protein ARALYDRAFT_316818       | gbpln                             | Arabidopsis lyrata   | AT1G79250.2   Symbols: AGC1.7   AGC kinase 1.7   chr1:29810336-29812186 REVERSE LENGTH=555                                                                                                                                                                                                                                                              | 640                                                                                             | 555 | 0        | 86.7      | 67.2  | 70.5  |       |
| Rsa1.0_00963.1.g21891.t1 | gb EOA35837.1  hypothetical protein CARUB_v10021078mg [Capsella rubella]                                                                                                                                                                                                                                                                                                                                                                                                                                                                                                                                                                                                                                                                                                                                                                                                                                                                                                                                                                                                                                                                        | 158 | 159 | 5.00E-76  | 100.6 | 86.7  | 93.0  | hypothetical protein CARUB_v10021078mg       | gbpln                             | Capsella rubella     | AT1G79260.1   Symbols:   CONTAINS InterPro DOMAIN/s: Domain of unknown function DUF1794 (InterPro:IPR014878); Has 30201 Blast hits to 17322 proteins in 780 species: Archae - 12; Bacteria - 1396; Metazoa - 17338; Fungi - 3422; Plants - 5037; Viruses - 0; Other Eukaryotes - 2996 (source: NCBI BLINK).   chr1:29813282-29814066 FORWARD LENGTH=166 | 158                                                                                             | 166 | 5.00E-78 | 105.1     | 86.7  | 92.4  |       |
| Rsa1.0_00963.1.g21892.t3 | ref XP_002887776.1  evolutionarily conserved C-terminal region 8 [Arabidopsis lyrata subsp. lyrata]<br>gi 297333617 gb EFH64035.1  evolutionarily conserved C-terminal region 8 [Arabidopsis lyrata subsp. lyrata]                                                                                                                                                                                                                                                                                                                                                                                                                                                                                                                                                                                                                                                                                                                                                                                                                                                                                                                              | 628 | 522 | 0         | 83.1  | 62.1  | 67.2  | evolutionarily conserved C-terminal region 8 | gbpln                             | Arabidopsis lyrata   | AT1G79270.1   Symbols: ECT8   evolutionarily conserved C-terminal region 8   chr1:29816157-29818811 FORWARD LENGTH=528                                                                                                                                                                                                                                  | 628                                                                                             | 528 | 0        | 84.1      | 61.3  | 66.9  |       |
| Rsa1.0_00963.1.g21893.t1 |                                                                                                                                                                                                                                                                                                                                                                                                                                                                                                                                                                                                                                                                                                                                                                                                                                                                                                                                                                                                                                                                                                                                                 | #   | #   | #         | #     | #     | #     | -                                            | ----                              | ----                 | #                                                                                                                                                                                                                                                                                                                                                       | #                                                                                               | #   | #        | #         | #     |       |       |
| Rsa1.0_00964.1.g21894.t1 | gb EOA20957.1  hypothetical protein CARUB_v10001289mg [Capsella rubella]                                                                                                                                                                                                                                                                                                                                                                                                                                                                                                                                                                                                                                                                                                                                                                                                                                                                                                                                                                                                                                                                        | 327 | 353 | 6.00E-87  | 108.0 | 54.1  | 66.4  | hypothetical protein CARUB_v10001289mg       | gbpln                             | Capsella rubella     | AT5G24180.1   Symbols:   Lipase class 3-related protein   chr5:8195600-8197119 FORWARD LENGTH=375                                                                                                                                                                                                                                                       | 327                                                                                             | 375 | 4.00E-89 | 114.7     | 52.6  | 68.5  |       |
| Rsa1.0_00964.1.g21895.t1 | ref NP_197811.2  lipase class 3-related protein [Arabidopsis thaliana]<br>gi 26453202 dbj BAC43675.1  unknown protein [Arabidopsis thaliana]<br>gi 28950935 gb AA063391.1  At5g24230 [Arabidopsis thaliana]<br>gi 332005890 gb AED93273.1  lipase class 3-related protein [Arabidopsis thaliana]                                                                                                                                                                                                                                                                                                                                                                                                                                                                                                                                                                                                                                                                                                                                                                                                                                                | 365 | 369 | 1.00E-179 | 101.1 | 86.8  | 92.3  | lipase class 3-related protein               | gbpln                             | Arabidopsis thaliana | AT5G24230.1   Symbols:   Lipase class 3-related protein   chr5:8229182-8230841 FORWARD LENGTH=369                                                                                                                                                                                                                                                       | 365                                                                                             | 369 | 0        | 101.1     | 86.8  | 92.3  |       |

|                          |                                                                                                                                                                                                                                                                                                                                                                                                                                                                                                                                                                                                          |      |      |           |       |      |      |                                                                                |       |                      |                                                                                                                                                                                                                                                                                                                                                        |      |      |           |       |      |      |
|--------------------------|----------------------------------------------------------------------------------------------------------------------------------------------------------------------------------------------------------------------------------------------------------------------------------------------------------------------------------------------------------------------------------------------------------------------------------------------------------------------------------------------------------------------------------------------------------------------------------------------------------|------|------|-----------|-------|------|------|--------------------------------------------------------------------------------|-------|----------------------|--------------------------------------------------------------------------------------------------------------------------------------------------------------------------------------------------------------------------------------------------------------------------------------------------------------------------------------------------------|------|------|-----------|-------|------|------|
| Rsa1.0_00964.1.g21896.t1 | refNP_197812.1  phosphatidylinositol 3- and 4-kinase family protein / ubiquitin family protein [Arabidopsis thaliana] gi 10177083 dbj BAB10389.1  ubiquitin [Arabidopsis thaliana] gi 110741569 dbj BAE98733.1  ubiquitin [Arabidopsis thaliana] gi 33200589 gb AED93274.1  phosphatidylinositol 3- and 4-kinase family protein / ubiquitin family protein [Arabidopsis thaliana] emb CCH26608.1  salt overly sensitive 3 [Arabidopsis thaliana] gi 469401053 emb CCH26609.1  salt overly sensitive 3 [Arabidopsis thaliana] gi 469401071 emb CCH26612.1  salt overly sensitive 3 [Arabidopsis thaliana] | 575  | 574  | 0         | 99.8  | 83.8 | 90.6 | phosphatidylinositol 3- and 4-kinase family protein / ubiquitin family protein | gbpln | Arabidopsis thaliana | AT5G24240.1   Symbols:   Phosphatidylinositol 3- and 4-kinase ,Ubiquitin family protein   chr5:8231110-8232925 REVERSE LENGTH=574                                                                                                                                                                                                                      | 575  | 574  | 0         | 99.8  | 83.8 | 90.6 |
| Rsa1.0_00964.1.g21897.t1 | emb CCH26608.1  salt overly sensitive 3 [Arabidopsis thaliana] gi 469401053 emb CCH26609.1  salt overly sensitive 3 [Arabidopsis thaliana] gi 469401071 emb CCH26612.1  salt overly sensitive 3 [Arabidopsis thaliana]                                                                                                                                                                                                                                                                                                                                                                                   | 221  | 222  | 1.00E-113 | 100.5 | 91.4 | 96.8 | salt overly sensitive 3                                                        | gbpln | Arabidopsis thaliana | AT5G24270.2   Symbols: SOS3   Calcium-binding EF-hand family protein   chr5:8238781-8240179 REVERSE LENGTH=222                                                                                                                                                                                                                                         | 221  | 222  | 1.00E-116 | 100.5 | 91.0 | 96.8 |
| Rsa1.0_00964.1.g21898.t2 | gb EOA19783.1  hypothetical protein CARUB_v10000029mg [Capsella rubella]                                                                                                                                                                                                                                                                                                                                                                                                                                                                                                                                 | 1562 | 1588 | 0         | 101.7 | 70.6 | 82.5 | hypothetical protein CARUB_v10000029mg                                         | gbpln | Capsella rubella     | AT5G24280.1   Symbols: GMI1   gamma-irradiation and mitomycin c induced 1   chr5:8251378-8261401 REVERSE LENGTH=1598                                                                                                                                                                                                                                   | 1562 | 1598 | 0         | 102.3 | 65.5 | 79.2 |
| Rsa1.0_00964.1.g21899.t1 | gb EOA19247.1  hypothetical protein CARUB_v10000030mg [Capsella rubella]                                                                                                                                                                                                                                                                                                                                                                                                                                                                                                                                 | 1574 | 1570 | 0         | 99.7  | 71.2 | 82.3 | hypothetical protein CARUB_v10000030mg                                         | gbpln | Capsella rubella     | AT5G24280.1   Symbols: GMI1   gamma-irradiation and mitomycin c induced 1   chr5:8251378-8261401 REVERSE LENGTH=1598                                                                                                                                                                                                                                   | 1574 | 1598 | 0         | 101.5 | 71.6 | 83.4 |
| Rsa1.0_00964.1.g21900.t1 | ref XP_002862436.1  predicted protein [Arabidopsis lyrata subsp. lyrata] gi 297307949 gb EFH38694.1  predicted protein [Arabidopsis lyrata subsp. lyrata]                                                                                                                                                                                                                                                                                                                                                                                                                                                | 454  | 530  | 7.00E-38  | 116.7 | 18.1 | 24.9 | predicted protein                                                              | gbpln | Arabidopsis lyrata   | AT2G07760.1   Symbols:   Zinc knuckle (CCHC-type) family protein   chr2:3584420-3586278 REVERSE LENGTH=530                                                                                                                                                                                                                                             | 454  | 530  | 1.00E-11  | 116.7 | 8.4  | 15.6 |
| Rsa1.0_00964.1.g21901.t1 | gb AAM62487.1  unknown [Arabidopsis thaliana]                                                                                                                                                                                                                                                                                                                                                                                                                                                                                                                                                            | 70   | 70   | 3.00E-22  | 100.0 | 85.7 | 90.0 | unknown                                                                        | gbpln | Arabidopsis thaliana | AT5G24570.1   Symbols:   unknown protein; Has 30201 Blast hits to 17322 proteins in 780 species: Archae - 12; Bacteria - 1396; Metazoa - 17338; Fungi - 3422; Plants - 5037; Viruses - 0; Other Eukaryotes - 2996 (source: NCBI BLINK).   chr5:8405814-8406026 REVERSE LENGTH=70                                                                       | 70   | 70   | 2.00E-24  | 100.0 | 84.3 | 88.6 |
| Rsa1.0_00964.1.g21902.t1 | ref NP_568449.1  heavy metal transport/detoxification domain-containing protein [Arabidopsis thaliana] gi 10177858 dbj BAB11210.1  unnamed protein product [Arabidopsis thaliana] gi 18175601 gb AAL59894.1  unknown protein [Arabidopsis thaliana] gi 22136850 gb AAM91769.1  unknown protein [Arabidopsis thaliana] gi 332005944 gb AED93327.1  heavy metal transport/detoxification domain-containing protein [Arabidopsis thaliana]                                                                                                                                                                  | 307  | 319  | 1.00E-109 | 103.9 | 80.1 | 85.0 | heavy metal transport/detoxification domain-containing protein                 | gbpln | Arabidopsis thaliana | AT5G24580.1   Symbols:   Heavy metal transport/detoxification superfamily protein   chr5:8410394-8412087 REVERSE LENGTH=319                                                                                                                                                                                                                            | 307  | 319  | 1.00E-112 | 103.9 | 80.1 | 85.0 |
| Rsa1.0_00964.1.g21903.t1 | #                                                                                                                                                                                                                                                                                                                                                                                                                                                                                                                                                                                                        | #    | #    | #         | #     | #    | #    | -                                                                              | ----  | ----                 | #                                                                                                                                                                                                                                                                                                                                                      | #    | #    | #         | #     | #    |      |
| Rsa1.0_00964.1.g21904.t1 | ref XP_002874210.1  tip [Arabidopsis lyrata subsp. lyrata] gi 297320047 gb EFH50469.1  tip [Arabidopsis lyrata subsp. lyrata] ref NP_197848.1  uncharacterized protein [Arabidopsis thaliana] gi 10177860 dbj BAB11212.1  unnamed protein product [Arabidopsis thaliana] gi 48310199 gb AAT41773.1  At5g24600 [Arabidopsis thaliana] gi 50198891 gb AAT70465.1  At5g24600 [Arabidopsis thaliana] gi 332005949 gb AED93332.1  uncharacterized protein AT5G24600 [Arabidopsis thaliana]                                                                                                                    | 433  | 461  | 1.00E-150 | 106.5 | 67.9 | 77.1 | tip                                                                            | gbpln | Arabidopsis lyrata   | AT5G24590.2   Symbols: ANAC091, TIP   TCV-interacting protein   chr5:8416920-8418723 REVERSE LENGTH=451                                                                                                                                                                                                                                                | 433  | 451  | 1.00E-139 | 104.2 | 65.8 | 74.8 |
| Rsa1.0_00964.1.g21905.t1 | ref NP_197848.1  uncharacterized protein [Arabidopsis thaliana] gi 10177860 dbj BAB11212.1  unnamed protein product [Arabidopsis thaliana] gi 48310199 gb AAT41773.1  At5g24600 [Arabidopsis thaliana] gi 50198891 gb AAT70465.1  At5g24600 [Arabidopsis thaliana] gi 332005949 gb AED93332.1  uncharacterized protein AT5G24600 [Arabidopsis thaliana]                                                                                                                                                                                                                                                  | 248  | 248  | 1.00E-130 | 100.0 | 92.3 | 94.8 | uncharacterized protein                                                        | gbpln | Arabidopsis thaliana | AT5G24600.1   Symbols:   Protein of unknown function, DUF589   chr5:8421790-8423342 REVERSE LENGTH=248                                                                                                                                                                                                                                                 | 248  | 248  | 1.00E-133 | 100.0 | 92.3 | 94.8 |
| Rsa1.0_00964.1.g21906.t1 | gb EOA21962.1  hypothetical protein CARUB_v10002461mg [Capsella rubella]                                                                                                                                                                                                                                                                                                                                                                                                                                                                                                                                 | 189  | 148  | 2.00E-62  | 78.3  | 65.1 | 70.4 | hypothetical protein CARUB_v10002461mg                                         | gbpln | Capsella rubella     | AT5G24610.1   Symbols:   unknown protein; BEST Arabidopsis thaliana protein match is: unknown protein (TAIR:AT3G49550.1); Has 1807 Blast hits to 1807 proteins in 277 species: Archae - 0; Bacteria - 0; Metazoa - 736; Fungi - 347; Plants - 385; Viruses - 0; Other Eukaryotes - 339 (source: NCBI BLINK).   chr5:8428577-8429017 FORWARD LENGTH=146 | 189  | 146  | 3.00E-62  | 77.2  | 64.0 | 68.3 |

|                           |                                                                                                                                                                                                                                                                                                                                                                                                                                                                                                                                                                                                                                                                                                                                                                                                                                                                                                                                                                                                                                                                                                                                                                                                                                                                        |      |      |           |       |      |      |                                                                                          |       |                      |                                                                                                                                                             |      |      |           |       |      |      |
|---------------------------|------------------------------------------------------------------------------------------------------------------------------------------------------------------------------------------------------------------------------------------------------------------------------------------------------------------------------------------------------------------------------------------------------------------------------------------------------------------------------------------------------------------------------------------------------------------------------------------------------------------------------------------------------------------------------------------------------------------------------------------------------------------------------------------------------------------------------------------------------------------------------------------------------------------------------------------------------------------------------------------------------------------------------------------------------------------------------------------------------------------------------------------------------------------------------------------------------------------------------------------------------------------------|------|------|-----------|-------|------|------|------------------------------------------------------------------------------------------|-------|----------------------|-------------------------------------------------------------------------------------------------------------------------------------------------------------|------|------|-----------|-------|------|------|
| Rsa1.0_00964.1.g21907.t1  | ref NP_197850.2  pathogenesis-related thaumatin-like protein [Arabidopsis thaliana] gi 193788746 gb ACF20472.1  AT5g24620 [Arabidopsis thaliana] gi 332005952 gb AED93335.1  pathogenesis-related thaumatin-like protein [Arabidopsis thaliana]                                                                                                                                                                                                                                                                                                                                                                                                                                                                                                                                                                                                                                                                                                                                                                                                                                                                                                                                                                                                                        | 405  | 420  | 0         | 103.7 | 85.4 | 91.1 | pathogenesis-related thaumatin-like protein                                              | gbpln | Arabidopsis thaliana | AT5G24620.1   Symbols:   Pathogenesis-related thaumatin superfamily protein   chr5:8430918-8432289 FORWARD LENGTH=420                                       | 405  | 420  | 0         | 103.7 | 85.4 | 91.1 |
| Rsa1.0_00964.1.g21908.t1  | ref NP_001154735.1  DNA-binding protein BIN4 [Arabidopsis thaliana] gi 332005955 gb AED93338.1  DNA-binding protein BIN4 [Arabidopsis thaliana]                                                                                                                                                                                                                                                                                                                                                                                                                                                                                                                                                                                                                                                                                                                                                                                                                                                                                                                                                                                                                                                                                                                        | 435  | 432  | 1.00E-123 | 99.3  | 64.8 | 75.2 | DNA-binding protein BIN4                                                                 | gbpln | Arabidopsis thaliana | AT5G24630.2   Symbols: BIN4   double-stranded DNA binding   chr5:8432523-8435682 REVERSE LENGTH=432                                                         | 435  | 432  | 1.00E-125 | 99.3  | 64.8 | 75.2 |
| Rsa1.0_00964.1.g21909.t1  | ref NP_197853.1  Mitochondrial import inner membrane translocase subunit Tim17/Tim22/Tim23 family protein [Arabidopsis thaliana] gi 10177865 dbj BAB11217.1  unnamed protein product [Arabidopsis thaliana] gi 17979479 gb AAL50076.1  AT5g24650/K18P6.19 [Arabidopsis thaliana] gi 22655440 gb AAM98312.1  AT5g24650/K18P6.19 [Arabidopsis thaliana] gi 89213233 gb ABD64056.1  AT5g24650 [Arabidopsis thaliana] gi 332005961 gb AED93344.1  Mitochondrial import inner membrane translocase subunit Tim17/Tim22/Tim23 family protein [Arabidopsis thaliana]                                                                                                                                                                                                                                                                                                                                                                                                                                                                                                                                                                                                                                                                                                          | 261  | 259  | 1.00E-129 | 99.2  | 90.8 | 95.0 | Mitochondrial import inner membrane translocase subunit Tim17/Tim22/Tim23 family protein | gbpln | Arabidopsis thaliana | AT5G24650.1   Symbols:   Mitochondrial import inner membrane translocase subunit Tim17/Tim22/Tim23 family protein   chr5:8437123-8438859 FORWARD LENGTH=259 | 261  | 259  | 1.00E-132 | 99.2  | 90.8 | 95.0 |
| Rsa1.0_00964.1.g21910.t1  | gb EOA21866.1  hypothetical protein CARUB_v10002342mg [Capsella rubella]                                                                                                                                                                                                                                                                                                                                                                                                                                                                                                                                                                                                                                                                                                                                                                                                                                                                                                                                                                                                                                                                                                                                                                                               | 93   | 93   | 6.00E-41  | 100.0 | 90.3 | 96.8 | hypothetical protein CARUB_v10002342mg                                                   | gbpln | Capsella rubella     | AT5G24660.1   Symbols: LSU2   response to low sulfur 2   chr5:8443472-8443756 REVERSE LENGTH=94                                                             | 93   | 94   | 5.00E-42  | 101.1 | 90.3 | 96.8 |
| Rsa1.0_00964.1.g21911.t2  | gb EOA20688.1  hypothetical protein CARUB_v10001002mg, partial [Capsella rubella]                                                                                                                                                                                                                                                                                                                                                                                                                                                                                                                                                                                                                                                                                                                                                                                                                                                                                                                                                                                                                                                                                                                                                                                      | 369  | 433  | 1.00E-162 | 117.3 | 78.6 | 88.9 | hypothetical protein CARUB_v10001002mg, partial                                          | gbpln | Capsella rubella     | AT5G24680.1   Symbols:   Peptidase C78, ubiquitin fold modifier-specific peptidase 1/2   chr5:8453666-8455358 FORWARD LENGTH=399                            | 369  | 399  | 1.00E-164 | 108.1 | 82.4 | 90.2 |
| Rsa1.0_00964.1.g21912.t1  | ref NP_197857.2  uncharacterized protein [Arabidopsis thaliana] gi 13877883 gb AAK44019.1 AF370204.1 unknown protein [Arabidopsis thaliana] gi 15912313 gb AAL08290.1  AT5g24690/MXC17.8 [Arabidopsis thaliana] gi 22136914 gb AAM91801.1  unknown protein [Arabidopsis thaliana] gi 110739396 dbj BAF01609.1  hypothetical protein [Arabidopsis thaliana] gi 110739479 dbj BAF01649.1  hypothetical protein [Arabidopsis thaliana] gi 110739599 dbj BAF01708.1  hypothetical protein [Arabidopsis thaliana] gi 110739615 dbj BAF01716.1  hypothetical protein [Arabidopsis thaliana] gi 110739722 dbj BAF01768.1  hypothetical protein [Arabidopsis thaliana] gi 110739756 dbj BAF01785.1  hypothetical protein [Arabidopsis thaliana] gi 110739958 dbj BAF01883.1  hypothetical protein [Arabidopsis thaliana] gi 110739966 dbj BAF01887.1  hypothetical protein [Arabidopsis thaliana] gi 110740027 dbj BAF01917.1  hypothetical protein [Arabidopsis thaliana] gi 110740029 dbj BAF01918.1  hypothetical protein [Arabidopsis thaliana] gi 110740431 dbj BAF02110.1  hypothetical protein [Arabidopsis thaliana] gi 110740452 dbj BAF02120.1  hypothetical protein [Arabidopsis thaliana] gi 110741324 dbj BAF02212.1  hypothetical protein [Arabidopsis thaliana] | 529  | 521  | 0         | 98.5  | 87.1 | 92.1 | uncharacterized protein                                                                  | gbpln | Arabidopsis thaliana | AT5G24690.1   Symbols:   Protein of unknown function (DUF3411)   chr5:8455783-8458513 REVERSE LENGTH=521                                                    | 529  | 521  | 0         | 98.5  | 87.1 | 92.1 |
| Rsa1.0_00964.1.g21913.t3  | ref XP_002874217.1  hypothetical protein ARALYDRAFT_489332 [Arabidopsis lyrata subsp. lyrata] gi 297320054 gb EFH50476.1  hypothetical protein ARALYDRAFT_489332 [Arabidopsis lyrata subsp. lyrata]                                                                                                                                                                                                                                                                                                                                                                                                                                                                                                                                                                                                                                                                                                                                                                                                                                                                                                                                                                                                                                                                    | 1349 | 1376 | 0         | 102.0 | 90.4 | 93.8 | hypothetical protein ARALYDRAFT_489332                                                   | gbpln | Arabidopsis lyrata   | AT5G24710.1   Symbols:   Transducin/WD40 repeat-like superfamily protein   chr5:8459148-8467920 REVERSE LENGTH=1377                                         | 1349 | 1377 | 0         | 102.1 | 90.8 | 94.0 |
| Rsa1.0_00964.1.g21914.t17 | ref NP_568451.7  uncharacterized protein [Arabidopsis thaliana] gi 332005969 gb AED93352.1  uncharacterized protein AT5G24740 [Arabidopsis thaliana]                                                                                                                                                                                                                                                                                                                                                                                                                                                                                                                                                                                                                                                                                                                                                                                                                                                                                                                                                                                                                                                                                                                   | 3787 | 3464 | 0         | 91.5  | 73.9 | 80.5 | uncharacterized protein                                                                  | gbpln | Arabidopsis thaliana | AT5G24740.1   Symbols:   Protein of unknown function (DUF1162)   chr5:8470073-8489703 REVERSE LENGTH=3464                                                   | 3787 | 3464 | 0         | 91.5  | 73.9 | 80.5 |



|                           |                                                                                                                                                                                                                                                                                                             |      |      |           |       |      |      |                                        |       |                      |                                                                                                                                                                                                                                                                                                                                                                         |      |      |           |       |      |      |   |
|---------------------------|-------------------------------------------------------------------------------------------------------------------------------------------------------------------------------------------------------------------------------------------------------------------------------------------------------------|------|------|-----------|-------|------|------|----------------------------------------|-------|----------------------|-------------------------------------------------------------------------------------------------------------------------------------------------------------------------------------------------------------------------------------------------------------------------------------------------------------------------------------------------------------------------|------|------|-----------|-------|------|------|---|
| Rsa1.0_00964.1.g21915.t1  | ref XP_002872126.1  hypothetical protein ARALYDRAFT_351499 [Arabidopsis lyrata subsp. lyrata] gi 297317963 gb EFH48385.1  hypothetical protein ARALYDRAFT_351499 [Arabidopsis lyrata subsp. lyrata]                                                                                                         | 248  | 247  | 1.00E-108 | 99.6  | 82.3 | 90.3 | hypothetical protein ARALYDRAFT_351499 | gbpln | Arabidopsis lyrata   | AT5G24790.1   Symbols:   Protein of unknown function, DUF599   chr5:8512076-8513064 FORWARD LENGTH=246                                                                                                                                                                                                                                                                  | 248  | 246  | 1.00E-111 | 99.2  | 82.7 | 90.7 |   |
| Rsa1.0_00964.1.g21916.t1  | gb EOA21129.1  hypothetical protein CARUB_v10001471mg [Capsella rubella]                                                                                                                                                                                                                                    | 293  | 320  | 1.00E-127 | 109.2 | 84.0 | 88.4 | hypothetical protein CARUB_v10001471mg | gbpln | Capsella rubella     | AT5G24800.1   Symbols: ATBZIP9, BZO2H2, BZIP9   basic leucine zipper 9   chr5:8515259-8516541 FORWARD LENGTH=277                                                                                                                                                                                                                                                        | 293  | 277  | 1.00E-126 | 94.5  | 77.5 | 83.3 |   |
| Rsa1.0_00964.1.g21917.t1  | gb EOA19667.1  hypothetical protein CARUB_v10003319mg [Capsella rubella]                                                                                                                                                                                                                                    | 993  | 1011 | 0         | 101.8 | 89.4 | 94.9 | hypothetical protein CARUB_v10003319mg | gbpln | Capsella rubella     | AT5G24810.1   Symbols:   ABC1 family protein   chr5:8516902-8522616 REVERSE LENGTH=1009                                                                                                                                                                                                                                                                                 | 993  | 1009 | 0         | 101.6 | 88.2 | 93.9 |   |
| Rsa1.0_00964.1.g21918.t1  | ref NP_568459.1  aspartyl protease family protein [Arabidopsis thaliana] gi 67633818 gb AA78833.1  aspartyl protease family protein [Arabidopsis thaliana] gi 111074346 gb ABH04546.1  At5g24820 [Arabidopsis thaliana] gi 332005993 gb AED93366.1  aspartyl protease family protein [Arabidopsis thaliana] | 413  | 407  | 1.00E-166 | 98.5  | 72.4 | 81.8 | aspartyl protease family protein       | gbpln | Arabidopsis thaliana | AT5G24820.1   Symbols:   Eukaryotic aspartyl protease family protein   chr5:8523406-8525297 FORWARD LENGTH=407                                                                                                                                                                                                                                                          | 413  | 407  | 1.00E-168 | 98.5  | 72.4 | 81.8 |   |
| Rsa1.0_00965.1.g21919.t14 | ref XP_002892883.1  hypothetical protein ARALYDRAFT_88972 [Arabidopsis lyrata subsp. lyrata] gi 297338725 gb EFH69142.1  hypothetical protein ARALYDRAFT_88972 [Arabidopsis lyrata subsp. lyrata]                                                                                                           | 1151 | 184  | 2.00E-50  | 16.0  | 9.0  | 11.4 | hypothetical protein ARALYDRAFT_88972  | gbpln | Arabidopsis lyrata   | AT1G15790.2   Symbols:   unknown protein; BEST Arabidopsis thaliana protein match is: unknown protein (TAIR:AT1G15780.1); Has 35333 Blast hits to 34131 proteins in 2444 species: Archae - 798; Bacteria - 22429; Metazoa - 974; Fungi - 991; Plants - 531; Viruses - 0; Other Eukaryotes - 9610 (source: NCBI BLINK)   chr1:5438477-5439820 REVERSE LENGTH=179         | 1151 | 179  | 7.00E-46  | 15.6  | 8.1  | 10.5 |   |
| Rsa1.0_00965.1.g21920.t11 | gb EOA39491.1  hypothetical protein CARUB_v10008096mg [Capsella rubella]                                                                                                                                                                                                                                    | 241  | 1344 | 2.00E-58  | 557.7 | 45.6 | 51.0 | hypothetical protein CARUB_v10008096mg | gbpln | Capsella rubella     | AT1G15780.1   Symbols:   unknown protein; BEST Arabidopsis thaliana protein match is: unknown protein (TAIR:AT2G10440.1); Has 103701 Blast hits to 43153 proteins in 1828 species: Archae - 30; Bacteria - 7385; Metazoa - 38639; Fungi - 11531; Plants - 7727; Viruses - 307; Other Eukaryotes - 38082 (source: NCBI BLINK)   chr1:5430446-5435921 REVERSE LENGTH=1335 | 241  | 1335 | 1.00E-59  | 553.9 | 44.8 | 50.2 |   |
| Rsa1.0_00965.1.g21921.t1  | gb EOA39491.1  hypothetical protein CARUB_v10008096mg [Capsella rubella]                                                                                                                                                                                                                                    | 564  | 1344 | 0         | 238.3 | 78.5 | 86.2 | hypothetical protein CARUB_v10008096mg | gbpln | Capsella rubella     | AT1G15780.1   Symbols:   unknown protein; BEST Arabidopsis thaliana protein match is: unknown protein (TAIR:AT2G10440.1); Has 103701 Blast hits to 43153 proteins in 1828 species: Archae - 30; Bacteria - 7385; Metazoa - 38639; Fungi - 11531; Plants - 7727; Viruses - 307; Other Eukaryotes - 38082 (source: NCBI BLINK)   chr1:5430446-5435921 REVERSE LENGTH=1335 | 564  | 1335 | 0         | 236.7 | 79.1 | 86.3 |   |
| Rsa1.0_00965.1.g21922.t1  | gb AAF79835.1 AC026875_15 T6D22.19 [Arabidopsis thaliana]                                                                                                                                                                                                                                                   | 676  | 745  | 0         | 110.2 | 48.4 | 63.5 | T6D22.19                               | gbpln | Arabidopsis thaliana | AT3G42170.1   Symbols:   BED zinc finger ;hAT family dimerisation domain   chr3:14321838-14323928 FORWARD LENGTH=696                                                                                                                                                                                                                                                    | 676  | 696  | 6.00E-82  | 103.0 | 27.5 | 45.7 |   |
| Rsa1.0_00965.1.g21923.t1  | ref XP_002892882.1  hypothetical protein ARALYDRAFT_471776 [Arabidopsis lyrata subsp. lyrata] gi 297338724 gb EFH69141.1  hypothetical protein ARALYDRAFT_471776 [Arabidopsis lyrata subsp. lyrata]                                                                                                         | 706  | 1343 | 0         | 190.2 | 56.4 | 58.5 | hypothetical protein ARALYDRAFT_471776 | gbpln | Arabidopsis lyrata   | AT1G15780.1   Symbols:   unknown protein; BEST Arabidopsis thaliana protein match is: unknown protein (TAIR:AT2G10440.1); Has 103701 Blast hits to 43153 proteins in 1828 species: Archae - 30; Bacteria - 7385; Metazoa - 38639; Fungi - 11531; Plants - 7727; Viruses - 307; Other Eukaryotes - 38082 (source: NCBI BLINK)   chr1:5430446-5435921 REVERSE LENGTH=1335 | 706  | 1335 | 0         | 189.1 | 55.7 | 58.2 |   |
| Rsa1.0_00965.1.g21924.t4  | dbj BAF01492.1  putative Ser/Thr protein kinase [Arabidopsis thaliana]                                                                                                                                                                                                                                      | 414  | 1025 | 2.00E-40  | 247.6 | 22.0 | 22.7 | putative Ser/Thr protein kinase        | gbpln | Arabidopsis thaliana | AT1G16270.2   Symbols:   Protein kinase superfamily protein with octicosapeptide/Phox/Bem1p domain   chr1:5563890-5568145 FORWARD LENGTH=1147                                                                                                                                                                                                                           | 414  | 1147 | 6.00E-43  | 277.1 | 22.0 | 22.7 |   |
| Rsa1.0_00965.1.g21925.t1  | ref XP_002892989.1  hypothetical protein ARALYDRAFT_889236 [Arabidopsis lyrata subsp. lyrata] gi 297338831 gb EFH69248.1  hypothetical protein ARALYDRAFT_889236 [Arabidopsis lyrata subsp. lyrata]                                                                                                         | 169  | 167  | 2.00E-22  | 98.8  | 35.5 | 48.5 | hypothetical protein ARALYDRAFT_889236 | gbpln | Arabidopsis lyrata   | # # # # # # #                                                                                                                                                                                                                                                                                                                                                           | #    | #    | #         | #     | #    | #    | # |

|                          |                                                                                                                                                                                                                                                                                |      |      |           |       |      |      |                                                 |       |                      |                                                                                                                                                                                                                                                                                                                                                                          |      |      |           |       |      |      |
|--------------------------|--------------------------------------------------------------------------------------------------------------------------------------------------------------------------------------------------------------------------------------------------------------------------------|------|------|-----------|-------|------|------|-------------------------------------------------|-------|----------------------|--------------------------------------------------------------------------------------------------------------------------------------------------------------------------------------------------------------------------------------------------------------------------------------------------------------------------------------------------------------------------|------|------|-----------|-------|------|------|
| Rsa1.0_00965.1.g21928.t2 | ref[XP_002892882.1] hypothetical protein ARALYDRAFT_471776 [Arabidopsis lyrata subsp. lyrata] gi 297338724 gb EFH69141.1  hypothetical protein ARALYDRAFT_471776 [Arabidopsis lyrata subsp. lyrata]                                                                            | 239  | 1343 | 1.00E-26  | 561.9 | 31.0 | 39.3 | hypothetical protein ARALYDRAFT_471776          | gbpln | Arabidopsis lyrata   | AT1G15780.1   Symbols:   unknown protein; BEST Arabidopsis thaliana protein match is: unknown protein (TAIR:AT2G10440.1); Has 103701 Blast hits to 43153 proteins in 1828 species: Archae - 30; Bacteria - 7385; Metazoa - 38639; Fungi - 11531; Plants - 7727; Viruses - 307; Other Eukaryotes - 38082 (source: NCBI BLINK).   chr1:5430446-5435921 REVERSE LENGTH=1335 | 239  | 1335 | 1.00E-27  | 558.6 | 27.2 | 35.6 |
| Rsa1.0_00965.1.g21927.t1 | ref[XP_002892989.1] hypothetical protein ARALYDRAFT_889236 [Arabidopsis lyrata subsp. lyrata] gi 297338831 gb EFH69248.1  hypothetical protein ARALYDRAFT_889236 [Arabidopsis lyrata subsp. lyrata]                                                                            | 239  | 167  | 6.00E-24  | 69.9  | 29.3 | 40.2 | hypothetical protein ARALYDRAFT_889236          | gbpln | Arabidopsis lyrata   | #                                                                                                                                                                                                                                                                                                                                                                        | #    | #    | #         | #     | #    |      |
| Rsa1.0_00965.1.g21928.t1 | gb[EOA39338.1] hypothetical protein CARUB_v10012382mg [Capsella rubella]                                                                                                                                                                                                       | 209  | 205  | 1.00E-86  | 98.1  | 75.6 | 83.7 | hypothetical protein CARUB_v10012382mg          | gbpln | Capsella rubella     | AT1G15760.1   Symbols:   Sterile alpha motif (SAM) domain-containing protein   chr1:5425714-5426322 FORWARD LENGTH=202                                                                                                                                                                                                                                                   | 209  | 202  | 1.00E-88  | 96.7  | 78.9 | 87.6 |
| Rsa1.0_00966.1.g21929.t1 | gb[EOA24147.1] hypothetical protein CARUB_v10017380mg, partial [Capsella rubella]                                                                                                                                                                                              | 351  | 403  | 1.00E-151 | 114.8 | 74.9 | 85.2 | hypothetical protein CARUB_v10017380mg, partial | gbpln | Capsella rubella     | AT3G57740.1   Symbols:   Protein kinase superfamily protein   chr3:21392671-21393744 FORWARD LENGTH=357                                                                                                                                                                                                                                                                  | 351  | 357  | 1.00E-153 | 101.7 | 76.4 | 86.9 |
| Rsa1.0_00966.1.g21930.t1 | gb[EOA25819.1] hypothetical protein CARUB_v10019188mg [Capsella rubella]                                                                                                                                                                                                       | 153  | 349  | 8.00E-19  | 228.1 | 41.8 | 54.2 | hypothetical protein CARUB_v10019188mg          | gbpln | Capsella rubella     | AT3G57710.1   Symbols:   Protein kinase superfamily protein   chr3:21386233-21387288 REVERSE LENGTH=351                                                                                                                                                                                                                                                                  | 153  | 351  | 9.00E-21  | 229.4 | 41.8 | 54.9 |
| Rsa1.0_00966.1.g21931.t1 | gb[EOA25623.1] hypothetical protein CARUB_v10018971mg [Capsella rubella]                                                                                                                                                                                                       | 376  | 360  | 9.00E-54  | 95.7  | 37.5 | 55.6 | hypothetical protein CARUB_v10018971mg          | gbpln | Capsella rubella     | AT2G34280.1   Symbols:   F-box and associated interaction domains-containing protein   chr2:14470335-14471510 REVERSE LENGTH=391                                                                                                                                                                                                                                         | 376  | 391  | 3.00E-45  | 104.0 | 38.8 | 54.5 |
| Rsa1.0_00966.1.g21932.t1 | gb[EOA28140.1] hypothetical protein CARUB_v10024329mg [Capsella rubella]                                                                                                                                                                                                       | 61   | 123  | 1.00E-15  | 201.6 | 78.7 | 90.2 | hypothetical protein CARUB_v10024329mg          | gbpln | Capsella rubella     | AT2G41905.1   Symbols:   BEST Arabidopsis thaliana protein match is: arabinogalactan protein 23 (TAIR:AT3G57690.1); Has 35333 Blast hits to 34131 proteins in 2444 species: Archae - 798; Bacteria - 22429; Metazoa - 974; Fungi - 991; Plants - 531; Viruses - 0; Other Eukaryotes - 9610 (source: NCBI BLINK).   chr2:17495766-17495951 FORWARD LENGTH=61              | 61   | 61   | 6.00E-18  | 100.0 | 82.0 | 90.2 |
| Rsa1.0_00966.1.g21933.t1 | ref[NP_191327.4] Peptidase S41 family protein [Arabidopsis thaliana] gi 332646165 gb AE79686.1  Peptidase S41 family protein [Arabidopsis thaliana]                                                                                                                            | 515  | 519  | 0         | 100.8 | 85.8 | 91.3 | Peptidase S41 family protein                    | gbpln | Arabidopsis thaliana | AT3G57680.1   Symbols:   Peptidase S41 family protein   chr3:21381054-21383629 FORWARD LENGTH=519                                                                                                                                                                                                                                                                        | 515  | 519  | 0         | 100.8 | 85.8 | 91.3 |
| Rsa1.0_00966.1.g21934.t1 | emb[CAB39638.1] RNA-directed DNA polymerase-like protein [Arabidopsis thaliana] gi 7267666 emb CAB78094.1  RNA-directed DNA polymerase-like protein [Arabidopsis thaliana]                                                                                                     | 1656 | 1274 | 0         | 76.9  | 31.8 | 41.4 | RNA-directed DNA polymerase-like protein        | gbpln | Arabidopsis thaliana | AT1G43760.1   Symbols:   DNase I-like superfamily protein   chr1:16528880-16531065 REVERSE LENGTH=626                                                                                                                                                                                                                                                                    | 1656 | 626  | 4.00E-25  | 37.8  | 5.7  | 9.5  |
| Rsa1.0_00966.1.g21935.t1 | gb[AAO64176.1] putative zinc finger protein [Arabidopsis thaliana] gi 110737098 dbj BAF00501.1  zinc finger like protein [Arabidopsis thaliana]                                                                                                                                | 376  | 383  | 1.00E-168 | 101.9 | 90.4 | 91.8 | putative zinc finger protein                    | gbpln | Arabidopsis thaliana | AT3G57670.1   Symbols: NTT, WIP2   C2H2-type zinc finger family protein   chr3:21370936-21373121 FORWARD LENGTH=383                                                                                                                                                                                                                                                      | 376  | 383  | 1.00E-167 | 101.9 | 91.0 | 92.3 |
| Rsa1.0_00966.1.g21936.t1 | ref[XP_002876429.1] hypothetical protein ARALYDRAFT_486216 [Arabidopsis lyrata subsp. lyrata] gi 297322267 gb EFH52688.1  hypothetical protein ARALYDRAFT_486216 [Arabidopsis lyrata subsp. lyrata]                                                                            | 1655 | 1678 | 0         | 101.4 | 80.8 | 88.6 | hypothetical protein ARALYDRAFT_486216          | gbpln | Arabidopsis lyrata   | AT3G57660.1   Symbols: NRPA1   nuclear RNA polymerase A1   chr3:21353746-21362814 FORWARD LENGTH=1670                                                                                                                                                                                                                                                                    | 1655 | 1670 | 0         | 100.9 | 80.3 | 88.2 |
| Rsa1.0_00966.1.g21937.t1 | gb[ADC97478.1] lysophosphatidic acid acyltransferase [Brassica napus] gi 289472613 gb ADC97480.1  lysophosphatidic acid acyltransferase [Brassica napus]                                                                                                                       | 389  | 390  | 0         | 100.3 | 98.5 | 99.5 | lysophosphatidic acid acyltransferase           | gbpln | Brassica napus       | AT3G57650.1   Symbols: LPAT2   lysophosphatidyl acyltransferase 2   chr3:21349751-21352839 FORWARD LENGTH=389                                                                                                                                                                                                                                                            | 389  | 389  | 0         | 100.0 | 92.5 | 96.7 |
| Rsa1.0_00967.1.g21938.t1 | ref[XP_002876954.1] CYP71B23 [Arabidopsis lyrata subsp. lyrata] gi 297322792 gb EFH53213.1  CYP71B23 [Arabidopsis lyrata subsp. lyrata]                                                                                                                                        | 436  | 501  | 0         | 114.9 | 86.7 | 92.4 | CYP71B23                                        | gbpln | Arabidopsis lyrata   | AT3G26210.1   Symbols: CYP71B23   cytochrome P450, family 71, subfamily B, polypeptide 23   chr3:959329-9595202 REVERSE LENGTH=501                                                                                                                                                                                                                                       | 436  | 501  | 0         | 114.9 | 86.2 | 92.7 |
| Rsa1.0_00967.1.g21939.t1 | ref[NP_189253.1] cytochrome P450 71B3 [Arabidopsis thaliana] gi 13878902 sp O65785.2 C71B3, ARATH RecName: Full=Cytochrome P450 71B3 gi 11994441 dbj BAB02443.1  cytochrome P450 [Arabidopsis thaliana] gi 332643614 gb AE77135.1  cytochrome P450 71B3 [Arabidopsis thaliana] | 504  | 501  | 0         | 99.4  | 76.6 | 88.3 | cytochrome P450 71B3                            | gbpln | Arabidopsis thaliana | AT3G26220.1   Symbols: CYP71B3   cytochrome P450, family 71, subfamily B, polypeptide 3   chr3:9596208-9597828 REVERSE LENGTH=501                                                                                                                                                                                                                                        | 504  | 501  | 0         | 99.4  | 76.6 | 88.3 |

|                          |                                                                                                                                                                                                                                                                                                                                                                                                                                                                                             |      |      |           |       |      |      |                                                 |       |                         |                                                                                                                                                                                                                                                                                                                                                                                                                                                                                                                                                                                                                                     |      |      |           |       |      |      |
|--------------------------|---------------------------------------------------------------------------------------------------------------------------------------------------------------------------------------------------------------------------------------------------------------------------------------------------------------------------------------------------------------------------------------------------------------------------------------------------------------------------------------------|------|------|-----------|-------|------|------|-------------------------------------------------|-------|-------------------------|-------------------------------------------------------------------------------------------------------------------------------------------------------------------------------------------------------------------------------------------------------------------------------------------------------------------------------------------------------------------------------------------------------------------------------------------------------------------------------------------------------------------------------------------------------------------------------------------------------------------------------------|------|------|-----------|-------|------|------|
| Rsa1.0_00967.1.g21940.t1 | refXP_002876956.1  CYP71B4<br>[Arabidopsis lyrata subsp. lyrata]<br>gi 297322794 gb EFH53215.1  CYP71B4<br>[Arabidopsis lyrata subsp. lyrata]                                                                                                                                                                                                                                                                                                                                               | 496  | 502  | 0         | 101.2 | 73.8 | 83.9 | CYP71B4                                         | gbpln | Arabidopsis<br>lyrata   | AT3G26280.1   Symbols: CYP71B4  <br>cytochrome P450, family 71, subfamily B,<br>polypeptide 4   chr3:9630358-9631970<br>REVERSE LENGTH=504                                                                                                                                                                                                                                                                                                                                                                                                                                                                                          | 496  | 504  | 0         | 101.6 | 71.8 | 83.5 |
| Rsa1.0_00967.1.g21941.t1 | refXP_002876956.1  CYP71B4<br>[Arabidopsis lyrata subsp. lyrata]<br>gi 297322794 gb EFH53215.1  CYP71B4<br>[Arabidopsis lyrata subsp. lyrata]                                                                                                                                                                                                                                                                                                                                               | 475  | 502  | 0         | 105.7 | 72.0 | 83.6 | CYP71B4                                         | gbpln | Arabidopsis<br>lyrata   | AT3G26280.1   Symbols: CYP71B4  <br>cytochrome P450, family 71, subfamily B,<br>polypeptide 4   chr3:9630358-9631970<br>REVERSE LENGTH=504                                                                                                                                                                                                                                                                                                                                                                                                                                                                                          | 475  | 504  | 0         | 106.1 | 70.5 | 82.5 |
| Rsa1.0_00967.1.g21942.t1 | refXP_002876962.1  CYP71B34<br>[Arabidopsis lyrata subsp. lyrata]<br>gi 297322800 gb EFH53221.1 <br>CYP71B34 [Arabidopsis lyrata subsp.<br>lyrata]                                                                                                                                                                                                                                                                                                                                          | 497  | 500  | 0         | 100.6 | 83.7 | 92.2 | CYP71B34                                        | gbpln | Arabidopsis<br>lyrata   | AT3G26300.1   Symbols: CYP71B34  <br>cytochrome P450, family 71, subfamily B,<br>polypeptide 34   chr3:9639199-9640866<br>REVERSE LENGTH=500                                                                                                                                                                                                                                                                                                                                                                                                                                                                                        | 497  | 500  | 0         | 100.6 | 82.3 | 92.2 |
| Rsa1.0_00967.1.g21943.t1 | refXP_002876964.1  CYP71B37<br>[Arabidopsis lyrata subsp. lyrata]<br>gi 297322802 gb EFH53223.1 <br>CYP71B37 [Arabidopsis lyrata subsp.<br>lyrata]                                                                                                                                                                                                                                                                                                                                          | 498  | 500  | 0         | 100.4 | 79.3 | 89.4 | CYP71B37                                        | gbpln | Arabidopsis<br>lyrata   | AT3G26330.1   Symbols: CYP71B37  <br>cytochrome P450, family 71, subfamily B,<br>polypeptide 37   chr3:9646873-9648536<br>REVERSE LENGTH=500                                                                                                                                                                                                                                                                                                                                                                                                                                                                                        | 498  | 500  | 0         | 100.4 | 76.9 | 86.3 |
| Rsa1.0_00967.1.g21944.t1 | refNP_176122.2  cytochrome p450 79c2<br>[Arabidopsis thaliana]<br>gi 8979947 gb AAF82261.1 AC008051_12<br>Strong similarity to N-hydroxylating<br>multifunctional cytochrome P-450<br>(CYP79) from Sorghum bicolor<br>gb J32624 and contains a Cytochrome<br>P450 PF 00067 domain [Arabidopsis<br>thaliana]<br>gi 12321833 gb AAG50952.1 AC073943_2<br>cytochrome P450, putative<br>[Arabidopsis thaliana]<br>gi 332195404 gb AEE33525.1 <br>cytochrome p450 79c2 [Arabidopsis<br>thaliana] | 589  | 530  | 0         | 90.0  | 59.8 | 66.4 | cytochrome p450 79c2                            | gbpln | Arabidopsis<br>thaliana | AT1G58260.1   Symbols: CYP79C2,<br>CYP79C3P   cytochrome p450 79c2  <br>chr1:21605752-21607995 FORWARD<br>LENGTH=530                                                                                                                                                                                                                                                                                                                                                                                                                                                                                                                | 589  | 530  | 0         | 90.0  | 59.8 | 66.4 |
| Rsa1.0_00967.1.g21945.t1 | refNP_189266.1  uncharacterized<br>protein [Arabidopsis thaliana]<br>gi 9294293 dbj BAB02195.1  unnamed<br>protein product [Arabidopsis thaliana]<br>gi 91805521 gb ABE65489.1  unknown<br>[Arabidopsis thaliana]<br>gi 332643627 gb AEE77148.1 <br>uncharacterized protein AT3G26350<br>[Arabidopsis thaliana]                                                                                                                                                                             | 365  | 356  | 1.00E-121 | 97.5  | 70.1 | 78.9 | uncharacterized<br>protein                      | gbpln | Arabidopsis<br>thaliana | AT3G26350.1   Symbols:   LOCATED IN:<br>chloroplast; EXPRESSED IN: root, pedicel,<br>carpel, stamen; EXPRESSED DURING: 4<br>anthesis, petal differentiation and expansion<br>stage; CONTAINS InterPro DOMAIN/s: Late<br>embryogenesis abundant protein, group 2<br>(InterPro:IPR004864); BEST Arabidopsis<br>thaliana protein match is: unknown protein<br>(TAIR:AT1G13050.1); Has 3534 Blast hits to<br>2704 proteins in 342 species: Archae - 6;<br>Bacteria - 192; Metazoa - 1076; Fungi - 505;<br>Plants - 1162; Viruses - 224; Other<br>Eukaryotes - 369 (source: NCBI BLINK).  <br>chr3:9653660-9654730 REVERSE<br>LENGTH=356 | 365  | 356  | 1.00E-124 | 97.5  | 70.1 | 78.9 |
| Rsa1.0_00967.1.g21946.t1 | dbj BAB02196.1  unnamed protein<br>product [Arabidopsis thaliana]                                                                                                                                                                                                                                                                                                                                                                                                                           | 102  | 99   | 1.00E-41  | 97.1  | 87.3 | 91.2 | unnamed protein<br>product                      | gbpln | Arabidopsis<br>thaliana | AT3G26360.1   Symbols:   Ribosomal protein<br>S21 family protein   chr3:9655963-9656373<br>REVERSE LENGTH=101                                                                                                                                                                                                                                                                                                                                                                                                                                                                                                                       | 102  | 101  | 3.00E-44  | 99.0  | 87.3 | 91.2 |
| Rsa1.0_00967.1.g21947.t1 | gb AAG51783.1 AC079679.3 reverse<br>transcriptase, putative; 16838-20266<br>[Arabidopsis thaliana]                                                                                                                                                                                                                                                                                                                                                                                          | 522  | 1142 | 1.00E-123 | 218.8 | 41.2 | 55.9 | reverse transcriptase,<br>putative; 16838-20266 | gbpln | Arabidopsis<br>thaliana | AT4G29090.1   Symbols:   Ribonuclease H-<br>like superfamily protein   chr4:14333528-<br>14335255 FORWARD LENGTH=575                                                                                                                                                                                                                                                                                                                                                                                                                                                                                                                | 522  | 575  | 8.00E-76  | 110.2 | 27.2 | 43.1 |
| Rsa1.0_00968.1.g21948.t1 | # # # # # # # # # #                                                                                                                                                                                                                                                                                                                                                                                                                                                                         | #    | #    | #         | #     | #    | #    | -                                               | ----  | ----                    | #                                                                                                                                                                                                                                                                                                                                                                                                                                                                                                                                                                                                                                   | #    | #    | #         | #     | #    | #    |
| Rsa1.0_00968.1.g21949.t1 | # # # # # # # # # #                                                                                                                                                                                                                                                                                                                                                                                                                                                                         | #    | #    | #         | #     | #    | #    | -                                               | ----  | ----                    | #                                                                                                                                                                                                                                                                                                                                                                                                                                                                                                                                                                                                                                   | #    | #    | #         | #     | #    | #    |
| Rsa1.0_00968.1.g21950.t1 | gb ABH07409.1  putative pol polyprotein<br>[Brassica oleracea var. botrytis]                                                                                                                                                                                                                                                                                                                                                                                                                | 1166 | 1239 | 0         | 106.3 | 51.7 | 59.2 | putative pol polyprotein                        | gbpln | Brassica<br>oleracea    | AT4G23160.1   Symbols: CRK8   cysteine-<br>rich RLK (RECEPTOR-like protein kinase) 8  <br>chr4:12129485-12134086 FORWARD<br>LENGTH=1262                                                                                                                                                                                                                                                                                                                                                                                                                                                                                             | 1166 | 1262 | 7.00E-86  | 108.2 | 14.8 | 23.6 |
| Rsa1.0_00968.1.g21951.t1 | gb EOA25101.1  hypothetical protein<br>CARUB_v10018408mg [Capsella rubella]                                                                                                                                                                                                                                                                                                                                                                                                                 | 248  | 245  | 5.00E-95  | 98.8  | 80.2 | 87.1 | hypothetical protein<br>CARUB_v10018408mg       | gbpln | Capsella<br>rubella     | AT3G30260.1   Symbols: AGL79  <br>AGAMOUS-like 79   chr3:11909119-<br>11912880 FORWARD LENGTH=249                                                                                                                                                                                                                                                                                                                                                                                                                                                                                                                                   | 248  | 249  | 2.00E-97  | 100.4 | 79.4 | 87.5 |
| Rsa1.0_00968.1.g21952.t1 | gb AAF79618.1 AC027665_19 F5M15.26<br>[Arabidopsis thaliana]                                                                                                                                                                                                                                                                                                                                                                                                                                | 209  | 1838 | 1.00E-20  | 879.4 | 32.1 | 51.7 | F5M15.26                                        | gbpln | Arabidopsis<br>thaliana | #                                                                                                                                                                                                                                                                                                                                                                                                                                                                                                                                                                                                                                   | #    | #    | #         | #     | #    | #    |
| Rsa1.0_00968.1.g21953.t1 | gb EOA24256.1  hypothetical protein<br>CARUB_v10017497mg [Capsella rubella]                                                                                                                                                                                                                                                                                                                                                                                                                 | 328  | 364  | 1.00E-144 | 111.0 | 79.9 | 85.4 | hypothetical protein<br>CARUB_v10017497mg       | gbpln | Capsella<br>rubella     | AT3G30340.1   Symbols:   nodulin MtN21<br>/EamA-like transporter family protein  <br>chr3:11956626-11958969 FORWARD<br>LENGTH=364                                                                                                                                                                                                                                                                                                                                                                                                                                                                                                   | 328  | 364  | 1.00E-145 | 111.0 | 77.4 | 86.3 |
| Rsa1.0_00968.1.g21954.t1 | # # # # # # # # # #                                                                                                                                                                                                                                                                                                                                                                                                                                                                         | #    | #    | #         | #     | #    | #    | -                                               | ----  | ----                    | #                                                                                                                                                                                                                                                                                                                                                                                                                                                                                                                                                                                                                                   | #    | #    | #         | #     | #    | #    |

|                          |                                                                                                                                                                                                                                                                       |      |      |           |       |      |      |                                        |       |                      |                                                                                                                                                                                                                                                                                                                                                                                                                                                                                                                                                                                                                                             |      |      |           |       |      |      |
|--------------------------|-----------------------------------------------------------------------------------------------------------------------------------------------------------------------------------------------------------------------------------------------------------------------|------|------|-----------|-------|------|------|----------------------------------------|-------|----------------------|---------------------------------------------------------------------------------------------------------------------------------------------------------------------------------------------------------------------------------------------------------------------------------------------------------------------------------------------------------------------------------------------------------------------------------------------------------------------------------------------------------------------------------------------------------------------------------------------------------------------------------------------|------|------|-----------|-------|------|------|
| Rsa1.0_00968.1.g21955.t2 | ref[NP_566853.1] uncharacterized protein [Arabidopsis thaliana]   g[313471490]sp[Q9L164.2]RGF4_ARATH RecName: Full=Root meristem growth factor 4; Short=AtRGF4; Flags: Precursor; g[332644113]gb[AEE77634.1] uncharacterized protein AT3G30350 [Arabidopsis thaliana] | 168  | 163  | 1.00E-47  | 97.0  | 66.1 | 76.8 | uncharacterized protein                | gbpln | Arabidopsis thaliana | AT3G30350.1   Symbols: RGF4   Encodes a root meristem growth factor (RGF). Belongs to a family of functionally redundant homologous peptides that are secreted, tyrosine-sulfated, and expressed mainly in the stem cell area and the innermost layer of central columella cells. RGFs are required for maintenance of the root stem cell niche and transit amplifying cell proliferation. Members of this family include: At5g60810 (RGF1), At1g13620 (RGF2), At2g04025 (RGF3), At3g30350 (RGF4), At5g51451 (RGF5), At4g16515 (RGF6), At3g02240 (RGF7), At2g03830 (RGF8) and At5g64770 (RGF9).   chr3:11960552-11961764 REVERSE LENGTH=163 | 168  | 163  | 4.00E-50  | 97.0  | 66.1 | 76.8 |
| Rsa1.0_00968.1.g21956.t1 | gb[EOA26153.1] hypothetical protein CARUB_v10019591mg [Capsella rubella]                                                                                                                                                                                              | 378  | 377  | 0         | 99.7  | 89.2 | 92.3 | hypothetical protein CARUB_v10019591mg | gbpln | Capsella rubella     | AT3G30380.2   Symbols:   alpha/beta-Hydrolases superfamily protein   chr3:11974424-11976571 FORWARD LENGTH=377                                                                                                                                                                                                                                                                                                                                                                                                                                                                                                                              | 378  | 377  | 0         | 99.7  | 88.4 | 91.5 |
| Rsa1.0_00968.1.g21957.t1 | gb[EOA25673.1] hypothetical protein CARUB_v10019025mg [Capsella rubella]                                                                                                                                                                                              | 457  | 458  | 0         | 100.2 | 89.1 | 95.4 | hypothetical protein CARUB_v10019025mg | gbpln | Capsella rubella     | AT3G30390.2   Symbols:   Transmembrane amino acid transporter family protein   chr3:11977112-11978827 REVERSE LENGTH=460                                                                                                                                                                                                                                                                                                                                                                                                                                                                                                                    | 457  | 460  | 0         | 100.7 | 88.8 | 94.1 |
| Rsa1.0_00969.1.g21958.t1 | ref[XP_002887784.1] predicted protein [Arabidopsis lyrata subsp. lyrata]   g[297333625]gb[EFH64043.1] predicted protein [Arabidopsis lyrata subsp. lyrata]                                                                                                            | 82   | 783  | 4.00E-40  | 954.9 | 92.7 | 97.6 | predicted protein                      | gbpln | Arabidopsis lyrata   | AT1G79400.1   Symbols: ATCHX2, CHX2   cation/H <sup>+</sup> exchanger 2   chr1:29864992-29867840 FORWARD LENGTH=783                                                                                                                                                                                                                                                                                                                                                                                                                                                                                                                         | 82   | 783  | 5.00E-42  | 954.9 | 91.5 | 96.3 |
| Rsa1.0_00969.1.g21959.t1 | ref[XP_002889243.1] hypothetical protein ARALYDRAFT_477106 [Arabidopsis lyrata subsp. lyrata]   g[297335084]gb[EFH65502.1] hypothetical protein ARALYDRAFT_477106 [Arabidopsis lyrata subsp. lyrata]                                                                  | 506  | 514  | 0         | 101.6 | 82.4 | 91.5 | hypothetical protein ARALYDRAFT_477106 | gbpln | Arabidopsis lyrata   | AT1G79410.1   Symbols: AtOCT5, 5-Oct   organic cation/carnitine transporter5   chr1:29868037-29869584 REVERSE LENGTH=515                                                                                                                                                                                                                                                                                                                                                                                                                                                                                                                    | 506  | 515  | 0         | 101.8 | 81.8 | 91.7 |
| Rsa1.0_00969.1.g21960.t1 | gb[EOA35357.1] hypothetical protein CARUB_v10020551mg [Capsella rubella]                                                                                                                                                                                              | 346  | 354  | 0         | 102.3 | 94.5 | 98.0 | hypothetical protein CARUB_v10020551mg | gbpln | Capsella rubella     | AT1G79430.2   Symbols: APL, WDY   Homeodomain-like superfamily protein   chr1:29877521-29879135 REVERSE LENGTH=358                                                                                                                                                                                                                                                                                                                                                                                                                                                                                                                          | 346  | 358  | 0         | 103.5 | 95.4 | 97.7 |
| Rsa1.0_00969.1.g21961.t2 | gb[EOA39471.1] hypothetical protein CARUB_v10008066mg [Capsella rubella]                                                                                                                                                                                              | 1079 | 2170 | 0         | 201.1 | 57.8 | 63.7 | hypothetical protein CARUB_v10008066mg | gbpln | Capsella rubella     | AT1G20960.2   Symbols: emb1507   U5 small nuclear ribonucleoprotein helicase, putative   chr1:7302591-7309914 REVERSE LENGTH=2171                                                                                                                                                                                                                                                                                                                                                                                                                                                                                                           | 1079 | 2171 | 0         | 201.2 | 57.1 | 63.3 |
| Rsa1.0_00969.1.g21962.t1 | ref[XP_002878905.1] predicted protein [Arabidopsis lyrata subsp. lyrata]   g[297324744]gb[EFH55164.1] predicted protein [Arabidopsis lyrata subsp. lyrata]                                                                                                            | 492  | 480  | 7.00E-44  | 97.6  | 25.0 | 42.5 | predicted protein                      | gbpln | Arabidopsis lyrata   | AT1G14800.1   Symbols:   Nucleic acid-binding, OB-fold-like protein   chr1:5099572-5102558 FORWARD LENGTH=384                                                                                                                                                                                                                                                                                                                                                                                                                                                                                                                               | 492  | 384  | 2.00E-26  | 78.0  | 13.2 | 20.9 |
| Rsa1.0_00969.1.g21963.t1 | # # # # # # # # - ---- ---- # # # # # # #                                                                                                                                                                                                                             |      |      |           |       |      |      |                                        |       |                      |                                                                                                                                                                                                                                                                                                                                                                                                                                                                                                                                                                                                                                             |      |      |           |       |      |      |
| Rsa1.0_00969.1.g21964.t1 | ref[XP_002864260.1] hypothetical protein ARALYDRAFT_918447 [Arabidopsis lyrata subsp. lyrata]   g[297310095]gb[EFH40519.1] hypothetical protein ARALYDRAFT_918447 [Arabidopsis lyrata subsp. lyrata]                                                                  | 226  | 231  | 1.00E-25  | 102.2 | 30.5 | 50.0 | hypothetical protein ARALYDRAFT_918447 | gbpln | Arabidopsis lyrata   | AT2G35280.1   Symbols:   F-box family protein   chr2:14859709-14860200 REVERSE LENGTH=163                                                                                                                                                                                                                                                                                                                                                                                                                                                                                                                                                   | 226  | 163  | 1.00E-25  | 72.1  | 24.8 | 38.5 |
| Rsa1.0_00969.1.g21965.t1 | gb[AAV44035.1] putative helicase [Oryza sativa Japonica Group]                                                                                                                                                                                                        | 1584 | 1634 | 0         | 103.2 | 44.5 | 62.4 | putative helicase                      | gbpln | Oryza sativa         | AT5G28780.1   Symbols:   PIF1 helicase   chr5:10812907-10814173 REVERSE LENGTH=337                                                                                                                                                                                                                                                                                                                                                                                                                                                                                                                                                          | 1584 | 337  | 2.00E-70  | 21.3  | 8.6  | 11.4 |
| Rsa1.0_00969.1.g21966.t1 | ref[XP_002889247.1] hypothetical protein ARALYDRAFT_477115 [Arabidopsis lyrata subsp. lyrata]   g[297335088]gb[EFH65506.1] hypothetical protein ARALYDRAFT_477115 [Arabidopsis lyrata subsp. lyrata]                                                                  | 310  | 386  | 1.00E-94  | 124.5 | 78.1 | 84.5 | hypothetical protein ARALYDRAFT_477115 | gbpln | Arabidopsis lyrata   | AT1G79480.1   Symbols:   Carbohydrate-binding X8 domain superfamily protein   chr1:29897905-29899267 REVERSE LENGTH=397                                                                                                                                                                                                                                                                                                                                                                                                                                                                                                                     | 310  | 397  | 1.00E-70  | 128.1 | 49.4 | 53.9 |
| Rsa1.0_00970.1.g21967.t1 | gb[AC114393.1] WRKY28-1 transcription factor [Brassica napus]                                                                                                                                                                                                         | 311  | 312  | 2.33E-156 | 100.3 | 84.6 | 89.7 | WRKY28-1 transcription factor          | gbpln | Brassica napus       | AT4G18170.1   Symbols: WRKY28, ATWRKY28   WRKY DNA-binding protein 28   chr4:10061508-10062691 FORWARD LENGTH=318                                                                                                                                                                                                                                                                                                                                                                                                                                                                                                                           | 311  | 318  | 1.00E-132 | 102.3 | 80.7 | 88.4 |
| Rsa1.0_00970.1.g21968.t1 | # # # # # # # # - ---- ---- # # # # # # #                                                                                                                                                                                                                             |      |      |           |       |      |      |                                        |       |                      |                                                                                                                                                                                                                                                                                                                                                                                                                                                                                                                                                                                                                                             |      |      |           |       |      |      |
| Rsa1.0_00970.1.g21969.t1 | ref[XP_002870064.1] predicted protein [Arabidopsis lyrata subsp. lyrata]   g[297315900]gb[EFH46323.1] predicted protein [Arabidopsis lyrata subsp. lyrata]                                                                                                            | 563  | 373  | 1.00E-140 | 66.3  | 50.1 | 52.9 | predicted protein                      | gbpln | Arabidopsis lyrata   | AT4G18190.1   Symbols: ATPUP6, PUP6   purine permease 6   chr4:10067939-10069193 FORWARD LENGTH=387                                                                                                                                                                                                                                                                                                                                                                                                                                                                                                                                         | 563  | 387  | 1.00E-139 | 68.7  | 49.7 | 52.6 |

|                          |                                                                                                                                                                                                                                                                                                                                                            |     |     |           |       |      |      |                                                        |       |                      |                                                                                                                                                                                                                                                                                                                                                                                                                                                                                                                                                  |     |     |           |       |      |      |
|--------------------------|------------------------------------------------------------------------------------------------------------------------------------------------------------------------------------------------------------------------------------------------------------------------------------------------------------------------------------------------------------|-----|-----|-----------|-------|------|------|--------------------------------------------------------|-------|----------------------|--------------------------------------------------------------------------------------------------------------------------------------------------------------------------------------------------------------------------------------------------------------------------------------------------------------------------------------------------------------------------------------------------------------------------------------------------------------------------------------------------------------------------------------------------|-----|-----|-----------|-------|------|------|
| Rsa1.0_00970.1.g21970.t1 | sp O49726.2 PUP9_ARATH RecName: Full=Probable purine permease 9; Short=AtPUP9                                                                                                                                                                                                                                                                              | 391 | 390 | 0         | 99.7  | 80.6 | 89.8 | RecName: Full=Probable purine permease 9; Short=AtPUP9 | ----  | ----                 | AT4G18210.1   Symbols: ATPUP10, PUP10   purine permease 10   chr4:10076175-10077495 FORWARD LENGTH=390                                                                                                                                                                                                                                                                                                                                                                                                                                           | 391 | 390 | 1.00E-178 | 99.7  | 80.3 | 88.5 |
| Rsa1.0_00970.1.g21971.t1 | ref XP_002868006.1  hypothetical protein ARALYDRAFT_493043 [Arabidopsis lyrata subsp. lyrata] gi 297313842 gb EFH44265.1  hypothetical protein ARALYDRAFT_493043 [Arabidopsis lyrata subsp. lyrata]                                                                                                                                                        | 235 | 233 | 1.00E-110 | 99.1  | 84.3 | 90.2 | hypothetical protein ARALYDRAFT_493043                 | gbpln | Arabidopsis lyrata   | AT4G18230.1   Symbols:   FUNCTIONS IN: molecular_function unknown; INVOLVED IN: biological_process unknown; LOCATED IN: endomembrane system; EXPRESSED IN: 23 plant structures; EXPRESSED DURING: 13 growth stages; CONTAINS InterPro DOMAIN/s: Oligosaccharide biosynthesis protein Alg14 like (InterPro PRO13969); Has 640 Blast hits to 640 proteins in 277 species: Archae - 4; Bacteria - 281; Metazoa - 94; Fungi - 127; Plants - 57; Viruses - 0; Other Eukaryotes - 77 (source: NCBI BLINK).   chr4:10080521-10081710 REVERSE LENGTH=233 | 235 | 233 | 1.00E-102 | 99.1  | 86.0 | 90.6 |
| Rsa1.0_00970.1.g21972.t1 | ref XP_002868005.1  hypothetical protein ARALYDRAFT_493041 [Arabidopsis lyrata subsp. lyrata] gi 297313841 gb EFH44264.1  hypothetical protein ARALYDRAFT_493041 [Arabidopsis lyrata subsp. lyrata]                                                                                                                                                        | 657 | 852 | 0         | 129.7 | 71.7 | 82.8 | hypothetical protein ARALYDRAFT_493041                 | gbpln | Arabidopsis lyrata   | AT4G18250.1   Symbols:   receptor serine/threonine kinase, putative   chr4:10115418-1011963 REVERSE LENGTH=853                                                                                                                                                                                                                                                                                                                                                                                                                                   | 657 | 853 | 0         | 129.8 | 71.2 | 81.3 |
| Rsa1.0_00970.1.g21973.t1 | #                                                                                                                                                                                                                                                                                                                                                          | #   | #   | #         | #     | #    | #    | -                                                      | ----  | ----                 | #                                                                                                                                                                                                                                                                                                                                                                                                                                                                                                                                                | #   | #   | #         | #     | #    | #    |
| Rsa1.0_00970.1.g21974.t1 | gb AAx19659.1  inward rectifying potassium channel [Brassica rapa subsp. pekinensis]                                                                                                                                                                                                                                                                       | 685 | 685 | 0         | 100.0 | 94.9 | 97.4 | inward rectifying potassium channel                    | gbpln | Brassica rapa        | AT4G18290.1   Symbols: KAT2   potassium channel in Arabidopsis thaliana 2   chr4:10115418-10118477 FORWARD LENGTH=697                                                                                                                                                                                                                                                                                                                                                                                                                            | 685 | 697 | 0         | 101.8 | 85.8 | 90.9 |
| Rsa1.0_00970.1.g21975.t1 | ref XP_002870053.1  hypothetical protein ARALYDRAFT_493032 [Arabidopsis lyrata subsp. lyrata] gi 297315889 gb EFH46312.1  hypothetical protein ARALYDRAFT_493032 [Arabidopsis lyrata subsp. lyrata]                                                                                                                                                        | 164 | 159 | 3.00E-49  | 97.0  | 71.3 | 79.3 | hypothetical protein ARALYDRAFT_493032                 | gbpln | Arabidopsis lyrata   | AT4G18335.1   Symbols:   unknown protein; FUNCTIONS IN: molecular_function unknown; INVOLVED IN: biological_process unknown; LOCATED IN: endomembrane system; Has 30201 Blast hits to 17322 proteins in 780 species: Archae - 12; Bacteria - 1396; Metazoa - 17338; Fungi - 3422; Plants - 5037; Viruses - 0; Other Eukaryotes - 2996 (source: NCBI BLINK).   chr4:10128869-10129363 FORWARD LENGTH=164                                                                                                                                          | 164 | 164 | 1.00E-51  | 100.0 | 78.0 | 82.9 |
| Rsa1.0_00970.1.g21976.t1 | ref NP_193568.2  glycosyl hydrolase family 17 protein [Arabidopsis thaliana] gi 21539539 gb AAM53322.1  beta-1,3-glucanase-like protein [Arabidopsis thaliana] gi 24899809 gb AAN65119.1  beta-1,3-glucanase-like protein [Arabidopsis thaliana] gi 332658629 gb AEE84029.1  glycosyl hydrolase family 17 protein [Arabidopsis thaliana]                   | 401 | 397 | 0         | 99.0  | 89.8 | 94.5 | glycosyl hydrolase family 17 protein                   | gbpln | Arabidopsis thaliana | AT4G18340.1   Symbols:   Glycosyl hydrolase superfamily protein   chr4:10130245-10132019 REVERSE LENGTH=397                                                                                                                                                                                                                                                                                                                                                                                                                                      | 401 | 397 | 0         | 99.0  | 89.8 | 94.5 |
| Rsa1.0_00971.1.g21977.t1 | ref NP_194771.1  nodulin MtN21 /EamA-like transporter family protein [Arabidopsis thaliana] gi 7518144 sp G9M0B8.1 WTR37_ARAT H RecName: Full=WAT1-related protein At4g30420 gi 7269943 emb CAB79760.1  nodulin-like protein [Arabidopsis thaliana] gi 332660363 gb AEE85763.1  nodulin MtN21 /EamA-like transporter family protein [Arabidopsis thaliana] | 283 | 373 | 1.00E-129 | 131.8 | 81.6 | 88.7 | nodulin MtN21 /EamA-like transporter family protein    | gbpln | Arabidopsis thaliana | AT4G30420.1   Symbols:   nodulin MtN21 /EamA-like transporter family protein   chr4:14877069-14878914 FORWARD LENGTH=373                                                                                                                                                                                                                                                                                                                                                                                                                         | 283 | 373 | 1.00E-132 | 131.8 | 81.6 | 88.7 |
| Rsa1.0_00971.1.g21978.t1 | ref XP_002867349.1  hypothetical protein ARALYDRAFT_328673 [Arabidopsis lyrata subsp. lyrata] gi 297313185 gb EFH443608.1  hypothetical protein ARALYDRAFT_328673 [Arabidopsis lyrata subsp. lyrata]                                                                                                                                                       | 269 | 272 | 1.00E-113 | 101.1 | 74.3 | 85.9 | hypothetical protein ARALYDRAFT_328673                 | gbpln | Arabidopsis lyrata   | AT4G30430.1   Symbols: TET9   tetraspanin9   chr4:14879029-14880272 REVERSE LENGTH=272                                                                                                                                                                                                                                                                                                                                                                                                                                                           | 269 | 272 | 1.00E-112 | 101.1 | 69.5 | 82.2 |

|                          |                                                                                                                                                                                                                                                                                                                                                                                                                                                                                                                                                                                                                                                                                                                                                                                                                                                                                                                                                                                                                                                                                                                                                                                                                                                                    |     |     |           |       |      |      |                                     |       |                      |                                                                                                                                  |     |     |           |       |      |      |
|--------------------------|--------------------------------------------------------------------------------------------------------------------------------------------------------------------------------------------------------------------------------------------------------------------------------------------------------------------------------------------------------------------------------------------------------------------------------------------------------------------------------------------------------------------------------------------------------------------------------------------------------------------------------------------------------------------------------------------------------------------------------------------------------------------------------------------------------------------------------------------------------------------------------------------------------------------------------------------------------------------------------------------------------------------------------------------------------------------------------------------------------------------------------------------------------------------------------------------------------------------------------------------------------------------|-----|-----|-----------|-------|------|------|-------------------------------------|-------|----------------------|----------------------------------------------------------------------------------------------------------------------------------|-----|-----|-----------|-------|------|------|
| Rsa1.0_00971.1.g21979.t1 | ref NP_194733.1  UDP-D-glucuronate 4-epimerase 1 [Arabidopsis thaliana] gi 297798928 ref XP_002867348.1  UDP-D-glucuronate 4-epimerase 1 [Arabidopsis lyrata subsp. lyrata] gi 75311748 sp Q9M0B6.1 GAE1_ARATH RecName: Full=UDP-glucuronate 4-epimerase 1; AltName: Full=UDP-glucuronic acid epimerase 1; Short=AtUGcAE3 gi 7269945 emb CAB79762.1  nucleotide sugar epimerase-like protein [Arabidopsis thaliana] gi 15810529 gb AAL07152.1  putative nucleotide sugar epimerase [Arabidopsis thaliana] gi 20466778 gb AAM20706.1  nucleotide sugar epimerase-like protein [Arabidopsis thaliana] gi 21553636 gb AAM62729.1  nucleotide sugar epimerase-like protein [Arabidopsis thaliana] gi 23198200 gb AAN15627.1  nucleotide sugar epimerase-like protein [Arabidopsis thaliana] gi 50429331 gb AAT77233.1  UDP-D-glucuronate 4-epimerase [Arabidopsis thaliana] gi 297313184 gb EFH43607.1  UDP-D-glucuronate 4-epimerase 1 [Arabidopsis lyrata subsp. lyrata] gi 332660365 gb AEE85765.1  UDP-D-glucuronate 4-epimerase 1 [Arabidopsis thaliana] gi 385137886 gb AFI41204.1  UDP-D-glucuronate 4-epimerase 1                                                                                                                                              | 429 | 429 | 0         | 100.0 | 98.8 | 99.8 | UDP-D-glucuronate 4-epimerase 1     | gbpln | Arabidopsis lyrata   | AT4G30440.1   Symbols: GAE1   UDP-D-glucuronate 4-epimerase 1   chr4:14881976-14883265 REVERSE LENGTH=429                        | 429 | 429 | 0         | 100.0 | 98.8 | 99.8 |
| Rsa1.0_00971.1.g21980.t1 | #                                                                                                                                                                                                                                                                                                                                                                                                                                                                                                                                                                                                                                                                                                                                                                                                                                                                                                                                                                                                                                                                                                                                                                                                                                                                  | #   | #   | #         | #     | #    | #    | -                                   | ----  | ----                 | #                                                                                                                                | #   | #   | #         | #     | #    | #    |
| Rsa1.0_00971.1.g21981.t1 | #                                                                                                                                                                                                                                                                                                                                                                                                                                                                                                                                                                                                                                                                                                                                                                                                                                                                                                                                                                                                                                                                                                                                                                                                                                                                  | #   | #   | #         | #     | #    | #    | -                                   | ----  | ----                 | AT4G30460.1   Symbols:   glycine-rich protein   chr4:14889246-14889734 REVERSE LENGTH=162                                        | 164 | 162 | 6.00E-11  | 98.8  | 17.7 | 18.9 |
| Rsa1.0_00971.1.g21982.t2 | #                                                                                                                                                                                                                                                                                                                                                                                                                                                                                                                                                                                                                                                                                                                                                                                                                                                                                                                                                                                                                                                                                                                                                                                                                                                                  | #   | #   | #         | #     | #    | #    | -                                   | ----  | ----                 | #                                                                                                                                | #   | #   | #         | #     | #    | #    |
| Rsa1.0_00971.1.g21983.t1 | #                                                                                                                                                                                                                                                                                                                                                                                                                                                                                                                                                                                                                                                                                                                                                                                                                                                                                                                                                                                                                                                                                                                                                                                                                                                                  | #   | #   | #         | #     | #    | #    | -                                   | ----  | ----                 | #                                                                                                                                | #   | #   | #         | #     | #    | #    |
| Rsa1.0_00971.1.g21984.t1 | ref NP_199541.1  putative F-box protein [Arabidopsis thaliana] gi 75264281 sp Q9LVS9.1 FB340_ARATH RecName: Full=Probable F-box protein At5g47300 gi 8809613 dbj BAA97164.1  unnamed protein product [Arabidopsis thaliana] gi 332008112 gb AED95495.1  putative F-box protein [Arabidopsis thaliana] ref NP_567820.1  elongation factor Ts family protein [Arabidopsis thaliana] gi 4972052 emb CAB43920.1  putative protein [Arabidopsis thaliana] gi 7269804 emb CAB79664.1  putative protein [Arabidopsis thaliana] gi 15983773 gb AAL10483.1  AT4g29060/F19B15_90 [Arabidopsis thaliana] gi 332660180 gb AEE85980.1  elongation factor Ts family protein [Arabidopsis thaliana] ref NP_195605.1  F-box/kelch-repeat protein [Arabidopsis thaliana] gi 75212071 sp Q9SVJ9.1 FBK95_ARATH RecName: Full=F-box/kelch-repeat protein At4g38940 gi 4539313 emb CAB38814.1  putative protein [Arabidopsis thaliana] gi 7270877 emb CAB80557.1  putative protein [Arabidopsis thaliana] gi 21593554 gb AAM65521.1  unknown [Arabidopsis thaliana] gi 51968770 dbj BAD43077.1  unknown protein [Arabidopsis thaliana] gi 51969398 dbj BAD43391.1  unknown protein [Arabidopsis thaliana] gi 332661596 gb AEE86996.1  F-box/kelch-repeat protein [Arabidopsis thaliana] | 324 | 416 | 5.00E-58  | 128.4 | 48.1 | 63.3 | putative F-box protein              | gbpln | Arabidopsis thaliana | AT5G47300.1   Symbols:   F-box and associated interaction domains-containing protein   chr5:19198125-19199375 FORWARD LENGTH=416 | 324 | 416 | 1.00E-60  | 128.4 | 48.1 | 63.3 |
| Rsa1.0_00971.1.g21985.t7 | ref NP_195605.1  F-box/kelch-repeat protein [Arabidopsis thaliana] gi 75212071 sp Q9SVJ9.1 FBK95_ARATH RecName: Full=F-box/kelch-repeat protein At4g38940 gi 4539313 emb CAB38814.1  putative protein [Arabidopsis thaliana] gi 7270877 emb CAB80557.1  putative protein [Arabidopsis thaliana] gi 21593554 gb AAM65521.1  unknown [Arabidopsis thaliana] gi 51968770 dbj BAD43077.1  unknown protein [Arabidopsis thaliana] gi 51969398 dbj BAD43391.1  unknown protein [Arabidopsis thaliana] gi 332661596 gb AEE86996.1  F-box/kelch-repeat protein [Arabidopsis thaliana]                                                                                                                                                                                                                                                                                                                                                                                                                                                                                                                                                                                                                                                                                      | 207 | 953 | 2.00E-17  | 460.4 | 26.1 | 29.5 | elongation factor Ts family protein | gbpln | Arabidopsis thaliana | AT4G29060.1   Symbols: emb2726   elongation factor Ts family protein   chr4:14317744-14321315 FORWARD LENGTH=953                 | 207 | 953 | 8.00E-20  | 460.4 | 26.1 | 29.5 |
| Rsa1.0_00971.1.g21986.t1 | ref NP_195605.1  F-box/kelch-repeat protein [Arabidopsis thaliana] gi 75212071 sp Q9SVJ9.1 FBK95_ARATH RecName: Full=F-box/kelch-repeat protein At4g38940 gi 4539313 emb CAB38814.1  putative protein [Arabidopsis thaliana] gi 7270877 emb CAB80557.1  putative protein [Arabidopsis thaliana] gi 21593554 gb AAM65521.1  unknown [Arabidopsis thaliana] gi 51968770 dbj BAD43077.1  unknown protein [Arabidopsis thaliana] gi 51969398 dbj BAD43391.1  unknown protein [Arabidopsis thaliana] gi 332661596 gb AEE86996.1  F-box/kelch-repeat protein [Arabidopsis thaliana]                                                                                                                                                                                                                                                                                                                                                                                                                                                                                                                                                                                                                                                                                      | 445 | 370 | 3.00E-70  | 83.1  | 33.7 | 46.5 | F-box/kelch-repeat protein          | gbpln | Arabidopsis thaliana | AT4G38940.1   Symbols:   Galactose oxidase/kelch repeat superfamily protein   chr4:18152848-18153960 FORWARD LENGTH=370          | 445 | 370 | 8.00E-73  | 83.1  | 33.7 | 46.5 |
| Rsa1.0_00971.1.g21987.t1 | gb AAK50344.1  defense-related protein [Brassica carinata]                                                                                                                                                                                                                                                                                                                                                                                                                                                                                                                                                                                                                                                                                                                                                                                                                                                                                                                                                                                                                                                                                                                                                                                                         | 250 | 250 | 1.00E-138 | 100.0 | 96.4 | 98.4 | defense-related protein             | gbpln | Brassica carinata    | AT4G30530.1   Symbols:   Class I glutamine amidotransferase-like superfamily protein   chr4:14920605-14922286 FORWARD LENGTH=250 | 250 | 250 | 1.00E-131 | 100.0 | 88.0 | 95.6 |

|                          |                                                                                                                                                                                                                                                                                                                                                                                                                                                                                                                                                                                                                                               |     |      |           |        |      |      |                                                                   |       |                      |                                                                                                                                                                                                                                                                                                                                              |     |     |           |       |      |      |
|--------------------------|-----------------------------------------------------------------------------------------------------------------------------------------------------------------------------------------------------------------------------------------------------------------------------------------------------------------------------------------------------------------------------------------------------------------------------------------------------------------------------------------------------------------------------------------------------------------------------------------------------------------------------------------------|-----|------|-----------|--------|------|------|-------------------------------------------------------------------|-------|----------------------|----------------------------------------------------------------------------------------------------------------------------------------------------------------------------------------------------------------------------------------------------------------------------------------------------------------------------------------------|-----|-----|-----------|-------|------|------|
| Rsa1.0_00971.1.g21988.t4 | ref[XP_002867337.1] signal recognition particle receptor alpha subunit family protein [Arabidopsis lyrata subsp. lyrata] gi 297313173 gb EFH43596.1 signal recognition particle receptor alpha subunit family protein [Arabidopsis lyrata subsp. lyrata]                                                                                                                                                                                                                                                                                                                                                                                      | 729 | 633  | 0         | 86.8   | 77.5 | 80.7 | signal recognition particle receptor alpha subunit family protein | gbpln | Arabidopsis lyrata   | AT4G30600.1   Symbols:   signal recognition particle receptor alpha subunit family protein   chr4:14938142-14940600 REVERSE LENGTH=634                                                                                                                                                                                                       | 729 | 634 | 0         | 87.0  | 77.2 | 80.8 |
| Rsa1.0_00971.1.g21989.t1 | gb[EOA18618.1] hypothetical protein CARUB_v10007192mg [Capsella rubella]                                                                                                                                                                                                                                                                                                                                                                                                                                                                                                                                                                      | 181 | 222  | 2.00E-36  | 122.7  | 54.1 | 68.0 | hypothetical protein CARUB_v10007192mg                            | gbpln | Capsella rubella     | AT4G30630.1   Symbols:   unknown protein; BEST Arabidopsis thaliana protein match is: unknown protein (TAIR:AT5G57910.1); Has 33 Blast hits to 33 proteins in 10 species: Archae - 0; Bacteria - 0; Metazoa - 0; Fungi - 0; Plants - 33; Viruses - 0; Other Eukaryotes - 0 (source: NCBI BLink).   chr4:14951048-14952159 FORWARD LENGTH=237 | 181 | 237 | 2.00E-22  | 130.9 | 34.8 | 38.7 |
| Rsa1.0_00972.1.g21990.t1 | #                                                                                                                                                                                                                                                                                                                                                                                                                                                                                                                                                                                                                                             | #   | #    | #         | #      | #    | #    | -                                                                 | ----  | ----                 | #                                                                                                                                                                                                                                                                                                                                            | #   | #   | #         | #     | #    |      |
| Rsa1.0_00972.1.g21991.t1 | ref[NP_192327.3] AAA-type ATPase family protein [Arabidopsis thaliana] gi 332659970 gb AEE82370.1 AAA-type ATPase family protein [Arabidopsis thaliana]                                                                                                                                                                                                                                                                                                                                                                                                                                                                                       | 984 | 609  | 0         | 61.9   | 52.1 | 55.5 | AAA-type ATPase family protein                                    | gbpln | Arabidopsis thaliana | AT4G04180.1   Symbols:   P-loop containing nucleoside triphosphate hydrolases superfamily protein   chr4:2020471-2023673 FORWARD LENGTH=609                                                                                                                                                                                                  | 984 | 609 | 0         | 61.9  | 52.1 | 55.5 |
| Rsa1.0_00972.1.g21992.t2 | gb[EOA22965.1] hypothetical protein CARUB_v10003705mg [Capsella rubella]                                                                                                                                                                                                                                                                                                                                                                                                                                                                                                                                                                      | 131 | 595  | 2.00E-22  | 454.2  | 41.2 | 45.8 | hypothetical protein CARUB_v10003705mg                            | gbpln | Capsella rubella     | AT4G04180.1   Symbols:   P-loop containing nucleoside triphosphate hydrolases superfamily protein   chr4:2020471-2023673 FORWARD LENGTH=609                                                                                                                                                                                                  | 131 | 609 | 3.00E-20  | 464.9 | 40.5 | 45.8 |
| Rsa1.0_00972.1.g21993.t1 | ref[NP_193901.1] uncharacterized protein [Arabidopsis thaliana] gi 4455278 emb CAB36814.1 hypothetical protein [Arabidopsis thaliana] gi 7268967 emb CAB81277.1 hypothetical protein [Arabidopsis thaliana] gi 332659091 gb AEE84491.1 uncharacterized protein AT4G21700 [Arabidopsis thaliana]                                                                                                                                                                                                                                                                                                                                               | 597 | 962  | 0         | 161.1  | 77.9 | 84.9 | uncharacterized protein                                           | gbpln | Arabidopsis thaliana | AT4G21700.1   Symbols:   Protein of unknown function (DUF2921)   chr4:11529956-11532844 FORWARD LENGTH=962                                                                                                                                                                                                                                   | 597 | 962 | 0         | 161.1 | 77.9 | 84.9 |
| Rsa1.0_00972.1.g21994.t4 | sp[Q56XW8.2]FBL30_ARATH RecName: Full=F-box/LRR-repeat protein At1g48400                                                                                                                                                                                                                                                                                                                                                                                                                                                                                                                                                                      | 178 | 487  | 2.00E-31  | 273.6  | 43.8 | 46.6 | RecName: Full=F-box/LRR-repeat protein At1g48400                  | ----  | ----                 | AT1G48400.1   Symbols:   F-box/RNI-like/FBD-like domains-containing protein   chr1:17882136-17883855 REVERSE LENGTH=513                                                                                                                                                                                                                      | 178 | 513 | 1.00E-33  | 288.2 | 43.8 | 46.6 |
| Rsa1.0_00972.1.g21995.t1 | gb[AAL36413.1] putative peptide transporter protein [Arabidopsis thaliana]                                                                                                                                                                                                                                                                                                                                                                                                                                                                                                                                                                    | 568 | 582  | 0         | 102.5  | 78.9 | 86.6 | putative peptide transporter protein                              | gbpln | Arabidopsis thaliana | AT5G46050.1   Symbols: ATPTR3, PTR3   peptide transporter 3   chr5:18675062-18679071 REVERSE LENGTH=582                                                                                                                                                                                                                                      | 568 | 582 | 0         | 102.5 | 78.9 | 86.6 |
| Rsa1.0_00972.1.g21996.t1 | gb[AAC63678.1] putative non-LTR retroelement reverse transcriptase [Arabidopsis thaliana]                                                                                                                                                                                                                                                                                                                                                                                                                                                                                                                                                     | 102 | 1216 | 2.00E-16  | 1192.2 | 39.2 | 62.7 | putative non-LTR retroelement reverse transcriptase               | gbpln | Arabidopsis thaliana | #                                                                                                                                                                                                                                                                                                                                            | #   | #   | #         | #     | #    |      |
| Rsa1.0_00972.1.g21997.t1 | #                                                                                                                                                                                                                                                                                                                                                                                                                                                                                                                                                                                                                                             | #   | #    | #         | #      | #    | #    | -                                                                 | ----  | ----                 | #                                                                                                                                                                                                                                                                                                                                            | #   | #   | #         | #     | #    |      |
| Rsa1.0_00972.1.g21998.t2 | ref[NP_192313.3] pyrophosphate-fructose-6-phosphate 1-phosphotransferase [Arabidopsis thaliana] gi 425936639 sp F4JGR5.1 PFPB2_ARATH RecName: Full=Pyrophosphate-fructose 6-phosphate 1-phosphotransferase subunit beta 2; Short=PFP2; AltName: Full=6-phosphofructokinase, pyrophosphate dependent 2; AltName: Full=PPi-PFK 2; AltName: Full=Protein MATERNAL EFFECT EMBRYO ARREST 51; AltName: Full=Pyrophosphate-fructose-6-phosphate 1-phosphotransferase 2; AltName: Full=Pyrophosphate-dependent 6-phosphofructose-1-kinase 2 gi 332656965 gb AEE82365.1 pyrophosphate-fructose-6-phosphate 1-phosphotransferase [Arabidopsis thaliana] | 599 | 569  | 0         | 95.0   | 85.8 | 90.8 | pyrophosphate-fructose-6-phosphate 1-phosphotransferase           | gbpln | Arabidopsis thaliana | AT4G04040.1   Symbols: MEE51   Phosphofructokinase family protein   chr4:1939250-1942765 FORWARD LENGTH=569                                                                                                                                                                                                                                  | 599 | 569 | 0         | 95.0  | 85.8 | 90.8 |
| Rsa1.0_00972.1.g21999.t1 | gb[EOA21123.1] hypothetical protein CARUB_v10001463mg [Capsella rubella]                                                                                                                                                                                                                                                                                                                                                                                                                                                                                                                                                                      | 318 | 322  | 1.00E-153 | 101.3  | 85.8 | 92.5 | hypothetical protein CARUB_v10001463mg                            | gbpln | Capsella rubella     | AT4G04020.1   Symbols: FIB   fibrillin   chr4:1932161-1933546 FORWARD LENGTH=318                                                                                                                                                                                                                                                             | 318 | 318 | 1.00E-155 | 100.0 | 83.6 | 91.8 |
| Rsa1.0_00973.1.g22000.t1 | dbj[BAJ34535.1] unnamed protein product [Theillungiella halophila]                                                                                                                                                                                                                                                                                                                                                                                                                                                                                                                                                                            | 548 | 552  | 0         | 100.7  | 83.2 | 90.1 | unnamed protein product                                           | ----  | ----                 | AT3G45680.1   Symbols:   Major facilitator superfamily protein   chr3:16770995-16772908 FORWARD LENGTH=558                                                                                                                                                                                                                                   | 548 | 558 | 0         | 101.8 | 82.3 | 90.0 |
| Rsa1.0_00973.1.g22001.t1 | gb[EOA29337.1] hypothetical protein CARUB_v10025619mg [Capsella rubella]                                                                                                                                                                                                                                                                                                                                                                                                                                                                                                                                                                      | 355 | 357  | 1.00E-176 | 100.6  | 84.8 | 92.7 | hypothetical protein CARUB_v10025619mg                            | gbpln | Capsella rubella     | AT2G25710.2   Symbols: HCS1   holocarboxylase synthase 1   chr2:10952719-10955061 FORWARD LENGTH=367                                                                                                                                                                                                                                         | 355 | 367 | 1.00E-174 | 103.4 | 83.4 | 90.4 |
| Rsa1.0_00973.1.g22002.t1 | #                                                                                                                                                                                                                                                                                                                                                                                                                                                                                                                                                                                                                                             | #   | #    | #         | #      | #    | #    | -                                                                 | ----  | ----                 | #                                                                                                                                                                                                                                                                                                                                            | #   | #   | #         | #     | #    |      |

|                          |                                                                                                                                                                                                                                                                                                                                                                 |      |      |           |        |      |      |                                                                            |       |                      |                                                                                                                                                |      |      |           |       |      |      |
|--------------------------|-----------------------------------------------------------------------------------------------------------------------------------------------------------------------------------------------------------------------------------------------------------------------------------------------------------------------------------------------------------------|------|------|-----------|--------|------|------|----------------------------------------------------------------------------|-------|----------------------|------------------------------------------------------------------------------------------------------------------------------------------------|------|------|-----------|-------|------|------|
| Rsa1.0_00973.1.g22003.t1 | gb EOA33985.1  hypothetical protein CARUB_v10021479mg [Capsella rubella]                                                                                                                                                                                                                                                                                        | 327  | 349  | 1.00E-114 | 106.7  | 73.7 | 84.4 | hypothetical protein CARUB_v10021479mg                                     | gbpln | Capsella rubella     | AT1G68150.1   Symbols: WRKY9, ATWRKY9   WRKY DNA-binding protein 9   chr1:25543970-25545615 FORWARD LENGTH=374                                 | 327  | 374  | 1.00E-115 | 114.4 | 73.1 | 83.8 |
| Rsa1.0_00973.1.g22004.t1 | #                                                                                                                                                                                                                                                                                                                                                               | #    | #    | #         | #      | #    | #    | -                                                                          | ----  | ----                 | #                                                                                                                                              | #    | #    | #         | #     | #    | #    |
| Rsa1.0_00973.1.g22005.t1 | #                                                                                                                                                                                                                                                                                                                                                               | #    | #    | #         | #      | #    | #    | -                                                                          | ----  | ----                 | #                                                                                                                                              | #    | #    | #         | #     | #    | #    |
| Rsa1.0_00973.1.g22006.t1 | ref XP_002888457.1  predicted protein [Arabidopsis lyrata subsp. lyrata]   gi 297334298 gb EFH64716.1  predicted protein [Arabidopsis lyrata subsp. lyrata]                                                                                                                                                                                                     | 1014 | 1058 | 0         | 104.3  | 77.8 | 87.1 | predicted protein                                                          | gbpln | Arabidopsis lyrata   | AT1G65810.1   Symbols:   P-loop containing nucleoside triphosphate hydrolases superfamily protein   chr1:24477043-24480728 REVERSE LENGTH=1050 | 1014 | 1050 | 0         | 103.6 | 76.4 | 85.5 |
| Rsa1.0_00973.1.g22007.t1 | ref XP_002887155.1  hypothetical protein ARALYDRAFT_475905 [Arabidopsis lyrata subsp. lyrata]   gi 297332996 gb EFH63414.1  hypothetical protein ARALYDRAFT_475905 [Arabidopsis lyrata subsp. lyrata]                                                                                                                                                           | 323  | 332  | 1.00E-118 | 102.8  | 73.4 | 82.4 | hypothetical protein ARALYDRAFT_475905                                     | gbpln | Arabidopsis lyrata   | AT1G68140.3   Symbols:   Protein of unknown function (DUF1644)   chr1:25539410-25540414 REVERSE LENGTH=334                                     | 323  | 334  | 1.00E-116 | 103.4 | 70.9 | 80.2 |
| Rsa1.0_00973.1.g22008.t8 | ref NP_176009.1  putative LRR receptor-like serine/threonine-protein kinase [Arabidopsis thaliana]   gi 263711285 sp COLGH2.2 Y1561_ARAT H RecName: Full=Probable LRR receptor-like serine/threonine-protein kinase At1g56130; Flags: Precursor   gi 332195226 gb AAE33347.1  putative LRR receptor-like serine/threonine-protein kinase [Arabidopsis thaliana] | 483  | 1032 | 0         | 213.7  | 71.0 | 81.2 | putative LRR receptor-like serine/threonine-protein kinase                 | gbpln | Arabidopsis thaliana | AT1G56130.1   Symbols:   Leucine-rich repeat transmembrane protein kinase   chr1:20994931-21000887 REVERSE LENGTH=1032                         | 483  | 1032 | 0         | 213.7 | 71.0 | 81.2 |
| Rsa1.0_00973.1.g22009.t1 | ref NP_197389.1  RNA-directed DNA polymerase (reverse transcriptase)-related family protein [Arabidopsis thaliana]   gi 332005241 gb AED92624.1  RNA-directed DNA polymerase (reverse transcriptase)-related family protein [Arabidopsis thaliana]                                                                                                              | 187  | 295  | 4.00E-11  | 157.8  | 21.9 | 31.6 | RNA-directed DNA polymerase (reverse transcriptase)-related family protein | gbpln | Arabidopsis thaliana | AT5G18880.1   Symbols:   RNA-directed DNA polymerase (reverse transcriptase)-related family protein   chr5:6300535-6301422 REVERSE LENGTH=295  | 187  | 295  | 1.00E-13  | 157.8 | 21.9 | 31.6 |
| Rsa1.0_00974.1.g22010.t1 | gb AAD32950.1  putative non-LTR retroelement reverse transcriptase [Arabidopsis thaliana]                                                                                                                                                                                                                                                                       | 312  | 773  | 4.00E-97  | 247.8  | 55.1 | 69.9 | putative non-LTR retroelement reverse transcriptase                        | gbpln | Arabidopsis thaliana | AT4G29090.1   Symbols:   Ribonuclease H-like superfamily protein   chr4:14333528-14335255 FORWARD LENGTH=575                                   | 312  | 575  | 6.00E-39  | 184.3 | 25.6 | 39.4 |
| Rsa1.0_00974.1.g22011.t1 | gb AAF69709.1 AC016041_14 F27J15.26 [Arabidopsis thaliana]   gi 11094814 gb AAQ29743.1 AC084414_11 unknown protein [Arabidopsis thaliana]                                                                                                                                                                                                                       | 589  | 608  | 0         | 103.2  | 82.7 | 90.0 | F27J15.26                                                                  | gbpln | Arabidopsis thaliana | AT1G48950.1   Symbols:   C3HC zinc finger-like   chr1:18107063-18110108 FORWARD LENGTH=594                                                     | 589  | 594  | 0         | 100.8 | 82.5 | 89.6 |
| Rsa1.0_00974.1.g22012.t1 | #                                                                                                                                                                                                                                                                                                                                                               | #    | #    | #         | #      | #    | #    | -                                                                          | ----  | ----                 | #                                                                                                                                              | #    | #    | #         | #     | #    | #    |
| Rsa1.0_00974.1.g22013.t1 | dbj BAB09502.1  transposon protein-like [Arabidopsis thaliana]                                                                                                                                                                                                                                                                                                  | 2741 | 1089 | 0         | 39.7   | 28.0 | 32.5 | transposon protein-like                                                    | gbpln | Arabidopsis thaliana | AT4G29090.1   Symbols:   Ribonuclease H-like superfamily protein   chr4:14333528-14335255 FORWARD LENGTH=575                                   | 2741 | 575  | 1.00E-118 | 21.0  | 6.9  | 9.3  |
| Rsa1.0_00974.1.g22014.t1 | dbj BAB09501.1  unnamed protein product [Arabidopsis thaliana]                                                                                                                                                                                                                                                                                                  | 340  | 312  | 1.00E-121 | 91.8   | 61.8 | 73.2 | unnamed protein product                                                    | gbpln | Arabidopsis thaliana | #                                                                                                                                              | #    | #    | #         | #     | #    | #    |
| Rsa1.0_00974.1.g22015.t1 | ref XP_002878035.1  hypothetical protein ARALYDRAFT_485976 [Arabidopsis lyrata subsp. lyrata]   gi 297323873 gb EFH54294.1  hypothetical protein ARALYDRAFT_485976 [Arabidopsis lyrata subsp. lyrata]                                                                                                                                                           | 184  | 185  | 8.00E-91  | 100.5  | 86.4 | 92.4 | hypothetical protein ARALYDRAFT_485976                                     | gbpln | Arabidopsis lyrata   | AT3G55490.1   Symbols:   GINS complex protein   chr3:20572171-20573415 REVERSE LENGTH=185                                                      | 184  | 185  | 6.00E-93  | 100.5 | 85.9 | 92.4 |
| Rsa1.0_00974.1.g22016.t1 | gb EOA28165.1  hypothetical protein CARUB_v10024354mg [Capsella rubella]                                                                                                                                                                                                                                                                                        | 114  | 113  | 2.00E-45  | 99.1   | 88.6 | 94.7 | hypothetical protein CARUB_v10024354mg                                     | gbpln | Capsella rubella     | AT2G40080.1   Symbols: ELF4   Protein of unknown function (DUF1313)   chr2:16734545-16734880 REVERSE LENGTH=111                                | 114  | 111  | 1.00E-47  | 97.4  | 88.6 | 93.0 |
| Rsa1.0_00974.1.g22017.t1 | gb AAG51783.1 AC079679_3 reverse transcriptase, putative; 16838-20266 [Arabidopsis thaliana]                                                                                                                                                                                                                                                                    | 180  | 1142 | 2.00E-27  | 634.4  | 43.3 | 58.3 | reverse transcriptase, putative; 16838-20266                               | gbpln | Arabidopsis thaliana | #                                                                                                                                              | #    | #    | #         | #     | #    | #    |
| Rsa1.0_00974.1.g22018.t1 | #                                                                                                                                                                                                                                                                                                                                                               | #    | #    | #         | #      | #    | #    | -                                                                          | ----  | ----                 | #                                                                                                                                              | #    | #    | #         | #     | #    | #    |
| Rsa1.0_00974.1.g22019.t1 | ref XP_002891463.1  hypothetical protein ARALYDRAFT_474037 [Arabidopsis lyrata subsp. lyrata]   gi 297337305 gb EFH67722.1  hypothetical protein ARALYDRAFT_474037 [Arabidopsis lyrata subsp. lyrata]                                                                                                                                                           | 603  | 550  | 2.00E-88  | 91.2   | 26.0 | 31.7 | hypothetical protein ARALYDRAFT_474037                                     | gbpln | Arabidopsis lyrata   | AT1G48920.1   Symbols: ATNUC-L1, PARL1, NUC-L1   nucleolin like 1   chr1:18098186-18101422 FORWARD LENGTH=557                                  | 603  | 557  | 1.00E-88  | 92.4  | 28.2 | 34.7 |
| Rsa1.0_00975.1.g22020.t1 | gb AAD15471.1  putative non-LTR retroelement reverse transcriptase [Arabidopsis thaliana]                                                                                                                                                                                                                                                                       | 108  | 1277 | 3.00E-14  | 1182.4 | 36.1 | 44.4 | putative non-LTR retroelement reverse transcriptase                        | gbpln | Arabidopsis thaliana | #                                                                                                                                              | #    | #    | #         | #     | #    | #    |
| Rsa1.0_00975.1.g22021.t1 | gb AAC3226.1  putative non-LTR retroelement reverse transcriptase [Arabidopsis thaliana]                                                                                                                                                                                                                                                                        | 390  | 1529 | 2.00E-44  | 392.1  | 22.1 | 36.4 | putative non-LTR retroelement reverse transcriptase                        | gbpln | Arabidopsis thaliana | AT2G07760.1   Symbols:   Zinc knuckle (OHC-type) family protein   chr2:3584420-3586278 REVERSE LENGTH=530                                      | 390  | 530  | 8.00E-13  | 135.9 | 9.0  | 13.3 |



|                           |                                                                                                                                                                                                                                                                                                                                                                                                                                                                                                                                                                                                |      |      |           |       |      |      |                                                 |       |                      |                                                                                                                                                                                                                                                                                                              |      |      |           |       |      |      |
|---------------------------|------------------------------------------------------------------------------------------------------------------------------------------------------------------------------------------------------------------------------------------------------------------------------------------------------------------------------------------------------------------------------------------------------------------------------------------------------------------------------------------------------------------------------------------------------------------------------------------------|------|------|-----------|-------|------|------|-------------------------------------------------|-------|----------------------|--------------------------------------------------------------------------------------------------------------------------------------------------------------------------------------------------------------------------------------------------------------------------------------------------------------|------|------|-----------|-------|------|------|
| Rsa1.0_00975.1.g22022.t1  | ref XP_002863188.1  predicted protein [Arabidopsis lyrata subsp. lyrata] gi 297309022 gb EFH39447.1  predicted protein [Arabidopsis lyrata subsp. lyrata]                                                                                                                                                                                                                                                                                                                                                                                                                                      | 388  | 394  | 0         | 101.5 | 85.8 | 92.0 | predicted protein                               | gbpln | Arabidopsis lyrata   | AT4G12980.1   Symbols:   Auxin-responsive family protein   chr4:7589670-7591074 REVERSE LENGTH=394                                                                                                                                                                                                           | 388  | 394  | 0         | 101.5 | 85.6 | 90.7 |
| Rsa1.0_00975.1.g22023.t1  | gb AAF69169.1 AC007915_21 F27F5.21 [Arabidopsis thaliana]                                                                                                                                                                                                                                                                                                                                                                                                                                                                                                                                      | 386  | 1023 | 1.00E-20  | 265.0 | 17.4 | 25.1 | F27F5.21                                        | gbpln | Arabidopsis thaliana | #                                                                                                                                                                                                                                                                                                            | #    | #    | #         | #     | #    | #    |
| Rsa1.0_00975.1.g22024.t3  | #                                                                                                                                                                                                                                                                                                                                                                                                                                                                                                                                                                                              | #    | #    | #         | #     | #    | -    | -                                               | ----  | ----                 | #                                                                                                                                                                                                                                                                                                            | #    | #    | #         | #     | #    | #    |
| Rsa1.0_00975.1.g22025.t1  | #                                                                                                                                                                                                                                                                                                                                                                                                                                                                                                                                                                                              | #    | #    | #         | #     | #    | -    | -                                               | ----  | ----                 | #                                                                                                                                                                                                                                                                                                            | #    | #    | #         | #     | #    | #    |
| Rsa1.0_00975.1.g22026.t1  | #                                                                                                                                                                                                                                                                                                                                                                                                                                                                                                                                                                                              | #    | #    | #         | #     | #    | -    | -                                               | ----  | ----                 | #                                                                                                                                                                                                                                                                                                            | #    | #    | #         | #     | #    | #    |
| Rsa1.0_00975.1.g22027.t1  | gb EOA17253.1  hypothetical protein CARUB_v10005528mg [Capsella rubella]                                                                                                                                                                                                                                                                                                                                                                                                                                                                                                                       | 217  | 261  | 3.00E-83  | 120.3 | 77.4 | 86.6 | hypothetical protein CARUB_v10005528mg          | gbpln | Capsella rubella     | AT4G27990.1   Symbols:   YLMG1-2, ATYLMG1-2   YGGT family protein   chr4:13923991-13924647 REVERSE LENGTH=218                                                                                                                                                                                                | 217  | 218  | 2.00E-81  | 100.5 | 77.4 | 85.3 |
| Rsa1.0_00976.1.g22028.t1  | gb AAF63125.1 AC009526_10 Similar to Athila ORF 1 [Arabidopsis thaliana] ref XP_002880836.1  hypothetical protein ARALYDRAFT_481553 [Arabidopsis lyrata subsp. lyrata] gi 297326675 gb EFH57095.1  hypothetical protein ARALYDRAFT_481553 [Arabidopsis lyrata subsp. lyrata]                                                                                                                                                                                                                                                                                                                   | 139  | 823  | 9.00E-16  | 592.1 | 33.1 | 49.6 | Similar to Athila ORF 1                         | gbpln | Arabidopsis thaliana | #                                                                                                                                                                                                                                                                                                            | #    | #    | #         | #     | #    | #    |
| Rsa1.0_00976.1.g22029.t1  | ref XP_002878992.1  hypothetical protein ARALYDRAFT_481528 [Arabidopsis lyrata subsp. lyrata] gi 297324831 gb EFH55251.1  hypothetical protein ARALYDRAFT_481528 [Arabidopsis lyrata subsp. lyrata]                                                                                                                                                                                                                                                                                                                                                                                            | 460  | 469  | 0         | 102.0 | 87.0 | 93.5 | hypothetical protein ARALYDRAFT_481553          | gbpln | Arabidopsis lyrata   | AT2G26800.2   Symbols:   Aldolase superfamily protein   chr2:11429192-11432290 REVERSE LENGTH=468                                                                                                                                                                                                            | 460  | 468  | 0         | 101.7 | 85.9 | 92.6 |
| Rsa1.0_00976.1.g22030.t1  | ref XP_002878992.1  hypothetical protein ARALYDRAFT_481528 [Arabidopsis lyrata subsp. lyrata] gi 297324831 gb EFH55251.1  hypothetical protein ARALYDRAFT_481528 [Arabidopsis lyrata subsp. lyrata]                                                                                                                                                                                                                                                                                                                                                                                            | 1248 | 1253 | 0         | 100.4 | 79.6 | 87.7 | hypothetical protein ARALYDRAFT_481528          | gbpln | Arabidopsis lyrata   | AT2G26610.1   Symbols:   Transducin family protein / WD-40 repeat family protein   chr2:11318771-11324174 FORWARD LENGTH=1249                                                                                                                                                                                | 1248 | 1249 | 0         | 100.1 | 78.8 | 87.3 |
| Rsa1.0_00976.1.g22031.t1  | gb EOA27277.1  hypothetical protein CARUB_v10023397mg [Capsella rubella]                                                                                                                                                                                                                                                                                                                                                                                                                                                                                                                       | 375  | 388  | 0         | 103.5 | 85.1 | 89.6 | hypothetical protein CARUB_v10023397mg          | gbpln | Capsella rubella     | AT2G26600.1   Symbols:   Glycosyl hydrolase superfamily protein   chr2:11316727-11318215 FORWARD LENGTH=388                                                                                                                                                                                                  | 375  | 388  | 0         | 103.5 | 83.2 | 87.2 |
| Rsa1.0_00976.1.g22032.t2  | #                                                                                                                                                                                                                                                                                                                                                                                                                                                                                                                                                                                              | #    | #    | #         | #     | #    | -    | -                                               | ----  | ----                 | #                                                                                                                                                                                                                                                                                                            | #    | #    | #         | #     | #    | #    |
| Rsa1.0_00976.1.g22033.t1  | #                                                                                                                                                                                                                                                                                                                                                                                                                                                                                                                                                                                              | #    | #    | #         | #     | #    | -    | -                                               | ----  | ----                 | #                                                                                                                                                                                                                                                                                                            | #    | #    | #         | #     | #    | #    |
| Rsa1.0_00976.1.g22034.t1  | ref NP_680296.1  uncharacterized protein [Arabidopsis thaliana] gi 332006517 gb AED93900.1  uncharacterized protein AT5G33393 [Arabidopsis thaliana]                                                                                                                                                                                                                                                                                                                                                                                                                                           | 156  | 435  | 7.00E-13  | 278.8 | 26.9 | 34.6 | uncharacterized protein                         | gbpln | Arabidopsis thaliana | AT5G33393.1   Symbols:   unknown protein; LOCATED IN: chloroplast; Has 30201 Blast hits to 17322 proteins in 780 species: Archae - 12; Bacteria - 1396; Metazoa - 17338; Fungi - 3422; Plants - 5037; Viruses - 0; Other Eukaryotes - 2996 (source: NCBI BLINK).   chr5:12656430-12658588 REVERSE LENGTH=435 | 156  | 435  | 2.00E-15  | 278.8 | 26.9 | 34.6 |
| Rsa1.0_00976.1.g22035.t8  | dbj BAB02793.1  helicase-like protein [Arabidopsis thaliana]                                                                                                                                                                                                                                                                                                                                                                                                                                                                                                                                   | 1355 | 1428 | 0         | 105.4 | 46.2 | 60.5 | helicase-like protein                           | gbpln | Arabidopsis thaliana | AT3G51700.1   Symbols:   PIF1 helicase   chr3:19179443-19181145 REVERSE LENGTH=344                                                                                                                                                                                                                           | 1355 | 344  | 9.00E-27  | 25.4  | 7.1  | 10.1 |
| Rsa1.0_00976.1.g22036.t1  | gb EOA28640.1  hypothetical protein CARUB_v10024862mg, partial [Capsella rubella]                                                                                                                                                                                                                                                                                                                                                                                                                                                                                                              | 443  | 490  | 1.00E-56  | 110.6 | 36.3 | 55.8 | hypothetical protein CARUB_v10024862mg, partial | gbpln | Capsella rubella     | AT1G52950.1   Symbols:   Nucleic acid-binding, OB-fold-like protein   chr1:19725483-19728007 FORWARD LENGTH=566                                                                                                                                                                                              | 443  | 566  | 1.00E-52  | 127.8 | 33.2 | 55.1 |
| Rsa1.0_00976.1.g22037.t7  | ref NP_565626.1  regulatory particle non-ATPase 13 [Arabidopsis thaliana] gi 79323128 ref NP_001031424.1  regulatory particle non-ATPase 13 [Arabidopsis thaliana] gi 79323137 ref NP_001031425.1  regulatory particle non-ATPase 13 [Arabidopsis thaliana] gi 20196943 gb AAC14506.2  expressed protein [Arabidopsis thaliana] gi 330252768 gb AEC07862.1  regulatory particle non-ATPase 13 [Arabidopsis thaliana] gi 330252769 gb AEC07863.1  regulatory particle non-ATPase 13 [Arabidopsis thaliana] gi 330252770 gb AEC07864.1  regulatory particle non-ATPase 13 [Arabidopsis thaliana] | 458  | 300  | 1.00E-133 | 65.5  | 52.8 | 56.6 | regulatory particle non-ATPase 13               | gbpln | Arabidopsis thaliana | AT2G26590.3   Symbols:   RPN13   regulatory particle non-ATPase 13   chr2:11311182-11314717 REVERSE LENGTH=300                                                                                                                                                                                               | 458  | 300  | 1.00E-136 | 65.5  | 52.8 | 56.6 |
| Rsa1.0_00976.1.g22038.t21 | dbj BAB02147.1  TNP2-like transposon protein-like [Arabidopsis thaliana]                                                                                                                                                                                                                                                                                                                                                                                                                                                                                                                       | 870  | 786  | 1.00E-143 | 90.3  | 31.5 | 38.6 | TNP2-like transposon protein-like               | gbpln | Arabidopsis thaliana | #                                                                                                                                                                                                                                                                                                            | #    | #    | #         | #     | #    | #    |
| Rsa1.0_00977.1.g22039.t1  | #                                                                                                                                                                                                                                                                                                                                                                                                                                                                                                                                                                                              | #    | #    | #         | #     | #    | -    | -                                               | ----  | ----                 | #                                                                                                                                                                                                                                                                                                            | #    | #    | #         | #     | #    | #    |
| Rsa1.0_00977.1.g22040.t2  | ref XP_002883291.1  Ca2+-transporting ATPase [Arabidopsis lyrata subsp. lyrata] gi 297329131 gb EFH59550.1  Ca2+-transporting ATPase [Arabidopsis lyrata subsp. lyrata]                                                                                                                                                                                                                                                                                                                                                                                                                        | 1099 | 1087 | 0         | 98.9  | 94.7 | 97.4 | Ca2+-transporting ATPase                        | gbpln | Arabidopsis lyrata   | AT3G21180.1   Symbols:   ACA9, ATACA9   autoinhibited Ca(2+)-ATPase 9   chr3:7425770-7431941 FORWARD LENGTH=1086                                                                                                                                                                                             | 1099 | 1086 | 0         | 98.8  | 94.6 | 97.3 |

|                          |                                                                                                                                                                                                                                                                                                                                                                                                                                                                                                                                                                                                                  |      |      |           |       |      |      |                                                          |       |                      |                                                                                                                               |      |      |           |       |      |      |
|--------------------------|------------------------------------------------------------------------------------------------------------------------------------------------------------------------------------------------------------------------------------------------------------------------------------------------------------------------------------------------------------------------------------------------------------------------------------------------------------------------------------------------------------------------------------------------------------------------------------------------------------------|------|------|-----------|-------|------|------|----------------------------------------------------------|-------|----------------------|-------------------------------------------------------------------------------------------------------------------------------|------|------|-----------|-------|------|------|
| Rsa1.0_00977.1.g22041.t6 | gb AAC35532.1  contains similarity to proteases [Arabidopsis thaliana]                                                                                                                                                                                                                                                                                                                                                                                                                                                                                                                                           | 1562 | 1392 | 0         | 89.1  | 54.7 | 67.1 | contains similarity to proteases                         | gbpln | Arabidopsis thaliana | AT4G23160.1   Symbols: CRK8   cysteine-rich RLK (RECEPTOR-like protein kinase) 8   chr4:12129485-12134086 FORWARD LENGTH=1262 | 1562 | 1262 | 1.00E-111 | 80.8  | 12.8 | 19.1 |
| Rsa1.0_00977.1.g22042.t1 | # # # # # # # #                                                                                                                                                                                                                                                                                                                                                                                                                                                                                                                                                                                                  |      |      |           |       |      |      | -                                                        | ----  | ----                 | # # # # # # #                                                                                                                 |      |      |           |       |      |      |
| Rsa1.0_00977.1.g22043.t1 | ref XP_002885421.1  FMN binding protein [Arabidopsis lyrata subsp. lyrata] gi 297331261 gb EFH61680.1  FMN binding protein [Arabidopsis lyrata subsp. lyrata]                                                                                                                                                                                                                                                                                                                                                                                                                                                    | 399  | 387  | 0         | 97.0  | 82.5 | 87.2 | FMN binding protein                                      | gbpln | Arabidopsis lyrata   | AT3G21140.1   Symbols:   Pyridoxamine 5'-phosphate oxidase family protein   chr3:7409696-7412086 REVERSE LENGTH=387           | 399  | 387  | 0         | 97.0  | 82.0 | 86.2 |
| Rsa1.0_00977.1.g22044.t1 | gb EOA40283.1  hypothetical protein CARUB_v10009011mg [Capsella rubella]                                                                                                                                                                                                                                                                                                                                                                                                                                                                                                                                         | 466  | 479  | 1.00E-176 | 102.8 | 70.8 | 81.8 | hypothetical protein CARUB_v10009011mg                   | gbpln | Capsella rubella     | AT1G51550.1   Symbols:   Kelch repeat-containing F-box family protein   chr1:19117646-19119291 REVERSE LENGTH=478             | 466  | 478  | 1.00E-178 | 102.6 | 69.1 | 80.0 |
| Rsa1.0_00977.1.g22045.t3 | gb AAG52629.1 AC024261_16 unknown protein; 27363-23366 [Arabidopsis thaliana]                                                                                                                                                                                                                                                                                                                                                                                                                                                                                                                                    | 425  | 1036 | 0         | 243.8 | 84.9 | 91.1 | unknown protein; 27363-23366                             | gbpln | Arabidopsis thaliana | AT1G51540.1   Symbols:   Galactose oxidase/kelch repeat superfamily protein   chr1:19115702-19117381 FORWARD LENGTH=415       | 425  | 415  | 0         | 97.6  | 84.9 | 91.1 |
| Rsa1.0_00977.1.g22047.t1 | ref NP_188748.1  phosphoribosylaminoimidazole-succinocarboxamide synthase [Arabidopsis thaliana] gi 79313319 ref NP_001030739.1  phosphoribosylaminoimidazole-succinocarboxamide synthase [Arabidopsis thaliana] gi 26454658 sp P38025.2 PUR7_ARATH RecName: Full=Phosphoribosylaminoimidazole-succinocarboxamide synthase, chloroplastic; AltName: Full=SAICAR synthetase; Flags: Precursor                                                                                                                                                                                                                     | 156  | 411  | 6.00E-46  | 263.5 | 57.7 | 60.9 | phosphoribosylaminoimidazole-succinocarboxamide synthase | gbpln | Arabidopsis thaliana | AT3G21110.2   Symbols: PUR7, PURC   purin 7   chr3:7402696-7405273 REVERSE LENGTH=411                                         | 156  | 411  | 2.00E-48  | 263.5 | 57.7 | 60.9 |
| Rsa1.0_00977.1.g22047.t1 | gi 11994271 dbj BAB01454.1  5'-phosphoribosyl-4-(N-succinocarboxamide)-5'-aminoimidazole synthetase [Arabidopsis thaliana] gi 27754219 gb AAO22563.1  putative phosphoribosylaminoimidazole-succinocarboxamide synthase [Arabidopsis thaliana] gi 332642941 gb AEE76462.1  phosphoribosylaminoimidazole-succinocarboxamide synthase [Arabidopsis thaliana] gi 332642942 gb AEE76463.1  phosphoribosylaminoimidazole-succinocarboxamide synthase [Arabidopsis thaliana] ref NP_974347.1  NAD(H) kinase 1 [Arabidopsis thaliana] gi 94717660 sp Q56YN3.2 NADK1_ARATH RecName: Full=NAD(H) kinase 1; Short=AtNADK-1 | 582  | 524  | 0         | 90.0  | 76.6 | 82.1 | NAD(H) kinase 1                                          | gbpln | Arabidopsis thaliana | AT3G21070.2   Symbols: NADK1   NAD kinase 1   chr3:7380434-7383874 REVERSE LENGTH=524                                         | 582  | 524  | 0         | 90.0  | 76.6 | 82.1 |
| Rsa1.0_00977.1.g22047.t1 | gi 39843359 gb AAR32133.1  NADK1 [Arabidopsis thaliana] gi 51970406 dbj BAD43895.1  unnamed protein product [Arabidopsis thaliana] gi 332642935 gb AEE76456.1  NAD(H) kinase 1 [Arabidopsis thaliana]                                                                                                                                                                                                                                                                                                                                                                                                            |      |      |           |       |      |      |                                                          |       |                      |                                                                                                                               |      |      |           |       |      |      |
| Rsa1.0_00977.1.g22048.t1 | gb EOA33084.1  hypothetical protein CARUB_v10016422mg [Capsella rubella]                                                                                                                                                                                                                                                                                                                                                                                                                                                                                                                                         | 81   | 106  | 4.00E-31  | 130.9 | 85.2 | 98.8 | hypothetical protein CARUB_v10016422mg                   | gbpln | Capsella rubella     | AT3G21055.1   Symbols: PSBTN   photosystem II subunit T   chr3:7376761-7377072 REVERSE LENGTH=103                             | 81   | 103  | 5.00E-33  | 127.2 | 88.9 | 95.1 |
| Rsa1.0_00977.1.g22049.t1 | dbj BAB01447.1  gag-pol polyprotein-like [Arabidopsis thaliana]                                                                                                                                                                                                                                                                                                                                                                                                                                                                                                                                                  | 401  | 420  | 1.00E-126 | 104.7 | 57.9 | 73.8 | gag-pol polyprotein-like                                 | gbpln | Arabidopsis thaliana | AT3G21000.1   Symbols:   Gag-Pol-related retrotransposon family protein   chr3:7363921-7365138 FORWARD LENGTH=405             | 401  | 405  | 1.00E-81  | 101.0 | 46.6 | 61.8 |
| Rsa1.0_00977.1.g22050.t1 | # # # # # # # #                                                                                                                                                                                                                                                                                                                                                                                                                                                                                                                                                                                                  |      |      |           |       |      |      | -                                                        | ----  | ----                 | AT1G28760.1   Symbols:   Uncharacterized conserved protein (DUF2215)   chr1:10103158-10104588 FORWARD LENGTH=476              | 76   | 476  | 6.00E-13  | 626.3 | 43.4 | 47.4 |
| Rsa1.0_00977.1.g22051.t1 | gb EOA30911.1  hypothetical protein CARUB_v10014058mg [Capsella rubella]                                                                                                                                                                                                                                                                                                                                                                                                                                                                                                                                         | 317  | 356  | 5.00E-67  | 112.3 | 40.7 | 43.5 | hypothetical protein CARUB_v10014058mg                   | gbpln | Capsella rubella     | AT3G20920.1   Symbols:   translocation protein-related   chr3:7328763-7330698 REVERSE LENGTH=365                              | 317  | 365  | 9.00E-68  | 115.1 | 40.1 | 42.0 |
| Rsa1.0_00977.1.g22052.t1 | gb AAC49265.1  CCAAT-binding factor B subunit homolog [Brassica napus] gi 1336840 gb AAB36222.1  CCAAT-binding factor B subunit [Brassica napus]                                                                                                                                                                                                                                                                                                                                                                                                                                                                 | 255  | 314  | 1.00E-110 | 123.1 | 79.2 | 83.9 | CCAAT-binding factor B subunit homolog                   | gbpln | Brassica napus       | AT3G20910.1   Symbols: NF-YA9   nuclear factor Y, subunit A9   chr3:7326495-7328369 FORWARD LENGTH=303                        | 255  | 303  | 1.00E-104 | 118.8 | 73.7 | 82.4 |

|                          |                                                                                                                                                                                                                                                                                                                                                                                                                                                                                                                                                                                                                                                                                                                                                                                                                                                                                                                                                                                               |      |      |           |       |      |      |                                                       |                                  |                                                                                                                              |                                                                                                                               |                                                                                                                                                                                                                                                                                                                                                                                                                                                                                       |          |           |          |       |      |      |
|--------------------------|-----------------------------------------------------------------------------------------------------------------------------------------------------------------------------------------------------------------------------------------------------------------------------------------------------------------------------------------------------------------------------------------------------------------------------------------------------------------------------------------------------------------------------------------------------------------------------------------------------------------------------------------------------------------------------------------------------------------------------------------------------------------------------------------------------------------------------------------------------------------------------------------------------------------------------------------------------------------------------------------------|------|------|-----------|-------|------|------|-------------------------------------------------------|----------------------------------|------------------------------------------------------------------------------------------------------------------------------|-------------------------------------------------------------------------------------------------------------------------------|---------------------------------------------------------------------------------------------------------------------------------------------------------------------------------------------------------------------------------------------------------------------------------------------------------------------------------------------------------------------------------------------------------------------------------------------------------------------------------------|----------|-----------|----------|-------|------|------|
| Rsa1.0_00977.1.g22053.t2 | ref[XP_003522346.1] PREDICTED:<br>uncharacterized protein LOC100809302<br>[Glycine max]                                                                                                                                                                                                                                                                                                                                                                                                                                                                                                                                                                                                                                                                                                                                                                                                                                                                                                       | 303  | 531  | 1.00E-107 | 175.2 | 62.7 | 76.2 | PREDICTED:<br>uncharacterized<br>protein LOC100809302 | gbenv/gbpln Glycine max          |                                                                                                                              |                                                                                                                               | AT5G35695.1   Symbols:   CONTAINS<br>InterPro DOMAIN/s: Putative harbinger<br>transposase-derived nuclease<br>(InterPro:IPR006912); BEST Arabidopsis<br>thaliana protein match is: unknown protein<br>(TAIR:AT5G41980.1); Has 30201 Blast hits to<br>17322 proteins in 780 species: Archae - 12;<br>Bacteria - 1396; Metazoa - 17338; Fungi -<br>3422; Plants - 5037; Viruses - 0; Other<br>Eukaryotes - 2996 (source: NCBI ELink).  <br>chr5:13869120-13869941 FORWARD<br>LENGTH=211 | 303      | 211       | 2.00E-55 | 69.6  | 36.3 | 42.6 |
| Rsa1.0_00977.1.g22054.t1 | ref[NP_188666.1] ethylene-responsive<br>transcription factor 7 [Arabidopsis<br>thaliana]<br>gi[57012873]sp[Q9LDE4.1]ERF83_ARAT<br>H RecName: Full=Ethylene-responsive<br>transcription factor 7; Short=ATERF7;<br>AltName: Full=Ethylene-responsive<br>element-binding factor 7;<br>Short=EREBP-7<br>gi[8467962]dbj[BAA96653.1] ERF<br>transcription factor 7 [Arabidopsis<br>thaliana] gi[9294548]dbj[BAB0281.1]<br>ethylene responsive element binding<br>factor-like protein [Arabidopsis<br>thaliana] gi[14335150]gb AAK59855.1<br>AT3g20310/MQC12.6 [Arabidopsis<br>thaliana] gi[20334802]gb AAM16262.1<br>AT3g20310/MQC12.6 [Arabidopsis<br>thaliana] gi[21537240]gb AAM61581.1<br>ethylene responsive element binding<br>factor, putative [Arabidopsis thaliana]<br>gi[110736859]dbj BAF00387.1 putative<br>ethylene responsive element binding<br>factor [Arabidopsis thaliana]<br>gi[33264284]gb AEE76362.1 ethylene-<br>responsive transcription factor 7<br>[Arabidopsis thaliana] | 203  | 244  | 1.00E-62  | 120.2 | 80.8 | 87.2 | ethylene-responsive<br>transcription factor 7         | gbpln<br>Arabidopsis<br>thaliana | AT3G20310.1   Symbols: ATERF-7, ATERF7,<br>ERF7   ethylene response factor 7  <br>chr3:7085932-7086691 REVERSE<br>LENGTH=244 | 203                                                                                                                           | 244                                                                                                                                                                                                                                                                                                                                                                                                                                                                                   | 5.00E-65 | 120.2     | 80.8     | 87.2  |      |      |
| Rsa1.0_00977.1.g22055.t1 | #                                                                                                                                                                                                                                                                                                                                                                                                                                                                                                                                                                                                                                                                                                                                                                                                                                                                                                                                                                                             | #    | #    | #         | #     | #    | #    | -                                                     | ----                             | ----                                                                                                                         |                                                                                                                               | AT4G2090.1   Symbols:   Ribonuclease H-<br>like superfamily protein   chr4:14333528-<br>14335255 FORWARD LENGTH=575                                                                                                                                                                                                                                                                                                                                                                   | 114      | 575       | 4.00E-11 | 504.4 | 27.2 | 37.7 |
| Rsa1.0_00977.1.g22056.t1 | ref[XP_002885364.1] extracellular<br>ligand-gated ion channel [Arabidopsis<br>lyrata subsp. lyrata]<br>gi[297331204]gb EFH61623.1<br>extracellular ligand-gated ion channel<br>[Arabidopsis lyrata subsp. lyrata]                                                                                                                                                                                                                                                                                                                                                                                                                                                                                                                                                                                                                                                                                                                                                                             | 448  | 451  | 0         | 100.7 | 90.8 | 96.0 | extracellular ligand-<br>gated ion channel            | gbpln                            | Arabidopsis<br>lyrata                                                                                                        | AT3G20300.1   Symbols:   Protein of<br>unknown function (DUF3537)  <br>chr3:7079832-7081809 REVERSE<br>LENGTH=452             | 448                                                                                                                                                                                                                                                                                                                                                                                                                                                                                   | 452      | 0         | 100.9    | 90.6  | 95.8 |      |
| Rsa1.0_00977.1.g22057.t1 | gb EOA30619.1  hypothetical protein<br>CARUB_v10013756mg [Capsella rubella]                                                                                                                                                                                                                                                                                                                                                                                                                                                                                                                                                                                                                                                                                                                                                                                                                                                                                                                   | 433  | 430  | 0         | 99.3  | 84.5 | 91.0 | hypothetical protein<br>CARUB_v10013756mg             | gbpln                            | Capsella<br>rubella                                                                                                          | AT3G20260.1   Symbols:   Protein of<br>unknown function (DUF1666)  <br>chr3:7064190-7065751 REVERSE<br>LENGTH=437             | 433                                                                                                                                                                                                                                                                                                                                                                                                                                                                                   | 437      | 0         | 100.9    | 84.5  | 91.0 |      |
| Rsa1.0_00977.1.g22058.t1 | ref[XP_002883238.1] mitochondrial<br>substrate carrier family protein<br>[Arabidopsis lyrata subsp. lyrata]<br>gi[297329078]gb EFH59497.1<br>mitochondrial substrate carrier family<br>protein [Arabidopsis lyrata subsp.<br>lyrata]                                                                                                                                                                                                                                                                                                                                                                                                                                                                                                                                                                                                                                                                                                                                                          | 350  | 348  | 1.00E-174 | 99.4  | 88.0 | 94.3 | mitochondrial substrate<br>carrier family protein     | gbpln                            | Arabidopsis<br>lyrata                                                                                                        | AT3G20240.1   Symbols:   Mitochondrial<br>substrate carrier family protein  <br>chr3:7057192-7058716 FORWARD<br>LENGTH=348    | 350                                                                                                                                                                                                                                                                                                                                                                                                                                                                                   | 348      | 1.00E-177 | 99.4     | 88.3  | 94.0 |      |
| Rsa1.0_00977.1.g22059.t1 | ref[XP_002883234.1] hypothetical<br>protein ARALYDRAFT_479539<br>[Arabidopsis lyrata subsp. lyrata]<br>gi[297329074]gb EFH59493.1<br>hypothetical protein<br>ARALYDRAFT_479539 [Arabidopsis<br>lyrata subsp. lyrata]                                                                                                                                                                                                                                                                                                                                                                                                                                                                                                                                                                                                                                                                                                                                                                          | 681  | 679  | 0         | 99.7  | 82.7 | 88.8 | hypothetical protein<br>ARALYDRAFT_479539             | gbpln                            | Arabidopsis<br>lyrata                                                                                                        | AT3G20190.1   Symbols:   Leucine-rich<br>repeat protein kinase family protein  <br>chr3:7044997-7047212 FORWARD<br>LENGTH=679 | 681                                                                                                                                                                                                                                                                                                                                                                                                                                                                                   | 679      | 0         | 99.7     | 82.2  | 88.0 |      |
| Rsa1.0_00977.1.g22060.t1 | gb EOA30474.1  hypothetical protein<br>CARUB_v10013599mg [Capsella rubella]                                                                                                                                                                                                                                                                                                                                                                                                                                                                                                                                                                                                                                                                                                                                                                                                                                                                                                                   | 508  | 477  | 0         | 93.9  | 76.2 | 84.6 | hypothetical protein<br>CARUB_v10013599mg             | gbpln                            | Capsella<br>rubella                                                                                                          | AT3G20170.1   Symbols:   ARM repeat<br>superfamily protein   chr3:7041780-7043207<br>FORWARD LENGTH=475                       | 508                                                                                                                                                                                                                                                                                                                                                                                                                                                                                   | 475      | 0         | 93.5     | 76.4  | 84.6 |      |
| Rsa1.0_00977.1.g22061.t1 | ref[XP_002883232.1] hypothetical<br>protein ARALYDRAFT_898426<br>[Arabidopsis lyrata subsp. lyrata]<br>gi[297329072]gb EFH59491.1<br>hypothetical protein<br>ARALYDRAFT_898426 [Arabidopsis<br>lyrata subsp. lyrata]                                                                                                                                                                                                                                                                                                                                                                                                                                                                                                                                                                                                                                                                                                                                                                          | 351  | 356  | 1.00E-154 | 101.4 | 78.3 | 86.6 | hypothetical protein<br>ARALYDRAFT_898426             | gbpln                            | Arabidopsis<br>lyrata                                                                                                        | AT3G20160.1   Symbols:   Terpenoid<br>synthases superfamily protein  <br>chr3:7038995-7040029 FORWARD<br>LENGTH=344           | 351                                                                                                                                                                                                                                                                                                                                                                                                                                                                                   | 344      | 1.00E-147 | 98.0     | 75.2  | 84.9 |      |
| Rsa1.0_00977.1.g22062.t1 | ref[XP_002883230.1] kinesin motor<br>family protein [Arabidopsis lyrata subsp.<br>lyrata] gi[297329070]gb EFH59489.1<br>kinesin motor family protein<br>[Arabidopsis lyrata subsp. lyrata]                                                                                                                                                                                                                                                                                                                                                                                                                                                                                                                                                                                                                                                                                                                                                                                                    | 1085 | 1127 | 0         | 103.9 | 84.9 | 91.6 | kinesin motor family<br>protein                       | gbpln                            | Arabidopsis<br>lyrata                                                                                                        | AT3G20150.1   Symbols:   Kinesin motor<br>family protein   chr3:7031412-7036499<br>FORWARD LENGTH=1114                        | 1085                                                                                                                                                                                                                                                                                                                                                                                                                                                                                  | 1114     | 0         | 102.7    | 83.3  | 90.2 |      |

|                          |                                                                                                                                                                                                                                                                                                                                                                                                                                                                                                                                  |     |     |           |       |      |      |                                                          |       |                      |                                                                                                                                                                                                                                                                                                                                                                                                                                                                                      |     |     |           |       |      |      |
|--------------------------|----------------------------------------------------------------------------------------------------------------------------------------------------------------------------------------------------------------------------------------------------------------------------------------------------------------------------------------------------------------------------------------------------------------------------------------------------------------------------------------------------------------------------------|-----|-----|-----------|-------|------|------|----------------------------------------------------------|-------|----------------------|--------------------------------------------------------------------------------------------------------------------------------------------------------------------------------------------------------------------------------------------------------------------------------------------------------------------------------------------------------------------------------------------------------------------------------------------------------------------------------------|-----|-----|-----------|-------|------|------|
| Rsa1.0_00977.1.g22063.t1 | gb EOA30355.1  hypothetical protein CARUB_v10013477mg [Capsella rubella]                                                                                                                                                                                                                                                                                                                                                                                                                                                         | 506 | 512 | 0         | 101.2 | 72.7 | 82.0 | hypothetical protein CARUB_v10013477mg                   | gbpln | Capsella rubella     | AT3G20080.2   Symbols: CYP705A15   cytochrome P450, family 705, subfamily A, polypeptide 15   chr3:7008813-7010463 FORWARD LENGTH=523                                                                                                                                                                                                                                                                                                                                                | 506 | 523 | 0         | 103.4 | 71.9 | 82.2 |
| Rsa1.0_00977.1.g22064.t1 | ref NP_566654.1  cytochrome P450, family 705, subfamily A, polypeptide 15 [Arabidopsis thaliana]<br>gi 42572495 ref NP_974343.1  cytochrome P450, family 705, subfamily A, polypeptide 15 [Arabidopsis thaliana]<br>gi 9293963 dbj BAB01866.1  cytochrome P450-like protein [Arabidopsis thaliana]<br>gi 332642809 gb AEE76330.1  cytochrome P450, family 705, subfamily A, polypeptide 15 [Arabidopsis thaliana]<br>gi 332642810 gb AEE76331.1  cytochrome P450, family 705, subfamily A, polypeptide 15 [Arabidopsis thaliana] | 505 | 523 | 0         | 103.6 | 72.1 | 82.0 | cytochrome P450, family 705, subfamily A, polypeptide 15 | gbpln | Arabidopsis thaliana | AT3G20080.2   Symbols: CYP705A15   cytochrome P450, family 705, subfamily A, polypeptide 15   chr3:7008813-7010463 FORWARD LENGTH=523                                                                                                                                                                                                                                                                                                                                                | 505 | 523 | 0         | 103.6 | 72.1 | 82.0 |
| Rsa1.0_00977.1.g22065.t1 | gb EOA30355.1  hypothetical protein CARUB_v10013477mg [Capsella rubella]                                                                                                                                                                                                                                                                                                                                                                                                                                                         | 517 | 512 | 0         | 99.0  | 65.0 | 77.9 | hypothetical protein CARUB_v10013477mg                   | gbpln | Capsella rubella     | AT3G20080.2   Symbols: CYP705A15   cytochrome P450, family 705, subfamily A, polypeptide 15   chr3:7008813-7010463 FORWARD LENGTH=523                                                                                                                                                                                                                                                                                                                                                | 517 | 523 | 0         | 101.2 | 65.2 | 77.8 |
| Rsa1.0_00977.1.g22066.t1 | dbj BAB08692.1  non-LTR retroelement reverse transcriptase-like protein [Arabidopsis thaliana]<br>gi 93007380 gb ABE97193.1  hypothetical protein At5g13655 [Arabidopsis thaliana]                                                                                                                                                                                                                                                                                                                                               | 275 | 385 | 6.00E-66  | 140.0 | 42.5 | 64.0 | non-LTR retroelement reverse transcriptase-like protein  | gbpln | Arabidopsis thaliana | AT3G24255.1   Symbols:   RNA-directed DNA polymerase (reverse transcriptase)-related family protein   chr3:8789471-8793208 FORWARD LENGTH=746                                                                                                                                                                                                                                                                                                                                        | 275 | 746 | 3.00E-54  | 271.3 | 38.2 | 54.2 |
| Rsa1.0_00977.1.g22067.t1 | gb EOA30355.1  hypothetical protein CARUB_v10013477mg [Capsella rubella]                                                                                                                                                                                                                                                                                                                                                                                                                                                         | 525 | 512 | 0         | 97.5  | 70.3 | 79.0 | hypothetical protein CARUB_v10013477mg                   | gbpln | Capsella rubella     | AT3G20080.2   Symbols: CYP705A15   cytochrome P450, family 705, subfamily A, polypeptide 15   chr3:7008813-7010463 FORWARD LENGTH=523                                                                                                                                                                                                                                                                                                                                                | 525 | 523 | 0         | 99.6  | 68.8 | 79.4 |
| Rsa1.0_00978.1.g22068.t1 | #                                                                                                                                                                                                                                                                                                                                                                                                                                                                                                                                | #   | #   | #         | #     | #    | #    | -                                                        | ----  | ----                 | #                                                                                                                                                                                                                                                                                                                                                                                                                                                                                    | #   | #   | #         | #     | #    |      |
| Rsa1.0_00978.1.g22069.t1 | ref XP_002882932.1  hypothetical protein ARALYDRAFT_897817 [Arabidopsis lyrata subsp. lyrata]<br>gi 297328772 gb EFH59191.1  hypothetical protein ARALYDRAFT_897817 [Arabidopsis lyrata subsp. lyrata]                                                                                                                                                                                                                                                                                                                           | 144 | 144 | 4.00E-74  | 100.0 | 93.1 | 97.9 | hypothetical protein ARALYDRAFT_897817                   | gbpln | Arabidopsis lyrata   | AT3G15358.1   Symbols:   unknown protein; FUNCTIONS IN: molecular function unknown; INVOLVED IN: biological process unknown; LOCATED IN: endomembrane system; BEST Arabidopsis thaliana protein match is: unknown protein (TAIR:AT1G53035.1). Has 35333 Blast hits to 34131 proteins in 2444 species: Archae - 798; Bacteria - 22429; Metazoa - 974; Fungi - 991; Plants - 531; Viruses - 0; Other Eukaryotes - 9610 (source: NCBI BLINK).   chr3:5178205-5178639 FORWARD LENGTH=144 | 144 | 144 | 6.00E-76  | 100.0 | 93.1 | 97.9 |
| Rsa1.0_00978.1.g22070.t1 | gb EOA25542.1  hypothetical protein CARUB_v10018887mg [Capsella rubella]                                                                                                                                                                                                                                                                                                                                                                                                                                                         | 272 | 291 | 1.00E-101 | 107.0 | 69.1 | 82.4 | hypothetical protein CARUB_v10018887mg                   | gbpln | Capsella rubella     | AT3G11470.1   Symbols:   4'-phosphopantetheinyl transferase superfamily   chr3:3610261-3612094 REVERSE LENGTH=300                                                                                                                                                                                                                                                                                                                                                                    | 272 | 300 | 1.00E-102 | 110.3 | 71.0 | 83.8 |
| Rsa1.0_00978.1.g22071.t1 | gb AFP57435.1  putative metallothionein type 3 [Brassica napus]                                                                                                                                                                                                                                                                                                                                                                                                                                                                  | 67  | 67  | 4.00E-27  | 100.0 | 94.0 | 97.0 | putative metallothionein type 3                          | gbpln | Brassica napus       | AT3G15353.1   Symbols: MT3, ATMT3   metallothionein 3   chr3:5180825-5181325 REVERSE LENGTH=69                                                                                                                                                                                                                                                                                                                                                                                       | 67  | 69  | 1.00E-24  | 103.0 | 85.1 | 88.1 |
| Rsa1.0_00978.1.g22072.t1 | ref XP_002882934.1  ubiquitin-conjugating enzyme 23 [Arabidopsis lyrata subsp. lyrata]<br>gi 297328774 gb EFH59193.1  ubiquitin-conjugating enzyme 23 [Arabidopsis lyrata subsp. lyrata]                                                                                                                                                                                                                                                                                                                                         | 542 | 605 | 0         | 111.6 | 64.9 | 74.5 | ubiquitin-conjugating enzyme 23                          | gbpln | Arabidopsis lyrata   | AT3G15355.1   Symbols: UBC25, PFU1   ubiquitin-conjugating enzyme 25   chr3:5183858-5186669 FORWARD LENGTH=609                                                                                                                                                                                                                                                                                                                                                                       | 542 | 609 | 1.00E-178 | 112.4 | 64.2 | 72.9 |
| Rsa1.0_00978.1.g22073.t1 | ref XP_002882935.1  hypothetical protein ARALYDRAFT_478974 [Arabidopsis lyrata subsp. lyrata]<br>gi 297328775 gb EFH59194.1  hypothetical protein ARALYDRAFT_478974 [Arabidopsis lyrata subsp. lyrata]                                                                                                                                                                                                                                                                                                                           | 154 | 144 | 8.00E-19  | 93.5  | 42.9 | 46.8 | hypothetical protein ARALYDRAFT_478974                   | gbpln | Arabidopsis lyrata   | AT3G15357.1   Symbols:   unknown protein; INVOLVED IN: biological process unknown; LOCATED IN: chloroplast; EXPRESSED IN: shoot apex, hypocotyl, root, leaf. Has 6931 Blast hits to 2036 proteins in 230 species: Archae - 7; Bacteria - 933; Metazoa - 1824; Fungi - 836; Plants - 482; Viruses - 218; Other Eukaryotes - 2631 (source: NCBI BLINK).   chr3:5187164-5187595 FORWARD LENGTH=143                                                                                      | 154 | 143 | 1.00E-20  | 92.9  | 42.2 | 48.1 |
| Rsa1.0_00978.1.g22074.t2 | gb EOA31519.1  hypothetical protein CARUB_v10014709mg [Capsella rubella]                                                                                                                                                                                                                                                                                                                                                                                                                                                         | 189 | 193 | 7.00E-83  | 102.1 | 87.3 | 91.5 | hypothetical protein CARUB_v10014709mg                   | gbpln | Capsella rubella     | AT3G15360.1   Symbols: ATHM4, TRX-M4, ATM4   thioredoxin M-type 4   chr3:5188448-5189457 FORWARD LENGTH=193                                                                                                                                                                                                                                                                                                                                                                          | 189 | 193 | 7.00E-84  | 102.1 | 85.7 | 91.0 |
| Rsa1.0_00978.1.g22075.t1 | gb EOA32479.1  hypothetical protein CARUB_v10015755mg [Capsella rubella]                                                                                                                                                                                                                                                                                                                                                                                                                                                         | 702 | 700 | 0         | 99.7  | 94.7 | 97.6 | hypothetical protein CARUB_v10015755mg                   | gbpln | Capsella rubella     | AT3G15380.1   Symbols:   Plasma-membrane choline transporter family protein   chr3:5193319-5196435 FORWARD LENGTH=700                                                                                                                                                                                                                                                                                                                                                                | 702 | 700 | 0         | 99.7  | 94.4 | 97.6 |

|                          |                                                                                                                                                                                                                                                                                                                                                                                                                                                                                                                                                                                                                                                                                                                                                                                                                                                                                                                                                                                                                                                                                                                                                                                                                                                                                                                                  |     |     |           |       |      |      |                                                     |       |                      |                                                                                                                                               |     |     |           |       |      |      |
|--------------------------|----------------------------------------------------------------------------------------------------------------------------------------------------------------------------------------------------------------------------------------------------------------------------------------------------------------------------------------------------------------------------------------------------------------------------------------------------------------------------------------------------------------------------------------------------------------------------------------------------------------------------------------------------------------------------------------------------------------------------------------------------------------------------------------------------------------------------------------------------------------------------------------------------------------------------------------------------------------------------------------------------------------------------------------------------------------------------------------------------------------------------------------------------------------------------------------------------------------------------------------------------------------------------------------------------------------------------------|-----|-----|-----------|-------|------|------|-----------------------------------------------------|-------|----------------------|-----------------------------------------------------------------------------------------------------------------------------------------------|-----|-----|-----------|-------|------|------|
| Rsa1.0_00978.1.g22076.t1 | refNP_001189900.1   protein silencing defective 5 [Arabidopsis thaliana] gi 332642142 gb AE75663.1   protein silencing defective 5 [Arabidopsis thaliana]                                                                                                                                                                                                                                                                                                                                                                                                                                                                                                                                                                                                                                                                                                                                                                                                                                                                                                                                                                                                                                                                                                                                                                        | 304 | 299 | 1.00E-119 | 98.4  | 73.7 | 82.6 | protein silencing defective 5                       | gbpln | Arabidopsis thaliana | AT3G15390.2   Symbols: SDE5   silencing defective 5   chr3:5196689-5198445 REVERSE LENGTH=299                                                 | 304 | 299 | 1.00E-122 | 98.4  | 73.7 | 82.6 |
| Rsa1.0_00978.1.g22077.t1 | refXP_002885085.1   hypothetical protein ARALYDRAFT_478977 [Arabidopsis lyrata subsp. lyrata] gi 297330925 gb EFH61344.1   hypothetical protein ARALYDRAFT_478977 [Arabidopsis lyrata subsp. lyrata] refNP_974321.1   uncharacterized protein [Arabidopsis thaliana] gi 42572453 refNP_974322.1   uncharacterized protein [Arabidopsis thaliana] gi 79313241 refNP_001030700.1   uncharacterized protein [Arabidopsis thaliana] gi 145332587 refNP_001078159.1   uncharacterized protein [Arabidopsis thaliana] gi 21593726 gb AAM65693.1   unknown [Arabidopsis thaliana] gi 111074242 gb ABH04494.1   AT3g15395 [Arabidopsis thaliana] gi 222423962 dbj BAH19943.1   AT3G15395 [Arabidopsis thaliana] gi 22242431.1 dbj BAH20112.1   AT3G15395 [Arabidopsis thaliana] gi 332642143 gb AE75664.1   uncharacterized protein AT3G15395 [Arabidopsis thaliana] gi 332642144 gb AE75665.1   uncharacterized protein AT3G15395 [Arabidopsis thaliana] gi 332642145 gb AE75666.1   uncharacterized protein AT3G15395 [Arabidopsis thaliana] gi 332642146 gb AE75667.1   uncharacterized protein AT3G15395 [Arabidopsis thaliana] refXP_002862700.1   hypothetical protein ARALYDRAFT_497329 [Arabidopsis lyrata subsp. lyrata] gi 297308375 gb EFH38958.1   hypothetical protein ARALYDRAFT_497329 [Arabidopsis lyrata subsp. lyrata] | 205 | 468 | 2.00E-79  | 228.3 | 73.7 | 84.4 | hypothetical protein ARALYDRAFT_478977              | gbpln | Arabidopsis lyrata   | AT3G15390.1   Symbols: SDE5   silencing defective 5   chr3:5196689-5199531 REVERSE LENGTH=490                                                 | 205 | 490 | 3.00E-79  | 239.0 | 72.7 | 82.9 |
| Rsa1.0_00978.1.g22078.t1 | refXP_002862700.1   hypothetical protein ARALYDRAFT_497329 [Arabidopsis lyrata subsp. lyrata] gi 297308375 gb EFH38958.1   hypothetical protein ARALYDRAFT_497329 [Arabidopsis lyrata subsp. lyrata] refXP_002882943.1   regulator of chromosome condensation family protein [Arabidopsis lyrata subsp. lyrata] gi 297328783 gb EFH59202.1   regulator of chromosome condensation family protein [Arabidopsis lyrata subsp. lyrata]                                                                                                                                                                                                                                                                                                                                                                                                                                                                                                                                                                                                                                                                                                                                                                                                                                                                                              | 517 | 358 | 9.00E-54  | 69.2  | 33.1 | 36.6 | hypothetical protein ARALYDRAFT_497329              | gbpln | Arabidopsis lyrata   | AT3G15400.1   Symbols: ATA20   anther 20   chr3:5201678-5202928 FORWARD LENGTH=416                                                            | 517 | 416 | 4.00E-37  | 80.5  | 21.1 | 23.2 |
| Rsa1.0_00978.1.g22080.t1 | refXP_002885089.1   WD-40 repeat family protein [Arabidopsis lyrata subsp. lyrata] gi 297330929 gb EFH61348.1   WD-40 repeat family protein [Arabidopsis lyrata subsp. lyrata]                                                                                                                                                                                                                                                                                                                                                                                                                                                                                                                                                                                                                                                                                                                                                                                                                                                                                                                                                                                                                                                                                                                                                   | 511 | 488 | 0         | 95.5  | 86.5 | 90.6 | regulator of chromosome condensation family protein | gbpln | Arabidopsis lyrata   | AT3G15430.2   Symbols:   Regulator of chromosome condensation (RCC1) family protein   chr3:5209408-5211562 FORWARD LENGTH=488                 | 511 | 488 | 0         | 95.5  | 86.7 | 90.4 |
| Rsa1.0_00978.1.g22081.t1 | gb EOA31283.1   hypothetical protein CARUB_v10014455mg [Capsella rubella]                                                                                                                                                                                                                                                                                                                                                                                                                                                                                                                                                                                                                                                                                                                                                                                                                                                                                                                                                                                                                                                                                                                                                                                                                                                        | 256 | 253 | 1.00E-130 | 98.8  | 87.1 | 94.1 | hypothetical protein CARUB_v10014455mg              | gbpln | Capsella rubella     | AT3G15450.1   Symbols:   Aluminium induced protein with YGL and LRDR motifs   chr3:5213050-5213998 FORWARD LENGTH=253                         | 256 | 253 | 1.00E-132 | 98.8  | 87.5 | 93.4 |
| Rsa1.0_00978.1.g22082.t1 | gb EOA38143.1   hypothetical protein CARUB_v10009615mg, partial [Capsella rubella]                                                                                                                                                                                                                                                                                                                                                                                                                                                                                                                                                                                                                                                                                                                                                                                                                                                                                                                                                                                                                                                                                                                                                                                                                                               | 337 | 346 | 1.00E-168 | 102.7 | 86.4 | 91.4 | hypothetical protein CARUB_v10009615mg, partial     | gbpln | Capsella rubella     | AT3G15460.1   Symbols:   Ribosomal RNA processing Brix domain protein   chr3:5214279-5216188 REVERSE LENGTH=315                               | 337 | 315 | 1.00E-167 | 93.5  | 84.9 | 88.7 |
| Rsa1.0_00978.1.g22083.t1 | refXP_002885089.1   WD-40 repeat family protein [Arabidopsis lyrata subsp. lyrata] gi 297330929 gb EFH61348.1   WD-40 repeat family protein [Arabidopsis lyrata subsp. lyrata]                                                                                                                                                                                                                                                                                                                                                                                                                                                                                                                                                                                                                                                                                                                                                                                                                                                                                                                                                                                                                                                                                                                                                   | 874 | 885 | 0         | 101.3 | 78.7 | 85.2 | WD-40 repeat family protein                         | gbpln | Arabidopsis lyrata   | AT3G15470.1   Symbols:   Transducin/WD40 repeat-like superfamily protein   chr3:5216630-5219868 REVERSE LENGTH=883                            | 874 | 883 | 0         | 101.0 | 78.6 | 85.6 |
| Rsa1.0_00979.1.g22084.t1 | #                                                                                                                                                                                                                                                                                                                                                                                                                                                                                                                                                                                                                                                                                                                                                                                                                                                                                                                                                                                                                                                                                                                                                                                                                                                                                                                                | #   | #   | #         | #     | #    | #    | -                                                   | ----  | ----                 | #                                                                                                                                             | #   | #   | #         | #     | #    | #    |
| Rsa1.0_00979.1.g22085.t1 | gb AAC19278.1   T14P8.10 [Arabidopsis thaliana] gi 7269009 emb CAB80742.1   AT4g02490 [Arabidopsis thaliana]                                                                                                                                                                                                                                                                                                                                                                                                                                                                                                                                                                                                                                                                                                                                                                                                                                                                                                                                                                                                                                                                                                                                                                                                                     | 436 | 657 | 3.00E-78  | 150.7 | 34.2 | 45.4 | T14P8.10                                            | gbpln | Arabidopsis thaliana | AT4G04650.1   Symbols:   RNA-directed DNA polymerase (reverse transcriptase)-related family protein   chr4:2353989-2355213 REVERSE LENGTH=332 | 436 | 332 | 8.00E-61  | 76.1  | 27.3 | 37.8 |
| Rsa1.0_00979.1.g22086.t1 | gb EOA35498.1   hypothetical protein CARUB_v10020705mg [Capsella rubella]                                                                                                                                                                                                                                                                                                                                                                                                                                                                                                                                                                                                                                                                                                                                                                                                                                                                                                                                                                                                                                                                                                                                                                                                                                                        | 296 | 306 | 1.00E-106 | 103.4 | 83.8 | 88.2 | hypothetical protein CARUB_v10020705mg              | gbpln | Capsella rubella     | AT1G75240.1   Symbols: ATHB33, HB33, ZHD5   homeobox protein 33   chr1:28241576-28242505 FORWARD LENGTH=309                                   | 296 | 309 | 7.00E-98  | 104.4 | 81.1 | 86.1 |

|                          |                                                                                                                                                                                                                                                                                                                                                                  |     |     |           |       |      |      |                                                      |       |                      |                                                                                                                                                                                                                                                                                                                                                 |     |     |           |       |      |      |
|--------------------------|------------------------------------------------------------------------------------------------------------------------------------------------------------------------------------------------------------------------------------------------------------------------------------------------------------------------------------------------------------------|-----|-----|-----------|-------|------|------|------------------------------------------------------|-------|----------------------|-------------------------------------------------------------------------------------------------------------------------------------------------------------------------------------------------------------------------------------------------------------------------------------------------------------------------------------------------|-----|-----|-----------|-------|------|------|
| Rsa1.0_00979.1.g22087.t1 | refNP_177661.1  RAD-like 6 protein [Arabidopsis thaliana] gi10092271 gb AAG12684.1 AC025814_8 myb-related protein; 20671-21051 [Arabidopsis thaliana] gi41618978 gb AA509995.1  MYB transcription factor [Arabidopsis thaliana] gi109946537 gb ABG48447.1  At1g75250 [Arabidopsis thaliana] gi332197572 gb AEE35693.1  RAD-like 6 protein [Arabidopsis thaliana] | 85  | 126 | 1.00E-37  | 148.2 | 87.1 | 91.8 | RAD-like 6 protein                                   | gbpln | Arabidopsis thaliana | AT1G75250.1   Symbols: ATRL6, RSM3, RL6   RAD-like 6   chr1:28245073-28245453 REVERSE LENGTH=126                                                                                                                                                                                                                                                | 85  | 126 | 2.00E-40  | 148.2 | 87.1 | 91.8 |
| Rsa1.0_00979.1.g22088.t1 | dbj BAJ34425.1  unnamed protein product [Thellungiella halophila]                                                                                                                                                                                                                                                                                                | 312 | 311 | 1.00E-138 | 99.7  | 75.0 | 89.7 | unnamed protein product                              | ----  | ----                 | AT1G75280.1   Symbols:   NmrA-like negative transcriptional regulator family protein   chr1:28252030-28253355 FORWARD LENGTH=310                                                                                                                                                                                                                | 312 | 310 | 1.00E-130 | 99.4  | 71.5 | 85.3 |
| Rsa1.0_00979.1.g22089.t1 | gb AAM65005.1  GSH-dependent dehydroascorbate reductase 1, putative [Arabidopsis thaliana]                                                                                                                                                                                                                                                                       | 214 | 213 | 1.00E-104 | 99.5  | 87.4 | 91.6 | GSH-dependent dehydroascorbate reductase 1, putative | gbpln | Arabidopsis thaliana | AT1G75270.1   Symbols: DHAR2   dehydroascorbate reductase 2   chr1:28250255-28251237 REVERSE LENGTH=213                                                                                                                                                                                                                                         | 214 | 213 | 1.00E-106 | 99.5  | 86.9 | 91.1 |
| Rsa1.0_00979.1.g22090.t1 | ref XP_002899019.1  hypothetical protein ARALYDRAFT_476678 [Arabidopsis lyrata subsp. lyrata] gi297334880 gb EFH65278.1  hypothetical protein ARALYDRAFT_476678 [Arabidopsis lyrata subsp. lyrata]                                                                                                                                                               | 371 | 375 | 0         | 101.1 | 92.5 | 94.6 | hypothetical protein ARALYDRAFT_476678               | gbpln | Arabidopsis lyrata   | AT1G75330.1   Symbols: OTG   ornithine carbamoyltransferase   chr1:28266457-28268383 REVERSE LENGTH=375                                                                                                                                                                                                                                         | 371 | 375 | 0         | 101.1 | 92.2 | 94.1 |
| Rsa1.0_00979.1.g22091.t1 | ref XP_002887589.1  hypothetical protein ARALYDRAFT_476681 [Arabidopsis lyrata subsp. lyrata] gi297333430 gb EFH63848.1  hypothetical protein ARALYDRAFT_476681 [Arabidopsis lyrata subsp. lyrata]                                                                                                                                                               | 250 | 294 | 6.00E-51  | 117.6 | 57.2 | 70.8 | hypothetical protein ARALYDRAFT_476681               | gbpln | Arabidopsis lyrata   | AT1G75360.1   Symbols:   unknown protein; Has 74 Blast hits to 71 proteins in 15 species: Archae - 0; Bacteria - 4; Metazoa - 4; Fungi - 0; Plants - 54; Viruses - 0; Other Eukaryotes - 12 (source: NCBI BLINK).   chr1:28275084-28275956 FORWARD LENGTH=290                                                                                   | 250 | 290 | 3.00E-44  | 116.0 | 49.2 | 62.0 |
| Rsa1.0_00979.1.g22092.t1 | ref XP_002899022.1  hypothetical protein ARALYDRAFT_476684 [Arabidopsis lyrata subsp. lyrata] gi297334883 gb EFH65281.1  hypothetical protein ARALYDRAFT_476684 [Arabidopsis lyrata subsp. lyrata]                                                                                                                                                               | 320 | 324 | 1.00E-158 | 101.3 | 87.5 | 91.6 | hypothetical protein ARALYDRAFT_476684               | gbpln | Arabidopsis lyrata   | AT1G75380.3   Symbols: ATBBD1, BBD1   bifunctional nuclease in basal defense response 1   chr1:28281789-28283631 REVERSE LENGTH=325                                                                                                                                                                                                             | 320 | 325 | 1.00E-160 | 101.6 | 87.2 | 91.6 |
| Rsa1.0_00979.1.g22093.t1 | #                                                                                                                                                                                                                                                                                                                                                                | #   | #   | #         | #     | #    | -    | ----                                                 | ----  | ----                 | #                                                                                                                                                                                                                                                                                                                                               | #   | #   | #         | #     | #    |      |
| Rsa1.0_00979.1.g22094.t1 | #                                                                                                                                                                                                                                                                                                                                                                | #   | #   | #         | #     | #    | -    | ----                                                 | ----  | ----                 | #                                                                                                                                                                                                                                                                                                                                               | #   | #   | #         | #     | #    |      |
| Rsa1.0_00979.1.g22095.t1 | #                                                                                                                                                                                                                                                                                                                                                                | #   | #   | #         | #     | #    | -    | ----                                                 | ----  | ----                 | #                                                                                                                                                                                                                                                                                                                                               | #   | #   | #         | #     | #    |      |
| Rsa1.0_00980.1.g22096.t1 | gb AAC34342.1  Hypothetical protein [Arabidopsis thaliana]                                                                                                                                                                                                                                                                                                       | 376 | 374 | 2.00E-35  | 99.5  | 26.1 | 37.2 | Hypothetical protein                                 | gbpln | Arabidopsis thaliana | AT1G10000.1   Symbols:   Ribonuclease H-like superfamily protein   chr1:3263877-3264788 REVERSE LENGTH=303                                                                                                                                                                                                                                      | 376 | 303 | 5.00E-38  | 80.6  | 26.1 | 37.5 |
| Rsa1.0_00980.1.g22097.t1 | ref XP_002866551.1  hypothetical protein ARALYDRAFT_919627 [Arabidopsis lyrata subsp. lyrata] gi297312386 gb EFH42810.1  hypothetical protein ARALYDRAFT_919627 [Arabidopsis lyrata subsp. lyrata]                                                                                                                                                               | 557 | 562 | 0         | 100.9 | 87.1 | 94.4 | hypothetical protein ARALYDRAFT_919627               | gbpln | Arabidopsis lyrata   | AT5G63380.1   Symbols:   AMP-dependent synthetase and ligase family protein   chr5:25387581-25390026 REVERSE LENGTH=562                                                                                                                                                                                                                         | 557 | 562 | 0         | 100.9 | 85.3 | 91.9 |
| Rsa1.0_00980.1.g22098.t1 | ref XP_002866550.1  kinase family protein [Arabidopsis lyrata subsp. lyrata] gi297312385 gb EFH42809.1  kinase family protein [Arabidopsis lyrata subsp. lyrata]                                                                                                                                                                                                 | 615 | 616 | 0         | 100.2 | 74.6 | 83.9 | kinase family protein                                | gbpln | Arabidopsis lyrata   | AT5G63370.4   Symbols:   Protein kinase superfamily protein   chr5:25384954-25386792 REVERSE LENGTH=612                                                                                                                                                                                                                                         | 615 | 612 | 0         | 99.5  | 72.7 | 82.3 |
| Rsa1.0_00980.1.g22099.t1 | #                                                                                                                                                                                                                                                                                                                                                                | #   | #   | #         | #     | #    | -    | ----                                                 | ----  | ----                 | #                                                                                                                                                                                                                                                                                                                                               | #   | #   | #         | #     | #    |      |
| Rsa1.0_00980.1.g22100.t1 | ref XP_002866549.1  hypothetical protein ARALYDRAFT_496519 [Arabidopsis lyrata subsp. lyrata] gi297312384 gb EFH42808.1  hypothetical protein ARALYDRAFT_496519 [Arabidopsis lyrata subsp. lyrata]                                                                                                                                                               | 295 | 304 | 1.00E-123 | 103.1 | 82.7 | 89.8 | hypothetical protein ARALYDRAFT_496519               | gbpln | Arabidopsis lyrata   | AT5G63350.1   Symbols:   unknown protein; BEST Arabidopsis thaliana protein match is: unknown protein (TAIR:AT3G48510.1); Has 103 Blast hits to 102 proteins in 13 species: Archae - 0; Bacteria - 0; Metazoa - 2; Fungi - 0; Plants - 101; Viruses - 0; Other Eukaryotes - 0 (source: NCBI BLINK).   chr5:25380216-25381124 REVERSE LENGTH=302 | 295 | 302 | 1.00E-115 | 102.4 | 82.4 | 88.8 |
| Rsa1.0_00980.1.g22101.t1 | ref XP_002864845.1  hypothetical protein ARALYDRAFT_496513 [Arabidopsis lyrata subsp. lyrata] gi297310680 gb EFH41104.1  hypothetical protein ARALYDRAFT_496513 [Arabidopsis lyrata subsp. lyrata]                                                                                                                                                               | 166 | 183 | 2.00E-50  | 110.2 | 62.7 | 66.9 | hypothetical protein ARALYDRAFT_496513               | gbpln | Arabidopsis lyrata   | AT5G63300.1   Symbols:   Ribosomal protein S21 family protein   chr5:25371122-25371759 FORWARD LENGTH=185                                                                                                                                                                                                                                       | 166 | 185 | 7.00E-52  | 111.4 | 60.8 | 63.3 |

|                          |                                                                                                                                                                                                                                                                                                                                                                                                                                                                                                                                                                                                                                                                                                                |     |     |           |       |      |      |                                        |       |                      |                                                                                                                                                                       |     |     |           |       |      |      |
|--------------------------|----------------------------------------------------------------------------------------------------------------------------------------------------------------------------------------------------------------------------------------------------------------------------------------------------------------------------------------------------------------------------------------------------------------------------------------------------------------------------------------------------------------------------------------------------------------------------------------------------------------------------------------------------------------------------------------------------------------|-----|-----|-----------|-------|------|------|----------------------------------------|-------|----------------------|-----------------------------------------------------------------------------------------------------------------------------------------------------------------------|-----|-----|-----------|-------|------|------|
| Rsa1.0_00980.1.g22102.t1 | refXP_002864844.1   zinc finger family protein [Arabidopsis lyrata subsp. lyrata] gi 297310679 gb EFH41103.1   zinc finger family protein [Arabidopsis lyrata subsp. lyrata]                                                                                                                                                                                                                                                                                                                                                                                                                                                                                                                                   | 266 | 270 | 1.00E-117 | 101.5 | 84.2 | 91.7 | zinc finger family protein             | gbpln | Arabidopsis lyrata   | AT5G63280.1   Symbols:   C2H2-like zinc finger protein   chr5:25367085-25368848 FORWARD LENGTH=271                                                                    | 266 | 271 | 1.00E-118 | 101.9 | 85.0 | 92.1 |
| Rsa1.0_00980.1.g22103.t1 | gb EOA14592.1   hypothetical protein CARUB_v10027842mg [Capsella rubella]                                                                                                                                                                                                                                                                                                                                                                                                                                                                                                                                                                                                                                      | 80  | 81  | 4.00E-28  | 101.3 | 82.5 | 87.5 | hypothetical protein CARUB_v10027842mg | gbpln | Capsella rubella     | AT5G63270.1   Symbols:   RPM1-interacting protein 4 (RIN4) family protein   chr5:25365498-25365949 REVERSE LENGTH=80                                                  | 80  | 80  | 4.00E-28  | 100.0 | 81.3 | 85.0 |
| Rsa1.0_00980.1.g22104.t2 | ref NP_201122.1   GDSL esterase/lipase [Arabidopsis thaliana] gi 75171684 sp Q9FMK6.1 GDL89.ARAT H RecName: Full=GDSL esterase/lipase At5g63170. AltName: Full=Extracellular lipase At5g63170; Flags: Precursor gi 10177298 dbj BAB10559.1   lipase/acylhydrolase-like protein [Arabidopsis thaliana] gi 332010331 gb AED97714.1   GDSL esterase/lipase [Arabidopsis thaliana]                                                                                                                                                                                                                                                                                                                                 | 334 | 338 | 1.00E-162 | 101.2 | 86.2 | 94.3 | GDSL esterase/lipase                   | gbpln | Arabidopsis thaliana | AT5G63170.1   Symbols:   GDSL-like Lipase/Acylhydrolase superfamily protein   chr5:25338699-25340096 REVERSE LENGTH=338                                               | 334 | 338 | 1.00E-165 | 101.2 | 86.2 | 94.3 |
| Rsa1.0_00980.1.g22105.t1 | ref XP_002866538.1   hypothetical protein ARALYDRAFT_919604 [Arabidopsis lyrata subsp. lyrata] gi 297312373 gb EFH42797.1   hypothetical protein ARALYDRAFT_919604 [Arabidopsis lyrata subsp. lyrata]                                                                                                                                                                                                                                                                                                                                                                                                                                                                                                          | 366 | 365 | 0         | 99.7  | 90.2 | 94.8 | hypothetical protein ARALYDRAFT_919604 | gbpln | Arabidopsis lyrata   | AT5G63160.1   Symbols: BT1   BTB and TAZ domain protein   chr5:25333485-25335399 REVERSE LENGTH=365                                                                   | 366 | 365 | 0         | 99.7  | 88.8 | 94.0 |
| Rsa1.0_00980.1.g22106.t1 | ref XP_002885669.1   hypothetical protein ARALYDRAFT_319176 [Arabidopsis lyrata subsp. lyrata] gi 297331509 gb EFH61928.1   hypothetical protein ARALYDRAFT_319176 [Arabidopsis lyrata subsp. lyrata] ref NP_201100.1   RNA polymerase II, Rpb4, core protein [Arabidopsis thaliana] gi 334188590 ref NP_001190602.1   RNA polymerase II, Rpb4, core protein [Arabidopsis thaliana] gi 32815911 gb AAP88340.1   At5g62950 [Arabidopsis thaliana] gi 110743157 dbj BAE99470.1   hypothetical protein [Arabidopsis thaliana] gi 332010294 gb AED97677.1   RNA polymerase II, Rpb4, core protein [Arabidopsis thaliana] gi 332010296 gb AED97679.1   RNA polymerase II, Rpb4, core protein [Arabidopsis thaliana] | 81  | 467 | 2.00E-27  | 576.5 | 66.7 | 75.3 | hypothetical protein ARALYDRAFT_319176 | gbpln | Arabidopsis lyrata   | AT3G62850.1   Symbols:   zinc finger protein-related   chr3:23237487-23239155 REVERSE LENGTH=472                                                                      | 81  | 472 | 1.00E-26  | 582.7 | 59.3 | 70.4 |
| Rsa1.0_00980.1.g22107.t1 | gi 334188590 ref NP_001190602.1   RNA polymerase II, Rpb4, core protein [Arabidopsis thaliana] gi 32815911 gb AAP88340.1   At5g62950 [Arabidopsis thaliana] gi 110743157 dbj BAE99470.1   hypothetical protein [Arabidopsis thaliana] gi 332010294 gb AED97677.1   RNA polymerase II, Rpb4, core protein [Arabidopsis thaliana] gi 332010296 gb AED97679.1   RNA polymerase II, Rpb4, core protein [Arabidopsis thaliana]                                                                                                                                                                                                                                                                                      | 150 | 139 | 6.00E-53  | 92.7  | 68.7 | 80.0 | RNA polymerase II, Rpb4, core protein  | gbpln | Arabidopsis thaliana | AT5G62950.3   Symbols:   RNA polymerase II, Rpb4, core protein   chr5:25262355-25263033 REVERSE LENGTH=139                                                            | 150 | 139 | 2.00E-55  | 92.7  | 68.7 | 80.0 |
| Rsa1.0_00980.1.g22108.t1 | gb EOA13674.1   hypothetical protein CARUB_v10026747mg [Capsella rubella]                                                                                                                                                                                                                                                                                                                                                                                                                                                                                                                                                                                                                                      | 302 | 336 | 9.00E-80  | 111.3 | 65.2 | 74.5 | hypothetical protein CARUB_v10026747mg | gbpln | Capsella rubella     | AT5G62910.1   Symbols:   RING/U-box superfamily protein   chr5:25250830-25252015 FORWARD LENGTH=327                                                                   | 302 | 327 | 1.00E-78  | 108.3 | 63.6 | 73.2 |
| Rsa1.0_00981.1.g22109.t1 | gb EOA40458.1   hypothetical protein CARUB_v10009182mg [Capsella rubella]                                                                                                                                                                                                                                                                                                                                                                                                                                                                                                                                                                                                                                      | 441 | 435 | 0         | 98.6  | 95.9 | 97.3 | hypothetical protein CARUB_v10009182mg | gbpln | Capsella rubella     | AT1G48850.1   Symbols: EMB1144   chorismate synthase, putative / 5-enolpyruvylshikimate-3-phosphate phospholase, putative   chr1:18065154-18067956 REVERSE LENGTH=436 | 441 | 436 | 0         | 98.9  | 93.9 | 96.1 |
| Rsa1.0_00981.1.g22110.t1 | ref XP_002878309.1   hypothetical protein ARALYDRAFT_907521 [Arabidopsis lyrata subsp. lyrata] gi 297324147 gb EFH54568.1   hypothetical protein ARALYDRAFT_907521 [Arabidopsis lyrata subsp. lyrata]                                                                                                                                                                                                                                                                                                                                                                                                                                                                                                          | 159 | 153 | 8.00E-50  | 96.2  | 61.0 | 74.2 | hypothetical protein ARALYDRAFT_907521 | gbpln | Arabidopsis lyrata   | AT1G20140.1   Symbols: ASK4, SK4   SKP1-like 4   chr1:6986430-6987079 FORWARD LENGTH=163                                                                              | 159 | 163 | 4.00E-49  | 102.5 | 60.4 | 74.2 |
| Rsa1.0_00981.1.g22111.t1 | dbj BAA97086.1   unnamed protein product [Arabidopsis thaliana]                                                                                                                                                                                                                                                                                                                                                                                                                                                                                                                                                                                                                                                | 285 | 341 | 5.00E-80  | 119.6 | 50.9 | 59.6 | unnamed protein product                | gbpln | Arabidopsis thaliana | #                                                                                                                                                                     | #   | #   | #         | #     | #    | #    |
| Rsa1.0_00981.1.g22112.t1 | ref NP_175319.2   protein trichome birefringence-like 7 [Arabidopsis thaliana] gi 332194241 gb AEE32362.1   protein trichome birefringence-like 7 [Arabidopsis thaliana]                                                                                                                                                                                                                                                                                                                                                                                                                                                                                                                                       | 443 | 445 | 0         | 100.5 | 90.5 | 95.9 | protein trichome birefringence-like 7  | gbpln | Arabidopsis thaliana | AT1G48880.1   Symbols: TBL7   TRICHOME BIREFRINGENCE-LIKE 7   chr1:18081033-18082650 FORWARD LENGTH=445                                                               | 443 | 445 | 0         | 100.5 | 90.5 | 95.9 |
| Rsa1.0_00981.1.g22113.t1 | gb EOA18188.1   hypothetical protein CARUB_v10006667mg [Capsella rubella]                                                                                                                                                                                                                                                                                                                                                                                                                                                                                                                                                                                                                                      | 206 | 171 | 5.00E-16  | 83.0  | 27.7 | 43.2 | hypothetical protein CARUB_v10006667mg | gbpln | Capsella rubella     | AT4G30760.1   Symbols:   Putative endonuclease or glycosyl hydrolase   chr4:14982552-14983285 FORWARD LENGTH=191                                                      | 206 | 191 | 2.00E-17  | 92.7  | 24.3 | 38.8 |
| Rsa1.0_00981.1.g22114.t1 | gb EOA40222.1   hypothetical protein CARUB_v10008947mg [Capsella rubella]                                                                                                                                                                                                                                                                                                                                                                                                                                                                                                                                                                                                                                      | 496 | 495 | 0         | 99.8  | 94.4 | 97.2 | hypothetical protein CARUB_v10008947mg | gbpln | Capsella rubella     | AT1G48900.1   Symbols:   Signal recognition particle, SRP54 subunit protein   chr1:18084972-18087743 REVERSE LENGTH=495                                               | 496 | 495 | 0         | 99.8  | 94.4 | 97.6 |

|                          |                                                                                                                                                                                                                                                                                                                                                                                                                                                                 |      |      |          |       |      |      |                                                                |       |                      |                                                                                                                                               |      |     |          |       |      |      |
|--------------------------|-----------------------------------------------------------------------------------------------------------------------------------------------------------------------------------------------------------------------------------------------------------------------------------------------------------------------------------------------------------------------------------------------------------------------------------------------------------------|------|------|----------|-------|------|------|----------------------------------------------------------------|-------|----------------------|-----------------------------------------------------------------------------------------------------------------------------------------------|------|-----|----------|-------|------|------|
| Rsa1.0_00982.1.g22115.t1 | emb CAN61554.1  hypothetical protein VITISV_028479 [Vitis vinifera]                                                                                                                                                                                                                                                                                                                                                                                             | 160  | 1144 | 5.00E-32 | 715.0 | 38.8 | 48.1 | hypothetical protein VITISV_028479                             | gbpln | Vitis vinifera       | #                                                                                                                                             | #    | #   | #        | #     | #    |      |
| Rsa1.0_00982.1.g22116.t1 | #                                                                                                                                                                                                                                                                                                                                                                                                                                                               | #    | #    | #        | #     | #    | -    | -                                                              | ----  | ----                 | #                                                                                                                                             | #    | #   | #        | #     | #    |      |
| Rsa1.0_00982.1.g22117.t1 | ref NP_850851.1  heavy metal transport/detoxification domain-containing protein [Arabidopsis thaliana] gi 238481311 ref NP_001154719.1  heavy metal transport/detoxification domain-containing protein [Arabidopsis thaliana] gi 332005268 gb AE92651.1  heavy metal transport/detoxification domain-containing protein [Arabidopsis thaliana] gi 332005269 gb AE92652.1  heavy metal transport/detoxification domain-containing protein [Arabidopsis thaliana] | 610  | 465  | 4.00E-49 | 76.2  | 18.2 | 18.4 | heavy metal transport/detoxification domain-containing protein | gbpln | Arabidopsis thaliana | AT5G19090.3   Symbols:   Heavy metal transport/detoxification superfamily protein   chr5:6387910-6389855 FORWARD LENGTH=465                   | 610  | 465 | 1.00E-51 | 76.2  | 18.2 | 18.4 |
| Rsa1.0_00982.1.g22118.t1 | #                                                                                                                                                                                                                                                                                                                                                                                                                                                               | #    | #    | #        | #     | #    | -    | -                                                              | ----  | ----                 | #                                                                                                                                             | #    | #   | #        | #     | #    |      |
| Rsa1.0_00982.1.g22119.t1 | #                                                                                                                                                                                                                                                                                                                                                                                                                                                               | #    | #    | #        | #     | #    | -    | -                                                              | ----  | ----                 | #                                                                                                                                             | #    | #   | #        | #     | #    |      |
| Rsa1.0_00982.1.g22120.t1 | #                                                                                                                                                                                                                                                                                                                                                                                                                                                               | #    | #    | #        | #     | #    | -    | -                                                              | ----  | ----                 | #                                                                                                                                             | #    | #   | #        | #     | #    |      |
| Rsa1.0_00983.1.g22121.t1 | ref NP_001077797.1  WPP domain-interacting tail-anchored protein 2 [Arabidopsis thaliana] gi 334183749 ref NP_001185353.1  WPP domain-interacting tail-anchored protein 2 [Arabidopsis thaliana] gi 332196738 gb AE34859.1  WPP domain-interacting tail-anchored protein 2 [Arabidopsis thaliana] gi 332196739 gb AE34860.1  WPP domain-interacting tail-anchored protein 2 [Arabidopsis thaliana]                                                              | 597  | 582  | 0        | 97.5  | 82.9 | 90.6 | WPP domain-interacting tail-anchored protein 2                 | gbpln | Arabidopsis thaliana | AT1G68910.3   Symbols: WIT2   WPP domain-interacting protein 2   chr1:25908373-25910485 REVERSE LENGTH=582                                    | 597  | 582 | 0        | 97.5  | 82.9 | 90.6 |
| Rsa1.0_00983.1.g22122.t1 | #                                                                                                                                                                                                                                                                                                                                                                                                                                                               | #    | #    | #        | #     | #    | -    | -                                                              | ----  | ----                 | AT1G14800.1   Symbols:   Nucleic acid-binding, OB-fold-like protein   chr1:5099572-5102558 FORWARD LENGTH=384                                 | 129  | 384 | 1.00E-10 | 297.7 | 22.5 | 26.4 |
| Rsa1.0_00983.1.g22123.t1 | ref NP_001031254.1  putative defensin-like protein 263 [Arabidopsis thaliana] gi 122209605 sp Q2V4D9.1 DF263 ARAT H RecName: Full=Putative defensin-like protein 263; Flags: Precursor gi 332196736 gb AE34857.1  putative defensin-like protein 263 [Arabidopsis thaliana]                                                                                                                                                                                     | 93   | 96   | 5.00E-34 | 103.2 | 76.3 | 84.9 | putative defensin-like protein 263                             | gbpln | Arabidopsis thaliana | AT1G68907.1   Symbols:   Defensin-like (DEFL) family protein   chr1:25907508-25907891 REVERSE LENGTH=96                                       | 93   | 96  | 8.00E-37 | 103.2 | 76.3 | 84.9 |
| Rsa1.0_00983.1.g22124.t1 | ref NP_001031253.1  putative defensin-like protein 262 [Arabidopsis thaliana] gi 122209606 sp Q2V4E0.1 DF262 ARAT H RecName: Full=Putative defensin-like protein 262; Flags: Precursor gi 332196735 gb AE34856.1  putative defensin-like protein 262 [Arabidopsis thaliana]                                                                                                                                                                                     | 90   | 95   | 2.00E-14 | 105.6 | 54.4 | 66.7 | putative defensin-like protein 262                             | gbpln | Arabidopsis thaliana | AT1G68905.1   Symbols:   Defensin-like (DEFL) family protein   chr1:25906716-25907092 REVERSE LENGTH=95                                       | 90   | 95  | 3.00E-17 | 105.6 | 54.4 | 66.7 |
| Rsa1.0_00983.1.g22125.t1 | ref XP_002865055.1  hypothetical protein ARALYDRAFT_920059 [Arabidopsis lyrata subsp. lyrata] gi 297310890 gb EFH41314.1  hypothetical protein ARALYDRAFT_920059 [Arabidopsis lyrata subsp. lyrata]                                                                                                                                                                                                                                                             | 385  | 398  | 1.00E-51 | 103.4 | 37.7 | 55.8 | hypothetical protein ARALYDRAFT_920059                         | gbpln | Arabidopsis lyrata   | AT5G66670.2   Symbols:   Protein of unknown function (DUF677)   chr5:26611474-26612700 REVERSE LENGTH=408                                     | 385  | 408 | 6.00E-49 | 106.0 | 36.6 | 54.0 |
| Rsa1.0_00983.1.g22126.t1 | #                                                                                                                                                                                                                                                                                                                                                                                                                                                               | #    | #    | #        | #     | #    | -    | -                                                              | ----  | ----                 | #                                                                                                                                             | #    | #   | #        | #     | #    |      |
| Rsa1.0_00983.1.g22127.t1 | gb EOA12536.1  hypothetical protein CARUB_v10026516mg [Capsella rubella]                                                                                                                                                                                                                                                                                                                                                                                        | 319  | 405  | 1.00E-39 | 127.0 | 34.8 | 54.2 | hypothetical protein CARUB_v10026516mg                         | gbpln | Capsella rubella     | AT5G66670.2   Symbols:   Protein of unknown function (DUF677)   chr5:26611474-26612700 REVERSE LENGTH=408                                     | 319  | 408 | 3.00E-39 | 127.9 | 37.3 | 57.4 |
| Rsa1.0_00983.1.g22128.t1 | #                                                                                                                                                                                                                                                                                                                                                                                                                                                               | #    | #    | #        | #     | #    | -    | -                                                              | ----  | ----                 | #                                                                                                                                             | #    | #   | #        | #     | #    |      |
| Rsa1.0_00984.1.g22129.t2 | ref NP_187969.1  calmodulin-binding protein-like protein [Arabidopsis thaliana] gi 11994562 db BAB02602.1  unnamed protein product [Arabidopsis thaliana] gi 332641860 gb AEE75381.1  calmodulin-binding protein-like protein [Arabidopsis thaliana]                                                                                                                                                                                                            | 222  | 605  | 4.00E-12 | 272.5 | 22.1 | 24.8 | calmodulin-binding protein-like protein                        | gbpln | Arabidopsis thaliana | AT3G13600.1   Symbols:   calmodulin-binding family protein   chr3:4445102-4447383 FORWARD LENGTH=605                                          | 222  | 605 | 1.00E-14 | 272.5 | 22.1 | 24.8 |
| Rsa1.0_00984.1.g22130.t1 | gb AAG50806.1 AC079281_8 unknown protein [Arabidopsis thaliana]                                                                                                                                                                                                                                                                                                                                                                                                 | 1716 | 1213 | 0        | 70.7  | 26.0 | 38.6 | unknown protein                                                | gbpln | Arabidopsis thaliana | AT1G43760.1   Symbols:   DNase I-like superfamily protein   chr1:16528880-16531065 REVERSE LENGTH=626                                         | 1716 | 626 | 5.00E-67 | 36.5  | 8.6  | 14.0 |
| Rsa1.0_00984.1.g22131.t1 | db BAD95408.1  hypothetical protein [Arabidopsis thaliana]                                                                                                                                                                                                                                                                                                                                                                                                      | 195  | 478  | 1.00E-39 | 245.1 | 42.1 | 58.5 | hypothetical protein                                           | gbpln | Arabidopsis thaliana | AT3G24255.1   Symbols:   RNA-directed DNA polymerase (reverse transcriptase)-related family protein   chr3:8789471-8793208 FORWARD LENGTH=746 | 195  | 746 | 5.00E-35 | 382.6 | 34.9 | 47.7 |



|                          |                                                                                                                                                                                                                                                                                                                                                |      |      |           |       |      |      |                                                |       |                      |                                                                                                                                     |      |      |          |       |      |      |
|--------------------------|------------------------------------------------------------------------------------------------------------------------------------------------------------------------------------------------------------------------------------------------------------------------------------------------------------------------------------------------|------|------|-----------|-------|------|------|------------------------------------------------|-------|----------------------|-------------------------------------------------------------------------------------------------------------------------------------|------|------|----------|-------|------|------|
| Rsa1.0_00984.1.g22132.t1 | gb AAD19773.1  putative retroelement pol polyprotein [Arabidopsis thaliana]                                                                                                                                                                                                                                                                    | 1576 | 1335 | 4.00E-87  | 84.7  | 13.1 | 19.0 | putative retroelement pol polyprotein          | gbpln | Arabidopsis thaliana | ATMG00300.1   Symbols: ORF145A   Gag-Pol-related retrotransposon family protein   chrM:89617-90054 REVERSE LENGTH=145               | 1576 | 145  | 4.00E-17 | 9.2   | 2.7  | 3.3  |
| Rsa1.0_00984.1.g22133.t1 | dbj BAB09923.1  copia-like retrotransposable element [Arabidopsis thaliana]                                                                                                                                                                                                                                                                    | 374  | 1342 | 1.00E-103 | 358.8 | 51.1 | 64.7 | copia-like retrotransposable element           | gbpln | Arabidopsis thaliana | AT4G23160.1   Symbols: CRK8   cysteine-rich RLK (RECEPTOR-like protein kinase) 8   chr4:12129485-12134086 FORWARD LENGTH=1262       | 374  | 1262 | 9.00E-40 | 337.4 | 29.1 | 47.3 |
| Rsa1.0_00984.1.g22134.t1 | ref XP_002865054.1  hypothetical protein ARALYDRAFT_920058 [Arabidopsis lyrata subsp. lyrata] gi 297310889 gb EFH41313.1  hypothetical protein ARALYDRAFT_920058 [Arabidopsis lyrata subsp. lyrata]                                                                                                                                            | 374  | 409  | 5.00E-58  | 109.4 | 42.8 | 60.2 | hypothetical protein ARALYDRAFT_920058         | gbpln | Arabidopsis lyrata   | AT5G66670.2   Symbols:   Protein of unknown function (DUF677)   chr5:26611474-26612700 REVERSE LENGTH=408                           | 374  | 408  | 2.00E-60 | 109.1 | 43.0 | 60.7 |
| Rsa1.0_00984.1.g22135.t1 | #                                                                                                                                                                                                                                                                                                                                              | #    | #    | #         | #     | #    | #    | -                                              | ----  | ----                 | #                                                                                                                                   | #    | #    | #        | #     | #    | #    |
| Rsa1.0_00984.1.g22136.t1 | gb AAF69169.1 AC007915_21 F27F5.21 [Arabidopsis thaliana]                                                                                                                                                                                                                                                                                      | 774  | 1023 | 1.00E-133 | 132.2 | 28.7 | 35.5 | F27F5.21                                       | gbpln | Arabidopsis thaliana | AT4G29090.1   Symbols:   Ribonuclease H-like superfamily protein   chr4:14333528-14335255 FORWARD LENGTH=575                        | 774  | 575  | 5.00E-43 | 74.3  | 16.4 | 27.3 |
| Rsa1.0_00985.1.g22137.t4 | #                                                                                                                                                                                                                                                                                                                                              | #    | #    | #         | #     | #    | #    | -                                              | ----  | ----                 | #                                                                                                                                   | #    | #    | #        | #     | #    | #    |
| Rsa1.0_00985.1.g22138.t1 | ref NP_189252.1  cytochrome P450 71B23 [Arabidopsis thaliana] gi 13878383 sp C9LTM0.1 C71BN_ARAT_H RecName: Full=Cytochrome P450 71B23 gi 11994440 dbj BAB02442.1  cytochrome P450 [Arabidopsis thaliana] gi 50897236 gb AAT85757.1  At3g26210 [Arabidopsis thaliana] gi 332643613 gb AAE77134.1  cytochrome P450 71B23 [Arabidopsis thaliana] | 501  | 501  | 0         | 100.0 | 82.4 | 91.8 | cytochrome P450 71B23                          | gbpln | Arabidopsis thaliana | AT3G26210.1   Symbols: CYP71B23   cytochrome P450, family 71, subfamily B, polypeptide 23   chr3:9593329-9595202 REVERSE LENGTH=501 | 501  | 501  | 0        | 100.0 | 82.4 | 91.8 |
| Rsa1.0_00985.1.g22139.t2 | ref XP_002876955.1  cytochrome P450 [Arabidopsis lyrata subsp. lyrata] gi 297322783 gb EFH53214.1  cytochrome P450 [Arabidopsis lyrata subsp. lyrata]                                                                                                                                                                                          | 1085 | 483  | 0         | 44.5  | 35.2 | 40.5 | cytochrome P450                                | gbpln | Arabidopsis lyrata   | AT3G26230.1   Symbols: CYP71B24   cytochrome P450, family 71, subfamily B, polypeptide 24   chr3:9598200-9599892 REVERSE LENGTH=498 | 1085 | 498  | 0        | 45.9  | 34.3 | 40.0 |
| Rsa1.0_00985.1.g22140.t1 | ref XP_002876962.1  CYP71B34 [Arabidopsis lyrata subsp. lyrata] gi 297322800 gb EFH53221.1  CYP71B34 [Arabidopsis lyrata subsp. lyrata]                                                                                                                                                                                                        | 497  | 500  | 0         | 100.6 | 68.2 | 84.1 | CYP71B34                                       | gbpln | Arabidopsis lyrata   | AT3G26300.1   Symbols: CYP71B34   cytochrome P450, family 71, subfamily B, polypeptide 34   chr3:9639199-9640866 REVERSE LENGTH=500 | 497  | 500  | 0        | 100.6 | 67.4 | 83.7 |
| Rsa1.0_00985.1.g22141.t1 | ref XP_002876962.1  CYP71B34 [Arabidopsis lyrata subsp. lyrata] gi 297322800 gb EFH53221.1  CYP71B34 [Arabidopsis lyrata subsp. lyrata]                                                                                                                                                                                                        | 500  | 500  | 0         | 100.0 | 74.0 | 85.8 | CYP71B34                                       | gbpln | Arabidopsis lyrata   | AT3G26300.1   Symbols: CYP71B34   cytochrome P450, family 71, subfamily B, polypeptide 34   chr3:9639199-9640866 REVERSE LENGTH=500 | 500  | 500  | 0        | 100.0 | 73.8 | 85.8 |
| Rsa1.0_00985.1.g22142.t1 | gb EOA25001.1  hypothetical protein CARUB_v10018299mg [Capsella rubella]                                                                                                                                                                                                                                                                       | 108  | 101  | 3.00E-40  | 93.5  | 81.5 | 85.2 | hypothetical protein CARUB_v10018299mg         | gbpln | Capsella rubella     | AT3G26360.1   Symbols:   Ribosomal protein S21 family protein   chr3:9655963-9656373 REVERSE LENGTH=101                             | 108  | 101  | 1.00E-42 | 93.5  | 81.5 | 84.3 |
| Rsa1.0_00985.1.g22143.t1 | ref XP_002875314.1  hypothetical protein ARALYDRAFT_484400 [Arabidopsis lyrata subsp. lyrata] gi 297321152 gb EFH51573.1  hypothetical protein ARALYDRAFT_484400 [Arabidopsis lyrata subsp. lyrata]                                                                                                                                            | 557  | 556  | 0         | 99.8  | 95.2 | 96.8 | hypothetical protein ARALYDRAFT_484400         | gbpln | Arabidopsis lyrata   | AT3G26370.1   Symbols:   O-fucosyltransferase family protein   chr3:9656886-9659741 FORWARD LENGTH=557                              | 557  | 557  | 0        | 100.0 | 95.3 | 96.8 |
| Rsa1.0_00985.1.g22144.t1 | gb EOA23740.1  hypothetical protein CARUB_v10016953mg [Capsella rubella]                                                                                                                                                                                                                                                                       | 565  | 555  | 0         | 98.2  | 80.5 | 85.1 | hypothetical protein CARUB_v10016953mg         | gbpln | Capsella rubella     | AT3G26400.1   Symbols: EIF4B1   eukaryotic translation initiation factor 4B1   chr3:9666616-9669081 FORWARD LENGTH=532              | 565  | 532  | 0        | 94.2  | 76.6 | 81.8 |
| Rsa1.0_00985.1.g22145.t1 | ref XP_002876970.1  methyltransferase/nucleic acid binding protein [Arabidopsis lyrata subsp. lyrata] gi 297322808 gb EFH53229.1  methyltransferase/nucleic acid binding protein [Arabidopsis lyrata subsp. lyrata]                                                                                                                            | 475  | 477  | 0         | 100.4 | 93.5 | 97.7 | methyltransferase/nucleic acid binding protein | gbpln | Arabidopsis lyrata   | AT3G26410.1   Symbols: TRM11, AtTRM11   methyltransferases/nucleic acid binding   chr3:9669508-9671273 REVERSE LENGTH=477           | 475  | 477  | 0        | 100.4 | 93.1 | 97.5 |

|                          |                                                                                                                                                                                                                                                                                                                                                                                                                                                                                                                                                                                                                                                                                                      |      |      |           |       |      |      |                                                                                |       |                      |                                                                                                                                                                      |      |      |           |       |      |      |
|--------------------------|------------------------------------------------------------------------------------------------------------------------------------------------------------------------------------------------------------------------------------------------------------------------------------------------------------------------------------------------------------------------------------------------------------------------------------------------------------------------------------------------------------------------------------------------------------------------------------------------------------------------------------------------------------------------------------------------------|------|------|-----------|-------|------|------|--------------------------------------------------------------------------------|-------|----------------------|----------------------------------------------------------------------------------------------------------------------------------------------------------------------|------|------|-----------|-------|------|------|
| Rsa1.0_00985.1.g22146.t1 | ref NP_189273.1  RNA recognition motif and CCHC-type zinc finger domain-containing protein [Arabidopsis thaliana] gi 15933477 gb AAL11606.1 AF424613.1 AT3g26240/F20C19_14 [Arabidopsis thaliana] gi 9294301 dbj BAE02203.1  unnamed protein product [Arabidopsis thaliana] gi 15451066 gb AAK96804.1  Unknown protein [Arabidopsis thaliana] gi 18377412 gb AAL66872.1  unknown protein [Arabidopsis thaliana] gi 62320797 dbj BAD93728.1  RNA-binding protein [Arabidopsis thaliana] gi 110742443 dbj BAE99140.1  putative RNA-binding protein [Arabidopsis thaliana] gi 332643635 gb AEE77156.1  RNA recognition motif and CCHC-type zinc finger domain-containing protein [Arabidopsis thaliana] | 246  | 245  | 2.00E-98  | 99.6  | 85.0 | 91.1 | RNA recognition motif and CCHC-type zinc finger domain-containing protein      | gbpln | Arabidopsis thaliana | AT3G26420.1   Symbols: ATRZ-1A   RNA-binding (R/RM/RBD/RNP motifs) family protein with retrovirus zinc finger-like domain   chr:3.9671953-9673055 FORWARD LENGTH=245 | 246  | 245  | 1.00E-101 | 99.6  | 85.0 | 91.1 |
| Rsa1.0_00985.1.g22147.t2 | ref NP_189274.1  GDSL esterase/lipase [Arabidopsis thaliana] gi 75273423 sp Q9LJN2.1 GDL53_ARATH RecName: Full=GDSL esterase/lipase At3g26430; AltName: Full=Extracellular lipase At3g26430; Flags: Precursor gi 9294302 dbj BAB02204.1  nodulin-like protein protein [Arabidopsis thaliana] gi 17064918 gb AAL32613.1  Unknown protein [Arabidopsis thaliana] gi 20259934 gb AAM13314.1  unknown protein [Arabidopsis thaliana] gi 332643634 gb AEE77155.1  GDSL esterase/lipase [Arabidopsis thaliana]                                                                                                                                                                                             | 383  | 380  | 0         | 99.2  | 82.8 | 91.4 | GDSL esterase/lipase                                                           | gbpln | Arabidopsis thaliana | AT3G26430.1   Symbols:   GDSL-like Lipase/Acylhydrolase superfamily protein   chr:3.9674419-9675899 FORWARD LENGTH=380                                               | 383  | 380  | 0         | 99.2  | 82.8 | 91.4 |
| Rsa1.0_00985.1.g22148.t1 | gb EOA33834.1  hypothetical protein CARUB_v10021315mg, partial [Capsella rubella]                                                                                                                                                                                                                                                                                                                                                                                                                                                                                                                                                                                                                    | 167  | 684  | 1.00E-61  | 409.6 | 65.3 | 77.8 | hypothetical protein CARUB_v10021315mg, partial                                | gbpln | Capsella rubella     | AT1G19260.1   Symbols:   TTF-type zinc finger protein with HAT dimerisation domain   chr:1.6657260-6659569 REVERSE LENGTH=769                                        | 167  | 769  | 9.00E-57  | 460.5 | 59.9 | 78.4 |
| Rsa1.0_00985.1.g22149.t2 | ref XP_002510773.1  ATP-dependent RNA helicase, putative [Ricinus communis] gi 223551474 gb EEF52960.1  ATP-dependent RNA helicase, putative [Ricinus communis]                                                                                                                                                                                                                                                                                                                                                                                                                                                                                                                                      | 1185 | 1177 | 0         | 99.3  | 81.3 | 87.8 | ATP-dependent RNA helicase, putative                                           | gbpln | Ricinus communis     | AT3G26560.1   Symbols:   ATP-dependent RNA helicase, putative   chr:3.9750122-9753719 REVERSE LENGTH=1168                                                            | 1185 | 1168 | 0         | 98.6  | 78.5 | 80.4 |
| Rsa1.0_00985.1.g22150.t1 | ref XP_002875323.1  binding protein [Arabidopsis lyrata subsp. lyrata] gi 29732116 gb EFH51582.1  binding protein [Arabidopsis lyrata subsp. lyrata]                                                                                                                                                                                                                                                                                                                                                                                                                                                                                                                                                 | 349  | 349  | 1.00E-172 | 100.0 | 89.1 | 93.1 | binding protein                                                                | gbpln | Arabidopsis lyrata   | AT3G26580.1   Symbols:   Tetratricopeptide repeat (TPR)-like superfamily protein   chr:3.9758933-9760349 FORWARD LENGTH=350                                          | 349  | 350  | 1.00E-172 | 100.3 | 88.0 | 92.0 |
| Rsa1.0_00985.1.g22151.t1 | ref NP_189291.1  mate efflux domain-containing protein [Arabidopsis thaliana] gi 1402878 emb CA66809.1  hypothetical protein [Arabidopsis thaliana] gi 9293938 dbj BAB01841.1  unnamed protein product [Arabidopsis thaliana] gi 16323121 gb AAL15295.1  AT3g26590/MFE16.11 [Arabidopsis thaliana] gi 25141209 gb AAN73299.1  AT3g26590/MFE16.11 [Arabidopsis thaliana] gi 332643662 gb AEE77183.1  mate efflux domain-containing protein [Arabidopsis thaliana]                                                                                                                                                                                                                                     | 503  | 500  | 0         | 99.4  | 87.1 | 93.4 | mate efflux domain-containing protein                                          | gbpln | Arabidopsis thaliana | AT3G26590.1   Symbols:   MATE efflux family protein   chr:3.9761927-9765259 REVERSE LENGTH=500                                                                       | 503  | 500  | 0         | 99.4  | 87.1 | 93.4 |
| Rsa1.0_00985.1.g22152.t2 | emb CAB39638.1  RNA-directed DNA polymerase-like protein [Arabidopsis thaliana] gi 7267666 emb CAB78094.1  RNA-directed DNA polymerase-like protein [Arabidopsis thaliana]                                                                                                                                                                                                                                                                                                                                                                                                                                                                                                                           | 2114 | 1274 | 0         | 60.3  | 28.7 | 38.2 | RNA-directed DNA polymerase-like protein                                       | gbpln | Arabidopsis thaliana | AT4G2090.1   Symbols:   Ribonuclease H-like superfamily protein   chr:4:14333528-14335255 FORWARD LENGTH=575                                                         | 2114 | 575  | 2.00E-51  | 27.2  | 5.5  | 8.2  |
| Rsa1.0_00986.1.g22153.t1 | dbj BAB10790.1  retroelement pol polyprotein-like [Arabidopsis thaliana]                                                                                                                                                                                                                                                                                                                                                                                                                                                                                                                                                                                                                             | 327  | 1864 | 3.00E-90  | 570.0 | 54.4 | 68.2 | retroelement pol polyprotein-like                                              | gbpln | Arabidopsis thaliana | #                                                                                                                                                                    | #    | #    | #         | #     | #    |      |
| Rsa1.0_00986.1.g22154.t1 | gb AAC28189.1  contains similarity to Arabidopsis thaliana retrotransposon Athila (GB:X81801) [Arabidopsis thaliana]                                                                                                                                                                                                                                                                                                                                                                                                                                                                                                                                                                                 | 521  | 940  | 5.00E-43  | 180.4 | 20.2 | 31.7 | contains similarity to Arabidopsis thaliana retrotransposon Athila (GB:X81801) | gbpln | Arabidopsis thaliana | #                                                                                                                                                                    | #    | #    | #         | #     | #    |      |
| Rsa1.0_00986.1.g22155.t1 | #                                                                                                                                                                                                                                                                                                                                                                                                                                                                                                                                                                                                                                                                                                    | #    | #    | #         | #     | #    | -    | -                                                                              | ----  | ----                 | #                                                                                                                                                                    | #    | #    | #         | #     | #    |      |
| Rsa1.0_00986.1.g22156.t1 | gb ABD65085.1  Ulp1 protease family protein [Brassica oleracea]                                                                                                                                                                                                                                                                                                                                                                                                                                                                                                                                                                                                                                      | 83   | 640  | 5.00E-12  | 771.1 | 42.2 | 48.2 | Ulp1 protease family protein                                                   | gbpln | Brassica oleracea    | #                                                                                                                                                                    | #    | #    | #         | #     | #    |      |
| Rsa1.0_00986.1.g22157.t1 | #                                                                                                                                                                                                                                                                                                                                                                                                                                                                                                                                                                                                                                                                                                    | #    | #    | #         | #     | #    | -    | -                                                                              | ----  | ----                 | #                                                                                                                                                                    | #    | #    | #         | #     | #    |      |

|                          |                                                                                                                                                                                                                                                                                                                                                                                                              |      |      |           |       |      |      |                                              |       |                      |                                                                                                                                                                                                                                                                                                                                                      |      |      |           |       |      |      |
|--------------------------|--------------------------------------------------------------------------------------------------------------------------------------------------------------------------------------------------------------------------------------------------------------------------------------------------------------------------------------------------------------------------------------------------------------|------|------|-----------|-------|------|------|----------------------------------------------|-------|----------------------|------------------------------------------------------------------------------------------------------------------------------------------------------------------------------------------------------------------------------------------------------------------------------------------------------------------------------------------------------|------|------|-----------|-------|------|------|
| Rsa1.0_00986.1.g22158.t2 | ref[XP_002894562.1] leucine-rich repeat family protein [Arabidopsis lyrata subsp. lyrata] gi 297340404 gb EFH70821.1  leucine-rich repeat family protein [Arabidopsis lyrata subsp. lyrata]                                                                                                                                                                                                                  | 1001 | 1031 | 0         | 103.0 | 75.5 | 86.2 | leucine-rich repeat family protein           | gbpln | Arabidopsis lyrata   | AT1G56130.1   Symbols:   Leucine-rich repeat transmembrane protein kinase   chr1:20994931-21000887 REVERSE LENGTH=1032                                                                                                                                                                                                                               | 1001 | 1032 | 0         | 103.1 | 75.0 | 86.0 |
| Rsa1.0_00986.1.g22159.t1 | dbj BAJ34267.1  unnamed protein product [Theilungella halophila]                                                                                                                                                                                                                                                                                                                                             | 433  | 422  | 0         | 97.5  | 85.5 | 90.3 | unnamed protein product                      | ----  | ----                 | AT5G43270.1   Symbols: SPL2   squamosa promoter binding protein-like 2   chr5:17360527-17362143 REVERSE LENGTH=419                                                                                                                                                                                                                                   | 433  | 419  | 0         | 96.8  | 81.8 | 86.8 |
| Rsa1.0_00986.1.g22160.t2 | gb ABD65060.1  hypothetical protein 27.t00039 [Brassica oleracea]                                                                                                                                                                                                                                                                                                                                            | 282  | 1367 | 1.00E-119 | 484.8 | 72.7 | 79.1 | hypothetical protein 27.t00039               | gbpln | Brassica oleracea    | AT3G51700.1   Symbols:   PIF1 helicase   chr3:19179443-19181145 REVERSE LENGTH=344                                                                                                                                                                                                                                                                   | 282  | 344  | 4.00E-43  | 122.0 | 31.2 | 44.0 |
| Rsa1.0_00987.1.g22161.t1 | ref[XP_002887110.1] hypothetical protein ARALYDRAFT_338955 [Arabidopsis lyrata subsp. lyrata] gi 297332951 gb EFH63369.1  hypothetical protein ARALYDRAFT_338955 [Arabidopsis lyrata subsp. lyrata]                                                                                                                                                                                                          | 292  | 330  | 6.00E-57  | 113.0 | 37.3 | 45.2 | hypothetical protein ARALYDRAFT_338955       | gbpln | Arabidopsis lyrata   | AT5G45220.1   Symbols:   Disease resistance protein (TIR-NBS-LRR class) family   chr5:18298926-18301069 REVERSE LENGTH=546                                                                                                                                                                                                                           | 292  | 546  | 2.00E-49  | 187.0 | 30.8 | 39.7 |
| Rsa1.0_00987.1.g22162.t1 | gb AAG51783.1 AC079679_3 reverse transcriptase, putative; 16838-20266 [Arabidopsis thaliana]                                                                                                                                                                                                                                                                                                                 | 160  | 1142 | 5.00E-35  | 713.8 | 50.6 | 66.3 | reverse transcriptase, putative; 16838-20266 | gbpln | Arabidopsis thaliana | AT2G22440.1   Symbols:   BEST Arabidopsis thaliana protein match is: Ribonuclease H-like superfamily protein (TAIR:AT4G29090.1); Has 208 Blast hits to 191 proteins in 10 species: Archae - 0; Bacteria - 0; Metazoa - 0; Fungi - 0; Plants - 208; Viruses - 0; Other Eukaryotes - 0 (source: NCBI BLINK).   chr2:9528910-9529917 FORWARD LENGTH=256 | 160  | 256  | 1.00E-15  | 160.0 | 30.0 | 43.1 |
| Rsa1.0_00987.1.g22163.t4 | ref[XP_002863513.1] predicted protein [Arabidopsis lyrata subsp. lyrata] gi 297309348 gb EFH39772.1  predicted protein [Arabidopsis lyrata subsp. lyrata]                                                                                                                                                                                                                                                    | 493  | 1327 | 1.00E-150 | 269.2 | 60.0 | 72.8 | predicted protein                            | gbpln | Arabidopsis lyrata   | AT5G45200.1   Symbols:   Disease resistance protein (TIR-NBS-LRR class) family   chr5:18283967-18290332 REVERSE LENGTH=1261                                                                                                                                                                                                                          | 493  | 1261 | 1.00E-105 | 255.8 | 40.2 | 46.7 |
| Rsa1.0_00987.1.g22164.t1 | dbj BAB11393.1  disease resistance protein RPS4 [Arabidopsis thaliana]                                                                                                                                                                                                                                                                                                                                       | 163  | 1232 | 2.00E-38  | 755.8 | 51.5 | 66.3 | disease resistance protein RPS4              | gbpln | Arabidopsis thaliana | AT5G45200.1   Symbols:   Disease resistance protein (TIR-NBS-LRR class) family   chr5:18283967-18290332 REVERSE LENGTH=1261                                                                                                                                                                                                                          | 163  | 1261 | 8.00E-41  | 773.6 | 51.5 | 66.3 |
| Rsa1.0_00987.1.g22165.t1 | emb CAA19715.1  putative protein [Arabidopsis thaliana] gi 7269574 emb CAB79576.1  putative protein [Arabidopsis thaliana]                                                                                                                                                                                                                                                                                   | 519  | 1318 | 2.00E-96  | 253.9 | 35.6 | 50.7 | putative protein                             | gbpln | Arabidopsis thaliana | #                                                                                                                                                                                                                                                                                                                                                    | #    | #    | #         | #     | #    | #    |
| Rsa1.0_00987.1.g22166.t1 | dbj BAB09923.1  copia-like retrotransposable element [Arabidopsis thaliana]                                                                                                                                                                                                                                                                                                                                  | 1358 | 1342 | 0         | 98.8  | 48.7 | 67.1 | copia-like retrotransposable element         | gbpln | Arabidopsis thaliana | AT4G23160.1   Symbols: CRK8   cysteine-rich RLK (RECEPTOR-like protein kinase) 8   chr4:12129485-12134086 FORWARD LENGTH=1262                                                                                                                                                                                                                        | 1358 | 1262 | 1.00E-77  | 92.9  | 12.8 | 19.9 |
| Rsa1.0_00987.1.g22167.t1 | #                                                                                                                                                                                                                                                                                                                                                                                                            | #    | #    | #         | #     | #    | -    | -                                            | ----  | ----                 | #                                                                                                                                                                                                                                                                                                                                                    | #    | #    | #         | #     | #    | #    |
| Rsa1.0_00988.1.g22168.t1 | dbj BAB10503.1  retroelement pol polyprotein-like [Arabidopsis thaliana]                                                                                                                                                                                                                                                                                                                                     | 1423 | 1475 | 0         | 103.7 | 60.6 | 75.4 | retroelement pol polyprotein-like            | gbpln | Arabidopsis thaliana | AT4G23160.1   Symbols: CRK8   cysteine-rich RLK (RECEPTOR-like protein kinase) 8   chr4:12129485-12134086 FORWARD LENGTH=1262                                                                                                                                                                                                                        | 1423 | 1262 | 1.00E-162 | 88.7  | 21.4 | 26.9 |
| Rsa1.0_00988.1.g22169.t1 | #                                                                                                                                                                                                                                                                                                                                                                                                            | #    | #    | #         | #     | #    | -    | -                                            | ----  | ----                 | #                                                                                                                                                                                                                                                                                                                                                    | #    | #    | #         | #     | #    | #    |
| Rsa1.0_00988.1.g22170.t1 | ref NP_564171.1  transcription factor bHLH94 [Arabidopsis thaliana] gi 218563531 sp Q9SK91.2 BH094_ARAT H RecName: Full=Transcription factor bHLH94; AltName: Full=Basic helix-loop-helix protein 94; Short=AtbHLH94; Short=bHLH 94; AltName: Full=Transcription factor EN 16; AltName: Full=bHLH transcription factor bHLH094 gi 332192126 gb AE30247.1  transcription factor bHLH94 [Arabidopsis thaliana] | 303  | 304  | 1.00E-122 | 100.3 | 79.5 | 86.5 | transcription factor bHLH94                  | gbpln | Arabidopsis thaliana | AT1G22490.1   Symbols:   basic helix-loop-helix (bHLH) DNA-binding superfamily protein   chr1:7938448-7940489 REVERSE LENGTH=304                                                                                                                                                                                                                     | 303  | 304  | 1.00E-124 | 100.3 | 79.5 | 86.5 |
| Rsa1.0_00988.1.g22171.t1 | gb AAM15219.1  putative retroelement pol polyprotein [Arabidopsis thaliana]                                                                                                                                                                                                                                                                                                                                  | 259  | 767  | 4.00E-32  | 296.1 | 25.5 | 30.9 | putative retroelement pol polyprotein        | gbpln | Arabidopsis thaliana | #                                                                                                                                                                                                                                                                                                                                                    | #    | #    | #         | #     | #    | #    |
| Rsa1.0_00988.1.g22172.t1 | #                                                                                                                                                                                                                                                                                                                                                                                                            | #    | #    | #         | #     | #    | -    | -                                            | ----  | ----                 | #                                                                                                                                                                                                                                                                                                                                                    | #    | #    | #         | #     | #    | #    |

|                          |                                                                                                                                                                                                                                                                                                                                                                                                                                                                                                                                                                                                                      |      |      |           |       |      |      |                                                 |       |                      |                                                                                                                                    |      |      |           |       |      |      |
|--------------------------|----------------------------------------------------------------------------------------------------------------------------------------------------------------------------------------------------------------------------------------------------------------------------------------------------------------------------------------------------------------------------------------------------------------------------------------------------------------------------------------------------------------------------------------------------------------------------------------------------------------------|------|------|-----------|-------|------|------|-------------------------------------------------|-------|----------------------|------------------------------------------------------------------------------------------------------------------------------------|------|------|-----------|-------|------|------|
| Rsa1.0_00988.1.g22173.t1 | ref NP_173661.1  cytochrome C oxidase 6B [Arabidopsis thaliana] gi 75193983 sp Q9S7L9.1 CX6B1_ARAT H RecName: Full=Cytochrome c oxidase subunit 6b-1; Short=AtCOX6b-1 gi 6587843 gb AAAF18532.1 AC006551.18 Subunit 6b of cytochrome c oxidase [Arabidopsis thaliana] gi 6518353 db BAA87883.1  subunit 6b of cytochrome c oxidase [Arabidopsis thaliana] gi 17381082 gb AA136353.1  putative cytochrome c oxidase subunit [Arabidopsis thaliana] gi 20465723 gb AAM20330.1  putative cytochrome c oxidase subunit [Arabidopsis thaliana] gi 332192122 gb AEE30243.1  cytochrome C oxidase 6B [Arabidopsis thaliana] | 188  | 191  | 5.00E-68  | 101.6 | 80.3 | 85.6 | cytochrome C oxidase 6B                         | gbpln | Arabidopsis thaliana | AT1G22450.1   Symbols: COX6B, ATCOX6B2   cytochrome C oxidase 6B   chr1:7925447-7926918 FORWARD LENGTH=191                         | 188  | 191  | 2.00E-70  | 101.6 | 80.3 | 85.6 |
| Rsa1.0_00988.1.g22174.t7 | gb AAD25621.1 AC005287_23 Hypothetical protein [Arabidopsis thaliana]                                                                                                                                                                                                                                                                                                                                                                                                                                                                                                                                                | 495  | 1250 | 4.00E-15  | 252.5 | 8.7  | 11.5 | Hypothetical protein                            | gbpln | Arabidopsis thaliana | AT5G28780.1   Symbols: PIF1 helicase   chr5:10812907-10814173 REVERSE LENGTH=337                                                   | 495  | 337  | 4.00E-12  | 68.1  | 7.1  | 9.5  |
| Rsa1.0_00988.1.g22175.t1 | #                                                                                                                                                                                                                                                                                                                                                                                                                                                                                                                                                                                                                    | #    | #    | #         | #     | #    | -    | ----                                            | ----  | #                    | #                                                                                                                                  | #    | #    | #         | #     | #    | #    |
| Rsa1.0_00988.1.g22176.t1 | #                                                                                                                                                                                                                                                                                                                                                                                                                                                                                                                                                                                                                    | #    | #    | #         | #     | #    | -    | ----                                            | ----  | #                    | #                                                                                                                                  | #    | #    | #         | #     | #    | #    |
| Rsa1.0_00988.1.g22177.t1 | gb EOA35441.1  hypothetical protein CARUB_v10020644mg, partial [Capsella rubella]                                                                                                                                                                                                                                                                                                                                                                                                                                                                                                                                    | 291  | 327  | 1.00E-115 | 112.4 | 73.5 | 80.8 | hypothetical protein CARUB_v10020644mg, partial | gbpln | Capsella rubella     | AT1G78300.1   Symbols: GRF2, 14-3-3 OMEGA, GF14 OMEGA   general regulatory factor 2   chr1:29461883-29463052 FORWARD LENGTH=259    | 291  | 259  | 1.00E-114 | 89.0  | 72.9 | 79.7 |
| Rsa1.0_00988.1.g22178.t1 | gb AAF18630.1 AC006228.1 F5J5.1 [Arabidopsis thaliana]                                                                                                                                                                                                                                                                                                                                                                                                                                                                                                                                                               | 147  | 1463 | 3.00E-31  | 995.2 | 44.2 | 60.5 | F5J5.1                                          | gbpln | Arabidopsis thaliana | #                                                                                                                                  | #    | #    | #         | #     | #    | #    |
| Rsa1.0_00989.1.g22179.t1 | gb AAF97298.1 AC007843.1 Hypothetical protein [Arabidopsis thaliana]                                                                                                                                                                                                                                                                                                                                                                                                                                                                                                                                                 | 257  | 362  | 5.00E-69  | 140.9 | 49.8 | 66.1 | Hypothetical protein                            | gbpln | Arabidopsis thaliana | #                                                                                                                                  | #    | #    | #         | #     | #    | #    |
| Rsa1.0_00989.1.g22180.t1 | #                                                                                                                                                                                                                                                                                                                                                                                                                                                                                                                                                                                                                    | #    | #    | #         | #     | #    | -    | ----                                            | ----  | #                    | #                                                                                                                                  | #    | #    | #         | #     | #    | #    |
| Rsa1.0_00989.1.g22181.t1 | ref XP_002866187.1  ATLLG4 [Arabidopsis lyrata subsp. lyrata] gi 297312022 gb EFH42446.1  ATLLG4 [Arabidopsis lyrata subsp. lyrata] ref XP_0028664502.1  basic helix-loop-helix family protein [Arabidopsis lyrata subsp. lyrata] gi 297310337 gb EFH40761.1  basic helix-loop-helix family protein [Arabidopsis lyrata subsp. lyrata]                                                                                                                                                                                                                                                                               | 1185 | 1221 | 0         | 103.0 | 89.0 | 94.0 | ATLLG4                                          | gbpln | Arabidopsis lyrata   | AT5G57160.1   Symbols: ATLLG4, LIG4   DNA ligase IV   chr5:23155150-23161688 REVERSE LENGTH=1219                                   | 1185 | 1219 | 0         | 102.9 | 89.2 | 94.1 |
| Rsa1.0_00989.1.g22182.t1 | ref XP_0028664502.1  basic helix-loop-helix family protein [Arabidopsis lyrata subsp. lyrata] gi 297310337 gb EFH40761.1  basic helix-loop-helix family protein [Arabidopsis lyrata subsp. lyrata]                                                                                                                                                                                                                                                                                                                                                                                                                   | 244  | 247  | 1.00E-125 | 101.2 | 93.0 | 97.1 | basic helix-loop-helix family protein           | gbpln | Arabidopsis lyrata   | AT5G57150.1   Symbols:   basic helix-loop-helix (bHLH) DNA-binding superfamily protein   chr5:23152361-23154872 FORWARD LENGTH=247 | 244  | 247  | 1.00E-128 | 101.2 | 93.0 | 97.1 |
| Rsa1.0_00989.1.g22183.t1 | gb EOA15000.1  hypothetical protein CARUB_v10028349mg, partial [Capsella rubella]                                                                                                                                                                                                                                                                                                                                                                                                                                                                                                                                    | 418  | 437  | 0         | 104.5 | 79.2 | 85.6 | hypothetical protein CARUB_v10028349mg, partial | gbpln | Capsella rubella     | AT5G57140.1   Symbols: ATPAP28, PAP28   purple acid phosphatase 28   chr5:23149926-23151370 FORWARD LENGTH=397                     | 418  | 397  | 0         | 95.0  | 77.5 | 85.6 |
| Rsa1.0_00989.1.g22184.t2 | ref NP_568849.2  Clp amino terminal domain-containing protein [Arabidopsis thaliana] gi 8843815 db BAA97363.1  unnamed protein product [Arabidopsis thaliana] gi 332009468 gb AED96851.1  Clp amino terminal domain-containing protein [Arabidopsis thaliana]                                                                                                                                                                                                                                                                                                                                                        | 1020 | 1028 | 0         | 100.8 | 78.9 | 86.3 | Clp amino terminal domain-containing protein    | gbpln | Arabidopsis thaliana | AT5G57130.1   Symbols:   Clp amino terminal domain-containing protein   chr5:23145291-23149395 FORWARD LENGTH=1028                 | 1020 | 1028 | 0         | 100.8 | 78.9 | 86.3 |
| Rsa1.0_00989.1.g22185.t1 | gb EOA18248.1  hypothetical protein CARUB_v10006740mg, partial [Capsella rubella]                                                                                                                                                                                                                                                                                                                                                                                                                                                                                                                                    | 426  | 441  | 8.00E-65  | 103.5 | 37.1 | 45.8 | hypothetical protein CARUB_v10006740mg, partial | gbpln | Capsella rubella     | AT3G24170.1   Symbols:   BED zinc finger :hAT family dimerisation domain   chr3:14321838-14323928 FORWARD LENGTH=696               | 426  | 696  | 1.00E-10  | 163.4 | 16.9 | 30.8 |
| Rsa1.0_00990.1.g22186.t1 | ref NP_001189938.1  legumain [Arabidopsis thaliana] gi 332642827 gb AEE76348.1  delta vacuolar processing enzyme/legumain [Arabidopsis thaliana]                                                                                                                                                                                                                                                                                                                                                                                                                                                                     | 575  | 571  | 0         | 99.3  | 77.6 | 86.6 | legumain                                        | gbpln | Arabidopsis thaliana | AT3G20210.2   Symbols: DELTA-VPE   delta vacuolar processing enzyme   chr3:7052482-7055416 FORWARD LENGTH=571                      | 575  | 571  | 0         | 99.3  | 77.6 | 86.6 |
| Rsa1.0_00990.1.g22187.t1 | ref NP_566655.1  Ribosomal L18p/L5e family protein [Arabidopsis thaliana] gi 9293979 db BAB01882.1  unnamed protein product [Arabidopsis thaliana] gi 21554527 gb AAM63600.1  unknown [Arabidopsis thaliana] gi 24030337 gb AAN41334.1  unknown protein [Arabidopsis thaliana] gi 222423792 db BAH19862.1  AT3G20230 [Arabidopsis thaliana] gi 332642829 gb AEE76350.1  Ribosomal L18p/L5e family protein [Arabidopsis thaliana]                                                                                                                                                                                     | 187  | 187  | 2.00E-99  | 100.0 | 94.1 | 98.4 | Ribosomal L18p/L5e family protein               | gbpln | Arabidopsis thaliana | AT3G20230.1   Symbols:   Ribosomal L18p/L5e family protein   chr3:7055639-7056679 REVERSE LENGTH=187                               | 187  | 187  | 1.00E-102 | 100.0 | 94.1 | 98.4 |

|                          |                                                                                                                                                                                                                                                                                                                                                                                                                                                                                                                                                                                                                                                                                                                                                                                                              |     |     |           |       |      |      |                                                |       |                      |                                                                                                                     |     |     |           |       |      |      |
|--------------------------|--------------------------------------------------------------------------------------------------------------------------------------------------------------------------------------------------------------------------------------------------------------------------------------------------------------------------------------------------------------------------------------------------------------------------------------------------------------------------------------------------------------------------------------------------------------------------------------------------------------------------------------------------------------------------------------------------------------------------------------------------------------------------------------------------------------|-----|-----|-----------|-------|------|------|------------------------------------------------|-------|----------------------|---------------------------------------------------------------------------------------------------------------------|-----|-----|-----------|-------|------|------|
| Rsa1.0_00990.1.g22188.t1 | ref NP_188659.1  Mitochondrial substrate carrier family protein [Arabidopsis thaliana] gi 75311227 sp Q9LJX5.1 BRTL1_ARAT H RecName: Full=Probable mitochondrial adenine nucleotide transporter BTL1; AltName: Full=Adenine nucleotide transporter BT1-like protein 1 gi 9293980 dbj BAB01883.1  unnamed protein product [Arabidopsis thaliana] gi 29029108 gb AAO64933.1  At3g20240 [Arabidopsis thaliana] gi 110743061 dbj BAE99423.1  putative mitochondrial carrier protein [Arabidopsis thaliana] gi 332642830 gb AEE76351.1  Mitochondrial substrate carrier family protein [Arabidopsis thaliana] ref XP_002885359.1  hypothetical protein ARALYDRAFT_342166 [Arabidopsis lyrata subsp. lyrata] gi 297331199 gb EFH61618.1  hypothetical protein ARALYDRAFT_342166 [Arabidopsis lyrata subsp. lyrata] | 346 | 348 | 1.00E-177 | 100.6 | 90.2 | 94.5 | Mitochondrial substrate carrier family protein | gbpln | Arabidopsis thaliana | AT3G20240.1   Symbols:   Mitochondrial substrate carrier family protein   chr3:7067192-7058716 FORWARD LENGTH=348   | 346 | 348 | 1.00E-179 | 100.6 | 90.2 | 94.5 |
| Rsa1.0_00990.1.g22189.t2 | ref XP_002885359.1  hypothetical protein ARALYDRAFT_342166 [Arabidopsis lyrata subsp. lyrata] gi 297331199 gb EFH61618.1  hypothetical protein ARALYDRAFT_342166 [Arabidopsis lyrata subsp. lyrata]                                                                                                                                                                                                                                                                                                                                                                                                                                                                                                                                                                                                          | 955 | 965 | 0         | 101.0 | 83.8 | 89.1 | hypothetical protein ARALYDRAFT_342166         | gbpln | Arabidopsis lyrata   | AT3G20250.1   Symbols: APUM5, PUM5   pumilio 5   chr3:7059098-7062660 REVERSE LENGTH=961                            | 955 | 961 | 0         | 100.6 | 82.6 | 88.1 |
| Rsa1.0_00990.1.g22190.t1 | gb EOA30619.1  hypothetical protein CARUB_v10013756mg [Capsella rubella]                                                                                                                                                                                                                                                                                                                                                                                                                                                                                                                                                                                                                                                                                                                                     | 431 | 430 | 0         | 99.8  | 84.0 | 89.1 | hypothetical protein CARUB_v10013756mg         | gbpln | Capsella rubella     | AT3G20260.1   Symbols:   Protein of unknown function (DUF1666)   chr3:7064190-7065751 REVERSE LENGTH=437            | 431 | 437 | 0         | 101.4 | 83.8 | 89.6 |
| Rsa1.0_00990.1.g22191.t1 | ref NP_851006.1  lipid-binding serum glycoprotein-like protein [Arabidopsis thaliana] gi 334185491 ref NP_001189939.1  lipid-binding serum glycoprotein-like protein [Arabidopsis thaliana] gi 332642833 gb AEE76354.1  lipid-binding serum glycoprotein-like protein [Arabidopsis thaliana] gi 332642835 gb AEE76356.1  putative BFP/LBP family protein [Arabidopsis thaliana]                                                                                                                                                                                                                                                                                                                                                                                                                              | 722 | 722 | 0         | 100.0 | 71.7 | 84.5 | lipid-binding serum glycoprotein-like protein  | gbpln | Arabidopsis thaliana | AT3G20270.3   Symbols:   lipid-binding serum glycoprotein family protein   chr3:7067779-7070866 FORWARD LENGTH=722  | 722 | 722 | 0         | 100.0 | 71.7 | 84.5 |
| Rsa1.0_00990.1.g22192.t1 | ref NP_851007.1  PHD finger protein [Arabidopsis thaliana] gi 332642836 gb AEE76357.1  PHD finger protein [Arabidopsis thaliana] ref NP_566657.1  EPS15 homology domain 1 protein [Arabidopsis thaliana] gi 79313303 ref NP_001030731.1  EPS15 homology domain 1 protein [Arabidopsis thaliana] gi 14334440 gb AAK59418.1  unknown protein [Arabidopsis thaliana] gi 28394001 gb AAO42408.1  unknown protein [Arabidopsis thaliana] gi 222424046 dbj BAH19984.1  AT3G20290 [Arabidopsis thaliana] gi 332642838 gb AEE76359.1  EPS15 homology domain 1 protein [Arabidopsis thaliana] gi 332642839 gb AEE76360.1  EPS15 homology domain 1 protein [Arabidopsis thaliana]                                                                                                                                      | 715 | 743 | 0         | 103.9 | 62.5 | 72.9 | PHD finger protein                             | gbpln | Arabidopsis thaliana | AT3G20280.1   Symbols:   RING/FYVE/PHD zinc finger superfamily protein   chr3:7071475-7074340 FORWARD LENGTH=743    | 715 | 743 | 0         | 103.9 | 62.5 | 72.9 |
| Rsa1.0_00990.1.g22193.t2 | ref NP_566657.1  EPS15 homology domain 1 protein [Arabidopsis thaliana] gi 79313303 ref NP_001030731.1  EPS15 homology domain 1 protein [Arabidopsis thaliana] gi 14334440 gb AAK59418.1  unknown protein [Arabidopsis thaliana] gi 28394001 gb AAO42408.1  unknown protein [Arabidopsis thaliana] gi 222424046 dbj BAH19984.1  AT3G20290 [Arabidopsis thaliana] gi 332642838 gb AEE76359.1  EPS15 homology domain 1 protein [Arabidopsis thaliana] gi 332642839 gb AEE76360.1  EPS15 homology domain 1 protein [Arabidopsis thaliana]                                                                                                                                                                                                                                                                       | 562 | 545 | 0         | 97.0  | 86.3 | 90.4 | EPS15 homology domain 1 protein                | gbpln | Arabidopsis thaliana | AT3G20290.2   Symbols: ATEHD1, EHD1   EPS15 homology domain 1   chr3:7075057-7078655 REVERSE LENGTH=545             | 562 | 545 | 0         | 97.0  | 86.3 | 90.4 |
| Rsa1.0_00990.1.g22194.t1 | # # # # # # # - ---- # # # # # #                                                                                                                                                                                                                                                                                                                                                                                                                                                                                                                                                                                                                                                                                                                                                                             |     |     |           |       |      |      |                                                |       |                      |                                                                                                                     |     |     |           |       |      |      |
| Rsa1.0_00990.1.g22195.t1 | ref XP_002885364.1  extracellular ligand-gated ion channel [Arabidopsis lyrata subsp. lyrata] gi 297331204 gb EFH61623.1  extracellular ligand-gated ion channel [Arabidopsis lyrata subsp. lyrata] ref XP_002885365.1  hypothetical protein ARALYDRAFT_479554 [Arabidopsis lyrata subsp. lyrata] gi 297331205 gb EFH61624.1  hypothetical protein ARALYDRAFT_479554 [Arabidopsis lyrata subsp. lyrata]                                                                                                                                                                                                                                                                                                                                                                                                      | 449 | 451 | 0         | 100.4 | 94.7 | 96.7 | extracellular ligand-gated ion channel         | gbpln | Arabidopsis lyrata   | AT3G20300.1   Symbols:   Protein of unknown function (DUF3537)   chr3:7079832-7081809 REVERSE LENGTH=452            | 449 | 452 | 0         | 100.7 | 93.5 | 96.2 |
| Rsa1.0_00990.1.g22196.t5 | ref XP_002885365.1  hypothetical protein ARALYDRAFT_479554 [Arabidopsis lyrata subsp. lyrata] gi 297331205 gb EFH61624.1  hypothetical protein ARALYDRAFT_479554 [Arabidopsis lyrata subsp. lyrata]                                                                                                                                                                                                                                                                                                                                                                                                                                                                                                                                                                                                          | 225 | 233 | 1.00E-76  | 103.6 | 81.8 | 85.3 | hypothetical protein ARALYDRAFT_479554         | gbpln | Arabidopsis lyrata   | AT3G20310.1   Symbols: ATERF-7, ATERF7, ERF7   ethylene response factor 7   chr3:7085957-7086691 REVERSE LENGTH=244 | 225 | 244 | 2.00E-76  | 108.4 | 84.4 | 87.6 |
| Rsa1.0_00990.1.g22197.t1 | gb EOA30740.1  hypothetical protein CARUB_v10013880mg [Capsella rubella]                                                                                                                                                                                                                                                                                                                                                                                                                                                                                                                                                                                                                                                                                                                                     | 393 | 398 | 0         | 101.3 | 92.1 | 96.2 | hypothetical protein CARUB_v10013880mg         | gbpln | Capsella rubella     | AT3G20330.1   Symbols: PYRB   PYRIMIDINE B   chr3:7090354-7091904 REVERSE LENGTH=390                                | 393 | 390 | 0         | 99.2  | 90.6 | 94.7 |

|                          |                                                                                                                                                                                                                                                                                                                                                                                                                                                                                                                                    |     |     |           |       |      |      |                                             |       |                      |                                                                                                                                                                                                                                                                                                                                                                                                                                                                                     |     |     |           |       |      |      |
|--------------------------|------------------------------------------------------------------------------------------------------------------------------------------------------------------------------------------------------------------------------------------------------------------------------------------------------------------------------------------------------------------------------------------------------------------------------------------------------------------------------------------------------------------------------------|-----|-----|-----------|-------|------|------|---------------------------------------------|-------|----------------------|-------------------------------------------------------------------------------------------------------------------------------------------------------------------------------------------------------------------------------------------------------------------------------------------------------------------------------------------------------------------------------------------------------------------------------------------------------------------------------------|-----|-----|-----------|-------|------|------|
| Rsa1.0_00990.1.g22198.t1 | refXP_002885368.1  hypothetical protein ARALYDRAFT_898447 [Arabidopsis lyrata subsp. lyrata] gi 297331208 gb EFH61627.1  hypothetical protein ARALYDRAFT_898447 [Arabidopsis lyrata subsp. lyrata]                                                                                                                                                                                                                                                                                                                                 | 116 | 116 | 6.00E-34  | 100.0 | 70.7 | 78.4 | hypothetical protein ARALYDRAFT_898447      | gbpln | Arabidopsis lyrata   | AT3G20340.1   Symbols:   Expression of the gene is downregulated in the presence of paraquat, an inducer of photooxidative stress.   chr3:7093075-7093422 REVERSE LENGTH=115                                                                                                                                                                                                                                                                                                        | 116 | 115 | 4.00E-36  | 99.1  | 70.7 | 78.4 |
| Rsa1.0_00990.1.g22199.t1 | ref NP_188670.1  uncharacterized protein [Arabidopsis thaliana] gi 219291108 gb ACL13988.1  At3g20350 [Arabidopsis thaliana] gi 332642846 gb AEE76367.1  uncharacterized protein AT3G20350 [Arabidopsis thaliana]                                                                                                                                                                                                                                                                                                                  | 649 | 673 | 0         | 103.7 | 73.7 | 82.4 | uncharacterized protein                     | gbpln | Arabidopsis thaliana | AT3G20350.1   Symbols:   unknown protein; INVOLVED IN: biological_process unknown; LOCATED IN: plasma membrane; EXPRESSED IN: cotyledon; BEST Arabidopsis thaliana protein match is: unknown protein (TAIRAT1G06660.1); Has 15095 Blast hits to 11224 proteins in 1051 species: Archae - 223; Bacteria - 1586; Metazoa - 7000; Fungi - 1255; Plants - 746; Viruses - 40; Other Eukaryotes - 4245 (source: NCBI BLINK).   chr3:7096602-7099372 FORWARD LENGTH=673                    | 649 | 673 | 0         | 103.7 | 73.7 | 82.4 |
| Rsa1.0_00991.1.g22200.t1 | gb EOA36193.1  hypothetical protein CARUB_v10010105mg [Capsella rubella]                                                                                                                                                                                                                                                                                                                                                                                                                                                           | 235 | 249 | 8.00E-73  | 106.0 | 78.7 | 88.1 | hypothetical protein CARUB_v10010105mg      | gbpln | Capsella rubella     | AT1G06160.1   Symbols: ORA59   octadecanoid-responsive Arabidopsis AP2/ERF 59   chr1:1883046-1883780 FORWARD LENGTH=244                                                                                                                                                                                                                                                                                                                                                             | 235 | 244 | 2.00E-67  | 103.8 | 76.2 | 85.1 |
| Rsa1.0_00991.1.g22201.t1 | ref XP_002889587.1  pentatricopeptide repeat-containing protein [Arabidopsis lyrata subsp. lyrata] gi 297335429 gb EFH65846.1  pentatricopeptide repeat-containing protein [Arabidopsis lyrata subsp. lyrata]                                                                                                                                                                                                                                                                                                                      | 659 | 558 | 0         | 84.7  | 67.2 | 74.5 | pentatricopeptide repeat-containing protein | gbpln | Arabidopsis lyrata   | AT1G06140.1   Symbols:   Pentatricopeptide repeat (PPR) superfamily protein   chr1:1864796-1866472 FORWARD LENGTH=558                                                                                                                                                                                                                                                                                                                                                               | 659 | 558 | 0         | 84.7  | 66.6 | 73.9 |
| Rsa1.0_00991.1.g22202.t1 | ref XP_002892321.1  hypothetical protein ARALYDRAFT_311691 [Arabidopsis lyrata subsp. lyrata] gi 297338163 gb EFH66580.1  hypothetical protein ARALYDRAFT_311691 [Arabidopsis lyrata subsp. lyrata]                                                                                                                                                                                                                                                                                                                                | 73  | 485 | 1.00E-12  | 664.4 | 61.6 | 72.6 | hypothetical protein ARALYDRAFT_311691      | gbpln | Arabidopsis lyrata   | AT1G06137.1   Symbols:   unknown protein; FUNCTIONS IN: molecular_function unknown; INVOLVED IN: biological_process unknown; LOCATED IN: endomembrane system; BEST Arabidopsis thaliana protein match is: unknown protein (TAIRAT1G06135.1); Has 30201 Blast hits to 17322 proteins in 780 species: Archae - 12; Bacteria - 1396; Metazoa - 17338; Fungi - 3422; Plants - 5037; Viruses - 0; Other Eukaryotes - 2996 (source: NCBI BLINK).   chr1:1863544-1863750 REVERSE LENGTH=68 | 73  | 68  | 2.00E-13  | 93.2  | 58.9 | 69.9 |
| Rsa1.0_00991.1.g22203.t1 | ref XP_002892320.1  skp1/ask-interacting protein 16 [Arabidopsis lyrata subsp. lyrata] gi 297338162 gb EFH66579.1  skp1/ask-interacting protein 16 [Arabidopsis lyrata subsp. lyrata]                                                                                                                                                                                                                                                                                                                                              | 436 | 435 | 1.00E-171 | 99.8  | 72.2 | 80.0 | skp1/ask-interacting protein 16             | gbpln | Arabidopsis lyrata   | AT1G06110.1   Symbols: SKIP16   SKP1/ASK-interacting protein 16   chr1:1853237-1854938 REVERSE LENGTH=436                                                                                                                                                                                                                                                                                                                                                                           | 436 | 436 | 1.00E-172 | 100.0 | 70.6 | 79.6 |
| Rsa1.0_00991.1.g22204.t1 | ref NP_172099.1  delta-9 desaturase-like 1 protein [Arabidopsis thaliana] gi 62510518 sp Q9LND9.1 ADSL1_ARAT H RecName: Full=Delta-9 desaturase-like 1 protein gi 8810471 gb AAF80132.1 AC024174_14 Contains similarity to delta 9 desaturase mRNA from Arabidopsis thaliana gb D88536 and contains a fatty acid desaturase PF 01069 domain. ESTs gb AV546954, gb A1993202, gb AV554343, gb T46147 come from this gene [Arabidopsis thaliana] gi 332189817 gb AEE27938.1  delta-9 desaturase-like 1 protein [Arabidopsis thaliana] | 297 | 299 | 1.00E-150 | 100.7 | 85.2 | 90.9 | delta-9 desaturase-like 1 protein           | gbpln | Arabidopsis thaliana | AT1G06090.1   Symbols:   Fatty acid desaturase family protein   chr1:1847921-1849500 FORWARD LENGTH=299                                                                                                                                                                                                                                                                                                                                                                             | 297 | 299 | 1.00E-152 | 100.7 | 85.2 | 90.9 |
| Rsa1.0_00991.1.g22205.t1 | ref XP_002889584.1  hypothetical protein ARALYDRAFT_887802 [Arabidopsis lyrata subsp. lyrata] gi 297335426 gb EFH65843.1  hypothetical protein ARALYDRAFT_887802 [Arabidopsis lyrata subsp. lyrata]                                                                                                                                                                                                                                                                                                                                | 304 | 305 | 1.00E-170 | 100.3 | 94.7 | 97.7 | hypothetical protein ARALYDRAFT_887802      | gbpln | Arabidopsis lyrata   | AT1G06080.1   Symbols: ADS1   delta 9 desaturase 1   chr1:1843661-1846093 FORWARD LENGTH=305                                                                                                                                                                                                                                                                                                                                                                                        | 304 | 305 | 1.00E-172 | 100.3 | 93.8 | 97.4 |
| Rsa1.0_00991.1.g22206.t1 | ref XP_002892318.1  hypothetical protein ARALYDRAFT_887800 [Arabidopsis lyrata subsp. lyrata] gi 297338160 gb EFH6577.1  hypothetical protein ARALYDRAFT_887800 [Arabidopsis lyrata subsp. lyrata]                                                                                                                                                                                                                                                                                                                                 | 402 | 427 | 1.00E-150 | 106.2 | 79.6 | 83.8 | hypothetical protein ARALYDRAFT_887800      | gbpln | Arabidopsis lyrata   | AT1G06070.1   Symbols:   Basic-leucine zipper (bZIP) transcription factor family protein   chr1:1835201-1837116 REVERSE LENGTH=423                                                                                                                                                                                                                                                                                                                                                  | 402 | 423 | 1.00E-149 | 105.2 | 78.9 | 83.3 |

|                          |                                                                                                                                                                                                                                                                                                                                                                                                                                                                                                |      |      |           |       |      |      |                                        |       |                      |                                                                                                                            |      |      |           |       |      |      |
|--------------------------|------------------------------------------------------------------------------------------------------------------------------------------------------------------------------------------------------------------------------------------------------------------------------------------------------------------------------------------------------------------------------------------------------------------------------------------------------------------------------------------------|------|------|-----------|-------|------|------|----------------------------------------|-------|----------------------|----------------------------------------------------------------------------------------------------------------------------|------|------|-----------|-------|------|------|
| Rsa1.0_00991.1.g22207.t1 | refXP_00289583.1   hypothetical protein ARALYDRAFT_470618 [Arabidopsis lyrata subsp. lyrata] gi 297335425 gb EFH65842.1   hypothetical protein ARALYDRAFT_470618 [Arabidopsis lyrata subsp. lyrata]                                                                                                                                                                                                                                                                                            | 107  | 213  | 6.00E-17  | 199.1 | 51.4 | 62.6 | hypothetical protein ARALYDRAFT_470618 | gbpln | Arabidopsis lyrata   | AT1G06060.1   Symbols:   LisH and RanBPM domains containing protein   chr1:1833071-1834516 FORWARD LENGTH=213              | 107  | 213  | 2.00E-17  | 199.1 | 49.5 | 60.7 |
| Rsa1.0_00991.1.g22208.t1 | refXP_002892317.1   hypothetical protein ARALYDRAFT_887798 [Arabidopsis lyrata subsp. lyrata] gi 297338159 gb EFH68576.1   hypothetical protein ARALYDRAFT_887798 [Arabidopsis lyrata subsp. lyrata]                                                                                                                                                                                                                                                                                           | 313  | 313  | 1.00E-147 | 100.0 | 82.1 | 89.1 | hypothetical protein ARALYDRAFT_887798 | gbpln | Arabidopsis lyrata   | AT1G06050.1   Symbols:   Protein of unknown function (DUF1336)   chr1:1830726-1831667 REVERSE LENGTH=313                   | 313  | 313  | 1.00E-149 | 100.0 | 83.1 | 89.8 |
| Rsa1.0_00991.1.g22209.t1 | gb ABV89657.1   salt tolerance protein [Brassica rapa]                                                                                                                                                                                                                                                                                                                                                                                                                                         | 250  | 243  | 1.00E-124 | 97.2  | 91.6 | 96.0 | salt tolerance protein                 | gbpln | Brassica rapa        | AT1G06040.1   Symbols:   STO   B-box zinc finger family protein   chr1:1828662-1829659 REVERSE LENGTH=248                  | 250  | 248  | 1.00E-116 | 99.2  | 85.2 | 90.8 |
| Rsa1.0_00991.1.g22210.t2 | ref NP_172093.1   fructokinase [Arabidopsis thaliana] gi 75311394 sp Q9LNE3.1   SCRK2_ARATH RecName: Full=Probable fructokinase-2 gi 8810465 gb AAF80126.1   AC024174.8 Contains similarity to a fructokinase from Solanum tuberosum gi 585973 and is a member of the pfkB carbohydrate kinase family PF00294 [Arabidopsis thaliana] gi 20258778 gb AAM13911.1   putative fructokinase [Arabidopsis thaliana] gi 332189810 gb AEE27931.1   probable fructokinase-2 [Arabidopsis thaliana]      | 371  | 329  | 1.00E-172 | 88.7  | 79.0 | 83.3 | fructokinase                           | gbpln | Arabidopsis thaliana | AT1G06030.1   Symbols:   pfkB-like carbohydrate kinase family protein   chr1:1826880-1828130 FORWARD LENGTH=329            | 371  | 329  | 1.00E-175 | 88.7  | 79.0 | 83.3 |
| Rsa1.0_00991.1.g22211.t1 | gb ABL97975.1   unknown [Brassica rapa]                                                                                                                                                                                                                                                                                                                                                                                                                                                        | 201  | 205  | 1.00E-96  | 102.0 | 84.1 | 91.5 | unknown                                | gbpln | Brassica rapa        | AT1G05970.2   Symbols:   RNA-binding (RRM/RBD/RNP motifs) family protein   chr1:1816253-1816991 REVERSE LENGTH=200         | 201  | 200  | 1.00E-80  | 99.5  | 67.2 | 84.6 |
| Rsa1.0_00991.1.g22212.t1 | gb EOA36797.1   hypothetical protein CARUB_v10008206mg [Capsella rubella]                                                                                                                                                                                                                                                                                                                                                                                                                      | 926  | 980  | 0         | 105.8 | 83.9 | 91.5 | hypothetical protein CARUB_v10008206mg | gbpln | Capsella rubella     | AT1G05960.1   Symbols:   ARM repeat superfamily protein   chr1:1808478-1815060 REVERSE LENGTH=982                          | 926  | 982  | 0         | 106.0 | 83.6 | 91.4 |
| Rsa1.0_00991.1.g22213.t1 | ref NP_172093.1   uncharacterized protein [Arabidopsis thaliana] gi 75108535 sp Q5RMO9.1   Y1592_ARATH RecName: Full=B3 domain-containing protein At1g05920 gi 55824346 gb AAV66313.1   hypothetical protein At1g05920 [Arabidopsis thaliana] gi 55978681 gb AAV68802.1   hypothetical protein AT1G05920 [Arabidopsis thaliana] gi 225897884 db BAH30274.1   hypothetical protein [Arabidopsis thaliana] gi 332189797 gb AEE27918.1   uncharacterized protein AT1G05920 [Arabidopsis thaliana] | 220  | 315  | 2.00E-37  | 143.2 | 39.1 | 49.5 | uncharacterized protein                | gbpln | Arabidopsis thaliana | AT1G05920.1   Symbols:   Domain of unknown function (DUF313)   chr1:1797044-1797991 FORWARD LENGTH=315                     | 220  | 315  | 7.00E-40  | 143.2 | 39.1 | 49.5 |
| Rsa1.0_00991.1.g22214.t1 | refXP_002889576.1   hypothetical protein ARALYDRAFT_470606 [Arabidopsis lyrata subsp. lyrata] gi 297335418 gb EFH65835.1   hypothetical protein ARALYDRAFT_470606 [Arabidopsis lyrata subsp. lyrata]                                                                                                                                                                                                                                                                                           | 1215 | 1208 | 0         | 99.4  | 87.7 | 92.7 | hypothetical protein ARALYDRAFT_470606 | gbpln | Arabidopsis lyrata   | AT1G05910.1   Symbols:   cell division cycle protein 48-related / CDC48-related   chr1:1790796-1796503 FORWARD LENGTH=1210 | 1215 | 1210 | 0         | 99.6  | 87.9 | 92.3 |
| Rsa1.0_00991.1.g22215.t1 | #                                                                                                                                                                                                                                                                                                                                                                                                                                                                                              | #    | #    | #         | #     | #    | #    | -                                      | ----  | ----                 | #                                                                                                                          | #    | #    | #         | #     | #    | #    |
| Rsa1.0_00991.1.g22216.t1 | refXP_002889573.1   hypothetical protein ARALYDRAFT_470601 [Arabidopsis lyrata subsp. lyrata] gi 297335415 gb EFH65832.1   hypothetical protein ARALYDRAFT_470601 [Arabidopsis lyrata subsp. lyrata]                                                                                                                                                                                                                                                                                           | 452  | 557  | 0         | 123.2 | 76.5 | 83.8 | hypothetical protein ARALYDRAFT_470601 | gbpln | Arabidopsis lyrata   | AT1G05890.1   Symbols:   AR15, ATAR15   RING/U-box superfamily protein   chr1:1779631-1784166 FORWARD LENGTH=552           | 452  | 552  | 0         | 122.1 | 71.7 | 79.2 |

|                          |                                                                                                                                                                                                                                                                                                                                                                                                                                                                                                                                                                                                                                                                                                                                                                                                                                                                                                                                                                                                                                                                                                                                                                                                        |     |     |           |       |      |      |                                                                                                                                          |       |                      |                                                                                                                                                                                                                                                                                                                                                                                                                                                                                                                                  |     |     |           |       |      |      |
|--------------------------|--------------------------------------------------------------------------------------------------------------------------------------------------------------------------------------------------------------------------------------------------------------------------------------------------------------------------------------------------------------------------------------------------------------------------------------------------------------------------------------------------------------------------------------------------------------------------------------------------------------------------------------------------------------------------------------------------------------------------------------------------------------------------------------------------------------------------------------------------------------------------------------------------------------------------------------------------------------------------------------------------------------------------------------------------------------------------------------------------------------------------------------------------------------------------------------------------------|-----|-----|-----------|-------|------|------|------------------------------------------------------------------------------------------------------------------------------------------|-------|----------------------|----------------------------------------------------------------------------------------------------------------------------------------------------------------------------------------------------------------------------------------------------------------------------------------------------------------------------------------------------------------------------------------------------------------------------------------------------------------------------------------------------------------------------------|-----|-----|-----------|-------|------|------|
| Rsa1.0_00991.1.g22217.t1 | refNP_172147.2  1-aminocyclopropane-1-carboxylate oxidase-1 [Arabidopsis thaliana]<br>gi 75297894 sp Q84MB3.1 ACCH1_ARATH<br>H RecName: Full=1-aminocyclopropane-1-carboxylate oxidase homolog 1<br>gi 30102640 gb AAP21238.1  At1g06620 [Arabidopsis thaliana]<br>gi 110743652 dbj BAE99663.1  oxidoreductase like protein [Arabidopsis thaliana] gi 332189889 gb AEE28010.1  1-aminocyclopropane-1-carboxylate oxidase-1 [Arabidopsis thaliana]                                                                                                                                                                                                                                                                                                                                                                                                                                                                                                                                                                                                                                                                                                                                                      | 365 | 365 | 0         | 100.0 | 83.8 | 92.6 | 1-aminocyclopropane-1-carboxylate oxidase-1                                                                                              | gbpln | Arabidopsis thaliana | AT1G06620.1   Symbols:   2-oxoglutarate (2OG) and Fe(II)-dependent oxygenase superfamily protein   chr1:2025618-2027094 FORWARD LENGTH=365                                                                                                                                                                                                                                                                                                                                                                                       | 365 | 365 | 0         | 100.0 | 83.8 | 92.6 |
| Rsa1.0_00991.1.g22218.t1 | gb AAF29395.1 AC009999_15 Contains similarity to Ariadne-2 protein from Drosophila melanogaster gb AJ010169 and contains an IBR PF 01485 and a KE2 PF 01920 domain [Arabidopsis thaliana]                                                                                                                                                                                                                                                                                                                                                                                                                                                                                                                                                                                                                                                                                                                                                                                                                                                                                                                                                                                                              | 518 | 512 | 1.00E-115 | 98.8  | 45.9 | 60.2 | Contains similarity to Ariadne-2 protein from Drosophila melanogaster gb AJ010169 and contains an IBR PF 01485 and a KE2 PF 01920 domain | gbpln | Arabidopsis thaliana | AT1G05880.2   Symbols: ARI12   RING/U-box superfamily protein   chr1:1775655-1778330 FORWARD LENGTH=496                                                                                                                                                                                                                                                                                                                                                                                                                          | 518 | 496 | 1.00E-112 | 95.8  | 44.6 | 58.1 |
| Rsa1.0_00991.1.g22219.t1 | gb AAM61025.1  unknown [Arabidopsis thaliana]                                                                                                                                                                                                                                                                                                                                                                                                                                                                                                                                                                                                                                                                                                                                                                                                                                                                                                                                                                                                                                                                                                                                                          | 159 | 340 | 2.00E-15  | 213.8 | 26.4 | 27.0 | unknown                                                                                                                                  | gbpln | Arabidopsis thaliana | AT3G19910.1   Symbols:   RING/U-box superfamily protein   chr3:6926497-6929324 FORWARD LENGTH=340                                                                                                                                                                                                                                                                                                                                                                                                                                | 159 | 340 | 4.00E-17  | 213.8 | 25.8 | 26.4 |
| Rsa1.0_00991.1.g22220.t2 | ref XP_002892311.1  hypothetical protein ARALYDRAFT.470598 [Arabidopsis lyrata subsp. lyrata]<br>gi 297338153 gb EFH68570.1  hypothetical protein ARALYDRAFT.470598 [Arabidopsis lyrata subsp. lyrata]                                                                                                                                                                                                                                                                                                                                                                                                                                                                                                                                                                                                                                                                                                                                                                                                                                                                                                                                                                                                 | 168 | 187 | 6.00E-55  | 111.3 | 68.5 | 73.8 | hypothetical protein ARALYDRAFT.470598                                                                                                   | gbpln | Arabidopsis lyrata   | AT1G05870.4   Symbols:   Protein of unknown function (DUF1655)   chr1:1772454-1773228 REVERSE LENGTH=189                                                                                                                                                                                                                                                                                                                                                                                                                         | 168 | 189 | 1.00E-56  | 112.5 | 73.8 | 81.5 |
| Rsa1.0_00991.1.g22221.t1 | ref XP_002899571.1  hypothetical protein ARALYDRAFT.470597 [Arabidopsis lyrata subsp. lyrata]<br>gi 297335413 gb EFH68530.1  hypothetical protein ARALYDRAFT.470597 [Arabidopsis lyrata subsp. lyrata]                                                                                                                                                                                                                                                                                                                                                                                                                                                                                                                                                                                                                                                                                                                                                                                                                                                                                                                                                                                                 | 288 | 277 | 1.00E-121 | 96.2  | 77.1 | 85.8 | hypothetical protein ARALYDRAFT.470597                                                                                                   | gbpln | Arabidopsis lyrata   | AT1G05860.1   Symbols:   unknown protein; FUNCTIONS IN: molecular function unknown; INVOLVED IN: biological process unknown; LOCATED IN: chloroplast; EXPRESSED IN: 20 plant structures; EXPRESSED DURING: 11 growth stages; BEST Arabidopsis thaliana protein match is: unknown protein (TAIR:AT2G31600.1); Has 101 Blast hits to 100 proteins in 32 species; Archae - 0; Bacteria - 0; Metazoa - 28; Fungi - 2; Plants - 66; Viruses - 0; Other Eukaryotes - 5 (source: NCBI BLINK).   chr1:1769061-1770349 FORWARD LENGTH=280 | 288 | 280 | 1.00E-118 | 97.2  | 76.0 | 85.4 |
| Rsa1.0_00991.1.g22222.t1 | ref NP_172147.1  chitinase-like protein 1 [Arabidopsis thaliana]<br>gi 75191903 sp Q9MA41.1 CTL1_ARATH<br>RecName: Full=Chitinase-like protein 1; Short=AtCTL1; AltName: Full=Protein ANION ALTERED ROOT MORPHOLOGY; AltName: Full=Protein ECTOPIC DEPOSITION OF LIGNIN IN PITH 1; AltName: Full=Protein ECTOPIC ROOT HAIR 2; AltName: Full=Protein POM-POM1; AltName: Full=Protein SENSITIVE TO HOT TEMPERATURES 2; Flags: Precursor<br>gi 6850314 gb AAF29391.1 AC009999_11 Contains similarity to a basic endochitinase from Arabidopsis thaliana gb AB023448, and contains a Chitinases class I PF 00182 domain. ESTs<br>gi A1995747, gb AA728545, gb Z26222, gb Z25683, gb T88386, gb T14122, gb T04241, gb N38122 come from this gene [Arabidopsis thaliana]<br>gi 12083324 gb AAG48821.1 AF332458.1 putative class I chitinase [Arabidopsis thaliana]<br>gi 17226329 gb AAL37736.1 AF422178.1 chitinase-like protein 1 [Arabidopsis thaliana]<br>gi 17226331 gb AAL37737.1 AF422179.1 chitinase-like protein 1 [Arabidopsis thaliana] gi 14334488 gb AAK59442.1  putative class I chitinase [Arabidopsis thaliana] gi 21280935 gb AAM44973.1  putative class I chitinase [Arabidopsis thaliana] | 379 | 321 | 1.00E-178 | 84.7  | 77.6 | 81.0 | chitinase-like protein 1                                                                                                                 | gbpln | Arabidopsis thaliana | AT1G05850.1   Symbols: POM1, ERH2, ELP1, CTL1, ELP, HOT2, ATCTL1   Chitinase family protein   chr1:1766833-1768117 REVERSE LENGTH=321                                                                                                                                                                                                                                                                                                                                                                                            | 379 | 321 | 0         | 84.7  | 77.6 | 81.0 |



|                          |                                                                                                                                                                                                                                                                                                                                                      |     |     |           |       |      |      |                                              |       |                      |                                                                                                                                                                                                                                                                                                                                             |     |      |           |       |      |      |
|--------------------------|------------------------------------------------------------------------------------------------------------------------------------------------------------------------------------------------------------------------------------------------------------------------------------------------------------------------------------------------------|-----|-----|-----------|-------|------|------|----------------------------------------------|-------|----------------------|---------------------------------------------------------------------------------------------------------------------------------------------------------------------------------------------------------------------------------------------------------------------------------------------------------------------------------------------|-----|------|-----------|-------|------|------|
| Rsa1.0_00991.1.g22223.t1 | dbj BAJ34259.1  unnamed protein product [Thelungiella halophila]                                                                                                                                                                                                                                                                                     | 355 | 353 | 1.00E-148 | 99.4  | 77.7 | 82.5 | unnamed protein product                      | ----  | ----                 | AT1G05805.1   Symbols:   basic helix-loop-helix (bHLH) DNA-binding superfamily protein   chr1:1744843-1747427 FORWARD LENGTH=362                                                                                                                                                                                                            | 355 | 362  | 1.00E-140 | 102.0 | 76.3 | 83.7 |
| Rsa1.0_00992.1.g22224.t1 | dbj BAJ34283.1  unnamed protein product [Thelungiella halophila]                                                                                                                                                                                                                                                                                     | 214 | 395 | 5.00E-55  | 184.6 | 51.4 | 57.0 | unnamed protein product                      | ----  | ----                 | AT3G48160.1   Symbols: DEL1, E2L3, E2FE   DP-E2F-like 1   chr3:17783641-17785688 FORWARD LENGTH=379                                                                                                                                                                                                                                         | 214 | 379  | 1.00E-51  | 177.1 | 49.1 | 56.1 |
| Rsa1.0_00992.1.g22225.t1 | gb AAQ55493.1  betaine aldehyde dehydrogenase [Brassica napus]                                                                                                                                                                                                                                                                                       | 503 | 503 | 0         | 100.0 | 96.0 | 98.4 | betaine aldehyde dehydrogenase               | gbpln | Brassica napus       | AT3G48170.1   Symbols: ALDH10A9   aldehyde dehydrogenase 10A9   chr3:17786290-17789918 REVERSE LENGTH=503                                                                                                                                                                                                                                   | 503 | 503  | 0         | 100.0 | 93.2 | 97.8 |
| Rsa1.0_00992.1.g22226.t1 | gb EOA25038.1  hypothetical protein CARUB_v10018344mg [Capsella rubella]                                                                                                                                                                                                                                                                             | 82  | 75  | 7.00E-20  | 91.5  | 70.7 | 79.3 | hypothetical protein CARUB_v10018344mg       | gbpln | Capsella rubella     | AT3G48180.1   Symbols:   unknown protein; BEST Arabidopsis thaliana protein match is: unknown protein (TAIR:AT1G19020.1); Has 84 Blast hits to 84 proteins in 15 species: Archae - 0; Bacteria - 0; Metazoa - 0; Fungi - 0; Plants - 84; Viruses - 0; Other Eukaryotes - 0 (source: NCBI BLink).   chr3:17790571-17790804 REVERSE LENGTH=77 | 82  | 77   | 2.00E-22  | 93.9  | 70.7 | 79.3 |
| Rsa1.0_00992.1.g22227.t1 | #                                                                                                                                                                                                                                                                                                                                                    | #   | #   | #         | #     | #    | #    | -                                            | ----  | ----                 | #                                                                                                                                                                                                                                                                                                                                           | #   | #    | #         | #     | #    | #    |
| Rsa1.0_00992.1.g22228.t1 | gb EOA26197.1  hypothetical protein CARUB_v10019635mg [Capsella rubella]                                                                                                                                                                                                                                                                             | 747 | 824 | 0         | 110.3 | 64.7 | 77.0 | hypothetical protein CARUB_v10019635mg       | gbpln | Capsella rubella     | AT3G48190.1   Symbols: ATM, ATATM   ataxia-telangiectasia mutated   chr3:17797628-17828361 FORWARD LENGTH=3845                                                                                                                                                                                                                              | 747 | 3845 | 0         | 514.7 | 64.8 | 76.4 |
| Rsa1.0_00992.1.g22229.t1 | #                                                                                                                                                                                                                                                                                                                                                    | #   | #   | #         | #     | #    | #    | -                                            | ----  | ----                 | #                                                                                                                                                                                                                                                                                                                                           | #   | #    | #         | #     | #    | #    |
| Rsa1.0_00992.1.g22230.t1 | #                                                                                                                                                                                                                                                                                                                                                    | #   | #   | #         | #     | #    | #    | -                                            | ----  | ----                 | #                                                                                                                                                                                                                                                                                                                                           | #   | #    | #         | #     | #    | #    |
| Rsa1.0_00992.1.g22231.t1 | ref XP_002892774.1  pentatricopeptide repeat-containing protein [Arabidopsis lyrata subsp. lyrata]<br>gi 297338616 gb EFH69033.1  pentatricopeptide repeat-containing protein [Arabidopsis lyrata subsp. lyrata]                                                                                                                                     | 953 | 883 | 0         | 92.7  | 41.4 | 53.9 | pentatricopeptide repeat-containing protein  | gbpln | Arabidopsis lyrata   | AT1G13800.1   Symbols:   Tetratricopeptide repeat (TPR)-like superfamily protein   chr1:4731056-4733707 REVERSE LENGTH=883                                                                                                                                                                                                                  | 953 | 883  | 1.00E-178 | 92.7  | 40.9 | 54.6 |
| Rsa1.0_00992.1.g22232.t1 | #                                                                                                                                                                                                                                                                                                                                                    | #   | #   | #         | #     | #    | #    | -                                            | ----  | ----                 | #                                                                                                                                                                                                                                                                                                                                           | #   | #    | #         | #     | #    | #    |
| Rsa1.0_00992.1.g22233.t1 | ref XP_002892642.1  ABC1 family protein [Arabidopsis lyrata subsp. lyrata]<br>gi 297338484 gb EFH68901.1  ABC1 family protein [Arabidopsis lyrata subsp. lyrata]                                                                                                                                                                                     | 607 | 624 | 0         | 102.8 | 87.8 | 92.1 | ABC1 family protein                          | gbpln | Arabidopsis lyrata   | AT1G11390.1   Symbols:   Protein kinase superfamily protein   chr1:3834762-3837305 REVERSE LENGTH=824                                                                                                                                                                                                                                       | 607 | 624  | 0         | 102.8 | 87.3 | 92.4 |
| Rsa1.0_00992.1.g22234.t1 | ref XP_002899863.1  S-locus lectin protein kinase family protein [Arabidopsis lyrata subsp. lyrata]<br>gi 297335705 gb EFH66122.1  S-locus lectin protein kinase family protein [Arabidopsis lyrata subsp. lyrata]                                                                                                                                   | 843 | 842 | 0         | 99.9  | 73.7 | 82.8 | S-locus lectin protein kinase family protein | gbpln | Arabidopsis lyrata   | AT1G11330.2   Symbols:   S-locus lectin protein kinase family protein   chr1:3810372-3813416 FORWARD LENGTH=842                                                                                                                                                                                                                             | 843 | 842  | 0         | 99.9  | 73.7 | 82.8 |
| Rsa1.0_00992.1.g22235.t1 | ref NP_001184962.1  putative receptor-like protein kinase [Arabidopsis thaliana]<br>gi 322510093 sp Q9SXB8.3 Y1133_ARAT H RecName: Full=G-type lectin S-receptor-like serine/threonine-protein kinase At1g11330; Flags: Precursor<br>gi 332190598 gb AE28719.1  G-type lectin S-receptor-like serine/threonine-protein kinase [Arabidopsis thaliana] | 834 | 842 | 0         | 101.0 | 77.2 | 87.1 | putative receptor-like protein kinase        | gbpln | Arabidopsis thaliana | AT1G11330.2   Symbols:   S-locus lectin protein kinase family protein   chr1:3810372-3813416 FORWARD LENGTH=842                                                                                                                                                                                                                             | 834 | 842  | 0         | 101.0 | 77.2 | 87.1 |
| Rsa1.0_00992.1.g22236.t1 | ref XP_002899863.1  S-locus lectin protein kinase family protein [Arabidopsis lyrata subsp. lyrata]<br>gi 297335705 gb EFH66122.1  S-locus lectin protein kinase family protein [Arabidopsis lyrata subsp. lyrata]                                                                                                                                   | 834 | 842 | 0         | 101.0 | 75.7 | 84.8 | S-locus lectin protein kinase family protein | gbpln | Arabidopsis lyrata   | AT1G11330.2   Symbols:   S-locus lectin protein kinase family protein   chr1:3810372-3813416 FORWARD LENGTH=842                                                                                                                                                                                                                             | 834 | 842  | 0         | 101.0 | 76.3 | 86.1 |
| Rsa1.0_00992.1.g22237.t1 | ref NP_001184962.1  putative receptor-like protein kinase [Arabidopsis thaliana]<br>gi 322510093 sp Q9SXB8.3 Y1133_ARAT H RecName: Full=G-type lectin S-receptor-like serine/threonine-protein kinase At1g11330; Flags: Precursor<br>gi 332190598 gb AE28719.1  G-type lectin S-receptor-like serine/threonine-protein kinase [Arabidopsis thaliana] | 843 | 842 | 0         | 99.9  | 82.1 | 90.0 | putative receptor-like protein kinase        | gbpln | Arabidopsis thaliana | AT1G11330.2   Symbols:   S-locus lectin protein kinase family protein   chr1:3810372-3813416 FORWARD LENGTH=842                                                                                                                                                                                                                             | 843 | 842  | 0         | 99.9  | 82.1 | 90.0 |

|                          |                                                                                                                                                                                                                                                                                                                                                                                                                                                                                                                                    |      |      |           |       |       |       |                                                    |       |                      |                                                                                                                                                                                                                                                                                                                                                                                                                                                                    |      |     |           |       |      |      |
|--------------------------|------------------------------------------------------------------------------------------------------------------------------------------------------------------------------------------------------------------------------------------------------------------------------------------------------------------------------------------------------------------------------------------------------------------------------------------------------------------------------------------------------------------------------------|------|------|-----------|-------|-------|-------|----------------------------------------------------|-------|----------------------|--------------------------------------------------------------------------------------------------------------------------------------------------------------------------------------------------------------------------------------------------------------------------------------------------------------------------------------------------------------------------------------------------------------------------------------------------------------------|------|-----|-----------|-------|------|------|
| Rsa1.0_00992.1.g22238.t7 | gb AAM08751.1 AC025098.18 Putative copia-type polyprotein [Oryza sativa Japonica Group]                                                                                                                                                                                                                                                                                                                                                                                                                                            | 1498 | 1803 | 0         | 120.4 | 34.5  | 47.5  | Putative copia-type polyprotein                    | gbpln | Oryza sativa         | AT1G34070.1   Symbols:   CONTAINS InterPro DOMAIN/s: Retrotransposon gag protein (InterPro:IPR005162); BEST Arabidopsis thaliana protein match is: unknown protein (TAIRAT5G48050.1); Has 648 Blast hits to 647 proteins in 29 species: Archae - 0; Bacteria - 0; Metazoa - 16; Fungi - 25; Plants - 607; Viruses - 0; Other Eukaryotes - 0 (source: NCBI BLink).   chr1:12402283-12403209 FORWARD LENGTH=308                                                      | 1498 | 308 | 3.00E-78  | 20.6  | 9.9  | 13.0 |
| Rsa1.0_00993.1.g22239.t1 | gb AAF22900.1 AC006932.17 T27G7.17 [Arabidopsis thaliana]                                                                                                                                                                                                                                                                                                                                                                                                                                                                          | 385  | 526  | 1.00E-54  | 136.6 | 29.1  | 30.6  | T27G7.17                                           | gbpln | Arabidopsis thaliana | AT1G08490.1   Symbols: ATSUF5, SUFS, ATCPNIFS, ATNFS2, CPNIFS   chloroplastic NIFS-like cysteine desulfurase   chr1:2685980-2688547 REVERSE LENGTH=463                                                                                                                                                                                                                                                                                                             | 385  | 463 | 5.00E-57  | 120.3 | 29.1 | 30.6 |
| Rsa1.0_00993.1.g22240.t1 | gb AAF79687.1 AC022314.28 F9C16.9 [Arabidopsis thaliana]                                                                                                                                                                                                                                                                                                                                                                                                                                                                           | 704  | 946  | 0         | 134.4 | 55.3  | 69.2  | F9C16.9                                            | gbpln | Arabidopsis thaliana | #                                                                                                                                                                                                                                                                                                                                                                                                                                                                  | #    | #   | #         | #     | #    |      |
| Rsa1.0_00993.1.g22241.t1 | gb EOA19350.1  hypothetical protein CARUB_v10000283mg [Capsella rubella]                                                                                                                                                                                                                                                                                                                                                                                                                                                           | 269  | 763  | 7.00E-83  | 283.6 | 60.2  | 65.8  | hypothetical protein CARUB_v10000283mg             | gbpln | Capsella rubella     | AT5G23450.2   Symbols: ATLCBK1, LCBK1   long-chain base (LCB) kinase 1   chr5:7905041-7908960 REVERSE LENGTH=763                                                                                                                                                                                                                                                                                                                                                   | 269  | 763 | 3.00E-83  | 283.6 | 58.7 | 65.4 |
| Rsa1.0_00993.1.g22242.t1 | gb ABD65035.1  hypothetical protein 26.t00052 [Brassica oleracea]                                                                                                                                                                                                                                                                                                                                                                                                                                                                  | 681  | 695  | 0         | 102.1 | 54.6  | 66.5  | hypothetical protein 26.t00052                     | gbpln | Brassica oleracea    | #                                                                                                                                                                                                                                                                                                                                                                                                                                                                  | #    | #   | #         | #     | #    |      |
| Rsa1.0_00993.1.g22243.t1 | gb AAD22283.1  putative retroelement pol polyprotein [Arabidopsis thaliana]                                                                                                                                                                                                                                                                                                                                                                                                                                                        | 1738 | 1787 | 0         | 102.8 | 29.1  | 37.5  | putative retroelement pol polyprotein              | gbpln | Arabidopsis thaliana | #                                                                                                                                                                                                                                                                                                                                                                                                                                                                  | #    | #   | #         | #     | #    |      |
| Rsa1.0_00993.1.g22244.t1 | gb EMJ00160.1  hypothetical protein PRUPE_ppa020671mg, partial [Prunus persica]                                                                                                                                                                                                                                                                                                                                                                                                                                                    | 955  | 1460 | 1.00E-177 | 152.9 | 33.4  | 42.2  | hypothetical protein PRUPE_ppa020671mg, partial    | gbpln | Prunus persica       | ATMG00860.1   Symbols: ORF158   DNA/RNA polymerases superfamily protein   chrM:235916-236392 FORWARD LENGTH=158                                                                                                                                                                                                                                                                                                                                                    | 955  | 158 | 1.00E-26  | 16.5  | 5.7  | 8.6  |
| Rsa1.0_00993.1.g22245.t1 | gb AAG51783.1 AC079679.3 reverse transcriptase, putative; 16838-20266 [Arabidopsis thaliana]                                                                                                                                                                                                                                                                                                                                                                                                                                       | 507  | 1142 | 1.00E-157 | 225.2 | 51.3  | 64.3  | reverse transcriptase, putative; 16838-20266       | gbpln | Arabidopsis thaliana | AT1G43760.1   Symbols:   DNase I-like superfamily protein   chr1:16528880-16531065 REVERSE LENGTH=626                                                                                                                                                                                                                                                                                                                                                              | 507  | 626 | 2.00E-37  | 123.5 | 21.1 | 34.9 |
| Rsa1.0_00993.1.g22246.t1 | emb CAA16721.1  MuDR transposable element - like protein [Arabidopsis thaliana] gi 7268634 emb CAB78843.1  MuDR transposable element-like protein [Arabidopsis thaliana]                                                                                                                                                                                                                                                                                                                                                           | 799  | 633  | 0         | 79.2  | 43.8  | 54.2  | MuDR transposable element - like protein           | gbpln | Arabidopsis thaliana | AT3G30370.1   Symbols:   CONTAINS InterPro DOMAIN/s: Transposase, MuDR, plant (InterPro:IPR004332); BEST Arabidopsis thaliana protein match is: SWAP (Suppressor-of-White-AFricot)/surp RNA-binding domain-containing protein (TAIRAT1G18050.1); Has 35 Blast hits to 35 proteins in 4 species: Archae - 0; Bacteria - 0; Metazoa - 0; Fungi - 0; Plants - 35; Viruses - 0; Other Eukaryotes - 0 (source: NCBI BLink).   chr3:11965180-11965719 REVERSE LENGTH=179 | 799  | 179 | 9.00E-29  | 22.4  | 7.0  | 9.4  |
| Rsa1.0_00993.1.g22247.t1 | emb CAB87198.1  putative protein [Arabidopsis thaliana] gi 91806512 gb ABE65983.1  hypothetical protein At3g42810 [Arabidopsis thaliana]                                                                                                                                                                                                                                                                                                                                                                                           | 118  | 154  | 2.00E-16  | 130.5 | 36.4  | 57.6  | putative protein                                   | gbpln | Arabidopsis thaliana | #                                                                                                                                                                                                                                                                                                                                                                                                                                                                  | #    | #   | #         | #     | #    |      |
| Rsa1.0_00994.1.g22248.t1 | emb CAF06580.1  SGT1-like protein [Brassica oleracea]                                                                                                                                                                                                                                                                                                                                                                                                                                                                              | 85   | 355  | 6.00E-43  | 417.6 | 100.0 | 100.0 | SGT1-like protein                                  | gbpln | Brassica oleracea    | AT4G11260.1   Symbols: ATSGT1B, ETA3, RPR1, EDM1, SGT1B   phosphatase-related   chr4:6851515-6853719 REVERSE LENGTH=358                                                                                                                                                                                                                                                                                                                                            | 85   | 358 | 6.00E-45  | 421.2 | 98.8 | 98.8 |
| Rsa1.0_00994.1.g22249.t1 | ref NP_567375.1  serine/threonine-protein phosphatase PP1 isozyme 6 [Arabidopsis thaliana] gi 148887170 sp P48486.2 PP16_ARATH RecName: Full=Serine/threonine-protein phosphatase PP1 isozyme 6 gi 19699316 gb AAL91268.1  AT4g11240/F8L21.30 [Arabidopsis thaliana] gi 21554190 gb AAM63269.1  protein phosphatase type 1 PP1BG [Arabidopsis thaliana] gi 21689631 gb AAM67437.1  AT4g11240/F8L21.30 [Arabidopsis thaliana] gi 332657588 gb AEE82988.1  serine/threonine-protein phosphatase PP1 isozyme 6 [Arabidopsis thaliana] | 322  | 322  | 1.00E-177 | 100.0 | 90.7  | 97.2  | serine/threonine-protein phosphatase PP1 isozyme 6 | gbpln | Arabidopsis thaliana | AT4G11240.1   Symbols: TOPP7   Calcineurin-like metallo-phosphoesterase superfamily protein   chr4:6847333-6849032 FORWARD LENGTH=322                                                                                                                                                                                                                                                                                                                              | 322  | 322 | 1.00E-179 | 100.0 | 90.7 | 97.2 |
| Rsa1.0_00994.1.g22250.t2 | ref NP_176850.2  MATE efflux family protein [Arabidopsis thaliana] gi 332196434 gb AEE34555.1  MATE efflux family protein [Arabidopsis thaliana]                                                                                                                                                                                                                                                                                                                                                                                   | 471  | 485  | 0         | 103.0 | 87.5  | 93.2  | MATE efflux family protein                         | gbpln | Arabidopsis thaliana | AT1G66780.1   Symbols:   MATE efflux family protein   chr1:24909213-24911485 FORWARD LENGTH=485                                                                                                                                                                                                                                                                                                                                                                    | 471  | 485 | 0         | 103.0 | 87.5 | 93.2 |
| Rsa1.0_00994.1.g22251.t2 | dbj BAB03046.1  unnamed protein product [Arabidopsis thaliana]                                                                                                                                                                                                                                                                                                                                                                                                                                                                     | 165  | 402  | 6.00E-32  | 243.6 | 47.9  | 55.2  | unnamed protein product                            | gbpln | Arabidopsis thaliana | AT3G21330.1   Symbols:   basic helix-loop-helix (bHLH) DNA-binding superfamily protein   chr3:7507720-7508841 FORWARD LENGTH=373                                                                                                                                                                                                                                                                                                                                   | 165  | 373 | 4.00E-30  | 226.1 | 44.2 | 49.1 |

|                          |                                                                                                                                                                                                                                                                                           |      |      |          |       |      |      |                                              |       |                      |                                                                                                                                                                                                                                                                                                                                                      |      |      |          |       |      |      |
|--------------------------|-------------------------------------------------------------------------------------------------------------------------------------------------------------------------------------------------------------------------------------------------------------------------------------------|------|------|----------|-------|------|------|----------------------------------------------|-------|----------------------|------------------------------------------------------------------------------------------------------------------------------------------------------------------------------------------------------------------------------------------------------------------------------------------------------------------------------------------------------|------|------|----------|-------|------|------|
| Rsa1.0_00994.1.g22252.t1 | ref[XP_002867698.1] hypothetical protein ARALYDRAFT_914233 [Arabidopsis lyrata subsp. lyrata] gi 297313534 gb EFH43957.1                                                                                                                                                                  | 709  | 775  | 0        | 109.3 | 88.2 | 93.7 | hypothetical protein ARALYDRAFT_914233       | gbpln | Arabidopsis lyrata   | AT4G23640.1   Symbols: TRH1, ATKT3, KUP4   Potassium transporter family protein   chr4:12320476-12324291 REVERSE LENGTH=775                                                                                                                                                                                                                          | 709  | 775  | 0        | 109.3 | 87.6 | 93.2 |
| Rsa1.0_00994.1.g22253.t1 | hypothetical protein ARALYDRAFT_914233 [Arabidopsis lyrata subsp. lyrata] ref[XP_002872559.1] disease resistance-responsive family protein [Arabidopsis lyrata subsp. lyrata] gi 297318396 gb EFH48818.1] disease resistance-responsive family protein [Arabidopsis lyrata subsp. lyrata] | 178  | 184  | 8.00E-66 | 103.4 | 68.5 | 79.8 | disease resistance-responsive family protein | gbpln | Arabidopsis lyrata   | AT4G11190.1   Symbols:   Disease resistance-responsive (dirigent-like protein) family protein   chr4:6826682-6827236 FORWARD LENGTH=184                                                                                                                                                                                                              | 178  | 184  | 1.00E-66 | 103.4 | 68.0 | 79.2 |
| Rsa1.0_00994.1.g22254.t1 | gb AAF19226.1 AC007505.2 Highly similar to Ta1-3 polyprotein [Arabidopsis thaliana]                                                                                                                                                                                                       | 233  | 1356 | 8.00E-81 | 582.0 | 60.1 | 82.4 | Highly similar to Ta1-3 polyprotein          | gbpln | Arabidopsis thaliana | AT4G23160.1   Symbols: CRK8   cysteine-rich RLK (RECEPTOR-like protein kinase) 8   chr4:12129485-12134086 FORWARD LENGTH=1262                                                                                                                                                                                                                        | 233  | 1262 | 5.00E-21 | 541.6 | 25.8 | 42.5 |
| Rsa1.0_00994.1.g22255.t1 | ref[XP_002877500.1] predicted protein [Arabidopsis lyrata subsp. lyrata] gi 297323338 gb EFH53759.1] predicted protein [Arabidopsis lyrata subsp. lyrata]                                                                                                                                 | 156  | 136  | 6.00E-17 | 87.2  | 28.8 | 39.7 | predicted protein                            | gbpln | Arabidopsis lyrata   | #                                                                                                                                                                                                                                                                                                                                                    | #    | #    | #        | #     | #    | #    |
| Rsa1.0_00994.1.g22256.t1 | gb EOA16078.1] hypothetical protein CARUB_v10004210mg [Capsella rubella]                                                                                                                                                                                                                  | 726  | 757  | 0        | 104.3 | 77.1 | 84.7 | hypothetical protein CARUB_v10004210mg       | gbpln | Capsella rubella     | AT4G26690.1   Symbols: SHV3, MRH5, GPDL2   PLC-like phosphodiesterase family protein   chr4:13456793-13459890 REVERSE LENGTH=759                                                                                                                                                                                                                     | 726  | 759  | 0        | 104.5 | 76.3 | 84.8 |
| Rsa1.0_00994.1.g22257.t1 | #                                                                                                                                                                                                                                                                                         | #    | #    | #        | #     | #    | -    | -                                            | ----  | ----                 | #                                                                                                                                                                                                                                                                                                                                                    | #    | #    | #        | #     | #    | #    |
| Rsa1.0_00994.1.g22258.t1 | gb AAG51783.1 AC079679.3 reverse transcriptase, putative; 16838-20266 [Arabidopsis thaliana]                                                                                                                                                                                              | 127  | 1142 | 6.00E-23 | 899.2 | 46.5 | 64.6 | reverse transcriptase, putative; 16838-20266 | gbpln | Arabidopsis thaliana | AT2G22440.1   Symbols:   BEST Arabidopsis thaliana protein match is: Ribonuclease H-like superfamily protein (TAIR:AT4G29090.1); Has 208 Blast hits to 191 proteins in 10 species: Archae - 0; Bacteria - 0; Metazoa - 0; Fungi - 0; Plants - 208; Viruses - 0; Other Eukaryotes - 0 (source: NCBI BLINK).   chr2:9528910-9529917 FORWARD LENGTH=256 | 127  | 256  | 2.00E-16 | 201.6 | 34.6 | 47.2 |
| Rsa1.0_00994.1.g22259.t1 | gb EOA21758.1] hypothetical protein CARUB_v10002215mg [Capsella rubella]                                                                                                                                                                                                                  | 141  | 141  | 5.00E-67 | 100.0 | 92.9 | 95.0 | hypothetical protein CARUB_v10002215mg       | gbpln | Capsella rubella     | AT4G11175.1   Symbols:   Nucleic acid-binding, OB-fold-like protein   chr4:6818162-6818806 FORWARD LENGTH=141                                                                                                                                                                                                                                        | 141  | 141  | 1.00E-67 | 100.0 | 87.9 | 93.6 |
| Rsa1.0_00994.1.g22260.t2 | dbj BAB01344.1] reverse transcriptase-like protein [Arabidopsis thaliana]                                                                                                                                                                                                                 | 1215 | 1115 | 3.00E-49 | 91.8  | 9.3  | 13.3 | reverse transcriptase-like protein           | gbpln | Arabidopsis thaliana | AT3G24255.1   Symbols:   RNA-directed DNA polymerase (reverse transcriptase)-related family protein   chr3:8789471-8793208 FORWARD LENGTH=746                                                                                                                                                                                                        | 1215 | 746  | 1.00E-33 | 61.4  | 7.4  | 11.2 |
| Rsa1.0_00995.1.g22261.t2 | gb ACQ44224.1] unknown [Arabis alpina]                                                                                                                                                                                                                                                    | 507  | 291  | 1.00E-35 | 57.4  | 15.0 | 19.5 | unknown                                      | gbpln | Arabis alpina        | AT1G31150.1   Symbols:   Domain of unknown function (DUF1985)   chr1:11120097-11122412 FORWARD LENGTH=673                                                                                                                                                                                                                                            | 507  | 673  | 3.00E-11 | 132.7 | 7.7  | 12.2 |
| Rsa1.0_00995.1.g22262.t1 | #                                                                                                                                                                                                                                                                                         | #    | #    | #        | #     | #    | -    | -                                            | ----  | ----                 | #                                                                                                                                                                                                                                                                                                                                                    | #    | #    | #        | #     | #    | #    |
| Rsa1.0_00995.1.g22263.t1 | ref[NP_566886.2] protein plastid transcriptionally active 16 [Arabidopsis thaliana] gi 5541681 emb CAB51187.1] putative protein [Arabidopsis thaliana] gi 332644683 gb AEE78204.1] protein plastid transcriptionally active 16 [Arabidopsis thaliana]                                     | 511  | 510  | 0        | 99.8  | 88.1 | 93.5 | protein plastid transcriptionally active 16  | gbpln | Arabidopsis thaliana | AT3G46780.1   Symbols: PTAC16   plastid transcriptionally active 16   chr3:17228766-17231021 FORWARD LENGTH=510                                                                                                                                                                                                                                      | 511  | 510  | 0        | 99.8  | 88.1 | 93.5 |
| Rsa1.0_00995.1.g22264.t1 | gb AAD31079.1] Mutator-like transposase [Arabidopsis thaliana]                                                                                                                                                                                                                            | 524  | 819  | 5.00E-65 | 156.3 | 25.4 | 35.7 | Mutator-like transposase                     | gbpln | Arabidopsis thaliana | AT1G64260.1   Symbols:   MuDR family transposase   chr1:23847756-23849915 FORWARD LENGTH=719                                                                                                                                                                                                                                                         | 524  | 719  | 1.00E-18 | 137.2 | 13.4 | 24.4 |
| Rsa1.0_00995.1.g22265.t8 | ref[XP_002891526.1] hypothetical protein ARALYDRAFT_337115 [Arabidopsis lyrata subsp. lyrata] gi 297337368 gb EFH67785.1] hypothetical protein ARALYDRAFT_337115 [Arabidopsis lyrata subsp. lyrata]                                                                                       | 874  | 824  | 1.00E-90 | 94.3  | 27.9 | 43.1 | hypothetical protein ARALYDRAFT_337115       | gbpln | Arabidopsis lyrata   | AT2G07190.1   Symbols:   Domain of unknown function (DUF1985)   chr2:2987367-2988945 FORWARD LENGTH=452                                                                                                                                                                                                                                              | 874  | 452  | 9.00E-33 | 51.7  | 13.7 | 21.3 |
| Rsa1.0_00995.1.g22266.t1 | ref[XP_002877513.1] hypothetical protein ARALYDRAFT_905886 [Arabidopsis lyrata subsp. lyrata] gi 297323351 gb EFH53772.1] hypothetical protein ARALYDRAFT_905886 [Arabidopsis lyrata subsp. lyrata]                                                                                       | 656  | 657  | 0        | 100.2 | 93.1 | 95.6 | hypothetical protein ARALYDRAFT_905886       | gbpln | Arabidopsis lyrata   | AT3G46790.1   Symbols: CRR2   Tetratricopeptide repeat (TPR)-like superfamily protein   chr3:17231975-17233948 REVERSE LENGTH=657                                                                                                                                                                                                                    | 656  | 657  | 0        | 100.2 | 92.7 | 95.9 |
| Rsa1.0_00995.1.g22267.t1 | #                                                                                                                                                                                                                                                                                         | #    | #    | #        | #     | #    | -    | -                                            | ----  | ----                 | #                                                                                                                                                                                                                                                                                                                                                    | #    | #    | #        | #     | #    | #    |
| Rsa1.0_00995.1.g22268.t1 | #                                                                                                                                                                                                                                                                                         | #    | #    | #        | #     | #    | -    | -                                            | ----  | ----                 | AT1G36970.1   Symbols:   Domain of unknown function (DUF1985)   chr1:14016385-14018356 REVERSE LENGTH=439                                                                                                                                                                                                                                            | 363  | 439  | 6.00E-13 | 120.9 | 9.1  | 11.6 |
| Rsa1.0_00996.1.g22269.t1 | #                                                                                                                                                                                                                                                                                         | #    | #    | #        | #     | #    | -    | -                                            | ----  | ----                 | #                                                                                                                                                                                                                                                                                                                                                    | #    | #    | #        | #     | #    | #    |

|                          |                                                                                                                                                                                                                                                                                                                                                                                                                                                                                    |      |      |           |       |      |      |                                                         |       |                      |                                                                                                                                               |      |      |           |       |      |      |
|--------------------------|------------------------------------------------------------------------------------------------------------------------------------------------------------------------------------------------------------------------------------------------------------------------------------------------------------------------------------------------------------------------------------------------------------------------------------------------------------------------------------|------|------|-----------|-------|------|------|---------------------------------------------------------|-------|----------------------|-----------------------------------------------------------------------------------------------------------------------------------------------|------|------|-----------|-------|------|------|
| Rsa1.0_00996.1.g22270.t1 | dbj BAB11447.1  polyprotein-like [Arabidopsis thaliana]                                                                                                                                                                                                                                                                                                                                                                                                                            | 180  | 509  | 8.00E-63  | 282.8 | 63.3 | 78.3 | polyprotein-like                                        | gbpln | Arabidopsis thaliana | AT4G23160.1   Symbols: CRK8   cysteine-rich RLK (RECEPTOR-like protein kinase) 8   chr4:12129485-12134086 FORWARD LENGTH=1262                 | 180  | 1262 | 2.00E-40  | 701.1 | 42.2 | 65.0 |
| Rsa1.0_00996.1.g22271.t1 | ref NP_564537.1  myb/SANT-like DNA-binding domain-containing protein [Arabidopsis thaliana]   gi 7770343 gb AAF69713.1 AC016041_18 F27J15.20 [Arabidopsis thaliana]   gi 21555865 gb AM63950.1  unknown [Arabidopsis thaliana]   gi 41618992 gb AAS09998.1  MYB transcription factor [Arabidopsis thaliana]   gi 89274145 gb ABD65593.1  At1g49010 [Arabidopsis thaliana]   gi 332194260 gb AEE32381.1  myb/SANT-like DNA-binding domain-containing protein [Arabidopsis thaliana] | 297  | 314  | 1.00E-123 | 105.7 | 84.2 | 89.9 | myb/SANT-like DNA-binding domain-containing protein     | gbpln | Arabidopsis thaliana | AT1G49010.1   Symbols:   Duplicated homeodomain-like superfamily protein   chr1:18132714-18133778 FORWARD LENGTH=314                          | 297  | 314  | 1.00E-126 | 105.7 | 84.2 | 89.9 |
| Rsa1.0_00996.1.g22272.t1 | ref NP_001190775.1  K+ uptake permease 9 [Arabidopsis thaliana]   gi 38502848 sp C49423.2 POT9_ARATH RecName: Full=Potassium transporter 9; Short=AtPOT9   gi 332658852 gb AEE84252.1  K+ uptake permease 9 [Arabidopsis thaliana]                                                                                                                                                                                                                                                 | 792  | 807  | 0         | 101.9 | 79.3 | 89.1 | K+ uptake permease 9                                    | gbpln | Arabidopsis thaliana | AT4G19960.2   Symbols: KUP9   K+ uptake permease 9   chr4:10813807-10816997 FORWARD LENGTH=807                                                | 792  | 807  | 0         | 101.9 | 79.3 | 89.1 |
| Rsa1.0_00996.1.g22273.t1 | dbj BAB09379.1  non-LTR retroelement reverse transcriptase-like protein [Arabidopsis thaliana]                                                                                                                                                                                                                                                                                                                                                                                     | 1164 | 1223 | 0         | 105.1 | 50.3 | 64.2 | non-LTR retroelement reverse transcriptase-like protein | gbpln | Arabidopsis thaliana | AT3G24255.1   Symbols:   RNA-directed DNA polymerase (reverse transcriptase)-related family protein   chr3:8789471-8793208 FORWARD LENGTH=746 | 1164 | 746  | 1.00E-84  | 64.1  | 12.5 | 16.9 |
| Rsa1.0_00996.1.g22274.t1 | #                                                                                                                                                                                                                                                                                                                                                                                                                                                                                  | #    | #    | #         | #     | #    | #    | -                                                       | ----  | ----                 | #                                                                                                                                             | #    | #    | #         | #     | #    | #    |
| Rsa1.0_00996.1.g22275.t1 | ref XP_002891480.1  hypothetical protein ARALYDRAFT_474061 [Arabidopsis lyrata subsp. lyrata]   gi 297337322 gb EFH67739.1  hypothetical protein ARALYDRAFT_474061 [Arabidopsis lyrata subsp. lyrata]                                                                                                                                                                                                                                                                              | 449  | 530  | 1.00E-106 | 118.0 | 55.5 | 73.1 | hypothetical protein ARALYDRAFT_474061                  | gbpln | Arabidopsis lyrata   | AT1G49190.1   Symbols: ARR19, RR19   response regulator 19   chr1:18191342-18193598 FORWARD LENGTH=808                                        | 449  | 608  | 2.00E-61  | 135.4 | 28.5 | 38.8 |
| Rsa1.0_00996.1.g22276.t4 | gb AAD15376.1  putative retroelement pol polyprotein [Arabidopsis thaliana]                                                                                                                                                                                                                                                                                                                                                                                                        | 785  | 962  | 1.00E-19  | 122.5 | 6.6  | 9.8  | putative retroelement pol polyprotein                   | gbpln | Arabidopsis thaliana | #                                                                                                                                             | #    | #    | #         | #     | #    | #    |
| Rsa1.0_00996.1.g22277.t1 | #                                                                                                                                                                                                                                                                                                                                                                                                                                                                                  | #    | #    | #         | #     | #    | #    | -                                                       | ----  | ----                 | #                                                                                                                                             | #    | #    | #         | #     | #    | #    |
| Rsa1.0_00996.1.g22278.t1 | #                                                                                                                                                                                                                                                                                                                                                                                                                                                                                  | #    | #    | #         | #     | #    | #    | -                                                       | ----  | ----                 | #                                                                                                                                             | #    | #    | #         | #     | #    | #    |
| Rsa1.0_00996.1.g22279.t1 | ref XP_002894164.1  hypothetical protein ARALYDRAFT_314341 [Arabidopsis lyrata subsp. lyrata]   gi 297340006 gb EFH70423.1  hypothetical protein ARALYDRAFT_314341 [Arabidopsis lyrata subsp. lyrata]                                                                                                                                                                                                                                                                              | 265  | 266  | 1.00E-134 | 100.4 | 86.0 | 92.1 | hypothetical protein ARALYDRAFT_314341                  | gbpln | Arabidopsis lyrata   | AT1G49180.2   Symbols:   protein kinase family protein   chr1:18184814-18187444 REVERSE LENGTH=376                                            | 265  | 376  | 1.00E-128 | 141.9 | 81.9 | 86.8 |
| Rsa1.0_00996.1.g22280.t1 | #                                                                                                                                                                                                                                                                                                                                                                                                                                                                                  | #    | #    | #         | #     | #    | #    | -                                                       | ----  | ----                 | #                                                                                                                                             | #    | #    | #         | #     | #    | #    |
| Rsa1.0_00997.1.g22281.t2 | gb EOA21157.1  hypothetical protein CARUB_v10001503mg [Capsella rubella]                                                                                                                                                                                                                                                                                                                                                                                                           | 172  | 314  | 7.00E-15  | 182.6 | 26.7 | 27.9 | hypothetical protein CARUB_v10001503mg                  | gbpln | Capsella rubella     | AT5G06130.2   Symbols:   chaperone protein dnaJ-related   chr5:1853754-1855763 REVERSE LENGTH=315                                             | 172  | 315  | 3.00E-16  | 183.1 | 26.2 | 27.9 |
| Rsa1.0_00997.1.g22282.t1 | gb EOA15376.1  hypothetical protein CARUB_v10006095mg [Capsella rubella]                                                                                                                                                                                                                                                                                                                                                                                                           | 104  | 104  | 2.00E-47  | 100.0 | 87.5 | 93.3 | hypothetical protein CARUB_v10006095mg                  | gbpln | Capsella rubella     | AT4G34770.1   Symbols:   SAUR-like auxin-responsive protein family   chr4:16591352-16591666 FORWARD LENGTH=104                                | 104  | 104  | 5.00E-50  | 100.0 | 88.5 | 92.3 |
| Rsa1.0_00997.1.g22283.t1 | ref XP_002869123.1  ATMTN2 [Arabidopsis lyrata subsp. lyrata]   gi 297314959 gb EFH45382.1  ATMTN2 [Arabidopsis lyrata subsp. lyrata]                                                                                                                                                                                                                                                                                                                                              | 267  | 254  | 1.00E-131 | 95.1  | 86.1 | 91.0 | ATMTN2                                                  | gbpln | Arabidopsis lyrata   | AT4G34840.1   Symbols: ATMTN2, ATMTAN2, MTN2, MTAN2   Phosphorylase superfamily protein   chr4:16606299-16607748 FORWARD LENGTH=254           | 267  | 254  | 1.00E-132 | 95.1  | 84.3 | 90.3 |
| Rsa1.0_00997.1.g22284.t1 | gb ADF43047.1  chalcone synthase 6 protein [Brassica rapa subsp. rapa]                                                                                                                                                                                                                                                                                                                                                                                                             | 392  | 392  | 0         | 100.0 | 94.9 | 97.4 | chalcone synthase 6 protein                             | gbpln | Brassica rapa        | AT4G34850.1   Symbols: LAP5   Chalcone and stilbene synthase family protein   chr4:16608349-16609720 FORWARD LENGTH=392                       | 392  | 392  | 0         | 100.0 | 92.9 | 95.9 |
| Rsa1.0_00997.1.g22285.t1 | ref XP_004289834.1  PREDICTED: uncharacterized protein LOC101301732 [Fragaria vesca subsp. vesca]                                                                                                                                                                                                                                                                                                                                                                                  | 469  | 573  | 0         | 122.2 | 84.4 | 90.2 | PREDICTED: uncharacterized protein LOC101301732         | gbpln | Fragaria vesca       | AT4G34860.2   Symbols:   Plant neutral invertase family protein   chr4:16609955-16612019 REVERSE LENGTH=571                                   | 469  | 571  | 0         | 121.7 | 69.3 | 71.2 |
| Rsa1.0_00997.1.g22286.t1 | gb EOA16221.1  hypothetical protein CARUB_v10004361mg [Capsella rubella]                                                                                                                                                                                                                                                                                                                                                                                                           | 615  | 633  | 0         | 102.9 | 84.7 | 90.7 | hypothetical protein CARUB_v10004361mg                  | gbpln | Capsella rubella     | AT4G34910.1   Symbols:   P-loop containing nucleoside triphosphate hydrolases superfamily protein   chr4:16631661-16634834 FORWARD LENGTH=626 | 615  | 626  | 0         | 101.8 | 82.3 | 88.1 |
| Rsa1.0_00997.1.g22287.t1 | gb AAM65736.1  unknown [Arabidopsis thaliana]                                                                                                                                                                                                                                                                                                                                                                                                                                      | 318  | 318  | 1.00E-168 | 100.0 | 88.4 | 94.7 | unknown                                                 | gbpln | Arabidopsis thaliana | AT4G34920.1   Symbols:   PLC-like phosphodiesterases superfamily protein   chr4:16635745-16636701 FORWARD LENGTH=318                          | 318  | 318  | 1.00E-169 | 100.0 | 87.7 | 94.0 |

|                          |                                                                                                                                                                                                                                                                                                                                                                                                                                                                                                                                                                                                                                                                                                                                                                                                                                                                  |     |      |           |        |      |      |                                                             |       |                      |                                                                                                                                               |     |     |           |       |      |      |
|--------------------------|------------------------------------------------------------------------------------------------------------------------------------------------------------------------------------------------------------------------------------------------------------------------------------------------------------------------------------------------------------------------------------------------------------------------------------------------------------------------------------------------------------------------------------------------------------------------------------------------------------------------------------------------------------------------------------------------------------------------------------------------------------------------------------------------------------------------------------------------------------------|-----|------|-----------|--------|------|------|-------------------------------------------------------------|-------|----------------------|-----------------------------------------------------------------------------------------------------------------------------------------------|-----|-----|-----------|-------|------|------|
| Rsa1.0_00997.1.g22288.t1 | ref NP_195219.1  1-phosphatidylinositol phosphodiesterase-related protein [Arabidopsis thaliana] gi 5123710 emb CAB45454.1  putative protein [Arabidopsis thaliana] gi 7270444 emb CAB80210.1  putative protein [Arabidopsis thaliana] gi 119360157 gb AB169807.1  At4g34930 [Arabidopsis thaliana] gi 332661039 gb AEE86438.1  1-phosphatidylinositol phosphodiesterase-related protein [Arabidopsis thaliana]                                                                                                                                                                                                                                                                                                                                                                                                                                                  | 355 | 391  | 1.00E-161 | 110.1  | 76.9 | 87.9 | 1-phosphatidylinositol phosphodiesterase-related protein    | gbpln | Arabidopsis thaliana | AT4G34930.1   Symbols:   PLC-like phosphodiesterases superfamily protein   chr4:16637551-16638726 FORWARD LENGTH=391                          | 355 | 391 | 1.00E-164 | 110.1 | 76.9 | 87.9 |
| Rsa1.0_00997.1.g22289.t1 | gb EOA19138.1  hypothetical protein CARUB_v10007809mg [Capsella rubella]                                                                                                                                                                                                                                                                                                                                                                                                                                                                                                                                                                                                                                                                                                                                                                                         | 659 | 668  | 0         | 101.4  | 93.9 | 97.6 | hypothetical protein CARUB_v10007809mg                      | gbpln | Capsella rubella     | AT4G34940.1   Symbols: ARO1   armadillo repeat only 1   chr4:16639760-16641754 FORWARD LENGTH=664                                             | 659 | 664 | 0         | 100.8 | 94.1 | 97.6 |
| Rsa1.0_00997.1.g22290.t1 | ref XP_002867099.1  nodulin family protein [Arabidopsis lyrata subsp. lyrata] gi 297312935 gb EFH43358.1  nodulin family protein [Arabidopsis lyrata subsp. lyrata]                                                                                                                                                                                                                                                                                                                                                                                                                                                                                                                                                                                                                                                                                              | 558 | 567  | 0         | 101.6  | 87.8 | 94.3 | nodulin family protein                                      | gbpln | Arabidopsis lyrata   | AT4G34950.1   Symbols:   Major facilitator superfamily protein   chr4:16642544-16644759 REVERSE LENGTH=567                                    | 558 | 567 | 0         | 101.6 | 85.8 | 92.3 |
| Rsa1.0_00997.1.g22291.t1 | dbj BAF81521.1  putative peptidyl-prolyl cis-trans isomerase [Brassica rapa]                                                                                                                                                                                                                                                                                                                                                                                                                                                                                                                                                                                                                                                                                                                                                                                     | 202 | 223  | 1.00E-91  | 110.4  | 84.2 | 89.1 | putative peptidyl-prolyl cis-trans isomerase                | gbpln | Brassica rapa        | AT4G34960.1   Symbols:   Cyclophilin-like peptidyl-prolyl cis-trans isomerase family protein   chr4:16648865-16650646 FORWARD LENGTH=224      | 202 | 224 | 4.00E-91  | 110.9 | 80.7 | 88.6 |
| Rsa1.0_00997.1.g22292.t1 | gb EOA17264.1  hypothetical protein CARUB_v10005538mg [Capsella rubella]                                                                                                                                                                                                                                                                                                                                                                                                                                                                                                                                                                                                                                                                                                                                                                                         | 261 | 258  | 2.00E-96  | 98.9   | 77.8 | 84.3 | hypothetical protein CARUB_v10005538mg                      | gbpln | Capsella rubella     | AT4G35040.1   Symbols: bZIP19   Basic-leucine zipper (bZIP) transcription factor family protein   chr4:16680821-16681805 FORWARD LENGTH=261   | 261 | 261 | 3.00E-94  | 100.0 | 74.3 | 81.2 |
| Rsa1.0_00998.1.g22293.t1 | gb ABW74585.1  pol polyprotein [Boechera divaricarpa]                                                                                                                                                                                                                                                                                                                                                                                                                                                                                                                                                                                                                                                                                                                                                                                                            | 158 | 551  | 2.00E-47  | 348.7  | 59.5 | 77.8 | pol polyprotein                                             | gbpln | Boechera divaricarpa | #                                                                                                                                             | #   | #   | #         | #     | #    | #    |
| Rsa1.0_00998.1.g22294.t1 | gb ABW81051.1  tn7 reverse transcriptase [Arabidopsis lyrata subsp. lyrata]                                                                                                                                                                                                                                                                                                                                                                                                                                                                                                                                                                                                                                                                                                                                                                                      | 119 | 441  | 2.00E-24  | 370.6  | 46.2 | 64.7 | tn7 reverse transcriptase                                   | gbpln | Arabidopsis lyrata   | #                                                                                                                                             | #   | #   | #         | #     | #    | #    |
| Rsa1.0_00998.1.g22295.t1 | emb CAB10225.1  retrovirus-related like polyprotein [Arabidopsis thaliana] gi 7268152 emb CAB78488.1  retrovirus-related like polyprotein [Arabidopsis thaliana]                                                                                                                                                                                                                                                                                                                                                                                                                                                                                                                                                                                                                                                                                                 | 75  | 1489 | 1.00E-12  | 1985.3 | 40.0 | 68.0 | retrovirus-related like polyprotein                         | gbpln | Arabidopsis thaliana | #                                                                                                                                             | #   | #   | #         | #     | #    | #    |
| Rsa1.0_00998.1.g22296.t1 | gb AAG50886.1 AC025294.24 hypothetical protein [Arabidopsis thaliana]                                                                                                                                                                                                                                                                                                                                                                                                                                                                                                                                                                                                                                                                                                                                                                                            | 753 | 629  | 1.00E-151 | 83.5   | 35.1 | 49.4 | hypothetical protein                                        | gbpln | Arabidopsis thaliana | AT3G24255.1   Symbols:   RNA-directed DNA polymerase (reverse transcriptase)-related family protein   chr3:8789471-8793208 FORWARD LENGTH=746 | 753 | 746 | 7.00E-88  | 99.1  | 23.2 | 30.8 |
| Rsa1.0_00998.1.g22297.t1 | ref NP_175610.1  putative mitochondrial-processing peptidase subunit alpha-1 [Arabidopsis thaliana] gi 29839695 sp Q9ZU25.1 MPPA1_ARAT H RecName: Full=Probable mitochondrial-processing peptidase subunit alpha-1; AltName: Full=Alpha-MPP 1; Flags: Precursor gi 4220446 gb AAD12673.1  Strong similarity to gi 2062155 T02O04.2 mitochondrial processing peptidase alpha subunit precursor isolog from Arabidopsis thaliana BAC gb AC001645. ESTs gb Z18504 and gb AA395715 come from this gene [Arabidopsis thaliana] gi 17529270 gb AAL38862.1  putative mitochondrial processing peptidase alpha subunit [Arabidopsis thaliana] gi 20258957 gb AAM14194.1  putative mitochondrial processing peptidase alpha subunit [Arabidopsis thaliana] gi 332194621 gb AEE32742.1  putative mitochondrial-processing peptidase subunit alpha-1 [Arabidopsis thaliana] | 507 | 503  | 0         | 99.2   | 88.6 | 94.1 | putative mitochondrial-processing peptidase subunit alpha-1 | gbpln | Arabidopsis thaliana | AT1G51980.1   Symbols:   Insulinase (Peptidase family M16) protein   chr1:19323692-19326771 REVERSE LENGTH=503                                | 507 | 503 | 0         | 99.2  | 88.6 | 94.1 |
| Rsa1.0_00998.1.g22298.t1 | ref XP_002891673.1  IQ-domain 27 [Arabidopsis lyrata subsp. lyrata] gi 297337515 gb EFH67932.1  IQ-domain 27 [Arabidopsis lyrata subsp. lyrata]                                                                                                                                                                                                                                                                                                                                                                                                                                                                                                                                                                                                                                                                                                                  | 292 | 345  | 4.00E-92  | 118.2  | 70.5 | 79.8 | IQ-domain 27                                                | gbpln | Arabidopsis lyrata   | AT1G51960.1   Symbols: IQD27   IQ-domain 27   chr1:19310355-19311683 FORWARD LENGTH=351                                                       | 292 | 351 | 3.00E-91  | 120.2 | 70.5 | 82.2 |
| Rsa1.0_00998.1.g22299.t1 | ref XP_002891672.1  hypothetical protein ARALYDRAFT_892185 [Arabidopsis lyrata subsp. lyrata] gi 297337514 gb EFH67931.1  hypothetical protein ARALYDRAFT_892185 [Arabidopsis lyrata subsp. lyrata]                                                                                                                                                                                                                                                                                                                                                                                                                                                                                                                                                                                                                                                              | 235 | 268  | 9.00E-86  | 114.0  | 80.0 | 85.5 | hypothetical protein ARALYDRAFT_892185                      | gbpln | Arabidopsis lyrata   | AT1G51950.1   Symbols: IAA18   indole-3-acetic acid inducible 18   chr1:19305670-19307130 FORWARD LENGTH=267                                  | 235 | 267 | 6.00E-88  | 113.6 | 80.0 | 84.7 |
| Rsa1.0_00998.1.g22300.t1 | #                                                                                                                                                                                                                                                                                                                                                                                                                                                                                                                                                                                                                                                                                                                                                                                                                                                                | #   | #    | #         | #      | #    | #    | -                                                           | ----  | ----                 | #                                                                                                                                             | #   | #   | #         | #     | #    | #    |

|                          |                                                                                                                                                                                                                                                                                                                                                                                                                                                                             |     |     |           |       |      |      |                                            |             |                      |                                                                                                                                                                                                                                                                                                                                                          |     |     |           |       |      |      |
|--------------------------|-----------------------------------------------------------------------------------------------------------------------------------------------------------------------------------------------------------------------------------------------------------------------------------------------------------------------------------------------------------------------------------------------------------------------------------------------------------------------------|-----|-----|-----------|-------|------|------|--------------------------------------------|-------------|----------------------|----------------------------------------------------------------------------------------------------------------------------------------------------------------------------------------------------------------------------------------------------------------------------------------------------------------------------------------------------------|-----|-----|-----------|-------|------|------|
| Rsa1.0_00998.1.g22301.t1 | gb EOA36821.1  hypothetical protein CARUB_v10008527mg [Capsella rubella]                                                                                                                                                                                                                                                                                                                                                                                                    | 641 | 660 | 0         | 103.0 | 90.6 | 94.7 | hypothetical protein CARUB_v10008527mg     | gbpln       | Capsella rubella     | AT1G51940.1   Symbols:   protein kinase family protein / peptidoglycan-binding LysM domain-containing protein   chr1:19296092-19298941 REVERSE LENGTH=651                                                                                                                                                                                                | 641 | 651 | 0         | 101.6 | 88.5 | 92.5 |
| Rsa1.0_00998.1.g22302.t6 | # # # # # # # # # #                                                                                                                                                                                                                                                                                                                                                                                                                                                         |     |     |           |       |      |      |                                            |             |                      |                                                                                                                                                                                                                                                                                                                                                          |     |     |           |       |      |      |
| Rsa1.0_00998.1.g22303.t1 | ref NP_001147018.1  ribosomal RNA apurinic site specific lyase [Zea mays] gi 195606500 gb ACG25080.1  ribosomal RNA apurinic site specific lyase [Zea mays]                                                                                                                                                                                                                                                                                                                 | 224 | 419 | 5.00E-44  | 187.1 | 45.5 | 55.4 | ribosomal RNA apurinic site specific lyase | gbenv/gbpln | Zea mays             | AT4G10400.2   Symbols:   F-box/RNI-like/FBD-like domains-containing protein   chr4:6446335-6447715 REVERSE LENGTH=409                                                                                                                                                                                                                                    | 224 | 409 | 3.00E-38  | 182.6 | 41.1 | 51.3 |
| Rsa1.0_00998.1.g22304.t1 | ref XP_002894330.1  RWD domain-containing protein [Arabidopsis lyrata subsp. lyrata] gi 297340172 gb EFH70589.1  RWD domain-containing protein [Arabidopsis lyrata subsp. lyrata]                                                                                                                                                                                                                                                                                           | 258 | 252 | 3.00E-16  | 97.7  | 16.3 | 17.4 | RWD domain-containing protein              | gbpln       | Arabidopsis lyrata   | AT1G51730.1   Symbols:   Ubiquitin-conjugating enzyme family protein   chr1:19186812-19188638 REVERSE LENGTH=252                                                                                                                                                                                                                                         | 258 | 252 | 9.00E-19  | 97.7  | 16.3 | 17.4 |
| Rsa1.0_00999.1.g22305.t1 | gb EOA12951.1  hypothetical protein CARUB_v10025933mg [Capsella rubella]                                                                                                                                                                                                                                                                                                                                                                                                    | 572 | 760 | 0         | 132.9 | 85.1 | 89.5 | hypothetical protein CARUB_v10025933mg     | gbpln       | Capsella rubella     | AT5G66850.1   Symbols: MAPKKK5   mitogen-activated protein kinase kinase 5   chr5:26695965-26699159 REVERSE LENGTH=716                                                                                                                                                                                                                                   | 572 | 716 | 0         | 125.2 | 82.7 | 87.2 |
| Rsa1.0_00999.1.g22306.t1 | gb EOA13733.1  hypothetical protein CARUB_v10026811mg [Capsella rubella]                                                                                                                                                                                                                                                                                                                                                                                                    | 324 | 313 | 1.00E-123 | 96.6  | 79.9 | 85.2 | hypothetical protein CARUB_v10026811mg     | gbpln       | Capsella rubella     | AT5G66870.1   Symbols: ASL1, LBD36   ASYMMETRIC LEAVES 2-like 1   chr5:26706621-26707562 FORWARD LENGTH=313                                                                                                                                                                                                                                              | 324 | 313 | 1.00E-121 | 96.6  | 80.6 | 86.7 |
| Rsa1.0_00999.1.g22307.t2 | dbj BAJ33953.1  unnamed protein product [Thelungiella halophila]                                                                                                                                                                                                                                                                                                                                                                                                            | 336 | 361 | 1.00E-141 | 107.4 | 76.2 | 78.0 | unnamed protein product                    |             |                      | AT3G50500.1   Symbols: SPK-2-2, SNRK2-2, SNRK2.2, SRK2D   SNF1-related protein kinase 2.2   chr3:18741805-18743904 REVERSE LENGTH=362                                                                                                                                                                                                                    | 336 | 362 | 1.00E-135 | 107.7 | 70.8 | 74.7 |
| Rsa1.0_00999.1.g22308.t1 | gb EOA14713.1  hypothetical protein CARUB_v10027991mg [Capsella rubella]                                                                                                                                                                                                                                                                                                                                                                                                    | 490 | 814 | 1.00E-148 | 166.1 | 57.1 | 71.8 | hypothetical protein CARUB_v10027991mg     | gbpln       | Capsella rubella     | AT5G66900.1   Symbols:   Disease resistance protein (CO-NBS-LRR class) family   chr5:26714931-26717757 REVERSE LENGTH=809                                                                                                                                                                                                                                | 490 | 809 | 1.00E-149 | 165.1 | 55.7 | 71.0 |
| Rsa1.0_00999.1.g22309.t2 | ref XP_002866726.1  predicted protein [Arabidopsis lyrata subsp. lyrata] gi 297312561 gb EFH42985.1  predicted protein [Arabidopsis lyrata subsp. lyrata]                                                                                                                                                                                                                                                                                                                   | 659 | 543 | 0         | 82.4  | 68.1 | 73.3 | predicted protein                          | gbpln       | Arabidopsis lyrata   | AT5G66920.1   Symbols: sks17   SKU5 similar 17   chr5:26722963-26725370 FORWARD LENGTH=546                                                                                                                                                                                                                                                               | 659 | 546 | 0         | 82.9  | 71.0 | 76.2 |
| Rsa1.0_00999.1.g22310.t1 | gb EOA13983.1  hypothetical protein CARUB_v10027114mg [Capsella rubella]                                                                                                                                                                                                                                                                                                                                                                                                    | 213 | 216 | 1.00E-105 | 101.4 | 89.2 | 93.9 | hypothetical protein CARUB_v10027114mg     | gbpln       | Capsella rubella     | AT5G66930.2   Symbols:   unknown protein; CONTAINS InterPro DOMAIN/s: Protein of unknown function DUF1649 (InterPro:IPR012445); Has 251 Blast hits to 251 proteins in 113 species: Archae - 0; Bacteria - 0; Metazoa - 91; Fungi - 85; Plants - 58; Viruses - 0; Other Eukaryotes - 17 (source: NCBI BLINK).   chr5:26725997-26727549 FORWARD LENGTH=215 | 213 | 215 | 1.00E-106 | 100.9 | 87.8 | 92.0 |
| Rsa1.0_00999.1.g22311.t1 | ref NP_201495.1  Dof zinc finger protein DOF5.8 [Arabidopsis thaliana] gi 55583982 sp O9FGD6.1 DOF58_ARAT H ResName: Full=Dof zinc finger protein DOF5.8; Short=AtDOF5.8 gi 9758539 dbj BAB08933.1  DNA binding protein-like [Arabidopsis thaliana] gi 119360101 gb ABL66779.1  At5g66940 [Arabidopsis thaliana] gi 225879170 dbj BAH30655.1  hypothetical protein [Arabidopsis thaliana] gi 332010899 gb AED98282.1  Dof zinc finger protein DOF5.8 [Arabidopsis thaliana] | 221 | 225 | 5.00E-87  | 101.8 | 77.8 | 87.3 | Dof zinc finger protein DOF5.8             | gbpln       | Arabidopsis thaliana | AT5G66940.1   Symbols:   Dof-type zinc finger DNA-binding family protein   chr5:26727989-26728666 REVERSE LENGTH=225                                                                                                                                                                                                                                     | 221 | 225 | 2.00E-89  | 101.8 | 77.8 | 87.3 |
| Rsa1.0_00999.1.g22312.t1 | ref XP_002866724.1  hypothetical protein ARALYDRAFT_496904 [Arabidopsis lyrata subsp. lyrata] gi 297312559 gb EFH42983.1  hypothetical protein ARALYDRAFT_496904 [Arabidopsis lyrata subsp. lyrata]                                                                                                                                                                                                                                                                         | 872 | 871 | 0         | 99.9  | 88.2 | 93.2 | hypothetical protein ARALYDRAFT_496904     | gbpln       | Arabidopsis lyrata   | AT5G66950.1   Symbols:   Pyridoxal phosphate (PLP)-dependent transferases superfamily protein   chr5:26733333-26735945 FORWARD LENGTH=870                                                                                                                                                                                                                | 872 | 870 | 0         | 99.8  | 87.5 | 92.5 |
| Rsa1.0_00999.1.g22313.t1 | ref XP_002866723.1  transcriptional factor B3 family protein [Arabidopsis lyrata subsp. lyrata] gi 297312558 gb EFH42982.1  transcriptional factor B3 family protein [Arabidopsis lyrata subsp. lyrata]                                                                                                                                                                                                                                                                     | 328 | 332 | 1.00E-102 | 101.2 | 60.1 | 73.5 | transcriptional factor B3 family protein   | gbpln       | Arabidopsis lyrata   | AT5G66980.1   Symbols:   AP2/B3-like transcriptional factor family protein   chr5:26741563-26742826 FORWARD LENGTH=334                                                                                                                                                                                                                                   | 328 | 334 | 1.00E-100 | 101.8 | 58.2 | 72.0 |

|                          |                                                                                                                                                                                                                                                                                                   |      |      |           |       |      |      |                                                 |       |                      |                                                                                                                                                                                                                                                                                                                                                          |      |      |           |       |      |      |
|--------------------------|---------------------------------------------------------------------------------------------------------------------------------------------------------------------------------------------------------------------------------------------------------------------------------------------------|------|------|-----------|-------|------|------|-------------------------------------------------|-------|----------------------|----------------------------------------------------------------------------------------------------------------------------------------------------------------------------------------------------------------------------------------------------------------------------------------------------------------------------------------------------------|------|------|-----------|-------|------|------|
| Rsa1.0_00999.1.g22314.t1 | ref NP_569043.1  uncharacterized protein [Arabidopsis thaliana]   gi 21593797 gb AM65764.1  unknown [Arabidopsis thaliana]   gi 89111824 gb ABD60684.1  At5g66985 [Arabidopsis thaliana]   gi 332010904 gb AED98287.1  uncharacterized protein AT5G66985 [Arabidopsis thaliana]                   | 89   | 83   | 5.00E-26  | 93.3  | 76.4 | 79.8 | uncharacterized protein                         | gbpln | Arabidopsis thaliana | AT5G66985.1   Symbols:   unknown protein; Has 30201 Blast hits to 17322 proteins in 780 species: Archae - 12; Bacteria - 1396; Metazoa - 17338; Fungi - 3422; Plants - 5037; Viruses - 0; Other Eukaryotes - 2996 (source: NCBI BLink).   chr5:26743412-26743663 FORWARD LENGTH=83                                                                       | 89   | 83   | 7.00E-29  | 93.3  | 76.4 | 79.8 |
| Rsa1.0_00999.1.g22315.t1 | gb EOA14385.1  hypothetical protein CARUB_v10027579mg [Capsella rubella]                                                                                                                                                                                                                          | 276  | 277  | 3.00E-78  | 100.4 | 59.8 | 73.9 | hypothetical protein CARUB_v10027579mg          | gbpln | Capsella rubella     | AT5G66990.1   Symbols:   RWP-RK domain-containing protein   chr5:26744257-26745362 REVERSE LENGTH=277                                                                                                                                                                                                                                                    | 276  | 277  | 5.00E-77  | 100.4 | 59.8 | 73.6 |
| Rsa1.0_00999.1.g22316.t1 | ref XP_002865034.1  hypothetical protein ARALYDRAFT_332869 [Arabidopsis lyrata subsp. lyrata]   gi 297310869 gb EFH41293.1  hypothetical protein ARALYDRAFT_332869 [Arabidopsis lyrata subsp. lyrata]                                                                                             | 145  | 146  | 6.00E-52  | 100.7 | 75.9 | 84.8 | hypothetical protein ARALYDRAFT_332869          | gbpln | Arabidopsis lyrata   | AT5G67010.1   Symbols:   Integrase-type DNA-binding superfamily protein   chr5:26749058-26749616 REVERSE LENGTH=162                                                                                                                                                                                                                                      | 145  | 162  | 3.00E-52  | 111.7 | 71.7 | 82.1 |
| Rsa1.0_00999.1.g22317.t1 | ref NP_201503.1  uncharacterized protein [Arabidopsis thaliana]   gi 9758547 dbj BAB08941.1  unnamed protein product [Arabidopsis thaliana]   gi 115646816 gb ABJ17128.1  At5g67020 [Arabidopsis thaliana]   gi 332010908 gb AED98291.1  uncharacterized protein AT5G67020 [Arabidopsis thaliana] | 388  | 394  | 1.00E-177 | 101.5 | 80.7 | 88.7 | uncharacterized protein                         | gbpln | Arabidopsis thaliana | AT5G67020.1   Symbols:   unknown protein; BEST Arabidopsis thaliana protein match is: unknown protein (TAIR:AT3G03040.1). Has 1807 Blast hits to 1807 proteins in 277 species: Archae - 0; Bacteria - 0; Metazoa - 736; Fungi - 347; Plants - 385; Viruses - 0; Other Eukaryotes - 339 (source: NCBI BLink).   chr5:26749962-26751146 FORWARD LENGTH=394 | 388  | 394  | 1.00E-180 | 101.5 | 80.7 | 88.7 |
| Rsa1.0_00999.1.g22318.t4 | gb ACM68704.1  zeaxanthin epoxidase [Brassica rapa subsp. pekinensis]                                                                                                                                                                                                                             | 649  | 668  | 0         | 102.9 | 95.2 | 96.3 | zeaxanthin epoxidase                            | gbpln | Brassica rapa        | AT5G67030.1   Symbols: ABA1, LOS6, NPQ2, ATABA1, ZEP, IBS3, ATZEP   zeaxanthin epoxidase (ZEP) (ABA1)   chr5:26753745-26757090 REVERSE LENGTH=667                                                                                                                                                                                                        | 649  | 667  | 0         | 102.8 | 87.5 | 92.6 |
| Rsa1.0_01000.1.g22319.t1 | ref XP_002880834.1  pentatricopeptide repeat-containing protein [Arabidopsis lyrata subsp. lyrata]   gi 297326673 gb EFH57093.1  pentatricopeptide repeat-containing protein [Arabidopsis lyrata subsp. lyrata]                                                                                   | 695  | 797  | 0         | 114.7 | 62.2 | 75.3 | pentatricopeptide repeat-containing protein     | gbpln | Arabidopsis lyrata   | AT2G26790.1   Symbols:   Pentatricopeptide repeat (PPR) superfamily protein   chr2:11425270-11427669 REVERSE LENGTH=799                                                                                                                                                                                                                                  | 695  | 799  | 0         | 115.0 | 60.6 | 74.0 |
| Rsa1.0_01000.1.g22320.t1 | ref XP_002880836.1  hypothetical protein ARALYDRAFT_481553 [Arabidopsis lyrata subsp. lyrata]   gi 297326675 gb EFH57095.1  hypothetical protein ARALYDRAFT_481553 [Arabidopsis lyrata subsp. lyrata]                                                                                             | 411  | 469  | 0         | 114.1 | 85.6 | 92.2 | hypothetical protein ARALYDRAFT_481553          | gbpln | Arabidopsis lyrata   | AT2G26800.2   Symbols:   Aldolase superfamily protein   chr2:11429192-11432290 REVERSE LENGTH=468                                                                                                                                                                                                                                                        | 411  | 468  | 0         | 113.9 | 82.7 | 91.0 |
| Rsa1.0_01000.1.g22321.t1 | gb EOA26445.1  hypothetical protein CARUB_v10022491mg [Capsella rubella]                                                                                                                                                                                                                          | 2554 | 2565 | 0         | 100.4 | 91.0 | 94.9 | hypothetical protein CARUB_v10022491mg          | gbpln | Capsella rubella     | AT2G26890.1   Symbols: GRV2, KAM2   DNAJ heat shock N-terminal domain-containing protein   chr2:11462327-11473841 REVERSE LENGTH=2554                                                                                                                                                                                                                    | 2554 | 2554 | 0         | 100.0 | 90.7 | 94.8 |
| Rsa1.0_01000.1.g22322.t1 | gb EOA27217.1  hypothetical protein CARUB_v10023327mg, partial [Capsella rubella]                                                                                                                                                                                                                 | 421  | 408  | 0         | 96.9  | 82.4 | 87.6 | hypothetical protein CARUB_v10023327mg, partial | gbpln | Capsella rubella     | AT2G26930.1   Symbols: ATCDPMEK, PDE277, ISPE, CDPMEK   4-(cytidine 5'-phospho)-2-C-methyl-D-erythritol kinase   chr2:11491829-11494229 REVERSE LENGTH=383                                                                                                                                                                                               | 421  | 383  | 0         | 91.0  | 80.5 | 84.6 |
| Rsa1.0_01000.1.g22323.t1 | ref NP_180262.1  C2H2-type zinc finger family protein [Arabidopsis thaliana]   gi 3426050 gb AAC32249.1  putative C2H2-type zinc finger protein [Arabidopsis thaliana]   gi 330252815 gb AEC07909.1  C2H2-type zinc finger family protein [Arabidopsis thaliana]                                  | 255  | 286  | 1.00E-50  | 112.2 | 56.1 | 64.3 | C2H2-type zinc finger family protein            | gbpln | Arabidopsis thaliana | AT2G26940.1   Symbols:   C2H2-type zinc finger family protein   chr2:11496518-11497378 REVERSE LENGTH=286                                                                                                                                                                                                                                                | 255  | 286  | 3.00E-53  | 112.2 | 56.1 | 64.3 |
| Rsa1.0_01000.1.g22324.t1 | ref XP_002880852.1  predicted protein [Arabidopsis lyrata subsp. lyrata]   gi 297326691 gb EFH57111.1  predicted protein [Arabidopsis lyrata subsp. lyrata]                                                                                                                                       | 400  | 387  | 1.00E-120 | 96.8  | 61.5 | 70.8 | predicted protein                               | gbpln | Arabidopsis lyrata   | AT2G26960.1   Symbols: AtMYB81, MYB81   myb domain protein 81   chr2:11506065-11507425 REVERSE LENGTH=427                                                                                                                                                                                                                                                | 400  | 427  | 1.00E-112 | 106.8 | 58.0 | 66.5 |

|                          |                                                                                                                                                                                                                                                                                                                                                                                                                                                                                                                                                                                                                                       |     |      |           |       |      |      |                                                     |       |                      |                                                                                                                                               |     |      |           |       |      |      |
|--------------------------|---------------------------------------------------------------------------------------------------------------------------------------------------------------------------------------------------------------------------------------------------------------------------------------------------------------------------------------------------------------------------------------------------------------------------------------------------------------------------------------------------------------------------------------------------------------------------------------------------------------------------------------|-----|------|-----------|-------|------|------|-----------------------------------------------------|-------|----------------------|-----------------------------------------------------------------------------------------------------------------------------------------------|-----|------|-----------|-------|------|------|
| Rsa1.0_01000.1.g22325.t1 | ref NP_850094.1  CBL-interacting serine/threonine-protein kinase 3 [Arabidopsis thaliana] gi 259016206 sp Q2V452.2 CIPK3_ARAT H RecName: Full=CBL-interacting serine/threonine-protein kinase 3. AltName: Full=SNF1-related kinase 3.17; AltName: Full=SOS2-like protein kinase PKS12<br>gi 202668690 gb AAM14049.1  putative protein kinase [Arabidopsis thaliana] gi 23296954 gb AANI3209.1  putative protein kinase [Arabidopsis thaliana] gi 30349498 gb AAP22036.1  CBL-interacting protein kinase 3 [Arabidopsis thaliana] gi 330252821 gb AEC07915.1  CBL-interacting serine/threonine-protein kinase 3 [Arabidopsis thaliana] | 430 | 441  | 0         | 102.6 | 88.6 | 94.2 | CBL-interacting serine/threonine-protein kinase 3   | gbpln | Arabidopsis thaliana | AT2G26980.3   Symbols: CIPK3   CBL-interacting protein kinase 3   chr2:11515234-11518205 REVERSE LENGTH=441                                   | 430 | 441  | 0         | 102.6 | 88.6 | 94.2 |
| Rsa1.0_01000.1.g22326.t1 | db BAJ33758.1  unnamed protein product [Theillungiella halophila]                                                                                                                                                                                                                                                                                                                                                                                                                                                                                                                                                                     | 292 | 439  | 1.00E-128 | 150.3 | 75.0 | 78.1 | unnamed protein product                             | ----  | ----                 | AT2G26990.1   Symbols: FUS12, ATCSN2, COP12, CSN2   proteasome family protein   chr2:11519684-11522412 REVERSE LENGTH=439                     | 292 | 439  | 1.00E-129 | 150.3 | 73.6 | 76.7 |
| Rsa1.0_01000.1.g22327.t1 | gb EOA27572.1  hypothetical protein CARUB_v10023709mg, partial [Capsella rubella]                                                                                                                                                                                                                                                                                                                                                                                                                                                                                                                                                     | 249 | 304  | 1.00E-142 | 122.1 | 98.4 | 99.6 | hypothetical protein CARUB_v10023709mg, partial     | gbpln | Capsella rubella     | AT2G27020.1   Symbols: PAG1   20S proteasome alpha subunit G1   chr2:11528515-11530858 REVERSE LENGTH=249                                     | 249 | 249  | 1.00E-144 | 100.0 | 98.8 | 99.6 |
| Rsa1.0_01000.1.g22328.t1 | gb AGA95981.1  argonaute 4 [Brassica rapa subsp. pekinensis]                                                                                                                                                                                                                                                                                                                                                                                                                                                                                                                                                                          | 923 | 922  | 0         | 99.9  | 95.9 | 97.9 | argonaute 4                                         | gbpln | Brassica rapa        | AT2G27040.2   Symbols: AGO4   Argonaute family protein   chr2:11541503 REVERSE LENGTH=924                                                     | 923 | 924  | 0         | 100.1 | 88.6 | 94.4 |
| Rsa1.0_01000.1.g22329.t1 | ref XP_002879042.1  ATP binding protein [Arabidopsis lyrata subsp. lyrata] gi 297324881 gb EFH55301.1  ATP binding protein [Arabidopsis lyrata subsp. lyrata]                                                                                                                                                                                                                                                                                                                                                                                                                                                                         | 959 | 1022 | 0         | 106.6 | 79.6 | 87.6 | ATP binding protein                                 | gbpln | Arabidopsis lyrata   | AT2G27060.1   Symbols:   Leucine-rich repeat protein kinase family protein   chr2:11551288-11554577 FORWARD LENGTH=1020                       | 959 | 1020 | 0         | 106.4 | 78.8 | 86.2 |
| Rsa1.0_01000.1.g22330.t1 | ref NP_180277.1  uncharacterized protein [Arabidopsis thaliana] gi 3885339 gb AAC77867.1  hypothetical protein [Arabidopsis thaliana] gi 46518491 gb AAS99727.1  At2g27090 [Arabidopsis thaliana] gi 110741655 db BAE98774.1  hypothetical protein [Arabidopsis thaliana] gi 330252841 gb AEC07935.1  uncharacterized protein AT2G27090 [Arabidopsis thaliana]                                                                                                                                                                                                                                                                        | 736 | 743  | 0         | 101.0 | 81.9 | 87.9 | uncharacterized protein                             | gbpln | Arabidopsis thaliana | AT2G27090.1   Symbols:   Protein of unknown function (DUF630 and DUF632)   chr2:11567691-11570345 REVERSE LENGTH=743                          | 736 | 743  | 0         | 101.0 | 81.9 | 87.9 |
| Rsa1.0_01001.1.g22331.t2 | gb AAD12028.1  putative non-LTR retroelement reverse transcriptase [Arabidopsis thaliana]                                                                                                                                                                                                                                                                                                                                                                                                                                                                                                                                             | 621 | 1447 | 1.00E-113 | 233.0 | 40.7 | 52.3 | putative non-LTR retroelement reverse transcriptase | gbpln | Arabidopsis thaliana | AT3G24255.1   Symbols:   RNA-directed DNA polymerase (reverse transcriptase)-related family protein   chr3:8789471-8793208 FORWARD LENGTH=746 | 621 | 746  | 2.00E-69  | 120.1 | 26.4 | 33.3 |
| Rsa1.0_01001.1.g22332.t1 | ref XP_002872976.1  hypothetical protein ARALYDRAFT_912253 [Arabidopsis lyrata subsp. lyrata] gi 297318813 gb EFH49235.1  hypothetical protein ARALYDRAFT_912253 [Arabidopsis lyrata subsp. lyrata]                                                                                                                                                                                                                                                                                                                                                                                                                                   | 190 | 162  | 1.00E-49  | 85.3  | 61.1 | 66.8 | hypothetical protein ARALYDRAFT_912253              | gbpln | Arabidopsis lyrata   | AT2G44840.1   Symbols: ATERF13, EREBP, ERF13   ethylene-responsive element binding factor 13   chr2:18495440-18496120 FORWARD LENGTH=226      | 190 | 226  | 8.00E-30  | 118.9 | 30.5 | 36.3 |
| Rsa1.0_01001.1.g22333.t1 | gb EOA31756.1  hypothetical protein CARUB_v10014973mg [Capsella rubella]                                                                                                                                                                                                                                                                                                                                                                                                                                                                                                                                                              | 112 | 107  | 2.00E-40  | 95.5  | 77.7 | 83.9 | hypothetical protein CARUB_v10014973mg              | gbpln | Capsella rubella     | AT3G15420.1   Symbols:   Transcription factor TFIIIC, tau55-related protein   chr3:5207704-5208289 REVERSE LENGTH=107                         | 112 | 107  | 2.00E-42  | 95.5  | 75.0 | 83.9 |
| Rsa1.0_01001.1.g22334.t1 | ref NP_563754.1  cationic amino acid transporter 9 [Arabidopsis thaliana] gi 75308782 sp Q9C5D6.1 CAAT9_ARAT H RecName: Full=Cationic amino acid transporter 9, chloroplastic; Flags: Precursor<br>gi 13430818 gb AAK26031.1 AF360321.1 unknown protein [Arabidopsis thaliana] gi 21280891 gb AAM44938.1  unknown protein [Arabidopsis thaliana] gi 332189800 gb AEE27921.1  cationic amino acid transporter 9 [Arabidopsis thaliana]                                                                                                                                                                                                 | 573 | 569  | 0         | 99.3  | 90.1 | 94.2 | cationic amino acid transporter 9                   | gbpln | Arabidopsis thaliana | AT1G05940.1   Symbols: CAT9   cationic amino acid transporter 9   chr1:1801365-1803942 REVERSE LENGTH=569                                     | 573 | 569  | 0         | 99.3  | 90.1 | 94.2 |



|                          |                                                                                                                                                                                                                                                    |      |      |           |       |      |      |                                              |       |                      |                                                                                                                                                                                                                                                                                                                                                                                                                                                                                                                        |      |      |           |       |      |      |
|--------------------------|----------------------------------------------------------------------------------------------------------------------------------------------------------------------------------------------------------------------------------------------------|------|------|-----------|-------|------|------|----------------------------------------------|-------|----------------------|------------------------------------------------------------------------------------------------------------------------------------------------------------------------------------------------------------------------------------------------------------------------------------------------------------------------------------------------------------------------------------------------------------------------------------------------------------------------------------------------------------------------|------|------|-----------|-------|------|------|
| Rsa1.0_01001.1.g22335.t1 | refXP_002872975.1   hypothetical protein ARALYDRAFT_912250 [Arabidopsis lyrata subsp. lyrata] gi 297318812 gb EFH49234.1   hypothetical protein ARALYDRAFT_912250 [Arabidopsis lyrata subsp. lyrata]                                               | 318  | 270  | 1.00E-101 | 84.9  | 68.2 | 72.3 | hypothetical protein ARALYDRAFT_912250       | gbpln | Arabidopsis lyrata   | AT4G00026.1   Symbols:   FUNCTIONS IN: molecular function unknown; INVOLVED IN: biological process unknown; LOCATED IN: chloroplast; EXPRESSED IN: cultured cell; CONTAINS InterPro DOMAIN/s: Mitochondrial inner membrane translocase complex, subunit Tim21 (InterPro:IPR013261); Has 35333 Blast hits to 34131 proteins in 2444 species: Archae - 798; Bacteria - 22429; Metazoa - 974; Fungi - 991; Plants - 531; Viruses - 0; Other Eukaryotes - 9610 (source: NCBI BLink).   chr4:11634-13285 REVERSE LENGTH=269 | 318  | 269  | 1.00E-101 | 84.6  | 60.1 | 61.3 |
| Rsa1.0_01001.1.g22336.t1 | refXP_002302516.1   predicted protein [Populus trichocarpa] gi 222844242 gb EEE81789.1   predicted protein [Populus trichocarpa]                                                                                                                   | 451  | 450  | 1.00E-147 | 99.8  | 60.3 | 75.4 | predicted protein                            | gbpln | Populus trichocarpa  | AT5G07670.1   Symbols:   RNL-like superfamily protein   chr5:2430421-2432065 FORWARD LENGTH=476                                                                                                                                                                                                                                                                                                                                                                                                                        | 451  | 476  | 1.00E-111 | 105.5 | 50.1 | 62.3 |
| Rsa1.0_01001.1.g22337.t1 | refXP_002875050.1   plastid-lipid associated protein pap [Arabidopsis lyrata subsp. lyrata] gi 297320887 gb EFH51309.1   plastid-lipid associated protein pap [Arabidopsis lyrata subsp. lyrata]                                                   | 209  | 209  | 1.00E-90  | 100.0 | 77.5 | 88.5 | plastid-lipid associated protein pap         | gbpln | Arabidopsis lyrata   | AT4G00030.1   Symbols:   Plastid-lipid associated protein PAP / fibrillin family protein   chr4:13565-14366 FORWARD LENGTH=212                                                                                                                                                                                                                                                                                                                                                                                         | 209  | 212  | 5.00E-93  | 101.4 | 78.5 | 87.1 |
| Rsa1.0_01001.1.g22338.t3 | refXP_002875048.1   hypothetical protein ARALYDRAFT_912247 [Arabidopsis lyrata subsp. lyrata] gi 297320885 gb EFH51307.1   hypothetical protein ARALYDRAFT_912247 [Arabidopsis lyrata subsp. lyrata]                                               | 388  | 403  | 1.00E-137 | 103.9 | 78.9 | 84.3 | hypothetical protein ARALYDRAFT_912247       | gbpln | Arabidopsis lyrata   | AT4G00050.1   Symbols: UNE10   basic helix-loop-helix (bHLH) DNA-binding superfamily protein   chr4:17863-19848 FORWARD LENGTH=399                                                                                                                                                                                                                                                                                                                                                                                     | 388  | 399  | 1.00E-132 | 102.8 | 75.0 | 80.9 |
| Rsa1.0_01001.1.g22339.t1 | gb EOA21556.1   hypothetical protein CARUB_v10001965mg [Capsella rubella]                                                                                                                                                                          | 175  | 209  | 8.00E-79  | 119.4 | 84.0 | 88.0 | hypothetical protein CARUB_v10001965mg       | gbpln | Capsella rubella     | AT4G00080.1   Symbols: UNE11   Plant invertase/pectin methyltransferase inhibitor superfamily protein   chr4:32946-33575 FORWARD LENGTH=209                                                                                                                                                                                                                                                                                                                                                                            | 175  | 209  | 3.00E-77  | 119.4 | 80.6 | 86.3 |
| Rsa1.0_01002.1.g22340.t1 | refNP_175369.1   WD40 domain-containing protein [Arabidopsis thaliana] gi 5430755 gb AAD43155.1   AC007504.1   0 Hypothetical Protein [Arabidopsis thaliana] gi 332194310 gb AEE32431.1   WD40 domain-containing protein [Arabidopsis thaliana]    | 468  | 471  | 0         | 100.6 | 86.1 | 93.4 | WD40 domain-containing protein               | gbpln | Arabidopsis thaliana | AT1G49450.1   Symbols:   Transducin/WD40 repeat-like superfamily protein   chr1:18305684-18307099 FORWARD LENGTH=471                                                                                                                                                                                                                                                                                                                                                                                                   | 468  | 471  | 0         | 100.6 | 86.1 | 93.4 |
| Rsa1.0_01002.1.g22341.t3 | gb AAD32898.1   putative retroelement pol polyprotein [Arabidopsis thaliana]                                                                                                                                                                       | 1316 | 1307 | 0         | 99.3  | 59.7 | 73.9 | putative retroelement pol polyprotein        | gbpln | Arabidopsis thaliana | AT4G23160.1   Symbols: CRK8   cysteine-rich RLK (RECEPTOR-like protein kinase) 8   chr4:12129485-12134086 FORWARD LENGTH=1262                                                                                                                                                                                                                                                                                                                                                                                          | 1316 | 1262 | 1.00E-101 | 95.9  | 13.6 | 21.9 |
| Rsa1.0_01002.1.g22342.t1 | #                                                                                                                                                                                                                                                  | #    | #    | #         | #     | #    | -    | ----                                         | ----  | ----                 | #                                                                                                                                                                                                                                                                                                                                                                                                                                                                                                                      | #    | #    | #         | #     | #    |      |
| Rsa1.0_01002.1.g22343.t1 | refXP_002891512.1   hypothetical protein ARALYDRAFT_474085 [Arabidopsis lyrata subsp. lyrata] gi 297337354 gb EFH67771.1   hypothetical protein ARALYDRAFT_474085 [Arabidopsis lyrata subsp. lyrata]                                               | 299  | 302  | 1.00E-143 | 101.0 | 88.0 | 94.3 | hypothetical protein ARALYDRAFT_474085       | gbpln | Arabidopsis lyrata   | AT1G49470.1   Symbols:   Family of unknown function (DUF716)   chr1:18310554-18311462 FORWARD LENGTH=302                                                                                                                                                                                                                                                                                                                                                                                                               | 299  | 302  | 2.33E-156 | 101.0 | 88.0 | 93.6 |
| Rsa1.0_01002.1.g22344.t1 | gb AAG51783.1   AC079679.3 reverse transcriptase, putative; 16838-20266 [Arabidopsis thaliana]                                                                                                                                                     | 1932 | 1142 | 0         | 59.1  | 27.5 | 36.2 | reverse transcriptase, putative; 16838-20266 | gbpln | Arabidopsis thaliana | AT4G29090.1   Symbols:   Ribonuclease H-like superfamily protein   chr4:14333528-14335255 FORWARD LENGTH=575                                                                                                                                                                                                                                                                                                                                                                                                           | 1932 | 575  | 3.00E-76  | 29.8  | 9.1  | 14.3 |
| Rsa1.0_01002.1.g22345.t4 | dbj BAB01019.1   unnamed protein product [Arabidopsis thaliana]                                                                                                                                                                                    | 553  | 355  | 2.00E-67  | 64.2  | 21.5 | 27.1 | unnamed protein product                      | gbpln | Arabidopsis thaliana | AT3G32904.1   Symbols:   unknown protein; FUNCTIONS IN: molecular function unknown; INVOLVED IN: N-terminal protein myristoylation; LOCATED IN: cellular component unknown; BEST Arabidopsis thaliana protein match is: unknown protein (TAIR:AT3G30520.1); Has 249 Blast hits to 117 proteins in 25 species: Archae - 0; Bacteria - 16; Metazoa - 73; Fungi - 5; Plants - 112; Viruses - 0; Other Eukaryotes - 43 (source: NCBI BLink).   chr3:13451438-13452807 REVERSE LENGTH=330                                   | 553  | 330  | 2.00E-40  | 59.7  | 16.6 | 21.0 |
| Rsa1.0_01002.1.g22346.t1 | #                                                                                                                                                                                                                                                  | #    | #    | #         | #     | #    | -    | ----                                         | ----  | ----                 | #                                                                                                                                                                                                                                                                                                                                                                                                                                                                                                                      | #    | #    | #         | #     | #    |      |
| Rsa1.0_01002.1.g22347.t1 | refNP_683415.2   B3 domain-containing protein [Arabidopsis thaliana] gi 238056770 sp Q9XIB4.2   y1475 ARAT H RecName: Full=B3 domain-containing protein At1g49475 gi 332194312 gb AEE32433.1   B3 domain-containing protein [Arabidopsis thaliana] | 220  | 190  | 4.00E-62  | 86.4  | 58.2 | 71.4 | B3 domain-containing protein                 | gbpln | Arabidopsis thaliana | AT1G49475.1   Symbols:   AP2/B3-like transcriptional factor family protein   chr1:18312983-18313748 FORWARD LENGTH=190                                                                                                                                                                                                                                                                                                                                                                                                 | 220  | 190  | 1.00E-64  | 86.4  | 58.2 | 71.4 |

|                          |                                                                                                                                                                                                                                                                                                                                                                                                                                                                                                                                         |     |      |           |       |      |      |                                                                                                                                   |       |                      |                                                                                                                        |     |      |           |       |      |      |
|--------------------------|-----------------------------------------------------------------------------------------------------------------------------------------------------------------------------------------------------------------------------------------------------------------------------------------------------------------------------------------------------------------------------------------------------------------------------------------------------------------------------------------------------------------------------------------|-----|------|-----------|-------|------|------|-----------------------------------------------------------------------------------------------------------------------------------|-------|----------------------|------------------------------------------------------------------------------------------------------------------------|-----|------|-----------|-------|------|------|
| Rsa1.0_01002.1.g22348.t1 | dbj BAB08885.1  retroelement pol polyprotein-like [Arabidopsis thaliana]                                                                                                                                                                                                                                                                                                                                                                                                                                                                | 115 | 370  | 4.00E-18  | 321.7 | 36.5 | 43.5 | retroelement pol polyprotein-like                                                                                                 | gbpln | Arabidopsis thaliana | #                                                                                                                      | #   | #    | #         | #     | #    |      |
| Rsa1.0_01002.1.g22349.t1 | #                                                                                                                                                                                                                                                                                                                                                                                                                                                                                                                                       | #   | #    | #         | #     | #    | -    | -                                                                                                                                 | ----  | ----                 | #                                                                                                                      | #   | #    | #         | #     | #    |      |
| Rsa1.0_01003.1.g22350.t1 | emb CAB46043.1  retrotransposon like protein [Arabidopsis thaliana]<br>gi 7268438 emb CAB80958.1  retrotransposon like protein [Arabidopsis thaliana]                                                                                                                                                                                                                                                                                                                                                                                   | 394 | 1474 | 6.00E-50  | 374.1 | 36.3 | 49.5 | retrotransposon like protein                                                                                                      | gbpln | Arabidopsis thaliana | #                                                                                                                      | #   | #    | #         | #     | #    |      |
| Rsa1.0_01003.1.g22351.t1 | ref NP_564335.3  Leucine-rich repeat transmembrane protein kinase [Arabidopsis thaliana]<br>gi 325511374 sp Q9ASQ6.3 Y1972_ARAT H RecName: Full=Probable LRR receptor-like serine/threonine-protein kinase At1g29720; Flags: Precursor<br>gi 332193000 gb AEE31121.1  Leucine-rich repeat transmembrane protein kinase [Arabidopsis thaliana]                                                                                                                                                                                           | 819 | 1019 | 0         | 124.4 | 59.2 | 67.4 | Leucine-rich repeat transmembrane protein kinase                                                                                  | gbpln | Arabidopsis thaliana | AT1G29720.1   Symbols:   Leucine-rich repeat transmembrane protein kinase   chr1:10393894-10399771 REVERSE LENGTH=1019 | 819 | 1019 | 0         | 124.4 | 59.2 | 67.4 |
| Rsa1.0_01003.1.g22352.t2 | gb AAD17351.1  contains similarity to retrovirus-related polyproteins and to CCHC zinc finger protein (Pfam: PF00098, Score=16.3, E=0.051, E= 1) [Arabidopsis thaliana]<br>gi 7267432 emb CAB77944.1  putative polyprotein [Arabidopsis thaliana]                                                                                                                                                                                                                                                                                       | 878 | 1138 | 2.00E-96  | 129.6 | 24.4 | 32.9 | contains similarity to retrovirus-related polyproteins and to CCHC zinc finger protein (Pfam: PF00098, Score=16.3, E=0.051, E= 1) | gbpln | Arabidopsis thaliana | #                                                                                                                      | #   | #    | #         | #     | #    |      |
| Rsa1.0_01003.1.g22353.t1 | gb EOA39560.1  hypothetical protein CARUB_v10008178mg [Capsella rubella]                                                                                                                                                                                                                                                                                                                                                                                                                                                                | 414 | 1022 | 1.00E-121 | 246.9 | 55.1 | 63.8 | hypothetical protein CARUB_v10008178mg                                                                                            | gbpln | Capsella rubella     | AT1G29720.1   Symbols:   Leucine-rich repeat transmembrane protein kinase   chr1:10393894-10399771 REVERSE LENGTH=1019 | 414 | 1019 | 1.00E-116 | 246.1 | 55.3 | 62.1 |
| Rsa1.0_01003.1.g22354.t2 | gb AAF18630.1 AC006228.1 F5J5.1 [Arabidopsis thaliana]                                                                                                                                                                                                                                                                                                                                                                                                                                                                                  | 532 | 1463 | 3.00E-27  | 275.0 | 11.7 | 17.5 | F5J5.1                                                                                                                            | gbpln | Arabidopsis thaliana | #                                                                                                                      | #   | #    | #         | #     | #    |      |
| Rsa1.0_01003.1.g22355.t1 | #                                                                                                                                                                                                                                                                                                                                                                                                                                                                                                                                       | #   | #    | #         | #     | #    | -    | -                                                                                                                                 | ----  | ----                 | #                                                                                                                      | #   | #    | #         | #     | #    |      |
| Rsa1.0_01003.1.g22356.t2 | gb ABW74585.1  pol polyprotein [Boechera divaricarpa]                                                                                                                                                                                                                                                                                                                                                                                                                                                                                   | 332 | 551  | 4.00E-15  | 166.0 | 13.3 | 18.7 | pol polyprotein                                                                                                                   | gbpln | Boechera divaricarpa | #                                                                                                                      | #   | #    | #         | #     | #    |      |
| Rsa1.0_01003.1.g22357.t7 | #                                                                                                                                                                                                                                                                                                                                                                                                                                                                                                                                       | #   | #    | #         | #     | #    | -    | -                                                                                                                                 | ----  | ----                 | #                                                                                                                      | #   | #    | #         | #     | #    |      |
| Rsa1.0_01003.1.g22358.t1 | #                                                                                                                                                                                                                                                                                                                                                                                                                                                                                                                                       | #   | #    | #         | #     | #    | -    | -                                                                                                                                 | ----  | ----                 | #                                                                                                                      | #   | #    | #         | #     | #    |      |
| Rsa1.0_01003.1.g22359.t1 | gb AAD26892.1  Mutator-like transposase [Arabidopsis thaliana]                                                                                                                                                                                                                                                                                                                                                                                                                                                                          | 443 | 580  | 4.00E-70  | 130.9 | 31.6 | 48.5 | Mutator-like transposase                                                                                                          | gbpln | Arabidopsis thaliana | #                                                                                                                      | #   | #    | #         | #     | #    |      |
| Rsa1.0_01003.1.g22360.t1 | emb CAB46045.1  retrotransposon like protein [Arabidopsis thaliana]<br>gi 7268441 emb CAB80961.1  retrotransposon like protein [Arabidopsis thaliana]                                                                                                                                                                                                                                                                                                                                                                                   | 382 | 687  | 5.00E-55  | 179.8 | 24.9 | 35.1 | retrotransposon like protein                                                                                                      | gbpln | Arabidopsis thaliana | AT2G07200.1   Symbols:   Cysteine proteinases superfamily protein   chr2:2989205-2989878 FORWARD LENGTH=151            | 382 | 151  | 4.00E-26  | 39.5  | 16.2 | 24.6 |
| Rsa1.0_01004.1.g22361.t1 | gb ACQ76806.1  WRKY transcription factor 40 [Brassica napus]                                                                                                                                                                                                                                                                                                                                                                                                                                                                            | 294 | 290  | 1.00E-155 | 98.6  | 91.2 | 94.9 | WRKY transcription factor 40                                                                                                      | gbpln | Brassica napus       | AT1G80840.1   Symbols: WRKY40, ATWRKY40   WRKY DNA-binding protein 40   chr1:30383834-30385356 FORWARD LENGTH=302      | 294 | 302  | 1.00E-143 | 102.7 | 85.7 | 92.9 |
| Rsa1.0_01004.1.g22362.t1 | ref NP_565246.1  phospholipid N-methyltransferase [Arabidopsis thaliana]<br>gi 42570261 ref NP_849916.2  phospholipid N-methyltransferase [Arabidopsis thaliana]<br>gi 6503297 gb AAF14673.1 AC011713.21 ESTs gb A1994515 and gb T44237 come from this gene [Arabidopsis thaliana]<br>gi 194708828 gb ACF88498.1  At1g90860 [Arabidopsis thaliana]<br>gi 332198338 gb AEE36459.1  phospholipid N-methyltransferase [Arabidopsis thaliana]<br>gi 332198339 gb AEE36460.1  phospholipid N-methyltransferase [Arabidopsis thaliana]        | 164 | 164  | 4.00E-83  | 100.0 | 92.1 | 97.0 | phospholipid N-methyltransferase                                                                                                  | gbpln | Arabidopsis thaliana | AT1G80860.1   Symbols: ATPLMT, PLMT   phospholipid N-methyltransferase   chr1:30388432-30389284 REVERSE LENGTH=164     | 164 | 164  | 1.00E-85  | 100.0 | 92.1 | 97.0 |
| Rsa1.0_01004.1.g22363.t1 | #                                                                                                                                                                                                                                                                                                                                                                                                                                                                                                                                       | #   | #    | #         | #     | #    | -    | -                                                                                                                                 | ----  | ----                 | #                                                                                                                      | #   | #    | #         | #     | #    |      |
| Rsa1.0_01004.1.g22364.t1 | ref NP_178202.1  protein kinase-like protein [Arabidopsis thaliana]<br>gi 75336903 sp Q9SAH3.1 Y1887_ARAT H RecName: Full=Putative receptor-like protein kinase At1g80870<br>gi 6503299 gb AAF14675.1 AC011713.23 Contains similarity to gb U82481 KI domain interacting kinase 1 from Zea mays and contains PF00069 Eukaryotic protein kinase domain. ESTs gb H77140, gb H76842 and gb A1994303 come from this gene [Arabidopsis thaliana]<br>gi 332198341 gb AEE36462.1  putative receptor-like protein kinase [Arabidopsis thaliana] | 696 | 692  | 0         | 99.4  | 82.3 | 88.5 | protein kinase-like protein                                                                                                       | gbpln | Arabidopsis thaliana | AT1G80870.1   Symbols:   Protein kinase superfamily protein   chr1:30392133-30394211 FORWARD LENGTH=692                | 696 | 692  | 0         | 99.4  | 82.3 | 88.5 |

|                          |                                                                                                                                                                                                                                                                                                                                                                                                                                                                                                                                                                                                                                                                                                                                                                                                                                                                               |     |     |           |        |      |       |                                                 |       |                      |                                                                                                                                                        |     |     |           |       |      |       |
|--------------------------|-------------------------------------------------------------------------------------------------------------------------------------------------------------------------------------------------------------------------------------------------------------------------------------------------------------------------------------------------------------------------------------------------------------------------------------------------------------------------------------------------------------------------------------------------------------------------------------------------------------------------------------------------------------------------------------------------------------------------------------------------------------------------------------------------------------------------------------------------------------------------------|-----|-----|-----------|--------|------|-------|-------------------------------------------------|-------|----------------------|--------------------------------------------------------------------------------------------------------------------------------------------------------|-----|-----|-----------|-------|------|-------|
| Rsa1.0_01004.1.g22365.t1 | refXP_002887805.1  hypothetical protein ARALYDRAFT_895892 [Arabidopsis lyrata subsp. lyrata] gi 297333646 gb EFH64064.1                                                                                                                                                                                                                                                                                                                                                                                                                                                                                                                                                                                                                                                                                                                                                       | 446 | 443 | 0         | 99.3   | 91.0 | 94.6  | hypothetical protein ARALYDRAFT_895892          | gbpln | Arabidopsis lyrata   | AT1G80900.1   Symbols: ATMGT1, MGT1, MRS2-10   magnesium transporter 1   chr1:30398289-30399870 REVERSE LENGTH=443                                     | 446 | 443 | 0         | 99.3  | 90.6 | 94.4  |
| Rsa1.0_01004.1.g22366.t1 | gb EOA35825.1  hypothetical protein CARUB_v10021065mg [Capsella rubella]                                                                                                                                                                                                                                                                                                                                                                                                                                                                                                                                                                                                                                                                                                                                                                                                      | 152 | 162 | 1.00E-69  | 106.6  | 90.8 | 94.1  | hypothetical protein CARUB_v10021065mg          | gbpln | Capsella rubella     | AT1G80920.1   Symbols: J8   Chaperone DnaJ-domain superfamily protein   chr1:30403863-30404549 REVERSE LENGTH=163                                      | 152 | 163 | 2.00E-71  | 107.2 | 90.8 | 94.1  |
| Rsa1.0_01004.1.g22367.t1 | ref NP_178208.1  pre-mRNA-splicing factor CWC22 [Arabidopsis thaliana] gi 6503305 gb AAF14681.1 AC011713.29 Contains similarity to gb U19615 LET 858 gene from Caenorhabditis elegans. ESTs gb AI995150, gb H76674 and gb R84035 come from this gene [Arabidopsis thaliana] gi 22654971 gb AAM98078.1  At1g80930/F23A5.23 [Arabidopsis thaliana] gi 28416525 gb AAO42793.1  At1g80930/F23A5.23 [Arabidopsis thaliana] gi 332198347 gb AEE36468.1  MIF4G and MA3 domain-containing protein [Arabidopsis thaliana] ref NP_178085.1  wall-associated receptor kinase-like 22 [Arabidopsis thaliana] gi 75247675 sp Q8RY17.1 WAKLIARAT H RecName: Full=Wall-associated receptor kinase-like 22; Flags: Precursor gi 19310447 gb AAL84959.1  At1g79670/F20B17.27 [Arabidopsis thaliana] gi 332198163 gb AEE36284.1  wall-associated receptor kinase-like 22 [Arabidopsis thaliana] | 926 | 900 | 0         | 97.2   | 74.1 | 79.8  | pre-mRNA-splicing factor CWC22                  | gbpln | Arabidopsis thaliana | AT1G80930.1   Symbols:   MIF4G domain-containing protein / MA3 domain-containing protein   chr1:30405774-30409499 REVERSE LENGTH=900                   | 926 | 900 | 0         | 97.2  | 74.1 | 79.8  |
| Rsa1.0_01004.1.g22368.t1 | gi 75247675 sp Q8RY17.1 WAKLIARAT H RecName: Full=Wall-associated receptor kinase-like 22; Flags: Precursor gi 19310447 gb AAL84959.1  At1g79670/F20B17.27 [Arabidopsis thaliana] gi 332198163 gb AEE36284.1  wall-associated receptor kinase-like 22 [Arabidopsis thaliana]                                                                                                                                                                                                                                                                                                                                                                                                                                                                                                                                                                                                  | 763 | 751 | 0         | 98.4   | 75.4 | 83.0  | wall-associated receptor kinase-like 22         | gbpln | Arabidopsis thaliana | AT1G79670.1   Symbols: RFO1, WAKL22   Wall-associated kinase family protein   chr1:29978887-29979337 REVERSE LENGTH=751                                | 763 | 751 | 0         | 98.4  | 75.4 | 83.0  |
| Rsa1.0_01004.1.g22369.t1 | gb ABD64941.1  Ulp1 protease family protein [Brassica oleracea]                                                                                                                                                                                                                                                                                                                                                                                                                                                                                                                                                                                                                                                                                                                                                                                                               | 76  | 871 | 3.00E-25  | 1146.1 | 86.8 | 90.8  | Ulp1 protease family protein                    | gbpln | Brassica oleracea    | #                                                                                                                                                      | #   | #   | #         | #     | #    | #     |
| Rsa1.0_01004.1.g22370.t1 | #                                                                                                                                                                                                                                                                                                                                                                                                                                                                                                                                                                                                                                                                                                                                                                                                                                                                             | #   | #   | #         | #      | #    | #     | -                                               | ----  | ----                 | #                                                                                                                                                      | #   | #   | #         | #     | #    | #     |
| Rsa1.0_01004.1.g22371.t1 | gb EOA34224.1  hypothetical protein CARUB_v10021735mg [Capsella rubella]                                                                                                                                                                                                                                                                                                                                                                                                                                                                                                                                                                                                                                                                                                                                                                                                      | 480 | 496 | 0         | 103.3  | 86.9 | 92.9  | hypothetical protein CARUB_v10021735mg          | gbpln | Capsella rubella     | AT1G79630.1   Symbols:   Protein phosphatase 2C family protein   chr1:29962931-29965169 REVERSE LENGTH=504                                             | 480 | 504 | 0         | 105.0 | 84.6 | 91.7  |
| Rsa1.0_01004.1.g22372.t1 | gb EOA33496.1  hypothetical protein CARUB_v10019721mg, partial [Capsella rubella]                                                                                                                                                                                                                                                                                                                                                                                                                                                                                                                                                                                                                                                                                                                                                                                             | 994 | 982 | 0         | 98.8   | 90.4 | 94.3  | hypothetical protein CARUB_v10019721mg, partial | gbpln | Capsella rubella     | AT1G79620.1   Symbols:   Leucine-rich repeat protein kinase family protein   chr1:29957633-29962174 REVERSE LENGTH=971                                 | 994 | 971 | 0         | 97.7  | 89.7 | 93.6  |
| Rsa1.0_01004.1.g22373.t1 | #                                                                                                                                                                                                                                                                                                                                                                                                                                                                                                                                                                                                                                                                                                                                                                                                                                                                             | #   | #   | #         | #      | #    | #     | -                                               | ----  | ----                 | AT1G79610.1   Symbols: ATNHX6, NHX6   Na <sup>+</sup> /H <sup>+</sup> antiporter 6   chr1:29953089-29957070 REVERSE LENGTH=535                         | 95  | 535 | 3.00E-11  | 563.2 | 46.3 | 51.6  |
| Rsa1.0_01004.1.g22374.t1 | gb EOA34811.1  hypothetical protein CARUB_v10022389mg [Capsella rubella]                                                                                                                                                                                                                                                                                                                                                                                                                                                                                                                                                                                                                                                                                                                                                                                                      | 714 | 713 | 0         | 99.9   | 92.6 | 95.7  | hypothetical protein CARUB_v10022389mg          | gbpln | Capsella rubella     | AT1G79600.1   Symbols:   Protein kinase superfamily protein   chr1:29950105-29952516 REVERSE LENGTH=711                                                | 714 | 711 | 0         | 99.6  | 91.3 | 94.8  |
| Rsa1.0_01004.1.g22375.t1 | ref NP_565213.1  syntaxin-52 [Arabidopsis thaliana] gi 79321486 ref NP_001031301.1  syntaxin-52 [Arabidopsis thaliana] gi 28380159 sp Q94KK7.1 SYP52 ARAT H RecName: Full=Syntaxin-52; Short=AtSYP52 gi 13811646 gb AAK40224.1 AF355756.1 syntaxin of plants 52 [Arabidopsis thaliana] gi 28393106 gb AAO41986.1  unknown protein [Arabidopsis thaliana] gi 29824261 gb AAP04091.1  unknown protein [Arabidopsis thaliana] gi 332198148 gb AEE36269.1  syntaxin-52 [Arabidopsis thaliana] gi 332198149 gb AEE36270.1  syntaxin-52 [Arabidopsis thaliana]                                                                                                                                                                                                                                                                                                                      | 235 | 233 | 1.00E-121 | 99.1   | 93.2 | 95.7  | syntaxin-52                                     | gbpln | Arabidopsis thaliana | AT1G79590.2   Symbols: SYP52, ATSYP52   syntaxin of plants 52   chr1:29947064-29948304 FORWARD LENGTH=233                                              | 235 | 233 | 1.00E-123 | 99.1  | 93.2 | 95.7  |
| Rsa1.0_01004.1.g22376.t1 | gb EOA35321.1  hypothetical protein CARUB_v10020504mg [Capsella rubella]                                                                                                                                                                                                                                                                                                                                                                                                                                                                                                                                                                                                                                                                                                                                                                                                      | 63  | 368 | 4.00E-29  | 584.1  | 96.8 | 100.0 | hypothetical protein CARUB_v10020504mg          | gbpln | Capsella rubella     | AT1G79580.3   Symbols: SMB   NAC (No Apical Meristem) domain transcriptional regulator superfamily protein   chr1:29941020-29942925 REVERSE LENGTH=371 | 63  | 371 | 1.00E-30  | 588.9 | 96.8 | 100.0 |
| Rsa1.0_01005.1.g22377.t1 | #                                                                                                                                                                                                                                                                                                                                                                                                                                                                                                                                                                                                                                                                                                                                                                                                                                                                             | #   | #   | #         | #      | #    | #     | -                                               | ----  | ----                 | #                                                                                                                                                      | #   | #   | #         | #     | #    | #     |

|                          |                                                                                                                                                                                                                                            |      |      |           |       |      |      |                                                                                                                                                                          |       |                      |                                                                                                                                                                                                                                                                          |      |      |           |       |      |      |
|--------------------------|--------------------------------------------------------------------------------------------------------------------------------------------------------------------------------------------------------------------------------------------|------|------|-----------|-------|------|------|--------------------------------------------------------------------------------------------------------------------------------------------------------------------------|-------|----------------------|--------------------------------------------------------------------------------------------------------------------------------------------------------------------------------------------------------------------------------------------------------------------------|------|------|-----------|-------|------|------|
| Rsa1.0_01005.1.g22378.t1 | emb CAC41369.1  enoyl-[acyl carrier-protein] reductase [Brassica napus]                                                                                                                                                                    | 396  | 387  | 1.00E-156 | 97.7  | 80.6 | 83.1 | enoyl-                                                                                                                                                                   | gbpln | Brassica napus       | AT2G05990.2   Symbols: MOD1, ENR1   NAD(P)-binding Rossmann-fold superfamily protein   chr2:2322876-2324867 FORWARD LENGTH=390                                                                                                                                           | 396  | 390  | 1.00E-155 | 98.5  | 76.3 | 81.6 |
| Rsa1.0_01005.1.g22379.t1 | dbj BAJ34600.1  unnamed protein product [Thellungiella halophila]                                                                                                                                                                          | 389  | 389  | 0         | 100.0 | 92.3 | 95.6 | unnamed protein product                                                                                                                                                  | ----  | ----                 | AT2G06050.3   Symbols: OPR3   oxophytodienoate reductase 3   chr2:2359240-2361971 REVERSE LENGTH=391                                                                                                                                                                     | 389  | 391  | 0         | 100.5 | 90.7 | 94.9 |
| Rsa1.0_01005.1.g22380.t1 | ref NP_178674.6  protein early flowering 8 [Arabidopsis thaliana]<br>gi 207079706 tpc FAA00428.1  TPA: VERNALIZATION INDEPENDENCE 6 [Arabidopsis thaliana]<br>gi 33025091.1 gb AE06005.1  protein early flowering 8 [Arabidopsis thaliana] | 1085 | 1091 | 0         | 100.6 | 91.7 | 95.1 | protein early flowering 8                                                                                                                                                | gbpln | Arabidopsis thaliana | AT2G08210.1   Symbols: ELF8, VIP6   binding   chr2:2429108-2436588 REVERSE LENGTH=1091                                                                                                                                                                                   | 1085 | 1091 | 0         | 100.6 | 91.7 | 95.1 |
| Rsa1.0_01005.1.g22381.t6 | gb EOA31389.1  hypothetical protein CARUB_v10014566mg [Capsella rubella]                                                                                                                                                                   | 225  | 225  | 1.00E-111 | 100.0 | 97.8 | 98.7 | hypothetical protein CARUB_v10014566mg                                                                                                                                   | gbpln | Capsella rubella     | AT2G06530.1   Symbols: VPS2.1   SNF7 family protein   chr2:2588740-2590285 REVERSE LENGTH=225                                                                                                                                                                            | 225  | 225  | 1.00E-113 | 100.0 | 97.8 | 98.2 |
| Rsa1.0_01005.1.g22382.t1 | #                                                                                                                                                                                                                                          | #    | #    | #         | #     | #    | #    | -                                                                                                                                                                        | ----  | ----                 | #                                                                                                                                                                                                                                                                        | #    | #    | #         | #     | #    | #    |
| Rsa1.0_01005.1.g22383.t1 | ref XP_002879863.1  predicted protein [Arabidopsis lyrata subsp. lyrata]<br>gi 297325702 gb EFH5122.1  predicted protein [Arabidopsis lyrata subsp. lyrata]                                                                                | 402  | 404  | 0         | 100.5 | 85.6 | 91.3 | predicted protein                                                                                                                                                        | gbpln | Arabidopsis lyrata   | AT1G43080.1   Symbols:   Pectin lyase-like superfamily protein   chr1:16213995-16215828 REVERSE LENGTH=404                                                                                                                                                               | 402  | 404  | 0         | 100.5 | 83.8 | 90.8 |
| Rsa1.0_01005.1.g22384.t1 | #                                                                                                                                                                                                                                          | #    | #    | #         | #     | #    | #    | -                                                                                                                                                                        | ----  | ----                 | #                                                                                                                                                                                                                                                                        | #    | #    | #         | #     | #    | #    |
| Rsa1.0_01005.1.g22385.t1 | sp Q6YDN9.1 XTH_BRAOB RecName: Full=Xyloglucan endotransglucosylase/hydrolase; AltName: Full=BobXET16A; Flags: Precursor; gi 37359374 gb AA000727.1  xyloglucan endotransglucosylase precursor [Brassica oleracea var. botrytis]           | 295  | 295  | 1.00E-174 | 100.0 | 98.0 | 99.3 | RecName: Full=Xyloglucan endotransglucosylase/hydrolase; AltName: Full=BobXET16A; Flags: Precursor; gi 37359374 gb AA000727.1  xyloglucan endotransglucosylase precursor | gbpln | Brassica oleracea    | AT2G08850.1   Symbols: EXGT-A1, EXT, XTH4   xyloglucan endotransglucosylase/hydrolase 4   chr2:2763619-2765490 FORWARD LENGTH=296                                                                                                                                        | 295  | 296  | 1.00E-172 | 100.3 | 96.3 | 98.0 |
| Rsa1.0_01005.1.g22386.t1 | ref XP_002883744.1  hypothetical protein ARALYDRAFT_319360 [Arabidopsis lyrata subsp. lyrata]<br>gi 297329584 gb EFH60003.1  hypothetical protein ARALYDRAFT_319360 [Arabidopsis lyrata subsp. lyrata]                                     | 201  | 181  | 8.00E-48  | 90.0  | 61.2 | 69.2 | hypothetical protein ARALYDRAFT_319360                                                                                                                                   | gbpln | Arabidopsis lyrata   | AT5G35320.1   Symbols:   unknown protein; Has 1807 Blast hits to 1807 proteins in 277 species: Archae - 0; Bacteria - 0; Metazoa - 736; Fungi - 347; Plants - 385; Viruses - 0; Other Eukaryotes - 339 (source: NCBI BLINK).   chr5:13521893-13523144 FORWARD LENGTH=225 | 201  | 225  | 4.00E-49  | 111.9 | 58.2 | 72.6 |
| Rsa1.0_01005.1.g22387.t1 | ref XP_002885825.1  kinase family protein [Arabidopsis lyrata subsp. lyrata]<br>gi 297331665 gb EFH62084.1  kinase family protein [Arabidopsis lyrata subsp. lyrata]                                                                       | 684  | 710  | 0         | 103.8 | 76.3 | 86.7 | kinase family protein                                                                                                                                                    | gbpln | Arabidopsis lyrata   | AT2G07020.1   Symbols:   Protein kinase protein with adenine nucleotide alpha hydrolases-like domain   chr2:2908473-2911198 REVERSE LENGTH=700                                                                                                                           | 684  | 700  | 0         | 102.3 | 73.4 | 84.6 |
| Rsa1.0_01005.1.g22388.t4 | ref XP_002883756.1  cycloartenol synthase [Arabidopsis lyrata subsp. lyrata]<br>gi 297329596 gb EFH60015.1  cycloartenol synthase [Arabidopsis lyrata subsp. lyrata]                                                                       | 728  | 759  | 0         | 104.3 | 92.2 | 95.3 | cycloartenol synthase                                                                                                                                                    | gbpln | Arabidopsis lyrata   | AT2G07050.1   Symbols: CAS1   cycloartenol synthase 1   chr2:2924629-2930295 FORWARD LENGTH=759                                                                                                                                                                          | 728  | 759  | 0         | 104.3 | 91.8 | 95.5 |
| Rsa1.0_01005.1.g22389.t1 | gb ABA18104.1  putative plasma membrane ATPase [Capsella rubella]<br>gi 482548056 gb EOA12258.1  hypothetical protein CARUB_v10008027mg [Capsella rubella]                                                                                 | 412  | 948  | 0         | 230.1 | 80.3 | 86.7 | putative plasma membrane ATPase                                                                                                                                          | gbpln | Capsella rubella     | AT2G07560.1   Symbols: AHA6, HA6   H(+)-ATPase 6   chr2:3170394-3173952 REVERSE LENGTH=949                                                                                                                                                                               | 412  | 949  | 0         | 230.3 | 85.0 | 87.6 |
| Rsa1.0_01006.1.g22390.t1 | ref XP_002887954.1  hypothetical protein ARALYDRAFT_475003 [Arabidopsis lyrata subsp. lyrata]<br>gi 297333795 gb EFH64213.1  hypothetical protein ARALYDRAFT_475003 [Arabidopsis lyrata subsp. lyrata]                                     | 221  | 517  | 2.00E-61  | 233.9 | 59.3 | 67.4 | hypothetical protein ARALYDRAFT_475003                                                                                                                                   | gbpln | Arabidopsis lyrata   | AT1G63520.1   Symbols:   Protein of unknown function (DUF3527)   chr1:23560205-23561873 FORWARD LENGTH=528                                                                                                                                                               | 221  | 528  | 1.00E-95  | 238.9 | 56.6 | 66.1 |
| Rsa1.0_01006.1.g22391.t1 | ref XP_002887955.1  kinase family protein [Arabidopsis lyrata subsp. lyrata]<br>gi 297333796 gb EFH64214.1  kinase family protein [Arabidopsis lyrata subsp. lyrata]                                                                       | 489  | 487  | 0         | 99.6  | 95.1 | 97.3 | kinase family protein                                                                                                                                                    | gbpln | Arabidopsis lyrata   | AT1G63500.1   Symbols:   Protein kinase protein with tetratricopeptide repeat domain   chr1:23556015-23558403 FORWARD LENGTH=487                                                                                                                                         | 489  | 487  | 0         | 99.6  | 94.9 | 97.3 |
| Rsa1.0_01006.1.g22392.t1 | ref XP_002886399.1  F2K11.14 [Arabidopsis lyrata subsp. lyrata]<br>gi 297332240 gb EFH62658.1  F2K11.14 [Arabidopsis lyrata subsp. lyrata]                                                                                                 | 1464 | 1461 | 0         | 99.8  | 79.4 | 86.6 | F2K11.14                                                                                                                                                                 | gbpln | Arabidopsis lyrata   | AT1G63490.1   Symbols:   transcription factor jumonji (jmc) domain-containing protein   chr1:23544938-23551946 REVERSE LENGTH=1116                                                                                                                                       | 1464 | 1116 | 0         | 76.2  | 58.5 | 64.5 |

|                          |                                                                                                                                                                                                                                                                                                                                                                                                                                                                                                                                                                                                                                                                                                                                                                                                                                                                                                                                                                                                       |      |      |           |        |      |      |                                                            |       |                      |                                                                                                                                                                                                                                                                                                                                              |      |     |           |       |      |      |
|--------------------------|-------------------------------------------------------------------------------------------------------------------------------------------------------------------------------------------------------------------------------------------------------------------------------------------------------------------------------------------------------------------------------------------------------------------------------------------------------------------------------------------------------------------------------------------------------------------------------------------------------------------------------------------------------------------------------------------------------------------------------------------------------------------------------------------------------------------------------------------------------------------------------------------------------------------------------------------------------------------------------------------------------|------|------|-----------|--------|------|------|------------------------------------------------------------|-------|----------------------|----------------------------------------------------------------------------------------------------------------------------------------------------------------------------------------------------------------------------------------------------------------------------------------------------------------------------------------------|------|-----|-----------|-------|------|------|
| Rsa1.0_01006.1.g22393.t1 | refNP_176536.2   AT hook motif DNA-binding family protein [Arabidopsis thaliana] gi 26451696 dbj BAC42943.1 putative DNA-binding protein [Arabidopsis thaliana] gi 28973281 gb AA063965.1   putative DNA-binding protein [Arabidopsis thaliana] gi 119657354 tpd FAA00276.1   TPA: AT-hook motif nuclear localized protein 5 [Arabidopsis thaliana] gi 332195982 gb AEE34103.1   AT hook motif DNA-binding family protein [Arabidopsis thaliana] gb ACF95839.1   heavy metal P-type ATPase [Arabidopsis thaliana] gi 195362187 gb ACF95841.1   heavy metal P-type ATPase [Arabidopsis thaliana] gi 195362195 gb ACF95845.1   heavy metal P-type ATPase [Arabidopsis thaliana] gi 195362205 gb ACF95850.1   heavy metal P-type ATPase [Arabidopsis thaliana] gi 195362211 gb ACF95853.1   heavy metal P-type ATPase [Arabidopsis thaliana] gi 195362221 gb ACF95858.1   heavy metal P-type ATPase [Arabidopsis thaliana] gi 195362233 gb ACF95864.1   heavy metal P-type ATPase [Arabidopsis thaliana] | 373  | 378  | 2.33E-156 | 101.3  | 80.2 | 86.9 | AT hook motif DNA-binding family protein                   | gbpln | Arabidopsis thaliana | AT1G63470.1   Symbols:   AT hook motif DNA-binding family protein   chr1:23536831-23538863 REVERSE LENGTH=378                                                                                                                                                                                                                                | 373  | 378 | 1.00E-149 | 101.3 | 80.2 | 86.9 |
| Rsa1.0_01006.1.g22394.t1 | refNP_176532.2   putative LRR receptor-like serine/threonine-protein kinase [Arabidopsis thaliana] gi 263430169 sp COLGH8.1 Y1634_ARAT H RecName: Full=Probable LRR receptor-like serine/threonine-protein kinase AT1g63430; Flags: Precursor gi 224589459 gb ACN59263.1   leucine-rich repeat receptor-like protein kinase [Arabidopsis thaliana] gi 332195977 gb AEE34098.1   putative LRR receptor-like serine/threonine-protein kinase [Arabidopsis thaliana] emb CAB39638.1   RNA-directed DNA polymerase-like protein [Arabidopsis thaliana] gi 7267666 emb CAB78094.1   RNA-directed DNA polymerase-like protein [Arabidopsis thaliana]                                                                                                                                                                                                                                                                                                                                                        | 1199 | 995  | 0         | 83.0   | 76.3 | 79.7 | heavy metal P-type ATPase                                  | gbpln | Arabidopsis thaliana | AT1G63440.1   Symbols: HMA5   heavy metal atpase 5   chr1:23527655-23531109 FORWARD LENGTH=995                                                                                                                                                                                                                                               | 1199 | 995 | 0         | 83.0  | 76.2 | 79.6 |
| Rsa1.0_01006.1.g22395.t1 | refNP_176532.2   putative LRR receptor-like serine/threonine-protein kinase [Arabidopsis thaliana] gi 263430169 sp COLGH8.1 Y1634_ARAT H RecName: Full=Probable LRR receptor-like serine/threonine-protein kinase AT1g63430; Flags: Precursor gi 224589459 gb ACN59263.1   leucine-rich repeat receptor-like protein kinase [Arabidopsis thaliana] gi 332195977 gb AEE34098.1   putative LRR receptor-like serine/threonine-protein kinase [Arabidopsis thaliana] emb CAB39638.1   RNA-directed DNA polymerase-like protein [Arabidopsis thaliana] gi 7267666 emb CAB78094.1   RNA-directed DNA polymerase-like protein [Arabidopsis thaliana]                                                                                                                                                                                                                                                                                                                                                        | 679  | 664  | 0         | 97.8   | 85.4 | 91.2 | putative LRR receptor-like serine/threonine-protein kinase | gbpln | Arabidopsis thaliana | AT1G63430.1   Symbols:   Leucine-rich repeat protein kinase family protein   chr1:23522896-23526451 FORWARD LENGTH=664                                                                                                                                                                                                                       | 679  | 664 | 0         | 97.8  | 85.4 | 91.2 |
| Rsa1.0_01006.1.g22396.t3 | refXP_002887961.1   hypothetical protein ARALYDRAFT_475010 [Arabidopsis lyrata subsp. lyrata] gi 297333802 gb EFH64220.1   hypothetical protein ARALYDRAFT_475010 [Arabidopsis lyrata subsp. lyrata]                                                                                                                                                                                                                                                                                                                                                                                                                                                                                                                                                                                                                                                                                                                                                                                                  | 934  | 1274 | 0         | 136.4  | 53.0 | 67.5 | RNA-directed DNA polymerase-like protein                   | gbpln | Arabidopsis thaliana | AT4G29090.1   Symbols:   Ribonuclease H-like superfamily protein   chr4:14333528-14335255 FORWARD LENGTH=575                                                                                                                                                                                                                                 | 934  | 575 | 6.00E-63  | 61.6  | 16.8 | 24.3 |
| Rsa1.0_01006.1.g22397.t1 | refXP_002886402.1   hypothetical protein ARALYDRAFT_475012 [Arabidopsis lyrata subsp. lyrata] gi 297332243 gb EFH62661.1   hypothetical protein ARALYDRAFT_475012 [Arabidopsis lyrata subsp. lyrata]                                                                                                                                                                                                                                                                                                                                                                                                                                                                                                                                                                                                                                                                                                                                                                                                  | 579  | 571  | 0         | 98.6   | 84.8 | 89.8 | hypothetical protein ARALYDRAFT_475010                     | gbpln | Arabidopsis lyrata   | AT1G63420.1   Symbols:   Arabidopsis thaliana protein of unknown function (DUF821)   chr1:23515874-23518777 FORWARD LENGTH=578                                                                                                                                                                                                               | 579  | 578 | 0         | 99.8  | 83.6 | 90.0 |
| Rsa1.0_01006.1.g22398.t1 | refXP_002886431.1   hypothetical protein ARALYDRAFT_893154 [Arabidopsis lyrata subsp. lyrata] gi 297332272 gb EFH62690.1   hypothetical protein ARALYDRAFT_893154 [Arabidopsis lyrata subsp. lyrata]                                                                                                                                                                                                                                                                                                                                                                                                                                                                                                                                                                                                                                                                                                                                                                                                  | 159  | 154  | 8.00E-61  | 96.9   | 76.1 | 83.6 | hypothetical protein ARALYDRAFT_475012                     | gbpln | Arabidopsis lyrata   | AT1G63310.1   Symbols:   unknown protein; BEST Arabidopsis thaliana protein match is: unknown protein (TAIR:AT2G20362.1). Has 78 Blast hits to 77 proteins in 11 species: Archae - 0; Bacteria - 0; Metazoa - 0; Fungi - 0; Plants - 78; Viruses - 0; Other Eukaryotes - 0 (source: NCBI BLink).   chr1:23486580-23487044 REVERSE LENGTH=154 | 159  | 154 | 6.00E-63  | 96.9  | 75.5 | 83.6 |
| Rsa1.0_01006.1.g22399.t1 | gb AGF69111.1   PPR [Raphanus sativus]                                                                                                                                                                                                                                                                                                                                                                                                                                                                                                                                                                                                                                                                                                                                                                                                                                                                                                                                                                | 47   | 479  | 2.00E-14  | 1019.1 | 83.0 | 83.0 | PPR                                                        | gbpln | Raphanus sativus     | #                                                                                                                                                                                                                                                                                                                                            | #    | #   | #         | #     | #    |      |
| Rsa1.0_01006.1.g22400.t1 | refXP_002886431.1   hypothetical protein ARALYDRAFT_893154 [Arabidopsis lyrata subsp. lyrata] gi 297332272 gb EFH62690.1   hypothetical protein ARALYDRAFT_893154 [Arabidopsis lyrata subsp. lyrata]                                                                                                                                                                                                                                                                                                                                                                                                                                                                                                                                                                                                                                                                                                                                                                                                  | 268  | 317  | 1.00E-132 | 118.3  | 90.3 | 95.5 | hypothetical protein ARALYDRAFT_893154                     | gbpln | Arabidopsis lyrata   | AT1G63120.1   Symbols: ATRBL2, RBL2   RHOMBROID-like 2   chr1:23409054-23410725 REVERSE LENGTH=317                                                                                                                                                                                                                                           | 268  | 317 | 1.00E-134 | 118.3 | 90.3 | 95.9 |

|                          |                                                                                                                                                                                                                                                                                                                                                                                                                                                                                                                                                                                                                                                                                                                                                                                                                                                                                                                                                               |     |     |           |       |      |      |                                        |       |                      |                                                                                                                                                                                                                                                                                                                                                                                                                                                                                                                                                                                                                                                   |     |     |           |       |      |      |
|--------------------------|---------------------------------------------------------------------------------------------------------------------------------------------------------------------------------------------------------------------------------------------------------------------------------------------------------------------------------------------------------------------------------------------------------------------------------------------------------------------------------------------------------------------------------------------------------------------------------------------------------------------------------------------------------------------------------------------------------------------------------------------------------------------------------------------------------------------------------------------------------------------------------------------------------------------------------------------------------------|-----|-----|-----------|-------|------|------|----------------------------------------|-------|----------------------|---------------------------------------------------------------------------------------------------------------------------------------------------------------------------------------------------------------------------------------------------------------------------------------------------------------------------------------------------------------------------------------------------------------------------------------------------------------------------------------------------------------------------------------------------------------------------------------------------------------------------------------------------|-----|-----|-----------|-------|------|------|
| Rsa1.0_01006.1.g22401.t1 | refNP_176498.1   scarecrow-like protein 28 [Arabidopsis thaliana]<br>gi 75169917 sp Q9CAN3.1 SCL28_ARAT<br>H RecName: Full=Scarecrow-like protein 28; Short=AtSCL28; AltName: Full=GRAS family protein 8; Short=AtGRAS-8<br>gi 12323248 gb AAG51600.1 AC010795_4 transcription factor SCARECROW, putative; 52594-50618 [Arabidopsis thaliana] gi 332195932 gb AEE34053.1 scarecrow-like protein 28 [Arabidopsis thaliana]                                                                                                                                                                                                                                                                                                                                                                                                                                                                                                                                     | 639 | 658 | 0         | 103.0 | 77.9 | 85.8 | scarecrow-like protein 28              | gbpln | Arabidopsis thaliana | AT1G63100.1   Symbols:   GRAS family transcription factor   chr1:23399391-23401367 REVERSE LENGTH=658                                                                                                                                                                                                                                                                                                                                                                                                                                                                                                                                             | 639 | 658 | 0         | 103.0 | 77.9 | 85.8 |
| Rsa1.0_01006.1.g22402.t1 | refXP_002886433.1   phloem protein 2-A11 [Arabidopsis lyrata subsp. lyrata]<br>gi 297332274 gb EFH62692.1  phloem protein 2-A11 [Arabidopsis lyrata subsp. lyrata]                                                                                                                                                                                                                                                                                                                                                                                                                                                                                                                                                                                                                                                                                                                                                                                            | 292 | 287 | 1.00E-139 | 98.3  | 81.8 | 90.1 | phloem protein 2-A11                   | gbpln | Arabidopsis lyrata   | AT1G63090.1   Symbols:   AtPP2-A11, PP2-A11   phloem protein 2-A11   chr1:23391293-23392609 REVERSE LENGTH=289                                                                                                                                                                                                                                                                                                                                                                                                                                                                                                                                    | 292 | 289 | 1.00E-133 | 99.0  | 80.1 | 88.0 |
| Rsa1.0_01006.1.g22403.t1 | refNP_564808.1   uncharacterized protein [Arabidopsis thaliana]<br>gi 12323263 gb AAG51615.1 AC010795_19 hypothetical protein; 35332-36114 [Arabidopsis thaliana]<br>gi 21593840 gb AAM65807.1  unknown [Arabidopsis thaliana]<br>gi 28393136 gb AAO42001.1  unknown protein [Arabidopsis thaliana]<br>gi 28827488 gb AAO50588.1  unknown protein [Arabidopsis thaliana]<br>gi 332195928 gb AEE34049.1  uncharacterized protein AT1G63060 [Arabidopsis thaliana]                                                                                                                                                                                                                                                                                                                                                                                                                                                                                              | 135 | 148 | 1.00E-60  | 109.6 | 83.0 | 87.4 | uncharacterized protein                | gbpln | Arabidopsis thaliana | AT1G63060.1   Symbols:   unknown protein; FUNCTIONS IN: molecular function unknown; INVOLVED IN: biological process unknown; LOCATED IN: mitochondrion; EXPRESSED IN: petal, leaf whorl, male gametophyte, flower; EXPRESSED DURING: L mature pollen stage, M germinating pollen stage, 4 anthesis, petal differentiation and expansion stage; BEST Arabidopsis thaliana protein match is: unknown protein (TAIR:AT5G07330.1); Has 42 Blast hits to 42 proteins in 12 species: Archae - 0; Bacteria - 0; Metazoa - 0; Fungi - 0; Plants - 42; Viruses - 0; Other Eukaryotes - 0 (source: NCBI BLINK).   chr1:23384105-23384887 FORWARD LENGTH=148 | 135 | 148 | 3.00E-63  | 109.6 | 83.0 | 87.4 |
| Rsa1.0_01006.1.g22404.t2 | #                                                                                                                                                                                                                                                                                                                                                                                                                                                                                                                                                                                                                                                                                                                                                                                                                                                                                                                                                             | #   | #   | #         | #     | #    | #    | -                                      | ----  | ----                 | #                                                                                                                                                                                                                                                                                                                                                                                                                                                                                                                                                                                                                                                 | #   | #   | #         | #     | #    |      |
| Rsa1.0_01006.1.g22405.t1 | gb EOA34651.1  hypothetical protein CARUB_v10022214mg [Capsella rubella]                                                                                                                                                                                                                                                                                                                                                                                                                                                                                                                                                                                                                                                                                                                                                                                                                                                                                      | 245 | 257 | 5.00E-82  | 104.9 | 75.9 | 82.9 | hypothetical protein CARUB_v10022214mg | gbpln | Capsella rubella     | AT1G12630.1   Symbols:   Integrase-type DNA-binding superfamily protein   chr1:4298897-4299475 FORWARD LENGTH=192                                                                                                                                                                                                                                                                                                                                                                                                                                                                                                                                 | 245 | 192 | 8.00E-41  | 78.4  | 41.2 | 49.4 |
| Rsa1.0_01007.1.g22406.t1 | gb EOA24627.1  hypothetical protein CARUB_v10017898mg [Capsella rubella]                                                                                                                                                                                                                                                                                                                                                                                                                                                                                                                                                                                                                                                                                                                                                                                                                                                                                      | 264 | 252 | 2.00E-56  | 95.5  | 60.6 | 73.1 | hypothetical protein CARUB_v10017898mg | gbpln | Capsella rubella     | AT3G27880.1   Symbols:   Protein of unknown function (DUF1645)   chr3:10338429-10339157 FORWARD LENGTH=242                                                                                                                                                                                                                                                                                                                                                                                                                                                                                                                                        | 264 | 242 | 1.00E-57  | 91.7  | 59.8 | 71.2 |
| Rsa1.0_01007.1.g22407.t1 | refNP_189421.1   50S ribosomal protein L12-1 [Arabidopsis thaliana]<br>gi 548653 sp P36210.1 RK121_ARATH RecName: Full=50S ribosomal protein L12-1, chloroplastic; AltName: Full=CL12-A; Flags: Precursor<br>gi 468771 emb CAA48181.1  ribosomal protein L12 [Arabidopsis thaliana]<br>gi 11994488 dbj BAB02529.1  50S ribosomal protein L12-like [Arabidopsis thaliana] gi 15450974 gb AAK96758.1  50s ribosomal protein L12-like [Arabidopsis thaliana]<br>gi 15810119 gb AAL07203.1  putative 50S ribosomal protein L12-A [Arabidopsis thaliana]<br>gi 22530940 gb AAM96974.1  50S ribosomal protein L12-A [Arabidopsis thaliana] gi 23198422 gb AAN15738.1  50S ribosomal protein L12-A [Arabidopsis thaliana]<br>gi 29824165 gb AAP04043.1  putative 50S ribosomal protein L12-A [Arabidopsis thaliana]<br>gi 30102916 gb AAP21376.1  At3g27830 [Arabidopsis thaliana]<br>gi 332643847 gb AEE77368.1  50S ribosomal protein L12-1 [Arabidopsis thaliana] | 191 | 191 | 1.00E-69  | 100.0 | 84.8 | 90.1 | 50S ribosomal protein L12-1            | gbpln | Arabidopsis thaliana | AT3G27830.1   Symbols:   RPL12-A, RPL12   ribosomal protein L12-A   chr3:10318576-10319151 FORWARD LENGTH=191                                                                                                                                                                                                                                                                                                                                                                                                                                                                                                                                     | 191 | 191 | 5.00E-72  | 100.0 | 84.8 | 90.1 |
| Rsa1.0_01007.1.g22408.t1 | gb EOA23892.1  hypothetical protein CARUB_v10017107mg [Capsella rubella]                                                                                                                                                                                                                                                                                                                                                                                                                                                                                                                                                                                                                                                                                                                                                                                                                                                                                      | 486 | 488 | 0         | 100.4 | 85.2 | 93.6 | hypothetical protein CARUB_v10017107mg | gbpln | Capsella rubella     | AT3G27820.1   Symbols:   ATMDAR4, MDAR4   monodehydroascorbate reductase 4   chr3:10315249-10317881 FORWARD LENGTH=488                                                                                                                                                                                                                                                                                                                                                                                                                                                                                                                            | 486 | 488 | 0         | 100.4 | 85.0 | 93.6 |

|                           |                                                                                                                                                                                                                                                                                                                                                                                                                                                                                                          |      |      |           |       |      |      |                                               |       |                      |                                                                                                                                                                                                                                                                                                                                                                                                                                                                                                                                             |      |      |           |       |      |      |
|---------------------------|----------------------------------------------------------------------------------------------------------------------------------------------------------------------------------------------------------------------------------------------------------------------------------------------------------------------------------------------------------------------------------------------------------------------------------------------------------------------------------------------------------|------|------|-----------|-------|------|------|-----------------------------------------------|-------|----------------------|---------------------------------------------------------------------------------------------------------------------------------------------------------------------------------------------------------------------------------------------------------------------------------------------------------------------------------------------------------------------------------------------------------------------------------------------------------------------------------------------------------------------------------------------|------|------|-----------|-------|------|------|
| Rsa1.0_01007.1.g22409.t1  | refNP_189416.2] myb domain protein 118 [Arabidopsis thaliana] gi 9294482 dbj BAB02701.1  probable MYB-like DNA-binding protein [Arabidopsis thaliana] gi 91806493 gb ABE65974.1  myb family transcription factor [Arabidopsis thaliana] gi 332643842 gb AEE77363.1  myb domain protein 118 [Arabidopsis thaliana]                                                                                                                                                                                        | 475  | 437  | 1.00E-156 | 92.0  | 62.5 | 71.2 | myb domain protein 118                        | gbpln | Arabidopsis thaliana | AT3G27785.1   Symbols: MYB118, ATMYB118, PGA37   myb domain protein 118   chr3:10288767-10290712 REVERSE LENGTH=437                                                                                                                                                                                                                                                                                                                                                                                                                         | 475  | 437  | 1.00E-159 | 92.0  | 62.5 | 71.2 |
| Rsa1.0_01007.1.g22410.t1  | refXP_002877071.1  hypothetical protein ARALYDRAFT_905031 [Arabidopsis lyrata subsp. lyrata] gi 297322909 gb EFH53330.1  hypothetical protein ARALYDRAFT_905031 [Arabidopsis lyrata subsp. lyrata]                                                                                                                                                                                                                                                                                                       | 313  | 321  | 1.00E-134 | 102.6 | 74.4 | 86.3 | hypothetical protein ARALYDRAFT_905031        | gbpln | Arabidopsis lyrata   | AT3G27770.1   Symbols:   unknown protein; FUNCTIONS IN: molecular function unknown; INVOLVED IN: biological process unknown; LOCATED IN: endomembrane system; EXPRESSED IN: 22 plant structures; EXPRESSED DURING: 13 growth stages; BEST Arabidopsis thaliana protein match is: unknown protein (TAIR:AT5G62960.1); Has 158 Blast hits to 157 proteins in 21 species: Archae - 0; Bacteria - 0; Metazoa - 13; Fungi - 0; Plants - 141; Viruses - 0; Other Eukaryotes - 4 (source: NCBI BLINK).   chr3:10285818-10287474 REVERSE LENGTH=315 | 313  | 315  | 1.00E-136 | 100.6 | 75.4 | 84.7 |
| Rsa1.0_01007.1.g22411.t21 | gb EOA26124.1  hypothetical protein CARUB_v10019550mg [Capsella rubella]                                                                                                                                                                                                                                                                                                                                                                                                                                 | 1126 | 1130 | 0         | 100.4 | 90.0 | 94.0 | hypothetical protein CARUB_v10019550mg        | gbpln | Capsella rubella     | AT3G27730.1   Symbols: RCK, MER3   ATP binding;ATP-dependent helicases;DNA helicases   chr3:10273952-10280213 REVERSE LENGTH=1133                                                                                                                                                                                                                                                                                                                                                                                                           | 1126 | 1133 | 0         | 100.6 | 89.8 | 93.7 |
| Rsa1.0_01007.1.g22412.t1  | refXP_002875399.1  hypothetical protein ARALYDRAFT_905025 [Arabidopsis lyrata subsp. lyrata] gi 297321237 gb EFH51658.1  hypothetical protein ARALYDRAFT_905025 [Arabidopsis lyrata subsp. lyrata] refNP_189407.2] zinc finger CCCH domain-containing protein 41 [Arabidopsis thaliana] gi 30688891 refNP_851008.1  zinc finger CCCH domain-containing protein 41 [Arabidopsis thaliana] gi 75335571 sp Q9LVX1.1 C3H41_ARAT_H RecName: Full=Zinc finger CCCH domain-containing protein 41; Short=A1C3H41 | 525  | 526  | 0         | 100.2 | 65.5 | 79.2 | hypothetical protein ARALYDRAFT_905025        | gbpln | Arabidopsis lyrata   | AT4G34370.1   Symbols: ATARI1, ARI1   RING/U-box superfamily protein   chr4:16434547-16437037 FORWARD LENGTH=597                                                                                                                                                                                                                                                                                                                                                                                                                            | 525  | 597  | 0         | 113.7 | 63.2 | 80.0 |
| Rsa1.0_01007.1.g22413.t1  | gi 9294475 dbj BAB02694.1  unnamed protein product [Arabidopsis thaliana] gi 23397275 gb AAN31919.1  unknown protein [Arabidopsis thaliana] gi 225898683 dbj BAH30472.1  hypothetical protein [Arabidopsis thaliana] gi 332643832 gb AEE77353.1  zinc finger CCCH domain-containing protein 41 [Arabidopsis thaliana] gi 332643833 gb AEE77354.1  zinc finger CCCH domain-containing protein 41 [Arabidopsis thaliana]                                                                                   | 876  | 908  | 0         | 103.7 | 77.1 | 83.9 | zinc finger CCCH domain-containing protein 41 | gbpln | Arabidopsis thaliana | AT3G27700.2   Symbols:   zinc finger (CCCH-type) family protein / RNA recognition motif (RRM)-containing protein   chr3:10257681-10261330 REVERSE LENGTH=908                                                                                                                                                                                                                                                                                                                                                                                | 876  | 908  | 0         | 103.7 | 77.1 | 83.9 |
| Rsa1.0_01007.1.g22414.t1  | dbj BAJ33772.1  unnamed protein product [Thellungiella halophila]                                                                                                                                                                                                                                                                                                                                                                                                                                        | 266  | 266  | 1.00E-151 | 100.0 | 99.2 | 99.6 | unnamed protein product                       | ----  | ----                 | AT3G27690.1   Symbols: LHCB2.4, LHCB2.3, LHCB2   photosystem II light harvesting complex gene 2.3   chr3:10256002-10256921 FORWARD LENGTH=266                                                                                                                                                                                                                                                                                                                                                                                               | 266  | 266  | 1.00E-152 | 100.0 | 97.0 | 98.5 |
| Rsa1.0_01007.1.g22415.t1  | gb ACG69503.1  oleosin S2-1 [Brassica napus]                                                                                                                                                                                                                                                                                                                                                                                                                                                             | 190  | 188  | 5.00E-85  | 98.9  | 94.7 | 95.3 | oleosin S2-1                                  | gbpln | Brassica napus       | AT3G27660.1   Symbols: OLEO4, OLE3   oleosin 4   chr3:10243851-10244821 FORWARD LENGTH=191                                                                                                                                                                                                                                                                                                                                                                                                                                                  | 190  | 191  | 4.00E-72  | 100.5 | 82.6 | 89.5 |
| Rsa1.0_01008.1.g22416.t1  | refXP_002885421.1  FMN binding protein [Arabidopsis lyrata subsp. lyrata] gi 297331261 gb EFH61680.1  FMN binding protein [Arabidopsis lyrata subsp. lyrata]                                                                                                                                                                                                                                                                                                                                             | 326  | 387  | 1.00E-147 | 118.7 | 82.8 | 85.6 | FMN binding protein                           | gbpln | Arabidopsis lyrata   | AT3G21140.1   Symbols:   Pyridoxamine 5'-phosphate oxidase family protein   chr3:7409696-7412086 REVERSE LENGTH=387                                                                                                                                                                                                                                                                                                                                                                                                                         | 326  | 387  | 1.00E-148 | 118.7 | 81.3 | 84.0 |
| Rsa1.0_01008.1.g22417.t1  | gb EOA12359.1  hypothetical protein CARUB_v10016511mg [Capsella rubella]                                                                                                                                                                                                                                                                                                                                                                                                                                 | 718  | 356  | 1.00E-84  | 49.6  | 26.5 | 33.4 | hypothetical protein CARUB_v10016511mg        | gbpln | Capsella rubella     | AT4G10190.1   Symbols:   F-box and associated interaction domains-containing protein   chr4:6350928-6352031 FORWARD LENGTH=367                                                                                                                                                                                                                                                                                                                                                                                                              | 718  | 367  | 2.00E-80  | 51.1  | 24.9 | 33.7 |
| Rsa1.0_01008.1.g22418.t1  | refXP_002889490.1  hypothetical protein ARALYDRAFT_333729 [Arabidopsis lyrata subsp. lyrata] gi 297335332 gb EFH65749.1  hypothetical protein ARALYDRAFT_333729 [Arabidopsis lyrata subsp. lyrata]                                                                                                                                                                                                                                                                                                       | 611  | 1328 | 1.00E-161 | 217.3 | 54.3 | 66.9 | hypothetical protein ARALYDRAFT_333729        | gbpln | Arabidopsis lyrata   | AT1G04080.1   Symbols: PRP39   Tetratricopeptide repeat (TPR)-like superfamily protein   chr1:1051803-1056550 FORWARD LENGTH=768                                                                                                                                                                                                                                                                                                                                                                                                            | 611  | 768  | 1.00E-159 | 125.7 | 55.0 | 68.1 |

|                          |                                                                                                                                                                                                                                                                                                                                                                                                                                    |      |      |          |       |      |      |                                        |       |                      |                                                                                                                                                                                                                                                                          |      |      |           |       |      |      |
|--------------------------|------------------------------------------------------------------------------------------------------------------------------------------------------------------------------------------------------------------------------------------------------------------------------------------------------------------------------------------------------------------------------------------------------------------------------------|------|------|----------|-------|------|------|----------------------------------------|-------|----------------------|--------------------------------------------------------------------------------------------------------------------------------------------------------------------------------------------------------------------------------------------------------------------------|------|------|-----------|-------|------|------|
| Rsa1.0_01008.1.g22419.t1 | gb EOA19601.1  hypothetical protein CARUB_v10002783mg [Capsella rubella]                                                                                                                                                                                                                                                                                                                                                           | 375  | 381  | 1.00E-72 | 101.6 | 49.1 | 62.4 | hypothetical protein CARUB_v10002783mg | gbpln | Capsella rubella     | AT4G10190.1   Symbols:   F-box and associated interaction domains-containing protein   chr4:6350928-6352031 FORWARD LENGTH=367                                                                                                                                           | 375  | 367  | 3.00E-64  | 97.9  | 42.9 | 57.9 |
| Rsa1.0_01008.1.g22420.t1 | gb EOA12359.1  hypothetical protein CARUB_v10016511mg [Capsella rubella]                                                                                                                                                                                                                                                                                                                                                           | 390  | 356  | 7.00E-87 | 91.3  | 49.2 | 61.5 | hypothetical protein CARUB_v10016511mg | gbpln | Capsella rubella     | AT4G10190.1   Symbols:   F-box and associated interaction domains-containing protein   chr4:6350928-6352031 FORWARD LENGTH=367                                                                                                                                           | 390  | 367  | 2.00E-74  | 94.1  | 44.9 | 60.8 |
| Rsa1.0_01008.1.g22421.t1 | ref XP_002872824.1  hypothetical protein ARALYDRAFT_490290 [Arabidopsis lyrata subsp. lyrata] gi 297318661 gb EFH49083.1  hypothetical protein ARALYDRAFT_490290 [Arabidopsis lyrata subsp. lyrata]                                                                                                                                                                                                                                | 885  | 888  | 0        | 100.3 | 92.3 | 96.3 | hypothetical protein ARALYDRAFT_490290 | gbpln | Arabidopsis lyrata   | AT4G02680.1   Symbols: EOL1   ETO1-like 1   chr4:1181202-1184328 REVERSE LENGTH=888                                                                                                                                                                                      | 885  | 888  | 0         | 100.3 | 92.3 | 96.0 |
| Rsa1.0_01008.1.g22422.t1 | gb EOA19773.1  hypothetical protein CARUB_v10000019mg [Capsella rubella]                                                                                                                                                                                                                                                                                                                                                           | 3553 | 3559 | 0        | 100.2 | 81.5 | 88.5 | hypothetical protein CARUB_v10000019mg | gbpln | Capsella rubella     | AT4G02680.1   Symbols:   Beige/BEACH domain ;WD domain, G-beta repeat protein   chr4:1159927-1173791 REVERSE LENGTH=3527                                                                                                                                                 | 3553 | 3527 | 0         | 99.3  | 81.0 | 87.8 |
| Rsa1.0_01008.1.g22423.t1 | ref XP_002866882.1  hypothetical protein ARALYDRAFT_327926 [Arabidopsis lyrata subsp. lyrata] gi 297312718 gb EFH43141.1  hypothetical protein ARALYDRAFT_327926 [Arabidopsis lyrata subsp. lyrata]                                                                                                                                                                                                                                | 384  | 864  | 1.00E-96 | 225.0 | 51.8 | 67.2 | hypothetical protein ARALYDRAFT_327926 | gbpln | Arabidopsis lyrata   | AT4G39756.1   Symbols:   Galactose oxidase/kelch repeat superfamily protein   chr4:18441756-18442880 FORWARD LENGTH=374                                                                                                                                                  | 384  | 374  | 2.00E-96  | 97.4  | 50.3 | 66.7 |
| Rsa1.0_01009.1.g22424.t3 | ref XP_002894283.1  hypothetical protein ARALYDRAFT_474212 [Arabidopsis lyrata subsp. lyrata] gi 297340125 gb EFH70542.1  hypothetical protein ARALYDRAFT_474212 [Arabidopsis lyrata subsp. lyrata] ref NP_564580.1  Ankyrin repeat family protein [Arabidopsis thaliana] gi 75248476 sp Q8VY88.1 LTD_ARATH RecName: Full=Protein LHCP TRANSLOCATION DEFECT; AltName: Full=Protein GRANA-DEFICIENT CHLOROPLAST 1; Flags: Precursor | 514  | 500  | 0        | 97.3  | 74.1 | 80.4 | hypothetical protein ARALYDRAFT_474212 | gbpln | Arabidopsis lyrata   | AT1G50910.1   Symbols:   unknown protein; Has 1105 Blast hits to 802 proteins in 217 species: Archae - 2; Bacteria - 177; Metazoa - 445; Fungi - 210; Plants - 58; Viruses - 6; Other Eukaryotes - 207 (source: NCBI BLink).   chr1:18867083-18869839 REVERSE LENGTH=500 | 514  | 500  | 0         | 97.3  | 73.2 | 80.0 |
| Rsa1.0_01009.1.g22425.t1 | gi 18252245 gb AL61955.1  unknown protein [Arabidopsis thaliana] gi 21386977 gb AAM47892.1  unknown protein [Arabidopsis thaliana] gi 21553984 gb AAM63065.1  unknown [Arabidopsis thaliana] gi 332194478 gb AE32599.1  Ankyrin repeat family protein [Arabidopsis thaliana]                                                                                                                                                       | 176  | 175  | 3.00E-79 | 99.4  | 87.5 | 92.6 | Ankyrin repeat family protein          | gbpln | Arabidopsis thaliana | AT1G50900.1   Symbols: GDC1   Ankyrin repeat family protein   chr1:18866272-18867014 FORWARD LENGTH=175                                                                                                                                                                  | 176  | 175  | 1.00E-81  | 99.4  | 87.5 | 92.6 |
| Rsa1.0_01009.1.g22426.t1 | ref XP_002891598.1  hypothetical protein ARALYDRAFT_474209 [Arabidopsis lyrata subsp. lyrata] gi 297337440 gb EFH67857.1  hypothetical protein ARALYDRAFT_474209 [Arabidopsis lyrata subsp. lyrata]                                                                                                                                                                                                                                | 224  | 378  | 5.00E-26 | 168.8 | 30.8 | 38.8 | hypothetical protein ARALYDRAFT_474209 | gbpln | Arabidopsis lyrata   | AT1G50870.1   Symbols:   F-box and associated interaction domains-containing protein   chr1:18855147-18856337 FORWARD LENGTH=396                                                                                                                                         | 224  | 396  | 5.00E-28  | 176.8 | 30.4 | 38.8 |
| Rsa1.0_01009.1.g22427.t1 | gb AAZ66952.1  117M18_33 [Brassica rapa]                                                                                                                                                                                                                                                                                                                                                                                           | 396  | 681  | 6.00E-68 | 172.0 | 38.4 | 50.3 | 117M18_33                              | gbpln | Brassica rapa        | #                                                                                                                                                                                                                                                                        | #    | #    | #         | #     | #    |      |
| Rsa1.0_01009.1.g22428.t1 | gb AAK43485.1 AC084807_10 polyprotein, putative [Arabidopsis thaliana] gi 225898008 dbj BAH30336.1  hypothetical protein [Arabidopsis thaliana]                                                                                                                                                                                                                                                                                    | 856  | 1459 | 0        | 170.4 | 59.3 | 73.9 | polyprotein, putative                  | gbpln | Arabidopsis thaliana | AT4G23160.1   Symbols: CRK8   cysteine-rich RLK (RECEPTOR-like protein kinase) 8   chr4:12129485-12134086 FORWARD LENGTH=1262                                                                                                                                            | 856  | 1262 | 1.00E-118 | 147.4 | 24.3 | 34.8 |
| Rsa1.0_01009.1.g22429.t1 | ref XP_002891598.1  hypothetical protein ARALYDRAFT_474209 [Arabidopsis lyrata subsp. lyrata] gi 297337440 gb EFH67857.1  hypothetical protein ARALYDRAFT_474209 [Arabidopsis lyrata subsp. lyrata]                                                                                                                                                                                                                                | 249  | 378  | 9.00E-45 | 151.8 | 46.6 | 64.3 | hypothetical protein ARALYDRAFT_474209 | gbpln | Arabidopsis lyrata   | AT1G48060.1   Symbols:   F-box and associated interaction domains-containing protein   chr1:17728295-17729448 FORWARD LENGTH=353                                                                                                                                         | 249  | 353  | 2.00E-36  | 141.8 | 41.8 | 58.6 |
| Rsa1.0_01009.1.g22430.t2 | gb AAK51235.1 AF287471_1 polyprotein [Arabidopsis thaliana]                                                                                                                                                                                                                                                                                                                                                                        | 1973 | 1453 | 0        | 73.6  | 35.1 | 44.1 | polyprotein                            | gbpln | Arabidopsis thaliana | AT1G50830.1   Symbols:   Aminotransferase-like, plant mobile domain family protein   chr1:18835559-18837865 REVERSE LENGTH=768                                                                                                                                           | 1973 | 768  | 1.00E-169 | 38.9  | 16.1 | 18.6 |
| Rsa1.0_01009.1.g22431.t1 | ref XP_002891593.1  hypothetical protein ARALYDRAFT_892015 [Arabidopsis lyrata subsp. lyrata] gi 297337435 gb EFH67852.1  hypothetical protein ARALYDRAFT_892015 [Arabidopsis lyrata subsp. lyrata]                                                                                                                                                                                                                                | 122  | 119  | 3.00E-46 | 97.5  | 78.7 | 90.2 | hypothetical protein ARALYDRAFT_892015 | gbpln | Arabidopsis lyrata   | AT1G50740.1   Symbols:   Transmembrane proteins 14C   chr1:18807861-18808765 FORWARD LENGTH=119                                                                                                                                                                          | 122  | 119  | 1.00E-48  | 97.5  | 77.9 | 89.3 |



|                          |                                                                                                                                                                                                                                                                                                                                                                                |      |      |          |       |      |      |                                                        |       |                      |                                                                                                                                                                                                                                                                                                                                                                                                                                                                                                                                                                          |      |      |          |       |      |      |
|--------------------------|--------------------------------------------------------------------------------------------------------------------------------------------------------------------------------------------------------------------------------------------------------------------------------------------------------------------------------------------------------------------------------|------|------|----------|-------|------|------|--------------------------------------------------------|-------|----------------------|--------------------------------------------------------------------------------------------------------------------------------------------------------------------------------------------------------------------------------------------------------------------------------------------------------------------------------------------------------------------------------------------------------------------------------------------------------------------------------------------------------------------------------------------------------------------------|------|------|----------|-------|------|------|
| Rsa1.0_01009.1.g22432.t1 | ref NP_001185189.1  uncharacterized protein [Arabidopsis thaliana]<br>gi 332194464 gb AE32585.1  uncharacterized protein AT1G50732 [Arabidopsis thaliana]                                                                                                                                                                                                                      | 116  | 118  | 2.00E-34 | 101.7 | 78.4 | 81.9 | uncharacterized protein                                | gbpln | Arabidopsis thaliana | AT1G50732.1   Symbols:   unknown protein.   chr1:18802781-18803263 FORWARD LENGTH=118                                                                                                                                                                                                                                                                                                                                                                                                                                                                                    | 116  | 118  | 3.00E-37 | 101.7 | 78.4 | 81.9 |
| Rsa1.0_01009.1.g22433.t5 | ref NP_175488.2  uncharacterized protein [Arabidopsis thaliana]<br>gi 332194463 gb AE32584.1  uncharacterized protein AT1G50730 [Arabidopsis thaliana]                                                                                                                                                                                                                         | 910  | 923  | 0        | 101.4 | 77.7 | 85.8 | uncharacterized protein                                | gbpln | Arabidopsis thaliana | AT1G50730.1   Symbols:   unknown protein; Has 218 Blast hits to 209 proteins in 78 species: Archaea - 0; Bacteria - 0; Metazoa - 141; Fungi - 2; Plants - 33; Viruses - 0; Other Eukaryotes - 42 (source: NCBI BLink).   chr1:18795275-18802098 FORWARD LENGTH=923                                                                                                                                                                                                                                                                                                       | 910  | 923  | 0        | 101.4 | 77.7 | 85.8 |
| Rsa1.0_01009.1.g22434.t1 | gb AAD32898.1  putative retroelement pol polyprotein [Arabidopsis thaliana]                                                                                                                                                                                                                                                                                                    | 1295 | 1307 | 0        | 100.9 | 59.2 | 73.1 | putative retroelement pol polyprotein                  | gbpln | Arabidopsis thaliana | AT4G23160.1   Symbols: CRK8   cysteine-rich RLK (RECEPTOR-like protein kinase) 8   chr4:12129485-12134086 FORWARD LENGTH=1262                                                                                                                                                                                                                                                                                                                                                                                                                                            | 1295 | 1262 | 9.00E-94 | 97.5  | 14.5 | 22.5 |
| Rsa1.0_01009.1.g22435.t1 | gb EOA37383.1  hypothetical protein CARUB_v10011220mg [Capsella rubella]                                                                                                                                                                                                                                                                                                       | 149  | 154  | 3.00E-59 | 103.4 | 80.5 | 91.3 | hypothetical protein CARUB_v10011220mg                 | gbpln | Capsella rubella     | AT1G50720.1   Symbols:   Stigma-specific Stg1 family protein   chr1:18789180-18789644 REVERSE LENGTH=154                                                                                                                                                                                                                                                                                                                                                                                                                                                                 | 149  | 154  | 1.00E-58 | 103.4 | 77.9 | 86.6 |
| Rsa1.0_01010.1.g22436.t1 | ref NP_195451.1  cytochrome P450, family 81, subfamily D, polypeptide 3 [Arabidopsis thaliana]<br>gi 4006851 emb CAB16769.1  cytochrome P450-like protein [Arabidopsis thaliana]<br>gi 7270717 emb CAB80400.1  cytochrome P450-like protein [Arabidopsis thaliana]<br>gi 332661383 gb AE68783.1  cytochrome P450, family 81, subfamily D, polypeptide 3 [Arabidopsis thaliana] | 501  | 500  | 0        | 99.8  | 77.0 | 86.2 | cytochrome P450, family 81, subfamily D, polypeptide 3 | gbpln | Arabidopsis thaliana | AT4G37340.1   Symbols: CYP81D3   cytochrome P450, family 81, subfamily D, polypeptide 3   chr4:17564953-17566706 REVERSE LENGTH=500                                                                                                                                                                                                                                                                                                                                                                                                                                      | 501  | 500  | 0        | 99.8  | 77.0 | 86.2 |
| Rsa1.0_01010.1.g22437.t1 | ref XP_002866955.1  CYP81D4 [Arabidopsis lyrata subsp. lyrata]<br>gi 297312791 gb EFH43214.1  CYP81D4 [Arabidopsis lyrata subsp. lyrata]                                                                                                                                                                                                                                       | 492  | 492  | 0        | 100.0 | 79.7 | 89.8 | CYP81D4                                                | gbpln | Arabidopsis lyrata   | AT4G37330.1   Symbols: CYP81D4   cytochrome P450, family 81, subfamily D, polypeptide 4   chr4:17562547-17564569 REVERSE LENGTH=492                                                                                                                                                                                                                                                                                                                                                                                                                                      | 492  | 492  | 0        | 100.0 | 78.3 | 89.6 |
| Rsa1.0_01010.1.g22438.t1 | ref XP_002866957.1  CYP81H1 [Arabidopsis lyrata subsp. lyrata]<br>gi 297312793 gb EFH43216.1  CYP81H1 [Arabidopsis lyrata subsp. lyrata]                                                                                                                                                                                                                                       | 511  | 519  | 0        | 101.6 | 85.5 | 91.0 | CYP81H1                                                | gbpln | Arabidopsis lyrata   | AT4G37310.1   Symbols: CYP81H1   cytochrome P450, family 81, subfamily H, polypeptide 1   chr4:1756152-17558833 REVERSE LENGTH=518                                                                                                                                                                                                                                                                                                                                                                                                                                       | 511  | 518  | 0        | 101.4 | 83.8 | 89.8 |
| Rsa1.0_01010.1.g22439.t1 | ref XP_002868994.1  hypothetical protein ARALYDRAFT_912615 [Arabidopsis lyrata subsp. lyrata]<br>gi 297314830 gb EFH45253.1  hypothetical protein ARALYDRAFT_912615 [Arabidopsis lyrata subsp. lyrata]                                                                                                                                                                         | 152  | 173  | 5.00E-54 | 113.8 | 69.1 | 71.1 | hypothetical protein ARALYDRAFT_912615                 | gbpln | Arabidopsis lyrata   | AT4G37300.1   Symbols: MEE59   maternal effect embryo arrest 59   chr4:17554805-17555498 FORWARD LENGTH=173                                                                                                                                                                                                                                                                                                                                                                                                                                                              | 152  | 173  | 5.00E-56 | 113.8 | 69.7 | 75.0 |
| Rsa1.0_01010.1.g22440.t1 | gb EOA18685.1  hypothetical protein CARUB_v10007260mg [Capsella rubella]                                                                                                                                                                                                                                                                                                       | 86   | 86   | 7.00E-35 | 100.0 | 84.9 | 90.7 | hypothetical protein CARUB_v10007260mg                 | gbpln | Capsella rubella     | AT4G37295.1   Symbols:   unknown protein; FUNCTIONS IN: molecular_function unknown; INVOLVED IN: biological_process unknown; LOCATED IN: endomembrane system; EXPRESSED IN: stem, root, leaf; EXPRESSED DURING: LP.06 six leaves visible, LP.04 four leaves visible; Has 30201 Blast hits to 17322 proteins in 780 species: Archaea - 12; Bacteria - 1396; Metazoa - 17338; Fungi - 3422; Plants - 5037; Viruses - 0; Other Eukaryotes - 2996 (source: NCBI BLink).   chr4:17553828-17553888 FORWARD LENGTH=86                                                           | 86   | 86   | 2.00E-36 | 100.0 | 83.7 | 90.7 |
| Rsa1.0_01010.1.g22441.t1 | #                                                                                                                                                                                                                                                                                                                                                                              | #    | #    | #        | #     | #    | #    | -                                                      | ----  | ----                 | #                                                                                                                                                                                                                                                                                                                                                                                                                                                                                                                                                                        | #    | #    | #        | #     | #    | #    |
| Rsa1.0_01010.1.g22442.t1 | gb EOA18862.1  hypothetical protein CARUB_v10007485mg [Capsella rubella]                                                                                                                                                                                                                                                                                                       | 134  | 86   | 2.00E-22 | 64.2  | 41.8 | 47.0 | hypothetical protein CARUB_v10007485mg                 | gbpln | Capsella rubella     | AT4G37290.1   Symbols:   unknown protein; FUNCTIONS IN: molecular_function unknown; INVOLVED IN: response to karrikin; LOCATED IN: endomembrane system; EXPRESSED IN: cotyledon, hypocotyl, leaf; EXPRESSED DURING: LP.04 four leaves visible; BEST Arabidopsis thaliana protein match is: unknown protein (TAIR:AT2G23270.1); Has 30201 Blast hits to 17322 proteins in 780 species: Archaea - 12; Bacteria - 1396; Metazoa - 17338; Fungi - 3422; Plants - 5037; Viruses - 0; Other Eukaryotes - 2996 (source: NCBI BLink).   chr4:17548929-17550183 REVERSE LENGTH=84 | 134  | 84   | 2.00E-21 | 62.7  | 39.6 | 44.8 |

|                          |                                                                                                                                                                                                                                                                                                                                                                                                                                                                                                                            |      |      |           |       |      |      |                                                 |       |                      |                                                                                                                                                                                                                                                                                                                                                                                                                                                                                                                                 |      |      |           |       |      |      |
|--------------------------|----------------------------------------------------------------------------------------------------------------------------------------------------------------------------------------------------------------------------------------------------------------------------------------------------------------------------------------------------------------------------------------------------------------------------------------------------------------------------------------------------------------------------|------|------|-----------|-------|------|------|-------------------------------------------------|-------|----------------------|---------------------------------------------------------------------------------------------------------------------------------------------------------------------------------------------------------------------------------------------------------------------------------------------------------------------------------------------------------------------------------------------------------------------------------------------------------------------------------------------------------------------------------|------|------|-----------|-------|------|------|
| Rsa1.0_01010.1.g22443.t1 | refNP_568021.1  mortality factor 4-like protein 1 [Arabidopsis thaliana] gi 14335028 gb AAK59778.1  AT4g37280/C7A10.80 [Arabidopsis thaliana] gi 22655420 gb AAM98302.1  At4g37280/C7A10.80 [Arabidopsis thaliana] gi 332661376 gb AEE86776.1  MRG family protein [Arabidopsis thaliana]                                                                                                                                                                                                                                   | 317  | 320  | 1.00E-163 | 100.9 | 89.9 | 95.6 | mortality factor 4-like protein 1               | gbpln | Arabidopsis thaliana | AT4G37280.1   Symbols:   MRG family protein   chr4:17546748-17549362 REVERSE LENGTH=320                                                                                                                                                                                                                                                                                                                                                                                                                                         | 317  | 320  | 1.00E-166 | 100.9 | 89.9 | 95.6 |
| Rsa1.0_01010.1.g22444.t1 | gb AA434978.1  chloroplast heavy metal P-type ATPase precursor [Arabidopsis thaliana]                                                                                                                                                                                                                                                                                                                                                                                                                                      | 790  | 819  | 0         | 103.7 | 91.0 | 94.7 | chloroplast heavy metal P-type ATPase precursor | gbpln | Arabidopsis thaliana | AT4G37270.1   Symbols: HMA1, ATHMA1   heavy metal atpase 1   chr4:17541987-17546352 REVERSE LENGTH=819                                                                                                                                                                                                                                                                                                                                                                                                                          | 790  | 819  | 0         | 103.7 | 91.1 | 94.8 |
| Rsa1.0_01010.1.g22445.t1 | refNP_195443.1  myb domain protein 73 [Arabidopsis thaliana] gi 2464855 emb CAB16756.1  myb-related protein [Arabidopsis thaliana] gi 7270709 emb CAB80392.1  myb-related protein [Arabidopsis thaliana] gi 17380912 gb AAL36268.1  putative myb-related protein [Arabidopsis thaliana] gi 20258981 gb AAM14206.1  putative myb-related protein [Arabidopsis thaliana] gi 41619352 gb AAS10083.1  MYB transcription factor [Arabidopsis thaliana] gi 332661374 gb AEE86774.1  myb domain protein 73 [Arabidopsis thaliana] | 327  | 320  | 1.00E-149 | 97.9  | 87.5 | 89.9 | myb domain protein 73                           | gbpln | Arabidopsis thaliana | AT4G37280.1   Symbols: MYB73, ATMYB73   myb domain protein 73   chr4:17540602-17541564 FORWARD LENGTH=320                                                                                                                                                                                                                                                                                                                                                                                                                       | 327  | 320  | 1.00E-152 | 97.9  | 87.5 | 89.9 |
| Rsa1.0_01010.1.g22446.t1 | #                                                                                                                                                                                                                                                                                                                                                                                                                                                                                                                          | #    | #    | #         | #     | #    | #    | -                                               | ----  | ----                 | #                                                                                                                                                                                                                                                                                                                                                                                                                                                                                                                               | #    | #    | #         | #     | #    | #    |
| Rsa1.0_01010.1.g22447.t1 | emb CAB75932.1  putative protein [Arabidopsis thaliana]                                                                                                                                                                                                                                                                                                                                                                                                                                                                    | 1346 | 1339 | 0         | 99.5  | 54.3 | 71.2 | putative protein                                | gbpln | Arabidopsis thaliana | AT4G23160.1   Symbols: CRK8   cysteine-rich RLK (RECEPTOR-like protein kinase) 8   chr4:12129485-12134086 FORWARD LENGTH=1262                                                                                                                                                                                                                                                                                                                                                                                                   | 1346 | 1262 | 1.00E-100 | 93.8  | 13.8 | 22.9 |
| Rsa1.0_01010.1.g22448.t1 | gb AAL57701.1  AT4g37250/C7A10.110 [Arabidopsis thaliana] gi 25090184 gb AAN72248.1  At4g37250/C7A10.110 [Arabidopsis thaliana]                                                                                                                                                                                                                                                                                                                                                                                            | 845  | 768  | 0         | 90.9  | 74.4 | 80.4 | AT4g37250/C7A10.110                             | gbpln | Arabidopsis thaliana | AT4G37250.1   Symbols:   Leucine-rich repeat protein kinase family protein   chr4:17527789-17530191 REVERSE LENGTH=768                                                                                                                                                                                                                                                                                                                                                                                                          | 845  | 768  | 0         | 90.9  | 74.4 | 80.5 |
| Rsa1.0_01010.1.g22449.t1 | gb EOA16840.1  hypothetical protein CARUB_v10005061mg [Capsella rubella]                                                                                                                                                                                                                                                                                                                                                                                                                                                   | 375  | 376  | 0         | 100.3 | 81.3 | 88.5 | hypothetical protein CARUB_v10005061mg          | gbpln | Capsella rubella     | AT4G36880.1   Symbols: CP1   cysteine proteinase1   chr4:17374692-17376180 REVERSE LENGTH=376                                                                                                                                                                                                                                                                                                                                                                                                                                   | 375  | 376  | 0         | 100.3 | 84.0 | 89.6 |
| Rsa1.0_01011.1.g22450.t1 | refXP_002887403.1  hypothetical protein ARALYDRAFT_895043 [Arabidopsis lyrata subsp. lyrata] gi 297333244 gb EFH63662.1  hypothetical protein ARALYDRAFT_895043 [Arabidopsis lyrata subsp. lyrata]                                                                                                                                                                                                                                                                                                                         | 208  | 225  | 3.00E-67  | 108.2 | 73.1 | 82.7 | hypothetical protein ARALYDRAFT_895043          | gbpln | Arabidopsis lyrata   | AT1G71970.1   Symbols:   unknown protein; FUNCTIONS IN: molecular function unknown; INVOLVED IN: biological process unknown; LOCATED IN: chloroplast; EXPRESSED IN: 22 plant structures; EXPRESSED DURING: 13 growth stages; BEST Arabidopsis thaliana protein match is: unknown protein (TAIR:AT1G22680.1); Has 58 Blast hits to 58 proteins in 13 species: Archae - 0; Bacteria - 0; Metazoa - 4; Fungi - 0; Plants - 49; Viruses - 0; Other Eukaryotes - 5 (source: NCBI BLINK).   chr1:27093099-27093776 FORWARD LENGTH=225 | 208  | 225  | 1.00E-66  | 108.2 | 72.6 | 82.2 |
| Rsa1.0_01011.1.g22451.t1 | gb AAK62788.1 AC027036.9 polyprotein, putative [Arabidopsis thaliana] gi 18265373 dbj BAB84015.1  polyprotein [Arabidopsis thaliana]                                                                                                                                                                                                                                                                                                                                                                                       | 352  | 1466 | 1.00E-100 | 416.5 | 53.7 | 69.9 | polyprotein, putative                           | gbpln | Arabidopsis thaliana | #                                                                                                                                                                                                                                                                                                                                                                                                                                                                                                                               | #    | #    | #         | #     | #    | #    |
| Rsa1.0_01011.1.g22452.t1 | refXP_002888855.1  hypothetical protein ARALYDRAFT_476326 [Arabidopsis lyrata subsp. lyrata] gi 297334696 gb EFH65114.1  hypothetical protein ARALYDRAFT_476326 [Arabidopsis lyrata subsp. lyrata]                                                                                                                                                                                                                                                                                                                         | 661  | 661  | 0         | 100.0 | 86.7 | 91.8 | hypothetical protein ARALYDRAFT_476326          | gbpln | Arabidopsis lyrata   | AT1G71960.1   Symbols: ABCG25, ATABCG25   ATP-binding cassette family G25   chr1:27082587-27088163 REVERSE LENGTH=662                                                                                                                                                                                                                                                                                                                                                                                                           | 661  | 662  | 0         | 100.2 | 86.1 | 92.0 |
| Rsa1.0_01011.1.g22453.t1 | refXP_002888854.1  hypothetical protein ARALYDRAFT_316165 [Arabidopsis lyrata subsp. lyrata] gi 297334695 gb EFH65113.1  hypothetical protein ARALYDRAFT_316165 [Arabidopsis lyrata subsp. lyrata]                                                                                                                                                                                                                                                                                                                         | 178  | 134  | 2.00E-32  | 75.3  | 41.6 | 45.5 | hypothetical protein ARALYDRAFT_316165          | gbpln | Arabidopsis lyrata   | AT1G71950.1   Symbols:   Proteinase inhibitor, propeptide   chr1:27080453-27081573 REVERSE LENGTH=136                                                                                                                                                                                                                                                                                                                                                                                                                           | 178  | 136  | 1.00E-34  | 76.4  | 41.6 | 45.5 |
| Rsa1.0_01011.1.g22454.t1 | gb EOA35575.1  hypothetical protein CARUB_v10020785mg [Capsella rubella]                                                                                                                                                                                                                                                                                                                                                                                                                                                   | 272  | 272  | 1.00E-144 | 100.0 | 94.1 | 96.7 | hypothetical protein CARUB_v10020785mg          | gbpln | Capsella rubella     | AT1G71940.1   Symbols:   SNARE associated Golgi protein family   chr1:27078781-27079948 FORWARD LENGTH=272                                                                                                                                                                                                                                                                                                                                                                                                                      | 272  | 272  | 2.33E-156 | 100.0 | 93.8 | 96.7 |

|                          |                                                                                                                                                                                                                                                                                                                                                                                                                 |     |     |           |       |      |      |                                                     |       |                      |                                                                                                                                                                                                                                                                 |     |     |           |       |      |      |
|--------------------------|-----------------------------------------------------------------------------------------------------------------------------------------------------------------------------------------------------------------------------------------------------------------------------------------------------------------------------------------------------------------------------------------------------------------|-----|-----|-----------|-------|------|------|-----------------------------------------------------|-------|----------------------|-----------------------------------------------------------------------------------------------------------------------------------------------------------------------------------------------------------------------------------------------------------------|-----|-----|-----------|-------|------|------|
| Rsa1.0_01011.1.g22455.t1 | refNP_177338.1   vascular related NAC-domain protein 7 [Arabidopsis thaliana]<br>gi 12324533 gb AAG52219.1 AC021665_2 NAM-like protein; 48543-50167 [Arabidopsis thaliana]<br>gi 21553558 gb AAM62651.1  NAM-like protein [Arabidopsis thaliana]<br>gi 111074362 gb ABH04554.1 <br>At1g71930 [Arabidopsis thaliana]<br>gi 332197133 gb AEE35254.1  vascular related NAC-domain protein 7 [Arabidopsis thaliana] | 325 | 324 | 1.00E-177 | 99.7  | 93.2 | 94.8 | vascular related NAC-domain protein 7               | gbpln | Arabidopsis thaliana | AT1G71930.1   Symbols: VND7, ANAC030   vascular related NAC-domain protein 7   chr1:27076205-27077829 FORWARD<br>LENGTH=324                                                                                                                                     | 325 | 324 | 1.00E-180 | 99.7  | 93.2 | 94.8 |
| Rsa1.0_01011.1.g22456.t1 | #                                                                                                                                                                                                                                                                                                                                                                                                               | #   | #   | #         | #     | #    | #    | -                                                   | ----  | ----                 | #                                                                                                                                                                                                                                                               | #   | #   | #         | #     | #    |      |
| Rsa1.0_01011.1.g22457.t1 | refNP_177336.1   uncharacterized protein [Arabidopsis thaliana]<br>gi 12324544 gb AAG52230.1 AC021665_13 hypothetical protein; 37561-38082 [Arabidopsis thaliana]<br>gi 26449816 dbj BAC42031.1  unknown protein [Arabidopsis thaliana]<br>gi 28372892 gb AAO39928.1  At1g71910 [Arabidopsis thaliana]<br>gi 332197129 gb AEE35250.1  uncharacterized protein AT1G71910 [Arabidopsis thaliana]                  | 162 | 173 | 4.00E-45  | 106.8 | 72.2 | 82.7 | uncharacterized protein                             | gbpln | Arabidopsis thaliana | AT1G71910.1   Symbols:   unknown protein; Has 28 Blast hits to 28 proteins in 10 species: Archae - 0; Bacteria - 0; Metazoa - 0; Fungi - 0; Plants - 28; Viruses - 0; Other Eukaryotes - 0 (source: NCBI BLink).   chr1:27065223-27065744 FORWARD<br>LENGTH=173 | 162 | 173 | 2.00E-47  | 106.8 | 72.2 | 82.7 |
| Rsa1.0_01012.1.g22458.t1 | refXP_002868963.1   homeobox-leucine zipper protein 22 [Arabidopsis lyrata subsp. lyrata]<br>gi 297314799 gb EFH45222.1  homeobox-leucine zipper protein 22 [Arabidopsis lyrata subsp. lyrata]                                                                                                                                                                                                                  | 280 | 283 | 1.00E-116 | 101.1 | 86.8 | 90.7 | homeobox-leucine zipper protein 22                  | gbpln | Arabidopsis lyrata   | AT4G37790.1   Symbols: HAT22   Homeobox-leucine zipper protein family   chr4:17768241-17769272 FORWARD<br>LENGTH=278                                                                                                                                            | 280 | 278 | 1.00E-118 | 99.3  | 85.4 | 89.6 |
| Rsa1.0_01012.1.g22459.t1 | #                                                                                                                                                                                                                                                                                                                                                                                                               | #   | #   | #         | #     | #    | #    | -                                                   | ----  | ----                 | AT5G38920.1   Symbols:   Polynucleotidyl transferase, ribonuclease H-like superfamily protein   chr5:15581719-15582439 REVERSE<br>LENGTH=192                                                                                                                    | 237 | 192 | 1.00E-11  | 81.0  | 14.3 | 21.1 |
| Rsa1.0_01012.1.g22460.t1 | gb ACB86852.1  xyloglucan endotransglycosylase [Brassica rapa subsp. pekinensis]                                                                                                                                                                                                                                                                                                                                | 292 | 292 | 1.00E-167 | 100.0 | 95.9 | 98.3 | xyloglucan endotransglycosylase                     | gbpln | Brassica rapa        | AT4G37800.1   Symbols: XTH7   xyloglucan endotransglycosylase/hydrolase 7   chr4:1775703-1777732 REVERSE<br>LENGTH=293                                                                                                                                          | 292 | 293 | 1.00E-164 | 100.3 | 93.2 | 96.6 |
| Rsa1.0_01012.1.g22461.t1 | #                                                                                                                                                                                                                                                                                                                                                                                                               | #   | #   | #         | #     | #    | #    | -                                                   | ----  | ----                 | #                                                                                                                                                                                                                                                               | #   | #   | #         | #     | #    |      |
| Rsa1.0_01012.1.g22462.t1 | gb EOA32164.1  hypothetical protein CARUB_v10015420mg [Capsella rubella]                                                                                                                                                                                                                                                                                                                                        | 282 | 219 | 8.00E-48  | 77.7  | 35.1 | 45.4 | hypothetical protein CARUB_v10015420mg              | gbpln | Capsella rubella     | AT3G59120.1   Symbols:   Cysteine/Histidine-rich C1 domain family protein   chr3:21857876-21860221 REVERSE<br>LENGTH=602                                                                                                                                        | 282 | 602 | 2.00E-33  | 213.5 | 33.3 | 42.9 |
| Rsa1.0_01012.1.g22463.t1 | gb EOA16167.1  hypothetical protein CARUB_v10004303mg [Capsella rubella]                                                                                                                                                                                                                                                                                                                                        | 581 | 671 | 1.00E-166 | 115.5 | 48.2 | 49.1 | hypothetical protein CARUB_v10004303mg              | gbpln | Capsella rubella     | AT4G37870.1   Symbols: PCK1, PEPC   phosphoenolpyruvate carboxykinase 1   chr4:17802974-17806332 REVERSE<br>LENGTH=671                                                                                                                                          | 581 | 671 | 1.00E-167 | 115.5 | 47.8 | 48.9 |
| Rsa1.0_01012.1.g22464.t1 | refNP_567180.1   uncharacterized protein [Arabidopsis thaliana]<br>gi 17380736 gb AAL36198.1  unknown protein [Arabidopsis thaliana]<br>gi 20258925 gb AAM14178.1  unknown protein [Arabidopsis thaliana]<br>gi 26452418 dbj BAC43294.1  unknown protein [Arabidopsis thaliana]<br>gi 332656505 gb AEE81905.1  uncharacterized protein AT4G00585 [Arabidopsis thaliana]                                         | 86  | 88  | 3.00E-37  | 102.3 | 87.2 | 93.0 | uncharacterized protein                             | gbpln | Arabidopsis thaliana | AT4G00585.1   Symbols:   unknown protein; Has 47 Blast hits to 47 proteins in 22 species: Archae - 0; Bacteria - 0; Metazoa - 3; Fungi - 7; Plants - 33; Viruses - 0; Other Eukaryotes - 4 (source: NCBI BLink).   chr4:251157-252284 REVERSE<br>LENGTH=88      | 86  | 88  | 6.00E-40  | 102.3 | 87.2 | 93.0 |
| Rsa1.0_01012.1.g22465.t1 | refNP_849514.1   Zinc finger (C3HC4-type RING finger) family protein [Arabidopsis thaliana]<br>gi 332661450 gb AEE86850.1  Zinc finger (C3HC4-type RING finger) family protein [Arabidopsis thaliana]                                                                                                                                                                                                           | 691 | 711 | 0         | 102.9 | 79.7 | 87.8 | Zinc finger (C3HC4-type RING finger) family protein | gbpln | Arabidopsis thaliana | AT4G37890.2   Symbols: EDA40   Zinc finger (C3HC4-type RING finger) family protein   chr4:17812812-17815031 REVERSE<br>LENGTH=711                                                                                                                               | 691 | 711 | 0         | 102.9 | 79.7 | 87.8 |
| Rsa1.0_01012.1.g22466.t1 | refXP_002866925.1   glycine-rich protein [Arabidopsis lyrata subsp. lyrata]<br>gi 297312761 gb EFH43184.1  glycine-rich protein [Arabidopsis lyrata subsp. lyrata]                                                                                                                                                                                                                                              | 755 | 787 | 0         | 104.2 | 73.1 | 79.5 | glycine-rich protein                                | gbpln | Arabidopsis lyrata   | AT4G37900.1   Symbols:   Protein of unknown function (duplicated DUF139)   chr4:17821737-17824445 REVERSE<br>LENGTH=787                                                                                                                                         | 755 | 787 | 0         | 104.2 | 73.2 | 79.2 |
| Rsa1.0_01013.1.g22467.t1 | emb CAN74823.1  hypothetical protein VITISV_034594 [Vitis vinifera]                                                                                                                                                                                                                                                                                                                                             | 461 | 952 | 4.00E-74  | 206.5 | 41.2 | 56.0 | hypothetical protein VITISV_034594                  | gbpln | Vitis vinifera       | #                                                                                                                                                                                                                                                               | #   | #   | #         | #     | #    |      |

|                          |                                                                                                                                                                                                                                                                                                                                                                                                                                         |      |      |           |       |      |      |                                        |       |                      |                                                                                                                                                                                                                                                                                                                                                                                                                                                                                                                                                                                                  |      |      |           |       |      |      |
|--------------------------|-----------------------------------------------------------------------------------------------------------------------------------------------------------------------------------------------------------------------------------------------------------------------------------------------------------------------------------------------------------------------------------------------------------------------------------------|------|------|-----------|-------|------|------|----------------------------------------|-------|----------------------|--------------------------------------------------------------------------------------------------------------------------------------------------------------------------------------------------------------------------------------------------------------------------------------------------------------------------------------------------------------------------------------------------------------------------------------------------------------------------------------------------------------------------------------------------------------------------------------------------|------|------|-----------|-------|------|------|
| Rsa1.0_01013.1.g22468.t1 | gb ABD65035.1  hypothetical protein 26.t00052 [Brassica oleracea]                                                                                                                                                                                                                                                                                                                                                                       | 741  | 695  | 0         | 93.8  | 57.9 | 69.8 | hypothetical protein 26.t00052         | gbpln | Brassica oleracea    | AT1G51172.1   Symbols:   unknown protein; FUNCTIONS IN: molecular_function unknown; INVOLVED IN: biological_process unknown; LOCATED IN: cellular_component unknown; CONTAINS InterPro DOMAIN/s: Protein of unknown function DUF601 (InterPro:IPR006736); BEST Arabidopsis thaliana protein match is: Protein of unknown function, DUF601 (TAIR:AT1G46896.1); Has 1849 Blast hits to 1554 proteins in 272 species: Archaea - 15; Bacteria - 116; Metazoa - 677; Fungi - 267; Plants - 154; Viruses - 11; Other Eukaryotes - 609 (source: NCBI BLINK)   chr1:18963205-18965571 FORWARD LENGTH=681 | 741  | 681  | 1.00E-21  | 91.9  | 6.2  | 10.1 |
| Rsa1.0_01013.1.g22469.t1 | #                                                                                                                                                                                                                                                                                                                                                                                                                                       | #    | #    | #         | #     | #    | #    | -                                      | ----  | ----                 | #                                                                                                                                                                                                                                                                                                                                                                                                                                                                                                                                                                                                | #    | #    | #         | #     | #    |      |
| Rsa1.0_01013.1.g22470.t1 | ref NP_849772.2  triacylglycerol lipase-like 1 protein [Arabidopsis thaliana] gi 22135828 gb AAM91100.1  At1g45200 [Arabidopsis thaliana] gi 25090355 gb AAN72283.1  At1g45200/At1g45200 [Arabidopsis thaliana] gi 332193974 gb AEE32095.1  triacylglycerol lipase-like 1 protein [Arabidopsis thaliana]                                                                                                                                | 248  | 479  | 1.00E-122 | 193.1 | 83.5 | 91.1 | triacylglycerol lipase-like 1 protein  | gbpln | Arabidopsis thaliana | AT1G45201.1   Symbols: ATLL1, TLL1   triacylglycerol lipase-like 1   chr1:17123889-17128462 FORWARD LENGTH=479                                                                                                                                                                                                                                                                                                                                                                                                                                                                                   | 248  | 479  | 1.00E-124 | 193.1 | 83.5 | 91.1 |
| Rsa1.0_01013.1.g22471.t1 | #                                                                                                                                                                                                                                                                                                                                                                                                                                       | #    | #    | #         | #     | #    | #    | -                                      | ----  | ----                 | #                                                                                                                                                                                                                                                                                                                                                                                                                                                                                                                                                                                                | #    | #    | #         | #     | #    |      |
| Rsa1.0_01013.1.g22472.t1 | #                                                                                                                                                                                                                                                                                                                                                                                                                                       | #    | #    | #         | #     | #    | #    | -                                      | ----  | ----                 | #                                                                                                                                                                                                                                                                                                                                                                                                                                                                                                                                                                                                | #    | #    | #         | #     | #    |      |
| Rsa1.0_01013.1.g22473.t1 | ref XP_002891317.1  zinc finger family protein [Arabidopsis lyrata subsp. lyrata] gi 297337159 gb EFH67576.1  zinc finger family protein [Arabidopsis lyrata subsp. lyrata]                                                                                                                                                                                                                                                             | 600  | 648  | 0         | 108.0 | 67.0 | 76.7 | zinc finger family protein             | gbpln | Arabidopsis lyrata   | AT1G45180.1   Symbols:   RING/U-box superfamily protein   chr1:17099335-17101683 FORWARD LENGTH=645                                                                                                                                                                                                                                                                                                                                                                                                                                                                                              | 600  | 645  | 0         | 107.5 | 66.7 | 76.0 |
| Rsa1.0_01013.1.g22474.t1 | gb EOA28676.1  hypothetical protein CARUB_v10024900mg [Capsella rubella]                                                                                                                                                                                                                                                                                                                                                                | 920  | 901  | 6.00E-95  | 97.9  | 18.6 | 26.2 | hypothetical protein CARUB_v10024900mg | gbpln | Capsella rubella     | AT5G28780.1   Symbols:   PIF1 helicase   chr5:10812907-10814173 REVERSE LENGTH=337                                                                                                                                                                                                                                                                                                                                                                                                                                                                                                               | 920  | 337  | 2.00E-18  | 36.6  | 6.0  | 8.2  |
| Rsa1.0_01014.1.g22475.t1 | gb ACP30598.1  disease resistance protein [Brassica rapa subsp. pekinensis]                                                                                                                                                                                                                                                                                                                                                             | 1315 | 2301 | 0         | 175.0 | 34.5 | 43.0 | disease resistance protein             | gbpln | Brassica rapa        | AT4G23160.1   Symbols: CRK8   cysteine-rich RLK (RECEPTOR-like protein kinase) 8   chr4:12129485-12134086 FORWARD LENGTH=1262                                                                                                                                                                                                                                                                                                                                                                                                                                                                    | 1315 | 1262 | 1.00E-107 | 96.0  | 14.7 | 22.1 |
| Rsa1.0_01014.1.g22476.t1 | ref XP_002877792.1  hypothetical protein ARALYDRAFT.485473 [Arabidopsis lyrata subsp. lyrata] gi 297323630 gb EFH54051.1  hypothetical protein ARALYDRAFT.485473 [Arabidopsis lyrata subsp. lyrata]                                                                                                                                                                                                                                     | 196  | 186  | 1.00E-76  | 94.9  | 77.0 | 86.2 | hypothetical protein ARALYDRAFT.485473 | gbpln | Arabidopsis lyrata   | AT3G51220.1   Symbols:   Plant protein of unknown function (DUF827)   chr3:19021943-19022612 REVERSE LENGTH=186                                                                                                                                                                                                                                                                                                                                                                                                                                                                                  | 196  | 186  | 2.00E-78  | 94.9  | 76.5 | 85.7 |
| Rsa1.0_01014.1.g22477.t1 | ref NP_190687.2  60S ribosomal protein L8-2 [Arabidopsis thaliana] gi 332278222 sp Q4PSL7.3 RL82_ARAT H RecName: Full=60S ribosomal protein L8-2 gi 67633686 gb AAY78767.1  60S ribosomal protein L8 [Arabidopsis thaliana] gi 332645240 gb AEE78761.1  60S ribosomal protein L8-2 [Arabidopsis thaliana]                                                                                                                               | 177  | 260  | 2.00E-37  | 146.9 | 44.1 | 48.6 | 60S ribosomal protein L8-2             | gbpln | Arabidopsis thaliana | AT3G51190.1   Symbols:   Ribosomal protein L2 family   chr3:19016606-19017547 REVERSE LENGTH=260                                                                                                                                                                                                                                                                                                                                                                                                                                                                                                 | 177  | 260  | 7.00E-40  | 146.9 | 44.1 | 48.6 |
| Rsa1.0_01014.1.g22478.t1 | ref NP_190685.2  GDP-mannose 4,6 dehydratase 2 [Arabidopsis thaliana] gi 82654938 sp P93031.3 GMD2_ARATH RecName: Full=GDP-mannose 4,6 dehydratase 2; AltName: Full=GDP-mannose dehydratase 2; Short=GMD 2 gi 1764100 gb AAB51505.1  GDP-D-mannose-4,6-dehydratase [Arabidopsis thaliana] gi 106879167 gb ABF82613.1  At3g51160 [Arabidopsis thaliana] gi 332645237 gb AEE78758.1  GDP-mannose 4,6 dehydratase 2 [Arabidopsis thaliana] | 364  | 373  | 0         | 102.5 | 90.9 | 95.9 | GDP-mannose 4,6 dehydratase 2          | gbpln | Arabidopsis thaliana | AT3G51160.1   Symbols: MUR1, MUR1, GMD2   NAD(P)-binding Rossmann-fold superfamily protein   chr3:19007232-19008353 REVERSE LENGTH=373                                                                                                                                                                                                                                                                                                                                                                                                                                                           | 364  | 373  | 0         | 102.5 | 90.9 | 95.9 |
| Rsa1.0_01014.1.g22479.t4 | ref XP_002876072.1  hypothetical protein ARALYDRAFT.485468 [Arabidopsis lyrata subsp. lyrata] gi 297321910 gb EFH52331.1  hypothetical protein ARALYDRAFT.485468 [Arabidopsis lyrata subsp. lyrata]                                                                                                                                                                                                                                     | 194  | 280  | 7.00E-70  | 144.3 | 72.7 | 82.0 | hypothetical protein ARALYDRAFT.485468 | gbpln | Arabidopsis lyrata   | AT3G51140.1   Symbols:   Protein of unknown function (DUF3353)   chr3:18998182-18999437 FORWARD LENGTH=278                                                                                                                                                                                                                                                                                                                                                                                                                                                                                       | 194  | 278  | 5.00E-70  | 143.3 | 71.6 | 82.0 |

|                           |                                                                                                                                                                                                                                                                                                                                                                                                                                                                                                                                                                                                                                                                                                                                                                                         |      |      |           |       |      |      |                                              |       |                          |                                                                                                                                                                                                                                                                                                                                                              |      |      |           |       |      |      |
|---------------------------|-----------------------------------------------------------------------------------------------------------------------------------------------------------------------------------------------------------------------------------------------------------------------------------------------------------------------------------------------------------------------------------------------------------------------------------------------------------------------------------------------------------------------------------------------------------------------------------------------------------------------------------------------------------------------------------------------------------------------------------------------------------------------------------------|------|------|-----------|-------|------|------|----------------------------------------------|-------|--------------------------|--------------------------------------------------------------------------------------------------------------------------------------------------------------------------------------------------------------------------------------------------------------------------------------------------------------------------------------------------------------|------|------|-----------|-------|------|------|
| Rsa1.0_01014.1.g22480.t1  | gb AAK43485.1 AC084807.10 polyprotein, putative [Arabidopsis thaliana] gi 225898008 dbj BAH30336.1  hypothetical protein [Arabidopsis thaliana]                                                                                                                                                                                                                                                                                                                                                                                                                                                                                                                                                                                                                                         | 1411 | 1459 | 0         | 103.4 | 60.5 | 75.0 | polyprotein, putative                        | gbpln | Arabidopsis thaliana     | AT4G23160.1   Symbols: CRK8   cysteine-rich RLK (RECEPTOR-like protein kinase) 8   chr4:12129485-12134086 FORWARD LENGTH=1262                                                                                                                                                                                                                                | 1411 | 1262 | 1.00E-115 | 89.4  | 14.5 | 21.7 |
| Rsa1.0_01014.1.g22481.t26 | gb AAM63377.1  Putative UPF0183 protein [Arabidopsis thaliana]                                                                                                                                                                                                                                                                                                                                                                                                                                                                                                                                                                                                                                                                                                                          | 568  | 409  | 0         | 72.0  | 61.3 | 63.7 | Putative UPF0183 protein                     | gbpln | Arabidopsis thaliana     | AT3G51130.1   Symbols:   unknown protein; CONTAINS InterPro DOMAIN/s; Uncharacterised protein family UPF0183 (InterPro:IPR005373). Has 269 Blast hits to 265 proteins in 123 species: Archae - 0; Bacteria - 0; Metazoa - 131; Fungi - 82; Plants - 37; Viruses - 0; Other Eukaryotes - 19 (source: NCBI BLINK).   chr3:18994219-18997180 FORWARD LENGTH=410 | 568  | 410  | 0         | 72.2  | 61.1 | 63.6 |
| Rsa1.0_01014.1.g22482.t1  | ref XP_002877789.1  hypothetical protein ARALYDRAFT_906461 [Arabidopsis lyrata subsp. lyrata] gi 297323627 gb EFH54048.1  hypothetical protein ARALYDRAFT_906461 [Arabidopsis lyrata subsp. lyrata]                                                                                                                                                                                                                                                                                                                                                                                                                                                                                                                                                                                     | 1270 | 1292 | 0         | 101.7 | 81.3 | 87.5 | hypothetical protein ARALYDRAFT_906461       | gbpln | Arabidopsis lyrata       | AT3G51120.1   Symbols:   DNA binding; zinc ion binding; nucleic acid binding; nucleic acid binding   chr3:18986026-18991886 REVERSE LENGTH=1292                                                                                                                                                                                                              | 1270 | 1292 | 0         | 101.7 | 81.8 | 87.6 |
| Rsa1.0_01015.1.g22483.t1  | ref NP_567820.1  elongation factor Ts family protein [Arabidopsis thaliana] gi 4972052 emb CAB43920.1  putative protein [Arabidopsis thaliana] gi 7269804 emb CAB79664.1  putative protein [Arabidopsis thaliana] gi 15983773 gb AAL10483.1  AT4g29060/F19B15.90 [Arabidopsis thaliana] gi 332660180 gb AEE85580.1  elongation factor Ts family protein [Arabidopsis thaliana]                                                                                                                                                                                                                                                                                                                                                                                                          | 1500 | 953  | 0         | 63.5  | 55.2 | 58.2 | elongation factor Ts family protein          | gbpln | Arabidopsis thaliana     | AT4G29060.1   Symbols: emb2726   elongation factor Ts family protein   chr4:14317744-14321315 FORWARD LENGTH=953                                                                                                                                                                                                                                             | 1500 | 953  | 0         | 63.5  | 55.2 | 58.2 |
| Rsa1.0_01015.1.g22484.t1  | dbj BAJ33683.1  unnamed protein product [Thellungiella halophila]                                                                                                                                                                                                                                                                                                                                                                                                                                                                                                                                                                                                                                                                                                                       | 285  | 304  | 1.00E-129 | 106.7 | 88.1 | 89.8 | unnamed protein product                      | ----  | ----                     | AT4G29080.1   Symbols: PAP2, IAA27   phytochrome-associated protein 2   chr4:14323665-14325213 REVERSE LENGTH=305                                                                                                                                                                                                                                            | 285  | 305  | 1.00E-131 | 107.0 | 86.3 | 89.8 |
| Rsa1.0_01015.1.g22485.t1  | ref NP_194639.1  transcription factor bHLH68 [Arabidopsis thaliana] gi 75159400 sp Q853D1.2 BH068 ARAT H RecName: Full=Transcription factor bHLH68; AltName: Full=Basic helix-loop-helix protein 68; Short=AtbHLH68; Short=bHLH 68; AltName: Full=Transcription factor EN 60; AltName: Full=bHLH transcription factor bHLH068 gi 22711852 gb AAM10966.2 AF488634.1 putative bHLH transcription factor [Arabidopsis thaliana] gi 4972056 emb CAB43924.1  putative protein [Arabidopsis thaliana] gi 7269808 emb CAB79668.1  putative protein [Arabidopsis thaliana] gi 19698939 gb AAL91205.1  putative protein [Arabidopsis thaliana] gi 23197826 gb AAN15440.1  putative protein [Arabidopsis thaliana] gi 332660186 gb AEE85586.1  transcription factor bHLH68 [Arabidopsis thaliana] | 375  | 407  | 1.00E-156 | 108.5 | 86.1 | 90.1 | transcription factor bHLH68                  | gbpln | Arabidopsis thaliana     | AT4G29100.1   Symbols:   basic helix-loop-helix (bHLH) DNA-binding superfamily protein   chr4:14341140-14344575 FORWARD LENGTH=407                                                                                                                                                                                                                           | 375  | 407  | 1.00E-159 | 108.5 | 86.1 | 90.1 |
| Rsa1.0_01015.1.g22486.t1  | #                                                                                                                                                                                                                                                                                                                                                                                                                                                                                                                                                                                                                                                                                                                                                                                       | #    | #    | #         | #     | #    | #    | -                                            | ----  | ----                     | #                                                                                                                                                                                                                                                                                                                                                            | #    | #    | #         | #     | #    |      |
| Rsa1.0_01015.1.g22487.t1  | gb ABD65000.1  hypothetical protein 26.t00020 [Brassica oleracea]                                                                                                                                                                                                                                                                                                                                                                                                                                                                                                                                                                                                                                                                                                                       | 296  | 302  | 4.00E-65  | 102.0 | 48.3 | 64.9 | hypothetical protein 26.t00020               | gbpln | Brassica oleracea        | AT3G47680.1   Symbols:   DNA binding   chr3:17577483-17578391 REVERSE LENGTH=302                                                                                                                                                                                                                                                                             | 296  | 302  | 2.00E-52  | 102.0 | 41.2 | 58.8 |
| Rsa1.0_01015.1.g22488.t1  | ref WP_000519654.1  hypothetical protein, partial [Streptococcus agalactiae]                                                                                                                                                                                                                                                                                                                                                                                                                                                                                                                                                                                                                                                                                                            | 180  | 183  | 2.00E-41  | 101.7 | 51.1 | 61.1 | hypothetical protein, partial                | gbpct | Streptococcus agalactiae | #                                                                                                                                                                                                                                                                                                                                                            | #    | #    | #         | #     | #    |      |
| Rsa1.0_01016.1.g22489.t1  | ref XP_002886423.1  predicted protein [Arabidopsis lyrata subsp. lyrata] gi 297332264 gb EFH62682.1  predicted protein [Arabidopsis lyrata subsp. lyrata]                                                                                                                                                                                                                                                                                                                                                                                                                                                                                                                                                                                                                               | 79   | 326  | 2.00E-11  | 412.7 | 40.5 | 55.7 | predicted protein                            | gbpln | Arabidopsis lyrata       | AT1G63190.1   Symbols:   Cystatin/monellin superfamily protein   chr1:23431835-23433002 FORWARD LENGTH=225                                                                                                                                                                                                                                                   | 79   | 225  | 2.00E-13  | 284.8 | 44.3 | 62.0 |
| Rsa1.0_01016.1.g22490.t1  | gb AAG51783.1 AC079679.3 reverse transcriptase, putative; 16838-20266 [Arabidopsis thaliana]                                                                                                                                                                                                                                                                                                                                                                                                                                                                                                                                                                                                                                                                                            | 371  | 1142 | 4.00E-59  | 307.8 | 39.1 | 50.1 | reverse transcriptase, putative; 16838-20266 | gbpln | Arabidopsis thaliana     | AT4G29090.1   Symbols:   Ribonuclease H-like superfamily protein   chr4:14333528-14335255 FORWARD LENGTH=575                                                                                                                                                                                                                                                 | 371  | 575  | 2.00E-22  | 155.0 | 24.8 | 41.2 |
| Rsa1.0_01016.1.g22491.t1  | #                                                                                                                                                                                                                                                                                                                                                                                                                                                                                                                                                                                                                                                                                                                                                                                       | #    | #    | #         | #     | #    | #    | -                                            | ----  | ----                     | #                                                                                                                                                                                                                                                                                                                                                            | #    | #    | #         | #     | #    |      |

|                          |                                                                                                                                                                                                                                                                                                                                                                                                                                                                                                                                                                                                                                                                                                                                                           |     |      |           |       |      |      |                                                  |       |                      |                                                                                                                                                                  |     |     |           |       |      |      |
|--------------------------|-----------------------------------------------------------------------------------------------------------------------------------------------------------------------------------------------------------------------------------------------------------------------------------------------------------------------------------------------------------------------------------------------------------------------------------------------------------------------------------------------------------------------------------------------------------------------------------------------------------------------------------------------------------------------------------------------------------------------------------------------------------|-----|------|-----------|-------|------|------|--------------------------------------------------|-------|----------------------|------------------------------------------------------------------------------------------------------------------------------------------------------------------|-----|-----|-----------|-------|------|------|
| Rsa1.0_01016.1.g22492.t1 | ref[XP_002875233.1] hypothetical protein ARALYDRAFT_484297 [Arabidopsis lyrata subsp. lyrata] gi 297321071 gb EFH51492.1                                                                                                                                                                                                                                                                                                                                                                                                                                                                                                                                                                                                                                  | 201 | 189  | 2.00E-57  | 94.0  | 61.7 | 73.6 | hypothetical protein ARALYDRAFT_484297           | gbpln | Arabidopsis lyrata   | AT2G03850.1   Symbols:   Late embryogenesis abundant protein (LEA) family protein   chr2:1175653-1176597 FORWARD LENGTH=191                                      | 201 | 191 | 1.00E-57  | 95.0  | 60.7 | 73.1 |
| Rsa1.0_01016.1.g22493.t1 | emb[CAB39638.1] RNA-directed DNA polymerase-like protein [Arabidopsis thaliana] gi 2767666 emb[CAB78094.1] RNA-directed DNA polymerase-like protein [Arabidopsis thaliana]                                                                                                                                                                                                                                                                                                                                                                                                                                                                                                                                                                                | 970 | 1274 | 0         | 131.3 | 49.3 | 64.0 | RNA-directed DNA polymerase-like protein         | gbpln | Arabidopsis thaliana | AT4G20909.1   Symbols:   Ribonuclease H-like superfamily protein   chr4:14333528-14335255 FORWARD LENGTH=575                                                     | 970 | 575 | 1.00E-46  | 59.3  | 15.9 | 24.1 |
| Rsa1.0_01016.1.g22494.t2 | ref[XP_002876893.1] hypothetical protein ARALYDRAFT_904656 [Arabidopsis lyrata subsp. lyrata] gi 297322731 gb EFH53152.1                                                                                                                                                                                                                                                                                                                                                                                                                                                                                                                                                                                                                                  | 449 | 456  | 0         | 101.6 | 82.9 | 87.8 | hypothetical protein ARALYDRAFT_904656           | gbpln | Arabidopsis lyrata   | AT2G03730.2   Symbols: ACR5   ACT domain repeat 5   chr2:1137820-1139809 REVERSE LENGTH=456                                                                      | 449 | 456 | 0         | 101.6 | 82.4 | 87.1 |
| Rsa1.0_01016.1.g22495.t1 | ref[XP_002876892.1] hypothetical protein ARALYDRAFT_904655 [Arabidopsis lyrata subsp. lyrata] gi 297322730 gb EFH53151.1                                                                                                                                                                                                                                                                                                                                                                                                                                                                                                                                                                                                                                  | 69  | 74   | 2.00E-19  | 107.2 | 71.0 | 76.8 | hypothetical protein ARALYDRAFT_904655           | gbpln | Arabidopsis lyrata   | #                                                                                                                                                                | #   | #   | #         | #     | #    | #    |
| Rsa1.0_01016.1.g22496.t1 | ref[NP_178467.1] adenine nucleotide alpha hydrolases-like protein [Arabidopsis thaliana] gi 4406763 gb AAD20074.1  unknown protein [Arabidopsis thaliana] gi 385666668 gb AAR24224.1  At2g03720 [Arabidopsis thaliana] gi 56381933 gb AAV85685.1  At2g03720 [Arabidopsis thaliana] gi 330250647 gb AEC05741.1  adenine nucleotide alpha hydrolases-like protein [Arabidopsis thaliana]                                                                                                                                                                                                                                                                                                                                                                    | 224 | 165  | 9.00E-85  | 73.7  | 67.9 | 70.1 | adenine nucleotide alpha hydrolases-like protein | gbpln | Arabidopsis thaliana | AT2G03720.1   Symbols: MRH6   Adenine nucleotide alpha hydrolases-like superfamily protein   chr2:1132364-1133225 FORWARD LENGTH=165                             | 224 | 165 | 3.00E-87  | 73.7  | 67.9 | 70.1 |
| Rsa1.0_01016.1.g22497.t1 | emb[CAD48302.1] MADS-box protein AGL3-a [Brassica oleracea var. botrytis]                                                                                                                                                                                                                                                                                                                                                                                                                                                                                                                                                                                                                                                                                 | 256 | 256  | 1.00E-139 | 100.0 | 93.8 | 96.1 | MADS-box protein AGL3-a                          | gbpln | Brassica oleracea    | AT2G03710.2   Symbols: SEP4, AGL3   K-box region and MADS-box transcription factor family protein   chr2:1129622-1131628 FORWARD LENGTH=257                      | 256 | 257 | 1.00E-125 | 100.4 | 85.2 | 92.6 |
| Rsa1.0_01016.1.g22498.t1 | #                                                                                                                                                                                                                                                                                                                                                                                                                                                                                                                                                                                                                                                                                                                                                         | #   | #    | #         | #     | #    | -    | ----                                             | ----  | ----                 | #                                                                                                                                                                | #   | #   | #         | #     | #    | #    |
| Rsa1.0_01016.1.g22499.t1 | ref[XP_002876891.1] predicted protein [Arabidopsis lyrata subsp. lyrata] gi 297322729 gb EFH53150.1  predicted protein [Arabidopsis lyrata subsp. lyrata]                                                                                                                                                                                                                                                                                                                                                                                                                                                                                                                                                                                                 | 226 | 226  | 1.00E-125 | 100.0 | 94.7 | 97.8 | predicted protein                                | gbpln | Arabidopsis lyrata   | AT2G03690.1   Symbols:   coenzyme Q biosynthesis Coq4 family protein / ubiquinone biosynthesis Coq4 family protein   chr2:1122122-1123011 REVERSE LENGTH=226     | 226 | 226 | 1.00E-126 | 100.0 | 93.8 | 97.3 |
| Rsa1.0_01016.1.g22500.t1 | gb EOA23227.1  hypothetical protein CARUB_v10016858mg [Capsella rubella]                                                                                                                                                                                                                                                                                                                                                                                                                                                                                                                                                                                                                                                                                  | 605 | 610  | 0         | 100.8 | 86.3 | 90.9 | hypothetical protein CARUB_v10016858mg           | gbpln | Capsella rubella     | AT2G03667.1   Symbols:   Asparagine synthase family protein   chr2:1114179-1117281 FORWARD LENGTH=610                                                            | 605 | 610 | 0         | 100.8 | 84.3 | 90.2 |
| Rsa1.0_01016.1.g22501.t1 | gb EOA25476.1  hypothetical protein CARUB_v10018815mg [Capsella rubella]                                                                                                                                                                                                                                                                                                                                                                                                                                                                                                                                                                                                                                                                                  | 408 | 426  | 1.00E-125 | 104.4 | 64.0 | 75.0 | hypothetical protein CARUB_v10018815mg           | gbpln | Capsella rubella     | AT2G03640.2   Symbols:   Nuclear transport factor 2 (NTF2) family protein with RNA binding (RRM-RBD-RNP motifs) domain   chr2:1104525-1106418 REVERSE LENGTH=423 | 408 | 423 | 1.00E-126 | 103.7 | 61.8 | 75.5 |
| Rsa1.0_01016.1.g22502.t1 | ref[NP_178460.1] magnesium transporter MRS2-5 [Arabidopsis thaliana] gi 186499098 ref[NP_001118259.1] magnesium transporter MRS2-5 [Arabidopsis thaliana] gi 75274822 sp Q9ZPR4.1 MRS25_ARAT H RecName: Full=Magnesium transporter MRS2-5; AltName: Full=Magnesium Transporter 3; Short=AtMGT3 gi 20336657 gb AAM19344.1 AF499434.1 hypothetical protein [Arabidopsis thaliana] gi 4406759 gb AAD20070.1  hypothetical protein [Arabidopsis thaliana] gi 17979301 gb AAL49876.1  unknown protein [Arabidopsis thaliana] gi 20465991 gb AAM20217.1  unknown protein [Arabidopsis thaliana] gi 330250631 gb AEC05725.1  magnesium transporter MRS2-5 [Arabidopsis thaliana] gi 330250632 gb AEC05726.1  magnesium transporter MRS2-5 [Arabidopsis thaliana] | 421 | 421  | 0         | 100.0 | 93.1 | 96.2 | magnesium transporter MRS2-5                     | gbpln | Arabidopsis thaliana | AT2G03620.2   Symbols: MGT3, MRS2-5   magnesium transporter 3   chr2:1100489-1102168 REVERSE LENGTH=421                                                          | 421 | 421 | 0         | 100.0 | 93.1 | 96.2 |

|                          |                                                                                                                                                                                                                                                                                                                                 |      |      |           |       |      |      |                                                            |       |                      |                                                                                                                                  |      |     |           |       |      |      |
|--------------------------|---------------------------------------------------------------------------------------------------------------------------------------------------------------------------------------------------------------------------------------------------------------------------------------------------------------------------------|------|------|-----------|-------|------|------|------------------------------------------------------------|-------|----------------------|----------------------------------------------------------------------------------------------------------------------------------|------|-----|-----------|-------|------|------|
| Rsa1.0_01016.1.g22503.t1 | refXP_002886688.1  hypothetical protein ARALYDRAFT_893645 [Arabidopsis lyrata subsp. lyrata] gi 297322529 gb EFH62947.1  hypothetical protein ARALYDRAFT_893645 [Arabidopsis lyrata subsp. lyrata]                                                                                                                              | 161  | 364  | 3.00E-19  | 226.1 | 32.9 | 45.3 | hypothetical protein ARALYDRAFT_893645                     | gbpln | Arabidopsis lyrata   | AT4G39756.1   Symbols:   Galactose oxidase/kelch repeat superfamily protein   chr4:18441756-18442880 FORWARD LENGTH=374          | 161  | 374 | 1.00E-18  | 232.3 | 32.9 | 44.7 |
| Rsa1.0_01016.1.g22504.t1 | refXP_002876888.1  myb family transcription factor [Arabidopsis lyrata subsp. lyrata] gi 297322726 gb EFH53147.1  myb family transcription factor [Arabidopsis lyrata subsp. lyrata]                                                                                                                                            | 421  | 456  | 1.00E-144 | 108.3 | 71.7 | 82.2 | myb family transcription factor                            | gbpln | Arabidopsis lyrata   | AT2G03470.1   Symbols:   ELM2 domain-containing protein   chr2:1045694-1047130 REVERSE LENGTH=450                                | 421  | 450 | 1.00E-140 | 106.9 | 68.6 | 80.3 |
| Rsa1.0_01016.1.g22505.t1 | ref NP_178443.1  nodulin-related protein 1 [Arabidopsis thaliana] gi 4335755 gb AAD17432.1  unknown protein [Arabidopsis thaliana] gi 22531277 gb AAM97142.1  unknown protein [Arabidopsis thaliana] gi 330250606 gb AEC05700.1  nodulin-related protein 1 [Arabidopsis thaliana]                                               | 243  | 187  | 1.00E-62  | 77.0  | 60.5 | 65.0 | nodulin-related protein 1                                  | gbpln | Arabidopsis thaliana | AT2G03440.1   Symbols: NRP1, ATNRP1   nodulin-related protein 1   chr2:1039409-1039972 REVERSE LENGTH=187                        | 243  | 187 | 3.00E-65  | 77.0  | 60.5 | 65.0 |
| Rsa1.0_01016.1.g22506.t1 | refXP_002876881.1  hypothetical protein ARALYDRAFT_904615 [Arabidopsis lyrata subsp. lyrata] gi 297322719 gb EFH53140.1  hypothetical protein ARALYDRAFT_904615 [Arabidopsis lyrata subsp. lyrata]                                                                                                                              | 333  | 331  | 1.00E-168 | 99.4  | 86.8 | 92.5 | hypothetical protein ARALYDRAFT_904615                     | gbpln | Arabidopsis lyrata   | AT2G03390.1   Symbols:   uvrB/uvrC motif-containing protein   chr2:1030635-1032354 REVERSE LENGTH=330                            | 333  | 330 | 1.00E-169 | 99.1  | 87.4 | 92.5 |
| Rsa1.0_01016.1.g22507.t1 | refXP_002875201.1  predicted protein [Arabidopsis lyrata subsp. lyrata] gi 297814638 ref XP_002875202.1  predicted protein [Arabidopsis lyrata subsp. lyrata] gi 297321039 gb EFH51460.1  predicted protein [Arabidopsis lyrata subsp. lyrata] gi 297321040 gb EFH51461.1  predicted protein [Arabidopsis lyrata subsp. lyrata] | 689  | 708  | 0         | 102.8 | 79.0 | 85.8 | predicted protein                                          | gbpln | Arabidopsis lyrata   | AT2G03380.1   Symbols:   Pentatricopeptide repeat (PPR) superfamily protein   chr2:1028292-1030361 FORWARD LENGTH=689            | 689  | 689 | 0         | 100.0 | 79.0 | 86.8 |
| Rsa1.0_01016.1.g22508.t1 | ref NP_178435.2  Glycosyltransferase family 61 protein [Arabidopsis thaliana] gi 330250597 gb AEC05691.1  Glycosyltransferase family 61 protein [Arabidopsis thaliana]                                                                                                                                                          | 457  | 451  | 0         | 98.7  | 76.1 | 86.0 | Glycosyltransferase family 61 protein                      | gbpln | Arabidopsis thaliana | AT2G03360.1   Symbols:   Glycosyltransferase family 61 protein   chr2:1022287-1024273 REVERSE LENGTH=451                         | 457  | 451 | 0         | 98.7  | 76.1 | 86.0 |
| Rsa1.0_01016.1.g22509.t1 | refXP_002876879.1  hypothetical protein ARALYDRAFT_484243 [Arabidopsis lyrata subsp. lyrata] gi 297322717 gb EFH53138.1  hypothetical protein ARALYDRAFT_484243 [Arabidopsis lyrata subsp. lyrata]                                                                                                                              | 179  | 179  | 2.00E-94  | 100.0 | 95.5 | 98.9 | hypothetical protein ARALYDRAFT_484243                     | gbpln | Arabidopsis lyrata   | AT2G03350.1   Symbols:   Protein of unknown function, DUF538   chr2:1019733-1021071 REVERSE LENGTH=179                           | 179  | 179 | 1.00E-96  | 100.0 | 94.4 | 98.9 |
| Rsa1.0_01016.1.g22510.t1 | gb AC114395.1  WRKY3-1 transcription factor [Brassica napus]                                                                                                                                                                                                                                                                    | 473  | 489  | 0         | 103.4 | 89.6 | 94.7 | WRKY3-1 transcription factor                               | gbpln | Brassica napus       | AT2G03340.1   Symbols: WRKY3   WRKY DNA-binding protein 3   chr2:1014724-1016936 REVERSE LENGTH=513                              | 473  | 513 | 0         | 108.5 | 82.2 | 88.2 |
| Rsa1.0_01016.1.g22511.t1 | #                                                                                                                                                                                                                                                                                                                               | #    | #    | #         | #     | #    | #    | -                                                          | ----  | ----                 | #                                                                                                                                | #    | #   | #         | #     | #    |      |
| Rsa1.0_01017.1.g22512.t3 | gb ACP30609.1  disease resistance protein [Brassica rapa subsp. pekinensis]                                                                                                                                                                                                                                                     | 1331 | 2726 | 0         | 204.8 | 48.8 | 64.5 | disease resistance protein                                 | gbpln | Brassica rapa        | ATMG00860.1   Symbols: ORF158   DNA/RNA polymerases superfamily protein   chrM:235916-236392 FORWARD LENGTH=158                  | 1331 | 158 | 2.00E-28  | 11.9  | 4.4  | 5.8  |
| Rsa1.0_01017.1.g22513.t1 | gb EOA39983.1  hypothetical protein CARUB_v10008671mg [Capsella rubella]                                                                                                                                                                                                                                                        | 716  | 585  | 0         | 81.7  | 64.2 | 70.3 | hypothetical protein CARUB_v10008671mg                     | gbpln | Capsella rubella     | AT1G34160.1   Symbols:   Tetratricopeptide repeat (TPR)-like superfamily protein   chr1:12441393-12443225 FORWARD LENGTH=581     | 716  | 581 | 0         | 81.1  | 62.7 | 69.4 |
| Rsa1.0_01017.1.g22514.t1 | refXP_002891079.1  hypothetical protein ARALYDRAFT_473569 [Arabidopsis lyrata subsp. lyrata] gi 297336921 gb EFH67338.1  hypothetical protein ARALYDRAFT_473569 [Arabidopsis lyrata subsp. lyrata]                                                                                                                              | 432  | 443  | 0         | 102.5 | 85.9 | 91.0 | hypothetical protein ARALYDRAFT_473569                     | gbpln | Arabidopsis lyrata   | AT1G34150.1   Symbols:   Pseudouridine synthase family protein   chr1:12436086-12439237 FORWARD LENGTH=446                       | 432  | 446 | 0         | 103.2 | 84.3 | 89.1 |
| Rsa1.0_01017.1.g22515.t1 | ref NP_174578.1  F-box and associated interaction domain-containing protein [Arabidopsis thaliana] gi 378405165 sp Q9MAP1.2 FB33_ARAT H RecName: Full=Putative F-box protein At1g33020 gi 332193429 gb AEE31550.1  F-box and associated interaction domain-containing protein [Arabidopsis thaliana]                            | 598  | 548  | 8.00E-67  | 91.6  | 28.8 | 37.6 | F-box and associated interaction domain-containing protein | gbpln | Arabidopsis thaliana | AT1G33020.1   Symbols:   F-box and associated interaction domains-containing protein   chr1:11962746-11964832 FORWARD LENGTH=548 | 598  | 548 | 2.00E-69  | 91.6  | 28.8 | 37.6 |

|                          |                                                                                                                                                                                                                                                                                                                                                                                                                                                                                                                                                                                                                                                                                              |     |     |          |       |      |      |                                                 |       |                      |                                                                                                                                      |     |     |          |       |      |      |
|--------------------------|----------------------------------------------------------------------------------------------------------------------------------------------------------------------------------------------------------------------------------------------------------------------------------------------------------------------------------------------------------------------------------------------------------------------------------------------------------------------------------------------------------------------------------------------------------------------------------------------------------------------------------------------------------------------------------------------|-----|-----|----------|-------|------|------|-------------------------------------------------|-------|----------------------|--------------------------------------------------------------------------------------------------------------------------------------|-----|-----|----------|-------|------|------|
| Rsa1.0_01017.1.g22516.t1 | refXP_002891078.1  hypothetical protein ARALYDRAFT_891007 [Arabidopsis lyrata subsp. lyrata] gi 297336920 gb EFH67337.1                                                                                                                                                                                                                                                                                                                                                                                                                                                                                                                                                                      | 743 | 738 | 0        | 99.3  | 95.3 | 97.4 | hypothetical protein ARALYDRAFT_891007          | gbpln | Arabidopsis lyrata   | AT1G34130.1   Symbols: STT3B   staurosporin and temperature sensitive 3-like b   chr1:12430000-12432985 FORWARD LENGTH=735           | 743 | 735 | 0        | 98.9  | 94.2 | 97.0 |
| Rsa1.0_01017.1.g22517.t1 | hypothetical protein ARALYDRAFT_891007 [Arabidopsis lyrata subsp. lyrata] gb ABD65022.1  hypothetical protein 26.t00077 [Brassica oleracea]                                                                                                                                                                                                                                                                                                                                                                                                                                                                                                                                                  | 181 | 242 | 1.00E-36 | 133.7 | 53.6 | 65.7 | hypothetical protein 26.t00077                  | gbpln | Brassica oleracea    | #                                                                                                                                    | #   | #   | #        | #     | #    | #    |
| Rsa1.0_01018.1.g22518.t1 | gb EOA23933.1  hypothetical protein CARUB_v10017147mg [Capsella rubella]                                                                                                                                                                                                                                                                                                                                                                                                                                                                                                                                                                                                                     | 485 | 475 | 0        | 97.9  | 89.5 | 94.6 | hypothetical protein CARUB_v10017147mg          | gbpln | Capsella rubella     | AT3G61490.3   Symbols: Pectin lyase-like superfamily protein   chr3:22758439-22760137 FORWARD LENGTH=476                             | 485 | 476 | 0        | 98.1  | 88.9 | 94.2 |
| Rsa1.0_01018.1.g22519.t1 | gb EOA25497.1  hypothetical protein CARUB_v10018840mg, partial [Capsella rubella]                                                                                                                                                                                                                                                                                                                                                                                                                                                                                                                                                                                                            | 474 | 496 | 0        | 104.6 | 85.7 | 92.6 | hypothetical protein CARUB_v10018840mg, partial | gbpln | Capsella rubella     | AT3G61510.1   Symbols: ACS1, AT-ACS1   ACC synthase 1   chr3:22763495-22765730 REVERSE LENGTH=488                                    | 474 | 488 | 0        | 103.0 | 86.3 | 92.6 |
| Rsa1.0_01018.1.g22520.t1 | #                                                                                                                                                                                                                                                                                                                                                                                                                                                                                                                                                                                                                                                                                            | #   | #   | #        | #     | #    | #    | -                                               | ----  | ----                 | #                                                                                                                                    | #   | #   | #        | #     | #    | #    |
| Rsa1.0_01018.1.g22521.t1 | ref NP_191712.1  Phosphoenolpyruvate carboxylase family protein [Arabidopsis thaliana] gi 42572757 ref NP_974474.1  Phosphoenolpyruvate carboxylase family protein [Arabidopsis thaliana] gi 6850844 emb CAB71083.1  3-methyl-2-oxobutanoate hydroxy-methyl-transferase-like protein [Arabidopsis thaliana] gi 2159312 gb AAM65070.1  3-methyl-2-oxobutanoate hydroxy-methyl-transferase-like protein [Arabidopsis thaliana] gi 94442441 gb ABF19008.1  At3g61530 [Arabidopsis thaliana] gi 332646697 gb AEE80218.1  Phosphoenolpyruvate carboxylase family protein [Arabidopsis thaliana] gi 332646698 gb AEE80219.1  Phosphoenolpyruvate carboxylase family protein [Arabidopsis thaliana] | 355 | 354 | 0        | 99.7  | 89.9 | 94.4 | Phosphoenolpyruvate carboxylase family protein  | gbpln | Arabidopsis thaliana | AT3G61530.2   Symbols: PANB2   Phosphoenolpyruvate carboxylase family protein   chr3:22771692-22773313 REVERSE LENGTH=354            | 355 | 354 | 0        | 99.7  | 89.9 | 94.4 |
| Rsa1.0_01018.1.g22522.t1 | #                                                                                                                                                                                                                                                                                                                                                                                                                                                                                                                                                                                                                                                                                            | #   | #   | #        | #     | #    | #    | -                                               | ----  | ----                 | #                                                                                                                                    | #   | #   | #        | #     | #    | #    |
| Rsa1.0_01018.1.g22523.t1 | gb EOA24745.1  hypothetical protein CARUB_v10018022mg [Capsella rubella]                                                                                                                                                                                                                                                                                                                                                                                                                                                                                                                                                                                                                     | 214 | 211 | 1.00E-80 | 98.6  | 73.8 | 79.0 | hypothetical protein CARUB_v10018022mg          | gbpln | Capsella rubella     | AT3G61550.1   Symbols: RING/U-box superfamily protein   chr3:22776444-22777082 FORWARD LENGTH=212                                    | 214 | 212 | 1.00E-80 | 99.1  | 73.4 | 79.4 |
| Rsa1.0_01018.1.g22524.t1 | ref XP_002878389.1  hypothetical protein ARALYDRAFT_907697 [Arabidopsis lyrata subsp. lyrata] gi 297324227 gb EFH54648.1  hypothetical protein ARALYDRAFT_907697 [Arabidopsis lyrata subsp. lyrata]                                                                                                                                                                                                                                                                                                                                                                                                                                                                                          | 709 | 710 | 0        | 100.1 | 83.9 | 91.3 | hypothetical protein ARALYDRAFT_907697          | gbpln | Arabidopsis lyrata   | AT3G61570.1   Symbols: GC3, GDAP1   GRIP-related ARF-binding domain-containing protein 1   chr3:22779637-22783642 REVERSE LENGTH=712 | 709 | 712 | 0        | 100.4 | 82.9 | 91.1 |
| Rsa1.0_01018.1.g22525.t1 | gb AEW24954.1  delta8-sphingolipid desaturase [Brassica rapa]                                                                                                                                                                                                                                                                                                                                                                                                                                                                                                                                                                                                                                | 449 | 447 | 0        | 99.6  | 91.1 | 96.0 | delta8-sphingolipid desaturase                  | gbpln | Brassica rapa        | AT3G61580.1   Symbols: Fatty acid/sphingolipid desaturase   chr3:22786253-22787602 FORWARD LENGTH=449                                | 449 | 449 | 0        | 100.0 | 87.5 | 93.5 |
| Rsa1.0_01018.1.g22526.t1 | ref NP_191718.1  F-box/kelch-repeat protein [Arabidopsis thaliana] gi 334186190 ref NP_001190155.1  F-box/kelch-repeat protein [Arabidopsis thaliana] gi 75183486 sp Q9M310.1 FBK77_ARAT H RecName: Full=F-box/kelch-repeat protein At3g61590 gi 14423514 gb AAK62439.1 AF386994.1 putative protein [Arabidopsis thaliana] gi 6850850 emb CAB71089.1  putative protein [Arabidopsis thaliana] gi 23197692 gb AAN15373.1  putative protein [Arabidopsis thaliana] gi 332646706 gb AEE80227.1  F-box/kelch-repeat protein [Arabidopsis thaliana] gi 332646707 gb AEE80228.1  F-box/kelch-repeat protein [Arabidopsis thaliana]                                                                 | 405 | 411 | 0        | 101.5 | 82.7 | 92.1 | F-box/kelch-repeat protein                      | gbpln | Arabidopsis thaliana | AT3G61590.2   Symbols: HWS   Galactose oxidase/kelch repeat superfamily protein   chr3:22792914-22794149 FORWARD LENGTH=411          | 405 | 411 | 0        | 101.5 | 82.7 | 92.1 |
| Rsa1.0_01018.1.g22527.t1 | ref NP_850733.1  POZ/BTB containin G-protein 1 [Arabidopsis thaliana] gi 327488374 sp Q9FPW6.2 POB1_ARAT H RecName: Full=BTB/POZ domain-containing protein POB1; AltName: Full=POZ/BTB CONTAINING-PROTEIN 1; Short=AtPOB1 gi 332646708 gb AEE80229.1  POZ/BTB containin G-protein 1 [Arabidopsis thaliana]                                                                                                                                                                                                                                                                                                                                                                                   | 557 | 561 | 0        | 100.7 | 73.2 | 82.2 | POZ/BTB containin G-protein 1                   | gbpln | Arabidopsis thaliana | AT3G61600.1   Symbols: ATPOB1, POB1   POZ/BTB containin G-protein 1   chr3:22795704-22797953 FORWARD LENGTH=561                      | 557 | 561 | 0        | 100.7 | 73.2 | 82.2 |



|                          |                                                                                                                                                                                                                                                                                                                                                                                                                                                                                                                                                                                                                                   |      |      |           |       |      |      |                                                                     |       |                      |                                                                                                                                                                                                                                                                        |      |     |           |       |      |      |
|--------------------------|-----------------------------------------------------------------------------------------------------------------------------------------------------------------------------------------------------------------------------------------------------------------------------------------------------------------------------------------------------------------------------------------------------------------------------------------------------------------------------------------------------------------------------------------------------------------------------------------------------------------------------------|------|------|-----------|-------|------|------|---------------------------------------------------------------------|-------|----------------------|------------------------------------------------------------------------------------------------------------------------------------------------------------------------------------------------------------------------------------------------------------------------|------|-----|-----------|-------|------|------|
| Rsa1.0_01018.1.g22528.t1 | ref[XP_002876625.1] aldose 1-epimerase family protein [Arabidopsis lyrata subsp. lyrata] gi 297322463 gb EFH52884.1  aldose 1-epimerase family protein [Arabidopsis lyrata subsp. lyrata]                                                                                                                                                                                                                                                                                                                                                                                                                                         | 325  | 317  | 1.00E-165 | 97.5  | 84.9 | 90.5 | aldose 1-epimerase family protein                                   | gbpln | Arabidopsis lyrata   | AT3G61610.1   Symbols:   Galactose mutarotase-like superfamily protein   chr3:22799480-22801029 FORWARD LENGTH=317                                                                                                                                                     | 325  | 317 | 1.00E-168 | 97.5  | 84.6 | 90.2 |
| Rsa1.0_01018.1.g22529.t8 | dbj BAB09379.1  non-LTR retroelement reverse transcriptase-like protein [Arabidopsis thaliana]                                                                                                                                                                                                                                                                                                                                                                                                                                                                                                                                    | 1480 | 1223 | 0         | 82.6  | 39.2 | 52.8 | non-LTR retroelement reverse transcriptase-like protein             | gbpln | Arabidopsis thaliana | AT3G24255.1   Symbols:   RNA-directed DNA polymerase (reverse transcriptase)-related family protein   chr3:8789471-8793208 FORWARD LENGTH=746                                                                                                                          | 1480 | 746 | 1.00E-89  | 50.4  | 11.6 | 16.8 |
| Rsa1.0_01018.1.g22530.t1 | gb EOA24449.1  hypothetical protein CARUB_v10017705mg [Capsella rubella]                                                                                                                                                                                                                                                                                                                                                                                                                                                                                                                                                          | 284  | 306  | 2.00E-93  | 107.7 | 68.7 | 79.2 | hypothetical protein CARUB_v10017705mg                              | gbpln | Capsella rubella     | AT3G61630.1   Symbols: CRF6   cytokinin response factor 6   chr3:22805274-22806221 FORWARD LENGTH=315                                                                                                                                                                  | 284  | 315 | 2.00E-86  | 110.9 | 66.9 | 76.8 |
| Rsa1.0_01018.1.g22531.t1 | ref[NP_191724.1] tubulin gamma-1 chain [Arabidopsis thaliana] gi 297821024 ref[XP_002878395.1] gamma-tubulin [Arabidopsis lyrata subsp. lyrata] gi 586079 sp P38557.1 TBG1_ARATH RecName: Full=Tubulin gamma-1 chain; AltName: Full=Gamma-1-tubulin gi 460089 gb AA20653.1  g1-tubulin [Arabidopsis thaliana] gi 6850856 emb CAB71095.1  TUBULIN GAMMA-1 CHAIN [Arabidopsis thaliana] gi 297324233 gb EFH54654.1  gamma-tubulin [Arabidopsis lyrata subsp. lyrata] gi 332646715 gb AEE80236.1  tubulin gamma-1 chain [Arabidopsis thaliana] gi 482559746 gb EOA23937.1  hypothetical protein CARUB_v10017152mg [Capsella rubella] | 473  | 474  | 0         | 100.2 | 98.3 | 99.6 | tubulin gamma-1 chain                                               | gbpln | Arabidopsis lyrata   | AT3G61650.1   Symbols: TUBG1   gamma-tubulin   chr3:22812601-22815011 REVERSE LENGTH=474                                                                                                                                                                               | 473  | 474 | 0         | 100.2 | 98.3 | 99.6 |
| Rsa1.0_01019.1.g22532.t1 | dbj BAH30499.1  hypothetical protein [Arabidopsis thaliana]                                                                                                                                                                                                                                                                                                                                                                                                                                                                                                                                                                       | 308  | 363  | 1.00E-103 | 117.9 | 71.4 | 78.2 | hypothetical protein                                                | gbpln | Arabidopsis thaliana | AT3G62090.2   Symbols: PIL2, PIF6   phytochrome interacting factor 3-like 2   chr3:22989097-22990546 REVERSE LENGTH=363                                                                                                                                                | 308  | 363 | 1.00E-100 | 117.9 | 67.9 | 75.0 |
| Rsa1.0_01019.1.g22533.t1 | gb ACP30598.1  disease resistance protein [Brassica rapa subsp. pekinensis]                                                                                                                                                                                                                                                                                                                                                                                                                                                                                                                                                       | 1022 | 2301 | 0         | 225.1 | 35.1 | 44.6 | disease resistance protein                                          | gbpln | Brassica rapa        | AT3G61970.1   Symbols: NGA2   AP2/B3-like transcriptional factor family protein   chr3:22951829-22952728 FORWARD LENGTH=299                                                                                                                                            | 1022 | 299 | 1.00E-121 | 29.3  | 24.0 | 25.5 |
| Rsa1.0_01019.1.g22534.t1 | gb AAD24601.1  putative non-LTR retroelement reverse transcriptase [Arabidopsis thaliana]                                                                                                                                                                                                                                                                                                                                                                                                                                                                                                                                         | 186  | 1319 | 1.00E-16  | 709.1 | 33.9 | 46.8 | putative non-LTR retroelement reverse transcriptase                 | gbpln | Arabidopsis thaliana | #                                                                                                                                                                                                                                                                      | #    | #   | #         | #     | #    | #    |
| Rsa1.0_01019.1.g22535.t1 | ref[XP_002878423.1] kinase family protein [Arabidopsis lyrata subsp. lyrata] gi 297324261 gb EFH54682.1  kinase family protein [Arabidopsis lyrata subsp. lyrata]                                                                                                                                                                                                                                                                                                                                                                                                                                                                 | 636  | 626  | 0         | 98.4  | 81.3 | 86.2 | kinase family protein                                               | gbpln | Arabidopsis lyrata   | AT3G61960.1   Symbols:   Protein kinase superfamily protein   chr3:22941966-22944996 REVERSE LENGTH=626                                                                                                                                                                | 636  | 626 | 0         | 98.4  | 80.2 | 84.9 |
| Rsa1.0_01019.1.g22536.t2 | emb CAB39638.1  RNA-directed DNA polymerase-like protein [Arabidopsis thaliana] gi 7267666 emb CAB78094.1  RNA-directed DNA polymerase-like protein [Arabidopsis thaliana]                                                                                                                                                                                                                                                                                                                                                                                                                                                        | 2011 | 1274 | 0         | 63.4  | 29.3 | 40.5 | RNA-directed DNA polymerase-like protein                            | gbpln | Arabidopsis thaliana | AT4G29090.1   Symbols:   Ribonuclease H-like superfamily protein   chr4:14333528-14335255 FORWARD LENGTH=575                                                                                                                                                           | 2011 | 575 | 7.00E-59  | 28.6  | 8.0  | 13.4 |
| Rsa1.0_01020.1.g22537.t1 | gb ACG60686.1  En/Spm-related transposon protein [Brassica oleracea var. alboglabra]                                                                                                                                                                                                                                                                                                                                                                                                                                                                                                                                              | 448  | 695  | 1.00E-113 | 155.1 | 43.5 | 45.8 | En/Spm-related transposon protein                                   | gbpln | Brassica oleracea    | #                                                                                                                                                                                                                                                                      | #    | #   | #         | #     | #    | #    |
| Rsa1.0_01020.1.g22538.t1 | gb AAF79618.1 AC027665_19 F5M15.26 [Arabidopsis thaliana]                                                                                                                                                                                                                                                                                                                                                                                                                                                                                                                                                                         | 521  | 1838 | 1.00E-139 | 352.8 | 48.8 | 62.6 | F5M15.26                                                            | gbpln | Arabidopsis thaliana | #                                                                                                                                                                                                                                                                      | #    | #   | #         | #     | #    | #    |
| Rsa1.0_01020.1.g22539.t5 | dbj BAB09502.1  transposon protein-like [Arabidopsis thaliana]                                                                                                                                                                                                                                                                                                                                                                                                                                                                                                                                                                    | 641  | 1089 | 5.00E-46  | 169.9 | 17.8 | 24.8 | transposon protein-like                                             | gbpln | Arabidopsis thaliana | AT4G03740.1   Symbols:   unknown protein; Has 1807 Blast hits to 1807 proteins in 277 species: Archae - 0; Bacteria - 0; Metazoa - 736; Fungi - 347; Plants - 385; Viruses - 0; Other Eukaryotes - 339 (source: NCBI BLINK).   chr4:1661992-1663515 REVERSE LENGTH=345 | 641  | 345 | 9.00E-13  | 53.8  | 5.3  | 7.3  |
| Rsa1.0_01020.1.g22540.t1 | ref[NP_190532.2] 2-oxoglutarate-Fe(II)-dependent oxygenase domain-containing protein [Arabidopsis thaliana] gi 332645047 gb AE78568.1  2-oxoglutarate-Fe(II)-dependent oxygenase domain-containing protein [Arabidopsis thaliana]                                                                                                                                                                                                                                                                                                                                                                                                 | 333  | 332  | 1.00E-160 | 99.7  | 82.0 | 88.9 | 2-oxoglutarate-Fe(II)-dependent oxygenase domain-containing protein | gbpln | Arabidopsis thaliana | AT3G49630.1   Symbols:   2-oxoglutarate (2OG) and Fe(II)-dependent oxygenase superfamily protein   chr3:18397759-18400255 FORWARD LENGTH=332                                                                                                                           | 333  | 332 | 1.00E-163 | 99.7  | 82.0 | 88.9 |
| Rsa1.0_01020.1.g22541.t3 | #                                                                                                                                                                                                                                                                                                                                                                                                                                                                                                                                                                                                                                 | #    | #    | #         | #     | #    | #    | -                                                                   | ----  | ----                 | #                                                                                                                                                                                                                                                                      | #    | #   | #         | #     | #    | #    |
| Rsa1.0_01020.1.g22542.t1 | gb ABD65163.1  hypothetical protein 40.t00048 [Brassica oleracea]                                                                                                                                                                                                                                                                                                                                                                                                                                                                                                                                                                 | 263  | 569  | 8.00E-28  | 216.3 | 27.8 | 39.9 | hypothetical protein 40.t00048                                      | gbpln | Brassica oleracea    | #                                                                                                                                                                                                                                                                      | #    | #   | #         | #     | #    | #    |

|                          |                                                                                                                                                                                                                                                                                                                                                                                                                                                                                                                                                                                                                                                                                                                   |     |      |           |       |      |      |                                              |       |                      |                                                                                                                                      |     |      |           |       |      |      |
|--------------------------|-------------------------------------------------------------------------------------------------------------------------------------------------------------------------------------------------------------------------------------------------------------------------------------------------------------------------------------------------------------------------------------------------------------------------------------------------------------------------------------------------------------------------------------------------------------------------------------------------------------------------------------------------------------------------------------------------------------------|-----|------|-----------|-------|------|------|----------------------------------------------|-------|----------------------|--------------------------------------------------------------------------------------------------------------------------------------|-----|------|-----------|-------|------|------|
| Rsa1.0_01020.1.g22543.t1 | refXP_002875990.1   ATBCAT-3 [Arabidopsis lyrata subsp. lyrata] gi297321828 gb EFH52249.1   ATBCAT-3 [Arabidopsis lyrata subsp. lyrata]                                                                                                                                                                                                                                                                                                                                                                                                                                                                                                                                                                           | 430 | 418  | 0         | 97.2  | 77.4 | 87.9 | ATBCAT-3                                     | gbpln | Arabidopsis lyrata   | AT3G49680.1   Symbols: ATBCAT-3, BCAT3   branched-chain aminotransferase 3   chr3:18422768-18425473 FORWARD LENGTH=413               | 430 | 413  | 0         | 96.0  | 76.3 | 86.5 |
| Rsa1.0_01020.1.g22544.t1 | # # # # # # # # # #                                                                                                                                                                                                                                                                                                                                                                                                                                                                                                                                                                                                                                                                                               | #   | #    | #         | #     | #    | -    |                                              | ----  | ----                 | #                                                                                                                                    | #   | #    | #         | #     | #    | #    |
| Rsa1.0_01020.1.g22545.t1 | ref NP_190538.1  transcription factor RAX3 [Arabidopsis thaliana] gi75335856 sp Q9M2Y9.1 RAX3_ARATH RecName: Full=Transcription factor RAX3; AltName: Full=Myb-related protein 84; Short=AKMYB84; AltName: Full=Protein REGULATOR OF AXILLARY MERISTEMS 3 gi8723414 emb CAB66907.1   AtMYB84 [Arabidopsis thaliana] gi41619286 gb AAS10067.1   MYB transcription factor [Arabidopsis thaliana] gi116325910 gb ABJ98556.1   At3g49690 [Arabidopsis thaliana] gi332645056 gb AEE78577.1   transcription factor RAX3 [Arabidopsis thaliana]                                                                                                                                                                          | 288 | 310  | 1.00E-119 | 107.6 | 83.3 | 88.5 | transcription factor RAX3                    | gbpln | Arabidopsis thaliana | AT3G49690.1   Symbols: RAX3, MYB84, ATMYB84   myb domain protein 84   chr3:18427941-18429100 FORWARD LENGTH=310                      | 288 | 310  | 1.00E-121 | 107.6 | 83.3 | 88.5 |
| Rsa1.0_01021.1.g22546.t1 | ref NP_197290.1  TIR-NBS-LRR class disease resistance protein [Arabidopsis thaliana] gi332005098 gb AED92481.1   TIR-NBS-LRR class disease resistance protein [Arabidopsis thaliana]                                                                                                                                                                                                                                                                                                                                                                                                                                                                                                                              | 542 | 1197 | 0         | 220.8 | 66.4 | 77.9 | TIR-NBS-LRR class disease resistance protein | gbpln | Arabidopsis thaliana | AT5G17880.1   Symbols: CSA1   disease resistance protein (TIR-NBS-LRR class)   chr5:5908874-5913096 REVERSE LENGTH=1197              | 542 | 1197 | 0         | 220.8 | 66.4 | 77.9 |
| Rsa1.0_01021.1.g22547.t1 | ref NP_197290.1  TIR-NBS-LRR class disease resistance protein [Arabidopsis thaliana] gi332005098 gb AED92481.1   TIR-NBS-LRR class disease resistance protein [Arabidopsis thaliana]                                                                                                                                                                                                                                                                                                                                                                                                                                                                                                                              | 590 | 1197 | 0         | 202.9 | 77.5 | 87.6 | TIR-NBS-LRR class disease resistance protein | gbpln | Arabidopsis thaliana | AT5G17880.1   Symbols: CSA1   disease resistance protein (TIR-NBS-LRR class)   chr5:5908874-5913096 REVERSE LENGTH=1197              | 590 | 1197 | 0         | 202.9 | 77.5 | 87.6 |
| Rsa1.0_01021.1.g22548.t1 | ref NP_568358.1  plastid-specific 50S ribosomal protein 6 [Arabidopsis thaliana] gi75171293 sp Q9FKP0.1 PSRP6_ARATH RecName: Full=50S ribosomal protein 6, chloroplastic; AltName: Full=CL25; AltName: Full=Plastid-specific 50S ribosomal protein 6; Short=PSRP-6; Flags: Precursor gi10177888 db BAB11220.1   unnamed protein product [Arabidopsis thaliana] gi14517428 gb AAK62604.1   AT5g17870/MPI7_10 [Arabidopsis thaliana] gi20147339 gb AAM10383.1   AT5g17870/MPI7_10 [Arabidopsis thaliana] gi21554906 gb AAM63726.1   plastid-specific ribosomal protein 6 precursor (Psrp-6)-like [Arabidopsis thaliana] gi332005097 gb AED92480.1   plastid-specific 50S ribosomal protein 6 [Arabidopsis thaliana] | 106 | 106  | 3.00E-46  | 100.0 | 87.7 | 92.5 | plastid-specific 50S ribosomal protein 6     | gbpln | Arabidopsis thaliana | AT5G17870.1   Symbols: PSRP6   plastid-specific 50S ribosomal protein 6   chr5:5907817-5908137 FORWARD LENGTH=106                    | 106 | 106  | 4.00E-49  | 100.0 | 87.7 | 92.5 |
| Rsa1.0_01021.1.g22549.t1 | # # # # # # # # # #                                                                                                                                                                                                                                                                                                                                                                                                                                                                                                                                                                                                                                                                                               | #   | #    | #         | #     | #    | -    |                                              | ----  | ----                 | #                                                                                                                                    | #   | #    | #         | #     | #    | #    |
| Rsa1.0_01021.1.g22550.t1 | db BAJ34263.1  unnamed protein product [Thellungiella halophila]                                                                                                                                                                                                                                                                                                                                                                                                                                                                                                                                                                                                                                                  | 576 | 577  | 0         | 100.2 | 87.2 | 92.9 | unnamed protein product                      | ----  | ----                 | AT5G17860.1   Symbols: CAX7   calcium exchanger 7   chr5:5902638-5904350 REVERSE LENGTH=570                                          | 576 | 570  | 0         | 99.0  | 84.9 | 92.0 |
| Rsa1.0_01021.1.g22551.t1 | gb EOA18522.1  hypothetical protein CARUB_v10007075mg [Capsella rubella]                                                                                                                                                                                                                                                                                                                                                                                                                                                                                                                                                                                                                                          | 388 | 401  | 1.00E-118 | 103.4 | 58.2 | 70.6 | hypothetical protein CARUB_v10007075mg       | gbpln | Capsella rubella     | AT4G22180.1   Symbols:   F-box family protein with a domain of unknown function (DUF295)   chr4:11738574-11739782 FORWARD LENGTH=402 | 388 | 402  | 1.00E-108 | 103.6 | 54.6 | 69.3 |
| Rsa1.0_01021.1.g22552.t1 | gb EOA20308.1  hypothetical protein CARUB_v1000616mg [Capsella rubella]                                                                                                                                                                                                                                                                                                                                                                                                                                                                                                                                                                                                                                           | 553 | 554  | 0         | 100.2 | 85.4 | 91.0 | hypothetical protein CARUB_v1000616mg        | gbpln | Capsella rubella     | AT5G17850.1   Symbols:   Sodium/calcium exchanger family protein   chr5:5899253-5900932 FORWARD LENGTH=559                           | 553 | 559  | 0         | 101.1 | 85.4 | 91.0 |
| Rsa1.0_01021.1.g22553.t1 | # # # # # # # # # #                                                                                                                                                                                                                                                                                                                                                                                                                                                                                                                                                                                                                                                                                               | #   | #    | #         | #     | #    | -    |                                              | ----  | ----                 | #                                                                                                                                    | #   | #    | #         | #     | #    | #    |
| Rsa1.0_01022.1.g22554.t1 | gb EOA29011.1  hypothetical protein CARUB_v10025264mg [Capsella rubella]                                                                                                                                                                                                                                                                                                                                                                                                                                                                                                                                                                                                                                          | 348 | 623  | 1.00E-127 | 179.0 | 66.1 | 72.1 | hypothetical protein CARUB_v10025264mg       | gbpln | Capsella rubella     | AT2G30290.2   Symbols: VSR2, AtVSR2   VACUOLAR SORTING RECEPTOR 2   chr2:12912569-12915781 REVERSE LENGTH=641                        | 348 | 641  | 1.00E-129 | 184.2 | 66.1 | 71.6 |
| Rsa1.0_01022.1.g22555.t1 | ref XP_002865895.1  hypothetical protein ARALYDRAFT_918255 [Arabidopsis lyrata subsp. lyrata] gi297311730 gb EFH42154.1   hypothetical protein ARALYDRAFT_918255 [Arabidopsis lyrata subsp. lyrata]                                                                                                                                                                                                                                                                                                                                                                                                                                                                                                               | 200 | 204  | 6.00E-30  | 102.0 | 42.0 | 52.0 | hypothetical protein ARALYDRAFT_918255       | gbpln | Arabidopsis lyrata   | AT5G52140.1   Symbols:   RING/U-box superfamily protein   chr5:21184566-21186872 REVERSE LENGTH=280                                  | 200 | 280  | 4.00E-22  | 140.0 | 38.0 | 57.5 |

|                          |                                                                                                                                                                                                                                                                                                                                                                                                                                          |     |      |           |       |      |      |                                                               |       |                      |                                                                                                                                                |     |     |           |       |      |      |
|--------------------------|------------------------------------------------------------------------------------------------------------------------------------------------------------------------------------------------------------------------------------------------------------------------------------------------------------------------------------------------------------------------------------------------------------------------------------------|-----|------|-----------|-------|------|------|---------------------------------------------------------------|-------|----------------------|------------------------------------------------------------------------------------------------------------------------------------------------|-----|-----|-----------|-------|------|------|
| Rsa1.0_01022.1.g22556.t1 | gb EOA12587.1  hypothetical protein CARUB_v10027027mg [Capsella rubella]                                                                                                                                                                                                                                                                                                                                                                 | 233 | 240  | 1.00E-92  | 103.0 | 74.7 | 85.0 | hypothetical protein CARUB_v10027027mg                        | gbpln | Capsella rubella     | AT4G25570.1   Symbols: ACYB-2   Cytochrome b561/ferric reductase transmembrane protein family   chr4:13053887-13055518 REVERSE LENGTH=239      | 233 | 239 | 2.00E-89  | 102.6 | 68.7 | 81.5 |
| Rsa1.0_01022.1.g22557.t1 | sp Q9FJU2.2 FBD37_ARATH RecName: Full=Putative FBD-associated F-box protein At5g56700                                                                                                                                                                                                                                                                                                                                                    | 408 | 398  | 1.00E-104 | 97.5  | 57.1 | 69.6 | RecName: Full=Putative FBD-associated F-box protein At5g56700 | ----  | ----                 | AT5G60610.1   Symbols:   F-box/RNI-like superfamily protein   chr5:24364049-24365386 FORWARD LENGTH=388                                        | 408 | 388 | 1.00E-101 | 95.1  | 53.4 | 66.9 |
| Rsa1.0_01022.1.g22558.t1 | ref NP_200041.1  Myosin heavy chain-related protein [Arabidopsis thaliana] gi 10177394 dbj BAB10525.1  hyaluronan mediated motility receptor-like protein [Arabidopsis thaliana] gi 47550677 gb AAT35237.1  At5g52280 [Arabidopsis thaliana] gi 51970830 dbj BAD44107.1  hyaluronan mediated motility receptor-like protein [Arabidopsis thaliana] gi 332008812 gb AED96195.1  Myosin heavy chain-related protein [Arabidopsis thaliana] | 805 | 853  | 0         | 106.0 | 84.7 | 93.3 | Myosin heavy chain-related protein                            | gbpln | Arabidopsis thaliana | AT5G52280.1   Symbols:   Myosin heavy chain-related protein   chr5:21226959-21230109 FORWARD LENGTH=853                                        | 805 | 853 | 0         | 106.0 | 84.7 | 93.3 |
| Rsa1.0_01022.1.g22559.t1 | gb EOA14447.1  hypothetical protein CARUB_v10027650mg [Capsella rubella]                                                                                                                                                                                                                                                                                                                                                                 | 553 | 634  | 1.00E-163 | 114.6 | 72.2 | 82.6 | hypothetical protein CARUB_v10027650mg                        | gbpln | Capsella rubella     | AT5G52300.1   Symbols: RD29B, LTI65   CAP160 protein   chr5:21237205-21239404 FORWARD LENGTH=619                                               | 553 | 619 | 1.00E-158 | 111.9 | 68.7 | 80.5 |
| Rsa1.0_01022.1.g22560.t1 | gb AAR21079.1  stress responsive protein [Brassica oleracea var. viridis]                                                                                                                                                                                                                                                                                                                                                                | 608 | 617  | 0         | 101.5 | 77.8 | 81.6 | stress responsive protein                                     | gbpln | Brassica oleracea    | AT5G52300.1   Symbols: RD29B, LTI65   CAP160 protein   chr5:21237205-21239404 FORWARD LENGTH=619                                               | 608 | 619 | 2.00E-67  | 101.8 | 45.2 | 57.2 |
| Rsa1.0_01022.1.g22561.t2 | ref XP_002864165.1  predicted protein [Arabidopsis lyrata subsp. lyrata] gi 297311000 gb EFH40424.1  predicted protein [Arabidopsis lyrata subsp. lyrata]                                                                                                                                                                                                                                                                                | 613 | 631  | 0         | 102.9 | 95.6 | 98.5 | predicted protein                                             | gbpln | Arabidopsis lyrata   | AT5G52340.1   Symbols: ATEXO70A2, EXO70A2   exocyst subunit exo70 family protein A2   chr5:21250802-21253939 FORWARD LENGTH=631                | 613 | 631 | 0         | 102.9 | 95.3 | 98.2 |
| Rsa1.0_01022.1.g22562.t1 | ref XP_002865909.1  hypothetical protein ARALYDRAFT_495305 [Arabidopsis lyrata subsp. lyrata] gi 297311744 gb EFH42168.1  hypothetical protein ARALYDRAFT_495305 [Arabidopsis lyrata subsp. lyrata] gi 482550326 gb EOA14520.1  hypothetical protein CARUB_v10027750mg [Capsella rubella]                                                                                                                                                | 130 | 137  | 2.00E-69  | 105.4 | 98.5 | 98.5 | hypothetical protein ARALYDRAFT_495305                        | gbpln | Arabidopsis lyrata   | AT5G52360.1   Symbols: ADF10   actin depolymerizing factor 10   chr5:21258157-21259229 REVERSE LENGTH=137                                      | 130 | 137 | 8.00E-70  | 105.4 | 95.4 | 96.9 |
| Rsa1.0_01022.1.g22563.t1 | ref XP_002865911.1  hypothetical protein ARALYDRAFT_918281 [Arabidopsis lyrata subsp. lyrata] gi 297311746 gb EFH42170.1  hypothetical protein ARALYDRAFT_918281 [Arabidopsis lyrata subsp. lyrata]                                                                                                                                                                                                                                      | 210 | 192  | 1.00E-96  | 91.4  | 82.4 | 87.6 | hypothetical protein ARALYDRAFT_918281                        | gbpln | Arabidopsis lyrata   | AT5G52390.1   Symbols:   PARI protein   chr5:21264281-21265173 REVERSE LENGTH=195                                                              | 210 | 195 | 7.00E-97  | 92.9  | 79.0 | 86.2 |
| Rsa1.0_01022.1.g22564.t1 | emb CAB39638.1  RNA-directed DNA polymerase-like protein [Arabidopsis thaliana] gi 7267666 emb CAB78094.1  RNA-directed DNA polymerase-like protein [Arabidopsis thaliana]                                                                                                                                                                                                                                                               | 918 | 1274 | 0         | 138.8 | 51.9 | 67.8 | RNA-directed DNA polymerase-like protein                      | gbpln | Arabidopsis thaliana | AT4G29090.1   Symbols:   Ribonuclease H-like superfamily protein   chr4:14333528-14335255 FORWARD LENGTH=575                                   | 918 | 575 | 2.00E-78  | 62.6  | 20.6 | 30.1 |
| Rsa1.0_01023.1.g22565.t1 | ref XP_002873219.1  hypothetical protein ARALYDRAFT_908485 [Arabidopsis lyrata subsp. lyrata] gi 2973119056 gb EFH49478.1  hypothetical protein ARALYDRAFT_908485 [Arabidopsis lyrata subsp. lyrata]                                                                                                                                                                                                                                     | 480 | 472  | 0         | 98.3  | 92.1 | 94.4 | hypothetical protein ARALYDRAFT_908485                        | gbpln | Arabidopsis lyrata   | AT5G05690.1   Symbols: CPD, CYP90A, CYP90, CBB3, DWF3, CYP90A1   Cytochrome P450 superfamily protein   chr5:1702907-1706705 REVERSE LENGTH=472 | 480 | 472 | 0         | 98.3  | 92.3 | 94.6 |
| Rsa1.0_01023.1.g22566.t1 | ref XP_002871176.1  hypothetical protein ARALYDRAFT_487368 [Arabidopsis lyrata subsp. lyrata] gi 297317013 gb EFH47435.1  hypothetical protein ARALYDRAFT_487368 [Arabidopsis lyrata subsp. lyrata]                                                                                                                                                                                                                                      | 811 | 810  | 0         | 99.9  | 87.3 | 94.1 | hypothetical protein ARALYDRAFT_487368                        | gbpln | Arabidopsis lyrata   | AT5G05680.1   Symbols: MOS7   nuclear pore complex protein-related   chr5:1698365-1702475 FORWARD LENGTH=810                                   | 811 | 810 | 0         | 99.9  | 86.2 | 93.1 |
| Rsa1.0_01023.1.g22567.t1 | ref XP_002873217.1  signal recognition particle binding protein [Arabidopsis lyrata subsp. lyrata] gi 297319054 gb EFH49476.1  signal recognition particle binding protein [Arabidopsis lyrata subsp. lyrata]                                                                                                                                                                                                                            | 259 | 260  | 1.00E-133 | 100.4 | 91.9 | 95.4 | signal recognition particle binding protein                   | gbpln | Arabidopsis lyrata   | AT5G05670.1   Symbols:   signal recognition particle binding   chr5:1695916-1697534 REVERSE LENGTH=260                                         | 259 | 260 | 1.00E-134 | 100.4 | 90.3 | 95.4 |

|                           |                                                                                                                                                                                                                                                                                                                                                                                   |      |      |           |       |      |      |                                        |       |                      |                                                                                                                                                                                                                                                                                                                            |      |      |           |       |      |      |
|---------------------------|-----------------------------------------------------------------------------------------------------------------------------------------------------------------------------------------------------------------------------------------------------------------------------------------------------------------------------------------------------------------------------------|------|------|-----------|-------|------|------|----------------------------------------|-------|----------------------|----------------------------------------------------------------------------------------------------------------------------------------------------------------------------------------------------------------------------------------------------------------------------------------------------------------------------|------|------|-----------|-------|------|------|
| Rsa1.0_01023.1.g22568.t1  | ref XP_002873216.1  transcription factor [Arabidopsis lyrata subsp. lyrata] gi 297319053 gb EFH49473.1  transcription factor [Arabidopsis lyrata subsp. lyrata]                                                                                                                                                                                                                   | 887  | 880  | 0         | 99.2  | 87.1 | 92.6 | transcription factor                   | gbpln | Arabidopsis lyrata   | AT5G05660.1   Symbols: ATNFXL2   sequence-specific DNA binding transcription factors; zinc ion binding; sequence-specific DNA binding transcription factors   chr5:169113-1695464 REVERSE LENGTH=880                                                                                                                       | 887  | 880  | 0         | 99.2  | 87.7 | 93.5 |
| Rsa1.0_01023.1.g22569.t1  | ref XP_002871174.1  amino acid permease family protein [Arabidopsis lyrata subsp. lyrata] gi 297317011 gb EFH47433.1  amino acid permease family protein [Arabidopsis lyrata subsp. lyrata]                                                                                                                                                                                       | 491  | 488  | 0         | 99.4  | 79.8 | 90.0 | amino acid permease family protein     | gbpln | Arabidopsis lyrata   | AT5G05630.1   Symbols:   Amino acid permease family protein   chr5:1682541-1684013 FORWARD LENGTH=490                                                                                                                                                                                                                      | 491  | 490  | 0         | 99.8  | 78.6 | 89.6 |
| Rsa1.0_01023.1.g22570.t1  | # # # # # # # # # # # # # # # #                                                                                                                                                                                                                                                                                                                                                   |      |      |           |       |      |      |                                        |       |                      |                                                                                                                                                                                                                                                                                                                            |      |      |           |       |      |      |
| Rsa1.0_01023.1.g22571.t1  | ref XP_002873214.1  PHD finger family protein [Arabidopsis lyrata subsp. lyrata] gi 297319051 gb EFH49473.1  PHD finger family protein [Arabidopsis lyrata subsp. lyrata]                                                                                                                                                                                                         | 238  | 241  | 1.00E-106 | 101.3 | 88.2 | 93.7 | PHD finger family protein              | gbpln | Arabidopsis lyrata   | AT5G05610.2   Symbols: AL1   affin-like 1   chr5:1677331-1678942 REVERSE LENGTH=241                                                                                                                                                                                                                                        | 238  | 241  | 1.00E-109 | 101.3 | 88.2 | 93.7 |
| Rsa1.0_01023.1.g22572.t1  | ref NP_001190229.1  syntaxin binding protein 5 (tomosyn) [Arabidopsis thaliana] gi 332003508 gb AED90891.1  transducin family protein / WD-40 repeat family protein [Arabidopsis thaliana]                                                                                                                                                                                        | 1085 | 1099 | 0         | 101.3 | 86.7 | 92.4 | syntaxin binding protein 5 (tomosyn)   | gbpln | Arabidopsis thaliana | AT5G05570.2   Symbols:   transducin family protein / WD-40 repeat family protein   chr5:1656766-1663728 FORWARD LENGTH=1099                                                                                                                                                                                                | 1085 | 1099 | 0         | 101.3 | 86.7 | 92.4 |
| Rsa1.0_01023.1.g22573.t1  | emb CAN83990.1  hypothetical protein VITISV_018454 [Vitis vinifera]                                                                                                                                                                                                                                                                                                               | 388  | 1243 | 2.00E-50  | 320.4 | 33.5 | 50.8 | hypothetical protein VITISV_018454     | gbpln | Vitis vinifera       | AT1G21280.1   Symbols:   CONTAINS InterPro DOMAIN/s: Retrotransposon gag protein (InterPro:IPR005162); Has 707 Blast hits to 705 proteins in 25 species: Archae - 0; Bacteria - 0; Metazoa - 4; Fungi - 0; Plants - 703; Viruses - 0; Other Eukaryotes - 0 (source: NOBI BLink).   chr1:7447690-7448403 REVERSE LENGTH=237 | 388  | 237  | 2.00E-11  | 61.1  | 8.8  | 13.9 |
| Rsa1.0_01023.1.g22574.t1  | gb EOA21447.1  hypothetical protein CARUB_v10001830mg [Capsella rubella]                                                                                                                                                                                                                                                                                                          | 251  | 243  | 2.00E-74  | 96.8  | 65.3 | 75.7 | hypothetical protein CARUB_v10001830mg | gbpln | Capsella rubella     | AT5G05550.1   Symbols:   sequence-specific DNA binding transcription factors   chr5:1639344-1640550 REVERSE LENGTH=246                                                                                                                                                                                                     | 251  | 246  | 2.00E-76  | 98.0  | 64.1 | 75.3 |
| Rsa1.0_01023.1.g22575.t1  | ref NP_568157.1  outer membrane OMP85 family protein [Arabidopsis thaliana] gi 10178129 dbj BAB11541.1  unnamed protein product [Arabidopsis thaliana] gi 16648863 gb AAL24283.1  Unknown protein [Arabidopsis thaliana] gi 20259796 gb AAM13245.1  unknown protein [Arabidopsis thaliana] gi 332003500 gb AED90883.1  outer membrane OMP85 family protein [Arabidopsis thaliana] | 557  | 524  | 0         | 94.1  | 74.7 | 83.8 | outer membrane OMP85 family protein    | gbpln | Arabidopsis thaliana | AT5G05520.1   Symbols:   Outer membrane OMP85 family protein   chr5:1632912-1635104 FORWARD LENGTH=524                                                                                                                                                                                                                     | 557  | 524  | 0         | 94.1  | 74.7 | 83.8 |
| Rsa1.0_01023.1.g22576.t1  | ref NP_196170.1  Mad3/BUB1 homology region 1 [Arabidopsis thaliana] gi 10178128 dbj BAB11540.1  unnamed protein product [Arabidopsis thaliana] gi 50253522 gb AAT71963.1  At5g05510 [Arabidopsis thaliana] gi 56381969 gb AAV85703.1  At5g05510 [Arabidopsis thaliana] gi 332003499 gb AED90882.1  Mad3/BUB1 homology region 1 [Arabidopsis thaliana]                             | 467  | 471  | 0         | 100.9 | 85.0 | 90.8 | Mad3/BUB1 homology region 1            | gbpln | Arabidopsis thaliana | AT5G05510.1   Symbols:   Mad3/BUB1 homology region 1   chr5:1630651-1632568 REVERSE LENGTH=471                                                                                                                                                                                                                             | 467  | 471  | 0         | 100.9 | 85.0 | 90.8 |
| Rsa1.0_01023.1.g22577.t1  | gb EOA22611.1  hypothetical protein CARUB_v10003279mg [Capsella rubella]                                                                                                                                                                                                                                                                                                          | 182  | 183  | 5.00E-91  | 100.5 | 90.7 | 95.1 | hypothetical protein CARUB_v10003279mg | gbpln | Capsella rubella     | AT5G05500.1   Symbols:   Pollen Ole e 1 allergen and extensin family protein   chr5:1629716-1630267 FORWARD LENGTH=183                                                                                                                                                                                                     | 182  | 183  | 6.00E-88  | 100.5 | 88.5 | 92.9 |
| Rsa1.0_01023.1.g22578.t10 | ref XP_002871163.1  DIF1/SYN1 [Arabidopsis lyrata subsp. lyrata] gi 297317000 gb EFH47422.1  DIF1/SYN1 [Arabidopsis lyrata subsp. lyrata]                                                                                                                                                                                                                                         | 693  | 619  | 0         | 89.3  | 70.6 | 76.5 | DIF1/SYN1                              | gbpln | Arabidopsis lyrata   | AT5G05490.2   Symbols: SYN1, DIF1   Rad21/Rec8-like family protein   chr5:1624712-1629144 FORWARD LENGTH=617                                                                                                                                                                                                               | 693  | 617  | 0         | 89.0  | 69.7 | 75.6 |
| Rsa1.0_01024.1.g22579.t1  | ref NP_001190461.1  COP1-interacting protein-like protein [Arabidopsis thaliana] gi 332007561 gb AED94944.1  COP1-interacting protein-like protein [Arabidopsis thaliana]                                                                                                                                                                                                         | 1179 | 1180 | 0         | 100.1 | 75.4 | 84.4 | COP1-interacting protein-like protein  | gbpln | Arabidopsis thaliana | AT5G43310.2   Symbols:   COP1-interacting protein-related   chr5:17379735-17385387 REVERSE LENGTH=1180                                                                                                                                                                                                                     | 1179 | 1180 | 0         | 100.1 | 75.4 | 84.4 |
| Rsa1.0_01024.1.g22580.t1  | dbj BAJ33598.1  unnamed protein product [Thellungiella halophila]                                                                                                                                                                                                                                                                                                                 | 222  | 604  | 2.00E-24  | 272.1 | 35.1 | 36.0 | unnamed protein product                | ----- | -----                | AT1G16720.1   Symbols: HCF173   high chlorophyll fluorescence phenotype 173   chr1:5723161-5726248 FORWARD LENGTH=598                                                                                                                                                                                                      | 222  | 598  | 4.00E-26  | 269.4 | 32.0 | 32.9 |

|                          |                                                                                                                                                                                                                                                                                                                                                                                                                                                                 |      |      |          |       |      |      |                                                |       |                      |                                                                                                                                                                                                                                                                                                                                                                                      |      |      |           |       |      |      |
|--------------------------|-----------------------------------------------------------------------------------------------------------------------------------------------------------------------------------------------------------------------------------------------------------------------------------------------------------------------------------------------------------------------------------------------------------------------------------------------------------------|------|------|----------|-------|------|------|------------------------------------------------|-------|----------------------|--------------------------------------------------------------------------------------------------------------------------------------------------------------------------------------------------------------------------------------------------------------------------------------------------------------------------------------------------------------------------------------|------|------|-----------|-------|------|------|
| Rsa1.0_01024.1.g22581.t1 | ref[NP_199146.1] casein kinase I-like 8 [Arabidopsis thaliana]<br>gi 13430690 gb AAK25967.1 AF360257.1 putative casein kinase I [Arabidopsis thaliana] gi 8843885 dbj BAA9741.1.1  casein kinase I [Arabidopsis thaliana] gi 14532894 gb AAK64129.1  putative casein kinase I [Arabidopsis thaliana] gi 62997000 gb AAY24544.1  casein kinase 1-like protein 8 [Arabidopsis thaliana] gi 332007562 gb AED94945.1  casein kinase I-like 8 [Arabidopsis thaliana] | 472  | 480  | 0        | 101.7 | 94.3 | 96.8 | casein kinase I-like 8                         | gbpln | Arabidopsis thaliana | AT5G43320.1   Symbols: ckl8   casein kinase I-like 8   chr5:17386043-17388941 REVERSE LENGTH=480                                                                                                                                                                                                                                                                                     | 472  | 480  | 0         | 101.7 | 94.3 | 96.8 |
| Rsa1.0_01024.1.g22582.t1 | emb CAN71038.1  hypothetical protein VITISV_011062 [Vitis vinifera]                                                                                                                                                                                                                                                                                                                                                                                             | 209  | 646  | 2.00E-31 | 309.1 | 37.8 | 50.2 | hypothetical protein VITISV_011062             | gbpln | Vitis vinifera       | #                                                                                                                                                                                                                                                                                                                                                                                    | #    | #    | #         | #     | #    | #    |
| Rsa1.0_01024.1.g22583.t1 | gb EOA19533.1  hypothetical protein CARUB_v10002484mg [Capsella rubella]                                                                                                                                                                                                                                                                                                                                                                                        | 518  | 518  | 0        | 100.0 | 80.7 | 89.6 | hypothetical protein CARUB_v10002484mg         | gbpln | Capsella rubella     | AT5G43340.1   Symbols: PHT6, PHT1.6   phosphate transporter 1:6   chr5:17393598-17395148 REVERSE LENGTH=516                                                                                                                                                                                                                                                                          | 518  | 516  | 0         | 99.6  | 81.1 | 89.4 |
| Rsa1.0_01024.1.g22584.t1 | gb EOA14581.1  hypothetical protein CARUB_v10027822mg [Capsella rubella]                                                                                                                                                                                                                                                                                                                                                                                        | 521  | 524  | 0        | 100.6 | 94.6 | 97.3 | hypothetical protein CARUB_v10027822mg         | gbpln | Capsella rubella     | AT5G43360.1   Symbols: PHT3, ATPT4, PHT1.3   phosphate transporter 1:3   chr5:17409524-17411214 FORWARD LENGTH=521                                                                                                                                                                                                                                                                   | 521  | 521  | 0         | 100.0 | 94.2 | 96.7 |
| Rsa1.0_01024.1.g22585.t1 | gb EOA14581.1  hypothetical protein CARUB_v10027822mg [Capsella rubella]                                                                                                                                                                                                                                                                                                                                                                                        | 454  | 524  | 0        | 115.4 | 88.1 | 91.9 | hypothetical protein CARUB_v10027822mg         | gbpln | Capsella rubella     | AT5G43360.1   Symbols: PHT3, ATPT4, PHT1.3   phosphate transporter 1:3   chr5:17409524-17411214 FORWARD LENGTH=521                                                                                                                                                                                                                                                                   | 454  | 521  | 0         | 114.8 | 86.8 | 91.0 |
| Rsa1.0_01024.1.g22586.t5 | #                                                                                                                                                                                                                                                                                                                                                                                                                                                               | #    | #    | #        | #     | #    | #    | -                                              | ----  | ----                 | #                                                                                                                                                                                                                                                                                                                                                                                    | #    | #    | #         | #     | #    | #    |
| Rsa1.0_01025.1.g22587.t1 | ref[NP_200559.1] uncharacterized protein [Arabidopsis thaliana] gi 9758312 dbj BAB08786.1  unnamed protein product [Arabidopsis thaliana] gi 91805711 gb ABE65584.1  hypothetical protein At5g57510 [Arabidopsis thaliana] gi 332009526 gb AED96909.1  uncharacterized protein AT5G57510 [Arabidopsis thaliana]                                                                                                                                                 | 94   | 130  | 8.00E-30 | 138.3 | 81.9 | 84.0 | uncharacterized protein                        | gbpln | Arabidopsis thaliana | AT5G57510.1   Symbols:   unknown protein; Has 27 Blast hits to 27 proteins in 9 species: Archae - 0; Bacteria - 0; Metazoa - 0; Fungi - 0; Plants - 27; Viruses - 0; Other Eukaryotes - 0 (source: NCBI BLINK).   chr5:23289164-23289556 REVERSE LENGTH=130                                                                                                                          | 94   | 130  | 1.00E-32  | 138.3 | 81.9 | 84.0 |
| Rsa1.0_01025.1.g22588.t1 | gb EOA14827.1  hypothetical protein CARUB_v10028137mg [Capsella rubella]                                                                                                                                                                                                                                                                                                                                                                                        | 173  | 172  | 3.00E-62 | 99.4  | 79.8 | 87.9 | hypothetical protein CARUB_v10028137mg         | gbpln | Capsella rubella     | AT5G57420.1   Symbols: IAA33   indole-3-acetic acid inducible 33   chr5:23270024-23270959 FORWARD LENGTH=171                                                                                                                                                                                                                                                                         | 173  | 171  | 3.00E-63  | 98.8  | 76.9 | 87.3 |
| Rsa1.0_01025.1.g22589.t1 | gb AAD26943.1  putative retroelement pol polyprotein [Arabidopsis thaliana]                                                                                                                                                                                                                                                                                                                                                                                     | 1378 | 1454 | 0        | 105.5 | 67.5 | 80.6 | putative retroelement pol polyprotein          | gbpln | Arabidopsis thaliana | AT4G23160.1   Symbols: CRK8   cysteine-rich RLK (RECEPTOR-like protein kinase) 8   chr4:12129485-12134086 FORWARD LENGTH=1262                                                                                                                                                                                                                                                        | 1378 | 1262 | 1.00E-162 | 91.6  | 21.0 | 26.5 |
| Rsa1.0_01025.1.g22590.t1 | #                                                                                                                                                                                                                                                                                                                                                                                                                                                               | #    | #    | #        | #     | #    | #    | -                                              | ----  | ----                 | #                                                                                                                                                                                                                                                                                                                                                                                    | #    | #    | #         | #     | #    | #    |
| Rsa1.0_01025.1.g22591.t1 | emb CAB40035.1  retrotransposon like protein [Arabidopsis thaliana] gi 7267767 emb CAB81170.1  retrotransposon like protein [Arabidopsis thaliana]                                                                                                                                                                                                                                                                                                              | 1427 | 1515 | 0        | 106.2 | 53.5 | 68.3 | retrotransposon like protein                   | gbpln | Arabidopsis thaliana | AT4G23160.1   Symbols: CRK8   cysteine-rich RLK (RECEPTOR-like protein kinase) 8   chr4:12129485-12134086 FORWARD LENGTH=1262                                                                                                                                                                                                                                                        | 1427 | 1262 | 1.00E-109 | 88.4  | 13.5 | 20.2 |
| Rsa1.0_01025.1.g22592.t1 | ref XP_002866204.1  predicted protein [Arabidopsis lyrata subsp. lyrata] gi 297312039 gb EFH42463.1  predicted protein [Arabidopsis lyrata subsp. lyrata]                                                                                                                                                                                                                                                                                                       | 200  | 202  | 2.00E-69 | 101.0 | 72.0 | 80.0 | predicted protein                              | gbpln | Arabidopsis lyrata   | AT4G25845.1   Symbols:   BEST Arabidopsis thaliana protein match is: OSBP(oxysterol binding protein)-related protein 4B (TAIR:AT4G25850.2); Has 35333 Blast hits to 34131 proteins in 2444 species: Archae - 798; Bacteria - 22429; Metazoa - 974; Fungi - 991; Plants - 531; Viruses - 0; Other Eukaryotes - 9610 (source: NCBI BLINK).   chr4:13142270-13142632 FORWARD LENGTH=120 | 200  | 120  | 4.00E-25  | 60.0  | 31.0 | 38.0 |
| Rsa1.0_01025.1.g22593.t2 | gb AAG51754.1 AC068867_33 reverse transcriptase, putative; 100033-105622 [Arabidopsis thaliana]                                                                                                                                                                                                                                                                                                                                                                 | 1751 | 1557 | 0        | 88.9  | 37.6 | 50.8 | reverse transcriptase, putative; 100033-105622 | gbpln | Arabidopsis thaliana | AT4G29090.1   Symbols:   Ribonuclease H-like superfamily protein   chr4:14333528-14335255 FORWARD LENGTH=575                                                                                                                                                                                                                                                                         | 1751 | 575  | 1.00E-91  | 32.8  | 11.0 | 17.2 |
| Rsa1.0_01025.1.g22594.t1 | #                                                                                                                                                                                                                                                                                                                                                                                                                                                               | #    | #    | #        | #     | #    | #    | -                                              | ----  | ----                 | #                                                                                                                                                                                                                                                                                                                                                                                    | #    | #    | #         | #     | #    | #    |
| Rsa1.0_01026.1.g22595.t1 | emb CAN64512.1  hypothetical protein VITISV_004351 [Vitis vinifera]                                                                                                                                                                                                                                                                                                                                                                                             | 190  | 282  | 3.00E-29 | 148.4 | 34.7 | 34.7 | hypothetical protein VITISV_004351             | gbpln | Vitis vinifera       | #                                                                                                                                                                                                                                                                                                                                                                                    | #    | #    | #         | #     | #    | #    |

|                          |                                                                                                                                                                                                                                                                                                                                                                                                              |     |     |           |       |      |      |                                        |       |                      |                                                                                                                                                                                                                                                                                                                                                                                                                                                                                                                                           |     |     |           |       |      |      |
|--------------------------|--------------------------------------------------------------------------------------------------------------------------------------------------------------------------------------------------------------------------------------------------------------------------------------------------------------------------------------------------------------------------------------------------------------|-----|-----|-----------|-------|------|------|----------------------------------------|-------|----------------------|-------------------------------------------------------------------------------------------------------------------------------------------------------------------------------------------------------------------------------------------------------------------------------------------------------------------------------------------------------------------------------------------------------------------------------------------------------------------------------------------------------------------------------------------|-----|-----|-----------|-------|------|------|
| Rsa1.0_01026.1.g22596.t1 | ref NP_566710.1  uncharacterized protein [Arabidopsis thaliana]<br>gi 18252913 gb AAL62383.1  unknown protein [Arabidopsis thaliana]<br>gi 23197929 gb AAN15490.1  unknown protein [Arabidopsis thaliana]<br>gi 332643129 gb AEE76650.1  uncharacterized protein AT3G22530 [Arabidopsis thaliana]                                                                                                            | 188 | 198 | 4.00E-65  | 105.3 | 79.8 | 86.7 | uncharacterized protein                | gbpln | Arabidopsis thaliana | AT3G22530.1   Symbols:   unknown protein; FUNCTIONS IN: molecular_function unknown; INVOLVED IN: biological_process unknown; LOCATED IN: plasma membrane; EXPRESSED IN: 25 plant structures; EXPRESSED DURING: 15 growth stages; BEST Arabidopsis thaliana protein match is: unknown protein (TAIR:AT4G14830.1); Has 77 Blast hits to 77 proteins in 12 species: Archae - 0; Bacteria - 0; Metazoa - 0; Fungi - 0; Plants - 77; Viruses - 0; Other Eukaryotes - 0 (source: NCBI BLINK).   chr3:7977774-7978370 REVERSE LENGTH=198         | 188 | 198 | 2.00E-67  | 105.3 | 79.8 | 86.7 |
| Rsa1.0_01026.1.g22597.t1 | ref NP_188891.1  uncharacterized protein [Arabidopsis thaliana]<br>gi 11994284 dbj BAB01467.1  unnamed protein product [Arabidopsis thaliana]<br>gi 17381094 gb AAL36359.1  unknown protein [Arabidopsis thaliana]<br>gi 20259295 gb AAM14383.1  unknown protein [Arabidopsis thaliana]<br>gi 332643128 gb AEE76649.1  uncharacterized protein AT3G22520 [Arabidopsis thaliana]                              | 578 | 600 | 0         | 103.8 | 83.0 | 89.3 | uncharacterized protein                | gbpln | Arabidopsis thaliana | AT3G22520.1   Symbols:   unknown protein; INVOLVED IN: biological_process unknown; LOCATED IN: chloroplast stroma, chloroplast, chloroplast envelope; EXPRESSED IN: 24 plant structures; EXPRESSED DURING: 13 growth stages; BEST Arabidopsis thaliana protein match is: unknown protein (TAIR:AT4G14840.1); Has 717 Blast hits to 703 proteins in 179 species: Archae - 14; Bacteria - 134; Metazoa - 141; Fungi - 74; Plants - 209; Viruses - 0; Other Eukaryotes - 145 (source: NCBI BLINK).   chr3:7974884-7977406 FORWARD LENGTH=600 | 578 | 600 | 0         | 103.8 | 83.0 | 89.3 |
| Rsa1.0_01026.1.g22598.t2 | gb EOA15469.1  hypothetical protein CARUB_v10004386mg [Capsella rubella]                                                                                                                                                                                                                                                                                                                                     | 528 | 619 | 7.00E-71  | 117.2 | 26.5 | 33.5 | hypothetical protein CARUB_v10004386mg | gbpln | Capsella rubella     | AT5G41020.1   Symbols:   myb family transcription factor   chr5:16425883-16427649 REVERSE LENGTH=588                                                                                                                                                                                                                                                                                                                                                                                                                                      | 528 | 588 | 4.00E-73  | 111.4 | 26.1 | 34.3 |
| Rsa1.0_01026.1.g22599.t1 | ref NP_188890.2  Pre-rRNA-processing protein TSR2 [Arabidopsis thaliana]<br>gi 50897194 gb AAT85736.1  At3g22510 [Arabidopsis thaliana]<br>gi 51972092 gb AAU15150.1  At3g22510 [Arabidopsis thaliana]<br>gi 332643127 gb AEE76648.1  Pre-rRNA-processing protein TSR2 [Arabidopsis thaliana]                                                                                                                | 126 | 124 | 5.00E-46  | 98.4  | 77.8 | 87.3 | Pre-rRNA-processing protein TSR2       | gbpln | Arabidopsis thaliana | AT3G22510.1   Symbols:   Pre-rRNA-processing protein TSR2, conserved region   chr3:7973544-7974087 FORWARD LENGTH=124                                                                                                                                                                                                                                                                                                                                                                                                                     | 126 | 124 | 1.00E-48  | 98.4  | 77.8 | 87.3 |
| Rsa1.0_01026.1.g22600.t1 | ref NP_188888.1  Seed maturation protein [Arabidopsis thaliana]<br>gi 11994281 dbj BAB01464.1  seed maturation protein, LEA protein in group 5-like [Arabidopsis thaliana]<br>gi 27754552 gb AAO22723.1  putative LEA protein [Arabidopsis thaliana]<br>gi 28394023 gb AAO42419.1  putative LEA protein [Arabidopsis thaliana]<br>gi 332643125 gb AEE76646.1  Seed maturation protein [Arabidopsis thaliana] | 262 | 262 | 1.00E-133 | 100.0 | 90.5 | 95.8 | Seed maturation protein                | gbpln | Arabidopsis thaliana | AT3G22490.1   Symbols:   Seed maturation protein   chr3:7969785-7970738 REVERSE LENGTH=262                                                                                                                                                                                                                                                                                                                                                                                                                                                | 262 | 262 | 1.00E-135 | 100.0 | 90.5 | 95.8 |
| Rsa1.0_01026.1.g22601.t1 | gb EOA31644.1  hypothetical protein CARUB_v10014846mg [Capsella rubella]<br>gi 482567456 gb EOA31645.1  hypothetical protein CARUB_v10014846mg [Capsella rubella]                                                                                                                                                                                                                                            | 152 | 148 | 6.00E-68  | 97.4  | 84.9 | 92.8 | hypothetical protein CARUB_v10014846mg | gbpln | Capsella rubella     | AT3G22480.1   Symbols: PDF2   prefoldin 2   chr3:7969080-7969526 FORWARD LENGTH=148                                                                                                                                                                                                                                                                                                                                                                                                                                                       | 152 | 148 | 3.00E-69  | 97.4  | 83.6 | 91.4 |
| Rsa1.0_01026.1.g22602.t4 | gb EOA29663.1  hypothetical protein CARUB_v10015596mg [Capsella rubella]                                                                                                                                                                                                                                                                                                                                     | 595 | 522 | 1.00E-166 | 87.7  | 59.5 | 69.4 | hypothetical protein CARUB_v10015596mg | gbpln | Capsella rubella     | AT3G22430.1   Symbols:   CONTAINS InterPro DOMAIN/s: Domain of unknown function XS (InterPro:IPR005380); BEST Arabidopsis thaliana protein match is: XS domain-containing protein / XS zinc finger domain-containing protein-related (TAIR:AT5G23570.1); Has 565 Blast hits to 510 proteins in 121 species: Archae - 2; Bacteria - 90; Metazoa - 191; Fungi - 32; Plants - 51; Viruses - 4; Other Eukaryotes - 195 (source: NCBI BLINK).   chr3:7953455-7957605 FORWARD LENGTH=510                                                        | 595 | 510 | 1.00E-166 | 85.7  | 60.0 | 67.4 |
| Rsa1.0_01026.1.g22603.t1 | #                                                                                                                                                                                                                                                                                                                                                                                                            | #   | #   | #         | #     | #    | #    | -                                      | ----  | ----                 | #                                                                                                                                                                                                                                                                                                                                                                                                                                                                                                                                         | #   | #   | #         | #     | #    |      |
| Rsa1.0_01026.1.g22604.t2 | ref XP_002868242.1  hypothetical protein ARALYDRAFT_915339 [Arabidopsis lyrata subsp. lyrata]<br>gi 297314076 gb EFH44501.1  hypothetical protein ARALYDRAFT_915339 [Arabidopsis lyrata subsp. lyrata]                                                                                                                                                                                                       | 271 | 271 | 1.00E-121 | 100.0 | 83.0 | 90.4 | hypothetical protein ARALYDRAFT_915339 | gbpln | Arabidopsis lyrata   | AT4G14910.1   Symbols: HISN5B   HISTIDINE BIOSYNTHESIS 5B   chr4:8528451-8530105 REVERSE LENGTH=272                                                                                                                                                                                                                                                                                                                                                                                                                                       | 271 | 272 | 1.00E-123 | 100.4 | 81.9 | 88.9 |
| Rsa1.0_01026.1.g22605.t1 | gb EOA13578.1  hypothetical protein CARUB_v10026643mg [Capsella rubella]                                                                                                                                                                                                                                                                                                                                     | 230 | 364 | 2.00E-19  | 158.3 | 40.4 | 54.8 | hypothetical protein CARUB_v10026643mg | gbpln | Capsella rubella     | AT5G64060.1   Symbols: anac103, NAC103   NAC domain containing protein 103   chr5:25633818-25635152 REVERSE LENGTH=356                                                                                                                                                                                                                                                                                                                                                                                                                    | 230 | 356 | 3.00E-17  | 154.8 | 34.8 | 47.8 |

|                           |                                                                                                                                                                                                                                                                                                                                  |      |      |           |       |      |      |                                          |       |                      |                                                                                                                                                           |      |      |           |       |      |      |
|---------------------------|----------------------------------------------------------------------------------------------------------------------------------------------------------------------------------------------------------------------------------------------------------------------------------------------------------------------------------|------|------|-----------|-------|------|------|------------------------------------------|-------|----------------------|-----------------------------------------------------------------------------------------------------------------------------------------------------------|------|------|-----------|-------|------|------|
| Rsa1.0_01026.1.g22606.t1  | gb[EOA30124.1] hypothetical protein CARUB_v10013233mg [Capsella rubella]                                                                                                                                                                                                                                                         | 621  | 621  | 0         | 100.0 | 88.1 | 93.9 | hypothetical protein CARUB_v10013233mg   | gbpln | Capsella rubella     | AT3G02280.1   Symbols: Flavodoxin family protein   chr3:453646-457659 FORWARD LENGTH=623                                                                  | 621  | 623  | 0         | 100.3 | 87.9 | 93.7 |
| Rsa1.0_01026.1.g22607.t1  | gb AAG50751.1 AC079733_19 polyprotein, putative [Arabidopsis thaliana]                                                                                                                                                                                                                                                           | 1441 | 1468 | 0         | 101.9 | 50.0 | 68.4 | polyprotein, putative                    | gbpln | Arabidopsis thaliana | AT4G23160.1   Symbols: CRK8   cysteine-rich RLK (RECEPTOR-like protein kinase) 8   chr4:12129485-12134086 FORWARD LENGTH=1262                             | 1441 | 1262 | 1.00E-138 | 87.6  | 16.6 | 24.4 |
| Rsa1.0_01026.1.g22608.t10 | ref XP_002883360.1  time for coffee [Arabidopsis lyrata subsp. lyrata]   gi 297329200 gb EFH59619.1  time for coffee [Arabidopsis lyrata subsp. lyrata]                                                                                                                                                                          | 1652 | 1550 | 0         | 93.8  | 74.8 | 80.6 | time for coffee                          | gbpln | Arabidopsis lyrata   | AT3G22380.2   Symbols: TIC   time for coffee   chr3:7913181-7918967 FORWARD LENGTH=1555                                                                   | 1652 | 1555 | 0         | 94.1  | 73.7 | 80.0 |
| Rsa1.0_01026.1.g22609.t1  | gb AEB00555.1  mitochondrial alternative oxidase 1a [Brassica juncea]                                                                                                                                                                                                                                                            | 370  | 360  | 0         | 97.3  | 91.6 | 93.2 | mitochondrial alternative oxidase 1a     | gbpln | Brassica juncea      | AT3G22370.1   Symbols: AOX1A, ATAOX1A   alternative oxidase 1A   chr3:7906890-7908416 FORWARD LENGTH=354                                                  | 370  | 354  | 1.00E-175 | 95.7  | 83.0 | 87.0 |
| Rsa1.0_01026.1.g22610.t1  | ref XP_002885498.1  ATRPABC24.3 [Arabidopsis lyrata subsp. lyrata]   gi 297331338 gb EFH61757.1  ATRPABC24.3 [Arabidopsis lyrata subsp. lyrata]                                                                                                                                                                                  | 206  | 205  | 1.00E-104 | 99.5  | 88.3 | 96.1 | ATRPABC24.3                              | gbpln | Arabidopsis lyrata   | AT3G22320.1   Symbols: ATRPABC24.3, RPB5A, NRPB5, NRPD5   Eukaryotic rpb5 RNA polymerase subunit family protein   chr3:7891045-7892094 REVERSE LENGTH=205 | 206  | 205  | 1.00E-107 | 99.5  | 87.9 | 96.1 |
| Rsa1.0_01026.1.g22611.t1  | gb[EOA30144.1] hypothetical protein CARUB_v10013251mg [Capsella rubella]                                                                                                                                                                                                                                                         | 600  | 609  | 0         | 101.5 | 74.0 | 77.8 | hypothetical protein CARUB_v10013251mg   | gbpln | Capsella rubella     | AT3G22310.1   Symbols: PMH1, ATRH9   putative mitochondrial RNA helicase 1   chr3:7887382-7889806 FORWARD LENGTH=610                                      | 600  | 610  | 0         | 101.7 | 71.5 | 77.5 |
| Rsa1.0_01026.1.g22612.t2  | ref XP_002883352.1  hypothetical protein ARALYDRAFT_479742 [Arabidopsis lyrata subsp. lyrata]   gi 297329192 gb EFH59611.1  hypothetical protein ARALYDRAFT_479742 [Arabidopsis lyrata subsp. lyrata]                                                                                                                            | 772  | 354  | 0         | 45.9  | 40.7 | 41.6 | hypothetical protein ARALYDRAFT_479742   | gbpln | Arabidopsis lyrata   | AT3G22290.1   Symbols: Endoplasmic reticulum vesicle transporter protein   chr3:7882082-7885260 FORWARD LENGTH=354                                        | 772  | 354  | 0         | 45.9  | 40.5 | 41.6 |
| Rsa1.0_01027.1.g22613.t1  | ref NP_180795.1  ubiquitin family protein [Arabidopsis thaliana]   gi 3831460 gb AAC69942.1  hypothetical protein [Arabidopsis thaliana]   gi 330253579 gb AEC08673.1  ubiquitin family protein [Arabidopsis thaliana]                                                                                                           | 166  | 175  | 1.00E-39  | 105.4 | 56.6 | 67.5 | ubiquitin family protein                 | gbpln | Arabidopsis thaliana | AT2G32360.1   Symbols: Ubiquitin-like superfamily protein   chr2:13737019-13737546 REVERSE LENGTH=175                                                     | 166  | 175  | 5.00E-42  | 105.4 | 56.6 | 67.5 |
| Rsa1.0_01027.1.g22614.t1  | ref XP_002524172.1  homeobox protein, putative [Ricinus communis]   gi 223536541 gb EEF38187.1  homeobox protein, putative [Ricinus communis]                                                                                                                                                                                    | 718  | 731  | 0         | 101.8 | 55.7 | 71.9 | homeobox protein, putative               | gbpln | Ricinus communis     | AT1G05230.3   Symbols: HDG2   homeodomain GLABROUS 2   chr1:1513388-1517024 REVERSE LENGTH=719                                                            | 718  | 719  | 0         | 100.1 | 55.6 | 70.9 |
| Rsa1.0_01027.1.g22615.t1  | dbj BAJ34475.1  unnamed protein product [Theellungiella halophila]                                                                                                                                                                                                                                                               | 1019 | 921  | 0         | 90.4  | 71.0 | 78.0 | unnamed protein product                  | ----  | ----                 | AT2G32400.1   Symbols: GLR5, GLR3.7, ATGLR3.7   glutamate receptor 5   chr2:13752665-13756233 REVERSE LENGTH=921                                          | 1019 | 921  | 0         | 90.4  | 69.7 | 77.5 |
| Rsa1.0_01027.1.g22616.t5  | ref NP_001184889.1  CCR4-NOT transcription complex subunit 1 [Arabidopsis thaliana]   gi 332189257 gb AEE27378.1  CCR4-NOT transcription complex subunit 1 [Arabidopsis thaliana]                                                                                                                                                | 641  | 2377 | 1.00E-127 | 370.8 | 37.1 | 39.6 | CCR4-NOT transcription complex subunit 1 | gbpln | Arabidopsis thaliana | AT1G02080.2   Symbols: transcription regulators   chr1:373694-386682 FORWARD LENGTH=2377                                                                  | 641  | 2377 | 1.00E-130 | 370.8 | 37.1 | 39.6 |
| Rsa1.0_01027.1.g22617.t1  | ref NP_180705.1  F-box protein DOR [Arabidopsis thaliana]   gi 229807544 sp Q5BPS3.2 DOR_ARATH RecName: Full=F-box protein DOR; AltName: Full=Protein DROUGHT TOLERANCE REPRESSOR   gi 4589954 gb AAD26472.1  hypothetical protein [Arabidopsis thaliana]   gi 330253458 gb AEC08552.1  F-box protein DOR [Arabidopsis thaliana] | 392  | 387  | 2.00E-87  | 98.7  | 46.9 | 63.5 | F-box protein DOR                        | gbpln | Arabidopsis thaliana | AT2G31470.1   Symbols: DOR   F-box and associated interaction domains-containing protein   chr2:13407492-13408655 REVERSE LENGTH=387                      | 392  | 387  | 6.00E-90  | 98.7  | 46.9 | 63.5 |
| Rsa1.0_01027.1.g22618.t1  | ref NP_189038.1  putative F-box protein [Arabidopsis thaliana]   gi 75273446 sp Q9LIR1.1 FB182_ARATH RecName: Full=Putative F-box protein At3g23960   gi 9294965 dbj BAB03014.1  unnamed protein product [Arabidopsis thaliana]   gi 332643318 gb AEE76839.1  putative F-box protein [Arabidopsis thaliana]                      | 535  | 402  | 7.00E-79  | 75.1  | 32.9 | 47.1 | putative F-box protein                   | gbpln | Arabidopsis thaliana | AT3G23960.1   Symbols: F-box and associated interaction domains-containing protein   chr3:8657736-8658944 FORWARD LENGTH=402                              | 535  | 402  | 2.00E-81  | 75.1  | 32.9 | 47.1 |
| Rsa1.0_01027.1.g22619.t1  | ref NP_189038.1  putative F-box protein [Arabidopsis thaliana]   gi 75273446 sp Q9LIR1.1 FB182_ARATH RecName: Full=Putative F-box protein At3g23960   gi 9294965 dbj BAB03014.1  unnamed protein product [Arabidopsis thaliana]   gi 332643318 gb AEE76839.1  putative F-box protein [Arabidopsis thaliana]                      | 392  | 402  | 2.00E-81  | 102.6 | 45.9 | 65.6 | putative F-box protein                   | gbpln | Arabidopsis thaliana | AT3G23960.1   Symbols: F-box and associated interaction domains-containing protein   chr3:8657736-8658944 FORWARD LENGTH=402                              | 392  | 402  | 5.00E-84  | 102.6 | 45.9 | 65.6 |

|                          |                                                                                                                                                                                                                                                                                                                                                                                                                                                                                                                                |     |     |           |       |      |      |                                                 |       |                      |                                                                                                                                                                                                                                                                                                                                                                                                                                                               |     |     |           |       |      |      |
|--------------------------|--------------------------------------------------------------------------------------------------------------------------------------------------------------------------------------------------------------------------------------------------------------------------------------------------------------------------------------------------------------------------------------------------------------------------------------------------------------------------------------------------------------------------------|-----|-----|-----------|-------|------|------|-------------------------------------------------|-------|----------------------|---------------------------------------------------------------------------------------------------------------------------------------------------------------------------------------------------------------------------------------------------------------------------------------------------------------------------------------------------------------------------------------------------------------------------------------------------------------|-----|-----|-----------|-------|------|------|
| Rsa1.0_01027.1.g22620.t2 | refNP_180705.1   F-box protein DOR [Arabidopsis thaliana] gi 229807544 sp Q5BPS3.2 DOR_ARATH RecName: Full=F-box protein DOR; AltName: Full=Protein DROUGHT TOLERANCE REPRESSOR gi 4589954 gb AAD26472.1  hypothetical protein [Arabidopsis thaliana] gi 330253458 gb AEC08552.1  F-box protein DOR [Arabidopsis thaliana] ref XP_002881226.1  hypothetical protein ARALYDRAFT_320982 [Arabidopsis lyrata subsp. lyrata] gi 297327065 gb EFH57485.1  hypothetical protein ARALYDRAFT_320982 [Arabidopsis lyrata subsp. lyrata] | 453 | 387 | 3.00E-76  | 85.4  | 37.7 | 49.0 | F-box protein DOR                               | gbpln | Arabidopsis thaliana | AT2G31470.1   Symbols: DOR   F-box and associated interaction domains-containing protein   chr2:13407492-13408655 REVERSE LENGTH=387                                                                                                                                                                                                                                                                                                                          | 453 | 387 | 8.00E-79  | 85.4  | 37.7 | 49.0 |
| Rsa1.0_01027.1.g22621.t6 | refXP_002881226.1   hypothetical protein ARALYDRAFT_320982 [Arabidopsis lyrata subsp. lyrata] gi 297327065 gb EFH57485.1  hypothetical protein ARALYDRAFT_320982 [Arabidopsis lyrata subsp. lyrata]                                                                                                                                                                                                                                                                                                                            | 873 | 891 | 0         | 102.1 | 80.2 | 87.9 | hypothetical protein ARALYDRAFT_320982          | gbpln | Arabidopsis lyrata   | AT2G32415.1   Symbols:   Polynucleotidyl transferase, ribonuclease H fold protein with HRDC domain   chr2:13761307-13765421 REVERSE LENGTH=891                                                                                                                                                                                                                                                                                                                | 873 | 891 | 0         | 102.1 | 79.8 | 88.7 |
| Rsa1.0_01027.1.g22622.t1 | gb AAL58845.1 AF411970.1 putative transcription factor MYB101 [Arabidopsis thaliana]                                                                                                                                                                                                                                                                                                                                                                                                                                           | 462 | 490 | 0         | 106.1 | 78.8 | 86.4 | putative transcription factor MYB101            | gbpln | Arabidopsis thaliana | AT2G32460.1   Symbols: MYB101, ATMYB101, ATM1   myb domain protein 101   chr2:13782419-13784363 REVERSE LENGTH=490                                                                                                                                                                                                                                                                                                                                            | 462 | 490 | 0         | 106.1 | 78.4 | 86.4 |
| Rsa1.0_01027.1.g22623.t1 | #                                                                                                                                                                                                                                                                                                                                                                                                                                                                                                                              | #   | #   | #         | #     | #    | #    | -                                               | ----  | ----                 | #                                                                                                                                                                                                                                                                                                                                                                                                                                                             | #   | #   | #         | #     | #    |      |
| Rsa1.0_01028.1.g22624.t1 | refXP_002893207.1   predicted protein [Arabidopsis lyrata subsp. lyrata] gi 297339049 gb EFH69466.1   predicted protein [Arabidopsis lyrata subsp. lyrata]                                                                                                                                                                                                                                                                                                                                                                     | 334 | 334 | 1.00E-157 | 100.0 | 89.5 | 93.4 | predicted protein                               | gbpln | Arabidopsis lyrata   | Arabidopsis thaliana protein match is: unknown protein (TAIR:AT1G77855.1); Has 99 Blast hits to 99 proteins in 17 species: Archae = 0; Bacteria = 0; Metazoa = 3; Fungi = 0; Plants = 96; Viruses = 0; Other Eukaryotes = 0 (source: NCBI BLink).   chr1:7759337-7760415 REVERSE LENGTH=333                                                                                                                                                                   | 334 | 333 | 1.00E-154 | 99.7  | 87.7 | 91.0 |
| Rsa1.0_01028.1.g22625.t1 | refNP_173621.1   serine hydroxymethyltransferase 6 [Arabidopsis thaliana] gi 9280677 gb AAF86546.1 AC069252.5 F2E2.7 [Arabidopsis thaliana] gi 21928157 gb AAM78106.1  At1g22020/F2E2_3 [Arabidopsis thaliana] gi 28416495 gb AAO42778.1  At1g22020/F2E2_3 [Arabidopsis thaliana] gi 332192065 gb AEE30186.1  serine hydroxymethyltransferase 6 [Arabidopsis thaliana]                                                                                                                                                         | 595 | 599 | 0         | 100.7 | 87.7 | 92.9 | serine hydroxymethyltransferase 6               | gbpln | Arabidopsis thaliana | AT1G22020.1   Symbols: SHM6   serine hydroxymethyltransferase 6   chr1:7754599-7757087 FORWARD LENGTH=599                                                                                                                                                                                                                                                                                                                                                     | 595 | 599 | 0         | 100.7 | 87.7 | 92.9 |
| Rsa1.0_01028.1.g22626.t1 | gb EOA36900.1  hypothetical protein CARUB_v10011446mg [Capsella rubella]                                                                                                                                                                                                                                                                                                                                                                                                                                                       | 334 | 396 | 1.00E-165 | 118.6 | 83.2 | 90.4 | hypothetical protein CARUB_v10011446mg          | gbpln | Capsella rubella     | AT1G22015.1   Symbols: DD46   Galactosyltransferase family protein   chr1:7751225-7753425 REVERSE LENGTH=398                                                                                                                                                                                                                                                                                                                                                  | 334 | 398 | 1.00E-163 | 119.2 | 82.9 | 90.7 |
| Rsa1.0_01028.1.g22627.t1 | gb ADF81045.1  LEC1-2 transcription factor [Brassica napus]                                                                                                                                                                                                                                                                                                                                                                                                                                                                    | 326 | 230 | 4.00E-92  | 70.6  | 56.1 | 58.3 | LEC1-2 transcription factor                     | gbpln | Brassica napus       | AT1G21970.1   Symbols: LEC1, EMB 212, EMB212, NF-YB9   Histone superfamily protein   chr1:7727750-7729571 REVERSE LENGTH=238                                                                                                                                                                                                                                                                                                                                  | 326 | 238 | 7.00E-87  | 73.0  | 49.1 | 53.7 |
| Rsa1.0_01028.1.g22628.t1 | gb EOA36681.1  hypothetical protein CARUB_v10012034mg, partial [Capsella rubella]                                                                                                                                                                                                                                                                                                                                                                                                                                              | 106 | 132 | 3.00E-12  | 124.5 | 48.1 | 62.3 | hypothetical protein CARUB_v10012034mg, partial | gbpln | Capsella rubella     | AT1G21940.1   Symbols:   unknown protein; FUNCTIONS IN: molecular function unknown; INVOLVED IN: biological process unknown; LOCATED IN: endomembrane system; BEST Arabidopsis thaliana protein match is: unknown protein (TAIR:AT1G21950.1); Has 19 Blast hits to 12 proteins in 2 species: Archae = 0; Bacteria = 0; Metazoa = 0; Fungi = 0; Plants = 19; Viruses = 0; Other Eukaryotes = 0 (source: NCBI BLink).   chr1:7715170-7716975 REVERSE LENGTH=183 | 106 | 183 | 1.00E-13  | 172.6 | 42.5 | 57.5 |
| Rsa1.0_01028.1.g22629.t1 | gb EOA36681.1  hypothetical protein CARUB_v10012034mg, partial [Capsella rubella]                                                                                                                                                                                                                                                                                                                                                                                                                                              | 114 | 132 | 1.00E-16  | 115.8 | 50.0 | 60.5 | hypothetical protein CARUB_v10012034mg, partial | gbpln | Capsella rubella     | AT1G21940.1   Symbols:   unknown protein; FUNCTIONS IN: molecular function unknown; INVOLVED IN: biological process unknown; LOCATED IN: endomembrane system; BEST Arabidopsis thaliana protein match is: unknown protein (TAIR:AT1G21950.1); Has 19 Blast hits to 12 proteins in 2 species: Archae = 0; Bacteria = 0; Metazoa = 0; Fungi = 0; Plants = 19; Viruses = 0; Other Eukaryotes = 0 (source: NCBI BLink).   chr1:7715170-7716975 REVERSE LENGTH=183 | 114 | 183 | 7.00E-18  | 160.5 | 43.0 | 57.9 |



|                          |                                                                                                                                                                                                                                                                                                                                                                                                                                                                                                                                                                                                                                                                                                                                                                                                                                                                                                                                                                                                                                                  |      |      |           |       |      |      |                                                               |       |                      |                                                                                                                                                                                                                                                                                                                                                                                                                                                                                                                                                                                                         |      |      |           |       |      |      |
|--------------------------|--------------------------------------------------------------------------------------------------------------------------------------------------------------------------------------------------------------------------------------------------------------------------------------------------------------------------------------------------------------------------------------------------------------------------------------------------------------------------------------------------------------------------------------------------------------------------------------------------------------------------------------------------------------------------------------------------------------------------------------------------------------------------------------------------------------------------------------------------------------------------------------------------------------------------------------------------------------------------------------------------------------------------------------------------|------|------|-----------|-------|------|------|---------------------------------------------------------------|-------|----------------------|---------------------------------------------------------------------------------------------------------------------------------------------------------------------------------------------------------------------------------------------------------------------------------------------------------------------------------------------------------------------------------------------------------------------------------------------------------------------------------------------------------------------------------------------------------------------------------------------------------|------|------|-----------|-------|------|------|
| Rsa1.0_01028.1.g22630.t1 | gb[EOA39330.1] hypothetical protein CARUB_v10012374mg [Capsella rubella]                                                                                                                                                                                                                                                                                                                                                                                                                                                                                                                                                                                                                                                                                                                                                                                                                                                                                                                                                                         | 109  | 127  | 9.00E-11  | 116.5 | 43.1 | 59.6 | hypothetical protein CARUB_v10012374mg                        | gbpln | Capsella rubella     | AT1G21940.1   Symbols:   unknown protein; FUNCTIONS IN: molecular.function unknown; INVOLVED IN: biological_process unknown; LOCATED IN: endomembrane system; BEST Arabidopsis thaliana protein match is: unknown protein (TAIR:AT1G21950.1); Has 19 Blast hits to 12 proteins in 2 species: Archae - 0; Bacteria - 0; Metazoa - 0; Fungi - 0; Plants - 19; Viruses - 0; Other Eukaryotes - 0 (source: NCBI BLink).   chr1:7715170-7716975 REVERSE LENGTH=183                                                                                                                                           | 109  | 183  | 8.00E-12  | 167.9 | 39.4 | 51.4 |
| Rsa1.0_01028.1.g22631.t1 | #                                                                                                                                                                                                                                                                                                                                                                                                                                                                                                                                                                                                                                                                                                                                                                                                                                                                                                                                                                                                                                                | #    | #    | #         | #     | #    | #    | -                                                             | ----  | ----                 | #                                                                                                                                                                                                                                                                                                                                                                                                                                                                                                                                                                                                       | #    | #    | #         | #     | #    |      |
| Rsa1.0_01028.1.g22632.t1 | ref[XP_002890472.1] hypothetical protein ARALYDRAFT.472429 [Arabidopsis lyrata subsp. lyrata] gi 297845196 ref[XP_002890479.1] predicted protein [Arabidopsis lyrata subsp. lyrata] gi 297336314 gb EFH66731.1] hypothetical protein ARALYDRAFT.472429 [Arabidopsis lyrata subsp. lyrata] gi 297336321 gb EFH66738.1] predicted protein [Arabidopsis lyrata subsp. lyrata]                                                                                                                                                                                                                                                                                                                                                                                                                                                                                                                                                                                                                                                                       | 106  | 97   | 3.00E-35  | 91.5  | 75.5 | 77.4 | hypothetical protein ARALYDRAFT.472429                        | gbpln | Arabidopsis lyrata   | AT3G42150.3   Symbols:   unknown protein; FUNCTIONS IN: molecular.function unknown; INVOLVED IN: biological_process unknown; LOCATED IN: endomembrane system; EXPRESSED IN: male gametophyte, pollen tube; EXPRESSED DURING: L mature pollen stage, M germinated pollen stage; BEST Arabidopsis thaliana protein match is: unknown protein (TAIR:AT1G21930.1); Has 35333 Blast hits to 34131 proteins in 2444 species: Archae - 798; Bacteria - 22429; Metazoa - 974; Fungi - 991; Plants - 531; Viruses - 0; Other Eukaryotes - 9610 (source: NCBI BLink).   chr3:14310567-14311465 FORWARD LENGTH=100 | 106  | 100  | 9.00E-38  | 94.3  | 71.7 | 73.6 |
| Rsa1.0_01028.1.g22633.t1 | emb[CAB10225.1] retrovirus-related like polyprotein [Arabidopsis thaliana] gi 7268152 emb[CAB78488.1] retrovirus-related like polyprotein [Arabidopsis thaliana]                                                                                                                                                                                                                                                                                                                                                                                                                                                                                                                                                                                                                                                                                                                                                                                                                                                                                 | 1522 | 1489 | 0         | 97.8  | 57.7 | 72.1 | retrovirus-related like polyprotein                           | gbpln | Arabidopsis thaliana | AT4G23160.1   Symbols: CRK8   cysteine-rich RLK (RECEPTOR-like protein kinase) 8   chr4:12129485-12134086 FORWARD LENGTH=1262                                                                                                                                                                                                                                                                                                                                                                                                                                                                           | 1522 | 1262 | 1.00E-170 | 82.9  | 19.2 | 24.7 |
| Rsa1.0_01028.1.g22634.t1 | gb[EOA40493.1] hypothetical protein CARUB_v10009218mg [Capsella rubella]                                                                                                                                                                                                                                                                                                                                                                                                                                                                                                                                                                                                                                                                                                                                                                                                                                                                                                                                                                         | 423  | 426  | 0         | 100.7 | 88.4 | 93.4 | hypothetical protein CARUB_v10009218mg                        | gbpln | Capsella rubella     | AT1G21920.1   Symbols:   Histone H3 K4-specific methyltransferase SET7/9 family protein   chr1:7704454-7705866 REVERSE LENGTH=417                                                                                                                                                                                                                                                                                                                                                                                                                                                                       | 423  | 417  | 1.00E-180 | 98.6  | 85.3 | 92.4 |
| Rsa1.0_01029.1.g22635.t1 | ref[NP_565974.1] serine/threonine-protein phosphatase PP2A-4 catalytic subunit [Arabidopsis thaliana] gi 297827949 ref[XP_002881857.1] protein phosphatase 2A-4 [Arabidopsis lyrata subsp. lyrata] gi 1352663 sp Q07100.2 PP2A4_ARATH RecName: Full=Serine/threonine-protein phosphatase PP2A-4 catalytic subunit; AltName: Full=Protein phosphatase 2A isoform 4 gi 466441 gb AA64742.1] Ser/Thr protein phosphatase [Arabidopsis thaliana] gi 4567320 gb AAD23731.1] serine/threonine protein phosphatase PP2A-3 catalytic subunit [Arabidopsis thaliana] gi 20198072 gb AAM15383.1] serine/threonine protein phosphatase PP2A-3 catalytic subunit [Arabidopsis thaliana] gi 33589738 gb AAQ22635.1] At2g42500/F14N22.23 [Arabidopsis thaliana] gi 297327696 gb EFH58116.1] protein phosphatase 2A-4 [Arabidopsis lyrata subsp. lyrata] gi 330255033 gb AEC10127.1] serine/threonine-protein phosphatase PP2A-4 catalytic subunit [Arabidopsis thaliana] gi 482563348 gb EOA27538.1] hypothetical protein CARUB_v10023677mg [Capsella rubella] | 282  | 313  | 1.00E-165 | 111.0 | 97.5 | 99.6 | serine/threonine-protein phosphatase PP2A-4 catalytic subunit | gbpln | Arabidopsis lyrata   | AT2G42500.1   Symbols: PP2A-3   protein phosphatase 2A-3   chr2:17698099-17701226 REVERSE LENGTH=313                                                                                                                                                                                                                                                                                                                                                                                                                                                                                                    | 282  | 313  | 1.00E-168 | 111.0 | 97.5 | 99.6 |
| Rsa1.0_01029.1.g22636.t5 | emb[CAA74662.1] SFR3 [Brassica oleracea var. viridis]                                                                                                                                                                                                                                                                                                                                                                                                                                                                                                                                                                                                                                                                                                                                                                                                                                                                                                                                                                                            | 926  | 841  | 0         | 90.8  | 81.7 | 85.4 | SFR3                                                          | gbpln | Brassica oleracea    | AT1G65800.1   Symbols: ARK2, RK2   receptor kinase 2   chr1:24473166-24476523 FORWARD LENGTH=847                                                                                                                                                                                                                                                                                                                                                                                                                                                                                                        | 926  | 847  | 0         | 91.5  | 67.6 | 76.7 |
| Rsa1.0_01029.1.g22637.t1 | #                                                                                                                                                                                                                                                                                                                                                                                                                                                                                                                                                                                                                                                                                                                                                                                                                                                                                                                                                                                                                                                | #    | #    | #         | #     | #    | #    | -                                                             | ----  | ----                 | #                                                                                                                                                                                                                                                                                                                                                                                                                                                                                                                                                                                                       | #    | #    | #         | #     | #    |      |
| Rsa1.0_01029.1.g22638.t1 | emb[CAA22150.1] hypothetical protein [Arabidopsis thaliana] gi 7269091 emb[CAB79200.1] hypothetical protein [Arabidopsis thaliana]                                                                                                                                                                                                                                                                                                                                                                                                                                                                                                                                                                                                                                                                                                                                                                                                                                                                                                               | 144  | 457  | 5.00E-17  | 317.4 | 37.5 | 47.9 | hypothetical protein                                          | gbpln | Arabidopsis thaliana | #                                                                                                                                                                                                                                                                                                                                                                                                                                                                                                                                                                                                       | #    | #    | #         | #     | #    |      |
| Rsa1.0_01029.1.g22639.t1 | gb[EOA26622.1] hypothetical protein CARUB_v10022684mg [Capsella rubella]                                                                                                                                                                                                                                                                                                                                                                                                                                                                                                                                                                                                                                                                                                                                                                                                                                                                                                                                                                         | 757  | 771  | 0         | 101.8 | 94.6 | 97.4 | hypothetical protein CARUB_v10022684mg                        | gbpln | Capsella rubella     | AT2G42490.1   Symbols:   Copper amine oxidase family protein   chr2:17691600-17695526 REVERSE LENGTH=776                                                                                                                                                                                                                                                                                                                                                                                                                                                                                                | 757  | 776  | 0         | 102.5 | 93.9 | 96.7 |

|                          |                                                                                                                                                                                                                                                                                                                                                                                                                                                                                                                                                                                                                                                                                                                                                                                                                                                                    |      |      |           |       |      |      |                                        |       |                      |                                                                                                                                                                                                                                                                                                      |      |      |           |       |      |      |
|--------------------------|--------------------------------------------------------------------------------------------------------------------------------------------------------------------------------------------------------------------------------------------------------------------------------------------------------------------------------------------------------------------------------------------------------------------------------------------------------------------------------------------------------------------------------------------------------------------------------------------------------------------------------------------------------------------------------------------------------------------------------------------------------------------------------------------------------------------------------------------------------------------|------|------|-----------|-------|------|------|----------------------------------------|-------|----------------------|------------------------------------------------------------------------------------------------------------------------------------------------------------------------------------------------------------------------------------------------------------------------------------------------------|------|------|-----------|-------|------|------|
| Rsa1.0_01029.1.g22641.t1 | ref[XP_002881850.1] predicted protein [Arabidopsis lyrata subsp. lyrata] gi 297327689 gb EFH58109.1  predicted protein [Arabidopsis lyrata subsp. lyrata]                                                                                                                                                                                                                                                                                                                                                                                                                                                                                                                                                                                                                                                                                                          | 281  | 308  | 5.00E-71  | 109.6 | 46.6 | 61.2 | predicted protein                      | gbpln | Arabidopsis lyrata   | AT2G42460.1   Symbols:   TRAF-like family protein   chr2:17676399-17679247 REVERSE LENGTH=442                                                                                                                                                                                                        | 281  | 442  | 4.00E-65  | 157.3 | 43.4 | 58.7 |
| Rsa1.0_01029.1.g22641.t1 | ref[XP_002881848.1] hypothetical protein ARALYDRAFT_346045 [Arabidopsis lyrata subsp. lyrata] gi 297327687 gb EFH58107.1  hypothetical protein ARALYDRAFT_346045 [Arabidopsis lyrata subsp. lyrata]                                                                                                                                                                                                                                                                                                                                                                                                                                                                                                                                                                                                                                                                | 308  | 293  | 4.00E-89  | 95.1  | 60.4 | 72.4 | hypothetical protein ARALYDRAFT_346045 | gbpln | Arabidopsis lyrata   | AT2G42460.1   Symbols:   TRAF-like family protein   chr2:17676399-17679247 REVERSE LENGTH=442                                                                                                                                                                                                        | 308  | 442  | 9.00E-72  | 143.5 | 45.8 | 63.3 |
| Rsa1.0_01029.1.g22642.t3 | gb AAG13591.2 AC051633.7 putative gag/pol polyprotein [Oryza sativa Japonica Group]                                                                                                                                                                                                                                                                                                                                                                                                                                                                                                                                                                                                                                                                                                                                                                                | 1231 | 1417 | 0         | 115.1 | 40.2 | 52.1 | putative gag/pol polyprotein           | gbpln | Oryza sativa         | AT4G23160.1   Symbols: CRK8   cysteine-rich RLK (RECEPTOR-like protein kinase) 8   chr4:12129485-12134086 FORWARD LENGTH=1262                                                                                                                                                                        | 1231 | 1262 | 2.00E-80  | 102.5 | 13.3 | 19.4 |
| Rsa1.0_01029.1.g22643.t1 | ref[NP_565973.1] LOB domain-containing protein 16 [Arabidopsis thaliana] gi 29428045 sp Q9SLB7.1 LBD16_ARAT H RecName: Full=LOB domain-containing protein 16; AltName: Full=ASYMMETRIC LEAVES 2-like protein 18; Short=AS2-like protein 18 gi 13569546 gb AAK31143.1 AF345339.1 unknown [Arabidopsis thaliana] gi 15294286 gb AAK95320.1 AF410334.1 At2g42430/MHK10.15 [Arabidopsis thaliana] gi 17227162 gb AAL38035.1 AF447890.1 LOB DOMAIN 16 [Arabidopsis thaliana] gi 4567314 gb AAD23725.1  expressed protein [Arabidopsis thaliana] gi 23507799 gb AAN38703.1  At2g42430/MHK10.15 [Arabidopsis thaliana] gi 110740350 dbj BAF02070.1  hypothetical protein [Arabidopsis thaliana] gi 21980712 dbj BAH10562.1  ASYMMETRIC LEAVES2-like 18 protein [Arabidopsis thaliana] gi 330255025 gb AEC10119.1  LOB domain-containing protein 16 [Arabidopsis thaliana] | 129  | 245  | 1.00E-51  | 189.9 | 84.5 | 87.6 | LOB domain-containing protein 16       | gbpln | Arabidopsis thaliana | AT2G42430.1   Symbols: LBD16, ASL18   lateral organ boundaries-domain 16   chr2:17663669-17665153 FORWARD LENGTH=245                                                                                                                                                                                 | 129  | 245  | 3.00E-54  | 189.9 | 84.5 | 87.6 |
| Rsa1.0_01029.1.g22644.t1 | gb EOA18088.1  hypothetical protein CARUB_v10006540mg [Capsella rubella]                                                                                                                                                                                                                                                                                                                                                                                                                                                                                                                                                                                                                                                                                                                                                                                           | 105  | 551  | 2.00E-20  | 524.8 | 50.5 | 54.3 | hypothetical protein CARUB_v10006540mg | gbpln | Capsella rubella     | AT4G14350.2   Symbols:   AGC (cAMP-dependent, cGMP-dependent and protein kinase C) kinase family protein   chr4:8256449-8259934 REVERSE LENGTH=551                                                                                                                                                   | 105  | 551  | 3.00E-23  | 524.8 | 50.5 | 55.2 |
| Rsa1.0_01029.1.g22645.t1 | #                                                                                                                                                                                                                                                                                                                                                                                                                                                                                                                                                                                                                                                                                                                                                                                                                                                                  | #    | #    | #         | #     | #    | #    | -                                      | ----  | ----                 | #                                                                                                                                                                                                                                                                                                    | #    | #    | #         | #     | #    |      |
| Rsa1.0_01029.1.g22646.t1 | gb EOA27725.1  hypothetical protein CARUB_v10023878mg [Capsella rubella]                                                                                                                                                                                                                                                                                                                                                                                                                                                                                                                                                                                                                                                                                                                                                                                           | 268  | 260  | 5.00E-87  | 97.0  | 71.6 | 76.9 | hypothetical protein CARUB_v10023878mg | gbpln | Capsella rubella     | AT2G42040.1   Symbols:   CONTAINS InterPro DOMAIN/s: WRC (InterPro:IPR014977); Has 219 Blast hits to 219 proteins in 19 species: Archae - 0; Bacteria - 0; Metazoa - 3; Fungi - 0; Plants - 215; Viruses - 0; Other Eukaryotes - 1 (source: NCBI BLINK).   chr2:17543282-17545063 FORWARD LENGTH=269 | 268  | 269  | 1.00E-83  | 100.4 | 72.4 | 78.4 |
| Rsa1.0_01029.1.g22647.t1 | gb ABD65170.1  hypothetical protein 40.100057 [Brassica oleracea]                                                                                                                                                                                                                                                                                                                                                                                                                                                                                                                                                                                                                                                                                                                                                                                                  | 226  | 255  | 2.00E-55  | 112.8 | 56.6 | 69.5 | hypothetical protein 40.100057         | gbpln | Brassica oleracea    | AT3G47680.1   Symbols:   DNA binding   chr3:17577483-17578391 REVERSE LENGTH=302                                                                                                                                                                                                                     | 226  | 302  | 3.00E-20  | 133.6 | 29.2 | 39.8 |
| Rsa1.0_01029.1.g22648.t1 | ref[XP_002881818.1] zinc finger family protein [Arabidopsis lyrata subsp. lyrata] gi 297327657 gb EFH58077.1  zinc finger family protein [Arabidopsis lyrata subsp. lyrata]                                                                                                                                                                                                                                                                                                                                                                                                                                                                                                                                                                                                                                                                                        | 183  | 413  | 2.00E-18  | 225.7 | 30.1 | 33.9 | zinc finger family protein             | gbpln | Arabidopsis lyrata   | AT2G42030.1   Symbols:   RING/U-box superfamily protein   chr2:17539069-17540346 REVERSE LENGTH=425                                                                                                                                                                                                  | 183  | 425  | 1.00E-19  | 232.2 | 27.9 | 31.7 |
| Rsa1.0_01029.1.g22649.t1 | gb EOA27569.1  hypothetical protein CARUB_v10023706mg [Capsella rubella]                                                                                                                                                                                                                                                                                                                                                                                                                                                                                                                                                                                                                                                                                                                                                                                           | 306  | 305  | 1.00E-164 | 99.7  | 90.8 | 93.8 | hypothetical protein CARUB_v10023706mg | gbpln | Capsella rubella     | AT3G58040.1   Symbols: SINAT2   seven in absentia of Arabidopsis 2   chr3:21489612-21491085 FORWARD LENGTH=308                                                                                                                                                                                       | 306  | 308  | 1.00E-164 | 100.7 | 87.9 | 91.8 |

|                           |                                                                                                                                                                                                                                                                                                                                                                                                                                                                                                                                                                                                                                                                                                                                                                                                                                       |      |      |           |       |      |      |                                                |       |                      |                                                                                                                                                                                                                                                                                                                                                                    |      |      |           |       |      |      |
|---------------------------|---------------------------------------------------------------------------------------------------------------------------------------------------------------------------------------------------------------------------------------------------------------------------------------------------------------------------------------------------------------------------------------------------------------------------------------------------------------------------------------------------------------------------------------------------------------------------------------------------------------------------------------------------------------------------------------------------------------------------------------------------------------------------------------------------------------------------------------|------|------|-----------|-------|------|------|------------------------------------------------|-------|----------------------|--------------------------------------------------------------------------------------------------------------------------------------------------------------------------------------------------------------------------------------------------------------------------------------------------------------------------------------------------------------------|------|------|-----------|-------|------|------|
| Rsa1.0_01029.1.g22650.t1  | ref[NP_181728.1] putative protein kinase [Arabidopsis thaliana] gi 75319137 sp P93749.1 Y2197_ARATH RecName: Full=Probable protein kinase At2g41970 gi 1871186 gb AAB63546.1  putative protein kinase [Arabidopsis thaliana] gi 38603828 gb AAR24659.1  At2g41970 [Arabidopsis thaliana] gi 51968610 dbj BAD42997.1  putative protein kinase [Arabidopsis thaliana] gi 51968682 dbj BAD43033.1  putative protein kinase [Arabidopsis thaliana] gi 51971150 dbj BAD44267.1  putative protein kinase [Arabidopsis thaliana] gi 51971369 dbj BAD44349.1  putative protein kinase [Arabidopsis thaliana] gi 51971789 dbj BAD44559.1  putative protein kinase [Arabidopsis thaliana] gi 62318717 dbj BAD93732.1  putative protein kinase [Arabidopsis thaliana] gi 330254963 gb AEC10057.1  putative protein kinase [Arabidopsis thaliana] | 364  | 365  | 0         | 100.3 | 94.8 | 98.1 | putative protein kinase                        | gbpln | Arabidopsis thaliana | AT2G41970.1   Symbols:   Protein kinase superfamily protein   chr2:17520517-17522304 REVERSE LENGTH=365                                                                                                                                                                                                                                                            | 364  | 365  | 0         | 100.3 | 94.8 | 98.1 |
| Rsa1.0_01029.1.g22651.t11 | ref[XP_002881811.1] hypothetical protein ARALYDRAFT_321881 [Arabidopsis lyrata subsp. lyrata] gi 297327650 gb EFH58070.1  hypothetical protein ARALYDRAFT_321881 [Arabidopsis lyrata subsp. lyrata]                                                                                                                                                                                                                                                                                                                                                                                                                                                                                                                                                                                                                                   | 1068 | 1218 | 0         | 114.0 | 39.4 | 47.3 | hypothetical protein ARALYDRAFT_321881         | gbpln | Arabidopsis lyrata   | AT2G41960.1   Symbols:   unknown protein; BEST Arabidopsis thaliana protein match is: unknown protein (TAIR:AT3G58050.1). Has 11991 Blast hits to 7260 proteins in 458 species: Archae - 17; Bacteria - 481; Metazoa - 5028; Fungi - 1325; Plants - 615; Viruses - 38; Other Eukaryotes - 4487 (source: NCBI BLINK).   chr2:17514244-17519015 REVERSE LENGTH=1215  | 1068 | 1215 | 0         | 113.8 | 38.9 | 46.8 |
| Rsa1.0_01029.1.g22652.t1  | ref[XP_002881810.1] predicted protein [Arabidopsis lyrata subsp. lyrata] gi 297327649 gb EFH58069.1  predicted protein [Arabidopsis lyrata subsp. lyrata]                                                                                                                                                                                                                                                                                                                                                                                                                                                                                                                                                                                                                                                                             | 158  | 158  | 8.00E-76  | 100.0 | 94.3 | 96.8 | predicted protein                              | gbpln | Arabidopsis lyrata   | AT2G41945.1   Symbols:   unknown protein; BEST Arabidopsis thaliana protein match is: unknown protein (TAIR:AT3G04040.1). Has 35333 Blast hits to 34131 proteins in 2444 species: Archae - 798; Bacteria - 22429; Metazoa - 974; Fungi - 991; Plants - 531; Viruses - 0; Other Eukaryotes - 9610 (source: NCBI BLINK).   chr2:17511071-17512898 REVERSE LENGTH=158 | 158  | 158  | 2.00E-77  | 100.0 | 93.7 | 96.2 |
| Rsa1.0_01029.1.g22653.t1  | ref[NP_181725.1] zinc finger protein 8 [Arabidopsis thaliana] gi 1871188 gb AAB63548.1  putative C2H2-type zinc finger protein [Arabidopsis thaliana] gi 14517524 gb AAK62652.1  At2g41940/T6D20.16 [Arabidopsis thaliana] gi 15810111 gb AAL06981.1  At2g41940/T6D20.16 [Arabidopsis thaliana] gi 330254957 gb AEC10051.1  zinc finger protein 8 [Arabidopsis thaliana]                                                                                                                                                                                                                                                                                                                                                                                                                                                              | 259  | 257  | 5.00E-87  | 99.2  | 70.7 | 80.7 | zinc finger protein 8                          | gbpln | Arabidopsis thaliana | AT2G41940.1   Symbols: ZFP8   zinc finger protein 8   chr2:17507556-17508329 FORWARD LENGTH=257                                                                                                                                                                                                                                                                    | 259  | 257  | 1.00E-89  | 99.2  | 70.7 | 80.7 |
| Rsa1.0_01029.1.g22654.t1  | ref[XP_002862436.1] predicted protein [Arabidopsis lyrata subsp. lyrata] gi 297307949 gb EFH38694.1  predicted protein [Arabidopsis lyrata subsp. lyrata]                                                                                                                                                                                                                                                                                                                                                                                                                                                                                                                                                                                                                                                                             | 520  | 530  | 3.00E-13  | 101.9 | 7.7  | 11.3 | predicted protein                              | gbpln | Arabidopsis lyrata   | # # # # # # #                                                                                                                                                                                                                                                                                                                                                      |      |      |           |       |      |      |
| Rsa1.0_01029.1.g22655.t1  | gb AAM82604.1 AF525305.2 putative AP endonuclease/reverse transcriptase [Brassica napus]                                                                                                                                                                                                                                                                                                                                                                                                                                                                                                                                                                                                                                                                                                                                              | 508  | 1214 | 8.00E-55  | 239.0 | 31.9 | 49.4 | putative AP endonuclease/reverse transcriptase | gbpln | Brassica napus       | AT4G04650.1   Symbols:   RNA-directed DNA polymerase (reverse transcriptase)-related family protein   chr4:2353989-2355213 REVERSE LENGTH=332                                                                                                                                                                                                                      | 508  | 332  | 4.00E-35  | 65.4  | 16.3 | 26.2 |
| Rsa1.0_01029.1.g22656.t1  | gb AAO22523.1 HY5 [Brassica rapa subsp. pekinensis]                                                                                                                                                                                                                                                                                                                                                                                                                                                                                                                                                                                                                                                                                                                                                                                   | 65   | 109  | 1.00E-11  | 167.7 | 56.9 | 58.5 | HY5                                            | gbpln | Brassica rapa        | AT5G11260.1   Symbols: HY5, TED 5   Basic-leucine zipper (bZIP) transcription factor family protein   chr5:3593583-3594800 REVERSE LENGTH=168                                                                                                                                                                                                                      | 65   | 168  | 1.00E-13  | 258.5 | 55.4 | 58.5 |
| Rsa1.0_01029.1.g22657.t1  | gb EOA27539.1  hypothetical protein CARUB_v10023678mg [Capsella rubella]                                                                                                                                                                                                                                                                                                                                                                                                                                                                                                                                                                                                                                                                                                                                                              | 312  | 312  | 1.00E-167 | 100.0 | 90.1 | 95.8 | hypothetical protein CARUB_v10023678mg         | gbpln | Capsella rubella     | AT2G41630.1   Symbols: TFIIB   transcription factor IIB   chr2:17355555-17357400 REVERSE LENGTH=312                                                                                                                                                                                                                                                                | 312  | 312  | 1.00E-167 | 100.0 | 89.1 | 95.5 |
| Rsa1.0_01029.1.g22658.t1  | gb AGC91761.1  glycerol-3-phosphate dehydrogenase 1.1 [Brassica napus] gi 469517559 gb AGH55534.1  glycerol-3-phosphate dehydrogenase 1 [Brassica napus]                                                                                                                                                                                                                                                                                                                                                                                                                                                                                                                                                                                                                                                                              | 463  | 462  | 0         | 99.8  | 97.6 | 98.5 | glycerol-3-phosphate dehydrogenase 1.1         | gbpln | Brassica napus       | AT2G41540.3   Symbols: GPDHC1   6-phosphogluconate dehydrogenase family protein   chr2:17328601-17328654 FORWARD LENGTH=462                                                                                                                                                                                                                                        | 463  | 462  | 0         | 99.8  | 95.9 | 97.6 |
| Rsa1.0_01029.1.g22659.t1  | ref[XP_002881781.1] hypothetical protein ARALYDRAFT_903473 [Arabidopsis lyrata subsp. lyrata] gi 297327620 gb EFH58040.1  hypothetical protein ARALYDRAFT_903473 [Arabidopsis lyrata subsp. lyrata]                                                                                                                                                                                                                                                                                                                                                                                                                                                                                                                                                                                                                                   | 284  | 284  | 1.00E-156 | 100.0 | 91.9 | 96.1 | hypothetical protein ARALYDRAFT_903473         | gbpln | Arabidopsis lyrata   | AT2G41530.1   Symbols: ATSFHG, SFGH   S-formylglutathione hydrolase   chr2:17323656-17325430 REVERSE LENGTH=284                                                                                                                                                                                                                                                    | 284  | 284  | 1.00E-158 | 100.0 | 90.8 | 96.5 |

|                           |                                                                                                                                                                                                               |     |      |           |       |      |      |                                                         |       |                      |                                                                                                                                                                                                                                                                                                                                                               |     |     |           |       |      |      |
|---------------------------|---------------------------------------------------------------------------------------------------------------------------------------------------------------------------------------------------------------|-----|------|-----------|-------|------|------|---------------------------------------------------------|-------|----------------------|---------------------------------------------------------------------------------------------------------------------------------------------------------------------------------------------------------------------------------------------------------------------------------------------------------------------------------------------------------------|-----|-----|-----------|-------|------|------|
| Rsa1.0_01029.1.g22661.t1  | ref[XP_002879935.1] ATCKX1/CKX1 [Arabidopsis lyrata subsp. lyrata] gi 29732574 gb EFH56194.1  ATCKX1/CKX1 [Arabidopsis lyrata subsp. lyrata]                                                                  | 545 | 564  | 0         | 103.5 | 86.6 | 94.3 | ATCKX1/CKX1                                             | gbpln | Arabidopsis lyrata   | AT2G41510.1   Symbols: ATCKX1, CKX1   cytokinin oxidase/dehydrogenase 1   chr2:17314626-17316861 FORWARD LENGTH=575                                                                                                                                                                                                                                           | 545 | 575 | 0         | 105.5 | 86.2 | 94.1 |
| Rsa1.0_01030.1.g22661.t1  | #                                                                                                                                                                                                             | #   | #    | #         | #     | #    | #    | -                                                       | ----  | ----                 | #                                                                                                                                                                                                                                                                                                                                                             | #   | #   | #         | #     | #    | #    |
| Rsa1.0_01030.1.g22662.t1  | gb ABW74585.1  pol polyprotein [Boechera divaricarpa]                                                                                                                                                         | 245 | 551  | 1.00E-22  | 224.9 | 23.3 | 29.4 | pol polyprotein                                         | gbpln | Boechera divaricarpa | #                                                                                                                                                                                                                                                                                                                                                             | #   | #   | #         | #     | #    | #    |
| Rsa1.0_01030.1.g22663.t1  | dbj BAB08714.1  non-LTR retroelement reverse transcriptase-like protein [Arabidopsis thaliana]                                                                                                                | 374 | 1197 | 7.00E-64  | 320.1 | 39.6 | 55.3 | non-LTR retroelement reverse transcriptase-like protein | gbpln | Arabidopsis thaliana | AT4G29090.1   Symbols:   Ribonuclease H-like superfamily protein   chr4:14333528-14335255 FORWARD LENGTH=575                                                                                                                                                                                                                                                  | 374 | 575 | 7.00E-42  | 153.7 | 31.3 | 49.2 |
| Rsa1.0_01030.1.g22664.t1  | emb CAB39638.1  RNA-directed DNA polymerase-like protein [Arabidopsis thaliana] gi 7267666 emb CAB78094.1  RNA-directed DNA polymerase-like protein [Arabidopsis thaliana]                                    | 226 | 1274 | 6.00E-56  | 563.7 | 50.4 | 67.3 | RNA-directed DNA polymerase-like protein                | gbpln | Arabidopsis thaliana | #                                                                                                                                                                                                                                                                                                                                                             | #   | #   | #         | #     | #    | #    |
| Rsa1.0_01030.1.g22665.t1  | gb EOA25182.1  hypothetical protein CARUB_v10018494mg [Capsella rubella]                                                                                                                                      | 168 | 282  | 7.00E-15  | 167.9 | 33.3 | 44.6 | hypothetical protein CARUB_v10018494mg                  | gbpln | Capsella rubella     | AT1G10000.1   Symbols:   Ribonuclease H-like superfamily protein   chr1:3263877-3264788 REVERSE LENGTH=303                                                                                                                                                                                                                                                    | 168 | 303 | 4.00E-16  | 180.4 | 28.6 | 45.8 |
| Rsa1.0_01030.1.g22666.t1  | gb EOA35333.1  hypothetical protein CARUB_v10020515mg [Capsella rubella]                                                                                                                                      | 352 | 364  | 1.00E-156 | 103.4 | 85.8 | 90.1 | hypothetical protein CARUB_v10020515mg                  | gbpln | Capsella rubella     | AT1G68810.1   Symbols:   basic helix-loop-helix (bHLH) DNA-binding superfamily protein   chr1:25861289-2586282 FORWARD LENGTH=368                                                                                                                                                                                                                             | 352 | 368 | 1.00E-157 | 104.5 | 86.9 | 91.5 |
| Rsa1.0_01030.1.g22667.t1  | #                                                                                                                                                                                                             | #   | #    | #         | #     | #    | #    | -                                                       | ----  | ----                 | #                                                                                                                                                                                                                                                                                                                                                             | #   | #   | #         | #     | #    | #    |
| Rsa1.0_01030.1.g22668.t1  | ref[XP_002887207.1] hypothetical protein ARALYDRAFT_476009 [Arabidopsis lyrata subsp. lyrata] gi 297333048 gb EFH63466.1  hypothetical protein ARALYDRAFT_476009 [Arabidopsis lyrata subsp. lyrata]           | 506 | 461  | 1.00E-155 | 91.1  | 62.3 | 70.2 | hypothetical protein ARALYDRAFT_476009                  | gbpln | Arabidopsis lyrata   | AT1G68820.1   Symbols:   Transmembrane Fragile-X-F-associated protein   chr1:25865852-25868800 FORWARD LENGTH=468                                                                                                                                                                                                                                             | 506 | 468 | 1.00E-158 | 92.5  | 62.3 | 70.0 |
| Rsa1.0_01030.1.g22669.t1  | #                                                                                                                                                                                                             | #   | #    | #         | #     | #    | #    | -                                                       | ----  | ----                 | #                                                                                                                                                                                                                                                                                                                                                             | #   | #   | #         | #     | #    | #    |
| Rsa1.0_01030.1.g22670.t9  | ref[XP_002887207.1] hypothetical protein ARALYDRAFT_476009 [Arabidopsis lyrata subsp. lyrata] gi 297333048 gb EFH63466.1  hypothetical protein ARALYDRAFT_476009 [Arabidopsis lyrata subsp. lyrata]           | 574 | 461  | 1.00E-143 | 80.3  | 50.3 | 57.5 | hypothetical protein ARALYDRAFT_476009                  | gbpln | Arabidopsis lyrata   | AT1G68820.1   Symbols:   Transmembrane Fragile-X-F-associated protein   chr1:25865852-25868800 FORWARD LENGTH=468                                                                                                                                                                                                                                             | 574 | 468 | 2.33E-156 | 81.5  | 51.2 | 58.2 |
| Rsa1.0_01031.1.g22671.t1  | ref[XP_002864842.1] tetratricopeptide repeat-containing protein [Arabidopsis lyrata subsp. lyrata] gi 297310677 gb EFH41101.1  tetratricopeptide repeat-containing protein [Arabidopsis lyrata subsp. lyrata] | 665 | 650  | 0         | 97.7  | 88.7 | 94.0 | tetratricopeptide repeat-containing protein             | gbpln | Arabidopsis lyrata   | AT5G63200.1   Symbols:   tetratricopeptide repeat (TPR)-containing protein   chr5:25349043-25352899 FORWARD LENGTH=649                                                                                                                                                                                                                                        | 665 | 649 | 0         | 97.6  | 89.0 | 92.8 |
| Rsa1.0_01031.1.g22672.t1  | gb EOA14404.1  hypothetical protein CARUB_v10027604mg [Capsella rubella]                                                                                                                                      | 319 | 324  | 1.00E-173 | 101.6 | 92.8 | 97.5 | hypothetical protein CARUB_v10027604mg                  | gbpln | Capsella rubella     | AT5G63220.1   Symbols:   unknown protein; CONTAINS InterPro DOMAIN/s; Uncharacterised protein family UPF0363 (InterPro:IPR007317); Has 304 Blast hits to 301 proteins in 161 species: Archae - 0; Bacteria - 0; Metazoa - 110; Fungi - 121; Plants - 35; Viruses - 0; Other Eukaryotes - 38 (source: NCBI BLINK).   chr5:25353256-25355410 REVERSE LENGTH=324 | 319 | 324 | 1.00E-175 | 101.6 | 91.8 | 97.2 |
| Rsa1.0_01031.1.g22673.t24 | ref[XP_002893783.1] predicted protein [Arabidopsis lyrata subsp. lyrata] gi 297339625 gb EFH70042.1  predicted protein [Arabidopsis lyrata subsp. lyrata]                                                     | 261 | 276  | 3.00E-12  | 105.7 | 24.5 | 37.9 | predicted protein                                       | gbpln | Arabidopsis lyrata   | AT5G03480.1   Symbols:   RNA-binding (RRM/RBD/RNP motifs) family protein   chr5:869208-870855 REVERSE LENGTH=321                                                                                                                                                                                                                                              | 261 | 321 | 7.00E-12  | 123.0 | 22.2 | 34.9 |
| Rsa1.0_01031.1.g22674.t1  | ref[XP_002866546.1] hypothetical protein ARALYDRAFT_496512 [Arabidopsis lyrata subsp. lyrata] gi 297312381 gb EFH42805.1  hypothetical protein ARALYDRAFT_496512 [Arabidopsis lyrata subsp. lyrata]           | 478 | 484  | 0         | 101.3 | 88.7 | 94.6 | hypothetical protein ARALYDRAFT_496512                  | gbpln | Arabidopsis lyrata   | AT5G63290.1   Symbols:   Radical SAM superfamily protein   chr5:25369349-25370894 REVERSE LENGTH=484                                                                                                                                                                                                                                                          | 478 | 484 | 0         | 101.3 | 88.5 | 94.6 |
| Rsa1.0_01031.1.g22675.t1  | gb EOA13406.1  hypothetical protein CARUB_v10026444mg, partial [Capsella rubella]                                                                                                                             | 399 | 430  | 1.00E-100 | 107.8 | 57.6 | 67.7 | hypothetical protein CARUB_v10026444mg, partial         | gbpln | Capsella rubella     | AT5G62660.1   Symbols:   F-box and associated interaction domains-containing protein   chr5:25156326-25157465 REVERSE LENGTH=379                                                                                                                                                                                                                              | 399 | 379 | 1.00E-101 | 95.0  | 51.1 | 60.7 |
| Rsa1.0_01031.1.g22676.t1  | ref[XP_002866553.1] hypothetical protein ARALYDRAFT_496525 [Arabidopsis lyrata subsp. lyrata] gi 297312388 gb EFH42812.1  hypothetical protein ARALYDRAFT_496525 [Arabidopsis lyrata subsp. lyrata]           | 240 | 246  | 1.00E-130 | 102.5 | 93.3 | 97.9 | hypothetical protein ARALYDRAFT_496525                  | gbpln | Arabidopsis lyrata   | AT5G63400.1   Symbols: ADK1   adenylate kinase 1   chr5:25393274-25394817 REVERSE LENGTH=246                                                                                                                                                                                                                                                                  | 240 | 246 | 1.00E-131 | 102.5 | 91.7 | 97.5 |

|                          |                                                                                                                                                                                                              |      |      |           |       |      |      |                                                                                                                                                                        |       |                      |                                                                                                                                                                                                                                                                                                                                                                                           |      |      |           |       |      |      |
|--------------------------|--------------------------------------------------------------------------------------------------------------------------------------------------------------------------------------------------------------|------|------|-----------|-------|------|------|------------------------------------------------------------------------------------------------------------------------------------------------------------------------|-------|----------------------|-------------------------------------------------------------------------------------------------------------------------------------------------------------------------------------------------------------------------------------------------------------------------------------------------------------------------------------------------------------------------------------------|------|------|-----------|-------|------|------|
| Rsa1.0_01031.1.g22677.t1 | gb EOA13020.1  hypothetical protein CARUB_v10026016mg [Capsella rubella]                                                                                                                                     | 676  | 678  | 0         | 100.3 | 87.0 | 93.5 | hypothetical protein CARUB_v10026016mg                                                                                                                                 | gbpln | Capsella rubella     | AT5G63410.1   Symbols:   Leucine-rich repeat protein kinase family protein   chr5:25395173-25397768 REVERSE LENGTH=680                                                                                                                                                                                                                                                                    | 676  | 680  | 0         | 100.6 | 88.3 | 94.1 |
| Rsa1.0_01031.1.g22678.t1 | #                                                                                                                                                                                                            | #    | #    | #         | #     | #    | -    | ----                                                                                                                                                                   | ----  | ----                 | #                                                                                                                                                                                                                                                                                                                                                                                         | #    | #    | #         | #     | #    | #    |
| Rsa1.0_01031.1.g22679.t1 | gb AAM60854.1  cytochrome P450-like protein [Arabidopsis thaliana]                                                                                                                                           | 504  | 508  | 0         | 100.8 | 87.1 | 91.7 | cytochrome P450-like protein                                                                                                                                           | gbpln | Arabidopsis thaliana | AT5G63450.1   Symbols: CYP94B1   cytochrome P450, family 94, subfamily B, polypeptide 1   chr5:25408987-25410519 REVERSE LENGTH=510                                                                                                                                                                                                                                                       | 504  | 510  | 0         | 101.2 | 87.1 | 91.7 |
| Rsa1.0_01031.1.g22680.t1 | dbj BAB08811.1  unnamed protein product [Arabidopsis thaliana]                                                                                                                                               | 161  | 188  | 3.00E-62  | 116.8 | 75.8 | 80.7 | unnamed protein product                                                                                                                                                | gbpln | Arabidopsis thaliana | AT5G63460.1   Symbols:   SAP domain-containing protein   chr5:25413605-25415399 REVERSE LENGTH=162                                                                                                                                                                                                                                                                                        | 161  | 162  | 5.00E-64  | 100.6 | 75.2 | 79.5 |
| Rsa1.0_01031.1.g22681.t1 | gb EOA14773.1  hypothetical protein CARUB_v10028072mg [Capsella rubella]                                                                                                                                     | 543  | 544  | 0         | 100.2 | 89.5 | 94.8 | hypothetical protein CARUB_v10028072mg                                                                                                                                 | gbpln | Capsella rubella     | AT5G63490.1   Symbols:   CBS / octicosapeptide/Phox/Bemp1 (PB1) domains-containing protein   chr5:25418716-25421970 REVERSE LENGTH=543                                                                                                                                                                                                                                                    | 543  | 543  | 0         | 100.0 | 87.3 | 92.8 |
| Rsa1.0_01031.1.g22682.t1 | ref XP_002864850.1  hypothetical protein ARALYDRAFT_496538 [Arabidopsis lyrata subsp. lyrata]   g 297310685 gb EFH41109.1  hypothetical protein ARALYDRAFT_496538 [Arabidopsis lyrata subsp. lyrata]         | 245  | 252  | 1.00E-113 | 102.9 | 84.9 | 88.2 | hypothetical protein ARALYDRAFT_496538                                                                                                                                 | gbpln | Arabidopsis lyrata   | AT5G63510.1   Symbols: GAMMA CAL1   gamma carbonic anhydrase like 1   chr5:25424054-25425612 FORWARD LENGTH=252                                                                                                                                                                                                                                                                           | 245  | 252  | 1.00E-113 | 102.9 | 83.7 | 86.9 |
| Rsa1.0_01031.1.g22683.t1 | gb ABH07409.1  putative pol polyprotein [Brassica oleracea var. botrytis]                                                                                                                                    | 1184 | 1239 | 0         | 104.6 | 43.0 | 52.4 | putative pol polyprotein                                                                                                                                               | gbpln | Brassica oleracea    | AT4G23160.1   Symbols: CRK8   cysteine-rich RLK (RECEPTOR-like protein kinase) 8   chr4:12129485-12134086 FORWARD LENGTH=1262                                                                                                                                                                                                                                                             | 1184 | 1262 | 1.00E-110 | 106.6 | 17.5 | 26.7 |
| Rsa1.0_01032.1.g22684.t2 | gb ADP20181.1  mutant gag-pol polyprotein [Pisum sativum]                                                                                                                                                    | 400  | 572  | 2.00E-43  | 143.0 | 33.5 | 50.5 | mutant gag-pol polyprotein                                                                                                                                             | gbpln | Pisum sativum        | #                                                                                                                                                                                                                                                                                                                                                                                         | #    | #    | #         | #     | #    | #    |
| Rsa1.0_01032.1.g22685.t2 | gb AAC33226.1  putative non-LTR retroelement reverse transcriptase [Arabidopsis thaliana]                                                                                                                    | 1290 | 1529 | 0         | 118.5 | 45.0 | 63.5 | putative non-LTR retroelement reverse transcriptase                                                                                                                    | gbpln | Arabidopsis thaliana | AT3G24255.1   Symbols:   RNA-directed DNA polymerase (reverse transcriptase)-related family protein   chr3:8789471-8793208 FORWARD LENGTH=746                                                                                                                                                                                                                                             | 1290 | 746  | 8.00E-81  | 57.8  | 11.8 | 16.0 |
| Rsa1.0_01032.1.g22686.t1 | dbj BAB09379.1  non-LTR retroelement reverse transcriptase-like protein [Arabidopsis thaliana]                                                                                                               | 1372 | 1223 | 0         | 89.1  | 41.3 | 54.5 | non-LTR retroelement reverse transcriptase-like protein                                                                                                                | gbpln | Arabidopsis thaliana | AT3G24255.1   Symbols:   RNA-directed DNA polymerase (reverse transcriptase)-related family protein   chr3:8789471-8793208 FORWARD LENGTH=746                                                                                                                                                                                                                                             | 1372 | 746  | 6.00E-70  | 54.4  | 9.9  | 12.6 |
| Rsa1.0_01032.1.g22687.t1 | sp P0C895.1 Y2010.ARATH RecName: Full=LRR repeats and ubiquitin-like domain-containing protein At2g30105                                                                                                     | 309  | 374  | 1.00E-144 | 121.0 | 84.1 | 90.3 | RecName: Full=LRR repeats and ubiquitin-like domain-containing protein At2g30105                                                                                       | ----  | ----                 | AT2G30105.1   Symbols:   CONTAINS InterPro DOMAIN/s: Leucine-rich repeat, typical subtype (InterPro:IPR003591). Leucine-rich repeat (InterPro:IPR001611). Ubiquitin (InterPro:IPR000626), Ubiquitin supergroup (InterPro:IPR019955); BEST Arabidopsis thaliana protein match is: Leucine-rich repeat (LRR) family protein (TAIR:AT5G07910.1).   chr2:12849855-12851908 FORWARD LENGTH=367 | 309  | 367  | 1.00E-147 | 118.8 | 84.1 | 90.3 |
| Rsa1.0_01032.1.g22688.t1 | ref XP_002874998.1  myb family transcription factor [Arabidopsis lyrata subsp. lyrata]   g 297320835 gb EFH51257.1  myb family transcription factor [Arabidopsis lyrata subsp. lyrata]                       | 179  | 79   | 4.00E-11  | 44.1  | 20.1 | 23.5 | myb family transcription factor                                                                                                                                        | gbpln | Arabidopsis lyrata   | AT4G01060.2   Symbols: ETC3, CPL3   CAPRICE-like MYB3   chr4:460534-460967 FORWARD LENGTH=74                                                                                                                                                                                                                                                                                              | 179  | 74   | 1.00E-12  | 41.3  | 19.6 | 22.9 |
| Rsa1.0_01032.1.g22689.t2 | gb AAC72868.1  contains similarity to human DHHC-domain-containing cysteine-rich protein (GB:U90653) and several S. cerevisiae probable membrane proteins (GB:U20865, Z48758, U43491) [Arabidopsis thaliana] | 170  | 513  | 1.00E-22  | 301.8 | 40.0 | 41.8 | contains similarity to human DHHC-domain-containing cysteine-rich protein (GB:U90653) and several S. cerevisiae probable membrane proteins (GB:U20865, Z48758, U43491) | gbpln | Arabidopsis thaliana | AT4G01730.1   Symbols:   DHHC-type zinc finger family protein   chr4:749574-752034 FORWARD LENGTH=508                                                                                                                                                                                                                                                                                     | 170  | 508  | 3.00E-24  | 298.8 | 39.4 | 41.2 |
| Rsa1.0_01032.1.g22690.t1 | #                                                                                                                                                                                                            | #    | #    | #         | #     | #    | -    | ----                                                                                                                                                                   | ----  | ----                 | #                                                                                                                                                                                                                                                                                                                                                                                         | #    | #    | #         | #     | #    | #    |
| Rsa1.0_01032.1.g22691.t1 | gb ABD65100.1  hypothetical protein 31.t00077 [Brassica oleracea]                                                                                                                                            | 422  | 391  | 2.00E-61  | 92.7  | 32.9 | 39.3 | hypothetical protein 31.t00077                                                                                                                                         | gbpln | Brassica oleracea    | #                                                                                                                                                                                                                                                                                                                                                                                         | #    | #    | #         | #     | #    | #    |
| Rsa1.0_01032.1.g22692.t1 | ref XP_002891409.1  hypothetical protein ARALYDRAFT_336931 [Arabidopsis lyrata subsp. lyrata]   g 297337251 gb EFH67668.1  hypothetical protein ARALYDRAFT_336931 [Arabidopsis lyrata subsp. lyrata]         | 389  | 379  | 2.00E-36  | 97.4  | 25.2 | 30.1 | hypothetical protein ARALYDRAFT_336931                                                                                                                                 | gbpln | Arabidopsis lyrata   | AT1G50870.1   Symbols:   F-box and associated interaction domains-containing protein   chr1:18855147-18856337 FORWARD LENGTH=396                                                                                                                                                                                                                                                          | 389  | 396  | 6.00E-38  | 101.8 | 23.1 | 30.3 |
| Rsa1.0_01032.1.g22693.t1 | ref XP_002863555.1  minichromosome maintenance family protein [Arabidopsis lyrata subsp. lyrata]   g 297309390 gb EFH39814.1  minichromosome maintenance family protein [Arabidopsis lyrata subsp. lyrata]   | 101  | 830  | 3.00E-18  | 821.8 | 57.4 | 65.3 | minichromosome maintenance family protein                                                                                                                              | gbpln | Arabidopsis lyrata   | AT5G44635.1   Symbols: MCM6   minichromosome maintenance (MCM2/3/5) family protein   chr5:18006431-18010542 REVERSE LENGTH=831                                                                                                                                                                                                                                                            | 101  | 831  | 2.00E-20  | 822.8 | 56.4 | 64.4 |

|                           |                                                                                                                                                                                                                                                                                                                                                                                                                                                                                                                                                                                                                                                                                                                                                                                                                                                                                                |      |      |           |       |      |      |                                                                                                                                                     |       |                      |                                                                                                                               |      |      |           |       |      |      |
|---------------------------|------------------------------------------------------------------------------------------------------------------------------------------------------------------------------------------------------------------------------------------------------------------------------------------------------------------------------------------------------------------------------------------------------------------------------------------------------------------------------------------------------------------------------------------------------------------------------------------------------------------------------------------------------------------------------------------------------------------------------------------------------------------------------------------------------------------------------------------------------------------------------------------------|------|------|-----------|-------|------|------|-----------------------------------------------------------------------------------------------------------------------------------------------------|-------|----------------------|-------------------------------------------------------------------------------------------------------------------------------|------|------|-----------|-------|------|------|
| Rsa1.0_01032.1.g22694.t10 | ref[XP_002876336.1] sedoheptulose-bisphosphatase [Arabidopsis lyrata subsp. lyrata] gi 297322174 gb EFH52595.1  sedoheptulose-bisphosphatase [Arabidopsis lyrata subsp. lyrata] gb AAC28207.1  T24H24.13 gene product [Arabidopsis thaliana]                                                                                                                                                                                                                                                                                                                                                                                                                                                                                                                                                                                                                                                   | 381  | 393  | 1.00E-38  | 103.1 | 25.5 | 26.5 | sedoheptulose-bisphosphatase                                                                                                                        | gbpln | Arabidopsis lyrata   | AT3G5800.1   Symbols: SBPASE   sedoheptulose-bisphosphatase   chr3:20709640-20711421 FORWARD LENGTH=393                       | 381  | 393  | 2.00E-40  | 103.1 | 24.9 | 26.5 |
| Rsa1.0_01032.1.g22695.t1  | gi 297309289 emb CAB7873.1  putative transposon protein [Arabidopsis thaliana]                                                                                                                                                                                                                                                                                                                                                                                                                                                                                                                                                                                                                                                                                                                                                                                                                 | 786  | 681  | 6.00E-17  | 86.6  | 6.5  | 9.8  | T24H24.13 gene product                                                                                                                              | gbpln | Arabidopsis thaliana | #                                                                                                                             | #    | #    | #         | #     | #    | #    |
| Rsa1.0_01033.1.g22696.t1  | ref[XP_002863453.1] hypothetical protein ARALYDRAFT_494402 [Arabidopsis lyrata subsp. lyrata] gi 297309289 gb EFH39712.1  hypothetical protein ARALYDRAFT_494402 [Arabidopsis lyrata subsp. lyrata]                                                                                                                                                                                                                                                                                                                                                                                                                                                                                                                                                                                                                                                                                            | 663  | 657  | 0         | 99.1  | 84.2 | 90.0 | hypothetical protein ARALYDRAFT_494402                                                                                                              | gbpln | Arabidopsis lyrata   | AT5G45800.1   Symbols: MEE62   Leucine-rich repeat protein kinase family protein   chr5:18575765-18578972 REVERSE LENGTH=666  | 663  | 666  | 0         | 100.5 | 83.9 | 89.6 |
| Rsa1.0_01033.1.g22697.t1  | gb EOA14707.1  hypothetical protein CARUB.v10027985mg [Capsella rubella]                                                                                                                                                                                                                                                                                                                                                                                                                                                                                                                                                                                                                                                                                                                                                                                                                       | 422  | 424  | 0         | 100.5 | 83.6 | 92.9 | hypothetical protein CARUB.v10027985mg                                                                                                              | gbpln | Capsella rubella     | AT5G45790.2   Symbols:   Ubiquitin carboxyl-terminal hydrolase family protein   chr5:18572345-18573664 FORWARD LENGTH=439     | 422  | 439  | 0         | 104.0 | 82.7 | 91.0 |
| Rsa1.0_01033.1.g22698.t1  | gb AFO67893.1  leucine-rich repeat receptor-like kinase (mitochondrion) [Brassica rapa subsp. oleifera]                                                                                                                                                                                                                                                                                                                                                                                                                                                                                                                                                                                                                                                                                                                                                                                        | 616  | 615  | 0         | 99.8  | 97.1 | 98.9 | leucine-rich repeat receptor-like kinase (mitochondrion)                                                                                            | gbpln | Brassica rapa        | AT5G45780.1   Symbols:   Leucine-rich repeat protein kinase family protein   chr5:18566946-18569625 REVERSE LENGTH=614        | 616  | 614  | 0         | 99.7  | 90.9 | 95.1 |
| Rsa1.0_01033.1.g22699.t1  | ref[NP_973487.2] Toll-Interleukin-Resistance domain-containing protein [Arabidopsis thaliana] gi 330251877 gb AEC06971.1  Toll-Interleukin-Resistance domain-containing protein [Arabidopsis thaliana]                                                                                                                                                                                                                                                                                                                                                                                                                                                                                                                                                                                                                                                                                         | 313  | 313  | 1.00E-156 | 100.0 | 84.0 | 92.0 | Toll-Interleukin-Resistance domain-containing protein                                                                                               | gbpln | Arabidopsis thaliana | AT2G20142.1   Symbols:   Toll-Interleukin-Resistance (TIR) domain family protein   chr2:8695387-8696566 FORWARD LENGTH=313    | 313  | 313  | 1.00E-159 | 100.0 | 84.0 | 92.0 |
| Rsa1.0_01033.1.g22700.t4  | ref[NP_850376.2] 60S ribosomal protein L11-1 [Arabidopsis thaliana] gi 297791141 ref[XP_002863455.1] 60S ribosomal protein L11 [Arabidopsis lyrata subsp. lyrata] gi 297804282 ref[XP_002870025.1] 60S ribosomal protein L11 [Arabidopsis lyrata subsp. lyrata] gi 21542441 sp P42795.2 RL111_ARATH RecName: Full=60S ribosomal protein L11-1; AltName: Full=L16A gi 110737006 dbj BAF00458.1  60S ribosomal protein L11B [Arabidopsis thaliana] gi 297309290 gb EFH39714.1  60S ribosomal protein L11 [Arabidopsis lyrata subsp. lyrata] gi 29731586.1 gb EFH46284.1  60S ribosomal protein L11 [Arabidopsis lyrata subsp. lyrata] gi 330255069 gb AEC10163.1  60S ribosomal protein L11-1 [Arabidopsis thaliana] gi 492549880 gb EOA14074.1  hypothetical protein CARUB.v10027211mg [Capsella rubella] gi 482560618 gb EOA24809.1  hypothetical protein CARUB.v10018095mg [Capsella rubella] | 261  | 182  | 1.00E-102 | 69.7  | 69.0 | 69.7 | 60S ribosomal protein L11-1                                                                                                                         | gbpln | Arabidopsis lyrata   | AT2G42740.1   Symbols: RPL16A   ribosomal protein large subunit 16A   chr2:17791794-17792946 FORWARD LENGTH=182               | 261  | 182  | 1.00E-104 | 69.7  | 69.0 | 69.7 |
| Rsa1.0_01033.1.g22701.t1  | pir [S65812 RNA-directed DNA polymerase (EC 2.7.7.49) (clone DW15) - Arabidopsis thaliana retrotransposon Ta11-1 gi 976278 gb AAA75254.1  reverse transcriptase [Arabidopsis thaliana]                                                                                                                                                                                                                                                                                                                                                                                                                                                                                                                                                                                                                                                                                                         | 150  | 1333 | 2.00E-14  | 888.7 | 30.0 | 42.0 | RNA-directed DNA polymerase (EC 2.7.7.49) (clone DW15) - Arabidopsis thaliana retrotransposon Ta11-1 gi 976278 gb AAA75254.1  reverse transcriptase | gbpln | Arabidopsis thaliana | AT4G29090.1   Symbols:   Ribonuclease H-like superfamily protein   chr4:14333528-14335255 FORWARD LENGTH=575                  | 150  | 575  | 4.00E-13  | 383.3 | 26.0 | 36.0 |
| Rsa1.0_01033.1.g22702.t1  | gb AAD19784.1  putative retroelement pol polyprotein [Arabidopsis thaliana]                                                                                                                                                                                                                                                                                                                                                                                                                                                                                                                                                                                                                                                                                                                                                                                                                    | 1647 | 1501 | 0         | 91.1  | 51.7 | 65.5 | putative retroelement pol polyprotein                                                                                                               | gbpln | Arabidopsis thaliana | AT4G23160.1   Symbols: CRK8   cysteine-rich RLK (RECEPTOR-like protein kinase) 8   chr4:12129485-12134086 FORWARD LENGTH=1262 | 1647 | 1262 | 1.00E-142 | 76.6  | 14.5 | 20.2 |
| Rsa1.0_01033.1.g22703.t1  | #                                                                                                                                                                                                                                                                                                                                                                                                                                                                                                                                                                                                                                                                                                                                                                                                                                                                                              | #    | #    | #         | #     | #    | #    | -                                                                                                                                                   | ----  | ----                 | #                                                                                                                             | #    | #    | #         | #     | #    | #    |

|                          |                                                                                                                                                                                                                                                                                                                                                                                                                                                                                                                                                                                                                                                                                                                                                                |     |     |           |       |      |       |                                                 |       |                      |                                                                                                                                                                                                                                                                                                                                                                                                                                                                                      |     |     |           |       |      |      |
|--------------------------|----------------------------------------------------------------------------------------------------------------------------------------------------------------------------------------------------------------------------------------------------------------------------------------------------------------------------------------------------------------------------------------------------------------------------------------------------------------------------------------------------------------------------------------------------------------------------------------------------------------------------------------------------------------------------------------------------------------------------------------------------------------|-----|-----|-----------|-------|------|-------|-------------------------------------------------|-------|----------------------|--------------------------------------------------------------------------------------------------------------------------------------------------------------------------------------------------------------------------------------------------------------------------------------------------------------------------------------------------------------------------------------------------------------------------------------------------------------------------------------|-----|-----|-----------|-------|------|------|
| Rsa1.0_01033.1.g22704.t1 | refNP_199387.1  Ras-related protein RABA1c [Arabidopsis thaliana] gi 297794685 ref XP_002865227.1  hypothetical protein ARALYDRAFT_494409 [Arabidopsis lyrata subsp. lyrata] gi 75171186 sp Q9FK68.1 RAA1C,ARAT H RecName: Full=Ras-related protein RABA1c; Short=AtRABA1c gi 13877913 gb AAK44034.1 AF370219.1 putative Rab-type small GTP-binding protein [Arabidopsis thaliana] gi 9758678 dbj BAB09217.1  Rab-type small GTP-binding protein-like [Arabidopsis thaliana] gi 16323446 gb AAL15217.1  putative Rab-type small GTP-binding protein [Arabidopsis thaliana] gi 297311062 gb EFH41486.1  hypothetical protein ARALYDRAFT_494409 [Arabidopsis lyrata subsp. lyrata] gi 332007909 gb AED95292.1  Ras-related protein RABA1c [Arabidopsis thaliana] | 216 | 216 | 1.00E-118 | 100.0 | 96.3 | 98.1  | Ras-related protein RABA1c                      | gbpln | Arabidopsis lyrata   | AT5G45750.1   Symbols: AtRABA1c, RABA1c   RAB GTPase homolog A1C   chr5:18559318-18560639 FORWARD LENGTH=216                                                                                                                                                                                                                                                                                                                                                                         | 216 | 216 | 1.00E-121 | 100.0 | 96.3 | 98.1 |
| Rsa1.0_01034.1.g22705.t1 | #                                                                                                                                                                                                                                                                                                                                                                                                                                                                                                                                                                                                                                                                                                                                                              | #   | #   | #         | #     | #    | #     | -                                               | ---   | ---                  | #                                                                                                                                                                                                                                                                                                                                                                                                                                                                                    | #   | #   | #         | #     | #    |      |
| Rsa1.0_01034.1.g22706.t1 | ref XP_002878272.1  hypothetical protein ARALYDRAFT_324413 [Arabidopsis lyrata subsp. lyrata] gi 297322411 gb EFH54531.1  hypothetical protein ARALYDRAFT_324413 [Arabidopsis lyrata subsp. lyrata]                                                                                                                                                                                                                                                                                                                                                                                                                                                                                                                                                            | 128 | 457 | 8.00E-11  | 357.0 | 38.3 | 46.9  | hypothetical protein ARALYDRAFT_324413          | gbpln | Arabidopsis lyrata   | AT3G59430.3   Symbols:   unknown protein; FUNCTIONS IN: molecular function unknown; INVOLVED IN: biological process unknown; LOCATED IN: cellular component unknown; EXPRESSED IN: 21 plant structures; EXPRESSED DURING: 10 growth stages; Has 35333 Blast hits to 34131 proteins in 2444 species: Archae - 798; Bacteria - 22429; Metazoa - 974; Fungi - 991; Plants - 531; Viruses - 0; Other Eukaryotes - 9610 (source: NCBI BLink).   chr3:21964484-21965606 REVERSE LENGTH=345 | 128 | 345 | 3.00E-13  | 269.5 | 38.3 | 45.3 |
| Rsa1.0_01034.1.g22707.t1 | gb EOA25120.1  hypothetical protein CARUB_v10018428mg, partial [Capsella rubella]                                                                                                                                                                                                                                                                                                                                                                                                                                                                                                                                                                                                                                                                              | 340 | 320 | 1.00E-35  | 94.1  | 29.4 | 44.1  | hypothetical protein CARUB_v10018428mg, partial | gbpln | Capsella rubella     | AT3G44780.1   Symbols:   Cysteine proteinases superfamily protein   chr3:16321624-16322604 REVERSE LENGTH=207                                                                                                                                                                                                                                                                                                                                                                        | 340 | 207 | 1.00E-15  | 60.9  | 13.8 | 19.4 |
| Rsa1.0_01034.1.g22708.t1 | ref XP_002879859.1  hypothetical protein ARALYDRAFT_903307 [Arabidopsis lyrata subsp. lyrata] gi 297325698 gb EFH56118.1  hypothetical protein ARALYDRAFT_903307 [Arabidopsis lyrata subsp. lyrata]                                                                                                                                                                                                                                                                                                                                                                                                                                                                                                                                                            | 217 | 304 | 1.00E-57  | 140.1 | 53.9 | 67.3  | hypothetical protein ARALYDRAFT_903307          | gbpln | Arabidopsis lyrata   | AT4G20095.2   Symbols:   Protein of unknown function (DUF626)   chr4:10871734-10873072 REVERSE LENGTH=249                                                                                                                                                                                                                                                                                                                                                                            | 217 | 249 | 6.00E-43  | 114.7 | 44.7 | 61.3 |
| Rsa1.0_01034.1.g22709.t1 | gb ACR56738.1  trans-2,3-enoyl-CoA reductase [Brassica napus] gi 238915413 gb ACR56737.1  trans-2,3-enoyl-CoA reductase [Brassica napus]                                                                                                                                                                                                                                                                                                                                                                                                                                                                                                                                                                                                                       | 310 | 310 | 0         | 100.0 | 99.7 | 100.0 | trans-2,3-enoyl-CoA reductase                   | gbpln | Brassica napus       | AT3G55360.1   Symbols: CER10, ECR, ATTS13, TSC13   3-oxo-5-alpha-steroid 4-dehydrogenase family protein   chr3:20521186-20522856 REVERSE LENGTH=310                                                                                                                                                                                                                                                                                                                                  | 310 | 310 | 0         | 100.0 | 97.4 | 99.0 |
| Rsa1.0_01034.1.g22710.t1 | ref NP_191095.1  PIF / Ping-Pong family of plant transposase [Arabidopsis thaliana] gi 7076778 emb CAB75893.1  putative protein [Arabidopsis thaliana] gi 21593300 gb AAM65249.1  unknown [Arabidopsis thaliana] gi 26449824 dbj BAC42035.1  unknown protein [Arabidopsis thaliana] gi 32362295 gb AAP80175.1  At3g55350 [Arabidopsis thaliana] gi 332645850 gb AEE79371.1  PIF / Ping-Pong family of plant transposase [Arabidopsis thaliana]                                                                                                                                                                                                                                                                                                                 | 406 | 406 | 0         | 100.0 | 79.3 | 83.5  | PIF / Ping-Pong family of plant transposase     | gbpln | Arabidopsis thaliana | AT3G55350.1   Symbols:   PIF / Ping-Pong family of plant transposases   chr3:20518518-20520690 FORWARD LENGTH=406                                                                                                                                                                                                                                                                                                                                                                    | 406 | 406 | 0         | 100.0 | 79.3 | 83.5 |
| Rsa1.0_01034.1.g22711.t1 | gb EOA18469.1  hypothetical protein CARUB_v10007015mg [Capsella rubella]                                                                                                                                                                                                                                                                                                                                                                                                                                                                                                                                                                                                                                                                                       | 888 | 451 | 1.00E-136 | 50.8  | 30.2 | 36.0  | hypothetical protein CARUB_v10007015mg          | gbpln | Capsella rubella     | AT1G70770.2   Symbols:   Protein of unknown function DUF2359, transmembrane   chr1:26688622-26691185 REVERSE LENGTH=610                                                                                                                                                                                                                                                                                                                                                              | 888 | 610 | 1.00E-120 | 68.7  | 27.3 | 32.2 |
| Rsa1.0_01034.1.g22712.t1 | gb EOA23583.1  hypothetical protein CARUB_v10016779mg [Capsella rubella]                                                                                                                                                                                                                                                                                                                                                                                                                                                                                                                                                                                                                                                                                       | 644 | 677 | 0         | 105.1 | 70.8 | 80.7  | hypothetical protein CARUB_v10016779mg          | gbpln | Capsella rubella     | AT3G55340.1   Symbols: PHIP1   phragmoplast interacting protein 1   chr3:20515672-20517832 FORWARD LENGTH=597                                                                                                                                                                                                                                                                                                                                                                        | 644 | 597 | 1.00E-180 | 92.7  | 58.9 | 68.5 |

|                          |                                                                                                                                                                                                                              |     |      |           |       |       |       |                                                    |                                              |                      |                                                                                                                                                                                                                                                                                                                                                                                                                                                                          |                                                                                                      |     |           |          |      |      |      |
|--------------------------|------------------------------------------------------------------------------------------------------------------------------------------------------------------------------------------------------------------------------|-----|------|-----------|-------|-------|-------|----------------------------------------------------|----------------------------------------------|----------------------|--------------------------------------------------------------------------------------------------------------------------------------------------------------------------------------------------------------------------------------------------------------------------------------------------------------------------------------------------------------------------------------------------------------------------------------------------------------------------|------------------------------------------------------------------------------------------------------|-----|-----------|----------|------|------|------|
| Rsa1.0_01034.1.g22713.t1 | refXP_002876294.1   short-chain dehydrogenase/reductase family protein [Arabidopsis lyrata subsp. lyrata] gi 297322132 gb EFH52553.1   short-chain dehydrogenase/reductase family protein [Arabidopsis lyrata subsp. lyrata] | 288 | 280  | 1.00E-123 | 97.2  | 78.1  | 87.8  | short-chain dehydrogenase/reductase family protein | gbpln                                        | Arabidopsis lyrata   | AT3G55290.2   Symbols:   NAD(P)-binding Rossmann-fold superfamily protein   chr3:20502653-20503730 FORWARD LENGTH=279                                                                                                                                                                                                                                                                                                                                                    | 288                                                                                                  | 279 | 1.00E-125 | 96.9     | 76.7 | 87.5 |      |
| Rsa1.0_01034.1.g22714.t1 | gb ABB97038.1  unknown [Brassica rapa]                                                                                                                                                                                       | 154 | 154  | 8.00E-79  | 100.0 | 99.4  | 100.0 | unknown                                            | gbpln                                        | Brassica rapa        | AT3G55280.2   Symbols: RPL23AB   ribosomal protein L23AB   chr3:20500667-20501519 FORWARD LENGTH=154                                                                                                                                                                                                                                                                                                                                                                     | 154                                                                                                  | 154 | 5.00E-61  | 100.0    | 94.8 | 96.8 |      |
| Rsa1.0_01034.1.g22715.t1 | refXP_002876290.1   hypothetical protein ARALYDRAFT_348614 [Arabidopsis lyrata subsp. lyrata] gi 297322128 gb EFH52549.1   hypothetical protein ARALYDRAFT_348614 [Arabidopsis lyrata subsp. lyrata]                         | 106 | 277  | 4.00E-28  | 261.3 | 64.2  | 67.9  | hypothetical protein ARALYDRAFT_348614             | gbpln                                        | Arabidopsis lyrata   | AT3G55250.1   Symbols:   unknown protein; FUNCTIONS IN: molecular, function unknown; INVOLVED IN: biological process unknown; LOCATED IN: mitochondrion, chloroplast, nucleus; EXPRESSED IN: 23 plant structures; EXPRESSED DURING: 13 growth stages; Has 46 Blast hits to 46 proteins in 17 species: Archae - 0; Bacteria - 0; Metazoa - 0; Fungi - 0; Plants - 46; Viruses - 0; Other Eukaryotes - 0 (source: NCBI BLINK).   chr3:20479302-20480324 FORWARD LENGTH=277 | 106                                                                                                  | 277 | 3.00E-29  | 261.3    | 61.3 | 67.0 |      |
| Rsa1.0_01034.1.g22716.t1 | #                                                                                                                                                                                                                            | #   | #    | #         | #     | #     | #     | -                                                  | ----                                         | ----                 | #                                                                                                                                                                                                                                                                                                                                                                                                                                                                        | #                                                                                                    | #   | #         | #        | #    |      |      |
| Rsa1.0_01035.1.g22717.t1 | gb AAG51783.1 AC079679_3 reverse transcriptase, putative; 16838-20266 [Arabidopsis thaliana]                                                                                                                                 | 740 | 1142 |           | 0     | 154.3 | 46.2  | 56.9                                               | reverse transcriptase, putative; 16838-20266 | gbpln                | Arabidopsis thaliana                                                                                                                                                                                                                                                                                                                                                                                                                                                     | AT1G43760.1   Symbols:   DNAse I-like superfamily protein   chr1:1652880-16531065 REVERSE LENGTH=626 | 740 | 626       | 5.00E-38 | 84.6 | 15.8 | 26.1 |
| Rsa1.0_01035.1.g22718.t1 | gb EOA29603.1  hypothetical protein CARUB_v10013521mg, partial [Capsella rubella]                                                                                                                                            | 547 | 498  | 4.00E-66  | 91.0  | 24.3  | 32.9  | hypothetical protein CARUB_v10013521mg, partial    | gbpln                                        | Capsella rubella     | AT3G31430.1   Symbols:   unknown protein; FUNCTIONS IN: molecular, function unknown; INVOLVED IN: biological process unknown; LOCATED IN: endomembrane system; BEST Arabidopsis thaliana protein match is: unknown protein (TAIR:AT5G18636.1); Has 295 Blast hits to 291 proteins in 12 species: Archae - 0; Bacteria - 0; Metazoa - 0; Fungi - 0; Plants - 295; Viruses - 0; Other Eukaryotes - 0 (source: NCBI BLINK).   chr3:12795861-12796871 REVERSE LENGTH=336     | 547                                                                                                  | 336 | 4.00E-26  | 61.4     | 12.4 | 19.0 |      |
| Rsa1.0_01035.1.g22719.t1 | refXP_002874244.1   hypothetical protein ARALYDRAFT_489371 [Arabidopsis lyrata subsp. lyrata] gi 297320081 gb EFH50503.1   hypothetical protein ARALYDRAFT_489371 [Arabidopsis lyrata subsp. lyrata]                         | 192 | 183  | 1.00E-81  | 95.3  | 82.8  | 87.0  | hypothetical protein ARALYDRAFT_489371             | gbpln                                        | Arabidopsis lyrata   | AT5G25190.1   Symbols:   Integrase-type DNA-binding superfamily protein   chr5:8707007-8707655 REVERSE LENGTH=181                                                                                                                                                                                                                                                                                                                                                        | 192                                                                                                  | 181 | 4.00E-81  | 94.3     | 79.2 | 85.4 |      |
| Rsa1.0_01035.1.g22720.t1 | refXP_002867420.1   phosphofructokinase family protein [Arabidopsis lyrata subsp. lyrata] gi 297313256 gb EFH43679.1   phosphofructokinase family protein [Arabidopsis lyrata subsp. lyrata]                                 | 229 | 472  | 2.00E-79  | 206.1 | 65.1  | 69.0  | phosphofructokinase family protein                 | gbpln                                        | Arabidopsis lyrata   | AT4G29220.1   Symbols: PFK1   phosphofructokinase 1   chr4:14403621-14406071 REVERSE LENGTH=473                                                                                                                                                                                                                                                                                                                                                                          | 229                                                                                                  | 473 | 5.00E-81  | 206.6    | 64.2 | 68.6 |      |
| Rsa1.0_01035.1.g22721.t1 | #                                                                                                                                                                                                                            | #   | #    | #         | #     | #     | #     | -                                                  | ----                                         | ----                 | #                                                                                                                                                                                                                                                                                                                                                                                                                                                                        | #                                                                                                    | #   | #         | #        | #    |      |      |
| Rsa1.0_01035.1.g22722.t1 | gb EOA21634.1  hypothetical protein CARUB_v10002045mg [Capsella rubella]                                                                                                                                                     | 175 | 188  | 2.00E-35  | 107.4 | 60.6  | 71.4  | hypothetical protein CARUB_v10002045mg             | gbpln                                        | Capsella rubella     | AT5G25210.1   Symbols:   unknown protein; BEST Arabidopsis thaliana protein match is: unknown protein (TAIR:AT4G32030.1); Has 30201 Blast hits to 17322 proteins in 780 species: Archae - 12; Bacteria - 1396; Metazoa - 17338; Fungi - 3422; Plants - 5037; Viruses - 0; Other Eukaryotes - 2996 (source: NCBI BLINK).   chr5:8724056-8725465 FORWARD LENGTH=175                                                                                                        | 175                                                                                                  | 175 | 1.00E-29  | 100.0    | 52.6 | 67.4 |      |
| Rsa1.0_01035.1.g22723.t1 | gb EOA20703.1  hypothetical protein CARUB_v10001020mg [Capsella rubella]                                                                                                                                                     | 452 | 427  | 0         | 94.5  | 83.4  | 85.8  | hypothetical protein CARUB_v10001020mg             | gbpln                                        | Capsella rubella     | AT5G25220.1   Symbols: KNAT3   KNOTTED1-like homeobox gene 3   chr5:8736208-8738115 FORWARD LENGTH=431                                                                                                                                                                                                                                                                                                                                                                   | 452                                                                                                  | 431 | 0         | 95.4     | 85.2 | 86.9 |      |
| Rsa1.0_01035.1.g22724.t1 | gb EOA22342.1  hypothetical protein CARUB_v10002958mg [Capsella rubella]                                                                                                                                                     | 623 | 660  | 0         | 105.9 | 80.3  | 86.4  | hypothetical protein CARUB_v10002958mg             | gbpln                                        | Capsella rubella     | AT5G25270.1   Symbols:   Ubiquitin-like superfamily protein   chr5:8757577-8762002 REVERSE LENGTH=658                                                                                                                                                                                                                                                                                                                                                                    | 623                                                                                                  | 658 | 0         | 105.6    | 78.2 | 83.9 |      |
| Rsa1.0_01036.1.g22725.t1 | gb EOA33796.1  hypothetical protein CARUB_v10021265mg [Capsella rubella]                                                                                                                                                     | 141 | 167  | 3.00E-69  | 118.4 | 89.4  | 97.2  | hypothetical protein CARUB_v10021265mg             | gbpln                                        | Capsella rubella     | AT1G66360.1   Symbols:   Calcium-dependent lipid-binding (CaLB domain) family protein   chr1:24751431-24752607 FORWARD LENGTH=174                                                                                                                                                                                                                                                                                                                                        | 141                                                                                                  | 174 | 1.00E-71  | 123.4    | 87.9 | 96.5 |      |
| Rsa1.0_01036.1.g22726.t1 | dbj BAA97290.1  non-LTR retroelement reverse transcriptase-like [Arabidopsis thaliana]                                                                                                                                       | 267 | 1072 | 4.00E-31  | 401.5 | 32.2  | 50.6  | non-LTR retroelement reverse transcriptase-like    | gbpln                                        | Arabidopsis thaliana | AT1G60720.1   Symbols:   RNA-directed DNA polymerase (reverse transcriptase)-related family protein   chr1:22357072-22357941 FORWARD LENGTH=289                                                                                                                                                                                                                                                                                                                          | 267                                                                                                  | 289 | 9.00E-33  | 108.2    | 33.0 | 52.1 |      |



|                          |      |      |           |       |      |      |                                                                                |       |                      |                                                                                                                                                                                                                                                                                                                                                               |      |      |           |       |      |      |
|--------------------------|------|------|-----------|-------|------|------|--------------------------------------------------------------------------------|-------|----------------------|---------------------------------------------------------------------------------------------------------------------------------------------------------------------------------------------------------------------------------------------------------------------------------------------------------------------------------------------------------------|------|------|-----------|-------|------|------|
| Rsa1.0_01036.1.g22727.t2 | 2040 | 1532 | 1.00E-173 | 75.1  | 22.7 | 28.3 | uncharacterized protein                                                        | gbpln | Arabidopsis thaliana | AT1G76740.1   Symbols:   unknown protein; BEST Arabidopsis thaliana protein match is: unknown protein (TAIR:AT1G76840.1). Has 3683 Blast hits to 2942 proteins in 407 species: Archae - 9; Bacteria - 440; Metazoa - 1472; Fungi - 269; Plants - 192; Viruses - 8; Other Eukaryotes - 1293 (source: NCBI BLink).   chr1:28805235-28810477 FORWARD LENGTH=1532 | 2040 | 1532 | 1.00E-175 | 75.1  | 22.7 | 28.3 |
| Rsa1.0_01036.1.g22728.t1 | 172  | 172  | 6.00E-79  | 100.0 | 83.1 | 90.7 | thioredoxin Y1                                                                 | gbpln | Arabidopsis thaliana | AT1G76760.1   Symbols: ATY1, TRX-Y1, TY1   thioredoxin Y1   chr1:28811873-28812948 REVERSE LENGTH=172                                                                                                                                                                                                                                                         | 172  | 172  | 2.00E-81  | 100.0 | 83.1 | 90.7 |
| Rsa1.0_01036.1.g22729.t1 | 245  | 249  | 4.00E-58  | 101.6 | 66.1 | 76.3 | hypothetical protein ARALYDRAFT_339849                                         | gbpln | Arabidopsis lyrata   | AT1G76770.1   Symbols:   HSP20-like chaperones superfamily protein   chr1:28813569-28814378 FORWARD LENGTH=244                                                                                                                                                                                                                                                | 245  | 244  | 3.00E-52  | 99.6  | 44.1 | 46.9 |
| Rsa1.0_01036.1.g22730.t1 | 370  | 370  | 0         | 100.0 | 95.9 | 97.8 | O-methyltransferase family 2 protein                                           | gbpln | Brassica napus       | AT1G76790.1   Symbols:   O-methyltransferase family protein   chr1:28822355-28823630 REVERSE LENGTH=367                                                                                                                                                                                                                                                       | 370  | 367  | 1.00E-167 | 99.2  | 80.0 | 88.6 |
| Rsa1.0_01036.1.g22731.t1 | 194  | 196  | 1.00E-87  | 101.0 | 91.2 | 96.9 | vacuolar iron transporter-like protein                                         | gbpln | Arabidopsis thaliana | AT1G76800.1   Symbols:   Vacuolar iron transporter (VIT) family protein   chr1:28829345-28829935 FORWARD LENGTH=196                                                                                                                                                                                                                                           | 194  | 196  | 4.00E-90  | 101.0 | 91.2 | 96.9 |
| Rsa1.0_01036.1.g22732.t1 | 97   | 98   | 3.00E-44  | 101.0 | 93.8 | 95.9 | hypothetical protein ARALYDRAFT_895567                                         | gbpln | Arabidopsis lyrata   | AT1G76860.1   Symbols:   Small nuclear ribonucleoprotein family protein   chr1:28854594-28855637 REVERSE LENGTH=98                                                                                                                                                                                                                                            | 97   | 98   | 1.00E-46  | 101.0 | 92.8 | 95.9 |
| Rsa1.0_01036.1.g22733.t1 | #    | #    | #         | #     | #    | #    | -                                                                              | ----  | ----                 | #                                                                                                                                                                                                                                                                                                                                                             | #    | #    | #         | #     | #    | #    |
| Rsa1.0_01036.1.g22734.t1 | 555  | 598  | 1.00E-175 | 107.7 | 67.7 | 72.8 | hypothetical protein ARALYDRAFT_895569                                         | gbpln | Arabidopsis lyrata   | AT1G76880.1   Symbols:   Duplicated homeodomain-like superfamily protein   chr1:28873211-28875203 REVERSE LENGTH=603                                                                                                                                                                                                                                          | 555  | 603  | 1.00E-175 | 108.6 | 66.1 | 71.9 |
| Rsa1.0_01036.1.g22735.t1 | 569  | 575  | 0         | 101.1 | 86.3 | 91.6 | GT2                                                                            | gbpln | Arabidopsis thaliana | AT1G76890.2   Symbols: GT2, AT-GT2   Duplicated homeodomain-like superfamily protein   chr1:28873211-28875203 REVERSE LENGTH=575                                                                                                                                                                                                                              | 569  | 575  | 0         | 101.1 | 86.6 | 91.9 |
| Rsa1.0_01037.1.g22736.t1 | 571  | 1586 | 3.00E-20  | 277.8 | 14.5 | 22.1 | T32E20.9                                                                       | gbpln | Arabidopsis thaliana | #                                                                                                                                                                                                                                                                                                                                                             | #    | #    | #         | #     | #    | #    |
| Rsa1.0_01037.1.g22737.t7 | 1371 | 777  | 1.00E-34  | 56.7  | 8.0  | 11.5 | retroelement pol polyprotein-like                                              | gbpln | Arabidopsis thaliana | #                                                                                                                                                                                                                                                                                                                                                             | #    | #    | #         | #     | #    | #    |
| Rsa1.0_01037.1.g22738.t1 | 202  | 940  | 5.00E-34  | 465.3 | 35.6 | 47.0 | contains similarity to Arabidopsis thaliana retrotransposon Athila (GB:X81801) | gbpln | Arabidopsis thaliana | #                                                                                                                                                                                                                                                                                                                                                             | #    | #    | #         | #     | #    | #    |
| Rsa1.0_01037.1.g22739.t1 | #    | #    | #         | #     | #    | #    | -                                                                              | ----  | ----                 | #                                                                                                                                                                                                                                                                                                                                                             | #    | #    | #         | #     | #    | #    |
| Rsa1.0_01037.1.g22740.t1 | #    | #    | #         | #     | #    | #    | -                                                                              | ----  | ----                 | #                                                                                                                                                                                                                                                                                                                                                             | #    | #    | #         | #     | #    | #    |

|                          |                                                                                                                                                                                                                                                                                                                                                                                                                                   |      |      |           |       |      |      |                                                     |       |                      |                                                                                                                                        |      |      |           |       |      |      |
|--------------------------|-----------------------------------------------------------------------------------------------------------------------------------------------------------------------------------------------------------------------------------------------------------------------------------------------------------------------------------------------------------------------------------------------------------------------------------|------|------|-----------|-------|------|------|-----------------------------------------------------|-------|----------------------|----------------------------------------------------------------------------------------------------------------------------------------|------|------|-----------|-------|------|------|
| Rsa1.0_01037.1.g22741.t1 | #                                                                                                                                                                                                                                                                                                                                                                                                                                 | #    | #    | #         | #     | #    | #    | #                                                   | -     | ----                 | ----                                                                                                                                   | #    | #    | #         | #     | #    | #    |
| Rsa1.0_01037.1.g22742.t2 | #                                                                                                                                                                                                                                                                                                                                                                                                                                 | #    | #    | #         | #     | #    | #    | #                                                   | -     | ----                 | ----                                                                                                                                   | #    | #    | #         | #     | #    | #    |
| Rsa1.0_01037.1.g22743.t1 | ref[XP_002893978.1] hypothetical protein ARALYDRAFT_473798 [Arabidopsis lyrata subsp. lyrata] gi 297339820 gb EFH70237.1  hypothetical protein ARALYDRAFT_473798 [Arabidopsis lyrata subsp. lyrata]                                                                                                                                                                                                                               | 476  | 480  | 0         | 100.8 | 79.2 | 89.3 | hypothetical protein ARALYDRAFT_473798              | gbpln | Arabidopsis lyrata   | AT1G44100.1   Symbols: AAP5   amino acid permease 5   chr1:16764651-16767223 REVERSE LENGTH=480                                        | 476  | 480  | 0         | 100.8 | 77.9 | 88.7 |
| Rsa1.0_01038.1.g22744.t2 | ref[XP_002863555.1] minichromosome maintenance family protein [Arabidopsis lyrata subsp. lyrata] gi 297309390 gb EFH39814.1  minichromosome maintenance family protein [Arabidopsis lyrata subsp. lyrata]                                                                                                                                                                                                                         | 334  | 830  | 3.00E-97  | 248.5 | 67.7 | 73.1 | minichromosome maintenance family protein           | gbpln | Arabidopsis lyrata   | AT5G44635.1   Symbols: MCM6   minichromosome maintenance (MCM2/3/5) family protein   chr5:18006431-18010542 REVERSE LENGTH=831         | 334  | 831  | 8.00E-97  | 248.8 | 65.9 | 72.5 |
| Rsa1.0_01038.1.g22745.t1 | ref[NP_199276.1] alpha-barbatene synthase [Arabidopsis thaliana] gi 254810224 sp Q4KSH9.2 BARS_ARATH RecName: Full=Alpha-barbatene synthase; Short=ATBS; AltName: Full=Beta-chamigrene synthase; AltName: Full=Terpendeoid synthase 11; Short=AtTPS11; AltName: Full=Thujopsene synthase gi 126352284 gb ABO09887.1  At5g44630 [Arabidopsis thaliana] gi 332007757 gb AED95140.1  alpha-barbatene synthase [Arabidopsis thaliana] | 349  | 557  | 1.00E-160 | 159.6 | 76.8 | 86.0 | alpha-barbatene synthase                            | gbpln | Arabidopsis thaliana | AT5G44630.1   Symbols:   Terpenoid cyclases/Protein prenyltransferases superfamily protein   chr5:18003280-18005616 FORWARD LENGTH=557 | 349  | 557  | 1.00E-163 | 159.6 | 76.8 | 86.0 |
| Rsa1.0_01038.1.g22746.t1 | gb AAC02666.1  polyprotein [Arabidopsis thaliana]                                                                                                                                                                                                                                                                                                                                                                                 | 1346 | 1451 | 0         | 107.8 | 67.4 | 79.0 | polyprotein                                         | gbpln | Arabidopsis thaliana | AT4G23160.1   Symbols: CRK8   cysteine-rich RLK (RECEPTOR-like protein kinase) 8   chr4:12129485-12134086 FORWARD LENGTH=1262          | 1346 | 1262 | 7.00E-96  | 93.8  | 13.2 | 19.1 |
| Rsa1.0_01038.1.g22747.t1 | gb EOA14843.1  hypothetical protein CARUB_v10028157mg [Capsella rubella]                                                                                                                                                                                                                                                                                                                                                          | 136  | 557  | 1.00E-38  | 409.6 | 59.6 | 69.9 | hypothetical protein CARUB_v10028157mg              | gbpln | Capsella rubella     | AT5G44630.1   Symbols:   Terpenoid cyclases/Protein prenyltransferases superfamily protein   chr5:18003280-18005616 FORWARD LENGTH=557 | 136  | 557  | 4.00E-35  | 409.6 | 54.4 | 65.4 |
| Rsa1.0_01038.1.g22748.t2 | #                                                                                                                                                                                                                                                                                                                                                                                                                                 | #    | #    | #         | #     | #    | #    | -                                                   | ----  | ----                 | #                                                                                                                                      | #    | #    | #         | #     | #    |      |
| Rsa1.0_01038.1.g22749.t1 | dbj BAJ33888.1  unnamed protein product [Theilungella halophila]                                                                                                                                                                                                                                                                                                                                                                  | 291  | 245  | 8.00E-38  | 84.2  | 35.4 | 42.6 | unnamed protein product                             | ----  | ----                 | #                                                                                                                                      | #    | #    | #         | #     | #    |      |
| Rsa1.0_01038.1.g22750.t1 | #                                                                                                                                                                                                                                                                                                                                                                                                                                 | #    | #    | #         | #     | #    | #    | -                                                   | ----  | ----                 | #                                                                                                                                      | #    | #    | #         | #     | #    |      |
| Rsa1.0_01038.1.g22751.t1 | #                                                                                                                                                                                                                                                                                                                                                                                                                                 | #    | #    | #         | #     | #    | #    | -                                                   | ----  | ----                 | #                                                                                                                                      | #    | #    | #         | #     | #    |      |
| Rsa1.0_01038.1.g22752.t1 | ref[XP_002878762.1] predicted protein [Arabidopsis lyrata subsp. lyrata] gi 297324601 gb EFH55021.1  predicted protein [Arabidopsis lyrata subsp. lyrata]                                                                                                                                                                                                                                                                         | 400  | 374  | 8.00E-66  | 93.5  | 42.8 | 58.5 | predicted protein                                   | gbpln | Arabidopsis lyrata   | AT3G17540.1   Symbols:   F-box and associated interaction domains-containing protein   chr3:6002783-6003973 FORWARD LENGTH=396         | 400  | 396  | 3.00E-67  | 99.0  | 42.5 | 59.3 |
| Rsa1.0_01038.1.g22753.t1 | gb AAD12028.1  putative non-LTR retroelement reverse transcriptase [Arabidopsis thaliana]                                                                                                                                                                                                                                                                                                                                         | 386  | 1447 | 3.00E-85  | 374.9 | 42.7 | 61.9 | putative non-LTR retroelement reverse transcriptase | gbpln | Arabidopsis thaliana | AT1G43760.1   Symbols:   DNase I-like superfamily protein   chr1:16528880-16531065 REVERSE LENGTH=626                                  | 386  | 626  | 4.00E-29  | 162.2 | 16.8 | 28.5 |
| Rsa1.0_01038.1.g22754.t1 | #                                                                                                                                                                                                                                                                                                                                                                                                                                 | #    | #    | #         | #     | #    | #    | -                                                   | ----  | ----                 | #                                                                                                                                      | #    | #    | #         | #     | #    |      |
| Rsa1.0_01039.1.g22755.t1 | ref[XP_002875755.1] hypothetical protein ARALYDRAFT_484967 [Arabidopsis lyrata subsp. lyrata] gi 297321593 gb EFH52014.1  hypothetical protein ARALYDRAFT_484967 [Arabidopsis lyrata subsp. lyrata]                                                                                                                                                                                                                               | 462  | 385  | 1.00E-174 | 83.3  | 69.9 | 72.3 | hypothetical protein ARALYDRAFT_484967              | gbpln | Arabidopsis lyrata   | AT3G45870.1   Symbols:   nodulin MtN21 /EamA-like transporter family protein   chr3:16867246-16868338 FORWARD LENGTH=385               | 462  | 385  | 1.00E-171 | 83.3  | 66.9 | 69.0 |
| Rsa1.0_01039.1.g22756.t5 | ref[XP_002877437.1] predicted protein [Arabidopsis lyrata subsp. lyrata] gi 297323275 gb EFH53696.1  predicted protein [Arabidopsis lyrata subsp. lyrata]                                                                                                                                                                                                                                                                         | 956  | 912  | 0         | 95.4  | 78.0 | 82.3 | predicted protein                                   | gbpln | Arabidopsis lyrata   | AT3G45810.1   Symbols:   ferric reductase-like transmembrane component family protein   chr3:16832883-16837569 REVERSE LENGTH=912      | 956  | 912  | 0         | 95.4  | 77.0 | 81.9 |
| Rsa1.0_01039.1.g22757.t1 | ref[XP_002873380.1] IBR domain-containing protein [Arabidopsis lyrata subsp. lyrata] gi 297319217 gb EFH49639.1  IBR domain-containing protein [Arabidopsis lyrata subsp. lyrata]                                                                                                                                                                                                                                                 | 455  | 497  | 1.00E-129 | 109.2 | 53.8 | 67.3 | IBR domain-containing protein                       | gbpln | Arabidopsis lyrata   | AT5G08730.1   Symbols: ATARI16, ARI16   IBR domain-containing protein   chr5:2845824-2847415 REVERSE LENGTH=500                        | 455  | 500  | 1.00E-127 | 109.9 | 52.1 | 67.5 |

|                          |                                                                                                                                                                                                                                                                                                                                                                                                                                                                                                                                                                                                                                                                                        |     |      |           |        |      |      |                                                       |       |                      |                                                                                                                               |     |     |           |       |      |      |
|--------------------------|----------------------------------------------------------------------------------------------------------------------------------------------------------------------------------------------------------------------------------------------------------------------------------------------------------------------------------------------------------------------------------------------------------------------------------------------------------------------------------------------------------------------------------------------------------------------------------------------------------------------------------------------------------------------------------------|-----|------|-----------|--------|------|------|-------------------------------------------------------|-------|----------------------|-------------------------------------------------------------------------------------------------------------------------------|-----|-----|-----------|-------|------|------|
| Rsa1.0_01039.1.g22758.t2 | refXP_002877430.1  hypothetical protein ARALYDRAFT_484955 [Arabidopsis lyrata subsp. lyrata] gi 297323268 gb EFH53689.1  hypothetical protein ARALYDRAFT_484955 [Arabidopsis lyrata subsp. lyrata] refNP_190160.1  haloacid dehalogenase-like hydrolase-like protein [Arabidopsis thaliana] gi 7019640 emb CAB75787.1  putative protein [Arabidopsis thaliana] gi 110738250 dbj BAF01054.1  hypothetical protein [Arabidopsis thaliana] gi 332644544 gb AEE78065.1  haloacid dehalogenase-like hydrolase-like protein [Arabidopsis thaliana]                                                                                                                                           | 454 | 680  | 1.00E-156 | 149.8  | 59.5 | 72.0 | hypothetical protein ARALYDRAFT_484955                | gbpln | Arabidopsis lyrata   | AT3G45750.1   Symbols:   Nucleotidyltransferase family protein   chr3:16793855-16797380 REVERSE LENGTH=682                    | 454 | 682 | 1.00E-156 | 150.2 | 58.4 | 70.9 |
| Rsa1.0_01039.1.g22759.t1 | refNP_190160.1  haloacid dehalogenase-like hydrolase-like protein [Arabidopsis thaliana] gi 7019640 emb CAB75787.1  putative protein [Arabidopsis thaliana] gi 110738250 dbj BAF01054.1  hypothetical protein [Arabidopsis thaliana] gi 332644544 gb AEE78065.1  haloacid dehalogenase-like hydrolase-like protein [Arabidopsis thaliana]                                                                                                                                                                                                                                                                                                                                              | 378 | 376  | 0         | 99.5   | 85.7 | 91.3 | haloacid dehalogenase-like hydrolase-like protein     | gbpln | Arabidopsis thaliana | AT3G45740.1   Symbols:   hydrolase family protein / HAD-superfamily protein   chr3:16790830-16793280 FORWARD LENGTH=376       | 378 | 376 | 0         | 99.5  | 85.7 | 91.3 |
| Rsa1.0_01039.1.g22760.t1 | gb EOA23731.1  hypothetical protein CARUB_v10016943mg [Capsella rubella]                                                                                                                                                                                                                                                                                                                                                                                                                                                                                                                                                                                                               | 553 | 564  | 0         | 102.0  | 89.7 | 94.9 | hypothetical protein CARUB_v10016943mg                | gbpln | Capsella rubella     | AT3G45650.1   Symbols: NAXT1   nitrate excretion transporter1   chr3:16759253-16761266 FORWARD LENGTH=558                     | 553 | 558 | 0         | 100.9 | 88.8 | 93.5 |
| Rsa1.0_01039.1.g22761.t1 | gb AAV34677.1  mitogen-activated protein kinase 3 [Brassica napus]                                                                                                                                                                                                                                                                                                                                                                                                                                                                                                                                                                                                                     | 370 | 370  | 0         | 100.0  | 98.4 | 99.5 | mitogen-activated protein kinase 3                    | gbpln | Brassica napus       | AT3G45640.1   Symbols: ATMPK3, MPK3, ATMAPK3   mitogen-activated protein kinase 3   chr3:16756918-16758476 FORWARD LENGTH=370 | 370 | 370 | 0         | 100.0 | 94.3 | 97.6 |
| Rsa1.0_01039.1.g22762.t1 | gb AAD24601.1  putative non-LTR retroelement reverse transcriptase [Arabidopsis thaliana] refXP_002877425.1  RNA recognition motif-containing protein [Arabidopsis lyrata subsp. lyrata] gi 297323263 gb EFH53684.1  RNA recognition motif-containing protein [Arabidopsis lyrata subsp. lyrata] refNP_190148.1  transducin/WD40 domain-containing protein [Arabidopsis thaliana] gi 6996265 emb CAB75491.1  putative protein [Arabidopsis thaliana] gi 26450489 dbj BAC42358.1  unknown protein [Arabidopsis thaliana] gi 28973383 gb AAO64016.1  unknown protein [Arabidopsis thaliana] gi 332644530 gb AEE78051.1  transducin/WD40 domain-containing protein [Arabidopsis thaliana] | 557 | 1319 | 1.00E-113 | 236.8  | 39.1 | 56.4 | putative non-LTR retroelement reverse transcriptase   | gbpln | Arabidopsis thaliana | AT4G29090.1   Symbols:   Ribonuclease H-like superfamily protein   chr4:14333528-14335255 FORWARD LENGTH=575                  | 557 | 575 | 3.00E-72  | 103.2 | 28.4 | 45.2 |
| Rsa1.0_01039.1.g22763.t1 | refXP_002877425.1  RNA recognition motif-containing protein [Arabidopsis lyrata subsp. lyrata] gi 297323263 gb EFH53684.1  RNA recognition motif-containing protein [Arabidopsis lyrata subsp. lyrata] refNP_190148.1  transducin/WD40 domain-containing protein [Arabidopsis thaliana] gi 6996265 emb CAB75491.1  putative protein [Arabidopsis thaliana] gi 26450489 dbj BAC42358.1  unknown protein [Arabidopsis thaliana] gi 28973383 gb AAO64016.1  unknown protein [Arabidopsis thaliana] gi 332644530 gb AEE78051.1  transducin/WD40 domain-containing protein [Arabidopsis thaliana]                                                                                           | 897 | 989  | 0         | 110.3  | 76.1 | 86.0 | RNA recognition motif-containing protein              | gbpln | Arabidopsis lyrata   | AT3G45630.1   Symbols:   RNA binding (RRM/RBD/RNP motifs) family protein   chr3:16748751-16753190 REVERSE LENGTH=989          | 897 | 989 | 0         | 110.3 | 74.8 | 83.7 |
| Rsa1.0_01039.1.g22764.t1 | gb AAV34677.1  mitogen-activated protein kinase 3 [Brassica napus]                                                                                                                                                                                                                                                                                                                                                                                                                                                                                                                                                                                                                     | 502 | 481  | 0         | 95.8   | 79.3 | 86.3 | transducin/WD40 domain-containing protein             | gbpln | Arabidopsis thaliana | AT3G45620.1   Symbols:   Transducin/WD40 repeat-like superfamily protein   chr3:16745918-16747993 FORWARD LENGTH=481          | 502 | 481 | 0         | 95.8  | 79.3 | 86.3 |
| Rsa1.0_01039.1.g22765.t1 | gb EOA25399.1  hypothetical protein CARUB_v10018731mg [Capsella rubella]                                                                                                                                                                                                                                                                                                                                                                                                                                                                                                                                                                                                               | 542 | 1119 | 0         | 206.5  | 76.0 | 83.8 | hypothetical protein CARUB_v10018731mg                | gbpln | Capsella rubella     | AT5G60250.1   Symbols:   zinc finger (C3HC4-type RING finger) family protein   chr5:24252226-24254710 FORWARD LENGTH=655      | 542 | 655 | 1.00E-101 | 120.8 | 36.9 | 54.2 |
| Rsa1.0_01040.1.g22766.t2 | gb ABA98367.2  retrotransposon protein, putative, Ty1-copia subclass [Oryza sativa Japonica Group]                                                                                                                                                                                                                                                                                                                                                                                                                                                                                                                                                                                     | 236 | 1745 | 6.00E-11  | 739.4  | 22.9 | 34.3 | retrotransposon protein, putative, Ty1-copia subclass | gbpln | Oryza sativa         | #                                                                                                                             | #   | #   | #         | #     | #    |      |
| Rsa1.0_01040.1.g22767.t1 | gb AAG51783.1 AC079679.3 reverse transcriptase, putative: 16838-20266 [Arabidopsis thaliana]                                                                                                                                                                                                                                                                                                                                                                                                                                                                                                                                                                                           | 100 | 1142 | 4.00E-13  | 1142.0 | 38.0 | 53.0 | reverse transcriptase, putative: 16838-20266          | gbpln | Arabidopsis thaliana | #                                                                                                                             | #   | #   | #         | #     | #    |      |
| Rsa1.0_01040.1.g22768.t1 | #                                                                                                                                                                                                                                                                                                                                                                                                                                                                                                                                                                                                                                                                                      | #   | #    | #         | #      | #    | -    | ----                                                  | ----  | #                    | #                                                                                                                             | #   | #   | #         | #     | #    |      |
| Rsa1.0_01040.1.g22769.t1 | #                                                                                                                                                                                                                                                                                                                                                                                                                                                                                                                                                                                                                                                                                      | #   | #    | #         | #      | #    | -    | ----                                                  | ----  | #                    | #                                                                                                                             | #   | #   | #         | #     | #    |      |
| Rsa1.0_01040.1.g22770.t1 | #                                                                                                                                                                                                                                                                                                                                                                                                                                                                                                                                                                                                                                                                                      | #   | #    | #         | #      | #    | -    | ----                                                  | ----  | #                    | #                                                                                                                             | #   | #   | #         | #     | #    |      |
| Rsa1.0_01040.1.g22771.t1 | refXP_004305746.1  PREDICTED: uncharacterized protein LOC101308702 [Fragaria vesca subsp. vesca]                                                                                                                                                                                                                                                                                                                                                                                                                                                                                                                                                                                       | 337 | 1163 | 2.00E-49  | 345.1  | 32.3 | 43.3 | PREDICTED: uncharacterized protein LOC101308702       | gbpln | Fragaria vesca       | ATMG00860.1   Symbols: ORF158   DNA/RNA polymerases superfamily protein   chrM:235916-236392 FORWARD LENGTH=158               | 337 | 158 | 2.00E-14  | 46.9  | 13.4 | 16.9 |
| Rsa1.0_01040.1.g22772.t4 | #                                                                                                                                                                                                                                                                                                                                                                                                                                                                                                                                                                                                                                                                                      | #   | #    | #         | #      | #    | -    | ----                                                  | ----  | #                    | #                                                                                                                             | #   | #   | #         | #     | #    |      |
| Rsa1.0_01040.1.g22773.t1 | gb ABD65636.1  hypothetical protein Z3.t00055 [Brassica oleracea]                                                                                                                                                                                                                                                                                                                                                                                                                                                                                                                                                                                                                      | 373 | 414  | 7.00E-63  | 111.0  | 50.7 | 61.9 | hypothetical protein Z3.t00055                        | gbpln | Brassica oleracea    | #                                                                                                                             | #   | #   | #         | #     | #    |      |
| Rsa1.0_01040.1.g22774.t1 | gb ACG60682.1  transposon-like ORF [Brassica oleracea var. alboglabra]                                                                                                                                                                                                                                                                                                                                                                                                                                                                                                                                                                                                                 | 895 | 704  | 0         | 78.7   | 51.3 | 57.5 | transposon-like ORF                                   | gbpln | Brassica oleracea    | #                                                                                                                             | #   | #   | #         | #     | #    |      |
| Rsa1.0_01040.1.g22775.t1 | gb AAD15474.1  putative retroelement pol polyprotein [Arabidopsis thaliana]                                                                                                                                                                                                                                                                                                                                                                                                                                                                                                                                                                                                            | 716 | 1466 | 1.00E-85  | 204.7  | 26.4 | 34.9 | putative retroelement pol polyprotein                 | gbpln | Arabidopsis thaliana | #                                                                                                                             | #   | #   | #         | #     | #    |      |
| Rsa1.0_01040.1.g22776.t1 | #                                                                                                                                                                                                                                                                                                                                                                                                                                                                                                                                                                                                                                                                                      | #   | #    | #         | #      | #    | -    | ----                                                  | ----  | #                    | #                                                                                                                             | #   | #   | #         | #     | #    |      |
| Rsa1.0_01041.1.g22777.t1 | gb AAM62596.1  sucrose cleavage protein-like [Arabidopsis thaliana]                                                                                                                                                                                                                                                                                                                                                                                                                                                                                                                                                                                                                    | 331 | 333  | 1.00E-168 | 100.6  | 87.3 | 94.6 | sucrose cleavage protein-like                         | gbpln | Arabidopsis thaliana | AT5G40510.1   Symbols:   Sucrase/ferredoxin-like family protein   chr5:16229277-16230798 FORWARD LENGTH=333                   | 331 | 333 | 1.00E-170 | 100.6 | 87.0 | 94.6 |

|                          |                                                                                                                                                                                                                                                                                                                                                                |      |      |           |       |      |      |                                                                  |       |                      |                                                                                                                                                                                                                                                                                     |      |      |           |       |      |      |
|--------------------------|----------------------------------------------------------------------------------------------------------------------------------------------------------------------------------------------------------------------------------------------------------------------------------------------------------------------------------------------------------------|------|------|-----------|-------|------|------|------------------------------------------------------------------|-------|----------------------|-------------------------------------------------------------------------------------------------------------------------------------------------------------------------------------------------------------------------------------------------------------------------------------|------|------|-----------|-------|------|------|
| Rsa1.0_01041.1.g22778.t1 | refXP_002870698.1   hypothetical protein ARALYDRAFT_355933 [Arabidopsis lyrata subsp. lyrata] gi 297316534 gb EFH46957.1   hypothetical protein ARALYDRAFT_355933 [Arabidopsis lyrata subsp. lyrata]                                                                                                                                                           | 127  | 115  | 1.00E-48  | 90.6  | 80.3 | 84.3 | hypothetical protein ARALYDRAFT_355933                           | gbpln | Arabidopsis lyrata   | AT5G40500.1   Symbols:   unknown protein; Has 30201 Blast hits to 17322 proteins in 780 species: Archae - 12; Bacteria - 1396; Metazoa - 17338; Fungi - 3422; Plants - 5037; Viruses - 0; Other Eukaryotes - 2996 (source: NCBI BLINK).   chr5:16227984-16228518 FORWARD LENGTH=123 | 127  | 123  | 4.00E-51  | 96.9  | 81.9 | 85.8 |
| Rsa1.0_01041.1.g22779.t1 | refXP_002870699.1   hypothetical protein ARALYDRAFT_493936 [Arabidopsis lyrata subsp. lyrata] gi 297316535 gb EFH46958.1   hypothetical protein ARALYDRAFT_493936 [Arabidopsis lyrata subsp. lyrata]                                                                                                                                                           | 417  | 421  | 1.00E-114 | 101.0 | 50.1 | 53.7 | hypothetical protein ARALYDRAFT_493936                           | gbpln | Arabidopsis lyrata   | AT5G40490.1   Symbols:   RNA-binding (RRM/RBD/RNP motifs) family protein   chr5:16225483-16227423 FORWARD LENGTH=423                                                                                                                                                                | 417  | 423  | 1.00E-117 | 101.4 | 50.4 | 53.7 |
| Rsa1.0_01041.1.g22780.t1 | #                                                                                                                                                                                                                                                                                                                                                              | #    | #    | #         | #     | #    | #    | -                                                                | ----  | ----                 | #                                                                                                                                                                                                                                                                                   | #    | #    | #         | #     | #    |      |
| Rsa1.0_01041.1.g22781.t1 | gb EOA28034.1  hypothetical protein CARUB_v10024220mg [Capsella rubella] gi 482563845 gb EOA28035.1   hypothetical protein CARUB_v10024220mg [Capsella rubella]                                                                                                                                                                                                | 164  | 160  | 2.00E-73  | 97.6  | 82.3 | 88.4 | hypothetical protein CARUB_v10024220mg                           | gbpln | Capsella rubella     | AT2G44860.2   Symbols:   Ribosomal protein L24e family protein   chr2:18501034-18502128 REVERSE LENGTH=159                                                                                                                                                                          | 164  | 159  | 9.00E-75  | 97.0  | 80.5 | 88.4 |
| Rsa1.0_01041.1.g22782.t1 | #                                                                                                                                                                                                                                                                                                                                                              | #    | #    | #         | #     | #    | #    | -                                                                | ----  | ----                 | #                                                                                                                                                                                                                                                                                   | #    | #    | #         | #     | #    |      |
| Rsa1.0_01041.1.g22783.t1 | ref NP_198618.1  S-adenosyl-L-methionine-dependent methyltransferase-like protein [Arabidopsis thaliana] gi 30102648 gb AAP21242.1  At5g38020 [Arabidopsis thaliana] gi 110736083 dbj BAF00014.1  SAMT-like protein [Arabidopsis thaliana] gi 332006875 gb AED94258.1  S-adenosyl-L-methionine-dependent methyltransferase-like protein [Arabidopsis thaliana] | 306  | 368  | 1.00E-144 | 120.3 | 81.0 | 88.9 | S-adenosyl-L-methionine-dependent methyltransferase-like protein | gbpln | Arabidopsis thaliana | AT5G38020.1   Symbols:   S-adenosyl-L-methionine-dependent methyltransferases superfamily protein   chr5:15165953-15167612 REVERSE LENGTH=368                                                                                                                                       | 306  | 368  | 2.33E-156 | 120.3 | 81.0 | 88.9 |
| Rsa1.0_01041.1.g22784.t1 | ref XP_003631792.1  PREDICTED: uncharacterized protein LOC100252656 [Vitis vinifera]                                                                                                                                                                                                                                                                           | 383  | 946  | 6.00E-68  | 247.0 | 40.7 | 50.9 | PREDICTED: uncharacterized protein LOC100252656                  | gbpln | Vitis vinifera       | AT4G23160.1   Symbols: CRK8   cysteine-rich RLK (RECEPTOR-like protein kinase) 8   chr4:12129485-12134086 FORWARD LENGTH=1262                                                                                                                                                       | 383  | 1262 | 1.00E-10  | 329.5 | 10.4 | 18.5 |
| Rsa1.0_01042.1.g22785.t1 | ref XP_002888762.1  nodulin MtN21 family protein [Arabidopsis lyrata subsp. lyrata] gi 297334603 gb EFH6502.1   nodulin MtN21 family protein [Arabidopsis lyrata subsp. lyrata]                                                                                                                                                                                | 373  | 375  | 0         | 100.5 | 89.5 | 94.9 | nodulin MtN21 family protein                                     | gbpln | Arabidopsis lyrata   | AT1G70260.1   Symbols:   nodulin MtN21 /EamA-like transporter family protein   chr1:26457067-26459338 REVERSE LENGTH=375                                                                                                                                                            | 373  | 375  | 0         | 100.5 | 88.7 | 94.4 |
| Rsa1.0_01042.1.g22786.t1 | gb AAM82604.1 AF525305.2 putative AP endonuclease/reverse transcriptase [Brassica napus]                                                                                                                                                                                                                                                                       | 1732 | 1214 | 0         | 70.1  | 24.1 | 35.7 | putative AP endonuclease/reverse transcriptase                   | gbpln | Brassica napus       | AT1G43760.1   Symbols:   DNase I-like superfamily protein   chr1:16528880-16531065 REVERSE LENGTH=626                                                                                                                                                                               | 1732 | 626  | 8.00E-62  | 36.1  | 7.7  | 11.8 |
| Rsa1.0_01042.1.g22787.t2 | #                                                                                                                                                                                                                                                                                                                                                              | #    | #    | #         | #     | #    | #    | -                                                                | ----  | ----                 | #                                                                                                                                                                                                                                                                                   | #    | #    | #         | #     | #    |      |
| Rsa1.0_01042.1.g22788.t1 | gb AAM63352.1  unknown [Arabidopsis thaliana]                                                                                                                                                                                                                                                                                                                  | 210  | 200  | 1.00E-76  | 95.2  | 70.5 | 81.9 | unknown                                                          | gbpln | Arabidopsis thaliana | AT1G70720.1   Symbols:   Plant invertase/pectin methylesterase inhibitor superfamily protein   chr1:26666427-26667029 FORWARD LENGTH=200                                                                                                                                            | 210  | 200  | 4.00E-73  | 95.2  | 70.5 | 81.9 |
| Rsa1.0_01042.1.g22789.t1 | ref NP_177231.2  protein kinase domain-containing protein [Arabidopsis thaliana] gi 193870477 gb ACF22895.1   At1g70740 [Arabidopsis thaliana] gi 332196987 gb AEE35108.1   protein kinase domain-containing protein [Arabidopsis thaliana]                                                                                                                    | 432  | 425  | 0         | 98.4  | 84.5 | 91.9 | protein kinase domain-containing protein                         | gbpln | Arabidopsis thaliana | AT1G70740.1   Symbols:   Protein kinase superfamily protein   chr1:26673847-26675687 REVERSE LENGTH=425                                                                                                                                                                             | 432  | 425  | 0         | 98.4  | 84.5 | 91.9 |
| Rsa1.0_01042.1.g22790.t3 | ref NP_173766.1  uncharacterized protein [Arabidopsis thaliana] gi 8778585 gb AAF79593.1 AC007945_13 F28C1.1.15 [Arabidopsis thaliana] gi 4056435 gb AAC98008.1   Similar to OBP32pep protein gi U37698 from Arabidopsis thaliana [Arabidopsis thaliana] gi 332192277 gb AEE30398.1   uncharacterized protein AT1G23520 [Arabidopsis thaliana]                 | 270  | 263  | 2.00E-56  | 97.4  | 45.9 | 61.5 | uncharacterized protein                                          | gbpln | Arabidopsis thaliana | AT1G23520.1   Symbols:   Domain of unknown function (DUF220)   chr1:8343571-8344675 REVERSE LENGTH=263                                                                                                                                                                              | 270  | 263  | 6.00E-59  | 97.4  | 45.9 | 61.5 |
| Rsa1.0_01042.1.g22791.t2 | ref XP_002888794.1  hypothetical protein ARALYDRAFT_476207 [Arabidopsis lyrata subsp. lyrata] gi 297334635 gb EFH65053.1   hypothetical protein ARALYDRAFT_476207 [Arabidopsis lyrata subsp. lyrata]                                                                                                                                                           | 125  | 616  | 4.00E-40  | 492.8 | 66.4 | 83.2 | hypothetical protein ARALYDRAFT_476207                           | gbpln | Arabidopsis lyrata   | AT1G70770.2   Symbols:   Protein of unknown function DUF2359, transmembrane   chr1:26688622-26691185 REVERSE LENGTH=610                                                                                                                                                             | 125  | 610  | 8.00E-41  | 488.0 | 64.8 | 80.0 |

|                          |                                                                                                                                                                                                      |      |      |           |       |      |      |                                          |       |                      |                                                                                                                                                                                                                                                                                                                                                                                                                                                                                                                                                                                           |      |      |           |       |      |      |
|--------------------------|------------------------------------------------------------------------------------------------------------------------------------------------------------------------------------------------------|------|------|-----------|-------|------|------|------------------------------------------|-------|----------------------|-------------------------------------------------------------------------------------------------------------------------------------------------------------------------------------------------------------------------------------------------------------------------------------------------------------------------------------------------------------------------------------------------------------------------------------------------------------------------------------------------------------------------------------------------------------------------------------------|------|------|-----------|-------|------|------|
| Rsa1.0_01042.1.g22792.t1 | refXP_002888795.1   hypothetical protein ARALYDRAFT_894896 [Arabidopsis lyrata subsp. lyrata] gi 297334636 gb EFH65054.1   hypothetical protein ARALYDRAFT_894896 [Arabidopsis lyrata subsp. lyrata] | 139  | 140  | 9.00E-64  | 100.7 | 89.9 | 95.0 | hypothetical protein ARALYDRAFT_894896   | gbpln | Arabidopsis lyrata   | AT1G70780.1   Symbols:   unknown protein; FUNCTIONS IN: molecular_function unknown; INVOLVED IN: biological_process unknown; LOCATED IN: mitochondrion; EXPRESSED IN: sperm cell, male gametophyte, pollen tube; EXPRESSED DURING: L mature pollen stage, M germinated pollen stage; BEST Arabidopsis thaliana protein match is: unknown protein (TAIRAT1G23150.1); Has 143 Blast hits to 143 proteins in 17 species: Archae - 0; Bacteria - 0; Metazoa - 0; Fungi - 0; Plants - 143; Viruses - 0; Other Eukaryotes - 0 (source: NCBI BLINK).   chr1:26695462-26695975 REVERSE LENGTH=140 | 139  | 140  | 4.00E-66  | 100.7 | 90.6 | 94.2 |
| Rsa1.0_01042.1.g22793.t1 | gb EOA33828.1   hypothetical protein CARUB_v10021307mg [Capsella rubella]                                                                                                                            | 655  | 515  | 1.00E-55  | 78.6  | 26.6 | 35.4 | hypothetical protein CARUB_v10021307mg   | gbpln | Capsella rubella     | AT2G07760.1   Symbols:   Zinc knuckle (CCHC-type) family protein   chr2:3584420-3586278 REVERSE LENGTH=530                                                                                                                                                                                                                                                                                                                                                                                                                                                                                | 655  | 530  | 3.00E-40  | 80.9  | 17.9 | 27.2 |
| Rsa1.0_01042.1.g22794.t1 | gb ADK63412.1   C2 domain-containing protein [Brassica rapa]                                                                                                                                         | 185  | 185  | 3.00E-94  | 100.0 | 89.7 | 95.1 | C2 domain-containing protein             | gbpln | Brassica rapa        | AT1G70790.1   Symbols:   Calcium-dependent lipid-binding (CaLB domain) family protein   chr1:26700724-26702127 FORWARD LENGTH=185                                                                                                                                                                                                                                                                                                                                                                                                                                                         | 185  | 185  | 3.00E-95  | 100.0 | 86.5 | 96.2 |
| Rsa1.0_01042.1.g22795.t1 | refNP_001077806.1   MLP-like protein 28 [Arabidopsis thaliana] gi 332197002 gb AE35123.1   MLP-like protein 28 [Arabidopsis thaliana]                                                                | 147  | 201  | 1.00E-65  | 136.7 | 86.4 | 93.2 | MLP-like protein 28                      | gbpln | Arabidopsis thaliana | AT1G70830.3   Symbols: MLP28   MLP-like protein 28   chr1:26710203-26711395 REVERSE LENGTH=201                                                                                                                                                                                                                                                                                                                                                                                                                                                                                            | 147  | 201  | 4.00E-68  | 136.7 | 86.4 | 93.2 |
| Rsa1.0_01042.1.g22796.t1 | emb CAC24691.1   efflux carrier of polar auxin transport [Brassica juncea]                                                                                                                           | 627  | 639  | 0         | 101.9 | 96.3 | 97.6 | efflux carrier of polar auxin transport  | gbpln | Brassica juncea      | AT1G70940.1   Symbols: PIN3, ATPIN3   Auxin efflux carrier family protein   chr1:26743170-26745871 FORWARD LENGTH=640                                                                                                                                                                                                                                                                                                                                                                                                                                                                     | 627  | 640  | 0         | 102.1 | 91.9 | 95.1 |
| Rsa1.0_01042.1.g22797.t1 | #                                                                                                                                                                                                    | #    | #    | #         | #     | #    | #    | -                                        | ----  | ----                 | #                                                                                                                                                                                                                                                                                                                                                                                                                                                                                                                                                                                         | #    | #    | #         | #     | #    |      |
| Rsa1.0_01043.1.g22798.t1 | gb EOA36617.1   hypothetical protein CARUB_v10011853mg [Capsella rubella]                                                                                                                            | 173  | 170  | 1.00E-44  | 98.3  | 54.9 | 71.7 | hypothetical protein CARUB_v10011853mg   | gbpln | Capsella rubella     | AT1G05291.1   Symbols:   Protein of unknown function (DUF1218)   chr1:1541348-1542323 REVERSE LENGTH=204                                                                                                                                                                                                                                                                                                                                                                                                                                                                                  | 173  | 204  | 2.00E-39  | 117.9 | 51.4 | 67.1 |
| Rsa1.0_01043.1.g22799.t1 | refXP_002892279.1   transcription factor [Arabidopsis lyrata subsp. lyrata] gi 297338121 gb EFH68538.1   transcription factor [Arabidopsis lyrata subsp. lyrata]                                     | 337  | 370  | 6.00E-67  | 109.8 | 52.2 | 63.8 | transcription factor                     | gbpln | Arabidopsis lyrata   | AT1G05290.1   Symbols:   CCT motif family protein   chr1:1539152-1540546 REVERSE LENGTH=369                                                                                                                                                                                                                                                                                                                                                                                                                                                                                               | 337  | 369  | 1.00E-69  | 109.5 | 50.4 | 65.0 |
| Rsa1.0_01043.1.g22800.t1 | refXP_002892278.1   hypothetical protein ARALYDRAFT_887710 [Arabidopsis lyrata subsp. lyrata] gi 297338120 gb EFH68537.1   hypothetical protein ARALYDRAFT_887710 [Arabidopsis lyrata subsp. lyrata] | 446  | 462  | 0         | 103.6 | 73.3 | 83.6 | hypothetical protein ARALYDRAFT_887710   | gbpln | Arabidopsis lyrata   | AT1G05280.1   Symbols:   Protein of unknown function (DUF604)   chr1:1535444-1537414 REVERSE LENGTH=461                                                                                                                                                                                                                                                                                                                                                                                                                                                                                   | 446  | 461  | 0         | 103.4 | 73.3 | 82.5 |
| Rsa1.0_01043.1.g22801.t1 | refXP_002892278.1   hypothetical protein ARALYDRAFT_887710 [Arabidopsis lyrata subsp. lyrata] gi 297338120 gb EFH68537.1   hypothetical protein ARALYDRAFT_887710 [Arabidopsis lyrata subsp. lyrata] | 445  | 462  | 0         | 103.8 | 72.6 | 83.1 | hypothetical protein ARALYDRAFT_887710   | gbpln | Arabidopsis lyrata   | AT1G05280.1   Symbols:   Protein of unknown function (DUF604)   chr1:1535444-1537414 REVERSE LENGTH=461                                                                                                                                                                                                                                                                                                                                                                                                                                                                                   | 445  | 461  | 0         | 103.6 | 72.6 | 82.0 |
| Rsa1.0_01043.1.g22802.t1 | gb EOA38328.1   hypothetical protein CARUB_v10009829mg [Capsella rubella]                                                                                                                            | 508  | 309  | 1.00E-132 | 60.8  | 45.5 | 47.0 | hypothetical protein CARUB_v10009829mg   | gbpln | Capsella rubella     | AT1G05260.1   Symbols: RCI3, RCI3A   Peroxidase superfamily protein   chr1:1529827-1531271 FORWARD LENGTH=326                                                                                                                                                                                                                                                                                                                                                                                                                                                                             | 508  | 326  | 1.00E-133 | 64.2  | 44.7 | 46.5 |
| Rsa1.0_01043.1.g22803.t2 | emb CAB39638.1   RNA-directed DNA polymerase-like protein [Arabidopsis thaliana] gi 7267666 emb CAB78094.1   RNA-directed DNA polymerase-like protein [Arabidopsis thaliana]                         | 1772 | 1274 | 0         | 71.9  | 36.5 | 48.6 | RNA-directed DNA polymerase-like protein | gbpln | Arabidopsis thaliana | AT4G29090.1   Symbols:   Ribonuclease H-like superfamily protein   chr4:14333528-14335255 FORWARD LENGTH=575                                                                                                                                                                                                                                                                                                                                                                                                                                                                              | 1772 | 575  | 6.00E-79  | 32.4  | 10.6 | 16.2 |
| Rsa1.0_01043.1.g22804.t1 | gb EOA39455.1   hypothetical protein CARUB_v10012652mg [Capsella rubella]                                                                                                                            | 320  | 320  | 1.00E-143 | 100.0 | 79.7 | 86.3 | hypothetical protein CARUB_v10012652mg   | gbpln | Capsella rubella     | AT1G05250.1   Symbols:   Peroxidase superfamily protein   chr1:1525924-1527169 REVERSE LENGTH=325                                                                                                                                                                                                                                                                                                                                                                                                                                                                                         | 320  | 325  | 1.00E-120 | 101.6 | 69.7 | 81.6 |
| Rsa1.0_01043.1.g22805.t1 | gb EOA39455.1   hypothetical protein CARUB_v10012652mg [Capsella rubella]                                                                                                                            | 268  | 320  | 1.00E-129 | 119.4 | 84.0 | 88.1 | hypothetical protein CARUB_v10012652mg   | gbpln | Capsella rubella     | AT1G05250.1   Symbols:   Peroxidase superfamily protein   chr1:1525924-1527169 REVERSE LENGTH=325                                                                                                                                                                                                                                                                                                                                                                                                                                                                                         | 268  | 325  | 1.00E-111 | 121.3 | 71.3 | 81.3 |
| Rsa1.0_01043.1.g22806.t1 | gb AAD19784.1   putative retroelement pol polyprotein [Arabidopsis thaliana]                                                                                                                         | 1261 | 1501 | 0         | 119.0 | 59.5 | 74.0 | putative retroelement pol polyprotein    | gbpln | Arabidopsis thaliana | AT4G23160.1   Symbols: CRK8   cysteine-rich RLK (RECEPTOR-like protein kinase) 8   chr4:12129485-12134086 FORWARD LENGTH=1262                                                                                                                                                                                                                                                                                                                                                                                                                                                             | 1261 | 1262 | 1.00E-139 | 100.1 | 19.3 | 27.9 |

|                          |                                                                                                                                                                                                                                                                                                                                                                                                                                                                                                                                                                                                                                                                                                                                                                                                                                                                                                                                                    |     |     |          |       |      |      |                                                   |       |                      |                                                                                                                                                                                                                                                           |     |     |          |       |      |      |
|--------------------------|----------------------------------------------------------------------------------------------------------------------------------------------------------------------------------------------------------------------------------------------------------------------------------------------------------------------------------------------------------------------------------------------------------------------------------------------------------------------------------------------------------------------------------------------------------------------------------------------------------------------------------------------------------------------------------------------------------------------------------------------------------------------------------------------------------------------------------------------------------------------------------------------------------------------------------------------------|-----|-----|----------|-------|------|------|---------------------------------------------------|-------|----------------------|-----------------------------------------------------------------------------------------------------------------------------------------------------------------------------------------------------------------------------------------------------------|-----|-----|----------|-------|------|------|
| Rsa1.0_01043.1.g22807.t1 | ref[NP_172015.1] homeobox-leucine zipper protein HDG2 [Arabidopsis thaliana] gi 30679181 ref[NP_849596.1] homeobox-leucine zipper protein HDG2 [Arabidopsis thaliana] gi 334182300 ref[NP_001184911.1] homeobox-leucine zipper protein HDG2 [Arabidopsis thaliana] gi 75332091 sp Q94C37.1 HDG2_ARATH RecName: Full=Homeobox-leucine zipper protein HDG2; AltName: Full=HD-ZIP protein HDG2; AltName: Full=Homeodomain GLABRA 2-like protein 2; AltName: Full=Homeodomain transcription factor HDG2; AltName: Full=Protein HOMEODOMAIN GLABROUS 2                                                                                                                                                                                                                                                                                                                                                                                                  | 723 | 721 | 0        | 99.7  | 94.9 | 97.0 | homeobox-leucine zipper protein HDG2              | gbpln | Arabidopsis thaliana | AT1G05230.4   Symbols: HDG2   homeodomain GLABROUS 2   chr1:1513388-1517024 REVERSE LENGTH=721                                                                                                                                                            | 723 | 721 | 0        | 99.7  | 94.9 | 97.0 |
| Rsa1.0_01043.1.g22808.t1 | At1g433499.6 gb AAK59762.1  At1g05230/YUP8H12.16 [Arabidopsis thaliana] gi 20147145 gb AAM10289.1  At1g05230/YUP8H12.16 [Arabidopsis thaliana] gi 222423025 dbj BAH19495.1  AT1G05230 [Arabidopsis thaliana] gi 332189688 gb AEE27809.1  homeobox-leucine zipper protein HDG2 [Arabidopsis thaliana] gi 332189689 gb AEE27810.1  homeobox-leucine zipper protein HDG2 [Arabidopsis thaliana] gi 332189691 gb AEE27812.1  homeobox-leucine zipper protein HDG2 [Arabidopsis thaliana] ref[XP_002889539.1] hypothetical protein ARALYDRAFT_470516 [Arabidopsis lyrata subsp. lyrata] gi 297335381 gb EFH65798.1  hypothetical protein ARALYDRAFT_470516 [Arabidopsis lyrata subsp. lyrata]                                                                                                                                                                                                                                                           | 168 | 168 | 6.00E-77 | 100.0 | 83.9 | 92.9 | hypothetical protein ARALYDRAFT_470516            | gbpln | Arabidopsis lyrata   | AT1G05210.1   Symbols:   Transmembrane protein 97, predicted   chr1:1510469-1511485 FORWARD LENGTH=168                                                                                                                                                    | 168 | 168 | 4.00E-78 | 100.0 | 83.3 | 91.7 |
| Rsa1.0_01043.1.g22809.t1 | ref[XP_002892274.1] hypothetical protein ARALYDRAFT_470515 [Arabidopsis lyrata subsp. lyrata] gi 297338116 gb EFH65833.1  hypothetical protein ARALYDRAFT_470515 [Arabidopsis lyrata subsp. lyrata]                                                                                                                                                                                                                                                                                                                                                                                                                                                                                                                                                                                                                                                                                                                                                | 86  | 91  | 2.00E-41 | 105.8 | 97.7 | 97.7 | hypothetical protein ARALYDRAFT_470515            | gbpln | Arabidopsis lyrata   | AT1G05205.1   Symbols:   unknown protein; Has 44 Blast hits to 44 proteins in 16 species: Archae - 0; Bacteria - 0; Metazoa - 0; Fungi - 0; Plants - 44; Viruses - 0; Other Eukaryotes - 0 (source: NCBI BLINK).   chr1:1509352-1510249 REVERSE LENGTH=91 | 86  | 91  | 1.00E-43 | 105.8 | 95.3 | 96.5 |
| Rsa1.0_01043.1.g22810.t1 | dbj BAJ34158.1  unnamed protein product [Thellungiella halophila]                                                                                                                                                                                                                                                                                                                                                                                                                                                                                                                                                                                                                                                                                                                                                                                                                                                                                  | 955 | 954 | 0        | 99.9  | 89.3 | 94.1 | unnamed protein product                           | ----  | ----                 | AT1G05200.2   Symbols: ATGLR3.4, GLR3.4, GLUR3   glutamate receptor 3.4   chr1:1505642-1509002 FORWARD LENGTH=959                                                                                                                                         | 955 | 959 | 0        | 100.4 | 87.0 | 93.3 |
| Rsa1.0_01044.1.g22811.t1 | #                                                                                                                                                                                                                                                                                                                                                                                                                                                                                                                                                                                                                                                                                                                                                                                                                                                                                                                                                  | #   | #   | #        | #     | #    | -    | ----                                              | ----  | ----                 | #                                                                                                                                                                                                                                                         | #   | #   | #        | #     | #    |      |
| Rsa1.0_01044.1.g22812.t1 | ref[NP_188940.1] CBL-interacting serine/threonine-protein kinase 7 [Arabidopsis thaliana] gi 75338665 sp Q9XIW0.1 CIPK7_ARATH RecName: Full=CBL-interacting serine/threonine-protein kinase 7; AltName: Full=SNF1-related kinase 3.10; AltName: Full=SOS2-like protein kinase PKS7; AltName: Full=Serine/threonine-protein kinase SR2; Short=AtSR2; Short=AtSRPK1 gi 13249113 gb AAK16682.1 AF290192.1 CBL-interacting protein kinase 7 [Arabidopsis thaliana] gi 13448039 gb AAK26846.1 AF339148.1 SOS2-like protein kinase PKS7 [Arabidopsis thaliana] gi 5478791 dbj BAA77716.2  SNF1 related protein kinase [Arabidopsis thaliana] gi 9294189 dbj BAB02091.1  SNF1 related protein kinase [Arabidopsis thaliana] gi 57222172 gb AAW38993.1  At3g23000 [Arabidopsis thaliana] gi 114213519 gb AB154342.1  At3g23000 [Arabidopsis thaliana] gi 332643183 gb AEE78704.1  CBL-interacting serine/threonine-protein kinase 7 [Arabidopsis thaliana] | 419 | 429 | 0        | 102.4 | 83.1 | 90.2 | CBL-interacting serine/threonine-protein kinase 7 | gbpln | Arabidopsis thaliana | AT3G23000.1   Symbols: CIPK7, SnRK3.10, PKS7, ATSRPK1, ATSR2   CBL-interacting protein kinase 7   chr3:8172654-8173943 FORWARD LENGTH=429                                                                                                                 | 419 | 429 | 0        | 102.4 | 83.1 | 90.2 |

|                          |                                                                                                                                                                                                                                                                                                                                                                                                                                                                                                                                         |      |      |           |       |      |      |                                             |       |                      |                                                                                                                                 |      |      |           |       |      |      |
|--------------------------|-----------------------------------------------------------------------------------------------------------------------------------------------------------------------------------------------------------------------------------------------------------------------------------------------------------------------------------------------------------------------------------------------------------------------------------------------------------------------------------------------------------------------------------------|------|------|-----------|-------|------|------|---------------------------------------------|-------|----------------------|---------------------------------------------------------------------------------------------------------------------------------|------|------|-----------|-------|------|------|
| Rsa1.0_01044.1.g22813.t1 | refNP_188942.1  pentatricopeptide repeat-containing protein [Arabidopsis thaliana]<br>gi 75273922 sp Q9LS88.1 PP250_ARATH RecName: Full=Pentatricopeptide repeat-containing protein At3g23020 gi 9294191 db BAB02093.1  unnamed protein product [Arabidopsis thaliana] gi 332643185 gb AEE76706.1  pentatricopeptide repeat-containing protein [Arabidopsis thaliana]<br>refXP_002884981.1  F-box family protein [Arabidopsis lyrata subsp. lyrata] gi 297330821 gb EFH61240.1  F-box family protein [Arabidopsis lyrata subsp. lyrata] | 850  | 842  | 0         | 99.1  | 86.2 | 92.6 | pentatricopeptide repeat-containing protein | gbpln | Arabidopsis thaliana | AT3G23020.1   Symbols:   Tetratricopeptide repeat (TPR)-like superfamily protein   chr3:8177215-8179743 REVERSE LENGTH=842      | 850  | 842  | 0         | 99.1  | 86.2 | 92.6 |
| Rsa1.0_01044.1.g22814.t1 | refXP_002884981.1  F-box family protein [Arabidopsis lyrata subsp. lyrata] gi 297330821 gb EFH61240.1  F-box family protein [Arabidopsis lyrata subsp. lyrata]<br>refXP_002885540.1  pentatricopeptide repeat-containing protein [Arabidopsis lyrata subsp. lyrata] gi 297331380 gb EFH61799.1  pentatricopeptide repeat-containing protein [Arabidopsis lyrata subsp. lyrata]                                                                                                                                                          | 426  | 400  | 6.00E-76  | 93.9  | 40.1 | 52.3 | F-box family protein                        | gbpln | Arabidopsis lyrata   | AT3G13680.1   Symbols:   F-box and associated interaction domains-containing protein   chr3:4477534-4478721 REVERSE LENGTH=395  | 426  | 395  | 8.00E-74  | 92.7  | 37.3 | 50.5 |
| Rsa1.0_01044.1.g22815.t1 | refXP_002885540.1  pentatricopeptide repeat-containing protein [Arabidopsis lyrata subsp. lyrata] gi 297331380 gb EFH61799.1  pentatricopeptide repeat-containing protein [Arabidopsis lyrata subsp. lyrata]                                                                                                                                                                                                                                                                                                                            | 173  | 841  | 5.00E-80  | 486.1 | 84.4 | 87.9 | pentatricopeptide repeat-containing protein | gbpln | Arabidopsis lyrata   | AT3G23020.1   Symbols:   Tetratricopeptide repeat (TPR)-like superfamily protein   chr3:8177215-8179743 REVERSE LENGTH=842      | 173  | 842  | 1.00E-81  | 486.7 | 83.8 | 86.7 |
| Rsa1.0_01044.1.g22816.t1 | #                                                                                                                                                                                                                                                                                                                                                                                                                                                                                                                                       | #    | #    | #         | #     | #    | #    | -                                           | ----  | ----                 | #                                                                                                                               | #    | #    | #         | #     | #    | #    |
| Rsa1.0_01044.1.g22817.t1 | refXP_002885542.1  indoleacetic acid-induced protein 2 [Arabidopsis lyrata subsp. lyrata] gi 297331382 gb EFH61801.1  indoleacetic acid-induced protein 2 [Arabidopsis lyrata subsp. lyrata]                                                                                                                                                                                                                                                                                                                                            | 171  | 174  | 2.00E-76  | 101.8 | 86.5 | 91.8 | indoleacetic acid-induced protein 2         | gbpln | Arabidopsis lyrata   | AT3G23030.1   Symbols:   IAA2   indole-3-acetic acid inducible 2   chr3:8181069-8181685 REVERSE LENGTH=174                      | 171  | 174  | 5.00E-78  | 101.8 | 84.8 | 90.6 |
| Rsa1.0_01044.1.g22818.t1 | gi AAG00239.1 AC002130.4 FIN21.6 [Arabidopsis thaliana]                                                                                                                                                                                                                                                                                                                                                                                                                                                                                 | 257  | 901  | 2.00E-52  | 350.6 | 47.1 | 59.1 | FIN21.6                                     | gbpln | Arabidopsis thaliana | #                                                                                                                               | #    | #    | #         | #     | #    | #    |
| Rsa1.0_01044.1.g22819.t1 | #                                                                                                                                                                                                                                                                                                                                                                                                                                                                                                                                       | #    | #    | #         | #     | #    | #    | -                                           | ----  | ----                 | #                                                                                                                               | #    | #    | #         | #     | #    | #    |
| Rsa1.0_01045.1.g22820.t1 | refXP_002876948.1  glycosyl hydrolase family 5 protein [Arabidopsis lyrata subsp. lyrata] gi 29732786 gb EFH53207.1  glycosyl hydrolase family 5 protein [Arabidopsis lyrata subsp. lyrata]                                                                                                                                                                                                                                                                                                                                             | 369  | 509  | 1.00E-176 | 137.9 | 80.5 | 87.8 | glycosyl hydrolase family 5 protein         | gbpln | Arabidopsis lyrata   | AT3G26140.1   Symbols:   Cellulase (glycosyl hydrolase family 5) protein   chr3:9559742-9563070 REVERSE LENGTH=508              | 369  | 508  | 1.00E-175 | 137.7 | 78.9 | 86.4 |
| Rsa1.0_01045.1.g22821.t2 | gb EOA12742.1  hypothetical protein CARUB_v10028251mg [Capsella rubella]                                                                                                                                                                                                                                                                                                                                                                                                                                                                | 168  | 618  | 3.00E-34  | 367.9 | 42.9 | 55.4 | hypothetical protein CARUB_v10028251mg      | gbpln | Capsella rubella     | AT3G42170.1   Symbols:   BED zinc finger hAT family dimerisation domain   chr3:14321838-14323928 FORWARD LENGTH=696             | 168  | 696  | 3.00E-18  | 414.3 | 23.8 | 35.1 |
| Rsa1.0_01045.1.g22822.t1 | gb EOA25800.1  hypothetical protein CARUB_v10019167mg [Capsella rubella]                                                                                                                                                                                                                                                                                                                                                                                                                                                                | 127  | 511  | 3.00E-51  | 402.4 | 78.7 | 85.8 | hypothetical protein CARUB_v10019167mg      | gbpln | Capsella rubella     | AT3G26140.1   Symbols:   Cellulase (glycosyl hydrolase family 5) protein   chr3:9559742-9563070 REVERSE LENGTH=508              | 127  | 508  | 9.00E-53  | 400.0 | 78.0 | 85.8 |
| Rsa1.0_01045.1.g22823.t1 | db BAB02432.1  unnamed protein product [Arabidopsis thaliana]                                                                                                                                                                                                                                                                                                                                                                                                                                                                           | 554  | 561  | 0         | 101.3 | 82.9 | 91.7 | unnamed protein product                     | gbpln | Arabidopsis thaliana | AT3G26130.1   Symbols:   Cellulase (glycosyl hydrolase family 5) protein   chr3:9553708-9555611 REVERSE LENGTH=551              | 554  | 551  | 0         | 99.5  | 81.8 | 90.6 |
| Rsa1.0_01045.1.g22824.t1 | db BAB01438.1  unnamed protein product [Arabidopsis thaliana]                                                                                                                                                                                                                                                                                                                                                                                                                                                                           | 606  | 708  | 0         | 116.8 | 78.9 | 86.5 | unnamed protein product                     | gbpln | Arabidopsis thaliana | AT3G26120.1   Symbols:   TEL1   terminal EAR1-like 1   chr3:9546398-9549186 FORWARD LENGTH=615                                  | 606  | 615  | 0         | 101.5 | 78.9 | 86.5 |
| Rsa1.0_01045.1.g22825.t2 | db BAB01437.1  unnamed protein product [Arabidopsis thaliana]                                                                                                                                                                                                                                                                                                                                                                                                                                                                           | 730  | 572  | 1.00E-177 | 78.4  | 42.3 | 47.4 | unnamed protein product                     | gbpln | Arabidopsis thaliana | AT3G26115.1   Symbols:   Pyridoxal-5'-phosphate-dependent enzyme family protein   chr3:9542301-9544246 FORWARD LENGTH=427       | 730  | 427  | 1.00E-179 | 58.5  | 42.3 | 47.1 |
| Rsa1.0_01045.1.g22826.t1 | refXP_002890798.1  hypothetical protein ARALYDRAFT_890443 [Arabidopsis lyrata subsp. lyrata] gi 297336640 gb EFH67057.1  hypothetical protein ARALYDRAFT_890443 [Arabidopsis lyrata subsp. lyrata]<br>refNP_001117377.1  O-fucosyltransferase-like protein [Arabidopsis thaliana] gi 332192938 gb AEE31059.1  O-fucosyltransferase-like protein [Arabidopsis thaliana]                                                                                                                                                                  | 440  | 574  | 1.00E-144 | 130.5 | 71.4 | 80.9 | hypothetical protein ARALYDRAFT_890443      | gbpln | Arabidopsis lyrata   | AT1G29240.1   Symbols:   Protein of unknown function (DUF688)   chr1:10217023-10218924 REVERSE LENGTH=577                       | 440  | 577  | 1.00E-141 | 131.1 | 69.8 | 79.8 |
| Rsa1.0_01045.1.g22827.t2 | refNP_001117377.1  O-fucosyltransferase-like protein [Arabidopsis thaliana] gi 332192938 gb AEE31059.1  O-fucosyltransferase-like protein [Arabidopsis thaliana]                                                                                                                                                                                                                                                                                                                                                                        | 626  | 611  | 0         | 97.6  | 82.9 | 88.8 | O-fucosyltransferase-like protein           | gbpln | Arabidopsis thaliana | AT1G29200.2   Symbols:   O-fucosyltransferase family protein   chr1:10208002-10210488 FORWARD LENGTH=611                        | 626  | 611  | 0         | 97.6  | 82.9 | 88.8 |
| Rsa1.0_01045.1.g22828.t1 | emb CAN83015.1  hypothetical protein VITISV_041694 [Vitis vinifera]                                                                                                                                                                                                                                                                                                                                                                                                                                                                     | 1338 | 1099 | 0         | 82.1  | 34.1 | 43.3 | hypothetical protein VITISV_041694          | gbpln | Vitis vinifera       | AT4G23160.1   Symbols:   CRK8   cysteine-rich RLK (RECEPTOR-like protein kinase) 8   chr4:12129485-12134086 FORWARD LENGTH=1262 | 1338 | 1262 | 1.00E-135 | 94.3  | 17.4 | 26.1 |

|                          |                                                                                                                                                                                                                                                                                                                                                                              |     |     |           |       |      |      |                                        |       |                      |                                                                                                                                                                                                                                                                                                                                                                                                                                                                                                                                                                                                                                                              |     |     |           |       |      |      |
|--------------------------|------------------------------------------------------------------------------------------------------------------------------------------------------------------------------------------------------------------------------------------------------------------------------------------------------------------------------------------------------------------------------|-----|-----|-----------|-------|------|------|----------------------------------------|-------|----------------------|--------------------------------------------------------------------------------------------------------------------------------------------------------------------------------------------------------------------------------------------------------------------------------------------------------------------------------------------------------------------------------------------------------------------------------------------------------------------------------------------------------------------------------------------------------------------------------------------------------------------------------------------------------------|-----|-----|-----------|-------|------|------|
| Rsa1.0_01045.1.g22829.t1 | refNP_172045.1  uncharacterized protein [Arabidopsis thaliana] gi 8778720 gb AAF79728.1 AC005106.9 T25N20.19 [Arabidopsis thaliana] gi 332189729 gb AEE27850.1  uncharacterized protein AT1G05540 [Arabidopsis thaliana]                                                                                                                                                     | 446 | 367 | 4.00E-90  | 82.3  | 43.5 | 55.6 | uncharacterized protein                | gbpln | Arabidopsis thaliana | AT1G05540.1   Symbols:   Protein of unknown function (DUF295)   chr1:1639348-1640707 FORWARD LENGTH=367                                                                                                                                                                                                                                                                                                                                                                                                                                                                                                                                                      | 446 | 367 | 1.00E-92  | 82.3  | 43.5 | 55.6 |
| Rsa1.0_01046.1.g22830.t1 | gb EOA30505.1  hypothetical protein CARUB_v10013628mg [Capsella rubella]                                                                                                                                                                                                                                                                                                     | 329 | 468 | 1.00E-127 | 142.2 | 76.9 | 86.6 | hypothetical protein CARUB_v10013628mg | gbpln | Capsella rubella     | AT3G02990.1   Symbols: ATHSFA1E, HSFA1E   heat shock transcription factor A1E   chr3:673614-675988 FORWARD LENGTH=468                                                                                                                                                                                                                                                                                                                                                                                                                                                                                                                                        | 329 | 468 | 1.00E-127 | 142.2 | 78.1 | 87.5 |
| Rsa1.0_01046.1.g22831.t1 | refNP_186959.2  D-xylose-proton symporter-like 1 [Arabidopsis thaliana] gi 75329736 sp Q8L6Z8.1 XYLL1_ARATH RecName: Full=D-xylose-proton symporter-like 1 gi 22655210 gb AAM98195.1  unknown protein [Arabidopsis thaliana] gi 34098871 gb AAQ56818.1  At3g03090 [Arabidopsis thaliana] gi 332640379 gb AEE73900.1  D-xylose-proton symporter-like 1 [Arabidopsis thaliana] | 610 | 503 | 0         | 82.5  | 69.8 | 76.4 | D-xylose-proton symporter-like 1       | gbpln | Arabidopsis thaliana | AT3G03090.1   Symbols: AtVGT1, VGT1   vacuolar glucose transporter 1   chr3:700749-704579 REVERSE LENGTH=503                                                                                                                                                                                                                                                                                                                                                                                                                                                                                                                                                 | 610 | 503 | 0         | 82.5  | 69.8 | 76.4 |
| Rsa1.0_01046.1.g22832.t1 | refNP_186959.2  D-xylose-proton symporter-like 1 [Arabidopsis thaliana] gi 75329736 sp Q8L6Z8.1 XYLL1_ARATH RecName: Full=D-xylose-proton symporter-like 1 gi 22655210 gb AAM98195.1  unknown protein [Arabidopsis thaliana] gi 34098871 gb AAQ56818.1  At3g03090 [Arabidopsis thaliana] gi 332640379 gb AEE73900.1  D-xylose-proton symporter-like 1 [Arabidopsis thaliana] | 688 | 503 | 0         | 73.1  | 62.2 | 67.9 | D-xylose-proton symporter-like 1       | gbpln | Arabidopsis thaliana | AT3G03090.1   Symbols: AtVGT1, VGT1   vacuolar glucose transporter 1   chr3:700749-704579 REVERSE LENGTH=503                                                                                                                                                                                                                                                                                                                                                                                                                                                                                                                                                 | 688 | 503 | 0         | 73.1  | 62.2 | 67.9 |
| Rsa1.0_01046.1.g22833.t1 | refXP_002884361.1  hypothetical protein ARALYDRAFT_896308 [Arabidopsis lyrata subsp. lyrata] gi 297330201 gb EFH60620.1  hypothetical protein ARALYDRAFT_896308 [Arabidopsis lyrata subsp. lyrata]                                                                                                                                                                           | 117 | 120 | 1.00E-46  | 102.6 | 83.8 | 88.9 | hypothetical protein ARALYDRAFT_896308 | gbpln | Arabidopsis lyrata   | AT3G03150.1   Symbols:   unknown protein; FUNCTIONS IN: molecular_function unknown; INVOLVED IN: biological_process unknown; LOCATED IN: mitochondrion; EXPRESSED IN: 22 plant structures; EXPRESSED DURING: 13 growth stages; BEST Arabidopsis thaliana protein match is: unknown protein (TAIR:AT5G17165.1); Has 39 Blast hits to 39 proteins in 11 species: Archae - 0; Bacteria - 0; Metazoa - 0; Fungi - 0; Plants - 39; Viruses - 0; Other Eukaryotes - 0 (source: NCBI BLink).   chr3:727733-729357 REVERSE LENGTH=121                                                                                                                                | 117 | 121 | 3.00E-47  | 103.4 | 80.3 | 84.6 |
| Rsa1.0_01046.1.g22834.t1 | refXP_002882276.1  hypothetical protein ARALYDRAFT_477563 [Arabidopsis lyrata subsp. lyrata] gi 297328116 gb EFH58535.1  hypothetical protein ARALYDRAFT_477563 [Arabidopsis lyrata subsp. lyrata]                                                                                                                                                                           | 130 | 130 | 2.00E-68  | 100.0 | 96.2 | 99.2 | hypothetical protein ARALYDRAFT_477563 | gbpln | Arabidopsis lyrata   | AT3G03160.1   Symbols:   FUNCTIONS IN: molecular_function unknown; INVOLVED IN: intracellular protein transport; LOCATED IN: endomembrane system, integral to membrane, endoplasmic reticulum; EXPRESSED IN: 23 plant structures; EXPRESSED DURING: 15 growth stages; CONTAINS InterPro DOMAIN/s: B-cell receptor-associated 31-like (InterPro:IPR008417); BEST Arabidopsis thaliana protein match is: unknown protein (TAIR:AT5G17190.1); Has 102 Blast hits to 102 proteins in 17 species: Archae - 0; Bacteria - 0; Metazoa - 0; Fungi - 0; Plants - 102; Viruses - 0; Other Eukaryotes - 0 (source: NCBI BLink).   chr3:729876-730268 FORWARD LENGTH=130 | 130 | 130 | 4.00E-71  | 100.0 | 96.2 | 99.2 |
| Rsa1.0_01046.1.g22835.t1 | refNP_566196.1  uncharacterized protein [Arabidopsis thaliana] gi 89001025 gb ABD59102.1  At3g03170 [Arabidopsis thaliana] gi 332640388 gb AEE73909.1  uncharacterized protein AT3G03170 [Arabidopsis thaliana]                                                                                                                                                              | 152 | 156 | 4.00E-58  | 102.6 | 83.6 | 90.1 | uncharacterized protein                | gbpln | Arabidopsis thaliana | AT3G03170.1   Symbols:   unknown protein; BEST Arabidopsis thaliana protein match is: unknown protein (TAIR:AT5G24890.1); Has 184 Blast hits to 184 proteins in 18 species: Archae - 0; Bacteria - 0; Metazoa - 0; Fungi - 0; Plants - 184; Viruses - 0; Other Eukaryotes - 0 (source: NCBI BLink).   chr3:732066-732729 FORWARD LENGTH=156                                                                                                                                                                                                                                                                                                                  | 152 | 156 | 1.00E-60  | 102.6 | 83.6 | 90.1 |
| Rsa1.0_01046.1.g22836.t1 | refNP_001078100.1  uncharacterized protein [Arabidopsis thaliana] gi 113204476 gb ABI34031.1  unknown protein [Arabidopsis thaliana] gi 332640400 gb AEE73921.1  uncharacterized protein AT3G03272 [Arabidopsis thaliana]                                                                                                                                                    | 127 | 120 | 5.00E-33  | 94.5  | 53.5 | 62.2 | uncharacterized protein                | gbpln | Arabidopsis thaliana | AT3G03272.1   Symbols:   Protein of unknown function (DUF1278)   chr3:763833-764195 REVERSE LENGTH=120                                                                                                                                                                                                                                                                                                                                                                                                                                                                                                                                                       | 127 | 120 | 1.00E-35  | 94.5  | 53.5 | 62.2 |



|                          |                                                                                                                                                                                                                                                                                                                                                                                                                                                                           |     |     |           |       |      |       |                                                                                                                                                                                                                                                                                                                            |       |                      |                                                                                                                                                                                                                                                                                                                                                                                                                                                   |     |     |           |       |      |      |
|--------------------------|---------------------------------------------------------------------------------------------------------------------------------------------------------------------------------------------------------------------------------------------------------------------------------------------------------------------------------------------------------------------------------------------------------------------------------------------------------------------------|-----|-----|-----------|-------|------|-------|----------------------------------------------------------------------------------------------------------------------------------------------------------------------------------------------------------------------------------------------------------------------------------------------------------------------------|-------|----------------------|---------------------------------------------------------------------------------------------------------------------------------------------------------------------------------------------------------------------------------------------------------------------------------------------------------------------------------------------------------------------------------------------------------------------------------------------------|-----|-----|-----------|-------|------|------|
| Rsa1.0_01046.1.g22837.t1 | ref[XP_002862609.1] predicted protein [Arabidopsis lyrata subsp. lyrata] gi 297308241 gb EFH38867.1  predicted protein [Arabidopsis lyrata subsp. lyrata]                                                                                                                                                                                                                                                                                                                 | 107 | 110 | 1.00E-22  | 102.8 | 63.6 | 72.0  | predicted protein                                                                                                                                                                                                                                                                                                          | gbpln | Arabidopsis lyrata   | AT3G03350.2   Symbols:   NAD(P)-binding Rossmann-fold superfamily protein   chr3:791273-794553 FORWARD LENGTH=359                                                                                                                                                                                                                                                                                                                                 | 107 | 359 | 6.00E-18  | 335.5 | 57.0 | 67.3 |
| Rsa1.0_01046.1.g22838.t1 | sp P69198.1 POLC2_BRANA RecName: Full=Polcalcin Bra n 2; AltName: Full=Calcium-binding pollen allergen Bra n 2; AltName: Allergen=Bra n 2 gi 59800146 sp P69199.1 POLC2_BRARA RecName: Full=Polcalcin Bra r 2; AltName: Full=Calcium-binding pollen allergen Bra r 2; AltName: Allergen=Bra r 2 gi 1255542 dbj BAA09635.1  calcium-binding protein [Brassica rapa]                                                                                                        | 83  | 83  | 7.00E-39  | 100.0 | 96.4 | 100.0 | RecName: Full=Polcalcin Bra n 2; AltName: Full=Calcium-binding pollen allergen Bra n 2; AltName: Allergen=Bra n 2 gi 59800146 sp P69199.1 POLC2_BRARA RecName: Full=Polcalcin Bra r 2; AltName: Full=Calcium-binding pollen allergen Bra r 2; AltName: Allergen=Bra r 2 gi 1255542 dbj BAA09635.1  calcium-binding protein | gbpln | Brassica rapa        | AT3G03430.1   Symbols:   Calcium-binding EF-hand family protein   chr3:814481-814732 FORWARD LENGTH=83                                                                                                                                                                                                                                                                                                                                            | 83  | 83  | 4.00E-40  | 100.0 | 92.8 | 98.8 |
| Rsa1.0_01046.1.g22839.t1 | ref[XP_002884382.1] CYP89A9 [Arabidopsis lyrata subsp. lyrata] gi 297330222 gb EFH60641.1  CYP89A9 [Arabidopsis lyrata subsp. lyrata] ref NP_186999.1  peroxin 19-1 [Arabidopsis thaliana] gi 75313803 sp Q9SRQ3.1 PE191_ARATH RecName: Full=Peroxisome biogenesis protein 19-1; AltName: Full=Peroxin-19-1; Short=AtPEX19-1; AltName: Full=Peroxisomal membrane protein import receptor PEX19-1; Flags: Precursor                                                        | 503 | 514 | 0         | 102.2 | 90.7 | 96.0  | CYP89A9                                                                                                                                                                                                                                                                                                                    | gbpln | Arabidopsis lyrata   | AT3G03470.1   Symbols: CYP89A9   cytochrome P450, family 87, subfamily A, polypeptide 9   chr3:824692-826345 REVERSE LENGTH=511                                                                                                                                                                                                                                                                                                                   | 503 | 511 | 0         | 101.6 | 90.1 | 95.2 |
| Rsa1.0_01046.1.g22840.t1 | gi 6017103 gb AAFO1586.1 AC009895.7 unknown protein [Arabidopsis thaliana] gi 46931296 gb AAT06452.1  At3g03490 [Arabidopsis thaliana] gi 66392759 emb CAD91898.1  peroxisomal membrane protein Pex19p [Arabidopsis thaliana] gi 332640429 gb AEE73950.1  peroxin 19-1 [Arabidopsis thaliana] ref XP_002884394.1  zinc finger family protein [Arabidopsis lyrata subsp. lyrata] gi 297330234 gb EFH60653.1  zinc finger family protein [Arabidopsis lyrata subsp. lyrata] | 250 | 248 | 1.00E-106 | 99.2  | 82.0 | 90.4  | peroxin 19-1                                                                                                                                                                                                                                                                                                               | gbpln | Arabidopsis thaliana | AT3G03490.1   Symbols: PEX19-1, AtPEX19-1   peroxin 19-1   chr3:830302-831759 REVERSE LENGTH=248                                                                                                                                                                                                                                                                                                                                                  | 250 | 248 | 1.00E-108 | 99.2  | 82.0 | 90.4 |
| Rsa1.0_01046.1.g22841.t1 | ref NP_187006.2  uncharacterized protein [Arabidopsis thaliana] gi 332640436 gb AEE73957.1  uncharacterized protein AT3G03560 [Arabidopsis thaliana]                                                                                                                                                                                                                                                                                                                      | 523 | 521 | 0         | 99.6  | 87.6 | 92.9  | zinc finger family protein                                                                                                                                                                                                                                                                                                 | gbpln | Arabidopsis lyrata   | AT3G03550.1   Symbols:   RING/U-box superfamily protein   chr3:850391-851461 REVERSE LENGTH=356                                                                                                                                                                                                                                                                                                                                                   | 334 | 356 | 1.00E-112 | 106.6 | 71.3 | 80.2 |
| Rsa1.0_01046.1.g22842.t1 | ref XP_002882297.1  hypothetical protein ARALYDRAFT.477602 [Arabidopsis lyrata subsp. lyrata] gi 297328137 gb EFH58556.1  hypothetical protein ARALYDRAFT.477602 [Arabidopsis lyrata subsp. lyrata] ref XP_002884398.1  hypothetical protein ARALYDRAFT.477605 [Arabidopsis lyrata subsp. lyrata] gi 297330238 gb EFH60657.1  hypothetical protein ARALYDRAFT.477605 [Arabidopsis lyrata subsp. lyrata]                                                                   | 601 | 606 | 0         | 100.8 | 88.5 | 93.3  | uncharacterized protein                                                                                                                                                                                                                                                                                                    | gbpln | Arabidopsis thaliana | AT3G03560.1   Symbols:   unknown protein; LOCATED IN: plasma membrane; EXPRESSED IN: 22 plant structures; EXPRESSED DURING: 13 growth stages; BEST Arabidopsis thaliana protein match is: unknown protein (TAIR:AT5G23490.1). Has 157 Blast hits to 146 proteins in 38 species: Archae - 3; Bacteria - 14; Metazoa - 8; Fungi - 0; Plants - 120; Viruses - 0; Other Eukaryotes - 12 (source: NCBI BLink).   chr3:853153-856486 REVERSE LENGTH=521 | 523 | 521 | 0         | 99.6  | 87.6 | 92.9 |
| Rsa1.0_01046.1.g22843.t1 | ref XP_002882297.1  hypothetical protein ARALYDRAFT.477602 [Arabidopsis lyrata subsp. lyrata] gi 297328137 gb EFH58556.1  hypothetical protein ARALYDRAFT.477602 [Arabidopsis lyrata subsp. lyrata] ref XP_002884398.1  hypothetical protein ARALYDRAFT.477605 [Arabidopsis lyrata subsp. lyrata] gi 297330238 gb EFH60657.1  hypothetical protein ARALYDRAFT.477605 [Arabidopsis lyrata subsp. lyrata]                                                                   | 601 | 606 | 0         | 100.8 | 88.5 | 93.3  | hypothetical protein ARALYDRAFT.477602                                                                                                                                                                                                                                                                                     | gbpln | Arabidopsis lyrata   | AT3G03570.1   Symbols:   Protein of unknown function (DUF3550/UPF0682)   chr3:857013-860105 FORWARD LENGTH=607                                                                                                                                                                                                                                                                                                                                    | 601 | 607 | 0         | 101.0 | 88.7 | 93.7 |
| Rsa1.0_01046.1.g22844.t1 | ref XP_002882297.1  hypothetical protein ARALYDRAFT.477602 [Arabidopsis lyrata subsp. lyrata] gi 297328137 gb EFH58556.1  hypothetical protein ARALYDRAFT.477602 [Arabidopsis lyrata subsp. lyrata] ref XP_002884398.1  hypothetical protein ARALYDRAFT.477605 [Arabidopsis lyrata subsp. lyrata] gi 297330238 gb EFH60657.1  hypothetical protein ARALYDRAFT.477605 [Arabidopsis lyrata subsp. lyrata]                                                                   | 220 | 219 | 1.00E-122 | 99.5  | 95.0 | 98.6  | hypothetical protein ARALYDRAFT.477605                                                                                                                                                                                                                                                                                     | gbpln | Arabidopsis lyrata   | AT3G03600.1   Symbols: RPS2   ribosomal protein S2   chr3:867847-868506 REVERSE LENGTH=219                                                                                                                                                                                                                                                                                                                                                        | 220 | 219 | 1.00E-123 | 99.5  | 93.2 | 98.6 |

|                          |                                                                                                                                                                                                                                                                                                                                                                                                                                                                                                                                                                                                                                                                                                                                   |     |      |           |       |      |      |                                                 |       |                      |                                                                                                                                                                                                                                                                                                                                                                                                                                                            |     |      |           |       |      |      |
|--------------------------|-----------------------------------------------------------------------------------------------------------------------------------------------------------------------------------------------------------------------------------------------------------------------------------------------------------------------------------------------------------------------------------------------------------------------------------------------------------------------------------------------------------------------------------------------------------------------------------------------------------------------------------------------------------------------------------------------------------------------------------|-----|------|-----------|-------|------|------|-------------------------------------------------|-------|----------------------|------------------------------------------------------------------------------------------------------------------------------------------------------------------------------------------------------------------------------------------------------------------------------------------------------------------------------------------------------------------------------------------------------------------------------------------------------------|-----|------|-----------|-------|------|------|
| Rsa1.0_01046.1.g22845.t1 | refXP_002884404.1   hypothetical protein ARALYDRAFT_477612 [Arabidopsis lyrata subsp. lyrata] gi 297330244 gb EFH60663.1                                                                                                                                                                                                                                                                                                                                                                                                                                                                                                                                                                                                          | 323 | 321  | 1.00E-149 | 99.4  | 81.1 | 89.2 | hypothetical protein ARALYDRAFT_477612          | gbpln | Arabidopsis lyrata   | AT3G03670.1   Symbols: Peroxidase superfamily protein   chr3:901985-903349 REVERSE LENGTH=321                                                                                                                                                                                                                                                                                                                                                              | 323 | 321  | 1.00E-150 | 99.4  | 80.5 | 88.5 |
| Rsa1.0_01046.1.g22846.t1 | hypothetical protein ARALYDRAFT_477612 [Arabidopsis lyrata subsp. lyrata] refXP_002882303.1   hypothetical protein ARALYDRAFT_896385 [Arabidopsis lyrata subsp. lyrata] gi 2973328143 gb EFH58562.1                                                                                                                                                                                                                                                                                                                                                                                                                                                                                                                               | 890 | 922  | 0         | 103.6 | 89.8 | 92.6 | hypothetical protein ARALYDRAFT_896385          | gbpln | Arabidopsis lyrata   | AT3G03710.1   Symbols: RIF10, PNP   polyribonucleotide nucleotidyltransferase, putative   chr3:919542-924906 FORWARD LENGTH=922                                                                                                                                                                                                                                                                                                                            | 890 | 922  | 0         | 103.6 | 88.2 | 91.3 |
| Rsa1.0_01047.1.g22847.t1 | hypothetical protein ARALYDRAFT_896385 [Arabidopsis lyrata subsp. lyrata] refXP_002888575.1   hypothetical protein ARALYDRAFT_894432 [Arabidopsis lyrata subsp. lyrata] gi 297334416 gb EFH64834.1                                                                                                                                                                                                                                                                                                                                                                                                                                                                                                                                | 225 | 224  | 7.00E-89  | 99.6  | 74.7 | 82.2 | hypothetical protein ARALYDRAFT_894432          | gbpln | Arabidopsis lyrata   | AT1G67080.1   Symbols: ABA4   abscisic acid (aba)-deficient 4   chr1:25045405-25046681 REVERSE LENGTH=220                                                                                                                                                                                                                                                                                                                                                  | 225 | 220  | 3.00E-91  | 97.8  | 70.2 | 81.3 |
| Rsa1.0_01047.1.g22848.t1 | hypothetical protein ARALYDRAFT_894432 [Arabidopsis lyrata subsp. lyrata] ref NP_17688U.1  ribulose biphosphate carboxylase small chain 1A [Arabidopsis thaliana] gi 27735223 sp P10795.2 RBS1A_ARAT H RecName: Full=Ribulose biphosphate carboxylase small chain 1A, chloroplastic; Short=RuBisCO small subunit 1A; Flags: Precursor gi 11782170 gb AAG40363.1 AF325011_1 000C10C11 [Arabidopsis thaliana] gi 15294200 gb AAK95277.1 AF410291_1 F1O19.10/F1O19.10 [Arabidopsis thaliana] gi 4204274 gb AAD10655.1                                                                                                                                                                                                                | 181 | 180  | 1.00E-93  | 99.4  | 89.0 | 92.8 | ribulose biphosphate carboxylase small chain 1A | gbpln | Arabidopsis thaliana | AT1G67090.1   Symbols: RBCS1A   ribulose biphosphate carboxylase small chain 1A   chr1:25048465-25049249 REVERSE LENGTH=180                                                                                                                                                                                                                                                                                                                                | 181 | 180  | 4.00E-96  | 99.4  | 89.0 | 92.8 |
| Rsa1.0_01047.1.g22849.t1 | ribulose biphosphate carboxylase, small subunit [Arabidopsis thaliana] gi 15451002 gb AAK96772.1   ribulose biphosphate carboxylase, small subunit [Arabidopsis thaliana] gi 15809842 gb AAL06849.1   At1g67090/F1O19.10 [Arabidopsis thaliana] gi 16604426 gb AAL24219.1   At1g67090/F1O19.10 [Arabidopsis thaliana] gi 16649141 gb AAL24422.1   ribulose biphosphate carboxylase, small subunit [Arabidopsis thaliana] gi 17065072 gb AAL32690.1   ribulose biphosphate carboxylase, small subunit [Arabidopsis thaliana] gi 17065270 gb AAL32789.1   ribulose biphosphate carboxylase, small subunit [Arabidopsis thaliana] gi 17473628 gb AAL38277.1   ribulose biphosphate carboxylase, small subunit [Arabidopsis thaliana] | 444 | 444  | 0         | 100.0 | 93.7 | 96.6 | mannose-6-phosphate isomerase-like protein      | gbpln | Brassica rapa        | AT1G67070.1   Symbols: DIN9, PM12   Mannose-6-phosphate isomerase, type 1   chr1:25042324-25044412 FORWARD LENGTH=441                                                                                                                                                                                                                                                                                                                                      | 444 | 441  | 0         | 99.3  | 84.5 | 90.5 |
| Rsa1.0_01047.1.g22850.t1 | gb AEJ89929.1   mannose-6-phosphate isomerase-like protein [Brassica rapa subsp. chinensis]                                                                                                                                                                                                                                                                                                                                                                                                                                                                                                                                                                                                                                       | #   | #    | #         | #     | #    | #    | -                                               | ----  | ----                 | #                                                                                                                                                                                                                                                                                                                                                                                                                                                          | #   | #    | #         | #     | #    |      |
| Rsa1.0_01047.1.g22851.t1 | emb CAB43904.1   putative protein [Arabidopsis thaliana] gi 7269745 emb CAB81478.1   putative protein [Arabidopsis thaliana]                                                                                                                                                                                                                                                                                                                                                                                                                                                                                                                                                                                                      | 602 | 1415 | 0         | 235.0 | 58.0 | 74.6 | putative protein                                | gbpln | Arabidopsis thaliana | AT4G23160.1   Symbols: CRK8   cysteine-rich RLK (RECEPTOR-like protein kinase) 8   chr4:12129485-12134086 FORWARD LENGTH=1262                                                                                                                                                                                                                                                                                                                              | 602 | 1262 | 1.00E-46  | 209.6 | 15.6 | 23.6 |
| Rsa1.0_01047.1.g22852.t1 | refXP_002887098.1   hypothetical protein ARALYDRAFT_475801 [Arabidopsis lyrata subsp. lyrata] gi 297332939 gb EFH63357.1                                                                                                                                                                                                                                                                                                                                                                                                                                                                                                                                                                                                          | 234 | 235  | 1.00E-129 | 100.4 | 99.1 | 99.1 | hypothetical protein ARALYDRAFT_475801          | gbpln | Arabidopsis lyrata   | AT1G67060.1   Symbols:   unknown protein; FUNCTIONS IN: molecular function unknown; INVOLVED IN: biological process unknown; LOCATED IN: plasma membrane; EXPRESSED IN: 22 plant structures; EXPRESSED DURING: 13 growth stages; Has 283 Blast hits to 281 proteins in 136 species: Archae - 0; Bacteria - 145; Metazoa - 0; Fungi - 65; Plants - 41; Viruses - 0; Other Eukaryotes - 32 (source: NCBI BLINK).   chr1:25036729-25039123 FORWARD LENGTH=234 | 234 | 234  | 1.00E-130 | 100.0 | 97.9 | 99.1 |

|                          |                                                                                                                                                                                                                                                                                           |     |      |           |       |      |      |                                                               |       |                      |                                                                                                                                                                                                                                                                                                                                                       |     |     |           |       |      |      |
|--------------------------|-------------------------------------------------------------------------------------------------------------------------------------------------------------------------------------------------------------------------------------------------------------------------------------------|-----|------|-----------|-------|------|------|---------------------------------------------------------------|-------|----------------------|-------------------------------------------------------------------------------------------------------------------------------------------------------------------------------------------------------------------------------------------------------------------------------------------------------------------------------------------------------|-----|-----|-----------|-------|------|------|
| Rsa1.0_01047.1.g22853.t1 | ref[XP_002888573.1] hypothetical protein ARALYDRAFT_475800 [Arabidopsis lyrata subsp. lyrata] gi 297334414 gb EFH64832.1  hypothetical protein ARALYDRAFT_475800 [Arabidopsis lyrata subsp. lyrata]                                                                                       | 272 | 266  | 4.00E-86  | 97.8  | 75.0 | 80.9 | hypothetical protein ARALYDRAFT_475800                        | gbpln | Arabidopsis lyrata   | AT1G67050.1   Symbols:   unknown protein; BEST Arabidopsis thaliana protein match is: unknown protein (TAIR:AT5G38320.1); Has 617 Blast hits to 318 proteins in 80 species: Archae - 0; Bacteria - 16; Metazoa - 141; Fungi - 62; Plants - 128; Viruses - 2; Other Eukaryotes - 268 (source: NCBI BLINK).   chr1:25028862-25029656 REVERSE LENGTH=264 | 272 | 264 | 7.00E-87  | 97.1  | 74.3 | 79.0 |
| Rsa1.0_01047.1.g22854.t1 | #                                                                                                                                                                                                                                                                                         | #   | #    | #         | #     | #    | -    | ----                                                          | ----  | #                    | #                                                                                                                                                                                                                                                                                                                                                     | #   | #   | #         | #     | #    |      |
| Rsa1.0_01048.1.g22855.t1 | gb ACQ90602.1  putative C2H2 zinc finger protein [Eutrema halophilum]                                                                                                                                                                                                                     | 195 | 607  | 3.00E-92  | 311.3 | 92.3 | 93.3 | putative C2H2 zinc finger protein                             | gbpln | Eutrema halophilum   | AT2G02070.1   Symbols: AtIDD5, IDD5   indeterminate(ID)-domain 9   chr2:505523-509154 FORWARD LENGTH=602                                                                                                                                                                                                                                              | 195 | 602 | 1.00E-89  | 308.7 | 92.3 | 94.4 |
| Rsa1.0_01048.1.g22856.t1 | gb ADQ43194.1  unknown [Eutrema parvulum]                                                                                                                                                                                                                                                 | 485 | 519  | 0         | 107.0 | 89.1 | 92.8 | unknown                                                       | gbpln | Eutrema parvulum     | AT2G02080.1   Symbols: AtIDD4, IDD4   indeterminate(ID)-domain 4   chr2:518328-521170 REVERSE LENGTH=516                                                                                                                                                                                                                                              | 485 | 516 | 0         | 106.4 | 84.5 | 90.1 |
| Rsa1.0_01048.1.g22857.t1 | gb ACQ90605.1  SWI/SNF helicase-like protein [Eutrema halophilum]                                                                                                                                                                                                                         | 815 | 768  | 0         | 94.2  | 85.0 | 88.0 | SWI/SNF helicase-like protein                                 | gbpln | Eutrema halophilum   | AT2G02090.1   Symbols: CHR19, CHA19, ETL1   SNF2 domain-containing protein / helicase domain-containing protein   chr2:523481-526884 FORWARD LENGTH=763                                                                                                                                                                                               | 815 | 763 | 0         | 93.6  | 84.0 | 87.0 |
| Rsa1.0_01048.1.g22858.t6 | ref[XP_002875115.1] hypothetical protein ARALYDRAFT_484136 [Arabidopsis lyrata subsp. lyrata] gi 297320953 gb EFH51374.1  hypothetical protein ARALYDRAFT_484136 [Arabidopsis lyrata subsp. lyrata]                                                                                       | 225 | 77   | 7.00E-25  | 34.2  | 23.6 | 26.2 | hypothetical protein ARALYDRAFT_484136                        | gbpln | Arabidopsis lyrata   | AT2G02130.1   Symbols: PDF2.3, LCR68   low-molecular-weight cysteine-rich 68   chr2:540071-540407 FORWARD LENGTH=77                                                                                                                                                                                                                                   | 225 | 77  | 4.00E-26  | 34.2  | 22.2 | 25.3 |
| Rsa1.0_01048.1.g22859.t1 | gb ADQ43199.1  unknown [Eutrema parvulum]                                                                                                                                                                                                                                                 | 444 | 1128 | 0         | 254.1 | 85.8 | 89.9 | unknown                                                       | gbpln | Eutrema parvulum     | AT2G02148.1   Symbols:   unknown protein.   chr2:547389-549316 REVERSE LENGTH=432                                                                                                                                                                                                                                                                     | 444 | 432 | 0         | 97.3  | 80.4 | 86.5 |
| Rsa1.0_01048.1.g22860.t4 | ref[XP_002876802.1] hypothetical protein ARALYDRAFT_322556 [Arabidopsis lyrata subsp. lyrata] gi 297322640 gb EFH53061.1  hypothetical protein ARALYDRAFT_322556 [Arabidopsis lyrata subsp. lyrata]                                                                                       | 326 | 492  | 5.00E-39  | 150.9 | 30.4 | 37.1 | hypothetical protein ARALYDRAFT_322556                        | gbpln | Arabidopsis lyrata   | AT2G02170.2   Symbols:   Remorin family protein   chr2:556595-558610 REVERSE LENGTH=486                                                                                                                                                                                                                                                               | 326 | 486 | 6.00E-41  | 149.1 | 30.4 | 37.1 |
| Rsa1.0_01048.1.g22861.t1 | #                                                                                                                                                                                                                                                                                         | #   | #    | #         | #     | #    | -    | ----                                                          | ----  | #                    | #                                                                                                                                                                                                                                                                                                                                                     | #   | #   | #         | #     | #    |      |
| Rsa1.0_01048.1.g22862.t1 | ref[XP_002875118.1] hypothetical protein ARALYDRAFT_484143 [Arabidopsis lyrata subsp. lyrata] gi 297320956 gb EFH51377.1  hypothetical protein ARALYDRAFT_484143 [Arabidopsis lyrata subsp. lyrata]                                                                                       | 499 | 308  | 1.00E-141 | 61.7  | 50.1 | 52.7 | hypothetical protein ARALYDRAFT_484143                        | gbpln | Arabidopsis lyrata   | AT2G02180.1   Symbols: TOM3   tobamovirus multiplication protein 3   chr2:560976-562961 FORWARD LENGTH=303                                                                                                                                                                                                                                            | 499 | 303 | 1.00E-140 | 60.7  | 50.3 | 52.5 |
| Rsa1.0_01048.1.g22863.t1 | #                                                                                                                                                                                                                                                                                         | #   | #    | #         | #     | #    | -    | ----                                                          | ----  | #                    | #                                                                                                                                                                                                                                                                                                                                                     | #   | #   | #         | #     | #    |      |
| Rsa1.0_01048.1.g22864.t1 | gb EOA24103.1  hypothetical protein CARUB_v10017334mg [Capsella rubella]                                                                                                                                                                                                                  | 94  | 418  | 4.00E-32  | 444.7 | 85.1 | 92.6 | hypothetical protein CARUB_v10017334mg                        | gbpln | Capsella rubella     | AT2G02450.2   Symbols: ANAC034, ANAC035, LOV1, NAC035   NAC domain containing protein 35   chr2:648044-650649 FORWARD LENGTH=414                                                                                                                                                                                                                      | 94  | 414 | 3.00E-33  | 440.4 | 81.9 | 91.5 |
| Rsa1.0_01049.1.g22865.t3 | #                                                                                                                                                                                                                                                                                         | #   | #    | #         | #     | #    | -    | ----                                                          | ----  | #                    | #                                                                                                                                                                                                                                                                                                                                                     | #   | #   | #         | #     | #    |      |
| Rsa1.0_01049.1.g22866.t1 | ref[XP_002893269.1] hypothetical protein ARALYDRAFT_472578 [Arabidopsis lyrata subsp. lyrata] gi 297339111 gb EFH69528.1  hypothetical protein ARALYDRAFT_472578 [Arabidopsis lyrata subsp. lyrata]                                                                                       | 218 | 205  | 5.00E-91  | 94.0  | 78.9 | 87.2 | hypothetical protein ARALYDRAFT_472578                        | gbpln | Arabidopsis lyrata   | AT1G23205.1   Symbols:   Plant invertase/pectin methylesterase inhibitor superfamily protein   chr1:8234234-8234851 REVERSE LENGTH=205                                                                                                                                                                                                                | 218 | 205 | 2.00E-92  | 94.0  | 77.5 | 87.2 |
| Rsa1.0_01049.1.g22867.t1 | gb EOA38769.1  hypothetical protein CARUB_v10010959mg [Capsella rubella]                                                                                                                                                                                                                  | 497 | 489  | 0         | 98.4  | 88.7 | 92.8 | hypothetical protein CARUB_v10010959mg                        | gbpln | Capsella rubella     | AT1G23210.1   Symbols: AtGH9B6, GH9B6   glycosyl hydrolase 9B6   chr1:8240174-8242129 FORWARD LENGTH=489                                                                                                                                                                                                                                              | 497 | 489 | 0         | 98.4  | 89.3 | 93.6 |
| Rsa1.0_01049.1.g22868.t1 | ref[XP_002890577.1] dynein light chain type 1 family protein [Arabidopsis lyrata subsp. lyrata] gi 297336419 gb EFH66836.1  dynein light chain type 1 family protein [Arabidopsis lyrata subsp. lyrata]                                                                                   | 82  | 129  | 5.00E-30  | 157.3 | 85.4 | 87.8 | dynein light chain type 1 family protein                      | gbpln | Arabidopsis lyrata   | AT1G23220.1   Symbols:   Dynein light chain type 1 family protein   chr1:8242614-8244136 FORWARD LENGTH=129                                                                                                                                                                                                                                           | 82  | 129 | 1.00E-31  | 157.3 | 84.1 | 86.6 |
| Rsa1.0_01049.1.g22869.t1 | ref[NP_191599.1] Mitochondrial transcription termination factor family protein [Arabidopsis thaliana] gi 7287988 emb CAB81826.1  putative protein [Arabidopsis thaliana] gi 332646534 gb AEE80055.1  Mitochondrial transcription termination factor family protein [Arabidopsis thaliana] | 206 | 558  | 1.00E-14  | 270.9 | 20.4 | 24.8 | Mitochondrial transcription termination factor family protein | gbpln | Arabidopsis thaliana | AT3G60400.1   Symbols:   Mitochondrial transcription termination factor family protein   chr3:22329093-22330769 FORWARD LENGTH=558                                                                                                                                                                                                                    | 206 | 558 | 4.00E-17  | 270.9 | 20.4 | 24.8 |

|                          |                                                                                                                                                                                                                                                                                                                                                                                                                                                                                                                                                                                                                                                                                                                                                                                      |      |      |           |       |      |      |                                            |       |                      |                                                                                                                                                                                                                                                                                                                                                                                                                                                                                                                                                  |      |      |           |       |      |      |
|--------------------------|--------------------------------------------------------------------------------------------------------------------------------------------------------------------------------------------------------------------------------------------------------------------------------------------------------------------------------------------------------------------------------------------------------------------------------------------------------------------------------------------------------------------------------------------------------------------------------------------------------------------------------------------------------------------------------------------------------------------------------------------------------------------------------------|------|------|-----------|-------|------|------|--------------------------------------------|-------|----------------------|--------------------------------------------------------------------------------------------------------------------------------------------------------------------------------------------------------------------------------------------------------------------------------------------------------------------------------------------------------------------------------------------------------------------------------------------------------------------------------------------------------------------------------------------------|------|------|-----------|-------|------|------|
| Rsa1.0_01049.1.g22870.t2 | ref[NP_001185071.1] uncharacterized protein [Arabidopsis thaliana] gi 332192239 gb AE30360.1  uncharacterized protein AT1G23230 [Arabidopsis thaliana]                                                                                                                                                                                                                                                                                                                                                                                                                                                                                                                                                                                                                               | 1552 | 1592 | 0         | 102.6 | 85.4 | 92.3 | uncharacterized protein                    | gbpln | Arabidopsis thaliana | AT1G23230.2   Symbols:   FUNCTIONS IN: molecular_function unknown; INVOLVED IN: response to salt stress; EXPRESSED IN: 24 plant structures; EXPRESSED DURING: 15 growth stages; CONTAINS InterPro DOMAIN/s: Mediator complex subunit Med23 (InterPro:IPR021629).   chr1:8244481-8251741 FORWARD LENGTH=1592                                                                                                                                                                                                                                      | 1552 | 1592 | 0         | 102.6 | 85.4 | 92.3 |
| Rsa1.0_01049.1.g22871.t1 | ref[NP_564191.1] ubiquitin-conjugating enzyme E2 variant 1A [Arabidopsis thaliana] gi 75305892 sp Q93YPO.1 UEV1A_ARAT H RecName: Full=Ubiquitin-conjugating enzyme E2 variant 1A; Short=Ubc enzyme variant 1A; AltName: Full=Protein MMS ZWEI HOMOLOG 1 gi 16649053 gb AAL24378.1  similar to DNA binding protein [Arabidopsis thaliana] gi 20259984 gb AAM13339.1  similar to DNA binding protein [Arabidopsis thaliana] gi 332192244 gb AE30365.1  ubiquitin-conjugating enzyme E2 variant 1A [Arabidopsis thaliana]                                                                                                                                                                                                                                                               | 158  | 158  | 1.00E-85  | 100.0 | 95.6 | 98.1 | ubiquitin-conjugating enzyme E2 variant 1A | gbpln | Arabidopsis thaliana | AT1G23260.1   Symbols: MMZ1, UEV1A   MMS ZWEI homologue 1   chr1:8257209-8258573 REVERSE LENGTH=158                                                                                                                                                                                                                                                                                                                                                                                                                                              | 158  | 158  | 4.00E-88  | 100.0 | 95.6 | 98.1 |
| Rsa1.0_01049.1.g22872.t1 | gb EOA36751.1  hypothetical protein CARUB_v10012590mg [Capsella rubella]                                                                                                                                                                                                                                                                                                                                                                                                                                                                                                                                                                                                                                                                                                             | 242  | 319  | 2.00E-27  | 131.8 | 41.7 | 52.9 | hypothetical protein CARUB_v10012590mg     | gbpln | Capsella rubella     | AT1G31460.1   Symbols:   unknown protein; FUNCTIONS IN: molecular_function unknown; INVOLVED IN: biological_process unknown; LOCATED IN: plasma membrane; EXPRESSED IN: 23 plant structures; EXPRESSED DURING: 13 growth stages; BEST Arabidopsis thaliana protein match is: unknown protein (TAIR:AT1G23270.1); Has 1251 Blast hits to 756 proteins in 185 species: Archae - 0; Bacteria - 295; Metazoa - 374; Fungi - 176; Plants - 58; Viruses - 17; Other Eukaryotes - 331 (source: NCBI BLINK).   chr1:11261705-11262610 REVERSE LENGTH=301 | 242  | 301  | 8.00E-24  | 124.4 | 42.6 | 55.4 |
| Rsa1.0_01049.1.g22873.t1 | ref[NP_173743.1] 60S ribosomal protein L27a-2 [Arabidopsis thaliana] gi 297845396 ref XP_002890579.1  RPL27A [Arabidopsis lyrata subsp. lyrata] gi 20143883 sp Q9LR33.1 R27A2_ARAT H RecName: Full=60S ribosomal protein L27a-2 gi 9295692 gb AAF86998.1 AC005292.7 F26F24.13 [Arabidopsis thaliana] gi 11692928 gb AAG40067.1 AF324716.1 At1g23290 [Arabidopsis thaliana] gi 13194820 gb AAK15572.1 AF349525.1 putative 60s ribosomal protein l27a [Arabidopsis thaliana] gi 15294178 gb AAK95266.1 AF410280.1 At1g23290/F26F24.23 [Arabidopsis thaliana] gi 23308283 gb AAN18111.1  At1g23290/F26F24.23 [Arabidopsis thaliana] gi 29733642 gb EFH66838.1  RPL27A [Arabidopsis lyrata subsp. lyrata] gi 332192247 gb AE30368.1  60S ribosomal protein L27a-2 [Arabidopsis thaliana] | 146  | 146  | 3.00E-74  | 100.0 | 94.5 | 97.3 | 60S ribosomal protein L27a-2               | gbpln | Arabidopsis lyrata   | AT1G23290.1   Symbols: RPL27A, RPL27AB   Ribosomal protein L18e/L15 superfamily protein   chr1:8263007-8263447 FORWARD LENGTH=146                                                                                                                                                                                                                                                                                                                                                                                                                | 146  | 146  | 9.00E-77  | 100.0 | 94.5 | 97.3 |
| Rsa1.0_01049.1.g22874.t5 | #                                                                                                                                                                                                                                                                                                                                                                                                                                                                                                                                                                                                                                                                                                                                                                                    | #    | #    | #         | #     | #    | -    | ----                                       | ----  | #                    | #                                                                                                                                                                                                                                                                                                                                                                                                                                                                                                                                                | #    | #    | #         | #     | #    |      |
| Rsa1.0_01049.1.g22875.t1 | #                                                                                                                                                                                                                                                                                                                                                                                                                                                                                                                                                                                                                                                                                                                                                                                    | #    | #    | #         | #     | #    | -    | ----                                       | ----  | #                    | #                                                                                                                                                                                                                                                                                                                                                                                                                                                                                                                                                | #    | #    | #         | #     | #    |      |
| Rsa1.0_01049.1.g22876.t1 | gb EOA37442.1  hypothetical protein CARUB_v10011523mg [Capsella rubella]                                                                                                                                                                                                                                                                                                                                                                                                                                                                                                                                                                                                                                                                                                             | 402  | 388  | 1.00E-168 | 96.5  | 73.4 | 81.8 | hypothetical protein CARUB_v10011523mg     | gbpln | Capsella rubella     | AT1G23320.1   Symbols: TAR1   tryptophan aminotransferase related 1   chr1:8273423-8275350 REVERSE LENGTH=388                                                                                                                                                                                                                                                                                                                                                                                                                                    | 402  | 388  | 1.00E-169 | 96.5  | 73.6 | 81.3 |
| Rsa1.0_01050.1.g22877.t1 | #                                                                                                                                                                                                                                                                                                                                                                                                                                                                                                                                                                                                                                                                                                                                                                                    | #    | #    | #         | #     | #    | -    | ----                                       | ----  | #                    | #                                                                                                                                                                                                                                                                                                                                                                                                                                                                                                                                                | #    | #    | #         | #     | #    |      |
| Rsa1.0_01050.1.g22878.t3 | gb AAD25557.1 AC005850_14 Hypothetical protein [Arabidopsis thaliana]                                                                                                                                                                                                                                                                                                                                                                                                                                                                                                                                                                                                                                                                                                                | 563  | 404  | 1.00E-134 | 71.8  | 44.4 | 50.8 | Hypothetical protein                       | gbpln | Arabidopsis thaliana | AT4G10890.1   Symbols:   unknown protein; CONTAINS InterPro DOMAIN/s: Protein of unknown function DUF2439 (InterPro:IPR018838); BEST Arabidopsis thaliana protein match is: unknown protein (TAIR:AT1G43722.1); Has 30201 Blast hits to 17322 proteins in 780 species: Archae - 12; Bacteria - 1396; Metazoa - 17338; Fungi - 3422; Plants - 5037; Viruses - 0; Other Eukaryotes - 2996 (source: NCBI BLINK).   chr4:6688833-6692937 FORWARD LENGTH=527                                                                                          | 563  | 527  | 1.00E-53  | 93.6  | 18.3 | 22.2 |

|                          |                                                                                                                                                                                                                                                                                                                                                                                                                                                                                                                                                                                                                     |      |      |           |       |      |      |                                                                                |       |                      |                                                                                                                                                                                                                                                                                                                                            |     |     |           |       |      |      |
|--------------------------|---------------------------------------------------------------------------------------------------------------------------------------------------------------------------------------------------------------------------------------------------------------------------------------------------------------------------------------------------------------------------------------------------------------------------------------------------------------------------------------------------------------------------------------------------------------------------------------------------------------------|------|------|-----------|-------|------|------|--------------------------------------------------------------------------------|-------|----------------------|--------------------------------------------------------------------------------------------------------------------------------------------------------------------------------------------------------------------------------------------------------------------------------------------------------------------------------------------|-----|-----|-----------|-------|------|------|
| Rsa1.0_01050.1.g22879.t1 | gb AAC95175.1  putative non-LTR retroelement reverse transcriptase [Arabidopsis thaliana]                                                                                                                                                                                                                                                                                                                                                                                                                                                                                                                           | 777  | 1352 | 3.00E-85  | 174.0 | 24.2 | 35.8 | putative non-LTR retroelement reverse transcriptase                            | gbpln | Arabidopsis thaliana | AT1G43760.1   Symbols:   DNase I-like superfamily protein   chr1:16528880-16531065 REVERSE LENGTH=626                                                                                                                                                                                                                                      | 777 | 626 | 2.00E-16  | 80.6  | 6.8  | 10.7 |
| Rsa1.0_01050.1.g22880.t1 | ref NP_567241.1  xyloglucan 6-xylosyltransferase [Arabidopsis thaliana] gi 46576207 sp Q22775.1 GT2_ARATH RecName: Full=Putative glycosyltransferase 2; Short=AtGT2 gi 3193287 gb AAC19271.1  T14P8.23 [Arabidopsis thaliana] gi 9716844 emb CAC01674.1  putative golgi glycosyltransferase [Arabidopsis thaliana] gi 16209669 gb AAL14393.1  AT4g02500/T10P1.20 [Arabidopsis thaliana] gi 22655160 gb AAM98170.1  putative glycosyltransferase [Arabidopsis thaliana] gi 30387559 gb AAP31945.1  At4g02500 [Arabidopsis thaliana] gi 33265678 gb AEE82181.1  putative glycosyltransferase 2 [Arabidopsis thaliana] | 489  | 461  | 0         | 94.3  | 89.4 | 91.8 | xyloglucan 6-xylosyltransferase                                                | gbpln | Arabidopsis thaliana | AT4G02500.1   Symbols: ATXT2, XXT2, XT2   UDP-xylosyltransferase 2   chr4:1101638-1103345 FORWARD LENGTH=461                                                                                                                                                                                                                               | 489 | 461 | 0         | 94.3  | 89.4 | 91.8 |
| Rsa1.0_01050.1.g22881.t1 | ref NP_567236.1  DNA mismatch repair protein PMS2 [Arabidopsis thaliana] gi 75249525 sp Q94116.1 PMS1_ARATH RecName: Full=DNA mismatch repair protein PMS1; AltName: Full=Postmeiotic segregation protein 1; AltName: Full=Protein POSTMEIOTIC SEGREGATION 1                                                                                                                                                                                                                                                                                                                                                        | 915  | 923  | 0         | 100.9 | 82.1 | 89.4 | DNA mismatch repair protein PMS2                                               | gbpln | Arabidopsis thaliana | AT4G02460.1   Symbols: PMS1   DNA mismatch repair protein, putative   chr4:1076306-1080510 REVERSE LENGTH=923                                                                                                                                                                                                                              | 915 | 923 | 0         | 100.9 | 82.1 | 89.4 |
| Rsa1.0_01050.1.g22882.t2 | gi 15617225 gb AAL01156.1  DNA mismatch repair protein [Arabidopsis thaliana] gi 332656779 gb AEE82175.1  DNA mismatch repair protein PMS1 [Arabidopsis thaliana] ref NP_001154201.1  HSP20-like chaperone [Arabidopsis thaliana] gi 332656774 gb AEE82174.1  HSP20-like chaperone [Arabidopsis thaliana]                                                                                                                                                                                                                                                                                                           | 361  | 240  | 3.00E-58  | 66.5  | 29.9 | 31.9 | HSP20-like chaperone                                                           | gbpln | Arabidopsis thaliana | AT4G02450.2   Symbols:   HSP20-like chaperones superfamily protein   chr4:1073987-1075765 REVERSE LENGTH=240                                                                                                                                                                                                                               | 361 | 240 | 7.00E-61  | 66.5  | 29.9 | 31.9 |
| Rsa1.0_01050.1.g22883.t1 | gb ACF48822.1  cyclophilin [Gossypium hirsutum]                                                                                                                                                                                                                                                                                                                                                                                                                                                                                                                                                                     | 275  | 173  | 9.00E-46  | 62.9  | 33.1 | 43.3 | cyclophilin                                                                    | gbpln | Gossypium hirsutum   | AT2G16600.1   Symbols: ROC3   rotamase CYP 3   chr2:7200862-7201383 FORWARD LENGTH=173                                                                                                                                                                                                                                                     | 275 | 173 | 3.00E-47  | 62.9  | 32.7 | 43.6 |
| Rsa1.0_01050.1.g22884.t1 | #                                                                                                                                                                                                                                                                                                                                                                                                                                                                                                                                                                                                                   | #    | #    | #         | #     | #    | -    | ----                                                                           | ----  | #                    | #                                                                                                                                                                                                                                                                                                                                          | #   | #   | #         | #     | #    |      |
| Rsa1.0_01050.1.g22885.t1 | #                                                                                                                                                                                                                                                                                                                                                                                                                                                                                                                                                                                                                   | #    | #    | #         | #     | #    | -    | ----                                                                           | ----  | #                    | #                                                                                                                                                                                                                                                                                                                                          | #   | #   | #         | #     | #    |      |
| Rsa1.0_01050.1.g22886.t2 | gb ABD65100.1  hypothetical protein 31.t00077 [Brassica oleracea]                                                                                                                                                                                                                                                                                                                                                                                                                                                                                                                                                   | 304  | 391  | 8.00E-29  | 128.6 | 23.0 | 28.6 | hypothetical protein 31.t00077                                                 | gbpln | Brassica oleracea    | #                                                                                                                                                                                                                                                                                                                                          | #   | #   | #         | #     | #    |      |
| Rsa1.0_01050.1.g22887.t1 | gb ACG60682.1  transposon-like ORF [Brassica oleracea var. alboblabra]                                                                                                                                                                                                                                                                                                                                                                                                                                                                                                                                              | 299  | 704  | 1.00E-104 | 235.5 | 59.2 | 62.5 | transposon-like ORF                                                            | gbpln | Brassica oleracea    | #                                                                                                                                                                                                                                                                                                                                          | #   | #   | #         | #     | #    |      |
| Rsa1.0_01050.1.g22888.t1 | #                                                                                                                                                                                                                                                                                                                                                                                                                                                                                                                                                                                                                   | #    | #    | #         | #     | #    | -    | ----                                                                           | ----  | #                    | #                                                                                                                                                                                                                                                                                                                                          | #   | #   | #         | #     | #    |      |
| Rsa1.0_01050.1.g22889.t2 | #                                                                                                                                                                                                                                                                                                                                                                                                                                                                                                                                                                                                                   | #    | #    | #         | #     | #    | -    | ----                                                                           | ----  | #                    | #                                                                                                                                                                                                                                                                                                                                          | #   | #   | #         | #     | #    |      |
| Rsa1.0_01051.1.g22890.t1 | #                                                                                                                                                                                                                                                                                                                                                                                                                                                                                                                                                                                                                   | #    | #    | #         | #     | #    | -    | ----                                                                           | ----  | #                    | #                                                                                                                                                                                                                                                                                                                                          | #   | #   | #         | #     | #    |      |
| Rsa1.0_01051.1.g22891.t1 | ref XP_002883480.1  hypothetical protein ARALYDRAFT_479917 [Arabidopsis lyrata subsp. lyrata] gi 297329320 gb EFH59739.1  hypothetical protein ARALYDRAFT_479917 [Arabidopsis lyrata subsp. lyrata]                                                                                                                                                                                                                                                                                                                                                                                                                 | 315  | 347  | 1.00E-132 | 110.2 | 79.7 | 87.3 | hypothetical protein ARALYDRAFT_479917                                         | gbpln | Arabidopsis lyrata   | AT3G24150.1   Symbols:   unknown protein; BEST Arabidopsis thaliana protein match is: unknown protein (TAIR:AT4G32295.1); Has 50 Blast hits to 50 proteins in 12 species: Archae - 0; Bacteria - 0; Metazoa - 7; Fungi - 0; Plants - 41; Viruses - 0; Other Eukaryotes - 2 (source: NCBI BLink).   chr3:8724273-8725586 REVERSE LENGTH=343 | 315 | 343 | 1.00E-132 | 108.9 | 81.9 | 88.6 |
| Rsa1.0_01051.1.g22892.t1 | gb AAC28189.1  contains similarity to Arabidopsis thaliana retrotransposon Athila (GB:X81801) [Arabidopsis thaliana]                                                                                                                                                                                                                                                                                                                                                                                                                                                                                                | 1286 | 940  | 2.00E-90  | 73.1  | 15.0 | 19.7 | contains similarity to Arabidopsis thaliana retrotransposon Athila (GB:X81801) | gbpln | Arabidopsis thaliana | #                                                                                                                                                                                                                                                                                                                                          | #   | #   | #         | #     | #    |      |
| Rsa1.0_01051.1.g22893.t1 | #                                                                                                                                                                                                                                                                                                                                                                                                                                                                                                                                                                                                                   | #    | #    | #         | #     | #    | -    | ----                                                                           | ----  | #                    | #                                                                                                                                                                                                                                                                                                                                          | #   | #   | #         | #     | #    |      |

|                          |                                                                                                                                                                                                                                                                                                                                                                                                                                                      |      |      |           |       |      |      |                                        |       |                      |                                                                                                                               |      |      |           |       |      |      |
|--------------------------|------------------------------------------------------------------------------------------------------------------------------------------------------------------------------------------------------------------------------------------------------------------------------------------------------------------------------------------------------------------------------------------------------------------------------------------------------|------|------|-----------|-------|------|------|----------------------------------------|-------|----------------------|-------------------------------------------------------------------------------------------------------------------------------|------|------|-----------|-------|------|------|
| Rsa1.0_01052.1.g22894.t1 | ref[XP_002866030.1] hypothetical protein ARALYDRAFT_357679 [Arabidopsis lyrata subsp. lyrata] gi 297796293 ref[XP_002866031.1] hypothetical protein ARALYDRAFT_331771 [Arabidopsis lyrata subsp. lyrata] gi 297311865 gb EFH42289.1                                                                                                                                                                                                                  | 319  | 320  | 1.00E-149 | 100.3 | 87.8 | 92.5 | hypothetical protein ARALYDRAFT_357679 | gbpln | Arabidopsis lyrata   | AT5G54230.1   Symbols: MYB49, AtMYB49   myb domain protein 49   chr5:22016357-22017845 REVERSE LENGTH=319                     | 319  | 319  | 1.00E-144 | 100.0 | 87.1 | 92.2 |
| Rsa1.0_01052.1.g22895.t1 | gb AAD32898.1  putative retroelement pol polyprotein [Arabidopsis thaliana]                                                                                                                                                                                                                                                                                                                                                                          | 1288 | 1307 | 0         | 101.5 | 58.4 | 72.7 | putative retroelement pol polyprotein  | gbpln | Arabidopsis thaliana | AT4G23160.1   Symbols: CRK8   cysteine-rich RLK (RECEPTOR-like protein kinase) 8   chr4:12129485-12134086 FORWARD LENGTH=1262 | 1288 | 1262 | 1.00E-88  | 98.0  | 14.4 | 22.5 |
| Rsa1.0_01052.1.g22896.t1 | ref[NP_200105.1] uncharacterized protein [Arabidopsis thaliana] gi 10177107 dbj BAB10441.1  unnamed protein product [Arabidopsis thaliana] gi 60547939 gb AAX23933.1  hypothetical protein At5g52930 [Arabidopsis thaliana] gi 71905609 gb AAZ52782.1  expressed protein [Arabidopsis thaliana] gi 332008896 gb AED96279.1  uncharacterized protein AT5G52930 [Arabidopsis thaliana]                                                                 | 368  | 359  | 1.00E-116 | 97.6  | 58.2 | 68.8 | uncharacterized protein                | gbpln | Arabidopsis thaliana | AT5G52930.1   Symbols:   Protein of unknown function (DUF295)   chr5:21470370-21471449 FORWARD LENGTH=359                     | 368  | 359  | 1.00E-118 | 97.6  | 58.2 | 68.8 |
| Rsa1.0_01052.1.g22897.t1 | ref[NP_200266.1] uncharacterized protein [Arabidopsis thaliana] gi 9758947 dbj BAB09334.1  unnamed protein product [Arabidopsis thaliana] gi 332009126 gb AED96509.1  uncharacterized protein AT5G54550 [Arabidopsis thaliana]                                                                                                                                                                                                                       | 243  | 359  | 7.00E-76  | 147.7 | 63.0 | 72.0 | uncharacterized protein                | gbpln | Arabidopsis thaliana | AT5G54550.1   Symbols:   Protein of unknown function (DUF295)   chr5:22158401-22159480 FORWARD LENGTH=359                     | 243  | 359  | 2.00E-78  | 147.7 | 63.0 | 72.0 |
| Rsa1.0_01052.1.g22898.t1 | ref[NP_200241.1] uncharacterized protein [Arabidopsis thaliana] gi 9759503 dbj BAB10753.1  cotton fiber expressed protein 1-like protein [Arabidopsis thaliana] gi 20466706 gb AAM20670.1  cotton fiber expressed protein 1-like protein [Arabidopsis thaliana] gi 23198239 gb AAN15646.1  cotton fiber expressed protein 1-like protein [Arabidopsis thaliana] gi 332009099 gb AED96482.1  uncharacterized protein AT5G54300 [Arabidopsis thaliana] | 294  | 326  | 9.00E-99  | 110.9 | 70.7 | 83.0 | uncharacterized protein                | gbpln | Arabidopsis thaliana | AT5G54300.1   Symbols:   Protein of unknown function (DUF761)   chr5:22054270-22055342 REVERSE LENGTH=326                     | 294  | 326  | 1.00E-101 | 110.9 | 70.7 | 83.0 |
| Rsa1.0_01052.1.g22899.t1 | gb EOA12434.1  hypothetical protein CARUB_v10028316mg [Capsella rubella]                                                                                                                                                                                                                                                                                                                                                                             | 472  | 480  | 0         | 101.7 | 87.9 | 93.4 | hypothetical protein CARUB_v10028316mg | gbpln | Capsella rubella     | AT5G54310.1   Symbols: NEV, AGD5   ARF-GAP domain 5   chr5:22057262-22061066 REVERSE LENGTH=483                               | 472  | 483  | 0         | 102.3 | 86.7 | 92.6 |
| Rsa1.0_01052.1.g22900.t1 | #                                                                                                                                                                                                                                                                                                                                                                                                                                                    | #    | #    | #         | #     | #    | -    | ----                                   | ----  | ----                 | #                                                                                                                             | #    | #    | #         | #     | #    |      |
| Rsa1.0_01052.1.g22901.t1 | gb ACP30609.1  disease resistance protein [Brassica rapa subsp. pekinensis]                                                                                                                                                                                                                                                                                                                                                                          | 1514 | 2726 | 0         | 180.1 | 52.8 | 71.8 | disease resistance protein             | gbpln | Brassica rapa        | ATMG00860.1   Symbols: ORF158   DNA/RNA polymerases superfamily protein   chrM:235916-236392 FORWARD LENGTH=158               | 1514 | 158  | 5.00E-35  | 10.4  | 4.8  | 5.7  |
| Rsa1.0_01053.1.g22902.t1 | ref[XP_002866937.1] hypothetical protein ARALYDRAFT_490852 [Arabidopsis lyrata subsp. lyrata] gi 297312773 gb EFH43196.1  hypothetical protein ARALYDRAFT_490852 [Arabidopsis lyrata subsp. lyrata]                                                                                                                                                                                                                                                  | 379  | 611  | 0         | 161.2 | 93.7 | 96.3 | hypothetical protein ARALYDRAFT_490852 | gbpln | Arabidopsis lyrata   | AT4G37670.2   Symbols: NAGS2   N-acetyl-L-glutamate synthase 2   chr4:17696179-17698836 REVERSE LENGTH=613                    | 379  | 613  | 0         | 161.7 | 93.1 | 95.8 |
| Rsa1.0_01053.1.g22903.t1 | ref[XP_002868978.1] hypothetical protein ARALYDRAFT_912572 [Arabidopsis lyrata subsp. lyrata] gi 297314814 gb EFH45237.1  hypothetical protein ARALYDRAFT_912572 [Arabidopsis lyrata subsp. lyrata]                                                                                                                                                                                                                                                  | 530  | 531  | 0         | 100.2 | 92.8 | 96.2 | hypothetical protein ARALYDRAFT_912572 | gbpln | Arabidopsis lyrata   | AT4G37650.1   Symbols: SHR, SGR7   GRAS family transcription factor   chr4:17691871-17693466 FORWARD LENGTH=531               | 530  | 531  | 0         | 100.2 | 92.8 | 96.0 |
| Rsa1.0_01053.1.g22904.t1 | ref[XP_002866939.1] hypothetical protein ARALYDRAFT_490858 [Arabidopsis lyrata subsp. lyrata] gi 297312775 gb EFH43198.1  hypothetical protein ARALYDRAFT_490858 [Arabidopsis lyrata subsp. lyrata]                                                                                                                                                                                                                                                  | 375  | 369  | 0         | 98.4  | 84.8 | 89.3 | hypothetical protein ARALYDRAFT_490858 | gbpln | Arabidopsis lyrata   | AT4G37610.1   Symbols: BT5   BTB and TAZ domain protein 5   chr4:17670606-17671992 REVERSE LENGTH=368                         | 375  | 368  | 0         | 98.1  | 83.5 | 89.3 |

|                          |                                                                                                                                                                                                                                                                                                                                                                                                                                                                                                                                                                                                                                                                                                                                                                                                                                                                                                                                                                                                                                                                                                                                                                                 |     |     |           |       |      |      |                                                                           |       |                      |                                                                                                                                             |     |     |           |       |      |      |
|--------------------------|---------------------------------------------------------------------------------------------------------------------------------------------------------------------------------------------------------------------------------------------------------------------------------------------------------------------------------------------------------------------------------------------------------------------------------------------------------------------------------------------------------------------------------------------------------------------------------------------------------------------------------------------------------------------------------------------------------------------------------------------------------------------------------------------------------------------------------------------------------------------------------------------------------------------------------------------------------------------------------------------------------------------------------------------------------------------------------------------------------------------------------------------------------------------------------|-----|-----|-----------|-------|------|------|---------------------------------------------------------------------------|-------|----------------------|---------------------------------------------------------------------------------------------------------------------------------------------|-----|-----|-----------|-------|------|------|
| Rsa1.0_01053.1.g22905.t1 | gb EOA16747.1  hypothetical protein CARUB_v10004955mg [Capsella rubella]                                                                                                                                                                                                                                                                                                                                                                                                                                                                                                                                                                                                                                                                                                                                                                                                                                                                                                                                                                                                                                                                                                        | 403 | 404 | 0         | 100.2 | 92.1 | 95.5 | hypothetical protein CARUB_v10004955mg                                    | gbpln | Capsella rubella     | AT4G37580.1   Symbols: HLS1, COP3, UNS2   Acyl-CoA N-acyltransferases (NAT) superfamily protein   chr4:17658932-17660564 FORWARD LENGTH=403 | 403 | 403 | 0         | 100.0 | 91.6 | 95.3 |
| Rsa1.0_01053.1.g22906.t1 | gb ACQ44224.1  unknown [Arabis alpina]                                                                                                                                                                                                                                                                                                                                                                                                                                                                                                                                                                                                                                                                                                                                                                                                                                                                                                                                                                                                                                                                                                                                          | 116 | 291 | 1.00E-23  | 250.9 | 50.0 | 68.1 | unknown                                                                   | gbpln | Arabis alpina        | AT1G31150.1   Symbols:   Domain of unknown function (DUF1985)   chr1:11120097-11122412 FORWARD LENGTH=673                                   | 116 | 673 | 6.00E-11  | 580.2 | 32.8 | 55.2 |
| Rsa1.0_01053.1.g22907.t1 | gb EOA18482.1  hypothetical protein CARUB_v10007029mg [Capsella rubella]                                                                                                                                                                                                                                                                                                                                                                                                                                                                                                                                                                                                                                                                                                                                                                                                                                                                                                                                                                                                                                                                                                        | 460 | 453 | 0         | 98.5  | 90.7 | 93.9 | hypothetical protein CARUB_v10007029mg                                    | gbpln | Capsella rubella     | AT4G37560.1   Symbols:   Acetamidase/Formamidase family protein   chr4:17646489-17648457 FORWARD LENGTH=452                                 | 460 | 452 | 0         | 98.3  | 90.2 | 93.3 |
| Rsa1.0_01053.1.g22908.t2 | ref NP_568029.1  formamidase [Arabidopsis thaliana] gi 23297225 gb AAN12921.1  putative formamidase [Arabidopsis thaliana] gi 332661412 gb AEE86812.1  acetamidase/Formamidase family protein [Arabidopsis thaliana]                                                                                                                                                                                                                                                                                                                                                                                                                                                                                                                                                                                                                                                                                                                                                                                                                                                                                                                                                            | 467 | 452 | 0         | 96.8  | 85.9 | 91.0 | formamidase                                                               | gbpln | Arabidopsis thaliana | AT4G37560.1   Symbols:   Acetamidase/Formamidase family protein   chr4:17646489-17648457 FORWARD LENGTH=452                                 | 467 | 452 | 0         | 96.8  | 85.9 | 91.0 |
| Rsa1.0_01053.1.g22909.t1 | gb AAM64844.1  unknown [Arabidopsis thaliana]                                                                                                                                                                                                                                                                                                                                                                                                                                                                                                                                                                                                                                                                                                                                                                                                                                                                                                                                                                                                                                                                                                                                   | 243 | 240 | 5.00E-96  | 98.8  | 77.4 | 83.1 | unknown                                                                   | gbpln | Arabidopsis thaliana | AT4G37540.1   Symbols: LBD39   LOB domain-containing protein 39   chr4:17639649-17640509 REVERSE LENGTH=240                                 | 243 | 240 | 6.00E-98  | 98.8  | 76.5 | 81.1 |
| Rsa1.0_01053.1.g22910.t1 | #                                                                                                                                                                                                                                                                                                                                                                                                                                                                                                                                                                                                                                                                                                                                                                                                                                                                                                                                                                                                                                                                                                                                                                               | #   | #   | #         | #     | #    | #    | -                                                                         | ----  | ----                 | #                                                                                                                                           | #   | #   | #         | #     | #    |      |
| Rsa1.0_01053.1.g22911.t1 | #                                                                                                                                                                                                                                                                                                                                                                                                                                                                                                                                                                                                                                                                                                                                                                                                                                                                                                                                                                                                                                                                                                                                                                               | #   | #   | #         | #     | #    | #    | -                                                                         | ----  | ----                 | #                                                                                                                                           | #   | #   | #         | #     | #    |      |
| Rsa1.0_01054.1.g22912.t1 | emb CAN72057.1  hypothetical protein VITISV_026927 [Vitis vinifera] ref NP_182227.1  pectinesterase 5 [Arabidopsis thaliana] gi 61213926 sp Q5MFV8.2 PME5_ARATH RecName: Full=Pectinesterase 5; Short=PE 5; AltName: Full=Pectin methylesterase 5; Short=AtPME5; AltName: Full=Pectin methylesterase 67; Short=AtPME67; AltName: Full=Protein VANGUARD 1; Flags: Precursor gi 3522956 gb AAC34240.1  putative pectinesterase [Arabidopsis thaliana] gi 20147201 gb AAM10316.1  At2g47040/F14M4.13 [Arabidopsis thaliana] gi 24796998 gb AAN64511.1  At2g47040/F14M4.13 [Arabidopsis thaliana] gi 330255697 gb AEC10791.1  pectinesterase 5 [Arabidopsis thaliana] ref NP_182228.1  plant invertase/pectin methylesterase inhibitor domain-containing protein [Arabidopsis thaliana] gi 3522940 gb AAC34222.1  putative pectinesterase [Arabidopsis thaliana] gi 26451376 dbj BAC42788.1  putative pectinesterase [Arabidopsis thaliana] gi 91806367 gb ABE65911.1  invertase/pectin methylesterase inhibitor family protein [Arabidopsis thaliana] gi 330255698 gb AEC10792.1  plant invertase/pectin methylesterase inhibitor domain-containing protein [Arabidopsis thaliana] | 131 | 417 | 2.00E-11  | 318.3 | 35.9 | 55.0 | hypothetical protein VITISV_026927                                        | gbpln | Vitis vinifera       | #                                                                                                                                           | #   | #   | #         | #     | #    |      |
| Rsa1.0_01054.1.g22913.t1 | ref NP_182228.1  plant invertase/pectin methylesterase inhibitor domain-containing protein [Arabidopsis thaliana] gi 3522940 gb AAC34222.1  putative pectinesterase [Arabidopsis thaliana] gi 26451376 dbj BAC42788.1  putative pectinesterase [Arabidopsis thaliana] gi 91806367 gb ABE65911.1  invertase/pectin methylesterase inhibitor family protein [Arabidopsis thaliana] gi 330255698 gb AEC10792.1  plant invertase/pectin methylesterase inhibitor domain-containing protein [Arabidopsis thaliana]                                                                                                                                                                                                                                                                                                                                                                                                                                                                                                                                                                                                                                                                   | 595 | 595 | 0         | 100.0 | 84.0 | 92.9 | pectinesterase 5                                                          | gbpln | Arabidopsis thaliana | AT2G47040.1   Symbols: VGD1   Plant invertase/pectin methylesterase inhibitor superfamily   chr2:19328186-19330060 REVERSE LENGTH=595       | 595 | 595 | 0         | 100.0 | 84.0 | 92.9 |
| Rsa1.0_01054.1.g22914.t1 | ref NP_182228.1  plant invertase/pectin methylesterase inhibitor domain-containing protein [Arabidopsis thaliana] gi 3522940 gb AAC34222.1  putative pectinesterase [Arabidopsis thaliana] gi 26451376 dbj BAC42788.1  putative pectinesterase [Arabidopsis thaliana] gi 91806367 gb ABE65911.1  invertase/pectin methylesterase inhibitor family protein [Arabidopsis thaliana] gi 330255698 gb AEC10792.1  plant invertase/pectin methylesterase inhibitor domain-containing protein [Arabidopsis thaliana]                                                                                                                                                                                                                                                                                                                                                                                                                                                                                                                                                                                                                                                                   | 216 | 216 | 1.00E-104 | 100.0 | 83.3 | 91.7 | plant invertase/pectin methylesterase inhibitor domain-containing protein | gbpln | Arabidopsis thaliana | AT2G47050.1   Symbols:   Plant invertase/pectin methylesterase inhibitor superfamily protein   chr2:19331927-19332577 REVERSE LENGTH=216    | 216 | 216 | 1.00E-106 | 100.0 | 83.3 | 91.7 |

|                          |                                                                                                                                                                                                                                                                                                                                                                                                                                                                                                                                                                                                                                                                                                                                                                                                                                                                     |      |      |           |       |      |      |                                                 |       |                        |                                                                                                                                                                                                                                                                                                                                                                                                                                                                                                                                               |      |      |           |       |      |      |
|--------------------------|---------------------------------------------------------------------------------------------------------------------------------------------------------------------------------------------------------------------------------------------------------------------------------------------------------------------------------------------------------------------------------------------------------------------------------------------------------------------------------------------------------------------------------------------------------------------------------------------------------------------------------------------------------------------------------------------------------------------------------------------------------------------------------------------------------------------------------------------------------------------|------|------|-----------|-------|------|------|-------------------------------------------------|-------|------------------------|-----------------------------------------------------------------------------------------------------------------------------------------------------------------------------------------------------------------------------------------------------------------------------------------------------------------------------------------------------------------------------------------------------------------------------------------------------------------------------------------------------------------------------------------------|------|------|-----------|-------|------|------|
| Rsa1.0_01054.1.g22915.t1 | refNP_191784.1  ubiquitin-40S ribosomal protein S27a-3 [Arabidopsis thaliana] gi 302393706 sp P59233.2 R27AC_ARAT H RecName: Full=Ubiquitin-40S ribosomal protein S27a-3; Contains: RecName: Full=Ubiquitin; Contains: RecName: Full=40S ribosomal protein S27a-3; Flags: Precursor gi 166934 gb AA32906.1  ubiquitin extension protein (UBQ5) [Arabidopsis thaliana] gi 689935 emb CAB71885.1  ubiquitin extension protein (UBQ5) [Arabidopsis thaliana] gi 15529190 gb AAK97689.1  AT3g62250.T17J13.210 [Arabidopsis thaliana] gi 21537196 gb AAM61537.1  ubiquitin extension protein UBQ5 [Arabidopsis thaliana] gi 22655050 gb AM98116.1  AT3g62250.T17J13.210 [Arabidopsis thaliana] gi 110742096 db BAE98979.1  ubiquitin extension protein [Arabidopsis thaliana] gi 332646806 gb AJEE80327.1  ubiquitin-40S ribosomal protein S27a-3 [Arabidopsis thaliana] | 157  | 157  | 1.00E-85  | 100.0 | 98.7 | 99.4 | ubiquitin-40S ribosomal protein S27a-3          | gbpln | Arabidopsis thaliana   | AT3G62250.1   Symbols: UBQ5   ubiquitin 5   chr3:23037138-23037611 FORWARD LENGTH=157                                                                                                                                                                                                                                                                                                                                                                                                                                                         | 157  | 157  | 3.00E-88  | 100.0 | 98.7 | 99.4 |
| Rsa1.0_01054.1.g22916.t1 | refXP_002882107.1  hypothetical protein ARALYDRAFT_322360 [Arabidopsis lyrata subsp. lyrata] gi 297327946 gb EFH58366.1  hypothetical protein ARALYDRAFT_322360 [Arabidopsis lyrata subsp. lyrata]                                                                                                                                                                                                                                                                                                                                                                                                                                                                                                                                                                                                                                                                  | 222  | 298  | 3.00E-77  | 134.2 | 65.8 | 73.9 | hypothetical protein ARALYDRAFT_322360          | gbpln | Arabidopsis lyrata     | AT2G47115.1   Symbols:   unknown protein; FUNCTIONS IN: molecular_function unknown; INVOLVED IN: biological_process unknown; LOCATED IN: endomembrane system; BEST Arabidopsis thaliana protein match is: unknown protein (TAIR:AT1G10660.1); Has 35333 Blast hits to 34131 proteins in 2444 species: Archae - 798; Bacteria - 22429; Metazoa - 974; Fungi - 991; Plants - 531; Viruses - 0; Other Eukaryotes - 9610 (source: NCBI BLINK)   chr2:19345376-19346864 REVERSE LENGTH=300                                                         | 222  | 300  | 2.00E-77  | 135.1 | 65.3 | 72.5 |
| Rsa1.0_01054.1.g22917.t1 | gb AEZ01592.1  3-beta-hydroxysteroid dehydrogenase 2 [Erysimum crepidifolium]                                                                                                                                                                                                                                                                                                                                                                                                                                                                                                                                                                                                                                                                                                                                                                                       | 258  | 257  | 1.00E-117 | 99.6  | 79.5 | 87.2 | 3-beta-hydroxysteroid dehydrogenase 2           | gbpln | Erysimum crepidifolium | AT2G47130.1   Symbols:   NAD(P)-binding Rossmann-fold superfamily protein   chr2:19349627-19350481 REVERSE LENGTH=257                                                                                                                                                                                                                                                                                                                                                                                                                         | 258  | 257  | 1.00E-118 | 99.6  | 78.7 | 86.4 |
| Rsa1.0_01054.1.g22918.t1 | gb AAD19784.1  putative retroelement pol polyprotein [Arabidopsis thaliana]                                                                                                                                                                                                                                                                                                                                                                                                                                                                                                                                                                                                                                                                                                                                                                                         | 1591 | 1501 | 0         | 94.3  | 43.6 | 54.7 | putative retroelement pol polyprotein           | gbpln | Arabidopsis thaliana   | AT2G47130.1   Symbols:   NAD(P)-binding Rossmann-fold superfamily protein   chr2:19349627-19350481 REVERSE LENGTH=257                                                                                                                                                                                                                                                                                                                                                                                                                         | 1591 | 257  | 1.00E-112 | 16.2  | 12.4 | 13.5 |
| Rsa1.0_01054.1.g22919.t1 | gb ADF30181.1  boron transporter [Brassica napus] gi 294713704 gb ADF30189.1  boron transporter [Brassica napus]                                                                                                                                                                                                                                                                                                                                                                                                                                                                                                                                                                                                                                                                                                                                                    | 703  | 703  | 0         | 100.0 | 98.0 | 99.0 | boron transporter                               | gbpln | Brassica napus         | AT2G47160.1   Symbols: BOR1   HCO3- transporter family   chr2:19357740-19360787 REVERSE LENGTH=704                                                                                                                                                                                                                                                                                                                                                                                                                                            | 703  | 704  | 0         | 100.1 | 95.3 | 98.2 |
| Rsa1.0_01054.1.g22920.t1 | #                                                                                                                                                                                                                                                                                                                                                                                                                                                                                                                                                                                                                                                                                                                                                                                                                                                                   | #    | #    | #         | #     | #    | -    | ----                                            | ----  | #                      | #                                                                                                                                                                                                                                                                                                                                                                                                                                                                                                                                             | #    | #    | #         | #     | #    |      |
| Rsa1.0_01055.1.g22921.t2 | gb AAD19784.1  putative retroelement pol polyprotein [Arabidopsis thaliana]                                                                                                                                                                                                                                                                                                                                                                                                                                                                                                                                                                                                                                                                                                                                                                                         | 866  | 1501 | 0         | 173.3 | 44.1 | 54.2 | putative retroelement pol polyprotein           | gbpln | Arabidopsis thaliana   | AT4G23160.1   Symbols: CRK8   cysteine-rich RLK (RECEPTOR-like protein kinase) 8   chr4:12129485-12134086 FORWARD LENGTH=1262                                                                                                                                                                                                                                                                                                                                                                                                                 | 866  | 1262 | 1.00E-48  | 145.7 | 11.7 | 17.0 |
| Rsa1.0_01055.1.g22922.t1 | refNP_176875.1  uncharacterized protein [Arabidopsis thaliana] gi 9755453 gb AAF98214.1 AC007152_10 Hypothetical protein [Arabidopsis thaliana] gi 332196468 gb AEE34589.1  uncharacterized protein AT1G67040 [Arabidopsis thaliana]                                                                                                                                                                                                                                                                                                                                                                                                                                                                                                                                                                                                                                | 751  | 826  | 0         | 110.0 | 74.0 | 82.0 | uncharacterized protein                         | gbpln | Arabidopsis thaliana   | AT1G67040.1   Symbols:   unknown protein; FUNCTIONS IN: molecular_function unknown; INVOLVED IN: biological_process unknown; LOCATED IN: cellular_component unknown; EXPRESSED IN: 20 plant structures; EXPRESSED DURING: 11 growth stages; BEST Arabidopsis thaliana protein match is: unknown protein (TAIR:AT5G26910.3); Has 89 Blast hits to 84 proteins in 15 species: Archae - 0; Bacteria - 0; Metazoa - 5; Fungi - 2; Plants - 82; Viruses - 0; Other Eukaryotes - 0 (source: NCBI BLINK)   chr1:25019105-25021922 REVERSE LENGTH=826 | 751  | 826  | 0         | 110.0 | 74.0 | 82.0 |
| Rsa1.0_01055.1.g22923.t1 | refNP_001185335.1  uncharacterized protein [Arabidopsis thaliana] gi 6054765 gb AAx23791.1  hypothetical protein At1g67035 [Arabidopsis thaliana] gi 332196467 gb AEE34588.1  uncharacterized protein AT1G67035 [Arabidopsis thaliana]                                                                                                                                                                                                                                                                                                                                                                                                                                                                                                                                                                                                                              | 226  | 229  | 8.00E-46  | 101.3 | 51.8 | 62.4 | uncharacterized protein                         | gbpln | Arabidopsis thaliana   | AT1G67035.2   Symbols:   unknown protein; FUNCTIONS IN: molecular_function unknown; INVOLVED IN: biological_process unknown; LOCATED IN: cellular_component unknown; BEST Arabidopsis thaliana protein match is: unknown protein (TAIR:AT5G38300.1)   chr1:25018173-25018862 FORWARD LENGTH=229                                                                                                                                                                                                                                               | 226  | 229  | 3.00E-48  | 101.3 | 51.8 | 62.4 |
| Rsa1.0_01055.1.g22924.t1 | gb EOA34388.1  hypothetical protein CARUB_v10021913mg. partial [Capsella rubella]                                                                                                                                                                                                                                                                                                                                                                                                                                                                                                                                                                                                                                                                                                                                                                                   | 861  | 864  | 0         | 100.3 | 63.2 | 73.4 | hypothetical protein CARUB_v10021913mg. partial | gbpln | Capsella rubella       | AT1G67000.1   Symbols:   Protein kinase superfamily protein   chr1:25004217-25007604 REVERSE LENGTH=892                                                                                                                                                                                                                                                                                                                                                                                                                                       | 861  | 892  | 0         | 103.6 | 63.5 | 75.5 |



|                          |                                                                                                                                                                                                                                                                                                                                                      |     |      |           |       |      |      |                                                                   |       |                      |                                                                                                                                                                                                                                                                                                                                                                                                                                                                                                                                                                                                                               |     |      |           |       |      |      |
|--------------------------|------------------------------------------------------------------------------------------------------------------------------------------------------------------------------------------------------------------------------------------------------------------------------------------------------------------------------------------------------|-----|------|-----------|-------|------|------|-------------------------------------------------------------------|-------|----------------------|-------------------------------------------------------------------------------------------------------------------------------------------------------------------------------------------------------------------------------------------------------------------------------------------------------------------------------------------------------------------------------------------------------------------------------------------------------------------------------------------------------------------------------------------------------------------------------------------------------------------------------|-----|------|-----------|-------|------|------|
| Rsa1.0_01055.1.g22925.t7 | ref[XP_002276757.1] PREDICTED: probable glycerophosphoryl diester phosphodiesterase 1 [Vitis vinifera] gi 297373518 emb CB126719.3  unnamed protein product [Vitis vinifera]                                                                                                                                                                         | 960 | 757  | 0         | 78.9  | 40.5 | 54.2 | PREDICTED: probable glycerophosphoryl diester phosphodiesterase 1 | gbpln | Vitis vinifera       | AT1G66980.1   Symbols: SNC4   suppressor of npr1-1 constitutive 4   chr1:24997491-25001961 REVERSE LENGTH=1118                                                                                                                                                                                                                                                                                                                                                                                                                                                                                                                | 960 | 1118 | 0         | 116.5 | 33.1 | 37.8 |
| Rsa1.0_01055.1.g22926.t1 | gb[EOA16078.1] hypothetical protein CARUB_v10004210mg [Capsella rubella]                                                                                                                                                                                                                                                                             | 653 | 757  | 0         | 115.9 | 76.4 | 87.4 | hypothetical protein CARUB_v10004210mg                            | gbpln | Capsella rubella     | AT1G66970.1   Symbols: SVL2   SHV3-like 2   chr1:24992746-24996005 REVERSE LENGTH=763                                                                                                                                                                                                                                                                                                                                                                                                                                                                                                                                         | 653 | 763  | 0         | 116.8 | 75.5 | 86.4 |
| Rsa1.0_01055.1.g22927.t1 | gb[EOA12077.1] hypothetical protein CARUB_v10007931mg [Capsella rubella]                                                                                                                                                                                                                                                                             | 684 | 860  | 0         | 125.7 | 59.2 | 70.6 | hypothetical protein CARUB_v10007931mg                            | gbpln | Capsella rubella     | AT1G67000.1   Symbols:   Protein kinase superfamily protein   chr1:25004217-25007604 REVERSE LENGTH=892                                                                                                                                                                                                                                                                                                                                                                                                                                                                                                                       | 684 | 892  | 0         | 130.4 | 55.8 | 66.2 |
| Rsa1.0_01055.1.g22928.t1 | ref[XP_002888563.1] hypothetical protein ARALYDRAFT_894412 [Arabidopsis lyrata subsp. lyrata] gi 297334404 gb EFH64822.1  hypothetical protein ARALYDRAFT_894412 [Arabidopsis lyrata subsp. lyrata]                                                                                                                                                  | 276 | 249  | 4.00E-92  | 90.2  | 62.0 | 75.7 | hypothetical protein ARALYDRAFT_894412                            | gbpln | Arabidopsis lyrata   | AT1G66940.1   Symbols:   protein kinase-related   chr1:24973201-24974684 REVERSE LENGTH=332                                                                                                                                                                                                                                                                                                                                                                                                                                                                                                                                   | 276 | 332  | 7.00E-74  | 120.3 | 51.4 | 62.3 |
| Rsa1.0_01055.1.g22929.t1 | ref[NP_180979.1] RNase H domain-containing protein [Arabidopsis thaliana] gi 3337363 gb AAC27408.1  putative non-LTR retroelement reverse transcriptase [Arabidopsis thaliana] gi 91805481 gb ABE65469.1  hypothetical protein At2g34320 [Arabidopsis thaliana] gi 330253864 gb AEC08958.1  RNase H domain-containing protein [Arabidopsis thaliana] | 271 | 292  | 2.00E-59  | 107.7 | 41.0 | 63.8 | RNase H domain-containing protein                                 | gbpln | Arabidopsis thaliana | AT2G34320.1   Symbols:   Polynucleotidyl transferase, ribonuclease H-like superfamily protein   chr2:14484959-14485837 FORWARD LENGTH=292                                                                                                                                                                                                                                                                                                                                                                                                                                                                                     | 271 | 292  | 6.00E-62  | 107.7 | 41.0 | 63.8 |
| Rsa1.0_01055.1.g22930.t1 | gb[EOA34832.1] hypothetical protein CARUB_v10022414mg [Capsella rubella]                                                                                                                                                                                                                                                                             | 220 | 635  | 5.00E-67  | 288.6 | 56.8 | 69.5 | hypothetical protein CARUB_v10022414mg                            | gbpln | Capsella rubella     | AT1G66880.1   Symbols:   Protein kinase superfamily protein   chr1:24946928-24955438 FORWARD LENGTH=1296                                                                                                                                                                                                                                                                                                                                                                                                                                                                                                                      | 220 | 1296 | 2.00E-64  | 589.1 | 56.4 | 68.6 |
| Rsa1.0_01055.1.g22931.t1 | gb[EOA34832.1] hypothetical protein CARUB_v10022414mg [Capsella rubella]                                                                                                                                                                                                                                                                             | 346 | 635  | 1.00E-158 | 183.5 | 79.2 | 86.1 | hypothetical protein CARUB_v10022414mg                            | gbpln | Capsella rubella     | AT1G66980.1   Symbols: SNC4   suppressor of npr1-1 constitutive 4   chr1:24997491-25001961 REVERSE LENGTH=1118                                                                                                                                                                                                                                                                                                                                                                                                                                                                                                                | 346 | 1118 | 1.00E-152 | 323.1 | 74.6 | 84.4 |
| Rsa1.0_01055.1.g22932.t1 | gb[EOA34388.1] hypothetical protein CARUB_v10021913mg, partial [Capsella rubella]                                                                                                                                                                                                                                                                    | 589 | 864  | 0         | 146.7 | 64.3 | 75.9 | hypothetical protein CARUB_v10021913mg, partial                   | gbpln | Capsella rubella     | AT1G67000.1   Symbols:   Protein kinase superfamily protein   chr1:25004217-25007604 REVERSE LENGTH=892                                                                                                                                                                                                                                                                                                                                                                                                                                                                                                                       | 589 | 892  | 0         | 151.4 | 64.9 | 74.5 |
| Rsa1.0_01056.1.g22933.t2 | gb[AAC69377.1] putative retroelement pol polyprotein [Arabidopsis thaliana]                                                                                                                                                                                                                                                                          | 922 | 1328 | 0         | 144.0 | 37.5 | 47.9 | putative retroelement pol polyprotein                             | gbpln | Arabidopsis thaliana | AT2G23450.1   Symbols:   Protein kinase superfamily protein   chr2:9988926-9991244 REVERSE LENGTH=708                                                                                                                                                                                                                                                                                                                                                                                                                                                                                                                         | 922 | 708  | 4.00E-58  | 76.8  | 11.9 | 13.2 |
| Rsa1.0_01056.1.g22934.t1 | gb[EOA18653.1] hypothetical protein CARUB_v10007229mg [Capsella rubella]                                                                                                                                                                                                                                                                             | 346 | 335  | 1.00E-143 | 96.8  | 75.7 | 81.2 | hypothetical protein CARUB_v10007229mg                            | gbpln | Capsella rubella     | AT5G38380.1   Symbols:   FUNCTIONS IN: molecular_function unknown; INVOLVED IN: biological_process unknown; LOCATED IN: membrane; EXPRESSED IN: 22 plant structures; EXPRESSED DURING: 14 growth stages; CONTAINS InterPro DOMAIN/s: Protein of unknown function DUF6, transmembrane (InterPro:IPR000620); BEST Arabidopsis thaliana protein match is: Cation efflux family protein (TAIR:AT2G04620.1); Has 123 Blast hits to 121 proteins in 39 species: Archae - 0; Bacteria - 0; Metazoa - 69; Fungi - 0; Plants - 45; Viruses - 0; Other Eukaryotes - 9 (source: NCBI BLink).   chr5:15345660-15348217 FORWARD LENGTH=361 | 346 | 361  | 1.00E-144 | 104.3 | 76.6 | 84.1 |
| Rsa1.0_01056.1.g22935.t1 | gb[EOA16775.1] hypothetical protein CARUB_v10004994mg [Capsella rubella]                                                                                                                                                                                                                                                                             | 338 | 392  | 1.00E-160 | 116.0 | 82.8 | 89.3 | hypothetical protein CARUB_v10004994mg                            | gbpln | Capsella rubella     | AT5G38360.1   Symbols:   alpha/beta-Hydrolases superfamily protein   chr5:15332289-15333556 REVERSE LENGTH=239                                                                                                                                                                                                                                                                                                                                                                                                                                                                                                                | 338 | 239  | 1.00E-111 | 70.7  | 58.9 | 63.0 |
| Rsa1.0_01056.1.g22936.t1 | gb[AAF97981.1]AC000103_31 F21J9.3 [Arabidopsis thaliana]                                                                                                                                                                                                                                                                                             | 273 | 457  | 4.00E-95  | 167.4 | 57.5 | 66.7 | F21J9.3                                                           | gbpln | Arabidopsis thaliana | AT2G13770.1   Symbols:   CONTAINS InterPro DOMAIN/s: Putative harbinger transposase-derived nuclease (InterPro:IPR006912); Has 451 Blast hits to 352 proteins in 33 species: Archae - 0; Bacteria - 0; Metazoa - 28; Fungi - 8; Plants - 388; Viruses - 0; Other Eukaryotes - 27 (source: NCBI BLink).   chr2:5736603-5737847 FORWARD LENGTH=343                                                                                                                                                                                                                                                                              | 273 | 343  | 2.00E-48  | 125.6 | 32.6 | 38.1 |
| Rsa1.0_01056.1.g22937.t1 | ref[XP_002865041.1] hypothetical protein ARALYDRAFT_920024 [Arabidopsis lyrata subsp. lyrata] gi 297310876 gb EFH41300.1  hypothetical protein ARALYDRAFT_920024 [Arabidopsis lyrata subsp. lyrata]                                                                                                                                                  | 176 | 246  | 3.00E-40  | 139.8 | 57.4 | 67.6 | hypothetical protein ARALYDRAFT_920024                            | gbpln | Arabidopsis lyrata   | AT4G10230.1   Symbols:   unknown protein; BEST Arabidopsis thaliana protein match is: unknown protein (TAIR:AT1G24380.1); Has 216 Blast hits to 216 proteins in 30 species: Archae - 0; Bacteria - 8; Metazoa - 10; Fungi - 4; Plants - 160; Viruses - 0; Other Eukaryotes - 34 (source: NCBI BLink).   chr4:6366261-6367185 FORWARD LENGTH=273                                                                                                                                                                                                                                                                               | 176 | 273  | 9.00E-25  | 155.1 | 33.0 | 49.4 |

|                           |                                                                                                                                                                                                                                                                                                                                                                                                                                              |      |      |           |       |      |      |                                        |       |                      |                                                                                                                                                              |      |      |           |       |      |      |
|---------------------------|----------------------------------------------------------------------------------------------------------------------------------------------------------------------------------------------------------------------------------------------------------------------------------------------------------------------------------------------------------------------------------------------------------------------------------------------|------|------|-----------|-------|------|------|----------------------------------------|-------|----------------------|--------------------------------------------------------------------------------------------------------------------------------------------------------------|------|------|-----------|-------|------|------|
| Rsa1.0_01056.1.g22938.t5  | gb EOA16130.1  hypothetical protein CARUB_v10004265mg [Capsella rubella]                                                                                                                                                                                                                                                                                                                                                                     | 600  | 701  | 1.00E-138 | 116.8 | 49.7 | 65.7 | hypothetical protein CARUB_v10004265mg | gbpln | Capsella rubella     | AT3G42170.1   Symbols:   BED zinc finger ;hAT family dimerisation domain   chr3:14321838-14323928 FORWARD LENGTH=696                                         | 600  | 696  | 4.00E-38  | 116.0 | 24.5 | 45.2 |
| Rsa1.0_01056.1.g22939.t1  | emb CAN80895.1  hypothetical protein VITISV_031817 [Vitis vinifera]                                                                                                                                                                                                                                                                                                                                                                          | 165  | 324  | 9.00E-58  | 196.4 | 64.2 | 81.2 | hypothetical protein VITISV_031817     | gbpln | Vitis vinifera       | #                                                                                                                                                            | #    | #    | #         | #     | #    | #    |
| Rsa1.0_01056.1.g22940.t1  | ref XP_002870853.1  predicted protein [Arabidopsis lyrata subsp. lyrata] gi 297316689 gb EFH47112.1  predicted protein [Arabidopsis lyrata subsp. lyrata]                                                                                                                                                                                                                                                                                    | 246  | 241  | 1.00E-117 | 98.0  | 85.0 | 90.2 | predicted protein                      | gbpln | Arabidopsis lyrata   | AT5G38290.2   Symbols:   Peptidyl-tRNA hydrolase family protein   chr5:15303491-15305381 FORWARD LENGTH=250                                                  | 246  | 250  | 1.00E-118 | 101.6 | 84.1 | 89.4 |
| Rsa1.0_01056.1.g22941.t2  | #                                                                                                                                                                                                                                                                                                                                                                                                                                            | #    | #    | #         | #     | #    | #    | -                                      | ----  | ----                 | #                                                                                                                                                            | #    | #    | #         | #     | #    | #    |
| Rsa1.0_01056.1.g22942.t1  | #                                                                                                                                                                                                                                                                                                                                                                                                                                            | #    | #    | #         | #     | #    | #    | -                                      | ----  | ----                 | #                                                                                                                                                            | #    | #    | #         | #     | #    | #    |
| Rsa1.0_01056.1.g22943.t1  | #                                                                                                                                                                                                                                                                                                                                                                                                                                            | #    | #    | #         | #     | #    | #    | -                                      | ----  | ----                 | #                                                                                                                                                            | #    | #    | #         | #     | #    | #    |
| Rsa1.0_01056.1.g22944.t1  | ref NP_199370.1  Ulp1 protease family protein [Arabidopsis thaliana] gi 10177930 dbj BAB11195.1  unnamed protein product [Arabidopsis thaliana] gi 332007886 gb AED95269.1  Ulp1 protease family protein [Arabidopsis thaliana]                                                                                                                                                                                                              | 188  | 921  | 3.00E-37  | 489.9 | 37.2 | 55.9 | Ulp1 protease family protein           | gbpln | Arabidopsis thaliana | AT5G45570.1   Symbols:   Ulp1 protease family protein   chr5:18472301-18475574 FORWARD LENGTH=921                                                            | 188  | 921  | 1.00E-39  | 489.9 | 37.2 | 55.9 |
| Rsa1.0_01057.1.g22945.t1  | #                                                                                                                                                                                                                                                                                                                                                                                                                                            | #    | #    | #         | #     | #    | #    | -                                      | ----  | ----                 | #                                                                                                                                                            | #    | #    | #         | #     | #    | #    |
| Rsa1.0_01057.1.g22946.t1  | ref XP_002892251.1  hypothetical protein ARALYDRAFT_470476 [Arabidopsis lyrata subsp. lyrata] gi 297338093 gb EFH68510.1  hypothetical protein ARALYDRAFT_470476 [Arabidopsis lyrata subsp. lyrata]                                                                                                                                                                                                                                          | 102  | 519  | 1.00E-41  | 508.8 | 89.2 | 92.2 | hypothetical protein ARALYDRAFT_470476 | gbpln | Arabidopsis lyrata   | AT1G04910.1   Symbols:   O-fucosyltransferase family protein   chr1:1388101-1391074 REVERSE LENGTH=519                                                       | 102  | 519  | 4.00E-43  | 508.8 | 87.3 | 91.2 |
| Rsa1.0_01057.1.g22947.t3  | gb AAC13586.1  F7N22.14 gene product [Arabidopsis thaliana] gi 8843871 dbj BAA97397.1  retroelement pol polyprotein-like [Arabidopsis thaliana]                                                                                                                                                                                                                                                                                              | 1055 | 961  | 1.00E-63  | 91.1  | 13.6 | 18.6 | F7N22.14 gene product                  | gbpln | Arabidopsis thaliana | AT5G45570.1   Symbols:   Ulp1 protease family protein   chr5:18472301-18475574 FORWARD LENGTH=921                                                            | 1055 | 921  | 3.00E-34  | 87.3  | 8.0  | 13.3 |
| Rsa1.0_01057.1.g22948.t1  | gb AAD23022.1  En/Spm-like transposon protein [Arabidopsis thaliana]                                                                                                                                                                                                                                                                                                                                                                         | 155  | 155  | 2.00E-32  | 100.0 | 47.7 | 60.6 | En/Spm-like transposon protein         | gbpln | Arabidopsis thaliana | #                                                                                                                                                            | #    | #    | #         | #     | #    | #    |
| Rsa1.0_01057.1.g22949.t13 | gb AAC13586.1  F7N22.14 gene product [Arabidopsis thaliana] gi 8843871 dbj BAA97397.1  retroelement pol polyprotein-like [Arabidopsis thaliana]                                                                                                                                                                                                                                                                                              | 921  | 961  | 5.00E-84  | 104.3 | 18.0 | 23.8 | F7N22.14 gene product                  | gbpln | Arabidopsis thaliana | AT5G45570.1   Symbols:   Ulp1 protease family protein   chr5:18472301-18475574 FORWARD LENGTH=921                                                            | 921  | 921  | 1.00E-48  | 100.0 | 11.6 | 17.8 |
| Rsa1.0_01057.1.g22950.t1  | ref XP_002890421.1  zinc-binding family protein [Arabidopsis lyrata subsp. lyrata] gi 297336263 gb EFH66680.1  zinc-binding family protein [Arabidopsis lyrata subsp. lyrata]                                                                                                                                                                                                                                                                | 228  | 246  | 1.00E-109 | 107.9 | 86.8 | 91.2 | zinc-binding family protein            | gbpln | Arabidopsis lyrata   | AT1G21000.2   Symbols:   PLATZ transcription factor family protein   chr1:7338013-7339088 FORWARD LENGTH=243                                                 | 228  | 243  | 1.00E-110 | 106.6 | 86.0 | 90.8 |
| Rsa1.0_01057.1.g22951.t1  | #                                                                                                                                                                                                                                                                                                                                                                                                                                            | #    | #    | #         | #     | #    | #    | -                                      | ----  | ----                 | #                                                                                                                                                            | #    | #    | #         | #     | #    | #    |
| Rsa1.0_01057.1.g22952.t1  | #                                                                                                                                                                                                                                                                                                                                                                                                                                            | #    | #    | #         | #     | #    | #    | -                                      | ----  | ----                 | #                                                                                                                                                            | #    | #    | #         | #     | #    | #    |
| Rsa1.0_01057.1.g22953.t1  | #                                                                                                                                                                                                                                                                                                                                                                                                                                            | #    | #    | #         | #     | #    | #    | -                                      | ----  | ----                 | #                                                                                                                                                            | #    | #    | #         | #     | #    | #    |
| Rsa1.0_01057.1.g22954.t1  | #                                                                                                                                                                                                                                                                                                                                                                                                                                            | #    | #    | #         | #     | #    | #    | -                                      | ----  | ----                 | #                                                                                                                                                            | #    | #    | #         | #     | #    | #    |
| Rsa1.0_01057.1.g22955.t1  | #                                                                                                                                                                                                                                                                                                                                                                                                                                            | #    | #    | #         | #     | #    | #    | -                                      | ----  | ----                 | #                                                                                                                                                            | #    | #    | #         | #     | #    | #    |
| Rsa1.0_01057.1.g22956.t1  | gb ABD65162.1  hypothetical protein 40.t00047 [Brassica oleracea]                                                                                                                                                                                                                                                                                                                                                                            | 166  | 203  | 8.00E-62  | 122.3 | 66.9 | 80.1 | hypothetical protein 40.t00047         | gbpln | Brassica oleracea    | #                                                                                                                                                            | #    | #    | #         | #     | #    | #    |
| Rsa1.0_01057.1.g22957.t2  | gb AAD31079.1  Mutator-like transposase [Arabidopsis thaliana]                                                                                                                                                                                                                                                                                                                                                                               | 755  | 819  | 0         | 108.5 | 58.9 | 73.5 | Mutator-like transposase               | gbpln | Arabidopsis thaliana | AT1G49920.1   Symbols:   MuDR family transposase   chr1:18481798-18484233 REVERSE LENGTH=785                                                                 | 755  | 785  | 4.00E-24  | 104.0 | 16.3 | 28.5 |
| Rsa1.0_01057.1.g22958.t6  | gb AAN60795.1  ascorbate peroxidase [Brassica juncea]                                                                                                                                                                                                                                                                                                                                                                                        | 96   | 250  | 4.00E-27  | 260.4 | 72.9 | 79.2 | ascorbate peroxidase                   | gbpln | Brassica juncea      | AT1G07890.8   Symbols:   APX1, MEE6, CS1, ATAPX1, ATAPX01   ascorbate peroxidase 1   chr1:2438005-2439435 FORWARD LENGTH=250                                 | 96   | 250  | 4.00E-28  | 260.4 | 69.8 | 77.1 |
| Rsa1.0_01058.1.g22959.t2  | ref NP_177414.1  phospholipid-translocating ATPase [Arabidopsis thaliana] gi 12229669 sp Q9SGG3.1 ALA5_ARATH RecName: Full=Putative phospholipid-transporting ATPase 5; Short=AtALA5; AltName: Full=Aminophospholipid flippase 5 gi 12323764 gb AAG51844.1 AC010926_7 putative P-type transporting ATPase; 43607-39026 [Arabidopsis thaliana] gi 332197241 gb AEE35362.1  putative phospholipid-transporting ATPase 5 [Arabidopsis thaliana] | 1321 | 1228 | 0         | 93.0  | 69.7 | 72.3 | phospholipid-translocating ATPase      | gbpln | Arabidopsis thaliana | AT1G72700.1   Symbols:   ATPase E1-E2 type family protein / haloacid dehalogenase-like hydrolase family protein   chr1:27366910-27371491 FORWARD LENGTH=1228 | 1321 | 1228 | 0         | 93.0  | 69.7 | 72.3 |

|                          |                                                                                                                                                                                                                                                                                                                                              |      |     |           |       |      |      |                                                 |       |                      |                                                                                                                                               |      |     |           |       |      |      |
|--------------------------|----------------------------------------------------------------------------------------------------------------------------------------------------------------------------------------------------------------------------------------------------------------------------------------------------------------------------------------------|------|-----|-----------|-------|------|------|-------------------------------------------------|-------|----------------------|-----------------------------------------------------------------------------------------------------------------------------------------------|------|-----|-----------|-------|------|------|
| Rsa1.0_01058.1.g22960.t2 | refXP_002888888.1   hypothetical protein ARALYDRAFT_895120 [Arabidopsis lyrata subsp. lyrata] gi 297334729 gb EFH65147.1   hypothetical protein ARALYDRAFT_895120 [Arabidopsis lyrata subsp. lyrata]                                                                                                                                         | 355  | 355 | 0         | 100.0 | 89.9 | 94.6 | hypothetical protein ARALYDRAFT_895120          | gbpln | Arabidopsis lyrata   | AT1G72680.1   Symbols: ATCAD1, CAD1   cinnamyl-alcohol dehydrogenase   chr1:273559346-27360876 REVERSE LENGTH=355                             | 355  | 355 | 0         | 100.0 | 89.3 | 94.4 |
| Rsa1.0_01058.1.g22961.t1 | refXP_002888887.1   IQ-domain 8 [Arabidopsis lyrata subsp. lyrata] gi 297334728 gb EFH65146.1   IQ-domain 8 [Arabidopsis lyrata subsp. lyrata]                                                                                                                                                                                               | 411  | 414 | 0         | 100.7 | 92.0 | 95.1 | IQ-domain 8                                     | gbpln | Arabidopsis lyrata   | AT1G72670.1   Symbols: iqd8   IQ-domain 8   chr1:27355898-27358657 REVERSE LENGTH=414                                                         | 411  | 414 | 0         | 100.7 | 92.0 | 95.4 |
| Rsa1.0_01058.1.g22962.t1 | refXP_002887445.1   hypothetical protein ARALYDRAFT_476401 [Arabidopsis lyrata subsp. lyrata] gi 297333286 gb EFH63704.1   hypothetical protein ARALYDRAFT_476401 [Arabidopsis lyrata subsp. lyrata]                                                                                                                                         | 1021 | 399 | 0         | 39.1  | 38.1 | 38.7 | hypothetical protein ARALYDRAFT_476401          | gbpln | Arabidopsis lyrata   | AT1G72660.3   Symbols:   P-loop containing nucleoside triphosphate hydrolases superfamily protein   chr1:27354161-27356543 FORWARD LENGTH=399 | 1021 | 399 | 0         | 39.1  | 37.8 | 38.4 |
| Rsa1.0_01058.1.g22963.t1 | refXP_002888886.1   hypothetical protein ARALYDRAFT_476397 [Arabidopsis lyrata subsp. lyrata] gi 297334727 gb EFH65145.1   hypothetical protein ARALYDRAFT_476397 [Arabidopsis lyrata subsp. lyrata]                                                                                                                                         | 385  | 311 | 1.00E-144 | 80.8  | 67.0 | 72.7 | hypothetical protein ARALYDRAFT_476397          | gbpln | Arabidopsis lyrata   | AT1G72640.1   Symbols:   NAD(P)-binding Rossmann-fold superfamily protein   chr1:27346409-27348147 REVERSE LENGTH=312                         | 385  | 312 | 2.33E-156 | 81.0  | 67.5 | 73.2 |
| Rsa1.0_01058.1.g22964.t1 | refNP_565044.1   protein ELF4-like 2 [Arabidopsis thaliana] gi 75165123 sp O94BS8.1 EF4L2_ARATH RecName: Full=Protein ELF4-LIKE 2 gi 14532584 gb AAK64020.1  unknown protein [Arabidopsis thaliana] gi 19310623 gb AAL85042.1  unknown protein [Arabidopsis thaliana] gi 332197229 gb AEE35350.1  protein ELF4-like 2 [Arabidopsis thaliana] | 142  | 119 | 5.00E-54  | 83.8  | 75.4 | 78.9 | protein ELF4-like 2                             | gbpln | Arabidopsis thaliana | AT1G72630.1   Symbols: ELF4-L2   ELF4-like 2   chr1:27344988-27345347 FORWARD LENGTH=119                                                      | 142  | 119 | 1.00E-56  | 83.8  | 75.4 | 78.9 |
| Rsa1.0_01058.1.g22965.t1 | gb AA35339.1  oxalic acid oxidase [Brassica napus]                                                                                                                                                                                                                                                                                           | 207  | 207 | 1.00E-103 | 100.0 | 97.1 | 98.1 | oxalic acid oxidase                             | gbpln | Brassica napus       | AT1G72610.1   Symbols: GLP1, ATGER1, GER1   germin-like protein 1   chr1:27333902-27339928 REVERSE LENGTH=208                                 | 207  | 208 | 4.00E-95  | 100.5 | 87.9 | 93.7 |
| Rsa1.0_01058.1.g22966.t1 | gb EOA35874.1  hypothetical protein CARUB_v10021124mg [Capsella rubella]                                                                                                                                                                                                                                                                     | 67   | 138 | 6.00E-11  | 206.0 | 53.7 | 55.2 | hypothetical protein CARUB_v10021124mg          | gbpln | Capsella rubella     | AT1G72600.2   Symbols:   hydroxyproline-rich glycoprotein family protein   chr1:27338272-27338679 FORWARD LENGTH=135                          | 67   | 135 | 4.00E-12  | 201.5 | 73.1 | 82.1 |
| Rsa1.0_01058.1.g22967.t2 | refNP_177400.2   protein PAUSED [Arabidopsis thaliana] gi 145327223 ref NP_001077813.1  protein PAUSED [Arabidopsis thaliana] gi 334183864 ref NP_001185383.1  protein PAUSED [Arabidopsis thaliana] gi 75140113 sp G7PC79.1 XPOT_ARATH RecName: Full=Exportin-T; AltName: Full=Exportin(tRNA); AltName: Full=tRNA exportin                  | 996  | 988 | 0         | 99.2  | 80.4 | 88.0 | protein PAUSED                                  | gbpln | Arabidopsis thaliana | AT1G72560.3   Symbols: PSD   ARM repeat superfamily protein   chr1:27325026-27329467 REVERSE LENGTH=988                                       | 996  | 988 | 0         | 99.2  | 80.4 | 88.0 |
| Rsa1.0_01058.1.g22968.t1 | gi 34303902 tog DAA01277.1  TPA_exp: exportin-t [Arabidopsis thaliana] gi 332197219 gb AEE35340.1  protein PAUSED [Arabidopsis thaliana] gi 332197220 gb AEE35341.1  exportin-T [Arabidopsis thaliana] gi 332197221 gb AEE35342.1  protein PAUSED [Arabidopsis thaliana]                                                                     | 99   | 674 | 3.00E-22  | 680.8 | 44.4 | 60.6 | hypothetical protein CARUB_v10019905mg, partial | gbpln | Capsella rubella     | AT1G69910.1   Symbols:   Protein kinase superfamily protein   chr1:26330166-26332076 FORWARD LENGTH=636                                       | 99   | 636 | 3.00E-24  | 642.4 | 43.4 | 51.5 |
| Rsa1.0_01058.1.g22969.t1 | gb EOA33525.1  hypothetical protein CARUB_v10021890mg, partial [Capsella rubella]                                                                                                                                                                                                                                                            | 455  | 448 | 0         | 98.5  | 86.8 | 93.2 | hypothetical protein CARUB_v10021890mg          | gbpln | Capsella rubella     | AT1G72540.1   Symbols:   Protein kinase superfamily protein   chr1:27314932-27316669 REVERSE LENGTH=450                                       | 455  | 450 | 0         | 98.9  | 88.6 | 93.6 |
| Rsa1.0_01058.1.g22970.t3 | gb EOA35762.1  hypothetical protein CARUB_v10020995mg [Capsella rubella]                                                                                                                                                                                                                                                                     | 198  | 188 | 2.00E-29  | 94.9  | 42.9 | 51.0 | hypothetical protein CARUB_v10020995mg          | gbpln | Capsella rubella     | AT1G72530.1   Symbols:   plastid developmental protein DAG, putative   chr1:27312999-27313937 FORWARD LENGTH=188                              | 198  | 188 | 3.00E-28  | 94.9  | 40.9 | 48.5 |
| Rsa1.0_01059.1.g22971.t1 | gb EOA20379.1  hypothetical protein CARUB_v10000692mg [Capsella rubella]                                                                                                                                                                                                                                                                     | 539  | 530 | 0         | 98.3  | 67.9 | 77.6 | hypothetical protein CARUB_v10000692mg          | gbpln | Capsella rubella     | AT5G04110.1   Symbols: GYRB3   DNA GYRASE B3   chr3:1110757-1114112 REVERSE LENGTH=546                                                        | 539  | 546 | 0         | 101.3 | 67.9 | 79.0 |
| Rsa1.0_01059.1.g22972.t1 | #                                                                                                                                                                                                                                                                                                                                            | #    | #   | #         | #     | #    | #    | -                                               | ----  | ----                 | #                                                                                                                                             | #    | #   | #         | #     | #    |      |

|                          |                                                                                                                                                                                                                                                                                                                                                                                                                               |      |      |           |       |      |      |                                        |       |                      |                                                                                                                                                                                                                                                                                                                                                                                                                   |      |      |           |       |      |      |
|--------------------------|-------------------------------------------------------------------------------------------------------------------------------------------------------------------------------------------------------------------------------------------------------------------------------------------------------------------------------------------------------------------------------------------------------------------------------|------|------|-----------|-------|------|------|----------------------------------------|-------|----------------------|-------------------------------------------------------------------------------------------------------------------------------------------------------------------------------------------------------------------------------------------------------------------------------------------------------------------------------------------------------------------------------------------------------------------|------|------|-----------|-------|------|------|
| Rsa1.0_01059.1.g22973.t1 | refNP_196026.1   putative methyltransferase PMT7 [Arabidopsis thaliana]<br>gi 75181220 sp Q9LZA4.1 PMT7_ARATH<br>RecName: Full=Probable methyltransferase PMT7<br>gi 7406416 emb CAB85526.1  putative protein [Arabidopsis thaliana]<br>gi 18086557 gb AAL57703.1 AT5g04060/F8F6_270 [Arabidopsis thaliana]<br>gi 332003309 gb AED90692.1  putative methyltransferase PMT7 [Arabidopsis thaliana]                             | 688  | 600  | 0         | 87.2  | 75.7 | 80.4 | putative methyltransferase PMT7        | gbpln | Arabidopsis thaliana | AT5G04060.1   Symbols:   S-adenosyl-L-methionine-dependent methyltransferases superfamily protein   chr5:1099271-1101810 FORWARD LENGTH=600                                                                                                                                                                                                                                                                       | 688  | 600  | 0         | 87.2  | 75.7 | 80.4 |
| Rsa1.0_01059.1.g22974.t1 | emb CAB85525.1  maturase-like protein [Arabidopsis thaliana]                                                                                                                                                                                                                                                                                                                                                                  | 755  | 696  | 0         | 92.2  | 77.5 | 85.3 | maturase-like protein                  | gbpln | Arabidopsis thaliana | AT5G04050.1   Symbols:   RNA-directed DNA polymerase (reverse transcriptase)   chr5:1096092-1097894 FORWARD LENGTH=600                                                                                                                                                                                                                                                                                            | 755  | 600  | 0         | 79.5  | 67.0 | 73.9 |
| Rsa1.0_01059.1.g22975.t1 | gb AAD09173.1  putative glutamate receptor [Arabidopsis thaliana]                                                                                                                                                                                                                                                                                                                                                             | 635  | 808  | 0         | 127.2 | 54.5 | 63.1 | putative glutamate receptor            | gbpln | Arabidopsis thaliana | AT3G04110.1   Symbols: GLR1, ATGLR1.1, GLR1.1   glutamate receptor 1.1   chr3:1077361-1080236 FORWARD LENGTH=808                                                                                                                                                                                                                                                                                                  | 635  | 808  | 0         | 127.2 | 54.3 | 63.0 |
| Rsa1.0_01059.1.g22976.t2 | refNP_196024.1   triacylglycerol lipase SDP1 [Arabidopsis thaliana]<br>gi 75181222 sp Q9LZA6.1 SDP1_ARATH<br>RecName: Full=Triacylglycerol lipase SDP1; AltName: Full=Protein SUGAR-DEPENDENT 1<br>gi 7406414 emb CAB85524.1  putative protein [Arabidopsis thaliana]<br>gi 22531263 gb AAM97135.1  putative protein [Arabidopsis thaliana]<br>gi 332003304 gb AED90687.1  triacylglycerol lipase SDP1 [Arabidopsis thaliana] | 803  | 825  | 0         | 102.7 | 88.7 | 93.3 | triacylglycerol lipase SDP1            | gbpln | Arabidopsis thaliana | AT5G04040.1   Symbols: SDP1   Patatin-like phospholipase family protein   chr5:1090346-1093003 FORWARD LENGTH=825                                                                                                                                                                                                                                                                                                 | 803  | 825  | 0         | 102.7 | 88.7 | 93.3 |
| Rsa1.0_01059.1.g22977.t1 | refXP_002873132.1   hypothetical protein ARALYDRAFT_908281 [Arabidopsis lyrata subsp. lyrata]<br>gi 297318969 gb EFH49391.1  hypothetical protein ARALYDRAFT_908281 [Arabidopsis lyrata subsp. lyrata]                                                                                                                                                                                                                        | 82   | 75   | 9.00E-16  | 91.5  | 53.7 | 67.1 | hypothetical protein ARALYDRAFT_908281 | gbpln | Arabidopsis lyrata   | AT5G04030.1   Symbols:   unknown protein; FUNCTIONS IN: molecular_function unknown; INVOLVED IN: biological_process unknown; LOCATED IN: endomembrane system; EXPRESSED IN: egg cell; Has 1807 Blast hits to 1807 proteins in 277 species: Archae - 0; Bacteria - 0; Metazoa - 736; Fungi - 347; Plants - 385; Viruses - 0; Other Eukaryotes - 339 (source: NCBI BLINK).   chr5:1088462-1088692 REVERSE LENGTH=76 | 82   | 76   | 1.00E-14  | 92.7  | 48.8 | 63.4 |
| Rsa1.0_01059.1.g22978.t1 | refXP_002873131.1   hypothetical protein ARALYDRAFT_487182 [Arabidopsis lyrata subsp. lyrata]<br>gi 297318968 gb EFH49390.1  hypothetical protein ARALYDRAFT_487182 [Arabidopsis lyrata subsp. lyrata]                                                                                                                                                                                                                        | 1542 | 1459 | 0         | 94.6  | 41.6 | 48.1 | hypothetical protein ARALYDRAFT_487182 | gbpln | Arabidopsis lyrata   | AT5G04020.1   Symbols:   calmodulin binding   chr5:1081980-1086546 REVERSE LENGTH=1495                                                                                                                                                                                                                                                                                                                            | 1542 | 1495 | 0         | 97.0  | 25.9 | 29.1 |
| Rsa1.0_01059.1.g22979.t4 | #                                                                                                                                                                                                                                                                                                                                                                                                                             | #    | #    | #         | #     | #    | -    | ----                                   | ----  | ----                 | #                                                                                                                                                                                                                                                                                                                                                                                                                 | #    | #    | #         | #     | #    |      |
| Rsa1.0_01059.1.g22980.t1 | #                                                                                                                                                                                                                                                                                                                                                                                                                             | #    | #    | #         | #     | #    | -    | ----                                   | ----  | ----                 | AT1G10000.1   Symbols:   Ribonuclease H-like superfamily protein   chr1:3263877-3264788 REVERSE LENGTH=303                                                                                                                                                                                                                                                                                                        | 107  | 303  | 1.00E-10  | 283.2 | 30.8 | 48.6 |
| Rsa1.0_01059.1.g22981.t1 | refXP_002523356.1   conserved hypothetical protein [Ricinus communis]<br>gi 223537444 gb EEF39072.1  conserved hypothetical protein [Ricinus communis]                                                                                                                                                                                                                                                                        | 239  | 441  | 5.00E-19  | 184.5 | 22.6 | 29.7 | conserved hypothetical protein         | gbpln | Ricinus communis     | AT3G62210.1   Symbols: EDA32   Putative endonuclease or glycosyl hydrolase   chr3:23026910-23028113 REVERSE LENGTH=279                                                                                                                                                                                                                                                                                            | 239  | 279  | 3.00E-16  | 116.7 | 23.4 | 36.4 |
| Rsa1.0_01059.1.g22982.t1 | dbj BAB10380.1  unnamed protein product [Arabidopsis thaliana]                                                                                                                                                                                                                                                                                                                                                                | 490  | 356  | 3.00E-15  | 72.7  | 14.5 | 22.7 | unnamed protein product                | gbpln | Arabidopsis thaliana | AT5G61190.1   Symbols:   putative endonuclease or glycosyl hydrolase with C2H2-type zinc finger domain   chr5:24615480-24619886 FORWARD LENGTH=995                                                                                                                                                                                                                                                                | 490  | 995  | 2.00E-16  | 203.1 | 11.2 | 18.4 |
| Rsa1.0_01060.1.g22983.t1 | #                                                                                                                                                                                                                                                                                                                                                                                                                             | #    | #    | #         | #     | #    | -    | ----                                   | ----  | ----                 | #                                                                                                                                                                                                                                                                                                                                                                                                                 | #    | #    | #         | #     | #    |      |
| Rsa1.0_01060.1.g22984.t1 | #                                                                                                                                                                                                                                                                                                                                                                                                                             | #    | #    | #         | #     | #    | -    | ----                                   | ----  | ----                 | #                                                                                                                                                                                                                                                                                                                                                                                                                 | #    | #    | #         | #     | #    |      |
| Rsa1.0_01060.1.g22985.t1 | refNP_197534.1   beta-1,3-glucanase 5 [Arabidopsis thaliana]<br>gi 2808439 emb CAA56135.1  bg5 [Arabidopsis thaliana]<br>gi 332005450 gb AED92833.1  beta-1,3-glucanase 5 [Arabidopsis thaliana]                                                                                                                                                                                                                              | 491  | 354  | 1.00E-152 | 72.1  | 54.4 | 59.5 | beta-1,3-glucanase 5                   | gbpln | Arabidopsis thaliana | AT5G20340.1   Symbols: BG5   beta-1,3-glucanase 5   chr5:6874787-6875851 FORWARD LENGTH=354                                                                                                                                                                                                                                                                                                                       | 491  | 354  | 1.00E-155 | 72.1  | 54.4 | 59.5 |
| Rsa1.0_01060.1.g22986.t1 | refXP_002873973.1   transducin family protein [Arabidopsis lyrata subsp. lyrata]<br>gi 297319810 gb EFH50232.1  transducin family protein [Arabidopsis lyrata subsp. lyrata]                                                                                                                                                                                                                                                  | 614  | 660  | 0         | 107.5 | 73.5 | 81.8 | transducin family protein              | gbpln | Arabidopsis lyrata   | AT5G19920.1   Symbols:   Transducin/WD40 repeat-like superfamily protein   chr5:6733622-6737266 REVERSE LENGTH=656                                                                                                                                                                                                                                                                                                | 614  | 656  | 0         | 106.8 | 72.5 | 79.6 |

|                          |                                                                                                                                                                                                                                                                                                                                                                                                                                                                            |     |     |           |       |      |      |                                          |       |                      |                                                                                                                                                                                                                                                                        |     |     |           |       |      |      |
|--------------------------|----------------------------------------------------------------------------------------------------------------------------------------------------------------------------------------------------------------------------------------------------------------------------------------------------------------------------------------------------------------------------------------------------------------------------------------------------------------------------|-----|-----|-----------|-------|------|------|------------------------------------------|-------|----------------------|------------------------------------------------------------------------------------------------------------------------------------------------------------------------------------------------------------------------------------------------------------------------|-----|-----|-----------|-------|------|------|
| Rsa1.0_01060.1.g22987.t1 | refNP_568388.1  RNA recognition motif-containing protein [Arabidopsis thaliana] gi 20260444 gb AAM13120.1  glycine-rich RNA-binding protein, putative [Arabidopsis thaliana] gi 28059296 gb AA030045.1  glycine-rich RNA-binding protein, putative [Arabidopsis thaliana] gi 33200539 gb AED92774.1  RNA recognition motif-containing protein [Arabidopsis thaliana]                                                                                                       | 356 | 337 | 1.00E-116 | 94.7  | 68.5 | 77.0 | RNA recognition motif-containing protein | gbpln | Arabidopsis thaliana | AT5G19960.1   Symbols:   RNA-binding (RRM/RBD/RNP motifs) family protein   chr5:6744029-6746133 FORWARD LENGTH=337                                                                                                                                                     | 356 | 337 | 1.00E-118 | 94.7  | 68.5 | 77.0 |
| Rsa1.0_01060.1.g22988.t1 | refXP_002871913.1  hypothetical protein ARALYDRAFT_910035 [Arabidopsis lyrata subsp. lyrata] gi 297317750 gb EFH48172.1  hypothetical protein ARALYDRAFT_910035 [Arabidopsis lyrata subsp. lyrata]                                                                                                                                                                                                                                                                         | 363 | 364 | 0         | 100.3 | 89.3 | 93.9 | hypothetical protein ARALYDRAFT_910035   | gbpln | Arabidopsis lyrata   | AT5G19970.1   Symbols:   unknown protein; Has 1807 Blast hits to 1807 proteins in 277 species: Archae - 0; Bacteria - 0; Metazoa - 736; Fungi - 347; Plants - 385; Viruses - 0; Other Eukaryotes - 339 (source: NCBI BLink).   chr5:6747550-6748641 FORWARD LENGTH=363 | 363 | 363 | 0         | 100.0 | 89.0 | 92.3 |
| Rsa1.0_01060.1.g22989.t1 | refNP_197498.1  golgi nucleotide sugar transporter 4 [Arabidopsis thaliana] gi 75146970 sp Q84L08.1 GONS4_ARAT H RecName: Full=GDP-mannose transporter GONST4; AltName: Full=Protein GOLGI NUCLEOTIDE SUGAR TRANSPORTER 4 gi 29329823 emb CAD83088.1  GONST4 Golgi Nucleotide sugar transporter [Arabidopsis thaliana] gi 89000965 gb ABD59072.1  At5g19980 [Arabidopsis thaliana] gi 332005393 gb AED92776.1  golgi nucleotide sugar transporter 4 [Arabidopsis thaliana] | 362 | 341 | 1.00E-109 | 94.2  | 55.2 | 60.2 | golgi nucleotide sugar transporter 4     | gbpln | Arabidopsis thaliana | AT5G19980.1   Symbols: GONST4   golgi nucleotide sugar transporter 4   chr5:6749907-6750932 REVERSE LENGTH=341                                                                                                                                                         | 362 | 341 | 1.00E-112 | 94.2  | 55.2 | 60.2 |
| Rsa1.0_01060.1.g22990.t1 | gb EOA20731.1  hypothetical protein CARUB_v10001052mg [Capsella rubella]                                                                                                                                                                                                                                                                                                                                                                                                   | 350 | 419 | 0         | 119.7 | 99.4 | 99.7 | hypothetical protein CARUB_v10001052mg   | gbpln | Capsella rubella     | AT5G19990.1   Symbols: RPT6A, ATSUG1   regulatory particle triple-A ATPase 6A   chr5:6752144-6754918 FORWARD LENGTH=419                                                                                                                                                | 350 | 419 | 0         | 119.7 | 99.4 | 99.7 |
| Rsa1.0_01060.1.g22991.t1 | refNP_197503.1  Plant Tudor-like RNA-binding protein [Arabidopsis thaliana] gi 21553399 gb AAM62492.1  unknown [Arabidopsis thaliana] gi 27808580 gb AA024570.1  At5g20030 [Arabidopsis thaliana] gi 332005398 gb AED92781.1  Plant Tudor-like RNA-binding protein [Arabidopsis thaliana]                                                                                                                                                                                  | 306 | 326 | 1.00E-126 | 106.5 | 79.4 | 85.9 | Plant Tudor-like RNA-binding protein     | gbpln | Arabidopsis thaliana | AT5G20030.1   Symbols:   Plant Tudor-like RNA-binding protein   chr5:6764971-6766036 REVERSE LENGTH=326                                                                                                                                                                | 306 | 326 | 1.00E-129 | 106.5 | 79.4 | 85.9 |
| Rsa1.0_01060.1.g22992.t1 | refXP_002873979.1  ATIPT9 [Arabidopsis lyrata subsp. lyrata] gi 297319816 gb EFH50238.1  ATIPT9 [Arabidopsis lyrata subsp. lyrata]                                                                                                                                                                                                                                                                                                                                         | 498 | 463 | 0         | 93.0  | 74.9 | 81.5 | ATIPT9                                   | gbpln | Arabidopsis lyrata   | AT5G20040.1   Symbols: ATIPT9, IPT9   isopentenyltransferase 9   chr5:6767939-6770980 REVERSE LENGTH=463                                                                                                                                                               | 498 | 463 | 0         | 93.0  | 74.1 | 81.5 |
| Rsa1.0_01061.1.g22993.t1 | refXP_002881608.1  GAUT7/LGT7 [Arabidopsis lyrata subsp. lyrata] gi 297327447 gb EFH57867.1  GAUT7/LGT7 [Arabidopsis lyrata subsp. lyrata]                                                                                                                                                                                                                                                                                                                                 | 225 | 617 | 5.00E-39  | 274.2 | 36.0 | 37.8 | GAUT7/LGT7                               | gbpln | Arabidopsis lyrata   | AT2G38650.2   Symbols: GAUT7   galacturonosyltransferase 7   chr2:16161856-16165523 REVERSE LENGTH=619                                                                                                                                                                 | 225 | 619 | 7.00E-41  | 275.1 | 35.6 | 37.3 |
| Rsa1.0_01061.1.g22994.t1 | gb EOA23044.1  hypothetical protein CARUB_v10003814mg [Capsella rubella]                                                                                                                                                                                                                                                                                                                                                                                                   | 180 | 416 | 1.00E-60  | 231.1 | 65.0 | 77.2 | hypothetical protein CARUB_v10003814mg   | gbpln | Capsella rubella     | AT1G05080.1   Symbols:   F-box/RNI-like/FBD-like domains-containing protein   chr1:1459091-1460579 FORWARD LENGTH=439                                                                                                                                                  | 180 | 439 | 2.00E-43  | 243.9 | 55.0 | 70.0 |
| Rsa1.0_01061.1.g22995.t1 | gb EOA27927.1  hypothetical protein CARUB_v10024098mg [Capsella rubella]                                                                                                                                                                                                                                                                                                                                                                                                   | 57  | 197 | 8.00E-19  | 345.6 | 84.2 | 87.7 | hypothetical protein CARUB_v10024098mg   | gbpln | Capsella rubella     | AT2G38640.1   Symbols:   Protein of unknown function (DUF567)   chr2:16157725-16158474 REVERSE LENGTH=196                                                                                                                                                              | 57  | 196 | 5.00E-21  | 343.9 | 82.5 | 87.7 |
| Rsa1.0_01061.1.g22996.t1 | refXP_002881608.1  GAUT7/LGT7 [Arabidopsis lyrata subsp. lyrata] gi 297327447 gb EFH57867.1  GAUT7/LGT7 [Arabidopsis lyrata subsp. lyrata]                                                                                                                                                                                                                                                                                                                                 | 618 | 617 | 0         | 99.8  | 81.7 | 90.3 | GAUT7/LGT7                               | gbpln | Arabidopsis lyrata   | AT2G38650.2   Symbols: GAUT7   galacturonosyltransferase 7   chr2:16161856-16165523 REVERSE LENGTH=619                                                                                                                                                                 | 618 | 619 | 0         | 100.2 | 81.7 | 89.6 |
| Rsa1.0_01061.1.g22997.t1 | gb EOA27393.1  hypothetical protein CARUB_v10023524mg [Capsella rubella]                                                                                                                                                                                                                                                                                                                                                                                                   | 352 | 352 | 0         | 100.0 | 88.4 | 94.6 | hypothetical protein CARUB_v10023524mg   | gbpln | Capsella rubella     | AT2G38660.3   Symbols:   Amino acid dehydrogenase family protein   chr2:16168392-16168194 FORWARD LENGTH=352                                                                                                                                                           | 352 | 352 | 0         | 100.0 | 88.1 | 93.5 |
| Rsa1.0_01061.1.g22998.t1 | refXP_002879759.1  hypothetical protein ARALYDRAFT_903103 [Arabidopsis lyrata subsp. lyrata] gi 297325598 gb EFH56018.1  hypothetical protein ARALYDRAFT_903103 [Arabidopsis lyrata subsp. lyrata]                                                                                                                                                                                                                                                                         | 453 | 421 | 0         | 92.9  | 83.7 | 87.0 | hypothetical protein ARALYDRAFT_903103   | gbpln | Arabidopsis lyrata   | AT2G38670.1   Symbols: PECT1   phosphorylethanolamine cytidyllyltransferase 1   chr2:16168979-16171680 FORWARD LENGTH=421                                                                                                                                              | 453 | 421 | 0         | 92.9  | 83.7 | 87.2 |

|                          |                                                                                                                                                                                                                                                                                                                                                                                                                                                                                                                                                                                          |     |      |           |        |      |      |                                              |       |                      |                                                                                                                                                                                                                                                                                                                                                                     |     |      |           |        |      |      |
|--------------------------|------------------------------------------------------------------------------------------------------------------------------------------------------------------------------------------------------------------------------------------------------------------------------------------------------------------------------------------------------------------------------------------------------------------------------------------------------------------------------------------------------------------------------------------------------------------------------------------|-----|------|-----------|--------|------|------|----------------------------------------------|-------|----------------------|---------------------------------------------------------------------------------------------------------------------------------------------------------------------------------------------------------------------------------------------------------------------------------------------------------------------------------------------------------------------|-----|------|-----------|--------|------|------|
| Rsa1.0_01061.1.g22999.t1 | gb EOA27880.1  hypothetical protein CARUB_v10024049mg [Capsella rubella]                                                                                                                                                                                                                                                                                                                                                                                                                                                                                                                 | 215 | 213  | 1.00E-113 | 99.1   | 91.2 | 94.0 | hypothetical protein CARUB_v10024049mg       | gbpln | Capsella rubella     | AT2G38710.2   Symbols:   AMMECR1 family   chr2:16184517-16186764 REVERSE LENGTH=214                                                                                                                                                                                                                                                                                 | 215 | 214  | 1.00E-113 | 99.5   | 90.2 | 94.0 |
| Rsa1.0_01061.1.g23000.t1 | gb EOA26362.1  hypothetical protein CARUB_v10022884mg [Capsella rubella]                                                                                                                                                                                                                                                                                                                                                                                                                                                                                                                 | 573 | 585  | 0         | 102.1  | 78.7 | 86.6 | hypothetical protein CARUB_v10022884mg       | gbpln | Capsella rubella     | AT2G38720.1   Symbols: MAP65-5   microtubule-associated protein 65-5   chr2:16189047-16192102 FORWARD LENGTH=587                                                                                                                                                                                                                                                    | 573 | 587  | 0         | 102.4  | 76.3 | 84.6 |
| Rsa1.0_01061.1.g23001.t1 | ref NP_181407.1  peptidyl-prolyl isomerase H (cyclophilin H) [Arabidopsis thaliana] gi 3785999 gb AAC67345.1  putative peptidyl-prolyl cis-trans isomerase [Arabidopsis thaliana] gi 25083102 gb AAN72042.1  putative peptidyl-prolyl cis-trans isomerase [Arabidopsis thaliana] gi 30102910 gb AAP21373.1  At2g38730 [Arabidopsis thaliana] gi 45680872 gb AAS75305.1  single domain cyclophilin type peptidyl-prolyl cis-trans isomerase [Arabidopsis thaliana] gi 330254448 gb AEC09578.1  cyclophilin-like peptidyl-prolyl cis-trans isomerase family protein [Arabidopsis thaliana] | 212 | 199  | 1.00E-105 | 93.9   | 87.3 | 92.0 | peptidyl-prolyl isomerase H (cyclophilin H)  | gbpln | Arabidopsis thaliana | AT2G38730.1   Symbols:   Cyclophilin-like peptidyl-prolyl cis-trans isomerase family protein   chr2:16192579-16194038 REVERSE LENGTH=199                                                                                                                                                                                                                            | 212 | 199  | 1.00E-107 | 93.9   | 87.3 | 92.0 |
| Rsa1.0_01061.1.g23002.t1 | gb EOA27764.1  hypothetical protein CARUB_v10023919mg [Capsella rubella]                                                                                                                                                                                                                                                                                                                                                                                                                                                                                                                 | 246 | 249  | 1.00E-128 | 101.2  | 90.7 | 95.9 | hypothetical protein CARUB_v10023919mg       | gbpln | Capsella rubella     | AT2G38740.1   Symbols:   Haloacid dehalogenase-like hydrolase (HAD) superfamily protein   chr2:16194639-16195995 REVERSE LENGTH=244                                                                                                                                                                                                                                 | 246 | 244  | 1.00E-128 | 99.2   | 89.4 | 94.3 |
| Rsa1.0_01061.1.g23003.t1 | gb ADD74397.1  annexin 4 [Brassica juncea]                                                                                                                                                                                                                                                                                                                                                                                                                                                                                                                                               | 316 | 315  | 1.00E-159 | 99.7   | 87.3 | 93.7 | annexin 4                                    | gbpln | Brassica juncea      | AT2G38750.1   Symbols: ANNAT4   annexin 4   chr2:16196582-16198431 REVERSE LENGTH=319                                                                                                                                                                                                                                                                               | 316 | 319  | 1.00E-155 | 100.9  | 82.9 | 93.0 |
| Rsa1.0_01061.1.g23004.t1 | gb ACQ65866.1  annexin 3 [Brassica juncea] gi 251747933 gb ABD47520.2  annexin 3 [Brassica juncea]                                                                                                                                                                                                                                                                                                                                                                                                                                                                                       | 319 | 319  | 1.00E-174 | 100.0  | 93.1 | 95.6 | annexin 3                                    | gbpln | Brassica juncea      | AT2G38760.1   Symbols: ANNAT3, ANN3   annexin 3   chr2:16201086-16202490 FORWARD LENGTH=321                                                                                                                                                                                                                                                                         | 319 | 321  | 1.00E-159 | 100.6  | 83.7 | 92.2 |
| Rsa1.0_01061.1.g23005.t1 | dbj BAJ33731.1  unnamed protein product [Thelungiella halophila]                                                                                                                                                                                                                                                                                                                                                                                                                                                                                                                         | 409 | 412  | 0         | 100.7  | 90.5 | 94.6 | unnamed protein product                      | ----- | -----                | AT2G26900.1   Symbols:   Sodium Bile acid symporter family   chr2:1475156-11477870 REVERSE LENGTH=409                                                                                                                                                                                                                                                               | 409 | 409  | 0         | 100.0  | 89.2 | 93.2 |
| Rsa1.0_01061.1.g23006.t1 | gb EOA26458.1  hypothetical protein CARUB_v10022305mg [Capsella rubella]                                                                                                                                                                                                                                                                                                                                                                                                                                                                                                                 | 146 | 1508 | 2.00E-67  | 1032.9 | 83.6 | 85.6 | hypothetical protein CARUB_v10022305mg       | gbpln | Capsella rubella     | AT2G38770.1   Symbols: EMB2765   P-loop containing nucleoside triphosphate hydrolases superfamily protein   chr2:16203185-16210253 REVERSE LENGTH=1509                                                                                                                                                                                                              | 146 | 1509 | 5.00E-70  | 1033.6 | 83.6 | 85.6 |
| Rsa1.0_01061.1.g23007.t1 | gb EOA27529.1  hypothetical protein CARUB_v10023669mg [Capsella rubella]                                                                                                                                                                                                                                                                                                                                                                                                                                                                                                                 | 320 | 316  | 1.00E-123 | 98.8   | 73.4 | 82.8 | hypothetical protein CARUB_v10023669mg       | gbpln | Capsella rubella     | AT2G38820.2   Symbols:   Protein of unknown function (DUF506)   chr2:16222271-16223393 FORWARD LENGTH=310                                                                                                                                                                                                                                                           | 320 | 310  | 1.00E-116 | 96.9   | 70.0 | 80.0 |
| Rsa1.0_01061.1.g23008.t1 | ref XP_002879767.1  hypothetical protein ARALYDRAFT_482897 [Arabidopsis lyrata subsp. lyrata] gi 297325606 gb EFH56026.1  hypothetical protein ARALYDRAFT_482897 [Arabidopsis lyrata subsp. lyrata]                                                                                                                                                                                                                                                                                                                                                                                      | 210 | 258  | 1.00E-49  | 122.9  | 61.0 | 74.8 | hypothetical protein ARALYDRAFT_482897       | gbpln | Arabidopsis lyrata   | AT2G38823.1   Symbols:   unknown protein; BEST Arabidopsis thaliana protein match is: unknown protein (TAIR:AT3G54520.1). Has 35333 Blast hits to 34131 proteins in 2444 species: Archaee - 798; Bacteria - 22429; Metazoa - 974; Fungi - 991; Plants - 531; Viruses - 0; Other Eukaryotes - 9610 (source: NCBI BLINK).   chr2:16224105-16225245 FORWARD LENGTH=258 | 210 | 258  | 4.00E-51  | 122.9  | 59.5 | 72.9 |
| Rsa1.0_01061.1.g23009.t1 | ref XP_002879768.1  hypothetical protein ARALYDRAFT_903122 [Arabidopsis lyrata subsp. lyrata] gi 297325607 gb EFH56027.1  hypothetical protein ARALYDRAFT_903122 [Arabidopsis lyrata subsp. lyrata]                                                                                                                                                                                                                                                                                                                                                                                      | 366 | 333  | 1.00E-128 | 91.0   | 62.8 | 72.1 | hypothetical protein ARALYDRAFT_903122       | gbpln | Arabidopsis lyrata   | AT2G38830.1   Symbols:   Ubiquitin-conjugating enzyme/RWD-like protein   chr2:16225777-16226772 FORWARD LENGTH=331                                                                                                                                                                                                                                                  | 366 | 331  | 1.00E-123 | 90.4   | 59.8 | 69.4 |
| Rsa1.0_01061.1.g23010.t3 | ref NP_181418.3  guanylate-binding-like protein [Arabidopsis thaliana] gi 330254499 gb AEC09593.1  guanylate-binding-like protein [Arabidopsis thaliana]                                                                                                                                                                                                                                                                                                                                                                                                                                 | 553 | 602  | 0         | 108.9  | 92.6 | 96.7 | guanylate-binding-like protein               | gbpln | Arabidopsis thaliana | AT2G38840.1   Symbols:   Guanylate-binding family protein   chr2:16227329-16232115 FORWARD LENGTH=602                                                                                                                                                                                                                                                               | 553 | 602  | 0         | 108.9  | 92.6 | 96.7 |
| Rsa1.0_01062.1.g23011.t1 | ref NP_190562.1  C2H2 and C2HC zinc finger-containing protein [Arabidopsis thaliana] gi 6522914 emb CAB62101.1  zinc-finger-like protein [Arabidopsis thaliana] gi 117168217 gb ABK32191.1  At3g49930 [Arabidopsis thaliana] gi 332645087 gb AEE78608.1  C2H2 and C2HC zinc finger-containing protein [Arabidopsis thaliana]                                                                                                                                                                                                                                                             | 234 | 215  | 8.00E-72  | 91.9   | 72.6 | 76.1 | C2H2 and C2HC zinc finger-containing protein | gbpln | Arabidopsis thaliana | AT3G49930.1   Symbols:   C2H2 and C2HC zinc fingers superfamily protein   chr3:18510246-18510893 FORWARD LENGTH=215                                                                                                                                                                                                                                                 | 234 | 215  | 2.00E-74  | 91.9   | 72.6 | 76.1 |
| Rsa1.0_01062.1.g23012.t1 | dbj BAA97087.1  copia-type pol polyprotein-like [Arabidopsis thaliana]                                                                                                                                                                                                                                                                                                                                                                                                                                                                                                                   | 129 | 1123 | 2.00E-55  | 870.5  | 78.3 | 89.1 | copia-type pol polyprotein-like              | gbpln | Arabidopsis thaliana | # # # # # #                                                                                                                                                                                                                                                                                                                                                         | #   | #    | #         | #      | #    | #    |

|                          |                                                                                                                                                                                                                                                                                                                                                                                                                                                                                                                                         |      |      |           |       |      |      |                                              |       |                      |                                                                                                                                                                                                                                                                                                                                              |      |      |           |       |      |      |
|--------------------------|-----------------------------------------------------------------------------------------------------------------------------------------------------------------------------------------------------------------------------------------------------------------------------------------------------------------------------------------------------------------------------------------------------------------------------------------------------------------------------------------------------------------------------------------|------|------|-----------|-------|------|------|----------------------------------------------|-------|----------------------|----------------------------------------------------------------------------------------------------------------------------------------------------------------------------------------------------------------------------------------------------------------------------------------------------------------------------------------------|------|------|-----------|-------|------|------|
| Rsa1.0_01062.1.g23013.t1 | gb AAC19278.1 T14P8.10 [Arabidopsis thaliana] gi 7269009 emb CAB80742.1 AT4g02490 [Arabidopsis thaliana]                                                                                                                                                                                                                                                                                                                                                                                                                                | 946  | 657  | 0         | 69.5  | 40.9 | 51.5 | T14P8.10                                     | gbpln | Arabidopsis thaliana | AT1G43760.1   Symbols:   DNase I-like superfamily protein   chr1:16528880-16531065 REVERSE LENGTH=626                                                                                                                                                                                                                                        | 946  | 626  | 6.00E-90  | 66.2  | 15.9 | 21.7 |
| Rsa1.0_01062.1.g23014.t1 | ref NP_180096.3 serpin-Z10 [Arabidopsis thaliana] gi 75313479 sp Q9SIR9.1 SPZ10_ARATH RecName: Full=Serpin-Z10; AltName: Full=ArathZ10 gi 4567253 gb AAD23667.1 putative serpin [Arabidopsis thaliana] gi 330252581 gb AEC07675.1 serpin-Z10 [Arabidopsis thaliana] ref NP_180096.3 serpin-Z10 [Arabidopsis thaliana] gi 75313479 sp Q9SIR9.1 SPZ10_ARATH RecName: Full=Serpin-Z10; AltName: Full=ArathZ10 gi 4567253 gb AAD23667.1 putative serpin [Arabidopsis thaliana] gi 330252581 gb AEC07675.1 serpin-Z10 [Arabidopsis thaliana] | 274  | 385  | 1.00E-108 | 140.5 | 69.7 | 79.2 | serpin-Z10                                   | gbpln | Arabidopsis thaliana | AT2G25240.1   Symbols:   Serine protease inhibitor (SERPIN) family protein   chr2:10751872-10753134 REVERSE LENGTH=385                                                                                                                                                                                                                       | 274  | 385  | 1.00E-111 | 140.5 | 69.7 | 79.2 |
| Rsa1.0_01062.1.g23015.t1 | ref NP_180096.3 serpin-Z10 [Arabidopsis thaliana] gi 75313479 sp Q9SIR9.1 SPZ10_ARATH RecName: Full=Serpin-Z10; AltName: Full=ArathZ10 gi 4567253 gb AAD23667.1 putative serpin [Arabidopsis thaliana] gi 330252581 gb AEC07675.1 serpin-Z10 [Arabidopsis thaliana]                                                                                                                                                                                                                                                                     | 330  | 385  | 1.00E-121 | 116.7 | 70.6 | 79.4 | serpin-Z10                                   | gbpln | Arabidopsis thaliana | AT2G25240.1   Symbols:   Serine protease inhibitor (SERPIN) family protein   chr2:10751872-10753134 REVERSE LENGTH=385                                                                                                                                                                                                                       | 330  | 385  | 1.00E-123 | 116.7 | 70.6 | 79.4 |
| Rsa1.0_01062.1.g23016.t1 | gb EOA20772.1 hypothetical protein CARUB_v10001101mg [Capsella rubella]                                                                                                                                                                                                                                                                                                                                                                                                                                                                 | 388  | 406  | 1.00E-55  | 104.6 | 37.9 | 54.1 | hypothetical protein CARUB_v10001101mg       | gbpln | Capsella rubella     | AT5G10340.1   Symbols:   F-box family protein   chr5:3253122-3255045 FORWARD LENGTH=445                                                                                                                                                                                                                                                      | 388  | 445  | 2.00E-53  | 114.7 | 36.9 | 53.6 |
| Rsa1.0_01062.1.g23017.t2 | emb CAN71782.1 hypothetical protein VITISV_028677 [Vitis vinifera]                                                                                                                                                                                                                                                                                                                                                                                                                                                                      | 730  | 1383 | 0         | 189.5 | 59.9 | 73.6 | hypothetical protein VITISV_028677           | gbpln | Vitis vinifera       | AT4G23160.1   Symbols: CRK8   cysteine-rich RLK (RECEPTOR-like protein kinase) 8   chr4:12129485-12134086 FORWARD LENGTH=1262                                                                                                                                                                                                                | 730  | 1262 | 3.00E-38  | 172.9 | 18.4 | 27.7 |
| Rsa1.0_01062.1.g23018.t1 | gb AAG51783.1 AC079679_3 reverse transcriptase, putative; 16838-20266 [Arabidopsis thaliana] ref XP_002876010.1 hypothetical protein ARALYDRAFT_485358 [Arabidopsis lyrata subsp. lyrata] gi 297321848 gb EFH52269.1 hypothetical protein ARALYDRAFT_485358 [Arabidopsis lyrata subsp. lyrata]                                                                                                                                                                                                                                          | 1913 | 1142 | 0         | 59.7  | 27.0 | 37.1 | reverse transcriptase, putative; 16838-20266 | gbpln | Arabidopsis thaliana | AT4G29090.1   Symbols:   Ribonuclease H-like superfamily protein   chr4:14333528-14335255 FORWARD LENGTH=575                                                                                                                                                                                                                                 | 1913 | 575  | 3.00E-90  | 30.1  | 9.6  | 14.3 |
| Rsa1.0_01062.1.g23019.t1 | ref XP_002876010.1 hypothetical protein ARALYDRAFT_485358 [Arabidopsis lyrata subsp. lyrata] gi 297321848 gb EFH52269.1 hypothetical protein ARALYDRAFT_485358 [Arabidopsis lyrata subsp. lyrata] ref XP_002877723.1 binding protein [Arabidopsis lyrata subsp. lyrata] gi 297323561 gb EFH53982.1 binding protein [Arabidopsis lyrata subsp. lyrata]                                                                                                                                                                                   | 335  | 405  | 0         | 120.9 | 91.9 | 93.4 | hypothetical protein ARALYDRAFT_485358       | gbpln | Arabidopsis lyrata   | AT3G50000.1   Symbols: CKA2, ATCKA2   casein kinase II, alpha chain 2   chr3:18534487-18536743 FORWARD LENGTH=403                                                                                                                                                                                                                            | 335  | 403  | 0         | 120.3 | 91.9 | 93.1 |
| Rsa1.0_01062.1.g23020.t1 | ref XP_002877723.1 binding protein [Arabidopsis lyrata subsp. lyrata] gi 297323561 gb EFH53982.1 binding protein [Arabidopsis lyrata subsp. lyrata]                                                                                                                                                                                                                                                                                                                                                                                     | 547  | 500  | 0         | 91.4  | 81.0 | 86.3 | binding protein                              | gbpln | Arabidopsis lyrata   | AT3G50030.1   Symbols:   ARM-repeat/Tetratricopeptide repeat (TPR)-like protein   chr3:18546490-18548132 REVERSE LENGTH=501                                                                                                                                                                                                                  | 547  | 501  | 0         | 91.6  | 79.2 | 86.1 |
| Rsa1.0_01062.1.g23021.t1 | emb CAB62112.1 putative protein [Arabidopsis thaliana]                                                                                                                                                                                                                                                                                                                                                                                                                                                                                  | 407  | 417  | 3.00E-88  | 102.5 | 53.8 | 65.8 | putative protein                             | gbpln | Arabidopsis thaliana | AT3G50040.1   Symbols:   unknown protein; BEST Arabidopsis thaliana protein match is: unknown protein (TAIR:AT4G37440.2); Has 70 Blast hits to 70 proteins in 12 species: Archae - 0; Bacteria - 0; Metazoa - 0; Fungi - 0; Plants - 70; Viruses - 0; Other Eukaryotes - 0 (source: NCBI BLink).   chr3:18549489-18551019 REVERSE LENGTH=421 | 407  | 421  | 3.00E-89  | 103.4 | 53.8 | 65.8 |
| Rsa1.0_01063.1.g23022.t1 | gb EOA29120.1 hypothetical protein CARUB_v10025387mg [Capsella rubella]                                                                                                                                                                                                                                                                                                                                                                                                                                                                 | 450  | 476  | 0         | 105.8 | 85.8 | 89.8 | hypothetical protein CARUB_v10025387mg       | gbpln | Capsella rubella     | AT2G28550.3   Symbols: RAP2.7   related to AP2.7   chr2:12226168-12228251 REVERSE LENGTH=464                                                                                                                                                                                                                                                 | 450  | 464  | 0         | 103.1 | 84.0 | 88.7 |
| Rsa1.0_01063.1.g23023.t2 | ref XP_002879163.1 nucleic acid binding protein [Arabidopsis lyrata subsp. lyrata] gi 297325002 gb EFH5422.1 nucleic acid binding protein [Arabidopsis lyrata subsp. lyrata]                                                                                                                                                                                                                                                                                                                                                            | 1013 | 967  | 0         | 95.5  | 66.7 | 75.6 | nucleic acid binding protein                 | gbpln | Arabidopsis lyrata   | AT2G28540.2   Symbols:   RNA binding (RRM/RBD/RNP motifs) family protein   chr2:12218652-12223594 FORWARD LENGTH=960                                                                                                                                                                                                                         | 1013 | 960  | 0         | 94.8  | 63.5 | 73.9 |
| Rsa1.0_01063.1.g23024.t1 | ref XP_002879161.1 VHA-A1 [Arabidopsis lyrata subsp. lyrata] gi 297325000 gb EFH5420.1 VHA-A1 [Arabidopsis lyrata subsp. lyrata]                                                                                                                                                                                                                                                                                                                                                                                                        | 795  | 822  | 0         | 103.4 | 95.8 | 98.1 | VHA-A1                                       | gbpln | Arabidopsis lyrata   | AT2G28520.1   Symbols: VHA-A1   vacuolar proton ATPase A1   chr2:12210026-12215532 FORWARD LENGTH=817                                                                                                                                                                                                                                        | 795  | 817  | 0         | 102.8 | 94.1 | 96.7 |
| Rsa1.0_01063.1.g23025.t1 | #                                                                                                                                                                                                                                                                                                                                                                                                                                                                                                                                       | #    | #    | #         | #     | #    | -    | ----                                         | ----  | #                    | #                                                                                                                                                                                                                                                                                                                                            | #    | #    | #         | #     | #    |      |
| Rsa1.0_01063.1.g23026.t1 | #                                                                                                                                                                                                                                                                                                                                                                                                                                                                                                                                       | #    | #    | #         | #     | #    | -    | ----                                         | ----  | #                    | #                                                                                                                                                                                                                                                                                                                                            | #    | #    | #         | #     | #    |      |
| Rsa1.0_01063.1.g23027.t1 | #                                                                                                                                                                                                                                                                                                                                                                                                                                                                                                                                       | #    | #    | #         | #     | #    | -    | ----                                         | ----  | #                    | #                                                                                                                                                                                                                                                                                                                                            | #    | #    | #         | #     | #    |      |
| Rsa1.0_01063.1.g23028.t1 | ref NP_180417.2 LOB domain-containing protein 11 [Arabidopsis thaliana] gi 334302828 sp Q9SK08.2 LBD11_ARATH RecName: Full=LOB domain-containing protein 11; AltName: Full=ASYMMETRIC LEAVES 2-like protein 7; Short=AS2-like protein 7 gi 330253037 gb AEC08131.1 LOB domain-containing protein 11 [Arabidopsis thaliana]                                                                                                                                                                                                              | 234  | 232  | 6.00E-96  | 99.1  | 87.2 | 91.0 | LOB domain-containing protein 11             | gbpln | Arabidopsis thaliana | AT2G28500.1   Symbols: LBD11   LOB domain-containing protein 11   chr2:12186603-12188110 REVERSE LENGTH=232                                                                                                                                                                                                                                  | 234  | 232  | 2.00E-98  | 99.1  | 87.2 | 91.0 |

|                          |                                                                                                                                                                                                                                                                                                                            |      |      |           |       |      |      |                                                   |       |                      |                                                                                                                                                                                                                                                                                                                                                                |      |     |           |       |      |      |
|--------------------------|----------------------------------------------------------------------------------------------------------------------------------------------------------------------------------------------------------------------------------------------------------------------------------------------------------------------------|------|------|-----------|-------|------|------|---------------------------------------------------|-------|----------------------|----------------------------------------------------------------------------------------------------------------------------------------------------------------------------------------------------------------------------------------------------------------------------------------------------------------------------------------------------------------|------|-----|-----------|-------|------|------|
| Rsa1.0_01063.1.g23029.t1 | #                                                                                                                                                                                                                                                                                                                          | #    | #    | #         | #     | #    | #    | -                                                 | ----  | ----                 | #                                                                                                                                                                                                                                                                                                                                                              | #    | #   | #         | #     | #    |      |
| Rsa1.0_01063.1.g23030.t1 | ref XP_002880986.1  cupin family protein [Arabidopsis lyrata subsp. lyrata] gi 297326829 gb EFH57245.1  cupin family protein [Arabidopsis lyrata subsp. lyrata]                                                                                                                                                            | 452  | 491  | 1.00E-122 | 108.6 | 48.0 | 53.3 | cupin family protein                              | gbpln | Arabidopsis lyrata   | AT2G28490.1   Symbols:   RmIC-like cupins superfamily protein   chr2:12178812-12180983 REVERSE LENGTH=511                                                                                                                                                                                                                                                      | 452  | 511 | 1.00E-124 | 113.1 | 47.1 | 53.8 |
| Rsa1.0_01063.1.g23031.t1 | gb AAC98462.1  putative chloroplast nucleoid DNA binding protein [Arabidopsis thaliana] gi 20197956 gb AAM15330.1  putative chloroplast nucleoid DNA binding protein [Arabidopsis thaliana]                                                                                                                                | 394  | 389  | 1.00E-141 | 98.7  | 63.7 | 76.9 | putative chloroplast nucleoid DNA binding protein | gbpln | Arabidopsis thaliana | AT2G28040.1   Symbols:   Eukaryotic aspartyl protease family protein   chr2:11936203-11937390 REVERSE LENGTH=395                                                                                                                                                                                                                                               | 394  | 395 | 1.00E-143 | 100.3 | 63.7 | 76.9 |
| Rsa1.0_01064.1.g23032.t1 | #                                                                                                                                                                                                                                                                                                                          | #    | #    | #         | #     | #    | #    | -                                                 | ----  | ----                 | #                                                                                                                                                                                                                                                                                                                                                              | #    | #   | #         | #     | #    |      |
| Rsa1.0_01064.1.g23033.t1 | ref NP_189038.1  putative F-box protein [Arabidopsis thaliana] gi 75273446 sp Q9LJR1.1 FB182_ARATH RecName: Full=Putative F-box protein At3g23960 gi 9294665 dbj BAB03014.1  unnamed protein product [Arabidopsis thaliana] gi 332643318 gb AEE76839.1  putative F-box protein [Arabidopsis thaliana]                      | 245  | 402  | 4.00E-49  | 164.1 | 48.6 | 66.1 | putative F-box protein                            | gbpln | Arabidopsis thaliana | AT3G23960.1   Symbols:   F-box and associated interaction domains-containing protein   chr3:8657736-8658944 FORWARD LENGTH=402                                                                                                                                                                                                                                 | 245  | 402 | 1.00E-51  | 164.1 | 48.6 | 66.1 |
| Rsa1.0_01064.1.g23034.t2 | ref XP_003609074.1  ATP-dependent DNA helicase PIF1 [Medicago truncatula] gi 355510129 gb AES91271.1  ATP-dependent DNA helicase PIF1 [Medicago truncatula]                                                                                                                                                                | 1305 | 1531 | 0         | 117.3 | 42.7 | 57.0 | ATP-dependent DNA helicase PIF1                   | gbpln | Medicago truncatula  | AT5G28760.1   Symbols:   PIF1 helicase   chr5:10812907-10814173 REVERSE LENGTH=337                                                                                                                                                                                                                                                                             | 1305 | 337 | 1.00E-95  | 25.8  | 13.6 | 16.2 |
| Rsa1.0_01064.1.g23035.t1 | gb EOA30626.1  hypothetical protein CARUB_v10013761mg [Capsella rubella]                                                                                                                                                                                                                                                   | 169  | 428  | 9.00E-21  | 253.3 | 28.4 | 30.8 | hypothetical protein CARUB_v10013761mg            | gbpln | Capsella rubella     | AT3G23080.1   Symbols:   Polyketide cyclase/dehydrase and lipid transport superfamily protein   chr3:8207612-8209181 REVERSE LENGTH=419                                                                                                                                                                                                                        | 169  | 419 | 1.00E-22  | 247.9 | 27.2 | 30.8 |
| Rsa1.0_01064.1.g23036.t1 | gb AFJ66186.1  hypothetical protein 11M19.5 [Arabidopsis halleri]                                                                                                                                                                                                                                                          | 1419 | 1557 | 0         | 109.7 | 64.2 | 78.2 | hypothetical protein 11M19.5                      | gbpln | Arabidopsis halleri  | ATMG00860.1   Symbols: ORF158   DNA/RNA polymerases superfamily protein   chrM:235916-236392 FORWARD LENGTH=158                                                                                                                                                                                                                                                | 1419 | 158 | 3.00E-32  | 11.1  | 4.7  | 5.8  |
| Rsa1.0_01064.1.g23037.t1 | ref NP_180705.1  F-box protein DOR [Arabidopsis thaliana] gi 229807544 sp Q5BPS3.2 DOR_ARATH RecName: Full=F-box protein DOR; AltName: Full=Protein DROUGHT TOLERANCE REPRESSOR gi 4589954 gb AAD26472.1  hypothetical protein [Arabidopsis thaliana] gi 330253458 gb AEC08552.1  F-box protein DOR [Arabidopsis thaliana] | 412  | 387  | 8.00E-90  | 93.9  | 48.3 | 62.9 | F-box protein DOR                                 | gbpln | Arabidopsis thaliana | AT2G31470.1   Symbols: DOR   F-box and associated interaction domains-containing protein   chr2:13407492-13408655 REVERSE LENGTH=387                                                                                                                                                                                                                           | 412  | 387 | 2.00E-92  | 93.9  | 48.3 | 62.9 |
| Rsa1.0_01064.1.g23038.t1 | ref XP_002874564.1  hypothetical protein ARALYDRAFT_911192 [Arabidopsis lyrata subsp. lyrata] gi 297320401 gb EFH50823.1  hypothetical protein ARALYDRAFT_911192 [Arabidopsis lyrata subsp. lyrata]                                                                                                                        | 177  | 664  | 5.00E-29  | 375.1 | 40.1 | 57.6 | hypothetical protein ARALYDRAFT_911192            | gbpln | Arabidopsis lyrata   | AT1G43722.1   Symbols:   unknown protein; BEST Arabidopsis thaliana protein match is: unknown protein (TAIR:AT5G28730.1). Has 924 Blast hits to 912 proteins in 109 species: Archae - 0; Bacteria - 0; Metazoa - 222; Fungi - 31; Plants - 661; Viruses - 0; Other Eukaryotes - 10 (source: NCBI BLINK).   chr1:16496403-16497377 FORWARD LENGTH=324           | 177  | 324 | 3.00E-20  | 183.1 | 25.4 | 36.7 |
| Rsa1.0_01064.1.g23039.t1 | ref XP_002887108.1  zinc finger family protein [Arabidopsis lyrata subsp. lyrata] gi 297332949 gb EFH63367.1  zinc finger family protein [Arabidopsis lyrata subsp. lyrata]                                                                                                                                                | 860  | 464  | 0         | 54.0  | 41.3 | 45.5 | zinc finger family protein                        | gbpln | Arabidopsis lyrata   | AT1G67180.1   Symbols:   zinc finger (C3HC4-type RING finger) family protein / BRCT domain-containing protein   chr1:25130099-25132169 FORWARD LENGTH=453                                                                                                                                                                                                      | 860  | 453 | 0         | 52.7  | 39.4 | 44.0 |
| Rsa1.0_01064.1.g23040.t1 | gb EOA14519.1  hypothetical protein CARUB_v10027748mg [Capsella rubella]                                                                                                                                                                                                                                                   | 317  | 368  | 1.00E-48  | 116.1 | 43.2 | 57.7 | hypothetical protein CARUB_v10027748mg            | gbpln | Capsella rubella     | AT4G38940.1   Symbols:   Galactose oxidase/kelch repeat superfamily protein   chr4:18152848-18153960 FORWARD LENGTH=370                                                                                                                                                                                                                                        | 317  | 370 | 1.00E-43  | 116.7 | 34.4 | 47.9 |
| Rsa1.0_01064.1.g23041.t1 | ref XP_002887107.1  hypothetical protein ARALYDRAFT_475814 [Arabidopsis lyrata subsp. lyrata] gi 297332948 gb EFH63366.1  hypothetical protein ARALYDRAFT_475814 [Arabidopsis lyrata subsp. lyrata]                                                                                                                        | 314  | 364  | 1.00E-117 | 115.9 | 76.1 | 86.6 | hypothetical protein ARALYDRAFT_475814            | gbpln | Arabidopsis lyrata   | AT1G67170.1   Symbols:   unknown protein; BEST Arabidopsis thaliana protein match is: unknown protein (TAIR:AT3G14750.1). Has 5478 Blast hits to 4354 proteins in 533 species: Archae - 87; Bacteria - 653; Metazoa - 2554; Fungi - 380; Plants - 418; Viruses - 16; Other Eukaryotes - 1370 (source: NCBI BLINK).   chr1:25127727-25129145 FORWARD LENGTH=359 | 314  | 359 | 1.00E-117 | 114.3 | 75.2 | 85.4 |
| Rsa1.0_01064.1.g23042.t1 | #                                                                                                                                                                                                                                                                                                                          | #    | #    | #         | #     | #    | #    | -                                                 | ----  | ----                 | #                                                                                                                                                                                                                                                                                                                                                              | #    | #   | #         | #     | #    |      |



|                          |                                                                                                                                                                                                                                                                                                                                                                                                                                                                                                                                                                                                                                                                                                                                                                                    |      |      |          |        |      |      |                                                     |       |                            |                                                                                                                                                                                                                                                                                                                                                      |      |     |           |       |      |      |
|--------------------------|------------------------------------------------------------------------------------------------------------------------------------------------------------------------------------------------------------------------------------------------------------------------------------------------------------------------------------------------------------------------------------------------------------------------------------------------------------------------------------------------------------------------------------------------------------------------------------------------------------------------------------------------------------------------------------------------------------------------------------------------------------------------------------|------|------|----------|--------|------|------|-----------------------------------------------------|-------|----------------------------|------------------------------------------------------------------------------------------------------------------------------------------------------------------------------------------------------------------------------------------------------------------------------------------------------------------------------------------------------|------|-----|-----------|-------|------|------|
| Rsa1.0_01065.1.g23043.t1 | refNP_191013.1   RNA polymerase II fifth largest subunit, E [Arabidopsis thaliana] gi 7258352 emb CAB77569.1   RNA polymerase 24kDa subunit-like protein [Arabidopsis thaliana] gi 332645717 gb AAE79238.1   RNA polymerase II fifth largest subunit, E [Arabidopsis thaliana]                                                                                                                                                                                                                                                                                                                                                                                                                                                                                                     | 279  | 233  | 6.00E-98 | 83.5   | 63.4 | 71.3 | RNA polymerase II fifth largest subunit, E          | gbpln | Arabidopsis thaliana       | AT3G54490.1   Symbols: RPB5E   RNA polymerase II fifth largest subunit, E   chr3:20173673-20175297 FORWARD LENGTH=233                                                                                                                                                                                                                                | 279  | 233 | 1.00E-100 | 83.5  | 63.4 | 71.3 |
| Rsa1.0_01065.1.g23044.t3 | dbj BAC41810.1   unknown protein [Arabidopsis thaliana]                                                                                                                                                                                                                                                                                                                                                                                                                                                                                                                                                                                                                                                                                                                            | 164  | 271  | 2.00E-43 | 165.2  | 64.0 | 75.0 | unknown protein                                     | gbpln | Arabidopsis thaliana       | AT3G54500.2   Symbols:   BEST Arabidopsis thaliana protein match is: dentin sialophosphoprotein-related (TAIR:AT5G64170.1); Has 162 Blast hits to 160 proteins in 41 species: Archae - 0; Bacteria - 0; Metazoa - 23; Fungi - 11; Plants - 118; Viruses - 0; Other Eukaryotes - 10 (source: NCBI BLINK).   chr3:20175792-20178275 REVERSE LENGTH=569 | 164  | 569 | 3.00E-41  | 347.0 | 58.5 | 68.9 |
| Rsa1.0_01065.1.g23045.t1 | refXP_002974570.1   hypothetical protein SELMODRAFT_442529 [Selaginella moellendorffii] gi 300157465 gb EFJ24090.1   hypothetical protein SELMODRAFT_442529 [Selaginella moellendorffii]                                                                                                                                                                                                                                                                                                                                                                                                                                                                                                                                                                                           | 544  | 516  | 2.00E-39 | 94.9   | 51.7 | 59.9 | hypothetical protein SELMODRAFT_442529              | gbpln | Selaginella moellendorffii | AT4G13390.1   Symbols:   Proline-rich extensin-like family protein   chr4:7783856-7785145 FORWARD LENGTH=429                                                                                                                                                                                                                                         | 544  | 429 | 4.00E-18  | 78.9  | 42.6 | 46.5 |
| Rsa1.0_01065.1.g23046.t1 | refNP_191022.2   hydroxyproline-rich glycoprotein [Arabidopsis thaliana] gi 332645732 gb AAE79253.1   hydroxyproline-rich glycoprotein [Arabidopsis thaliana]                                                                                                                                                                                                                                                                                                                                                                                                                                                                                                                                                                                                                      | 192  | 699  | 2.00E-17 | 364.1  | 28.6 | 33.3 | hydroxyproline-rich glycoprotein                    | gbpln | Arabidopsis thaliana       | AT3G54590.1   Symbols: ATHRGP1, HRGP1   hydroxyproline-rich glycoprotein   chr3:20206223-20208472 FORWARD LENGTH=699                                                                                                                                                                                                                                 | 192  | 699 | 5.00E-20  | 364.1 | 28.6 | 33.3 |
| Rsa1.0_01065.1.g23047.t1 | refXP_002876258.1   ATGCN4 [Arabidopsis lyrata subsp. lyrata] gi 297322096 gb EFH52517.1   ATGCN4 [Arabidopsis lyrata subsp. lyrata]                                                                                                                                                                                                                                                                                                                                                                                                                                                                                                                                                                                                                                               | 662  | 723  | 0        | 109.2  | 78.5 | 87.5 | ATGCN4                                              | gbpln | Arabidopsis lyrata         | AT3G54540.1   Symbols: ATGCN4, GCN4   general control non-repressible 4   chr3:20190393-20192564 FORWARD LENGTH=723                                                                                                                                                                                                                                  | 662  | 723 | 0         | 109.2 | 78.1 | 87.2 |
| Rsa1.0_01065.1.g23048.t1 | refNP_191019.1   histone H2A [Arabidopsis thaliana] gi 297816752 ref XP_002876259.1   histone H2A.F/Z [Arabidopsis lyrata subsp. lyrata] gi 75277395 sp O23628.1 H2AV1_ARAT H RecName: Full=Histone H2A variant 1; AltName: Full=H2A.F/Z 1; AltName: Full=H2AvA; AltName: Full=HTA11 gi 2407800 emb CAA73155.1   histone H2A.F/Z [Arabidopsis thaliana] gi 7258359 emb CAB77576.1   histone H2A.F/Z [Arabidopsis thaliana] gi 21592838 gb AAM64788.1   histone H2A.F/Z [Arabidopsis thaliana] gi 28950691 gb AAO63269.1   At3g54560 [Arabidopsis thaliana] gi 110736078 dbj BAF00012.1   histone H2A.F/Z [Arabidopsis thaliana] gi 297322097 gb EFH52518.1   histone H2A.F/Z [Arabidopsis lyrata subsp. lyrata] gi 332645729 gb AAE79250.1   histone H2A 11 [Arabidopsis thaliana] | 136  | 136  | 2.00E-63 | 100.0  | 97.1 | 97.8 | histone H2A                                         | gbpln | Arabidopsis lyrata         | AT3G54560.1   Symbols: HTA11   histone H2A 11   chr3:20196532-20197466 FORWARD LENGTH=136                                                                                                                                                                                                                                                            | 136  | 136 | 4.00E-66  | 100.0 | 97.1 | 97.8 |
| Rsa1.0_01065.1.g23049.t1 | gb EOA12473.1   hypothetical protein CARUB_v10025904mg [Capsella rubella]                                                                                                                                                                                                                                                                                                                                                                                                                                                                                                                                                                                                                                                                                                          | 68   | 800  | 3.00E-16 | 1176.5 | 58.8 | 64.7 | hypothetical protein CARUB_v10025904mg              | gbpln | Capsella rubella           | #                                                                                                                                                                                                                                                                                                                                                    | #    | #   | #         | #     | #    |      |
| Rsa1.0_01065.1.g23050.t1 | #                                                                                                                                                                                                                                                                                                                                                                                                                                                                                                                                                                                                                                                                                                                                                                                  | #    | #    | #        | #      | #    | -    | -                                                   | ----  | ----                       | #                                                                                                                                                                                                                                                                                                                                                    | #    | #   | #         | #     | #    |      |
| Rsa1.0_01065.1.g23051.t1 | refXP_002974570.1   hypothetical protein SELMODRAFT_442529 [Selaginella moellendorffii] gi 300157465 gb EFJ24090.1   hypothetical protein SELMODRAFT_442529 [Selaginella moellendorffii]                                                                                                                                                                                                                                                                                                                                                                                                                                                                                                                                                                                           | 983  | 516  | 4.00E-38 | 52.5   | 27.0 | 30.8 | hypothetical protein SELMODRAFT_442529              | gbpln | Selaginella moellendorffii | AT4G13390.1   Symbols:   Proline-rich extensin-like family protein   chr4:7783856-7785145 FORWARD LENGTH=429                                                                                                                                                                                                                                         | 983  | 429 | 5.00E-14  | 43.6  | 21.9 | 23.0 |
| Rsa1.0_01065.1.g23052.t1 | gb ABD65076.1   SLL3 ORF2 protein, putative [Brassica oleracea]                                                                                                                                                                                                                                                                                                                                                                                                                                                                                                                                                                                                                                                                                                                    | 255  | 443  | 1.00E-33 | 173.7  | 43.9 | 58.8 | SLL3 ORF2 protein, putative                         | gbpln | Brassica oleracea          | #                                                                                                                                                                                                                                                                                                                                                    | #    | #   | #         | #     | #    |      |
| Rsa1.0_01065.1.g23053.t1 | #                                                                                                                                                                                                                                                                                                                                                                                                                                                                                                                                                                                                                                                                                                                                                                                  | #    | #    | #        | #      | #    | -    | ----                                                | ----  | ----                       | #                                                                                                                                                                                                                                                                                                                                                    | #    | #   | #         | #     | #    |      |
| Rsa1.0_01066.1.g23054.t1 | gb AAD24831.1   putative non-LTR retroelement reverse transcriptase [Arabidopsis thaliana]                                                                                                                                                                                                                                                                                                                                                                                                                                                                                                                                                                                                                                                                                         | 1130 | 1524 | 0        | 134.9  | 42.3 | 59.9 | putative non-LTR retroelement reverse transcriptase | gbpln | Arabidopsis thaliana       | AT4G29090.1   Symbols:   Ribonuclease H-like superfamily protein   chr4:14333528-14335255 FORWARD LENGTH=575                                                                                                                                                                                                                                         | 1130 | 575 | 2.00E-65  | 50.9  | 13.5 | 21.7 |
| Rsa1.0_01066.1.g23055.t3 | refXP_002876727.1   hypothetical protein ARALYDRAFT_486866 [Arabidopsis lyrata subsp. lyrata] gi 297322585 gb EFH52986.1   hypothetical protein ARALYDRAFT_486866 [Arabidopsis lyrata subsp. lyrata]                                                                                                                                                                                                                                                                                                                                                                                                                                                                                                                                                                               | 156  | 550  | 4.00E-25 | 352.6  | 38.5 | 40.4 | hypothetical protein ARALYDRAFT_486866              | gbpln | Arabidopsis lyrata         | AT3G63520.1   Symbols: CCD1, ATCCD1, ATNCED1, NCED1   carotenoid cleavage dioxygenase 1   chr3:23452940-23455896 FORWARD LENGTH=538                                                                                                                                                                                                                  | 156  | 538 | 7.00E-27  | 344.9 | 37.8 | 40.4 |

|                           |                                                                                                                                                                                                     |      |      |           |       |      |      |                                                                                                                                              |       |                      |                                                                                                                                                                                                                                                                                     |      |     |           |       |      |      |
|---------------------------|-----------------------------------------------------------------------------------------------------------------------------------------------------------------------------------------------------|------|------|-----------|-------|------|------|----------------------------------------------------------------------------------------------------------------------------------------------|-------|----------------------|-------------------------------------------------------------------------------------------------------------------------------------------------------------------------------------------------------------------------------------------------------------------------------------|------|-----|-----------|-------|------|------|
| Rsa1.0_01066.1.g23056.t1  | dbj BAA97086.1  unnamed protein product [Arabidopsis thaliana]                                                                                                                                      | 211  | 341  | 3.00E-36  | 161.6 | 36.0 | 55.5 | unnamed protein product                                                                                                                      | gbpln | Arabidopsis thaliana | #                                                                                                                                                                                                                                                                                   | #    | #   | #         | #     | #    | #    |
| Rsa1.0_01066.1.g23057.t1  | gb AAL79774.1 AF331849.1 elongation factor 1 alpha [Saccharum hybrid cultivar CP65-357]                                                                                                             | 248  | 447  | 4.00E-30  | 180.2 | 28.6 | 30.6 | elongation factor 1 alpha                                                                                                                    | gbpln | Saccharum hybrid     | AT5G60390.3   Symbols:   GTP binding Elongation factor Tu family protein   chr5:24289226-24290675 FORWARD LENGTH=449                                                                                                                                                                | 248  | 449 | 4.00E-32  | 181.0 | 29.8 | 33.1 |
| Rsa1.0_01066.1.g23058.t2  | gb AAK43485.1 AC084807.10 polyprotein, putative [Arabidopsis thaliana] gi 225898008 dbj BAH30336.1  hypothetical protein [Arabidopsis thaliana]                                                     | 647  | 1459 | 1.00E-175 | 225.5 | 50.9 | 63.2 | polyprotein, putative                                                                                                                        | gbpln | Arabidopsis thaliana | AT2G24970.1   Symbols:   unknown protein; Has 33 Blast hits to 33 proteins in 17 species: Archae - 0; Bacteria - 0; Metazoa - 1; Fungi - 0; Plants - 28; Viruses - 0; Other Eukaryotes - 4 (source: NCBI BLINK).   chr2:10620215-10621250 REVERSE LENGTH=152                        | 647  | 152 | 8.00E-32  | 23.5  | 9.4  | 10.7 |
| Rsa1.0_01067.1.g23059.t1  | gb AAZ86538.1  fructose 1,6-bisphosphatase [Brassica rapa subsp. pekinensis]                                                                                                                        | 340  | 340  | 0         | 100.0 | 95.6 | 99.1 | fructose 1,6-bisphosphatase                                                                                                                  | gbpln | Brassica rapa        | AT1G43670.1   Symbols:   Inositol monophosphatase family protein   chr1:16468184-16470347 FORWARD LENGTH=341                                                                                                                                                                        | 340  | 341 | 0         | 100.3 | 95.0 | 97.1 |
| Rsa1.0_01067.1.g23060.t1  | #                                                                                                                                                                                                   | #    | #    | #         | #     | #    | #    | -                                                                                                                                            | ----  | ----                 | #                                                                                                                                                                                                                                                                                   | #    | #   | #         | #     | #    | #    |
| Rsa1.0_01067.1.g23061.t1  | gb AAF81293.1 AC027656.10 Strong similarity to a mutator-like transposase from Arabidopsis thaliana gb AC006067. It contains a zinc finger, CCHC class domain PF 00098 [Arabidopsis thaliana]       | 290  | 753  | 1.00E-102 | 259.7 | 67.6 | 75.9 | Strong similarity to a mutator-like transposase from Arabidopsis thaliana gb AC006067. It contains a zinc finger, CCHC class domain PF 00098 | gbpln | Arabidopsis thaliana | hypothetical protein CARUB_v10009579mg, partial                                                                                                                                                                                                                                     | #    | #   | #         | #     | #    | #    |
| Rsa1.0_01067.1.g23062.t1  | gb EOA38110.1  hypothetical protein CARUB_v10009579mg, partial [Capsella rubella]                                                                                                                   | 111  | 353  | 5.00E-34  | 318.0 | 85.6 | 88.3 | hypothetical protein CARUB_v10009579mg, partial                                                                                              | gbpln | Capsella rubella     | AT1G43650.1   Symbols:   nodulin MtN21 /EamA-like transporter family protein   chr1:16446814-16446814 REVERSE LENGTH=343                                                                                                                                                            | 111  | 343 | 3.00E-36  | 309.0 | 83.8 | 88.3 |
| Rsa1.0_01067.1.g23063.t2  | emb CAB39638.1  RNA-directed DNA polymerase-like protein [Arabidopsis thaliana] gi 7267666 emb CAB78094.1  RNA-directed DNA polymerase-like protein [Arabidopsis thaliana]                          | 1283 | 1274 | 0         | 99.3  | 38.1 | 50.4 | RNA-directed DNA polymerase-like protein                                                                                                     | gbpln | Arabidopsis thaliana | AT1G43760.1   Symbols:   DNase I-like superfamily protein   chr1:16528880-16531065 REVERSE LENGTH=626                                                                                                                                                                               | 1283 | 626 | 1.00E-34  | 48.8  | 9.0  | 15.1 |
| Rsa1.0_01067.1.g23064.t20 | gb EOA29603.1  hypothetical protein CARUB_v10013521mg, partial [Capsella rubella]                                                                                                                   | 508  | 498  | 3.00E-46  | 98.0  | 20.5 | 27.8 | hypothetical protein CARUB_v10013521mg, partial                                                                                              | gbpln | Capsella rubella     | AT5G40595.1   Symbols:   unknown protein; Has 30201 Blast hits to 17322 proteins in 780 species: Archae - 12; Bacteria - 1396; Metazoa - 17338; Fungi - 3422; Plants - 5037; Viruses - 0; Other Eukaryotes - 2996 (source: NCBI BLINK).   chr5:16253510-16254079 FORWARD LENGTH=141 | 508  | 141 | 8.00E-13  | 27.8  | 7.7  | 10.8 |
| Rsa1.0_01067.1.g23065.t1  | #                                                                                                                                                                                                   | #    | #    | #         | #     | #    | #    | -                                                                                                                                            | ----  | ----                 | #                                                                                                                                                                                                                                                                                   | #    | #   | #         | #     | #    | #    |
| Rsa1.0_01067.1.g23066.t1  | ref XP_002893952.1  hypothetical protein ARALYDRAFT_473769 [Arabidopsis lyrata subsp. lyrata] gi 297339794 gb EFH70211.1  hypothetical protein ARALYDRAFT_473769 [Arabidopsis lyrata subsp. lyrata] | 380  | 385  | 0         | 101.3 | 85.8 | 93.7 | hypothetical protein ARALYDRAFT_473769                                                                                                       | gbpln | Arabidopsis lyrata   | AT1G43630.1   Symbols:   Protein of unknown function (DUF793)   chr1:16436445-16437686 REVERSE LENGTH=413                                                                                                                                                                           | 380  | 413 | 0         | 108.7 | 85.5 | 93.2 |
| Rsa1.0_01068.1.g23067.t2  | gb ADI52861.1  chloroplast beta-carbonic anhydrase [Brassica napus]                                                                                                                                 | 259  | 331  | 1.00E-148 | 127.8 | 99.2 | 99.6 | chloroplast beta-carbonic anhydrase                                                                                                          | gbpln | Brassica napus       | AT3G01500.2   Symbols: CA1   carbonic anhydrase 1   chr3:194853-197873 REVERSE LENGTH=347                                                                                                                                                                                           | 259  | 347 | 1.00E-147 | 134.0 | 96.1 | 99.2 |
| Rsa1.0_01068.1.g23068.t1  | emb CAB39638.1  RNA-directed DNA polymerase-like protein [Arabidopsis thaliana] gi 7267666 emb CAB78094.1  RNA-directed DNA polymerase-like protein [Arabidopsis thaliana]                          | 270  | 1274 | 4.00E-28  | 471.9 | 22.6 | 29.3 | RNA-directed DNA polymerase-like protein                                                                                                     | gbpln | Arabidopsis thaliana | #                                                                                                                                                                                                                                                                                   | #    | #   | #         | #     | #    | #    |
| Rsa1.0_01068.1.g23069.t1  | emb CAC19877.1  long chain acyl-CoA synthetase [Brassica napus]                                                                                                                                     | 251  | 693  | 8.00E-34  | 276.1 | 27.1 | 30.7 | long chain acyl-CoA synthetase                                                                                                               | gbpln | Brassica napus       | AT1G77590.1   Symbols: LACS9   long chain acyl-CoA synthetase 9   chr1:29148501-29151776 REVERSE LENGTH=691                                                                                                                                                                         | 251  | 691 | 1.00E-27  | 275.3 | 25.1 | 31.5 |
| Rsa1.0_01068.1.g23070.t1  | gb EOA32012.1  hypothetical protein CARUB_v10015255mg [Capsella rubella]                                                                                                                            | 408  | 410  | 0         | 100.5 | 93.4 | 97.1 | hypothetical protein CARUB_v10015255mg                                                                                                       | gbpln | Capsella rubella     | AT3G01490.1   Symbols:   Protein kinase superfamily protein   chr3:191095-193258 REVERSE LENGTH=411                                                                                                                                                                                 | 408  | 411 | 0         | 100.7 | 92.9 | 96.6 |
| Rsa1.0_01068.1.g23071.t1  | ref XP_002884278.1  hypothetical protein ARALYDRAFT_477375 [Arabidopsis lyrata subsp. lyrata] gi 297330118 gb EFH60537.1  hypothetical protein ARALYDRAFT_477375 [Arabidopsis lyrata subsp. lyrata] | 449  | 437  | 0         | 97.3  | 78.2 | 84.0 | hypothetical protein ARALYDRAFT_477375                                                                                                       | gbpln | Arabidopsis lyrata   | AT3G01480.1   Symbols: CYP38, ATCYP38   cyclophilin 38   chr3:188569-190674 FORWARD LENGTH=437                                                                                                                                                                                      | 449  | 437 | 0         | 97.3  | 76.8 | 83.5 |
| Rsa1.0_01068.1.g23072.t2  | dbj BAJ33940.1  unnamed protein product [Theillungiella halophila] gi 312283511 dbj BAJ34621.1  unnamed protein product [Theillungiella halophila]                                                  | 264  | 274  | 1.00E-103 | 103.8 | 77.7 | 86.0 | unnamed protein product                                                                                                                      | ----  | ----                 | AT3G01470.1   Symbols: ATHB-1, ATHB1, HD-ZIP-1, HAT5, HB-1   homeobox 1   chr3:182648-184034 REVERSE LENGTH=272                                                                                                                                                                     | 264  | 272 | 4.00E-95  | 103.0 | 76.1 | 84.1 |

|                          |                                                                                                                                                                                                                                                                                                                                                                                                                                                                                                                                                                                                                                                                                                                                                                                                                                                                                                                                                                                                                                  |     |      |           |       |      |      |                                                                                |       |                      |                                                                                                                                                                                                                                                                                                                                                                                                                                                                                                          |     |     |           |       |      |      |
|--------------------------|----------------------------------------------------------------------------------------------------------------------------------------------------------------------------------------------------------------------------------------------------------------------------------------------------------------------------------------------------------------------------------------------------------------------------------------------------------------------------------------------------------------------------------------------------------------------------------------------------------------------------------------------------------------------------------------------------------------------------------------------------------------------------------------------------------------------------------------------------------------------------------------------------------------------------------------------------------------------------------------------------------------------------------|-----|------|-----------|-------|------|------|--------------------------------------------------------------------------------|-------|----------------------|----------------------------------------------------------------------------------------------------------------------------------------------------------------------------------------------------------------------------------------------------------------------------------------------------------------------------------------------------------------------------------------------------------------------------------------------------------------------------------------------------------|-----|-----|-----------|-------|------|------|
| Rsa1.0_01068.1.g23073.t2 | ref NP_566137.1  photosystem II oxygen-evolving enhancer protein [Arabidopsis thaliana] gi 75204862 sp Q9SGH4.1 PQL2_ARATH RecName: Full=PsbQ-like protein 2, chloroplastic; AltName: Full=Protein photosynthetic NDH subcomplex L 3; Flags: Precursor gi 6692264 gb AAF24614.1 AC010870.7 hypothetical protein [Arabidopsis thaliana] gi 17979498 gb AAL50085.1 AT3g01440/T13O15.8 [Arabidopsis thaliana] gi 20147295 gb AAM10361.1 AT3g01440/T13O15.8 [Arabidopsis thaliana] gi 332640146 gb AEE73667.1  photosynthetic NDH subcomplex L3 [Arabidopsis thaliana] ref NP_974205.1  uncharacterized protein [Arabidopsis thaliana] gi 75123851 sp Q6ID77.1 MED11_ARATH RecName: Full=Mediator of RNA polymerase II transcription subunit 11 gi 48310228 gb AAT41779.1  At3g01435 [Arabidopsis thaliana] gi 52218796 gb AAU29468.1  At3g01435 [Arabidopsis thaliana] gi 110738543 db BAF01197.1  hypothetical protein [Arabidopsis thaliana] gi 332640145 gb AEE73666.1  uncharacterized protein AT3G01435 [Arabidopsis thaliana] | 221 | 220  | 1.00E-99  | 99.5  | 81.4 | 88.7 | photosystem II oxygen-evolving enhancer protein                                | gbpln | Arabidopsis thaliana | AT3G01440.1   Symbols: PQL1, PQL2   PsbQ-like 1   chr3:168478-169407 FORWARD LENGTH=220                                                                                                                                                                                                                                                                                                                                                                                                                  | 221 | 220 | 1.00E-102 | 99.5  | 81.4 | 88.7 |
| Rsa1.0_01068.1.g23074.t1 | gi 52218796 gb AAU29468.1  At3g01435 [Arabidopsis thaliana] gi 110738543 db BAF01197.1  hypothetical protein [Arabidopsis thaliana] gi 332640145 gb AEE73666.1  uncharacterized protein AT3G01435 [Arabidopsis thaliana]                                                                                                                                                                                                                                                                                                                                                                                                                                                                                                                                                                                                                                                                                                                                                                                                         | 116 | 115  | 1.00E-45  | 99.1  | 75.9 | 84.5 | uncharacterized protein                                                        | gbpln | Arabidopsis thaliana | AT3G01435.1   Symbols:   Expressed protein   chr3:166853-167984 REVERSE LENGTH=115                                                                                                                                                                                                                                                                                                                                                                                                                       | 116 | 115 | 2.00E-48  | 99.1  | 75.9 | 84.5 |
| Rsa1.0_01068.1.g23075.t2 | gb EOA30078.1  hypothetical protein CARUB_v10013184mg, partial [Capsella rubella]                                                                                                                                                                                                                                                                                                                                                                                                                                                                                                                                                                                                                                                                                                                                                                                                                                                                                                                                                | 424 | 645  | 0         | 152.1 | 81.1 | 88.7 | hypothetical protein CARUB_v10013184mg, partial                                | gbpln | Capsella rubella     | AT3G01420.1   Symbols: ALPHA-DOX1, DOX1, DIOX1, PADOX-1   Peroxidase superfamily protein   chr3:159689-162726 REVERSE LENGTH=639                                                                                                                                                                                                                                                                                                                                                                         | 424 | 639 | 0         | 150.7 | 81.4 | 87.7 |
| Rsa1.0_01069.1.g23076.t2 | emb CAB41929.1  putative protein [Arabidopsis thaliana] gi 7268021 emb CAB78361.1  putative protein [Arabidopsis thaliana]                                                                                                                                                                                                                                                                                                                                                                                                                                                                                                                                                                                                                                                                                                                                                                                                                                                                                                       | 415 | 405  | 1.00E-170 | 97.6  | 69.9 | 75.9 | putative protein                                                               | gbpln | Arabidopsis thaliana | AT4G13190.1   Symbols:   Protein kinase superfamily protein   chr4:7659435-7661106 REVERSE LENGTH=389                                                                                                                                                                                                                                                                                                                                                                                                    | 415 | 389 | 1.00E-172 | 93.7  | 69.6 | 75.2 |
| Rsa1.0_01069.1.g23077.t1 | gb EOA29603.1  hypothetical protein CARUB_v10013521mg, partial [Capsella rubella]                                                                                                                                                                                                                                                                                                                                                                                                                                                                                                                                                                                                                                                                                                                                                                                                                                                                                                                                                | 617 | 498  | 2.00E-60  | 80.7  | 26.9 | 38.6 | hypothetical protein CARUB_v10013521mg, partial                                | gbpln | Capsella rubella     | AT2G13450.1   Symbols:   unknown protein; BEST Arabidopsis thaliana protein match is: unknown protein (TAIR:AT4G02000.1); Has 247 Blast hits to 243 proteins in 13 species: Archae - 0; Bacteria - 2; Metazoa - 0; Fungi - 2; Plants - 243; Viruses - 0; Other Eukaryotes - 0 (source: NCBI BLINK).   chr2:5598739-5599923 REVERSE LENGTH=394                                                                                                                                                            | 617 | 394 | 3.00E-15  | 63.9  | 7.6  | 12.5 |
| Rsa1.0_01069.1.g23078.t1 | #                                                                                                                                                                                                                                                                                                                                                                                                                                                                                                                                                                                                                                                                                                                                                                                                                                                                                                                                                                                                                                | #   | #    | #         | #     | #    | #    | -                                                                              | ----  | ----                 | #                                                                                                                                                                                                                                                                                                                                                                                                                                                                                                        | #   | #   | #         | #     | #    |      |
| Rsa1.0_01069.1.g23079.t2 | gb AAM62995.1  unknown [Arabidopsis thaliana]                                                                                                                                                                                                                                                                                                                                                                                                                                                                                                                                                                                                                                                                                                                                                                                                                                                                                                                                                                                    | 580 | 185  | 5.00E-42  | 31.9  | 20.0 | 22.1 | unknown                                                                        | gbpln | Arabidopsis thaliana | AT4G13200.1   Symbols:   unknown protein; FUNCTIONS IN: molecular_function unknown; INVOLVED IN: biological_process unknown; LOCATED IN: thylakoid, chloroplast thylakoid membrane, chloroplast, plastoglobule; EXPRESSED IN: 22 plant structures; EXPRESSED DURING: 13 growth stages; Has 97 Blast hits to 97 proteins in 46 species: Archae - 0; Bacteria - 65; Metazoa - 2; Fungi - 0; Plants - 28; Viruses - 0; Other Eukaryotes - 2 (source: NCBI BLINK).   chr4:7668292-7669166 REVERSE LENGTH=185 | 580 | 185 | 8.00E-41  | 31.9  | 20.0 | 22.1 |
| Rsa1.0_01069.1.g23080.t3 | gb AAC28189.1  contains similarity to Arabidopsis thaliana retrotransposon Athila (GB:X81801) [Arabidopsis thaliana]                                                                                                                                                                                                                                                                                                                                                                                                                                                                                                                                                                                                                                                                                                                                                                                                                                                                                                             | 489 | 940  | 6.00E-18  | 192.2 | 11.7 | 17.8 | contains similarity to Arabidopsis thaliana retrotransposon Athila (GB:X81801) | gbpln | Arabidopsis thaliana | #                                                                                                                                                                                                                                                                                                                                                                                                                                                                                                        | #   | #   | #         | #     | #    |      |
| Rsa1.0_01069.1.g23081.t1 | pir G85073 probable myosin-like protein [imported] - Arabidopsis thaliana gi 5032276 gb AAD38224.1 AF147264.7 contains similarity to intermediate filament protein A; may be a pseudogene [Arabidopsis thaliana] gi 7267350 emb CAB81123.1  putative myosin-like protein [Arabidopsis thaliana]                                                                                                                                                                                                                                                                                                                                                                                                                                                                                                                                                                                                                                                                                                                                  | 840 | 786  | 6.00E-18  | 93.6  | 5.7  | 8.2  | probable myosin-like protein                                                   | gbpln | Arabidopsis thaliana | AT4G03830.1   Symbols:   Protein of unknown function, DUF601   chr4:1790440-1792458 FORWARD LENGTH=578                                                                                                                                                                                                                                                                                                                                                                                                   | 840 | 578 | 4.00E-19  | 68.8  | 6.3  | 9.0  |
| Rsa1.0_01069.1.g23082.t1 | gb AAF79618.1 AC027665_19 F5M15.26 [Arabidopsis thaliana]                                                                                                                                                                                                                                                                                                                                                                                                                                                                                                                                                                                                                                                                                                                                                                                                                                                                                                                                                                        | 656 | 1838 | 2.00E-45  | 280.2 | 16.2 | 24.5 | F5M15.26                                                                       | gbpln | Arabidopsis thaliana | #                                                                                                                                                                                                                                                                                                                                                                                                                                                                                                        | #   | #   | #         | #     | #    |      |

|                          |                                                                                                                                                                                                                                                                                                                                                                                                                                                                                                                                                                                                                                                                                                                                                                                                                                                                                                                                                                                                                                                                                                                                                                                                                                                                                                                                                                                             |     |     |           |       |      |      |                                           |       |                      |                                                                                                                                                                                                                                                                                                                                              |     |     |           |       |      |      |
|--------------------------|---------------------------------------------------------------------------------------------------------------------------------------------------------------------------------------------------------------------------------------------------------------------------------------------------------------------------------------------------------------------------------------------------------------------------------------------------------------------------------------------------------------------------------------------------------------------------------------------------------------------------------------------------------------------------------------------------------------------------------------------------------------------------------------------------------------------------------------------------------------------------------------------------------------------------------------------------------------------------------------------------------------------------------------------------------------------------------------------------------------------------------------------------------------------------------------------------------------------------------------------------------------------------------------------------------------------------------------------------------------------------------------------|-----|-----|-----------|-------|------|------|-------------------------------------------|-------|----------------------|----------------------------------------------------------------------------------------------------------------------------------------------------------------------------------------------------------------------------------------------------------------------------------------------------------------------------------------------|-----|-----|-----------|-------|------|------|
| Rsa1.0_01069.1.g23083.t1 | gb EOA18445.1  hypothetical protein CARUB_v10006988mg [Capsella rubella]                                                                                                                                                                                                                                                                                                                                                                                                                                                                                                                                                                                                                                                                                                                                                                                                                                                                                                                                                                                                                                                                                                                                                                                                                                                                                                                    | 581 | 683 | 1.00E-144 | 117.6 | 46.8 | 61.4 | hypothetical protein CARUB_v10006988mg    | gbpln | Capsella rubella     | AT3G42170.1   Symbols:   BED zinc finger ;hAT family dimerisation domain   chr3:14321838-14323928 FORWARD LENGTH=696                                                                                                                                                                                                                         | 581 | 696 | 1.00E-24  | 119.8 | 17.2 | 32.2 |
| Rsa1.0_01069.1.g23084.t1 | # # # # # # # # # # #                                                                                                                                                                                                                                                                                                                                                                                                                                                                                                                                                                                                                                                                                                                                                                                                                                                                                                                                                                                                                                                                                                                                                                                                                                                                                                                                                                       |     |     |           |       |      |      |                                           |       |                      |                                                                                                                                                                                                                                                                                                                                              |     |     |           |       |      |      |
| Rsa1.0_01069.1.g23085.t1 | ref NP_001190715.1  putative pectate lyase 14 [Arabidopsis thaliana] gi 357528834 sp Q9SVQ6.2 PLY14_ARA TH RecName: Full=Putative pectate lyase 14; Flags: Precursor gi 332657846 gb AEE83246.1  putative pectate lyase 14 [Arabidopsis thaliana] ref XP_002883351.1  hypothetical protein ARALYDRAFT_479740 [Arabidopsis lyrata subsp. lyrata] gi 297329191 gb EFH59610.1  hypothetical protein ARALYDRAFT_479740 [Arabidopsis lyrata subsp. lyrata] ref NP_566704.1  OTU-like cysteine protease family protein [Arabidopsis thaliana] gi 332643092 gb AEE76613.1  OTU-like cysteine protease family protein [Arabidopsis thaliana] gi 407080571 gb AFS88960.1  OTU-containing deubiquitinating enzyme OTU11 isoform ii [Arabidopsis thaliana]                                                                                                                                                                                                                                                                                                                                                                                                                                                                                                                                                                                                                                             | 387 | 438 | 0         | 113.2 | 89.7 | 93.0 | putative pectate lyase 14                 | gbpln | Arabidopsis thaliana | AT4G13210.2   Symbols:   Pectin lyase-like superfamily protein   chr4:7670040-7673135 FORWARD LENGTH=438                                                                                                                                                                                                                                     | 387 | 438 | 0         | 113.2 | 89.7 | 93.0 |
| Rsa1.0_01070.1.g23086.t1 | ref XP_002883351.1  hypothetical protein ARALYDRAFT_479740 [Arabidopsis lyrata subsp. lyrata] gi 297329191 gb EFH59610.1  hypothetical protein ARALYDRAFT_479740 [Arabidopsis lyrata subsp. lyrata] ref NP_566704.1  OTU-like cysteine protease family protein [Arabidopsis thaliana] gi 332643092 gb AEE76613.1  OTU-like cysteine protease family protein [Arabidopsis thaliana] gi 407080571 gb AFS88960.1  OTU-containing deubiquitinating enzyme OTU11 isoform ii [Arabidopsis thaliana]                                                                                                                                                                                                                                                                                                                                                                                                                                                                                                                                                                                                                                                                                                                                                                                                                                                                                               | 777 | 782 | 0         | 100.6 | 83.4 | 89.4 | hypothetical protein ARALYDRAFT_479740    | gbpln | Arabidopsis lyrata   | AT3G22270.1   Symbols:   Topoisomerase II-associated protein PAT1   chr3:7874480-7877857 FORWARD LENGTH=782                                                                                                                                                                                                                                  | 777 | 782 | 0         | 100.6 | 83.4 | 89.4 |
| Rsa1.0_01070.1.g23087.t1 | ref NP_566704.1  OTU-like cysteine protease family protein [Arabidopsis thaliana] gi 332643092 gb AEE76613.1  OTU-like cysteine protease family protein [Arabidopsis thaliana] gi 407080571 gb AFS88960.1  OTU-containing deubiquitinating enzyme OTU11 isoform ii [Arabidopsis thaliana]                                                                                                                                                                                                                                                                                                                                                                                                                                                                                                                                                                                                                                                                                                                                                                                                                                                                                                                                                                                                                                                                                                   | 466 | 240 | 1.00E-111 | 51.5  | 45.9 | 49.1 | OTU-like cysteine protease family protein | gbpln | Arabidopsis thaliana | AT3G22260.1   Symbols:   Cysteine proteinases superfamily protein   chr3:7871489-7873393 FORWARD LENGTH=240                                                                                                                                                                                                                                  | 466 | 240 | 1.00E-114 | 51.5  | 45.9 | 49.1 |
| Rsa1.0_01070.1.g23088.t1 | gb EOA32026.1  hypothetical protein CARUB_v10015270mg [Capsella rubella] ref NP_566703.4  uncharacterized protein [Arabidopsis thaliana] gi 9294090 dbj BAB01942.1  unnamed protein product [Arabidopsis thaliana] gi 21593174 gb AAM65123.1  unknown [Arabidopsis thaliana] gi 51969350 dbj BAD43367.1  unknown protein [Arabidopsis thaliana] gi 51969492 dbj BAD43438.1  unknown protein [Arabidopsis thaliana] gi 51970550 dbj BAD43967.1  unknown protein [Arabidopsis thaliana] gi 51970942 dbj BAD44163.1  unknown protein [Arabidopsis thaliana] gi 51971146 dbj BAD44265.1  unknown protein [Arabidopsis thaliana] gi 332643090 gb AEE76611.1  uncharacterized protein AT3G22240 [Arabidopsis thaliana] ref NP_193236.1  60S ribosomal protein L27-3 [Arabidopsis thaliana] gi 3123264 sp P51419.2 RL273_ARATH RecName: Full=60S ribosomal protein L27-3 gi 2244857 emb CAB10279.1  ribosomal protein [Arabidopsis thaliana] gi 7268246 emb CAB78542.1  ribosomal protein [Arabidopsis thaliana] gi 17381062 gb AAL36343.1  putative ribosomal protein [Arabidopsis thaliana] gi 20466061 gb AAM20365.1  putative ribosomal protein [Arabidopsis thaliana] gi 2153620 gb AAM62713.1  ribosomal protein [Arabidopsis thaliana] gi 110736737 dbj BAF00331.1  ribosomal protein [Arabidopsis thaliana] gi 332658135 gb AEE83535.1  60S ribosomal protein L27-3 [Arabidopsis thaliana] | 159 | 463 | 4.00E-77  | 291.2 | 86.8 | 93.1 | hypothetical protein CARUB_v10015270mg    | gbpln | Capsella rubella     | AT3G22250.1   Symbols:   UDP-Glycosyltransferase superfamily protein   chr3:7867806-7870053 FORWARD LENGTH=461                                                                                                                                                                                                                               | 159 | 461 | 9.00E-74  | 289.9 | 86.8 | 93.7 |
| Rsa1.0_01070.1.g23089.t1 | ref NP_566703.4  uncharacterized protein [Arabidopsis thaliana] gi 9294090 dbj BAB01942.1  unnamed protein product [Arabidopsis thaliana] gi 21593174 gb AAM65123.1  unknown [Arabidopsis thaliana] gi 51969350 dbj BAD43367.1  unknown protein [Arabidopsis thaliana] gi 51969492 dbj BAD43438.1  unknown protein [Arabidopsis thaliana] gi 51970550 dbj BAD43967.1  unknown protein [Arabidopsis thaliana] gi 51970942 dbj BAD44163.1  unknown protein [Arabidopsis thaliana] gi 51971146 dbj BAD44265.1  unknown protein [Arabidopsis thaliana] gi 332643090 gb AEE76611.1  uncharacterized protein AT3G22240 [Arabidopsis thaliana] ref NP_193236.1  60S ribosomal protein L27-3 [Arabidopsis thaliana] gi 3123264 sp P51419.2 RL273_ARATH RecName: Full=60S ribosomal protein L27-3 gi 2244857 emb CAB10279.1  ribosomal protein [Arabidopsis thaliana] gi 7268246 emb CAB78542.1  ribosomal protein [Arabidopsis thaliana] gi 17381062 gb AAL36343.1  putative ribosomal protein [Arabidopsis thaliana] gi 20466061 gb AAM20365.1  putative ribosomal protein [Arabidopsis thaliana] gi 2153620 gb AAM62713.1  ribosomal protein [Arabidopsis thaliana] gi 110736737 dbj BAF00331.1  ribosomal protein [Arabidopsis thaliana] gi 332658135 gb AEE83535.1  60S ribosomal protein L27-3 [Arabidopsis thaliana]                                                                          | 71  | 72  | 1.00E-16  | 101.4 | 76.1 | 78.9 | uncharacterized protein                   | gbpln | Arabidopsis thaliana | AT3G22240.1   Symbols:   unknown protein; BEST Arabidopsis thaliana protein match is: unknown protein (TAIR:AT3G22235.2); Has 177 Blast hits to 177 proteins in 14 species: Archae - 0; Bacteria - 0; Metazoa - 0; Fungi - 0; Plants - 177; Viruses - 0; Other Eukaryotes - 0 (source: NCBI BLINK).   chr3:7863788-7864675 REVERSE LENGTH=72 | 71  | 72  | 2.00E-19  | 101.4 | 76.1 | 78.9 |
| Rsa1.0_01070.1.g23090.t1 | ref NP_193236.1  60S ribosomal protein L27-3 [Arabidopsis thaliana] gi 3123264 sp P51419.2 RL273_ARATH RecName: Full=60S ribosomal protein L27-3 gi 2244857 emb CAB10279.1  ribosomal protein [Arabidopsis thaliana] gi 7268246 emb CAB78542.1  ribosomal protein [Arabidopsis thaliana] gi 17381062 gb AAL36343.1  putative ribosomal protein [Arabidopsis thaliana] gi 20466061 gb AAM20365.1  putative ribosomal protein [Arabidopsis thaliana] gi 2153620 gb AAM62713.1  ribosomal protein [Arabidopsis thaliana] gi 110736737 dbj BAF00331.1  ribosomal protein [Arabidopsis thaliana] gi 332658135 gb AEE83535.1  60S ribosomal protein L27-3 [Arabidopsis thaliana]                                                                                                                                                                                                                                                                                                                                                                                                                                                                                                                                                                                                                                                                                                                  | 135 | 135 | 3.00E-69  | 100.0 | 96.3 | 99.3 | 60S ribosomal protein L27-3               | gbpln | Arabidopsis thaliana | AT4G15000.1   Symbols:   Ribosomal L27e protein family   chr4:8571896-8572303 FORWARD LENGTH=135                                                                                                                                                                                                                                             | 135 | 135 | 6.00E-72  | 100.0 | 96.3 | 99.3 |
| Rsa1.0_01070.1.g23091.t1 | gb EOA30373.1  hypothetical protein CARUB_v10013496mg [Capsella rubella]                                                                                                                                                                                                                                                                                                                                                                                                                                                                                                                                                                                                                                                                                                                                                                                                                                                                                                                                                                                                                                                                                                                                                                                                                                                                                                                    | 619 | 505 | 0         | 81.6  | 74.8 | 77.5 | hypothetical protein CARUB_v10013496mg    | gbpln | Capsella rubella     | AT3G22200.1   Symbols:   POP2, GABA-T, HER1   Pyridoxal phosphate (PLP)-dependent transferases superfamily protein   chr3:7835286-7838863 FORWARD LENGTH=504                                                                                                                                                                                 | 619 | 504 | 0         | 81.4  | 72.5 | 76.3 |
| Rsa1.0_01070.1.g23092.t1 | gb EOA30650.1  hypothetical protein CARUB_v10013787mg [Capsella rubella]                                                                                                                                                                                                                                                                                                                                                                                                                                                                                                                                                                                                                                                                                                                                                                                                                                                                                                                                                                                                                                                                                                                                                                                                                                                                                                                    | 299 | 422 | 2.00E-94  | 141.1 | 68.9 | 73.2 | hypothetical protein CARUB_v10013787mg    | gbpln | Capsella rubella     | AT3G22190.2   Symbols:   IQD5   IQ-domain 5   chr3:7831280-7833512 REVERSE LENGTH=422                                                                                                                                                                                                                                                        | 299 | 422 | 3.00E-95  | 141.1 | 67.6 | 73.2 |

|                          |                                                                                                                                                                                                                                                                                                                                                                                                                                                                                                                                                                                                                               |     |      |           |       |      |      |                                        |       |                      |                                                                                                                               |     |      |           |       |      |      |
|--------------------------|-------------------------------------------------------------------------------------------------------------------------------------------------------------------------------------------------------------------------------------------------------------------------------------------------------------------------------------------------------------------------------------------------------------------------------------------------------------------------------------------------------------------------------------------------------------------------------------------------------------------------------|-----|------|-----------|-------|------|------|----------------------------------------|-------|----------------------|-------------------------------------------------------------------------------------------------------------------------------|-----|------|-----------|-------|------|------|
| Rsa1.0_01070.1.g23093.t1 | ref XP_002883347.1  zinc finger family protein [Arabidopsis lyrata subsp. lyrata] gi 297329187 gb EFH59606.1  zinc finger family protein [Arabidopsis lyrata subsp. lyrata]                                                                                                                                                                                                                                                                                                                                                                                                                                                   | 643 | 704  | 0         | 109.5 | 75.1 | 84.4 | zinc finger family protein             | gbpln | Arabidopsis lyrata   | AT3G22180.1   Symbols:   DHHC-type zinc finger family protein   chr3:7827190-7830508 FORWARD LENGTH=706                       | 643 | 706  | 0         | 109.8 | 74.3 | 84.6 |
| Rsa1.0_01070.1.g23094.t1 | # # # # # # # # # #                                                                                                                                                                                                                                                                                                                                                                                                                                                                                                                                                                                                           |     |      |           |       |      |      | -                                      | ----  | ----                 | #                                                                                                                             | #   | #    | #         | #     | #    | #    |
| Rsa1.0_01070.1.g23095.t1 | ref NP_188856.2  far-red elongated hypocotyls 3 protein [Arabidopsis thaliana] gi 186510310 ref NP_001118673.1  far-red elongated hypocotyls 3 protein [Arabidopsis thaliana] gi 75273369 sp Q9LIE5.1 FHY3_ARATH RecName: Full=Protein FAR-RED ELONGATED HYPOCOTYL 3 gi 11994736 dbj BAB03065.1  far-red impaired response protein; Mutator-like transposase-like protein; phytochrome A signaling protein-like [Arabidopsis thaliana] gi 332643075 gb AEE76596.1  far-red elongated hypocotyls 3 protein [Arabidopsis thaliana] gi 332643076 gb AEE76597.1  far-red elongated hypocotyls 3 protein [Arabidopsis thaliana]    | 835 | 839  | 0         | 100.5 | 82.4 | 89.8 | far-red elongated hypocotyls 3 protein | gbpln | Arabidopsis thaliana | AT3G22170.2   Symbols: FHY3   far-red elongated hypocotyls 3   chr3:7822359-7825414 REVERSE LENGTH=839                        | 835 | 839  | 0         | 100.5 | 82.4 | 89.8 |
| Rsa1.0_01070.1.g23096.t1 | gb EOA31512.1  hypothetical protein CARUB_v10014701mg [Capsella rubella]                                                                                                                                                                                                                                                                                                                                                                                                                                                                                                                                                      | 197 | 195  | 6.00E-56  | 99.0  | 77.7 | 83.2 | hypothetical protein CARUB_v10014701mg | gbpln | Capsella rubella     | AT3G22160.1   Symbols:   VQ motif-containing protein   chr3:7818148-7818726 REVERSE LENGTH=192                                | 197 | 192  | 5.00E-56  | 97.5  | 77.7 | 83.2 |
| Rsa1.0_01071.1.g23097.t1 | gb AAD32898.1  putative retroelement pol polyprotein [Arabidopsis thaliana]                                                                                                                                                                                                                                                                                                                                                                                                                                                                                                                                                   | 179 | 1307 | 5.00E-31  | 730.2 | 40.8 | 50.8 | putative retroelement pol polyprotein  | gbpln | Arabidopsis thaliana | AT4G23160.1   Symbols: CRK8   cysteine-rich RLK (RECEPTOR-like protein kinase) 8   chr4:12129485-12134086 FORWARD LENGTH=1262 | 179 | 1262 | 6.00E-17  | 705.0 | 27.9 | 39.7 |
| Rsa1.0_01071.1.g23098.t2 | gb AAC95173.1  putative retroelement pol polyprotein [Arabidopsis thaliana]                                                                                                                                                                                                                                                                                                                                                                                                                                                                                                                                                   | 376 | 1200 | 1.00E-101 | 319.1 | 53.7 | 72.9 | putative retroelement pol polyprotein  | gbpln | Arabidopsis thaliana | #                                                                                                                             | #   | #    | #         | #     | #    |      |
| Rsa1.0_01071.1.g23099.t1 | dbj BAB02990.1  retroelement pol polyprotein-like [Arabidopsis thaliana]                                                                                                                                                                                                                                                                                                                                                                                                                                                                                                                                                      | 536 | 1250 | 0         | 233.2 | 61.9 | 74.3 | retroelement pol polyprotein-like      | gbpln | Arabidopsis thaliana | AT4G23160.1   Symbols: CRK8   cysteine-rich RLK (RECEPTOR-like protein kinase) 8   chr4:12129485-12134086 FORWARD LENGTH=1262 | 536 | 1262 | 5.00E-86  | 235.4 | 30.6 | 47.0 |
| Rsa1.0_01071.1.g23100.t1 | ref NP_191073.1  ABC transporter G family member 19 [Arabidopsis thaliana] gi 75335879 sp Q9M3D6.1 AB19G_ARATH RecName: Full=ABC transporter G family member 19; Short=ABC transporter ABCG19; Short=AtABCG19; AltName: Full=White-brown complex homolog protein 19; Short=AtWBC19 gi 7019646 emb CAB75747.1  ABC transporter-like protein [Arabidopsis thaliana] gi 15029219 gb AAK76606.1  putative ABC transporter protein [Arabidopsis thaliana] gi 19310775 gb AAL85118.1  putative ABC transporter protein [Arabidopsis thaliana] gi 332645822 gb AEE79343.1  ABC transporter G family member 19 [Arabidopsis thaliana] | 715 | 725  | 0         | 101.4 | 81.5 | 87.8 | ABC transporter G family member 19     | gbpln | Arabidopsis thaliana | AT3G55130.1   Symbols: ATWBC19, WBC19   white-brown complex homolog 19   chr3:20434111-20436288 REVERSE LENGTH=725            | 715 | 725  | 0         | 101.4 | 81.5 | 87.8 |
| Rsa1.0_01071.1.g23101.t1 | ref XP_002868466.1  hypothetical protein ARALYDRAFT_493666 [Arabidopsis lyrata subsp. lyrata] gi 297314302 gb EFH44725.1  hypothetical protein ARALYDRAFT_493666 [Arabidopsis lyrata subsp. lyrata]                                                                                                                                                                                                                                                                                                                                                                                                                           | 284 | 296  | 1.00E-134 | 104.2 | 92.3 | 96.5 | hypothetical protein ARALYDRAFT_493666 | gbpln | Arabidopsis lyrata   | AT5G36290.2   Symbols:   Uncharacterized protein family (UPF0016)   chr5:14302977-14304972 FORWARD LENGTH=293                 | 284 | 293  | 1.00E-133 | 103.2 | 89.4 | 94.0 |
| Rsa1.0_01071.1.g23102.t1 | ref XP_002870476.1  hypothetical protein ARALYDRAFT_915762 [Arabidopsis lyrata subsp. lyrata] gi 297316312 gb EFH46735.1  hypothetical protein ARALYDRAFT_915762 [Arabidopsis lyrata subsp. lyrata]                                                                                                                                                                                                                                                                                                                                                                                                                           | 133 | 127  | 5.00E-54  | 95.5  | 82.7 | 89.5 | hypothetical protein ARALYDRAFT_915762 | gbpln | Arabidopsis lyrata   | AT1G65290.1   Symbols: mtACP2   mitochondrial acyl carrier protein 2   chr1:24249088-24250366 REVERSE LENGTH=126              | 133 | 126  | 2.00E-53  | 94.7  | 77.4 | 87.2 |

|                          |                                                                                                                                                                                                                                                                                                                                                                                                                                                                                                                                                                                                                                                                                                                                                                                                                                                                |      |      |           |        |      |      |                                                                                   |       |                                                                                                 |                                                                                                                                                                                                                                                                                                                                                                                                                                                                               |     |          |           |        |      |      |
|--------------------------|----------------------------------------------------------------------------------------------------------------------------------------------------------------------------------------------------------------------------------------------------------------------------------------------------------------------------------------------------------------------------------------------------------------------------------------------------------------------------------------------------------------------------------------------------------------------------------------------------------------------------------------------------------------------------------------------------------------------------------------------------------------------------------------------------------------------------------------------------------------|------|------|-----------|--------|------|------|-----------------------------------------------------------------------------------|-------|-------------------------------------------------------------------------------------------------|-------------------------------------------------------------------------------------------------------------------------------------------------------------------------------------------------------------------------------------------------------------------------------------------------------------------------------------------------------------------------------------------------------------------------------------------------------------------------------|-----|----------|-----------|--------|------|------|
| Rsa1.0_01071.1.g23103.t1 | refNP_564847.1   uncharacterized protein [Arabidopsis thaliana] gi 30697168 refNP_849845.1   uncharacterized protein [Arabidopsis thaliana] gi 42572005 refNP_974093.1   uncharacterized protein [Arabidopsis thaliana] gi 3335335 gb AAC27137.1   ESTs gb F14113 and gb T42122 come from this region [Arabidopsis thaliana] gi 27311649 gb AAO00790.1   expressed protein [Arabidopsis thaliana] gi 30023788 gb AAP13427.1   At1g65270 [Arabidopsis thaliana] gi 222423330 dbj BAH19640.1   AT1G65270 [Arabidopsis thaliana] gi 222423443 dbj BAH19692.1   AT1G65270 [Arabidopsis thaliana] gi 332196229 gb AEE34350.1   uncharacterized protein AT1G65270 [Arabidopsis thaliana] gi 332196230 gb AEE34351.1   uncharacterized protein AT1G65270 [Arabidopsis thaliana] gi 332196231 gb AEE34352.1   uncharacterized protein AT1G65270 [Arabidopsis thaliana] | 294  | 292  | 1.00E-116 | 99.3   | 73.8 | 81.0 | uncharacterized protein                                                           | gbpln | Arabidopsis thaliana                                                                            | AT1G65270.1   Symbols:   unknown protein; FUNCTIONS IN: molecular_function unknown; INVOLVED IN: biological_process unknown; LOCATED IN: endoplasmic reticulum, plasma membrane; EXPRESSED IN: 24 plant structures; EXPRESSED DURING: 13 growth stages; Has 149 Blast hits to 149 proteins in 49 species: Archae - 0; Bacteria - 0; Metazoa - 98; Fungi - 0; Plants - 47; Viruses - 0; Other Eukaryotes - 4 (source: NCBI BLink).   chr1:24241855-24244504 FORWARD LENGTH=292 | 294 | 292      | 1.00E-119 | 99.3   | 73.8 | 81.0 |
| Rsa1.0_01071.1.g23104.t1 | #                                                                                                                                                                                                                                                                                                                                                                                                                                                                                                                                                                                                                                                                                                                                                                                                                                                              | #    | #    | #         | #      | #    | -    | ----                                                                              | ----  | #                                                                                               | #                                                                                                                                                                                                                                                                                                                                                                                                                                                                             | #   | #        | #         | #      |      |      |
| Rsa1.0_01071.1.g23105.t1 | dbj BAA97087.1   copia-type pol polyprotein-like [Arabidopsis thaliana]                                                                                                                                                                                                                                                                                                                                                                                                                                                                                                                                                                                                                                                                                                                                                                                        | 73   | 1123 | 5.00E-11  | 1538.4 | 45.2 | 52.1 | copia-type pol polyprotein-like                                                   | gbpln | Arabidopsis thaliana                                                                            | #                                                                                                                                                                                                                                                                                                                                                                                                                                                                             | #   | #        | #         | #      |      |      |
| Rsa1.0_01071.1.g23106.t1 | #                                                                                                                                                                                                                                                                                                                                                                                                                                                                                                                                                                                                                                                                                                                                                                                                                                                              | #    | #    | #         | #      | #    | -    | ----                                                                              | ----  | #                                                                                               | #                                                                                                                                                                                                                                                                                                                                                                                                                                                                             | #   | #        | #         | #      |      |      |
| Rsa1.0_01071.1.g23107.t2 | #                                                                                                                                                                                                                                                                                                                                                                                                                                                                                                                                                                                                                                                                                                                                                                                                                                                              | #    | #    | #         | #      | #    | -    | ----                                                                              | ----  | AT3G01400.1   Symbols:   ARM repeat superfamily protein   chr3:151920-152987 FORWARD LENGTH=355 | 72                                                                                                                                                                                                                                                                                                                                                                                                                                                                            | 355 | 5.00E-12 | 493.1     | 51.4   | 51.4 |      |
| Rsa1.0_01071.1.g23108.t1 | gb EOA23471.1   hypothetical protein CARUB_v10016663mg [Capsella rubella]                                                                                                                                                                                                                                                                                                                                                                                                                                                                                                                                                                                                                                                                                                                                                                                      | 857  | 911  | 1.00E-24  | 106.3  | 8.9  | 13.3 | hypothetical protein CARUB_v10016663mg                                            | gbpln | Capsella rubella                                                                                | AT2G15420.1   Symbols:   myosin heavy chain-related   chr2:6723948-6728183 REVERSE LENGTH=957                                                                                                                                                                                                                                                                                                                                                                                 | 857 | 957      | 4.00E-23  | 111.7  | 8.1  | 13.1 |
| Rsa1.0_01071.1.g23109.t1 | gb AAF79618.1 AC027665_19 F5M15.26 [Arabidopsis thaliana]                                                                                                                                                                                                                                                                                                                                                                                                                                                                                                                                                                                                                                                                                                                                                                                                      | 1477 | 1838 | 0         | 124.4  | 32.0 | 40.4 | F5M15.26                                                                          | gbpln | Arabidopsis thaliana                                                                            | #                                                                                                                                                                                                                                                                                                                                                                                                                                                                             | #   | #        | #         | #      |      |      |
| Rsa1.0_01072.1.g23110.t1 | dbj BAJ33974.1   unnamed protein product [Thellungiella halophila]                                                                                                                                                                                                                                                                                                                                                                                                                                                                                                                                                                                                                                                                                                                                                                                             | 485  | 622  | 0         | 128.2  | 93.6 | 97.5 | unnamed protein product                                                           | ----  | ----                                                                                            | AT1G69870.1   Symbols: NRT1.7   nitrate transporter 1.7   chr1:26316208-26320097 FORWARD LENGTH=620                                                                                                                                                                                                                                                                                                                                                                           | 485 | 620      | 0         | 127.8  | 86.6 | 94.0 |
| Rsa1.0_01072.1.g23111.t1 | ref XP_002863106.1   hypothetical protein ARALYDRAFT_920363 [Arabidopsis lyrata subsp. lyrata] gi 297308928 gb EFH39365.1   hypothetical protein ARALYDRAFT_920363 [Arabidopsis lyrata subsp. lyrata]                                                                                                                                                                                                                                                                                                                                                                                                                                                                                                                                                                                                                                                          | 275  | 284  | 1.00E-125 | 103.3  | 84.7 | 89.1 | hypothetical protein ARALYDRAFT_920363                                            | gbpln | Arabidopsis lyrata                                                                              | AT1G69890.1   Symbols:   Protein of unknown function (DUF569)   chr1:26323426-26324527 REVERSE LENGTH=279                                                                                                                                                                                                                                                                                                                                                                     | 275 | 279      | 1.00E-127 | 101.5  | 84.4 | 90.2 |
| Rsa1.0_01072.1.g23112.t1 | gb EOA33387.1   hypothetical protein CARUB_v10020368mg, partial [Capsella rubella]                                                                                                                                                                                                                                                                                                                                                                                                                                                                                                                                                                                                                                                                                                                                                                             | 392  | 417  | 1.00E-180 | 106.4  | 82.1 | 91.6 | hypothetical protein CARUB_v10020368mg, partial                                   | gbpln | Capsella rubella                                                                                | AT1G69900.1   Symbols:   Actin cross-linking protein   chr1:26326520-26327816 REVERSE LENGTH=397                                                                                                                                                                                                                                                                                                                                                                              | 392 | 397      | 1.00E-166 | 101.3  | 78.1 | 86.0 |
| Rsa1.0_01072.1.g23113.t1 | gb AAD32759.1   putative retroelement pol polyprotein [Arabidopsis thaliana]                                                                                                                                                                                                                                                                                                                                                                                                                                                                                                                                                                                                                                                                                                                                                                                   | 313  | 1356 | 8.00E-37  | 433.2  | 27.8 | 42.2 | putative retroelement pol polyprotein                                             | gbpln | Arabidopsis thaliana                                                                            | #                                                                                                                                                                                                                                                                                                                                                                                                                                                                             | #   | #        | #         | #      |      |      |
| Rsa1.0_01072.1.g23114.t1 | ref XP_004155336.1   PREDICTED: LOW QUALITY PROTEIN: paired amphipathic helix protein Sin3-like 4-like [Cucumis sativus]                                                                                                                                                                                                                                                                                                                                                                                                                                                                                                                                                                                                                                                                                                                                       | 107  | 1419 | 3.00E-19  | 1326.2 | 49.5 | 67.3 | PREDICTED: LOW QUALITY PROTEIN: paired amphipathic helix protein Sin3-like 4-like | gbpln | Cucumis sativus                                                                                 | AT1G10450.1   Symbols: SNL6   SIN3-like 6   chr1:3432313-3437979 FORWARD LENGTH=1122                                                                                                                                                                                                                                                                                                                                                                                          | 107 | 1122     | 1.00E-20  | 1048.6 | 44.9 | 66.4 |
| Rsa1.0_01072.1.g23115.t1 | ref XP_002863104.1   hypothetical protein ARALYDRAFT_920359 [Arabidopsis lyrata subsp. lyrata] gi 297308926 gb EFH39363.1   hypothetical protein ARALYDRAFT_920359 [Arabidopsis lyrata subsp. lyrata]                                                                                                                                                                                                                                                                                                                                                                                                                                                                                                                                                                                                                                                          | 229  | 254  | 1.00E-106 | 110.9  | 80.8 | 89.1 | hypothetical protein ARALYDRAFT_920359                                            | gbpln | Arabidopsis lyrata                                                                              | AT1G69920.1   Symbols: ATGSTU12, GSTU12   glutathione S-transferase TAU 12   chr1:26334395-2633537 REVERSE LENGTH=254                                                                                                                                                                                                                                                                                                                                                         | 229 | 254      | 1.00E-108 | 110.9  | 79.5 | 88.6 |

|                          |                                                                                                                                                                                                                                                                                                                                                                                                                                                                                                                                                                            |     |      |           |       |      |      |                                                |       |                      |                                                                                                                                                                                                                                                                                                                                                          |     |     |           |       |      |      |  |
|--------------------------|----------------------------------------------------------------------------------------------------------------------------------------------------------------------------------------------------------------------------------------------------------------------------------------------------------------------------------------------------------------------------------------------------------------------------------------------------------------------------------------------------------------------------------------------------------------------------|-----|------|-----------|-------|------|------|------------------------------------------------|-------|----------------------|----------------------------------------------------------------------------------------------------------------------------------------------------------------------------------------------------------------------------------------------------------------------------------------------------------------------------------------------------------|-----|-----|-----------|-------|------|------|--|
| Rsa1.0_01072.1.g23116.t1 | ref[NP_177151.1] glutathione S-transferase TAU 11 [Arabidopsis thaliana]<br>gi 75333668 sp C9CAS6.1 GSTUB_ARA TH RecName: Full=Glutathione S-transferase U11; Short=AtGSTU11; AltName: Full=GST class-tau member 11<br>gi 12325238 gb AAG52568.1 AC010675.16 putative glutathione transferase; 14657-15612 [Arabidopsis thaliana]<br>gi 26453280 dbj BAC43713.1  putative glutathione transferase [Arabidopsis thaliana] gi 30017271 gb AAP12869.1 At1g69930 [Arabidopsis thaliana]<br>gi 332196878 gb AEE34999.1  glutathione S-transferase TAU 11 [Arabidopsis thaliana] | 230 | 234  | 1.00E-121 | 101.7 | 92.6 | 96.1 | glutathione S-transferase TAU 11               | gbpln | Arabidopsis thaliana | AT1G69930.1   Symbols: ATGSTU11, GSTU11   glutathione S-transferase TAU 11   chr1:26337735-26338690 REVERSE LENGTH=234                                                                                                                                                                                                                                   | 230 | 234 | 1.00E-123 | 101.7 | 92.6 | 96.1 |  |
| Rsa1.0_01072.1.g23117.t2 | gb EOA35497.1  hypothetical protein CARUB_v10020704mg [Capsella rubella]                                                                                                                                                                                                                                                                                                                                                                                                                                                                                                   | 480 | 307  | 1.00E-175 | 64.0  | 61.5 | 62.7 | hypothetical protein CARUB_v10020704mg         | gbpln | Capsella rubella     | AT1G69960.1   Symbols: PP2A   serine/threonine protein phosphatase 2A   chr1:26348892-26350511 REVERSE LENGTH=307                                                                                                                                                                                                                                        | 480 | 307 | 1.00E-178 | 64.0  | 61.5 | 62.3 |  |
| Rsa1.0_01072.1.g23118.t1 | # # # # # # # # # #                                                                                                                                                                                                                                                                                                                                                                                                                                                                                                                                                        |     |      |           |       |      |      |                                                | ----  | ----                 | # # # # # # # #                                                                                                                                                                                                                                                                                                                                          |     |     |           |       |      |      |  |
| Rsa1.0_01073.1.g23119.t1 | ref XP_002866723.1  transcriptional factor B3 family protein [Arabidopsis lyrata subsp. lyrata]<br>gi 297312558 gb EFH42982.1  transcriptional factor B3 family protein [Arabidopsis lyrata subsp. lyrata]<br>ref XP_002865039.1  predicted protein [Arabidopsis lyrata subsp. lyrata]<br>gi 297310874 gb EFH41298.1  predicted protein [Arabidopsis lyrata subsp. lyrata]                                                                                                                                                                                                 | 316 | 332  | 2.00E-96  | 105.1 | 61.4 | 73.7 | transcriptional factor B3 family protein       | gbpln | Arabidopsis lyrata   | AT5G66980.1   Symbols:   AP2/B3-like transcriptional factor family protein   chr5:26741563-26742826 FORWARD LENGTH=334                                                                                                                                                                                                                                   | 316 | 334 | 1.00E-98  | 105.7 | 59.8 | 74.1 |  |
| Rsa1.0_01073.1.g23120.t1 | ref XP_002865039.1  predicted protein [Arabidopsis lyrata subsp. lyrata]<br>gi 297310874 gb EFH41298.1  predicted protein [Arabidopsis lyrata subsp. lyrata]                                                                                                                                                                                                                                                                                                                                                                                                               | 791 | 792  | 0         | 100.1 | 94.4 | 97.3 | predicted protein                              | gbpln | Arabidopsis lyrata   | AT5G66960.1   Symbols:   Prolyl oligopeptidase family protein   chr5:26736209-26739493 REVERSE LENGTH=792                                                                                                                                                                                                                                                | 791 | 792 | 0         | 100.1 | 93.9 | 97.7 |  |
| Rsa1.0_01073.1.g23121.t1 | ref XP_002866724.1  hypothetical protein ARALYDRAFT_496904 [Arabidopsis lyrata subsp. lyrata]<br>gi 297312559 gb EFH42983.1  hypothetical protein ARALYDRAFT_496904 [Arabidopsis lyrata subsp. lyrata]<br>ref XP_002865040.1  Dof-type zinc finger domain-containing protein [Arabidopsis lyrata subsp. lyrata]<br>gi 297310875 gb EFH41299.1  Dof-type zinc finger domain-containing protein [Arabidopsis lyrata subsp. lyrata]                                                                                                                                           | 875 | 871  | 0         | 99.5  | 86.2 | 90.6 | hypothetical protein ARALYDRAFT_496904         | gbpln | Arabidopsis lyrata   | AT5G66950.1   Symbols:   Pyridoxal phosphate (PLP)-dependent transferases superfamily protein   chr5:26733333-26735945 FORWARD LENGTH=870                                                                                                                                                                                                                | 875 | 870 | 0         | 99.4  | 85.9 | 90.5 |  |
| Rsa1.0_01073.1.g23122.t1 | ref XP_002865040.1  Dof-type zinc finger domain-containing protein [Arabidopsis lyrata subsp. lyrata]<br>gi 297310875 gb EFH41299.1  Dof-type zinc finger domain-containing protein [Arabidopsis lyrata subsp. lyrata]                                                                                                                                                                                                                                                                                                                                                     | 213 | 223  | 2.00E-72  | 104.7 | 77.0 | 85.0 | Dof-type zinc finger domain-containing protein | gbpln | Arabidopsis lyrata   | AT5G66940.1   Symbols:   Dof-type zinc finger DNA-binding family protein   chr5:26727989-26728666 REVERSE LENGTH=225                                                                                                                                                                                                                                     | 213 | 225 | 1.00E-74  | 105.6 | 74.2 | 85.4 |  |
| Rsa1.0_01073.1.g23123.t1 | gb EOA13983.1  hypothetical protein CARUB_v10027114mg [Capsella rubella]                                                                                                                                                                                                                                                                                                                                                                                                                                                                                                   | 218 | 216  | 1.00E-110 | 99.1  | 90.4 | 94.5 | hypothetical protein CARUB_v10027114mg         | gbpln | Capsella rubella     | AT5G66930.2   Symbols:   unknown protein; CONTAINS InterPro DOMAIN/s: Protein of unknown function DUF1649 (InterPro:IPR012445); Has 251 Blast hits to 251 proteins in 113 species: Archae - 0; Bacteria - 0; Metazoa - 91; Fungi - 85; Plants - 58; Viruses - 0; Other Eukaryotes - 17 (source: NCBI BLINK).   chr5:26725997-26727549 FORWARD LENGTH=215 | 218 | 215 | 1.00E-110 | 98.6  | 89.9 | 92.7 |  |
| Rsa1.0_01073.1.g23124.t1 | ref XP_002866726.1  predicted protein [Arabidopsis lyrata subsp. lyrata]<br>gi 297312561 gb EFH42985.1  predicted protein [Arabidopsis lyrata subsp. lyrata]                                                                                                                                                                                                                                                                                                                                                                                                               | 571 | 543  | 0         | 95.1  | 80.7 | 84.8 | predicted protein                              | gbpln | Arabidopsis lyrata   | AT5G66920.1   Symbols:   sks17   SKU5 similar 17   chr5:26722963-26725370 FORWARD LENGTH=546                                                                                                                                                                                                                                                             | 571 | 546 | 0         | 95.6  | 80.4 | 84.8 |  |
| Rsa1.0_01073.1.g23125.t1 | gb ACP30573.1  disease resistance protein [Brassica rapa subsp. pekinensis]<br>ref XP_002865045.1  predicted protein [Arabidopsis lyrata subsp. lyrata]<br>gi 297310880 gb EFH41304.1  predicted protein [Arabidopsis lyrata subsp. lyrata]                                                                                                                                                                                                                                                                                                                                | 818 | 1038 | 0         | 126.9 | 83.4 | 87.9 | disease resistance protein                     | gbpln | Brassica rapa        | AT5G66900.1   Symbols:   Disease resistance protein (CC-NBS-LRR class) family   chr5:26714931-26717757 REVERSE LENGTH=809                                                                                                                                                                                                                                | 818 | 809 | 0         | 98.9  | 76.9 | 84.8 |  |
| Rsa1.0_01073.1.g23126.t1 | ref XP_002865045.1  predicted protein [Arabidopsis lyrata subsp. lyrata]<br>gi 297310880 gb EFH41304.1  predicted protein [Arabidopsis lyrata subsp. lyrata]                                                                                                                                                                                                                                                                                                                                                                                                               | 400 | 421  | 1.00E-174 | 105.3 | 76.0 | 88.0 | predicted protein                              | gbpln | Arabidopsis lyrata   | AT5G66890.1   Symbols:   Leucine-rich repeat (LRR) family protein   chr5:26712944-26714383 REVERSE LENGTH=415                                                                                                                                                                                                                                            | 400 | 415 | 1.00E-171 | 103.8 | 73.8 | 85.8 |  |
| Rsa1.0_01073.1.g23127.t1 | gb EOA13203.1  hypothetical protein CARUB_v10026228mg [Capsella rubella]                                                                                                                                                                                                                                                                                                                                                                                                                                                                                                   | 461 | 522  | 1.00E-144 | 113.2 | 64.4 | 70.9 | hypothetical protein CARUB_v10026228mg         | gbpln | Capsella rubella     | AT5G66840.1   Symbols:   SAP domain-containing protein   chr5:26692922-26695296 REVERSE LENGTH=551                                                                                                                                                                                                                                                       | 461 | 551 | 1.00E-136 | 119.5 | 65.3 | 71.4 |  |
| Rsa1.0_01073.1.g23128.t1 | gb EOA30805.1  hypothetical protein CARUB_v10013949mg [Capsella rubella]                                                                                                                                                                                                                                                                                                                                                                                                                                                                                                   | 382 | 381  | 2.00E-79  | 99.7  | 49.2 | 61.0 | hypothetical protein CARUB_v10013949mg         | gbpln | Capsella rubella     | AT3G08810.1   Symbols:   Galactose oxidase/kelch repeat superfamily protein   chr3:2675631-2676662 REVERSE LENGTH=343                                                                                                                                                                                                                                    | 382 | 343 | 6.00E-62  | 89.8  | 45.5 | 55.0 |  |

|                          |                                                                                                                                                                                                                 |      |      |           |       |      |      |                                              |       |                      |                                                                                                                                                                                                                                                                                                                                                                                                                                                                                          |      |      |           |       |      |      |
|--------------------------|-----------------------------------------------------------------------------------------------------------------------------------------------------------------------------------------------------------------|------|------|-----------|-------|------|------|----------------------------------------------|-------|----------------------|------------------------------------------------------------------------------------------------------------------------------------------------------------------------------------------------------------------------------------------------------------------------------------------------------------------------------------------------------------------------------------------------------------------------------------------------------------------------------------------|------|------|-----------|-------|------|------|
| Rsa1.0_01073.1.g23129.t2 | ref[XP_002866734.1] hypothetical protein ARALYDRAFT_920040 [Arabidopsis lyrata subsp. lyrata] gi 297312569 gb EFH42993.1] hypothetical protein ARALYDRAFT_920040 [Arabidopsis lyrata subsp. lyrata]             | 84   | 101  | 8.00E-23  | 120.2 | 63.1 | 73.8 | hypothetical protein ARALYDRAFT_920040       | gbpln | Arabidopsis lyrata   | AT5G66816.1   Symbols:   unknown protein; FUNCTIONS IN: molecular_function unknown; INVOLVED IN: biological_process unknown; LOCATED IN: endomembrane system; BEST Arabidopsis thaliana protein match is: unknown protein (TAIR:AT3G50610.1); Has 30201 Blast hits to 17322 proteins in 780 species: Archaea - 12; Bacteria - 1396; Metazoa - 17338; Fungi - 3422; Plants - 5037; Viruses - 0; Other Eukaryotes - 2996 (source: NCBI BLINK).   chr5:26681495-26681800 FORWARD LENGTH=101 | 84   | 101  | 2.00E-22  | 120.2 | 63.1 | 72.6 |
| Rsa1.0_01073.1.g23130.t1 | #                                                                                                                                                                                                               | #    | #    | #         | #     | #    | #    | -                                            | ----  | ----                 | #                                                                                                                                                                                                                                                                                                                                                                                                                                                                                        | #    | #    | #         | #     | #    |      |
| Rsa1.0_01074.1.g23131.t1 | #                                                                                                                                                                                                               | #    | #    | #         | #     | #    | #    | -                                            | ----  | ----                 | #                                                                                                                                                                                                                                                                                                                                                                                                                                                                                        | #    | #    | #         | #     | #    |      |
| Rsa1.0_01074.1.g23132.t1 | #                                                                                                                                                                                                               | #    | #    | #         | #     | #    | #    | -                                            | ----  | ----                 | #                                                                                                                                                                                                                                                                                                                                                                                                                                                                                        | #    | #    | #         | #     | #    |      |
| Rsa1.0_01074.1.g23133.t1 | ref[XP_002869790.1] hypothetical protein ARALYDRAFT_492556 [Arabidopsis lyrata subsp. lyrata] gi 297315626 gb EFH46049.1] hypothetical protein ARALYDRAFT_492556 [Arabidopsis lyrata subsp. lyrata]             | 384  | 390  | 1.00E-122 | 101.6 | 60.9 | 75.0 | hypothetical protein ARALYDRAFT_492556       | gbpln | Arabidopsis lyrata   | AT4G10220.1   Symbols:   Protein of Unknown Function (DUF239)   chr4:6362189-6365079 FORWARD LENGTH=400                                                                                                                                                                                                                                                                                                                                                                                  | 384  | 400  | 1.00E-123 | 104.2 | 58.6 | 74.0 |
| Rsa1.0_01074.1.g23134.t1 | ref[XP_002867731.1] hypothetical protein ARALYDRAFT_914292 [Arabidopsis lyrata subsp. lyrata] gi 297313567 gb EFH43990.1] hypothetical protein ARALYDRAFT_914292 [Arabidopsis lyrata subsp. lyrata]             | 492  | 491  | 0         | 99.8  | 77.0 | 87.0 | hypothetical protein ARALYDRAFT_914292       | gbpln | Arabidopsis lyrata   | AT4G23100.3   Symbols: GSH1   glutamate-cysteine ligase   chr4:12103458-12106751 REVERSE LENGTH=522                                                                                                                                                                                                                                                                                                                                                                                      | 492  | 522  | 0         | 106.1 | 66.9 | 78.9 |
| Rsa1.0_01074.1.g23135.t1 | dbj BAJ34068.1  unnamed protein product [Theellungiella halophila]                                                                                                                                              | 570  | 524  | 0         | 91.9  | 82.6 | 85.6 | unnamed protein product                      | ----  | ----                 | AT4G23100.3   Symbols: GSH1   glutamate-cysteine ligase   chr4:12103458-12106751 REVERSE LENGTH=522                                                                                                                                                                                                                                                                                                                                                                                      | 570  | 522  | 0         | 91.6  | 80.4 | 84.4 |
| Rsa1.0_01074.1.g23136.t1 | #                                                                                                                                                                                                               | #    | #    | #         | #     | #    | #    | -                                            | ----  | ----                 | #                                                                                                                                                                                                                                                                                                                                                                                                                                                                                        | #    | #    | #         | #     | #    |      |
| Rsa1.0_01074.1.g23137.t1 | #                                                                                                                                                                                                               | #    | #    | #         | #     | #    | #    | -                                            | ----  | ----                 | #                                                                                                                                                                                                                                                                                                                                                                                                                                                                                        | #    | #    | #         | #     | #    |      |
| Rsa1.0_01074.1.g23138.t1 | #                                                                                                                                                                                                               | #    | #    | #         | #     | #    | #    | -                                            | ----  | ----                 | #                                                                                                                                                                                                                                                                                                                                                                                                                                                                                        | #    | #    | #         | #     | #    |      |
| Rsa1.0_01074.1.g23139.t1 | #                                                                                                                                                                                                               | #    | #    | #         | #     | #    | #    | -                                            | ----  | ----                 | #                                                                                                                                                                                                                                                                                                                                                                                                                                                                                        | #    | #    | #         | #     | #    |      |
| Rsa1.0_01074.1.g23140.t2 | ref[XP_002867728.1] predicted protein [Arabidopsis lyrata subsp. lyrata] gi 297313564 gb EFH43987.1] predicted protein [Arabidopsis lyrata subsp. lyrata]                                                       | 634  | 671  | 0         | 105.8 | 74.8 | 83.1 | predicted protein                            | gbpln | Arabidopsis lyrata   | AT4G23130.1   Symbols: CRK5, RLK6   cysteine-rich RLK (RECEPTOR-like protein kinase) 5   chr4:12117688-12120134 REVERSE LENGTH=659                                                                                                                                                                                                                                                                                                                                                       | 634  | 659  | 0         | 103.9 | 71.6 | 81.2 |
| Rsa1.0_01074.1.g23141.t1 | gb EOA16181.1  hypothetical protein CARUB_v10004319mg [Capsella rubella]                                                                                                                                        | 651  | 660  | 0         | 101.4 | 70.5 | 81.3 | hypothetical protein CARUB_v10004319mg       | gbpln | Capsella rubella     | AT4G23130.2   Symbols: CRK5, RLK6   cysteine-rich RLK (RECEPTOR-like protein kinase) 5   chr4:12117688-12120134 REVERSE LENGTH=663                                                                                                                                                                                                                                                                                                                                                       | 651  | 663  | 0         | 101.8 | 63.3 | 76.3 |
| Rsa1.0_01075.1.g23142.t9 | #                                                                                                                                                                                                               | #    | #    | #         | #     | #    | #    | -                                            | ----  | ----                 | #                                                                                                                                                                                                                                                                                                                                                                                                                                                                                        | #    | #    | #         | #     | #    |      |
| Rsa1.0_01075.1.g23143.t2 | #                                                                                                                                                                                                               | #    | #    | #         | #     | #    | #    | -                                            | ----  | ----                 | #                                                                                                                                                                                                                                                                                                                                                                                                                                                                                        | #    | #    | #         | #     | #    |      |
| Rsa1.0_01075.1.g23144.t2 | #                                                                                                                                                                                                               | #    | #    | #         | #     | #    | #    | -                                            | ----  | ----                 | #                                                                                                                                                                                                                                                                                                                                                                                                                                                                                        | #    | #    | #         | #     | #    |      |
| Rsa1.0_01075.1.g23145.t1 | gb EOA12628.1  hypothetical protein CARUB_v10027518mg [Capsella rubella]                                                                                                                                        | 1180 | 1253 | 0         | 106.2 | 78.1 | 87.0 | hypothetical protein CARUB_v10027518mg       | gbpln | Capsella rubella     | AT5G44700.1   Symbols: EDA23, GSO2   Leucine-rich repeat transmembrane protein kinase   chr5:18033049-18036894 REVERSE LENGTH=1252                                                                                                                                                                                                                                                                                                                                                       | 1180 | 1252 | 0         | 106.1 | 78.6 | 88.1 |
| Rsa1.0_01075.1.g23146.t1 | dbj BAB08824.1  unnamed protein product [Arabidopsis thaliana]                                                                                                                                                  | 97   | 108  | 4.00E-41  | 111.3 | 88.7 | 94.8 | unnamed protein product                      | gbpln | Arabidopsis thaliana | AT5G44710.1   Symbols:   CONTAINS InterPro DOMAIN/s: Ribosomal protein S27/S33, mitochondrial (InterPro:IPR013219); Has 101 Blast hits to 101 proteins in 55 species: Archaea - 0; Bacteria - 0; Metazoa - 8; Fungi - 59; Plants - 26; Viruses - 0; Other Eukaryotes - 8 (source: NCBI BLINK).   chr5:18041621-18042322 FORWARD LENGTH=102                                                                                                                                               | 97   | 102  | 7.00E-41  | 105.2 | 86.6 | 91.8 |
| Rsa1.0_01075.1.g23147.t1 | ref[XP_002865328.1] molybdenum cofactor sulfurase family protein [Arabidopsis lyrata subsp. lyrata] gi 297311163 gb EFH41587.1] molybdenum cofactor sulfurase family protein [Arabidopsis lyrata subsp. lyrata] | 308  | 308  | 1.00E-167 | 100.0 | 92.9 | 96.1 | molybdenum cofactor sulfurase family protein | gbpln | Arabidopsis lyrata   | AT5G44720.1   Symbols:   Molybdenum cofactor sulfurase family protein   chr5:18043086-18045275 FORWARD LENGTH=308                                                                                                                                                                                                                                                                                                                                                                        | 308  | 308  | 1.00E-167 | 100.0 | 90.3 | 94.5 |
| Rsa1.0_01075.1.g23148.t1 | gb EOA33803.1  hypothetical protein CARUB_v10021274mg [Capsella rubella]                                                                                                                                        | 284  | 304  | 2.00E-86  | 107.0 | 56.3 | 68.0 | hypothetical protein CARUB_v10021274mg       | gbpln | Capsella rubella     | AT2G40560.1   Symbols:   Protein kinase superfamily protein   chr2:16938705-16939616 REVERSE LENGTH=303                                                                                                                                                                                                                                                                                                                                                                                  | 284  | 303  | 7.00E-75  | 106.7 | 53.5 | 69.4 |
| Rsa1.0_01075.1.g23149.t1 | #                                                                                                                                                                                                               | #    | #    | #         | #     | #    | #    | -                                            | ----  | ----                 | #                                                                                                                                                                                                                                                                                                                                                                                                                                                                                        | #    | #    | #         | #     | #    |      |



|                          |                                                                                                                                                                                                                                                                                                                                                                                                                            |      |      |           |       |      |      |                                                 |       |                      |                                                                                                                                                                                                                                                                                                                                                  |      |     |           |       |      |      |
|--------------------------|----------------------------------------------------------------------------------------------------------------------------------------------------------------------------------------------------------------------------------------------------------------------------------------------------------------------------------------------------------------------------------------------------------------------------|------|------|-----------|-------|------|------|-------------------------------------------------|-------|----------------------|--------------------------------------------------------------------------------------------------------------------------------------------------------------------------------------------------------------------------------------------------------------------------------------------------------------------------------------------------|------|-----|-----------|-------|------|------|
| Rsa1.0_01075.1.g23150.t1 | refXP_002863541.1   glycoside hydrolase family 28 protein [Arabidopsis lyrata subsp. lyrata]   gi297309376 gb EFH39800.1   glycoside hydrolase family 28 protein [Arabidopsis lyrata subsp. lyrata]                                                                                                                                                                                                                        | 362  | 381  | 1.00E-138 | 105.2 | 70.4 | 81.2 | glycoside hydrolase family 28 protein           | gbpln | Arabidopsis lyrata   | AT5G44840.1   Symbols:   Pectin lyase-like superfamily protein   chr5:18104851-18107127 REVERSE LENGTH=381                                                                                                                                                                                                                                       | 362  | 381 | 1.00E-139 | 105.2 | 69.6 | 80.4 |
| Rsa1.0_01075.1.g23151.t1 | # # # # # # # # # #                                                                                                                                                                                                                                                                                                                                                                                                        |      |      |           |       |      | -    |                                                 | ----  | ----                 | #                                                                                                                                                                                                                                                                                                                                                | #    | #   | #         | #     | #    | #    |
| Rsa1.0_01075.1.g23152.t1 | refXP_002863539.1   hypothetical protein ARALYDRAFT_917078 [Arabidopsis lyrata subsp. lyrata]   gi29779131   refXP_002863540.1   hypothetical protein ARALYDRAFT_917082 [Arabidopsis lyrata subsp. lyrata]   gi297309374 gb EFH39798.1   hypothetical protein ARALYDRAFT_917078 [Arabidopsis lyrata subsp. lyrata]   gi297309375 gb EFH39799.1   hypothetical protein ARALYDRAFT_917082 [Arabidopsis lyrata subsp. lyrata] | 322  | 321  | 1.00E-160 | 99.7  | 91.0 | 96.6 | hypothetical protein ARALYDRAFT_917078          | gbpln | Arabidopsis lyrata   | AT5G44860.1   Symbols:   unknown protein; BEST Arabidopsis thaliana protein match is: unknown protein (TAIR:AT4G19950.1); Has 233 Blast hits to 227 proteins in 25 species: Archae - 0; Bacteria - 13; Metazoa - 1; Fungi - 0; Plants - 216; Viruses - 0; Other Eukaryotes - 3 (source: NCBI BLINK).   chr5:18110688-18111653 REVERSE LENGTH=321 | 322  | 321 | 1.00E-162 | 99.7  | 90.7 | 96.3 |
| Rsa1.0_01075.1.g23153.t1 | gb ABD64943.1   myb transcription factor, putative [Brassica oleracea]                                                                                                                                                                                                                                                                                                                                                     | 342  | 327  | 1.00E-112 | 95.6  | 63.7 | 70.8 | myb transcription factor, putative              | gbpln | Brassica oleracea    | AT5G47390.1   Symbols:   myb-like transcription factor family protein   chr5:19227001-19228546 FORWARD LENGTH=365                                                                                                                                                                                                                                | 342  | 365 | 1.00E-105 | 106.7 | 64.3 | 72.8 |
| Rsa1.0_01075.1.g23154.t2 | ref NP_199308.1   putative F-box/FBD/LRR-repeat protein [Arabidopsis thaliana]   gi75262649 sp O9FLA2.1 FDL34_ARAT H RecName: Full=Putative F-box/FBD/LRR-repeat protein At5g44950   gi10177487 dbj BAB10878.1   unnamed protein product [Arabidopsis thaliana]   gi332007796 gb AED95179.1   putative F-box/FBD/LRR-repeat protein [Arabidopsis thaliana]                                                                 | 488  | 438  | 1.00E-127 | 89.8  | 53.5 | 64.8 | putative F-box/FBD/LRR-repeat protein           | gbpln | Arabidopsis thaliana | AT5G44950.1   Symbols:   F-box/RNI-like/FBD-like domains-containing protein   chr5:18151665-18153164 FORWARD LENGTH=438                                                                                                                                                                                                                          | 488  | 438 | 1.00E-130 | 89.8  | 53.5 | 64.8 |
| Rsa1.0_01075.1.g23155.t1 | ref XP_002865306.1   predicted protein [Arabidopsis lyrata subsp. lyrata]   gi297311141 gb EFH41565.1   predicted protein [Arabidopsis lyrata subsp. lyrata]                                                                                                                                                                                                                                                               | 300  | 352  | 1.00E-141 | 117.3 | 82.0 | 88.7 | predicted protein                               | gbpln | Arabidopsis lyrata   | AT5G44990.2   Symbols:   Glutathione S-transferase family protein   chr5:18163370-18164768 FORWARD LENGTH=350                                                                                                                                                                                                                                    | 300  | 350 | 1.00E-142 | 116.7 | 80.0 | 87.7 |
| Rsa1.0_01075.1.g23156.t1 | ref XP_002862977.1   predicted protein [Arabidopsis lyrata subsp. lyrata]   gi297308767 gb EFH39236.1   predicted protein [Arabidopsis lyrata subsp. lyrata]                                                                                                                                                                                                                                                               | 166  | 393  | 4.00E-48  | 236.7 | 56.0 | 72.9 | predicted protein                               | gbpln | Arabidopsis lyrata   | AT5G45080.1   Symbols:   AtPP2-A6, PP2-A6   phloem protein 2-A6   chr5:18191575-18193207 REVERSE LENGTH=392                                                                                                                                                                                                                                      | 166  | 392 | 1.00E-46  | 236.1 | 54.2 | 68.1 |
| Rsa1.0_01075.1.g23157.t2 | gb EOA14989.1   hypothetical protein CARUB_v10028333mg [Capsella rubella]                                                                                                                                                                                                                                                                                                                                                  | 387  | 355  | 1.00E-125 | 91.7  | 57.4 | 72.1 | hypothetical protein CARUB_v10028333mg          | gbpln | Capsella rubella     | AT5G45070.1   Symbols:   AtPP2-A8, PP2-A8   phloem protein 2-A8   chr5:18187899-18189382 REVERSE LENGTH=354                                                                                                                                                                                                                                      | 387  | 354 | 1.00E-117 | 91.5  | 54.0 | 69.5 |
| Rsa1.0_01076.1.g23158.t1 | gb EOA22172.1   hypothetical protein CARUB_v10002743mg, partial [Capsella rubella]                                                                                                                                                                                                                                                                                                                                         | 459  | 510  | 1.00E-140 | 111.1 | 57.1 | 72.3 | hypothetical protein CARUB_v10002743mg, partial | gbpln | Capsella rubella     | AT5G14930.2   Symbols:   SAG101   senescence-associated gene 101   chr5:4828754-4830769 FORWARD LENGTH=537                                                                                                                                                                                                                                       | 459  | 537 | 1.00E-137 | 117.0 | 60.1 | 73.9 |
| Rsa1.0_01076.1.g23159.t4 | gb AAD32898.1   putative retroelement pol polyprotein [Arabidopsis thaliana]                                                                                                                                                                                                                                                                                                                                               | 1826 | 1307 | 0         | 71.6  | 44.5 | 54.4 | putative retroelement pol polyprotein           | gbpln | Arabidopsis thaliana | AT5G14930.2   Symbols:   SAG101   senescence-associated gene 101   chr5:4828754-4830769 FORWARD LENGTH=537                                                                                                                                                                                                                                       | 1826 | 537 | 1.00E-178 | 29.4  | 18.5 | 22.2 |
| Rsa1.0_01076.1.g23160.t1 | dbj BAJ34616.1   unnamed protein product [Theilungiella halophila]                                                                                                                                                                                                                                                                                                                                                         | 232  | 247  | 7.00E-37  | 106.5 | 56.0 | 59.9 | unnamed protein product                         | ----  | ----                 | AT5G14920.1   Symbols:   Gibberellin-regulated family protein   chr5:4826598-4827761 FORWARD LENGTH=275                                                                                                                                                                                                                                          | 232  | 275 | 9.00E-34  | 118.5 | 25.9 | 26.7 |
| Rsa1.0_01076.1.g23161.t1 | ref NP_196993.2   NHL domain-containing protein [Arabidopsis thaliana]   gi332004703 gb AED92086.1   NHL domain-containing protein [Arabidopsis thaliana]                                                                                                                                                                                                                                                                  | 172  | 754  | 4.00E-81  | 438.4 | 81.4 | 89.0 | NHL domain-containing protein                   | gbpln | Arabidopsis thaliana | AT5G14890.1   Symbols:   NHL domain-containing protein   chr5:4818056-4821534 FORWARD LENGTH=754                                                                                                                                                                                                                                                 | 172  | 754 | 2.00E-83  | 438.4 | 81.4 | 89.0 |
| Rsa1.0_01076.1.g23162.t1 | ref XP_002871635.1   NHL repeat-containing protein [Arabidopsis lyrata subsp. lyrata]   gi297317472 gb EFH47894.1   NHL repeat-containing protein [Arabidopsis lyrata subsp. lyrata]                                                                                                                                                                                                                                       | 475  | 704  | 0         | 148.2 | 87.4 | 91.6 | NHL repeat-containing protein                   | gbpln | Arabidopsis lyrata   | AT5G14890.1   Symbols:   NHL domain-containing protein   chr5:4818056-4821534 FORWARD LENGTH=754                                                                                                                                                                                                                                                 | 475  | 754 | 0         | 158.7 | 85.7 | 90.7 |
| Rsa1.0_01076.1.g23163.t2 | gb EOA20060.1   hypothetical protein CARUB_v10000335mg [Capsella rubella]                                                                                                                                                                                                                                                                                                                                                  | 714  | 712  | 0         | 99.7  | 93.4 | 96.4 | hypothetical protein CARUB_v10000335mg          | gbpln | Capsella rubella     | AT5G14870.1   Symbols:   CNGC18, ATONGC18   cyclic nucleotide-gated channel 18   chr5:4808268-4810897 REVERSE LENGTH=706                                                                                                                                                                                                                         | 714  | 706 | 0         | 98.9  | 92.7 | 95.7 |

|                          |                                                                                                                                                                                                                                                                            |     |     |           |       |      |      |                                             |       |                      |                                                                                                                                                                                                                                                                                                                                                                                                      |     |     |           |       |      |      |
|--------------------------|----------------------------------------------------------------------------------------------------------------------------------------------------------------------------------------------------------------------------------------------------------------------------|-----|-----|-----------|-------|------|------|---------------------------------------------|-------|----------------------|------------------------------------------------------------------------------------------------------------------------------------------------------------------------------------------------------------------------------------------------------------------------------------------------------------------------------------------------------------------------------------------------------|-----|-----|-----------|-------|------|------|
| Rsa1.0_01076.1.g23164.t1 | ref[NP_196990.2] putative glucosyltransferase [Arabidopsis thaliana] gi 91806858 gb ABE66156.1  UDP-glucuronosyl/UDP-glucosyl transferase family protein [Arabidopsis thaliana] gi 332004700 gb AED92083.1  putative glucosyltransferase [Arabidopsis thaliana]            | 489 | 492 | 0         | 100.6 | 80.6 | 89.2 | putative glucosyltransferase                | gbpln | Arabidopsis thaliana | AT5G14860.1   Symbols:   UDP-Glycosyltransferase superfamily protein   chr5:4805887-4807759 FORWARD LENGTH=492                                                                                                                                                                                                                                                                                       | 489 | 492 | 0         | 100.6 | 80.6 | 89.2 |
| Rsa1.0_01076.1.g23165.t1 | dbj BAJ34507.1  unnamed protein product [Thellungiella halophila]                                                                                                                                                                                                          | 276 | 276 | 1.00E-150 | 100.0 | 97.1 | 99.3 | unnamed protein product                     | ----  | ----                 | AT5G14800.1   Symbols: P5CR, AT-P5R, AT-P5C1, EMB2772   pyrroline-5-carboxylate (P5C) reductase   chr5:4786190-4787618 REVERSE LENGTH=276                                                                                                                                                                                                                                                            | 276 | 276 | 1.00E-145 | 100.0 | 92.4 | 96.4 |
| Rsa1.0_01076.1.g23166.t2 | gb EOA22474.1  hypothetical protein CARUB_v10003121mg [Capsella rubella]                                                                                                                                                                                                   | 771 | 358 | 0         | 46.4  | 44.2 | 45.4 | hypothetical protein CARUB_v10003121mg      | gbpln | Capsella rubella     | AT5G14780.1   Symbols: FDH   formate dehydrogenase   chr5:477043-4779190 FORWARD LENGTH=384                                                                                                                                                                                                                                                                                                          | 771 | 384 | 0         | 49.8  | 43.3 | 44.9 |
| Rsa1.0_01076.1.g23167.t1 | ref XP_002873691.1  pentatricopeptide repeat-containing protein [Arabidopsis lyrata subsp. lyrata] gi 297319528 gb EFH49950.1  pentatricopeptide repeat-containing protein [Arabidopsis lyrata subsp. lyrata]                                                              | 977 | 938 | 0         | 96.0  | 77.1 | 84.2 | pentatricopeptide repeat-containing protein | gbpln | Arabidopsis lyrata   | AT5G14770.1   Symbols:   Tetratricopeptide repeat (TPR)-like superfamily protein   chr5:4772881-4775697 REVERSE LENGTH=938                                                                                                                                                                                                                                                                           | 977 | 938 | 0         | 96.0  | 75.9 | 83.9 |
| Rsa1.0_01076.1.g23168.t1 | ref[NP_568304.1] L-aspartate oxidase [Arabidopsis thaliana] gi 15010650 gb AAK73984.1  At5g14760/T9L3.60 [Arabidopsis thaliana] gi 24111279 gb AAN46763.1  At5g14760/T9L3.60 [Arabidopsis thaliana] gi 332004691 gb AED92074.1  L-aspartate oxidase [Arabidopsis thaliana] | 650 | 651 | 0         | 100.2 | 91.1 | 94.6 | L-aspartate oxidase                         | gbpln | Arabidopsis thaliana | AT5G14760.1   Symbols: AO   L-aspartate oxidase   chr5:4769133-4772012 FORWARD LENGTH=651                                                                                                                                                                                                                                                                                                            | 650 | 651 | 0         | 100.2 | 91.1 | 94.6 |
| Rsa1.0_01077.1.g23169.t1 | #                                                                                                                                                                                                                                                                          | #   | #   | #         | #     | #    | #    | -                                           | ----  | ----                 | #                                                                                                                                                                                                                                                                                                                                                                                                    | #   | #   | #         | #     | #    | #    |
| Rsa1.0_01077.1.g23170.t1 | ref XP_002871357.1  zinc finger family protein [Arabidopsis lyrata subsp. lyrata] gi 297317194 gb EFH47616.1  zinc finger family protein [Arabidopsis lyrata subsp. lyrata]                                                                                                | 220 | 369 | 1.00E-11  | 167.7 | 18.2 | 19.1 | zinc finger family protein                  | gbpln | Arabidopsis lyrata   | AT5G08750.3   Symbols:   RING/FYVE/PHD zinc finger superfamily protein   chr5:2852912-2854343 FORWARD LENGTH=370                                                                                                                                                                                                                                                                                     | 220 | 370 | 5.00E-14  | 168.2 | 18.2 | 19.1 |
| Rsa1.0_01077.1.g23171.t1 | #                                                                                                                                                                                                                                                                          | #   | #   | #         | #     | #    | #    | -                                           | ----  | ----                 | #                                                                                                                                                                                                                                                                                                                                                                                                    | #   | #   | #         | #     | #    | #    |
| Rsa1.0_01077.1.g23172.t1 | ref XP_002873383.1  hypothetical protein ARALYDRAFT_908859 [Arabidopsis lyrata subsp. lyrata] gi 297319220 gb EFH49642.1  hypothetical protein ARALYDRAFT_908859 [Arabidopsis lyrata subsp. lyrata]                                                                        | 281 | 283 | 1.00E-139 | 100.7 | 90.0 | 93.2 | hypothetical protein ARALYDRAFT_908859      | gbpln | Arabidopsis lyrata   | AT5G08790.1   Symbols: ATAF2, anac081   NAC (No Apical Meristem) domain transcriptional regulator superfamily protein   chr5:2859113-2860144 REVERSE LENGTH=283                                                                                                                                                                                                                                      | 281 | 283 | 1.00E-140 | 100.7 | 89.0 | 92.9 |
| Rsa1.0_01077.1.g23173.t1 | ref XP_002873388.1  hypothetical protein ARALYDRAFT_908867 [Arabidopsis lyrata subsp. lyrata] gi 297319225 gb EFH49647.1  hypothetical protein ARALYDRAFT_908867 [Arabidopsis lyrata subsp. lyrata]                                                                        | 71  | 71  | 1.00E-20  | 100.0 | 85.9 | 90.1 | hypothetical protein ARALYDRAFT_908867      | gbpln | Arabidopsis lyrata   | AT5G09225.1   Symbols:   unknown protein; FUNCTIONS IN: molecular_function unknown; INVOLVED IN: biological_process unknown; LOCATED IN: endomembrane system; Has 35333 Blast hits to 34131 proteins in 2444 species: Archae - 798; Bacteria - 22429; Metazoa - 974; Fungi - 991; Plants - 531; Viruses - 0; Other Eukaryotes - 9610 (source: NCBI BLLink).   chr5:2869556-2870379 REVERSE LENGTH=68 | 71  | 68  | 2.00E-21  | 95.8  | 84.5 | 87.3 |
| Rsa1.0_01077.1.g23174.t1 | gb EOA20784.1  hypothetical protein CARUB_v10001119mg [Capsella rubella]                                                                                                                                                                                                   | 357 | 400 | 0         | 112.0 | 90.5 | 95.0 | hypothetical protein CARUB_v10001119mg      | gbpln | Capsella rubella     | AT5G09230.7   Symbols: SRT2   sirtuin 2   chr5:2871559-2873613 FORWARD LENGTH=376                                                                                                                                                                                                                                                                                                                    | 357 | 376 | 0         | 105.3 | 90.2 | 95.2 |
| Rsa1.0_01077.1.g23175.t1 | ref XP_002873390.1  predicted protein [Arabidopsis lyrata subsp. lyrata] gi 297319227 gb EFH49649.1  predicted protein [Arabidopsis lyrata subsp. lyrata]                                                                                                                  | 107 | 107 | 8.00E-49  | 100.0 | 90.7 | 96.3 | predicted protein                           | gbpln | Arabidopsis lyrata   | AT5G09250.1   Symbols: KIWI   ssDNA-binding transcriptional regulator   chr5:2875421-2876368 REVERSE LENGTH=107                                                                                                                                                                                                                                                                                      | 107 | 107 | 3.00E-51  | 100.0 | 90.7 | 95.3 |
| Rsa1.0_01077.1.g23176.t1 | gb EOA21825.1  hypothetical protein CARUB_v10002290mg [Capsella rubella]                                                                                                                                                                                                   | 114 | 112 | 1.00E-51  | 98.2  | 87.7 | 93.9 | hypothetical protein CARUB_v10002290mg      | gbpln | Capsella rubella     | AT5G09270.2   Symbols:   unknown protein; Has 25 Blast hits to 25 proteins in 9 species: Archae - 0; Bacteria - 0; Metazoa - 0; Fungi - 0; Plants - 25; Viruses - 0; Other Eukaryotes - 0 (source: NCBI BLLink).   chr5:2879680-2880015 FORWARD LENGTH=111                                                                                                                                           | 114 | 111 | 2.00E-51  | 97.4  | 83.3 | 90.4 |
| Rsa1.0_01077.1.g23177.t1 | gb EMJ23027.1  hypothetical protein PRUPE_ppa016255mg [Prunus persica]                                                                                                                                                                                                     | 378 | 395 | 1.00E-151 | 104.5 | 66.1 | 79.6 | hypothetical protein PRUPE_ppa016255mg      | gbpln | Prunus persica       | AT5G09280.1   Symbols:   Pectin lyase-like superfamily protein   chr5:2880423-2881597 REVERSE LENGTH=297                                                                                                                                                                                                                                                                                             | 378 | 297 | 1.00E-142 | 78.6  | 62.4 | 64.6 |
| Rsa1.0_01077.1.g23178.t1 | gb EOA20803.1  hypothetical protein CARUB_v10001139mg [Capsella rubella]                                                                                                                                                                                                   | 399 | 393 | 1.00E-157 | 98.5  | 72.2 | 81.2 | hypothetical protein CARUB_v10001139mg      | gbpln | Capsella rubella     | AT5G09330.4   Symbols: VNI1   NAC domain containing protein 82   chr5:2892623-2894708 REVERSE LENGTH=489                                                                                                                                                                                                                                                                                             | 399 | 489 | 1.00E-147 | 122.6 | 65.4 | 73.4 |

|                          |                                                                                                                                                                                                                                                                                                                                                                                                                          |     |      |           |       |      |      |                                                |       |                      |                                                                                                                                                              |     |     |           |       |      |      |
|--------------------------|--------------------------------------------------------------------------------------------------------------------------------------------------------------------------------------------------------------------------------------------------------------------------------------------------------------------------------------------------------------------------------------------------------------------------|-----|------|-----------|-------|------|------|------------------------------------------------|-------|----------------------|--------------------------------------------------------------------------------------------------------------------------------------------------------------|-----|-----|-----------|-------|------|------|
| Rsa1.0_01077.1.g23179.t1 | gb EOA21675.1  hypothetical protein CARUB_v10002098mg [Capsella rubella]                                                                                                                                                                                                                                                                                                                                                 | 169 | 173  | 1.00E-37  | 102.4 | 53.3 | 63.9 | hypothetical protein CARUB_v10002098mg         | gbpln | Capsella rubella     | AT5G09370.1   Symbols:   Bifunctional inhibitor/lipid-transfer protein/seed storage 2S albumin superfamily protein   chr5:2909450-2910475 REVERSE LENGTH=158 | 169 | 158 | 6.00E-26  | 93.5  | 42.0 | 49.1 |
| Rsa1.0_01077.1.g23180.t1 | ref XP_002868708.1  hypothetical protein ARALYDRAFT_494031 [Arabidopsis lyrata subsp. lyrata] gi 297314544 gb EFH44967.1  hypothetical protein ARALYDRAFT_494031 [Arabidopsis lyrata subsp. lyrata]                                                                                                                                                                                                                      | 186 | 318  | 4.00E-38  | 171.0 | 45.7 | 60.2 | hypothetical protein ARALYDRAFT_494031         | gbpln | Arabidopsis lyrata   | AT5G64120.1   Symbols:   Peroxidase superfamily protein   chr5:25659551-25660946 REVERSE LENGTH=328                                                          | 186 | 328 | 1.00E-39  | 176.3 | 45.2 | 57.0 |
| Rsa1.0_01077.1.g23181.t1 | ref NP_568213.2  Potassium transporter 7 [Arabidopsis thaliana] gi 38503183 sp Q9FY75.2 POT7_ARATH RecName: Full=Potassium transporter 7; Short=AtHAK7; Short=AtPOT7 gi 332004004 gb AED91387.1  Potassium transporter 7 [Arabidopsis thaliana]                                                                                                                                                                          | 877 | 858  | 0         | 97.8  | 89.5 | 94.0 | Potassium transporter 7                        | gbpln | Arabidopsis thaliana | AT5G09400.1   Symbols: KUP7   K+ uptake permease 7   chr5:2916377-2920604 FORWARD LENGTH=858                                                                 | 877 | 858 | 0         | 97.8  | 89.5 | 94.0 |
| Rsa1.0_01077.1.g23182.t1 | ref NP_196505.2  alpha/beta-hydrolase domain-containing protein [Arabidopsis thaliana] gi 67633792 gb AA78820.1  hydrolase [Arabidopsis thaliana] gi 332004009 gb AED91392.1  alpha/beta-hydrolase domain-containing protein [Arabidopsis thaliana]                                                                                                                                                                      | 314 | 311  | 1.00E-170 | 99.0  | 91.7 | 96.8 | alpha/beta-hydrolase domain-containing protein | gbpln | Arabidopsis thaliana | AT5G09430.1   Symbols:   alpha/beta-Hydrolases superfamily protein   chr5:2932162-2933362 FORWARD LENGTH=311                                                 | 314 | 311 | 1.00E-172 | 99.0  | 91.7 | 96.8 |
| Rsa1.0_01077.1.g23183.t1 | ref NP_196506.1  protein exordium like 4 [Arabidopsis thaliana] gi 9955531 emb CAC05470.1  putative protein [Arabidopsis thaliana] gi 17473691 gb AAL38302.1  putative protein [Arabidopsis thaliana] gi 20148463 gb AAM10122.1  putative protein [Arabidopsis thaliana] gi 21593400 gb AAM65367.1  phi-1-like protein [Arabidopsis thaliana] gi 332004010 gb AED91393.1  protein exordium like 4 [Arabidopsis thaliana] | 348 | 278  | 1.00E-105 | 79.9  | 60.6 | 67.5 | protein exordium like 4                        | gbpln | Arabidopsis thaliana | AT5G09440.1   Symbols: EXL4   EXORDIUM like 4   chr5:2938397-2939233 FORWARD LENGTH=278                                                                      | 348 | 278 | 1.00E-107 | 79.9  | 60.6 | 67.5 |
| Rsa1.0_01077.1.g23184.t1 | gb EOA20749.1  hypothetical protein CARUB_v10001077mg [Capsella rubella]                                                                                                                                                                                                                                                                                                                                                 | 409 | 412  | 0         | 100.7 | 85.1 | 92.9 | hypothetical protein CARUB_v10001077mg         | gbpln | Capsella rubella     | AT5G09450.1   Symbols:   Tetratricopeptide repeat (TPR)-like superfamily protein   chr5:2941864-2943324 FORWARD LENGTH=409                                   | 409 | 409 | 0         | 100.0 | 84.1 | 92.2 |
| Rsa1.0_01077.1.g23185.t1 | ref XP_002873405.1  predicted protein [Arabidopsis lyrata subsp. lyrata] gi 297319242 gb EFH49664.1  predicted protein [Arabidopsis lyrata subsp. lyrata]                                                                                                                                                                                                                                                                | 152 | 152  | 3.00E-77  | 100.0 | 92.8 | 96.7 | predicted protein                              | gbpln | Arabidopsis lyrata   | AT5G09490.1   Symbols:   Ribosomal protein S19 family protein   chr5:2952378-2953183 REVERSE LENGTH=152                                                      | 152 | 152 | 7.00E-76  | 100.0 | 87.5 | 95.4 |
| Rsa1.0_01077.1.g23186.t1 | gb EOA22511.1  hypothetical protein CARUB_v10003166mg [Capsella rubella]                                                                                                                                                                                                                                                                                                                                                 | 149 | 150  | 9.00E-74  | 100.7 | 93.3 | 97.3 | hypothetical protein CARUB_v10003166mg         | gbpln | Capsella rubella     | AT5G09500.1   Symbols:   Ribosomal protein S19 family protein   chr5:2954044-2954850 REVERSE LENGTH=150                                                      | 149 | 150 | 5.00E-76  | 100.7 | 93.3 | 96.6 |
| Rsa1.0_01077.1.g23187.t1 | gb AAK96839.1  periaxin-like protein [Arabidopsis thaliana]                                                                                                                                                                                                                                                                                                                                                              | 340 | 370  | 3.00E-96  | 108.8 | 80.0 | 88.8 | periaxin-like protein                          | gbpln | Arabidopsis thaliana | AT5G09530.1   Symbols:   hydroxyproline-rich glycoprotein family protein   chr5:2960080-2961192 REVERSE LENGTH=370                                           | 340 | 370 | 4.00E-98  | 108.8 | 79.4 | 88.2 |
| Rsa1.0_01078.1.g23189.t1 | gb EOA20547.1  hypothetical protein CARUB_v10000859mg [Capsella rubella]                                                                                                                                                                                                                                                                                                                                                 | 478 | 477  | 0         | 99.8  | 77.4 | 86.8 | hypothetical protein CARUB_v10000859mg         | gbpln | Capsella rubella     | AT5G07670.1   Symbols:   RN1-like superfamily protein   chr5:2430421-2432065 FORWARD LENGTH=476                                                              | 478 | 476 | 0         | 99.6  | 76.6 | 85.8 |
| Rsa1.0_01078.1.g23190.t1 | gb AAR13700.1  WD-repeat protein [Brassica oleracea]                                                                                                                                                                                                                                                                                                                                                                     | 857 | 458  | 0         | 53.4  | 52.3 | 53.2 | WD-repeat protein                              | gbpln | Brassica oleracea    | AT5G07590.1   Symbols:   Transducin/WD40 repeat-like superfamily protein   chr5:2401712-2403731 REVERSE LENGTH=458                                           | 857 | 458 | 0         | 53.4  | 51.8 | 52.9 |
| Rsa1.0_01078.1.g23191.t1 | gb AAR15436.1  AP2 transcription factor [Sisymbrium irio]                                                                                                                                                                                                                                                                                                                                                                | 219 | 218  | 5.00E-99  | 99.5  | 89.0 | 92.7 | AP2 transcription factor                       | gbpln | Sisymbrium irio      | AT5G07580.1   Symbols:   Integrase-type DNA-binding superfamily protein   chr5:2399525-2400349 FORWARD LENGTH=274                                            | 219 | 274 | 1.00E-85  | 125.1 | 79.0 | 84.0 |
| Rsa1.0_01078.1.g23192.t1 | gb AAG51783.1 AC079679_3 reverse transcriptase, putative; 16838-20266 [Arabidopsis thaliana]                                                                                                                                                                                                                                                                                                                             | 142 | 1142 | 3.00E-18  | 804.2 | 35.2 | 45.8 | reverse transcriptase, putative; 16838-20266   | gbpln | Arabidopsis thaliana | AT1G10000.1   Symbols:   Ribonuclease H-like superfamily protein   chr1:3263877-3264788 REVERSE LENGTH=303                                                   | 142 | 303 | 4.00E-11  | 213.4 | 23.2 | 38.6 |

|                          |                                                                                                                                                                                                                                                                                                                                                                                                                                                                                                            |      |      |           |       |      |      |                                                 |       |                      |                                                                                                                                                             |      |      |           |       |      |      |
|--------------------------|------------------------------------------------------------------------------------------------------------------------------------------------------------------------------------------------------------------------------------------------------------------------------------------------------------------------------------------------------------------------------------------------------------------------------------------------------------------------------------------------------------|------|------|-----------|-------|------|------|-------------------------------------------------|-------|----------------------|-------------------------------------------------------------------------------------------------------------------------------------------------------------|------|------|-----------|-------|------|------|
| Rsa1.0_01078.1.g23193.t1 | ref NP_196346.1  MEI2-like protein 4 [Arabidopsis thaliana]   gi 7535654 sp Q9LYN7.1 AML4_ARATH RecName: Full=Protein MEI2-like 4; Short=AML4; AltName: Full=MEI2-like protein 4   gi 7546707 emb CAB87285.1  MeI2-like protein [Arabidopsis thaliana]   gi 110742203 dbj BAE99028.1  MeI2-like protein [Arabidopsis thaliana]   gi 332003750 gb AED91133.1  MEI2-like protein 4 [Arabidopsis thaliana]                                                                                                    | 901  | 907  | 0         | 100.7 | 83.2 | 90.1 | MEI2-like protein 4                             | gbpln | Arabidopsis thaliana | AT5G07290.1   Symbols: AML4, ML4   MEI2-like 4   chr5:2294248-2298491 FORWARD LENGTH=907                                                                    | 901  | 907  | 0         | 100.7 | 83.2 | 90.1 |
| Rsa1.0_01078.1.g23194.t2 | #                                                                                                                                                                                                                                                                                                                                                                                                                                                                                                          | #    | #    | #         | #     | #    | -    |                                                 | ----  | ----                 | #                                                                                                                                                           | #    | #    | #         | #     | #    |      |
| Rsa1.0_01078.1.g23195.t1 | gb EOA19823.1  hypothetical protein CARUB_v10000068mg [Capsella rubella]                                                                                                                                                                                                                                                                                                                                                                                                                                   | 1265 | 1200 | 0         | 94.9  | 75.2 | 82.8 | hypothetical protein CARUB_v10000068mg          | gbpln | Capsella rubella     | AT5G07280.1   Symbols: EMS1, EXS   Leucine-rich repeat transmembrane protein kinase   chr5:2285089-2288666 FORWARD LENGTH=1192                              | 1265 | 1192 | 0         | 94.2  | 73.0 | 81.7 |
| Rsa1.0_01078.1.g23196.t1 | #                                                                                                                                                                                                                                                                                                                                                                                                                                                                                                          | #    | #    | #         | #     | #    | -    |                                                 | ----  | ----                 | #                                                                                                                                                           | #    | #    | #         | #     | #    |      |
| Rsa1.0_01078.1.g23197.t1 | ref NP_196344.2  E3 ubiquitin-protein ligase XBAT33 [Arabidopsis thaliana]   gi 122239678 sp Q4FE45.1 XB33_ARATH RecName: Full=E3 ubiquitin-protein ligase XBAT33; AltName: Full=Ankyrin repeat domain and RING finger-containing protein XBAT33; AltName: Full=Protein XB3 homolog 3   gi 70905089 gb AAZ14070.1  At5g07270 [Arabidopsis thaliana]   gi 117168057 gb ABK32111.1  At5g07270 [Arabidopsis thaliana]   gi 332003748 gb AED91131.1  E3 ubiquitin-protein ligase XBAT33 [Arabidopsis thaliana] | 518  | 513  | 0         | 99.0  | 90.7 | 94.6 | E3 ubiquitin-protein ligase XBAT33              | gbpln | Arabidopsis thaliana | AT5G07270.1   Symbols: XBAT33   XB3 ortholog 3 in Arabidopsis thaliana   chr5:2280821-2283384 FORWARD LENGTH=513                                            | 518  | 513  | 0         | 99.0  | 90.7 | 94.6 |
| Rsa1.0_01078.1.g23198.t1 | gb EOA20989.1  hypothetical protein CARUB_v10001321mg [Capsella rubella]                                                                                                                                                                                                                                                                                                                                                                                                                                   | 348  | 346  | 1.00E-152 | 99.4  | 80.2 | 88.2 | hypothetical protein CARUB_v10001321mg          | gbpln | Capsella rubella     | AT5G07250.1   Symbols: ATRBL3, RBL3   RHOMBOLD-like protein 3   chr5:2274437-2275935 REVERSE LENGTH=346                                                     | 348  | 346  | 2.33E-156 | 99.4  | 81.0 | 87.1 |
| Rsa1.0_01078.1.g23199.t1 | gb EOA20989.1  hypothetical protein CARUB_v10001321mg [Capsella rubella]                                                                                                                                                                                                                                                                                                                                                                                                                                   | 348  | 346  | 1.00E-139 | 99.4  | 72.7 | 83.9 | hypothetical protein CARUB_v10001321mg          | gbpln | Capsella rubella     | AT5G07250.1   Symbols: ATRBL3, RBL3   RHOMBOLD-like protein 3   chr5:2274437-2275935 REVERSE LENGTH=346                                                     | 348  | 346  | 1.00E-132 | 99.4  | 73.0 | 82.2 |
| Rsa1.0_01078.1.g23200.t1 | ref XP_002871260.1  IQ-domain 24 [Arabidopsis lyrata subsp. lyrata]   gi 297317097 gb EFH47519.1  IQ-domain 24 [Arabidopsis lyrata subsp. lyrata]                                                                                                                                                                                                                                                                                                                                                          | 350  | 401  | 1.00E-123 | 114.6 | 80.0 | 85.7 | IQ-domain 24                                    | gbpln | Arabidopsis lyrata   | AT5G07240.1   Symbols: IQD24   IQ-domain 24   chr5:2272028-2274051 FORWARD LENGTH=401                                                                       | 350  | 401  | 1.00E-123 | 114.6 | 78.6 | 85.7 |
| Rsa1.0_01078.1.g23201.t1 | gb AAO85389.1  tapetum-specific protein BcA9 [Brassica rapa subsp. oleifera]                                                                                                                                                                                                                                                                                                                                                                                                                               | 82   | 103  | 5.00E-37  | 125.6 | 96.3 | 96.3 | tapetum-specific protein BcA9                   | gbpln | Brassica rapa        | AT5G07230.1   Symbols:   Bifunctional inhibitor/lipid-transfer protein/seed storage 2S albumin superfamily protein   chr5:2271013-2271408 FORWARD LENGTH=91 | 82   | 91   | 1.00E-28  | 111.0 | 75.6 | 82.9 |
| Rsa1.0_01078.1.g23202.t1 | ref NP_196339.1  BCL-2-associated athanogene 3 [Arabidopsis thaliana]   gi 75181093 sp Q9LYP4.1 BAG3_ARATH RecName: Full=BAG family molecular chaperone regulator 3; AltName: Full=Bcl-2-associated athanogene 3   gi 16226483 gb AAL16179.1 AF428411.1 AT5g07220/T28J14.160 [Arabidopsis thaliana]   gi 7546700 emb CAB87278.1  putative protein [Arabidopsis thaliana]   gi 332003740 gb AED91123.1  BCL-2-associated athanogene 3 [Arabidopsis thaliana]                                                | 308  | 303  | 1.00E-140 | 98.4  | 82.8 | 89.3 | BCL-2-associated athanogene 3                   | gbpln | Arabidopsis thaliana | AT5G07220.1   Symbols: ATBAG3, BAG3   BCL-2-associated athanogene 3   chr5:2265845-2266720 REVERSE LENGTH=303                                               | 308  | 303  | 1.00E-143 | 98.4  | 82.8 | 89.3 |
| Rsa1.0_01078.1.g23203.t1 | #                                                                                                                                                                                                                                                                                                                                                                                                                                                                                                          | #    | #    | #         | #     | #    | -    |                                                 | ----  | ----                 | #                                                                                                                                                           | #    | #    | #         | #     | #    |      |
| Rsa1.0_01078.1.g23204.t1 | ref NP_196338.1  putative two-component response regulator ARR21 [Arabidopsis thaliana]   gi 7546699 emb CAB87277.1  putative protein [Arabidopsis thaliana]   gi 332003739 gb AED91122.1  putative two-component response regulator ARR21 [Arabidopsis thaliana]                                                                                                                                                                                                                                          | 721  | 621  | 1.00E-152 | 86.1  | 39.0 | 45.4 | putative two-component response regulator ARR21 | gbpln | Arabidopsis thaliana | AT5G07210.1   Symbols: ARR21, RR21   response regulator 21   chr5:2252237-2256018 FORWARD LENGTH=621                                                        | 721  | 621  | 1.00E-155 | 86.1  | 39.0 | 45.4 |
| Rsa1.0_01078.1.g23205.t1 | #                                                                                                                                                                                                                                                                                                                                                                                                                                                                                                          | #    | #    | #         | #     | #    | -    |                                                 | ----  | ----                 | #                                                                                                                                                           | #    | #    | #         | #     | #    |      |
| Rsa1.0_01078.1.g23206.t1 | gb EOA19715.1  hypothetical protein CARUB_v10003732mg [Capsella rubella]                                                                                                                                                                                                                                                                                                                                                                                                                                   | 355  | 381  | 1.00E-135 | 107.3 | 65.9 | 71.0 | hypothetical protein CARUB_v10003732mg          | gbpln | Capsella rubella     | AT5G07200.1   Symbols: YAP169, GA20OX3, ATGA20OX3   gibberellin 20-oxidase 3   chr5:2243635-2245157 REVERSE LENGTH=380                                      | 355  | 380  | 1.00E-135 | 107.0 | 63.4 | 67.0 |

|                          |                                                                                                                                                                                                                                                                                                                                                                                                                                                                                                                                                                                 |     |      |           |       |      |      |                                           |       |                         |                                                                                                                                                                                                                                                                                                                                                                                                                                                                                                                                                                                                                                                                                                                                                                                                                             |     |      |           |       |      |      |
|--------------------------|---------------------------------------------------------------------------------------------------------------------------------------------------------------------------------------------------------------------------------------------------------------------------------------------------------------------------------------------------------------------------------------------------------------------------------------------------------------------------------------------------------------------------------------------------------------------------------|-----|------|-----------|-------|------|------|-------------------------------------------|-------|-------------------------|-----------------------------------------------------------------------------------------------------------------------------------------------------------------------------------------------------------------------------------------------------------------------------------------------------------------------------------------------------------------------------------------------------------------------------------------------------------------------------------------------------------------------------------------------------------------------------------------------------------------------------------------------------------------------------------------------------------------------------------------------------------------------------------------------------------------------------|-----|------|-----------|-------|------|------|
| Rsa1.0_01079.1.g23207.t1 | refNP_190576.1  cyclin-D3-3<br>[Arabidopsis thaliana]<br>gi 75313638 sp Q9SN11.1 CCD33_ARAT<br>H RecName: Full=Cyclin-D3-3;<br>AltName: Full=G1/S-specific cyclin-<br>D3-3; Short=CycD3.3<br>gi 6522928 emb CAB62115.1  cyclin D3-<br>like protein [Arabidopsis thaliana]<br>gi 15450595 gb AAK96569.1<br>AT3g50070/F3A4_150 [Arabidopsis<br>thaliana] gi 17380632 gb AAL36079.1<br>AT3g50070/F3A4_150 [Arabidopsis<br>thaliana] gi 21593092 gb AAM65041.1<br>cyclin D3-like protein [Arabidopsis<br>thaliana] gi 332645102 gb AEE78623.1<br>cyclin-D3-3 [Arabidopsis thaliana] | 361 | 361  | 1.00E-131 | 100.0 | 70.6 | 80.1 | cyclin-D3-3                               | gbpln | Arabidopsis<br>thaliana | AT3G50070.1   Symbols: CYCD3.3   CYCLIN<br>D3.3   chr3:18565322-18566669 REVERSE<br>LENGTH=361                                                                                                                                                                                                                                                                                                                                                                                                                                                                                                                                                                                                                                                                                                                              | 361 | 361  | 1.00E-133 | 100.0 | 70.6 | 80.1 |
| Rsa1.0_01079.1.g23208.t1 | #                                                                                                                                                                                                                                                                                                                                                                                                                                                                                                                                                                               | #   | #    | #         | #     | #    | #    | -                                         | ----  | ----                    | #                                                                                                                                                                                                                                                                                                                                                                                                                                                                                                                                                                                                                                                                                                                                                                                                                           | #   | #    | #         | #     | #    |      |
| Rsa1.0_01079.1.g23209.t1 | gb ABL97967.1  R2R3-MYB<br>transcription factor [Brassica rapa]                                                                                                                                                                                                                                                                                                                                                                                                                                                                                                                 | 268 | 266  | 1.00E-116 | 99.3  | 85.8 | 88.4 | R2R3-MYB<br>transcription factor          | gbpln | Brassica<br>rapa        | AT3G50060.1   Symbols: MYB77   myb<br>domain protein 77   chr3:18558146-18559051<br>REVERSE LENGTH=301                                                                                                                                                                                                                                                                                                                                                                                                                                                                                                                                                                                                                                                                                                                      | 268 | 301  | 1.00E-94  | 112.3 | 77.2 | 84.7 |
| Rsa1.0_01079.1.g23210.t1 | gb ACP30550.1  disease resistance<br>protein [Brassica rapa subsp.<br>pekinensis]                                                                                                                                                                                                                                                                                                                                                                                                                                                                                               | 855 | 818  | 0         | 95.7  | 77.0 | 81.1 | disease resistance<br>protein             | gbpln | Brassica<br>rapa        | AT1G12220.2   Symbols: RPS5   Disease<br>resistance protein (CC-NBS-LRR class)<br>family   chr1:4145011-4147680 FORWARD<br>LENGTH=889                                                                                                                                                                                                                                                                                                                                                                                                                                                                                                                                                                                                                                                                                       | 855 | 889  | 0         | 104.0 | 59.5 | 73.7 |
| Rsa1.0_01079.1.g23211.t1 | dbj BAA01091.1  casein kinase II<br>catalytic subunit [Arabidopsis thaliana]                                                                                                                                                                                                                                                                                                                                                                                                                                                                                                    | 404 | 333  | 0         | 82.4  | 79.7 | 81.7 | casein kinase II<br>catalytic subunit     | gbpln | Arabidopsis<br>thaliana | AT3G50000.1   Symbols: CKA2, ATCKA2  <br>casein kinase II, alpha chain 2  <br>chr3:18534487-18536743 FORWARD<br>LENGTH=403                                                                                                                                                                                                                                                                                                                                                                                                                                                                                                                                                                                                                                                                                                  | 404 | 403  | 0         | 99.8  | 84.4 | 86.6 |
| Rsa1.0_01079.1.g23212.t1 | ref XP_002877714.1  predicted protein<br>[Arabidopsis lyrata subsp. lyrata]<br>gi 297323552 gb EFH53973.1  predicted<br>protein [Arabidopsis lyrata subsp.<br>lyrata]                                                                                                                                                                                                                                                                                                                                                                                                           | 566 | 551  | 0         | 97.3  | 73.9 | 86.0 | predicted protein                         | gbpln | Arabidopsis<br>lyrata   | AT5G67385.1   Symbols:   Phototropic-<br>responsive NPH3 family protein  <br>chr5:26884754-26887083 FORWARD<br>LENGTH=604                                                                                                                                                                                                                                                                                                                                                                                                                                                                                                                                                                                                                                                                                                   | 566 | 604  | 0         | 106.7 | 73.3 | 85.7 |
| Rsa1.0_01079.1.g23213.t1 | ref NP_180096.3  serpin-Z10<br>[Arabidopsis thaliana]<br>gi 75313479 sp Q9SIR9.1 SPZ10_ARATH<br>RecName: Full=Serpins-Z10; AltName:<br>Full=ArathZ10<br>gi 4567253 gb AAD23667.1  putative<br>serpin [Arabidopsis thaliana]<br>gi 330252581 gb AEC07675.1  serpin-<br>Z10 [Arabidopsis thaliana]                                                                                                                                                                                                                                                                                | 384 | 385  | 1.00E-170 | 100.3 | 76.0 | 85.4 | serpin-Z10                                | gbpln | Arabidopsis<br>thaliana | AT2G25240.1   Symbols:   Serine protease<br>inhibitor (SERPIN) family protein  <br>chr2:10751872-10753134 REVERSE<br>LENGTH=385                                                                                                                                                                                                                                                                                                                                                                                                                                                                                                                                                                                                                                                                                             | 384 | 385  | 1.00E-173 | 100.3 | 76.0 | 85.4 |
| Rsa1.0_01079.1.g23214.t1 | ref NP_190564.1  scarecrow-like protein<br>32 [Arabidopsis thaliana]<br>gi 75206856 sp Q9SN22.1 SCL32_ARAT<br>H RecName: Full=Scarecrow-like<br>protein 32; Short=AtSCL32; AltName:<br>Full=GRAS family protein 18;<br>Short=AtGRAS-18<br>gi 6522916 emb CAB62103.1  putative<br>protein [Arabidopsis thaliana]<br>gi 46518431 gb AAS99697.1  At3g49950<br>[Arabidopsis thaliana]<br>gi 110741573 dbj BAE98735.1 <br>hypothetical protein [Arabidopsis<br>thaliana] gi 332645089 gb AEE78610.1 <br>scarecrow-like protein 32 [Arabidopsis<br>thaliana]                          | 418 | 410  | 0         | 98.1  | 83.0 | 89.2 | scarecrow-like protein<br>32              | gbpln | Arabidopsis<br>thaliana | AT3G49950.1   Symbols:   GRAS family<br>transcription factor   chr3:18522570-<br>18523802 FORWARD LENGTH=410                                                                                                                                                                                                                                                                                                                                                                                                                                                                                                                                                                                                                                                                                                                | 418 | 410  | 0         | 98.1  | 83.0 | 89.2 |
| Rsa1.0_01079.1.g23215.t1 | #                                                                                                                                                                                                                                                                                                                                                                                                                                                                                                                                                                               | #   | #    | #         | #     | #    | #    | -                                         | ----  | ----                    | #                                                                                                                                                                                                                                                                                                                                                                                                                                                                                                                                                                                                                                                                                                                                                                                                                           | #   | #    | #         | #     | #    |      |
| Rsa1.0_01080.1.g23216.t1 | #                                                                                                                                                                                                                                                                                                                                                                                                                                                                                                                                                                               | #   | #    | #         | #     | #    | #    | -                                         | ----  | ----                    | #                                                                                                                                                                                                                                                                                                                                                                                                                                                                                                                                                                                                                                                                                                                                                                                                                           | #   | #    | #         | #     | #    |      |
| Rsa1.0_01080.1.g23217.t1 | gb AAD32898.1  putative retroelement<br>pol polyprotein [Arabidopsis thaliana]                                                                                                                                                                                                                                                                                                                                                                                                                                                                                                  | 937 | 1307 | 0         | 139.5 | 62.6 | 76.3 | putative retroelement<br>pol polyprotein  | gbpln | Arabidopsis<br>thaliana | AT4G23160.1   Symbols: CRK8   cysteine-<br>rich RLK (RECEPTOR-like protein kinase) 8  <br>chr4:12129485-12134086 FORWARD<br>LENGTH=1262<br>AT1G47980.1   Symbols:   unknown protein;<br>FUNCTIONS IN: molecular_function unknown;<br>INVOLVED IN: biological_process unknown;<br>LOCATED IN: endomembrane system;<br>EXPRESSED IN: 6 plant structures;<br>EXPRESSED DURING: 4 anthesis, F mature<br>embryo stage, petal differentiation and<br>expansion stage, E expanded cotyledon<br>stage; BEST Arabidopsis thaliana protein<br>match is: unknown protein<br>(TAIR:AT3G62730.1); Has 169 Blast hits to<br>169 proteins in 41 species: Archae - 0;<br>Bacteria - 68; Metazoa - 0; Fungi - 0; Plants<br>- 101; Viruses - 0; Other Eukaryotes - 0<br>(source: NCBI BLINK).   chr1:17691985-<br>17693818 REVERSE LENGTH=315 | 937 | 1262 | 1.00E-100 | 134.7 | 21.7 | 32.3 |
| Rsa1.0_01080.1.g23218.t1 | ref XP_002894087.1  hypothetical<br>protein ARALYDRAFT_891606<br>[Arabidopsis lyrata subsp. lyrata]<br>gi 297339929 gb EFH70346.1 <br>hypothetical protein<br>ARALYDRAFT_891606 [Arabidopsis<br>lyrata subsp. lyrata]                                                                                                                                                                                                                                                                                                                                                           | 309 | 315  | 1.00E-155 | 101.9 | 87.7 | 92.9 | hypothetical protein<br>ARALYDRAFT_891606 | gbpln | Arabidopsis<br>lyrata   | AT3G50070.1   Symbols: CYCD3.3   CYCLIN<br>D3.3   chr3:18565322-18566669 REVERSE<br>LENGTH=361                                                                                                                                                                                                                                                                                                                                                                                                                                                                                                                                                                                                                                                                                                                              | 309 | 315  | 1.00E-156 | 101.9 | 86.4 | 92.6 |

|                          |                                                                                                                                                                                                                                                                                                                                                                                                                                                                                                                                                                                                                                                                                                                                                |     |     |           |       |      |       |                                                    |       |                      |                                                                                                                                                                                                                                                                                                                                                                      |     |     |           |       |      |      |
|--------------------------|------------------------------------------------------------------------------------------------------------------------------------------------------------------------------------------------------------------------------------------------------------------------------------------------------------------------------------------------------------------------------------------------------------------------------------------------------------------------------------------------------------------------------------------------------------------------------------------------------------------------------------------------------------------------------------------------------------------------------------------------|-----|-----|-----------|-------|------|-------|----------------------------------------------------|-------|----------------------|----------------------------------------------------------------------------------------------------------------------------------------------------------------------------------------------------------------------------------------------------------------------------------------------------------------------------------------------------------------------|-----|-----|-----------|-------|------|------|
| Rsa1.0_01080.1.g23219.t1 | ref[XP_002891403.1] gibberellin 2-oxidase 4 [Arabidopsis lyrata subsp. lyrata] gi297337245[gb EFH67662.1] gibberellin 2-oxidase 4 [Arabidopsis lyrata subsp. lyrata]                                                                                                                                                                                                                                                                                                                                                                                                                                                                                                                                                                           | 325 | 321 | 1.00E-169 | 98.8  | 88.0 | 92.3  | gibberellin 2-oxidase 4                            | gbpln | Arabidopsis lyrata   | AT1G47990.1   Symbols: ATGA2OX4, GA2OX4   gibberellin 2-oxidase 4   chr1:17698655-17700834 FORWARD LENGTH=321                                                                                                                                                                                                                                                        | 325 | 321 | 1.00E-170 | 98.8  | 87.1 | 92.0 |
| Rsa1.0_01080.1.g23220.t1 | gb EOA39303.1  hypothetical protein CARUB_v10012316mg [Capsella rubella]                                                                                                                                                                                                                                                                                                                                                                                                                                                                                                                                                                                                                                                                       | 177 | 177 | 1.00E-77  | 100.0 | 79.1 | 89.3  | hypothetical protein CARUB_v10012316mg             | gbpln | Capsella rubella     | AT1G48020.1   Symbols: PME11, ATPME11   pectin methyltransferase inhibitor 1   chr1:17716234-17716764 REVERSE LENGTH=176                                                                                                                                                                                                                                             | 177 | 176 | 6.00E-77  | 99.4  | 81.4 | 89.8 |
| Rsa1.0_01080.1.g23221.t1 | dbj BAJ34104.1  unnamed protein product [Theillungiella halophila]                                                                                                                                                                                                                                                                                                                                                                                                                                                                                                                                                                                                                                                                             | 363 | 383 | 0         | 105.5 | 92.0 | 95.6  | unnamed protein product                            | ----  | ----                 | AT1G48040.1   Symbols:   Protein phosphatase 2C family protein   chr1:17720064-17721698 REVERSE LENGTH=383                                                                                                                                                                                                                                                           | 363 | 383 | 0         | 105.5 | 87.9 | 93.4 |
| Rsa1.0_01080.1.g23222.t1 | gb AAF61460.1 AF139817.1 peroxiredoxin antioxidant [Brassica napus]                                                                                                                                                                                                                                                                                                                                                                                                                                                                                                                                                                                                                                                                            | 215 | 216 | 1.00E-121 | 100.5 | 97.2 | 100.0 | peroxiredoxin antioxidant                          | gbpln | Brassica napus       | AT1G48130.1   Symbols: ATPER1, PER1   1-cysteine peroxiredoxin 1   chr1:17780610-17781500 FORWARD LENGTH=216                                                                                                                                                                                                                                                         | 215 | 216 | 1.00E-114 | 100.5 | 89.3 | 94.9 |
| Rsa1.0_01080.1.g23223.t4 | #                                                                                                                                                                                                                                                                                                                                                                                                                                                                                                                                                                                                                                                                                                                                              | #   | #   | #         | #     | #    | #     | -                                                  | ----  | ----                 | #                                                                                                                                                                                                                                                                                                                                                                    | #   | #   | #         | #     | #    |      |
| Rsa1.0_01080.1.g23224.t2 | ref[NP_175260.1] CBL-interacting serine/threonine-protein kinase 17 [Arabidopsis thaliana] gi175332093[sp Q94C40.1 CIPKH_ARAT H RecName: Full=CBL-interacting serine/threonine-protein kinase 17; AltName: Full=SNF1-related kinase 3.21; AltName: Full=SOS2-like protein kinase PKS20 gi114571553[gb AAK64513.1] CBL-interacting protein kinase 17 [Arabidopsis thaliana] gi116325942[gb ABJ98572.1] At1g48260 [Arabidopsis thaliana] gi332194148[gb AEE32269.1] CBL-interacting serine/threonine-protein kinase 17 [Arabidopsis thaliana] ref[XP_002863103.1] hypothetical protein ARALYDRAFT_497157 [Arabidopsis lyrata subsp. lyrata] gi297308925[gb EFH39362.1] hypothetical protein ARALYDRAFT_497157 [Arabidopsis lyrata subsp. lyrata] | 333 | 432 | 1.00E-158 | 129.7 | 81.7 | 88.3  | CBL-interacting serine/threonine-protein kinase 17 | gbpln | Arabidopsis thaliana | AT1G48260.1   Symbols: CIPK17, SnRK3.21   CBL-interacting protein kinase 17   chr1:17814226-17817226 REVERSE LENGTH=432                                                                                                                                                                                                                                              | 333 | 432 | 1.00E-161 | 129.7 | 81.7 | 88.3 |
| Rsa1.0_01081.1.g23225.t1 | ref[XP_002863103.1] hypothetical protein ARALYDRAFT_497157 [Arabidopsis lyrata subsp. lyrata] gi297308925[gb EFH39362.1] hypothetical protein ARALYDRAFT_497157 [Arabidopsis lyrata subsp. lyrata]                                                                                                                                                                                                                                                                                                                                                                                                                                                                                                                                             | 234 | 234 | 1.00E-126 | 100.0 | 93.2 | 96.2  | hypothetical protein ARALYDRAFT_497157             | gbpln | Arabidopsis lyrata   | AT1G69930.1   Symbols: ATGSTU11, GSTU11   glutathione S-transferase TAU 11   chr1:26337735-26338690 REVERSE LENGTH=234                                                                                                                                                                                                                                               | 234 | 234 | 1.00E-125 | 100.0 | 91.5 | 94.4 |
| Rsa1.0_01081.1.g23226.t1 | ref[XP_002888745.1] hypothetical protein ARALYDRAFT_894783 [Arabidopsis lyrata subsp. lyrata] gi297334586[gb EFH65004.1] hypothetical protein ARALYDRAFT_894783 [Arabidopsis lyrata subsp. lyrata]                                                                                                                                                                                                                                                                                                                                                                                                                                                                                                                                             | 122 | 191 | 1.00E-17  | 156.6 | 64.8 | 72.1  | hypothetical protein ARALYDRAFT_894783             | gbpln | Arabidopsis lyrata   | AT1G69935.1   Symbols: SHW1   short hypocotyl in white light1   chr1:26342072-26343082 REVERSE LENGTH=192                                                                                                                                                                                                                                                            | 122 | 192 | 5.00E-15  | 157.4 | 51.6 | 59.8 |
| Rsa1.0_01081.1.g23227.t1 | gb AAG52564.1 AC010675.12 unknown protein; 6859-4829 [Arabidopsis thaliana]                                                                                                                                                                                                                                                                                                                                                                                                                                                                                                                                                                                                                                                                    | 647 | 676 | 0         | 104.5 | 75.0 | 85.6  | unknown protein; 6859-4829                         | gbpln | Arabidopsis thaliana | AT3G42170.1   Symbols:   BED zinc finger ;hAT family dimerisation domain   chr3:14321838-14323928 FORWARD LENGTH=696                                                                                                                                                                                                                                                 | 647 | 696 | 3.00E-87  | 107.6 | 32.0 | 51.6 |
| Rsa1.0_01081.1.g23228.t1 | ref[NP_001117575.1] CLAVATA3/ESR-related 26 protein [Arabidopsis thaliana] gi332196883[gb AEE35004.1] CLAVATA3/ESR (CLE)-related protein 26 [Arabidopsis thaliana]                                                                                                                                                                                                                                                                                                                                                                                                                                                                                                                                                                             | 100 | 102 | 3.00E-32  | 102.0 | 71.0 | 80.0  | CLAVATA3/ESR-related 26 protein                    | gbpln | Arabidopsis thaliana | AT1G69970.2   Symbols: CLE26   CLAVATA3/ESR-RELATED 26   chr1:26353079-26354256 REVERSE LENGTH=102                                                                                                                                                                                                                                                                   | 100 | 102 | 6.00E-35  | 102.0 | 71.0 | 80.0 |
| Rsa1.0_01081.1.g23229.t1 | ref[NP_564982.1] uncharacterized protein [Arabidopsis thaliana] gi119360057[gb ABL6757.1] At1g69980 [Arabidopsis thaliana] gi332196884[gb AEE35005.1] uncharacterized protein AT1G69980 [Arabidopsis thaliana]                                                                                                                                                                                                                                                                                                                                                                                                                                                                                                                                 | 212 | 205 | 4.00E-70  | 96.7  | 68.9 | 80.7  | uncharacterized protein                            | gbpln | Arabidopsis thaliana | AT1G69980.1   Symbols:   unknown protein; LOCATED IN: endomembrane system; EXPRESSED IN: 24 plant structures; EXPRESSED DURING: 15 growth stages; Has 30 Blast hits to 30 proteins in 12 species: Archae - 0; Bacteria - 0; Metazoa - 0; Fungi - 0; Plants - 30; Viruses - 0; Other Eukaryotes - 0 (source: NCBI BLink).   chr1:26356559-26357647 REVERSE LENGTH=205 | 212 | 205 | 1.00E-72  | 96.7  | 68.9 | 80.7 |
| Rsa1.0_01081.1.g23230.t1 | gb EOA36532.1  hypothetical protein CARUB_v10011581mg [Capsella rubella]                                                                                                                                                                                                                                                                                                                                                                                                                                                                                                                                                                                                                                                                       | 374 | 425 | 5.00E-75  | 113.6 | 48.4 | 63.1  | hypothetical protein CARUB_v10011581mg             | gbpln | Capsella rubella     | AT1G25150.1   Symbols:   F-box family protein   chr1:8821027-8822328 FORWARD LENGTH=433                                                                                                                                                                                                                                                                              | 374 | 433 | 8.00E-69  | 115.8 | 44.4 | 59.4 |

|                          |                                                                                                                                                                                                                                                                                                                                                                                                                                                                                                                                                                                                                  |      |      |          |       |      |      |                                                            |       |                      |                                                                                                                                               |      |      |          |       |      |      |
|--------------------------|------------------------------------------------------------------------------------------------------------------------------------------------------------------------------------------------------------------------------------------------------------------------------------------------------------------------------------------------------------------------------------------------------------------------------------------------------------------------------------------------------------------------------------------------------------------------------------------------------------------|------|------|----------|-------|------|------|------------------------------------------------------------|-------|----------------------|-----------------------------------------------------------------------------------------------------------------------------------------------|------|------|----------|-------|------|------|
| Rsa1.0_01081.1.g23231.t1 | refNP_177157.1  putative LRR receptor-like serine/threonine-protein kinase [Arabidopsis thaliana] gi 264664457 sp COL.GI5.1 Y1699_ARAT H RecName: Full=Probable LRR receptor-like serine/threonine-protein kinase At1g69990; Flags: Precursor gi 224589473 gb ACN59270.1  leucine-rich repeat receptor-like protein kinase [Arabidopsis thaliana] gi 332196885 gb AEE35006.1  putative LRR receptor-like serine/threonine-protein kinase [Arabidopsis thaliana] dbj BAB01155.1  unnamed protein product [Arabidopsis thaliana] gi 49823524 gb AAT68745.1                                                         | 583  | 591  | 0        | 101.4 | 76.3 | 86.1 | putative LRR receptor-like serine/threonine-protein kinase | gbpln | Arabidopsis thaliana | AT1G69990.1   Symbols:   Leucine-rich repeat protein kinase family protein   chr1:26360235-26362010 REVERSE LENGTH=591                        | 583  | 591  | 0        | 101.4 | 76.3 | 86.1 |
| Rsa1.0_01081.1.g23232.t1 | hypothetical protein At3g17200 [Arabidopsis thaliana] gi 60547763 gb AXX23845.1  hypothetical protein At3g17200 [Arabidopsis thaliana] refXP_002887270.1  hypothetical protein ARALYDRAFT_894796 [Arabidopsis lyrata subsp. lyrata] gi 29733311 gb EFH63529.1  hypothetical protein ARALYDRAFT_894796 [Arabidopsis lyrata subsp. lyrata]                                                                                                                                                                                                                                                                         | 397  | 310  | 5.00E-57 | 78.1  | 28.2 | 41.1 | unnamed protein product                                    | gbpln | Arabidopsis thaliana | AT3G24255.1   Symbols:   RNA-directed DNA polymerase (reverse transcriptase)-related family protein   chr3:8789471-8793208 FORWARD LENGTH=746 | 397  | 746  | 4.00E-37 | 187.9 | 21.7 | 30.5 |
| Rsa1.0_01081.1.g23233.t1 | refXP_002887270.1  hypothetical protein ARALYDRAFT_894796 [Arabidopsis lyrata subsp. lyrata] gi 29733311 gb EFH63529.1  hypothetical protein ARALYDRAFT_894796 [Arabidopsis lyrata subsp. lyrata]                                                                                                                                                                                                                                                                                                                                                                                                                | 211  | 177  | 2.00E-62 | 83.9  | 57.3 | 66.4 | hypothetical protein ARALYDRAFT_894796                     | gbpln | Arabidopsis lyrata   | AT1G70040.1   Symbols:   Protein of unknown function (DUF163)   chr1:26381233-26381908 FORWARD LENGTH=193                                     | 211  | 193  | 4.00E-62 | 91.5  | 52.6 | 61.1 |
| Rsa1.0_01081.1.g23234.t2 | #                                                                                                                                                                                                                                                                                                                                                                                                                                                                                                                                                                                                                | #    | #    | #        | #     | #    | #    | -                                                          | ----  | ----                 | #                                                                                                                                             | #    | #    | #        | #     | #    |      |
| Rsa1.0_01081.1.g23235.t1 | gb EOA33276.1  hypothetical protein CARUB_v10019668mg [Capsella rubella]                                                                                                                                                                                                                                                                                                                                                                                                                                                                                                                                         | 1293 | 1328 | 0        | 102.7 | 82.9 | 88.9 | hypothetical protein CARUB_v10019668mg                     | gbpln | Capsella rubella     | AT1G70060.1   Symbols: SNL4   SIN3-like 4   chr1:26383789-26389568 FORWARD LENGTH=1326                                                        | 1293 | 1326 | 0        | 102.6 | 81.7 | 88.0 |
| Rsa1.0_01081.1.g23236.t1 | refNP_177164.1  DEAD-box ATP-dependent RNA helicase ISE2 [Arabidopsis thaliana] gi 298351833 sp B9DFG3.2 ISE2_ARATH RecName: Full=DEAD-box ATP-dependent RNA helicase ISE2; chloroplastic; AltName: Full=Protein EMBRYO DEFECTIVE 25; AltName: Full=Protein INCREASED SIZE EXCLUSION LIMIT 2; AltName: Full=Protein PIGMENT DEFECTIVE 317; Flags: Precursor gi 332196892 gb AEE35013.1  DEAD-box ATP-dependent RNA helicase ISE2 [Arabidopsis thaliana] refXP_002887288.1  predicted protein [Arabidopsis lyrata subsp. lyrata] gi 297333129 gb EFH63547.1  predicted protein [Arabidopsis lyrata subsp. lyrata] | 1171 | 1171 | 0        | 100.0 | 90.5 | 95.7 | DEAD-box ATP-dependent RNA helicase ISE2                   | gbpln | Arabidopsis thaliana | AT1G70070.1   Symbols: EMB25, PDE317, ISE2   DEAD/DEAH box helicase, putative   chr1:26390016-26394148 REVERSE LENGTH=1171                    | 1171 | 1171 | 0        | 100.0 | 90.5 | 95.7 |
| Rsa1.0_01081.1.g23237.t1 | refXP_002887288.1  predicted protein [Arabidopsis lyrata subsp. lyrata] gi 297333129 gb EFH63547.1  predicted protein [Arabidopsis lyrata subsp. lyrata]                                                                                                                                                                                                                                                                                                                                                                                                                                                         | 413  | 419  | 0        | 101.5 | 88.4 | 92.7 | predicted protein                                          | gbpln | Arabidopsis lyrata   | AT1G70230.1   Symbols: TBL27   TRICHOME BIREFRINGENCE-LIKE 27   chr1:26450389-26451724 FORWARD LENGTH=416                                     | 413  | 416  | 0        | 100.7 | 86.4 | 92.3 |
| Rsa1.0_01081.1.g23238.t1 | gb EOA35311.1  hypothetical protein CARUB_v10020485mg [Capsella rubella]                                                                                                                                                                                                                                                                                                                                                                                                                                                                                                                                         | 376  | 375  | 0        | 99.7  | 85.6 | 94.1 | hypothetical protein CARUB_v10020485mg                     | gbpln | Capsella rubella     | AT1G70260.1   Symbols:   nodulin MtN21 /EamA-like transporter family protein   chr1:26457067-26459338 REVERSE LENGTH=375                      | 376  | 375  | 0        | 99.7  | 84.3 | 92.3 |
| Rsa1.0_01081.1.g23239.t1 | refXP_002889763.1  NHL repeat-containing protein [Arabidopsis lyrata subsp. lyrata] gi 297334604 gb EFH65022.1  NHL repeat-containing protein [Arabidopsis lyrata subsp. lyrata]                                                                                                                                                                                                                                                                                                                                                                                                                                 | 544  | 503  | 0        | 92.5  | 76.8 | 85.1 | NHL repeat-containing protein                              | gbpln | Arabidopsis lyrata   | AT1G70280.2   Symbols:   NHL domain-containing protein   chr1:26466086-26468471 REVERSE LENGTH=509                                            | 544  | 509  | 0        | 93.6  | 74.3 | 81.3 |
| Rsa1.0_01081.1.g23240.t2 | refNP_176009.1  putative LRR receptor-like serine/threonine-protein kinase [Arabidopsis thaliana] gi 263711285 sp COL.GH2.2 Y1561_ARAT H RecName: Full=Probable LRR receptor-like serine/threonine-protein kinase At1g56130; Flags: Precursor gi 332195226 gb AEE33347.1  putative LRR receptor-like serine/threonine-protein kinase [Arabidopsis thaliana] gb AAG51783.1 AC079679.3 reverse transcriptase, putative; 16838-20266 [Arabidopsis thaliana]                                                                                                                                                         | 639  | 1032 | 0        | 161.5 | 82.8 | 90.9 | putative LRR receptor-like serine/threonine-protein kinase | gbpln | Arabidopsis thaliana | AT1G56130.1   Symbols:   Leucine-rich repeat transmembrane protein kinase   chr1:20994931-21000887 REVERSE LENGTH=1032                        | 639  | 1032 | 0        | 161.5 | 82.8 | 90.9 |
| Rsa1.0_01081.1.g23241.t1 | refXP_002889763.1  NHL repeat-containing protein [Arabidopsis lyrata subsp. lyrata] gi 297334604 gb EFH65022.1  NHL repeat-containing protein [Arabidopsis lyrata subsp. lyrata]                                                                                                                                                                                                                                                                                                                                                                                                                                 | 166  | 1142 | 2.00E-32 | 688.0 | 45.2 | 57.2 | reverse transcriptase, putative; 16838-20266               | gbpln | Arabidopsis thaliana | AT4G29090.1   Symbols:   Ribonuclease H-like superfamily protein   chr4:14333528-14335255 FORWARD LENGTH=575                                  | 166  | 575  | 1.00E-13 | 346.4 | 25.3 | 44.6 |
| Rsa1.0_01081.1.g23242.t1 | gb EOA22321.1  hypothetical protein CARUB_v10002922mg [Capsella rubella]                                                                                                                                                                                                                                                                                                                                                                                                                                                                                                                                         | 636  | 713  | 0        | 112.1 | 69.0 | 80.7 | hypothetical protein CARUB_v10002922mg                     | gbpln | Capsella rubella     | AT5G26830.1   Symbols:   Threonyl-tRNA synthetase   chr5:9437351-9441568 FORWARD LENGTH=709                                                   | 636  | 709  | 0        | 111.5 | 67.9 | 79.9 |
| Rsa1.0_01081.1.g23243.t1 | #                                                                                                                                                                                                                                                                                                                                                                                                                                                                                                                                                                                                                | #    | #    | #        | #     | #    | #    | -                                                          | ----  | ----                 | AT4G34210.1   Symbols: ASK11, SK11   SKP1-like 11   chr4:16379003-16379461 FORWARD LENGTH=152                                                 | 159  | 152  | 4.00E-11 | 95.6  | 28.9 | 52.8 |

|                          |                                                                                                                                                                                                                                                                                                                                                                                                                                                                                                                                                                                                                                                                                                                                                                                                                                                                                                                                                                                                                                                                                                                                             |      |      |           |       |       |       |                                        |       |                      |                                                                                                                                                                                                                                                                                                                                            |      |      |           |       |       |       |
|--------------------------|---------------------------------------------------------------------------------------------------------------------------------------------------------------------------------------------------------------------------------------------------------------------------------------------------------------------------------------------------------------------------------------------------------------------------------------------------------------------------------------------------------------------------------------------------------------------------------------------------------------------------------------------------------------------------------------------------------------------------------------------------------------------------------------------------------------------------------------------------------------------------------------------------------------------------------------------------------------------------------------------------------------------------------------------------------------------------------------------------------------------------------------------|------|------|-----------|-------|-------|-------|----------------------------------------|-------|----------------------|--------------------------------------------------------------------------------------------------------------------------------------------------------------------------------------------------------------------------------------------------------------------------------------------------------------------------------------------|------|------|-----------|-------|-------|-------|
| Rsa1.0_01081.1.g23244.t1 | ref XP_002888765.1  hypothetical protein ARALYDRAFT_894830 [Arabidopsis lyrata subsp. lyrata] gi 297334606 gb EFH65024.1                                                                                                                                                                                                                                                                                                                                                                                                                                                                                                                                                                                                                                                                                                                                                                                                                                                                                                                                                                                                                    | 783  | 783  | 0         | 100.0 | 88.8  | 93.9  | hypothetical protein ARALYDRAFT_894830 | gbpln | Arabidopsis lyrata   | AT1G70300.1   Symbols: KUP6   K+ uptake permease 6   chr1:26477993-26481233 REVERSE LENGTH=782                                                                                                                                                                                                                                             | 783  | 782  | 0         | 99.9  | 88.9  | 94.0  |
| Rsa1.0_01081.1.g23245.t1 | ref XP_002887300.1  kinase family protein [Arabidopsis lyrata subsp. lyrata] gi 297333141 gb EFH63559.1  kinase family protein [Arabidopsis lyrata subsp. lyrata]                                                                                                                                                                                                                                                                                                                                                                                                                                                                                                                                                                                                                                                                                                                                                                                                                                                                                                                                                                           | 568  | 604  | 0         | 106.3 | 77.6  | 84.3  | kinase family protein                  | gbpln | Arabidopsis lyrata   | AT1G70430.1   Symbols:   Protein kinase superfamily protein   chr1:26545589-26548756 FORWARD LENGTH=594                                                                                                                                                                                                                                    | 568  | 594  | 0         | 104.6 | 77.5  | 84.3  |
| Rsa1.0_01081.1.g23246.t1 | ref NP_177201.1  SRO3-like protein [Arabidopsis thaliana] gi 338819582 sp O64592.2 SRO3 ARAT H RecName: Full=Probable inactive poly [ADP-ribose] polymerase SRO3; AltName: Full=Protein SIMILAR TO RCD ONE 3 gi 332196941 gb AAE35062.1  probable inactive poly [ADP-ribose] polymerase SRO3 [Arabidopsis thaliana]                                                                                                                                                                                                                                                                                                                                                                                                                                                                                                                                                                                                                                                                                                                                                                                                                         | 309  | 305  | 1.00E-114 | 98.7  | 65.7  | 79.9  | SRO3-like protein                      | gbpln | Arabidopsis thaliana | AT1G70440.1   Symbols: SRO3   similar to RCD one 3   chr1:26549354-26550520 REVERSE LENGTH=305                                                                                                                                                                                                                                             | 309  | 305  | 1.00E-116 | 98.7  | 65.7  | 79.9  |
| Rsa1.0_01081.1.g23247.t1 | #                                                                                                                                                                                                                                                                                                                                                                                                                                                                                                                                                                                                                                                                                                                                                                                                                                                                                                                                                                                                                                                                                                                                           | #    | #    | #         | #     | #     | #     | -                                      | ----  | ----                 | #                                                                                                                                                                                                                                                                                                                                          | #    | #    | #         | #     | #     |       |
| Rsa1.0_01081.1.g23248.t1 | gb AAF99727.1 AC004557.6 F17L21.7 [Arabidopsis thaliana]                                                                                                                                                                                                                                                                                                                                                                                                                                                                                                                                                                                                                                                                                                                                                                                                                                                                                                                                                                                                                                                                                    | 1437 | 1534 | 0         | 106.8 | 64.9  | 77.1  | F17L21.7                               | gbpln | Arabidopsis thaliana | AT4G23180.1   Symbols: CRK8   cysteine-rich RLK (RECEPTOR-like protein kinase) 8   chr4:12129485-12134086 FORWARD LENGTH=1262                                                                                                                                                                                                              | 1437 | 1262 | 1.00E-97  | 87.8  | 13.2  | 20.0  |
| Rsa1.0_01081.1.g23249.t1 | gb EOA33797.1  hypothetical protein CARUB_v10021266mg [Capsella rubella]                                                                                                                                                                                                                                                                                                                                                                                                                                                                                                                                                                                                                                                                                                                                                                                                                                                                                                                                                                                                                                                                    | 828  | 691  | 0         | 83.5  | 39.7  | 43.0  | hypothetical protein CARUB_v10021266mg | gbpln | Capsella rubella     | AT1G70460.1   Symbols: RHS10   root hair specific 10   chr1:26556155-26558994 FORWARD LENGTH=710                                                                                                                                                                                                                                           | 828  | 710  | 0         | 85.7  | 39.3  | 43.0  |
| Rsa1.0_01081.1.g23250.t1 | ref XP_002888781.1  hypothetical protein ARALYDRAFT_476167 [Arabidopsis lyrata subsp. lyrata] gi 297334622 gb EFH65040.1  hypothetical protein ARALYDRAFT_476167 [Arabidopsis lyrata subsp. lyrata]                                                                                                                                                                                                                                                                                                                                                                                                                                                                                                                                                                                                                                                                                                                                                                                                                                                                                                                                         | 169  | 151  | 3.00E-42  | 89.3  | 65.1  | 72.8  | hypothetical protein ARALYDRAFT_476167 | gbpln | Arabidopsis lyrata   | AT1G23530.1   Symbols:   unknown protein; BEST Arabidopsis thaliana protein match is: unknown protein (TAIR:AT1G70470.1); Has 38 Blast hits to 38 proteins in 12 species: Archae - 0; Bacteria - 0; Metazoa - 0; Fungi - 0; Plants - 37; Viruses - 0; Other Eukaryotes - 1 (source: NCBI BLINK).   chr1:8345861-8346430 FORWARD LENGTH=189 | 169  | 189  | 2.00E-36  | 111.8 | 59.2  | 69.8  |
| Rsa1.0_01081.1.g23251.t1 | gb EOA33842.1  hypothetical protein CARUB_v10021325mg [Capsella rubella]                                                                                                                                                                                                                                                                                                                                                                                                                                                                                                                                                                                                                                                                                                                                                                                                                                                                                                                                                                                                                                                                    | 325  | 320  | 1.00E-150 | 98.5  | 83.4  | 90.2  | hypothetical protein CARUB_v10021325mg | gbpln | Capsella rubella     | AT1G70480.2   Symbols:   Domain of unknown function (DUF220)   chr1:26562250-26563608 FORWARD LENGTH=338                                                                                                                                                                                                                                   | 325  | 338  | 1.00E-152 | 104.0 | 82.8  | 90.5  |
| Rsa1.0_01081.1.g23252.t1 | ref NP_117206.1  ADP-ribosylation factor 2 [Arabidopsis thaliana] gi 18395248 ref NP_564195.1  ADP-ribosylation factor 2 [Arabidopsis thaliana] gi 3069872 ref NP_850975.1  ADP-ribosylation factor 2 [Arabidopsis thaliana] gi 42572059 ref NP_974120.1  ADP-ribosylation factor 2 [Arabidopsis thaliana] gi 297845410 ref XP_002890586.1  hypothetical protein ARALYDRAFT_472612 [Arabidopsis lyrata subsp. lyrata] gi 378548287 sp PODH91.1 ARF2B_ARA TH RecName: Full=ADP-ribosylation factor 2-B; Short=AtARF2; AltName: Full=ARF1-like protein U5 gi 378548311 sp Q9LQC8.2 ARF2A_ARA TH RecName: Full=ADP-ribosylation factor 2-A; Short=AtARF2 gi 11692864 gb AAG40035.1 AF324684.1 At1g23490 [Arabidopsis thaliana] gi 11762198 gb AAG40377.1 AF325025.1 At1g70490 [Arabidopsis thaliana] gi 1193875 gb AAG42921.1 AF329504.1 putative ADP-ribosylation factor [Arabidopsis thaliana] gi 12325036 gb AAG52463.1 AC010796.2 putative ADP-ribosylation factor 1: 15065-14075 [Arabidopsis thaliana] gi 13430504 gb AAK25874.1 AF360164.1 putative ADP-ribosylation factor 1 [Arabidopsis thaliana] ..1193875 gb AAG42921.1 AF329504.1 | 181  | 181  | 1.00E-102 | 100.0 | 100.0 | 100.0 | ADP-ribosylation factor 2              | gbpln | Arabidopsis lyrata   | AT1G70490.2   Symbols: ATARFA1D, ARFA1D   Ras-related small GTP-binding family protein   chr1:26564162-26565152 REVERSE LENGTH=181                                                                                                                                                                                                         | 181  | 181  | 1.00E-105 | 100.0 | 100.0 | 100.0 |



|                          |                                                                                                                                                                                                                                                                                                                                                                                                                                                                                                                                                                                                                                                                                                                                                                                                          |      |      |           |       |      |      |                                                     |       |                      |                                                                                                                                                                                                                                                                                                                                                                        |      |      |           |       |      |      |
|--------------------------|----------------------------------------------------------------------------------------------------------------------------------------------------------------------------------------------------------------------------------------------------------------------------------------------------------------------------------------------------------------------------------------------------------------------------------------------------------------------------------------------------------------------------------------------------------------------------------------------------------------------------------------------------------------------------------------------------------------------------------------------------------------------------------------------------------|------|------|-----------|-------|------|------|-----------------------------------------------------|-------|----------------------|------------------------------------------------------------------------------------------------------------------------------------------------------------------------------------------------------------------------------------------------------------------------------------------------------------------------------------------------------------------------|------|------|-----------|-------|------|------|
| Rsa1.0_01081.1.g23253.t1 | refXP_002863817.1  hypothetical protein ARALYDRAFT_917597 [Arabidopsis lyrata subsp. lyrata] gi 297309652 gb EFH40076.1  hypothetical protein ARALYDRAFT_917597 [Arabidopsis lyrata subsp. lyrata] ref NP_189609.1  HXXXD-type acyl-transferase-like protein [Arabidopsis thaliana] gi 75273808 sp Q9LRQ8.1 PMAT2_ARAT H RecName: Full=Phenolic glucoside malonyltransferase 2 gi 11944477 dbj BAB02518.1  anthocyanin 5-aromatic acyltransferase/benzoyltransferase-like protein [Arabidopsis thaliana] gi 26452509 dbj BAC43339.1  putative anthocyanin 5-aromatic acyltransferase [Arabidopsis thaliana] gi 29824113 gb AAP04017.1  putative anthocyanin 5-aromatic acyltransferase [Arabidopsis thaliana] gi 332644078 gb AEE77599.1  phenolic glucoside malonyltransferase 2 [Arabidopsis thaliana] | 1087 | 1083 | 0         | 99.6  | 83.7 | 90.3 | hypothetical protein ARALYDRAFT_917597              | gbpln | Arabidopsis lyrata   | AT5G42140.1   Symbols:   Regulator of chromosome condensation (RCC1) family with FYVE zinc finger domain   chr5:16837547-16841640 REVERSE LENGTH=1073                                                                                                                                                                                                                  | 1087 | 1073 | 0         | 98.7  | 82.0 | 88.4 |
| Rsa1.0_01081.1.g23254.t4 | gi 75273808 sp Q9LRQ8.1 PMAT2_ARAT H RecName: Full=Phenolic glucoside malonyltransferase 2 gi 11944477 dbj BAB02518.1  anthocyanin 5-aromatic acyltransferase/benzoyltransferase-like protein [Arabidopsis thaliana] gi 26452509 dbj BAC43339.1  putative anthocyanin 5-aromatic acyltransferase [Arabidopsis thaliana] gi 29824113 gb AAP04017.1  putative anthocyanin 5-aromatic acyltransferase [Arabidopsis thaliana] gi 332644078 gb AEE77599.1  phenolic glucoside malonyltransferase 2 [Arabidopsis thaliana]                                                                                                                                                                                                                                                                                     | 459  | 451  | 1.00E-162 | 98.3  | 64.3 | 78.4 | HXXXD-type acyl-transferase-like protein            | gbpln | Arabidopsis thaliana | AT3G29670.1   Symbols:   HXXXD-type acyl-transferase family protein   chr3:11527952-11529307 FORWARD LENGTH=451                                                                                                                                                                                                                                                        | 459  | 451  | 1.00E-164 | 98.3  | 64.3 | 78.4 |
| Rsa1.0_01081.1.g23255.t1 | gb ABD64939.1  hypothetical protein 24.t00017 [Brassica oleracea]                                                                                                                                                                                                                                                                                                                                                                                                                                                                                                                                                                                                                                                                                                                                        | 171  | 442  | 7.00E-52  | 258.5 | 61.4 | 76.0 | hypothetical protein 24.t00017                      | gbpln | Brassica oleracea    | AT2G13770.1   Symbols:   CONTAINS InterPro DOMAIN/s: Putative harbinger transposase-derived nuclease (InterPro:IPR006912); Has 451 Blast hits to 352 proteins in 33 species: Archae - 0; Bacteria - 0; Metazoa - 28; Fungi - 8; Plants - 388; Viruses - 0; Other Eukaryotes - 27 (source: NCBI BLINK)   chr2:5735603-5737847 FORWARD LENGTH=343                        | 171  | 343  | 1.00E-21  | 200.6 | 35.7 | 48.0 |
| Rsa1.0_01081.1.g23256.t1 | gb AAB87099.1  putative retroelement pol polyprotein [Arabidopsis thaliana]                                                                                                                                                                                                                                                                                                                                                                                                                                                                                                                                                                                                                                                                                                                              | 1631 | 1496 | 0         | 91.7  | 52.8 | 66.1 | putative retroelement pol polyprotein               | gbpln | Arabidopsis thaliana | AT4G23180.1   Symbols: CRK8   cysteine-rich RLK (RECEPTOR-like protein kinase) 8   chr4:12129485-12134086 FORWARD LENGTH=1262                                                                                                                                                                                                                                          | 1631 | 1262 | 1.00E-143 | 77.4  | 15.6 | 22.7 |
| Rsa1.0_01081.1.g23257.t1 | ref XP_002887314.1  F-box family protein [Arabidopsis lyrata subsp. lyrata] gi 297333155 gb EFH63573.1  F-box family protein [Arabidopsis lyrata subsp. lyrata]                                                                                                                                                                                                                                                                                                                                                                                                                                                                                                                                                                                                                                          | 341  | 345  | 1.00E-160 | 101.2 | 83.0 | 89.4 | F-box family protein                                | gbpln | Arabidopsis lyrata   | AT1G70590.1   Symbols:   F-box family protein   chr1:26618403-26620159 FORWARD LENGTH=351                                                                                                                                                                                                                                                                              | 341  | 351  | 1.00E-157 | 102.9 | 80.4 | 88.0 |
| Rsa1.0_01081.1.g23258.t1 | gb ABM30196.1  ribosomal large subunit structural protein [Brassica juncea]                                                                                                                                                                                                                                                                                                                                                                                                                                                                                                                                                                                                                                                                                                                              | 146  | 146  | 1.00E-75  | 100.0 | 96.6 | 98.6 | ribosomal large subunit structural protein          | gbpln | Brassica juncea      | AT1G70600.1   Symbols:   Ribosomal protein L18e/L15 superfamily protein   chr1:26621168-26621608 REVERSE LENGTH=146                                                                                                                                                                                                                                                    | 146  | 146  | 1.00E-77  | 100.0 | 95.2 | 97.9 |
| Rsa1.0_01081.1.g23259.t1 | ref XP_002892897.1  hypothetical protein ARALYDRAFT_471818 [Arabidopsis lyrata subsp. lyrata] gi 297338739 gb EFH69156.1  hypothetical protein ARALYDRAFT_471818 [Arabidopsis lyrata subsp. lyrata]                                                                                                                                                                                                                                                                                                                                                                                                                                                                                                                                                                                                      | 232  | 233  | 1.00E-100 | 100.4 | 88.8 | 97.0 | hypothetical protein ARALYDRAFT_471818              | gbpln | Arabidopsis lyrata   | AT1G16210.1   Symbols:   unknown protein; CONTAINS InterPro DOMAIN/s: Protein of unknown function DUF1014 (InterPro:IPR010422); Has 16107 Blast hits to 8386 proteins in 1107 species: Archae - 26; Bacteria - 3370; Metazoa - 4013; Fungi - 1516; Plants - 526; Viruses - 120; Other Eukaryotes - 6536 (source: NCBI BLINK)   chr1:5546352-5547447 REVERSE LENGTH=234 | 232  | 234  | 1.00E-102 | 100.9 | 84.5 | 93.1 |
| Rsa1.0_01081.1.g23260.t1 | gb EOA33216.1  hypothetical protein CARUB_v10019952mg [Capsella rubella]                                                                                                                                                                                                                                                                                                                                                                                                                                                                                                                                                                                                                                                                                                                                 | 636  | 634  | 0         | 99.7  | 80.7 | 88.7 | hypothetical protein CARUB_v10019952mg              | gbpln | Capsella rubella     | AT1G70630.1   Symbols:   Nucleotide-diphospho-sugar transferase family protein   chr1:26632118-26633991 FORWARD LENGTH=537                                                                                                                                                                                                                                             | 636  | 537  | 0         | 84.4  | 70.0 | 76.1 |
| Rsa1.0_01081.1.g23261.t1 | ref NP_177221.1  octicosapeptide/Phox/Be.1 domain-containing protein [Arabidopsis thaliana] gi 12324740 gb AAG52322.1 AC011663.1 unknown protein; 68334-67702 [Arabidopsis thaliana] gi 12325050 gb AAG52477.1 AC010796.16 unknown protein; 86168-86800 [Arabidopsis thaliana] gi 149944319 gb ABR46202.1  At1g70640 [Arabidopsis thaliana] gi 332196972 gb AEE35093.1  octicosapeptide/Phox/Be.1 domain-containing protein [Arabidopsis thaliana]                                                                                                                                                                                                                                                                                                                                                       | 166  | 174  | 1.00E-47  | 104.8 | 68.7 | 74.7 | octicosapeptide/Phox/Be.1 domain-containing protein | gbpln | Arabidopsis thaliana | AT1G70640.1   Symbols:   octicosapeptide/Phox/Bem1p (PB1) domain-containing protein   chr1:26636255-26636887 FORWARD LENGTH=174                                                                                                                                                                                                                                        | 166  | 174  | 5.00E-50  | 104.8 | 68.7 | 74.7 |
| Rsa1.0_01081.1.g23262.t1 | gb EOA32094.1  hypothetical protein CARUB_v10015343mg [Capsella rubella]                                                                                                                                                                                                                                                                                                                                                                                                                                                                                                                                                                                                                                                                                                                                 | 112  | 103  | 2.00E-12  | 92.0  | 36.6 | 45.5 | hypothetical protein CARUB_v10015343mg              | gbpln | Capsella rubella     | AT3G01324.1   Symbols:   ECA1-like gametogenesis related family protein   chr3:122140-122448 REVERSE LENGTH=102                                                                                                                                                                                                                                                        | 112  | 102  | 4.00E-14  | 91.1  | 35.7 | 48.2 |

|                          |                                                                                                                                                                                                                                                                                                                                                                                                                                                                                                                                                                                                                                                                                                                                            |      |     |           |       |      |      |                                                                            |       |                      |                                                                                                                                                                                                                                                                                                                          |      |     |           |       |      |      |
|--------------------------|--------------------------------------------------------------------------------------------------------------------------------------------------------------------------------------------------------------------------------------------------------------------------------------------------------------------------------------------------------------------------------------------------------------------------------------------------------------------------------------------------------------------------------------------------------------------------------------------------------------------------------------------------------------------------------------------------------------------------------------------|------|-----|-----------|-------|------|------|----------------------------------------------------------------------------|-------|----------------------|--------------------------------------------------------------------------------------------------------------------------------------------------------------------------------------------------------------------------------------------------------------------------------------------------------------------------|------|-----|-----------|-------|------|------|
| Rsa1.0_01081.1.g23263.t2 | refNP_564993.1   zinc finger (Ran-binding) domain-containing protein [Arabidopsis thaliana]<br>gi 332196973 gb AE35094.1   zinc finger (Ran-binding) domain-containing protein [Arabidopsis thaliana]                                                                                                                                                                                                                                                                                                                                                                                                                                                                                                                                      | 464  | 466 | 0         | 100.4 | 77.6 | 84.5 | zinc finger (Ran-binding) domain-containing protein                        | gbpln | Arabidopsis thaliana | AT1G70650.1   Symbols:   Ran BP2/NZF zinc finger-like superfamily protein   chr1:26638158-26640126 FORWARD LENGTH=466                                                                                                                                                                                                    | 464  | 466 | 0         | 100.4 | 77.6 | 84.5 |
| Rsa1.0_01081.1.g23264.t1 | gb EOA33452.1   hypothetical protein CARUB_v10020949mg.partial [Capsella rubella]                                                                                                                                                                                                                                                                                                                                                                                                                                                                                                                                                                                                                                                          | 191  | 210 | 3.00E-91  | 109.9 | 86.4 | 92.1 | hypothetical protein CARUB_v10020949mg.partial                             | gbpln | Capsella rubella     | AT1G70670.1   Symbols:   Caleosin-related family protein   chr1:26644830-26645970 FORWARD LENGTH=195                                                                                                                                                                                                                     | 191  | 195 | 3.00E-93  | 102.1 | 85.9 | 92.7 |
| Rsa1.0_01082.1.g23265.t1 | refNP_181463.1   jacalin-related lectin 22 [Arabidopsis thaliana]<br>gi 238479502 refNP_001154564.1   jacalin-related lectin 22 [Arabidopsis thaliana]<br>gi 12230237 sp O80950.1 MB22_ARATH RecName: Full=Myrosinase-binding protein-like At2g39310<br>gi 3402676 gb AAC28979.1   putative myrosinase-binding protein [Arabidopsis thaliana]<br>gi 15809794 gb AAL06820.1   At2g39310/T16B24.5 [Arabidopsis thaliana]<br>gi 17978944 gb AAL47438.1   At2g39310/T16B24.5 [Arabidopsis thaliana]<br>gi 22655362 gb AAM98273.1   At2g39310/T16B24.5 [Arabidopsis thaliana]<br>gi 330254564 gb AEC09658.1   jacalin-related lectin 22 [Arabidopsis thaliana]<br>gi 330254566 gb AEC09660.1   jacalin-related lectin 22 [Arabidopsis thaliana] | 451  | 458 | 0         | 101.6 | 74.5 | 85.6 | jacalin-related lectin 22                                                  | gbpln | Arabidopsis thaliana | AT2G39310.3   Symbols:   jacalin-related lectin 22   chr2:16414262-16416323 REVERSE LENGTH=458                                                                                                                                                                                                                           | 451  | 458 | 0         | 101.6 | 74.5 | 85.6 |
| Rsa1.0_01082.1.g23266.t1 | refNP_181462.4   uncharacterized protein [Arabidopsis thaliana]<br>gi 334184821 refNP_001189711.1   uncharacterized protein [Arabidopsis thaliana]<br>gi 330254562 gb AEC09656.1   uncharacterized protein AT2G39300 [Arabidopsis thaliana]<br>gi 330254563 gb AEC09657.1   uncharacterized protein AT2G39300 [Arabidopsis thaliana]                                                                                                                                                                                                                                                                                                                                                                                                       | 794  | 837 | 0         | 105.4 | 69.4 | 80.5 | uncharacterized protein                                                    | gbpln | Arabidopsis thaliana | AT2G39300.2   Symbols:   unknown protein; INVOLVED IN: biological_process unknown; EXPRESSED IN: 8 plant structures; EXPRESSED DURING: 4 anthesis, petal differentiation and expansion stage; BEST Arabidopsis thaliana protein match is: unknown protein (TAIR:AT3G5060.1).   chr2:16410109-16412869 REVERSE LENGTH=837 | 794  | 837 | 0         | 105.4 | 69.4 | 80.5 |
| Rsa1.0_01082.1.g23267.t1 | gb EOA27607.1   hypothetical protein CARUB_v10023748mg [Capsella rubella]                                                                                                                                                                                                                                                                                                                                                                                                                                                                                                                                                                                                                                                                  | 305  | 296 | 1.00E-122 | 97.0  | 78.0 | 83.0 | hypothetical protein CARUB_v10023748mg                                     | gbpln | Capsella rubella     | AT2G39290.1   Symbols:   PPGS1, PGP1, PGS1   phosphatidylglycerolphosphate synthase 1   chr2:16407274-16408840 FORWARD LENGTH=296                                                                                                                                                                                        | 305  | 296 | 1.00E-118 | 97.0  | 78.7 | 83.0 |
| Rsa1.0_01082.1.g23268.t1 | #                                                                                                                                                                                                                                                                                                                                                                                                                                                                                                                                                                                                                                                                                                                                          | #    | #   | #         | #     | #    | -    | ---                                                                        | ---   | #                    | #                                                                                                                                                                                                                                                                                                                        | #    | #   | #         | #     | #    |      |
| Rsa1.0_01082.1.g23269.t1 | dbj BAA97086.1   unnamed protein product [Arabidopsis thaliana]                                                                                                                                                                                                                                                                                                                                                                                                                                                                                                                                                                                                                                                                            | 196  | 341 | 9.00E-45  | 174.0 | 49.0 | 65.8 | unnamed protein product                                                    | gbpln | Arabidopsis thaliana | #                                                                                                                                                                                                                                                                                                                        | #    | #   | #         | #     | #    |      |
| Rsa1.0_01082.1.g23270.t1 | gb EOA14519.1   hypothetical protein CARUB_v10027748mg [Capsella rubella]                                                                                                                                                                                                                                                                                                                                                                                                                                                                                                                                                                                                                                                                  | 296  | 368 | 4.00E-53  | 124.3 | 42.6 | 58.8 | hypothetical protein CARUB_v10027748mg                                     | gbpln | Capsella rubella     | AT4G38940.1   Symbols:   Galactose oxidase/kelch repeat superfamily protein   chr4:18152848-18153960 FORWARD LENGTH=370                                                                                                                                                                                                  | 296  | 370 | 7.00E-46  | 125.0 | 41.6 | 56.4 |
| Rsa1.0_01082.1.g23271.t1 | refNP_178356.1   RNA-directed DNA polymerase (reverse transcriptase)-related family protein [Arabidopsis thaliana]<br>gi 3184287 gb AAC18934.1   putative non-LTR retroelement reverse transcriptase [Arabidopsis thaliana]<br>gi 330250497 gb AEC05591.1   RNA-directed DNA polymerase (reverse transcriptase)-related family protein [Arabidopsis thaliana]                                                                                                                                                                                                                                                                                                                                                                              | 175  | 211 | 3.00E-17  | 120.6 | 24.0 | 38.3 | RNA-directed DNA polymerase (reverse transcriptase)-related family protein | gbpln | Arabidopsis thaliana | AT2G02520.1   Symbols:   RNA-directed DNA polymerase (reverse transcriptase)-related family protein   chr2:676771-678145 REVERSE LENGTH=211                                                                                                                                                                              | 175  | 211 | 1.00E-19  | 120.6 | 24.0 | 38.3 |
| Rsa1.0_01082.1.g23272.t1 | #                                                                                                                                                                                                                                                                                                                                                                                                                                                                                                                                                                                                                                                                                                                                          | #    | #   | #         | #     | #    | -    | ---                                                                        | ---   | #                    | #                                                                                                                                                                                                                                                                                                                        | #    | #   | #         | #     | #    |      |
| Rsa1.0_01082.1.g23273.t1 | gb EOA27019.1   hypothetical protein CARUB_v10023117mg [Capsella rubella]                                                                                                                                                                                                                                                                                                                                                                                                                                                                                                                                                                                                                                                                  | 64   | 478 | 2.00E-14  | 746.9 | 59.4 | 64.1 | hypothetical protein CARUB_v10023117mg                                     | gbpln | Capsella rubella     | AT2G38400.2   Symbols:   AGT3   alanine:glyoxylate aminotransferase 3   chr2:16083779-16086115 FORWARD LENGTH=493                                                                                                                                                                                                        | 64   | 493 | 9.00E-17  | 770.3 | 57.8 | 64.1 |
| Rsa1.0_01082.1.g23274.t1 | refXP_002865823.1   nodulin MtN3 family protein [Arabidopsis lyrata subsp. lyrata]<br>gi 297311658 gb EFH42082.1   nodulin MtN3 family protein [Arabidopsis lyrata subsp. lyrata]                                                                                                                                                                                                                                                                                                                                                                                                                                                                                                                                                          | 203  | 289 | 6.00E-65  | 142.4 | 64.0 | 81.8 | nodulin MtN3 family protein                                                | gbpln | Arabidopsis lyrata   | AT5G50790.1   Symbols:   SWEET10, ASWEET10   Nodulin MtN3 family protein   chr5:20656461-20657827 REVERSE LENGTH=289                                                                                                                                                                                                     | 203  | 289 | 2.00E-67  | 142.4 | 63.5 | 81.8 |
| Rsa1.0_01082.1.g23275.t1 | dbj BAF00918.1   putative reverse transcriptase [Arabidopsis thaliana]                                                                                                                                                                                                                                                                                                                                                                                                                                                                                                                                                                                                                                                                     | 1209 | 910 | 0         | 75.3  | 29.8 | 40.4 | putative reverse transcriptase                                             | gbpln | Arabidopsis thaliana | AT1G43760.1   Symbols:   DNase I-like superfamily protein   chr1:16528880-16531065 REVERSE LENGTH=626                                                                                                                                                                                                                    | 1209 | 626 | 1.00E-108 | 51.8  | 17.5 | 24.7 |

|                          |                                                                                                                                                                                                                                                                                                                                                                                                                                                                                                                                                                               |     |      |           |       |      |      |                                        |       |                      |                                                                                                                                   |     |     |           |       |      |      |
|--------------------------|-------------------------------------------------------------------------------------------------------------------------------------------------------------------------------------------------------------------------------------------------------------------------------------------------------------------------------------------------------------------------------------------------------------------------------------------------------------------------------------------------------------------------------------------------------------------------------|-----|------|-----------|-------|------|------|----------------------------------------|-------|----------------------|-----------------------------------------------------------------------------------------------------------------------------------|-----|-----|-----------|-------|------|------|
| Rsa1.0_01083.1.g23276.t1 | refXP_002871573.1   hypothetical protein ARALYDRAFT_488176 [Arabidopsis lyrata subsp. lyrata] gi 297317410 gb EFH47832.1   hypothetical protein ARALYDRAFT_488176 [Arabidopsis lyrata subsp. lyrata]                                                                                                                                                                                                                                                                                                                                                                          | 290 | 373  | 1.00E-114 | 128.6 | 70.3 | 79.0 | hypothetical protein ARALYDRAFT_488176 | gbpln | Arabidopsis lyrata   | AT5G13570.1   Symbols: DCP2, TDT, ATDPCP2   decapping 2   chr5:4367532-4369992 FORWARD LENGTH=373                                 | 290 | 373 | 1.00E-116 | 128.6 | 69.7 | 78.3 |
| Rsa1.0_01083.1.g23277.t1 | gb EOA17696.1   hypothetical protein CARUB_v10006067mg [Capsella rubella]                                                                                                                                                                                                                                                                                                                                                                                                                                                                                                     | 111 | 111  | 4.00E-48  | 100.0 | 83.8 | 89.2 | hypothetical protein CARUB_v10006067mg | gbpln | Capsella rubella     | AT5G40370.1   Symbols:   Glutaredoxin family protein   chr5:16147828-16149052 REVERSE LENGTH=111                                  | 111 | 111 | 1.00E-50  | 100.0 | 83.8 | 87.4 |
| Rsa1.0_01083.1.g23278.t1 | refXP_002884714.1   predicted protein [Arabidopsis lyrata subsp. lyrata] gi 297330554 gb EFH60973.1   predicted protein [Arabidopsis lyrata subsp. lyrata]                                                                                                                                                                                                                                                                                                                                                                                                                    | 485 | 492  | 1.00E-117 | 101.4 | 48.9 | 68.0 | predicted protein                      | gbpln | Arabidopsis lyrata   | AT3G09120.1   Symbols:   Protein of unknown function (DUF674)   chr3:2797556-2798588 REVERSE LENGTH=314                           | 485 | 314 | 2.00E-93  | 64.7  | 37.5 | 46.4 |
| Rsa1.0_01083.1.g23279.t1 | refXP_002870668.1   WD-40 repeat family protein [Arabidopsis lyrata subsp. lyrata] gi 297316504 gb EFH46927.1   WD-40 repeat family protein [Arabidopsis lyrata subsp. lyrata]                                                                                                                                                                                                                                                                                                                                                                                                | 461 | 466  | 0         | 101.1 | 75.1 | 82.6 | WD-40 repeat family protein            | gbpln | Arabidopsis lyrata   | AT5G40880.1   Symbols:   WD-40 repeat family protein / zfw3 protein (ZFW3)   chr5:16379481-16381205 FORWARD LENGTH=472            | 461 | 472 | 0         | 102.4 | 72.5 | 80.5 |
| Rsa1.0_01083.1.g23280.t1 | refXP_002870668.1   WD-40 repeat family protein [Arabidopsis lyrata subsp. lyrata] gi 297316504 gb EFH46927.1   WD-40 repeat family protein [Arabidopsis lyrata subsp. lyrata]                                                                                                                                                                                                                                                                                                                                                                                                | 524 | 466  | 0         | 88.9  | 63.4 | 70.6 | WD-40 repeat family protein            | gbpln | Arabidopsis lyrata   | AT5G40880.1   Symbols:   WD-40 repeat family protein / zfw3 protein (ZFW3)   chr5:16379481-16381205 FORWARD LENGTH=472            | 524 | 472 | 0         | 90.1  | 63.5 | 70.8 |
| Rsa1.0_01083.1.g23281.t1 | refXP_002875410.1   hypothetical protein ARALYDRAFT_484578 [Arabidopsis lyrata subsp. lyrata] gi 297321248 gb EFH51669.1   hypothetical protein ARALYDRAFT_484578 [Arabidopsis lyrata subsp. lyrata]                                                                                                                                                                                                                                                                                                                                                                          | 234 | 244  | 6.00E-36  | 104.3 | 54.7 | 66.7 | hypothetical protein ARALYDRAFT_484578 | gbpln | Arabidopsis lyrata   | AT3G27880.1   Symbols:   Protein of unknown function (DUF1645)   chr3:10338429-10339157 FORWARD LENGTH=242                        | 234 | 242 | 4.00E-37  | 103.4 | 50.9 | 61.5 |
| Rsa1.0_01083.1.g23282.t1 | refNP_198849.1   transcription factor MYB23 [Arabidopsis thaliana] gi 75332916 sp Q96276.1 MYB23_ARAT H RecName: Full=Transcription factor MYB23; AltName: Full=Myb-related protein 23; Short=AtMYB23 gi 1495253 emb CAA92281.1   myb-related protein [Arabidopsis thaliana] gi 10176143 dbj BAB11588.1   Myb-related protein [Arabidopsis thaliana] gi 141619432 gb AAS10101.1   MYB transcription factor [Arabidopsis thaliana] gi 94442501 gb ABF19038.1   At5g40330 [Arabidopsis thaliana] gi 332007151 gb AED94534.1   transcription factor MYB23 [Arabidopsis thaliana] | 233 | 219  | 1.00E-100 | 94.0  | 76.8 | 82.4 | transcription factor MYB23             | gbpln | Arabidopsis thaliana | AT5G40330.1   Symbols: MYB23, ATMYPB23, ATMYPBRTF   myb domain protein 23   chr5:16127849-16129468 FORWARD LENGTH=219             | 233 | 219 | 1.00E-102 | 94.0  | 76.8 | 82.4 |
| Rsa1.0_01084.1.g23283.t6 | refNP_200492.1   putative F-box/FBD/LRR-repeat protein [Arabidopsis thaliana] gi 75262578 sp Q9FJT2.1 FDL40_ARAT H RecName: Full=Putative F-box/FBD/LRR-repeat protein At5g56810 gi 10176785 dbj BAB09899.1   unnamed protein product [Arabidopsis thaliana] gi 33200942 gb AED96810.1   putative F-box/FBD/LRR-repeat protein [Arabidopsis thaliana]                                                                                                                                                                                                                         | 692 | 435  | 3.00E-95  | 62.9  | 32.7 | 41.8 | putative F-box/FBD/LRR-repeat protein  | gbpln | Arabidopsis thaliana | AT5G56810.1   Symbols:   F-box/RNI-like/FBD-like domains-containing protein   chr5:22974520-22975992 FORWARD LENGTH=435           | 692 | 435 | 6.00E-98  | 62.9  | 32.7 | 41.8 |
| Rsa1.0_01084.1.g23284.t1 | gb AAD20658.1   putative retroelement pol polyprotein [Arabidopsis thaliana]                                                                                                                                                                                                                                                                                                                                                                                                                                                                                                  | 449 | 1611 | 2.00E-19  | 358.8 | 18.3 | 30.1 | putative retroelement pol polyprotein  | gbpln | Arabidopsis thaliana | # # # # # # #                                                                                                                     | #   | #   | #         | #     | #    | #    |
| Rsa1.0_01084.1.g23285.t2 | gb EOA24087.1   hypothetical protein CARUB_v10017318mg [Capsella rubella]                                                                                                                                                                                                                                                                                                                                                                                                                                                                                                     | 437 | 424  | 0         | 97.0  | 87.0 | 92.0 | hypothetical protein CARUB_v10017318mg | gbpln | Capsella rubella     | AT3G48530.1   Symbols: KING1   SNF1-related protein kinase regulatory subunit gamma 1   chr3:17987559-17989592 FORWARD LENGTH=424 | 437 | 424 | 0         | 97.0  | 86.7 | 91.8 |
| Rsa1.0_01084.1.g23286.t1 | gb EOA25308.1   hypothetical protein CARUB_v10018623mg [Capsella rubella]                                                                                                                                                                                                                                                                                                                                                                                                                                                                                                     | 227 | 230  | 1.00E-119 | 101.3 | 89.9 | 94.7 | hypothetical protein CARUB_v10018623mg | gbpln | Capsella rubella     | AT3G48540.1   Symbols:   Cytidine/deoxycytidylate deaminase family protein   chr3:17989798-17992015 REVERSE LENGTH=232            | 227 | 232 | 1.00E-120 | 102.2 | 90.3 | 95.6 |
| Rsa1.0_01084.1.g23287.t1 | # # # # # # # # # #                                                                                                                                                                                                                                                                                                                                                                                                                                                                                                                                                           | #   | #    | #         | #     | #    | #    | -                                      | ----  | ----                 | # # # # # # #                                                                                                                     | #   | #   | #         | #     | #    | #    |
| Rsa1.0_01084.1.g23288.t1 | gb AAF97298.1 AC007843.1 Hypothetical protein [Arabidopsis thaliana]                                                                                                                                                                                                                                                                                                                                                                                                                                                                                                          | 340 | 362  | 9.00E-46  | 106.5 | 29.1 | 38.5 | Hypothetical protein                   | gbpln | Arabidopsis thaliana | # # # # # # #                                                                                                                     | #   | #   | #         | #     | #    | #    |

|                          |                                                                                                                                                                                                                                                                                                                                                                                                                                                                                                                                                                                                                                                                                                                                                                                      |     |     |           |       |      |      |                                                     |       |                      |                                                                                                                                                                                                                                                                                                                                           |     |     |           |       |      |      |
|--------------------------|--------------------------------------------------------------------------------------------------------------------------------------------------------------------------------------------------------------------------------------------------------------------------------------------------------------------------------------------------------------------------------------------------------------------------------------------------------------------------------------------------------------------------------------------------------------------------------------------------------------------------------------------------------------------------------------------------------------------------------------------------------------------------------------|-----|-----|-----------|-------|------|------|-----------------------------------------------------|-------|----------------------|-------------------------------------------------------------------------------------------------------------------------------------------------------------------------------------------------------------------------------------------------------------------------------------------------------------------------------------------|-----|-----|-----------|-------|------|------|
| Rsa1.0_01084.1.g23289.t1 | ref[XP_002875912.1] hypothetical protein ARALYDRAFT_485213 [Arabidopsis lyrata subsp. lyrata] gi 297321750 gb EFH52171.1  hypothetical protein ARALYDRAFT_485213 [Arabidopsis lyrata subsp. lyrata]                                                                                                                                                                                                                                                                                                                                                                                                                                                                                                                                                                                  | 161 | 160 | 5.00E-67  | 99.4  | 88.2 | 91.3 | hypothetical protein ARALYDRAFT_485213              | gbpln | Arabidopsis lyrata   | AT3G48550.1   Symbols:   BEST Arabidopsis thaliana protein match is: C2H2-like zinc finger protein (TAIR:AT2G01940.3); Has 78 Blast hits to 78 proteins in 11 species: Archae - 0; Bacteria - 0; Metazoa - 0; Fungi - 0; Plants - 78; Viruses - 0; Other Eukaryotes - 0 (source: NCBI BLink).   chr3:17994048-17994595 FORWARD LENGTH=158 | 161 | 158 | 8.00E-67  | 98.1  | 86.3 | 90.1 |
| Rsa1.0_01085.1.g23290.t1 | #                                                                                                                                                                                                                                                                                                                                                                                                                                                                                                                                                                                                                                                                                                                                                                                    | #   | #   | #         | #     | #    | -    | ----                                                | ----  | #                    | #                                                                                                                                                                                                                                                                                                                                         | #   | #   | #         | #     | #    |      |
| Rsa1.0_01085.1.g23291.t1 | ref[NP_200149.1] Putative pectinesterase/pectinesterase inhibitor 61 [Arabidopsis thaliana] gi 75309150 sp Q9FK05.1 PME61_ARATH RecName: Full=Probable pectinesterase/pectinesterase inhibitor 61; Includes: RecName: Full=Pectinesterase inhibitor 61; AltName: Full=Pectin methylsterase inhibitor 61; Includes: RecName: Full=Pectinesterase 61; Short=PE 61; AltName: Full=AtPMEpcrF; AltName: Full=Pectin methylsterase 61; Short=AtPME61 gi 13507549 gb AAK28637.1 AF360340.1 putative pectinesterase [Arabidopsis thaliana] gi 9759184 dbj BAB09799.1  pectinesterase [Arabidopsis thaliana] gi 15293287 gb AAK93754.1  putative pectinesterase [Arabidopsis thaliana] gi 332008962 gb AED96345.1  Putative pectinesterase/pectinesterase inhibitor 61 [Arabidopsis thaliana] | 586 | 587 | 0         | 100.2 | 86.2 | 92.8 | Putative pectinesterase/pectinesterase inhibitor 61 | gbpln | Arabidopsis thaliana | AT5G53370.1   Symbols: ATPMEPCRF, PMEPCRF   pectin methylsterase PCR fragment. F   chr5:21649683-21651530 REVERSE LENGTH=587                                                                                                                                                                                                              | 586 | 587 | 0         | 100.2 | 86.2 | 92.8 |
| Rsa1.0_01085.1.g23292.t1 | #                                                                                                                                                                                                                                                                                                                                                                                                                                                                                                                                                                                                                                                                                                                                                                                    | #   | #   | #         | #     | #    | -    | ----                                                | ----  | #                    | #                                                                                                                                                                                                                                                                                                                                         | #   | #   | #         | #     | #    |      |
| Rsa1.0_01085.1.g23293.t1 | ref[NP_568791.1] putative beta-1,3-galactosyltransferase 11 [Arabidopsis thaliana] gi 75165503 sp Q94F27.1 B3GTB_ARATH RecName: Full=Probable beta-1,3-galactosyltransferase 11 gi 14423410 gb AAK62387.1 AF386942.1 Avr9 elicitor response protein-like [Arabidopsis thaliana] gi 20148409 gb AAM10095.1  Avr9 elicitor response protein-like [Arabidopsis thaliana] gi 332008958 gb AED96341.1  putative beta-1,3-galactosyltransferase 11 [Arabidopsis thaliana]                                                                                                                                                                                                                                                                                                                  | 337 | 338 | 1.00E-177 | 100.3 | 92.9 | 96.4 | putative beta-1,3-galactosyltransferase 11          | gbpln | Arabidopsis thaliana | AT5G53340.1   Symbols:   Galactosyltransferase family protein   chr5:21641045-21643195 REVERSE LENGTH=338                                                                                                                                                                                                                                 | 337 | 338 | 1.00E-180 | 100.3 | 92.9 | 96.4 |
| Rsa1.0_01085.1.g23294.t1 | #                                                                                                                                                                                                                                                                                                                                                                                                                                                                                                                                                                                                                                                                                                                                                                                    | #   | #   | #         | #     | #    | -    | ----                                                | ----  | #                    | #                                                                                                                                                                                                                                                                                                                                         | #   | #   | #         | #     | #    |      |
| Rsa1.0_01085.1.g23295.t1 | gb[ECA13991.1] hypothetical protein CARUB_v10027123mg [Capsella rubella]                                                                                                                                                                                                                                                                                                                                                                                                                                                                                                                                                                                                                                                                                                             | 205 | 213 | 3.00E-97  | 103.9 | 88.8 | 93.2 | hypothetical protein CARUB_v10027123mg              | gbpln | Capsella rubella     | AT5G53310.1   Symbols:   myosin heavy chain-related   chr5:21634657-21636094 FORWARD LENGTH=210                                                                                                                                                                                                                                           | 205 | 210 | 7.00E-97  | 102.4 | 85.9 | 92.7 |

|                           |                                                                                                                                                                                                                                                                                                                                                                                                                                                                                                                                                                                                                                                                                                                                                                                                                                                                                                                                                                                                                                                                                                                                                                               |     |     |           |       |      |       |                                               |       |                      |                                                                                                                                                                           |     |     |           |       |      |       |
|---------------------------|-------------------------------------------------------------------------------------------------------------------------------------------------------------------------------------------------------------------------------------------------------------------------------------------------------------------------------------------------------------------------------------------------------------------------------------------------------------------------------------------------------------------------------------------------------------------------------------------------------------------------------------------------------------------------------------------------------------------------------------------------------------------------------------------------------------------------------------------------------------------------------------------------------------------------------------------------------------------------------------------------------------------------------------------------------------------------------------------------------------------------------------------------------------------------------|-----|-----|-----------|-------|------|-------|-----------------------------------------------|-------|----------------------|---------------------------------------------------------------------------------------------------------------------------------------------------------------------------|-----|-----|-----------|-------|------|-------|
| Rsa1.0_01085.1.g23296.t1  | ref NP_568788.1  ubiquitin-conjugating enzyme E2 10 [Arabidopsis thaliana] gi 30696309 ref NP_851181.1  ubiquitin-conjugating enzyme E2 10 [Arabidopsis thaliana] gi 334188360 ref NP_001190528.1  ubiquitin-conjugating enzyme E2 10 [Arabidopsis thaliana] gi 297796167 ref XP_002865968.1  ubiquitin-conjugating enzyme 10 [Arabidopsis lyrata subsp. lyrata] gi 464987 sp P35133.1 UBC10_ARATH RecName: Full=Ubiquitin-conjugating enzyme E2 10; AltName: Full=Ubiquitin carrier protein 10/12; AltName: Full=Ubiquitin-conjugating enzyme E2-17 kDa 10/12; AltName: Full=Ubiquitin-protein ligase 10/12 gi 11692932 gb AAG40069.1 AF324718.1 AT5g53300 [Arabidopsis thaliana] gi 11762158 gb AAG40357.1 AF325005.1 AT5g53300 [Arabidopsis thaliana] gi 11908050 gb AAG41454.1 AF326872.1 putative E2, ubiquitin-conjugating enzyme UBC10 [Arabidopsis thaliana] gi 297878 emb CAA78715.1  ubiquitin conjugating enzyme [Arabidopsis thaliana] gi 349213 gb AAA32895.1  ubiquitin conjugating enzyme [Arabidopsis thaliana] gi 9759177 dbj BAB09792.1  ubiquitin-conjugating enzyme E2-17 kD 10 (ubiquitin-protein ligase 10) (ubiquitin carrier protein 10) [Arabidopsis | 148 | 148 | 6.00E-82  | 100.0 | 99.3 | 100.0 | ubiquitin-conjugating enzyme E2 10            | gbpln | Arabidopsis lyrata   | AT5G53300.4   Symbols: UBC10   ubiquitin-conjugating enzyme 10   chr5:21632802-21633989 REVERSE LENGTH=148                                                                | 148 | 148 | 2.00E-84  | 100.0 | 99.3 | 100.0 |
| Rsa1.0_01085.1.g23297.t1  | #                                                                                                                                                                                                                                                                                                                                                                                                                                                                                                                                                                                                                                                                                                                                                                                                                                                                                                                                                                                                                                                                                                                                                                             | #   | #   | #         | #     | #    | #     | -                                             | ----  | ----                 | #                                                                                                                                                                         | #   | #   | #         | #     | #    |       |
| Rsa1.0_01085.1.g23298.t1  | ref NP_200141.1  ethylene-responsive transcription factor CRF3 [Arabidopsis thaliana] gi 75262588 sp Q9FK12.1 CRF3_ARATH RecName: Full=Ethylene-responsive transcription factor CRF3; AltName: Full=Protein CYTOKININ RESPONSE FACTOR 3 gi 9759176 dbj BAB09791.1  unnamed protein product [Arabidopsis thaliana] gi 48479349 gb AA744945.1  putative AP2/EREBP transcription factor [Arabidopsis thaliana] gi 56121914 gb AAV74238.1  At5g53290 [Arabidopsis thaliana] gi 60543347 gb AAX22271.1  At5g53290 [Arabidopsis thaliana] gi 332008950 gb AED96333.1  ethylene-responsive transcription factor CRF3 [Arabidopsis thaliana]                                                                                                                                                                                                                                                                                                                                                                                                                                                                                                                                          | 355 | 354 | 1.00E-118 | 99.7  | 70.7 | 78.9  | ethylene-responsive transcription factor CRF3 | gbpln | Arabidopsis thaliana | AT5G53290.1   Symbols: CRF3   cytokinin response factor 3   chr5:21617961-21619025 REVERSE LENGTH=354                                                                     | 355 | 354 | 1.00E-120 | 99.7  | 70.7 | 78.9  |
| Rsa1.0_01086.1.g23299.t1  | gb EOA12866.1  hypothetical protein CARUB_v10025834mg [Capsella rubella]                                                                                                                                                                                                                                                                                                                                                                                                                                                                                                                                                                                                                                                                                                                                                                                                                                                                                                                                                                                                                                                                                                      | 926 | 934 | 0         | 100.9 | 95.0 | 97.7  | hypothetical protein CARUB_v10025834mg        | gbpln | Capsella rubella     | AT5G60700.1   Symbols:   glycosyltransferase family protein 2   chr5:24402329-24404729 REVERSE LENGTH=668                                                                 | 926 | 668 | 0         | 72.1  | 69.4 | 70.8  |
| Rsa1.0_01086.1.g23300.t1  | ref XP_002864698.1  hypothetical protein ARALYDRAFT_496218 [Arabidopsis lyrata subsp. lyrata] gi 297310533 gb EFH40957.1  hypothetical protein ARALYDRAFT_496218 [Arabidopsis lyrata subsp. lyrata]                                                                                                                                                                                                                                                                                                                                                                                                                                                                                                                                                                                                                                                                                                                                                                                                                                                                                                                                                                           | 849 | 844 | 0         | 99.4  | 92.1 | 96.5  | hypothetical protein ARALYDRAFT_496218        | gbpln | Arabidopsis lyrata   | AT5G60690.1   Symbols: REV_IFL, IFL1   Homeobox-leucine zipper family protein / lipid-binding START domain-containing protein   chr5:24397734-24401933 FORWARD LENGTH=842 | 849 | 842 | 0         | 99.2  | 92.1 | 96.5  |
| Rsa1.0_01086.1.g23301.t1  | #                                                                                                                                                                                                                                                                                                                                                                                                                                                                                                                                                                                                                                                                                                                                                                                                                                                                                                                                                                                                                                                                                                                                                                             | #   | #   | #         | #     | #    | #     | -                                             | ----  | ----                 | #                                                                                                                                                                         | #   | #   | #         | #     | #    |       |
| Rsa1.0_01086.1.g23302.t1  | ref XP_002864697.1  hypothetical protein ARALYDRAFT_496217 [Arabidopsis lyrata subsp. lyrata] gi 297310532 gb EFH40956.1  hypothetical protein ARALYDRAFT_496217 [Arabidopsis lyrata subsp. lyrata] ref XP_002866390.1  hypothetical protein ARALYDRAFT_496216 [Arabidopsis lyrata subsp. lyrata] gi 297312225 gb EFH42649.1  hypothetical protein ARALYDRAFT_496216 [Arabidopsis lyrata subsp. lyrata]                                                                                                                                                                                                                                                                                                                                                                                                                                                                                                                                                                                                                                                                                                                                                                       | 168 | 158 | 6.00E-51  | 94.0  | 72.6 | 82.1  | hypothetical protein ARALYDRAFT_496217        | gbpln | Arabidopsis lyrata   | AT5G60680.1   Symbols:   Protein of unknown function, DUF584   chr5:24386247-24386738 FORWARD LENGTH=163                                                                  | 168 | 163 | 4.00E-47  | 97.0  | 69.6 | 80.4  |
| Rsa1.0_01086.1.g23303.t12 | ref XP_002866390.1  hypothetical protein ARALYDRAFT_496216 [Arabidopsis lyrata subsp. lyrata] gi 297312225 gb EFH42649.1  hypothetical protein ARALYDRAFT_496216 [Arabidopsis lyrata subsp. lyrata]                                                                                                                                                                                                                                                                                                                                                                                                                                                                                                                                                                                                                                                                                                                                                                                                                                                                                                                                                                           | 292 | 155 | 5.00E-12  | 53.1  | 14.4 | 15.8  | hypothetical protein ARALYDRAFT_496216        | gbpln | Arabidopsis lyrata   | AT5G60670.1   Symbols:   Ribosomal protein L11 family protein   chr5:24381066-24381566 REVERSE LENGTH=166                                                                 | 292 | 166 | 3.00E-13  | 56.8  | 14.4 | 16.1  |

|                          |                                                                                                                                                                                                                                                                                                                                                                                                                                                                                                                                                                                                                                                                                                                                                                                                              |     |      |          |       |      |      |                                                     |       |                      |                                                                                                                                                                                                                                                                                                                                                                                                                                                                             |     |     |          |       |      |      |
|--------------------------|--------------------------------------------------------------------------------------------------------------------------------------------------------------------------------------------------------------------------------------------------------------------------------------------------------------------------------------------------------------------------------------------------------------------------------------------------------------------------------------------------------------------------------------------------------------------------------------------------------------------------------------------------------------------------------------------------------------------------------------------------------------------------------------------------------------|-----|------|----------|-------|------|------|-----------------------------------------------------|-------|----------------------|-----------------------------------------------------------------------------------------------------------------------------------------------------------------------------------------------------------------------------------------------------------------------------------------------------------------------------------------------------------------------------------------------------------------------------------------------------------------------------|-----|-----|----------|-------|------|------|
| Rsa1.0_01087.1.g23304.t1 | gb AAG51783.1 AC079679.3 reverse transcriptase, putative; 16838-20266 [Arabidopsis thaliana]<br>ref NP_563715.1 putative pectate lyase 1 [Arabidopsis thaliana]<br>gi 32129844 sp Q940Q1.2 PEL1_ARATH<br>RecName: Full=Probable pectate lyase 1; AltName: Full=Pectate lyase A1;<br>Flags: Precursor<br>gi 2494113 gb AAB80622.1  Strong similarity to Musa pectate lyase (gb X92943). ESTs gb AA042458, gb ATTS4502, gb N38552 come from this gene [Arabidopsis thaliana]<br>gi 18086433 gb AAL57671.1 <br>At1g04680/T1G11.6 [Arabidopsis thaliana] gi 21593312 gb AAM65261.1  putative pectate lyase A11 [Arabidopsis thaliana] gi 332189611 gb AEE27732.1  putative pectate lyase 1 [Arabidopsis thaliana]                                                                                                | 457 | 1142 | 6.00E-77 | 249.9 | 33.3 | 47.7 | reverse transcriptase, putative; 16838-20266        | gbpln | Arabidopsis thaliana | AT4G29090.1   Symbols:   Ribonuclease H-like superfamily protein   chr4:14333528-14335255 FORWARD LENGTH=575                                                                                                                                                                                                                                                                                                                                                                | 457 | 575 | 3.00E-40 | 125.8 | 21.2 | 33.5 |
| Rsa1.0_01087.1.g23305.t1 | gb ATTS4502, gb N38552 come from this gene [Arabidopsis thaliana]<br>gi 18086433 gb AAL57671.1 <br>At1g04680/T1G11.6 [Arabidopsis thaliana] gi 21593312 gb AAM65261.1  putative pectate lyase A11 [Arabidopsis thaliana] gi 332189611 gb AEE27732.1  putative pectate lyase 1 [Arabidopsis thaliana]                                                                                                                                                                                                                                                                                                                                                                                                                                                                                                         | 431 | 431  | 0        | 100.0 | 93.3 | 97.0 | putative pectate lyase 1                            | gbpln | Arabidopsis thaliana | AT1G04680.1   Symbols:   Pectin lyase-like superfamily protein   chr1:1304052-1307780 REVERSE LENGTH=431                                                                                                                                                                                                                                                                                                                                                                    | 431 | 431 | 0        | 100.0 | 93.3 | 97.0 |
| Rsa1.0_01087.1.g23306.t2 | gb ABH09777.1  pollen-preferential protein [Brassica rapa subsp. chinensis]                                                                                                                                                                                                                                                                                                                                                                                                                                                                                                                                                                                                                                                                                                                                  | 129 | 129  | 5.00E-63 | 100.0 | 94.6 | 95.3 | pollen-preferential protein                         | gbpln | Brassica rapa        | AT1G04670.1   Symbols:   unknown protein; Has 40 Blast hits to 40 proteins in 14 species: Archae - 2; Bacteria - 5; Metazoa - 1; Fungi - 2; Plants - 30; Viruses - 0; Other Eukaryotes - 0 (source: NCBI BLink).   chr1:1301985-1302532 FORWARD LENGTH=126                                                                                                                                                                                                                  | 129 | 126 | 2.00E-52 | 97.7  | 76.7 | 86.0 |
| Rsa1.0_01087.1.g23307.t1 | ref XP_002892235.1  predicted protein [Arabidopsis lyrata subsp. lyrata]<br>gi 297338077 gb EFH68494.1  predicted protein [Arabidopsis lyrata subsp. lyrata]                                                                                                                                                                                                                                                                                                                                                                                                                                                                                                                                                                                                                                                 | 215 | 207  | 6.00E-17 | 96.3  | 20.5 | 23.3 | predicted protein                                   | gbpln | Arabidopsis lyrata   | AT1G04660.1   Symbols:   glycine-rich protein   chr1:1300668-1301306 REVERSE LENGTH=212                                                                                                                                                                                                                                                                                                                                                                                     | 215 | 212 | 9.00E-19 | 98.6  | 20.5 | 22.8 |
| Rsa1.0_01087.1.g23308.t1 | gb AAD12028.1  putative non-LTR retroelement reverse transcriptase [Arabidopsis thaliana]                                                                                                                                                                                                                                                                                                                                                                                                                                                                                                                                                                                                                                                                                                                    | 331 | 1447 | 5.00E-76 | 437.2 | 44.1 | 62.5 | putative non-LTR retroelement reverse transcriptase | gbpln | Arabidopsis thaliana | AT3G24255.1   Symbols:   RNA-directed DNA polymerase (reverse transcriptase)-related family protein   chr3:8789471-8793208 FORWARD LENGTH=746<br>AT1G21280.1   Symbols:   CONTAINS InterPro DOMAIN/s: Retrotransposon gag protein (InterPro:IPR005162); Has 707 Blast hits to 705 proteins in 25 species: Archae - 0; Bacteria - 0; Metazoa - 4; Fungi - 0; Plants - 703; Viruses - 0; Other Eukaryotes - 0 (source: NCBI BLink).   chr1:7447690-7448403 REVERSE LENGTH=237 | 331 | 746 | 7.00E-53 | 225.4 | 34.1 | 50.5 |
| Rsa1.0_01087.1.g23309.t1 | dbj BAA97099.1  retroelement pol polyprotein-like [Arabidopsis thaliana]                                                                                                                                                                                                                                                                                                                                                                                                                                                                                                                                                                                                                                                                                                                                     | 154 | 1098 | 3.00E-40 | 713.0 | 50.6 | 62.3 | retroelement pol polyprotein-like                   | gbpln | Arabidopsis thaliana | AT2G33220.1   Symbols:   GRIM-19 protein   chr2:14078974-14079929 FORWARD LENGTH=143                                                                                                                                                                                                                                                                                                                                                                                        | 154 | 237 | 4.00E-17 | 153.9 | 32.5 | 50.0 |
| Rsa1.0_01087.1.g23310.t1 | ref NP_565761.1  NADH dehydrogenase [Arabidopsis thaliana]<br>gi 297823115 ref XP_002879440.1  hypothetical protein ARALYDRAFT_482258 [Arabidopsis lyrata subsp. lyrata]<br>gi 75219577 sp O49313.1 NDADB_ARATH<br>RecName: Full=NADH dehydrogenase [ubiquinone] 1 alpha subcomplex subunit 13-B<br>gi 2924772 gb AAC04901.1  expressed protein [Arabidopsis thaliana]<br>gi 17529030 gb AAL38725.1  unknown protein [Arabidopsis thaliana]<br>gi 20259081 gb AAM14256.1  unknown protein [Arabidopsis thaliana]<br>gi 21618056 gb AAM67106.1  unknown [Arabidopsis thaliana]<br>gi 297325279 gb EFH55699.1  hypothetical protein ARALYDRAFT_482258 [Arabidopsis lyrata subsp. lyrata]<br>gi 330253707 gb AEC08801.1  NADH dehydrogenase [ubiquinone] 1 alpha subcomplex subunit 13-B [Arabidopsis thaliana] | 71  | 143  | 3.00E-18 | 201.4 | 59.2 | 63.4 | NADH dehydrogenase                                  | gbpln | Arabidopsis lyrata   | AT2G33220.1   Symbols:   GRIM-19 protein   chr2:14078974-14079929 FORWARD LENGTH=143                                                                                                                                                                                                                                                                                                                                                                                        | 71  | 143 | 4.00E-21 | 201.4 | 59.2 | 63.4 |
| Rsa1.0_01087.1.g23311.t1 | gb EOA36577.1  hypothetical protein CARUB_v10011757mg [Capsella rubella]                                                                                                                                                                                                                                                                                                                                                                                                                                                                                                                                                                                                                                                                                                                                     | 437 | 436  | 0        | 99.8  | 92.2 | 96.1 | hypothetical protein CARUB_v10011757mg              | gbpln | Capsella rubella     | AT1G04610.1   Symbols: YUC3   YUCCA 3   chr1:1279524-1281331 FORWARD LENGTH=437                                                                                                                                                                                                                                                                                                                                                                                             | 437 | 437 | 0        | 100.0 | 90.6 | 95.9 |

|                          |                                                                                                                                                                                                                                                                                                                                                      |     |     |           |       |      |      |                                            |       |                      |                                                                                                                                                                                                                                                                                                                                                                              |     |     |           |       |      |      |
|--------------------------|------------------------------------------------------------------------------------------------------------------------------------------------------------------------------------------------------------------------------------------------------------------------------------------------------------------------------------------------------|-----|-----|-----------|-------|------|------|--------------------------------------------|-------|----------------------|------------------------------------------------------------------------------------------------------------------------------------------------------------------------------------------------------------------------------------------------------------------------------------------------------------------------------------------------------------------------------|-----|-----|-----------|-------|------|------|
| Rsa1.0_01088.1.g23312.t1 | refNP_190559.1  Phototropic-responsive NPH3 family protein [Arabidopsis thaliana]   gi175183315 sp Q9M2W8.1 Y3990_ARATH RecName: Full=BTB/POZ domain-containing protein At3g49900   gi6723435 emb CAB66928.1  putative protein [Arabidopsis thaliana]   gi332645082 gb AEE78603.1  Phototropic-responsive NPH3 family protein [Arabidopsis thaliana] | 442 | 517 | 1.00E-145 | 117.0 | 62.9 | 69.7 | Phototropic-responsive NPH3 family protein | gbpln | Arabidopsis thaliana | AT3G49900.1   Symbols:   Phototropic-responsive NPH3 family protein   chr3:18500635-18502614 REVERSE LENGTH=517                                                                                                                                                                                                                                                              | 442 | 517 | 1.00E-148 | 117.0 | 62.9 | 69.7 |
| Rsa1.0_01088.1.g23313.t1 | refXP_002893922.1  predicted protein [Arabidopsis lyrata subsp. lyrata]   gi297339764 gb EFH70181.1  predicted protein [Arabidopsis lyrata subsp. lyrata]                                                                                                                                                                                            | 132 | 582 | 2.00E-26  | 440.9 | 57.6 | 72.7 | predicted protein                          | gbpln | Arabidopsis lyrata   | AT4G08510.1   Symbols:   unknown protein; LOCATED IN: chloroplast; BEST Arabidopsis thaliana protein match is: unknown protein (TAIR:AT1G36990.1); Has 888 Blast hits to 321 proteins in 121 species: Archae - 0; Bacteria - 120; Metazoa - 86; Fungi - 24; Plants - 79; Viruses - 0; Other Eukaryotes - 579 (source: NCBI BLink).   chr4:5411023-5413016 FORWARD LENGTH=551 | 132 | 551 | 9.00E-28  | 417.4 | 59.8 | 72.7 |
| Rsa1.0_01088.1.g23314.t1 | refXP_002865966.1  hypothetical protein ARALYDRAFT_357572 [Arabidopsis lyrata subsp. lyrata]   gi297311801 gb EFH42225.1  hypothetical protein ARALYDRAFT_357572 [Arabidopsis lyrata subsp. lyrata]                                                                                                                                                  | 295 | 455 | 1.00E-80  | 154.2 | 53.2 | 68.1 | hypothetical protein ARALYDRAFT_357572     | gbpln | Arabidopsis lyrata   | AT1G30790.1   Symbols:   F-box and associated interaction domains-containing protein   chr1:10932713-10933912 FORWARD LENGTH=399                                                                                                                                                                                                                                             | 295 | 399 | 8.00E-57  | 135.3 | 46.1 | 61.4 |
| Rsa1.0_01088.1.g23315.t1 | refNP_190558.1  uncharacterized protein [Arabidopsis thaliana]   gi6723434 emb CAB66927.1  putative protein [Arabidopsis thaliana]   gi9285661.1 gb ABE77408.1  At3g49890 [Arabidopsis thaliana]   gi332645081 gb AEE78602.1  uncharacterized protein AT3G49890 [Arabidopsis thaliana]                                                               | 66  | 220 | 1.00E-10  | 333.3 | 60.6 | 68.2 | uncharacterized protein                    | gbpln | Arabidopsis thaliana | AT3G49890.1   Symbols:   unknown protein; Has 27 Blast hits to 27 proteins in 13 species: Archae - 0; Bacteria - 0; Metazoa - 3; Fungi - 0; Plants - 21; Viruses - 0; Other Eukaryotes - 3 (source: NCBI BLink).   chr3:18499296-18500501 FORWARD LENGTH=220                                                                                                                 | 66  | 220 | 2.00E-13  | 333.3 | 60.6 | 68.2 |
| Rsa1.0_01088.1.g23316.t1 | refXP_002876002.1  glycosyl hydrolase family protein 43 [Arabidopsis lyrata subsp. lyrata]   gi297321840 gb EFH52261.1  glycosyl hydrolase family protein 43 [Arabidopsis lyrata subsp. lyrata]                                                                                                                                                      | 498 | 465 | 0         | 93.4  | 78.1 | 83.7 | glycosyl hydrolase family protein 43       | gbpln | Arabidopsis lyrata   | AT3G49880.1   Symbols:   glycosyl hydrolase family protein 43   chr3:18496907-18498398 FORWARD LENGTH=466                                                                                                                                                                                                                                                                    | 498 | 466 | 0         | 93.6  | 78.9 | 84.7 |
| Rsa1.0_01088.1.g23317.t1 | gb EOA24466.1  hypothetical protein CARUB_v10017722mg [Capsella rubella]                                                                                                                                                                                                                                                                             | 287 | 302 | 4.00E-86  | 105.2 | 75.3 | 83.6 | hypothetical protein CARUB_v10017722mg     | gbpln | Capsella rubella     | AT3G49850.1   Symbols: TRB3, ATTRB3, TBP2   telomere repeat binding factor 3   chr3:18489451-18490731 FORWARD LENGTH=295                                                                                                                                                                                                                                                     | 287 | 295 | 1.00E-85  | 102.8 | 72.8 | 83.6 |
| Rsa1.0_01088.1.g23318.t1 | emb CAB66922.1  putative protein [Arabidopsis thaliana]                                                                                                                                                                                                                                                                                              | 115 | 651 | 8.00E-12  | 566.1 | 55.7 | 56.5 | putative protein                           | gbpln | Arabidopsis thaliana | #                                                                                                                                                                                                                                                                                                                                                                            | #   | #   | #         | #     | #    | #    |
| Rsa1.0_01088.1.g23319.t1 | refXP_002875997.1  predicted protein [Arabidopsis lyrata subsp. lyrata]   gi297321835 gb EFH52256.1  predicted protein [Arabidopsis lyrata subsp. lyrata]                                                                                                                                                                                            | 129 | 141 | 1.00E-44  | 109.3 | 71.3 | 77.5 | predicted protein                          | gbpln | Arabidopsis lyrata   | AT3G49820.1   Symbols:   unknown protein; BEST Arabidopsis thaliana protein match is: unknown protein (TAIR:AT5G65925.1). Has 23 Blast hits to 23 proteins in 7 species: Archae - 0; Bacteria - 0; Metazoa - 0; Fungi - 0; Plants - 23; Viruses - 0; Other Eukaryotes - 0 (source: NCBI BLink).   chr3:18481237-18481722 FORWARD LENGTH=161                                  | 129 | 161 | 3.00E-38  | 124.8 | 71.3 | 77.5 |
| Rsa1.0_01088.1.g23320.t1 | #                                                                                                                                                                                                                                                                                                                                                    | #   | #   | #         | #     | #    | #    | -                                          | ----  | ----                 | #                                                                                                                                                                                                                                                                                                                                                                            | #   | #   | #         | #     | #    | #    |
| Rsa1.0_01088.1.g23321.t1 | gb EOA19072.1  hypothetical protein CARUB_v10007738mg [Capsella rubella]                                                                                                                                                                                                                                                                             | 170 | 480 | 2.00E-32  | 282.4 | 40.6 | 57.1 | hypothetical protein CARUB_v10007738mg     | gbpln | Capsella rubella     | AT1G52950.1   Symbols:   Nucleic acid-binding, OB-fold-like protein   chr1:19725483-19728007 FORWARD LENGTH=566                                                                                                                                                                                                                                                              | 170 | 566 | 1.00E-34  | 332.9 | 38.2 | 60.6 |
| Rsa1.0_01089.1.g23322.t1 | refXP_002868337.1  hypothetical protein ARALYDRAFT_493535 [Arabidopsis lyrata subsp. lyrata]   gi297314173 gb EFH44596.1  hypothetical protein ARALYDRAFT_493535 [Arabidopsis lyrata subsp. lyrata]                                                                                                                                                  | 91  | 92  | 3.00E-37  | 101.1 | 86.8 | 92.3 | hypothetical protein ARALYDRAFT_493535     | gbpln | Arabidopsis lyrata   | AT4G13790.1   Symbols:   SAUR-like auxin-responsive protein family   chr4:7999846-8000124 REVERSE LENGTH=92                                                                                                                                                                                                                                                                  | 91  | 92  | 2.00E-39  | 101.1 | 84.6 | 92.3 |
| Rsa1.0_01089.1.g23323.t1 | gb EOA15994.1  hypothetical protein CARUB_v10004113mg [Capsella rubella]                                                                                                                                                                                                                                                                             | 827 | 866 | 0         | 104.7 | 66.6 | 79.9 | hypothetical protein CARUB_v10004113mg     | gbpln | Capsella rubella     | AT4G13820.1   Symbols:   Leucine-rich repeat (LRR) family protein   chr4:8008535-8010694 REVERSE LENGTH=719                                                                                                                                                                                                                                                                  | 827 | 719 | 0         | 86.9  | 60.2 | 69.3 |
| Rsa1.0_01089.1.g23324.t1 | #                                                                                                                                                                                                                                                                                                                                                    | #   | #   | #         | #     | #    | #    | -                                          | ----  | ----                 | AT3G09510.1   Symbols:   Ribonuclease H-like superfamily protein   chr3:2921804-2923258 FORWARD LENGTH=484                                                                                                                                                                                                                                                                   | 123 | 484 | 1.00E-11  | 393.5 | 23.6 | 29.3 |
| Rsa1.0_01089.1.g23325.t1 | gb EOA15770.1  hypothetical protein CARUB_v10006927mg [Capsella rubella]                                                                                                                                                                                                                                                                             | 868 | 852 | 0         | 98.2  | 67.2 | 79.6 | hypothetical protein CARUB_v10006927mg     | gbpln | Capsella rubella     | AT4G13810.1   Symbols:   AtRLP47, RLP47   receptor like protein 47   chr4:8005062-8007287 REVERSE LENGTH=741                                                                                                                                                                                                                                                                 | 868 | 741 | 0         | 85.4  | 59.4 | 68.5 |

|                          |                                                                                                                                                                                                        |     |      |           |       |      |      |                                                 |       |                      |                                                                                                                                                                                                                                                                                                                                                                                                                                                                                                                                             |     |     |           |       |      |      |
|--------------------------|--------------------------------------------------------------------------------------------------------------------------------------------------------------------------------------------------------|-----|------|-----------|-------|------|------|-------------------------------------------------|-------|----------------------|---------------------------------------------------------------------------------------------------------------------------------------------------------------------------------------------------------------------------------------------------------------------------------------------------------------------------------------------------------------------------------------------------------------------------------------------------------------------------------------------------------------------------------------------|-----|-----|-----------|-------|------|------|
| Rsa1.0_01089.1.g23326.t1 | refXP_002868330.1   hypothetical protein ARALYDRAFT_493524 [Arabidopsis lyrata subsp. lyrata]   g 297314166 gb EFH44589.1   hypothetical protein ARALYDRAFT_493524 [Arabidopsis lyrata subsp. lyrata]  | 271 | 286  | 1.00E-122 | 105.5 | 84.5 | 92.6 | hypothetical protein ARALYDRAFT_493524          | gbpln | Arabidopsis lyrata   | AT4G13870.2   Symbols: WRNEXO   Werner syndrome-like exonuclease   chr4:8023563-8025542 REVERSE LENGTH=288                                                                                                                                                                                                                                                                                                                                                                                                                                  | 271 | 288 | 1.00E-125 | 106.3 | 83.0 | 91.1 |
| Rsa1.0_01089.1.g23327.t1 | refXP_002868327.1   hypothetical protein ARALYDRAFT_915517 [Arabidopsis lyrata subsp. lyrata]   g 297314163 gb EFH44586.1   hypothetical protein ARALYDRAFT_915517 [Arabidopsis lyrata subsp. lyrata]  | 471 | 471  | 0         | 100.0 | 93.6 | 97.2 | hypothetical protein ARALYDRAFT_915517          | gbpln | Arabidopsis lyrata   | AT4G13930.1   Symbols: SHM4   serine hydroxymethyltransferase 4   chr4:8048013-8050021 REVERSE LENGTH=471                                                                                                                                                                                                                                                                                                                                                                                                                                   | 471 | 471 | 0         | 100.0 | 93.2 | 96.8 |
| Rsa1.0_01089.1.g23328.t1 | gb AAD17409.1   putative retroelement pol polyprotein [Arabidopsis thaliana]                                                                                                                           | 293 | 1347 | 1.00E-102 | 459.7 | 61.1 | 70.6 | putative retroelement pol polyprotein           | gbpln | Arabidopsis thaliana | #                                                                                                                                                                                                                                                                                                                                                                                                                                                                                                                                           | #   | #   | #         | #     | #    | #    |
| Rsa1.0_01089.1.g23329.t1 | gb EOA11936.1   hypothetical protein CARUB_v10016547mg, partial [Capsella rubella]                                                                                                                     | 116 | 149  | 1.00E-23  | 128.4 | 44.0 | 61.2 | hypothetical protein CARUB_v10016547mg, partial | gbpln | Capsella rubella     | #                                                                                                                                                                                                                                                                                                                                                                                                                                                                                                                                           | #   | #   | #         | #     | #    | #    |
| Rsa1.0_01089.1.g23330.t1 | #                                                                                                                                                                                                      | #   | #    | #         | #     | #    | #    | -                                               | ----  | ----                 | #                                                                                                                                                                                                                                                                                                                                                                                                                                                                                                                                           | #   | #   | #         | #     | #    | #    |
| Rsa1.0_01090.1.g23331.t1 | refXP_002887896.1   predicted protein [Arabidopsis lyrata subsp. lyrata]   g 297333737 gb EFH64155.1   predicted protein [Arabidopsis lyrata subsp. lyrata]                                            | 260 | 261  | 6.00E-75  | 100.4 | 68.8 | 77.7 | predicted protein                               | gbpln | Arabidopsis lyrata   | AT1G64340.1   Symbols:   unknown protein; BEST Arabidopsis thaliana protein match is: unknown protein (TAIR:AT5G41810.1); Has 30201 Blast hits to 17322 proteins in 780 species: Archae - 12; Bacteria - 1396; Metazoa - 17338; Fungi - 3422; Plants - 5037; Viruses - 0; Other Eukaryotes - 2996 (source: NCBI BLink).   chr1:23878125-23880635 FORWARD LENGTH=263                                                                                                                                                                         | 260 | 263 | 9.00E-74  | 101.2 | 68.5 | 76.9 |
| Rsa1.0_01090.1.g23332.t1 | refXP_002887894.1   hypothetical protein ARALYDRAFT_474915 [Arabidopsis lyrata subsp. lyrata]   g 297333735 gb EFH64153.1   hypothetical protein ARALYDRAFT_474915 [Arabidopsis lyrata subsp. lyrata]  | 195 | 198  | 4.00E-89  | 101.5 | 83.6 | 91.3 | hypothetical protein ARALYDRAFT_474915          | gbpln | Arabidopsis lyrata   | AT1G64355.1   Symbols:   unknown protein; FUNCTIONS IN: molecular function unknown; INVOLVED IN: biological process unknown; LOCATED IN: chloroplast; EXPRESSED IN: 23 plant structures; EXPRESSED DURING: 13 growth stages; CONTAINS InterPro DOMAIN/s: Protein of unknown function DUF3593 (InterPro:IPRO21995); Has 301 Blast hits to 301 proteins in 96 species: Archae - 0; Bacteria - 143; Metazoa - 0; Fungi - 0; Plants - 44; Viruses - 0; Other Eukaryotes - 114 (source: NCBI BLink).   chr1:23886152-23886987 FORWARD LENGTH=199 | 195 | 199 | 9.00E-88  | 102.1 | 84.1 | 89.7 |
| Rsa1.0_01090.1.g23333.t1 | #                                                                                                                                                                                                      | #   | #    | #         | #     | #    | #    | -                                               | ----  | ----                 | #                                                                                                                                                                                                                                                                                                                                                                                                                                                                                                                                           | #   | #   | #         | #     | #    | #    |
| Rsa1.0_01090.1.g23334.t1 | gb EOA35864.1   hypothetical protein CARUB_v10021104mg [Capsella rubella]                                                                                                                              | 146 | 150  | 2.00E-44  | 102.7 | 65.1 | 78.1 | hypothetical protein CARUB_v10021104mg          | gbpln | Capsella rubella     | AT1G64370.1   Symbols:   unknown protein; Has 773 Blast hits to 375 proteins in 118 species: Archae - 0; Bacteria - 97; Metazoa - 421; Fungi - 108; Plants - 31; Viruses - 0; Other Eukaryotes - 116 (source: NCBI BLink).   chr1:23888967-23889503 FORWARD LENGTH=178                                                                                                                                                                                                                                                                      | 146 | 178 | 2.00E-43  | 121.9 | 67.1 | 78.1 |
| Rsa1.0_01090.1.g23335.t1 | #                                                                                                                                                                                                      | #   | #    | #         | #     | #    | #    | -                                               | ----  | ----                 | #                                                                                                                                                                                                                                                                                                                                                                                                                                                                                                                                           | #   | #   | #         | #     | #    | #    |
| Rsa1.0_01090.1.g23336.t1 | refXP_002886346.1   hypothetical protein ARALYDRAFT_474912 [Arabidopsis lyrata subsp. lyrata]   g 2973332187 gb EFH62605.1   hypothetical protein ARALYDRAFT_474912 [Arabidopsis lyrata subsp. lyrata] | 206 | 339  | 2.00E-48  | 164.6 | 54.9 | 57.8 | hypothetical protein ARALYDRAFT_474912          | gbpln | Arabidopsis lyrata   | AT1G64380.1   Symbols:   Integrase-type DNA-binding superfamily protein   chr1:23890981-23891988 REVERSE LENGTH=335                                                                                                                                                                                                                                                                                                                                                                                                                         | 206 | 335 | 2.00E-48  | 162.6 | 52.9 | 55.8 |
| Rsa1.0_01090.1.g23337.t1 | gb EOA35354.1   hypothetical protein CARUB_v10020548mg [Capsella rubella]                                                                                                                              | 354 | 354  | 1.00E-110 | 100.0 | 68.4 | 77.4 | hypothetical protein CARUB_v10020548mg          | gbpln | Capsella rubella     | AT1G64385.1   Symbols:   unknown protein; FUNCTIONS IN: molecular function unknown; INVOLVED IN: biological process unknown; LOCATED IN: endomembrane system; Has 66 Blast hits to 66 proteins in 21 species: Archae - 0; Bacteria - 0; Metazoa - 6; Fungi - 4; Plants - 51; Viruses - 0; Other Eukaryotes - 5 (source: NCBI BLink).   chr1:23900309-23901956 FORWARD LENGTH=351                                                                                                                                                            | 354 | 351 | 1.00E-112 | 99.2  | 67.2 | 77.7 |
| Rsa1.0_01090.1.g23338.t1 | #                                                                                                                                                                                                      | #   | #    | #         | #     | #    | #    | -                                               | ----  | ----                 | #                                                                                                                                                                                                                                                                                                                                                                                                                                                                                                                                           | #   | #   | #         | #     | #    | #    |
| Rsa1.0_01090.1.g23339.t1 | gb AAN31840.1   putative endo-beta-1,4-glucanase [Arabidopsis thaliana]                                                                                                                                | 496 | 620  | 0         | 125.0 | 87.3 | 91.7 | putative endo-beta-1,4-glucanase                | gbpln | Arabidopsis thaliana | AT1G64390.1   Symbols: AtGH9C2, GH9C2   glycosyl hydrolase 9C2   chr1:23911329-23914642 FORWARD LENGTH=620                                                                                                                                                                                                                                                                                                                                                                                                                                  | 496 | 620 | 0         | 125.0 | 87.3 | 91.7 |
| Rsa1.0_01090.1.g23340.t1 | gb EOA33728.1   hypothetical protein CARUB_v10019918mg [Capsella rubella]                                                                                                                              | 660 | 660  | 0         | 100.0 | 93.6 | 96.2 | hypothetical protein CARUB_v10019918mg          | gbpln | Capsella rubella     | AT1G64400.1   Symbols: LACS3   AMP-dependent synthetase and ligase family protein   chr1:23915802-23919681 REVERSE LENGTH=665                                                                                                                                                                                                                                                                                                                                                                                                               | 660 | 665 | 0         | 100.8 | 91.7 | 95.6 |



|                          |                                                                                                                                                                                                                                                                                                                                                                                                                                                                                                                                                                                                                                                                      |     |     |           |       |      |      |                                                            |       |                      |                                                                                                                                                                |     |     |           |       |      |      |
|--------------------------|----------------------------------------------------------------------------------------------------------------------------------------------------------------------------------------------------------------------------------------------------------------------------------------------------------------------------------------------------------------------------------------------------------------------------------------------------------------------------------------------------------------------------------------------------------------------------------------------------------------------------------------------------------------------|-----|-----|-----------|-------|------|------|------------------------------------------------------------|-------|----------------------|----------------------------------------------------------------------------------------------------------------------------------------------------------------|-----|-----|-----------|-------|------|------|
| Rsa1.0_01091.1.g23341.t1 | gb EOA13620.1  hypothetical protein CARUB_v10026686mg [Capsella rubella]                                                                                                                                                                                                                                                                                                                                                                                                                                                                                                                                                                                             | 48  | 353 | 9.00E-12  | 735.4 | 75.0 | 89.6 | hypothetical protein CARUB_v10026686mg                     | gbpln | Capsella rubella     | AT5G52470.1   Symbols: SOG1, ATF1B1, ATFBR1, SKIP7   fibrillar 1   chr5:21294290-21296509 FORWARD LENGTH=308                                                   | 48  | 308 | 2.00E-14  | 641.7 | 75.0 | 89.6 |
| Rsa1.0_01091.1.g23342.t1 | ref NP_564237.2  Di-glucose binding protein with Leucine-rich repeat domain [Arabidopsis thaliana]<br>gi 332192522 gb AE30643.1  Di-glucose binding protein with Leucine-rich repeat domain [Arabidopsis thaliana]                                                                                                                                                                                                                                                                                                                                                                                                                                                   | 666 | 628 | 0         | 94.3  | 79.4 | 83.9 | Di-glucose binding protein with Leucine-rich repeat domain | gbpln | Arabidopsis thaliana | AT1G25570.1   Symbols:   Di-glucose binding protein with Leucine-rich repeat domain   chr1:8992183-8995430 REVERSE LENGTH=628                                  | 666 | 628 | 0         | 94.3  | 79.4 | 83.9 |
| Rsa1.0_01091.1.g23343.t1 | ref XP_002890682.1  ANAC008 [Arabidopsis lyrata subsp. lyrata]<br>gi 297336524 gb EFH66941.1  ANAC008 [Arabidopsis lyrata subsp. lyrata]                                                                                                                                                                                                                                                                                                                                                                                                                                                                                                                             | 469 | 459 | 0         | 97.9  | 77.4 | 84.6 | ANAC008                                                    | gbpln | Arabidopsis lyrata   | AT1G25580.1   Symbols: SOG1, ANAC008   NAC (No Apical Meristem) domain transcriptional regulator superfamily protein   chr1:8997064-8999600 REVERSE LENGTH=449 | 469 | 449 | 0         | 95.7  | 76.5 | 83.8 |
| Rsa1.0_01091.1.g23344.t2 | ref NP_173930.1  coiled-coil domain-containing protein 130 [Arabidopsis thaliana]<br>gi 12320741 gb AAG50519.1 AC084221.1 unknown protein [Arabidopsis thaliana] gi 44681478 gb AAS47679.1  At1g25682 [Arabidopsis thaliana] gi 62320731 dbj BAD95398.1  hypothetical protein [Arabidopsis thaliana] gi 332192524 gb AEE30645.1  uncharacterized protein AT1G25682 [Arabidopsis thaliana]                                                                                                                                                                                                                                                                            | 525 | 310 | 1.00E-165 | 59.0  | 54.1 | 56.8 | coiled-coil domain-containing protein 130                  | gbpln | Arabidopsis thaliana | AT1G25682.1   Symbols:   Family of unknown function (DUF572)   chr1:9002532-9004550 REVERSE LENGTH=310                                                         | 525 | 310 | 1.00E-167 | 59.0  | 54.1 | 56.8 |
| Rsa1.0_01091.1.g23345.t1 | # # # # # # # - ---- ---- # # # # # #                                                                                                                                                                                                                                                                                                                                                                                                                                                                                                                                                                                                                                |     |     |           |       |      |      |                                                            |       |                      |                                                                                                                                                                |     |     |           |       |      |      |
| Rsa1.0_01091.1.g23346.t2 | ref NP_564242.1  putative phosphatidylinositol 4-kinase type 2-beta [Arabidopsis thaliana]<br>gi 75169053 sp Q9C671.1 P4K2B_ARATH RecName: Full=Probable phosphatidylinositol 4-kinase type 2-beta At1g26270; Short=Phosphatidylinositol 4-kinase type II-beta<br>gi 12321173 gb AAG50675.1 AC079829.8 hypothetical protein [Arabidopsis thaliana] gi 14334682 gb AAK59519.1  unknown protein [Arabidopsis thaliana] gi 16648787 gb AAL25584.1  At1g26270/F28B23.7 [Arabidopsis thaliana] gi 18700159 gb AAL77691.1  At1g26270/F28B23.7 [Arabidopsis thaliana] gi 332192549 gb AEE30670.1  putative phosphatidylinositol 4-kinase type 2-beta [Arabidopsis thaliana] | 231 | 630 | 4.00E-45  | 272.7 | 42.0 | 45.0 | putative phosphatidylinositol 4-kinase type 2-beta         | gbpln | Arabidopsis thaliana | AT1G26270.1   Symbols:   Phosphatidylinositol 3- and 4-kinase family protein   chr1:9089822-9091714 REVERSE LENGTH=630                                         | 231 | 630 | 1.00E-47  | 272.7 | 42.0 | 45.0 |
| Rsa1.0_01091.1.g23347.t1 | gb EOA40307.1  hypothetical protein CARUB_v10009035mg [Capsella rubella]                                                                                                                                                                                                                                                                                                                                                                                                                                                                                                                                                                                             | 464 | 473 | 0         | 101.9 | 86.2 | 91.2 | hypothetical protein CARUB_v10009035mg                     | gbpln | Capsella rubella     | AT1G26120.1   Symbols: ICME-LIKE1   alpha/beta-Hydrolases superfamily protein   chr1:9028656-9031402 REVERSE LENGTH=476                                        | 464 | 476 | 0         | 102.6 | 84.9 | 91.4 |
| Rsa1.0_01091.1.g23348.t1 | ref XP_002890674.1  hypothetical protein ARALYDRAFT_472802 [Arabidopsis lyrata subsp. lyrata]<br>gi 297336516 gb EFH66933.1  hypothetical protein ARALYDRAFT_472802 [Arabidopsis lyrata subsp. lyrata]<br>ref NP_173944.1  phosphoribulokinase/uridine kinase-like protein [Arabidopsis thaliana]<br>gi 12321172 gb AAG50674.1 AC079829.7 hypothetical protein [Arabidopsis thaliana] gi 20259437 gb AAM14039.1  unknown protein [Arabidopsis thaliana] gi 21436169 gb AAM51372.1  unknown protein [Arabidopsis thaliana] gi 332192538 gb AEE30659.1  phosphoribulokinase/uridine kinase-like protein [Arabidopsis thaliana]                                         | 858 | 754 | 0         | 87.9  | 45.2 | 48.6 | hypothetical protein ARALYDRAFT_472802                     | gbpln | Arabidopsis lyrata   | AT1G68690.1   Symbols:   Protein kinase superfamily protein   chr1:25789192-25791886 FORWARD LENGTH=708                                                        | 858 | 708 | 0         | 82.5  | 36.2 | 42.1 |
| Rsa1.0_01091.1.g23349.t2 | gi 12321172 gb AAG50674.1 AC079829.7 hypothetical protein [Arabidopsis thaliana] gi 20259437 gb AAM14039.1  unknown protein [Arabidopsis thaliana] gi 21436169 gb AAM51372.1  unknown protein [Arabidopsis thaliana] gi 332192538 gb AEE30659.1  phosphoribulokinase/uridine kinase-like protein [Arabidopsis thaliana]                                                                                                                                                                                                                                                                                                                                              | 672 | 674 | 0         | 100.3 | 83.8 | 91.8 | phosphoribulokinase/uridine kinase-like protein            | gbpln | Arabidopsis thaliana | AT1G26190.1   Symbols:   Phosphoribulokinase / Uridine kinase family   chr1:9057285-9060433 REVERSE LENGTH=674                                                 | 672 | 674 | 0         | 100.3 | 83.8 | 91.8 |
| Rsa1.0_01091.1.g23350.t1 | gb EOA39890.1  hypothetical protein CARUB_v10008568mg [Capsella rubella]                                                                                                                                                                                                                                                                                                                                                                                                                                                                                                                                                                                             | 620 | 632 | 0         | 101.9 | 87.1 | 92.9 | hypothetical protein CARUB_v10008568mg                     | gbpln | Capsella rubella     | AT1G26270.1   Symbols:   Phosphatidylinositol 3- and 4-kinase family protein   chr1:9089822-9091714 REVERSE LENGTH=630                                         | 620 | 630 | 0         | 101.6 | 86.6 | 92.6 |
| Rsa1.0_01091.1.g23351.t1 | emb CAD40837.3  OSJNBa0086B14.9 [Oryza sativa Japonica Group]                                                                                                                                                                                                                                                                                                                                                                                                                                                                                                                                                                                                        | 61  | 294 | 3.00E-18  | 482.0 | 75.4 | 75.4 | OSJNBa0086B14.9                                            | gbpln | Oryza sativa         | AT4G40030.2   Symbols:   Histone superfamily protein   chr4:18555840-18556827 REVERSE LENGTH=164                                                               | 61  | 164 | 1.00E-20  | 268.9 | 75.4 | 75.4 |

|                           |                                                                                                                                                                                                                                                                                                                                                                                                                                                                     |     |      |           |       |      |      |                                                                |       |                      |                                                                                                                                    |     |     |           |       |      |      |
|---------------------------|---------------------------------------------------------------------------------------------------------------------------------------------------------------------------------------------------------------------------------------------------------------------------------------------------------------------------------------------------------------------------------------------------------------------------------------------------------------------|-----|------|-----------|-------|------|------|----------------------------------------------------------------|-------|----------------------|------------------------------------------------------------------------------------------------------------------------------------|-----|-----|-----------|-------|------|------|
| Rsa1.0_01092.1.g23352.t1  | gb[EOA22057.1] hypothetical protein CARUB_v10002597mg, partial [Capsella rubella]                                                                                                                                                                                                                                                                                                                                                                                   | 90  | 221  | 2.00E-26  | 245.6 | 72.2 | 77.8 | hypothetical protein CARUB_v10002597mg, partial                | gbpln | Capsella rubella     | AT5G23360.1   Symbols:   GRAM domain-containing protein / ABA-responsive protein-related   chr5:7861817-7862449 FORWARD LENGTH=210 | 90  | 210 | 2.00E-28  | 233.3 | 73.3 | 80.0 |
| Rsa1.0_01092.1.g23354.t1  | gb[EOA20047.1] hypothetical protein CARUB_v10000319mg [Capsella rubella]                                                                                                                                                                                                                                                                                                                                                                                            | 729 | 729  | 0         | 100.0 | 91.2 | 94.1 | hypothetical protein CARUB_v10000319mg                         | gbpln | Capsella rubella     | AT5G23390.1   Symbols:   Plant protein of unknown function [DUF639]   chr5:7870719-7874283 REVERSE LENGTH=730                      | 729 | 730 | 0         | 100.1 | 91.5 | 95.6 |
| Rsa1.0_01092.1.g23354.t1  | ref NP_680211.1  Cox19-like CHCH family protein [Arabidopsis thaliana]   gi 26450246 dbj BAC42240.1  unknown protein [Arabidopsis thaliana]   gi 28827550 gb AA050619.1  unknown protein [Arabidopsis thaliana]   gi 332005776 gb AED93159.1  Cox19-like CHCH family protein [Arabidopsis thaliana]                                                                                                                                                                 | 162 | 162  | 5.00E-58  | 100.0 | 80.2 | 90.1 | Cox19-like CHCH family protein                                 | gbpln | Arabidopsis thaliana | AT5G23395.1   Symbols: MIA40   Cox19-like CHCH family protein   chr5:7874848-7876091 REVERSE LENGTH=162                            | 162 | 162 | 2.00E-60  | 100.0 | 80.2 | 90.1 |
| Rsa1.0_01092.1.g23355.t1  | dbj BAJ34388.1  unnamed protein product [Theilingiella halophila]                                                                                                                                                                                                                                                                                                                                                                                                   | 587 | 587  | 0         | 100.0 | 85.0 | 91.1 | unnamed protein product                                        | ----  | ----                 | AT5G23400.1   Symbols:   Leucine-rich repeat (LRR) family protein   chr5:7880603-7882372 FORWARD LENGTH=589                        | 587 | 589 | 0         | 100.3 | 82.6 | 89.3 |
| Rsa1.0_01092.1.g23356.t1  | gb[EOA21466.1] hypothetical protein CARUB_v10001858mg [Capsella rubella]                                                                                                                                                                                                                                                                                                                                                                                            | 173 | 236  | 2.00E-25  | 136.4 | 45.1 | 53.8 | hypothetical protein CARUB_v10001858mg                         | gbpln | Capsella rubella     | AT5G23420.1   Symbols: HMGB6   high-mobility group box 6   chr5:7888712-7890111 REVERSE LENGTH=241                                 | 173 | 241 | 2.00E-21  | 139.3 | 38.2 | 47.4 |
| Rsa1.0_01092.1.g23357.t1  | gb[EOA21466.1] hypothetical protein CARUB_v10001858mg [Capsella rubella]                                                                                                                                                                                                                                                                                                                                                                                            | 125 | 236  | 3.00E-25  | 188.8 | 53.6 | 61.6 | hypothetical protein CARUB_v10001858mg                         | gbpln | Capsella rubella     | AT5G23420.1   Symbols: HMGB6   high-mobility group box 6   chr5:7888712-7890111 REVERSE LENGTH=241                                 | 125 | 241 | 6.00E-22  | 192.8 | 48.8 | 59.2 |
| Rsa1.0_01092.1.g23358.t1  | #                                                                                                                                                                                                                                                                                                                                                                                                                                                                   | #   | #    | #         | #     | #    | #    | -                                                              | ----  | ----                 | #                                                                                                                                  | #   | #   | #         | #     | #    | #    |
| Rsa1.0_01092.1.g23359.t1  | ref NP_851064.1  Katanin p80 WD40 repeat-containing subunit B1-1 [Arabidopsis thaliana]   gi 73620972 sp Q9HOT9.3 KTNB1_ARAT H RecName: Full=Katanin p80 WD40 repeat-containing subunit B1 homolog   gi 25083345 gb AAN72064.1  putative protein [Arabidopsis thaliana]   gi 332005783 gb AED93166.1  Katanin p80 WD40 repeat-containing subunit B1-1 [Arabidopsis thaliana]                                                                                        | 842 | 837  | 0         | 99.4  | 90.5 | 95.1 | Katanin p80 WD40 repeat-containing subunit B1-1                | gbpln | Arabidopsis thaliana | AT5G23430.1   Symbols:   Transducin/WD40 repeat-like superfamily protein   chr5:7894073-7899862 REVERSE LENGTH=837                 | 842 | 837 | 0         | 99.4  | 90.5 | 95.1 |
| Rsa1.0_01092.1.g23360.t1  | gb AAC28221.1  similar to reverse transcriptases (PFam: rvLhmm, score: 60.13) [Arabidopsis thaliana]                                                                                                                                                                                                                                                                                                                                                                | 328 | 1164 | 5.00E-50  | 354.9 | 36.3 | 44.2 | similar to reverse transcriptases (PFam: rvLhmm, score: 60.13) | gbpln | Arabidopsis thaliana | AT1G43760.1   Symbols:   DNase I-like superfamily protein   chr1:16528880-16531065 REVERSE LENGTH=626                              | 328 | 626 | 8.00E-20  | 190.9 | 17.4 | 27.1 |
| Rsa1.0_01092.1.g23361.t29 | ref XP_002872058.1  hypothetical protein ARALYDRAFT_351368 [Arabidopsis lyrata subsp. lyrata]   gi 297317895 gb EFH48317.1  hypothetical protein ARALYDRAFT_351368 [Arabidopsis lyrata subsp. lyrata]                                                                                                                                                                                                                                                               | 410 | 604  | 2.00E-50  | 147.3 | 35.9 | 48.0 | hypothetical protein ARALYDRAFT_351368                         | gbpln | Arabidopsis lyrata   | AT5G23480.1   Symbols:   SWB/MDM2 domain Plus-3,GYF   chr5:7916314-7919155 FORWARD LENGTH=570                                      | 410 | 570 | 3.00E-49  | 139.0 | 27.8 | 33.9 |
| Rsa1.0_01092.1.g23362.t1  | ref NP_197743.1  smr (Small MutS Related) domain-containing protein [Arabidopsis thaliana]   gi 8809708 dbj BAA97249.1  unnamed protein product [Arabidopsis thaliana]   gi 22531192 gb AAM97100.1  unknown protein [Arabidopsis thaliana]   gi 23198016 gb AAN15535.1  unknown protein [Arabidopsis thaliana]   gi 332005795 gb AED93178.1  smr (Small MutS Related) domain-containing protein [Arabidopsis thaliana]                                              | 417 | 435  | 1.00E-176 | 104.3 | 77.7 | 85.6 | smr (Small MutS Related) domain-containing protein             | gbpln | Arabidopsis thaliana | AT5G23520.1   Symbols:   smr (Small MutS Related) domain-containing protein   chr5:7929591-7931296 REVERSE LENGTH=435              | 417 | 435 | 1.00E-178 | 104.3 | 77.7 | 85.6 |
| Rsa1.0_01092.1.g23363.t1  | ref NP_197744.1  carboxylesterase 18 [Arabidopsis thaliana]   gi 75335430 sp Q9LT10.1 CXE18_ARAT H RecName: Full=Probable carboxylesterase 18; AltName: Full=AtCXE18   gi 8809707 dbj BAA97248.1  unnamed protein product [Arabidopsis thaliana]   gi 110742010 dbj BAE98944.1  hypothetical protein [Arabidopsis thaliana]   gi 114050665 gb ABI49482.1  At5g23530 [Arabidopsis thaliana]   gi 332005796 gb AED93179.1  carboxylesterase 18 [Arabidopsis thaliana] | 333 | 335  | 1.00E-159 | 100.6 | 81.1 | 91.6 | carboxylesterase 18                                            | gbpln | Arabidopsis thaliana | AT5G23530.1   Symbols: AtCXE18, CXE18   carboxylesterase 18   chr5:7933366-7934373 REVERSE LENGTH=335                              | 333 | 335 | 1.00E-162 | 100.6 | 81.1 | 91.6 |

|                          |                                                                                                                                                                                                                                                                                                                                                                                                                                                                                                                                                                                                                                                                                                                                                                                                                                                                                                                                                                                                                                                                                                                                                                                                                                                                                                                                                                                                                                                                                                                                                                                                                                                                                 |     |     |          |       |       |       |                                                 |       |                      |                                                                                                                                             |     |     |          |       |       |       |
|--------------------------|---------------------------------------------------------------------------------------------------------------------------------------------------------------------------------------------------------------------------------------------------------------------------------------------------------------------------------------------------------------------------------------------------------------------------------------------------------------------------------------------------------------------------------------------------------------------------------------------------------------------------------------------------------------------------------------------------------------------------------------------------------------------------------------------------------------------------------------------------------------------------------------------------------------------------------------------------------------------------------------------------------------------------------------------------------------------------------------------------------------------------------------------------------------------------------------------------------------------------------------------------------------------------------------------------------------------------------------------------------------------------------------------------------------------------------------------------------------------------------------------------------------------------------------------------------------------------------------------------------------------------------------------------------------------------------|-----|-----|----------|-------|-------|-------|-------------------------------------------------|-------|----------------------|---------------------------------------------------------------------------------------------------------------------------------------------|-----|-----|----------|-------|-------|-------|
| Rsa1.0_01092.1.g23364.t1 | ref NP_680212.1  50S ribosomal protein L24-like protein [Arabidopsis thaliana] gi 297808355 ref XP_002872061.1  KOW domain-containing protein [Arabidopsis lyrata subsp. lyrata] gi 8809706 dbj BAA97247.1  50S ribosomal protein L24 [Arabidopsis thaliana] gi 44681334 gb AAS47607.1  At5g23535 [Arabidopsis thaliana] gi 45773844 gb AAS76726.1  At5g23535 [Arabidopsis thaliana] gi 110735795 dbj BAE99874.1  50S ribosomal protein L24 [Arabidopsis thaliana] gi 297317898 gb EFH48320.1  KOW domain-containing protein [Arabidopsis lyrata subsp. lyrata] gi 332005797 gb AED93180.1  50S ribosomal protein L24-like protein [Arabidopsis thaliana] ref NP_197745.1  26S proteasome non-ATPase regulatory subunit 14 [Arabidopsis thaliana] gi 51701846 sp Q9LT08.1 PSDE_ARATH RecName: Full=26S proteasome non-ATPase regulatory subunit 14. AltName: Full=26S proteasome regulatory subunit rpn11 gi 8809705 dbj BAA97246.1  26S proteasome, non-ATPase regulatory subunit [Arabidopsis thaliana] gi 17979145 gb AAL49768.1  putative 26S proteasome, non-ATPase regulatory subunit [Arabidopsis thaliana] gi 20259105 gb AAM14268.1  putative 26S proteasome, non-ATPase regulatory subunit [Arabidopsis thaliana] gi 32700040 gb AAP86670.1  26S proteasome subunit RPN11A [Arabidopsis thaliana] gi 32700042 gb AAP86671.1  26S proteasome subunit RPN11a [Arabidopsis thaliana] gi 32700044 gb AAP86672.1  26S proteasome subunit RPN11 [Arabidopsis thaliana] gi 110737189 dbj BAF00543.1  26S proteasome, non-ATPase regulatory subunit [Arabidopsis thaliana] gi 332005798 gb AED93181.1  26S proteasome non-ATPase regulatory subunit 14 [Arabidopsis thaliana] | 159 | 159 | 2.00E-85 | 100.0 | 99.4  | 99.4  | 50S ribosomal protein L24-like protein          | gbpln | Arabidopsis lyrata   | AT5G23535.1   Symbols:   KOW domain-containing protein   chr5:7935871-7937127 FORWARD LENGTH=159                                            | 159 | 159 | 7.00E-88 | 100.0 | 99.4  | 99.4  |
| Rsa1.0_01092.1.g23365.t1 | gi 32700040 gb AAP86670.1  26S proteasome subunit RPN11A [Arabidopsis thaliana] gi 32700042 gb AAP86671.1  26S proteasome subunit RPN11a [Arabidopsis thaliana] gi 32700044 gb AAP86672.1  26S proteasome subunit RPN11 [Arabidopsis thaliana] gi 110737189 dbj BAF00543.1  26S proteasome, non-ATPase regulatory subunit [Arabidopsis thaliana] gi 332005798 gb AED93181.1  26S proteasome non-ATPase regulatory subunit 14 [Arabidopsis thaliana]                                                                                                                                                                                                                                                                                                                                                                                                                                                                                                                                                                                                                                                                                                                                                                                                                                                                                                                                                                                                                                                                                                                                                                                                                             | 308 | 308 | 0        | 100.0 | 100.0 | 100.0 | 26S proteasome non-ATPase regulatory subunit 14 | gbpln | Arabidopsis thaliana | AT5G23540.1   Symbols:   Mov34/MPN/PAD-1 family protein   chr5:7937772-7939339 FORWARD LENGTH=308                                           | 308 | 308 | 0        | 100.0 | 100.0 | 100.0 |
| Rsa1.0_01093.1.g23366.t1 | #                                                                                                                                                                                                                                                                                                                                                                                                                                                                                                                                                                                                                                                                                                                                                                                                                                                                                                                                                                                                                                                                                                                                                                                                                                                                                                                                                                                                                                                                                                                                                                                                                                                                               | #   | #   | #        | #     | #     | -     | -----                                           | ----- | #                    | #                                                                                                                                           | #   | #   | #        | #     | #     |       |
| Rsa1.0_01093.1.g23367.t1 | gb EOA15341.1  hypothetical protein CARUB_v10004114mg [Capsella rubella]                                                                                                                                                                                                                                                                                                                                                                                                                                                                                                                                                                                                                                                                                                                                                                                                                                                                                                                                                                                                                                                                                                                                                                                                                                                                                                                                                                                                                                                                                                                                                                                                        | 124 | 864 | 4.00E-37 | 696.8 | 58.9  | 63.7  | hypothetical protein CARUB_v10004114mg          | gbpln | Capsella rubella     | AT4G14330.1   Symbols:   P-loop containing nucleoside triphosphate hydrolases superfamily protein   chr4:8244228-8247286 FORWARD LENGTH=869 | 124 | 869 | 5.00E-39 | 700.8 | 58.1  | 62.9  |
| Rsa1.0_01093.1.g23368.t1 | ref NP_193120.1  HXXXD-type acyl-transferase-like protein [Arabidopsis thaliana] gi 17933317 gb AAL48240.1 AF446369.1 AT4g13840/F18A5.230 [Arabidopsis thaliana] gi 4455313 emb CAB36848.1  fatty acid elongase-like protein (cer2-like) [Arabidopsis thaliana] gi 7268088 emb CAB78426.1  fatty acid elongase-like protein (cer2-like) [Arabidopsis thaliana] gi 23308387 gb AAN18163.1  At4g13840/F18A5.230 [Arabidopsis thaliana] gi 110740566 dbj BAE98388.1  fatty acid elongase-like protein [Arabidopsis thaliana] gi 332657932 gb AEE83332.1  HXXXD-type acyl-transferase-like protein [Arabidopsis thaliana]                                                                                                                                                                                                                                                                                                                                                                                                                                                                                                                                                                                                                                                                                                                                                                                                                                                                                                                                                                                                                                                           | 149 | 428 | 2.00E-71 | 287.2 | 83.2  | 91.9  | HXXXD-type acyl-transferase-like protein        | gbpln | Arabidopsis thaliana | AT4G13840.1   Symbols:   HXXXD-type acyl-transferase family protein   chr4:8014088-8016326 REVERSE LENGTH=428                               | 149 | 428 | 5.00E-74 | 287.2 | 83.2  | 91.9  |

|                          |                                                                                                                                                                                                                                                                                                                                                                                                                                                                                                                                                                                                                                                                                                                                                                                                                                           |     |      |           |       |      |      |                                                     |       |                      |                                                                                                                          |     |     |           |       |      |      |
|--------------------------|-------------------------------------------------------------------------------------------------------------------------------------------------------------------------------------------------------------------------------------------------------------------------------------------------------------------------------------------------------------------------------------------------------------------------------------------------------------------------------------------------------------------------------------------------------------------------------------------------------------------------------------------------------------------------------------------------------------------------------------------------------------------------------------------------------------------------------------------|-----|------|-----------|-------|------|------|-----------------------------------------------------|-------|----------------------|--------------------------------------------------------------------------------------------------------------------------|-----|-----|-----------|-------|------|------|
| Rsa1.0_01093.1.g23369.t1 | ref[NP_193120.1] HXXXD-type acyl-transferase-like protein [Arabidopsis thaliana]<br>gi 17933317 gb AAL48240.1 AF446369.1 AT4g13840/F18A5_230 [Arabidopsis thaliana] gi 4455313 emb CAB36848.1  fatty acid elongase-like protein (cer2-like) [Arabidopsis thaliana]<br>gi 7268088 emb CA78426.1  fatty acid elongase-like protein (cer2-like) [Arabidopsis thaliana]<br>gi 23308387 gb AAN18163.1  At4g13840/F18A5_230 [Arabidopsis thaliana] gi 110740566 dbj BAE98388.1  fatty acid elongase - like protein [Arabidopsis thaliana]<br>gi 332657932 gb AEE83332.1  HXXXD-type acyl-transferase-like protein [Arabidopsis thaliana]<br>ref[XP_002870353.1] hypothetical protein ARALYDRAFT_493532 [Arabidopsis lyrata subsp. lyrata] gi 297316189 gb EFH46612.1  hypothetical protein ARALYDRAFT_493532 [Arabidopsis lyrata subsp. lyrata] | 281 | 428  | 1.00E-125 | 152.3 | 77.9 | 89.3 | HXXXD-type acyl-transferase-like protein            | gbpln | Arabidopsis thaliana | AT4G13840.1   Symbols:   HXXXD-type acyl-transferase family protein   chr4:8014088-8016326 REVERSE LENGTH=428            | 281 | 428 | 1.00E-128 | 152.3 | 77.9 | 89.3 |
| Rsa1.0_01093.1.g23370.t1 | ref[XP_002870353.1] hypothetical protein ARALYDRAFT_493532 [Arabidopsis lyrata subsp. lyrata] gi 297316189 gb EFH46612.1  hypothetical protein ARALYDRAFT_493532 [Arabidopsis lyrata subsp. lyrata]                                                                                                                                                                                                                                                                                                                                                                                                                                                                                                                                                                                                                                       | 201 | 197  | 5.00E-91  | 98.0  | 83.1 | 91.5 | hypothetical protein ARALYDRAFT_493532              | gbpln | Arabidopsis lyrata   | AT4G13830.2   Symbols: J20   DNAJ-like 20   chr4:8011518-8012577 FORWARD LENGTH=197                                      | 201 | 197 | 9.00E-93  | 98.0  | 82.1 | 90.0 |
| Rsa1.0_01093.1.g23371.t1 | gb ABD64958.1  ethylene responsive element binding factor -related [Brassica oleracea]                                                                                                                                                                                                                                                                                                                                                                                                                                                                                                                                                                                                                                                                                                                                                    | 127 | 954  | 2.00E-19  | 751.2 | 44.9 | 57.5 | ethylene responsive element binding factor -related | gbpln | Brassica oleracea    | #                                                                                                                        | #   | #   | #         | #     | #    |      |
| Rsa1.0_01093.1.g23372.t1 | gb ABD65089.1  zinc knuckle containing protein [Brassica oleracea]                                                                                                                                                                                                                                                                                                                                                                                                                                                                                                                                                                                                                                                                                                                                                                        | 260 | 333  | 5.00E-27  | 128.1 | 40.8 | 47.7 | zinc knuckle containing protein                     | gbpln | Brassica oleracea    | #                                                                                                                        | #   | #   | #         | #     | #    |      |
| Rsa1.0_01093.1.g23373.t1 | gb EOA15994.1  hypothetical protein CARUB_v10004113mg [Capsella rubella]                                                                                                                                                                                                                                                                                                                                                                                                                                                                                                                                                                                                                                                                                                                                                                  | 905 | 866  | 0         | 95.7  | 67.1 | 77.2 | hypothetical protein CARUB_v10004113mg              | gbpln | Capsella rubella     | AT4G13820.1   Symbols:   Leucine-rich repeat (LRR) family protein   chr4:8008535-8010694 REVERSE LENGTH=719              | 905 | 719 | 0         | 79.4  | 60.0 | 67.6 |
| Rsa1.0_01093.1.g23374.t1 | ref[XP_002868336.1] hypothetical protein ARALYDRAFT_493534 [Arabidopsis lyrata subsp. lyrata] gi 297314172 gb EFH44595.1  hypothetical protein ARALYDRAFT_493534 [Arabidopsis lyrata subsp. lyrata]                                                                                                                                                                                                                                                                                                                                                                                                                                                                                                                                                                                                                                       | 332 | 336  | 1.00E-164 | 101.2 | 91.6 | 94.9 | hypothetical protein ARALYDRAFT_493534              | gbpln | Arabidopsis lyrata   | AT4G13800.1   Symbols:   Protein of unknown function (DUF803)   chr4:8002129-8003858 REVERSE LENGTH=336                  | 332 | 336 | 1.00E-165 | 101.2 | 91.3 | 94.3 |
| Rsa1.0_01093.1.g23375.t1 | gb AAG51783.1 AC079679.3 reverse transcriptase, putative; 16838-20266 [Arabidopsis thaliana]                                                                                                                                                                                                                                                                                                                                                                                                                                                                                                                                                                                                                                                                                                                                              | 371 | 1142 | 2.00E-58  | 307.8 | 40.4 | 57.7 | reverse transcriptase, putative; 16838-20266        | gbpln | Arabidopsis thaliana | AT4G29090.1   Symbols:   Ribonuclease H-like superfamily protein   chr4:14333528-14335255 FORWARD LENGTH=575             | 371 | 575 | 9.00E-29  | 155.0 | 24.8 | 40.4 |
| Rsa1.0_01094.1.g23376.t1 | ref[XP_002876454.1] seven in absentia family protein [Arabidopsis lyrata subsp. lyrata] gi 297322292 gb EFH52713.1  seven in absentia family protein [Arabidopsis lyrata subsp. lyrata]                                                                                                                                                                                                                                                                                                                                                                                                                                                                                                                                                                                                                                                   | 311 | 309  | 1.00E-178 | 99.4  | 95.5 | 97.1 | seven in absentia family protein                    | gbpln | Arabidopsis lyrata   | AT3G58040.1   Symbols: SINAT2   seven in absentia of Arabidopsis 2   chr3:21489612-21491085 FORWARD LENGTH=308           | 311 | 308 | 1.00E-180 | 99.0  | 95.5 | 96.8 |
| Rsa1.0_01094.1.g23377.t1 | gb EOA24053.1  hypothetical protein CARUB_v10017271mg [Capsella rubella]                                                                                                                                                                                                                                                                                                                                                                                                                                                                                                                                                                                                                                                                                                                                                                  | 394 | 437  | 0         | 110.9 | 91.6 | 96.2 | hypothetical protein CARUB_v10017271mg              | gbpln | Capsella rubella     | AT3G58030.4   Symbols:   RING/U-box superfamily protein   chr3:21485527-21486837 FORWARD LENGTH=436                      | 394 | 436 | 0         | 110.7 | 89.1 | 94.7 |
| Rsa1.0_01094.1.g23378.t1 | ref[XP_002880160.1] hypothetical protein ARALYDRAFT_483647 [Arabidopsis lyrata subsp. lyrata] gi 297325999 gb EFH56419.1  hypothetical protein ARALYDRAFT_483647 [Arabidopsis lyrata subsp. lyrata]                                                                                                                                                                                                                                                                                                                                                                                                                                                                                                                                                                                                                                       | 240 | 239  | 1.00E-113 | 99.6  | 89.2 | 94.6 | hypothetical protein ARALYDRAFT_483647              | gbpln | Arabidopsis lyrata   | AT2G45140.1   Symbols: PVA12   plant VAP homolog 12   chr2:18611029-18612971 FORWARD LENGTH=239                          | 240 | 239 | 1.00E-114 | 99.6  | 87.9 | 94.6 |
| Rsa1.0_01094.1.g23379.t1 | ref[NP_182041.1] scarecrow-like protein 27 [Arabidopsis thaliana] gi 75276030 sp Q7XJM8.1 SCL27_ARAT H RecName: Full=Scarecrow-like protein 27; Short=AtSCL27; AltName: Full=GRAS family protein 14; Short=AtGRAS-14 gi 58652078 gb AAW80864.1  At2g45160 [Arabidopsis thaliana] gi 219291105 gb ACL13987.1  At2g45160 [Arabidopsis thaliana] gi 330255424 gb AEC10518.1  scarecrow-like protein 27 [Arabidopsis thaliana]                                                                                                                                                                                                                                                                                                                                                                                                                | 602 | 640  | 0         | 106.3 | 82.4 | 89.0 | scarecrow-like protein 27                           | gbpln | Arabidopsis thaliana | AT2G45160.1   Symbols: HAM1, ATHAM1, LOM1   GRAS family transcription factor   chr2:18618110-18620032 REVERSE LENGTH=640 | 602 | 640 | 0         | 106.3 | 82.4 | 89.0 |

|                          |                                                                                                                                                                                                                                                                                                                                                                                                                                                                                                                                                                                                                                                                                                                                     |      |      |           |       |      |      |                                                                                                                                                                                                 |       |                      |                                                                                                                                                                                                                                                                                                                                                                                                                                                                     |      |      |           |       |      |      |
|--------------------------|-------------------------------------------------------------------------------------------------------------------------------------------------------------------------------------------------------------------------------------------------------------------------------------------------------------------------------------------------------------------------------------------------------------------------------------------------------------------------------------------------------------------------------------------------------------------------------------------------------------------------------------------------------------------------------------------------------------------------------------|------|------|-----------|-------|------|------|-------------------------------------------------------------------------------------------------------------------------------------------------------------------------------------------------|-------|----------------------|---------------------------------------------------------------------------------------------------------------------------------------------------------------------------------------------------------------------------------------------------------------------------------------------------------------------------------------------------------------------------------------------------------------------------------------------------------------------|------|------|-----------|-------|------|------|
| Rsa1.0_01094.1.g23380.t1 | gb AAD21778.1  putative non-LTR retroelement reverse transcriptase [Arabidopsis thaliana]                                                                                                                                                                                                                                                                                                                                                                                                                                                                                                                                                                                                                                           | 1703 | 1715 | 0         | 100.7 | 40.3 | 57.4 | putative non-LTR retroelement reverse transcriptase                                                                                                                                             | gbpln | Arabidopsis thaliana | AT3G31430.1   Symbols:   unknown protein; FUNCTIONS IN: molecular_function unknown; INVOLVED IN: biological_process unknown; LOCATED IN: endomembrane system; BEST Arabidopsis thaliana protein match is: unknown protein (TAIR:AT5G18636.1); Has 295 Blast hits to 291 proteins in 12 species: Archae - 0; Bacteria - 0; Metazoa - 0; Fungi - 0; Plants - 295; Viruses - 0; Other Eukaryotes - 0 (source: NCBI BLink).   chr3:12795861-12796871 REVERSE LENGTH=336 | 1703 | 336  | 4.00E-87  | 19.7  | 9.3  | 12.9 |
| Rsa1.0_01094.1.g23381.t1 | gb EOA28141.1  hypothetical protein CARUB_v10024330mg [Capsella rubella]                                                                                                                                                                                                                                                                                                                                                                                                                                                                                                                                                                                                                                                            | 122  | 122  | 1.00E-59  | 100.0 | 95.1 | 99.2 | hypothetical protein CARUB_v10024330mg                                                                                                                                                          | gbpln | Capsella rubella     | AT2G45170.2   Symbols: ATATG8E, ATG8E   AUTOPHAGY 8E   chr2:18624545-18625526 FORWARD LENGTH=122                                                                                                                                                                                                                                                                                                                                                                    | 122  | 122  | 2.00E-61  | 100.0 | 93.4 | 98.4 |
| Rsa1.0_01094.1.g23382.t1 | #                                                                                                                                                                                                                                                                                                                                                                                                                                                                                                                                                                                                                                                                                                                                   | #    | #    | #         | #     | #    | -    | ----                                                                                                                                                                                            | ----  | #                    | #                                                                                                                                                                                                                                                                                                                                                                                                                                                                   | #    | #    | #         | #     | #    |      |
| Rsa1.0_01094.1.g23383.t1 | #                                                                                                                                                                                                                                                                                                                                                                                                                                                                                                                                                                                                                                                                                                                                   | #    | #    | #         | #     | #    | -    | ----                                                                                                                                                                                            | ----  | #                    | #                                                                                                                                                                                                                                                                                                                                                                                                                                                                   | #    | #    | #         | #     | #    |      |
| Rsa1.0_01094.1.g23384.t1 | ref NP_191352.1  uncharacterized protein [Arabidopsis thaliana] gi 79315480 ref NP_001030881.1  uncharacterized protein [Arabidopsis thaliana] gi 6729536 emb CAB67621.1  putative protein [Arabidopsis thaliana] gi 28393650 gb AAO42243.1  unknown protein [Arabidopsis thaliana] gi 28973601 gb AAO64125.1  unknown protein [Arabidopsis thaliana] gi 332646197 gb AEE79718.1  uncharacterized protein AT3G57930 [Arabidopsis thaliana] gi 332646199 gb AEE79719.1  uncharacterized protein AT3G57930 [Arabidopsis thaliana] ref XP_002878178.1  hypothetical protein ARALYDRAFT_486243 [Arabidopsis lyrata subsp. lyrata] gi 297324016 gb EFH54437.1  hypothetical protein ARALYDRAFT_486243 [Arabidopsis lyrata subsp. lyrata] | 137  | 141  | 9.00E-47  | 102.9 | 80.3 | 91.2 | uncharacterized protein                                                                                                                                                                         | gbpln | Arabidopsis thaliana | AT3G57930.2   Symbols:   unknown protein; BEST Arabidopsis thaliana protein match is: unknown protein (TAIR:AT2G42190.1); Has 35333 Blast hits to 34131 proteins in 2444 species: Archae - 798; Bacteria - 22429; Metazoa - 974; Fungi - 991; Plants - 531; Viruses - 0; Other Eukaryotes - 9610 (source: NCBI BLink).   chr3:21447250-21447675 REVERSE LENGTH=141                                                                                                  | 137  | 141  | 2.00E-49  | 102.9 | 80.3 | 91.2 |
| Rsa1.0_01094.1.g23385.t1 | ref XP_002878178.1  hypothetical protein ARALYDRAFT_486243 [Arabidopsis lyrata subsp. lyrata] gi 297324016 gb EFH54437.1  hypothetical protein ARALYDRAFT_486243 [Arabidopsis lyrata subsp. lyrata]                                                                                                                                                                                                                                                                                                                                                                                                                                                                                                                                 | 321  | 347  | 1.00E-126 | 108.1 | 76.9 | 84.7 | hypothetical protein ARALYDRAFT_486243                                                                                                                                                          | gbpln | Arabidopsis lyrata   | AT3G57920.1   Symbols: SPL15   squamosa promoter binding protein-like 15   chr3:21444450-21445852 REVERSE LENGTH=354                                                                                                                                                                                                                                                                                                                                                | 321  | 354  | 1.00E-120 | 110.3 | 73.8 | 82.2 |
| Rsa1.0_01094.1.g23386.t1 | gb EOA23174.1  hypothetical protein CARUB_v10017834mg [Capsella rubella]                                                                                                                                                                                                                                                                                                                                                                                                                                                                                                                                                                                                                                                            | 167  | 269  | 8.00E-73  | 161.1 | 88.0 | 93.4 | hypothetical protein CARUB_v10017834mg                                                                                                                                                          | gbpln | Capsella rubella     | AT3G57910.1   Symbols:   D111/G-patch domain-containing protein   chr3:21442771-21443968 FORWARD LENGTH=265                                                                                                                                                                                                                                                                                                                                                         | 167  | 265  | 1.00E-62  | 158.7 | 89.2 | 94.0 |
| Rsa1.0_01094.1.g23387.t1 | gb AAO64176.1  putative zinc finger protein [Arabidopsis thaliana] gi 110737098 dbj BAF00501.1  zinc finger like protein [Arabidopsis thaliana] ref NP_191325.1  DNA-directed RNA polymerase I subunit A1 [Arabidopsis thaliana] gi 4678281 emb CAB41189.1  DNA-directed RNA polymerase I 190K chain-like protein [Arabidopsis thaliana] gi 332646163 gb AEE79684.1  nuclear RNA polymerase A1 [Arabidopsis thaliana]                                                                                                                                                                                                                                                                                                               | 231  | 383  | 2.00E-71  | 165.8 | 80.1 | 86.1 | putative zinc finger protein                                                                                                                                                                    | gbpln | Arabidopsis thaliana | AT3G57670.1   Symbols: NTT, WIP2   C2H2-type zinc finger family protein   chr3:21370936-21373121 FORWARD LENGTH=383                                                                                                                                                                                                                                                                                                                                                 | 231  | 383  | 8.00E-71  | 165.8 | 80.1 | 86.1 |
| Rsa1.0_01094.1.g23388.t1 | ref NP_191325.1  DNA-directed RNA polymerase I subunit A1 [Arabidopsis thaliana] gi 4678281 emb CAB41189.1  DNA-directed RNA polymerase I 190K chain-like protein [Arabidopsis thaliana] gi 332646163 gb AEE79684.1  nuclear RNA polymerase A1 [Arabidopsis thaliana]                                                                                                                                                                                                                                                                                                                                                                                                                                                               | 1459 | 1670 | 0         | 114.5 | 79.9 | 87.0 | DNA-directed RNA polymerase I subunit A1                                                                                                                                                        | gbpln | Arabidopsis thaliana | AT3G57660.1   Symbols: NRPA1   nuclear RNA polymerase A1   chr3:21353746-21362814 FORWARD LENGTH=1670                                                                                                                                                                                                                                                                                                                                                               | 1459 | 1670 | 0         | 114.5 | 79.9 | 87.0 |
| Rsa1.0_01094.1.g23389.t1 | sp Q9XFW4.1 LPAT2_BRANA RecName: Full=1-acyl-sn-glycerol-3-phosphate acyltransferase 2; AltName: Full=Lysophosphatidyl acyltransferase 2 gi 4583544 emb CAB09138.1  acyl-CoA:1-acylglycerol-3-phosphate acyltransferase [Brassica napus]                                                                                                                                                                                                                                                                                                                                                                                                                                                                                            | 391  | 390  | 0         | 99.7  | 97.2 | 99.0 | RecName: Full=1-acyl-sn-glycerol-3-phosphate acyltransferase 2; AltName: Full=Lysophosphatidyl acyltransferase 2 gi 4583544 emb CAB09138.1  acyl-CoA:1-acylglycerol-3-phosphate acyltransferase | gbpln | Brassica napus       | AT3G57650.1   Symbols: LPAT2   lysophosphatidyl acyltransferase 2   chr3:21349751-21352839 FORWARD LENGTH=389                                                                                                                                                                                                                                                                                                                                                       | 391  | 389  | 0         | 99.5  | 92.3 | 96.4 |
| Rsa1.0_01095.1.g23390.t1 | gb EOA26734.1  hypothetical protein CARUB_v10022820mg [Capsella rubella]                                                                                                                                                                                                                                                                                                                                                                                                                                                                                                                                                                                                                                                            | 353  | 527  | 8.00E-61  | 149.3 | 42.8 | 56.9 | hypothetical protein CARUB_v10022820mg                                                                                                                                                          | gbpln | Capsella rubella     | AT4G05360.1   Symbols:   Zinc knuckle (GCHC-type) family protein   chr4:2728204-2732337 FORWARD LENGTH=735                                                                                                                                                                                                                                                                                                                                                          | 353  | 735  | 5.00E-54  | 208.2 | 41.1 | 57.2 |
| Rsa1.0_01095.1.g23391.t1 | gb EOA13223.1  hypothetical protein CARUB_v10026246mg [Capsella rubella]                                                                                                                                                                                                                                                                                                                                                                                                                                                                                                                                                                                                                                                            | 523  | 511  | 0         | 97.7  | 75.1 | 83.0 | hypothetical protein CARUB_v10026246mg                                                                                                                                                          | gbpln | Capsella rubella     | AT5G52050.1   Symbols:   MATE efflux family protein   chr5:21138933-21140450 FORWARD LENGTH=505                                                                                                                                                                                                                                                                                                                                                                     | 523  | 505  | 0         | 96.6  | 75.0 | 83.6 |
| Rsa1.0_01095.1.g23392.t1 | gb AAD15534.1  putative retroelement pol polyprotein [Arabidopsis thaliana]                                                                                                                                                                                                                                                                                                                                                                                                                                                                                                                                                                                                                                                         | 767  | 1664 | 0         | 216.9 | 46.8 | 59.2 | putative retroelement pol polyprotein                                                                                                                                                           | gbpln | Arabidopsis thaliana | AT4G23160.1   Symbols: CRK8   cysteine-rich RLK (RECEPTOR-like protein kinase) 8   chr4:12129485-12134086 FORWARD LENGTH=1262                                                                                                                                                                                                                                                                                                                                       | 767  | 1262 | 1.00E-25  | 164.5 | 9.0  | 12.5 |

|                           |                                                                                                                                                                                                                                                                                                                                                                                                                                   |      |      |           |       |      |      |                                                                                |       |                      |                                                                                                                                                                                                                                                                                                                                                        |      |      |           |       |      |      |
|---------------------------|-----------------------------------------------------------------------------------------------------------------------------------------------------------------------------------------------------------------------------------------------------------------------------------------------------------------------------------------------------------------------------------------------------------------------------------|------|------|-----------|-------|------|------|--------------------------------------------------------------------------------|-------|----------------------|--------------------------------------------------------------------------------------------------------------------------------------------------------------------------------------------------------------------------------------------------------------------------------------------------------------------------------------------------------|------|------|-----------|-------|------|------|
| Rsa1.0_01095.1.g23393.t1  | ref XP_002864146.1  hypothetical protein ARALYDRAFT_495273 [Arabidopsis lyrata subsp. lyrata] gi 297309981 gb EFH40405.1                                                                                                                                                                                                                                                                                                          | 396  | 404  | 0         | 102.0 | 88.4 | 92.2 | hypothetical protein ARALYDRAFT_495273                                         | gbpln | Arabidopsis lyrata   | AT5G52030.2   Symbols:   TraB family protein   chr5:21128291-21130034 FORWARD LENGTH=402                                                                                                                                                                                                                                                               | 396  | 402  | 0         | 101.5 | 85.4 | 90.7 |
| Rsa1.0_01095.1.g23394.t11 | gb AAF69161.1 AC007915_13 F27F5.19 [Arabidopsis thaliana]                                                                                                                                                                                                                                                                                                                                                                         | 1051 | 1309 | 0         | 124.5 | 33.8 | 42.6 | F27F5.19                                                                       | gbpln | Arabidopsis thaliana | AT4G23160.1   Symbols: CRK8   cysteine-rich RLK (RECEPTOR-like protein kinase) 8   chr4:12129485-12134086 FORWARD LENGTH=1262                                                                                                                                                                                                                          | 1051 | 1262 | 1.00E-123 | 120.1 | 20.6 | 28.4 |
| Rsa1.0_01095.1.g23395.t1  | ref NP_200009.1  uncharacterized protein [Arabidopsis thaliana] gi 10177731 dbj BAB11044.1  unnamed protein product [Arabidopsis thaliana] gi 37202072 gb AAQ89651.1  At5g51960 [Arabidopsis thaliana] gi 51969014 dbj BAD43199.1  unknown protein [Arabidopsis thaliana] gi 51969196 dbj BAD43290.1  unknown protein [Arabidopsis thaliana] gi 332008768 gb AED96151.1  uncharacterized protein AT5G51960 [Arabidopsis thaliana] | 94   | 103  | 4.00E-33  | 109.6 | 78.7 | 83.0 | uncharacterized protein                                                        | gbpln | Arabidopsis thaliana | AT5G51960.1   Symbols:   CONTAINS InterPro DOMAIN/s: Complex 1 LYR protein (InterPro:IPR008011); Has 45 Blast hits to 45 proteins in 14 species: Archae - 0; Bacteria - 0; Metazoa - 0; Fungi - 0; Plants - 45; Viruses - 0; Other Eukaryotes - 0 (source: NCBI BLink).   chr5:21110716-21111116 FORWARD LENGTH=103                                    | 94   | 103  | 7.00E-36  | 109.6 | 78.7 | 83.0 |
| Rsa1.0_01095.1.g23396.t1  | gb EOA14537.1  hypothetical protein CARUB_v10027769mg [Capsella rubella]                                                                                                                                                                                                                                                                                                                                                          | 553  | 587  | 0         | 106.1 | 86.3 | 93.3 | hypothetical protein CARUB_v10027769mg                                         | gbpln | Capsella rubella     | AT5G51950.2   Symbols:   Glucose-methanol-choline (GMC) oxidoreductase family protein   chr5:21106093-21108348 REVERSE LENGTH=553                                                                                                                                                                                                                      | 553  | 553  | 0         | 100.0 | 87.0 | 93.9 |
| Rsa1.0_01095.1.g23397.t1  | gb AAG51404.1 AC009465.4 unknown protein; 32997-32284 [Arabidopsis thaliana]                                                                                                                                                                                                                                                                                                                                                      | 111  | 152  | 8.00E-14  | 136.9 | 48.6 | 54.1 | unknown protein; 32997-32284                                                   | gbpln | Arabidopsis thaliana | AT3G04950.1   Symbols:   CONTAINS InterPro DOMAIN/s: SEC-C motif (InterPro:IPR004027); Has 583 Blast hits to 583 proteins in 248 species: Archae - 0; Bacteria - 488; Metazoa - 0; Fungi - 0; Plants - 34; Viruses - 0; Other Eukaryotes - 61 (source: NCBI BLink).   chr3:1371786-1373300 FORWARD LENGTH=231                                          | 111  | 231  | 6.00E-16  | 208.1 | 45.0 | 49.5 |
| Rsa1.0_01096.1.g23398.t1  | #                                                                                                                                                                                                                                                                                                                                                                                                                                 | #    | #    | #         | #     | #    | #    | -                                                                              | ----  | ----                 | #                                                                                                                                                                                                                                                                                                                                                      | #    | #    | #         | #     | #    | #    |
| Rsa1.0_01096.1.g23399.t1  | gb EOA14432.1  hypothetical protein CARUB_v10027635mg [Capsella rubella]                                                                                                                                                                                                                                                                                                                                                          | 386  | 386  | 0         | 100.0 | 95.1 | 98.2 | hypothetical protein CARUB_v10027635mg                                         | gbpln | Capsella rubella     | AT5G45620.1   Symbols:   Proteasome component (PCI) domain protein   chr5:18501590-18503868 FORWARD LENGTH=386                                                                                                                                                                                                                                         | 386  | 386  | 0         | 100.0 | 94.3 | 97.9 |
| Rsa1.0_01096.1.g23400.t1  | ref XP_002863466.1  binding protein [Arabidopsis lyrata subsp. lyrata] gi 297309301 gb EFH39725.1  binding protein [Arabidopsis lyrata subsp. lyrata]                                                                                                                                                                                                                                                                             | 692  | 633  | 1.00E-134 | 91.5  | 34.5 | 38.2 | binding protein                                                                | gbpln | Arabidopsis lyrata   | AT5G45610.1   Symbols: SUV2   protein dimerizations   chr5:18496397-18499673 REVERSE LENGTH=646                                                                                                                                                                                                                                                        | 692  | 646  | 1.00E-137 | 93.4  | 34.1 | 37.7 |
| Rsa1.0_01096.1.g23401.t1  | ref XP_002870807.1  hypothetical protein ARALYDRAFT_916420 [Arabidopsis lyrata subsp. lyrata] gi 297316643 gb EFH47066.1  hypothetical protein ARALYDRAFT_916420 [Arabidopsis lyrata subsp. lyrata]                                                                                                                                                                                                                               | 157  | 168  | 1.00E-28  | 107.0 | 43.9 | 59.9 | hypothetical protein ARALYDRAFT_916420                                         | gbpln | Arabidopsis lyrata   | AT5G39010.1   Symbols:   unknown protein; BEST Arabidopsis thaliana protein match is: unknown protein (TAIR:AT2G39782.1); Has 12 Blast hits to 12 proteins in 3 species: Archae - 0; Bacteria - 0; Metazoa - 0; Fungi - 0; Plants - 12; Viruses - 0; Other Eukaryotes - 0 (source: NCBI BLink).   chr5:15615948-15616457 FORWARD LENGTH=169            | 157  | 169  | 2.00E-22  | 107.6 | 41.4 | 58.0 |
| Rsa1.0_01096.1.g23402.t1  | ref NP_001190475.1  YEATS family protein [Arabidopsis thaliana] gi 332007891 gb AED95274.1  YEATS family protein [Arabidopsis thaliana]                                                                                                                                                                                                                                                                                           | 267  | 267  | 1.00E-147 | 100.0 | 93.6 | 98.1 | YEATS family protein                                                           | gbpln | Arabidopsis thaliana | AT5G45600.2   Symbols: GAS41   YEATS family protein   chr5:18488059-18489666 FORWARD LENGTH=267                                                                                                                                                                                                                                                        | 267  | 267  | 1.00E-150 | 100.0 | 93.6 | 98.1 |
| Rsa1.0_01096.1.g23403.t1  | pir  T00833 RNA-directed DNA polymerase homolog T13L16.7 - Arabidopsis thaliana (fragment)                                                                                                                                                                                                                                                                                                                                        | 1386 | 1365 | 0         | 98.5  | 43.1 | 60.6 | RNA-directed DNA polymerase homolog T13L16.7 - Arabidopsis thaliana (fragment) | ----  | ----                 | AT4G29090.1   Symbols:   Ribonuclease H-like superfamily protein   chr4:14333528-14335255 FORWARD LENGTH=575                                                                                                                                                                                                                                           | 1386 | 575  | 5.00E-77  | 41.5  | 13.7 | 20.2 |
| Rsa1.0_01096.1.g23404.t1  | gb AAB61072.1  contains similarity to a DNAJ-like domain [Arabidopsis thaliana]                                                                                                                                                                                                                                                                                                                                                   | 563  | 1609 | 4.00E-77  | 285.8 | 25.4 | 33.4 | contains similarity to a DNAJ-like domain                                      | gbpln | Arabidopsis thaliana | AT5G27260.1   Symbols:   unknown protein; BEST Arabidopsis thaliana protein match is: unknown protein (TAIR:AT2G29880.1); Has 1807 Blast hits to 1807 proteins in 277 species: Archae - 0; Bacteria - 0; Metazoa - 736; Fungi - 347; Plants - 385; Viruses - 0; Other Eukaryotes - 339 (source: NCBI BLink).   chr5:9603943-9604930 FORWARD LENGTH=303 | 563  | 303  | 1.00E-79  | 53.8  | 25.4 | 33.4 |

|                          |                                                                                                                                                                                                                                                                                                                                                                                                                                    |     |      |          |       |      |      |                                        |       |                      |                                                                                                                                        |     |     |          |       |      |      |
|--------------------------|------------------------------------------------------------------------------------------------------------------------------------------------------------------------------------------------------------------------------------------------------------------------------------------------------------------------------------------------------------------------------------------------------------------------------------|-----|------|----------|-------|------|------|----------------------------------------|-------|----------------------|----------------------------------------------------------------------------------------------------------------------------------------|-----|-----|----------|-------|------|------|
| Rsa1.0_01096.1.g23405.t1 | refNP_199276.1   alpha-barbatene synthase [Arabidopsis thaliana] gi 254810224 sp Q4KSH9.2 BARS_ARAT H RecName: Full=Alpha-barbatene synthase; Short=ATBS; AltName: Full=Beta-chamigrene synthase; AltName: Full=Terpendeoid synthase 11; Short=ATPS11; AltName: Full=Thujopsene synthase gi 126352284 gb ABO09887.1  At5g44630 [Arabidopsis thaliana] gi 332007757 gb AED95140.1   alpha-barbatene synthase [Arabidopsis thaliana] | 556 | 557  | 0        | 100.2 | 73.4 | 84.7 | alpha-barbatene synthase               | gbpln | Arabidopsis thaliana | AT5G44630.1   Symbols:   Terpenoid cyclases/Protein prenyltransferases superfamily protein   chr5:18003280-18005616 FORWARD LENGTH=557 | 556 | 557 | 0        | 100.2 | 73.4 | 84.7 |
| Rsa1.0_01097.1.g23406.t3 | refXP_002882622.1   ATEXO70H4 [Arabidopsis lyrata subsp. lyrata] gi 297328462 gb EFH58881.1  ATEXO70H4 [Arabidopsis lyrata subsp. lyrata]                                                                                                                                                                                                                                                                                          | 632 | 628  | 0        | 99.4  | 75.6 | 85.6 | ATEXO70H4                              | gbpln | Arabidopsis lyrata   | AT3G09520.1   Symbols: ATEXO70H4, EXO70H4   exocyst subunit exo70 family protein H4   chr3:2923743-2925629 FORWARD LENGTH=628          | 632 | 628 | 0        | 99.4  | 74.8 | 85.3 |
| Rsa1.0_01097.1.g23407.t1 | gb EOA31721.1  hypothetical protein CARUB_v10014930mg [Capsella rubella]                                                                                                                                                                                                                                                                                                                                                           | 123 | 123  | 2.00E-58 | 100.0 | 94.3 | 98.4 | hypothetical protein CARUB_v10014930mg | gbpln | Capsella rubella     | AT3G09500.1   Symbols:   Ribosomal L29 family protein   chr3:2917047-2917895 FORWARD LENGTH=123                                        | 123 | 123 | 4.00E-61 | 100.0 | 94.3 | 98.4 |
| Rsa1.0_01097.1.g23408.t1 | #                                                                                                                                                                                                                                                                                                                                                                                                                                  | #   | #    | #        | #     | #    | -    | -                                      | ----  | ----                 | #                                                                                                                                      | #   | #   | #        | #     | #    |      |
| Rsa1.0_01097.1.g23409.t1 | gb EOA31010.1  hypothetical protein CARUB_v10014153mg [Capsella rubella]                                                                                                                                                                                                                                                                                                                                                           | 312 | 331  | 1.00E-89 | 106.1 | 63.8 | 75.6 | hypothetical protein CARUB_v10014153mg | gbpln | Capsella rubella     | AT3G09490.1   Symbols:   Tetratricopeptide repeat (TPR)-like superfamily protein   chr3:2915636-2916640 FORWARD LENGTH=334             | 312 | 334 | 2.00E-91 | 107.1 | 64.4 | 77.9 |
| Rsa1.0_01097.1.g23410.t1 | #                                                                                                                                                                                                                                                                                                                                                                                                                                  | #   | #    | #        | #     | #    | -    | -                                      | ----  | ----                 | #                                                                                                                                      | #   | #   | #        | #     | #    |      |
| Rsa1.0_01097.1.g23411.t1 | refNP_187552.3   putative pectinacetyltransferase [Arabidopsis thaliana] gi 6478931 gb AAF14036.1 AC011436.20 putative pectinacetyltransferase [Arabidopsis thaliana] gi 119935842 gb ABM06009.1  At3g09410 [Arabidopsis thaliana] gi 332641244 gb AEE74765.1  putative pectinacetyltransferase [Arabidopsis thaliana]                                                                                                             | 427 | 427  | 0        | 100.0 | 81.0 | 88.8 | putative pectinacetyltransferase       | gbpln | Arabidopsis thaliana | AT3G09410.1   Symbols:   Pectinacetyltransferase family protein   chr3:2898243-2900984 REVERSE LENGTH=427                              | 427 | 427 | 0        | 100.0 | 81.0 | 88.8 |
| Rsa1.0_01097.1.g23412.t1 | gb EOA32896.1  hypothetical protein CARUB_v10016220mg [Capsella rubella]                                                                                                                                                                                                                                                                                                                                                           | 204 | 150  | 1.00E-32 | 73.5  | 34.3 | 42.2 | hypothetical protein CARUB_v10016220mg | gbpln | Capsella rubella     | AT3G09380.1   Symbols:   Protein of unknown function (DUF59)   chr3:2885265-2886116 REVERSE LENGTH=156                                 | 204 | 156 | 3.00E-35 | 76.5  | 35.8 | 43.1 |
| Rsa1.0_01097.1.g23413.t1 | refXP_002882616.1   hypothetical protein ARALYDRAFT_317739 [Arabidopsis lyrata subsp. lyrata] gi 297328456 gb EFH58875.1  hypothetical protein ARALYDRAFT_317739 [Arabidopsis lyrata subsp. lyrata]                                                                                                                                                                                                                                | 493 | 1245 | 0        | 252.5 | 73.6 | 80.3 | hypothetical protein ARALYDRAFT_317739 | gbpln | Arabidopsis lyrata   | AT3G09370.1   Symbols: MYB3R-3, ATMYB3R3   myb domain protein 3r-3   chr3:2879534-2882128 FORWARD LENGTH=505                           | 493 | 505 | 0        | 102.4 | 72.4 | 78.9 |
| Rsa1.0_01097.1.g23414.t1 | refXP_002882612.1   oxysterol-binding family protein [Arabidopsis lyrata subsp. lyrata] gi 297328452 gb EFH58871.1  oxysterol-binding family protein [Arabidopsis lyrata subsp. lyrata]                                                                                                                                                                                                                                            | 453 | 456  | 0        | 100.7 | 95.6 | 97.1 | oxysterol-binding family protein       | gbpln | Arabidopsis lyrata   | AT3G09300.1   Symbols: ORP3B   OSBP(oxysterol binding protein)-related protein 3B   chr3:2858068-2860462 FORWARD LENGTH=458            | 453 | 458 | 0        | 101.1 | 94.9 | 96.9 |
| Rsa1.0_01097.1.g23415.t1 | refXP_002862963.1   hypothetical protein ARALYDRAFT_920906 [Arabidopsis lyrata subsp. lyrata] gi 297829458 refXP_002882611.1  hypothetical protein ARALYDRAFT_897082 [Arabidopsis lyrata subsp. lyrata] gi 297308750 gb EFH39222.1  hypothetical protein ARALYDRAFT_920906 [Arabidopsis lyrata subsp. lyrata] gi 297328451 gb EFH58870.1  hypothetical protein ARALYDRAFT_897082 [Arabidopsis lyrata subsp. lyrata]                | 171 | 174  | 2.00E-67 | 101.8 | 80.1 | 87.1 | hypothetical protein ARALYDRAFT_920906 | gbpln | Arabidopsis lyrata   | AT3G09290.1   Symbols: TAC1   telomerase activator1   chr3:2856141-2856659 FORWARD LENGTH=172                                          | 171 | 172 | 1.00E-66 | 100.6 | 76.0 | 83.0 |
| Rsa1.0_01097.1.g23416.t1 | refXP_002869001.1   hypothetical protein ARALYDRAFT_328051 [Arabidopsis lyrata subsp. lyrata] gi 297314837 gb EFH45260.1  hypothetical protein ARALYDRAFT_328051 [Arabidopsis lyrata subsp. lyrata]                                                                                                                                                                                                                                | 202 | 787  | 2.00E-19 | 389.6 | 30.7 | 35.1 | hypothetical protein ARALYDRAFT_328051 | gbpln | Arabidopsis lyrata   | AT4G36950.1   Symbols: MAPKKK21   mitogen-activated protein kinase kinase kinase 21   chr4:1742834-17423844 REVERSE LENGTH=336         | 202 | 336 | 6.00E-21 | 166.3 | 31.7 | 39.1 |
| Rsa1.0_01097.1.g23417.t1 | #                                                                                                                                                                                                                                                                                                                                                                                                                                  | #   | #    | #        | #     | #    | -    | -                                      | ----  | ----                 | #                                                                                                                                      | #   | #   | #        | #     | #    |      |

|                          |                                                                                                                                                                                                                                                                                                                                                                                                                            |      |      |           |        |      |      |                                                     |       |                      |                                                                                                                                                                                                                                                                                                                                                      |      |      |           |       |      |      |
|--------------------------|----------------------------------------------------------------------------------------------------------------------------------------------------------------------------------------------------------------------------------------------------------------------------------------------------------------------------------------------------------------------------------------------------------------------------|------|------|-----------|--------|------|------|-----------------------------------------------------|-------|----------------------|------------------------------------------------------------------------------------------------------------------------------------------------------------------------------------------------------------------------------------------------------------------------------------------------------------------------------------------------------|------|------|-----------|-------|------|------|
| Rsa1.0_01097.1.g23418.t1 | gb AAC19278.1  T14P8.10 [Arabidopsis thaliana] gi 7269009 emb CAB80742.1  AT4g02490 [Arabidopsis thaliana]                                                                                                                                                                                                                                                                                                                 | 301  | 657  | 2.00E-74  | 218.3  | 46.8 | 63.5 | T14P8.10                                            | gbpln | Arabidopsis thaliana | AT3G24255.1   Symbols:   RNA-directed DNA polymerase (reverse transcriptase)-related family protein   chr:3:8789471-8793208 FORWARD LENGTH=746                                                                                                                                                                                                       | 301  | 746  | 6.00E-47  | 247.8 | 33.2 | 51.5 |
| Rsa1.0_01098.1.g23419.t1 | ref NP_192771.1  glycine-rich protein [Arabidopsis thaliana] gi 4538962 emb CAB39786.1  hypothetical protein [Arabidopsis thaliana] gi 7267730 emb CAB78156.1  hypothetical protein [Arabidopsis thaliana] gi 19347875 gb AA185995.1  unknown protein [Arabidopsis thaliana] gi 22136796 gb AAM91742.1  unknown protein [Arabidopsis thaliana] gi 332657468 gb AEE82688.1  glycine-rich protein [Arabidopsis thaliana]     | 102  | 130  | 4.00E-20  | 127.5  | 61.8 | 69.6 | glycine-rich protein                                | gbpln | Arabidopsis thaliana | AT4G10330.1   Symbols:   glycine-rich protein   chr:4:6406551-6407136 FORWARD LENGTH=130                                                                                                                                                                                                                                                             | 102  | 130  | 6.00E-23  | 127.5 | 61.8 | 69.6 |
| Rsa1.0_01098.1.g23420.t1 | gb AAC63844.1  putative non-LTR retroelement reverse transcriptase [Arabidopsis thaliana]                                                                                                                                                                                                                                                                                                                                  | 1080 | 1231 | 0         | 114.0  | 57.5 | 72.0 | putative non-LTR retroelement reverse transcriptase | gbpln | Arabidopsis thaliana | AT5G42905.1   Symbols:   Polynucleotidyl transferase, ribonuclease H-like superfamily protein   chr:5:17201414-17202323 REVERSE LENGTH=258                                                                                                                                                                                                           | 1080 | 258  | 2.00E-78  | 23.9  | 13.1 | 16.4 |
| Rsa1.0_01098.1.g23421.t1 | dbj BAB09923.1  copia-like retrotransposable element [Arabidopsis thaliana]                                                                                                                                                                                                                                                                                                                                                | 1642 | 1342 | 0         | 81.7   | 42.4 | 57.9 | copia-like retrotransposable element                | gbpln | Arabidopsis thaliana | AT4G23160.1   Symbols: CRK8   cysteine-rich RLK (RECEPTOR-like protein kinase) 8   chr:4:12129485-12134086 FORWARD LENGTH=1262                                                                                                                                                                                                                       | 1642 | 1262 | 1.00E-81  | 76.9  | 10.8 | 16.3 |
| Rsa1.0_01098.1.g23422.t1 | # # # # # # # # # # # # # # # #                                                                                                                                                                                                                                                                                                                                                                                            |      |      |           |        |      |      |                                                     |       |                      |                                                                                                                                                                                                                                                                                                                                                      |      |      |           |       |      |      |
| Rsa1.0_01098.1.g23423.t1 | ref XP_002894196.1  nucleotide binding protein [Arabidopsis lyrata subsp. lyrata] gi 297340038 gb EFH70455.1  nucleotide binding protein [Arabidopsis lyrata subsp. lyrata]                                                                                                                                                                                                                                                | 815  | 839  | 0         | 102.9  | 92.8 | 96.2 | nucleotide binding protein                          | gbpln | Arabidopsis lyrata   | AT1G49540.1   Symbols: ELP2, AtELP2   elongator protein 2   chr:1:18333767-18337382 REVERSE LENGTH=838                                                                                                                                                                                                                                               | 815  | 838  | 0         | 102.8 | 92.0 | 96.2 |
| Rsa1.0_01098.1.g23424.t1 | gb EOA40419.1  hypothetical protein CARUB_v10009144mg [Capsella rubella]                                                                                                                                                                                                                                                                                                                                                   | 678  | 443  | 3.00E-63  | 65.3   | 23.6 | 31.3 | hypothetical protein CARUB_v10009144mg              | gbpln | Capsella rubella     | AT1G43770.2   Symbols:   RING/FYVE/PHD zinc finger superfamily protein   chr:1:16548509-16550257 FORWARD LENGTH=431                                                                                                                                                                                                                                  | 678  | 431  | 2.00E-63  | 63.6  | 23.6 | 30.4 |
| Rsa1.0_01098.1.g23425.t1 | gb EOA13223.1  hypothetical protein CARUB_v10026248mg [Capsella rubella]                                                                                                                                                                                                                                                                                                                                                   | 497  | 511  | 1.00E-155 | 102.8  | 58.4 | 69.4 | hypothetical protein CARUB_v10026248mg              | gbpln | Capsella rubella     | AT5G52050.1   Symbols:   MATE efflux family protein   chr:5:21138933-21140450 FORWARD LENGTH=505                                                                                                                                                                                                                                                     | 497  | 505  | 1.00E-155 | 101.6 | 56.7 | 69.4 |
| Rsa1.0_01099.1.g23426.t1 | dbj BAA97087.1  copia-type pol polyprotein-like [Arabidopsis thaliana]                                                                                                                                                                                                                                                                                                                                                     | 71   | 1123 | 2.00E-26  | 1581.7 | 78.9 | 90.1 | copia-type pol polyprotein-like                     | gbpln | Arabidopsis thaliana | #                                                                                                                                                                                                                                                                                                                                                    | #    | #    | #         | #     | #    | #    |
| Rsa1.0_01099.1.g23427.t1 | gb EOA19882.1  hypothetical protein CARUB_v10000128mg [Capsella rubella]                                                                                                                                                                                                                                                                                                                                                   | 998  | 1013 | 0         | 101.5  | 91.2 | 95.2 | hypothetical protein CARUB_v10000128mg              | gbpln | Capsella rubella     | AT4G11800.1   Symbols:   Calcineurin-like metallo-phosphoesterase superfamily protein   chr:4:7093666-7098519 REVERSE LENGTH=1013                                                                                                                                                                                                                    | 998  | 1013 | 0         | 101.5 | 90.9 | 94.7 |
| Rsa1.0_01099.1.g23428.t3 | ref XP_002872625.1  hypothetical protein ARALYDRAFT_489995 [Arabidopsis lyrata subsp. lyrata] gi 297318462 gb EFH48884.1  hypothetical protein ARALYDRAFT_489995 [Arabidopsis lyrata subsp. lyrata]                                                                                                                                                                                                                        | 393  | 425  | 1.00E-160 | 108.1  | 79.1 | 85.2 | hypothetical protein ARALYDRAFT_489995              | gbpln | Arabidopsis lyrata   | AT4G11790.1   Symbols:   Pleckstrin homology (PH) domain superfamily protein   chr:4:7090456-7093208 FORWARD LENGTH=443                                                                                                                                                                                                                              | 393  | 443  | 1.00E-148 | 112.7 | 74.6 | 83.5 |
| Rsa1.0_01099.1.g23429.t1 | ref XP_002872624.1  hypothetical protein ARALYDRAFT_489994 [Arabidopsis lyrata subsp. lyrata] gi 297318461 gb EFH48883.1  hypothetical protein ARALYDRAFT_489994 [Arabidopsis lyrata subsp. lyrata]                                                                                                                                                                                                                        | 491  | 477  | 1.00E-165 | 97.1   | 70.1 | 79.2 | hypothetical protein ARALYDRAFT_489994              | gbpln | Arabidopsis lyrata   | AT4G11780.1   Symbols:   unknown protein; BEST Arabidopsis thaliana protein match is: unknown protein (TAIR:AT4G23020.2); Has 550 Blast hits to 387 proteins in 92 species: Archae - 0; Bacteria - 32; Metazoa - 132; Fungi - 122; Plants - 80; Viruses - 0; Other Eukaryotes - 184 (source: NCBI BLINK).   chr:4:7085970-7088212 FORWARD LENGTH=473 | 491  | 473  | 1.00E-166 | 96.3  | 69.9 | 78.8 |
| Rsa1.0_01099.1.g23430.t1 | ref XP_002886390.1  hypothetical protein ARALYDRAFT_893070 [Arabidopsis lyrata subsp. lyrata] gi 297332231 gb EFH62649.1  hypothetical protein ARALYDRAFT_893070 [Arabidopsis lyrata subsp. lyrata]                                                                                                                                                                                                                        | 285  | 298  | 1.00E-74  | 104.6  | 52.6 | 68.8 | hypothetical protein ARALYDRAFT_893070              | gbpln | Arabidopsis lyrata   | AT2G42470.1   Symbols:   TRAF-like family protein   chr:2:17679887-17685187 REVERSE LENGTH=898                                                                                                                                                                                                                                                       | 285  | 898  | 4.00E-65  | 315.1 | 49.5 | 68.4 |
| Rsa1.0_01099.1.g23431.t1 | ref NP_568884.4  dehydrodolichyl diphosphate synthase 5 [Arabidopsis thaliana] gi 83305680 sp Q570Q8.2 DDPS5_ARAT H_RecName: Full=Dehydrodolichyl diphosphate synthase 5; Short=Dedol-PP synthase 5 gi 8843800 dbj BAA97348.1  cis-prenyltransferase homolog-like; undecaprenyl phosphate synthetase-like [Arabidopsis thaliana] gi 332009716 gb AED97099.1  dehydrodolichyl diphosphate synthase 5 [Arabidopsis thaliana] | 280  | 302  | 1.00E-104 | 107.9  | 67.1 | 79.3 | dehydrodolichyl diphosphate synthase 5              | gbpln | Arabidopsis thaliana | AT5G58784.1   Symbols:   Undecaprenyl pyrophosphate synthetase family protein   chr:5:23739950-23741267 REVERSE LENGTH=302                                                                                                                                                                                                                           | 280  | 302  | 1.00E-106 | 107.9 | 67.1 | 79.3 |



|                           |                                                                                                                                                                                                                                                                  |     |     |           |       |      |      |                                                                                                                                                                      |             |                      |                                                                                                                                             |     |     |           |       |      |      |
|---------------------------|------------------------------------------------------------------------------------------------------------------------------------------------------------------------------------------------------------------------------------------------------------------|-----|-----|-----------|-------|------|------|----------------------------------------------------------------------------------------------------------------------------------------------------------------------|-------------|----------------------|---------------------------------------------------------------------------------------------------------------------------------------------|-----|-----|-----------|-------|------|------|
| Rsa1.0_01099.1.g23432.t1  | refXP_002877743.1   hypothetical protein ARALYDRAFT_485389 [Arabidopsis lyrata subsp. lyrata] g 297323581 gb EFH54002.1                                                                                                                                          | 116 | 117 | 2.00E-38  | 100.9 | 69.8 | 80.2 | hypothetical protein ARALYDRAFT_485389                                                                                                                               | gbpln       | Arabidopsis lyrata   | AT5G51360.1   Symbols:   Transcription elongation factor (TFIIS) family protein   chr5:20871918-20872277 FORWARD LENGTH=119                 | 116 | 119 | 3.00E-33  | 102.6 | 63.8 | 77.6 |
| Rsa1.0_01099.1.g23433.t1  | hypothetical protein ARALYDRAFT_485389 [Arabidopsis lyrata subsp. lyrata] gb EOA20188.1   hypothetical protein CARUB_v10000484mg, partial [Capsella rubella]                                                                                                     | 478 | 617 | 0         | 129.1 | 78.2 | 87.7 | hypothetical protein CARUB_v10000484mg, partial                                                                                                                      | gbpln       | Capsella rubella     | AT4G11740.1   Symbols: SAY1   Ubiquitin-like superfamily protein   chr4:7071955-7075256 FORWARD LENGTH=564                                  | 478 | 564 | 1.00E-166 | 118.0 | 78.2 | 87.9 |
| Rsa1.0_01099.1.g23434.t1  | sp Q39242.2 TRXB2_ARATH RecName: Full=Thioredoxin reductase 2; AltName: Full=NADPH-dependent thioredoxin reductase 2; Short=NTR2; AltName: Full=NADPH-dependent thioredoxin reductase A; Short=AtNTRA                                                            | 159 | 383 | 9.00E-34  | 240.9 | 45.3 | 47.2 | Full=Thioredoxin reductase 2; AltName: Full=NADPH-dependent thioredoxin reductase 2; Short=NTR2; AltName: Full=NADPH-dependent thioredoxin reductase A; Short=AtNTRA | -----       | -----                | AT2G17420.1   Symbols: NTRA, ATNTRA, NTR2   NADPH-dependent thioredoxin reductase A   chr2:7564357-7566219 FORWARD LENGTH=378               | 159 | 378 | 3.00E-36  | 237.7 | 45.3 | 47.2 |
| Rsa1.0_01099.1.g23435.t1  | gb EJP69747.1   hypothetical protein BBA_01712 [Beauveria bassiana ARSEF 2860]                                                                                                                                                                                   | 251 | 318 | 1.00E-63  | 126.7 | 48.2 | 67.3 | hypothetical protein BBA_01712                                                                                                                                       | gbenv/gbpln | Beauveria bassiana   | #                                                                                                                                           | #   | #   | #         | #     | #    | #    |
| Rsa1.0_01099.1.g23436.t1  | refXP_002881638.1   hypothetical protein ARALYDRAFT_321615 [Arabidopsis lyrata subsp. lyrata] g 297327477 gb EFH57897.1                                                                                                                                          | 254 | 584 | 8.00E-71  | 229.9 | 62.6 | 75.6 | hypothetical protein ARALYDRAFT_321615                                                                                                                               | gbpln       | Arabidopsis lyrata   | AT2G39240.1   Symbols:   RNA polymerase I specific transcription initiation factor RRN3 protein   chr2:16384786-16387827 REVERSE LENGTH=573 | 254 | 573 | 7.00E-69  | 225.6 | 59.8 | 70.9 |
| Rsa1.0_01099.1.g23437.t1  | ref NP_192758.1   TTF-type zinc finger protein with HAT dimerization domain [Arabidopsis thaliana] g 453994 emb CAB39772.1   putative protein [Arabidopsis thaliana] g 726771 emb CAB78143.1   putative protein [Arabidopsis thaliana] g 332657454 gb AEE82854.1 | 642 | 733 | 0         | 114.2 | 58.3 | 68.8 | TTF-type zinc finger protein with HAT dimerization domain                                                                                                            | gbpln       | Arabidopsis thaliana | AT4G10200.1   Symbols:   TTF-type zinc finger protein with HAT dimerization domain   chr4:6353172-6355591 FORWARD LENGTH=733                | 642 | 733 | 0         | 114.2 | 58.3 | 68.8 |
| Rsa1.0_01099.1.g23438.t5  | ref NP_174347.1   RNA polymerase I specific transcription initiation factor RRN3 protein [Arabidopsis thaliana] g 332193126 gb AEE31247.1   RNA polymerase I specific transcription initiation factor RRN3 protein [Arabidopsis thaliana]                        | 259 | 604 | 6.00E-97  | 233.2 | 73.4 | 82.2 | RNA polymerase I specific transcription initiation factor RRN3 protein                                                                                               | gbpln       | Arabidopsis thaliana | AT1G30590.1   Symbols:   RNA polymerase I specific transcription initiation factor RRN3 protein   chr1:10835976-10839524 REVERSE LENGTH=604 | 259 | 604 | 2.00E-99  | 233.2 | 73.4 | 82.2 |
| Rsa1.0_01099.1.g23439.t1  | gb EOA21441.1   hypothetical protein CARUB_v10001823mg [Capsella rubella]                                                                                                                                                                                        | 244 | 244 | 1.00E-125 | 100.0 | 88.9 | 93.0 | hypothetical protein CARUB_v10001823mg                                                                                                                               | gbpln       | Capsella rubella     | AT4G11650.1   Symbols: ATOSM34, OSM34   osmotin_34   chr4:7025127-7026113 REVERSE LENGTH=244                                                | 244 | 244 | 1.00E-127 | 100.0 | 88.1 | 93.0 |
| Rsa1.0_01099.1.g23440.t1  | gb AAD23020.1   hypothetical protein [Arabidopsis thaliana]                                                                                                                                                                                                      | 664 | 926 | 1.00E-108 | 139.5 | 39.5 | 56.5 | hypothetical protein                                                                                                                                                 | gbpln       | Arabidopsis thaliana | AT5G45570.1   Symbols:   Ulp1 protease family protein   chr5:18472301-18475574 FORWARD LENGTH=921                                           | 664 | 921 | 1.00E-50  | 138.7 | 16.3 | 25.6 |
| Rsa1.0_01100.1.g23441.t22 | refXP_003551900.1   PREDICTED: glucose-6-phosphate/phosphate translocator 1, chloroplastic-like [Glycine max]                                                                                                                                                    | 123 | 394 | 1.00E-14  | 320.3 | 45.5 | 48.0 | PREDICTED: glucose-6-phosphate/phosphate translocator 1, chloroplastic-like                                                                                          | gbenv/gbpln | Glycine max          | AT5G54800.1   Symbols: GPT1, ATGPT1   glucose 6-phosphate/phosphate translocator 1   chr5:22261408-22263562 FORWARD LENGTH=388              | 123 | 388 | 3.00E-15  | 315.4 | 45.5 | 49.6 |
| Rsa1.0_01100.1.g23442.t1  | gb EOA15489.1   hypothetical protein CARUB_v10004733mg [Capsella rubella]                                                                                                                                                                                        | 313 | 470 | 1.00E-108 | 150.2 | 66.5 | 70.3 | hypothetical protein CARUB_v10004733mg                                                                                                                               | gbpln       | Capsella rubella     | AT4G27070.1   Symbols: TSB2   tryptophan synthase beta-subunit 2   chr4:13586564-13588619 FORWARD LENGTH=475                                | 313 | 475 | 1.00E-110 | 151.8 | 66.5 | 70.6 |
| Rsa1.0_01100.1.g23443.t1  | #                                                                                                                                                                                                                                                                | #   | #   | #         | #     | #    | -    | -----                                                                                                                                                                | -----       | #                    | #                                                                                                                                           | #   | #   | #         | #     | #    | #    |
| Rsa1.0_01100.1.g23444.t1  | ref NP_174696.2   translation initiation factor IF-3 [Arabidopsis thaliana] g 45773942 gb AAS76775.1   At g34360 [Arabidopsis thaliana] g 332193581 gb AEE31702.1   translation initiation factor IF-3 [Arabidopsis thaliana]                                    | 497 | 520 | 1.00E-170 | 104.6 | 72.2 | 82.1 | translation initiation factor IF-3                                                                                                                                   | gbpln       | Arabidopsis thaliana | AT1G34360.1   Symbols:   translation initiation factor 3 (IF-3) family protein   chr1:12542986-12546025 FORWARD LENGTH=520                  | 497 | 520 | 1.00E-173 | 104.6 | 72.2 | 82.1 |
| Rsa1.0_01100.1.g23445.t1  | ref NP_001189538.1   splicing factor, CC1-like protein [Arabidopsis thaliana] g 330251466 gb AEC06560.1   splicing factor, CC1-like protein [Arabidopsis thaliana]                                                                                               | 554 | 610 | 0         | 110.1 | 88.3 | 92.1 | splicing factor, CC1-like protein                                                                                                                                    | gbpln       | Arabidopsis thaliana | AT2G16940.2   Symbols:   Splicing factor, CC1-like   chr2:7342869-7347052 REVERSE LENGTH=610                                                | 554 | 610 | 0         | 110.1 | 88.3 | 92.1 |
| Rsa1.0_01100.1.g23446.t1  | gb EOA32915.1   hypothetical protein CARUB_v10016240mg [Capsella rubella]                                                                                                                                                                                        | 573 | 565 | 0         | 98.6  | 83.8 | 88.7 | hypothetical protein CARUB_v10016240mg                                                                                                                               | gbpln       | Capsella rubella     | AT2G16910.1   Symbols: AMS   basic helix-loop-helix (bHLH) DNA-binding superfamily protein   chr2:7331721-7334077 FORWARD LENGTH=571        | 573 | 571 | 0         | 99.7  | 86.7 | 91.8 |

|                          |                                                                                                                                                                                                                                                                                                                                                                                |     |      |           |       |      |      |                                                                   |       |                      |                                                                                                                                               |     |     |           |       |      |      |
|--------------------------|--------------------------------------------------------------------------------------------------------------------------------------------------------------------------------------------------------------------------------------------------------------------------------------------------------------------------------------------------------------------------------|-----|------|-----------|-------|------|------|-------------------------------------------------------------------|-------|----------------------|-----------------------------------------------------------------------------------------------------------------------------------------------|-----|-----|-----------|-------|------|------|
| Rsa1.0_01100.1.g23447.t1 | gb AAC95175.1  putative non-LTR retroelement reverse transcriptase [Arabidopsis thaliana]                                                                                                                                                                                                                                                                                      | 667 | 1352 | 3.00E-36  | 202.7 | 17.7 | 24.4 | putative non-LTR retroelement reverse transcriptase               | gbpln | Arabidopsis thaliana | AT3G24255.1   Symbols:   RNA-directed DNA polymerase (reverse transcriptase)-related family protein   chr3:8789471-8793208 FORWARD LENGTH=746 | 667 | 746 | 1.00E-19  | 111.8 | 10.6 | 15.9 |
| Rsa1.0_01100.1.g23448.t1 | ref NP_565397.1  phospholipase-like protein [Arabidopsis thaliana]<br>gi 20197278 gb AAC64221.2  expressed protein [Arabidopsis thaliana]<br>gi 330251456 gb AEC06550.1  phospholipase-like protein [Arabidopsis thaliana]                                                                                                                                                     | 378 | 382  | 1.00E-166 | 101.1 | 76.7 | 88.1 | phospholipase-like protein                                        | gbpln | Arabidopsis thaliana | AT2G16900.1   Symbols:   Arabidopsis phospholipase-like protein (PEARL4) family   chr2:7323857-7325374 REVERSE LENGTH=382                     | 378 | 382 | 1.00E-168 | 101.1 | 76.7 | 88.1 |
| Rsa1.0_01101.1.g23449.t1 | gb AAD14492.1  Hypothetical protein [Arabidopsis thaliana]                                                                                                                                                                                                                                                                                                                     | 83  | 240  | 1.00E-17  | 289.2 | 56.6 | 63.9 | Hypothetical protein                                              | gbpln | Arabidopsis thaliana | #                                                                                                                                             | #   | #   | #         | #     | #    | #    |
| Rsa1.0_01101.1.g23450.t1 | gb AAG50886.1 AC025294_24 hypothetical protein [Arabidopsis thaliana]                                                                                                                                                                                                                                                                                                          | 470 | 629  | 1.00E-102 | 133.8 | 45.5 | 62.6 | hypothetical protein                                              | gbpln | Arabidopsis thaliana | AT3G24255.1   Symbols:   RNA-directed DNA polymerase (reverse transcriptase)-related family protein   chr3:8789471-8793208 FORWARD LENGTH=746 | 470 | 746 | 3.00E-78  | 158.7 | 33.4 | 43.8 |
| Rsa1.0_01101.1.g23451.t1 | ref NP_849898.1  uncharacterized protein [Arabidopsis thaliana]<br>gi 62320812 dbj BAD93751.1  hypothetical protein [Arabidopsis thaliana]<br>gi 110742469 dbj BAE99153.1  hypothetical protein [Arabidopsis thaliana]<br>gi 114050645 gb ABI49472.1  At1g77122 [Arabidopsis thaliana]<br>gi 332197817 gb AEE35938.1  uncharacterized protein AT1G77122 [Arabidopsis thaliana] | 342 | 323  | 1.00E-110 | 94.4  | 67.0 | 76.9 | uncharacterized protein                                           | gbpln | Arabidopsis thaliana | AT1G77122.1   Symbols:   Uncharacterised protein family UPF0090   chr1:28977427-28978674 REVERSE LENGTH=323                                   | 342 | 323 | 1.00E-113 | 94.4  | 67.0 | 76.9 |
| Rsa1.0_01101.1.g23452.t1 | gb AEC13713.1  alcohol dehydrogenase 1 [Brassica rapa]                                                                                                                                                                                                                                                                                                                         | 377 | 379  | 0         | 100.5 | 95.2 | 97.9 | alcohol dehydrogenase 1                                           | gbpln | Brassica rapa        | AT1G77120.1   Symbols: ADH1, ADH, ATADH, ATADH1   alcohol dehydrogenase 1   chr1:28975509-28977216 FORWARD LENGTH=379                         | 377 | 379 | 0         | 100.5 | 92.6 | 96.3 |
| Rsa1.0_01101.1.g23453.t3 | ref XP_002888647.1  hypothetical protein ARALYDRAFT_475925 [Arabidopsis lyrata subsp. lyrata]<br>gi 297334488 gb EFH64906.1  hypothetical protein ARALYDRAFT_475925 [Arabidopsis lyrata subsp. lyrata]                                                                                                                                                                         | 210 | 232  | 1.00E-108 | 110.5 | 91.9 | 94.8 | hypothetical protein ARALYDRAFT_475925                            | gbpln | Arabidopsis lyrata   | AT1G67980.1   Symbols: CCOAMT   coffeyl-CoA 3-O-methyltransferase   chr1:25487724-25488934 FORWARD LENGTH=232                                 | 210 | 232 | 1.00E-110 | 110.5 | 91.4 | 94.8 |
| Rsa1.0_01101.1.g23454.t1 | ref XP_002887160.1  hypothetical protein ARALYDRAFT_339050 [Arabidopsis lyrata subsp. lyrata]<br>gi 297333001 gb EFH63419.1  hypothetical protein ARALYDRAFT_339050 [Arabidopsis lyrata subsp. lyrata]                                                                                                                                                                         | 396 | 302  | 1.00E-106 | 76.3  | 52.8 | 60.6 | hypothetical protein ARALYDRAFT_339050                            | gbpln | Arabidopsis lyrata   | AT1G68030.1   Symbols:   RING/FYVE/PHD zinc finger superfamily protein   chr1:25500378-25501544 REVERSE LENGTH=314                            | 396 | 314 | 1.00E-101 | 79.3  | 51.5 | 59.3 |
| Rsa1.0_01101.1.g23455.t1 | ref XP_002888642.1  S-adenosyl-L-methionine:carboxyl methyltransferase family protein [Arabidopsis lyrata subsp. lyrata]<br>gi 297334483 gb EFH64901.1  S-adenosyl-L-methionine:carboxyl methyltransferase family protein [Arabidopsis lyrata subsp. lyrata]                                                                                                                   | 361 | 362  | 0         | 100.3 | 88.9 | 94.7 | S-adenosyl-L-methionine:carboxyl methyltransferase family protein | gbpln | Arabidopsis lyrata   | AT1G68040.1   Symbols:   S-adenosyl-L-methionine-dependent methyltransferases superfamily protein   chr1:25502876-25505224 FORWARD LENGTH=363 | 361 | 363 | 0         | 100.6 | 86.7 | 93.4 |
| Rsa1.0_01101.1.g23456.t1 | ref XP_002887158.1  hypothetical protein ARALYDRAFT_475916 [Arabidopsis lyrata subsp. lyrata]<br>gi 297332999 gb EFH63417.1  hypothetical protein ARALYDRAFT_475916 [Arabidopsis lyrata subsp. lyrata]                                                                                                                                                                         | 343 | 344  | 1.00E-165 | 100.3 | 83.1 | 90.4 | hypothetical protein ARALYDRAFT_475916                            | gbpln | Arabidopsis lyrata   | AT1G68070.1   Symbols:   Zinc finger, C3HC4 type (RING finger) family protein   chr1:25515412-25516767 REVERSE LENGTH=343                     | 343 | 343 | 1.00E-167 | 100.0 | 81.9 | 89.5 |
| Rsa1.0_01101.1.g23457.t1 | gb EOA34223.1  hypothetical protein CARUB_v10021734mg [Capsella rubella]                                                                                                                                                                                                                                                                                                       | 601 | 373  | 1.00E-142 | 62.1  | 44.1 | 51.9 | hypothetical protein CARUB_v10021734mg                            | gbpln | Capsella rubella     | AT1G68110.1   Symbols:   ENTH/ANTH/VHS superfamily protein   chr1:25524901-25526040 FORWARD LENGTH=379                                        | 601 | 379 | 1.00E-141 | 63.1  | 43.6 | 50.2 |
| Rsa1.0_01101.1.g23458.t1 | ref XP_002888637.1  atidd14-domain 14 [Arabidopsis lyrata subsp. lyrata]<br>gi 297334478 gb EFH64896.1  atidd14-domain 14 [Arabidopsis lyrata subsp. lyrata]                                                                                                                                                                                                                   | 408 | 423  | 0         | 103.7 | 87.7 | 92.4 | atidd14-domain 14                                                 | gbpln | Arabidopsis lyrata   | AT1G68130.1   Symbols: AtIDD14, IDD14   indeterminate(ID)-domain 14   chr1:25532484-25534317 FORWARD LENGTH=419                               | 408 | 419 | 0         | 102.7 | 85.8 | 89.7 |
| Rsa1.0_01102.1.g23459.t1 | #                                                                                                                                                                                                                                                                                                                                                                              | #   | #    | #         | #     | #    | -    | ----                                                              | ----  | ----                 | #                                                                                                                                             | #   | #   | #         | #     | #    | #    |
| Rsa1.0_01102.1.g23460.t1 | gb EOA38904.1  hypothetical protein CARUB_v10011286mg [Capsella rubella]                                                                                                                                                                                                                                                                                                       | 319 | 270  | 3.00E-11  | 84.6  | 10.3 | 12.2 | hypothetical protein CARUB_v10011286mg                            | gbpln | Capsella rubella     | #                                                                                                                                             | #   | #   | #         | #     | #    | #    |
| Rsa1.0_01102.1.g23461.t2 | ref XP_002879921.1  glutaredoxin family protein [Arabidopsis lyrata subsp. lyrata]<br>gi 297325760 gb EFH56180.1  glutaredoxin family protein [Arabidopsis lyrata subsp. lyrata]                                                                                                                                                                                               | 652 | 408  | 1.00E-139 | 62.6  | 40.3 | 44.8 | glutaredoxin family protein                                       | gbpln | Arabidopsis lyrata   | AT2G41330.1   Symbols:   Glutaredoxin family protein   chr2:17227067-17228275 FORWARD LENGTH=402                                              | 652 | 402 | 1.00E-136 | 61.7  | 39.0 | 43.9 |

|                          |                                                                                                                                                                                                                                                                                                                                                                                                                                                                                                                                                                                                                                                 |     |      |           |       |      |      |                                                      |       |                      |                                                                                                                                                                                                                                                                                                                                                                                                                                |     |     |           |       |      |      |
|--------------------------|-------------------------------------------------------------------------------------------------------------------------------------------------------------------------------------------------------------------------------------------------------------------------------------------------------------------------------------------------------------------------------------------------------------------------------------------------------------------------------------------------------------------------------------------------------------------------------------------------------------------------------------------------|-----|------|-----------|-------|------|------|------------------------------------------------------|-------|----------------------|--------------------------------------------------------------------------------------------------------------------------------------------------------------------------------------------------------------------------------------------------------------------------------------------------------------------------------------------------------------------------------------------------------------------------------|-----|-----|-----------|-------|------|------|
| Rsa1.0_01102.1.g23462.t1 | refNP_181668.1  ankyrin repeat and BTB/POZ domain-containing protein [Arabidopsis thaliana] gi 75315939 sp Q9ZVC2.1 NPR5_ARATH RecName: Full=Regulatory protein NPR5; AltName: Full=BTB/POZ domain-containing protein NPR5; AltName: Full=Protein BLADE ON PETIOLE 2 gi 3894187 gb AAC78536.1  hypothetical protein [Arabidopsis thaliana] gi 53749156 gb AAU90063.1  At2g41370 [Arabidopsis thaliana] gi 60545031 gb AAX22759.1  BLADE-ON-PETIOLE2 [Arabidopsis thaliana] gi 330254872 gb AEC09966.1  regulatory protein NPR5 [Arabidopsis thaliana] gb AAD17395.1  putative non-LTR retroelement reverse transcriptase [Arabidopsis thaliana] | 441 | 491  | 0         | 111.3 | 91.2 | 94.3 | ankyrim repeat and BTB/POZ domain-containing protein | gbpln | Arabidopsis thaliana | AT2G41370.1   Symbols: BOP2   Ankyrim repeat family protein / BTB/POZ domain-containing protein   chr2:17238019-17240203 REVERSE LENGTH=491                                                                                                                                                                                                                                                                                    | 441 | 491 | 0         | 111.3 | 91.2 | 94.3 |
| Rsa1.0_01102.1.g23463.t1 | #                                                                                                                                                                                                                                                                                                                                                                                                                                                                                                                                                                                                                                               | #   | #    | #         | #     | #    | #    | putative non-LTR retroelement reverse transcriptase  | gbpln | Arabidopsis thaliana | #                                                                                                                                                                                                                                                                                                                                                                                                                              | #   | #   | #         | #     | #    |      |
| Rsa1.0_01102.1.g23464.t1 | #                                                                                                                                                                                                                                                                                                                                                                                                                                                                                                                                                                                                                                               | #   | #    | #         | #     | #    | #    | -                                                    | ----  | ----                 | #                                                                                                                                                                                                                                                                                                                                                                                                                              | #   | #   | #         | #     | #    |      |
| Rsa1.0_01102.1.g23465.t1 | gb ABD65170.1  hypothetical protein 40.t00057 [Brassica oleracea]                                                                                                                                                                                                                                                                                                                                                                                                                                                                                                                                                                               | 470 | 255  | 3.00E-64  | 54.3  | 28.3 | 36.8 | hypothetical protein 40.t00057                       | gbpln | Brassica oleracea    | AT3G47690.1   Symbols:   DNA binding   chr3:17577483-17578391 REVERSE LENGTH=302                                                                                                                                                                                                                                                                                                                                               | 470 | 302 | 2.00E-49  | 64.3  | 25.5 | 37.4 |
| Rsa1.0_01102.1.g23466.t1 | #                                                                                                                                                                                                                                                                                                                                                                                                                                                                                                                                                                                                                                               | #   | #    | #         | #     | #    | #    | -                                                    | ----  | ----                 | #                                                                                                                                                                                                                                                                                                                                                                                                                              | #   | #   | #         | #     | #    |      |
| Rsa1.0_01102.1.g23467.t1 | gb EOA22285.1  hypothetical protein CARUB_v10002883mg [Capsella rubella]                                                                                                                                                                                                                                                                                                                                                                                                                                                                                                                                                                        | 149 | 151  | 3.00E-19  | 101.3 | 34.9 | 44.3 | hypothetical protein CARUB_v10002883mg               | gbpln | Capsella rubella     | AT5G05020.1   Symbols:   Pollen Ole e 1 allergen and extensin family protein   chr5:1481084-1481548 REVERSE LENGTH=154                                                                                                                                                                                                                                                                                                         | 149 | 154 | 2.00E-14  | 103.4 | 27.5 | 40.9 |
| Rsa1.0_01102.1.g23468.t1 | emb CAB39638.1  RNA-directed DNA polymerase-like protein [Arabidopsis thaliana] gi 7267666 emb CAB78094.1  RNA-directed DNA polymerase-like protein [Arabidopsis thaliana]                                                                                                                                                                                                                                                                                                                                                                                                                                                                      | 946 | 1274 | 0         | 134.7 | 48.4 | 66.2 | RNA-directed DNA polymerase-like protein             | gbpln | Arabidopsis thaliana | AT4G29090.1   Symbols:   Ribonuclease H-like superfamily protein   chr4:14333528-14335255 FORWARD LENGTH=575                                                                                                                                                                                                                                                                                                                   | 946 | 575 | 3.00E-74  | 60.8  | 19.5 | 29.8 |
| Rsa1.0_01102.1.g23469.t1 | gb EOA27696.1  hypothetical protein CARUB_v10023848mg [Capsella rubella]                                                                                                                                                                                                                                                                                                                                                                                                                                                                                                                                                                        | 268 | 270  | 1.00E-133 | 100.7 | 85.8 | 92.9 | hypothetical protein CARUB_v10023848mg               | gbpln | Capsella rubella     | AT2G41380.1   Symbols:   S-adenosyl-L-methionine-dependent methyltransferases superfamily protein   chr2:17251981-17252886 FORWARD LENGTH=269                                                                                                                                                                                                                                                                                  | 268 | 269 | 1.00E-135 | 100.4 | 84.7 | 93.7 |
| Rsa1.0_01103.1.g23470.t1 | #                                                                                                                                                                                                                                                                                                                                                                                                                                                                                                                                                                                                                                               | #   | #    | #         | #     | #    | #    | -                                                    | ----  | ----                 | #                                                                                                                                                                                                                                                                                                                                                                                                                              | #   | #   | #         | #     | #    |      |
| Rsa1.0_01103.1.g23471.t1 | ref XP_002872098.1  hypothetical protein ARALYDRAFT_351441 [Arabidopsis lyrata subsp. lyrata] gi 297317935 gb EFH48357.1  hypothetical protein ARALYDRAFT_351441 [Arabidopsis lyrata subsp. lyrata]                                                                                                                                                                                                                                                                                                                                                                                                                                             | 371 | 375  | 1.00E-138 | 101.1 | 66.0 | 78.4 | hypothetical protein ARALYDRAFT_351441               | gbpln | Arabidopsis lyrata   | AT5G24220.1   Symbols:   Lipase class 3-related protein   chr5:8225861-8227551 FORWARD LENGTH=376                                                                                                                                                                                                                                                                                                                              | 371 | 376 | 1.00E-137 | 101.3 | 63.9 | 77.4 |
| Rsa1.0_01103.1.g23472.t1 | ref NP_567387.1  uncharacterized protein [Arabidopsis thaliana] gi 14994259 gb AAK73264.1  putative protein [Arabidopsis thaliana] gi 26451708 dbj BAC42949.1  unknown protein [Arabidopsis thaliana] gi 332657693 gb AEB3093.1  uncharacterized protein AT4G12070 [Arabidopsis thaliana]                                                                                                                                                                                                                                                                                                                                                       | 465 | 483  | 0         | 103.9 | 91.4 | 94.2 | uncharacterized protein                              | gbpln | Arabidopsis thaliana | AT4G12070.1   Symbols:   unknown protein; INVOLVED IN: biological_process unknown; LOCATED IN: plasma membrane; EXPRESSED IN: 22 plant structures; EXPRESSED DURING: 13 growth stages; Has 30201 Blast hits to 17322 proteins in 780 species: Archae - 12; Bacteria - 1396; Metazoa - 17338; Fungi - 3422; Plants - 5037; Viruses - 0; Other Eukaryotes - 2996 (source: NCBI BLINK).   chr4:7231941-7234272 FORWARD LENGTH=483 | 465 | 483 | 0         | 103.9 | 91.4 | 94.2 |
| Rsa1.0_01103.1.g23473.t1 | #                                                                                                                                                                                                                                                                                                                                                                                                                                                                                                                                                                                                                                               | #   | #    | #         | #     | #    | #    | -                                                    | ----  | ----                 | #                                                                                                                                                                                                                                                                                                                                                                                                                              | #   | #   | #         | #     | #    |      |
| Rsa1.0_01103.1.g23474.t1 | #                                                                                                                                                                                                                                                                                                                                                                                                                                                                                                                                                                                                                                               | #   | #    | #         | #     | #    | #    | -                                                    | ----  | ----                 | #                                                                                                                                                                                                                                                                                                                                                                                                                              | #   | #   | #         | #     | #    |      |
| Rsa1.0_01103.1.g23475.t1 | #                                                                                                                                                                                                                                                                                                                                                                                                                                                                                                                                                                                                                                               | #   | #    | #         | #     | #    | #    | -                                                    | ----  | ----                 | #                                                                                                                                                                                                                                                                                                                                                                                                                              | #   | #   | #         | #     | #    |      |
| Rsa1.0_01103.1.g23476.t2 | ref NP_192945.2  AT-hook motif nuclear-localized protein 1 [Arabidopsis thaliana] gi 17979485 gb AAL50079.1  AT4g12080/F16J13.150 [Arabidopsis thaliana] gi 23506149 gb AAN31086.1  AT4g12080/F16J13.150 [Arabidopsis thaliana] gi 11842090 dbj BAF37220.1  AT-hook motif nuclear localized protein 1 [Arabidopsis thaliana] gi 332657694 gb AEB3094.1  AT-hook motif nuclear-localized protein 1 [Arabidopsis thaliana]                                                                                                                                                                                                                        | 347 | 356  | 1.00E-153 | 102.6 | 83.9 | 88.2 | AT-hook motif nuclear-localized protein 1            | gbpln | Arabidopsis thaliana | AT4G12080.1   Symbols: AHL1, ATAH1   AT-hook motif nuclear-localized protein 1   chr4:7239466-7241246 FORWARD LENGTH=356                                                                                                                                                                                                                                                                                                       | 347 | 356 | 1.00E-156 | 102.6 | 83.9 | 88.2 |
| Rsa1.0_01103.1.g23477.t1 | ref XP_002874746.1  predicted protein [Arabidopsis lyrata subsp. lyrata] gi 297320583 gb EFH51005.1  predicted protein [Arabidopsis lyrata subsp. lyrata]                                                                                                                                                                                                                                                                                                                                                                                                                                                                                       | 135 | 135  | 2.00E-64  | 100.0 | 88.1 | 94.8 | predicted protein                                    | gbpln | Arabidopsis lyrata   | AT4G12090.1   Symbols:   Cornichon family protein   chr4:7242165-7242924 REVERSE LENGTH=135                                                                                                                                                                                                                                                                                                                                    | 135 | 135 | 2.00E-65  | 100.0 | 84.4 | 94.1 |
| Rsa1.0_01103.1.g23478.t1 | #                                                                                                                                                                                                                                                                                                                                                                                                                                                                                                                                                                                                                                               | #   | #    | #         | #     | #    | #    | -                                                    | ----  | ----                 | #                                                                                                                                                                                                                                                                                                                                                                                                                              | #   | #   | #         | #     | #    |      |
| Rsa1.0_01103.1.g23479.t1 | #                                                                                                                                                                                                                                                                                                                                                                                                                                                                                                                                                                                                                                               | #   | #    | #         | #     | #    | #    | -                                                    | ----  | ----                 | #                                                                                                                                                                                                                                                                                                                                                                                                                              | #   | #   | #         | #     | #    |      |

|                          |                                                                                                                                                                                                                                                                                                                                                                                                                                                                                                                                                                                                                                                                                                                                                                 |     |     |           |       |      |       |                                                     |       |                      |                                                                                                                                                                                               |     |     |           |       |      |       |
|--------------------------|-----------------------------------------------------------------------------------------------------------------------------------------------------------------------------------------------------------------------------------------------------------------------------------------------------------------------------------------------------------------------------------------------------------------------------------------------------------------------------------------------------------------------------------------------------------------------------------------------------------------------------------------------------------------------------------------------------------------------------------------------------------------|-----|-----|-----------|-------|------|-------|-----------------------------------------------------|-------|----------------------|-----------------------------------------------------------------------------------------------------------------------------------------------------------------------------------------------|-----|-----|-----------|-------|------|-------|
| Rsa1.0_01103.1.g23480.t1 | gb EOA21411.1  hypothetical protein CARUB_v10001784mg [Capsella rubella]                                                                                                                                                                                                                                                                                                                                                                                                                                                                                                                                                                                                                                                                                        | 248 | 254 | 4.00E-89  | 102.4 | 74.6 | 83.5  | hypothetical protein CARUB_v10001784mg              | gbpln | Capsella rubella     | AT4G22758.1   Symbols:   unknown protein; LOCATED IN: chloroplast; BEST Arabidopsis thaliana protein match is: unknown protein (TAIR:AT2G27830.1)   chr4:11958477-11959904 FORWARD LENGTH=255 | 248 | 255 | 3.00E-72  | 102.8 | 63.7 | 77.4  |
| Rsa1.0_01103.1.g23481.t2 | dbj BAA97086.1  unnamed protein product [Arabidopsis thaliana]<br>ref NP_175640.1  60S ribosomal protein L37-2 [Arabidopsis thaliana]<br>gi 20143906 sp C43292.2 RL372_ARATH RecName: Full=60S ribosomal protein L37-2<br>gi 12323122 gb AAG51542.1 AC037424_7 60S ribosomal protein L37, putative; 56921-57860 [Arabidopsis thaliana]<br>gi 13877907 gb AAK44031.1 AF370216.1 putative 60S ribosomal protein L37 [Arabidopsis thaliana]<br>gi 21280805 gb AAM44969.1  putative 60S ribosomal protein L37 [Arabidopsis thaliana] gi 222423584 dbj BAH19761.1  AT1G52300 [Arabidopsis thaliana]<br>gi 332194658 gb AEE32779.1  60S ribosomal protein L37-2 [Arabidopsis thaliana]<br>ref XP_002885130.1  F-box family protein [Arabidopsis lyrata subsp. lyrata] | 177 | 341 | 9.00E-31  | 192.7 | 37.3 | 58.8  | unnamed protein product                             | gbpln | Arabidopsis thaliana | #                                                                                                                                                                                             | #   | #   | #         | #     | #    | #     |
| Rsa1.0_01104.1.g23482.t2 | gi 12323122 gb AAG51542.1 AC037424_7 60S ribosomal protein L37, putative; 56921-57860 [Arabidopsis thaliana]<br>gi 13877907 gb AAK44031.1 AF370216.1 putative 60S ribosomal protein L37 [Arabidopsis thaliana]<br>gi 21280805 gb AAM44969.1  putative 60S ribosomal protein L37 [Arabidopsis thaliana] gi 222423584 dbj BAH19761.1  AT1G52300 [Arabidopsis thaliana]<br>gi 332194658 gb AEE32779.1  60S ribosomal protein L37-2 [Arabidopsis thaliana]<br>ref XP_002885130.1  F-box family protein [Arabidopsis lyrata subsp. lyrata]                                                                                                                                                                                                                           | 94  | 95  | 1.00E-44  | 101.1 | 98.9 | 100.0 | 60S ribosomal protein L37-2                         | gbpln | Arabidopsis thaliana | AT1G52300.1   Symbols:   Zinc-binding ribosomal protein family protein   chr1:19475213-19476152 REVERSE LENGTH=95                                                                             | 94  | 95  | 2.00E-47  | 101.1 | 98.9 | 100.0 |
| Rsa1.0_01104.1.g23483.t1 | gi 297330973 gb EFH61389.1  F-box family protein [Arabidopsis lyrata subsp. lyrata]<br>ref NP_001189909.1  putative eukaryotic LigT protein [Arabidopsis thaliana]                                                                                                                                                                                                                                                                                                                                                                                                                                                                                                                                                                                              | 514 | 362 | 1.00E-156 | 70.4  | 51.2 | 59.5  | F-box family protein                                | gbpln | Arabidopsis lyrata   | AT3G16210.1   Symbols:   F-box family protein   chr3:5494533-5495615 REVERSE LENGTH=360                                                                                                       | 514 | 360 | 1.00E-157 | 70.0  | 52.1 | 58.9  |
| Rsa1.0_01104.1.g23484.t7 | gi 332642286 gb AE75787.1  putative eukaryotic LigT protein [Arabidopsis thaliana]                                                                                                                                                                                                                                                                                                                                                                                                                                                                                                                                                                                                                                                                              | 430 | 449 | 0         | 104.4 | 80.5 | 89.1  | putative eukaryotic LigT protein                    | gbpln | Arabidopsis thaliana | AT3G16230.2   Symbols:   Predicted eukaryotic LigT   chr3:5500563-5503303 FORWARD LENGTH=449                                                                                                  | 430 | 449 | 0         | 104.4 | 80.5 | 89.1  |
| Rsa1.0_01104.1.g23485.t1 | dbj BAA31452.1  delta-VM23 [Raphanus sativus]<br>ref XP_002885133.1  predicted protein [Arabidopsis lyrata subsp. lyrata]<br>gi 297330973 gb EFH61392.1  predicted protein [Arabidopsis lyrata subsp. lyrata]                                                                                                                                                                                                                                                                                                                                                                                                                                                                                                                                                   | 248 | 248 | 1.00E-128 | 100.0 | 96.0 | 98.8  | delta-VM23                                          | gbpln | Raphanus sativus     | AT3G16240.1   Symbols: DELTA-TIP, TIP2;1, DELTA-TIP1, AQP1, ATTIP2;1   delta tonoplast integral protein   chr3:5505534-5506788 FORWARD LENGTH=250                                             | 248 | 250 | 1.00E-129 | 100.8 | 96.8 | 99.6  |
| Rsa1.0_01104.1.g23486.t1 | gi 297330973 gb EFH61392.1  predicted protein [Arabidopsis lyrata subsp. lyrata]                                                                                                                                                                                                                                                                                                                                                                                                                                                                                                                                                                                                                                                                                | 208 | 212 | 3.00E-90  | 101.9 | 85.1 | 92.3  | predicted protein                                   | gbpln | Arabidopsis lyrata   | AT3G16300.1   Symbols:   Uncharacterised protein family (UPF0497)   chr3:5525491-5526207 REVERSE LENGTH=212                                                                                   | 208 | 212 | 4.00E-87  | 101.9 | 83.2 | 89.9  |
| Rsa1.0_01104.1.g23487.t1 | #                                                                                                                                                                                                                                                                                                                                                                                                                                                                                                                                                                                                                                                                                                                                                               | #   | #   | #         | #     | #    | #     | -                                                   | ----  | ----                 | #                                                                                                                                                                                             | #   | #   | #         | #     | #    | #     |
| Rsa1.0_01104.1.g23488.t1 | gb AAB63650.1  Myb-related transcription activator (MybSt1) isolog [Arabidopsis thaliana]<br>gi 9279717 dbj BAB01274.1  Myb-related transcription activator [Arabidopsis thaliana]                                                                                                                                                                                                                                                                                                                                                                                                                                                                                                                                                                              | 200 | 369 | 4.00E-66  | 184.5 | 74.5 | 78.5  | Myb-related transcription activator (MybSt1) isolog | gbpln | Arabidopsis thaliana | AT3G16350.1   Symbols:   Homeodomain-like superfamily protein   chr3:5547828-5549397 FORWARD LENGTH=387                                                                                       | 200 | 387 | 6.00E-64  | 193.5 | 74.0 | 77.5  |
| Rsa1.0_01104.1.g23489.t1 | #                                                                                                                                                                                                                                                                                                                                                                                                                                                                                                                                                                                                                                                                                                                                                               | #   | #   | #         | #     | #    | #     | -                                                   | ----  | ----                 | #                                                                                                                                                                                             | #   | #   | #         | #     | #    | #     |
| Rsa1.0_01104.1.g23490.t1 | dbj BAB01275.1  histidine-containing phosphotransfer protein-like [Arabidopsis thaliana]<br>ref XP_002883006.1  pyk10-binding protein 1 [Arabidopsis lyrata subsp. lyrata] gi 297328846 gb EFH59265.1  pyk10-binding protein 1 [Arabidopsis lyrata subsp. lyrata]                                                                                                                                                                                                                                                                                                                                                                                                                                                                                               | 144 | 133 | 8.00E-68  | 92.4  | 85.4 | 89.6  | histidine-containing phosphotransfer protein-like   | gbpln | Arabidopsis thaliana | AT3G16360.2   Symbols: AHP4   HPT phosphotransmitter 4   chr3:5554351-5555518 FORWARD LENGTH=145                                                                                              | 144 | 145 | 2.00E-69  | 100.7 | 84.0 | 88.9  |
| Rsa1.0_01104.1.g23491.t1 | ref XP_002883006.1  pyk10-binding protein 1 [Arabidopsis lyrata subsp. lyrata] gi 297328846 gb EFH59265.1  pyk10-binding protein 1 [Arabidopsis lyrata subsp. lyrata]                                                                                                                                                                                                                                                                                                                                                                                                                                                                                                                                                                                           | 297 | 298 | 1.00E-143 | 100.3 | 85.2 | 91.9  | pyk10-binding protein 1                             | gbpln | Arabidopsis lyrata   | AT3G16430.2   Symbols: JAL31   jacalin-related lectin 31   chr3:5581830-5582959 FORWARD LENGTH=296                                                                                            | 297 | 296 | 1.00E-137 | 99.7  | 79.8 | 86.9  |
| Rsa1.0_01104.1.g23492.t1 | gb EOA31381.1  hypothetical protein CARUB_v10014589mg [Capsella rubella]<br>ref XP_002883038.1  transcriptional factor B3 family protein [Arabidopsis lyrata subsp. lyrata] gi 297328878 gb EFH59297.1  transcriptional factor B3 family protein [Arabidopsis lyrata subsp. lyrata]                                                                                                                                                                                                                                                                                                                                                                                                                                                                             | 174 | 220 | 5.00E-80  | 126.4 | 82.2 | 88.5  | hypothetical protein CARUB_v10014589mg              | gbpln | Capsella rubella     | AT3G16990.1   Symbols:   Haem oxygenase-like, multi-helical   chr3:5795937-5796783 REVERSE LENGTH=221                                                                                         | 174 | 221 | 6.00E-80  | 127.0 | 79.9 | 87.9  |
| Rsa1.0_01104.1.g23493.t1 | ref XP_002883038.1  transcriptional factor B3 family protein [Arabidopsis lyrata subsp. lyrata] gi 297328878 gb EFH59297.1  transcriptional factor B3 family protein [Arabidopsis lyrata subsp. lyrata]                                                                                                                                                                                                                                                                                                                                                                                                                                                                                                                                                         | 258 | 302 | 5.00E-70  | 117.1 | 53.1 | 72.1  | transcriptional factor B3 family protein            | gbpln | Arabidopsis lyrata   | AT3G17010.1   Symbols:   AP2/B3-like transcriptional factor family protein   chr3:5800460-5802303 FORWARD LENGTH=302                                                                          | 258 | 302 | 3.00E-72  | 117.1 | 53.9 | 71.7  |

|                          |                                                                                                                                                                                                                                                                                                                                                                                                                                                                                                                                                                                                                                                                                                                        |      |      |          |       |      |      |                                                          |       |                      |                                                                                                                                                                                                                                                                                                                                                                  |      |      |          |       |      |      |
|--------------------------|------------------------------------------------------------------------------------------------------------------------------------------------------------------------------------------------------------------------------------------------------------------------------------------------------------------------------------------------------------------------------------------------------------------------------------------------------------------------------------------------------------------------------------------------------------------------------------------------------------------------------------------------------------------------------------------------------------------------|------|------|----------|-------|------|------|----------------------------------------------------------|-------|----------------------|------------------------------------------------------------------------------------------------------------------------------------------------------------------------------------------------------------------------------------------------------------------------------------------------------------------------------------------------------------------|------|------|----------|-------|------|------|
| Rsa1.0_01104.1.g23494.t1 | ref NP_188326.1  AP2/B3 domain-containing protein [Arabidopsis thaliana] gi 75274019 sp G9LSP6.1 Y3701_ARATH RecName: Full=B3 domain-containing protein At3g17010 gi 7670025 db BAA94979.1  unnamed protein product [Arabidopsis thaliana] gi 22389865.1 db BAH30456.1  hypothetical protein [Arabidopsis thaliana] gi 332642373 gb AEE75894.1  AP2/B3 domain-containing protein [Arabidopsis thaliana]                                                                                                                                                                                                                                                                                                                | 277  | 302  | 3.00E-77 | 109.0 | 58.8 | 72.2 | AP2/B3 domain-containing protein                         | gbpln | Arabidopsis thaliana | AT3G17010.1   Symbols:   AP2/B3-like transcriptional factor family protein   chr3:5800460-5802303 FORWARD LENGTH=302                                                                                                                                                                                                                                             | 277  | 302  | 9.00E-80 | 109.0 | 58.8 | 72.2 |
| Rsa1.0_01104.1.g23495.t1 | gb ABL97971.1  unknown [Brassica rapa]                                                                                                                                                                                                                                                                                                                                                                                                                                                                                                                                                                                                                                                                                 | 163  | 163  | 7.00E-81 | 100.0 | 90.2 | 92.6 | unknown                                                  | gbpln | Brassica rapa        | AT3G17020.1   Symbols:   Adenine nucleotide alpha hydrolases-like superfamily protein   chr3:5802728-5804063 REVERSE LENGTH=163                                                                                                                                                                                                                                  | 163  | 163  | 3.00E-81 | 100.0 | 85.9 | 92.6 |
| Rsa1.0_01104.1.g23496.t1 | db BAJ34089.1  unnamed protein product [Thellungiella halophila]                                                                                                                                                                                                                                                                                                                                                                                                                                                                                                                                                                                                                                                       | 1100 | 1172 | 0        | 106.5 | 86.3 | 91.7 | unnamed protein product                                  | ----  | ----                 | AT2G18790.1   Symbols: PHYB, HY3, OOP1   phytochrome B   chr2:8140079-8144151 FORWARD LENGTH=1172                                                                                                                                                                                                                                                                | 1100 | 1172 | 0        | 106.5 | 85.5 | 91.5 |
| Rsa1.0_01104.1.g23497.t1 | gb EOA32450.1  hypothetical protein CARUB_v10015726mg [Capsella rubella]                                                                                                                                                                                                                                                                                                                                                                                                                                                                                                                                                                                                                                               | 344  | 344  | 0        | 100.0 | 92.4 | 95.1 | hypothetical protein CARUB_v10015726mg                   | gbpln | Capsella rubella     | AT3G17060.1   Symbols:   Pectin lyase-like superfamily protein   chr3:5816953-5818458 REVERSE LENGTH=344                                                                                                                                                                                                                                                         | 344  | 344  | 0        | 100.0 | 91.9 | 95.1 |
| Rsa1.0_01104.1.g23498.t1 | gb AAM61747.1  protein phosphatase-2c, putative [Arabidopsis thaliana]                                                                                                                                                                                                                                                                                                                                                                                                                                                                                                                                                                                                                                                 | 380  | 384  | 0        | 101.1 | 83.9 | 90.8 | protein phosphatase-2c, putative                         | gbpln | Arabidopsis thaliana | AT3G17090.1   Symbols:   Protein phosphatase 2C family protein   chr3:5826984-5829327 FORWARD LENGTH=384                                                                                                                                                                                                                                                         | 380  | 384  | 0        | 101.1 | 84.7 | 91.8 |
| Rsa1.0_01104.1.g23499.t1 | #                                                                                                                                                                                                                                                                                                                                                                                                                                                                                                                                                                                                                                                                                                                      | #    | #    | #        | #     | #    | #    | -                                                        | ----  | ----                 | #                                                                                                                                                                                                                                                                                                                                                                | #    | #    | #        | #     | #    | #    |
| Rsa1.0_01104.1.g23500.t1 | ref XP_002883017.1  hypothetical protein ARALYDRAFT_318437 [Arabidopsis lyrata subsp. lyrata] gi 297328857 gb EFH59276.1  hypothetical protein ARALYDRAFT_318437 [Arabidopsis lyrata subsp. lyrata]                                                                                                                                                                                                                                                                                                                                                                                                                                                                                                                    | 159  | 185  | 3.00E-22 | 116.4 | 53.5 | 67.3 | hypothetical protein ARALYDRAFT_318437                   | gbpln | Arabidopsis lyrata   | AT3G16660.1   Symbols:   Pollen Ole e 1 allergen and extensin family protein   chr3:5676904-5677789 FORWARD LENGTH=180                                                                                                                                                                                                                                           | 159  | 180  | 2.00E-24 | 113.2 | 52.2 | 65.4 |
| Rsa1.0_01104.1.g23501.t1 | #                                                                                                                                                                                                                                                                                                                                                                                                                                                                                                                                                                                                                                                                                                                      | #    | #    | #        | #     | #    | #    | -                                                        | ----  | ----                 | #                                                                                                                                                                                                                                                                                                                                                                | #    | #    | #        | #     | #    | #    |
| Rsa1.0_01104.1.g23502.t1 | #                                                                                                                                                                                                                                                                                                                                                                                                                                                                                                                                                                                                                                                                                                                      | #    | #    | #        | #     | #    | #    | -                                                        | ----  | ----                 | #                                                                                                                                                                                                                                                                                                                                                                | #    | #    | #        | #     | #    | #    |
| Rsa1.0_01104.1.g23503.t1 | ref NP_188337.1  uncharacterized protein [Arabidopsis thaliana] gi 42572461 ref NP_974326.1  uncharacterized protein [Arabidopsis thaliana] gi 18087521 gb AAL58895.1 AF462799_1 AT3g17120/K14A17_24 [Arabidopsis thaliana] gi 7670036 db BA494990.1  unnamed protein product [Arabidopsis thaliana] gi 332642385 gb AEE75906.1  uncharacterized protein AT3G17120 [Arabidopsis thaliana] gi 332642386 gb AEE75907.1  uncharacterized protein AT3G17120 [Arabidopsis thaliana] ref XP_002885187.1  invertase/pectin methylesterase inhibitor family protein [Arabidopsis lyrata subsp. lyrata] gi 297331027 gb EFH61446.1  invertase/pectin methylesterase inhibitor family protein [Arabidopsis lyrata subsp. lyrata] | 220  | 219  | 2.00E-84 | 99.5  | 77.7 | 86.4 | uncharacterized protein                                  | gbpln | Arabidopsis thaliana | AT3G17120.2   Symbols:   unknown protein; BEST Arabidopsis thaliana protein match is: unknown protein (TAIR:AT1G02380.1); Has 35333 Blast hits to 34131 proteins in 2444 species: Archaea - 798; Bacteria - 22429; Metazoa - 974; Fungi - 991; Plants - 531; Viruses - 0; Other Eukaryotes - 9610 (source: NCBI BLINK)   chr3:5842410-5843246 FORWARD LENGTH=219 | 220  | 219  | 5.00E-87 | 99.5  | 77.7 | 86.4 |
| Rsa1.0_01104.1.g23504.t1 | ref XP_002885187.1  invertase/pectin methylesterase inhibitor family protein [Arabidopsis lyrata subsp. lyrata] gi 297331027 gb EFH61446.1  invertase/pectin methylesterase inhibitor family protein [Arabidopsis lyrata subsp. lyrata]                                                                                                                                                                                                                                                                                                                                                                                                                                                                                | 183  | 182  | 8.00E-74 | 99.5  | 80.9 | 89.6 | invertase/pectin methylesterase inhibitor family protein | gbpln | Arabidopsis lyrata   | AT3G17130.1   Symbols:   Plant invertase/pectin methylesterase inhibitor superfamily protein   chr3:5844495-5845046 REVERSE LENGTH=183                                                                                                                                                                                                                           | 183  | 183  | 4.00E-76 | 100.0 | 79.2 | 88.5 |
| Rsa1.0_01104.1.g23505.t2 | gb EOA29659.1  hypothetical protein CARUB_v10015473mg [Capsella rubella]                                                                                                                                                                                                                                                                                                                                                                                                                                                                                                                                                                                                                                               | 134  | 162  | 3.00E-46 | 120.9 | 71.6 | 82.8 | hypothetical protein CARUB_v10015473mg                   | gbpln | Capsella rubella     | AT3G17140.1   Symbols:   Plant invertase/pectin methylesterase inhibitor superfamily protein   chr3:5846002-5846589 REVERSE LENGTH=112                                                                                                                                                                                                                           | 134  | 112  | 1.00E-46 | 83.6  | 65.7 | 76.1 |
| Rsa1.0_01104.1.g23506.t1 | #                                                                                                                                                                                                                                                                                                                                                                                                                                                                                                                                                                                                                                                                                                                      | #    | #    | #        | #     | #    | #    | -                                                        | ----  | ----                 | #                                                                                                                                                                                                                                                                                                                                                                | #    | #    | #        | #     | #    | #    |
| Rsa1.0_01104.1.g23507.t1 | ref XP_002885957.1  hypothetical protein ARALYDRAFT_899752 [Arabidopsis lyrata subsp. lyrata] gi 297331797 gb EFH62216.1  hypothetical protein ARALYDRAFT_899752 [Arabidopsis lyrata subsp. lyrata]                                                                                                                                                                                                                                                                                                                                                                                                                                                                                                                    | 185  | 187  | 9.00E-42 | 101.1 | 54.1 | 68.6 | hypothetical protein ARALYDRAFT_899752                   | gbpln | Arabidopsis lyrata   | AT3G17230.1   Symbols:   invertase/pectin methylesterase inhibitor family protein   chr3:5886381-5888236 REVERSE LENGTH=351                                                                                                                                                                                                                                      | 185  | 351  | 2.00E-39 | 189.7 | 53.0 | 65.4 |

|                          |                                                                                                                                                                                                                                                                                                                                                                                                                                                                         |      |      |           |       |      |      |                                        |       |                      |                                                                                                                                                                                                                                                                                                                                                                                                                                                                                                                                                                                                                                    |      |     |           |       |      |      |
|--------------------------|-------------------------------------------------------------------------------------------------------------------------------------------------------------------------------------------------------------------------------------------------------------------------------------------------------------------------------------------------------------------------------------------------------------------------------------------------------------------------|------|------|-----------|-------|------|------|----------------------------------------|-------|----------------------|------------------------------------------------------------------------------------------------------------------------------------------------------------------------------------------------------------------------------------------------------------------------------------------------------------------------------------------------------------------------------------------------------------------------------------------------------------------------------------------------------------------------------------------------------------------------------------------------------------------------------------|------|-----|-----------|-------|------|------|
| Rsa1.0_01104.1.g23508.t1 | ref XP_002874950.1  hypothetical protein ARALYDRAFT_490383 [Arabidopsis lyrata subsp. lyrata] gi 297320787 gb EFH51209.1  hypothetical protein ARALYDRAFT_490383 [Arabidopsis lyrata subsp. lyrata]                                                                                                                                                                                                                                                                     | 251  | 256  | 1.00E-125 | 102.0 | 88.0 | 93.6 | hypothetical protein ARALYDRAFT_490383 | gbpln | Arabidopsis lyrata   | AT4G01935.1   Symbols:   unknown protein; FUNCTIONS IN: molecular_function unknown; INVOLVED IN: biological_process unknown; LOCATED IN: chloroplast; Has 37 Blast hits to 37 proteins in 17 species: Archae - 0; Bacteria - 0; Metazoa - 0; Fungi - 0; Plants - 30; Viruses - 0; Other Eukaryotes - 7 (source: NCBI BLink).   chr4:841102-842228 FORWARD LENGTH=256                                                                                                                                                                                                                                                               | 251  | 256 | 1.00E-125 | 102.0 | 86.1 | 93.2 |
| Rsa1.0_01104.1.g23509.t1 | #                                                                                                                                                                                                                                                                                                                                                                                                                                                                       | #    | #    | #         | #     | #    | -    | ----                                   | ----  | #                    | #                                                                                                                                                                                                                                                                                                                                                                                                                                                                                                                                                                                                                                  | #    | #   | #         | #     | #    |      |
| Rsa1.0_01104.1.g23510.t2 | gb AAD32898.1  putative retroelement pol polyprotein [Arabidopsis thaliana]                                                                                                                                                                                                                                                                                                                                                                                             | 1846 | 1307 | 0         | 70.8  | 43.5 | 54.7 | putative retroelement pol polyprotein  | gbpln | Arabidopsis thaliana | AT3G17800.1   Symbols:   Protein of unknown function (DUF760)   chr3:6091248-6092873 REVERSE LENGTH=421                                                                                                                                                                                                                                                                                                                                                                                                                                                                                                                            | 1846 | 421 | 0         | 22.8  | 19.2 | 20.7 |
| Rsa1.0_01104.1.g23511.t1 | ref NP_188408.1  pyrimidine 1 [Arabidopsis thaliana] gi 9294485 dbj BAB02704.1  senescence-related protein; dihydroorotate dehydrogenase-like protein [Arabidopsis thaliana] gi 14334712 gb AAK59534.1  putative dehydrogenase [Arabidopsis thaliana] gi 16323430 gb AAL15209.1  putative dehydrogenase [Arabidopsis thaliana] gi 24850451 gb AAN64919.1  putative dehydrogenase [Arabidopsis thaliana] gi 332642489 gb AAE76010.1  pyrimidine 1 [Arabidopsis thaliana] | 427  | 426  | 0         | 99.8  | 91.3 | 96.3 | pyrimidine 1                           | gbpln | Arabidopsis thaliana | AT3G17810.1   Symbols: PYD1   pyrimidine 1   chr3:6094279-6096289 FORWARD LENGTH=426                                                                                                                                                                                                                                                                                                                                                                                                                                                                                                                                               | 427  | 426 | 0         | 99.8  | 91.3 | 96.3 |
| Rsa1.0_01104.1.g23512.t1 | dbj BAA04994.1  glutamine synthetase [Raphanus sativus]                                                                                                                                                                                                                                                                                                                                                                                                                 | 354  | 354  | 0         | 100.0 | 95.5 | 98.6 | glutamine synthetase                   | gbpln | Raphanus sativus     | AT3G17820.1   Symbols: ATGSKB6, GLN1.3, GLN1.3   glutamine synthetase 1.3   chr3:6097503-6099408 FORWARD LENGTH=354                                                                                                                                                                                                                                                                                                                                                                                                                                                                                                                | 354  | 354 | 0         | 100.0 | 93.5 | 97.7 |
| Rsa1.0_01104.1.g23513.t1 | #                                                                                                                                                                                                                                                                                                                                                                                                                                                                       | #    | #    | #         | #     | #    | -    | ----                                   | ----  | #                    | #                                                                                                                                                                                                                                                                                                                                                                                                                                                                                                                                                                                                                                  | #    | #   | #         | #     | #    |      |
| Rsa1.0_01104.1.g23514.t1 | ref XP_002866514.1  predicted protein [Arabidopsis lyrata subsp. lyrata] gi 297312349 gb EFH42773.1  predicted protein [Arabidopsis lyrata subsp. lyrata]                                                                                                                                                                                                                                                                                                               | 120  | 406  | 5.00E-18  | 338.3 | 48.3 | 61.7 | predicted protein                      | gbpln | Arabidopsis lyrata   | AT2G26990.1   Symbols: FUS12, ATCSN2, COP12, CSN2   proteasome family protein   chr2:11519684-11522412 REVERSE LENGTH=439                                                                                                                                                                                                                                                                                                                                                                                                                                                                                                          | 120  | 439 | 2.00E-19  | 365.8 | 45.0 | 60.0 |
| Rsa1.0_01104.1.g23515.t1 | ref XP_002883095.1  hypothetical protein ARALYDRAFT_898144 [Arabidopsis lyrata subsp. lyrata] gi 297328935 gb EFH59354.1  hypothetical protein ARALYDRAFT_898144 [Arabidopsis lyrata subsp. lyrata]                                                                                                                                                                                                                                                                     | 768  | 837  | 0         | 109.0 | 90.0 | 94.7 | hypothetical protein ARALYDRAFT_898144 | gbpln | Arabidopsis lyrata   | AT3G17900.1   Symbols:   unknown protein; FUNCTIONS IN: molecular_function unknown; INVOLVED IN: biological_process unknown; LOCATED IN: cellular_component unknown; EXPRESSED IN: 23 plant structures; EXPRESSED DURING: 13 growth stages; Has 45 Blast hits to 44 proteins in 14 species: Archae - 0; Bacteria - 0; Metazoa - 2; Fungi - 2; Plants - 39; Viruses - 0; Other Eukaryotes - 2 (source: NCBI BLink).   chr3:6128983-6133069 FORWARD LENGTH=838                                                                                                                                                                       | 768  | 838 | 0         | 109.1 | 89.7 | 93.9 |
| Rsa1.0_01105.1.g23516.t1 | gb AAM61622.1  unknown [Arabidopsis thaliana]                                                                                                                                                                                                                                                                                                                                                                                                                           | 113  | 112  | 2.00E-49  | 99.1  | 83.2 | 89.4 | unknown                                | gbpln | Arabidopsis thaliana | AT5G09960.1   Symbols:   FUNCTIONS IN: molecular_function unknown; LOCATED IN: biological_process unknown; LOCATED IN: plasma membrane; EXPRESSED IN: 22 growth stages; EXPRESSED DURING: 13 growth stages; CONTAINS InterPro DOMAIN/s: RPM1-interacting protein 4, defence response (InterPro:IPR008700); BEST Arabidopsis thaliana protein match is: unknown protein (TAIR:AT5G64850.1); Has 30201 Blast hits to 17322 proteins in 780 species: Archae - 12; Bacteria - 1396; Metazoa - 17338; Fungi - 3422; Plants - 5037; Viruses - 0; Other Eukaryotes - 2996 (source: NCBI BLink).   chr5:3106503-3107658 FORWARD LENGTH=112 | 113  | 112 | 4.00E-52  | 99.1  | 83.2 | 89.4 |
| Rsa1.0_01105.1.g23517.t1 | gb AAZ66921.1  117M18.2 [Brassica rapa]                                                                                                                                                                                                                                                                                                                                                                                                                                 | 204  | 329  | 1.00E-77  | 161.3 | 72.1 | 82.8 | 117M18.2                               | gbpln | Brassica rapa        | AT5G09940.1   Symbols:   Protein of unknown function (DUF1635)   chr5:3101192-3101833 FORWARD LENGTH=213                                                                                                                                                                                                                                                                                                                                                                                                                                                                                                                           | 204  | 213 | 7.00E-44  | 104.4 | 57.4 | 72.5 |
| Rsa1.0_01105.1.g23518.t1 | #                                                                                                                                                                                                                                                                                                                                                                                                                                                                       | #    | #    | #         | #     | #    | -    | ----                                   | ----  | #                    | #                                                                                                                                                                                                                                                                                                                                                                                                                                                                                                                                                                                                                                  | #    | #   | #         | #     | #    |      |
| Rsa1.0_01105.1.g23519.t1 | gb EOA21762.1  hypothetical protein CARUB_v10002229mg [Capsella rubella]                                                                                                                                                                                                                                                                                                                                                                                                | 275  | 138  | 2.00E-72  | 50.2  | 49.1 | 49.5 | hypothetical protein CARUB_v10002229mg | gbpln | Capsella rubella     | AT5G09920.1   Symbols: RPB15.9, ATRPB15.9, RPB15.9.9, NRPB4   RNA polymerase II, Rpb4, core protein   chr5:3096276-3097370 FORWARD LENGTH=138                                                                                                                                                                                                                                                                                                                                                                                                                                                                                      | 275  | 138 | 1.00E-74  | 50.2  | 48.7 | 49.5 |
| Rsa1.0_01105.1.g23520.t1 | gb EOA19397.1  hypothetical protein CARUB_v10000967mg [Capsella rubella]                                                                                                                                                                                                                                                                                                                                                                                                | 501  | 442  | 0         | 88.2  | 86.0 | 87.2 | hypothetical protein CARUB_v10000967mg | gbpln | Capsella rubella     | AT5G09900.1   Symbols: EMB2107, RPN5A, MSA   26S proteasome regulatory subunit, putative (RPN5)   chr5:3089462-3092434 REVERSE LENGTH=442                                                                                                                                                                                                                                                                                                                                                                                                                                                                                          | 501  | 442 | 0         | 88.2  | 84.4 | 87.4 |

|                          |                                                                                                                                                                                                                                                                                                                                                                                                                                                                                                                                                                                                                                                                                                                                                                                                                       |     |      |           |       |      |       |                                                             |       |                      |                                                                                                                                                                                                                                                                                                                                                                                                                                                                                                                                    |     |      |           |       |      |      |
|--------------------------|-----------------------------------------------------------------------------------------------------------------------------------------------------------------------------------------------------------------------------------------------------------------------------------------------------------------------------------------------------------------------------------------------------------------------------------------------------------------------------------------------------------------------------------------------------------------------------------------------------------------------------------------------------------------------------------------------------------------------------------------------------------------------------------------------------------------------|-----|------|-----------|-------|------|-------|-------------------------------------------------------------|-------|----------------------|------------------------------------------------------------------------------------------------------------------------------------------------------------------------------------------------------------------------------------------------------------------------------------------------------------------------------------------------------------------------------------------------------------------------------------------------------------------------------------------------------------------------------------|-----|------|-----------|-------|------|------|
| Rsa1.0_01105.1.g23521.t1 | ref[XP_002873428.1] predicted protein [Arabidopsis lyrata subsp. lyrata] gi 297319265 gb EFH49687.1  predicted protein [Arabidopsis lyrata subsp. lyrata]                                                                                                                                                                                                                                                                                                                                                                                                                                                                                                                                                                                                                                                             | 550 | 520  | 0         | 94.5  | 81.1 | 85.3  | predicted protein                                           | gbpln | Arabidopsis lyrata   | AT5G09880.1   Symbols:   Splicing factor, CC1-like   chr5:3081646-3085179 REVERSE LENGTH=527                                                                                                                                                                                                                                                                                                                                                                                                                                       | 550 | 527  | 0         | 95.8  | 81.5 | 86.2 |
| Rsa1.0_01105.1.g23522.t1 | ref[XP_002871388.1] hypothetical protein ARALYDRAFT_908935 [Arabidopsis lyrata subsp. lyrata] gi 297317225 gb EFH47647.1  hypothetical protein ARALYDRAFT_908935 [Arabidopsis lyrata subsp. lyrata]                                                                                                                                                                                                                                                                                                                                                                                                                                                                                                                                                                                                                   | 583 | 597  | 0         | 102.4 | 89.9 | 94.5  | hypothetical protein ARALYDRAFT_908935                      | gbpln | Arabidopsis lyrata   | AT5G09860.1   Symbols: AtTHO1, THO1, ATHPR1, HPR1   nuclear matrix protein-related   chr5:3066815-3070733 FORWARD LENGTH=599                                                                                                                                                                                                                                                                                                                                                                                                       | 583 | 599  | 0         | 102.7 | 89.9 | 94.7 |
| Rsa1.0_01105.1.g23523.t1 | dbj BAJ34498.1  unnamed protein product [Theilungiella halophila] gi 482556658 gb EOA20850.1  hypothetical protein CARUB_v10001188mg [Capsella rubella]                                                                                                                                                                                                                                                                                                                                                                                                                                                                                                                                                                                                                                                               | 377 | 377  | 0         | 100.0 | 99.7 | 100.0 | unnamed protein product                                     | gbpln | Capsella rubella     | AT5G09810.1   Symbols: ACT7   actin 7   chr5:3052809-3054220 FORWARD LENGTH=377                                                                                                                                                                                                                                                                                                                                                                                                                                                    | 377 | 377  | 0         | 100.0 | 99.5 | 99.7 |
| Rsa1.0_01105.1.g23524.t1 | gb EOA20839.1  hypothetical protein CARUB_v10001176mg [Capsella rubella]                                                                                                                                                                                                                                                                                                                                                                                                                                                                                                                                                                                                                                                                                                                                              | 396 | 380  | 1.00E-157 | 96.0  | 72.0 | 81.8  | hypothetical protein CARUB_v10001176mg                      | gbpln | Capsella rubella     | AT5G09790.2   Symbols: ATXR5, SDG15   ARABIDOPSIS TRITHORAX-RELATED PROTEIN 5   chr5:3039204-3040970 REVERSE LENGTH=379                                                                                                                                                                                                                                                                                                                                                                                                            | 396 | 379  | 1.00E-157 | 95.7  | 70.2 | 78.0 |
| Rsa1.0_01105.1.g23525.t1 | ref[NP_196538.1] Putative pectinesterase/pectinesterase inhibitor 51 [Arabidopsis thaliana] gi 75180831 sp Q9LXD9.1 PME51_ARATH RecName: Full=Probable pectinesterase/pectinesterase inhibitor 51; Includes: RecName: Full=Pectinesterase inhibitor 51; AltName: Full=Pectin methyltransferase inhibitor 51; Includes: RecName: Full=Pectinesterase 51; Short=PE 51; AltName: Full=Pectin methyltransferase 51; Short=AtPME51; Flags: Precursor gi 7671413 emb CAB89354.1  pectin methyltransferase-like protein [Arabidopsis thaliana] gi 17979183 gb AAL49830.1  putative pectin methyltransferase [Arabidopsis thaliana] gi 29824167 gb AAP0404.1  putative pectin methyltransferase [Arabidopsis thaliana] gi 332004060 gb AED91443.1  Putative pectinesterase/pectinesterase inhibitor 51 [Arabidopsis thaliana] | 540 | 551  | 0         | 102.0 | 82.8 | 88.1  | Putative pectinesterase/pectinesterase inhibitor 51         | gbpln | Arabidopsis thaliana | AT5G09760.1   Symbols:   Plant invertase/pectin methyltransferase inhibitor superfamily   chr5:3032446-3034364 FORWARD LENGTH=551                                                                                                                                                                                                                                                                                                                                                                                                  | 540 | 551  | 0         | 102.0 | 82.8 | 88.1 |
| Rsa1.0_01105.1.g23526.t1 | ref[NP_196537.1] transcription factor HEC3 [Arabidopsis thaliana] gi 75311668 sp Q9LXD8.1 HEC3_ARATH RecName: Full=Transcription factor HEC3; AltName: Full=Basic helix-loop-helix protein 43; Short=AtbHLH43; Short=bHLH 43; AltName: Full=Protein HECATE 3; AltName: Full=Transcription factor EN 119; AltName: Full=bHLH transcription factor bHLH043 gi 7671414 emb CAB89355.1  putative protein [Arabidopsis thaliana] gi 9759006 dbj BAB09533.1  unnamed protein product [Arabidopsis thaliana] gi 332004059 gb AED91442.1  transcription factor HEC3 [Arabidopsis thaliana]                                                                                                                                                                                                                                    | 212 | 224  | 1.00E-65  | 105.7 | 86.8 | 91.0  | transcription factor HEC3                                   | gbpln | Arabidopsis thaliana | AT5G09750.1   Symbols: HEC3   basic helix-loop-helix (bHLH) DNA-binding superfamily protein   chr5:3026401-3027075 REVERSE LENGTH=224                                                                                                                                                                                                                                                                                                                                                                                              | 212 | 224  | 5.00E-68  | 105.7 | 86.8 | 91.0 |
| Rsa1.0_01106.1.g23527.t1 | gb AAB80620.1  Contains similarity to Glycine protein kinase 6 (gb M67449) [Arabidopsis thaliana]                                                                                                                                                                                                                                                                                                                                                                                                                                                                                                                                                                                                                                                                                                                     | 371 | 1029 | 8.00E-56  | 277.4 | 28.8 | 31.0  | Contains similarity to Glycine protein kinase 6 (gb M67449) | gbpln | Arabidopsis thaliana | AT1G04700.1   Symbols:   PB1 domain-containing protein tyrosine kinase   chr1:1316919-1320653 FORWARD LENGTH=1042                                                                                                                                                                                                                                                                                                                                                                                                                  | 371 | 1042 | 3.00E-58  | 280.9 | 28.6 | 30.5 |
| Rsa1.0_01106.1.g23528.t1 | #                                                                                                                                                                                                                                                                                                                                                                                                                                                                                                                                                                                                                                                                                                                                                                                                                     | #   | #    | #         | #     | #    | #     | -                                                           | ----  | ----                 | AT5G28823.1   Symbols:   FUNCTIONS IN: molecular_function unknown; INVOLVED IN: biological_process unknown; LOCATED IN: cellular_component unknown; EXPRESSED IN: cultured cell; BEST Arabidopsis thaliana protein match is: Zinc knuckle (CCHC-type) family protein (TAIR:AT2G07760.1); Has 30201 Blast hits to 17322 proteins in 780 species: Archae - 12; Bacteria - 1396; Metazoa - 17338; Fungi - 3422; Plants - 5037; Viruses - 0; Other Eukaryotes - 2996 (source: NCBI BLINK).   chr5:10837849-10839826 REVERSE LENGTH=568 | 272 | 568  | 1.00E-11  | 208.8 | 15.8 | 22.4 |
| Rsa1.0_01106.1.g23529.t1 | #                                                                                                                                                                                                                                                                                                                                                                                                                                                                                                                                                                                                                                                                                                                                                                                                                     | #   | #    | #         | #     | #    | #     | -                                                           | ----  | ----                 | #                                                                                                                                                                                                                                                                                                                                                                                                                                                                                                                                  | #   | #    | #         | #     | #    |      |
| Rsa1.0_01106.1.g23530.t1 | #                                                                                                                                                                                                                                                                                                                                                                                                                                                                                                                                                                                                                                                                                                                                                                                                                     | #   | #    | #         | #     | #    | #     | -                                                           | ----  | ----                 | #                                                                                                                                                                                                                                                                                                                                                                                                                                                                                                                                  | #   | #    | #         | #     | #    |      |

|                           |                                                                                                                                                                                                                                                                                                                                                                                                   |      |      |           |        |      |      |                                                 |       |                      |                                                                                                                                                                                                                                                                                                                                                 |      |      |           |       |      |      |
|---------------------------|---------------------------------------------------------------------------------------------------------------------------------------------------------------------------------------------------------------------------------------------------------------------------------------------------------------------------------------------------------------------------------------------------|------|------|-----------|--------|------|------|-------------------------------------------------|-------|----------------------|-------------------------------------------------------------------------------------------------------------------------------------------------------------------------------------------------------------------------------------------------------------------------------------------------------------------------------------------------|------|------|-----------|-------|------|------|
| Rsa1.0_01106.1.g23531.t1  | #                                                                                                                                                                                                                                                                                                                                                                                                 | #    | #    | #         | #      | #    | #    | -                                               | ----  | ----                 | #                                                                                                                                                                                                                                                                                                                                               | #    | #    | #         | #     | #    | #    |
| Rsa1.0_01106.1.g23532.t1  | gb EOA32395.1  hypothetical protein CARUB_v10015666mg [Capsella rubella]                                                                                                                                                                                                                                                                                                                          | 244  | 262  | 4.00E-68  | 107.4  | 54.9 | 69.3 | hypothetical protein CARUB_v10015666mg          | gbpln | Capsella rubella     | AT3G22040.1   Symbols:   Domain of unknown function (DUF26)   chr3:7761807-7762675 FORWARD LENGTH=257                                                                                                                                                                                                                                           | 244  | 257  | 2.00E-67  | 105.3 | 52.0 | 69.3 |
| Rsa1.0_01106.1.g23533.t1  | #                                                                                                                                                                                                                                                                                                                                                                                                 | #    | #    | #         | #      | #    | #    | -                                               | ----  | ----                 | #                                                                                                                                                                                                                                                                                                                                               | #    | #    | #         | #     | #    | #    |
| Rsa1.0_01107.1.g23534.t3  | #                                                                                                                                                                                                                                                                                                                                                                                                 | #    | #    | #         | #      | #    | #    | -                                               | ----  | ----                 | #                                                                                                                                                                                                                                                                                                                                               | #    | #    | #         | #     | #    | #    |
| Rsa1.0_01107.1.g23535.t3  | #                                                                                                                                                                                                                                                                                                                                                                                                 | #    | #    | #         | #      | #    | #    | -                                               | ----  | ----                 | #                                                                                                                                                                                                                                                                                                                                               | #    | #    | #         | #     | #    | #    |
| Rsa1.0_01107.1.g23536.t1  | gb AAZ41811.1  O1P13-1 [Brassica rapa subsp. pekinensis]                                                                                                                                                                                                                                                                                                                                          | 286  | 1545 | 3.00E-70  | 540.2  | 44.1 | 55.2 | O1P13-1                                         | gbpln | Brassica rapa        | AT4G23160.1   Symbols: CRK8   cysteine-rich RLK (RECEPTOR-like protein kinase) 8   chr4:12129485-12134086 FORWARD LENGTH=1262                                                                                                                                                                                                                   | 286  | 1262 | 4.00E-23  | 441.3 | 21.7 | 35.0 |
| Rsa1.0_01107.1.g23537.t1  | #                                                                                                                                                                                                                                                                                                                                                                                                 | #    | #    | #         | #      | #    | #    | -                                               | ----  | ----                 | #                                                                                                                                                                                                                                                                                                                                               | #    | #    | #         | #     | #    | #    |
| Rsa1.0_01107.1.g23538.t1  | #                                                                                                                                                                                                                                                                                                                                                                                                 | #    | #    | #         | #      | #    | #    | -                                               | ----  | ----                 | #                                                                                                                                                                                                                                                                                                                                               | #    | #    | #         | #     | #    | #    |
| Rsa1.0_01107.1.g23539.t1  | gb AAM15254.1  putative retroelement pol polyprotein [Arabidopsis thaliana]                                                                                                                                                                                                                                                                                                                       | 339  | 930  | 5.00E-20  | 274.3  | 23.9 | 37.5 | putative retroelement pol polyprotein           | gbpln | Arabidopsis thaliana | #                                                                                                                                                                                                                                                                                                                                               | #    | #    | #         | #     | #    | #    |
| Rsa1.0_01107.1.g23540.t12 | dbj BAB02259.1  retroelement pol polyprotein-like [Arabidopsis thaliana]                                                                                                                                                                                                                                                                                                                          | 536  | 777  | 6.00E-17  | 145.0  | 12.3 | 15.9 | retroelement pol polyprotein-like               | gbpln | Arabidopsis thaliana | #                                                                                                                                                                                                                                                                                                                                               | #    | #    | #         | #     | #    | #    |
| Rsa1.0_01107.1.g23541.t1  | #                                                                                                                                                                                                                                                                                                                                                                                                 | #    | #    | #         | #      | #    | #    | -                                               | ----  | ----                 | #                                                                                                                                                                                                                                                                                                                                               | #    | #    | #         | #     | #    | #    |
| Rsa1.0_01108.1.g23542.t1  | gb EOA27097.1  hypothetical protein CARUB_v10023195mg [Capsella rubella]                                                                                                                                                                                                                                                                                                                          | 399  | 452  | 0         | 113.3  | 86.0 | 92.7 | hypothetical protein CARUB_v10023195mg          | gbpln | Capsella rubella     | AT2G22900.1   Symbols:   Galactosyl transferase GMA12/MNN10 family protein   chr2:9744359-9746193 REVERSE LENGTH=449                                                                                                                                                                                                                            | 399  | 449  | 0         | 112.5 | 85.2 | 93.2 |
| Rsa1.0_01108.1.g23543.t1  | dbj BAF34635.1  DNA methyltransferase 1a [Brassica rapa]                                                                                                                                                                                                                                                                                                                                          | 1532 | 1528 | 0         | 99.7   | 87.7 | 93.1 | DNA methyltransferase 1a                        | gbpln | Brassica rapa        | AT5G49160.1   Symbols: MET1, MET2, METI, DDM2, DMT01, DMT1   methyltransferase 1   chr5:19932501-19938186 FORWARD LENGTH=1534                                                                                                                                                                                                                   | 1532 | 1534 | 0         | 100.1 | 71.7 | 83.3 |
| Rsa1.0_01108.1.g23544.t1  | gb EOA26510.1  hypothetical protein CARUB_v10022563mg [Capsella rubella]                                                                                                                                                                                                                                                                                                                          | 1015 | 1015 | 0         | 100.0  | 95.2 | 97.7 | hypothetical protein CARUB_v10022563mg          | gbpln | Capsella rubella     | AT2G22950.1   Symbols:   Cation transporter/ E1-E2 ATPase family protein   chr2:9766127-9769766 FORWARD LENGTH=1015                                                                                                                                                                                                                             | 1015 | 1015 | 0         | 100.0 | 94.2 | 97.1 |
| Rsa1.0_01108.1.g23545.t1  | ref NP_565527.1  PLAT-plant-stress domain-containing protein [Arabidopsis thaliana]   gi 4567207 gb AAD23623.1  expressed protein [Arabidopsis thaliana]   gi 27754389 gb AAO22643.1  unknown protein [Arabidopsis thaliana]   gi 28393941 gb AAO42378.1  unknown protein [Arabidopsis thaliana]   gi 330252180 gb AEC07274.1  PLAT-plant-stress domain-containing protein [Arabidopsis thaliana] | 142  | 183  | 1.00E-31  | 128.9  | 51.4 | 65.5 | PLAT-plant-stress domain-containing protein     | gbpln | Arabidopsis thaliana | AT2G22170.1   Symbols:   Lipase/lipoxygenase, PLAT/LH2 family protein   chr2:9427010-9427742 REVERSE LENGTH=183                                                                                                                                                                                                                                 | 142  | 183  | 3.00E-34  | 128.9 | 51.4 | 65.5 |
| Rsa1.0_01108.1.g23546.t1  | emb CBI29329.3  unnamed protein product [Vitis vinifera]                                                                                                                                                                                                                                                                                                                                          | 199  | 4396 | 5.00E-25  | 2209.0 | 33.2 | 47.2 | unnamed protein product                         | gbpln | Vitis vinifera       | #                                                                                                                                                                                                                                                                                                                                               | #    | #    | #         | #     | #    | #    |
| Rsa1.0_01108.1.g23547.t1  | gb AAM62648.1  dehydration stress-induced protein [Arabidopsis thaliana]                                                                                                                                                                                                                                                                                                                          | 156  | 182  | 5.00E-31  | 116.7  | 48.1 | 66.7 | dehydration stress-induced protein              | gbpln | Arabidopsis thaliana | AT2G22170.1   Symbols:   Lipase/lipoxygenase, PLAT/LH2 family protein   chr2:9427010-9427742 REVERSE LENGTH=183                                                                                                                                                                                                                                 | 156  | 183  | 4.00E-33  | 117.3 | 47.4 | 66.7 |
| Rsa1.0_01108.1.g23548.t2  | ref XP_002887955.1  kinase family protein [Arabidopsis lyrata subsp. lyrata]   gi 297333796 gb EFH64214.1  kinase family protein [Arabidopsis lyrata subsp. lyrata]                                                                                                                                                                                                                               | 208  | 487  | 5.00E-51  | 234.1  | 51.4 | 55.3 | kinase family protein                           | gbpln | Arabidopsis lyrata   | AT1G63500.1   Symbols:   Protein kinase protein with tetratricopeptide repeat domain   chr1:23556015-23558403 FORWARD LENGTH=487                                                                                                                                                                                                                | 208  | 487  | 3.00E-53  | 234.1 | 51.0 | 55.3 |
| Rsa1.0_01109.1.g23549.t1  | #                                                                                                                                                                                                                                                                                                                                                                                                 | #    | #    | #         | #      | #    | #    | -                                               | ----  | ----                 | #                                                                                                                                                                                                                                                                                                                                               | #    | #    | #         | #     | #    | #    |
| Rsa1.0_01109.1.g23550.t1  | gb EOA18865.1  hypothetical protein CARUB_v10007488mg, partial [Capsella rubella]                                                                                                                                                                                                                                                                                                                 | 485  | 509  | 0         | 104.9  | 90.7 | 94.4 | hypothetical protein CARUB_v10007488mg, partial | gbpln | Capsella rubella     | AT4G18700.1   Symbols: CIPK12, SnRK3.9, ATWL4, WL4   CBL-interacting protein kinase 12   chr4:10289110-10290579 REVERSE LENGTH=489                                                                                                                                                                                                              | 485  | 489  | 0         | 100.8 | 90.3 | 93.8 |
| Rsa1.0_01109.1.g23551.t1  | #                                                                                                                                                                                                                                                                                                                                                                                                 | #    | #    | #         | #      | #    | #    | -                                               | ----  | ----                 | #                                                                                                                                                                                                                                                                                                                                               | #    | #    | #         | #     | #    | #    |
| Rsa1.0_01109.1.g23552.t1  | ref NP_193604.2  uncharacterized protein [Arabidopsis thaliana]   gi 61742729 gb AAX55185.1  hypothetical protein AT4g18690 [Arabidopsis thaliana]   gi 71905519 gb AZ52737.1  hypothetical protein AT4g18690 [Arabidopsis thaliana]   gi 332658676 gb AEE84076.1  uncharacterized protein AT4g18690 [Arabidopsis thaliana]                                                                       | 288  | 282  | 1.00E-109 | 97.9   | 67.0 | 77.1 | uncharacterized protein                         | gbpln | Arabidopsis thaliana | AT4G18690.1   Symbols:   unknown protein; BEST Arabidopsis thaliana protein match is: unknown protein (TAIR:AT4G18680.1); Has 522 Blast hits to 522 proteins in 39 species: Archae - 0; Bacteria - 0; Metazoa - 9; Fungi - 0; Plants - 513; Viruses - 0; Other Eukaryotes - 0 (source: NCBI BLink).   chr4:10282788-10283636 FORWARD LENGTH=282 | 288  | 282  | 1.00E-112 | 97.9  | 67.0 | 77.1 |
| Rsa1.0_01109.1.g23553.t1  | #                                                                                                                                                                                                                                                                                                                                                                                                 | #    | #    | #         | #      | #    | #    | -                                               | ----  | ----                 | #                                                                                                                                                                                                                                                                                                                                               | #    | #    | #         | #     | #    | #    |



|                          |                                                                                                                                                                                                                                                                                                                                                                                             |     |      |           |       |      |      |                                                                                |       |                      |                                                                                                                                         |     |     |           |       |      |      |
|--------------------------|---------------------------------------------------------------------------------------------------------------------------------------------------------------------------------------------------------------------------------------------------------------------------------------------------------------------------------------------------------------------------------------------|-----|------|-----------|-------|------|------|--------------------------------------------------------------------------------|-------|----------------------|-----------------------------------------------------------------------------------------------------------------------------------------|-----|-----|-----------|-------|------|------|
| Rsa1.0_01109.1.g23554.t1 | ref XP_002884509.1  hypothetical protein ARALYDRAFT_477824 [Arabidopsis lyrata subsp. lyrata] gi 297330349 gb EFH60768.1                                                                                                                                                                                                                                                                    | 754 | 786  | 0         | 104.2 | 60.7 | 70.8 | hypothetical protein ARALYDRAFT_477824                                         | gbpln | Arabidopsis lyrata   | AT3G05370.1   Symbols: AtRLP31, RLP31   receptor like protein 31   chr3:1536134-1538716 REVERSE LENGTH=860                              | 754 | 860 | 0         | 114.1 | 59.2 | 73.1 |
| Rsa1.0_01109.1.g23555.t1 | gb ACP30591.1  disease resistance protein [Brassica rapa subsp. pekinensis]                                                                                                                                                                                                                                                                                                                 | 187 | 1555 | 6.00E-32  | 831.6 | 42.2 | 58.8 | disease resistance protein                                                     | gbpln | Brassica rapa        | AT4G09490.1   Symbols:   Polynucleotidyl transferase, ribonuclease H-like superfamily protein   chr4:6015583-6016575 REVERSE LENGTH=170 | 187 | 170 | 6.00E-11  | 90.9  | 22.5 | 33.2 |
| Rsa1.0_01109.1.g23556.t1 | gb AAC28189.1  contains similarity to Arabidopsis thaliana retrotransposon Athila (GB:X81801) [Arabidopsis thaliana]                                                                                                                                                                                                                                                                        | 745 | 940  | 3.00E-46  | 126.2 | 21.9 | 34.9 | contains similarity to Arabidopsis thaliana retrotransposon Athila (GB:X81801) | gbpln | Arabidopsis thaliana | #                                                                                                                                       | #   | #   | #         | #     | #    | #    |
| Rsa1.0_01109.1.g23557.t1 | ref XP_002870033.1  hypothetical protein ARALYDRAFT_914818 [Arabidopsis lyrata subsp. lyrata] gi 297315869 gb EFH46292.1                                                                                                                                                                                                                                                                    | 195 | 191  | 2.00E-84  | 97.9  | 89.7 | 91.3 | hypothetical protein ARALYDRAFT_914818                                         | gbpln | Arabidopsis lyrata   | AT4G18610.1   Symbols: LSH9   Protein of unknown function (DUF640)   chr4:10250794-10251369 FORWARD LENGTH=191                          | 195 | 191 | 1.00E-86  | 97.9  | 89.2 | 91.8 |
| Rsa1.0_01109.1.g23558.t1 | ref NP_567562.1  pollen Ole e 1 allergen and extensin family protein [Arabidopsis thaliana] gi 44681468 gb AAS47674.1  At4g18596 [Arabidopsis thaliana] gi 62320348 dbj BAD94719.1  pollen-specific protein - like [Arabidopsis thaliana] gi 332658666 gb AEE84066.1  pollen Ole e 1 allergen and extensin family protein [Arabidopsis thaliana]                                            | 171 | 172  | 3.00E-86  | 100.6 | 91.2 | 97.1 | pollen Ole e 1 allergen and extensin family protein                            | gbpln | Arabidopsis thaliana | AT4G18596.1   Symbols:   Pollen Ole e 1 allergen and extensin family protein   chr4:10239114-10239728 FORWARD LENGTH=172                | 171 | 172 | 1.00E-88  | 100.6 | 91.2 | 97.1 |
| Rsa1.0_01110.1.g23559.t1 | #                                                                                                                                                                                                                                                                                                                                                                                           | #   | #    | #         | #     | #    | #    | -                                                                              | ----  | ----                 | #                                                                                                                                       | #   | #   | #         | #     | #    | #    |
| Rsa1.0_01110.1.g23560.t1 | ref XP_002877057.1  hypothetical protein ARALYDRAFT_484543 [Arabidopsis lyrata subsp. lyrata] gi 297322895 gb EFH53316.1                                                                                                                                                                                                                                                                    | 937 | 914  | 0         | 97.5  | 86.4 | 90.5 | hypothetical protein ARALYDRAFT_484543                                         | gbpln | Arabidopsis lyrata   | AT3G27530.1   Symbols: GC6, MAG4   golgin candidate 6   chr3:10193778-10199659 REVERSE LENGTH=914                                       | 937 | 914 | 0         | 97.5  | 86.6 | 90.7 |
| Rsa1.0_01110.1.g23561.t1 | gb EOA23253.1  hypothetical protein CARUB_v10017415mg [Capsella rubella]                                                                                                                                                                                                                                                                                                                    | 389 | 390  | 0         | 100.3 | 87.1 | 94.1 | hypothetical protein CARUB_v10017415mg                                         | gbpln | Capsella rubella     | AT3G27540.1   Symbols:   beta-1,4-N-acetylglucosaminyltransferase family protein   chr3:10205489-10206888 FORWARD LENGTH=390            | 389 | 390 | 0         | 100.3 | 87.1 | 94.1 |
| Rsa1.0_01110.1.g23562.t1 | gb EOA23738.1  hypothetical protein CARUB_v10016951mg, partial [Capsella rubella]                                                                                                                                                                                                                                                                                                           | 546 | 556  | 0         | 101.8 | 86.8 | 90.3 | hypothetical protein CARUB_v10016951mg, partial                                | gbpln | Capsella rubella     | AT3G27550.1   Symbols:   RNA-binding CRS1 / YhbY (CRM) domain protein   chr3:10208010-10209899 REVERSE LENGTH=491                       | 546 | 491 | 0         | 89.9  | 79.3 | 82.6 |
| Rsa1.0_01110.1.g23563.t1 | ref NP_189393.1  protein kinase family protein [Arabidopsis thaliana] gi 11994183 dbj BAB01286.1  nearly identical to protein kinase ATN1 [Arabidopsis thaliana] gi 16604328 gb AAL24170.1  AT3g27560/MMJ24_11 [Arabidopsis thaliana] gi 19699190 gb AAL90961.1  AT3g27560/MMJ24_11 [Arabidopsis thaliana] gi 332643816 gb AEE77337.1  protein kinase family protein [Arabidopsis thaliana] | 356 | 356  | 0         | 100.0 | 93.0 | 95.8 | protein kinase family protein                                                  | gbpln | Arabidopsis thaliana | AT3G27560.1   Symbols: ATN1   Protein kinase superfamily protein   chr3:10210597-10212507 REVERSE LENGTH=356                            | 356 | 356 | 0         | 100.0 | 93.0 | 95.8 |
| Rsa1.0_01110.1.g23564.t1 | ref XP_002877060.1  AT3g27570/MMJ24_12 [Arabidopsis lyrata subsp. lyrata] gi 297322898 gb EFH53319.1  AT3g27570/MMJ24_12 [Arabidopsis lyrata subsp. lyrata]                                                                                                                                                                                                                                 | 334 | 339  | 1.00E-157 | 101.5 | 84.4 | 88.6 | AT3g27570/MMJ24_12                                                             | gbpln | Arabidopsis lyrata   | AT3G27570.1   Symbols:   Sucrase/ferredoxin-like family protein   chr3:10214276-10216681 REVERSE LENGTH=379                             | 334 | 379 | 1.00E-153 | 113.5 | 82.3 | 88.6 |
| Rsa1.0_01110.1.g23565.t1 | gb EOA23693.1  hypothetical protein CARUB_v10016900mg [Capsella rubella]                                                                                                                                                                                                                                                                                                                    | 565 | 592  | 0         | 104.8 | 83.7 | 88.1 | hypothetical protein CARUB_v10016900mg                                         | gbpln | Capsella rubella     | AT3G27580.2   Symbols: ATPK7   Protein kinase superfamily protein   chr3:10217671-10219484 REVERSE LENGTH=578                           | 565 | 578 | 0         | 102.3 | 80.5 | 85.0 |
| Rsa1.0_01110.1.g23566.t1 | #                                                                                                                                                                                                                                                                                                                                                                                           | #   | #    | #         | #     | #    | #    | -                                                                              | ----  | ----                 | #                                                                                                                                       | #   | #   | #         | #     | #    | #    |

|                          |                                                                                                                                                                                                                                                                                                                                                                                              |      |      |           |       |      |      |                                                      |       |                      |                                                                                                                                                                                                                                                                                                                                                                                                                                                                       |      |      |           |       |      |      |
|--------------------------|----------------------------------------------------------------------------------------------------------------------------------------------------------------------------------------------------------------------------------------------------------------------------------------------------------------------------------------------------------------------------------------------|------|------|-----------|-------|------|------|------------------------------------------------------|-------|----------------------|-----------------------------------------------------------------------------------------------------------------------------------------------------------------------------------------------------------------------------------------------------------------------------------------------------------------------------------------------------------------------------------------------------------------------------------------------------------------------|------|------|-----------|-------|------|------|
| Rsa1.0_01110.1.g23567.t1 | ref XP_002877083.1  hypothetical protein ARALYDRAFT_484582 [Arabidopsis lyrata subsp. lyrata] gi 297322921 gb EFH53342.1  hypothetical protein ARALYDRAFT_484582 [Arabidopsis lyrata subsp. lyrata]                                                                                                                                                                                          | 425  | 425  | 0         | 100.0 | 85.2 | 90.8 | hypothetical protein ARALYDRAFT_484582               | gbpln | Arabidopsis lyrata   | AT3G27930.1   Symbols:   unknown protein; FUNCTIONS IN: molecular function unknown; INVOLVED IN: N-terminal protein myristoylation; LOCATED IN: cellular component unknown; EXPRESSED IN: 23 plant structures; EXPRESSED DURING: 14 growth stages; Has 35 Blast hits to 35 proteins in 12 species: Archae - 0; Bacteria - 0; Metazoa - 0; Fungi - 0; Plants - 35; Viruses - 0; Other Eukaryotes - 0 (source: NCBI BLINK).   chr3:10369593-10372318 REVERSE LENGTH=425 | 425  | 425  | 0         | 100.0 | 83.3 | 90.1 |
| Rsa1.0_01110.1.g23568.t2 | ref NP_198848.1  cysteine/histidine-rich C1 domain-containing protein [Arabidopsis thaliana] gi 10179142 dbj BAB11587.1  CHP-rich zinc finger protein-like [Arabidopsis thaliana] gi 332007150 gb AED94533.1  cysteine/histidine-rich C1 domain-containing protein [Arabidopsis thaliana]                                                                                                    | 957  | 594  | 1.00E-151 | 62.1  | 29.9 | 37.5 | cysteine/histidine-rich C1 domain-containing protein | gbpln | Arabidopsis thaliana | AT5G40320.1   Symbols:   Cysteine/Histidine-rich C1 domain family protein   chr5:16121757-16123541 FORWARD LENGTH=594                                                                                                                                                                                                                                                                                                                                                 | 957  | 594  | 1.00E-153 | 62.1  | 29.9 | 37.5 |
| Rsa1.0_01110.1.g23569.t1 | gb EOA23597.1  hypothetical protein CARUB_v10016794mg [Capsella rubella]                                                                                                                                                                                                                                                                                                                     | 663  | 664  | 0         | 100.2 | 88.2 | 93.4 | hypothetical protein CARUB_v10016794mg               | gbpln | Capsella rubella     | AT3G27960.1   Symbols:   Tetratricopeptide repeat (TPR)-like superfamily protein   chr3:10380513-10382593 REVERSE LENGTH=663                                                                                                                                                                                                                                                                                                                                          | 663  | 663  | 0         | 100.0 | 86.7 | 93.1 |
| Rsa1.0_01110.1.g23570.t1 | gb ABD65024.1  Zinc knuckle containing protein [Brassica oleracea]                                                                                                                                                                                                                                                                                                                           | 243  | 324  | 1.00E-12  | 133.3 | 18.9 | 21.0 | Zinc knuckle containing protein                      | gbpln | Brassica oleracea    | # # # # # # #                                                                                                                                                                                                                                                                                                                                                                                                                                                         |      |      |           |       |      |      |
| Rsa1.0_01111.1.g23571.t1 | gb EOA31069.1  hypothetical protein CARUB_v10014221mg [Capsella rubella]                                                                                                                                                                                                                                                                                                                     | 239  | 314  | 6.00E-55  | 131.4 | 50.6 | 54.4 | hypothetical protein CARUB_v10014221mg               | gbpln | Capsella rubella     | AT2G16070.2   Symbols: PDV2   plastid division2   chr2:6984072-6985356 REVERSE LENGTH=307                                                                                                                                                                                                                                                                                                                                                                             | 239  | 307  | 2.00E-53  | 128.5 | 49.8 | 53.6 |
| Rsa1.0_01111.1.g23572.t1 | ref NP_179215.1  uncharacterized protein [Arabidopsis thaliana] gi 4678214 gb AAD26960.1  hypothetical protein [Arabidopsis thaliana] gi 52354251 gb AAU44446.1  hypothetical protein AT2G16190 [Arabidopsis thaliana] gi 61742584 gb AAX55113.1  hypothetical protein At2g16190 [Arabidopsis thaliana] gi 330251375 gb AEC06469.1  uncharacterized protein AT2G16190 [Arabidopsis thaliana] | 285  | 303  | 2.00E-77  | 106.3 | 59.3 | 68.8 | uncharacterized protein                              | gbpln | Arabidopsis thaliana | AT2G16190.1   Symbols:   BEST Arabidopsis thaliana protein match is: hydroxyproline-rich glycoprotein family protein (TAIRAT1G49330.1); Has 77 Blast hits to 77 proteins in 25 species: Archae - 0; Bacteria - 0; Metazoa - 6; Fungi - 13; Plants - 56; Viruses - 0; Other Eukaryotes - 2 (source: NCBI BLINK).   chr2:7020689-7021600 REVERSE LENGTH=303                                                                                                             | 285  | 303  | 7.00E-80  | 106.3 | 59.3 | 68.8 |
| Rsa1.0_01111.1.g23573.t3 | gb EOA32510.1  hypothetical protein CARUB_v10015799mg [Capsella rubella]                                                                                                                                                                                                                                                                                                                     | 524  | 499  | 0         | 95.2  | 78.2 | 83.6 | hypothetical protein CARUB_v10015799mg               | gbpln | Capsella rubella     | AT2G16230.1   Symbols:   O-Glycosyl hydrolases family 17 protein   chr2:7035463-7038326 REVERSE LENGTH=503                                                                                                                                                                                                                                                                                                                                                            | 524  | 503  | 0         | 96.0  | 77.1 | 82.6 |
| Rsa1.0_01111.1.g23574.t1 | ref XP_002884160.1  hypothetical protein ARALYDRAFT_900287 [Arabidopsis lyrata subsp. lyrata] gi 297330000 gb EFH60419.1  hypothetical protein ARALYDRAFT_900287 [Arabidopsis lyrata subsp. lyrata]                                                                                                                                                                                          | 471  | 511  | 0         | 108.5 | 85.8 | 92.1 | hypothetical protein ARALYDRAFT_900287               | gbpln | Arabidopsis lyrata   | AT2G16280.1   Symbols: KCS9   3-ketoacyl-CoA synthase 9   chr2:7051186-7052724 FORWARD LENGTH=512                                                                                                                                                                                                                                                                                                                                                                     | 471  | 512  | 0         | 108.7 | 85.8 | 92.4 |
| Rsa1.0_01111.1.g23575.t1 | ref XP_002886215.1  hypothetical protein ARALYDRAFT_900289 [Arabidopsis lyrata subsp. lyrata] gi 297332055 gb EFH62474.1  hypothetical protein ARALYDRAFT_900289 [Arabidopsis lyrata subsp. lyrata]                                                                                                                                                                                          | 364  | 387  | 1.00E-116 | 106.3 | 62.6 | 73.9 | hypothetical protein ARALYDRAFT_900289               | gbpln | Arabidopsis lyrata   | AT2G16290.1   Symbols:   F-box family protein with a domain of unknown function (DUF295)   chr2:7058930-7060573 REVERSE LENGTH=415                                                                                                                                                                                                                                                                                                                                    | 364  | 415  | 1.00E-70  | 114.0 | 47.8 | 61.5 |
| Rsa1.0_01111.1.g23576.t7 | dbj BAA97287.1  retroelement pol polyprotein-like [Arabidopsis thaliana]                                                                                                                                                                                                                                                                                                                     | 1303 | 1491 | 0         | 114.4 | 58.5 | 72.8 | retroelement pol polyprotein-like                    | gbpln | Arabidopsis thaliana | AT4G23180.1   Symbols: CRK8   cysteine-rich RLK (RECEPTOR-like protein kinase) 8   chr4:12129485-12134086 FORWARD LENGTH=1262                                                                                                                                                                                                                                                                                                                                         | 1303 | 1262 | 1.00E-121 | 96.9  | 16.3 | 23.3 |

|                          |                                                                                                                                                                                                                                                                                                                                                                                                                                                                                                                                                                                                                                                                                                                                                                                                                                                                                                                                                                                                              |      |      |           |        |      |      |                                        |       |                      |                                                                                                                                                                                                                                                                                                                                                                     |      |      |           |        |      |      |
|--------------------------|--------------------------------------------------------------------------------------------------------------------------------------------------------------------------------------------------------------------------------------------------------------------------------------------------------------------------------------------------------------------------------------------------------------------------------------------------------------------------------------------------------------------------------------------------------------------------------------------------------------------------------------------------------------------------------------------------------------------------------------------------------------------------------------------------------------------------------------------------------------------------------------------------------------------------------------------------------------------------------------------------------------|------|------|-----------|--------|------|------|----------------------------------------|-------|----------------------|---------------------------------------------------------------------------------------------------------------------------------------------------------------------------------------------------------------------------------------------------------------------------------------------------------------------------------------------------------------------|------|------|-----------|--------|------|------|
| Rsa1.0_01111.1.g23577.t1 | refNP_179235.1  purple acid phosphatase 10 [Arabidopsis thaliana] gi 75265912 sp Q9SIV9.1 PPA10_ARATH RecName: Full=Purple acid phosphatase 10; Flags: Precursor gi 20257483 gb AAM15911.1 AF492662.1 purple acid phosphatase [Arabidopsis thaliana] gi 4544387 gb AAD22297.1 putative purple acid phosphatase precursor [Arabidopsis thaliana] gi 20260674 gb AAM13235.1  putative purple acid phosphatase precursor [Arabidopsis thaliana] gi 31376393 gb AAP49523.1  At2g16430 [Arabidopsis thaliana] gi 330251402 gb AEC06496.1  purple acid phosphatase 10 [Arabidopsis thaliana] refNP_565388.1  uncharacterized protein [Arabidopsis thaliana] gi 17529264 gb AAL38859.1  unknown protein [Arabidopsis thaliana] gi 20198032 gb AAD22294.2  expressed protein [Arabidopsis thaliana] gi 21536621 gb AAM60953.1  unknown [Arabidopsis thaliana] gi 29824341 gb AAP04131.1  unknown protein [Arabidopsis thaliana] gi 330251406 gb AEC06500.1  uncharacterized protein AT2G16460 [Arabidopsis thaliana] | 470  | 468  | 0         | 99.6   | 85.3 | 91.7 | purple acid phosphatase 10             | gbpln | Arabidopsis thaliana | AT2G16430.2   Symbols: PAPA10, ATPAPA10   purple acid phosphatase 10   chr2:7120502-7122772 REVERSE LENGTH=468                                                                                                                                                                                                                                                      | 470  | 468  | 0         | 99.6   | 85.3 | 91.7 |
| Rsa1.0_01111.1.g23578.t1 | refNP_189943.1  GDSL esterase/lipase [Arabidopsis thaliana] gi 75173224 sp Q9FYD3.1 GDL56_ARATH RecName: Full=GDSL esterase/lipase At3g43570; AltName: Full=Extracellular lipase At3g43570; Flags: Precursor gi 9967506 emb CAC05631.1  putative protein [Arabidopsis thaliana] gi 332644285 gb AEE77806.1  GDSL esterase/lipase [Arabidopsis thaliana] refXP_002890318.1  hypothetical protein ARALYDRAFT_472131 [Arabidopsis lyrata subsp. lyrata] gi 297336160 gb EFH66577.1  hypothetical protein ARALYDRAFT_472131 [Arabidopsis lyrata subsp. lyrata]                                                                                                                                                                                                                                                                                                                                                                                                                                                   | 288  | 230  | 1.00E-108 | 79.9   | 68.8 | 72.9 | uncharacterized protein                | gbpln | Arabidopsis thaliana | AT2G16460.1   Symbols:   Protein of unknown function (DUF1640)   chr2:7133704-7135483 REVERSE LENGTH=230                                                                                                                                                                                                                                                            | 288  | 230  | 1.00E-110 | 79.9   | 68.8 | 72.9 |
| Rsa1.0_01111.1.g23579.t1 | refXP_002890318.1  hypothetical protein ARALYDRAFT_472131 [Arabidopsis lyrata subsp. lyrata] gi 297336160 gb EFH66577.1  hypothetical protein ARALYDRAFT_472131 [Arabidopsis lyrata subsp. lyrata]                                                                                                                                                                                                                                                                                                                                                                                                                                                                                                                                                                                                                                                                                                                                                                                                           | 308  | 320  | 1.00E-144 | 103.9  | 80.2 | 89.3 | GDSL esterase/lipase                   | gbpln | Arabidopsis thaliana | AT3G43570.1   Symbols:   GDSL-like Lipase/Acylhydrolase superfamily protein   chr3:15473345-15474765 FORWARD LENGTH=320                                                                                                                                                                                                                                             | 308  | 320  | 2.33E-156 | 103.9  | 80.2 | 89.3 |
| Rsa1.0_01111.1.g23580.t1 | emb CAN74668.1  hypothetical protein VITISV_005686 [Vitis vinifera]                                                                                                                                                                                                                                                                                                                                                                                                                                                                                                                                                                                                                                                                                                                                                                                                                                                                                                                                          | 61   | 755  | 3.00E-14  | 1237.7 | 78.7 | 82.0 | hypothetical protein ARALYDRAFT_472131 | gbpln | Arabidopsis lyrata   | AT1G19110.1   Symbols:   inter-alpha-trypsin inhibitor heavy chain-related   chr1:6602270-6605766 FORWARD LENGTH=754                                                                                                                                                                                                                                                | 61   | 754  | 2.00E-16  | 1236.1 | 77.0 | 82.0 |
| Rsa1.0_01112.1.g23581.t1 | refXP_002869254.1  predicted protein [Arabidopsis lyrata subsp. lyrata] gi 297315090 gb EFH45513.1  predicted protein [Arabidopsis lyrata subsp. lyrata]                                                                                                                                                                                                                                                                                                                                                                                                                                                                                                                                                                                                                                                                                                                                                                                                                                                     | 127  | 480  | 2.00E-26  | 378.0  | 55.1 | 61.4 | hypothetical protein VITISV_005686     | gbpln | Vitis vinifera       | AT2G12480.2   Symbols: SCPL43   serine carboxypeptidase-like 43   chr2:5069795-507227 REVERSE LENGTH=443                                                                                                                                                                                                                                                            | 127  | 443  | 1.00E-28  | 348.8  | 48.8 | 52.8 |
| Rsa1.0_01112.1.g23582.t2 | refNP_567900.1  uncharacterized protein [Arabidopsis thaliana] gi 332660703 gb AEE86103.1  uncharacterized protein AT4G32680 [Arabidopsis thaliana]                                                                                                                                                                                                                                                                                                                                                                                                                                                                                                                                                                                                                                                                                                                                                                                                                                                          | 2106 | 2147 | 0         | 101.9  | 86.4 | 91.7 | predicted protein                      | gbpln | Arabidopsis lyrata   | AT4G32700.2   Symbols:   helicases;ATP-dependent helicases;nucleic acid binding;ATP binding;DNA-directed DNA polymerases;DNA binding   chr4:15767440-15779185 FORWARD LENGTH=2154                                                                                                                                                                                   | 2106 | 2154 | 0         | 102.3  | 85.7 | 91.5 |
| Rsa1.0_01112.1.g23583.t1 | gb EOA23152.1  hypothetical protein CARUB_v10016599mg [Capsella rubella]                                                                                                                                                                                                                                                                                                                                                                                                                                                                                                                                                                                                                                                                                                                                                                                                                                                                                                                                     | 1074 | 1174 | 0         | 109.3  | 80.9 | 84.4 | hypothetical protein CARUB_v10016599mg | gbpln | Capsella rubella     | AT3G26560.1   Symbols:   ATP-dependent RNA helicase, putative   chr3:9750122-9753719 REVERSE LENGTH=1168                                                                                                                                                                                                                                                            | 1074 | 1168 | 0         | 108.8  | 80.6 | 84.2 |
| Rsa1.0_01112.1.g23584.t1 | refNP_195530.2  FAR1-related sequence 9 [Arabidopsis thaliana] gi 334302810 sp Q9SZL7.2 FRS9_ARATH RecName: Full=Protein FAR1-RELATED SEQUENCE 9 gi 332661489 gb AEE86889.1  FAR1-related sequence 9 [Arabidopsis thaliana]                                                                                                                                                                                                                                                                                                                                                                                                                                                                                                                                                                                                                                                                                                                                                                                  | 249  | 282  | 1.00E-81  | 113.3  | 71.1 | 82.3 | uncharacterized protein                | gbpln | Arabidopsis thaliana | AT4G32680.1   Symbols:   unknown protein; BEST Arabidopsis thaliana protein match is: unknown protein (TAIR:AT1G52343.1); Has 30201 Blast hits to 17322 proteins in 780 species: Archae - 12; Bacteria - 1396; Metazoa - 17338; Fungi - 3422; Plants - 5037; Viruses - 0; Other Eukaryotes - 2996 (source: NCBI BLINK).   chr4:15763462-15765039 REVERSE LENGTH=282 | 249  | 282  | 3.00E-84  | 113.3  | 71.1 | 82.3 |
| Rsa1.0_01112.1.g23585.t1 | refNP_195530.2  FAR1-related sequence 9 [Arabidopsis thaliana] gi 334302810 sp Q9SZL7.2 FRS9_ARATH RecName: Full=Protein FAR1-RELATED SEQUENCE 9 gi 332661489 gb AEE86889.1  FAR1-related sequence 9 [Arabidopsis thaliana]                                                                                                                                                                                                                                                                                                                                                                                                                                                                                                                                                                                                                                                                                                                                                                                  | 520  | 545  | 0         | 104.8  | 68.8 | 81.5 | FAR1-related sequence 9                | gbpln | Arabidopsis thaliana | AT4G38170.1   Symbols: FRS9   FAR1-related sequence 9   chr4:17904613-17906439 FORWARD LENGTH=545                                                                                                                                                                                                                                                                   | 520  | 545  | 0         | 104.8  | 68.8 | 81.5 |
| Rsa1.0_01112.1.g23586.t1 | dbj BAH20056.1  AT2G25670 [Arabidopsis thaliana]                                                                                                                                                                                                                                                                                                                                                                                                                                                                                                                                                                                                                                                                                                                                                                                                                                                                                                                                                             | 316  | 318  | 9.00E-63  | 100.6  | 73.7 | 84.5 | AT2G25670                              | gbpln | Arabidopsis thaliana | AT4G32610.1   Symbols:   copper ion binding   chr4:15728376-15729897 REVERSE LENGTH=315                                                                                                                                                                                                                                                                             | 316  | 315  | 7.00E-61  | 99.7   | 75.6 | 85.4 |

|                          |                                                                                                                                                                                                                 |      |      |           |       |      |      |                                                |       |                    |                                                                                                                                                                                                                                                              |      |     |           |       |      |      |
|--------------------------|-----------------------------------------------------------------------------------------------------------------------------------------------------------------------------------------------------------------|------|------|-----------|-------|------|------|------------------------------------------------|-------|--------------------|--------------------------------------------------------------------------------------------------------------------------------------------------------------------------------------------------------------------------------------------------------------|------|-----|-----------|-------|------|------|
| Rsa1.0_01112.1.g23587.t1 | gb EOA16248.1  hypothetical protein CARUB_v10004394mg [Capsella rubella]                                                                                                                                        | 584  | 613  | 0         | 105.0 | 83.0 | 91.3 | hypothetical protein CARUB_v10004394mg         | gbpln | Capsella rubella   | AT5G40410.1   Symbols:   Tetratricopeptide repeat (TPR)-like superfamily protein   chr5:16171385-16173211 FORWARD LENGTH=608                                                                                                                                 | 584  | 608 | 0         | 104.1 | 81.7 | 89.9 |
| Rsa1.0_01112.1.g23588.t1 | gb EOA16606.1  hypothetical protein CARUB_v10004779mg [Capsella rubella]                                                                                                                                        | 405  | 454  | 1.00E-171 | 112.1 | 84.2 | 89.9 | hypothetical protein CARUB_v10004779mg         | gbpln | Capsella rubella   | AT4G32600.1   Symbols:   RING/U-box superfamily protein   chr4:15724010-15725737 FORWARD LENGTH=453                                                                                                                                                          | 405  | 453 | 1.00E-172 | 111.9 | 82.7 | 88.9 |
| Rsa1.0_01112.1.g23589.t1 | gb AAM82604.1 AF525305.2 putative AP endonuclease/reverse transcriptase [Brassica napus]                                                                                                                        | 1605 | 1214 | 0         | 75.6  | 28.1 | 41.6 | putative AP endonuclease/reverse transcriptase | gbpln | Brassica napus     | AT1G43760.1   Symbols:   DNase I-like superfamily protein   chr1:16528880-16531065 REVERSE LENGTH=626                                                                                                                                                        | 1605 | 626 | 1.00E-82  | 39.0  | 10.3 | 15.6 |
| Rsa1.0_01112.1.g23590.t2 | ref XP_002869282.1  hypothetical protein ARALYDRAFT_491495 [Arabidopsis lyrata subsp. lyrata] gi 297315118 gb EFH45541.1  hypothetical protein ARALYDRAFT_491495 [Arabidopsis lyrata subsp. lyrata]             | 427  | 437  | 1.00E-157 | 102.3 | 73.3 | 79.2 | hypothetical protein ARALYDRAFT_491495         | gbpln | Arabidopsis lyrata | AT4G32330.3   Symbols:   TPX2 (targeting protein for Xklp2) protein family   chr4:15609801-15611867 FORWARD LENGTH=437                                                                                                                                       | 427  | 437 | 1.00E-158 | 102.3 | 71.7 | 78.2 |
| Rsa1.0_01112.1.g23591.t1 | ref XP_002869284.1  lectin protein kinase family protein [Arabidopsis lyrata subsp. lyrata] gi 297315120 gb EFH45543.1  lectin protein kinase family protein [Arabidopsis lyrata subsp. lyrata]                 | 830  | 825  | 0         | 99.4  | 83.5 | 91.1 | lectin protein kinase family protein           | gbpln | Arabidopsis lyrata | AT4G32300.1   Symbols:   SD2-5   S-domain-oxidase/kelch repeat superfamily protein   chr4:15599970-15602435 FORWARD LENGTH=821                                                                                                                               | 830  | 821 | 0         | 98.9  | 82.8 | 90.1 |
| Rsa1.0_01112.1.g23592.t1 | gb EOA15559.1  hypothetical protein CARUB_v10005173mg [Capsella rubella]                                                                                                                                        | 343  | 344  | 1.00E-177 | 100.3 | 89.5 | 95.0 | hypothetical protein CARUB_v10005173mg         | gbpln | Capsella rubella   | AT4G32272.1   Symbols:   Nucleotide/sugar transporter family protein   chr4:15577195-15579689 REVERSE LENGTH=344                                                                                                                                             | 343  | 344 | 1.00E-177 | 100.3 | 88.6 | 94.5 |
| Rsa1.0_01112.1.g23593.t1 | ref XP_002872474.1  hypothetical protein ARALYDRAFT_911263 [Arabidopsis lyrata subsp. lyrata] gi 297318311 gb EFH48733.1  hypothetical protein ARALYDRAFT_911263 [Arabidopsis lyrata subsp. lyrata]             | 427  | 417  | 1.00E-93  | 97.7  | 48.7 | 63.2 | hypothetical protein ARALYDRAFT_911263         | gbpln | Arabidopsis lyrata | AT3G26010.1   Symbols:   Galactose oxidase/kelch repeat superfamily protein   chr3:9511901-9513145 FORWARD LENGTH=414                                                                                                                                        | 427  | 414 | 3.00E-39  | 97.0  | 31.1 | 46.4 |
| Rsa1.0_01112.1.g23594.t1 | ref XP_002867250.1  hypothetical protein ARALYDRAFT_491506 [Arabidopsis lyrata subsp. lyrata] gi 297313086 gb EFH43509.1  hypothetical protein ARALYDRAFT_491506 [Arabidopsis lyrata subsp. lyrata]             | 203  | 237  | 4.00E-52  | 116.7 | 59.6 | 72.9 | hypothetical protein ARALYDRAFT_491506         | gbpln | Arabidopsis lyrata | AT4G32270.1   Symbols:   Ubiquitin-like superfamily protein   chr4:15575015-15576360 REVERSE LENGTH=239                                                                                                                                                      | 203  | 239 | 5.00E-53  | 117.7 | 60.1 | 70.4 |
| Rsa1.0_01112.1.g23595.t1 | gb EOA16255.1  hypothetical protein CARUB_v10004401mg [Capsella rubella] gi 482552063 gb EOA16256.1  hypothetical protein CARUB_v10004401mg [Capsella rubella]                                                  | 623  | 611  | 0         | 98.1  | 76.6 | 85.1 | hypothetical protein CARUB_v10004401mg         | gbpln | Capsella rubella   | AT4G32250.3   Symbols:   Protein kinase superfamily protein   chr4:15570285-15572528 REVERSE LENGTH=611                                                                                                                                                      | 623  | 611 | 0         | 98.1  | 76.9 | 85.9 |
| Rsa1.0_01112.1.g23596.t1 | ref XP_002869310.1  hypothetical protein ARALYDRAFT_491553 [Arabidopsis lyrata subsp. lyrata] gi 297315146 gb EFH45569.1  hypothetical protein ARALYDRAFT_491553 [Arabidopsis lyrata subsp. lyrata]             | 173  | 177  | 7.00E-73  | 102.3 | 83.8 | 88.4 | hypothetical protein ARALYDRAFT_491553         | gbpln | Arabidopsis lyrata | AT4G31840.1   Symbols:   ENODL15, AtENODL15   early nodulin-like protein 15   chr4:15401798-15402426 FORWARD LENGTH=177                                                                                                                                      | 173  | 177 | 6.00E-74  | 102.3 | 82.7 | 86.7 |
| Rsa1.0_01112.1.g23597.t1 | ref XP_002867277.1  hypothetical protein ARALYDRAFT_913282 [Arabidopsis lyrata subsp. lyrata] gi 297313113 gb EFH43536.1  hypothetical protein ARALYDRAFT_913282 [Arabidopsis lyrata subsp. lyrata]             | 100  | 100  | 6.00E-49  | 100.0 | 96.0 | 99.0 | hypothetical protein ARALYDRAFT_913282         | gbpln | Arabidopsis lyrata | AT4G31830.1   Symbols:   unknown protein; Has 42 Blast hits to 42 proteins in 10 species: Archae - 0; Bacteria - 0; Metazoa - 0; Fungi - 0; Plants - 42; Viruses - 0; Other Eukaryotes - 0 (source: NCBI BLINK).   chr4:15400803-15401105 REVERSE LENGTH=100 | 100  | 100 | 1.00E-51  | 100.0 | 96.0 | 98.0 |
| Rsa1.0_01112.1.g23598.t1 | ref XP_002867278.1  enoyl-CoA hydratase/isomerase family protein [Arabidopsis lyrata subsp. lyrata] gi 297313114 gb EFH43537.1  enoyl-CoA hydratase/isomerase family protein [Arabidopsis lyrata subsp. lyrata] | 409  | 409  | 0         | 100.0 | 89.5 | 95.6 | enoyl-CoA hydratase/isomerase family protein   | gbpln | Arabidopsis lyrata | AT4G31810.1   Symbols:   ATP-dependent caseinolytic (Clp) protease/crotonase family protein   chr4:15387365-15390290 REVERSE LENGTH=409                                                                                                                      | 409  | 409 | 0         | 100.0 | 88.3 | 94.4 |
| Rsa1.0_01112.1.g23599.t1 | #                                                                                                                                                                                                               | #    | #    | #         | #     | #    | -    | ----                                           | ----  | ----               | #                                                                                                                                                                                                                                                            | #    | #   | #         | #     | #    |      |
| Rsa1.0_01112.1.g23600.t1 | gb AAS13378.1  WRKY1 [Brassica rapa subsp. chinensis]                                                                                                                                                           | 313  | 308  | 1.00E-157 | 98.4  | 88.8 | 91.4 | WRKY1                                          | gbpln | Brassica rapa      | AT4G31800.1   Symbols:   WRKY18, ATWRKY18   WRKY DNA-binding protein 18   chr4:15383296-15384812 FORWARD LENGTH=310                                                                                                                                          | 313  | 310 | 1.00E-138 | 99.0  | 79.2 | 88.5 |
| Rsa1.0_01113.1.g23601.t1 | emb CAB45522.1  [acyl-carrier protein] S-malonyltransferase [Brassica napus]                                                                                                                                    | 369  | 349  | 0         | 94.6  | 90.0 | 92.4 |                                                | gbpln | Brassica napus     | AT2G30200.1   Symbols:   catalytic:transferases;[acyl-carrier-protein] S-malonyltransferases;binding   chr2:12883162-12885482 REVERSE LENGTH=393                                                                                                             | 369  | 393 | 0         | 106.5 | 86.7 | 89.7 |

|                          |                                                                                                                                                                                                                                                                                                                                                                                                                                                                                                                                                                            |      |      |           |       |      |      |                                                          |       |                      |                                                                                                                                                                                                                                                                                                                                             |      |      |          |       |      |      |
|--------------------------|----------------------------------------------------------------------------------------------------------------------------------------------------------------------------------------------------------------------------------------------------------------------------------------------------------------------------------------------------------------------------------------------------------------------------------------------------------------------------------------------------------------------------------------------------------------------------|------|------|-----------|-------|------|------|----------------------------------------------------------|-------|----------------------|---------------------------------------------------------------------------------------------------------------------------------------------------------------------------------------------------------------------------------------------------------------------------------------------------------------------------------------------|------|------|----------|-------|------|------|
| Rsa1.0_01113.1.g23602.t1 | ref[XP_002880821.1] kinase family protein [Arabidopsis lyrata subsp. lyrata] g[297326693]g[EFH57080.1] kinase family protein [Arabidopsis lyrata subsp. lyrata]                                                                                                                                                                                                                                                                                                                                                                                                            | 330  | 318  | 1.00E-104 | 96.4  | 56.1 | 65.2 | kinase family protein                                    | gbpln | Arabidopsis lyrata   | AT2G41920.1   Symbols:   Protein kinase superfamily protein   chr2:17499448-17500404 FORWARD LENGTH=318                                                                                                                                                                                                                                     | 330  | 318  | 4.00E-99 | 96.4  | 53.9 | 66.1 |
| Rsa1.0_01113.1.g23603.t1 | ref[XP_002879254.1] UDP-glucuronosyl/UDP-glucosyl transferase family protein [Arabidopsis lyrata subsp. lyrata] g[297326693]g[EFH55513.1] UDP-glucuronosyl/UDP-glucosyl transferase family protein [Arabidopsis lyrata subsp. lyrata]                                                                                                                                                                                                                                                                                                                                      | 423  | 455  | 0         | 107.6 | 79.4 | 89.1 | UDP-glucuronosyl/UDP-glucosyl transferase family protein | gbpln | Arabidopsis lyrata   | AT2G30140.1   Symbols:   UDP-Glycosyltransferase superfamily protein   chr2:12872200-12873691 FORWARD LENGTH=455                                                                                                                                                                                                                            | 423  | 455  | 0        | 107.6 | 78.3 | 87.7 |
| Rsa1.0_01113.1.g23604.t1 | gb[ABD65147.1] hypothetical protein 40.t00024 [Brassica oleracea]                                                                                                                                                                                                                                                                                                                                                                                                                                                                                                          | 405  | 480  | 2.00E-13  | 118.5 | 16.0 | 20.2 | hypothetical protein 40.t00024                           | gbpln | Brassica oleracea    | #                                                                                                                                                                                                                                                                                                                                           | #    | #    | #        | #     | #    | #    |
| Rsa1.0_01113.1.g23605.t1 | ref[NP_565695.1] LOB domain-containing protein 12 [Arabidopsis thaliana] g[29427828]sp[Q8LBW3.2][LBD12_ARAT_H_RecName: Full=LOB domain-containing protein 12; AltName: Full=ASYMMETRIC LEAVES 2-like protein 5; Short=AS2-like protein 5] g[3150407]g[AAAC16959.1] expressed protein [Arabidopsis thaliana] g[45330813]dbj[BAD12425.1] ASYMMETRIC LEAVES2-like gene 5 protein [Arabidopsis thaliana] g[219807086]dbj[BAH10549.1] ASYMMETRIC LEAVES2-like 5 protein [Arabidopsis thaliana] g[330253255]g[AE08349.1] LOB domain-containing protein 12 [Arabidopsis thaliana] | 188  | 193  | 6.00E-82  | 102.7 | 89.4 | 93.1 | LOB domain-containing protein 12                         | gbpln | Arabidopsis thaliana | AT2G30130.1   Symbols: ASL5, LBD12, PCK1   Lateral organ boundaries (LOB) domain family protein   chr2:12868740-12869684 FORWARD LENGTH=193                                                                                                                                                                                                 | 188  | 193  | 2.00E-84 | 102.7 | 89.4 | 93.1 |
| Rsa1.0_01113.1.g23606.t1 | ref[XP_002862737.1] hypothetical protein ARALYDRAFT_920315 [Arabidopsis lyrata subsp. lyrata] g[297308435]g[EFH38995.1] hypothetical protein ARALYDRAFT_920315 [Arabidopsis lyrata subsp. lyrata]                                                                                                                                                                                                                                                                                                                                                                          | 195  | 193  | 3.00E-80  | 99.0  | 77.4 | 79.0 | hypothetical protein ARALYDRAFT_920315                   | gbpln | Arabidopsis lyrata   | AT1G07090.1   Symbols: LSH6   Protein of unknown function (DUF640)   chr1:2174202-2174792 REVERSE LENGTH=196                                                                                                                                                                                                                                | 195  | 196  | 9.00E-71 | 100.5 | 69.7 | 78.5 |
| Rsa1.0_01113.1.g23607.t1 | ref[XP_002881085.1] hypothetical protein ARALYDRAFT_481921 [Arabidopsis lyrata subsp. lyrata] g[297326924]g[EFH57344.1] hypothetical protein ARALYDRAFT_481921 [Arabidopsis lyrata subsp. lyrata]                                                                                                                                                                                                                                                                                                                                                                          | 1019 | 1083 | 0         | 106.3 | 95.0 | 97.8 | hypothetical protein ARALYDRAFT_481921                   | gbpln | Arabidopsis lyrata   | AT2G30110.1   Symbols: ATUBA1, MOSS, UBA1   ubiquitin-activating enzyme 1   chr2:12852632-12857369 REVERSE LENGTH=1080                                                                                                                                                                                                                      | 1019 | 1080 | 0        | 106.0 | 95.1 | 97.7 |
| Rsa1.0_01113.1.g23608.t1 | ref[XP_002886268.1] hypothetical protein ARALYDRAFT_900376 [Arabidopsis lyrata subsp. lyrata] g[297332108]g[EFH62527.1] hypothetical protein ARALYDRAFT_900376 [Arabidopsis lyrata subsp. lyrata]                                                                                                                                                                                                                                                                                                                                                                          | 366  | 346  | 7.00E-71  | 94.5  | 46.4 | 62.0 | hypothetical protein ARALYDRAFT_900376                   | gbpln | Arabidopsis lyrata   | AT4G38940.1   Symbols:   Galactose oxidase/kelch repeat superfamily protein   chr4:18152848-18153960 FORWARD LENGTH=370                                                                                                                                                                                                                     | 366  | 370  | 8.00E-65 | 101.1 | 41.5 | 58.2 |
| Rsa1.0_01113.1.g23609.t1 | ref[XP_002886268.1] hypothetical protein ARALYDRAFT_900376 [Arabidopsis lyrata subsp. lyrata] g[297332108]g[EFH62527.1] hypothetical protein ARALYDRAFT_900376 [Arabidopsis lyrata subsp. lyrata]                                                                                                                                                                                                                                                                                                                                                                          | 243  | 346  | 1.00E-42  | 142.4 | 46.1 | 63.8 | hypothetical protein ARALYDRAFT_900376                   | gbpln | Arabidopsis lyrata   | AT4G38940.1   Symbols:   Galactose oxidase/kelch repeat superfamily protein   chr4:18152848-18153960 FORWARD LENGTH=370                                                                                                                                                                                                                     | 243  | 370  | 3.00E-41 | 152.3 | 42.4 | 62.1 |
| Rsa1.0_01114.1.g23610.t1 | gb[AAD17398.1] putative non-LTR retroelement reverse transcriptase [Arabidopsis thaliana]                                                                                                                                                                                                                                                                                                                                                                                                                                                                                  | 361  | 1225 | 6.00E-77  | 339.3 | 36.8 | 53.2 | putative non-LTR retroelement reverse transcriptase      | gbpln | Arabidopsis thaliana | #                                                                                                                                                                                                                                                                                                                                           | #    | #    | #        | #     | #    | #    |
| Rsa1.0_01114.1.g23611.t1 | gb[EOA23804.1] hypothetical protein CARUB_v10017017mg, partial [Capsella rubella]                                                                                                                                                                                                                                                                                                                                                                                                                                                                                          | 676  | 521  | 7.00E-65  | 77.1  | 18.3 | 24.7 | hypothetical protein CARUB_v10017017mg, partial          | gbpln | Capsella rubella     | AT2G17920.1   Symbols:   nucleic acid binding:zinc ion binding   chr2:7782808-7783731 FORWARD LENGTH=307                                                                                                                                                                                                                                    | 676  | 307  | 1.00E-22 | 45.4  | 8.7  | 13.3 |
| Rsa1.0_01114.1.g23612.t1 | gb[AAF18641.1]AC006228_12 F5J5.16 [Arabidopsis thaliana]                                                                                                                                                                                                                                                                                                                                                                                                                                                                                                                   | 112  | 1024 | 4.00E-27  | 914.3 | 50.9 | 60.7 | F5J5.16                                                  | gbpln | Arabidopsis thaliana | #                                                                                                                                                                                                                                                                                                                                           | #    | #    | #        | #     | #    | #    |
| Rsa1.0_01114.1.g23613.t1 | gb[EOA36607.1] hypothetical protein CARUB_v10011815mg [Capsella rubella]                                                                                                                                                                                                                                                                                                                                                                                                                                                                                                   | 77   | 80   | 5.00E-34  | 103.9 | 93.5 | 98.7 | hypothetical protein CARUB_v10011815mg                   | gbpln | Capsella rubella     | AT1G48330.1   Symbols:   unknown protein; BEST Arabidopsis thaliana protein match is: unknown protein (TAIR:AT3G17580.1); Has 40 Blast hits to 40 proteins in 11 species: Archae - 0; Bacteria - 0; Metazoa - 0; Fungi - 0; Plants - 40; Viruses - 0; Other Eukaryotes - 0 (source: NCBI BLink).   chr1:17863897-17864124 FORWARD LENGTH=75 | 77   | 75   | 2.00E-32 | 97.4  | 81.8 | 84.4 |
| Rsa1.0_01114.1.g23614.t1 | #                                                                                                                                                                                                                                                                                                                                                                                                                                                                                                                                                                          | #    | #    | #         | #     | #    | #    | -                                                        | ----  | ----                 | #                                                                                                                                                                                                                                                                                                                                           | #    | #    | #        | #     | #    | #    |
| Rsa1.0_01114.1.g23615.t1 | #                                                                                                                                                                                                                                                                                                                                                                                                                                                                                                                                                                          | #    | #    | #         | #     | #    | #    | -                                                        | ----  | ----                 | #                                                                                                                                                                                                                                                                                                                                           | #    | #    | #        | #     | #    | #    |

|                          |                                                                                                                                                                                                                                                                                                                                                                                                                                                                                                                                                                                                                                                                                                                                                                                                                                                                                                                                                                                                                                                                                                                                                                                                                                                                                                                                                                                                                                                                                                                                                                                                                                                                                                          |     |      |           |       |      |      |                                              |       |                      |                                                                                                                                                                                                                                                                                  |     |     |           |       |      |      |
|--------------------------|----------------------------------------------------------------------------------------------------------------------------------------------------------------------------------------------------------------------------------------------------------------------------------------------------------------------------------------------------------------------------------------------------------------------------------------------------------------------------------------------------------------------------------------------------------------------------------------------------------------------------------------------------------------------------------------------------------------------------------------------------------------------------------------------------------------------------------------------------------------------------------------------------------------------------------------------------------------------------------------------------------------------------------------------------------------------------------------------------------------------------------------------------------------------------------------------------------------------------------------------------------------------------------------------------------------------------------------------------------------------------------------------------------------------------------------------------------------------------------------------------------------------------------------------------------------------------------------------------------------------------------------------------------------------------------------------------------|-----|------|-----------|-------|------|------|----------------------------------------------|-------|----------------------|----------------------------------------------------------------------------------------------------------------------------------------------------------------------------------------------------------------------------------------------------------------------------------|-----|-----|-----------|-------|------|------|
| Rsa1.0_01114.1.g23616.t1 | gb EOA36133.1  hypothetical protein CARUB_v10012487mg [Capsella rubella]                                                                                                                                                                                                                                                                                                                                                                                                                                                                                                                                                                                                                                                                                                                                                                                                                                                                                                                                                                                                                                                                                                                                                                                                                                                                                                                                                                                                                                                                                                                                                                                                                                 | 271 | 285  | 1.00E-99  | 105.2 | 72.3 | 85.6 | hypothetical protein CARUB_v10012487mg       | gbpln | Capsella rubella     | AT1G48405.1   Symbols: Kinase interacting (KIP1-like) family protein   chr1:17884645-17885614 REVERSE LENGTH=297                                                                                                                                                                 | 271 | 297 | 1.00E-100 | 109.6 | 74.2 | 85.2 |
| Rsa1.0_01114.1.g23617.t1 | # # # # # # # #                                                                                                                                                                                                                                                                                                                                                                                                                                                                                                                                                                                                                                                                                                                                                                                                                                                                                                                                                                                                                                                                                                                                                                                                                                                                                                                                                                                                                                                                                                                                                                                                                                                                                          | #   | #    | #         | #     | #    | #    | -                                            | ----  | ----                 | # # # # # # #                                                                                                                                                                                                                                                                    | #   | #   | #         | #     | #    | #    |
| Rsa1.0_01114.1.g23618.t1 | gb AAG51783.1 AC079679.3 reverse transcriptase, putative; 16838-20266 [Arabidopsis thaliana]<br>ref XP_002884458.1  pre-mRNA cleavage complex family protein [Arabidopsis lyrata subsp. lyrata] gi 297330298 gb EFH60717.1  pre-mRNA cleavage complex family protein [Arabidopsis lyrata subsp. lyrata]                                                                                                                                                                                                                                                                                                                                                                                                                                                                                                                                                                                                                                                                                                                                                                                                                                                                                                                                                                                                                                                                                                                                                                                                                                                                                                                                                                                                  | 378 | 1142 | 2.00E-51  | 302.1 | 26.2 | 37.0 | reverse transcriptase, putative; 16838-20266 | gbpln | Arabidopsis thaliana | AT1G43760.1   Symbols: DNase I-like superfamily protein   chr1:16528880-16531065 REVERSE LENGTH=626                                                                                                                                                                              | 378 | 626 | 2.00E-11  | 165.6 | 18.3 | 32.8 |
| Rsa1.0_01114.1.g23619.t1 | ref XP_002884458.1  pre-mRNA cleavage complex family protein [Arabidopsis lyrata subsp. lyrata] gi 297330298 gb EFH60717.1  pre-mRNA cleavage complex family protein [Arabidopsis lyrata subsp. lyrata]                                                                                                                                                                                                                                                                                                                                                                                                                                                                                                                                                                                                                                                                                                                                                                                                                                                                                                                                                                                                                                                                                                                                                                                                                                                                                                                                                                                                                                                                                                  | 182 | 443  | 2.00E-32  | 243.4 | 38.5 | 43.4 | pre-mRNA cleavage complex family protein     | gbpln | Arabidopsis lyrata   | AT3G04680.2   Symbols: CLPS3   CLP-similar protein 3   chr3:1270053-1272415 REVERSE LENGTH=444                                                                                                                                                                                   | 182 | 444 | 2.00E-34  | 244.0 | 37.9 | 43.4 |
| Rsa1.0_01114.1.g23620.t1 | # # # # # # # #                                                                                                                                                                                                                                                                                                                                                                                                                                                                                                                                                                                                                                                                                                                                                                                                                                                                                                                                                                                                                                                                                                                                                                                                                                                                                                                                                                                                                                                                                                                                                                                                                                                                                          | #   | #    | #         | #     | #    | #    | -                                            | ----  | ----                 | # # # # # # #                                                                                                                                                                                                                                                                    | #   | #   | #         | #     | #    | #    |
| Rsa1.0_01115.1.g23621.t3 | ref NP_178022.1  NADH dehydrogenase [ubiquinone] iron-sulfur protein 8 [Arabidopsis thaliana] gi 297842689 ref XP_002889226.1  NADH-ubiquinone oxidoreductase 23 kDa subunit, mitochondrial [Arabidopsis lyrata subsp. lyrata] gi 3929364 sp Q42599.1 NDS8A_ARATH RecName: Full=NADH dehydrogenase [ubiquinone] iron-sulfur protein 8-A, mitochondrial; Flags: Precursor gi 666977 emb CAA59061.1  NADH dehydrogenase [Arabidopsis thaliana] gi 3152573 gb AAC17054.1  Match to NADH:ubiquinone oxidoreductase gb X84318 from A.thaliana. ESTs gb Z27005, gb T04711, gb T45078 and gb Z28689 come from this gene [Arabidopsis thaliana] gi 15081697 gb AAK82503.1  At1g79010/YLJP8H12R.21 [Arabidopsis thaliana] gi 18252265 gb AAL62013.1  At1g79010/YLJP8H12R.21 [Arabidopsis thaliana] gi 21593880 gb AAM65847.1  NADH dehydrogenase, putative [Arabidopsis thaliana] gi 110740838 dbj BAE98516.1  hypothetical protein [Arabidopsis thaliana] gi 297335067 gb EFH65485.1  NADH-ubiquinone oxidoreductase 23 kDa subunit, mitochondrial [Arabidopsis lyrata subsp. lyrata] gi 332198072 gb AEE36193.1  NADH dehydrogenase [ubiquinone] iron-sulfur ref NP_565196.1  uncharacterized protein [Arabidopsis thaliana] gi 21554958 gb AAM63739.1  unknown [Arabidopsis thaliana] gi 22531253 gb AAM97130.1  expressed protein [Arabidopsis thaliana] gi 30102864 gb AAP21350.1  At1g78995 [Arabidopsis thaliana] gi 332198069 gb AEE36190.1  uncharacterized protein AT1G78995 [Arabidopsis thaliana] ref XP_002886496.1  hypothetical protein ARALYDRAFT_893290 [Arabidopsis lyrata subsp. lyrata] gi 297332337 gb EFH62755.1  hypothetical protein ARALYDRAFT_893290 [Arabidopsis lyrata subsp. lyrata] | 222 | 222  | 1.00E-123 | 100.0 | 95.9 | 98.2 | NADH dehydrogenase                           | gbpln | Arabidopsis lyrata   | AT1G79010.1   Symbols: Alpha-helical ferredoxin   chr1:29725138-29726933 REVERSE LENGTH=222                                                                                                                                                                                      | 222 | 222 | 1.00E-125 | 100.0 | 95.9 | 98.2 |
| Rsa1.0_01115.1.g23622.t1 | ref NP_565196.1  uncharacterized protein [Arabidopsis thaliana] gi 21554958 gb AAM63739.1  unknown [Arabidopsis thaliana] gi 22531253 gb AAM97130.1  expressed protein [Arabidopsis thaliana] gi 30102864 gb AAP21350.1  At1g78995 [Arabidopsis thaliana] gi 332198069 gb AEE36190.1  uncharacterized protein AT1G78995 [Arabidopsis thaliana] ref XP_002886496.1  hypothetical protein ARALYDRAFT_893290 [Arabidopsis lyrata subsp. lyrata] gi 297332337 gb EFH62755.1  hypothetical protein ARALYDRAFT_893290 [Arabidopsis lyrata subsp. lyrata]                                                                                                                                                                                                                                                                                                                                                                                                                                                                                                                                                                                                                                                                                                                                                                                                                                                                                                                                                                                                                                                                                                                                                       | 154 | 159  | 5.00E-56  | 103.2 | 85.1 | 88.3 | uncharacterized protein                      | gbpln | Arabidopsis thaliana | AT1G78995.1   Symbols: unknown protein; Has 30201 Blast hits to 17322 proteins in 780 species: Archae - 12; Bacteria - 1396; Metazoa - 17338; Fungi - 3422; Plants - 5037; Viruses - 0; Other Eukaryotes - 2996 (source: NCBI BLINK)   chr1:29715433-29716079 REVERSE LENGTH=159 | 154 | 159 | 2.00E-58  | 103.2 | 85.1 | 88.3 |
| Rsa1.0_01115.1.g23623.t1 | ref XP_002886496.1  hypothetical protein ARALYDRAFT_893290 [Arabidopsis lyrata subsp. lyrata] gi 297332337 gb EFH62755.1  hypothetical protein ARALYDRAFT_893290 [Arabidopsis lyrata subsp. lyrata]                                                                                                                                                                                                                                                                                                                                                                                                                                                                                                                                                                                                                                                                                                                                                                                                                                                                                                                                                                                                                                                                                                                                                                                                                                                                                                                                                                                                                                                                                                      | 347 | 416  | 7.00E-58  | 119.9 | 37.5 | 48.4 | hypothetical protein ARALYDRAFT_893290       | gbpln | Arabidopsis lyrata   | AT5G68580.1   Symbols: F-box and associated interaction domains-containing protein   chr5:26346317-26347495 FORWARD LENGTH=392                                                                                                                                                   | 347 | 392 | 1.00E-50  | 113.0 | 32.6 | 43.2 |
| Rsa1.0_01115.1.g23624.t1 | dbj BAJ33720.1  unnamed protein product [Thellungiella halophila]<br>ref NP_177964.2  ROP interactive partner 2 [Arabidopsis thaliana] gi 374095407 sp Q9M9F9.2 ICR4_ARATH RecName: Full=Interactor of constitutive active ROPs 4; AltName: Full=ROP interactive partner 2 gi 332197984 gb AEE36105.1  ROP interactive partner 2 [Arabidopsis thaliana]                                                                                                                                                                                                                                                                                                                                                                                                                                                                                                                                                                                                                                                                                                                                                                                                                                                                                                                                                                                                                                                                                                                                                                                                                                                                                                                                                  | 339 | 294  | 1.00E-125 | 86.7  | 72.3 | 77.9 | unnamed protein product                      | ----  | ----                 | AT1G78600.1   Symbols: LZFI, STH3, DBB3   light-regulated zinc finger protein 1   chr1:29567370-29568662 FORWARD LENGTH=299                                                                                                                                                      | 339 | 299 | 1.00E-119 | 88.2  | 68.7 | 74.3 |
| Rsa1.0_01115.1.g23625.t1 | ref NP_177964.2  ROP interactive partner 2 [Arabidopsis thaliana] gi 374095407 sp Q9M9F9.2 ICR4_ARATH RecName: Full=Interactor of constitutive active ROPs 4; AltName: Full=ROP interactive partner 2 gi 332197984 gb AEE36105.1  ROP interactive partner 2 [Arabidopsis thaliana]                                                                                                                                                                                                                                                                                                                                                                                                                                                                                                                                                                                                                                                                                                                                                                                                                                                                                                                                                                                                                                                                                                                                                                                                                                                                                                                                                                                                                       | 320 | 324  | 1.00E-123 | 101.3 | 78.4 | 88.1 | ROP interactive partner 2                    | gbpln | Arabidopsis thaliana | AT1G78430.1   Symbols: RIP2   ROP interactive partner 2   chr1:29509605-29510679 FORWARD LENGTH=324                                                                                                                                                                              | 320 | 324 | 1.00E-126 | 101.3 | 78.4 | 88.1 |
| Rsa1.0_01115.1.g23626.t2 | # # # # # # # #                                                                                                                                                                                                                                                                                                                                                                                                                                                                                                                                                                                                                                                                                                                                                                                                                                                                                                                                                                                                                                                                                                                                                                                                                                                                                                                                                                                                                                                                                                                                                                                                                                                                                          | #   | #    | #         | #     | #    | #    | -                                            | ----  | ----                 | # # # # # # #                                                                                                                                                                                                                                                                    | #   | #   | #         | #     | #    | #    |

|                          |                                                                                                                                                                                                                                                                                                                                                                                                                                                                                                                                                                                                                                                                                                                                                                                                                                                                                                                                                                                                                                                                                                                                                                                                                                                      |     |      |           |       |      |      |                                              |       |                      |                                                                                                                                                 |     |     |           |       |      |      |
|--------------------------|------------------------------------------------------------------------------------------------------------------------------------------------------------------------------------------------------------------------------------------------------------------------------------------------------------------------------------------------------------------------------------------------------------------------------------------------------------------------------------------------------------------------------------------------------------------------------------------------------------------------------------------------------------------------------------------------------------------------------------------------------------------------------------------------------------------------------------------------------------------------------------------------------------------------------------------------------------------------------------------------------------------------------------------------------------------------------------------------------------------------------------------------------------------------------------------------------------------------------------------------------|-----|------|-----------|-------|------|------|----------------------------------------------|-------|----------------------|-------------------------------------------------------------------------------------------------------------------------------------------------|-----|-----|-----------|-------|------|------|
| Rsa1.0_01115.1.g23627.t1 | ref[XP_002887735.1] VQ motif-containing protein [Arabidopsis lyrata subsp. lyrata] gi 297333576 gb EFH63994.1  VQ motif-containing protein [Arabidopsis lyrata subsp. lyrata]                                                                                                                                                                                                                                                                                                                                                                                                                                                                                                                                                                                                                                                                                                                                                                                                                                                                                                                                                                                                                                                                        | 100 | 110  | 2.00E-30  | 110.0 | 76.0 | 86.0 | VQ motif-containing protein                  | gbpln | Arabidopsis lyrata   | AT1G78410.1   Symbols:   VQ motif-containing protein   chr1:29502728-29503054 FORWARD LENGTH=108                                                | 100 | 108 | 9.00E-33  | 108.0 | 76.0 | 86.0 |
| Rsa1.0_01115.1.g23628.t1 | ref[NP_177514.1] ethylene insensitive 3-like 3 protein [Arabidopsis thaliana] gi 37078126 sp Q23116.1 EIL3_ARATH RecName: Full=ETHYLENE INSENSITIVE 3-like 3 protein gi 12324201 gb AAG52067.1 AC012679_5 ethylene-insensitive3-like3 (EIL3); 60307-58378 [Arabidopsis thaliana] gi 2224931 gb AAC49748.1  ethylene-insensitive3-like3 [Arabidopsis thaliana] gi 17979067 gb AAL49801.1  putative ethylene-insensitive protein EIL3 [Arabidopsis thaliana] gi 22136858 gb AAM91773.1  putative ethylene-insensitive protein EIL3 [Arabidopsis thaliana] gi 332197381 gb AEE35502.1  ethylene insensitive 3-like 3 protein [Arabidopsis thaliana] ref[NP_178198.1] metal transporter Nramp1 [Arabidopsis thaliana] gi 29839673 sp Q9SAH8.1 NRAMP1_ARATH RecName: Full=Metal transporter Nramp1; Short=AtNramp1 gi 5503294 gb AAF14670.1 AC011713_18 Identical to gb AAF181687  metal ion transporter from Arabidopsis thaliana. ESTs: gb Z30530, gb AA585940, gb AI998720 and gb Z33946 come from this gene [Arabidopsis thaliana] gi 7108911 gb AAF36535.1 AF165125_1 NRAMP1 protein [Arabidopsis thaliana] gi 117168063 gb ABK32114.1  At1g80830 [Arabidopsis thaliana] gi 332198334 gb AEE36455.1  metal transporter Nramp1 [Arabidopsis thaliana] | 305 | 567  | 8.00E-68  | 185.9 | 51.1 | 55.7 | ethylene insensitive 3-like 3 protein        | gbpln | Arabidopsis thaliana | AT1G73730.1   Symbols: EIL3, SLIM1, ATSLIM, AEIL3   ETHYLENE-INSENSITIVE3-like 3   chr1:27730434-27732363 REVERSE LENGTH=567                    | 305 | 567 | 2.00E-70  | 185.9 | 51.1 | 55.7 |
| Rsa1.0_01115.1.g23629.t1 | gb AI998720 and gb Z33946 come from this gene [Arabidopsis thaliana] gi 7108911 gb AAF36535.1 AF165125_1 NRAMP1 protein [Arabidopsis thaliana] gi 117168063 gb ABK32114.1  At1g80830 [Arabidopsis thaliana] gi 332198334 gb AEE36455.1  metal transporter Nramp1 [Arabidopsis thaliana]                                                                                                                                                                                                                                                                                                                                                                                                                                                                                                                                                                                                                                                                                                                                                                                                                                                                                                                                                              | 527 | 532  | 0         | 100.9 | 90.9 | 95.3 | metal transporter Nramp1                     | gbpln | Arabidopsis thaliana | AT1G80830.1   Symbols: NRAMP1, PMIT1, ATNRAMP1   natural resistance-associated macrophage protein 1   chr1:30373066-30375644 REVERSE LENGTH=532 | 527 | 532 | 0         | 100.9 | 90.9 | 95.3 |
| Rsa1.0_01115.1.g23630.t1 | gb AAG51783.1 AC079679_3 reverse transcriptase, putative; 16838-20266 [Arabidopsis thaliana]                                                                                                                                                                                                                                                                                                                                                                                                                                                                                                                                                                                                                                                                                                                                                                                                                                                                                                                                                                                                                                                                                                                                                         | 145 | 1142 | 3.00E-23  | 787.6 | 44.1 | 55.9 | reverse transcriptase, putative; 16838-20266 | gbpln | Arabidopsis thaliana | #                                                                                                                                               | #   | #   | #         | #     | #    | #    |
| Rsa1.0_01115.1.g23631.t1 | #                                                                                                                                                                                                                                                                                                                                                                                                                                                                                                                                                                                                                                                                                                                                                                                                                                                                                                                                                                                                                                                                                                                                                                                                                                                    | #   | #    | #         | #     | #    | -    | -                                            | ----  | ----                 | #                                                                                                                                               | #   | #   | #         | #     | #    | #    |
| Rsa1.0_01115.1.g23632.t1 | #                                                                                                                                                                                                                                                                                                                                                                                                                                                                                                                                                                                                                                                                                                                                                                                                                                                                                                                                                                                                                                                                                                                                                                                                                                                    | #   | #    | #         | #     | #    | -    | -                                            | ----  | ----                 | #                                                                                                                                               | #   | #   | #         | #     | #    | #    |
| Rsa1.0_01115.1.g23633.t1 | ref[NP_565178.1] glutathione S-transferase TAU 19 [Arabidopsis thaliana] gi 75338923 sp Q9ZRW8.1 GSTUJ_ARATH RecName: Full=Glutathione S-transferase U19; Short=AtGSTU19; AltName: Full=GST class-tau member 19; AltName: Full=Glutathione S-transferase 8 gi 14326477 gb AAK60284.1 AF385691_1 At1g78380/F3F9_11 [Arabidopsis thaliana] gi 4006934 emb CAA10060.1  glutathione transferase [Arabidopsis thaliana] gi 18700206 gb AAL7713.1  At1g78380/F3F9_11 [Arabidopsis thaliana] gi 332197978 gb AEE36099.1  glutathione S-transferase TAU 19 [Arabidopsis thaliana]                                                                                                                                                                                                                                                                                                                                                                                                                                                                                                                                                                                                                                                                            | 219 | 219  | 1.00E-107 | 100.0 | 84.5 | 91.3 | glutathione S-transferase TAU 19             | gbpln | Arabidopsis thaliana | AT1G78380.1   Symbols: ATGSTU19, GST8, GSTU19   glutathione S-transferase TAU 19   chr1:29486659-29487819 REVERSE LENGTH=219                    | 219 | 219 | 1.00E-109 | 100.0 | 84.5 | 91.3 |

|                           |                                                                                                                                                                                                                                                                                                                                                                                                                                                                                                                                                                                                                                                                                                    |     |     |           |       |      |      |                                        |       |                      |                                                                                                                                                               |     |      |           |       |      |      |
|---------------------------|----------------------------------------------------------------------------------------------------------------------------------------------------------------------------------------------------------------------------------------------------------------------------------------------------------------------------------------------------------------------------------------------------------------------------------------------------------------------------------------------------------------------------------------------------------------------------------------------------------------------------------------------------------------------------------------------------|-----|-----|-----------|-------|------|------|----------------------------------------|-------|----------------------|---------------------------------------------------------------------------------------------------------------------------------------------------------------|-----|------|-----------|-------|------|------|
| Rsa1.0_011116.1.g23634.t1 | ref NP_180305.1  uncharacterized protein [Arabidopsis thaliana] gi 75216242 sp Q9ZQ12.1 CASP3_ARAT H RecName: Full=Casparian strip membrane protein 3 gi 5306261 gb AAD41993.1  unknown protein [Arabidopsis thaliana] gi 20197657 gb AAM15182.1  unknown protein [Arabidopsis thaliana] gi 27765014 gb AAO23628.1  At2g27370 [Arabidopsis thaliana] gi 110743400 dbj BAE99586.1  hypothetical protein [Arabidopsis thaliana] gi 330252892 gb AEC07986.1  uncharacterized protein AT2G27370 [Arabidopsis thaliana] gi 339515802 gb AEJ82279.1  casparian strip protein 3 [Cloning vector pCASP3::CASP3:GFP] gi 339515817 gb AEJ82289.1  casparian strip protein 3 [Cloning vector p35S::CASP3:GFP] | 219 | 221 | 1.00E-109 | 100.9 | 94.1 | 97.3 | uncharacterized protein                | gbpln | Arabidopsis thaliana | AT2G27370.1   Symbols:   Uncharacterised protein family (UPF0497)   chr2:11708628-11709905 REVERSE LENGTH=221                                                 | 219 | 221  | 1.00E-111 | 100.9 | 94.1 | 97.3 |
| Rsa1.0_011116.1.g23635.t1 | gb AAA62850.1  nodulin [Medicago truncatula]                                                                                                                                                                                                                                                                                                                                                                                                                                                                                                                                                                                                                                                       | 850 | 549 | 2.00E-45  | 64.6  | 30.7 | 37.4 | nodulin                                | gbpln | Medicago truncatula  | AT3G22142.1   Symbols:   Bifunctional inhibitor/lipid-transfer protein/seed storage 2S albumin superfamily protein   chr3:7803604-7808046 REVERSE LENGTH=1480 | 850 | 1480 | 2.00E-25  | 174.1 | 46.2 | 54.4 |
| Rsa1.0_011116.1.g23636.t1 | ref XP_002879088.1  hypothetical protein ARALYDRAFT_344504 [Arabidopsis lyrata subsp. lyrata] gi 297324927 gb EFH55347.1  hypothetical protein ARALYDRAFT_344504 [Arabidopsis lyrata subsp. lyrata]                                                                                                                                                                                                                                                                                                                                                                                                                                                                                                | 304 | 316 | 1.00E-136 | 103.9 | 79.6 | 90.8 | hypothetical protein ARALYDRAFT_344504 | gbpln | Arabidopsis lyrata   | AT1G08340.1   Symbols:   Rho GTPase activating protein with PAK-box/P21-Rho-binding domain   chr1:2631308-2632669 FORWARD LENGTH=331                          | 304 | 331  | 1.00E-122 | 108.9 | 66.4 | 75.0 |
| Rsa1.0_011116.1.g23637.t2 | gb EOA27585.1  hypothetical protein CARUB_v10023735mg [Capsella rubella]                                                                                                                                                                                                                                                                                                                                                                                                                                                                                                                                                                                                                           | 315 | 299 | 1.00E-166 | 94.9  | 90.5 | 93.3 | hypothetical protein CARUB_v10023735mg | gbpln | Capsella rubella     | AT2G27450.1   Symbols: NLP1, ATNLP1, CPA   nitrilase-like protein 1   chr2:11737666-11739577 REVERSE LENGTH=299                                               | 315 | 299  | 1.00E-168 | 94.9  | 90.2 | 92.7 |
| Rsa1.0_011116.1.g23638.t1 | gb EOA26640.1  hypothetical protein CARUB_v10022704mg [Capsella rubella]                                                                                                                                                                                                                                                                                                                                                                                                                                                                                                                                                                                                                           | 746 | 745 | 0         | 99.9  | 91.3 | 95.3 | hypothetical protein CARUB_v10022704mg | gbpln | Capsella rubella     | AT2G27460.1   Symbols:   sec23/sec24 transport family protein   chr2:11740670-11744867 FORWARD LENGTH=745                                                     | 746 | 745  | 0         | 99.9  | 91.0 | 95.6 |
| Rsa1.0_011116.1.g23639.t1 | ref XP_002880924.1  hypothetical protein ARALYDRAFT_901657 [Arabidopsis lyrata subsp. lyrata] gi 297326763 gb EFH57183.1  hypothetical protein ARALYDRAFT_901657 [Arabidopsis lyrata subsp. lyrata]                                                                                                                                                                                                                                                                                                                                                                                                                                                                                                | 148 | 154 | 3.00E-68  | 104.1 | 83.8 | 90.5 | hypothetical protein ARALYDRAFT_901657 | gbpln | Arabidopsis lyrata   | AT2G27510.1   Symbols: ATFD3, FD3   ferredoxin 3   chr2:11758281-11758748 REVERSE LENGTH=155                                                                  | 148 | 155  | 2.00E-70  | 104.7 | 83.8 | 91.2 |
| Rsa1.0_011116.1.g23640.t1 | ref XP_002879155.1  60S ribosomal protein L10A [Arabidopsis lyrata subsp. lyrata] gi 297324994 gb EFH55414.1  60S ribosomal protein L10A [Arabidopsis lyrata subsp. lyrata]                                                                                                                                                                                                                                                                                                                                                                                                                                                                                                                        | 216 | 216 | 1.00E-108 | 100.0 | 96.8 | 98.1 | 60S ribosomal protein L10A             | gbpln | Arabidopsis lyrata   | AT2G27530.2   Symbols: PGY1   Ribosomal protein L1p/L10e family   chr2:11763443-11764570 REVERSE LENGTH=216                                                   | 216 | 216  | 1.00E-110 | 100.0 | 96.3 | 98.1 |
| Rsa1.0_011116.1.g23641.t1 | ref XP_00286958.1  hypothetical protein ARALYDRAFT_914664 [Arabidopsis lyrata subsp. lyrata] gi 297315794 gb EFH46217.1  hypothetical protein ARALYDRAFT_914664 [Arabidopsis lyrata subsp. lyrata]                                                                                                                                                                                                                                                                                                                                                                                                                                                                                                 | 408 | 428 | 1.00E-130 | 104.9 | 61.0 | 76.7 | hypothetical protein ARALYDRAFT_914664 | gbpln | Arabidopsis lyrata   | AT4G19930.1   Symbols:   F-box and associated interaction domains-containing protein   chr4:10803558-10804853 FORWARD LENGTH=431                              | 408 | 431  | 1.00E-114 | 105.6 | 57.4 | 71.6 |
| Rsa1.0_011116.1.g23642.t1 | gb EOA36409.1  hypothetical protein CARUB_v10010878mg [Capsella rubella]                                                                                                                                                                                                                                                                                                                                                                                                                                                                                                                                                                                                                           | 383 | 305 | 1.00E-140 | 79.6  | 61.9 | 68.1 | hypothetical protein CARUB_v10010878mg | gbpln | Capsella rubella     | AT1G08310.1   Symbols:   alpha/beta-Hydrolases superfamily protein   chr1:2619134-2620338 FORWARD LENGTH=315                                                  | 383 | 315  | 1.00E-142 | 82.2  | 62.7 | 69.7 |
| Rsa1.0_011117.1.g23643.t1 | ref XP_002882175.1  hypothetical protein ARALYDRAFT_477362 [Arabidopsis lyrata subsp. lyrata] gi 297328015 gb EFH58434.1  hypothetical protein ARALYDRAFT_477362 [Arabidopsis lyrata subsp. lyrata]                                                                                                                                                                                                                                                                                                                                                                                                                                                                                                | 685 | 625 | 0         | 91.2  | 67.0 | 70.5 | hypothetical protein ARALYDRAFT_477362 | gbpln | Arabidopsis lyrata   | AT3G01540.4   Symbols: DRH1, ATDRH1   DEAD box RNA helicase 1   chr3:213077-216142 REVERSE LENGTH=619                                                         | 685 | 619  | 0         | 90.4  | 65.3 | 69.1 |



|                          |                                                                                                                                                                                                                                                                                                                                                                                                                                                                                                                                                                                     |      |      |           |       |      |      |                                                 |       |                      |                                                                                                                                                                                                                                                                                                                                                                                                              |      |     |           |       |      |      |
|--------------------------|-------------------------------------------------------------------------------------------------------------------------------------------------------------------------------------------------------------------------------------------------------------------------------------------------------------------------------------------------------------------------------------------------------------------------------------------------------------------------------------------------------------------------------------------------------------------------------------|------|------|-----------|-------|------|------|-------------------------------------------------|-------|----------------------|--------------------------------------------------------------------------------------------------------------------------------------------------------------------------------------------------------------------------------------------------------------------------------------------------------------------------------------------------------------------------------------------------------------|------|-----|-----------|-------|------|------|
| Rsa1.0_01117.1.g23644.t1 | ref NP_186817.1  uncharacterized protein [Arabidopsis thaliana]<br>gi 6016725 gb AAF01551.1 AC009325.21 unknown protein [Arabidopsis thaliana]<br>gi 30725324 gb AAP37684.1  At3g01680 [Arabidopsis thaliana]<br>gi 110736167 dbj BAF00055.1  hypothetical protein [Arabidopsis thaliana]<br>gi 307101698 gb ADN32814.1  sieve element occlusion b [Arabidopsis thaliana]<br>gi 332640181 gb AEE73702.1  uncharacterized protein AT3G01680 [Arabidopsis thaliana]                                                                                                                   | 735  | 740  | 0         | 100.7 | 87.9 | 92.8 | uncharacterized protein                         | gbpln | Arabidopsis thaliana | AT3G01680.1   Symbols:   CONTAINS InterPro DOMAIN/s: Mediator complex subunit Med28 (InterPro:IPRO21640); BEST Arabidopsis thaliana protein match is: unknown protein (TAIR:AT3G01670.1); Has 122 Blast hits to 112 proteins in 13 species: Archae - 0; Bacteria - 0; Metazoa - 0; Fungi - 0; Plants - 122; Viruses - 0; Other Eukaryotes - 0 (source: NCBI BLINK).   chr:3:252033-255246 FORWARD LENGTH=740 | 735  | 740 | 0         | 100.7 | 87.9 | 92.8 |
| Rsa1.0_01117.1.g23645.t1 | emb CAB91581.1  putative protein [Arabidopsis thaliana]                                                                                                                                                                                                                                                                                                                                                                                                                                                                                                                             | 1649 | 1752 | 0         | 106.2 | 52.8 | 66.5 | putative protein                                | gbpln | Arabidopsis thaliana | AT3G51690.1   Symbols:   PIF1 helicase   chr:3:19176731-19178107 REVERSE LENGTH=331                                                                                                                                                                                                                                                                                                                          | 1649 | 331 | 3.00E-70  | 20.1  | 8.3  | 11.5 |
| Rsa1.0_01117.1.g23646.t1 | gb EOA28640.1  hypothetical protein CARUB_v10024862mg, partial [Capsella rubella]                                                                                                                                                                                                                                                                                                                                                                                                                                                                                                   | 499  | 490  | 9.00E-87  | 98.2  | 38.9 | 56.5 | hypothetical protein CARUB_v10024862mg, partial | gbpln | Capsella rubella     | AT1G52950.1   Symbols:   Nucleic acid-binding, OB-fold-like protein   chr:1:19725483-19728007 FORWARD LENGTH=566                                                                                                                                                                                                                                                                                             | 499  | 566 | 3.00E-83  | 113.4 | 34.7 | 57.3 |
| Rsa1.0_01117.1.g23647.t1 | gb EOA30906.1  hypothetical protein CARUB_v10014053mg [Capsella rubella]                                                                                                                                                                                                                                                                                                                                                                                                                                                                                                            | 360  | 357  | 1.00E-167 | 99.2  | 83.6 | 89.7 | hypothetical protein CARUB_v10014053mg          | gbpln | Capsella rubella     | AT3G01690.1   Symbols:   alpha/beta-Hydrolases superfamily protein   chr:3:256753-258379 FORWARD LENGTH=361                                                                                                                                                                                                                                                                                                  | 360  | 361 | 1.00E-166 | 100.3 | 85.3 | 90.0 |
| Rsa1.0_01117.1.g23648.t1 | ref XP_002882166.1  ribosomal protein L13 family protein [Arabidopsis lyrata subsp. lyrata]<br>gi 297326006 gb EFH58425.1  ribosomal protein L13 family protein [Arabidopsis lyrata subsp. lyrata]                                                                                                                                                                                                                                                                                                                                                                                  | 214  | 205  | 1.00E-101 | 95.8  | 88.3 | 90.2 | ribosomal protein L13 family protein            | gbpln | Arabidopsis lyrata   | AT3G01790.2   Symbols:   Ribosomal protein L13 family protein   chr:3:283880-285583 REVERSE LENGTH=205                                                                                                                                                                                                                                                                                                       | 214  | 205 | 1.00E-102 | 95.8  | 86.4 | 88.3 |
| Rsa1.0_01117.1.g23649.t1 | ref NP_186852.4  transferase [Arabidopsis thaliana]<br>gi 332640230 gb AEE73751.1  transferase [Arabidopsis thaliana]                                                                                                                                                                                                                                                                                                                                                                                                                                                               | 658  | 662  | 0         | 100.6 | 85.3 | 91.2 | transferase                                     | gbpln | Arabidopsis thaliana | AT3G02030.1   Symbols:   transferases, transferring acyl groups other than amino-acyl groups:acyltransferases   chr:3:345024-348311 FORWARD LENGTH=662                                                                                                                                                                                                                                                       | 658  | 662 | 0         | 100.6 | 85.3 | 91.2 |
| Rsa1.0_01117.1.g23650.t1 | ref NP_566159.1  senescence-related protein [Arabidopsis thaliana]<br>gi 6513927 gb AAF14831.1 AC011664_13 hypothetical protein [Arabidopsis thaliana]<br>gi 18175909 gb AAL59949.1  unknown protein [Arabidopsis thaliana]<br>gi 21280829 gb AAM45121.1  unknown protein [Arabidopsis thaliana]<br>gi 332640231 gb AEE73752.1  senescence-related protein [Arabidopsis thaliana]                                                                                                                                                                                                   | 364  | 361  | 1.00E-175 | 99.2  | 85.4 | 90.4 | senescence-related protein                      | gbpln | Arabidopsis thaliana | AT3G02040.1   Symbols: SRG3   senescence-related gene 3   chr:3:348505-349909 REVERSE LENGTH=361                                                                                                                                                                                                                                                                                                             | 364  | 361 | 1.00E-178 | 99.2  | 85.4 | 90.4 |
| Rsa1.0_01117.1.g23651.t1 | ref XP_002883173.1  hypothetical protein ARALYDRAFT_479449 [Arabidopsis lyrata subsp. lyrata]<br>gi 297329013 gb EFH59432.1  hypothetical protein ARALYDRAFT_479449 [Arabidopsis lyrata subsp. lyrata]                                                                                                                                                                                                                                                                                                                                                                              | 344  | 349  | 1.00E-150 | 101.5 | 81.1 | 88.1 | hypothetical protein ARALYDRAFT_479449          | gbpln | Arabidopsis lyrata   | AT3G19330.3   Symbols:   Protein of unknown function (DUF677)   chr:3:6699423-6700776 FORWARD LENGTH=345                                                                                                                                                                                                                                                                                                     | 344  | 345 | 1.00E-151 | 100.3 | 81.1 | 87.2 |
| Rsa1.0_01117.1.g23652.t1 | gb EOA32984.1  hypothetical protein CARUB_v10016314mg [Capsella rubella]                                                                                                                                                                                                                                                                                                                                                                                                                                                                                                            | 790  | 789  | 0         | 99.9  | 82.3 | 89.1 | hypothetical protein CARUB_v10016314mg          | gbpln | Capsella rubella     | AT3G02050.1   Symbols: KUP3, ATKUP3, ATK4   K+ uptake transporter 3   chr:3:350815-354135 FORWARD LENGTH=789                                                                                                                                                                                                                                                                                                 | 790  | 789 | 0         | 99.9  | 83.4 | 89.7 |
| Rsa1.0_01118.1.g23653.t1 | ref NP_565930.1  uncharacterized protein [Arabidopsis thaliana]<br>gi 30688262 ref NP_850329.1  uncharacterized protein [Arabidopsis thaliana]<br>gi 15294188 gb AAK95271.1 AF410285.1 At2g40400/T3G21.17 [Arabidopsis thaliana]<br>gi 4586056 gb AD25674.1  chloroplast lumen common protein family [Arabidopsis thaliana]<br>gi 20857082 gb AAM26698.1  At2g40400/T3G21.17 [Arabidopsis thaliana]<br>gi 330254728 gb AEC09822.1  uncharacterized protein AT2G40400 [Arabidopsis thaliana]<br>gi 330254729 gb AEC09823.1  uncharacterized protein AT2G40400 [Arabidopsis thaliana] | 617  | 735  | 0         | 119.1 | 91.6 | 95.1 | uncharacterized protein                         | gbpln | Arabidopsis thaliana | AT2G40400.2   Symbols:   Protein of unknown function (DUF399 and DUF3411)   chr:2:16869363-16872569 FORWARD LENGTH=735                                                                                                                                                                                                                                                                                       | 617  | 735 | 0         | 119.1 | 91.6 | 95.1 |

|                          |                                                                                                                                                                                                                                                                  |     |     |           |       |      |      |                                                      |       |                      |                                                                                                                                                                                                                                                                                                                                                                                          |     |     |           |       |      |      |
|--------------------------|------------------------------------------------------------------------------------------------------------------------------------------------------------------------------------------------------------------------------------------------------------------|-----|-----|-----------|-------|------|------|------------------------------------------------------|-------|----------------------|------------------------------------------------------------------------------------------------------------------------------------------------------------------------------------------------------------------------------------------------------------------------------------------------------------------------------------------------------------------------------------------|-----|-----|-----------|-------|------|------|
| Rsa1.0_01118.1.g23654.t1 | ref NP_179556.1  cysteine/histidine-rich C1 domain-containing protein [Arabidopsis thaliana] gi 44917427 gb AAS49038.1  At2g19660 [Arabidopsis thaliana] gi 330251815 gb AEC06909.1  cysteine/histidine-rich C1 domain-containing protein [Arabidopsis thaliana] | 666 | 662 | 0         | 99.4  | 57.5 | 71.0 | cysteine/histidine-rich C1 domain-containing protein | gbpln | Arabidopsis thaliana | AT2G19660.1   Symbols:   Cysteine/Histidine-rich C1 domain family protein   chr2:8496720-8498708 REVERSE LENGTH=662                                                                                                                                                                                                                                                                      | 666 | 662 | 0         | 99.4  | 57.5 | 71.0 |
| Rsa1.0_01118.1.g23655.t1 | gb EOA26430.1  hypothetical protein CARUB_v10025046mg [Capsella rubella]                                                                                                                                                                                         | 311 | 302 | 1.00E-147 | 97.1  | 80.4 | 89.4 | hypothetical protein CARUB_v10025046mg               | gbpln | Capsella rubella     | AT1G74100.1   Symbols: SOT16, ATST5A   sulfotransferase 16   chr1:27864489-27865505 REVERSE LENGTH=338                                                                                                                                                                                                                                                                                   | 311 | 338 | 2.00E-52  | 108.7 | 37.3 | 58.5 |
| Rsa1.0_01118.1.g23656.t1 | ref XP_002879869.1  amino acid transporter family protein [Arabidopsis lyrata subsp. lyrata] gi 297325708 gb EFH56128.1  amino acid transporter family protein [Arabidopsis lyrata subsp. lyrata]                                                                | 445 | 440 | 0         | 98.9  | 87.2 | 94.4 | amino acid transporter family protein                | gbpln | Arabidopsis lyrata   | AT2G40420.1   Symbols:   Transmembrane amino acid transporter family protein   chr2:16877300-16878982 FORWARD LENGTH=440                                                                                                                                                                                                                                                                 | 445 | 440 | 0         | 98.9  | 87.2 | 94.4 |
| Rsa1.0_01118.1.g23657.t1 | gb EOA29100.1  hypothetical protein CARUB_v10025367mg, partial [Capsella rubella]                                                                                                                                                                                | 393 | 381 | 1.00E-148 | 96.9  | 72.5 | 81.9 | hypothetical protein CARUB_v10025367mg, partial      | gbpln | Capsella rubella     | AT2G40430.3   Symbols:   FUNCTIONS IN: molecular_function unknown; INVOLVED IN: biological_process unknown; LOCATED IN: cellular_component unknown; EXPRESSED IN: 22 plant structures; EXPRESSED DURING: 13 growth stages; CONTAINS InterPro DOMAIN/s: Tumour suppressor protein Gtscr2 (InterPro:IPR011211), P60-like (InterPro:IPR011687).   chr2:16879466-16882365 REVERSE LENGTH=441 | 393 | 441 | 1.00E-137 | 112.2 | 72.3 | 81.9 |
| Rsa1.0_01118.1.g23658.t1 | ref XP_002893164.1  hypothetical protein ARALYDRAFT_335387 [Arabidopsis lyrata subsp. lyrata] gi 297339006 gb EFH69423.1  hypothetical protein ARALYDRAFT_335387 [Arabidopsis lyrata subsp. lyrata]                                                              | 437 | 279 | 4.00E-43  | 63.8  | 27.0 | 38.4 | hypothetical protein ARALYDRAFT_335387               | gbpln | Arabidopsis lyrata   | AT4G21570.1   Symbols:   Protein of unknown function (DUF300)   chr4:11471126-11472269 REVERSE LENGTH=294                                                                                                                                                                                                                                                                                | 437 | 294 | 9.00E-44  | 67.3  | 18.1 | 19.0 |
| Rsa1.0_01118.1.g23659.t1 | gb EOA15725.1  hypothetical protein CARUB_v10006633mg, partial [Capsella rubella]                                                                                                                                                                                | 195 | 483 | 1.00E-25  | 247.7 | 30.3 | 43.1 | hypothetical protein CARUB_v10006633mg, partial      | gbpln | Capsella rubella     | AT1G52950.1   Symbols:   Nucleic acid-binding, OB-fold-like protein   chr1:19725483-19728007 FORWARD LENGTH=566                                                                                                                                                                                                                                                                          | 195 | 566 | 9.00E-25  | 290.3 | 32.3 | 49.7 |
| Rsa1.0_01118.1.g23660.t1 | # # # # # # # #                                                                                                                                                                                                                                                  |     |     |           |       |      |      | -                                                    | ----  | ----                 | # # # # # # # #                                                                                                                                                                                                                                                                                                                                                                          |     |     |           |       |      |      |
| Rsa1.0_01118.1.g23661.t1 | gb AAD50007.1 AC007651_2 Similar to mudrA protein [Arabidopsis thaliana]                                                                                                                                                                                         | 132 | 622 | 2.00E-13  | 471.2 | 29.5 | 35.6 | Similar to mudrA protein                             | gbpln | Arabidopsis thaliana | # # # # # # # #                                                                                                                                                                                                                                                                                                                                                                          |     |     |           |       |      |      |
| Rsa1.0_01118.1.g23662.t1 | db BAJ34566.1  unnamed protein product [Theilungiella halophila]                                                                                                                                                                                                 | 473 | 582 | 0         | 123.0 | 90.5 | 96.8 | unnamed protein product                              | ----  | ----                 | AT2G40460.1   Symbols:   Major facilitator superfamily protein   chr2:16897123-16901171 FORWARD LENGTH=583                                                                                                                                                                                                                                                                               | 473 | 583 | 0         | 123.3 | 91.5 | 96.6 |
| Rsa1.0_01118.1.g23663.t1 | gb EOA12026.1  hypothetical protein CARUB_v10008039mg [Capsella rubella]                                                                                                                                                                                         | 345 | 709 | 1.00E-10  | 205.5 | 19.1 | 25.5 | hypothetical protein CARUB_v10008039mg               | gbpln | Capsella rubella     | # # # # # # # #                                                                                                                                                                                                                                                                                                                                                                          |     |     |           |       |      |      |
| Rsa1.0_01119.1.g23664.t1 | gb EOA23283.1  hypothetical protein CARUB_v10018092mg [Capsella rubella]                                                                                                                                                                                         | 174 | 182 | 3.00E-33  | 104.6 | 63.8 | 72.4 | hypothetical protein CARUB_v10018092mg               | gbpln | Capsella rubella     | AT2G03310.1   Symbols:   unknown protein; Has 17 Blast hits to 17 proteins in 6 species: Archae - 0; Bacteria - 0; Metazoa - 0; Fungi - 0; Plants - 17; Viruses - 0; Other Eukaryotes - 0 (source: NCBI BLINK).   chr2:1006476-1007089 REVERSE LENGTH=176                                                                                                                                | 174 | 176 | 5.00E-33  | 101.1 | 62.6 | 71.8 |
| Rsa1.0_01119.1.g23665.t1 | gb EOA24337.1  hypothetical protein CARUB_v10017574mg [Capsella rubella]                                                                                                                                                                                         | 334 | 342 | 1.00E-118 | 102.4 | 69.5 | 81.1 | hypothetical protein CARUB_v10017574mg               | gbpln | Capsella rubella     | AT3G11810.1   Symbols:   unknown protein; BEST Arabidopsis thaliana protein match is: unknown protein (TAIR:AT2G03330.1); Has 141 Blast hits to 141 proteins in 21 species: Archae - 0; Bacteria - 9; Metazoa - 0; Fungi - 0; Plants - 131; Viruses - 0; Other Eukaryotes - 1 (source: NCBI BLINK).   chr3:3727819-3728865 FORWARD LENGTH=348                                            | 334 | 348 | 1.00E-116 | 104.2 | 66.5 | 77.8 |
| Rsa1.0_01119.1.g23666.t1 | ref NP_001118256.1  Glycosyltransferase family 61 protein [Arabidopsis thaliana] gi 330250598 gb AEC05692.1  Glycosyltransferase family 61 protein [Arabidopsis thaliana]                                                                                        | 390 | 455 | 1.00E-176 | 116.7 | 74.1 | 86.7 | Glycosyltransferase family 61 protein                | gbpln | Arabidopsis thaliana | AT2G03360.2   Symbols:   Glycosyltransferase family 61 protein   chr2:1022287-1024273 REVERSE LENGTH=455                                                                                                                                                                                                                                                                                 | 390 | 455 | 1.00E-178 | 116.7 | 74.1 | 86.7 |
| Rsa1.0_01119.1.g23667.t1 | gb EOA23213.1  hypothetical protein CARUB_v10019429mg [Capsella rubella]                                                                                                                                                                                         | 510 | 348 | 1.00E-174 | 68.2  | 59.0 | 63.3 | hypothetical protein CARUB_v10019429mg               | gbpln | Capsella rubella     | AT2G03410.1   Symbols:   Mo25 family protein   chr2:1033907-1034953 FORWARD LENGTH=348                                                                                                                                                                                                                                                                                                   | 510 | 348 | 1.00E-174 | 68.2  | 58.6 | 62.4 |

|                           |                                                                                                                                                                                                                                                                                                                                                                                                                                          |     |     |           |       |      |      |                                                  |       |                      |                                                                                                                                                                                                                                                                                                                                               |     |     |           |       |      |      |
|---------------------------|------------------------------------------------------------------------------------------------------------------------------------------------------------------------------------------------------------------------------------------------------------------------------------------------------------------------------------------------------------------------------------------------------------------------------------------|-----|-----|-----------|-------|------|------|--------------------------------------------------|-------|----------------------|-----------------------------------------------------------------------------------------------------------------------------------------------------------------------------------------------------------------------------------------------------------------------------------------------------------------------------------------------|-----|-----|-----------|-------|------|------|
| Rsa1.0_011119.1.g23668.t1 | refXP_002876885.1   hypothetical protein ARALYDRAFT_904622 [Arabidopsis lyrata subsp. lyrata] gi 297322723 gb EFH5144.1   hypothetical protein ARALYDRAFT_904622 [Arabidopsis lyrata subsp. lyrata]                                                                                                                                                                                                                                      | 168 | 175 | 6.00E-74  | 104.2 | 86.3 | 91.7 | hypothetical protein ARALYDRAFT_904622           | gbpln | Arabidopsis lyrata   | AT2G03420.1   Symbols:   unknown protein; Has 38 Blast hits to 38 proteins in 17 species: Archae - 0; Bacteria - 0; Metazoa - 0; Fungi - 0; Plants - 38; Viruses - 0; Other Eukaryotes - 0 (source: NCBI BLink).   chr2:1035100-1035937 REVERSE LENGTH=170                                                                                    | 168 | 170 | 1.00E-72  | 101.2 | 86.9 | 92.3 |
| Rsa1.0_011119.1.g23669.t1 | refNP_178442.2   26S proteasome non-ATPase regulatory subunit 10 [Arabidopsis thaliana] gi 26449603 dbj BAC41927.1   putative ankyrin [Arabidopsis thaliana] gi 28950799 gb AAO63323.1   At2g03430 [Arabidopsis thaliana] gi 330250605 gb AECO5699.1   Ankyrin repeat family protein [Arabidopsis thaliana]                                                                                                                              | 246 | 240 | 1.00E-119 | 97.6  | 85.8 | 91.9 | 26S proteasome non-ATPase regulatory subunit 10  | gbpln | Arabidopsis thaliana | AT2G03430.1   Symbols:   Ankyrin repeat family protein   chr2:1036192-1037536 REVERSE LENGTH=240                                                                                                                                                                                                                                              | 246 | 240 | 1.00E-121 | 97.6  | 85.8 | 91.9 |
| Rsa1.0_011119.1.g23670.t1 | gb EOA24282.1   hypothetical protein CARUB_v10017522mg [Capsella rubella]                                                                                                                                                                                                                                                                                                                                                                | 358 | 356 | 0         | 99.4  | 91.9 | 95.5 | hypothetical protein CARUB_v10017522mg           | gbpln | Capsella rubella     | AT2G03510.1   Symbols:   SPFH/Band 7/PHB domain-containing membrane-associated protein family   chr2:1066717-1068934 FORWARD LENGTH=356                                                                                                                                                                                                       | 358 | 356 | 0         | 99.4  | 90.5 | 95.8 |
| Rsa1.0_011119.1.g23671.t1 | refXP_002875210.1   ureide permease 4 [Arabidopsis lyrata subsp. lyrata] gi 297321048 gb EFH51469.1   ureide permease 4 [Arabidopsis lyrata subsp. lyrata]                                                                                                                                                                                                                                                                               | 410 | 407 | 0         | 99.3  | 88.5 | 92.4 | ureide permease 4                                | gbpln | Arabidopsis lyrata   | AT2G03520.1   Symbols: ATUPS4, UPS4   ureide permease 4   chr2:1069494-1071269 FORWARD LENGTH=401                                                                                                                                                                                                                                             | 410 | 401 | 0         | 97.8  | 86.6 | 91.0 |
| Rsa1.0_011119.1.g23672.t1 | refXP_002875213.1   hypothetical protein ARALYDRAFT_484264 [Arabidopsis lyrata subsp. lyrata] gi 297321051 gb EFH51472.1   hypothetical protein ARALYDRAFT_484264 [Arabidopsis lyrata subsp. lyrata]                                                                                                                                                                                                                                     | 274 | 313 | 1.00E-113 | 114.2 | 75.2 | 85.8 | hypothetical protein ARALYDRAFT_484264           | gbpln | Arabidopsis lyrata   | AT2G03550.1   Symbols:   alpha/beta-Hydrolases superfamily protein   chr2:1077080-1078018 FORWARD LENGTH=312                                                                                                                                                                                                                                  | 274 | 312 | 1.00E-111 | 113.9 | 73.7 | 83.9 |
| Rsa1.0_011119.1.g23673.t1 | refNP_565303.1   ureide permease 1 [Arabidopsis thaliana] gi 68566149 sp Q9ZPR7.1 UPS1_ARATH RecName: Full=Ureide permease 1; Short=AtUPS1 gi 4406756 gb AAD20067.1   expressed protein [Arabidopsis thaliana] gi 21554091 gb AAM63172.1   putative integral membrane protein [Arabidopsis thaliana] gi 115646808 gb ABJ17125.1   At2g03590 [Arabidopsis thaliana] gi 330250624 gb AEC05718.1   ureide permease 1 [Arabidopsis thaliana] | 390 | 390 | 0         | 100.0 | 92.3 | 96.4 | ureide permease 1                                | gbpln | Arabidopsis thaliana | AT2G03590.1   Symbols: ATUPS1, UPS1   ureide permease 1   chr2:1095129-1096711 FORWARD LENGTH=390                                                                                                                                                                                                                                             | 390 | 390 | 0         | 100.0 | 92.3 | 96.4 |
| Rsa1.0_011119.1.g23674.t1 | refNP_178461.1   uncharacterized protein [Arabidopsis thaliana] gi 4406760 gb AAD20071.1   hypothetical protein [Arabidopsis thaliana] gi 330250633 gb AEC05727.1   uncharacterized protein AT2G03630 [Arabidopsis thaliana]                                                                                                                                                                                                             | 260 | 252 | 1.00E-43  | 96.9  | 53.1 | 60.0 | uncharacterized protein                          | gbpln | Arabidopsis thaliana | AT2G03630.1   Symbols:   unknown protein; BEST Arabidopsis thaliana protein match is: unknown protein (TAIR:AT1G74220.1); Has 126 Blast hits to 126 proteins in 28 species: Archae - 0; Bacteria - 6; Metazoa - 7; Fungi - 5; Plants - 87; Viruses - 0; Other Eukaryotes - 21 (source: NCBI BLink).   chr2:1103205-1103963 FORWARD LENGTH=252 | 260 | 252 | 3.00E-46  | 96.9  | 53.1 | 60.0 |
| Rsa1.0_011119.1.g23675.t1 | gb EOA23669.1   hypothetical protein CARUB_v10016877mg [Capsella rubella]                                                                                                                                                                                                                                                                                                                                                                | 614 | 603 | 0         | 98.2  | 86.5 | 92.2 | hypothetical protein CARUB_v10016877mg           | gbpln | Capsella rubella     | AT2G03670.1   Symbols: CDC48B   cell division cycle 48B   chr2:1117595-1120361 FORWARD LENGTH=603                                                                                                                                                                                                                                             | 614 | 603 | 0         | 98.2  | 86.0 | 91.7 |
| Rsa1.0_011119.1.g23676.t1 | gb EOA24844.1   hypothetical protein CARUB_v10018134mg, partial [Capsella rubella]                                                                                                                                                                                                                                                                                                                                                       | 121 | 169 | 3.00E-36  | 139.7 | 76.9 | 81.8 | hypothetical protein CARUB_v10018134mg, partial  | gbpln | Capsella rubella     | AT2G03680.2   Symbols: SPR1, SKU6   spiral1   chr2:1121398-1121850 FORWARD LENGTH=119                                                                                                                                                                                                                                                         | 121 | 119 | 5.00E-38  | 98.3  | 83.5 | 86.8 |
| Rsa1.0_011119.1.g23677.t1 | gb EOA27628.1   hypothetical protein CARUB_v10023776mg [Capsella rubella]                                                                                                                                                                                                                                                                                                                                                                | 253 | 288 | 1.00E-119 | 113.8 | 84.6 | 87.7 | hypothetical protein CARUB_v10023776mg           | gbpln | Capsella rubella     | AT2G45330.2   Symbols: emb1067   RNA 2'-phosphotransferase, Tpt1 / KtpA family   chr2:18686340-18687874 FORWARD LENGTH=286                                                                                                                                                                                                                    | 253 | 286 | 1.00E-113 | 113.0 | 85.0 | 88.9 |
| Rsa1.0_011119.1.g23678.t1 | emb CAD48302.1   MADS-box protein AGL3-a [Brassica oleracea var. botrytis]                                                                                                                                                                                                                                                                                                                                                               | 226 | 256 | 1.00E-107 | 113.3 | 85.0 | 91.2 | MADS-box protein AGL3-a                          | gbpln | Brassica oleracea    | AT2G03710.2   Symbols: SEP4, AGL3   K-box region and MADS-box transcription factor family protein   chr2:1129622-1131628 FORWARD LENGTH=257                                                                                                                                                                                                   | 226 | 257 | 1.00E-107 | 113.7 | 86.3 | 92.0 |
| Rsa1.0_011119.1.g23679.t1 | refNP_178467.1   adenine nucleotide alpha hydrolases-like protein [Arabidopsis thaliana] gi 4406763 gb AAD20074.1   unknown protein [Arabidopsis thaliana] gi 38566668 gb AAR24224.1   At2g03720 [Arabidopsis thaliana] gi 56381933 gb AAV85685.1   At2g03720 [Arabidopsis thaliana] gi 330250647 gb AEC05741.1   adenine nucleotide alpha hydrolases-like protein [Arabidopsis thaliana]                                                | 232 | 165 | 5.00E-89  | 71.1  | 67.7 | 69.4 | adenine nucleotide alpha hydrolases-like protein | gbpln | Arabidopsis thaliana | AT2G03720.1   Symbols: MRH6   Adenine nucleotide alpha hydrolases-like superfamily protein   chr2:1132364-1133225 FORWARD LENGTH=165                                                                                                                                                                                                          | 232 | 165 | 1.00E-91  | 71.1  | 67.7 | 69.4 |

|                          |                                                                                                                                                                                                                                                                                                    |      |      |           |       |      |      |                                                 |       |                      |                                                                                                                                                                                                                                                                                                                                                                                                                                                                     |      |      |           |       |      |      |
|--------------------------|----------------------------------------------------------------------------------------------------------------------------------------------------------------------------------------------------------------------------------------------------------------------------------------------------|------|------|-----------|-------|------|------|-------------------------------------------------|-------|----------------------|---------------------------------------------------------------------------------------------------------------------------------------------------------------------------------------------------------------------------------------------------------------------------------------------------------------------------------------------------------------------------------------------------------------------------------------------------------------------|------|------|-----------|-------|------|------|
| Rsa1.0_01120.1.g23680.t2 | gb EOA29603.1  hypothetical protein CARUB_v10013521mg, partial [Capsella rubella]                                                                                                                                                                                                                  | 688  | 498  | 7.00E-74  | 72.4  | 21.8 | 28.9 | hypothetical protein CARUB_v10013521mg, partial | gbpln | Capsella rubella     | AT2G17920.1   Symbols:   nucleic acid binding; zinc ion binding   chr2:7782808-7783731 FORWARD LENGTH=307                                                                                                                                                                                                                                                                                                                                                           | 688  | 307  | 9.00E-22  | 44.6  | 8.1  | 13.7 |
| Rsa1.0_01120.1.g23681.t9 | ref NP_175703.1  Nucleic acid-binding, OB-fold-like protein [Arabidopsis thaliana]<br>gi 12324642 gb AAG52278.1 AC019018.15 putative replication protein; 94555-97079 [Arabidopsis thaliana]<br>gi 332194750 gb AAE32871.1  Nucleic acid-binding, OB-fold-like protein [Arabidopsis thaliana]      | 437  | 566  | 3.00E-37  | 129.5 | 24.9 | 43.9 | Nucleic acid-binding, OB-fold-like protein      | gbpln | Arabidopsis thaliana | AT1G52950.1   Symbols:   Nucleic acid-binding, OB-fold-like protein   chr1:19725483-19728007 FORWARD LENGTH=566                                                                                                                                                                                                                                                                                                                                                     | 437  | 566  | 8.00E-40  | 129.5 | 24.9 | 43.9 |
| Rsa1.0_01120.1.g23682.t1 | gb ABD65063.1  hypothetical protein 27.t00041 [Brassica oleracea]                                                                                                                                                                                                                                  | 158  | 198  | 1.00E-33  | 125.3 | 48.7 | 68.4 | hypothetical protein 27.t00041                  | gbpln | Brassica oleracea    | #                                                                                                                                                                                                                                                                                                                                                                                                                                                                   | #    | #    | #         | #     | #    | #    |
| Rsa1.0_01120.1.g23683.t4 | gb AAD15468.1  putative helicase [Arabidopsis thaliana]                                                                                                                                                                                                                                            | 1038 | 1265 | 0         | 121.9 | 55.5 | 70.4 | putative helicase                               | gbpln | Arabidopsis thaliana | AT3G51690.1   Symbols:   PIF1 helicase   chr3:19176731-19178107 REVERSE LENGTH=331                                                                                                                                                                                                                                                                                                                                                                                  | 1038 | 331  | 4.00E-38  | 31.9  | 9.1  | 13.8 |
| Rsa1.0_01120.1.g23684.t1 | dbj BAB10393.1  unnamed protein product [Arabidopsis thaliana]                                                                                                                                                                                                                                     | 794  | 1335 | 4.00E-55  | 168.1 | 19.3 | 28.2 | unnamed protein product                         | gbpln | Arabidopsis thaliana | AT2G06420.1   Symbols:   Domain of unknown function (DUF1985)   chr2:2539083-2539885 FORWARD LENGTH=249                                                                                                                                                                                                                                                                                                                                                             | 794  | 249  | 1.00E-38  | 31.4  | 11.8 | 16.8 |
| Rsa1.0_01120.1.g23685.t3 | dbj BAB01350.1  Mutator-like transposase [Arabidopsis thaliana]                                                                                                                                                                                                                                    | 571  | 811  | 1.00E-89  | 142.0 | 31.0 | 41.0 | Mutator-like transposase                        | gbpln | Arabidopsis thaliana | AT1G49920.1   Symbols:   MuDR family transposase   chr1:18481798-18484233 REVERSE LENGTH=785                                                                                                                                                                                                                                                                                                                                                                        | 571  | 785  | 5.00E-12  | 137.5 | 9.1  | 14.4 |
| Rsa1.0_01120.1.g23686.t1 | ref XP_002875676.1  predicted protein [Arabidopsis lyrata subsp. lyrata]<br>gi 297321514 gb EFH51935.1  predicted protein [Arabidopsis lyrata subsp. lyrata]                                                                                                                                       | 218  | 1058 | 3.00E-61  | 485.3 | 52.8 | 60.6 | predicted protein                               | gbpln | Arabidopsis lyrata   | AT3G25510.1   Symbols:   disease resistance protein (TIR-NBS-LRR class), putative   chr3:9260838-9268797 REVERSE LENGTH=1981                                                                                                                                                                                                                                                                                                                                        | 218  | 1981 | 5.00E-63  | 908.7 | 49.1 | 57.3 |
| Rsa1.0_01120.1.g23687.t4 | gb AAM15254.1  putative retroelement pol polyprotein [Arabidopsis thaliana]                                                                                                                                                                                                                        | 656  | 930  | 6.00E-33  | 141.8 | 16.0 | 20.7 | putative retroelement pol polyprotein           | gbpln | Arabidopsis thaliana | #                                                                                                                                                                                                                                                                                                                                                                                                                                                                   | #    | #    | #         | #     | #    | #    |
| Rsa1.0_01120.1.g23688.t1 | #                                                                                                                                                                                                                                                                                                  | #    | #    | #         | #     | #    | -    | -                                               | ----  | ----                 | #                                                                                                                                                                                                                                                                                                                                                                                                                                                                   | #    | #    | #         | #     | #    | #    |
| Rsa1.0_01120.1.g23689.t1 | gb AAF79618.1 AC027665_19 F5M15.26 [Arabidopsis thaliana]                                                                                                                                                                                                                                          | 1086 | 1838 | 0         | 169.2 | 28.5 | 34.3 | F5M15.26                                        | gbpln | Arabidopsis thaliana | #                                                                                                                                                                                                                                                                                                                                                                                                                                                                   | #    | #    | #         | #     | #    | #    |
| Rsa1.0_01121.1.g23690.t1 | #                                                                                                                                                                                                                                                                                                  | #    | #    | #         | #     | #    | -    | -                                               | ----  | ----                 | #                                                                                                                                                                                                                                                                                                                                                                                                                                                                   | #    | #    | #         | #     | #    | #    |
| Rsa1.0_01121.1.g23691.t1 | ref XP_002876344.1  zinc finger (CCH-type) family protein [Arabidopsis lyrata subsp. lyrata]<br>gi 297322182 gb EFH52603.1  zinc finger (CCH-type) family protein [Arabidopsis lyrata subsp. lyrata]                                                                                               | 550  | 551  | 0         | 100.2 | 86.5 | 92.4 | zinc finger (CCH-type) family protein           | gbpln | Arabidopsis lyrata   | AT3G55980.1   Symbols: SZF1, ATSZF1   salt-inducible zinc finger 1   chr3:20776857-20778599 FORWARD LENGTH=580                                                                                                                                                                                                                                                                                                                                                      | 550  | 580  | 0         | 105.5 | 87.8 | 93.3 |
| Rsa1.0_01121.1.g23692.t2 | ref XP_002876345.1  hypothetical protein ARALYDRAFT_907033 [Arabidopsis lyrata subsp. lyrata]<br>gi 297322183 gb EFH52604.1  hypothetical protein ARALYDRAFT_907033 [Arabidopsis lyrata subsp. lyrata]                                                                                             | 472  | 487  | 0         | 103.2 | 90.0 | 94.3 | hypothetical protein ARALYDRAFT_907033          | gbpln | Arabidopsis lyrata   | AT3G55990.1   Symbols: ESK1, TBL29   Plant protein of unknown function (DUF828)   chr3:20780410-20782931 FORWARD LENGTH=487                                                                                                                                                                                                                                                                                                                                         | 472  | 487  | 0         | 103.2 | 90.3 | 94.1 |
| Rsa1.0_01121.1.g23693.t1 | ref XP_002878056.1  hypothetical protein ARALYDRAFT_907034 [Arabidopsis lyrata subsp. lyrata]<br>gi 297323894 gb EFH54315.1  hypothetical protein ARALYDRAFT_907034 [Arabidopsis lyrata subsp. lyrata]                                                                                             | 523  | 528  | 0         | 101.0 | 89.3 | 95.0 | hypothetical protein ARALYDRAFT_907034          | gbpln | Arabidopsis lyrata   | AT3G56000.1   Symbols: ATCSLA14, CSLA14   cellulose synthase like A14   chr3:20783462-20785684 REVERSE LENGTH=535                                                                                                                                                                                                                                                                                                                                                   | 523  | 535  | 0         | 102.3 | 87.4 | 93.9 |
| Rsa1.0_01121.1.g23694.t1 | ref XP_002876346.1  hypothetical protein ARALYDRAFT_907035 [Arabidopsis lyrata subsp. lyrata]<br>gi 297322184 gb EFH52605.1  hypothetical protein ARALYDRAFT_907035 [Arabidopsis lyrata subsp. lyrata]                                                                                             | 209  | 198  | 8.00E-74  | 94.7  | 71.3 | 82.3 | hypothetical protein ARALYDRAFT_907035          | gbpln | Arabidopsis lyrata   | AT3G56010.1   Symbols:   unknown protein; FUNCTIONS IN: molecular_function unknown; INVOLVED IN: biological_process unknown; LOCATED IN: chloroplast thylakoid membrane; EXPRESSED IN: 22 plant structures; EXPRESSED DURING: 13 growth stages; Has 25 Blast hits to 25 proteins in 12 species: Archaea - 0; Bacteria - 0; Metazoa - 0; Fungi - 0; Plants - 25; Viruses - 0; Other Eukaryotes - 0 (source: NCBI BLINK).   chr3:20788758-20789656 FORWARD LENGTH=201 | 209  | 201  | 8.00E-72  | 96.2  | 71.3 | 83.3 |
| Rsa1.0_01121.1.g23695.t1 | ref NP_191162.2  pentatricopeptide repeat-containing protein [Arabidopsis thaliana]<br>gi 218546756 sp Q9LY43.2 PP283_ARAT_H RecName: Full=Pentatricopeptide repeat-containing protein At3g56030<br>gi 332645947 gb AAE79468.1  pentatricopeptide repeat-containing protein [Arabidopsis thaliana] | 332  | 351  | 1.00E-163 | 105.7 | 84.9 | 91.6 | pentatricopeptide repeat-containing protein     | gbpln | Arabidopsis thaliana | AT3G56030.1   Symbols:   Tetratricopeptide repeat (TPR)-like superfamily protein   chr3:20791259-20792314 FORWARD LENGTH=351                                                                                                                                                                                                                                                                                                                                        | 332  | 351  | 1.00E-166 | 105.7 | 84.9 | 91.6 |

|                          |                                                                                                                                                                                                                                                                                                                                                     |      |      |           |       |      |      |                                                                  |       |                      |                                                                                                                                                                                                                                                             |      |      |           |       |      |      |
|--------------------------|-----------------------------------------------------------------------------------------------------------------------------------------------------------------------------------------------------------------------------------------------------------------------------------------------------------------------------------------------------|------|------|-----------|-------|------|------|------------------------------------------------------------------|-------|----------------------|-------------------------------------------------------------------------------------------------------------------------------------------------------------------------------------------------------------------------------------------------------------|------|------|-----------|-------|------|------|
| Rsa1.0_01121.1.g23696.t2 | gb EOA25329.1  hypothetical protein CARUB_v10018646mg [Capsella rubella]                                                                                                                                                                                                                                                                            | 881  | 879  | 0         | 99.8  | 86.9 | 92.6 | hypothetical protein CARUB_v10018646mg                           | gbpln | Capsella rubella     | AT3G56040.1   Symbols: UGP3   UDP-glucose pyrophosphorylase 3   chr3:20792689-20797482 REVERSE LENGTH=883                                                                                                                                                   | 881  | 883  | 0         | 100.2 | 88.1 | 92.8 |
| Rsa1.0_01121.1.g23697.t1 | ref XP_002878058.1  kinase family protein [Arabidopsis lyrata subsp. lyrata] gi 297323896 gb EFH54317.1  kinase family protein [Arabidopsis lyrata subsp. lyrata]                                                                                                                                                                                   | 500  | 499  | 0         | 99.8  | 78.8 | 96.6 | kinase family protein                                            | gbpln | Arabidopsis lyrata   | AT3G56050.2   Symbols:   Protein kinase family protein   chr3:20803328-2080706 REVERSE LENGTH=499                                                                                                                                                           | 500  | 499  | 0         | 99.8  | 80.0 | 88.2 |
| Rsa1.0_01121.1.g23698.t1 | gb EOA25148.1  hypothetical protein CARUB_v10018458mg [Capsella rubella]                                                                                                                                                                                                                                                                            | 576  | 581  | 0         | 100.9 | 82.6 | 91.8 | hypothetical protein CARUB_v10018458mg                           | gbpln | Capsella rubella     | AT3G56060.1   Symbols:   Glucose-methanol-choline (GMC) oxidoreductase family protein   chr3:20803328-20805983 REVERSE LENGTH=577                                                                                                                           | 576  | 577  | 0         | 100.2 | 78.1 | 87.2 |
| Rsa1.0_01121.1.g23699.t1 | ref XP_002868561.1  AT5g42080/MJC20_19 [Arabidopsis lyrata subsp. lyrata] gi 297314397 gb EFH44820.1  AT5g42080/MJC20_19 [Arabidopsis lyrata subsp. lyrata]                                                                                                                                                                                         | 387  | 610  | 1.00E-174 | 157.6 | 85.5 | 90.7 | AT5g42080/MJC20_19                                               | gbpln | Arabidopsis lyrata   | AT5G42080.1   Symbols: ADL1, ADL1A, AG68, DRP1A, RSW9, DL1   dynamin-like protein   chr5:16820661-16824536 REVERSE LENGTH=610                                                                                                                               | 387  | 610  | 1.00E-176 | 157.6 | 85.3 | 90.7 |
| Rsa1.0_01121.1.g23700.t1 | #                                                                                                                                                                                                                                                                                                                                                   | #    | #    | #         | #     | #    | #    | -                                                                | ----  | ----                 | #                                                                                                                                                                                                                                                           | #    | #    | #         | #     | #    |      |
| Rsa1.0_01122.1.g23701.t1 | dbj BAK52341.1  S9 Tyrosyl aminopeptidase [Raphanus sativus]                                                                                                                                                                                                                                                                                        | 703  | 685  | 0         | 97.4  | 94.0 | 95.3 | S9 Tyrosyl aminopeptidase                                        | gbpln | Raphanus sativus     | AT5G36210.1   Symbols:   alpha/beta-Hydrolases superfamily protein   chr5:14248202-14253272 REVERSE LENGTH=730                                                                                                                                              | 703  | 730  | 0         | 103.8 | 85.5 | 91.6 |
| Rsa1.0_01122.1.g23702.t1 | ref NP_564694.2  Nuclear pore complex protein [Arabidopsis thaliana] gi 332195141 gb AE33262.1  Nuclear pore complex protein [Arabidopsis thaliana]                                                                                                                                                                                                 | 1821 | 1816 | 0         | 99.7  | 71.7 | 78.2 | Nuclear pore complex protein                                     | gbpln | Arabidopsis thaliana | AT1G55540.1   Symbols: emb1011   Nuclear pore complex protein   chr1:20734759-20743049 REVERSE LENGTH=1816                                                                                                                                                  | 1821 | 1816 | 0         | 99.7  | 71.7 | 78.2 |
| Rsa1.0_01122.1.g23703.t1 | #                                                                                                                                                                                                                                                                                                                                                   | #    | #    | #         | #     | #    | #    | -                                                                | ----  | ----                 | #                                                                                                                                                                                                                                                           | #    | #    | #         | #     | #    |      |
| Rsa1.0_01122.1.g23704.t1 | ref NP_564696.2  P-loop containing nucleoside triphosphate hydrolase-like protein [Arabidopsis thaliana] gi 332195144 gb AE33265.1  P-loop containing nucleoside triphosphate hydrolase-like protein [Arabidopsis thaliana]                                                                                                                         | 862  | 859  | 0         | 99.7  | 71.6 | 79.9 | P-loop containing nucleoside triphosphate hydrolase-like protein | gbpln | Arabidopsis thaliana | AT1G55550.1   Symbols:   P-loop containing nucleoside triphosphate hydrolases superfamily protein   chr1:20748915-20752862 FORWARD LENGTH=859                                                                                                               | 862  | 859  | 0         | 99.7  | 71.6 | 79.9 |
| Rsa1.0_01122.1.g23705.t1 | ref XP_002894511.1  hypothetical protein ARALYDRAFT_474617 [Arabidopsis lyrata subsp. lyrata] gi 297340353 gb EFH70770.1  hypothetical protein ARALYDRAFT_474617 [Arabidopsis lyrata subsp. lyrata]                                                                                                                                                 | 549  | 549  | 0         | 100.0 | 96.4 | 98.5 | hypothetical protein ARALYDRAFT_474617                           | gbpln | Arabidopsis lyrata   | AT1G55560.1   Symbols: sks14   SKU5 similar 14   chr1:20754474-20756527 REVERSE LENGTH=549                                                                                                                                                                  | 549  | 549  | 0         | 100.0 | 95.3 | 98.7 |
| Rsa1.0_01122.1.g23706.t1 | #                                                                                                                                                                                                                                                                                                                                                   | #    | #    | #         | #     | #    | #    | -                                                                | ----  | ----                 | AT1G05470.1   Symbols: CVP2   DNAse I-like superfamily protein   chr1:1608558-1611291 REVERSE LENGTH=617                                                                                                                                                    | 92   | 617  | 1.00E-10  | 670.7 | 39.1 | 51.1 |
| Rsa1.0_01122.1.g23707.t1 | ref XP_002891844.1  hypothetical protein ARALYDRAFT_892557 [Arabidopsis lyrata subsp. lyrata] gi 297337686 gb EFH68103.1  hypothetical protein ARALYDRAFT_892557 [Arabidopsis lyrata subsp. lyrata]                                                                                                                                                 | 512  | 555  | 0         | 108.4 | 95.5 | 97.9 | hypothetical protein ARALYDRAFT_892557                           | gbpln | Arabidopsis lyrata   | AT1G55570.1   Symbols: sks12   SKU5 similar 12   chr1:20757882-20759771 FORWARD LENGTH=555                                                                                                                                                                  | 512  | 555  | 0         | 108.4 | 94.7 | 97.9 |
| Rsa1.0_01122.1.g23708.t5 | emb CAB39638.1  RNA-directed DNA polymerase-like protein [Arabidopsis thaliana] gi 7267666 emb CAB78094.1  RNA-directed DNA polymerase-like protein [Arabidopsis thaliana]                                                                                                                                                                          | 1022 | 1274 | 1.00E-118 | 124.7 | 20.2 | 27.0 | RNA-directed DNA polymerase-like protein                         | gbpln | Arabidopsis thaliana | AT1G55600.1   Symbols: WRKY10, ATWRKY10, MINJ3   WRKY DNA-binding protein 10   chr1:20774049-20776293 REVERSE LENGTH=485                                                                                                                                    | 1022 | 485  | 1.00E-35  | 47.5  | 8.8  | 12.0 |
| Rsa1.0_01123.1.g23709.t1 | ref NP_564933.1  uncharacterized protein [Arabidopsis thaliana] gi 21536535 gb AAM60867.1  unknown [Arabidopsis thaliana] gi 110739339 dbj BAF01582.1  hypothetical protein [Arabidopsis thaliana] gi 114050551 gb ABI49425.1  At1g68585 [Arabidopsis thaliana] gi 332196694 gb AE34815.1  uncharacterized protein AT1G68585 [Arabidopsis thaliana] | 68   | 116  | 1.00E-19  | 170.6 | 76.5 | 89.7 | uncharacterized protein                                          | gbpln | Arabidopsis thaliana | AT1G68585.1   Symbols:   unknown protein; Has 23 Blast hits to 23 proteins in 6 species: Archae - 0; Bacteria - 0; Metazoa - 0; Fungi - 0; Plants - 23; Viruses - 0; Other Eukaryotes - 0 (source: NCBI BLINK).   chr1:25756911-25757426 FORWARD LENGTH=116 | 68   | 116  | 2.00E-22  | 170.6 | 76.5 | 89.7 |
| Rsa1.0_01123.1.g23710.t1 | ref NP_001077793.1  30S ribosomal protein 3-1 [Arabidopsis thaliana] gi 332196696 gb AE34817.1  30S ribosomal protein 3-1 [Arabidopsis thaliana]                                                                                                                                                                                                    | 129  | 163  | 2.00E-42  | 126.4 | 69.8 | 78.3 | 30S ribosomal protein 3-1                                        | gbpln | Arabidopsis thaliana | AT1G68590.2   Symbols:   Ribosomal protein PSRP-3/Ycf65   chr1:25757593-25758169 REVERSE LENGTH=163                                                                                                                                                         | 129  | 163  | 4.00E-45  | 126.4 | 69.8 | 78.3 |

|                          |                                                                                                                                                                                                                                                                                                                      |      |      |           |       |      |      |                                            |       |                      |                                                                                                                                                                                                                                                                                                                                                                                                                                                                                |      |      |           |       |      |      |
|--------------------------|----------------------------------------------------------------------------------------------------------------------------------------------------------------------------------------------------------------------------------------------------------------------------------------------------------------------|------|------|-----------|-------|------|------|--------------------------------------------|-------|----------------------|--------------------------------------------------------------------------------------------------------------------------------------------------------------------------------------------------------------------------------------------------------------------------------------------------------------------------------------------------------------------------------------------------------------------------------------------------------------------------------|------|------|-----------|-------|------|------|
| Rsa1.0_01123.1.g23711.t1 | ref XP_002887194.1  hypothetical protein ARALYDRAFT.475988 [Arabidopsis lyrata subsp. lyrata] gi 297333035 gb EFH63453.1  hypothetical protein ARALYDRAFT.475988 [Arabidopsis lyrata subsp. lyrata]                                                                                                                  | 335  | 336  | 1.00E-150 | 100.3 | 77.0 | 86.0 | hypothetical protein ARALYDRAFT.475988     | gbpln | Arabidopsis lyrata   | AT1G68620.1   Symbols:   alpha/beta-Hydrolases superfamily protein   chr1:25766018-25767028 FORWARD LENGTH=336                                                                                                                                                                                                                                                                                                                                                                 | 335  | 336  | 1.00E-148 | 100.3 | 75.5 | 84.5 |
| Rsa1.0_01123.1.g23712.t1 | gb AAF69169.1 AC007915.21 F27F5.21 [Arabidopsis thaliana]                                                                                                                                                                                                                                                            | 284  | 1023 | 3.00E-32  | 360.2 | 30.6 | 44.7 | F27F5.21                                   | gbpln | Arabidopsis thaliana | AT2G22440.1   Symbols:   BEST Arabidopsis thaliana protein match is: Ribonuclease H-like superfamily protein (TAIR:AT4G29090.1); Has 208 Blast hits to 191 proteins in 10 species: Archae - 0; Bacteria - 0; Metazoa - 0; Fungi - 0; Plants - 208; Viruses - 0; Other Eukaryotes - 0 (source: NCBI BLink).   chr2:9528910-9529917 FORWARD LENGTH=256                                                                                                                           | 284  | 256  | 6.00E-15  | 90.1  | 22.2 | 34.2 |
| Rsa1.0_01123.1.g23713.t1 | ref XP_002888676.1  hypothetical protein ARALYDRAFT.894639 [Arabidopsis lyrata subsp. lyrata] gi 297334517 gb EFH64935.1  hypothetical protein ARALYDRAFT.894639 [Arabidopsis lyrata subsp. lyrata]                                                                                                                  | 157  | 159  | 2.00E-79  | 101.3 | 95.5 | 96.2 | hypothetical protein ARALYDRAFT.894639     | gbpln | Arabidopsis lyrata   | AT1G68660.1   Symbols:   Ribosomal protein L12/ ATP-dependent Clp protease adaptor protein ClpS family protein   chr1:25778058-25779083 REVERSE LENGTH=159                                                                                                                                                                                                                                                                                                                     | 157  | 159  | 4.00E-81  | 101.3 | 94.3 | 95.5 |
| Rsa1.0_01123.1.g23714.t1 | #                                                                                                                                                                                                                                                                                                                    | #    | #    | #         | #     | #    | #    | -                                          | ----  | ----                 | #                                                                                                                                                                                                                                                                                                                                                                                                                                                                              | #    | #    | #         | #     | #    |      |
| Rsa1.0_01123.1.g23715.t1 | ref NP_564938.1  myb-like transcription factor-like protein [Arabidopsis thaliana] gi 17380860 gb AAL36242.1  unknown protein [Arabidopsis thaliana] gi 20258929 gb AAM14180.1  unknown protein [Arabidopsis thaliana] gi 332196705 gb AEE34826.1  myb-like transcription factor-like protein [Arabidopsis thaliana] | 370  | 354  | 1.00E-116 | 95.7  | 70.8 | 75.7 | myb-like transcription factor-like protein | gbpln | Arabidopsis thaliana | AT1G68670.1   Symbols:   myb-like transcription factor family protein   chr1:25782344-25783873 FORWARD LENGTH=354                                                                                                                                                                                                                                                                                                                                                              | 370  | 354  | 1.00E-119 | 95.7  | 70.8 | 75.7 |
| Rsa1.0_01123.1.g23716.t4 | dbj BAC42528.1  putative deaminase [Arabidopsis thaliana] gi 38564244 gb AAR23701.1  At1g68720 [Arabidopsis thaliana]                                                                                                                                                                                                | 1377 | 1307 | 0         | 94.9  | 62.0 | 68.8 | putative deaminase                         | gbpln | Arabidopsis thaliana | AT1G68720.1   Symbols: TADA, ATTADA   tRNA arginine adenosine deaminase   chr1:25804547-25808820 FORWARD LENGTH=1307                                                                                                                                                                                                                                                                                                                                                           | 1377 | 1307 | 0         | 94.9  | 61.9 | 68.8 |
| Rsa1.0_01123.1.g23717.t2 | gb EOA34564.1  hypothetical protein CARUB_v10022115mg [Capsella rubella]                                                                                                                                                                                                                                             | 207  | 184  | 5.00E-50  | 88.9  | 54.6 | 59.4 | hypothetical protein CARUB_v10022115mg     | gbpln | Capsella rubella     | AT1G68730.1   Symbols:   Zim17-type zinc finger protein   chr1:25810321-25811128 REVERSE LENGTH=170                                                                                                                                                                                                                                                                                                                                                                            | 207  | 170  | 6.00E-52  | 82.1  | 52.7 | 59.4 |
| Rsa1.0_01123.1.g23718.t1 | gb EOA33660.1  hypothetical protein CARUB_v10019828mg [Capsella rubella]                                                                                                                                                                                                                                             | 772  | 784  | 0         | 101.6 | 90.9 | 94.7 | hypothetical protein CARUB_v10019828mg     | gbpln | Capsella rubella     | AT1G68740.1   Symbols: PHO1;H1   EXS (ERD1/XPRI1/SYG1) family protein   chr1:25812735-25816574 REVERSE LENGTH=784                                                                                                                                                                                                                                                                                                                                                              | 772  | 784  | 0         | 101.6 | 90.3 | 93.8 |
| Rsa1.0_01124.1.g23719.t1 | dbj BAJ34508.1  unnamed protein product [Theilungiella halophila]                                                                                                                                                                                                                                                    | 507  | 502  | 0         | 99.0  | 84.4 | 90.7 | unnamed protein product                    | ----  | ----                 | AT4G21910.3   Symbols:   MATE efflux family protein   chr4:11625821-11630964 REVERSE LENGTH=507                                                                                                                                                                                                                                                                                                                                                                                | 507  | 507  | 0         | 100.0 | 83.4 | 89.7 |
| Rsa1.0_01124.1.g23720.t8 | dbj BAJ34508.1  unnamed protein product [Theilungiella halophila]                                                                                                                                                                                                                                                    | 644  | 502  | 0         | 78.0  | 55.7 | 59.2 | unnamed protein product                    | ----  | ----                 | AT4G21903.1   Symbols:   MATE efflux family protein   chr4:11621169-11623738 REVERSE LENGTH=504                                                                                                                                                                                                                                                                                                                                                                                | 644  | 504  | 0         | 78.3  | 54.3 | 57.6 |
| Rsa1.0_01124.1.g23721.t1 | gb AAD25646.1  putative retroelement pol polyprotein [Arabidopsis thaliana]                                                                                                                                                                                                                                          | 1476 | 1461 | 0         | 99.0  | 51.5 | 67.3 | putative retroelement pol polyprotein      | gbpln | Arabidopsis thaliana | AT4G23160.1   Symbols: CRK8   cysteine-rich RLK (RECEPTOR-like protein kinase) 8   chr4:12128485-12134086 FORWARD LENGTH=1262                                                                                                                                                                                                                                                                                                                                                  | 1476 | 1262 | 0         | 85.5  | 21.3 | 27.8 |
| Rsa1.0_01124.1.g23722.t1 | ref XP_002867811.1  hypothetical protein ARALYDRAFT.492676 [Arabidopsis lyrata subsp. lyrata] gi 297313647 gb EFH44070.1  hypothetical protein ARALYDRAFT.492676 [Arabidopsis lyrata subsp. lyrata]                                                                                                                  | 118  | 128  | 1.00E-28  | 108.5 | 71.2 | 81.4 | hypothetical protein ARALYDRAFT.492676     | gbpln | Arabidopsis lyrata   | AT4G21920.1   Symbols:   unknown protein; FUNCTIONS IN: molecular_function unknown; INVOLVED IN: N-terminal protein myristoylation; LOCATED IN: cellular_component unknown; BEST Arabidopsis thaliana protein match is: unknown protein (TAIR:AT3G20340.1); Has 40 Blast hits to 40 proteins in 10 species: Archae - 0; Bacteria - 0; Metazoa - 0; Fungi - 0; Plants - 40; Viruses - 0; Other Eukaryotes - 0 (source: NCBI BLink).   chr4:11636084-11636473 REVERSE LENGTH=129 | 118  | 129  | 2.00E-28  | 109.3 | 67.8 | 81.4 |
| Rsa1.0_01124.1.g23723.t1 | dbj BAN04702.1  putative disease resistance protein [Brassica rapa subsp. pekinensis]                                                                                                                                                                                                                                | 1193 | 1325 | 0         | 111.1 | 70.5 | 77.9 | putative disease resistance protein        | gbpln | Brassica rapa        | AT5G11250.1   Symbols:   Disease resistance protein (TR-NBS-LRR class)   chr5:3587978-3591960 REVERSE LENGTH=1189                                                                                                                                                                                                                                                                                                                                                              | 1193 | 1189 | 0         | 99.7  | 54.1 | 68.6 |
| Rsa1.0_01124.1.g23724.t1 | dbj BAN04700.1  putative disease resistance protein [Brassica rapa subsp. pekinensis] gi 469403159 dbj BAN04701.1  putative disease resistance protein [Brassica rapa subsp. pekinensis]                                                                                                                             | 1335 | 1325 | 0         | 99.3  | 68.2 | 78.6 | putative disease resistance protein        | gbpln | Brassica rapa        | AT1G69550.1   Symbols:   disease resistance protein (TR-NBS-LRR class)   chr1:26148836-26153374 REVERSE LENGTH=1400                                                                                                                                                                                                                                                                                                                                                            | 1335 | 1400 | 0         | 104.9 | 54.2 | 69.5 |

|                          |                                                                                                                                                                                                                                                                                                                                                                                                          |     |      |           |       |      |      |                                                           |             |                      |                                                                                                                                                                                                                                                                                     |     |     |           |       |      |      |
|--------------------------|----------------------------------------------------------------------------------------------------------------------------------------------------------------------------------------------------------------------------------------------------------------------------------------------------------------------------------------------------------------------------------------------------------|-----|------|-----------|-------|------|------|-----------------------------------------------------------|-------------|----------------------|-------------------------------------------------------------------------------------------------------------------------------------------------------------------------------------------------------------------------------------------------------------------------------------|-----|-----|-----------|-------|------|------|
| Rsa1.0_01124.1.g23725.t1 | refXP_002869851.1  hypothetical protein ARALYDRAFT_492672 [Arabidopsis lyrata subsp. lyrata] gi 297315687 gb EFH46110.1                                                                                                                                                                                                                                                                                  | 157 | 158  | 5.00E-62  | 100.6 | 78.3 | 89.2 | hypothetical protein ARALYDRAFT_492672                    | gbpln       | Arabidopsis lyrata   | AT4G21970.1   Symbols:   Protein of unknown function. DUF584   chr4:11653633-11654106 FORWARD LENGTH=157                                                                                                                                                                            | 157 | 157 | 2.00E-59  | 100.0 | 73.9 | 83.4 |
| Rsa1.0_01124.1.g23726.t1 | hypothetical protein ARALYDRAFT_492672 [Arabidopsis lyrata subsp. lyrata]<br>refNP_001078424.1  autophagy-related protein 8a [Arabidopsis thaliana] gi 332659138 gb AE84538.1  autophagy-related protein 8a [Arabidopsis thaliana]                                                                                                                                                                       | 124 | 137  | 2.00E-61  | 110.5 | 91.1 | 96.8 | autophagy-related protein 8a                              | gbpln       | Arabidopsis thaliana | AT4G21980.2   Symbols: APG8A, ATG8A   Ubiquitin-like superfamily protein   chr4:11655868-11656809 FORWARD LENGTH=137                                                                                                                                                                | 124 | 137 | 4.00E-64  | 110.5 | 91.1 | 96.8 |
| Rsa1.0_01124.1.g23727.t1 | refXP_002867800.1  PRH26 protein [Arabidopsis lyrata subsp. lyrata] gi 297313636 gb EFH44059.1  PRH26 protein [Arabidopsis lyrata subsp. lyrata]                                                                                                                                                                                                                                                         | 460 | 458  | 0         | 99.6  | 91.5 | 95.7 | PRH26 protein                                             | gbpln       | Arabidopsis lyrata   | AT4G21990.1   Symbols: APR3, PRH-26, PRH26, ATAPR3   APS reductase 3   chr4:11657284-11658973 REVERSE LENGTH=458                                                                                                                                                                    | 460 | 458 | 0         | 99.6  | 90.9 | 95.2 |
| Rsa1.0_01124.1.g23728.t1 | refXP_003531171.1  PREDICTED: uncharacterized protein LOC100806735 isoform 1 [Glycine max] gi 356525114 refXP_003531172.1  PREDICTED: uncharacterized protein LOC100806735 isoform 2 [Glycine max]                                                                                                                                                                                                       | 72  | 128  | 2.00E-20  | 177.8 | 70.8 | 76.4 | PREDICTED: uncharacterized protein LOC100806735 isoform 1 | gbenv/gbpln | Glycine max          | AT4G22000.1   Symbols:   unknown protein; Has 30201 Blast hits to 17322 proteins in 780 species: Archae - 12; Bacteria - 1396; Metazoa - 17338; Fungi - 3422; Plants - 5037; Viruses - 0; Other Eukaryotes - 2996 (source: NCBI BLINK).   chr4:11659810-11660202 REVERSE LENGTH=130 | 72  | 130 | 6.00E-20  | 180.6 | 61.1 | 63.9 |
| Rsa1.0_01125.1.g23729.t1 | refNP_566730.1  mate efflux domain-containing protein [Arabidopsis thaliana] gi 75274226 sp O9LUH2.1 ALF5_ARATH RecName: Full=MATE efflux family protein ALF5; AltName: Full=Protein ABERRANT LATERAL ROOT FORMATION 5; AltName: Full=Protein DTX19                                                                                                                                                      | 407 | 477  | 1.00E-174 | 117.2 | 74.7 | 80.3 | mate efflux domain-containing protein                     | gbpln       | Arabidopsis thaliana | AT3G23560.1   Symbols: ALF5   MATE efflux family protein   chr3:8454361-8456588 REVERSE LENGTH=477                                                                                                                                                                                  | 407 | 477 | 1.00E-177 | 117.2 | 74.7 | 80.3 |
| Rsa1.0_01125.1.g23730.t1 | gi 13384114 gb AAK21273.1 AF337954.1 aberrant lateral root formation 5 [Arabidopsis thaliana] gi 9294512 dbj BAB02774.1  unnamed protein product [Arabidopsis thaliana] gi 17064870 gb AAL32589.1  Unknown protein [Arabidopsis thaliana] gi 332643256 gb AEE7677.1  MATE efflux family protein ALF5 [Arabidopsis thaliana]                                                                              | 533 | 477  | 0         | 89.5  | 70.4 | 76.7 | mate efflux domain-containing protein                     | gbpln       | Arabidopsis thaliana | AT3G23560.1   Symbols: ALF5   MATE efflux family protein   chr3:8454361-8456588 REVERSE LENGTH=477                                                                                                                                                                                  | 533 | 477 | 0         | 89.5  | 70.4 | 76.7 |
| Rsa1.0_01125.1.g23731.t1 | refNP_566730.1  mate efflux domain-containing protein [Arabidopsis thaliana] gi 75274226 sp O9LUH2.1 ALF5_ARATH RecName: Full=MATE efflux family protein ALF5; AltName: Full=Protein ABERRANT LATERAL ROOT FORMATION 5; AltName: Full=Protein DTX19                                                                                                                                                      | 483 | 476  | 0         | 98.6  | 79.9 | 89.6 | hypothetical protein ARALYDRAFT_479865                    | gbpln       | Arabidopsis lyrata   | AT3G23560.1   Symbols: ALF5   MATE efflux family protein   chr3:8454361-8456588 REVERSE LENGTH=477                                                                                                                                                                                  | 483 | 477 | 0         | 98.8  | 80.5 | 89.4 |
| Rsa1.0_01125.1.g23732.t1 | refXP_002885569.1  hypothetical protein ARALYDRAFT_479865 [Arabidopsis lyrata subsp. lyrata] gi 297331409 gb EFH61828.1  hypothetical protein ARALYDRAFT_479865 [Arabidopsis lyrata subsp. lyrata]<br>refXP_002883434.1  hypothetical protein ARALYDRAFT_898866 [Arabidopsis lyrata subsp. lyrata] gi 297329274 gb EFH59693.1  hypothetical protein ARALYDRAFT_898866 [Arabidopsis lyrata subsp. lyrata] | 525 | 565  | 0         | 107.6 | 84.4 | 89.9 | hypothetical protein ARALYDRAFT_898866                    | gbpln       | Arabidopsis lyrata   | AT3G23540.1   Symbols:   alpha/beta-Hydrolases superfamily protein   chr3:8443665-8448070 FORWARD LENGTH=566                                                                                                                                                                        | 525 | 566 | 0         | 107.8 | 83.4 | 88.8 |
| Rsa1.0_01125.1.g23733.t1 | gb EOA40356.1  hypothetical protein CARUB_v10009084mg [Capsella rubella]                                                                                                                                                                                                                                                                                                                                 | 439 | 459  | 1.00E-147 | 104.6 | 69.5 | 81.5 | hypothetical protein CARUB_v10009084mg                    | gbpln       | Capsella rubella     | AT1G50040.1   Symbols:   Protein of unknown function (DUF1005)   chr1:18542236-18543823 FORWARD LENGTH=460                                                                                                                                                                          | 439 | 460 | 2.33E-156 | 104.8 | 69.0 | 81.8 |
| Rsa1.0_01125.1.g23734.t1 | gb ABH07409.1  putative pol polyprotein [Brassica oleracea var. botrytis]                                                                                                                                                                                                                                                                                                                                | 270 | 1239 | 2.00E-51  | 458.9 | 43.7 | 53.0 | putative pol polyprotein                                  | gbpln       | Brassica oleracea    | #                                                                                                                                                                                                                                                                                   | #   | #   | #         | #     | #    | #    |

| Rsa1.0_01125.1.g23735.t1 | #                                                                                                                                                                                                      | #   | #   | #         | #     | #    | #    | #                                         | -     | ----                 | ----                                                                                                                                          | #   | #   | #         | #     | #    | #    |
|--------------------------|--------------------------------------------------------------------------------------------------------------------------------------------------------------------------------------------------------|-----|-----|-----------|-------|------|------|-------------------------------------------|-------|----------------------|-----------------------------------------------------------------------------------------------------------------------------------------------|-----|-----|-----------|-------|------|------|
|                          | ref[NP_187842.1] ankyrin repeats-containing protein [Arabidopsis thaliana]<br>gi 75308849 sp Q9C7A2.1 Y3236_ARATH<br>RecName: Full=Ankyrin repeat-containing protein At3g12360                         |     |     |           |       |      |      |                                           |       |                      |                                                                                                                                               |     |     |           |       |      |      |
| Rsa1.0_01126.1.g23736.t1 | gi 12321945 gb AA051002.1 AC069474.1 ankyrin-like protein; 93648-91299 [Arabidopsis thaliana]<br>gi 332641667 gb AEE75188.1  ankyrin repeats-containing protein [Arabidopsis thaliana]                 | 279 | 590 | 1.00E-153 | 211.5 | 95.0 | 97.1 | ankyrin repeats-containing protein        | gbpln | Arabidopsis thaliana | AT3G12360.1   Symbols: ITN1   Ankyrin repeat family protein   chr3:3934146-3936495 FORWARD LENGTH=590                                         | 279 | 590 | 1.00E-156 | 211.5 | 95.0 | 97.1 |
| Rsa1.0_01126.1.g23737.t1 | ref[XP_002884899.1] ribosomal protein L10 family protein [Arabidopsis lyrata subsp. lyrata]<br>gi 297330739 gb EFH61158.1  ribosomal protein L10 family protein [Arabidopsis lyrata subsp. lyrata]     | 209 | 170 | 8.00E-17  | 81.3  | 31.1 | 40.2 | ribosomal protein L10 family protein      | gbpln | Arabidopsis lyrata   | AT3G12370.1   Symbols:   Ribosomal protein L10 family protein   chr3:3937464-3937979 REVERSE LENGTH=171                                       | 209 | 171 | 8.00E-17  | 81.8  | 30.1 | 40.7 |
| Rsa1.0_01126.1.g23738.t1 | gb EOA31478.1  hypothetical protein CARUB_v10014664mg [Capsella rubella]                                                                                                                               | 203 | 203 | 3.00E-82  | 100.0 | 90.1 | 94.6 | hypothetical protein CARUB_v10014664mg    | gbpln | Capsella rubella     | AT3G12390.1   Symbols:   Nascent polypeptide-associated complex (NAC), alpha subunit family protein   chr3:3942344-3943595 FORWARD LENGTH=203 | 203 | 203 | 2.00E-76  | 100.0 | 84.7 | 90.6 |
| Rsa1.0_01126.1.g23739.t1 | gb EOA31428.1  hypothetical protein CARUB_v10014617mg [Capsella rubella]                                                                                                                               | 217 | 212 | 3.00E-66  | 97.7  | 59.0 | 72.4 | hypothetical protein CARUB_v10014617mg    | gbpln | Capsella rubella     | AT3G12410.1   Symbols:   Polynucleotidyl transferase, ribonuclease H-like superfamily protein   chr3:3946267-3946959 REVERSE LENGTH=230       | 217 | 230 | 2.00E-61  | 106.0 | 55.3 | 69.1 |
| Rsa1.0_01126.1.g23740.t1 | dbj BAJ34153.1  unnamed protein product [Thellungiella halophila]                                                                                                                                      | 291 | 294 | 1.00E-117 | 101.0 | 85.2 | 86.6 | unnamed protein product                   | ----  | ----                 | AT3G12480.1   Symbols: NF-YC11   nuclear factor Y, subunit C11   chr3:3958065-3960278 FORWARD LENGTH=293                                      | 291 | 293 | 1.00E-110 | 100.7 | 79.4 | 84.2 |
| Rsa1.0_01126.1.g23741.t1 | gb AFW97773.1  cysteine protease inhibitor [Brassica oleracea var. italica]                                                                                                                            | 207 | 205 | 1.00E-107 | 99.0  | 93.2 | 95.7 | cysteine protease inhibitor               | gbpln | Brassica oleracea    | AT3G12490.2   Symbols: ATCYSB, ATCYS6, CYSB   cystatin B   chr3:3960523-3961876 REVERSE LENGTH=234                                            | 207 | 234 | 1.00E-101 | 113.0 | 87.4 | 91.3 |
| Rsa1.0_01126.1.g23742.t1 | dbj BAJ34362.1  unnamed protein product [Thellungiella halophila]                                                                                                                                      | 332 | 322 | 1.00E-142 | 97.0  | 74.4 | 80.4 | unnamed protein product                   | ----  | ----                 | AT3G12500.1   Symbols: ATHCHIB, PR3, PR-3, CHI-B, B-CHI, HCHIB   basic chitinase   chr3:3962501-3963984 REVERSE LENGTH=335                    | 332 | 335 | 1.00E-132 | 100.9 | 74.4 | 81.6 |
| Rsa1.0_01126.1.g23743.t1 | dbj BAJ34362.1  unnamed protein product [Thellungiella halophila]                                                                                                                                      | 335 | 322 | 1.00E-148 | 96.1  | 76.4 | 81.5 | unnamed protein product                   | ----  | ----                 | AT3G12500.1   Symbols: ATHCHIB, PR3, PR-3, CHI-B, B-CHI, HCHIB   basic chitinase   chr3:3962501-3963984 REVERSE LENGTH=335                    | 335 | 335 | 1.00E-138 | 100.0 | 73.1 | 78.5 |
| Rsa1.0_01126.1.g23744.t1 | gb ABB83614.1  unknown [Brassica oleracea]                                                                                                                                                             | 190 | 158 | 6.00E-47  | 83.2  | 58.4 | 66.8 | unknown                                   | gbpln | Brassica oleracea    | AT3G12510.1   Symbols:   MADS-box family protein   chr3:3967127-3967648 FORWARD LENGTH=173                                                    | 190 | 173 | 4.00E-17  | 91.1  | 32.1 | 43.2 |
| Rsa1.0_01126.1.g23745.t1 | ref[NP_187859.2] DNA replication complex GINS protein PSF2 [Arabidopsis thaliana]<br>gi 37999772 sp Q9C7A8.2 PSF2_ARATH<br>RecName: Full=DNA replication complex GINS protein PSF2                     | 237 | 210 | 1.00E-96  | 88.6  | 75.1 | 81.9 | DNA replication complex GINS protein PSF2 | gbpln | Arabidopsis thaliana | AT3G12530.1   Symbols: PSF2   PSF2   chr3:3972604-3973864 REVERSE LENGTH=210                                                                  | 237 | 210 | 3.00E-99  | 88.6  | 75.1 | 81.9 |
| Rsa1.0_01126.1.g23746.t1 | ref[XP_002879891.1] RNA binding protein [Arabidopsis lyrata subsp. lyrata]<br>gi 297325730 gb EFH56150.1  RNA binding protein [Arabidopsis lyrata subsp. lyrata]                                       | 162 | 171 | 2.00E-70  | 105.6 | 84.0 | 91.4 | RNA binding protein                       | gbpln | Arabidopsis lyrata   | AT2G40780.1   Symbols:   Nucleic acid-binding, OB-fold-like protein   chr2:17021875-17022748 FORWARD LENGTH=171                               | 162 | 171 | 3.00E-71  | 105.6 | 80.2 | 89.9 |
| Rsa1.0_01126.1.g23747.t1 | dbj BAJ34614.1  unnamed protein product [Thellungiella halophila]                                                                                                                                      | 600 | 637 | 0         | 106.2 | 80.8 | 89.5 | unnamed protein product                   | ----  | ----                 | AT3G12560.1   Symbols: TRFL9, ATTPB2   TRF-like 9   chr3:3982272-3984848 REVERSE LENGTH=619                                                   | 600 | 619 | 0         | 103.2 | 77.8 | 85.7 |
| Rsa1.0_01126.1.g23748.t1 | gb EOA30419.1  hypothetical protein CARUB_v10013545mg [Capsella rubella]<br>gi 48256823 gb EOA30420.1  hypothetical protein CARUB_v10013545mg [Capsella rubella]                                       | 490 | 489 | 0         | 99.8  | 91.2 | 95.1 | hypothetical protein CARUB_v10013545mg    | gbpln | Capsella rubella     | AT3G12570.4   Symbols: FYD   FYD   chr3:3989407-3990876 FORWARD LENGTH=489                                                                    | 490 | 489 | 0         | 99.8  | 90.6 | 94.7 |
| Rsa1.0_01126.1.g23749.t1 | ref[XP_002884912.1] hypothetical protein ARALYDRAFT_897465 [Arabidopsis lyrata subsp. lyrata]<br>gi 297330752 gb EFH61171.1  hypothetical protein ARALYDRAFT_897465 [Arabidopsis lyrata subsp. lyrata] | 651 | 650 | 0         | 99.8  | 97.1 | 98.5 | hypothetical protein ARALYDRAFT_897465    | gbpln | Arabidopsis lyrata   | AT3G12580.1   Symbols: HSP70, ATHSP70   heat shock protein 70   chr3:3991487-3993689 REVERSE LENGTH=650                                       | 651 | 650 | 0         | 99.8  | 97.5 | 98.6 |



|                          |                                                                                                                                                                                                                                                                                                                                                   |      |      |           |        |      |      |                                                                                                                                                                                                                                                                                              |       |                      |                                                                                                                                                                                                                                                                                                                               |      |      |           |       |      |      |
|--------------------------|---------------------------------------------------------------------------------------------------------------------------------------------------------------------------------------------------------------------------------------------------------------------------------------------------------------------------------------------------|------|------|-----------|--------|------|------|----------------------------------------------------------------------------------------------------------------------------------------------------------------------------------------------------------------------------------------------------------------------------------------------|-------|----------------------|-------------------------------------------------------------------------------------------------------------------------------------------------------------------------------------------------------------------------------------------------------------------------------------------------------------------------------|------|------|-----------|-------|------|------|
| Rsa1.0_01126.1.g23750.t1 | ref NP_187865.6  uncharacterized protein [Arabidopsis thaliana] g 332641699 gb AE75220.1  uncharacterized protein AT3G12590 [Arabidopsis thaliana]                                                                                                                                                                                                | 1242 | 1184 | 0         | 95.3   | 87.0 | 90.3 | uncharacterized protein                                                                                                                                                                                                                                                                      | gbpln | Arabidopsis thaliana | AT3G12590.1   Symbols:   unknown protein; INVOLVED IN: biological_process unknown; LOCATED IN: chloroplast; Has 50 Blast hits to 41 proteins in 15 species: Archae - 0; Bacteria - 0; Metazoa - 2; Fungi - 0; Plants - 43; Viruses - 0; Other Eukaryotes - 5 (source: NCBI BLINK).   chr3:3996473-4003657 REVERSE LENGTH=1184 | 1242 | 1184 | 0         | 95.3  | 87.0 | 90.3 |
| Rsa1.0_01126.1.g23751.t1 | gb EOA31556.1  hypothetical protein CARUB_v10014749mg [Capsella rubella]                                                                                                                                                                                                                                                                          | 207  | 181  | 5.00E-84  | 87.4   | 76.8 | 79.2 | hypothetical protein CARUB_v10014749mg                                                                                                                                                                                                                                                       | gbpln | Capsella rubella     | AT3G12600.1   Symbols: atnudt16, NUDT16   nudix hydrolase homolog 16   chr3:4004809-4005995 FORWARD LENGTH=180                                                                                                                                                                                                                | 207  | 180  | 4.00E-77  | 87.0  | 71.5 | 77.3 |
| Rsa1.0_01126.1.g23752.t1 | dbj BAJ34133.1  unnamed protein product [Theellungiella halophila]                                                                                                                                                                                                                                                                                | 369  | 406  | 0         | 110.0  | 89.7 | 94.6 | unnamed protein product                                                                                                                                                                                                                                                                      | ----  | ----                 | AT3G12610.1   Symbols: DRT100   Leucine-rich repeat (LRR) family protein   chr3:4006661-4007779 REVERSE LENGTH=372                                                                                                                                                                                                            | 369  | 372  | 0         | 100.8 | 87.0 | 93.0 |
| Rsa1.0_01127.1.g23753.t1 | #                                                                                                                                                                                                                                                                                                                                                 | #    | #    | #         | #      | #    | #    | -                                                                                                                                                                                                                                                                                            | ----  | ----                 | #                                                                                                                                                                                                                                                                                                                             | #    | #    | #         | #     | #    |      |
| Rsa1.0_01127.1.g23754.t1 | ref XP_002891334.1  hypothetical protein ARALYDRAFT_891486 [Arabidopsis lyrata subsp. lyrata] g 297337176 gb EFH67593.1  hypothetical protein ARALYDRAFT_891486 [Arabidopsis lyrata subsp. lyrata]                                                                                                                                                | 83   | 83   | 9.00E-20  | 100.0  | 66.3 | 77.1 | hypothetical protein ARALYDRAFT_891486                                                                                                                                                                                                                                                       | gbpln | Arabidopsis lyrata   | #                                                                                                                                                                                                                                                                                                                             | #    | #    | #         | #     | #    |      |
| Rsa1.0_01127.1.g23755.t1 | #                                                                                                                                                                                                                                                                                                                                                 | #    | #    | #         | #      | #    | #    | -                                                                                                                                                                                                                                                                                            | ----  | ----                 | #                                                                                                                                                                                                                                                                                                                             | #    | #    | #         | #     | #    |      |
| Rsa1.0_01127.1.g23756.t1 | gb AAF79797.1 AC020646_20 T32E20.30 [Arabidopsis thaliana]                                                                                                                                                                                                                                                                                        | 239  | 1397 | 2.00E-54  | 584.5  | 46.4 | 60.7 | T32E20.30                                                                                                                                                                                                                                                                                    | gbpln | Arabidopsis thaliana | #                                                                                                                                                                                                                                                                                                                             | #    | #    | #         | #     | #    |      |
| Rsa1.0_01127.1.g23757.t2 | ref XP_002887053.1  hypothetical protein ARALYDRAFT_894325 [Arabidopsis lyrata subsp. lyrata] g 297332894 gb EFH63312.1  hypothetical protein ARALYDRAFT_894325 [Arabidopsis lyrata subsp. lyrata]                                                                                                                                                | 367  | 455  | 2.00E-80  | 124.0  | 51.2 | 62.7 | hypothetical protein ARALYDRAFT_894325                                                                                                                                                                                                                                                       | gbpln | Arabidopsis lyrata   | AT5G01140.1   Symbols:   Protein of unknown function (DUF674)   chr5:49891-51437 FORWARD LENGTH=473                                                                                                                                                                                                                           | 367  | 473  | 6.00E-47  | 128.9 | 34.9 | 48.0 |
| Rsa1.0_01127.1.g23758.t2 | gb AAG50806.1 AC079281_8 unknown protein [Arabidopsis thaliana]                                                                                                                                                                                                                                                                                   | 1567 | 1213 | 0         | 77.4   | 27.2 | 39.3 | unknown protein                                                                                                                                                                                                                                                                              | gbpln | Arabidopsis thaliana | AT3G24255.1   Symbols:   RNA-directed DNA polymerase (reverse transcriptase)-related family protein   chr3:8789471-8793208 FORWARD LENGTH=746                                                                                                                                                                                 | 1567 | 746  | 7.00E-50  | 47.6  | 8.0  | 11.9 |
| Rsa1.0_01127.1.g23759.t1 | gb AAC67331.1  putative non-LTR retroelement reverse transcriptase [Arabidopsis thaliana]                                                                                                                                                                                                                                                         | 757  | 1449 | 5.00E-50  | 191.4  | 19.9 | 28.9 | putative non-LTR retroelement reverse transcriptase                                                                                                                                                                                                                                          | gbpln | Arabidopsis thaliana | AT3G24255.1   Symbols:   RNA-directed DNA polymerase (reverse transcriptase)-related family protein   chr3:8789471-8793208 FORWARD LENGTH=746                                                                                                                                                                                 | 757  | 746  | 3.00E-19  | 98.5  | 10.7 | 14.3 |
| Rsa1.0_01127.1.g23760.t1 | gb AAO67369.1  polyprotein 1 [Petunia vein clearing virus]                                                                                                                                                                                                                                                                                        | 162  | 1886 | 2.00E-12  | 1164.2 | 37.0 | 49.4 | polyprotein 1                                                                                                                                                                                                                                                                                | gbvrl | Petunia vein         | #                                                                                                                                                                                                                                                                                                                             | #    | #    | #         | #     | #    |      |
| Rsa1.0_01127.1.g23761.t1 | sp Q6XKE6.1 POLG_PVGV2 RecName: Full=Genome polyprotein; Contains: RecName: Full=Movement protein; Short=MP; Contains: RecName: Full=Capsid protein; Short=CP; Contains: RecName: Full=Aspartic protease; Short=PR; Contains: RecName: Full=Reverse transcriptase; Short=RT g 34328896 gb AAO67368.1  polyprotein 1 [Petunia vein clearing virus] | 1061 | 2180 | 3.00E-97  | 205.5  | 26.9 | 42.3 | RecName: Full=Genome polyprotein; Contains: RecName: Full=Movement protein; Short=MP; Contains: RecName: Full=Capsid protein; Short=CP; Contains: RecName: Full=Aspartic protease; Short=PR; Contains: RecName: Full=Reverse transcriptase; Short=RT g 34328896 gb AAO67368.1  polyprotein 1 | gbvrl | Petunia vein         | AT1G37113.1   Symbols:   unknown protein; LOCATED IN: chloroplast; Has 24 Blast hits to 24 proteins in 7 species: Archae - 0; Bacteria - 0; Metazoa - 4; Fungi - 0; Plants - 14; Viruses - 6; Other Eukaryotes - 0 (source: NCBI BLINK).   chr1:14136413-14138245 FORWARD LENGTH=414                                          | 1061 | 414  | 3.00E-21  | 39.0  | 6.7  | 9.1  |
| Rsa1.0_01127.1.g23762.t1 | emb CAN64509.1  hypothetical protein VITISV_041217 [Vitis vinifera]                                                                                                                                                                                                                                                                               | 1303 | 1269 | 0         | 97.4   | 48.7 | 62.5 | hypothetical protein VITISV_041217                                                                                                                                                                                                                                                           | gbpln | Vitis vinifera       | AT4G23180.1   Symbols: CRK8   cysteine-rich RLK (RECEPTOR-like protein kinase) 8   chr4:12129485-12134086 FORWARD LENGTH=1262                                                                                                                                                                                                 | 1303 | 1262 | 2.00E-98  | 96.9  | 14.0 | 21.4 |
| Rsa1.0_01127.1.g23763.t1 | gb AAL60580.1 AF454958.1 senescence-associated cysteine protease [Brassica oleracea]                                                                                                                                                                                                                                                              | 300  | 485  | 1.00E-151 | 161.7  | 92.3 | 96.7 | senescence-associated cysteine protease                                                                                                                                                                                                                                                      | gbpln | Brassica oleracea    | AT1G47128.1   Symbols: RD21, RD21A   Granulin repeat cysteine protease family protein   chr1:17283139-17285609 REVERSE LENGTH=462                                                                                                                                                                                             | 300  | 462  | 1.00E-151 | 154.0 | 88.0 | 94.3 |
| Rsa1.0_01127.1.g23764.t1 | #                                                                                                                                                                                                                                                                                                                                                 | #    | #    | #         | #      | #    | #    | -                                                                                                                                                                                                                                                                                            | ----  | ----                 | #                                                                                                                                                                                                                                                                                                                             | #    | #    | #         | #     | #    |      |
| Rsa1.0_01128.1.g23765.t1 | dbj BAB10790.1  retroelement pol polyprotein-like [Arabidopsis thaliana]                                                                                                                                                                                                                                                                          | 2497 | 1864 | 0         | 74.6   | 27.4 | 33.6 | retroelement pol polyprotein-like                                                                                                                                                                                                                                                            | gbpln | Arabidopsis thaliana | #                                                                                                                                                                                                                                                                                                                             | #    | #    | #         | #     | #    |      |
| Rsa1.0_01128.1.g23766.t7 | gb AAF18641.1 AC006228_12 F5J5.16 [Arabidopsis thaliana]                                                                                                                                                                                                                                                                                          | 1341 | 1024 | 8.00E-75  | 76.4   | 11.6 | 16.0 | F5J5.16                                                                                                                                                                                                                                                                                      | gbpln | Arabidopsis thaliana | #                                                                                                                                                                                                                                                                                                                             | #    | #    | #         | #     | #    |      |
| Rsa1.0_01128.1.g23767.t2 | #                                                                                                                                                                                                                                                                                                                                                 | #    | #    | #         | #      | #    | #    | -                                                                                                                                                                                                                                                                                            | ----  | ----                 | #                                                                                                                                                                                                                                                                                                                             | #    | #    | #         | #     | #    |      |
| Rsa1.0_01128.1.g23768.t3 | emb CAN84035.1  hypothetical protein VITISV_016995 [Vitis vinifera]                                                                                                                                                                                                                                                                               | 848  | 965  | 0         | 113.8  | 40.1 | 52.6 | hypothetical protein VITISV_016995                                                                                                                                                                                                                                                           | gbpln | Vitis vinifera       | #                                                                                                                                                                                                                                                                                                                             | #    | #    | #         | #     | #    |      |

|                          |                                                                                                                                                                                                                                                                                                                                                                                                                                                                                                                                                                                             |      |      |           |       |      |      |                                                                                                                                                                                                                                                                                                      |       |                      |                                                                                                                                               |      |     |           |       |      |      |
|--------------------------|---------------------------------------------------------------------------------------------------------------------------------------------------------------------------------------------------------------------------------------------------------------------------------------------------------------------------------------------------------------------------------------------------------------------------------------------------------------------------------------------------------------------------------------------------------------------------------------------|------|------|-----------|-------|------|------|------------------------------------------------------------------------------------------------------------------------------------------------------------------------------------------------------------------------------------------------------------------------------------------------------|-------|----------------------|-----------------------------------------------------------------------------------------------------------------------------------------------|------|-----|-----------|-------|------|------|
| Rsa1.0_01128.1.g23769.t3 | gb AAF99763.1 AC003981.13<br>F22O13.21 [Arabidopsis thaliana]<br>gi 9293930 dbj BAB01833.1  Mutator-<br>like transposase [Arabidopsis thaliana]<br>gi 10177478 dbj BAB10869.1  mutator-<br>like transposase [Arabidopsis thaliana]                                                                                                                                                                                                                                                                                                                                                          | 883  | 915  | 1.00E-120 | 103.6 | 24.8 | 36.8 | F22O13.21                                                                                                                                                                                                                                                                                            | gbpln | Arabidopsis thaliana | AT1G64260.1   Symbols:   MuDR family transposase   chr1:23847756-23849915 FORWARD LENGTH=719                                                  | 883  | 719 | 1.00E-22  | 81.4  | 13.3 | 23.7 |
| Rsa1.0_01128.1.g23770.t1 | gb ABD64941.1  Ulp1 protease family protein [Brassica oleracea]                                                                                                                                                                                                                                                                                                                                                                                                                                                                                                                             | 876  | 871  | 6.00E-58  | 99.4  | 17.5 | 26.0 | Ulp1 protease family protein                                                                                                                                                                                                                                                                         | gbpln | Brassica oleracea    | AT1G31150.1   Symbols:   Domain of unknown function (DUF1985)   chr1:1120097-1122412 FORWARD LENGTH=673                                       | 876  | 673 | 1.00E-25  | 76.8  | 8.7  | 14.8 |
| Rsa1.0_01128.1.g23771.t1 | #                                                                                                                                                                                                                                                                                                                                                                                                                                                                                                                                                                                           | #    | #    | #         | #     | #    | -    | ----                                                                                                                                                                                                                                                                                                 | ----  | #                    | #                                                                                                                                             | #    | #   | #         | #     | #    | #    |
| Rsa1.0_01128.1.g23772.t1 | ref XP_002890207.1  hypothetical protein ARALYDRAFT_471920 [Arabidopsis lyrata subsp. lyrata]<br>gi 297336049 gb EFH66466.1  hypothetical protein ARALYDRAFT_471920 [Arabidopsis lyrata subsp. lyrata]                                                                                                                                                                                                                                                                                                                                                                                      | 140  | 218  | 6.00E-15  | 155.7 | 45.0 | 56.4 | hypothetical protein ARALYDRAFT_471920                                                                                                                                                                                                                                                               | gbpln | Arabidopsis lyrata   | AT1G17170.1   Symbols:   ATGSTU24, GST, GSTU24   glutathione S-transferase TAU 24   chr1:5868895-5870691 FORWARD LENGTH=218                   | 140  | 218 | 1.00E-16  | 155.7 | 42.1 | 55.7 |
| Rsa1.0_01128.1.g23773.t1 | ref NP_192445.1  Zinc knuckle (CCHC-type) family protein [Arabidopsis thaliana] gi 7267296 emb CAB81078.1  putative protein [Arabidopsis thaliana] gi 332657109 gb AEE82509.1  Zinc knuckle (CCHC-type) family protein [Arabidopsis thaliana]                                                                                                                                                                                                                                                                                                                                               | 398  | 735  | 4.00E-75  | 184.7 | 43.5 | 58.5 | Zinc knuckle (CCHC-type) family protein                                                                                                                                                                                                                                                              | gbpln | Arabidopsis thaliana | AT4G05360.1   Symbols:   Zinc knuckle (CCHC-type) family protein   chr4:2728204-2732337 FORWARD LENGTH=735                                    | 398  | 735 | 9.00E-78  | 184.7 | 43.5 | 58.5 |
| Rsa1.0_01129.1.g23774.t1 | #                                                                                                                                                                                                                                                                                                                                                                                                                                                                                                                                                                                           | #    | #    | #         | #     | #    | -    | ----                                                                                                                                                                                                                                                                                                 | ----  | #                    | #                                                                                                                                             | #    | #   | #         | #     | #    | #    |
| Rsa1.0_01129.1.g23775.t1 | gb AAT40486.1  putative polyprotein [Solanum demissum]                                                                                                                                                                                                                                                                                                                                                                                                                                                                                                                                      | 216  | 1065 | 2.00E-27  | 493.1 | 33.3 | 44.9 | putative polyprotein                                                                                                                                                                                                                                                                                 | gbpln | Solanum demissum     | #                                                                                                                                             | #    | #   | #         | #     | #    | #    |
| Rsa1.0_01129.1.g23776.t1 | ref XP_002891032.1  dehydration-responsive family protein [Arabidopsis lyrata subsp. lyrata]<br>gi 297336874 gb EFH67291.1  dehydration-responsive family protein [Arabidopsis lyrata subsp. lyrata]                                                                                                                                                                                                                                                                                                                                                                                        | 645  | 639  | 0         | 99.1  | 89.0 | 93.8 | dehydration-responsive family protein                                                                                                                                                                                                                                                                | gbpln | Arabidopsis lyrata   | AT1G33170.1   Symbols:   S-adenosyl-L-methionine-dependent methyltransferases superfamily protein   chr1:12027262-12030397 FORWARD LENGTH=639 | 645  | 639 | 0         | 99.1  | 88.5 | 93.6 |
| Rsa1.0_01129.1.g23777.t2 | gb EOA39207.1  hypothetical protein CARUB_v10012177mg [Capsella rubella]                                                                                                                                                                                                                                                                                                                                                                                                                                                                                                                    | 386  | 347  | 1.00E-166 | 89.9  | 81.6 | 85.5 | hypothetical protein CARUB_v10012177mg                                                                                                                                                                                                                                                               | gbpln | Capsella rubella     | AT1G33230.1   Symbols:   TMPIT-like protein   chr1:12046844-12049794 FORWARD LENGTH=347                                                       | 386  | 347 | 1.00E-162 | 89.9  | 79.0 | 81.9 |
| Rsa1.0_01129.1.g23778.t1 | ref NP_174594.1  protein GT-2-like 1 [Arabidopsis thaliana]<br>gi 332193452 gb AEE31573.1  trihelix transcription factor GTL1 [Arabidopsis thaliana]                                                                                                                                                                                                                                                                                                                                                                                                                                        | 646  | 669  | 0         | 103.6 | 77.2 | 82.7 | protein GT-2-like 1                                                                                                                                                                                                                                                                                  | gbpln | Arabidopsis thaliana | AT1G33240.1   Symbols:   AT-GTL1, AT-GTL2, GTL1   GT-2-like 1   chr1:12051859-12054320 REVERSE LENGTH=669                                     | 646  | 669 | 0         | 103.6 | 77.2 | 82.7 |
| Rsa1.0_01129.1.g23779.t1 | #                                                                                                                                                                                                                                                                                                                                                                                                                                                                                                                                                                                           | #    | #    | #         | #     | #    | -    | ----                                                                                                                                                                                                                                                                                                 | ----  | #                    | #                                                                                                                                             | #    | #   | #         | #     | #    | #    |
| Rsa1.0_01130.1.g23780.t1 | #                                                                                                                                                                                                                                                                                                                                                                                                                                                                                                                                                                                           | #    | #    | #         | #     | #    | -    | ----                                                                                                                                                                                                                                                                                                 | ----  | #                    | #                                                                                                                                             | #    | #   | #         | #     | #    | #    |
| Rsa1.0_01130.1.g23781.t2 | gb AAD17398.1  putative non-LTR retroelement reverse transcriptase [Arabidopsis thaliana]                                                                                                                                                                                                                                                                                                                                                                                                                                                                                                   | 1760 | 1225 | 1.00E-166 | 69.6  | 17.5 | 23.1 | putative non-LTR retroelement reverse transcriptase                                                                                                                                                                                                                                                  | gbpln | Arabidopsis thaliana | AT4G29090.1   Symbols:   Ribonuclease H-like superfamily protein   chr4:14333528-14335255 FORWARD LENGTH=575                                  | 1760 | 575 | 9.00E-43  | 32.7  | 6.8  | 12.0 |
| Rsa1.0_01130.1.g23782.t1 | gb AAF81343.1 AC007767.23 Contains similarity to a peptide transport protein homolog F17L22.140 gi 7488004 from Arabidopsis thaliana BAC F17L22 gi AL035527. It contains a POT family domain PF00854. ESTs gi BE038248, gi T22680, gi T04498, gi R89961, gi R30626, gi R30389, gi AA713063 and gi AA585801 come from this gene [Arabidopsis thaliana]                                                                                                                                                                                                                                       | 612  | 606  | 0         | 99.0  | 91.2 | 95.6 | Contains similarity to a peptide transport protein homolog F17L22.140 gi 7488004 from Arabidopsis thaliana BAC F17L22 gi AL035527. It contains a POT family domain PF00854. ESTs gi BE038248, gi T22680, gi T04498, gi R89961, gi R30626, gi R30389, gi AA713063 and gi AA585801 come from this gene | gbpln | Arabidopsis thaliana | AT1G32450.1   Symbols:   NRT1.5   nitrate transporter 1.5   chr1:11715337-11719807 REVERSE LENGTH=614                                         | 612  | 614 | 0         | 100.3 | 90.8 | 95.3 |
| Rsa1.0_01130.1.g23783.t1 | ref NP_564402.1  plastidial pyruvate kinase 3 [Arabidopsis thaliana]<br>gi 75305901 sp Q93Z53.1 PKP3_ARATH<br>RecName: Full=Plastidial pyruvate kinase 3, chloroplastic; Short=PKp3; AltName: Full=Pyruvate kinase I; AltName: Full=Pyruvate kinase isozyme B2, chloroplastic; Short=PKP-BETA2; Short=Plastidic pyruvate kinase beta subunit 2; Flags: Precursor<br>gi 16648691 gb AAL25538.1  At1g32440/F5D14.7 [Arabidopsis thaliana] gi 24797052 gb AAN64538.1  At1g32440/F5D14.7 [Arabidopsis thaliana] gi 332193366 gb AEE31487.1  plastidial pyruvate kinase 3 [Arabidopsis thaliana] | 576  | 571  | 0         | 99.1  | 90.5 | 94.1 | plastidial pyruvate kinase 3                                                                                                                                                                                                                                                                         | gbpln | Arabidopsis thaliana | AT1G32440.1   Symbols:   PKp3   plastidial pyruvate kinase 3   chr1:11712205-11714963 FORWARD LENGTH=571                                      | 576  | 571 | 0         | 99.1  | 90.5 | 94.1 |

|                          |                                                                                                                                                                                                                                                                                                                                                                                                                                                                                                                                                                                                                                                                                                                              |     |      |           |       |      |      |                                                            |       |                      |                                                                                                                                      |     |     |           |       |      |      |
|--------------------------|------------------------------------------------------------------------------------------------------------------------------------------------------------------------------------------------------------------------------------------------------------------------------------------------------------------------------------------------------------------------------------------------------------------------------------------------------------------------------------------------------------------------------------------------------------------------------------------------------------------------------------------------------------------------------------------------------------------------------|-----|------|-----------|-------|------|------|------------------------------------------------------------|-------|----------------------|--------------------------------------------------------------------------------------------------------------------------------------|-----|-----|-----------|-------|------|------|
| Rsa1.0_01130.1.g23784.t1 | #                                                                                                                                                                                                                                                                                                                                                                                                                                                                                                                                                                                                                                                                                                                            | #   | #    | #         | #     | #    | #    | -                                                          | ----  | ----                 | #                                                                                                                                    | #   | #   | #         | #     | #    |      |
| Rsa1.0_01130.1.g23785.t1 | dbj BAJ34310.1  unnamed protein product [Theellungiella halophila]                                                                                                                                                                                                                                                                                                                                                                                                                                                                                                                                                                                                                                                           | 268 | 280  | 1.00E-127 | 104.5 | 91.4 | 95.5 | unnamed protein product                                    | ----  | ----                 | AT1G32400.3   Symbols: TOM2A   tobamovirus multiplication 2A   chr1:11689393-11690873 REVERSE LENGTH=280                             | 268 | 280 | 1.00E-129 | 104.5 | 90.7 | 95.9 |
| Rsa1.0_01130.1.g23786.t1 | #                                                                                                                                                                                                                                                                                                                                                                                                                                                                                                                                                                                                                                                                                                                            | #   | #    | #         | #     | #    | #    | -                                                          | ----  | ----                 | #                                                                                                                                    | #   | #   | #         | #     | #    |      |
| Rsa1.0_01130.1.g23787.t1 | ref NP_174578.1  F-box and associated interaction domain-containing protein [Arabidopsis thaliana]<br>gi 378405165 sp Q9MAPI.2 FB33.ARATH RecName: Full=Putative F-box protein At1g33020<br>gi 332193429 gb AEE31550.1  F-box and associated interaction domain-containing protein [Arabidopsis thaliana]                                                                                                                                                                                                                                                                                                                                                                                                                    | 516 | 548  | 2.00E-83  | 106.2 | 39.3 | 52.3 | F-box and associated interaction domain-containing protein | gbpln | Arabidopsis thaliana | AT1G33020.1   Symbols:   F-box and associated interaction domains-containing protein   chr1:11962746-11964832 FORWARD LENGTH=548     | 516 | 548 | 5.00E-86  | 106.2 | 39.3 | 52.3 |
| Rsa1.0_01131.1.g23788.t1 | #                                                                                                                                                                                                                                                                                                                                                                                                                                                                                                                                                                                                                                                                                                                            | #   | #    | #         | #     | #    | #    | -                                                          | ----  | ----                 | #                                                                                                                                    | #   | #   | #         | #     | #    |      |
| Rsa1.0_01131.1.g23789.t3 | ref XP_002884722.1  hypothetical protein ARALYDRAFT_478237 [Arabidopsis lyrata subsp. lyrata]<br>gi 297330562 gb EFH60981.1  hypothetical protein ARALYDRAFT_478237 [Arabidopsis lyrata subsp. lyrata]                                                                                                                                                                                                                                                                                                                                                                                                                                                                                                                       | 564 | 567  | 0         | 100.5 | 84.0 | 89.5 | hypothetical protein ARALYDRAFT_478237                     | gbpln | Arabidopsis lyrata   | AT3G09220.1   Symbols: LAC7   laccase 7   chr3:2835668-2837956 REVERSE LENGTH=567                                                    | 564 | 567 | 0         | 100.5 | 82.3 | 88.5 |
| Rsa1.0_01131.1.g23790.t1 | ref XP_002884723.1  hypothetical protein ARALYDRAFT_317726 [Arabidopsis lyrata subsp. lyrata]<br>gi 297330563 gb EFH60982.1  hypothetical protein ARALYDRAFT_317726 [Arabidopsis lyrata subsp. lyrata]                                                                                                                                                                                                                                                                                                                                                                                                                                                                                                                       | 491 | 506  | 0         | 103.1 | 84.5 | 90.4 | hypothetical protein ARALYDRAFT_317726                     | gbpln | Arabidopsis lyrata   | AT3G09240.1   Symbols:   Protein kinase protein with tetratricopeptide repeat domain   chr3:2835668-2837956 REVERSE LENGTH=477       | 491 | 477 | 0         | 97.1  | 80.2 | 86.4 |
| Rsa1.0_01131.1.g23791.t1 | dbj BAJ34410.1  unnamed protein product [Theellungiella halophila]                                                                                                                                                                                                                                                                                                                                                                                                                                                                                                                                                                                                                                                           | 516 | 524  | 0         | 101.6 | 86.0 | 92.1 | unnamed protein product                                    | ----  | ----                 | AT3G09260.1   Symbols: PYK10, PSR3.1, BGLU23, LEB   Glycosyl hydrolase superfamily protein   chr3:2840657-2843730 REVERSE LENGTH=524 | 516 | 524 | 0         | 101.6 | 83.1 | 89.9 |
| Rsa1.0_01131.1.g23792.t1 | gb AAF69169.1 AC007915.21 F27F5.21 [Arabidopsis thaliana]                                                                                                                                                                                                                                                                                                                                                                                                                                                                                                                                                                                                                                                                    | 267 | 1023 | 8.00E-38  | 383.1 | 33.7 | 45.7 | F27F5.21                                                   | gbpln | Arabidopsis thaliana | #                                                                                                                                    | #   | #   | #         | #     | #    |      |
| Rsa1.0_01131.1.g23793.t1 | emb CAB39638.1  RNA-directed DNA polymerase-like protein [Arabidopsis thaliana] gi 267666 emb CAB78094.1  RNA-directed DNA polymerase-like protein [Arabidopsis thaliana]                                                                                                                                                                                                                                                                                                                                                                                                                                                                                                                                                    | 497 | 1274 | 1.00E-133 | 256.3 | 49.7 | 66.0 | RNA-directed DNA polymerase-like protein                   | gbpln | Arabidopsis thaliana | AT4G29090.1   Symbols:   Ribonuclease H-like superfamily protein   chr4:14333528-14335255 FORWARD LENGTH=575                         | 497 | 575 | 4.00E-54  | 115.7 | 31.4 | 49.9 |
| Rsa1.0_01131.1.g23794.t1 | gb ACP30591.1  disease resistance protein [Brassica rapa subsp. pekinensis]                                                                                                                                                                                                                                                                                                                                                                                                                                                                                                                                                                                                                                                  | 277 | 1555 | 2.00E-74  | 561.4 | 51.6 | 66.4 | disease resistance protein                                 | gbpln | Brassica rapa        | AT2G06845.1   Symbols:   Beta-galactosidase related protein   chr2:2754666-2756008 FORWARD LENGTH=315                                | 277 | 315 | 6.00E-39  | 113.7 | 35.7 | 48.0 |
| Rsa1.0_01132.1.g23795.t1 | gb EOA35101.1  hypothetical protein CARUB_v10020215mg [Capsella rubella]                                                                                                                                                                                                                                                                                                                                                                                                                                                                                                                                                                                                                                                     | 394 | 480  | 0         | 121.8 | 87.8 | 91.9 | hypothetical protein CARUB_v10020215mg                     | gbpln | Capsella rubella     | AT1G69790.1   Symbols:   Protein kinase superfamily protein   chr1:26266838-26268818 FORWARD LENGTH=387                              | 394 | 387 | 0         | 98.2  | 87.3 | 91.6 |
| Rsa1.0_01132.1.g23796.t1 | #                                                                                                                                                                                                                                                                                                                                                                                                                                                                                                                                                                                                                                                                                                                            | #   | #    | #         | #     | #    | #    | -                                                          | ----  | ----                 | #                                                                                                                                    | #   | #   | #         | #     | #    |      |
| Rsa1.0_01132.1.g23797.t1 | ref NP_177136.1  homeobox-leucine zipper protein ATHB-13 [Arabidopsis thaliana]<br>gi 118573191 sp Q8LC03.2 ATB13. ARATH RecName: Full=Homeobox-leucine zipper protein ATHB-13; AltName: Full=HD-ZIP protein ATHB-13; AltName: Full=Homeodomain transcription factor ATHB-13<br>gi 6644295 gb AAF20996.1 AF208044.1 homeodomain leucine-zipper protein ATHB13 [Arabidopsis thaliana]<br>gi 12325190 gb AAG52541.1 AC013289.8 homeobox gene 13 protein; 11736-10437 [Arabidopsis thaliana]<br>gi 15982929 gb AAL09811.1 At1g69780/T6C23.2 [Arabidopsis thaliana] gi 22137260 gb AAM91475.1 At1g69780/T6C23.2 [Arabidopsis thaliana] gi 332196853 gb AEE34974.1 homeobox-leucine zipper protein ATHB-13 [Arabidopsis thaliana] | 288 | 294  | 1.00E-150 | 102.1 | 92.4 | 95.1 | homeobox-leucine zipper protein ATHB-13                    | gbpln | Arabidopsis thaliana | AT1G69780.1   Symbols: ATHB13   Homeobox-leucine zipper protein family   chr1:26259166-26260465 FORWARD LENGTH=294                   | 288 | 294 | 1.00E-153 | 102.1 | 92.4 | 95.1 |
| Rsa1.0_01132.1.g23798.t1 | gb AAC63678.1  putative non-LTR retroelement reverse transcriptase [Arabidopsis thaliana]                                                                                                                                                                                                                                                                                                                                                                                                                                                                                                                                                                                                                                    | 400 | 1216 | 1.00E-100 | 304.0 | 44.8 | 62.3 | putative non-LTR retroelement reverse transcriptase        | gbpln | Arabidopsis thaliana | AT1G43760.1   Symbols:   DNase I-like superfamily protein   chr1:16528880-16531065 REVERSE LENGTH=626                                | 400 | 626 | 4.00E-22  | 156.5 | 11.5 | 20.3 |

|                          |                                                                                                                                                                                                                                                                                                                                                                                                                                                                                                                                                                                                                                                                                                                                                                                                                                                                                                                                                                          |      |      |           |       |      |      |                                                                      |       |                      |                                                                                                                                           |      |      |           |       |      |      |
|--------------------------|--------------------------------------------------------------------------------------------------------------------------------------------------------------------------------------------------------------------------------------------------------------------------------------------------------------------------------------------------------------------------------------------------------------------------------------------------------------------------------------------------------------------------------------------------------------------------------------------------------------------------------------------------------------------------------------------------------------------------------------------------------------------------------------------------------------------------------------------------------------------------------------------------------------------------------------------------------------------------|------|------|-----------|-------|------|------|----------------------------------------------------------------------|-------|----------------------|-------------------------------------------------------------------------------------------------------------------------------------------|------|------|-----------|-------|------|------|
| Rsa1.0_01133.1.g23799.t1 | refNP_680410.1   C3H4 type zinc finger protein [Arabidopsis thaliana] gi 8978263 dbj BAA98154.1   retroelement pol polyprotein-like [Arabidopsis thaliana] gi 23306382 gb AAN17418.1   Unknown protein [Arabidopsis thaliana] gi 34098795 gb AAQ56780.1   At5g49665 [Arabidopsis thaliana] gi 332008460 gb AED95843.1   C3H4 type zinc finger protein [Arabidopsis thaliana] gi 358031540 dbj BAL15672.1   WAVY GROWTH3 [Arabidopsis thaliana] refNP_201198.1   leucine-rich repeat protein kinase-like protein [Arabidopsis thaliana] gi 75264278 sp Q9LVPO.1   Y5639_ARATH RecName: Full=Probable leucine-rich repeat receptor-like protein kinase At5g63930; Flags: Precursor gi 8777306 dbj BAA96896.1   receptor-like protein kinase [Arabidopsis thaliana] gi 22458974 gb ACN59405.1   leucine-rich repeat receptor-like protein kinase [Arabidopsis thaliana] gi 332010434 gb AED97817.1   leucine-rich repeat protein kinase-like protein [Arabidopsis thaliana] | 712  | 740  | 0         | 103.9 | 83.1 | 89.0 | C3H4 type zinc finger protein                                        | gbpln | Arabidopsis thaliana | AT5G49665.1   Symbols:   Zinc finger (C3H4-type RING finger) family protein   chr5:20167119-20169420 REVERSE LENGTH=740                   | 712  | 740  | 0         | 103.9 | 83.1 | 89.0 |
| Rsa1.0_01133.1.g23800.t1 | gi 75264278 sp Q9LVPO.1   Y5639_ARATH RecName: Full=Probable leucine-rich repeat receptor-like protein kinase At5g63930; Flags: Precursor gi 8777306 dbj BAA96896.1   receptor-like protein kinase [Arabidopsis thaliana] gi 22458974 gb ACN59405.1   leucine-rich repeat receptor-like protein kinase [Arabidopsis thaliana] gi 332010434 gb AED97817.1   leucine-rich repeat protein kinase-like protein [Arabidopsis thaliana]                                                                                                                                                                                                                                                                                                                                                                                                                                                                                                                                        | 1150 | 1102 | 0         | 95.8  | 83.4 | 88.9 | leucine-rich repeat protein kinase-like protein                      | gbpln | Arabidopsis thaliana | AT5G63930.1   Symbols:   Leucine-rich repeat protein kinase family protein   chr5:25853006-2586392 FORWARD LENGTH=1102                    | 1150 | 1102 | 0         | 95.8  | 83.4 | 88.9 |
| Rsa1.0_01133.1.g23801.t3 | gb ABD65084.1   hypothetical protein 27.t00096 [Brassica oleracea]                                                                                                                                                                                                                                                                                                                                                                                                                                                                                                                                                                                                                                                                                                                                                                                                                                                                                                       | 486  | 645  | 6.00E-97  | 132.7 | 44.4 | 55.3 | hypothetical protein 27.t00096                                       | gbpln | Brassica oleracea    | AT5G45570.1   Symbols:   Ulp1 protease family protein   chr5:18472301-18475574 FORWARD LENGTH=921                                         | 486  | 921  | 2.00E-29  | 189.5 | 19.8 | 31.5 |
| Rsa1.0_01133.1.g23802.t1 | gb AAD23705.1   putative Athila retroelement ORF1 protein [Arabidopsis thaliana]                                                                                                                                                                                                                                                                                                                                                                                                                                                                                                                                                                                                                                                                                                                                                                                                                                                                                         | 399  | 333  | 8.00E-39  | 83.5  | 22.3 | 31.1 | putative Athila retroelement ORF1 protein                            | gbpln | Arabidopsis thaliana | #                                                                                                                                         | #    | #    | #         | #     | #    |      |
| Rsa1.0_01133.1.g23803.t4 | #                                                                                                                                                                                                                                                                                                                                                                                                                                                                                                                                                                                                                                                                                                                                                                                                                                                                                                                                                                        | #    | #    | #         | #     | #    | -    | -                                                                    | ----  | ----                 | #                                                                                                                                         | #    | #    | #         | #     | #    |      |
| Rsa1.0_01133.1.g23804.t1 | gb ABW81060.1   GagPol3 [Arabidopsis lyrata subsp. lyrata]                                                                                                                                                                                                                                                                                                                                                                                                                                                                                                                                                                                                                                                                                                                                                                                                                                                                                                               | 520  | 1103 | 5.00E-35  | 212.1 | 14.4 | 16.5 | GagPol3                                                              | gbpln | Arabidopsis lyrata   | #                                                                                                                                         | #    | #    | #         | #     | #    |      |
| Rsa1.0_01133.1.g23805.t3 | refNP_176659.6   protein ILITYHIA [Arabidopsis thaliana] gi 332196168 gb AE34289.1   protein ILITYHIA [Arabidopsis thaliana] refNP_190893.1   SAUR-like auxin-responsive protein [Arabidopsis thaliana] gi 6630745 emb CAB64228.1   putative protein [Arabidopsis thaliana] gi 332645533 gb AEE79054.1   SAUR-like auxin-responsive protein [Arabidopsis thaliana]                                                                                                                                                                                                                                                                                                                                                                                                                                                                                                                                                                                                       | 2641 | 2610 | 0         | 98.8  | 90.6 | 94.5 | protein ILITYHIA                                                     | gbpln | Arabidopsis thaliana | AT1G64790.1   Symbols:   ILA   ILITYHIA   chr1:24065232-24081908 REVERSE LENGTH=2610                                                      | 2641 | 2610 | 0         | 98.8  | 90.6 | 94.5 |
| Rsa1.0_01134.1.g23806.t1 | refNP_190893.1   SAUR-like auxin-responsive protein [Arabidopsis thaliana] gi 6630745 emb CAB64228.1   putative protein [Arabidopsis thaliana] gi 332645533 gb AEE79054.1   SAUR-like auxin-responsive protein [Arabidopsis thaliana]                                                                                                                                                                                                                                                                                                                                                                                                                                                                                                                                                                                                                                                                                                                                    | 116  | 109  | 7.00E-45  | 94.0  | 83.6 | 87.9 | SAUR-like auxin-responsive protein                                   | gbpln | Arabidopsis thaliana | AT3G53250.1   Symbols:   SAUR-like auxin-responsive protein family   chr3:19742968-19743297 FORWARD LENGTH=109                            | 116  | 109  | 1.00E-47  | 94.0  | 83.6 | 87.9 |
| Rsa1.0_01134.1.g23807.t1 | gb ADL09136.1   phenylalanine ammonia-lyase [Brassica oleracea var. botrytis]                                                                                                                                                                                                                                                                                                                                                                                                                                                                                                                                                                                                                                                                                                                                                                                                                                                                                            | 707  | 723  | 0         | 102.3 | 98.7 | 99.6 | phenylalanine ammonia-lyase                                          | gbpln | Brassica oleracea    | AT3G53260.1   Symbols:   PAL2, ATPAL2   phenylalanine ammonia-lyase 2   chr3:19744256-19746619 REVERSE LENGTH=717                         | 707  | 717  | 0         | 101.4 | 95.3 | 98.0 |
| Rsa1.0_01134.1.g23808.t2 | refNP_001190076.1   Small nuclear RNA activating complex (SNAPc), subunit SNAP43 protein [Arabidopsis thaliana] gi 332645540 gb AEE79061.1   Small nuclear RNA activating complex (SNAPc), subunit SNAP43 protein [Arabidopsis thaliana]                                                                                                                                                                                                                                                                                                                                                                                                                                                                                                                                                                                                                                                                                                                                 | 131  | 278  | 7.00E-26  | 212.2 | 61.1 | 69.5 | Small nuclear RNA activating complex (SNAPc), subunit SNAP43 protein | gbpln | Arabidopsis thaliana | AT3G53270.6   Symbols:   Small nuclear RNA activating complex (SNAPc), subunit SNAP43 protein   chr3:19750406-19752168 REVERSE LENGTH=278 | 131  | 278  | 2.00E-28  | 212.2 | 61.1 | 69.5 |
| Rsa1.0_01134.1.g23809.t1 | gb EOA31982.1   hypothetical protein CARUB_v10015243mg [Capsella rubella]                                                                                                                                                                                                                                                                                                                                                                                                                                                                                                                                                                                                                                                                                                                                                                                                                                                                                                | 398  | 416  | 7.00E-73  | 104.5 | 48.0 | 59.8 | hypothetical protein CARUB_v10015243mg                               | gbpln | Capsella rubella     | AT3G19880.1   Symbols:   F-box and associated interaction domains-containing protein   chr3:6911435-6912604 REVERSE LENGTH=389            | 398  | 389  | 8.00E-73  | 97.7  | 44.2 | 57.8 |
| Rsa1.0_01134.1.g23810.t1 | refXP_002876198.1   CYP71B5 [Arabidopsis lyrata subsp. lyrata] gi 297322036 gb EFH52457.1   CYP71B5 [Arabidopsis lyrata subsp. lyrata] refNP_851150.1   putative acetyl-CoA acetyltransferase, cytosolic 2 [Arabidopsis thaliana] gi 42573608 refNP_974900.1   putative acetyl-CoA acetyltransferase, cytosolic 2 [Arabidopsis thaliana] gi 332008175 gb AED95558.1   putative acetyl-CoA acetyltransferase, cytosolic 2 [Arabidopsis thaliana] gi 332008178 gb AED95561.1   putative acetyl-CoA acetyltransferase, cytosolic 2 [Arabidopsis thaliana]                                                                                                                                                                                                                                                                                                                                                                                                                   | 343  | 498  | 1.00E-136 | 145.2 | 72.9 | 78.4 | CYP71B5                                                              | gbpln | Arabidopsis lyrata   | AT3G53280.1   Symbols:   CYP71B5   cytochrome p450 71b5   chr3:19755749-19757466 FORWARD LENGTH=498                                       | 343  | 498  | 1.00E-134 | 145.2 | 67.6 | 74.3 |
| Rsa1.0_01134.1.g23811.t1 | refNP_851150.1   putative acetyl-CoA acetyltransferase, cytosolic 2 [Arabidopsis thaliana] gi 42573608 refNP_974900.1   putative acetyl-CoA acetyltransferase, cytosolic 2 [Arabidopsis thaliana] gi 332008175 gb AED95558.1   putative acetyl-CoA acetyltransferase, cytosolic 2 [Arabidopsis thaliana] gi 332008178 gb AED95561.1   putative acetyl-CoA acetyltransferase, cytosolic 2 [Arabidopsis thaliana]                                                                                                                                                                                                                                                                                                                                                                                                                                                                                                                                                          | 164  | 405  | 7.00E-17  | 247.0 | 33.5 | 36.6 | putative acetyl-CoA acetyltransferase, cytosolic 2                   | gbpln | Arabidopsis thaliana | AT5G47720.1   Symbols:   Thiolase family protein   chr5:19331762-19334009 FORWARD LENGTH=405                                              | 164  | 405  | 2.00E-19  | 247.0 | 33.5 | 36.6 |

|                          |                                                                                                                                                                                                                                                                                                                                                                                                                                                                                                                              |     |     |           |       |       |       |                                                 |       |                      |                                                                                                                                                                                                                                                                                                                                                                   |     |     |           |       |      |      |
|--------------------------|------------------------------------------------------------------------------------------------------------------------------------------------------------------------------------------------------------------------------------------------------------------------------------------------------------------------------------------------------------------------------------------------------------------------------------------------------------------------------------------------------------------------------|-----|-----|-----------|-------|-------|-------|-------------------------------------------------|-------|----------------------|-------------------------------------------------------------------------------------------------------------------------------------------------------------------------------------------------------------------------------------------------------------------------------------------------------------------------------------------------------------------|-----|-----|-----------|-------|------|------|
| Rsa1.0_01134.1.g23812.t1 | ref XP_002876198.1  CYP71B5 [Arabidopsis lyrata subsp. lyrata] gi 297322036 gb EFH52457.1  CYP71B5 [Arabidopsis lyrata subsp. lyrata]                                                                                                                                                                                                                                                                                                                                                                                        | 191 | 498 | 1.00E-89  | 260.7 | 90.6  | 93.2  | CYP71B5                                         | gbpln | Arabidopsis lyrata   | AT3G53280.1   Symbols: CYP71B5   cytochrome p450 71b5   chr3:19755749-19757466 FORWARD LENGTH=498                                                                                                                                                                                                                                                                 | 191 | 498 | 4.00E-91  | 260.7 | 89.5 | 92.7 |
| Rsa1.0_01134.1.g23813.t1 | gb EOA25898.1  hypothetical protein CARUB_v10019277mg [Capsella rubella]                                                                                                                                                                                                                                                                                                                                                                                                                                                     | 254 | 281 | 7.00E-83  | 110.6 | 65.4  | 78.0  | hypothetical protein CARUB_v10019277mg          | gbpln | Capsella rubella     | AT3G53310.1   Symbols:   AP2/B3-like transcriptional factor family protein   chr3:19768927-19768368 REVERSE LENGTH=286                                                                                                                                                                                                                                            | 254 | 286 | 8.00E-73  | 112.6 | 56.3 | 70.9 |
| Rsa1.0_01134.1.g23814.t2 | gb EOA23668.1  hypothetical protein CARUB_v10016876mg, partial [Capsella rubella]                                                                                                                                                                                                                                                                                                                                                                                                                                            | 587 | 604 | 0         | 102.9 | 68.8  | 77.5  | hypothetical protein CARUB_v10016876mg, partial | gbpln | Capsella rubella     | AT3G53320.1   Symbols:   unknown protein; BEST Arabidopsis thaliana protein match is: unknown protein (TAIR:AT2G37070.1); Has 11044 Blast hits to 5993 proteins in 551 species: Archae - 8; Bacteria - 1486; Metazoa - 4078; Fungi - 1814; Plants - 348; Viruses - 112; Other Eukaryotes - 3198 (source: NCBI BLINK).   chr3:19769397-19772278 REVERSE LENGTH=553 | 587 | 553 | 0         | 94.2  | 68.7 | 77.2 |
| Rsa1.0_01134.1.g23815.t1 | ref XP_002879649.1  hypothetical protein ARALYDRAFT_902841 [Arabidopsis lyrata subsp. lyrata] gi 297325458 gb EFH55908.1  hypothetical protein ARALYDRAFT_902841 [Arabidopsis lyrata subsp. lyrata]                                                                                                                                                                                                                                                                                                                          | 191 | 175 | 5.00E-74  | 91.6  | 74.3  | 80.6  | hypothetical protein ARALYDRAFT_902841          | gbpln | Arabidopsis lyrata   | AT3G53340.1   Symbols: NF-YB10   nuclear factor Y, subunit B10   chr3:19774667-19775991 REVERSE LENGTH=176                                                                                                                                                                                                                                                        | 191 | 176 | 1.00E-74  | 92.1  | 78.0 | 81.7 |
| Rsa1.0_01134.1.g23816.t2 | ref NP_974423.1  interactor of constitutive active ROPs 5 [Arabidopsis thaliana] gi 42572657 ref NP_974424.1  interactor of constitutive active ROPs 5 [Arabidopsis thaliana] gi 6729486 emb CAB67642.1  putative protein [Arabidopsis thaliana] gi 332645552 gb AEE79073.1  interactor of constitutive active ROPs 5 [Arabidopsis thaliana] gi 332645553 gb AEE79074.1  interactor of constitutive active ROPs 5 [Arabidopsis thaliana]                                                                                     | 376 | 394 | 1.00E-163 | 104.8 | 81.6  | 89.1  | interactor of constitutive active ROPs 5        | gbpln | Arabidopsis thaliana | AT3G53350.3   Symbols: RIP4   ROP interactive partner 4   chr3:19780190-19781555 REVERSE LENGTH=394                                                                                                                                                                                                                                                               | 376 | 394 | 1.00E-166 | 104.8 | 81.6 | 89.1 |
| Rsa1.0_01134.1.g23817.t1 | ref XP_002876202.1  pentatricopeptide repeat-containing protein [Arabidopsis lyrata subsp. lyrata] gi 297322040 gb EFH52461.1  pentatricopeptide repeat-containing protein [Arabidopsis lyrata subsp. lyrata]                                                                                                                                                                                                                                                                                                                | 762 | 769 | 0         | 100.9 | 82.3  | 89.9  | pentatricopeptide repeat-containing protein     | gbpln | Arabidopsis lyrata   | AT3G53360.1   Symbols:   Tetratricopeptide repeat (TPR)-like superfamily protein   chr3:19784502-19786808 FORWARD LENGTH=768                                                                                                                                                                                                                                      | 762 | 768 | 0         | 100.8 | 81.4 | 89.5 |
| Rsa1.0_01134.1.g23818.t1 | #                                                                                                                                                                                                                                                                                                                                                                                                                                                                                                                            | #   | #   | #         | #     | #     | #     | -                                               | ----  | ----                 | #                                                                                                                                                                                                                                                                                                                                                                 | #   | #   | #         | #     | #    | #    |
| Rsa1.0_01134.1.g23819.t1 | ref NP_565859.1  DNA-binding protein S1FA2 [Arabidopsis thaliana] gi 52000784 sp Q42337.2 S1FA2_ARATH RecName: Full=DNA-binding protein S1FA2 gi 13926275 gb AAK49608.1 AF372892.1 At2g37120/T2N18.12 [Arabidopsis thaliana] gi 4371289 gb AAD18147.1  expressed protein [Arabidopsis thaliana] gi 21553573 gb AAM62666.1  DNA BINDING PROTEIN S1FA [Arabidopsis thaliana] gi 27363332 gb AAD11585.1  At2g37120/T2N18.12 [Arabidopsis thaliana] gi 330254259 gb AEC09353.1  DNA-binding protein S1FA2 [Arabidopsis thaliana] | 76  | 76  | 3.00E-13  | 100.0 | 80.3  | 85.5  | DNA-binding protein S1FA2                       | gbpln | Arabidopsis thaliana | AT2G37120.1   Symbols:   S1FA-like DNA-binding protein   chr2:15594250-15594815 REVERSE LENGTH=76                                                                                                                                                                                                                                                                 | 76  | 76  | 5.00E-16  | 100.0 | 80.3 | 85.5 |
| Rsa1.0_01134.1.g23820.t3 | ref XP_002876204.1  hypothetical protein ARALYDRAFT_906727 [Arabidopsis lyrata subsp. lyrata] gi 297322042 gb EFH52463.1  hypothetical protein ARALYDRAFT_906727 [Arabidopsis lyrata subsp. lyrata]                                                                                                                                                                                                                                                                                                                          | 121 | 465 | 6.00E-33  | 384.3 | 66.1  | 72.7  | hypothetical protein ARALYDRAFT_906727          | gbpln | Arabidopsis lyrata   | AT3G53400.1   Symbols:   BEST Arabidopsis thaliana protein match is: conserved peptide upstream open reading frame 47 (TAIR:AT5G03190.1); Has 285 Blast hits to 285 proteins in 23 species: Archae - 0; Bacteria - 0; Metazoa - 1; Fungi - 0; Plants - 279; Viruses - 0; Other Eukaryotes - 5 (source: NCBI BLINK).   chr3:19798526-19799926 FORWARD LENGTH=466   | 121 | 466 | 2.00E-33  | 385.1 | 63.6 | 72.7 |
| Rsa1.0_01134.1.g23821.t1 | dbj BAA32778.1  Plasma membrane aquaporin (PAQ2) [Raphanus sativus]                                                                                                                                                                                                                                                                                                                                                                                                                                                          | 287 | 287 | 1.00E-162 | 100.0 | 100.0 | 100.0 | Plasma membrane aquaporin (PAQ2)                | gbpln | Raphanus sativus     | AT3G53420.2   Symbols: PIP2A, PIP2, PIP2.1   plasma membrane intrinsic protein 2A   chr3:19803906-19805454 REVERSE LENGTH=287                                                                                                                                                                                                                                     | 287 | 287 | 1.00E-155 | 100.0 | 93.4 | 96.5 |
| Rsa1.0_01134.1.g23822.t1 | ref XP_002877919.1  60S ribosomal protein L12 [Arabidopsis lyrata subsp. lyrata] gi 297323757 gb EFH54178.1  60S ribosomal protein L12 [Arabidopsis lyrata subsp. lyrata]                                                                                                                                                                                                                                                                                                                                                    | 166 | 166 | 2.00E-88  | 100.0 | 99.4  | 100.0 | 60S ribosomal protein L12                       | gbpln | Arabidopsis lyrata   | AT3G53430.1   Symbols:   Ribosomal protein L11 family protein   chr3:19809895-19810395 REVERSE LENGTH=166                                                                                                                                                                                                                                                         | 166 | 166 | 1.00E-90  | 100.0 | 99.4 | 99.4 |

|                          |                                                                                                                                                                                                                                                                                                                                                                                                                                                                                                                                                                                                                                                                                                                                                                                                                              |      |      |          |       |      |      |                                                                                    |       |                      |                                                                                                                                                                                                                                                                                                                                                                                                                                                                                                                                          |      |      |           |       |      |      |
|--------------------------|------------------------------------------------------------------------------------------------------------------------------------------------------------------------------------------------------------------------------------------------------------------------------------------------------------------------------------------------------------------------------------------------------------------------------------------------------------------------------------------------------------------------------------------------------------------------------------------------------------------------------------------------------------------------------------------------------------------------------------------------------------------------------------------------------------------------------|------|------|----------|-------|------|------|------------------------------------------------------------------------------------|-------|----------------------|------------------------------------------------------------------------------------------------------------------------------------------------------------------------------------------------------------------------------------------------------------------------------------------------------------------------------------------------------------------------------------------------------------------------------------------------------------------------------------------------------------------------------------------|------|------|-----------|-------|------|------|
| Rsa1.0_01135.1.g23823.t1 | emb[CAB40035.1] retrotransposon like protein [Arabidopsis thaliana] gi 7267767 emb[CAB81170.1] retrotransposon like protein [Arabidopsis thaliana]                                                                                                                                                                                                                                                                                                                                                                                                                                                                                                                                                                                                                                                                           | 1353 | 1515 | 0        | 112.0 | 58.5 | 73.4 | retrotransposon like protein                                                       | gbpln | Arabidopsis thaliana | AT4G23160.1   Symbols: CRK8   cysteine-rich RLK (RECEPTOR-like protein kinase) 8   chr4:12129485-12134086 FORWARD LENGTH=1262                                                                                                                                                                                                                                                                                                                                                                                                            | 1353 | 1262 | 1.00E-116 | 93.3  | 14.6 | 21.7 |
| Rsa1.0_01135.1.g23824.t1 | #                                                                                                                                                                                                                                                                                                                                                                                                                                                                                                                                                                                                                                                                                                                                                                                                                            | #    | #    | #        | #     | #    | #    | -                                                                                  | ----  | ----                 | #                                                                                                                                                                                                                                                                                                                                                                                                                                                                                                                                        | #    | #    | #         | #     | #    |      |
| Rsa1.0_01135.1.g23825.t1 | gb AAG51783.1 AC079679.3 reverse transcriptase, putative; 16838-20266 [Arabidopsis thaliana]                                                                                                                                                                                                                                                                                                                                                                                                                                                                                                                                                                                                                                                                                                                                 | 169  | 1142 | 7.00E-29 | 675.7 | 49.7 | 60.4 | reverse transcriptase, putative; 16838-20266                                       | gbpln | Arabidopsis thaliana | AT2G34320.1   Symbols:   Polynucleotidyl transferase, ribonuclease H-like superfamily protein   chr2:14484959-14485837 FORWARD LENGTH=292                                                                                                                                                                                                                                                                                                                                                                                                | 169  | 292  | 1.00E-13  | 172.8 | 32.5 | 51.5 |
| Rsa1.0_01135.1.g23826.t1 | ref NP_565348.1  bifunctional inhibitor/lipid-transfer protein/seed storage 2S albumin-like protein [Arabidopsis thaliana] gi 30678667 ref NP_849949.1  bifunctional inhibitor/lipid-transfer protein/seed storage 2S albumin-like protein [Arabidopsis thaliana] gi 4662841 gb AAD26911.1  expressed protein [Arabidopsis thaliana] gi 17473865 gb AAL38354.1  unknown protein [Arabidopsis thaliana] gi 22022562 gb AAM83238.1  At2g10940/F15K19.1 [Arabidopsis thaliana] gi 23308313 gb AAN18126.1  At2g10940/F15K19.1 [Arabidopsis thaliana] gi 330251063 gb AEC06157.1  bifunctional inhibitor/lipid-transfer protein/seed storage 2S albumin-like protein [Arabidopsis thaliana] gi 330251064 gb AEC06158.1  bifunctional inhibitor/lipid-transfer protein/seed storage 2S albumin-like protein [Arabidopsis thaliana] | 252  | 291  | 2.00E-80 | 115.5 | 80.2 | 86.1 | bifunctional inhibitor/lipid-transfer protein/seed storage 2S albumin-like protein | gbpln | Arabidopsis thaliana | AT2G10940.2   Symbols:   Bifunctional inhibitor/lipid-transfer protein/seed storage 2S albumin superfamily protein   chr2:4311160-4312035 REVERSE LENGTH=291                                                                                                                                                                                                                                                                                                                                                                             | 252  | 291  | 5.00E-83  | 115.5 | 80.2 | 86.1 |
| Rsa1.0_01135.1.g23827.t1 | gb EOA30359.1  hypothetical protein CARUB_v10013480mg [Capsella rubella]                                                                                                                                                                                                                                                                                                                                                                                                                                                                                                                                                                                                                                                                                                                                                     | 503  | 511  | 0        | 101.6 | 83.9 | 91.7 | hypothetical protein CARUB_v10013480mg                                             | gbpln | Capsella rubella     | AT2G11520.1   Symbols: CROCK3   calmodulin-binding receptor-like cytoplasmic kinase 3   chr2:4619145-4621448 FORWARD LENGTH=510                                                                                                                                                                                                                                                                                                                                                                                                          | 503  | 510  | 0         | 101.4 | 83.7 | 90.3 |
| Rsa1.0_01135.1.g23828.t1 | gb EOA30514.1  hypothetical protein CARUB_v10013637mg [Capsella rubella]                                                                                                                                                                                                                                                                                                                                                                                                                                                                                                                                                                                                                                                                                                                                                     | 468  | 466  | 0        | 99.6  | 89.3 | 94.2 | hypothetical protein CARUB_v10013637mg                                             | gbpln | Capsella rubella     | AT2G11810.1   Symbols: MGD3, ATMGD3   monogalactosyl diacylglycerol synthase type C   chr2:4743388-4746633 FORWARD LENGTH=465                                                                                                                                                                                                                                                                                                                                                                                                            | 468  | 465  | 0         | 99.4  | 89.1 | 93.4 |
| Rsa1.0_01135.1.g23829.t1 | ref XP_002885847.1  hypothetical protein ARALYDRAFT_899524 [Arabidopsis lyrata subsp. lyrata] gi 297331687 gb EFH62106.1  hypothetical protein ARALYDRAFT_899524 [Arabidopsis lyrata subsp. lyrata]                                                                                                                                                                                                                                                                                                                                                                                                                                                                                                                                                                                                                          | 168  | 168  | 2.00E-30 | 100.0 | 69.0 | 88.1 | hypothetical protein ARALYDRAFT_899524                                             | gbpln | Arabidopsis lyrata   | AT2G11910.2   Symbols:   unknown protein; FUNCTIONS IN: molecular_function unknown; INVOLVED IN: biological_process unknown; LOCATED IN: chloroplast envelope; EXPRESSED IN: 22 plant structures; EXPRESSED DURING: 13 growth stages; Has 92883 Blast hits to 31060 proteins in 1576 species: Archae - 765; Bacteria - 32670; Metazoa - 21164; Fungi - 12252; Plants - 4238; Viruses - 1282; Other Eukaryotes - 20512 (source: NCBI BLink).   chr2:4805862-4807164 REVERSE LENGTH=168                                                    | 168  | 168  | 1.00E-30  | 100.0 | 67.3 | 85.7 |
| Rsa1.0_01135.1.g23830.t1 | gb EOA33013.1  hypothetical protein CARUB_v10016344mg [Capsella rubella]                                                                                                                                                                                                                                                                                                                                                                                                                                                                                                                                                                                                                                                                                                                                                     | 528  | 538  | 0        | 101.9 | 83.0 | 90.2 | hypothetical protein CARUB_v10016344mg                                             | gbpln | Capsella rubella     | AT2G12400.1   Symbols:   unknown protein; FUNCTIONS IN: molecular_function unknown; INVOLVED IN: biological_process unknown; LOCATED IN: endomembrane system; EXPRESSED IN: 25 plant structures; EXPRESSED DURING: 13 growth stages; BEST Arabidopsis thaliana protein match is: unknown protein (TAIR:AT2G25270.1); Has 177 Blast hits to 172 proteins in 23 species: Archae - 0; Bacteria - 2; Metazoa - 3; Fungi - 0; Plants - 164; Viruses - 0; Other Eukaryotes - 8 (source: NCBI BLink).   chr2:5005144-5008140 REVERSE LENGTH=541 | 528  | 541  | 0         | 102.5 | 83.1 | 90.5 |
| Rsa1.0_01135.1.g23831.t1 | ref XP_004306187.1  PREDICTED: uncharacterized protein LOC101313541 [Fragaria vesca subsp. vesca]                                                                                                                                                                                                                                                                                                                                                                                                                                                                                                                                                                                                                                                                                                                            | 273  | 402  | 3.00E-57 | 147.3 | 45.8 | 64.1 | PREDICTED: uncharacterized protein LOC101313541                                    | gbpln | Fragaria vesca       | AT5G33406.1   Symbols:   hAT dimerisation domain-containing protein / transposase-related   chr5:12676126-12678403 REVERSE LENGTH=509                                                                                                                                                                                                                                                                                                                                                                                                    | 273  | 509  | 6.00E-36  | 186.4 | 31.5 | 46.2 |
| Rsa1.0_01136.1.g23832.t1 | #                                                                                                                                                                                                                                                                                                                                                                                                                                                                                                                                                                                                                                                                                                                                                                                                                            | #    | #    | #        | #     | #    | #    | -                                                                                  | ----  | ----                 | #                                                                                                                                                                                                                                                                                                                                                                                                                                                                                                                                        | #    | #    | #         | #     | #    |      |

|                          |                                                                                                                                                                                                                                                                                                                                                                                                                                                                                                                                                                                                                                                                                                                                                                                                                                                                                                                                                                                                                                                                                                                                                                                                                                                                                                                                                                                                                                                                                                                            |     |     |          |       |      |      |                                                 |       |                      |                                                                                                                                                                                                                                                                                                                                                                                                                                                      |     |     |          |       |      |      |
|--------------------------|----------------------------------------------------------------------------------------------------------------------------------------------------------------------------------------------------------------------------------------------------------------------------------------------------------------------------------------------------------------------------------------------------------------------------------------------------------------------------------------------------------------------------------------------------------------------------------------------------------------------------------------------------------------------------------------------------------------------------------------------------------------------------------------------------------------------------------------------------------------------------------------------------------------------------------------------------------------------------------------------------------------------------------------------------------------------------------------------------------------------------------------------------------------------------------------------------------------------------------------------------------------------------------------------------------------------------------------------------------------------------------------------------------------------------------------------------------------------------------------------------------------------------|-----|-----|----------|-------|------|------|-------------------------------------------------|-------|----------------------|------------------------------------------------------------------------------------------------------------------------------------------------------------------------------------------------------------------------------------------------------------------------------------------------------------------------------------------------------------------------------------------------------------------------------------------------------|-----|-----|----------|-------|------|------|
| Rsa1.0_01136.1.g23833.t1 | ref NP_172953.1  serine carboxypeptidase-like 50 [Arabidopsis thaliana]<br>gi 75336113 sp Q9M9Q6.1 SCP50_ARAT<br>H RecName: Full=Serine carboxypeptidase-like 50; Flags:<br>Precursor<br>gi 6899645 gb AAF31022.1 AC012189.4<br>Contains similarity to serine-type carboxypeptidase like protein from Arabidopsis thaliana gi 4678929 and contains two Serine carboxypeptidase domains PF 00450 [Arabidopsis thaliana] gi 19715607 gb AAL91626.1 <br>At1g15000/T15D22.7 [Arabidopsis thaliana] gi 27363234 gb AAO11536.1 <br>At1g15000/T15D22.7 [Arabidopsis thaliana] gi 332191131 gb AEE29252.1 <br>serine carboxypeptidase-like 50 [Arabidopsis thaliana]                                                                                                                                                                                                                                                                                                                                                                                                                                                                                                                                                                                                                                                                                                                                                                                                                                                               | 454 | 444 | 0        | 97.8  | 82.6 | 87.9 | serine carboxypeptidase-like 50                 | gbpln | Arabidopsis thaliana | AT1G15000.1   Symbols: scp150   serine carboxypeptidase-like 50   chr1:5168613-5169947 FORWARD LENGTH=444                                                                                                                                                                                                                                                                                                                                            | 454 | 444 | 0        | 97.8  | 82.6 | 87.9 |
| Rsa1.0_01136.1.g23834.t1 | gb EOA37149.1  hypothetical protein CARUB_v10010473mg, partial [Capsella rubella]                                                                                                                                                                                                                                                                                                                                                                                                                                                                                                                                                                                                                                                                                                                                                                                                                                                                                                                                                                                                                                                                                                                                                                                                                                                                                                                                                                                                                                          | 124 | 170 | 3.00E-66 | 137.1 | 96.0 | 98.4 | hypothetical protein CARUB_v10010473mg, partial | gbpln | Capsella rubella     | AT1G14990.1   Symbols:   unknown protein; FUNCTION IN: molecular_function unknown; INVOLVED IN: biological_process unknown; LOCATED IN: endomembrane system; EXPRESSED IN: 22 plant structures; EXPRESSED DURING: 13 growth stages; Has 34 Blast hits to 34 proteins in 12 species: Archae - 0; Bacteria - 0; Metazoa - 0; Fungi - 0; Plants - 34; Viruses - 0; Other Eukaryotes - 0 (source: NCBI BLINK).   chr1:5167354-5168151 REVERSE LENGTH=122 | 124 | 122 | 8.00E-68 | 98.4  | 93.5 | 97.6 |
| Rsa1.0_01136.1.g23835.t1 | ref NP_363961.1  chaperonin 10 [Arabidopsis thaliana]<br>gi 297849924 ref XP_002892843.1 <br>hypothetical protein ARALYDRAFT_471686 [Arabidopsis lyrata subsp. lyrata]<br>gi 461729 sp P34893.1 CH10_ARATH<br>RecName: Full=10 kDa chaperonin; AltName: Full=Chaperonin 10; Short=CPN10; AltName: Full=Protein groES<br>gi 6899643 gb AAF31020.1 AC012189_2<br>Strong similarity to 10 KD chaperonin (protein CPN10) from Arabidopsis thaliana gi 102843 containing Chaperonin subunit PF 00166. ESTs gb Z29788_gb AW004285 come from this gene [Arabidopsis thaliana]<br>gi 166662 gb AAA32767.1  10 kDa chaperonin [Arabidopsis thaliana]<br>gi 11990458 dbj BAA13588.2 <br>mitochondrial chaperonin 10 [Arabidopsis thaliana]<br>gi 17380944 gb AAL36284.1  putative chaperonin CPN10 protein [Arabidopsis thaliana] gi 20258951 gb AAM14191.1 <br>putative chaperonin CPN10 protein [Arabidopsis thaliana]<br>gi 21555041 gb AAM63762.1  chaperonin CPN10 [Arabidopsis thaliana]<br>gi 297338685 gb EFH69102.1 <br>hypothetical protein ARALYDRAFT_471686 [Arabidopsis lyrata subsp. lyrata]<br>ref XP_002892842.1  hypothetical protein ARALYDRAFT_471685 [Arabidopsis lyrata subsp. lyrata]<br>gi 297338684 gb EFH69101.1 <br>hypothetical protein ARALYDRAFT_471685 [Arabidopsis lyrata subsp. lyrata]<br>ref XP_002892841.1  hypothetical protein ARALYDRAFT_471684 [Arabidopsis lyrata subsp. lyrata]<br>gi 297338683 gb EFH69100.1 <br>hypothetical protein ARALYDRAFT_471684 [Arabidopsis lyrata subsp. lyrata] | 98  | 98  | 8.00E-48 | 100.0 | 98.0 | 99.0 | chaperonin 10                                   | gbpln | Arabidopsis lyrata   | AT1G14980.1   Symbols: CPN10   chaperonin 10   chr1:5165930-5166654 REVERSE LENGTH=98                                                                                                                                                                                                                                                                                                                                                                | 98  | 98  | 1.00E-50 | 100.0 | 98.0 | 99.0 |
| Rsa1.0_01136.1.g23836.t1 | ref XP_002892842.1  hypothetical protein ARALYDRAFT_471685 [Arabidopsis lyrata subsp. lyrata]<br>gi 297338684 gb EFH69101.1 <br>hypothetical protein ARALYDRAFT_471685 [Arabidopsis lyrata subsp. lyrata]<br>ref XP_002892841.1  hypothetical protein ARALYDRAFT_471684 [Arabidopsis lyrata subsp. lyrata]<br>gi 297338683 gb EFH69100.1 <br>hypothetical protein ARALYDRAFT_471684 [Arabidopsis lyrata subsp. lyrata]                                                                                                                                                                                                                                                                                                                                                                                                                                                                                                                                                                                                                                                                                                                                                                                                                                                                                                                                                                                                                                                                                                     | 573 | 561 | 0        | 97.9  | 84.5 | 89.5 | hypothetical protein ARALYDRAFT_471685          | gbpln | Arabidopsis lyrata   | AT1G14970.1   Symbols:   O-fucosyltransferase family protein   chr1:5162085-5164917 REVERSE LENGTH=562                                                                                                                                                                                                                                                                                                                                               | 573 | 562 | 0        | 98.1  | 83.4 | 88.8 |
| Rsa1.0_01136.1.g23837.t1 | ref XP_002892841.1  hypothetical protein ARALYDRAFT_471684 [Arabidopsis lyrata subsp. lyrata]<br>gi 297338683 gb EFH69100.1 <br>hypothetical protein ARALYDRAFT_471684 [Arabidopsis lyrata subsp. lyrata]                                                                                                                                                                                                                                                                                                                                                                                                                                                                                                                                                                                                                                                                                                                                                                                                                                                                                                                                                                                                                                                                                                                                                                                                                                                                                                                  | 144 | 153 | 7.00E-45 | 106.3 | 65.3 | 77.1 | hypothetical protein ARALYDRAFT_471684          | gbpln | Arabidopsis lyrata   | AT1G14960.1   Symbols:   Polyketide cyclase/dehydrase and lipid transport superfamily protein   chr1:5159334-5159992 REVERSE LENGTH=153                                                                                                                                                                                                                                                                                                              | 144 | 153 | 1.00E-46 | 106.3 | 65.3 | 77.8 |

|                          |                                                                                                                                                                                                                                                                                                                                                                                                                              |      |      |          |       |      |      |                                                          |       |                      |                                                                                                                                                                                                                                                                                                                                                                                                                                                                                                                                                                                      |      |      |          |       |      |      |
|--------------------------|------------------------------------------------------------------------------------------------------------------------------------------------------------------------------------------------------------------------------------------------------------------------------------------------------------------------------------------------------------------------------------------------------------------------------|------|------|----------|-------|------|------|----------------------------------------------------------|-------|----------------------|--------------------------------------------------------------------------------------------------------------------------------------------------------------------------------------------------------------------------------------------------------------------------------------------------------------------------------------------------------------------------------------------------------------------------------------------------------------------------------------------------------------------------------------------------------------------------------------|------|------|----------|-------|------|------|
| Rsa1.0_01136.1.g23838.t1 | refXP_002892840.1   hypothetical protein ARALYDRAFT_471683 [Arabidopsis lyrata subsp. lyrata] gi 297338682 gb EFH69099.1   hypothetical protein ARALYDRAFT_471683 [Arabidopsis lyrata subsp. lyrata]                                                                                                                                                                                                                         | 149  | 155  | 3.00E-68 | 104.0 | 83.2 | 91.3 | hypothetical protein ARALYDRAFT_471683                   | gbpln | Arabidopsis lyrata   | AT1G14950.1   Symbols:   Polyketide cyclase/dehydrase and lipid transport superfamily protein   chr1:5157588-5158144 REVERSE LENGTH=155                                                                                                                                                                                                                                                                                                                                                                                                                                              | 149  | 155  | 2.00E-70 | 104.0 | 82.6 | 89.9 |
| Rsa1.0_01136.1.g23839.t1 | dbj BAB10503.1  retroelement pol polyprotein-like [Arabidopsis thaliana]                                                                                                                                                                                                                                                                                                                                                     | 1406 | 1475 | 0        | 104.9 | 61.2 | 76.5 | retroelement pol polyprotein-like                        | gbpln | Arabidopsis thaliana | AT4G23160.1   Symbols: CRK8   cysteine-rich RLK (RECEPTOR-like protein kinase) 8   chr4:12129485-12134086 FORWARD LENGTH=1262                                                                                                                                                                                                                                                                                                                                                                                                                                                        | 1406 | 1262 | 0        | 89.8  | 21.6 | 28.7 |
| Rsa1.0_01136.1.g23840.t1 | gb EOA39741.1  hypothetical protein CARUB_v10008396mg [Capsella rubella]                                                                                                                                                                                                                                                                                                                                                     | 732  | 742  | 0        | 101.4 | 78.1 | 84.3 | hypothetical protein CARUB_v10008396mg                   | gbpln | Capsella rubella     | AT1G14910.1   Symbols:   ENTH/ANTH/VHS superfamily protein   chr1:5139928-5143571 REVERSE LENGTH=692                                                                                                                                                                                                                                                                                                                                                                                                                                                                                 | 732  | 692  | 0        | 94.5  | 73.0 | 79.1 |
| Rsa1.0_01136.1.g23841.t1 | refXP_002890079.1   invertase/pectin methylesterase inhibitor family protein [Arabidopsis lyrata subsp. lyrata] gi 29733592.1 gb EFH65338.1   invertase/pectin methylesterase inhibitor family protein [Arabidopsis lyrata subsp. lyrata]                                                                                                                                                                                    | 201  | 201  | 2.00E-95 | 100.0 | 82.6 | 90.5 | invertase/pectin methylesterase inhibitor family protein | gbpln | Arabidopsis lyrata   | AT1G14890.1   Symbols:   Plant invertase/pectin methylesterase inhibitor superfamily protein   chr1:5137045-5137704 FORWARD LENGTH=219                                                                                                                                                                                                                                                                                                                                                                                                                                               | 201  | 219  | 2.00E-97 | 109.0 | 82.1 | 90.5 |
| Rsa1.0_01136.1.g23842.t1 | gb EOA37179.1  hypothetical protein CARUB_v10010549mg [Capsella rubella]                                                                                                                                                                                                                                                                                                                                                     | 240  | 152  | 1.00E-53 | 63.3  | 43.3 | 45.0 | hypothetical protein CARUB_v10010549mg                   | gbpln | Capsella rubella     | AT1G14870.1   Symbols: PCR2   PLANT CADMIUM RESISTANCE 2   chr1:5128591-5129458 REVERSE LENGTH=152<br>AT3G55646.1   Symbols:   unknown protein; FUNCTIONS IN: molecular_function unknown; INVOLVED IN: biological_process unknown; LOCATED IN: chloroplast; BEST Arabidopsis thaliana protein match is: unknown protein (TAIR:AT3G39855.2); Has 35333 Blast hits to 34131 proteins in 2444 species: Archae - 798; Bacteria - 22429; Metazoa - 974; Fungi - 991; Plants - 531; Viruses - 0; Other Eukaryotes - 9610 (source: NCBI BLINK).   chr3:20645087-20646148 FORWARD LENGTH=146 | 240  | 152  | 6.00E-96 | 63.3  | 42.5 | 45.8 |
| Rsa1.0_01137.1.g23843.t2 | refXP_002876320.1   hypothetical protein ARALYDRAFT_485995 [Arabidopsis lyrata subsp. lyrata] gi 297322158 gb EFH52579.1   hypothetical protein ARALYDRAFT_485995 [Arabidopsis lyrata subsp. lyrata]                                                                                                                                                                                                                         | 141  | 139  | 1.00E-46 | 98.6  | 76.6 | 80.9 | hypothetical protein ARALYDRAFT_485995                   | gbpln | Arabidopsis lyrata   | AT3G55660.1   Symbols: ATROPGEF6, ROPGEF6   ROP (rho of plants) guanine nucleotide exchange factor 6   chr3:20649051-20651290 REVERSE LENGTH=579                                                                                                                                                                                                                                                                                                                                                                                                                                     | 141  | 146  | 1.00E-45 | 103.5 | 80.9 | 86.5 |
| Rsa1.0_01137.1.g23844.t1 | gb EOA23716.1  hypothetical protein CARUB_v10016923mg [Capsella rubella]                                                                                                                                                                                                                                                                                                                                                     | 572  | 579  | 0        | 101.2 | 88.8 | 94.6 | hypothetical protein CARUB_v10016923mg                   | gbpln | Capsella rubella     | AT3G55700.1   Symbols:   UDP-Glycosyltransferase superfamily protein   chr3:20671202-20673278 FORWARD LENGTH=460                                                                                                                                                                                                                                                                                                                                                                                                                                                                     | 572  | 579  | 0        | 101.2 | 87.4 | 93.0 |
| Rsa1.0_01137.1.g23845.t1 | ref NP_191129.1  UDP-glycosyltransferase-like protein [Arabidopsis thaliana] gi 7526450.1 sp Q9M052.1 U76F1_ARAT H RecName: Full=UDP-glycosyltransferase 76F1 [Arabidopsis thaliana] gi 7263558 emb CAB81595.1   glucuronosyl transferase-like protein [Arabidopsis thaliana] gi 111074514 gb ABH04630.1   At3g55700 [Arabidopsis thaliana] gi 332645903 gb AEE79424.1   UDP-glycosyltransferase 76F1 [Arabidopsis thaliana] | 300  | 460  | 2.00E-55 | 153.3 | 42.3 | 52.0 | UDP-glycosyltransferase-like protein                     | gbpln | Arabidopsis thaliana | AT3G55700.1   Symbols:   UDP-Glycosyltransferase superfamily protein   chr3:20671202-20673278 FORWARD LENGTH=460                                                                                                                                                                                                                                                                                                                                                                                                                                                                     | 300  | 460  | 7.00E-58 | 153.3 | 42.3 | 52.0 |
| Rsa1.0_01137.1.g23846.t1 | ref NP_191129.1  UDP-glycosyltransferase-like protein [Arabidopsis thaliana] gi 7526450.1 sp Q9M052.1 U76F1_ARAT H RecName: Full=UDP-glycosyltransferase 76F1 [Arabidopsis thaliana] gi 7263558 emb CAB81595.1   glucuronosyl transferase-like protein [Arabidopsis thaliana] gi 111074514 gb ABH04630.1   At3g55700 [Arabidopsis thaliana] gi 332645903 gb AEE79424.1   UDP-glycosyltransferase 76F1 [Arabidopsis thaliana] | 462  | 460  | 0        | 99.6  | 78.4 | 86.1 | UDP-glycosyltransferase-like protein                     | gbpln | Arabidopsis thaliana | AT3G55700.1   Symbols:   UDP-Glycosyltransferase superfamily protein   chr3:20671202-20673278 FORWARD LENGTH=460                                                                                                                                                                                                                                                                                                                                                                                                                                                                     | 462  | 460  | 0        | 99.6  | 78.4 | 86.1 |
| Rsa1.0_01137.1.g23847.t1 | # # # # # # # # - ----                                                                                                                                                                                                                                                                                                                                                                                                       |      |      |          |       |      |      |                                                          |       |                      |                                                                                                                                                                                                                                                                                                                                                                                                                                                                                                                                                                                      |      |      |          |       |      |      |
| Rsa1.0_01137.1.g23848.t1 | refXP_002876329.1   hypothetical protein ARALYDRAFT_486006 [Arabidopsis lyrata subsp. lyrata] gi 297322167 gb EFH52588.1   hypothetical protein ARALYDRAFT_486006 [Arabidopsis lyrata subsp. lyrata]                                                                                                                                                                                                                         | 435  | 438  | 0        | 100.7 | 88.3 | 93.1 | hypothetical protein ARALYDRAFT_486006                   | gbpln | Arabidopsis lyrata   | AT3G55720.1   Symbols:   Protein of unknown function (DUF620)   chr3:20679893-20681338 FORWARD LENGTH=438                                                                                                                                                                                                                                                                                                                                                                                                                                                                            | 435  | 438  | 0        | 100.7 | 86.9 | 92.9 |



|                          |                                                                                                                                                                                                                                                                                                                                                                                                               |      |      |           |       |      |      |                                                      |       |                      |                                                                                                                                                                                                                                                                                                                                                           |      |      |           |       |      |      |
|--------------------------|---------------------------------------------------------------------------------------------------------------------------------------------------------------------------------------------------------------------------------------------------------------------------------------------------------------------------------------------------------------------------------------------------------------|------|------|-----------|-------|------|------|------------------------------------------------------|-------|----------------------|-----------------------------------------------------------------------------------------------------------------------------------------------------------------------------------------------------------------------------------------------------------------------------------------------------------------------------------------------------------|------|------|-----------|-------|------|------|
| Rsa1.0_01137.1.g23849.t2 | dbj BAJ33746.1  unnamed protein product [Thellungiella halophila]                                                                                                                                                                                                                                                                                                                                             | 392  | 395  | 1.00E-154 | 100.8 | 77.6 | 81.4 | unnamed protein product                              | ----  | ----                 | AT3G55730.1   Symbols: MYB109, AtMYB109   myb domain protein 109   chr3:20682114-20683963 REVERSE LENGTH=399                                                                                                                                                                                                                                              | 392  | 399  | 1.00E-147 | 101.8 | 73.5 | 78.8 |
| Rsa1.0_01137.1.g23850.t1 | dbj BAB10837.1  retroelement pol polyprotein-like [Arabidopsis thaliana]                                                                                                                                                                                                                                                                                                                                      | 661  | 1462 | 0         | 221.2 | 61.7 | 76.4 | retroelement pol polyprotein-like                    | gbpln | Arabidopsis thaliana | AT4G23160.1   Symbols: CRK8   cysteine-rich RLK (RECEPTOR-like protein kinase) 8   chr4:12129485-12134086 FORWARD LENGTH=1262                                                                                                                                                                                                                             | 661  | 1262 | 1.00E-133 | 190.9 | 34.8 | 51.6 |
| Rsa1.0_01137.1.g23851.t1 | #                                                                                                                                                                                                                                                                                                                                                                                                             | #    | #    | #         | #     | #    | #    | -                                                    | ----  | ----                 | #                                                                                                                                                                                                                                                                                                                                                         | #    | #    | #         | #     | #    | #    |
| Rsa1.0_01137.1.g23852.t1 | gb EOA24978.1  hypothetical protein CARUB_v10018275mg [Capsella rubella]                                                                                                                                                                                                                                                                                                                                      | 146  | 111  | 2.00E-49  | 76.0  | 65.1 | 65.8 | hypothetical protein CARUB_v10018275mg               | gbpln | Capsella rubella     | AT1G07070.1   Symbols:   Ribosomal protein L35Ae family protein   chr1:2168652-2169703 FORWARD LENGTH=112                                                                                                                                                                                                                                                 | 146  | 112  | 3.00E-51  | 76.7  | 63.0 | 66.4 |
| Rsa1.0_01138.1.g23853.t1 | ref NP_001031065.1  DNAJ heat shock N-terminal domain-containing protein [Arabidopsis thaliana]<br>gi 332191627 gb AEE29748.1  DNAJ heat shock N-terminal domain-containing protein [Arabidopsis thaliana]                                                                                                                                                                                                    | 1862 | 705  | 0         | 37.9  | 30.7 | 33.7 | DNAJ heat shock N-terminal domain-containing protein | gbpln | Arabidopsis thaliana | AT1G18700.2   Symbols:   DNAJ heat shock N-terminal domain-containing protein   chr1:6437591-6443814 FORWARD LENGTH=705                                                                                                                                                                                                                                   | 1862 | 705  | 0         | 37.9  | 30.7 | 33.7 |
| Rsa1.0_01138.1.g23854.t1 | ref NP_173303.1  HNH endonuclease domain-containing protein [Arabidopsis thaliana]<br>gi 6730716 gb AAF27111.1 AC011809.20 Unknown protein [Arabidopsis thaliana]<br>gi 26451201 dbj BAC42704.1  unknown protein [Arabidopsis thaliana]<br>gi 28973585 gb AAO64117.1  unknown protein [Arabidopsis thaliana]<br>gi 332191624 gb AEE29745.1  HNH endonuclease domain-containing protein [Arabidopsis thaliana] | 186  | 186  | 2.00E-80  | 100.0 | 83.9 | 87.6 | HNH endonuclease domain-containing protein           | gbpln | Arabidopsis thaliana | AT1G18680.1   Symbols:   HNH endonuclease domain-containing protein   chr1:6432133-6433434 REVERSE LENGTH=186                                                                                                                                                                                                                                             | 186  | 186  | 6.00E-83  | 100.0 | 83.9 | 87.6 |
| Rsa1.0_01138.1.g23855.t4 | gb EOA39803.1  hypothetical protein CARUB_v10008466mg [Capsella rubella]                                                                                                                                                                                                                                                                                                                                      | 821  | 699  | 0         | 85.1  | 69.8 | 73.7 | hypothetical protein CARUB_v10008466mg               | gbpln | Capsella rubella     | AT1G18670.1   Symbols: IBS1   Protein kinase superfamily protein   chr1:6427242-6430696 REVERSE LENGTH=709                                                                                                                                                                                                                                                | 821  | 709  | 0         | 86.4  | 68.7 | 73.7 |
| Rsa1.0_01138.1.g23856.t2 | gb EOA40258.1  hypothetical protein CARUB_v10008983mg [Capsella rubella]                                                                                                                                                                                                                                                                                                                                      | 486  | 486  | 0         | 100.0 | 93.0 | 97.3 | hypothetical protein CARUB_v10008983mg               | gbpln | Capsella rubella     | AT1G18660.1   Symbols:   zinc finger (C3HC4-type RING finger) family protein   chr1:6421433-6425565 FORWARD LENGTH=486                                                                                                                                                                                                                                    | 486  | 486  | 0         | 100.0 | 92.4 | 96.3 |
| Rsa1.0_01138.1.g23857.t1 | gb AAD26943.1  putative retroelement pol polyprotein [Arabidopsis thaliana]                                                                                                                                                                                                                                                                                                                                   | 1272 | 1454 | 0         | 114.3 | 63.4 | 76.6 | putative retroelement pol polyprotein                | gbpln | Arabidopsis thaliana | AT4G23160.1   Symbols: CRK8   cysteine-rich RLK (RECEPTOR-like protein kinase) 8   chr4:12129485-12134086 FORWARD LENGTH=1262                                                                                                                                                                                                                             | 1272 | 1262 | 1.00E-132 | 99.2  | 19.4 | 25.2 |
| Rsa1.0_01138.1.g23858.t1 | gb ACB59200.1  unknown protein [Brassica oleracea]                                                                                                                                                                                                                                                                                                                                                            | 891  | 839  | 0         | 94.2  | 80.9 | 86.3 | unknown protein                                      | gbpln | Brassica oleracea    | AT1G18620.1   Symbols:   unknown protein; BEST Arabidopsis thaliana protein match is: unknown protein (TAIR:AT1G74160.1). Has 1987 Blast hits to 1263 proteins in 207 species: Archaee - 0; Bacteria - 172; Metazoa - 665; Fungi - 149; Plants - 271; Viruses - 6; Other Eukaryotes - 724 (source: NCBI BLink).   chr1:6410719-6414269 FORWARD LENGTH=978 | 891  | 978  | 0         | 109.8 | 75.0 | 84.1 |
| Rsa1.0_01138.1.g23859.t1 | gb AAG52949.1  gag/pol polyprotein [Arabidopsis thaliana]                                                                                                                                                                                                                                                                                                                                                     | 419  | 1643 | 1.00E-167 | 392.1 | 66.8 | 80.2 | gag/pol polyprotein                                  | gbpln | Arabidopsis thaliana | AT4G23160.1   Symbols: CRK8   cysteine-rich RLK (RECEPTOR-like protein kinase) 8   chr4:12129485-12134086 FORWARD LENGTH=1262                                                                                                                                                                                                                             | 419  | 1262 | 1.00E-74  | 301.2 | 35.8 | 53.2 |
| Rsa1.0_01138.1.g23860.t1 | gb ABD65118.1  hypothetical protein 31.t00031 [Brassica oleracea]                                                                                                                                                                                                                                                                                                                                             | 377  | 467  | 5.00E-79  | 123.9 | 42.4 | 55.4 | hypothetical protein 31.t00031                       | gbpln | Brassica oleracea    | AT1G52950.1   Symbols:   Nucleic acid-binding, OB-fold-like protein   chr1:19725483-19728007 FORWARD LENGTH=566                                                                                                                                                                                                                                           | 377  | 566  | 4.00E-24  | 150.1 | 17.8 | 31.0 |
| Rsa1.0_01138.1.g23861.t1 | gb ABD65063.1  hypothetical protein 27.t00041 [Brassica oleracea]                                                                                                                                                                                                                                                                                                                                             | 137  | 198  | 9.00E-20  | 144.5 | 37.2 | 43.8 | hypothetical protein 27.t00041                       | gbpln | Brassica oleracea    | #                                                                                                                                                                                                                                                                                                                                                         | #    | #    | #         | #     | #    | #    |
| Rsa1.0_01138.1.g23862.t1 | gb ABD65118.1  hypothetical protein 31.t00031 [Brassica oleracea]                                                                                                                                                                                                                                                                                                                                             | 524  | 467  | 1.00E-117 | 89.1  | 42.6 | 55.2 | hypothetical protein 31.t00031                       | gbpln | Brassica oleracea    | AT1G52950.1   Symbols:   Nucleic acid-binding, OB-fold-like protein   chr1:19725483-19728007 FORWARD LENGTH=566                                                                                                                                                                                                                                           | 524  | 566  | 3.00E-71  | 108.0 | 29.0 | 47.1 |
| Rsa1.0_01138.1.g23863.t4 | gb ABD65117.1  hypothetical protein 31.t00030 [Brassica oleracea]                                                                                                                                                                                                                                                                                                                                             | 1737 | 1471 | 0         | 84.7  | 60.7 | 69.1 | hypothetical protein 31.t00030                       | gbpln | Brassica oleracea    | AT3G51700.1   Symbols:   PIF1 helicase   chr3:19179443-19181145 REVERSE LENGTH=344                                                                                                                                                                                                                                                                        | 1737 | 344  | 4.00E-63  | 19.8  | 7.4  | 10.1 |
| Rsa1.0_01138.1.g23864.t1 | gb ABD65101.1  hypothetical protein 31.t00082 [Brassica oleracea]                                                                                                                                                                                                                                                                                                                                             | 254  | 226  | 3.00E-58  | 89.0  | 46.9 | 60.6 | hypothetical protein 31.t00082                       | gbpln | Brassica oleracea    | #                                                                                                                                                                                                                                                                                                                                                         | #    | #    | #         | #     | #    | #    |
| Rsa1.0_01138.1.g23865.t1 | gb ABD65063.1  hypothetical protein 27.t00041 [Brassica oleracea]                                                                                                                                                                                                                                                                                                                                             | 180  | 198  | 2.00E-50  | 110.0 | 53.3 | 72.2 | hypothetical protein 27.t00041                       | gbpln | Brassica oleracea    | AT2G35280.1   Symbols:   F-box family protein   chr2:14859709-14860200 REVERSE LENGTH=163                                                                                                                                                                                                                                                                 | 180  | 163  | 7.00E-12  | 90.6  | 17.8 | 31.1 |
| Rsa1.0_01139.1.g23866.t1 | gb AAL14644.1 AF417856.1 AOP1.2 [Arabidopsis thaliana]                                                                                                                                                                                                                                                                                                                                                        | 127  | 321  | 6.00E-50  | 252.8 | 76.4 | 86.6 | AOP1.2                                               | gbpln | Arabidopsis thaliana | AT4G03070.1   Symbols: AOP1, AOP, AOP1.1   2-oxoglutarate (2OG) and Fe(II)-dependent oxygenase superfamily protein   chr4:1358442-1359620 FORWARD LENGTH=322                                                                                                                                                                                              | 127  | 322  | 1.00E-50  | 253.5 | 74.0 | 85.0 |

|                          |                                                                                                                                                                                                                                                                                                                                                                                                                                        |      |      |           |        |      |       |                                                        |       |                      |                                                                                                                                                              |      |      |           |       |      |      |
|--------------------------|----------------------------------------------------------------------------------------------------------------------------------------------------------------------------------------------------------------------------------------------------------------------------------------------------------------------------------------------------------------------------------------------------------------------------------------|------|------|-----------|--------|------|-------|--------------------------------------------------------|-------|----------------------|--------------------------------------------------------------------------------------------------------------------------------------------------------------|------|------|-----------|-------|------|------|
| Rsa1.0_01139.1.g23867.t1 | gb AAF23556.1 AF110458.1 alcohol dehydrogenase [Barbarea vulgaris]                                                                                                                                                                                                                                                                                                                                                                     | 113  | 379  | 7.00E-29  | 335.4  | 52.2 | 54.9  | alcohol dehydrogenase                                  | gbpln | Barbarea vulgaris    | AT1G77120.1   Symbols: ADH1, ADH, ATADH, ATADH1   alcohol dehydrogenase 1   chr1:28975509-28977216 FORWARD LENGTH=379                                        | 113  | 379  | 3.00E-30  | 335.4 | 50.4 | 54.9 |
| Rsa1.0_01139.1.g23868.t1 | gb AAL14645.1 AF417857.1 AOP1 [Arabidopsis lyrata]<br>gi 16118984 gb AAL14690.1 2-oxoglutarate-dependent dioxygenase [Arabidopsis lyrata]                                                                                                                                                                                                                                                                                              | 321  | 318  | 1.00E-132 | 99.1   | 71.3 | 83.2  | AOP1                                                   | gbpln | Arabidopsis lyrata   | AT4G03070.1   Symbols: AOP1, AOP, AOP1.1   2-oxoglutarate (2OG) and Fe(II)-dependent oxygenase superfamily protein   chr4:1358442-1359620 FORWARD LENGTH=322 | 321  | 322  | 1.00E-131 | 100.3 | 69.8 | 81.6 |
| Rsa1.0_01139.1.g23869.t1 | gb AAF99727.1 AC004557.6 F17L21.7 [Arabidopsis thaliana]                                                                                                                                                                                                                                                                                                                                                                               | 1437 | 1534 | 0         | 106.8  | 71.0 | 80.9  | F17L21.7                                               | gbpln | Arabidopsis thaliana | AT4G23160.1   Symbols: CRK8   cysteine-rich RLK (RECEPTOR-like protein kinase) 8   chr4:12129485-12134086 FORWARD LENGTH=1262                                | 1437 | 1262 | 1.00E-104 | 87.8  | 14.3 | 20.3 |
| Rsa1.0_01139.1.g23870.t1 | gb EMJ11389.1  hypothetical protein PRUPE_ppa017790mg [Prunus persica]                                                                                                                                                                                                                                                                                                                                                                 | 1444 | 1485 | 0         | 102.8  | 43.9 | 59.2  | hypothetical protein PRUPE_ppa017790mg                 | gbpln | Prunus persica       | ATMG00860.1   Symbols: ORF158   DNA/RNA polymerases superfamily protein   chrM:235916-236392 FORWARD LENGTH=158                                              | 1444 | 158  | 9.00E-30  | 10.9  | 4.1  | 6.0  |
| Rsa1.0_01139.1.g23871.t1 | ref XP_002872801.1  transducin family protein [Arabidopsis lyrata subsp. lyrata] gi 297318638 gb EFH49060.1  transducin family protein [Arabidopsis lyrata subsp. lyrata]<br>ref NP_175159.1  gamma carbonic anhydrase 2 [Arabidopsis thaliana] gi 75169075 sp Q9C6B3.1 GCA2_ARATH<br>RecName: Full=Gamma carbonic anhydrase 2, mitochondrial; Short=AtCA2; Short=GAMMA CA2; AltName: Full=Transcription factor APF1; Flags: Precursor | 469  | 493  | 0         | 105.1  | 93.0 | 95.9  | transducin family protein                              | gbpln | Arabidopsis lyrata   | AT4G03020.2   Symbols:   transducin family protein / WD-40 repeat family protein   chr4:1331704-1334472 REVERSE LENGTH=493                                   | 469  | 493  | 0         | 105.1 | 92.3 | 95.5 |
| Rsa1.0_01140.1.g23872.t1 | gi 12325399 gb AAG52641.1 AC079677.5 unknown protein; 6976-8939 [Arabidopsis thaliana]<br>gi 15028353 gb AAK76653.1  unknown protein [Arabidopsis thaliana]<br>gi 21230065 gb AM44984.1  unknown protein [Arabidopsis thaliana]<br>gi 332194023 gb AEE32144.1  gamma carbonic anhydrase 2 [Arabidopsis thaliana]                                                                                                                       | 276  | 278  | 1.00E-144 | 100.7  | 89.1 | 95.3  | gamma carbonic anhydrase 2                             | gbpln | Arabidopsis thaliana | AT1G47260.1   Symbols: APF1, GAMMA CA2   gamma carbonic anhydrase 2   chr1:17321384-17323347 REVERSE LENGTH=278                                              | 276  | 278  | 2.33E-156 | 100.7 | 89.1 | 95.3 |
| Rsa1.0_01140.1.g23873.t1 | ref XP_002891341.1  hypothetical protein ARALYDRAFT_473874 [Arabidopsis lyrata subsp. lyrata] gi 297337183 gb EFH67600.1  hypothetical protein ARALYDRAFT_473874 [Arabidopsis lyrata subsp. lyrata]                                                                                                                                                                                                                                    | 275  | 277  | 1.00E-143 | 100.7  | 94.9 | 97.1  | hypothetical protein ARALYDRAFT_473874                 | gbpln | Arabidopsis lyrata   | AT1G47250.1   Symbols: PAF2   20S proteasome alpha subunit F2   chr1:17319220-17320900 FORWARD LENGTH=277                                                    | 275  | 277  | 1.00E-143 | 100.7 | 91.6 | 94.9 |
| Rsa1.0_01140.1.g23874.t1 | #                                                                                                                                                                                                                                                                                                                                                                                                                                      | #    | #    | #         | #      | #    | #     | -                                                      | ----  | ----                 | #                                                                                                                                                            | #    | #    | #         | #     | #    |      |
| Rsa1.0_01140.1.g23875.t1 | gb EOA40120.1  hypothetical protein CARUB_v10008822mg [Capsella rubella]                                                                                                                                                                                                                                                                                                                                                               | 534  | 531  | 0         | 99.4   | 93.6 | 96.3  | hypothetical protein CARUB_v10008822mg                 | gbpln | Capsella rubella     | AT1G47240.1   Symbols: NRAMP2, ATNRAMP2   NRAMP metal ion transporter 2   chr1:17309043-17311308 REVERSE LENGTH=530                                          | 534  | 530  | 0         | 99.3  | 91.9 | 94.6 |
| Rsa1.0_01140.1.g23876.t1 | gb ABB97043.1  cyclin-dependent protein kinase regulator-like protein [Brassica rapa]                                                                                                                                                                                                                                                                                                                                                  | 364  | 365  | 0         | 100.3  | 92.3 | 95.1  | cyclin-dependent protein kinase regulator-like protein | gbpln | Brassica rapa        | AT1G47230.1   Symbols: CYCA3;4   CYCLIN A3.4   chr1:17306752-17308587 FORWARD LENGTH=369                                                                     | 364  | 369  | 1.00E-175 | 101.4 | 82.7 | 90.4 |
| Rsa1.0_01140.1.g23877.t1 | ref XP_002891337.1  CYCA3_2 [Arabidopsis lyrata subsp. lyrata] gi 297337179 gb EFH67596.1  CYCA3_2 [Arabidopsis lyrata subsp. lyrata]                                                                                                                                                                                                                                                                                                  | 365  | 368  | 1.00E-175 | 100.8  | 82.7 | 91.5  | CYCA3_2                                                | gbpln | Arabidopsis lyrata   | AT1G47210.2   Symbols: CYCA3;2   cyclin-dependent protein kinase 3;2   chr1:17301036-17302584 FORWARD LENGTH=372                                             | 365  | 372  | 1.00E-178 | 101.9 | 82.5 | 91.8 |
| Rsa1.0_01140.1.g23878.t1 | dbj BAB10772.1  unnamed protein product [Arabidopsis thaliana]                                                                                                                                                                                                                                                                                                                                                                         | 176  | 171  | 8.00E-40  | 97.2   | 44.3 | 58.0  | unnamed protein product                                | gbpln | Arabidopsis thaliana | #                                                                                                                                                            | #    | #    | #         | #     | #    |      |
| Rsa1.0_01140.1.g23879.t1 | gb AAM62902.1  unknown [Arabidopsis thaliana]                                                                                                                                                                                                                                                                                                                                                                                          | 188  | 180  | 7.00E-43  | 95.7   | 68.1 | 74.5  | unknown                                                | gbpln | Arabidopsis thaliana | AT1G47200.1   Symbols: WPP2   WPP domain protein 2   chr1:17298181-17298723 REVERSE LENGTH=180                                                               | 188  | 180  | 3.00E-45  | 95.7  | 66.0 | 72.3 |
| Rsa1.0_01140.1.g23880.t1 | dbj BAA97290.1  non-LTR retroelement reverse transcriptase-like [Arabidopsis thaliana]                                                                                                                                                                                                                                                                                                                                                 | 305  | 1072 | 1.00E-58  | 351.5  | 39.7 | 60.7  | non-LTR retroelement reverse transcriptase-like        | gbpln | Arabidopsis thaliana | AT1G60720.1   Symbols:   RNA-directed DNA polymerase (reverse transcriptase)-related family protein   chr1:22357072-22357941 FORWARD LENGTH=289              | 305  | 289  | 1.00E-47  | 94.8  | 34.4 | 48.2 |
| Rsa1.0_01141.1.g23881.t1 | dbj BAA97087.1  copia-type pol polyprotein-like [Arabidopsis thaliana]                                                                                                                                                                                                                                                                                                                                                                 | 52   | 1123 | 2.00E-20  | 2159.6 | 86.5 | 100.0 | copia-type pol polyprotein-like                        | gbpln | Arabidopsis thaliana | #                                                                                                                                                            | #    | #    | #         | #     | #    |      |
| Rsa1.0_01141.1.g23882.t1 | dbj BAJ33878.1  unnamed protein product [Thellungiella halophila]                                                                                                                                                                                                                                                                                                                                                                      | 709  | 711  | 0         | 100.3  | 93.8 | 97.0  | unnamed protein product                                | ----  | ----                 | AT4G30210.2   Symbols: ATR2, AR2   P450 reductase 2   chr4:14798900-14800578 FORWARD LENGTH=711                                                              | 709  | 711  | 0         | 100.3 | 92.2 | 95.6 |

|                          |                                                                                                                                                                                                                                                                                                                                                                                                                                                                                                                                                                                                                                                                                                                                                                                            |     |     |           |       |      |      |                                               |             |                      |                                                                                                                                                                                                                                                                                                                                                                                                                                                               |     |     |           |       |      |      |
|--------------------------|--------------------------------------------------------------------------------------------------------------------------------------------------------------------------------------------------------------------------------------------------------------------------------------------------------------------------------------------------------------------------------------------------------------------------------------------------------------------------------------------------------------------------------------------------------------------------------------------------------------------------------------------------------------------------------------------------------------------------------------------------------------------------------------------|-----|-----|-----------|-------|------|------|-----------------------------------------------|-------------|----------------------|---------------------------------------------------------------------------------------------------------------------------------------------------------------------------------------------------------------------------------------------------------------------------------------------------------------------------------------------------------------------------------------------------------------------------------------------------------------|-----|-----|-----------|-------|------|------|
| Rsa1.0_01141.1.g23883.t1 | refNP_193031.1  Fasciclin-like arabinogalactan family protein [Arabidopsis thaliana] gi 5123936 emb CAB45494.1  hypothetical protein [Arabidopsis thaliana] gi 7267997 emb CAB78337.1  hypothetical protein [Arabidopsis thaliana] gi 91805587 gb ABE65522.1  hypothetical protein At4g12950 [Arabidopsis thaliana] gi 332657806 gb AEE83206.1  Fasciclin-like arabinogalactan family protein [Arabidopsis thaliana]                                                                                                                                                                                                                                                                                                                                                                       | 190 | 176 | 1.00E-55  | 92.6  | 57.4 | 71.6 | Fasciclin-like arabinogalactan family protein | gbpln       | Arabidopsis thaliana | AT4G12950.1   Symbols:   Fasciclin-like arabinogalactan family protein   chr4:7576642-7577172 FORWARD LENGTH=176                                                                                                                                                                                                                                                                                                                                              | 190 | 176 | 4.00E-58  | 92.6  | 57.4 | 71.6 |
| Rsa1.0_01141.1.g23884.t1 | #                                                                                                                                                                                                                                                                                                                                                                                                                                                                                                                                                                                                                                                                                                                                                                                          | #   | #   | #         | #     | #    | #    | -                                             | ----        | ----                 | #                                                                                                                                                                                                                                                                                                                                                                                                                                                             | #   | #   | #         | #     | #    |      |
| Rsa1.0_01141.1.g23885.t1 | refNP_193031.1  Fasciclin-like arabinogalactan family protein [Arabidopsis thaliana] gi 5123936 emb CAB45494.1  hypothetical protein [Arabidopsis thaliana] gi 7267997 emb CAB78337.1  hypothetical protein [Arabidopsis thaliana] gi 91805587 gb ABE65522.1  hypothetical protein At4g12950 [Arabidopsis thaliana] gi 332657806 gb AEE83206.1  Fasciclin-like arabinogalactan family protein [Arabidopsis thaliana]                                                                                                                                                                                                                                                                                                                                                                       | 202 | 176 | 6.00E-32  | 87.1  | 31.7 | 46.0 | Fasciclin-like arabinogalactan family protein | gbpln       | Arabidopsis thaliana | AT4G12950.1   Symbols:   Fasciclin-like arabinogalactan family protein   chr4:7576642-7577172 FORWARD LENGTH=176                                                                                                                                                                                                                                                                                                                                              | 202 | 176 | 2.00E-34  | 87.1  | 31.7 | 46.0 |
| Rsa1.0_01141.1.g23886.t1 | refNP_193028.1  aspartyl protease family protein [Arabidopsis thaliana] gi 5123933 emb CAB45491.1  putative protein [Arabidopsis thaliana] gi 7267994 emb CAB78334.1  putative protein [Arabidopsis thaliana] gi 332657803 gb AEE83203.1  aspartyl protease family protein [Arabidopsis thaliana]                                                                                                                                                                                                                                                                                                                                                                                                                                                                                          | 378 | 389 | 1.00E-126 | 102.9 | 61.9 | 75.4 | aspartyl protease family protein              | gbpln       | Arabidopsis thaliana | AT4G12920.1   Symbols:   Eukaryotic aspartyl protease family protein   chr4:7568286-7569455 FORWARD LENGTH=389                                                                                                                                                                                                                                                                                                                                                | 378 | 389 | 1.00E-129 | 102.9 | 61.9 | 75.4 |
| Rsa1.0_01141.1.g23887.t1 | refNP_001152699.1  PHD finger-like domain-containing protein 5A [Zea mays] gi 226499812 ref NP_001148557.1  PHD finger-like domain-containing protein 5A [Zea mays] gi 195620406 gb ACG32033.1  PHD finger-like domain-containing protein 5A [Zea mays] gi 195636758 gb ACG37837.1  PHD finger-like domain-containing protein 5A [Zea mays] gi 195659129 gb ACG49032.1  PHD finger-like domain-containing protein 5A [Zea mays] gi 223946749 gb ACN27458.1  unknown [Zea mays] gi 414584947 tpg DAA35518.1  TPA: PHD finger-like domain-containing protein 5A isoform 1 [Zea mays] gi 414584948 tpg DAA35519.1  TPA: PHD finger-like domain-containing protein 5A isoform 2 [Zea mays] gi 414584949 tpg DAA35520.1  TPA: PHD finger-like domain-containing protein 5A isoform 3 [Zea mays] | 81  | 110 | 6.00E-31  | 135.8 | 93.8 | 93.8 | PHD finger-like domain-containing protein 5A  | gbenv/gbpln | Zea mays             | AT2G30000.1   Symbols:   PHF5-like protein   chr2:12804042-12804374 REVERSE LENGTH=110                                                                                                                                                                                                                                                                                                                                                                        | 81  | 110 | 2.00E-33  | 135.8 | 92.6 | 93.8 |
| Rsa1.0_01141.1.g23888.t1 | refNP_193030.1  uncharacterized protein [Arabidopsis thaliana] gi 5123935 emb CAB45493.1  putative protein [Arabidopsis thaliana] gi 7267996 emb CAB78336.1  putative protein [Arabidopsis thaliana] gi 11716811 gb ABK32138.1  At4g12940 [Arabidopsis thaliana] gi 332657805 gb AEE83205.1  uncharacterized protein AT4G12940 [Arabidopsis thaliana]                                                                                                                                                                                                                                                                                                                                                                                                                                      | 121 | 151 | 1.00E-37  | 124.8 | 65.3 | 74.4 | uncharacterized protein                       | gbpln       | Arabidopsis thaliana | AT4G12940.1   Symbols:   unknown protein; FUNCTIONS IN: molecular_function unknown; INVOLVED IN: biological_process unknown; LOCATED IN: endomembrane system; BEST Arabidopsis thaliana protein match is: unknown protein (TAIR:AT4G12930.1); Has 12 Blast hits to 12 proteins in 2 species: Archae - 0; Bacteria - 0; Metazoa - 0; Fungi - 0; Plants - 12; Viruses - 0; Other Eukaryotes - 0 (source: NCBI BLink).   chr4:7574172-7574627 FORWARD LENGTH=151 | 121 | 151 | 2.00E-40  | 124.8 | 65.3 | 74.4 |

|                          |                                                                                                                                                                                                                                                                                                                                                               |      |     |           |       |      |      |                                        |       |                            |                                                                                                                                                                                                                                                                                                                                                                                                                                                                                                                                                                                                                                                                  |      |     |           |       |      |      |
|--------------------------|---------------------------------------------------------------------------------------------------------------------------------------------------------------------------------------------------------------------------------------------------------------------------------------------------------------------------------------------------------------|------|-----|-----------|-------|------|------|----------------------------------------|-------|----------------------------|------------------------------------------------------------------------------------------------------------------------------------------------------------------------------------------------------------------------------------------------------------------------------------------------------------------------------------------------------------------------------------------------------------------------------------------------------------------------------------------------------------------------------------------------------------------------------------------------------------------------------------------------------------------|------|-----|-----------|-------|------|------|
| Rsa1.0_01141.1.g23889.t1 | refNP_193029.1 uncharacterized protein [Arabidopsis thaliana] gi 5123934 emb CAB45492.1  hypothetical protein [Arabidopsis thaliana] gi 7267995 emb CAB78335.1  hypothetical protein [Arabidopsis thaliana] gi 117168195 gb ABK32180.1  At4g12930 [Arabidopsis thaliana] gi 332657804 gb AEE83204.1  uncharacterized protein AT4G12930 [Arabidopsis thaliana] | 141  | 141 | 2.00E-44  | 100.0 | 64.5 | 78.7 | uncharacterized protein                | gbpln | Arabidopsis thaliana       | AT4G12930.1   Symbols:   unknown protein; FUNCTIONS IN: molecular function unknown; INVOLVED IN: biological_process unknown; LOCATED IN: endomembrane system; EXPRESSED IN: leaf whorl, sepal, male gametophyte, flower, pollen tube; EXPRESSED DURING: L mature pollen stage, M germinated pollen stage, 4 anthesis, petal differentiation and expansion stage; BEST Arabidopsis thaliana protein match is: unknown protein (TAIR:AT4G28930.1); Has 12 Blast hits to 12 proteins in 2 species: Archae - 0; Bacteria - 0; Metazoa - 0; Fungi - 0; Plants - 12; Viruses - 0; Other Eukaryotes - 0 (source: NCBI BLINK).   chr4:7573281-7573706 REVERSE LENGTH=141 | 141  | 141 | 5.00E-47  | 100.0 | 64.5 | 78.7 |
| Rsa1.0_01141.1.g23890.t1 | gb EOA15440.1  hypothetical protein CARUB_v10004082mg [Capsella rubella]                                                                                                                                                                                                                                                                                      | 948  | 948 | 0         | 100.0 | 92.6 | 96.1 | hypothetical protein CARUB_v10004082mg | gbpln | Capsella rubella           | AT4G30190.1   Symbols: AHA2, PMA2, HA2   H(+)-ATPase 2   chr4:14770820-14775920 REVERSE LENGTH=948                                                                                                                                                                                                                                                                                                                                                                                                                                                                                                                                                               | 948  | 948 | 0         | 100.0 | 92.5 | 96.1 |
| Rsa1.0_01142.1.g23891.t1 | # # # # # # # #                                                                                                                                                                                                                                                                                                                                               | #    | #   | #         | #     | #    | #    | -                                      | ----  | ----                       | #                                                                                                                                                                                                                                                                                                                                                                                                                                                                                                                                                                                                                                                                | #    | #   | #         | #     | #    |      |
| Rsa1.0_01142.1.g23892.t1 | refXP_002884081.1 zinc finger family protein [Arabidopsis lyrata subsp. lyrata] gi 297329921 gb EFH60340.1  zinc finger family protein [Arabidopsis lyrata subsp. lyrata]                                                                                                                                                                                     | 238  | 239 | 1.00E-120 | 100.4 | 89.9 | 94.5 | zinc finger family protein             | gbpln | Arabidopsis lyrata         | AT4G35840.1   Symbols:   RING/U-box superfamily protein   chr4:16981083-16982266 FORWARD LENGTH=236                                                                                                                                                                                                                                                                                                                                                                                                                                                                                                                                                              | 238  | 236 | 1.00E-115 | 99.2  | 82.8 | 92.0 |
| Rsa1.0_01142.1.g23893.t1 | # # # # # # # #                                                                                                                                                                                                                                                                                                                                               | #    | #   | #         | #     | #    | #    | -                                      | ----  | ----                       | AT1G51690.3   Symbols: B ALPHA   protein phosphatase 2A 55 kDa regulatory subunit B alpha isoform   chr1:19164124-19169974 FORWARD LENGTH=603                                                                                                                                                                                                                                                                                                                                                                                                                                                                                                                    | 139  | 603 | 3.00E-11  | 433.8 | 23.7 | 30.9 |
| Rsa1.0_01142.1.g23894.t1 | # # # # # # # #                                                                                                                                                                                                                                                                                                                                               | #    | #   | #         | #     | #    | #    | -                                      | ----  | ----                       | #                                                                                                                                                                                                                                                                                                                                                                                                                                                                                                                                                                                                                                                                | #    | #   | #         | #     | #    |      |
| Rsa1.0_01142.1.g23895.t1 | refNP_175139.1 receptor like protein 6 [Arabidopsis thaliana] gi 12321005 gb AA50623.1 AC083835_8 disease resistance protein, putative [Arabidopsis thaliana] gi 332193999 gb AEE32120.1  receptor like protein 6 [Arabidopsis thaliana]                                                                                                                      | 1015 | 994 | 0         | 97.9  | 65.6 | 75.6 | receptor like protein 6                | gbpln | Arabidopsis thaliana       | AT1G45616.1   Symbols: AtRLP6, RLP6   receptor like protein 6   chr1:17183550-17186534 REVERSE LENGTH=994                                                                                                                                                                                                                                                                                                                                                                                                                                                                                                                                                        | 1015 | 994 | 0         | 97.9  | 65.6 | 75.6 |
| Rsa1.0_01142.1.g23896.t1 | refNP_175139.1 receptor like protein 6 [Arabidopsis thaliana] gi 12321005 gb AA50623.1 AC083835_8 disease resistance protein, putative [Arabidopsis thaliana] gi 332193999 gb AEE32120.1  receptor like protein 6 [Arabidopsis thaliana]                                                                                                                      | 990  | 994 | 0         | 100.4 | 65.9 | 75.8 | receptor like protein 6                | gbpln | Arabidopsis thaliana       | AT1G45616.1   Symbols: AtRLP6, RLP6   receptor like protein 6   chr1:17183550-17186534 REVERSE LENGTH=994                                                                                                                                                                                                                                                                                                                                                                                                                                                                                                                                                        | 990  | 994 | 0         | 100.4 | 65.9 | 75.8 |
| Rsa1.0_01142.1.g23897.t1 | refXP_002877467.1 predicted protein [Arabidopsis lyrata subsp. lyrata] gi 297323305 gb EFH53726.1  predicted protein [Arabidopsis lyrata subsp. lyrata]                                                                                                                                                                                                       | 105  | 186 | 5.00E-13  | 177.1 | 41.0 | 53.3 | predicted protein                      | gbpln | Arabidopsis lyrata         | #                                                                                                                                                                                                                                                                                                                                                                                                                                                                                                                                                                                                                                                                | #    | #   | #         | #     | #    |      |
| Rsa1.0_01142.1.g23898.t1 | gb EOA32800.1  hypothetical protein CARUB_v10016111mg [Capsella rubella]                                                                                                                                                                                                                                                                                      | 512  | 513 | 0         | 100.2 | 87.3 | 93.9 | hypothetical protein CARUB_v10016111mg | gbpln | Capsella rubella           | AT2G17760.1   Symbols:   Eukaryotic aspartyl protease family protein   chr2:7713488-7716269 FORWARD LENGTH=513                                                                                                                                                                                                                                                                                                                                                                                                                                                                                                                                                   | 512  | 513 | 0         | 100.2 | 88.7 | 95.1 |
| Rsa1.0_01143.1.g23899.t1 | refXP_002974570.1 hypothetical protein SELMODRAFT_442529 [Selaginella moellendorffii] gi 300157465 gb EFJ24090.1  hypothetical protein SELMODRAFT_442529 [Selaginella moellendorffii]                                                                                                                                                                         | 417  | 516 | 6.00E-54  | 123.7 | 66.9 | 69.1 | hypothetical protein SELMODRAFT_442529 | gbpln | Selaginella moellendorffii | AT4G08370.1   Symbols:   Proline-rich extensin-like family protein   chr4:5301962-5303314 REVERSE LENGTH=350                                                                                                                                                                                                                                                                                                                                                                                                                                                                                                                                                     | 417  | 350 | 8.00E-25  | 83.9  | 40.3 | 47.2 |
| Rsa1.0_01143.1.g23900.t1 | gb EOA39890.1  hypothetical protein CARUB_v10008568mg [Capsella rubella]                                                                                                                                                                                                                                                                                      | 111  | 632 | 5.00E-34  | 569.4 | 63.1 | 67.6 | hypothetical protein CARUB_v10008568mg | gbpln | Capsella rubella           | AT1G26270.1   Symbols:   Phosphatidylinositol 3- and 4-kinase family protein   chr1:9089822-9091714 REVERSE LENGTH=630                                                                                                                                                                                                                                                                                                                                                                                                                                                                                                                                           | 111  | 630 | 2.00E-34  | 567.6 | 60.4 | 64.0 |
| Rsa1.0_01143.1.g23901.t1 | refXP_002982842.1 hypothetical protein SELMODRAFT_422106 [Selaginella moellendorffii] gi 300149432 gb EFJ16087.1  hypothetical protein SELMODRAFT_422106 [Selaginella moellendorffii]                                                                                                                                                                         | 111  | 386 | 9.00E-20  | 347.7 | 75.7 | 79.3 | hypothetical protein SELMODRAFT_422106 | gbpln | Selaginella moellendorffii | #                                                                                                                                                                                                                                                                                                                                                                                                                                                                                                                                                                                                                                                                | #    | #   | #         | #     | #    |      |
| Rsa1.0_01143.1.g23902.t1 | gb EOA39890.1  hypothetical protein CARUB_v10008568mg [Capsella rubella]                                                                                                                                                                                                                                                                                      | 101  | 632 | 4.00E-43  | 625.7 | 84.2 | 90.1 | hypothetical protein CARUB_v10008568mg | gbpln | Capsella rubella           | AT1G26270.1   Symbols:   Phosphatidylinositol 3- and 4-kinase family protein   chr1:9089822-9091714 REVERSE LENGTH=630                                                                                                                                                                                                                                                                                                                                                                                                                                                                                                                                           | 101  | 630 | 3.00E-44  | 623.8 | 82.2 | 86.1 |

|                          |                                                                                                                                                                                                                                                                                                                                                                                                                                                 |      |      |           |       |      |      |                                                                                                                                                                                                                                                                                                               |       |                            |                                                                                                                                                   |      |      |           |       |      |      |
|--------------------------|-------------------------------------------------------------------------------------------------------------------------------------------------------------------------------------------------------------------------------------------------------------------------------------------------------------------------------------------------------------------------------------------------------------------------------------------------|------|------|-----------|-------|------|------|---------------------------------------------------------------------------------------------------------------------------------------------------------------------------------------------------------------------------------------------------------------------------------------------------------------|-------|----------------------------|---------------------------------------------------------------------------------------------------------------------------------------------------|------|------|-----------|-------|------|------|
| Rsa1.0_01143.1.g23903.t1 | refXP_002974570.1  hypothetical protein SELMODRAFT_442529 [Selaginella moellendorffii] gi 300157465 gb EFJ24090.1  hypothetical protein SELMODRAFT_442529 [Selaginella moellendorffii]                                                                                                                                                                                                                                                          | 360  | 516  | 1.00E-45  | 143.3 | 65.0 | 66.7 | hypothetical protein SELMODRAFT_442529                                                                                                                                                                                                                                                                        | gbpln | Selaginella moellendorffii | AT4G08370.1   Symbols:   Proline-rich extensin-like family protein   chr4:5301962-5303314 REVERSE LENGTH=350                                      | 360  | 350  | 1.00E-27  | 97.2  | 52.8 | 60.8 |
| Rsa1.0_01143.1.g23904.t1 | gb EOA39890.1  hypothetical protein CARUB_v10008568mg [Capsella rubella]                                                                                                                                                                                                                                                                                                                                                                        | 621  | 632  | 0         | 101.8 | 83.1 | 90.2 | hypothetical protein CARUB_v10008568mg                                                                                                                                                                                                                                                                        | gbpln | Capsella rubella           | AT1G26270.1   Symbols:   Phosphatidylinositol 3- and 4-kinase family protein   chr1:9089822-9091714 REVERSE LENGTH=630                            | 621  | 630  | 0         | 101.4 | 82.1 | 90.2 |
| Rsa1.0_01143.1.g23905.t1 | sp Q6R4S3.1 CAL_BRARA RecName: Full=Transcription factor CAULIFLOWER; Short=BcrCAL; AltName: Full=Agamous-like MADS-box protein CAL gi 75291799 sp Q6R4S6.1 CAL_BRARC RecName: Full=Transcription factor CAULIFLOWER; Short=BcccCAL; AltName: Full=Agamous-like MADS-box protein CAL gi 45533860 gb AAS67303.1  DNA binding protein [Brassica rapa subsp. chinensis] gi 45533866 gb AAS67306.1  DNA binding protein [Brassica rapa subsp. rapa] | 254  | 254  | 1.00E-140 | 100.0 | 95.7 | 97.6 | RecName: Full=Transcription factor CAULIFLOWER; Short=BcrCAL; AltName: Full=Agamous-like MADS-box protein CAL gi 75291799 sp Q6R4S6.1 CAL_BRARC RecName: Full=Transcription factor CAULIFLOWER; Short=BcccCAL; AltName: Full=Agamous-like MADS-box protein CAL gi 45533860 gb AAS67303.1  DNA binding protein | gbpln | Brassica rapa              | AT1G26310.1   Symbols: CAL, CAL1, AGL10   K-box region and MADS-box transcription factor family protein   chr1:9100330-9103510 REVERSE LENGTH=255 | 254  | 255  | 1.00E-121 | 100.4 | 85.0 | 91.3 |
| Rsa1.0_01143.1.g23906.t1 | ref NP_173960.2  methyl esterase 13 [Arabidopsis thaliana] gi 395406784 sp F4I6E5.1 MES13_ARATH RecName: Full=Putative methylesterase 13, chloroplastic; Short=AtMES13; Flags: Precursor gi 332192561 gb AEE30682.1  methyl esterase 13 [Arabidopsis thaliana]                                                                                                                                                                                  | 397  | 444  | 1.00E-176 | 111.8 | 82.9 | 89.7 | methyl esterase 13                                                                                                                                                                                                                                                                                            | gbpln | Arabidopsis thaliana       | AT1G26360.1   Symbols: ATMES13, MES13   methyl esterase 13   chr1:9119021-9121203 REVERSE LENGTH=444                                              | 397  | 444  | 1.00E-179 | 111.8 | 82.9 | 89.7 |
| Rsa1.0_01143.1.g23907.t1 | ref NP_172913.1  Valyl-tRNA synthetase [Arabidopsis thaliana] gi 21542452 sp P93736.2 SYV_ARATH RecName: Full=Valine--tRNA ligase; AltName: Full=Valyl-tRNA synthetase; Short=ValRS gi 332191069 gb AEE29190.1  Valyl-tRNA synthetase [Arabidopsis thaliana]                                                                                                                                                                                    | 1303 | 1108 | 0         | 85.0  | 64.8 | 70.7 | Valyl-tRNA synthetase                                                                                                                                                                                                                                                                                         | gbpln | Arabidopsis thaliana       | AT1G14610.1   Symbols: TWN2, VALRS   valyl-tRNA synthetase / valine--tRNA ligase (VALRS)   chr1:5008502-5014486 REVERSE LENGTH=1108               | 1303 | 1108 | 0         | 85.0  | 64.8 | 70.7 |
| Rsa1.0_01144.1.g23908.t1 | ref XP_002879302.1  hypothetical protein ARALYDRAFT_482033 [Arabidopsis lyrata subsp. lyrata] gi 297325141 gb EFH55561.1  hypothetical protein ARALYDRAFT_482033 [Arabidopsis lyrata subsp. lyrata]                                                                                                                                                                                                                                             | 82   | 81   | 4.00E-29  | 98.8  | 89.0 | 93.9 | hypothetical protein ARALYDRAFT_482033                                                                                                                                                                                                                                                                        | gbpln | Arabidopsis lyrata         | AT2G31081.1   Symbols: CLE4   CLAVATA3/ESR-RELATED 4   chr2:13238103-13238345 FORWARD LENGTH=80                                                   | 82   | 80   | 2.00E-30  | 97.6  | 87.8 | 91.5 |
| Rsa1.0_01144.1.g23909.t1 | gb EOA26707.1  hypothetical protein CARUB_v10022794mg [Capsella rubella]                                                                                                                                                                                                                                                                                                                                                                        | 673  | 664  | 0         | 98.7  | 85.3 | 89.3 | hypothetical protein CARUB_v10022794mg                                                                                                                                                                                                                                                                        | gbpln | Capsella rubella           | AT2G31060.2   Symbols:   elongation factor family protein   chr2:13213496-13218544 REVERSE LENGTH=667                                             | 673  | 667  | 0         | 99.1  | 84.8 | 89.3 |
| Rsa1.0_01144.1.g23910.t1 | ref XP_002878835.1  hypothetical protein ARALYDRAFT_901144 [Arabidopsis lyrata subsp. lyrata] gi 297324674 gb EFH55094.1  hypothetical protein ARALYDRAFT_901144 [Arabidopsis lyrata subsp. lyrata]                                                                                                                                                                                                                                             | 336  | 200  | 2.00E-57  | 59.5  | 36.0 | 43.8 | hypothetical protein ARALYDRAFT_901144                                                                                                                                                                                                                                                                        | gbpln | Arabidopsis lyrata         | AT2G40450.1   Symbols:   BTB/POZ domain-containing protein   chr2:16892024-16892790 REVERSE LENGTH=209                                            | 336  | 209  | 2.00E-53  | 62.2  | 36.6 | 43.2 |
| Rsa1.0_01144.1.g23911.t1 | gb AAM64960.1  unknown [Arabidopsis thaliana]                                                                                                                                                                                                                                                                                                                                                                                                   | 340  | 350  | 1.00E-169 | 102.9 | 87.4 | 93.5 | unknown                                                                                                                                                                                                                                                                                                       | gbpln | Arabidopsis thaliana       | AT2G31040.1   Symbols:   ATP synthase protein I--related   chr2:13209094-13211012 REVERSE LENGTH=350                                              | 340  | 350  | 1.00E-171 | 102.9 | 87.1 | 93.5 |
| Rsa1.0_01144.1.g23912.t1 | ref NP_180658.3  protein kinase domain-containing protein [Arabidopsis thaliana] gi 334184603 ref NP_001189646.1  protein kinase domain-containing protein [Arabidopsis thaliana] gi 330253382 gb AEC08476.1  protein kinase domain-containing protein [Arabidopsis thaliana] gi 330253383 gb AEC08477.1  protein kinase domain-containing protein [Arabidopsis thaliana]                                                                       | 799  | 775  | 0         | 97.0  | 82.1 | 87.6 | protein kinase domain-containing protein                                                                                                                                                                                                                                                                      | gbpln | Arabidopsis thaliana       | AT2G31010.2   Symbols:   Protein kinase superfamily protein   chr2:13194839-13199642 FORWARD LENGTH=775                                           | 799  | 775  | 0         | 97.0  | 82.1 | 87.6 |

|                          |                                                                                                                                                                                                                                                                                                                                                                                                                                                                   |     |     |          |       |      |      |                                        |       |                      |                                                                                                                                                                                                                                                                                                                                                                                                                                                                                             |     |     |          |       |      |      |
|--------------------------|-------------------------------------------------------------------------------------------------------------------------------------------------------------------------------------------------------------------------------------------------------------------------------------------------------------------------------------------------------------------------------------------------------------------------------------------------------------------|-----|-----|----------|-------|------|------|----------------------------------------|-------|----------------------|---------------------------------------------------------------------------------------------------------------------------------------------------------------------------------------------------------------------------------------------------------------------------------------------------------------------------------------------------------------------------------------------------------------------------------------------------------------------------------------------|-----|-----|----------|-------|------|------|
| Rsa1.0_01144.1.g23913.t2 | refNP_001031451.1   uncharacterized protein [Arabidopsis thaliana]   gi79567094   refNP_180656.3   uncharacterized protein [Arabidopsis thaliana]   gi330253378   gb AEC08472.1   uncharacterized protein AT2G30990 [Arabidopsis thaliana]   gi330253379   gb AEC08473.1   uncharacterized protein AT2G30990 [Arabidopsis thaliana]   refXP_002881146.1   hypothetical protein ARALYDRAFT_902112 [Arabidopsis lyrata subsp. lyrata]   gi297326985   gb EFH57405.1 | 534 | 593 | 0        | 111.0 | 76.2 | 83.3 | uncharacterized protein                | gbpln | Arabidopsis thaliana | AT2G30990.2   Symbols:   Protein of unknown function (DUF688)   chr2:131817776-13189761 REVERSE LENGTH=593                                                                                                                                                                                                                                                                                                                                                                                  | 534 | 593 | 0        | 111.0 | 76.2 | 83.3 |
| Rsa1.0_01144.1.g23914.t1 | refXP_002881146.1   hypothetical protein ARALYDRAFT_902112 [Arabidopsis lyrata subsp. lyrata]   gi297326985   gb EFH57405.1                                                                                                                                                                                                                                                                                                                                       | 411 | 412 | 0        | 100.2 | 94.2 | 96.1 | hypothetical protein ARALYDRAFT_902112 | gbpln | Arabidopsis lyrata   | AT2G30980.1   Symbols: ASK4Zeta, ATSK23, BIL1, ATSK2-2, SK4Zeta   SHAGGY-related protein kinase dZeta   chr2:13182350-13185870 REVERSE LENGTH=412                                                                                                                                                                                                                                                                                                                                           | 411 | 412 | 0        | 100.2 | 93.7 | 96.1 |
| Rsa1.0_01145.1.g23915.t1 | gb ACP30551.1   disease resistance protein [Brassica rapa subsp. pekinensis]                                                                                                                                                                                                                                                                                                                                                                                      | 747 | 717 | 0        | 96.0  | 66.3 | 71.8 | disease resistance protein             | gbpln | Brassica rapa        | AT1G63350.1   Symbols:   Disease resistance protein (CC-NBS-LRR class) family   chr1:23494935-23497631 REVERSE LENGTH=898                                                                                                                                                                                                                                                                                                                                                                   | 747 | 898 | 0        | 120.2 | 58.4 | 72.0 |
| Rsa1.0_01145.1.g23916.t1 | gb EOA28746.1   hypothetical protein CARUB_v10024977mg [Capsella rubella]                                                                                                                                                                                                                                                                                                                                                                                         | 450 | 473 | 0        | 105.1 | 75.8 | 86.0 | hypothetical protein CARUB_v10024977mg | gbpln | Capsella rubella     | AT2G36070.1   Symbols: ATTIM44-2, TIM44-2   translocase inner membrane subunit 44-2   chr2:15145119-15147895 REVERSE LENGTH=469                                                                                                                                                                                                                                                                                                                                                             | 450 | 469 | 0        | 104.2 | 75.3 | 86.7 |
| Rsa1.0_01145.1.g23917.t1 | dbj BAB09991.1   mutator-like transposase-like [Arabidopsis thaliana]                                                                                                                                                                                                                                                                                                                                                                                             | 228 | 825 | 9.00E-82 | 361.8 | 64.5 | 75.0 | mutator-like transposase-like          | gbpln | Arabidopsis thaliana | #                                                                                                                                                                                                                                                                                                                                                                                                                                                                                           | #   | #   | #        | #     | #    | #    |
| Rsa1.0_01145.1.g23918.t1 | refXP_002886283.1   hypothetical protein ARALYDRAFT_900407 [Arabidopsis lyrata subsp. lyrata]   gi297332123   gb EFH62542.1                                                                                                                                                                                                                                                                                                                                       | 130 | 136 | 3.00E-39 | 104.6 | 65.4 | 77.7 | hypothetical protein ARALYDRAFT_900407 | gbpln | Arabidopsis lyrata   | AT2G20500.1   Symbols:   unknown protein; FUNCTIONS IN: molecular_function unknown; INVOLVED IN: biological_process unknown; LOCATED IN: mitochondrion; EXPRESSED IN: 21 plant structures; EXPRESSED DURING: 13 growth stages; Has 13 Blast hits to 13 proteins in 5 species: Archae - 0; Bacteria - 0; Metazoa - 0; Fungi - 0; Plants - 13; Viruses - 0; Other Eukaryotes - 0 (source: NCBI BLINK).   chr2:8835300-8835710 REVERSE LENGTH=136                                              | 130 | 136 | 7.00E-41 | 104.6 | 65.4 | 77.7 |
| Rsa1.0_01145.1.g23919.t1 | refXP_002884205.1   EDA27/NOP10 [Arabidopsis lyrata subsp. lyrata]   gi297330045   gb EFH60464.1   EDA27/NOP10 [Arabidopsis lyrata subsp. lyrata]                                                                                                                                                                                                                                                                                                                 | 64  | 64  | 2.00E-27 | 100.0 | 93.8 | 96.9 | EDA27/NOP10                            | gbpln | Arabidopsis lyrata   | AT2G20490.1   Symbols: NOP10, EDA27   nucleolar RNA-binding Nop10p family protein   chr2:8831897-8832723 FORWARD LENGTH=64                                                                                                                                                                                                                                                                                                                                                                  | 64  | 64  | 7.00E-30 | 100.0 | 92.2 | 96.9 |
| Rsa1.0_01145.1.g23920.t1 | ref NP_179634.2   RabGAP/TBC domain-containing protein [Arabidopsis thaliana]   gi238479300   ref NP_001154525.1   RabGAP/TBC domain-containing protein [Arabidopsis thaliana]   gi330251913   gb AEC07007.1   RabGAP/TBC domain-containing protein [Arabidopsis thaliana]   gi330251914   gb AEC07008.1   RabGAP/TBC domain-containing protein [Arabidopsis thaliana]                                                                                            | 465 | 425 | 0        | 91.4  | 83.9 | 86.7 | RabGAP/TBC domain-containing protein   | gbpln | Arabidopsis thaliana | AT2G20440.2   Symbols:   Ypt/Rab-GAP domain of gyp1p superfamily protein   chr2:8811034-8813251 REVERSE LENGTH=425                                                                                                                                                                                                                                                                                                                                                                          | 465 | 425 | 0        | 91.4  | 83.9 | 86.7 |
| Rsa1.0_01145.1.g23921.t1 | refXP_002884199.1   hypothetical protein ARALYDRAFT_900392 [Arabidopsis lyrata subsp. lyrata]   gi297330039   gb EFH60458.1                                                                                                                                                                                                                                                                                                                                       | 337 | 400 | 1.00E-86 | 118.7 | 60.8 | 73.6 | hypothetical protein ARALYDRAFT_900392 | gbpln | Arabidopsis lyrata   | AT2G20400.1   Symbols:   myb-like HTH transcriptional regulator family protein   chr2:8799624-8801621 FORWARD LENGTH=397                                                                                                                                                                                                                                                                                                                                                                    | 337 | 397 | 1.00E-80 | 117.8 | 58.5 | 69.4 |
| Rsa1.0_01145.1.g23922.t1 | gb ABK28502.1   unknown [Arabidopsis thaliana]                                                                                                                                                                                                                                                                                                                                                                                                                    | 189 | 213 | 9.00E-57 | 112.7 | 73.5 | 82.0 | unknown                                | gbpln | Arabidopsis thaliana | AT2G20430.1   Symbols: RIC6   ROP-interactive CRIB motif-containing protein 6   chr2:8808667-8809781 REVERSE LENGTH=212                                                                                                                                                                                                                                                                                                                                                                     | 189 | 212 | 4.00E-59 | 112.2 | 73.5 | 82.0 |
| Rsa1.0_01145.1.g23923.t1 | refXP_002884197.1   hypothetical protein ARALYDRAFT_480864 [Arabidopsis lyrata subsp. lyrata]   gi297330037   gb EFH60456.1                                                                                                                                                                                                                                                                                                                                       | 205 | 127 | 1.00E-41 | 62.0  | 42.0 | 44.9 | hypothetical protein ARALYDRAFT_480864 | gbpln | Arabidopsis lyrata   | AT2G20362.1   Symbols:   unknown protein; FUNCTIONS IN: molecular_function unknown; INVOLVED IN: biological_process unknown; LOCATED IN: cellular_component unknown; BEST Arabidopsis thaliana protein match is: unknown protein (TAIR:AT1G63310.1); Has 30201 Blast hits to 17322 proteins in 780 species: Archae - 12; Bacteria - 1396; Metazoa - 1738; Fungi - 3422; Plants - 5037; Viruses - 0; Other Eukaryotes - 2996 (source: NCBI BLINK).   chr2:8789772-8790155 FORWARD LENGTH=127 | 205 | 127 | 4.00E-44 | 62.0  | 42.0 | 44.9 |

|                          |                                                                                                                                                                                                                                                                                                                                                                                                  |      |      |           |       |      |      |                                                                                                                                          |       |                      |                                                                                                                                            |      |      |           |       |      |      |
|--------------------------|--------------------------------------------------------------------------------------------------------------------------------------------------------------------------------------------------------------------------------------------------------------------------------------------------------------------------------------------------------------------------------------------------|------|------|-----------|-------|------|------|------------------------------------------------------------------------------------------------------------------------------------------|-------|----------------------|--------------------------------------------------------------------------------------------------------------------------------------------|------|------|-----------|-------|------|------|
| Rsa1.0_01145.1.g23924.t1 | refXP_002884196.1 catalytic/coenzyme binding protein [Arabidopsis lyrata subsp. lyrata] gi 297330036 gb EFH60455.1 catalytic/coenzyme binding protein [Arabidopsis lyrata subsp. lyrata]                                                                                                                                                                                                         | 403  | 402  | 0         | 99.8  | 93.8 | 96.8 | catalytic/coenzyme binding protein                                                                                                       | gbpln | Arabidopsis lyrata   | AT2G20360.1   Symbols:   NAD(P)-binding Rossmann-fold superfamily protein   chr2:8786070-8789098 FORWARD LENGTH=402                        | 403  | 402  | 0         | 99.8  | 92.6 | 95.5 |
| Rsa1.0_01145.1.g23925.t2 | gb EOA29723.1  hypothetical protein CARUB_v10012810mg [Capsella rubella]                                                                                                                                                                                                                                                                                                                         | 1775 | 1513 | 0         | 85.2  | 78.3 | 81.0 | hypothetical protein CARUB_v10012810mg                                                                                                   | gbpln | Capsella rubella     | AT1G04120.1   Symbols: ATMRP5, MRP5, ATABC05, ABC05   multidrug resistance-associated protein 5   chr1:1064848-1070396 REVERSE LENGTH=1514 | 1775 | 1514 | 0         | 85.3  | 65.9 | 73.5 |
| Rsa1.0_01145.1.g23926.t1 | refXP_002884194.1 hypothetical protein ARALYDRAFT_900384 [Arabidopsis lyrata subsp. lyrata] gi 297330034 gb EFH60453.1  hypothetical protein ARALYDRAFT_900384 [Arabidopsis lyrata subsp. lyrata]                                                                                                                                                                                                | 371  | 479  | 0         | 129.1 | 89.8 | 94.9 | hypothetical protein ARALYDRAFT_900384                                                                                                   | gbpln | Arabidopsis lyrata   | AT2G20340.1   Symbols:   Pyridoxal phosphate (PLP)-dependent transferases superfamily protein   chr2:8779804-8782490 FORWARD LENGTH=490    | 371  | 490  | 0         | 132.1 | 89.5 | 94.1 |
| Rsa1.0_01146.1.g23927.t1 | #                                                                                                                                                                                                                                                                                                                                                                                                | #    | #    | #         | #     | #    | #    | -                                                                                                                                        | ----  | ----                 | #                                                                                                                                          | #    | #    | #         | #     | #    |      |
| Rsa1.0_01146.1.g23928.t1 | refXP_002882368.1  hypothetical protein ARALYDRAFT_896506 [Arabidopsis lyrata subsp. lyrata] gi 297328208 gb EFH58627.1  hypothetical protein ARALYDRAFT_896506 [Arabidopsis lyrata subsp. lyrata]                                                                                                                                                                                               | 171  | 392  | 4.00E-58  | 229.2 | 62.6 | 75.4 | hypothetical protein ARALYDRAFT_896506                                                                                                   | gbpln | Arabidopsis lyrata   | AT3G04660.1   Symbols:   F-box and associated interaction domains-containing protein   chr3:1264794-1265966 FORWARD LENGTH=390             | 171  | 390  | 2.00E-37  | 228.1 | 49.7 | 66.1 |
| Rsa1.0_01146.1.g23929.t1 | refXP_002882368.1  hypothetical protein ARALYDRAFT_896506 [Arabidopsis lyrata subsp. lyrata] gi 297328208 gb EFH58627.1  hypothetical protein ARALYDRAFT_896506 [Arabidopsis lyrata subsp. lyrata]                                                                                                                                                                                               | 636  | 392  | 1.00E-134 | 61.6  | 39.3 | 48.1 | hypothetical protein ARALYDRAFT_896506                                                                                                   | gbpln | Arabidopsis lyrata   | AT3G04660.1   Symbols:   F-box and associated interaction domains-containing protein   chr3:1264794-1265966 FORWARD LENGTH=390             | 636  | 390  | 7.00E-95  | 61.3  | 29.6 | 40.1 |
| Rsa1.0_01146.1.g23930.t1 | refXP_002882368.1  hypothetical protein ARALYDRAFT_896506 [Arabidopsis lyrata subsp. lyrata] gi 297328208 gb EFH58627.1  hypothetical protein ARALYDRAFT_896506 [Arabidopsis lyrata subsp. lyrata]                                                                                                                                                                                               | 384  | 392  | 1.00E-129 | 102.1 | 63.8 | 77.3 | hypothetical protein ARALYDRAFT_896506                                                                                                   | gbpln | Arabidopsis lyrata   | AT3G04660.1   Symbols:   F-box and associated interaction domains-containing protein   chr3:1264794-1265966 FORWARD LENGTH=390             | 384  | 390  | 6.00E-88  | 101.6 | 47.4 | 65.1 |
| Rsa1.0_01146.1.g23931.t1 | refNP_001189808.1  ankyrin repeat family protein [Arabidopsis thaliana] gi 332640603 gb AE74124.1  ankyrin repeat family protein [Arabidopsis thaliana]                                                                                                                                                                                                                                          | 454  | 680  | 0         | 149.8 | 89.6 | 95.4 | ankyrin repeat family protein                                                                                                            | gbpln | Arabidopsis thaliana | AT3G04710.3   Symbols: TPR10   ankyrin repeat family protein   chr3:1276948-1280942 FORWARD LENGTH=680                                     | 454  | 680  | 0         | 149.8 | 89.6 | 95.4 |
| Rsa1.0_01146.1.g23932.t1 | gb ABV89663.1  indoleacetic acid-induced protein 16 [Brassica rapa]                                                                                                                                                                                                                                                                                                                              | 236  | 231  | 1.00E-118 | 97.9  | 88.6 | 91.9 | indoleacetic acid-induced protein 16                                                                                                     | gbpln | Brassica rapa        | AT3G04730.1   Symbols: IAA16   indoleacetic acid-induced protein 16   chr3:1288993-1290415 REVERSE LENGTH=236                              | 236  | 236  | 1.00E-119 | 100.0 | 91.9 | 94.9 |
| Rsa1.0_01146.1.g23933.t1 | gb EOA31567.1  hypothetical protein CARUB_v10014759mg [Capsella rubella]                                                                                                                                                                                                                                                                                                                         | 176  | 176  | 8.00E-96  | 100.0 | 96.0 | 99.4 | hypothetical protein CARUB_v10014759mg                                                                                                   | gbpln | Capsella rubella     | AT3G04780.1   Symbols:   Protein of unknown function (DUF1000)   chr3:1311444-1313013 REVERSE LENGTH=176                                   | 176  | 176  | 1.00E-97  | 100.0 | 95.5 | 98.9 |
| Rsa1.0_01146.1.g23934.t1 | refXP_002882374.1  hypothetical protein ARALYDRAFT_896526 [Arabidopsis lyrata subsp. lyrata] gi 297328214 gb EFH58633.1  hypothetical protein ARALYDRAFT_896526 [Arabidopsis lyrata subsp. lyrata]                                                                                                                                                                                               | 276  | 276  | 1.00E-142 | 100.0 | 92.8 | 96.4 | hypothetical protein ARALYDRAFT_896526                                                                                                   | gbpln | Arabidopsis lyrata   | AT3G04790.1   Symbols:   Ribose 5-phosphate isomerase, type A protein   chr3:1313365-1314195 FORWARD LENGTH=276                            | 276  | 276  | 1.00E-143 | 100.0 | 91.7 | 95.7 |
| Rsa1.0_01146.1.g23935.t1 | sp P49396.2 RS3A_BRARA RecName: Full=40S ribosomal protein S3a; AltName: Full=S phase-specific protein B1S289 gi 387909 gb AAA33013.1  S-phase-specific protein [Brassica rapa] gi 397401 emb CAA81030.1  unnamed protein product [Brassica rapa]                                                                                                                                                | 261  | 262  | 1.00E-139 | 100.4 | 97.7 | 98.5 | RecName: Full=40S ribosomal protein S3a; AltName: Full=S phase-specific protein B1S289 gi 387909 gb AAA33013.1  S-phase-specific protein | gbpln | Brassica rapa        | AT4G34670.1   Symbols:   Ribosomal protein S3Aa   chr4:16548724-16550222 FORWARD LENGTH=262                                                | 261  | 262  | 1.00E-136 | 100.4 | 93.1 | 96.2 |
| Rsa1.0_01146.1.g23936.t1 | refNP_566240.1  uncharacterized protein [Arabidopsis thaliana] gi 12322843 gb AAG51405.1 AC009465_5 unknown protein; 64727-65596 [Arabidopsis thaliana] gi 16612261 gb AAL27500.1 AF439828.1 AT3g04860/T9J14.19 [Arabidopsis thaliana] gi 21928087 gb AAM78072.1  AT3g04860/T9J14.19 [Arabidopsis thaliana] gi 332640626 gb AEE74147.1  uncharacterized protein AT3G04860 [Arabidopsis thaliana] | 287  | 289  | 1.00E-142 | 100.7 | 88.2 | 93.4 | uncharacterized protein                                                                                                                  | gbpln | Arabidopsis thaliana | AT3G04860.1   Symbols:   Plant protein of unknown function (DUF865)   chr3:1339349-1340218 REVERSE LENGTH=289                              | 287  | 289  | 1.00E-145 | 100.7 | 88.2 | 93.4 |

|                          |                                                                                                                                                                                                                                                                                                                                                                                                                         |      |      |           |       |      |      |                                                                                                                                                                                                  |       |                      |                                                                                                                                             |      |      |           |       |      |      |
|--------------------------|-------------------------------------------------------------------------------------------------------------------------------------------------------------------------------------------------------------------------------------------------------------------------------------------------------------------------------------------------------------------------------------------------------------------------|------|------|-----------|-------|------|------|--------------------------------------------------------------------------------------------------------------------------------------------------------------------------------------------------|-------|----------------------|---------------------------------------------------------------------------------------------------------------------------------------------|------|------|-----------|-------|------|------|
| Rsa1.0_01146.1.g23937.t1 | refXP_002884488.1   hypothetical protein ARALYDRAFT_477786 [Arabidopsis lyrata subsp. lyrata] gi 297330328 gb EFH60747.1   hypothetical protein ARALYDRAFT_477786 [Arabidopsis lyrata subsp. lyrata]                                                                                                                                                                                                                    | 1122 | 1202 | 0         | 107.1 | 48.9 | 66.4 | hypothetical protein ARALYDRAFT_477786                                                                                                                                                           | gbpln | Arabidopsis lyrata   | AT3G05040.1   Symbols: HST, HST1   ARM repeat superfamily protein   chr3:1401479-1408095 REVERSE LENGTH=1202                                | 1122 | 1202 | 0         | 107.1 | 48.4 | 66.3 |
| Rsa1.0_01146.1.g23938.t1 | refNP_974219.1   tryptophanyl-tRNA synthetase [Arabidopsis thaliana] gi 332640583 gb AE74104.1   tryptophanyl-tRNA synthetase [Arabidopsis thaliana]                                                                                                                                                                                                                                                                    | 448  | 402  | 1.00E-178 | 89.7  | 68.8 | 77.0 | tryptophanyl-tRNA synthetase                                                                                                                                                                     | gbpln | Arabidopsis thaliana | AT3G04600.2   Symbols:   Nucleotidyl transferase superfamily protein   chr3:1243152-1245958 FORWARD LENGTH=402                              | 448  | 402  | 1.00E-180 | 89.7  | 68.8 | 77.0 |
| Rsa1.0_01146.1.g23939.t1 | refXP_002882383.1   40S ribosomal protein S24 [Arabidopsis lyrata subsp. lyrata] gi 225898008 db BAH30336.1   40S ribosomal protein S24 [Arabidopsis lyrata subsp. lyrata]                                                                                                                                                                                                                                              | 133  | 133  | 2.00E-68  | 100.0 | 98.5 | 99.2 | 40S ribosomal protein S24                                                                                                                                                                        | gbpln | Arabidopsis lyrata   | AT5G28060.1   Symbols:   Ribosomal protein S24e family protein   chr5:10069791-10070792 REVERSE LENGTH=133                                  | 133  | 133  | 3.00E-68  | 100.0 | 94.0 | 97.0 |
| Rsa1.0_01146.1.g23940.t1 | gb AAK43485.1 AC084807.10 polyprotein, putative [Arabidopsis thaliana] gi 225898008 db BAH30336.1   hypothetical protein [Arabidopsis thaliana]                                                                                                                                                                                                                                                                         | 1435 | 1459 | 0         | 101.7 | 63.0 | 76.0 | polyprotein, putative                                                                                                                                                                            | gbpln | Arabidopsis thaliana | AT4G23160.1   Symbols: CRK8   cysteine-rich RLK (RECEPTOR-like protein kinase) 8   chr4:12129485-12134086 FORWARD LENGTH=1262               | 1435 | 1262 | 1.00E-107 | 87.9  | 13.3 | 19.6 |
| Rsa1.0_01146.1.g23941.t1 | refNP_187166.2   sugar transporter ERD6-like 8 [Arabidopsis thaliana] gi 117940178 sp Q0WQ63.1 ERDL8_ARATH RecName: Full=Sugar transporter ERD6-like 8 gi 110737589 dbj BAF00736.1   putative sugar transporter [Arabidopsis thaliana] gi 332640670 gb AEE74191.1   sugar transporter ERD6-like 8 [Arabidopsis thaliana]                                                                                                | 465  | 470  | 0         | 101.1 | 92.7 | 95.9 | sugar transporter ERD6-like 8                                                                                                                                                                    | gbpln | Arabidopsis thaliana | AT3G05150.1   Symbols:   Major facilitator superfamily protein   chr3:1440216-1443361 FORWARD LENGTH=470                                    | 465  | 470  | 0         | 101.1 | 92.7 | 95.9 |
| Rsa1.0_01146.1.g23942.t3 | gb EOA23889.1   hypothetical protein CARUB_v10017105mg [Capsella rubella]                                                                                                                                                                                                                                                                                                                                               | 620  | 488  | 0         | 78.7  | 65.3 | 69.7 | hypothetical protein CARUB_v10017105mg                                                                                                                                                           | gbpln | Capsella rubella     | AT3G42950.1   Symbols:   Pectin lyase-like superfamily protein   chr3:15015383-15017800 FORWARD LENGTH=484                                  | 620  | 484  | 0         | 78.1  | 62.1 | 67.1 |
| Rsa1.0_01146.1.g23943.t1 | refXP_002882393.1   hypothetical protein ARALYDRAFT_317378 [Arabidopsis lyrata subsp. lyrata] gi 297328233 gb EFH58652.1   hypothetical protein ARALYDRAFT_317378 [Arabidopsis lyrata subsp. lyrata]                                                                                                                                                                                                                    | 330  | 341  | 1.00E-161 | 103.3 | 85.5 | 92.1 | hypothetical protein ARALYDRAFT_317378                                                                                                                                                           | gbpln | Arabidopsis lyrata   | AT3G05100.1   Symbols:   S-adenosyl-L-methionine-dependent methyltransferases superfamily protein   chr3:1424155-1425667 FORWARD LENGTH=336 | 330  | 336  | 1.00E-158 | 101.8 | 83.3 | 90.0 |
| Rsa1.0_01146.1.g23944.t1 | refNP_187156.1   protein kinase domain-containing protein [Arabidopsis thaliana] gi 6729015 gb AAF27011.1 AC009177.1 putative cyclin-dependent protein kinase [Arabidopsis thaliana] gi 14532508 gb AAK63982.1 AT3g05050/T12H1.1 [Arabidopsis thaliana] gi 23506083 gb AAN28901.1 At3g05050/T12H1.1 [Arabidopsis thaliana] gi 332640659 gb AEE74180.1   protein kinase domain-containing protein [Arabidopsis thaliana] | 586  | 593  | 0         | 101.2 | 85.5 | 93.0 | protein kinase domain-containing protein                                                                                                                                                         | gbpln | Arabidopsis thaliana | AT3G05050.1   Symbols:   Protein kinase superfamily protein   chr3:1408789-1411194 REVERSE LENGTH=593                                       | 586  | 593  | 0         | 101.2 | 85.5 | 93.0 |
| Rsa1.0_01146.1.g23945.t1 | sp P08971.1 ACP5_BRANA RecName: Full=Acyl carrier protein, chloroplastic; Short=ACP; AltName: Full=Clones 28F10, 10H11/11D11, 34F12 and 04F05/05E01; Flags: Precursor gi 17759 emb CAA31513.1   unnamed protein product [Brassica napus] gi 17763 emb CAA30782.1   unnamed protein product [Brassica napus]                                                                                                             | 136  | 134  | 2.00E-65  | 98.5  | 94.1 | 96.3 | RecName: Full=Acyl carrier protein, chloroplastic; Short=ACP; AltName: Full=Clones 28F10, 10H11/11D11, 34F12 and 04F05/05E01; Flags: Precursor gi 17759 emb CAA31513.1   unnamed protein product | gbpln | Brassica napus       | AT3G05020.1   Symbols: ACP1, ACP   acyl carrier protein 1   chr3:1391863-1392878 REVERSE LENGTH=137                                         | 136  | 137  | 8.00E-56  | 100.7 | 80.1 | 88.2 |



|                          |                                                                                                                                                                                                                                                                                                                                                                                                                                                                                                                                           |     |     |           |       |      |      |                                                            |       |                      |                                                                                                                                                                                                                                                                                      |     |     |           |       |      |      |
|--------------------------|-------------------------------------------------------------------------------------------------------------------------------------------------------------------------------------------------------------------------------------------------------------------------------------------------------------------------------------------------------------------------------------------------------------------------------------------------------------------------------------------------------------------------------------------|-----|-----|-----------|-------|------|------|------------------------------------------------------------|-------|----------------------|--------------------------------------------------------------------------------------------------------------------------------------------------------------------------------------------------------------------------------------------------------------------------------------|-----|-----|-----------|-------|------|------|
| Rsa1.0_01147.1.g23946.t1 | ref[NP_568670.1] mitochondrial carnitine/acylcarnitine carrier-like protein [Arabidopsis thaliana] gi 24211999 sp Q93XM7.1 MCAT_ARATH RecName: Full=Mitochondrial carnitine/acylcarnitine carrier-like protein; AltName: Full=Carnitine/acylcarnitine translocase-like protein; Short=CAC-like protein; AltName: Full=Protein A BOUT DE SOUFFLE                                                                                                                                                                                           | 300 | 300 | 1.00E-158 | 100.0 | 94.0 | 95.3 | mitochondrial carnitine/acylcarnitine carrier-like protein | gbpln | Arabidopsis thaliana | AT5G46800.1   Symbols: BOU   Mitochondrial substrate carrier family protein   chr5:18988779-18989810 REVERSE LENGTH=300                                                                                                                                                              | 300 | 300 | 1.00E-161 | 100.0 | 94.0 | 95.3 |
| Rsa1.0_01147.1.g23947.t1 | gb AAM61509.1  unknown [Arabidopsis thaliana]                                                                                                                                                                                                                                                                                                                                                                                                                                                                                             | 188 | 191 | 3.00E-58  | 101.6 | 84.6 | 89.9 | unknown                                                    | gbpln | Arabidopsis thaliana | AT5G46795.1   Symbols: MSP2   microspore-specific promoter 2   chr5:18987055-18988168 REVERSE LENGTH=192                                                                                                                                                                             | 188 | 192 | 7.00E-59  | 102.1 | 83.5 | 89.4 |
| Rsa1.0_01147.1.g23948.t1 | ref XP_002865162.1  hypothetical protein ARALYDRAFT_916750 [Arabidopsis lyrata subsp. lyrata] gi 297310997 gb EFH41421.1  hypothetical protein ARALYDRAFT_916750 [Arabidopsis lyrata subsp. lyrata]                                                                                                                                                                                                                                                                                                                                       | 225 | 233 | 1.00E-72  | 103.6 | 85.8 | 91.1 | hypothetical protein ARALYDRAFT_916750                     | gbpln | Arabidopsis lyrata   | AT5G46780.2   Symbols:   VQ motif-containing protein   chr5:18979236-18979949 FORWARD LENGTH=237                                                                                                                                                                                     | 225 | 237 | 1.00E-72  | 105.3 | 85.3 | 89.3 |
| Rsa1.0_01147.1.g23949.t1 | ref XP_002865163.1  hypothetical protein ARALYDRAFT_916751 [Arabidopsis lyrata subsp. lyrata] gi 297310998 gb EFH41422.1  hypothetical protein ARALYDRAFT_916751 [Arabidopsis lyrata subsp. lyrata]                                                                                                                                                                                                                                                                                                                                       | 133 | 133 | 1.00E-53  | 100.0 | 78.9 | 85.0 | hypothetical protein ARALYDRAFT_916751                     | gbpln | Arabidopsis lyrata   | AT5G46770.1   Symbols:   unknown protein; Has 30201 Blast hits to 17322 proteins in 780 species: Archaee - 12; Bacteria - 1396; Metazoa - 17338; Fungi - 3422; Plants - 5037; Viruses - 0; Other Eukaryotes - 2996 (source: NCBI BLINK).   chr5:18977494-18977895 FORWARD LENGTH=133 | 133 | 133 | 2.00E-53  | 100.0 | 76.7 | 83.5 |
| Rsa1.0_01147.1.g23950.t1 | #                                                                                                                                                                                                                                                                                                                                                                                                                                                                                                                                         | #   | #   | #         | #     | #    | #    | -                                                          | ----  | ----                 | #                                                                                                                                                                                                                                                                                    | #   | #   | #         | #     | #    | #    |
| Rsa1.0_01147.1.g23951.t1 | #                                                                                                                                                                                                                                                                                                                                                                                                                                                                                                                                         | #   | #   | #         | #     | #    | #    | -                                                          | ----  | ----                 | #                                                                                                                                                                                                                                                                                    | #   | #   | #         | #     | #    | #    |
| Rsa1.0_01147.1.g23952.t1 | ref XP_002863392.1  ubiquitin-specific protease 21 [Arabidopsis lyrata subsp. lyrata] gi 297309227 gb EFH39651.1  ubiquitin-specific protease 21 [Arabidopsis lyrata subsp. lyrata]                                                                                                                                                                                                                                                                                                                                                       | 673 | 724 | 0         | 107.6 | 62.1 | 74.7 | ubiquitin-specific protease 21                             | gbpln | Arabidopsis lyrata   | AT5G46740.1   Symbols: UBP21   ubiquitin-specific protease 21   chr5:18965410-18968492 REVERSE LENGTH=732                                                                                                                                                                            | 673 | 732 | 0         | 108.8 | 62.4 | 73.7 |
| Rsa1.0_01147.1.g23953.t1 | gb EOA17250.1  hypothetical protein CARUB_v10005524mg, partial [Capsella rubella]                                                                                                                                                                                                                                                                                                                                                                                                                                                         | 226 | 262 | 5.00E-76  | 115.9 | 64.2 | 77.0 | hypothetical protein CARUB_v10005524mg, partial            | gbpln | Capsella rubella     | AT4G17900.1   Symbols:   PLATZ transcription factor family protein   chr4:9946046-9947697 FORWARD LENGTH=227                                                                                                                                                                         | 226 | 227 | 2.00E-78  | 100.4 | 65.0 | 76.5 |
| Rsa1.0_01147.1.g23954.t1 | ref[NP_199482.1] Tetraspanin family protein [Arabidopsis thaliana] gi 75262522 sp Q9FIQ5.1 TRN2_ARATH RecName: Full=Protein TORNADO 2; AltName: Full=Protein EKEKO; AltName: Full=TETRASPANIN-1 gi 9758506 dbj BAB08914.1  senescence-associated protein 5-like protein [Arabidopsis thaliana] gi 56381915 gb AAV85676.1  At5g46700 [Arabidopsis thaliana] gi 110740669 dbj BAE98437.1  senescence-associated protein 5-like protein [Arabidopsis thaliana] gi 332008032 gb AED95415.1  Tetraspanin family protein [Arabidopsis thaliana] | 255 | 269 | 1.00E-107 | 105.5 | 82.0 | 90.6 | Tetraspanin family protein                                 | gbpln | Arabidopsis thaliana | AT5G46700.1   Symbols: TET1, TRN2   Tetraspanin family protein   chr5:18951035-18952439 FORWARD LENGTH=269                                                                                                                                                                           | 255 | 269 | 1.00E-109 | 105.5 | 82.0 | 90.6 |
| Rsa1.0_01147.1.g23955.t1 | gb EOA34273.1  hypothetical protein CARUB_v10021787mg [Capsella rubella]                                                                                                                                                                                                                                                                                                                                                                                                                                                                  | 289 | 336 | 1.00E-156 | 116.3 | 92.0 | 97.2 | hypothetical protein CARUB_v10021787mg                     | gbpln | Capsella rubella     | AT1G54870.1   Symbols:   NAD(P)-binding Rossmann-fold superfamily protein   chr1:20459011-20460417 FORWARD LENGTH=335                                                                                                                                                                | 289 | 335 | 1.00E-158 | 115.9 | 91.7 | 96.9 |

|                          |                                                                                                                                                                                                                                                                                                                                                                                                                                                                                                                                                                                                                                                                                                                                              |      |      |           |       |      |       |                                             |       |                      |                                                                                                                                                                                                                                                                                                                                                   |      |     |           |       |      |       |
|--------------------------|----------------------------------------------------------------------------------------------------------------------------------------------------------------------------------------------------------------------------------------------------------------------------------------------------------------------------------------------------------------------------------------------------------------------------------------------------------------------------------------------------------------------------------------------------------------------------------------------------------------------------------------------------------------------------------------------------------------------------------------------|------|------|-----------|-------|------|-------|---------------------------------------------|-------|----------------------|---------------------------------------------------------------------------------------------------------------------------------------------------------------------------------------------------------------------------------------------------------------------------------------------------------------------------------------------------|------|-----|-----------|-------|------|-------|
| Rsa1.0_01147.1.g23956.t1 | refNP_568665.1  pentatricopeptide repeat-containing protein [Arabidopsis thaliana]<br>gi 223635755 sp Q56XR6.2 PP421_ARATH RecName: Full=Pentatricopeptide repeat-containing protein At5g46680 gi 332008030 gb AED95413.1  pentatricopeptide repeat-containing protein [Arabidopsis thaliana]<br>ref NP_199475.1  AP-2 complex subunit mu-1 [Arabidopsis thaliana]<br>gi 297794577 ref XP_002865173.1  clathrin adaptor complexes medium subunit family protein [Arabidopsis lyrata subsp. lyrata]<br>gi 2271477 gb AAB88283.1  AP47/50p [Arabidopsis thaliana]<br>gi 9758499 dbj BAB08907.1  AP47/50p [Arabidopsis thaliana]<br>gi 297311008 gb EFH41432.1  clathrin adaptor complexes medium subunit family protein [Arabidopsis thaliana] | 468  | 468  | 0         | 100.0 | 83.8 | 92.5  | pentatricopeptide repeat-containing protein | gbpln | Arabidopsis thaliana | AT5G46680.1   Symbols:   Pentatricopeptide repeat (PPR-like) superfamily protein   chr5:18941118-18942524 FORWARD LENGTH=468                                                                                                                                                                                                                      | 468  | 468 | 0         | 100.0 | 83.8 | 92.5  |
| Rsa1.0_01147.1.g23957.t1 | gi 9758499 dbj BAB08907.1  AP47/50p [Arabidopsis thaliana]<br>gi 297311008 gb EFH41432.1  clathrin adaptor complexes medium subunit family protein [Arabidopsis lyrata subsp. lyrata]<br>gi 332008024 gb AED95407.1  clathrin adaptor complexes medium subunit family protein [Arabidopsis thaliana]                                                                                                                                                                                                                                                                                                                                                                                                                                         | 438  | 438  | 0         | 100.0 | 99.3 | 100.0 | AP-2 complex subunit mu-1                   | gbpln | Arabidopsis lyrata   | AT5G46630.1   Symbols:   Clathrin adaptor complexes medium subunit family protein   chr5:18920580-18923252 FORWARD LENGTH=438                                                                                                                                                                                                                     | 438  | 438 | 0         | 100.0 | 99.3 | 100.0 |
| Rsa1.0_01147.1.g23958.t1 | gb ABD64968.1  hypothetical protein 25.t00005 [Brassica oleracea]                                                                                                                                                                                                                                                                                                                                                                                                                                                                                                                                                                                                                                                                            | 268  | 299  | 8.00E-75  | 111.6 | 56.3 | 70.5  | hypothetical protein 25.t00005              | gbpln | Brassica oleracea    | AT5G47590.1   Symbols:   Heat shock protein HSP20/alpha crystallin family   chr5:19297945-19299099 REVERSE LENGTH=264                                                                                                                                                                                                                             | 268  | 264 | 8.00E-71  | 98.5  | 53.4 | 69.0  |
| Rsa1.0_01148.1.g23959.t1 | gb EOA31492.1  hypothetical protein CARUB_v10014678mg [Capsella rubella]                                                                                                                                                                                                                                                                                                                                                                                                                                                                                                                                                                                                                                                                     | 117  | 200  | 8.00E-54  | 170.9 | 93.2 | 97.4  | hypothetical protein CARUB_v10014678mg      | gbpln | Capsella rubella     | AT3G15190.1   Symbols:   chloroplast 30S ribosomal protein S20, putative   chr3:5116216-5117412 FORWARD LENGTH=202                                                                                                                                                                                                                                | 117  | 202 | 4.00E-54  | 172.6 | 93.2 | 95.7  |
| Rsa1.0_01148.1.g23960.t1 | refNP_188138.1  pentatricopeptide repeat-containing protein [Arabidopsis thaliana]<br>gi 75273407 sp Q9LIL5.1 PP233_ARATH RecName: Full=Putative pentatricopeptide repeat-containing protein At3g15200<br>gi 11994509 dbj BAB02574.1  unnamed protein product [Arabidopsis thaliana]<br>gi 332642110 gb AEE75631.1  pentatricopeptide repeat-containing protein [Arabidopsis thaliana]                                                                                                                                                                                                                                                                                                                                                       | 522  | 523  | 0         | 100.2 | 76.2 | 86.6  | pentatricopeptide repeat-containing protein | gbpln | Arabidopsis thaliana | AT3G15200.1   Symbols:   Tetratricopeptide repeat (TPR)-like superfamily protein   chr3:5117489-5119060 REVERSE LENGTH=523                                                                                                                                                                                                                        | 522  | 523 | 0         | 100.2 | 76.2 | 86.6  |
| Rsa1.0_01148.1.g23961.t1 | gb AAG50806.1 AC079281.8 unknown protein [Arabidopsis thaliana]                                                                                                                                                                                                                                                                                                                                                                                                                                                                                                                                                                                                                                                                              | 1170 | 1213 | 0         | 103.7 | 36.9 | 54.5  | unknown protein                             | gbpln | Arabidopsis thaliana | AT1G43760.1   Symbols:   DNase I-like superfamily protein   chr1:16528880-16531065 REVERSE LENGTH=626                                                                                                                                                                                                                                             | 1170 | 626 | 4.00E-59  | 53.5  | 11.6 | 19.7  |
| Rsa1.0_01148.1.g23962.t1 | ref XP_002882920.1  ATERF-4/ATERF4/ERF4/RAP2.5 [Arabidopsis lyrata subsp. lyrata]<br>gi 297328760 gb EFH59179.1  ATERF-4/ATERF4/ERF4/RAP2.5 [Arabidopsis lyrata subsp. lyrata]                                                                                                                                                                                                                                                                                                                                                                                                                                                                                                                                                               | 219  | 219  | 1.00E-85  | 100.0 | 79.9 | 84.9  | ATERF-4/ATERF4/ERF4/RAP2.5                  | gbpln | Arabidopsis lyrata   | AT3G15210.1   Symbols:   ATERF-4, ERF4, RAP2.5, ATERF4   ethylene responsive element binding factor 4   chr3:5121472-5122140 FORWARD LENGTH=222                                                                                                                                                                                                   | 219  | 222 | 3.00E-79  | 101.4 | 75.3 | 80.8  |
| Rsa1.0_01148.1.g23963.t2 | emb CAA08758.1  BnMAP4K alpha2 [Brassica napus]                                                                                                                                                                                                                                                                                                                                                                                                                                                                                                                                                                                                                                                                                              | 841  | 676  | 0         | 80.4  | 77.4 | 78.8  | BnMAP4K alpha2                              | gbpln | Brassica napus       | AT3G15220.1   Symbols:   Protein kinase superfamily protein   chr3:5126899-5131752 REVERSE LENGTH=690                                                                                                                                                                                                                                             | 841  | 690 | 0         | 82.0  | 69.2 | 73.1  |
| Rsa1.0_01148.1.g23964.t1 | ref XP_002882922.1  hypothetical protein ARALYDRAFT.478955 [Arabidopsis lyrata subsp. lyrata]<br>gi 297328762 gb EFH59181.1  hypothetical protein ARALYDRAFT.478955 [Arabidopsis lyrata subsp. lyrata]                                                                                                                                                                                                                                                                                                                                                                                                                                                                                                                                       | 370  | 360  | 0         | 97.3  | 85.4 | 88.6  | hypothetical protein ARALYDRAFT.478955      | gbpln | Arabidopsis lyrata   | AT3G15240.2   Symbols:   Serine/threonine-protein kinase WNK (With No Lysine)-related   chr3:5133681-5135797 FORWARD LENGTH=362                                                                                                                                                                                                                   | 370  | 362 | 1.00E-175 | 97.8  | 83.5 | 87.3  |
| Rsa1.0_01148.1.g23965.t1 | ref XP_002885076.1  hypothetical protein ARALYDRAFT.478956 [Arabidopsis lyrata subsp. lyrata]<br>gi 297330916 gb EFH61335.1  hypothetical protein ARALYDRAFT.478956 [Arabidopsis lyrata subsp. lyrata]                                                                                                                                                                                                                                                                                                                                                                                                                                                                                                                                       | 213  | 224  | 1.00E-63  | 105.2 | 74.6 | 80.8  | hypothetical protein ARALYDRAFT.478956      | gbpln | Arabidopsis lyrata   | AT3G15250.1   Symbols:   unknown protein; BEST Arabidopsis thaliana protein match is: unknown protein (TAIR:AT1G53163.1); Has 409 Blast hits to 218 proteins in 63 species: Archae - 0; Bacteria - 22; Metazoa - 178; Fungi - 77; Plants - 38; Viruses - 1; Other Eukaryotes - 93 (source: NCBI BLINK).   chr3:5136503-5137183 REVERSE LENGTH=226 | 213  | 226 | 1.00E-61  | 106.1 | 70.9 | 76.5  |
| Rsa1.0_01148.1.g23966.t1 | ref XP_002882923.1  hypothetical protein ARALYDRAFT.478958 [Arabidopsis lyrata subsp. lyrata]<br>gi 297328763 gb EFH59182.1  hypothetical protein ARALYDRAFT.478958 [Arabidopsis lyrata subsp. lyrata]                                                                                                                                                                                                                                                                                                                                                                                                                                                                                                                                       | 290  | 289  | 1.00E-158 | 99.7  | 93.8 | 96.9  | hypothetical protein ARALYDRAFT.478958      | gbpln | Arabidopsis lyrata   | AT3G15260.2   Symbols:   Protein phosphatase 2C family protein   chr3:5138842-5140242 FORWARD LENGTH=289                                                                                                                                                                                                                                          | 290  | 289 | 1.00E-160 | 99.7  | 93.8 | 96.9  |

|                          |                                                                                                                                                                                                                                                                                                                                                                              |     |      |           |       |      |      |                                                                                      |       |                      |                                                                                                                                                                                                                                                                                                                                                                                                                                                                   |     |     |           |       |      |      |
|--------------------------|------------------------------------------------------------------------------------------------------------------------------------------------------------------------------------------------------------------------------------------------------------------------------------------------------------------------------------------------------------------------------|-----|------|-----------|-------|------|------|--------------------------------------------------------------------------------------|-------|----------------------|-------------------------------------------------------------------------------------------------------------------------------------------------------------------------------------------------------------------------------------------------------------------------------------------------------------------------------------------------------------------------------------------------------------------------------------------------------------------|-----|-----|-----------|-------|------|------|
| Rsa1.0_01148.1.g23967.t1 | gb EOA31451.1  hypothetical protein CARUB_v10014636mg, partial [Capsella rubella]                                                                                                                                                                                                                                                                                            | 179 | 208  | 2.00E-81  | 116.2 | 82.1 | 89.9 | hypothetical protein CARUB_v10014636mg, partial                                      | gbpln | Capsella rubella     | AT3G15270.1   Symbols: SPL5   squamosa promoter binding protein-like 5   chr3:5140624-5141256 REVERSE LENGTH=181                                                                                                                                                                                                                                                                                                                                                  | 179 | 181 | 2.00E-78  | 101.1 | 86.6 | 91.1 |
| Rsa1.0_01148.1.g23968.t1 | ref NP_566504.1  uncharacterized protein [Arabidopsis thaliana]   gi 9294255 dbj BAB02157.1  unnamed protein product [Arabidopsis thaliana]   gi 16974611 gb AAL31208.1  AT3g15280/K7L4.8 [Arabidopsis thaliana]   gi 21928105 gb AAM78081.1  AT3g15280/K7L4.8 [Arabidopsis thaliana]   gi 332642119 gb AEE75640.1  uncharacterized protein AT3G15280 [Arabidopsis thaliana] | 154 | 150  | 1.00E-54  | 97.4  | 73.4 | 80.5 | uncharacterized protein                                                              | gbpln | Arabidopsis thaliana | AT3G15290.1   Symbols:   unknown protein; FUNCTIONS IN: molecular.function unknown; LOCATED IN: mitochondrion; EXPRESSED IN: 8 plant structures; EXPRESSED DURING: L mature pollen stage, 4 anthesis, petal differentiation and expansion stage; Has 36 Blast hits to 36 proteins in 15 species: Archae - 0; Bacteria - 0; Metazoa - 1; Fungi - 2; Plants - 33; Viruses - 0; Other Eukaryotes - 0 (source: NCBI BLINK).   chr3:5144144-5144670 REVERSE LENGTH=150 | 154 | 150 | 3.00E-57  | 97.4  | 73.4 | 80.5 |
| Rsa1.0_01148.1.g23969.t1 | dbj BAJ34596.1  unnamed protein product [Thellungiella halophila]                                                                                                                                                                                                                                                                                                            | 286 | 297  | 1.00E-152 | 103.8 | 93.0 | 96.9 | unnamed protein product                                                              | ----  | ----                 | AT3G15290.1   Symbols:   3-hydroxyacyl-CoA dehydrogenase family protein   chr3:5145054-5146613 FORWARD LENGTH=294                                                                                                                                                                                                                                                                                                                                                 | 286 | 294 | 1.00E-151 | 102.8 | 90.9 | 95.5 |
| Rsa1.0_01148.1.g23970.t1 | ref NP_188148.1  VQ motif-containing protein [Arabidopsis thaliana]   gi 9294257 dbj BAB02159.1  unnamed protein product [Arabidopsis thaliana]   gi 38454098 gb AAR20743.1  At3g15300 [Arabidopsis thaliana]   gi 41349916 gb AAS00343.1  At3g15300 [Arabidopsis thaliana]   gi 332642121 gb AEE75642.1  VQ motif-containing protein [Arabidopsis thaliana]                 | 220 | 219  | 5.00E-77  | 99.5  | 76.4 | 81.8 | VQ motif-containing protein                                                          | gbpln | Arabidopsis thaliana | AT3G15300.1   Symbols:   VQ motif-containing protein   chr3:5147551-5148210 REVERSE LENGTH=219                                                                                                                                                                                                                                                                                                                                                                    | 220 | 219 | 2.00E-79  | 99.5  | 76.4 | 81.8 |
| Rsa1.0_01148.1.g23971.t2 | gb AAD17398.1  putative non-LTR retroelement reverse transcriptase [Arabidopsis thaliana]                                                                                                                                                                                                                                                                                    | 392 | 1225 | 7.00E-69  | 312.5 | 40.8 | 56.6 | putative non-LTR retroelement reverse transcriptase                                  | gbpln | Arabidopsis thaliana | AT4G29090.1   Symbols:   Ribonuclease H-like superfamily protein   chr4:14333528-14335255 FORWARD LENGTH=575                                                                                                                                                                                                                                                                                                                                                      | 392 | 575 | 1.00E-37  | 146.7 | 32.7 | 51.3 |
| Rsa1.0_01148.1.g23972.t1 | gb EOA33180.1  hypothetical protein CARUB_v100133261mg [Capsella rubella]   gi 482568992 gb EOA33181.1  hypothetical protein CARUB_v100133261mg [Capsella rubella]   gi 482568993 gb EOA33182.1  hypothetical protein CARUB_v100133261mg [Capsella rubella]                                                                                                                  | 589 | 575  | 0         | 97.6  | 68.1 | 78.9 | hypothetical protein CARUB_v100133261mg                                              | gbpln | Capsella rubella     | AT3G15340.1   Symbols: PPI2   proton pump interactor 2   chr3:5160016-5162305 REVERSE LENGTH=589                                                                                                                                                                                                                                                                                                                                                                  | 589 | 589 | 0         | 100.0 | 66.6 | 79.3 |
| Rsa1.0_01149.1.g23973.t1 | ref XP_002869066.1  hypothetical protein ARALYDRAFT_491076 [Arabidopsis lyrata subsp. lyrata]   gi 297314902 gb EFH45325.1  hypothetical protein ARALYDRAFT_491076 [Arabidopsis lyrata subsp. lyrata]                                                                                                                                                                        | 322 | 325  | 2.33E-156 | 100.9 | 86.0 | 94.1 | hypothetical protein ARALYDRAFT_491076                                               | gbpln | Arabidopsis lyrata   | AT4G35720.1   Symbols:   Arabidopsis protein of unknown function (DUF241)   chr4:16927972-16928949 FORWARD LENGTH=325                                                                                                                                                                                                                                                                                                                                             | 322 | 325 | 1.00E-147 | 100.9 | 85.1 | 93.8 |
| Rsa1.0_01149.1.g23974.t1 | gb ABD64940.1  hypothetical protein 24100018 [Brassica oleracea]                                                                                                                                                                                                                                                                                                             | 138 | 380  | 8.00E-26  | 275.4 | 48.6 | 56.5 | hypothetical protein 24100018                                                        | gbpln | Brassica oleracea    | AT5G41220.1   Symbols: ATGSTT3, GST10C, GSTT3   glutathione S-transferase THETA 3   chr5:16494560-16496969 REVERSE LENGTH=590                                                                                                                                                                                                                                                                                                                                     | 138 | 590 | 2.00E-21  | 427.5 | 36.2 | 52.9 |
| Rsa1.0_01149.1.g23975.t1 | ref XP_002869069.1  hypothetical protein ARALYDRAFT_912802 [Arabidopsis lyrata subsp. lyrata]   gi 297314905 gb EFH45328.1  hypothetical protein ARALYDRAFT_912802 [Arabidopsis lyrata subsp. lyrata]                                                                                                                                                                        | 175 | 283  | 2.00E-72  | 161.7 | 81.1 | 88.0 | hypothetical protein ARALYDRAFT_912802                                               | gbpln | Arabidopsis lyrata   | AT4G35690.1   Symbols:   Arabidopsis protein of unknown function (DUF241)   chr4:16921886-16922740 FORWARD LENGTH=284                                                                                                                                                                                                                                                                                                                                             | 175 | 284 | 2.00E-70  | 162.3 | 75.4 | 80.6 |
| Rsa1.0_01149.1.g23976.t1 | ref NP_195293.1  uncharacterized protein [Arabidopsis thaliana]   gi 3367586 emb CAA20038.1  putative protein [Arabidopsis thaliana]   gi 7270519 emb CAB80284.1  putative protein [Arabidopsis thaliana]   gi 332661148 gb AEE86548.1  uncharacterized protein AT4G35680 [Arabidopsis thaliana]                                                                             | 307 | 503  | 1.00E-112 | 163.8 | 74.9 | 83.4 | uncharacterized protein                                                              | gbpln | Arabidopsis thaliana | AT4G35680.1   Symbols:   Arabidopsis protein of unknown function (DUF241)   chr4:16917938-16919749 FORWARD LENGTH=503                                                                                                                                                                                                                                                                                                                                             | 307 | 503 | 1.00E-115 | 163.8 | 74.9 | 83.4 |
| Rsa1.0_01149.1.g23977.t1 | ref NP_195292.2  glycoside hydrolase family 28 protein / polygalacturonase (pectinase) family protein [Arabidopsis thaliana]   gi 332661147 gb AEE86547.1  glycoside hydrolase family 28 protein / polygalacturonase (pectinase) family protein [Arabidopsis thaliana]                                                                                                       | 394 | 394  | 1.00E-166 | 100.0 | 73.1 | 84.3 | glycoside hydrolase family 28 protein / polygalacturonase (pectinase) family protein | gbpln | Arabidopsis thaliana | AT4G35670.1   Symbols:   Pectin lyase-like superfamily protein   chr4:16914996-16917201 FORWARD LENGTH=394                                                                                                                                                                                                                                                                                                                                                        | 394 | 394 | 1.00E-169 | 100.0 | 73.1 | 84.3 |

|                          |                                                                                                                                                                                                                                                                                                                                                                                                                                                                           |      |      |           |       |      |      |                                               |       |                      |                                                                                                                                 |      |      |           |       |      |      |
|--------------------------|---------------------------------------------------------------------------------------------------------------------------------------------------------------------------------------------------------------------------------------------------------------------------------------------------------------------------------------------------------------------------------------------------------------------------------------------------------------------------|------|------|-----------|-------|------|------|-----------------------------------------------|-------|----------------------|---------------------------------------------------------------------------------------------------------------------------------|------|------|-----------|-------|------|------|
| Rsa1.0_01149.1.g23978.t1 | ref NP_189164.1  Ribonuclease H-like protein [Arabidopsis thaliana] gi 9294184 dbj BAB02086.1  reverse transcriptase-like protein [Arabidopsis thaliana] gi 332643482 gb AEE77003.1  Ribonuclease H-like protein [Arabidopsis thaliana]                                                                                                                                                                                                                                   | 342  | 343  | 2.00E-82  | 100.3 | 43.9 | 62.0 | Ribonuclease H-like protein                   | gbpln | Arabidopsis thaliana | AT3G25270.1   Symbols: Ribonuclease H-like superfamily protein   chr3:9203934-9204965 REVERSE LENGTH=343                        | 342  | 343  | 6.00E-85  | 100.3 | 43.9 | 62.0 |
| Rsa1.0_01149.1.g23979.t1 | ref XP_002869072.1  hypothetical protein ARALYDRAFT_491080 [Arabidopsis lyrata subsp. lyrata] gi 297314908 gb EFH45331.1  hypothetical protein ARALYDRAFT_491080 [Arabidopsis lyrata subsp. lyrata]                                                                                                                                                                                                                                                                       | 249  | 286  | 1.00E-97  | 114.9 | 71.9 | 81.1 | hypothetical protein ARALYDRAFT_491080        | gbpln | Arabidopsis lyrata   | AT4G35660.1   Symbols: Arabidopsis protein of unknown function (DUF241)   chr4:16912792-16913658 FORWARD LENGTH=288             | 249  | 288  | 1.00E-92  | 115.7 | 68.3 | 78.7 |
| Rsa1.0_01149.1.g23980.t1 | gb EOA16659.1  hypothetical protein CARUB_v10004843mg [Capsella rubella]                                                                                                                                                                                                                                                                                                                                                                                                  | 403  | 434  | 1.00E-178 | 107.7 | 84.1 | 88.8 | hypothetical protein CARUB_v10004843mg        | gbpln | Capsella rubella     | AT4G35620.1   Symbols: CYGB2.2   Cyclin B2.2   chr4:16901744-16903766 FORWARD LENGTH=429                                        | 403  | 429  | 1.00E-174 | 106.5 | 84.4 | 87.6 |
| Rsa1.0_01149.1.g23981.t1 | ref NP_195285.3  putative serine/threonine-protein kinase Cx32 [Arabidopsis thaliana] gi 49066036 sp P27450.2 CX32_ARATH RecName: Full=Probable serine/threonine-protein kinase Cx32, chloroplastic; Flags: Precursor gi 17529234 gb AL38844.1  putative protein kinase [Arabidopsis thaliana] gi 20465931 gb AAM20151.1  putative protein kinase [Arabidopsis thaliana] gi 332661138 gb AEE86538.1  putative serine/threonine-protein kinase Cx32 [Arabidopsis thaliana] | 364  | 419  | 1.00E-151 | 115.1 | 76.1 | 86.0 | putative serine/threonine-protein kinase Cx32 | gbpln | Arabidopsis thaliana | AT4G35600.1   Symbols: CONNEXIN 32   Protein kinase superfamily protein   chr4:16896448-16898714 FORWARD LENGTH=419             | 364  | 419  | 1.00E-154 | 115.1 | 76.1 | 86.0 |
| Rsa1.0_01149.1.g23982.t1 | gb EOA16696.1  hypothetical protein CARUB_v10004888mg [Capsella rubella]                                                                                                                                                                                                                                                                                                                                                                                                  | 448  | 424  | 0         | 94.6  | 77.9 | 85.9 | hypothetical protein CARUB_v10004888mg        | gbpln | Capsella rubella     | AT4G35600.2   Symbols: CONNEXIN 32   Protein kinase superfamily protein   chr4:16896448-16898714 FORWARD LENGTH=420             | 448  | 420  | 0         | 93.8  | 77.2 | 85.0 |
| Rsa1.0_01149.1.g23983.t1 | ref XP_002886121.1  hypothetical protein ARALYDRAFT_480649 [Arabidopsis lyrata subsp. lyrata] gi 297331961 gb EFH62380.1  hypothetical protein ARALYDRAFT_480649 [Arabidopsis lyrata subsp. lyrata]                                                                                                                                                                                                                                                                       | 205  | 143  | 2.00E-51  | 69.8  | 51.2 | 59.5 | hypothetical protein ARALYDRAFT_480649        | gbpln | Arabidopsis lyrata   | AT2G17560.2   Symbols: HMGB4, NFD4, NFD04   high mobility group B4   chr2:7642486-7643468 REVERSE LENGTH=138                    | 205  | 138  | 1.00E-51  | 67.3  | 49.8 | 60.0 |
| Rsa1.0_01149.1.g23984.t1 | gb EOA18736.1  hypothetical protein CARUB_v10007318mg [Capsella rubella]                                                                                                                                                                                                                                                                                                                                                                                                  | 1039 | 1046 | 0         | 100.7 | 83.0 | 90.4 | hypothetical protein CARUB_v10007318mg        | gbpln | Capsella rubella     | AT4G35560.1   Symbols: Transducin/WD40 repeat-like superfamily protein   chr4:16881562-16886878 FORWARD LENGTH=1049             | 1039 | 1049 | 0         | 101.0 | 83.4 | 90.4 |
| Rsa1.0_01149.1.g23985.t1 | ref XP_002867072.1  ring-H2 finger A3B [Arabidopsis lyrata subsp. lyrata] gi 297312908 gb EFH43331.1  ring-H2 finger A3B [Arabidopsis lyrata subsp. lyrata]                                                                                                                                                                                                                                                                                                               | 196  | 200  | 2.00E-84  | 102.0 | 85.2 | 92.9 | ring-H2 finger A3B                            | gbpln | Arabidopsis lyrata   | AT4G35480.1   Symbols: RHA3B   RING-H2 finger A3B   chr4:16852233-16852835 REVERSE LENGTH=200                                   | 196  | 200  | 4.00E-85  | 102.0 | 84.7 | 92.3 |
| Rsa1.0_01149.1.g23986.t2 | ref XP_002869086.1  NADPH-dependent thioredoxin reductase 1 [Arabidopsis lyrata subsp. lyrata] gi 297314922 gb EFH45345.1  NADPH-dependent thioredoxin reductase 1 [Arabidopsis lyrata subsp. lyrata]                                                                                                                                                                                                                                                                     | 839  | 375  | 1.00E-164 | 44.7  | 35.9 | 39.1 | NADPH-dependent thioredoxin reductase 1       | gbpln | Arabidopsis lyrata   | AT4G35460.1   Symbols: ATNTRB, NTRB, NTR1   NADPH-dependent thioredoxin reductase B   chr4:16842218-16843740 FORWARD LENGTH=375 | 839  | 375  | 1.00E-164 | 44.7  | 35.9 | 39.0 |
| Rsa1.0_01149.1.g23987.t1 | # # # # # # # # -                                                                                                                                                                                                                                                                                                                                                                                                                                                         | #    | #    | #         | #     | #    | #    | ----                                          | ----  | #                    | #                                                                                                                               | #    | #    | #         | #     | #    | #    |
| Rsa1.0_01149.1.g23988.t1 | ref XP_002877718.1  cytokinin-independent 1 [Arabidopsis lyrata subsp. lyrata] gi 297323556 gb EFH53977.1  cytokinin-independent 1 [Arabidopsis lyrata subsp. lyrata]                                                                                                                                                                                                                                                                                                     | 953  | 1063 | 0         | 111.5 | 68.7 | 78.1 | cytokinin-independent 1                       | gbpln | Arabidopsis lyrata   | AT2G47430.1   Symbols: CKI1   Signal transduction histidine kinase   chr2:19459167-19463122 REVERSE LENGTH=1122                 | 953  | 1122 | 0         | 117.7 | 59.5 | 65.9 |
| Rsa1.0_01149.1.g23989.t1 | gb AAT70424.1  At4g35335 [Arabidopsis thaliana] gi 51971024 dbj BAD44204.1  unnamed protein product [Arabidopsis thaliana] gi 53828601 gb AAU94410.1  At4g35335 [Arabidopsis thaliana]                                                                                                                                                                                                                                                                                    | 380  | 352  | 0         | 92.6  | 88.9 | 90.8 | At4g35335                                     | gbpln | Arabidopsis thaliana | AT4G35335.1   Symbols: Nucleotide-sugar transporter family protein   chr4:16807286-16810015 FORWARD LENGTH=352                  | 380  | 352  | 0         | 92.6  | 88.7 | 90.5 |
| Rsa1.0_01149.1.g23990.t1 | gb AAZ32751.1  calcium dependent kinase 5 [Brassica oleracea var. alboglabra]                                                                                                                                                                                                                                                                                                                                                                                             | 552  | 535  | 0         | 96.9  | 93.3 | 95.5 | calcium dependent kinase 5                    | gbpln | Brassica oleracea    | AT4G35310.1   Symbols: CPK5, ATPCK5   calmodulin-domain protein kinase 5   chr4:16802436-16804628 FORWARD LENGTH=556            | 552  | 556  | 0         | 100.7 | 91.1 | 95.1 |

|                          |                                                                                                                                                                                                                                                                                                                                                                                                                                                                                                                                                                                                          |     |      |           |       |      |      |                                                                |       |                      |                                                                                                                                     |     |     |           |       |      |      |
|--------------------------|----------------------------------------------------------------------------------------------------------------------------------------------------------------------------------------------------------------------------------------------------------------------------------------------------------------------------------------------------------------------------------------------------------------------------------------------------------------------------------------------------------------------------------------------------------------------------------------------------------|-----|------|-----------|-------|------|------|----------------------------------------------------------------|-------|----------------------|-------------------------------------------------------------------------------------------------------------------------------------|-----|-----|-----------|-------|------|------|
| Rsa1.0_01149.1.g23991.t1 | ref NP_195254.1  C2H2-like zinc finger protein [Arabidopsis thaliana] gi 75318572 sp O65499.1 ZAT3_ARATH RecName: Full=Zinc finger protein ZAT3; AltName: Full=Protein DUO1-ACTIVATED ZINC FINGER 2 gi 3080422 emb CAA18741.1  putative zinc-finger protein [Arabidopsis thaliana] gi 7270480 emb CAB80245.1  putative zinc-finger protein [Arabidopsis thaliana] gi 91806770 gb ABE66112.1  zinc finger family protein [Arabidopsis thaliana] gi 225898853 dbj BAH30557.1  hypothetical protein [Arabidopsis thaliana] gi 332661089 gb AEE86489.1  C2H2-like zinc finger protein [Arabidopsis thaliana] | 289 | 284  | 1.00E-113 | 98.3  | 75.1 | 81.7 | C2H2-like zinc finger protein                                  | gbpln | Arabidopsis thaliana | AT4G35280.1   Symbols:   C2H2-like zinc finger protein   chr4:16787429-16788283 REVERSE LENGTH=284                                  | 289 | 284 | 1.00E-115 | 98.3  | 75.1 | 81.7 |
| Rsa1.0_01150.1.g23992.t1 | #                                                                                                                                                                                                                                                                                                                                                                                                                                                                                                                                                                                                        | #   | #    | #         | #     | #    | #    | -                                                              | ----  | ----                 | AT1G67800.2   Symbols:   Copine (Calcium-dependent phospholipid-binding protein) family   chr1:25421029-25423297 REVERSE LENGTH=453 | 65  | 453 | 8.00E-12  | 696.9 | 46.2 | 47.7 |
| Rsa1.0_01150.1.g23993.t5 | ref NP_849630.3  protein prenyltransferase [Arabidopsis thaliana] gi 3540189 gb AAC34339.1  Hypothetical protein [Arabidopsis thaliana] gi 332190420 gb AEE28541.1  protein prenyltransferase [Arabidopsis thaliana]                                                                                                                                                                                                                                                                                                                                                                                     | 437 | 420  | 1.00E-171 | 96.1  | 72.1 | 80.1 | protein prenyltransferase                                      | gbpln | Arabidopsis thaliana | AT1G10095.1   Symbols:   Protein prenyltransferase superfamily protein   chr1:3297478-3300353 REVERSE LENGTH=420                    | 437 | 420 | 1.00E-174 | 96.1  | 72.1 | 80.1 |
| Rsa1.0_01150.1.g23994.t1 | dbj BAJ34293.1  unnamed protein product [Theilingiella halophila]                                                                                                                                                                                                                                                                                                                                                                                                                                                                                                                                        | 433 | 455  | 0         | 105.1 | 97.0 | 98.8 | unnamed protein product                                        | ----  | ----                 | AT5G44370.1   Symbols:   PHT4.6   phosphate transporter 4:6   chr5:17875147-17876445 REVERSE LENGTH=432                             | 433 | 432 | 0         | 99.8  | 96.5 | 98.4 |
| Rsa1.0_01150.1.g23995.t1 | gb EOA14351.1  hypothetical protein CARUB_v10027532mg [Capsella rubella]                                                                                                                                                                                                                                                                                                                                                                                                                                                                                                                                 | 547 | 531  | 0         | 97.1  | 84.3 | 90.5 | hypothetical protein CARUB_v10027532mg                         | gbpln | Capsella rubella     | AT5G44360.1   Symbols:   FAD-binding Berberine family protein   chr5:17872100-17873698 REVERSE LENGTH=532                           | 547 | 532 | 0         | 97.3  | 83.7 | 89.9 |
| Rsa1.0_01150.1.g23996.t1 | gb AAG51783.1  AC079679.3 reverse transcriptase, putative; 16838-20266 [Arabidopsis thaliana]                                                                                                                                                                                                                                                                                                                                                                                                                                                                                                            | 754 | 1142 | 1.00E-135 | 151.5 | 32.6 | 45.9 | reverse transcriptase, putative; 16838-20266                   | gbpln | Arabidopsis thaliana | AT4G29090.1   Symbols:   Ribonuclease H-like superfamily protein   chr4:14333528-14335255 FORWARD LENGTH=575                        | 754 | 575 | 4.00E-94  | 76.3  | 24.9 | 39.9 |
| Rsa1.0_01150.1.g23997.t1 | ref NP_001118664.1  haloacid dehalogenase-like hydrolase domain-containing protein [Arabidopsis thaliana] gi 9294424 dbj BAB02544.1  unnamed protein product [Arabidopsis thaliana] gi 332642743 gb AEE76264.1  haloacid dehalogenase-like hydrolase domain-containing protein [Arabidopsis thaliana]                                                                                                                                                                                                                                                                                                    | 306 | 307  | 3.00E-96  | 100.3 | 59.8 | 74.2 | haloacid dehalogenase-like hydrolase domain-containing protein | gbpln | Arabidopsis thaliana | AT3G19595.1   Symbols:   Haloacid dehalogenase-like hydrolase (HAD) superfamily protein   chr3:6808585-6809508 REVERSE LENGTH=307   | 306 | 307 | 7.00E-99  | 100.3 | 59.8 | 74.2 |
| Rsa1.0_01150.1.g23998.t1 | #                                                                                                                                                                                                                                                                                                                                                                                                                                                                                                                                                                                                        | #   | #    | #         | #     | #    | #    | -                                                              | ----  | ----                 | #                                                                                                                                   | #   | #   | #         | #     | #    | #    |
| Rsa1.0_01150.1.g23999.t1 | ref NP_199252.1  FAD-binding and BBE domain-containing protein [Arabidopsis thaliana] gi 10176894 dbj BAB10124.1  berberine bridge enzyme-like protein [Arabidopsis thaliana] gi 33200772 gb AED95104.1  FAD-binding and BBE domain-containing protein [Arabidopsis thaliana]                                                                                                                                                                                                                                                                                                                            | 543 | 542  | 0         | 99.8  | 70.7 | 82.5 | FAD-binding and BBE domain-containing protein                  | gbpln | Arabidopsis thaliana | AT5G44390.1   Symbols:   FAD-binding Berberine family protein   chr5:17882329-17884906 REVERSE LENGTH=542                           | 543 | 542 | 0         | 99.8  | 70.7 | 82.5 |
| Rsa1.0_01150.1.g24000.t1 | #                                                                                                                                                                                                                                                                                                                                                                                                                                                                                                                                                                                                        | #   | #    | #         | #     | #    | #    | -                                                              | ----  | ----                 | #                                                                                                                                   | #   | #   | #         | #     | #    | #    |
| Rsa1.0_01151.1.g24001.t1 | gb EOA40235.1  hypothetical protein CARUB_v10008955mg [Capsella rubella]                                                                                                                                                                                                                                                                                                                                                                                                                                                                                                                                 | 114 | 493  | 1.00E-48  | 432.5 | 83.3 | 88.6 | hypothetical protein CARUB_v10008955mg                         | gbpln | Capsella rubella     | AT1G08210.1   Symbols:   Eukaryotic aspartyl protease family protein   chr1:2577119-2580581 REVERSE LENGTH=492                      | 114 | 492 | 2.00E-49  | 431.6 | 79.8 | 87.7 |
| Rsa1.0_01151.1.g24002.t1 | ref NP_172306.1  WIP domain protein 3 [Arabidopsis thaliana] gi 6579204 gb AAF18247.1  AC011438.9 T23G18.15 [Arabidopsis thaliana] gi 18027014 gb AAL55723.1  AF254448.1 WIP3 protein [Arabidopsis thaliana] gi 20258782 gb AAM13913.1  unknown protein [Arabidopsis thaliana] gi 26452714 dbj BAC43439.1  unknown protein [Arabidopsis thaliana] gi 332190149 gb AEE28270.1  WIP domain protein 3 [Arabidopsis thaliana]                                                                                                                                                                                | 339 | 337  | 1.00E-160 | 99.4  | 84.1 | 90.3 | WIP domain protein 3                                           | gbpln | Arabidopsis thaliana | AT1G08290.1   Symbols:   WIP3   WIP domain protein 3   chr1:2610680-2613180 REVERSE LENGTH=337                                      | 339 | 337 | 1.00E-163 | 99.4  | 84.1 | 90.3 |

|                          |                                                                                                                                                                                                                                                                                                                                                                                                                                                                                                             |     |     |           |       |      |      |                                                                   |       |                      |                                                                                                                                               |     |     |           |       |      |      |
|--------------------------|-------------------------------------------------------------------------------------------------------------------------------------------------------------------------------------------------------------------------------------------------------------------------------------------------------------------------------------------------------------------------------------------------------------------------------------------------------------------------------------------------------------|-----|-----|-----------|-------|------|------|-------------------------------------------------------------------|-------|----------------------|-----------------------------------------------------------------------------------------------------------------------------------------------|-----|-----|-----------|-------|------|------|
| Rsa1.0_01151.1.g24003.t3 | refNP_563810.2  bZIP transcription factor-like protein [Arabidopsis thaliana]<br>gi 79317351 refNP_001030999.1  bZIP transcription factor-like protein [Arabidopsis thaliana]<br>gi 14272369 emb CAC40022.1  bZIP transcription factor [Arabidopsis thaliana] gi 309952053 gb ADO95300.1  bZIP21 [Arabidopsis thaliana] gi 332190154 gb AEE28275.1  bZIP transcription factor-like protein [Arabidopsis thaliana] gi 332190156 gb AEE28277.1  bZIP transcription factor-like protein [Arabidopsis thaliana] | 479 | 481 | 0         | 100.4 | 89.4 | 93.9 | bZIP transcription factor-like protein                            | gbpln | Arabidopsis thaliana | AT1G08320.3   Symbols: TGA9, bZIP21   bZIP transcription factor family protein   chr1:2622113-2627451 REVERSE LENGTH=481                      | 479 | 481 | 0         | 100.4 | 89.4 | 93.9 |
| Rsa1.0_01151.1.g24004.t1 | #                                                                                                                                                                                                                                                                                                                                                                                                                                                                                                           | #   | #   | #         | #     | #    | #    | -                                                                 | ----  | ----                 | #                                                                                                                                             | #   | #   | #         | #     | #    |      |
| Rsa1.0_01151.1.g24005.t1 | refNP_172310.1  Rho GTPase activating protein with PAK-box/P21-Rho-binding domain [Arabidopsis thaliana] gi 46931246 gb AAT06427.1  At1g08340 [Arabidopsis thaliana] gi 48958519 gb AAT47812.1  At1g08340 [Arabidopsis thaliana] gi 110736318 dbj BAF00129.1  hypothetical protein [Arabidopsis thaliana] gi 332190157 gb AEE28278.1  Rho GTPase activating protein with PAK-box/P21-Rho-binding domain [Arabidopsis thaliana]                                                                              | 295 | 331 | 4.00E-79  | 112.2 | 61.0 | 70.2 | Rho GTPase activating protein with PAK-box/P21-Rho-binding domain | gbpln | Arabidopsis thaliana | AT1G08340.1   Symbols:   Rho GTPase activating protein with PAK-box/P21-Rho-binding domain   chr1:2631308-2632669 FORWARD LENGTH=331          | 295 | 331 | 1.00E-81  | 112.2 | 61.0 | 70.2 |
| Rsa1.0_01151.1.g24006.t1 | gb EOA38046.1  hypothetical protein CARUB_v10009516mg [Capsella rubella]                                                                                                                                                                                                                                                                                                                                                                                                                                    | 381 | 365 | 1.00E-141 | 95.8  | 74.8 | 82.7 | hypothetical protein CARUB_v10009516mg                            | gbpln | Capsella rubella     | AT1G08370.1   Symbols: DCP1, ATDCP1   decapping 1   chr1:2638355-2640367 FORWARD LENGTH=367                                                   | 381 | 367 | 1.00E-133 | 96.3  | 72.4 | 80.3 |
| Rsa1.0_01151.1.g24007.t1 | dbj BAJ33638.1  unnamed protein product [Theillungiella halophila]                                                                                                                                                                                                                                                                                                                                                                                                                                          | 145 | 142 | 1.00E-67  | 97.9  | 86.9 | 94.5 | unnamed protein product                                           | ----  | ----                 | AT1G08380.1   Symbols: PSAO   photosystem I subunit O   chr1:2641004-2641739 REVERSE LENGTH=140                                               | 145 | 140 | 1.00E-68  | 96.6  | 85.5 | 93.1 |
| Rsa1.0_01151.1.g24008.t2 | ref XP_002899691.1  GTP-binding family protein [Arabidopsis lyrata subsp. lyrata] gi 297335533 gb EFH65950.1  GTP-binding family protein [Arabidopsis lyrata subsp. lyrata]                                                                                                                                                                                                                                                                                                                                 | 538 | 583 | 0         | 108.4 | 88.5 | 93.9 | GTP-binding family protein                                        | gbpln | Arabidopsis lyrata   | AT1G08410.1   Symbols:   P-loop containing nucleoside triphosphate hydrolases superfamily protein   chr1:2646307-2649106 FORWARD LENGTH=589   | 538 | 589 | 0         | 109.5 | 88.5 | 93.3 |
| Rsa1.0_01151.1.g24009.t1 | ref XP_002892457.1  hypothetical protein ARALYDRAFT_888076 [Arabidopsis lyrata subsp. lyrata] gi 297338299 gb EFH68716.1  hypothetical protein ARALYDRAFT_888076 [Arabidopsis lyrata subsp. lyrata]                                                                                                                                                                                                                                                                                                         | 429 | 423 | 0         | 98.6  | 91.1 | 93.9 | hypothetical protein ARALYDRAFT_888076                            | gbpln | Arabidopsis lyrata   | AT1G08450.1   Symbols: CRT3, PSL1, EBS2, ATCRT3   calreticulin 3   chr1:2668008-2671800 REVERSE LENGTH=424                                    | 429 | 424 | 0         | 98.8  | 91.1 | 93.5 |
| Rsa1.0_01151.1.g24010.t1 | ref NP_563817.1  histone deacetylase 8 [Arabidopsis thaliana] gi 75250015 sp Q94EJ2.1 HDA8_ARATH RecName: Full=Histone deacetylase 8 gi 15294162 gb AAK95258.1 AF410272.1 At1g08460/T2G7.7 [Arabidopsis thaliana] gi 20453297 gb AAM19887.1  At1g08460/T2G7.7 [Arabidopsis thaliana] gi 21360988 gb AAM49769.1  HDA8 [Arabidopsis thaliana] gi 332190173 gb AEE28294.1  histone deacetylase 8 [Arabidopsis thaliana]                                                                                        | 386 | 377 | 0         | 97.7  | 87.6 | 92.7 | histone deacetylase 8                                             | gbpln | Arabidopsis thaliana | AT1G08460.1   Symbols: HDA08, HDA8, ATHDA8   histone deacetylase 8   chr1:2672527-2674469 FORWARD LENGTH=377                                  | 386 | 377 | 0         | 97.7  | 87.6 | 92.7 |
| Rsa1.0_01151.1.g24011.t1 | gb EOA36256.1  hypothetical protein CARUB_v10010384mg [Capsella rubella]                                                                                                                                                                                                                                                                                                                                                                                                                                    | 142 | 188 | 1.00E-66  | 132.4 | 87.3 | 91.5 | hypothetical protein CARUB_v10010384mg                            | gbpln | Capsella rubella     | AT1G08465.1   Symbols: YAB2   Plant-specific transcription factor YABBY family protein   chr1:2676033-2679382 FORWARD LENGTH=184              | 142 | 184 | 2.00E-62  | 129.6 | 81.0 | 87.3 |
| Rsa1.0_01152.1.g24012.t2 | ref XP_002879327.1  invertase/pectin methyltransferase inhibitor family protein [Arabidopsis lyrata subsp. lyrata] gi 297325166 gb EFH55586.1  invertase/pectin methyltransferase inhibitor family protein [Arabidopsis lyrata subsp. lyrata]                                                                                                                                                                                                                                                               | 305 | 179 | 8.00E-45  | 58.7  | 29.2 | 35.1 | invertase/pectin methyltransferase inhibitor family protein       | gbpln | Arabidopsis lyrata   | AT2G31430.1   Symbols:   Plant invertase/pectin methyltransferase inhibitor superfamily protein   chr2:13396293-13396911 FORWARD LENGTH=179   | 305 | 179 | 1.00E-46  | 58.7  | 28.9 | 35.1 |
| Rsa1.0_01152.1.g24013.t2 | dbj BAB01431.1  non-LTR retroelement reverse transcriptase-like protein [Arabidopsis thaliana]                                                                                                                                                                                                                                                                                                                                                                                                              | 467 | 637 | 5.00E-58  | 136.4 | 27.2 | 37.3 | non-LTR retroelement reverse transcriptase-like protein           | gbpln | Arabidopsis thaliana | AT5G18880.1   Symbols:   RNA-directed DNA polymerase (reverse transcriptase)-related family protein   chr5:6300535-6301422 REVERSE LENGTH=295 | 467 | 295 | 1.00E-46  | 63.2  | 21.8 | 32.1 |
| Rsa1.0_01152.1.g24014.t1 | gb AFJ66167.1  hypothetical protein 11M19.11 [Arabidopsis halleri]                                                                                                                                                                                                                                                                                                                                                                                                                                          | 499 | 502 | 0         | 100.6 | 94.8 | 97.2 | hypothetical protein 11M19.11                                     | gbpln | Arabidopsis halleri  | AT5G51050.1   Symbols:   Mitochondrial substrate carrier family protein   chr5:20753381-20755714 FORWARD LENGTH=487                           | 499 | 487 | 0         | 97.6  | 91.8 | 93.8 |
| Rsa1.0_01152.1.g24015.t1 | #                                                                                                                                                                                                                                                                                                                                                                                                                                                                                                           | #   | #   | #         | #     | #    | #    | -                                                                 | ----  | ----                 | #                                                                                                                                             | #   | #   | #         | #     | #    |      |

|                          |                                                                                                                                                                                                                                                                                                                                                                                                                |      |      |           |       |      |      |                                                        |       |                      |                                                                                                                                                                                                                                                                                                                                                            |      |      |           |       |      |      |
|--------------------------|----------------------------------------------------------------------------------------------------------------------------------------------------------------------------------------------------------------------------------------------------------------------------------------------------------------------------------------------------------------------------------------------------------------|------|------|-----------|-------|------|------|--------------------------------------------------------|-------|----------------------|------------------------------------------------------------------------------------------------------------------------------------------------------------------------------------------------------------------------------------------------------------------------------------------------------------------------------------------------------------|------|------|-----------|-------|------|------|
| Rsa1.0_01152.1.g24016.t1 | #                                                                                                                                                                                                                                                                                                                                                                                                              | #    | #    | #         | #     | #    | #    | -                                                      | ----  | ----                 | #                                                                                                                                                                                                                                                                                                                                                          | #    | #    | #         | #     | #    |      |
|                          | ref NP_199917.1  uncharacterized protein [Arabidopsis thaliana] gi 9758251 dbj BAB08750.1  unnamed protein product [Arabidopsis thaliana] gi 98960953 gb AF58960.1  AT5G51040 [Arabidopsis thaliana]                                                                                                                                                                                                           |      |      |           |       |      |      |                                                        |       |                      |                                                                                                                                                                                                                                                                                                                                                            |      |      |           |       |      |      |
| Rsa1.0_01152.1.g24017.t1 |                                                                                                                                                                                                                                                                                                                                                                                                                | 86   | 188  | 2.00E-37  | 218.6 | 87.2 | 91.9 | uncharacterized protein                                | gbpln | Arabidopsis thaliana | AT5G51040.1   Symbols:   unknown protein; CONTAINS InterPro DOMAIN/s: Protein of unknown function DUF339 (InterPro:IPR005631). Has 532 Blast hits to 532 proteins in 207 species: Archae - 0; Bacteria - 285; Metazoa - 16; Fungi - 41; Plants - 40; Viruses - 0; Other Eukaryotes - 150 (source: NCBI BLINK).   chr5:20750700-20751790 FORWARD LENGTH=188 | 86   | 188  | 3.00E-40  | 218.6 | 87.2 | 91.9 |
| Rsa1.0_01152.1.g24018.t1 | dbj BAB10837.1  retroelement pol polyprotein-like [Arabidopsis thaliana]                                                                                                                                                                                                                                                                                                                                       | 1454 | 1462 | 0         | 100.6 | 68.2 | 79.8 | retroelement pol polyprotein-like                      | gbpln | Arabidopsis thaliana | AT4G23160.1   Symbols: CRK8   cysteine-rich RLK (RECEPTOR-like protein kinase) 8   chr4:12129485-12134086 FORWARD LENGTH=1262                                                                                                                                                                                                                              | 1454 | 1262 | 1.00E-134 | 86.8  | 16.4 | 23.3 |
| Rsa1.0_01152.1.g24019.t1 | gb EOA16537.1  hypothetical protein CARUB_v10004697mg [Capsella rubella]                                                                                                                                                                                                                                                                                                                                       | 368  | 484  | 0         | 131.5 | 86.4 | 92.9 | hypothetical protein CARUB_v10004697mg                 | gbpln | Capsella rubella     | AT4G32360.1   Symbols:   Pyridine nucleotide-disulphide oxidoreductase family protein   chr4:15621550-15624711 FORWARD LENGTH=483                                                                                                                                                                                                                          | 368  | 483  | 0         | 131.3 | 85.6 | 91.8 |
| Rsa1.0_01153.1.g24020.t1 | #                                                                                                                                                                                                                                                                                                                                                                                                              | #    | #    | #         | #     | #    | #    | -                                                      | ----  | ----                 | #                                                                                                                                                                                                                                                                                                                                                          | #    | #    | #         | #     | #    |      |
| Rsa1.0_01153.1.g24021.t1 | gb EOA30900.1  hypothetical protein CARUB_v10014047mg [Capsella rubella]                                                                                                                                                                                                                                                                                                                                       | 361  | 359  | 1.00E-134 | 99.4  | 70.9 | 77.3 | hypothetical protein CARUB_v10014047mg                 | gbpln | Capsella rubella     | AT3G29430.1   Symbols:   Terpenoid synthases superfamily protein   chr3:11311427-11312604 FORWARD LENGTH=357                                                                                                                                                                                                                                               | 361  | 357  | 1.00E-134 | 98.9  | 72.3 | 80.1 |
| Rsa1.0_01153.1.g24022.t1 | dbj BAJ34446.1  unnamed protein product [Theillungiella halophila]                                                                                                                                                                                                                                                                                                                                             | 154  | 149  | 3.00E-59  | 96.8  | 76.6 | 88.3 | unnamed protein product                                | ----  | ----                 |                                                                                                                                                                                                                                                                                                                                                            | 154  | 154  | 9.00E-58  | 100.0 | 76.0 | 87.0 |
| Rsa1.0_01153.1.g24023.t1 | gb EOA29501.1  hypothetical protein CARUB_v10013073mg [Capsella rubella]                                                                                                                                                                                                                                                                                                                                       | 686  | 718  | 0         | 104.7 | 76.7 | 84.3 | hypothetical protein CARUB_v10013073mg                 | gbpln | Capsella rubella     | AT1G53590.1   Symbols: NTMC2TYPE6.1, NTMC2T6.1   Calcium-dependent lipid-binding (CaLB domain) family protein   chr1:19986556-20000127 FORWARD LENGTH=751                                                                                                                                                                                                  | 686  | 751  | 0         | 109.5 | 66.6 | 77.7 |
| Rsa1.0_01153.1.g24024.t1 | ref NP_188079.1  cytochrome P450, family 72, subfamily A, polypeptide 7 [Arabidopsis thaliana] gi 9294383 dbj BAB02393.1  cytochrome P450 [Arabidopsis thaliana] gi 18252155 gb AAL61910.1  cytochrome P450 [Arabidopsis thaliana] gi 28059362 gb AAO30051.1  cytochrome P450 [Arabidopsis thaliana] gi 332642026 gb AEE75547.1  cytochrome P450, family 72, subfamily A, polypeptide 7 [Arabidopsis thaliana] | 509  | 512  | 0         | 100.6 | 73.7 | 86.4 | cytochrome P450, family 72, subfamily A, polypeptide 7 | gbpln | Arabidopsis thaliana | AT3G14610.1   Symbols: CYP72A7   cytochrome P450, family 72, subfamily A, polypeptide 7   chr3:4912565-4914503 FORWARD LENGTH=512                                                                                                                                                                                                                          | 509  | 512  | 0         | 100.6 | 73.7 | 86.4 |
| Rsa1.0_01153.1.g24025.t2 | ref NP_188079.1  cytochrome P450, family 72, subfamily A, polypeptide 7 [Arabidopsis thaliana] gi 9294383 dbj BAB02393.1  cytochrome P450 [Arabidopsis thaliana] gi 18252155 gb AAL61910.1  cytochrome P450 [Arabidopsis thaliana] gi 28059362 gb AAO30051.1  cytochrome P450 [Arabidopsis thaliana] gi 332642026 gb AEE75547.1  cytochrome P450, family 72, subfamily A, polypeptide 7 [Arabidopsis thaliana] | 442  | 512  | 0         | 115.8 | 73.8 | 85.5 | cytochrome P450, family 72, subfamily A, polypeptide 7 | gbpln | Arabidopsis thaliana | AT3G14610.1   Symbols: CYP72A7   cytochrome P450, family 72, subfamily A, polypeptide 7   chr3:4912565-4914503 FORWARD LENGTH=512                                                                                                                                                                                                                          | 442  | 512  | 0         | 115.8 | 73.8 | 85.5 |
| Rsa1.0_01153.1.g24026.t1 | ref XP_002882888.1  CYP72A15 [Arabidopsis lyrata subsp. lyrata] gi 297328728 gb EFH59147.1  CYP72A15 [Arabidopsis lyrata subsp. lyrata]                                                                                                                                                                                                                                                                        | 513  | 512  | 0         | 99.8  | 86.5 | 92.2 | CYP72A15                                               | gbpln | Arabidopsis lyrata   | AT3G14690.1   Symbols: CYP72A15   cytochrome P450, family 72, subfamily A, polypeptide 15   chr3:4939310 FORWARD LENGTH=512                                                                                                                                                                                                                                | 513  | 512  | 0         | 99.8  | 85.8 | 91.8 |
| Rsa1.0_01153.1.g24027.t1 | ref XP_002882888.1  CYP72A15 [Arabidopsis lyrata subsp. lyrata] gi 297328728 gb EFH59147.1  CYP72A15 [Arabidopsis lyrata subsp. lyrata]                                                                                                                                                                                                                                                                        | 512  | 512  | 0         | 100.0 | 84.0 | 91.2 | CYP72A15                                               | gbpln | Arabidopsis lyrata   | AT3G14690.1   Symbols: CYP72A15   cytochrome P450, family 72, subfamily A, polypeptide 15   chr3:4937410-4939310 FORWARD LENGTH=512                                                                                                                                                                                                                        | 512  | 512  | 0         | 100.0 | 82.2 | 90.4 |
| Rsa1.0_01153.1.g24028.t1 | gb EOA30165.1  hypothetical protein CARUB_v10013281mg [Capsella rubella]                                                                                                                                                                                                                                                                                                                                       | 601  | 598  | 0         | 99.5  | 91.0 | 94.7 | hypothetical protein CARUB_v10013281mg                 | gbpln | Capsella rubella     | AT3G14720.1   Symbols: ATPK19, MPK19   MAP kinase 19   chr3:4946057-4948906 FORWARD LENGTH=598                                                                                                                                                                                                                                                             | 601  | 598  | 0         | 99.5  | 91.0 | 94.5 |

|                          |                                                                                                                                                                                                                                                                                                                                                                                                                                                                                                 |     |     |           |       |      |      |                                                 |       |                      |                                                                                                                                                                                                                                                                                                                                                                                                                                                                                         |     |     |           |       |      |      |
|--------------------------|-------------------------------------------------------------------------------------------------------------------------------------------------------------------------------------------------------------------------------------------------------------------------------------------------------------------------------------------------------------------------------------------------------------------------------------------------------------------------------------------------|-----|-----|-----------|-------|------|------|-------------------------------------------------|-------|----------------------|-----------------------------------------------------------------------------------------------------------------------------------------------------------------------------------------------------------------------------------------------------------------------------------------------------------------------------------------------------------------------------------------------------------------------------------------------------------------------------------------|-----|-----|-----------|-------|------|------|
| Rsa1.0_01153.1.g24029.t1 | refXP_002885052.1  pentatricopeptide repeat-containing protein [Arabidopsis lyrata subsp. lyrata]<br>gi 297330892 gb EFH6131.1  pentatricopeptide repeat-containing protein [Arabidopsis lyrata subsp. lyrata]                                                                                                                                                                                                                                                                                  | 660 | 652 | 0         | 98.8  | 74.5 | 84.8 | pentatricopeptide repeat-containing protein     | gbpln | Arabidopsis lyrata   | AT3G14730.1   Symbols:   Pentatricopeptide repeat (PPR) superfamily protein   chr3:4949385-4951346 REVERSE LENGTH=653                                                                                                                                                                                                                                                                                                                                                                   | 660 | 653 | 0         | 98.9  | 74.5 | 85.0 |
| Rsa1.0_01153.1.g24030.t1 | refNP_188094.2  uncharacterized protein [Arabidopsis thaliana]<br>gi 1194586 dbj BAB02641.1  unnamed protein product [Arabidopsis thaliana]<br>gi 18252977 gb AAL62415.1  unknown protein [Arabidopsis thaliana]<br>gi 21389655 gb AAM48026.1  unknown protein [Arabidopsis thaliana]<br>gi 332642043 gb AEE75564.1  uncharacterized protein AT3G14760 [Arabidopsis thaliana]                                                                                                                   | 183 | 168 | 2.00E-62  | 91.8  | 71.0 | 75.4 | uncharacterized protein                         | gbpln | Arabidopsis thaliana | AT3G14760.1   Symbols:   unknown protein; FUNCTIONS IN: molecular_function unknown; INVOLVED IN: biological_process unknown; LOCATED IN: endomembrane system; EXPRESSED IN: 6 plant structures; EXPRESSED DURING: LP.04 four leaves visible, LP.02 two leaves visible; Has 63 Blast hits to 63 proteins in 13 species: Archae - 0; Bacteria - 0; Metazoa - 0; Fungi - 0; Plants - 63; Viruses - 0; Other Eukaryotes - 0 (source: NCBI BLINK).   chr3:4956440-4957045 FORWARD LENGTH=168 | 183 | 168 | 8.00E-65  | 91.8  | 71.0 | 75.4 |
| Rsa1.0_01153.1.g24031.t1 | refNP_566493.1  nodulin MtN3-like protein [Arabidopsis thaliana]<br>gi 75273203 sp Q9LH79.1 SWET2_ARAT H RecName: Full=Bidirectional sugar transporter SWEET2; Short=AtSWEET2<br>gi 1194587 dbj BAB02642.1  MtN3-like protein [Arabidopsis thaliana]<br>gi 15809925 gb AAL06889.1  AT3g14770/T21E2.2 [Arabidopsis thaliana]<br>gi 17978879 gb AAL47411.1  AT3g14770/T21E2.2 [Arabidopsis thaliana]<br>gi 332642044 gb AEE75565.1  bidirectional sugar transporter SWEET2 [Arabidopsis thaliana] | 236 | 236 | 1.00E-111 | 100.0 | 86.0 | 93.6 | nodulin MtN3-like protein                       | gbpln | Arabidopsis thaliana | AT3G14770.1   Symbols: SWEET2, AtSWEET2   Nodulin MtN3 family protein   chr3:4957787-4959202 REVERSE LENGTH=236                                                                                                                                                                                                                                                                                                                                                                         | 236 | 236 | 1.00E-113 | 100.0 | 86.0 | 93.6 |
| Rsa1.0_01153.1.g24032.t1 | gb EOA30048.1  hypothetical protein CARUB_v10013153mg [Capsella rubella]                                                                                                                                                                                                                                                                                                                                                                                                                        | 666 | 664 | 0         | 99.7  | 94.0 | 96.7 | hypothetical protein CARUB_v10013153mg          | gbpln | Capsella rubella     | AT3G14790.1   Symbols: RHM3, ATRHM3   rhamnose biosynthesis 3   chr3:4964791-4966875 FORWARD LENGTH=664                                                                                                                                                                                                                                                                                                                                                                                 | 666 | 664 | 0         | 99.7  | 93.5 | 96.8 |
| Rsa1.0_01154.1.g24033.t1 | refNP_181377.2  uncharacterized protein [Arabidopsis thaliana]<br>gi 61742655 gb AAX55148.1  hypothetical protein At2g38430 [Arabidopsis thaliana]<br>gi 330254442 gb AEC09536.1  uncharacterized protein AT2G38430 [Arabidopsis thaliana]                                                                                                                                                                                                                                                      | 391 | 393 | 1.00E-160 | 100.5 | 71.6 | 83.6 | uncharacterized protein                         | gbpln | Arabidopsis thaliana | AT2G38430.1   Symbols:   unknown protein; BEST Arabidopsis thaliana protein match is: unknown protein (TAIR:AT3G54310.1); Has 35333 Blast hits to 34131 proteins in 2444 species: Archae - 798; Bacteria - 22429; Metazoa - 974; Fungi - 991; Plants - 531; Viruses - 0; Other Eukaryotes - 9610 (source: NCBI BLINK).   chr2:16092950-16094810 REVERSE LENGTH=393                                                                                                                      | 391 | 393 | 1.00E-163 | 100.5 | 71.6 | 83.6 |
| Rsa1.0_01154.1.g24034.t1 | emb CAG77504.1  peroxidase precursor [Raphanus sativus var. niger]                                                                                                                                                                                                                                                                                                                                                                                                                              | 350 | 284 | 1.00E-164 | 81.1  | 80.6 | 80.6 | peroxidase precursor                            | gbpln | Raphanus sativus     | AT2G38390.1   Symbols:   Peroxidase superfamily protein   chr2:16079726-16081381 FORWARD LENGTH=349                                                                                                                                                                                                                                                                                                                                                                                     | 350 | 349 | 1.00E-161 | 99.7  | 77.4 | 84.6 |
| Rsa1.0_01154.1.g24035.t1 | emb CAG77503.1  peroxidase precursor [Raphanus sativus var. niger]                                                                                                                                                                                                                                                                                                                                                                                                                              | 350 | 350 | 0         | 100.0 | 99.7 | 99.7 | peroxidase precursor                            | gbpln | Raphanus sativus     | AT2G38390.1   Symbols:   Peroxidase superfamily protein   chr2:16079726-16081381 FORWARD LENGTH=349                                                                                                                                                                                                                                                                                                                                                                                     | 350 | 349 | 1.00E-162 | 99.7  | 82.6 | 87.4 |
| Rsa1.0_01154.1.g24036.t1 | gb EOA26871.1  hypothetical protein CARUB_v10022963mg, partial [Capsella rubella]                                                                                                                                                                                                                                                                                                                                                                                                               | 514 | 536 | 1.00E-156 | 104.3 | 69.3 | 80.7 | hypothetical protein CARUB_v10022963mg, partial | gbpln | Capsella rubella     | AT2G38370.1   Symbols:   Plant protein of unknown function (DUF827)   chr2:16072184-16074168 REVERSE LENGTH=522                                                                                                                                                                                                                                                                                                                                                                         | 514 | 522 | 1.00E-144 | 101.6 | 65.6 | 76.3 |
| Rsa1.0_01154.1.g24037.t1 | refNP_565888.1  trichome birefringence-like 34 protein [Arabidopsis thaliana]<br>gi 13878095 gb AAK44125.1 AF370310.1 unknown protein [Arabidopsis thaliana]<br>gi 20197242 gb AAC28772.2  expressed protein [Arabidopsis thaliana]<br>gi 330254429 gb AEC09523.1  trichome birefringence-like 34 protein [Arabidopsis thaliana]                                                                                                                                                                | 413 | 410 | 0         | 99.3  | 83.1 | 90.6 | trichome birefringence-like 34 protein          | gbpln | Arabidopsis thaliana | AT2G38320.1   Symbols: TBL34   TRICHOME BIREFRINGENCE-LIKE 34   chr2:16055488-16057874 FORWARD LENGTH=410                                                                                                                                                                                                                                                                                                                                                                               | 413 | 410 | 0         | 99.3  | 83.1 | 90.6 |
| Rsa1.0_01154.1.g24038.t1 | gb EOA29053.1  hypothetical protein CARUB_v10025307mg [Capsella rubella]                                                                                                                                                                                                                                                                                                                                                                                                                        | 204 | 207 | 2.00E-98  | 101.5 | 92.6 | 95.6 | hypothetical protein CARUB_v10025307mg          | gbpln | Capsella rubella     | AT2G38310.1   Symbols: PYL4, RCAR10   PYR1-like 4   chr2:16050251-16050874 FORWARD LENGTH=207                                                                                                                                                                                                                                                                                                                                                                                           | 204 | 207 | 1.00E-100 | 101.5 | 92.6 | 95.6 |



|                          |                                                                                                                                                                                                                                                                                                                                                                                                                                                                  |      |     |           |       |      |      |                                        |       |                      |                                                                                                                              |      |     |           |       |      |      |
|--------------------------|------------------------------------------------------------------------------------------------------------------------------------------------------------------------------------------------------------------------------------------------------------------------------------------------------------------------------------------------------------------------------------------------------------------------------------------------------------------|------|-----|-----------|-------|------|------|----------------------------------------|-------|----------------------|------------------------------------------------------------------------------------------------------------------------------|------|-----|-----------|-------|------|------|
| Rsa1.0_01154.1.g24039.t2 | refNP_198523.1  uncharacterized protein [Arabidopsis thaliana]<br>gi 10177986 dbj BAB11359.1  unnamed protein product [Arabidopsis thaliana]<br>gi 34365659 gb AAQ65141.1  At5g37070 [Arabidopsis thaliana]<br>gi 51970366 dbj BAD43875.1  putative protein [Arabidopsis thaliana]<br>gi 51971132 dbj BAD44258.1  putative protein [Arabidopsis thaliana]<br>gi 33200676 gb AED94144.1  uncharacterized protein AT5G37070 [Arabidopsis thaliana]                 | 166  | 170 | 8.00E-89  | 102.4 | 96.4 | 99.4 | uncharacterized protein                | gbpln | Arabidopsis thaliana | AT5G37070.1   Symbols:   Protein of unknown function, DUF538   chr5:14651091-14652147 FORWARD LENGTH=170                     | 166  | 170 | 3.00E-91  | 102.4 | 96.4 | 99.4 |
| Rsa1.0_01154.1.g24040.t1 | dbj BAB02422.1  unnamed protein product [Arabidopsis thaliana]                                                                                                                                                                                                                                                                                                                                                                                                   | 1166 | 390 | 3.00E-35  | 33.4  | 7.1  | 8.7  | unnamed protein product                | gbpln | Arabidopsis thaliana | AT3G12775.1   Symbols:   ubiquitin-conjugating enzyme family protein   chr3:4059772-4060944 FORWARD LENGTH=362               | 1166 | 362 | 6.00E-37  | 31.0  | 6.9  | 8.4  |
| Rsa1.0_01154.1.g24041.t1 | dbj BAJ33778.1  unnamed protein product [Thellungiella halophila]                                                                                                                                                                                                                                                                                                                                                                                                | 488  | 490 | 0         | 100.4 | 93.0 | 95.1 | unnamed protein product                | ----  | ----                 | AT2G38290.1   Symbols: ATAMT2, AMT2.1, AMT2   ammonium transporter 2   chr2:16039672-16042291 REVERSE LENGTH=475             | 488  | 475 | 0         | 97.3  | 89.1 | 93.0 |
| Rsa1.0_01155.1.g24042.t1 | refNP_564021.1  lipoxygenase 3 [Arabidopsis thaliana]<br>gi 75264086 sp Q9LNR3.1 LOX3 ARATH<br>RecName: Full=Lipoxygenase 3, chloroplastic; Short=AtLOX3; Flags: Precursor<br>gi 8778453 gb AAF7946.1 AC022492.5 F1L3.11 [Arabidopsis thaliana]<br>gi 19715630 gb AAL91636.1 <br>At1g17420/F1L3.1 [Arabidopsis thaliana] gi 30102476 gb AAP21156.1 <br>At1g17420/F1L3.1 [Arabidopsis thaliana] gi 332191464 gb AEE29585.1  lipoxygenase 3 [Arabidopsis thaliana] | 919  | 919 | 0         | 100.0 | 91.1 | 96.1 | lipoxygenase 3                         | gbpln | Arabidopsis thaliana | AT1G17420.1   Symbols: LOX3   lipoxygenase 3   chr1:5977512-5981384 FORWARD LENGTH=919                                       | 919  | 919 | 0         | 100.0 | 91.1 | 96.1 |
| Rsa1.0_01155.1.g24043.t2 | refXP_002890225.1  hypothetical protein ARALYDRAFT_471948 [Arabidopsis lyrata subsp. lyrata]<br>gi 297336067 gb EFH66484.1  hypothetical protein ARALYDRAFT_471948 [Arabidopsis lyrata subsp. lyrata]                                                                                                                                                                                                                                                            | 395  | 333 | 1.00E-166 | 84.3  | 74.2 | 78.7 | hypothetical protein ARALYDRAFT_471948 | gbpln | Arabidopsis lyrata   | AT1G17430.1   Symbols:   alpha/beta-Hydrolases superfamily protein   chr1:5982310-5983919 FORWARD LENGTH=332                 | 395  | 332 | 1.00E-168 | 84.1  | 73.2 | 77.5 |
| Rsa1.0_01155.1.g24044.t1 | refXP_002892989.1  hypothetical protein ARALYDRAFT_889236 [Arabidopsis lyrata subsp. lyrata]<br>gi 297338831 gb EFH69248.1  hypothetical protein ARALYDRAFT_889236 [Arabidopsis lyrata subsp. lyrata]                                                                                                                                                                                                                                                            | 149  | 167 | 2.00E-12  | 112.1 | 26.8 | 38.9 | hypothetical protein ARALYDRAFT_889236 | gbpln | Arabidopsis lyrata   | #                                                                                                                            | #    | #   | #         | #     | #    | #    |
| Rsa1.0_01155.1.g24045.t1 | refXP_002892989.1  hypothetical protein ARALYDRAFT_889236 [Arabidopsis lyrata subsp. lyrata]<br>gi 297338831 gb EFH69248.1  hypothetical protein ARALYDRAFT_889236 [Arabidopsis lyrata subsp. lyrata]                                                                                                                                                                                                                                                            | 149  | 167 | 1.00E-14  | 112.1 | 28.2 | 38.9 | hypothetical protein ARALYDRAFT_889236 | gbpln | Arabidopsis lyrata   | #                                                                                                                            | #    | #   | #         | #     | #    | #    |
| Rsa1.0_01155.1.g24046.t1 | gb EOA40609.1  hypothetical protein CARUB_v10009345mg [Capsella rubella]                                                                                                                                                                                                                                                                                                                                                                                         | 111  | 399 | 2.00E-32  | 359.5 | 57.7 | 59.5 | hypothetical protein CARUB_v10009345mg | gbpln | Capsella rubella     | AT1G17470.2   Symbols: ATDRG1, ATDRG, DRG1   developmentally regulated G-protein 1   chr1:6003442-6006155 FORWARD LENGTH=399 | 111  | 399 | 3.00E-35  | 359.5 | 57.7 | 59.5 |
| Rsa1.0_01155.1.g24047.t1 | gb EOA36959.1  hypothetical protein CARUB_v10009890mg [Capsella rubella]                                                                                                                                                                                                                                                                                                                                                                                         | 296  | 295 | 1.00E-104 | 99.7  | 72.3 | 81.8 | hypothetical protein CARUB_v10009890mg | gbpln | Capsella rubella     | AT1G17520.1   Symbols:   Homeodomain-like/winged-helix DNA-binding family protein   chr1:6024959-6027224 REVERSE LENGTH=296  | 296  | 296 | 1.00E-102 | 100.0 | 72.3 | 83.1 |

|                          |                                                                                                                                                                                                                                                                                                                                                                                                                                                                                                                                                                                                                                                                                                                                                                                                                                                                                                                                                                                                                                                                                                                                                                                                                                                                                                             |     |      |           |       |      |      |                                                                             |       |                      |                                                                                                                                                |     |      |           |       |      |      |
|--------------------------|-------------------------------------------------------------------------------------------------------------------------------------------------------------------------------------------------------------------------------------------------------------------------------------------------------------------------------------------------------------------------------------------------------------------------------------------------------------------------------------------------------------------------------------------------------------------------------------------------------------------------------------------------------------------------------------------------------------------------------------------------------------------------------------------------------------------------------------------------------------------------------------------------------------------------------------------------------------------------------------------------------------------------------------------------------------------------------------------------------------------------------------------------------------------------------------------------------------------------------------------------------------------------------------------------------------|-----|------|-----------|-------|------|------|-----------------------------------------------------------------------------|-------|----------------------|------------------------------------------------------------------------------------------------------------------------------------------------|-----|------|-----------|-------|------|------|
| Rsa1.0_01155.1.g24048.t1 | ref[NP_564028.1] translocase of inner mitochondrial membrane 23 [Arabidopsis thaliana] gi 75175255 sp Q9LNG1.1 TI231_ARATH RecName: Full=Mitochondrial import inner membrane translocase subunit TIM23-1 gi 8778460 gb AAF79468.1 AC022492.12 F1L3.24 [Arabidopsis thaliana] gi 15010570 gb AAK73944.1 At1g17530/F11A6.4 [Arabidopsis thaliana] gi 20147387 gb AAM10403.1 At1g17530/F11A6.4 [Arabidopsis thaliana] gi 38678776 gb AAR26373.1 mitochondrial inner membrane translocase TM23-1 [Arabidopsis thaliana] gi 332191481 gb AEE29602.1 translocase of inner mitochondrial membrane 23 [Arabidopsis thaliana] ref[NP_173197.2] Protein kinase protein with adenine nucleotide alpha hydrolases-like domain [Arabidopsis thaliana] gi 51969566 db BAD43475.1 putative protein kinase [Arabidopsis thaliana] gi 332191482 gb AEE29603.1 Protein kinase protein with adenine nucleotide alpha hydrolases-like domain [Arabidopsis thaliana] ref[XP_002890234.1] hypothetical protein ARALYDRAFT_889163 [Arabidopsis lyrata subsp. lyrata] gi 297336076 gb EFH66493.1 hypothetical protein ARALYDRAFT_889163 [Arabidopsis lyrata subsp. lyrata] ref[XP_002870343.1] predicted protein [Arabidopsis lyrata subsp. lyrata] gi 297316179 gb EFH46602.1 predicted protein [Arabidopsis lyrata subsp. lyrata] | 187 | 187  | 9.00E-70  | 100.0 | 74.3 | 86.6 | translocase of inner mitochondrial membrane 23                              | gbpln | Arabidopsis thaliana | AT1G17530.1   Symbols: ATTIM23-1, TIM23-1   translocase of inner mitochondrial membrane 23   chr1:6027723-6028286 FORWARD LENGTH=187           | 187 | 187  | 3.00E-72  | 100.0 | 74.3 | 86.6 |
| Rsa1.0_01155.1.g24049.t1 | ref[XP_002890234.1] hypothetical protein ARALYDRAFT_889163 [Arabidopsis lyrata subsp. lyrata] gi 297336076 gb EFH66493.1 hypothetical protein ARALYDRAFT_889163 [Arabidopsis lyrata subsp. lyrata] ref[XP_002870343.1] predicted protein [Arabidopsis lyrata subsp. lyrata] gi 297316179 gb EFH46602.1 predicted protein [Arabidopsis lyrata subsp. lyrata]                                                                                                                                                                                                                                                                                                                                                                                                                                                                                                                                                                                                                                                                                                                                                                                                                                                                                                                                                 | 706 | 728  | 0         | 103.1 | 80.5 | 88.1 | Protein kinase protein with adenine nucleotide alpha hydrolases-like domain | gbpln | Arabidopsis thaliana | AT1G17540.1   Symbols:   Protein kinase protein with adenine nucleotide alpha hydrolases-like domain   chr1:6029551-6032641 REVERSE LENGTH=728 | 706 | 728  | 0         | 103.1 | 80.5 | 88.1 |
| Rsa1.0_01155.1.g24050.t1 | ref[XP_002890234.1] hypothetical protein ARALYDRAFT_889163 [Arabidopsis lyrata subsp. lyrata] gi 297336076 gb EFH66493.1 hypothetical protein ARALYDRAFT_889163 [Arabidopsis lyrata subsp. lyrata]                                                                                                                                                                                                                                                                                                                                                                                                                                                                                                                                                                                                                                                                                                                                                                                                                                                                                                                                                                                                                                                                                                          | 489 | 514  | 0         | 105.1 | 87.7 | 92.8 | hypothetical protein ARALYDRAFT_889163                                      | gbpln | Arabidopsis lyrata   | AT1G17550.1   Symbols: HAB2   homology to AB12   chr1:6034917-6036939 FORWARD LENGTH=511                                                       | 489 | 511  | 0         | 104.5 | 86.9 | 92.2 |
| Rsa1.0_01155.1.g24051.t2 | ref[XP_002870343.1] predicted protein [Arabidopsis lyrata subsp. lyrata] gi 297316179 gb EFH46602.1 predicted protein [Arabidopsis lyrata subsp. lyrata]                                                                                                                                                                                                                                                                                                                                                                                                                                                                                                                                                                                                                                                                                                                                                                                                                                                                                                                                                                                                                                                                                                                                                    | 926 | 966  | 0         | 104.3 | 52.9 | 66.1 | predicted protein                                                           | gbpln | Arabidopsis lyrata   | AT5G48770.1   Symbols:   Disease resistance protein (TIR-NBS-LRR class) family   chr5:19773277-19777242 REVERSE LENGTH=1190                    | 926 | 1190 | 0         | 128.5 | 44.2 | 56.6 |
| Rsa1.0_01155.1.g24052.t1 | gb ACP30589.1  disease resistance protein [Brassica rapa subsp. pekinensis]                                                                                                                                                                                                                                                                                                                                                                                                                                                                                                                                                                                                                                                                                                                                                                                                                                                                                                                                                                                                                                                                                                                                                                                                                                 | 504 | 1104 | 1.00E-129 | 219.0 | 52.8 | 67.5 | disease resistance protein                                                  | gbpln | Brassica rapa        | AT5G48770.1   Symbols:   Disease resistance protein (TIR-NBS-LRR class) family   chr5:19773277-19777242 REVERSE LENGTH=1190                    | 504 | 1190 | 1.00E-115 | 236.1 | 47.6 | 63.7 |
| Rsa1.0_01156.1.g24053.t1 | ref[NP_201414.1] cell cycle checkpoint protein RAD17 [Arabidopsis thaliana] gi 55976607 sp Q9MBA3.1 RAD17_ARATH RecName: Full=Cell cycle checkpoint protein RAD17; Short=ATRAD17; AltName: Full=Radiation-sensitive protein 17 gi 6855472 db BAA90479.1 ATRAD17 [Arabidopsis thaliana] gi 10177128 db BAB10418.1 ATRAD17 [Arabidopsis thaliana] gi 332010780 gb AED98163.1 cell cycle checkpoint protein RAD17 [Arabidopsis thaliana]                                                                                                                                                                                                                                                                                                                                                                                                                                                                                                                                                                                                                                                                                                                                                                                                                                                                       | 644 | 599  | 0         | 93.0  | 72.7 | 80.9 | cell cycle checkpoint protein RAD17                                         | gbpln | Arabidopsis thaliana | AT5G66130.1   Symbols: ATRAD17, RAD17   RADIATION SENSITIVE 17   chr5:26434236-26437091 FORWARD LENGTH=599                                     | 644 | 599  | 0         | 93.0  | 72.7 | 80.9 |
| Rsa1.0_01156.1.g24054.t1 | ref[XP_002865086.1] hypothetical protein ARALYDRAFT_358942 [Arabidopsis lyrata subsp. lyrata] gi 297310921 gb EFH41345.1 hypothetical protein ARALYDRAFT_358942 [Arabidopsis lyrata subsp. lyrata]                                                                                                                                                                                                                                                                                                                                                                                                                                                                                                                                                                                                                                                                                                                                                                                                                                                                                                                                                                                                                                                                                                          | 434 | 443  | 0         | 102.1 | 89.4 | 93.8 | hypothetical protein ARALYDRAFT_358942                                      | gbpln | Arabidopsis lyrata   | AT5G66120.2   Symbols:   3-dehydroquinate synthase, putative   chr5:26431516-26433649 REVERSE LENGTH=442                                       | 434 | 442  | 0         | 101.8 | 88.0 | 92.4 |
| Rsa1.0_01156.1.g24055.t1 | gb EOA13364.1  hypothetical protein CARUB_v10026401mg [Capsella rubella]                                                                                                                                                                                                                                                                                                                                                                                                                                                                                                                                                                                                                                                                                                                                                                                                                                                                                                                                                                                                                                                                                                                                                                                                                                    | 380 | 445  | 1.00E-105 | 117.1 | 65.5 | 75.8 | hypothetical protein CARUB_v10026401mg                                      | gbpln | Capsella rubella     | AT5G66100.1   Symbols:   winged-helix DNA-binding transcription factor family protein   chr5:26427639-26429772 FORWARD LENGTH=453              | 380 | 453  | 1.00E-105 | 119.2 | 65.0 | 76.8 |
| Rsa1.0_01156.1.g24056.t2 | ref[NP_201407.4] iron ion binding / oxidoreductase / oxidoreductase protein [Arabidopsis thaliana] gi 332010770 gb AED98153.1 iron ion binding / oxidoreductase / oxidoreductase protein [Arabidopsis thaliana]                                                                                                                                                                                                                                                                                                                                                                                                                                                                                                                                                                                                                                                                                                                                                                                                                                                                                                                                                                                                                                                                                             | 540 | 289  | 1.00E-153 | 53.5  | 48.3 | 50.6 | iron ion binding / oxidoreductase / oxidoreductase protein                  | gbpln | Arabidopsis thaliana | AT5G66060.1   Symbols:   2-oxoglutarate (2OG) and Fe(II)-dependent oxygenase superfamily protein   chr5:26419481-26421118 FORWARD LENGTH=289   | 540 | 289  | 1.00E-155 | 53.5  | 48.3 | 50.6 |
| Rsa1.0_01156.1.g24057.t1 | gb AAA32812.1  ankyrin repeat-containing protein [Arabidopsis thaliana]                                                                                                                                                                                                                                                                                                                                                                                                                                                                                                                                                                                                                                                                                                                                                                                                                                                                                                                                                                                                                                                                                                                                                                                                                                     | 436 | 439  | 1.00E-180 | 100.7 | 75.0 | 81.0 | ankyrin repeat-containing protein                                           | gbpln | Arabidopsis thaliana | AT5G66055.1   Symbols: EMB16, EMB2036, AKRP   ankyrin repeat protein   chr5:26417425-26419234 REVERSE LENGTH=435                               | 436 | 435  | 0         | 99.8  | 73.6 | 79.1 |

|                          |                                                                                                                                                                                                                                                                                                                                                                                                                                                                                                                                                                                                                                                                                                                                                           |      |      |           |       |      |      |                                          |       |                      |                                                                                                                                  |      |     |           |       |      |      |
|--------------------------|-----------------------------------------------------------------------------------------------------------------------------------------------------------------------------------------------------------------------------------------------------------------------------------------------------------------------------------------------------------------------------------------------------------------------------------------------------------------------------------------------------------------------------------------------------------------------------------------------------------------------------------------------------------------------------------------------------------------------------------------------------------|------|------|-----------|-------|------|------|------------------------------------------|-------|----------------------|----------------------------------------------------------------------------------------------------------------------------------|------|-----|-----------|-------|------|------|
| Rsa1.0_01156.1.g24058.t1 | refNP_201406.2   Wound-responsive family protein [Arabidopsis thaliana] gi 26452559 dbj BAC43364.1   unknown protein [Arabidopsis thaliana] gi 29824181 gb AAP04051.1   unknown protein [Arabidopsis thaliana] gi 332010765 gb AED98148.1   Wound-responsive family protein [Arabidopsis thaliana]                                                                                                                                                                                                                                                                                                                                                                                                                                                        | 363  | 340  | 1.00E-138 | 93.7  | 76.6 | 83.2 | Wound-responsive family protein          | gbpln | Arabidopsis thaliana | AT5G66050.1   Symbols:   Wound-responsive family protein   chr5:26412333-26414428 REVERSE LENGTH=340                             | 363  | 340 | 1.00E-140 | 93.7  | 76.6 | 83.2 |
| Rsa1.0_01156.1.g24059.t1 | refNP_851278.1   thiosulfate sulfurtransferase [Arabidopsis thaliana] gi 62903514 sp Q39129.2 STR16_ARATH RecName: Full=Thiosulfate sulfurtransferase 16, chloroplastic; AltName: Full=Rhodanese; AltName: Full=Senescence-associated protein; AltName: Full=Sulfurtransferase 16; Short=AtStr16 gi 10177119 dbj BAB10409.1   senescence-associated protein sen1-like protein; ketoconazole resistance protein-like [Arabidopsis thaliana] gi 15146322 gb AAK83644.1   AT5g66040/K2A18.11 [Arabidopsis thaliana] gi 21536991 gb AAM61332.1   senescence-associated protein [Arabidopsis thaliana] gi 23507795 gb AAN38701.1   At5g66040/K2A18.11 [Arabidopsis thaliana] gi 332010763 gb AED98146.1   thiosulfate sulfurtransferase [Arabidopsis thaliana] | 121  | 120  | 8.00E-48  | 99.2  | 75.2 | 86.8 | thiosulfate sulfurtransferase            | gbpln | Arabidopsis thaliana | AT5G66040.1   Symbols: STR16   sulfurtransferase protein 16   chr5:26410557-26411139 FORWARD LENGTH=120                          | 121  | 120 | 1.00E-50  | 99.2  | 75.2 | 86.8 |
| Rsa1.0_01156.1.g24060.t1 | gb ADD16954.1   SAC-like protein [Brassica rapa]                                                                                                                                                                                                                                                                                                                                                                                                                                                                                                                                                                                                                                                                                                          | 1364 | 594  | 0         | 43.5  | 41.6 | 42.4 | SAC-like protein                         | gbpln | Brassica rapa        | AT5G66030.1   Symbols: ATGRIP, GRIP   Golgi-localized GRIP domain-containing protein   chr5:26405133-26409888 REVERSE LENGTH=788 | 1364 | 788 | 0         | 57.8  | 47.2 | 50.0 |
| Rsa1.0_01156.1.g24061.t1 | ref XP_002866780.1   predicted protein [Arabidopsis lyrata subsp. lyrata] gi 297312615 gb EFH43039.1   predicted protein [Arabidopsis lyrata subsp. lyrata]                                                                                                                                                                                                                                                                                                                                                                                                                                                                                                                                                                                               | 619  | 395  | 0         | 63.8  | 59.9 | 61.7 | predicted protein                        | gbpln | Arabidopsis lyrata   | AT5G65980.1   Symbols:   Auxin efflux carrier family protein   chr5:26392444-26394232 FORWARD LENGTH=395                         | 619  | 395 | 0         | 63.8  | 59.8 | 61.4 |
| Rsa1.0_01156.1.g24062.t1 | ref XP_002866782.1   hypothetical protein ARALYDRAFT_920139 [Arabidopsis lyrata subsp. lyrata] gi 297312617 gb EFH43041.1   hypothetical protein ARALYDRAFT_920139 [Arabidopsis lyrata subsp. lyrata]                                                                                                                                                                                                                                                                                                                                                                                                                                                                                                                                                     | 382  | 394  | 1.00E-161 | 103.1 | 84.6 | 90.1 | hypothetical protein ARALYDRAFT_920139   | gbpln | Arabidopsis lyrata   | AT5G65960.1   Symbols:   GTP binding   chr5:26385413-26387197 FORWARD LENGTH=393                                                 | 382  | 393 | 1.00E-156 | 102.9 | 82.5 | 90.8 |
| Rsa1.0_01156.1.g24063.t1 | ref NP_201395.1   3-hydroxyisobutyryl-CoA hydrolase 1 [Arabidopsis thaliana] gi 75263928 sp Q9LKJ1.1 HIBC1_ARATH RecName: Full=3-hydroxyisobutyryl-CoA hydrolase 1; AltName: Full=CoA-thioester hydrolase CHY1 gi 8572760 gb AAF77193.1 AF276301.1 CoA-thioester hydrolase CHY1 [Arabidopsis thaliana] gi 9759578 dbj BAB11141.1   3-hydroxyisobutyryl-coenzyme A hydrolase [Arabidopsis thaliana] gi 24030391 gb AAN41356.1   putative 3-hydroxyisobutyryl-coenzyme A hydrolase [Arabidopsis thaliana] gi 332010745 gb AED98128.1   3-hydroxyisobutyryl-CoA hydrolase 1 [Arabidopsis thaliana]                                                                                                                                                           | 196  | 378  | 7.00E-18  | 192.9 | 33.2 | 39.8 | 3-hydroxyisobutyryl-CoA hydrolase 1      | gbpln | Arabidopsis thaliana | AT5G65940.1   Symbols: CHY1   beta-hydroxyisobutyryl-CoA hydrolase 1   chr5:26376830-26379161 REVERSE LENGTH=378                 | 196  | 378 | 2.00E-20  | 192.9 | 33.2 | 39.8 |
| Rsa1.0_01157.1.g24064.t3 | gb AAF79275.1 AC023279_24 F12K21.5 [Arabidopsis thaliana]                                                                                                                                                                                                                                                                                                                                                                                                                                                                                                                                                                                                                                                                                                 | 775  | 1033 | 5.00E-92  | 133.3 | 23.0 | 29.0 | F12K21.5                                 | gbpln | Arabidopsis thaliana | AT1G31150.1   Symbols:   Domain of unknown function (DUF1985)   chr1:1120097-1122412 FORWARD LENGTH=673                          | 775  | 673 | 5.00E-25  | 86.8  | 12.8 | 20.3 |
| Rsa1.0_01157.1.g24065.t1 | emb CAB39638.1   RNA-directed DNA polymerase-like protein [Arabidopsis thaliana] gi 7267666 emb CAB78094.1   RNA-directed DNA polymerase-like protein [Arabidopsis thaliana]                                                                                                                                                                                                                                                                                                                                                                                                                                                                                                                                                                              | 479  | 1274 | 1.00E-111 | 266.0 | 45.9 | 62.8 | RNA-directed DNA polymerase-like protein | gbpln | Arabidopsis thaliana | AT4G2090.1   Symbols:   Ribonuclease H-like superfamily protein   chr4:14333528-14335255 FORWARD LENGTH=575                      | 479  | 575 | 3.00E-51  | 120.0 | 32.4 | 49.9 |
| Rsa1.0_01157.1.g24066.t1 | gb EOA25511.1   hypothetical protein CARUB_v10018854mg [Capsella rubella]                                                                                                                                                                                                                                                                                                                                                                                                                                                                                                                                                                                                                                                                                 | 368  | 360  | 1.00E-137 | 97.8  | 66.0 | 79.1 | hypothetical protein CARUB_v10018854mg   | gbpln | Capsella rubella     | AT3G57720.1   Symbols:   Protein kinase superfamily protein   chr3:21387766-21388845 FORWARD LENGTH=359                          | 368  | 359 | 1.00E-139 | 97.6  | 66.3 | 77.7 |

|                          |                                                                                                                                                                                                                                                                                                                                                                                                                                                                                                                                                            |     |      |           |       |      |      |                                                                                                |       |                      |                                                                                                                                                                                                                                                                                                                                                                                                                |     |     |           |       |      |      |
|--------------------------|------------------------------------------------------------------------------------------------------------------------------------------------------------------------------------------------------------------------------------------------------------------------------------------------------------------------------------------------------------------------------------------------------------------------------------------------------------------------------------------------------------------------------------------------------------|-----|------|-----------|-------|------|------|------------------------------------------------------------------------------------------------|-------|----------------------|----------------------------------------------------------------------------------------------------------------------------------------------------------------------------------------------------------------------------------------------------------------------------------------------------------------------------------------------------------------------------------------------------------------|-----|-----|-----------|-------|------|------|
| Rsa1.0_01157.1.g24067.t1 | ref[NP_191330.1] protein kinase family protein [Arabidopsis thaliana] gi 4678276 emb CAB41184.1  putative protein [Arabidopsis thaliana] gi 21537362 gb AAM61703.1  protein kinase-like protein [Arabidopsis thaliana] gi 51968400 dbj BAD42892.1  protein kinase - like protein [Arabidopsis thaliana] gi 51969234 dbj BAD43309.1  protein kinase - like protein [Arabidopsis thaliana] gi 51969278 dbj BAD43331.1  protein kinase - like protein [Arabidopsis thaliana] gi 332646167 gb AEE79688.1  protein kinase family protein [Arabidopsis thaliana] | 228 | 351  | 3.00E-36  | 153.9 | 37.7 | 52.2 | protein kinase family protein                                                                  | gbpln | Arabidopsis thaliana | AT3G57710.1   Symbols:   Protein kinase superfamily protein   chr3:21386233-21387288 REVERSE LENGTH=351                                                                                                                                                                                                                                                                                                        | 228 | 351 | 8.00E-39  | 153.9 | 37.7 | 52.2 |
| Rsa1.0_01157.1.g24068.t1 | gb EOA29259.1  hypothetical protein CARUB_v10025533mg, partial [Capsella rubella]                                                                                                                                                                                                                                                                                                                                                                                                                                                                          | 385 | 293  | 8.00E-37  | 76.1  | 19.2 | 21.0 | hypothetical protein CARUB_v10025533mg, partial                                                | gbpln | Capsella rubella     | AT1G34070.1   Symbols:   CONTAINS InterPro DOMAIN/s: Retrotransposon gag protein (InterPro:IPR005162); BEST Arabidopsis thaliana protein match is: unknown protein (TAIR:AT5G48050.1); Has 648 Blast hits to 647 proteins in 29 species: Archae - 0; Bacteria - 0; Metazoa - 16; Fungi - 25; Plants - 607; Viruses - 0; Other Eukaryotes - 0 (source: NCBI BLink).   chr1:12402283-12403209 FORWARD LENGTH=308 | 385 | 308 | 2.00E-30  | 80.0  | 14.8 | 19.5 |
| Rsa1.0_01157.1.g24069.t1 | gb EOA23580.1  hypothetical protein CARUB_v10016776mg [Capsella rubella]                                                                                                                                                                                                                                                                                                                                                                                                                                                                                   | 586 | 679  | 0         | 115.9 | 75.9 | 85.5 | hypothetical protein CARUB_v10016776mg                                                         | gbpln | Capsella rubella     | AT3G57780.1   Symbols:   BEST Arabidopsis thaliana protein match is: nucleolar protein gar2-related (TAIR:AT2G42320.2); Has 3163 Blast hits to 2460 proteins in 357 species: Archae - 16; Bacteria - 291; Metazoa - 841; Fungi - 335; Plants - 248; Viruses - 72; Other Eukaryotes - 1360 (source: NCBI BLink).   chr3:21399766-21402329 REVERSE LENGTH=671                                                    | 586 | 671 | 0         | 114.5 | 75.9 | 84.8 |
| Rsa1.0_01157.1.g24070.t1 | #                                                                                                                                                                                                                                                                                                                                                                                                                                                                                                                                                          | #   | #    | #         | #     | #    | #    | -                                                                                              | ----  | ----                 | #                                                                                                                                                                                                                                                                                                                                                                                                              | #   | #   | #         | #     | #    | #    |
| Rsa1.0_01157.1.g24071.t1 | ref[NP_567057.2] transcription factor bHLH60 [Arabidopsis thaliana] gi 122214701 sp Q3EAI1.1 BH060_ARAT H RecName: Full=Transcription factor bHLH60; AltName: Full=Basic helix-loop-helix protein 60; Short=AtbHLH60; Short=bHLH 60; AltName: Full=Transcription factor EN 91; AltName: Full=bHLH transcription factor bHLH060 gi 332646181 gb AEE79702.1  transcription factor bHLH60 [Arabidopsis thaliana]                                                                                                                                              | 386 | 426  | 1.00E-143 | 110.4 | 78.0 | 84.5 | transcription factor bHLH60                                                                    | gbpln | Arabidopsis thaliana | AT3G57800.1   Symbols:   basic helix-loop-helix (bHLH) DNA-binding superfamily protein   chr3:21408034-21411321 REVERSE LENGTH=426                                                                                                                                                                                                                                                                             | 386 | 426 | 2.33E-156 | 110.4 | 78.0 | 84.5 |
| Rsa1.0_01157.1.g24072.t1 | gb ADP37981.1  ubiquitin-protein ligase [Brassica napus]                                                                                                                                                                                                                                                                                                                                                                                                                                                                                                   | 160 | 160  | 2.00E-89  | 100.0 | 98.8 | 99.4 | ubiquitin-protein ligase                                                                       | gbpln | Brassica napus       | AT3G57870.1   Symbols: AHUS5, EMB1637, SCE1, SCE1A, AT_SCE1   sumo conjugation enzyme 1   chr3:21428831-21430110 REVERSE LENGTH=160                                                                                                                                                                                                                                                                            | 160 | 160 | 4.00E-89  | 100.0 | 95.6 | 96.9 |
| Rsa1.0_01157.1.g24073.t1 | ref[NP_191347.1] calcium-dependent lipid-binding domain-containing plant phosphoribosyltransferase-like protein [Arabidopsis thaliana] gi 6729531 emb CAB67616.1  anthranilate phosphoribosyltransferase-like protein [Arabidopsis thaliana] gi 332646191 gb AEE79712.1  calcium-dependent lipid-binding domain-containing plant phosphoribosyltransferase-like protein [Arabidopsis thaliana]                                                                                                                                                             | 775 | 773  | 0         | 99.7  | 95.7 | 97.8 | calcium-dependent lipid-binding domain-containing plant phosphoribosyltransferase-like protein | gbpln | Arabidopsis thaliana | AT3G57880.1   Symbols:   Calcium-dependent lipid-binding (CaLB domain) plant phosphoribosyltransferase family protein   chr3:21431198-21433519 REVERSE LENGTH=773                                                                                                                                                                                                                                              | 775 | 773 | 0         | 99.7  | 95.7 | 97.8 |
| Rsa1.0_01158.1.g24074.t1 | ref[NP_172933.1] Nucleic acid-binding, OB-fold-like protein [Arabidopsis thaliana] gi 332191106 gb AEE29227.1  Nucleic acid-binding, OB-fold-like protein [Arabidopsis thaliana]                                                                                                                                                                                                                                                                                                                                                                           | 198 | 384  | 4.00E-21  | 193.9 | 26.8 | 39.4 | Nucleic acid-binding, OB-fold-like protein                                                     | gbpln | Arabidopsis thaliana | AT1G14900.1   Symbols:   Nucleic acid-binding, OB-fold-like protein   chr1:5099572-5102558 FORWARD LENGTH=384                                                                                                                                                                                                                                                                                                  | 198 | 384 | 1.00E-23  | 193.9 | 26.8 | 39.4 |
| Rsa1.0_01158.1.g24075.t1 | ref[XP_002877088.1] hypothetical protein ARALYDRAFT_905062 [Arabidopsis lyrata subsp. lyrata] gi 297322926 gb EFH53347.1  hypothetical protein ARALYDRAFT_905062 [Arabidopsis lyrata subsp. lyrata]                                                                                                                                                                                                                                                                                                                                                        | 130 | 503  | 9.00E-16  | 386.9 | 33.1 | 37.7 | hypothetical protein ARALYDRAFT_905062                                                         | gbpln | Arabidopsis lyrata   | #                                                                                                                                                                                                                                                                                                                                                                                                              | #   | #   | #         | #     | #    | #    |
| Rsa1.0_01158.1.g24076.t1 | gb AAF69169.1 AC007915.21 F27F5.21 [Arabidopsis thaliana]                                                                                                                                                                                                                                                                                                                                                                                                                                                                                                  | 260 | 1023 | 5.00E-19  | 393.5 | 20.8 | 31.5 | F27F5.21                                                                                       | gbpln | Arabidopsis thaliana | #                                                                                                                                                                                                                                                                                                                                                                                                              | #   | #   | #         | #     | #    | #    |

|                          |                                                                                                                                                                                                                                                    |      |      |           |       |      |      |                                                   |       |                      |                                                                                                                                                                                                                                                                                                                                                    |      |     |           |       |      |      |
|--------------------------|----------------------------------------------------------------------------------------------------------------------------------------------------------------------------------------------------------------------------------------------------|------|------|-----------|-------|------|------|---------------------------------------------------|-------|----------------------|----------------------------------------------------------------------------------------------------------------------------------------------------------------------------------------------------------------------------------------------------------------------------------------------------------------------------------------------------|------|-----|-----------|-------|------|------|
| Rsa1.0_01158.1.g24077.t3 | #                                                                                                                                                                                                                                                  | #    | #    | #         | #     | #    | #    | #                                                 | -     | ----                 | ----                                                                                                                                                                                                                                                                                                                                               | #    | #   | #         | #     | #    | #    |
| Rsa1.0_01158.1.g24078.t1 | ref YP_004927579.1  orf113a (mitochondrion) [Brassica carinata] gi 335355040 gb AEH43594.1  orf113a [Brassica carinata]                                                                                                                            | 129  | 113  | 2.00E-19  | 87.6  | 38.0 | 38.8 | orf113a (mitochondrion)                           | gbpln | Brassica carinata    | ATMG00050.1   Symbols: ORF131   hypothetical protein   chrM:16856-17251 FORWARD LENGTH=131                                                                                                                                                                                                                                                         | 129  | 131 | 5.00E-18  | 101.6 | 34.1 | 34.9 |
| Rsa1.0_01158.1.g24079.t1 | gb EOA15091.1  hypothetical protein CARUB_v10028459mg [Capsella rubella]                                                                                                                                                                           | 377  | 377  | 0         | 100.0 | 99.2 | 99.5 | hypothetical protein CARUB_v10028459mg            | gbpln | Capsella rubella     | AT3G46520.1   Symbols: ACT12   actin-12   chr3:17128567-17129981 FORWARD LENGTH=377                                                                                                                                                                                                                                                                | 377  | 377 | 0         | 100.0 | 99.2 | 99.5 |
| Rsa1.0_01158.1.g24080.t1 | gb AAG51046.1 AC069473.8 gypsy/Ty-3 retroelement polyprotein; 69905-74404 [Arabidopsis thaliana] gi 10998138 dbj BAB03109.1  retroelement pol polyprotein [Arabidopsis thaliana]                                                                   | 989  | 1499 | 0         | 151.6 | 61.8 | 75.2 | gypsy/Ty-3 retroelement polyprotein; 69905-74404  | gbpln | Arabidopsis thaliana | ATMG00860.1   Symbols: ORF158   DNA/RNA polymerases superfamily protein   chrM:235916-236392 FORWARD LENGTH=158                                                                                                                                                                                                                                    | 989  | 158 | 4.00E-22  | 16.0  | 5.2  | 7.0  |
| Rsa1.0_01158.1.g24081.t1 | gb EOA23471.1  hypothetical protein CARUB_v10016663mg [Capsella rubella]                                                                                                                                                                           | 1191 | 911  | 1.00E-32  | 76.5  | 13.3 | 20.7 | hypothetical protein CARUB_v10016663mg            | gbpln | Capsella rubella     | AT2G15420.1   Symbols:   myosin heavy chain-related   chr2:6723948-6728183 REVERSE LENGTH=957                                                                                                                                                                                                                                                      | 1191 | 957 | 4.00E-34  | 80.4  | 11.8 | 20.5 |
| Rsa1.0_01158.1.g24082.t1 | gb AAG51464.1 AC069160.10 gypsy/Ty3 element polyprotein, putative [Arabidopsis thaliana] ref XP_002884714.1  predicted protein [Arabidopsis lyrata subsp. lyrata] gi 297330554 gb EFH60973.1  predicted protein [Arabidopsis lyrata subsp. lyrata] | 429  | 1447 | 1.00E-77  | 337.3 | 42.7 | 55.5 | gypsy/Ty3 element polyprotein, putative           | gbpln | Arabidopsis thaliana | #                                                                                                                                                                                                                                                                                                                                                  | #    | #   | #         | #     | #    | #    |
| Rsa1.0_01158.1.g24083.t1 | ref XP_002884714.1  predicted protein [Arabidopsis lyrata subsp. lyrata] gi 297330554 gb EFH60973.1  predicted protein [Arabidopsis lyrata subsp. lyrata]                                                                                          | 505  | 492  | 0         | 97.4  | 72.9 | 83.4 | predicted protein                                 | gbpln | Arabidopsis lyrata   | AT3G09110.1   Symbols:   Protein of unknown function (DUF674)   chr3:2794850-2795963 REVERSE LENGTH=343                                                                                                                                                                                                                                            | 505  | 343 | 1.00E-151 | 67.9  | 51.3 | 58.2 |
| Rsa1.0_01158.1.g24084.t1 | #                                                                                                                                                                                                                                                  | #    | #    | #         | #     | #    | #    | -                                                 | ----  | ----                 | #                                                                                                                                                                                                                                                                                                                                                  | #    | #   | #         | #     | #    | #    |
| Rsa1.0_01159.1.g24085.t1 | gb AAF37287.1 AF227978.1 putative G-protein-coupled transmembrane receptor [Brassica oleracea var. botrytis]                                                                                                                                       | 231  | 457  | 5.00E-50  | 197.8 | 55.8 | 63.6 | putative G-protein-coupled transmembrane receptor | gbpln | Brassica oleracea    | #                                                                                                                                                                                                                                                                                                                                                  | #    | #   | #         | #     | #    | #    |
| Rsa1.0_01159.1.g24086.t1 | ref XP_002893598.1  predicted protein [Arabidopsis lyrata subsp. lyrata] gi 297339440 gb EFH69857.1  predicted protein [Arabidopsis lyrata subsp. lyrata]                                                                                          | 542  | 376  | 0         | 69.4  | 60.3 | 62.9 | predicted protein                                 | gbpln | Arabidopsis lyrata   | AT1G30080.1   Symbols:   Glycosyl hydrolase superfamily protein   chr1:10551231-10553167 REVERSE LENGTH=408                                                                                                                                                                                                                                        | 542  | 408 | 0         | 75.3  | 59.4 | 62.4 |
| Rsa1.0_01159.1.g24087.t6 | gb EOA38497.1  hypothetical protein CARUB_v10010265mg [Capsella rubella]                                                                                                                                                                           | 482  | 218  | 1.00E-83  | 45.2  | 32.2 | 34.6 | hypothetical protein CARUB_v10010265mg            | gbpln | Capsella rubella     | AT1G30070.1   Symbols:   SGS domain-containing protein   chr1:10546794-10548072 REVERSE LENGTH=222                                                                                                                                                                                                                                                 | 482  | 222 | 3.00E-81  | 46.1  | 32.2 | 35.1 |
| Rsa1.0_01159.1.g24088.t1 | gb EOA37925.1  hypothetical protein CARUB_v10009392mg [Capsella rubella]                                                                                                                                                                           | 410  | 390  | 1.00E-155 | 95.1  | 80.0 | 85.6 | hypothetical protein CARUB_v10009392mg            | gbpln | Capsella rubella     | AT1G30050.1   Symbols:   unknown protein; BEST Arabidopsis thaliana protein match is: unknown protein (TAIR:AT5G01970.1). Has 246 Blast hits to 244 proteins in 61 species: Archae - 0; Bacteria - 8; Metazoa - 78; Fungi - 10; Plants - 117; Viruses - 0; Other Eukaryotes - 33 (source: NCBI BLINK).   chr1:10543177-10544418 FORWARD LENGTH=389 | 410  | 389 | 1.00E-155 | 94.9  | 76.6 | 83.2 |
| Rsa1.0_01159.1.g24089.t1 | dbj BAG16378.1  gibberellin 2-oxidase family protein [Brassica rapa var. perviridis]                                                                                                                                                               | 339  | 338  | 0         | 99.7  | 91.2 | 94.1 | gibberellin 2-oxidase family protein              | gbpln | Brassica rapa        | AT1G30040.1   Symbols: ATGA20X2, GA20X2   gibberellin 2-oxidase   chr1:10537769-10539570 FORWARD LENGTH=341                                                                                                                                                                                                                                        | 339  | 341 | 1.00E-175 | 100.6 | 86.4 | 92.0 |
| Rsa1.0_01160.1.g24090.t1 | #                                                                                                                                                                                                                                                  | #    | #    | #         | #     | #    | #    | -                                                 | ----  | ----                 | #                                                                                                                                                                                                                                                                                                                                                  | #    | #   | #         | #     | #    | #    |
| Rsa1.0_01160.1.g24091.t1 | gb EOA25574.1  hypothetical protein CARUB_v10018920mg [Capsella rubella]                                                                                                                                                                           | 135  | 700  | 4.00E-60  | 518.5 | 80.7 | 85.9 | hypothetical protein CARUB_v10018920mg            | gbpln | Capsella rubella     | AT3G45420.1   Symbols:   Concanavalin A-like lectin protein kinase family protein   chr3:16657263-16659266 REVERSE LENGTH=667                                                                                                                                                                                                                      | 135  | 667 | 1.00E-61  | 494.1 | 80.7 | 90.4 |
| Rsa1.0_01160.1.g24092.t1 | #                                                                                                                                                                                                                                                  | #    | #    | #         | #     | #    | #    | -                                                 | ----  | ----                 | #                                                                                                                                                                                                                                                                                                                                                  | #    | #   | #         | #     | #    | #    |
| Rsa1.0_01160.1.g24093.t1 | #                                                                                                                                                                                                                                                  | #    | #    | #         | #     | #    | #    | -                                                 | ----  | ----                 | #                                                                                                                                                                                                                                                                                                                                                  | #    | #   | #         | #     | #    | #    |
| Rsa1.0_01160.1.g24094.t1 | ref YP_002608359.1  orf104 [Vitis vinifera] gi 209954156 emb CAQ77593.1  orf104 [Vitis vinifera] gi 239764779 gb ACS15247.1  ORF104 [Vitis vinifera]                                                                                               | 201  | 103  | 4.00E-27  | 51.2  | 29.9 | 31.3 | orf104                                            | gbpln | Vitis vinifera       | #                                                                                                                                                                                                                                                                                                                                                  | #    | #   | #         | #     | #    | #    |
| Rsa1.0_01160.1.g24095.t1 | ref XP_002886115.1  hypothetical protein ARALYDRAFT_480631 [Arabidopsis lyrata subsp. lyrata] gi 297331955 gb EFH62374.1  hypothetical protein ARALYDRAFT_480631 [Arabidopsis lyrata subsp. lyrata]                                                | 596  | 591  | 0         | 99.2  | 81.0 | 87.8 | hypothetical protein ARALYDRAFT_480631            | gbpln | Arabidopsis lyrata   | AT2G17480.1   Symbols: MLO8, ATMLO8   Seven transmembrane MLO family protein   chr2:7590559-7593768 REVERSE LENGTH=593                                                                                                                                                                                                                             | 596  | 593 | 0         | 99.5  | 78.0 | 85.4 |
| Rsa1.0_01160.1.g24096.t1 | gb AAG51046.1 AC069473.8 gypsy/Ty-3 retroelement polyprotein; 69905-74404 [Arabidopsis thaliana] gi 10998138 dbj BAB03109.1  retroelement pol polyprotein [Arabidopsis thaliana]                                                                   | 664  | 1499 | 0         | 225.8 | 60.2 | 69.4 | gypsy/Ty-3 retroelement polyprotein; 69905-74404  | gbpln | Arabidopsis thaliana | ATMG00860.1   Symbols: ORF158   DNA/RNA polymerases superfamily protein   chrM:235916-236392 FORWARD LENGTH=158                                                                                                                                                                                                                                    | 664  | 158 | 3.00E-26  | 23.8  | 8.6  | 10.7 |

|                          |                                                                                                                                                                                                                                                                                                                                                                                        |      |      |           |       |      |      |                                                       |       |                      |                                                                                                                                                |      |      |           |       |      |      |
|--------------------------|----------------------------------------------------------------------------------------------------------------------------------------------------------------------------------------------------------------------------------------------------------------------------------------------------------------------------------------------------------------------------------------|------|------|-----------|-------|------|------|-------------------------------------------------------|-------|----------------------|------------------------------------------------------------------------------------------------------------------------------------------------|------|------|-----------|-------|------|------|
| Rsa1.0_01160.1.g24097.t2 | refNP_179338.1  Aluminium activated malate transporter family protein [Arabidopsis thaliana]<br>gi 75205692 sp Q9SHM1.1 ALMT6 ARAT H RecName: Full=Aluminum-activated malate transporter 6; Short=AtALMT6 gi 4914368 gb AAD32904.1  unknown protein [Arabidopsis thaliana]<br>gi 330251538 gb AEC06632.1  Aluminium activated malate transporter family protein [Arabidopsis thaliana] | 532  | 538  | 0         | 101.1 | 81.2 | 86.1 | Aluminium activated malate transporter family protein | gbpln | Arabidopsis thaliana | AT2G17470.1   Symbols:   Aluminium activated malate transporter family protein   chr2:7584572-7588008 REVERSE LENGTH=538                       | 532  | 538  | 0         | 101.1 | 81.2 | 86.1 |
| Rsa1.0_01161.1.g24098.t1 | #                                                                                                                                                                                                                                                                                                                                                                                      | #    | #    | #         | #     | #    | #    | -                                                     | ----  | ----                 | #                                                                                                                                              | #    | #    | #         | #     | #    | #    |
| Rsa1.0_01161.1.g24099.t1 | #                                                                                                                                                                                                                                                                                                                                                                                      | #    | #    | #         | #     | #    | #    | -                                                     | ----  | ----                 | #                                                                                                                                              | #    | #    | #         | #     | #    | #    |
| Rsa1.0_01161.1.g24100.t1 | gb AAF79375.1 AC007887.34 F1504.28 [Arabidopsis thaliana]                                                                                                                                                                                                                                                                                                                              | 206  | 570  | 1.00E-37  | 276.7 | 46.1 | 67.5 | F1504.28                                              | gbpln | Arabidopsis thaliana | #                                                                                                                                              | #    | #    | #         | #     | #    | #    |
| Rsa1.0_01161.1.g24101.t1 | gb EOA27937.1  hypothetical protein CARUB_v10024106mg [Capsella rubella]                                                                                                                                                                                                                                                                                                               | 250  | 195  | 4.00E-79  | 78.0  | 66.4 | 70.4 | hypothetical protein CARUB_v10024106mg                | gbpln | Capsella rubella     | AT2G27290.1   Symbols:   Protein of unknown function (DUF1279)   chr2:11678586-11679765 REVERSE LENGTH=201                                     | 250  | 201  | 2.00E-73  | 80.4  | 59.6 | 66.8 |
| Rsa1.0_01161.1.g24102.t1 | #                                                                                                                                                                                                                                                                                                                                                                                      | #    | #    | #         | #     | #    | #    | -                                                     | ----  | ----                 | #                                                                                                                                              | #    | #    | #         | #     | #    | #    |
| Rsa1.0_01161.1.g24103.t1 | gb AAD17414.1  copia-like retroelement pol polyprotein [Arabidopsis thaliana]                                                                                                                                                                                                                                                                                                          | 1470 | 1166 | 0         | 79.3  | 48.2 | 58.8 | copia-like retroelement pol polyprotein               | gbpln | Arabidopsis thaliana | AT4G23160.1   Symbols: CRK8   cysteine-rich RLK (RECEPTOR-like protein kinase) 8   chr4:12129485-12134086 FORWARD LENGTH=1262                  | 1470 | 1262 | 7.00E-79  | 85.9  | 11.2 | 18.4 |
| Rsa1.0_01161.1.g24104.t1 | #                                                                                                                                                                                                                                                                                                                                                                                      | #    | #    | #         | #     | #    | #    | -                                                     | ----  | ----                 | #                                                                                                                                              | #    | #    | #         | #     | #    | #    |
| Rsa1.0_01161.1.g24105.t1 | ref XP_002879078.1  hypothetical protein ARALYDRAFT_481623 [Arabidopsis lyrata subsp. lyrata]<br>gi 297324917 gb EFH55337.1  hypothetical protein ARALYDRAFT_481623 [Arabidopsis lyrata subsp. lyrata]                                                                                                                                                                                 | 190  | 243  | 1.00E-59  | 127.9 | 65.8 | 77.9 | hypothetical protein ARALYDRAFT_481623                | gbpln | Arabidopsis lyrata   | AT2G27260.1   Symbols:   Late embryogenesis abundant (LEA) hydroxyproline-rich glycoprotein family   chr2:11669769-11670500 FORWARD LENGTH=243 | 190  | 243  | 1.00E-58  | 127.9 | 63.7 | 75.8 |
| Rsa1.0_01161.1.g24106.t1 | gb ABD65163.1  hypothetical protein 40.t00048 [Brassica oleracea]                                                                                                                                                                                                                                                                                                                      | 590  | 569  | 1.00E-156 | 96.4  | 52.0 | 56.9 | hypothetical protein 40.t00048                        | gbpln | Brassica oleracea    | #                                                                                                                                              | #    | #    | #         | #     | #    | #    |
| Rsa1.0_01162.1.g24107.t2 | gb EOA15220.1  hypothetical protein CARUB_v10028610mg [Capsella rubella]                                                                                                                                                                                                                                                                                                               | 507  | 424  | 0         | 83.6  | 64.1 | 69.8 | hypothetical protein CARUB_v10028610mg                | gbpln | Capsella rubella     | AT5G58230.1   Symbols: MS11, MEE70, ATMS11   Transducin/WD40 repeat-like superfamily protein   chr5:23556112-23557994 FORWARD LENGTH=424       | 507  | 424  | 0         | 83.6  | 63.7 | 70.2 |
| Rsa1.0_01162.1.g24108.t1 | ref XP_002862436.1  predicted protein [Arabidopsis lyrata subsp. lyrata]<br>gi 297307949 gb EFH38694.1  predicted protein [Arabidopsis lyrata subsp. lyrata]                                                                                                                                                                                                                           | 544  | 530  | 3.00E-39  | 97.4  | 20.6 | 28.7 | predicted protein                                     | gbpln | Arabidopsis lyrata   | AT2G07760.1   Symbols:   Zinc knuckle (CCHC-type) family protein   chr2:3584420-3586278 REVERSE LENGTH=530                                     | 544  | 530  | 1.00E-14  | 97.4  | 9.2  | 17.1 |
| Rsa1.0_01162.1.g24109.t1 | gb ABD65056.1  hypothetical protein 27.t00122 [Brassica oleracea]                                                                                                                                                                                                                                                                                                                      | 226  | 239  | 6.00E-18  | 105.8 | 23.9 | 31.4 | hypothetical protein 27.t00122                        | gbpln | Brassica oleracea    | #                                                                                                                                              | #    | #    | #         | #     | #    | #    |
| Rsa1.0_01162.1.g24110.t1 | db BAA97287.1  retroelement pol polyprotein-like [Arabidopsis thaliana]                                                                                                                                                                                                                                                                                                                | 191  | 1491 | 1.00E-29  | 780.6 | 31.4 | 42.4 | retroelement pol polyprotein-like                     | gbpln | Arabidopsis thaliana | #                                                                                                                                              | #    | #    | #         | #     | #    | #    |
| Rsa1.0_01162.1.g24111.t1 | ref XP_002864686.1  MADS-box protein [Arabidopsis lyrata subsp. lyrata]<br>gi 297310521 gb EFH40945.1  MADS-box protein [Arabidopsis lyrata subsp. lyrata]                                                                                                                                                                                                                             | 154  | 291  | 2.00E-22  | 189.0 | 47.4 | 64.3 | MADS-box protein                                      | gbpln | Arabidopsis lyrata   | AT5G60440.1   Symbols: AGL62   AGAMOUS-like 62   chr5:24306329-24307520 FORWARD LENGTH=299                                                     | 154  | 299  | 8.00E-24  | 194.2 | 50.6 | 68.2 |
| Rsa1.0_01162.1.g24112.t2 | ref XP_004292625.1  PREDICTED: uncharacterized protein LOC101299743 [Fragaria vesca subsp. vesca]                                                                                                                                                                                                                                                                                      | 204  | 746  | 6.00E-49  | 365.7 | 51.0 | 66.2 | PREDICTED: uncharacterized protein LOC101299743       | gbpln | Fragaria vesca       | AT5G33406.1   Symbols:   hAT dimerisation domain-containing protein / transposase-related   chr5:12676126-12678403 REVERSE LENGTH=509          | 204  | 509  | 3.00E-29  | 249.5 | 34.3 | 55.9 |
| Rsa1.0_01162.1.g24113.t1 | gb EOA13855.1  hypothetical protein CARUB_v10026958mg [Capsella rubella]                                                                                                                                                                                                                                                                                                               | 455  | 268  | 7.00E-97  | 58.9  | 41.3 | 47.0 | hypothetical protein CARUB_v10026958mg                | gbpln | Capsella rubella     | AT5G58530.1   Symbols:   Glutaredoxin family protein   chr5:23660428-23661249 FORWARD LENGTH=273                                               | 455  | 273  | 8.00E-98  | 60.0  | 40.9 | 46.8 |
| Rsa1.0_01162.1.g24114.t1 | ref XP_002864585.1  oxidoreductase [Arabidopsis lyrata subsp. lyrata]<br>gi 297310420 gb EFH40844.1  oxidoreductase [Arabidopsis lyrata subsp. lyrata]                                                                                                                                                                                                                                 | 347  | 348  | 1.00E-163 | 100.3 | 83.3 | 91.4 | oxidoreductase                                        | gbpln | Arabidopsis lyrata   | AT5G58660.1   Symbols:   2-oxoglutarate (2OG) and Fe(II)-dependent oxygenase superfamily protein   chr5:23701509-23703802 FORWARD LENGTH=352   | 347  | 352  | 1.00E-158 | 101.4 | 81.0 | 90.5 |
| Rsa1.0_01162.1.g24115.t1 | gb EOA30805.1  hypothetical protein CARUB_v10013949mg [Capsella rubella]                                                                                                                                                                                                                                                                                                               | 295  | 381  | 3.00E-30  | 129.2 | 28.5 | 33.2 | hypothetical protein CARUB_v10013949mg                | gbpln | Capsella rubella     | AT5G38670.1   Symbols:   Galactose oxidase/kelch repeat superfamily protein   chr5:15475786-15476871 FORWARD LENGTH=291                        | 295  | 291  | 2.00E-29  | 98.6  | 35.3 | 47.1 |
| Rsa1.0_01162.1.g24116.t1 | ref XP_002866283.1  ATPLC1 [Arabidopsis lyrata subsp. lyrata]<br>gi 297312118 gb EFH42542.1  ATPLC1 [Arabidopsis lyrata subsp. lyrata]                                                                                                                                                                                                                                                 | 578  | 563  | 0         | 97.4  | 84.8 | 90.3 | ATPLC1                                                | gbpln | Arabidopsis lyrata   | AT5G58670.1   Symbols: ATPLC1, ATPLC, PLC1   phospholipase C1   chr5:23704457-23706751 REVERSE LENGTH=561                                      | 578  | 561  | 0         | 97.1  | 83.2 | 89.4 |
| Rsa1.0_01162.1.g24117.t1 | gb EOA33134.1  hypothetical protein CARUB_v10016476mg [Capsella rubella]                                                                                                                                                                                                                                                                                                               | 329  | 354  | 1.00E-147 | 107.6 | 80.5 | 90.6 | hypothetical protein CARUB_v10016476mg                | gbpln | Capsella rubella     | AT3G01400.1   Symbols:   ARM repeat superfamily protein   chr3:151920-152987 FORWARD LENGTH=355                                                | 329  | 355  | 1.00E-149 | 107.9 | 81.8 | 91.2 |



|                          |                                                                                                                                                                                                                                                                                                                                                                                                                                                                                                                                             |     |      |          |       |      |      |                                           |       |                      |                                                                                                                                                |     |     |          |       |      |      |
|--------------------------|---------------------------------------------------------------------------------------------------------------------------------------------------------------------------------------------------------------------------------------------------------------------------------------------------------------------------------------------------------------------------------------------------------------------------------------------------------------------------------------------------------------------------------------------|-----|------|----------|-------|------|------|-------------------------------------------|-------|----------------------|------------------------------------------------------------------------------------------------------------------------------------------------|-----|-----|----------|-------|------|------|
| Rsa1.0_01164.1.g24133.t1 | gb AAG10817.1 AC011808.5 Putative retroelement polyprotein [Arabidopsis thaliana]                                                                                                                                                                                                                                                                                                                                                                                                                                                           | 215 | 1413 | 1.00E-36 | 657.2 | 36.7 | 44.7 | Putative retroelement polyprotein         | gbpln | Arabidopsis thaliana | #                                                                                                                                              | #   | #   | #        | #     | #    | #    |
| Rsa1.0_01164.1.g24134.t1 | gb EOA29780.1  hypothetical protein CARUB_v10012885mg [Capsella rubella]                                                                                                                                                                                                                                                                                                                                                                                                                                                                    | 493 | 1012 | 1.00E-84 | 205.3 | 37.1 | 45.8 | hypothetical protein CARUB_v10012885mg    | gbpln | Capsella rubella     | AT2G15900.1   Symbols:   Phox-associated domain:Phox-like,Sorting nexin, C-terminal   chr2:6927390-6932535 FORWARD LENGTH=994                  | 493 | 994 | 1.00E-86 | 201.6 | 33.5 | 38.9 |
| Rsa1.0_01164.1.g24135.t1 | ref XP_002882838.1  kinase family protein [Arabidopsis lyrata subsp. lyrata] gi 297328678 gb EFH59097.1  kinase family protein [Arabidopsis lyrata subsp. lyrata]                                                                                                                                                                                                                                                                                                                                                                           | 680 | 703  | 0        | 103.4 | 91.3 | 94.1 | kinase family protein                     | gbpln | Arabidopsis lyrata   | AT3G13670.1   Symbols:   Protein kinase family protein   chr3:4469434-4473234 FORWARD LENGTH=703                                               | 680 | 703 | 0        | 103.4 | 91.5 | 94.4 |
| Rsa1.0_01164.1.g24136.t1 | gb EOA32205.1  hypothetical protein CARUB_v10015462mg [Capsella rubella]                                                                                                                                                                                                                                                                                                                                                                                                                                                                    | 204 | 216  | 8.00E-87 | 105.9 | 77.5 | 88.2 | hypothetical protein CARUB_v10015462mg    | gbpln | Capsella rubella     | AT3G13672.1   Symbols:   TRAF-like superfamily protein   chr3:4473541-4474343 REVERSE LENGTH=216                                               | 204 | 216 | 1.00E-87 | 105.9 | 78.4 | 86.8 |
| Rsa1.0_01164.1.g24137.t1 | ref XP_002882840.1  kinase family protein [Arabidopsis lyrata subsp. lyrata] gi 297328680 gb EFH59099.1  kinase family protein [Arabidopsis lyrata subsp. lyrata]                                                                                                                                                                                                                                                                                                                                                                           | 691 | 752  | 0        | 108.8 | 88.3 | 91.8 | kinase family protein                     | gbpln | Arabidopsis lyrata   | AT3G13690.1   Symbols:   Protein kinase protein with adenine nucleotide alpha hydrolases-like domain   chr3:4486920-4490011 FORWARD LENGTH=753 | 691 | 753 | 0        | 109.0 | 88.1 | 91.9 |
| Rsa1.0_01164.1.g24138.t1 | gb AAF79353.1 AC007887_12 F15O4.27 [Arabidopsis thaliana]                                                                                                                                                                                                                                                                                                                                                                                                                                                                                   | 585 | 638  | 0        | 109.1 | 67.2 | 76.4 | F15O4.27                                  | gbpln | Arabidopsis thaliana | AT1G35610.1   Symbols:   Cysteine/Histidine-rich C1 domain family protein   chr1:13143150-13144988 REVERSE LENGTH=612                          | 585 | 612 | 0        | 104.6 | 67.2 | 76.4 |
| Rsa1.0_01164.1.g24139.t1 | gb AAF79353.1 AC007887_12 F15O4.27 [Arabidopsis thaliana]                                                                                                                                                                                                                                                                                                                                                                                                                                                                                   | 413 | 638  | 4.00E-78 | 154.5 | 39.5 | 48.2 | F15O4.27                                  | gbpln | Arabidopsis thaliana | AT1G35610.1   Symbols:   Cysteine/Histidine-rich C1 domain family protein   chr1:13143150-13144988 REVERSE LENGTH=612                          | 413 | 612 | 2.00E-80 | 148.2 | 39.5 | 48.2 |
| Rsa1.0_01164.1.g24140.t1 | gb EOA30083.1  hypothetical protein CARUB_v10013189mg [Capsella rubella]                                                                                                                                                                                                                                                                                                                                                                                                                                                                    | 638 | 641  | 0        | 100.5 | 97.0 | 97.6 | hypothetical protein CARUB_v10013189mg    | gbpln | Capsella rubella     | AT3G13772.1   Symbols: TMN7, AtTMN7   transmembrane nine 7   chr3:4521712-4524394 REVERSE LENGTH=641                                           | 638 | 641 | 0        | 100.5 | 97.3 | 98.0 |
| Rsa1.0_01164.1.g24141.t1 | ref XP_002882849.1  metallo-beta-lactamase family protein [Arabidopsis lyrata subsp. lyrata] gi 297328689 gb EFH59108.1  metallo-beta-lactamase family protein [Arabidopsis lyrata subsp. lyrata] ref XP_002882851.1  hypothetical protein ARALYDRAFT_478784 [Arabidopsis lyrata subsp. lyrata] gi 297328691 gb EFH59110.1  hypothetical protein ARALYDRAFT_478784 [Arabidopsis lyrata subsp. lyrata]                                                                                                                                       | 358 | 359  | 0        | 100.3 | 88.3 | 92.7 | metallo-beta-lactamase family protein     | gbpln | Arabidopsis lyrata   | AT3G13800.1   Symbols:   Metallo-hydrolase/oxidoreductase superfamily protein   chr3:4538879-4541366 FORWARD LENGTH=361                        | 358 | 361 | 0        | 100.8 | 86.9 | 92.5 |
| Rsa1.0_01164.1.g24142.t1 | hypothetical protein ARALYDRAFT_478784 [Arabidopsis lyrata subsp. lyrata]                                                                                                                                                                                                                                                                                                                                                                                                                                                                   | 506 | 507  | 0        | 100.2 | 81.2 | 87.7 | hypothetical protein ARALYDRAFT_478784    | gbpln | Arabidopsis lyrata   | AT3G13810.1   Symbols: AtIDD11, IDD11   indeterminate(ID)-domain 11   chr3:4544941-4547300 FORWARD LENGTH=513                                  | 506 | 513 | 0        | 101.4 | 80.6 | 87.2 |
| Rsa1.0_01165.1.g24143.t1 | gb AAB60771.1  F19K23.19 gene product [Arabidopsis thaliana]                                                                                                                                                                                                                                                                                                                                                                                                                                                                                | 207 | 486  | 7.00E-23 | 234.8 | 35.3 | 43.5 | F19K23.19 gene product                    | gbpln | Arabidopsis thaliana | #                                                                                                                                              | #   | #   | #        | #     | #    |      |
| Rsa1.0_01165.1.g24144.t1 | gb EOA34475.1  hypothetical protein CARUB_v10022015mg [Capsella rubella]                                                                                                                                                                                                                                                                                                                                                                                                                                                                    | 661 | 670  | 0        | 101.4 | 79.9 | 86.1 | hypothetical protein CARUB_v10022015mg    | gbpln | Capsella rubella     | AT1G70110.1   Symbols:   Concanavalin A-like lectin protein kinase family protein   chr1:26406238-26408323 REVERSE LENGTH=666                  | 661 | 666 | 0        | 100.8 | 75.0 | 84.0 |
| Rsa1.0_01165.1.g24145.t1 | ref XP_002887278.1  hypothetical protein ARALYDRAFT_316004 [Arabidopsis lyrata subsp. lyrata] gi 297333119 gb EFH63537.1  hypothetical protein ARALYDRAFT_316004 [Arabidopsis lyrata subsp. lyrata]                                                                                                                                                                                                                                                                                                                                         | 202 | 179  | 3.00E-64 | 88.6  | 59.9 | 68.3 | hypothetical protein ARALYDRAFT_316004    | gbpln | Arabidopsis lyrata   | AT1G70120.1   Symbols:   Protein of unknown function (DUF1163)   chr1:26408921-26409597 FORWARD LENGTH=193                                     | 202 | 193 | 5.00E-59 | 95.5  | 55.0 | 63.4 |
| Rsa1.0_01165.1.g24146.t1 | #                                                                                                                                                                                                                                                                                                                                                                                                                                                                                                                                           | #   | #    | #        | #     | #    | -    | ----                                      | ----  | ----                 | #                                                                                                                                              | #   | #   | #        | #     | #    |      |
| Rsa1.0_01165.1.g24147.t1 | ref NP_177168.1  concanavalin A-like lectin protein kinase [Arabidopsis thaliana] gi 75317843 sp O04534.1 LRK51_ARATH RecName: Full=Putative L-type lectin-domain containing receptor kinase V.1; Short=Arabidopsis thaliana lectin-receptor kinase b2; Short=AtLecRK-b2; Short=LecRK-V.1; Flags: Precursor gi 2194128 gb AAB61103.1  Strong similarity to Arabidopsis receptor-like kinase (gb ATLECGENE) and F20P5.15 [Arabidopsis thaliana] gi 332196900 gb AEE35021.1  concanavalin A-like lectin protein kinase [Arabidopsis thaliana] | 607 | 666  | 0        | 109.7 | 71.8 | 80.9 | concanavalin A-like lectin protein kinase | gbpln | Arabidopsis thaliana | AT1G70110.1   Symbols:   Concanavalin A-like lectin protein kinase family protein   chr1:26406238-26408323 REVERSE LENGTH=666                  | 607 | 666 | 0        | 109.7 | 71.8 | 80.9 |



|                           |                                                                                                                                                                                                                                                                                                                                                                                                                                                                                                                                                                                                                                                 |      |      |           |       |      |      |                                                                                                                                                     |       |                      |                                                                                                                                                                                                                                                                                                                                |      |      |           |       |      |      |
|---------------------------|-------------------------------------------------------------------------------------------------------------------------------------------------------------------------------------------------------------------------------------------------------------------------------------------------------------------------------------------------------------------------------------------------------------------------------------------------------------------------------------------------------------------------------------------------------------------------------------------------------------------------------------------------|------|------|-----------|-------|------|------|-----------------------------------------------------------------------------------------------------------------------------------------------------|-------|----------------------|--------------------------------------------------------------------------------------------------------------------------------------------------------------------------------------------------------------------------------------------------------------------------------------------------------------------------------|------|------|-----------|-------|------|------|
| Rsa1.0_01165.1.g24148.t3  | refXP_002311786.1  SIN3 component, histone deacetylase complex [Populus trichocarpa]<br>gi 222851606 gb EEE89153.1  SIN3 component, histone deacetylase complex [Populus trichocarpa]                                                                                                                                                                                                                                                                                                                                                                                                                                                           | 308  | 1343 | 7.00E-26  | 436.0 | 20.1 | 31.8 | SIN3 component, histone deacetylase complex                                                                                                         | gbpln | Populus trichocarpa  | AT1G58980.2   Symbols: SNL5   SIN3-like 5   chr1:22044326-22050670 FORWARD LENGTH=1167                                                                                                                                                                                                                                         | 308  | 1167 | 8.00E-26  | 378.9 | 18.8 | 28.2 |
| Rsa1.0_01165.1.g24149.t3  | # # # # # # #                                                                                                                                                                                                                                                                                                                                                                                                                                                                                                                                                                                                                                   | #    | #    | #         | #     | #    | #    | -                                                                                                                                                   | ----  | ----                 | #                                                                                                                                                                                                                                                                                                                              | #    | #    | #         | #     | #    | #    |
| Rsa1.0_01166.1.g24150.t1  | pir[[S65812 RNA-directed DNA polymerase (EC 2.7.7.49) (clone DW15) - Arabidopsis thaliana retrotransposon Ta11-1 gi 976278 gb AAA75254.1] reverse transcriptase [Arabidopsis thaliana]                                                                                                                                                                                                                                                                                                                                                                                                                                                          | 1402 | 1333 | 0         | 95.1  | 46.0 | 60.8 | RNA-directed DNA polymerase (EC 2.7.7.49) (clone DW15) - Arabidopsis thaliana retrotransposon Ta11-1 gi 976278 gb AAA75254.1] reverse transcriptase | gbpln | Arabidopsis thaliana | AT4G29090.1   Symbols:   Ribonuclease H-like superfamily protein   chr4:14333528-14335255 FORWARD LENGTH=575                                                                                                                                                                                                                   | 1402 | 575  | 5.00E-80  | 41.0  | 11.3 | 17.5 |
| Rsa1.0_01166.1.g24151.t1  | gb EOA40001.1  hypothetical protein CARUB_v10008691mg [Capsella rubella]                                                                                                                                                                                                                                                                                                                                                                                                                                                                                                                                                                        | 573  | 578  | 0         | 100.9 | 85.5 | 92.7 | hypothetical protein CARUB_v10008691mg                                                                                                              | gbpln | Capsella rubella     | AT1G11310.1   Symbols: MLO2, ATMLO2, PMR2   Seven transmembrane MLO family protein   chr1:3800899-3803870 REVERSE LENGTH=573                                                                                                                                                                                                   | 573  | 573  | 0         | 100.0 | 83.8 | 90.4 |
| Rsa1.0_01166.1.g24152.t1  | ref NP_172592.1  sugar transporter 1 [Arabidopsis thaliana]<br>gi 21542458 sp P23586.2 STP1_ARATH<br>RecName: Full= Sugar transport protein 1; AltName: Full=Glucose transporter; AltName: Full=Hexose transporter 1<br>gi 5734730 gb AAD49995.1 AC007259.8<br>glucose transporter [Arabidopsis thaliana] gi 15809962 gb AAL06908.1 <br>At1g11260/T28P6.18 [Arabidopsis thaliana] gi 16604673 gb AAL24129.1 <br>putative glucose transporter protein [Arabidopsis thaliana]<br>gi 22136870 gb AAM91779.1  putative glucose transporter protein [Arabidopsis thaliana] gi 332190584 gb AEE28705.1 <br>sugar transporter 1 [Arabidopsis thaliana] | 524  | 522  | 0         | 99.6  | 95.0 | 97.5 | sugar transporter 1                                                                                                                                 | gbpln | Arabidopsis thaliana | AT1G11260.1   Symbols: STP1, ATSTP1   sugar transporter 1   chr1:3777460-3780133 FORWARD LENGTH=522                                                                                                                                                                                                                            | 524  | 522  | 0         | 99.6  | 95.0 | 97.5 |
| Rsa1.0_01166.1.g24153.t1  | gb EOA36707.1  hypothetical protein CARUB_v10012241mg [Capsella rubella]                                                                                                                                                                                                                                                                                                                                                                                                                                                                                                                                                                        | 165  | 173  | 4.00E-42  | 104.8 | 63.0 | 75.8 | hypothetical protein CARUB_v10012241mg                                                                                                              | gbpln | Capsella rubella     | AT1G61340.1   Symbols:   F-box family protein   chr1:22628526-22629741 FORWARD LENGTH=185                                                                                                                                                                                                                                      | 165  | 185  | 3.00E-30  | 112.1 | 54.5 | 70.9 |
| Rsa1.0_01166.1.g24154.t1  | ref XP_002888093.1  SYP124 [Arabidopsis lyrata subsp. lyrata]<br>gi 297333934 gb EFH64352.1  SYP124 [Arabidopsis lyrata subsp. lyrata]                                                                                                                                                                                                                                                                                                                                                                                                                                                                                                          | 298  | 303  | 1.00E-159 | 101.7 | 91.6 | 96.3 | SYP124                                                                                                                                              | gbpln | Arabidopsis lyrata   | AT1G61290.1   Symbols: SYP124, ATSYP124   syntaxin of plants 124   chr1:22605188-22606216 FORWARD LENGTH=303                                                                                                                                                                                                                   | 298  | 303  | 1.00E-159 | 101.7 | 89.9 | 96.3 |
| Rsa1.0_01166.1.g24155.t1  | gb EOA37117.1  hypothetical protein CARUB_v10010339mg [Capsella rubella]                                                                                                                                                                                                                                                                                                                                                                                                                                                                                                                                                                        | 199  | 199  | 4.00E-61  | 100.0 | 75.9 | 85.9 | hypothetical protein CARUB_v10010339mg                                                                                                              | gbpln | Capsella rubella     | AT1G11240.1   Symbols:   CONTAINS InterPro DOMAIN/s: Nucleolar protein 12 (InterPro:IPRO19186); Has 2484 Blast hits to 1934 proteins in 262 species: Archae - 0; Bacteria - 90; Metazoa - 921; Fungi - 378; Plants - 144; Viruses - 18; Other Eukaryotes - 933 (source: NCBI BLINK).   chr1:3766936-3768212 REVERSE LENGTH=200 | 199  | 200  | 6.00E-63  | 100.5 | 77.9 | 86.4 |
| Rsa1.0_01166.1.g24156.t1  | gb AAD50002.1 AC007259_15 Unknown protein [Arabidopsis thaliana]                                                                                                                                                                                                                                                                                                                                                                                                                                                                                                                                                                                | 262  | 325  | 2.00E-60  | 124.0 | 57.6 | 69.8 | Unknown protein                                                                                                                                     | gbpln | Arabidopsis thaliana | AT1G11220.1   Symbols:   Protein of unknown function (DUF761)   chr1:3760022-3761165 REVERSE LENGTH=310                                                                                                                                                                                                                        | 262  | 310  | 8.00E-63  | 118.3 | 57.6 | 69.8 |
| Rsa1.0_01166.1.g24157.t1  | gb AAM65215.1  unknown [Arabidopsis thaliana]                                                                                                                                                                                                                                                                                                                                                                                                                                                                                                                                                                                                   | 293  | 308  | 2.00E-80  | 105.1 | 62.5 | 75.4 | unknown                                                                                                                                             | gbpln | Arabidopsis thaliana | AT1G11210.1   Symbols:   Protein of unknown function (DUF761)   chr1:3755876-3756911 REVERSE LENGTH=308                                                                                                                                                                                                                        | 293  | 308  | 1.00E-82  | 105.1 | 62.1 | 75.4 |
| Rsa1.0_01166.1.g24158.t22 | gb EOA40454.1  hypothetical protein CARUB_v10009178mg [Capsella rubella]                                                                                                                                                                                                                                                                                                                                                                                                                                                                                                                                                                        | 748  | 438  | 0         | 58.6  | 47.1 | 50.4 | hypothetical protein CARUB_v10009178mg                                                                                                              | gbpln | Capsella rubella     | AT1G11170.1   Symbols:   Protein of unknown function (DUF707)   chr1:3741724-3744459 FORWARD LENGTH=438                                                                                                                                                                                                                        | 748  | 438  | 0         | 58.6  | 47.3 | 49.7 |

|                          |                                                                                                                                                                                                                                                                                                                                                                                                                                                                                                                                                                                                                                                                                                                                                                                                                                                                                                                                                                                         |      |      |           |       |      |                                        |                                                                                     |                  |                                                                                                          |                                                                                                                                                                                                                                                                                                                                                                                                                                                                                       |      |           |          |       |      |      |
|--------------------------|-----------------------------------------------------------------------------------------------------------------------------------------------------------------------------------------------------------------------------------------------------------------------------------------------------------------------------------------------------------------------------------------------------------------------------------------------------------------------------------------------------------------------------------------------------------------------------------------------------------------------------------------------------------------------------------------------------------------------------------------------------------------------------------------------------------------------------------------------------------------------------------------------------------------------------------------------------------------------------------------|------|------|-----------|-------|------|----------------------------------------|-------------------------------------------------------------------------------------|------------------|----------------------------------------------------------------------------------------------------------|---------------------------------------------------------------------------------------------------------------------------------------------------------------------------------------------------------------------------------------------------------------------------------------------------------------------------------------------------------------------------------------------------------------------------------------------------------------------------------------|------|-----------|----------|-------|------|------|
| Rsa1.0_01166.1.g24159.t1 | ref[NP_172580.2] protein STRUBBELIG [Arabidopsis thaliana] gi 75158778 sp Q8RWZ1.1 SUB_ARATH RecName: Full=Protein STRUBBELIG; AltName: Full=Leucine-rich repeat receptor kinase-like protein SUB; AltName: Full=Protein SCRAMBLED; Flags: Precursor gi 33307660 gb AAQ03031.1 AF399923.1 LRR receptor kinase [Arabidopsis thaliana] gi 20259441 gb AAM14041.1  unknown protein [Arabidopsis thaliana] gi 2143621 gb AAM51393.1  unknown protein [Arabidopsis thaliana] gi 110742467 dbj BAE99152.1  LRR receptor-like protein kinase strubbelig [Arabidopsis thaliana] gi 224589388 gb ACN59228.1  leucine-rich repeat receptor-like protein kinase [Arabidopsis thaliana] gi 332190569 gb AEE28690.1  protein STRUBBELIG [Arabidopsis thaliana] ref[NP_197172.1] glycosyl hydrolase family 5 protein [Arabidopsis thaliana] gi 9755722 emb CAC01834.1  putative protein [Arabidopsis thaliana] gi 332004944 gb AED92327.1  glycosyl hydrolase family 5 protein [Arabidopsis thaliana] | 754  | 768  | 0         | 101.9 | 88.1 | 93.0                                   | protein STRUBBELIG                                                                  | gbpln            | Arabidopsis thaliana                                                                                     | AT1G11130.1   Symbols: SUB, SCM, SRF9   Leucine-rich repeat protein kinase family protein   chr1:3723135-3727178 FORWARD LENGTH=768                                                                                                                                                                                                                                                                                                                                                   | 754  | 768       | 0        | 101.9 | 88.1 | 93.0 |
| Rsa1.0_01167.1.g24160.t1 | ref[NP_197172.1] glycosyl hydrolase family 5 protein [Arabidopsis thaliana] gi 9755722 emb CAC01834.1  putative protein [Arabidopsis thaliana] gi 332004944 gb AED92327.1  glycosyl hydrolase family 5 protein [Arabidopsis thaliana]                                                                                                                                                                                                                                                                                                                                                                                                                                                                                                                                                                                                                                                                                                                                                   | 575  | 488  | 0         | 84.9  | 68.5 | 73.7                                   | glycosyl hydrolase family 5 protein                                                 | gbpln            | Arabidopsis thaliana                                                                                     | AT5G16700.1   Symbols:   Glycosyl hydrolase superfamily protein   chr5:5480763-5483045 FORWARD LENGTH=488                                                                                                                                                                                                                                                                                                                                                                             | 575  | 488       | 0        | 84.9  | 68.5 | 73.7 |
| Rsa1.0_01167.1.g24161.t1 | ref[XP_002892663.1] hypothetical protein ARALYDRAFT_312221 [Arabidopsis lyrata subsp. lyrata] gi 297338505 gb EFH68922.1  hypothetical protein ARALYDRAFT_312221 [Arabidopsis lyrata subsp. lyrata]                                                                                                                                                                                                                                                                                                                                                                                                                                                                                                                                                                                                                                                                                                                                                                                     | 165  | 383  | 8.00E-63  | 232.1 | 69.1 | 70.9                                   | hypothetical protein ARALYDRAFT_312221                                              | gbpln            | Arabidopsis lyrata                                                                                       | AT1G11920.1   Symbols:   Pectin lyase-like superfamily protein   chr1:4023667-4025097 REVERSE LENGTH=384                                                                                                                                                                                                                                                                                                                                                                              | 165  | 384       | 2.00E-63 | 232.7 | 67.3 | 69.7 |
| Rsa1.0_01167.1.g24162.t1 | gb EOA36500.1  hypothetical protein CARUB_v10011187mg [Capsella rubella]                                                                                                                                                                                                                                                                                                                                                                                                                                                                                                                                                                                                                                                                                                                                                                                                                                                                                                                | 372  | 385  | 1.00E-167 | 103.5 | 84.9 | hypothetical protein CARUB_v10011187mg | gbpln                                                                               | Capsella rubella | AT1G11920.1   Symbols:   Pectin lyase-like superfamily protein   chr1:4023667-4025097 REVERSE LENGTH=384 | 372                                                                                                                                                                                                                                                                                                                                                                                                                                                                                   | 384  | 1.00E-170 | 103.2    | 78.2  | 85.2 |      |
| Rsa1.0_01167.1.g24163.t1 | ref[XP_002889903.1] hypothetical protein ARALYDRAFT_471341 [Arabidopsis lyrata subsp. lyrata] gi 297338745 gb EFH6162.1  hypothetical protein ARALYDRAFT_471341 [Arabidopsis lyrata subsp. lyrata]                                                                                                                                                                                                                                                                                                                                                                                                                                                                                                                                                                                                                                                                                                                                                                                      | 136  | 329  | 4.00E-59  | 241.9 | 86.0 | 94.1                                   | hypothetical protein ARALYDRAFT_471341                                              | gbpln            | Arabidopsis lyrata                                                                                       | AT1G11915.1   Symbols:   unknown protein; FUNCTIONS IN: molecular function unknown; INVOLVED IN: biological process unknown; LOCATED IN: endomembrane system; EXPRESSED IN: root; BEST Arabidopsis thaliana protein match is: unknown protein (TAIR:AT3G17350.1); Has 261 Blast hits to 261 proteins in 13 species: Archae - 0; Bacteria - 0; Metazoa - 0; Fungi - 0; Plants - 261; Viruses - 0; Other Eukaryotes - 0 (source: NCBI BLINK).   chr1:4021830-4023084 FORWARD LENGTH=329 | 136  | 329       | 2.00E-60 | 241.9 | 83.8 | 93.4 |
| Rsa1.0_01167.1.g24164.t1 | ref[XP_002878123.1] OBP3-responsive gene 3 [Arabidopsis lyrata subsp. lyrata] gi 297323961 gb EFH54382.1  OBP3-responsive gene 3 [Arabidopsis lyrata subsp. lyrata]                                                                                                                                                                                                                                                                                                                                                                                                                                                                                                                                                                                                                                                                                                                                                                                                                     | 234  | 258  | 1.00E-70  | 110.3 | 64.5 | 78.6                                   | OBP3-responsive gene 3                                                              | gbpln            | Arabidopsis lyrata                                                                                       | AT3G56970.1   Symbols: BHLH038, ORG2   basic helix-loop-helix (bHLH) DNA-binding superfamily protein   chr3:21084204-21085094 REVERSE LENGTH=253                                                                                                                                                                                                                                                                                                                                      | 234  | 253       | 4.00E-73 | 108.1 | 61.1 | 76.1 |
| Rsa1.0_01167.1.g24165.t1 | dbj BAA97099.1  retroelement pol polyprotein-like [Arabidopsis thaliana]                                                                                                                                                                                                                                                                                                                                                                                                                                                                                                                                                                                                                                                                                                                                                                                                                                                                                                                | 281  | 1098 | 1.00E-41  | 390.7 | 37.4 | 53.7                                   | retroelement pol polyprotein-like                                                   | gbpln            | Arabidopsis thaliana                                                                                     | #                                                                                                                                                                                                                                                                                                                                                                                                                                                                                     | #    | #         | #        | #     | #    |      |
| Rsa1.0_01167.1.g24166.t1 | gb EOA29734.1  hypothetical protein CARUB_v10012821mg [Capsella rubella]                                                                                                                                                                                                                                                                                                                                                                                                                                                                                                                                                                                                                                                                                                                                                                                                                                                                                                                | 1333 | 1343 | 0         | 100.8 | 84.5 | 90.3                                   | hypothetical protein CARUB_v10012821mg                                              | gbpln            | Capsella rubella                                                                                         | AT3G23670.1   Symbols: PAKRP1L, KINESIN-12B   phragmoplast-associated kinesin-related protein, putative   chr3:8519290-8525055 FORWARD LENGTH=1313                                                                                                                                                                                                                                                                                                                                    | 1333 | 1313      | 0        | 98.5  | 84.2 | 90.0 |
| Rsa1.0_01167.1.g24167.t1 | gb ABD32665.1  Terpenoid cyclases/protein prenyltransferase alpha-alpha toroid; Bacterial adhesion [Medicago truncatula]                                                                                                                                                                                                                                                                                                                                                                                                                                                                                                                                                                                                                                                                                                                                                                                                                                                                | 285  | 426  | 1.00E-115 | 149.5 | 76.1 | 85.6                                   | Terpenoid cyclases/protein prenyltransferase alpha-alpha toroid; Bacterial adhesion | gbpln            | Medicago truncatula                                                                                      | AT2G13770.1   Symbols:   CONTAINS InterPro DOMAIN/s: Putative harbinger transposase-derived nuclease (InterPro:IPR006912); Has 451 Blast hits to 352 proteins in 33 species: Archae - 0; Bacteria - 0; Metazoa - 28; Fungi - 8; Plants - 388; Viruses - 0; Other Eukaryotes - 27 (source: NCBI BLINK).   chr2:5736603-5737847 FORWARD LENGTH=343                                                                                                                                      | 285  | 343       | 6.00E-36 | 120.4 | 31.6 | 42.8 |
| Rsa1.0_01167.1.g24168.t1 | #                                                                                                                                                                                                                                                                                                                                                                                                                                                                                                                                                                                                                                                                                                                                                                                                                                                                                                                                                                                       | #    | #    | #         | #     | #    | -                                      | ----                                                                                | ----             | #                                                                                                        | #                                                                                                                                                                                                                                                                                                                                                                                                                                                                                     | #    | #         | #        | #     | #    |      |
| Rsa1.0_01167.1.g24169.t1 | gb AAF79675.1 AC022314.16 F9C16.30 [Arabidopsis thaliana]                                                                                                                                                                                                                                                                                                                                                                                                                                                                                                                                                                                                                                                                                                                                                                                                                                                                                                                               | 618  | 1001 | 7.00E-55  | 162.0 | 22.8 | 31.7                                   | F9C16.30                                                                            | gbpln            | Arabidopsis thaliana                                                                                     | #                                                                                                                                                                                                                                                                                                                                                                                                                                                                                     | #    | #         | #        | #     | #    |      |
| Rsa1.0_01167.1.g24170.t1 | #                                                                                                                                                                                                                                                                                                                                                                                                                                                                                                                                                                                                                                                                                                                                                                                                                                                                                                                                                                                       | #    | #    | #         | #     | #    | -                                      | ----                                                                                | ----             | #                                                                                                        | #                                                                                                                                                                                                                                                                                                                                                                                                                                                                                     | #    | #         | #        | #     | #    |      |
| Rsa1.0_01168.1.g24171.t1 | #                                                                                                                                                                                                                                                                                                                                                                                                                                                                                                                                                                                                                                                                                                                                                                                                                                                                                                                                                                                       | #    | #    | #         | #     | #    | -                                      | ----                                                                                | ----             | #                                                                                                        | #                                                                                                                                                                                                                                                                                                                                                                                                                                                                                     | #    | #         | #        | #     | #    |      |

|                          |                                                                                                                                                                                                                                                                                                                                                                                                        |     |      |           |       |      |      |                                                            |                      |                                                                                                                                                                                                                                                           |     |     |           |       |      |      |
|--------------------------|--------------------------------------------------------------------------------------------------------------------------------------------------------------------------------------------------------------------------------------------------------------------------------------------------------------------------------------------------------------------------------------------------------|-----|------|-----------|-------|------|------|------------------------------------------------------------|----------------------|-----------------------------------------------------------------------------------------------------------------------------------------------------------------------------------------------------------------------------------------------------------|-----|-----|-----------|-------|------|------|
| Rsa1.0_01168.1.g24172.t1 | gb EOA29791.1  hypothetical protein CARUB_v10012886mg, partial [Capsella rubella]                                                                                                                                                                                                                                                                                                                      | 899 | 1011 | 0         | 112.5 | 77.0 | 84.4 | hypothetical protein CARUB_v10012886mg, gbpln partial      | Capsella rubella     | AT3G10310.1   Symbols:   P-loop nucleoside triphosphate hydrolases superfamily protein with CH (Calponin Homology) domain   chr3:3190208-3195005 FORWARD LENGTH=922                                                                                       | 899 | 922 | 0         | 102.6 | 73.6 | 81.0 |
| Rsa1.0_01168.1.g24173.t1 | ref NP_187746.1  cysteine/histidine-rich C1 domain-containing protein [Arabidopsis thaliana]   gi 12322904 gb AAG51442.1 AC008153_15 unknown protein; 12363-14495 [Arabidopsis thaliana]   gi 332641516 gb AEE75037.1  cysteine/histidine-rich C1 domain-containing protein [Arabidopsis thaliana]                                                                                                     | 738 | 710  | 0         | 96.2  | 47.8 | 54.5 | cysteine/histidine-rich C1 domain-containing protein gbpln | Arabidopsis thaliana | AT3G11390.1   Symbols:   Cysteine/Histidine-rich C1 domain family protein   chr3:3569828-3571960 FORWARD LENGTH=710                                                                                                                                       | 738 | 710 | 0         | 96.2  | 47.8 | 54.5 |
| Rsa1.0_01168.1.g24174.t1 | ref NP_187746.1  cysteine/histidine-rich C1 domain-containing protein [Arabidopsis thaliana]   gi 12322904 gb AAG51442.1 AC008153_15 unknown protein; 12363-14495 [Arabidopsis thaliana]   gi 332641516 gb AEE75037.1  cysteine/histidine-rich C1 domain-containing protein [Arabidopsis thaliana]                                                                                                     | 621 | 710  | 0         | 114.3 | 59.9 | 69.9 | cysteine/histidine-rich C1 domain-containing protein gbpln | Arabidopsis thaliana | AT3G11390.1   Symbols:   Cysteine/Histidine-rich C1 domain family protein   chr3:3569828-3571960 FORWARD LENGTH=710                                                                                                                                       | 621 | 710 | 0         | 114.3 | 59.9 | 69.9 |
| Rsa1.0_01168.1.g24175.t1 | ref XP_002882573.1  hypothetical protein ARALYDRAFT_478161 [Arabidopsis lyrata subsp. lyrata]   gi 297328413 gb EFH58832.1  hypothetical protein ARALYDRAFT_478161 [Arabidopsis lyrata subsp. lyrata]                                                                                                                                                                                                  | 311 | 315  | 1.00E-112 | 101.3 | 78.5 | 87.8 | hypothetical protein ARALYDRAFT_478161 gbpln               | Arabidopsis lyrata   | AT3G08600.1   Symbols:   Protein of unknown function (DUF1191)   chr3:2612646-2613596 FORWARD LENGTH=316                                                                                                                                                  | 311 | 316 | 1.00E-110 | 101.6 | 74.9 | 82.0 |
| Rsa1.0_01168.1.g24176.t1 | gb AAP21180.1  At3g08610 [Arabidopsis thaliana]                                                                                                                                                                                                                                                                                                                                                        | 65  | 73   | 1.00E-29  | 112.3 | 96.9 | 98.5 | At3g08610 gbpln                                            | Arabidopsis thaliana | AT3G08610.1   Symbols:   unknown protein; Has 40 Blast hits to 40 proteins in 15 species: Archae - 0; Bacteria - 0; Metazoa - 0; Fungi - 0; Plants - 40; Viruses - 0; Other Eukaryotes - 0 (source: NCBI BLink).   chr3:2616435-2616768 REVERSE LENGTH=65 | 65  | 65  | 3.00E-32  | 100.0 | 96.9 | 98.5 |
| Rsa1.0_01168.1.g24177.t1 | gb EOA30171.1  hypothetical protein CARUB_v10013288mg [Capsella rubella]                                                                                                                                                                                                                                                                                                                               | 597 | 595  | 0         | 99.7  | 92.0 | 96.1 | hypothetical protein CARUB_v10013288mg gbpln               | Capsella rubella     | AT3G08650.2   Symbols:   ZIP metal ion transporter family   chr3:2624694-2627308 REVERSE LENGTH=619                                                                                                                                                       | 597 | 619 | 0         | 103.7 | 92.1 | 96.0 |
| Rsa1.0_01168.1.g24178.t1 | ref NP_187478.1  phototropic-responsive NPH3-like protein [Arabidopsis thaliana]   gi 75262254 sp Q9C9Z0.1 Y3866_ARATH RecName: Full=Putative BTB/POZ domain-containing protein At3g08660   gi 12322729 gb AAG51353.1 AC012562_14 putative non-phototropic hypocotyl; 42053-44089 [Arabidopsis thaliana]   gi 332641139 gb AEE74660.1  phototropic-responsive NPH3-like protein [Arabidopsis thaliana] | 613 | 582  | 0         | 94.9  | 71.5 | 80.6 | phototropic-responsive NPH3-like protein gbpln             | Arabidopsis thaliana | AT3G08660.1   Symbols:   Phototropic-responsive NPH3 family protein   chr3:2631130-2633166 FORWARD LENGTH=582                                                                                                                                             | 613 | 582 | 0         | 94.9  | 71.5 | 80.6 |

|                          |                                                                                                                                                                                                                                                                                                                                                                                                                                                                                                                                                                                                                                                                                                                                                                                                                                                                                                                                                                                                                                                                                                                                                                                                                                                                                                                                                             |     |      |          |       |      |       |                                              |       |                      |                                                                                                                                               |     |      |          |       |      |       |
|--------------------------|-------------------------------------------------------------------------------------------------------------------------------------------------------------------------------------------------------------------------------------------------------------------------------------------------------------------------------------------------------------------------------------------------------------------------------------------------------------------------------------------------------------------------------------------------------------------------------------------------------------------------------------------------------------------------------------------------------------------------------------------------------------------------------------------------------------------------------------------------------------------------------------------------------------------------------------------------------------------------------------------------------------------------------------------------------------------------------------------------------------------------------------------------------------------------------------------------------------------------------------------------------------------------------------------------------------------------------------------------------------|-----|------|----------|-------|------|-------|----------------------------------------------|-------|----------------------|-----------------------------------------------------------------------------------------------------------------------------------------------|-----|------|----------|-------|------|-------|
|                          | ref NP_566331.1  ubiquitin-conjugating enzyme E2 11 [Arabidopsis thaliana] gi 334185174 ref NP_001189841.1  ubiquitin-conjugating enzyme E2 11 [Arabidopsis thaliana] gi 297829396 ref XP_002882580.1  ubiquitin-conjugating enzyme 11 [Arabidopsis lyrata subsp. lyrata] gi 12643427 sp P35134.2 UBC11_ARATH RecName: Full=Ubiquitin-conjugating enzyme E2 11; AltName: Full=Ubiquitin carrier protein 11; AltName: Full=Ubiquitin-conjugating enzyme E2-17 kDa 11; AltName: Full=Ubiquitin-protein ligase 11 gi 12322738 gb AAG51362.1 AC012562.23 putative ubiquitin conjugating enzyme; 52410-53412 [Arabidopsis thaliana] gi 17380790 gb AAL36225.1  putative E2 ubiquitin-conjugating enzyme UBC11 [Arabidopsis thaliana] gi 20259611 gb AAM14162.1  putative ubiquitin conjugating enzyme 11 (UBC11) [Arabidopsis thaliana] gi 21554241 gb AAM63316.1  E2 ubiquitin-conjugating enzyme UBC11 [Arabidopsis thaliana] gi 66354432 gb AAY44851.1  ubiquitinating enzyme [Arabidopsis thaliana] gi 110736468 dbj BAF00202.1  putative ubiquitin conjugating enzyme [Arabidopsis thaliana] gi 297328420 gb EFH58839.1  ubiquitin-conjugating enzyme 11 [Arabidopsis lyrata subsp. lyrata] ref XP_002882582.1  thioredoxin H-type 9 [Arabidopsis lyrata subsp. lyrata] gi 297328422 gb EFH58841.1  thioredoxin H-type 9 [Arabidopsis lyrata subsp. lyrata] | 148 | 148  | 8.00E-81 | 100.0 | 98.0 | 100.0 | ubiquitin-conjugating enzyme E2 11           | gbpln | Arabidopsis lyrata   | AT3G08690.2   Symbols: UBC11   ubiquitin-conjugating enzyme 11   chr3:2641487-2642489 FORWARD LENGTH=148                                      | 148 | 148  | 2.00E-83 | 100.0 | 98.0 | 100.0 |
| Rsa1.0_01168.1.g24179.t3 |                                                                                                                                                                                                                                                                                                                                                                                                                                                                                                                                                                                                                                                                                                                                                                                                                                                                                                                                                                                                                                                                                                                                                                                                                                                                                                                                                             |     |      |          |       |      |       |                                              |       |                      |                                                                                                                                               |     |      |          |       |      |       |
| Rsa1.0_01168.1.g24180.t1 |                                                                                                                                                                                                                                                                                                                                                                                                                                                                                                                                                                                                                                                                                                                                                                                                                                                                                                                                                                                                                                                                                                                                                                                                                                                                                                                                                             | 140 | 141  | 2.00E-70 | 100.7 | 89.3 | 97.9  | thioredoxin H-type 9                         | gbpln | Arabidopsis lyrata   | AT3G08710.2   Symbols: ATH9, TRX H9, TH9   thioredoxin H-type 9   chr3:2645590-2646304 FORWARD LENGTH=140                                     | 140 | 140  | 1.00E-71 | 100.0 | 88.6 | 97.1  |
| Rsa1.0_01168.1.g24181.t1 | gb EOA29639.1  hypothetical protein CARUB_v10014964mg [Capsella rubella]                                                                                                                                                                                                                                                                                                                                                                                                                                                                                                                                                                                                                                                                                                                                                                                                                                                                                                                                                                                                                                                                                                                                                                                                                                                                                    | 115 | 113  | 5.00E-36 | 98.3  | 62.6 | 78.3  | hypothetical protein CARUB_v10014964mg       | gbpln | Capsella rubella     | AT3G08770.1   Symbols: LTP6   lipid transfer protein 6   chr3:2664349-2664784 REVERSE LENGTH=113                                              | 115 | 113  | 8.00E-35 | 98.3  | 58.3 | 70.4  |
| Rsa1.0_01168.1.g24182.t2 | ref XP_002884699.1  D-alanine--D-alanine ligase family [Arabidopsis lyrata subsp. lyrata] gi 297330539 gb EFH60958.1  D-alanine--D-alanine ligase family [Arabidopsis lyrata subsp. lyrata]                                                                                                                                                                                                                                                                                                                                                                                                                                                                                                                                                                                                                                                                                                                                                                                                                                                                                                                                                                                                                                                                                                                                                                 | 975 | 943  | 0        | 96.7  | 80.5 | 86.5  | D-alanine--D-alanine ligase family           | gbpln | Arabidopsis lyrata   | AT3G08840.2   Symbols:   D-alanine--D-alanine ligase family   chr3:2679648-2686157 REVERSE LENGTH=937                                         | 975 | 937  | 0        | 96.1  | 80.2 | 86.5  |
| Rsa1.0_01169.1.g24183.t1 | gb AAF18630.1 AC006228.1 F5J5.1 [Arabidopsis thaliana]                                                                                                                                                                                                                                                                                                                                                                                                                                                                                                                                                                                                                                                                                                                                                                                                                                                                                                                                                                                                                                                                                                                                                                                                                                                                                                      | 183 | 1463 | 5.00E-62 | 799.5 | 57.9 | 69.9  | F5J5.1                                       | gbpln | Arabidopsis thaliana | AT4G23160.1   Symbols: CRK8   cysteine-rich RIK (RECEPTOR-like protein kinase) 8   chr4:12129485-12134086 FORWARD LENGTH=1262                 | 183 | 1262 | 9.00E-21 | 689.6 | 26.2 | 37.2  |
| Rsa1.0_01169.1.g24184.t4 | gb EOA23251.1  hypothetical protein CARUB_v10017299mg [Capsella rubella]                                                                                                                                                                                                                                                                                                                                                                                                                                                                                                                                                                                                                                                                                                                                                                                                                                                                                                                                                                                                                                                                                                                                                                                                                                                                                    | 468 | 431  | 3.00E-28 | 92.1  | 17.7 | 27.4  | hypothetical protein CARUB_v10017299mg       | gbpln | Capsella rubella     | #                                                                                                                                             | #   | #    | #        | #     | #    | #     |
| Rsa1.0_01169.1.g24185.t1 | ref XP_002884894.1  hypothetical protein ARALYDRAFT_897434 [Arabidopsis lyrata subsp. lyrata] gi 297330734 gb EFH61153.1  hypothetical protein ARALYDRAFT_897434 [Arabidopsis lyrata subsp. lyrata]                                                                                                                                                                                                                                                                                                                                                                                                                                                                                                                                                                                                                                                                                                                                                                                                                                                                                                                                                                                                                                                                                                                                                         | 152 | 435  | 1.00E-50 | 286.2 | 69.7 | 75.7  | hypothetical protein ARALYDRAFT_897434       | gbpln | Arabidopsis lyrata   | AT3G12230.1   Symbols: scpl14   serine carboxypeptidase-like 14   chr3:3899431-3901879 REVERSE LENGTH=435                                     | 152 | 435  | 1.00E-52 | 286.2 | 70.4 | 76.3  |
| Rsa1.0_01169.1.g24186.t1 | ref XP_002893642.1  hypothetical protein ARALYDRAFT_473306 [Arabidopsis lyrata subsp. lyrata] gi 297339484 gb EFH68901.1  hypothetical protein ARALYDRAFT_473306 [Arabidopsis lyrata subsp. lyrata]                                                                                                                                                                                                                                                                                                                                                                                                                                                                                                                                                                                                                                                                                                                                                                                                                                                                                                                                                                                                                                                                                                                                                         | 611 | 613  | 0        | 100.3 | 84.1 | 89.5  | hypothetical protein ARALYDRAFT_473306       | gbpln | Arabidopsis lyrata   | AT1G30755.1   Symbols:   Protein of unknown function (DUF668)   chr1:10905991-10908773 REVERSE LENGTH=615                                     | 611 | 615  | 0        | 100.7 | 82.0 | 87.7  |
| Rsa1.0_01169.1.g24187.t1 | #                                                                                                                                                                                                                                                                                                                                                                                                                                                                                                                                                                                                                                                                                                                                                                                                                                                                                                                                                                                                                                                                                                                                                                                                                                                                                                                                                           | #   | #    | #        | #     | #    | -     | ----                                         | ----  | ----                 | #                                                                                                                                             | #   | #    | #        | #     | #    | #     |
| Rsa1.0_01169.1.g24188.t1 | gb AAG51783.1 AC079679.3 reverse transcriptase, putative; 16838-20266 [Arabidopsis thaliana]                                                                                                                                                                                                                                                                                                                                                                                                                                                                                                                                                                                                                                                                                                                                                                                                                                                                                                                                                                                                                                                                                                                                                                                                                                                                | 358 | 1142 | 8.00E-45 | 319.0 | 34.1 | 50.3  | reverse transcriptase, putative; 16838-20266 | gbpln | Arabidopsis thaliana | AT4G29090.1   Symbols:   Ribonuclease H-like superfamily protein   chr4:14333528-14335255 FORWARD LENGTH=575                                  | 358 | 575  | 2.00E-21 | 160.6 | 13.4 | 19.3  |
| Rsa1.0_01169.1.g24189.t1 | gb EOA40128.1  hypothetical protein CARUB_v10008835mg [Capsella rubella]                                                                                                                                                                                                                                                                                                                                                                                                                                                                                                                                                                                                                                                                                                                                                                                                                                                                                                                                                                                                                                                                                                                                                                                                                                                                                    | 534 | 527  | 0        | 98.7  | 90.8 | 94.9  | hypothetical protein CARUB_v10008835mg       | gbpln | Capsella rubella     | AT1G30760.1   Symbols:   FAD-binding Berberine family protein   chr1:10918321-10920441 FORWARD LENGTH=534                                     | 534 | 534  | 0        | 100.0 | 91.4 | 96.3  |
| Rsa1.0_01169.1.g24190.t2 | gb ABD64964.1  hypothetical protein 25.t00001 [Brassica oleracea]                                                                                                                                                                                                                                                                                                                                                                                                                                                                                                                                                                                                                                                                                                                                                                                                                                                                                                                                                                                                                                                                                                                                                                                                                                                                                           | 509 | 1103 | 3.00E-35 | 216.7 | 15.7 | 18.5  | hypothetical protein 25.t00001               | gbpln | Brassica oleracea    | AT3G28570.1   Symbols:   P-loop containing nucleoside triphosphate hydrolases superfamily protein   chr3:10710534-10711889 FORWARD LENGTH=451 | 509 | 451  | 3.00E-26 | 88.6  | 12.0 | 14.5  |

|                          |                                                                                                                                                                                                                                                                                                                                                                                                                                                                         |      |      |           |       |      |      |                                                 |       |                      |                                                                                                                                           |      |      |           |       |      |      |
|--------------------------|-------------------------------------------------------------------------------------------------------------------------------------------------------------------------------------------------------------------------------------------------------------------------------------------------------------------------------------------------------------------------------------------------------------------------------------------------------------------------|------|------|-----------|-------|------|------|-------------------------------------------------|-------|----------------------|-------------------------------------------------------------------------------------------------------------------------------------------|------|------|-----------|-------|------|------|
| Rsa1.0_01169.1.g24191.t2 | ref NP_173766.1  uncharacterized protein [Arabidopsis thaliana] gi 8778585 gb AAF79593.1 AC007945_13 F28C11.15 [Arabidopsis thaliana] gi 4056435 gb AAC98008.1  Similar to OBP32pep protein gb U37698 from Arabidopsis thaliana [Arabidopsis thaliana] gi 332192277 gb AEE30398.1  uncharacterized protein AT1G23520 [Arabidopsis thaliana]                                                                                                                             | 247  | 263  | 6.00E-51  | 106.5 | 47.4 | 65.2 | uncharacterized protein                         | gbpln | Arabidopsis thaliana | AT1G23520.1   Symbols:   Domain of unknown function (DUF220)   chr1:8343571-8344675 REVERSE LENGTH=263                                    | 247  | 263  | 2.00E-53  | 106.5 | 47.4 | 65.2 |
| Rsa1.0_01169.1.g24192.t4 | # # # # # # # # # # # # # # # #                                                                                                                                                                                                                                                                                                                                                                                                                                         |      |      |           |       |      |      |                                                 |       |                      |                                                                                                                                           |      |      |           |       |      |      |
| Rsa1.0_01169.1.g24193.t2 | emb CAB10225.1  retrovirus-related like polyprotein [Arabidopsis thaliana] gi 7288152 emb CAB78488.1  retrovirus-related like polyprotein [Arabidopsis thaliana]                                                                                                                                                                                                                                                                                                        | 1262 | 1489 | 0         | 118.0 | 55.2 | 68.1 | retrovirus-related like polyprotein             | gbpln | Arabidopsis thaliana | AT4G23160.1   Symbols: CRK8   cysteine-rich RLK (RECEPTOR-like protein kinase) 8   chr4:12129485-12134086 FORWARD LENGTH=1262             | 1262 | 1262 | 2.00E-52  | 100.0 | 7.7  | 10.1 |
| Rsa1.0_01169.1.g24194.t1 | ref NP_173766.1  uncharacterized protein [Arabidopsis thaliana] gi 8778585 gb AAF79593.1 AC007945_13 F28C11.15 [Arabidopsis thaliana] gi 4056435 gb AAC98008.1  Similar to OBP32pep protein gb U37698 from Arabidopsis thaliana [Arabidopsis thaliana] gi 332192277 gb AEE30398.1  uncharacterized protein AT1G23520 [Arabidopsis thaliana]                                                                                                                             | 223  | 263  | 2.00E-48  | 117.9 | 53.4 | 69.5 | uncharacterized protein                         | gbpln | Arabidopsis thaliana | AT1G23520.1   Symbols:   Domain of unknown function (DUF220)   chr1:8343571-8344675 REVERSE LENGTH=263                                    | 223  | 263  | 7.00E-51  | 117.9 | 53.4 | 69.5 |
| Rsa1.0_01170.1.g24195.t1 | emb CAB39638.1  RNA-directed DNA polymerase-like protein [Arabidopsis thaliana] gi 7267666 emb CAB78094.1  RNA-directed DNA polymerase-like protein [Arabidopsis thaliana]                                                                                                                                                                                                                                                                                              | 1055 | 1274 | 0         | 120.8 | 48.0 | 63.8 | RNA-directed DNA polymerase-like protein        | gbpln | Arabidopsis thaliana | AT4G29090.1   Symbols:   Ribonuclease H-like superfamily protein   chr4:14333528-14335255 FORWARD LENGTH=575                              | 1055 | 575  | 4.00E-60  | 54.5  | 15.2 | 24.2 |
| Rsa1.0_01170.1.g24196.t1 | gb EOA19955.1  hypothetical protein CARUB_v10000205mg [Capsella rubella]                                                                                                                                                                                                                                                                                                                                                                                                | 863  | 855  | 0         | 99.1  | 77.5 | 85.2 | hypothetical protein CARUB_v10000205mg          | gbpln | Capsella rubella     | AT5G16630.2   Symbols: ATRAD4, RAD4   DNA repair protein Rad4 family   chr5:5455325-5459461 FORWARD LENGTH=865                            | 863  | 865  | 0         | 100.2 | 75.6 | 83.4 |
| Rsa1.0_01170.1.g24197.t2 | gb EOA20659.1  hypothetical protein CARUB_v10000974mg [Capsella rubella]                                                                                                                                                                                                                                                                                                                                                                                                | 454  | 441  | 0         | 97.1  | 80.6 | 85.5 | hypothetical protein CARUB_v10000974mg          | gbpln | Capsella rubella     | AT5G16620.1   Symbols: PDE120, TIC40, ATTIC40   hydroxyproline-rich glycoprotein family protein   chr5:5450808-5454256 FORWARD LENGTH=447 | 454  | 447  | 1.00E-179 | 98.5  | 81.9 | 87.0 |
| Rsa1.0_01170.1.g24198.t1 | ref NP_174394.1  F-box domain-containing protein [Arabidopsis thaliana] gi 75336888 sp Q9SA02.1 FB26_ARATH RecName: Full=F-box protein At g31080 gi 4512631 gb AAD21700.1  Contains similarity to gi 3249080 T13D8.24 MYB transcription factor homolog from A. thaliana BAC gb AC004473 [Arabidopsis thaliana] gi 67633404 gb AA78627.1  F-box family protein [Arabidopsis thaliana] gi 332193191 gb AEE31312.1  F-box domain-containing protein [Arabidopsis thaliana] | 314  | 355  | 8.00E-49  | 113.1 | 45.5 | 60.8 | F-box domain-containing protein                 | gbpln | Arabidopsis thaliana | AT1G31080.1   Symbols:   F-box family protein   chr1:11091832-11092899 FORWARD LENGTH=355                                                 | 314  | 355  | 2.00E-51  | 113.1 | 45.5 | 60.8 |
| Rsa1.0_01170.1.g24199.t1 | gb AAD32898.1  putative retroelement pol polyprotein [Arabidopsis thaliana]                                                                                                                                                                                                                                                                                                                                                                                             | 1398 | 1307 | 0         | 93.5  | 59.2 | 73.3 | putative retroelement pol polyprotein           | gbpln | Arabidopsis thaliana | AT4G23160.1   Symbols: CRK8   cysteine-rich RLK (RECEPTOR-like protein kinase) 8   chr4:12129485-12134086 FORWARD LENGTH=1262             | 1398 | 1262 | 5.00E-96  | 90.3  | 13.1 | 21.0 |
| Rsa1.0_01170.1.g24200.t1 | ref XP_002873779.1  rop-interactive crib motif-containing protein 4 [Arabidopsis lyrata subsp. lyrata] gi 297319616 gb EFH50038.1  rop-interactive crib motif-containing protein 4 [Arabidopsis lyrata subsp. lyrata]                                                                                                                                                                                                                                                   | 150  | 153  | 3.00E-59  | 102.0 | 82.7 | 90.0 | rop-interactive crib motif-containing protein 4 | gbpln | Arabidopsis lyrata   | AT5G16490.1   Symbols: RIC4   ROP-interactive CRIB motif-containing protein 4   chr5:5384468-5385205 REVERSE LENGTH=153                   | 150  | 153  | 2.00E-59  | 102.0 | 79.3 | 86.7 |
| Rsa1.0_01170.1.g24201.t1 | ref XP_002873778.1  hypothetical protein ARALYDRAFT_488502 [Arabidopsis lyrata subsp. lyrata] gi 297319615 gb EFH50037.1  hypothetical protein ARALYDRAFT_488502 [Arabidopsis lyrata subsp. lyrata]                                                                                                                                                                                                                                                                     | 208  | 203  | 1.00E-101 | 97.6  | 85.6 | 90.9 | hypothetical protein ARALYDRAFT_488502          | gbpln | Arabidopsis lyrata   | AT5G16480.1   Symbols:   Phosphotyrosine protein phosphatases superfamily protein   chr5:5381334-5382618 REVERSE LENGTH=204               | 208  | 204  | 1.00E-102 | 98.1  | 85.6 | 91.3 |
| Rsa1.0_01170.1.g24202.t1 | gb EOA31756.1  hypothetical protein CARUB_v10014973mg [Capsella rubella]                                                                                                                                                                                                                                                                                                                                                                                                | 115  | 107  | 2.00E-40  | 93.0  | 75.7 | 81.7 | hypothetical protein CARUB_v10014973mg          | gbpln | Capsella rubella     | AT3G15420.1   Symbols:   Transcription factor TFIIIC, tau55-related protein   chr3:5207704-5208289 REVERSE LENGTH=107                     | 115  | 107  | 3.00E-42  | 93.0  | 72.2 | 83.5 |

|                          |                                                                                                                                                                                                                                                                                                                                                                                                                                                                                                                                                                                                                                                      |     |      |           |       |      |      |                                                              |       |                      |                                                                                                                                           |     |      |           |       |      |      |
|--------------------------|------------------------------------------------------------------------------------------------------------------------------------------------------------------------------------------------------------------------------------------------------------------------------------------------------------------------------------------------------------------------------------------------------------------------------------------------------------------------------------------------------------------------------------------------------------------------------------------------------------------------------------------------------|-----|------|-----------|-------|------|------|--------------------------------------------------------------|-------|----------------------|-------------------------------------------------------------------------------------------------------------------------------------------|-----|------|-----------|-------|------|------|
| Rsa1.0_01170.1.g24203.t1 | ref XP_002884979.1  hypothetical protein ARALYDRAFT_897607 [Arabidopsis lyrata subsp. lyrata] gi 297330819 gb EFH61238.1  hypothetical protein ARALYDRAFT_897607 [Arabidopsis lyrata subsp. lyrata]                                                                                                                                                                                                                                                                                                                                                                                                                                                  | 380 | 398  | 1.00E-96  | 104.7 | 54.5 | 68.9 | hypothetical protein ARALYDRAFT_897607                       | gbpln | Arabidopsis lyrata   | AT3G13680.1   Symbols:   F-box and associated interaction domains-containing protein   chr3:4477534-4478721 REVERSE LENGTH=395            | 380 | 395  | 8.00E-97  | 103.9 | 54.7 | 68.7 |
| Rsa1.0_01170.1.g24204.t1 | ref NP_197151.1  C2H2 type zinc finger protein [Arabidopsis thaliana] gi 297807673 ref XP_002871720.1  zinc finger family protein [Arabidopsis lyrata subsp. lyrata] gi 9759129 dbj BAB09614.1  unnamed protein product [Arabidopsis thaliana] gi 27008636 gb AAO24598.1  At5g16470 [Arabidopsis thaliana] gi 110736298 dbj BAF00119.1  hypothetical protein [Arabidopsis thaliana] gi 297317557 gb EFH47979.1  zinc finger family protein [Arabidopsis lyrata subsp. lyrata] gi 332004914 gb AED92297.1  C2H2 type zinc finger protein [Arabidopsis thaliana] gi 482557657 gb EOA21849.1  hypothetical protein CARUB.v10002316mg [Capsella rubella] | 129 | 104  | 7.00E-44  | 80.6  | 77.5 | 78.3 | C2H2 type zinc finger protein                                | gbpln | Arabidopsis lyrata   | AT5G16470.1   Symbols:   zinc finger (C2H2 type) family protein   chr5:5379516-5379830 FORWARD LENGTH=104                                 | 129 | 104  | 2.00E-46  | 80.6  | 77.5 | 78.3 |
| Rsa1.0_01170.1.g24205.t1 | ref NP_197150.1  Putative adipose-regulatory protein (Seipin) [Arabidopsis thaliana] gi 9759128 dbj BA809613.1  unnamed protein product [Arabidopsis thaliana] gi 332004913 gb AED92296.1  Putative adipose-regulatory protein (Seipin) [Arabidopsis thaliana]                                                                                                                                                                                                                                                                                                                                                                                       | 357 | 368  | 1.00E-161 | 103.1 | 75.6 | 82.9 | Putative adipose-regulatory protein (Seipin)                 | gbpln | Arabidopsis thaliana | AT5G16460.1   Symbols:   Putative adipose-regulatory protein (Seipin)   chr5:5377085-5378533 REVERSE LENGTH=368                           | 357 | 368  | 1.00E-164 | 103.1 | 75.6 | 82.9 |
| Rsa1.0_01170.1.g24206.t1 | ref NP_001031891.1  defensin-like protein 24 [Arabidopsis thaliana] gi 122209268 sp Q2V371.1 DEF24 ARAT H RecName: Full=Defensin-like protein 24; Flags: Precursor                                                                                                                                                                                                                                                                                                                                                                                                                                                                                   | 85  | 88   | 7.00E-17  | 103.5 | 58.8 | 75.3 | defensin-like protein 24                                     | gbpln | Arabidopsis thaliana | AT5G16453.1   Symbols:   Defensin-like (DEFL) family protein   chr5:5375543-5375919 REVERSE LENGTH=88                                     | 85  | 88   | 1.00E-19  | 103.5 | 58.8 | 75.3 |
| Rsa1.0_01170.1.g24207.t1 | gi 113204464 gb AEI34025.1  unknown [Arabidopsis thaliana] gi 332004912 gb AED92295.1  defensin-like protein 24 [Arabidopsis thaliana] ref NP_197145.2  HXXXD-type acyl-transferase-like protein [Arabidopsis thaliana] gi 50233516 gb AAT71960.1  At5g16410 [Arabidopsis thaliana] gi 53950537 gb AAU95445.1  At5g16410 [Arabidopsis thaliana] gi 332004906 gb AED92289.1  HXXXD-type acyl-transferase-like protein [Arabidopsis thaliana]                                                                                                                                                                                                          | 456 | 480  | 0         | 105.3 | 78.1 | 86.2 | HXXXD-type acyl-transferase-like protein                     | gbpln | Arabidopsis thaliana | AT5G16410.1   Symbols:   HXXXD-type acyl-transferase family protein   chr5:5365685-5367383 REVERSE LENGTH=480                             | 456 | 480  | 0         | 105.3 | 78.1 | 86.2 |
| Rsa1.0_01170.1.g24208.t1 | ref NP_197144.1  thioredoxin F2 [Arabidopsis thaliana] gi 1135405 sp Q9XFH9.1 TRXF2_ARAT H RecName: Full=Thioredoxin F2; chloroplastic; Short=AtTrxF2; AltName: Full=Thioredoxin F1; Short=AtTrxF1; Flags: Precursor                                                                                                                                                                                                                                                                                                                                                                                                                                 | 188 | 185  | 1.00E-82  | 98.4  | 80.9 | 91.0 | thioredoxin F2                                               | gbpln | Arabidopsis thaliana | AT5G16400.1   Symbols: TRXF2, ATF2   thioredoxin F2   chr5:5363905-5365249 REVERSE LENGTH=185                                             | 188 | 185  | 5.00E-85  | 98.4  | 80.9 | 91.0 |
| Rsa1.0_01170.1.g24209.t1 | gi 4973254 gb AAD35004.1 AF144386_1 thioredoxin f2 [Arabidopsis thaliana] gi 13878187 gb AAK44171.1 AF370356_1 putative thioredoxin f2 protein [Arabidopsis thaliana] gi 9759122 dbj BAB09607.1  thioredoxin f2 [Arabidopsis thaliana] gi 16323396 gb AAL15192.1  putative thioredoxin f2 protein [Arabidopsis thaliana] gi 332004905 gb AED92288.1  thioredoxin F2 [Arabidopsis thaliana]                                                                                                                                                                                                                                                           | 278 | 276  | 1.00E-115 | 99.3  | 87.1 | 89.6 | chloroplast acetyl-CoA carboxylase biotin-containing subunit | gbpln | Brassica rapa        | AT5G16390.1   Symbols: CAC1A, CAC1A, BCCP, BCCP1   chloroplastic acetylcoenzyme A carboxylase 1   chr5:5361098-5363020 REVERSE LENGTH=280 | 278 | 280  | 1.00E-105 | 100.7 | 83.5 | 87.8 |
| Rsa1.0_01170.1.g24210.t9 | ref XP_002871712.1  hypothetical protein ARALYDRAFT_909607 [Arabidopsis lyrata subsp. lyrata] gi 297317549 gb EFH47971.1  hypothetical protein ARALYDRAFT_909607 [Arabidopsis lyrata subsp. lyrata]                                                                                                                                                                                                                                                                                                                                                                                                                                                  | 953 | 1030 | 0         | 108.1 | 64.1 | 71.5 | hypothetical protein ARALYDRAFT_909607                       | gbpln | Arabidopsis lyrata   | AT5G16270.1   Symbols: ATRAD21.3, SYN4   sister chromatid cohesion 1 protein 4   chr5:5316783-5322330 FORWARD LENGTH=1031                 | 953 | 1031 | 0         | 108.2 | 62.9 | 69.8 |

|                          |                                                                                                                                                                                                                                                                                                                                                                                                                                                                                                                                                                                                                                                                                                                                                                                                                                                                                                                                                                                                                                                                                                                                                                                                                                                                    |      |     |           |       |      |      |                                          |       |                      |                                                                                                                                                                  |      |     |          |       |      |      |
|--------------------------|--------------------------------------------------------------------------------------------------------------------------------------------------------------------------------------------------------------------------------------------------------------------------------------------------------------------------------------------------------------------------------------------------------------------------------------------------------------------------------------------------------------------------------------------------------------------------------------------------------------------------------------------------------------------------------------------------------------------------------------------------------------------------------------------------------------------------------------------------------------------------------------------------------------------------------------------------------------------------------------------------------------------------------------------------------------------------------------------------------------------------------------------------------------------------------------------------------------------------------------------------------------------|------|-----|-----------|-------|------|------|------------------------------------------|-------|----------------------|------------------------------------------------------------------------------------------------------------------------------------------------------------------|------|-----|----------|-------|------|------|
| Rsa1.0_01170.1.g24211.t2 | ref[XP_002871711.1] RNA recognition motif-containing protein [Arabidopsis lyrata subsp. lyrata] gi 297317548 gb EFH47970.1  RNA recognition motif-containing protein [Arabidopsis lyrata subsp. lyrata]                                                                                                                                                                                                                                                                                                                                                                                                                                                                                                                                                                                                                                                                                                                                                                                                                                                                                                                                                                                                                                                            | 494  | 519 | 2.00E-40  | 105.1 | 15.6 | 19.0 | RNA recognition motif-containing protein | gbpln | Arabidopsis lyrata   | AT5G16260.1   Symbols: ELF9   RNA binding (RRM/RBD/RNP motifs) family protein   chr5:5311363-5115496 FORWARD LENGTH=519                                          | 494  | 519 | 2.00E-42 | 105.1 | 15.4 | 19.0 |
| Rsa1.0_01170.1.g24212.t1 | gb AAF79687.1 AC022314.28 F9C16.9 [Arabidopsis thaliana]                                                                                                                                                                                                                                                                                                                                                                                                                                                                                                                                                                                                                                                                                                                                                                                                                                                                                                                                                                                                                                                                                                                                                                                                           | 258  | 946 | 6.00E-42  | 366.7 | 39.1 | 53.1 | F9C16.9                                  | gbpln | Arabidopsis thaliana | #                                                                                                                                                                | #    | #   | #        | #     | #    |      |
| Rsa1.0_01170.1.g24213.t1 | gb ABD64950.1 GRF zinc finger containing protein [Brassica oleracea]                                                                                                                                                                                                                                                                                                                                                                                                                                                                                                                                                                                                                                                                                                                                                                                                                                                                                                                                                                                                                                                                                                                                                                                               | 136  | 180 | 2.00E-56  | 132.4 | 77.9 | 86.8 | GRF zinc finger containing protein       | gbpln | Brassica oleracea    | AT5G15690.1   Symbols:   zinc ion binding   chr5:5113823-5114402 REVERSE LENGTH=169                                                                              | 136  | 169 | 1.00E-11 | 124.3 | 25.0 | 36.0 |
| Rsa1.0_01170.1.g24214.t7 | gb EOA19955.1 hypothetical protein CARUB_v10000205mg [Capsella rubella]                                                                                                                                                                                                                                                                                                                                                                                                                                                                                                                                                                                                                                                                                                                                                                                                                                                                                                                                                                                                                                                                                                                                                                                            | 556  | 855 | 0         | 153.8 | 76.3 | 83.6 | hypothetical protein CARUB_v10000205mg   | gbpln | Capsella rubella     | AT5G16630.2   Symbols: ATRAD4, RAD4   DNA repair protein Rad4 family   chr5:5455325-5459461 FORWARD LENGTH=865                                                   | 556  | 865 | 0        | 155.6 | 71.8 | 80.0 |
| Rsa1.0_01171.1.g24215.t1 | gb EOA35357.1 hypothetical protein CARUB_v10020551mg [Capsella rubella]                                                                                                                                                                                                                                                                                                                                                                                                                                                                                                                                                                                                                                                                                                                                                                                                                                                                                                                                                                                                                                                                                                                                                                                            | 357  | 354 | 0         | 99.2  | 93.3 | 96.4 | hypothetical protein CARUB_v10020551mg   | gbpln | Capsella rubella     | AT1G79430.2   Symbols: APL, WDY   Homeodomain-like superfamily protein   chr1:29877521-29879135 REVERSE LENGTH=358                                               | 357  | 358 | 0        | 100.3 | 95.0 | 96.9 |
| Rsa1.0_01171.1.g24216.t1 | ref[NP_178062.1] succinate-semialdehyde dehydrogenase [Arabidopsis thaliana] gi 118575126 sp Q9SAK4.2 SSDH_ARAT H RecName: Full=Succinate-semialdehyde dehydrogenase, mitochondrial; Short=At-SSADH1; AltName: Full=Aldehyde dehydrogenase family 5 member F1; AltName: Full=NAD(+)-dependent succinic semialdehyde dehydrogenase; Flags: Precursor gi 6684442 gb AAF23590.1 AF117335.1 succinic semialdehyde dehydrogenase [Arabidopsis thaliana] gi 16226915 gb AAL16297.1 AF428367.1 At1g79440/TBK14.14 [Arabidopsis thaliana] gi 15810165 gb AAL07226.1 putative succinic semialdehyde dehydrogenase gabD [Arabidopsis thaliana] gi 332198122 gb AEE36243.1 succinate-semialdehyde dehydrogenase [Arabidopsis thaliana] ref[NP_178064.1] Ent-kaur-16-ene synthase [Arabidopsis thaliana] gi 62900442 sp Q9SAK2.1 KSB_ARATH RecName: Full=Ent-kaur-16-ene synthase, chloroplastic; AltName: Full=Ent-kaurene synthase; Short=AtKS; AltName: Full=Ent-kaurene synthase B; Short=KSB; AltName: Full=Protein GA REQUIRING 2; Flags: Precursor gi 4835764 gb AAD30231.1 AC007202_13 Identical to gb AF034774 ent-kaurene synthase (GA2) from Arabidopsis thaliana [Arabidopsis thaliana] gi 332198125 gb AEE36246.1 Ent-kaur-16-ene synthase [Arabidopsis thaliana] | 514  | 528 | 0         | 102.7 | 91.4 | 96.1 | succinate-semialdehyde dehydrogenase     | gbpln | Arabidopsis thaliana | AT1G79440.1   Symbols: ALDH5F1, SSADH1, SSADH   aldehyde dehydrogenase 5F1   chr1:29882525-29887275 REVERSE LENGTH=528                                           | 514  | 528 | 0        | 102.7 | 91.4 | 96.1 |
| Rsa1.0_01171.1.g24217.t3 | ref[NP_178064.1] Ent-kaur-16-ene synthase [Arabidopsis thaliana] gi 62900442 sp Q9SAK2.1 KSB_ARATH RecName: Full=Ent-kaur-16-ene synthase, chloroplastic; AltName: Full=Ent-kaurene synthase; Short=AtKS; AltName: Full=Ent-kaurene synthase B; Short=KSB; AltName: Full=Protein GA REQUIRING 2; Flags: Precursor gi 4835764 gb AAD30231.1 AC007202_13 Identical to gb AF034774 ent-kaurene synthase (GA2) from Arabidopsis thaliana [Arabidopsis thaliana] gi 332198125 gb AEE36246.1 Ent-kaur-16-ene synthase [Arabidopsis thaliana]                                                                                                                                                                                                                                                                                                                                                                                                                                                                                                                                                                                                                                                                                                                             | 1178 | 785 | 0         | 66.6  | 55.6 | 60.9 | Ent-kaur-16-ene synthase                 | gbpln | Arabidopsis thaliana | AT1G79460.1   Symbols: GA2, KS, ATKS, ATKS1, KS1   Terpenoid cyclases/Protein prenyltransferases superfamily protein   chr1:29890568-29894436 FORWARD LENGTH=785 | 1178 | 785 | 0        | 66.6  | 55.6 | 60.9 |
| Rsa1.0_01171.1.g24218.t1 | gb EOA35064.1 hypothetical protein CARUB_v10020175mg [Capsella rubella]                                                                                                                                                                                                                                                                                                                                                                                                                                                                                                                                                                                                                                                                                                                                                                                                                                                                                                                                                                                                                                                                                                                                                                                            | 503  | 503 | 0         | 100.0 | 92.2 | 96.6 | hypothetical protein CARUB_v10020175mg   | gbpln | Capsella rubella     | AT1G79470.1   Symbols:   Aldolase-type TIM barrel family protein   chr1:29894772-29896661 REVERSE LENGTH=503                                                     | 503  | 503 | 0        | 100.0 | 91.3 | 96.0 |
| Rsa1.0_01171.1.g24219.t2 | ref[XP_002889247.1] hypothetical protein ARALYDRAFT_477115 [Arabidopsis lyrata subsp. lyrata] gi 297335088 gb EFH65506.1 hypothetical protein ARALYDRAFT_477115 [Arabidopsis lyrata subsp. lyrata]                                                                                                                                                                                                                                                                                                                                                                                                                                                                                                                                                                                                                                                                                                                                                                                                                                                                                                                                                                                                                                                                 | 402  | 386 | 1.00E-124 | 96.0  | 75.4 | 82.3 | hypothetical protein ARALYDRAFT_477115   | gbpln | Arabidopsis lyrata   | AT1G79480.1   Symbols:   Carbohydrate-binding X3 domain superfamily protein   chr1:29897905-29899267 REVERSE LENGTH=397                                          | 402  | 397 | 3.00E-68 | 98.8  | 39.1 | 41.5 |
| Rsa1.0_01171.1.g24220.t1 | ref[NP_178070.2] Cation efflux family protein [Arabidopsis thaliana] gi 310947336 sp Q9SAJ7.2 MTP9_ARAT H RecName: Full=Metal tolerance protein 9; Short=AtMTP9 gi 332198137 gb AEE36258.1 Cation efflux family protein [Arabidopsis thaliana]                                                                                                                                                                                                                                                                                                                                                                                                                                                                                                                                                                                                                                                                                                                                                                                                                                                                                                                                                                                                                     | 401  | 402 | 0         | 100.2 | 92.5 | 94.8 | Cation efflux family protein             | gbpln | Arabidopsis thaliana | AT1G79520.1   Symbols:   Cation efflux family protein   chr1:29912369-29914515 REVERSE LENGTH=402                                                                | 401  | 402 | 0        | 100.2 | 92.5 | 94.8 |

|                          |                                                                                                                                                                                                                 |      |      |           |       |      |      |                                                 |       |                      |                                                                                                                                                                                                                                                                                                                                                                      |      |      |           |       |      |       |
|--------------------------|-----------------------------------------------------------------------------------------------------------------------------------------------------------------------------------------------------------------|------|------|-----------|-------|------|------|-------------------------------------------------|-------|----------------------|----------------------------------------------------------------------------------------------------------------------------------------------------------------------------------------------------------------------------------------------------------------------------------------------------------------------------------------------------------------------|------|------|-----------|-------|------|-------|
| Rsa1.0_01171.1.g24221.t1 | refXP_002889252.1   pentatricopeptide repeat-containing protein [Arabidopsis lyrata subsp. lyrata]   gi 297335093 gb EFH6551.1   pentatricopeptide repeat-containing protein [Arabidopsis lyrata subsp. lyrata] | 786  | 780  | 0         | 99.2  | 84.1 | 91.3 | pentatricopeptide repeat-containing protein     | gbpln | Arabidopsis lyrata   | AT1G79540.1   Symbols:   Pentatricopeptide repeat (PPR) superfamily protein   chr1:29920334-29922676 REVERSE LENGTH=780                                                                                                                                                                                                                                              | 786  | 780  | 0         | 99.2  | 84.7 | 91.7  |
| Rsa1.0_01171.1.g24222.t1 | gb EOA35321.1  hypothetical protein CARUB_v10020504mg [Capsella rubella]                                                                                                                                        | 355  | 368  | 1.00E-163 | 103.7 | 88.5 | 92.1 | hypothetical protein CARUB_v10020504mg          | gbpln | Capsella rubella     | AT1G79580.3   Symbols: SMB   NAC (No Apical Meristem) domain transcriptional regulator superfamily protein   chr1:29941020-29942925 REVERSE LENGTH=371                                                                                                                                                                                                               | 355  | 371  | 1.00E-152 | 104.5 | 87.3 | 91.3  |
| Rsa1.0_01171.1.g24223.t1 | refXP_002887794.1   hypothetical protein ARALYDRAFT_477131 [Arabidopsis lyrata subsp. lyrata]   gi 297333635 gb EFH64053.1   hypothetical protein ARALYDRAFT_477131 [Arabidopsis lyrata subsp. lyrata]          | 230  | 233  | 1.00E-120 | 101.3 | 93.0 | 97.8 | hypothetical protein ARALYDRAFT_477131          | gbpln | Arabidopsis lyrata   | AT1G79590.2   Symbols: SYP52, ATSYP52   syntaxin of plants 52   chr1:29947064-29948304 FORWARD LENGTH=233                                                                                                                                                                                                                                                            | 230  | 233  | 1.00E-120 | 101.3 | 92.2 | 96.1  |
| Rsa1.0_01172.1.g24224.t1 | #                                                                                                                                                                                                               | #    | #    | #         | #     | #    | #    | -                                               | ----  | ----                 | #                                                                                                                                                                                                                                                                                                                                                                    | #    | #    | #         | #     | #    |       |
| Rsa1.0_01172.1.g24225.t1 | refXP_002881497.1   hypothetical protein ARALYDRAFT_482714 [Arabidopsis lyrata subsp. lyrata]   gi 297327336 gb EFH57756.1   hypothetical protein ARALYDRAFT_482714 [Arabidopsis lyrata subsp. lyrata]          | 279  | 289  | 1.00E-108 | 103.6 | 80.6 | 84.9 | hypothetical protein ARALYDRAFT_482714          | gbpln | Arabidopsis lyrata   | AT2G37220.1   Symbols:   RNA-binding (RRM/RBD/RNP motifs) family protein   chr2:15634980-15636331 REVERSE LENGTH=289                                                                                                                                                                                                                                                 | 279  | 289  | 1.00E-107 | 103.6 | 79.9 | 84.9  |
| Rsa1.0_01172.1.g24226.t1 | refXP_002879658.1   ADK/ATPADK1 [Arabidopsis lyrata subsp. lyrata]   gi 297325497 gb EFH55917.1   ADK/ATPADK1 [Arabidopsis lyrata subsp. lyrata]                                                                | 285  | 284  | 1.00E-151 | 99.6  | 93.7 | 96.1 | ADK/ATPADK1                                     | gbpln | Arabidopsis lyrata   | AT2G37250.1   Symbols: ADK, ATPADK1   adenosine kinase   chr2:15641991-15643318 FORWARD LENGTH=284                                                                                                                                                                                                                                                                   | 285  | 284  | 1.00E-149 | 99.6  | 90.9 | 95.1  |
| Rsa1.0_01172.1.g24227.t1 | gb EOA27796.1  hypothetical protein CARUB_v10023948mg, partial [Capsella rubella]                                                                                                                               | 207  | 241  | 1.00E-116 | 116.4 | 98.6 | 99.5 | hypothetical protein CARUB_v10023948mg, partial | gbpln | Capsella rubella     | AT2G37270.2   Symbols: ATRPS5B, RPS5B   ribosomal protein 5B   chr2:15647883-15649042 REVERSE LENGTH=207                                                                                                                                                                                                                                                             | 207  | 207  | 1.00E-118 | 100.0 | 98.1 | 100.0 |
| Rsa1.0_01172.1.g24228.t2 | refXP_002879660.1   predicted protein [Arabidopsis lyrata subsp. lyrata]   gi 297325499 gb EFH55919.1   predicted protein [Arabidopsis lyrata subsp. lyrata]                                                    | 1399 | 1424 | 0         | 101.8 | 83.2 | 90.4 | predicted protein                               | gbpln | Arabidopsis lyrata   | AT2G37280.1   Symbols: PDR5, ATPDR5   pleiotropic drug resistance 5   chr2:15650400-15656417 FORWARD LENGTH=1413                                                                                                                                                                                                                                                     | 1399 | 1413 | 0         | 101.0 | 83.1 | 89.9  |
| Rsa1.0_01172.1.g24229.t1 | gb EOA27940.1  hypothetical protein CARUB_v10024110mg [Capsella rubella]                                                                                                                                        | 166  | 194  | 1.00E-43  | 116.9 | 72.3 | 81.3 | hypothetical protein CARUB_v10024110mg          | gbpln | Capsella rubella     | AT2G37300.1   Symbols:   unknown protein; Has 93 Blast hits to 62 proteins in 29 species: Archaea - 0; Bacteria - 6; Metazoa - 13; Fungi - 19; Plants - 25; Viruses - 0; Other Eukaryotes - 30 (source: NCBI BLINK).   chr2:15662845-15663547 REVERSE LENGTH=169                                                                                                     | 166  | 169  | 5.00E-40  | 101.8 | 71.1 | 77.7  |
| Rsa1.0_01172.1.g24230.t1 | gb EOA26355.1  hypothetical protein CARUB_v10022801mg [Capsella rubella]                                                                                                                                        | 652  | 656  | 0         | 100.6 | 86.2 | 93.1 | hypothetical protein CARUB_v10022801mg          | gbpln | Capsella rubella     | AT2G37310.1   Symbols:   Pentatricopeptide repeat (PPR) superfamily protein   chr2:15665102-15667075 REVERSE LENGTH=657                                                                                                                                                                                                                                              | 652  | 657  | 0         | 100.8 | 85.0 | 93.1  |
| Rsa1.0_01172.1.g24231.t1 | gb EOA27537.1  hypothetical protein CARUB_v10023676mg, partial [Capsella rubella]                                                                                                                               | 273  | 313  | 1.00E-137 | 114.7 | 93.0 | 97.1 | hypothetical protein CARUB_v10023676mg, partial | gbpln | Capsella rubella     | AT2G37330.1   Symbols: ALS3   aluminum sensitive 3   chr2:15669190-15670172 FORWARD LENGTH=273                                                                                                                                                                                                                                                                       | 273  | 273  | 1.00E-136 | 100.0 | 90.1 | 95.6  |
| Rsa1.0_01172.1.g24232.t1 | gb EOA28485.1  hypothetical protein CARUB_v10024695mg [Capsella rubella]                                                                                                                                        | 744  | 753  | 0         | 101.2 | 89.0 | 93.7 | hypothetical protein CARUB_v10024695mg          | gbpln | Capsella rubella     | AT2G37360.1   Symbols:   ABC-2 type transporter family protein   chr2:15673555-15675822 REVERSE LENGTH=755                                                                                                                                                                                                                                                           | 744  | 755  | 0         | 101.5 | 85.8 | 92.3  |
| Rsa1.0_01172.1.g24233.t9 | gb EOA29128.1  hypothetical protein CARUB_v10025396mg [Capsella rubella]                                                                                                                                        | 678  | 679  | 0         | 100.1 | 83.3 | 89.2 | hypothetical protein CARUB_v10025396mg          | gbpln | Capsella rubella     | AT2G37370.1   Symbols:   unknown protein; BEST Arabidopsis thaliana protein match is: unknown protein (TAIR:AT5G13560.1); Has 30201 Blast hits to 17322 proteins in 780 species: Archaea - 12; Bacteria - 1396; Metazoa - 17338; Fungi - 3422; Plants - 5037; Viruses - 0; Other Eukaryotes - 2996 (source: NCBI BLINK).   chr2:15679273-15682932 FORWARD LENGTH=669 | 678  | 669  | 0         | 98.7  | 82.2 | 87.6  |
| Rsa1.0_01172.1.g24234.t1 | refNP_001189699.1   Chloroplast-targeted copper chaperone protein [Arabidopsis thaliana]   gi 330254298 gb AE09392.1   Chloroplast-targeted copper chaperone protein [Arabidopsis thaliana]                     | 267  | 258  | 2.00E-97  | 96.6  | 71.9 | 81.6 | Chloroplast-targeted copper chaperone protein   | gbpln | Arabidopsis thaliana | AT2G37390.2   Symbols: NAKR2   Chloroplast-targeted copper chaperone protein   chr2:15694300-15695461 FORWARD LENGTH=258                                                                                                                                                                                                                                             | 267  | 258  | 1.00E-100 | 96.6  | 71.9 | 81.6  |
| Rsa1.0_01172.1.g24235.t1 | refXP_002881505.1   hypothetical protein ARALYDRAFT_482732 [Arabidopsis lyrata subsp. lyrata]   gi 297327344 gb EFH57764.1   hypothetical protein ARALYDRAFT_482732 [Arabidopsis lyrata subsp. lyrata]          | 334  | 334  | 1.00E-134 | 100.0 | 79.0 | 86.5 | hypothetical protein ARALYDRAFT_482732          | gbpln | Arabidopsis lyrata   | AT2G37400.1   Symbols:   Tetratricopeptide repeat (TPR)-like superfamily protein   chr2:15696365-15697366 REVERSE LENGTH=333                                                                                                                                                                                                                                         | 334  | 333  | 1.00E-129 | 99.7  | 75.4 | 83.5  |



|                          |                                                                                                                                                                                                                                                                         |      |      |           |       |      |      |                                              |       |                      |                                                                                                                                                                                                                                                                                     |      |      |           |       |      |      |
|--------------------------|-------------------------------------------------------------------------------------------------------------------------------------------------------------------------------------------------------------------------------------------------------------------------|------|------|-----------|-------|------|------|----------------------------------------------|-------|----------------------|-------------------------------------------------------------------------------------------------------------------------------------------------------------------------------------------------------------------------------------------------------------------------------------|------|------|-----------|-------|------|------|
| Rsa1.0_01172.1.g24236.t1 | refNP_850281.1   ATP binding microtubule motor family protein [Arabidopsis thaliana] gi 110737312 dbj BAF00602.1   putative kinesin heavy chain [Arabidopsis thaliana] gi 330254302 gb AEC09396.1   ATP binding microtubule motor family protein [Arabidopsis thaliana] | 1062 | 1039 | 0         | 97.8  | 84.8 | 91.4 | ATP binding microtubule motor family protein | gbpln | Arabidopsis thaliana | AT2G37420.1   Symbols:   ATP binding microtubule motor family protein   chr2:15700550-15705165 FORWARD LENGTH=1039                                                                                                                                                                  | 1062 | 1039 | 0         | 97.8  | 84.8 | 91.4 |
| Rsa1.0_01173.1.g24237.t1 | gb AAM67188.1   GS1-like protein [Arabidopsis thaliana]                                                                                                                                                                                                                 | 299  | 298  | 1.00E-140 | 99.7  | 82.3 | 87.3 | GS1-like protein                             | gbpln | Arabidopsis thaliana | AT4G25840.1   Symbols: GPP1   glycerol-3-phosphatase 1   chr4:13139026-13140719 FORWARD LENGTH=298                                                                                                                                                                                  | 299  | 298  | 1.00E-142 | 99.7  | 82.9 | 88.0 |
| Rsa1.0_01173.1.g24238.t1 | refXP_002867589.1   hypothetical protein ARALYDRAFT_492232 [Arabidopsis lyrata subsp. lyrata] gi 297313425 gb EFH43848.1   hypothetical protein ARALYDRAFT_492232 [Arabidopsis lyrata subsp. lyrata]                                                                    | 376  | 389  | 0         | 103.5 | 88.6 | 92.8 | hypothetical protein ARALYDRAFT_492232       | gbpln | Arabidopsis lyrata   | AT4G25870.1   Symbols:   Core-2/-branching beta-1,6-N-acetylglucosaminyltransferase family protein   chr4:13149831-13151737 REVERSE LENGTH=389                                                                                                                                      | 376  | 389  | 0         | 103.5 | 87.2 | 92.8 |
| Rsa1.0_01173.1.g24239.t2 | refXP_002869646.1   hypothetical protein ARALYDRAFT_913980 [Arabidopsis lyrata subsp. lyrata] gi 297315482 gb EFH45905.1   hypothetical protein ARALYDRAFT_913980 [Arabidopsis lyrata subsp. lyrata]                                                                    | 773  | 858  | 0         | 111.0 | 78.7 | 85.4 | hypothetical protein ARALYDRAFT_913980       | gbpln | Arabidopsis lyrata   | AT4G25890.1   Symbols: APUM6, PUM6   pumilio 6   chr4:13155518-13159078 FORWARD LENGTH=861                                                                                                                                                                                          | 773  | 861  | 0         | 111.4 | 78.1 | 85.5 |
| Rsa1.0_01173.1.g24240.t1 | refXP_002867586.1   hypothetical protein ARALYDRAFT_492222 [Arabidopsis lyrata subsp. lyrata] gi 297313422 gb EFH43845.1   hypothetical protein ARALYDRAFT_492222 [Arabidopsis lyrata subsp. lyrata]                                                                    | 108  | 108  | 8.00E-50  | 100.0 | 92.6 | 99.1 | hypothetical protein ARALYDRAFT_492222       | gbpln | Arabidopsis lyrata   | AT4G25950.1   Symbols: VATG3   vacuolar ATP synthase G3   chr4:13173815-13174324 REVERSE LENGTH=108                                                                                                                                                                                 | 108  | 108  | 1.00E-50  | 100.0 | 90.7 | 96.3 |
| Rsa1.0_01173.1.g24241.t1 | refXP_002869639.1   multidrug resistance protein 2 [Arabidopsis lyrata subsp. lyrata] gi 297315475 gb EFH45898.1   multidrug resistance protein 2 [Arabidopsis lyrata subsp. lyrata]                                                                                    | 1237 | 1233 | 0         | 99.7  | 87.4 | 93.3 | multidrug resistance protein 2               | gbpln | Arabidopsis lyrata   | AT4G25960.1   Symbols: PGP2   P-glycoprotein 2   chr4:13177438-13183425 FORWARD LENGTH=1273                                                                                                                                                                                         | 1237 | 1273 | 0         | 102.9 | 87.3 | 93.3 |
| Rsa1.0_01173.1.g24242.t1 | refXP_002867585.1   hypothetical protein ARALYDRAFT_354188 [Arabidopsis lyrata subsp. lyrata] gi 297313421 gb EFH43844.1   hypothetical protein ARALYDRAFT_354188 [Arabidopsis lyrata subsp. lyrata]                                                                    | 400  | 392  | 1.00E-104 | 98.0  | 62.5 | 72.3 | hypothetical protein ARALYDRAFT_354188       | gbpln | Arabidopsis lyrata   | AT4G25990.1   Symbols: CIL   CCT motif family protein   chr4:13191937-13193543 REVERSE LENGTH=394                                                                                                                                                                                   | 400  | 394  | 1.00E-107 | 98.5  | 62.8 | 72.8 |
| Rsa1.0_01173.1.g24243.t1 | refXP_002869635.1   hypothetical protein ARALYDRAFT_492216 [Arabidopsis lyrata subsp. lyrata] gi 297315471 gb EFH45894.1   hypothetical protein ARALYDRAFT_492216 [Arabidopsis lyrata subsp. lyrata]                                                                    | 490  | 495  | 0         | 101.0 | 83.3 | 91.0 | hypothetical protein ARALYDRAFT_492216       | gbpln | Arabidopsis lyrata   | AT4G26000.1   Symbols: PEP   RNA-binding KH domain-containing protein   chr4:13197280-13199539 FORWARD LENGTH=495                                                                                                                                                                   | 490  | 495  | 0         | 101.0 | 81.6 | 90.6 |
| Rsa1.0_01173.1.g24244.t1 | gb EOA15699.1   hypothetical protein CARUB_v10006454mg [Capsella rubella]                                                                                                                                                                                               | 312  | 312  | 1.00E-163 | 100.0 | 90.1 | 95.5 | hypothetical protein CARUB_v10006454mg       | gbpln | Capsella rubella     | AT4G26010.1   Symbols:   Peroxidase superfamily protein   chr4:13200653-13201688 FORWARD LENGTH=310                                                                                                                                                                                 | 312  | 310  | 1.00E-156 | 99.4  | 85.6 | 90.4 |
| Rsa1.0_01173.1.g24245.t1 | refXP_002869633.1   hypothetical protein ARALYDRAFT_354185 [Arabidopsis lyrata subsp. lyrata] gi 297315469 gb EFH45892.1   hypothetical protein ARALYDRAFT_354185 [Arabidopsis lyrata subsp. lyrata]                                                                    | 312  | 312  | 1.00E-148 | 100.0 | 82.1 | 89.1 | hypothetical protein ARALYDRAFT_354185       | gbpln | Arabidopsis lyrata   | AT4G26010.1   Symbols:   Peroxidase superfamily protein   chr4:13200653-13201688 FORWARD LENGTH=310                                                                                                                                                                                 | 312  | 310  | 1.00E-140 | 99.4  | 75.6 | 84.9 |
| Rsa1.0_01173.1.g24246.t1 | gb EOA17329.1   hypothetical protein CARUB_v10005600mg [Capsella rubella]                                                                                                                                                                                               | 247  | 247  | 1.00E-117 | 100.0 | 86.2 | 94.7 | hypothetical protein CARUB_v10005600mg       | gbpln | Capsella rubella     | AT4G26020.1   Symbols:   unknown protein; Has 17652 Blast hits to 12460 proteins in 982 species: Archae - 248; Bacteria - 2077; Metazoa - 7446; Fungi - 1455; Plants - 656; Viruses - 34; Other Eukaryotes - 5736 (source: NCBI BLINK).   chr4:13202249-13204028 REVERSE LENGTH=247 | 247  | 247  | 1.00E-119 | 100.0 | 86.6 | 94.3 |
| Rsa1.0_01173.1.g24247.t1 | refXP_002884137.1   hypothetical protein ARALYDRAFT_900233 [Arabidopsis lyrata subsp. lyrata] gi 297329977 gb EFH60396.1   hypothetical protein ARALYDRAFT_900233 [Arabidopsis lyrata subsp. lyrata]                                                                    | 357  | 333  | 1.00E-20  | 93.3  | 30.3 | 45.7 | hypothetical protein ARALYDRAFT_900233       | gbpln | Arabidopsis lyrata   | AT5G42640.1   Symbols:   C2H2 and C2HC zinc fingers superfamily protein   chr5:17088695-17089597 FORWARD LENGTH=300                                                                                                                                                                 | 357  | 300  | 4.00E-19  | 84.0  | 29.7 | 42.6 |
| Rsa1.0_01173.1.g24248.t1 | #                                                                                                                                                                                                                                                                       | #    | #    | #         | #     | #    | #    | -                                            | ----  | ----                 | #                                                                                                                                                                                                                                                                                   | #    | #    | #         | #     | #    |      |

|                          |                                                                                                                                                                                                       |      |      |           |       |      |      |                                                     |       |                      |                                                                                                                                                                                                                                                                                                                                                                                                                                                                    |      |      |           |       |      |      |
|--------------------------|-------------------------------------------------------------------------------------------------------------------------------------------------------------------------------------------------------|------|------|-----------|-------|------|------|-----------------------------------------------------|-------|----------------------|--------------------------------------------------------------------------------------------------------------------------------------------------------------------------------------------------------------------------------------------------------------------------------------------------------------------------------------------------------------------------------------------------------------------------------------------------------------------|------|------|-----------|-------|------|------|
| Rsa1.0_01174.1.g24249.t1 | gb AAC33226.1  putative non-LTR retroelement reverse transcriptase [Arabidopsis thaliana]                                                                                                             | 160  | 1529 | 5.00E-33  | 955.6 | 43.1 | 58.8 | putative non-LTR retroelement reverse transcriptase | gbpln | Arabidopsis thaliana | AT5G18880.1   Symbols:   RNA-directed DNA polymerase (reverse transcriptase)-related family protein   chr5:6300535-6301422 REVERSE LENGTH=295                                                                                                                                                                                                                                                                                                                      | 160  | 295  | 1.00E-21  | 184.4 | 39.4 | 55.6 |
| Rsa1.0_01174.1.g24250.t9 | gb AAB82639.1  putative non-LTR retroelement reverse transcriptase [Arabidopsis thaliana]                                                                                                             | 1347 | 1374 | 0         | 102.0 | 48.8 | 65.6 | putative non-LTR retroelement reverse transcriptase | gbpln | Arabidopsis thaliana | AT4G29090.1   Symbols:   Ribonuclease H-like superfamily protein   chr4:14333528-14335255 FORWARD LENGTH=575                                                                                                                                                                                                                                                                                                                                                       | 1347 | 575  | 1.00E-120 | 42.7  | 14.0 | 21.2 |
| Rsa1.0_01174.1.g24251.t1 | gb EOA27084.1  hypothetical protein CARUB_v10023180mg [Capsella rubella]                                                                                                                              | 454  | 456  | 0         | 100.4 | 88.8 | 94.9 | hypothetical protein CARUB_v10023180mg              | gbpln | Capsella rubella     | AT2G28840.1   Symbols: XBAT31   XB3 ortholog 1 in Arabidopsis thaliana   chr2:12378542-12380474 FORWARD LENGTH=456                                                                                                                                                                                                                                                                                                                                                 | 454  | 456  | 0         | 100.4 | 89.9 | 95.8 |
| Rsa1.0_01174.1.g24252.t6 | emb CAN79321.1  hypothetical protein VITISV_018984 [Vitis vinifera]                                                                                                                                   | 1313 | 1521 | 0         | 115.8 | 39.1 | 56.1 | hypothetical protein VITISV_018984                  | gbpln | Vitis vinifera       | ATMG00860.1   Symbols: ORF158   DNA/RNA polymerases superfamily protein   chrM:235916-236392 FORWARD LENGTH=158                                                                                                                                                                                                                                                                                                                                                    | 1313 | 158  | 5.00E-15  | 12.0  | 2.5  | 4.0  |
| Rsa1.0_01174.1.g24253.t1 | dbj BAD12263.1  protein kinase [Brassica rapa]                                                                                                                                                        | 384  | 404  | 0         | 105.2 | 91.4 | 94.3 | protein kinase                                      | gbpln | Brassica rapa        | AT2G28930.2   Symbols: APK1B, PK1B   protein kinase 1B   chr2:12424551-12426565 FORWARD LENGTH=412                                                                                                                                                                                                                                                                                                                                                                 | 384  | 412  | 1.00E-180 | 107.3 | 79.7 | 89.6 |
| Rsa1.0_01174.1.g24254.t1 | ref XP_002879205.1  hypothetical protein ARALYDRAFT_901879 [Arabidopsis lyrata subsp. lyrata]   gi 297325044 gb EFH55464.1  hypothetical protein ARALYDRAFT_901879 [Arabidopsis lyrata subsp. lyrata] | 176  | 167  | 1.00E-57  | 94.9  | 80.7 | 85.8 | hypothetical protein ARALYDRAFT_901879              | gbpln | Arabidopsis lyrata   | AT2G29180.1   Symbols:   unknown protein; FUNCTIONS IN: molecular function unknown; INVOLVED IN: biological process unknown; LOCATED IN: chloroplast thylakoid membrane; EXPRESSED IN: 23 plant structures; EXPRESSED DURING: 13 growth stages; Has 34 Blast hits to 33 proteins in 16 species: Archae - 0; Bacteria - 0; Metazoa - 0; Fungi - 0; Plants - 33; Viruses - 0; Other Eukaryotes - 1 (source: NCBI BLink).   chr2:12543081-12543702 FORWARD LENGTH=169 | 176  | 169  | 2.00E-53  | 96.0  | 77.8 | 82.4 |
| Rsa1.0_01174.1.g24255.t1 | gb EOA12750.1  hypothetical protein CARUB_v10028431mg [Capsella rubella]                                                                                                                              | 403  | 423  | 1.00E-123 | 105.0 | 58.3 | 72.7 | hypothetical protein CARUB_v10028431mg              | gbpln | Capsella rubella     | AT5G56430.1   Symbols:   F-box/FBD-like domains containing protein   chr5:22853323-22854575 REVERSE LENGTH=360                                                                                                                                                                                                                                                                                                                                                     | 403  | 360  | 1.00E-101 | 89.3  | 43.9 | 53.1 |
| Rsa1.0_01174.1.g24256.t1 | gb EOA37750.1  hypothetical protein CARUB_v10012565mg [Capsella rubella]                                                                                                                              | 198  | 679  | 2.00E-48  | 342.9 | 50.5 | 69.2 | hypothetical protein CARUB_v10012565mg              | gbpln | Capsella rubella     | AT1G18560.1   Symbols:   BED zinc finger hAT family dimerisation domain   chr1:6385614-6388005 FORWARD LENGTH=690                                                                                                                                                                                                                                                                                                                                                  | 198  | 690  | 9.00E-13  | 348.5 | 17.2 | 26.8 |
| Rsa1.0_01175.1.g24257.t1 | gb EOA29622.1  hypothetical protein CARUB_v10014335mg [Capsella rubella]                                                                                                                              | 225  | 282  | 3.00E-61  | 125.3 | 68.9 | 76.0 | hypothetical protein CARUB_v10014335mg              | gbpln | Capsella rubella     | AT3G53500.2   Symbols: RSZ32, RS2Z32, At-RS2Z   RNA-binding (RRM/RBD/RNP motifs) family protein with retrovirus zinc finger-like domain   chr3:19834557-19836507 REVERSE LENGTH=284                                                                                                                                                                                                                                                                                | 225  | 284  | 6.00E-53  | 126.2 | 60.4 | 71.1 |
| Rsa1.0_01175.1.g24258.t1 | ref XP_002884506.1  hypothetical protein ARALYDRAFT_896610 [Arabidopsis lyrata subsp. lyrata]   gi 297330346 gb EFH60765.1  hypothetical protein ARALYDRAFT_896610 [Arabidopsis lyrata subsp. lyrata] | 82   | 801  | 1.00E-31  | 976.8 | 87.8 | 93.9 | hypothetical protein ARALYDRAFT_896610              | gbpln | Arabidopsis lyrata   | AT3G05330.1   Symbols: ATN, ATTN   cyclin family   chr3:1519162-1521159 REVERSE LENGTH=444                                                                                                                                                                                                                                                                                                                                                                         | 82   | 444  | 2.00E-34  | 541.5 | 89.0 | 92.7 |
| Rsa1.0_01175.1.g24259.t1 | #                                                                                                                                                                                                     | #    | #    | #         | #     | #    | #    | -                                                   | ----  | ----                 | #                                                                                                                                                                                                                                                                                                                                                                                                                                                                  | #    | #    | #         | #     | #    |      |
| Rsa1.0_01175.1.g24260.t1 | dbj BAJ33929.1  unnamed protein product [Thellungiella halophila]                                                                                                                                     | 348  | 370  | 1.00E-177 | 106.3 | 89.4 | 94.0 | unnamed protein product                             | ----  | ----                 | AT5G02760.1   Symbols:   Protein phosphatase 2C family protein   chr5:625377-626817 FORWARD LENGTH=370                                                                                                                                                                                                                                                                                                                                                             | 348  | 370  | 1.00E-173 | 106.3 | 85.3 | 91.4 |
| Rsa1.0_01175.1.g24261.t1 | ref XP_002873065.1  hypothetical protein ARALYDRAFT_487051 [Arabidopsis lyrata subsp. lyrata]   gi 297318902 gb EFH49324.1  hypothetical protein ARALYDRAFT_487051 [Arabidopsis lyrata subsp. lyrata] | 206  | 214  | 9.00E-67  | 103.9 | 78.6 | 83.0 | hypothetical protein ARALYDRAFT_487051              | gbpln | Arabidopsis lyrata   | AT5G02770.1   Symbols:   unknown protein; Has 469 Blast hits to 336 proteins in 126 species: Archae - 0; Bacteria - 54; Metazoa - 249; Fungi - 22; Plants - 47; Viruses - 0; Other Eukaryotes - 97 (source: NCBI BLink).   chr5:628101-629168 REVERSE LENGTH=214                                                                                                                                                                                                   | 206  | 214  | 1.00E-66  | 103.9 | 76.7 | 82.5 |
| Rsa1.0_01175.1.g24262.t1 | ref XP_002870997.1  ubiquitin-protein ligase 4 [Arabidopsis lyrata subsp. lyrata]   gi 297316834 gb EFH47256.1  ubiquitin-protein ligase 4 [Arabidopsis lyrata subsp. lyrata]                         | 1528 | 1509 | 0         | 98.8  | 80.8 | 88.0 | ubiquitin-protein ligase 4                          | gbpln | Arabidopsis lyrata   | AT5G02880.1   Symbols: UPL4   ubiquitin-protein ligase 4   chr5:662643-668847 FORWARD LENGTH=1502                                                                                                                                                                                                                                                                                                                                                                  | 1528 | 1502 | 0         | 98.3  | 79.6 | 86.8 |
| Rsa1.0_01175.1.g24263.t1 | gb EOA20937.1  hypothetical protein CARUB_v10001270mg [Capsella rubella]                                                                                                                              | 348  | 357  | 1.00E-133 | 102.6 | 69.5 | 83.6 | hypothetical protein CARUB_v10001270mg              | gbpln | Capsella rubella     | AT5G02890.1   Symbols:   HXXXD-type acyl-transferase family protein   chr5:670207-671454 REVERSE LENGTH=353                                                                                                                                                                                                                                                                                                                                                        | 348  | 353  | 1.00E-129 | 101.4 | 67.8 | 80.2 |
| Rsa1.0_01175.1.g24264.t1 | gb EOA22049.1  hypothetical protein CARUB_v10002589mg, partial [Capsella rubella]                                                                                                                     | 458  | 393  | 1.00E-102 | 85.8  | 46.9 | 59.4 | hypothetical protein CARUB_v10002589mg, partial     | gbpln | Capsella rubella     | AT5G02910.1   Symbols:   F-box/RNI-like superfamily protein   chr5:677120-678907 FORWARD LENGTH=458                                                                                                                                                                                                                                                                                                                                                                | 458  | 458  | 3.00E-89  | 100.0 | 44.1 | 57.2 |

|                          |                                                                                                                                                                                                                                                                                                                                                                                                                                                                                                                                                                                                                                                                        |      |      |           |       |      |      |                                                       |       |                      |                                                                                                                                                                                                                                                                                                                                                                                                                                                    |      |      |           |       |      |      |
|--------------------------|------------------------------------------------------------------------------------------------------------------------------------------------------------------------------------------------------------------------------------------------------------------------------------------------------------------------------------------------------------------------------------------------------------------------------------------------------------------------------------------------------------------------------------------------------------------------------------------------------------------------------------------------------------------------|------|------|-----------|-------|------|------|-------------------------------------------------------|-------|----------------------|----------------------------------------------------------------------------------------------------------------------------------------------------------------------------------------------------------------------------------------------------------------------------------------------------------------------------------------------------------------------------------------------------------------------------------------------------|------|------|-----------|-------|------|------|
| Rsa1.0_01175.1.g24265.t1 | ref NP_189482.1  F-box domain-containing protein [Arabidopsis thaliana] gi 334302799 sp Q9LSJ3.2 FBL48_ARAT H RecName: Full=Putative F-box/LRR-repeat protein At3g28410 gi 332643920 gb AE77441.1  F-box domain-containing protein [Arabidopsis thaliana]                                                                                                                                                                                                                                                                                                                                                                                                              | 461  | 465  | 6.00E-98  | 100.9 | 51.2 | 62.9 | F-box domain-containing protein                       | gbpln | Arabidopsis thaliana | AT3G28410.1   Symbols:   F-box/RNI-like superfamily protein   chr3:10640152-10642071 REVERSE LENGTH=465                                                                                                                                                                                                                                                                                                                                            | 461  | 465  | 1.00E-100 | 100.9 | 51.2 | 62.9 |
| Rsa1.0_01175.1.g24266.t1 | gb EOA32309.1  hypothetical protein CARUB_v10015571mg, partial [Capsella rubella] ref NP_568110.2  protein IQ-domain 2 [Arabidopsis thaliana] gi 238481199 ref NP_001154693.1  protein IQ-domain 2 [Arabidopsis thaliana] gi 334187391 ref NP_001190211.1  protein IQ-domain 2 [Arabidopsis thaliana] gi 15982840 gb AAL09767.1  AT5g03040/F15A17.70 [Arabidopsis thaliana] gi 23506103 gb AAN28911.1  At5g03040/F15A17.70 [Arabidopsis thaliana] gi 332003165 gb AED90548.1  protein IQ-domain 2 [Arabidopsis thaliana] gi 332003166 gb AED90549.1  protein IQ-domain 2 [Arabidopsis thaliana] gi 332003167 gb AED90550.1  protein IQ-domain 2 [Arabidopsis thaliana] | 185  | 161  | 5.00E-74  | 87.0  | 75.1 | 75.1 | hypothetical protein CARUB_v10015571mg, partial       | gbpln | Capsella rubella     | AT5G02960.1   Symbols:   Ribosomal protein S12/S23 family protein   chr5:693280-694396 REVERSE LENGTH=142                                                                                                                                                                                                                                                                                                                                          | 185  | 142  | 8.00E-76  | 76.8  | 75.1 | 75.1 |
| Rsa1.0_01175.1.g24267.t3 | ref XP_002871012.1  hypothetical protein ARALYDRAFT_349596 [Arabidopsis lyrata subsp. lyrata] gi 297316849 gb EFH47271.1  hypothetical protein ARALYDRAFT_349596 [Arabidopsis lyrata subsp. lyrata]                                                                                                                                                                                                                                                                                                                                                                                                                                                                    | 530  | 461  | 1.00E-178 | 87.0  | 65.7 | 67.9 | protein IQ-domain 2                                   | gbpln | Arabidopsis thaliana | AT5G03040.3   Symbols:   iqd2   IQ-domain 2   chr5:710390-712406 REVERSE LENGTH=461                                                                                                                                                                                                                                                                                                                                                                | 530  | 461  | 0         | 87.0  | 65.7 | 67.9 |
| Rsa1.0_01175.1.g24268.t1 | db BAB11200.1  copia-type polyprotein [Arabidopsis thaliana] gi 13872710 emb CAC37622.1  polyprotein [Arabidopsis thaliana]                                                                                                                                                                                                                                                                                                                                                                                                                                                                                                                                            | 312  | 293  | 2.00E-79  | 93.9  | 61.5 | 69.2 | hypothetical protein ARALYDRAFT_349596                | gbpln | Arabidopsis lyrata   | AT5G03110.1   Symbols:   FUNCTIONS IN: molecular_function unknown; INVOLVED IN: biological_process unknown; LOCATED IN: plasma membrane; BEST Arabidopsis thaliana protein match is: protamine P1 family protein (TAIR:AT2G37100.1); Has 81 Blast hits to 73 proteins in 9 species: Archae - 0; Bacteria - 0; Metazoa - 0; Fungi - 0; Plants - 81; Viruses - 0; Other Eukaryotes - 0 (source: NCBI BLink).   chr5:730346-731197 FORWARD LENGTH=283 | 312  | 283  | 1.00E-78  | 90.7  | 60.6 | 68.3 |
| Rsa1.0_01175.1.g24269.t1 | db BAB11200.1  copia-type polyprotein [Arabidopsis thaliana] gi 13872710 emb CAC37622.1  polyprotein [Arabidopsis thaliana]                                                                                                                                                                                                                                                                                                                                                                                                                                                                                                                                            | 1229 | 1334 | 0         | 108.5 | 68.7 | 81.6 | copia-type polyprotein                                | gbpln | Arabidopsis thaliana | AT4G23160.1   Symbols:   CRK8   cysteine-rich RLK (RECEPTOR-like protein kinase) 8   chr4:12129485-12134086 FORWARD LENGTH=1262                                                                                                                                                                                                                                                                                                                    | 1229 | 1262 | 5.00E-89  | 102.7 | 13.9 | 22.8 |
| Rsa1.0_01175.1.g24270.t1 | #                                                                                                                                                                                                                                                                                                                                                                                                                                                                                                                                                                                                                                                                      | #    | #    | #         | #     | #    | #    | -                                                     | ----  | ----                 | #                                                                                                                                                                                                                                                                                                                                                                                                                                                  | #    | #    | #         | #     | #    |      |
| Rsa1.0_01176.1.g24271.t1 | gb EOA23672.1  hypothetical protein CARUB_v10016879mg [Capsella rubella]                                                                                                                                                                                                                                                                                                                                                                                                                                                                                                                                                                                               | 595  | 602  | 0         | 101.2 | 83.4 | 92.4 | hypothetical protein CARUB_v10016879mg                | gbpln | Capsella rubella     | AT3G53960.1   Symbols:   Major facilitator superfamily protein   chr3:19978306-19980886 REVERSE LENGTH=602                                                                                                                                                                                                                                                                                                                                         | 595  | 602  | 0         | 101.2 | 81.8 | 91.4 |
| Rsa1.0_01176.1.g24272.t1 | gb EOA24451.1  hypothetical protein CARUB_v10017709mg [Capsella rubella]                                                                                                                                                                                                                                                                                                                                                                                                                                                                                                                                                                                               | 302  | 306  | 9.00E-67  | 101.3 | 53.3 | 65.6 | hypothetical protein CARUB_v10017709mg                | gbpln | Capsella rubella     | AT3G53970.1   Symbols:   proteasome inhibitor-related   chr3:19985208-19987132 FORWARD LENGTH=302                                                                                                                                                                                                                                                                                                                                                  | 302  | 302  | 3.00E-63  | 100.0 | 54.0 | 66.2 |
| Rsa1.0_01176.1.g24273.t1 | gb EOA24974.1  hypothetical protein CARUB_v10018271mg [Capsella rubella]                                                                                                                                                                                                                                                                                                                                                                                                                                                                                                                                                                                               | 120  | 114  | 9.00E-52  | 95.0  | 81.7 | 87.5 | hypothetical protein CARUB_v10018271mg                | gbpln | Capsella rubella     | AT3G53980.2   Symbols:   Bifunctional inhibitor/lipid-transfer protein/seed storage 2S albumin superfamily protein   chr3:19987760-19988203 REVERSE LENGTH=114                                                                                                                                                                                                                                                                                     | 120  | 114  | 2.00E-47  | 95.0  | 80.8 | 88.3 |
| Rsa1.0_01176.1.g24274.t1 | #                                                                                                                                                                                                                                                                                                                                                                                                                                                                                                                                                                                                                                                                      | #    | #    | #         | #     | #    | #    | -                                                     | ----  | ----                 | #                                                                                                                                                                                                                                                                                                                                                                                                                                                  | #    | #    | #         | #     | #    |      |
| Rsa1.0_01176.1.g24275.t1 | gb AAF18538.1 AC006551_24 Very similar to retrotransposon reverse transcriptase [Arabidopsis thaliana] ref XP_002870068.1  hypothetical protein ARALYDRAFT_354931 [Arabidopsis lyrata subsp. lyrata] gi 297315904 gb EFH46327.1  hypothetical protein ARALYDRAFT_354931 [Arabidopsis lyrata subsp. lyrata]                                                                                                                                                                                                                                                                                                                                                             | 1575 | 1231 | 0         | 78.2  | 37.8 | 50.8 | Very similar to retrotransposon reverse transcriptase | gbpln | Arabidopsis thaliana | AT4G2090.1   Symbols:   Ribonuclease H-like superfamily protein   chr4:14333528-14335255 FORWARD LENGTH=575                                                                                                                                                                                                                                                                                                                                        | 1575 | 575  | 2.00E-91  | 36.5  | 12.1 | 18.5 |
| Rsa1.0_01176.1.g24276.t3 | ref XP_002870068.1  hypothetical protein ARALYDRAFT_354931 [Arabidopsis lyrata subsp. lyrata] gi 297315904 gb EFH46327.1  hypothetical protein ARALYDRAFT_354931 [Arabidopsis lyrata subsp. lyrata]                                                                                                                                                                                                                                                                                                                                                                                                                                                                    | 608  | 567  | 4.00E-61  | 93.3  | 22.7 | 31.7 | hypothetical protein ARALYDRAFT_354931                | gbpln | Arabidopsis lyrata   | AT2G07190.1   Symbols:   Domain of unknown function (DUF1985)   chr2:2987367-2988945 FORWARD LENGTH=452                                                                                                                                                                                                                                                                                                                                            | 608  | 452  | 1.00E-38  | 74.3  | 15.3 | 21.1 |
| Rsa1.0_01176.1.g24277.t1 | emb CAB51200.1  putative protein [Arabidopsis thaliana] ref XP_002877951.1  universal stress protein family protein [Arabidopsis lyrata subsp. lyrata] gi 297323789 gb EFH54210.1  universal stress protein family protein [Arabidopsis lyrata subsp. lyrata]                                                                                                                                                                                                                                                                                                                                                                                                          | 673  | 739  | 1.00E-107 | 109.8 | 35.8 | 55.7 | putative protein                                      | gbpln | Arabidopsis thaliana | AT1G64260.1   Symbols:   MuDR family transposase   chr1:23847756-23849915 FORWARD LENGTH=719                                                                                                                                                                                                                                                                                                                                                       | 673  | 719  | 9.00E-21  | 106.8 | 12.6 | 21.0 |
| Rsa1.0_01176.1.g24278.t1 | ref XP_002877951.1  universal stress protein family protein [Arabidopsis lyrata subsp. lyrata] gi 297323789 gb EFH54210.1  universal stress protein family protein [Arabidopsis lyrata subsp. lyrata]                                                                                                                                                                                                                                                                                                                                                                                                                                                                  | 162  | 162  | 3.00E-77  | 100.0 | 88.3 | 92.0 | universal stress protein family protein               | gbpln | Arabidopsis lyrata   | AT3G53990.1   Symbols:   Adenine nucleotide alpha hydrolases-like superfamily protein   chr3:19989658-19991019 REVERSE LENGTH=160                                                                                                                                                                                                                                                                                                                  | 162  | 160  | 4.00E-77  | 98.8  | 85.8 | 88.9 |

|                          |                                                                                                                                                                                                                                                                                                                                                                                                                                                                                                                                                                     |      |      |          |       |      |      |                                                       |       |                      |                                                                                                                                                 |      |      |          |       |      |      |
|--------------------------|---------------------------------------------------------------------------------------------------------------------------------------------------------------------------------------------------------------------------------------------------------------------------------------------------------------------------------------------------------------------------------------------------------------------------------------------------------------------------------------------------------------------------------------------------------------------|------|------|----------|-------|------|------|-------------------------------------------------------|-------|----------------------|-------------------------------------------------------------------------------------------------------------------------------------------------|------|------|----------|-------|------|------|
| Rsa1.0_01177.1.g24279.t1 | refNP_177441.1  LOB domain-containing protein 7 [Arabidopsis thaliana]<br>gi 29428051 sp Q9SSM9.1 LBD7_ARATH<br>RecName: Full=LOB domain-containing protein 7; AltName: Full=ASYMMETRIC LEAVES 2-like protein 31; Short=AS2-like protein 31<br>gi 5903087 gb AAD55645.1 AC008017.18<br>Hypothetical protein [Arabidopsis thaliana] gi 219807138 dbj BAH10575.1 ASYMMETRIC LEAVES2-like 31 protein [Arabidopsis thaliana]<br>gi 332197278 gb AEE35399.1  LOB domain-containing protein 7 [Arabidopsis thaliana]                                                      | 197  | 214  | 6.00E-52 | 108.6 | 58.4 | 74.6 | LOB domain-containing protein 7                       | gbpln | Arabidopsis thaliana | AT1G72980.1   Symbols: LBD7   LOB domain-containing protein 7   chr1:27456227-27456871 REVERSE<br>LENGTH=214                                    | 197  | 214  | 2.00E-54 | 108.6 | 58.4 | 74.6 |
| Rsa1.0_01177.1.g24280.t1 | dbj BAA77842.1  ACE [Arabidopsis thaliana]                                                                                                                                                                                                                                                                                                                                                                                                                                                                                                                          | 590  | 594  | 0        | 100.7 | 92.0 | 95.8 | ACE                                                   | gbpln | Arabidopsis thaliana | AT1G72970.1   Symbols: HTH, EDA17   Glucose-methanol-choline (GMC) oxidoreductase family protein   chr1:27452872-27455706 FORWARD<br>LENGTH=594 | 590  | 594  | 0        | 100.7 | 91.9 | 95.6 |
| Rsa1.0_01177.1.g24281.t1 | refNP_177435.1  Toll-Interleukin-Resistance domain-containing protein [Arabidopsis thaliana]<br>gi 5903081 gb AAD55639.1 AC008017.12<br>Similar to part of disease resistance protein [Arabidopsis thaliana]<br>gi 332197270 gb AEE35391.1  Toll-Interleukin-Resistance domain-containing protein [Arabidopsis thaliana]                                                                                                                                                                                                                                            | 159  | 275  | 1.00E-57 | 173.0 | 69.8 | 78.0 | Toll-Interleukin-Resistance domain-containing protein | gbpln | Arabidopsis thaliana | AT1G72920.1   Symbols:   Toll-Interleukin-Resistance (TIR) domain family protein   chr1:27437947-27438868 FORWARD<br>LENGTH=275                 | 159  | 275  | 4.00E-60 | 173.0 | 69.8 | 78.0 |
| Rsa1.0_01177.1.g24282.t1 | #                                                                                                                                                                                                                                                                                                                                                                                                                                                                                                                                                                   | #    | #    | #        | #     | #    | #    | -                                                     | ----  | ----                 | #                                                                                                                                               | #    | #    | #        | #     | #    |      |
| Rsa1.0_01177.1.g24283.t8 | dbj BAB02990.1  retroelement polypeptide-like [Arabidopsis thaliana]                                                                                                                                                                                                                                                                                                                                                                                                                                                                                                | 1134 | 1250 | 0        | 110.2 | 33.8 | 41.8 | retroelement polypeptide-like                         | gbpln | Arabidopsis thaliana | AT4G23160.1   Symbols: CRK8   cysteine-rich RLK (RECEPTOR-like protein kinase) 8   chr4:12129485-12134086 FORWARD<br>LENGTH=1262                | 1134 | 1262 | 2.00E-85 | 111.3 | 15.7 | 24.2 |
| Rsa1.0_01177.1.g24284.t1 | gb ACP30576.1  disease resistance protein [Brassica rapa subsp. pekinensis]                                                                                                                                                                                                                                                                                                                                                                                                                                                                                         | 184  | 426  | 2.00E-72 | 231.5 | 71.7 | 80.4 | disease resistance protein                            | gbpln | Brassica rapa        | AT1G72890.1   Symbols:   Disease resistance protein (TIR-NBS class)   chr1:27429947-27431717 FORWARD<br>LENGTH=438                              | 184  | 438  | 2.00E-66 | 238.0 | 66.8 | 73.9 |
| Rsa1.0_01177.1.g24285.t1 | gb ACP30576.1  disease resistance protein [Brassica rapa subsp. pekinensis]                                                                                                                                                                                                                                                                                                                                                                                                                                                                                         | 186  | 426  | 6.00E-70 | 229.0 | 75.8 | 84.9 | disease resistance protein                            | gbpln | Brassica rapa        | AT1G72890.1   Symbols:   Disease resistance protein (TIR-NBS class)   chr1:27429947-27431717 FORWARD<br>LENGTH=438                              | 186  | 438  | 6.00E-71 | 235.5 | 76.9 | 86.0 |
| Rsa1.0_01177.1.g24286.t2 | gb AAD55633.1 AC008017.6<br>Similar to downy mildew resistance protein RPP5 [Arabidopsis thaliana]                                                                                                                                                                                                                                                                                                                                                                                                                                                                  | 331  | 1258 | 1.00E-82 | 380.1 | 58.6 | 71.6 | Similar to downy mildew resistance protein RPP5       | gbpln | Arabidopsis thaliana | AT5G48770.1   Symbols:   Disease resistance protein (TIR-NBS-LRR class) family   chr5:19773277-19777242 REVERSE<br>LENGTH=1190                  | 331  | 1190 | 5.00E-43 | 359.5 | 37.8 | 57.4 |
| Rsa1.0_01177.1.g24287.t1 | refNP_177431.1  survival protein SurE-like phosphatase/nucleotidase [Arabidopsis thaliana]<br>gi 30698907 refNP_849880.1  survival protein SurE-like phosphatase/nucleotidase [Arabidopsis thaliana]<br>gi 30102530 gb AAP21183.1  At1g72890 [Arabidopsis thaliana]<br>gi 110742851 dbj BAE98324.1  hypothetical protein [Arabidopsis thaliana]<br>gi 332197264 gb AEE35385.1  survival protein SurE-like phosphatase/nucleotidase [Arabidopsis thaliana]<br>gi 332197265 gb AEE35386.1  survival protein SurE-like phosphatase/nucleotidase [Arabidopsis thaliana] | 380  | 385  | 0        | 101.3 | 90.0 | 93.7 | survival protein SurE-like phosphatase/nucleotidase   | gbpln | Arabidopsis thaliana | AT1G72880.1   Symbols:   Survival protein SurE-like phosphatase/nucleotidase   chr1:27423678-27425928 REVERSE<br>LENGTH=385                     | 380  | 385  | 0        | 101.3 | 90.0 | 93.7 |
| Rsa1.0_01178.1.g24288.t2 | gb AAG51783.1 AC079679.3<br>reverse transcriptase, putative; 16838-20266 [Arabidopsis thaliana]                                                                                                                                                                                                                                                                                                                                                                                                                                                                     | 893  | 1142 | 0        | 127.9 | 52.1 | 66.5 | reverse transcriptase, putative; 16838-20266          | gbpln | Arabidopsis thaliana | AT4G29090.1   Symbols:   Ribonuclease H-like superfamily protein   chr4:14333528-14335255 FORWARD<br>LENGTH=575                                 | 893  | 575  | 4.00E-65 | 64.4  | 16.5 | 25.5 |
| Rsa1.0_01178.1.g24289.t1 | refNP_175583.2  glutamate dehydrogenase (NADP+) [Arabidopsis thaliana]<br>gi 332194586 gb AEE32707.1  amino acid dehydrogenase family protein [Arabidopsis thaliana]                                                                                                                                                                                                                                                                                                                                                                                                | 648  | 637  | 0        | 98.3  | 95.5 | 97.5 | glutamate dehydrogenase (NADP+)                       | gbpln | Arabidopsis thaliana | AT1G51720.1   Symbols:   Amino acid dehydrogenase family protein   chr1:19181741-19186297 FORWARD<br>LENGTH=637                                 | 648  | 637  | 0        | 98.3  | 95.5 | 97.5 |

|                          |                                                                                                                                                                                                                                                                                                                                                                                                    |     |     |           |       |      |      |                                                 |             |                      |                                                                                                                                                                                                                                                                                                                                                                                                                                                                     |     |     |           |       |      |      |
|--------------------------|----------------------------------------------------------------------------------------------------------------------------------------------------------------------------------------------------------------------------------------------------------------------------------------------------------------------------------------------------------------------------------------------------|-----|-----|-----------|-------|------|------|-------------------------------------------------|-------------|----------------------|---------------------------------------------------------------------------------------------------------------------------------------------------------------------------------------------------------------------------------------------------------------------------------------------------------------------------------------------------------------------------------------------------------------------------------------------------------------------|-----|-----|-----------|-------|------|------|
| Rsa1.0_01178.1.g24290.t1 | ref NP_175584.1  ubiquitin-conjugating enzyme-like protein [Arabidopsis thaliana]<br>gi 12321663 gb AAG50865.1 AC025294_3 unknown protein [Arabidopsis thaliana] gi 19698889 gb AAL91180.1  unknown protein [Arabidopsis thaliana] gi 23198350 gb AANI15702.1  unknown protein [Arabidopsis thaliana] gi 332194587 gb AEE32708.1  ubiquitin-conjugating enzyme-like protein [Arabidopsis thaliana] | 253 | 252 | 1.00E-106 | 99.6  | 87.4 | 94.5 | ubiquitin-conjugating enzyme-like protein       | gbpln       | Arabidopsis thaliana | AT1G51730.1   Symbols:   Ubiquitin-conjugating enzyme family protein   chr1:19186812-19188638 REVERSE LENGTH=252                                                                                                                                                                                                                                                                                                                                                    | 253 | 252 | 1.00E-108 | 99.6  | 87.4 | 94.5 |
| Rsa1.0_01178.1.g24291.t4 | ref NP_001147018.1  ribosomal RNA apurinic site specific lyase [Zea mays] gi 195606500 gb ACG25080.1  ribosomal RNA apurinic site specific lyase [Zea mays]                                                                                                                                                                                                                                        | 219 | 419 | 8.00E-35  | 191.3 | 37.4 | 46.6 | ribosomal RNA apurinic site specific lyase      | gbenv/gbpln | Zea mays             | AT4G10400.2   Symbols:   F-box/RNI-like/FBD-like domains-containing protein   chr4:6446335-6447715 REVERSE LENGTH=409                                                                                                                                                                                                                                                                                                                                               | 219 | 409 | 4.00E-33  | 186.8 | 36.1 | 46.6 |
| Rsa1.0_01178.1.g24292.t3 | ref XP_002894307.1  hypothetical protein ARALYDRAFT_474240 [Arabidopsis lyrata subsp. lyrata] gi 297340149 gb EFH70566.1  hypothetical protein ARALYDRAFT_474240 [Arabidopsis lyrata subsp. lyrata]                                                                                                                                                                                                | 375 | 376 | 1.00E-157 | 100.3 | 70.9 | 82.1 | hypothetical protein ARALYDRAFT_474240          | gbpln       | Arabidopsis lyrata   | AT1G51260.1   Symbols:   LPAT3   lysophosphatidyl acyltransferase 3   chr1:19003460-19005512 REVERSE LENGTH=376                                                                                                                                                                                                                                                                                                                                                     | 375 | 376 | 1.00E-159 | 100.3 | 70.1 | 81.9 |
| Rsa1.0_01178.1.g24293.t1 | gb EOA13258.1  hypothetical protein CARUB_v10026287mg [Capsella rubella]                                                                                                                                                                                                                                                                                                                           | 480 | 494 | 0         | 102.9 | 87.1 | 91.9 | hypothetical protein CARUB_v10026287mg          | gbpln       | Capsella rubella     | AT1G51310.1   Symbols:   transferases:tRNA (5-methylaminomethyl-2-thiouridylyl)-methyltransferases   chr1:19019185-19021735 REVERSE LENGTH=497                                                                                                                                                                                                                                                                                                                      | 480 | 497 | 0         | 103.5 | 88.3 | 92.3 |
| Rsa1.0_01179.1.g24294.t1 | ref NP_973528.1  ankyrin repeat-containing protein [Arabidopsis thaliana] gi 334184418 ref NP_001189592.1  ankyrin repeat-containing protein [Arabidopsis thaliana] gi 330252503 gb AEC07597.1  ankyrin repeat-containing protein [Arabidopsis thaliana] gi 330252508 gb AEC07600.1  ankyrin repeat-containing protein [Arabidopsis thaliana]                                                      | 341 | 601 | 1.00E-102 | 176.2 | 57.5 | 67.4 | ankyrin repeat-containing protein               | gbpln       | Arabidopsis thaliana | AT2G24600.4   Symbols:   Ankyrin repeat family protein   chr2:10452430-10454414 REVERSE LENGTH=601                                                                                                                                                                                                                                                                                                                                                                  | 341 | 601 | 1.00E-105 | 176.2 | 57.5 | 67.4 |
| Rsa1.0_01179.1.g24295.t1 | ref XP_002880527.1  hypothetical protein ARALYDRAFT_900864 [Arabidopsis lyrata subsp. lyrata] gi 297326366 gb EFH56786.1  hypothetical protein ARALYDRAFT_900864 [Arabidopsis lyrata subsp. lyrata]                                                                                                                                                                                                | 349 | 335 | 1.00E-147 | 96.0  | 76.2 | 85.1 | hypothetical protein ARALYDRAFT_900864          | gbpln       | Arabidopsis lyrata   | AT2G23790.1   Symbols:   Protein of unknown function (DUF007)   chr2:10125692-10127455 REVERSE LENGTH=336                                                                                                                                                                                                                                                                                                                                                           | 349 | 336 | 1.00E-148 | 96.3  | 75.9 | 84.8 |
| Rsa1.0_01179.1.g24296.t1 | gb ADK63399.1  C3HC4 type zinc finger protein [Brassica rapa]                                                                                                                                                                                                                                                                                                                                      | 232 | 227 | 1.00E-120 | 97.8  | 94.0 | 94.4 | C3HC4 type zinc finger protein                  | gbpln       | Brassica rapa        | AT2G23780.1   Symbols:   RING/U-box superfamily protein   chr2:10123551-10124234 REVERSE LENGTH=227                                                                                                                                                                                                                                                                                                                                                                 | 232 | 227 | 6.00E-90  | 97.8  | 73.3 | 81.9 |
| Rsa1.0_01179.1.g24297.t1 | ref XP_002880525.1  hypothetical protein ARALYDRAFT_481239 [Arabidopsis lyrata subsp. lyrata] gi 297326364 gb EFH56784.1  hypothetical protein ARALYDRAFT_481239 [Arabidopsis lyrata subsp. lyrata]                                                                                                                                                                                                | 606 | 611 | 0         | 100.8 | 76.7 | 86.6 | hypothetical protein ARALYDRAFT_481239          | gbpln       | Arabidopsis lyrata   | AT2G23770.1   Symbols:   protein kinase family protein / peptidoglycan-binding LysM domain-containing protein   chr2:10120242-10122080 REVERSE LENGTH=612                                                                                                                                                                                                                                                                                                           | 606 | 612 | 0         | 101.0 | 74.8 | 86.0 |
| Rsa1.0_01179.1.g24298.t1 | dbj BAJ33897.1  unnamed protein product [Thellungiella halophila]                                                                                                                                                                                                                                                                                                                                  | 356 | 651 | 1.00E-123 | 182.9 | 80.9 | 83.4 | unnamed protein product                         | ----        | ----                 | AT2G23760.3   Symbols:   BLH4, SAW2   BEL1-like homeodomain 4   chr2:10107951-10112736 REVERSE LENGTH=627                                                                                                                                                                                                                                                                                                                                                           | 356 | 627 | 1.00E-101 | 176.1 | 75.6 | 80.1 |
| Rsa1.0_01179.1.g24299.t1 | dbj BAJ33897.1  unnamed protein product [Thellungiella halophila]                                                                                                                                                                                                                                                                                                                                  | 305 | 651 | 1.00E-143 | 213.4 | 89.5 | 93.1 | unnamed protein product                         | ----        | ----                 | AT2G23760.3   Symbols:   BLH4, SAW2   BEL1-like homeodomain 4   chr2:10107951-10112736 REVERSE LENGTH=627                                                                                                                                                                                                                                                                                                                                                           | 305 | 627 | 1.00E-128 | 205.6 | 82.0 | 87.2 |
| Rsa1.0_01179.1.g24300.t1 | gb EOA29603.1  hypothetical protein CARUB_v10013521mg, partial [Capsella rubella]                                                                                                                                                                                                                                                                                                                  | 630 | 498 | 9.00E-67  | 79.0  | 22.5 | 31.6 | hypothetical protein CARUB_v10013521mg, partial | gbpln       | Capsella rubella     | AT3G31430.1   Symbols:   unknown protein; FUNCTIONS IN: molecular_function unknown; INVOLVED IN: biological_process unknown; LOCATED IN: endomembrane system; BEST Arabidopsis thaliana protein match is: unknown protein (TAIR:AT5G18636.1); Has 295 Blast hits to 291 proteins in 12 species: Archae - 0; Bacteria - 0; Metazoa - 0; Fungi - 0; Plants - 295; Viruses - 0; Other Eukaryotes - 0 (source: NCBI BLINK).   chr3:12795861-12796871 REVERSE LENGTH=336 | 630 | 336 | 4.00E-24  | 53.3  | 10.3 | 15.9 |
| Rsa1.0_01180.1.g24301.t1 | ref XP_002876050.1  predicted protein [Arabidopsis lyrata subsp. lyrata] gi 297321888 gb EFH52309.1  predicted protein [Arabidopsis lyrata subsp. lyrata]                                                                                                                                                                                                                                          | 279 | 294 | 1.00E-110 | 105.4 | 79.9 | 86.0 | predicted protein                               | gbpln       | Arabidopsis lyrata   | AT3G50870.1   Symbols:   MNP, HAN, GATA18   GATA type zinc finger transcription factor family protein   chr3:18911112-18912369 FORWARD LENGTH=295                                                                                                                                                                                                                                                                                                                   | 279 | 295 | 1.00E-111 | 105.7 | 78.1 | 84.9 |



|                          |                                                                                                                                                                                                                                                                                                                                                                                                                                                                                                                                                                                                                                                                                                                                                                                                                                                                                                                                                                                                                                                  |     |      |           |        |      |      |                                                               |       |                      |                                                                                                                                                                                                                                                                                                                            |     |     |           |       |      |      |
|--------------------------|--------------------------------------------------------------------------------------------------------------------------------------------------------------------------------------------------------------------------------------------------------------------------------------------------------------------------------------------------------------------------------------------------------------------------------------------------------------------------------------------------------------------------------------------------------------------------------------------------------------------------------------------------------------------------------------------------------------------------------------------------------------------------------------------------------------------------------------------------------------------------------------------------------------------------------------------------------------------------------------------------------------------------------------------------|-----|------|-----------|--------|------|------|---------------------------------------------------------------|-------|----------------------|----------------------------------------------------------------------------------------------------------------------------------------------------------------------------------------------------------------------------------------------------------------------------------------------------------------------------|-----|-----|-----------|-------|------|------|
| Rsa1.0_01181.1.g24317.t1 | dbj BAB10837.1  retroelement pol polyprotein-like [Arabidopsis thaliana]                                                                                                                                                                                                                                                                                                                                                                                                                                                                                                                                                                                                                                                                                                                                                                                                                                                                                                                                                                         | 135 | 1462 | 1.00E-38  | 1083.0 | 52.6 | 66.7 | retroelement pol polyprotein-like                             | gbpln | Arabidopsis thaliana | AT1G21280.1   Symbols:   CONTAINS InterPro DOMAIN/s: Retrotransposon gag protein (InterPro:IPR005162); Has 707 Blast hits to 705 proteins in 25 species: Archae - 0; Bacteria - 0; Metazoa - 4; Fungi - 0; Plants - 703; Viruses - 0; Other Eukaryotes - 0 (source: NCBI BLINK).   chr1:7447690-7448403 REVERSE LENGTH=237 | 135 | 237 | 7.00E-11  | 175.6 | 18.5 | 32.6 |
| Rsa1.0_01182.1.g24318.t1 | ref NP_565974.1  serine/threonine-protein phosphatase PP2A-4 catalytic subunit [Arabidopsis thaliana] gi 297827949 ref XP_002881857.1  protein phosphatase 2A-4 [Arabidopsis lyrata subsp. lyrata] gi 1352663 sp Q07100.2 PP2A4_ARATH RecName: Full=Serine/threonine-protein phosphatase PP2A-4 catalytic subunit; AltName: Full=Protein phosphatase 2A isoform 4 gi 466441 gb AA64742.1  Ser/Thr protein phosphatase [Arabidopsis thaliana] gi 4567320 gb AAD23731.1  serine threonine protein phosphatase PP2A-3 catalytic subunit [Arabidopsis thaliana] gi 20198072 gb AAM15383.1  serine/threonine protein phosphatase PP2A-3 catalytic subunit [Arabidopsis thaliana] gi 33589738 gb AAQ22635.1  At2g42500/F14N22.23 [Arabidopsis thaliana] gi 297327696 gb EFH58116.1  protein phosphatase 2A-4 [Arabidopsis lyrata subsp. lyrata] gi 330255033 gb AEC10127.1  serine/threonine-protein phosphatase PP2A-4 catalytic subunit [Arabidopsis thaliana] gi 482563348 gb EOA27538.1  hypothetical protein CARUB_v10023677mg [Capsella rubella] | 327 | 313  | 1.00E-178 | 95.7   | 92.0 | 93.9 | serine/threonine-protein phosphatase PP2A-4 catalytic subunit | gbpln | Arabidopsis lyrata   | AT2G42500.1   Symbols: PP2A-3   protein phosphatase 2A-3   chr2:17698099-17701226 REVERSE LENGTH=313                                                                                                                                                                                                                       | 327 | 313 | 0         | 95.7  | 92.0 | 93.9 |
| Rsa1.0_01182.1.g24319.t1 | gb EOA25539.1  hypothetical protein CARUB_v10018884mg [Capsella rubella]                                                                                                                                                                                                                                                                                                                                                                                                                                                                                                                                                                                                                                                                                                                                                                                                                                                                                                                                                                         | 615 | 609  | 0         | 99.0   | 80.3 | 83.7 | hypothetical protein CARUB_v10018884mg                        | gbpln | Capsella rubella     | AT3G58510.3   Symbols:   DEA(D/H)-box RNA helicase family protein   chr3:21640608-21643464 FORWARD LENGTH=612                                                                                                                                                                                                              | 615 | 612 | 0         | 99.5  | 79.7 | 84.2 |
| Rsa1.0_01182.1.g24320.t1 | gb EOA25772.1  hypothetical protein CARUB_v10019134mg [Capsella rubella]                                                                                                                                                                                                                                                                                                                                                                                                                                                                                                                                                                                                                                                                                                                                                                                                                                                                                                                                                                         | 395 | 418  | 0         | 105.8  | 87.1 | 91.1 | hypothetical protein CARUB_v10019134mg                        | gbpln | Capsella rubella     | AT3G58520.1   Symbols:   Ubiquitin carboxyl-terminal hydrolase family protein   chr3:21643921-21645277 REVERSE LENGTH=418                                                                                                                                                                                                  | 395 | 418 | 0         | 105.8 | 87.3 | 90.1 |
| Rsa1.0_01182.1.g24321.t2 | ref XP_002876467.1  hypothetical protein ARALYDRAFT_486305 [Arabidopsis lyrata subsp. lyrata] gi 297322305 gb EFH52726.1  hypothetical protein ARALYDRAFT_486305 [Arabidopsis lyrata subsp. lyrata] ref XP_002878227.1  endonuclease/exonuclease/phosphatase family protein [Arabidopsis lyrata subsp. lyrata] gi 297324065 gb EFH54486.1  endonuclease/exonuclease/phosphatase family protein [Arabidopsis lyrata subsp. lyrata]                                                                                                                                                                                                                                                                                                                                                                                                                                                                                                                                                                                                                | 349 | 353  | 1.00E-163 | 101.1  | 84.0 | 90.0 | hypothetical protein ARALYDRAFT_486305                        | gbpln | Arabidopsis lyrata   | AT3G58530.1   Symbols:   RNI-like superfamily protein   chr3:21645759-21648219 FORWARD LENGTH=353                                                                                                                                                                                                                          | 349 | 353 | 1.00E-156 | 101.1 | 77.4 | 84.0 |
| Rsa1.0_01182.1.g24322.t1 | ref NP_191416.1  DEAD-box ATP-dependent RNA helicase 52 [Arabidopsis thaliana] gi 75335836 sp Q9M2F9.1 RH52_ARATH RecName: Full=DEAD-box ATP-dependent RNA helicase 52 gi 6735374 emb CAB68195.1  ATP-dependent RNA helicase-like protein [Arabidopsis thaliana] gi 15146288 gb AAK83627.1  AT3g58570/F14P22_160 [Arabidopsis thaliana] gi 21593710 gb AAM65677.1  ATP-dependent RNA helicase-like protein [Arabidopsis thaliana] gi 27363456 gb AAO11647.1  At3g58570/F14P22_160 [Arabidopsis thaliana] gi 332646279 gb AEE79800.1  DEAD-box ATP-dependent RNA helicase 52 [Arabidopsis thaliana]                                                                                                                                                                                                                                                                                                                                                                                                                                               | 65  | 598  | 2.00E-16  | 920.0  | 81.5 | 87.7 | endonuclease/exonuclease/phosphatase family protein           | gbpln | Arabidopsis lyrata   | AT3G58560.1   Symbols:   DNAse I-like superfamily protein   chr3:21650880-21653896 REVERSE LENGTH=602                                                                                                                                                                                                                      | 65  | 602 | 6.00E-18  | 926.2 | 78.5 | 84.6 |
| Rsa1.0_01182.1.g24323.t2 | ref NP_191416.1  DEAD-box ATP-dependent RNA helicase 52 [Arabidopsis thaliana] gi 75335836 sp Q9M2F9.1 RH52_ARATH RecName: Full=DEAD-box ATP-dependent RNA helicase 52 gi 6735374 emb CAB68195.1  ATP-dependent RNA helicase-like protein [Arabidopsis thaliana] gi 15146288 gb AAK83627.1  AT3g58570/F14P22_160 [Arabidopsis thaliana] gi 21593710 gb AAM65677.1  ATP-dependent RNA helicase-like protein [Arabidopsis thaliana] gi 27363456 gb AAO11647.1  At3g58570/F14P22_160 [Arabidopsis thaliana] gi 332646279 gb AEE79800.1  DEAD-box ATP-dependent RNA helicase 52 [Arabidopsis thaliana]                                                                                                                                                                                                                                                                                                                                                                                                                                               | 659 | 646  | 0         | 98.0   | 75.4 | 78.6 | DEAD-box ATP-dependent RNA helicase 52                        | gbpln | Arabidopsis thaliana | AT3G58570.1   Symbols:   P-loop containing nucleoside triphosphate hydrolases superfamily protein   chr3:21657099-21660352 FORWARD LENGTH=646                                                                                                                                                                              | 659 | 646 | 0         | 98.0  | 75.4 | 78.6 |

|                          |                                                                                                                                                                                                                                                                                                                                                                                   |      |      |           |       |      |      |                                                             |       |                      |                                                                                                                                                                                                                                                                                                                                                                                                              |      |     |           |       |      |      |
|--------------------------|-----------------------------------------------------------------------------------------------------------------------------------------------------------------------------------------------------------------------------------------------------------------------------------------------------------------------------------------------------------------------------------|------|------|-----------|-------|------|------|-------------------------------------------------------------|-------|----------------------|--------------------------------------------------------------------------------------------------------------------------------------------------------------------------------------------------------------------------------------------------------------------------------------------------------------------------------------------------------------------------------------------------------------|------|-----|-----------|-------|------|------|
| Rsa1.0_01182.1.g24324.t1 | gb EOA23679.1  hypothetical protein CARUB_v10016885mg [Capsella rubella]                                                                                                                                                                                                                                                                                                          | 594  | 600  | 0         | 101.0 | 89.1 | 92.8 | hypothetical protein CARUB_v10016885mg                      | gbpln | Capsella rubella     | AT3G58580.1   Symbols:   DNase I-like superfamily protein   chr3:2160866-21663697 REVERSE LENGTH=603                                                                                                                                                                                                                                                                                                         | 594  | 603 | 0         | 101.5 | 88.9 | 93.4 |
| Rsa1.0_01182.1.g24325.t1 | gb EOA23697.1  hypothetical protein CARUB_v10016904mg [Capsella rubella]                                                                                                                                                                                                                                                                                                          | 585  | 591  | 0         | 101.0 | 92.6 | 96.9 | hypothetical protein CARUB_v10016904mg                      | gbpln | Capsella rubella     | AT3G58610.3   Symbols:   ketol-acid reductoisomerase   chr3:21671561-21674639 FORWARD LENGTH=591                                                                                                                                                                                                                                                                                                             | 585  | 591 | 0         | 101.0 | 92.6 | 96.2 |
| Rsa1.0_01182.1.g24326.t1 | ref XP_002876471.1  hypothetical protein ARALYDRAFT_486314 [Arabidopsis lyrata subsp. lyrata] gi 297322309 gb EFH52730.1  hypothetical protein ARALYDRAFT_486314 [Arabidopsis lyrata subsp. lyrata]                                                                                                                                                                               | 645  | 685  | 0         | 106.2 | 81.4 | 88.7 | hypothetical protein ARALYDRAFT_486314                      | gbpln | Arabidopsis lyrata   | AT3G58620.1   Symbols: TTL4   tetratricopeptide-repeat thioredoxin-like 4   chr3:21680397-21682959 FORWARD LENGTH=682                                                                                                                                                                                                                                                                                        | 645  | 682 | 0         | 105.7 | 81.4 | 88.7 |
| Rsa1.0_01182.1.g24327.t1 | gb AAS58438.1  DREB2A [Eutrema salsugineum]                                                                                                                                                                                                                                                                                                                                       | 325  | 340  | 1.00E-108 | 104.6 | 70.2 | 80.0 | DREB2A                                                      | gbpln | Eutrema salsugineum  | AT5G05410.1   Symbols: DREB2A, DREB2   DRE-binding protein 2A   chr5:1602650-1603657 FORWARD LENGTH=335                                                                                                                                                                                                                                                                                                      | 325  | 335 | 1.00E-109 | 103.1 | 68.3 | 80.0 |
| Rsa1.0_01182.1.g24328.t1 | ref NP_196159.1  LRR and NB-ARC domain-containing disease resistance protein [Arabidopsis thaliana] gi 46395986 sp Q9FLB4.1 DRL31_ARAT H RecName: Full=Putative disease resistance protein At5g05400 gi 10176752 dbj BAB09983.1  NBS/LRR disease resistance protein [Arabidopsis thaliana] gi 332003486 gb AED90869.1  putative disease resistance protein [Arabidopsis thaliana] | 302  | 874  | 1.00E-111 | 289.4 | 69.2 | 79.5 | LRR and NB-ARC domain-containing disease resistance protein | gbpln | Arabidopsis thaliana | AT5G05400.1   Symbols:   LRR and NB-ARC domains-containing disease resistance protein   chr5:1597745-1600369 REVERSE LENGTH=874                                                                                                                                                                                                                                                                              | 302  | 874 | 1.00E-114 | 289.4 | 69.2 | 79.5 |
| Rsa1.0_01182.1.g24329.t1 | gb AAG50806.1 AC079281.8 unknown protein [Arabidopsis thaliana]                                                                                                                                                                                                                                                                                                                   | 1981 | 1213 | 0         | 61.2  | 32.1 | 42.0 | unknown protein                                             | gbpln | Arabidopsis thaliana | AT5G05390.1   Symbols: LAC12   laccase 12   chr5:1594753-1597042 FORWARD LENGTH=565                                                                                                                                                                                                                                                                                                                          | 1981 | 565 | 0         | 28.5  | 25.1 | 25.9 |
| Rsa1.0_01182.1.g24330.t1 | ref XP_002871155.1  prenylated rab receptor 2 [Arabidopsis lyrata subsp. lyrata] gi 297316992 gb EFH47414.1  prenylated rab receptor 2 [Arabidopsis lyrata subsp. lyrata]                                                                                                                                                                                                         | 254  | 216  | 6.00E-84  | 85.0  | 69.3 | 72.0 | prenylated rab receptor 2                                   | gbpln | Arabidopsis lyrata   | AT5G05380.1   Symbols: PRA1.B3   prenylated RAB acceptor 1.B3   chr5:1592214-1592867 FORWARD LENGTH=217                                                                                                                                                                                                                                                                                                      | 254  | 217 | 1.00E-85  | 85.4  | 70.9 | 73.2 |
| Rsa1.0_01182.1.g24331.t1 | gb EOA19506.1  hypothetical protein CARUB_v10002333mg [Capsella rubella]                                                                                                                                                                                                                                                                                                          | 89   | 97   | 3.00E-26  | 109.0 | 65.2 | 65.2 | hypothetical protein CARUB_v10002333mg                      | gbpln | Capsella rubella     | AT5G05370.1   Symbols:   Cytochrome b-c1 complex, subunit 8 protein   chr5:1590977-1591869 REVERSE LENGTH=72                                                                                                                                                                                                                                                                                                 | 89   | 72  | 3.00E-28  | 80.9  | 62.9 | 65.2 |
| Rsa1.0_01182.1.g24332.t1 | ref XP_002871154.1  metal ion binding protein [Arabidopsis lyrata subsp. lyrata] gi 297316991 gb EFH47413.1  metal ion binding protein [Arabidopsis lyrata subsp. lyrata]                                                                                                                                                                                                         | 77   | 77   | 2.00E-33  | 100.0 | 94.8 | 96.1 | metal ion binding protein                                   | gbpln | Arabidopsis lyrata   | AT5G05365.1   Symbols:   Heavy metal transport/detoxification superfamily protein   chr5:1590125-1590672 FORWARD LENGTH=77                                                                                                                                                                                                                                                                                   | 77   | 77  | 4.00E-35  | 100.0 | 92.2 | 93.5 |
| Rsa1.0_01182.1.g24333.t1 | ref NP_196155.2  uncharacterized protein [Arabidopsis thaliana] gi 332003481 gb AED90864.1  uncharacterized protein AT5G05360 [Arabidopsis thaliana]                                                                                                                                                                                                                              | 166  | 163  | 2.00E-72  | 98.2  | 84.3 | 87.3 | uncharacterized protein                                     | gbpln | Arabidopsis thaliana | AT5G05360.1   Symbols:   unknown protein; INVOLVED IN: biological process unknown; LOCATED IN: chloroplast; BEST Arabidopsis thaliana protein match is: unknown protein (TAIR:AT2G38450.1); Has 84 Blast hits to 84 proteins in 24 species: Archae - 0; Bacteria - 8; Metazoa - 0; Fungi - 0; Plants - 73; Viruses - 0; Other Eukaryotes - 3 (source: NCBI BLink).   chr5:1588356-1589178 FORWARD LENGTH=163 | 166  | 163 | 6.00E-75  | 98.2  | 84.3 | 87.3 |
| Rsa1.0_01182.1.g24334.t1 | ref NP_196154.1  PLAC8 family protein [Arabidopsis thaliana] gi 52354439 gb AAU44540.1  hypothetical protein AT5G05350 [Arabidopsis thaliana] gi 332003479 gb AED90862.1  PLAC8 family protein [Arabidopsis thaliana]                                                                                                                                                             | 434  | 526  | 0         | 121.2 | 80.6 | 88.0 | PLAC8 family protein                                        | gbpln | Arabidopsis thaliana | AT5G05350.1   Symbols:   PLAC8 family protein   chr5:1585757-1587337 FORWARD LENGTH=526                                                                                                                                                                                                                                                                                                                      | 434  | 526 | 0         | 121.2 | 80.6 | 88.0 |
| Rsa1.0_01182.1.g24335.t1 | # # # # # # # # # # # # # # # # # # # # # #                                                                                                                                                                                                                                                                                                                                       |      |      |           |       |      |      |                                                             |       |                      |                                                                                                                                                                                                                                                                                                                                                                                                              |      |     |           |       |      |      |
| Rsa1.0_01182.1.g24336.t1 | gb ACT35473.1  peroxidase 52, partial [Brassica rapa]                                                                                                                                                                                                                                                                                                                             | 325  | 306  | 1.00E-172 | 94.2  | 91.7 | 93.8 | peroxidase 52, partial                                      | gbpln | Brassica rapa        | AT5G05340.1   Symbols:   Peroxidase superfamily protein   chr5:1579142-1580819 REVERSE LENGTH=324                                                                                                                                                                                                                                                                                                            | 325  | 324 | 1.00E-164 | 99.7  | 88.6 | 94.5 |
| Rsa1.0_01182.1.g24337.t1 | ref XP_002873206.1  predicted protein [Arabidopsis lyrata subsp. lyrata] gi 297319043 gb EFH49465.1  predicted protein [Arabidopsis lyrata subsp. lyrata]                                                                                                                                                                                                                         | 156  | 188  | 6.00E-48  | 120.5 | 69.2 | 80.1 | predicted protein                                           | gbpln | Arabidopsis lyrata   | AT5G05330.1   Symbols:   HMG-box (high mobility group) DNA-binding family protein   chr5:1577289-1578750 REVERSE LENGTH=220                                                                                                                                                                                                                                                                                  | 156  | 220 | 1.00E-47  | 141.0 | 66.0 | 80.1 |
| Rsa1.0_01182.1.g24338.t1 | ref NP_850772.1  TLC ATP/ADP transporter [Arabidopsis thaliana] gi 332003473 gb AED90856.1  TLC ATP/ADP transporter [Arabidopsis thaliana]                                                                                                                                                                                                                                        | 525  | 511  | 0         | 97.3  | 88.0 | 90.5 | TLC ATP/ADP transporter                                     | gbpln | Arabidopsis thaliana | AT5G05310.3   Symbols:   TLC ATP/ADP transporter   chr5:1571271-1574458 FORWARD LENGTH=511                                                                                                                                                                                                                                                                                                                   | 525  | 511 | 0         | 97.3  | 88.0 | 90.5 |



|                          |                                                                                                                                                                                                                                                                                                                                                                                                                            |     |     |           |       |      |      |                                                                                                                                                                                                                                     |       |                      |                                                                                                                                                                                                                                                                                                                                                                                                                                                                  |     |     |           |       |      |      |
|--------------------------|----------------------------------------------------------------------------------------------------------------------------------------------------------------------------------------------------------------------------------------------------------------------------------------------------------------------------------------------------------------------------------------------------------------------------|-----|-----|-----------|-------|------|------|-------------------------------------------------------------------------------------------------------------------------------------------------------------------------------------------------------------------------------------|-------|----------------------|------------------------------------------------------------------------------------------------------------------------------------------------------------------------------------------------------------------------------------------------------------------------------------------------------------------------------------------------------------------------------------------------------------------------------------------------------------------|-----|-----|-----------|-------|------|------|
| Rsa1.0_01182.1.g24339.t1 | ref NP_196149.1  uncharacterized protein [Arabidopsis thaliana] gi 10176742 dbj BAB09973.1  unnamed protein product [Arabidopsis thaliana] gi 332003470 gb AED90853.1  uncharacterized protein AT5G05300 [Arabidopsis thaliana]                                                                                                                                                                                            | 319 | 102 | 5.00E-16  | 32.0  | 17.6 | 19.7 | uncharacterized protein                                                                                                                                                                                                             | gbpln | Arabidopsis thaliana | AT5G05300.1   Symbols:   unknown protein; FUNCTIONS IN: molecular_function unknown; INVOLVED IN: biological_process unknown; LOCATED IN: endomembrane system; EXPRESSED IN: 10 plant structures; EXPRESSED DURING: 8 growth stages; Has 1807 Blast hits to 1807 proteins in 277 species: Archae - 0; Bacteria - 0; Metazoa - 736; Fungi - 347; Plants - 385; Viruses - 0; Other Eukaryotes - 339 (source: NCBI BLink).   chr5:1570102-1570410 REVERSE LENGTH=102 | 319 | 102 | 1.00E-18  | 32.0  | 17.6 | 19.7 |
| Rsa1.0_01182.1.g24340.t1 | ref XP_002871148.1  ATEXPA2 [Arabidopsis lyrata subsp. lyrata] gi 297316985 gb EFH47407.1  ATEXPA2 [Arabidopsis lyrata subsp. lyrata]                                                                                                                                                                                                                                                                                      | 201 | 253 | 4.00E-89  | 125.9 | 77.1 | 84.1 | ATEXPA2                                                                                                                                                                                                                             | gbpln | Arabidopsis lyrata   | AT5G05290.1   Symbols: ATEXPA2, EXP2, ATEXP2, ATHEXP ALPHA 1.12, EXPA2   expansin A2   chr5:1568752-1569712 FORWARD LENGTH=255                                                                                                                                                                                                                                                                                                                                   | 201 | 255 | 2.00E-91  | 126.9 | 77.1 | 83.6 |
| Rsa1.0_01182.1.g24341.t1 | ref XP_002873203.1  zinc finger family protein [Arabidopsis lyrata subsp. lyrata] gi 297319040 gb EFH49462.1  zinc finger family protein [Arabidopsis lyrata subsp. lyrata]                                                                                                                                                                                                                                                | 175 | 178 | 7.00E-70  | 101.7 | 76.6 | 84.6 | zinc finger family protein                                                                                                                                                                                                          | gbpln | Arabidopsis lyrata   | AT5G05280.1   Symbols:   RING/U-box superfamily protein   chr5:1565509-1566039 REVERSE LENGTH=176                                                                                                                                                                                                                                                                                                                                                                | 175 | 176 | 2.00E-71  | 100.6 | 77.7 | 84.0 |
| Rsa1.0_01182.1.g24342.t1 | pdb 4DOK A Chain A, Crystal Structure Of Arabidopsis Thaliana Chalcone-Isomerase Like Protein At5g05270 (Atchil) gi 386783410 pdb 4DOK B Chain B, Crystal Structure Of Arabidopsis Thaliana Chalcone-Isomerase Like Protein At5g05270 (Atchil)                                                                                                                                                                             | 205 | 208 | 1.00E-100 | 101.5 | 93.7 | 97.1 | Chain A, Crystal Structure Of Arabidopsis Thaliana Chalcone-Isomerase Like Protein At5g05270 (Atchil) gi 386783410 pdb 4DOK B Chain B, Crystal Structure Of Arabidopsis Thaliana Chalcone-Isomerase Like Protein At5g05270 (Atchil) | ----  | ----                 | AT5G05270.2   Symbols:   Chalcone-flavanone isomerase family protein   chr5:1563543-1564827 FORWARD LENGTH=209                                                                                                                                                                                                                                                                                                                                                   | 205 | 209 | 1.00E-102 | 102.0 | 93.7 | 97.1 |
| Rsa1.0_01183.1.g24343.t1 | ref XP_002880609.1  hypothetical protein ARALYDRAFT_901029 [Arabidopsis lyrata subsp. lyrata] gi 297326448 gb EFH56868.1  hypothetical protein ARALYDRAFT_901029 [Arabidopsis lyrata subsp. lyrata]                                                                                                                                                                                                                        | 430 | 464 | 1.00E-119 | 107.9 | 56.0 | 69.3 | hypothetical protein ARALYDRAFT_901029                                                                                                                                                                                              | gbpln | Arabidopsis lyrata   | AT3G18150.1   Symbols:   RNI-like superfamily protein   chr3:6217929-6219500 FORWARD LENGTH=456                                                                                                                                                                                                                                                                                                                                                                  | 430 | 456 | 1.00E-109 | 106.0 | 51.6 | 67.2 |
| Rsa1.0_01183.1.g24344.t5 | ref XP_002880609.1  hypothetical protein ARALYDRAFT_901029 [Arabidopsis lyrata subsp. lyrata] gi 297326448 gb EFH56868.1  hypothetical protein ARALYDRAFT_901029 [Arabidopsis lyrata subsp. lyrata]                                                                                                                                                                                                                        | 411 | 464 | 1.00E-107 | 112.9 | 54.0 | 68.9 | hypothetical protein ARALYDRAFT_901029                                                                                                                                                                                              | gbpln | Arabidopsis lyrata   | AT3G18150.1   Symbols:   RNI-like superfamily protein   chr3:6217929-6219500 FORWARD LENGTH=456                                                                                                                                                                                                                                                                                                                                                                  | 411 | 456 | 1.00E-104 | 110.9 | 53.0 | 67.4 |
| Rsa1.0_01183.1.g24345.t1 | gb EOA30184.1  hypothetical protein CARUB_v10013301mg [Capsella rubella]                                                                                                                                                                                                                                                                                                                                                   | 499 | 589 | 1.00E-169 | 118.0 | 61.7 | 69.7 | hypothetical protein CARUB_v10013301mg                                                                                                                                                                                              | gbpln | Capsella rubella     | AT3G18180.1   Symbols:   Glycosyltransferase family 61 protein   chr3:6230270-6231878 FORWARD LENGTH=470                                                                                                                                                                                                                                                                                                                                                         | 499 | 470 | 1.00E-154 | 94.2  | 55.3 | 64.9 |
| Rsa1.0_01183.1.g24346.t1 | gb EOA30184.1  hypothetical protein CARUB_v10013301mg [Capsella rubella]                                                                                                                                                                                                                                                                                                                                                   | 503 | 589 | 0         | 117.1 | 66.2 | 75.9 | hypothetical protein CARUB_v10013301mg                                                                                                                                                                                              | gbpln | Capsella rubella     | AT3G18180.1   Symbols:   Glycosyltransferase family 61 protein   chr3:6230270-6231878 FORWARD LENGTH=470                                                                                                                                                                                                                                                                                                                                                         | 503 | 470 | 1.00E-142 | 93.4  | 53.3 | 64.4 |
| Rsa1.0_01183.1.g24347.t1 | # # # # # # # # # # # # # # # #                                                                                                                                                                                                                                                                                                                                                                                            |     |     |           |       |      |      |                                                                                                                                                                                                                                     | ----  | ----                 | # # # # # # # # # #                                                                                                                                                                                                                                                                                                                                                                                                                                              |     |     |           |       |      |      |
| Rsa1.0_01183.1.g24348.t1 | ref NP_188447.1  TCP-1/cpn60 chaperonin family protein [Arabidopsis thaliana] gi 9294075 dbj BAB02032.1  cytosolic chaperonin, delta-subunit [Arabidopsis thaliana] gi 20466822 gb AAM20728.1  chaperonin subunit, putative [Arabidopsis thaliana] gi 28059669 gb AAO30081.1  chaperonin subunit, putative [Arabidopsis thaliana] gi 332642540 gb AEE76061.1  TCP-1/cpn60 chaperonin family protein [Arabidopsis thaliana] | 534 | 536 | 0         | 100.4 | 94.4 | 97.8 | TCP-1/cpn60 chaperonin family protein                                                                                                                                                                                               | gbpln | Arabidopsis thaliana | AT3G18190.1   Symbols:   TCP-1/cpn60 chaperonin family protein   chr3:6232226-6233836 FORWARD LENGTH=536                                                                                                                                                                                                                                                                                                                                                         | 534 | 536 | 0         | 100.4 | 94.4 | 97.8 |
| Rsa1.0_01183.1.g24349.t1 | gb EOA30759.1  hypothetical protein CARUB_v10013901mg [Capsella rubella]                                                                                                                                                                                                                                                                                                                                                   | 381 | 392 | 0         | 102.9 | 79.0 | 90.0 | hypothetical protein CARUB_v10013901mg                                                                                                                                                                                              | gbpln | Capsella rubella     | AT3G18210.2   Symbols:   2-oxoglutarate (2OG) and Fe(II)-dependent oxygenase superfamily protein   chr3:6238264-6240396 REVERSE LENGTH=394                                                                                                                                                                                                                                                                                                                       | 381 | 394 | 0         | 103.4 | 78.2 | 89.5 |
| Rsa1.0_01183.1.g24350.t1 | ref XP_002883119.1  hypothetical protein ARALYDRAFT_898182 [Arabidopsis lyrata subsp. lyrata] gi 297328959 gb EFH59378.1  hypothetical protein ARALYDRAFT_898182 [Arabidopsis lyrata subsp. lyrata]                                                                                                                                                                                                                        | 245 | 244 | 1.00E-120 | 99.6  | 84.9 | 92.7 | hypothetical protein ARALYDRAFT_898182                                                                                                                                                                                              | gbpln | Arabidopsis lyrata   | AT3G18215.1   Symbols:   Protein of unknown function, DUF599   chr3:6240968-6242358 FORWARD LENGTH=244                                                                                                                                                                                                                                                                                                                                                           | 245 | 244 | 1.00E-116 | 99.6  | 82.9 | 91.4 |



|                          |                                                                                                                                                                                                                                                                                                                                                                                                                                                                                                                                                                                                                                                                                                                                                                                                         |     |     |          |       |      |      |                                           |       |                         |                                                                                                                              |     |     |          |       |      |      |
|--------------------------|---------------------------------------------------------------------------------------------------------------------------------------------------------------------------------------------------------------------------------------------------------------------------------------------------------------------------------------------------------------------------------------------------------------------------------------------------------------------------------------------------------------------------------------------------------------------------------------------------------------------------------------------------------------------------------------------------------------------------------------------------------------------------------------------------------|-----|-----|----------|-------|------|------|-------------------------------------------|-------|-------------------------|------------------------------------------------------------------------------------------------------------------------------|-----|-----|----------|-------|------|------|
| Rsa1.0_01185.1.g24363.t1 | ref XP_002892087.1  T25K16.10<br>[Arabidopsis lyrata subsp. lyrata]<br>gi 297337929 gb EFH68346.1  T25K16.10<br>[Arabidopsis lyrata subsp. lyrata]                                                                                                                                                                                                                                                                                                                                                                                                                                                                                                                                                                                                                                                      | 522 | 527 | 0        | 101.0 | 84.7 | 90.2 | T25K16.10                                 | gbpln | Arabidopsis<br>lyrata   | AT1G01110.2   Symbols: IQD18   IQ-domain<br>18   chr1:52239-54494 FORWARD<br>LENGTH=527                                      | 522 | 527 | 0        | 101.0 | 84.1 | 88.9 |
| Rsa1.0_01185.1.g24364.t1 | ref NP_567190.1  60S acidic ribosomal<br>protein P1-2 [Arabidopsis thaliana]<br>gi 30678744 ref NP_849278.1  60S acidic<br>ribosomal protein P1-2 [Arabidopsis<br>thaliana]<br>gi 41019478 sp O23095.2 RLA12_ARATH<br>RecName: Full=60S acidic ribosomal<br>protein P1-2<br>gi 13605597 gb AAK32792.1 AF361624.1<br>AT4g00810/A.TM018A10.9<br>[Arabidopsis thaliana]<br>gi 15777871 gb AAL05896.1 <br>AT4g00810/A.TM018A10.9<br>[Arabidopsis thaliana]<br>gi 21554797 gb AAM63694.1  acidic<br>ribosomal protein p1 [Arabidopsis<br>thaliana] gi 222423235 dbj BAH19594.1 <br>AT4G00810 [Arabidopsis thaliana]<br>gi 332656537 gb AEE81937.1  60S acidic<br>ribosomal protein P1-2 [Arabidopsis<br>thaliana] gi 332656538 gb AEE81938.1 <br>60S acidic ribosomal protein P1-2<br>[Arabidopsis thaliana] | 113 | 113 | 8.00E-36 | 100.0 | 84.1 | 89.4 | 60S acidic ribosomal<br>protein P1-2      | gbpln | Arabidopsis<br>thaliana | AT4G00810.2   Symbols:   60S acidic<br>ribosomal protein family   chr4:346179-<br>346957 REVERSE LENGTH=113                  | 113 | 113 | 1.00E-38 | 100.0 | 84.1 | 89.4 |
| Rsa1.0_01185.1.g24365.t1 | gb EOA040477.1  hypothetical protein<br>CARUB_v10009201mg [Capsella rubella]                                                                                                                                                                                                                                                                                                                                                                                                                                                                                                                                                                                                                                                                                                                            | 427 | 430 | 0        | 100.7 | 94.6 | 97.2 | hypothetical protein<br>CARUB_v10009201mg | gbpln | Capsella<br>rubella     | AT1G01090.1   Symbols: PDH-E1 ALPHA  <br>pyruvate dehydrogenase E1 alpha  <br>chr1:47705-49166 REVERSE LENGTH=428            | 427 | 428 | 0        | 100.2 | 92.3 | 96.0 |
| Rsa1.0_01185.1.g24366.t1 | gb EOA36541.1  hypothetical protein<br>CARUB_v10011623mg [Capsella rubella]                                                                                                                                                                                                                                                                                                                                                                                                                                                                                                                                                                                                                                                                                                                             | 268 | 251 | 1.00E-75 | 93.7  | 54.1 | 60.1 | hypothetical protein<br>CARUB_v10011623mg | gbpln | Capsella<br>rubella     | AT3G04430.1   Symbols: anac049, NAC049  <br>NAC domain containing protein 49  <br>chr3:1175506-1176986 REVERSE<br>LENGTH=198 | 268 | 198 | 6.00E-64 | 73.9  | 50.7 | 55.2 |
| Rsa1.0_01185.1.g24367.t1 | ref NP_171727.2  NAC domain-<br>containing protein 5 [Arabidopsis<br>thaliana]<br>gi 238065080 sp O81914.2 NAC5_ARAT<br>H RecName: Full=NAC domain-<br>containing protein 5; Short=ANAC005<br>gi 225897862 dbj BAH30263.1 <br>hypothetical protein [Arabidopsis<br>thaliana] gi 332189285 gb AEE27406.1 <br>NAC domain-containing protein 5<br>[Arabidopsis thaliana]<br>ref NP_171727.2  NAC domain-<br>containing protein 5 [Arabidopsis<br>thaliana]<br>gi 238065080 sp O81914.2 NAC5_ARAT<br>H RecName: Full=NAC domain-<br>containing protein 5; Short=ANAC005<br>gi 225897862 dbj BAH30263.1 <br>hypothetical protein [Arabidopsis<br>thaliana] gi 332189285 gb AEE27406.1 <br>NAC domain-containing protein 5<br>[Arabidopsis thaliana]                                                          | 382 | 362 | 3.00E-86 | 94.8  | 54.5 | 65.2 | NAC domain-<br>containing protein 5       | gbpln | Arabidopsis<br>thaliana | AT1G02250.1   Symbols: anac005, NAC005  <br>NAC domain containing protein 5  <br>chr1:437951-439559 REVERSE<br>LENGTH=362    | 382 | 362 | 7.00E-89 | 94.8  | 54.5 | 65.2 |
| Rsa1.0_01185.1.g24368.t1 | ref NP_171727.2  NAC domain-<br>containing protein 5 [Arabidopsis<br>thaliana]<br>gi 238065080 sp O81914.2 NAC5_ARAT<br>H RecName: Full=NAC domain-<br>containing protein 5; Short=ANAC005<br>gi 225897862 dbj BAH30263.1 <br>hypothetical protein [Arabidopsis<br>thaliana] gi 332189285 gb AEE27406.1 <br>NAC domain-containing protein 5<br>[Arabidopsis thaliana]                                                                                                                                                                                                                                                                                                                                                                                                                                   | 380 | 362 | 9.00E-79 | 95.3  | 51.8 | 64.2 | NAC domain-<br>containing protein 5       | gbpln | Arabidopsis<br>thaliana | AT1G02250.1   Symbols: anac005, NAC005  <br>NAC domain containing protein 5  <br>chr1:437951-439559 REVERSE<br>LENGTH=362    | 380 | 362 | 2.00E-81 | 95.3  | 51.8 | 64.2 |
| Rsa1.0_01185.1.g24369.t1 | #                                                                                                                                                                                                                                                                                                                                                                                                                                                                                                                                                                                                                                                                                                                                                                                                       | #   | #   | #        | #     | #    | -    | ----                                      | ----  | ----                    | #                                                                                                                            | #   | #   | #        | #     | #    |      |
| Rsa1.0_01185.1.g24370.t1 | ref XP_002892094.1  hypothetical<br>protein ARALYDRAFT_333558<br>[Arabidopsis lyrata subsp. lyrata]<br>gi 297337936 gb EFH68353.1 <br>hypothetical protein<br>ARALYDRAFT_333558 [Arabidopsis<br>lyrata subsp. lyrata]                                                                                                                                                                                                                                                                                                                                                                                                                                                                                                                                                                                   | 318 | 216 | 1.00E-56 | 67.9  | 42.8 | 54.1 | hypothetical protein<br>ARALYDRAFT_333558 | gbpln | Arabidopsis<br>lyrata   | AT1G02250.1   Symbols: anac005, NAC005  <br>NAC domain containing protein 5  <br>chr1:437951-439559 REVERSE<br>LENGTH=362    | 318 | 362 | 1.00E-58 | 113.8 | 45.3 | 53.5 |
| Rsa1.0_01185.1.g24371.t1 | ref NP_171727.2  NAC domain-<br>containing protein 5 [Arabidopsis<br>thaliana]<br>gi 238065080 sp O81914.2 NAC5_ARAT<br>H RecName: Full=NAC domain-<br>containing protein 5; Short=ANAC005<br>gi 225897862 dbj BAH30263.1 <br>hypothetical protein [Arabidopsis<br>thaliana] gi 332189285 gb AEE27406.1 <br>NAC domain-containing protein 5<br>[Arabidopsis thaliana]                                                                                                                                                                                                                                                                                                                                                                                                                                   | 399 | 362 | 2.00E-84 | 90.7  | 50.4 | 61.9 | NAC domain-<br>containing protein 5       | gbpln | Arabidopsis<br>thaliana | AT1G02250.1   Symbols: anac005, NAC005  <br>NAC domain containing protein 5  <br>chr1:437951-439559 REVERSE<br>LENGTH=362    | 399 | 362 | 4.00E-87 | 90.7  | 50.4 | 61.9 |

|                          |                                                                                                                                                                                                                                                                                                                                                                                                                                       |     |      |           |       |      |      |                                                       |       |                      |                                                                                                                                                                                                                                                                                    |     |      |           |       |      |      |
|--------------------------|---------------------------------------------------------------------------------------------------------------------------------------------------------------------------------------------------------------------------------------------------------------------------------------------------------------------------------------------------------------------------------------------------------------------------------------|-----|------|-----------|-------|------|------|-------------------------------------------------------|-------|----------------------|------------------------------------------------------------------------------------------------------------------------------------------------------------------------------------------------------------------------------------------------------------------------------------|-----|------|-----------|-------|------|------|
| Rsa1.0_01185.1.g24372.t1 | refNP_563646.1   uncharacterized calcium-binding protein [Arabidopsis thaliana]<br>gi 148887024 sp O81916.2 YC22_ARATH<br>RecName: Full=Uncharacterized calcium-binding protein At1g02270<br>gi 15450673 gb AK96608.1 <br>At1g02270/T6A9.9 [Arabidopsis thaliana] gi 17380606 gb AAL36066.1 <br>At1g02270/T6A9.9 [Arabidopsis thaliana] gi 332189287 gb AEE27408.1 <br>uncharacterized calcium-binding protein [Arabidopsis thaliana] | 491 | 484  | 0         | 98.6  | 83.5 | 90.4 | uncharacterized calcium-binding protein               | gbpln | Arabidopsis thaliana | AT1G02270.1   Symbols:   Calcium-binding endonuclease/exonuclease/phosphatase family   chr1:443301-446197 REVERSE LENGTH=484                                                                                                                                                       | 491 | 484  | 0         | 98.6  | 83.5 | 90.4 |
| Rsa1.0_01185.1.g24373.t1 | gb EOA36595.1  hypothetical protein CARUB_v10011793mg [Capsella rubella]                                                                                                                                                                                                                                                                                                                                                              | 314 | 317  | 1.00E-143 | 101.0 | 86.0 | 92.4 | hypothetical protein CARUB_v10011793mg                | gbpln | Capsella rubella     | AT2G41610.1   Symbols:   unknown protein; Has 35333 Blast hits to 34131 proteins in 2444 species: Archae - 798; Bacteria - 22429; Metazoa - 974; Fungi - 991; Plants - 531; Viruses - 0; Other Eukaryotes - 9610 (source: NCBI BLINK).   chr2:17347181-17348113 FORWARD LENGTH=310 | 314 | 310  | 1.00E-129 | 98.7  | 81.5 | 91.7 |
| Rsa1.0_01185.1.g24374.t1 | gb AAQ17548.1  TOC33 [Brassica napus]                                                                                                                                                                                                                                                                                                                                                                                                 | 297 | 297  | 1.00E-169 | 100.0 | 98.3 | 99.3 | TOC33                                                 | gbpln | Brassica napus       | AT1G02280.2   Symbols: TOC33, ATTOC33, PPI1   translocan at the outer envelope membrane of chloroplasts 33   chr1:448665-450246 REVERSE LENGTH=297                                                                                                                                 | 297 | 297  | 1.00E-167 | 100.0 | 94.9 | 98.0 |
| Rsa1.0_01185.1.g24375.t1 | ref XP_002889395.1  hypothetical protein ARALYDRAFT_887368 [Arabidopsis lyrata subsp. lyrata]<br>gi 297335237 gb EFH65654.1 <br>hypothetical protein ARALYDRAFT_887368 [Arabidopsis lyrata subsp. lyrata]                                                                                                                                                                                                                             | 361 | 360  | 0         | 99.7  | 87.3 | 93.1 | hypothetical protein ARALYDRAFT_887368                | gbpln | Arabidopsis lyrata   | AT1G02305.1   Symbols:   Cysteine proteinases superfamily protein   chr1:455816-457974 FORWARD LENGTH=362                                                                                                                                                                          | 361 | 362  | 0         | 100.3 | 87.3 | 93.6 |
| Rsa1.0_01185.1.g24376.t1 | #                                                                                                                                                                                                                                                                                                                                                                                                                                     | #   | #    | #         | #     | #    | #    | -                                                     | ----  | ----                 | #                                                                                                                                                                                                                                                                                  | #   | #    | #         | #     | #    |      |
| Rsa1.0_01185.1.g24377.t1 | ref NP_001190727.1  structural constituent of ribosome [Arabidopsis thaliana] gi 332658002 gb AEE83402.1 <br>structural constituent of ribosome [Arabidopsis thaliana]                                                                                                                                                                                                                                                                | 182 | 815  | 6.00E-30  | 447.8 | 38.5 | 49.5 | structural constituent of ribosome                    | gbpln | Arabidopsis thaliana | AT4G14250.2   Symbols:   structural constituent of ribosome   chr4:8208985-8213237 REVERSE LENGTH=815                                                                                                                                                                              | 182 | 815  | 2.00E-32  | 447.8 | 38.5 | 49.5 |
| Rsa1.0_01185.1.g24378.t1 | ref XP_002874719.1  hypothetical protein ARALYDRAFT_911537 [Arabidopsis lyrata subsp. lyrata]<br>gi 297320556 gb EFH50978.1 <br>hypothetical protein ARALYDRAFT_911537 [Arabidopsis lyrata subsp. lyrata]                                                                                                                                                                                                                             | 373 | 456  | 1.00E-99  | 122.3 | 53.6 | 64.9 | hypothetical protein ARALYDRAFT_911537                | gbpln | Arabidopsis lyrata   | AT4G36840.1   Symbols:   Galactose oxidase/kelch repeat superfamily protein   chr4:17352166-17352882 FORWARD LENGTH=238                                                                                                                                                            | 373 | 238  | 9.00E-35  | 63.8  | 26.8 | 37.0 |
| Rsa1.0_01185.1.g24379.t1 | gb AAF18538.1 AC006551_24 Very similar to retrotransposon reverse transcriptase [Arabidopsis thaliana]<br>ref NP_171733.2  mannan endo-1,4-beta-mannosidase 1 [Arabidopsis thaliana]<br>gi 75263247 sp Q9FZ29.1 MAN1_ARATH<br>RecName: Full=Mannan endo-1,4-beta-mannosidase 1; AltName: Full=Beta-mannanase 1; AltName: Full=Endo-beta-1,4-mannanase 1; Short=AtMAN1;<br>Flags: Precursor                                            | 133 | 1231 | 5.00E-17  | 925.6 | 35.3 | 48.9 | Very similar to retrotransposon reverse transcriptase | gbpln | Arabidopsis thaliana | #                                                                                                                                                                                                                                                                                  | #   | #    | #         | #     | #    |      |
| Rsa1.0_01185.1.g24380.t1 | gi 9857528 gb AAQ00883.1 AC064879.1<br>Similar to mannan endo-1,4-beta-mannosidase [Arabidopsis thaliana]<br>gi 19699011 gb AAL91241.1  (1-4)-beta-mannan endohydrolase precursor, putative [Arabidopsis thaliana]<br>gi 25084063 gb AAN72165.1  (1-4)-beta-mannan endohydrolase precursor, putative [Arabidopsis thaliana]<br>gi 332189293 gb AEE27414.1  mannan endo-1,4-beta-mannosidase 1 [Arabidopsis thaliana]                  | 408 | 411  | 0         | 100.7 | 88.5 | 94.4 | mannan endo-1,4-beta-mannosidase 1                    | gbpln | Arabidopsis thaliana | AT1G02310.1   Symbols: MAN1   Glycosyl hydrolase superfamily protein   chr1:458243-460652 REVERSE LENGTH=411                                                                                                                                                                       | 408 | 411  | 0         | 100.7 | 88.5 | 94.4 |
| Rsa1.0_01186.1.g24381.t1 | dbj BAJ34051.1  unnamed protein product [Thellungiella halophila]                                                                                                                                                                                                                                                                                                                                                                     | 250 | 251  | 1.00E-129 | 100.4 | 90.0 | 96.0 | unnamed protein product                               | ----  | ----                 | AT5G20700.1   Symbols:   Protein of unknown function (DUF581)   chr5:7006178-7007003 REVERSE LENGTH=248                                                                                                                                                                            | 250 | 248  | 1.00E-129 | 99.2  | 88.0 | 94.0 |
| Rsa1.0_01186.1.g24382.t2 | emb CAB40067.1  putative retrotransposon polyprotein [Arabidopsis thaliana]<br>gi 7267797 emb CAB81200.1  putative retrotransposon polyprotein [Arabidopsis thaliana]                                                                                                                                                                                                                                                                 | 272 | 1203 | 6.00E-79  | 442.3 | 59.6 | 74.3 | putative retrotransposon polyprotein                  | gbpln | Arabidopsis thaliana | AT4G23160.1   Symbols: CRK8   cysteine-rich RLK (RECEPTOR-like protein kinase) 8   chr4:12129485-12134086 FORWARD LENGTH=1262                                                                                                                                                      | 272 | 1262 | 3.00E-58  | 464.0 | 48.5 | 66.2 |
| Rsa1.0_01186.1.g24383.t1 | gb EOA23063.1  hypothetical protein CARUB_v10003833mg [Capsella rubella]                                                                                                                                                                                                                                                                                                                                                              | 641 | 660  | 0         | 103.0 | 76.3 | 84.7 | hypothetical protein CARUB_v10003833mg                | gbpln | Capsella rubella     | AT5G20690.1   Symbols:   Leucine-rich repeat protein kinase family protein   chr5:7002453-7004551 FORWARD LENGTH=659                                                                                                                                                               | 641 | 659  | 0         | 102.8 | 74.6 | 84.6 |

|                          |                                                                                                                                                                                                                    |      |      |           |       |      |      |                                                         |       |                      |                                                                                                                                                                                                                                                                                                                                                        |      |      |           |       |      |      |
|--------------------------|--------------------------------------------------------------------------------------------------------------------------------------------------------------------------------------------------------------------|------|------|-----------|-------|------|------|---------------------------------------------------------|-------|----------------------|--------------------------------------------------------------------------------------------------------------------------------------------------------------------------------------------------------------------------------------------------------------------------------------------------------------------------------------------------------|------|------|-----------|-------|------|------|
| Rsa1.0_01186.1.g24384.t1 | gb[EOA20312.1] hypothetical protein CARUB_v10000619mg [Capsella rubella]                                                                                                                                           | 502  | 554  | 0         | 110.4 | 85.7 | 91.4 | hypothetical protein CARUB_v10000619mg                  | gbpln | Capsella rubella     | AT5G20680.2   Symbols:   TRICHOME BIREFRINGENCE-LIKE 16   chr5:6999221-7001596 FORWARD LENGTH=533                                                                                                                                                                                                                                                      | 502  | 533  | 0         | 106.2 | 84.1 | 91.2 |
| Rsa1.0_01186.1.g24385.t1 | emb[CAB40035.1] retrotransposon like protein [Arabidopsis thaliana] gi 7267767 emb CAB81170.1  retrotransposon like protein [Arabidopsis thaliana]                                                                 | 1316 | 1515 | 0         | 115.1 | 53.7 | 68.8 | retrotransposon like protein                            | gbpln | Arabidopsis thaliana | AT4G23160.1   Symbols: CRK8   cysteine-rich RLK (RECEPTOR-like protein kinase) 8   chr4:12129485-12134086 FORWARD LENGTH=1262                                                                                                                                                                                                                          | 1316 | 1262 | 2.00E-85  | 95.9  | 12.9 | 19.5 |
| Rsa1.0_01186.1.g24386.t1 | ref NP_197567.1  uncharacterized protein [Arabidopsis thaliana] gi 149944295 gb ABR46190.1  At5g20670 [Arabidopsis thaliana] gi 33200549.1 gb AED92874.1  uncharacterized protein AT5G20670 [Arabidopsis thaliana] | 150  | 153  | 2.00E-69  | 102.0 | 88.0 | 91.3 | uncharacterized protein                                 | gbpln | Arabidopsis thaliana | AT5G20670.1   Symbols:   Protein of unknown function (DUF1677)   chr5:6993332-6993793 REVERSE LENGTH=153                                                                                                                                                                                                                                               | 150  | 153  | 6.00E-72  | 102.0 | 88.0 | 91.3 |
| Rsa1.0_01186.1.g24387.t1 | gb[EOA21677.1] hypothetical protein CARUB_v10002100mg, partial [Capsella rubella]                                                                                                                                  | 143  | 173  | 5.00E-69  | 121.0 | 88.1 | 94.4 | hypothetical protein CARUB_v10002100mg, partial         | gbpln | Capsella rubella     | AT5G20650.1   Symbols: COPT5   copper transporter 5   chr5:6985481-6985921 REVERSE LENGTH=146                                                                                                                                                                                                                                                          | 143  | 146  | 6.00E-69  | 102.1 | 88.1 | 93.7 |
| Rsa1.0_01186.1.g24388.t1 | gb ABK28708.1  unknown [Arabidopsis thaliana]                                                                                                                                                                      | 217  | 216  | 2.00E-96  | 99.5  | 80.2 | 90.8 | unknown                                                 | gbpln | Arabidopsis thaliana | AT5G20640.1   Symbols:   Protein of unknown function (DUF567)   chr5:6984379-6985205 FORWARD LENGTH=215                                                                                                                                                                                                                                                | 217  | 215  | 6.00E-99  | 99.1  | 80.2 | 90.8 |
| Rsa1.0_01186.1.g24389.t1 | #                                                                                                                                                                                                                  | #    | #    | #         | #     | #    | -    | ----                                                    | ----  | #                    | #                                                                                                                                                                                                                                                                                                                                                      | #    | #    | #         | #     | #    | #    |
| Rsa1.0_01186.1.g24390.t1 | #                                                                                                                                                                                                                  | #    | #    | #         | #     | #    | -    | ----                                                    | ----  | #                    | #                                                                                                                                                                                                                                                                                                                                                      | #    | #    | #         | #     | #    | #    |
| Rsa1.0_01186.1.g24391.t1 | ref XP_002874007.1  hypothetical protein ARALYDRAFT_910104 [Arabidopsis lyrata subsp. lyrata] gi 297319844 gb EFH50266.1  hypothetical protein ARALYDRAFT_910104 [Arabidopsis lyrata subsp. lyrata]                | 211  | 211  | 1.00E-112 | 100.0 | 96.2 | 98.1 | hypothetical protein ARALYDRAFT_910104                  | gbpln | Arabidopsis lyrata   | AT5G20630.1   Symbols: GLP3, GLP3A, GLP3B, ATGER3, GER3   germin 3   chr5:6975315-6975950 REVERSE LENGTH=211                                                                                                                                                                                                                                           | 211  | 211  | 1.00E-112 | 100.0 | 93.8 | 97.2 |
| Rsa1.0_01186.1.g24392.t1 | ref NP_197561.1  uncharacterized protein [Arabidopsis thaliana] gi 332005483 gb AED92866.1  uncharacterized protein AT5G20610 [Arabidopsis thaliana]                                                               | 1085 | 1164 | 0         | 107.3 | 82.1 | 88.5 | uncharacterized protein                                 | gbpln | Arabidopsis thaliana | AT5G20610.1   Symbols:   unknown protein; BEST Arabidopsis thaliana protein match is: unknown protein (TAIR:AT5G26160.1); Has 918 Blast hits to 759 proteins in 180 species: Archae - 6; Bacteria - 105; Metazoa - 264; Fungi - 89; Plants - 167; Viruses - 5; Other Eukaryotes - 282 (source: NCBI BLINK).   chr5:6969184-6972794 FORWARD LENGTH=1164 | 1085 | 1164 | 0         | 107.3 | 82.1 | 88.5 |
| Rsa1.0_01187.1.g24393.t1 | gb AAD32898.1  putative retroelement pol polyprotein [Arabidopsis thaliana]                                                                                                                                        | 771  | 1307 | 0         | 169.5 | 64.9 | 79.8 | putative retroelement pol polyprotein                   | gbpln | Arabidopsis thaliana | AT4G23160.1   Symbols: CRK8   cysteine-rich RLK (RECEPTOR-like protein kinase) 8   chr4:12129485-12134086 FORWARD LENGTH=1262                                                                                                                                                                                                                          | 771  | 1262 | 1.00E-104 | 163.7 | 25.4 | 39.9 |
| Rsa1.0_01187.1.g24394.t1 | #                                                                                                                                                                                                                  | #    | #    | #         | #     | #    | -    | ----                                                    | ----  | #                    | #                                                                                                                                                                                                                                                                                                                                                      | #    | #    | #         | #     | #    | #    |
| Rsa1.0_01187.1.g24395.t1 | #                                                                                                                                                                                                                  | #    | #    | #         | #     | #    | -    | ----                                                    | ----  | #                    | #                                                                                                                                                                                                                                                                                                                                                      | #    | #    | #         | #     | #    | #    |
| Rsa1.0_01187.1.g24396.t1 | #                                                                                                                                                                                                                  | #    | #    | #         | #     | #    | -    | ----                                                    | ----  | #                    | #                                                                                                                                                                                                                                                                                                                                                      | #    | #    | #         | #     | #    | #    |
| Rsa1.0_01187.1.g24397.t2 | emb CAA65042.1  chlorophyll a/b-binding protein CP26 in PS II [Brassica juncea]                                                                                                                                    | 158  | 283  | 4.00E-78  | 179.1 | 90.5 | 91.1 | chlorophyll a/b-binding protein CP26 in PS II           | gbpln | Brassica juncea      | AT4G10340.1   Symbols: LHCB5   light harvesting complex of photosystem II 5   chr4:6408200-6409496 FORWARD LENGTH=280                                                                                                                                                                                                                                  | 158  | 280  | 3.00E-63  | 177.2 | 86.1 | 88.6 |
| Rsa1.0_01187.1.g24398.t1 | gb AAD32898.1  putative retroelement pol polyprotein [Arabidopsis thaliana]                                                                                                                                        | 1025 | 1307 | 1.00E-161 | 127.5 | 32.3 | 40.5 | putative retroelement pol polyprotein                   | gbpln | Arabidopsis thaliana | AT4G23160.1   Symbols: CRK8   cysteine-rich RLK (RECEPTOR-like protein kinase) 8   chr4:12129485-12134086 FORWARD LENGTH=1262                                                                                                                                                                                                                          | 1025 | 1262 | 2.00E-59  | 123.1 | 15.8 | 23.3 |
| Rsa1.0_01187.1.g24399.t1 | dbj BAB08714.1  non-LTR retroelement reverse transcriptase-like protein [Arabidopsis thaliana]                                                                                                                     | 1805 | 1197 | 1.00E-135 | 66.3  | 18.4 | 28.4 | non-LTR retroelement reverse transcriptase-like protein | gbpln | Arabidopsis thaliana | AT4G29090.1   Symbols:   Ribonuclease H-like superfamily protein   chr4:14333528-14335255 FORWARD LENGTH=575                                                                                                                                                                                                                                           | 1805 | 575  | 4.00E-78  | 31.9  | 10.1 | 16.0 |
| Rsa1.0_01187.1.g24400.t1 | ref XP_002896107.1  predicted protein [Arabidopsis lyrata subsp. lyrata] gi 297331947 gb EFH62366.1  predicted protein [Arabidopsis lyrata subsp. lyrata]                                                          | 512  | 337  | 3.00E-66  | 65.8  | 33.4 | 40.6 | predicted protein                                       | gbpln | Arabidopsis lyrata   | #                                                                                                                                                                                                                                                                                                                                                      | #    | #    | #         | #     | #    | #    |
| Rsa1.0_01188.1.g24401.t1 | gb ACG60682.1  transposon-like ORF [Brassica oleracea var. alboglabra]                                                                                                                                             | 171  | 704  | 3.00E-37  | 411.7 | 56.1 | 72.5 | transposon-like ORF                                     | gbpln | Brassica oleracea    | #                                                                                                                                                                                                                                                                                                                                                      | #    | #    | #         | #     | #    | #    |
| Rsa1.0_01188.1.g24402.t1 | #                                                                                                                                                                                                                  | #    | #    | #         | #     | #    | -    | ----                                                    | ----  | #                    | #                                                                                                                                                                                                                                                                                                                                                      | #    | #    | #         | #     | #    | #    |
| Rsa1.0_01188.1.g24403.t1 | ref XP_002865280.1  hypothetical protein ARALYDRAFT_494469 [Arabidopsis lyrata subsp. lyrata] gi 297311115 gb EFH41539.1  hypothetical protein ARALYDRAFT_494469 [Arabidopsis lyrata subsp. lyrata]                | 588  | 586  | 0         | 99.7  | 84.0 | 90.1 | hypothetical protein ARALYDRAFT_494469                  | gbpln | Arabidopsis lyrata   | AT5G45110.1   Symbols: NPR3, ATNPR3   NPR1-like protein 3   chr5:18229319-18231334 FORWARD LENGTH=586                                                                                                                                                                                                                                                  | 588  | 586  | 0         | 99.7  | 84.0 | 90.0 |
| Rsa1.0_01188.1.g24404.t1 | gb[EOA15133.1] hypothetical protein CARUB_v10028508mg [Capsella rubella]                                                                                                                                           | 580  | 550  | 0         | 94.8  | 69.8 | 80.0 | hypothetical protein CARUB_v10028508mg                  | gbpln | Capsella rubella     | AT5G45113.1   Symbols:   mitochondrial transcription termination factor-related / mTERF-related   chr5:18232277-18233521 REVERSE LENGTH=414                                                                                                                                                                                                            | 580  | 414  | 0         | 71.4  | 54.5 | 62.1 |

|                          |                                                                                                                                    |      |      |           |       |      |      |                                                                                |       |                      |                                                                                                                                                    |      |      |           |       |      |      |
|--------------------------|------------------------------------------------------------------------------------------------------------------------------------|------|------|-----------|-------|------|------|--------------------------------------------------------------------------------|-------|----------------------|----------------------------------------------------------------------------------------------------------------------------------------------------|------|------|-----------|-------|------|------|
| Rsa1.0_01188.1.g24405.t1 | ref[XP_002880870.1] hypothetical protein ARALYDRAFT_901538 [Arabidopsis lyrata subsp. lyrata] gi 297326709 gb EFH57129.1           | 202  | 323  | 8.00E-42  | 159.9 | 55.4 | 67.8 | hypothetical protein ARALYDRAFT_901538                                         | gbpln | Arabidopsis lyrata   | AT1G35890.1   Symbols:   NAC (No Apical Meristem) domain transcriptional regulator superfamily protein   chr1:13341300-13341953 FORWARD LENGTH=171 | 202  | 171  | 1.00E-17  | 84.7  | 20.3 | 24.8 |
| Rsa1.0_01188.1.g24406.t1 | gb[EOA14027.1] hypothetical protein CARUB_v10027159mg [Capsella rubella]                                                           | 202  | 200  | 1.00E-108 | 99.0  | 96.5 | 97.5 | hypothetical protein CARUB_v10027159mg                                         | gbpln | Capsella rubella     | AT5G45130.1   Symbols: ATRAB5A, ATRABF2A, RABF2A, RAB5A, RHA1, ATRAB-F2A, RAB-F2A   RAB homolog 1   chr5:18244495-18246060 FORWARD LENGTH=200      | 202  | 200  | 1.00E-110 | 99.0  | 95.0 | 96.0 |
| Rsa1.0_01188.1.g24407.t2 | ref[XP_002863522.1] hypothetical protein ARALYDRAFT_917015 [Arabidopsis lyrata subsp. lyrata] gi 297309357 gb EFH39781.1           | 1134 | 1165 | 0         | 102.7 | 89.6 | 94.7 | hypothetical protein ARALYDRAFT_917015                                         | gbpln | Arabidopsis lyrata   | AT5G45140.1   Symbols: NRPC2   nuclear RNA polymerase C2   chr5:18247416-18257713 REVERSE LENGTH=1161                                              | 1134 | 1161 | 0         | 102.4 | 88.4 | 93.5 |
| Rsa1.0_01188.1.g24408.t1 | ref[XP_002865275.1] root hair defective 3 GTP-binding family protein [Arabidopsis lyrata subsp. lyrata] gi 297311110 gb EFH41534.1 | 813  | 833  | 0         | 102.5 | 88.2 | 94.3 | root hair defective 3 GTP-binding family protein                               | gbpln | Arabidopsis lyrata   | AT5G45160.1   Symbols:   Root hair defective 3 GTP-binding protein (RHD3)   chr5:18264991-18270035 FORWARD LENGTH=834                              | 813  | 834  | 0         | 102.6 | 87.9 | 94.0 |
| Rsa1.0_01188.1.g24409.t1 | ref[XP_002863521.1] hypothetical protein ARALYDRAFT_494462 [Arabidopsis lyrata subsp. lyrata] gi 297309356 gb EFH3780.1            | 374  | 372  | 0         | 99.5  | 87.7 | 93.0 | hypothetical protein ARALYDRAFT_494462                                         | gbpln | Arabidopsis lyrata   | AT5G45170.1   Symbols:   Haloacid dehalogenase-like hydrolase (HAD) superfamily protein   chr5:18270555-18273129 REVERSE LENGTH=372                | 374  | 372  | 0         | 99.5  | 86.9 | 91.7 |
| Rsa1.0_01189.1.g24410.t1 | #                                                                                                                                  | #    | #    | #         | #     | #    | -    | ----                                                                           | ----  | ----                 | #                                                                                                                                                  | #    | #    | #         | #     | #    | #    |
| Rsa1.0_01189.1.g24411.t1 | gb[EOA38306.1] hypothetical protein CARUB_v10009810mg [Capsella rubella]                                                           | 109  | 313  | 1.00E-40  | 287.2 | 67.9 | 71.6 | hypothetical protein CARUB_v10009810mg                                         | gbpln | Capsella rubella     | AT1G25682.1   Symbols:   Family of unknown function (DUF572)   chr1:9002532-9004550 REVERSE LENGTH=310                                             | 109  | 310  | 2.00E-43  | 284.4 | 67.0 | 71.6 |
| Rsa1.0_01189.1.g24412.t2 | #                                                                                                                                  | #    | #    | #         | #     | #    | -    | ----                                                                           | ----  | ----                 | #                                                                                                                                                  | #    | #    | #         | #     | #    | #    |
| Rsa1.0_01189.1.g24413.t1 | #                                                                                                                                  | #    | #    | #         | #     | #    | -    | ----                                                                           | ----  | ----                 | #                                                                                                                                                  | #    | #    | #         | #     | #    | #    |
| Rsa1.0_01189.1.g24414.t1 | gb[EOA20192.1] hypothetical protein CARUB_v10000488mg, partial [Capsella rubella]                                                  | 76   | 614  | 9.00E-32  | 807.9 | 90.8 | 93.4 | hypothetical protein CARUB_v10000488mg, partial                                | gbpln | Capsella rubella     | AT4G05020.1   Symbols: NDB2   NAD(P)H dehydrogenase B2   chr4:2572752-2576222 FORWARD LENGTH=582                                                   | 76   | 582  | 5.00E-33  | 765.8 | 88.2 | 90.8 |
| Rsa1.0_01189.1.g24415.t1 | emb[CAB39638.1] RNA-directed DNA polymerase-like protein [Arabidopsis thaliana] gi 7267666 emb[CAB78094.1]                         | 517  | 1274 | 1.00E-107 | 246.4 | 45.1 | 59.8 | RNA-directed DNA polymerase-like protein                                       | gbpln | Arabidopsis thaliana | AT4G29090.1   Symbols:   Ribonuclease H-like superfamily protein   chr4:14333528-14335255 FORWARD LENGTH=575                                       | 517  | 575  | 2.00E-47  | 111.2 | 29.4 | 46.8 |
| Rsa1.0_01189.1.g24416.t1 | emb[CAB39638.1] RNA-directed DNA polymerase-like protein [Arabidopsis thaliana] gi 7267666 emb[CAB78094.1]                         | 1049 | 1274 | 1.00E-149 | 121.4 | 27.2 | 35.0 | RNA-directed DNA polymerase-like protein                                       | gbpln | Arabidopsis thaliana | AT1G43760.1   Symbols:   DNase I-like superfamily protein   chr1:16528880-16531065 REVERSE LENGTH=626                                              | 1049 | 626  | 1.00E-26  | 59.7  | 10.9 | 18.3 |
| Rsa1.0_01189.1.g24417.t1 | dbj BAA97290.1  non-LTR retroelement reverse transcriptase-like [Arabidopsis thaliana]                                             | 335  | 1072 | 2.00E-83  | 320.0 | 45.7 | 62.1 | non-LTR retroelement reverse transcriptase-like                                | gbpln | Arabidopsis thaliana | AT1G60720.1   Symbols:   RNA-directed DNA polymerase (reverse transcriptase)-related family protein   chr1:22357072-22357941 FORWARD LENGTH=289    | 335  | 289  | 2.00E-74  | 86.3  | 40.3 | 55.8 |
| Rsa1.0_01189.1.g24418.t1 | pir [T00833 RNA-directed DNA polymerase homolog T13L16.7 - Arabidopsis thaliana (fragment)]                                        | 994  | 1365 | 0         | 137.3 | 44.6 | 62.4 | RNA-directed DNA polymerase homolog T13L16.7 - Arabidopsis thaliana (fragment) | ----  | ----                 | AT4G29090.1   Symbols:   Ribonuclease H-like superfamily protein   chr4:14333528-14335255 FORWARD LENGTH=575                                       | 994  | 575  | 1.00E-73  | 57.8  | 17.5 | 27.6 |
| Rsa1.0_01190.1.g24419.t1 | gb AAD19773.1  putative retroelement pol polyprotein [Arabidopsis thaliana]                                                        | 1281 | 1335 | 0         | 104.2 | 59.5 | 75.3 | putative retroelement pol polyprotein                                          | gbpln | Arabidopsis thaliana | AT4G23160.1   Symbols: CRK8   cysteine-rich RLK (RECEPTOR-like protein kinase) 8   chr4:12129495-12134086 FORWARD LENGTH=1282                      | 1281 | 1262 | 2.00E-83  | 98.5  | 14.4 | 21.7 |

|                          |                                                                                                                                                                                                                                                                                                                                                                                                                                                                                                                                                                                        |     |     |          |       |      |      |                                                                 |       |                      |                                                                                                                                                                                                                                                                                                                                                                                                                                                                                                                                       |     |     |          |       |      |      |
|--------------------------|----------------------------------------------------------------------------------------------------------------------------------------------------------------------------------------------------------------------------------------------------------------------------------------------------------------------------------------------------------------------------------------------------------------------------------------------------------------------------------------------------------------------------------------------------------------------------------------|-----|-----|----------|-------|------|------|-----------------------------------------------------------------|-------|----------------------|---------------------------------------------------------------------------------------------------------------------------------------------------------------------------------------------------------------------------------------------------------------------------------------------------------------------------------------------------------------------------------------------------------------------------------------------------------------------------------------------------------------------------------------|-----|-----|----------|-------|------|------|
| Rsa1.0_01190.1.g24420.t1 | ref[NP_174340.2] acyl-activating enzyme 14 [Arabidopsis thaliana] gi 75304445 sp Q8VYJ1.1 MENE_ARATH RecName: Full=2-succinylbenzoate--CoA ligase, chloroplastic/peroxisomal; AltName: Full=Acyl-activating enzyme 14; AltName: Full=O-succinylbenzoyl-CoA ligase; Flags: Precursor gi 17979487 gb AAL50080.1  At1g30520/F26G16.3 [Arabidopsis thaliana] gi 29893264 gb AAP03026.1  acyl-activating enzyme 14 [Arabidopsis thaliana] gi 34365547 gb AAQ65085.1  At1g30520/F26G16.3 [Arabidopsis thaliana] gi 332193118 gb AEE31239.1  acyl-activating enzyme 14 [Arabidopsis thaliana] | 554 | 560 | 0        | 101.1 | 85.9 | 91.9 | acyl-activating enzyme 14                                       | gbpln | Arabidopsis thaliana | AT1G30520.1   Symbols: AAE14   acyl-activating enzyme 14   chr1:10811039-10813546 FORWARD LENGTH=560                                                                                                                                                                                                                                                                                                                                                                                                                                  | 554 | 560 | 0        | 101.1 | 85.9 | 91.9 |
| Rsa1.0_01190.1.g24421.t1 | ref[NP_564356.1] uncharacterized protein [Arabidopsis thaliana] gi 21618079 gb AAM67129.1  unknown [Arabidopsis thaliana] gi 92856557 gb ABE77398.1  At1g30515 [Arabidopsis thaliana] gi 332193117 gb AEE31238.1  uncharacterized protein AT1G30515 [Arabidopsis thaliana]                                                                                                                                                                                                                                                                                                             | 150 | 144 | 1.00E-38 | 96.0  | 63.3 | 74.7 | uncharacterized protein                                         | gbpln | Arabidopsis thaliana | AT1G30515.1   Symbols:   unknown protein; FUNCTIONS IN: molecular_function unknown; INVOLVED IN: biological_process unknown; LOCATED IN: endomembrane system; EXPRESSED IN: 16 plant structures; EXPRESSED DURING: 6 growth stages; BEST Arabidopsis thaliana protein match is: unknown protein (TAIR:AT4G21740.1); Has 20 Blast hits to 20 proteins in 4 species: Archae - 0; Bacteria - 0; Metazoa - 0; Fungi - 0; Plants - 20; Viruses - 0; Other Eukaryotes - 0 (source: NCBI BLINK).   chr1:10809432-10809866 REVERSE LENGTH=144 | 150 | 144 | 4.00E-41 | 96.0  | 63.3 | 74.7 |
| Rsa1.0_01190.1.g24422.t1 | gb EOA37968.1  hypothetical protein CARUB_v10009436mg [Capsella rubella]                                                                                                                                                                                                                                                                                                                                                                                                                                                                                                               | 387 | 382 | 0        | 98.7  | 91.5 | 95.3 | hypothetical protein CARUB_v10009436mg                          | gbpln | Capsella rubella     | AT1G30510.2   Symbols: ATRFNR2, RFN2   root_FNR2   chr1:10807150-10808984 REVERSE LENGTH=382                                                                                                                                                                                                                                                                                                                                                                                                                                          | 387 | 382 | 0        | 98.7  | 92.0 | 95.3 |
| Rsa1.0_01190.1.g24423.t2 | ref XP_002893628.1  CCAAT-binding transcription factor (CBF-B/NF-YA) family protein [Arabidopsis lyrata subsp. lyrata] gi 297339470 gb EFH69887.1  CCAAT-binding transcription factor (CBF-B/NF-YA) family protein [Arabidopsis lyrata subsp. lyrata]                                                                                                                                                                                                                                                                                                                                  | 193 | 190 | 9.00E-65 | 98.4  | 73.6 | 79.3 | CCAAT-binding transcription factor (CBF-B/NF-YA) family protein | gbpln | Arabidopsis lyrata   | AT1G30500.2   Symbols: NF-YA7   nuclear factor Y, subunit A7   chr1:10804736-10805896 REVERSE LENGTH=190                                                                                                                                                                                                                                                                                                                                                                                                                              | 193 | 190 | 4.00E-67 | 98.4  | 74.6 | 79.3 |
| Rsa1.0_01190.1.g24424.t1 | dbj BAJ34344.1  unnamed protein product [Thellungiella halophila]                                                                                                                                                                                                                                                                                                                                                                                                                                                                                                                      | 840 | 844 | 0        | 100.5 | 95.6 | 97.9 | unnamed protein product                                         | ----  | ----                 | AT1G30490.1   Symbols: PHV, ATHB9   Homeobox-leucine zipper family protein / lipid-binding START domain-containing protein   chr1:10796328-10800744 REVERSE LENGTH=841                                                                                                                                                                                                                                                                                                                                                                | 840 | 841 | 0        | 100.1 | 95.1 | 98.2 |
| Rsa1.0_01190.1.g24425.t1 | gb EOA37280.1  hypothetical protein CARUB_v10010883mg, partial [Capsella rubella]                                                                                                                                                                                                                                                                                                                                                                                                                                                                                                      | 268 | 233 | 8.00E-28 | 86.9  | 30.2 | 39.9 | hypothetical protein CARUB_v10010883mg, partial                 | gbpln | Capsella rubella     | AT1G30473.1   Symbols:   Heavy metal transport/detoxification superfamily protein   chr1:10787215-10788107 FORWARD LENGTH=239                                                                                                                                                                                                                                                                                                                                                                                                         | 268 | 239 | 5.00E-27 | 89.2  | 28.4 | 37.7 |
| Rsa1.0_01190.1.g24426.t2 | ref[NP_174335.4] SIT4 phosphatase-associated-like protein [Arabidopsis thaliana] gi 332193102 gb AEE31223.1  SIT4 phosphatase-associated-like protein [Arabidopsis thaliana]                                                                                                                                                                                                                                                                                                                                                                                                           | 834 | 811 | 0        | 97.2  | 81.3 | 86.9 | SIT4 phosphatase-associated-like protein                        | gbpln | Arabidopsis thaliana | AT1G30470.1   Symbols:   SIT4 phosphatase-associated family protein   chr1:10778423-10786415 FORWARD LENGTH=811                                                                                                                                                                                                                                                                                                                                                                                                                       | 834 | 811 | 0        | 97.2  | 81.3 | 86.9 |
| Rsa1.0_01190.1.g24427.t1 | ref[NP_174332.1] Phototropic-responsive NPH3-like protein [Arabidopsis thaliana] gi 166228367 sp Q9S9Q9.2 Y1044_ARATH H RecName: Full=BTB/POZ domain-containing protein At1g30440 gi 332193095 gb AEE31216.1  Phototropic-responsive NPH3-like protein [Arabidopsis thaliana]                                                                                                                                                                                                                                                                                                          | 657 | 665 | 0        | 101.2 | 93.5 | 96.5 | Phototropic-responsive NPH3-like protein                        | gbpln | Arabidopsis thaliana | AT1G30440.1   Symbols:   Phototropic-responsive NPH3 family protein   chr1:10758475-10762199 FORWARD LENGTH=665                                                                                                                                                                                                                                                                                                                                                                                                                       | 657 | 665 | 0        | 101.2 | 93.5 | 96.5 |
| Rsa1.0_01190.1.g24428.t1 | # # # # # # # # - ----                                                                                                                                                                                                                                                                                                                                                                                                                                                                                                                                                                 |     |     |          |       |      |      |                                                                 |       |                      |                                                                                                                                                                                                                                                                                                                                                                                                                                                                                                                                       |     |     |          |       |      |      |
| Rsa1.0_01190.1.g24429.t1 | ref XP_002890866.1  photosystem I reaction center subunit X psaK [Arabidopsis lyrata subsp. lyrata] gi 297336708 gb EFH67125.1  photosystem I reaction center subunit X psaK [Arabidopsis lyrata subsp. lyrata]                                                                                                                                                                                                                                                                                                                                                                        | 131 | 131 | 1.00E-64 | 100.0 | 96.2 | 98.5 | photosystem I reaction center subunit X psaK                    | gbpln | Arabidopsis lyrata   | AT1G30380.1   Symbols: PSAK   photosystem I subunit K   chr1:10722325-10723013 FORWARD LENGTH=130                                                                                                                                                                                                                                                                                                                                                                                                                                     | 131 | 130 | 1.00E-65 | 99.2  | 95.4 | 98.5 |
| Rsa1.0_01190.1.g24430.t1 | ref[NP_174326.1] lipase-3 domain-containing protein [Arabidopsis thaliana] gi 12322127 gb AAG51101.1 AC025295.9 lipase, putative [Arabidopsis thaliana] gi 332193089 gb AEE31210.1  lipase-3 domain-containing protein [Arabidopsis thaliana]                                                                                                                                                                                                                                                                                                                                          | 529 | 529 | 0        | 100.0 | 89.8 | 94.9 | lipase-3 domain-containing protein                              | gbpln | Arabidopsis thaliana | AT1G30370.1   Symbols:   alpha/beta-Hydrolases superfamily protein   chr1:10719169-10720758 REVERSE LENGTH=529                                                                                                                                                                                                                                                                                                                                                                                                                        | 529 | 529 | 0        | 100.0 | 89.8 | 94.9 |

|                          |                                                                                                                                                                                                                                                                                                                                                                                                                                                              |      |      |           |       |      |      |                                               |       |                      |                                                                                                                                                                                                                                                                                                                                                                                                                                                                                                                                                                          |      |      |           |       |      |      |
|--------------------------|--------------------------------------------------------------------------------------------------------------------------------------------------------------------------------------------------------------------------------------------------------------------------------------------------------------------------------------------------------------------------------------------------------------------------------------------------------------|------|------|-----------|-------|------|------|-----------------------------------------------|-------|----------------------|--------------------------------------------------------------------------------------------------------------------------------------------------------------------------------------------------------------------------------------------------------------------------------------------------------------------------------------------------------------------------------------------------------------------------------------------------------------------------------------------------------------------------------------------------------------------------|------|------|-----------|-------|------|------|
| Rsa1.0_01190.1.g24431.t1 | gb ABV89627.1  early-responsive to dehydration 4 [Brassica rapa]                                                                                                                                                                                                                                                                                                                                                                                             | 722  | 723  | 0         | 100.1 | 85.2 | 93.6 | early-responsive to dehydration 4             | gbpln | Brassica rapa        | AT1G30360.1   Symbols: ERD4   Early-responsive to dehydration stress protein (ERD4)   chr1:10715892-10718799 FORWARD LENGTH=724                                                                                                                                                                                                                                                                                                                                                                                                                                          | 722  | 724  | 0         | 100.3 | 80.9 | 90.9 |
| Rsa1.0_01190.1.g24432.t1 | #                                                                                                                                                                                                                                                                                                                                                                                                                                                            | #    | #    | #         | #     | #    | -    | -                                             | ----  | ----                 | #                                                                                                                                                                                                                                                                                                                                                                                                                                                                                                                                                                        | #    | #    | #         | #     | #    |      |
| Rsa1.0_01190.1.g24433.t1 | #                                                                                                                                                                                                                                                                                                                                                                                                                                                            | #    | #    | #         | #     | #    | -    | -                                             | ----  | ----                 | #                                                                                                                                                                                                                                                                                                                                                                                                                                                                                                                                                                        | #    | #    | #         | #     | #    |      |
| Rsa1.0_01190.1.g24434.t3 | #                                                                                                                                                                                                                                                                                                                                                                                                                                                            | #    | #    | #         | #     | #    | -    | -                                             | ----  | ----                 | #                                                                                                                                                                                                                                                                                                                                                                                                                                                                                                                                                                        | #    | #    | #         | #     | #    |      |
| Rsa1.0_01191.1.g24435.t1 | ref XP_002880635.1  hypothetical protein ARALYDRAFT_481345 [Arabidopsis lyrata subsp. lyrata]   gi 297326474 gb EFH56894.1  hypothetical protein ARALYDRAFT_481345 [Arabidopsis lyrata subsp. lyrata]                                                                                                                                                                                                                                                        | 226  | 445  | 2.00E-88  | 196.9 | 72.1 | 83.2 | hypothetical protein ARALYDRAFT_481345        | gbpln | Arabidopsis lyrata   | AT2G24850.1   Symbols: TAT3, TAT   tyrosine aminotransferase 3   chr2:10583070-10585152 REVERSE LENGTH=445                                                                                                                                                                                                                                                                                                                                                                                                                                                               | 226  | 445  | 6.00E-90  | 196.9 | 70.8 | 83.6 |
| Rsa1.0_01191.1.g24436.t1 | ref XP_002880635.1  hypothetical protein ARALYDRAFT_481345 [Arabidopsis lyrata subsp. lyrata]   gi 297326474 gb EFH56894.1  hypothetical protein ARALYDRAFT_481345 [Arabidopsis lyrata subsp. lyrata]                                                                                                                                                                                                                                                        | 441  | 445  | 0         | 100.9 | 78.5 | 88.4 | hypothetical protein ARALYDRAFT_481345        | gbpln | Arabidopsis lyrata   | AT2G24850.1   Symbols: TAT3, TAT   tyrosine aminotransferase 3   chr2:10583070-10585152 REVERSE LENGTH=445                                                                                                                                                                                                                                                                                                                                                                                                                                                               | 441  | 445  | 0         | 100.9 | 77.8 | 88.7 |
| Rsa1.0_01191.1.g24437.t2 | gb AAC19277.1  T14P8.8 [Arabidopsis thaliana]   gi 7269000 emb CAB80741.1  AT4g02480 [Arabidopsis thaliana]                                                                                                                                                                                                                                                                                                                                                  | 329  | 731  | 3.00E-16  | 222.2 | 26.1 | 33.1 | T14P8.8                                       | gbpln | Arabidopsis thaliana | AT4G02480.1   Symbols:   AAA-type ATPase family protein   chr4:1082082-1088680 REVERSE LENGTH=1265<br>AT4G16060.1   Symbols:   unknown protein; FUNCTIONS IN: molecular_function unknown; INVOLVED IN: biological_process unknown; LOCATED IN: chloroplast, chloroplast stroma; EXPRESSED IN: 22 plant structures; EXPRESSED DURING: 13 growth stages; Has 42 Blast hits to 42 proteins in 16 species: Archaea - 0; Bacteria - 2; Metazoa - 0; Fungi - 0; Plants - 33; Viruses - 0; Other Eukaryotes - 7 (source: NCBI BLINK).   chr4:9094424-9096147 FORWARD LENGTH=289 | 329  | 1265 | 6.00E-18  | 384.5 | 20.7 | 23.7 |
| Rsa1.0_01191.1.g24438.t1 | gb EOA15951.1  hypothetical protein CARUB_v10004048mg [Capsella rubella]                                                                                                                                                                                                                                                                                                                                                                                     | 301  | 1041 | 1.00E-139 | 345.8 | 84.1 | 89.7 | hypothetical protein CARUB_v10004048mg        | gbpln | Capsella rubella     | AT4G15930.1   Symbols:   Dynein light chain type 1 family protein   chr4:9036344-9037825 FORWARD LENGTH=123                                                                                                                                                                                                                                                                                                                                                                                                                                                              | 301  | 289  | 1.00E-128 | 96.0  | 79.7 | 84.1 |
| Rsa1.0_01191.1.g24439.t1 | ref XP_002870199.1  At4g15930 [Arabidopsis lyrata subsp. lyrata]   gi 297316035 gb EFH46458.1  At4g15930 [Arabidopsis lyrata subsp. lyrata]                                                                                                                                                                                                                                                                                                                  | 98   | 123  | 5.00E-32  | 125.5 | 81.6 | 87.8 | At4g15930                                     | gbpln | Arabidopsis lyrata   | AT4G15930.1   Symbols:   Dynein light chain type 1 family protein   chr4:9036344-9037825 FORWARD LENGTH=123                                                                                                                                                                                                                                                                                                                                                                                                                                                              | 98   | 123  | 1.00E-34  | 125.5 | 81.6 | 87.8 |
| Rsa1.0_01191.1.g24440.t1 | gb AAO22792.1  putative cytochrome c oxidoreductase [Arabidopsis thaliana]                                                                                                                                                                                                                                                                                                                                                                                   | 238  | 241  | 1.00E-117 | 101.3 | 88.7 | 94.5 | putative cytochrome c oxidoreductase          | gbpln | Arabidopsis thaliana | AT4G15920.1   Symbols: SWEET17, ASWEE17   Nodulin MtN3 family protein   chr4:9030742-9033343 REVERSE LENGTH=241                                                                                                                                                                                                                                                                                                                                                                                                                                                          | 238  | 241  | 1.00E-118 | 101.3 | 87.8 | 93.7 |
| Rsa1.0_01191.1.g24441.t1 | gb EOA16548.1  hypothetical protein CARUB_v10004707mg [Capsella rubella]                                                                                                                                                                                                                                                                                                                                                                                     | 477  | 481  | 0         | 100.8 | 92.5 | 96.6 | hypothetical protein CARUB_v10004707mg        | gbpln | Capsella rubella     | AT4G15900.1   Symbols: PRL1   pleiotropic regulatory locus 1   chr4:9023775-9027443 FORWARD LENGTH=486                                                                                                                                                                                                                                                                                                                                                                                                                                                                   | 477  | 486  | 0         | 101.9 | 92.7 | 96.4 |
| Rsa1.0_01191.1.g24442.t1 | gb EOA15906.1  hypothetical protein CARUB_v10003997mg [Capsella rubella]                                                                                                                                                                                                                                                                                                                                                                                     | 1331 | 1318 | 0         | 99.0  | 86.4 | 91.8 | hypothetical protein CARUB_v10003997mg        | gbpln | Capsella rubella     | AT4G15890.1   Symbols:   binding   chr4:9017453-9022745 FORWARD LENGTH=1314                                                                                                                                                                                                                                                                                                                                                                                                                                                                                              | 1331 | 1314 | 0         | 98.7  | 87.7 | 92.8 |
| Rsa1.0_01191.1.g24443.t2 | ref NP_188285.1  kinesin family member 2/24 [Arabidopsis thaliana]   gi 30684173 ref NP_850598.1  kinesin family member 2/24 [Arabidopsis thaliana]   gi 15810129 gb AAL07208.1  putative kinesin protein [Arabidopsis thaliana]   gi 110741480 dbj BAE98696.1  kinesin like protein [Arabidopsis thaliana]   gi 332642324 gb AEE75845.1  kinesin 13A [Arabidopsis thaliana]   gi 332642325 gb AEE75846.1  kinesin family member 2/24 [Arabidopsis thaliana] | 929  | 794  | 0         | 85.5  | 71.2 | 77.3 | kinesin family member 2/24                    | gbpln | Arabidopsis thaliana | AT3G16630.2   Symbols: ATKINESIN-13A, KINESIN-13A   P-loop containing nucleoside triphosphate hydrolases superfamily protein   chr3:5662660-5667261 REVERSE LENGTH=794                                                                                                                                                                                                                                                                                                                                                                                                   | 929  | 794  | 0         | 85.5  | 71.2 | 77.3 |
| Rsa1.0_01191.1.g24444.t1 | gb EOA16487.1  hypothetical protein CARUB_v10004645mg [Capsella rubella]                                                                                                                                                                                                                                                                                                                                                                                     | 472  | 498  | 1.00E-179 | 105.5 | 73.1 | 79.9 | hypothetical protein CARUB_v10004645mg        | gbpln | Capsella rubella     | AT4G15880.1   Symbols: ESD4, ATESD4   Cysteine proteinases superfamily protein   chr4:9012769-9015797 FORWARD LENGTH=489                                                                                                                                                                                                                                                                                                                                                                                                                                                 | 472  | 489  | 1.00E-178 | 103.6 | 71.8 | 80.3 |
| Rsa1.0_01191.1.g24445.t1 | gb EOA18019.1  hypothetical protein CARUB_v10006459mg [Capsella rubella]                                                                                                                                                                                                                                                                                                                                                                                     | 372  | 374  | 1.00E-144 | 100.5 | 68.5 | 78.8 | hypothetical protein CARUB_v10006459mg        | gbpln | Capsella rubella     | AT1G30350.1   Symbols:   Pectin lyase-like superfamily protein   chr1:10710194-10711664 REVERSE LENGTH=368                                                                                                                                                                                                                                                                                                                                                                                                                                                               | 372  | 368  | 1.00E-142 | 98.9  | 64.5 | 78.5 |
| Rsa1.0_01192.1.g24446.t1 | ref XP_002882474.1  botrytis-susceptible1, myb domain protein 108 [Arabidopsis lyrata subsp. lyrata]   gi 297328314 gb EFH58733.1  botrytis-susceptible1, myb domain protein 108 [Arabidopsis lyrata subsp. lyrata]                                                                                                                                                                                                                                          | 322  | 322  | 1.00E-143 | 100.0 | 85.7 | 91.6 | botrytis-susceptible1, myb domain protein 108 | gbpln | Arabidopsis lyrata   | AT3G06490.1   Symbols: MYB108, ATMYB108, BOS1   myb domain protein 108   chr3:2004298-2006358 FORWARD LENGTH=323                                                                                                                                                                                                                                                                                                                                                                                                                                                         | 322  | 323  | 1.00E-140 | 100.3 | 87.0 | 93.2 |



|                          |                                                                                                                                                                                                                                                                                                                                                                                                                                                                                                                                                                                                                                                                                                                                                                                                                      |      |      |          |       |      |      |                                                                               |       |                      |                                                                                                                                                                                                                                                                                                                                       |      |      |          |       |      |      |
|--------------------------|----------------------------------------------------------------------------------------------------------------------------------------------------------------------------------------------------------------------------------------------------------------------------------------------------------------------------------------------------------------------------------------------------------------------------------------------------------------------------------------------------------------------------------------------------------------------------------------------------------------------------------------------------------------------------------------------------------------------------------------------------------------------------------------------------------------------|------|------|----------|-------|------|------|-------------------------------------------------------------------------------|-------|----------------------|---------------------------------------------------------------------------------------------------------------------------------------------------------------------------------------------------------------------------------------------------------------------------------------------------------------------------------------|------|------|----------|-------|------|------|
| Rsa1.0_01192.1.g24447.t1 | refNP_566285.1 beta-glucosidase-like SFR2 [Arabidopsis thaliana] gi 75305863 sp Q93Y07.1 SFR2_ARATH RecName: Full=Beta-glucosidase-like SFR2, chloroplastic; AltName: Full=Protein SENSITIVE TO FREEZING 2; Short=AtSFR2 gi 16649039 gb AL24371.1 beta-glucosidase, putative [Arabidopsis thaliana] gi 22077112 emb CAD36512.1 putative beta-glucosidase [Arabidopsis thaliana] gi 25083735 gb AAN7211.1 beta-glucosidase, putative [Arabidopsis thaliana] gi 332640883 gb AEE74404.1 beta-glucosidase-like SFR2 [Arabidopsis thaliana]                                                                                                                                                                                                                                                                              | 1381 | 622  | 0        | 45.0  | 38.8 | 42.0 | beta-glucosidase-like SFR2                                                    | gbpln | Arabidopsis thaliana | AT3G06510.1   Symbols: SFR2, AT_SFR2   Glycosyl hydrolase superfamily protein   chr3:2016450-2019533 FORWARD LENGTH=622                                                                                                                                                                                                               | 1381 | 622  | 0        | 45.0  | 38.8 | 42.0 |
| Rsa1.0_01192.1.g24448.t1 | gb EOA29708.1 hypothetical protein CARUB_v10012793mg [Capsella rubella]                                                                                                                                                                                                                                                                                                                                                                                                                                                                                                                                                                                                                                                                                                                                              | 2140 | 2208 | 0        | 103.2 | 56.4 | 62.1 | hypothetical protein CARUB_v10012793mg                                        | gbpln | Capsella rubella     | AT3G06530.1   Symbols:   ARM repeat superfamily protein   chr3:2022596-2033637 FORWARD LENGTH=2197                                                                                                                                                                                                                                    | 2140 | 2197 | 0        | 102.7 | 55.9 | 62.2 |
| Rsa1.0_01192.1.g24449.t1 | gb AAM19852.1 AT3g06540/F5E6_13 [Arabidopsis thaliana] gi 23463083 gb AAN33212.1 At3g06540/F5E6_13 [Arabidopsis thaliana]                                                                                                                                                                                                                                                                                                                                                                                                                                                                                                                                                                                                                                                                                            | 567  | 563  | 0        | 99.3  | 80.6 | 89.2 | AT3g06540/F5E6_13                                                             | gbpln | Arabidopsis thaliana | AT3G06540.1   Symbols: REP, AthREP   Rab escort protein   chr3:2035201-2037662 REVERSE LENGTH=563                                                                                                                                                                                                                                     | 567  | 563  | 0        | 99.3  | 80.6 | 89.2 |
| Rsa1.0_01193.1.g24450.t1 | gb AAG51783.1 AC079679.3 reverse transcriptase, putative; 16838-20266 [Arabidopsis thaliana]                                                                                                                                                                                                                                                                                                                                                                                                                                                                                                                                                                                                                                                                                                                         | 872  | 1142 | 0        | 131.0 | 43.7 | 57.8 | reverse transcriptase, putative; 16838-20266                                  | gbpln | Arabidopsis thaliana | AT1G43760.1   Symbols:   DNase I-like superfamily protein   chr1:16528880-16531065 REVERSE LENGTH=626                                                                                                                                                                                                                                 | 872  | 626  | 4.00E-29 | 71.8  | 10.7 | 16.4 |
| Rsa1.0_01193.1.g24451.t1 | gb EOA37904.1 hypothetical protein CARUB_v10009370mg [Capsella rubella]                                                                                                                                                                                                                                                                                                                                                                                                                                                                                                                                                                                                                                                                                                                                              | 394  | 394  | 0        | 100.0 | 95.7 | 97.5 | hypothetical protein CARUB_v10009370mg                                        | gbpln | Capsella rubella     | AT1G30580.1   Symbols:   GTP binding   chr1:10831953-10835454 REVERSE LENGTH=394                                                                                                                                                                                                                                                      | 394  | 394  | 0        | 100.0 | 95.7 | 97.2 |
| Rsa1.0_01193.1.g24452.t1 | ref NP_001154386.2 S-adenosyl-L-methionine-dependent methyltransferase domain-containing protein [Arabidopsis thaliana] gi 332193122 gb AEE31243.1 S-adenosyl-L-methionine-dependent methyltransferase domain-containing protein [Arabidopsis thaliana]                                                                                                                                                                                                                                                                                                                                                                                                                                                                                                                                                              | 257  | 221  | 3.00E-90 | 86.0  | 59.9 | 67.7 | S-adenosyl-L-methionine-dependent methyltransferase domain-containing protein | gbpln | Arabidopsis thaliana | AT1G30550.2   Symbols:   S-adenosyl-L-methionine-dependent methyltransferases superfamily protein   chr1:10822341-10823641 REVERSE LENGTH=221                                                                                                                                                                                         | 257  | 221  | 1.00E-92 | 86.0  | 59.9 | 67.7 |
| Rsa1.0_01193.1.g24453.t1 | ref XP_002893626.1 hypothetical protein ARALYDRAFT_473274 [Arabidopsis lyrata subsp. lyrata] gi 297339468 gb EFH69885.1 hypothetical protein ARALYDRAFT_473274 [Arabidopsis lyrata subsp. lyrata]                                                                                                                                                                                                                                                                                                                                                                                                                                                                                                                                                                                                                    | 165  | 192  | 3.00E-39 | 116.4 | 70.9 | 78.8 | hypothetical protein ARALYDRAFT_473274                                        | gbpln | Arabidopsis lyrata   | AT1G30475.1   Symbols:   BEST Arabidopsis thaliana protein match is: embryo defective 1303 (TAIR:AT1G56200.1); Has 148 Blast hits to 148 proteins in 34 species: Archae = 0; Bacteria = 14; Metazoa = 63; Fungi = 0; Plants = 62; Viruses = 0; Other Eukaryotes = 9 (source: NCBI BLink).   chr1:10785501-10789943 REVERSE LENGTH=191 | 165  | 191  | 8.00E-40 | 115.8 | 70.3 | 76.4 |
| Rsa1.0_01193.1.g24454.t1 | ref NP_001185116.1 SIT4 phosphatase-associated-like protein [Arabidopsis thaliana] gi 332193104 gb AEE31225.1 SIT4 phosphatase-associated-like protein [Arabidopsis thaliana]                                                                                                                                                                                                                                                                                                                                                                                                                                                                                                                                                                                                                                        | 834  | 805  | 0        | 96.5  | 81.5 | 86.3 | SIT4 phosphatase-associated-like protein                                      | gbpln | Arabidopsis thaliana | AT1G30470.2   Symbols:   SIT4 phosphatase-associated family protein   chr1:10779435-10786415 FORWARD LENGTH=805                                                                                                                                                                                                                       | 834  | 805  | 0        | 96.5  | 81.5 | 86.3 |
| Rsa1.0_01193.1.g24455.t1 | # # # # # # # # - ----                                                                                                                                                                                                                                                                                                                                                                                                                                                                                                                                                                                                                                                                                                                                                                                               | #    | #    | #        | #     | #    | #    | -                                                                             | ----  | ----                 | #                                                                                                                                                                                                                                                                                                                                     | #    | #    | #        | #     | #    | #    |
| Rsa1.0_01193.1.g24456.t2 | ref NP_174333.2 cation-chloride co-transporter 1 [Arabidopsis thaliana] gi 30691718 ref NP_849731.1 cation-chloride co-transporter 1 [Arabidopsis thaliana] gi 30691724 ref NP_849732.1 cation-chloride co-transporter 1 [Arabidopsis thaliana] gi 122209111 sp Q2UVJ5.1 CCC1_ARATH RecName: Full=Cation-chloride cotransporter 1; Short=AtCCC1; AltName: Full=Protein HAPLESS 5 gi 83523649 emb CAJ34849.1 cation chloride cotransporter [Arabidopsis thaliana] gi 110741532 dbj BAE98715.1 putative cation-chloride co-transporter [Arabidopsis thaliana] gi 332193096 gb AEE31217.1 cation-chloride co-transporter 1 [Arabidopsis thaliana] gi 332193097 gb AEE31218.1 cation-chloride co-transporter 1 [Arabidopsis thaliana] gi 332193098 gb AEE31219.1 cation-chloride co-transporter 1 [Arabidopsis thaliana] | 1007 | 975  | 0        | 96.8  | 90.0 | 92.2 | cation-chloride co-transporter 1                                              | gbpln | Arabidopsis thaliana | AT1G30450.2   Symbols: CCG1, ATCCCG1, HAP5   cation-chloride co-transporter 1   chr1:10762905-10769061 FORWARD LENGTH=975                                                                                                                                                                                                             | 1007 | 975  | 0        | 96.8  | 90.0 | 92.2 |
| Rsa1.0_01194.1.g24457.t1 | dbj BAJ33907.1 unnamed protein product [Theilungiella halophila]                                                                                                                                                                                                                                                                                                                                                                                                                                                                                                                                                                                                                                                                                                                                                     | 513  | 595  | 0        | 116.0 | 86.9 | 90.1 | unnamed protein product                                                       | ----  | ----                 | AT5G60790.1   Symbols: ATGCN1, GCN1   ABC transporter family protein   chr5:24453760-24455767 REVERSE LENGTH=595                                                                                                                                                                                                                      | 513  | 595  | 0        | 116.0 | 85.8 | 89.3 |

|                          |                                                                                                                                                                                                                                                                                                                                                                                                                              |     |      |           |        |      |      |                                              |       |                      |                                                                                                                                                   |     |      |           |        |      |      |
|--------------------------|------------------------------------------------------------------------------------------------------------------------------------------------------------------------------------------------------------------------------------------------------------------------------------------------------------------------------------------------------------------------------------------------------------------------------|-----|------|-----------|--------|------|------|----------------------------------------------|-------|----------------------|---------------------------------------------------------------------------------------------------------------------------------------------------|-----|------|-----------|--------|------|------|
| Rsa1.0_01194.1.g24458.t1 | ref NP_200886.1  nitrate transporter 2.3 [Arabidopsis thaliana] gi 75262552 sp Q9FJH7.1 NRT23_ARAT H RecName: Full=High affinity nitrate transporter 2.3; Short=AtNRT2.3 gi 10176906 dbj BAB10099.1  high affinity nitrate transporter [Arabidopsis thaliana] gi 91807076 gb ABE66265.1  high-affinity nitrate transporter [Arabidopsis thaliana] gi 332009993 gb AED97376.1  nitrate transporter 2.3 [Arabidopsis thaliana] | 536 | 539  | 0         | 100.6  | 93.3 | 96.5 | nitrate transporter 2.3                      | gbpln | Arabidopsis thaliana | AT5G60780.1   Symbols: ATNRT2.3, NRT2.3   nitrate transporter 2.3   chr5:24450839-24452756 FORWARD LENGTH=539                                     | 536 | 539  | 0         | 100.6  | 93.3 | 96.5 |
| Rsa1.0_01194.1.g24459.t1 | ref NP_191137.1  glycosyl hydrolase family 17 protein [Arabidopsis thaliana] gi 7263566 emb CAB81603.1  beta-1, 3-glucanase-like protein [Arabidopsis thaliana] gi 332645920 gb AEE79441.1  glycosyl hydrolase family 17 protein [Arabidopsis thaliana]                                                                                                                                                                      | 61  | 429  | 1.00E-16  | 703.3  | 68.9 | 77.0 | glycosyl hydrolase family 17 protein         | gbpln | Arabidopsis thaliana | AT3G55780.1   Symbols:   Glycosyl hydrolase superfamily protein   chr3:20705627-20707021 FORWARD LENGTH=429                                       | 61  | 429  | 2.00E-19  | 703.3  | 68.9 | 77.0 |
| Rsa1.0_01194.1.g24460.t1 | gb EOA32375.1  hypothetical protein CARUB_v10015642mg [Capsella rubella]                                                                                                                                                                                                                                                                                                                                                     | 158 | 1127 | 5.00E-26  | 713.3  | 34.8 | 36.7 | hypothetical protein CARUB_v10015642mg       | gbpln | Capsella rubella     | AT3G16830.1   Symbols: TPR2   TOPLESS-related 2   chr3:5731709-5737531 FORWARD LENGTH=1131                                                        | 158 | 1131 | 4.00E-28  | 715.8  | 34.8 | 36.1 |
| Rsa1.0_01194.1.g24461.t1 | ref XP_002864701.1  hypothetical protein ARALYDRAFT_496224 [Arabidopsis lyrata subsp. lyrata] gi 297310536 gb EFH40960.1  hypothetical protein ARALYDRAFT_496224 [Arabidopsis lyrata subsp. lyrata]                                                                                                                                                                                                                          | 637 | 739  | 0         | 116.0  | 55.6 | 58.9 | hypothetical protein ARALYDRAFT_496224       | gbpln | Arabidopsis lyrata   | AT5G60780.1   Symbols:   P-loop containing nucleoside triphosphate hydrolases superfamily protein   chr5:24438465-24442004 FORWARD LENGTH=738     | 637 | 738  | 1.00E-179 | 115.9  | 52.1 | 56.8 |
| Rsa1.0_01194.1.g24462.t1 | ref XP_002864699.1  anion-transporting ATPase family protein [Arabidopsis lyrata subsp. lyrata] gi 297310534 gb EFH40958.1  anion-transporting ATPase family protein [Arabidopsis lyrata subsp. lyrata]                                                                                                                                                                                                                      | 829 | 391  | 1.00E-174 | 47.2   | 41.3 | 43.1 | anion-transporting ATPase family protein     | gbpln | Arabidopsis lyrata   | AT5G60730.1   Symbols:   Anion-transporting ATPase   chr5:24422838-24425352 FORWARD LENGTH=391                                                    | 829 | 391  | 1.00E-175 | 47.2   | 41.0 | 42.7 |
| Rsa1.0_01194.1.g24463.t1 | #                                                                                                                                                                                                                                                                                                                                                                                                                            | #   | #    | #         | #      | #    | #    | -                                            | ----  | ----                 | #                                                                                                                                                 | #   | #    | #         | #      | #    | #    |
| Rsa1.0_01194.1.g24464.t1 | ref NP_200879.1  C3H4 type zinc finger protein [Arabidopsis thaliana] gi 9759335 dbj BAB09844.1  retroelement pol polyprotein-like [Arabidopsis thaliana] gi 332009996 gb AED97369.1  C3H4 type zinc finger protein [Arabidopsis thaliana]                                                                                                                                                                                   | 67  | 704  | 1.00E-19  | 1050.7 | 74.6 | 80.6 | C3H4 type zinc finger protein                | gbpln | Arabidopsis thaliana | AT5G60710.1   Symbols:   Zinc finger (C3HC4-type RING finger) family protein   chr5:24410953-24414849 REVERSE LENGTH=704                          | 67  | 704  | 2.00E-22  | 1050.7 | 74.6 | 80.6 |
| Rsa1.0_01194.1.g24465.t1 | gb AAM53301.1  putative protein [Arabidopsis thaliana] gi 23198328 gb AAN15691.1  putative protein [Arabidopsis thaliana]                                                                                                                                                                                                                                                                                                    | 644 | 704  | 0         | 109.3  | 82.6 | 89.0 | putative protein                             | gbpln | Arabidopsis thaliana | AT5G60710.1   Symbols:   Zinc finger (C3HC4-type RING finger) family protein   chr5:24410953-24414849 REVERSE LENGTH=704                          | 644 | 704  | 0         | 109.3  | 82.6 | 89.0 |
| Rsa1.0_01194.1.g24466.t1 | #                                                                                                                                                                                                                                                                                                                                                                                                                            | #   | #    | #         | #      | #    | #    | -                                            | ----  | ----                 | #                                                                                                                                                 | #   | #    | #         | #      | #    | #    |
| Rsa1.0_01195.1.g24467.t1 | #                                                                                                                                                                                                                                                                                                                                                                                                                            | #   | #    | #         | #      | #    | #    | -                                            | ----  | ----                 | #                                                                                                                                                 | #   | #    | #         | #      | #    | #    |
| Rsa1.0_01195.1.g24468.t1 | #                                                                                                                                                                                                                                                                                                                                                                                                                            | #   | #    | #         | #      | #    | #    | -                                            | ----  | ----                 | #                                                                                                                                                 | #   | #    | #         | #      | #    | #    |
| Rsa1.0_01195.1.g24469.t1 | #                                                                                                                                                                                                                                                                                                                                                                                                                            | #   | #    | #         | #      | #    | #    | -                                            | ----  | ----                 | #                                                                                                                                                 | #   | #    | #         | #      | #    | #    |
| Rsa1.0_01195.1.g24470.t1 | gb EOA26809.1  hypothetical protein CARUB_v10022902mg [Capsella rubella]                                                                                                                                                                                                                                                                                                                                                     | 578 | 573  | 0         | 99.1   | 85.1 | 90.3 | hypothetical protein CARUB_v10022902mg       | gbpln | Capsella rubella     | AT2G46500.2   Symbols: ATPI4K GAMMA 4, UBDK GAMMA 4, PI4K GAMMA 4   phosphoinositide 4-kinase gamma 4   chr2:19086741-19088534 REVERSE LENGTH=566 | 578 | 566  | 0         | 97.9   | 83.7 | 89.4 |
| Rsa1.0_01195.1.g24471.t1 | ref XP_002882072.1  hypothetical protein ARALYDRAFT_904117 [Arabidopsis lyrata subsp. lyrata] gi 29732791 gb EFH58331.1  hypothetical protein ARALYDRAFT_904117 [Arabidopsis lyrata subsp. lyrata]                                                                                                                                                                                                                           | 149 | 148  | 3.00E-50  | 99.3   | 71.1 | 85.9 | hypothetical protein ARALYDRAFT_904117       | gbpln | Arabidopsis lyrata   | AT2G46505.1   Symbols: SDH4   succinate dehydrogenase subunit 4   chr2:19090013-19090468 REVERSE LENGTH=151                                       | 149 | 151  | 3.00E-50  | 101.3  | 67.8 | 84.6 |
| Rsa1.0_01195.1.g24472.t1 | gb EOA27345.1  hypothetical protein CARUB_v10023459mg [Capsella rubella]                                                                                                                                                                                                                                                                                                                                                     | 356 | 372  | 1.00E-161 | 104.5  | 87.6 | 93.3 | hypothetical protein CARUB_v10023459mg       | gbpln | Capsella rubella     | AT2G46590.1   Symbols: DAG2   Dof-type zinc finger DNA-binding family protein   chr2:19133832-19134905 FORWARD LENGTH=357                         | 356 | 357  | 1.00E-144 | 100.3  | 85.1 | 89.9 |
| Rsa1.0_01195.1.g24473.t1 | gb EOA28618.1  hypothetical protein CARUB_v10024839mg [Capsella rubella]                                                                                                                                                                                                                                                                                                                                                     | 137 | 133  | 6.00E-61  | 97.1   | 81.0 | 94.9 | hypothetical protein CARUB_v10024839mg       | gbpln | Capsella rubella     | AT2G46600.1   Symbols:   Calcium-binding EF-hand family protein   chr2:19136070-19136477 FORWARD LENGTH=135                                       | 137 | 135  | 3.00E-63  | 98.5   | 82.5 | 94.2 |
| Rsa1.0_01195.1.g24474.t1 | #                                                                                                                                                                                                                                                                                                                                                                                                                            | #   | #    | #         | #      | #    | #    | -                                            | ----  | ----                 | #                                                                                                                                                 | #   | #    | #         | #      | #    | #    |
| Rsa1.0_01195.1.g24475.t1 | #                                                                                                                                                                                                                                                                                                                                                                                                                            | #   | #    | #         | #      | #    | #    | -                                            | ----  | ----                 | #                                                                                                                                                 | #   | #    | #         | #      | #    | #    |
| Rsa1.0_01195.1.g24476.t1 | gb AAG51783.1 AC079679.3 reverse transcriptase, putative; 16838-20266 [Arabidopsis thaliana]                                                                                                                                                                                                                                                                                                                                 | 162 | 1142 | 3.00E-31  | 704.9  | 45.1 | 57.4 | reverse transcriptase, putative; 16838-20266 | gbpln | Arabidopsis thaliana | AT2G34320.1   Symbols:   Polynucleotidyl transferase, ribonuclease H-like superfamily protein   chr2:14484959-14485837 FORWARD LENGTH=292         | 162 | 292  | 1.00E-14  | 180.2  | 28.4 | 46.3 |

|                          |                                                                                                                                                                                                                                                                                                                                                                                                                                                                                                                                                                                                                                                                                                                                                                                                                                                             |      |      |           |       |      |      |                                          |       |                      |                                                                                                                                               |      |     |           |       |      |      |
|--------------------------|-------------------------------------------------------------------------------------------------------------------------------------------------------------------------------------------------------------------------------------------------------------------------------------------------------------------------------------------------------------------------------------------------------------------------------------------------------------------------------------------------------------------------------------------------------------------------------------------------------------------------------------------------------------------------------------------------------------------------------------------------------------------------------------------------------------------------------------------------------------|------|------|-----------|-------|------|------|------------------------------------------|-------|----------------------|-----------------------------------------------------------------------------------------------------------------------------------------------|------|-----|-----------|-------|------|------|
| Rsa1.0_01195.1.g24477.t2 | gb ACG60682.1  transposon-like ORF [Brassica oleracea var. alboglabra] ref XP_002862757.1  hypothetical protein ARALYDRAFT_497309                                                                                                                                                                                                                                                                                                                                                                                                                                                                                                                                                                                                                                                                                                                           | 180  | 704  | 5.00E-53  | 391.1 | 58.9 | 63.3 | transposon-like ORF                      | gbpln | Brassica oleracea    | #                                                                                                                                             | #    | #   | #         | #     | #    |      |
| Rsa1.0_01195.1.g24478.t1 | [Arabidopsis lyrata subsp. lyrata] gi 297308457 gb EFH39015.1  hypothetical protein ARALYDRAFT_497309 [Arabidopsis lyrata subsp. lyrata]                                                                                                                                                                                                                                                                                                                                                                                                                                                                                                                                                                                                                                                                                                                    | 310  | 312  | 1.00E-123 | 100.6 | 78.7 | 83.9 | hypothetical protein ARALYDRAFT_497309   | gbpln | Arabidopsis lyrata   | AT2G46870.1   Symbols: NGA1   AP2/B3-like transcriptional factor family protein   chr2:19261313-19262245 FORWARD LENGTH=310                   | 310  | 310 | 1.00E-126 | 100.0 | 77.7 | 83.9 |
| Rsa1.0_01195.1.g24479.t1 | #                                                                                                                                                                                                                                                                                                                                                                                                                                                                                                                                                                                                                                                                                                                                                                                                                                                           | #    | #    | #         | #     | #    | -    | ----                                     | ----  | #                    | #                                                                                                                                             | #    | #   | #         | #     | #    |      |
| Rsa1.0_01196.1.g24480.t1 | gb ABB45859.1  hypothetical protein [Eutrema halophilum]                                                                                                                                                                                                                                                                                                                                                                                                                                                                                                                                                                                                                                                                                                                                                                                                    | 274  | 258  | 1.00E-123 | 94.2  | 79.9 | 87.2 | hypothetical protein                     | gbpln | Eutrema halophilum   | AT5G66510.1   Symbols: GAMMA CA3   gamma carbonic anhydrase 3   chr5:26550016-26551496 REVERSE LENGTH=258                                     | 274  | 258 | 1.00E-119 | 94.2  | 75.5 | 84.7 |
| Rsa1.0_01196.1.g24481.t1 | gb ABB45850.1  hypothetical protein [Eutrema halophilum]                                                                                                                                                                                                                                                                                                                                                                                                                                                                                                                                                                                                                                                                                                                                                                                                    | 272  | 296  | 1.00E-113 | 108.8 | 82.4 | 88.6 | hypothetical protein                     | gbpln | Eutrema halophilum   | AT5G66450.1   Symbols:   Phosphatidic acid phosphatase (PAP2) family protein   chr5:26534801-26535951 FORWARD LENGTH=286                      | 272  | 286 | 1.00E-108 | 105.1 | 78.3 | 87.5 |
| Rsa1.0_01196.1.g24482.t1 | gb ABB45857.1  hypothetical protein [Eutrema halophilum]                                                                                                                                                                                                                                                                                                                                                                                                                                                                                                                                                                                                                                                                                                                                                                                                    | 358  | 369  | 0         | 103.1 | 93.3 | 96.4 | hypothetical protein                     | gbpln | Eutrema halophilum   | AT5G66280.1   Symbols: GMD1   GDP-D-mannose 4,6-dehydratase 1   chr5:26476434-26477519 FORWARD LENGTH=361                                     | 358  | 361 | 0         | 100.8 | 91.6 | 95.5 |
| Rsa1.0_01196.1.g24483.t2 | emb CAH65737.1  folate transporter [Arabidopsis thaliana]                                                                                                                                                                                                                                                                                                                                                                                                                                                                                                                                                                                                                                                                                                                                                                                                   | 293  | 308  | 1.00E-138 | 105.1 | 86.0 | 91.5 | folate transporter                       | gbpln | Arabidopsis thaliana | AT5G66380.1   Symbols: ATFOLT1, FOLT1   folate transporter 1   chr5:26513645-26515533 REVERSE LENGTH=308                                      | 293  | 308 | 1.00E-140 | 105.1 | 85.7 | 91.1 |
| Rsa1.0_01196.1.g24484.t1 | gb ABB45838.1  hypothetical protein [Eutrema halophilum]                                                                                                                                                                                                                                                                                                                                                                                                                                                                                                                                                                                                                                                                                                                                                                                                    | 337  | 336  | 0         | 99.7  | 91.1 | 93.5 | hypothetical protein                     | gbpln | Eutrema halophilum   | AT5G66390.1   Symbols:   Peroxidase superfamily protein   chr5:26516063-26517329 REVERSE LENGTH=336                                           | 337  | 336 | 0         | 99.7  | 89.3 | 93.5 |
| Rsa1.0_01196.1.g24485.t1 | gb EOA14069.1  hypothetical protein CARUB_v10027206mg [Capsella rubella]                                                                                                                                                                                                                                                                                                                                                                                                                                                                                                                                                                                                                                                                                                                                                                                    | 192  | 184  | 4.00E-44  | 95.8  | 76.0 | 77.6 | hypothetical protein CARUB_v10027206mg   | gbpln | Capsella rubella     | AT5G66400.1   Symbols: RAB18, ATD18   Dehydrin family protein   chr5:26518511-26519153 REVERSE LENGTH=186                                     | 192  | 186 | 4.00E-43  | 96.9  | 74.5 | 76.6 |
| Rsa1.0_01196.1.g24486.t1 | emb CAB39638.1  RNA-directed DNA polymerase-like protein [Arabidopsis thaliana] gi 7267666 emb CAB78094.1  RNA-directed DNA polymerase-like protein [Arabidopsis thaliana]                                                                                                                                                                                                                                                                                                                                                                                                                                                                                                                                                                                                                                                                                  | 1137 | 1274 | 0         | 112.0 | 55.1 | 68.7 | RNA-directed DNA polymerase-like protein | gbpln | Arabidopsis thaliana | AT4G2090.1   Symbols:   Ribonuclease H-like superfamily protein   chr4:14333528-14335255 FORWARD LENGTH=575                                   | 1137 | 575 | 6.00E-73  | 50.6  | 16.4 | 24.5 |
| Rsa1.0_01196.1.g24487.t1 | gb EOA12679.1  hypothetical protein CARUB_v10027866mg [Capsella rubella]                                                                                                                                                                                                                                                                                                                                                                                                                                                                                                                                                                                                                                                                                                                                                                                    | 378  | 326  | 1.00E-165 | 86.2  | 76.5 | 80.2 | hypothetical protein CARUB_v10027866mg   | gbpln | Capsella rubella     | AT5G66240.2   Symbols:   Transducin/WD40 repeat-like superfamily protein   chr5:26466348-26468201 FORWARD LENGTH=331                          | 378  | 331 | 1.00E-166 | 87.6  | 75.7 | 79.4 |
| Rsa1.0_01196.1.g24488.t1 | gb EOA13055.1  hypothetical protein CARUB_v10026056mg [Capsella rubella]                                                                                                                                                                                                                                                                                                                                                                                                                                                                                                                                                                                                                                                                                                                                                                                    | 646  | 651  | 0         | 100.8 | 93.3 | 96.6 | hypothetical protein CARUB_v10026056mg   | gbpln | Capsella rubella     | AT5G66200.1   Symbols: ARO2   armadillo repeat only 2   chr5:26453648-26455603 REVERSE LENGTH=651                                             | 646  | 651 | 0         | 100.8 | 92.1 | 95.5 |
| Rsa1.0_01196.1.g24489.t1 | ref NP_201420.1  ferredoxin--NADP+ reductase [Arabidopsis thaliana] gi 75171342 sp Q9FKW6.1 FNRL1_ARAT H RecName: Full=Ferredoxin--NADP reductase, leaf isozyme 1, chloroplastic; AltName: Full=Leaf FNR 1; Short=ATLFNR1; Short=FNR-1; Flags: Precursor gi 10177134 dbj BAB10424.1  ferredoxin--NADP+ reductase [Arabidopsis thaliana] gi 18175825 gb AAL59934.1  putative ferredoxin--NADP+ reductase [Arabidopsis thaliana] gi 20465661 gb AAM20299.1  putative ferredoxin--NADP+ reductase [Arabidopsis thaliana] gi 332010791 gb AED98174.1  ferredoxin--NADP+ reductase [Arabidopsis thaliana] ref NP_201419.2  S-adenosyl-L-methionine-dependent methyltransferase domain-containing protein [Arabidopsis thaliana] gi 332010788 gb AED98171.1  S-adenosyl-L-methionine-dependent methyltransferase domain-containing protein [Arabidopsis thaliana] | 361  | 360  | 1.00E-180 | 99.7  | 92.0 | 94.7 | ferredoxin--NADP+ reductase              | gbpln | Arabidopsis thaliana | AT5G66190.1   Symbols: ATLFNR1, FNR1   ferredoxin--NADP(+)-oxidoreductase 1   chr5:26451203-26453012 REVERSE LENGTH=360                       | 361  | 360 | 0         | 99.7  | 92.0 | 94.7 |
| Rsa1.0_01196.1.g24490.t1 | gb AAM64406.1  senescence-associated protein [Arabidopsis thaliana]                                                                                                                                                                                                                                                                                                                                                                                                                                                                                                                                                                                                                                                                                                                                                                                         | 134  | 136  | 1.00E-53  | 101.5 | 74.6 | 86.6 | senescence-associated protein            | gbpln | Arabidopsis thaliana | AT5G66180.1   Symbols:   S-adenosyl-L-methionine-dependent methyltransferases superfamily protein   chr5:26448952-26450919 FORWARD LENGTH=395 | 387  | 395 | 0         | 102.1 | 84.2 | 92.0 |
| Rsa1.0_01196.1.g24491.t1 | gb AAM64406.1  senescence-associated protein [Arabidopsis thaliana]                                                                                                                                                                                                                                                                                                                                                                                                                                                                                                                                                                                                                                                                                                                                                                                         | 134  | 136  | 1.00E-53  | 101.5 | 74.6 | 86.6 | senescence-associated protein            | gbpln | Arabidopsis thaliana | AT5G66170.3   Symbols: STR18   sulfurtransferase 18   chr5:26447828-26448586 FORWARD LENGTH=136                                               | 134  | 136 | 4.00E-56  | 101.5 | 74.6 | 85.8 |

|                           |                                                                                                                                                                                                                                                                                                                                                                                                                                                                                                                                                                        |      |      |          |       |      |      |                                                                                                                                                                                                                                                                                                                                                                                                                                                                                                                                                             |       |                      |                                                                                                                                                                                                                                                                                                                                                                                                                                                       |      |      |           |       |      |      |
|---------------------------|------------------------------------------------------------------------------------------------------------------------------------------------------------------------------------------------------------------------------------------------------------------------------------------------------------------------------------------------------------------------------------------------------------------------------------------------------------------------------------------------------------------------------------------------------------------------|------|------|----------|-------|------|------|-------------------------------------------------------------------------------------------------------------------------------------------------------------------------------------------------------------------------------------------------------------------------------------------------------------------------------------------------------------------------------------------------------------------------------------------------------------------------------------------------------------------------------------------------------------|-------|----------------------|-------------------------------------------------------------------------------------------------------------------------------------------------------------------------------------------------------------------------------------------------------------------------------------------------------------------------------------------------------------------------------------------------------------------------------------------------------|------|------|-----------|-------|------|------|
| Rsa1.0_01196.1.g24492.t11 | dbj BAJ34496.1  unnamed protein product [Theilungiella halophila]                                                                                                                                                                                                                                                                                                                                                                                                                                                                                                      | 395  | 210  | 9.00E-71 | 53.2  | 38.7 | 43.3 | unnamed protein product                                                                                                                                                                                                                                                                                                                                                                                                                                                                                                                                     | ----- | -----                | AT5G66090.1   Symbols:   unknown protein; FUNCTIONS IN: molecular_function unknown; LOCATED IN: chloroplast, chloroplast stroma; EXPRESSED DURING: 21 plant structures; EXPRESSED DURING: 13 growth stages; Has 30201 Blast hits to 17322 proteins in 780 species: Archae - 12; Bacteria - 1396; Metazoa - 17338; Fungi - 3422; Plants - 5037; Viruses - 0; Other Eukaryotes - 2996 (source: NCBI BLINK);   chr5:26425831-26426955 FORWARD LENGTH=210 | 395  | 210  | 5.00E-70  | 53.2  | 38.5 | 43.3 |
| Rsa1.0_01196.1.g24493.t1  | ref XP_002866780.1  predicted protein [Arabidopsis lyrata subsp. lyrata] gi 297312615 gb EFH43039.1  predicted protein [Arabidopsis lyrata subsp. lyrata]                                                                                                                                                                                                                                                                                                                                                                                                              | 395  | 395  | 0        | 100.0 | 96.7 | 98.5 | predicted protein                                                                                                                                                                                                                                                                                                                                                                                                                                                                                                                                           | gbpln | Arabidopsis lyrata   | AT5G65980.1   Symbols:   Auxin efflux carrier family protein   chr5:26392444-26394232 FORWARD LENGTH=395                                                                                                                                                                                                                                                                                                                                              | 395  | 395  | 0         | 100.0 | 95.4 | 97.2 |
| Rsa1.0_01196.1.g24494.t27 | ref XP_002865094.1  hypothetical protein ARALYDRAFT_497034 [Arabidopsis lyrata subsp. lyrata] gi 297310929 gb EFH41353.1  hypothetical protein ARALYDRAFT_497034 [Arabidopsis lyrata subsp. lyrata]                                                                                                                                                                                                                                                                                                                                                                    | 1741 | 1261 | 0        | 72.4  | 67.5 | 69.8 | hypothetical protein ARALYDRAFT_497034                                                                                                                                                                                                                                                                                                                                                                                                                                                                                                                      | gbpln | Arabidopsis lyrata   | AT5G65930.2   Symbols: ZWI, PKCBP, KOBP   kinesin-like calmodulin-binding protein (ZWICHEL)   chr5:26370369-26376394 REVERSE LENGTH=1260                                                                                                                                                                                                                                                                                                              | 1741 | 1260 | 0         | 72.4  | 66.9 | 69.6 |
| Rsa1.0_01196.1.g24495.t5  | #                                                                                                                                                                                                                                                                                                                                                                                                                                                                                                                                                                      | #    | #    | #        | #     | #    | #    | -                                                                                                                                                                                                                                                                                                                                                                                                                                                                                                                                                           | ----- | -----                | AT5G04410.1   Symbols: NAC2, anac078   NAC domain containing protein 2   chr5:1243980-1246416 FORWARD LENGTH=567                                                                                                                                                                                                                                                                                                                                      | 182  | 567  | 2.00E-12  | 311.5 | 18.1 | 22.5 |
| Rsa1.0_01197.1.g24496.t2  | emb CAB78060.1  putative protein [Arabidopsis thaliana]                                                                                                                                                                                                                                                                                                                                                                                                                                                                                                                | 574  | 666  | 9.00E-72 | 116.0 | 25.4 | 36.1 | putative protein                                                                                                                                                                                                                                                                                                                                                                                                                                                                                                                                            | gbpln | Arabidopsis thaliana | AT2G06420.1   Symbols:   Domain of unknown function (DUF1985)   chr2:2539083-2539985 FORWARD LENGTH=249                                                                                                                                                                                                                                                                                                                                               | 574  | 249  | 5.00E-23  | 43.4  | 11.1 | 15.7 |
| Rsa1.0_01197.1.g24497.t1  | #                                                                                                                                                                                                                                                                                                                                                                                                                                                                                                                                                                      | #    | #    | #        | #     | #    | #    | -                                                                                                                                                                                                                                                                                                                                                                                                                                                                                                                                                           | ----- | -----                | #                                                                                                                                                                                                                                                                                                                                                                                                                                                     | #    | #    | #         | #     | #    |      |
| Rsa1.0_01197.1.g24498.t1  | #                                                                                                                                                                                                                                                                                                                                                                                                                                                                                                                                                                      | #    | #    | #        | #     | #    | #    | -                                                                                                                                                                                                                                                                                                                                                                                                                                                                                                                                                           | ----- | -----                | #                                                                                                                                                                                                                                                                                                                                                                                                                                                     | #    | #    | #         | #     | #    |      |
| Rsa1.0_01197.1.g24499.t1  | #                                                                                                                                                                                                                                                                                                                                                                                                                                                                                                                                                                      | #    | #    | #        | #     | #    | #    | -                                                                                                                                                                                                                                                                                                                                                                                                                                                                                                                                                           | ----- | -----                | #                                                                                                                                                                                                                                                                                                                                                                                                                                                     | #    | #    | #         | #     | #    |      |
| Rsa1.0_01197.1.g24500.t1  | dbj BAB10503.1  retroelement pol polyprotein-like [Arabidopsis thaliana]                                                                                                                                                                                                                                                                                                                                                                                                                                                                                               | 1127 | 1475 | 0        | 130.9 | 59.4 | 74.9 | retroelement pol polyprotein-like                                                                                                                                                                                                                                                                                                                                                                                                                                                                                                                           | gbpln | Arabidopsis thaliana | AT4G23160.1   Symbols: CRK8   cysteine-rich RLK (RECEPTOR-like protein kinase) 8   chr4:12129485-12134086 FORWARD LENGTH=1262                                                                                                                                                                                                                                                                                                                         | 1127 | 1262 | 0         | 112.0 | 27.5 | 36.0 |
| Rsa1.0_01197.1.g24501.t1  | ref XP_002890776.1  hypothetical protein ARALYDRAFT_473063 [Arabidopsis lyrata subsp. lyrata] gi 297338618 gb EFH67035.1  hypothetical protein ARALYDRAFT_473063 [Arabidopsis lyrata subsp. lyrata]                                                                                                                                                                                                                                                                                                                                                                    | 1029 | 996  | 0        | 96.8  | 72.3 | 78.8 | hypothetical protein ARALYDRAFT_473063                                                                                                                                                                                                                                                                                                                                                                                                                                                                                                                      | gbpln | Arabidopsis lyrata   | AT1G28440.1   Symbols: HSL1   HAESA-like 1   chr1:9996914-10000171 FORWARD LENGTH=996                                                                                                                                                                                                                                                                                                                                                                 | 1029 | 996  | 0         | 96.8  | 72.0 | 78.4 |
| Rsa1.0_01197.1.g24502.t3  | gb AAB82639.1  putative non-LTR retroelement reverse transcriptase [Arabidopsis thaliana]                                                                                                                                                                                                                                                                                                                                                                                                                                                                              | 1688 | 1374 | 0        | 81.4  | 37.9 | 50.9 | putative non-LTR retroelement reverse transcriptase                                                                                                                                                                                                                                                                                                                                                                                                                                                                                                         | gbpln | Arabidopsis thaliana | AT4G29090.1   Symbols:   Ribonuclease H-like superfamily protein   chr4:14333528-14335255 FORWARD LENGTH=575                                                                                                                                                                                                                                                                                                                                          | 1688 | 575  | 1.00E-114 | 34.1  | 13.6 | 19.1 |
| Rsa1.0_01197.1.g24503.t1  | pdb 2DRE A Chain A, Crystal Structure Of Water-Soluble Chlorophyll Protein From Lepidium Virginicum At 2.00 Angstrom Resolution gi 122919966 pdb 2DRE B Chain B, Crystal Structure Of Water-Soluble Chlorophyll Protein From Lepidium Virginicum At 2.00 Angstrom Resolution gi 122919967 pdb 2DRE C Chain C, Crystal Structure Of Water-Soluble Chlorophyll Protein From Lepidium Virginicum At 2.00 Angstrom Resolution gi 122919968 pdb 2DRE D Chain D, Crystal Structure Of Water-Soluble Chlorophyll Protein From Lepidium Virginicum At 2.00 Angstrom Resolution | 190  | 180  | 2.00E-19 | 94.7  | 27.9 | 34.2 | Chain A, Crystal Structure Of Water-Soluble Chlorophyll Protein From Lepidium Virginicum At 2.00 Angstrom Resolution gi 122919966 pdb 2DRE   Chain B, Crystal Structure Of Water-Soluble Chlorophyll Protein From Lepidium Virginicum At 2.00 Angstrom Resolution gi 122919967 pdb 2DRE   Chain C, Crystal Structure Of Water-Soluble Chlorophyll Protein From Lepidium Virginicum At 2.00 Angstrom Resolution gi 122919968 pdb 2DRE   Chain D, Crystal Structure Of Water-Soluble Chlorophyll Protein From Lepidium Virginicum At 2.00 Angstrom Resolution | ----- | -----                | AT1G73325.1   Symbols:   Kunitz family trypsin and protease inhibitor protein   chr1:27567518-27568186 REVERSE LENGTH=222                                                                                                                                                                                                                                                                                                                             | 190  | 222  | 9.00E-11  | 116.8 | 16.3 | 28.4 |

|                          |                                                                                                                                                                                                                                                                                                                                                                                                                                                                                                                                                                                      |      |      |           |       |      |      |                                                                                 |       |                      |                                                                                                                                                                                                                                                                               |      |      |           |       |      |      |
|--------------------------|--------------------------------------------------------------------------------------------------------------------------------------------------------------------------------------------------------------------------------------------------------------------------------------------------------------------------------------------------------------------------------------------------------------------------------------------------------------------------------------------------------------------------------------------------------------------------------------|------|------|-----------|-------|------|------|---------------------------------------------------------------------------------|-------|----------------------|-------------------------------------------------------------------------------------------------------------------------------------------------------------------------------------------------------------------------------------------------------------------------------|------|------|-----------|-------|------|------|
| Rsa1.0_01198.1.g24504.t1 | ref XP_002864790.1  hypothetical protein ARALYDRAFT_496418 [Arabidopsis lyrata subsp. lyrata] gi 297310625 gb EFH41049.1                                                                                                                                                                                                                                                                                                                                                                                                                                                             | 1134 | 1175 | 0         | 103.6 | 93.2 | 96.9 | hypothetical protein ARALYDRAFT_496418                                          | gbpln | Arabidopsis lyrata   | AT5G62410.1   Symbols: SMC2, TTN3, ATCAP-E1, ATSMC4   structural maintenance of chromosomes 2   chr5:25056308-25062436 FORWARD LENGTH=1175                                                                                                                                    | 1134 | 1175 | 0         | 103.6 | 92.9 | 96.6 |
| Rsa1.0_01198.1.g24505.t1 | gb EOA14154.1  hypothetical protein CARUB_v10027301mg, partial [Capsella rubella]                                                                                                                                                                                                                                                                                                                                                                                                                                                                                                    | 122  | 152  | 4.00E-62  | 124.6 | 96.7 | 96.7 | hypothetical protein CARUB_v10027301mg, partial                                 | gbpln | Capsella rubella     | AT3G47370.3   Symbols:   Ribosomal protein S10p/S20e family protein   chr3:17453671-17454437 REVERSE LENGTH=122                                                                                                                                                               | 122  | 122  | 7.00E-64  | 100.0 | 95.9 | 95.9 |
| Rsa1.0_01198.1.g24506.t1 | gb EOA13325.1  hypothetical protein CARUB_v10026360mg [Capsella rubella]                                                                                                                                                                                                                                                                                                                                                                                                                                                                                                             | 446  | 463  | 1.00E-175 | 103.8 | 78.3 | 87.4 | hypothetical protein CARUB_v10026360mg                                          | gbpln | Capsella rubella     | AT5G62390.1   Symbols: ATBAG7, BAG7   BCL-2-associated athanogene 7   chr5:25052377-25054170 REVERSE LENGTH=446                                                                                                                                                               | 446  | 446  | 1.00E-166 | 100.0 | 75.3 | 85.7 |
| Rsa1.0_01198.1.g24507.t1 | ref NP_201044.1  NAC-domain protein 101 [Arabidopsis thaliana] gi 8809651 dbj BAA97202.1  NAM (no apical meristem)-like protein [Arabidopsis thaliana] gi 67633909 gb AA78878.1  no apical meristem family protein [Arabidopsis thaliana] gi 11074488 gb ABH04617.1  At5g62380 [Arabidopsis thaliana] gi 332010219 gb AED97602.1  NAC-domain protein 101 [Arabidopsis thaliana]                                                                                                                                                                                                      | 348  | 348  | 1.00E-167 | 100.0 | 89.7 | 92.0 | NAC-domain protein 101                                                          | gbpln | Arabidopsis thaliana | AT5G62380.1   Symbols: VND6, ANAC101, NAC101   NAC-domain protein 101   chr5:25050664-25051858 FORWARD LENGTH=348                                                                                                                                                             | 348  | 348  | 1.00E-170 | 100.0 | 89.7 | 92.0 |
| Rsa1.0_01198.1.g24508.t1 | #                                                                                                                                                                                                                                                                                                                                                                                                                                                                                                                                                                                    | #    | #    | #         | #     | #    | -    | ----                                                                            | ----  | ----                 | #                                                                                                                                                                                                                                                                             | #    | #    | #         | #     | #    |      |
| Rsa1.0_01198.1.g24509.t1 | gb AAM67138.1  ripening-related protein-like [Arabidopsis thaliana]                                                                                                                                                                                                                                                                                                                                                                                                                                                                                                                  | 204  | 202  | 1.00E-99  | 99.0  | 86.8 | 92.6 | ripening-related protein-like                                                   | gbpln | Arabidopsis thaliana | AT5G62350.1   Symbols:   Plant invertase/pectin methylesterase inhibitor superfamily protein   chr5:25037504-25038112 FORWARD LENGTH=202                                                                                                                                      | 204  | 202  | 3.00E-97  | 99.0  | 86.3 | 92.6 |
| Rsa1.0_01198.1.g24510.t1 | gb EOA15072.1  hypothetical protein CARUB_v10028436mg [Capsella rubella]                                                                                                                                                                                                                                                                                                                                                                                                                                                                                                             | 240  | 243  | 1.00E-104 | 101.3 | 85.8 | 90.4 | hypothetical protein CARUB_v10028436mg                                          | gbpln | Capsella rubella     | AT5G62320.1   Symbols: MYB99, ATMYBCU15, ATMYB99   myb domain protein 99   chr5:25028885-25029786 REVERSE LENGTH=245                                                                                                                                                          | 240  | 245  | 1.00E-103 | 102.1 | 86.7 | 90.0 |
| Rsa1.0_01198.1.g24511.t1 | ref NP_201037.1  AGC (cAMP-dependent, cGMP-dependent and protein kinase C) kinase family protein [Arabidopsis thaliana] gi 6729346 dbj BAA89783.1  IRE [Arabidopsis thaliana] gi 8809644 dbj BAA97195.1  IRE [Arabidopsis thaliana] gi 332010212 gb AED97595.1  AGC (cAMP-dependent, cGMP-dependent and protein kinase C) kinase family protein [Arabidopsis thaliana] ref NP_001119478.1  nucleotide-sensitive chloride conductance regulator family protein [Arabidopsis thaliana] gi 332010209 gb AED97592.1  chloride conductance regulatory protein ICln [Arabidopsis thaliana] | 1120 | 1168 | 0         | 104.3 | 89.6 | 93.0 | AGC (cAMP-dependent, cGMP-dependent and protein kinase C) kinase family protein | gbpln | Arabidopsis thaliana | AT5G62310.1   Symbols: IRE   AGC (cAMP-dependent, cGMP-dependent and protein kinase C) kinase family protein   chr5:25023405-25028414 FORWARD LENGTH=1168                                                                                                                     | 1120 | 1168 | 0         | 104.3 | 89.6 | 93.0 |
| Rsa1.0_01198.1.g24512.t1 | ref NP_001119478.1  nucleotide-sensitive chloride conductance regulator family protein [Arabidopsis thaliana] gi 332010209 gb AED97592.1  chloride conductance regulatory protein ICln [Arabidopsis thaliana]                                                                                                                                                                                                                                                                                                                                                                        | 117  | 228  | 1.00E-27  | 194.9 | 58.1 | 61.5 | nucleotide-sensitive chloride conductance regulator family protein              | gbpln | Arabidopsis thaliana | AT5G62290.2   Symbols:   nucleotide-sensitive chloride conductance regulator (ICln) family protein   chr5:25019568-25020972 FORWARD LENGTH=228                                                                                                                                | 117  | 228  | 2.00E-30  | 194.9 | 58.1 | 61.5 |
| Rsa1.0_01198.1.g24513.t1 | gb EOA12583.1  hypothetical protein CARUB_v10027009mg, partial [Capsella rubella]                                                                                                                                                                                                                                                                                                                                                                                                                                                                                                    | 181  | 245  | 4.00E-57  | 135.4 | 75.1 | 80.1 | hypothetical protein CARUB_v10027009mg, partial                                 | gbpln | Capsella rubella     | AT5G62280.1   Symbols:   Protein of unknown function (DUF1442)   chr5:25017165-25017985 FORWARD LENGTH=236                                                                                                                                                                    | 181  | 236  | 2.00E-51  | 130.4 | 74.0 | 79.0 |
| Rsa1.0_01198.1.g24514.t1 | gb EOA13508.1  hypothetical protein CARUB_v10026575mg [Capsella rubella]                                                                                                                                                                                                                                                                                                                                                                                                                                                                                                             | 296  | 387  | 1.00E-149 | 130.7 | 89.5 | 96.6 | hypothetical protein CARUB_v10026575mg                                          | gbpln | Capsella rubella     | AT5G62270.2   Symbols:   FUNCTIONS IN: molecular_function unknown; INVOLVED IN: biological_process unknown; LOCATED IN: cellular_component unknown; BEST Arabidopsis thaliana protein match is: mucin-related (TAIR:AT2G02880.1).   chr5:25012227-25014486 FORWARD LENGTH=420 | 296  | 420  | 1.00E-143 | 141.9 | 86.8 | 95.3 |
| Rsa1.0_01198.1.g24515.t1 | gb EOA12533.1  hypothetical protein CARUB_v10026514mg [Capsella rubella]                                                                                                                                                                                                                                                                                                                                                                                                                                                                                                             | 463  | 407  | 1.00E-132 | 87.9  | 59.2 | 62.9 | hypothetical protein CARUB_v10026514mg                                          | gbpln | Capsella rubella     | AT5G62260.1   Symbols:   AT hook motif DNA-binding family protein   chr5:25009331-25011348 FORWARD LENGTH=404                                                                                                                                                                 | 463  | 404  | 1.00E-128 | 87.3  | 58.1 | 61.8 |
| Rsa1.0_01199.1.g24516.t1 | ref NP_199205.1  transducin/WD40 domain-containing protein [Arabidopsis thaliana] gi 9758551 dbj BAB09052.1  WD-repeat protein-like [Arabidopsis thaliana] gi 11074272 dbj BAE99272.1  WD-repeat protein-like [Arabidopsis thaliana] gi 148535209 gb ABQ85545.1  will die slowly [Arabidopsis thaliana] gi 332007645 gb AED95028.1  transducin/WD40 domain-containing protein [Arabidopsis thaliana]                                                                                                                                                                                 | 529  | 523  | 0         | 98.9  | 83.6 | 90.9 | transducin/WD40 domain-containing protein                                       | gbpln | Arabidopsis thaliana | AT5G43920.1   Symbols:   transducin family protein / WD-40 repeat family protein   chr5:17673397-17675630 FORWARD LENGTH=523                                                                                                                                                  | 529  | 523  | 0         | 98.9  | 83.6 | 90.9 |

|                          |                                                                                                                                                                                                                                                                                                                                                                                                                                                                                                                                                                                                          |      |      |           |       |      |      |                                                  |             |                      |                                                                                                                                                                                                                                                                                                                                                          |      |      |           |       |      |      |
|--------------------------|----------------------------------------------------------------------------------------------------------------------------------------------------------------------------------------------------------------------------------------------------------------------------------------------------------------------------------------------------------------------------------------------------------------------------------------------------------------------------------------------------------------------------------------------------------------------------------------------------------|------|------|-----------|-------|------|------|--------------------------------------------------|-------------|----------------------|----------------------------------------------------------------------------------------------------------------------------------------------------------------------------------------------------------------------------------------------------------------------------------------------------------------------------------------------------------|------|------|-----------|-------|------|------|
| Rsa1.0_01199.1.g24517.t4 | gb ACJ49161.1  protection of telomeres 1a protein [Brassica oleracea]                                                                                                                                                                                                                                                                                                                                                                                                                                                                                                                                    | 464  | 456  | 0         | 98.3  | 71.8 | 80.0 | protection of telomeres 1a protein               | gbpln       | Brassica oleracea    | AT2G05210.3   Symbols: AtPOT1a   Nucleic acid-binding, OB-fold-like protein   chr2:1891814-1894196 FORWARD LENGTH=467                                                                                                                                                                                                                                    | 464  | 467  | 1.00E-162 | 100.6 | 64.9 | 76.1 |
| Rsa1.0_01199.1.g24518.t1 | ref NP_198436.1  uncharacterized protein [Arabidopsis thaliana]   gi 10176706 dbj BAB09928.1  unnamed protein product [Arabidopsis thaliana]   gi 91805673 gb ABE65565.1  hypothetical protein AT5G35870 [Arabidopsis thaliana]   gi 332006639 gb AED94022.1  uncharacterized protein AT5G35870 [Arabidopsis thaliana]                                                                                                                                                                                                                                                                                   | 156  | 196  | 4.00E-44  | 125.6 | 67.9 | 80.1 | uncharacterized protein                          | gbpln       | Arabidopsis thaliana | AT5G35870.1   Symbols:   unknown protein; BEST Arabidopsis thaliana protein match is: unknown protein (TAIR:AT2G04480.1); Has 1807 Blast hits to 1807 proteins in 277 species: Archae - 0; Bacteria - 0; Metazoa - 736; Fungi - 347; Plants - 385; Viruses - 0; Other Eukaryotes - 339 (source: NCBI BLINK).   chr5:14021022-14021612 FORWARD LENGTH=196 | 156  | 196  | 1.00E-46  | 125.6 | 67.9 | 80.1 |
| Rsa1.0_01199.1.g24519.t2 | gb ACP30577.1  disease resistance protein [Brassica rapa subsp. pekinensis]                                                                                                                                                                                                                                                                                                                                                                                                                                                                                                                              | 1350 | 1235 | 0         | 91.5  | 69.0 | 76.1 | disease resistance protein                       | gbpln       | Brassica rapa        | AT5G11250.1   Symbols:   Disease resistance protein (TIR-NBS-LRR class)   chr5:3587978-3591960 REVERSE LENGTH=1189                                                                                                                                                                                                                                       | 1350 | 1189 | 0         | 88.1  | 60.1 | 70.0 |
| Rsa1.0_01199.1.g24520.t1 | ref XP_002862509.1  basic helix-loop-helix family protein [Arabidopsis lyrata subsp. lyrata]   gi 297308072 gb EFH38767.1  basic helix-loop-helix family protein [Arabidopsis lyrata subsp. lyrata]                                                                                                                                                                                                                                                                                                                                                                                                      | 236  | 247  | 8.00E-93  | 104.7 | 74.6 | 86.0 | basic helix-loop-helix family protein            | gbpln       | Arabidopsis lyrata   | AT5G43650.1   Symbols: BHLH92   basic helix-loop-helix (bHLH) DNA-binding superfamily protein   chr5:17533310-17534758 REVERSE LENGTH=247                                                                                                                                                                                                                | 236  | 247  | 1.00E-88  | 104.7 | 71.6 | 83.1 |
| Rsa1.0_01199.1.g24521.t1 | gb EOA14915.1  hypothetical protein CARUB_v10028255mg [Capsella rubella]                                                                                                                                                                                                                                                                                                                                                                                                                                                                                                                                 | 138  | 137  | 2.00E-51  | 99.3  | 84.8 | 89.1 | hypothetical protein CARUB_v10028255mg           | gbpln       | Capsella rubella     | AT5G43540.1   Symbols:   C2H2 and C2HC zinc fingers superfamily protein   chr5:17498993-17497406 FORWARD LENGTH=137                                                                                                                                                                                                                                      | 138  | 137  | 5.00E-45  | 99.3  | 79.7 | 84.1 |
| Rsa1.0_01199.1.g24522.t1 | gb ACG24094.1  nicotiana lesion-inducing like [Zea mays]   ref NP_199157.1  putative 2-oxoglutarate-dependent dioxygenase [Arabidopsis thaliana]   gi 75311542 sp Q9LSW7.1 ACCH9_ARAT H RecName: Full=1-aminocyclopropane-1-carboxylate oxidase homolog 9   gi 8843897 dbj BAA97423.1  1-aminocyclopropane-1-carboxylate oxidase [Arabidopsis thaliana]   gi 15933009 gb AAL10501.1  AT5g43440/MWF20.15 [Arabidopsis thaliana]   gi 23505905 gb AAN28912.1  At5g43440/MWF20.15 [Arabidopsis thaliana]   gi 332007580 gb AED94963.1  putative 2-oxoglutarate-dependent dioxygenase [Arabidopsis thaliana] | 157  | 157  | 3.00E-81  | 100.0 | 97.5 | 98.1 | nicotiana lesion-inducing like                   | gbenv/gbpln | Zea mays             | AT1G04340.1   Symbols:   HR-like lesion-inducing protein-related   chr1:1163345-1164737 REVERSE LENGTH=159                                                                                                                                                                                                                                               | 157  | 159  | 4.00E-71  | 101.3 | 85.4 | 91.7 |
| Rsa1.0_01199.1.g24523.t1 | ref NP_199157.1  putative 2-oxoglutarate-dependent dioxygenase [Arabidopsis thaliana]   gi 75311542 sp Q9LSW7.1 ACCH9_ARAT H RecName: Full=1-aminocyclopropane-1-carboxylate oxidase homolog 9   gi 8843897 dbj BAA97423.1  1-aminocyclopropane-1-carboxylate oxidase [Arabidopsis thaliana]   gi 15933009 gb AAL10501.1  AT5g43440/MWF20.15 [Arabidopsis thaliana]   gi 23505905 gb AAN28912.1  At5g43440/MWF20.15 [Arabidopsis thaliana]   gi 332007580 gb AED94963.1  putative 2-oxoglutarate-dependent dioxygenase [Arabidopsis thaliana]                                                            | 345  | 365  | 1.00E-150 | 105.8 | 75.9 | 84.6 | putative 2-oxoglutarate-dependent dioxygenase    | gbpln       | Arabidopsis thaliana | AT5G43440.1   Symbols:   2-oxoglutarate (2OG) and Fe(II)-dependent oxygenase superfamily protein   chr5:17455356-17456608 REVERSE LENGTH=365                                                                                                                                                                                                             | 345  | 365  | 1.00E-152 | 105.8 | 75.9 | 84.6 |
| Rsa1.0_01199.1.g24524.t1 | gb EOA14060.1  hypothetical protein CARUB_v10027196mg, partial [Capsella rubella]                                                                                                                                                                                                                                                                                                                                                                                                                                                                                                                        | 130  | 187  | 4.00E-38  | 143.8 | 65.4 | 73.8 | hypothetical protein CARUB_v10027196mg, partial  | gbpln       | Capsella rubella     | AT1G04340.1   Symbols:   HR-like lesion-inducing protein-related   chr1:1163345-1164737 REVERSE LENGTH=159                                                                                                                                                                                                                                               | 130  | 159  | 9.00E-39  | 122.3 | 63.8 | 73.1 |
| Rsa1.0_01199.1.g24525.t1 | gb AAM61464.1  electron transfer flavoprotein beta-subunit-like [Arabidopsis thaliana]                                                                                                                                                                                                                                                                                                                                                                                                                                                                                                                   | 251  | 251  | 1.00E-133 | 100.0 | 93.2 | 98.0 | electron transfer flavoprotein beta-subunit-like | gbpln       | Arabidopsis thaliana | AT5G43430.1   Symbols: ETFBETA   electron transfer flavoprotein beta   chr5:17453656-17455111 FORWARD LENGTH=251                                                                                                                                                                                                                                         | 251  | 251  | 1.00E-135 | 100.0 | 92.8 | 97.6 |
| Rsa1.0_01199.1.g24526.t1 | #                                                                                                                                                                                                                                                                                                                                                                                                                                                                                                                                                                                                        | #    | #    | #         | #     | #    | #    | -                                                | ----        | ----                 | #                                                                                                                                                                                                                                                                                                                                                        | #    | #    | #         | #     | #    | #    |
| Rsa1.0_01199.1.g24527.t1 | #                                                                                                                                                                                                                                                                                                                                                                                                                                                                                                                                                                                                        | #    | #    | #         | #     | #    | #    | -                                                | ----        | ----                 | #                                                                                                                                                                                                                                                                                                                                                        | #    | #    | #         | #     | #    | #    |
| Rsa1.0_01199.1.g24528.t1 | gb EOA14898.1  hypothetical protein CARUB_v10028227mg [Capsella rubella]                                                                                                                                                                                                                                                                                                                                                                                                                                                                                                                                 | 133  | 136  | 3.00E-44  | 102.3 | 83.5 | 88.0 | hypothetical protein CARUB_v10028227mg           | gbpln       | Capsella rubella     | AT5G43410.1   Symbols:   Integrase-type DNA-binding superfamily protein   chr5:17435010-17435405 REVERSE LENGTH=131                                                                                                                                                                                                                                      | 133  | 131  | 2.00E-45  | 98.5  | 83.5 | 88.7 |
| Rsa1.0_01199.1.g24529.t1 | gb EOA14581.1  hypothetical protein CARUB_v10027822mg [Capsella rubella]                                                                                                                                                                                                                                                                                                                                                                                                                                                                                                                                 | 482  | 524  | 0         | 108.7 | 94.6 | 97.3 | hypothetical protein CARUB_v10027822mg           | gbpln       | Capsella rubella     | AT5G43360.1   Symbols: PHT3, ATPT4, PHT1.3   phosphate transporter 1.3   chr5:17409524-17411214 FORWARD LENGTH=521                                                                                                                                                                                                                                       | 482  | 521  | 0         | 108.1 | 93.4 | 96.5 |
| Rsa1.0_01199.1.g24530.t1 | gb EOA21445.1  hypothetical protein CARUB_v10001828mg [Capsella rubella]   ref XP_002865428.1  hypothetical protein ARALYDRAFT_331059 [Arabidopsis lyrata subsp. lyrata]   gi 297311263 gb EFH41687.1  hypothetical protein ARALYDRAFT_331059 [Arabidopsis lyrata subsp. lyrata]                                                                                                                                                                                                                                                                                                                         | 194  | 244  | 1.00E-100 | 125.8 | 93.3 | 97.4 | hypothetical protein CARUB_v10001828mg           | gbpln       | Capsella rubella     | AT1G33140.1   Symbols: PGY2   Ribosomal protein L6 family   chr1:12023360-12024502 FORWARD LENGTH=194                                                                                                                                                                                                                                                    | 194  | 194  | 1.00E-102 | 100.0 | 93.3 | 97.9 |
| Rsa1.0_01199.1.g24531.t1 | ref XP_002865428.1  hypothetical protein ARALYDRAFT_331059 [Arabidopsis lyrata subsp. lyrata]   gi 297311263 gb EFH41687.1  hypothetical protein ARALYDRAFT_331059 [Arabidopsis lyrata subsp. lyrata]                                                                                                                                                                                                                                                                                                                                                                                                    | 86   | 517  | 1.00E-41  | 601.2 | 97.7 | 98.8 | hypothetical protein ARALYDRAFT_331059           | gbpln       | Arabidopsis lyrata   | AT5G43360.1   Symbols: PHT3, ATPT4, PHT1.3   phosphate transporter 1.3   chr5:17409524-17411214 FORWARD LENGTH=521                                                                                                                                                                                                                                       | 86   | 521  | 9.00E-44  | 605.8 | 96.5 | 97.7 |
| Rsa1.0_01200.1.g24532.t1 | ref XP_003617941.1  40S ribosomal protein [Medicago truncatula]   gi 355519276 gb AEI00900.1  40S ribosomal protein [Medicago truncatula]                                                                                                                                                                                                                                                                                                                                                                                                                                                                | 69   | 230  | 3.00E-24  | 333.3 | 79.7 | 87.0 | 40S ribosomal protein                            | gbpln       | Medicago truncatula  | AT2G40590.1   Symbols:   Ribosomal protein S26a family protein   chr2:16945215-16946345 REVERSE LENGTH=131                                                                                                                                                                                                                                               | 69   | 131  | 1.00E-25  | 189.9 | 76.8 | 76.8 |

|                          |                                                                                                                                                                                                                                                                                                                                                                                                                                                                                                                                                                                                                                                                                                                                                                                                                   |     |     |           |       |      |      |                                        |       |                      |                                                                                                                                                                                                                                                                                                                                                                                                                                                                                                                                                                                                                                                            |     |     |           |       |      |      |
|--------------------------|-------------------------------------------------------------------------------------------------------------------------------------------------------------------------------------------------------------------------------------------------------------------------------------------------------------------------------------------------------------------------------------------------------------------------------------------------------------------------------------------------------------------------------------------------------------------------------------------------------------------------------------------------------------------------------------------------------------------------------------------------------------------------------------------------------------------|-----|-----|-----------|-------|------|------|----------------------------------------|-------|----------------------|------------------------------------------------------------------------------------------------------------------------------------------------------------------------------------------------------------------------------------------------------------------------------------------------------------------------------------------------------------------------------------------------------------------------------------------------------------------------------------------------------------------------------------------------------------------------------------------------------------------------------------------------------------|-----|-----|-----------|-------|------|------|
| Rsa1.0_01200.1.g24533.t1 | gb EOA26897.1  hypothetical protein CARUB_v10022988mg [Capsella rubella]                                                                                                                                                                                                                                                                                                                                                                                                                                                                                                                                                                                                                                                                                                                                          | 530 | 528 | 0         | 99.6  | 80.8 | 88.9 | hypothetical protein CARUB_v10022988mg | gbpln | Capsella rubella     | AT2G40570.1   Symbols:   initiator tRNA phosphoribosyl transferase family protein   chr2:16941066-16943288 FORWARD LENGTH=521                                                                                                                                                                                                                                                                                                                                                                                                                                                                                                                              | 530 | 521 | 0         | 98.3  | 79.8 | 88.7 |
| Rsa1.0_01200.1.g24534.t1 | gb EOA33803.1  hypothetical protein CARUB_v10021274mg [Capsella rubella]                                                                                                                                                                                                                                                                                                                                                                                                                                                                                                                                                                                                                                                                                                                                          | 350 | 304 | 8.00E-76  | 86.9  | 43.4 | 54.9 | hypothetical protein CARUB_v10021274mg | gbpln | Capsella rubella     | AT2G40580.1   Symbols:   Protein kinase superfamily protein   chr2:16943964-16944899 FORWARD LENGTH=311                                                                                                                                                                                                                                                                                                                                                                                                                                                                                                                                                    | 350 | 311 | 4.00E-72  | 88.9  | 43.7 | 56.6 |
| Rsa1.0_01200.1.g24535.t2 | ref XP_002879879.1  hypothetical protein ARALYDRAFT_483112 [Arabidopsis lyrata subsp. lyrata] gi 297325718 gb EFH56138.1  hypothetical protein ARALYDRAFT_483112 [Arabidopsis lyrata subsp. lyrata]                                                                                                                                                                                                                                                                                                                                                                                                                                                                                                                                                                                                               | 598 | 589 | 0         | 98.5  | 84.4 | 88.8 | hypothetical protein ARALYDRAFT_483112 | gbpln | Arabidopsis lyrata   | AT2G40550.1   Symbols: ETG1   E2F target gene 1   chr2:16934927-16938033 FORWARD LENGTH=589                                                                                                                                                                                                                                                                                                                                                                                                                                                                                                                                                                | 598 | 589 | 0         | 98.5  | 83.1 | 88.3 |
| Rsa1.0_01200.1.g24536.t1 | gb EOA28443.1  hypothetical protein CARUB_v10024650mg [Capsella rubella]                                                                                                                                                                                                                                                                                                                                                                                                                                                                                                                                                                                                                                                                                                                                          | 778 | 795 | 0         | 102.2 | 92.9 | 96.5 | hypothetical protein CARUB_v10024650mg | gbpln | Capsella rubella     | AT2G40540.2   Symbols: KT2, ATKT2, SHY3, KUP2, ATKUP2, TRK2   potassium transporter 2   chr2:16931445-16934516 FORWARD LENGTH=794<br>AT2G40530.1   Symbols:   unknown protein; FUNCTIONS IN: molecular_function unknown; INVOLVED IN: biological_process unknown; LOCATED IN: endomembrane system; EXPRESSED IN: leaf apex, inflorescence meristem, petal, flower; EXPRESSED DURING: 4 anthesis, petal differentiation and expansion stage; Has 5 Blast hits to 5 proteins in 2 species: Archae - 0; Bacteria - 0; Metazoa - 0; Fungi - 0; Plants - 5; Viruses - 0; Other Eukaryotes - 0 (source: NCBI BLink).   chr2:16927600-16927917 FORWARD LENGTH=105 | 778 | 794 | 0         | 102.1 | 92.7 | 96.5 |
| Rsa1.0_01200.1.g24537.t1 | ref NP_565935.1  uncharacterized protein [Arabidopsis thaliana] gi 2651304 gb AAB87584.1  expressed protein [Arabidopsis thaliana] gi 88900366 gb ABD57495.1  At2g40530 [Arabidopsis thaliana] gi 330254750 gb AEC09844.1  uncharacterized protein AT2G40530 [Arabidopsis thaliana]                                                                                                                                                                                                                                                                                                                                                                                                                                                                                                                               | 101 | 105 | 4.00E-23  | 104.0 | 71.3 | 80.2 | uncharacterized protein                | gbpln | Arabidopsis thaliana | AT2G40520.4   Symbols:   Nucleotidyltransferase family protein   chr2:16923541-16925675 FORWARD LENGTH=502                                                                                                                                                                                                                                                                                                                                                                                                                                                                                                                                                 | 101 | 105 | 6.00E-26  | 104.0 | 71.3 | 80.2 |
| Rsa1.0_01200.1.g24538.t1 | gb EOA26742.1  hypothetical protein CARUB_v10022828mg [Capsella rubella]                                                                                                                                                                                                                                                                                                                                                                                                                                                                                                                                                                                                                                                                                                                                          | 487 | 619 | 0         | 127.1 | 71.5 | 81.7 | hypothetical protein CARUB_v10022828mg | gbpln | Capsella rubella     | AT2G40520.4   Symbols:   Nucleotidyltransferase family protein   chr2:16923541-16925675 FORWARD LENGTH=502                                                                                                                                                                                                                                                                                                                                                                                                                                                                                                                                                 | 487 | 502 | 1.00E-175 | 103.1 | 59.5 | 74.9 |
| Rsa1.0_01200.1.g24539.t1 | ref NP_181581.1  Uroporphyrinogen decarboxylase 2 [Arabidopsis thaliana] gi 6014937 sp O22886.1 DCUP2_ARATH RecName: Full=Uroporphyrinogen decarboxylase 2, chloroplastic; Short=UPD2; Short=URO-D2; Flags: Precursor gi 2651307 gb AAB87587.1  putative uroporphyrinogen decarboxylase [Arabidopsis thaliana] gi 23297097 gb AAN13092.1  putative uroporphyrinogen decarboxylase [Arabidopsis thaliana] gi 330254743 gb AEC09837.1  Uroporphyrinogen decarboxylase 2 [Arabidopsis thaliana] ref NP_181580.2  uncharacterized protein [Arabidopsis thaliana] gi 75111145 sp Q5XVC7.1 Y2048_ARATH RecName: Full=WEB family protein At2g40480 gi 52354289 gb AAU44465.1  hypothetical protein AT2G40480 [Arabidopsis thaliana] gi 330254742 gb AEC09836.1  uncharacterized protein AT2G40480 [Arabidopsis thaliana] | 408 | 394 | 0         | 96.6  | 91.9 | 94.4 | Uroporphyrinogen decarboxylase 2       | gbpln | Arabidopsis thaliana | AT2G40490.1   Symbols: HEME2   Uroporphyrinogen decarboxylase   chr2:16912961-16914988 FORWARD LENGTH=394                                                                                                                                                                                                                                                                                                                                                                                                                                                                                                                                                  | 408 | 394 | 0         | 96.6  | 91.9 | 94.4 |
| Rsa1.0_01200.1.g24540.t1 | ref NP_181580.2  uncharacterized protein [Arabidopsis thaliana] gi 75111145 sp Q5XVC7.1 Y2048_ARATH RecName: Full=WEB family protein At2g40480 gi 52354289 gb AAU44465.1  hypothetical protein AT2G40480 [Arabidopsis thaliana] gi 330254742 gb AEC09836.1  uncharacterized protein AT2G40480 [Arabidopsis thaliana]                                                                                                                                                                                                                                                                                                                                                                                                                                                                                              | 460 | 518 | 1.00E-161 | 112.6 | 74.6 | 82.4 | uncharacterized protein                | gbpln | Arabidopsis thaliana | AT2G40480.1   Symbols:   Plant protein of unknown function (DUF827)   chr2:16910425-16912444 FORWARD LENGTH=518                                                                                                                                                                                                                                                                                                                                                                                                                                                                                                                                            | 460 | 518 | 1.00E-164 | 112.6 | 74.6 | 82.4 |
| Rsa1.0_01200.1.g24541.t1 | ref XP_002881725.1  hypothetical protein ARALYDRAFT_903340 [Arabidopsis lyrata subsp. lyrata] gi 297327564 gb EFH57984.1  hypothetical protein ARALYDRAFT_903340 [Arabidopsis lyrata subsp. lyrata]                                                                                                                                                                                                                                                                                                                                                                                                                                                                                                                                                                                                               | 185 | 192 | 8.00E-50  | 103.8 | 73.0 | 81.1 | hypothetical protein ARALYDRAFT_903340 | gbpln | Arabidopsis lyrata   | AT2G40475.1   Symbols:   unknown protein; BEST Arabidopsis thaliana protein match is: unknown protein (TAIR:AT3G56260.2); Has 477 Blast hits to 219 proteins in 41 species: Archae - 0; Bacteria - 4; Metazoa - 91; Fungi - 61; Plants - 144; Viruses - 0; Other Eukaryotes - 177 (source: NCBI BLink).   chr2:16907222-16907803 REVERSE LENGTH=193                                                                                                                                                                                                                                                                                                        | 185 | 193 | 2.00E-46  | 104.3 | 71.4 | 77.8 |
| Rsa1.0_01200.1.g24542.t1 | gb EOA27836.1  hypothetical protein CARUB_v10024002mg [Capsella rubella]                                                                                                                                                                                                                                                                                                                                                                                                                                                                                                                                                                                                                                                                                                                                          | 226 | 226 | 1.00E-102 | 100.0 | 93.4 | 94.7 | hypothetical protein CARUB_v10024002mg | gbpln | Capsella rubella     | AT2G40470.1   Symbols: LBD15, ASL11   LOB domain-containing protein 15   chr2:16902430-16903546 REVERSE LENGTH=224                                                                                                                                                                                                                                                                                                                                                                                                                                                                                                                                         | 226 | 224 | 1.00E-103 | 99.1  | 89.8 | 90.7 |
| Rsa1.0_01201.1.g24543.t1 | # # # # # # # #                                                                                                                                                                                                                                                                                                                                                                                                                                                                                                                                                                                                                                                                                                                                                                                                   |     |     |           |       |      | -    | ----                                   | ----  | ----                 | AT2G42210.2   Symbols: ATOEP16-3, OEP16-3   Mitochondrial import inner membrane translocase subunit Tim17/Tim22/Tim23 family protein   chr2:17590600-17591591 FORWARD LENGTH=173                                                                                                                                                                                                                                                                                                                                                                                                                                                                           | 78  | 173 | 5.00E-13  | 221.8 | 44.9 | 51.3 |

|                          |                                                                                                                                                                                                                                                                                      |      |      |           |       |      |      |                                                     |       |                      |                                                                                                                                                                                                                                                                                                                                            |      |      |           |       |      |      |
|--------------------------|--------------------------------------------------------------------------------------------------------------------------------------------------------------------------------------------------------------------------------------------------------------------------------------|------|------|-----------|-------|------|------|-----------------------------------------------------|-------|----------------------|--------------------------------------------------------------------------------------------------------------------------------------------------------------------------------------------------------------------------------------------------------------------------------------------------------------------------------------------|------|------|-----------|-------|------|------|
| Rsa1.0_01201.1.g24544.t1 | gb EOA13997.1  hypothetical protein CARUB_v10027129mg [Capsella rubella]                                                                                                                                                                                                             | 206  | 211  | 2.00E-94  | 102.4 | 85.4 | 90.3 | hypothetical protein CARUB_v10027129mg              | gbpln | Capsella rubella     | AT5G50200.1   Symbols: WR3, ATNRT3.1, NRT3.1   nitrate transmembrane transporters   chr5:20436612-20437535 FORWARD LENGTH=210                                                                                                                                                                                                              | 206  | 210  | 6.00E-90  | 101.9 | 79.1 | 86.4 |
| Rsa1.0_01201.1.g24545.t1 | gb AAG51783.1 AC079679.3 reverse transcriptase, putative; 16838-20266 [Arabidopsis thaliana]                                                                                                                                                                                         | 391  | 1142 | 3.00E-69  | 292.1 | 40.4 | 60.4 | reverse transcriptase, putative; 16838-20266        | gbpln | Arabidopsis thaliana | AT4G29090.1   Symbols:   Ribonuclease H-like superfamily protein   chr4:14333528-14335255 FORWARD LENGTH=575                                                                                                                                                                                                                               | 391  | 575  | 5.00E-43  | 147.1 | 31.2 | 51.9 |
| Rsa1.0_01201.1.g24546.t1 | emb CAB39637.1  putative protein [Arabidopsis thaliana] gi 7267665 emb CAB78093.1  putative protein [Arabidopsis thaliana] gi 91805577 gb ABE65517.1  hypothetical protein At4g09700 [Arabidopsis thaliana]                                                                          | 449  | 371  | 2.00E-39  | 82.6  | 17.6 | 23.8 | putative protein                                    | gbpln | Arabidopsis thaliana | AT5G36228.1   Symbols:   nucleic acid binding/zinc ion binding   chr5:14271691-14272776 FORWARD LENGTH=361                                                                                                                                                                                                                                 | 449  | 361  | 6.00E-17  | 80.4  | 10.9 | 16.5 |
| Rsa1.0_01201.1.g24547.t1 | gb AAD22286.1  putative non-LTR retroelement reverse transcriptase [Arabidopsis thaliana]                                                                                                                                                                                            | 617  | 1311 | 3.00E-81  | 212.5 | 34.8 | 49.4 | putative non-LTR retroelement reverse transcriptase | gbpln | Arabidopsis thaliana | ATMG01250.1   Symbols: ORF102   RNA-directed DNA polymerase (reverse transcriptase)   chrM:310514-310882 FORWARD LENGTH=122                                                                                                                                                                                                                | 617  | 122  | 3.00E-17  | 19.8  | 7.0  | 9.2  |
| Rsa1.0_01201.1.g24548.t1 | gb AAF79618.1 AC027665_19 F5M15.26 [Arabidopsis thaliana]                                                                                                                                                                                                                            | 447  | 1838 | 4.00E-43  | 411.2 | 21.5 | 35.6 | F5M15.26                                            | gbpln | Arabidopsis thaliana | #                                                                                                                                                                                                                                                                                                                                          | #    | #    | #         | #     | #    | #    |
| Rsa1.0_01201.1.g24549.t1 | #                                                                                                                                                                                                                                                                                    | #    | #    | #         | #     | #    | #    | -                                                   | ----  | ----                 | #                                                                                                                                                                                                                                                                                                                                          | #    | #    | #         | #     | #    | #    |
| Rsa1.0_01201.1.g24550.t1 | #                                                                                                                                                                                                                                                                                    | #    | #    | #         | #     | #    | #    | -                                                   | ----  | ----                 | #                                                                                                                                                                                                                                                                                                                                          | #    | #    | #         | #     | #    | #    |
| Rsa1.0_01201.1.g24551.t1 | gb AAD17398.1  putative non-LTR retroelement reverse transcriptase [Arabidopsis thaliana]                                                                                                                                                                                            | 195  | 1225 | 8.00E-17  | 628.2 | 25.1 | 38.5 | putative non-LTR retroelement reverse transcriptase | gbpln | Arabidopsis thaliana | #                                                                                                                                                                                                                                                                                                                                          | #    | #    | #         | #     | #    | #    |
| Rsa1.0_01201.1.g24552.t2 | ref NP_199835.2  protein-l-isoaspartate methyltransferase 2 [Arabidopsis thaliana] gi 40950547 gb AAR97903.1  L-isoaspartyl methyltransferase 2 TIS I alpha-psi [Arabidopsis thaliana] gi 332008532 gb AED95915.1  protein-l-isoaspartate methyltransferase 2 [Arabidopsis thaliana] | 283  | 309  | 1.00E-128 | 109.2 | 80.6 | 87.3 | protein-l-isoaspartate methyltransferase 2          | gbpln | Arabidopsis thaliana | AT5G50240.1   Symbols: PIMT2, AtPIMT2   protein-l-isoaspartate methyltransferase 2   chr5:20451251-20452461 FORWARD LENGTH=309                                                                                                                                                                                                             | 283  | 309  | 1.00E-130 | 109.2 | 80.6 | 87.3 |
| Rsa1.0_01202.1.g24553.t1 | gb AAF99829.1 AC008046.1 Hypothetical protein [Arabidopsis thaliana]                                                                                                                                                                                                                 | 105  | 529  | 2.00E-22  | 503.8 | 50.5 | 69.5 | Hypothetical protein                                | gbpln | Arabidopsis thaliana | #                                                                                                                                                                                                                                                                                                                                          | #    | #    | #         | #     | #    | #    |
| Rsa1.0_01202.1.g24554.t1 | gb EOA36824.1  hypothetical protein CARUB_v10008545mg [Capsella rubella]                                                                                                                                                                                                             | 648  | 648  | 0         | 100.0 | 94.8 | 97.7 | hypothetical protein CARUB_v10008545mg              | gbpln | Capsella rubella     | AT1G31770.1   Symbols: ABCG14   ATP-binding cassette 14   chr1:11375252-11377644 REVERSE LENGTH=648                                                                                                                                                                                                                                        | 648  | 648  | 0         | 100.0 | 93.8 | 97.4 |
| Rsa1.0_01202.1.g24555.t1 | #                                                                                                                                                                                                                                                                                    | #    | #    | #         | #     | #    | #    | -                                                   | ----  | ----                 | #                                                                                                                                                                                                                                                                                                                                          | #    | #    | #         | #     | #    | #    |
| Rsa1.0_01202.1.g24556.t1 | gb EOA39827.1  hypothetical protein CARUB_v10008495mg [Capsella rubella]                                                                                                                                                                                                             | 681  | 680  | 0         | 99.9  | 94.1 | 97.7 | hypothetical protein CARUB_v10008495mg              | gbpln | Capsella rubella     | AT1G31780.1   Symbols:   CONTAINS InterPro DOMAIN/s: Conserved oligomeric complex GOG6 (InterPro:IPR010490); Has 384 Blast hits to 379 proteins in 190 species: Archae - 0; Bacteria - 4; Metazoa - 151; Fungi - 156; Plants - 42; Viruses - 0; Other Eukaryotes - 31 (source: NCBI BLink).   chr1:11391341-11394610 FORWARD LENGTH=680    | 681  | 680  | 0         | 99.9  | 94.3 | 97.5 |
| Rsa1.0_01202.1.g24557.t2 | gb AAD32898.1  putative retroelement pol polyprotein [Arabidopsis thaliana]                                                                                                                                                                                                          | 1104 | 1307 | 0         | 118.4 | 57.0 | 71.5 | putative retroelement pol polyprotein               | gbpln | Arabidopsis thaliana | AT4G23160.1   Symbols: CRK8   cysteine-rich RLK (RECEPTOR-like protein kinase) 8   chr4:12129485-12134086 FORWARD LENGTH=1262                                                                                                                                                                                                              | 1104 | 1262 | 3.00E-60  | 114.3 | 13.7 | 20.1 |
| Rsa1.0_01202.1.g24558.t1 | gb AAL47433.1  AT5g62580/K19B1_19 [Arabidopsis thaliana]                                                                                                                                                                                                                             | 131  | 615  | 1.00E-12  | 469.5 | 35.9 | 38.9 | AT5g62580/K19B1_19                                  | gbpln | Arabidopsis thaliana | AT5G62580.1   Symbols:   ARM repeat superfamily protein   chr5:25120010-25122259 FORWARD LENGTH=615                                                                                                                                                                                                                                        | 131  | 615  | 3.00E-15  | 469.5 | 35.9 | 38.9 |
| Rsa1.0_01203.1.g24559.t1 | gb EOA32667.1  hypothetical protein CARUB_v10015969mg [Capsella rubella]                                                                                                                                                                                                             | 193  | 203  | 2.00E-93  | 105.2 | 95.3 | 99.0 | hypothetical protein CARUB_v10015969mg              | gbpln | Capsella rubella     | AT3G12870.1   Symbols:   unknown protein; BEST Arabidopsis thaliana protein match is: unknown protein (TAIR:AT5G56120.1); Has 70 Blast hits to 70 proteins in 12 species: Archae - 0; Bacteria - 0; Metazoa - 0; Fungi - 0; Plants - 70; Viruses - 0; Other Eukaryotes - 0 (source: NCBI BLink).   chr3:4094417-4095037 REVERSE LENGTH=206 | 193  | 206  | 2.00E-95  | 106.7 | 95.9 | 99.0 |
| Rsa1.0_01203.1.g24560.t1 | ref XP_002882791.1  hypothetical protein ARALYDRAFT_478647 [Arabidopsis lyrata subsp. lyrata] gi 297328631 gb EFH59050.1  hypothetical protein ARALYDRAFT_478647 [Arabidopsis lyrata subsp. lyrata]                                                                                  | 500  | 499  | 0         | 99.8  | 91.0 | 96.4 | hypothetical protein ARALYDRAFT_478647              | gbpln | Arabidopsis lyrata   | AT3G12860.1   Symbols:   NOP56-like pre RNA processing ribonucleoprotein   chr3:4091678-4093921 FORWARD LENGTH=499                                                                                                                                                                                                                         | 500  | 499  | 0         | 99.8  | 90.8 | 95.4 |
| Rsa1.0_01203.1.g24561.t1 | gb ABD65170.1  hypothetical protein 40.t00057 [Brassica oleracea]                                                                                                                                                                                                                    | 454  | 255  | 2.00E-49  | 56.2  | 26.2 | 32.6 | hypothetical protein 40.t00057                      | gbpln | Brassica oleracea    | AT3G47680.1   Symbols:   DNA binding   chr3:17577483-17578391 REVERSE LENGTH=302                                                                                                                                                                                                                                                           | 454  | 302  | 2.00E-39  | 66.5  | 23.3 | 33.5 |



|                          |                                                                                                                                                                                                                                                                                                                                                                                                                                                                                                                                                                                                                                                                                                                                                                                                                                                                                                                                                                                                                                                                                                                                                                    |      |      |           |       |      |      |                                           |       |                      |                                                                                                                                                                                                                                                                                                                                                                                                                                                                                                                                          |      |      |           |       |      |      |
|--------------------------|--------------------------------------------------------------------------------------------------------------------------------------------------------------------------------------------------------------------------------------------------------------------------------------------------------------------------------------------------------------------------------------------------------------------------------------------------------------------------------------------------------------------------------------------------------------------------------------------------------------------------------------------------------------------------------------------------------------------------------------------------------------------------------------------------------------------------------------------------------------------------------------------------------------------------------------------------------------------------------------------------------------------------------------------------------------------------------------------------------------------------------------------------------------------|------|------|-----------|-------|------|------|-------------------------------------------|-------|----------------------|------------------------------------------------------------------------------------------------------------------------------------------------------------------------------------------------------------------------------------------------------------------------------------------------------------------------------------------------------------------------------------------------------------------------------------------------------------------------------------------------------------------------------------------|------|------|-----------|-------|------|------|
| Rsa1.0_01203.1.g24562.t1 | ref[XP_002884929.1] auxin-responsive family protein [Arabidopsis lyrata subsp. lyrata] gi 297330769 gb EFH61188.1  auxin-responsive family protein [Arabidopsis lyrata subsp. lyrata]                                                                                                                                                                                                                                                                                                                                                                                                                                                                                                                                                                                                                                                                                                                                                                                                                                                                                                                                                                              | 132  | 132  | 7.00E-56  | 100.0 | 82.6 | 89.4 | auxin-responsive family protein           | gbpln | Arabidopsis lyrata   | AT3G12830.1   Symbols: SAUR-like auxin-responsive protein family   chr3:4079117-4079515 REVERSE LENGTH=132                                                                                                                                                                                                                                                                                                                                                                                                                               | 132  | 132  | 9.00E-58  | 100.0 | 81.8 | 88.6 |
| Rsa1.0_01203.1.g24563.t1 | ref[XP_002882790.1] photoperiod-independent early flowering 1 [Arabidopsis lyrata subsp. lyrata] gi 297328630 gb EFH59049.1  photoperiod-independent early flowering 1 [Arabidopsis lyrata subsp. lyrata]                                                                                                                                                                                                                                                                                                                                                                                                                                                                                                                                                                                                                                                                                                                                                                                                                                                                                                                                                          | 2062 | 2057 | 0         | 99.8  | 85.4 | 91.0 | photoperiod-independent early flowering 1 | gbpln | Arabidopsis lyrata   | AT3G12810.1   Symbols: PIE1, SRCAP, chr13   SNF2 domain-containing protein / helicase domain-containing protein   chr3:4065636-4073992 FORWARD LENGTH=2055                                                                                                                                                                                                                                                                                                                                                                               | 2062 | 2055 | 0         | 99.7  | 84.5 | 90.3 |
| Rsa1.0_01203.1.g24564.t1 | gb EOA31122.1  hypothetical protein CARUB_v10014282mg [Capsella rubella]                                                                                                                                                                                                                                                                                                                                                                                                                                                                                                                                                                                                                                                                                                                                                                                                                                                                                                                                                                                                                                                                                           | 294  | 298  | 1.00E-143 | 101.4 | 88.8 | 93.9 | hypothetical protein CARUB_v10014282mg    | gbpln | Capsella rubella     | AT3G12800.1   Symbols: SDRB, DECR   short-chain dehydrogenase-reductase B   chr3:4063463-4064757 REVERSE LENGTH=298                                                                                                                                                                                                                                                                                                                                                                                                                      | 294  | 298  | 1.00E-138 | 101.4 | 87.8 | 93.9 |
| Rsa1.0_01203.1.g24565.t1 | ref[NP_181884.1] phosphoglycerate kinase 1 [Arabidopsis thaliana] gi 75273138 sp Q9LD57.1 PGKH1_ARAT H RecName: Full=Phosphoglycerate kinase 1, chloroplastic; Flags: Precursor gi 7839389 gb AAF70258.1 AF247558.1 phosphoglycerate kinase [Arabidopsis thaliana] gi 13430644 gb AAK25944.1 AF360234.1 putative phosphoglycerate kinase [Arabidopsis thaliana] gi 16226508 gb AAL16186.1 AF428418.1 AT3g12780/MBK21.14 [Arabidopsis thaliana] gi 1199442.1 dbj BAB02423.1  phosphoglycerate kinase [Arabidopsis thaliana] gi 15010644 gb AAK73981.1 AT3g12780/MBK21.14 [Arabidopsis thaliana] gi 16648943 gb AAL24323.1  phosphoglycerate kinase [Arabidopsis thaliana] gi 17065610 gb AAL33785.1  putative phosphoglycerate kinase [Arabidopsis thaliana] gi 20334796 gb AAM16259.1  AT3g12780/MBK21.14 [Arabidopsis thaliana] gi 21387107 gb AAM47957.1  phosphoglycerate kinase [Arabidopsis thaliana] gi 22022520 gb AAM83218.1  AT3g12780/MBK21.14 [Arabidopsis thaliana] gi 110742702 dbj BAE99262.1  phosphoglycerate kinase like protein [Arabidopsis thaliana] gi 222423303 dbj BAH19627.1  AT3G12780 [Arabidopsis thaliana] ...:1999641795111AEE76946.1 | 479  | 481  | 0         | 100.4 | 91.9 | 94.6 | phosphoglycerate kinase 1                 | gbpln | Arabidopsis thaliana | AT3G12780.1   Symbols: PGK1   phosphoglycerate kinase 1   chr3:4061127-4063140 REVERSE LENGTH=481                                                                                                                                                                                                                                                                                                                                                                                                                                        | 479  | 481  | 0         | 100.4 | 91.9 | 94.6 |
| Rsa1.0_01203.1.g24566.t1 | dbj BAB02422.1  unnamed protein product [Arabidopsis thaliana]                                                                                                                                                                                                                                                                                                                                                                                                                                                                                                                                                                                                                                                                                                                                                                                                                                                                                                                                                                                                                                                                                                     | 403  | 390  | 1.00E-108 | 96.8  | 58.3 | 70.7 | unnamed protein product                   | gbpln | Arabidopsis thaliana | AT3G12775.1   Symbols:   ubiquitin-conjugating enzyme family protein   chr3:4059772-4060944 FORWARD LENGTH=362                                                                                                                                                                                                                                                                                                                                                                                                                           | 403  | 362  | 1.00E-107 | 89.8  | 51.1 | 61.8 |
| Rsa1.0_01203.1.g24567.t1 | ref[XP_002884925.1] predicted protein [Arabidopsis lyrata subsp. lyrata] gi 297330765 gb EFH61184.1  predicted protein [Arabidopsis lyrata subsp. lyrata]                                                                                                                                                                                                                                                                                                                                                                                                                                                                                                                                                                                                                                                                                                                                                                                                                                                                                                                                                                                                          | 687  | 694  | 0         | 101.0 | 90.5 | 94.8 | predicted protein                         | gbpln | Arabidopsis lyrata   | AT3G12770.1   Symbols: MEF22   mitochondrial editing factor 22   chr3:4057027-4059193 REVERSE LENGTH=694                                                                                                                                                                                                                                                                                                                                                                                                                                 | 687  | 694  | 0         | 101.0 | 90.2 | 94.3 |
| Rsa1.0_01203.1.g24568.t1 | ref[NP_566436.1] uncharacterized protein [Arabidopsis thaliana] gi 11994418 dbj BAB02420.1  unnamed protein product [Arabidopsis thaliana] gi 23297357 gb AAN12948.1  unknown protein [Arabidopsis thaliana] gi 332641722 gb AE75243.1  uncharacterized protein AT3G12760 [Arabidopsis thaliana]                                                                                                                                                                                                                                                                                                                                                                                                                                                                                                                                                                                                                                                                                                                                                                                                                                                                   | 246  | 250  | 1.00E-120 | 101.6 | 87.0 | 91.1 | uncharacterized protein                   | gbpln | Arabidopsis thaliana | AT3G12760.1   Symbols:   CONTAINS InterPro DOMAIN/s: Defective-in-cullin neddylation protein (InterPro:IPR014764). Protein of unknown function DUF298 (InterPro:IPR005176), UBA-like (InterPro:IPR009060), BEST Arabidopsis thaliana protein match is: Domain of unknown function (DUF298) (TAIR:AT1G15860.2); Has 857 Blast hits to 855 proteins in 202 species: Archae - 0; Bacteria - 0; Metazoa - 482; Fungi - 154; Plants - 139; Viruses - 0; Other Eukaryotes - 82 (source: NCBI BLINK).   chr3:4054963-4056826 FORWARD LENGTH=250 | 246  | 250  | 1.00E-122 | 101.6 | 87.0 | 91.1 |
| Rsa1.0_01204.1.g24569.t1 | ref[XP_002893330.1] IAA-conjugate-resistant 4 [Arabidopsis lyrata subsp. lyrata] gi 297339172 gb EFH69589.1  IAA-conjugate-resistant 4 [Arabidopsis lyrata subsp. lyrata]                                                                                                                                                                                                                                                                                                                                                                                                                                                                                                                                                                                                                                                                                                                                                                                                                                                                                                                                                                                          | 394  | 393  | 0         | 99.7  | 85.5 | 93.7 | IAA-conjugate-resistant 4                 | gbpln | Arabidopsis lyrata   | AT1G24180.1   Symbols: IAR4   Thiamin diphosphate-binding fold (THDP-binding) superfamily protein   chr1:8560777-8563382 REVERSE LENGTH=393                                                                                                                                                                                                                                                                                                                                                                                              | 394  | 393  | 0         | 99.7  | 85.3 | 93.7 |
| Rsa1.0_01204.1.g24570.t1 | gb EOA35263.1  hypothetical protein CARUB_v10020432mg [Capsella rubella]                                                                                                                                                                                                                                                                                                                                                                                                                                                                                                                                                                                                                                                                                                                                                                                                                                                                                                                                                                                                                                                                                           | 389  | 390  | 0         | 100.3 | 86.9 | 92.3 | hypothetical protein CARUB_v10020432mg    | gbpln | Capsella rubella     | AT1G70090.2   Symbols: GATL9, LGT8   glucosyl transferase family 8   chr1:26400927-26402099 FORWARD LENGTH=390                                                                                                                                                                                                                                                                                                                                                                                                                           | 389  | 390  | 0         | 100.3 | 86.1 | 92.3 |

|                          |                                                                                                                                                                                                                                                                                                                                                                                                                                                                                                                                                   |     |     |           |       |      |      |                                           |       |                      |                                                                                                                                                                                                                                                                                                                                                                                                                                                                                                                                             |     |     |           |       |      |      |
|--------------------------|---------------------------------------------------------------------------------------------------------------------------------------------------------------------------------------------------------------------------------------------------------------------------------------------------------------------------------------------------------------------------------------------------------------------------------------------------------------------------------------------------------------------------------------------------|-----|-----|-----------|-------|------|------|-------------------------------------------|-------|----------------------|---------------------------------------------------------------------------------------------------------------------------------------------------------------------------------------------------------------------------------------------------------------------------------------------------------------------------------------------------------------------------------------------------------------------------------------------------------------------------------------------------------------------------------------------|-----|-----|-----------|-------|------|------|
| Rsa1.0_01204.1.g24571.t1 | refNP_974118.1  uncharacterized protein [Arabidopsis thaliana]<br>gi 332196898 gb AE35019.1  uncharacterized protein AT1G70100 [Arabidopsis thaliana]                                                                                                                                                                                                                                                                                                                                                                                             | 476 | 504 | 1.00E-154 | 105.9 | 69.7 | 80.0 | uncharacterized protein                   | gbpln | Arabidopsis thaliana | AT1G70100.3   Symbols:   unknown protein; BEST Arabidopsis thaliana protein match is: unknown protein (TAIR:AT1G24160.2); Has 35333 Blast hits to 34131 proteins in 2444 species: Archaea - 798; Bacteria - 22429; Metazoa - 974; Fungi - 991; Plants - 531; Viruses - 0; Other Eukaryotes - 9610 (source: NCBI BLINK).   chr1:26403736-26405832 FORWARD LENGTH=504                                                                                                                                                                         | 476 | 504 | 1.00E-156 | 105.9 | 69.7 | 80.0 |
| Rsa1.0_01204.1.g24572.t1 | refNP_177168.1  concanavalin A-like lectin protein kinase [Arabidopsis thaliana]<br>gi 75317843 sp O04534.1 LRK51_ARATH RecName: Full=Putative L-type lectin-domain containing receptor kinase V.1; Short=Arabidopsis thaliana lectin-receptor kinase b2; Short=AthlecRK-b2; Short=LecRK-V.1; Flags: Precursor gi 2194128 gb AAB61103.1  Strong similarity to Arabidopsis receptor-like kinase (gb ATLECGENE) and F20P5.15 [Arabidopsis thaliana]<br>gi 332196900 gb AEE35021.1  concanavalin A-like lectin protein kinase [Arabidopsis thaliana] | 98  | 666 | 2.00E-34  | 679.6 | 74.5 | 83.7 | concanavalin A-like lectin protein kinase | gbpln | Arabidopsis thaliana | AT1G70110.1   Symbols:   Concanavalin A-like lectin protein kinase family protein   chr1:26406238-26408323 REVERSE LENGTH=666                                                                                                                                                                                                                                                                                                                                                                                                               | 98  | 666 | 3.00E-37  | 679.6 | 74.5 | 83.7 |
| Rsa1.0_01204.1.g24573.t1 | refXP_002873484.1  predicted protein [Arabidopsis lyrata subsp. lyrata]<br>gi 297319321 gb EFH49743.1  predicted protein [Arabidopsis lyrata subsp. lyrata]                                                                                                                                                                                                                                                                                                                                                                                       | 305 | 603 | 4.00E-44  | 197.7 | 30.8 | 34.4 | predicted protein                         | gbpln | Arabidopsis lyrata   | AT5G10900.1   Symbols:   Calcineurin-like metallo-phosphoesterase superfamily protein   chr5:3436413-3439221 REVERSE LENGTH=600                                                                                                                                                                                                                                                                                                                                                                                                             | 305 | 600 | 9.00E-43  | 196.7 | 31.1 | 34.4 |
| Rsa1.0_01204.1.g24574.t1 | refXP_002888756.1  hypothetical protein ARALYDRAFT_316005 [Arabidopsis lyrata subsp. lyrata]<br>gi 297334597 gb EFH65015.1  hypothetical protein ARALYDRAFT_316005 [Arabidopsis lyrata subsp. lyrata]                                                                                                                                                                                                                                                                                                                                             | 651 | 660 | 0         | 101.4 | 84.0 | 89.7 | hypothetical protein ARALYDRAFT_316005    | gbpln | Arabidopsis lyrata   | AT1G70130.1   Symbols:   Concanavalin A-like lectin protein kinase family protein   chr1:26409743-26411801 REVERSE LENGTH=656                                                                                                                                                                                                                                                                                                                                                                                                               | 651 | 656 | 0         | 100.8 | 82.0 | 88.8 |
| Rsa1.0_01204.1.g24575.t1 | refNP_177171.1  formin-like protein 8 [Arabidopsis thaliana]<br>gi 75097064 sp O04532.1 FH8_ARATH RecName: Full=Formin-like protein 8; Short=AtFH8; Short=AtFORMIN-1; Flags: Precursor gi 2194126 gb AAB61101.1  EST gb T43335 comes from this gene [Arabidopsis thaliana]<br>gi 332196903 gb AEE35024.1  formin-like protein 8 [Arabidopsis thaliana]                                                                                                                                                                                            | 788 | 760 | 0         | 96.4  | 74.5 | 82.5 | formin-like protein 8                     | gbpln | Arabidopsis thaliana | AT1G70140.1   Symbols: ATFH8, FH8   formin 8   chr1:26412688-26415048 REVERSE LENGTH=760                                                                                                                                                                                                                                                                                                                                                                                                                                                    | 788 | 760 | 0         | 96.4  | 74.5 | 82.5 |
| Rsa1.0_01204.1.g24576.t1 | refNP_177172.6  zinc ion binding protein [Arabidopsis thaliana]<br>gi 332196904 gb AEE35025.1  zinc ion binding protein [Arabidopsis thaliana]                                                                                                                                                                                                                                                                                                                                                                                                    | 377 | 374 | 1.00E-176 | 99.2  | 78.8 | 87.5 | zinc ion binding protein                  | gbpln | Arabidopsis thaliana | AT1G70150.1   Symbols:   zinc ion binding   chr1:26416898-26419521 FORWARD LENGTH=374                                                                                                                                                                                                                                                                                                                                                                                                                                                       | 377 | 374 | 1.00E-178 | 99.2  | 78.8 | 87.5 |
| Rsa1.0_01204.1.g24577.t1 | gb EOA33344.1  hypothetical protein CARUB_v10020126mg [Capsella rubella]                                                                                                                                                                                                                                                                                                                                                                                                                                                                          | 531 | 531 | 0         | 100.0 | 87.4 | 92.3 | hypothetical protein CARUB_v10020126mg    | gbpln | Capsella rubella     | AT1G70160.1   Symbols:   unknown protein; FUNCTIONS IN: molecular_function unknown; INVOLVED IN: biological_process unknown; LOCATED IN: endomembrane system; EXPRESSED IN: 24 plant structures; EXPRESSED DURING: 15 growth stages; BEST Arabidopsis thaliana protein match is: unknown protein (TAIR:AT4G27020.1); Has 108 Blast hits to 108 proteins in 20 species: Archaea - 0; Bacteria - 0; Metazoa - 0; Fungi - 0; Plants - 39; Viruses - 0; Other Eukaryotes - 19 (source: NCBI BLINK).   chr1:26420159-26422345 FORWARD LENGTH=523 | 531 | 523 | 0         | 98.5  | 86.8 | 91.7 |
| Rsa1.0_01204.1.g24578.t1 | refXP_002884714.1  predicted protein [Arabidopsis lyrata subsp. lyrata]<br>gi 297330554 gb EFH69973.1  predicted protein [Arabidopsis lyrata subsp. lyrata]                                                                                                                                                                                                                                                                                                                                                                                       | 482 | 492 | 1.00E-116 | 102.1 | 50.2 | 67.8 | predicted protein                         | gbpln | Arabidopsis lyrata   | AT3G09120.1   Symbols:   Protein of unknown function (DUF874)   chr3:2797556-2798588 REVERSE LENGTH=314                                                                                                                                                                                                                                                                                                                                                                                                                                     | 482 | 314 | 9.00E-95  | 65.1  | 38.6 | 47.5 |
| Rsa1.0_01204.1.g24579.t1 | refNP_177174.1  matrix metalloproteinase [Arabidopsis thaliana]<br>gi 2194124 gb AAB61099.1  Similar to Glycine metalloendoproteinase (gb U63725) [Arabidopsis thaliana]<br>gi 332196906 gb AEE35027.1  matrix metalloproteinase [Arabidopsis thaliana]                                                                                                                                                                                                                                                                                           | 375 | 378 | 0         | 100.8 | 88.0 | 91.7 | matrix metalloproteinase                  | gbpln | Arabidopsis thaliana | AT1G70170.1   Symbols: MMP   matrix metalloproteinase   chr1:26424005-26425141 FORWARD LENGTH=378                                                                                                                                                                                                                                                                                                                                                                                                                                           | 375 | 378 | 0         | 100.8 | 88.0 | 91.7 |

|                          |                                                                                                                                                                                                                                                                                                                                                                                                                                                                                                                                                |      |      |           |       |      |      |                                                                                 |       |                      |                                                                                                                                     |      |      |           |       |      |      |
|--------------------------|------------------------------------------------------------------------------------------------------------------------------------------------------------------------------------------------------------------------------------------------------------------------------------------------------------------------------------------------------------------------------------------------------------------------------------------------------------------------------------------------------------------------------------------------|------|------|-----------|-------|------|------|---------------------------------------------------------------------------------|-------|----------------------|-------------------------------------------------------------------------------------------------------------------------------------|------|------|-----------|-------|------|------|
| Rsa1.0_01205.1.g24580.t1 | gb AAB61111.1  Strong similarity to Zea mays retrotransposon Hopscotch polyprotein [gb U12626] [Arabidopsis thaliana]                                                                                                                                                                                                                                                                                                                                                                                                                          | 142  | 1315 | 5.00E-42  | 926.1 | 56.3 | 70.4 | Strong similarity to Zea mays retrotransposon Hopscotch polyprotein [gb U12626] | gbpln | Arabidopsis thaliana | AT4G23160.1   Symbols: CRK8   cysteine-rich RLK (RECEPTOR-like protein kinase) 8   chr4:12129485-12134086 FORWARD LENGTH=1262       | 142  | 1262 | 5.00E-35  | 888.7 | 45.1 | 52.1 |
| Rsa1.0_01205.1.g24581.t1 | gb ACP30609.1  disease resistance protein [Brassica rapa subsp. pekinensis]                                                                                                                                                                                                                                                                                                                                                                                                                                                                    | 1530 | 2726 | 0         | 178.2 | 50.7 | 68.4 | disease resistance protein                                                      | gbpln | Brassica rapa        | ATMG00860.1   Symbols: ORF158   DNA/RNA polymerases superfamily protein   chrM:235916-236392 FORWARD LENGTH=158                     | 1530 | 158  | 5.00E-39  | 10.3  | 4.9  | 6.1  |
| Rsa1.0_01205.1.g24582.t1 | ref XP_002865541.1  pentatricopeptide repeat-containing protein [Arabidopsis lyrata subsp. lyrata]   gi 297311376 gb EFH41800.1  pentatricopeptide repeat-containing protein [Arabidopsis lyrata subsp. lyrata]                                                                                                                                                                                                                                                                                                                                | 703  | 711  | 0         | 101.1 | 91.0 | 94.3 | pentatricopeptide repeat-containing protein                                     | gbpln | Arabidopsis lyrata   | AT5G42310.1   Symbols:   Pentatricopeptide repeat (PPR-like) superfamily protein   chr5:16915860-16918238 FORWARD LENGTH=709        | 703  | 709  | 0         | 100.9 | 89.6 | 94.7 |
| Rsa1.0_01205.1.g24583.t1 | #                                                                                                                                                                                                                                                                                                                                                                                                                                                                                                                                              | #    | #    | #         | #     | #    | #    | -                                                                               | ----  | ----                 | #                                                                                                                                   | #    | #    | #         | #     | #    |      |
| Rsa1.0_01205.1.g24584.t6 | gb AAC95212.1  Mutator-like transposase [Arabidopsis thaliana]                                                                                                                                                                                                                                                                                                                                                                                                                                                                                 | 1095 | 915  | 2.00E-90  | 83.6  | 18.4 | 26.3 | Mutator-like transposase                                                        | gbpln | Arabidopsis thaliana | AT1G64260.1   Symbols:   MuDR family transposase   chr1:23847756-23849915 FORWARD LENGTH=719                                        | 1095 | 719  | 6.00E-23  | 65.7  | 11.7 | 20.6 |
| Rsa1.0_01205.1.g24585.t6 | gb AAD20658.1  putative retroelement pol polyprotein [Arabidopsis thaliana]                                                                                                                                                                                                                                                                                                                                                                                                                                                                    | 1404 | 1611 | 0         | 114.7 | 40.6 | 53.9 | putative retroelement pol polyprotein                                           | gbpln | Arabidopsis thaliana | ATMG00860.1   Symbols: ORF158   DNA/RNA polymerases superfamily protein   chrM:235916-236392 FORWARD LENGTH=158                     | 1404 | 158  | 2.00E-26  | 11.3  | 4.4  | 6.2  |
| Rsa1.0_01205.1.g24586.t1 | #                                                                                                                                                                                                                                                                                                                                                                                                                                                                                                                                              | #    | #    | #         | #     | #    | #    | -                                                                               | ----  | ----                 | #                                                                                                                                   | #    | #    | #         | #     | #    |      |
| Rsa1.0_01206.1.g24587.t1 | ref XP_003611507.1  Receptor-like protein kinase [Medicago truncatula]   gi 355512842 gb AE594465.1  Receptor-like protein kinase [Medicago truncatula]                                                                                                                                                                                                                                                                                                                                                                                        | 115  | 1109 | 7.00E-32  | 964.3 | 63.5 | 69.6 | Receptor-like protein kinase                                                    | gbpln | Medicago truncatula  | AT5G65700.2   Symbols: BAM1   Leucine-rich receptor-like protein kinase family protein   chr5:26281826-26284945 FORWARD LENGTH=1003 | 115  | 1003 | 2.00E-31  | 872.2 | 67.8 | 73.0 |
| Rsa1.0_01206.1.g24588.t1 | gb EOA30324.1  hypothetical protein CARUB_v10013451mg [Capsella rubella]                                                                                                                                                                                                                                                                                                                                                                                                                                                                       | 440  | 445  | 1.00E-121 | 101.1 | 51.1 | 64.3 | hypothetical protein CARUB_v10013451mg                                          | gbpln | Capsella rubella     | AT3G62850.1   Symbols:   zinc finger protein-related   chr3:23237487-23239155 REVERSE LENGTH=472                                    | 440  | 472  | 1.00E-119 | 107.3 | 51.6 | 65.9 |
| Rsa1.0_01206.1.g24589.t1 | ref XP_002884960.1  DNAJ heat shock N-terminal domain-containing protein [Arabidopsis lyrata subsp. lyrata]   gi 297330800 gb EFH61219.1  DNAJ heat shock N-terminal domain-containing protein [Arabidopsis lyrata subsp. lyrata]                                                                                                                                                                                                                                                                                                              | 161  | 157  | 2.00E-58  | 97.5  | 78.3 | 84.5 | DNAJ heat shock N-terminal domain-containing protein                            | gbpln | Arabidopsis lyrata   | AT3G13310.1   Symbols:   Chaperone DnaJ-domain superfamily protein   chr3:4310827-4311300 REVERSE LENGTH=157                        | 161  | 157  | 1.00E-57  | 97.5  | 73.9 | 80.7 |
| Rsa1.0_01206.1.g24590.t2 | ref NP_566452.1  vacuolar cation/proton exchanger 2 [Arabidopsis thaliana]   gi 122056116 sl Q39254.2 CAX2_ARAT H RecName: Full=Vacuolar cation/proton exchanger 2; AltName: Full=Ca(2+)/H(+) antiporter CAX2; AltName: Full=Ca(2+)/H(+) exchanger 2; AltName: Full=Protein CATION EXCHANGER 2   gi 15983507 gb AAL11621.1 AF424628.1 AT3g13320/MDC11_10 [Arabidopsis thaliana]   gi 20453241 gb AAM19859.1  AT3g13320/MDC11_10 [Arabidopsis thaliana]   gi 332641812 gb AEE75333.1  vacuolar cation/proton exchanger 2 [Arabidopsis thaliana] | 459  | 441  | 0         | 96.1  | 87.8 | 90.8 | vacuolar cation/proton exchanger 2                                              | gbpln | Arabidopsis thaliana | AT3G13320.1   Symbols: CAX2, atcax2   cation exchanger 2   chr3:4315418-4317997 FORWARD LENGTH=441                                  | 459  | 441  | 0         | 96.1  | 87.8 | 90.8 |
| Rsa1.0_01206.1.g24591.t1 | ref NP_187941.6  proteasome activator subunit 4 [Arabidopsis thaliana]   gi 332641813 gb AEE75334.1  proteasome activating protein 200 [Arabidopsis thaliana]                                                                                                                                                                                                                                                                                                                                                                                  | 1802 | 1816 | 0         | 100.8 | 92.9 | 96.5 | proteasome activator subunit 4                                                  | gbpln | Arabidopsis thaliana | AT3G13330.1   Symbols: PA200   proteasome activating protein 200   chr3:4319804-4330061 REVERSE LENGTH=1816                         | 1802 | 1816 | 0         | 100.8 | 92.9 | 96.5 |
| Rsa1.0_01206.1.g24592.t1 | gb EOA30574.1  hypothetical protein CARUB_v10013702mg [Capsella rubella]                                                                                                                                                                                                                                                                                                                                                                                                                                                                       | 351  | 446  | 0         | 127.1 | 94.0 | 96.9 | hypothetical protein CARUB_v10013702mg                                          | gbpln | Capsella rubella     | AT3G13340.2   Symbols:   Transducin/WD40 repeat-like superfamily protein   chr3:4332370-4334603 FORWARD LENGTH=447                  | 351  | 447  | 0         | 127.4 | 93.4 | 96.0 |
| Rsa1.0_01206.1.g24593.t1 | dbj BAB02805.1  unnamed protein product [Arabidopsis thaliana]                                                                                                                                                                                                                                                                                                                                                                                                                                                                                 | 454  | 538  | 1.00E-141 | 118.5 | 67.6 | 76.9 | unnamed protein product                                                         | gbpln | Arabidopsis thaliana | AT3G13360.1   Symbols: WIP3   WPP domain interacting protein 3   chr3:4338472-4339982 REVERSE LENGTH=459                            | 454  | 459  | 1.00E-142 | 101.1 | 66.3 | 75.1 |
| Rsa1.0_01206.1.g24594.t1 | emb CAA47177.1  Bplo [Brassica napus]                                                                                                                                                                                                                                                                                                                                                                                                                                                                                                          | 530  | 555  | 0         | 104.7 | 94.2 | 97.5 | Bplo                                                                            | gbpln | Brassica napus       | AT1G55570.1   Symbols: sks12   SKU5 similar 12   chr1:20757882-20759771 FORWARD LENGTH=555                                          | 530  | 555  | 0         | 104.7 | 87.2 | 92.8 |

|                          |                                                                                                                                                                                                                                                                                                                                                                                                                                                                                                                                              |     |      |           |       |      |      |                                        |       |                      |                                                                                                                                                                                                                                                                                                                                                                                                                                                                                                                                         |     |      |           |       |      |      |
|--------------------------|----------------------------------------------------------------------------------------------------------------------------------------------------------------------------------------------------------------------------------------------------------------------------------------------------------------------------------------------------------------------------------------------------------------------------------------------------------------------------------------------------------------------------------------------|-----|------|-----------|-------|------|------|----------------------------------------|-------|----------------------|-----------------------------------------------------------------------------------------------------------------------------------------------------------------------------------------------------------------------------------------------------------------------------------------------------------------------------------------------------------------------------------------------------------------------------------------------------------------------------------------------------------------------------------------|-----|------|-----------|-------|------|------|
| Rsa1.0_01206.1.g24595.t1 | refNP_187948.1  protein SKU5-like 13 [Arabidopsis thaliana] gi 9280290 dbj BAB01745.1  BNH protein; pectinesterase-like protein; pollen-specific protein-like [Arabidopsis thaliana] gi 15912263 gb AAL08265.1  AT3g13400/MRP15.3 [Arabidopsis thaliana] gi 18176449 gb AAL60046.1  putative pollen specific protein [Arabidopsis thaliana] gi 20465921 gb AAM20113.1  putative pollen-specific protein [Arabidopsis thaliana] gi 332641821 gb AEE75342.1  protein SKU5-like 13 [Arabidopsis thaliana]                                       | 551 | 551  | 0         | 100.0 | 95.5 | 98.0 | protein SKU5-like 13                   | gbpln | Arabidopsis thaliana | AT3G13400.1   Symbols: sks13   SKU5 similar 13   chr3:4355257-4357305 FORWARD LENGTH=551                                                                                                                                                                                                                                                                                                                                                                                                                                                | 551 | 551  | 0         | 100.0 | 95.5 | 98.0 |
| Rsa1.0_01206.1.g24598.t1 | gb AAN60225.1  unknown [Arabidopsis thaliana]                                                                                                                                                                                                                                                                                                                                                                                                                                                                                                | 442 | 321  | 1.00E-154 | 72.6  | 62.7 | 66.1 | unknown                                | gbpln | Arabidopsis thaliana | AT3G13410.1   Symbols:   unknown protein; FUNCTIONS IN: molecular_function unknown; INVOLVED IN: biological_process unknown; LOCATED IN: endoplasmic reticulum; EXPRESSED IN: 25 plant structures; EXPRESSED DURING: 15 growth stages; BEST Arabidopsis thaliana protein match is: unknown protein (TAIR:AT1G55946.1); Has 49 Blast hits to 49 proteins in 14 species: Archae - 0; Bacteria - 0; Metazoa - 0; Fungi - 0; Plants - 48; Viruses - 0; Other Eukaryotes - 1 (source: NCBI BLINK).   chr3:4362149-4364032 REVERSE LENGTH=321 | 442 | 321  | 1.00E-155 | 72.6  | 62.4 | 65.6 |
| Rsa1.0_01206.1.g24597.t1 | refNP_181023.1  fatty acid hydroxylase 1 [Arabidopsis thaliana] gi 75098527 sp O48916.1 FAH1_ARATH RecName: Full=Fatty acid 2-hydroxylase 1; Short=AtFAH1 gi 2736147 gb AAB94072.1  fatty acid hydroxylase Fah1p [Arabidopsis thaliana] gi 3132481 gb AAC16270.1  fatty acid hydroxylase (FAH1) [Arabidopsis thaliana] gi 15215596 gb AAK91343.1  At2g34770/T29F13.2 [Arabidopsis thaliana] gi 23308163 gb AAN18051.1  At2g34770/T29F13.2 [Arabidopsis thaliana] gi 330253925 gb AEC09019.1  fatty acid hydroxylase 1 [Arabidopsis thaliana] | 140 | 237  | 8.00E-69  | 169.3 | 87.9 | 92.9 | fatty acid hydroxylase 1               | gbpln | Arabidopsis thaliana | AT2G34770.1   Symbols: FAH1, ATFAH1   fatty acid hydroxylase 1   chr2:14666776-14668061 FORWARD LENGTH=237                                                                                                                                                                                                                                                                                                                                                                                                                              | 140 | 237  | 2.00E-71  | 169.3 | 87.9 | 92.9 |
| Rsa1.0_01207.1.g24598.t1 | gb EOA24245.1  hypothetical protein CARUB_v10017480mg [Capsella rubella]                                                                                                                                                                                                                                                                                                                                                                                                                                                                     | 364 | 366  | 2.00E-71  | 100.5 | 44.2 | 57.7 | hypothetical protein CARUB_v10017480mg | gbpln | Capsella rubella     | AT5G54560.1   Symbols:   Protein of unknown function (DUF295)   chr5:22161134-22162216 FORWARD LENGTH=360                                                                                                                                                                                                                                                                                                                                                                                                                               | 364 | 360  | 4.00E-65  | 98.9  | 44.8 | 59.9 |
| Rsa1.0_01207.1.g24599.t1 | ref XP_002864202.1  hypothetical protein ARALYDRAFT_495358 [Arabidopsis lyrata subsp. lyrata] gi 297310037 gb EFH40461.1  hypothetical protein ARALYDRAFT_495358 [Arabidopsis lyrata subsp. lyrata]                                                                                                                                                                                                                                                                                                                                          | 169 | 355  | 8.00E-33  | 210.1 | 45.0 | 59.2 | hypothetical protein ARALYDRAFT_495358 | gbpln | Arabidopsis lyrata   | AT5G52930.1   Symbols:   Protein of unknown function (DUF295)   chr5:21470370-21471449 FORWARD LENGTH=359                                                                                                                                                                                                                                                                                                                                                                                                                               | 169 | 359  | 2.00E-32  | 212.4 | 43.2 | 58.6 |
| Rsa1.0_01207.1.g24600.t1 | ref NP_178168.1  nodulin family protein [Arabidopsis thaliana] gi 6730730 gb AAF27120.1 AC018849.8 nodulin-like protein; 38383-40406 [Arabidopsis thaliana] gi 14334880 gb AAK59618.1  putative nodulin protein [Arabidopsis thaliana] gi 15810607 gb AAL07191.1  putative nodulin protein [Arabidopsis thaliana] gi 332198295 gb AEE36416.1  nodulin family protein [Arabidopsis thaliana]                                                                                                                                                  | 167 | 561  | 2.00E-41  | 335.9 | 57.5 | 61.7 | nodulin family protein                 | gbpln | Arabidopsis thaliana | AT1G80530.1   Symbols:   Major facilitator superfamily protein   chr1:30278224-30280247 REVERSE LENGTH=561                                                                                                                                                                                                                                                                                                                                                                                                                              | 167 | 561  | 9.00E-44  | 335.9 | 57.5 | 61.7 |
| Rsa1.0_01207.1.g24601.t1 | gb AAG50806.1 AC079281.8 unknown protein [Arabidopsis thaliana]                                                                                                                                                                                                                                                                                                                                                                                                                                                                              | 185 | 1213 | 8.00E-56  | 655.7 | 54.6 | 67.6 | unknown protein                        | gbpln | Arabidopsis thaliana | AT3G24255.1   Symbols:   RNA-directed DNA polymerase (reverse transcriptase)-related family protein   chr3:8789471-8793208 FORWARD LENGTH=746                                                                                                                                                                                                                                                                                                                                                                                           | 185 | 746  | 4.00E-26  | 403.2 | 27.0 | 37.8 |
| Rsa1.0_01207.1.g24602.t1 | gb EOA35711.1  hypothetical protein CARUB_v10020938mg [Capsella rubella]                                                                                                                                                                                                                                                                                                                                                                                                                                                                     | 198 | 215  | 5.00E-63  | 108.6 | 62.6 | 68.2 | hypothetical protein CARUB_v10020938mg | gbpln | Capsella rubella     | AT1G80450.1   Symbols:   VQ motif-containing protein   chr1:30244155-30244688 REVERSE LENGTH=177                                                                                                                                                                                                                                                                                                                                                                                                                                        | 198 | 177  | 4.00E-63  | 89.4  | 62.1 | 68.2 |
| Rsa1.0_01207.1.g24603.t1 | ref XP_002890903.1  hypothetical protein ARALYDRAFT_901626 [Arabidopsis lyrata subsp. lyrata] gi 297326742 gb EFH57162.1  hypothetical protein ARALYDRAFT_901626 [Arabidopsis lyrata subsp. lyrata]                                                                                                                                                                                                                                                                                                                                          | 984 | 1014 | 0         | 103.0 | 69.9 | 82.2 | hypothetical protein ARALYDRAFT_901626 | gbpln | Arabidopsis lyrata   | AT3G47570.1   Symbols:   Leucine-rich repeat protein kinase family protein   chr3:17527611-17530748 FORWARD LENGTH=1010                                                                                                                                                                                                                                                                                                                                                                                                                 | 984 | 1010 | 0         | 102.6 | 67.2 | 80.4 |

| Rsa1.0_01207.1.g24604.t1                                                                                                                                                                                                                                                                                                                                                                                                                                    | #                                                                                                                                                                                                                                                                                                                                         | #    | #    | #         | #     | #    | #    | #                                                                | -     | ----                 | ----                                                                                                                                          | #    | #    | #         | #     | #    | #    |
|-------------------------------------------------------------------------------------------------------------------------------------------------------------------------------------------------------------------------------------------------------------------------------------------------------------------------------------------------------------------------------------------------------------------------------------------------------------|-------------------------------------------------------------------------------------------------------------------------------------------------------------------------------------------------------------------------------------------------------------------------------------------------------------------------------------------|------|------|-----------|-------|------|------|------------------------------------------------------------------|-------|----------------------|-----------------------------------------------------------------------------------------------------------------------------------------------|------|------|-----------|-------|------|------|
| ref NP_178157.2  tetratricopeptide repeat-containing protein [Arabidopsis thaliana] gi 17381118 gb AAL36371.1  putative N-terminal acetyltransferase [Arabidopsis thaliana] gi 20259245 gb AAM14358.1  putative N-terminal acetyltransferase [Arabidopsis thaliana] gi 26451312 dbj BAC42757.1  putative N-terminal acetyltransferase [Arabidopsis thaliana] gi 332198278 gb AEE36399.1  tetratricopeptide repeat-containing protein [Arabidopsis thaliana] |                                                                                                                                                                                                                                                                                                                                           |      |      |           |       |      |      |                                                                  |       |                      |                                                                                                                                               |      |      |           |       |      |      |
| Rsa1.0_01207.1.g24605.t5                                                                                                                                                                                                                                                                                                                                                                                                                                    |                                                                                                                                                                                                                                                                                                                                           | 1007 | 897  | 0         | 89.1  | 81.1 | 84.9 | tetratricopeptide repeat-containing protein                      | gbpln | Arabidopsis thaliana | AT1G80410.1   Symbols: EMB2753   tetratricopeptide repeat (TPR)-containing protein   chr1:30227963-30234832 REVERSE LENGTH=897                | 1007 | 897  | 0         | 89.1  | 81.1 | 84.9 |
| Rsa1.0_01207.1.g24606.t1                                                                                                                                                                                                                                                                                                                                                                                                                                    | gb EOA35146.1  hypothetical protein CARUB_v10020281mg [Capsella rubella]                                                                                                                                                                                                                                                                  | 464  | 454  | 0         | 97.8  | 79.3 | 86.0 | hypothetical protein CARUB_v10020281mg                           | gbpln | Capsella rubella     | AT1G80380.2   Symbols:   P-loop containing nucleoside triphosphate hydrolases superfamily protein   chr1:30217332-30219784 FORWARD LENGTH=456 | 464  | 456  | 0         | 98.3  | 80.8 | 88.6 |
| Rsa1.0_01207.1.g24607.t1                                                                                                                                                                                                                                                                                                                                                                                                                                    | ref NP_178153.1  cyclin-A2-4 [Arabidopsis thaliana] gi 75308908 sp Q9C968.1 CCA24_ARAT H RecName: Full=Cyclin-A2-4; AltName: Full=G2/mitotic-specific cyclin-A2-4; Short=CycA2-4 gi 12324983 gb AAG52439.1 AC018848_10 putative cyclin; 42214-44381 [Arabidopsis thaliana] gi 332198271 gb AEE36392.1  cyclin-A2-4 [Arabidopsis thaliana] | 459  | 461  | 0         | 100.4 | 79.3 | 86.7 | cyclin-A2-4                                                      | gbpln | Arabidopsis thaliana | AT1G80370.1   Symbols: CYCA2.4   Cyclin A2.4   chr1:30214694-30216861 FORWARD LENGTH=461                                                      | 459  | 461  | 0         | 100.4 | 79.3 | 86.7 |
| Rsa1.0_01207.1.g24608.t1                                                                                                                                                                                                                                                                                                                                                                                                                                    | #                                                                                                                                                                                                                                                                                                                                         | #    | #    | #         | #     | #    | #    | -                                                                | ----  | ----                 | #                                                                                                                                             | #    | #    | #         | #     | #    | #    |
| Rsa1.0_01208.1.g24609.t1                                                                                                                                                                                                                                                                                                                                                                                                                                    | gb EOA39810.1  hypothetical protein CARUB_v10011128mg [Capsella rubella]                                                                                                                                                                                                                                                                  | 324  | 1008 | 5.00E-31  | 311.1 | 21.6 | 24.4 | hypothetical protein CARUB_v10011128mg                           | gbpln | Capsella rubella     | AT1G29720.1   Symbols:   Leucine-rich repeat transmembrane protein kinase   chr1:10393894-10399771 REVERSE LENGTH=1019                        | 324  | 1019 | 3.00E-25  | 314.5 | 18.2 | 21.6 |
| Rsa1.0_01208.1.g24610.t12                                                                                                                                                                                                                                                                                                                                                                                                                                   | gb AAG10622.1 AC008030.22 Putative receptor-like serine/threonine kinase - partial protein [Arabidopsis thaliana]                                                                                                                                                                                                                         | 1983 | 1013 | 1.00E-162 | 51.1  | 14.6 | 16.1 | Putative receptor-like serine/threonine kinase - partial protein | gbpln | Arabidopsis thaliana | AT1G29720.1   Symbols:   Leucine-rich repeat transmembrane protein kinase   chr1:10393894-10399771 REVERSE LENGTH=1019                        | 1983 | 1019 | 1.00E-163 | 51.4  | 14.3 | 15.7 |
| Rsa1.0_01208.1.g24611.t1                                                                                                                                                                                                                                                                                                                                                                                                                                    | gb AAG10622.1 AC008030.22 Putative receptor-like serine/threonine kinase - partial protein [Arabidopsis thaliana]                                                                                                                                                                                                                         | 488  | 1013 | 0         | 207.6 | 77.3 | 84.2 | Putative receptor-like serine/threonine kinase - partial protein | gbpln | Arabidopsis thaliana | AT1G29720.1   Symbols:   Leucine-rich repeat transmembrane protein kinase   chr1:10393894-10399771 REVERSE LENGTH=1019                        | 488  | 1019 | 0         | 208.8 | 78.7 | 85.7 |
| Rsa1.0_01208.1.g24612.t1                                                                                                                                                                                                                                                                                                                                                                                                                                    | ref XP_002890805.1  predicted protein [Arabidopsis lyrata subsp. lyrata] gi 297336647 gb EFH67064.1  predicted protein [Arabidopsis lyrata subsp. lyrata]                                                                                                                                                                                 | 274  | 203  | 4.00E-23  | 74.1  | 22.3 | 32.5 | predicted protein                                                | gbpln | Arabidopsis lyrata   | AT1G02370.1   Symbols:   Tetratricopeptide repeat (TPR)-like superfamily protein   chr1:474516-476383 FORWARD LENGTH=537                      | 274  | 537  | 7.00E-16  | 196.0 | 14.6 | 25.2 |
| Rsa1.0_01208.1.g24613.t2                                                                                                                                                                                                                                                                                                                                                                                                                                    | gb AAD17398.1  putative non-LTR retroelement reverse transcriptase [Arabidopsis thaliana]                                                                                                                                                                                                                                                 | 1599 | 1225 | 1.00E-79  | 76.6  | 10.3 | 14.2 | putative non-LTR retroelement reverse transcriptase              | gbpln | Arabidopsis thaliana | AT1G09650.1   Symbols:   F-box and associated interaction domains-containing protein   chr1:3125978-3127126 FORWARD LENGTH=382                | 1599 | 382  | 9.00E-27  | 23.9  | 5.3  | 7.3  |
| Rsa1.0_01209.1.g24614.t1                                                                                                                                                                                                                                                                                                                                                                                                                                    | #                                                                                                                                                                                                                                                                                                                                         | #    | #    | #         | #     | #    | #    | -                                                                | ----  | ----                 | #                                                                                                                                             | #    | #    | #         | #     | #    | #    |
| Rsa1.0_01209.1.g24615.t1                                                                                                                                                                                                                                                                                                                                                                                                                                    | ref NP_198762.1  F-box protein [Arabidopsis thaliana] gi 75262687 sp Q9FLZ1.1 FB272_ARATH RecName: Full=Putative F-box protein At5g39460 gi 10177693 dbj BAB11019.1  unnamed protein product [Arabidopsis thaliana] gi 332007052 gb AED84435.1  putative F-box protein [Arabidopsis thaliana]                                             | 217  | 571  | 4.00E-68  | 263.1 | 61.3 | 71.9 | F-box protein                                                    | gbpln | Arabidopsis thaliana | AT5G39460.1   Symbols:   F-box family protein   chr5:15788289-15790004 REVERSE LENGTH=571                                                     | 217  | 571  | 1.00E-70  | 263.1 | 61.3 | 71.9 |
| Rsa1.0_01209.1.g24616.t1                                                                                                                                                                                                                                                                                                                                                                                                                                    | dbj BAB11018.1  unnamed protein product [Arabidopsis thaliana]                                                                                                                                                                                                                                                                            | 338  | 576  | 8.00E-58  | 170.4 | 34.9 | 40.8 | unnamed protein product                                          | gbpln | Arabidopsis thaliana | AT5G39450.1   Symbols:   F-box family protein   chr5:15786045-15787877 FORWARD LENGTH=579                                                     | 338  | 579  | 2.00E-60  | 171.3 | 34.9 | 40.8 |
| Rsa1.0_01209.1.g24617.t1                                                                                                                                                                                                                                                                                                                                                                                                                                    | gb EOA14339.1  hypothetical protein CARUB_v10027520mg [Capsella rubella]                                                                                                                                                                                                                                                                  | 533  | 495  | 0         | 92.9  | 65.7 | 78.6 | hypothetical protein CARUB_v10027520mg                           | gbpln | Capsella rubella     | AT3G62120.2   Symbols:   Class II aaRS and biotin synthetases superfamily protein   chr3:23001227-23003849 REVERSE LENGTH=530                 | 533  | 530  | 0         | 99.4  | 60.4 | 73.7 |
| Rsa1.0_01209.1.g24618.t2                                                                                                                                                                                                                                                                                                                                                                                                                                    | ref XP_002870776.1  hypothetical protein ARALYDRAFT_494037 [Arabidopsis lyrata subsp. lyrata] gi 297316612 gb EFH47035.1  hypothetical protein ARALYDRAFT_494037 [Arabidopsis lyrata subsp. lyrata]                                                                                                                                       | 1588 | 1445 | 0         | 91.0  | 79.7 | 84.7 | hypothetical protein ARALYDRAFT_494037                           | gbpln | Arabidopsis lyrata   | AT5G39500.1   Symbols: GNL1, ERMO1   GNOM-like 1   chr5:15815274-15819910 FORWARD LENGTH=1443                                                 | 1588 | 1443 | 0         | 90.9  | 78.7 | 84.4 |
| Rsa1.0_01209.1.g24619.t1                                                                                                                                                                                                                                                                                                                                                                                                                                    | gb AAG50806.1 AC079281.8 unknown protein [Arabidopsis thaliana]                                                                                                                                                                                                                                                                           | 1727 | 1213 | 0         | 70.2  | 25.0 | 37.1 | unknown protein                                                  | gbpln | Arabidopsis thaliana | AT1G43760.1   Symbols:   DNase I-like superfamily protein   chr1:16528880-16531065 REVERSE LENGTH=626                                         | 1727 | 626  | 4.00E-66  | 36.2  | 8.3  | 14.1 |

|                          |                                                                                                                                                                                                                                                                                                                                  |      |      |           |       |      |      |                                              |       |                      |                                                                                                                                                                                                                                                                                                                                                                                                                                                                                                                                                 |      |      |           |       |      |      |
|--------------------------|----------------------------------------------------------------------------------------------------------------------------------------------------------------------------------------------------------------------------------------------------------------------------------------------------------------------------------|------|------|-----------|-------|------|------|----------------------------------------------|-------|----------------------|-------------------------------------------------------------------------------------------------------------------------------------------------------------------------------------------------------------------------------------------------------------------------------------------------------------------------------------------------------------------------------------------------------------------------------------------------------------------------------------------------------------------------------------------------|------|------|-----------|-------|------|------|
| Rsa1.0_01209.1.g24620.t1 | dbj BAJ34483.1  unnamed protein product [Theellungiella halophila]                                                                                                                                                                                                                                                               | 227  | 220  | 1.00E-106 | 96.9  | 85.0 | 93.4 | unnamed protein product                      | ----  | ----                 | AT5G39510.1   Symbols: VTI11, ATV11A, ATV11.1, ZIG, SGR4, VTI1A, ZIG1   Vesicle transport v-SNARE family protein   chr5:15822035-15823591 FORWARD LENGTH=221                                                                                                                                                                                                                                                                                                                                                                                    | 227  | 221  | 2.00E-93  | 97.4  | 80.2 | 92.1 |
| Rsa1.0_01209.1.g24621.t2 | gb AAM65834.1  unknown [Arabidopsis thaliana]                                                                                                                                                                                                                                                                                    | 431  | 230  | 1.00E-95  | 53.4  | 39.0 | 42.9 | unknown                                      | gbpln | Arabidopsis thaliana | AT5G39520.1   Symbols:   Protein of unknown function (DUF1997)   chr5:15823920-15825416 REVERSE LENGTH=230                                                                                                                                                                                                                                                                                                                                                                                                                                      | 431  | 230  | 5.00E-98  | 53.4  | 38.7 | 42.9 |
| Rsa1.0_01209.1.g24622.t1 | ref XP_002868712.1  hypothetical protein ARALYDRAFT_916349 [Arabidopsis lyrata subsp. lyrata]   gi 297314548 gb EFH44971.1  hypothetical protein ARALYDRAFT_916349 [Arabidopsis lyrata subsp. lyrata]                                                                                                                            | 238  | 242  | 1.00E-113 | 101.7 | 83.2 | 90.3 | hypothetical protein ARALYDRAFT_916349       | gbpln | Arabidopsis lyrata   | AT5G39530.1   Symbols:   Protein of unknown function (DUF1997)   chr5:15826285-15827517 REVERSE LENGTH=239                                                                                                                                                                                                                                                                                                                                                                                                                                      | 238  | 239  | 1.00E-114 | 100.4 | 81.9 | 90.3 |
| Rsa1.0_01209.1.g24623.t1 | gb EOA16722.1  hypothetical protein CARUB_v10004926mg [Capsella rubella]                                                                                                                                                                                                                                                         | 357  | 384  | 1.00E-110 | 107.6 | 80.4 | 85.7 | hypothetical protein CARUB_v10004926mg       | gbpln | Capsella rubella     | AT5G39570.1   Symbols:   FUNCTIONS IN: molecular_function unknown; INVOLVED IN: biological_process unknown; LOCATED IN: cytosol, nucleus; EXPRESSED IN: 25 plant structures; EXPRESSED DURING: 14 growth stages; BEST Arabidopsis thaliana protein match is: glycine-rich protein (TAIR:AT3G29075.1); Has 30201 Blast hits to 17322 proteins in 780 species: Archae - 12; Bacteria - 1396; Metazoa - 17338; Fungi - 3422; Plants - 5037; Viruses - 0; Other Eukaryotes - 2996 (source: NCBI BLink).   chr5:15844021-15845827 FORWARD LENGTH=381 | 357  | 381  | 1.00E-105 | 106.7 | 73.9 | 79.8 |
| Rsa1.0_01209.1.g24624.t1 | gb AAG51783.1 AC079679.3 reverse transcriptase, putative; 16838-20266 [Arabidopsis thaliana]                                                                                                                                                                                                                                     | 169  | 1142 | 1.00E-32  | 675.7 | 46.2 | 60.9 | reverse transcriptase, putative; 16838-20266 | gbpln | Arabidopsis thaliana | AT2G34320.1   Symbols:   Polynucleotidyl transferase, ribonuclease H-like superfamily protein   chr2:14484959-14485837 FORWARD LENGTH=292                                                                                                                                                                                                                                                                                                                                                                                                       | 169  | 292  | 7.00E-17  | 172.8 | 30.8 | 46.2 |
| Rsa1.0_01210.1.g24625.t1 | dbj BAB09923.1  copia-like retrotransposable element [Arabidopsis thaliana]                                                                                                                                                                                                                                                      | 189  | 1342 | 7.00E-12  | 710.1 | 25.9 | 37.0 | copia-like retrotransposable element         | gbpln | Arabidopsis thaliana | #                                                                                                                                                                                                                                                                                                                                                                                                                                                                                                                                               | #    | #    | #         | #     | #    |      |
| Rsa1.0_01210.1.g24626.t1 | gb AAF18630.1 AC006228_1 F5J5.1 [Arabidopsis thaliana]                                                                                                                                                                                                                                                                           | 541  | 1463 | 3.00E-22  | 270.4 | 20.5 | 30.5 | F5J5.1                                       | gbpln | Arabidopsis thaliana | #                                                                                                                                                                                                                                                                                                                                                                                                                                                                                                                                               | #    | #    | #         | #     | #    |      |
| Rsa1.0_01210.1.g24627.t1 | gb EOA32569.1  hypothetical protein CARUB_v10015859mg [Capsella rubella]                                                                                                                                                                                                                                                         | 1047 | 804  | 0         | 76.8  | 65.9 | 70.3 | hypothetical protein CARUB_v10015859mg       | gbpln | Capsella rubella     | AT3G14205.1   Symbols:   Phosphoinositide phosphatase family protein   chr3:4716008-4720524 REVERSE LENGTH=808                                                                                                                                                                                                                                                                                                                                                                                                                                  | 1047 | 808  | 0         | 77.2  | 66.6 | 71.2 |
| Rsa1.0_01210.1.g24628.t1 | ref NP_180705.1  F-box protein DOR [Arabidopsis thaliana]   gi 229807544 sp Q5BPS3.2 DOR_ARATH RecName: Full=F-box protein DOR; AltName: Full=Protein DROUGHT TOLERANCE REPRESSOR   gi 4589954 gb AAD26472.1  hypothetical protein [Arabidopsis thaliana]   gi 330253458 gb AEC08552.1  F-box protein DOR [Arabidopsis thaliana] | 392  | 387  | 2.00E-69  | 98.7  | 41.6 | 56.9 | F-box protein DOR                            | gbpln | Arabidopsis thaliana | AT2G31470.1   Symbols: DOR   F-box and associated interaction domains-containing protein   chr2:13407492-13408655 REVERSE LENGTH=387                                                                                                                                                                                                                                                                                                                                                                                                            | 392  | 387  | 4.00E-72  | 98.7  | 41.6 | 56.9 |
| Rsa1.0_01210.1.g24629.t1 | gb AAG50806.1 AC079291.8 unknown protein [Arabidopsis thaliana]                                                                                                                                                                                                                                                                  | 1787 | 1213 | 0         | 67.9  | 24.8 | 37.9 | unknown protein                              | gbpln | Arabidopsis thaliana | AT1G43760.1   Symbols:   DNase I-like superfamily protein   chr1:16528880-16531065 REVERSE LENGTH=626                                                                                                                                                                                                                                                                                                                                                                                                                                           | 1787 | 626  | 3.00E-62  | 35.0  | 7.9  | 13.3 |
| Rsa1.0_01210.1.g24630.t1 | gb EOA29201.1  hypothetical protein CARUB_v10025475mg [Capsella rubella]                                                                                                                                                                                                                                                         | 242  | 420  | 1.00E-70  | 173.6 | 55.0 | 67.8 | hypothetical protein CARUB_v10025475mg       | gbpln | Capsella rubella     | AT4G39753.1   Symbols:   Galactose oxidase/kelch repeat superfamily protein   chr4:18440125-18441297 FORWARD LENGTH=390                                                                                                                                                                                                                                                                                                                                                                                                                         | 242  | 390  | 2.00E-71  | 161.2 | 55.8 | 67.4 |
| Rsa1.0_01211.1.g24631.t1 | gb EOA39490.1  hypothetical protein CARUB_v10008095mg [Capsella rubella]                                                                                                                                                                                                                                                         | 1428 | 1361 | 0         | 95.3  | 70.4 | 78.1 | hypothetical protein CARUB_v10008095mg       | gbpln | Capsella rubella     | AT1G20970.1   Symbols:   FUNCTIONS IN: molecular_function unknown; INVOLVED IN: biological_process unknown; LOCATED IN: plasma membrane, vacuole; EXPRESSED IN: guard cell, cultured cell; BEST Arabidopsis thaliana protein match is: proton pump interactor 1 (TAIR:AT4G27500.1); Has 30201 Blast hits to 17322 proteins in 780 species: Archae - 12; Bacteria - 1396; Metazoa - 17338; Fungi - 3422; Plants - 5037; Viruses - 0; Other Eukaryotes - 2996 (source: NCBI BLink).   chr1:7314338-7319246 FORWARD LENGTH=1364                    | 1428 | 1364 | 0         | 95.5  | 70.6 | 78.2 |
| Rsa1.0_01211.1.g24632.t1 | dbj BAJ34640.1  unnamed protein product [Theellungiella halophila]                                                                                                                                                                                                                                                               | 1013 | 1035 | 0         | 102.2 | 86.9 | 92.2 | unnamed protein product                      | ----  | ----                 | AT1G20980.1   Symbols: SPL14, FBR6, SPL1R2, ATSPL14   squamosa promoter binding protein-like 14   chr1:7325042-7328933 FORWARD LENGTH=1035                                                                                                                                                                                                                                                                                                                                                                                                      | 1013 | 1035 | 0         | 102.2 | 84.8 | 90.9 |
| Rsa1.0_01211.1.g24633.t1 | dbj BAF00918.1  putative reverse transcriptase [Arabidopsis thaliana]                                                                                                                                                                                                                                                            | 1188 | 910  | 0         | 76.6  | 37.5 | 52.3 | putative reverse transcriptase               | gbpln | Arabidopsis thaliana | AT1G43760.1   Symbols:   DNase I-like superfamily protein   chr1:16528880-16531065 REVERSE LENGTH=626                                                                                                                                                                                                                                                                                                                                                                                                                                           | 1188 | 626  | 3.00E-97  | 52.7  | 15.2 | 24.1 |

|                          |                                                                                                                                                                                                                                                        |      |      |           |       |      |      |                                               |       |                      |                                                                                                                                                                                                                                                                                                                                                                                                                                                                                                                                                       |      |      |           |       |      |      |
|--------------------------|--------------------------------------------------------------------------------------------------------------------------------------------------------------------------------------------------------------------------------------------------------|------|------|-----------|-------|------|------|-----------------------------------------------|-------|----------------------|-------------------------------------------------------------------------------------------------------------------------------------------------------------------------------------------------------------------------------------------------------------------------------------------------------------------------------------------------------------------------------------------------------------------------------------------------------------------------------------------------------------------------------------------------------|------|------|-----------|-------|------|------|
| Rsa1.0_01211.1.g24634.t1 | refNP_173523.1   DC1 domain-containing protein [Arabidopsis thaliana] gi 332191930 gb AE30051.1   DC1 domain-containing protein [Arabidopsis thaliana]                                                                                                 | 322  | 319  | 1.00E-137 | 99.1  | 85.1 | 92.2 | DC1 domain-containing protein                 | gbpln | Arabidopsis thaliana | AT1G20990.1   Symbols:   Cysteine/Histidine-rich C1 domain family protein   chr1:7330524-7331946 REVERSE LENGTH=319                                                                                                                                                                                                                                                                                                                                                                                                                                   | 322  | 319  | 1.00E-140 | 99.1  | 85.1 | 92.2 |
| Rsa1.0_01211.1.g24635.t1 | refXP_002890421.1   zinc-binding family protein [Arabidopsis lyrata subsp. lyrata] gi 297336263 gb EFH6680.1   zinc-binding family protein [Arabidopsis lyrata subsp. lyrata]                                                                          | 268  | 246  | 1.00E-130 | 91.8  | 86.2 | 88.4 | zinc-binding family protein                   | gbpln | Arabidopsis lyrata   | AT1G21000.2   Symbols:   PLATZ transcription factor family protein   chr1:7338013-7339088 FORWARD LENGTH=243                                                                                                                                                                                                                                                                                                                                                                                                                                          | 268  | 243  | 1.00E-130 | 90.7  | 84.7 | 87.7 |
| Rsa1.0_01211.1.g24636.t1 | refXP_002890422.1   hypothetical protein ARALYDRAFT_889558 [Arabidopsis lyrata subsp. lyrata] gi 297336264 gb EFH66681.1   hypothetical protein ARALYDRAFT_889558 [Arabidopsis lyrata subsp. lyrata]                                                   | 115  | 207  | 2.00E-34  | 180.0 | 77.4 | 84.3 | hypothetical protein ARALYDRAFT_889558        | gbpln | Arabidopsis lyrata   | AT1G21010.1   Symbols:   unknown protein; FUNCTIONS IN: molecular function unknown; INVOLVED IN: N-terminal protein myristoylation; LOCATED IN: cellular component unknown; EXPRESSED IN: 24 plant structures; EXPRESSED DURING: 14 growth stages; BEST Arabidopsis thaliana protein match is: unknown protein (TAIRAT1G76600.1); Has 206 Blast hits to 206 proteins in 13 species: Archae - 0; Bacteria - 0; Metazoa - 0; Fungi - 0; Plants - 206; Viruses - 0; Other Eukaryotes - 0 (source: NCBI BLink).   chr1:7346239-7346871 FORWARD LENGTH=210 | 115  | 210  | 3.00E-35  | 182.6 | 75.7 | 81.7 |
| Rsa1.0_01212.1.g24637.t1 | refXP_002887531.1   predicted protein [Arabidopsis lyrata subsp. lyrata] gi 297333372 gb EFH63790.1   predicted protein [Arabidopsis lyrata subsp. lyrata]                                                                                             | 391  | 391  | 0         | 100.0 | 88.0 | 94.9 | predicted protein                             | gbpln | Arabidopsis lyrata   | AT1G74210.1   Symbols:   PLC-like phosphodiesterases superfamily protein   chr1:27910396-27912785 FORWARD LENGTH=392                                                                                                                                                                                                                                                                                                                                                                                                                                  | 391  | 392  | 0         | 100.3 | 88.5 | 95.1 |
| Rsa1.0_01212.1.g24638.t2 | refXP_002888967.1   leucine-rich repeat family protein [Arabidopsis lyrata subsp. lyrata] gi 297334808 gb EFH65226.1   leucine-rich repeat family protein [Arabidopsis lyrata subsp. lyrata]                                                           | 878  | 966  | 0         | 110.0 | 63.6 | 76.2 | leucine-rich repeat family protein            | gbpln | Arabidopsis lyrata   | AT1G74190.1   Symbols:   AtRLP15, RLP15   receptor like protein 15   chr1:27902590-27906158 REVERSE LENGTH=965                                                                                                                                                                                                                                                                                                                                                                                                                                        | 878  | 965  | 0         | 109.9 | 62.0 | 75.9 |
| Rsa1.0_01212.1.g24639.t1 | #                                                                                                                                                                                                                                                      | #    | #    | #         | #     | #    | #    | -                                             | ----  | ----                 | #                                                                                                                                                                                                                                                                                                                                                                                                                                                                                                                                                     | #    | #    | #         | #     | #    |      |
| Rsa1.0_01212.1.g24640.t1 | refXP_002865001.1   hypothetical protein ARALYDRAFT_496850 [Arabidopsis lyrata subsp. lyrata] gi 297310836 gb EFH41260.1   hypothetical protein ARALYDRAFT_496850 [Arabidopsis lyrata subsp. lyrata]                                                   | 101  | 246  | 3.00E-11  | 243.6 | 47.5 | 61.4 | hypothetical protein ARALYDRAFT_496850        | gbpln | Arabidopsis lyrata   | AT5G67450.1   Symbols:   AZF1, ZF1   zinc-finger protein 1   chr5:26919142-26919879 REVERSE LENGTH=245                                                                                                                                                                                                                                                                                                                                                                                                                                                | 101  | 245  | 2.00E-13  | 242.6 | 46.5 | 60.4 |
| Rsa1.0_01212.1.g24641.t1 | gb AAG52362.1 AC011765.14 putative receptor protein kinase; 10992-14231 [Arabidopsis thaliana]                                                                                                                                                         | 663  | 1079 | 0         | 162.7 | 70.3 | 78.6 | putative receptor protein kinase; 10992-14231 | gbpln | Arabidopsis thaliana | AT1G74360.1   Symbols:   Leucine-rich repeat protein kinase family protein   chr1:27954299-27957911 FORWARD LENGTH=1106                                                                                                                                                                                                                                                                                                                                                                                                                               | 663  | 1106 | 0         | 166.8 | 70.1 | 78.6 |
| Rsa1.0_01212.1.g24642.t2 | gb EOA35256.1  hypothetical protein CARUB_v10020425mg [Capsella rubella]                                                                                                                                                                               | 371  | 393  | 0         | 105.9 | 87.9 | 93.5 | hypothetical protein CARUB_v10020425mg        | gbpln | Capsella rubella     | AT1G74210.1   Symbols:   PLC-like phosphodiesterases superfamily protein   chr1:27910396-27912785 FORWARD LENGTH=392                                                                                                                                                                                                                                                                                                                                                                                                                                  | 371  | 392  | 0         | 105.7 | 87.6 | 93.8 |
| Rsa1.0_01212.1.g24643.t1 | refXP_002888967.1   leucine-rich repeat family protein [Arabidopsis lyrata subsp. lyrata] gi 297334808 gb EFH65226.1   leucine-rich repeat family protein [Arabidopsis lyrata subsp. lyrata]                                                           | 928  | 966  | 0         | 104.1 | 66.7 | 78.2 | leucine-rich repeat family protein            | gbpln | Arabidopsis lyrata   | AT1G74190.1   Symbols:   AtRLP15, RLP15   receptor like protein 15   chr1:27902590-27906158 REVERSE LENGTH=965                                                                                                                                                                                                                                                                                                                                                                                                                                        | 928  | 965  | 0         | 104.0 | 65.7 | 77.8 |
| Rsa1.0_01212.1.g24644.t1 | refXP_002888967.1   leucine-rich repeat family protein [Arabidopsis lyrata subsp. lyrata] gi 297334808 gb EFH65226.1   leucine-rich repeat family protein [Arabidopsis lyrata subsp. lyrata]                                                           | 964  | 966  | 0         | 100.2 | 70.9 | 80.8 | leucine-rich repeat family protein            | gbpln | Arabidopsis lyrata   | AT1G74190.1   Symbols:   AtRLP15, RLP15   receptor like protein 15   chr1:27902590-27906158 REVERSE LENGTH=965                                                                                                                                                                                                                                                                                                                                                                                                                                        | 964  | 965  | 0         | 100.1 | 69.3 | 79.8 |
| Rsa1.0_01212.1.g24645.t1 | refXP_002888967.1   leucine-rich repeat family protein [Arabidopsis lyrata subsp. lyrata] gi 297334808 gb EFH65226.1   leucine-rich repeat family protein [Arabidopsis lyrata subsp. lyrata]                                                           | 362  | 966  | 1.00E-129 | 266.9 | 71.3 | 81.8 | leucine-rich repeat family protein            | gbpln | Arabidopsis lyrata   | AT1G74190.1   Symbols:   AtRLP15, RLP15   receptor like protein 15   chr1:27902590-27906158 REVERSE LENGTH=965                                                                                                                                                                                                                                                                                                                                                                                                                                        | 362  | 965  | 1.00E-127 | 266.6 | 69.9 | 80.9 |
| Rsa1.0_01212.1.g24646.t1 | gb AAD19784.1  putative retroelement pol polyprotein [Arabidopsis thaliana]                                                                                                                                                                            | 1531 | 1501 | 0         | 98.0  | 60.3 | 73.7 | putative retroelement pol polyprotein         | gbpln | Arabidopsis thaliana | AT4G23160.1   Symbols:   CRK8   cysteine-rich RLK (RECEPTOR-like protein kinase) 8   chr4:12129485-12134086 FORWARD LENGTH=1262                                                                                                                                                                                                                                                                                                                                                                                                                       | 1531 | 1262 | 1.00E-123 | 82.4  | 14.8 | 20.7 |
| Rsa1.0_01212.1.g24647.t1 | ref NP_177559.1  receptor like protein 15 [Arabidopsis thaliana] gi 2323812 gb AAG51871.1 AC079678.1 disease resistance protein, putative; 1096-4664 [Arabidopsis thaliana] gi 332197443 gb AE35564.1  receptor like protein 15 [Arabidopsis thaliana] | 213  | 965  | 2.00E-74  | 453.1 | 64.3 | 75.1 | receptor like protein 15                      | gbpln | Arabidopsis thaliana | AT1G74190.1   Symbols:   AtRLP15, RLP15   receptor like protein 15   chr1:27902590-27906158 REVERSE LENGTH=965                                                                                                                                                                                                                                                                                                                                                                                                                                        | 213  | 965  | 5.00E-77  | 453.1 | 64.3 | 75.1 |
| Rsa1.0_01212.1.g24648.t1 | #                                                                                                                                                                                                                                                      | #    | #    | #         | #     | #    | #    | -                                             | ----  | ----                 | #                                                                                                                                                                                                                                                                                                                                                                                                                                                                                                                                                     | #    | #    | #         | #     | #    |      |

|                          |                                                                                                                                                                                                                                                                                                                                                                     |      |      |           |       |      |      |                                                                             |       |                      |                                                                                                                                                                                                                                                                                                                                                 |      |      |           |       |      |      |
|--------------------------|---------------------------------------------------------------------------------------------------------------------------------------------------------------------------------------------------------------------------------------------------------------------------------------------------------------------------------------------------------------------|------|------|-----------|-------|------|------|-----------------------------------------------------------------------------|-------|----------------------|-------------------------------------------------------------------------------------------------------------------------------------------------------------------------------------------------------------------------------------------------------------------------------------------------------------------------------------------------|------|------|-----------|-------|------|------|
| Rsa1.0_01212.1.g24649.t1 | refXP_002881173.1   pentatricopeptide repeat-containing protein [Arabidopsis lyrata subsp. lyrata]   gi 297327012 gb EFH57432.1   pentatricopeptide repeat-containing protein [Arabidopsis lyrata subsp. lyrata]                                                                                                                                                    | 201  | 917  | 7.00E-12  | 456.2 | 22.4 | 26.9 | pentatricopeptide repeat-containing protein                                 | gbpln | Arabidopsis lyrata   | AT2G31400.1   Symbols: GUN1   genomes uncoupled 1   chr2:13387201-13390550 REVERSE LENGTH=918                                                                                                                                                                                                                                                   | 201  | 918  | 1.00E-12  | 456.7 | 21.4 | 24.4 |
| Rsa1.0_01212.1.g24650.t1 | gb ACR10272.1  sulfotransferase 5b [Brassica rapa subsp. pekinensis]                                                                                                                                                                                                                                                                                                | 344  | 342  | 1.00E-171 | 99.4  | 84.0 | 88.7 | sulfotransferase 5b                                                         | gbpln | Brassica rapa        | AT1G74090.1   Symbols: SOT18, ATSOT18, ATST5B   desulfo-glucosinolate sulfotransferase 18   chr1:27863003-27864055 FORWARD LENGTH=350                                                                                                                                                                                                           | 344  | 350  | 1.00E-153 | 101.7 | 74.4 | 87.2 |
| Rsa1.0_01212.1.g24651.t1 | gb ACR10272.1  sulfotransferase 5b [Brassica rapa subsp. pekinensis]                                                                                                                                                                                                                                                                                                | 343  | 342  | 1.00E-175 | 99.7  | 85.4 | 91.3 | sulfotransferase 5b                                                         | gbpln | Brassica rapa        | AT1G18590.1   Symbols: SOT17, ATSOT17, ATST5C   sulfotransferase 17   chr1:6398634-6399674 FORWARD LENGTH=346                                                                                                                                                                                                                                   | 343  | 346  | 1.00E-149 | 100.9 | 69.4 | 84.3 |
| Rsa1.0_01212.1.g24652.t1 | gb ACR10272.1  sulfotransferase 5b [Brassica rapa subsp. pekinensis]                                                                                                                                                                                                                                                                                                | 313  | 342  | 1.00E-138 | 109.3 | 75.4 | 80.2 | sulfotransferase 5b                                                         | gbpln | Brassica rapa        | AT1G74100.1   Symbols: SOT16, ATSOT16, COR1-7, ATST5A   sulfotransferase 16   chr1:27864489-27865505 REVERSE LENGTH=338                                                                                                                                                                                                                         | 313  | 338  | 1.00E-126 | 108.0 | 63.6 | 77.3 |
| Rsa1.0_01213.1.g24653.t1 | ref NP_001185022.1  B-block binding subunit of TFIIIC [Arabidopsis thaliana]   gi 332191469 gb AE29590.1  B-block binding subunit of TFIIIC [Arabidopsis thaliana]                                                                                                                                                                                                  | 1822 | 1844 | 0         | 101.2 | 82.1 | 89.5 | B-block binding subunit of TFIIIC                                           | gbpln | Arabidopsis thaliana | AT1G17450.2   Symbols:   B-block binding subunit of TFIIIC   chr1:5988579-5996693 REVERSE LENGTH=1844                                                                                                                                                                                                                                           | 1822 | 1844 | 0         | 101.2 | 82.1 | 89.5 |
| Rsa1.0_01213.1.g24654.t1 | ref XP_002888930.1  hypothetical protein ARALYDRAFT_895209 [Arabidopsis lyrata subsp. lyrata]   gi 297334771 gb EFH65189.1  hypothetical protein ARALYDRAFT_895209 [Arabidopsis lyrata subsp. lyrata]                                                                                                                                                               | 313  | 192  | 1.00E-16  | 61.3  | 17.9 | 21.7 | hypothetical protein ARALYDRAFT_895209                                      | gbpln | Arabidopsis lyrata   | AT1G73510.1   Symbols:   unknown protein; Has 7 Blast hits to 7 proteins in 2 species: Archae - 0; Bacteria - 0; Metazoa - 0; Fungi - 0; Plants - 7; Viruses - 0; Other Eukaryotes - 0 (source: NCBI BLINK).   chr1:27642651-27643118 REVERSE LENGTH=155                                                                                        | 313  | 155  | 1.00E-11  | 49.5  | 12.8 | 16.0 |
| Rsa1.0_01213.1.g24655.t2 | gb AAC33983.1  contains similarity to reverse transcriptases (Pfam: rvt.hmm, score: 11.19) [Arabidopsis thaliana]                                                                                                                                                                                                                                                   | 1051 | 1633 | 0         | 155.4 | 56.5 | 69.8 | contains similarity to reverse transcriptases (Pfam: rvt.hmm, score: 11.19) | gbpln | Arabidopsis thaliana | AT4G23160.1   Symbols: CRK8   cysteine-rich RLK (RECEPTOR-like protein kinase) 8   chr4:12129485-12134086 FORWARD LENGTH=1262                                                                                                                                                                                                                   | 1051 | 1262 | 1.00E-165 | 120.1 | 27.5 | 37.5 |
| Rsa1.0_01213.1.g24656.t1 | #                                                                                                                                                                                                                                                                                                                                                                   | #    | #    | #         | #     | #    | #    | -                                                                           | ----  | ----                 | #                                                                                                                                                                                                                                                                                                                                               | #    | #    | #         | #     | #    | #    |
| Rsa1.0_01213.1.g24657.t1 | gb EOA30679.1  hypothetical protein CARUB_v10013818mg, partial [Capsella rubella]                                                                                                                                                                                                                                                                                   | 397  | 414  | 0         | 104.3 | 80.6 | 86.1 | hypothetical protein CARUB_v10013818mg, partial                             | gbpln | Capsella rubella     | AT3G25210.1   Symbols:   Tetratricopeptide repeat (TPR)-like superfamily protein   chr3:9180348-9181487 FORWARD LENGTH=379                                                                                                                                                                                                                      | 397  | 379  | 0         | 95.5  | 80.1 | 86.1 |
| Rsa1.0_01213.1.g24658.t1 | #                                                                                                                                                                                                                                                                                                                                                                   | #    | #    | #         | #     | #    | #    | -                                                                           | ----  | ----                 | #                                                                                                                                                                                                                                                                                                                                               | #    | #    | #         | #     | #    | #    |
| Rsa1.0_01213.1.g24659.t1 | gb EOA16322.1  hypothetical protein CARUB_v10004472mg [Capsella rubella]                                                                                                                                                                                                                                                                                            | 488  | 570  | 8.00E-82  | 116.8 | 39.5 | 51.2 | hypothetical protein CARUB_v10004472mg                                      | gbpln | Capsella rubella     | AT5G41690.1   Symbols:   RNA-binding (RRM/RBD/RNP motifs) family protein   chr5:16670126-16674189 REVERSE LENGTH=567                                                                                                                                                                                                                            | 488  | 567  | 3.00E-78  | 116.2 | 37.1 | 49.0 |
| Rsa1.0_01214.1.g24660.t1 | ref NP_565100.1  DNA-3-methyladenine glycosylase I [Arabidopsis thaliana]   gi 14334652 gb AAK59504.1  putative DNA-3-methyladenine glycosylase I [Arabidopsis thaliana]   gi 17104587 gb AAL34182.1  putative DNA-3-methyladenine glycosylase I [Arabidopsis thaliana]   gi 332197550 gb AEE35671.1  putative 3-methyladenine glycosylase I [Arabidopsis thaliana] | 316  | 329  | 1.00E-134 | 104.1 | 82.0 | 88.6 | DNA-3-methyladenine glycosylase I                                           | gbpln | Arabidopsis thaliana | AT1G75090.1   Symbols:   DNA glycosylase superfamily protein   chr1:28187647-28189612 REVERSE LENGTH=329                                                                                                                                                                                                                                        | 316  | 329  | 1.00E-136 | 104.1 | 82.0 | 88.6 |
| Rsa1.0_01214.1.g24661.t1 | gb AAL57684.1  At1g75080/F9E10.7 [Arabidopsis thaliana]   gi 20147315 gb AAM10371.1  At1g75080/F9E10.7 [Arabidopsis thaliana]                                                                                                                                                                                                                                       | 325  | 336  | 1.00E-131 | 103.4 | 91.4 | 93.2 | At1g75080/F9E10.7                                                           | gbpln | Arabidopsis thaliana | AT1G75080.2   Symbols: BZR1   Brassinosteroid signalling positive regulator (BZR1) family protein   chr1:28185709-28187063 FORWARD LENGTH=336                                                                                                                                                                                                   | 325  | 336  | 1.00E-133 | 103.4 | 91.1 | 93.2 |
| Rsa1.0_01214.1.g24662.t1 | ref XP_002889006.1  hypothetical protein ARALYDRAFT_476644 [Arabidopsis lyrata subsp. lyrata]   gi 297334847 gb EFH65265.1  hypothetical protein ARALYDRAFT_476644 [Arabidopsis lyrata subsp. lyrata]                                                                                                                                                               | 228  | 244  | 1.00E-100 | 107.0 | 78.1 | 87.3 | hypothetical protein ARALYDRAFT_476644                                      | gbpln | Arabidopsis lyrata   | AT1G75060.1   Symbols:   unknown protein; BEST Arabidopsis thaliana protein match is: unknown protein (TAIR:AT1G19330.2); Has 104 Blast hits to 104 proteins in 22 species: Archae - 0; Bacteria - 0; Metazoa - 0; Fungi - 0; Plants - 104; Viruses - 0; Other Eukaryotes - 0 (source: NCBI BLINK).   chr1:28181481-28183285 REVERSE LENGTH=242 | 228  | 242  | 1.00E-100 | 106.1 | 76.8 | 85.5 |
| Rsa1.0_01214.1.g24663.t1 | ref XP_002887572.1  hypothetical protein ARALYDRAFT_316436 [Arabidopsis lyrata subsp. lyrata]   gi 297333413 gb EFH63831.1  hypothetical protein ARALYDRAFT_316436 [Arabidopsis lyrata subsp. lyrata]                                                                                                                                                               | 88   | 245  | 3.00E-35  | 278.4 | 83.0 | 88.6 | hypothetical protein ARALYDRAFT_316436                                      | gbpln | Arabidopsis lyrata   | AT1G75050.1   Symbols:   Pathogenesis-related thaumatin superfamily protein   chr1:28180116-28181062 FORWARD LENGTH=246                                                                                                                                                                                                                         | 88   | 246  | 5.00E-37  | 279.5 | 84.1 | 88.6 |



|                          |                                                                                                                                                                                                                                                                                                                                                                                           |     |     |           |       |      |      |                                        |       |                      |                                                                                                                                                                                                                                                                                                                                                                                                                                      |     |     |           |       |      |      |
|--------------------------|-------------------------------------------------------------------------------------------------------------------------------------------------------------------------------------------------------------------------------------------------------------------------------------------------------------------------------------------------------------------------------------------|-----|-----|-----------|-------|------|------|----------------------------------------|-------|----------------------|--------------------------------------------------------------------------------------------------------------------------------------------------------------------------------------------------------------------------------------------------------------------------------------------------------------------------------------------------------------------------------------------------------------------------------------|-----|-----|-----------|-------|------|------|
| Rsa1.0_01214.1.g24664.t1 | refNP_177640.1  thaumatin-like protein 3 [Arabidopsis thaliana]<br>gi 12323901 gb AAG51927.1 AC013258.21 thaumatin-like protein; 28949-28112 [Arabidopsis thaliana]<br>gi 51968828 dbj BAD43106.1  thaumatin-like protein [Arabidopsis thaliana] gi 124301078 gb ABN04791.1  At1g75030 [Arabidopsis thaliana] gi 332197543 gb AEE35664.1  thaumatin-like protein 3 [Arabidopsis thaliana] | 246 | 246 | 1.00E-105 | 100.0 | 78.9 | 86.6 | thaumatin-like protein 3               | gbpln | Arabidopsis thaliana | AT1G75030.1   Symbols: ATLP-3, TLP-3   thaumatin-like protein 3   chr1:28174418-28175255 FORWARD LENGTH=246                                                                                                                                                                                                                                                                                                                          | 246 | 246 | 1.00E-108 | 100.0 | 78.9 | 86.6 |
| Rsa1.0_01214.1.g24665.t1 | refXP_002887572.1  hypothetical protein ARALYDRAFT_316436 [Arabidopsis lyrata subsp. lyrata] gi 297333413 gb EFH63831.1  hypothetical protein ARALYDRAFT_316436 [Arabidopsis lyrata subsp. lyrata]                                                                                                                                                                                        | 231 | 245 | 3.00E-98  | 106.1 | 77.1 | 85.7 | hypothetical protein ARALYDRAFT_316436 | gbpln | Arabidopsis lyrata   | AT1G75030.1   Symbols: ATLP-3, TLP-3   thaumatin-like protein 3   chr1:28174418-28175255 FORWARD LENGTH=246                                                                                                                                                                                                                                                                                                                          | 231 | 246 | 8.00E-99  | 106.5 | 76.2 | 84.4 |
| Rsa1.0_01214.1.g24666.t1 | gb ABD85170.1  hypothetical protein 40.t00057 [Brassica oleracea]                                                                                                                                                                                                                                                                                                                         | 473 | 255 | 4.00E-59  | 53.9  | 28.3 | 34.9 | hypothetical protein 40.t00057         | gbpln | Brassica oleracea    | AT3G47680.1   Symbols:   DNA binding   chr3:17577483-17578391 REVERSE LENGTH=302<br>AT2G13770.1   Symbols:   CONTAINS InterPro DOMAIN/s: Putative harbinger transposase-derived nuclease (InterPro:IPR006912); Has 451 Blast hits to 352 proteins in 33 species: Archae - 0; Bacteria - 0; Metazoa - 28; Fungi - 8; Plants - 388; Viruses - 0; Other Eukaryotes - 27 (source: NCBI BLINK).   chr2:5736603-5737847 FORWARD LENGTH=343 | 473 | 302 | 4.00E-47  | 63.8  | 26.0 | 36.8 |
| Rsa1.0_01214.1.g24667.t1 | gb ABD64939.1  hypothetical protein 24.t00017 [Brassica oleracea]                                                                                                                                                                                                                                                                                                                         | 113 | 442 | 9.00E-33  | 391.2 | 59.3 | 68.1 | hypothetical protein 24.t00017         | gbpln | Brassica oleracea    | AT2G13770.1   Symbols:   CONTAINS InterPro DOMAIN/s: Putative harbinger transposase-derived nuclease (InterPro:IPR006912); Has 451 Blast hits to 352 proteins in 33 species: Archae - 0; Bacteria - 0; Metazoa - 28; Fungi - 8; Plants - 388; Viruses - 0; Other Eukaryotes - 27 (source: NCBI BLINK).   chr2:5736603-5737847 FORWARD LENGTH=343                                                                                     | 113 | 343 | 4.00E-19  | 303.5 | 43.4 | 55.8 |
| Rsa1.0_01214.1.g24668.t1 | #                                                                                                                                                                                                                                                                                                                                                                                         | #   | #   | #         | #     | #    | #    | -                                      | ----  | ----                 | #                                                                                                                                                                                                                                                                                                                                                                                                                                    | #   | #   | #         | #     | #    | #    |
| Rsa1.0_01214.1.g24669.t1 | refNP_177638.2  GTP binding protein [Arabidopsis thaliana] gi 327507752 sp Q6F6B5.2 ARC3_ARATH RecName: Full=Protein ACCUMULATION AND REPLICATION OF CHLOROPLASTS 3; Flags: Precursor gi 332197540 gb AEE35661.1  protein accumulation and replication of chloroplast 3 [Arabidopsis thaliana]                                                                                            | 743 | 741 | 0         | 99.7  | 84.1 | 90.7 | GTP binding protein                    | gbpln | Arabidopsis thaliana | AT1G75010.1   Symbols: ARC3   GTP binding   chr1:28164994-28169941 REVERSE LENGTH=741                                                                                                                                                                                                                                                                                                                                                | 743 | 741 | 0         | 99.7  | 84.1 | 90.7 |
| Rsa1.0_01214.1.g24670.t1 | refXP_002897568.1  GNS1/SUR4 membrane family protein [Arabidopsis lyrata subsp. lyrata] gi 297333409 gb EFH63827.1  GNS1/SUR4 membrane family protein [Arabidopsis lyrata subsp. lyrata]                                                                                                                                                                                                  | 273 | 281 | 1.00E-132 | 102.9 | 88.6 | 93.4 | GNS1/SUR4 membrane family protein      | gbpln | Arabidopsis lyrata   | AT1G75000.1   Symbols:   GNS1/SUR4 membrane protein family   chr1:28163650-28164586 FORWARD LENGTH=281                                                                                                                                                                                                                                                                                                                               | 273 | 281 | 1.00E-133 | 102.9 | 87.9 | 91.9 |
| Rsa1.0_01214.1.g24671.t1 | refXP_002899004.1  zinc finger family protein [Arabidopsis lyrata subsp. lyrata] gi 297334845 gb EFH65263.1  zinc finger family protein [Arabidopsis lyrata subsp. lyrata]                                                                                                                                                                                                                | 132 | 137 | 9.00E-51  | 103.8 | 75.0 | 86.4 | zinc finger family protein             | gbpln | Arabidopsis lyrata   | AT1G74990.1   Symbols:   RING/U-box superfamily protein   chr1:28159837-28160250 REVERSE LENGTH=137                                                                                                                                                                                                                                                                                                                                  | 132 | 137 | 1.00E-51  | 103.8 | 75.0 | 86.4 |

|                          |                                                                                                                                                                                                                                                                                                                                                                                                                                                                                                                                                                                                                                                                                                                                                                                                                                                                                                                                                                                                                                                                                                                                                                                  |     |     |           |       |      |      |                                        |       |                      |                                                                                                                                   |     |     |           |       |      |      |
|--------------------------|----------------------------------------------------------------------------------------------------------------------------------------------------------------------------------------------------------------------------------------------------------------------------------------------------------------------------------------------------------------------------------------------------------------------------------------------------------------------------------------------------------------------------------------------------------------------------------------------------------------------------------------------------------------------------------------------------------------------------------------------------------------------------------------------------------------------------------------------------------------------------------------------------------------------------------------------------------------------------------------------------------------------------------------------------------------------------------------------------------------------------------------------------------------------------------|-----|-----|-----------|-------|------|------|----------------------------------------|-------|----------------------|-----------------------------------------------------------------------------------------------------------------------------------|-----|-----|-----------|-------|------|------|
|                          | ref NP_17635.1  30S ribosomal protein S9 [Arabidopsis thaliana]<br>gi 48428563 sp O9XJ27.1 RR9_ARATH RecName: Full=30S ribosomal protein S9, chloroplastic; Flags: Precursor<br>gi 5882726 gb AAD55279.1 AC008263.10 Identical to gb AB022676 ribosomal protein S9 from Arabidopsis thaliana. ESTs: gb T13861, gb AA389790, gb T42539, gb AA586013, gb AA395093 and gb AA041154 come from this gene [Arabidopsis thaliana]<br>gi 12744979 gb AAK06869.1 AF344318.1 putative ribosomal protein S9 [Arabidopsis thaliana]<br>gi 5456946 db BAA82396.1  ribosomal protein S9 [Arabidopsis thaliana]<br>gi 15010598 gb AAK73958.1  ATg74970/F25A4.6 [Arabidopsis thaliana] gi 15027999 gb AAK76530.1  putative ribosomal protein S9 [Arabidopsis thaliana]<br>gi 20259211 gb AAM14321.1  putative ribosomal protein S9 [Arabidopsis thaliana] gi 21554316 gb AAM63421.1  ribosomal protein S9, putative [Arabidopsis thaliana]<br>gi 51968396 db BAD42890.1  putative ribosomal protein S9 [Arabidopsis thaliana] gi 51969144 db BAD43264.1  putative ribosomal protein S9 [Arabidopsis thaliana]<br>gi 51969266 db BAD43325.1  putative ribosomal protein S9 [Arabidopsis thaliana] | 211 | 208 | 1.00E-95  | 98.6  | 90.0 | 93.4 | 30S ribosomal protein S9               | gbpln | Arabidopsis thaliana | AT1G74970.1   Symbols: RPS9, TWN3   ribosomal protein S9   chr1:28157761-28159202 REVERSE LENGTH=208                              | 211 | 208 | 3.00E-98  | 98.6  | 90.0 | 93.4 |
| Rsa1.0_01214.1.g24672.t1 |                                                                                                                                                                                                                                                                                                                                                                                                                                                                                                                                                                                                                                                                                                                                                                                                                                                                                                                                                                                                                                                                                                                                                                                  |     |     |           |       |      |      |                                        |       |                      |                                                                                                                                   |     |     |           |       |      |      |
| Rsa1.0_01214.1.g24673.t1 | gb AAL91174.1  putative 3-ketoacyl-ACP synthase [Arabidopsis thaliana]                                                                                                                                                                                                                                                                                                                                                                                                                                                                                                                                                                                                                                                                                                                                                                                                                                                                                                                                                                                                                                                                                                           | 542 | 541 | 0         | 99.8  | 90.2 | 93.5 | putative 3-ketoacyl-ACP synthase       | gbpln | Arabidopsis thaliana | AT1G74960.3   Symbols: FAB1   fatty acid biosynthesis 1   chr1:28152564-28155948 REVERSE LENGTH=541                               | 542 | 541 | 0         | 99.8  | 90.4 | 93.7 |
| Rsa1.0_01214.1.g24674.t1 | db BAJ33919.1  unnamed protein product [Thellungiella halophila]                                                                                                                                                                                                                                                                                                                                                                                                                                                                                                                                                                                                                                                                                                                                                                                                                                                                                                                                                                                                                                                                                                                 | 256 | 251 | 3.00E-90  | 98.0  | 73.4 | 82.4 | unnamed protein product                | ----  | ----                 | AT1G74950.1   Symbols: JAZ2, TIFY10B   TIFY domain/Divergent CCT motif family protein   chr1:28148919-28150258 REVERSE LENGTH=249 | 256 | 249 | 1.00E-81  | 97.3  | 69.9 | 80.5 |
| Rsa1.0_01214.1.g24675.t1 | ref NP_565095.1  uncharacterized protein [Arabidopsis thaliana]<br>gi 23306420 gb AAN17437.1  expressed protein [Arabidopsis thaliana]<br>gi 27311889 gb AA000910.1  expressed protein [Arabidopsis thaliana]<br>gi 332197532 gb AEE35653.1  uncharacterized protein AT1G74940 [Arabidopsis thaliana]                                                                                                                                                                                                                                                                                                                                                                                                                                                                                                                                                                                                                                                                                                                                                                                                                                                                            | 223 | 222 | 3.00E-94  | 99.6  | 79.8 | 88.3 | uncharacterized protein                | gbpln | Arabidopsis thaliana | AT1G74940.1   Symbols:   Protein of unknown function (DUF581)   chr1:28146284-28147065 FORWARD LENGTH=222                         | 223 | 222 | 9.00E-97  | 99.6  | 79.8 | 88.3 |
| Rsa1.0_01215.1.g24676.t1 | gb ACG60686.1  En/Spm-related transposon protein [Brassica oleracea var. alboglabra]                                                                                                                                                                                                                                                                                                                                                                                                                                                                                                                                                                                                                                                                                                                                                                                                                                                                                                                                                                                                                                                                                             | 150 | 695 | 1.00E-72  | 463.3 | 85.3 | 92.0 | En/Spm-related transposon protein      | gbpln | Brassica oleracea    | #                                                                                                                                 | #   | #   | #         | #     | #    | #    |
| Rsa1.0_01215.1.g24677.t1 | ref NP_198536.1  RING/U-box domain-containing protein [Arabidopsis thaliana]<br>gi 10178231 db BAB11642.1  unnamed protein product [Arabidopsis thaliana]<br>gi 332006769 gb AED94152.1  RING/U-box domain-containing protein [Arabidopsis thaliana]                                                                                                                                                                                                                                                                                                                                                                                                                                                                                                                                                                                                                                                                                                                                                                                                                                                                                                                             | 204 | 217 | 1.00E-39  | 106.4 | 52.9 | 65.7 | RING/U-box domain-containing protein   | gbpln | Arabidopsis thaliana | AT5G37200.1   Symbols:   RING/U-box superfamily protein   chr5:14727832-14728485 FORWARD LENGTH=217                               | 204 | 217 | 4.00E-42  | 106.4 | 52.9 | 65.7 |
| Rsa1.0_01215.1.g24678.t1 | gb EOA18545.1  hypothetical protein CARUB_v10007102mg [Capsella rubella]                                                                                                                                                                                                                                                                                                                                                                                                                                                                                                                                                                                                                                                                                                                                                                                                                                                                                                                                                                                                                                                                                                         | 208 | 208 | 4.00E-33  | 100.0 | 45.2 | 62.0 | hypothetical protein CARUB_v10007102mg | gbpln | Capsella rubella     | AT5G37200.1   Symbols:   RING/U-box superfamily protein   chr5:14727832-14728485 FORWARD LENGTH=217                               | 208 | 217 | 2.00E-30  | 104.3 | 41.3 | 58.2 |
| Rsa1.0_01215.1.g24679.t1 | gb EOA17626.1  hypothetical protein CARUB_v10005991mg [Capsella rubella]                                                                                                                                                                                                                                                                                                                                                                                                                                                                                                                                                                                                                                                                                                                                                                                                                                                                                                                                                                                                                                                                                                         | 139 | 136 | 2.00E-58  | 97.8  | 80.6 | 92.8 | hypothetical protein CARUB_v10005991mg | gbpln | Capsella rubella     | AT5G37670.1   Symbols:   HSP20-like chaperones superfamily protein   chr5:14969035-14969448 FORWARD LENGTH=137                    | 139 | 137 | 5.00E-59  | 98.6  | 84.2 | 92.1 |
| Rsa1.0_01215.1.g24680.t1 | ref XP_002870553.1  hypothetical protein ARALYDRAFT_915910 [Arabidopsis lyrata subsp. lyrata]<br>gi 297316399 gb EFH46812.1  hypothetical protein ARALYDRAFT_915910 [Arabidopsis lyrata subsp. lyrata]                                                                                                                                                                                                                                                                                                                                                                                                                                                                                                                                                                                                                                                                                                                                                                                                                                                                                                                                                                           | 184 | 184 | 1.00E-101 | 100.0 | 98.9 | 99.5 | hypothetical protein ARALYDRAFT_915910 | gbpln | Arabidopsis lyrata   | AT5G37680.1   Symbols: ATARLA1A, ARLA1A   ADP-ribosylation factor-like A1A   chr5:14969797-14971098 REVERSE LENGTH=184            | 184 | 184 | 1.00E-103 | 100.0 | 97.8 | 98.9 |
| Rsa1.0_01215.1.g24681.t2 | gb EOA18579.1  hypothetical protein CARUB_v10007145mg [Capsella rubella]                                                                                                                                                                                                                                                                                                                                                                                                                                                                                                                                                                                                                                                                                                                                                                                                                                                                                                                                                                                                                                                                                                         | 357 | 357 | 0         | 100.0 | 86.3 | 93.8 | hypothetical protein CARUB_v10007145mg | gbpln | Capsella rubella     | AT5G37690.1   Symbols:   SGNH hydrolase-type esterase superfamily protein   chr5:14973610-14976115 REVERSE LENGTH=356             | 357 | 356 | 0         | 99.7  | 87.1 | 94.1 |
| Rsa1.0_01215.1.g24682.t1 | #                                                                                                                                                                                                                                                                                                                                                                                                                                                                                                                                                                                                                                                                                                                                                                                                                                                                                                                                                                                                                                                                                                                                                                                | #   | #   | #         | #     | #    | #    | -                                      | ----  | ----                 | #                                                                                                                                 | #   | #   | #         | #     | #    | #    |
| Rsa1.0_01215.1.g24683.t1 | #                                                                                                                                                                                                                                                                                                                                                                                                                                                                                                                                                                                                                                                                                                                                                                                                                                                                                                                                                                                                                                                                                                                                                                                | #   | #   | #         | #     | #    | #    | -                                      | ----  | ----                 | #                                                                                                                                 | #   | #   | #         | #     | #    | #    |

|                          |                                                                                                                                                                                                                                                                                                                                                                                                                                                                                                                                         |      |      |           |       |      |      |                                                                           |       |                      |                                                                                                                                                                                                                                                                                                                                                          |      |     |          |       |      |      |
|--------------------------|-----------------------------------------------------------------------------------------------------------------------------------------------------------------------------------------------------------------------------------------------------------------------------------------------------------------------------------------------------------------------------------------------------------------------------------------------------------------------------------------------------------------------------------------|------|------|-----------|-------|------|------|---------------------------------------------------------------------------|-------|----------------------|----------------------------------------------------------------------------------------------------------------------------------------------------------------------------------------------------------------------------------------------------------------------------------------------------------------------------------------------------------|------|-----|----------|-------|------|------|
| Rsa1.0_01215.1.g24684.t1 | dbj BAB08316.1  calmodulin-binding heat-shock protein [Arabidopsis thaliana]                                                                                                                                                                                                                                                                                                                                                                                                                                                            | 442  | 449  | 0         | 101.6 | 88.7 | 94.6 | calmodulin-binding heat-shock protein                                     | gbpln | Arabidopsis thaliana | AT5G37710.1   Symbols:   alpha/beta-Hydrolases superfamily protein   chr5:14979159-14981400 FORWARD LENGTH=436                                                                                                                                                                                                                                           | 442  | 436 | 0        | 98.6  | 88.0 | 93.9 |
| Rsa1.0_01215.1.g24685.t1 | ref NP_198588.2  THO complex subunit 4 [Arabidopsis thaliana] gi 37201990 gb AAQ89610.1  At5g37720 [Arabidopsis thaliana] gi 110735849 dbj BAE99901.1  hypothetical protein [Arabidopsis thaliana] gi 332006839 gb AED94222.1  THO complex subunit 4 [Arabidopsis thaliana]                                                                                                                                                                                                                                                             | 298  | 288  | 8.00E-86  | 96.6  | 75.2 | 80.9 | THO complex subunit 4                                                     | gbpln | Arabidopsis thaliana | AT5G37720.1   Symbols: ALY4   ALWAYS EARLY 4   chr5:14981805-14983978 REVERSE LENGTH=288                                                                                                                                                                                                                                                                 | 298  | 288 | 2.00E-88 | 96.6  | 75.2 | 80.9 |
| Rsa1.0_01215.1.g24686.t2 | ref XP_002870559.1  predicted protein [Arabidopsis lyrata subsp. lyrata] gi 297316395 gb EFH46818.1  predicted protein [Arabidopsis lyrata subsp. lyrata]                                                                                                                                                                                                                                                                                                                                                                               | 378  | 121  | 4.00E-44  | 32.0  | 24.6 | 25.7 | predicted protein                                                         | gbpln | Arabidopsis lyrata   | AT5G37730.1   Symbols:   unknown protein; BEST Arabidopsis thaliana protein match is: unknown protein (TAIR:AT1G23150.1); Has 1807 Blast hits to 1807 proteins in 277 species: Archae - 0; Bacteria - 0; Metazoa - 736; Fungi - 347; Plants - 385; Viruses - 0; Other Eukaryotes - 339 (source: NCBI BLink).   chr5:14986141-14986884 REVERSE LENGTH=182 | 378  | 182 | 3.00E-46 | 48.1  | 23.5 | 25.7 |
| Rsa1.0_01216.1.g24687.t2 | # # # # # # # # - ----                                                                                                                                                                                                                                                                                                                                                                                                                                                                                                                  |      |      |           |       |      |      |                                                                           |       |                      |                                                                                                                                                                                                                                                                                                                                                          |      |     |          |       |      |      |
| Rsa1.0_01216.1.g24688.t1 | ref NP_200294.1  DOMON and dopamine beta-monoxygenase N-terminal domain-containing protein [Arabidopsis thaliana] gi 9758263 dbj BAB08762.1  unnamed protein product [Arabidopsis thaliana] gi 19699059 gb AAL90897.1  AT5g54830/MBG8.9 [Arabidopsis thaliana] gi 27363250 gb AAO11544.1  AT5g54830/MBG8.9 [Arabidopsis thaliana] gi 110742339 dbj BAE99093.1  hypothetical protein [Arabidopsis thaliana] gi 332009162 gb AED96545.1  DOMON and dopamine beta-monoxygenase N-terminal domain-containing protein [Arabidopsis thaliana] | 919  | 907  | 0         | 98.7  | 88.5 | 92.9 | DOMON and dopamine beta-monoxygenase N-terminal domain-containing protein | gbpln | Arabidopsis thaliana | AT5G54830.1   Symbols:   DOMON domain-containing protein / dopamine beta-monoxygenase N-terminal domain-containing protein   chr5:22273394-22276117 FORWARD LENGTH=907                                                                                                                                                                                   | 919  | 907 | 0        | 98.7  | 88.5 | 92.9 |
| Rsa1.0_01216.1.g24689.t1 | gb AAM63660.1  glucose-6-phosphate/phosphate translocator [Arabidopsis thaliana]                                                                                                                                                                                                                                                                                                                                                                                                                                                        | 392  | 388  | 0         | 99.0  | 89.8 | 91.8 | glucose-6-phosphate/phosphate translocator                                | gbpln | Arabidopsis thaliana | AT5G54800.1   Symbols: GPT1, ATGPT1   glucose 6-phosphate/phosphate translocator 1   chr5:22261408-22263562 FORWARD LENGTH=388                                                                                                                                                                                                                           | 392  | 388 | 0        | 99.0  | 90.1 | 92.1 |
| Rsa1.0_01216.1.g24690.t1 | # # # # # # # # - ----                                                                                                                                                                                                                                                                                                                                                                                                                                                                                                                  |      |      |           |       |      |      |                                                                           |       |                      |                                                                                                                                                                                                                                                                                                                                                          |      |     |          |       |      |      |
| Rsa1.0_01216.1.g24691.t1 | gb ABD64940.1  hypothetical protein 24.t00018 [Brassica oleracea]                                                                                                                                                                                                                                                                                                                                                                                                                                                                       | 440  | 380  | 5.00E-56  | 86.4  | 28.2 | 36.1 | hypothetical protein 24.t00018                                            | gbpln | Brassica oleracea    | AT3G47680.1   Symbols:   DNA binding   chr3:17577483-17578391 REVERSE LENGTH=302                                                                                                                                                                                                                                                                         | 440  | 302 | 5.00E-49 | 68.6  | 26.1 | 36.6 |
| Rsa1.0_01216.1.g24692.t1 | ref XP_002866061.1  hypothetical protein ARALYDRAFT_495560 [Arabidopsis lyrata subsp. lyrata] gi 297311896 gb EFH42320.1  hypothetical protein ARALYDRAFT_495560 [Arabidopsis lyrata subsp. lyrata]                                                                                                                                                                                                                                                                                                                                     | 130  | 165  | 4.00E-30  | 126.9 | 60.8 | 70.8 | hypothetical protein ARALYDRAFT_495560                                    | gbpln | Arabidopsis lyrata   | AT5G54790.1   Symbols:   unknown protein; BEST Arabidopsis thaliana protein match is: unknown protein (TAIR:AT1G50930.1); Has 53 Blast hits to 53 proteins in 10 species: Archae - 0; Bacteria - 0; Metazoa - 0; Fungi - 0; Plants - 53; Viruses - 0; Other Eukaryotes - 0 (source: NCBI BLink).   chr5:22254195-22255489 REVERSE LENGTH=165             | 130  | 165 | 1.00E-30 | 126.9 | 62.3 | 73.1 |
| Rsa1.0_01216.1.g24693.t4 | gb AAC33226.1  putative non-LTR retroelement reverse transcriptase [Arabidopsis thaliana]                                                                                                                                                                                                                                                                                                                                                                                                                                               | 1608 | 1529 | 0         | 95.1  | 30.3 | 46.6 | putative non-LTR retroelement reverse transcriptase                       | gbpln | Arabidopsis thaliana | AT1G43760.1   Symbols:   DNase I-like superfamily protein   chr1:16528880-16531065 REVERSE LENGTH=626                                                                                                                                                                                                                                                    | 1608 | 626 | 2.00E-52 | 38.9  | 8.0  | 13.2 |
| Rsa1.0_01217.1.g24694.t1 | # # # # # # # # - ----                                                                                                                                                                                                                                                                                                                                                                                                                                                                                                                  |      |      |           |       |      |      |                                                                           |       |                      |                                                                                                                                                                                                                                                                                                                                                          |      |     |          |       |      |      |
| Rsa1.0_01217.1.g24695.t1 | ref XP_002869942.1  predicted protein [Arabidopsis lyrata subsp. lyrata] gi 297315778 gb EFH46201.1  predicted protein [Arabidopsis lyrata subsp. lyrata]                                                                                                                                                                                                                                                                                                                                                                               | 130  | 211  | 6.00E-21  | 162.3 | 36.9 | 43.1 | predicted protein                                                         | gbpln | Arabidopsis lyrata   | AT4G20280.1   Symbols: TAF11   TBP-associated factor 11   chr4:10953792-10954664 FORWARD LENGTH=210                                                                                                                                                                                                                                                      | 130  | 210 | 4.00E-23 | 161.5 | 36.2 | 42.3 |
| Rsa1.0_01217.1.g24696.t1 | ref NP_176226.3  RNA-binding protein 25 [Arabidopsis thaliana] gi 18377662 gb AAL66981.1  unknown protein [Arabidopsis thaliana] gi 25055015 gb AAN71971.1  unknown protein [Arabidopsis thaliana] gi 332195545 gb AEE33666.1  splicing factor PWI domain-containing protein / RNA recognition motif (RRM)-containing protein [Arabidopsis thaliana]                                                                                                                                                                                    | 841  | 899  | 1.00E-178 | 106.9 | 49.9 | 53.5 | RNA-binding protein 25                                                    | gbpln | Arabidopsis thaliana | AT1G60200.1   Symbols:   splicing factor PWI domain-containing protein / RNA recognition motif (RRM)-containing protein   chr1:22200882-22205241 REVERSE LENGTH=899                                                                                                                                                                                      | 841  | 899 | 0        | 106.9 | 49.9 | 53.5 |

|                          |                                                                                                                                                                                                                                                                                                                                                                                                                                                                                |      |      |           |       |      |      |                                                 |       |                      |                                                                                                                                                      |      |     |           |       |      |      |
|--------------------------|--------------------------------------------------------------------------------------------------------------------------------------------------------------------------------------------------------------------------------------------------------------------------------------------------------------------------------------------------------------------------------------------------------------------------------------------------------------------------------|------|------|-----------|-------|------|------|-------------------------------------------------|-------|----------------------|------------------------------------------------------------------------------------------------------------------------------------------------------|------|-----|-----------|-------|------|------|
| Rsa1.0_01217.1.g24697.t1 | ref[XP_002888147.1] armadillo/beta-catenin repeat family protein [Arabidopsis lyrata subsp. lyrata] gi 297333988 gb EFH64406.1                                                                                                                                                                                                                                                                                                                                                 | 685  | 686  | 0         | 100.1 | 76.5 | 85.8 | armadillo/beta-catenin repeat family protein    | gbpln | Arabidopsis lyrata   | AT1G60190.1   Symbols:   ARM repeat superfamily protein   chr1:22198403-22200463 FORWARD LENGTH=686                                                  | 685  | 686 | 0         | 100.1 | 76.4 | 85.5 |
| Rsa1.0_01217.1.g24698.t1 | gb[EOA35096.1] hypothetical protein CARUB_v10020207mg, partial [Capsella rubella]                                                                                                                                                                                                                                                                                                                                                                                              | 485  | 484  | 0         | 99.8  | 92.8 | 97.1 | hypothetical protein CARUB_v10020207mg, partial | gbpln | Capsella rubella     | AT1G60170.1   Symbols: emb1220   pre-mRNA processing ribonucleoprotein binding region-containing protein   chr1:22193008-22195177 FORWARD LENGTH=485 | 485  | 485 | 0         | 100.0 | 91.1 | 95.7 |
| Rsa1.0_01217.1.g24699.t1 | ref[NP_176586.1] serpin-Z1 [Arabidopsis thaliana] gi 189029934 sp Q9SH52.2 SPZ1_ARAT H RecName: Full=Serpin-Z1; AltName: Full=ArathZ1 gi 332196061 gb AEE34182.1  serpin-Z1 [Arabidopsis thaliana]                                                                                                                                                                                                                                                                             | 392  | 385  | 1.00E-103 | 98.2  | 55.4 | 67.9 | serpin-Z1                                       | gbpln | Arabidopsis thaliana | AT1G64030.1   Symbols: ATSRP3, SRP3   serpin 3   chr1:23752873-23754348 REVERSE LENGTH=385                                                           | 392  | 385 | 1.00E-105 | 98.2  | 55.4 | 67.9 |
| Rsa1.0_01217.1.g24700.t1 | gb AAG51783.1 AC079679.3 reverse transcriptase, putative; 16838-20266 [Arabidopsis thaliana]                                                                                                                                                                                                                                                                                                                                                                                   | 1212 | 1142 | 0         | 94.2  | 30.4 | 40.9 | reverse transcriptase, putative; 16838-20266    | gbpln | Arabidopsis thaliana | AT4G29090.1   Symbols:   Ribonuclease H-like superfamily protein   chr4:14333528-14335255 FORWARD LENGTH=575                                         | 1212 | 575 | 1.00E-74  | 47.4  | 13.9 | 21.9 |
| Rsa1.0_01217.1.g24701.t1 | gb[EOA19642.1] hypothetical protein CARUB_v10003012mg [Capsella rubella]                                                                                                                                                                                                                                                                                                                                                                                                       | 366  | 390  | 4.00E-67  | 106.6 | 46.2 | 61.5 | hypothetical protein CARUB_v10003012mg          | gbpln | Capsella rubella     | AT4G04690.1   Symbols:   F-box and associated interaction domains-containing protein   chr4:2373999-2375135 REVERSE LENGTH=378                       | 366  | 378 | 7.00E-69  | 103.3 | 43.7 | 60.7 |
| Rsa1.0_01217.1.g24702.t1 | ref[NP_567270.1] putative F-box only protein 15 [Arabidopsis thaliana] gi 75265492 sp Q9S9V1.1 FBX15_ARAT H RecName: Full=Putative F-box only protein 15 gi 5732058 gb AAD48957.1 AF149414.6 contains similarity to Pfam family PF00646 (F-box domain); score=11/3, E=0.23, N=1 [Arabidopsis thaliana] gi 7267227 emb CAB80834.1  AT4G04690 [Arabidopsis thaliana] gi 332657012 gb AEE82412.1  putative F-box only protein 15 [Arabidopsis thaliana]                           | 134  | 378  | 3.00E-33  | 282.1 | 56.7 | 68.7 | putative F-box only protein 15                  | gbpln | Arabidopsis thaliana | AT4G04690.1   Symbols:   F-box and associated interaction domains-containing protein   chr4:2373999-2375135 REVERSE LENGTH=378                       | 134  | 378 | 7.00E-36  | 282.1 | 56.7 | 68.7 |
| Rsa1.0_01217.1.g24703.t1 | ref[NP_176222.2] putative potassium transporter 12 [Arabidopsis thaliana] gi 38502862 sp Q80739.2 POT12_ARAT H RecName: Full=Putative potassium transporter 12; Short=ATPOT12 gi 332195542 gb AEE33663.1  putative potassium transporter 12 [Arabidopsis thaliana]                                                                                                                                                                                                             | 768  | 827  | 0         | 107.7 | 86.1 | 88.3 | putative potassium transporter 12               | gbpln | Arabidopsis thaliana | AT1G60160.1   Symbols:   Potassium transporter family protein   chr1:22188330-22191395 REVERSE LENGTH=827                                            | 768  | 827 | 0         | 107.7 | 86.1 | 88.3 |
| Rsa1.0_01218.1.g24704.t1 | ref[XP_002893765.1] hypothetical protein ARALYDRAFT_890918 [Arabidopsis lyrata subsp. lyrata] gi 297339607 gb EFH70024.1  hypothetical protein ARALYDRAFT_890918 [Arabidopsis lyrata subsp. lyrata]                                                                                                                                                                                                                                                                            | 89   | 93   | 2.00E-36  | 104.5 | 86.5 | 94.4 | hypothetical protein ARALYDRAFT_890918          | gbpln | Arabidopsis lyrata   | AT4G10270.1   Symbols:   Wound-responsive family protein   chr4:6374805-6375077 FORWARD LENGTH=90                                                    | 89   | 90  | 3.00E-29  | 101.1 | 70.8 | 83.1 |
| Rsa1.0_01218.1.g24705.t1 | gb[EOA36610.1] hypothetical protein CARUB_v10011824mg [Capsella rubella]                                                                                                                                                                                                                                                                                                                                                                                                       | 653  | 652  | 0         | 99.8  | 88.7 | 92.0 | hypothetical protein CARUB_v10011824mg          | gbpln | Capsella rubella     | AT1G33360.1   Symbols:   ATP-dependent Clp protease   chr1:12092111-12095789 FORWARD LENGTH=656                                                      | 653  | 656 | 0         | 100.5 | 88.5 | 92.3 |
| Rsa1.0_01218.1.g24706.t1 | ref[NP_174603.1] pentatricopeptide repeat-containing protein [Arabidopsis thaliana] gi 75168867 sp Q9C501.1 PPR70_ARAT H RecName: Full=Pentatricopeptide repeat-containing protein At1g33350 gi 12322383 gb AAC51215.1 AC051630.12 unknown protein; 15445-13829 [Arabidopsis thaliana] gi 12322567 gb AAG51281.1 AC027035.4 PPR-repeat protein, putative [Arabidopsis thaliana] gi 332193465 gb AEE31586.1  pentatricopeptide repeat-containing protein [Arabidopsis thaliana] | 518  | 538  | 0         | 103.9 | 85.1 | 92.3 | pentatricopeptide repeat-containing protein     | gbpln | Arabidopsis thaliana | AT1G33350.1   Symbols:   Pentatricopeptide repeat (PPR) superfamily protein   chr1:12090071-12091687 REVERSE LENGTH=538                              | 518  | 538 | 0         | 103.9 | 85.1 | 92.3 |
| Rsa1.0_01218.1.g24707.t1 | ref[XP_002893762.1] predicted protein [Arabidopsis lyrata subsp. lyrata] gi 297339604 gb EFH70021.1  predicted protein [Arabidopsis lyrata subsp. lyrata]                                                                                                                                                                                                                                                                                                                      | 172  | 191  | 3.00E-69  | 111.0 | 84.3 | 93.0 | predicted protein                               | gbpln | Arabidopsis lyrata   | AT4G10250.1   Symbols: ATHSP22.0   HSP20-like chaperones superfamily protein   chr4:6370537-6371124 FORWARD LENGTH=195                               | 172  | 195 | 6.00E-63  | 113.4 | 68.6 | 84.3 |
| Rsa1.0_01218.1.g24708.t1 | gb AAX51974.1  transposase [Pisum sativum]                                                                                                                                                                                                                                                                                                                                                                                                                                     | 386  | 412  | 1.00E-122 | 106.7 | 56.0 | 73.6 | transposase                                     | gbpln | Pisum sativum        | #                                                                                                                                                    | #    | #   | #         | #     | #    |      |

|                          |                                                                                                                                                                                                                                                                                                               |      |      |           |       |      |      |                                                     |       |                      |                                                                                                                                                                                                                                                                                                                                                                                                                                                                     |      |      |           |       |      |      |
|--------------------------|---------------------------------------------------------------------------------------------------------------------------------------------------------------------------------------------------------------------------------------------------------------------------------------------------------------|------|------|-----------|-------|------|------|-----------------------------------------------------|-------|----------------------|---------------------------------------------------------------------------------------------------------------------------------------------------------------------------------------------------------------------------------------------------------------------------------------------------------------------------------------------------------------------------------------------------------------------------------------------------------------------|------|------|-----------|-------|------|------|
| Rsa1.0_01218.1.g24709.t1 | gb AAD20714.1  putative non-LTR retroelement reverse transcriptase [Arabidopsis thaliana]                                                                                                                                                                                                                     | 357  | 1750 | 4.00E-40  | 490.2 | 28.0 | 39.8 | putative non-LTR retroelement reverse transcriptase | gbpln | Arabidopsis thaliana | AT3G31430.1   Symbols:   unknown protein; FUNCTIONS IN: molecular_function unknown; INVOLVED IN: biological_process unknown; LOCATED IN: endomembrane system; BEST Arabidopsis thaliana protein match is: unknown protein (TAIR:AT5G18636.1); Has 295 Blast hits to 291 proteins in 12 species: Archae - 0; Bacteria - 0; Metazoa - 0; Fungi - 0; Plants - 295; Viruses - 0; Other Eukaryotes - 0 (source: NCBI BLink).   chr3:12795861-12796871 REVERSE LENGTH=336 | 357  | 336  | 4.00E-35  | 94.1  | 19.9 | 27.7 |
| Rsa1.0_01219.1.g24710.t1 | gb EOA21965.1  hypothetical protein CARUB_v10002464mg [Capsella rubella]                                                                                                                                                                                                                                      | 219  | 201  | 9.00E-42  | 91.8  | 48.9 | 57.5 | hypothetical protein CARUB_v10002464mg              | gbpln | Capsella rubella     | AT3G05685.1   Symbols:   Cystatin/monellin superfamily protein   chr3:1673780-1674908 REVERSE LENGTH=180                                                                                                                                                                                                                                                                                                                                                            | 219  | 180  | 7.00E-29  | 82.2  | 33.8 | 43.4 |
| Rsa1.0_01219.1.g24711.t2 | ref NP_192270.4  metallo-beta-lactamase domain-containing protein [Arabidopsis thaliana]   gi 332656944 gb AE82344.1  metallo-beta-lactamase domain-containing protein [Arabidopsis thaliana]                                                                                                                 | 307  | 303  | 1.00E-116 | 98.7  | 66.4 | 71.3 | metallo-beta-lactamase domain-containing protein    | gbpln | Arabidopsis thaliana | AT4G03610.1   Symbols:   Metallo-hydrolase/oxidoreductase superfamily protein   chr4:1605039-1606917 FORWARD LENGTH=303                                                                                                                                                                                                                                                                                                                                             | 307  | 303  | 1.00E-118 | 98.7  | 66.4 | 71.3 |
| Rsa1.0_01219.1.g24712.t1 | ref NP_192271.1  myosin heavy chain-like protein [Arabidopsis thaliana]   gi 4263049 gb AAD15318.1  hypothetical protein [Arabidopsis thaliana]   gi 7270685 emb CAB77847.1  hypothetical protein [Arabidopsis thaliana]   gi 332656946 gb AEE82346.1  myosin heavy chain-like protein [Arabidopsis thaliana] | 307  | 342  | 1.00E-129 | 111.4 | 78.2 | 86.6 | myosin heavy chain-like protein                     | gbpln | Arabidopsis thaliana | AT4G03620.1   Symbols:   myosin heavy chain-related   chr4:1607040-1608665 REVERSE LENGTH=342                                                                                                                                                                                                                                                                                                                                                                       | 307  | 342  | 1.00E-132 | 111.4 | 78.2 | 86.6 |
| Rsa1.0_01219.1.g24713.t1 | gb AAD19773.1  putative retroelement pol polyprotein [Arabidopsis thaliana]                                                                                                                                                                                                                                   | 1169 | 1335 | 0         | 114.2 | 53.4 | 68.7 | putative retroelement pol polyprotein               | gbpln | Arabidopsis thaliana | AT4G23160.1   Symbols: CRK8   cysteine-rich RLK (RECEPTOR-like protein kinase) 8   chr4:12129485-12134086 FORWARD LENGTH=1262                                                                                                                                                                                                                                                                                                                                       | 1169 | 1262 | 1.00E-58  | 108.0 | 12.2 | 19.3 |
| Rsa1.0_01219.1.g24714.t1 | ref XP_002874843.1  hypothetical protein ARALYDRAFT_911810 [Arabidopsis lyrata subsp. lyrata]   gi 297320680 gb EFH51102.1  hypothetical protein ARALYDRAFT_911810 [Arabidopsis lyrata subsp. lyrata]                                                                                                         | 320  | 610  | 1.00E-121 | 190.6 | 65.3 | 74.7 | hypothetical protein ARALYDRAFT_911810              | gbpln | Arabidopsis lyrata   | AT4G05460.1   Symbols:   RNI-like superfamily protein   chr4:2761106-2762400 REVERSE LENGTH=302                                                                                                                                                                                                                                                                                                                                                                     | 320  | 302  | 1.00E-95  | 94.4  | 57.5 | 70.9 |
| Rsa1.0_01219.1.g24715.t1 | gb EOA21150.1  hypothetical protein CARUB_v10001497mg [Capsella rubella]                                                                                                                                                                                                                                      | 296  | 315  | 4.00E-92  | 106.4 | 60.1 | 70.9 | hypothetical protein CARUB_v10001497mg              | gbpln | Capsella rubella     | AT4G05460.1   Symbols:   RNI-like superfamily protein   chr4:2761106-2762400 REVERSE LENGTH=302                                                                                                                                                                                                                                                                                                                                                                     | 296  | 302  | 2.00E-91  | 102.0 | 60.5 | 72.6 |
| Rsa1.0_01219.1.g24716.t1 | ref XP_002874843.1  hypothetical protein ARALYDRAFT_911810 [Arabidopsis lyrata subsp. lyrata]   gi 297320680 gb EFH51102.1  hypothetical protein ARALYDRAFT_911810 [Arabidopsis lyrata subsp. lyrata]                                                                                                         | 108  | 610  | 1.00E-25  | 564.8 | 54.6 | 61.1 | hypothetical protein ARALYDRAFT_911810              | gbpln | Arabidopsis lyrata   | AT4G05475.1   Symbols:   RNI-like superfamily protein   chr4:2765962-2767957 REVERSE LENGTH=309                                                                                                                                                                                                                                                                                                                                                                     | 108  | 309  | 2.00E-28  | 286.1 | 51.9 | 59.3 |
| Rsa1.0_01219.1.g24717.t1 | gb AAG51783.1 AC079679_3 reverse transcriptase, putative; 16838-20266 [Arabidopsis thaliana]   ref XP_002874843.1  hypothetical protein ARALYDRAFT_911810 [Arabidopsis lyrata subsp. lyrata]   gi 297320680 gb EFH51102.1  hypothetical protein ARALYDRAFT_911810 [Arabidopsis lyrata subsp. lyrata]          | 1917 | 1142 | 0         | 59.6  | 27.7 | 37.1 | reverse transcriptase, putative; 16838-20266        | gbpln | Arabidopsis thaliana | AT4G29090.1   Symbols:   Ribonuclease H-like superfamily protein   chr4:14333528-14335255 FORWARD LENGTH=575                                                                                                                                                                                                                                                                                                                                                        | 1917 | 575  | 1.00E-73  | 30.0  | 8.8  | 14.6 |
| Rsa1.0_01219.1.g24718.t1 | ref XP_002874843.1  hypothetical protein ARALYDRAFT_911810 [Arabidopsis lyrata subsp. lyrata]   gi 297320680 gb EFH51102.1  hypothetical protein ARALYDRAFT_911810 [Arabidopsis lyrata subsp. lyrata]                                                                                                         | 283  | 610  | 1.00E-110 | 215.5 | 69.3 | 78.8 | hypothetical protein ARALYDRAFT_911810              | gbpln | Arabidopsis lyrata   | AT4G05460.1   Symbols:   RNI-like superfamily protein   chr4:2761106-2762400 REVERSE LENGTH=302                                                                                                                                                                                                                                                                                                                                                                     | 283  | 302  | 2.00E-88  | 106.7 | 56.9 | 67.8 |
| Rsa1.0_01219.1.g24719.t1 | gb EOA21150.1  hypothetical protein CARUB_v10001497mg [Capsella rubella]                                                                                                                                                                                                                                      | 336  | 315  | 3.00E-98  | 93.8  | 58.6 | 71.1 | hypothetical protein CARUB_v10001497mg              | gbpln | Capsella rubella     | AT4G05460.1   Symbols:   RNI-like superfamily protein   chr4:2761106-2762400 REVERSE LENGTH=302                                                                                                                                                                                                                                                                                                                                                                     | 336  | 302  | 1.00E-89  | 89.9  | 53.0 | 60.4 |
| Rsa1.0_01219.1.g24720.t2 | gb AAM62925.1  MFDX2 precursor [Arabidopsis thaliana]                                                                                                                                                                                                                                                         | 151  | 197  | 1.00E-18  | 130.5 | 29.1 | 30.5 | MFDX2 precursor                                     | gbpln | Arabidopsis thaliana | AT4G05450.1   Symbols: ATMFDX1, MFDX1   mitochondrial ferredoxin 1   chr4:2759048-2760634 FORWARD LENGTH=197                                                                                                                                                                                                                                                                                                                                                        | 151  | 197  | 4.00E-21  | 130.5 | 29.1 | 30.5 |
| Rsa1.0_01219.1.g24721.t1 | gb EOA21150.1  hypothetical protein CARUB_v10001497mg [Capsella rubella]                                                                                                                                                                                                                                      | 293  | 315  | 1.00E-95  | 107.5 | 61.4 | 72.7 | hypothetical protein CARUB_v10001497mg              | gbpln | Capsella rubella     | AT4G05460.1   Symbols:   RNI-like superfamily protein   chr4:2761106-2762400 REVERSE LENGTH=302                                                                                                                                                                                                                                                                                                                                                                     | 293  | 302  | 1.00E-88  | 103.1 | 60.8 | 69.3 |
| Rsa1.0_01219.1.g24722.t1 | #                                                                                                                                                                                                                                                                                                             | #    | #    | #         | #     | #    | #    | -                                                   | ----  | ----                 | AT4G05450.1   Symbols: ATMFDX1, MFDX1   mitochondrial ferredoxin 1   chr4:2759048-2760634 FORWARD LENGTH=197                                                                                                                                                                                                                                                                                                                                                        | 70   | 197  | 2.00E-11  | 281.4 | 45.7 | 51.4 |
| Rsa1.0_01220.1.g24723.t1 | #                                                                                                                                                                                                                                                                                                             | #    | #    | #         | #     | #    | #    | -                                                   | ----  | ----                 | AT1G09210.1   Symbols: CRT1b, AtCRT1b   calreticulin 1b   chr1:2973217-2976655 REVERSE LENGTH=424                                                                                                                                                                                                                                                                                                                                                                   | 95   | 424  | 4.00E-11  | 446.3 | 32.6 | 33.7 |

|                          |                                                                                                                                                                                                                                                                                                                                                                                                                                                                                                                                                                                                                                                                                                                                                                                |      |      |           |       |      |      |                                                       |       |                      |                                                                                                                                     |      |      |           |       |      |      |
|--------------------------|--------------------------------------------------------------------------------------------------------------------------------------------------------------------------------------------------------------------------------------------------------------------------------------------------------------------------------------------------------------------------------------------------------------------------------------------------------------------------------------------------------------------------------------------------------------------------------------------------------------------------------------------------------------------------------------------------------------------------------------------------------------------------------|------|------|-----------|-------|------|------|-------------------------------------------------------|-------|----------------------|-------------------------------------------------------------------------------------------------------------------------------------|------|------|-----------|-------|------|------|
| Rsa1.0_01220.1.g24724.t1 | gb AAG33975.1 AF250961.1 methionine aminopeptidase-like protein [Arabidopsis thaliana]                                                                                                                                                                                                                                                                                                                                                                                                                                                                                                                                                                                                                                                                                         | 329  | 369  | 1.00E-29  | 112.2 | 19.5 | 19.5 | methionine aminopeptidase-like protein                | gbpln | Arabidopsis thaliana | AT1G13270.1   Symbols: MAP1C, MAP1B   methionine aminopeptidase 1B   chr1:4544999-4547155 FORWARD LENGTH=369                        | 329  | 369  | 2.00E-31  | 112.2 | 18.8 | 19.5 |
| Rsa1.0_01220.1.g24725.t1 | ref NP_199923.1  Fe superoxide dismutase 2 [Arabidopsis thaliana] gi 75264241 sp O9LU64.1 SODF2_ARAT H RecName: Full=Superoxide dismutase [Fe] 2, chloroplastic; AltName: Full=Protein ALBINO OR PALE GREEN 8; AltName: Full=Protein FE SUPEROXIDE DISMUTASE 2; Flags: Precursor gi 8843846 dbj BAA97372.1  unnamed protein product [Arabidopsis thaliana] gi 21537292 gb AAM61633.1  Fe-superoxide dismutase precursor [Arabidopsis thaliana] gi 28393352 gb AAO42100.1  putative iron superoxide dismutase [Arabidopsis thaliana] gi 28827610 gb AAO50649.1  putative iron superoxide dismutase [Arabidopsis thaliana] gi 110737010 dbj BAF00460.1  hypothetical protein [Arabidopsis thaliana] gi 332008651 gb AED96034.1  Fe superoxide dismutase 2 [Arabidopsis thaliana] | 298  | 305  | 1.00E-148 | 102.3 | 85.2 | 89.3 | Fe superoxide dismutase 2                             | gbpln | Arabidopsis thaliana | AT5G51100.1   Symbols: FSD2   Fe superoxide dismutase 2   chr5:20773357-20775635 REVERSE LENGTH=305                                 | 298  | 305  | 1.00E-150 | 102.3 | 85.2 | 89.3 |
| Rsa1.0_01220.1.g24726.t1 | gb AFA44307.1  FRIGIDA-like protein [Brassica napus]                                                                                                                                                                                                                                                                                                                                                                                                                                                                                                                                                                                                                                                                                                                           | 604  | 583  | 0         | 96.5  | 76.7 | 83.8 | FRIGIDA-like protein                                  | gbpln | Brassica napus       | AT4G00650.1   Symbols: FRI, FLA   FRIGIDA-like protein   chr4:269026-270363 FORWARD LENGTH=314                                      | 604  | 314  | 9.00E-84  | 52.0  | 27.6 | 34.4 |
| Rsa1.0_01220.1.g24727.t1 | db BAJ34087.1  unnamed protein product [Thellungiella halophila]                                                                                                                                                                                                                                                                                                                                                                                                                                                                                                                                                                                                                                                                                                               | 933  | 950  | 0         | 101.8 | 91.0 | 94.9 | unnamed protein product                               | ----  | ----                 | AT5G51070.1   Symbols: ERD1, CLPD, SAG15   Clp ATPase   chr5:20764479-20768481 FORWARD LENGTH=945                                   | 933  | 945  | 0         | 101.3 | 90.6 | 94.2 |
| Rsa1.0_01220.1.g24728.t1 | ref XP_002865839.1  hypothetical protein ARALYDRAFT_495172 [Arabidopsis lyrata subsp. lyrata] gi 297311674 gb EFH42098.1  hypothetical protein ARALYDRAFT_495172 [Arabidopsis lyrata subsp. lyrata]                                                                                                                                                                                                                                                                                                                                                                                                                                                                                                                                                                            | 917  | 906  | 0         | 98.8  | 91.7 | 95.4 | hypothetical protein ARALYDRAFT_495172                | gbpln | Arabidopsis lyrata   | AT5G51060.1   Symbols: RHD2, ATRBOHC, RBOHC   NADPH/respiratory burst oxidase protein D   chr5:20757484-20762175 REVERSE LENGTH=905 | 917  | 905  | 0         | 98.7  | 91.6 | 95.2 |
| Rsa1.0_01220.1.g24729.t1 | gb AFJ66164.1  hypothetical protein 11M19.8 [Arabidopsis halleri]                                                                                                                                                                                                                                                                                                                                                                                                                                                                                                                                                                                                                                                                                                              | 310  | 314  | 1.00E-168 | 101.3 | 92.3 | 96.8 | hypothetical protein 11M19.8                          | gbpln | Arabidopsis halleri  | AT5G51030.1   Symbols:   NAD(P)-binding Rossmann-fold superfamily protein   chr5:20747862-20749352 REVERSE LENGTH=314               | 310  | 314  | 1.00E-171 | 101.3 | 92.3 | 96.5 |
| Rsa1.0_01220.1.g24730.t1 | #                                                                                                                                                                                                                                                                                                                                                                                                                                                                                                                                                                                                                                                                                                                                                                              | #    | #    | #         | #     | #    | -    | ----                                                  | ----  | ----                 | #                                                                                                                                   | #    | #    | #         | #     | #    | #    |
| Rsa1.0_01220.1.g24731.t1 | gb EOA26503.1  hypothetical protein CARUB_v10022552mg [Capsella rubella]                                                                                                                                                                                                                                                                                                                                                                                                                                                                                                                                                                                                                                                                                                       | 1735 | 1043 | 0         | 60.1  | 28.4 | 31.2 | hypothetical protein CARUB_v10022552mg                | gbpln | Capsella rubella     | AT2G31660.1   Symbols: SAD2, URM9   ARM repeat superfamily protein   chr2:13464519-13471353 FORWARD LENGTH=1040                     | 1735 | 1040 | 0         | 59.9  | 27.8 | 30.8 |
| Rsa1.0_01220.1.g24732.t1 | #                                                                                                                                                                                                                                                                                                                                                                                                                                                                                                                                                                                                                                                                                                                                                                              | #    | #    | #         | #     | #    | -    | ----                                                  | ----  | ----                 | #                                                                                                                                   | #    | #    | #         | #     | #    | #    |
| Rsa1.0_01220.1.g24733.t1 | ref NP_199903.1  armadillo/beta-catenin-like repeat-containing protein [Arabidopsis thaliana] gi 9758237 dbj BAB08736.1  unnamed protein product [Arabidopsis thaliana] gi 58652072 gb AAW80861.1  At5g50900 [Arabidopsis thaliana] gi 190576485 gb ACE79043.1  At5g50900 [Arabidopsis thaliana] gi 332008624 gb AED96007.1  armadillo/beta-catenin-like repeat-containing protein [Arabidopsis thaliana]                                                                                                                                                                                                                                                                                                                                                                      | 553  | 555  | 0         | 100.4 | 75.9 | 88.1 | armadillo/beta-catenin-like repeat-containing protein | gbpln | Arabidopsis thaliana | AT5G50900.1   Symbols:   ARM repeat superfamily protein   chr5:20705051-20706718 REVERSE LENGTH=555                                 | 553  | 555  | 0         | 100.4 | 75.9 | 88.1 |
| Rsa1.0_01220.1.g24734.t2 | ref XP_002865827.1  ubiquitin-conjugating enzyme 26 [Arabidopsis lyrata subsp. lyrata] gi 297311662 gb EFH42086.1  ubiquitin-conjugating enzyme 26 [Arabidopsis lyrata subsp. lyrata]                                                                                                                                                                                                                                                                                                                                                                                                                                                                                                                                                                                          | 187  | 192  | 3.00E-98  | 102.7 | 93.0 | 98.9 | ubiquitin-conjugating enzyme 26                       | gbpln | Arabidopsis lyrata   | AT5G50870.1   Symbols: UBC27   ubiquitin-conjugating enzyme 27   chr5:20699626-20700998 REVERSE LENGTH=192                          | 187  | 192  | 1.00E-100 | 102.7 | 92.5 | 97.9 |
| Rsa1.0_01220.1.g24735.t1 | ref NP_199899.1  protein kinase family protein [Arabidopsis thaliana] gi 8953767 dbj BAA98122.1  cyclin-dependent protein kinase-like [Arabidopsis thaliana] gi 332008619 gb AED96002.1  protein kinase family protein [Arabidopsis thaliana]                                                                                                                                                                                                                                                                                                                                                                                                                                                                                                                                  | 578  | 580  | 0         | 100.3 | 81.0 | 86.2 | protein kinase family protein                         | gbpln | Arabidopsis thaliana | AT5G50860.1   Symbols:   Protein kinase superfamily protein   chr5:20693778-20696983 REVERSE LENGTH=580                             | 578  | 580  | 0         | 100.3 | 81.0 | 86.2 |
| Rsa1.0_01220.1.g24736.t1 | db BAJ34206.1  unnamed protein product [Thellungiella halophila]                                                                                                                                                                                                                                                                                                                                                                                                                                                                                                                                                                                                                                                                                                               | 367  | 366  | 0         | 99.7  | 97.8 | 98.9 | unnamed protein product                               | ----  | ----                 | AT5G50850.1   Symbols: MAB1   Transketolase family protein   chr5:20689671-20692976 FORWARD LENGTH=363                              | 367  | 363  | 0         | 98.9  | 95.6 | 97.8 |

|                          |                                                                                                                                                                                                       |      |      |           |       |      |      |                                                     |       |                      |                                                                                                                                                                                                                                                                                                                                                                                                                                                                 |      |     |           |       |      |      |
|--------------------------|-------------------------------------------------------------------------------------------------------------------------------------------------------------------------------------------------------|------|------|-----------|-------|------|------|-----------------------------------------------------|-------|----------------------|-----------------------------------------------------------------------------------------------------------------------------------------------------------------------------------------------------------------------------------------------------------------------------------------------------------------------------------------------------------------------------------------------------------------------------------------------------------------|------|-----|-----------|-------|------|------|
| Rsa1.0_01220.1.g24737.t1 | gb[EOA14605.1] hypothetical protein CARUB_v10027856mg [Capsella rubella]                                                                                                                              | 410  | 406  | 1.00E-178 | 99.0  | 83.7 | 91.0 | hypothetical protein CARUB_v10027856mg              | gbpln | Capsella rubella     | AT5G50840.1   Symbols:   CONTAINS InterPro DOMAIN/s: Taxilin (InterPro:IPR019132); Has 30201 Blast hits to 17322 proteins in 780 species: Archae - 12; Bacteria - 1396; Metazoa - 17338; Fungi - 3422; Plants - 5037; Viruses - 0; Other Eukaryotes - 2996 (source: NCBI BLink).   chr5:20685903-20688739 FORWARD LENGTH=404                                                                                                                                    | 410  | 404 | 1.00E-176 | 98.5  | 83.2 | 89.8 |
| Rsa1.0_01220.1.g24738.t1 | gb[EOA14430.1] hypothetical protein CARUB_v10027633mg [Capsella rubella]                                                                                                                              | 278  | 268  | 3.00E-86  | 96.4  | 68.7 | 77.7 | hypothetical protein CARUB_v10027633mg              | gbpln | Capsella rubella     | AT5G50830.2   Symbols:   unknown protein; Has 4750 Blast hits to 3160 proteins in 341 species: Archae - 14; Bacteria - 239; Metazoa - 1329; Fungi - 394; Plants - 197; Viruses - 79; Other Eukaryotes - 2498 (source: NCBI BLink).   chr5:20683452-20684549 FORWARD LENGTH=282                                                                                                                                                                                  | 278  | 282 | 1.00E-82  | 101.4 | 69.8 | 80.6 |
| Rsa1.0_01220.1.g24739.t2 | gb[AAC33226.1] putative non-LTR retroelement reverse transcriptase [Arabidopsis thaliana]                                                                                                             | 1633 | 1529 | 1.00E-170 | 93.6  | 27.1 | 41.6 | putative non-LTR retroelement reverse transcriptase | gbpln | Arabidopsis thaliana | AT1G43760.1   Symbols:   DNase I-like superfamily protein   chr1:16528880-16531065 REVERSE LENGTH=626                                                                                                                                                                                                                                                                                                                                                           | 1633 | 626 | 4.00E-62  | 38.3  | 8.2  | 13.7 |
| Rsa1.0_01220.1.g24740.t1 | gb[EOA14264.1] hypothetical protein CARUB_v10027424mg, partial [Capsella rubella]                                                                                                                     | 75   | 103  | 3.00E-26  | 137.3 | 76.0 | 89.3 | hypothetical protein CARUB_v10027424mg, partial     | gbpln | Capsella rubella     | AT5G50810.1   Symbols: TIM8   translocase inner membrane subunit 8   chr5:20675875-20676505 REVERSE LENGTH=77                                                                                                                                                                                                                                                                                                                                                   | 75   | 77  | 2.00E-22  | 102.7 | 72.0 | 88.0 |
| Rsa1.0_01220.1.g24741.t1 | ref[XP_002865823.1] nodulin MtN3 family protein [Arabidopsis lyrata subsp. lyrata]   gi 297311658 gb EFH42082.1  nodulin MtN3 family protein [Arabidopsis lyrata subsp. lyrata]                       | 289  | 289  | 1.00E-140 | 100.0 | 84.8 | 91.7 | nodulin MtN3 family protein                         | gbpln | Arabidopsis lyrata   | AT5G50790.1   Symbols: SWEET10, ASWEET10   Nodulin MN3 family protein   chr5:20656461-20657827 REVERSE LENGTH=289                                                                                                                                                                                                                                                                                                                                               | 289  | 289 | 1.00E-142 | 100.0 | 84.4 | 92.0 |
| Rsa1.0_01220.1.g24742.t1 | ref[XP_002864076.1] hypothetical protein ARALYDRAFT_495140 [Arabidopsis lyrata subsp. lyrata]   gi 297309911 gb EFH40335.1  hypothetical protein ARALYDRAFT_495140 [Arabidopsis lyrata subsp. lyrata] | 759  | 804  | 0         | 105.9 | 75.1 | 84.6 | hypothetical protein ARALYDRAFT_495140              | gbpln | Arabidopsis lyrata   | AT5G50780.1   Symbols:   Histidine kinase-, DNA gyrase B-, and HSP90-like ATPase family protein   chr5:20650269-20654948 FORWARD LENGTH=819                                                                                                                                                                                                                                                                                                                     | 759  | 819 | 0         | 107.9 | 74.2 | 84.8 |
| Rsa1.0_01220.1.g24743.t1 | gb[EOA14070.1] hypothetical protein CARUB_v10027207mg [Capsella rubella]                                                                                                                              | 179  | 184  | 8.00E-51  | 102.8 | 67.0 | 79.3 | hypothetical protein CARUB_v10027207mg              | gbpln | Capsella rubella     | AT5G50760.1   Symbols:   SAUR-like auxin-responsive protein family   chr5:20644780-20645331 FORWARD LENGTH=183                                                                                                                                                                                                                                                                                                                                                  | 179  | 183 | 5.00E-51  | 102.2 | 68.7 | 81.6 |
| Rsa1.0_01221.1.g24744.t1 | gb[EOA33975.1] hypothetical protein CARUB_v10021470mg [Capsella rubella]                                                                                                                              | 682  | 688  | 0         | 100.9 | 88.4 | 94.4 | hypothetical protein CARUB_v10021470mg              | gbpln | Capsella rubella     | AT1G71460.1   Symbols:   Pentatricopeptide repeat (PPR-like) superfamily protein   chr1:26928247-26930316 REVERSE LENGTH=689                                                                                                                                                                                                                                                                                                                                    | 682  | 689 | 0         | 101.0 | 87.4 | 93.4 |
| Rsa1.0_01221.1.g24745.t1 | gb[EOA34774.1] hypothetical protein CARUB_v10022349mg [Capsella rubella]                                                                                                                              | 183  | 182  | 4.00E-82  | 99.5  | 83.6 | 89.1 | hypothetical protein CARUB_v10022349mg              | gbpln | Capsella rubella     | AT1G71450.1   Symbols:   Integrase-type DNA-binding superfamily protein   chr1:26927088-26927639 FORWARD LENGTH=183                                                                                                                                                                                                                                                                                                                                             | 183  | 183 | 2.00E-78  | 100.0 | 78.7 | 85.2 |
| Rsa1.0_01221.1.g24746.t1 | ref[XP_002888837.1] hypothetical protein ARALYDRAFT_476275 [Arabidopsis lyrata subsp. lyrata]   gi 297334678 gb EFH65096.1  hypothetical protein ARALYDRAFT_476275 [Arabidopsis lyrata subsp. lyrata] | 526  | 531  | 0         | 101.0 | 82.7 | 91.1 | hypothetical protein ARALYDRAFT_476275              | gbpln | Arabidopsis lyrata   | AT1G71440.1   Symbols: PFI, TFC E   tubulin folding cofactor E / Pfifferling (PFI)   chr1:26921271-26924373 REVERSE LENGTH=531                                                                                                                                                                                                                                                                                                                                  | 526  | 531 | 0         | 101.0 | 82.7 | 90.1 |
| Rsa1.0_01221.1.g24747.t1 | ref[XP_002887373.1] hypothetical protein ARALYDRAFT_894991 [Arabidopsis lyrata subsp. lyrata]   gi 297333214 gb EFH63632.1  hypothetical protein ARALYDRAFT_894991 [Arabidopsis lyrata subsp. lyrata] | 141  | 163  | 2.00E-16  | 115.6 | 39.7 | 46.8 | hypothetical protein ARALYDRAFT_894991              | gbpln | Arabidopsis lyrata   | AT1G71430.1   Symbols:   unknown protein; FUNCTIONS IN: molecular_function unknown; INVOLVED IN: biological_process unknown; LOCATED IN: cellular_component unknown; EXPRESSED IN: 23 plant structures; EXPRESSED DURING: 13 growth stages; Has 64 Blast hits to 64 proteins in 28 species: Archae - 0; Bacteria - 0; Metazoa - 14; Fungi - 6; Plants - 42; Viruses - 0; Other Eukaryotes - 2 (source: NCBI BLink).   chr1:26920564-26921058 FORWARD LENGTH=164 | 141  | 164 | 1.00E-15  | 116.3 | 55.3 | 68.1 |
| Rsa1.0_01221.1.g24748.t1 | gb[EOA33249.1] hypothetical protein CARUB_v10021914mg [Capsella rubella]                                                                                                                              | 1647 | 914  | 0         | 55.5  | 48.9 | 50.9 | hypothetical protein CARUB_v10021914mg              | gbpln | Capsella rubella     | AT1G71410.1   Symbols:   ARM repeat superfamily protein   chr1:26913070-26917515 REVERSE LENGTH=909                                                                                                                                                                                                                                                                                                                                                             | 1647 | 909 | 0         | 55.2  | 49.1 | 51.1 |
| Rsa1.0_01221.1.g24749.t1 | ref[XP_002887372.1] hypothetical protein ARALYDRAFT_476271 [Arabidopsis lyrata subsp. lyrata]   gi 297333213 gb EFH63631.1  hypothetical protein ARALYDRAFT_476271 [Arabidopsis lyrata subsp. lyrata] | 797  | 832  | 0         | 104.4 | 66.5 | 77.8 | hypothetical protein ARALYDRAFT_476271              | gbpln | Arabidopsis lyrata   | AT1G71400.1   Symbols: AtRLP12, RLP12   receptor like protein 12   chr1:26909905-26912448 FORWARD LENGTH=847                                                                                                                                                                                                                                                                                                                                                    | 797  | 847 | 0         | 106.3 | 64.6 | 76.4 |

|                          |                                                                                                                                                                                                                                                                                                                                                                                                                                                              |      |      |          |        |      |      |                                                            |       |                      |                                                                                                                                   |      |      |           |        |      |      |
|--------------------------|--------------------------------------------------------------------------------------------------------------------------------------------------------------------------------------------------------------------------------------------------------------------------------------------------------------------------------------------------------------------------------------------------------------------------------------------------------------|------|------|----------|--------|------|------|------------------------------------------------------------|-------|----------------------|-----------------------------------------------------------------------------------------------------------------------------------|------|------|-----------|--------|------|------|
| Rsa1.0_01221.1.g24750.t1 | ref XP_002887372.1  hypothetical protein ARALYDRAFT_476271 [Arabidopsis lyrata subsp. lyrata] gi 297333213 gb EFH63631.1                                                                                                                                                                                                                                                                                                                                     | 814  | 832  | 0        | 102.2  | 64.6 | 76.0 | hypothetical protein ARALYDRAFT_476271                     | gbpln | Arabidopsis lyrata   | AT1G71400.1   Symbols: AtRLP12, RLP12   receptor like protein 12   chr1:26909905-26912448 FORWARD LENGTH=847                      | 814  | 847  | 0         | 104.1  | 62.8 | 75.7 |
| Rsa1.0_01221.1.g24751.t1 | #                                                                                                                                                                                                                                                                                                                                                                                                                                                            | #    | #    | #        | #      | #    | #    | -                                                          | ----  | ----                 | #                                                                                                                                 | #    | #    | #         | #      | #    |      |
| Rsa1.0_01221.1.g24752.t1 | ref NP_177294.1  endoglucanase 9 [Arabidopsis thaliana] gi 75169715 sp Q9C9H5.1 GUN9_ARATH RecName: Full=Endoglucanase 9, AltName: Full=Cellulase 3, Short=AtCEL3; AltName: Full=Endo-1,4-beta glucanase 9; Flags: Precursor gi 12323721 gb AAG51817.1 AC016163.6 putative beta-glucanase; 74324-76084 [Arabidopsis thaliana] gi 11074386 gb ABH04566.1  At1g71380 [Arabidopsis thaliana] gi 332197074 gb AEE35195.1  endoglucanase 9 [Arabidopsis thaliana] | 484  | 484  | 0        | 100.0  | 90.1 | 95.0 | endoglucanase 9                                            | gbpln | Arabidopsis thaliana | AT1G71380.1   Symbols: ATGH9B3, ATCEL3, CEL3   cellulase 3   chr1:26899989-26901749 REVERSE LENGTH=484                            | 484  | 484  | 0         | 100.0  | 90.1 | 95.0 |
| Rsa1.0_01221.1.g24753.t1 | gb EOA34941.1  hypothetical protein CARUB_v10020025mg [Capsella rubella]                                                                                                                                                                                                                                                                                                                                                                                     | 561  | 592  | 0        | 105.5  | 81.3 | 87.3 | hypothetical protein CARUB_v10020025mg                     | gbpln | Capsella rubella     | AT1G71360.1   Symbols:   Galactose-binding protein   chr1:26892214-26894166 REVERSE LENGTH=596                                    | 561  | 596  | 0         | 106.2  | 79.7 | 86.1 |
| Rsa1.0_01221.1.g24754.t1 | #                                                                                                                                                                                                                                                                                                                                                                                                                                                            | #    | #    | #        | #      | #    | #    | -                                                          | ----  | ----                 | #                                                                                                                                 | #    | #    | #         | #      | #    |      |
| Rsa1.0_01221.1.g24755.t1 | ref NP_177291.2  eukaryotic translation initiation factor SUI1-like protein [Arabidopsis thaliana] gi 110742437 dbj BAE99137.1  hypothetical protein [Arabidopsis thaliana] gi 332197071 gb AEE35192.1  eukaryotic translation initiation factor SUI1-like protein [Arabidopsis thaliana] ref NP_851080.1  serine hydroxymethyltransferase 2 [Arabidopsis thaliana]                                                                                          | 597  | 597  | 0        | 100.0  | 87.1 | 92.8 | eukaryotic translation initiation factor SUI1-like protein | gbpln | Arabidopsis thaliana | AT1G71350.1   Symbols:   eukaryotic translation initiation factor SUI1 family protein   chr1:26888525-26891209 REVERSE LENGTH=597 | 597  | 597  | 0         | 100.0  | 87.1 | 92.8 |
| Rsa1.0_01221.1.g24756.t1 | gi 227202628 dbj BAH56787.1  AT5G26780 [Arabidopsis thaliana] gi 332006219 gb AED93602.1  serine hydroxymethyltransferase 2 [Arabidopsis thaliana]                                                                                                                                                                                                                                                                                                           | 512  | 517  | 0        | 101.0  | 93.6 | 97.7 | serine hydroxymethyltransferase 2                          | gbpln | Arabidopsis thaliana | AT5G26780.1   Symbols: SHM2   serine hydroxymethyltransferase 2   chr5:9418299-9421725 FORWARD LENGTH=517                         | 512  | 517  | 0         | 101.0  | 93.6 | 97.7 |
| Rsa1.0_01222.1.g24757.t2 | gb EOA20809.1  hypothetical protein CARUB_v10001145mg [Capsella rubella]                                                                                                                                                                                                                                                                                                                                                                                     | 393  | 391  | 0        | 99.5   | 89.1 | 94.7 | hypothetical protein CARUB_v10001145mg                     | gbpln | Capsella rubella     | AT4G12230.1   Symbols:   alpha/beta-Hydrolases superfamily protein   chr4:7284645-7287348 FORWARD LENGTH=392                      | 393  | 392  | 0         | 99.7   | 89.3 | 93.9 |
| Rsa1.0_01222.1.g24758.t1 | ref NP_197249.1  putative calcium-binding protein CML32 [Arabidopsis thaliana] gi 75334917 sp Q9LF55.1 CML32_ARATH RecName: Full=Probable calcium-binding protein CML32; AltName: Full=Calmmodulin-like protein 32 gi 9755771 emb CAC01891.1  calmodulin-like protein [Arabidopsis thaliana] gi 332005048 gb AED92431.1  putative calcium-binding protein CML32 [Arabidopsis thaliana]                                                                       | 68   | 146  | 7.00E-19 | 214.7  | 63.2 | 82.4 | putative calcium-binding protein CML32                     | gbpln | Arabidopsis thaliana | AT5G17470.1   Symbols:   EF hand calcium-binding protein family   chr5:5760966-5761406 REVERSE LENGTH=146                         | 68   | 146  | 1.00E-21  | 214.7  | 63.2 | 82.4 |
| Rsa1.0_01222.1.g24759.t1 | gb EOA19751.1  hypothetical protein CARUB_v10003910mg [Capsella rubella]                                                                                                                                                                                                                                                                                                                                                                                     | 239  | 205  | 2.00E-29 | 85.8   | 29.3 | 36.0 | hypothetical protein CARUB_v10003910mg                     | gbpln | Capsella rubella     | AT4G05350.1   Symbols:   RING/U-box superfamily protein   chr4:2726910-2727530 REVERSE LENGTH=206                                 | 239  | 206  | 2.00E-31  | 86.2   | 36.4 | 52.3 |
| Rsa1.0_01222.1.g24760.t1 | ref NP_192950.2  glycine cleavage T-protein family protein [Arabidopsis thaliana] gi 22655070 gb AAM98126.1  putative protein [Arabidopsis thaliana] gi 30725630 gb AAP37837.1  At4g12130 [Arabidopsis thaliana] gi 332657699 gb AEE83099.1  glycine cleavage T-protein family protein [Arabidopsis thaliana]                                                                                                                                                | 393  | 393  | 0        | 100.0  | 91.3 | 95.4 | glycine cleavage T-protein family protein                  | gbpln | Arabidopsis thaliana | AT4G12130.1   Symbols:   Glycine cleavage T-protein family   chr4:7263640-7265425 FORWARD LENGTH=393                              | 393  | 393  | 0         | 100.0  | 91.3 | 95.4 |
| Rsa1.0_01222.1.g24761.t1 | gb EOA32302.1  hypothetical protein CARUB_v10015564mg [Capsella rubella]                                                                                                                                                                                                                                                                                                                                                                                     | 79   | 799  | 8.00E-17 | 1011.4 | 58.2 | 60.8 | hypothetical protein CARUB_v10015564mg                     | gbpln | Capsella rubella     | AT3G07770.1   Symbols: Hsp99.1, AtHsp90.6, AtHsp90-6   HEAT SHOCK PROTEIN 99.1   chr3:2479611-2483970 FORWARD LENGTH=799          | 79   | 799  | 4.00E-18  | 1011.4 | 55.7 | 58.2 |
| Rsa1.0_01222.1.g24762.t1 | gb AAM08751.1 AC025098.18 Putative copia-type polyprotein [Oryza sativa Japonica Group]                                                                                                                                                                                                                                                                                                                                                                      | 1373 | 1803 | 0        | 131.3  | 44.7 | 60.8 | Putative copia-type polyprotein                            | gbpln | Oryza sativa         | AT4G23160.1   Symbols: CRK8   cysteine-rich RLK (RECEPTOR-like protein kinase) 8   chr4:12129485-12134086 FORWARD LENGTH=1262     | 1373 | 1262 | 1.00E-111 | 91.9   | 14.1 | 21.4 |
| Rsa1.0_01222.1.g24763.t1 | gb AAD20433.1  putative retroelement pol polyprotein [Arabidopsis thaliana]                                                                                                                                                                                                                                                                                                                                                                                  | 109  | 889  | 3.00E-23 | 815.6  | 45.9 | 69.7 | putative retroelement pol polyprotein                      | gbpln | Arabidopsis thaliana | #                                                                                                                                 | #    | #    | #         | #      | #    |      |



| Rsa1.0_01222.1.g24764.t1 | #                                                                                                                                                                                                                                                                                                                                                                                                                                                    | #    | #    | #         | #     | #    | #    | #                                                   | -     | ----                 | ----                                                                                                                                                                                                                                                                    | #    | #   | #         | #     | #    | #    |
|--------------------------|------------------------------------------------------------------------------------------------------------------------------------------------------------------------------------------------------------------------------------------------------------------------------------------------------------------------------------------------------------------------------------------------------------------------------------------------------|------|------|-----------|-------|------|------|-----------------------------------------------------|-------|----------------------|-------------------------------------------------------------------------------------------------------------------------------------------------------------------------------------------------------------------------------------------------------------------------|------|-----|-----------|-------|------|------|
| Rsa1.0_01222.1.g24765.t1 | ref[XP_002888027.1] hypothetical protein ARALYDRAFT_893244 [Arabidopsis lyrata subsp. lyrata] gi 297333868 gb EFH64286.1                                                                                                                                                                                                                                                                                                                             | 234  | 271  | 5.00E-45  | 115.8 | 46.2 | 61.5 | hypothetical protein ARALYDRAFT_893244              | gbpln | Arabidopsis lyrata   | AT5G57870.1   Symbols: eFiso4G1   MIF4G domain-containing protein / MA3 domain-containing protein   chr5:23439755-23443433 FORWARD LENGTH=780                                                                                                                           | 234  | 780 | 1.00E-43  | 333.3 | 41.0 | 52.1 |
| Rsa1.0_01222.1.g24766.t1 | ref[NP_567388.1] protein transport sec1b [Arabidopsis thaliana] gi 332278220 sp Q9SZ77.3 SEC1B_ARATH RecName: Full=Protein transport Sec1b; Short=AtSec1b gi 332657698 gb AAE83098.1   protein transport sec1b [Arabidopsis thaliana] gb AAD17398.1   putative non-LTR retroelement reverse transcriptase [Arabidopsis thaliana]                                                                                                                     | 776  | 662  | 0         | 85.3  | 70.4 | 74.2 | protein transport sec1b                             | gbpln | Arabidopsis thaliana | AT4G12120.1   Symbols: SEC1B, ATSEC1B   Sec1/munc18-like (SM) proteins superfamily   chr4:7256687-7260914 REVERSE LENGTH=662                                                                                                                                            | 776  | 662 | 0         | 85.3  | 70.4 | 74.2 |
| Rsa1.0_01223.1.g24767.t1 | ref[NP_199856.1] MYND-type zinc finger protein [Arabidopsis thaliana] gi 75171164 sp Q9FK27.1 FB342_ARATH RecName: Full=F-box protein At5g50450 gi 9758927 dbj BAB09464.1   unnamed protein product [Arabidopsis thaliana] gi 20466554 gb AAM20594.1   putative protein [Arabidopsis thaliana] gi 23198134 gb AANI5594.1   putative protein [Arabidopsis thaliana] gi 332008564 gb AED95947.1   MYND-type zinc finger protein [Arabidopsis thaliana] | 559  | 1225 | 8.00E-79  | 219.1 | 32.2 | 47.6 | putative non-LTR retroelement reverse transcriptase | gbpln | Arabidopsis thaliana | AT4G29090.1   Symbols:   Ribonuclease H-like superfamily protein   chr4:14333528-14335255 FORWARD LENGTH=575                                                                                                                                                            | 559  | 575 | 5.00E-36  | 102.9 | 14.8 | 25.8 |
| Rsa1.0_01223.1.g24768.t1 | ref[NP_199856.1] MYND-type zinc finger protein [Arabidopsis thaliana] gi 75171164 sp Q9FK27.1 FB342_ARATH RecName: Full=F-box protein At5g50450 gi 9758927 dbj BAB09464.1   unnamed protein product [Arabidopsis thaliana] gi 20466554 gb AAM20594.1   putative protein [Arabidopsis thaliana] gi 23198134 gb AANI5594.1   putative protein [Arabidopsis thaliana] gi 332008564 gb AED95947.1   MYND-type zinc finger protein [Arabidopsis thaliana] | 323  | 336  | 1.00E-149 | 104.0 | 85.4 | 92.0 | MYND-type zinc finger protein                       | gbpln | Arabidopsis thaliana | AT5G50450.1   Symbols:   HCP-like superfamily protein with MYND-type zinc finger   chr5:20543519-20544698 REVERSE LENGTH=336                                                                                                                                            | 323  | 336 | 1.00E-151 | 104.0 | 85.4 | 92.0 |
| Rsa1.0_01223.1.g24770.t1 | gb EOA15279.1] hypothetical protein CARUB_v10028679mg [Capsella rubella]                                                                                                                                                                                                                                                                                                                                                                             | 74   | 77   | 1.00E-24  | 104.1 | 81.1 | 89.2 | hypothetical protein CARUB_v10028679mg              | gbpln | Capsella rubella     | #                                                                                                                                                                                                                                                                       | #    | #   | #         | #     | #    | #    |
| Rsa1.0_01223.1.g24771.t1 | ref[XP_002862436.1] predicted protein [Arabidopsis lyrata subsp. lyrata] gi 297307949 gb EFH38694.1   predicted protein [Arabidopsis lyrata subsp. lyrata]                                                                                                                                                                                                                                                                                           | 509  | 530  | 1.00E-35  | 104.1 | 19.4 | 24.6 | predicted protein                                   | gbpln | Arabidopsis lyrata   | AT2G07760.1   Symbols:   Zinc knuckle (OCHC-type) family protein   chr2:3584420-3586278 REVERSE LENGTH=530                                                                                                                                                              | 509  | 530 | 3.00E-14  | 104.1 | 8.6  | 13.2 |
| Rsa1.0_01223.1.g24772.t1 | gb AAG50806.1 AC079281.8 unknown protein [Arabidopsis thaliana]                                                                                                                                                                                                                                                                                                                                                                                      | 1187 | 1213 | 0         | 102.2 | 36.4 | 54.3 | unknown protein                                     | gbpln | Arabidopsis thaliana | AT1G43760.1   Symbols:   DNase I-like superfamily protein   chr1:16528880-16531065 REVERSE LENGTH=626                                                                                                                                                                   | 1187 | 626 | 6.00E-73  | 52.7  | 13.4 | 20.9 |
| Rsa1.0_01223.1.g24773.t1 | ref[NP_199853.1] peptide-O-fucosyltransferase [Arabidopsis thaliana] gi 9758924 dbj BAB09461.1   unnamed protein product [Arabidopsis thaliana] gi 133778858 gb ABO38769.1   At5g50420 [Arabidopsis thaliana] gi 332008558 gb AED95941.1   O-fucosyltransferase family protein [Arabidopsis thaliana]                                                                                                                                                | 533  | 566  | 0         | 106.2 | 86.1 | 91.0 | peptide-O-fucosyltransferase                        | gbpln | Arabidopsis thaliana | AT5G50420.1   Symbols:   O-fucosyltransferase family protein   chr5:20530453-20532635 REVERSE LENGTH=566                                                                                                                                                                | 533  | 566 | 0         | 106.2 | 86.1 | 91.0 |
| Rsa1.0_01223.1.g24774.t1 | ref[NP_199852.1] uncharacterized protein [Arabidopsis thaliana] gi 9758923 dbj BAB09460.1   unnamed protein product [Arabidopsis thaliana] gi 46931304 gb AAT06456.1   At5g50410 [Arabidopsis thaliana] gi 332008557 gb AED95940.1   uncharacterized protein AT5G50410 [Arabidopsis thaliana]                                                                                                                                                        | 252  | 259  | 1.00E-114 | 102.8 | 82.5 | 90.1 | uncharacterized protein                             | gbpln | Arabidopsis thaliana | AT5G50410.1   Symbols:   unknown protein; Has 1807 Blast hits to 1807 proteins in 277 species: Archae - 0; Bacteria - 0; Metazoa - 736; Fungi - 347; Plants - 385; Viruses - 0; Other Eukaryotes - 339 (source: NCBI BLiNK)   chr5:20528446-20529816 REVERSE LENGTH=259 | 252  | 259 | 1.00E-116 | 102.8 | 82.5 | 90.1 |
| Rsa1.0_01223.1.g24775.t2 | ref[NP_195555.2] protein SKU5 similar 9 [Arabidopsis thaliana] gi 18176392 gb AL60036.1   putative pectinesterase [Arabidopsis thaliana] gi 20465521 gb AAM20243.1   putative pectinesterase [Arabidopsis thaliana] gi 332661527 gb AAE86927.1   protein SKU5 similar 9 [Arabidopsis thaliana]                                                                                                                                                       | 548  | 549  | 0         | 100.2 | 71.5 | 81.6 | protein SKU5 similar 9                              | gbpln | Arabidopsis thaliana | AT4G38420.1   Symbols: sks9   SKU5 similar 9   chr4:17982840-17985173 FORWARD LENGTH=549                                                                                                                                                                                | 548  | 549 | 0         | 100.2 | 71.5 | 81.6 |
| Rsa1.0_01224.1.g24777.t1 | gb ABW81018.1] gag-pol polymerase [Arabidopsis lyrata subsp. lyrata]                                                                                                                                                                                                                                                                                                                                                                                 | 317  | 672  | 3.00E-29  | 212.0 | 27.4 | 42.6 | gag-pol polymerase                                  | gbpln | Arabidopsis lyrata   | #                                                                                                                                                                                                                                                                       | #    | #   | #         | #     | #    | #    |
| Rsa1.0_01224.1.g24778.t1 | gb ABD65091.1] hypothetical protein 31.t00049 [Brassica oleracea]                                                                                                                                                                                                                                                                                                                                                                                    | 85   | 530  | 4.00E-11  | 623.5 | 41.2 | 50.6 | hypothetical protein 31.t00049                      | gbpln | Brassica oleracea    | #                                                                                                                                                                                                                                                                       | #    | #   | #         | #     | #    | #    |
| Rsa1.0_01224.1.g24779.t1 | gb ABD65163.1] hypothetical protein 40.t00048 [Brassica oleracea]                                                                                                                                                                                                                                                                                                                                                                                    | 297  | 569  | 6.00E-24  | 191.6 | 21.2 | 29.3 | hypothetical protein 40.t00048                      | gbpln | Brassica oleracea    | #                                                                                                                                                                                                                                                                       | #    | #   | #         | #     | #    | #    |
| Rsa1.0_01224.1.g24779.t2 | ref[NP_195555.2] protein SKU5 similar 9 [Arabidopsis thaliana] gi 18176392 gb AL60036.1   putative pectinesterase [Arabidopsis thaliana] gi 20465521 gb AAM20243.1   putative pectinesterase [Arabidopsis thaliana] gi 332661527 gb AAE86927.1   protein SKU5 similar 9 [Arabidopsis thaliana]                                                                                                                                                       | 548  | 549  | 0         | 100.2 | 71.5 | 81.6 | protein SKU5 similar 9                              | gbpln | Arabidopsis thaliana | AT4G38420.1   Symbols: sks9   SKU5 similar 9   chr4:17982840-17985173 FORWARD LENGTH=549                                                                                                                                                                                | 548  | 549 | 0         | 100.2 | 71.5 | 81.6 |
| Rsa1.0_01224.1.g24777.t1 | gb ABW81018.1] gag-pol polymerase [Arabidopsis lyrata subsp. lyrata]                                                                                                                                                                                                                                                                                                                                                                                 | 317  | 672  | 3.00E-29  | 212.0 | 27.4 | 42.6 | gag-pol polymerase                                  | gbpln | Arabidopsis lyrata   | #                                                                                                                                                                                                                                                                       | #    | #   | #         | #     | #    | #    |
| Rsa1.0_01224.1.g24778.t1 | gb ABD65091.1] hypothetical protein 31.t00049 [Brassica oleracea]                                                                                                                                                                                                                                                                                                                                                                                    | 85   | 530  | 4.00E-11  | 623.5 | 41.2 | 50.6 | hypothetical protein 31.t00049                      | gbpln | Brassica oleracea    | #                                                                                                                                                                                                                                                                       | #    | #   | #         | #     | #    | #    |
| Rsa1.0_01224.1.g24779.t1 | gb ABD65163.1] hypothetical protein 40.t00048 [Brassica oleracea]                                                                                                                                                                                                                                                                                                                                                                                    | 297  | 569  | 6.00E-24  | 191.6 | 21.2 | 29.3 | hypothetical protein 40.t00048                      | gbpln | Brassica oleracea    | #                                                                                                                                                                                                                                                                       | #    | #   | #         | #     | #    | #    |

|                          |                                                                                                                                                                                                                                                                                                                                                                                                                                                                     |      |      |           |       |      |      |                                                                |       |                      |                                                                                                                                                                                                                                                                                                                                                                   |      |      |           |       |      |      |
|--------------------------|---------------------------------------------------------------------------------------------------------------------------------------------------------------------------------------------------------------------------------------------------------------------------------------------------------------------------------------------------------------------------------------------------------------------------------------------------------------------|------|------|-----------|-------|------|------|----------------------------------------------------------------|-------|----------------------|-------------------------------------------------------------------------------------------------------------------------------------------------------------------------------------------------------------------------------------------------------------------------------------------------------------------------------------------------------------------|------|------|-----------|-------|------|------|
| Rsa1.0_01224.1.g24780.t2 | gb AAD37019.2  putative non-LTR retroelement reverse transcriptase [Arabidopsis thaliana]                                                                                                                                                                                                                                                                                                                                                                           | 944  | 855  | 0         | 90.6  | 40.9 | 52.6 | putative non-LTR retroelement reverse transcriptase            | gbpln | Arabidopsis thaliana | AT2G01050.1   Symbols:   zinc ion binding/nucleic acid binding   chr2:68337-69884 REVERSE LENGTH=515                                                                                                                                                                                                                                                              | 944  | 515  | 1.00E-64  | 54.6  | 14.6 | 18.2 |
| Rsa1.0_01224.1.g24781.t1 | gb AAD14492.1  Hypothetical protein [Arabidopsis thaliana]                                                                                                                                                                                                                                                                                                                                                                                                          | 96   | 240  | 2.00E-15  | 250.0 | 45.8 | 55.2 | Hypothetical protein                                           | gbpln | Arabidopsis thaliana | #                                                                                                                                                                                                                                                                                                                                                                 | #    | #    | #         | #     | #    | #    |
| Rsa1.0_01224.1.g24782.t5 | gb ABD65057.1  hypothetical protein 27.t00123 [Brassica oleracea]                                                                                                                                                                                                                                                                                                                                                                                                   | 750  | 190  | 7.00E-32  | 25.3  | 12.9 | 14.4 | hypothetical protein 27.t00123                                 | gbpln | Brassica oleracea    | #                                                                                                                                                                                                                                                                                                                                                                 | #    | #    | #         | #     | #    | #    |
| Rsa1.0_01224.1.g24783.t1 | gb EOA12473.1  hypothetical protein CARUB_v10025904mg [Capsella rubella]                                                                                                                                                                                                                                                                                                                                                                                            | 118  | 800  | 4.00E-22  | 678.0 | 45.8 | 55.9 | hypothetical protein CARUB_v10025904mg                         | gbpln | Capsella rubella     | #                                                                                                                                                                                                                                                                                                                                                                 | #    | #    | #         | #     | #    | #    |
| Rsa1.0_01224.1.g24784.t1 | #                                                                                                                                                                                                                                                                                                                                                                                                                                                                   | #    | #    | #         | #     | #    | #    | -                                                              | ----  | ----                 | #                                                                                                                                                                                                                                                                                                                                                                 | #    | #    | #         | #     | #    | #    |
| Rsa1.0_01225.1.g24785.t1 | gb ABW81051.1  tn7 reverse transcriptase [Arabidopsis lyrata subsp. lyrata]                                                                                                                                                                                                                                                                                                                                                                                         | 294  | 441  | 1.00E-43  | 150.0 | 28.2 | 44.2 | tn7 reverse transcriptase                                      | gbpln | Arabidopsis lyrata   | AT3G24255.1   Symbols:   RNA-directed DNA polymerase (reverse transcriptase)-related family protein   chr3:8789471-8793208 FORWARD LENGTH=746                                                                                                                                                                                                                     | 294  | 746  | 6.00E-29  | 253.7 | 22.1 | 31.6 |
| Rsa1.0_01225.1.g24786.t1 | ref NP_179810.1  ethylene-responsive transcription factor ERF056 [Arabidopsis thaliana]   gi 75265888 sp Q9SIE4.1 ERF56_ARATH RecName: Full=Ethylene-responsive transcription factor ERF056   gi 4567204 gb AAD23620.1  AP2 domain transcription factor [Arabidopsis thaliana]   gi 330252183 gb AEC07277.1  ethylene-responsive transcription factor ERF056 [Arabidopsis thaliana]                                                                                 | 210  | 261  | 2.00E-77  | 124.3 | 70.5 | 84.3 | ethylene-responsive transcription factor ERF056                | gbpln | Arabidopsis thaliana | AT2G22200.1   Symbols:   Integrase-type DNA-binding superfamily protein   chr2:9443422-9444207 REVERSE LENGTH=261                                                                                                                                                                                                                                                 | 210  | 261  | 8.00E-80  | 124.3 | 70.5 | 84.3 |
| Rsa1.0_01225.1.g24787.t1 | gb AAG10817.1 AC011808.5 Putative retroelement polyprotein [Arabidopsis thaliana]                                                                                                                                                                                                                                                                                                                                                                                   | 1358 | 1413 | 0         | 104.1 | 66.2 | 79.7 | Putative retroelement polyprotein                              | gbpln | Arabidopsis thaliana | AT4G23160.1   Symbols: CRK8   cysteine-rich RLK (RECEPTOR-like protein kinase) 8   chr4:12129485-12134086 FORWARD LENGTH=1262                                                                                                                                                                                                                                     | 1358 | 1262 | 0         | 92.9  | 23.4 | 30.1 |
| Rsa1.0_01225.1.g24788.t1 | #                                                                                                                                                                                                                                                                                                                                                                                                                                                                   | #    | #    | #         | #     | #    | #    | -                                                              | ----  | ----                 | #                                                                                                                                                                                                                                                                                                                                                                 | #    | #    | #         | #     | #    | #    |
| Rsa1.0_01225.1.g24789.t1 | #                                                                                                                                                                                                                                                                                                                                                                                                                                                                   | #    | #    | #         | #     | #    | #    | -                                                              | ----  | ----                 | #                                                                                                                                                                                                                                                                                                                                                                 | #    | #    | #         | #     | #    | #    |
| Rsa1.0_01225.1.g24790.t2 | ref NP_179809.2  haloacid dehalogenase-like hydrolase domain-containing protein [Arabidopsis thaliana]   gi 75116496 sp Q67X99.1 TPPE_ARATH RecName: Full=Probable trehalose-phosphate phosphatase E; Short=AtTPPE; AltName: Full=Trehalose 6-phosphate phosphatase   gi 51972037 dbj BAD44683.1  putative trehalose-6-phosphate phosphatase [Arabidopsis thaliana]   gi 330252182 gb AEC07276.1  probable trehalose-phosphate phosphatase E [Arabidopsis thaliana] | 320  | 354  | 1.00E-157 | 110.6 | 86.6 | 88.8 | haloacid dehalogenase-like hydrolase domain-containing protein | gbpln | Arabidopsis thaliana | AT2G22190.1   Symbols: TPPE   Haloacid dehalogenase-like hydrolase (HAD) superfamily protein   chr2:9433897-9436482 REVERSE LENGTH=354                                                                                                                                                                                                                            | 320  | 354  | 1.00E-160 | 110.6 | 86.6 | 88.8 |
| Rsa1.0_01225.1.g24791.t1 | gb ACP30591.1  disease resistance protein [Brassica rapa subsp. pekinensis]                                                                                                                                                                                                                                                                                                                                                                                         | 305  | 1555 | 3.00E-47  | 509.8 | 34.4 | 50.8 | disease resistance protein                                     | gbpln | Brassica rapa        | AT2G06845.1   Symbols:   Beta-galactosidase related protein   chr2:2754666-2756008 FORWARD LENGTH=315                                                                                                                                                                                                                                                             | 305  | 315  | 4.00E-31  | 103.3 | 26.2 | 36.7 |
| Rsa1.0_01225.1.g24792.t1 | #                                                                                                                                                                                                                                                                                                                                                                                                                                                                   | #    | #    | #         | #     | #    | #    | -                                                              | ----  | ----                 | #                                                                                                                                                                                                                                                                                                                                                                 | #    | #    | #         | #     | #    | #    |
| Rsa1.0_01225.1.g24793.t1 | #                                                                                                                                                                                                                                                                                                                                                                                                                                                                   | #    | #    | #         | #     | #    | #    | -                                                              | ----  | ----                 | #                                                                                                                                                                                                                                                                                                                                                                 | #    | #    | #         | #     | #    | #    |
| Rsa1.0_01226.1.g24794.t1 | ref XP_002893747.1  galactosyltransferase family protein [Arabidopsis lyrata subsp. lyrata]   gi 297339589 gb EFH70006.1  galactosyltransferase family protein [Arabidopsis lyrata subsp. lyrata]                                                                                                                                                                                                                                                                   | 389  | 399  | 0         | 102.6 | 95.1 | 96.9 | galactosyltransferase family protein                           | gbpln | Arabidopsis lyrata   | AT1G32930.1   Symbols:   Galactosyltransferase family protein   chr1:11931980-11934399 REVERSE LENGTH=399                                                                                                                                                                                                                                                         | 389  | 399  | 0         | 102.6 | 94.3 | 96.9 |
| Rsa1.0_01226.1.g24795.t1 | ref NP_001031132.1  uncharacterized protein [Arabidopsis thaliana]   gi 62320897 dbj BAD93886.1  hypothetical protein [Arabidopsis thaliana]   gi 98962165 gb ABF59412.1  unknown protein [Arabidopsis thaliana]   gi 332193419 gb AEE31540.1  uncharacterized protein AT1G32928 [Arabidopsis thaliana]                                                                                                                                                             | 79   | 84   | 2.00E-20  | 106.3 | 68.4 | 75.9 | uncharacterized protein                                        | gbpln | Arabidopsis thaliana | AT1G32928.1   Symbols:   unknown protein; BEST Arabidopsis thaliana protein match is: unknown protein (TAIR:AT1G32920.1); Has 35333 Blast hits to 34131 proteins in 2444 species: Archae - 798; Bacteria - 22429; Metazoa - 974; Fungi - 991; Plants - 531; Viruses - 0; Other Eukaryotes - 9610 (source: NCBI BLINK);   chr1:11931332-11931586 FORWARD LENGTH=84 | 79   | 84   | 4.00E-23  | 106.3 | 68.4 | 75.9 |

|                          |                                                                                                                                                                                                                                                                                                                                                                                  |     |      |           |        |      |      |                                                        |       |                      |                                                                                                                                                                                                                                                                                                                                                                                                                                                                                                                                 |     |     |          |        |      |      |
|--------------------------|----------------------------------------------------------------------------------------------------------------------------------------------------------------------------------------------------------------------------------------------------------------------------------------------------------------------------------------------------------------------------------|-----|------|-----------|--------|------|------|--------------------------------------------------------|-------|----------------------|---------------------------------------------------------------------------------------------------------------------------------------------------------------------------------------------------------------------------------------------------------------------------------------------------------------------------------------------------------------------------------------------------------------------------------------------------------------------------------------------------------------------------------|-----|-----|----------|--------|------|------|
| Rsa1.0_01226.1.g24796.t1 | ref NP_564411.1  uncharacterized protein [Arabidopsis thaliana] gi 15294268 gb AAK9531.1 AF410325.1 At1g32920/FRL1.1.25 [Arabidopsis thaliana] gi 15450637 gb AAK96590.1  At1g32920/FRL1.1.25 [Arabidopsis thaliana] gi 20147259 gb AAAM10343.1  At1g32920/FRL1.1.25 [Arabidopsis thaliana] gi 332193418 gb AEE31539.1  uncharacterized protein AT1G32920 [Arabidopsis thaliana] | 76  | 78   | 4.00E-23  | 102.6  | 77.6 | 82.9 | uncharacterized protein                                | gbpln | Arabidopsis thaliana | AT1G32920.1   Symbols:   unknown protein; FUNCTIONS IN: molecular function unknown; INVOLVED IN: response to wounding; LOCATED IN: endomembrane system; EXPRESSED IN: 23 plant structures; EXPRESSED DURING: 13 growth stages; BEST Arabidopsis thaliana protein match is: unknown protein (TAIR:AT1G32928.1); Has 42 Blast hits to 42 proteins in 8 species: Archae - 0; Bacteria - 0; Metazoa - 0; Fungi - 0; Plants - 42; Viruses - 0; Other Eukaryotes - 0 (source: NCBI BLink).   chr1:11928901-11929137 FORWARD LENGTH=78 | 76  | 78  | 6.00E-26 | 102.6  | 77.6 | 82.9 |
| Rsa1.0_01226.1.g24797.t1 | ref XP_002893744.1  glycosyl hydrolase family 17 protein [Arabidopsis lyrata subsp. lyrata] gi 297339586 gb EFH70003.1  glycosyl hydrolase family 17 protein [Arabidopsis lyrata subsp. lyrata]                                                                                                                                                                                  | 416 | 427  | 0         | 102.6  | 83.7 | 91.6 | glycosyl hydrolase family 17 protein                   | gbpln | Arabidopsis lyrata   | AT1G32860.1   Symbols:   Glycosyl hydrolase superfamily protein   chr1:11907308-11908803 REVERSE LENGTH=426                                                                                                                                                                                                                                                                                                                                                                                                                     | 416 | 426 | 0        | 102.4  | 83.2 | 92.1 |
| Rsa1.0_01226.1.g24798.t1 | ref XP_002891012.1  ubiquitin carboxyl-terminal hydrolase family protein [Arabidopsis lyrata subsp. lyrata] gi 297336854 gb EFH67271.1  ubiquitin carboxyl-terminal hydrolase family protein [Arabidopsis lyrata subsp. lyrata]                                                                                                                                                  | 876 | 894  | 0         | 102.1  | 75.5 | 85.2 | ubiquitin carboxyl-terminal hydrolase family protein   | gbpln | Arabidopsis lyrata   | AT1G32850.1   Symbols: UBP11   ubiquitin-specific protease 11   chr1:11902629-11906900 FORWARD LENGTH=892                                                                                                                                                                                                                                                                                                                                                                                                                       | 876 | 892 | 0        | 101.8  | 73.1 | 83.4 |
| Rsa1.0_01226.1.g24799.t1 | ref NP_200045.1  cytochrome P450, family 96, subfamily A, polypeptide 4 [Arabidopsis thaliana] gi 10177398 dbj BAB10529.1  cytochrome P450 [Arabidopsis thaliana] gi 332008817 gb AED96200.1  cytochrome P450, family 96, subfamily A, polypeptide 4 [Arabidopsis thaliana]                                                                                                      | 461 | 502  | 0         | 108.9  | 81.1 | 90.0 | cytochrome P450, family 96, subfamily A, polypeptide 4 | gbpln | Arabidopsis thaliana | AT5G52320.1   Symbols: CYP96A4   cytochrome P450, family 96, subfamily A, polypeptide 4   chr5:21245111-21246619 REVERSE LENGTH=502                                                                                                                                                                                                                                                                                                                                                                                             | 461 | 502 | 0        | 108.9  | 81.1 | 90.0 |
| Rsa1.0_01226.1.g24800.t1 | #                                                                                                                                                                                                                                                                                                                                                                                | #   | #    | #         | #      | #    | #    | -                                                      | ----  | ----                 | #                                                                                                                                                                                                                                                                                                                                                                                                                                                                                                                               | #   | #   | #        | #      | #    |      |
| Rsa1.0_01226.1.g24801.t1 | #                                                                                                                                                                                                                                                                                                                                                                                | #   | #    | #         | #      | #    | #    | -                                                      | ----  | ----                 | #                                                                                                                                                                                                                                                                                                                                                                                                                                                                                                                               | #   | #   | #        | #      | #    |      |
| Rsa1.0_01226.1.g24802.t1 | gb EOA16028.1  hypothetical protein CARUB_v10004157mg [Capsella rubella]                                                                                                                                                                                                                                                                                                         | 60  | 812  | 4.00E-18  | 1353.3 | 70.0 | 80.0 | hypothetical protein CARUB_v10004157mg                 | gbpln | Capsella rubella     | AT4G19960.2   Symbols: KUP9   K+ uptake permease 9   chr4:10813807-10816997 FORWARD LENGTH=807                                                                                                                                                                                                                                                                                                                                                                                                                                  | 60  | 807 | 2.00E-20 | 1345.0 | 71.7 | 76.7 |
| Rsa1.0_01226.1.g24803.t2 | gb AAG51783.1 AC079679.3 reverse transcriptase, putative; 16838-20266 [Arabidopsis thaliana]                                                                                                                                                                                                                                                                                     | 368 | 1142 | 7.00E-19  | 310.3  | 14.4 | 17.9 | reverse transcriptase, putative; 16838-20266           | gbpln | Arabidopsis thaliana | #                                                                                                                                                                                                                                                                                                                                                                                                                                                                                                                               | #   | #   | #        | #      | #    |      |
| Rsa1.0_01227.1.g24804.t1 | #                                                                                                                                                                                                                                                                                                                                                                                | #   | #    | #         | #      | #    | #    | -                                                      | ----  | ----                 | #                                                                                                                                                                                                                                                                                                                                                                                                                                                                                                                               | #   | #   | #        | #      | #    |      |
| Rsa1.0_01227.1.g24805.t3 | ref NP_190288.1  Glycosyl hydrolase family protein [Arabidopsis thaliana] gi 6522585 emb CAB61950.1  beta-D-glucan exohydrolase-like protein [Arabidopsis thaliana] gi 332644714 gb AEE78235.1  Glycosyl hydrolase family protein [Arabidopsis thaliana]                                                                                                                         | 626 | 636  | 0         | 101.6  | 83.7 | 91.4 | Glycosyl hydrolase family protein                      | gbpln | Arabidopsis thaliana | AT3G47040.1   Symbols:   Glycosyl hydrolase family protein   chr3:17324231-17327105 REVERSE LENGTH=636                                                                                                                                                                                                                                                                                                                                                                                                                          | 626 | 636 | 0        | 101.6  | 83.7 | 91.4 |
| Rsa1.0_01227.1.g24806.t1 | ref NP_193584.3  uncharacterized protein [Arabidopsis thaliana] gi 357529131 sp P16128.3 Y4849_ARAT H RecName: Full=Uncharacterized protein At4g18490 gi 332658652 gb AEE84052.1  uncharacterized protein AT4G18490 [Arabidopsis thaliana]                                                                                                                                       | 201 | 756  | 8.00E-36  | 376.1  | 37.3 | 42.3 | uncharacterized protein                                | gbpln | Arabidopsis thaliana | AT4G18490.1   Symbols:   unknown protein; Has 30201 Blast hits to 17322 proteins in 780 species: Archae - 12; Bacteria - 1396; Metazoa - 17338; Fungi - 3422; Plants - 5037; Viruses - 0; Other Eukaryotes - 2996 (source: NCBI BLink).   chr4:10204388-10208197 FORWARD LENGTH=756                                                                                                                                                                                                                                             | 201 | 756 | 3.00E-38 | 376.1  | 37.3 | 42.3 |
| Rsa1.0_01227.1.g24807.t4 | ref NP_001078254.1  beta-glucosidase [Arabidopsis thaliana] gi 332644717 gb AEE78238.1  glycosyl hydrolase family protein [Arabidopsis thaliana]                                                                                                                                                                                                                                 | 550 | 447  | 3.00E-64  | 81.3   | 25.8 | 29.6 | beta-glucosidase                                       | gbpln | Arabidopsis thaliana | AT3G47050.2   Symbols:   Glycosyl hydrolase family protein   chr3:17328684-17330857 REVERSE LENGTH=447                                                                                                                                                                                                                                                                                                                                                                                                                          | 550 | 447 | 6.00E-67 | 81.3   | 25.8 | 29.6 |
| Rsa1.0_01227.1.g24808.t1 | #                                                                                                                                                                                                                                                                                                                                                                                | #   | #    | #         | #      | #    | #    | -                                                      | ----  | ----                 | #                                                                                                                                                                                                                                                                                                                                                                                                                                                                                                                               | #   | #   | #        | #      | #    |      |
| Rsa1.0_01227.1.g24809.t4 | gb ABD65088.1  hypothetical protein 27.t00109 [Brassica oleracea]                                                                                                                                                                                                                                                                                                                | 635 | 1176 | 1.00E-161 | 185.2  | 53.1 | 61.6 | hypothetical protein 27.t00109                         | gbpln | Brassica oleracea    | AT2G07190.1   Symbols:   Domain of unknown function (DUF1985)   chr2:2987367-2988945 FORWARD LENGTH=452                                                                                                                                                                                                                                                                                                                                                                                                                         | 635 | 452 | 2.00E-26 | 71.2   | 11.7 | 18.7 |
| Rsa1.0_01227.1.g24810.t1 | emb CAE05256.2  OSJNBb0115109.18 [Oryza sativa Japonica Group]                                                                                                                                                                                                                                                                                                                   | 511 | 1134 | 5.00E-98  | 221.9  | 45.0 | 59.5 | OSJNBb0115109.18                                       | gbpln | Oryza sativa         | #                                                                                                                                                                                                                                                                                                                                                                                                                                                                                                                               | #   | #   | #        | #      | #    |      |

|                          |                                                                                                                                                                                                                                                                                                                                                                                                                                                  |      |      |           |       |      |      |                                                                               |       |                      |                                                                                                                                                        |      |      |           |       |      |      |
|--------------------------|--------------------------------------------------------------------------------------------------------------------------------------------------------------------------------------------------------------------------------------------------------------------------------------------------------------------------------------------------------------------------------------------------------------------------------------------------|------|------|-----------|-------|------|------|-------------------------------------------------------------------------------|-------|----------------------|--------------------------------------------------------------------------------------------------------------------------------------------------------|------|------|-----------|-------|------|------|
| Rsa1.0_01227.1.g24811.t2 | refNP_190320.1   hydroxysteroid dehydrogenase 3 [Arabidopsis thaliana] gi 75313891 sp Q9STY7.1 HSD3_ARATH RecName: Full=1-beta-hydroxysteroid dehydrogenase-like 3; AltName: Full=17-beta-hydroxysteroid dehydrogenase-like 3; AltName: Full=Hydroxysteroid dehydrogenase 3; Short=AtHSD3 gi 5541703 emb CAB51208.1   putative protein [Arabidopsis thaliana] gi 332644749 gb AEE78270.1   hydroxysteroid dehydrogenase 3 [Arabidopsis thaliana] | 251  | 309  | 1.00E-36  | 123.1 | 31.1 | 32.7 | hydroxysteroid dehydrogenase 3                                                | gbpln | Arabidopsis thaliana | AT3G47360.1   Symbols: ATHSD3, HSD3   hydroxysteroid dehydrogenase 3   chr3:17451112-17452843 FORWARD LENGTH=309                                       | 251  | 309  | 3.00E-39  | 123.1 | 31.1 | 32.7 |
| Rsa1.0_01227.1.g24812.t1 | gb ABD65100.1   hypothetical protein 31.t00077 [Brassica oleracea]                                                                                                                                                                                                                                                                                                                                                                               | 249  | 391  | 1.00E-52  | 157.0 | 48.6 | 58.6 | hypothetical protein 31.t00077                                                | gbpln | Brassica oleracea    | #                                                                                                                                                      | #    | #    | #         | #     | #    |      |
| Rsa1.0_01227.1.g24813.t1 | #                                                                                                                                                                                                                                                                                                                                                                                                                                                | #    | #    | #         | #     | #    | -    | -                                                                             | ----  | ----                 | #                                                                                                                                                      | #    | #    | #         | #     | #    |      |
| Rsa1.0_01228.1.g24814.t2 | #                                                                                                                                                                                                                                                                                                                                                                                                                                                | #    | #    | #         | #     | #    | -    | -                                                                             | ----  | ----                 | AT1G64750.2   Symbols: ATDSS1(0), DSS1(0)   deletion of SUV3 suppressor 1(0)   chr1:24052787-24053712 REVERSE LENGTH=74                                | 83   | 74   | 2.00E-11  | 89.2  | 77.1 | 79.5 |
| Rsa1.0_01228.1.g24815.t1 | ref XP_002866410.1   evolutionary conserved C-terminal 3 [Arabidopsis lyrata subsp. lyrata] gi 297312245 gb EFH42689.1   evolutionary conserved C-terminal 3 [Arabidopsis lyrata subsp. lyrata]                                                                                                                                                                                                                                                  | 443  | 498  | 1.00E-132 | 112.4 | 61.2 | 72.5 | evolutionary conserved C-terminal 3                                           | gbpln | Arabidopsis lyrata   | AT5G61020.2   Symbols: ECT3   evolutionarily conserved C-terminal region 3   chr5:24557485-24559780 REVERSE LENGTH=493                                 | 443  | 493  | 1.00E-127 | 111.3 | 59.6 | 69.5 |
| Rsa1.0_01228.1.g24816.t1 | ref XP_002886783.1   hypothetical protein ARALYDRAFT_475499 [Arabidopsis lyrata subsp. lyrata] gi 297332624 gb EFH63042.1   hypothetical protein ARALYDRAFT_475499 [Arabidopsis lyrata subsp. lyrata]                                                                                                                                                                                                                                            | 1195 | 1203 | 0         | 100.7 | 81.7 | 89.7 | hypothetical protein ARALYDRAFT_475499                                        | gbpln | Arabidopsis lyrata   | AT1G64960.1   Symbols:   ARM repeat superfamily protein   chr1:24129918-24134049 FORWARD LENGTH=1203                                                   | 1195 | 1203 | 0         | 100.7 | 79.9 | 88.2 |
| Rsa1.0_01228.1.g24817.t1 | ref XP_002887112.1   hypothetical protein ARALYDRAFT_894451 [Arabidopsis lyrata subsp. lyrata] gi 297332953 gb EFH63371.1   hypothetical protein ARALYDRAFT_894451 [Arabidopsis lyrata subsp. lyrata]                                                                                                                                                                                                                                            | 863  | 1022 | 0         | 118.4 | 56.3 | 67.9 | hypothetical protein ARALYDRAFT_894451                                        | gbpln | Arabidopsis lyrata   | AT1G67220.1   Symbols: HAC02, HAC2, ATHPCAT1   histone acetyltransferase of the CBP family 2   chr1:25145587-25150450 FORWARD LENGTH=1367              | 863  | 1367 | 0         | 158.4 | 55.7 | 67.6 |
| Rsa1.0_01228.1.g24818.t2 | gb AAG00256.1 AC002130.21 F1N21.7 [Arabidopsis thaliana]                                                                                                                                                                                                                                                                                                                                                                                         | 141  | 303  | 1.00E-67  | 214.9 | 85.8 | 93.6 | F1N21.7                                                                       | gbpln | Arabidopsis thaliana | AT1G67250.1   Symbols:   Proteasome maturation factor UMP1   chr1:25163808-25164967 REVERSE LENGTH=141                                                 | 141  | 141  | 1.00E-69  | 100.0 | 86.5 | 93.6 |
| Rsa1.0_01228.1.g24819.t1 | gb AAF18538.1 AC006551.24 Very similar to retrotransposon reverse transcriptase [Arabidopsis thaliana]                                                                                                                                                                                                                                                                                                                                           | 779  | 1231 | 0         | 158.0 | 48.8 | 64.3 | Very similar to retrotransposon reverse transcriptase                         | gbpln | Arabidopsis thaliana | AT4G29090.1   Symbols:   Ribonuclease H-like superfamily protein   chr4:14333528-14335255 FORWARD LENGTH=575                                           | 779  | 575  | 2.00E-97  | 73.8  | 24.8 | 38.3 |
| Rsa1.0_01228.1.g24820.t1 | gb AEW29768.1 TCP1 [Calepina irregularis]                                                                                                                                                                                                                                                                                                                                                                                                        | 345  | 354  | 1.00E-119 | 102.6 | 73.0 | 82.0 | TCP1                                                                          | gbpln | Calepina irregularis | AT1G67260.2   Symbols: TCP1   TCP family transcription factor   chr1:25168152-25169307 REVERSE LENGTH=351                                              | 345  | 351  | 1.00E-111 | 101.7 | 66.7 | 77.1 |
| Rsa1.0_01228.1.g24821.t7 | ref XP_002889589.1   calmodulin binding protein [Arabidopsis lyrata subsp. lyrata] gi 297334430 gb EFH64848.1   calmodulin binding protein [Arabidopsis lyrata subsp. lyrata]                                                                                                                                                                                                                                                                    | 1191 | 1031 | 0         | 86.6  | 57.3 | 66.1 | calmodulin binding protein                                                    | gbpln | Arabidopsis lyrata   | AT1G67310.1   Symbols:   Calmodulin-binding transcription activator protein with CG-1 and Ankyrin domains   chr1:25198182-25203126 REVERSE LENGTH=1016 | 1191 | 1016 | 0         | 85.3  | 56.5 | 64.8 |
| Rsa1.0_01229.1.g24822.t1 | gb AAF88013.1   contains similarity to mudra transposase (GB:AAA21566.1); may be a pseudogene [Arabidopsis thaliana]                                                                                                                                                                                                                                                                                                                             | 222  | 457  | 7.00E-26  | 205.9 | 37.4 | 48.6 | contains similarity to mudra transposase (GB:AAA21566.1); may be a pseudogene | gbpln | Arabidopsis thaliana | #                                                                                                                                                      | #    | #    | #         | #     | #    |      |
| Rsa1.0_01229.1.g24823.t1 | ref XP_002884160.1   hypothetical protein ARALYDRAFT_900287 [Arabidopsis lyrata subsp. lyrata] gi 297330000 gb EFH60419.1   hypothetical protein ARALYDRAFT_900287 [Arabidopsis lyrata subsp. lyrata]                                                                                                                                                                                                                                            | 507  | 511  | 0         | 100.8 | 92.7 | 96.1 | hypothetical protein ARALYDRAFT_900287                                        | gbpln | Arabidopsis lyrata   | AT2G16280.1   Symbols: KCS9   3-ketoacyl-CoA synthase 9   chr2:7051186-7052724 FORWARD LENGTH=512                                                      | 507  | 512  | 0         | 101.0 | 92.7 | 96.3 |
| Rsa1.0_01229.1.g24824.t2 | gb AAC33226.1   putative non-LTR retroelement reverse transcriptase [Arabidopsis thaliana]                                                                                                                                                                                                                                                                                                                                                       | 1203 | 1529 | 0         | 127.1 | 39.7 | 54.4 | putative non-LTR retroelement reverse transcriptase                           | gbpln | Arabidopsis thaliana | AT1G43760.1   Symbols:   DNase I-like superfamily protein   chr1:16528880-16531065 REVERSE LENGTH=626                                                  | 1203 | 626  | 3.00E-35  | 52.0  | 9.9  | 16.5 |
| Rsa1.0_01229.1.g24825.t1 | gb AAG50886.1 AC025294.24 hypothetical protein [Arabidopsis thaliana]                                                                                                                                                                                                                                                                                                                                                                            | 358  | 629  | 3.00E-64  | 175.7 | 31.3 | 47.5 | hypothetical protein                                                          | gbpln | Arabidopsis thaliana | AT3G24255.1   Symbols:   RNA-directed DNA polymerase (reverse transcriptase)-related family protein   chr3:8789471-8793208 FORWARD LENGTH=746          | 358  | 746  | 3.00E-43  | 208.4 | 24.6 | 33.8 |
| Rsa1.0_01229.1.g24826.t1 | ref XP_002884163.1   3-ketoacyl-CoA synthase [Arabidopsis lyrata subsp. lyrata] gi 297330003 gb EFH60422.1   3-ketoacyl-CoA synthase [Arabidopsis lyrata subsp. lyrata]                                                                                                                                                                                                                                                                          | 386  | 486  | 0         | 125.9 | 85.0 | 91.5 | 3-ketoacyl-CoA synthase                                                       | gbpln | Arabidopsis lyrata   | AT4G34520.1   Symbols: FAE1, KCS18   3-ketoacyl-CoA synthase 18   chr4:16494205-16495725 FORWARD LENGTH=506                                            | 386  | 506  | 1.00E-176 | 131.1 | 74.4 | 86.0 |

|                          |                                                                                                                                                                                                                                                                                                                                                                                                                                                                                  |     |      |           |       |      |      |                                          |       |                          |   |     |     |           |       |      |      |
|--------------------------|----------------------------------------------------------------------------------------------------------------------------------------------------------------------------------------------------------------------------------------------------------------------------------------------------------------------------------------------------------------------------------------------------------------------------------------------------------------------------------|-----|------|-----------|-------|------|------|------------------------------------------|-------|--------------------------|---|-----|-----|-----------|-------|------|------|
| Rsa1.0_01229.1.g24827.t1 | ref WP_001871707.1  hypothetical protein [Streptococcus agalactiae] gi 77173851 gb EA076897.1  hypothetical protein SAI_2423 [Streptococcus agalactiae H36B]                                                                                                                                                                                                                                                                                                                     | 164 | 181  | 2.00E-31  | 110.4 | 44.5 | 53.0 | hypothetical protein                     | gbbc  | Streptococcus agalactiae | # | #   | #   | #         | #     | #    | #    |
| Rsa1.0_01229.1.g24828.t1 | #                                                                                                                                                                                                                                                                                                                                                                                                                                                                                | #   | #    | #         | #     | #    | -    | -                                        | ----  | ----                     | # | #   | #   | #         | #     | #    | #    |
| Rsa1.0_01229.1.g24829.t1 | gb AAG50553.1 AC074228.8 En/Spm-like transposon protein, putative [Arabidopsis thaliana]                                                                                                                                                                                                                                                                                                                                                                                         | 168 | 1074 | 3.00E-33  | 639.3 | 38.1 | 51.2 | En/Spm-like transposon protein, putative | gbpln | Arabidopsis thaliana     | # | #   | #   | #         | #     | #    | #    |
| Rsa1.0_01229.1.g24830.t1 | #                                                                                                                                                                                                                                                                                                                                                                                                                                                                                | #   | #    | #         | #     | #    | -    | -                                        | ----  | ----                     | # | #   | #   | #         | #     | #    | #    |
| Rsa1.0_01230.1.g24831.t1 | ref XP_002866380.1  hypothetical protein ARALYDRAFT_496184 [Arabidopsis lyrata subsp. lyrata] gi 297312215 gb EFH42639.1  hypothetical protein ARALYDRAFT_496184 [Arabidopsis lyrata subsp. lyrata]                                                                                                                                                                                                                                                                              | 97  | 94   | 4.00E-24  | 96.9  | 67.0 | 78.4 | hypothetical protein ARALYDRAFT_496184   | gbpln | Arabidopsis lyrata       | # | 97  | 91  | 2.00E-23  | 93.8  | 67.0 | 77.3 |
| Rsa1.0_01230.1.g24832.t1 | gb ACS68201.1  elongation factor 1 alpha [Brassica napus] gi 482513961 gb AGK07381.1  elongation factor 1-alpha protein [Brassica oleracea var. botrytis]                                                                                                                                                                                                                                                                                                                        | 293 | 449  | 1.00E-160 | 153.2 | 92.8 | 93.2 | elongation factor 1 alpha                | gbpln | Brassica napus           | # | 293 | 449 | 1.00E-162 | 153.2 | 92.2 | 93.2 |
| Rsa1.0_01230.1.g24833.t1 | ref XP_002866380.1  hypothetical protein ARALYDRAFT_496184 [Arabidopsis lyrata subsp. lyrata] gi 297312215 gb EFH42639.1  hypothetical protein ARALYDRAFT_496184 [Arabidopsis lyrata subsp. lyrata]                                                                                                                                                                                                                                                                              | 72  | 94   | 1.00E-11  | 130.6 | 59.7 | 73.6 | hypothetical protein ARALYDRAFT_496184   | gbpln | Arabidopsis lyrata       | # | #   | #   | #         | #     | #    | #    |
| Rsa1.0_01230.1.g24834.t1 | gb ACS68201.1  elongation factor 1 alpha [Brassica napus] gi 482513961 gb AGK07381.1  elongation factor 1-alpha protein [Brassica oleracea var. botrytis]                                                                                                                                                                                                                                                                                                                        | 238 | 449  | 6.00E-88  | 188.7 | 71.0 | 71.0 | elongation factor 1 alpha                | gbpln | Brassica napus           | # | 238 | 449 | 2.00E-89  | 188.7 | 69.7 | 71.0 |
| Rsa1.0_01230.1.g24835.t1 | ref NP_200845.1  uncharacterized protein [Arabidopsis thaliana] gi 75171272 sp Q9FKK6.1 EXO5_ARATH ResName: Full=Exonuclease V, chloroplastic; Short=Exo V; Flags: Precursor gi 9757741 dbj BAB08222.1  unnamed protein product [Arabidopsis thaliana] gi 18175767 gb AAL59924.1  unknown protein [Arabidopsis thaliana] gi 23296592 gb AANI13127.1  unknown protein [Arabidopsis thaliana] gi 332009933 gb AED97316.1  uncharacterized protein AT5G60370 [Arabidopsis thaliana] | 407 | 413  | 1.00E-175 | 101.5 | 80.3 | 90.4 | uncharacterized protein                  | gbpln | Arabidopsis thaliana     | # | 407 | 413 | 1.00E-177 | 101.5 | 80.3 | 90.4 |
| Rsa1.0_01230.1.g24836.t1 | dbj BAJ34286.1  unnamed protein product [Thellungiella halophila]                                                                                                                                                                                                                                                                                                                                                                                                                | 358 | 358  | 0         | 100.0 | 88.3 | 95.0 | unnamed protein product                  | ----  | ----                     | # | 358 | 358 | 0         | 100.0 | 86.0 | 94.7 |
| Rsa1.0_01230.1.g24837.t1 | gb EOA25724.1  hypothetical protein CARUB_v10019078mg [Capsella rubella]                                                                                                                                                                                                                                                                                                                                                                                                         | 99  | 168  | 6.00E-18  | 169.7 | 56.6 | 70.7 | hypothetical protein CARUB_v10019078mg   | gbpln | Capsella rubella         | # | 99  | 166 | 5.00E-20  | 167.7 | 55.6 | 71.7 |
| Rsa1.0_01230.1.g24838.t1 | gb EOA13014.1  hypothetical protein CARUB_v10026008mg [Capsella rubella]                                                                                                                                                                                                                                                                                                                                                                                                         | 678 | 683  | 0         | 100.7 | 77.1 | 85.4 | hypothetical protein CARUB_v10026008mg   | gbpln | Capsella rubella         | # | 678 | 718 | 0         | 105.9 | 71.8 | 80.2 |
| Rsa1.0_01230.1.g24839.t1 | ref XP_002864676.1  lectin protein kinase family protein [Arabidopsis lyrata subsp. lyrata] gi 29731051.1 gb EFH40935.1  lectin protein kinase family protein [Arabidopsis lyrata subsp. lyrata]                                                                                                                                                                                                                                                                                 | 665 | 668  | 0         | 100.5 | 81.1 | 89.3 | lectin protein kinase family protein     | gbpln | Arabidopsis lyrata       | # | 665 | 668 | 0         | 100.5 | 80.6 | 89.3 |

|                          |                                                                                                                                                                                                                                                                                                                                                                                                                                                                                                                                                              |      |      |           |       |      |      |                                                                            |       |                      |                                                                                                                                                                                                                                                                                                                                                          |      |     |           |       |      |      |
|--------------------------|--------------------------------------------------------------------------------------------------------------------------------------------------------------------------------------------------------------------------------------------------------------------------------------------------------------------------------------------------------------------------------------------------------------------------------------------------------------------------------------------------------------------------------------------------------------|------|------|-----------|-------|------|------|----------------------------------------------------------------------------|-------|----------------------|----------------------------------------------------------------------------------------------------------------------------------------------------------------------------------------------------------------------------------------------------------------------------------------------------------------------------------------------------------|------|-----|-----------|-------|------|------|
| Rsa1.0_01230.1.g24840.t1 | ref[NP_200829.5] interactor of constitutive active ROPs 3 [Arabidopsis thaliana]<br>gi 334188518 ref[NP_001190579.1] interactor of constitutive active ROPs 3 [Arabidopsis thaliana]<br>gi 75180396 sp Q9LSS5.1 ICR3_ARATH RecName: Full=Interactor of constitutive active ROPs 3<br>gi 8885572 dbj BAA97502.1  myosin heavy chain-like [Arabidopsis thaliana]<br>gi 332009910 gb AED97293.1  interactor of constitutive active ROPs 3 [Arabidopsis thaliana]<br>gi 332009911 gb AED97294.1  interactor of constitutive active ROPs 3 [Arabidopsis thaliana] | 549  | 564  | 0         | 102.7 | 86.3 | 92.5 | interactor of constitutive active ROPs 3                                   | gbpln | Arabidopsis thaliana | AT5G60210.2   Symbols: RIP5   ROP interactive partner 5   chr5:24243529-24245889 REVERSE LENGTH=564                                                                                                                                                                                                                                                      | 549  | 564 | 0         | 102.7 | 86.3 | 92.5 |
| Rsa1.0_01230.1.g24841.t1 | gb EOA13642.1  hypothetical protein CARUB_v10026713mg [Capsella rubella]                                                                                                                                                                                                                                                                                                                                                                                                                                                                                     | 236  | 344  | 1.00E-109 | 145.8 | 85.2 | 90.7 | hypothetical protein CARUB_v10026713mg                                     | gbpln | Capsella rubella     | AT5G60200.1   Symbols: TMO6   TARGET OF MONOPTEROS 6   chr5:24241078-24241951 FORWARD LENGTH=257                                                                                                                                                                                                                                                         | 236  | 257 | 1.00E-108 | 108.9 | 83.5 | 88.1 |
| Rsa1.0_01231.1.g24842.t1 | gb AAC33226.1  putative non-LTR retroelement reverse transcriptase [Arabidopsis thaliana]<br>ref[XP_004133751.1] PREDICTED: cytochrome c1-1, heme protein, mitochondrial-like [Cucumis sativus]<br>gi 449478083 ref[XP_004155217.1] PREDICTED: cytochrome c1-1, heme protein, mitochondrial-like [Cucumis sativus]                                                                                                                                                                                                                                           | 240  | 1529 | 3.00E-19  | 637.1 | 30.8 | 46.7 | putative non-LTR retroelement reverse transcriptase                        | gbpln | Arabidopsis thaliana | #                                                                                                                                                                                                                                                                                                                                                        | #    | #   | #         | #     | #    | #    |
| Rsa1.0_01231.1.g24843.t1 | ref[XP_004133751.1] PREDICTED: cytochrome c1-1, heme protein, mitochondrial-like [Cucumis sativus]<br>gi 449478083 ref[XP_004155217.1] PREDICTED: cytochrome c1-1, heme protein, mitochondrial-like [Cucumis sativus]                                                                                                                                                                                                                                                                                                                                        | 203  | 307  | 9.00E-80  | 151.2 | 77.3 | 79.8 | PREDICTED: cytochrome c1-1, heme protein, mitochondrial-like               | gbpln | Cucumis sativus      | AT5G40810.1   Symbols:   Cytochrome C1 family   chr5:16340200-16342327 FORWARD LENGTH=307                                                                                                                                                                                                                                                                | 203  | 307 | 3.00E-71  | 151.2 | 80.3 | 80.8 |
| Rsa1.0_01231.1.g24844.t1 | ref[NP_178356.1] RNA-directed DNA polymerase (reverse transcriptase)-related family protein [Arabidopsis thaliana]<br>gi 3184287 gb AAC18934.1  putative non-LTR retroelement reverse transcriptase [Arabidopsis thaliana]<br>gi 330250497 gb AEC05591.1  RNA-directed DNA polymerase (reverse transcriptase)-related family protein [Arabidopsis thaliana]                                                                                                                                                                                                  | 178  | 211  | 2.00E-30  | 118.5 | 34.3 | 46.6 | RNA-directed DNA polymerase (reverse transcriptase)-related family protein | gbpln | Arabidopsis thaliana | AT2G02520.1   Symbols:   RNA-directed DNA polymerase (reverse transcriptase)-related family protein   chr2:676771-678145 REVERSE LENGTH=211                                                                                                                                                                                                              | 178  | 211 | 8.00E-33  | 118.5 | 34.3 | 46.6 |
| Rsa1.0_01231.1.g24845.t1 | #                                                                                                                                                                                                                                                                                                                                                                                                                                                                                                                                                            | #    | #    | #         | #     | #    | #    | -                                                                          | ----  | ----                 | #                                                                                                                                                                                                                                                                                                                                                        | #    | #   | #         | #     | #    | #    |
| Rsa1.0_01231.1.g24846.t1 | ref[NP_198896.1] uncharacterized protein [Arabidopsis thaliana]<br>gi 10177959 dbj BAB11342.1  unnamed protein product [Arabidopsis thaliana]<br>gi 91805685 gb ABE65571.1  hypothetical protein At5g40800 [Arabidopsis thaliana]<br>gi 332007213 gb AED94596.1  uncharacterized protein AT5G40800 [Arabidopsis thaliana]                                                                                                                                                                                                                                    | 277  | 272  | 1.00E-126 | 98.2  | 82.3 | 87.0 | uncharacterized protein                                                    | gbpln | Arabidopsis thaliana | AT5G40800.1   Symbols:   unknown protein; BEST Arabidopsis thaliana protein match is: unknown protein (TAIR:AT3G27250.1); Has 1807 Blast hits to 1807 proteins in 277 species: Archae - 0; Bacteria - 0; Metazoa - 736; Fungi - 347; Plants - 385; Viruses - 0; Other Eukaryotes - 339 (source: NCBI BLink).   chr5:16334810-16335628 REVERSE LENGTH=272 | 277  | 272 | 1.00E-129 | 98.2  | 82.3 | 87.0 |
| Rsa1.0_01231.1.g24847.t1 | ref[XP_002868637.1] hypothetical protein ARALYDRAFT_916149 [Arabidopsis lyrata subsp. lyrata]<br>gi 297314473 gb EFH44896.1  hypothetical protein ARALYDRAFT_916149 [Arabidopsis lyrata subsp. lyrata]                                                                                                                                                                                                                                                                                                                                                       | 314  | 304  | 1.00E-106 | 96.8  | 65.6 | 75.2 | hypothetical protein ARALYDRAFT_916149                                     | gbpln | Arabidopsis lyrata   | AT5G40790.1   Symbols:   unknown protein; BEST Arabidopsis thaliana protein match is: unknown protein (TAIR:AT3G27250.1); Has 1807 Blast hits to 1807 proteins in 277 species: Archae - 0; Bacteria - 0; Metazoa - 736; Fungi - 347; Plants - 385; Viruses - 0; Other Eukaryotes - 339 (source: NCBI BLink).   chr5:16330115-16331026 REVERSE LENGTH=303 | 314  | 303 | 1.00E-106 | 96.5  | 65.3 | 75.8 |
| Rsa1.0_01231.1.g24848.t1 | dbj BAB09379.1  non-LTR retroelement reverse transcriptase-like protein [Arabidopsis thaliana]                                                                                                                                                                                                                                                                                                                                                                                                                                                               | 131  | 1223 | 5.00E-47  | 933.6 | 70.2 | 77.1 | non-LTR retroelement reverse transcriptase-like protein                    | gbpln | Arabidopsis thaliana | AT1G43760.1   Symbols:   DNase I-like superfamily protein   chr1:16528880-16531065 REVERSE LENGTH=626                                                                                                                                                                                                                                                    | 131  | 626 | 4.00E-11  | 477.9 | 23.7 | 33.6 |
| Rsa1.0_01231.1.g24849.t1 | gb AAD15377.1  putative non-LTR retroelement reverse transcriptase [Arabidopsis thaliana]                                                                                                                                                                                                                                                                                                                                                                                                                                                                    | 2115 | 1044 | 0         | 49.4  | 22.7 | 30.9 | putative non-LTR retroelement reverse transcriptase                        | gbpln | Arabidopsis thaliana | AT5G40780.2   Symbols:   lysine histidine transporter 1   chr5:16323823-16327082 FORWARD LENGTH=445                                                                                                                                                                                                                                                      | 2115 | 445 | 0         | 21.0  | 19.4 | 20.4 |
| Rsa1.0_01232.1.g24850.t1 | ref[XP_004308303.1] PREDICTED: uncharacterized protein LOC101292460 [Fragaria vesca subsp. vesca]                                                                                                                                                                                                                                                                                                                                                                                                                                                            | 75   | 689  | 1.00E-14  | 918.7 | 65.3 | 70.7 | PREDICTED: uncharacterized protein LOC101292460                            | gbpln | Fragaria vesca       | #                                                                                                                                                                                                                                                                                                                                                        | #    | #   | #         | #     | #    | #    |
| Rsa1.0_01232.1.g24851.t1 | gb AAD21778.1  putative non-LTR retroelement reverse transcriptase [Arabidopsis thaliana]                                                                                                                                                                                                                                                                                                                                                                                                                                                                    | 235  | 1715 | 2.00E-31  | 729.8 | 37.0 | 45.1 | putative non-LTR retroelement reverse transcriptase                        | gbpln | Arabidopsis thaliana | #                                                                                                                                                                                                                                                                                                                                                        | #    | #   | #         | #     | #    | #    |

|                          |                                                                                                                                                                                                                                                                                                                                                                                                                                                                                                                                                                                                                                                                                                                                                                                                                                                                               |     |      |           |       |      |      |                                        |       |                      |                                                                                                                                               |     |     |           |       |      |      |
|--------------------------|-------------------------------------------------------------------------------------------------------------------------------------------------------------------------------------------------------------------------------------------------------------------------------------------------------------------------------------------------------------------------------------------------------------------------------------------------------------------------------------------------------------------------------------------------------------------------------------------------------------------------------------------------------------------------------------------------------------------------------------------------------------------------------------------------------------------------------------------------------------------------------|-----|------|-----------|-------|------|------|----------------------------------------|-------|----------------------|-----------------------------------------------------------------------------------------------------------------------------------------------|-----|-----|-----------|-------|------|------|
| Rsa1.0_01232.1.g24852.t1 | ref[NP_180995.1] 60S ribosomal protein L18a-2 [Arabidopsis thaliana] gi 297826909 ref XP_002881337.1  60S ribosomal protein L18A [Arabidopsis lyrata subsp. lyrata] gi 21431842 sp P51418.2 R18A2_ARATH RecName: Full=60S ribosomal protein L18a-2 gi 3128228 gb AAC26708.1  60S ribosomal protein L18A [Arabidopsis thaliana] gi 14596031 gb AAK68743.1  Unknown protein [Arabidopsis thaliana] gi 20197170 gb AAM14956.1  60S ribosomal protein L18A [Arabidopsis thaliana] gi 21539567 gb AAM53336.1  60S ribosomal protein L18A [Arabidopsis thaliana] gi 23197736 gb AAN15395.1  60S ribosomal protein L18A [Arabidopsis thaliana] gi 30102998 gb AAP21367.1  At2g34480 [Arabidopsis thaliana] gi 297327176 gb EFH57596.1  60S ribosomal protein L18A [Arabidopsis lyrata subsp. lyrata] gi 330253886 gb AEC08980.1  60S ribosomal protein L18a-2 [Arabidopsis thaliana] | 191 | 178  | 7.00E-97  | 93.2  | 89.5 | 91.6 | 60S ribosomal protein L18a-2           | gbpln | Arabidopsis lyrata   | AT2G34480.1   Symbols:   Ribosomal protein L18ae/LX family protein   chr2:14532916-14534161 REVERSE LENGTH=178                                | 191 | 178 | 3.00E-99  | 93.2  | 89.5 | 91.6 |
| Rsa1.0_01232.1.g24853.t1 | ref[XP_003604534.1] NBS-containing resistance-like protein [Medicago truncatula] gi 355505589 gb AES86731.1  NBS-containing resistance-like protein [Medicago truncatula]                                                                                                                                                                                                                                                                                                                                                                                                                                                                                                                                                                                                                                                                                                     | 218 | 1302 | 3.00E-18  | 597.2 | 39.9 | 53.7 | NBS-containing resistance-like protein | gbpln | Medicago truncatula  | #                                                                                                                                             | #   | #   | #         | #     | #    |      |
| Rsa1.0_01232.1.g24854.t1 | ref[NP_181002.1] gibberellin 2-beta-dioxygenase 3 [Arabidopsis thaliana] gi 49035761 sp O64692.1 G2OX3_ARATH RecName: Full=Gibberellin 2-beta-dioxygenase 3; AltName: Full=GA 2-oxidase 3; AltName: Full=Gibberellin 2-beta-hydroxylase 3; AltName: Full=Gibberellin 2-oxidase 3 gi 4678370 emb CAB41009.1  GA 2-oxidase [Arabidopsis thaliana] gi 20197080 gb AAM14908.1  putative gibberellin 2-oxidase [Arabidopsis thaliana] gi 330253895 gb AEC08989.1  gibberellin 2-beta-dioxygenase 3 [Arabidopsis thaliana]                                                                                                                                                                                                                                                                                                                                                          | 335 | 335  | 1.00E-156 | 100.0 | 80.0 | 89.3 | gibberellin 2-beta-dioxygenase 3       | gbpln | Arabidopsis thaliana | AT2G34555.1   Symbols: ATGA2OX3, GA2OX3   gibberellin 2-oxidase 3   chr2:14557102-14558682 FORWARD LENGTH=335                                 | 335 | 335 | 1.00E-159 | 100.0 | 80.0 | 89.3 |
| Rsa1.0_01232.1.g24855.t2 | ref[XP_002879503.1] hypothetical protein ARALYDRAFT_482419 [Arabidopsis lyrata subsp. lyrata] gi 297325342 gb EFH55762.1  hypothetical protein ARALYDRAFT_482419 [Arabidopsis lyrata subsp. lyrata]                                                                                                                                                                                                                                                                                                                                                                                                                                                                                                                                                                                                                                                                           | 353 | 390  | 1.00E-174 | 110.5 | 89.2 | 93.5 | hypothetical protein ARALYDRAFT_482419 | gbpln | Arabidopsis lyrata   | AT2G34560.2   Symbols:   P-loop containing nucleoside triphosphate hydrolases superfamily protein   chr2:14560266-14562695 FORWARD LENGTH=393 | 353 | 393 | 1.00E-174 | 111.3 | 87.5 | 92.4 |
| Rsa1.0_01232.1.g24856.t1 | ref[NP_181004.2] PIN domain-containing MEE21 protein [Arabidopsis thaliana] gi 21805693 gb AAM76754.1  hypothetical protein [Arabidopsis thaliana] gi 61742637 gb AAX55139.1  hypothetical protein At2g34570 [Arabidopsis thaliana] gi 330253898 gb AEC08992.1  PIN domain-containing MEE21 protein [Arabidopsis thaliana]                                                                                                                                                                                                                                                                                                                                                                                                                                                                                                                                                    | 283 | 281  | 1.00E-128 | 99.3  | 78.8 | 89.4 | PIN domain-containing MEE21 protein    | gbpln | Arabidopsis thaliana | AT2G34570.1   Symbols: MEE21   PIN domain-like family protein   chr2:14563048-14564681 REVERSE LENGTH=281                                     | 283 | 281 | 1.00E-130 | 99.3  | 78.8 | 89.4 |
| Rsa1.0_01232.1.g24857.t1 | #                                                                                                                                                                                                                                                                                                                                                                                                                                                                                                                                                                                                                                                                                                                                                                                                                                                                             | #   | #    | #         | #     | #    | -    | ----                                   | ----  | #                    | #                                                                                                                                             | #   | #   | #         | #     |      |      |
| Rsa1.0_01232.1.g24858.t1 | ref[NP_181007.1] protein TIFY 5B [Arabidopsis thaliana] gi 75099146 sp O64687.1 TIF5B_ARATH RecName: Full=Protein TIFY 5B; AltName: Full=Jasmonate ZIM domain-containing protein 7 gi 3128215 gb AAC26695.1  hypothetical protein [Arabidopsis thaliana] gi 38454058 gb AAR20723.1  At2g34600 [Arabidopsis thaliana] gi 38603996 gb AAR24741.1  At2g34600 [Arabidopsis thaliana] gi 330253903 gb AEC08997.1  protein TIFY 5B [Arabidopsis thaliana]                                                                                                                                                                                                                                                                                                                                                                                                                           | 121 | 148  | 3.00E-20  | 122.3 | 55.4 | 63.6 | protein TIFY 5B                        | gbpln | Arabidopsis thaliana | AT2G34600.1   Symbols: JAZ7, TIFY5B   jasmonate-zim-domain protein 7   chr2:14573172-14573718 FORWARD LENGTH=148                              | 121 | 148 | 5.00E-23  | 122.3 | 55.4 | 63.6 |

|                          |                                                                                                                                                                                                                                                                                                                                                                                                                                                                                                                                                                                                                             |      |      |           |       |      |      |                                                      |       |                      |                                                                                                                       |      |      |           |       |      |      |
|--------------------------|-----------------------------------------------------------------------------------------------------------------------------------------------------------------------------------------------------------------------------------------------------------------------------------------------------------------------------------------------------------------------------------------------------------------------------------------------------------------------------------------------------------------------------------------------------------------------------------------------------------------------------|------|------|-----------|-------|------|------|------------------------------------------------------|-------|----------------------|-----------------------------------------------------------------------------------------------------------------------|------|------|-----------|-------|------|------|
| Rsa1.0_01232.1.g24859.t1 | ref NP_199643.1  cysteine/histidine-rich C1 domain-containing protein [Arabidopsis thaliana] gi 8978336 db BAA98189.1  unnamed protein product [Arabidopsis thaliana] gi 332008268 gb AED95651.1  cysteine/histidine-rich C1 domain-containing protein [Arabidopsis thaliana]                                                                                                                                                                                                                                                                                                                                               | 553  | 977  | 1.00E-162 | 176.7 | 54.1 | 70.0 | cysteine/histidine-rich C1 domain-containing protein | gbpln | Arabidopsis thaliana | AT5G48320.1   Symbols:   Cysteine/Histidine-rich C1 domain family protein   chr5:19581794-19584727 REVERSE LENGTH=977 | 553  | 977  | 1.00E-165 | 176.7 | 54.1 | 70.0 |
| Rsa1.0_01232.1.g24860.t1 | gb EOA26368.1  hypothetical protein CARUB_v10023285mg [Capsella rubella]                                                                                                                                                                                                                                                                                                                                                                                                                                                                                                                                                    | 428  | 422  | 0         | 98.6  | 86.4 | 91.8 | hypothetical protein CARUB_v10023285mg               | gbpln | Capsella rubella     | AT2G34630.2   Symbols: GPPS, GPS1   geranyl diphosphate synthase 1   chr2:14578689-14581632 FORWARD LENGTH=422        | 428  | 422  | 0         | 98.6  | 85.7 | 91.6 |
| Rsa1.0_01232.1.g24861.t1 | gb EOA26331.1  hypothetical protein CARUB_v10025625mg [Capsella rubella]                                                                                                                                                                                                                                                                                                                                                                                                                                                                                                                                                    | 644  | 696  | 0         | 108.1 | 84.9 | 90.7 | hypothetical protein CARUB_v10025625mg               | gbpln | Capsella rubella     | AT2G34670.2   Symbols:   Protein of unknown function (DUF630 and DUF632)   chr2:14612741-14615231 REVERSE LENGTH=694  | 644  | 694  | 0         | 107.8 | 84.3 | 89.9 |
| Rsa1.0_01233.1.g24862.t1 | ref XP_002882262.1  MYB107 [Arabidopsis lyrata subsp. lyrata] gi 297328102 gb EFH5521.1  MYB107 [Arabidopsis lyrata subsp. lyrata]                                                                                                                                                                                                                                                                                                                                                                                                                                                                                          | 322  | 322  | 1.00E-148 | 100.0 | 88.5 | 94.1 | MYB107                                               | gbpln | Arabidopsis lyrata   | AT3G02940.1   Symbols: MYB107, AtMYB107   myb domain protein 107   chr3:662141-663830 FORWARD LENGTH=321              | 322  | 321  | 1.00E-148 | 99.7  | 87.9 | 92.9 |
| Rsa1.0_01233.1.g24863.t1 | gb EOA29907.1  hypothetical protein CARUB_v10013001mg [Capsella rubella]                                                                                                                                                                                                                                                                                                                                                                                                                                                                                                                                                    | 553  | 803  | 1.00E-138 | 145.2 | 62.7 | 76.1 | hypothetical protein CARUB_v10013001mg               | gbpln | Capsella rubella     | AT3G02930.1   Symbols:   Plant protein of unknown function (DUF827)   chr3:655306-658319 FORWARD LENGTH=806           | 553  | 806  | 1.00E-133 | 145.8 | 64.6 | 78.1 |
| Rsa1.0_01233.1.g24864.t1 | ref XP_002884345.1  hypothetical protein ARALYDRAFT_477538 [Arabidopsis lyrata subsp. lyrata] gi 297330185 gb EFH60604.1  hypothetical protein ARALYDRAFT_477538 [Arabidopsis lyrata subsp. lyrata]                                                                                                                                                                                                                                                                                                                                                                                                                         | 307  | 278  | 1.00E-138 | 90.6  | 78.2 | 85.0 | hypothetical protein ARALYDRAFT_477538               | gbpln | Arabidopsis lyrata   | AT3G02920.2   Symbols: RPA32B   Replication protein A, subunit RPA32   chr3:651844-654189 REVERSE LENGTH=298          | 307  | 298  | 1.00E-140 | 97.1  | 77.9 | 86.0 |
| Rsa1.0_01233.1.g24865.t1 | gb AAM63759.1  unknown [Arabidopsis thaliana]                                                                                                                                                                                                                                                                                                                                                                                                                                                                                                                                                                               | 190  | 187  | 8.00E-86  | 98.4  | 86.8 | 89.5 | unknown                                              | gbpln | Arabidopsis thaliana | AT3G02910.1   Symbols:   AIG2-like (avirulence induced gene) family protein   chr3:649986-650549 FORWARD LENGTH=187   | 190  | 187  | 2.00E-87  | 98.4  | 86.3 | 88.4 |
| Rsa1.0_01233.1.g24866.t3 | gb EOA31660.1  hypothetical protein CARUB_v10014865mg [Capsella rubella]                                                                                                                                                                                                                                                                                                                                                                                                                                                                                                                                                    | 129  | 128  | 1.00E-64  | 99.2  | 92.2 | 96.1 | hypothetical protein CARUB_v10014865mg               | gbpln | Capsella rubella     | AT5G16650.1   Symbols:   Chaperone DnaJ-domain superfamily protein   chr5:5463446-5465075 REVERSE LENGTH=128          | 129  | 128  | 4.00E-56  | 99.2  | 79.8 | 86.0 |
| Rsa1.0_01233.1.g24867.t1 | gb EOA33035.1  hypothetical protein CARUB_v10016366mg [Capsella rubella]                                                                                                                                                                                                                                                                                                                                                                                                                                                                                                                                                    | 1057 | 1135 | 0         | 107.4 | 56.7 | 67.2 | hypothetical protein CARUB_v10016366mg               | gbpln | Capsella rubella     | AT5G16680.1   Symbols:   RING/FYVE/PHD zinc finger superfamily protein   chr5:5467534-5472956 REVERSE LENGTH=1311     | 1057 | 1311 | 1.00E-165 | 124.0 | 44.0 | 58.2 |
| Rsa1.0_01233.1.g24868.t1 | # # # # # # # # - ---- ---- # # # # # #                                                                                                                                                                                                                                                                                                                                                                                                                                                                                                                                                                                     |      |      |           |       |      |      |                                                      |       |                      |                                                                                                                       |      |      |           |       |      |      |
| Rsa1.0_01233.1.g24869.t1 | ref NP_186938.1  putative inactive receptor kinase [Arabidopsis thaliana] gi 75186527 sp Q9M8T0.1 Y3288_ARAT H RecName: Full=Probable inactive receptor kinase At3g02880; Flags: Precursor gi 6729973 gb AAF26971.1 AC018363_16 putative protein kinase [Arabidopsis thaliana] gi 13937228 gb AAK50106.1 AF372969_1 AT3g02880/F13E7.17 [Arabidopsis thaliana] gi 30102484 gb AAP21160.1  At3g02880/F13E7.17 [Arabidopsis thaliana] gi 224589555 gb ACN59311.1  leucine-rich repeat receptor-like protein kinase [Arabidopsis thaliana] gi 332640352 gb AEE73873.1  putative inactive receptor kinase [Arabidopsis thaliana] | 621  | 627  | 0         | 101.0 | 84.7 | 91.1 | putative inactive receptor kinase                    | gbpln | Arabidopsis thaliana | AT3G02880.1   Symbols:   Leucine-rich repeat protein kinase family protein   chr3:634819-636982 FORWARD LENGTH=627    | 621  | 627  | 0         | 101.0 | 84.7 | 91.1 |
| Rsa1.0_01233.1.g24870.t1 | ref NP_566183.1  zinc finger CCH domain-containing protein 33 [Arabidopsis thaliana] gi 62901378 sp Q8GXX7.1 C3H33_ARAT H RecName: Full=Zinc finger CCH domain-containing protein 33; Short=AtC3H33; AltName: Full=Zinc finger CCH domain-containing protein ZFN1 gi 26451016 dbj BAC42614.1  putative zinc finger protein 1 zfn1 [Arabidopsis thaliana] gi 109134113 gb ABG25055.1  At3g02830 [Arabidopsis thaliana] gi 332640343 gb AEE73864.1  zinc finger CCH domain-containing protein 33 [Arabidopsis thaliana]                                                                                                       | 386  | 397  | 1.00E-172 | 102.8 | 79.5 | 81.6 | zinc finger CCH domain-containing protein 33         | gbpln | Arabidopsis thaliana | AT3G02830.1   Symbols: ZFN1   zinc finger protein 1   chr3:614075-615916 FORWARD LENGTH=397                           | 386  | 397  | 1.00E-175 | 102.8 | 79.5 | 81.6 |



|                          |                                                                                                                                                                                                                                                                                                                                                                                                                                                                                                                                                                                                                                                                                                |     |     |           |       |      |      |                                              |       |                      |                                                                                                                                                                                                                                                                                                                                               |     |     |           |       |      |      |
|--------------------------|------------------------------------------------------------------------------------------------------------------------------------------------------------------------------------------------------------------------------------------------------------------------------------------------------------------------------------------------------------------------------------------------------------------------------------------------------------------------------------------------------------------------------------------------------------------------------------------------------------------------------------------------------------------------------------------------|-----|-----|-----------|-------|------|------|----------------------------------------------|-------|----------------------|-----------------------------------------------------------------------------------------------------------------------------------------------------------------------------------------------------------------------------------------------------------------------------------------------------------------------------------------------|-----|-----|-----------|-------|------|------|
| Rsa1.0_01234.1.g24871.t1 | ref XP_002885130.1  F-box family protein [Arabidopsis lyrata subsp. lyrata] gi 297330970 gb EFH61389.1  F-box family protein [Arabidopsis lyrata subsp. lyrata]                                                                                                                                                                                                                                                                                                                                                                                                                                                                                                                                | 43  | 362 | 5.00E-12  | 841.9 | 76.7 | 90.7 | F-box family protein                         | gbpln | Arabidopsis lyrata   | AT3G16210.1   Symbols:   F-box family protein   chr3:5494533-5495615 REVERSE LENGTH=360                                                                                                                                                                                                                                                       | 43  | 360 | 3.00E-14  | 837.2 | 74.4 | 88.4 |
| Rsa1.0_01234.1.g24872.t1 | dbj BAA31452.1  delta-VM23 [Raphanus sativus]                                                                                                                                                                                                                                                                                                                                                                                                                                                                                                                                                                                                                                                  | 248 | 248 | 1.00E-132 | 100.0 | 99.6 | 99.6 | delta-VM23                                   | gbpln | Raphanus sativus     | AT3G16240.1   Symbols: DELTA-TIP, TIP2;1, DELTA-TIP1, AQP1, ATTIP2;1   delta tonoplast integral protein   chr3:5505534-5506788 FORWARD LENGTH=250                                                                                                                                                                                             | 248 | 250 | 1.00E-129 | 100.8 | 96.0 | 98.8 |
| Rsa1.0_01234.1.g24873.t1 | gb EOA31467.1  hypothetical protein CARUB_v10014651mg [Capsella rubella]                                                                                                                                                                                                                                                                                                                                                                                                                                                                                                                                                                                                                       | 204 | 205 | 1.00E-106 | 100.5 | 92.6 | 95.1 | hypothetical protein CARUB_v10014651mg       | gbpln | Capsella rubella     | AT3G16250.1   Symbols: NDF4   NDH-dependent cyclic electron flow 1   chr3:5507091-5508320 REVERSE LENGTH=204                                                                                                                                                                                                                                  | 204 | 204 | 1.00E-104 | 100.0 | 90.2 | 93.1 |
| Rsa1.0_01234.1.g24874.t1 | ref NP_188247.2  tRNAse Z4 [Arabidopsis thaliana] gi 332642270 gb AEE75791.1  tRNAse Z4 [Arabidopsis thaliana]                                                                                                                                                                                                                                                                                                                                                                                                                                                                                                                                                                                 | 942 | 942 | 0         | 100.0 | 84.3 | 89.9 | tRNAse Z4                                    | gbpln | Arabidopsis thaliana | AT3G16260.1   Symbols: TRZ4   tRNAse Z4   chr3:5509397-5513118 FORWARD LENGTH=942                                                                                                                                                                                                                                                             | 942 | 942 | 0         | 100.0 | 84.3 | 89.9 |
| Rsa1.0_01234.1.g24875.t1 | gb EOA32412.1  hypothetical protein CARUB_v10015684mg [Capsella rubella]                                                                                                                                                                                                                                                                                                                                                                                                                                                                                                                                                                                                                       | 831 | 447 | 0         | 53.8  | 38.7 | 41.8 | hypothetical protein CARUB_v10015684mg       | gbpln | Capsella rubella     | AT3G16270.1   Symbols:   ENTH/VHS family protein   chr3:5513701-5516540 FORWARD LENGTH=690                                                                                                                                                                                                                                                    | 831 | 690 | 0         | 83.0  | 37.5 | 39.7 |
| Rsa1.0_01234.1.g24876.t1 | dbj BAB01268.1  transcription factor TINY-like protein [Arabidopsis thaliana]                                                                                                                                                                                                                                                                                                                                                                                                                                                                                                                                                                                                                  | 243 | 254 | 4.00E-65  | 104.5 | 72.0 | 80.7 | transcription factor TINY-like protein       | gbpln | Arabidopsis thaliana | AT3G16280.1   Symbols:   Integrase-type DNA-binding superfamily protein   chr3:5518355-5519065 FORWARD LENGTH=236                                                                                                                                                                                                                             | 243 | 236 | 2.00E-67  | 97.1  | 72.0 | 80.7 |
| Rsa1.0_01234.1.g24877.t1 | ref XP_002885132.1  EMB2083 [Arabidopsis lyrata subsp. lyrata] gi 297330972 gb EFH61391.1  EMB2083 [Arabidopsis lyrata subsp. lyrata]                                                                                                                                                                                                                                                                                                                                                                                                                                                                                                                                                          | 890 | 874 | 0         | 98.2  | 84.7 | 91.1 | EMB2083                                      | gbpln | Arabidopsis lyrata   | AT3G16290.1   Symbols: EMB2083   AAA-type ATPase family protein   chr3:5521187-5524995 REVERSE LENGTH=876                                                                                                                                                                                                                                     | 890 | 876 | 0         | 98.4  | 84.8 | 91.1 |
| Rsa1.0_01234.1.g24878.t1 | ref NP_566542.1  nuclear pore complex protein Nup53 [Arabidopsis thaliana] gi 2062172 gb AAB63646.1  unknown protein [Arabidopsis thaliana] gi 9279713 dbj BAB01270.1  unnamed protein product [Arabidopsis thaliana] gi 21592552 gb AAM64501.1  unknown [Arabidopsis thaliana] gi 26983840 gb AAN86172.1  unknown protein [Arabidopsis thaliana] gi 332642275 gb AEE75796.1  nuclear pore complex protein Nup53 [Arabidopsis thaliana]                                                                                                                                                                                                                                                        | 568 | 329 | 1.00E-158 | 57.9  | 51.1 | 53.9 | nuclear pore complex protein Nup53           | gbpln | Arabidopsis thaliana | AT3G16310.1   Symbols:   mitotic phosphoprotein N' end (MPPN) family protein   chr3:5526593-5528106 REVERSE LENGTH=329                                                                                                                                                                                                                        | 568 | 329 | 1.00E-161 | 57.9  | 51.1 | 53.9 |
| Rsa1.0_01234.1.g24879.t1 | ref XP_002882998.1  binding protein [Arabidopsis lyrata subsp. lyrata] gi 297328838 gb EFH59257.1  binding protein [Arabidopsis lyrata subsp. lyrata]                                                                                                                                                                                                                                                                                                                                                                                                                                                                                                                                          | 726 | 717 | 0         | 98.8  | 78.8 | 86.9 | binding protein                              | gbpln | Arabidopsis lyrata   | AT3G16320.1   Symbols: CDC27a   Tetrapeptide repeat (TPR)-like superfamily protein   chr3:5529534-5534465 FORWARD LENGTH=717                                                                                                                                                                                                                  | 726 | 717 | 0         | 98.8  | 78.2 | 85.8 |
| Rsa1.0_01234.1.g24880.t1 | gb EOA31439.1  hypothetical protein CARUB_v10014623mg [Capsella rubella]                                                                                                                                                                                                                                                                                                                                                                                                                                                                                                                                                                                                                       | 209 | 210 | 6.00E-90  | 100.5 | 81.3 | 89.0 | hypothetical protein CARUB_v10014623mg       | gbpln | Capsella rubella     | AT3G16330.1   Symbols:   unknown protein; BEST Arabidopsis thaliana protein match is: unknown protein (TAIR:AT1G52140.1); Has 109 Blast hits to 109 proteins in 16 species: Archae - 0; Bacteria - 0; Metazoa - 0; Fungi - 0; Plants - 109; Viruses - 0; Other Eukaryotes - 0 (source: NCBI BLINK).   chr3:5535263-5535880 FORWARD LENGTH=205 | 209 | 205 | 1.00E-89  | 98.1  | 79.4 | 86.6 |
| Rsa1.0_01235.1.g24881.t2 | ref NP_190777.1  DNA-directed RNA polymerase II subunit RPB11 [Arabidopsis thaliana] gi 3219858 sp Q38859.1 RPB11_ARATH RecName: Full=DNA-directed RNA polymerase II subunit RPB11; Short=RNA polymerase II subunit B11; AltName: Full=DNA-directed RNA polymerase II 13.6 kDa polypeptide; AltName: Full=DNA-directed RNA polymerase II subunit J gi 881501 gb AAB02849.1  RNA polymerase II 13.6 kDa subunit [Arabidopsis thaliana] gi 4678938 emb CAB41329.1  DNA-directed RNA polymerase II 13.6K chain [Arabidopsis thaliana] gi 29029080 gb AA064919.1  At3g52090 [Arabidopsis thaliana] gi 332645368 gb AEE78889.1  DNA-directed RNA polymerase II subunit RPB11 [Arabidopsis thaliana] | 64  | 116 | 1.00E-23  | 181.3 | 81.3 | 87.5 | DNA-directed RNA polymerase II subunit RPB11 | gbpln | Arabidopsis thaliana | AT3G52090.1   Symbols: ATRPB13.6, NRPB11, NRPD11, NRPE11   DNA-directed RNA polymerase, RBP11-like   chr3:19318069-19318998 REVERSE LENGTH=116                                                                                                                                                                                                | 64  | 116 | 2.00E-26  | 181.3 | 81.3 | 87.5 |
| Rsa1.0_01235.1.g24882.t2 | #                                                                                                                                                                                                                                                                                                                                                                                                                                                                                                                                                                                                                                                                                              | #   | #   | #         | #     | #    | #    | -                                            | ----  | ----                 | #                                                                                                                                                                                                                                                                                                                                             | #   | #   | #         | #     | #    |      |

|                          |                                                                                                                                                                                                                                                                                                                                                                                                                                                                                                                                                                                                                                                                                                                                                                                                                                                                                                                                                                                                   |      |      |           |       |      |      |                                              |       |                      |                                                                                                                                                                                                                                                                                                                                                                                                                                                                                                                                                 |      |      |           |       |      |      |
|--------------------------|---------------------------------------------------------------------------------------------------------------------------------------------------------------------------------------------------------------------------------------------------------------------------------------------------------------------------------------------------------------------------------------------------------------------------------------------------------------------------------------------------------------------------------------------------------------------------------------------------------------------------------------------------------------------------------------------------------------------------------------------------------------------------------------------------------------------------------------------------------------------------------------------------------------------------------------------------------------------------------------------------|------|------|-----------|-------|------|------|----------------------------------------------|-------|----------------------|-------------------------------------------------------------------------------------------------------------------------------------------------------------------------------------------------------------------------------------------------------------------------------------------------------------------------------------------------------------------------------------------------------------------------------------------------------------------------------------------------------------------------------------------------|------|------|-----------|-------|------|------|
| Rsa1.0_01235.1.g24883.t1 | gb EOA39489.1  hypothetical protein CARUB_v10008092mg [Capsella rubella]                                                                                                                                                                                                                                                                                                                                                                                                                                                                                                                                                                                                                                                                                                                                                                                                                                                                                                                          | 1428 | 1401 | 0         | 98.1  | 76.3 | 82.8 | hypothetical protein CARUB_v10008092mg       | gbpln | Capsella rubella     | AT1G48120.1   Symbols:   hydrolases:protein serine/threonine phosphatases   chr1:17774238-17779624 REVERSE LENGTH=1340                                                                                                                                                                                                                                                                                                                                                                                                                          | 1428 | 1340 | 0         | 93.8  | 75.6 | 82.1 |
| Rsa1.0_01235.1.g24884.t2 | ref XP_002894096.1  evolutionarily conserved C-terminal region 7 [Arabidopsis lyrata subsp. lyrata] gi 297339938 gb EFH70355.1  evolutionarily conserved C-terminal region 7 [Arabidopsis lyrata subsp. lyrata]                                                                                                                                                                                                                                                                                                                                                                                                                                                                                                                                                                                                                                                                                                                                                                                   | 645  | 647  | 0         | 100.3 | 76.7 | 84.5 | evolutionarily conserved C-terminal region 7 | gbpln | Arabidopsis lyrata   | AT1G48110.2   Symbols: ECT7   evolutionarily conserved C-terminal region 7   chr1:17770339-17772806 REVERSE LENGTH=639                                                                                                                                                                                                                                                                                                                                                                                                                          | 645  | 639  | 0         | 99.1  | 74.3 | 83.1 |
| Rsa1.0_01235.1.g24885.t1 | ref XP_002891410.1  glycoside hydrolase family 28 protein [Arabidopsis lyrata subsp. lyrata] gi 297337252 gb EFH67669.1  glycoside hydrolase family 28 protein [Arabidopsis lyrata subsp. lyrata]                                                                                                                                                                                                                                                                                                                                                                                                                                                                                                                                                                                                                                                                                                                                                                                                 | 472  | 474  | 0         | 100.4 | 89.6 | 93.9 | glycoside hydrolase family 28 protein        | gbpln | Arabidopsis lyrata   | AT1G48100.1   Symbols:   Pectin lyase-like superfamily protein   chr1:17766921-17769625 FORWARD LENGTH=475                                                                                                                                                                                                                                                                                                                                                                                                                                      | 472  | 475  | 0         | 100.6 | 88.6 | 92.8 |
| Rsa1.0_01235.1.g24886.t1 | gb AAD26943.1  putative retroelement pol polyprotein [Arabidopsis thaliana]                                                                                                                                                                                                                                                                                                                                                                                                                                                                                                                                                                                                                                                                                                                                                                                                                                                                                                                       | 362  | 1454 | 1.00E-148 | 401.7 | 71.3 | 83.7 | putative retroelement pol polyprotein        | gbpln | Arabidopsis thaliana | AT4G23160.1   Symbols: CRK8   cysteine-rich RLK (RECEPTOR-like protein kinase) 8   chr4:12129485-12134086 FORWARD LENGTH=1262                                                                                                                                                                                                                                                                                                                                                                                                                   | 362  | 1262 | 1.00E-107 | 348.6 | 51.7 | 65.2 |
| Rsa1.0_01235.1.g24887.t4 | # # # # # # # # # # # # # # # #                                                                                                                                                                                                                                                                                                                                                                                                                                                                                                                                                                                                                                                                                                                                                                                                                                                                                                                                                                   |      |      |           |       |      |      |                                              |       |                      |                                                                                                                                                                                                                                                                                                                                                                                                                                                                                                                                                 |      |      |           |       |      |      |
| Rsa1.0_01236.1.g24888.t1 | gb EOA14225.1  hypothetical protein CARUB_v10027381mg [Capsella rubella]                                                                                                                                                                                                                                                                                                                                                                                                                                                                                                                                                                                                                                                                                                                                                                                                                                                                                                                          | 123  | 123  | 2.00E-62  | 100.0 | 97.6 | 99.2 | hypothetical protein CARUB_v10027381mg       | gbpln | Capsella rubella     | AT5G42890.1   Symbols: ATSCP2, SCP2   sterol carrier protein 2   chr5:17194458-17195910 REVERSE LENGTH=123                                                                                                                                                                                                                                                                                                                                                                                                                                      | 123  | 123  | 1.00E-64  | 100.0 | 95.9 | 99.2 |
| Rsa1.0_01236.1.g24889.t1 | ref NP_001190457.1  phosphatidic acid phosphohydrolase 2 [Arabidopsis thaliana] gi 332007495 gb AED94878.1  phosphatidic acid phosphohydrolase 2 [Arabidopsis thaliana]                                                                                                                                                                                                                                                                                                                                                                                                                                                                                                                                                                                                                                                                                                                                                                                                                           | 837  | 925  | 0         | 110.5 | 76.5 | 85.4 | phosphatidic acid phosphohydrolase 2         | gbpln | Arabidopsis thaliana | AT5G42870.2   Symbols: PAH2   phosphatidic acid phosphohydrolase 2   chr5:17185719-17189681 REVERSE LENGTH=925                                                                                                                                                                                                                                                                                                                                                                                                                                  | 837  | 925  | 0         | 110.5 | 76.5 | 85.4 |
| Rsa1.0_01236.1.g24890.t1 | gb EOA13721.1  hypothetical protein CARUB_v10026791mg [Capsella rubella]                                                                                                                                                                                                                                                                                                                                                                                                                                                                                                                                                                                                                                                                                                                                                                                                                                                                                                                          | 322  | 321  | 1.00E-141 | 99.7  | 89.8 | 93.2 | hypothetical protein CARUB_v10026791mg       | gbpln | Capsella rubella     | AT5G42860.1   Symbols:   unknown protein; FUNCTIONS IN: molecular_function unknown; INVOLVED IN: biological_process unknown; LOCATED IN: plasma membrane; EXPRESSED IN: 19 plant structures; EXPRESSED DURING: 11 growth stages; BEST Arabidopsis thaliana protein match is: unknown protein (TAIR:AT1G45688.1); Has 1807 Blast hits to 1807 proteins in 277 species: Archae - 0; Bacteria - 0; Metazoa - 736; Fungi - 347; Plants - 385; Viruses - 0; Other Eukaryotes - 339 (source: NCBI BLink).   chr5:17183339-17184857 REVERSE LENGTH=320 | 322  | 320  | 1.00E-143 | 99.4  | 88.2 | 92.5 |
| Rsa1.0_01236.1.g24891.t1 | ref NP_199096.1  Splicing factor U2af small subunit B [Arabidopsis thaliana] gi 42573547 ref NP_974870.1  Splicing factor U2af small subunit B [Arabidopsis thaliana] gi 75334092 sp Q9FMY5.1 U2AFB ARAT H RecName: Full=Splicing factor U2af small subunit B; AltName: Full=U2 auxiliary factor 35 kDa subunit B; AltName: Full=U2 small nuclear ribonucleoprotein auxiliary factor small subunit B; Short=U2 snRNP auxiliary factor small subunit B; AltName: Full=Zinc finger CCOH domain-containing protein 60; Short=AtC3H60 gi 10177285 dbj BAE10638.1  U2 snRNP auxiliary factor, small subunit [Arabidopsis thaliana] gi 22531195 gb AAM97101.1  U2 snRNP auxiliary factor small subunit [Arabidopsis thaliana] gi 23198022 gb AAN15538.1  U2 snRNP auxiliary factor small subunit [Arabidopsis thaliana] gi 332007485 gb AED94868.1  Splicing factor U2af small subunit B [Arabidopsis thaliana] gi 332007486 gb AED94869.1  Splicing factor U2af small subunit B [Arabidopsis thaliana] | 287  | 283  | 1.00E-117 | 98.6  | 85.7 | 88.5 | Splicing factor U2af small subunit B         | gbpln | Arabidopsis thaliana | AT5G42820.1   Symbols: ATU2AF35B, U2AF35B   Zinc finger C-x8-C-x5-C-x3-H type family protein   chr5:17170445-17171296 REVERSE LENGTH=283                                                                                                                                                                                                                                                                                                                                                                                                        | 287  | 283  | 1.00E-120 | 98.6  | 85.7 | 88.5 |

|                          |                                                                                                                                                                                                                                                                                                                                                                                                                                                                                                                                                                                                                                                 |     |     |           |       |      |      |                                                |       |                      |                                                                                                                                                                                                                                                                                                                                                                                                                                                                                                                                                               |     |     |           |       |      |      |
|--------------------------|-------------------------------------------------------------------------------------------------------------------------------------------------------------------------------------------------------------------------------------------------------------------------------------------------------------------------------------------------------------------------------------------------------------------------------------------------------------------------------------------------------------------------------------------------------------------------------------------------------------------------------------------------|-----|-----|-----------|-------|------|------|------------------------------------------------|-------|----------------------|---------------------------------------------------------------------------------------------------------------------------------------------------------------------------------------------------------------------------------------------------------------------------------------------------------------------------------------------------------------------------------------------------------------------------------------------------------------------------------------------------------------------------------------------------------------|-----|-----|-----------|-------|------|------|
| Rsa1.0_01236.1.g24892.t2 | refNP_568613.1  inositol-pentakisphosphate 2-kinase [Arabidopsis thaliana]<br>gi 75163638 sp Q93YN9.1 IPPK_ARATH<br>RecName: Full=Inositol-pentakisphosphate 2-kinase; AltName: Full=Inositol-1,3,4,5,6-pentakisphosphate 2-kinase; AltName: Full=Ins(1,3,4,5,6)P5 2-kinase; Short=ATIPK1; Short=InsP5 2-kinase<br>gi 16649057 gb AL24380.1  Unknown protein [Arabidopsis thaliana]<br>gi 20260028 gb AAM13361.1  unknown protein [Arabidopsis thaliana]<br>gi 74100007 gb AAZ99216.1  inositol polyphosphate IP4/IP5 2-kinase [Arabidopsis thaliana]<br>gi 332007484 gb AED94867.1  inositol-pentakisphosphate 2-kinase [Arabidopsis thaliana] | 600 | 451 | 0         | 75.2  | 60.5 | 64.8 | inositol-pentakisphosphate 2-kinase            | gbpln | Arabidopsis thaliana | AT5G42810.1   Symbols: ATIPK1, IPK1   inositol-pentakisphosphate 2-kinase 1   chr5:17167073-17169337 FORWARD LENGTH=451                                                                                                                                                                                                                                                                                                                                                                                                                                       | 600 | 451 | 0         | 75.2  | 60.5 | 64.8 |
| Rsa1.0_01236.1.g24893.t1 | refXP_004241213.1  PREDICTED: protein TOC75-3, chloroplastic-like [Solanum lycopersicum]                                                                                                                                                                                                                                                                                                                                                                                                                                                                                                                                                        | 84  | 812 | 4.00E-12  | 966.7 | 44.0 | 60.7 | PREDICTED: protein TOC75-3, chloroplastic-like | gbpln | Solanum lycopersicum | AT4G09080.1   Symbols: TOC75-IV, ATTOC75-IV   Outer membrane OMP85 family protein   chr4:5804451-5806093 FORWARD LENGTH=396                                                                                                                                                                                                                                                                                                                                                                                                                                   | 84  | 396 | 2.00E-14  | 471.4 | 44.0 | 59.5 |
| Rsa1.0_01236.1.g24894.t1 | gb ABF00984.1  disease resistance protein RPP13 variant [Arabidopsis thaliana]                                                                                                                                                                                                                                                                                                                                                                                                                                                                                                                                                                  | 871 | 843 | 0         | 96.8  | 65.0 | 78.4 | disease resistance protein RPP13 variant       | gbpln | Arabidopsis thaliana | AT3G46530.1   Symbols: RPP13   NB-ARC domain-containing disease resistance protein   chr3:17130739-17133246 REVERSE LENGTH=835                                                                                                                                                                                                                                                                                                                                                                                                                                | 871 | 835 | 0         | 95.9  | 65.6 | 77.6 |
| Rsa1.0_01236.1.g24895.t1 | gb ABL86389.1  dihydroflavonol 4-reductase [Brassica juncea]<br>gi 119656083 gb ABL86390.1  dihydroflavonol 4-reductase [Brassica juncea]                                                                                                                                                                                                                                                                                                                                                                                                                                                                                                       | 387 | 385 | 0         | 99.5  | 94.3 | 96.1 | dihydroflavonol 4-reductase                    | gbpln | Brassica juncea      | AT5G42800.1   Symbols: DFR, TT3, M318   dihydroflavonol 4-reductase   chr5:17164296-17165864 REVERSE LENGTH=382                                                                                                                                                                                                                                                                                                                                                                                                                                               | 387 | 382 | 0         | 98.7  | 84.5 | 91.2 |
| Rsa1.0_01236.1.g24896.t1 | refXP_002891341.1  hypothetical protein ARALYDRAFT_473874 [Arabidopsis lyrata subsp. lyrata]<br>gi 297337183 gb EFH67600.1  hypothetical protein ARALYDRAFT_473874 [Arabidopsis lyrata subsp. lyrata]                                                                                                                                                                                                                                                                                                                                                                                                                                           | 275 | 277 | 1.00E-141 | 100.7 | 90.9 | 94.5 | hypothetical protein ARALYDRAFT_473874         | gbpln | Arabidopsis lyrata   | AT1G47250.1   Symbols: PAF2   20S proteasome alpha subunit E2   chr1:17319220-17320900 FORWARD LENGTH=277                                                                                                                                                                                                                                                                                                                                                                                                                                                     | 275 | 277 | 1.00E-142 | 100.7 | 89.8 | 93.5 |
| Rsa1.0_01236.1.g24897.t1 | refNP_680381.1  uncharacterized protein [Arabidopsis thaliana]<br>gi 91806976 gb ABE66215.1  hypothetical protein AT5g42785 [Arabidopsis thaliana]<br>gi 332007480 gb AED94863.1  uncharacterized protein AT5G42785 [Arabidopsis thaliana]                                                                                                                                                                                                                                                                                                                                                                                                      | 108 | 115 | 6.00E-35  | 106.5 | 75.0 | 81.5 | uncharacterized protein                        | gbpln | Arabidopsis thaliana | AT5G42785.1   Symbols:   unknown protein; FUNCTIONS IN: molecular function unknown; INVOLVED IN: biological process unknown; LOCATED IN: endomembrane system; Has 30201 Blast hits to 17322 proteins in 780 species: Archae - 12; Bacteria - 1396; Metazoa - 17338; Fungi - 3422; Plants - 5037; Viruses - 0; Other Eukaryotes - 2996 (source: NCBI BLINK).   chr5:17157069-17157693 REVERSE LENGTH=115                                                                                                                                                       | 108 | 115 | 9.00E-38  | 106.5 | 75.0 | 81.5 |
| Rsa1.0_01236.1.g24898.t1 | refXP_002865484.1  ATHB27 [Arabidopsis lyrata subsp. lyrata]<br>gi 297311319 gb EFH41743.1  ATHB27 [Arabidopsis lyrata subsp. lyrata]                                                                                                                                                                                                                                                                                                                                                                                                                                                                                                           | 310 | 242 | 4.00E-17  | 78.1  | 13.9 | 14.8 | ATHB27                                         | gbpln | Arabidopsis lyrata   | AT5G42780.1   Symbols: ATHB27, HB27, ZHD13   homeobox protein 27   chr5:17154841-17155569 FORWARD LENGTH=242                                                                                                                                                                                                                                                                                                                                                                                                                                                  | 310 | 242 | 3.00E-19  | 78.1  | 15.2 | 16.5 |
| Rsa1.0_01236.1.g24899.t1 | refXP_002865485.1  hypothetical protein ARALYDRAFT_331123 [Arabidopsis lyrata subsp. lyrata]<br>gi 297311320 gb EFH41744.1  hypothetical protein ARALYDRAFT_331123 [Arabidopsis lyrata subsp. lyrata]                                                                                                                                                                                                                                                                                                                                                                                                                                           | 212 | 206 | 2.00E-92  | 97.2  | 82.1 | 88.2 | hypothetical protein ARALYDRAFT_331123         | gbpln | Arabidopsis lyrata   | AT5G42770.2   Symbols:   Maf-like protein   chr5:17152147-17154355 FORWARD LENGTH=233                                                                                                                                                                                                                                                                                                                                                                                                                                                                         | 212 | 233 | 9.00E-92  | 109.9 | 82.5 | 89.2 |
| Rsa1.0_01236.1.g24900.t1 | refNP_568612.1  uncharacterized protein [Arabidopsis thaliana]<br>gi 332007476 gb AED94859.1  uncharacterized protein AT5G42765 [Arabidopsis thaliana]                                                                                                                                                                                                                                                                                                                                                                                                                                                                                          | 224 | 229 | 2.00E-83  | 102.2 | 77.2 | 88.4 | uncharacterized protein                        | gbpln | Arabidopsis thaliana | AT5G42765.1   Symbols:   INVOLVED IN: biological process unknown; LOCATED IN: thylakoid, chloroplast thylakoid membrane, chloroplast; EXPRESSED IN: 22 plant structures; EXPRESSED DURING: 13 growth stages; CONTAINS InterPro DOMAIN/s: Twin-arginine translocation pathway, signal sequence (InterPro:IPR006311); Has 30201 Blast hits to 17322 proteins in 780 species: Archae - 12; Bacteria - 1396; Metazoa - 17338; Fungi - 3422; Plants - 5037; Viruses - 0; Other Eukaryotes - 2996 (source: NCBI BLINK).   chr5:17150505-17151641 REVERSE LENGTH=229 | 224 | 229 | 7.00E-86  | 102.2 | 77.2 | 88.4 |
| Rsa1.0_01236.1.g24901.t1 | dbj BAB17636.1  cytosolic phosphoglucose isomerase [Arabidopsis thaliana]                                                                                                                                                                                                                                                                                                                                                                                                                                                                                                                                                                       | 542 | 560 | 0         | 103.3 | 95.2 | 98.3 | cytosolic phosphoglucose isomerase             | gbpln | Arabidopsis thaliana | AT5G42740.1   Symbols:   Sugar isomerase (SIS) family protein   chr5:17136080-17140622 FORWARD LENGTH=560                                                                                                                                                                                                                                                                                                                                                                                                                                                     | 542 | 560 | 0         | 103.3 | 95.0 | 98.2 |

|                          |                                                                                                                                                                                                                                                                                                                                                     |      |      |           |       |      |      |                                        |       |                      |                                                                                                                                          |      |      |           |       |      |      |
|--------------------------|-----------------------------------------------------------------------------------------------------------------------------------------------------------------------------------------------------------------------------------------------------------------------------------------------------------------------------------------------------|------|------|-----------|-------|------|------|----------------------------------------|-------|----------------------|------------------------------------------------------------------------------------------------------------------------------------------|------|------|-----------|-------|------|------|
| Rsa1.0_01237.1.g24902.t1 | refNP_568012.1  Remorin family protein [Arabidopsis thaliana] gi4006876 emb[CAB16794.1] hypothetical protein [Arabidopsis thaliana] gi7270646 emb[CAB80363.1] hypothetical protein [Arabidopsis thaliana] gi23297309 gb AAN12938.1  unknown protein [Arabidopsis thaliana] gi332661326 gb AEE86726.1  Remorin family protein [Arabidopsis thaliana] | 414  | 427  | 1.00E-120 | 103.1 | 71.0 | 78.3 | Remorin family protein                 | gbpln | Arabidopsis thaliana | AT4G36970.1   Symbols: Remorin family protein   chr4:17429826-17431459 REVERSE LENGTH=427                                                | 414  | 427  | 1.00E-122 | 103.1 | 71.0 | 78.3 |
| Rsa1.0_01237.1.g24903.t1 | gb EOA19051.1  hypothetical protein CARUB_v10007712mg [Capsella rubella]                                                                                                                                                                                                                                                                            | 350  | 346  | 1.00E-150 | 98.9  | 78.0 | 85.1 | hypothetical protein CARUB_v10007712mg | gbpln | Capsella rubella     | AT4G36950.1   Symbols: MAPKKK21   mitogen-activated protein kinase kinase 21   chr4:17422834-17423844 REVERSE LENGTH=336                 | 350  | 336  | 1.00E-150 | 96.0  | 76.6 | 84.0 |
| Rsa1.0_01237.1.g24904.t1 | gb EOA16859.1  hypothetical protein CARUB_v10005083mg [Capsella rubella]                                                                                                                                                                                                                                                                            | 342  | 369  | 1.00E-107 | 107.9 | 74.0 | 82.2 | hypothetical protein CARUB_v10005083mg | gbpln | Capsella rubella     | AT4G36930.1   Symbols: SPT   basic helix-loop-helix (bHLH) DNA-binding superfamily protein   chr4:17414167-17415945 FORWARD LENGTH=373   | 342  | 373  | 1.00E-108 | 109.1 | 75.7 | 83.0 |
| Rsa1.0_01237.1.g24905.t1 | #                                                                                                                                                                                                                                                                                                                                                   | #    | #    | #         | #     | #    | #    | -                                      | ----  | ----                 | #                                                                                                                                        | #    | #    | #         | #     | #    |      |
| Rsa1.0_01237.1.g24906.t1 | emb CAA05084.1  putative Ckc2 [Arabidopsis thaliana]                                                                                                                                                                                                                                                                                                | 185  | 246  | 5.00E-39  | 133.0 | 53.5 | 61.1 | putative Ckc2                          | gbpln | Arabidopsis thaliana | AT3G16770.1   Symbols: RAP2.3, ATEBP, ERF72, EBP   ethylene-responsive element binding protein   chr3:5705784-5706768 FORWARD LENGTH=248 | 185  | 248  | 6.00E-40  | 134.1 | 51.4 | 54.1 |
| Rsa1.0_01237.1.g24907.t1 | emb CAA05084.1  putative Ckc2 [Arabidopsis thaliana]                                                                                                                                                                                                                                                                                                | 162  | 246  | 5.00E-31  | 151.9 | 53.1 | 60.5 | putative Ckc2                          | gbpln | Arabidopsis thaliana | AT3G16770.1   Symbols: RAP2.3, ATEBP, ERF72, EBP   ethylene-responsive element binding protein   chr3:5705784-5706768 FORWARD LENGTH=248 | 162  | 248  | 2.00E-31  | 153.1 | 51.2 | 53.7 |
| Rsa1.0_01237.1.g24908.t1 | dbj BAJ33685.1  unnamed protein product [Theilingella halophila]                                                                                                                                                                                                                                                                                    | 434  | 439  | 0         | 101.2 | 92.9 | 95.2 | unnamed protein product                | ----  | ----                 | AT4G36920.2   Symbols: AP2   Integrase-type DNA-binding superfamily protein   chr4:17400998-17403140 FORWARD LENGTH=432                  | 434  | 432  | 0         | 99.5  | 89.6 | 92.9 |
| Rsa1.0_01237.1.g24909.t1 | gb AAC49776.1  AP2 domain containing protein RAP2.10 [Arabidopsis thaliana] gi2632063 emb CAA05630.1  TINY-like protein [Arabidopsis thaliana]                                                                                                                                                                                                      | 183  | 259  | 1.00E-58  | 141.5 | 74.9 | 78.1 | AP2 domain containing protein RAP2.10  | gbpln | Arabidopsis thaliana | AT4G36900.1   Symbols: RAP2.10, DEAR4   related to AP2 10   chr4:17389015-17389605 FORWARD LENGTH=196                                    | 183  | 196  | 2.00E-60  | 107.1 | 74.9 | 78.1 |
| Rsa1.0_01237.1.g24910.t1 | emb CAB40035.1  retrotransposon like protein [Arabidopsis thaliana] gi17267767 emb CAB81170.1  retrotransposon like protein [Arabidopsis thaliana]                                                                                                                                                                                                  | 1457 | 1515 | 0         | 104.0 | 56.9 | 71.3 | retrotransposon like protein           | gbpln | Arabidopsis thaliana | AT4G23160.1   Symbols: CRK8   cysteine-rich RLK (RECEPTOR-like protein kinase) 8   chr4:12129485-12134086 FORWARD LENGTH=1262            | 1457 | 1262 | 1.00E-108 | 86.6  | 12.7 | 20.0 |
| Rsa1.0_01238.1.g24911.t1 | gb EOA31457.1  hypothetical protein CARUB_v10014643mg [Capsella rubella]                                                                                                                                                                                                                                                                            | 174  | 206  | 1.00E-57  | 118.4 | 65.5 | 67.2 | hypothetical protein CARUB_v10014643mg | gbpln | Capsella rubella     | AT3G24830.1   Symbols: Ribosomal protein L13 family protein   chr3:9064613-9065871 FORWARD LENGTH=206                                    | 174  | 206  | 6.00E-60  | 118.4 | 65.5 | 67.2 |
| Rsa1.0_01238.1.g24912.t1 | ref XP_002867884.1  predicted protein [Arabidopsis lyrata subsp. lyrata] gi297313720 gb EFH44143.1  predicted protein [Arabidopsis lyrata subsp. lyrata]                                                                                                                                                                                            | 175  | 175  | 2.00E-82  | 100.0 | 85.1 | 92.0 | predicted protein                      | gbpln | Arabidopsis lyrata   | AT4G20370.1   Symbols: TSF   PEBP (phosphatidyethanolamine-binding protein) family protein   chr4:11001011-11002965 REVERSE LENGTH=175   | 175  | 175  | 1.00E-82  | 100.0 | 82.9 | 89.7 |
| Rsa1.0_01238.1.g24913.t1 | ref XP_002862436.1  predicted protein [Arabidopsis lyrata subsp. lyrata] gi297307949 gb EFH38694.1  predicted protein [Arabidopsis lyrata subsp. lyrata]                                                                                                                                                                                            | 621  | 530  | 4.00E-41  | 85.3  | 14.2 | 18.7 | predicted protein                      | gbpln | Arabidopsis lyrata   | AT2G07760.1   Symbols: Zinc knuckle (CCHC-type) family protein   chr2:3584420-3586278 REVERSE LENGTH=530                                 | 621  | 530  | 1.00E-13  | 85.3  | 6.0  | 12.1 |
| Rsa1.0_01238.1.g24914.t1 | #                                                                                                                                                                                                                                                                                                                                                   | #    | #    | #         | #     | #    | #    | -                                      | ----  | ----                 | #                                                                                                                                        | #    | #    | #         | #     | #    |      |
| Rsa1.0_01238.1.g24915.t1 | #                                                                                                                                                                                                                                                                                                                                                   | #    | #    | #         | #     | #    | #    | -                                      | ----  | ----                 | #                                                                                                                                        | #    | #    | #         | #     | #    |      |
| Rsa1.0_01238.1.g24916.t1 | gb AAG50806.1 AC079281.8 unknown protein [Arabidopsis thaliana]                                                                                                                                                                                                                                                                                     | 1798 | 1213 | 0         | 67.5  | 35.0 | 46.5 | unknown protein                        | gbpln | Arabidopsis thaliana | AT1G43760.1   Symbols: DNase I-like superfamily protein   chr1:16528880-16531065 REVERSE LENGTH=626                                      | 1798 | 626  | 1.00E-74  | 34.8  | 9.0  | 14.0 |
| Rsa1.0_01238.1.g24917.t1 | dbj BAJ34070.1  unnamed protein product [Theilingella halophila]                                                                                                                                                                                                                                                                                    | 408  | 445  | 0         | 109.1 | 89.0 | 91.7 | unnamed protein product                | ----  | ----                 | AT1G76900.2   Symbols: AtTLP1, TLP1   tubby like protein 1   chr1:28882741-28884377 FORWARD LENGTH=455                                   | 408  | 455  | 0         | 111.5 | 87.0 | 90.7 |
| Rsa1.0_01239.1.g24918.t1 | gb EOA30637.1  hypothetical protein CARUB_v10013773mg [Capsella rubella]                                                                                                                                                                                                                                                                            | 423  | 425  | 0         | 100.5 | 74.7 | 83.5 | hypothetical protein CARUB_v10013773mg | gbpln | Capsella rubella     | AT3G23840.1   Symbols: HXXXD-type acyl-transferase family protein   chr3:8611177-8612559 FORWARD LENGTH=420                              | 423  | 420  | 1.00E-177 | 99.3  | 73.5 | 83.7 |

|                          |                                                                                                                                                                                                                                                                                                                                                                                                                                                                                                                                                                                                                                                                                                                                                                                                                                                                                                                                                                                                                                                                                                                                                                                                                                                                                                                                                                                                                                                                                                                                                          |      |      |           |       |      |      |                                           |       |                      |                                                                                                                                                                                                                                                                                                                                                                                                                                                                                                                              |      |      |           |       |      |      |
|--------------------------|----------------------------------------------------------------------------------------------------------------------------------------------------------------------------------------------------------------------------------------------------------------------------------------------------------------------------------------------------------------------------------------------------------------------------------------------------------------------------------------------------------------------------------------------------------------------------------------------------------------------------------------------------------------------------------------------------------------------------------------------------------------------------------------------------------------------------------------------------------------------------------------------------------------------------------------------------------------------------------------------------------------------------------------------------------------------------------------------------------------------------------------------------------------------------------------------------------------------------------------------------------------------------------------------------------------------------------------------------------------------------------------------------------------------------------------------------------------------------------------------------------------------------------------------------------|------|------|-----------|-------|------|------|-------------------------------------------|-------|----------------------|------------------------------------------------------------------------------------------------------------------------------------------------------------------------------------------------------------------------------------------------------------------------------------------------------------------------------------------------------------------------------------------------------------------------------------------------------------------------------------------------------------------------------|------|------|-----------|-------|------|------|
| Rsa1.0_01239.1.g24919.t1 | ref NP_567604.1  cysteine-rich repeat secretory protein 54 [Arabidopsis thaliana] gi 18415520 ref NP_567604.1  cysteine-rich repeat secretory protein 53 [Arabidopsis thaliana] gi 18415540 ref NP_567613.1  cysteine-rich repeat secretory protein 44 [Arabidopsis thaliana] gi 5262176 emb CAB45819.1  putative protein [Arabidopsis thaliana] gi 5262177 emb CAB45820.1  putative protein [Arabidopsis thaliana] gi 5262178 emb CAB45821.1  putative protein [Arabidopsis thaliana] gi 5262179 emb CAB45822.1  putative protein [Arabidopsis thaliana] gi 5262180 emb CAB45823.1  putative protein [Arabidopsis thaliana] gi 5262181 emb CAB45824.1  putative protein [Arabidopsis thaliana] gi 5262182 emb CAB45825.1  putative protein [Arabidopsis thaliana] gi 5262183 emb CAB45826.1  putative protein [Arabidopsis thaliana] gi 5262184 emb CAB45827.1  putative protein [Arabidopsis thaliana] gi 5262185 emb CAB45828.1  putative protein [Arabidopsis thaliana] gi 5262186 emb CAB45829.1  putative protein [Arabidopsis thaliana] gi 5262187 emb CAB45830.1  putative protein [Arabidopsis thaliana] gi 7268849 emb CAB79053.1  putative protein [Arabidopsis thaliana] ref XP_002868336.1  hypothetical protein ARALYDRAFT_493534 [Arabidopsis lyrata subsp. lyrata] gi 297314172 gb EFH44595.1  hypothetical protein ARALYDRAFT_493534 [Arabidopsis lyrata subsp. lyrata] ref XP_002885602.1  F-box family protein [Arabidopsis lyrata subsp. lyrata] gi 297331442 gb EFH61861.1  F-box family protein [Arabidopsis lyrata subsp. lyrata] | 100  | 468  | 3.00E-17  | 468.0 | 46.0 | 59.0 | cysteine-rich repeat secretory protein 54 | gbpln | Arabidopsis thaliana | AT4G20530.1   Symbols:   Protein with domains of unknown function (DUF26 and DUF1204)   chr4:11048627-11050975 FORWARD LENGTH=468                                                                                                                                                                                                                                                                                                                                                                                            | 100  | 468  | 5.00E-20  | 468.0 | 46.0 | 59.0 |
| Rsa1.0_01239.1.g24920.t1 | ref XP_002868336.1  hypothetical protein ARALYDRAFT_493534 [Arabidopsis lyrata subsp. lyrata] gi 297314172 gb EFH44595.1  hypothetical protein ARALYDRAFT_493534 [Arabidopsis lyrata subsp. lyrata] ref XP_002885602.1  F-box family protein [Arabidopsis lyrata subsp. lyrata] gi 297331442 gb EFH61861.1  F-box family protein [Arabidopsis lyrata subsp. lyrata]                                                                                                                                                                                                                                                                                                                                                                                                                                                                                                                                                                                                                                                                                                                                                                                                                                                                                                                                                                                                                                                                                                                                                                                      | 333  | 336  | 1.00E-150 | 100.9 | 84.1 | 90.7 | hypothetical protein ARALYDRAFT_493534    | gbpln | Arabidopsis lyrata   | AT3G23870.1   Symbols:   Protein of unknown function (DUF803)   chr3:8620253-8621755 FORWARD LENGTH=335                                                                                                                                                                                                                                                                                                                                                                                                                      | 333  | 335  | 1.00E-152 | 100.6 | 90.1 | 95.8 |
| Rsa1.0_01239.1.g24921.t1 | ref XP_002885602.1  F-box family protein [Arabidopsis lyrata subsp. lyrata] gi 297331442 gb EFH61861.1  F-box family protein [Arabidopsis lyrata subsp. lyrata]                                                                                                                                                                                                                                                                                                                                                                                                                                                                                                                                                                                                                                                                                                                                                                                                                                                                                                                                                                                                                                                                                                                                                                                                                                                                                                                                                                                          | 369  | 347  | 1.00E-173 | 94.0  | 81.6 | 86.7 | F-box family protein                      | gbpln | Arabidopsis lyrata   | AT3G23880.1   Symbols:   F-box and associated interaction domains-containing protein   chr3:8622061-8623155 REVERSE LENGTH=364                                                                                                                                                                                                                                                                                                                                                                                               | 369  | 364  | 1.00E-165 | 98.6  | 80.5 | 85.9 |
| Rsa1.0_01239.1.g24922.t1 | ref XP_002885604.1  hypothetical protein ARALYDRAFT_342541 [Arabidopsis lyrata subsp. lyrata] gi 297331444 gb EFH61863.1  hypothetical protein ARALYDRAFT_342541 [Arabidopsis lyrata subsp. lyrata]                                                                                                                                                                                                                                                                                                                                                                                                                                                                                                                                                                                                                                                                                                                                                                                                                                                                                                                                                                                                                                                                                                                                                                                                                                                                                                                                                      | 417  | 421  | 1.00E-172 | 101.0 | 76.3 | 86.8 | hypothetical protein ARALYDRAFT_342541    | gbpln | Arabidopsis lyrata   | AT3G23910.1   Symbols:   BEST Arabidopsis thaliana protein match is: RNA-directed DNA polymerase (reverse transcriptase)-related family protein (TAIR:AT3G24255.2); Has 562 Blast hits to 532 proteins in 147 species: Archae - 28; Bacteria - 51; Metazoa - 157; Fungi - 82; Plants - 85; Viruses - 6; Other Eukaryotes - 153 (source: NCBI BLINK).   chr3:8636594-8639344 REVERSE LENGTH=421                                                                                                                               | 417  | 421  | 1.00E-171 | 101.0 | 74.8 | 86.1 |
| Rsa1.0_01239.1.g24923.t8 | ref XP_002883472.1  hypothetical protein ARALYDRAFT_898937 [Arabidopsis lyrata subsp. lyrata] gi 297329312 gb EFH59731.1  hypothetical protein ARALYDRAFT_898937 [Arabidopsis lyrata subsp. lyrata]                                                                                                                                                                                                                                                                                                                                                                                                                                                                                                                                                                                                                                                                                                                                                                                                                                                                                                                                                                                                                                                                                                                                                                                                                                                                                                                                                      | 368  | 295  | 1.00E-44  | 80.2  | 35.9 | 50.0 | hypothetical protein ARALYDRAFT_898937    | gbpln | Arabidopsis lyrata   | AT3G24260.1   Symbols:   FUNCTIONS IN: molecular_function unknown; INVOLVED IN: biological_process unknown; LOCATED IN: chloroplast; CONTAINS InterPro DOMAIN/s: Histone deacetylase interacting (InterPro:IPR013194); BEST Arabidopsis thaliana protein match is: unknown protein (TAIR:AT3G28870.1); Has 220 Blast hits to 218 proteins in 65 species: Archae - 7; Bacteria - 6; Metazoa - 43; Fungi - 2; Plants - 115; Viruses - 0; Other Eukaryotes - 47 (source: NCBI BLINK).   chr3:8793837-8794961 REVERSE LENGTH=374 | 368  | 374  | 7.00E-32  | 101.6 | 24.2 | 34.5 |
| Rsa1.0_01239.1.g24924.t1 | ref XP_002885607.1  hypothetical protein ARALYDRAFT_479903 [Arabidopsis lyrata subsp. lyrata] gi 297331447 gb EFH61866.1  hypothetical protein ARALYDRAFT_479903 [Arabidopsis lyrata subsp. lyrata]                                                                                                                                                                                                                                                                                                                                                                                                                                                                                                                                                                                                                                                                                                                                                                                                                                                                                                                                                                                                                                                                                                                                                                                                                                                                                                                                                      | 1135 | 1140 | 0         | 100.4 | 90.3 | 93.6 | hypothetical protein ARALYDRAFT_479903    | gbpln | Arabidopsis lyrata   | AT3G24240.1   Symbols:   Leucine-rich repeat receptor-like protein kinase family protein   chr3:8780551-8784150 FORWARD LENGTH=1141                                                                                                                                                                                                                                                                                                                                                                                          | 1135 | 1141 | 0         | 100.5 | 88.4 | 92.0 |
| Rsa1.0_01239.1.g24925.t1 | emb CAN66208.1  hypothetical protein VITISV_035070 [Vitis vinifera]                                                                                                                                                                                                                                                                                                                                                                                                                                                                                                                                                                                                                                                                                                                                                                                                                                                                                                                                                                                                                                                                                                                                                                                                                                                                                                                                                                                                                                                                                      | 765  | 1496 | 0         | 195.6 | 65.4 | 78.4 | hypothetical protein VITISV_035070        | gbpln | Vitis vinifera       | AT4G23160.1   Symbols: CRK8   cysteine-rich RLK (RECEPTOR-like protein kinase) 8   chr4:12129485-12134086 FORWARD LENGTH=1262                                                                                                                                                                                                                                                                                                                                                                                                | 765  | 1262 | 7.00E-44  | 165.0 | 15.4 | 25.2 |
| Rsa1.0_01239.1.g24926.t2 | #                                                                                                                                                                                                                                                                                                                                                                                                                                                                                                                                                                                                                                                                                                                                                                                                                                                                                                                                                                                                                                                                                                                                                                                                                                                                                                                                                                                                                                                                                                                                                        | #    | #    | #         | #     | #    | -    | ----                                      | ----  | #                    | #                                                                                                                                                                                                                                                                                                                                                                                                                                                                                                                            | #    | #    | #         | #     | #    |      |

|                           |                                                                                                                                                                                                                                                                                                                                                                                                                        |      |      |           |       |      |      |                                                  |       |                      |                                                                                                                                                                                                                                                                                                                                                         |      |     |           |       |      |      |
|---------------------------|------------------------------------------------------------------------------------------------------------------------------------------------------------------------------------------------------------------------------------------------------------------------------------------------------------------------------------------------------------------------------------------------------------------------|------|------|-----------|-------|------|------|--------------------------------------------------|-------|----------------------|---------------------------------------------------------------------------------------------------------------------------------------------------------------------------------------------------------------------------------------------------------------------------------------------------------------------------------------------------------|------|-----|-----------|-------|------|------|
| Rsa1.0_01239.1.g24927.t1  | ref XP_002870357.1  pectate lyase family protein [Arabidopsis lyrata subsp. lyrata] gi 297316193 gb EFH46616.1  pectate lyase family protein [Arabidopsis lyrata subsp. lyrata]                                                                                                                                                                                                                                        | 366  | 484  | 1.00E-172 | 132.2 | 80.3 | 88.0 | pectate lyase family protein                     | gbpln | Arabidopsis lyrata   | AT4G13710.1   Symbols:   Pectin lyase-like superfamily protein   chr4:7962550-7966012 FORWARD LENGTH=470                                                                                                                                                                                                                                                | 366  | 470 | 1.00E-175 | 128.4 | 80.1 | 88.0 |
| Rsa1.0_01240.1.g24928.t2  | #                                                                                                                                                                                                                                                                                                                                                                                                                      | #    | #    | #         | #     | #    | #    | -                                                | ----  | ----                 | #                                                                                                                                                                                                                                                                                                                                                       | #    | #   | #         | #     | #    | #    |
| Rsa1.0_01240.1.g24929.t1  | gb AAG51046.1 AC069473.8 gypsy/Ty-3 retroelement polyprotein; 69905-74404 [Arabidopsis thaliana] gi 10998138 dbj BAB03109.1  retroelement pol polyprotein [Arabidopsis thaliana]                                                                                                                                                                                                                                       | 1455 | 1499 | 0         | 103.0 | 60.2 | 73.3 | gypsy/Ty-3 retroelement polyprotein; 69905-74404 | gbpln | Arabidopsis thaliana | ATMG00860.1   Symbols: ORF158   DNA/RNA polymerases superfamily protein   chrM:235916-236392 FORWARD LENGTH=158                                                                                                                                                                                                                                         | 1455 | 158 | 4.00E-33  | 10.9  | 4.5  | 5.9  |
| Rsa1.0_01240.1.g24930.t2  | ref NP_680393.1  minichromosome maintenance protein 6 [Arabidopsis thaliana] gi 332007758 gb AED95141.1  minichromosome maintenance protein 6 [Arabidopsis thaliana]                                                                                                                                                                                                                                                   | 621  | 831  | 4.00E-89  | 133.8 | 31.6 | 35.1 | minichromosome maintenance protein 6             | gbpln | Arabidopsis thaliana | AT5G44635.1   Symbols: MCM6   minichromosome maintenance (MCM2/3/5) family protein   chr5:18006431-18010542 REVERSE LENGTH=831                                                                                                                                                                                                                          | 621  | 831 | 9.00E-92  | 133.8 | 31.6 | 35.1 |
| Rsa1.0_01240.1.g24931.t20 | dbj BAM44535.1  polyprotein [Arabidopsis thaliana]                                                                                                                                                                                                                                                                                                                                                                     | 282  | 1475 | 4.00E-71  | 523.0 | 56.0 | 66.0 | polyprotein                                      | gbpln | Arabidopsis thaliana | #                                                                                                                                                                                                                                                                                                                                                       | #    | #   | #         | #     | #    | #    |
| Rsa1.0_01240.1.g24932.t1  | gb EOA14735.1  hypothetical protein CARUB_v10028028mg [Capsella rubella]                                                                                                                                                                                                                                                                                                                                               | 336  | 360  | 1.00E-126 | 107.1 | 80.4 | 89.0 | hypothetical protein CARUB_v10028028mg           | gbpln | Capsella rubella     | AT5G44660.1   Symbols:   unknown protein; BEST Arabidopsis thaliana protein match is: unknown protein (TAIR:AT4G20190.1); Has 944 Blast hits to 462 proteins in 141 species: Archae - 2; Bacteria - 370; Metazoa - 161; Fungi - 102; Plants - 64; Viruses - 6; Other Eukaryotes - 239 (source: NCBI BLink).   chr5:18015810-18017081 FORWARD LENGTH=423 | 336  | 423 | 1.00E-113 | 125.9 | 78.0 | 86.6 |
| Rsa1.0_01240.1.g24933.t1  | #                                                                                                                                                                                                                                                                                                                                                                                                                      | #    | #    | #         | #     | #    | #    | -                                                | ----  | ----                 | #                                                                                                                                                                                                                                                                                                                                                       | #    | #   | #         | #     | #    | #    |
| Rsa1.0_01240.1.g24934.t1  | ref NP_199281.1  DNA-3-methyladenine glycosylase I [Arabidopsis thaliana] gi 9758372 dbj BAB08821.1  unnamed protein product [Arabidopsis thaliana] gi 28393027 gb AAO41948.1  unknown protein [Arabidopsis thaliana] gi 28827242 gb AAO50465.1  unknown protein [Arabidopsis thaliana] gi 332007763 gb AED95146.1  putative 3-methyladenine glycosylase I [Arabidopsis thaliana]                                      | 349  | 353  | 1.00E-171 | 101.1 | 85.7 | 90.5 | DNA-3-methyladenine glycosylase I                | gbpln | Arabidopsis thaliana | AT5G44680.1   Symbols:   DNA glycosylase superfamily protein   chr5:18024461-18025893 REVERSE LENGTH=353                                                                                                                                                                                                                                                | 349  | 353 | 1.00E-173 | 101.1 | 85.7 | 90.5 |
| Rsa1.0_01241.1.g24935.t1  | ref XP_002886130.1  early-responsive to dehydration 7 [Arabidopsis lyrata subsp. lyrata] gi 297331970 gb EFH62389.1  early-responsive to dehydration 7 [Arabidopsis lyrata subsp. lyrata]                                                                                                                                                                                                                              | 453  | 450  | 0         | 99.3  | 85.4 | 92.7 | early-responsive to dehydration 7                | gbpln | Arabidopsis lyrata   | AT2G17840.1   Symbols: ERD7   Senescence/dehydration-associated protein-related   chr2:7755923-7757798 REVERSE LENGTH=452                                                                                                                                                                                                                               | 453  | 452 | 0         | 99.8  | 85.4 | 92.9 |
| Rsa1.0_01241.1.g24936.t1  | ref XP_002886132.1  hypothetical protein ARALYDRAFT_343407 [Arabidopsis lyrata subsp. lyrata] gi 297331972 gb EFH62391.1  hypothetical protein ARALYDRAFT_343407 [Arabidopsis lyrata subsp. lyrata]                                                                                                                                                                                                                    | 249  | 298  | 1.00E-117 | 119.7 | 83.9 | 89.2 | hypothetical protein ARALYDRAFT_343407           | gbpln | Arabidopsis lyrata   | AT2G17860.1   Symbols:   Pathogenesis-related thaumatin superfamily protein   chr2:7762257-7763018 REVERSE LENGTH=253                                                                                                                                                                                                                                   | 249  | 253 | 1.00E-116 | 101.6 | 81.1 | 88.4 |
| Rsa1.0_01241.1.g24937.t1  | gb EOA32089.1  hypothetical protein CARUB_v10015336mg [Capsella rubella]                                                                                                                                                                                                                                                                                                                                               | 296  | 310  | 7.00E-90  | 104.7 | 76.7 | 82.8 | hypothetical protein CARUB_v10015336mg           | gbpln | Capsella rubella     | AT2G17870.1   Symbols: ATCSP3, CSP3   cold shock domain protein 3   chr2:7764276-7765181 REVERSE LENGTH=301                                                                                                                                                                                                                                             | 296  | 301 | 8.00E-86  | 101.7 | 75.0 | 82.8 |
| Rsa1.0_01241.1.g24938.t1  | ref NP_179379.1  calcium-dependent protein kinase 16 [Arabidopsis thaliana] gi 75327228 sp Q7XJR9.1 CDPKG_ARAT H RecName: Full=Calcium-dependent protein kinase 16 gi 330251605 gb AEC06699.1  calcium-dependent protein kinase 16 [Arabidopsis thaliana]                                                                                                                                                              | 574  | 571  | 0         | 99.5  | 90.8 | 94.4 | calcium-dependent protein kinase 16              | gbpln | Arabidopsis thaliana | AT2G17890.1   Symbols: CPK16   calcium-dependent protein kinase 16   chr2:7769885-7772627 REVERSE LENGTH=571                                                                                                                                                                                                                                            | 574  | 571 | 0         | 99.5  | 90.8 | 94.4 |
| Rsa1.0_01241.1.g24939.t1  | #                                                                                                                                                                                                                                                                                                                                                                                                                      | #    | #    | #         | #     | #    | #    | -                                                | ----  | ----                 | #                                                                                                                                                                                                                                                                                                                                                       | #    | #   | #         | #     | #    | #    |
| Rsa1.0_01241.1.g24940.t1  | ref NP_849969.1  histone-lysine N-methyltransferase ASHR1 [Arabidopsis thaliana] gi 94707144 sp Q7XJS0.2 ASHR1_ARAT H RecName: Full=Histone-lysine N-methyltransferase ASHR1; AltName: Full=ASH1-related protein 1; AltName: Full=Protein SET DOMAIN GROUP 37 gi 145651792 gb ABP88121.1  At2g17900 [Arabidopsis thaliana] gi 330251606 gb AEC06700.1  histone-lysine N-methyltransferase ASHR1 [Arabidopsis thaliana] | 483  | 480  | 0         | 99.4  | 87.2 | 93.4 | histone-lysine N-methyltransferase ASHR1         | gbpln | Arabidopsis thaliana | AT2G17900.1   Symbols: SDG37   SET domain group 37   chr2:7773420-7776675 REVERSE LENGTH=480                                                                                                                                                                                                                                                            | 483  | 480 | 0         | 99.4  | 87.2 | 93.4 |
| Rsa1.0_01241.1.g24941.t1  | #                                                                                                                                                                                                                                                                                                                                                                                                                      | #    | #    | #         | #     | #    | #    | -                                                | ----  | ----                 | #                                                                                                                                                                                                                                                                                                                                                       | #    | #   | #         | #     | #    | #    |

|                          |                                                                                                                                                                                                                                                                                                                   |     |     |           |       |      |      |                                                  |       |                      |                                                                                                                                                                                                                                                                                                                                                                                                                                                                                                                                                                                 |     |     |           |       |      |      |
|--------------------------|-------------------------------------------------------------------------------------------------------------------------------------------------------------------------------------------------------------------------------------------------------------------------------------------------------------------|-----|-----|-----------|-------|------|------|--------------------------------------------------|-------|----------------------|---------------------------------------------------------------------------------------------------------------------------------------------------------------------------------------------------------------------------------------------------------------------------------------------------------------------------------------------------------------------------------------------------------------------------------------------------------------------------------------------------------------------------------------------------------------------------------|-----|-----|-----------|-------|------|------|
| Rsa1.0_01241.1.g24942.t1 | gb EOA31432.1  hypothetical protein CARUB_v10014611mg [Capsella rubella]                                                                                                                                                                                                                                          | 210 | 214 | 1.00E-67  | 101.9 | 70.5 | 78.1 | hypothetical protein CARUB_v10014611mg           | gbpln | Capsella rubella     | AT2G17940.1   Symbols:   Plant protein of unknown function (DUF827)   chr2:7802878-7803815 FORWARD LENGTH=208<br>AT1G57540.3   Symbols:   unknown protein; FUNCTIONS IN: molecular.function unknown; INVOLVED IN: biological.process unknown; LOCATED IN: cellular.component unknown; EXPRESSED IN: 23 plant structures; EXPRESSED DURING: 13 growth stages; Has 29 Blast hits to 29 proteins in 11 species: Archae - 0; Bacteria - 0; Metazoa - 0; Fungi - 0; Plants - 29; Viruses - 0; Other Eukaryotes - 0 (source: NCBI BLINK).   chr1:21310478-21311215 REVERSE LENGTH=103 | 210 | 208 | 2.00E-67  | 99.0  | 73.3 | 78.1 |
| Rsa1.0_01242.1.g24943.t1 | gb EOA35939.1  hypothetical protein CARUB_v10021196mg [Capsella rubella]                                                                                                                                                                                                                                          | 130 | 103 | 7.00E-48  | 79.2  | 70.8 | 73.8 | hypothetical protein CARUB_v10021196mg           | gbpln | Capsella rubella     |                                                                                                                                                                                                                                                                                                                                                                                                                                                                                                                                                                                 | 130 | 103 | 4.00E-50  | 79.2  | 70.0 | 73.1 |
| Rsa1.0_01242.1.g24944.t1 | ref XP_002891994.1  hypothetical protein ARALYDRAFT_314946 [Arabidopsis lyrata subsp. lyrata]   g 297337836 gb EFH68253.1  hypothetical protein ARALYDRAFT_314946 [Arabidopsis lyrata subsp. lyrata]                                                                                                              | 534 | 504 | 0         | 94.4  | 77.0 | 83.5 | hypothetical protein ARALYDRAFT_314946           | gbpln | Arabidopsis lyrata   | AT1G11910.1   Symbols: APA1, ATAPA1   aspartic proteinase A1   chr1:4017119-4019874 REVERSE LENGTH=506                                                                                                                                                                                                                                                                                                                                                                                                                                                                          | 534 | 506 | 1.00E-169 | 94.8  | 53.9 | 65.4 |
| Rsa1.0_01242.1.g24945.t3 | ref XP_002894677.1  membrane bound O-acyl transferase family protein [Arabidopsis lyrata subsp. lyrata]   g 297340519 gb EFH70936.1  membrane bound O-acyl transferase family protein [Arabidopsis lyrata subsp. lyrata]                                                                                          | 979 | 533 | 0         | 54.4  | 46.6 | 49.5 | membrane bound O-acyl transferase family protein | gbpln | Arabidopsis lyrata   | AT1G57600.1   Symbols:   MBOAT (membrane bound O-acyl transferase) family protein   chr1:21330729-21334596 REVERSE LENGTH=533                                                                                                                                                                                                                                                                                                                                                                                                                                                   | 979 | 533 | 0         | 54.4  | 46.2 | 49.2 |
| Rsa1.0_01242.1.g24946.t1 | emb CAC69066.1  GDP-Mannose transporter [Arabidopsis thaliana]                                                                                                                                                                                                                                                    | 574 | 333 | 1.00E-171 | 58.0  | 54.5 | 55.9 | GDP-Mannose transporter                          | gbpln | Arabidopsis thaliana | AT2G13650.3   Symbols: GONST1   golgi nucleotide sugar transporter 1   chr2:5687584-5690303 REVERSE LENGTH=333                                                                                                                                                                                                                                                                                                                                                                                                                                                                  | 574 | 333 | 1.00E-174 | 58.0  | 54.5 | 55.9 |
| Rsa1.0_01242.1.g24947.t1 | gb EOA34968.1  hypothetical protein CARUB_v10020054mg [Capsella rubella]                                                                                                                                                                                                                                          | 585 | 570 | 0         | 97.4  | 92.0 | 94.9 | hypothetical protein CARUB_v10020054mg           | gbpln | Capsella rubella     | AT1G57770.1   Symbols:   FAD/NAD(P)-binding oxidoreductase family protein   chr12:1395254-21398135 FORWARD LENGTH=574                                                                                                                                                                                                                                                                                                                                                                                                                                                           | 585 | 574 | 0         | 98.1  | 90.3 | 93.7 |
| Rsa1.0_01242.1.g24948.t1 | ref XP_002894690.1  hypothetical protein ARALYDRAFT_474859 [Arabidopsis lyrata subsp. lyrata]   g 297340532 gb EFH70949.1  hypothetical protein ARALYDRAFT_474859 [Arabidopsis lyrata subsp. lyrata]                                                                                                              | 497 | 499 | 0         | 100.4 | 73.4 | 86.1 | hypothetical protein ARALYDRAFT_474859           | gbpln | Arabidopsis lyrata   | AT1G57750.1   Symbols: MAH1, CYP96A15   cytochrome P450, family 96, subfamily A, polypeptide 15   chr1:21384186-21385679 REVERSE LENGTH=497                                                                                                                                                                                                                                                                                                                                                                                                                                     | 497 | 497 | 0         | 100.0 | 71.8 | 83.7 |
| Rsa1.0_01242.1.g24949.t1 | ref NP_195913.1  F-box/LRR-repeat protein [Arabidopsis thaliana]   g 75264447 sp Q9LYZ2.1 FBL80 ARAT H RecName: Full=Putative F-box/LRR-repeat protein At5g02930   g 7413568 emb CAB86047.1  putative protein [Arabidopsis thaliana]   g 332003154 gb AED90537.1  F-box/LRR-repeat protein [Arabidopsis thaliana] | 451 | 469 | 1.00E-102 | 104.0 | 49.2 | 66.5 | F-box/LRR-repeat protein                         | gbpln | Arabidopsis thaliana | AT5G02930.1   Symbols:   F-box/RNI-like superfamily protein   chr5:682577-684480 FORWARD LENGTH=469                                                                                                                                                                                                                                                                                                                                                                                                                                                                             | 451 | 469 | 1.00E-105 | 104.0 | 49.2 | 66.5 |
| Rsa1.0_01242.1.g24950.t1 | ref NP_195913.1  F-box/LRR-repeat protein [Arabidopsis thaliana]   g 75264447 sp Q9LYZ2.1 FBL80 ARAT H RecName: Full=Putative F-box/LRR-repeat protein At5g02930   g 7413568 emb CAB86047.1  putative protein [Arabidopsis thaliana]   g 332003154 gb AED90537.1  F-box/LRR-repeat protein [Arabidopsis thaliana] | 443 | 469 | 1.00E-103 | 105.9 | 51.0 | 67.5 | F-box/LRR-repeat protein                         | gbpln | Arabidopsis thaliana | AT5G02930.1   Symbols:   F-box/RNI-like superfamily protein   chr5:682577-684480 FORWARD LENGTH=469                                                                                                                                                                                                                                                                                                                                                                                                                                                                             | 443 | 469 | 1.00E-105 | 105.9 | 51.0 | 67.5 |
| Rsa1.0_01242.1.g24951.t1 | ref XP_002894690.1  hypothetical protein ARALYDRAFT_474859 [Arabidopsis lyrata subsp. lyrata]   g 297340532 gb EFH70949.1  hypothetical protein ARALYDRAFT_474859 [Arabidopsis lyrata subsp. lyrata]                                                                                                              | 496 | 499 | 0         | 100.6 | 81.3 | 89.9 | hypothetical protein ARALYDRAFT_474859           | gbpln | Arabidopsis lyrata   | AT1G57750.1   Symbols: MAH1, CYP96A15   cytochrome P450, family 96, subfamily A, polypeptide 15   chr1:21384186-21385679 REVERSE LENGTH=497                                                                                                                                                                                                                                                                                                                                                                                                                                     | 496 | 497 | 0         | 100.2 | 77.2 | 87.3 |
| Rsa1.0_01242.1.g24952.t1 | ref XP_002894690.1  hypothetical protein ARALYDRAFT_474859 [Arabidopsis lyrata subsp. lyrata]   g 297340532 gb EFH70949.1  hypothetical protein ARALYDRAFT_474859 [Arabidopsis lyrata subsp. lyrata]                                                                                                              | 471 | 499 | 0         | 105.9 | 82.6 | 92.4 | hypothetical protein ARALYDRAFT_474859           | gbpln | Arabidopsis lyrata   | AT1G57750.1   Symbols: MAH1, CYP96A15   cytochrome P450, family 96, subfamily A, polypeptide 15   chr1:21384186-21385679 REVERSE LENGTH=497                                                                                                                                                                                                                                                                                                                                                                                                                                     | 471 | 497 | 0         | 105.5 | 81.7 | 91.9 |
| Rsa1.0_01243.1.g24953.t1 | #                                                                                                                                                                                                                                                                                                                 | #   | #   | #         | #     | #    | #    | -                                                | ----  | ----                 | #                                                                                                                                                                                                                                                                                                                                                                                                                                                                                                                                                                               | #   | #   | #         | #     | #    |      |

|                          |                                                                                                                                                                                                                                                                                                                                                |     |      |           |       |      |      |                                                          |       |                      |                                                                                                                                                                                                                                                                                                                                                                                                                                                                                                                               |     |      |           |       |      |      |
|--------------------------|------------------------------------------------------------------------------------------------------------------------------------------------------------------------------------------------------------------------------------------------------------------------------------------------------------------------------------------------|-----|------|-----------|-------|------|------|----------------------------------------------------------|-------|----------------------|-------------------------------------------------------------------------------------------------------------------------------------------------------------------------------------------------------------------------------------------------------------------------------------------------------------------------------------------------------------------------------------------------------------------------------------------------------------------------------------------------------------------------------|-----|------|-----------|-------|------|------|
| Rsa1.0_01243.1.g24954.t1 | gb EOA20251.1  hypothetical protein CARUB_v10000551mg [Capsella rubella]                                                                                                                                                                                                                                                                       | 485 | 584  | 1.00E-176 | 120.4 | 67.8 | 81.2 | hypothetical protein CARUB_v10000551mg                   | gbpln | Capsella rubella     | AT4G11560.1   Symbols:   bromo-adjacent homology (BAH) domain-containing protein   chr4:7000095-7003445 REVERSE LENGTH=587                                                                                                                                                                                                                                                                                                                                                                                                    | 485 | 587  | 1.00E-178 | 121.0 | 68.2 | 80.0 |
| Rsa1.0_01243.1.g24955.t1 | ref NP_192893.2  bromo-adjacent homology (BAH) domain-containing protein [Arabidopsis thaliana] gi 19347810 gb AAL86355.1  unknown protein [Arabidopsis thaliana] gi 22136724 gb AAM91681.1  unknown protein [Arabidopsis thaliana] gi 332657624 gb AEE83024.1  bromo-adjacent homology (BAH) domain-containing protein [Arabidopsis thaliana] | 519 | 587  | 0         | 113.1 | 66.3 | 78.2 | bromo-adjacent homology (BAH) domain-containing protein  | gbpln | Arabidopsis thaliana | AT4G11560.1   Symbols:   bromo-adjacent homology (BAH) domain-containing protein   chr4:7000095-7003445 REVERSE LENGTH=587                                                                                                                                                                                                                                                                                                                                                                                                    | 519 | 587  | 0         | 113.1 | 66.3 | 78.2 |
| Rsa1.0_01243.1.g24956.t1 | gb AAG51783.1 AC079679.3 reverse transcriptase, putative; 16838-20266 [Arabidopsis thaliana]                                                                                                                                                                                                                                                   | 432 | 1142 | 4.00E-95  | 264.4 | 38.4 | 50.2 | reverse transcriptase, putative; 16838-20266             | gbpln | Arabidopsis thaliana | AT4G29090.1   Symbols:   Ribonuclease H-like superfamily protein   chr4:14333528-14335255 FORWARD LENGTH=575                                                                                                                                                                                                                                                                                                                                                                                                                  | 432 | 575  | 6.00E-19  | 133.1 | 9.0  | 13.0 |
| Rsa1.0_01243.1.g24957.t1 | gb ABD65624.1  hypothetical protein Z3.t00036 [Brassica oleracea]                                                                                                                                                                                                                                                                              | 937 | 842  | 1.00E-122 | 89.9  | 35.0 | 50.2 | hypothetical protein Z3.t00036                           | gbpln | Brassica oleracea    | AT2G07240.1   Symbols:   cysteine-type peptidases:cysteine-type peptidases   chr2:3007102-3011701 REVERSE LENGTH=874                                                                                                                                                                                                                                                                                                                                                                                                          | 937 | 874  | 2.00E-33  | 93.3  | 8.5  | 13.2 |
| Rsa1.0_01243.1.g24958.t1 | gb ABD65615.1  hypothetical protein Z3.t00033 [Brassica oleracea]                                                                                                                                                                                                                                                                              | 205 | 326  | 2.00E-27  | 159.0 | 30.2 | 53.2 | hypothetical protein Z3.t00033                           | gbpln | Brassica oleracea    | #                                                                                                                                                                                                                                                                                                                                                                                                                                                                                                                             | #   | #    | #         | #     | #    | #    |
| Rsa1.0_01243.1.g24959.t3 | gb AAC95212.1  Mutator-like transposase [Arabidopsis thaliana]                                                                                                                                                                                                                                                                                 | 958 | 915  | 1.00E-137 | 95.5  | 23.2 | 33.5 | Mutator-like transposase                                 | gbpln | Arabidopsis thaliana | AT1G64260.1   Symbols:   MuDR family transposase   chr1:23847756-23849915 FORWARD LENGTH=719                                                                                                                                                                                                                                                                                                                                                                                                                                  | 958 | 719  | 5.00E-30  | 75.1  | 10.8 | 17.8 |
| Rsa1.0_01243.1.g24960.t1 | ref XP_002872537.1  hypothetical protein ARALYDRAFT_489924 [Arabidopsis lyrata subsp. lyrata] gi 297318374 gb EFH48796.1  hypothetical protein ARALYDRAFT_489924 [Arabidopsis lyrata subsp. lyrata]                                                                                                                                            | 292 | 283  | 1.00E-108 | 96.9  | 71.6 | 78.8 | hypothetical protein ARALYDRAFT_489924                   | gbpln | Arabidopsis lyrata   | AT4G10800.1   Symbols:   BEST Arabidopsis thaliana protein match is: BTB/POZ domain-containing protein (TAIR:AT3G05675.1); Has 1807 Blast hits to 1807 proteins in 277 species: Archae - 0; Bacteria - 0; Metazoa - 736; Fungi - 347; Plants - 385; Viruses - 0; Other Eukaryotes - 339 (source: NCBI BLink).   chr4:6643678-6644529 FORWARD LENGTH=283                                                                                                                                                                       | 292 | 283  | 1.00E-107 | 96.9  | 69.5 | 76.7 |
| Rsa1.0_01243.1.g24961.t1 | ref XP_002874150.1  agenet domain-containing protein [Arabidopsis lyrata subsp. lyrata] gi 297319987 gb EFH50409.1  agenet domain-containing protein [Arabidopsis lyrata subsp. lyrata]                                                                                                                                                        | 294 | 552  | 8.00E-74  | 187.8 | 52.4 | 68.7 | agenet domain-containing protein                         | gbpln | Arabidopsis lyrata   | AT5G23800.1   Symbols:   ATDUF10, DUF 10   DOMAIN OF UNKNOWN FUNCTION 724 10   chr5:8022216-8024689 REVERSE LENGTH=552                                                                                                                                                                                                                                                                                                                                                                                                        | 294 | 552  | 2.00E-75  | 187.8 | 53.1 | 68.7 |
| Rsa1.0_01243.1.g24962.t1 | emb CAN76546.1  hypothetical protein VITISV_010420 [Vitis vinifera]                                                                                                                                                                                                                                                                            | 561 | 1288 | 2.00E-69  | 229.6 | 34.2 | 46.7 | hypothetical protein VITISV_010420                       | gbpln | Vitis vinifera       | AT4G23160.1   Symbols:   CRK8   cysteine-rich RLK (RECEPTOR-like protein kinase) 8   chr4:12129485-12134086 FORWARD LENGTH=1262                                                                                                                                                                                                                                                                                                                                                                                               | 561 | 1262 | 8.00E-43  | 225.0 | 20.3 | 27.5 |
| Rsa1.0_01243.1.g24963.t1 | #                                                                                                                                                                                                                                                                                                                                              | #   | #    | #         | #     | #    | -    | ----                                                     | ----  | ----                 | #                                                                                                                                                                                                                                                                                                                                                                                                                                                                                                                             | #   | #    | #         | #     | #    | #    |
| Rsa1.0_01243.1.g24964.t2 | gb AAG16628.1  protein serine/threonine kinase BNK1 [Brassica napus]                                                                                                                                                                                                                                                                           | 412 | 376  | 1.00E-169 | 91.3  | 75.7 | 79.1 | protein serine/threonine kinase BNK1                     | gbpln | Brassica napus       | AT5G02800.1   Symbols:   Protein kinase superfamily protein   chr5:635545-637374 REVERSE LENGTH=378                                                                                                                                                                                                                                                                                                                                                                                                                           | 412 | 378  | 1.00E-164 | 91.7  | 76.7 | 80.3 |
| Rsa1.0_01243.1.g24965.t1 | ref XP_002865752.1  UDP-glucuronosyl/UDP-glucosyl transferase family protein [Arabidopsis lyrata subsp. lyrata] gi 297311587 gb EFH42011.1  UDP-glucuronosyl/UDP-glucosyl transferase family protein [Arabidopsis lyrata subsp. lyrata]                                                                                                        | 379 | 515  | 1.00E-177 | 135.9 | 79.7 | 88.1 | UDP-glucuronosyl/UDP-glucosyl transferase family protein | gbpln | Arabidopsis lyrata   | AT5G49690.1   Symbols:   UDP-Glycosyltransferase superfamily protein   chr5:20189968-20191350 REVERSE LENGTH=460                                                                                                                                                                                                                                                                                                                                                                                                              | 379 | 460  | 1.00E-178 | 121.4 | 79.7 | 87.1 |
| Rsa1.0_01244.1.g24966.t1 | ref XP_002877968.1  ATVAMP727 [Arabidopsis lyrata subsp. lyrata] gi 297323806 gb EFH54227.1  ATVAMP727 [Arabidopsis lyrata subsp. lyrata]                                                                                                                                                                                                      | 70  | 240  | 5.00E-32  | 342.9 | 95.7 | 98.6 | ATVAMP727                                                | gbpln | Arabidopsis lyrata   | AT3G54300.2   Symbols:   ATVAMP727, VAMP727   vesicle-associated membrane protein 727   chr3:20108355-20110127 REVERSE LENGTH=240                                                                                                                                                                                                                                                                                                                                                                                             | 70  | 240  | 1.00E-34  | 342.9 | 95.7 | 97.1 |
| Rsa1.0_01244.1.g24967.t1 | ref XP_002877966.1  hypothetical protein ARALYDRAFT_485826 [Arabidopsis lyrata subsp. lyrata] gi 297323804 gb EFH54225.1  hypothetical protein ARALYDRAFT_485826 [Arabidopsis lyrata subsp. lyrata]                                                                                                                                            | 365 | 353  | 1.00E-160 | 96.7  | 77.8 | 84.1 | hypothetical protein ARALYDRAFT_485826                   | gbpln | Arabidopsis lyrata   | AT3G54290.1   Symbols:   FUNCTIONS IN: molecular_function unknown; INVOLVED IN: N-terminal protein myristoylation; LOCATED IN: chloroplast; EXPRESSED IN: 23 plant structures; EXPRESSED DURING: 13 growth stages; CONTAINS InterPro DOMAIN/s: Haemerythrin/HHE cation-binding motif (InterPro:IPR012312); Has 59 Blast hits to 59 proteins in 14 species: Archae - 0; Bacteria - 2; Metazoa - 0; Fungi - 0; Plants - 56; Viruses - 0; Other Eukaryotes - 1 (source: NCBI BLink).   chr3:20104623-20105845 REVERSE LENGTH=350 | 365 | 350  | 1.00E-160 | 95.9  | 77.0 | 84.4 |



|                          |                                                                                                                                                                                                                                                                                                                                                                                                                                                                                                                                                                                                                                                                                                      |      |      |          |       |      |      |                                                         |       |                      |                                                                                                                                                                                                           |      |      |          |       |      |      |
|--------------------------|------------------------------------------------------------------------------------------------------------------------------------------------------------------------------------------------------------------------------------------------------------------------------------------------------------------------------------------------------------------------------------------------------------------------------------------------------------------------------------------------------------------------------------------------------------------------------------------------------------------------------------------------------------------------------------------------------|------|------|----------|-------|------|------|---------------------------------------------------------|-------|----------------------|-----------------------------------------------------------------------------------------------------------------------------------------------------------------------------------------------------------|------|------|----------|-------|------|------|
| Rsa1.0.01244.1.g24968.t1 | refNP_190996.3  TATA box binding protein associated factor-like protein [Arabidopsis thaliana] gi 197691963 dbj BAG70033.1  homolog of human BTAF1 [Arabidopsis thaliana] gi 332645686 gb AEE79207.1  TATA box binding protein associated factor-like protein [Arabidopsis thaliana]                                                                                                                                                                                                                                                                                                                                                                                                                 | 2077 | 2045 | 0        | 98.5  | 90.1 | 93.9 | TATA box binding protein associated factor-like protein | gbpln | Arabidopsis thaliana | AT3G54280.1   Symbols: CHR16, CHA16, RGD3, ATBTAF1, BTAF1   DNA binding;ATP binding;nucleic acid binding;binding;helicases;ATP binding;DNA binding;helicases   chr3:20092361-20103807 FORWARD LENGTH=2045 | 2077 | 2045 | 0        | 98.5  | 90.1 | 93.9 |
| Rsa1.0.01244.1.g24969.t1 | refNP_190995.2  putative sucrose-phosphatase 3a [Arabidopsis thaliana] gi 206558305 sp Q93WU4.2 SPP3A_ARA TH RecName: Full=Probable sucrose-phosphatase 3a; Short=AtSPP3a gi 332645685 gb AEE79206.1  putative sucrose-phosphatase 3a [Arabidopsis thaliana]                                                                                                                                                                                                                                                                                                                                                                                                                                         | 426  | 425  | 0        | 99.8  | 81.5 | 89.7 | putative sucrose-phosphatase 3a                         | gbpln | Arabidopsis thaliana | AT3G54270.1   Symbols:   sucrose-6F-phosphate phosphohydrolase family protein   chr3:20087419-20089735 REVERSE LENGTH=425                                                                                 | 426  | 425  | 0        | 99.8  | 81.5 | 89.7 |
| Rsa1.0.01244.1.g24970.t1 | refNP_566995.1  diphosphomevalonate decarboxylase [Arabidopsis thaliana] gi 332645683 gb AEE79204.1  diphosphomevalonate decarboxylase [Arabidopsis thaliana]                                                                                                                                                                                                                                                                                                                                                                                                                                                                                                                                        | 419  | 419  | 0        | 100.0 | 94.0 | 96.4 | diphosphomevalonate decarboxylase                       | gbpln | Arabidopsis thaliana | AT3G54250.1   Symbols:   GHMP kinase family protein   chr3:20082468-20084688 REVERSE LENGTH=419                                                                                                           | 419  | 419  | 0        | 100.0 | 94.0 | 96.4 |
| Rsa1.0.01244.1.g24971.t1 | #                                                                                                                                                                                                                                                                                                                                                                                                                                                                                                                                                                                                                                                                                                    | #    | #    | #        | #     | #    | #    | -                                                       | ----  | ----                 | #                                                                                                                                                                                                         | #    | #    | #        | #     | #    |      |
| Rsa1.0.01244.1.g24972.t1 | gb ADE44117.1  suppressor of ABI3-5 [Arabidopsis thaliana]                                                                                                                                                                                                                                                                                                                                                                                                                                                                                                                                                                                                                                           | 985  | 1007 | 0        | 102.2 | 80.7 | 88.3 | suppressor of ABI3-5                                    | gbpln | Arabidopsis thaliana | AT3G54230.1   Symbols: SUA   suppressor of abi3-5   chr3:20073872-20080142 FORWARD LENGTH=1007                                                                                                            | 985  | 1007 | 0        | 102.2 | 80.9 | 88.5 |
| Rsa1.0.01244.1.g24973.t1 | refXP_002876247.1  hypothetical protein ARALYDRAFT_485819 [Arabidopsis lyrata subsp. lyrata] gi 297322085 gb EFH52506.1  hypothetical protein ARALYDRAFT_485819 [Arabidopsis lyrata subsp. lyrata]                                                                                                                                                                                                                                                                                                                                                                                                                                                                                                   | 635  | 646  | 0        | 101.7 | 83.1 | 85.5 | hypothetical protein ARALYDRAFT_485819                  | gbpln | Arabidopsis lyrata   | AT3G54220.1   Symbols: SCR, SGR1   GRAS family transcription factor   chr3:20070550-20072625 FORWARD LENGTH=653                                                                                           | 635  | 653  | 0        | 102.8 | 83.0 | 85.2 |
| Rsa1.0.01244.1.g24974.t1 | refNP_190989.1  50S ribosomal protein L17 [Arabidopsis thaliana] gi 75311820 sp Q9M385.1 RK17_ARATH RecName: Full=50S ribosomal protein L17, chloroplastic; AltName: Full=CL17; Flags: Precursor gi 14030669 gb AAK53009.1 AF375425.1 AT3g54210/F24B22_170 [Arabidopsis thaliana] gi 6822067 emb CAB70995.1  ribosomal protein L17-like protein [Arabidopsis thaliana] gi 21700779 gb AAM70513.1  AT3g54210/F24B22_170 [Arabidopsis thaliana] gi 22530904 gb AAM96956.1  ribosomal protein L17-like protein [Arabidopsis thaliana] gi 23198410 gb AANI5732.1  ribosomal protein L17-like protein [Arabidopsis thaliana] gi 332645678 gb AEE79199.1  50S ribosomal protein L17 [Arabidopsis thaliana] | 201  | 211  | 5.00E-97 | 105.0 | 91.5 | 94.5 | 50S ribosomal protein L17                               | gbpln | Arabidopsis thaliana | AT3G54210.1   Symbols:   Ribosomal protein L17 family protein   chr3:20067672-20068385 REVERSE LENGTH=211                                                                                                 | 201  | 211  | 2.00E-99 | 105.0 | 91.5 | 94.5 |
| Rsa1.0.01244.1.g24975.t1 | refXP_002876246.1  hypothetical protein ARALYDRAFT_485817 [Arabidopsis lyrata subsp. lyrata] gi 297322084 gb EFH52505.1  hypothetical protein ARALYDRAFT_485817 [Arabidopsis lyrata subsp. lyrata]                                                                                                                                                                                                                                                                                                                                                                                                                                                                                                   | 231  | 235  | 3.00E-82 | 101.7 | 73.2 | 89.2 | hypothetical protein ARALYDRAFT_485817                  | gbpln | Arabidopsis lyrata   | AT3G54200.1   Symbols:   Late embryogenesis abundant (LEA) hydroxyproline-rich glycoprotein family   chr3:20065731-20066438 FORWARD LENGTH=235                                                            | 231  | 235  | 8.00E-70 | 101.7 | 70.1 | 85.7 |
| Rsa1.0.01245.1.g24976.t1 | #                                                                                                                                                                                                                                                                                                                                                                                                                                                                                                                                                                                                                                                                                                    | #    | #    | #        | #     | #    | #    | -                                                       | ----  | ----                 | #                                                                                                                                                                                                         | #    | #    | #        | #     | #    |      |
| Rsa1.0.01245.1.g24977.t1 | #                                                                                                                                                                                                                                                                                                                                                                                                                                                                                                                                                                                                                                                                                                    | #    | #    | #        | #     | #    | #    | -                                                       | ----  | ----                 | #                                                                                                                                                                                                         | #    | #    | #        | #     | #    |      |
| Rsa1.0.01245.1.g24978.t1 | refNP_188216.2  DNA topoisomerase-like protein [Arabidopsis thaliana] gi 9294600 dbj BAB02881.1  unnamed protein product [Arabidopsis thaliana] gi 21539511 gb AAM53308.1  unknown protein [Arabidopsis thaliana] gi 24899759 gb AAN65094.1  unknown protein [Arabidopsis thaliana] gi 332642230 gb AEE75751.1  DNA topoisomerase-like protein [Arabidopsis thaliana]                                                                                                                                                                                                                                                                                                                                | 749  | 772  | 0        | 103.1 | 80.0 | 88.8 | DNA topoisomerase-like protein                          | gbpln | Arabidopsis thaliana | AT3G15950.1   Symbols: NAI2   DNA topoisomerase-related   chr3:5397783-5402610 REVERSE LENGTH=772                                                                                                         | 749  | 772  | 0        | 103.1 | 80.0 | 88.8 |
| Rsa1.0.01245.1.g24979.t1 | #                                                                                                                                                                                                                                                                                                                                                                                                                                                                                                                                                                                                                                                                                                    | #    | #    | #        | #     | #    | #    | -                                                       | ----  | ----                 | #                                                                                                                                                                                                         | #    | #    | #        | #     | #    |      |
| Rsa1.0.01245.1.g24980.t1 | emb CAN64334.1  hypothetical protein VITISV_039730 [Vitis vinifera]                                                                                                                                                                                                                                                                                                                                                                                                                                                                                                                                                                                                                                  | 168  | 1098 | 4.00E-67 | 653.6 | 76.8 | 85.7 | hypothetical protein VITISV_039730                      | gbpln | Vitis vinifera       | AT4G14540.1   Symbols: NF-YB3   nuclear factor Y, subunit B3   chr4:8344663-8345148 FORWARD LENGTH=161                                                                                                    | 168  | 161  | 4.00E-68 | 95.8  | 81.5 | 85.1 |

|                          |                                                                                                                                                                                                                                                                                                                                                                                                                                 |     |      |           |       |      |      |                                                             |       |                      |                                                                                                                                                                                                                                                                                                                                                                                                                                                                                                                                                                                       |     |     |           |       |      |      |
|--------------------------|---------------------------------------------------------------------------------------------------------------------------------------------------------------------------------------------------------------------------------------------------------------------------------------------------------------------------------------------------------------------------------------------------------------------------------|-----|------|-----------|-------|------|------|-------------------------------------------------------------|-------|----------------------|---------------------------------------------------------------------------------------------------------------------------------------------------------------------------------------------------------------------------------------------------------------------------------------------------------------------------------------------------------------------------------------------------------------------------------------------------------------------------------------------------------------------------------------------------------------------------------------|-----|-----|-----------|-------|------|------|
| Rsa1.0_01245.1.g24981.t1 | refXP_002885116.1  glycosyl transferase family 1 protein [Arabidopsis lyrata subsp. lyrata] gi 297330956 gb EFH61375.1  glycosyl transferase family 1 protein [Arabidopsis lyrata subsp. lyrata]                                                                                                                                                                                                                                | 670 | 696  | 0         | 103.9 | 84.9 | 90.9 | glycosyl transferase family 1 protein                       | gbpln | Arabidopsis lyrata   | AT3G15940.2   Symbols:   UDP-Glycosyltransferase superfamily protein   chr3:5359832-5396187 REVERSE LENGTH=697                                                                                                                                                                                                                                                                                                                                                                                                                                                                        | 670 | 697 | 0         | 104.0 | 84.2 | 90.4 |
| Rsa1.0_01245.1.g24982.t3 | gb ABS86965.1  delta-9 fatty acid desaturase [Descurainia sophia]                                                                                                                                                                                                                                                                                                                                                               | 495 | 377  | 4.00E-61  | 76.2  | 21.8 | 27.7 | delta-9 fatty acid desaturase                               | gbpln | Descurainia sophia   | AT3G15850.1   Symbols: FAD5, FADB, JB67, ADS3   fatty acid desaturase 5   chr3:5359087-5360998 FORWARD LENGTH=371                                                                                                                                                                                                                                                                                                                                                                                                                                                                     | 495 | 371 | 2.00E-61  | 74.9  | 22.0 | 27.9 |
| Rsa1.0_01245.1.g24983.t1 | refNP_188207.1  uncharacterized protein [Arabidopsis thaliana] gi 52354305 gb AAU4473.1  hypothetical protein AT3G15860 [Arabidopsis thaliana] gi 55740627 gb AAV63906.1  hypothetical protein AT3G15860 [Arabidopsis thaliana] gi 332642217 gb AEE75738.1  uncharacterized protein AT3G15860 [Arabidopsis thaliana]                                                                                                            | 146 | 170  | 8.00E-68  | 116.4 | 89.7 | 94.5 | uncharacterized protein                                     | gbpln | Arabidopsis thaliana | AT3G15860.1   Symbols:   FUNCTIONS IN: molecular function unknown; INVOLVED IN: biological process unknown; LOCATED IN: endomembrane system; EXPRESSED IN: pollen tube; CONTAINS InterPro DOMAIN/s: Plant self-incompatibility S1 (InterPro:IPR010264); BEST Arabidopsis thaliana protein match is: Plant self-incompatibility protein S1 family (TAIR:AT5G26090.1); Has 19 Blast hits to 16 proteins in 2 species: Archaee = 0; Bacteria = 0; Metazoa = 0; Fungi = 0; Plants = 19; Viruses = 0; Other Eukaryotes = 0 (source: NCBI BLINK).   chr3:5361207-5361719 REVERSE LENGTH=170 | 146 | 170 | 2.00E-70  | 116.4 | 89.7 | 94.5 |
| Rsa1.0_01245.1.g24984.t1 | gb EOA30854.1  hypothetical protein CARUB_v10013996mg [Capsella rubella]                                                                                                                                                                                                                                                                                                                                                        | 374 | 368  | 0         | 98.4  | 85.0 | 91.7 | hypothetical protein CARUB_v10013996mg                      | gbpln | Capsella rubella     | AT3G15850.1   Symbols: FAD5, FADB, JB67, ADS3   fatty acid desaturase 5   chr3:5359087-5360998 FORWARD LENGTH=371                                                                                                                                                                                                                                                                                                                                                                                                                                                                     | 374 | 371 | 1.00E-178 | 99.2  | 84.5 | 90.4 |
| Rsa1.0_01245.1.g24985.t1 | refNP_566528.1  post-illumination chlorophyll fluorescence increase protein [Arabidopsis thaliana] gi 1194356 dbj BAB02315.1  unnamed protein product [Arabidopsis thaliana] gi 14334704 gb AAK59530.1  unknown protein [Arabidopsis thaliana] gi 22136938 gb AAM91813.1  unknown protein [Arabidopsis thaliana] gi 332642211 gb AEE75732.1  post-illumination chlorophyll fluorescence increase protein [Arabidopsis thaliana] | 293 | 268  | 1.00E-142 | 91.5  | 85.3 | 87.7 | post-illumination chlorophyll fluorescence increase protein | gbpln | Arabidopsis thaliana | AT3G15840.1   Symbols: PIFI   post-illumination chlorophyll fluorescence increase   chr3:5356782-5358418 REVERSE LENGTH=268                                                                                                                                                                                                                                                                                                                                                                                                                                                           | 293 | 268 | 1.00E-145 | 91.5  | 85.3 | 87.7 |
| Rsa1.0_01245.1.g24986.t1 | refXP_002882965.1  hypothetical protein ARALYDRAFT_897881 [Arabidopsis lyrata subsp. lyrata] gi 297328805 gb EFH59224.1  hypothetical protein ARALYDRAFT_897881 [Arabidopsis lyrata subsp. lyrata]                                                                                                                                                                                                                              | 286 | 301  | 1.00E-139 | 105.2 | 88.5 | 94.4 | hypothetical protein ARALYDRAFT_897881                      | gbpln | Arabidopsis lyrata   | AT3G15820.1   Symbols: ROD1   phosphatidic acid phosphatase-related / PAP2-related   chr3:5351217-5353573 FORWARD LENGTH=301                                                                                                                                                                                                                                                                                                                                                                                                                                                          | 286 | 301 | 1.00E-138 | 105.2 | 85.7 | 93.0 |
| Rsa1.0_01245.1.g24987.t1 | refXP_002885109.1  hypothetical protein ARALYDRAFT_897880 [Arabidopsis lyrata subsp. lyrata] gi 297330949 gb EFH61368.1  hypothetical protein ARALYDRAFT_897880 [Arabidopsis lyrata subsp. lyrata]                                                                                                                                                                                                                              | 218 | 220  | 1.00E-108 | 100.9 | 90.4 | 93.6 | hypothetical protein ARALYDRAFT_897880                      | gbpln | Arabidopsis lyrata   | AT3G15810.1   Symbols:   Protein of unknown function (DUF567)   chr3:5348054-5349178 REVERSE LENGTH=220                                                                                                                                                                                                                                                                                                                                                                                                                                                                               | 218 | 220 | 1.00E-109 | 100.9 | 89.4 | 92.7 |
| Rsa1.0_01245.1.g24988.t1 | dbj BAB02311.1  beta-1,3-glucanase-like protein [Arabidopsis thaliana]                                                                                                                                                                                                                                                                                                                                                          | 393 | 391  | 0         | 99.5  | 79.9 | 83.5 | beta-1,3-glucanase-like protein                             | gbpln | Arabidopsis thaliana | AT3G15800.1   Symbols:   Glycosyl hydrolase superfamily protein   chr3:5345051-5346988 FORWARD LENGTH=399                                                                                                                                                                                                                                                                                                                                                                                                                                                                             | 393 | 399 | 0         | 101.5 | 79.4 | 83.0 |
| Rsa1.0_01246.1.g24989.t1 | dbj BAB08714.1  non-LTR retroelement reverse transcriptase-like protein [Arabidopsis thaliana]                                                                                                                                                                                                                                                                                                                                  | 544 | 1197 | 1.00E-90  | 220.0 | 39.3 | 53.1 | non-LTR retroelement reverse transcriptase-like protein     | gbpln | Arabidopsis thaliana | AT4G29090.1   Symbols:   Ribonuclease H-like superfamily protein   chr4:14333528-14335255 FORWARD LENGTH=575                                                                                                                                                                                                                                                                                                                                                                                                                                                                          | 544 | 575 | 6.00E-48  | 105.7 | 26.3 | 42.1 |
| Rsa1.0_01246.1.g24990.t1 | #                                                                                                                                                                                                                                                                                                                                                                                                                               | #   | #    | #         | #     | #    | -    | ---                                                         | ---   | ---                  | #                                                                                                                                                                                                                                                                                                                                                                                                                                                                                                                                                                                     | #   | #   | #         | #     | #    |      |
| Rsa1.0_01246.1.g24991.t1 | dbj BAJ34416.1  unnamed protein product [Thelungella halophila]                                                                                                                                                                                                                                                                                                                                                                 | 317 | 334  | 1.00E-131 | 105.4 | 92.4 | 94.0 | unnamed protein product                                     | ---   | ---                  | AT1G69690.1   Symbols:   TCP family transcription factor   chr1:26216449-26217426 FORWARD LENGTH=325                                                                                                                                                                                                                                                                                                                                                                                                                                                                                  | 317 | 325 | 1.00E-120 | 102.5 | 87.4 | 91.5 |

|                          |                                                                                                                                                                                                                                                                                                                                                                                                                                                                                                                                                                                                                                                                                                                                                                         |     |      |           |       |      |      |                                                     |       |                      |                                                                                                                                                                                                                                                                                                                                                |     |     |           |       |      |      |
|--------------------------|-------------------------------------------------------------------------------------------------------------------------------------------------------------------------------------------------------------------------------------------------------------------------------------------------------------------------------------------------------------------------------------------------------------------------------------------------------------------------------------------------------------------------------------------------------------------------------------------------------------------------------------------------------------------------------------------------------------------------------------------------------------------------|-----|------|-----------|-------|------|------|-----------------------------------------------------|-------|----------------------|------------------------------------------------------------------------------------------------------------------------------------------------------------------------------------------------------------------------------------------------------------------------------------------------------------------------------------------------|-----|-----|-----------|-------|------|------|
| Rsa1.0_01246.1.g24992.t1 | ref NP_564878.1  60S ribosomal protein L10-3 [Arabidopsis thaliana]<br>gi 297838747 ref XP_002887255.1  60S ribosomal protein L10 [Arabidopsis lyrata subsp. lyrata]<br>gi 175249285 sp Q93W22.1 RL103.ARAAT.H RecName: Full=60S ribosomal protein L10-3<br>gi 14194141 gb AAK56265.1 AF367276.1 At1g66580/T1217.3 [Arabidopsis thaliana] gi 15777885 gb AAL05903.1  At1g66580/T1217.3 [Arabidopsis thaliana] gi 21593025 gb AAM64974.1  60S ribosomal protein L10, putative [Arabidopsis thaliana]<br>gi 297333096 gb EFH63514.1  60S ribosomal protein L10 [Arabidopsis lyrata subsp. lyrata]<br>gi 332196410 gb AEE34531.1  60S ribosomal protein L10-3 [Arabidopsis thaliana] gi 482569259 gb EOA33447.1  hypothetical protein CARUB_v10020922mg [Capsella rubella] | 221 | 221  | 1.00E-123 | 100.0 | 96.4 | 98.6 | 60S ribosomal protein L10-3                         | gbpln | Arabidopsis lyrata   | AT1G66580.1   Symbols: SAG24, RPL10C   senescence associated gene 24   chr1:24839208-24840439 FORWARD LENGTH=221                                                                                                                                                                                                                               | 221 | 221 | 1.00E-126 | 100.0 | 96.4 | 98.6 |
| Rsa1.0_01246.1.g24993.t1 | gb AAG51175.1 AC079285.8 hypothetical protein [Arabidopsis thaliana]                                                                                                                                                                                                                                                                                                                                                                                                                                                                                                                                                                                                                                                                                                    | 94  | 135  | 6.00E-45  | 143.6 | 92.6 | 94.7 | hypothetical protein                                | gbpln | Arabidopsis thaliana | AT1G66590.1   Symbols: ATCOX19-1, COX19-1   cytochrome c oxidase 19-1   chr1:24841191-24842157 FORWARD LENGTH=98                                                                                                                                                                                                                               | 94  | 98  | 4.00E-47  | 104.3 | 92.6 | 94.7 |
| Rsa1.0_01246.1.g24994.t1 | gb AAM63020.1  unknown [Arabidopsis thaliana]                                                                                                                                                                                                                                                                                                                                                                                                                                                                                                                                                                                                                                                                                                                           | 180 | 177  | 6.00E-55  | 98.3  | 73.3 | 82.2 | unknown                                             | gbpln | Arabidopsis thaliana | AT1G69760.1   Symbols:   unknown protein; BEST Arabidopsis thaliana protein match is: unknown protein (TAIR:AT1G28920.1); Has 51 Blast hits to 51 proteins in 15 species: Archaea - 0; Bacteria - 2; Metazoa - 2; Fungi - 7; Plants - 29; Viruses - 0; Other Eukaryotes - 11 (source: NCBI BLINK).   chr1:26240094-26240627 REVERSE LENGTH=177 | 180 | 177 | 1.00E-56  | 98.3  | 72.2 | 82.2 |
| Rsa1.0_01247.1.g24995.t2 | gb AAC33226.1  putative non-LTR retroelement reverse transcriptase [Arabidopsis thaliana]                                                                                                                                                                                                                                                                                                                                                                                                                                                                                                                                                                                                                                                                               | 922 | 1529 | 1.00E-115 | 165.8 | 28.1 | 43.3 | putative non-LTR retroelement reverse transcriptase | gbpln | Arabidopsis thaliana | AT1G43760.1   Symbols:   DNase I-like superfamily protein   chr1:16528820-16531065 REVERSE LENGTH=626                                                                                                                                                                                                                                          | 922 | 626 | 5.00E-33  | 67.9  | 8.0  | 12.9 |
| Rsa1.0_01247.1.g24996.t1 | gb EOA22023.1  hypothetical protein CARUB_v10002546mg [Capsella rubella]                                                                                                                                                                                                                                                                                                                                                                                                                                                                                                                                                                                                                                                                                                | 131 | 251  | 2.00E-42  | 191.6 | 71.8 | 83.2 | hypothetical protein CARUB_v10002546mg              | gbpln | Capsella rubella     | AT5G24560.1   Symbols: AtPP2-B12, PP2-B12   phloem protein 2-B12   chr5:8402205-8403266 FORWARD LENGTH=251                                                                                                                                                                                                                                     | 131 | 251 | 6.00E-45  | 191.6 | 71.8 | 83.2 |
| Rsa1.0_01247.1.g24997.t1 | ref NP_197841.1  downy mildew resistance 6 protein / oxidoreductase [Arabidopsis thaliana]<br>gi 14423476 gb AAK62420.1 AF386975.1 flavanone 3-hydroxylase-like protein [Arabidopsis thaliana]<br>gi 10177853 dbj BAB11205.1  flavanone 3-hydroxylase-like protein [Arabidopsis thaliana] gi 20148253 gb AAM10017.1  flavanone 3-hydroxylase-like protein [Arabidopsis thaliana]<br>gi 332005939 gb AED93322.1  downy mildew resistance 6 protein / oxidoreductase [Arabidopsis thaliana]<br>ref XP_002872117.1  oxidoreductase [Arabidopsis lyrata subsp. lyrata]<br>gi 297317954 gb EFH48376.1  oxidoreductase [Arabidopsis lyrata subsp. lyrata]                                                                                                                     | 161 | 341  | 1.00E-88  | 211.8 | 92.5 | 97.5 | downy mildew resistance 6 protein / oxidoreductase  | gbpln | Arabidopsis thaliana | AT5G24530.1   Symbols: DMR6   2-oxoglutarate (2OG) and Fe(II)-dependent oxygenase superfamily protein   chr5:8378964-8383154 FORWARD LENGTH=341                                                                                                                                                                                                | 161 | 341 | 5.00E-91  | 211.8 | 92.5 | 97.5 |
| Rsa1.0_01247.1.g24998.t1 | ref XP_002872117.1  oxidoreductase [Arabidopsis lyrata subsp. lyrata]<br>gi 297317954 gb EFH48376.1  oxidoreductase [Arabidopsis lyrata subsp. lyrata]                                                                                                                                                                                                                                                                                                                                                                                                                                                                                                                                                                                                                  | 149 | 341  | 6.00E-72  | 228.9 | 87.2 | 93.3 | oxidoreductase                                      | gbpln | Arabidopsis lyrata   | AT5G24530.1   Symbols: DMR6   2-oxoglutarate (2OG) and Fe(II)-dependent oxygenase superfamily protein   chr5:8378964-8383154 FORWARD LENGTH=341                                                                                                                                                                                                | 149 | 341 | 3.00E-74  | 228.9 | 87.2 | 93.3 |
| Rsa1.0_01247.1.g24999.t3 | #                                                                                                                                                                                                                                                                                                                                                                                                                                                                                                                                                                                                                                                                                                                                                                       | #   | #    | #         | #     | #    | #    | -                                                   | ----  | ----                 | AT2G07760.1   Symbols:   Zinc knuckle (GCHC-type) family protein   chr2:3584420-3586278 REVERSE LENGTH=530                                                                                                                                                                                                                                     | 306 | 530 | 4.00E-12  | 173.2 | 11.8 | 12.1 |
| Rsa1.0_01247.1.g25000.t1 | gb ADP38078.1  WD40 transcription regulator [Brassica oleracea var. botrytis]                                                                                                                                                                                                                                                                                                                                                                                                                                                                                                                                                                                                                                                                                           | 335 | 337  | 0         | 100.6 | 95.5 | 97.6 | WD40 transcription regulator                        | gbpln | Brassica oleracea    | AT5G24520.2   Symbols: TTG1, TTG   Transducin/WD40 repeat-like superfamily protein   chr5:8371708-8372733 REVERSE LENGTH=341                                                                                                                                                                                                                   | 335 | 341 | 0         | 101.8 | 93.7 | 96.7 |
| Rsa1.0_01247.1.g25001.t1 | gb ADA58345.1  pseudo-response regulator 5b [Brassica rapa]                                                                                                                                                                                                                                                                                                                                                                                                                                                                                                                                                                                                                                                                                                             | 554 | 628  | 0         | 113.4 | 94.8 | 96.0 | pseudo-response regulator 5b                        | gbpln | Brassica rapa        | AT5G24470.1   Symbols: APRR5, PRR5   pseudo-response regulator 5   chr5:8356204-8358873 REVERSE LENGTH=667                                                                                                                                                                                                                                     | 554 | 667 | 0         | 120.4 | 77.8 | 84.8 |

|                          |                                                                                                                                                                                                                                                                                                                                                                                                                                         |     |      |           |       |      |      |                                               |       |                      |                                                                                                                                                                                                                                                                                                                                                                                                               |     |      |           |       |      |      |
|--------------------------|-----------------------------------------------------------------------------------------------------------------------------------------------------------------------------------------------------------------------------------------------------------------------------------------------------------------------------------------------------------------------------------------------------------------------------------------|-----|------|-----------|-------|------|------|-----------------------------------------------|-------|----------------------|---------------------------------------------------------------------------------------------------------------------------------------------------------------------------------------------------------------------------------------------------------------------------------------------------------------------------------------------------------------------------------------------------------------|-----|------|-----------|-------|------|------|
| Rsa1.0_01247.1.g25002.t1 | gb[EOA22093.1] hypothetical protein CARUB_v10003348mg [Capsella rubella]                                                                                                                                                                                                                                                                                                                                                                | 248 | 294  | 3.00E-58  | 118.5 | 63.7 | 73.4 | hypothetical protein CARUB_v10002643mg        | gbpln | Capsella rubella     | AT5G24460.1   Symbols:   unknown protein; INVOLVED IN: biological process unknown; LOCATED IN: cell wall; EXPRESSED IN: 24 plant structures; EXPRESSED DURING: 15 growth stages; Has 1807 Blast hits to 1807 proteins in 277 species: Archae - 0; Bacteria - 0; Metazoa - 736; Fungi - 347; Plants - 385; Viruses - 0; Other Eukaryotes - 339 (source: NCBI BLink).   chr5:8354815-8355717 FORWARD LENGTH=300 | 248 | 300  | 3.00E-57  | 121.0 | 46.8 | 58.1 |
| Rsa1.0_01247.1.g25003.t3 | gb[EOA19681.1] hypothetical protein CARUB_v10003348mg [Capsella rubella]                                                                                                                                                                                                                                                                                                                                                                | 320 | 321  | 1.00E-106 | 100.3 | 63.4 | 73.8 | hypothetical protein CARUB_v10003348mg        | gbpln | Capsella rubella     | AT5G24440.1   Symbols: CID13   CTC-interacting domain 13   chr5:8345402-8347776 REVERSE LENGTH=320                                                                                                                                                                                                                                                                                                            | 320 | 320  | 1.00E-104 | 100.0 | 61.9 | 72.5 |
| Rsa1.0_01247.1.g25004.t1 | ref[NP_197831.3] calcium dependent protein kinase-like protein [Arabidopsis thaliana]<br>gi[75333922]sp[Q9FIM9.1]CAMK4_ARAT H RecName: Full=CDPK-related kinase 4; Short=AtCRK4; AltName: Full=Calcium/calmodulin-dependent protein kinase CRK4<br>gi[10177904]dbj[BAB11236.1] calcium dependent protein kinase-like protein [Arabidopsis thaliana]<br>gi[332005927]gb[AE93310.1] CDPK-related kinase 4 (AtCRK4) [Arabidopsis thaliana] | 591 | 594  | 0         | 100.5 | 93.6 | 95.4 | calcium dependent protein kinase-like protein | gbpln | Arabidopsis thaliana | AT5G24430.1   Symbols:   Calcium-dependent protein kinase (CDPK) family protein   chr5:8339390-8342913 REVERSE LENGTH=594                                                                                                                                                                                                                                                                                     | 591 | 594  | 0         | 100.5 | 93.6 | 95.4 |
| Rsa1.0_01247.1.g25005.t1 | gb[AAK50346.1] putative 6-phosphogluconolactonase [Brassica carinata]                                                                                                                                                                                                                                                                                                                                                                   | 258 | 258  | 1.00E-143 | 100.0 | 94.2 | 96.9 | putative 6-phosphogluconolactonase            | gbpln | Brassica carinata    | AT5G24420.1   Symbols: PGL5   6-phosphogluconolactonase 5   chr5:8336943-8337879 REVERSE LENGTH=252                                                                                                                                                                                                                                                                                                           | 258 | 252  | 1.00E-114 | 97.7  | 75.2 | 85.7 |
| Rsa1.0_01247.1.g25006.t1 | gb[AAK50346.1] putative 6-phosphogluconolactonase [Brassica carinata]                                                                                                                                                                                                                                                                                                                                                                   | 258 | 258  | 1.00E-126 | 100.0 | 83.3 | 89.1 | putative 6-phosphogluconolactonase            | gbpln | Brassica carinata    | AT5G24420.1   Symbols: PGL5   6-phosphogluconolactonase 5   chr5:8336943-8337879 REVERSE LENGTH=252                                                                                                                                                                                                                                                                                                           | 258 | 252  | 1.00E-111 | 97.7  | 73.6 | 83.7 |
| Rsa1.0_01248.1.g25007.t1 | emb[CAA54683.1] acetyl-CoA carboxylase [Brassica napus]                                                                                                                                                                                                                                                                                                                                                                                 | 304 | 2304 | 8.00E-75  | 757.9 | 62.5 | 70.1 | acetyl-CoA carboxylase                        | gbpln | Brassica napus       | AT1G36180.1   Symbols: ACC2   acetyl-CoA carboxylase 2   chr1:13546047-13558339 FORWARD LENGTH=2355                                                                                                                                                                                                                                                                                                           | 304 | 2355 | 6.00E-59  | 774.7 | 51.0 | 62.2 |
| Rsa1.0_01248.1.g25008.t1 | gb[EOA38589.1] hypothetical protein CARUB_v10010420mg [Capsella rubella]                                                                                                                                                                                                                                                                                                                                                                | 180 | 180  | 5.00E-71  | 100.0 | 75.6 | 83.9 | hypothetical protein CARUB_v10010420mg        | gbpln | Capsella rubella     | AT1G36940.1   Symbols:   unknown protein; Has 21 Blast hits to 21 proteins in 8 species: Archae - 0; Bacteria - 0; Metazoa - 0; Fungi - 0; Plants - 21; Viruses - 0; Other Eukaryotes - 0 (source: NCBI BLink).   chr1:14004158-14004706 FORWARD LENGTH=182                                                                                                                                                   | 180 | 182  | 6.00E-59  | 101.1 | 72.8 | 83.9 |
| Rsa1.0_01248.1.g25009.t1 | gb[EOA38576.1] hypothetical protein CARUB_v10010396mg [Capsella rubella]                                                                                                                                                                                                                                                                                                                                                                | 144 | 185  | 6.00E-63  | 128.5 | 83.3 | 83.3 | hypothetical protein CARUB_v10010396mg        | gbpln | Capsella rubella     | AT1G36980.1   Symbols:   unknown protein; CONTAINS InterPro DOMAIN/s: Uncharacterised protein family UPF0220 (InterPro:IPR007919); Has 424 Blast hits to 424 proteins in 159 species: Archae - 0; Bacteria - 0; Metazoa - 228; Fungi - 120; Plants - 62; Viruses - 0; Other Eukaryotes - 14 (source: NCBI BLink).   chr1:14025084-14026727 FORWARD LENGTH=135                                                 | 144 | 135  | 2.00E-65  | 93.8  | 83.3 | 84.0 |
| Rsa1.0_01248.1.g25010.t4 | gb[EOA39197.1] hypothetical protein CARUB_v10012165mg [Capsella rubella]                                                                                                                                                                                                                                                                                                                                                                | 757 | 588  | 0         | 77.7  | 68.7 | 71.6 | hypothetical protein CARUB_v10012165mg        | gbpln | Capsella rubella     | AT1G38131.1   Symbols:   O-fucosyltransferase family protein   chr1:14293392-14296020 REVERSE LENGTH=589                                                                                                                                                                                                                                                                                                      | 757 | 589  | 0         | 77.8  | 67.9 | 71.5 |
| Rsa1.0_01248.1.g25011.t1 | gb[EOA37688.1] hypothetical protein CARUB_v10012340mg [Capsella rubella]                                                                                                                                                                                                                                                                                                                                                                | 326 | 326  | 1.00E-140 | 100.0 | 79.1 | 85.9 | hypothetical protein CARUB_v10012340mg        | gbpln | Capsella rubella     | AT1G60360.1   Symbols:   RING/U-box superfamily protein   chr1:22242748-22243731 REVERSE LENGTH=327                                                                                                                                                                                                                                                                                                           | 326 | 327  | 1.00E-137 | 100.3 | 76.7 | 84.7 |
| Rsa1.0_01248.1.g25012.t1 | gb[EOA39082.1] hypothetical protein CARUB_v10011794mg [Capsella rubella]                                                                                                                                                                                                                                                                                                                                                                | 113 | 115  | 8.00E-36  | 101.8 | 84.1 | 91.2 | hypothetical protein CARUB_v10011794mg        | gbpln | Capsella rubella     | AT2G25720.1   Symbols:   unknown protein; Has 38 Blast hits to 38 proteins in 18 species: Archae - 0; Bacteria - 0; Metazoa - 0; Fungi - 0; Plants - 38; Viruses - 0; Other Eukaryotes - 0 (source: NCBI BLink).   chr2:10955664-10956017 REVERSE LENGTH=117                                                                                                                                                  | 113 | 117  | 9.00E-35  | 103.5 | 78.8 | 85.8 |

|                          |                                                                                                                                                                                                                                                                                                                                                                                                                                                                                                                                                                                                                                                                                                                                                                                                                                                                                                                      |     |     |           |       |      |      |                                              |       |                      |                                                                                                                                                   |     |     |           |       |      |      |
|--------------------------|----------------------------------------------------------------------------------------------------------------------------------------------------------------------------------------------------------------------------------------------------------------------------------------------------------------------------------------------------------------------------------------------------------------------------------------------------------------------------------------------------------------------------------------------------------------------------------------------------------------------------------------------------------------------------------------------------------------------------------------------------------------------------------------------------------------------------------------------------------------------------------------------------------------------|-----|-----|-----------|-------|------|------|----------------------------------------------|-------|----------------------|---------------------------------------------------------------------------------------------------------------------------------------------------|-----|-----|-----------|-------|------|------|
| Rsa1.0_01248.1.g25013.t1 | ref NP_567860.1  ubiquitin carboxyl-terminal hydrolase 24 [Arabidopsis thaliana] gi 42573095 ref NP_974644.1  ubiquitin carboxyl-terminal hydrolase 24 [Arabidopsis thaliana] gi 334187041 ref NP_001190875.1  ubiquitin carboxyl-terminal hydrolase 24 [Arabidopsis thaliana] gi 75262799 sp Q9FPS3.1 UBP24_ARAT H RecName: Full=Ubiquitin carboxyl-terminal hydrolase 24; AltName: Full=Deubiquitinating enzyme 24; Short=AtUBP24; AltName: Full=Ubiquitin thioesterase 24; AltName: Full=Ubiquitin-specific-processing protease 24 gi 11993488 gb AAG42762.1 AF302672.1 ubiquitin-specific protease 24 [Arabidopsis thaliana] gi 332660424 gb AEE85824.1  ubiquitin carboxyl-terminal hydrolase 24 [Arabidopsis thaliana] gi 332660425 gb AEE85825.1  ubiquitin carboxyl-terminal hydrolase 24 [Arabidopsis thaliana] gi 332660426 gb AEE85826.1  ubiquitin carboxyl-terminal hydrolase 24 [Arabidopsis thaliana] | 257 | 551 | 4.00E-48  | 214.4 | 38.1 | 42.4 | ubiquitin carboxyl-terminal hydrolase 24     | gbpln | Arabidopsis thaliana | AT4G30890.3   Symbols: UBP24   ubiquitin-specific protease 24   chr4:15036383-15038825 REVERSE LENGTH=551                                         | 257 | 551 | 1.00E-50  | 214.4 | 38.1 | 42.4 |
| Rsa1.0_01248.1.g25014.t1 | #                                                                                                                                                                                                                                                                                                                                                                                                                                                                                                                                                                                                                                                                                                                                                                                                                                                                                                                    | #   | #   | #         | #     | #    | -    | ----                                         | ----  | #                    | #                                                                                                                                                 | #   | #   | #         | #     | #    |      |
| Rsa1.0_01248.1.g25015.t1 | gb AAZ86538.1  fructose 1,6-bisphosphatase [Brassica rapa subsp. pekinensis]                                                                                                                                                                                                                                                                                                                                                                                                                                                                                                                                                                                                                                                                                                                                                                                                                                         | 324 | 340 | 0         | 104.9 | 98.1 | 99.1 | fructose 1,6-bisphosphatase                  | gbpln | Brassica rapa        | AT1G43670.1   Symbols: Inositol monophosphatase family protein   chr1:16468184-16470347 FORWARD LENGTH=341                                        | 324 | 341 | 0         | 105.2 | 95.1 | 98.1 |
| Rsa1.0_01248.1.g25016.t1 | ref XP_002893962.1  EMB1075 [Arabidopsis lyrata subsp. lyrata] gi 297339804 gb EFH70221.1  EMB1075 [Arabidopsis lyrata subsp. lyrata]                                                                                                                                                                                                                                                                                                                                                                                                                                                                                                                                                                                                                                                                                                                                                                                | 166 | 462 | 2.00E-84  | 278.3 | 89.8 | 92.8 | EMB1075                                      | gbpln | Arabidopsis lyrata   | AT1G43710.1   Symbols: emb1075   Pyridoxal phosphate (PLP)-dependent transferases superfamily protein   chr1:16486534-16488298 REVERSE LENGTH=482 | 166 | 462 | 3.00E-83  | 290.4 | 89.2 | 91.6 |
| Rsa1.0_01248.1.g25017.t1 | #                                                                                                                                                                                                                                                                                                                                                                                                                                                                                                                                                                                                                                                                                                                                                                                                                                                                                                                    | #   | #   | #         | #     | #    | -    | ----                                         | ----  | #                    | #                                                                                                                                                 | #   | #   | #         | #     | #    |      |
| Rsa1.0_01248.1.g25018.t1 | ref XP_002894031.1  vier F-box protein 1 [Arabidopsis lyrata subsp. lyrata] gi 297339873 gb EFH70290.1  vier F-box protein 1 [Arabidopsis lyrata subsp. lyrata]                                                                                                                                                                                                                                                                                                                                                                                                                                                                                                                                                                                                                                                                                                                                                      | 228 | 520 | 2.00E-51  | 228.1 | 53.5 | 59.6 | vier F-box protein 1                         | gbpln | Arabidopsis lyrata   | AT1G47056.1   Symbols: VFB1   VIER F-box proteine 1   chr1:17276103-17277659 REVERSE LENGTH=518                                                   | 228 | 518 | 6.00E-50  | 227.2 | 51.8 | 57.9 |
| Rsa1.0_01249.1.g25019.t1 | #                                                                                                                                                                                                                                                                                                                                                                                                                                                                                                                                                                                                                                                                                                                                                                                                                                                                                                                    | #   | #   | #         | #     | #    | -    | ----                                         | ----  | #                    | #                                                                                                                                                 | #   | #   | #         | #     | #    |      |
| Rsa1.0_01249.1.g25020.t1 | ref XP_002878329.1  armadillo/beta-catenin repeat family protein [Arabidopsis lyrata subsp. lyrata] gi 297324167 gb EFH54588.1  armadillo/beta-catenin repeat family protein [Arabidopsis lyrata subsp. lyrata]                                                                                                                                                                                                                                                                                                                                                                                                                                                                                                                                                                                                                                                                                                      | 97  | 928 | 7.00E-16  | 956.7 | 45.4 | 56.7 | armadillo/beta-catenin repeat family protein | gbpln | Arabidopsis lyrata   | AT3G60350.1   Symbols: ARABIDILLO-2, ARABIDILLO2   ARABIDILLO-2   chr3:22306806-22310596 REVERSE LENGTH=928                                       | 97  | 928 | 1.00E-16  | 956.7 | 41.2 | 55.7 |
| Rsa1.0_01249.1.g25021.t1 | ref XP_002878329.1  armadillo/beta-catenin repeat family protein [Arabidopsis lyrata subsp. lyrata] gi 297324167 gb EFH54588.1  armadillo/beta-catenin repeat family protein [Arabidopsis lyrata subsp. lyrata]                                                                                                                                                                                                                                                                                                                                                                                                                                                                                                                                                                                                                                                                                                      | 154 | 928 | 4.00E-18  | 602.6 | 28.6 | 36.4 | armadillo/beta-catenin repeat family protein | gbpln | Arabidopsis lyrata   | AT3G60350.1   Symbols: ARABIDILLO-2, ARABIDILLO2   ARABIDILLO-2   chr3:22306806-22310596 REVERSE LENGTH=928                                       | 154 | 928 | 3.00E-19  | 602.6 | 27.3 | 37.0 |
| Rsa1.0_01249.1.g25022.t1 | ref NP_191594.1  protein ARABIDILLO 2 [Arabidopsis thaliana] gi 75264584 sp Q9M224.1 ADLO2_ARAT H RecName: Full=Protein ARABIDILLO 2 gi 7287993 emb CA581821.1  Arm repeat containing protein-like [Arabidopsis thaliana] gi 332646529 gb AEE80050.1  protein ARABIDILLO 2 [Arabidopsis thaliana]                                                                                                                                                                                                                                                                                                                                                                                                                                                                                                                                                                                                                    | 857 | 928 | 0         | 108.3 | 63.9 | 78.2 | protein ARABIDILLO 2                         | gbpln | Arabidopsis thaliana | AT3G60350.1   Symbols: ARABIDILLO-2, ARABIDILLO2   ARABIDILLO-2   chr3:22306806-22310596 REVERSE LENGTH=928                                       | 857 | 928 | 0         | 108.3 | 63.9 | 78.2 |
| Rsa1.0_01249.1.g25023.t1 | gb EOA24695.1  hypothetical protein CARUB_v10017973mg [Capsella rubella]                                                                                                                                                                                                                                                                                                                                                                                                                                                                                                                                                                                                                                                                                                                                                                                                                                             | 228 | 228 | 1.00E-115 | 100.0 | 88.6 | 96.1 | hypothetical protein CARUB_v10017973mg       | gbpln | Capsella rubella     | AT3G60360.1   Symbols: EDA14, UTP11   embryo sac development arrest 14   chr3:22312477-22314002 REVERSE LENGTH=228                                | 228 | 228 | 1.00E-114 | 100.0 | 85.1 | 94.3 |
| Rsa1.0_01249.1.g25024.t1 | gb AAA56904.1  homeobox protein [Arabidopsis thaliana] gi 549890 gb AAA56905.1  homeobox protein [Arabidopsis thaliana]                                                                                                                                                                                                                                                                                                                                                                                                                                                                                                                                                                                                                                                                                                                                                                                              | 314 | 315 | 1.00E-141 | 100.3 | 87.3 | 92.4 | homeobox protein                             | gbpln | Arabidopsis thaliana | AT3G60390.1   Symbols: HAT3   homeobox-leucine zipper protein 3   chr3:22320788-22322370 REVERSE LENGTH=315                                       | 314 | 315 | 1.00E-138 | 100.3 | 86.6 | 91.7 |

|                          |                                                                                                                                                                                                                                                                                                                                                                                                 |     |      |           |       |      |      |                                        |       |                      |                                                                                                                                                                                                                                                                                                                                                           |     |      |           |       |      |      |
|--------------------------|-------------------------------------------------------------------------------------------------------------------------------------------------------------------------------------------------------------------------------------------------------------------------------------------------------------------------------------------------------------------------------------------------|-----|------|-----------|-------|------|------|----------------------------------------|-------|----------------------|-----------------------------------------------------------------------------------------------------------------------------------------------------------------------------------------------------------------------------------------------------------------------------------------------------------------------------------------------------------|-----|------|-----------|-------|------|------|
| Rsa1.0_01249.1.g25025.t1 | refXP_002876552.1   hypothetical protein ARALYDRAFT_907562 [Arabidopsis lyrata subsp. lyrata] gi 297322390 gb EFH52811.1                                                                                                                                                                                                                                                                        | 919 | 560  | 0         | 60.9  | 43.6 | 52.3 | hypothetical protein ARALYDRAFT_907562 | gbpln | Arabidopsis lyrata   | AT3G60400.1   Symbols:   Mitochondrial transcription termination factor family protein   chr3:22329093-22330769 FORWARD LENGTH=558                                                                                                                                                                                                                        | 919 | 558  | 0         | 60.7  | 43.2 | 51.7 |
| Rsa1.0_01249.1.g25026.t1 | hypothetical protein ARALYDRAFT_907562 [Arabidopsis lyrata subsp. lyrata]<br>refXP_002876557.1   hypothetical protein ARALYDRAFT_486518 [Arabidopsis lyrata subsp. lyrata] gi 297322395 gb EFH52816.1                                                                                                                                                                                           | 259 | 274  | 1.00E-103 | 105.8 | 69.5 | 83.0 | hypothetical protein ARALYDRAFT_486518 | gbpln | Arabidopsis lyrata   | AT3G60450.1   Symbols:   Phosphoglycerate mutase family protein   chr3:22340982-22342187 FORWARD LENGTH=274                                                                                                                                                                                                                                               | 259 | 274  | 1.00E-104 | 105.8 | 68.3 | 82.6 |
| Rsa1.0_01249.1.g25027.t1 | hypothetical protein ARALYDRAFT_486518 [Arabidopsis lyrata subsp. lyrata]<br>refXP_002876557.1   hypothetical protein ARALYDRAFT_486518 [Arabidopsis lyrata subsp. lyrata] gi 297322395 gb EFH52816.1                                                                                                                                                                                           | 500 | 274  | 1.00E-104 | 54.8  | 37.8 | 43.2 | hypothetical protein ARALYDRAFT_486518 | gbpln | Arabidopsis lyrata   | AT3G60450.1   Symbols:   Phosphoglycerate mutase family protein   chr3:22340982-22342187 FORWARD LENGTH=274                                                                                                                                                                                                                                               | 500 | 274  | 1.00E-105 | 54.8  | 37.2 | 43.0 |
| Rsa1.0_01249.1.g25028.t2 | refNP_191605.1   myb proto-oncogene protein, plant [Arabidopsis thaliana] gi 18766549 gb AAL79015.1 AF469468.1 putative transcription factor [Arabidopsis thaliana] gi 7287994 emb CAB81832.1   myb protein-like [Arabidopsis thaliana] gi 302589002 gb ADL59373.1   duo pollen 1 [Arabidopsis thaliana] gi 332646543 gb AEE80064.1   R2R3 myb transcription factor DUO1 [Arabidopsis thaliana] | 269 | 297  | 1.00E-105 | 110.4 | 80.3 | 85.9 | myb proto-oncogene protein, plant      | gbpln | Arabidopsis thaliana | AT3G60460.1   Symbols: DUO1   myb-like HTH transcriptional regulator family protein   chr3:22342429-22343491 REVERSE LENGTH=297                                                                                                                                                                                                                           | 269 | 297  | 1.00E-107 | 110.4 | 80.3 | 85.9 |
| Rsa1.0_01249.1.g25029.t1 | refNP_567103.1   Transketolase [Arabidopsis thaliana] gi 75247623 sp Q8RWW0.1 TKTC1_ARAT H RecName: Full=Transketolase-1, chloroplastic; Short=TK; Flags: Precursor gi 20268682 gb AAM14045.1   putative transketolase [Arabidopsis thaliana] gi 22136900 gb AAM91794.1   putative transketolase [Arabidopsis thaliana] gi 332646582 gb AEE80103.1   Transketolase [Arabidopsis thaliana]       | 746 | 741  | 0         | 99.3  | 94.0 | 96.5 | Transketolase                          | gbpln | Arabidopsis thaliana | AT3G60750.1   Symbols:   Transketolase   chr3:22454004-22456824 FORWARD LENGTH=741                                                                                                                                                                                                                                                                        | 746 | 741  | 0         | 99.3  | 94.0 | 96.5 |
| Rsa1.0_01249.1.g25030.t1 | gb AAK51235.1 AF287471.1 polyprotein [Arabidopsis thaliana]                                                                                                                                                                                                                                                                                                                                     | 991 | 1453 | 0         | 146.6 | 54.4 | 66.6 | polyprotein                            | gbpln | Arabidopsis thaliana | AT4G23160.1   Symbols: CRK8   cysteine-rich RLK (RECEPTOR-like protein kinase) 8   chr4:12129485-12134086 FORWARD LENGTH=1262                                                                                                                                                                                                                             | 991 | 1262 | 1.00E-101 | 127.3 | 18.3 | 28.3 |
| Rsa1.0_01249.1.g25031.t1 | refXP_002876581.1   hypothetical protein ARALYDRAFT_486550 [Arabidopsis lyrata subsp. lyrata] gi 297322419 gb EFH52840.1                                                                                                                                                                                                                                                                        | 218 | 218  | 1.00E-106 | 100.0 | 86.7 | 94.0 | hypothetical protein ARALYDRAFT_486550 | gbpln | Arabidopsis lyrata   | AT3G60780.1   Symbols:   Protein of unknown function (DUF1442)   chr3:22462695-22463630 FORWARD LENGTH=218                                                                                                                                                                                                                                                | 218 | 218  | 1.00E-104 | 100.0 | 82.6 | 92.2 |
| Rsa1.0_01249.1.g25032.t4 | hypothetical protein ARALYDRAFT_486550 [Arabidopsis lyrata subsp. lyrata]<br>refXP_002876582.1   hypothetical protein ARALYDRAFT_486551 [Arabidopsis lyrata subsp. lyrata] gi 297322420 gb EFH52841.1                                                                                                                                                                                           | 471 | 494  | 1.00E-130 | 104.9 | 54.6 | 67.7 | hypothetical protein ARALYDRAFT_486551 | gbpln | Arabidopsis lyrata   | AT3G60790.1   Symbols:   F-box family protein   chr3:22464623-22466948 FORWARD LENGTH=488                                                                                                                                                                                                                                                                 | 471 | 488  | 1.00E-119 | 103.6 | 51.0 | 65.0 |
| Rsa1.0_01249.1.g25033.t1 | hypothetical protein ARALYDRAFT_486551 [Arabidopsis lyrata subsp. lyrata]<br>refXP_002876582.1   hypothetical protein ARALYDRAFT_486551 [Arabidopsis lyrata subsp. lyrata] gi 297322420 gb EFH52841.1                                                                                                                                                                                           | 462 | 494  | 1.00E-119 | 106.9 | 53.5 | 67.1 | hypothetical protein ARALYDRAFT_486551 | gbpln | Arabidopsis lyrata   | AT3G60790.1   Symbols:   F-box family protein   chr3:22464623-22466948 FORWARD LENGTH=488                                                                                                                                                                                                                                                                 | 462 | 488  | 1.00E-103 | 105.6 | 48.5 | 62.8 |
| Rsa1.0_01249.1.g25034.t1 | hypothetical protein ARALYDRAFT_486551 [Arabidopsis lyrata subsp. lyrata]<br>gb EOA24450.1   hypothetical protein CARUB_v10017708mg [Capsella rubella]                                                                                                                                                                                                                                          | 305 | 306  | 1.00E-161 | 100.3 | 93.1 | 96.7 | hypothetical protein CARUB_v10017708mg | gbpln | Capsella rubella     | AT3G60800.1   Symbols:   DHHC-type zinc finger family protein   chr3:22467486-22469273 REVERSE LENGTH=307                                                                                                                                                                                                                                                 | 305 | 307  | 1.00E-162 | 100.7 | 92.8 | 96.1 |
| Rsa1.0_01249.1.g25035.t1 | refXP_002876583.1   hypothetical protein ARALYDRAFT_486553 [Arabidopsis lyrata subsp. lyrata] gi 297322421 gb EFH52842.1                                                                                                                                                                                                                                                                        | 216 | 216  | 1.00E-108 | 100.0 | 88.4 | 94.4 | hypothetical protein ARALYDRAFT_486553 | gbpln | Arabidopsis lyrata   | AT3G60810.1   Symbols:   unknown protein; CONTAINS InterPro DOMAIN/s; Protein of unknown function DUF1499 (InterPro:IPR010865); Has 444 Blast hits to 444 proteins in 143 species: Archae - 0; Bacteria - 268; Metazoa - 0; Fungi - 0; Plants - 51; Viruses - 0; Other Eukaryotes - 125 (source: NCBI BLINK).   chr3:22470579-22471756 FORWARD LENGTH=214 | 216 | 214  | 1.00E-108 | 99.1  | 87.0 | 93.1 |

|                          |                                                                                                                                                                                                                                                                                                                                                                                                                                                                 |      |     |           |       |      |      |                                                   |             |                      |                                                                                                                                                                                                                                                                                                                                                                                                                                                               |      |     |           |       |      |      |
|--------------------------|-----------------------------------------------------------------------------------------------------------------------------------------------------------------------------------------------------------------------------------------------------------------------------------------------------------------------------------------------------------------------------------------------------------------------------------------------------------------|------|-----|-----------|-------|------|------|---------------------------------------------------|-------------|----------------------|---------------------------------------------------------------------------------------------------------------------------------------------------------------------------------------------------------------------------------------------------------------------------------------------------------------------------------------------------------------------------------------------------------------------------------------------------------------|------|-----|-----------|-------|------|------|
| Rsa1.0_01249.1.g25036.t1 | emb[CAA47753.1] proteosome subunit [Arabidopsis thaliana]                                                                                                                                                                                                                                                                                                                                                                                                       | 223  | 230 | 1.00E-124 | 103.1 | 94.6 | 98.2 | proteosome subunit                                | gbpln       | Arabidopsis thaliana | AT3G60820.3   Symbols: PBF1   N-terminal nucleophile aminohydrolases (Ntn hydrolases) superfamily protein   chr3:22472038-22473809 REVERSE LENGTH=223                                                                                                                                                                                                                                                                                                         | 223  | 223 | 1.00E-126 | 100.0 | 94.6 | 98.2 |
| Rsa1.0_01249.1.g25037.t1 | ref[XP_003534403.1] PREDICTED: actin-related protein 7-like isoform 2 [Glycine max]                                                                                                                                                                                                                                                                                                                                                                             | 183  | 330 | 3.00E-47  | 180.3 | 58.5 | 68.3 | PREDICTED: actin-related protein 7-like isoform 2 | gbenv/gbpln | Glycine max          | AT3G60830.1   Symbols: ATARP7, ARP7   actin-related protein 7   chr3:22474298-22476000 FORWARD LENGTH=363                                                                                                                                                                                                                                                                                                                                                     | 183  | 363 | 2.00E-49  | 198.4 | 48.1 | 50.8 |
| Rsa1.0_01249.1.g25038.t1 | gb[EOA23610.1] hypothetical protein CARUB_v10016810mg [Capsella rubella] gi[482559420]gb[EOA23611.1] hypothetical protein CARUB_v10016810mg [Capsella rubella]                                                                                                                                                                                                                                                                                                  | 749  | 652 | 0         | 87.0  | 63.4 | 70.5 | hypothetical protein CARUB_v10016810mg            | gbpln       | Capsella rubella     | AT3G60850.1   Symbols:   unknown protein; FUNCTIONS IN: molecular_function unknown; INVOLVED IN: biological_process unknown; LOCATED IN: cellular_component unknown; EXPRESSED IN: 22 plant structures; EXPRESSED DURING: 11 growth stages; Has 42 Blast hits to 42 proteins in 12 species: Archae - 0; Bacteria - 0; Metazoa - 4; Fungi - 0; Plants - 37; Viruses - 0; Other Eukaryotes - 1 (source: NCBI BLINK)   chr3:22482053-22483999 FORWARD LENGTH=648 | 749  | 648 | 1.00E-176 | 86.5  | 41.3 | 45.1 |
| Rsa1.0_01249.1.g25039.t1 | gb[EOA23258.1] hypothetical protein CARUB_v10017487mg [Capsella rubella]                                                                                                                                                                                                                                                                                                                                                                                        | 211  | 365 | 1.00E-64  | 173.0 | 56.9 | 60.2 | hypothetical protein CARUB_v10017487mg            | gbpln       | Capsella rubella     | AT3G60880.2   Symbols: DHDP5, DHDP5   dihydrodipicolinate synthase 1   chr3:22495086-22496542 FORWARD LENGTH=365                                                                                                                                                                                                                                                                                                                                              | 211  | 365 | 3.00E-66  | 173.0 | 55.0 | 60.7 |
| Rsa1.0_01249.1.g25040.t1 | ref[NP_191649.1] fasciclin-like arabinogalactan protein 10 [Arabidopsis thaliana] gi[38257776]sp[Q9LZX4.1]FLA10_ARATH RecName: Full=Fasciclin-like arabinogalactan protein 10; Flags: Precursor gi[7329700]emb[CAB82694.1] endosperm specific protein-like [Arabidopsis thaliana] gi[21593224]gb[AM65173.1] endosperm specific protein-like [Arabidopsis thaliana] gi[332646604]gb[AEE80125.1] fasciclin-like arabinogalactan protein 10 [Arabidopsis thaliana] | 365  | 422 | 1.00E-141 | 115.6 | 74.5 | 78.6 | fasciclin-like arabinogalactan protein 10         | gbpln       | Arabidopsis thaliana | AT3G60900.1   Symbols: FLA10   FASCICLIN-like arabinogalactan-protein 10   chr3:22499573-22500841 REVERSE LENGTH=422                                                                                                                                                                                                                                                                                                                                          | 365  | 422 | 1.00E-144 | 115.6 | 74.5 | 78.6 |
| Rsa1.0_01250.1.g25041.t1 | gb[AAF79253.1]AC023279_2 F12K21.4 [Arabidopsis thaliana]                                                                                                                                                                                                                                                                                                                                                                                                        | 833  | 857 | 0         | 102.9 | 48.1 | 63.5 | F12K21.4                                          | gbpln       | Arabidopsis thaliana | AT1G64260.1   Symbols:   MuDR family transposase   chr1:23847756-23849915 FORWARD LENGTH=719                                                                                                                                                                                                                                                                                                                                                                  | 833  | 719 | 7.00E-22  | 86.3  | 13.8 | 23.4 |
| Rsa1.0_01250.1.g25042.t1 | gb[AAD46014.1]AC007894_12 F21H2.13 [Arabidopsis thaliana]                                                                                                                                                                                                                                                                                                                                                                                                       | 1162 | 993 | 4.00E-86  | 85.5  | 14.8 | 20.2 | F21H2.13                                          | gbpln       | Arabidopsis thaliana | AT1G31150.1   Symbols:   Domain of unknown function (DUF1985)   chr1:11120097-11122412 FORWARD LENGTH=673                                                                                                                                                                                                                                                                                                                                                     | 1162 | 673 | 9.00E-23  | 57.9  | 9.0  | 13.8 |
| Rsa1.0_01250.1.g25043.t1 | gb[EOA20993.1] hypothetical protein CARUB_v10001326mg [Capsella rubella]                                                                                                                                                                                                                                                                                                                                                                                        | 283  | 345 | 1.00E-142 | 121.9 | 86.6 | 92.9 | hypothetical protein CARUB_v10001326mg            | gbpln       | Capsella rubella     | AT4G08770.1   Symbols: Prx37   Peroxidase superfamily protein   chr4:5598259-5600262 REVERSE LENGTH=346                                                                                                                                                                                                                                                                                                                                                       | 283  | 346 | 1.00E-142 | 122.3 | 86.6 | 91.9 |
| Rsa1.0_01250.1.g25044.t1 | gb[ACG60682.1] transposon-like ORF [Brassica oleracea var. aboglabra]                                                                                                                                                                                                                                                                                                                                                                                           | 558  | 704 | 1.00E-126 | 126.2 | 42.7 | 46.8 | transposon-like ORF                               | gbpln       | Brassica oleracea    | AT5G19270.1   Symbols:   unknown protein; BEST Arabidopsis thaliana protein match is: unknown protein (TAIR:AT4G03566.1); Has 30201 Blast hits to 17322 proteins in 780 species: Archae - 12; Bacteria - 1396; Metazoa - 17338; Fungi - 3422; Plants - 5037; Viruses - 0; Other Eukaryotes - 2996 (source: NCBI BLINK)   chr5:6485617-6487009 REVERSE LENGTH=365                                                                                              | 558  | 365 | 3.00E-30  | 65.4  | 13.8 | 18.8 |
| Rsa1.0_01250.1.g25045.t2 | #                                                                                                                                                                                                                                                                                                                                                                                                                                                               | #    | #   | #         | #     | #    | #    | -                                                 | ----        | ----                 | #                                                                                                                                                                                                                                                                                                                                                                                                                                                             | #    | #   | #         | #     | #    | #    |
| Rsa1.0_01250.1.g25046.t1 | ref[XP_002874554.1] hypothetical protein ARALYDRAFT_911156 [Arabidopsis lyrata subsp. lyrata] gi[297320391]gb[EFH50813.1] hypothetical protein ARALYDRAFT_911156 [Arabidopsis lyrata subsp. lyrata]                                                                                                                                                                                                                                                             | 220  | 307 | 1.00E-85  | 139.5 | 75.0 | 80.9 | hypothetical protein ARALYDRAFT_911156            | gbpln       | Arabidopsis lyrata   | AT4G08790.1   Symbols:   Nitrilase/cyanide hydratase and apolipoprotein N-acetyltransferase family protein   chr4:5608489-5611118 REVERSE LENGTH=307                                                                                                                                                                                                                                                                                                          | 220  | 307 | 7.00E-88  | 139.5 | 75.0 | 81.8 |
| Rsa1.0_01250.1.g25047.t1 | #                                                                                                                                                                                                                                                                                                                                                                                                                                                               | #    | #   | #         | #     | #    | #    | -                                                 | ----        | ----                 | #                                                                                                                                                                                                                                                                                                                                                                                                                                                             | #    | #   | #         | #     | #    | #    |
| Rsa1.0_01250.1.g25048.t1 | #                                                                                                                                                                                                                                                                                                                                                                                                                                                               | #    | #   | #         | #     | #    | #    | -                                                 | ----        | ----                 | #                                                                                                                                                                                                                                                                                                                                                                                                                                                             | #    | #   | #         | #     | #    | #    |
| Rsa1.0_01250.1.g25049.t1 | gb[EOA18064.1] hypothetical protein CARUB_v10006510mg, partial [Capsella rubella]                                                                                                                                                                                                                                                                                                                                                                               | 78   | 555 | 2.00E-11  | 711.5 | 38.5 | 59.0 | hypothetical protein CARUB_v10006510mg, partial   | gbpln       | Capsella rubella     | #                                                                                                                                                                                                                                                                                                                                                                                                                                                             | #    | #   | #         | #     | #    | #    |
| Rsa1.0_01250.1.g25050.t1 | #                                                                                                                                                                                                                                                                                                                                                                                                                                                               | #    | #   | #         | #     | #    | #    | -                                                 | ----        | ----                 | #                                                                                                                                                                                                                                                                                                                                                                                                                                                             | #    | #   | #         | #     | #    | #    |
| Rsa1.0_01251.1.g25051.t1 | ref[XP_002889266.1] aspartyl protease family protein [Arabidopsis lyrata subsp. lyrata] gi[297335107]gb[EFH65525.1] aspartyl protease family protein [Arabidopsis lyrata subsp. lyrata]                                                                                                                                                                                                                                                                         | 163  | 489 | 7.00E-42  | 300.0 | 49.7 | 52.8 | aspartyl protease family protein                  | gbpln       | Arabidopsis lyrata   | AT1G79720.1   Symbols:   Eukaryotic aspartyl protease family protein   chr1:29997259-29998951 REVERSE LENGTH=484                                                                                                                                                                                                                                                                                                                                              | 163  | 484 | 2.00E-43  | 296.9 | 49.1 | 51.5 |

|                          |                                                                                                                                                                                                                                                                                                                                                                                                                                                       |      |      |           |       |      |      |                                                                          |       |                      |                                                                                                                                                                                                                                                                                                                                                                    |      |     |           |       |      |      |
|--------------------------|-------------------------------------------------------------------------------------------------------------------------------------------------------------------------------------------------------------------------------------------------------------------------------------------------------------------------------------------------------------------------------------------------------------------------------------------------------|------|------|-----------|-------|------|------|--------------------------------------------------------------------------|-------|----------------------|--------------------------------------------------------------------------------------------------------------------------------------------------------------------------------------------------------------------------------------------------------------------------------------------------------------------------------------------------------------------|------|-----|-----------|-------|------|------|
| Rsa1.0_01251.1.g25052.t1 | ref[XP_002887801.1] integral membrane transporter family protein [Arabidopsis lyrata subsp. lyrata]<br>gi 297333642 gb EFH64060.1  integral membrane transporter family protein [Arabidopsis lyrata subsp. lyrata]                                                                                                                                                                                                                                    | 494  | 497  | 0         | 100.6 | 90.5 | 96.4 | integral membrane transporter family protein                             | gbpln | Arabidopsis lyrata   | AT1G79710.1   Symbols:   Major facilitator superfamily protein   chr1:29995137-29996988 FORWARD LENGTH=497                                                                                                                                                                                                                                                         | 494  | 497 | 0         | 100.6 | 89.3 | 95.7 |
| Rsa1.0_01251.1.g25053.t1 | dbj BAJ33872.1  unnamed protein product [Theellungiella halophila]                                                                                                                                                                                                                                                                                                                                                                                    | 305  | 328  | 1.00E-130 | 107.5 | 83.3 | 89.2 | unnamed protein product                                                  | ----  | ----                 | AT1G79700.2   Symbols:   Integrase-type DNA-binding superfamily protein   chr1:29990440-29993658 REVERSE LENGTH=313                                                                                                                                                                                                                                                | 305  | 313 | 1.00E-119 | 102.6 | 80.0 | 86.9 |
| Rsa1.0_01251.1.g25054.t1 | ref NP_565218.1  nudix hydrolase 3 [Arabidopsis thaliana]<br>gi 88565909 sp Q8L831.1 NUDT3_ARAT H RecName: Full=Nudix hydrolase 3, Short=AtNUDT3<br>gi 21539559 gb AAM53332.1  unknown protein [Arabidopsis thaliana]<br>gi 23197868 gb AAN15461.1  unknown protein [Arabidopsis thaliana]<br>gi 332198166 gb AEE36287.1  nudix hydrolase 3 [Arabidopsis thaliana]<br>ref NP_178086.1  wall-associated receptor kinase-like 10 [Arabidopsis thaliana] | 776  | 772  | 0         | 99.5  | 89.4 | 94.6 | nudix hydrolase 3                                                        | gbpln | Arabidopsis thaliana | AT1G79690.1   Symbols: atnudt3, NUDT3   nudix hydrolase homolog 3   chr1:29985360-29990171 FORWARD LENGTH=772                                                                                                                                                                                                                                                      | 776  | 772 | 0         | 99.5  | 89.4 | 94.6 |
| Rsa1.0_01251.1.g25055.t1 | gi 75331123 sp Q8VYA3.1 WAKLJ_ARAT H RecName: Full=Wall-associated receptor kinase-like 10; Flags: Precursor gi 18252189 gb AAL61927.1  wall-associated kinase 2, putative [Arabidopsis thaliana]<br>gi 22136108 gb AAM91132.1  wall-associated kinase 2, putative [Arabidopsis thaliana]<br>gi 332198165 gb AEE36286.1  wall-associated receptor kinase-like 10 [Arabidopsis thaliana]                                                               | 776  | 769  | 0         | 99.1  | 65.3 | 76.2 | wall-associated receptor kinase-like 10                                  | gbpln | Arabidopsis thaliana | AT1G79680.1   Symbols: WAKL10, ATWAKL10   WALL ASSOCIATED KINASE (WAK)-LIKE 10   chr1:29980188-29982749 REVERSE LENGTH=769                                                                                                                                                                                                                                         | 776  | 769 | 0         | 99.1  | 65.3 | 76.2 |
| Rsa1.0_01251.1.g25056.t1 | gb AAy86486.1  RFO1 [Arabidopsis thaliana]                                                                                                                                                                                                                                                                                                                                                                                                            | 756  | 749  | 0         | 99.1  | 86.2 | 91.9 | RFO1                                                                     | gbpln | Arabidopsis thaliana | AT1G79670.1   Symbols: RFO1, WAKL22   Wall-associated kinase family protein   chr1:29976887-29979337 REVERSE LENGTH=751                                                                                                                                                                                                                                            | 756  | 751 | 0         | 99.3  | 86.2 | 91.9 |
| Rsa1.0_01251.1.g25057.t1 | gb EOA33804.1  hypothetical protein CARUB_v10021275mg [Capsella rubella]                                                                                                                                                                                                                                                                                                                                                                              | 94   | 93   | 4.00E-40  | 98.9  | 88.3 | 93.6 | hypothetical protein CARUB_v10021275mg                                   | gbpln | Capsella rubella     | AT1G79660.1   Symbols:   unknown protein; BEST Arabidopsis thaliana protein match is: unknown protein (TAIR:AT1G16170.1); Has 30201 Blast hits to 17322 proteins in 780 species: Archae - 12; Bacteria - 1396; Metazoa - 17338; Fungi - 3422; Plants - 5037; Viruses - 0; Other Eukaryotes - 2996 (source: NCBI BLINK).   chr1:29976294-29976575 FORWARD LENGTH=93 | 94   | 93  | 2.00E-41  | 98.9  | 85.1 | 91.5 |
| Rsa1.0_01251.1.g25058.t1 | ref NP_178082.6  protein kinase domain-containing protein [Arabidopsis thaliana]<br>gi 332198156 gb AEE36277.1  protein kinase domain-containing protein [Arabidopsis thaliana]                                                                                                                                                                                                                                                                       | 672  | 687  | 0         | 102.2 | 90.5 | 94.5 | protein kinase domain-containing protein                                 | gbpln | Arabidopsis thaliana | AT1G79640.1   Symbols:   Protein kinase superfamily protein   chr1:29966913-29971387 REVERSE LENGTH=687                                                                                                                                                                                                                                                            | 672  | 687 | 0         | 102.2 | 90.5 | 94.5 |
| Rsa1.0_01251.1.g25059.t1 | ref XP_002889260.1  phosphatase 2C family protein [Arabidopsis lyrata subsp. lyrata]<br>gi 297335101 gb EFH65519.1  phosphatase 2C family protein [Arabidopsis lyrata subsp. lyrata]                                                                                                                                                                                                                                                                  | 496  | 501  | 0         | 101.0 | 86.1 | 91.7 | phosphatase 2C family protein                                            | gbpln | Arabidopsis lyrata   | AT1G79630.1   Symbols:   Protein phosphatase 2C family protein   chr1:29962931-29965169 REVERSE LENGTH=504                                                                                                                                                                                                                                                         | 496  | 504 | 0         | 101.6 | 85.7 | 92.3 |
| Rsa1.0_01251.1.g25060.t1 | gb AAB82639.1  putative non-LTR retroelement reverse transcriptase [Arabidopsis thaliana]                                                                                                                                                                                                                                                                                                                                                             | 1891 | 1374 | 0         | 72.7  | 39.8 | 52.8 | putative non-LTR retroelement reverse transcriptase                      | gbpln | Arabidopsis thaliana | AT4G29090.1   Symbols:   Ribonuclease H-like superfamily protein   chr4:14333528-14335255 FORWARD LENGTH=575                                                                                                                                                                                                                                                       | 1891 | 575 | 1.00E-177 | 30.4  | 15.1 | 21.5 |
| Rsa1.0_01251.1.g25061.t2 | gb AFV60030.1  Na <sup>+</sup> /K <sup>+</sup> -H <sup>+</sup> antiporter NHX6, partial [Brassica oleracea]                                                                                                                                                                                                                                                                                                                                           | 549  | 524  | 0         | 95.4  | 90.0 | 91.1 | Na <sup>+</sup> /K <sup>+</sup> -H <sup>+</sup> antiporter NHX6, partial | gbpln | Brassica oleracea    | AT1G79610.1   Symbols: ATNHX6, NHX6   Na <sup>+</sup> /H <sup>+</sup> antiporter 6   chr1:29853089-29857070 REVERSE LENGTH=535                                                                                                                                                                                                                                     | 549  | 535 | 0         | 97.4  | 88.5 | 91.3 |
| Rsa1.0_01251.1.g25062.t1 | gb EOA31250.1  hypothetical protein CARUB_v10014420mg [Capsella rubella]                                                                                                                                                                                                                                                                                                                                                                              | 218  | 262  | 1.00E-85  | 120.2 | 72.5 | 81.7 | hypothetical protein CARUB_v10014420mg                                   | gbpln | Capsella rubella     | AT3G19184.1   Symbols:   AP2/B3-like transcriptional factor family protein   chr3:6637555-6639035 FORWARD LENGTH=277                                                                                                                                                                                                                                               | 218  | 277 | 4.00E-81  | 127.1 | 71.6 | 79.8 |
| Rsa1.0_01252.1.g25063.t1 | #                                                                                                                                                                                                                                                                                                                                                                                                                                                     | #    | #    | #         | #     | #    | -    | ----                                                                     | ----  | ----                 | #                                                                                                                                                                                                                                                                                                                                                                  | #    | #   | #         | #     | #    | #    |
| Rsa1.0_01252.1.g25064.t1 | gb EMJ09180.1  hypothetical protein PRUPE_ppa015715mg, partial [Prunus persica]                                                                                                                                                                                                                                                                                                                                                                       | 668  | 1445 | 1.00E-82  | 216.3 | 22.6 | 28.9 | hypothetical protein PRUPE_ppa015715mg, partial                          | gbpln | Prunus persica       | AT1G47350.1   Symbols:   F-box associated ubiquitination effector family protein   chr1:17358447-17360722 REVERSE LENGTH=528                                                                                                                                                                                                                                       | 668  | 528 | 3.00E-28  | 79.0  | 10.2 | 12.9 |
| Rsa1.0_01252.1.g25065.t1 | #                                                                                                                                                                                                                                                                                                                                                                                                                                                     | #    | #    | #         | #     | #    | -    | ----                                                                     | ----  | ----                 | #                                                                                                                                                                                                                                                                                                                                                                  | #    | #   | #         | #     | #    | #    |
| Rsa1.0_01252.1.g25066.t9 | gb AAF18641.1 AC006228_12 F5J5.16 [Arabidopsis thaliana]                                                                                                                                                                                                                                                                                                                                                                                              | 1408 | 1024 | 1.00E-52  | 72.7  | 8.7  | 12.4 | F5J5.16                                                                  | gbpln | Arabidopsis thaliana | #                                                                                                                                                                                                                                                                                                                                                                  | #    | #   | #         | #     | #    | #    |



|                          |                                                                                                                                                                                         |     |      |           |       |      |      |                                                 |       |                      |                                                                                                                                                                                                                                                                                                                                                                                                                                                                     |     |     |           |       |      |      |
|--------------------------|-----------------------------------------------------------------------------------------------------------------------------------------------------------------------------------------|-----|------|-----------|-------|------|------|-------------------------------------------------|-------|----------------------|---------------------------------------------------------------------------------------------------------------------------------------------------------------------------------------------------------------------------------------------------------------------------------------------------------------------------------------------------------------------------------------------------------------------------------------------------------------------|-----|-----|-----------|-------|------|------|
| Rsa1.0_01252.1.g25067.t1 | dbj BAB11308.1  copia-like retroelement pol polyprotein [Arabidopsis thaliana]                                                                                                          | 338 | 1013 | 1.00E-53  | 299.7 | 34.3 | 55.6 | copia-like retroelement pol polyprotein         | gbpln | Arabidopsis thaliana | #                                                                                                                                                                                                                                                                                                                                                                                                                                                                   | #   | #   | #         | #     | #    | #    |
| Rsa1.0_01252.1.g25068.t1 | ref XP_002894284.1  etfalpha [Arabidopsis lyrata subsp. lyrata] gi 297340126 gb EFH70543.1  etfalpha [Arabidopsis lyrata subsp. lyrata]                                                 | 361 | 365  | 0         | 101.1 | 90.9 | 95.0 | etfalpha                                        | gbpln | Arabidopsis lyrata   | AT1G50940.1   Symbols: ETFALPHA   electron transfer flavoprotein alpha   chr1:18878038-18879939 REVERSE LENGTH=363                                                                                                                                                                                                                                                                                                                                                  | 361 | 363 | 0         | 100.6 | 89.5 | 94.5 |
| Rsa1.0_01252.1.g25069.t1 | #                                                                                                                                                                                       | #   | #    | #         | #     | #    | #    | -                                               | ----  | ----                 | AT5G47880.2   Symbols: ERF1-1   eukaryotic release factor 1-1   chr5:19386555-19387865 REVERSE LENGTH=436                                                                                                                                                                                                                                                                                                                                                           | 80  | 436 | 1.00E-12  | 545.0 | 38.8 | 48.8 |
| Rsa1.0_01252.1.g25070.t2 | gb EOA34301.1  hypothetical protein CARUB_v10021819mg [Capsella rubella]                                                                                                                | 305 | 383  | 3.00E-78  | 125.6 | 61.0 | 73.8 | hypothetical protein CARUB_v10021819mg          | gbpln | Capsella rubella     | AT1G50980.1   Symbols:   F-box/RNI-like/FBD-like domains-containing protein   chr1:18900541-18902057 REVERSE LENGTH=370                                                                                                                                                                                                                                                                                                                                             | 305 | 370 | 5.00E-67  | 121.3 | 53.8 | 65.2 |
| Rsa1.0_01252.1.g25071.t1 | gb AAG52313.1 AC021666.2 Mutator-like transposase; 53847-56139 [Arabidopsis thaliana]                                                                                                   | 365 | 583  | 1.00E-23  | 159.7 | 17.5 | 23.0 | Mutator-like transposase; 53847-56139           | gbpln | Arabidopsis thaliana | #                                                                                                                                                                                                                                                                                                                                                                                                                                                                   | #   | #   | #         | #     | #    | #    |
| Rsa1.0_01252.1.g25072.t1 | gb ABD64950.1  GRF zinc finger containing protein [Brassica oleracea]                                                                                                                   | 142 | 180  | 1.00E-54  | 126.8 | 75.4 | 83.1 | GRF zinc finger containing protein              | gbpln | Brassica oleracea    | #                                                                                                                                                                                                                                                                                                                                                                                                                                                                   | #   | #   | #         | #     | #    | #    |
| Rsa1.0_01252.1.g25073.t1 | gb AAG51228.1 AC035249.3 Tam3-like transposon protein; 93317-95488 [Arabidopsis thaliana] gi 12323055 gb AAG51515.1 AC068324.3 hAT-element transposase, putative [Arabidopsis thaliana] | 498 | 723  | 1.00E-109 | 145.2 | 43.6 | 57.2 | Tam3-like transposon protein; 93317-95488       | gbpln | Arabidopsis thaliana | AT3G42170.1   Symbols:   BED zinc finger hAT family dimerisation domain   chr3:14321838-14323928 FORWARD LENGTH=696                                                                                                                                                                                                                                                                                                                                                 | 498 | 696 | 1.00E-15  | 139.8 | 18.3 | 32.7 |
| Rsa1.0_01252.1.g25074.t1 | ref XP_002894316.1  predicted protein [Arabidopsis lyrata subsp. lyrata] gi 297340158 gb EFH70575.1  predicted protein [Arabidopsis lyrata subsp. lyrata]                               | 423 | 424  | 0         | 100.2 | 83.2 | 89.8 | predicted protein                               | gbpln | Arabidopsis lyrata   | AT1G51420.1   Symbols: ATSP1_SPP1   sucrose-phosphatase 1   chr1:19064852-19066704 REVERSE LENGTH=423                                                                                                                                                                                                                                                                                                                                                               | 423 | 423 | 0         | 100.0 | 82.7 | 89.6 |
| Rsa1.0_01252.1.g25075.t1 | ref XP_004143235.1  PREDICTED: cinnamoyl-CoA reductase 1-like [Cucumis sativus]                                                                                                         | 245 | 256  | 1.00E-101 | 104.5 | 71.8 | 84.5 | PREDICTED: cinnamoyl-CoA reductase 1-like       | gbpln | Cucumis sativus      | AT1G51410.1   Symbols:   NAD(P)-binding Rossmann-fold superfamily protein   chr1:19059885-19061424 FORWARD LENGTH=325                                                                                                                                                                                                                                                                                                                                               | 245 | 325 | 3.00E-68  | 132.7 | 49.4 | 51.0 |
| Rsa1.0_01252.1.g25076.t1 | ref NP_849791.1  myosin-related protein [Arabidopsis thaliana] gi 332194543 gb AEE32664.1  myosin-related protein [Arabidopsis thaliana]                                                | 443 | 847  | 0         | 109.9 | 81.0 | 88.5 | myosin-related protein                          | gbpln | Arabidopsis thaliana | AT1G51405.1   Symbols:   myosin-related   chr1:19057780-19059582 FORWARD LENGTH=487                                                                                                                                                                                                                                                                                                                                                                                 | 443 | 487 | 0         | 109.9 | 81.0 | 88.5 |
| Rsa1.0_01252.1.g25077.t1 | gb EOA29603.1  hypothetical protein CARUB_v10013521mg, partial [Capsella rubella]                                                                                                       | 581 | 498  | 1.00E-54  | 85.7  | 20.7 | 27.4 | hypothetical protein CARUB_v10013521mg, partial | gbpln | Capsella rubella     | AT3G31430.1   Symbols:   unknown protein; FUNCTIONS IN: molecular_function unknown; INVOLVED IN: biological_process unknown; LOCATED IN: endomembrane system; BEST Arabidopsis thaliana protein match is: unknown protein (TAIR:AT5G18636.1); Has 295 Blast hits to 291 proteins in 12 species: Archae - 0; Bacteria - 0; Metazoa - 0; Fungi - 0; Plants - 295; Viruses - 0; Other Eukaryotes - 0 (source: NCBI BLINK).   chr3:12795861-12796871 REVERSE LENGTH=336 | 581 | 336 | 4.00E-19  | 57.8  | 9.6  | 16.7 |
| Rsa1.0_01253.1.g25078.t1 | #                                                                                                                                                                                       | #   | #    | #         | #     | #    | #    | -                                               | ----  | ----                 | #                                                                                                                                                                                                                                                                                                                                                                                                                                                                   | #   | #   | #         | #     | #    | #    |
| Rsa1.0_01253.1.g25079.t1 | #                                                                                                                                                                                       | #   | #    | #         | #     | #    | #    | -                                               | ----  | ----                 | #                                                                                                                                                                                                                                                                                                                                                                                                                                                                   | #   | #   | #         | #     | #    | #    |
| Rsa1.0_01253.1.g25080.t1 | #                                                                                                                                                                                       | #   | #    | #         | #     | #    | #    | -                                               | ----  | ----                 | #                                                                                                                                                                                                                                                                                                                                                                                                                                                                   | #   | #   | #         | #     | #    | #    |
| Rsa1.0_01253.1.g25081.t1 | ref XP_002876110.1  AT-HSFA7A [Arabidopsis lyrata subsp. lyrata] gi 297321948 gb EFH52369.1  AT-HSFA7A [Arabidopsis lyrata subsp. lyrata]                                               | 73  | 277  | 2.00E-17  | 379.5 | 76.7 | 86.3 | AT-HSFA7A                                       | gbpln | Arabidopsis lyrata   | AT3G51910.1   Symbols: AT-HSFA7A, HSF7A   heat shock transcription factor 7A   chr3:19265294-19266619 FORWARD LENGTH=272                                                                                                                                                                                                                                                                                                                                            | 73  | 272 | 4.00E-18  | 372.6 | 69.9 | 82.2 |
| Rsa1.0_01253.1.g25082.t1 | gb AF066530.1  putative nucleic acid-binding OB-fold protein [Brassica napus]                                                                                                           | 273 | 102  | 7.00E-11  | 37.4  | 12.5 | 12.8 | putative nucleic acid-binding OB-fold protein   | gbpln | Brassica napus       | #                                                                                                                                                                                                                                                                                                                                                                                                                                                                   | #   | #   | #         | #     | #    | #    |
| Rsa1.0_01253.1.g25083.t1 | #                                                                                                                                                                                       | #   | #    | #         | #     | #    | #    | -                                               | ----  | ----                 | #                                                                                                                                                                                                                                                                                                                                                                                                                                                                   | #   | #   | #         | #     | #    | #    |
| Rsa1.0_01253.1.g25084.t1 | #                                                                                                                                                                                       | #   | #    | #         | #     | #    | #    | -                                               | ----  | ----                 | #                                                                                                                                                                                                                                                                                                                                                                                                                                                                   | #   | #   | #         | #     | #    | #    |
| Rsa1.0_01253.1.g25085.t1 | gb AFN85666.1  glucanase 1 [Brassica rapa subsp. pekinensis]                                                                                                                            | 317 | 341  | 1.00E-179 | 107.6 | 97.8 | 98.7 | glucanase 1                                     | gbpln | Brassica rapa        | AT3G57240.1   Symbols: BG3   beta-1,3-glucanase 3   chr3:21181916-21183045 REVERSE LENGTH=341                                                                                                                                                                                                                                                                                                                                                                       | 317 | 341 | 1.00E-149 | 107.6 | 81.7 | 87.4 |
| Rsa1.0_01254.1.g25086.t1 | gb ABE68874.1  cinnamate 4-hydroxylase [Brassica rapa subsp. pekinensis]                                                                                                                | 505 | 505  | 0         | 100.0 | 91.5 | 96.0 | cinnamate 4-hydroxylase                         | gbpln | Brassica rapa        | AT2G30490.1   Symbols: ATC4H, C4H, CYP73A5, REF3   cinnamate-4-hydroxylase   chr2:12993861-12995683 REVERSE LENGTH=505                                                                                                                                                                                                                                                                                                                                              | 505 | 505 | 0         | 100.0 | 88.1 | 94.7 |
| Rsa1.0_01254.1.g25087.t1 | dbj BAJ34588.1  unnamed protein product [Thellungiella halophila]                                                                                                                       | 751 | 809  | 0         | 107.7 | 79.0 | 86.3 | unnamed protein product                         | ----  | ----                 | AT2G30470.1   Symbols: HSI2, VAL1   high-level expression of sugar-inducible gene 2   chr2:12980904-12984724 REVERSE LENGTH=790                                                                                                                                                                                                                                                                                                                                     | 751 | 790 | 0         | 105.2 | 73.1 | 83.0 |

|                          |                                                                                                                                                                                                                                                                                                                                                                                                                                                                                                                                                                                                                                                                                                                                                                                                                                                                                                                                |     |     |           |       |      |      |                                                    |       |                      |                                                                                                                                  |     |     |           |       |      |      |
|--------------------------|--------------------------------------------------------------------------------------------------------------------------------------------------------------------------------------------------------------------------------------------------------------------------------------------------------------------------------------------------------------------------------------------------------------------------------------------------------------------------------------------------------------------------------------------------------------------------------------------------------------------------------------------------------------------------------------------------------------------------------------------------------------------------------------------------------------------------------------------------------------------------------------------------------------------------------|-----|-----|-----------|-------|------|------|----------------------------------------------------|-------|----------------------|----------------------------------------------------------------------------------------------------------------------------------|-----|-----|-----------|-------|------|------|
| Rsa1.0_01254.1.g25088.t1 | refNP_180603.2  thylakoidal processing peptidase 1 [Arabidopsis thaliana] gi 75276837 sp O04348.2 TPP1_ARATH RecName: Full=Thylakoidal processing peptidase 1, chloroplastic; AltName: Full=Signal peptidase 1-1; Flags: Precursor gi 2769566 emb CAA71502.1  chloroplast thylakoidal processing peptidase [Arabidopsis thaliana] gi 22135950 gb AAM91557.1  putative signal peptidase 1 [Arabidopsis thaliana] gi 58652110 gb AAW80880.1  At2g30440 [Arabidopsis thaliana] gi 330253295 gb AEC08389.1  thylakoidal processing peptidase 1 [Arabidopsis thaliana]                                                                                                                                                                                                                                                                                                                                                              | 328 | 340 | 1.00E-131 | 103.7 | 78.0 | 86.6 | thylakoidal processing peptidase 1                 | gbpln | Arabidopsis thaliana | AT2G30440.1   Symbols: TPP   thylakoid processing peptide   chr2:12973244-12975027 FORWARD LENGTH=340                            | 328 | 340 | 1.00E-134 | 103.7 | 78.0 | 86.6 |
| Rsa1.0_01254.1.g25089.t1 | refXP_002879263.1  hypothetical protein ARALYDRAFT_481952 [Arabidopsis lyrata subsp. lyrata] gi 297325102 gb EFH55522.1  hypothetical protein ARALYDRAFT_481952 [Arabidopsis lyrata subsp. lyrata]                                                                                                                                                                                                                                                                                                                                                                                                                                                                                                                                                                                                                                                                                                                             | 287 | 319 | 4.00E-94  | 111.1 | 70.4 | 78.0 | hypothetical protein ARALYDRAFT_481952             | gbpln | Arabidopsis lyrata   | AT2G30400.1   Symbols: ATOFP2, OFP2   ovate family protein 2   chr2:12956592-12957554 FORWARD LENGTH=320                         | 287 | 320 | 7.00E-90  | 111.5 | 72.5 | 83.3 |
| Rsa1.0_01254.1.g25090.t1 | refXP_002881107.1  ATOFP17/OFP17 [Arabidopsis lyrata subsp. lyrata] gi 297326946 gb EFH57366.1  ATOFP17/OFP17 [Arabidopsis lyrata subsp. lyrata]                                                                                                                                                                                                                                                                                                                                                                                                                                                                                                                                                                                                                                                                                                                                                                               | 196 | 195 | 4.00E-79  | 99.5  | 79.1 | 84.7 | ATOFP17/OFP17                                      | gbpln | Arabidopsis lyrata   | AT2G30395.1   Symbols: ATOFP17, OFP17   ovate family protein 17   chr2:12954409-12955083 REVERSE LENGTH=195                      | 196 | 195 | 2.00E-79  | 99.5  | 77.0 | 84.2 |
| Rsa1.0_01254.1.g25091.t1 | # # # # # # # # - ---- # # # # # #                                                                                                                                                                                                                                                                                                                                                                                                                                                                                                                                                                                                                                                                                                                                                                                                                                                                                             |     |     |           |       |      |      |                                                    |       |                      |                                                                                                                                  |     |     |           |       |      |      |
| Rsa1.0_01254.1.g25092.t1 | refNP_001189638.1  allergen-related protein [Arabidopsis thaliana] gi 122180229 sp Q1PEY6.1 EPFL6_ARATH RecName: Full=EPIDERMAL PATTERNING FACTOR-like protein 6; Short=EPF-like protein 6; Flags: Precursor gi 91806295 gb ABE65875.1  allergen-like [Arabidopsis thaliana] gi 330253283 gb AEC08377.1  epidermal patterning factor-like protein 6 [Arabidopsis thaliana]                                                                                                                                                                                                                                                                                                                                                                                                                                                                                                                                                     | 107 | 156 | 5.00E-30  | 145.8 | 66.4 | 72.0 | allergen-related protein                           | gbpln | Arabidopsis thaliana | AT2G30370.2   Symbols: CHAL, EPFL6   allergen-related   chr2:12940577-12942167 REVERSE LENGTH=156                                | 107 | 156 | 9.00E-33  | 145.8 | 66.4 | 72.0 |
| Rsa1.0_01254.1.g25093.t1 | refXP_002881592.1  hypothetical protein ARALYDRAFT_903069 [Arabidopsis lyrata subsp. lyrata] gi 297327431 gb EFH57851.1  hypothetical protein ARALYDRAFT_903069 [Arabidopsis lyrata subsp. lyrata]                                                                                                                                                                                                                                                                                                                                                                                                                                                                                                                                                                                                                                                                                                                             | 376 | 411 | 4.00E-90  | 109.3 | 53.7 | 68.6 | hypothetical protein ARALYDRAFT_903069             | gbpln | Arabidopsis lyrata   | AT4G33290.1   Symbols:   F-box and associated interaction domains-containing protein   chr4:16049573-16050865 FORWARD LENGTH=430 | 376 | 430 | 2.00E-87  | 114.4 | 50.5 | 65.2 |
| Rsa1.0_01254.1.g25094.t1 | refNP_180595.1  CBL-interacting serine/threonine-protein kinase 11 [Arabidopsis thaliana] gi 55976213 sp O22932.1 CIPKB_ARATH RecName: Full=CBL-interacting serine/threonine-protein kinase 11; AltName: Full=SNF1-related kinase 3.22; AltName: Full=SOS2-like protein kinase PKS5; AltName: Full=SOS3-interacting protein 4 gi 13249121 gb AAK16686.1 AF295666.1 CBL-interacting protein kinase 11 [Arabidopsis thaliana] gi 13448035 gb AAK26844.1 AF339146.1 SOS2-like protein kinase PKS5 [Arabidopsis thaliana] gi 13877673 gb AAK43914.1 AF370595.1 putative protein kinase [Arabidopsis thaliana] gi 2347199 gb AAC16938.1  putative protein kinase [Arabidopsis thaliana] gi 27311745 gb AAO00838.1  putative protein kinase [Arabidopsis thaliana] gi 30387521 gb AAP31926.1  At2g30360 [Arabidopsis thaliana] gi 330253281 gb AEC08375.1  CBL-interacting serine/threonine-protein kinase 11 [Arabidopsis thaliana] | 434 | 435 | 0         | 100.2 | 83.2 | 88.7 | CBL-interacting serine/threonine-protein kinase 11 | gbpln | Arabidopsis thaliana | AT2G30360.1   Symbols: CIPK11, PKS5, SIP4, SNRK3.22   SOS3-interacting protein 4   chr2:12937265-12938572 REVERSE LENGTH=435     | 434 | 435 | 0         | 100.2 | 83.2 | 88.7 |

|                           |                                                                                                                                                                                                                                                                                                                                                                                                                                                                                                                                                                                                                                                                                                                                                     |      |      |           |       |      |      |                                                         |       |                      |                                                                                                                                            |      |      |           |       |      |      |
|---------------------------|-----------------------------------------------------------------------------------------------------------------------------------------------------------------------------------------------------------------------------------------------------------------------------------------------------------------------------------------------------------------------------------------------------------------------------------------------------------------------------------------------------------------------------------------------------------------------------------------------------------------------------------------------------------------------------------------------------------------------------------------------------|------|------|-----------|-------|------|------|---------------------------------------------------------|-------|----------------------|--------------------------------------------------------------------------------------------------------------------------------------------|------|------|-----------|-------|------|------|
| Rsa1.0_01254.1.g25095.t9  | ref NP_850141.1  LOB domain-containing protein 13 [Arabidopsis thaliana]<br>gi 29427981 sp Q9AT61.2 LBD13_ARATH RecName: Full=LOB domain-containing protein 13; AltName: Full=ASYMMETRIC LEAVES 2-like protein 10; Short=AS2-like protein 10<br>gi 17227158 gb AAL38033.1 AF447888.1 LOB DOMAIN 13 [Arabidopsis thaliana]<br>gi 20196885 gb AAC16936.2  expressed protein [Arabidopsis thaliana]<br>gi 109946459 gb ABG48408.1  At2g30340 [Arabidopsis thaliana]<br>gi 219807096 dbj BAH10554.1  ASYMMETRIC LEAVES2-like 10 protein [Arabidopsis thaliana]<br>gi 330253278 gb AEC08372.1  LOB domain-containing protein 13 [Arabidopsis thaliana]<br>dbj BAB08714.1  non-LTR retroelement reverse transcriptase-like protein [Arabidopsis thaliana] | 263  | 268  | 2.00E-98  | 101.9 | 86.3 | 91.6 | LOB domain-containing protein 13                        | gbpln | Arabidopsis thaliana | AT2G30340.1   Symbols: LBD13   LOB domain-containing protein 13   chr2:12931306-12932540 REVERSE LENGTH=268                                | 263  | 268  | 1.00E-101 | 101.9 | 86.3 | 91.6 |
| Rsa1.0_01255.1.g25096.t1  | dbj BAB08714.1  non-LTR retroelement reverse transcriptase-like protein [Arabidopsis thaliana]                                                                                                                                                                                                                                                                                                                                                                                                                                                                                                                                                                                                                                                      | 361  | 1197 | 1.00E-77  | 331.6 | 40.7 | 57.3 | non-LTR retroelement reverse transcriptase-like protein | gbpln | Arabidopsis thaliana | AT4G29090.1   Symbols:   Ribonuclease H-like superfamily protein   chr4:14333528-14335255 FORWARD LENGTH=575                               | 361  | 575  | 3.00E-37  | 159.3 | 28.5 | 46.3 |
| Rsa1.0_01255.1.g25097.t1  | gb AAD25575.1  Mutator-like transposase [Arabidopsis thaliana]                                                                                                                                                                                                                                                                                                                                                                                                                                                                                                                                                                                                                                                                                      | 484  | 607  | 9.00E-64  | 125.4 | 29.5 | 43.2 | Mutator-like transposase                                | gbpln | Arabidopsis thaliana | AT1G64260.1   Symbols:   MuDR family transposase   chr1:23847756-23849915 FORWARD LENGTH=719                                               | 484  | 719  | 1.00E-14  | 148.6 | 17.1 | 29.5 |
| Rsa1.0_01255.1.g25098.t10 | ref XP_002891526.1  hypothetical protein ARALYDRAFT_337115 [Arabidopsis lyrata subsp. lyrata]<br>gi 297337388 gb EFH67785.1  hypothetical protein ARALYDRAFT_337115 [Arabidopsis lyrata subsp. lyrata]                                                                                                                                                                                                                                                                                                                                                                                                                                                                                                                                              | 915  | 824  | 4.00E-90  | 90.1  | 26.7 | 40.9 | hypothetical protein ARALYDRAFT_337115                  | gbpln | Arabidopsis lyrata   | AT2G07190.1   Symbols:   Domain of unknown function (DUF1985)   chr2:2987367-2988945 FORWARD LENGTH=452                                    | 915  | 452  | 3.00E-28  | 49.4  | 12.1 | 18.0 |
| Rsa1.0_01255.1.g25099.t2  | # # # # # # # #                                                                                                                                                                                                                                                                                                                                                                                                                                                                                                                                                                                                                                                                                                                                     | #    | #    | #         | #     | #    | #    | -                                                       | ----  | ----                 | #                                                                                                                                          | #    | #    | #         | #     | #    | #    |
| Rsa1.0_01255.1.g25100.t1  | gb EOA28640.1  hypothetical protein CARUB_v10024862mg, partial [Capsella rubella]                                                                                                                                                                                                                                                                                                                                                                                                                                                                                                                                                                                                                                                                   | 515  | 490  | 1.00E-89  | 95.1  | 37.7 | 57.7 | hypothetical protein CARUB_v10024862mg, partial         | gbpln | Capsella rubella     | AT1G52950.1   Symbols:   Nucleic acid-binding, OB-fold-like protein   chr1:19725483-19728007 FORWARD LENGTH=566                            | 515  | 566  | 3.00E-92  | 109.9 | 36.5 | 60.8 |
| Rsa1.0_01255.1.g25101.t1  | gb ABD65063.1  hypothetical protein 27.t00041 [Brassica oleracea]                                                                                                                                                                                                                                                                                                                                                                                                                                                                                                                                                                                                                                                                                   | 195  | 198  | 1.00E-44  | 101.5 | 51.3 | 66.7 | hypothetical protein 27.t00041                          | gbpln | Brassica oleracea    | AT2G35280.1   Symbols:   F-box family protein   chr2:14859709-14860200 REVERSE LENGTH=163                                                  | 195  | 163  | 1.00E-11  | 83.6  | 17.4 | 28.2 |
| Rsa1.0_01255.1.g25102.t1  | dbj BAB11364.1  helicase [Arabidopsis thaliana]                                                                                                                                                                                                                                                                                                                                                                                                                                                                                                                                                                                                                                                                                                     | 627  | 1523 | 1.00E-136 | 242.9 | 39.6 | 48.8 | helicase                                                | gbpln | Arabidopsis thaliana | #                                                                                                                                          | #    | #    | #         | #     | #    | #    |
| Rsa1.0_01255.1.g25103.t1  | gb AAB84340.1  putative non-LTR retroelement reverse transcriptase [Arabidopsis thaliana]<br>ref NP_178999.2  somatic embryogenesis receptor kinase 4 [Arabidopsis thaliana]<br>gi 254814126 sp Q9SKG5.2 SERK4_ARATH RecName: Full=Somatic embryogenesis receptor kinase 4; Short=AtSERK4; AltName: Full=Protein BAK1-like 1; Short=AtBKK1; AltName: Full=Somatic embryogenesis receptor-like kinase 2; Flags: Precursor<br>gi 15810409 gb AAL07092.1  unknown protein [Arabidopsis thaliana]<br>gi 224589505 gb ACN59286.1  leucine-rich repeat receptor-like protein kinase [Arabidopsis thaliana]<br>gi 330251165 gb AEC06259.1  somatic embryogenesis receptor kinase 4 [Arabidopsis thaliana]                                                  | 1755 | 1094 | 0         | 62.3  | 27.9 | 39.5 | putative non-LTR retroelement reverse transcriptase     | gbpln | Arabidopsis thaliana | AT4G29090.1   Symbols:   Ribonuclease H-like superfamily protein   chr4:14333528-14335255 FORWARD LENGTH=575                               | 1755 | 575  | 6.00E-81  | 32.8  | 10.2 | 16.5 |
| Rsa1.0_01255.1.g25104.t1  | ref NP_178999.2  somatic embryogenesis receptor kinase 4 [Arabidopsis thaliana]<br>gi 254814126 sp Q9SKG5.2 SERK4_ARATH RecName: Full=Somatic embryogenesis receptor kinase 4; Short=AtSERK4; AltName: Full=Protein BAK1-like 1; Short=AtBKK1; AltName: Full=Somatic embryogenesis receptor-like kinase 2; Flags: Precursor<br>gi 15810409 gb AAL07092.1  unknown protein [Arabidopsis thaliana]<br>gi 224589505 gb ACN59286.1  leucine-rich repeat receptor-like protein kinase [Arabidopsis thaliana]<br>gi 330251165 gb AEC06259.1  somatic embryogenesis receptor kinase 4 [Arabidopsis thaliana]                                                                                                                                               | 615  | 620  | 0         | 100.8 | 81.5 | 86.0 | somatic embryogenesis receptor kinase 4                 | gbpln | Arabidopsis thaliana | AT2G13790.1   Symbols: ATSERK4, SERK4, BKK1, BAK7   somatic embryogenesis receptor-like kinase 4   chr2:5741979-5746581 FORWARD LENGTH=620 | 615  | 620  | 0         | 100.8 | 81.5 | 86.0 |
| Rsa1.0_01256.1.g25105.t14 | gb AAF69150.1 AC007915.2 F27F5.2 [Arabidopsis thaliana]                                                                                                                                                                                                                                                                                                                                                                                                                                                                                                                                                                                                                                                                                             | 944  | 937  | 0         | 99.3  | 70.6 | 78.2 | F27F5.2                                                 | gbpln | Arabidopsis thaliana | AT1G44910.1   Symbols: ATPRP40A, PRP40A   pre-mRNA-processing protein 40A   chr1:16975930-16982818 FORWARD LENGTH=958                      | 944  | 958  | 0         | 101.5 | 57.7 | 64.1 |
| Rsa1.0_01256.1.g25106.t1  | # # # # # # # #                                                                                                                                                                                                                                                                                                                                                                                                                                                                                                                                                                                                                                                                                                                                     | #    | #    | #         | #     | #    | #    | -                                                       | ----  | ----                 | #                                                                                                                                          | #    | #    | #         | #     | #    | #    |
| Rsa1.0_01256.1.g25107.t1  | gb AAK51235.1 AF287471.1 polyprotein [Arabidopsis thaliana]                                                                                                                                                                                                                                                                                                                                                                                                                                                                                                                                                                                                                                                                                         | 681  | 1453 | 0         | 213.4 | 61.7 | 75.6 | polyprotein                                             | gbpln | Arabidopsis thaliana | AT4G23160.1   Symbols: CRK8   cysteine-rich RLK (RECEPTOR-like protein kinase) 8   chr4:12129485-12134086 FORWARD LENGTH=1262              | 681  | 1262 | 3.00E-82  | 185.3 | 25.0 | 37.7 |

|                          |                                                                                                                                                                                                                                                                                                                                                                                                                                 |      |      |           |       |      |      |                                              |       |                      |                                                                                                                                                                                                                                                                                                                                                                                                                |      |      |           |       |      |      |
|--------------------------|---------------------------------------------------------------------------------------------------------------------------------------------------------------------------------------------------------------------------------------------------------------------------------------------------------------------------------------------------------------------------------------------------------------------------------|------|------|-----------|-------|------|------|----------------------------------------------|-------|----------------------|----------------------------------------------------------------------------------------------------------------------------------------------------------------------------------------------------------------------------------------------------------------------------------------------------------------------------------------------------------------------------------------------------------------|------|------|-----------|-------|------|------|
| Rsa1.0_01256.1.g25108.t1 | emb CAC37623.1  copia-like polyprotein [Arabidopsis thaliana]                                                                                                                                                                                                                                                                                                                                                                   | 507  | 1466 | 0         | 289.2 | 64.3 | 77.9 | copia-like polyprotein                       | gbpln | Arabidopsis thaliana | AT1G34070.1   Symbols:   CONTAINS InterPro DOMAIN/s: Retrotransposon gag protein (InterPro:IPR005162); BEST Arabidopsis thaliana protein match is: unknown protein (TAIR:AT5G48050.1); Has 648 Blast hits to 647 proteins in 29 species: Archae - 0; Bacteria - 0; Metazoa - 16; Fungi - 25; Plants - 607; Viruses - 0; Other Eukaryotes - 0 (source: NCBI BLink).   chr1:12402283-12403209 FORWARD LENGTH=308 | 507  | 308  | 1.00E-13  | 60.7  | 12.6 | 20.3 |
| Rsa1.0_01256.1.g25109.t1 | #                                                                                                                                                                                                                                                                                                                                                                                                                               | #    | #    | #         | #     | #    | -    | ---                                          | ---   | #                    | #                                                                                                                                                                                                                                                                                                                                                                                                              | #    | #    | #         | #     | #    |      |
| Rsa1.0_01256.1.g25110.t2 | gb AAG10817.1 AC011808_5 Putative retroelement polyprotein [Arabidopsis thaliana]                                                                                                                                                                                                                                                                                                                                               | 1231 | 1413 | 0         | 114.8 | 52.7 | 68.5 | Putative retroelement polyprotein            | gbpln | Arabidopsis thaliana | AT4G23160.1   Symbols: CRK8   cysteine-rich RLK (RECEPTOR-like protein kinase) 8   chr4:12129485-12134086 FORWARD LENGTH=1262                                                                                                                                                                                                                                                                                  | 1231 | 1262 | 1.00E-150 | 102.5 | 21.2 | 27.9 |
| Rsa1.0_01256.1.g25111.t4 | gb ABD65090.1  hypothetical protein 27.t00116 [Brassica oleracea]                                                                                                                                                                                                                                                                                                                                                               | 216  | 484  | 7.00E-14  | 224.1 | 22.7 | 36.1 | hypothetical protein 27.t00116               | gbpln | Brassica oleracea    | #                                                                                                                                                                                                                                                                                                                                                                                                              | #    | #    | #         | #     | #    |      |
| Rsa1.0_01256.1.g25112.t5 | emb CAB39638.1  RNA-directed DNA polymerase-like protein [Arabidopsis thaliana] gi 7267666 emb CAB78094.1  RNA-directed DNA polymerase-like protein [Arabidopsis thaliana]                                                                                                                                                                                                                                                      | 1302 | 1274 | 0         | 97.8  | 42.6 | 59.3 | RNA-directed DNA polymerase-like protein     | gbpln | Arabidopsis thaliana | AT4G29090.1   Symbols:   Ribonuclease H-like superfamily protein   chr4:1433528-14335255 FORWARD LENGTH=575                                                                                                                                                                                                                                                                                                    | 1302 | 575  | 1.00E-34  | 44.2  | 10.1 | 15.2 |
| Rsa1.0_01257.1.g25113.t1 | #                                                                                                                                                                                                                                                                                                                                                                                                                               | #    | #    | #         | #     | #    | -    | ---                                          | ---   | #                    | #                                                                                                                                                                                                                                                                                                                                                                                                              | #    | #    | #         | #     | #    |      |
| Rsa1.0_01257.1.g25114.t1 | ref XP_002887308.1  predicted protein [Arabidopsis lyrata subsp. lyrata] gi 297333149 gb EFH63567.1  predicted protein [Arabidopsis lyrata subsp. lyrata]                                                                                                                                                                                                                                                                       | 445  | 466  | 0         | 104.7 | 80.2 | 83.6 | predicted protein                            | gbpln | Arabidopsis lyrata   | AT1G70550.1   Symbols:   Protein of Unknown Function (DUF239)   chr1:26597510-26599888 FORWARD LENGTH=465                                                                                                                                                                                                                                                                                                      | 445  | 465  | 0         | 104.5 | 77.8 | 82.5 |
| Rsa1.0_01257.1.g25115.t1 | ref NP_177210.1  cysteine-rich receptor-like protein kinase 3 [Arabidopsis thaliana] gi 75333658 sp Q9CAL2.1 CRK3_ARATH RecName: Full=Cysteine-rich receptor-like protein kinase 3; Short=Cysteine-rich RLK3; Flags: Precursor gi 12325043 gb AAG52470.1 AC010796_9 putative protein kinase; 41292-38663 [Arabidopsis thaliana] gi 332196954 gb AEE35075.1  cysteine-rich receptor-like protein kinase 3 [Arabidopsis thaliana] | 618  | 646  | 0         | 104.5 | 84.1 | 90.9 | cysteine-rich receptor-like protein kinase 3 | gbpln | Arabidopsis thaliana | AT1G70530.1   Symbols: CRK3   cysteine-rich RLK (RECEPTOR-like protein kinase) 3   chr1:26588750-26591379 REVERSE LENGTH=646                                                                                                                                                                                                                                                                                   | 618  | 646  | 0         | 104.5 | 84.1 | 90.9 |
| Rsa1.0_01257.1.g25116.t1 | #                                                                                                                                                                                                                                                                                                                                                                                                                               | #    | #    | #         | #     | #    | -    | ---                                          | ---   | #                    | #                                                                                                                                                                                                                                                                                                                                                                                                              | #    | #    | #         | #     | #    |      |
| Rsa1.0_01257.1.g25117.t1 | ref NP_177210.1  cysteine-rich receptor-like protein kinase 3 [Arabidopsis thaliana] gi 75333658 sp Q9CAL2.1 CRK3_ARATH RecName: Full=Cysteine-rich receptor-like protein kinase 3; Short=Cysteine-rich RLK3; Flags: Precursor gi 12325043 gb AAG52470.1 AC010796_9 putative protein kinase; 41292-38663 [Arabidopsis thaliana] gi 332196954 gb AEE35075.1  cysteine-rich receptor-like protein kinase 3 [Arabidopsis thaliana] | 647  | 646  | 0         | 99.8  | 85.3 | 91.7 | cysteine-rich receptor-like protein kinase 3 | gbpln | Arabidopsis thaliana | AT1G70530.1   Symbols: CRK3   cysteine-rich RLK (RECEPTOR-like protein kinase) 3   chr1:26588750-26591379 REVERSE LENGTH=646                                                                                                                                                                                                                                                                                   | 647  | 646  | 0         | 99.8  | 85.3 | 91.7 |
| Rsa1.0_01257.1.g25118.t1 | gb EOA33736.1  hypothetical protein CARUB_v10019929mg [Capsella rubella]                                                                                                                                                                                                                                                                                                                                                        | 652  | 649  | 0         | 99.5  | 85.6 | 91.0 | hypothetical protein CARUB_v10019929mg       | gbpln | Capsella rubella     | AT1G70520.1   Symbols: CRK2   cysteine-rich RLK (RECEPTOR-like protein kinase) 2   chr1:26584888-26587334 REVERSE LENGTH=649                                                                                                                                                                                                                                                                                   | 652  | 649  | 0         | 99.5  | 85.3 | 91.0 |
| Rsa1.0_01257.1.g25119.t1 | gb EOA35431.1  hypothetical protein CARUB_v10020633mg [Capsella rubella]                                                                                                                                                                                                                                                                                                                                                        | 353  | 330  | 1.00E-149 | 93.5  | 74.8 | 82.7 | hypothetical protein CARUB_v10020633mg       | gbpln | Capsella rubella     | AT1G70505.1   Symbols:   unknown protein; BEST Arabidopsis thaliana protein match is: unknown protein (TAIR:AT1G10660.1); Has 141 Blast hits to 140 proteins in 16 species: Archae - 0; Bacteria - 0; Metazoa - 4; Fungi - 0; Plants - 135; Viruses - 0; Other Eukaryotes - 2 (source: NCBI BLink).   chr1:26570647-26572463 FORWARD LENGTH=358                                                                | 353  | 358  | 1.00E-121 | 101.4 | 60.3 | 67.7 |
| Rsa1.0_01257.1.g25120.t1 | ref XP_002877193.1  predicted protein [Arabidopsis lyrata subsp. lyrata] gi 297323031 gb EFH53452.1  predicted protein [Arabidopsis lyrata subsp. lyrata]                                                                                                                                                                                                                                                                       | 428  | 453  | 1.00E-154 | 105.8 | 66.1 | 79.9 | predicted protein                            | gbpln | Arabidopsis lyrata   | AT3G29670.1   Symbols:   HXXD-type acyl-transferase family protein   chr3:11527952-11529307 FORWARD LENGTH=451                                                                                                                                                                                                                                                                                                 | 428  | 451  | 1.00E-156 | 105.4 | 65.7 | 80.1 |

|                           |                                                                                                                                                                                                                                                                                                                                                                                                                                                 |      |      |           |       |      |      |                                                            |             |                      |                                                                                                                                                                                                                                                                                  |      |     |           |       |      |      |
|---------------------------|-------------------------------------------------------------------------------------------------------------------------------------------------------------------------------------------------------------------------------------------------------------------------------------------------------------------------------------------------------------------------------------------------------------------------------------------------|------|------|-----------|-------|------|------|------------------------------------------------------------|-------------|----------------------|----------------------------------------------------------------------------------------------------------------------------------------------------------------------------------------------------------------------------------------------------------------------------------|------|-----|-----------|-------|------|------|
| Rsa1.0_01257.1.g25121.t1  | refNP_175703.1  Nucleic acid-binding, OB-fold-like protein [Arabidopsis thaliana]<br>gi 12324642 gb AAG52278.1 AC019018_15 putative replication protein; 94555-97079 [Arabidopsis thaliana]<br>gi 332194750 gb AEE32871.1  Nucleic acid-binding, OB-fold-like protein [Arabidopsis thaliana]                                                                                                                                                    | 512  | 566  | 7.00E-92  | 110.5 | 36.1 | 59.2 | Nucleic acid-binding, OB-fold-like protein                 | gbpln       | Arabidopsis thaliana | AT1G52950.1   Symbols:   Nucleic acid-binding, OB-fold-like protein   chr1:19725483-19728007 FORWARD LENGTH=566                                                                                                                                                                  | 512  | 566 | 2.00E-94  | 110.5 | 36.1 | 59.2 |
| Rsa1.0_01257.1.g25122.t3  | emb CAB91581.1  putative protein [Arabidopsis thaliana]                                                                                                                                                                                                                                                                                                                                                                                         | 1639 | 1752 | 0         | 106.9 | 52.4 | 66.3 | putative protein                                           | gbpln       | Arabidopsis thaliana | AT3G51700.1   Symbols:   PIF1 helicase   chr3:19178443-19181145 REVERSE LENGTH=344                                                                                                                                                                                               | 1639 | 344 | 2.00E-73  | 21.0  | 8.5  | 11.6 |
| Rsa1.0_01258.1.g25123.t1  | gb ACG47680.1  hypothetical protein [Zea mays]<br>gi 413946083 gb AFW78732.1  hypothetical protein ZEAMMB73_647957 [Zea mays]                                                                                                                                                                                                                                                                                                                   | 56   | 72   | 6.00E-17  | 128.6 | 75.0 | 85.7 | hypothetical protein                                       | gbenv/gbpln | Zea mays             | AT5G14105.1   Symbols:   unknown protein; Has 30201 Blast hits to 17322 proteins in 780 species: Archae - 12; Bacteria - 1396; Metazoa - 17338; Fungi - 3422; Plants - 5037; Viruses - 0; Other Eukaryotes - 2996 (source: NCBI BLINK).   chr5:4552169-4552901 REVERSE LENGTH=76 | 56   | 76  | 4.00E-15  | 135.7 | 64.3 | 69.6 |
| Rsa1.0_01258.1.g25124.t1  | # # # # # # # # -                                                                                                                                                                                                                                                                                                                                                                                                                               |      |      |           |       |      |      |                                                            | ----        | ----                 | #                                                                                                                                                                                                                                                                                | #    | #   | #         | #     | #    | #    |
| Rsa1.0_01258.1.g25125.t1  | refNP_190950.1  C2H2 and C2HC zinc finger-containing protein [Arabidopsis thaliana] gi 7630002 emb CAB88344.1  putative C2H2-type zinc finger protein [Arabidopsis thaliana]<br>gi 67633692 gb AA778770.1  zinc finger (C2H2 type) family protein [Arabidopsis thaliana] gi 22589871 db BAH30488.1  hypothetical protein [Arabidopsis thaliana] gi 332645626 gb AEE79147.1  C2H2 and C2HC zinc finger-containing protein [Arabidopsis thaliana] | 139  | 142  | 1.00E-57  | 102.2 | 80.6 | 87.1 | C2H2 and C2HC zinc finger-containing protein               | gbpln       | Arabidopsis thaliana | AT3G53820.1   Symbols:   C2H2 and C2HC zinc fingers superfamily protein   chr3:19938706-19939134 FORWARD LENGTH=142                                                                                                                                                              | 139  | 142 | 4.00E-60  | 102.2 | 80.6 | 87.1 |
| Rsa1.0_01258.1.g25126.t1  | refXP_002872057.1  NLI interacting factor family protein [Arabidopsis lyrata subsp. lyrata]<br>gi 297317894 gb EFH48316.1  NLI interacting factor family protein [Arabidopsis lyrata subsp. lyrata]                                                                                                                                                                                                                                             | 256  | 302  | 5.00E-68  | 118.0 | 60.2 | 70.3 | NLI interacting factor family protein                      | gbpln       | Arabidopsis lyrata   | AT2G02290.1   Symbols:   Haloacid dehalogenase-like hydrolase (HAD) superfamily protein   chr2:604453-605361 FORWARD LENGTH=302                                                                                                                                                  | 256  | 302 | 1.00E-68  | 118.0 | 59.0 | 71.1 |
| Rsa1.0_01258.1.g25127.t10 | refNP_190951.2  Regulator of chromosome condensation (RCC1) family protein [Arabidopsis thaliana] gi 332645627 gb AEE79148.1  Regulator of chromosome condensation (RCC1) family protein [Arabidopsis thaliana]                                                                                                                                                                                                                                 | 466  | 472  | 0         | 101.3 | 86.5 | 92.1 | Regulator of chromosome condensation (RCC1) family protein | gbpln       | Arabidopsis thaliana | AT3G53830.1   Symbols:   Regulator of chromosome condensation (RCC1) family protein   chr3:19940814-19943592 FORWARD LENGTH=472                                                                                                                                                  | 466  | 472 | 0         | 101.3 | 86.5 | 92.1 |
| Rsa1.0_01258.1.g25128.t4  | gb EOA25028.1  hypothetical protein CARUB_v10018334mg [Capsella rubella]                                                                                                                                                                                                                                                                                                                                                                        | 124  | 82   | 1.00E-39  | 66.1  | 62.9 | 64.5 | hypothetical protein CARUB_v10018334mg                     | gbpln       | Capsella rubella     | AT5G27700.1   Symbols:   Ribosomal protein S21e   chr5:9807541-9808048 REVERSE LENGTH=82                                                                                                                                                                                         | 124  | 82  | 8.00E-42  | 66.1  | 62.1 | 63.7 |
| Rsa1.0_01258.1.g25129.t3  | emb CAB83107.1  sigma factor 3 [Sinapis alba]                                                                                                                                                                                                                                                                                                                                                                                                   | 877  | 567  | 0         | 64.7  | 56.3 | 59.2 | sigma factor 3                                             | gbpln       | Sinapis alba         | AT3G53920.1   Symbols:   SIGC, SIG3   RNAPolymerase sigma-subunit C   chr3:19961041-19963820 REVERSE LENGTH=571                                                                                                                                                                  | 877  | 571 | 0         | 65.1  | 52.2 | 56.2 |
| Rsa1.0_01258.1.g25130.t1  | # # # # # # # # -                                                                                                                                                                                                                                                                                                                                                                                                                               |      |      |           |       |      |      |                                                            | ----        | ----                 | #                                                                                                                                                                                                                                                                                | #    | #   | #         | #     | #    | #    |
| Rsa1.0_01258.1.g25131.t1  | db BAA97086.1  unnamed protein product [Arabidopsis thaliana]                                                                                                                                                                                                                                                                                                                                                                                   | 166  | 341  | 1.00E-31  | 205.4 | 44.6 | 62.7 | unnamed protein product                                    | gbpln       | Arabidopsis thaliana | #                                                                                                                                                                                                                                                                                | #    | #   | #         | #     | #    | #    |
| Rsa1.0_01258.1.g25132.t1  | # # # # # # # # -                                                                                                                                                                                                                                                                                                                                                                                                                               |      |      |           |       |      |      |                                                            | ----        | ----                 | #                                                                                                                                                                                                                                                                                | #    | #   | #         | #     | #    | #    |
| Rsa1.0_01258.1.g25133.t1  | gb EOA25347.1  hypothetical protein CARUB_v10018670mg [Capsella rubella]                                                                                                                                                                                                                                                                                                                                                                        | 717  | 707  | 0         | 98.6  | 85.9 | 91.5 | hypothetical protein CARUB_v10018670mg                     | gbpln       | Capsella rubella     | AT3G53930.2   Symbols:   Protein kinase superfamily protein   chr3:19966541-19970580 FORWARD LENGTH=712                                                                                                                                                                          | 717  | 712 | 0         | 99.3  | 84.9 | 90.9 |
| Rsa1.0_01258.1.g25134.t1  | refNP_190962.2  Mitochondrial substrate carrier family protein [Arabidopsis thaliana]<br>gi 17064804 gb AAL32556.1  putative protein [Arabidopsis thaliana] gi 20259828 gb AAM13261.1  putative protein [Arabidopsis thaliana] gi 332645641 gb AEE79162.1  Mitochondrial substrate carrier family protein [Arabidopsis thaliana]                                                                                                                | 356  | 365  | 1.00E-167 | 102.5 | 83.4 | 90.4 | Mitochondrial substrate carrier family protein             | gbpln       | Arabidopsis thaliana | AT3G53940.1   Symbols:   Mitochondrial substrate carrier family protein   chr3:19971258-19973564 REVERSE LENGTH=365                                                                                                                                                              | 356  | 365 | 1.00E-169 | 102.5 | 83.4 | 90.4 |
| Rsa1.0_01259.1.g25135.t1  | # # # # # # # # -                                                                                                                                                                                                                                                                                                                                                                                                                               |      |      |           |       |      |      |                                                            | ----        | ----                 | #                                                                                                                                                                                                                                                                                | #    | #   | #         | #     | #    | #    |

|                          |                                                                                                                                                                                                                                                                                                                                                                                                                                                                                                                   |      |      |           |       |      |      |                                                                       |       |                      |                                                                                                                                                                                                                                                                                                                                                                                                                                                                                                 |      |      |           |       |      |      |
|--------------------------|-------------------------------------------------------------------------------------------------------------------------------------------------------------------------------------------------------------------------------------------------------------------------------------------------------------------------------------------------------------------------------------------------------------------------------------------------------------------------------------------------------------------|------|------|-----------|-------|------|------|-----------------------------------------------------------------------|-------|----------------------|-------------------------------------------------------------------------------------------------------------------------------------------------------------------------------------------------------------------------------------------------------------------------------------------------------------------------------------------------------------------------------------------------------------------------------------------------------------------------------------------------|------|------|-----------|-------|------|------|
| Rsa1.0_01259.1.g25136.t1 | refNP_200165.1  vacuolar protein sorting 26A [Arabidopsis thaliana] gi 75171014 sp Q9FJD0.1 VP26A_ARAT H RecName: Full=Vacuolar protein sorting-associated protein 26A; AltName: Full=Vesicle protein sorting 26A gi 9759192 dbj BAB09729.1  vacuolar sorting protein-like; embryogenesis protein H beta 58-like protein [Arabidopsis thaliana] gi 110735821 dbj BAE99887.1  vacuolar sorting protein-like [Arabidopsis thaliana] gi 332008990 gb AED96373.1  vacuolar protein sorting 26A [Arabidopsis thaliana] | 302  | 302  | 1.00E-167 | 100.0 | 95.0 | 97.4 | vacuolar protein sorting 26A                                          | gbpln | Arabidopsis thaliana | AT5G53530.1   Symbols: VPS26A   vacuolar protein sorting 26A   chr5:21746275-21748156 REVERSE LENGTH=302                                                                                                                                                                                                                                                                                                                                                                                        | 302  | 302  | 1.00E-169 | 100.0 | 95.0 | 97.4 |
| Rsa1.0_01259.1.g25137.t1 | refXP_002864247.1  ATOPT9 [Arabidopsis lyrata subsp. lyrata] gi 297310082 gb EFH40506.1  ATOPT9 [Arabidopsis lyrata subsp. lyrata]                                                                                                                                                                                                                                                                                                                                                                                | 740  | 741  | 0         | 100.1 | 91.4 | 95.8 | ATOPT9                                                                | gbpln | Arabidopsis lyrata   | AT5G53510.1   Symbols: ATOPT9, OPT9   oligopeptide transporter 9   chr5:21738849-21742082 FORWARD LENGTH=741                                                                                                                                                                                                                                                                                                                                                                                    | 740  | 741  | 0         | 100.1 | 90.4 | 95.4 |
| Rsa1.0_01259.1.g25138.t1 | gb AAF97298.1 AC007843.1 Hypothetical protein [Arabidopsis thaliana]                                                                                                                                                                                                                                                                                                                                                                                                                                              | 354  | 362  | 1.00E-108 | 102.3 | 56.5 | 72.3 | Hypothetical protein                                                  | gbpln | Arabidopsis thaliana | #                                                                                                                                                                                                                                                                                                                                                                                                                                                                                               | #    | #    | #         | #     | #    | #    |
| Rsa1.0_01260.1.g25139.t1 | gb AAC95173.1  putative retroelement pol polyprotein [Arabidopsis thaliana]                                                                                                                                                                                                                                                                                                                                                                                                                                       | 1212 | 1200 | 0         | 99.0  | 55.8 | 71.0 | putative retroelement pol polyprotein                                 | gbpln | Arabidopsis thaliana | AT4G23160.1   Symbols: CRK8   cysteine-rich RLK (RECEPTOR-like protein kinase) 8   chr4:12129485-12134086 FORWARD LENGTH=1262                                                                                                                                                                                                                                                                                                                                                                   | 1212 | 1262 | 1.00E-89  | 104.1 | 14.1 | 22.3 |
| Rsa1.0_01260.1.g25140.t1 | gb EOA29315.1  hypothetical protein CARUB_v10025596mg [Capsella rubella]                                                                                                                                                                                                                                                                                                                                                                                                                                          | 964  | 971  | 0         | 100.7 | 81.1 | 88.9 | hypothetical protein CARUB_v10025596mg                                | gbpln | Capsella rubella     | AT2G41790.1   Symbols:   Insulinase (Peptidase family M16) family protein   chr2:17429453-17436110 REVERSE LENGTH=970                                                                                                                                                                                                                                                                                                                                                                           | 964  | 970  | 0         | 100.6 | 76.8 | 86.9 |
| Rsa1.0_01260.1.g25141.t1 | gb EOA29315.1  hypothetical protein CARUB_v10025596mg [Capsella rubella]                                                                                                                                                                                                                                                                                                                                                                                                                                          | 994  | 971  | 0         | 97.7  | 80.2 | 87.4 | hypothetical protein CARUB_v10025596mg                                | gbpln | Capsella rubella     | AT2G41790.1   Symbols:   Insulinase (Peptidase family M16) family protein   chr2:17429453-17436110 REVERSE LENGTH=970                                                                                                                                                                                                                                                                                                                                                                           | 994  | 970  | 0         | 97.6  | 76.3 | 86.0 |
| Rsa1.0_01260.1.g25142.t1 | gb EOA23287.1  hypothetical protein CARUB_v10018323mg [Capsella rubella]                                                                                                                                                                                                                                                                                                                                                                                                                                          | 97   | 87   | 2.00E-30  | 89.7  | 78.4 | 81.4 | hypothetical protein CARUB_v10018323mg                                | gbpln | Capsella rubella     | AT3G57450.1   Symbols:   unknown protein; Has 65 Blast hits to 65 proteins in 11 species: Archae - 0; Bacteria - 0; Metazoa - 0; Fungi - 0; Plants - 65; Viruses - 0; Other Eukaryotes - 0 (source: NCBI BLink).   chr3:21262028-21262318 FORWARD LENGTH=96                                                                                                                                                                                                                                     | 97   | 96   | 1.00E-24  | 99.0  | 72.2 | 78.4 |
| Rsa1.0_01260.1.g25143.t1 | #                                                                                                                                                                                                                                                                                                                                                                                                                                                                                                                 | #    | #    | #         | #     | #    | #    | -                                                                     | ----  | ----                 | #                                                                                                                                                                                                                                                                                                                                                                                                                                                                                               | #    | #    | #         | #     | #    | #    |
| Rsa1.0_01260.1.g25144.t1 | #                                                                                                                                                                                                                                                                                                                                                                                                                                                                                                                 | #    | #    | #         | #     | #    | #    | -                                                                     | ----  | ----                 | #                                                                                                                                                                                                                                                                                                                                                                                                                                                                                               | #    | #    | #         | #     | #    | #    |
| Rsa1.0_01261.1.g25145.t1 | refNP_001154751.1  tetraco-peptide repeat-containing protein-like protein [Arabidopsis thaliana] gi 332006684 gb AED94067.1  putative pentatricopeptide repeat-containing protein [Arabidopsis thaliana]                                                                                                                                                                                                                                                                                                          | 228  | 284  | 5.00E-14  | 124.6 | 18.0 | 19.3 | tetraco-peptide repeat-containing protein-like protein                | gbpln | Arabidopsis thaliana | AT5G36300.1   Symbols:   Tetratricopeptide repeat (TPR)-like superfamily protein   chr5:14320668-14322398 FORWARD LENGTH=284                                                                                                                                                                                                                                                                                                                                                                    | 228  | 284  | 1.00E-16  | 124.6 | 18.0 | 19.3 |
| Rsa1.0_01261.1.g25146.t1 | gb EOA39397.1  hypothetical protein CARUB_v10012485mg [Capsella rubella]                                                                                                                                                                                                                                                                                                                                                                                                                                          | 105  | 581  | 4.00E-48  | 553.3 | 84.8 | 94.3 | hypothetical protein CARUB_v10012485mg                                | gbpln | Capsella rubella     | AT1G09280.1   Symbols:   CONTAINS InterPro DOMAIN/s: Rhodanese-like (InterPro:IPR001763). Serine hydrolase (InterPro:IPR005645); BEST Arabidopsis thaliana protein match is: Rhodanese/Cell cycle control phosphatase superfamily protein (TAIR:AT2G40760.1); Has 5925 Blast hits to 5912 proteins in 1592 species: Archae - 0; Bacteria - 2946; Metazoa - 156; Fungi - 408; Plants - 229; Viruses - 0; Other Eukaryotes - 2186 (source: NCBI BLink).   chr1:2998209-3001253 REVERSE LENGTH=581 | 105  | 581  | 1.00E-49  | 553.3 | 83.8 | 93.3 |
| Rsa1.0_01261.1.g25147.t1 | refXP_002868469.1  hypothetical protein ARALYDRAFT_330235 [Arabidopsis lyrata subsp. lyrata] gi 297314305 gb EFH44728.1  hypothetical protein ARALYDRAFT_330235 [Arabidopsis lyrata subsp. lyrata]                                                                                                                                                                                                                                                                                                                | 558  | 448  | 0         | 80.3  | 66.1 | 71.1 | hypothetical protein ARALYDRAFT_330235                                | gbpln | Arabidopsis lyrata   | AT5G42310.1   Symbols:   Pentatricopeptide repeat (PPR)-like superfamily protein   chr5:16915860-16918238 FORWARD LENGTH=709                                                                                                                                                                                                                                                                                                                                                                    | 558  | 709  | 1.00E-80  | 127.1 | 29.0 | 44.1 |
| Rsa1.0_01261.1.g25148.t7 | refNP_568540.1  Acyl-CoA N-acyltransferase with RING/FYVE/PHD-type zinc finger domain [Arabidopsis thaliana] gi 332006726 gb AED94109.1  Acyl-CoA N-acyltransferase with RING/FYVE/PHD-type zinc finger domain [Arabidopsis thaliana]                                                                                                                                                                                                                                                                             | 1082 | 1179 | 0         | 109.0 | 62.9 | 72.9 | Acyl-CoA N-acyltransferase with RING/FYVE/PHD-type zinc finger domain | gbpln | Arabidopsis thaliana | AT5G36740.1   Symbols:   Acyl-CoA N-acyltransferase with RING/FYVE/PHD-type zinc finger protein   chr5:14460790-14465727 FORWARD LENGTH=1179                                                                                                                                                                                                                                                                                                                                                    | 1082 | 1179 | 0         | 109.0 | 62.9 | 72.9 |

|                          |                                                                                                                                                                                                                                                                                                                                                                                                                                                                                                                                                                                                                                                                                                                                                                                                                                                                                                                                                                                                                                                                                                |     |     |           |       |      |      |                                                                |       |                      |                                                                                                                                                                                                                                                                                                                                                                                                                                                                                        |     |     |           |       |      |      |
|--------------------------|------------------------------------------------------------------------------------------------------------------------------------------------------------------------------------------------------------------------------------------------------------------------------------------------------------------------------------------------------------------------------------------------------------------------------------------------------------------------------------------------------------------------------------------------------------------------------------------------------------------------------------------------------------------------------------------------------------------------------------------------------------------------------------------------------------------------------------------------------------------------------------------------------------------------------------------------------------------------------------------------------------------------------------------------------------------------------------------------|-----|-----|-----------|-------|------|------|----------------------------------------------------------------|-------|----------------------|----------------------------------------------------------------------------------------------------------------------------------------------------------------------------------------------------------------------------------------------------------------------------------------------------------------------------------------------------------------------------------------------------------------------------------------------------------------------------------------|-----|-----|-----------|-------|------|------|
| Rsa1.0_01261.1.g25149.t1 | ret[NP_198485.1] haloacid dehalogenase-like hydrolase domain-containing protein [Arabidopsis thaliana] gi 30692947 ref[NP_198485.2] 2-phosphoglycolate phosphatase 1 [Arabidopsis thaliana] gi 186526986 ref[NP_001119316.1] 2-phosphoglycolate phosphatase 1 [Arabidopsis thaliana] gi 186527016 ref[NP_001119318.1] haloacid dehalogenase-like hydrolase domain-containing protein [Arabidopsis thaliana] gi 334188040 ref[NP_001190427.1] 2-phosphoglycolate phosphatase 1 [Arabidopsis thaliana] gi 334188042 ref[NP_001190428.1] haloacid dehalogenase-like hydrolase domain-containing protein [Arabidopsis thaliana] gi 487522899 sp PODKC4.1 PGP1B_ARA TH RecName: Full=Phosphoglycolate phosphatase 1B, chloroplastic; Flags: Precursor gi 487523199 sp PODKC3.1 PGP1A_ARA TH RecName: Full=Phosphoglycolate phosphatase 1A, chloroplastic; Flags: Precursor gi 20453153 gb AAM19818.1 AT5g36790/f5h8_20 [Arabidopsis thaliana] gi 21689621 gb AAM67432.1 AT5g36790/f5h8_20 [Arabidopsis thaliana] gi 332006716 gb AED94099.1 2-phosphoglycolate phosphatase 1 [Arabidopsis thaliana] | 355 | 362 | 0         | 102.0 | 91.5 | 95.8 | haloacid dehalogenase-like hydrolase domain-containing protein | gbpln | Arabidopsis thaliana | AT5G36700.4   Symbols: PGLP1   2-phosphoglycolate phosphatase 1   chr5:14421929-14424430 REVERSE LENGTH=362                                                                                                                                                                                                                                                                                                                                                                            | 355 | 362 | 0         | 102.0 | 91.5 | 95.8 |
| Rsa1.0_01261.1.g25150.t1 | gb ABL97950.1  unknown [Brassica rapa]                                                                                                                                                                                                                                                                                                                                                                                                                                                                                                                                                                                                                                                                                                                                                                                                                                                                                                                                                                                                                                                         | 182 | 182 | 4.00E-98  | 100.0 | 98.4 | 98.9 | unknown                                                        | gbpln | Brassica rapa        | AT5G36710.1   Symbols:   unknown protein; FUNCTIONS IN: molecular function unknown; INVOLVED IN: biological process unknown; LOCATED IN: endomembrane system; BEST Arabidopsis thaliana protein match is: unknown protein (TAIR:AT5G36800.1); Has 35333 Blast hits to 34131 proteins in 2444 species: Archae - 798; Bacteria - 22429; Metazoa - 974; Fungi - 991; Plants - 531; Viruses - 0; Other Eukaryotes - 9610 (source: NCBI BLINK).   chr5:14425491-14426042 REVERSE LENGTH=183 | 182 | 183 | 2.00E-90  | 100.5 | 88.5 | 95.6 |
| Rsa1.0_01261.1.g25151.t2 | ref XP_002870490.1  glycosyl hydrolase family 1 protein [Arabidopsis lyrata subsp. lyrata] gi 297316326 gb EFH46749.1  glycosyl hydrolase family 1 protein [Arabidopsis lyrata subsp. lyrata]                                                                                                                                                                                                                                                                                                                                                                                                                                                                                                                                                                                                                                                                                                                                                                                                                                                                                                  | 487 | 490 | 0         | 100.6 | 85.4 | 92.0 | glycosyl hydrolase family 1 protein                            | gbpln | Arabidopsis lyrata   | AT5G36890.1   Symbols: BGLU42   beta glucosidase 42   chr5:14542164-14546090 REVERSE LENGTH=490                                                                                                                                                                                                                                                                                                                                                                                        | 487 | 490 | 0         | 100.6 | 85.0 | 91.8 |
| Rsa1.0_01262.1.g25152.t1 | ref NP_175557.1  ABC transporter G family member 13 [Arabidopsis thaliana] gi 7533523 sp Q9C8J8.1 AB13G_ARAT H RecName: Full=ABC transporter G family member 13; Short=ABC transporter ABCG13; Short=AtABCG13; AltName: Full=White-brown complex homolog protein 13; Short=AtWBC13 gi 12325372 gb AAG52631.1 AC024261.18 ATP-dependent transmembrane transporter, putative; 59412-63615 [Arabidopsis thaliana] gi 332194549 gb AEE32670.1  ABC transporter G family member 13 [Arabidopsis thaliana]                                                                                                                                                                                                                                                                                                                                                                                                                                                                                                                                                                                           | 685 | 678 | 0         | 99.0  | 87.0 | 93.4 | ABC transporter G family member 13                             | gbpln | Arabidopsis thaliana | AT1G51460.1   Symbols:   ABC-2 type transporter family protein   chr1:19077132-19081335 REVERSE LENGTH=678                                                                                                                                                                                                                                                                                                                                                                             | 685 | 678 | 0         | 99.0  | 87.0 | 93.4 |
| Rsa1.0_01262.1.g25153.t1 | gb EOA36866.1  hypothetical protein CARUB_v10008858mg [Capsella rubella]                                                                                                                                                                                                                                                                                                                                                                                                                                                                                                                                                                                                                                                                                                                                                                                                                                                                                                                                                                                                                       | 455 | 521 | 1.00E-170 | 114.5 | 75.4 | 83.7 | hypothetical protein CARUB_v10008858mg                         | gbpln | Capsella rubella     | AT1G51450.1   Symbols: TRO   TRAUCO   chr1:19074399-19076220 FORWARD LENGTH=509                                                                                                                                                                                                                                                                                                                                                                                                        | 455 | 509 | 1.00E-169 | 111.9 | 71.6 | 78.2 |
| Rsa1.0_01262.1.g25154.t1 | # # # # # # # # # #                                                                                                                                                                                                                                                                                                                                                                                                                                                                                                                                                                                                                                                                                                                                                                                                                                                                                                                                                                                                                                                                            | #   | #   | #         | #     | #    | #    | -                                                              | ----  | ----                 | #                                                                                                                                                                                                                                                                                                                                                                                                                                                                                      | #   | #   | #         | #     | #    | #    |
| Rsa1.0_01262.1.g25155.t1 | gb EOA39443.1  hypothetical protein CARUB_v10012613mg [Capsella rubella]                                                                                                                                                                                                                                                                                                                                                                                                                                                                                                                                                                                                                                                                                                                                                                                                                                                                                                                                                                                                                       | 326 | 345 | 1.00E-154 | 105.8 | 86.2 | 90.5 | hypothetical protein CARUB_v10012613mg                         | gbpln | Capsella rubella     | AT1G51220.1   Symbols: WIP5   WIP domain protein 5   chr1:1898925-18992034 REVERSE LENGTH=337                                                                                                                                                                                                                                                                                                                                                                                          | 326 | 337 | 1.00E-154 | 103.4 | 85.0 | 89.3 |
| Rsa1.0_01262.1.g25156.t1 | ref XP_002891623.1  UDP-glucuronosyl/UDP-glucosyl transferase family protein [Arabidopsis lyrata subsp. lyrata] gi 297337465 gb EFH67882.1  UDP-glucuronosyl/UDP-glucosyl transferase family protein [Arabidopsis lyrata subsp. lyrata]                                                                                                                                                                                                                                                                                                                                                                                                                                                                                                                                                                                                                                                                                                                                                                                                                                                        | 461 | 456 | 0         | 98.9  | 70.3 | 78.3 | UDP-glucuronosyl/UDP-glucosyl transferase family protein       | gbpln | Arabidopsis lyrata   | AT1G51210.1   Symbols:   UDP-Glycosyltransferase superfamily protein   chr1:18987809-18989110 FORWARD LENGTH=433                                                                                                                                                                                                                                                                                                                                                                       | 461 | 433 | 0         | 93.9  | 65.5 | 74.2 |

|                           |                                                                                                                                                                                                                                                                                                                                                                                                                                        |      |      |           |       |      |      |                                                          |       |                      |                                                                                                                                    |      |     |           |       |      |      |
|---------------------------|----------------------------------------------------------------------------------------------------------------------------------------------------------------------------------------------------------------------------------------------------------------------------------------------------------------------------------------------------------------------------------------------------------------------------------------|------|------|-----------|-------|------|------|----------------------------------------------------------|-------|----------------------|------------------------------------------------------------------------------------------------------------------------------------|------|-----|-----------|-------|------|------|
| Rsa1.0_01262.1.g25157.t1  | gb AAD30636.1 AC006085.9<br>Hypothetical protein [Arabidopsis thaliana]                                                                                                                                                                                                                                                                                                                                                                | 114  | 299  | 6.00E-18  | 262.3 | 36.0 | 36.0 | Hypothetical protein                                     | gbpln | Arabidopsis thaliana | AT3G20880.1   Symbols: WIP4   WIP domain protein 4   chr3:37313759-7315792 REVERSE LENGTH=412                                      | 114  | 412 | 1.00E-20  | 361.4 | 36.0 | 36.0 |
| Rsa1.0_01262.1.g25158.t3  | gb AAG51754.1 AC068667_33 reverse transcriptase, putative: 100033-105622 [Arabidopsis thaliana]                                                                                                                                                                                                                                                                                                                                        | 1603 | 1557 | 0         | 97.1  | 42.9 | 60.0 | reverse transcriptase, putative: 100033-105622           | gbpln | Arabidopsis thaliana | AT4G29090.1   Symbols:   Ribonuclease H-like superfamily protein   chr4:14333528-14335255 FORWARD LENGTH=575                       | 1603 | 575 | 8.00E-82  | 35.9  | 11.5 | 17.5 |
| Rsa1.0_01262.1.g25159.t1  | ref XP_002877953.1  hypothetical protein ARALYDRAFT_485800 [Arabidopsis lyrata subsp. lyrata]   gi 297323791 gb EFH54212.1  hypothetical protein ARALYDRAFT_485800 [Arabidopsis lyrata subsp. lyrata]                                                                                                                                                                                                                                  | 184  | 183  | 6.00E-87  | 99.5  | 85.9 | 92.9 | hypothetical protein ARALYDRAFT_485800                   | gbpln | Arabidopsis lyrata   | AT3G54040.1   Symbols:   PAR1 protein   chr3:20014032-20015299 REVERSE LENGTH=183                                                  | 184  | 183 | 2.00E-86  | 99.5  | 82.1 | 92.4 |
| Rsa1.0_01262.1.g25160.t3  | # # # # # # # # - ---- ---- # # # # # #                                                                                                                                                                                                                                                                                                                                                                                                |      |      |           |       |      |      |                                                          |       |                      |                                                                                                                                    |      |     |           |       |      |      |
| Rsa1.0_01262.1.g25161.t1  | ref XP_002891623.1  UDP-glucuronosyl/UDP-glucosyl transferase family protein [Arabidopsis lyrata subsp. lyrata]   gi 297337465 gb EFH67882.1  UDP-glucuronosyl/UDP-glucosyl transferase family protein [Arabidopsis lyrata subsp. lyrata]                                                                                                                                                                                              | 463  | 456  | 0         | 98.5  | 77.1 | 84.9 | UDP-glucuronosyl/UDP-glucosyl transferase family protein | gbpln | Arabidopsis lyrata   | AT1G51210.1   Symbols:   UDP-Glycosyltransferase superfamily protein   chr1:18987809-18989110 FORWARD LENGTH=433                   | 463  | 433 | 0         | 93.5  | 74.3 | 80.8 |
| Rsa1.0_01262.1.g25162.t1  | gb ABV89666.1  zinc finger an1-like family protein [Brassica rapa]                                                                                                                                                                                                                                                                                                                                                                     | 181  | 168  | 2.00E-91  | 92.8  | 89.0 | 91.2 | zinc finger an1-like family protein                      | gbpln | Brassica rapa        | AT1G51200.4   Symbols:   A20/AN1-like zinc finger family protein   chr1:18985690-18986211 FORWARD LENGTH=173                       | 181  | 173 | 5.00E-72  | 95.6  | 82.9 | 86.2 |
| Rsa1.0_01262.1.g25163.t1  | ref XP_002870649.1  hypothetical protein ARALYDRAFT_355852 [Arabidopsis lyrata subsp. lyrata]   gi 297316485 gb EFH46908.1  hypothetical protein ARALYDRAFT_355852 [Arabidopsis lyrata subsp. lyrata]                                                                                                                                                                                                                                  | 586  | 634  | 1.00E-123 | 108.2 | 50.7 | 63.8 | hypothetical protein ARALYDRAFT_355852                   | gbpln | Arabidopsis lyrata   | AT5G41690.1   Symbols:   RNA-binding (RRM/RBD/RNP motifs) family protein   chr5:16670126-16674189 REVERSE LENGTH=567               | 586  | 567 | 1.00E-108 | 96.8  | 44.7 | 59.7 |
| Rsa1.0_01263.1.g25164.t1  | gb EOA16688.1  hypothetical protein CARUB_v10004881mg [Capsella rubella]                                                                                                                                                                                                                                                                                                                                                               | 438  | 424  | 0         | 96.8  | 78.5 | 86.1 | hypothetical protein CARUB_v10004881mg                   | gbpln | Capsella rubella     | AT4G20960.1   Symbols:   Cytidine/deoxycytidylate deaminase family protein   chr4:11212077-11213530 FORWARD LENGTH=426             | 438  | 426 | 0         | 97.3  | 80.6 | 87.9 |
| Rsa1.0_01263.1.g25165.t1  | gb EOA17462.1  hypothetical protein CARUB_v10005784mg, partial [Capsella rubella]                                                                                                                                                                                                                                                                                                                                                      | 165  | 196  | 2.00E-59  | 118.8 | 75.2 | 84.8 | hypothetical protein CARUB_v10005784mg, partial          | gbpln | Capsella rubella     | AT4G20970.1   Symbols:   basic helix-loop-helix (bHLH) DNA-binding superfamily protein   chr4:11215259-11216212 FORWARD LENGTH=190 | 165  | 190 | 2.00E-57  | 115.2 | 75.2 | 86.7 |
| Rsa1.0_01263.1.g25166.t14 | gb EOA18536.1  hypothetical protein CARUB_v10007090mg [Capsella rubella]                                                                                                                                                                                                                                                                                                                                                               | 293  | 255  | 4.00E-99  | 87.0  | 68.9 | 77.1 | hypothetical protein CARUB_v10007090mg                   | gbpln | Capsella rubella     | AT4G21020.1   Symbols:   Late embryogenesis abundant protein (LEA) family protein   chr4:11228263-11229392 FORWARD LENGTH=266      | 293  | 266 | 1.00E-95  | 90.8  | 67.2 | 77.1 |
| Rsa1.0_01263.1.g25167.t1  | ref XP_002869912.1  hypothetical protein ARALYDRAFT_914579 [Arabidopsis lyrata subsp. lyrata]   gi 297315748 gb EFH46171.1  hypothetical protein ARALYDRAFT_914579 [Arabidopsis lyrata subsp. lyrata]                                                                                                                                                                                                                                  | 75   | 194  | 8.00E-20  | 258.7 | 62.7 | 76.0 | hypothetical protein ARALYDRAFT_914579                   | gbpln | Arabidopsis lyrata   | AT4G21050.1   Symbols:   Dof-type zinc finger domain-containing protein   chr4:11238441-11239073 FORWARD LENGTH=210                | 75   | 210 | 8.00E-22  | 280.0 | 62.7 | 76.0 |
| Rsa1.0_01263.1.g25168.t1  | ref XP_002869911.1  Dof-type zinc finger domain-containing protein [Arabidopsis lyrata subsp. lyrata]   gi 297315747 gb EFH46170.1  Dof-type zinc finger domain-containing protein [Arabidopsis lyrata subsp. lyrata]   ref NP_193839.4  protein BREAST CANCER SUSCEPTIBILITY 1-like protein [Arabidopsis thaliana]   gi 75158839 sp Q8RXD4.1 BRCA1 ARAT H RecName: Full=Protein BREAST CANCER SUSCEPTIBILITY 1 homolog; Short=AtBRCA1 | 259  | 223  | 1.00E-52  | 86.1  | 50.6 | 59.1 | Dof-type zinc finger domain-containing protein           | gbpln | Arabidopsis lyrata   | AT4G21050.1   Symbols:   Dof-type zinc finger domain-containing protein   chr4:11238441-11239073 FORWARD LENGTH=210                | 259  | 210 | 7.00E-41  | 81.1  | 37.8 | 45.9 |
| Rsa1.0_01263.1.g25169.t1  | gi 19698963 gb AAL91217.1  unknown protein [Arabidopsis thaliana]   gi 28372474 gb AO39850.1  BRCA1 [Arabidopsis thaliana]   gi 3436571 gb AA065170.1  At4g21070 [Arabidopsis thaliana]   gi 332658996 gb AEE84396.1  protein BREAST CANCER SUSCEPTIBILITY 1-like protein [Arabidopsis thaliana]                                                                                                                                       | 929  | 941  | 0         | 101.3 | 72.4 | 82.0 | protein BREAST CANCER SUSCEPTIBILITY 1-like protein      | gbpln | Arabidopsis thaliana | AT4G21070.1   Symbols: ATBRCA1, BRCA1   breast cancer susceptibility 1   chr4:11248174-11252633 FORWARD LENGTH=941                 | 929  | 941 | 0         | 101.3 | 72.4 | 82.0 |



|                          |                                                                                                                                                                                                                                                                                                                                                                                                                                                                                                                                                                                                                                                                                                                                                                                                                                                                                                                                                         |      |      |          |       |      |       |                                                                                                                                                                                                                                                 |       |                      |                                                                                                                                     |      |      |           |       |      |       |
|--------------------------|---------------------------------------------------------------------------------------------------------------------------------------------------------------------------------------------------------------------------------------------------------------------------------------------------------------------------------------------------------------------------------------------------------------------------------------------------------------------------------------------------------------------------------------------------------------------------------------------------------------------------------------------------------------------------------------------------------------------------------------------------------------------------------------------------------------------------------------------------------------------------------------------------------------------------------------------------------|------|------|----------|-------|------|-------|-------------------------------------------------------------------------------------------------------------------------------------------------------------------------------------------------------------------------------------------------|-------|----------------------|-------------------------------------------------------------------------------------------------------------------------------------|------|------|-----------|-------|------|-------|
| Rsa1.0_01263.1.g25170.t1 | ref[NP_193841.2] ferredoxin 2 [Arabidopsis thaliana] gi 30685306 ref[NP_849415.1] ferredoxin 2 [Arabidopsis thaliana] gi 79325201 ref[NP_001031685.1] ferredoxin 2 [Arabidopsis thaliana] gi 19698259 dbj BAB86773.1  MFDX2 precursor [Arabidopsis thaliana] gi 28192429 gb AAL82812.1  adrenodoxin-like ferredoxin 1 [Arabidopsis thaliana] gi 28466923 gb AAO44070.1  At4g21090 [Arabidopsis thaliana] gi 110743957 dbj BAE99811.1  mitochondrial ferredoxin [Arabidopsis thaliana] gi 222424373 dbj BAH20142.1  AT4G21090 [Arabidopsis thaliana] gi 332658998 gb AEE84398.1  ferredoxin 2 [Arabidopsis thaliana] gi 332658999 gb AEE84399.1  ferredoxin 2 [Arabidopsis thaliana] gi 332659000 gb AEE84400.1  ferredoxin 2 [Arabidopsis thaliana] ref XP_002867863.1  hypothetical protein ARALYDRAFT_492777 [Arabidopsis lyrata subsp. lyrata] gi 297313689 gb EFH44122.1  hypothetical protein ARALYDRAFT_492777 [Arabidopsis lyrata subsp. lyrata] | 209  | 197  | 1.00E-65 | 94.3  | 63.2 | 69.4  | ferredoxin 2                                                                                                                                                                                                                                    | gbpln | Arabidopsis thaliana | AT4G21090.3   Symbols: ATMFDX2, MFDX2   MITOCHONDRIAL FERREDOXIN 2   chr4:11256663-11258269 REVERSE LENGTH=197                      | 209  | 197  | 5.00E-68  | 94.3  | 63.2 | 69.4  |
| Rsa1.0_01263.1.g25171.t1 | ref XP_002867863.1  hypothetical protein ARALYDRAFT_492777 [Arabidopsis lyrata subsp. lyrata] gi 297313689 gb EFH44122.1  hypothetical protein ARALYDRAFT_492777 [Arabidopsis lyrata subsp. lyrata]                                                                                                                                                                                                                                                                                                                                                                                                                                                                                                                                                                                                                                                                                                                                                     | 1088 | 1088 | 0        | 100.0 | 91.5 | 96.1  | hypothetical protein ARALYDRAFT_492777                                                                                                                                                                                                          | gbpln | Arabidopsis lyrata   | AT4G21100.1   Symbols: DDB1B   damaged DNA binding protein 1B   chr4:11258916-11265309 REVERSE LENGTH=1088                          | 1088 | 1088 | 0         | 100.0 | 90.0 | 95.7  |
| Rsa1.0_01263.1.g25172.t1 | gb EOA17786.1  hypothetical protein CARUB_v10006179mg [Capsella rubella]                                                                                                                                                                                                                                                                                                                                                                                                                                                                                                                                                                                                                                                                                                                                                                                                                                                                                | 68   | 68   | 8.00E-32 | 100.0 | 98.5 | 100.0 | hypothetical protein CARUB_v10006179mg                                                                                                                                                                                                          | gbpln | Capsella rubella     | AT4G21105.1   Symbols:   cytochrome-c oxidases,electron carriers   chr4:11266273-11266724 FORWARD LENGTH=68                         | 68   | 68   | 4.00E-34  | 100.0 | 95.6 | 100.0 |
| Rsa1.0_01263.1.g25173.t1 | gb EOA17580.1  hypothetical protein CARUB_v10005939mg [Capsella rubella]                                                                                                                                                                                                                                                                                                                                                                                                                                                                                                                                                                                                                                                                                                                                                                                                                                                                                | 168  | 153  | 4.00E-66 | 91.1  | 73.8 | 79.2  | hypothetical protein CARUB_v10005939mg                                                                                                                                                                                                          | gbpln | Capsella rubella     | AT4G21110.1   Symbols:   G10 family protein   chr4:11267673-11268774 FORWARD LENGTH=145                                             | 168  | 145  | 3.00E-47  | 86.3  | 49.4 | 54.2  |
| Rsa1.0_01263.1.g25174.t1 | ref XP_002869906.1  hypothetical protein ARALYDRAFT_329490 [Arabidopsis lyrata subsp. lyrata] gi 297315742 gb EFH46165.1  hypothetical protein ARALYDRAFT_329490 [Arabidopsis lyrata subsp. lyrata]                                                                                                                                                                                                                                                                                                                                                                                                                                                                                                                                                                                                                                                                                                                                                     | 598  | 599  | 0        | 100.2 | 87.0 | 93.3  | hypothetical protein ARALYDRAFT_329490                                                                                                                                                                                                          | gbpln | Arabidopsis lyrata   | AT4G21120.1   Symbols: AAT1, CAT1   amino acid transporter 1   chr4:11270318-11273775 FORWARD LENGTH=594                            | 598  | 594  | 0         | 99.3  | 86.0 | 92.6  |
| Rsa1.0_01264.1.g25175.t1 | ref XP_002893071.1  hypothetical protein ARALYDRAFT_335233 [Arabidopsis lyrata subsp. lyrata] gi 297338913 gb EFH69330.1  hypothetical protein ARALYDRAFT_335233 [Arabidopsis lyrata subsp. lyrata]                                                                                                                                                                                                                                                                                                                                                                                                                                                                                                                                                                                                                                                                                                                                                     | 933  | 986  | 0        | 105.7 | 84.2 | 90.7  | hypothetical protein ARALYDRAFT_335233                                                                                                                                                                                                          | gbpln | Arabidopsis lyrata   | AT1G19835.2   Symbols:   Plant protein of unknown function (DUF869)   chr1:6856212-6859513 REVERSE LENGTH=982                       | 933  | 982  | 0         | 105.3 | 83.7 | 90.1  |
| Rsa1.0_01264.1.g25176.t2 | ref XP_002890353.1  ATPUP14 [Arabidopsis lyrata subsp. lyrata] gi 297336195 gb EFH66612.1  ATPUP14 [Arabidopsis lyrata subsp. lyrata]                                                                                                                                                                                                                                                                                                                                                                                                                                                                                                                                                                                                                                                                                                                                                                                                                   | 704  | 393  | 0        | 55.8  | 45.5 | 50.3  | ATPUP14                                                                                                                                                                                                                                         | gbpln | Arabidopsis lyrata   | AT1G19770.1   Symbols: ATPUP14, PUP14   purine permease 14   chr1:6832426-6833702 FORWARD LENGTH=393                                | 704  | 393  | 1.00E-176 | 55.8  | 45.2 | 49.7  |
| Rsa1.0_01264.1.g25177.t1 | gb EOA39312.1  hypothetical protein CARUB_v10012347mg [Capsella rubella]                                                                                                                                                                                                                                                                                                                                                                                                                                                                                                                                                                                                                                                                                                                                                                                                                                                                                | 555  | 1361 | 0        | 245.2 | 77.3 | 87.6  | hypothetical protein CARUB_v10012347mg                                                                                                                                                                                                          | gbpln | Capsella rubella     | AT1G19715.1   Symbols:   Mannose-binding lectin superfamily protein   chr1:6816934-6819432 REVERSE LENGTH=595                       | 555  | 595  | 0         | 107.2 | 77.8 | 89.4  |
| Rsa1.0_01264.1.g25178.t4 | dbj BAJ33686.1  unnamed protein product [Thellungiella halophila]                                                                                                                                                                                                                                                                                                                                                                                                                                                                                                                                                                                                                                                                                                                                                                                                                                                                                       | 625  | 554  | 0        | 88.6  | 66.4 | 72.0  | unnamed protein product                                                                                                                                                                                                                         | ----  | ----                 | AT1G19700.3   Symbols: BEL10   BEL1-like homeodomain 10   chr1:6809958-6811854 REVERSE LENGTH=538                                   | 625  | 538  | 0         | 86.1  | 62.1 | 69.1  |
| Rsa1.0_01264.1.g25179.t2 | #                                                                                                                                                                                                                                                                                                                                                                                                                                                                                                                                                                                                                                                                                                                                                                                                                                                                                                                                                       | #    | #    | #        | #     | #    | #     | -                                                                                                                                                                                                                                               | ----  | ----                 | #                                                                                                                                   | #    | #    | #         | #     | #    |       |
| Rsa1.0_01264.1.g25180.t1 | sp Q9SBK6.1 JMT_BRARP RecName: Full=Jasmonate O-methyltransferase; AltName: Full=Floral nectary-specific protein 1; AltName: Full=S-adenosyl-L-methioninejasmonic acid carboxyl methyltransferase gi 6651395 gb AAF22289.1 AF179222.1 floral nectary-specific protein [Brassica rapa subsp. pekinensis]                                                                                                                                                                                                                                                                                                                                                                                                                                                                                                                                                                                                                                                 | 392  | 392  | 0        | 100.0 | 91.8 | 95.7  | RecName: Full=Jasmonate O-methyltransferase; AltName: Full=Floral nectary-specific protein 1; AltName: Full=S-adenosyl-L-methioninejasmonic acid carboxyl methyltransferase gi 6651395 gb AAF22289.1 AF179222.1 floral nectary-specific protein | gbpln | Brassica rapa        | AT1G19640.1   Symbols: JMT   jasmonic acid carboxyl methyltransferase   chr1:6789166-6791708 REVERSE LENGTH=389                     | 392  | 389  | 1.00E-179 | 99.2  | 83.2 | 89.3  |
| Rsa1.0_01264.1.g25181.t1 | gb EOA40276.1  hypothetical protein CARUB_v10009004mg [Capsella rubella]                                                                                                                                                                                                                                                                                                                                                                                                                                                                                                                                                                                                                                                                                                                                                                                                                                                                                | 458  | 481  | 0        | 105.0 | 68.6 | 72.7  | hypothetical protein CARUB_v10009004mg                                                                                                                                                                                                          | gbpln | Capsella rubella     | AT1G19630.1   Symbols: CYP722A1   cytochrome P450, family 722, subfamily A, polypeptide 1   chr1:6785427-6787967 REVERSE LENGTH=476 | 458  | 476  | 0         | 103.9 | 67.5 | 72.7  |

|                          |                                                                                                                                                                                                                |     |      |           |       |      |      |                                              |       |                      |                                                                                                                                                  |     |     |           |       |      |      |
|--------------------------|----------------------------------------------------------------------------------------------------------------------------------------------------------------------------------------------------------------|-----|------|-----------|-------|------|------|----------------------------------------------|-------|----------------------|--------------------------------------------------------------------------------------------------------------------------------------------------|-----|-----|-----------|-------|------|------|
| Rsa1.0_01265.1.g25182.t1 | ref[XP_002879091.1] calcium ion binding protein [Arabidopsis lyrata subsp. lyrata] gi 297324930 gb EFH55350.1  calcium ion binding protein [Arabidopsis lyrata subsp. lyrata]                                  | 183 | 228  | 2.00E-75  | 124.6 | 79.8 | 85.8 | calcium ion binding protein                  | gbpln | Arabidopsis lyrata   | AT2G27480.1   Symbols:   Calcium-binding EF-hand family protein   chr2:11746811-11747885 FORWARD LENGTH=228                                      | 183 | 228 | 3.00E-75  | 124.6 | 78.7 | 84.7 |
| Rsa1.0_01265.1.g25183.t1 | gb AAG51783.1 AC079679_3 reverse transcriptase, putative: 16838-20266 [Arabidopsis thaliana]                                                                                                                   | 862 | 1142 | 0         | 132.5 | 39.3 | 49.0 | reverse transcriptase, putative: 16838-20266 | gbpln | Arabidopsis thaliana | ATMG00310.1   Symbols: ORF154   RNA-directed DNA polymerase (reverse transcriptase)-related family protein   chrM:90883-91347 REVERSE LENGTH=154 | 862 | 154 | 4.00E-38  | 17.9  | 8.5  | 11.5 |
| Rsa1.0_01265.1.g25184.t1 | #                                                                                                                                                                                                              | #   | #    | #         | #     | #    | #    | -                                            | ----  | ----                 | #                                                                                                                                                | #   | #   | #         | #     | #    | #    |
| Rsa1.0_01265.1.g25185.t2 | gb AAF97297.1 AC010164_19 Hypothetical protein [Arabidopsis thaliana]                                                                                                                                          | 320 | 308  | 6.00E-25  | 96.3  | 16.9 | 18.8 | Hypothetical protein                         | gbpln | Arabidopsis thaliana | #                                                                                                                                                | #   | #   | #         | #     | #    | #    |
| Rsa1.0_01265.1.g25186.t1 | ref[XP_002880914.1] binding protein [Arabidopsis lyrata subsp. lyrata] gi 297326753 gb EFH57173.1  binding protein [Arabidopsis lyrata subsp. lyrata]                                                          | 133 | 440  | 2.00E-51  | 330.8 | 78.2 | 88.7 | binding protein                              | gbpln | Arabidopsis lyrata   | AT2G27430.1   Symbols:   ARM repeat superfamily protein   chr2:11729914-11733170 REVERSE LENGTH=438                                              | 133 | 438 | 1.00E-53  | 329.3 | 76.7 | 89.5 |
| Rsa1.0_01265.1.g25187.t1 | gb AAD32866.1 AC005489_4 F14N23.4 [Arabidopsis thaliana]                                                                                                                                                       | 754 | 1161 | 8.00E-83  | 154.0 | 21.1 | 28.5 | F14N23.4                                     | gbpln | Arabidopsis thaliana | AT1G43760.1   Symbols:   DNase I-like superfamily protein   chr1:16528880-16531065 REVERSE LENGTH=626                                            | 754 | 626 | 2.00E-78  | 83.0  | 17.5 | 25.2 |
| Rsa1.0_01265.1.g25188.t1 | gb AAC19278.1 T14P8.10 [Arabidopsis thaliana] gi 7269009 emb CAB80742.1  AT4g02490 [Arabidopsis thaliana]                                                                                                      | 792 | 657  | 0         | 83.0  | 46.8 | 61.1 | T14P8.10                                     | gbpln | Arabidopsis thaliana | AT4G04650.1   Symbols:   RNA-directed DNA polymerase (reverse transcriptase)-related family protein   chr4:2353989-2355213 REVERSE LENGTH=332    | 792 | 332 | 1.00E-72  | 41.9  | 16.0 | 22.7 |
| Rsa1.0_01265.1.g25189.t1 | ref[XP_002880914.1] binding protein [Arabidopsis lyrata subsp. lyrata] gi 297326753 gb EFH57173.1  binding protein [Arabidopsis lyrata subsp. lyrata]                                                          | 282 | 440  | 1.00E-134 | 156.0 | 86.2 | 93.3 | binding protein                              | gbpln | Arabidopsis lyrata   | AT2G27430.1   Symbols:   ARM repeat superfamily protein   chr2:11729914-11733170 REVERSE LENGTH=438                                              | 282 | 438 | 1.00E-135 | 155.3 | 85.8 | 92.9 |
| Rsa1.0_01265.1.g25190.t1 | gb ABW81051.1 tn7 reverse transcriptase [Arabidopsis lyrata subsp. lyrata]                                                                                                                                     | 206 | 441  | 4.00E-50  | 214.1 | 45.1 | 64.1 | tn7 reverse transcriptase                    | gbpln | Arabidopsis lyrata   | AT3G24255.1   Symbols:   RNA-directed DNA polymerase (reverse transcriptase)-related family protein   chr3:8789471-8793208 FORWARD LENGTH=746    | 206 | 746 | 3.00E-35  | 362.1 | 33.0 | 45.1 |
| Rsa1.0_01265.1.g25191.t1 | #                                                                                                                                                                                                              | #   | #    | #         | #     | #    | #    | -                                            | ----  | ----                 | #                                                                                                                                                | #   | #   | #         | #     | #    | #    |
| Rsa1.0_01265.1.g25192.t1 | ref[NP_001189619.1] uncharacterized protein [Arabidopsis thaliana] gi 330252897 gb AEC07991.1  uncharacterized protein AT2G27389 [Arabidopsis thaliana]                                                        | 182 | 186  | 4.00E-12  | 102.2 | 19.8 | 24.7 | uncharacterized protein                      | gbpln | Arabidopsis thaliana | AT2G27389.1   Symbols:   unknown protein; LOCATED IN: endomembrane system.   chr2:11720362-11720922 FORWARD LENGTH=186                           | 182 | 186 | 2.00E-14  | 102.2 | 19.8 | 24.7 |
| Rsa1.0_01266.1.g25193.t1 | ref[XP_002879716.1] hypothetical protein ARALYDRAFT_482800 [Arabidopsis lyrata subsp. lyrata] gi 297325555 gb EFH55975.1  hypothetical protein ARALYDRAFT_482800 [Arabidopsis lyrata subsp. lyrata]            | 307 | 305  | 1.00E-168 | 99.3  | 94.1 | 96.7 | hypothetical protein ARALYDRAFT_482800       | gbpln | Arabidopsis lyrata   | AT2G37940.1   Symbols: AtIPCS2   Arabidopsis Inositol phosphorylceramide synthase 2   chr2:15877169-15879411 FORWARD LENGTH=305                  | 307 | 305 | 1.00E-170 | 99.3  | 93.8 | 96.7 |
| Rsa1.0_01266.1.g25194.t1 | gb EOA27751.1 hypothetical protein CARUB_v10023904mg [Capsella rubella]                                                                                                                                        | 200 | 253  | 5.00E-80  | 126.5 | 82.5 | 86.0 | hypothetical protein CARUB_v10023904mg       | gbpln | Capsella rubella     | AT2G37920.1   Symbols: emb1513   copper ion transmembrane transporters   chr2:15869269-15870024 REVERSE LENGTH=251                               | 200 | 251 | 3.00E-81  | 125.5 | 80.5 | 84.0 |
| Rsa1.0_01266.1.g25195.t1 | gb EOA26793.1 hypothetical protein CARUB_v10022888mg [Capsella rubella]                                                                                                                                        | 586 | 583  | 0         | 99.5  | 85.0 | 92.0 | hypothetical protein CARUB_v10022888mg       | gbpln | Capsella rubella     | AT2G37900.1   Symbols:   Major facilitator superfamily protein   chr2:15864396-15866408 REVERSE LENGTH=575                                       | 586 | 575 | 0         | 98.1  | 83.1 | 90.1 |
| Rsa1.0_01266.1.g25196.t1 | ref[NP_565873.1] uncharacterized protein [Arabidopsis thaliana] gi 91806329 gb ABE65892.1  unknown [Arabidopsis thaliana] gi 330254367 gb AEC09461.1  uncharacterized protein AT2G37880 [Arabidopsis thaliana] | 245 | 247  | 1.00E-102 | 100.8 | 82.0 | 89.4 | uncharacterized protein                      | gbpln | Arabidopsis thaliana | AT2G37880.1   Symbols:   Protein of unknown function, DUF617   chr2:15860705-15861448 FORWARD LENGTH=247                                         | 245 | 247 | 1.00E-104 | 100.8 | 82.0 | 89.4 |
| Rsa1.0_01266.1.g25197.t1 | gb AAD17409.1 putative retroelement pol polyprotein [Arabidopsis thaliana]                                                                                                                                     | 833 | 1347 | 1.00E-100 | 161.7 | 22.1 | 34.9 | putative retroelement pol polyprotein        | gbpln | Arabidopsis thaliana | AT3G21000.1   Symbols:   Gag-Pol-related retrotransposon family protein   chr3:7363921-7365138 FORWARD LENGTH=405                                | 833 | 405 | 8.00E-43  | 48.6  | 13.8 | 24.6 |
| Rsa1.0_01266.1.g25198.t1 | #                                                                                                                                                                                                              | #   | #    | #         | #     | #    | #    | -                                            | ----  | ----                 | #                                                                                                                                                | #   | #   | #         | #     | #    | #    |
| Rsa1.0_01266.1.g25199.t1 | ref[XP_002879710.1] kinase family protein [Arabidopsis lyrata subsp. lyrata] gi 297325549 gb EFH55969.1  kinase family protein [Arabidopsis lyrata subsp. lyrata]                                              | 663 | 733  | 0         | 110.6 | 85.4 | 91.3 | kinase family protein                        | gbpln | Arabidopsis lyrata   | AT2G37840.1   Symbols:   Protein kinase superfamily protein   chr2:15851978-15856047 FORWARD LENGTH=733                                          | 663 | 733 | 0         | 110.6 | 85.4 | 90.8 |
| Rsa1.0_01266.1.g25200.t1 | #                                                                                                                                                                                                              | #   | #    | #         | #     | #    | #    | -                                            | ----  | ----                 | #                                                                                                                                                | #   | #   | #         | #     | #    | #    |

|                          |                                                                                                                                                                                                                                                                                                                                                                   |      |      |           |       |      |      |                                                                                                                                   |       |                      |                                                                                                                                                                                                                                                                                                                                                                  |      |      |           |       |      |      |
|--------------------------|-------------------------------------------------------------------------------------------------------------------------------------------------------------------------------------------------------------------------------------------------------------------------------------------------------------------------------------------------------------------|------|------|-----------|-------|------|------|-----------------------------------------------------------------------------------------------------------------------------------|-------|----------------------|------------------------------------------------------------------------------------------------------------------------------------------------------------------------------------------------------------------------------------------------------------------------------------------------------------------------------------------------------------------|------|------|-----------|-------|------|------|
| Rsa1.0_01266.1.g25201.t1 | ref NP_181316.1  cysteine/histidine-rich C1 domain-containing protein [Arabidopsis thaliana] gi 330254358 gb AEC09452.1  cysteine/histidine-rich C1 domain-containing protein [Arabidopsis thaliana]                                                                                                                                                              | 251  | 396  | 1.00E-101 | 157.8 | 75.7 | 84.1 | cysteine/histidine-rich C1 domain-containing protein                                                                              | gbpln | Arabidopsis thaliana | AT2G37800.1   Symbols:   Cysteine/Histidine-rich C1 domain family protein   chr2:15841039-15843610 REVERSE LENGTH=396                                                                                                                                                                                                                                            | 251  | 396  | 1.00E-103 | 157.8 | 75.7 | 84.1 |
| Rsa1.0_01266.1.g25202.t1 | ref NP_001189996.1  V-type proton ATPase subunit d2 [Arabidopsis thaliana] gi 332643961 gb AAE77482.1  V-type proton ATPase subunit d2 [Arabidopsis thaliana]                                                                                                                                                                                                     | 178  | 343  | 3.00E-11  | 192.7 | 34.3 | 42.7 | V-type proton ATPase subunit d2                                                                                                   | gbpln | Arabidopsis thaliana | AT3G28715.2   Symbols:   ATPase, V0/A0 complex, subunit c/D   chr3:10778025-10780350 FORWARD LENGTH=343                                                                                                                                                                                                                                                          | 178  | 343  | 1.00E-13  | 192.7 | 34.3 | 42.7 |
| Rsa1.0_01266.1.g25203.t1 | ref NP_181316.1  cysteine/histidine-rich C1 domain-containing protein [Arabidopsis thaliana] gi 330254358 gb AEC09452.1  cysteine/histidine-rich C1 domain-containing protein [Arabidopsis thaliana]                                                                                                                                                              | 328  | 396  | 2.00E-70  | 120.7 | 38.4 | 45.7 | cysteine/histidine-rich C1 domain-containing protein                                                                              | gbpln | Arabidopsis thaliana | AT2G37800.1   Symbols:   Cysteine/Histidine-rich C1 domain family protein   chr2:15841039-15843610 REVERSE LENGTH=396                                                                                                                                                                                                                                            | 328  | 396  | 5.00E-73  | 120.7 | 38.4 | 45.7 |
| Rsa1.0_01266.1.g25204.t1 | #                                                                                                                                                                                                                                                                                                                                                                 | #    | #    | #         | #     | #    | #    | -                                                                                                                                 | ----  | ----                 | AT2G37790.1   Symbols:   NAD(P)-linked oxidoreductase superfamily protein   chr2:15838838-15840752 FORWARD LENGTH=314                                                                                                                                                                                                                                            | 109  | 314  | 2.00E-11  | 288.1 | 33.0 | 41.3 |
| Rsa1.0_01266.1.g25205.t1 | gb EOA29194.1  hypothetical protein CARUB_v10025466mg [Capsella rubella]                                                                                                                                                                                                                                                                                          | 237  | 182  | 2.00E-65  | 76.8  | 58.6 | 62.9 | hypothetical protein CARUB_v10025466mg                                                                                            | gbpln | Capsella rubella     | AT2G37780.1   Symbols:   Cysteine/Histidine-rich C1 domain family protein   chr1:15837442-15838302 REVERSE LENGTH=286                                                                                                                                                                                                                                            | 237  | 286  | 8.00E-64  | 120.7 | 51.1 | 59.1 |
| Rsa1.0_01267.1.g25206.t1 | gb ACG60682.1  transposon-like ORF [Brassica oleracea var. alboglabra]                                                                                                                                                                                                                                                                                            | 198  | 704  | 2.00E-18  | 355.6 | 20.7 | 23.2 | transposon-like ORF                                                                                                               | gbpln | Brassica oleracea    | #                                                                                                                                                                                                                                                                                                                                                                | #    | #    | #         | #     | #    |      |
| Rsa1.0_01267.1.g25207.t1 | gb EOA38640.1  hypothetical protein CARUB_v10010550mg [Capsella rubella]                                                                                                                                                                                                                                                                                          | 152  | 152  | 2.00E-77  | 100.0 | 92.1 | 96.7 | hypothetical protein CARUB_v10010550mg                                                                                            | gbpln | Capsella rubella     | AT1G22990.1   Symbols: HIPP22   Heavy metal transport/detoxification superfamily protein   chr1:8139221-8140045 FORWARD LENGTH=152                                                                                                                                                                                                                               | 152  | 152  | 2.00E-78  | 100.0 | 90.8 | 94.7 |
| Rsa1.0_01267.1.g25208.t3 | gb AAF69172.1 AC007915.24 F27F5.11 [Arabidopsis thaliana]                                                                                                                                                                                                                                                                                                         | 329  | 1313 | 4.00E-29  | 399.1 | 23.7 | 31.9 | F27F5.11                                                                                                                          | gbpln | Arabidopsis thaliana | #                                                                                                                                                                                                                                                                                                                                                                | #    | #    | #         | #     | #    |      |
| Rsa1.0_01267.1.g25209.t2 | gb ACP30609.1  disease resistance protein [Brassica rapa subsp. pekinensis]                                                                                                                                                                                                                                                                                       | 1401 | 2726 | 0         | 194.6 | 68.2 | 81.4 | disease resistance protein                                                                                                        | gbpln | Brassica rapa        | ATMG00860.1   Symbols: ORF158   DNA/RNA polymerases superfamily protein   chrM:235916-236392 FORWARD LENGTH=158                                                                                                                                                                                                                                                  | 1401 | 158  | 2.00E-31  | 11.3  | 4.7  | 6.1  |
| Rsa1.0_01267.1.g25210.t7 | ref NP_173708.3  uncharacterized PKHD-type hydroxylase [Arabidopsis thaliana] gi 193306639 sp Q3ED68.2 Y1295_ARAT H RecName: Full=Uncharacterized PKHD-type hydroxylase At1g22950 gi 332192193 gb AAE30314.1  uncharacterized PKHD-type hydroxylase [Arabidopsis thaliana]                                                                                        | 284  | 397  | 1.00E-106 | 139.8 | 61.3 | 77.1 | uncharacterized PKHD-type hydroxylase                                                                                             | gbpln | Arabidopsis thaliana | AT1G22950.1   Symbols:   2-oxoglutarate (2OG) and Fe(II)-dependent oxygenase superfamily protein   chr1:8125291-8127168 REVERSE LENGTH=397                                                                                                                                                                                                                       | 284  | 397  | 1.00E-109 | 139.8 | 61.3 | 77.1 |
| Rsa1.0_01267.1.g25211.t1 | db BAK41511.1  polyprotein [Arabidopsis thaliana]                                                                                                                                                                                                                                                                                                                 | 245  | 1466 | 2.00E-43  | 598.4 | 39.6 | 53.1 | polyprotein                                                                                                                       | gbpln | Arabidopsis thaliana | #                                                                                                                                                                                                                                                                                                                                                                | #    | #    | #         | #     | #    |      |
| Rsa1.0_01267.1.g25212.t1 | ref NP_173701.1  endoglucanase 3 [Arabidopsis thaliana] gi 114149313 sp Q2V4L8.2 GUN3_ARAT H RecName: Full=Endoglucanase 3; AltName: Full=Cellulase 5; Short=AtCEL5; AltName: Full=Endo-1,4-beta glucanase 3; Flags: Precursor gi 2462836 gb AAB72171.1  beta-glucanase [Arabidopsis thaliana] gi 332192178 gb AAE30299.1  endoglucanase 3 [Arabidopsis thaliana] | 509  | 484  | 0         | 95.1  | 83.5 | 86.8 | endoglucanase 3                                                                                                                   | gbpln | Arabidopsis thaliana | AT1G22880.1   Symbols: ATGH9B4, ATCEL5, CEL5   cellulase 5   chr1:8095770-8097539 FORWARD LENGTH=484                                                                                                                                                                                                                                                             | 509  | 484  | 0         | 95.1  | 83.5 | 86.8 |
| Rsa1.0_01267.1.g25213.t1 | gb AAD17351.1  contains similarity to retrovirus-related polyproteins and to COHC zinc finger protein (Pfam: PF00099, Score=16.3, E=0.051, E= 1) [Arabidopsis thaliana] gi 7267432 emb CAB77944.1  putative polyprotein [Arabidopsis thaliana]                                                                                                                    | 354  | 1138 | 2.00E-32  | 321.5 | 21.5 | 31.1 | contains similarity to retrovirus-related polyproteins and to COHC zinc finger protein (Pfam: PF00099, Score=16.3, E=0.051, E= 1) | gbpln | Arabidopsis thaliana | AT3G13300.2   Symbols: VCS   Transducin/WD40 repeat-like superfamily protein   chr3:4304085-4309949 FORWARD LENGTH=1309                                                                                                                                                                                                                                          | 354  | 1309 | 1.00E-24  | 369.8 | 20.1 | 28.2 |
| Rsa1.0_01268.1.g25214.t1 | gb AAD36950.1 AF069441.10 putative transposon protein [Arabidopsis thaliana] gi 7267189 emb CAB77899.1  putative transposon protein [Arabidopsis thaliana]                                                                                                                                                                                                        | 769  | 1011 | 2.00E-22  | 131.5 | 7.3  | 9.9  | putative transposon protein                                                                                                       | gbpln | Arabidopsis thaliana | AT4G07350.1   Symbols:   unknown protein; BEST Arabidopsis thaliana protein match is: unknown protein (TAIR:AT1G40129.1); Has 30201 Blast hits to 17322 proteins in 780 species; Archaea = 12; Bacteria = 1396; Metazoa = 1738; Fungi = 3422; Plants = 5037; Viruses = 0; Other Eukaryotes = 2996 (source: NCBI BLINK)   chr4:4172609-4175227 REVERSE LENGTH=330 | 769  | 330  | 1.00E-23  | 42.9  | 7.0  | 9.0  |

|                          |                                                                                                                                                                                                                                                                                                                                                                                                                                                                                                                                                                      |      |      |           |       |      |      |                                                                  |       |                      |                                                                                                                                                                                                                                                                                                                                                                                                                                                             |      |      |           |       |      |      |
|--------------------------|----------------------------------------------------------------------------------------------------------------------------------------------------------------------------------------------------------------------------------------------------------------------------------------------------------------------------------------------------------------------------------------------------------------------------------------------------------------------------------------------------------------------------------------------------------------------|------|------|-----------|-------|------|------|------------------------------------------------------------------|-------|----------------------|-------------------------------------------------------------------------------------------------------------------------------------------------------------------------------------------------------------------------------------------------------------------------------------------------------------------------------------------------------------------------------------------------------------------------------------------------------------|------|------|-----------|-------|------|------|
| Rsa1.0_01268.1.g25215.t1 | gb EOA38822.1  hypothetical protein CARUB_v10011146mg [Capsella rubella]                                                                                                                                                                                                                                                                                                                                                                                                                                                                                             | 395  | 386  | 1.00E-70  | 97.7  | 41.8 | 60.5 | hypothetical protein CARUB_v10011146mg                           | gbpln | Capsella rubella     | AT1G09650.1   Symbols:   F-box and associated interaction domains-containing protein   chr1:3125978-3127126 FORWARD LENGTH=382                                                                                                                                                                                                                                                                                                                              | 395  | 382  | 2.00E-65  | 96.7  | 40.3 | 57.5 |
| Rsa1.0_01268.1.g25216.t1 | #                                                                                                                                                                                                                                                                                                                                                                                                                                                                                                                                                                    | #    | #    | #         | #     | #    | -    | ----                                                             | ----  | ----                 | #                                                                                                                                                                                                                                                                                                                                                                                                                                                           | #    | #    | #         | #     | #    | #    |
| Rsa1.0_01268.1.g25217.t1 | gb AAD32898.1  putative retroelement pol polyprotein [Arabidopsis thaliana]                                                                                                                                                                                                                                                                                                                                                                                                                                                                                          | 1353 | 1307 | 0         | 96.6  | 59.9 | 74.1 | putative retroelement pol polyprotein                            | gbpln | Arabidopsis thaliana | AT4G23160.1   Symbols: CRK8   cysteine-rich RLK (RECEPTOR-like protein kinase) 8   chr4:12129485-12134086 FORWARD LENGTH=1262                                                                                                                                                                                                                                                                                                                               | 1353 | 1262 | 1.00E-101 | 93.3  | 14.1 | 22.5 |
| Rsa1.0_01268.1.g25218.t1 | gb AAD32898.1  putative retroelement pol polyprotein [Arabidopsis thaliana]                                                                                                                                                                                                                                                                                                                                                                                                                                                                                          | 1291 | 1307 | 0         | 101.2 | 61.7 | 77.1 | putative retroelement pol polyprotein                            | gbpln | Arabidopsis thaliana | AT4G23160.1   Symbols: CRK8   cysteine-rich RLK (RECEPTOR-like protein kinase) 8   chr4:12129485-12134086 FORWARD LENGTH=1262                                                                                                                                                                                                                                                                                                                               | 1291 | 1262 | 1.00E-88  | 97.8  | 14.3 | 20.9 |
| Rsa1.0_01268.1.g25219.t1 | gb AAF67379.1  Hypothetical protein T15F17.k [Arabidopsis thaliana]                                                                                                                                                                                                                                                                                                                                                                                                                                                                                                  | 304  | 341  | 4.00E-95  | 112.2 | 61.8 | 75.0 | Hypothetical protein T15F17.k                                    | gbpln | Arabidopsis thaliana | #                                                                                                                                                                                                                                                                                                                                                                                                                                                           | #    | #    | #         | #     | #    | #    |
| Rsa1.0_01268.1.g25220.t1 | #                                                                                                                                                                                                                                                                                                                                                                                                                                                                                                                                                                    | #    | #    | #         | #     | #    | -    | ----                                                             | ----  | ----                 | #                                                                                                                                                                                                                                                                                                                                                                                                                                                           | #    | #    | #         | #     | #    | #    |
| Rsa1.0_01268.1.g25221.t1 | gb AAC26241.1  F9D12.15 gene product [Arabidopsis thaliana]                                                                                                                                                                                                                                                                                                                                                                                                                                                                                                          | 265  | 850  | 7.00E-18  | 320.8 | 17.7 | 29.1 | F9D12.15 gene product                                            | gbpln | Arabidopsis thaliana | #                                                                                                                                                                                                                                                                                                                                                                                                                                                           | #    | #    | #         | #     | #    | #    |
| Rsa1.0_01268.1.g25222.t1 | gb AAF18641.1 AC006228_12 F5J5.16 [Arabidopsis thaliana]                                                                                                                                                                                                                                                                                                                                                                                                                                                                                                             | 326  | 1024 | 3.00E-35  | 314.1 | 26.1 | 37.4 | F5J5.16                                                          | gbpln | Arabidopsis thaliana | #                                                                                                                                                                                                                                                                                                                                                                                                                                                           | #    | #    | #         | #     | #    | #    |
| Rsa1.0_01269.1.g25223.t1 | #                                                                                                                                                                                                                                                                                                                                                                                                                                                                                                                                                                    | #    | #    | #         | #     | #    | -    | ----                                                             | ----  | ----                 | #                                                                                                                                                                                                                                                                                                                                                                                                                                                           | #    | #    | #         | #     | #    | #    |
| Rsa1.0_01269.1.g25224.t1 | #                                                                                                                                                                                                                                                                                                                                                                                                                                                                                                                                                                    | #    | #    | #         | #     | #    | -    | ----                                                             | ----  | ----                 | #                                                                                                                                                                                                                                                                                                                                                                                                                                                           | #    | #    | #         | #     | #    | #    |
| Rsa1.0_01269.1.g25225.t1 | gb AAF79618.1 AC027665_19 F5M15.26 [Arabidopsis thaliana]                                                                                                                                                                                                                                                                                                                                                                                                                                                                                                            | 372  | 1838 | 3.00E-81  | 494.1 | 42.7 | 59.7 | F5M15.26                                                         | gbpln | Arabidopsis thaliana | #                                                                                                                                                                                                                                                                                                                                                                                                                                                           | #    | #    | #         | #     | #    | #    |
| Rsa1.0_01269.1.g25226.t1 | gb ABW81060.1  GagPol3 [Arabidopsis lyrata subsp. lyrata]                                                                                                                                                                                                                                                                                                                                                                                                                                                                                                            | 786  | 1103 | 1.00E-147 | 140.3 | 37.3 | 49.6 | GagPol3                                                          | gbpln | Arabidopsis lyrata   | #                                                                                                                                                                                                                                                                                                                                                                                                                                                           | #    | #    | #         | #     | #    | #    |
| Rsa1.0_01269.1.g25227.t1 | #                                                                                                                                                                                                                                                                                                                                                                                                                                                                                                                                                                    | #    | #    | #         | #     | #    | -    | ----                                                             | ----  | ----                 | AT2G11010.1   Symbols:   FUNCTIONS IN: molecular_function unknown; INVOLVED IN: biological_process unknown; LOCATED IN: mitochondrion; BEST Arabidopsis thaliana protein match is: myosin heavy chain-related (TAIR:AT5G32590.1); Has 404 Blast hits to 390 proteins in 105 species: Archae - 10; Bacteria - 61; Metazoa - 184; Fungi - 25; Plants - 79; Viruses - 0; Other Eukaryotes - 45 (source: NCBI BLink).   chr2:4361869-4365919 FORWARD LENGTH=693 | 559  | 693  | 1.00E-10  | 124.0 | 8.6  | 14.1 |
| Rsa1.0_01269.1.g25228.t1 | #                                                                                                                                                                                                                                                                                                                                                                                                                                                                                                                                                                    | #    | #    | #         | #     | #    | -    | ----                                                             | ----  | ----                 | AT3G45730.1   Symbols:   unknown protein; Has 3 Blast hits to 3 proteins in 1 species: Archae - 0; Bacteria - 0; Metazoa - 0; Fungi - 0; Plants - 3; Viruses - 0; Other Eukaryotes - 0 (source: NCBI BLink).   chr3:16790072-16790290 FORWARD LENGTH=72                                                                                                                                                                                                     | 74   | 72   | 2.00E-13  | 97.3  | 51.4 | 62.2 |
| Rsa1.0_01269.1.g25229.t1 | ref NP_566881.1  putative trans-2-enoyl-CoA reductase [Arabidopsis thaliana]<br>gi 62900587 sp Q8LCU7.1 MECR_ARAT H RecName: Full=Probable trans-2-enoyl-CoA reductase, mitochondrial; Flags: Precursor<br>gi 21592515 gb AAM64465.1  nuclear receptor binding factor-like protein [Arabidopsis thaliana]<br>gi 3326444550 gb AEE78071.1  putative trans-2-enoyl-CoA reductase [Arabidopsis thaliana]                                                                                                                                                                | 375  | 375  | 0         | 100.0 | 88.0 | 92.5 | putative trans-2-enoyl-CoA reductase                             | gbpln | Arabidopsis thaliana | AT3G45770.1   Symbols:   Polyketide synthase, enoylreductase family protein   chr3:16805753-1680774 REVERSE LENGTH=375                                                                                                                                                                                                                                                                                                                                      | 375  | 375  | 0         | 100.0 | 88.0 | 92.5 |
| Rsa1.0_01269.1.g25230.t1 | #                                                                                                                                                                                                                                                                                                                                                                                                                                                                                                                                                                    | #    | #    | #         | #     | #    | -    | ----                                                             | ----  | ----                 | #                                                                                                                                                                                                                                                                                                                                                                                                                                                           | #    | #    | #         | #     | #    | #    |
| Rsa1.0_01269.1.g25231.t1 | #                                                                                                                                                                                                                                                                                                                                                                                                                                                                                                                                                                    | #    | #    | #         | #     | #    | -    | ----                                                             | ----  | ----                 | #                                                                                                                                                                                                                                                                                                                                                                                                                                                           | #    | #    | #         | #     | #    | #    |
| Rsa1.0_01269.1.g25232.t1 | #                                                                                                                                                                                                                                                                                                                                                                                                                                                                                                                                                                    | #    | #    | #         | #     | #    | -    | ----                                                             | ----  | ----                 | #                                                                                                                                                                                                                                                                                                                                                                                                                                                           | #    | #    | #         | #     | #    | #    |
| Rsa1.0_01269.1.g25233.t1 | ref NP_190171.1  P-loop containing nucleoside triphosphate hydrolase-like protein [Arabidopsis thaliana]<br>gi 334185753 ref NP_001190017.1  P-loop containing nucleoside triphosphate hydrolase-like protein [Arabidopsis thaliana]<br>gi 7339486 emb CAB82809.1  kinesin-related protein-like [Arabidopsis thaliana]<br>gi 332644559 gb AEE78080.1  P-loop containing nucleoside triphosphate hydrolase-like protein [Arabidopsis thaliana]<br>gi 332644560 gb AEE78081.1  P-loop containing nucleoside triphosphate hydrolase-like protein [Arabidopsis thaliana] | 1055 | 1058 | 0         | 100.3 | 94.2 | 97.6 | P-loop containing nucleoside triphosphate hydrolase-like protein | gbpln | Arabidopsis thaliana | AT3G45850.2   Symbols:   P-loop containing nucleoside triphosphate hydrolases superfamily protein   chr3:16855814-16860950 REVERSE LENGTH=1058                                                                                                                                                                                                                                                                                                              | 1055 | 1058 | 0         | 100.3 | 94.2 | 97.6 |

|                          |                                                                                                                                                                                                                                                                                      |      |      |           |       |      |      |                                                      |       |                      |                                                                                                                                                     |      |      |           |       |      |      |
|--------------------------|--------------------------------------------------------------------------------------------------------------------------------------------------------------------------------------------------------------------------------------------------------------------------------------|------|------|-----------|-------|------|------|------------------------------------------------------|-------|----------------------|-----------------------------------------------------------------------------------------------------------------------------------------------------|------|------|-----------|-------|------|------|
| Rsa1.0_01269.1.g25234.t2 | gb ABD64958.1  ethylene responsive element binding factor --related [Brassica oleracea]                                                                                                                                                                                              | 382  | 954  | 2.00E-51  | 249.7 | 42.7 | 57.9 | ethylene responsive element binding factor --related | gbpln | Brassica oleracea    | #                                                                                                                                                   | #    | #    | #         | #     | #    | #    |
| Rsa1.0_01270.1.g25235.t1 | #                                                                                                                                                                                                                                                                                    | #    | #    | #         | #     | #    | #    | -                                                    | ----  | ----                 | #                                                                                                                                                   | #    | #    | #         | #     | #    | #    |
| Rsa1.0_01270.1.g25236.t2 | emb CAA31653.1  polyprotein [Arabidopsis thaliana]                                                                                                                                                                                                                                   | 579  | 1291 | 1.00E-120 | 223.0 | 40.8 | 56.8 | polyprotein                                          | gbpln | Arabidopsis thaliana | ATMG00300.1   Symbols: ORF145A   Gag-Pol-related retrotransposon family protein   chrM:89617-90054 REVERSE LENGTH=145                               | 579  | 145  | 1.00E-24  | 25.0  | 9.5  | 13.1 |
| Rsa1.0_01270.1.g25237.t1 | gb EOA39820.1  hypothetical protein CARUB_v10008487mg, partial [Capsella rubella]                                                                                                                                                                                                    | 600  | 685  | 0         | 114.2 | 80.0 | 87.5 | hypothetical protein CARUB_v10008487mg, partial      | gbpln | Capsella rubella     | AT1G20670.1   Symbols:   DNA-binding bromodomain-containing protein   chr1:7164537-7167933 REVERSE LENGTH=652                                       | 600  | 652  | 0         | 108.7 | 77.7 | 85.2 |
| Rsa1.0_01270.1.g25238.t1 | ref XP_002884894.1  hypothetical protein ARALYDRAFT_897434 [Arabidopsis lyrata subsp. lyrata]   gi 297330734 gb EFH61153.1  hypothetical protein ARALYDRAFT_897434 [Arabidopsis lyrata subsp. lyrata]                                                                                | 422  | 435  | 0         | 103.1 | 81.0 | 89.3 | hypothetical protein ARALYDRAFT_897434               | gbpln | Arabidopsis lyrata   | AT3G12230.1   Symbols: scpl14   serine carboxypeptidase-like 14   chr3:3899431-3901879 REVERSE LENGTH=435                                           | 422  | 435  | 0         | 103.1 | 79.1 | 89.3 |
| Rsa1.0_01270.1.g25239.t2 | gb AAD30292.1 AF139539_1 catalase 3 [Raphanus sativus]                                                                                                                                                                                                                               | 492  | 492  | 0         | 100.0 | 99.6 | 99.8 | catalase 3                                           | gbpln | Raphanus sativus     | AT1G20620.1   Symbols: CAT3, SEN2, ATCAT3   catalase 3   chr1:7143142-7146193 FORWARD LENGTH=492                                                    | 492  | 492  | 0         | 100.0 | 98.2 | 99.2 |
| Rsa1.0_01270.1.g25240.t1 | gb ACG60686.1  En/Spm-related transposon protein [Brassica oleracea var. alboglabra]                                                                                                                                                                                                 | 585  | 695  | 1.00E-154 | 118.8 | 45.1 | 47.4 | En/Spm-related transposon protein                    | gbpln | Brassica oleracea    | #                                                                                                                                                   | #    | #    | #         | #     | #    |      |
| Rsa1.0_01270.1.g25241.t1 | gb AAG51783.1 AC079679_3 reverse transcriptase, putative; 16838-20266 [Arabidopsis thaliana]                                                                                                                                                                                         | 456  | 1142 | 4.00E-96  | 250.4 | 40.1 | 57.5 | reverse transcriptase, putative; 16838-20266         | gbpln | Arabidopsis thaliana | AT4G29090.1   Symbols:   Ribonuclease H-like superfamily protein   chr4:1433528-14335255 FORWARD LENGTH=575                                         | 456  | 575  | 2.00E-55  | 126.1 | 28.7 | 48.7 |
| Rsa1.0_01270.1.g25242.t1 | #                                                                                                                                                                                                                                                                                    | #    | #    | #         | #     | #    | #    | -                                                    | ----  | ----                 | #                                                                                                                                                   | #    | #    | #         | #     | #    | #    |
| Rsa1.0_01271.1.g25243.t1 | #                                                                                                                                                                                                                                                                                    | #    | #    | #         | #     | #    | #    | -                                                    | ----  | ----                 | #                                                                                                                                                   | #    | #    | #         | #     | #    | #    |
| Rsa1.0_01271.1.g25244.t1 | emb CAN77974.1  hypothetical protein VITISV_006175 [Vitis vinifera]                                                                                                                                                                                                                  | 268  | 1501 | 1.00E-112 | 560.1 | 71.3 | 84.3 | hypothetical protein VITISV_006175                   | gbpln | Vitis vinifera       | AT4G23160.1   Symbols: CRK8   cysteine-rich RLK (RECEPTOR-like protein kinase) 8   chr4:12129485-12134086 FORWARD LENGTH=1262                       | 268  | 1262 | 2.00E-25  | 470.9 | 25.4 | 35.8 |
| Rsa1.0_01271.1.g25245.t1 | gb ABD64973.1  Zinc knuckle containing protein [Brassica oleracea]                                                                                                                                                                                                                   | 184  | 319  | 4.00E-83  | 173.4 | 81.5 | 89.1 | Zinc knuckle containing protein                      | gbpln | Brassica oleracea    | #                                                                                                                                                   | #    | #    | #         | #     | #    |      |
| Rsa1.0_01271.1.g25246.t1 | dbj BAJ33967.1  unnamed protein product [Theellungiella halophila]                                                                                                                                                                                                                   | 587  | 530  | 0         | 90.3  | 78.4 | 82.6 | unnamed protein product                              | ----  | ----                 | AT2G22830.1   Symbols: SQE2   squalene epoxidase 2   chr2:9723947-9726270 REVERSE LENGTH=855                                                        | 587  | 585  | 0         | 99.7  | 77.7 | 85.0 |
| Rsa1.0_01271.1.g25247.t1 | ref XP_002878639.1  ATPSK2 [Arabidopsis lyrata subsp. lyrata]   gi 297324478 gb EFH54898.1  ATPSK2 [Arabidopsis lyrata subsp. lyrata]                                                                                                                                                | 86   | 86   | 8.00E-29  | 100.0 | 77.9 | 83.7 | ATPSK2                                               | gbpln | Arabidopsis lyrata   | AT2G22860.1   Symbols: ATPSK2, PSK2   phytoisoflavone 2 precursor   chr2:9737666-9738077 FORWARD LENGTH=87                                          | 86   | 87   | 6.00E-28  | 101.2 | 74.4 | 80.2 |
| Rsa1.0_01271.1.g25248.t1 | ref XP_002878640.1  EMB2001 [Arabidopsis lyrata subsp. lyrata]   gi 297324479 gb EFH54899.1  EMB2001 [Arabidopsis lyrata subsp. lyrata]                                                                                                                                              | 304  | 300  | 1.00E-148 | 98.7  | 86.8 | 91.1 | EMB2001                                              | gbpln | Arabidopsis lyrata   | AT2G22870.1   Symbols: EMB2001   P-loop containing nucleoside triphosphate hydrolases superfamily protein   chr2:9739476-9740921 FORWARD LENGTH=300 | 304  | 300  | 1.00E-147 | 98.7  | 85.9 | 90.5 |
| Rsa1.0_01271.1.g25249.t1 | ref XP_002868207.1  transferase family protein [Arabidopsis lyrata subsp. lyrata]   gi 297314043 gb EFH44466.1  transferase family protein [Arabidopsis lyrata subsp. lyrata]                                                                                                        | 239  | 436  | 7.00E-85  | 182.4 | 65.7 | 77.4 | transferase family protein                           | gbpln | Arabidopsis lyrata   | AT4G15400.1   Symbols:   HXXXD-type acyl-transferase family protein   chr4:8812121-8813428 REVERSE LENGTH=435                                       | 239  | 435  | 2.00E-84  | 182.0 | 63.6 | 76.6 |
| Rsa1.0_01271.1.g25250.t1 | ref XP_002868207.1  transferase family protein [Arabidopsis lyrata subsp. lyrata]   gi 297314043 gb EFH44466.1  transferase family protein [Arabidopsis lyrata subsp. lyrata]                                                                                                        | 156  | 436  | 3.00E-43  | 279.5 | 65.4 | 75.6 | transferase family protein                           | gbpln | Arabidopsis lyrata   | AT4G15400.1   Symbols:   HXXXD-type acyl-transferase family protein   chr4:8812121-8813428 REVERSE LENGTH=435                                       | 156  | 435  | 1.00E-44  | 278.8 | 63.5 | 75.0 |
| Rsa1.0_01271.1.g25251.t1 | dbj BAF34636.1  DNA methyltransferase 1b [Brassica rapa]                                                                                                                                                                                                                             | 1507 | 1519 | 0         | 100.8 | 86.3 | 91.6 | DNA methyltransferase 1b                             | gbpln | Brassica rapa        | AT5G49160.1   Symbols: MET1, MET2, MET1, DDM2, DDMT01, DMT1   methyltransferase 1   chr5:19932501-19938186 FORWARD LENGTH=1534                      | 1507 | 1534 | 0         | 101.8 | 67.9 | 80.7 |
| Rsa1.0_01271.1.g25252.t1 | #                                                                                                                                                                                                                                                                                    | #    | #    | #         | #     | #    | #    | -                                                    | ----  | ----                 | #                                                                                                                                                   | #    | #    | #         | #     | #    |      |
| Rsa1.0_01272.1.g25253.t1 | ref NP_180475.2  glutamate receptor 2.8 [Arabidopsis thaliana]   gi 41017226 sp Q9C5V5.2 GLR28_ARAT H RecName: Full=Glutamate receptor 2.8; AltName: Full=Ligand-gated ion channel 2.8; Flags: Precursor   gi 330253118 gb AEC08212.1  glutamate receptor 2.8 [Arabidopsis thaliana] | 865  | 947  | 0         | 109.5 | 75.1 | 85.4 | glutamate receptor 2.8                               | gbpln | Arabidopsis thaliana | AT2G29110.1   Symbols: ATGLR2.8, GLR2.8   glutamate receptor 2.8   chr2:12506880-12510552 REVERSE LENGTH=947                                        | 865  | 947  | 0         | 109.5 | 75.1 | 85.4 |
| Rsa1.0_01272.1.g25254.t1 | gb EOA27010.1  hypothetical protein CARUB_v10023106mg [Capsella rubella]                                                                                                                                                                                                             | 459  | 484  | 0         | 105.4 | 86.1 | 91.7 | hypothetical protein CARUB_v10023106mg               | gbpln | Capsella rubella     | AT2G29090.2   Symbols: CYP707A2   cytochrome P450, family 707, subfamily A, polypeptide 2   chr2:12495038-12499080 REVERSE LENGTH=482               | 459  | 482  | 0         | 105.0 | 83.4 | 86.7 |

|                          |                                                                                                                                                                                                                                                                                                                                                                                                                                                                                                                                                                                         |     |      |           |       |      |      |                                                                                                                                            |       |                      |                                                                                                                                                                                |     |      |           |       |      |      |
|--------------------------|-----------------------------------------------------------------------------------------------------------------------------------------------------------------------------------------------------------------------------------------------------------------------------------------------------------------------------------------------------------------------------------------------------------------------------------------------------------------------------------------------------------------------------------------------------------------------------------------|-----|------|-----------|-------|------|------|--------------------------------------------------------------------------------------------------------------------------------------------|-------|----------------------|--------------------------------------------------------------------------------------------------------------------------------------------------------------------------------|-----|------|-----------|-------|------|------|
| Rsa1.0_01272.1.g25255.t1 | refXP_002881027.1   hypothetical protein ARALYDRAFT_344684 [Arabidopsis lyrata subsp. lyrata] gi 297326866 gb EFH57286.1   hypothetical protein ARALYDRAFT_344684 [Arabidopsis lyrata subsp. lyrata] ref[NP_001189628.1] GRAS family transcription factor [Arabidopsis thaliana] gi 206557919 sp POC884.1 SCL34_ARAT H RecName: Full=Scarecrow-like protein 34; Short=AtSCL34; AltName: Full=GRAS family protein 12; Short=AtGRAS-12 gi 330253111 gb AEC08205.1  GRAS family transcription factor [Arabidopsis thaliana]                                                                | 778 | 818  | 0         | 105.1 | 90.1 | 94.0 | hypothetical protein ARALYDRAFT_344684                                                                                                     | gbpln | Arabidopsis lyrata   | AT2G29080.1   Symbols: ftsh3   FTSH protease 3   chr2:12489911-12492999 REVERSE LENGTH=809                                                                                     | 778 | 809  | 0         | 104.0 | 89.7 | 94.0 |
| Rsa1.0_01272.1.g25256.t1 | refXP_002879199.1   scarecrow transcription factor family protein [Arabidopsis lyrata subsp. lyrata] gi 297326865 gb EFH57285.1   exostosin family protein [Arabidopsis lyrata subsp. lyrata] ref[XP_002862803.1] rab5-interacting family protein [Arabidopsis lyrata subsp. lyrata] gi 297822627 ref[XP_002879196.1] rab5-interacting family protein [Arabidopsis lyrata subsp. lyrata] gi 297308535 gb EFH39061.1   rab5-interacting family protein [Arabidopsis lyrata subsp. lyrata] gi 297325035 gb EFH5455.1   rab5-interacting family protein [Arabidopsis lyrata subsp. lyrata] | 629 | 630  | 0         | 100.2 | 78.9 | 86.8 | GRAS family transcription factor                                                                                                           | gbpln | Arabidopsis thaliana | AT2G29065.1   Symbols:   GRAS family transcription factor   chr2:12485049-12486941 FORWARD LENGTH=630                                                                          | 629 | 630  | 0         | 100.2 | 78.9 | 86.8 |
| Rsa1.0_01272.1.g25257.t1 | ref[XP_002879199.1] scarecrow transcription factor family protein [Arabidopsis lyrata subsp. lyrata] gi 297326866 gb EFH5458.1   scarecrow transcription factor family protein [Arabidopsis lyrata subsp. lyrata]                                                                                                                                                                                                                                                                                                                                                                       | 715 | 1321 | 0         | 184.8 | 75.8 | 84.8 | scarecrow transcription factor family protein                                                                                              | gbpln | Arabidopsis lyrata   | AT2G29060.1   Symbols:   GRAS family transcription factor   chr2:12481991-12484075 FORWARD LENGTH=694                                                                          | 715 | 694  | 0         | 97.1  | 74.5 | 84.1 |
| Rsa1.0_01272.1.g25258.t1 | gb EOA27304.1   hypothetical protein CARUB_v10023423mg [Capsella rubella]                                                                                                                                                                                                                                                                                                                                                                                                                                                                                                               | 391 | 381  | 0         | 97.4  | 85.4 | 92.6 | hypothetical protein CARUB_v10023423mg                                                                                                     | gbpln | Capsella rubella     | AT2G29050.1   Symbols: ATRBL1, RBL1   RHOMBOLD-like 1   chr2:12478245-12480121 FORWARD LENGTH=389                                                                              | 391 | 389  | 0         | 99.5  | 85.9 | 93.1 |
| Rsa1.0_01272.1.g25259.t1 | ref[XP_002881026.1] exostosin family protein [Arabidopsis lyrata subsp. lyrata] gi 297326865 gb EFH57285.1   exostosin family protein [Arabidopsis lyrata subsp. lyrata] ref[XP_002862803.1] rab5-interacting family protein [Arabidopsis lyrata subsp. lyrata] gi 297822627 ref[XP_002879196.1] rab5-interacting family protein [Arabidopsis lyrata subsp. lyrata] gi 297308535 gb EFH39061.1   rab5-interacting family protein [Arabidopsis lyrata subsp. lyrata] gi 297325035 gb EFH5455.1   rab5-interacting family protein [Arabidopsis lyrata subsp. lyrata]                      | 682 | 707  | 0         | 103.7 | 82.1 | 88.3 | exostosin family protein                                                                                                                   | gbpln | Arabidopsis lyrata   | AT2G29040.1   Symbols:   Exostosin family protein   chr2:12472425-12474962 REVERSE LENGTH=720                                                                                  | 682 | 720  | 0         | 105.6 | 80.9 | 88.9 |
| Rsa1.0_01272.1.g25260.t1 | ref[XP_002862803.1] rab5-interacting family protein [Arabidopsis lyrata subsp. lyrata] gi 297822627 ref[XP_002879196.1] rab5-interacting family protein [Arabidopsis lyrata subsp. lyrata] gi 297308535 gb EFH39061.1   rab5-interacting family protein [Arabidopsis lyrata subsp. lyrata] gi 297325035 gb EFH5455.1   rab5-interacting family protein [Arabidopsis lyrata subsp. lyrata]                                                                                                                                                                                               | 135 | 132  | 5.00E-53  | 97.8  | 87.4 | 93.3 | rab5-interacting family protein                                                                                                            | gbpln | Arabidopsis lyrata   | AT5G59410.1   Symbols:   Rab5-interacting family protein   chr5:23959761-23960730 REVERSE LENGTH=130                                                                           | 135 | 130  | 5.00E-54  | 96.3  | 75.6 | 86.7 |
| Rsa1.0_01272.1.g25261.t1 | #                                                                                                                                                                                                                                                                                                                                                                                                                                                                                                                                                                                       | #   | #    | #         | #     | #    | -    | ----                                                                                                                                       | ----  | #                    | #                                                                                                                                                                              | #   | #    | #         | #     | #    |      |
| Rsa1.0_01272.1.g25262.t1 | gb EOA29069.1   hypothetical protein CARUB_v10025325mg [Capsella rubella]                                                                                                                                                                                                                                                                                                                                                                                                                                                                                                               | 890 | 882  | 0         | 99.1  | 82.5 | 90.2 | hypothetical protein CARUB_v10025325mg                                                                                                     | gbpln | Capsella rubella     | AT2G28960.1   Symbols:   Leucine-rich repeat protein kinase family protein   chr2:12438058-12442347 REVERSE LENGTH=880                                                         | 890 | 880  | 0         | 98.9  | 58.3 | 73.1 |
| Rsa1.0_01273.1.g25263.t1 | #                                                                                                                                                                                                                                                                                                                                                                                                                                                                                                                                                                                       | #   | #    | #         | #     | #    | -    | ----                                                                                                                                       | ----  | #                    | #                                                                                                                                                                              | #   | #    | #         | #     | #    |      |
| Rsa1.0_01273.1.g25264.t1 | ref[NP_001190627.1] branched-chain-amino-acid aminotransferase 5 [Arabidopsis thaliana] gi 332010724 gb AED98107.1   branched-chain-amino-acid aminotransferase 5 [Arabidopsis thaliana]                                                                                                                                                                                                                                                                                                                                                                                                | 564 | 1018 | 1.00E-113 | 180.5 | 43.4 | 54.3 | branched-chain-amino-acid aminotransferase 5                                                                                               | gbpln | Arabidopsis thaliana | AT5G65780.2   Symbols: ATBCAT-5   branched-chain amino acid aminotransferase 5 / branched-chain amino acid transaminase 5 (BCAT5)   chr5:26311587-26315610 FORWARD LENGTH=1018 | 564 | 1018 | 1.00E-115 | 180.5 | 43.4 | 54.3 |
| Rsa1.0_01273.1.g25265.t1 | gb EOA34618.1   hypothetical protein CARUB_v10022178mg [Capsella rubella]                                                                                                                                                                                                                                                                                                                                                                                                                                                                                                               | 454 | 456  | 0         | 100.4 | 88.8 | 95.2 | hypothetical protein CARUB_v10022178mg                                                                                                     | gbpln | Capsella rubella     | AT1G78990.1   Symbols:   HXXXD-type acyl-transferase family protein   chr1:29713531-29714969 REVERSE LENGTH=455                                                                | 454 | 455  | 0         | 100.2 | 88.8 | 95.4 |
| Rsa1.0_01273.1.g25266.t2 | ref[XP_002889223.1] ATP binding protein [Arabidopsis lyrata subsp. lyrata] gi 297335064 gb EFH65482.1   ATP binding protein [Arabidopsis lyrata subsp. lyrata]                                                                                                                                                                                                                                                                                                                                                                                                                          | 696 | 699  | 0         | 100.4 | 89.1 | 93.5 | ATP binding protein                                                                                                                        | gbpln | Arabidopsis lyrata   | AT1G78980.1   Symbols: SRF5   STRUBBELIG-receptor family 5   chr1:29707923-29711266 REVERSE LENGTH=699                                                                         | 696 | 699  | 0         | 100.4 | 87.9 | 93.7 |
| Rsa1.0_01273.1.g25267.t1 | ref[XP_002897124.1] ATLUP2 [Arabidopsis lyrata subsp. lyrata] gi 297332965 gb EFH63383.1   ATLUP2 [Arabidopsis lyrata subsp. lyrata]                                                                                                                                                                                                                                                                                                                                                                                                                                                    | 769 | 759  | 0         | 98.7  | 90.0 | 93.6 | ATLUP2                                                                                                                                     | gbpln | Arabidopsis lyrata   | AT1G78960.1   Symbols: ATLUP2, LUP2   lupeol synthase 2   chr1:29696722-29701024 FORWARD LENGTH=763                                                                            | 769 | 763  | 0         | 99.2  | 83.4 | 90.6 |
| Rsa1.0_01273.1.g25268.t1 | gb AAC17080.1   Strong similarity to lupeol synthase gb U49919 and cycloartenol synthase gb U02555 from A. thaliana (the third gene with similar homology) [Arabidopsis thaliana]                                                                                                                                                                                                                                                                                                                                                                                                       | 763 | 1565 | 0         | 205.1 | 89.1 | 94.9 | Strong similarity to lupeol synthase gb U49919 and cycloartenol synthase gb U02555 from A. thaliana (the third gene with similar homology) | gbpln | Arabidopsis thaliana | AT1G78955.1   Symbols: CAMS1   camelliol C synthase 1   chr1:29689153-29694255 REVERSE LENGTH=769                                                                              | 763 | 769  | 0         | 100.8 | 89.1 | 94.9 |

|                          |                                                                                                                                                                                                                                                                                           |     |     |           |       |      |      |                                                 |       |                      |                                                                                                                                                                                                                                                                                                                                              |     |     |           |       |      |      |
|--------------------------|-------------------------------------------------------------------------------------------------------------------------------------------------------------------------------------------------------------------------------------------------------------------------------------------|-----|-----|-----------|-------|------|------|-------------------------------------------------|-------|----------------------|----------------------------------------------------------------------------------------------------------------------------------------------------------------------------------------------------------------------------------------------------------------------------------------------------------------------------------------------|-----|-----|-----------|-------|------|------|
| Rsa1.0_01273.1.g25269.t1 | ref[XP_002889221.1] predicted protein [Arabidopsis lyrata subsp. lyrata]   g[297335062]gb[EFH65480.1] predicted protein [Arabidopsis lyrata subsp. lyrata]                                                                                                                                | 757 | 752 | 0         | 99.3  | 87.5 | 92.1 | predicted protein                               | gbpln | Arabidopsis lyrata   | AT1G78940.2   Symbols:   Protein kinase protein with adenine nucleotide alpha hydrolases-like domain   chr1:29680854-29683985 REVERSE LENGTH=754                                                                                                                                                                                             | 757 | 754 | 0         | 99.6  | 86.7 | 91.7 |
| Rsa1.0_01273.1.g25270.t1 | gb[EOA34936.1] hypothetical protein CARUB_v10020021mg [Capsella rubella]                                                                                                                                                                                                                  | 589 | 594 | 0         | 100.8 | 81.0 | 89.0 | hypothetical protein CARUB_v10020021mg          | gbpln | Capsella rubella     | AT1G78930.1   Symbols:   Mitochondrial transcription termination factor family protein   chr1:29678285-29680648 REVERSE LENGTH=591                                                                                                                                                                                                           | 589 | 591 | 0         | 100.3 | 82.2 | 88.8 |
| Rsa1.0_01273.1.g25271.t1 | gb[EOA33649.1] hypothetical protein CARUB_v10019817mg [Capsella rubella]                                                                                                                                                                                                                  | 802 | 802 | 0         | 100.0 | 97.6 | 99.1 | hypothetical protein CARUB_v10019817mg          | gbpln | Capsella rubella     | AT1G78920.2   Symbols: AVP2, AVPL1, AtVHP2.1, VHP2.1, VP2   vacuolar H <sup>+</sup> pyrophosphatase 2   chr1:29672340-29676761 FORWARD LENGTH=802                                                                                                                                                                                            | 802 | 802 | 0         | 100.0 | 97.4 | 99.1 |
| Rsa1.0_01274.1.g25272.t1 | ref[XP_002283518.1] PREDICTED: nucleolar protein 56-like [Vitis vinifera]                                                                                                                                                                                                                 | 104 | 558 | 2.00E-11  | 536.5 | 34.6 | 37.5 | PREDICTED: nucleolar protein 56-like            | gbpln | Vitis vinifera       | AT1G56110.1   Symbols: NOP56   homolog of nucleolar protein NOP56   chr1:20984544-20986893 REVERSE LENGTH=522                                                                                                                                                                                                                                | 104 | 522 | 6.00E-13  | 501.9 | 34.6 | 36.5 |
| Rsa1.0_01274.1.g25273.t1 | ref[XP_002869304.1] CYP82C4 [Arabidopsis lyrata subsp. lyrata]   g[297315140]gb[EFH45563.1] CYP82C4 [Arabidopsis lyrata subsp. lyrata]                                                                                                                                                    | 523 | 524 | 0         | 100.2 | 87.6 | 93.9 | CYP82C4                                         | gbpln | Arabidopsis lyrata   | AT4G31940.1   Symbols: CYP82C4   cytochrome P450, family 82, subfamily C, polypeptide 4   chr4:15452040-15453966 FORWARD LENGTH=524                                                                                                                                                                                                          | 523 | 524 | 0         | 100.2 | 87.0 | 95.0 |
| Rsa1.0_01274.1.g25274.t1 | dbj[BAB01085.1] unnamed protein product [Arabidopsis thaliana]                                                                                                                                                                                                                            | 272 | 271 | 1.00E-85  | 99.6  | 61.0 | 75.0 | unnamed protein product                         | gbpln | Arabidopsis thaliana | AT3G27040.1   Symbols:   Meprin and TRAF (MATH) homology domain-containing protein   chr3:9974912-9977927 REVERSE LENGTH=358                                                                                                                                                                                                                 | 272 | 358 | 4.00E-88  | 131.6 | 61.0 | 75.0 |
| Rsa1.0_01274.1.g25275.t1 | ref[XP_002877013.1] hypothetical protein ARALYDRAFT_322831 [Arabidopsis lyrata subsp. lyrata]   g[297322851]gb[EFH53272.1] hypothetical protein ARALYDRAFT_322831 [Arabidopsis lyrata subsp. lyrata]                                                                                      | 270 | 362 | 2.00E-88  | 134.1 | 64.1 | 77.8 | hypothetical protein ARALYDRAFT_322831          | gbpln | Arabidopsis lyrata   | AT3G27040.1   Symbols:   Meprin and TRAF (MATH) homology domain-containing protein   chr3:9974912-9977927 REVERSE LENGTH=358                                                                                                                                                                                                                 | 270 | 358 | 1.00E-87  | 132.6 | 63.0 | 76.7 |
| Rsa1.0_01274.1.g25276.t1 | gb[EOA28252.1] hypothetical protein CARUB_v10024445mg, partial [Capsella rubella]                                                                                                                                                                                                         | 51  | 77  | 6.00E-21  | 151.0 | 98.0 | 98.0 | hypothetical protein CARUB_v10024445mg, partial | gbpln | Capsella rubella     | AT4G31985.1   Symbols:   Ribosomal protein L39 family protein   chr4:15469931-15470366 FORWARD LENGTH=51                                                                                                                                                                                                                                     | 51  | 51  | 3.00E-23  | 100.0 | 98.0 | 98.0 |
| Rsa1.0_01274.1.g25277.t1 | gb[EOA17237.1] hypothetical protein CARUB_v10005509mg [Capsella rubella]                                                                                                                                                                                                                  | 255 | 266 | 1.00E-61  | 104.3 | 64.7 | 75.7 | hypothetical protein CARUB_v10005509mg          | gbpln | Capsella rubella     | AT4G32030.1   Symbols:   unknown protein; BEST Arabidopsis thaliana protein match is: unknown protein (TAIR:AT1G80610.1). Has 63 Blast hits to 59 proteins in 12 species: Archae - 0; Bacteria - 0; Metazoa - 6; Fungi - 0; Plants - 53; Viruses - 0; Other Eukaryotes - 4 (source: NCBI BLINK).   chr4:15490903-15493007 FORWARD LENGTH=253 | 255 | 253 | 2.00E-63  | 99.2  | 64.7 | 76.1 |
| Rsa1.0_01274.1.g25278.t1 | gb[EOA16773.1] hypothetical protein CARUB_v10004992mg [Capsella rubella]                                                                                                                                                                                                                  | 387 | 393 | 0         | 101.6 | 91.2 | 95.3 | hypothetical protein CARUB_v10004992mg          | gbpln | Capsella rubella     | AT4G32140.1   Symbols:   EamA-like transporter family   chr4:15523037-15525195 REVERSE LENGTH=394                                                                                                                                                                                                                                            | 387 | 394 | 0         | 101.8 | 90.7 | 94.8 |
| Rsa1.0_01274.1.g25279.t1 | ref[XP_002867255.1] vesicle-associated membrane protein 7C [Arabidopsis lyrata subsp. lyrata]   g[297313091]gb[EFH43514.1] vesicle-associated membrane protein 7C [Arabidopsis lyrata subsp. lyrata]                                                                                      | 219 | 219 | 1.00E-115 | 100.0 | 95.9 | 98.2 | vesicle-associated membrane protein 7C          | gbpln | Arabidopsis lyrata   | AT4G32150.1   Symbols: VAMP711, ATVAMP711   vesicle-associated membrane protein 711   chr4:15526407-15527651 REVERSE LENGTH=219                                                                                                                                                                                                              | 219 | 219 | 1.00E-116 | 100.0 | 95.0 | 97.7 |
| Rsa1.0_01274.1.g25280.t1 | ref[XP_002869291.1] hypothetical protein ARALYDRAFT_491516 [Arabidopsis lyrata subsp. lyrata]   g[297315127]gb[EFH45550.1] hypothetical protein ARALYDRAFT_491516 [Arabidopsis lyrata subsp. lyrata]                                                                                      | 210 | 241 | 1.00E-99  | 114.8 | 88.1 | 93.8 | hypothetical protein ARALYDRAFT_491516          | gbpln | Arabidopsis lyrata   | AT4G32175.1   Symbols:   PNAS-3 related   chr4:15535555-15537537 FORWARD LENGTH=241                                                                                                                                                                                                                                                          | 210 | 241 | 9.00E-99  | 114.8 | 86.7 | 93.8 |
| Rsa1.0_01274.1.g25281.t1 | ref[XP_002867254.1] ATPANK2 [Arabidopsis lyrata subsp. lyrata]   g[297313090]gb[EFH43513.1] ATPANK2 [Arabidopsis lyrata subsp. lyrata]                                                                                                                                                    | 934 | 902 | 0         | 96.6  | 92.1 | 93.5 | ATPANK2                                         | gbpln | Arabidopsis lyrata   | AT4G32180.1   Symbols: ATPANK2, PANK2   pantothenate kinase 2   chr4:15537724-15543715 REVERSE LENGTH=901                                                                                                                                                                                                                                    | 934 | 901 | 0         | 96.5  | 91.3 | 93.5 |
| Rsa1.0_01275.1.g25282.t1 | gb[ABD65063.1] hypothetical protein 27.t00041 [Brassica oleracea]                                                                                                                                                                                                                         | 195 | 198 | 5.00E-44  | 101.5 | 51.8 | 69.2 | hypothetical protein 27.t00041                  | gbpln | Brassica oleracea    | AT2G35280.1   Symbols:   F-box family protein   chr2:14859709-14860200 REVERSE LENGTH=163                                                                                                                                                                                                                                                    | 195 | 163 | 2.00E-14  | 83.6  | 17.9 | 29.7 |
| Rsa1.0_01275.1.g25283.t1 | ref[NP_175703.1] Nucleic acid-binding, OB-fold-like protein [Arabidopsis thaliana]   g[12324642]gb[AG52278.1]AC019018, 15 putative replication protein; 94555-97079 [Arabidopsis thaliana]   g[332194750]gb[AEE32871.1] Nucleic acid-binding, OB-fold-like protein [Arabidopsis thaliana] | 459 | 566 | 9.00E-70  | 123.3 | 32.2 | 56.2 | Nucleic acid-binding, OB-fold-like protein      | gbpln | Arabidopsis thaliana | AT1G52950.1   Symbols:   Nucleic acid-binding, OB-fold-like protein   chr1:19725483-19728007 FORWARD LENGTH=566                                                                                                                                                                                                                              | 459 | 566 | 2.00E-72  | 123.3 | 32.2 | 56.2 |
| Rsa1.0_01275.1.g25284.t1 | emb[CAB86685.1] putative protein [Arabidopsis thaliana]                                                                                                                                                                                                                                   | 204 | 303 | 1.00E-11  | 148.5 | 33.3 | 55.9 | putative protein                                | gbpln | Arabidopsis thaliana | #                                                                                                                                                                                                                                                                                                                                            | #   | #   | #         | #     | #    | #    |
| Rsa1.0_01275.1.g25285.t1 | #                                                                                                                                                                                                                                                                                         | #   | #   | #         | #     | #    | #    | -                                               | ----  | ----                 | #                                                                                                                                                                                                                                                                                                                                            | #   | #   | #         | #     | #    | #    |

|                          |                                                                                                                                                                                                                                                                                                                                                                                                                                                                                                                                                                                                      |      |      |           |       |      |      |                                                    |       |                      |                                                                                                                                               |      |     |           |       |      |      |
|--------------------------|------------------------------------------------------------------------------------------------------------------------------------------------------------------------------------------------------------------------------------------------------------------------------------------------------------------------------------------------------------------------------------------------------------------------------------------------------------------------------------------------------------------------------------------------------------------------------------------------------|------|------|-----------|-------|------|------|----------------------------------------------------|-------|----------------------|-----------------------------------------------------------------------------------------------------------------------------------------------|------|-----|-----------|-------|------|------|
| Rsa1.0_01275.1.g25286.t1 | #                                                                                                                                                                                                                                                                                                                                                                                                                                                                                                                                                                                                    | #    | #    | #         | #     | #    | #    | #                                                  | -     | ----                 | ----                                                                                                                                          | #    | #   | #         | #     | #    | #    |
| Rsa1.0_01275.1.g25287.t1 | #                                                                                                                                                                                                                                                                                                                                                                                                                                                                                                                                                                                                    | #    | #    | #         | #     | #    | #    | #                                                  | -     | ----                 | ----                                                                                                                                          | #    | #   | #         | #     | #    | #    |
| Rsa1.0_01275.1.g25288.t1 | gb AAD20658.1  putative retroelement pol polyprotein [Arabidopsis thaliana]                                                                                                                                                                                                                                                                                                                                                                                                                                                                                                                          | 402  | 1611 | 2.33E-156 | 400.7 | 63.9 | 77.1 | putative retroelement pol polyprotein              | gbpln | Arabidopsis thaliana | #                                                                                                                                             | #    | #   | #         | #     | #    | #    |
| Rsa1.0_01275.1.g25289.t1 | #                                                                                                                                                                                                                                                                                                                                                                                                                                                                                                                                                                                                    | #    | #    | #         | #     | #    | #    | -                                                  | ----  | ----                 | #                                                                                                                                             | #    | #   | #         | #     | #    | #    |
| Rsa1.0_01275.1.g25290.t2 | #                                                                                                                                                                                                                                                                                                                                                                                                                                                                                                                                                                                                    | #    | #    | #         | #     | #    | #    | -                                                  | ----  | ----                 | #                                                                                                                                             | #    | #   | #         | #     | #    | #    |
| Rsa1.0_01275.1.g25291.t3 | #                                                                                                                                                                                                                                                                                                                                                                                                                                                                                                                                                                                                    | #    | #    | #         | #     | #    | #    | -                                                  | ----  | ----                 | #                                                                                                                                             | #    | #   | #         | #     | #    | #    |
| Rsa1.0_01275.1.g25292.t7 | #                                                                                                                                                                                                                                                                                                                                                                                                                                                                                                                                                                                                    | #    | #    | #         | #     | #    | #    | -                                                  | ----  | ----                 | #                                                                                                                                             | #    | #   | #         | #     | #    | #    |
| Rsa1.0_01276.1.g25293.t1 | ref XP_002881749.1  ubiquitin-specific protease 5 [Arabidopsis lyrata subsp. lyrata] gi 297327589 gb EFH58008.1  ubiquitin-specific protease 5 [Arabidopsis lyrata subsp. lyrata]                                                                                                                                                                                                                                                                                                                                                                                                                    | 928  | 924  | 0         | 99.6  | 89.5 | 94.8 | ubiquitin-specific protease 5                      | gbpln | Arabidopsis lyrata   | AT2G40930.1   Symbols: UBP5, ATUBP5, PDE323   ubiquitin-specific protease 5   chr2:17076714-17082192 REVERSE LENGTH=924                       | 928  | 924 | 0         | 99.6  | 89.0 | 94.4 |
| Rsa1.0_01276.1.g25294.t1 | dbj BAE98403.1  putative non-LTR reverse transcriptase [Arabidopsis thaliana]                                                                                                                                                                                                                                                                                                                                                                                                                                                                                                                        | 174  | 278  | 5.00E-35  | 159.8 | 46.0 | 55.2 | putative non-LTR reverse transcriptase             | gbpln | Arabidopsis thaliana | AT3G24255.1   Symbols:   RNA-directed DNA polymerase (reverse transcriptase)-related family protein   chr3:8789471-8793208 FORWARD LENGTH=746 | 174  | 746 | 8.00E-27  | 428.7 | 35.1 | 47.1 |
| Rsa1.0_01276.1.g25295.t1 | gb EOA13563.1  hypothetical protein CARUB_v10026624mg [Capsella rubella]                                                                                                                                                                                                                                                                                                                                                                                                                                                                                                                             | 290  | 368  | 1.00E-124 | 126.9 | 75.5 | 85.2 | hypothetical protein CARUB_v10026624mg             | gbpln | Capsella rubella     | AT5G42440.1   Symbols:   Protein kinase superfamily protein   chr5:16973434-16974513 REVERSE LENGTH=359                                       | 290  | 359 | 1.00E-125 | 123.8 | 76.6 | 85.2 |
| Rsa1.0_01276.1.g25296.t1 | gb EOA27257.1  hypothetical protein CARUB_v10023376mg [Capsella rubella]                                                                                                                                                                                                                                                                                                                                                                                                                                                                                                                             | 531  | 393  | 0         | 74.0  | 60.6 | 66.1 | hypothetical protein CARUB_v10023376mg             | gbpln | Capsella rubella     | AT2G40900.1   Symbols:   nodulin MtN21 /EamA-like transporter family protein   chr2:17063396-17065514 REVERSE LENGTH=394                      | 531  | 394 | 0         | 74.2  | 61.0 | 66.7 |
| Rsa1.0_01276.1.g25297.t1 | ref NP_850337.1  cytochrome P450 98A3 [Arabidopsis thaliana] gi 5915859 sp O22203.1 C98A3_ARATH RecName: Full=Cytochrome P450 98A3; AltName: Full=Protein REDUCED EPIDERMAL FLUORESCENCE 8; AltName: Full=p-coumaroylshikimate/quinate 3'-hydroxylase; Short=C3H gi 330254799 gb AEC09893.1  cytochrome P450 98A3 [Arabidopsis thaliana]                                                                                                                                                                                                                                                             | 508  | 508  | 0         | 100.0 | 95.1 | 97.6 | cytochrome P450 98A3                               | gbpln | Arabidopsis thaliana | AT2G40890.1   Symbols: CYP98A3   cytochrome P450, family 98, subfamily A, polypeptide 3   chr2:17058291-17060532 REVERSE LENGTH=508           | 508  | 508 | 0         | 100.0 | 95.1 | 97.6 |
| Rsa1.0_01276.1.g25298.t2 | ref NP_181620.1  cysteine proteinase inhibitor 3 [Arabidopsis thaliana] gi 125991829 sp Q41906.2 CYT3_ARATH RecName: Full=Cysteine proteinase inhibitor 3; Short=AtCYS-3; Flags: Precursor gi 2623302 gb AAB86448.1  putative cysteine proteinase inhibitor B (cystatin B) [Arabidopsis thaliana] gi 21536996 gb AAM61337.1  putative cysteine proteinase inhibitor B (cystatin B) [Arabidopsis thaliana] gi 23297693 gb AAN13009.1  putative cysteine proteinase inhibitor B (cystatin B) [Arabidopsis thaliana] gi 330254798 gb AEC09892.1  cysteine proteinase inhibitor 3 [Arabidopsis thaliana] | 249  | 125  | 1.00E-19  | 50.2  | 19.7 | 21.7 | cysteine proteinase inhibitor 3                    | gbpln | Arabidopsis thaliana | AT2G40880.1   Symbols: FL3-27, ATCYSA, CYSA   cystatin A   chr2:17057463-17057930 FORWARD LENGTH=125                                          | 249  | 125 | 4.00E-22  | 50.2  | 19.7 | 21.7 |
| Rsa1.0_01276.1.g25299.t1 | gb AEH20527.1  coumarate 3-hydroxylase [Isatis tinctoria]                                                                                                                                                                                                                                                                                                                                                                                                                                                                                                                                            | 61   | 508  | 2.00E-23  | 832.8 | 83.6 | 88.5 | coumarate 3-hydroxylase                            | gbpln | Isatis tinctoria     | AT2G40890.1   Symbols: CYP98A3   cytochrome P450, family 98, subfamily A, polypeptide 3   chr2:17058291-17060532 REVERSE LENGTH=508           | 61   | 508 | 6.00E-26  | 832.8 | 83.6 | 86.9 |
| Rsa1.0_01276.1.g25300.t1 | gb AAL86314.1  putative cysteine proteinase inhibitor cystatin B [Arabidopsis thaliana]                                                                                                                                                                                                                                                                                                                                                                                                                                                                                                              | 117  | 116  | 8.00E-44  | 99.1  | 74.4 | 85.5 | putative cysteine proteinase inhibitor cystatin B  | gbpln | Arabidopsis thaliana | AT2G40880.1   Symbols: FL3-27, ATCYSA, CYSA   cystatin A   chr2:17057463-17057930 FORWARD LENGTH=125                                          | 117  | 125 | 2.00E-46  | 106.8 | 74.4 | 86.3 |
| Rsa1.0_01276.1.g25301.t1 | ref XP_002873094.1  predicted protein [Arabidopsis lyrata subsp. lyrata] gi 297318931 gb EFH49353.1  predicted protein [Arabidopsis lyrata subsp. lyrata]                                                                                                                                                                                                                                                                                                                                                                                                                                            | 241  | 262  | 2.00E-25  | 108.7 | 35.7 | 47.3 | predicted protein                                  | gbpln | Arabidopsis lyrata   | AT5G03495.1   Symbols:   RNA-binding (RRM/RBD/RNP motifs) family protein   chr5:873804-875025 REVERSE LENGTH=226                              | 241  | 226 | 8.00E-25  | 93.8  | 29.9 | 41.1 |
| Rsa1.0_01276.1.g25302.t1 | dbj BAF00918.1  putative reverse transcriptase [Arabidopsis thaliana]                                                                                                                                                                                                                                                                                                                                                                                                                                                                                                                                | 1728 | 910  | 0         | 52.7  | 26.7 | 36.6 | putative reverse transcriptase                     | gbpln | Arabidopsis thaliana | AT1G43760.1   Symbols:   DNase I-like superfamily protein   chr1:16528880-16531065 REVERSE LENGTH=626                                         | 1728 | 626 | 2.00E-97  | 36.2  | 11.0 | 16.4 |
| Rsa1.0_01276.1.g25303.t1 | ref XP_002879895.1  phosphatidylinositol 3-and 4-kinase family protein [Arabidopsis lyrata subsp. lyrata] gi 297325734 gb EFH56154.1  phosphatidylinositol 3-and 4-kinase family protein [Arabidopsis lyrata subsp. lyrata]                                                                                                                                                                                                                                                                                                                                                                          | 275  | 542  | 6.00E-82  | 197.1 | 68.4 | 78.5 | phosphatidylinositol 3-and 4-kinase family protein | gbpln | Arabidopsis lyrata   | AT2G40850.1   Symbols: ATP4K GAMMA 1, PI4K GAMMA 1   phosphoinositide 4-kinase gamma 1   chr2:17051575-17053260 FORWARD LENGTH=561            | 275  | 561 | 2.00E-84  | 204.0 | 68.7 | 78.2 |
| Rsa1.0_01277.1.g25304.t1 | #                                                                                                                                                                                                                                                                                                                                                                                                                                                                                                                                                                                                    | #    | #    | #         | #     | #    | #    | -                                                  | ----  | ----                 | #                                                                                                                                             | #    | #   | #         | #     | #    | #    |



|                          |                                                                                                                                                                                                                                  |      |      |           |       |      |      |                                                                                                                                              |       |                      |                                                                                                                                                                                                                                                                                                                                            |      |      |           |       |      |      |
|--------------------------|----------------------------------------------------------------------------------------------------------------------------------------------------------------------------------------------------------------------------------|------|------|-----------|-------|------|------|----------------------------------------------------------------------------------------------------------------------------------------------|-------|----------------------|--------------------------------------------------------------------------------------------------------------------------------------------------------------------------------------------------------------------------------------------------------------------------------------------------------------------------------------------|------|------|-----------|-------|------|------|
| Rsa1.0_01277.1.g25305.t1 | ref[XP_002882794.1] oxidoreductase [Arabidopsis lyrata subsp. lyrata] gi 297328634 gb EFH59053.1  oxidoreductase [Arabidopsis lyrata subsp. lyrata]                                                                              | 357  | 357  | 0         | 100.0 | 88.0 | 94.1 | oxidoreductase                                                                                                                               | gbpln | Arabidopsis lyrata   | AT3G12900.1   Symbols:   2-oxoglutarate (2OG) and Fe(II)-dependent oxygenase superfamily protein   chr3:4104576-4106112 FORWARD LENGTH=357                                                                                                                                                                                                 | 357  | 357  | 0         | 100.0 | 86.3 | 93.3 |
| Rsa1.0_01277.1.g25306.t2 | gb AAF18538.1 AC006551.24 Very similar to retrotransposon reverse transcriptase [Arabidopsis thaliana]                                                                                                                           | 133  | 1231 | 2.00E-28  | 925.6 | 46.6 | 64.7 | Very similar to retrotransposon reverse transcriptase                                                                                        | gbpln | Arabidopsis thaliana | #                                                                                                                                                                                                                                                                                                                                          | #    | #    | #         | #     | #    | #    |
| Rsa1.0_01277.1.g25307.t1 | ref[XP_002882793.1] hypothetical protein ARALYDRAFT_478650 [Arabidopsis lyrata subsp. lyrata] gi 297328633 gb EFH59052.1  hypothetical protein ARALYDRAFT_478650 [Arabidopsis lyrata subsp. lyrata]                              | 249  | 251  | 1.00E-118 | 100.8 | 84.3 | 90.8 | hypothetical protein ARALYDRAFT_478650                                                                                                       | gbpln | Arabidopsis lyrata   | AT3G12890.1   Symbols: ASML2   activator of spomin:LUC2   chr3:4099223-4100277 FORWARD LENGTH=251                                                                                                                                                                                                                                          | 249  | 251  | 1.00E-117 | 100.8 | 82.7 | 89.2 |
| Rsa1.0_01277.1.g25308.t1 | gb EOA32667.1  hypothetical protein CARUB_v10015969mg [Capsella rubella]                                                                                                                                                         | 202  | 203  | 2.00E-89  | 100.5 | 90.1 | 95.0 | hypothetical protein CARUB_v10015969mg                                                                                                       | gbpln | Capsella rubella     | AT3G12870.1   Symbols:   unknown protein; BEST Arabidopsis thaliana protein match is: unknown protein (TAIR:AT5G56120.1); Has 70 Blast hits to 70 proteins in 12 species: Archae - 0; Bacteria - 0; Metazoa - 0; Fungi - 0; Plants - 70; Viruses - 0; Other Eukaryotes - 0 (source: NCBI BLINK).   chr3:4094417-4095037 REVERSE LENGTH=206 | 202  | 206  | 2.00E-91  | 102.0 | 90.6 | 95.5 |
| Rsa1.0_01277.1.g25309.t2 | gb AAF81293.1 AC027656.10 Strong similarity to a mutator-like transposase from Arabidopsis thaliana gb AC006067. It contains a zinc finger, CCHC class domain PF 00098 [Arabidopsis thaliana]                                    | 763  | 753  | 0         | 98.7  | 70.5 | 80.5 | Strong similarity to a mutator-like transposase from Arabidopsis thaliana gb AC006067. It contains a zinc finger, CCHC class domain PF 00098 | gbpln | Arabidopsis thaliana | #                                                                                                                                                                                                                                                                                                                                          | #    | #    | #         | #     | #    | #    |
| Rsa1.0_01277.1.g25310.t1 | ref[XP_002884929.1] auxin-responsive family protein [Arabidopsis lyrata subsp. lyrata] gi 297330769 gb EFH61188.1  auxin-responsive family protein [Arabidopsis lyrata subsp. lyrata]                                            | 133  | 132  | 1.00E-62  | 99.2  | 88.7 | 94.0 | auxin-responsive family protein                                                                                                              | gbpln | Arabidopsis lyrata   | AT3G12830.1   Symbols:   SAUR-like auxin-responsive protein family   chr3:4079117-4079515 REVERSE LENGTH=132                                                                                                                                                                                                                               | 133  | 132  | 4.00E-65  | 99.2  | 88.7 | 94.0 |
| Rsa1.0_01277.1.g25311.t1 | ref[XP_002884928.1] AtMYB10 [Arabidopsis lyrata subsp. lyrata] gi 297330768 gb EFH61187.1  AtMYB10 [Arabidopsis lyrata subsp. lyrata]                                                                                            | 218  | 238  | 5.00E-72  | 109.2 | 73.9 | 82.1 | AtMYB10                                                                                                                                      | gbpln | Arabidopsis lyrata   | AT3G12820.1   Symbols: AtMYB10, MYB10   myb domain protein 10   chr3:4074328-4075614 REVERSE LENGTH=239                                                                                                                                                                                                                                    | 218  | 239  | 1.00E-72  | 109.6 | 70.6 | 82.1 |
| Rsa1.0_01278.1.g25312.t2 | emb CAN71108.1  hypothetical protein VITISV_001478 [Vitis vinifera]                                                                                                                                                              | 1133 | 1354 | 0         | 119.5 | 46.3 | 62.1 | hypothetical protein VITISV_001478                                                                                                           | gbpln | Vitis vinifera       | AT4G23160.1   Symbols: CRK8   cysteine-rich RLK (RECEPTOR-like protein kinase) 8   chr4:12129485-12134086 FORWARD LENGTH=1262                                                                                                                                                                                                              | 1133 | 1262 | 5.00E-95  | 111.4 | 15.9 | 22.8 |
| Rsa1.0_01278.1.g25313.t1 | #                                                                                                                                                                                                                                | #    | #    | #         | #     | #    | #    | -                                                                                                                                            | ----  | ----                 | #                                                                                                                                                                                                                                                                                                                                          | #    | #    | #         | #     | #    | #    |
| Rsa1.0_01278.1.g25314.t1 | ref[XP_002874538.1] hypothetical protein ARALYDRAFT_489755 [Arabidopsis lyrata subsp. lyrata] gi 297320375 gb EFH50797.1  hypothetical protein ARALYDRAFT_489755 [Arabidopsis lyrata subsp. lyrata]                              | 499  | 621  | 1.00E-134 | 124.4 | 64.7 | 72.3 | hypothetical protein ARALYDRAFT_489755                                                                                                       | gbpln | Arabidopsis lyrata   | AT4G08500.1   Symbols: MEKK1, ATMEKK1, MAPKK8, ARAKIN   MAPK/ERK kinase kinase 1   chr4:5404272-5407062 REVERSE LENGTH=608                                                                                                                                                                                                                 | 499  | 608  | 1.00E-131 | 121.8 | 62.1 | 70.7 |
| Rsa1.0_01278.1.g25315.t1 | gb AAG51754.1 AC068667.33 reverse transcriptase, putative; 100033-105622 [Arabidopsis thaliana]                                                                                                                                  | 1684 | 1557 | 0         | 92.5  | 42.0 | 56.4 | reverse transcriptase, putative; 100033-105622                                                                                               | gbpln | Arabidopsis thaliana | AT4G29090.1   Symbols:   Ribonuclease H-like superfamily protein   chr4:14333528-14335255 FORWARD LENGTH=575                                                                                                                                                                                                                               | 1684 | 575  | 4.00E-54  | 34.1  | 8.6  | 12.3 |
| Rsa1.0_01278.1.g25316.t1 | gb AAC19287.1 T14P8.5 [Arabidopsis thaliana] gi 7269005 emb CAB80738.1  putative protein [Arabidopsis thaliana]                                                                                                                  | 431  | 262  | 2.00E-59  | 60.8  | 25.3 | 26.9 | T14P8.5                                                                                                                                      | gbpln | Arabidopsis thaliana | AT4G02450.2   Symbols:   HSP20-like chaperones superfamily protein   chr4:1073987-1075765 REVERSE LENGTH=240                                                                                                                                                                                                                               | 431  | 240  | 4.00E-61  | 55.7  | 24.8 | 26.5 |
| Rsa1.0_01278.1.g25317.t1 | ref[NP_567238.2] AAA-type ATPase family protein [Arabidopsis thaliana] gi 110739712 dbj BAF01763.1  hypothetical protein [Arabidopsis thaliana] gi 33265677 gb AEE82177.1  AAA-type ATPase family protein [Arabidopsis thaliana] | 1258 | 1265 | 0         | 100.6 | 88.6 | 93.8 | AAA-type ATPase family protein                                                                                                               | gbpln | Arabidopsis thaliana | AT4G02480.1   Symbols:   AAA-type ATPase family protein   chr4:1082082-1088680 REVERSE LENGTH=1265                                                                                                                                                                                                                                         | 1258 | 1265 | 0         | 100.6 | 88.6 | 93.8 |
| Rsa1.0_01278.1.g25318.t1 | #                                                                                                                                                                                                                                | #    | #    | #         | #     | #    | #    | -                                                                                                                                            | ----  | ----                 | #                                                                                                                                                                                                                                                                                                                                          | #    | #    | #         | #     | #    | #    |

|                          |                                                                                                                                                                                                                                                                                                                                                                                                                                                                                                                                                                                                                                  |     |      |           |       |      |      |                                                                  |       |                      |                                                                                                                                                            |     |     |           |       |      |      |
|--------------------------|----------------------------------------------------------------------------------------------------------------------------------------------------------------------------------------------------------------------------------------------------------------------------------------------------------------------------------------------------------------------------------------------------------------------------------------------------------------------------------------------------------------------------------------------------------------------------------------------------------------------------------|-----|------|-----------|-------|------|------|------------------------------------------------------------------|-------|----------------------|------------------------------------------------------------------------------------------------------------------------------------------------------------|-----|-----|-----------|-------|------|------|
| Rsa1.0_01278.1.g25319.t1 | ref[NP_567241.1] xyloglucan 6-xylosyltransferase [Arabidopsis thaliana]<br>gi 46576207 sp O22775.1 GT2_ARATH<br>RecName: Full=Putative glycosyltransferase 2; Short=AtGT2<br>gi 3193287 gb AAC19271.1 T14P8.23 [Arabidopsis thaliana]<br>gi 97116844 emb CAC01674.1  putative golgi glycosyltransferase [Arabidopsis thaliana] gi 16209669 gb AAL14393.1 AT4g02500/T10P11.20 [Arabidopsis thaliana] gi 22655160 gb AAM98170.1  putative glycosyltransferase [Arabidopsis thaliana] gi 30387559 gb AAP31945.1  At4g02500 [Arabidopsis thaliana] gi 332656781 gb AEE82181.1  putative glycosyltransferase 2 [Arabidopsis thaliana] | 470 | 461  | 0         | 98.1  | 92.6 | 94.0 | xyloglucan 6-xylosyltransferase                                  | gbpln | Arabidopsis thaliana | AT4G02500.1   Symbols: ATXT2, XXT2, XT2   UDP-xylosyltransferase 2   chr4:1101638-1103345 FORWARD LENGTH=461                                               | 470 | 461 | 0         | 98.1  | 92.6 | 94.0 |
| Rsa1.0_01279.1.g25320.t1 | gb EOA32513.1  hypothetical protein CARUB_v10015793mg [Capsella rubella]                                                                                                                                                                                                                                                                                                                                                                                                                                                                                                                                                         | 489 | 487  | 0         | 99.6  | 81.4 | 88.5 | hypothetical protein CARUB_v10015793mg                           | gbpln | Capsella rubella     | AT3G11680.1   Symbols:   Aluminium activated malate transporter family protein   chr3:3686995-3689329 REVERSE LENGTH=488                                   | 489 | 488 | 0         | 99.8  | 81.0 | 88.8 |
| Rsa1.0_01279.1.g25321.t2 | db BAJ34190.1  unnamed protein product [Thellungiella halophila]                                                                                                                                                                                                                                                                                                                                                                                                                                                                                                                                                                 | 752 | 806  | 0         | 107.2 | 89.2 | 94.0 | unnamed protein product                                          | ----  | ----                 | AT3G11670.1   Symbols: DGD1   UDP-Glycosyltransferase superfamily protein   chr3:3681090-3684495 REVERSE LENGTH=808                                        | 752 | 808 | 0         | 107.4 | 85.8 | 90.6 |
| Rsa1.0_01279.1.g25322.t1 | ref XP_002886482.1  C4-dicarboxylate transporter/malic acid transport family protein [Arabidopsis lyrata subsp. lyrata] gi 297332323 gb EFH62741.1  C4-dicarboxylate transporter/malic acid transport family protein [Arabidopsis lyrata subsp. lyrata]                                                                                                                                                                                                                                                                                                                                                                          | 397 | 385  | 0         | 97.0  | 78.3 | 84.6 | C4-dicarboxylate transporter/malic acid transport family protein | gbpln | Arabidopsis lyrata   | AT1G62280.1   Symbols: SLAH1   SLAC1 homologue 1   chr1:23007309-23008540 REVERSE LENGTH=385                                                               | 397 | 385 | 0         | 97.0  | 76.8 | 84.1 |
| Rsa1.0_01279.1.g25323.t1 | ref NP_566396.1  NDR1/HIN1-Like protein 1 [Arabidopsis thaliana] gi 6041819 gb AAF02134.1 AC009918.6 unknown protein [Arabidopsis thaliana] gi 9502172 gb AAF8802.1 AF264697.1 NDR1/HIN1-Like protein 1 [Arabidopsis thaliana] gi 21595601 gb AAM66116.1  harpin-induced protein-like [Arabidopsis thaliana] gi 56381911 gb AAV85674.1  At3g11660 [Arabidopsis thaliana] gi 58331799 gb AAW70397.1  At3g11660 [Arabidopsis thaliana] gi 332641559 gb AEE75080.1  NDR1/HIN1-Like protein 1 [Arabidopsis thaliana]                                                                                                                 | 211 | 209  | 5.00E-96  | 99.1  | 80.6 | 89.1 | NDR1/HIN1-Like protein 1                                         | gbpln | Arabidopsis thaliana | AT3G11660.1   Symbols: NHL1   NDR1/HIN1-like 1   chr3:3679031-3679660 REVERSE LENGTH=209                                                                   | 211 | 209 | 2.00E-98  | 99.1  | 80.6 | 89.1 |
| Rsa1.0_01279.1.g25324.t1 | gb AAP57211.1  methyl transferase [Arabidopsis lyrata subsp. lyrata]                                                                                                                                                                                                                                                                                                                                                                                                                                                                                                                                                             | 526 | 380  | 1.00E-159 | 72.2  | 52.1 | 57.4 | methyl transferase                                               | gbpln | Arabidopsis lyrata   | AT3G11480.1   Symbols: BSMT1, ATBSMT1   S-adenosyl-L-methionine-dependent methyltransferases superfamily protein   chr3:3614544-3617137 FORWARD LENGTH=379 | 526 | 379 | 1.00E-156 | 72.1  | 50.6 | 56.5 |
| Rsa1.0_01279.1.g25325.t1 | gb EOA14700.1  hypothetical protein CARUB_v10027975mg [Capsella rubella]                                                                                                                                                                                                                                                                                                                                                                                                                                                                                                                                                         | 667 | 766  | 0         | 114.8 | 67.3 | 81.7 | hypothetical protein CARUB_v10027975mg                           | gbpln | Capsella rubella     | AT1G19260.1   Symbols:   TTF-type zinc finger protein with HAT dimerisation domain   chr1:6657260-6659569 REVERSE LENGTH=769                               | 667 | 769 | 0         | 115.3 | 67.3 | 81.0 |
| Rsa1.0_01279.1.g25326.t1 | gb AAD20102.1  hypothetical protein [Arabidopsis thaliana]                                                                                                                                                                                                                                                                                                                                                                                                                                                                                                                                                                       | 93  | 221  | 3.00E-12  | 237.6 | 40.9 | 58.1 | hypothetical protein                                             | gbpln | Arabidopsis thaliana | # # # # # #                                                                                                                                                | #   | #   | #         | #     | #    | #    |
| Rsa1.0_01279.1.g25327.t1 | ref NP_187756.1  rac GTPase activating protein [Arabidopsis thaliana] gi 12322911 gb AAG51449.1 AC008153.22 putative rac GTPase activating protein; 62102-60058 [Arabidopsis thaliana] gi 332641533 gb AEE75054.1  rac GTPase activating protein [Arabidopsis thaliana]                                                                                                                                                                                                                                                                                                                                                          | 99  | 435  | 2.00E-22  | 439.4 | 58.6 | 63.6 | rac GTPase activating protein                                    | gbpln | Arabidopsis thaliana | AT3G11490.1   Symbols:   rac GTPase activating protein   chr3:3617523-3619567 REVERSE LENGTH=435                                                           | 99  | 435 | 4.00E-25  | 439.4 | 58.6 | 63.6 |
| Rsa1.0_01279.1.g25328.t1 | gb AAP57211.1  methyl transferase [Arabidopsis lyrata subsp. lyrata]                                                                                                                                                                                                                                                                                                                                                                                                                                                                                                                                                             | 329 | 380  | 1.00E-157 | 115.5 | 83.3 | 92.1 | methyl transferase                                               | gbpln | Arabidopsis lyrata   | AT3G11480.1   Symbols: BSMT1, ATBSMT1   S-adenosyl-L-methionine-dependent methyltransferases superfamily protein   chr3:3614544-3617137 FORWARD LENGTH=379 | 329 | 379 | 1.00E-158 | 115.2 | 82.4 | 91.5 |
| Rsa1.0_01279.1.g25329.t1 | #                                                                                                                                                                                                                                                                                                                                                                                                                                                                                                                                                                                                                                | #   | #    | #         | #     | #    | -    | ----                                                             | ----  | ----                 | # # # # # #                                                                                                                                                | #   | #   | #         | #     | #    | #    |
| Rsa1.0_01279.1.g25330.t1 | emb CAB39638.1  RNA-directed DNA polymerase-like protein [Arabidopsis thaliana] gi 7267666 emb CAB78094.1  RNA-directed DNA polymerase-like protein [Arabidopsis thaliana]                                                                                                                                                                                                                                                                                                                                                                                                                                                       | 508 | 1274 | 4.00E-96  | 250.8 | 40.4 | 56.5 | RNA-directed DNA polymerase-like protein                         | gbpln | Arabidopsis thaliana | AT4G29090.1   Symbols:   Ribonuclease H-like superfamily protein   chr4:14333528-14335255 FORWARD LENGTH=575                                               | 508 | 575 | 1.00E-58  | 113.2 | 30.7 | 49.4 |

|                          |                                                                                                                                                                                                                                                                                                                                                                                                                                                                                                                                                                                                                                                                                                                                                                                                                                                                                                                                                                                                                                                                                                                                                                                                                                                                                                                                                                                                                           |      |      |           |       |      |      |                                                                                                   |       |                      |                                                                                                                             |      |      |           |       |      |      |
|--------------------------|---------------------------------------------------------------------------------------------------------------------------------------------------------------------------------------------------------------------------------------------------------------------------------------------------------------------------------------------------------------------------------------------------------------------------------------------------------------------------------------------------------------------------------------------------------------------------------------------------------------------------------------------------------------------------------------------------------------------------------------------------------------------------------------------------------------------------------------------------------------------------------------------------------------------------------------------------------------------------------------------------------------------------------------------------------------------------------------------------------------------------------------------------------------------------------------------------------------------------------------------------------------------------------------------------------------------------------------------------------------------------------------------------------------------------|------|------|-----------|-------|------|------|---------------------------------------------------------------------------------------------------|-------|----------------------|-----------------------------------------------------------------------------------------------------------------------------|------|------|-----------|-------|------|------|
| Rsa1.0_01279.1.g25331.t1 | #                                                                                                                                                                                                                                                                                                                                                                                                                                                                                                                                                                                                                                                                                                                                                                                                                                                                                                                                                                                                                                                                                                                                                                                                                                                                                                                                                                                                                         | #    | #    | #         | #     | #    | #    | -                                                                                                 | ----  | ----                 | #                                                                                                                           | #    | #    | #         | #     | #    |      |
| Rsa1.0_01279.1.g25332.t1 | gb AAD29058.1  putative non-LTR retroelement reverse transcriptase [Arabidopsis thaliana]                                                                                                                                                                                                                                                                                                                                                                                                                                                                                                                                                                                                                                                                                                                                                                                                                                                                                                                                                                                                                                                                                                                                                                                                                                                                                                                                 | 898  | 1229 | 1.00E-65  | 136.9 | 15.8 | 23.3 | putative non-LTR retroelement reverse transcriptase                                               | gbpln | Arabidopsis thaliana | AT1G43760.1   Symbols:   DNase I-like superfamily protein   chr1:1652880-16531065 REVERSE LENGTH=626                        | 898  | 626  | 8.00E-21  | 69.7  | 6.6  | 11.1 |
| Rsa1.0_01280.1.g25333.t2 | gb AAC17040.1  Similarity to A. thaliana gene product F21M12.20. gb AC000132. EST gb Z25651 comes from this gene [Arabidopsis thaliana]                                                                                                                                                                                                                                                                                                                                                                                                                                                                                                                                                                                                                                                                                                                                                                                                                                                                                                                                                                                                                                                                                                                                                                                                                                                                                   | 307  | 530  | 1.00E-106 | 172.6 | 60.6 | 65.5 | Similarity to A. thaliana gene product F21M12.20. gb AC000132. EST gb Z25651 comes from this gene | gbpln | Arabidopsis thaliana | AT1G79270.1   Symbols: ECT8   evolutionarily conserved C-terminal region 8   chr1:29816157-29818811 FORWARD LENGTH=528      | 307  | 528  | 1.00E-109 | 172.0 | 60.6 | 65.5 |
| Rsa1.0_01280.1.g25334.t2 | ref NP_178048.2  nucleoprotein TPR [Arabidopsis thaliana] gi 302425121 sp A4GSN8.1 NUA_ARATH RecName: Full=Nuclear-pore anchor; AltName: Full=Protein TRANSLOCATED PROMOTER REGION; Short=AtTPR gi 126594444 gb ABO21684.1  nuclear-pore anchor [Arabidopsis thaliana] gi 332198105 gb AEE36226.1  nucleoprotein TPR [Arabidopsis thaliana]                                                                                                                                                                                                                                                                                                                                                                                                                                                                                                                                                                                                                                                                                                                                                                                                                                                                                                                                                                                                                                                                               | 2129 | 2093 | 0         | 98.3  | 77.7 | 85.0 | nucleoprotein TPR                                                                                 | gbpln | Arabidopsis thaliana | AT1G79280.1   Symbols: NUA, AtTPR   nuclear_pore_anchor   chr1:29819176-29832809 REVERSE LENGTH=2093                        | 2129 | 2093 | 0         | 98.3  | 77.7 | 85.0 |
| Rsa1.0_01280.1.g25335.t1 | #                                                                                                                                                                                                                                                                                                                                                                                                                                                                                                                                                                                                                                                                                                                                                                                                                                                                                                                                                                                                                                                                                                                                                                                                                                                                                                                                                                                                                         | #    | #    | #         | #     | #    | #    | -                                                                                                 | ----  | ----                 | #                                                                                                                           | #    | #    | #         | #     | #    |      |
| Rsa1.0_01280.1.g25336.t1 | gb EOA35282.1  hypothetical protein CARUB_v10020450mg [Capsella rubella]                                                                                                                                                                                                                                                                                                                                                                                                                                                                                                                                                                                                                                                                                                                                                                                                                                                                                                                                                                                                                                                                                                                                                                                                                                                                                                                                                  | 391  | 385  | 1.00E-163 | 98.5  | 77.0 | 84.1 | hypothetical protein CARUB_v10020450mg                                                            | gbpln | Capsella rubella     | AT1G79330.1   Symbols: AMC6, ATMCP2B, ATMCS, MC5   metacaspase 5   chr1:29838722-29840137 FORWARD LENGTH=410                | 391  | 410  | 1.00E-139 | 104.9 | 65.5 | 78.3 |
| Rsa1.0_01280.1.g25337.t1 | ref NP_178050.1  metacaspase 6 [Arabidopsis thaliana] gi 75219814 sp O64519.1 MCA6_ARATH RecName: Full=Metacaspase-6; Short=AtMC6; AltName: Full=Metacaspase 2c; Short=AtMCP2c; AltName: Full=Metacaspase-5 gi 3152597 gb AAC17078.1  Contains similarity to S. cerevisiae hypothetical protein YOR197w. gb Z75105 [Arabidopsis thaliana] gi 32482826 gb AAP84713.1  metacaspase 5 [Arabidopsis thaliana] gi 37788555 gb AAP44519.1  metacaspase 6 precursor [Arabidopsis thaliana] gi 116325926 gb ABJ98564.1  At1g79320 [Arabidopsis thaliana] gi 332198109 gb AEE36230.1  metacaspase 6 [Arabidopsis thaliana] ref NP_178051.1  metacaspase 5 [Arabidopsis thaliana] gi 75219813 sp O64518.1 MCA5_ARATH RecName: Full=Metacaspase-5; Short=AtMC5; AltName: Full=Metacaspase 2b; Short=AtMCP2b; AltName: Full=Metacaspase-6 gi 3152557 gb AAC17038.1  Contains similarity to S. cerevisiae hypothetical protein YOR197w. gb Z75105. EST gb T76227 comes from this gene [Arabidopsis thaliana] gi 32482828 gb AAP84714.1  metacaspase 6 [Arabidopsis thaliana] gi 37788553 gb AAP44518.1  metacaspase 5 precursor [Arabidopsis thaliana] gi 116325934 gb ABJ98568.1  At1g79330 [Arabidopsis thaliana] gi 332198110 gb AEE36231.1  metacaspase 5 [Arabidopsis thaliana] ref XP_002887781.1  metacaspase 7 [Arabidopsis lyrata subsp. lyrata] gi 297333622 gb EFH64040.1  metacaspase 7 [Arabidopsis lyrata subsp. lyrata] | 375  | 368  | 0         | 98.1  | 84.8 | 92.0 | metacaspase 6                                                                                     | gbpln | Arabidopsis thaliana | AT1G79320.1   Symbols: AtMC6, MC6   metacaspase 6   chr1:29836686-29837908 FORWARD LENGTH=368                               | 375  | 368  | 0         | 98.1  | 84.8 | 92.0 |
| Rsa1.0_01280.1.g25338.t1 | ref NP_178051.1  metacaspase 5 [Arabidopsis thaliana] gi 75219813 sp O64518.1 MCA5_ARATH RecName: Full=Metacaspase-5; Short=AtMC5; AltName: Full=Metacaspase 2b; Short=AtMCP2b; AltName: Full=Metacaspase-6 gi 3152557 gb AAC17038.1  Contains similarity to S. cerevisiae hypothetical protein YOR197w. gb Z75105. EST gb T76227 comes from this gene [Arabidopsis thaliana] gi 32482828 gb AAP84714.1  metacaspase 6 [Arabidopsis thaliana] gi 37788553 gb AAP44518.1  metacaspase 5 precursor [Arabidopsis thaliana] gi 116325934 gb ABJ98568.1  At1g79330 [Arabidopsis thaliana] gi 332198110 gb AEE36231.1  metacaspase 5 [Arabidopsis thaliana] ref XP_002887781.1  metacaspase 7 [Arabidopsis lyrata subsp. lyrata] gi 297333622 gb EFH64040.1  metacaspase 7 [Arabidopsis lyrata subsp. lyrata]                                                                                                                                                                                                                                                                                                                                                                                                                                                                                                                                                                                                                   | 387  | 410  | 1.00E-180 | 105.9 | 84.0 | 91.7 | metacaspase 5                                                                                     | gbpln | Arabidopsis thaliana | AT1G79330.1   Symbols: AMC6, ATMCP2B, ATMCS, MC5   metacaspase 5   chr1:29838722-29840137 FORWARD LENGTH=410                | 387  | 410  | 0         | 105.9 | 84.0 | 91.7 |
| Rsa1.0_01280.1.g25339.t1 | ref NP_178051.1  metacaspase 5 [Arabidopsis thaliana] gi 75219813 sp O64518.1 MCA5_ARATH RecName: Full=Metacaspase-5; Short=AtMC5; AltName: Full=Metacaspase 2b; Short=AtMCP2b; AltName: Full=Metacaspase-6 gi 3152557 gb AAC17038.1  Contains similarity to S. cerevisiae hypothetical protein YOR197w. gb Z75105. EST gb T76227 comes from this gene [Arabidopsis thaliana] gi 32482828 gb AAP84714.1  metacaspase 6 [Arabidopsis thaliana] gi 37788553 gb AAP44518.1  metacaspase 5 precursor [Arabidopsis thaliana] gi 116325934 gb ABJ98568.1  At1g79330 [Arabidopsis thaliana] gi 332198110 gb AEE36231.1  metacaspase 5 [Arabidopsis thaliana] ref XP_002887781.1  metacaspase 7 [Arabidopsis lyrata subsp. lyrata] gi 297333622 gb EFH64040.1  metacaspase 7 [Arabidopsis lyrata subsp. lyrata]                                                                                                                                                                                                                                                                                                                                                                                                                                                                                                                                                                                                                   | 409  | 418  | 0         | 102.2 | 92.4 | 97.1 | metacaspase 7                                                                                     | gbpln | Arabidopsis lyrata   | AT1G79340.1   Symbols: AtMC4, MC4   metacaspase 4   chr1:29842849-29844368 FORWARD LENGTH=418                               | 409  | 418  | 0         | 102.2 | 91.9 | 96.1 |
| Rsa1.0_01280.1.g25340.t2 | ref NP_178053.4  RING/FYVE/PHD zinc finger domain-containing protein [Arabidopsis thaliana] gi 332198112 gb AEE36233.1  RING/FYVE/PHD zinc finger domain-containing protein [Arabidopsis thaliana]                                                                                                                                                                                                                                                                                                                                                                                                                                                                                                                                                                                                                                                                                                                                                                                                                                                                                                                                                                                                                                                                                                                                                                                                                        | 1252 | 1295 | 0         | 103.4 | 92.4 | 95.0 | RING/FYVE/PHD zinc finger domain-containing protein                                               | gbpln | Arabidopsis thaliana | AT1G79350.1   Symbols: EMB1135   RING/FYVE/PHD zinc finger superfamily protein   chr1:29844829-29853215 REVERSE LENGTH=1295 | 1252 | 1295 | 0         | 103.4 | 92.4 | 95.0 |

|                          |                                                                                                                                                                                                                                                                                                                                                                                                                                                                                                                                                                                                                                                                                                                                                                                                                                                                                                     |     |     |           |       |      |      |                                           |       |                      |                                                                                                                                                                                                                                                            |     |     |           |       |      |      |
|--------------------------|-----------------------------------------------------------------------------------------------------------------------------------------------------------------------------------------------------------------------------------------------------------------------------------------------------------------------------------------------------------------------------------------------------------------------------------------------------------------------------------------------------------------------------------------------------------------------------------------------------------------------------------------------------------------------------------------------------------------------------------------------------------------------------------------------------------------------------------------------------------------------------------------------------|-----|-----|-----------|-------|------|------|-------------------------------------------|-------|----------------------|------------------------------------------------------------------------------------------------------------------------------------------------------------------------------------------------------------------------------------------------------------|-----|-----|-----------|-------|------|------|
| Rsa1.0_01281.1.g25341.t1 | refNP_187088.2   histone-lysine N-methyltransferase SUVVR4 [Arabidopsis thaliana]<br>gi 94730582 sp Q8W595.2 SUVVR4_ARAT H RecName: Full=Histone-lysine N-methyltransferase SUVVR4; AltName: Full=Protein SET DOMAIN GROUP 31; AltName: Full=Suppressor of variegation 3-9-related protein 4; Short=Su(var)3-9-related protein 4<br>gi 332640552 gb AEE74073.1   histone-lysine N-methyltransferase SUVVR4 [Arabidopsis thaliana]                                                                                                                                                                                                                                                                                                                                                                                                                                                                   | 659 | 492 | 0         | 74.7  | 50.1 | 56.0 | histone-lysine N-methyltransferase SUVVR4 | gbpln | Arabidopsis thaliana | AT3G04380.1   Symbols: SUVVR4, SDG31   SET-domain containing protein lysine methyltransferase family protein   chr3:1161602-1164539 FORWARD LENGTH=492                                                                                                     | 659 | 492 | 0         | 74.7  | 50.1 | 56.0 |
| Rsa1.0_01281.1.g25342.t1 | gb EOA30795.1   hypothetical protein CARUB_v10013938mg [Capsella rubella]                                                                                                                                                                                                                                                                                                                                                                                                                                                                                                                                                                                                                                                                                                                                                                                                                           | 389 | 382 | 1.00E-137 | 98.2  | 78.1 | 84.8 | hypothetical protein CARUB_v10013938mg    | gbpln | Capsella rubella     | AT3G04360.1   Symbols:   Calcium-dependent lipid-binding (CaLB domain) family protein   chr3:1157025-1158200 REVERSE LENGTH=391                                                                                                                            | 389 | 391 | 1.00E-138 | 100.5 | 79.7 | 85.9 |
| Rsa1.0_01281.1.g25343.t1 | refNP_187081.1   uncharacterized protein [Arabidopsis thaliana]<br>gi 6721155 gb AAF26783.1 AC016829.7 hypothetical protein [Arabidopsis thaliana] gi 332640544 gb AEE74065.1   uncharacterized protein AT3G04310 [Arabidopsis thaliana]                                                                                                                                                                                                                                                                                                                                                                                                                                                                                                                                                                                                                                                            | 263 | 269 | 1.00E-76  | 102.3 | 67.3 | 78.3 | uncharacterized protein                   | gbpln | Arabidopsis thaliana | AT3G04310.1   Symbols:   unknown protein; Has 44 Blast hits to 44 proteins in 12 species: Archae - 0; Bacteria - 0; Metazoa - 0; Fungi - 0; Plants - 44; Viruses - 0; Other Eukaryotes - 0 (source: NCBI BLink).   chr3:1141581-1142528 REVERSE LENGTH=269 | 263 | 269 | 3.00E-79  | 102.3 | 67.3 | 78.3 |
| Rsa1.0_01281.1.g25344.t1 | refNP_187080.1   cupin domain-containing protein [Arabidopsis thaliana]<br>gi 6721156 gb AAF26784.1 AC016829.8 hypothetical protein [Arabidopsis thaliana] gi 37202048 gb AAQ89639.1   At3g04300 [Arabidopsis thaliana]<br>gi 1968382 dbj BA042883.1   unknown protein [Arabidopsis thaliana]<br>gi 332640543 gb AEE74064.1   cupin domain-containing protein [Arabidopsis thaliana]                                                                                                                                                                                                                                                                                                                                                                                                                                                                                                                | 98  | 96  | 3.00E-43  | 98.0  | 88.8 | 93.9 | cupin domain-containing protein           | gbpln | Arabidopsis thaliana | AT3G04300.1   Symbols:   RmlC-like cupins superfamily protein   chr3:1140318-1140723 FORWARD LENGTH=96                                                                                                                                                     | 98  | 96  | 6.00E-46  | 98.0  | 88.8 | 93.9 |
| Rsa1.0_01281.1.g25345.t1 | refXP_002884438.1   Li-tolerant lipase 1 [Arabidopsis lyrata subsp. lyrata]<br>gi 297330278 gb EFH60697.1   Li-tolerant lipase 1 [Arabidopsis lyrata subsp. lyrata]                                                                                                                                                                                                                                                                                                                                                                                                                                                                                                                                                                                                                                                                                                                                 | 372 | 366 | 0         | 98.4  | 95.2 | 96.0 | Li-tolerant lipase 1                      | gbpln | Arabidopsis lyrata   | AT3G04290.1   Symbols: ATLTL1, LTL1   Li-tolerant lipase 1   chr3:1133620-1136223 REVERSE LENGTH=366                                                                                                                                                       | 372 | 366 | 0         | 98.4  | 94.4 | 95.7 |
| Rsa1.0_01281.1.g25346.t1 | #                                                                                                                                                                                                                                                                                                                                                                                                                                                                                                                                                                                                                                                                                                                                                                                                                                                                                                   | #   | #   | #         | #     | #    | -    | ----                                      | ----  | #                    | #                                                                                                                                                                                                                                                          | #   | #   | #         | #     | #    |      |
| Rsa1.0_01281.1.g25347.t1 | refNP_566601.1   uncharacterized protein [Arabidopsis thaliana]<br>gi 9294078 dbj BAB02035.1   unnamed protein product [Arabidopsis thaliana]<br>gi 15810371 gb AAL07073.1   unknown protein [Arabidopsis thaliana]<br>gi 20259213 gb AAM14322.1   unknown protein [Arabidopsis thaliana]<br>gi 332642545 gb AEE76066.1   uncharacterized protein AT3G18215 [Arabidopsis thaliana]                                                                                                                                                                                                                                                                                                                                                                                                                                                                                                                  | 116 | 244 | 2.00E-58  | 210.3 | 90.5 | 94.8 | uncharacterized protein                   | gbpln | Arabidopsis thaliana | AT3G18215.1   Symbols:   Protein of unknown function, DUF599   chr3:6240968-6242358 FORWARD LENGTH=244                                                                                                                                                     | 116 | 244 | 4.00E-61  | 210.3 | 90.5 | 94.8 |
| Rsa1.0_01281.1.g25348.t1 | refNP_187078.1   two-component response regulator ARR22 [Arabidopsis thaliana] gi 30679083 refNP_850511.1   two-component response regulator ARR22 [Arabidopsis thaliana]<br>gi 145331750 refNP_001078102.1   two-component response regulator ARR22 [Arabidopsis thaliana]<br>gi 51316101 sp Q9M8Y4.1 ARR22_ARAT H RecName: Full=Two-component response regulator ARR22<br>gi 6721158 gb AAF26786.1 AC016829.10 putative response regulator protein (receiver component) [Arabidopsis thaliana] gi 21553766 gb AAM62859.1   putative response regulator protein (receiver component) [Arabidopsis thaliana] gi 332640539 gb AEE74060.1   two-component response regulator ARR22 [Arabidopsis thaliana]<br>gi 332640540 gb AEE74061.1   two-component response regulator ARR22 [Arabidopsis thaliana]<br>gi 332640541 gb AEE74062.1   two-component response regulator ARR22 [Arabidopsis thaliana] | 167 | 142 | 5.00E-53  | 85.0  | 67.7 | 73.1 | two-component response regulator ARR22    | gbpln | Arabidopsis thaliana | AT3G04280.3   Symbols: ARR22, RR22   response regulator 22   chr3:1130138-1130689 REVERSE LENGTH=142                                                                                                                                                       | 167 | 142 | 2.00E-55  | 85.0  | 67.7 | 73.1 |

|                          |                                                                                                                                                                                                                                                                                                                                                                                                                                                                                                                                                                                                 |      |      |           |       |      |      |                                                  |       |                      |                                                                                                                                                                                                                                                                         |      |      |           |       |      |      |
|--------------------------|-------------------------------------------------------------------------------------------------------------------------------------------------------------------------------------------------------------------------------------------------------------------------------------------------------------------------------------------------------------------------------------------------------------------------------------------------------------------------------------------------------------------------------------------------------------------------------------------------|------|------|-----------|-------|------|------|--------------------------------------------------|-------|----------------------|-------------------------------------------------------------------------------------------------------------------------------------------------------------------------------------------------------------------------------------------------------------------------|------|------|-----------|-------|------|------|
| Rsa1.0_01281.1.g25349.t1 | gb EOA17608.1  hypothetical protein CARUB_v10005968mg [Capsella rubella] gi 482557559 gb EOA21751.1  hypothetical protein CARUB_v10002207mg [Capsella rubella]                                                                                                                                                                                                                                                                                                                                                                                                                                  | 146  | 146  | 3.00E-73  | 100.0 | 91.8 | 94.5 | hypothetical protein CARUB_v10005968mg           | gbpln | Capsella rubella     | AT5G18380.1   Symbols:   Ribosomal protein S5 domain 2-like superfamily protein   chr5:6090253-6090693 REVERSE LENGTH=146                                                                                                                                               | 146  | 146  | 2.00E-75  | 100.0 | 91.1 | 94.5 |
| Rsa1.0_01281.1.g25350.t1 | gb EOA29984.1  hypothetical protein CARUB_v10013089mg [Capsella rubella]                                                                                                                                                                                                                                                                                                                                                                                                                                                                                                                        | 643  | 703  | 0         | 109.3 | 72.3 | 83.5 | hypothetical protein CARUB_v10013089mg           | gbpln | Capsella rubella     | AT3G04160.1   Symbols:   unknown protein; Has 1711 Blast hits to 1353 proteins in 195 species: Archae - 0; Bacteria - 64; Metazoa - 693; Fungi - 201; Plants - 207; Viruses - 0; Other Eukaryotes - 546 (source: NCBI BLINK).   chr3:1091647-1094296 REVERSE LENGTH=712 | 643  | 712  | 0         | 110.7 | 70.5 | 79.6 |
| Rsa1.0_01281.1.g25351.t1 | ref XP_002882328.1  hypothetical protein ARALYDRAFT_340564 [Arabidopsis lyrata subsp. lyrata] gi 297328168 gb EFH58587.1  hypothetical protein ARALYDRAFT_340564 [Arabidopsis lyrata subsp. lyrata]                                                                                                                                                                                                                                                                                                                                                                                             | 437  | 510  | 1.00E-163 | 116.7 | 74.6 | 84.0 | hypothetical protein ARALYDRAFT_340564           | gbpln | Arabidopsis lyrata   | AT3G04050.1   Symbols:   Pyruvate kinase family protein   chr3:1049795-1051522 FORWARD LENGTH=510                                                                                                                                                                       | 437  | 510  | 1.00E-158 | 116.7 | 71.9 | 82.2 |
| Rsa1.0_01281.1.g25352.t1 | gb EOA32860.1  hypothetical protein CARUB_v10016174mg [Capsella rubella]                                                                                                                                                                                                                                                                                                                                                                                                                                                                                                                        | 544  | 549  | 0         | 100.9 | 96.7 | 98.7 | hypothetical protein CARUB_v10016174mg           | gbpln | Capsella rubella     | AT3G03960.1   Symbols:   TCP-1/cpn60 chaperonin family protein   chr3:1024432-1027604 FORWARD LENGTH=549                                                                                                                                                                | 544  | 549  | 0         | 100.9 | 95.8 | 98.3 |
| Rsa1.0_01281.1.g25353.t1 | gb EOA29894.1  hypothetical protein CARUB_v10012990mg [Capsella rubella]                                                                                                                                                                                                                                                                                                                                                                                                                                                                                                                        | 812  | 818  | 0         | 100.7 | 75.0 | 84.1 | hypothetical protein CARUB_v10012990mg           | gbpln | Capsella rubella     | AT4G04220.1   Symbols:   AtRLP46, RLP46   receptor like protein 46   chr4:2033427-2035946 FORWARD LENGTH=811                                                                                                                                                            | 812  | 811  | 0         | 99.9  | 67.4 | 76.2 |
| Rsa1.0_01281.1.g25354.t1 | ref XP_002882315.1  hypothetical protein ARALYDRAFT_477638 [Arabidopsis lyrata subsp. lyrata] gi 297328155 gb EFH58574.1  hypothetical protein ARALYDRAFT_477638 [Arabidopsis lyrata subsp. lyrata]                                                                                                                                                                                                                                                                                                                                                                                             | 255  | 300  | 1.00E-121 | 117.6 | 83.9 | 89.8 | hypothetical protein ARALYDRAFT_477638           | gbpln | Arabidopsis lyrata   | AT3G03860.1   Symbols:   ATAPRL5, APRL5   APR-like 5   chr3:992465-994315 FORWARD LENGTH=300                                                                                                                                                                            | 255  | 300  | 1.00E-121 | 117.6 | 82.0 | 89.0 |
| Rsa1.0_01281.1.g25355.t1 | gb AAG51046.1 AC069473.8 gypsy/Ty-3 retroelement polyprotein; 69905-74404 [Arabidopsis thaliana] gi 10998138 dbj BAB03109.1  retroelement pol polyprotein [Arabidopsis thaliana]                                                                                                                                                                                                                                                                                                                                                                                                                | 1502 | 1499 | 0         | 99.8  | 63.8 | 78.6 | gypsy/Ty-3 retroelement polyprotein; 69905-74404 | gbpln | Arabidopsis thaliana | ATMG00860.1   Symbols:   ORF158   DNA/RNA polymerases superfamily protein   chrM:235916-236392 FORWARD LENGTH=158                                                                                                                                                       | 1502 | 158  | 3.00E-32  | 10.5  | 4.2  | 5.9  |
| Rsa1.0_01282.1.g25356.t1 | ref NP_193817.2  tripeptidyl peptidase ii [Arabidopsis thaliana] gi 332658968 gb AEE84368.1  tripeptidyl peptidase ii [Arabidopsis thaliana]                                                                                                                                                                                                                                                                                                                                                                                                                                                    | 1390 | 1380 | 0         | 99.3  | 88.1 | 91.8 | tripeptidyl peptidase ii                         | gbpln | Arabidopsis thaliana | AT4G20850.1   Symbols:   TPP2   tripeptidyl peptidase ii   chr4:11160935-11169889 REVERSE LENGTH=1380                                                                                                                                                                   | 1390 | 1380 | 0         | 99.3  | 88.1 | 91.8 |
| Rsa1.0_01282.1.g25357.t1 | gb EOA18748.1  hypothetical protein CARUB_v10007331mg [Capsella rubella]                                                                                                                                                                                                                                                                                                                                                                                                                                                                                                                        | 539  | 555  | 0         | 103.0 | 86.3 | 93.1 | hypothetical protein CARUB_v10007331mg           | gbpln | Capsella rubella     | AT4G20840.1   Symbols:   FAD-binding Berberine family protein   chr4:11157916-11159535 FORWARD LENGTH=539                                                                                                                                                               | 539  | 539  | 0         | 100.0 | 83.9 | 90.5 |
| Rsa1.0_01282.1.g25358.t1 | gb EOA18748.1  hypothetical protein CARUB_v10007331mg [Capsella rubella]                                                                                                                                                                                                                                                                                                                                                                                                                                                                                                                        | 534  | 555  | 0         | 103.9 | 81.5 | 91.0 | hypothetical protein CARUB_v10007331mg           | gbpln | Capsella rubella     | AT4G20840.1   Symbols:   FAD-binding Berberine family protein   chr4:11157916-11159535 FORWARD LENGTH=539                                                                                                                                                               | 534  | 539  | 0         | 100.9 | 77.3 | 86.9 |
| Rsa1.0_01282.1.g25359.t1 | # # # # # # # # # # # # # # # #                                                                                                                                                                                                                                                                                                                                                                                                                                                                                                                                                                 | #    | #    | #         | #     | #    | #    | -                                                | ----  | ----                 | #                                                                                                                                                                                                                                                                       | #    | #    | #         | #     | #    | #    |
| Rsa1.0_01282.1.g25360.t1 | gb EOA18285.1  hypothetical protein CARUB_v10006784mg [Capsella rubella]                                                                                                                                                                                                                                                                                                                                                                                                                                                                                                                        | 514  | 519  | 0         | 101.0 | 74.1 | 85.4 | hypothetical protein CARUB_v10006784mg           | gbpln | Capsella rubella     | AT4G20790.1   Symbols:   Leucine-rich repeat protein kinase family protein   chr4:11134775-11136423 REVERSE LENGTH=518                                                                                                                                                  | 514  | 518  | 0         | 100.8 | 75.9 | 85.8 |
| Rsa1.0_01282.1.g25361.t1 | ref NP_193810.1  calcium-binding protein CML42 [Arabidopsis thaliana] gi 75337714 sp Q9SVG9.1 CML42_ARAT H RecName: Full=Calcium-binding protein CML42; AltName: Full=Calmodulin-like protein 42 gi 5262218 emb CAB45844.1  calcium-binding protein-like [Arabidopsis thaliana] gi 7268874 emb CAB79078.1  calcium-binding protein-like [Arabidopsis thaliana] gi 26450755 dbj BAC42486.1  putative calcium-binding protein [Arabidopsis thaliana] gi 28372940 gb AAO39952.1  At4g20780 [Arabidopsis thaliana] gi 332658960 gb AEE84360.1  calcium-binding protein CML42 [Arabidopsis thaliana] | 191  | 191  | 7.00E-85  | 100.0 | 85.9 | 91.6 | calcium-binding protein CML42                    | gbpln | Arabidopsis thaliana | AT4G20780.1   Symbols:   CML42   calmodulin like 42   chr4:11133309-11133884 REVERSE LENGTH=191                                                                                                                                                                         | 191  | 191  | 3.00E-87  | 100.0 | 85.9 | 91.6 |
| Rsa1.0_01282.1.g25362.t1 | dbj BAD43836.1  unknown protein [Arabidopsis thaliana]                                                                                                                                                                                                                                                                                                                                                                                                                                                                                                                                          | 226  | 254  | 4.00E-67  | 112.4 | 69.9 | 72.6 | unknown protein                                  | gbpln | Arabidopsis thaliana | AT5G44500.2   Symbols:   Small nuclear ribonucleoprotein family protein   chr5:17927505-17928269 FORWARD LENGTH=254                                                                                                                                                     | 226  | 254  | 9.00E-67  | 112.4 | 67.3 | 69.9 |
| Rsa1.0_01282.1.g25363.t1 | gb ABA00707.1  putative tapetum-specific A3 [Brassica napus]                                                                                                                                                                                                                                                                                                                                                                                                                                                                                                                                    | 112  | 139  | 2.00E-50  | 124.1 | 90.2 | 95.5 | putative tapetum-specific A3                     | gbpln | Brassica napus       | AT4G20420.1   Symbols:   Tapetum specific protein TAP35/TAP44   chr4:11017041-11017469 FORWARD LENGTH=142                                                                                                                                                               | 112  | 142  | 1.00E-30  | 126.8 | 67.0 | 76.8 |

|                          |                                                                                                                                                                                                      |      |      |           |       |      |      |                                                                                |       |                      |                                                                                                                                                                                                                                                                                                                                                                                                                                                         |      |      |           |       |      |      |
|--------------------------|------------------------------------------------------------------------------------------------------------------------------------------------------------------------------------------------------|------|------|-----------|-------|------|------|--------------------------------------------------------------------------------|-------|----------------------|---------------------------------------------------------------------------------------------------------------------------------------------------------------------------------------------------------------------------------------------------------------------------------------------------------------------------------------------------------------------------------------------------------------------------------------------------------|------|------|-----------|-------|------|------|
| Rsa1.0_01282.1.g25364.t1 | gb AAL50982.1 AF453323.1 zinc finger protein LSD2 [Brassica oleracea]                                                                                                                                | 189  | 193  | 2.00E-89  | 102.1 | 92.1 | 96.3 | zinc finger protein LSD2                                                       | gbpln | Brassica oleracea    | AT4G20380.7   Symbols: LSD1   LSD1 zinc finger family protein   chr4:11005012-11006438 FORWARD LENGTH=189                                                                                                                                                                                                                                                                                                                                               | 189  | 189  | 1.00E-67  | 100.0 | 77.8 | 85.2 |
| Rsa1.0_01282.1.g25365.t1 | gb EOA18090.1  hypothetical protein CARUB_v10006542mg [Capsella rubella]                                                                                                                             | 475  | 480  | 0         | 101.1 | 93.5 | 94.5 | hypothetical protein CARUB_v10006542mg                                         | gbpln | Capsella rubella     | AT4G20360.1   Symbols: ATRAB8D, ATRABE1B, RABE1b   RAB GTPase homolog, E1B   chr4:10990036-10991466 FORWARD LENGTH=476                                                                                                                                                                                                                                                                                                                                  | 475  | 476  | 0         | 100.2 | 91.8 | 93.9 |
| Rsa1.0_01282.1.g25366.t1 | ref NP_001078412.2  ribonuclease H2 subunit B [Arabidopsis thaliana]   g 332658907 gb AEE84307.1  ribonuclease H2 subunit B domain-containing protein [Arabidopsis thaliana]                         | 297  | 277  | 1.00E-137 | 93.3  | 81.5 | 86.9 | ribonuclease H2 subunit B                                                      | gbpln | Arabidopsis thaliana | AT4G20325.1   Symbols:   FUNCTIONS IN: molecular_function unknown; INVOLVED IN: biological_process unknown; LOCATED IN: nucleus; CONTAINS InterPro DOMAIN/s: Ribonuclease H2, subunit B (InterPro:IPR019024); Has 30201 Blast hits to 17322 proteins in 780 species: Archaea - 12; Bacteria - 1396; Metazoa - 1738; Fungi - 3422; Plants - 5037; Viruses - 0; Other Eukaryotes - 2996 (source: NCBI BLINK).   chr4:10980124-10982426 FORWARD LENGTH=277 | 297  | 277  | 1.00E-140 | 93.3  | 81.5 | 86.9 |
| Rsa1.0_01282.1.g25367.t1 | ref XP_002869939.1  CTP synthase [Arabidopsis lyrata subsp. lyrata]   g 297315775 gb EFH46198.1  CTP synthase [Arabidopsis lyrata subsp. lyrata]                                                     | 589  | 597  | 0         | 101.4 | 93.7 | 96.4 | CTP synthase                                                                   | gbpln | Arabidopsis lyrata   | AT4G20320.2   Symbols:   CTP synthase family protein   chr4:10974980-10978998 FORWARD LENGTH=597                                                                                                                                                                                                                                                                                                                                                        | 589  | 597  | 0         | 101.4 | 92.4 | 96.4 |
| Rsa1.0_01283.1.g25368.t1 | gb ABH07409.1  putative pol polyprotein [Brassica oleracea var. botrytis]                                                                                                                            | 196  | 1239 | 8.00E-57  | 632.1 | 50.0 | 55.6 | putative pol polyprotein                                                       | gbpln | Brassica oleracea    | AT4G23160.1   Symbols: CRK8   cysteine-rich RLK (RECEPTOR-like protein kinase) 8   chr4:12129485-12134086 FORWARD LENGTH=1262                                                                                                                                                                                                                                                                                                                           | 196  | 1262 | 1.00E-19  | 643.9 | 25.0 | 35.2 |
| Rsa1.0_01283.1.g25369.t1 | #                                                                                                                                                                                                    | #    | #    | #         | #     | #    | -    | ----                                                                           | ----  | ----                 | #                                                                                                                                                                                                                                                                                                                                                                                                                                                       | #    | #    | #         | #     | #    |      |
| Rsa1.0_01283.1.g25370.t1 | ref XP_002884121.1  hypothetical protein ARALYDRAFT_480729 [Arabidopsis lyrata subsp. lyrata]   g 297329961 gb EFH60380.1  hypothetical protein ARALYDRAFT_480729 [Arabidopsis lyrata subsp. lyrata] | 251  | 221  | 2.00E-82  | 88.0  | 62.9 | 70.1 | hypothetical protein ARALYDRAFT_480729                                         | gbpln | Arabidopsis lyrata   | AT2G18240.2   Symbols:   Rer1 family protein   chr2:7935466-7936464 FORWARD LENGTH=220                                                                                                                                                                                                                                                                                                                                                                  | 251  | 220  | 5.00E-84  | 87.6  | 62.5 | 69.7 |
| Rsa1.0_01283.1.g25371.t1 | pir  T00833 RNA-directed DNA polymerase homolog T13L16.7 - Arabidopsis thaliana (fragment)                                                                                                           | 1525 | 1365 | 0         | 89.5  | 24.3 | 36.7 | RNA-directed DNA polymerase homolog T13L16.7 - Arabidopsis thaliana (fragment) | ----  | ----                 | AT4G29090.1   Symbols:   Ribonuclease H-like superfamily protein   chr4:14333528-14335255 FORWARD LENGTH=575                                                                                                                                                                                                                                                                                                                                            | 1525 | 575  | 6.00E-83  | 37.7  | 9.5  | 13.8 |
| Rsa1.0_01283.1.g25372.t1 | ref XP_002886161.1  inorganic pyrophosphatase [Arabidopsis lyrata subsp. lyrata]   g 297332001 gb EFH62420.1  inorganic pyrophosphatase [Arabidopsis lyrata subsp. lyrata]                           | 229  | 218  | 1.00E-116 | 95.2  | 90.8 | 91.3 | inorganic pyrophosphatase                                                      | gbpln | Arabidopsis lyrata   | AT2G18230.1   Symbols: AtPPa2, PPa2   pyrophosphorylase 2   chr2:7932139-7933560 REVERSE LENGTH=218                                                                                                                                                                                                                                                                                                                                                     | 229  | 218  | 1.00E-117 | 95.2  | 90.0 | 91.3 |
| Rsa1.0_01283.1.g25373.t1 | ref XP_002884119.1  hypothetical protein ARALYDRAFT_480727 [Arabidopsis lyrata subsp. lyrata]   g 297329959 gb EFH60378.1  hypothetical protein ARALYDRAFT_480727 [Arabidopsis lyrata subsp. lyrata] | 774  | 772  | 0         | 99.7  | 77.0 | 84.8 | hypothetical protein ARALYDRAFT_480727                                         | gbpln | Arabidopsis lyrata   | AT2G18220.1   Symbols:   Noc2p family   chr2:7928254-7931851 FORWARD LENGTH=764                                                                                                                                                                                                                                                                                                                                                                         | 774  | 764  | 0         | 98.7  | 73.1 | 80.1 |
| Rsa1.0_01283.1.g25374.t1 | gb AAG51783.1 AC079679.3 reverse transcriptase, putative; 16838-20266 [Arabidopsis thaliana]                                                                                                         | 134  | 1142 | 2.00E-23  | 852.2 | 44.0 | 60.4 | reverse transcriptase, putative; 16838-20266                                   | gbpln | Arabidopsis thaliana | #                                                                                                                                                                                                                                                                                                                                                                                                                                                       | #    | #    | #         | #     | #    |      |
| Rsa1.0_01283.1.g25375.t1 | gb AAC69125.1  Mutator-like transposase [Arabidopsis thaliana]                                                                                                                                       | 701  | 590  | 6.00E-83  | 84.2  | 22.3 | 30.1 | Mutator-like transposase                                                       | gbpln | Arabidopsis thaliana | AT1G64260.1   Symbols:   MuDR family transposase   chr1:23847756-23849915 FORWARD LENGTH=719                                                                                                                                                                                                                                                                                                                                                            | 701  | 719  | 2.00E-20  | 102.6 | 9.0  | 15.1 |
| Rsa1.0_01283.1.g25376.t4 | gb ABD64941.1  Ulp1 protease family protein [Brassica oleracea]                                                                                                                                      | 570  | 871  | 3.00E-33  | 152.8 | 12.1 | 14.9 | Ulp1 protease family protein                                                   | gbpln | Brassica oleracea    | AT1G31150.1   Symbols:   Domain of unknown function (DUF1985)   chr1:1120097-11122412 FORWARD LENGTH=673                                                                                                                                                                                                                                                                                                                                                | 570  | 673  | 3.00E-19  | 118.1 | 9.6  | 13.9 |
| Rsa1.0_01283.1.g25377.t1 | gb EOA38015.1  hypothetical protein CARUB_v10009486mg, partial [Capsella rubella]                                                                                                                    | 99   | 372  | 3.00E-22  | 375.8 | 66.7 | 71.7 | hypothetical protein CARUB_v10009486mg, partial                                | gbpln | Capsella rubella     | AT1G09460.1   Symbols:   Carbohydrate-binding X8 domain superfamily protein   chr1:3053901-3055090 FORWARD LENGTH=330                                                                                                                                                                                                                                                                                                                                   | 99   | 330  | 1.00E-23  | 333.3 | 64.6 | 70.7 |
| Rsa1.0_01283.1.g25378.t1 | #                                                                                                                                                                                                    | #    | #    | #         | #     | #    | -    | ----                                                                           | ----  | ----                 | #                                                                                                                                                                                                                                                                                                                                                                                                                                                       | #    | #    | #         | #     | #    |      |
| Rsa1.0_01284.1.g25379.t1 | gb AAG51783.1 AC079679.3 reverse transcriptase, putative; 16838-20266 [Arabidopsis thaliana]                                                                                                         | 993  | 1142 | 0         | 115.0 | 51.6 | 64.9 | reverse transcriptase, putative; 16838-20266                                   | gbpln | Arabidopsis thaliana | AT4G29090.1   Symbols:   Ribonuclease H-like superfamily protein   chr4:14333528-14335255 FORWARD LENGTH=575                                                                                                                                                                                                                                                                                                                                            | 993  | 575  | 8.00E-42  | 57.9  | 8.8  | 12.8 |
| Rsa1.0_01284.1.g25380.t1 | #                                                                                                                                                                                                    | #    | #    | #         | #     | #    | -    | ----                                                                           | ----  | ----                 | #                                                                                                                                                                                                                                                                                                                                                                                                                                                       | #    | #    | #         | #     | #    |      |
| Rsa1.0_01284.1.g25381.t1 | #                                                                                                                                                                                                    | #    | #    | #         | #     | #    | -    | ----                                                                           | ----  | ----                 | #                                                                                                                                                                                                                                                                                                                                                                                                                                                       | #    | #    | #         | #     | #    |      |
| Rsa1.0_01284.1.g25382.t1 | dbj BAA96887.1  copia-like retroelement pol polyprotein [Arabidopsis thaliana]                                                                                                                       | 254  | 1140 | 5.00E-53  | 448.8 | 44.5 | 58.7 | copia-like retroelement pol polyprotein                                        | gbpln | Arabidopsis thaliana | #                                                                                                                                                                                                                                                                                                                                                                                                                                                       | #    | #    | #         | #     | #    |      |

|                          |                                                                                                                                                                                                                                                                                                                                                                                                          |     |      |           |       |      |      |                                                           |       |                      |                                                                                                                                                                                                                                                                        |     |     |           |       |      |      |
|--------------------------|----------------------------------------------------------------------------------------------------------------------------------------------------------------------------------------------------------------------------------------------------------------------------------------------------------------------------------------------------------------------------------------------------------|-----|------|-----------|-------|------|------|-----------------------------------------------------------|-------|----------------------|------------------------------------------------------------------------------------------------------------------------------------------------------------------------------------------------------------------------------------------------------------------------|-----|-----|-----------|-------|------|------|
| Rsa1.0_01284.1.g25383.t1 | gb EOA20915.1  hypothetical protein CARUB_v10001250mg [Capsella rubella]                                                                                                                                                                                                                                                                                                                                 | 362 | 360  | 1.00E-145 | 99.4  | 73.2 | 84.8 | hypothetical protein CARUB_v10001250mg                    | gbpln | Capsella rubella     | AT4G01450.2   Symbols:   nodulin MtN21 /EamA-like transporter family protein   chr4:608586-610487 FORWARD LENGTH=361                                                                                                                                                   | 362 | 361 | 1.00E-143 | 99.7  | 75.4 | 85.9 |
| Rsa1.0_01284.1.g25384.t1 | ref XP_002877467.1  predicted protein [Arabidopsis lyrata subsp. lyrata]   g 297323305 gb EFH53726.1  predicted protein [Arabidopsis lyrata subsp. lyrata]                                                                                                                                                                                                                                               | 219 | 186  | 1.00E-26  | 84.9  | 32.0 | 45.7 | predicted protein                                         | gbpln | Arabidopsis lyrata   | AT5G18880.1   Symbols:   RNA-directed DNA polymerase (reverse transcriptase)-related family protein   chr5:6300535-6301422 REVERSE LENGTH=295                                                                                                                          | 219 | 295 | 4.00E-17  | 134.7 | 29.2 | 45.7 |
| Rsa1.0_01284.1.g25385.t1 | # # # # # # # #                                                                                                                                                                                                                                                                                                                                                                                          |     |      |           |       |      |      |                                                           |       |                      |                                                                                                                                                                                                                                                                        |     |     |           |       |      |      |
| Rsa1.0_01284.1.g25386.t1 | gb AAG51754.1 AC068667.33 reverse transcriptase, putative; 100033-105622 [Arabidopsis thaliana]                                                                                                                                                                                                                                                                                                          | 197 | 1557 | 2.00E-14  | 790.4 | 29.4 | 49.7 | reverse transcriptase, putative; 100033-105622            | gbpln | Arabidopsis thaliana | AT3G27140.1   Symbols:   Protein phosphatase 2C family protein   chr3:10006891-10008174 REVERSE LENGTH=245                                                                                                                                                             | 197 | 245 | 8.00E-11  | 124.4 | 14.7 | 19.3 |
| Rsa1.0_01284.1.g25387.t1 | gb EOA20915.1  hypothetical protein CARUB_v10001250mg [Capsella rubella]                                                                                                                                                                                                                                                                                                                                 | 327 | 360  | 1.00E-137 | 110.1 | 78.3 | 90.8 | hypothetical protein CARUB_v10001250mg                    | gbpln | Capsella rubella     | AT4G01450.2   Symbols:   nodulin MtN21 /EamA-like transporter family protein   chr4:608586-610487 FORWARD LENGTH=361                                                                                                                                                   | 327 | 361 | 1.00E-132 | 110.4 | 80.4 | 92.4 |
| Rsa1.0_01285.1.g25388.t1 | gb AAP37140.1 WOX11 protein [Arabidopsis thaliana]                                                                                                                                                                                                                                                                                                                                                       | 265 | 268  | 1.00E-115 | 101.1 | 86.8 | 90.6 | WOX11 protein                                             | gbpln | Arabidopsis thaliana | AT3G03660.1   Symbols:   WOX11   WUSCHEL related homeobox 11   chr3:889515-892162 REVERSE LENGTH=268                                                                                                                                                                   | 265 | 268 | 1.00E-117 | 101.1 | 86.0 | 89.8 |
| Rsa1.0_01285.1.g25389.t1 | gb EOA32859.1  hypothetical protein CARUB_v10016173mg [Capsella rubella]                                                                                                                                                                                                                                                                                                                                 | 486 | 508  | 0         | 104.5 | 84.8 | 92.4 | hypothetical protein CARUB_v10016173mg                    | gbpln | Capsella rubella     | AT3G03650.1   Symbols:   EDA5   Exostosin family protein   chr3:884298-886166 REVERSE LENGTH=499                                                                                                                                                                       | 486 | 499 | 0         | 102.7 | 86.6 | 93.2 |
| Rsa1.0_01285.1.g25390.t1 | ref XP_002884399.1  mate efflux family protein [Arabidopsis lyrata subsp. lyrata]   g 297330239 gb EFH60658.1  mate efflux family protein [Arabidopsis lyrata subsp. lyrata]                                                                                                                                                                                                                             | 479 | 500  | 0         | 104.4 | 88.3 | 93.9 | mate efflux family protein                                | gbpln | Arabidopsis lyrata   | AT3G03620.1   Symbols:   MATE efflux family protein   chr3:873904-876252 REVERSE LENGTH=500                                                                                                                                                                            | 479 | 500 | 0         | 104.4 | 88.5 | 94.4 |
| Rsa1.0_01285.1.g25391.t1 | ref XP_002882299.1  hypothetical protein ARALYDRAFT_477606 [Arabidopsis lyrata subsp. lyrata]   g 297328139 gb EFH58558.1  hypothetical protein ARALYDRAFT_477606 [Arabidopsis lyrata subsp. lyrata]                                                                                                                                                                                                     | 349 | 322  | 1.00E-166 | 92.3  | 85.1 | 87.7 | hypothetical protein ARALYDRAFT_477606                    | gbpln | Arabidopsis lyrata   | AT3G03610.1   Symbols:   ELMO/CE2-12 family protein   chr3:869479-871687 FORWARD LENGTH=323                                                                                                                                                                            | 349 | 323 | 1.00E-166 | 92.6  | 84.5 | 87.1 |
| Rsa1.0_01285.1.g25392.t1 | gb EOA31411.1  hypothetical protein CARUB_v10014591mg [Capsella rubella]                                                                                                                                                                                                                                                                                                                                 | 219 | 219  | 1.00E-120 | 100.0 | 92.7 | 98.2 | hypothetical protein CARUB_v10014591mg                    | gbpln | Capsella rubella     | AT3G03600.1   Symbols:   RPS2   ribosomal protein S2   chr3:867847-868506 REVERSE LENGTH=219                                                                                                                                                                           | 219 | 219 | 1.00E-122 | 100.0 | 92.2 | 98.2 |
| Rsa1.0_01285.1.g25393.t1 | gb EOA31614.1  hypothetical protein CARUB_v10014811mg [Capsella rubella]                                                                                                                                                                                                                                                                                                                                 | 149 | 154  | 2.00E-51  | 103.4 | 79.9 | 87.2 | hypothetical protein CARUB_v10014811mg                    | gbpln | Capsella rubella     | AT3G03590.1   Symbols:   SWIB/MDM2 domain superfamily protein   chr3:865341-866669 REVERSE LENGTH=143                                                                                                                                                                  | 149 | 143 | 2.00E-51  | 96.0  | 75.2 | 83.2 |
| Rsa1.0_01285.1.g25394.t1 | ref XP_002884396.1  pentatricopeptide repeat-containing protein [Arabidopsis lyrata subsp. lyrata]   g 297330236 gb EFH60655.1  pentatricopeptide repeat-containing protein [Arabidopsis lyrata subsp. lyrata]                                                                                                                                                                                           | 881 | 882  | 0         | 100.1 | 82.4 | 91.4 | pentatricopeptide repeat-containing protein               | gbpln | Arabidopsis lyrata   | AT3G03580.1   Symbols:   Tetratricopeptide repeat (TPR)-like superfamily protein   chr3:860695-863343 REVERSE LENGTH=882                                                                                                                                               | 881 | 882 | 0         | 100.1 | 83.3 | 91.9 |
| Rsa1.0_01285.1.g25395.t1 | gb AAD12055.1  DnaJ protein [Hevea brasiliensis]                                                                                                                                                                                                                                                                                                                                                         | 123 | 415  | 5.00E-17  | 337.4 | 34.1 | 35.0 | DnaJ protein                                              | gbpln | Hevea brasiliensis   | AT5G22060.1   Symbols:   ATJ2, J2   DNAJ homologue 2   chr5:7303798-7305668 REVERSE LENGTH=419                                                                                                                                                                         | 123 | 419 | 2.00E-15  | 340.7 | 37.4 | 38.2 |
| Rsa1.0_01285.1.g25396.t5 | gb ABD65153.1  SLL3 ORF2 protein [Brassica oleracea]                                                                                                                                                                                                                                                                                                                                                     | 295 | 333  | 4.00E-27  | 112.9 | 20.7 | 25.1 | SLL3 ORF2 protein                                         | gbpln | Brassica oleracea    | AT4G03740.1   Symbols:   unknown protein; Has 1807 Blast hits to 1807 proteins in 277 species: Archae - 0; Bacteria - 0; Metazoa - 736; Fungi - 347; Plants - 385; Viruses - 0; Other Eukaryotes - 339 (source: NCBI BLINK).   chr4:1661992-1663515 REVERSE LENGTH=345 | 295 | 345 | 2.00E-11  | 116.9 | 12.2 | 16.3 |
| Rsa1.0_01285.1.g25397.t1 | ref NP_187002.1  non-specific phospholipase C3 [Arabidopsis thaliana]   g 16017100 gb AAF01583.1 AC009895.4 unknown protein [Arabidopsis thaliana]   g 23297654 gb AAN13002.1  unknown protein [Arabidopsis thaliana]   g 24417135 db BAC22510.1  phosphatidylglycerol specific phospholipase C [Arabidopsis thaliana]   g 332640432 gb AEE73953.1  non-specific phospholipase C3 [Arabidopsis thaliana] | 485 | 523  | 0         | 107.8 | 93.4 | 96.3 | non-specific phospholipase C3                             | gbpln | Arabidopsis thaliana | AT3G03520.1   Symbols:   NPC3   non-specific phospholipase C3   chr3:837972-840511 REVERSE LENGTH=523                                                                                                                                                                  | 485 | 523 | 0         | 107.8 | 93.4 | 96.3 |
| Rsa1.0_01285.1.g25398.t1 | sp Q9SRQ5.2 Y3351_ARATH RecName: Full=BTB/POZ domain-containing protein At3g03510                                                                                                                                                                                                                                                                                                                        | 518 | 508  | 0         | 98.1  | 73.9 | 83.8 | RecName: Full=BTB/POZ domain-containing protein At3g03510 | ----- | -----                | AT3G03510.1   Symbols:   Phototropic-responsive NPH3 family protein   chr3:836340-837707 FORWARD LENGTH=455                                                                                                                                                            | 518 | 455 | 0         | 87.8  | 67.0 | 75.7 |

|                          |                                                                                                                                                                                                                                                                                                                                                                      |      |      |           |       |      |      |                                                                                                                                                                                                                                                                                                                             |       |                       |                                                                                                                                                                                                                                                                                 |      |      |           |       |      |      |
|--------------------------|----------------------------------------------------------------------------------------------------------------------------------------------------------------------------------------------------------------------------------------------------------------------------------------------------------------------------------------------------------------------|------|------|-----------|-------|------|------|-----------------------------------------------------------------------------------------------------------------------------------------------------------------------------------------------------------------------------------------------------------------------------------------------------------------------------|-------|-----------------------|---------------------------------------------------------------------------------------------------------------------------------------------------------------------------------------------------------------------------------------------------------------------------------|------|------|-----------|-------|------|------|
| Rsa1.0_01285.1.g25399.t1 | refXP_002884383.1   chat-3-HEXEN-1-OL ACETYLTRANSFERASE [Arabidopsis lyrata subsp. lyrata] gi 297330223 gb EFH60642.1   chat-3-HEXEN-1-OL ACETYLTRANSFERASE [Arabidopsis lyrata subsp. lyrata]                                                                                                                                                                       | 456  | 453  | 0         | 99.3  | 81.6 | 90.1 | chat-3-HEXEN-1-OL ACETYLTRANSFERASE                                                                                                                                                                                                                                                                                         | gbpln | Arabidopsis lyrata    | AT3G03480.1   Symbols: CHAT   acetyl CoA(Z)-3-hexen-1-ol acetyltransferase   chr3:828400-829863 REVERSE LENGTH=454                                                                                                                                                              | 456  | 454  | 0         | 99.6  | 81.1 | 88.8 |
| Rsa1.0_01285.1.g25400.t3 | refXP_002884383.1   chat-3-HEXEN-1-OL ACETYLTRANSFERASE [Arabidopsis lyrata subsp. lyrata] gi 297330223 gb EFH60642.1   chat-3-HEXEN-1-OL ACETYLTRANSFERASE [Arabidopsis lyrata subsp. lyrata]                                                                                                                                                                       | 388  | 453  | 1.00E-143 | 116.8 | 71.6 | 79.9 | chat-3-HEXEN-1-OL ACETYLTRANSFERASE                                                                                                                                                                                                                                                                                         | gbpln | Arabidopsis lyrata    | AT3G03480.1   Symbols: CHAT   acetyl CoA(Z)-3-hexen-1-ol acetyltransferase   chr3:828400-829863 REVERSE LENGTH=454                                                                                                                                                              | 388  | 454  | 1.00E-143 | 117.0 | 71.1 | 79.6 |
| Rsa1.0_01285.1.g25401.t1 | gb AGA16543.1  DELLA protein RGL2, partial [Sisymbrium officinale]                                                                                                                                                                                                                                                                                                   | 542  | 533  | 0         | 98.3  | 88.2 | 90.8 | DELLA protein RGL2, partial                                                                                                                                                                                                                                                                                                 | gbpln | Sisymbrium officinale | AT3G03450.1   Symbols: RGL2   RGA-like 2   chr3:819636-821279 REVERSE LENGTH=547                                                                                                                                                                                                | 542  | 547  | 0         | 100.9 | 83.4 | 89.7 |
| Rsa1.0_01285.1.g25402.t1 | ref NP_186994.2  armadillo/beta-catenin-like repeat-containing protein [Arabidopsis thaliana] gi 332640423 gb AE73944.1   armadillo/beta-catenin-like repeat-containing protein [Arabidopsis thaliana]                                                                                                                                                               | 286  | 408  | 1.00E-133 | 142.7 | 89.2 | 90.6 | armadillo/beta-catenin-like repeat-containing protein                                                                                                                                                                                                                                                                       | gbpln | Arabidopsis thaliana  | AT3G03440.1   Symbols:   ARM repeat superfamily protein   chr3:815709-818568 FORWARD LENGTH=408                                                                                                                                                                                 | 286  | 408  | 1.00E-135 | 142.7 | 89.2 | 90.6 |
| Rsa1.0_01285.1.g25403.t1 | sp P69198.1 POLC2_BRANA RecName: Full=Polcalcin Bra n 2; AltName: Full=Calcium-binding pollen allergen Bra n 2; AltName: Allergen=Bra n 2 gi 59800146 sp P69199.1 POLC2_BRARA RecName: Full=Polcalcin Bra r 2; AltName: Full=Calcium-binding pollen allergen Bra r 2; AltName: Allergen=Bra r 2 gi 1255542 dbj BAA09635.1   calcium-binding protein [Brassica rapa]  | 83   | 83   | 1.00E-38  | 100.0 | 96.4 | 98.8 | RecName: Full=Polcalcin Bra n 2; AltName: Full=Calcium-binding pollen allergen Bra n 2; AltName: Allergen=Bra n 2 gi 59800146 sp P69199.1 POLC2_BRARA RecName: Full=Polcalcin Bra r 2; AltName: Full=Calcium-binding pollen allergen Bra r 2; AltName: Allergen=Bra r 2 gi 1255542 dbj BAA09635.1   calcium-binding protein | gbpln | Brassica rapa         | AT3G03430.1   Symbols:   Calcium-binding EF-hand family protein   chr3:814481-814732 FORWARD LENGTH=83                                                                                                                                                                          | 83   | 83   | 5.00E-40  | 100.0 | 94.0 | 96.4 |
| Rsa1.0_01285.1.g25404.t1 | gb EOA31513.1  hypothetical protein CARUB_v10014702mg [Capsella rubella]                                                                                                                                                                                                                                                                                             | 185  | 194  | 2.00E-80  | 104.9 | 76.8 | 78.9 | hypothetical protein CARUB_v10014702mg                                                                                                                                                                                                                                                                                      | gbpln | Capsella rubella      | AT3G03420.1   Symbols:   Ku70-binding family protein   chr3:812527-813644 FORWARD LENGTH=194                                                                                                                                                                                    | 185  | 194  | 3.00E-82  | 104.9 | 76.2 | 78.9 |
| Rsa1.0_01285.1.g25405.t1 | gb EOA29773.1  hypothetical protein CARUB_v10012864mg [Capsella rubella]                                                                                                                                                                                                                                                                                             | 1121 | 1097 | 0         | 97.9  | 91.4 | 94.8 | hypothetical protein CARUB_v10012864mg                                                                                                                                                                                                                                                                                      | gbpln | Capsella rubella      | AT3G03380.1   Symbols: DegP7   DegP protease 7   chr3:799720-808319 FORWARD LENGTH=1097                                                                                                                                                                                         | 1121 | 1097 | 0         | 97.9  | 91.1 | 94.6 |
| Rsa1.0_01285.1.g25406.t1 | ref XP_002862611.1  hypothetical protein ARALYDRAFT_497388 [Arabidopsis lyrata subsp. lyrata] gi 297308243 gb EFH38869.1   hypothetical protein ARALYDRAFT_497388 [Arabidopsis lyrata subsp. lyrata]                                                                                                                                                                 | 66   | 70   | 5.00E-13  | 106.1 | 53.0 | 54.5 | hypothetical protein ARALYDRAFT_497388                                                                                                                                                                                                                                                                                      | gbpln | Arabidopsis lyrata    | AT3G03341.1   Symbols:   unknown protein; Has 30201 Blast hits to 17322 proteins in 780 species: Archaea - 12; Bacteria - 1396; Metazoa - 17338; Fungi - 3422; Plants - 5037; Viruses - 0; Other Eukaryotes - 2996 (source: NCBI BLINK).   chr3:790338-790556 REVERSE LENGTH=72 | 66   | 72   | 8.00E-16  | 109.1 | 53.0 | 54.5 |
| Rsa1.0_01286.1.g25407.t1 | gb EOA31131.1  hypothetical protein CARUB_v10014293mg [Capsella rubella]                                                                                                                                                                                                                                                                                             | 299  | 293  | 1.00E-117 | 98.0  | 69.2 | 78.3 | hypothetical protein CARUB_v10014293mg                                                                                                                                                                                                                                                                                      | gbpln | Capsella rubella      | AT2G26540.1   Symbols: HEMD, UROS, ATUROS, ATDUF3, DUF3   uroporphyrinogen-III synthase family protein   chr2:11287666-11290224 REVERSE LENGTH=321                                                                                                                              | 299  | 321  | 1.00E-117 | 107.4 | 70.9 | 82.3 |
| Rsa1.0_01286.1.g25408.t1 | gb EOA28135.1  hypothetical protein CARUB_v10024324mg [Capsella rubella]                                                                                                                                                                                                                                                                                             | 124  | 125  | 8.00E-55  | 100.8 | 85.5 | 94.4 | hypothetical protein CARUB_v10024324mg                                                                                                                                                                                                                                                                                      | gbpln | Capsella rubella      | AT2G26500.1   Symbols:   cytochrome b6f complex subunit (petM), putative   chr2:11270370-11270747 FORWARD LENGTH=125                                                                                                                                                            | 124  | 125  | 4.00E-57  | 100.8 | 84.7 | 94.4 |
| Rsa1.0_01286.1.g25409.t1 | ref NP_180217.1  WD40 domain-containing protein [Arabidopsis thaliana] gi 2739374 gb AAC14498.1   En/Spm-like transposon protein [Arabidopsis thaliana] gi 50253512 gb AAT71958.1   At2g26490 [Arabidopsis thaliana] gi 53850519 gb AAU95436.1   At2g26490 [Arabidopsis thaliana] gi 330252750 gb AECO7844.1   WD40 domain-containing protein [Arabidopsis thaliana] | 466  | 465  | 0         | 99.8  | 94.0 | 96.4 | WD40 domain-containing protein                                                                                                                                                                                                                                                                                              | gbpln | Arabidopsis thaliana  | AT2G26490.1   Symbols:   Transducin/WD40 repeat-like superfamily protein   chr2:11268035-11269432 FORWARD LENGTH=465                                                                                                                                                            | 466  | 465  | 0         | 99.8  | 94.0 | 96.4 |
| Rsa1.0_01286.1.g25410.t2 | ref XP_002880800.1  red family protein [Arabidopsis lyrata subsp. lyrata] gi 297326639 gb EFH57059.1   red family protein [Arabidopsis lyrata subsp. lyrata]                                                                                                                                                                                                         | 584  | 574  | 0         | 98.3  | 85.4 | 90.2 | red family protein                                                                                                                                                                                                                                                                                                          | gbpln | Arabidopsis lyrata    | AT2G26460.1   Symbols: SMU2   RED family protein   chr2:11255049-11258913 REVERSE LENGTH=585                                                                                                                                                                                    | 584  | 585  | 0         | 100.2 | 85.1 | 89.7 |



|                          |                                                                                                                                                                                                                                                                                     |      |      |           |        |      |      |                                             |       |                      |                                                                                                                                                                                                                                                                                                                                                                                                                                                                                                              |      |     |           |       |      |      |
|--------------------------|-------------------------------------------------------------------------------------------------------------------------------------------------------------------------------------------------------------------------------------------------------------------------------------|------|------|-----------|--------|------|------|---------------------------------------------|-------|----------------------|--------------------------------------------------------------------------------------------------------------------------------------------------------------------------------------------------------------------------------------------------------------------------------------------------------------------------------------------------------------------------------------------------------------------------------------------------------------------------------------------------------------|------|-----|-----------|-------|------|------|
| Rsa1.0_01286.1.g25411.t2 | ref NP_180215.2  uncharacterized protein [Arabidopsis thaliana] gi 26449484 dbj BAC41868.1  unknown protein [Arabidopsis thaliana] gi 29028900 gb AA064829.1  At2g26470 [Arabidopsis thaliana] gi 330252748 gb AEC07842.1  uncharacterized protein AT2G26470 [Arabidopsis thaliana] | 405  | 487  | 2.33E-156 | 120.2  | 65.4 | 73.3 | uncharacterized protein                     | gbpln | Arabidopsis thaliana | AT2G26470.1   Symbols:   unknown protein; CONTAINS InterPro DOMAIN/s: Protein of unknown function DUF159 (InterPro:IPR003738); Has 3646 Blast hits to 3636 proteins in 1001 species: Archae - 41; Bacteria - 1922; Metazoa - 142; Fungi - 125; Plants - 44; Viruses - 14; Other Eukaryotes - 1358 (source: NCBI BLink).   chr2:11259316-11262362 REVERSE LENGTH=487                                                                                                                                          | 405  | 487 | 1.00E-149 | 120.2 | 65.4 | 73.3 |
| Rsa1.0_01286.1.g25412.t1 | ref XP_002877696.1  pentatricopeptide repeat-containing protein [Arabidopsis lyrata subsp. lyrata] gi 297323534 gb EFH53955.1  pentatricopeptide repeat-containing protein [Arabidopsis lyrata subsp. lyrata]                                                                       | 115  | 1188 | 3.00E-40  | 1033.0 | 70.4 | 80.0 | pentatricopeptide repeat-containing protein | gbpln | Arabidopsis lyrata   | AT3G49730.1   Symbols:   Tetratricopeptide repeat (TPR)-like superfamily protein   chr3:18445730-18447646 REVERSE LENGTH=638                                                                                                                                                                                                                                                                                                                                                                                 | 115  | 638 | 8.00E-42  | 554.8 | 69.6 | 80.0 |
| Rsa1.0_01286.1.g25413.t1 | ref XP_002877935.1  zinc finger family protein [Arabidopsis lyrata subsp. lyrata] gi 297323773 gb EFH54194.1  zinc finger family protein [Arabidopsis lyrata subsp. lyrata]                                                                                                         | 325  | 322  | 1.00E-130 | 99.1   | 73.5 | 82.8 | zinc finger family protein                  | gbpln | Arabidopsis lyrata   | AT3G53690.1   Symbols:   RING/U-box superfamily protein   chr3:19898997-19900044 REVERSE LENGTH=320                                                                                                                                                                                                                                                                                                                                                                                                          | 325  | 320 | 1.00E-124 | 98.5  | 72.3 | 81.8 |
| Rsa1.0_01286.1.g25414.t1 | ref XP_002866685.1  hypothetical protein ARALYDRAFT_358769 [Arabidopsis lyrata subsp. lyrata] gi 297312520 gb EFH42944.1  hypothetical protein ARALYDRAFT_358769 [Arabidopsis lyrata subsp. lyrata]                                                                                 | 80   | 914  | 9.00E-23  | 1142.5 | 67.5 | 73.8 | hypothetical protein ARALYDRAFT_358769      | gbpln | Arabidopsis lyrata   | AT5G65687.1   Symbols:   Major facilitator superfamily protein   chr5:26270038-26272787 REVERSE LENGTH=492                                                                                                                                                                                                                                                                                                                                                                                                   | 80   | 492 | 1.00E-24  | 615.0 | 67.5 | 72.5 |
| Rsa1.0_01286.1.g25415.t1 | ref XP_002880789.1  hypothetical protein ARALYDRAFT_320430 [Arabidopsis lyrata subsp. lyrata] gi 297326628 gb EFH57048.1  hypothetical protein ARALYDRAFT_320430 [Arabidopsis lyrata subsp. lyrata]                                                                                 | 1315 | 705  | 0         | 53.6   | 48.7 | 50.6 | hypothetical protein ARALYDRAFT_320430      | gbpln | Arabidopsis lyrata   | AT2G26420.1   Symbols:   PIP5K3   1-phosphatidylinositol-4-phosphate 5-kinase 3   chr2:11239434-11242239 REVERSE LENGTH=705                                                                                                                                                                                                                                                                                                                                                                                  | 1315 | 705 | 0         | 53.6  | 48.0 | 50.3 |
| Rsa1.0_01286.1.g25416.t1 | ref XP_002880778.1  hypothetical protein ARALYDRAFT_481492 [Arabidopsis lyrata subsp. lyrata] gi 297326617 gb EFH57037.1  hypothetical protein ARALYDRAFT_481492 [Arabidopsis lyrata subsp. lyrata]                                                                                 | 359  | 388  | 1.00E-169 | 108.1  | 83.3 | 88.3 | hypothetical protein ARALYDRAFT_481492      | gbpln | Arabidopsis lyrata   | AT2G26350.1   Symbols:   PEX10, ATPEX10   peroxin 10   chr2:11217767-11220415 REVERSE LENGTH=381                                                                                                                                                                                                                                                                                                                                                                                                             | 359  | 381 | 1.00E-170 | 106.1 | 83.0 | 87.7 |
| Rsa1.0_01286.1.g25417.t3 | gb EOA27758.1  hypothetical protein CARUB_v10023913mg [Capsella rubella]                                                                                                                                                                                                            | 224  | 251  | 5.00E-91  | 112.1  | 79.9 | 86.6 | hypothetical protein CARUB_v10023913mg      | gbpln | Capsella rubella     | AT2G26340.1   Symbols:   unknown protein; FUNCTIONS IN: molecular_function unknown; INVOLVED IN: biological_process unknown; LOCATED IN: chloroplast thylakoid membrane, chloroplast thylakoid lumen, chloroplast; EXPRESSED IN: 22 plant structures; EXPRESSED DURING: 13 growth stages; Has 38 Blast hits to 38 proteins in 13 species: Archae - 0; Bacteria - 0; Metazoa - 0; Fungi - 0; Plants - 38; Viruses - 0; Other Eukaryotes - 0 (source: NCBI BLink).   chr2:11215254-11216480 FORWARD LENGTH=253 | 224  | 253 | 1.00E-85  | 112.9 | 80.8 | 88.4 |
| Rsa1.0_01286.1.g25418.t1 | ref XP_002880777.1  hypothetical protein ARALYDRAFT_481491 [Arabidopsis lyrata subsp. lyrata] gi 297326616 gb EFH57036.1  hypothetical protein ARALYDRAFT_481491 [Arabidopsis lyrata subsp. lyrata]                                                                                 | 344  | 976  | 0         | 283.7  | 93.6 | 95.3 | hypothetical protein ARALYDRAFT_481491      | gbpln | Arabidopsis lyrata   | AT2G26330.1   Symbols:   ER, QRP1   Leucine-rich receptor-like protein kinase family protein   chr2:11208367-11213895 REVERSE LENGTH=976                                                                                                                                                                                                                                                                                                                                                                     | 344  | 976 | 0         | 283.7 | 91.9 | 94.5 |
| Rsa1.0_01287.1.g25419.t1 | gb AAM60851.1  unknown [Arabidopsis thaliana]                                                                                                                                                                                                                                       | 451  | 453  | 0         | 100.4  | 92.7 | 96.9 | unknown                                     | gbpln | Arabidopsis thaliana | AT5G39410.1   Symbols:   Saccharopine dehydrogenase   chr5:15768415-15770274 REVERSE LENGTH=454                                                                                                                                                                                                                                                                                                                                                                                                              | 451  | 454 | 0         | 100.7 | 92.5 | 96.7 |
| Rsa1.0_01287.1.g25420.t1 | #                                                                                                                                                                                                                                                                                   | #    | #    | #         | #      | #    | #    | -                                           | ----  | ----                 | AT2G16730.1   Symbols:   BGAL13   glycosyl hydrolase family 35 protein   chr2:7261986-7266105 REVERSE LENGTH=848                                                                                                                                                                                                                                                                                                                                                                                             | 130  | 848 | 5.00E-11  | 652.3 | 20.0 | 26.9 |
| Rsa1.0_01287.1.g25421.t1 | ref XP_002868719.1  predicted protein [Arabidopsis lyrata subsp. lyrata] gi 297314555 gb EFH44978.1  predicted protein [Arabidopsis lyrata subsp. lyrata]                                                                                                                           | 508  | 516  | 0         | 101.6  | 83.7 | 90.9 | predicted protein                           | gbpln | Arabidopsis lyrata   | AT5G39430.1   Symbols:   Protein of unknown function (DUF1336)   chr5:15775302-15777599 REVERSE LENGTH=511                                                                                                                                                                                                                                                                                                                                                                                                   | 508  | 511 | 0         | 100.6 | 80.7 | 88.8 |
| Rsa1.0_01287.1.g25422.t2 | #                                                                                                                                                                                                                                                                                   | #    | #    | #         | #      | #    | #    | -                                           | ----  | ----                 | #                                                                                                                                                                                                                                                                                                                                                                                                                                                                                                            | #    | #   | #         | #     | #    |      |

|                          |                                                                                                                                                                                                                                                                                                                                |      |      |           |       |      |      |                                                                                                                    |       |                      |                                                                                                                                                                                                                                                                                                                                                                                                                                                                                                                                                                                                              |      |     |           |       |      |      |
|--------------------------|--------------------------------------------------------------------------------------------------------------------------------------------------------------------------------------------------------------------------------------------------------------------------------------------------------------------------------|------|------|-----------|-------|------|------|--------------------------------------------------------------------------------------------------------------------|-------|----------------------|--------------------------------------------------------------------------------------------------------------------------------------------------------------------------------------------------------------------------------------------------------------------------------------------------------------------------------------------------------------------------------------------------------------------------------------------------------------------------------------------------------------------------------------------------------------------------------------------------------------|------|-----|-----------|-------|------|------|
| Rsa1.0_01287.1.g25423.t1 | gb AAB60731.1  Strong similarity to R. communis phosphoglycerate mutase (gb X70652). ESTs gb T41853,gb T76648 come from this gene [Arabidopsis thaliana]                                                                                                                                                                       | 168  | 575  | 3.00E-21  | 342.3 | 31.5 | 33.3 | Strong similarity to R. communis phosphoglycerate mutase (gb X70652). ESTs gb T41853,gb T76648 come from this gene | gbpln | Arabidopsis thaliana | AT1G09780.1   Symbols:   Phosphoglycerate mutase, 2,3-bisphosphoglycerate-independent   chr1:3165550-3167812 REVERSE LENGTH=557                                                                                                                                                                                                                                                                                                                                                                                                                                                                              | 168  | 557 | 1.00E-23  | 331.5 | 31.5 | 33.3 |
| Rsa1.0_01287.1.g25424.t1 | pir [T00833 RNA-directed DNA polymerase homolog T13L16.7 - Arabidopsis thaliana (fragment)                                                                                                                                                                                                                                     | 265  | 1365 | 1.00E-16  | 515.1 | 17.0 | 20.0 | RNA-directed DNA polymerase homolog T13L16.7 - Arabidopsis thaliana (fragment)                                     | ----- | -----                | #                                                                                                                                                                                                                                                                                                                                                                                                                                                                                                                                                                                                            | #    | #   | #         | #     | #    |      |
| Rsa1.0_01287.1.g25425.t4 | ref XP_002870779.1  hypothetical protein ARALYDRAFT_330549 [Arabidopsis lyrata subsp. lyrata] gi 297316615 gb EFH47038.1  hypothetical protein ARALYDRAFT_330549 [Arabidopsis lyrata subsp. lyrata]                                                                                                                            | 551  | 491  | 0         | 89.1  | 63.3 | 73.9 | hypothetical protein ARALYDRAFT_330549                                                                             | gbpln | Arabidopsis lyrata   | AT5G39440.1   Symbols: SnRK1.3   SNF1-related protein kinase 1.3   chr5:15781907-15784699 FORWARD LENGTH=494                                                                                                                                                                                                                                                                                                                                                                                                                                                                                                 | 551  | 494 | 0         | 89.7  | 62.6 | 73.9 |
| Rsa1.0_01287.1.g25426.t1 | ref NP_198761.2  F-box protein [Arabidopsis thaliana] gi 75247593 sp Q8RWD6.1 FB271_ARAT H RecName: Full=F-box protein At5g39450 gi 2026053 gb AAM13163.1  unknown protein [Arabidopsis thaliana] gi 31711988 gb AAP68350.1  At5g39450 [Arabidopsis thaliana] gi 332007051 gb AED94434.1  F-box protein [Arabidopsis thaliana] | 577  | 579  | 0         | 100.3 | 70.5 | 80.8 | F-box protein                                                                                                      | gbpln | Arabidopsis thaliana | AT5G39450.1   Symbols:   F-box family protein   chr5:15786045-15787877 FORWARD LENGTH=579                                                                                                                                                                                                                                                                                                                                                                                                                                                                                                                    | 577  | 579 | 0         | 100.3 | 70.5 | 80.8 |
| Rsa1.0_01288.1.g25427.t1 | gb EOA39933.1  hypothetical protein CARUB_v10011332mg [Capsella rubella]                                                                                                                                                                                                                                                       | 80   | 331  | 3.00E-27  | 413.8 | 78.8 | 81.3 | hypothetical protein CARUB_v10011332mg                                                                             | gbpln | Capsella rubella     | AT1G53345.1   Symbols:   unknown protein; INVOLVED IN: biological process unknown; LOCATED IN: endomembrane system; EXPRESSED IN: 8 plant structures; EXPRESSED DURING: 4 anthesis, F mature embryo stage, petal differentiation and expansion stage, E expanded cotyledon stage, D bilateral stage; BEST Arabidopsis thaliana protein match is: unknown protein (TAIR:AT5G09580.1); Has 201 Blast hits to 201 proteins in 75 species: Archae - 6; Bacteria - 102; Metazoa - 2; Fungi - 0; Plants - 47; Viruses - 7; Other Eukaryotes - 37 (source: NCBI BLINK).   chr1:19902561-19903538 FORWARD LENGTH=325 | 80   | 325 | 8.00E-28  | 406.3 | 73.8 | 80.0 |
| Rsa1.0_01288.1.g25428.t1 | gb AAC33226.1  putative non-LTR retroelement reverse transcriptase [Arabidopsis thaliana]                                                                                                                                                                                                                                      | 1576 | 1529 | 0         | 97.0  | 44.2 | 62.1 | putative non-LTR retroelement reverse transcriptase                                                                | gbpln | Arabidopsis thaliana | AT3G24255.1   Symbols:   RNA-directed DNA polymerase (reverse transcriptase)-related family protein   chr3:8789471-8793208 FORWARD LENGTH=746                                                                                                                                                                                                                                                                                                                                                                                                                                                                | 1576 | 746 | 1.00E-108 | 47.3  | 12.4 | 16.6 |
| Rsa1.0_01288.1.g25429.t1 | gb EOA28769.1  hypothetical protein CARUB_v10025001mg, partial [Capsella rubella]                                                                                                                                                                                                                                              | 147  | 389  | 8.00E-24  | 264.6 | 46.9 | 55.8 | hypothetical protein CARUB_v10025001mg, partial                                                                    | gbpln | Capsella rubella     | AT3G17540.1   Symbols:   F-box and associated interaction domains-containing protein   chr3:6002783-6003973 FORWARD LENGTH=396                                                                                                                                                                                                                                                                                                                                                                                                                                                                               | 147  | 396 | 1.00E-23  | 269.4 | 44.9 | 55.8 |
| Rsa1.0_01288.1.g25430.t5 | gb AAB82639.1  putative non-LTR retroelement reverse transcriptase [Arabidopsis thaliana]                                                                                                                                                                                                                                      | 2332 | 1374 | 0         | 58.9  | 31.7 | 41.9 | putative non-LTR retroelement reverse transcriptase                                                                | gbpln | Arabidopsis thaliana | AT1G53380.3   Symbols:   Plant protein of unknown function (DUF641)   chr1:19913341-19914702 REVERSE LENGTH=453                                                                                                                                                                                                                                                                                                                                                                                                                                                                                              | 2332 | 453 | 0         | 19.4  | 15.7 | 16.9 |
| Rsa1.0_01288.1.g25431.t1 | gb EOA37713.1  hypothetical protein CARUB_v10012449mg [Capsella rubella]                                                                                                                                                                                                                                                       | 190  | 315  | 2.00E-56  | 165.8 | 71.6 | 83.2 | hypothetical protein CARUB_v10012449mg                                                                             | gbpln | Capsella rubella     | AT1G53460.1   Symbols:   BEST Arabidopsis thaliana protein match is: Ran BP2/NZF zinc finger-like superfamily protein (TAIR:AT1G70650.2); Has 485 Blast hits to 413 proteins in 88 species: Archae - 11; Bacteria - 27; Metazoa - 119; Fungi - 17; Plants - 101; Viruses - 2; Other Eukaryotes - 208 (source: NCBI BLINK).   chr1:19954558-19956509 REVERSE LENGTH=314                                                                                                                                                                                                                                       | 190  | 314 | 9.00E-59  | 165.3 | 72.6 | 82.6 |
| Rsa1.0_01288.1.g25432.t1 | gb EOA39638.1  hypothetical protein CARUB_v10008272mg [Capsella rubella]                                                                                                                                                                                                                                                       | 869  | 880  | 0         | 101.3 | 87.0 | 92.6 | hypothetical protein CARUB_v10008272mg                                                                             | gbpln | Capsella rubella     | AT1G53470.1   Symbols: MSL4   mechanosensitive channel of small conductance-like 4   chr1:1995587-19961578 FORWARD LENGTH=881                                                                                                                                                                                                                                                                                                                                                                                                                                                                                | 869  | 881 | 0         | 101.4 | 85.7 | 92.3 |
| Rsa1.0_01288.1.g25433.t1 | ref NP_175754.2  RING/U-box domain-containing protein [Arabidopsis thaliana] gi 332194827 gb AE32948.1  RING/U-box domain-containing protein [Arabidopsis thaliana]                                                                                                                                                            | 290  | 304  | 1.00E-129 | 104.8 | 76.9 | 84.5 | RING/U-box domain-containing protein                                                                               | gbpln | Arabidopsis thaliana | AT1G53490.1   Symbols:   RING/U-box superfamily protein   chr1:19965146-19966811 FORWARD LENGTH=304                                                                                                                                                                                                                                                                                                                                                                                                                                                                                                          | 290  | 304 | 1.00E-132 | 104.8 | 76.9 | 84.5 |
| Rsa1.0_01288.1.g25434.t1 | gb EOA30048.1  hypothetical protein CARUB_v10013153mg [Capsella rubella]                                                                                                                                                                                                                                                       | 184  | 664  | 2.00E-55  | 360.9 | 62.5 | 66.3 | hypothetical protein CARUB_v10013153mg                                                                             | gbpln | Capsella rubella     | AT3G14790.1   Symbols: RHM3, ATRHM3   rhamnose biosynthesis 3   chr3:4964791-4966875 FORWARD LENGTH=664                                                                                                                                                                                                                                                                                                                                                                                                                                                                                                      | 184  | 664 | 5.00E-57  | 360.9 | 62.0 | 65.8 |

|                          |                                                                                                                                                                                                                                                                                                                                                                                                                                                                                 |      |      |           |       |      |      |                                                          |       |                      |                                                                                                                                                                                                                                                                                                                                                          |      |      |           |       |      |      |
|--------------------------|---------------------------------------------------------------------------------------------------------------------------------------------------------------------------------------------------------------------------------------------------------------------------------------------------------------------------------------------------------------------------------------------------------------------------------------------------------------------------------|------|------|-----------|-------|------|------|----------------------------------------------------------|-------|----------------------|----------------------------------------------------------------------------------------------------------------------------------------------------------------------------------------------------------------------------------------------------------------------------------------------------------------------------------------------------------|------|------|-----------|-------|------|------|
| Rsa1.0_01288.1.g25435.t1 | gb AAC79110.1  putative polyprotein of LTR transposon [Arabidopsis thaliana] gi 7269781 emb CAB77781.1  putative polyprotein of LTR transposon [Arabidopsis thaliana]                                                                                                                                                                                                                                                                                                           | 161  | 1456 | 3.00E-43  | 904.3 | 52.8 | 60.9 | putative polyprotein of LTR transposon                   | gbpln | Arabidopsis thaliana | AT4G23160.1   Symbols: CRK8   cysteine-rich RLK (RECEPTOR-like protein kinase) 8   chr4:12129485-12134086 FORWARD LENGTH=1262                                                                                                                                                                                                                            | 161  | 1262 | 6.00E-19  | 783.9 | 26.7 | 43.5 |
| Rsa1.0_01288.1.g25436.t1 | ref XP_002896377.1  predicted protein [Arabidopsis lyrata subsp. lyrata] gi 297332218 gb EFH62636.1  predicted protein [Arabidopsis lyrata subsp. lyrata]                                                                                                                                                                                                                                                                                                                       | 229  | 934  | 3.00E-68  | 407.9 | 54.1 | 58.5 | predicted protein                                        | gbpln | Arabidopsis lyrata   | AT1G63730.1   Symbols:   Disease resistance protein (TIR-NBS-LRR class) family   chr1:23641770-23645132 FORWARD LENGTH=966                                                                                                                                                                                                                               | 229  | 966  | 7.00E-70  | 421.8 | 55.5 | 59.8 |
| Rsa1.0_01289.1.g25437.t1 | gb EOA40076.1  hypothetical protein CARUB_v10008772mg [Capsella rubella]                                                                                                                                                                                                                                                                                                                                                                                                        | 523  | 546  | 0         | 104.4 | 79.2 | 89.1 | hypothetical protein CARUB_v10008772mg                   | gbpln | Capsella rubella     | AT1G14080.1   Symbols: FUT6, ATFUT6   fucosyltransferase 6   chr1:4822580-4824218 FORWARD LENGTH=519                                                                                                                                                                                                                                                     | 523  | 519  | 0         | 99.2  | 79.2 | 87.6 |
| Rsa1.0_01289.1.g25438.t3 | ref NP_172857.2  phosphate transporter PHO1-3 [Arabidopsis thaliana] gi 306756302 sp Q6R8G7.2 PHO13_ARA TH RecName: Full=Phosphate transporter PHO1 homolog 3; AltName: Full=Protein PHO1 homolog 3; Short=AtPHO1;H3 gi 332190980 gb AEE29101.1  phosphate transporter PHO1-3 [Arabidopsis thaliana]                                                                                                                                                                            | 213  | 813  | 1.00E-62  | 381.7 | 63.4 | 78.9 | phosphate transporter PHO1-3                             | gbpln | Arabidopsis thaliana | AT1G14040.1   Symbols:   EXS (ERD1/XPR1/SYG1) family protein   chr1:4810488-4814543 FORWARD LENGTH=813                                                                                                                                                                                                                                                   | 213  | 813  | 4.00E-65  | 381.7 | 63.4 | 78.9 |
| Rsa1.0_01289.1.g25439.t1 | # # # # # # # # - ----                                                                                                                                                                                                                                                                                                                                                                                                                                                          |      |      |           |       |      |      |                                                          |       |                      |                                                                                                                                                                                                                                                                                                                                                          |      |      |           |       |      |      |
| Rsa1.0_01289.1.g25440.t2 | emb CAB39638.1  RNA-directed DNA polymerase-like protein [Arabidopsis thaliana] gi 7267666 emb CAB78094.1  RNA-directed DNA polymerase-like protein [Arabidopsis thaliana] ref NP_172857.2  phosphate transporter PHO1-3 [Arabidopsis thaliana] gi 306756302 sp Q6R8G7.2 PHO13_ARA TH RecName: Full=Phosphate transporter PHO1 homolog 3; AltName: Full=Protein PHO1 homolog 3; Short=AtPHO1;H3 gi 332190980 gb AEE29101.1  phosphate transporter PHO1-3 [Arabidopsis thaliana] | 2835 | 1274 | 0         | 44.9  | 21.8 | 29.9 | RNA-directed DNA polymerase-like protein                 | gbpln | Arabidopsis thaliana | AT1G14040.1   Symbols:   EXS (ERD1/XPR1/SYG1) family protein   chr1:4810488-4814543 FORWARD LENGTH=813                                                                                                                                                                                                                                                   | 2835 | 813  | 1.00E-124 | 28.7  | 8.4  | 9.2  |
| Rsa1.0_01289.1.g25441.t1 | ref NP_172857.2  phosphate transporter PHO1-3 [Arabidopsis thaliana] gi 306756302 sp Q6R8G7.2 PHO13_ARA TH RecName: Full=Phosphate transporter PHO1 homolog 3; AltName: Full=Protein PHO1 homolog 3; Short=AtPHO1;H3 gi 332190980 gb AEE29101.1  phosphate transporter PHO1-3 [Arabidopsis thaliana]                                                                                                                                                                            | 596  | 813  | 0         | 136.4 | 86.7 | 93.1 | phosphate transporter PHO1-3                             | gbpln | Arabidopsis thaliana | AT1G14040.1   Symbols:   EXS (ERD1/XPR1/SYG1) family protein   chr1:4810488-4814543 FORWARD LENGTH=813                                                                                                                                                                                                                                                   | 596  | 813  | 0         | 136.4 | 86.7 | 93.1 |
| Rsa1.0_01290.1.g25442.t1 | # # # # # # # # - ----                                                                                                                                                                                                                                                                                                                                                                                                                                                          |      |      |           |       |      |      |                                                          |       |                      |                                                                                                                                                                                                                                                                                                                                                          |      |      |           |       |      |      |
| Rsa1.0_01290.1.g25443.t1 | gb AAD24567.1 AF120335.1 putative transposase [Arabidopsis thaliana]                                                                                                                                                                                                                                                                                                                                                                                                            | 130  | 577  | 2.00E-31  | 443.8 | 50.8 | 66.2 | putative transposase                                     | gbpln | Arabidopsis thaliana | #                                                                                                                                                                                                                                                                                                                                                        | #    | #    | #         | #     | #    | #    |
| Rsa1.0_01290.1.g25444.t2 | gb EOA12975.1  hypothetical protein CARUB_v10025964mg [Capsella rubella]                                                                                                                                                                                                                                                                                                                                                                                                        | 772  | 725  | 0         | 93.9  | 77.5 | 85.8 | hypothetical protein CARUB_v10025964mg                   | gbpln | Capsella rubella     | AT5G49880.1   Symbols:   mitotic checkpoint family protein   chr5:20282305-20287775 FORWARD LENGTH=726                                                                                                                                                                                                                                                   | 772  | 726  | 0         | 94.0  | 78.2 | 85.4 |
| Rsa1.0_01290.1.g25445.t2 | # # # # # # # # - ----                                                                                                                                                                                                                                                                                                                                                                                                                                                          |      |      |           |       |      |      |                                                          |       |                      |                                                                                                                                                                                                                                                                                                                                                          |      |      |           |       |      |      |
| Rsa1.0_01290.1.g25446.t2 | # # # # # # # # - ----                                                                                                                                                                                                                                                                                                                                                                                                                                                          |      |      |           |       |      |      |                                                          |       |                      |                                                                                                                                                                                                                                                                                                                                                          |      |      |           |       |      |      |
| Rsa1.0_01290.1.g25447.t1 | # # # # # # # # - ----                                                                                                                                                                                                                                                                                                                                                                                                                                                          |      |      |           |       |      |      |                                                          |       |                      |                                                                                                                                                                                                                                                                                                                                                          |      |      |           |       |      |      |
| Rsa1.0_01290.1.g25448.t1 | gb EOA29112.1  hypothetical protein CARUB_v10025379mg [Capsella rubella]                                                                                                                                                                                                                                                                                                                                                                                                        | 374  | 1560 | 3.00E-57  | 417.1 | 44.7 | 56.7 | hypothetical protein CARUB_v10025379mg                   | gbpln | Capsella rubella     | AT2G36490.1   Symbols: DML1, ROS1   demeter-like 1   chr2:15308259-15314272 REVERSE LENGTH=1393                                                                                                                                                                                                                                                          | 374  | 1393 | 5.00E-56  | 372.5 | 38.0 | 47.6 |
| Rsa1.0_01290.1.g25449.t1 | gb AAC26234.1  contains similarity to maize transposon MuDR (GB:M76978) [Arabidopsis thaliana]                                                                                                                                                                                                                                                                                                                                                                                  | 505  | 940  | 2.00E-32  | 186.1 | 13.1 | 18.6 | contains similarity to maize transposon MuDR (GB:M76978) | gbpln | Arabidopsis thaliana | #                                                                                                                                                                                                                                                                                                                                                        | #    | #    | #         | #     | #    | #    |
| Rsa1.0_01290.1.g25450.t1 | gb ABD65058.1  GRF zinc finger containing protein [Brassica oleracea]                                                                                                                                                                                                                                                                                                                                                                                                           | 144  | 172  | 9.00E-14  | 119.4 | 34.0 | 46.5 | GRF zinc finger containing protein                       | gbpln | Brassica oleracea    | #                                                                                                                                                                                                                                                                                                                                                        | #    | #    | #         | #     | #    | #    |
| Rsa1.0_01291.1.g25451.t1 | gb EOA28069.1  hypothetical protein CARUB_v10024251mg [Capsella rubella]                                                                                                                                                                                                                                                                                                                                                                                                        | 354  | 151  | 4.00E-17  | 42.7  | 15.5 | 20.1 | hypothetical protein CARUB_v10024251mg                   | gbpln | Capsella rubella     | AT2G38880.7   Symbols: NF-YB1   nuclear factor Y, subunit B1   chr2:1623865-16240316 FORWARD LENGTH=139                                                                                                                                                                                                                                                  | 354  | 139  | 7.00E-19  | 39.3  | 15.5 | 19.5 |
| Rsa1.0_01291.1.g25452.t1 | gb ABL97987.1  protein translocase [Brassica rapa]                                                                                                                                                                                                                                                                                                                                                                                                                              | 466  | 220  | 1.00E-104 | 47.2  | 44.0 | 44.6 | protein translocase                                      | gbpln | Brassica rapa        | AT2G37410.2   Symbols: ATTIM17-2, TIM17, TIM17-2   translocase inner membrane subunit 17-2   chr2:15698119-15698850 REVERSE LENGTH=243                                                                                                                                                                                                                   | 466  | 243  | 7.00E-82  | 52.1  | 36.1 | 40.3 |
| Rsa1.0_01291.1.g25453.t1 | ref XP_002879665.1  hypothetical protein ARALYDRAFT_482731 [Arabidopsis lyrata subsp. lyrata] gi 297325504 gb EFH55924.1  hypothetical protein ARALYDRAFT_482731 [Arabidopsis lyrata subsp. lyrata]                                                                                                                                                                                                                                                                             | 261  | 312  | 6.00E-59  | 119.5 | 73.2 | 79.3 | hypothetical protein ARALYDRAFT_482731                   | gbpln | Arabidopsis lyrata   | AT2G37380.1   Symbols:   unknown protein; BEST Arabidopsis thaliana protein match is: unknown protein (TAIR:AT2G39370.1); Has 1284 Blast hits to 422 proteins in 114 species: Archae - 0; Bacteria - 90; Metazoa - 125; Fungi - 151; Plants - 136; Viruses - 0; Other Eukaryotes - 782 (source: NCBI BLINK).   chr2:15686828-15687793 FORWARD LENGTH=321 | 261  | 321  | 5.00E-61  | 123.0 | 75.5 | 81.6 |

|                          |                                                                                                                                                                                                                                                                                                                                                                                                                                                                                                                                                                                                                                                                         |     |     |           |       |      |      |                                                      |       |                      |                                                                                                                                                                                                                                                                                                                                              |     |     |           |       |      |      |  |
|--------------------------|-------------------------------------------------------------------------------------------------------------------------------------------------------------------------------------------------------------------------------------------------------------------------------------------------------------------------------------------------------------------------------------------------------------------------------------------------------------------------------------------------------------------------------------------------------------------------------------------------------------------------------------------------------------------------|-----|-----|-----------|-------|------|------|------------------------------------------------------|-------|----------------------|----------------------------------------------------------------------------------------------------------------------------------------------------------------------------------------------------------------------------------------------------------------------------------------------------------------------------------------------|-----|-----|-----------|-------|------|------|--|
| Rsa1.0_01292.1.g25454.t1 | ref NP_566257.1  U4/U6.U5 tri-snRNP component [Arabidopsis thaliana] gi 14517383 gb AAK62582.1  AT3g05760/F10A16.5 [Arabidopsis thaliana] gi 15450543 gb AAK96449.1  AT3g05760/F10A16.5 [Arabidopsis thaliana] gi 332640772 gb AEE74293.1  U4/U6.U5 tri-snRNP component [Arabidopsis thaliana]                                                                                                                                                                                                                                                                                                                                                                          | 201 | 202 | 7.00E-88  | 100.5 | 93.5 | 96.5 | U4/U6.U5 tri-snRNP component                         | gbpln | Arabidopsis thaliana | AT3G05760.1   Symbols:   C2H2 and C2HC zinc fingers superfamily protein   chr3:1707981-1709910 FORWARD LENGTH=202                                                                                                                                                                                                                            | 201 | 202 | 2.00E-90  | 100.5 | 93.5 | 96.5 |  |
| Rsa1.0_01292.1.g25455.t2 | gb AAD25610.1 AC005287.12 Hypothetical protein [Arabidopsis thaliana]                                                                                                                                                                                                                                                                                                                                                                                                                                                                                                                                                                                                   | 449 | 444 | 3.00E-64  | 98.9  | 36.7 | 45.9 | Hypothetical protein                                 | gbpln | Arabidopsis thaliana | AT3G05770.1   Symbols:   unknown protein; BEST Arabidopsis thaliana protein match is: unknown protein (TAIR:AT1G54300.1); Has 105 Blast hits to 105 proteins in 16 species: Archae - 0; Bacteria - 0; Metazoa - 0; Fungi - 0; Plants - 99; Viruses - 0; Other Eukaryotes - 6 (source: NCBI BLink).   chr3:1710328-1712165 REVERSE LENGTH=410 | 449 | 410 | 2.00E-63  | 91.3  | 36.5 | 45.7 |  |
| Rsa1.0_01292.1.g25456.t2 | gb EOA29822.1  hypothetical protein CARUB_v10012917mg [Capsella rubella]                                                                                                                                                                                                                                                                                                                                                                                                                                                                                                                                                                                                | 929 | 937 | 0         | 100.9 | 72.1 | 81.6 | hypothetical protein CARUB_v10012917mg               | gbpln | Capsella rubella     | AT3G05790.1   Symbols: LON4   lon protease 4   chr3:1720154-1725182 REVERSE LENGTH=942                                                                                                                                                                                                                                                       | 929 | 942 | 0         | 101.4 | 73.1 | 82.1 |  |
| Rsa1.0_01292.1.g25457.t1 | # # # # # # # #                                                                                                                                                                                                                                                                                                                                                                                                                                                                                                                                                                                                                                                         |     |     |           |       |      |      | -                                                    | ----  | ----                 | # # # # # # #                                                                                                                                                                                                                                                                                                                                |     |     |           |       |      |      |  |
| Rsa1.0_01292.1.g25458.t1 | gb EOA30990.1  hypothetical protein CARUB_v10014135mg, partial [Capsella rubella]                                                                                                                                                                                                                                                                                                                                                                                                                                                                                                                                                                                       | 293 | 335 | 5.00E-93  | 114.3 | 70.6 | 79.2 | hypothetical protein CARUB_v10014135mg, partial      | gbpln | Capsella rubella     | AT3G06020.1   Symbols:   Protein of unknown function (DUF3049)   chr3:1813267-1814169 FORWARD LENGTH=300                                                                                                                                                                                                                                     | 293 | 300 | 9.00E-85  | 102.4 | 71.7 | 80.5 |  |
| Rsa1.0_01292.1.g25459.t1 | ref NP_187254.1  mitogen-activated protein kinase kinase kinase 3 [Arabidopsis thaliana] gi 46576859 sp O22042.1 M3K3_ARATH RecName: Full=Mitogen-activated protein kinase kinase kinase 3; AltName: Full=Arabidopsis NPK1--related protein kinase 3 gi 2342427 dbj BAA21857.1  NPK1--related protein kinase 3 [Arabidopsis thaliana] gi 7658341 gb IAAF66131.1  NPK1--related protein kinase 3; 8286-4476 [Arabidopsis thaliana] gi 17979012 gb AAL47465.1  AT3g06030/F24F17.1 [Arabidopsis thaliana] gi 24111309 gb AAN46778.1  At3g06030/F24F17.1 [Arabidopsis thaliana] gi 33264081 gb AEE74332.1  mitogen-activated protein kinase kinase 3 [Arabidopsis thaliana] | 656 | 651 | 0         | 99.2  | 87.5 | 91.5 | mitogen-activated protein kinase kinase kinase 3     | gbpln | Arabidopsis thaliana | AT3G06030.1   Symbols: ANP3, MAPKKK12, NP3   NPK1--related protein kinase 3   chr3:1818895-1822705 REVERSE LENGTH=651                                                                                                                                                                                                                        | 656 | 651 | 0         | 99.2  | 87.5 | 91.5 |  |
| Rsa1.0_01292.1.g25460.t1 | ref NP_566267.1  glycoprotein membrane precursor GPI-anchored protein [Arabidopsis thaliana] gi 34395875 sp Q84MC0.1 UGPI4_ARATH RecName: Full=Uncharacterized GPI-anchored protein At3g06035; Flags: Precursor gi 30102608 gb AAP21222.1  At3g06035 [Arabidopsis thaliana] gi 110735967 dbj BAE99958.1  hypothetical protein [Arabidopsis thaliana] gi 332640812 gb AEE74333.1  glycoprotein membrane precursor GPI-anchored protein [Arabidopsis thaliana]                                                                                                                                                                                                            | 198 | 200 | 3.00E-83  | 101.0 | 76.3 | 84.8 | glycoprotein membrane precursor GPI-anchored protein | gbpln | Arabidopsis thaliana | AT3G06035.1   Symbols:   Glycoprotein membrane precursor GPI-anchored   chr3:1823172-1824110 REVERSE LENGTH=200                                                                                                                                                                                                                              | 198 | 200 | 1.00E-85  | 101.0 | 76.3 | 84.8 |  |
| Rsa1.0_01292.1.g25461.t1 | gb EOA31534.1  hypothetical protein CARUB_v10014726mg [Capsella rubella]                                                                                                                                                                                                                                                                                                                                                                                                                                                                                                                                                                                                | 191 | 188 | 8.00E-78  | 98.4  | 83.2 | 89.5 | hypothetical protein CARUB_v10014726mg               | gbpln | Capsella rubella     | AT3G06040.3   Symbols:   Ribosomal protein L12/ ATP-dependent Clp protease adaptor protein ClpS family protein   chr3:1824516-1825076 REVERSE LENGTH=186                                                                                                                                                                                     | 191 | 186 | 8.00E-77  | 97.4  | 81.2 | 88.0 |  |
| Rsa1.0_01292.1.g25462.t1 | dbj BAJ34275.1  unnamed protein product [Thellungiella halophila]                                                                                                                                                                                                                                                                                                                                                                                                                                                                                                                                                                                                       | 201 | 201 | 1.00E-104 | 100.0 | 94.0 | 95.5 | unnamed protein product                              | ----  | ----                 | AT3G06050.1   Symbols: PRXIF, ATPRXIF   peroxiredoxin IIF   chr3:1826311-1827809 REVERSE LENGTH=201                                                                                                                                                                                                                                          | 201 | 201 | 1.00E-106 | 100.0 | 92.5 | 96.5 |  |
| Rsa1.0_01292.1.g25463.t1 | ref XP_002884556.1  short-chain dehydrogenase/reductase family protein [Arabidopsis lyrata subsp. lyrata] gi 297330396 gb EFH60815.1  short-chain dehydrogenase/reductase family protein [Arabidopsis lyrata subsp. lyrata]                                                                                                                                                                                                                                                                                                                                                                                                                                             | 329 | 326 | 1.00E-167 | 99.1  | 87.5 | 94.5 | short-chain dehydrogenase/reductase family protein   | gbpln | Arabidopsis lyrata   | AT3G06060.1   Symbols:   NAD(P)-binding Rossmann-fold superfamily protein   chr3:1828296-1830160 REVERSE LENGTH=326                                                                                                                                                                                                                          | 329 | 326 | 1.00E-164 | 99.1  | 87.8 | 93.9 |  |

|                          |                                                                                                                                                                                                                                                                                 |      |      |           |       |      |      |                                                 |       |                      |                                                                                                                                                                                                                                                                                                                                                                                                                                                                       |      |      |           |       |      |      |
|--------------------------|---------------------------------------------------------------------------------------------------------------------------------------------------------------------------------------------------------------------------------------------------------------------------------|------|------|-----------|-------|------|------|-------------------------------------------------|-------|----------------------|-----------------------------------------------------------------------------------------------------------------------------------------------------------------------------------------------------------------------------------------------------------------------------------------------------------------------------------------------------------------------------------------------------------------------------------------------------------------------|------|------|-----------|-------|------|------|
| Rsa1.0_01292.1.g25464.t1 | ref[XP_002884557.1] predicted protein [Arabidopsis lyrata subsp. lyrata] gi 297330397 gb EFH60816.1  predicted protein [Arabidopsis lyrata subsp. lyrata]                                                                                                                       | 155  | 152  | 2.00E-60  | 98.1  | 78.1 | 85.8 | predicted protein                               | gbpln | Arabidopsis lyrata   | AT3G06070.1   Symbols:   unknown protein; BEST Arabidopsis thaliana protein match is: unknown protein (TAIR:AT5G19190.1). Has 33 Blast hits to 33 proteins in 12 species: Archae - 0; Bacteria - 0; Metazoa - 1; Fungi - 0; Plants - 32; Viruses - 0; Other Eukaryotes - 0 (source: NCBI BLink).   chr3:1831305-1831846 REVERSE LENGTH=151                                                                                                                            | 155  | 151  | 3.00E-60  | 97.4  | 78.7 | 86.5 |
| Rsa1.0_01292.1.g25465.t1 | gb EOA30487.1  hypothetical protein CARUB_v10013611mg [Capsella rubella]                                                                                                                                                                                                        | 469  | 473  | 0         | 100.9 | 84.4 | 91.0 | hypothetical protein CARUB_v10013611mg          | gbpln | Capsella rubella     | AT3G06080.2   Symbols:   Plant protein of unknown function (DUF828)   chr3:1834959-1837524 REVERSE LENGTH=469                                                                                                                                                                                                                                                                                                                                                         | 469  | 469  | 0         | 100.0 | 84.0 | 90.6 |
| Rsa1.0_01293.1.g25466.t1 | gb AAC15700.1  BURP domain containing protein [Brassica napus] gi 226427141 gb ACO54860.1  BURP domain protein [Brassica napus] gi 226427143 gb ACO54861.1  BURP domain protein [Brassica napus]                                                                                | 249  | 282  | 1.00E-124 | 113.3 | 84.3 | 92.4 | BURP domain containing protein                  | gbpln | Brassica napus       | AT1G49320.1   Symbols: ATUSPL1, USPL1   unknown seed protein like 1   chr1:18246441-18247817 FORWARD LENGTH=280                                                                                                                                                                                                                                                                                                                                                       | 249  | 280  | 1.00E-123 | 112.4 | 80.7 | 92.0 |
| Rsa1.0_01293.1.g25467.t1 | gb EOA39437.1  hypothetical protein CARUB_v10012580mg, partial [Capsella rubella]                                                                                                                                                                                               | 507  | 342  | 8.00E-75  | 67.5  | 25.2 | 28.2 | hypothetical protein CARUB_v10012580mg, partial | gbpln | Capsella rubella     | AT1G49330.1   Symbols:   hydroxyproline-rich glycoprotein family protein   chr1:18250043-18251038 FORWARD LENGTH=331                                                                                                                                                                                                                                                                                                                                                  | 507  | 331  | 6.00E-72  | 65.3  | 24.3 | 27.6 |
| Rsa1.0_01293.1.g25468.t1 | gb AAD43164.1 AC007504_19 Putative Phosphatidylinositol 4-kinase PI4K [Arabidopsis thaliana]                                                                                                                                                                                    | 2023 | 2051 | 0         | 101.4 | 93.9 | 96.8 | Putative Phosphatidylinositol 4-kinase PI4K     | gbpln | Arabidopsis thaliana | AT1G49340.1   Symbols: ATP14K ALPHA   Phosphatidylinositol 3- and 4-kinase family protein   chr1:18252355-18263967 FORWARD LENGTH=2028                                                                                                                                                                                                                                                                                                                                | 2023 | 2028 | 0         | 100.2 | 93.8 | 96.4 |
| Rsa1.0_01293.1.g25469.t1 | gb EOA32409.1  hypothetical protein CARUB_v10015681mg [Capsella rubella]                                                                                                                                                                                                        | 131  | 131  | 9.00E-45  | 100.0 | 66.4 | 80.2 | hypothetical protein CARUB_v10015681mg          | gbpln | Capsella rubella     | AT3G03410.1   Symbols:   EF hand calcium-binding protein family   chr3:811324-811719 REVERSE LENGTH=131                                                                                                                                                                                                                                                                                                                                                               | 131  | 131  | 6.00E-43  | 100.0 | 61.8 | 77.1 |
| Rsa1.0_01293.1.g25470.t1 | ref[XP_002894180.1] hypothetical protein ARALYDRAFT_891816 [Arabidopsis lyrata subsp. lyrata] gi 297340022 gb EFH70439.1  hypothetical protein ARALYDRAFT_891816 [Arabidopsis lyrata subsp. lyrata]                                                                             | 54   | 54   | 2.00E-20  | 100.0 | 87.0 | 94.4 | hypothetical protein ARALYDRAFT_891816          | gbpln | Arabidopsis lyrata   | AT1G49410.1   Symbols: TOM6   translocase of the outer mitochondrial membrane 6   chr1:18286738-18286902 REVERSE LENGTH=54                                                                                                                                                                                                                                                                                                                                            | 54   | 54   | 3.00E-23  | 100.0 | 88.9 | 92.6 |
| Rsa1.0_01293.1.g25471.t1 | emb CAA96523.1  acyl CoA synthetase [Brassica napus]                                                                                                                                                                                                                            | 666  | 666  | 0         | 100.0 | 97.7 | 98.9 | acyl CoA synthetase                             | gbpln | Brassica napus       | AT1G49430.1   Symbols: LACS2, LRD2   long-chain acyl-CoA synthetase 2   chr1:18291188-18295641 FORWARD LENGTH=665                                                                                                                                                                                                                                                                                                                                                     | 666  | 665  | 0         | 99.8  | 91.9 | 96.2 |
| Rsa1.0_01293.1.g25472.t1 | db BAJ34322.1  unnamed protein product [Thellungiella halophila]                                                                                                                                                                                                                | 269  | 226  | 5.00E-96  | 84.0  | 66.5 | 72.5 | unnamed protein product                         | ----  | ----                 | AT1G49480.1   Symbols: RTV1   related to vernalization 1   chr1:18314596-18315460 REVERSE LENGTH=226                                                                                                                                                                                                                                                                                                                                                                  | 269  | 226  | 5.00E-95  | 84.0  | 63.6 | 72.1 |
| Rsa1.0_01294.1.g25473.t1 | ref[XP_002876357.1] hypothetical protein ARALYDRAFT_486067 [Arabidopsis lyrata subsp. lyrata] gi 297322195 gb EFH52616.1  hypothetical protein ARALYDRAFT_486067 [Arabidopsis lyrata subsp. lyrata]                                                                             | 421  | 440  | 1.00E-133 | 104.5 | 68.2 | 79.3 | hypothetical protein ARALYDRAFT_486067          | gbpln | Arabidopsis lyrata   | AT3G56270.1   Symbols:   Plant protein of unknown function (DUF827)   chr3:20870220-20871854 FORWARD LENGTH=446                                                                                                                                                                                                                                                                                                                                                       | 421  | 446  | 1.00E-135 | 105.9 | 67.5 | 79.3 |
| Rsa1.0_01294.1.g25474.t1 | ref[NP_001190104.1] uncharacterized protein [Arabidopsis thaliana] gi 44681332 gb AAS47606.1  At3g56260 [Arabidopsis thaliana] gi 45773858 gb AAS76733.1  At3g56260 [Arabidopsis thaliana] gi 332645982 gb AEE79503.1  uncharacterized protein AT3G56260 [Arabidopsis thaliana] | 201  | 197  | 4.00E-40  | 98.0  | 57.7 | 70.1 | uncharacterized protein                         | gbpln | Arabidopsis thaliana | AT3G56260.2   Symbols:   unknown protein; FUNCTIONS IN: molecular function unknown; INVOLVED IN: biological process unknown; LOCATED IN: cellular component unknown; EXPRESSED IN: 8 plant structures: EXPRESSED DURING: F mature embryo stage, petal differentiation and expansion stage, E expanded cotyledon stage, D bilateral stage; BEST Arabidopsis thaliana protein match is: unknown protein (TAIR:AT2G40475.1).   chr3:20868199-20868792 REVERSE LENGTH=197 | 201  | 197  | 1.00E-42  | 98.0  | 57.7 | 70.1 |
| Rsa1.0_01294.1.g25475.t2 | ref[NP_191184.1] uncharacterized protein [Arabidopsis thaliana] gi 7572923 emb CAB87424.1  putative protein [Arabidopsis thaliana] gi 332645980 gb AEE79501.1  uncharacterized protein AT3G56250 [Arabidopsis thaliana]                                                         | 261  | 222  | 4.00E-45  | 85.1  | 51.7 | 61.7 | uncharacterized protein                         | gbpln | Arabidopsis thaliana | AT3G56250.1   Symbols:   unknown protein; Has 109 Blast hits to 83 proteins in 41 species: Archae - 0; Bacteria - 6; Metazoa - 18; Fungi - 20; Plants - 21; Viruses - 0; Other Eukaryotes - 44 (source: NCBI BLink).   chr3:20866120-20867840 FORWARD LENGTH=222                                                                                                                                                                                                      | 261  | 222  | 1.00E-47  | 85.1  | 51.7 | 61.7 |
| Rsa1.0_01294.1.g25476.t1 | ref[XP_002878075.1] hypothetical protein ARALYDRAFT_486064 [Arabidopsis lyrata subsp. lyrata] gi 297323913 gb EFH54334.1  hypothetical protein ARALYDRAFT_486064 [Arabidopsis lyrata subsp. lyrata]                                                                             | 109  | 121  | 5.00E-48  | 111.0 | 93.6 | 96.3 | hypothetical protein ARALYDRAFT_486064          | gbpln | Arabidopsis lyrata   | AT3G56240.1   Symbols: CCH   copper chaperone   chr3:20863460-20864402 REVERSE LENGTH=121                                                                                                                                                                                                                                                                                                                                                                             | 109  | 121  | 2.00E-49  | 111.0 | 91.7 | 94.5 |

|                          |                                                                                                                                                                                                                                                                                                                                                                                                                                                                                                                                                                                                                                          |     |     |           |       |      |      |                                         |       |                      |                                                                                                                                                                                                                                                                                                                                                                   |     |     |           |       |      |      |
|--------------------------|------------------------------------------------------------------------------------------------------------------------------------------------------------------------------------------------------------------------------------------------------------------------------------------------------------------------------------------------------------------------------------------------------------------------------------------------------------------------------------------------------------------------------------------------------------------------------------------------------------------------------------------|-----|-----|-----------|-------|------|------|-----------------------------------------|-------|----------------------|-------------------------------------------------------------------------------------------------------------------------------------------------------------------------------------------------------------------------------------------------------------------------------------------------------------------------------------------------------------------|-----|-----|-----------|-------|------|------|
| Rsa1.0_01294.1.g25477.t1 | ref NP_191182.1  BTB/POZ domain-containing protein [Arabidopsis thaliana]<br>gi 75264422 sp Q9LYL9.1 Y3623_ARATH<br>RecName: Full=BTB/POZ domain-containing protein At3g56230<br>gi 7572921 emb CAB87422.1  putative protein [Arabidopsis thaliana]<br>gi 45825155 gb AA577485.1  At3g56230 [Arabidopsis thaliana]<br>gi 51970740 dbj BAD44062.1  putative protein [Arabidopsis thaliana]<br>gi 332645978 gb AEE79499.1  BTB/POZ domain-containing protein [Arabidopsis thaliana]                                                                                                                                                        | 283 | 282 | 1.00E-137 | 99.6  | 84.8 | 93.3 | BTB/POZ domain-containing protein       | gbpln | Arabidopsis thaliana | AT3G56230.1   Symbols:   BTB/POZ domain-containing protein   chr3:20860899-20862135 REVERSE LENGTH=282                                                                                                                                                                                                                                                            | 283 | 282 | 1.00E-140 | 99.6  | 84.8 | 93.3 |
| Rsa1.0_01294.1.g25478.t1 | gb EOA24875.1  hypothetical protein CARUB_v10018165mg [Capsella rubella]                                                                                                                                                                                                                                                                                                                                                                                                                                                                                                                                                                 | 157 | 157 | 3.00E-63  | 100.0 | 76.4 | 86.6 | hypothetical protein CARUB_v10018165mg  | gbpln | Capsella rubella     | AT3G56220.1   Symbols:   transcription regulators   chr3:20858941-20860302 FORWARD LENGTH=156                                                                                                                                                                                                                                                                     | 157 | 156 | 4.00E-65  | 99.4  | 76.4 | 86.6 |
| Rsa1.0_01294.1.g25479.t1 | ref XP_002878073.1  binding protein [Arabidopsis lyrata subsp. lyrata]<br>gi 297322192 gb EFH54332.1  binding protein [Arabidopsis lyrata subsp. lyrata]                                                                                                                                                                                                                                                                                                                                                                                                                                                                                 | 194 | 195 | 4.00E-92  | 100.5 | 86.1 | 93.3 | binding protein                         | gbpln | Arabidopsis lyrata   | AT3G56210.4   Symbols:   ARM repeat superfamily protein   chr3:20853995-20855445 REVERSE LENGTH=191                                                                                                                                                                                                                                                               | 194 | 191 | 1.00E-90  | 98.5  | 83.5 | 90.2 |
| Rsa1.0_01294.1.g25480.t1 | ref XP_002876354.1  amino acid transporter family protein [Arabidopsis lyrata subsp. lyrata]<br>gi 297322192 gb EFH52613.1  amino acid transporter family protein [Arabidopsis lyrata subsp. lyrata]                                                                                                                                                                                                                                                                                                                                                                                                                                     | 445 | 435 | 0         | 97.8  | 84.3 | 91.7 | amino acid transporter family protein   | gbpln | Arabidopsis lyrata   | AT3G56200.1   Symbols:   Transmembrane amino acid transporter family protein   chr3:20850087-20851779 FORWARD LENGTH=435                                                                                                                                                                                                                                          | 445 | 435 | 0         | 97.8  | 82.5 | 91.2 |
| Rsa1.0_01294.1.g25481.t5 | ref XP_002876354.1  amino acid transporter family protein [Arabidopsis lyrata subsp. lyrata]<br>gi 297322192 gb EFH52613.1  amino acid transporter family protein [Arabidopsis lyrata subsp. lyrata]                                                                                                                                                                                                                                                                                                                                                                                                                                     | 852 | 435 | 0         | 51.1  | 42.4 | 44.4 | amino acid transporter family protein   | gbpln | Arabidopsis lyrata   | AT3G56200.1   Symbols:   Transmembrane amino acid transporter family protein   chr3:20850087-20851779 FORWARD LENGTH=435                                                                                                                                                                                                                                          | 852 | 435 | 0         | 51.1  | 41.5 | 44.1 |
| Rsa1.0_01294.1.g25483.t1 | ref NP_191178.1  alpha-soluble NSF attachment protein 2 [Arabidopsis thaliana]<br>gi 18203446 sp Q9SPE6.1 SNAA2_ARATH<br>RecName: Full=Alpha-soluble NSF attachment protein 2; Short=Alpha-SNAP2; AltName: Full=N-ethylmaleimide-sensitive factor attachment protein alpha 2<br>gi 6013204 gb AAF01284.1 AF177989.1<br>alpha-soluble NSF attachment protein [Arabidopsis thaliana]<br>gi 7572917 emb CAB87418.1  alpha-soluble NSF attachment protein [Arabidopsis thaliana]<br>gi 89000917 gb ABD59048.1  At3g56190 [Arabidopsis thaliana]<br>gi 332645970 gb AEE79491.1  alpha-soluble NSF attachment protein 2 [Arabidopsis thaliana] | 325 | 289 | 1.00E-131 | 88.9  | 80.6 | 93.4 | alpha-soluble NSF attachment protein 2  | gbpln | Arabidopsis thaliana | AT3G56190.1   Symbols: ALPHA-SNAP2, ASNAP   alpha-soluble NSF attachment protein 2   chr3:20846119-20848356 REVERSE LENGTH=289                                                                                                                                                                                                                                    | 325 | 289 | 1.00E-133 | 88.9  | 80.6 | 83.4 |
| Rsa1.0_01294.1.g25483.t1 | gb EOA24383.1  hypothetical protein CARUB_v10017620mg [Capsella rubella]                                                                                                                                                                                                                                                                                                                                                                                                                                                                                                                                                                 | 623 | 329 | 1.00E-128 | 52.8  | 37.9 | 42.1 | hypothetical protein CARUB_v10017620mg  | gbpln | Capsella rubella     | AT3G56170.1   Symbols: CAN   Ca-2+ dependent nuclease   chr3:20842614-20844319 FORWARD LENGTH=323                                                                                                                                                                                                                                                                 | 623 | 323 | 1.00E-126 | 51.8  | 37.2 | 40.4 |
| Rsa1.0_01294.1.g25484.t1 | gb ABK28199.1  unknown [Arabidopsis thaliana]                                                                                                                                                                                                                                                                                                                                                                                                                                                                                                                                                                                            | 275 | 315 | 3.00E-65  | 114.5 | 44.7 | 52.0 | unknown                                 | gbpln | Arabidopsis thaliana | AT5G42905.1   Symbols:   Polynucleotidyl transferase, ribonuclease H-like superfamily protein   chr5:17201414-17202323 REVERSE LENGTH=258                                                                                                                                                                                                                         | 275 | 258 | 9.00E-41  | 93.8  | 28.4 | 34.9 |
| Rsa1.0_01295.1.g25485.t1 | gb AAZ66928.1  117M18_9 [Brassica rapa]                                                                                                                                                                                                                                                                                                                                                                                                                                                                                                                                                                                                  | 339 | 371 | 1.00E-178 | 109.4 | 90.6 | 93.8 | 117M18_9                                | gbpln | Brassica rapa        | AT5G10100.1   Symbols: TPPI   Haloacid dehalogenase-like hydrolase (HAD) superfamily protein   chr5:3157980-3160275 FORWARD LENGTH=369                                                                                                                                                                                                                            | 339 | 369 | 1.00E-174 | 108.8 | 87.9 | 92.9 |
| Rsa1.0_01295.1.g25486.t1 | gb AAZ66929.1  117M18_10 [Brassica rapa]                                                                                                                                                                                                                                                                                                                                                                                                                                                                                                                                                                                                 | 293 | 283 | 1.00E-100 | 96.6  | 75.4 | 80.2 | 117M18_10                               | gbpln | Brassica rapa        | AT5G10110.1   Symbols:   unknown protein; BEST Arabidopsis thaliana protein match is: unknown protein (TAIR:AT5G65120.1); Has 30201 Blast hits to 17322 proteins in 780 species: Archae - 12; Bacteria - 1396; Metazoa - 17338; Fungi - 3422; Plants - 5037; Viruses - 0; Other Eukaryotes - 2996 (source: NCBI BLINK).   chr5:3166660-3167938 REVERSE LENGTH=321 | 293 | 321 | 6.00E-77  | 109.6 | 62.1 | 74.4 |
| Rsa1.0_01295.1.g25487.t1 | gb ACQ44230.1  putative ethylene insensitive 3 protein [Arabis alpina]                                                                                                                                                                                                                                                                                                                                                                                                                                                                                                                                                                   | 477 | 460 | 0         | 96.4  | 77.6 | 83.4 | putative ethylene insensitive 3 protein | gbpln | Arabis alpina        | AT5G10120.1   Symbols:   Ethylene insensitive 3 family protein   chr5:3169732-3171147 FORWARD LENGTH=471                                                                                                                                                                                                                                                          | 477 | 471 | 0         | 98.7  | 74.2 | 81.3 |

|                          |                                                                                                                                                                                                                                                                                                                                                                                                                      |      |      |           |       |       |       |                                                 |             |                      |                                                                                                                                                                                                                                                                                                                                                                                                                                                                                                                                                                                                                         |      |      |           |       |       |       |
|--------------------------|----------------------------------------------------------------------------------------------------------------------------------------------------------------------------------------------------------------------------------------------------------------------------------------------------------------------------------------------------------------------------------------------------------------------|------|------|-----------|-------|-------|-------|-------------------------------------------------|-------------|----------------------|-------------------------------------------------------------------------------------------------------------------------------------------------------------------------------------------------------------------------------------------------------------------------------------------------------------------------------------------------------------------------------------------------------------------------------------------------------------------------------------------------------------------------------------------------------------------------------------------------------------------------|------|------|-----------|-------|-------|-------|
| Rsa1.0_01295.1.g25488.t2 | dbj BAK55645.1  flowering locus C [Raphanus sativus]   g 398802992 gb AFP19441.1  FLC [Raphanus sativus]                                                                                                                                                                                                                                                                                                             | 196  | 197  | 1.00E-101 | 100.5 | 96.9  | 96.9  | flowering locus C                               | gbpln       | Raphanus sativus     | AT5G10140.1   Symbols: FLC, FLF, AGL25   K-box region and MADS-box transcription factor family protein   chr5:3173724-3179339 REVERSE LENGTH=196                                                                                                                                                                                                                                                                                                                                                                                                                                                                        | 196  | 196  | 2.00E-74  | 100.0 | 82.1  | 90.3  |
| Rsa1.0_01295.1.g25489.t1 | gb AAZ66933.1  117M18_14 [Brassica rapa]                                                                                                                                                                                                                                                                                                                                                                             | 226  | 224  | 1.00E-119 | 99.1  | 94.7  | 97.3  | 117M18_14                                       | gbpln       | Brassica rapa        | AT5G10160.1   Symbols:   Thioesterase superfamily protein   chr5:3185819-3187159 FORWARD LENGTH=219                                                                                                                                                                                                                                                                                                                                                                                                                                                                                                                     | 226  | 219  | 1.00E-109 | 96.9  | 85.8  | 92.0  |
| Rsa1.0_01295.1.g25490.t1 | gb AAZ66934.1  117M18_15 [Brassica rapa]                                                                                                                                                                                                                                                                                                                                                                             | 580  | 608  | 0         | 104.8 | 98.6  | 99.1  | 117M18_15                                       | gbpln       | Brassica rapa        | AT5G10240.1   Symbols: ASN3   asparagine synthetase 3   chr5:3212934-3216418 REVERSE LENGTH=578                                                                                                                                                                                                                                                                                                                                                                                                                                                                                                                         | 580  | 578  | 0         | 99.7  | 90.9  | 95.7  |
| Rsa1.0_01295.1.g25491.t1 | gb AAZ66935.1  117M18_16 [Brassica rapa]                                                                                                                                                                                                                                                                                                                                                                             | 207  | 216  | 1.00E-113 | 104.3 | 99.5  | 99.5  | 117M18_16                                       | gbpln       | Brassica rapa        | AT5G10260.1   Symbols: AtRABH1e, RABH1e   RAB GTPase homolog H1E   chr5:3219991-3221301 FORWARD LENGTH=207                                                                                                                                                                                                                                                                                                                                                                                                                                                                                                              | 207  | 207  | 1.00E-111 | 100.0 | 90.8  | 97.6  |
| Rsa1.0_01295.1.g25492.t1 | #                                                                                                                                                                                                                                                                                                                                                                                                                    | #    | #    | #         | #     | #     | #     | -                                               | ----        | ----                 | #                                                                                                                                                                                                                                                                                                                                                                                                                                                                                                                                                                                                                       | #    | #    | #         | #     | #     |       |
| Rsa1.0_01295.1.g25493.t1 | gb AAZ66936.1  117M18_17 [Brassica rapa]                                                                                                                                                                                                                                                                                                                                                                             | 334  | 384  | 1.00E-164 | 115.0 | 87.7  | 93.7  | 117M18_17                                       | gbpln       | Brassica rapa        | AT5G10280.1   Symbols: MYB92, ATMYPB92, ATMYPB64   myb domain protein 92   chr5:3232776-3233956 FORWARD LENGTH=334                                                                                                                                                                                                                                                                                                                                                                                                                                                                                                      | 334  | 334  | 1.00E-149 | 100.0 | 79.9  | 88.0  |
| Rsa1.0_01295.1.g25494.t1 | gb AAZ66937.1  117M18_18 [Brassica rapa]                                                                                                                                                                                                                                                                                                                                                                             | 282  | 249  | 1.00E-131 | 88.3  | 82.6  | 83.7  | 117M18_18                                       | gbpln       | Brassica rapa        | AT5G10360.1   Symbols: EMB3010, RPS6B   Ribosomal protein S6e   chr5:3259734-3260142 REVERSE LENGTH=249                                                                                                                                                                                                                                                                                                                                                                                                                                                                                                                 | 282  | 249  | 1.00E-130 | 88.3  | 80.5  | 82.3  |
| Rsa1.0_01295.1.g25495.t1 | gb AAZ66938.1  117M18_19 [Brassica rapa]                                                                                                                                                                                                                                                                                                                                                                             | 1755 | 1755 | 0         | 100.0 | 93.0  | 96.5  | 117M18_19                                       | gbpln       | Brassica rapa        | AT5G10370.1   Symbols:   helicase domain-containing protein / IBR domain-containing protein / zinc finger protein-related   chr5:3261245-3267188 FORWARD LENGTH=1775                                                                                                                                                                                                                                                                                                                                                                                                                                                    | 1755 | 1775 | 0         | 101.1 | 80.2  | 88.1  |
| Rsa1.0_01295.1.g25496.t1 | tpg DAA55311.1  TPA: histone H3.2 [Zea mays]                                                                                                                                                                                                                                                                                                                                                                         | 136  | 245  | 1.00E-72  | 180.1 | 100.0 | 100.0 | TPA: histone H3.2                               | gbenv/gbpln | Zea mays             | AT5G65360.1   Symbols:   Histone superfamily protein   chr5:26120099-26120509 REVERSE LENGTH=136                                                                                                                                                                                                                                                                                                                                                                                                                                                                                                                        | 136  | 136  | 5.00E-74  | 100.0 | 100.0 | 100.0 |
| Rsa1.0_01296.1.g25497.t1 | ref NP_195186.1  uncharacterized protein [Arabidopsis thaliana]   g 3096929 emb CAA18839.1  putative protein [Arabidopsis thaliana]   g 7270410 emb CAB80177.1  putative protein [Arabidopsis thaliana]   g 38566572 g AAR24176.1  At4g34600 [Arabidopsis thaliana]   g 47550671 g AAT35234.1  At4g34600 [Arabidopsis thaliana]   g 332660998 g AEE86398.1  uncharacterized protein AT4G34600 [Arabidopsis thaliana] | 82   | 83   | 6.00E-30  | 101.2 | 84.1  | 91.5  | uncharacterized protein                         | gbpln       | Arabidopsis thaliana | AT4G34600.1   Symbols:   unknown protein; FUNCTIONS IN: molecular function unknown; INVOLVED IN: pollen tube growth; LOCATED IN: endomembrane system; EXPRESSED IN: 11 plant structures; EXPRESSED DURING: M germinated pollen stage, LP_04 four leaves visible, 4 anthesis, petal differentiation and expansion stage; BEST Arabidopsis thaliana protein match is: unknown protein (TAIRAT2G16385.1); Has 17 Blast hits to 17 proteins in 4 species: Archae - 0; Bacteria - 0; Metazoa - 0; Fungi - 0; Plants - 17; Viruses - 0; Other Eukaryotes - 0 (source: NCBI BLINK).   chr4:16529280-16529958 FORWARD LENGTH=83 | 82   | 83   | 1.00E-32  | 101.2 | 84.1  | 91.5  |
| Rsa1.0_01296.1.g25498.t1 | ref XP_002869133.1  hypothetical protein ARALYDRAFT_912921 [Arabidopsis lyrata subsp. lyrata]   g 297314969 g EFH45392.1  hypothetical protein ARALYDRAFT_912921 [Arabidopsis lyrata subsp. lyrata]                                                                                                                                                                                                                  | 447  | 412  | 0         | 92.2  | 78.5  | 81.7  | hypothetical protein ARALYDRAFT_912921          | gbpln       | Arabidopsis lyrata   | AT4G34640.1   Symbols: SQS1, ERG9   squalene synthase 1   chr4:16538489-16541655 FORWARD LENGTH=410                                                                                                                                                                                                                                                                                                                                                                                                                                                                                                                     | 447  | 410  | 0         | 91.7  | 77.9  | 81.0  |
| Rsa1.0_01296.1.g25499.t1 | ref XP_002867108.1  SH3 domain-containing protein 2 [Arabidopsis lyrata subsp. lyrata]   g 297312944 g EFH443367.1  SH3 domain-containing protein 2 [Arabidopsis lyrata subsp. lyrata]                                                                                                                                                                                                                               | 384  | 368  | 0         | 95.8  | 88.8  | 93.0  | SH3 domain-containing protein 2                 | gbpln       | Arabidopsis lyrata   | AT4G34660.1   Symbols:   SH3 domain-containing protein   chr4:16545595-16548294 REVERSE LENGTH=368                                                                                                                                                                                                                                                                                                                                                                                                                                                                                                                      | 384  | 368  | 0         | 95.8  | 88.8  | 92.4  |
| Rsa1.0_01296.1.g25500.t1 | gb EOA17249.1  hypothetical protein CARUB_v10005523mg [Capsella rubella]                                                                                                                                                                                                                                                                                                                                             | 261  | 262  | 1.00E-137 | 100.4 | 94.6  | 98.9  | hypothetical protein CARUB_v10005523mg          | gbpln       | Capsella rubella     | AT4G34670.1   Symbols:   Ribosomal protein S3Ae   chr4:16548724-16550222 FORWARD LENGTH=262                                                                                                                                                                                                                                                                                                                                                                                                                                                                                                                             | 261  | 262  | 1.00E-137 | 100.4 | 93.1  | 97.3  |
| Rsa1.0_01296.1.g25501.t1 | dbj BAJ33857.1  unnamed protein product [Thellungiella halophila]                                                                                                                                                                                                                                                                                                                                                    | 263  | 269  | 1.00E-123 | 102.3 | 86.3  | 91.6  | unnamed protein product                         | ----        | ----                 | AT4G34680.2   Symbols: GATA3   GATA transcription factor 3   chr4:16553700-16554610 FORWARD LENGTH=269                                                                                                                                                                                                                                                                                                                                                                                                                                                                                                                  | 263  | 269  | 1.00E-114 | 102.3 | 83.3  | 88.6  |
| Rsa1.0_01296.1.g25502.t1 | gb EOA17609.1  hypothetical protein CARUB_v10005980mg, partial [Capsella rubella]                                                                                                                                                                                                                                                                                                                                    | 117  | 140  | 6.00E-62  | 119.7 | 96.6  | 99.1  | hypothetical protein CARUB_v10005980mg, partial | gbpln       | Capsella rubella     | AT4G34700.1   Symbols: CIB22   LTR family of Fe/S cluster biogenesis protein   chr4:16556874-16558362 FORWARD LENGTH=117                                                                                                                                                                                                                                                                                                                                                                                                                                                                                                | 117  | 117  | 3.00E-64  | 100.0 | 97.4  | 98.3  |
| Rsa1.0_01296.1.g25503.t1 | #                                                                                                                                                                                                                                                                                                                                                                                                                    | #    | #    | #         | #     | #     | #     | -                                               | ----        | ----                 | #                                                                                                                                                                                                                                                                                                                                                                                                                                                                                                                                                                                                                       | #    | #    | #         | #     | #     |       |
| Rsa1.0_01296.1.g25504.t1 | gb AAF26434.1  arginine decarboxylase [Brassica juncea]                                                                                                                                                                                                                                                                                                                                                              | 699  | 692  | 0         | 99.0  | 92.7  | 95.1  | arginine decarboxylase                          | gbpln       | Brassica juncea      | AT4G34710.2   Symbols: ADC2, SPE2, ATADC2   arginine decarboxylase 2   chr4:16560315-16562450 REVERSE LENGTH=711                                                                                                                                                                                                                                                                                                                                                                                                                                                                                                        | 699  | 711  | 0         | 101.7 | 85.1  | 91.7  |
| Rsa1.0_01296.1.g25505.t1 | dbj BAA77394.1  SAE1-S9-protein [Brassica rapa]                                                                                                                                                                                                                                                                                                                                                                      | 202  | 255  | 2.00E-13  | 126.2 | 17.8  | 21.8  | SAE1-S9-protein                                 | gbpln       | Brassica rapa        | AT3G25720.1   Symbols:   RNA-directed DNA polymerase (reverse transcriptase)-related family protein   chr3:9380234-9381405 FORWARD LENGTH=282                                                                                                                                                                                                                                                                                                                                                                                                                                                                           | 202  | 282  | 3.00E-11  | 139.6 | 30.2  | 46.0  |

|                          |                                                                                                                                                                                                                                                                                                                                                                                                                                                                                                                                                                                                                                                                                                                                                                                                                                                                                                                                                                             |      |      |          |       |       |       |                                                                            |       |                      |                                                                                                                                                                                                                                                                                                                                                                                                                                                                                                                                                        |      |      |           |       |       |       |
|--------------------------|-----------------------------------------------------------------------------------------------------------------------------------------------------------------------------------------------------------------------------------------------------------------------------------------------------------------------------------------------------------------------------------------------------------------------------------------------------------------------------------------------------------------------------------------------------------------------------------------------------------------------------------------------------------------------------------------------------------------------------------------------------------------------------------------------------------------------------------------------------------------------------------------------------------------------------------------------------------------------------|------|------|----------|-------|-------|-------|----------------------------------------------------------------------------|-------|----------------------|--------------------------------------------------------------------------------------------------------------------------------------------------------------------------------------------------------------------------------------------------------------------------------------------------------------------------------------------------------------------------------------------------------------------------------------------------------------------------------------------------------------------------------------------------------|------|------|-----------|-------|-------|-------|
| Rsa1.0_01296.1.g25506.t1 | #                                                                                                                                                                                                                                                                                                                                                                                                                                                                                                                                                                                                                                                                                                                                                                                                                                                                                                                                                                           | #    | #    | #        | #     | #     | #     | -                                                                          | ----  | ----                 | #                                                                                                                                                                                                                                                                                                                                                                                                                                                                                                                                                      | #    | #    | #         | #     | #     |       |
| Rsa1.0_01296.1.g25507.t1 | ref XP_002313006.1  predicted protein [Populus trichocarpa] gi 222849414 gb EE86961.1  predicted protein [Populus trichocarpa]                                                                                                                                                                                                                                                                                                                                                                                                                                                                                                                                                                                                                                                                                                                                                                                                                                              | 164  | 207  | 6.00E-85 | 126.2 | 100.0 | 100.0 | predicted protein                                                          | gbpln | Populus trichocarpa  | AT4G34720.1   Symbols: AVA-P1, VHA-C1, ATVHA-C1   ATPase, FO/V0 complex, subunit C protein   chr4:16568223-16569165 REVERSE LENGTH=164                                                                                                                                                                                                                                                                                                                                                                                                                 | 164  | 164  | 4.00E-87  | 100.0 | 100.0 | 100.0 |
| Rsa1.0_01297.1.g25508.t1 | #                                                                                                                                                                                                                                                                                                                                                                                                                                                                                                                                                                                                                                                                                                                                                                                                                                                                                                                                                                           | #    | #    | #        | #     | #     | #     | -                                                                          | ----  | ----                 | #                                                                                                                                                                                                                                                                                                                                                                                                                                                                                                                                                      | #    | #    | #         | #     | #     |       |
| Rsa1.0_01297.1.g25509.t1 | #                                                                                                                                                                                                                                                                                                                                                                                                                                                                                                                                                                                                                                                                                                                                                                                                                                                                                                                                                                           | #    | #    | #        | #     | #     | #     | -                                                                          | ----  | ----                 | #                                                                                                                                                                                                                                                                                                                                                                                                                                                                                                                                                      | #    | #    | #         | #     | #     |       |
| Rsa1.0_01297.1.g25510.t1 | #                                                                                                                                                                                                                                                                                                                                                                                                                                                                                                                                                                                                                                                                                                                                                                                                                                                                                                                                                                           | #    | #    | #        | #     | #     | #     | -                                                                          | ----  | ----                 | #                                                                                                                                                                                                                                                                                                                                                                                                                                                                                                                                                      | #    | #    | #         | #     | #     |       |
| Rsa1.0_01297.1.g25511.t1 | ref NP_193303.1  monothiol glutaredoxin-S4 [Arabidopsis thaliana] gi 297804672 ref XP_002670220.1  glutaredoxin family protein [Arabidopsis lyrata subsp. lyrata] gi 75097840 sp O23419.1 GRXS4_ARAT H RecName: Full=Monothiol glutaredoxin-S4; Short=AtGrxS4; AltName: Full=Protein ROXY 13 gi 2244924 emb CAB10346.1  glutaredoxin [Arabidopsis thaliana] gi 7268316 emb CAB78610.1  glutaredoxin [Arabidopsis thaliana] gi 21592753 gb AAM64702.1  glutaredoxin [Arabidopsis thaliana] gi 88900356 gb ABD57490.1  At4g15680 [Arabidopsis thaliana] gi 226348204 gb ACO50418.1  glutaredoxin [Arabidopsis thaliana] gi 297316056 gb EFH46479.1  glutaredoxin family protein [Arabidopsis lyrata subsp. lyrata] gi 332658235 gb AEE83635.1  monothiol glutaredoxin-S4 [Arabidopsis thaliana] ref XP_002870217.1  glutaredoxin family protein [Arabidopsis lyrata subsp. lyrata] gi 297316053 gb EFH46476.1  glutaredoxin family protein [Arabidopsis lyrata subsp. lyrata] | 102  | 102  | 2.00E-51 | 100.0 | 97.1  | 99.0  | monothiol glutaredoxin-S4                                                  | gbpln | Arabidopsis lyrata   | AT4G15680.1   Symbols:   Thioredoxin superfamily protein   chr4:8931813-8932121 FORWARD LENGTH=102                                                                                                                                                                                                                                                                                                                                                                                                                                                     | 102  | 102  | 3.00E-54  | 100.0 | 97.1  | 99.0  |
| Rsa1.0_01297.1.g25512.t1 | emb CAB10343.1  kinase like protein [Arabidopsis thaliana] gi 7268313 emb CAB78607.1  kinase like protein [Arabidopsis thaliana]                                                                                                                                                                                                                                                                                                                                                                                                                                                                                                                                                                                                                                                                                                                                                                                                                                            | 612  | 258  | 6.00E-51 | 42.2  | 22.1  | 27.5  | kinase like protein                                                        | gbpln | Arabidopsis thaliana | AT4G15650.1   Symbols:   unknown protein; FUNCTIONS IN: molecular, function unknown; INVOLVED IN: N-terminal protein myristoylation; LOCATED IN: cellular, component unknown; EXPRESSED IN: male gametophyte, flower, pollen tube; EXPRESSED DURING: L mature pollen stage, M germinated pollen stage, 4 anthesis; Has 5184 Blast hits to 3451 proteins in 562 species: Archae - 30; Bacteria - 838; Metazoa - 1576; Fungi - 798; Plants - 319; Viruses - 111; Other Eukaryotes - 1512 (source: NCBI BLINK).   chr4:8922632-8923815 FORWARD LENGTH=261 | 612  | 261  | 2.00E-53  | 42.6  | 22.1  | 27.5  |
| Rsa1.0_01297.1.g25513.t1 | emb CAB10343.1  kinase like protein [Arabidopsis thaliana] gi 7268313 emb CAB78607.1  kinase like protein [Arabidopsis thaliana]                                                                                                                                                                                                                                                                                                                                                                                                                                                                                                                                                                                                                                                                                                                                                                                                                                            | 612  | 258  | 6.00E-51 | 42.2  | 22.1  | 27.5  | kinase like protein                                                        | gbpln | Arabidopsis thaliana | AT4G15640.1   Symbols:   unknown protein; BEST Arabidopsis thaliana protein match is: unknown protein (TAIR:AT3G21465.1); Has 38 Blast hits to 38 proteins in 14 species: Archae - 0; Bacteria - 0; Metazoa - 0; Fungi - 0; Plants - 38; Viruses - 0; Other Eukaryotes - 0 (source: NCBI BLINK).   chr4:8919245-8921852 REVERSE LENGTH=390                                                                                                                                                                                                             | 195  | 390  | 3.00E-47  | 200.0 | 55.9  | 62.6  |
| Rsa1.0_01297.1.g25514.t4 | gb EOA19099.1  hypothetical protein CARUB.v10007767mg [Capsella rubella]                                                                                                                                                                                                                                                                                                                                                                                                                                                                                                                                                                                                                                                                                                                                                                                                                                                                                                    | 195  | 390  | 4.00E-45 | 200.0 | 53.3  | 65.1  | hypothetical protein CARUB.v10007767mg                                     | gbpln | Capsella rubella     | AT4G15630.1   Symbols:   Uncharacterised protein family (UPF0497)   chr4:8917527-8918683 FORWARD LENGTH=190                                                                                                                                                                                                                                                                                                                                                                                                                                            | 190  | 190  | 6.00E-87  | 100.0 | 82.1  | 91.1  |
| Rsa1.0_01297.1.g25515.t1 | gb AAM67044.1  unknown [Arabidopsis thaliana]                                                                                                                                                                                                                                                                                                                                                                                                                                                                                                                                                                                                                                                                                                                                                                                                                                                                                                                               | 190  | 190  | 4.00E-85 | 100.0 | 82.6  | 90.5  | unknown                                                                    | gbpln | Arabidopsis thaliana | AT4G23160.1   Symbols: CRK8   cysteine-rich RLK (RECEPTOR-like protein kinase) 8   chr4:12129485-12134086 FORWARD LENGTH=1262                                                                                                                                                                                                                                                                                                                                                                                                                          | 1372 | 1262 | 1.00E-173 | 92.0  | 21.5  | 27.8  |
| Rsa1.0_01297.1.g25516.t1 | dbj BAB10503.1  retroelement pol polyprotein-like [Arabidopsis thaliana]                                                                                                                                                                                                                                                                                                                                                                                                                                                                                                                                                                                                                                                                                                                                                                                                                                                                                                    | 1372 | 1475 | 0        | 107.5 | 60.3  | 75.4  | retroelement pol polyprotein-like                                          | gbpln | Arabidopsis thaliana | AT5G18880.1   Symbols:   RNA-directed DNA polymerase (reverse transcriptase)-related family protein [Arabidopsis thaliana] gi 332005241 gb AED92624.1  RNA-directed DNA polymerase (reverse transcriptase)-related family protein [Arabidopsis thaliana]                                                                                                                                                                                                                                                                                               | 431  | 295  | 9.00E-78  | 68.4  | 32.5  | 45.2  |
| Rsa1.0_01297.1.g25517.t1 | ref NP_197389.1  RNA-directed DNA polymerase (reverse transcriptase)-related family protein [Arabidopsis thaliana] gi 332005241 gb AED92624.1  RNA-directed DNA polymerase (reverse transcriptase)-related family protein [Arabidopsis thaliana]                                                                                                                                                                                                                                                                                                                                                                                                                                                                                                                                                                                                                                                                                                                            | 431  | 295  | 4.00E-75 | 68.4  | 32.5  | 45.2  | RNA-directed DNA polymerase (reverse transcriptase)-related family protein | gbpln | Arabidopsis thaliana | AT5G18880.1   Symbols:   RNA-directed DNA polymerase (reverse transcriptase)-related family protein   chr5:6300535-6301422 REVERSE LENGTH=295                                                                                                                                                                                                                                                                                                                                                                                                          | 328  | 295  | 9.00E-50  | 89.9  | 33.8  | 50.3  |
| Rsa1.0_01297.1.g25518.t1 | gb AAD12028.1  putative non-LTR retroelement reverse transcriptase [Arabidopsis thaliana]                                                                                                                                                                                                                                                                                                                                                                                                                                                                                                                                                                                                                                                                                                                                                                                                                                                                                   | 328  | 1447 | 1.00E-56 | 441.2 | 36.6  | 54.0  | putative non-LTR retroelement reverse transcriptase                        | gbpln | Arabidopsis thaliana | AT5G18880.1   Symbols:   RNA-directed DNA polymerase (reverse transcriptase)-related family protein   chr5:6300535-6301422 REVERSE LENGTH=295                                                                                                                                                                                                                                                                                                                                                                                                          | 328  | 295  | 9.00E-50  | 89.9  | 33.8  | 50.3  |
| Rsa1.0_01298.1.g25519.t1 | #                                                                                                                                                                                                                                                                                                                                                                                                                                                                                                                                                                                                                                                                                                                                                                                                                                                                                                                                                                           | #    | #    | #        | #     | #     | #     | -                                                                          | ----  | ----                 | #                                                                                                                                                                                                                                                                                                                                                                                                                                                                                                                                                      | #    | #    | #         | #     | #     |       |



|                           |                                                                                                                                                                                                                                                                                                                                                                                                                                                                                                                                                                                                                                                                                                                                                                                                               |      |      |           |       |      |      |                                                     |       |                      |   |      |     |           |       |      |      |
|---------------------------|---------------------------------------------------------------------------------------------------------------------------------------------------------------------------------------------------------------------------------------------------------------------------------------------------------------------------------------------------------------------------------------------------------------------------------------------------------------------------------------------------------------------------------------------------------------------------------------------------------------------------------------------------------------------------------------------------------------------------------------------------------------------------------------------------------------|------|------|-----------|-------|------|------|-----------------------------------------------------|-------|----------------------|---|------|-----|-----------|-------|------|------|
| Rsa1.0_01298.1.g25520.t12 | gb AAD20433.1  putative retroelement pol polyprotein [Arabidopsis thaliana]                                                                                                                                                                                                                                                                                                                                                                                                                                                                                                                                                                                                                                                                                                                                   | 791  | 889  | 1.00E-114 | 112.4 | 28.2 | 33.0 | putative retroelement pol polyprotein               | gbpln | Arabidopsis thaliana | # | #    | #   | #         | #     | #    |      |
| Rsa1.0_01298.1.g25521.t1  | gb ABD65035.1  hypothetical protein 26.t00052 [Brassica oleracea]                                                                                                                                                                                                                                                                                                                                                                                                                                                                                                                                                                                                                                                                                                                                             | 656  | 695  | 0         | 105.9 | 54.3 | 66.3 | hypothetical protein 26.t00052                      | gbpln | Brassica oleracea    | # | #    | #   | #         | #     | #    |      |
| Rsa1.0_01298.1.g25522.t2  | #                                                                                                                                                                                                                                                                                                                                                                                                                                                                                                                                                                                                                                                                                                                                                                                                             | #    | #    | #         | #     | #    | -    | -                                                   | ----  | ----                 | # | #    | #   | #         | #     | #    |      |
| Rsa1.0_01298.1.g25523.t1  | gb AAC69114.1  putative gag-protease polyprotein [Arabidopsis thaliana]                                                                                                                                                                                                                                                                                                                                                                                                                                                                                                                                                                                                                                                                                                                                       | 524  | 627  | 2.00E-36  | 119.7 | 19.8 | 28.1 | putative gag-protease polyprotein                   | gbpln | Arabidopsis thaliana | # | #    | #   | #         | #     | #    |      |
| Rsa1.0_01298.1.g25524.t1  | #                                                                                                                                                                                                                                                                                                                                                                                                                                                                                                                                                                                                                                                                                                                                                                                                             | #    | #    | #         | #     | #    | -    | -                                                   | ----  | ----                 | # | #    | #   | #         | #     | #    |      |
| Rsa1.0_01298.1.g25525.t1  | ref XP_002870429.1  kinase family protein [Arabidopsis lyrata subsp. lyrata] gi 297316265 gb EFH46688.1  kinase family protein [Arabidopsis lyrata subsp. lyrata]                                                                                                                                                                                                                                                                                                                                                                                                                                                                                                                                                                                                                                             | 251  | 737  | 1.00E-119 | 293.6 | 80.5 | 86.5 | kinase family protein                               | gbpln | Arabidopsis lyrata   | # | 251  | 731 | 1.00E-112 | 291.2 | 78.1 | 84.5 |
| Rsa1.0_01298.1.g25526.t7  | gb EOA16073.1  hypothetical protein CARUB_v10004206mg [Capsella rubella]                                                                                                                                                                                                                                                                                                                                                                                                                                                                                                                                                                                                                                                                                                                                      | 181  | 763  | 2.00E-73  | 421.5 | 72.9 | 86.7 | hypothetical protein CARUB_v10004206mg              | gbpln | Capsella rubella     | # | 181  | 331 | 2.00E-51  | 182.9 | 54.7 | 74.0 |
| Rsa1.0_01299.1.g25527.t1  | gb ABO76902.1  high-affinity K+ transporter HAK5 [Eutrema halophilum]                                                                                                                                                                                                                                                                                                                                                                                                                                                                                                                                                                                                                                                                                                                                         | 591  | 790  | 0         | 133.7 | 92.6 | 96.4 | high-affinity K+ transporter HAK5                   | gbpln | Eutrema halophilum   | # | 591  | 785 | 0         | 132.8 | 90.2 | 95.3 |
| Rsa1.0_01299.1.g25528.t2  | ref NP_193066.4  terpenoid synthase 13 [Arabidopsis thaliana] gi 317373358 sp Q9TOK1.2 GBIS2_ARAT H RecName: Full=(Z)-gamma-bisabolene synthase 2; AltName: Full=Terpenoid synthase 13; Short=AtTPS13 gi 332657860 gb AEE83260.1  terpenoid synthase 13 [Arabidopsis thaliana]                                                                                                                                                                                                                                                                                                                                                                                                                                                                                                                                | 1472 | 554  | 0         | 37.6  | 28.6 | 32.4 | terpenoid synthase 13                               | gbpln | Arabidopsis thaliana | # | 1472 | 554 | 0         | 37.6  | 28.6 | 32.4 |
| Rsa1.0_01299.1.g25529.t1  | emb CAB80843.1  hypothetical protein [Arabidopsis thaliana]                                                                                                                                                                                                                                                                                                                                                                                                                                                                                                                                                                                                                                                                                                                                                   | 171  | 381  | 3.00E-19  | 222.8 | 24.0 | 27.5 | hypothetical protein                                | gbpln | Arabidopsis thaliana | # | 171  | 150 | 2.00E-21  | 87.7  | 29.2 | 45.6 |
| Rsa1.0_01299.1.g25530.t1  | emb CAA19618.1  hypothetical protein [Arabidopsis thaliana] gi 7268726 emb CAB78933.1  hypothetical protein [Arabidopsis thaliana]                                                                                                                                                                                                                                                                                                                                                                                                                                                                                                                                                                                                                                                                            | 857  | 389  | 2.00E-52  | 45.4  | 13.1 | 18.9 | hypothetical protein                                | gbpln | Arabidopsis thaliana | # | 857  | 673 | 9.00E-19  | 78.5  | 5.1  | 7.2  |
| Rsa1.0_01299.1.g25531.t1  | ref NP_191042.1  putative aquaporin PIP2-5 [Arabidopsis thaliana] gi 32363433 sp Q9SV31.1 PIP25_ARATH RecName: Full=Probable aquaporin PIP2-5; AltName: Full=Plasma membrane intrinsic protein 2-5; Short=AtPIP2;5; AltName: Full=Plasma membrane intrinsic protein 2d; Short=PIP2d gi 13878177 gb AAK44166.1 AF370351.1 putative aquaporin/MIP protein [Arabidopsis thaliana] gi 4678311 emb CAB41102.1  aquaporin/MIP-like protein [Arabidopsis thaliana] gi 17104533 gb AAL34155.1  putative aquaporin/MIP protein [Arabidopsis thaliana] gi 21537067 gb AAM61408.1  aquaporin/MIP-like protein [Arabidopsis thaliana] gi 23397063 gb AAN31817.1  putative aquaporin/plasma membrane intrinsic protein [Arabidopsis thaliana] gi 332645774 gb AEE79295.1  putative aquaporin PIP2-5 [Arabidopsis thaliana] | 286  | 286  | 1.00E-155 | 100.0 | 94.1 | 97.6 | putative aquaporin PIP2-5                           | gbpln | Arabidopsis thaliana | # | 286  | 286 | 1.00E-158 | 100.0 | 94.1 | 97.6 |
| Rsa1.0_01299.1.g25532.t1  | gb AAG51783.1 AC079679_3 reverse transcriptase, putative; 16838-20266 [Arabidopsis thaliana]                                                                                                                                                                                                                                                                                                                                                                                                                                                                                                                                                                                                                                                                                                                  | 198  | 1142 | 1.00E-26  | 576.8 | 35.9 | 44.4 | reverse transcriptase, putative; 16838-20266        | gbpln | Arabidopsis thaliana | # | #    | #   | #         | #     | #    |      |
| Rsa1.0_01299.1.g25533.t2  | dbj BA85462.1  transposon-like ORF [Brassica rapa]                                                                                                                                                                                                                                                                                                                                                                                                                                                                                                                                                                                                                                                                                                                                                            | 779  | 703  | 1.00E-134 | 90.2  | 30.2 | 31.1 | transposon-like ORF                                 | gbpln | Brassica rapa        | # | #    | #   | #         | #     | #    |      |
| Rsa1.0_01299.1.g25534.t1  | gb AAC95175.1  putative non-LTR retroelement reverse transcriptase [Arabidopsis thaliana]                                                                                                                                                                                                                                                                                                                                                                                                                                                                                                                                                                                                                                                                                                                     | 1615 | 1352 | 0         | 83.7  | 43.7 | 58.3 | putative non-LTR retroelement reverse transcriptase | gbpln | Arabidopsis thaliana | # | 1615 | 746 | 1.00E-105 | 46.2  | 12.3 | 15.7 |
| Rsa1.0_01299.1.g25535.t1  | #                                                                                                                                                                                                                                                                                                                                                                                                                                                                                                                                                                                                                                                                                                                                                                                                             | #    | #    | #         | #     | #    | -    | -                                                   | ----  | ----                 | # | #    | #   | #         | #     | #    |      |

|                          |                                                                                                                                                                                                                                                                                                                                                                                                                                     |     |     |           |       |      |      |                                           |       |                      |                                                                                                                                                                                                                                                          |     |     |           |       |      |      |
|--------------------------|-------------------------------------------------------------------------------------------------------------------------------------------------------------------------------------------------------------------------------------------------------------------------------------------------------------------------------------------------------------------------------------------------------------------------------------|-----|-----|-----------|-------|------|------|-------------------------------------------|-------|----------------------|----------------------------------------------------------------------------------------------------------------------------------------------------------------------------------------------------------------------------------------------------------|-----|-----|-----------|-------|------|------|
| Rsa1.0_01299.1.g25536.t1 | refNP_191055.1  patatin-like protein 6 [Arabidopsis thaliana] gi 4678298 emb CAB41089.1  putative protein [Arabidopsis thaliana] gi 110738274 dbj BAF01066.1  hypothetical protein [Arabidopsis thaliana] gi 332645796 gb AEE79317.1  patatin-like protein 6 [Arabidopsis thaliana]                                                                                                                                                 | 482 | 488 | 0         | 101.2 | 87.8 | 92.7 | patatin-like protein 6                    | gbpln | Arabidopsis thaliana | AT3G54950.1   Symbols: PLP7, PLA IIIA   patatin-like protein 6   chr3:20359076-20360774 REVERSE LENGTH=488                                                                                                                                               | 482 | 488 | 0         | 101.2 | 87.8 | 92.7 |
| Rsa1.0_01299.1.g25537.t1 | #                                                                                                                                                                                                                                                                                                                                                                                                                                   | #   | #   | #         | #     | #    | #    | -                                         | ----  | ----                 | #                                                                                                                                                                                                                                                        | #   | #   | #         | #     | #    |      |
| Rsa1.0_01299.1.g25538.t1 | refNP_567012.1  tonneau 1 [Arabidopsis thaliana] gi 75262841 sp Q9FQ25.1 TON1A_ARAT H RecName: Full=Protein TONNEAU 1a; AltName: Full=Protein TONNEAU 1 gi 11494364 gb AAG35779.1 AF280058.1 tonneau 1a [Arabidopsis thaliana] gi 26449686 dbj BAC41967.1  unknown protein [Arabidopsis thaliana] gi 87116608 gb ABD19668.1  At3g55000 [Arabidopsis thaliana] gi 332645804 gb AEE79325.1  protein TONNEAU 1a [Arabidopsis thaliana] | 298 | 260 | 1.00E-109 | 87.2  | 74.2 | 78.5 | tonneau 1                                 | gbpln | Arabidopsis thaliana | AT3G55000.1   Symbols: TON1A, TON1   tonneau family protein   chr3:20381612-20383577 FORWARD LENGTH=260                                                                                                                                                  | 298 | 260 | 1.00E-112 | 87.2  | 74.2 | 78.5 |
| Rsa1.0_01299.1.g25539.t1 | gb EOA25829.1  hypothetical protein CARUB_v10019201mg [Capsella rubella]                                                                                                                                                                                                                                                                                                                                                            | 267 | 383 | 1.00E-114 | 143.4 | 85.8 | 92.1 | hypothetical protein CARUB_v10019201mg    | gbpln | Capsella rubella     | AT3G55010.2   Symbols: ATPURM, PUR5   phosphoribosylformylglycinamide cyclo- ligase, chloroplast / phosphoribosyl- aminoimidazole synthetase / AIR synthase (PUR5)   chr3:20386818-20388549 FORWARD LENGTH=389                                           | 267 | 389 | 1.00E-110 | 145.7 | 85.0 | 90.3 |
| Rsa1.0_01300.1.g25540.t1 | refXP_002873053.1  hypothetical protein ARALYDRAFT_487025 [Arabidopsis lyrata subsp. lyrata] gi 297318890 gb EFH49312.1  hypothetical protein ARALYDRAFT_487025 [Arabidopsis lyrata subsp. lyrata]                                                                                                                                                                                                                                  | 286 | 290 | 1.00E-138 | 101.4 | 89.2 | 91.6 | hypothetical protein ARALYDRAFT_487025    | gbpln | Arabidopsis lyrata   | AT5G02470.3   Symbols: DPA   Transcription factor DP   chr5:542562-544423 REVERSE LENGTH=292                                                                                                                                                             | 286 | 292 | 1.00E-140 | 102.1 | 88.5 | 92.7 |
| Rsa1.0_01300.1.g25541.t1 | refXP_002873052.1  hypothetical protein ARALYDRAFT_487022 [Arabidopsis lyrata subsp. lyrata] gi 297318889 gb EFH49311.1  hypothetical protein ARALYDRAFT_487022 [Arabidopsis lyrata subsp. lyrata]                                                                                                                                                                                                                                  | 413 | 403 | 1.00E-133 | 97.6  | 77.7 | 83.3 | hypothetical protein ARALYDRAFT_487022    | gbpln | Arabidopsis lyrata   | AT5G02460.1   Symbols:   Dof-type zinc finger DNA-binding family protein   chr5:539549-541058 REVERSE LENGTH=399                                                                                                                                         | 413 | 399 | 1.00E-131 | 96.6  | 79.4 | 84.3 |
| Rsa1.0_01300.1.g25542.t1 | refNP_195863.1  transducin/WD40 domain-containing protein [Arabidopsis thaliana] gi 7413632 emb CAB85980.1  putative protein [Arabidopsis thaliana] gi 332003088 gb AED90471.1  transducin/WD40 domain-containing protein [Arabidopsis thaliana]                                                                                                                                                                                    | 897 | 905 | 0         | 100.9 | 80.6 | 86.8 | transducin/WD40 domain-containing protein | gbpln | Arabidopsis thaliana | AT5G02430.1   Symbols:   Transducin/WD40 repeat-like superfamily protein   chr5:526592-529839 FORWARD LENGTH=905                                                                                                                                         | 897 | 905 | 0         | 100.9 | 80.6 | 86.8 |
| Rsa1.0_01300.1.g25543.t1 | refNP_195862.1  uncharacterized protein [Arabidopsis thaliana] gi 75181194 sp Q9LZ60.1 SMR3_ARATH RecName: Full=Cyclin-dependent protein kinase inhibitor SMR3; AltName: Full=Protein SIAMESE-RELATED 3 gi 7413631 emb CAB85979.1  putative protein [Arabidopsis thaliana] gi 332003087 gb AED90470.1  uncharacterized protein AT5G02420 [Arabidopsis thaliana]                                                                     | 109 | 115 | 8.00E-41  | 105.5 | 82.6 | 89.9 | uncharacterized protein                   | gbpln | Arabidopsis thaliana | AT5G02420.1   Symbols:   unknown protein; Has 90 Blast hits to 90 proteins in 10 species: Archae - 0; Bacteria - 0; Metazoa - 0; Fungi - 0; Plants - 90; Viruses - 0; Other Eukaryotes - 0 (source: NCBI BLINK).   chr5:523501-523848 FORWARD LENGTH=115 | 109 | 115 | 1.00E-43  | 105.5 | 82.6 | 89.9 |
| Rsa1.0_01300.1.g25544.t1 | refNP_195861.2  alpha-1,2-glucosyltransferase [Arabidopsis thaliana] gi 20466149 gb AAM20392.1  putative protein [Arabidopsis thaliana] gi 25083857 gb AAN72128.1  putative protein [Arabidopsis thaliana] gi 332003086 gb AED90469.1  alpha-1,2-glucosyltransferase [Arabidopsis thaliana]                                                                                                                                         | 507 | 509 | 0         | 100.4 | 82.1 | 89.0 | alpha-1,2-glucosyltransferase             | gbpln | Arabidopsis thaliana | AT5G02410.1   Symbols:   DIE2/ALG10 family   chr5:517319-519634 REVERSE LENGTH=509                                                                                                                                                                       | 507 | 509 | 0         | 100.4 | 82.1 | 89.0 |
| Rsa1.0_01300.1.g25545.t1 | gb ADP37973.1  metallothionein protein [Brassica napus]                                                                                                                                                                                                                                                                                                                                                                             | 80  | 81  | 8.00E-29  | 101.3 | 86.3 | 90.0 | metallothionein protein                   | gbpln | Brassica napus       | AT3G09390.1   Symbols: MT2A, ATMT-K, ATMT-1   metallothionein 2A   chr3:2889737-2890188 REVERSE LENGTH=81                                                                                                                                                | 80  | 81  | 9.00E-22  | 101.3 | 58.8 | 65.0 |
| Rsa1.0_01300.1.g25546.t1 | refNP_195857.2  kinesin family member 22 [Arabidopsis thaliana] gi 59958334 gb AAX12877.1  At5g02370 [Arabidopsis thaliana] gi 332003081 gb AED90464.1  ATP binding microtubule motor family protein [Arabidopsis thaliana]                                                                                                                                                                                                         | 643 | 628 | 0         | 97.7  | 78.1 | 83.4 | kinesin family member 22                  | gbpln | Arabidopsis thaliana | AT5G02370.1   Symbols:   ATP binding microtubule motor family protein   chr5:503444-506388 FORWARD LENGTH=628                                                                                                                                            | 643 | 628 | 0         | 97.7  | 78.1 | 83.4 |

|                          |                                                                                                                                                                                                                                                                                                                                                                                                                                                                                                                                                                                                                                                                                                                                               |      |      |           |       |      |      |                                              |       |                      |                                                                                                                                                    |      |      |           |       |      |      |
|--------------------------|-----------------------------------------------------------------------------------------------------------------------------------------------------------------------------------------------------------------------------------------------------------------------------------------------------------------------------------------------------------------------------------------------------------------------------------------------------------------------------------------------------------------------------------------------------------------------------------------------------------------------------------------------------------------------------------------------------------------------------------------------|------|------|-----------|-------|------|------|----------------------------------------------|-------|----------------------|----------------------------------------------------------------------------------------------------------------------------------------------------|------|------|-----------|-------|------|------|
| Rsa1.0_01300.1.g25547.t1 | refNP_195851.2  proteolysis 6 [Arabidopsis thaliana] gi 332003074 gb AED90457.1  proteolysis 6 [Arabidopsis thaliana]                                                                                                                                                                                                                                                                                                                                                                                                                                                                                                                                                                                                                         | 1904 | 2006 | 0         | 105.4 | 55.1 | 60.4 | proteolysis 6                                | gbpln | Arabidopsis thaliana | AT5G02310.1   Symbols: PRT6   proteolysis 6   chr5:474279-482552 FORWARD LENGTH=2006                                                               | 1904 | 2006 | 0         | 105.4 | 55.1 | 60.4 |
| Rsa1.0_01300.1.g25548.t2 | refXP_002873046.1  hypothetical protein ARALYDRAFT_487008 [Arabidopsis lyrata subsp. lyrata] gi 297318883 gb EFH49305.1  hypothetical protein ARALYDRAFT_487008 [Arabidopsis lyrata subsp. lyrata]                                                                                                                                                                                                                                                                                                                                                                                                                                                                                                                                            | 389  | 389  | 0         | 100.0 | 86.1 | 90.7 | hypothetical protein ARALYDRAFT_487008       | gbpln | Arabidopsis lyrata   | AT5G02290.2   Symbols: NAK   Protein kinase superfamily protein   chr5:470387-472397 REVERSE LENGTH=389                                            | 389  | 389  | 0         | 100.0 | 85.1 | 90.7 |
| Rsa1.0_01300.1.g25549.t1 | refNP_195848.1  SNARE-like superfamily protein [Arabidopsis thaliana] gi 297806167 ref XP_002870967.1  hypothetical protein ARALYDRAFT_908094 [Arabidopsis lyrata subsp. lyrata] gi 7406424 emb CAB85533.1  putative protein [Arabidopsis thaliana] gi 21618125 gb AAM67175.1  unknown [Arabidopsis thaliana] gi 28393092 gb AAO41980.1  unknown protein [Arabidopsis thaliana] gi 28827482 gb AAO50585.1  unknown protein [Arabidopsis thaliana] gi 297316804 gb EFH47226.1  hypothetical protein ARALYDRAFT_908094 [Arabidopsis lyrata subsp. lyrata] gi 332003071 gb AED90454.1  SNARE-like superfamily protein [Arabidopsis thaliana] ref XP_002864360.1  integral membrane transporter family protein [Arabidopsis lyrata subsp. lyrata] | 141  | 141  | 3.00E-75  | 100.0 | 95.0 | 98.6 | SNARE-like superfamily protein               | gbpln | Arabidopsis lyrata   | AT5G02280.1   Symbols:   SNARE-like superfamily protein   chr5:469377-470129 FORWARD LENGTH=141                                                    | 141  | 141  | 9.00E-78  | 100.0 | 95.0 | 98.6 |
| Rsa1.0_01301.1.g25550.t1 | refXP_002864357.1  hypothetical protein ARALYDRAFT_331822 [Arabidopsis lyrata subsp. lyrata] gi 297310195 gb EFH40619.1  integral membrane transporter family protein [Arabidopsis lyrata subsp. lyrata]                                                                                                                                                                                                                                                                                                                                                                                                                                                                                                                                      | 105  | 491  | 3.00E-18  | 467.6 | 51.4 | 56.2 | integral membrane transporter family protein | gbpln | Arabidopsis lyrata   | AT5G54860.1   Symbols:   Major facilitator superfamily protein   chr5:22284721-22287025 FORWARD LENGTH=491                                         | 105  | 491  | 9.00E-21  | 467.6 | 50.5 | 56.2 |
| Rsa1.0_01301.1.g25551.t1 | refXP_002864357.1  hypothetical protein ARALYDRAFT_331822 [Arabidopsis lyrata subsp. lyrata] gi 297310192 gb EFH40616.1  hypothetical protein ARALYDRAFT_331822 [Arabidopsis lyrata subsp. lyrata]                                                                                                                                                                                                                                                                                                                                                                                                                                                                                                                                            | 472  | 476  | 1.00E-102 | 100.8 | 45.1 | 64.0 | hypothetical protein ARALYDRAFT_331822       | gbpln | Arabidopsis lyrata   | AT5G54820.1   Symbols:   F-box/RNI-like superfamily protein   chr5:22269859-22271777 FORWARD LENGTH=472                                            | 472  | 472  | 1.00E-104 | 100.0 | 44.5 | 62.9 |
| Rsa1.0_01301.1.g25552.t1 | gb AAM63660.1  glucose-6-phosphate/phosphate translocator [Arabidopsis thaliana]                                                                                                                                                                                                                                                                                                                                                                                                                                                                                                                                                                                                                                                              | 395  | 388  | 0         | 98.2  | 87.3 | 90.4 | glucose-6-phosphate/phosphate translocator   | gbpln | Arabidopsis thaliana | AT5G54800.1   Symbols: GPT1, ATGPT1   glucose 6-phosphate/phosphate translocator 1   chr5:22261408-22263562 FORWARD LENGTH=388                     | 395  | 388  | 0         | 98.2  | 87.8 | 90.6 |
| Rsa1.0_01301.1.g25553.t1 | refXP_002866060.1  hypothetical protein ARALYDRAFT_495559 [Arabidopsis lyrata subsp. lyrata] gi 297311895 gb EFH42319.1  hypothetical protein ARALYDRAFT_495559 [Arabidopsis lyrata subsp. lyrata]                                                                                                                                                                                                                                                                                                                                                                                                                                                                                                                                            | 433  | 438  | 0         | 101.2 | 92.4 | 94.9 | hypothetical protein ARALYDRAFT_495559       | gbpln | Arabidopsis lyrata   | AT5G54780.1   Symbols:   Ypt/Rab-GAP domain of gyp1p superfamily protein   chr5:22248696-22251692 REVERSE LENGTH=432                               | 433  | 432  | 0         | 99.8  | 90.5 | 93.3 |
| Rsa1.0_01301.1.g25554.t1 | refXP_002864354.1  hypothetical protein ARALYDRAFT_918614 [Arabidopsis lyrata subsp. lyrata] gi 297310189 gb EFH40613.1  hypothetical protein ARALYDRAFT_918614 [Arabidopsis lyrata subsp. lyrata]                                                                                                                                                                                                                                                                                                                                                                                                                                                                                                                                            | 351  | 352  | 0         | 100.3 | 93.7 | 96.9 | hypothetical protein ARALYDRAFT_918614       | gbpln | Arabidopsis lyrata   | AT5G54770.1   Symbols: THI1, TZ, TH14   thiazole biosynthetic enzyme, chloroplast (ARA6) (THI1) (TH14)   chr5:22246634-22247891 FORWARD LENGTH=349 | 351  | 349  | 0         | 99.4  | 92.0 | 95.4 |
| Rsa1.0_01301.1.g25555.t1 | #                                                                                                                                                                                                                                                                                                                                                                                                                                                                                                                                                                                                                                                                                                                                             | #    | #    | #         | #     | #    | #    | -                                            | ----  | ----                 | #                                                                                                                                                  | #    | #    | #         | #     | #    | #    |
| Rsa1.0_01301.1.g25556.t1 | refXP_002880903.1  hypothetical protein ARALYDRAFT_901626 [Arabidopsis lyrata subsp. lyrata] gi 297326742 gb EFH57162.1  hypothetical protein ARALYDRAFT_901626 [Arabidopsis lyrata subsp. lyrata]                                                                                                                                                                                                                                                                                                                                                                                                                                                                                                                                            | 890  | 1014 | 0         | 113.9 | 70.7 | 81.1 | hypothetical protein ARALYDRAFT_901626       | gbpln | Arabidopsis lyrata   | AT3G47570.1   Symbols:   Leucine-rich repeat protein kinase family protein   chr3:17527611-17530748 FORWARD LENGTH=1010                            | 890  | 1010 | 0         | 113.5 | 67.2 | 78.7 |
| Rsa1.0_01301.1.g25557.t1 | refXP_002877365.1  predicted protein [Arabidopsis lyrata subsp. lyrata] gi 297323203 gb EFH53624.1  predicted protein [Arabidopsis lyrata subsp. lyrata]                                                                                                                                                                                                                                                                                                                                                                                                                                                                                                                                                                                      | 112  | 977  | 1.00E-40  | 872.3 | 67.9 | 83.9 | predicted protein                            | gbpln | Arabidopsis lyrata   | AT3G47090.1   Symbols:   Leucine-rich repeat protein kinase family protein   chr3:17341512-17344645 REVERSE LENGTH=1009                            | 112  | 1009 | 2.00E-41  | 900.9 | 64.3 | 82.1 |
| Rsa1.0_01301.1.g25558.t1 | gb AAD32898.1  putative retroelement pol polyprotein [Arabidopsis thaliana]                                                                                                                                                                                                                                                                                                                                                                                                                                                                                                                                                                                                                                                                   | 1377 | 1307 | 0         | 94.9  | 59.6 | 74.6 | putative retroelement pol polyprotein        | gbpln | Arabidopsis thaliana | AT4G23160.1   Symbols: CRK8   cysteine-rich RLK (RECEPTOR-like protein kinase) 8   chr4:12129485-12134086 FORWARD LENGTH=1262                      | 1377 | 1262 | 3.00E-99  | 91.6  | 14.2 | 21.7 |

|                          |                                                                                                                                                                                                                                                                                                                                                                                                                                                                                                                              |     |      |           |       |      |      |                                                 |       |                      |                                                                                                                                                                                                                                                                                                                                    |     |     |           |       |      |      |
|--------------------------|------------------------------------------------------------------------------------------------------------------------------------------------------------------------------------------------------------------------------------------------------------------------------------------------------------------------------------------------------------------------------------------------------------------------------------------------------------------------------------------------------------------------------|-----|------|-----------|-------|------|------|-------------------------------------------------|-------|----------------------|------------------------------------------------------------------------------------------------------------------------------------------------------------------------------------------------------------------------------------------------------------------------------------------------------------------------------------|-----|-----|-----------|-------|------|------|
| Rsa1.0_01301.1.g25559.t1 | ref NP_200284.1  autophagy 18F-like protein [Arabidopsis thaliana] gi 75333833 sp Q9FH32.1 AT18F_ARAT H RecName: Full=Autophagy-related protein 18F; Short=ATATG18F gi 10176800 db BAB09939.1  unnamed protein product [Arabidopsis thaliana] gi 332009148 gb AED96531.1  autophagy 18F-like protein [Arabidopsis thaliana]                                                                                                                                                                                                  | 747 | 763  | 0         | 102.1 | 71.4 | 80.5 | autophagy 18F-like protein                      | gbpln | Arabidopsis thaliana | AT5G54730.1   Symbols: ATATG18F, ATG18F, G18F   homolog of yeast autophagy 18 (ATG18)   chr5:22233977-22236804 REVERSE LENGTH=763                                                                                                                                                                                                  | 747 | 763 | 0         | 102.1 | 71.4 | 80.5 |
| Rsa1.0_01301.1.g25560.t1 | ref XP_002864345.1  RNA recognition motif-containing protein [Arabidopsis lyrata subsp. lyrata] gi 297310180 gb EFH40604.1  RNA recognition motif-containing protein [Arabidopsis lyrata subsp. lyrata] ref XP_002870773.1  hypothetical protein ARALYDRAFT_494030 [Arabidopsis lyrata subsp. lyrata] gi 297316609 gb EFH47032.1  hypothetical protein ARALYDRAFT_494030 [Arabidopsis lyrata subsp. lyrata]                                                                                                                  | 80  | 156  | 5.00E-24  | 195.0 | 68.8 | 71.3 | RNA recognition motif-containing protein        | gbpln | Arabidopsis lyrata   | AT5G54580.1   Symbols:   RNA-binding (RRM/RBD/RNP motifs) family protein   chr5:22171332-22172656 FORWARD LENGTH=156                                                                                                                                                                                                               | 80  | 156 | 9.00E-27  | 195.0 | 68.8 | 71.3 |
| Rsa1.0_01302.1.g25561.t1 | ref XP_002870773.1  hypothetical protein ARALYDRAFT_494030 [Arabidopsis lyrata subsp. lyrata] gi 297316609 gb EFH47032.1  hypothetical protein ARALYDRAFT_494030 [Arabidopsis lyrata subsp. lyrata]                                                                                                                                                                                                                                                                                                                          | 537 | 542  | 0         | 100.9 | 82.1 | 90.7 | hypothetical protein ARALYDRAFT_494030          | gbpln | Arabidopsis lyrata   | AT5G39590.1   Symbols:   TLD-domain containing nucleolar protein   chr5:15851483-15853768 FORWARD LENGTH=542                                                                                                                                                                                                                       | 537 | 542 | 0         | 100.9 | 81.6 | 89.8 |
| Rsa1.0_01302.1.g25562.t1 | gb EOA17624.1  hypothetical protein CARUB_v10005989mg, partial [Capsella rubella]                                                                                                                                                                                                                                                                                                                                                                                                                                            | 128 | 136  | 5.00E-66  | 106.3 | 96.1 | 98.4 | hypothetical protein CARUB_v10005989mg, partial | gbpln | Capsella rubella     | AT5G39600.1   Symbols:   CONTAINS InterPro DOMAIN/s: Ribosomal protein L53, mitochondrial (InterPro:IPR019716); Has 50 Blast hits to 50 proteins in 19 species: Archae - 0; Bacteria - 0; Metazoa - 6; Fungi - 0; Plants - 42; Viruses - 0; Other Eukaryotes - 2 (source: NCBI BLink).   chr5:15854188-15854771 REVERSE LENGTH=127 | 128 | 127 | 5.00E-68  | 99.2  | 94.5 | 98.4 |
| Rsa1.0_01302.1.g25563.t8 | gb EEE52627.1  hypothetical protein OsJ_34967 [Oryza sativa Japonica Group]                                                                                                                                                                                                                                                                                                                                                                                                                                                  | 628 | 1395 | 2.00E-32  | 222.1 | 18.5 | 31.1 | hypothetical protein OsJ_34967                  | gbpln | Oryza sativa         | ATMG00310.1   Symbols: ORF154   RNA-directed DNA polymerase (reverse transcriptase)-related family protein   chrM:90883-91347 REVERSE LENGTH=154                                                                                                                                                                                   | 628 | 154 | 3.00E-17  | 24.5  | 7.5  | 11.9 |
| Rsa1.0_01302.1.g25564.t1 | #                                                                                                                                                                                                                                                                                                                                                                                                                                                                                                                            | #   | #    | #         | #     | #    | -    | -                                               | ----  | ----                 | #                                                                                                                                                                                                                                                                                                                                  | #   | #   | #         | #     | #    |      |
| Rsa1.0_01302.1.g25565.t1 | ref XP_002868706.1  ANAC092/ATNAC2/ATNAC6 [Arabidopsis lyrata subsp. lyrata] gi 297314542 gb EFH44965.1  ANAC092/ATNAC2/ATNAC6 [Arabidopsis lyrata subsp. lyrata]                                                                                                                                                                                                                                                                                                                                                            | 300 | 288  | 1.00E-135 | 96.0  | 79.7 | 85.7 | ANAC092/ATNAC2/ATNAC6                           | gbpln | Arabidopsis lyrata   | AT5G39610.1   Symbols: ATNAC2, ORE1, ANAC092, ATNAC6, NAC2, NAC6   NAC domain containing protein 6   chr5:15858591-15859650 REVERSE LENGTH=285                                                                                                                                                                                     | 300 | 285 | 1.00E-135 | 95.0  | 78.7 | 84.3 |
| Rsa1.0_01302.1.g25566.t1 | #                                                                                                                                                                                                                                                                                                                                                                                                                                                                                                                            | #   | #    | #         | #     | #    | -    | -                                               | ----  | ----                 | #                                                                                                                                                                                                                                                                                                                                  | #   | #   | #         | #     | #    |      |
| Rsa1.0_01302.1.g25567.t1 | gb AAG50751.1 AC079733_19 polyprotein, putative [Arabidopsis thaliana]                                                                                                                                                                                                                                                                                                                                                                                                                                                       | 244 | 1468 | 3.00E-88  | 601.6 | 69.3 | 78.3 | polyprotein, putative                           | gbpln | Arabidopsis thaliana | AT1G21280.1   Symbols:   CONTAINS InterPro DOMAIN/s: Retrotransposon gag protein (InterPro:IPR005162); Has 707 Blast hits to 705 proteins in 25 species: Archae - 0; Bacteria - 0; Metazoa - 4; Fungi - 0; Plants - 703; Viruses - 0; Other Eukaryotes - 0 (source: NCBI BLink).   chr1:7447690-7448403 REVERSE LENGTH=237         | 244 | 237 | 2.00E-25  | 97.1  | 19.7 | 32.4 |
| Rsa1.0_01302.1.g25568.t1 | ref NP_568567.1  Dof zinc finger protein DOF5.2 [Arabidopsis thaliana] gi 30693448 ref NP_851106.1  Dof zinc finger protein DOF5.2 [Arabidopsis thaliana] gi 55583973 sp Q93ZL5.2 CDF2_ARATH RecName: Full=Cyclic dof factor 2; AltName: Full=Dof zinc finger protein DOF5.2; Short=AtDOF5.2 gi 53749192 gb AAU90081.1  At5g39660 [Arabidopsis thaliana] gi 332007077 gb AED94460.1  Dof zinc finger protein DOF5.2 [Arabidopsis thaliana] gi 332007078 gb AED94461.1  Dof zinc finger protein DOF5.2 [Arabidopsis thaliana] | 439 | 457  | 0         | 104.1 | 82.5 | 87.5 | Dof zinc finger protein DOF5.2                  | gbpln | Arabidopsis thaliana | AT5G39660.2   Symbols: CDF2   cycling DOF factor 2   chr5:15878920-15880712 FORWARD LENGTH=457                                                                                                                                                                                                                                     | 439 | 457 | 0         | 104.1 | 82.5 | 87.5 |
| Rsa1.0_01302.1.g25569.t1 | gb EOA27133.1  hypothetical protein CARUB_v10023232mg [Capsella rubella]                                                                                                                                                                                                                                                                                                                                                                                                                                                     | 108 | 439  | 1.00E-15  | 406.5 | 35.2 | 38.9 | hypothetical protein CARUB_v10023232mg          | gbpln | Capsella rubella     | AT2G42120.1   Symbols: POLD2   DNA polymerase delta small subunit   chr2:17563282-17565965 REVERSE LENGTH=441                                                                                                                                                                                                                      | 108 | 441 | 1.00E-17  | 408.3 | 34.3 | 38.0 |
| Rsa1.0_01302.1.g25570.t1 | #                                                                                                                                                                                                                                                                                                                                                                                                                                                                                                                            | #   | #    | #         | #     | #    | -    | -                                               | ----  | ----                 | #                                                                                                                                                                                                                                                                                                                                  | #   | #   | #         | #     | #    |      |
| Rsa1.0_01302.1.g25571.t1 | ref XP_002870769.1  calcium-binding EF hand family protein [Arabidopsis lyrata subsp. lyrata] gi 297316605 gb EFH47028.1  calcium-binding EF hand family protein [Arabidopsis lyrata subsp. lyrata]                                                                                                                                                                                                                                                                                                                          | 200 | 203  | 4.00E-87  | 101.5 | 84.5 | 89.5 | calcium-binding EF hand family protein          | gbpln | Arabidopsis lyrata   | AT5G39670.1   Symbols:   Calcium-binding EF-hand family protein   chr5:15883270-15883884 FORWARD LENGTH=204                                                                                                                                                                                                                        | 200 | 204 | 5.00E-87  | 102.0 | 82.5 | 90.0 |

|                          |                                                                                                                                                                                                                                                                                                                                                                                                                                                                                                                                                                                                                                                                                                                                                                                                         |      |      |           |       |      |      |                                                            |       |                      |                                                                                                                                   |      |      |           |       |      |      |
|--------------------------|---------------------------------------------------------------------------------------------------------------------------------------------------------------------------------------------------------------------------------------------------------------------------------------------------------------------------------------------------------------------------------------------------------------------------------------------------------------------------------------------------------------------------------------------------------------------------------------------------------------------------------------------------------------------------------------------------------------------------------------------------------------------------------------------------------|------|------|-----------|-------|------|------|------------------------------------------------------------|-------|----------------------|-----------------------------------------------------------------------------------------------------------------------------------|------|------|-----------|-------|------|------|
| Rsa1.0_01303.1.g25572.t1 | gb AAD14492.1  Hypothetical protein [Arabidopsis thaliana]                                                                                                                                                                                                                                                                                                                                                                                                                                                                                                                                                                                                                                                                                                                                              | 159  | 240  | 2.00E-28  | 150.9 | 44.0 | 53.5 | Hypothetical protein                                       | gbpln | Arabidopsis thaliana | AT4G29090.1   Symbols:   Ribonuclease H-like superfamily protein   chr4:14333528-14335255 FORWARD LENGTH=575                      | 159  | 575  | 2.00E-12  | 361.6 | 28.9 | 44.0 |
| Rsa1.0_01303.1.g25573.t1 | gb EOA12705.1  hypothetical protein CARUB_v10027998mg [Capsella rubella]                                                                                                                                                                                                                                                                                                                                                                                                                                                                                                                                                                                                                                                                                                                                | 322  | 315  | 1.00E-151 | 97.8  | 83.2 | 88.2 | hypothetical protein CARUB_v10027998mg                     | gbpln | Capsella rubella     | AT5G58220.1   Symbols: TTL   transthyretin-like protein   chr5:23554546-23555861 REVERSE LENGTH=324                               | 322  | 324  | 1.00E-141 | 100.6 | 79.5 | 87.6 |
| Rsa1.0_01303.1.g25574.t1 | ref NP_001190565.1  metallophosphatase domain-containing protein [Arabidopsis thaliana] gi 332009630 gb AED97013.1  metallophosphatase domain-containing protein [Arabidopsis thaliana]                                                                                                                                                                                                                                                                                                                                                                                                                                                                                                                                                                                                                 | 306  | 309  | 1.00E-136 | 101.0 | 79.1 | 86.9 | metallophosphatase domain-containing protein               | gbpln | Arabidopsis thaliana | AT5G58200.2   Symbols:   Calcineurin-like metallo-phosphoesterase superfamily protein   chr5:23549605-23551972 FORWARD LENGTH=309 | 306  | 309  | 1.00E-139 | 101.0 | 79.1 | 86.9 |
| Rsa1.0_01303.1.g25575.t1 | ref XP_002864554.1  hypothetical protein ARALYDRAFT_332107 [Arabidopsis lyrata subsp. lyrata] gi 297310389 gb EFH40813.1  hypothetical protein ARALYDRAFT_332107 [Arabidopsis lyrata subsp. lyrata] ref NP_176624.2  pentatricopeptide repeat-containing protein [Arabidopsis thaliana] gi 79320695 ref NP_001031231.1  pentatricopeptide repeat-containing protein [Arabidopsis thaliana] gi 17529266 gb AAL38860.1  unknown protein [Arabidopsis thaliana] gi 332196119 gb AEE34239.1  pentatricopeptide repeat-containing protein [Arabidopsis thaliana] gi 332196119 gb AEE34240.1  pentatricopeptide repeat-containing protein [Arabidopsis thaliana]                                                                                                                                              | 529  | 549  | 0         | 103.8 | 78.4 | 85.4 | hypothetical protein ARALYDRAFT_332107                     | gbpln | Arabidopsis lyrata   | AT5G58190.2   Symbols: ECT10   evolutionarily conserved C-terminal region 10   chr5:23546434-23549363 FORWARD LENGTH=528          | 529  | 528  | 0         | 99.8  | 77.1 | 83.6 |
| Rsa1.0_01303.1.g25576.t1 | gb EOA14030.1  hypothetical protein CARUB_v10027163mg [Capsella rubella] gi 482549837 gb EOA14031.1  hypothetical protein CARUB_v10027163mg [Capsella rubella]                                                                                                                                                                                                                                                                                                                                                                                                                                                                                                                                                                                                                                          | 262  | 559  | 1.00E-22  | 213.4 | 22.5 | 27.1 | pentatricopeptide repeat-containing protein                | gbpln | Arabidopsis thaliana | AT1G64430.2   Symbols:   Pentatricopeptide repeat (PPR) superfamily protein   chr1:23933541-23936336 FORWARD LENGTH=559           | 262  | 559  | 3.00E-25  | 213.4 | 22.5 | 27.1 |
| Rsa1.0_01303.1.g25577.t1 | ref XP_002866252.1  glycerophosphoryl diester phosphodiesterase family protein [Arabidopsis lyrata subsp. lyrata] gi 297312087 gb EFH42511.1  glycerophosphoryl diester phosphodiesterase family protein [Arabidopsis lyrata subsp. lyrata] ref XP_002864551.1  hypothetical protein ARALYDRAFT_495923 [Arabidopsis lyrata subsp. lyrata] gi 297310386 gb EFH40810.1  hypothetical protein ARALYDRAFT_495923 [Arabidopsis lyrata subsp. lyrata] ref NP_851210.1  phototropin 2 [Arabidopsis thaliana] gi 30697010 ref NP_851211.1  phototropin 2 [Arabidopsis thaliana] gi 82593023 sp P93025.2 PHOT2_ARAT H RecName: Full=Phototropin-2; AltName: Full=Defective in chloroplast avoidance protein 1; AltName: Full=Non-phototropic hypocotyl 1-like protein 1; Short=AtKin7; Short=NPH1-like protein 1 | 199  | 199  | 3.00E-83  | 100.0 | 74.4 | 83.9 | hypothetical protein CARUB_v10027163mg                     | gbpln | Capsella rubella     | AT5G58060.1   Symbols: YKT61, ATYKT61, ATGP1   SNARE-like superfamily protein   chr5:23498277-23500128 FORWARD LENGTH=199         | 199  | 199  | 2.00E-84  | 100.0 | 73.4 | 82.9 |
| Rsa1.0_01303.1.g25578.t1 | ref XP_002866252.1  glycerophosphoryl diester phosphodiesterase family protein [Arabidopsis lyrata subsp. lyrata] gi 297312087 gb EFH42511.1  glycerophosphoryl diester phosphodiesterase family protein [Arabidopsis lyrata subsp. lyrata] ref XP_002864551.1  hypothetical protein ARALYDRAFT_495923 [Arabidopsis lyrata subsp. lyrata] gi 297310386 gb EFH40810.1  hypothetical protein ARALYDRAFT_495923 [Arabidopsis lyrata subsp. lyrata] ref NP_851210.1  phototropin 2 [Arabidopsis thaliana] gi 30697010 ref NP_851211.1  phototropin 2 [Arabidopsis thaliana] gi 82593023 sp P93025.2 PHOT2_ARAT H RecName: Full=Phototropin-2; AltName: Full=Defective in chloroplast avoidance protein 1; AltName: Full=Non-phototropic hypocotyl 1-like protein 1; Short=AtKin7; Short=NPH1-like protein 1 | 764  | 754  | 0         | 98.7  | 80.0 | 88.2 | glycerophosphoryl diester phosphodiesterase family protein | gbpln | Arabidopsis lyrata   | AT5G58170.1   Symbols: SVL5   SHV3-like 5   chr5:23540261-23543092 REVERSE LENGTH=750                                             | 764  | 750  | 0         | 98.2  | 79.3 | 88.2 |
| Rsa1.0_01303.1.g25579.t1 | ref XP_002864551.1  hypothetical protein ARALYDRAFT_495923 [Arabidopsis lyrata subsp. lyrata] gi 297310386 gb EFH40810.1  hypothetical protein ARALYDRAFT_495923 [Arabidopsis lyrata subsp. lyrata] ref NP_851210.1  phototropin 2 [Arabidopsis thaliana] gi 30697010 ref NP_851211.1  phototropin 2 [Arabidopsis thaliana] gi 82593023 sp P93025.2 PHOT2_ARAT H RecName: Full=Phototropin-2; AltName: Full=Defective in chloroplast avoidance protein 1; AltName: Full=Non-phototropic hypocotyl 1-like protein 1; Short=AtKin7; Short=NPH1-like protein 1                                                                                                                                                                                                                                             | 1307 | 1185 | 0         | 90.7  | 38.6 | 41.9 | hypothetical protein ARALYDRAFT_495923                     | gbpln | Arabidopsis lyrata   | AT5G58160.1   Symbols:   actin binding   chr5:23533724-23539465 FORWARD LENGTH=1324                                               | 1307 | 1324 | 0         | 101.3 | 30.9 | 32.4 |
| Rsa1.0_01303.1.g25580.t2 | gi 5391442 gb AAC27293.2  non phototropic hypocotyl 1-like [Arabidopsis thaliana] gi 10176790 dbj BAB09904.1  unnamed protein product [Arabidopsis thaliana] gi 332009619 gb AED97002.1  phototropin 2 [Arabidopsis thaliana] gi 332009621 gb AED97004.1  phototropin 2 [Arabidopsis thaliana]                                                                                                                                                                                                                                                                                                                                                                                                                                                                                                          | 902  | 915  | 0         | 101.4 | 87.9 | 91.6 | phototropin 2                                              | gbpln | Arabidopsis thaliana | AT5G58140.1   Symbols: PHOT2, NPL1   phototropin 2   chr5:23524771-23529993 FORWARD LENGTH=915                                    | 902  | 915  | 0         | 101.4 | 87.9 | 91.6 |
| Rsa1.0_01304.1.g25581.t2 | dbj BAC76056.1  S receptor kinase [Brassica rapa]                                                                                                                                                                                                                                                                                                                                                                                                                                                                                                                                                                                                                                                                                                                                                       | 828  | 859  | 0         | 103.7 | 73.8 | 82.4 | S receptor kinase                                          | gbpln | Brassica rapa        | AT4G21380.1   Symbols: ARK3, RK3   receptor kinase 3   chr4:11389219-11393090 REVERSE LENGTH=850                                  | 828  | 850  | 0         | 102.7 | 59.7 | 73.4 |

|                          |                                                                                                                                                                                                                                                                                                                                                                                                                                                                                                                                                                                                                                                                                                                 |      |      |           |       |      |      |                                                     |       |                      |                                                                                                                               |      |      |           |       |      |      |
|--------------------------|-----------------------------------------------------------------------------------------------------------------------------------------------------------------------------------------------------------------------------------------------------------------------------------------------------------------------------------------------------------------------------------------------------------------------------------------------------------------------------------------------------------------------------------------------------------------------------------------------------------------------------------------------------------------------------------------------------------------|------|------|-----------|-------|------|------|-----------------------------------------------------|-------|----------------------|-------------------------------------------------------------------------------------------------------------------------------|------|------|-----------|-------|------|------|
| Rsa1.0_01304.1.g25582.t1 | ref NP_181459.4  RNA binding protein [Arabidopsis thaliana] gi 476007187 sp F4UX6.1 RENT2_ARAT H RecName: Full=Regulator of nonsense transcripts UPF2; AltName: Full=Nonsense mRNA reducing factor UPF2; AltName: Full=Up-frameshift suppressor 2 homolog; Short=AtUpF2 gi 330254557 gb AEC0965.1  RNA binding protein [Arabidopsis thaliana] gb AAD29058.1  putative non-LTR retroelement reverse transcriptase [Arabidopsis thaliana]                                                                                                                                                                                                                                                                         | 161  | 1181 | 7.00E-23  | 733.5 | 34.8 | 36.6 | RNA binding protein                                 | gbpln | Arabidopsis thaliana | AT2G39260.1   Symbols:   binding:RNA binding   chr2:16392288-16399588 REVERSE LENGTH=1181                                     | 161  | 1181 | 3.00E-25  | 733.5 | 34.8 | 36.6 |
| Rsa1.0_01304.1.g25583.t4 | ref XP_002879788.1  pentatricopeptide repeat-containing protein [Arabidopsis lyrata subsp. lyrata] gi 297325627 gb EFH56047.1  pentatricopeptide repeat-containing protein [Arabidopsis lyrata subsp. lyrata]                                                                                                                                                                                                                                                                                                                                                                                                                                                                                                   | 1521 | 1229 | 1.00E-171 | 80.8  | 21.2 | 28.9 | putative non-LTR retroelement reverse transcriptase | gbpln | Arabidopsis thaliana | AT2G17920.1   Symbols:   nucleic acid binding zinc ion binding   chr2:7782808-7783731 FORWARD LENGTH=307                      | 1521 | 307  | 3.00E-30  | 20.2  | 5.0  | 8.0  |
| Rsa1.0_01304.1.g25584.t1 | emb CAC37623.1  copia-like polyprotein [Arabidopsis thaliana]                                                                                                                                                                                                                                                                                                                                                                                                                                                                                                                                                                                                                                                   | 223  | 1466 | 6.00E-57  | 657.4 | 51.1 | 60.5 | copia-like polyprotein                              | gbpln | Arabidopsis thaliana | #                                                                                                                             | #    | #    | #         | #     | #    | #    |
| Rsa1.0_01304.1.g25585.t1 | gb AAD43604.1 AC005698_3 T3P18.3 [Arabidopsis thaliana]                                                                                                                                                                                                                                                                                                                                                                                                                                                                                                                                                                                                                                                         | 680  | 1309 | 0         | 192.5 | 54.0 | 68.8 | T3P18.3                                             | gbpln | Arabidopsis thaliana | AT4G23160.1   Symbols: CRK8   cysteine-rich RLK (RECEPTOR-like protein kinase) 8   chr4:12129485-12134086 FORWARD LENGTH=1262 | 680  | 1262 | 2.00E-74  | 185.6 | 22.4 | 36.0 |
| Rsa1.0_01304.1.g25586.t1 | ref XP_002879788.1  pentatricopeptide repeat-containing protein [Arabidopsis lyrata subsp. lyrata] gi 297325627 gb EFH56047.1  pentatricopeptide repeat-containing protein [Arabidopsis lyrata subsp. lyrata]                                                                                                                                                                                                                                                                                                                                                                                                                                                                                                   | 241  | 867  | 1.00E-100 | 359.8 | 74.7 | 87.6 | pentatricopeptide repeat-containing protein         | gbpln | Arabidopsis lyrata   | AT2G39230.1   Symbols: LOJ   LATERAL ORGAN JUNCTION   chr2:16381647-16384250 FORWARD LENGTH=867                               | 241  | 867  | 4.00E-97  | 359.8 | 71.0 | 85.9 |
| Rsa1.0_01304.1.g25587.t1 | ref NP_181459.4  RNA binding protein [Arabidopsis thaliana] gi 476007187 sp F4UX6.1 RENT2_ARAT H RecName: Full=Regulator of nonsense transcripts UPF2; AltName: Full=Nonsense mRNA reducing factor UPF2; AltName: Full=Up-frameshift suppressor 2 homolog; Short=AtUpF2 gi 330254557 gb AEC0965.1  RNA binding protein [Arabidopsis thaliana]                                                                                                                                                                                                                                                                                                                                                                   | 187  | 1181 | 1.00E-66  | 631.6 | 74.3 | 79.7 | RNA binding protein                                 | gbpln | Arabidopsis thaliana | AT2G39260.1   Symbols:   binding:RNA binding   chr2:16392288-16399588 REVERSE LENGTH=1181                                     | 187  | 1181 | 5.00E-69  | 631.6 | 74.3 | 79.7 |
| Rsa1.0_01305.1.g25588.t1 | ref XP_002881966.1  protein binding protein [Arabidopsis lyrata subsp. lyrata] gi 297327805 gb EFH58225.1  protein binding protein [Arabidopsis lyrata subsp. lyrata]                                                                                                                                                                                                                                                                                                                                                                                                                                                                                                                                           | 136  | 145  | 3.00E-51  | 106.6 | 72.1 | 81.6 | protein binding protein                             | gbpln | Arabidopsis lyrata   | AT2G44578.1   Symbols:   RING/U-box superfamily protein   chr2:18400864-18401301 REVERSE LENGTH=145                           | 136  | 145  | 4.00E-53  | 106.6 | 71.3 | 83.8 |
| Rsa1.0_01305.1.g25589.t1 | gb EOA26379.1  hypothetical protein CARUB_v10023367mg [Capsella rubella]                                                                                                                                                                                                                                                                                                                                                                                                                                                                                                                                                                                                                                        | 456  | 396  | 0         | 86.8  | 78.9 | 81.1 | hypothetical protein CARUB_v10023367mg              | gbpln | Capsella rubella     | AT2G44530.1   Symbols:   Phosphoribosyltransferase family protein   chr2:18383732-18385974 FORWARD LENGTH=394                 | 456  | 394  | 0         | 86.4  | 78.3 | 80.7 |
| Rsa1.0_01305.1.g25590.t1 | ref NP_566019.1  protoheme IX farnesyltransferase [Arabidopsis thaliana] gi 75099253 sp O64886.4 COX10_ARAT H RecName: Full=Protoheme IX farnesyltransferase, mitochondrial; AltName: Full=Cytochrome c oxidase assembly protein COX10; AltName: Full=Heme O synthase; Flags: Precursor gi 15028299 gb AAK76626.1  putative heme A:farnesyltransferase [Arabidopsis thaliana] gi 20197028 gb AAC27454.3  putative heme A:farnesyltransferase [Arabidopsis thaliana] gi 20197183 gb AAM14960.1  putative heme A:farnesyltransferase [Arabidopsis thaliana] gi 21280973 gb AAM45064.1  putative heme A [Arabidopsis thaliana] gi 330255338 gb AEC10432.1  protoheme IX farnesyltransferase [Arabidopsis thaliana] | 422  | 431  | 0         | 102.1 | 85.3 | 89.8 | protoheme IX farnesyltransferase                    | gbpln | Arabidopsis thaliana | AT2G44520.1   Symbols: COX10   cytochrome c oxidase 10   chr2:18379660-18381731 FORWARD LENGTH=431                            | 422  | 431  | 0         | 102.1 | 85.3 | 89.8 |
| Rsa1.0_01305.1.g25591.t3 | ref XP_002880121.1  hypothetical protein ARALYDRAFT_903875 [Arabidopsis lyrata subsp. lyrata] gi 297325960 gb EFH56380.1  hypothetical protein ARALYDRAFT_903875 [Arabidopsis lyrata subsp. lyrata]                                                                                                                                                                                                                                                                                                                                                                                                                                                                                                             | 321  | 327  | 1.00E-135 | 101.9 | 80.1 | 91.3 | hypothetical protein ARALYDRAFT_903875              | gbpln | Arabidopsis lyrata   | AT2G44510.1   Symbols:   CDK inhibitor P21 binding protein   chr2:18377411-18379030 FORWARD LENGTH=326                        | 321  | 326  | 1.00E-137 | 101.6 | 80.1 | 90.3 |
| Rsa1.0_01305.1.g25592.t2 | gb EOA29106.1  hypothetical protein CARUB_v10025373mg, partial [Capsella rubella]                                                                                                                                                                                                                                                                                                                                                                                                                                                                                                                                                                                                                               | 532  | 555  | 0         | 104.3 | 78.2 | 87.8 | hypothetical protein CARUB_v10025373mg, partial     | gbpln | Capsella rubella     | AT5G24550.1   Symbols: BGLU32   beta glucosidase 32   chr5:8392059-8395302 REVERSE LENGTH=534                                 | 532  | 534  | 0         | 100.4 | 75.2 | 87.8 |
| Rsa1.0_01305.1.g25593.t1 | #                                                                                                                                                                                                                                                                                                                                                                                                                                                                                                                                                                                                                                                                                                               | #    | #    | #         | #     | #    | -    | ----                                                | ----  | #                    | #                                                                                                                             | #    | #    | #         | #     | #    |      |

|                          |                                                                                                                                                                                                                                                                                                                                                                                                                                                                                                                                                                                                                                                                                                                                                                                                                                                                                                                                                                                                                                                                                                                                                    |      |      |           |       |      |      |                                           |       |                      |                                                                                                                                                    |      |      |           |       |      |      |
|--------------------------|----------------------------------------------------------------------------------------------------------------------------------------------------------------------------------------------------------------------------------------------------------------------------------------------------------------------------------------------------------------------------------------------------------------------------------------------------------------------------------------------------------------------------------------------------------------------------------------------------------------------------------------------------------------------------------------------------------------------------------------------------------------------------------------------------------------------------------------------------------------------------------------------------------------------------------------------------------------------------------------------------------------------------------------------------------------------------------------------------------------------------------------------------|------|------|-----------|-------|------|------|-------------------------------------------|-------|----------------------|----------------------------------------------------------------------------------------------------------------------------------------------------|------|------|-----------|-------|------|------|
| Rsa1.0_01305.1.g25594.t1 | ref[XP_002880115.1] glycosyl hydrolase family 1 protein [Arabidopsis lyrata subsp. lyrata] gi 297325954 gb EFH56374.1  glycosyl hydrolase family 1 protein [Arabidopsis lyrata subsp. lyrata] ref[NP_567747.4] putative uracil phosphoribosyltransferase [Arabidopsis thaliana] gi 240256079 ref[NP_849448.4] putative uracil phosphoribosyltransferase [Arabidopsis thaliana] gi 298286881 sp O65583.2 UKL4_ARATH RecName: Full=Uridine kinase-like protein 4; Includes: RecName: Full=Uridine kinase; Short=UK; Includes: RecName: Full=Putative uracil phosphoribosyltransferase; Short=UPRTase; AltName: Full=UMP pyrophosphorylase gi 21554263 gb AAM63338.1  putative uracil phosphoribosyl transferase [Arabidopsis thaliana] gi 63003884 gb AAy25471.1  At4g26510 [Arabidopsis thaliana] gi 33265981 gb AEE8521.1  putative uracil phosphoribosyltransferase [Arabidopsis thaliana] gi 33265981.2 gb AEE8521.2  putative uracil phosphoribosyltransferase [Arabidopsis thaliana] ref[XP_002864427.1] predicted protein [Arabidopsis lyrata subsp. lyrata] gi 297310262 gb EFH40686.1  predicted protein [Arabidopsis lyrata subsp. lyrata] | 378  | 579  | 1.00E-174 | 153.2 | 82.0 | 88.6 | glycosyl hydrolase family 1 protein       | gbpln | Arabidopsis lyrata   | AT2G44460.1   Symbols: BGLU28   beta glucosidase 28   chr2:18346500-18349826 FORWARD LENGTH=582                                                    | 378  | 582  | 1.00E-173 | 154.0 | 80.4 | 86.8 |
| Rsa1.0_01306.1.g25595.t1 | ref[XP_002864427.1] predicted protein [Arabidopsis lyrata subsp. lyrata] gi 297310262 gb EFH40686.1  predicted protein [Arabidopsis lyrata subsp. lyrata] ref[XP_002864201.1] hypothetical protein ARALYDRAFT_495357 [Arabidopsis lyrata subsp. lyrata] gi 297310006 gb EFH40460.1  hypothetical protein ARALYDRAFT_495357 [Arabidopsis lyrata subsp. lyrata]                                                                                                                                                                                                                                                                                                                                                                                                                                                                                                                                                                                                                                                                                                                                                                                      | 152  | 469  | 8.00E-81  | 308.6 | 96.7 | 99.3 | putative uracil phosphoribosyltransferase | gbpln | Arabidopsis thaliana | AT4G26510.2   Symbols: UKL4   uridine kinase-like 4   chr4:13384503-13387920 FORWARD LENGTH=469                                                    | 152  | 469  | 2.00E-83  | 308.6 | 96.7 | 99.3 |
| Rsa1.0_01306.1.g25596.t1 | ref[XP_002864427.1] predicted protein [Arabidopsis lyrata subsp. lyrata] gi 297310262 gb EFH40686.1  predicted protein [Arabidopsis lyrata subsp. lyrata]                                                                                                                                                                                                                                                                                                                                                                                                                                                                                                                                                                                                                                                                                                                                                                                                                                                                                                                                                                                          | 1120 | 1090 | 0         | 97.3  | 87.8 | 91.4 | predicted protein                         | gbpln | Arabidopsis lyrata   | AT5G56040.2   Symbols:   Leucine-rich receptor-like protein kinase family protein   chr5:22695050-22698410 FORWARD LENGTH=1090                     | 1120 | 1090 | 0         | 97.3  | 87.0 | 91.2 |
| Rsa1.0_01306.1.g25597.t1 | ref[XP_002864201.1] hypothetical protein ARALYDRAFT_495357 [Arabidopsis lyrata subsp. lyrata] gi 297310006 gb EFH40460.1  hypothetical protein ARALYDRAFT_495357 [Arabidopsis lyrata subsp. lyrata]                                                                                                                                                                                                                                                                                                                                                                                                                                                                                                                                                                                                                                                                                                                                                                                                                                                                                                                                                | 142  | 335  | 5.00E-39  | 235.9 | 55.6 | 66.2 | hypothetical protein ARALYDRAFT_495357    | gbpln | Arabidopsis lyrata   | AT5G54320.1   Symbols:   Protein of unknown function (DUF295)   chr5:22062805-22063914 FORWARD LENGTH=369                                          | 142  | 369  | 8.00E-41  | 259.9 | 52.1 | 64.8 |
| Rsa1.0_01306.1.g25598.t1 | gb EOA12588.1  hypothetical protein CARUB.v10027067mg [Capsella rubella]                                                                                                                                                                                                                                                                                                                                                                                                                                                                                                                                                                                                                                                                                                                                                                                                                                                                                                                                                                                                                                                                           | 226  | 226  | 1.00E-127 | 100.0 | 98.7 | 99.6 | hypothetical protein CARUB.v10027067mg    | gbpln | Capsella rubella     | AT5G55990.1   Symbols: CBL2, ATCBL2   calcineurin B-like protein 2   chr5:22672189-22673579 FORWARD LENGTH=226                                     | 226  | 226  | 1.00E-129 | 100.0 | 98.2 | 99.1 |
| Rsa1.0_01306.1.g25599.t1 | ref[XP_002864421.1] hypothetical protein ARALYDRAFT_918740 [Arabidopsis lyrata subsp. lyrata] gi 297310256 gb EFH40680.1  hypothetical protein ARALYDRAFT_918740 [Arabidopsis lyrata subsp. lyrata]                                                                                                                                                                                                                                                                                                                                                                                                                                                                                                                                                                                                                                                                                                                                                                                                                                                                                                                                                | 115  | 113  | 2.00E-31  | 98.3  | 73.0 | 80.0 | hypothetical protein ARALYDRAFT_918740    | gbpln | Arabidopsis lyrata   | AT5G55980.1   Symbols:   serine-rich protein-related   chr5:22670301-22670642 FORWARD LENGTH=113                                                   | 115  | 113  | 2.00E-31  | 98.3  | 70.4 | 76.5 |
| Rsa1.0_01306.1.g25600.t1 | ref[XP_002864420.1] zinc finger family protein [Arabidopsis lyrata subsp. lyrata] gi 297310255 gb EFH40679.1  zinc finger family protein [Arabidopsis lyrata subsp. lyrata]                                                                                                                                                                                                                                                                                                                                                                                                                                                                                                                                                                                                                                                                                                                                                                                                                                                                                                                                                                        | 303  | 343  | 1.00E-119 | 113.2 | 71.6 | 80.2 | zinc finger family protein                | gbpln | Arabidopsis lyrata   | AT5G55970.2   Symbols:   RING/U-box superfamily protein   chr5:22668019-22668932 FORWARD LENGTH=343                                                | 303  | 343  | 1.00E-120 | 113.2 | 74.9 | 85.5 |
| Rsa1.0_01306.1.g25601.t1 | ref[NP_176234.1] NAC domain containing protein 23 [Arabidopsis thaliana] gi 3249075 gb AAC24059.1  Contains similarity to no-apical-meristem (NAM) protein [X92205 from Petunia hybrida [Arabidopsis thaliana] gi 124301174 gb ABN04839.1] At1g60280 [Arabidopsis thaliana] gi 332195552 gb AEE33673.1  NAC domain containing protein 23 [Arabidopsis thaliana]                                                                                                                                                                                                                                                                                                                                                                                                                                                                                                                                                                                                                                                                                                                                                                                    | 328  | 347  | 5.00E-94  | 105.8 | 57.9 | 69.8 | NAC domain containing protein 23          | gbpln | Arabidopsis thaliana | AT1G60280.1   Symbols: ANAC023, NAC023   NAC domain containing protein 23   chr1:22226885-22227928 REVERSE LENGTH=347                              | 328  | 347  | 1.00E-96  | 105.8 | 57.9 | 69.8 |
| Rsa1.0_01306.1.g25602.t2 | ref[XP_002871839.1] F-box family protein [Arabidopsis lyrata subsp. lyrata] gi 297317676 gb EFH48098.1  F-box family protein [Arabidopsis lyrata subsp. lyrata]                                                                                                                                                                                                                                                                                                                                                                                                                                                                                                                                                                                                                                                                                                                                                                                                                                                                                                                                                                                    | 326  | 478  | 5.00E-35  | 146.6 | 29.8 | 35.6 | F-box family protein                      | gbpln | Arabidopsis lyrata   | AT5G18770.1   Symbols:   F-box/FBD-like domains containing protein   chr5:6261426-6263172 FORWARD LENGTH=481                                       | 326  | 481  | 2.00E-33  | 147.5 | 25.8 | 30.7 |
| Rsa1.0_01306.1.g25603.t1 | emb CCD74528.1  NAC domain containing protein 23 [Arabidopsis halleri subsp. halleri]                                                                                                                                                                                                                                                                                                                                                                                                                                                                                                                                                                                                                                                                                                                                                                                                                                                                                                                                                                                                                                                              | 326  | 334  | 3.00E-93  | 102.5 | 58.6 | 67.8 | NAC domain containing protein 23          | gbpln | Arabidopsis halleri  | AT1G60300.1   Symbols:   NAC (No Apical Meristem) domain transcriptional regulator superfamily protein   chr1:22229780-22230748 REVERSE LENGTH=322 | 326  | 322  | 3.00E-94  | 98.8  | 57.1 | 69.3 |

|                          |                                                                                                                                                                                                                                                                                                            |      |      |           |       |      |      |                                                                                                                                                     |       |                      |                                                                                                                                                                                                                                                                                                                                                                             |      |     |          |       |      |      |
|--------------------------|------------------------------------------------------------------------------------------------------------------------------------------------------------------------------------------------------------------------------------------------------------------------------------------------------------|------|------|-----------|-------|------|------|-----------------------------------------------------------------------------------------------------------------------------------------------------|-------|----------------------|-----------------------------------------------------------------------------------------------------------------------------------------------------------------------------------------------------------------------------------------------------------------------------------------------------------------------------------------------------------------------------|------|-----|----------|-------|------|------|
| Rsa1.0_01306.1.g25604.t1 | ref NP_568833.1  uncharacterized protein [Arabidopsis thaliana] gi 16648987 gb AAL24345.1  Unknown protein [Arabidopsis thaliana] gi 2805905 gb AAO29982.1  Unknown protein [Arabidopsis thaliana] gi 332009320 gb AED96703.1  uncharacterized protein AT5G55960 [Arabidopsis thaliana]                    | 643  | 648  | 0         | 100.8 | 91.6 | 95.3 | uncharacterized protein                                                                                                                             | gbpln | Arabidopsis thaliana | AT5G55960.1   Symbols:   unknown protein; CONTAINS InterPro DOMAIN/s: Uncharacterised protein family UPF0118 (InterPro:IPR02549); Has 30201 Blast hits to 17322 proteins in 780 species: Archae - 12; Bacteria - 1396; Metazoa - 17338; Fungi - 3422; Plants - 5037; Viruses - 0; Other Eukaryotes - 2996 (source: NCBI BLINK).   chr5:22662726-22664762 FORWARD LENGTH=648 | 643  | 648 | 0        | 100.8 | 91.6 | 95.3 |
| Rsa1.0_01307.1.g25605.t1 | gb EOA26734.1  hypothetical protein CARUB_v10022820mg [Capsella rubella]                                                                                                                                                                                                                                   | 486  | 527  | 4.00E-52  | 108.4 | 25.9 | 34.8 | hypothetical protein CARUB_v10022820mg                                                                                                              | gbpln | Capsella rubella     | AT4G05360.1   Symbols:   Zinc knuckle (CCHC-type) family protein   chr4:2728204-2732337 FORWARD LENGTH=735                                                                                                                                                                                                                                                                  | 486  | 735 | 5.00E-50 | 151.2 | 23.7 | 35.6 |
| Rsa1.0_01307.1.g25606.t1 | #                                                                                                                                                                                                                                                                                                          | #    | #    | #         | #     | #    | #    | -                                                                                                                                                   | ----  | ----                 | #                                                                                                                                                                                                                                                                                                                                                                           | #    | #   | #        | #     | #    |      |
| Rsa1.0_01307.1.g25607.t1 | ref NP_199139.1  nuclear factor Y, subunit C13 [Arabidopsis thaliana] gi 10177387 dbj BAB10588.1  unnamed protein product [Arabidopsis thaliana] gi 225879084 dbj BAH30612.1  hypothetical protein [Arabidopsis thaliana] gi 332007548 gb AED94931.1  nuclear factor Y, subunit C13 [Arabidopsis thaliana] | 129  | 130  | 2.00E-52  | 100.8 | 82.9 | 89.9 | nuclear factor Y, subunit C13                                                                                                                       | gbpln | Arabidopsis thaliana | AT5G43250.1   Symbols: NF-YC13   nuclear factor Y, subunit C13   chr5:17356174-17356566 REVERSE LENGTH=130                                                                                                                                                                                                                                                                  | 129  | 130 | 4.00E-55 | 100.8 | 82.9 | 89.9 |
| Rsa1.0_01307.1.g25608.t1 | #                                                                                                                                                                                                                                                                                                          | #    | #    | #         | #     | #    | #    | -                                                                                                                                                   | ----  | ----                 | #                                                                                                                                                                                                                                                                                                                                                                           | #    | #   | #        | #     | #    |      |
| Rsa1.0_01307.1.g25609.t1 | gb AAF13073.1 AC011621.1 putative retroelement pol polyprotein [Arabidopsis thaliana]                                                                                                                                                                                                                      | 1453 | 1661 | 0         | 114.3 | 54.0 | 69.4 | putative retroelement pol polyprotein                                                                                                               | gbpln | Arabidopsis thaliana | ATMG00860.1   Symbols: ORF158   DNA/RNA polymerases superfamily protein   chrM:235916-236392 FORWARD LENGTH=158                                                                                                                                                                                                                                                             | 1453 | 158 | 1.00E-43 | 10.9  | 5.8  | 6.6  |
| Rsa1.0_01307.1.g25610.t3 | gb EOA30885.1  hypothetical protein CARUB_v10014029mg [Capsella rubella]                                                                                                                                                                                                                                   | 265  | 363  | 6.00E-41  | 137.0 | 40.4 | 46.4 | hypothetical protein CARUB_v10014029mg                                                                                                              | gbpln | Capsella rubella     | AT3G15890.1   Symbols:   Protein kinase superfamily protein   chr3:5374389-5376114 FORWARD LENGTH=361                                                                                                                                                                                                                                                                       | 265  | 361 | 1.00E-42 | 136.2 | 40.4 | 45.7 |
| Rsa1.0_01307.1.g25611.t1 | gb EOA37750.1  hypothetical protein CARUB_v10012565mg [Capsella rubella]                                                                                                                                                                                                                                   | 664  | 679  | 1.00E-164 | 102.3 | 46.1 | 63.0 | hypothetical protein CARUB_v10012565mg                                                                                                              | gbpln | Capsella rubella     | AT3G42170.1   Symbols:   BED zinc finger .hAT family dimerisation domain   chr3:14321838-14323928 FORWARD LENGTH=696                                                                                                                                                                                                                                                        | 664  | 696 | 1.00E-33 | 104.8 | 22.0 | 42.2 |
| Rsa1.0_01307.1.g25612.t1 | gb EOA14275.1  hypothetical protein CARUB_v10027437mg [Capsella rubella]                                                                                                                                                                                                                                   | 98   | 98   | 2.00E-42  | 100.0 | 85.7 | 93.9 | hypothetical protein CARUB_v10027437mg                                                                                                              | gbpln | Capsella rubella     | AT5G43260.1   Symbols:   chaperone protein dnaJ-related   chr5:17357693-17357986 REVERSE LENGTH=97                                                                                                                                                                                                                                                                          | 98   | 97  | 2.00E-43 | 99.0  | 84.7 | 92.9 |
| Rsa1.0_01308.1.g25613.t2 | #                                                                                                                                                                                                                                                                                                          | #    | #    | #         | #     | #    | #    | -                                                                                                                                                   | ----  | ----                 | #                                                                                                                                                                                                                                                                                                                                                                           | #    | #   | #        | #     | #    |      |
| Rsa1.0_01308.1.g25614.t1 | #                                                                                                                                                                                                                                                                                                          | #    | #    | #         | #     | #    | #    | -                                                                                                                                                   | ----  | ----                 | #                                                                                                                                                                                                                                                                                                                                                                           | #    | #   | #        | #     | #    |      |
| Rsa1.0_01308.1.g25615.t1 | pir S65812  RNA-directed DNA polymerase (EC 2.7.7.49) (clone DW15) - Arabidopsis thaliana retrotransposon Ta11-1 gi 976278 gb AAA75254.1  reverse transcriptase [Arabidopsis thaliana]                                                                                                                     | 1198 | 1333 | 0         | 111.3 | 48.2 | 63.5 | RNA-directed DNA polymerase (EC 2.7.7.49) (clone DW15) - Arabidopsis thaliana retrotransposon Ta11-1 gi 976278 gb AAA75254.1  reverse transcriptase | gbpln | Arabidopsis thaliana | AT4G29090.1   Symbols:   Ribonuclease H-like superfamily protein   chr4:14333528-14335255 FORWARD LENGTH=575                                                                                                                                                                                                                                                                | 1198 | 575 | 1.00E-84 | 48.0  | 14.1 | 23.2 |
| Rsa1.0_01308.1.g25616.t1 | dbj BAB01217.1  Ta11 non-LTR retroelement protein-like [Arabidopsis thaliana] gi 67633664 gb AAY78756.1  putative zinc finger protein [Arabidopsis thaliana]                                                                                                                                               | 421  | 487  | 1.00E-80  | 115.7 | 45.4 | 60.8 | Ta11 non-LTR retroelement protein-like                                                                                                              | gbpln | Arabidopsis thaliana | AT5G18636.1   Symbols:   unknown protein; BEST Arabidopsis thaliana protein match is: unknown protein (TAIR:AT5G25200.1); Has 35333 Blast hits to 34131 proteins in 2444 species: Archae - 798; Bacteria - 22429; Metazoa - 974; Fungi - 991; Plants - 531; Viruses - 0; Other Eukaryotes - 9610 (source: NCBI BLINK).   chr5:6211268-6212371 FORWARD LENGTH=367            | 421  | 367 | 3.00E-17 | 87.2  | 15.7 | 24.9 |
| Rsa1.0_01308.1.g25617.t1 | ref XP_002882730.1  hypothetical protein ARALYDRAFT.478479 [Arabidopsis lyrata subsp. lyrata] gi 297328570 gb EFH58989.1  hypothetical protein ARALYDRAFT.478479 [Arabidopsis lyrata subsp. lyrata]                                                                                                        | 506  | 505  | 0         | 99.8  | 86.0 | 91.1 | hypothetical protein ARALYDRAFT.478479                                                                                                              | gbpln | Arabidopsis lyrata   | AT3G11420.1   Symbols:   Protein of unknown function (DUF604)   chr3:3591834-3594923 FORWARD LENGTH=505                                                                                                                                                                                                                                                                     | 506  | 505 | 0        | 99.8  | 84.4 | 90.5 |
| Rsa1.0_01308.1.g25618.t1 | ref XP_002882731.1  glycerol-3-phosphate acyltransferase 5 [Arabidopsis lyrata subsp. lyrata] gi 297328571 gb EFH58990.1  glycerol-3-phosphate acyltransferase 5 [Arabidopsis lyrata subsp. lyrata]                                                                                                        | 500  | 502  | 0         | 100.4 | 89.8 | 94.2 | glycerol-3-phosphate acyltransferase 5                                                                                                              | gbpln | Arabidopsis lyrata   | AT3G11430.1   Symbols: ATPGAT5, GPAT5   glycerol-3-phosphate acyltransferase 5   chr3:3595911-3597678 FORWARD LENGTH=502                                                                                                                                                                                                                                                    | 500  | 502 | 0        | 100.4 | 89.4 | 94.4 |
| Rsa1.0_01308.1.g25619.t1 | ref XP_002882732.1  hypothetical protein ARALYDRAFT.478481 [Arabidopsis lyrata subsp. lyrata] gi 297328572 gb EFH58991.1  hypothetical protein ARALYDRAFT.478481 [Arabidopsis lyrata subsp. lyrata]                                                                                                        | 513  | 551  | 0         | 107.4 | 77.2 | 83.4 | hypothetical protein ARALYDRAFT.478481                                                                                                              | gbpln | Arabidopsis lyrata   | AT3G11440.1   Symbols: ATMYB65, MYB65   myb domain protein 65   chr3:3603056-3604929 FORWARD LENGTH=553                                                                                                                                                                                                                                                                     | 513  | 553 | 0        | 107.8 | 76.4 | 83.6 |





|                          |                                                                                                                                                                                                                                                                                                                                                                                                                                           |     |     |           |       |      |      |                                                 |       |                      |                                                                                                                                         |     |     |           |       |      |      |
|--------------------------|-------------------------------------------------------------------------------------------------------------------------------------------------------------------------------------------------------------------------------------------------------------------------------------------------------------------------------------------------------------------------------------------------------------------------------------------|-----|-----|-----------|-------|------|------|-------------------------------------------------|-------|----------------------|-----------------------------------------------------------------------------------------------------------------------------------------|-----|-----|-----------|-------|------|------|
| Rsa1.0_01309.1.g25630.t1 | refXP_002888025.1   hypothetical protein ARALYDRAFT_475099 [Arabidopsis lyrata subsp. lyrata] gi 297333866 gb EFH64284.1   hypothetical protein ARALYDRAFT_475099 [Arabidopsis lyrata subsp. lyrata]                                                                                                                                                                                                                                      | 774 | 713 | 0         | 92.1  | 47.0 | 48.7 | hypothetical protein ARALYDRAFT_475099          | gbpln | Arabidopsis lyrata   | AT1G12040.1   Symbols: LRX1   leucine-rich repeat/extensin 1   chr1:4070160-4072394 FORWARD LENGTH=744                                  | 774 | 744 | 0         | 96.1  | 39.1 | 42.6 |
| Rsa1.0_01309.1.g25631.t1 | gb EOA34754.1   hypothetical protein CARUB_v10022325mg [Capsella rubella]                                                                                                                                                                                                                                                                                                                                                                 | 223 | 224 | 1.00E-113 | 100.4 | 92.4 | 97.3 | hypothetical protein CARUB_v10022325mg          | gbpln | Capsella rubella     | AT1G62450.1   Symbols:   Immunoglobulin E-set superfamily protein   chr1:23115958-23117370 REVERSE LENGTH=223                           | 223 | 223 | 1.00E-109 | 100.0 | 90.6 | 94.6 |
| Rsa1.0_01310.1.g25632.t1 | refXP_002871588.1   hypothetical protein ARALYDRAFT_488205 [Arabidopsis lyrata subsp. lyrata] gi 297317425 gb EFH47847.1   hypothetical protein ARALYDRAFT_488205 [Arabidopsis lyrata subsp. lyrata]                                                                                                                                                                                                                                      | 388 | 648 | 1.00E-117 | 167.0 | 70.1 | 77.6 | hypothetical protein ARALYDRAFT_488205          | gbpln | Arabidopsis lyrata   | AT5G13820.1   Symbols: TBP1, ATBP-1, ATBP1, ATTBP1, HPPBF-1   telomeric DNA binding protein 1   chr5:4461694-4464355 FORWARD LENGTH=640 | 388 | 640 | 1.00E-116 | 164.9 | 68.8 | 76.3 |
| Rsa1.0_01310.1.g25633.t1 | refXP_002871586.1   glutaredoxin family protein [Arabidopsis lyrata subsp. lyrata] gi 297317423 gb EFH47845.1   glutaredoxin family protein [Arabidopsis lyrata subsp. lyrata]                                                                                                                                                                                                                                                            | 275 | 270 | 1.00E-117 | 98.2  | 79.6 | 87.3 | glutaredoxin family protein                     | gbpln | Arabidopsis lyrata   | AT5G13810.1   Symbols:   Glutaredoxin family protein   chr5:4456769-4456593 FORWARD LENGTH=274                                          | 275 | 274 | 1.00E-116 | 99.6  | 78.9 | 87.6 |
| Rsa1.0_01310.1.g25634.t1 | gb EOA20527.1   hypothetical protein CARUB_v10000840mg [Capsella rubella]                                                                                                                                                                                                                                                                                                                                                                 | 494 | 484 | 0         | 98.0  | 79.6 | 88.1 | hypothetical protein CARUB_v10000840mg          | gbpln | Capsella rubella     | AT5G13800.1   Symbols: PPH, CRN1   pheophytinase   chr5:4452063-4454141 REVERSE LENGTH=484                                              | 494 | 484 | 0         | 98.0  | 80.0 | 88.1 |
| Rsa1.0_01310.1.g25635.t1 | gb ABD77425.1   agamous-like 15 [Brassica napus]                                                                                                                                                                                                                                                                                                                                                                                          | 253 | 264 | 1.00E-114 | 104.3 | 90.1 | 93.7 | agamous-like 15                                 | gbpln | Brassica napus       | AT5G13790.1   Symbols: AGL15   AGAMOUS-like 15   chr5:4449128-4450802 REVERSE LENGTH=268                                                | 253 | 268 | 1.00E-92  | 105.9 | 72.3 | 83.4 |
| Rsa1.0_01310.1.g25636.t1 | gb EOA19567.1   hypothetical protein CARUB_v10002619mg [Capsella rubella]                                                                                                                                                                                                                                                                                                                                                                 | 478 | 479 | 0         | 100.2 | 84.1 | 91.4 | hypothetical protein CARUB_v10002619mg          | gbpln | Capsella rubella     | AT5G13750.1   Symbols: ZIFL1   zinc induced facilitator-like 1   chr5:4438318-4441289 FORWARD LENGTH=478                                | 478 | 478 | 0         | 100.0 | 83.3 | 90.8 |
| Rsa1.0_01310.1.g25637.t1 | gb AAM12978.1   transporter-like protein [Arabidopsis thaliana] gi 22136244 gb AAM91200.1   transporter-like protein [Arabidopsis thaliana]                                                                                                                                                                                                                                                                                               | 411 | 460 | 0         | 111.9 | 87.3 | 92.0 | transporter-like protein                        | gbpln | Arabidopsis thaliana | AT5G13740.1   Symbols: ZIF1   zinc induced facilitator 1   chr5:4432689-4436483 FORWARD LENGTH=486                                      | 411 | 486 | 0         | 118.2 | 87.3 | 92.0 |
| Rsa1.0_01310.1.g25638.t1 | ref NP_850812.2   receptor-like kinase CORYNE [Arabidopsis thaliana] gi 75335675 sp Q9LYU7.1    CRN ARATH RecName: Full=Inactive leucine-rich repeat receptor-like protein kinase CORYNE; AltName: Full=Protein SUPPRESSOR OF OVEREXPRESSION OF LLP1 2; Flags: Precursor gi 7529284 emb CAB86636.1   protein kinase precursor-like [Arabidopsis thaliana] gi 332004493 gb AED91876.1   receptor-like kinase CORYNE [Arabidopsis thaliana] | 180 | 401 | 6.00E-81  | 222.8 | 82.8 | 90.6 | receptor-like kinase CORYNE                     | gbpln | Arabidopsis thaliana | AT5G13290.2   Symbols: SOL2, CRN   Protein kinase superfamily protein   chr5:4252924-4254215 REVERSE LENGTH=401                         | 180 | 401 | 2.00E-83  | 222.8 | 82.8 | 90.6 |
| Rsa1.0_01310.1.g25639.t1 | gb EOA22755.1   hypothetical protein CARUB_v10003467mg, partial [Capsella rubella]                                                                                                                                                                                                                                                                                                                                                        | 276 | 325 | 1.00E-107 | 117.8 | 75.7 | 83.0 | hypothetical protein CARUB_v10003467mg, partial | gbpln | Capsella rubella     | AT5G13250.1   Symbols:   RING finger protein   chr5:4234486-4241615 FORWARD LENGTH=387                                                  | 276 | 387 | 1.00E-103 | 140.2 | 75.7 | 82.6 |
| Rsa1.0_01310.1.g25640.t1 | refXP_002871554.1   hypothetical protein ARALYDRAFT_488138 [Arabidopsis lyrata subsp. lyrata] gi 297317391 gb EFH47813.1   hypothetical protein ARALYDRAFT_488138 [Arabidopsis lyrata subsp. lyrata]                                                                                                                                                                                                                                      | 195 | 198 | 1.00E-77  | 101.5 | 76.9 | 87.2 | hypothetical protein ARALYDRAFT_488138          | gbpln | Arabidopsis lyrata   | AT5G13220.1   Symbols: JAZ10, TIFY9, JAS1   jasmonate-zim-domain protein 10   chr5:4219001-4220502 FORWARD LENGTH=197                   | 195 | 197 | 9.00E-78  | 101.0 | 75.9 | 84.6 |
| Rsa1.0_01310.1.g25641.t1 | #                                                                                                                                                                                                                                                                                                                                                                                                                                         | #   | #   | #         | #     | #    | -    | ----                                            | ----  | #                    | #                                                                                                                                       | #   | #   | #         | #     | #    |      |
| Rsa1.0_01310.1.g25642.t1 | #                                                                                                                                                                                                                                                                                                                                                                                                                                         | #   | #   | #         | #     | #    | -    | ----                                            | ----  | #                    | #                                                                                                                                       | #   | #   | #         | #     | #    |      |
| Rsa1.0_01310.1.g25643.t1 | gb AFI56995.1   NAC5 [Brassica napus]                                                                                                                                                                                                                                                                                                                                                                                                     | 249 | 249 | 1.00E-118 | 100.0 | 90.4 | 94.4 | NAC5                                            | gbpln | Brassica napus       | AT5G13180.1   Symbols: ANAC083, VNI2, NAC083   NAC domain containing protein 83   chr5:4196643-4197577 FORWARD LENGTH=252               | 249 | 252 | 1.00E-113 | 101.2 | 88.0 | 94.0 |
| Rsa1.0_01311.1.g25644.t1 | ref NP_174430.1   aspartyl protease-like protein [Arabidopsis thaliana] gi 12322538 gb AAG51267.1    AC027135_8 chloroplast nucleoid DNA binding protein, putative [Arabidopsis thaliana] gi 67633408 gb AY78629.1   aspartyl protease family protein [Arabidopsis thaliana] gi 332193236 gb AEE31357.1   aspartyl protease-like protein [Arabidopsis thaliana]                                                                           | 404 | 445 | 1.00E-157 | 110.1 | 72.8 | 81.2 | aspartyl protease-like protein                  | gbpln | Arabidopsis thaliana | AT1G31450.1   Symbols:   Eukaryotic aspartyl protease family protein   chr1:11259872-11261209 REVERSE LENGTH=445                        | 404 | 445 | 1.00E-159 | 110.1 | 72.8 | 81.2 |
| Rsa1.0_01311.1.g25645.t1 | #                                                                                                                                                                                                                                                                                                                                                                                                                                         | #   | #   | #         | #     | #    | -    | ----                                            | ----  | #                    | #                                                                                                                                       | #   | #   | #         | #     | #    |      |

|                          |                                                                                                                                                                                                                                                                                                                                                                                    |      |      |           |       |      |      |                                                                            |       |                      |                                                                                                                                                                                                                                                                                                                                                                                                                                                                                                                                                   |      |      |           |       |      |      |
|--------------------------|------------------------------------------------------------------------------------------------------------------------------------------------------------------------------------------------------------------------------------------------------------------------------------------------------------------------------------------------------------------------------------|------|------|-----------|-------|------|------|----------------------------------------------------------------------------|-------|----------------------|---------------------------------------------------------------------------------------------------------------------------------------------------------------------------------------------------------------------------------------------------------------------------------------------------------------------------------------------------------------------------------------------------------------------------------------------------------------------------------------------------------------------------------------------------|------|------|-----------|-------|------|------|
| Rsa1.0_01311.1.g25646.t1 | gb ACP30598.1  disease resistance protein [Brassica rapa subsp. pekinensis]                                                                                                                                                                                                                                                                                                        | 1253 | 2301 | 0         | 183.6 | 52.0 | 65.7 | disease resistance protein                                                 | gbpln | Brassica rapa        | AT4G23160.1   Symbols: CRK8   cysteine-rich RLK (RECEPTOR-like protein kinase) 8   chr4:12129485-12134086 FORWARD LENGTH=1262                                                                                                                                                                                                                                                                                                                                                                                                                     | 1253 | 1262 | 1.00E-107 | 100.7 | 14.7 | 22.5 |
| Rsa1.0_01311.1.g25647.t1 | #                                                                                                                                                                                                                                                                                                                                                                                  | #    | #    | #         | #     | #    | -    |                                                                            | ----  | ----                 | #                                                                                                                                                                                                                                                                                                                                                                                                                                                                                                                                                 | #    | #    | #         | #     | #    | #    |
| Rsa1.0_01311.1.g25648.t1 | gb EOA37770.1  hypothetical protein CARUB_v10012628mg [Capsella rubella]                                                                                                                                                                                                                                                                                                           | 282  | 316  | 3.00E-90  | 112.1 | 75.2 | 85.5 | hypothetical protein CARUB_v10012628mg                                     | gbpln | Capsella rubella     | AT1G31460.1   Symbols:   unknown protein; FUNCTIONS IN: molecular_function unknown; INVOLVED IN: biological_process unknown; LOCATED IN: plasma membrane; EXPRESSED IN: 23 plant structures; EXPRESSED DURING: 13 growth stages; BEST Arabidopsis thaliana protein match is: unknown protein (TAIR:AT1G23270.1); Has 1251 Blast hits to 756 proteins in 185 species: Archaea - 0; Bacteria - 295; Metazoa - 374; Fungi - 176; Plants - 58; Viruses - 17; Other Eukaryotes - 331 (source: NCBI BLINK).   chr1:11261705-11262610 REVERSE LENGTH=301 | 282  | 301  | 8.00E-83  | 106.7 | 67.0 | 77.3 |
| Rsa1.0_01311.1.g25649.t1 | ref NP_174432.2  nuclear fusion defective 4 protein [Arabidopsis thaliana]   gi 332193238 gb AEE31359.1  nuclear fusion defective 4 protein [Arabidopsis thaliana]                                                                                                                                                                                                                 | 579  | 582  | 0         | 100.5 | 86.5 | 92.1 | nuclear fusion defective 4 protein                                         | gbpln | Arabidopsis thaliana | AT1G31470.1   Symbols: NFD4   Major facilitator superfamily protein   chr1:11262937-11264944 REVERSE LENGTH=582                                                                                                                                                                                                                                                                                                                                                                                                                                   | 579  | 582  | 0         | 100.5 | 86.5 | 92.1 |
| Rsa1.0_01311.1.g25650.t4 | gb EOA39604.1  hypothetical protein CARUB_v10008231mg [Capsella rubella]                                                                                                                                                                                                                                                                                                           | 939  | 937  | 0         | 99.8  | 85.1 | 91.2 | hypothetical protein CARUB_v10008231mg                                     | gbpln | Capsella rubella     | AT1G31480.1   Symbols: SGR2   shoot gravitropism 2 (SGR2)   chr1:11266225-11271527 FORWARD LENGTH=933                                                                                                                                                                                                                                                                                                                                                                                                                                             | 939  | 933  | 0         | 99.4  | 84.3 | 89.7 |
| Rsa1.0_01311.1.g25651.t1 | ref NP_174434.1  HXXXD-type acyl-transferase-like protein [Arabidopsis thaliana]   gi 12322545 gb AAG51274.1 AC027135.15 N- hydroxycinnamoyl/benzoyltransferase, putative [Arabidopsis thaliana]   gi 12597836 gb AAC60146.1 AC074360.11 hypothetical protein [Arabidopsis thaliana]   gi 332193240 gb AEE31361.1  HXXXD-type acyl-transferase-like protein [Arabidopsis thaliana] | 446  | 444  | 0         | 99.6  | 85.7 | 92.6 | HXXXD-type acyl-transferase-like protein                                   | gbpln | Arabidopsis thaliana | AT1G31490.1   Symbols:   HXXXD-type acyl-transferase family protein   chr1:11271744-11273078 REVERSE LENGTH=444                                                                                                                                                                                                                                                                                                                                                                                                                                   | 446  | 444  | 0         | 99.6  | 85.7 | 92.6 |
| Rsa1.0_01311.1.g25652.t1 | ref NP_174435.2  carbon catabolite repressor protein 4-like 4 [Arabidopsis thaliana]   gi 332193241 gb AEE31362.1  carbon catabolite repressor protein 4-like 4 [Arabidopsis thaliana]                                                                                                                                                                                             | 355  | 388  | 1.00E-179 | 109.3 | 87.6 | 93.0 | carbon catabolite repressor protein 4-like 4                               | gbpln | Arabidopsis thaliana | AT1G31500.1   Symbols:   DNase I-like superfamily protein   chr1:11273821-11276534 REVERSE LENGTH=388                                                                                                                                                                                                                                                                                                                                                                                                                                             | 355  | 388  | 0         | 109.3 | 87.6 | 93.0 |
| Rsa1.0_01311.1.g25653.t1 | ref NP_174446.2  RHO guanyl-nucleotide exchange factor 14 [Arabidopsis thaliana]   gi 82321355 db BA094650.1  hypothetical protein [Arabidopsis thaliana]   gi 332193259 gb AEE31380.1  RHO guanyl-nucleotide exchange factor 14 [Arabidopsis thaliana]                                                                                                                            | 351  | 576  | 1.00E-175 | 164.1 | 85.8 | 90.0 | RHO guanyl-nucleotide exchange factor 14                                   | gbpln | Arabidopsis thaliana | AT1G31650.1   Symbols: ATROPGEF14, ROPGEF14   RHO guanyl-nucleotide exchange factor 14   chr1:11326474-11329767 REVERSE LENGTH=576                                                                                                                                                                                                                                                                                                                                                                                                                | 351  | 576  | 1.00E-177 | 164.1 | 85.8 | 90.0 |
| Rsa1.0_01312.1.g25654.t1 | ref NP_197389.1  RNA-directed DNA polymerase (reverse transcriptase)-related family protein [Arabidopsis thaliana]   gi 332005241 gb AED92624.1  RNA-directed DNA polymerase (reverse transcriptase)-related family protein [Arabidopsis thaliana]                                                                                                                                 | 187  | 295  | 2.00E-22  | 157.8 | 34.2 | 44.9 | RNA-directed DNA polymerase (reverse transcriptase)-related family protein | gbpln | Arabidopsis thaliana | AT5G18880.1   Symbols:   RNA-directed DNA polymerase (reverse transcriptase)-related family protein   chr5:6300535-6301422 REVERSE LENGTH=295                                                                                                                                                                                                                                                                                                                                                                                                     | 187  | 295  | 6.00E-25  | 157.8 | 34.2 | 44.9 |
| Rsa1.0_01312.1.g25655.t1 | ref XP_002872853.1  ATIMPALPHA3/MOS6 [Arabidopsis lyrata subsp. lyrata]   gi 297318690 gb EPH49112.1  ATIMPALPHA3/MOS6 [Arabidopsis lyrata subsp. lyrata]                                                                                                                                                                                                                          | 555  | 534  | 0         | 96.2  | 71.9 | 81.4 | ATIMPALPHA3/MOS6                                                           | gbpln | Arabidopsis lyrata   | AT4G02150.1   Symbols: MOS6, ATIMPALPHA3, IMPA-3   ARM repeat superfamily protein   chr4:950884-953602 REVERSE LENGTH=531                                                                                                                                                                                                                                                                                                                                                                                                                         | 555  | 531  | 0         | 95.7  | 69.7 | 79.3 |
| Rsa1.0_01312.1.g25656.t1 | gb AAC02664.1  polyprotein [Arabidopsis thaliana]                                                                                                                                                                                                                                                                                                                                  | 784  | 1451 | 0         | 185.1 | 69.1 | 78.7 | polyprotein                                                                | gbpln | Arabidopsis thaliana | AT4G23160.1   Symbols: CRK8   cysteine-rich RLK (RECEPTOR-like protein kinase) 8   chr4:12129485-12134086 FORWARD LENGTH=1262                                                                                                                                                                                                                                                                                                                                                                                                                     | 784  | 1262 | 1.00E-113 | 161.0 | 25.1 | 36.5 |
| Rsa1.0_01312.1.g25657.t1 | gb AAC02666.1  polyprotein [Arabidopsis thaliana]                                                                                                                                                                                                                                                                                                                                  | 504  | 1451 | 0         | 287.9 | 68.3 | 78.4 | polyprotein                                                                | gbpln | Arabidopsis thaliana | #                                                                                                                                                                                                                                                                                                                                                                                                                                                                                                                                                 | #    | #    | #         | #     | #    |      |
| Rsa1.0_01312.1.g25658.t2 | gb AFJ66186.1  hypothetical protein 11M19.5 [Arabidopsis halleri]                                                                                                                                                                                                                                                                                                                  | 1546 | 1557 | 0         | 100.7 | 63.0 | 75.8 | hypothetical protein 11M19.5                                               | gbpln | Arabidopsis halleri  | ATMG00860.1   Symbols: ORF158   DNA/RNA polymerases superfamily protein   chrM:235916-236392 FORWARD LENGTH=158                                                                                                                                                                                                                                                                                                                                                                                                                                   | 1546 | 158  | 2.00E-28  | 10.2  | 4.5  | 5.5  |

|                           |                                                                                                                                                                                                                                                                                                                                                                                                                                                                                   |      |      |           |       |      |      |                                                     |       |                      |                                                                                                                                                                                                                                                                                                                                                                                             |      |      |           |       |      |      |
|---------------------------|-----------------------------------------------------------------------------------------------------------------------------------------------------------------------------------------------------------------------------------------------------------------------------------------------------------------------------------------------------------------------------------------------------------------------------------------------------------------------------------|------|------|-----------|-------|------|------|-----------------------------------------------------|-------|----------------------|---------------------------------------------------------------------------------------------------------------------------------------------------------------------------------------------------------------------------------------------------------------------------------------------------------------------------------------------------------------------------------------------|------|------|-----------|-------|------|------|
| Rsa1.0_01312.1.g25659.t1  | ref NP_180368.1  aspartyl protease-like protein [Arabidopsis thaliana] gi 4510415 gb AAD21501.1  putative chloroplast nucleoid DNA binding protein [Arabidopsis thaliana] gi 330252975 gb AEC08069.1  aspartyl protease-like protein [Arabidopsis thaliana]                                                                                                                                                                                                                       | 436  | 396  | 1.00E-121 | 90.8  | 54.8 | 67.4 | aspartyl protease-like protein                      | gbpln | Arabidopsis thaliana | AT2G28010.1   Symbols:   Eukaryotic aspartyl protease family protein   chr2:11930579-11931769 REVERSE LENGTH=396                                                                                                                                                                                                                                                                            | 436  | 396  | 1.00E-123 | 90.8  | 54.8 | 67.4 |
| Rsa1.0_01312.1.g25660.t1  | gb AAD15377.1  putative non-LTR retroelement reverse transcriptase [Arabidopsis thaliana]                                                                                                                                                                                                                                                                                                                                                                                         | 1421 | 1044 | 1.00E-132 | 73.5  | 15.6 | 21.0 | putative non-LTR retroelement reverse transcriptase | gbpln | Arabidopsis thaliana | AT4G29090.1   Symbols:   Ribonuclease H-like superfamily protein   chr4:14333528-14335255 FORWARD LENGTH=575                                                                                                                                                                                                                                                                                | 1421 | 575  | 2.00E-28  | 40.5  | 4.8  | 7.5  |
| Rsa1.0_01312.1.g25661.t1  | gb AAM82604.1 AF525305.2 putative AP endonuclease/reverse transcriptase [Brassica napus]                                                                                                                                                                                                                                                                                                                                                                                          | 708  | 1214 | 1.00E-164 | 171.5 | 43.8 | 63.3 | putative AP endonuclease/reverse transcriptase      | gbpln | Brassica napus       | AT5G18880.1   Symbols:   RNA-directed DNA polymerase (reverse transcriptase)-related family protein   chr5:6300535-6301422 REVERSE LENGTH=295                                                                                                                                                                                                                                               | 708  | 295  | 6.00E-84  | 41.7  | 21.9 | 28.5 |
| Rsa1.0_01312.1.g25662.t2  | ref NP_565613.1  uncharacterized protein [Arabidopsis thaliana] gi 15294292 gb AAK95323.1 AF410337.1 At2g25920/F17H15.5 [Arabidopsis thaliana] gi 20197392 gb AAC42240.2  expressed protein [Arabidopsis thaliana] gi 23507801 gb AAN36704.1  At2g25920/F17H15.5 [Arabidopsis thaliana] gi 330252679 gb AEC07773.1  uncharacterized protein AT2G25920 [Arabidopsis thaliana]                                                                                                      | 269  | 280  | 5.00E-99  | 104.1 | 74.7 | 79.9 | uncharacterized protein                             | gbpln | Arabidopsis thaliana | AT2G25920.1   Symbols:   BEST Arabidopsis thaliana protein match is: 3'-5' exonuclease domain-containing protein / KH domain-containing protein (TAIRAT2G25910.2). Has 131 Blast hits to 125 proteins in 54 species: Archae - 0; Bacteria - 50; Metazoa - 12; Fungi - 12; Plants - 41; Viruses - 0; Other Eukaryotes - 16 (source: NCBI BLINK).   chr2:11054425-11055916 REVERSE LENGTH=280 | 269  | 280  | 1.00E-101 | 104.1 | 74.7 | 79.9 |
| Rsa1.0_01312.1.g25663.t1  | ref XP_002875851.1  hypothetical protein ARALYDRAFT_323370 [Arabidopsis lyrata subsp. lyrata] gi 297321689 gb EFH52110.1  hypothetical protein ARALYDRAFT_323370 [Arabidopsis lyrata subsp. lyrata]                                                                                                                                                                                                                                                                               | 250  | 970  | 5.00E-66  | 388.0 | 50.4 | 63.6 | hypothetical protein ARALYDRAFT_323370              | gbpln | Arabidopsis lyrata   | AT3G47580.1   Symbols:   Leucine-rich repeat protein kinase family protein   chr3:17532687-17535810 FORWARD LENGTH=1011                                                                                                                                                                                                                                                                     | 250  | 1011 | 3.00E-67  | 404.4 | 51.2 | 61.6 |
| Rsa1.0_01313.1.g25664.t1  | gb AAB87721.1  maize gl1 homolog [Arabidopsis thaliana]                                                                                                                                                                                                                                                                                                                                                                                                                           | 645  | 625  | 0         | 96.9  | 80.9 | 86.8 | maize gl1 homolog                                   | gbpln | Arabidopsis thaliana | AT1G02205.2   Symbols: CER1   Fatty acid hydroxylase superfamily   chr1:418818-422154 FORWARD LENGTH=625                                                                                                                                                                                                                                                                                    | 645  | 625  | 0         | 96.9  | 82.3 | 87.6 |
| Rsa1.0_01313.1.g25665.t9  | ref NP_001077448.1  alpha-1,6-mannosyltransferase [Arabidopsis thaliana] gi 347662308 sp A8MR93.1 ALG12_ARA TH RechName: Full=Dol-P-MamMan(7)GlcNAc(2)-PP-Dol alpha-1,6-mannosyltransferase; AltName: Full=Alpha-1,6-mannosyltransferase ALG12; AltName: Full=Asparagine-linked glycosylation protein 12; AltName: Full=EMS-mutagenized BRI1 suppressor 4                                                                                                                         | 508  | 497  | 0         | 97.8  | 85.8 | 90.6 | alpha-1,6-mannosyltransferase                       | gbpln | Arabidopsis thaliana | AT1G02145.3   Symbols: ALG12, EBS4   homolog of asparagine-linked glycosylation 12   chr1:404627-40485 FORWARD LENGTH=497                                                                                                                                                                                                                                                                   | 508  | 497  | 0         | 97.8  | 85.8 | 90.6 |
| Rsa1.0_01313.1.g25666.t10 | gi 332189270 gb AEE27391.1  alpha-1,6-mannosyltransferase [Arabidopsis thaliana] gb EOA36262.1  hypothetical protein CARUB_v10010485mg, partial [Capsella rubella]                                                                                                                                                                                                                                                                                                                | 153  | 167  | 4.00E-62  | 109.2 | 78.4 | 84.3 | hypothetical protein CARUB_v10010485mg, partial     | gbpln | Capsella rubella     | AT1G02140.1   Symbols: MEE63, MAGO, HAP1   mago nashi family protein   chr1:403467-404401 REVERSE LENGTH=150                                                                                                                                                                                                                                                                                | 153  | 150  | 1.00E-62  | 98.0  | 75.8 | 83.7 |
| Rsa1.0_01313.1.g25667.t1  | ref NP_171712.2  Leucine carboxyl methyltransferase [Arabidopsis thaliana] gi 42571301 ref NP_973741.1  Leucine carboxyl methyltransferase [Arabidopsis thaliana] gi 18377694 gb AAL66997.1  unknown protein [Arabidopsis thaliana] gi 22136718 gb AAM91678.1  unknown protein [Arabidopsis thaliana] gi 332189262 gb AEE27383.1  Leucine carboxyl methyltransferase [Arabidopsis thaliana] gi 332189263 gb AEE27384.1  Leucine carboxyl methyltransferase [Arabidopsis thaliana] | 325  | 332  | 1.00E-153 | 102.2 | 85.2 | 90.2 | Leucine carboxyl methyltransferase                  | gbpln | Arabidopsis thaliana | AT1G02100.1   Symbols:   Leucine carboxyl methyltransferase   chr1:389876-392448 FORWARD LENGTH=332                                                                                                                                                                                                                                                                                         | 325  | 332  | 1.00E-155 | 102.2 | 85.2 | 90.2 |
| Rsa1.0_01313.1.g25668.t1  | gb AAG50806.1 AC079281.8 unknown protein [Arabidopsis thaliana]                                                                                                                                                                                                                                                                                                                                                                                                                   | 1747 | 1213 | 0         | 69.4  | 35.7 | 45.6 | unknown protein                                     | gbpln | Arabidopsis thaliana | AT3G24255.1   Symbols:   RNA-directed DNA polymerase (reverse transcriptase)-related family protein   chr3:8789471-8793208 FORWARD LENGTH=746                                                                                                                                                                                                                                               | 1747 | 746  | 1.00E-68  | 42.7  | 8.4  | 12.0 |
| Rsa1.0_01313.1.g25669.t1  | #                                                                                                                                                                                                                                                                                                                                                                                                                                                                                 | #    | #    | #         | #     | #    | -    | ----                                                | ----  | #                    | #                                                                                                                                                                                                                                                                                                                                                                                           | #    | #    | #         | #     | #    |      |

|                          |                                                                                                                                                                                                                                                                                                                                                                                                                                                              |     |      |           |       |      |       |                                              |       |                      |                                                                                                                                                                                                                                                                                                             |     |     |           |       |      |       |
|--------------------------|--------------------------------------------------------------------------------------------------------------------------------------------------------------------------------------------------------------------------------------------------------------------------------------------------------------------------------------------------------------------------------------------------------------------------------------------------------------|-----|------|-----------|-------|------|-------|----------------------------------------------|-------|----------------------|-------------------------------------------------------------------------------------------------------------------------------------------------------------------------------------------------------------------------------------------------------------------------------------------------------------|-----|-----|-----------|-------|------|-------|
| Rsa1.0_01313.1.g25670.t1 | ref[XP_002867599.1] hypothetical protein ARALYDRAFT_492259 [Arabidopsis lyrata subsp. lyrata] gi 297313435 gb EFH43858.1  hypothetical protein ARALYDRAFT_492259 [Arabidopsis lyrata subsp. lyrata]                                                                                                                                                                                                                                                          | 205 | 187  | 3.00E-18  | 91.2  | 25.4 | 28.3  | hypothetical protein ARALYDRAFT_492259       | gbpln | Arabidopsis lyrata   | AT4G25670.2   Symbols:   unknown protein; LOCATED IN: cellular component unknown; EXPRESSED DURING: male gametophyte, pollen tube; EXPRESSED DURING: M germinated pollen stage; BEST Arabidopsis thaliana protein match is: unknown protein (TAIR:AT4G25690.2).   chr4:13085431-13085997 REVERSE LENGTH=188 | 205 | 188 | 9.00E-20  | 91.7  | 25.9 | 27.8  |
| Rsa1.0_01314.1.g25671.t1 | #                                                                                                                                                                                                                                                                                                                                                                                                                                                            | #   | #    | #         | #     | #    | -     | ----                                         | ----  | #                    | #                                                                                                                                                                                                                                                                                                           | #   | #   | #         | #     | #    |       |
| Rsa1.0_01314.1.g25672.t2 | #                                                                                                                                                                                                                                                                                                                                                                                                                                                            | #   | #    | #         | #     | #    | -     | ----                                         | ----  | #                    | #                                                                                                                                                                                                                                                                                                           | #   | #   | #         | #     | #    |       |
| Rsa1.0_01314.1.g25673.t1 | gb AAF79618.1 AC027665_19 F5M15.26 [Arabidopsis thaliana]                                                                                                                                                                                                                                                                                                                                                                                                    | 674 | 1838 | 1.00E-132 | 272.7 | 45.1 | 57.6  | F5M15.26                                     | gbpln | Arabidopsis thaliana | #                                                                                                                                                                                                                                                                                                           | #   | #   | #         | #     | #    |       |
| Rsa1.0_01314.1.g25674.t1 | gb ABD65089.1  zinc knuckle containing protein [Brassica oleracea]                                                                                                                                                                                                                                                                                                                                                                                           | 508 | 333  | 1.00E-39  | 65.6  | 20.5 | 23.2  | zinc knuckle containing protein              | gbpln | Brassica oleracea    | #                                                                                                                                                                                                                                                                                                           | #   | #   | #         | #     | #    |       |
| Rsa1.0_01314.1.g25675.t1 | #                                                                                                                                                                                                                                                                                                                                                                                                                                                            | #   | #    | #         | #     | #    | -     | ----                                         | ----  | #                    | #                                                                                                                                                                                                                                                                                                           | #   | #   | #         | #     | #    |       |
| Rsa1.0_01314.1.g25676.t1 | gb EOA20993.1  hypothetical protein CARUB_v10001326mg [Capsella rubella]                                                                                                                                                                                                                                                                                                                                                                                     | 362 | 345  | 1.00E-162 | 95.3  | 79.6 | 86.5  | hypothetical protein CARUB_v10001326mg       | gbpln | Capsella rubella     | AT4G08770.1   Symbols: Prx37   Peroxidase superfamily protein   chr4:5598259-5600262 REVERSE LENGTH=346                                                                                                                                                                                                     | 362 | 346 | 1.00E-160 | 95.6  | 77.9 | 82.6  |
| Rsa1.0_01314.1.g25677.t1 | #                                                                                                                                                                                                                                                                                                                                                                                                                                                            | #   | #    | #         | #     | #    | -     | ----                                         | ----  | #                    | #                                                                                                                                                                                                                                                                                                           | #   | #   | #         | #     | #    |       |
| Rsa1.0_01315.1.g25678.t1 | ref[XP_002874144.1] DNA binding protein [Arabidopsis lyrata subsp. lyrata] gi 297319981 gb EFH50403.1  DNA binding protein [Arabidopsis lyrata subsp. lyrata]                                                                                                                                                                                                                                                                                                | 292 | 230  | 3.00E-71  | 78.8  | 47.9 | 58.2  | DNA binding protein                          | gbpln | Arabidopsis lyrata   | AT5G23710.1   Symbols:   DNA binding;DNA-directed RNA polymerases   chr5:7996528-7997220 REVERSE LENGTH=230                                                                                                                                                                                                 | 292 | 230 | 4.00E-73  | 78.8  | 46.6 | 57.9  |
| Rsa1.0_01315.1.g25679.t1 | gb AAD32866.1 AC005489_4 F14N23.4 [Arabidopsis thaliana]                                                                                                                                                                                                                                                                                                                                                                                                     | 274 | 1161 | 2.00E-60  | 423.7 | 43.4 | 54.4  | F14N23.4                                     | gbpln | Arabidopsis thaliana | AT4G04650.1   Symbols:   RNA-directed DNA polymerase (reverse transcriptase)-related family protein   chr4:2353989-2355213 REVERSE LENGTH=332                                                                                                                                                               | 274 | 332 | 1.00E-59  | 121.2 | 41.2 | 54.7  |
| Rsa1.0_01315.1.g25680.t1 | ref[NP_568435.2] transducin/WD40 domain-containing protein [Arabidopsis thaliana] gi 75333740 sp Q9FFA7.1 RUP2 ARATH RecName: Full=WD repeat-containing protein RUP2; AltName: Full=Protein EARLY FLOWERING BY OVEREXPRESSION 2; AltName: Full=Protein EPRESSOR OF UV-B PHOTOMORPHOGENESIS 2 gi 10176840 dbj BAB10046.1  unnamed protein product [Arabidopsis thaliana] gi 332005822 gb AED93205.1  WD repeat-containing protein RUP2 [Arabidopsis thaliana] | 387 | 368  | 1.00E-179 | 95.1  | 88.1 | 91.2  | transducin/WD40 domain-containing protein    | gbpln | Arabidopsis thaliana | AT5G23730.1   Symbols: RUP2   Transducin/WD40 repeat-like superfamily protein   chr5:8005286-8006392 FORWARD LENGTH=368                                                                                                                                                                                     | 387 | 368 | 0         | 95.1  | 88.1 | 91.2  |
| Rsa1.0_01315.1.g25681.t1 | ref[XP_002869362.1] 40S ribosomal protein S11 [Arabidopsis lyrata subsp. lyrata] gi 297315198 gb EFH45621.1  40S ribosomal protein S11 [Arabidopsis lyrata subsp. lyrata]                                                                                                                                                                                                                                                                                    | 375 | 159  | 4.00E-83  | 42.4  | 38.9 | 40.5  | 40S ribosomal protein S11                    | gbpln | Arabidopsis lyrata   | AT5G23740.1   Symbols: RPS11-BETA   ribosomal protein S11-beta   chr5:8008251-8009330 REVERSE LENGTH=159                                                                                                                                                                                                    | 375 | 159 | 1.00E-80  | 42.4  | 40.3 | 41.1  |
| Rsa1.0_01315.1.g25682.t1 | ref[XP_002874147.1] hypothetical protein ARALYDRAFT_910389 [Arabidopsis lyrata subsp. lyrata] gi 297319984 gb EFH50406.1  hypothetical protein ARALYDRAFT_910389 [Arabidopsis lyrata subsp. lyrata]                                                                                                                                                                                                                                                          | 103 | 103  | 3.00E-44  | 100.0 | 99.0 | 100.0 | hypothetical protein ARALYDRAFT_910389       | gbpln | Arabidopsis lyrata   | AT5G23760.1   Symbols:   Copper transport protein family   chr5:8013242-8014129 REVERSE LENGTH=103                                                                                                                                                                                                          | 103 | 103 | 1.00E-46  | 100.0 | 98.1 | 100.0 |
| Rsa1.0_01315.1.g25683.t1 | gb EOA19597.1  hypothetical protein CARUB_v10002779mg [Capsella rubella]                                                                                                                                                                                                                                                                                                                                                                                     | 490 | 467  | 0         | 95.3  | 80.2 | 87.8  | hypothetical protein CARUB_v10002779mg       | gbpln | Capsella rubella     | AT5G23810.1   Symbols: AAP7   amino acid permease 7   chr5:8028461-8030730 FORWARD LENGTH=467                                                                                                                                                                                                               | 490 | 467 | 0         | 95.3  | 78.2 | 86.1  |
| Rsa1.0_01315.1.g25684.t1 | ref[XP_002874560.1] hypothetical protein ARALYDRAFT_911169 [Arabidopsis lyrata subsp. lyrata] gi 297320397 gb EFH50819.1  hypothetical protein ARALYDRAFT_911169 [Arabidopsis lyrata subsp. lyrata]                                                                                                                                                                                                                                                          | 65  | 77   | 1.00E-12  | 118.5 | 60.0 | 69.2  | hypothetical protein ARALYDRAFT_911169       | gbpln | Arabidopsis lyrata   | #                                                                                                                                                                                                                                                                                                           | #   | #   | #         | #     | #    |       |
| Rsa1.0_01315.1.g25685.t1 | ref[NP_197779.4] ATP binding microtubule motor family protein [Arabidopsis thaliana] gi 332005850 gb AED93233.1  ATP binding microtubule motor family protein [Arabidopsis thaliana]                                                                                                                                                                                                                                                                         | 697 | 701  | 0         | 100.6 | 67.0 | 76.9  | ATP binding microtubule motor family protein | gbpln | Arabidopsis thaliana | AT5G23910.1   Symbols:   ATP binding microtubule motor family protein   chr5:8068452-8072723 FORWARD LENGTH=701                                                                                                                                                                                             | 697 | 701 | 0         | 100.6 | 67.0 | 76.9  |
| Rsa1.0_01315.1.g25686.t1 | gb EOA21333.1  hypothetical protein CARUB_v10001693mg [Capsella rubella]                                                                                                                                                                                                                                                                                                                                                                                     | 260 | 273  | 8.00E-99  | 105.0 | 76.2 | 81.5  | hypothetical protein CARUB_v10001693mg       | gbpln | Capsella rubella     | AT5G23950.1   Symbols:   Calcium-dependent lipid-binding (CaLB domain) family protein   chr5:8082789-8083448 FORWARD LENGTH=219                                                                                                                                                                             | 260 | 219 | 5.00E-77  | 84.2  | 60.8 | 66.2  |

|                          |                                                                                                                                                                                                                                                                                                                                                                                                                           |      |      |           |       |      |      |                                                                                                                                                                                                                       |       |                      |                                                                                                                                |      |      |           |       |      |      |
|--------------------------|---------------------------------------------------------------------------------------------------------------------------------------------------------------------------------------------------------------------------------------------------------------------------------------------------------------------------------------------------------------------------------------------------------------------------|------|------|-----------|-------|------|------|-----------------------------------------------------------------------------------------------------------------------------------------------------------------------------------------------------------------------|-------|----------------------|--------------------------------------------------------------------------------------------------------------------------------|------|------|-----------|-------|------|------|
| Rsa1.0_01315.1.g25687.t1 | refNP_197785.1   HXXXD-type acyl-transferase-like protein [Arabidopsis thaliana] gi 9758221 dbj BAB08720.1  acetyl-CoA:benzylalcohol acetyltransferase-like protein [Arabidopsis thaliana] gi 111074496 gb ABH04621.1  At5g23970 [Arabidopsis thaliana] gi 332005857 gb AED93240.1   HXXXD-type acyl-transferase-like protein [Arabidopsis thaliana]                                                                      | 436  | 428  | 0         | 98.2  | 75.7 | 85.3 | HXXXD-type acyl-transferase-like protein                                                                                                                                                                              | gbpln | Arabidopsis thaliana | AT5G23970.1   Symbols:   HXXXD-type acyl-transferase family protein   chr5:8096326-8097612 FORWARD LENGTH=428                  | 436  | 428  | 0         | 98.2  | 75.7 | 85.3 |
| Rsa1.0_01315.1.g25688.t1 | emb CAB40035.1  retrotransposon like protein [Arabidopsis thaliana] gi 7267767 emb CAB81170.1  retrotransposon like protein [Arabidopsis thaliana]                                                                                                                                                                                                                                                                        | 1431 | 1515 | 0         | 105.9 | 55.1 | 69.2 | retrotransposon like protein                                                                                                                                                                                          | gbpln | Arabidopsis thaliana | AT4G23160.1   Symbols: CRK8   cysteine-rich RLK (RECEPTOR-like protein kinase) 8   chr4:12129485-12134086 FORWARD LENGTH=1262  | 1431 | 1262 | 1.00E-110 | 88.2  | 13.6 | 20.4 |
| Rsa1.0_01315.1.g25689.t1 | gb EOA20155.1  hypothetical protein CARUB_v10000447mg [Capsella rubella]                                                                                                                                                                                                                                                                                                                                                  | 561  | 637  | 0         | 113.5 | 86.1 | 92.3 | hypothetical protein CARUB_v10000447mg                                                                                                                                                                                | gbpln | Capsella rubella     | AT5G24030.1   Symbols: SLAH3   SLAC1 homologue 3   chr5:8118618-8120993 REVERSE LENGTH=635                                     | 561  | 635  | 0         | 113.2 | 87.2 | 92.3 |
| Rsa1.0_01316.1.g25690.t1 | refNP_175672.2   O-fucosyltransferase family protein [Arabidopsis thaliana] gi 18491205 gb AAL69505.1  unknown protein [Arabidopsis thaliana] gi 20465295 gb AAM20051.1  unknown protein [Arabidopsis thaliana] gi 332194710 gb AEE32831.1   O-fucosyltransferase family protein [Arabidopsis thaliana]                                                                                                                   | 706  | 439  | 0         | 62.2  | 48.2 | 51.8 | O-fucosyltransferase family protein                                                                                                                                                                                   | gbpln | Arabidopsis thaliana | AT1G52630.1   Symbols:   O-fucosyltransferase family protein   chr1:19606470-19608526 REVERSE LENGTH=439                       | 706  | 439  | 0         | 62.2  | 48.2 | 51.8 |
| Rsa1.0_01316.1.g25691.t1 | refNP_566523.1   signal peptidase, endoplasmic reticulum-type [Arabidopsis thaliana] gi 11994343 dbj BAB02302.1  signal sequence processing protein; peptidase-like protein [Arabidopsis thaliana] gi 50897212 gb AAT85745.1  At3g15710 [Arabidopsis thaliana] gi 51972110 gb AAU15159.1  At3g15710 [Arabidopsis thaliana] gi 332642196 gb AEE75717.1  Peptidase S24/S26A/S26B/S26C family protein [Arabidopsis thaliana] | 180  | 180  | 4.00E-86  | 100.0 | 87.2 | 94.4 | signal peptidase, endoplasmic reticulum-type                                                                                                                                                                          | gbpln | Arabidopsis thaliana | AT3G15710.1   Symbols:   Peptidase S24/S26A/S26B/S26C family protein   chr3:5323564-5324785 REVERSE LENGTH=180                 | 180  | 180  | 2.00E-88  | 100.0 | 87.2 | 94.4 |
| Rsa1.0_01316.1.g25692.t1 | refXP_002882972.1   hypothetical protein ARALYDRAFT_341728 [Arabidopsis lyrata subsp. lyrata] gi 297328812 gb EFH59231.1  hypothetical protein ARALYDRAFT_341728 [Arabidopsis lyrata subsp. lyrata]                                                                                                                                                                                                                       | 388  | 366  | 1.00E-112 | 94.3  | 55.9 | 70.4 | hypothetical protein ARALYDRAFT_341728                                                                                                                                                                                | gbpln | Arabidopsis lyrata   | AT3G17620.1   Symbols:   F-box and associated interaction domains-containing protein   chr3:6026498-6027694 REVERSE LENGTH=398 | 388  | 398  | 1.00E-96  | 102.6 | 49.2 | 64.7 |
| Rsa1.0_01316.1.g25693.t1 | #                                                                                                                                                                                                                                                                                                                                                                                                                         | #    | #    | #         | #     | #    | #    | -                                                                                                                                                                                                                     | ----  | ----                 | #                                                                                                                              | #    | #    | #         | #     | #    |      |
| Rsa1.0_01316.1.g25694.t1 | refXP_002882972.1   hypothetical protein ARALYDRAFT_341728 [Arabidopsis lyrata subsp. lyrata] gi 297328812 gb EFH59231.1  hypothetical protein ARALYDRAFT_341728 [Arabidopsis lyrata subsp. lyrata]                                                                                                                                                                                                                       | 376  | 366  | 1.00E-119 | 97.3  | 62.0 | 75.0 | hypothetical protein ARALYDRAFT_341728                                                                                                                                                                                | gbpln | Arabidopsis lyrata   | AT3G16740.1   Symbols:   F-box and associated interaction domains-containing protein   chr3:5699476-5700651 FORWARD LENGTH=391 | 376  | 391  | 7.00E-97  | 104.0 | 50.8 | 68.9 |
| Rsa1.0_01316.1.g25695.t7 | refXP_002885106.1   glycoside hydrolase family 28 protein [Arabidopsis lyrata subsp. lyrata] gi 297330946 gb EFH61365.1  glycoside hydrolase family 28 protein [Arabidopsis lyrata subsp. lyrata]                                                                                                                                                                                                                         | 418  | 454  | 1.00E-171 | 108.6 | 70.3 | 76.3 | glycoside hydrolase family 28 protein                                                                                                                                                                                 | gbpln | Arabidopsis lyrata   | AT3G15720.1   Symbols:   Pectin lyase-like superfamily protein   chr3:5325329-5327457 REVERSE LENGTH=456                       | 418  | 456  | 1.00E-172 | 109.1 | 68.4 | 74.6 |
| Rsa1.0_01316.1.g25696.t1 | #                                                                                                                                                                                                                                                                                                                                                                                                                         | #    | #    | #         | #     | #    | #    | -                                                                                                                                                                                                                     | ----  | ----                 | AT4G38510.4   Symbols:   ATPase, V1 complex, subunit B protein   chr4:18011155-18014789 REVERSE LENGTH=487                     | 181  | 487  | 6.00E-11  | 269.1 | 20.4 | 24.9 |
| Rsa1.0_01316.1.g25697.t1 | sp O82549.1 PLDA1_BRAOC RecName: Full=Phospholipase D alpha 1; Short=PLD 1; AltName: Full=Choline phosphatase 1; AltName: Full=Phosphatidylcholine-hydrolyzing phospholipase D 1; Flags: Precursor gi 3639089 gb AAC78487.1  phospholipase D1 [Brassica oleracea var. capitata] gi 4324969 gb AAD17208.1  phospholipase D1 [Brassica oleracea var. capitata]                                                              | 810  | 810  | 0         | 100.0 | 97.2 | 98.9 | RecName: Full=Phospholipase D alpha 1; Short=PLD 1; AltName: Full=Choline phosphatase 1; AltName: Full=Phosphatidylcholine-hydrolyzing phospholipase D 1; Flags: Precursor gi 3639089 gb AAC78487.1  phospholipase D1 | gbpln | Brassica oleracea    | AT3G15730.1   Symbols: PLDALPHA1, PLD   phospholipase D alpha 1   chr3:5330835-5333474 FORWARD LENGTH=810                      | 810  | 810  | 0         | 100.0 | 94.0 | 97.8 |

|                          |                                                                                                                                                                                                                                                                                                                                                                     |      |      |           |       |      |      |                                                         |       |                      |                                                                                                                                                                                                                                                                                                                                                                                                                                                                                                                                       |      |     |           |       |      |      |
|--------------------------|---------------------------------------------------------------------------------------------------------------------------------------------------------------------------------------------------------------------------------------------------------------------------------------------------------------------------------------------------------------------|------|------|-----------|-------|------|------|---------------------------------------------------------|-------|----------------------|---------------------------------------------------------------------------------------------------------------------------------------------------------------------------------------------------------------------------------------------------------------------------------------------------------------------------------------------------------------------------------------------------------------------------------------------------------------------------------------------------------------------------------------|------|-----|-----------|-------|------|------|
| Rsa1.0_01316.1.g25698.t1 | ref XP_002882960.1  predicted protein [Arabidopsis lyrata subsp. lyrata] gi 297326800 gb EFH59219.1  predicted protein [Arabidopsis lyrata subsp. lyrata]                                                                                                                                                                                                           | 110  | 135  | 3.00E-41  | 122.7 | 80.9 | 91.8 | predicted protein                                       | gbpln | Arabidopsis lyrata   | AT3G15760.1   Symbols:   unknown protein; FUNCTIONS IN: molecular_function unknown; INVOLVED IN: biological_process unknown; LOCATED IN: endomembrane system; EXPRESSED IN: 22 plant structures; EXPRESSED DURING: 10 growth stages; BEST Arabidopsis thaliana protein match is: unknown protein (TAIR:AT1G52565.1); Has 42 Blast hits to 42 proteins in 10 species: Archae - 0; Bacteria - 0; Metazoa - 0; Fungi - 0; Plants - 42; Viruses - 0; Other Eukaryotes - 0 (source: NCBI BLink).   chr3:5337734-5338219 FORWARD LENGTH=135 | 110  | 135 | 1.00E-38  | 122.7 | 72.7 | 84.5 |
| Rsa1.0_01316.1.g25699.t1 | ref NP_188199.1  uncharacterized protein [Arabidopsis thaliana] gi 11994350 dbj BAB02309.1  unnamed protein product [Arabidopsis thaliana] gi 17065466 gb AAL32887.1  Unknown protein [Arabidopsis thaliana] gi 20148569 gb AAM10175.1  unknown protein [Arabidopsis thaliana] gi 332642205 gb AEE75726.1  uncharacterized protein AT3G15780 [Arabidopsis thaliana] | 307  | 117  | 1.00E-16  | 38.1  | 24.4 | 27.0 | uncharacterized protein                                 | gbpln | Arabidopsis thaliana | AT3G15780.1   Symbols:   unknown protein; BEST Arabidopsis thaliana protein match is: unknown protein (TAIR:AT1G52550.1); Has 20 Blast hits to 20 proteins in 5 species: Archae - 0; Bacteria - 0; Metazoa - 0; Fungi - 0; Plants - 20; Viruses - 0; Other Eukaryotes - 0 (source: NCBI BLink).   chr3:5341434-5342351 FORWARD LENGTH=117                                                                                                                                                                                             | 307  | 117 | 3.00E-19  | 38.1  | 24.4 | 27.0 |
| Rsa1.0_01317.1.g25700.t1 | gb AAD29058.1  putative non-LTR retroelement reverse transcriptase [Arabidopsis thaliana]                                                                                                                                                                                                                                                                           | 293  | 1229 | 3.00E-29  | 419.5 | 32.1 | 46.1 | putative non-LTR retroelement reverse transcriptase     | gbpln | Arabidopsis thaliana | AT1G10000.1   Symbols:   Ribonuclease H-like superfamily protein   chr1:3263877-3264788 REVERSE LENGTH=303                                                                                                                                                                                                                                                                                                                                                                                                                            | 293  | 303 | 6.00E-31  | 103.4 | 33.1 | 48.1 |
| Rsa1.0_01317.1.g25701.t1 | ref NP_176441.1  uncharacterized protein [Arabidopsis thaliana] gi 5454194 gb AAD43609.1 AC005698.8 T3P18.8 [Arabidopsis thaliana] gi 28393500 gb AAO42171.1  unknown protein [Arabidopsis thaliana] gi 28973499 gb AAO64074.1  unknown protein [Arabidopsis thaliana] gi 332195853 gb AEE33974.1  uncharacterized protein AT1G62520 [Arabidopsis thaliana]         | 264  | 280  | 1.00E-107 | 106.1 | 83.3 | 91.3 | uncharacterized protein                                 | gbpln | Arabidopsis thaliana | AT1G62520.1   Symbols:   unknown protein; BEST Arabidopsis thaliana protein match is: unknown protein (TAIR:AT4G12450.1); Has 388 Blast hits to 388 proteins in 26 species: Archae - 0; Bacteria - 1; Metazoa - 0; Fungi - 8; Plants - 376; Viruses - 0; Other Eukaryotes - 3 (source: NCBI BLink).   chr1:23144506-23145348 FORWARD LENGTH=280                                                                                                                                                                                       | 264  | 280 | 1.00E-110 | 106.1 | 83.3 | 91.3 |
| Rsa1.0_01317.1.g25702.t1 | #                                                                                                                                                                                                                                                                                                                                                                   | #    | #    | #         | #     | #    | #    | -                                                       | ----  | ----                 | #                                                                                                                                                                                                                                                                                                                                                                                                                                                                                                                                     | #    | #   | #         | #     | #    |      |
| Rsa1.0_01317.1.g25703.t2 | gb AAF97969.1 AC000103_19 F21J9.30 [Arabidopsis thaliana]                                                                                                                                                                                                                                                                                                           | 1711 | 1270 | 0         | 74.2  | 37.6 | 48.2 | F21J9.30                                                | gbpln | Arabidopsis thaliana | AT4G29090.1   Symbols:   Ribonuclease H-like superfamily protein   chr4:14333528-14335255 FORWARD LENGTH=575                                                                                                                                                                                                                                                                                                                                                                                                                          | 1711 | 575 | 2.00E-76  | 33.6  | 9.9  | 15.8 |
| Rsa1.0_01317.1.g25704.t1 | ref XP_002888015.1  hypothetical protein ARALYDRAFT_475088 [Arabidopsis lyrata subsp. lyrata] gi 297333856 gb EFH64274.1  hypothetical protein ARALYDRAFT_475088 [Arabidopsis lyrata subsp. lyrata]                                                                                                                                                                 | 908  | 452  | 0         | 49.8  | 42.7 | 45.9 | hypothetical protein ARALYDRAFT_475088                  | gbpln | Arabidopsis lyrata   | AT1G62600.1   Symbols:   Flavin-binding monooxygenase family protein   chr1:23179542-23181411 FORWARD LENGTH=452                                                                                                                                                                                                                                                                                                                                                                                                                      | 908  | 452 | 0         | 49.8  | 42.3 | 46.0 |
| Rsa1.0_01318.1.g25705.t2 | ref NP_199308.1  putative F-box/FBD/LRR-repeat protein [Arabidopsis thaliana] gi 75262649 sp Q9FLA2.1 FDL34_ARAT H RecName: Full=Putative F-box/FBD/LRR-repeat protein At5g44950 gi 10177487 dbj BAB10878.1  unnamed protein product [Arabidopsis thaliana] gi 332007796 gb AED95179.1  putative F-box/FBD/LRR-repeat protein [Arabidopsis thaliana]                | 646  | 438  | 1.00E-86  | 67.8  | 30.8 | 39.3 | putative F-box/FBD/LRR-repeat protein                   | gbpln | Arabidopsis thaliana | AT5G44950.1   Symbols:   F-box/RNI-like/FBD-like domains-containing protein   chr5:18151665-18153164 FORWARD LENGTH=438                                                                                                                                                                                                                                                                                                                                                                                                               | 646  | 438 | 3.00E-89  | 67.8  | 30.8 | 39.3 |
| Rsa1.0_01318.1.g25706.t1 | #                                                                                                                                                                                                                                                                                                                                                                   | #    | #    | #         | #     | #    | #    | -                                                       | ----  | ----                 | #                                                                                                                                                                                                                                                                                                                                                                                                                                                                                                                                     | #    | #   | #         | #     | #    |      |
| Rsa1.0_01318.1.g25707.t1 | ref XP_002863468.1  hypothetical protein ARALYDRAFT_356449 [Arabidopsis lyrata subsp. lyrata] gi 297308903 gb EFH39727.1  hypothetical protein ARALYDRAFT_356449 [Arabidopsis lyrata subsp. lyrata]                                                                                                                                                                 | 281  | 280  | 1.00E-141 | 99.6  | 88.3 | 93.6 | hypothetical protein ARALYDRAFT_356449                  | gbpln | Arabidopsis lyrata   | AT5G45580.1   Symbols:   Homeodomain-like superfamily protein   chr5:18481092-18482598 REVERSE LENGTH=264                                                                                                                                                                                                                                                                                                                                                                                                                             | 281  | 264 | 1.00E-134 | 94.0  | 82.9 | 87.9 |
| Rsa1.0_01318.1.g25708.t1 | dbj BAB01431.1  non-LTR retroelement reverse transcriptase-like protein [Arabidopsis thaliana]                                                                                                                                                                                                                                                                      | 218  | 637  | 1.00E-40  | 292.2 | 40.4 | 51.8 | non-LTR retroelement reverse transcriptase-like protein | gbpln | Arabidopsis thaliana | AT5G18880.1   Symbols:   RNA-directed DNA polymerase (reverse transcriptase)-related family protein   chr5:6300535-6301422 REVERSE LENGTH=295                                                                                                                                                                                                                                                                                                                                                                                         | 218  | 295 | 1.00E-34  | 135.3 | 35.8 | 50.5 |
| Rsa1.0_01318.1.g25709.t1 | ref NP_199367.1  uncharacterized protein [Arabidopsis thaliana] gi 9758744 dbj BAB09182.1  unnamed protein product [Arabidopsis thaliana] gi 332007883 gb AED95266.1  uncharacterized protein AT5G45540 [Arabidopsis thaliana]                                                                                                                                      | 774  | 803  | 0         | 103.7 | 79.8 | 88.1 | uncharacterized protein                                 | gbpln | Arabidopsis thaliana | AT5G45540.1   Symbols:   Protein of unknown function (DUF594)   chr5:18458294-18460705 REVERSE LENGTH=803                                                                                                                                                                                                                                                                                                                                                                                                                             | 774  | 803 | 0         | 103.7 | 79.8 | 88.1 |

|                          |                                                                                                                                                                                                                                                                                                                                                                     |      |      |           |       |      |      |                                                     |       |                      |                                                                                                                                                                                                                                                                                                                                                                  |      |      |           |       |      |      |
|--------------------------|---------------------------------------------------------------------------------------------------------------------------------------------------------------------------------------------------------------------------------------------------------------------------------------------------------------------------------------------------------------------|------|------|-----------|-------|------|------|-----------------------------------------------------|-------|----------------------|------------------------------------------------------------------------------------------------------------------------------------------------------------------------------------------------------------------------------------------------------------------------------------------------------------------------------------------------------------------|------|------|-----------|-------|------|------|
| Rsa1.0_01318.1.g25710.t1 | ref[XP_002863471.1] hypothetical protein ARALYDRAFT_494430 [Arabidopsis lyrata subsp. lyrata] gi 2973089306 gb EFH39730.1                                                                                                                                                                                                                                           | 823  | 798  | 0         | 97.0  | 76.3 | 84.3 | hypothetical protein ARALYDRAFT_494430              | gbpln | Arabidopsis lyrata   | AT5G45530.1   Symbols:   Protein of unknown function (DUF594)   chr5:18454316-18457222 REVERSE LENGTH=798                                                                                                                                                                                                                                                        | 823  | 798  | 0         | 97.0  | 76.2 | 83.8 |
| Rsa1.0_01318.1.g25711.t1 | gb[EOA15239.1] hypothetical protein CARUB_v10028636mg [Capsella rubella]                                                                                                                                                                                                                                                                                            | 1109 | 1176 | 0         | 106.0 | 55.1 | 69.8 | hypothetical protein CARUB_v10028636mg              | gbpln | Capsella rubella     | AT5G45520.1   Symbols:   Leucine-rich repeat (LRR) family protein   chr5:18449509-18453012 REVERSE LENGTH=1167                                                                                                                                                                                                                                                   | 1109 | 1167 | 0         | 105.2 | 56.4 | 69.3 |
| Rsa1.0_01318.1.g25712.t1 | #                                                                                                                                                                                                                                                                                                                                                                   | #    | #    | #         | #     | #    | -    | -                                                   | ----  | ----                 | #                                                                                                                                                                                                                                                                                                                                                                | #    | #    | #         | #     | #    |      |
| Rsa1.0_01319.1.g25713.t1 | gb[AAF79618.1]AC027665_19 F5M15.26 [Arabidopsis thaliana]                                                                                                                                                                                                                                                                                                           | 1520 | 1838 | 0         | 120.9 | 27.6 | 38.4 | F5M15.26                                            | gbpln | Arabidopsis thaliana | AT3G01410.2   Symbols:   Polynucleotidyl transferase, ribonuclease H-like superfamily protein   chr3:153650-155439 REVERSE LENGTH=294                                                                                                                                                                                                                            | 1520 | 294  | 2.00E-13  | 19.3  | 2.4  | 3.3  |
| Rsa1.0_01319.1.g25714.t1 | #                                                                                                                                                                                                                                                                                                                                                                   | #    | #    | #         | #     | #    | -    | -                                                   | ----  | ----                 | #                                                                                                                                                                                                                                                                                                                                                                | #    | #    | #         | #     | #    |      |
| Rsa1.0_01319.1.g25715.t1 | #                                                                                                                                                                                                                                                                                                                                                                   | #    | #    | #         | #     | #    | -    | -                                                   | ----  | ----                 | #                                                                                                                                                                                                                                                                                                                                                                | #    | #    | #         | #     | #    |      |
| Rsa1.0_01319.1.g25716.t1 | ref[XP_002868357.1] hypothetical protein ARALYDRAFT_493559 [Arabidopsis lyrata subsp. lyrata] gi 297314193 gb EFH44616.1                                                                                                                                                                                                                                            | 259  | 265  | 2.00E-77  | 102.3 | 67.2 | 80.3 | hypothetical protein ARALYDRAFT_493559              | gbpln | Arabidopsis lyrata   | AT4G13530.1   Symbols:   unknown protein; BEST Arabidopsis thaliana protein match is: unknown protein (TAIR:AT4G10080.1); Has 30201 Blast hits to 17322 proteins in 780 species: Archae - 12; Bacteria - 1396; Metazoa - 17338; Fungi - 3422; Plants - 5037; Viruses - 0; Other Eukaryotes - 2996 (source: NCBI BLINK).   chr4:786808-7868555 FORWARD LENGTH=270 | 259  | 270  | 1.00E-77  | 104.2 | 69.1 | 82.2 |
| Rsa1.0_01319.1.g25717.t1 | #                                                                                                                                                                                                                                                                                                                                                                   | #    | #    | #         | #     | #    | -    | -                                                   | ----  | ----                 | #                                                                                                                                                                                                                                                                                                                                                                | #    | #    | #         | #     | #    |      |
| Rsa1.0_01319.1.g25718.t1 | #                                                                                                                                                                                                                                                                                                                                                                   | #    | #    | #         | #     | #    | -    | -                                                   | ----  | ----                 | #                                                                                                                                                                                                                                                                                                                                                                | #    | #    | #         | #     | #    |      |
| Rsa1.0_01319.1.g25719.t1 | #                                                                                                                                                                                                                                                                                                                                                                   | #    | #    | #         | #     | #    | -    | -                                                   | ----  | ----                 | #                                                                                                                                                                                                                                                                                                                                                                | #    | #    | #         | #     | #    |      |
| Rsa1.0_01319.1.g25720.t1 | gb[AAK43485.1]AC084807_10 polyprotein, putative [Arabidopsis thaliana] gi 225898008 db BAH30336.1                                                                                                                                                                                                                                                                   | 1345 | 1459 | 0         | 108.5 | 53.5 | 70.3 | polyprotein, putative                               | gbpln | Arabidopsis thaliana | AT4G23160.1   Symbols: CRK8   cysteine-rich RLK (RECEPTOR-like protein kinase) 8   chr4:12129485-12134086 FORWARD LENGTH=1262                                                                                                                                                                                                                                    | 1345 | 1262 | 1.00E-109 | 93.8  | 14.3 | 20.6 |
| Rsa1.0_01319.1.g25721.t1 | gb[EOA11936.1] hypothetical protein CARUB_v10016547mg, partial [Capsella rubella]                                                                                                                                                                                                                                                                                   | 110  | 149  | 2.00E-23  | 135.5 | 44.5 | 65.5 | hypothetical protein CARUB_v10016547mg, partial     | gbpln | Capsella rubella     | #                                                                                                                                                                                                                                                                                                                                                                | #    | #    | #         | #     | #    |      |
| Rsa1.0_01319.1.g25722.t1 | gb[EOA15614.1] hypothetical protein CARUB_v10005748mg [Capsella rubella]                                                                                                                                                                                                                                                                                            | 194  | 206  | 4.00E-85  | 106.2 | 78.4 | 88.7 | hypothetical protein CARUB_v10005748mg              | gbpln | Capsella rubella     | AT4G14100.1   Symbols:   transferases, transferring glycosyl groups   chr4:8120749-8122288 FORWARD LENGTH=206                                                                                                                                                                                                                                                    | 194  | 206  | 4.00E-87  | 106.2 | 78.4 | 87.6 |
| Rsa1.0_01319.1.g25723.t1 | gb[EOA18020.1] hypothetical protein CARUB_v10006460mg [Capsella rubella]                                                                                                                                                                                                                                                                                            | 898  | 797  | 0         | 88.8  | 69.9 | 77.4 | hypothetical protein CARUB_v10006460mg              | gbpln | Capsella rubella     | AT4G14280.1   Symbols:   ARM repeat superfamily protein   chr4:8222518-8225074 FORWARD LENGTH=798                                                                                                                                                                                                                                                                | 898  | 798  | 0         | 88.9  | 69.5 | 77.2 |
| Rsa1.0_01320.1.g25724.t2 | gb[AAD37019.2] putative non-LTR retroelement reverse transcriptase [Arabidopsis thaliana]                                                                                                                                                                                                                                                                           | 973  | 855  | 0         | 87.9  | 44.7 | 57.9 | putative non-LTR retroelement reverse transcriptase | gbpln | Arabidopsis thaliana | AT2G01050.1   Symbols:   zinc ion binding/nucleic acid binding   chr2:68337-69884 REVERSE LENGTH=515                                                                                                                                                                                                                                                             | 973  | 515  | 1.00E-127 | 52.9  | 24.9 | 32.7 |
| Rsa1.0_01320.1.g25725.t1 | #                                                                                                                                                                                                                                                                                                                                                                   | #    | #    | #         | #     | #    | -    | -                                                   | ----  | ----                 | #                                                                                                                                                                                                                                                                                                                                                                | #    | #    | #         | #     | #    |      |
| Rsa1.0_01320.1.g25726.t1 | gb[EOA39737.1] hypothetical protein CARUB_v10008382mg [Capsella rubella]                                                                                                                                                                                                                                                                                            | 750  | 763  | 0         | 101.7 | 85.3 | 89.9 | hypothetical protein CARUB_v10008382mg              | gbpln | Capsella rubella     | AT1G21980.1   Symbols: ATP1P5K1, ATP1P1, PIP5K1   phosphatidylinositol-4-phosphate 5-kinase 1   chr1:7735053-7738309 FORWARD LENGTH=752                                                                                                                                                                                                                          | 750  | 752  | 0         | 100.3 | 85.1 | 90.1 |
| Rsa1.0_01320.1.g25727.t1 | gb[EOA36900.1] hypothetical protein CARUB_v10011446mg [Capsella rubella]                                                                                                                                                                                                                                                                                            | 391  | 396  | 0         | 101.3 | 84.7 | 93.1 | hypothetical protein CARUB_v10011446mg              | gbpln | Capsella rubella     | AT1G22015.1   Symbols: DD46   Galactosyltransferase family protein   chr1:7751225-7753425 REVERSE LENGTH=398                                                                                                                                                                                                                                                     | 391  | 398  | 0         | 101.8 | 84.1 | 92.1 |
| Rsa1.0_01320.1.g25728.t1 | ref[NP_173621.1] serine hydroxymethyltransferase 6 [Arabidopsis thaliana] gi 9280677 gb AAF86546.1 AC069252_5 F2E2.7 [Arabidopsis thaliana] gi 21928157 gb AAM78106.1 At1g22020/F2E2_3 [Arabidopsis thaliana] gi 28416495 gb AAO42778.1 At1g22020/F2E2_3 [Arabidopsis thaliana] gi 332192065 gb AEE30186.1 serine hydroxymethyltransferase 6 [Arabidopsis thaliana] | 363  | 599  | 1.00E-138 | 165.0 | 65.0 | 69.1 | serine hydroxymethyltransferase 6                   | gbpln | Arabidopsis thaliana | AT1G22020.1   Symbols: SHM6   serine hydroxymethyltransferase 6   chr1:7754599-7757087 FORWARD LENGTH=599                                                                                                                                                                                                                                                        | 363  | 599  | 1.00E-140 | 165.0 | 65.0 | 69.1 |
| Rsa1.0_01320.1.g25729.t1 | #                                                                                                                                                                                                                                                                                                                                                                   | #    | #    | #         | #     | #    | -    | -                                                   | ----  | ----                 | #                                                                                                                                                                                                                                                                                                                                                                | #    | #    | #         | #     | #    |      |



|                          |                                                                                                                                                                                                                                                                                                                                                                                                                                                                                                                                                                                                                                                                                                                                                                                                |      |      |           |       |      |      |                                                                                     |       |                      |                                                                                                                                                                                                                                                                                                                                                                                                    |      |      |           |       |      |      |
|--------------------------|------------------------------------------------------------------------------------------------------------------------------------------------------------------------------------------------------------------------------------------------------------------------------------------------------------------------------------------------------------------------------------------------------------------------------------------------------------------------------------------------------------------------------------------------------------------------------------------------------------------------------------------------------------------------------------------------------------------------------------------------------------------------------------------------|------|------|-----------|-------|------|------|-------------------------------------------------------------------------------------|-------|----------------------|----------------------------------------------------------------------------------------------------------------------------------------------------------------------------------------------------------------------------------------------------------------------------------------------------------------------------------------------------------------------------------------------------|------|------|-----------|-------|------|------|
| Rsa1.0_01320.1.g25730.t1 | ref[XP_002893207.1] predicted protein [Arabidopsis lyrata subsp. lyrata] gi 297339049 gb EFH69466.1  predicted protein [Arabidopsis lyrata subsp. lyrata]                                                                                                                                                                                                                                                                                                                                                                                                                                                                                                                                                                                                                                      | 325  | 334  | 1.00E-156 | 102.8 | 90.8 | 93.8 | predicted protein                                                                   | gbpln | Arabidopsis lyrata   | AT1G22030.1   Symbols:   CONTAINS InterPro DOMAIN/s: Protein BYPASS related (InterPro:IPR008511); BEST Arabidopsis thaliana protein match is: unknown protein (TAIR:AT1G7855.1); Has 99 Blast hits to 99 proteins in 17 species: Archaea - 0; Bacteria - 0; Metazoa - 3; Fungi - 0; Plants - 96; Viruses - 0; Other Eukaryotes - 0 (source: NCBI BLINK).   chr1:7759337-7760415 REVERSE LENGTH=333 | 325  | 333  | 1.00E-152 | 102.5 | 88.6 | 91.4 |
| Rsa1.0_01320.1.g25731.t1 | #                                                                                                                                                                                                                                                                                                                                                                                                                                                                                                                                                                                                                                                                                                                                                                                              | #    | #    | #         | #     | #    | #    | -                                                                                   | ----  | ----                 | #                                                                                                                                                                                                                                                                                                                                                                                                  | #    | #    | #         | #     | #    |      |
| Rsa1.0_01321.1.g25732.t1 | #                                                                                                                                                                                                                                                                                                                                                                                                                                                                                                                                                                                                                                                                                                                                                                                              | #    | #    | #         | #     | #    | #    | -                                                                                   | ----  | ----                 | #                                                                                                                                                                                                                                                                                                                                                                                                  | #    | #    | #         | #     | #    |      |
| Rsa1.0_01321.1.g25733.t1 | dbj BAJ34070.1  unnamed protein product [Thellungiella halophila]                                                                                                                                                                                                                                                                                                                                                                                                                                                                                                                                                                                                                                                                                                                              | 455  | 445  | 0         | 97.8  | 89.9 | 92.1 | unnamed protein product                                                             | ----  | ----                 | AT1G76900.2   Symbols: AtTLP1, TLP1   tubby like protein 1   chr1:28882741-28884377 FORWARD LENGTH=455                                                                                                                                                                                                                                                                                             | 455  | 455  | 0         | 100.0 | 87.9 | 91.6 |
| Rsa1.0_01321.1.g25734.t1 | ref[XP_002867884.1] predicted protein [Arabidopsis lyrata subsp. lyrata] gi 297313720 gb EFH44143.1  predicted protein [Arabidopsis lyrata subsp. lyrata]                                                                                                                                                                                                                                                                                                                                                                                                                                                                                                                                                                                                                                      | 176  | 175  | 5.00E-83  | 99.4  | 84.1 | 92.6 | predicted protein                                                                   | gbpln | Arabidopsis lyrata   | AT4G20370.1   Symbols: TSF   PEBP (phosphatidylethanolamine-binding protein) family protein   chr4:11001011-11002965 REVERSE LENGTH=175                                                                                                                                                                                                                                                            | 176  | 175  | 9.00E-85  | 99.4  | 84.1 | 90.3 |
| Rsa1.0_01321.1.g25735.t1 | ref[NP_173553.1] extensin 3 [Arabidopsis thaliana] gi 334302912 sp Q9FS16.3 EXTN3_ARA TH RecName: Full=Extensin-3; Short=AtExt3; Short=AtExt5; Flags: Precursor gi 8920638 gb AAF81360.1 AC036104.9 Contains similarity to Extensin (atExt1) from Arabidopsis thaliana gb U43627 and contains 12 concatamers of 28 amino acids rich in proline. ESTs gb AA597816, gb AA712635, gb N65860, gb AA598180, gb H77085, gb AA394416, gb AA394413, gb AA650774, gb AA650748, gb Z25975, gb AA597958, gb AA597955 come from this gene [Arabidopsis thaliana] gi 332191962 gb AEE30083.1  extensin 3 [Arabidopsis thaliana] emb CAB39638.1  RNA-directed DNA polymerase-like protein [Arabidopsis thaliana] gi 17267066 emb CAB78094.1  RNA-directed DNA polymerase-like protein [Arabidopsis thaliana] | 343  | 431  | 4.00E-51  | 125.7 | 85.4 | 87.2 | extensin 3                                                                          | gbpln | Arabidopsis thaliana | AT1G21310.1   Symbols: ATEXT3, RSH, EXT3   extensin 3   chr1:7453693-7454988 REVERSE LENGTH=431                                                                                                                                                                                                                                                                                                    | 343  | 431  | 1.00E-53  | 125.7 | 85.4 | 87.2 |
| Rsa1.0_01321.1.g25736.t3 | ref[NP_565144.1] regulator of chromosome condensation and FYVE zinc finger domain-containing protein [Arabidopsis thaliana] gi 15811367 gb AAL08940.1  zinc finger protein [Arabidopsis thaliana] gi 332197787 gb AEE35908.1  regulator of chromosome condensation and FYVE zinc finger domain-containing protein [Arabidopsis thaliana]                                                                                                                                                                                                                                                                                                                                                                                                                                                       | 610  | 1274 | 1.00E-151 | 208.9 | 50.2 | 65.2 | RNA-directed DNA polymerase-like protein                                            | gbpln | Arabidopsis thaliana | ATMG00310.1   Symbols: ORF154   RNA-directed DNA polymerase (reverse transcriptase)-related family protein   chrM:90883-91347 REVERSE LENGTH=154                                                                                                                                                                                                                                                   | 610  | 154  | 1.00E-29  | 25.2  | 10.3 | 14.9 |
| Rsa1.0_01321.1.g25737.t1 | ref[NP_565144.1] regulator of chromosome condensation and FYVE zinc finger domain-containing protein [Arabidopsis thaliana] gi 15811367 gb AAL08940.1  zinc finger protein [Arabidopsis thaliana] gi 332197787 gb AEE35908.1  regulator of chromosome condensation and FYVE zinc finger domain-containing protein [Arabidopsis thaliana]                                                                                                                                                                                                                                                                                                                                                                                                                                                       | 1320 | 1103 | 0         | 83.6  | 74.5 | 78.5 | regulator of chromosome condensation and FYVE zinc finger domain-containing protein | gbpln | Arabidopsis thaliana | AT1G76950.1   Symbols: PRAF1   Regulator of chromosome condensation (RCC1) family with FYVE zinc finger domain   chr1:28906952-28911325 FORWARD LENGTH=1103                                                                                                                                                                                                                                        | 1320 | 1103 | 0         | 83.6  | 74.5 | 78.5 |
| Rsa1.0_01322.1.g25738.t4 | #                                                                                                                                                                                                                                                                                                                                                                                                                                                                                                                                                                                                                                                                                                                                                                                              | #    | #    | #         | #     | #    | #    | -                                                                                   | ----  | ----                 | AT5G27750.1   Symbols:   F-box/FBD-like domains containing protein   chr5:9828430-9829981 FORWARD LENGTH=459                                                                                                                                                                                                                                                                                       | 66   | 459  | 5.00E-13  | 695.5 | 53.0 | 54.5 |
| Rsa1.0_01322.1.g25739.t3 | ref[NP_172830.1] putative inactive purple acid phosphatase 1 [Arabidopsis thaliana] gi 15264050 sp Q9LMX4.1 PPA1_ARATH RecName: Full=Probable inactive purple acid phosphatase 1; Flags: Precursor gi 8920580 gb AAF81302.1 AC027656_19 Strong similarity to a hypothetical protein F13M23.30 gi 7485455 from Arabidopsis thaliana BAC F13M23 gb AL035523. It contains a purple acid phosphatase domain PF 02227 [Arabidopsis thaliana] gi 20466209 gb AAM20422.1  unknown protein [Arabidopsis thaliana] gi 24899849 gb AAN65139.1  unknown protein [Arabidopsis thaliana] gi 55982669 gb AAV69752.1  putative purple acid phosphatase [Arabidopsis thaliana] gi 332190942 gb AEE29063.1  putative inactive purple acid phosphatase 1 [Arabidopsis thaliana]                                  | 610  | 613  | 0         | 100.5 | 77.9 | 86.9 | putative inactive purple acid phosphatase 1                                         | gbpln | Arabidopsis thaliana | AT1G13750.1   Symbols:   Purple acid phosphatases superfamily protein   chr1:4715490-4718091 REVERSE LENGTH=613                                                                                                                                                                                                                                                                                    | 610  | 613  | 0         | 100.5 | 77.9 | 86.9 |

|                          |                                                                                                                                                                                                                                                                                                                                                |      |      |           |       |      |      |                                                                |       |                      |                                                                                                                                                                                                                                                           |      |     |           |       |      |      |
|--------------------------|------------------------------------------------------------------------------------------------------------------------------------------------------------------------------------------------------------------------------------------------------------------------------------------------------------------------------------------------|------|------|-----------|-------|------|------|----------------------------------------------------------------|-------|----------------------|-----------------------------------------------------------------------------------------------------------------------------------------------------------------------------------------------------------------------------------------------------------|------|-----|-----------|-------|------|------|
| Rsa1.0_01322.1.g25740.t1 | gb AAL07175.1  unknown protein [Arabidopsis thaliana]                                                                                                                                                                                                                                                                                          | 333  | 348  | 1.00E-109 | 104.5 | 72.1 | 78.7 | unknown protein                                                | gbpln | Arabidopsis thaliana | AT1G13740.1   Symbols: AFP2   ABI five binding protein 2   chr1:4713969-4715158 FORWARD LENGTH=348                                                                                                                                                        | 333  | 348 | 1.00E-111 | 104.5 | 72.1 | 78.7 |
| Rsa1.0_01322.1.g25741.t1 | ref XP_002890018.1  nuclear transport factor 2 family protein [Arabidopsis lyrata subsp. lyrata]<br>gi 297335860 gb EFH66277.1  nuclear transport factor 2 family protein [Arabidopsis lyrata subsp. lyrata]                                                                                                                                   | 400  | 438  | 1.00E-153 | 109.5 | 75.3 | 86.8 | nuclear transport factor 2 family protein                      | gbpln | Arabidopsis lyrata   | AT1G13730.1   Symbols:   Nuclear transport factor 2 (NTF2) family protein with RNA binding (RRM-RBD-RNP motifs) domain   chr1:4710519-4712332 FORWARD LENGTH=428                                                                                          | 400  | 428 | 1.00E-151 | 107.0 | 73.0 | 83.0 |
| Rsa1.0_01322.1.g25742.t1 | gb EOA40155.1  hypothetical protein CARUB_v10008872mg [Capsella rubella]                                                                                                                                                                                                                                                                       | 457  | 516  | 0         | 112.9 | 84.2 | 91.7 | hypothetical protein CARUB_v10008872mg                         | gbpln | Capsella rubella     | AT1G13710.1   Symbols: CYP78A5, KLU   cytochrome P450, family 78, subfamily A, polypeptide 5   chr1:4702932-4704592 REVERSE LENGTH=517                                                                                                                    | 457  | 517 | 0         | 113.1 | 84.9 | 89.9 |
| Rsa1.0_01322.1.g25743.t2 | ref XP_002892767.1  glucosamine/galactosamine-6-phosphate isomerase family protein [Arabidopsis lyrata subsp. lyrata]<br>gi 297338609 gb EFH69026.1  glucosamine/galactosamine-6-phosphate isomerase family protein [Arabidopsis lyrata subsp. lyrata]                                                                                         | 288  | 268  | 1.00E-113 | 93.1  | 73.6 | 79.9 | glucosamine/galactosamine-6-phosphate isomerase family protein | gbpln | Arabidopsis lyrata   | AT1G13700.1   Symbols: PQL1   6-phosphogluconolactonase 1   chr1:4694475-4695600 REVERSE LENGTH=268                                                                                                                                                       | 288  | 268 | 1.00E-115 | 93.1  | 74.3 | 78.8 |
| Rsa1.0_01322.1.g25744.t1 | gb EOA37141.1  hypothetical protein CARUB_v10010435mg [Capsella rubella]                                                                                                                                                                                                                                                                       | 181  | 177  | 2.00E-88  | 97.8  | 87.3 | 89.5 | hypothetical protein CARUB_v10010435mg                         | gbpln | Capsella rubella     | AT1G13690.1   Symbols: ATE1   ATPase E1   chr1:4693380-4694179 FORWARD LENGTH=177                                                                                                                                                                         | 181  | 177 | 2.00E-89  | 97.8  | 86.2 | 89.0 |
| Rsa1.0_01322.1.g25745.t1 | #                                                                                                                                                                                                                                                                                                                                              | #    | #    | #         | #     | #    | -    | -                                                              | ----  | ----                 | #                                                                                                                                                                                                                                                         | #    | #   | #         | #     | #    |      |
| Rsa1.0_01322.1.g25746.t4 | emb CAB39638.1  RNA-directed DNA polymerase-like protein [Arabidopsis thaliana]<br>gi 7267666 emb CAB78094.1  RNA-directed DNA polymerase-like protein [Arabidopsis thaliana]                                                                                                                                                                  | 1300 | 1274 | 0         | 98.0  | 40.9 | 56.9 | RNA-directed DNA polymerase-like protein                       | gbpln | Arabidopsis thaliana | AT4G29090.1   Symbols:   Ribonuclease H-like superfamily protein   chr4:14333528-14335255 FORWARD LENGTH=575                                                                                                                                              | 1300 | 575 | 2.00E-54  | 44.2  | 12.1 | 18.4 |
| Rsa1.0_01322.1.g25747.t1 | ref NP_172824.3  phospholipase C/ phosphoric diester hydrolase [Arabidopsis thaliana]<br>gi 8920573 gb AAF81295.1 AC027656_12 Contains similarity to MAP3K-like protein kinase from Arabidopsis thaliana<br>gi 299707 Arabidopsis thaliana<br>gi 332190936 gb AEE29057.1  phospholipase C/ phosphoric diester hydrolase [Arabidopsis thaliana] | 347  | 346  | 1.00E-161 | 99.7  | 77.8 | 87.6 | phospholipase C/ phosphoric diester hydrolase                  | gbpln | Arabidopsis thaliana | AT1G13680.1   Symbols:   PLC-like phosphodiesterases superfamily protein   chr1:4690409-4692702 FORWARD LENGTH=346                                                                                                                                        | 347  | 346 | 1.00E-163 | 99.7  | 77.8 | 87.6 |
| Rsa1.0_01322.1.g25748.t2 | ref XP_002890015.1  hypothetical protein ARALYDRAFT_888738 [Arabidopsis lyrata subsp. lyrata]<br>gi 297335857 gb EFH66274.1  hypothetical protein ARALYDRAFT_888738 [Arabidopsis lyrata subsp. lyrata]                                                                                                                                         | 242  | 222  | 1.00E-70  | 91.7  | 64.0 | 70.7 | hypothetical protein ARALYDRAFT_888738                         | gbpln | Arabidopsis lyrata   | AT1G13670.1   Symbols:   unknown protein; Has 22 Blast hits to 22 proteins in 7 species: Archae - 0; Bacteria - 0; Metazoa - 0; Fungi - 0; Plants - 22; Viruses - 0; Other Eukaryotes - 0 (source: NCBI BLink).   chr1:4688201-4688878 FORWARD LENGTH=225 | 242  | 225 | 9.00E-72  | 93.0  | 62.0 | 69.8 |
| Rsa1.0_01323.1.g25749.t1 | ref XP_002886292.1  ROOTY/SUPERROOT1 [Arabidopsis lyrata subsp. lyrata]<br>gi 297332132 gb EFH62551.1  ROOTY/SUPERROOT1 [Arabidopsis lyrata subsp. lyrata]                                                                                                                                                                                     | 456  | 462  | 0         | 101.3 | 88.6 | 94.1 | ROOTY/SUPERROOT1                                               | gbpln | Arabidopsis lyrata   | AT2G20610.1   Symbols: SUR1, HLS3, RTY, ALF1, RTY1   Tyrosine transaminase family protein   chr2:8878150-8880298 REVERSE LENGTH=462                                                                                                                       | 456  | 462 | 0         | 101.3 | 88.4 | 93.9 |
| Rsa1.0_01323.1.g25750.t1 | db BAA97156.1  unnamed protein product [Arabidopsis thaliana]                                                                                                                                                                                                                                                                                  | 294  | 329  | 1.00E-44  | 111.9 | 34.0 | 46.9 | unnamed protein product                                        | gbpln | Arabidopsis thaliana | AT4G29090.1   Symbols:   Ribonuclease H-like superfamily protein   chr4:14333528-14335255 FORWARD LENGTH=575                                                                                                                                              | 294  | 575 | 7.00E-28  | 195.6 | 21.1 | 41.2 |
| Rsa1.0_01323.1.g25751.t1 | gb AAB82639.1  putative non-LTR retroelement reverse transcriptase [Arabidopsis thaliana]                                                                                                                                                                                                                                                      | 651  | 1374 | 1.00E-161 | 211.1 | 44.1 | 65.0 | putative non-LTR retroelement reverse transcriptase            | gbpln | Arabidopsis thaliana | AT1G43760.1   Symbols:   DNase I-like superfamily protein   chr1:16528890-16531065 REVERSE LENGTH=626                                                                                                                                                     | 651  | 626 | 9.00E-23  | 96.2  | 13.5 | 25.5 |
| Rsa1.0_01323.1.g25752.t1 | #                                                                                                                                                                                                                                                                                                                                              | #    | #    | #         | #     | #    | -    | -                                                              | ----  | ----                 | #                                                                                                                                                                                                                                                         | #    | #   | #         | #     | #    |      |
| Rsa1.0_01323.1.g25753.t1 | gb EOA31768.1  hypothetical protein CARUB_v10014989mg [Capsella rubella]                                                                                                                                                                                                                                                                       | 106  | 97   | 8.00E-37  | 91.5  | 76.4 | 81.1 | hypothetical protein CARUB_v10014989mg                         | gbpln | Capsella rubella     | AT2G20585.3   Symbols: NFD6   nuclear fusion defective 6   chr2:8865222-8866097 FORWARD LENGTH=95                                                                                                                                                         | 106  | 95  | 5.00E-33  | 89.6  | 77.4 | 81.1 |

|                          |                                                                                                                                                                                                                                                                                                                                                                                                                                                                                                                                                                                                                                                                                                                                                                                                                                                                                                                                                                                                                                        |      |      |           |       |      |      |                                                                                             |       |                      |                                                                                                                                               |      |      |           |       |      |      |
|--------------------------|----------------------------------------------------------------------------------------------------------------------------------------------------------------------------------------------------------------------------------------------------------------------------------------------------------------------------------------------------------------------------------------------------------------------------------------------------------------------------------------------------------------------------------------------------------------------------------------------------------------------------------------------------------------------------------------------------------------------------------------------------------------------------------------------------------------------------------------------------------------------------------------------------------------------------------------------------------------------------------------------------------------------------------------|------|------|-----------|-------|------|------|---------------------------------------------------------------------------------------------|-------|----------------------|-----------------------------------------------------------------------------------------------------------------------------------------------|------|------|-----------|-------|------|------|
| Rsa1.0_01323.1.g25754.t1 | ref[NP_565477.1] 26S proteasome regulatory subunit N1 [Arabidopsis thaliana]<br>gi 75265911 sp Q9SIV2.2 RPN1A_ARAT<br>H RecName: Full=26S proteasome non-ATPase regulatory subunit 2 1A;<br>AltName: Full=26S proteasome regulatory subunit RPN1 A;<br>Short=AtRPN1a; AltName: Full=26S proteasome regulatory subunit S2 1A<br>gi 13430608 gb AAK25926.1 AF360216.1 putative 26S proteasome regulatory subunit S2 [Arabidopsis thaliana]<br>gi 14532874 gb AAK64119.1  putative 26S proteasome regulatory subunit S2 [Arabidopsis thaliana]<br>gi 20198043 gb AAD21708.2  26S proteasome regulatory subunit S2 (RPN1) [Arabidopsis thaliana]<br>gi 32700010 gb AAP86655.1  26S proteasome subunit RPN1a [Arabidopsis thaliana]<br>gi 330251939 gb AEC07032.1  26S proteasome regulatory subunit S2 1A [Arabidopsis thaliana]<br>ref XP_002884211.1  hypothetical protein ARALYDRAFT_480887 [Arabidopsis lyrata subsp. lyrata]<br>gi 297330051 gb EFH60470.1  hypothetical protein ARALYDRAFT_480887 [Arabidopsis lyrata subsp. lyrata] | 825  | 891  | 0         | 108.0 | 95.4 | 98.8 | 26S proteasome regulatory subunit N1                                                        | gbpln | Arabidopsis thaliana | AT2G20580.1   Symbols: RPN1A, ATRPN1A   26S proteasome regulatory subunit S2 1A   chr2:8859211-8864699 FORWARD LENGTH=891                     | 825  | 891  | 0         | 108.0 | 95.4 | 98.8 |
| Rsa1.0_01323.1.g25755.t1 | ref XP_002884211.1  hypothetical protein ARALYDRAFT_480887 [Arabidopsis lyrata subsp. lyrata]<br>gi 297330051 gb EFH60470.1  hypothetical protein ARALYDRAFT_480887 [Arabidopsis lyrata subsp. lyrata]                                                                                                                                                                                                                                                                                                                                                                                                                                                                                                                                                                                                                                                                                                                                                                                                                                 | 433  | 412  | 1.00E-158 | 95.2  | 77.8 | 83.6 | hypothetical protein ARALYDRAFT_480887                                                      | gbpln | Arabidopsis lyrata   | AT2G20570.1   Symbols: GPR11, GLK1, ATGLK1   GBF's pro-rich region-interacting factor 1   chr2:8855486-8857522 FORWARD LENGTH=420             | 433  | 420  | 1.00E-159 | 97.0  | 79.2 | 85.5 |
| Rsa1.0_01324.1.g25756.t1 | #                                                                                                                                                                                                                                                                                                                                                                                                                                                                                                                                                                                                                                                                                                                                                                                                                                                                                                                                                                                                                                      | #    | #    | #         | #     | #    | #    | -                                                                                           | ----  | ----                 | #                                                                                                                                             | #    | #    | #         | #     | #    |      |
| Rsa1.0_01324.1.g25757.t8 | gb EOA28805.1  hypothetical protein CARUB_v10025037mg [Capsella rubella]                                                                                                                                                                                                                                                                                                                                                                                                                                                                                                                                                                                                                                                                                                                                                                                                                                                                                                                                                               | 340  | 509  | 4.00E-38  | 149.7 | 27.1 | 45.3 | hypothetical protein CARUB_v10025037mg                                                      | gbpln | Capsella rubella     | AT1G52950.1   Symbols:   Nucleic acid-binding, OB-fold-like protein   chr1:19725483-19728007 FORWARD LENGTH=566                               | 340  | 566  | 3.00E-33  | 166.5 | 25.6 | 42.6 |
| Rsa1.0_01324.1.g25758.t2 | gb EOA22562.1  hypothetical protein CARUB_v10003223mg [Capsella rubella]                                                                                                                                                                                                                                                                                                                                                                                                                                                                                                                                                                                                                                                                                                                                                                                                                                                                                                                                                               | 1070 | 752  | 0         | 70.3  | 36.5 | 47.1 | hypothetical protein CARUB_v10003223mg                                                      | gbpln | Capsella rubella     | AT3G51690.1   Symbols:   PIF1 helicase   chr3:19176731-19178107 REVERSE LENGTH=331                                                            | 1070 | 331  | 6.00E-49  | 30.9  | 8.5  | 11.9 |
| Rsa1.0_01324.1.g25759.t1 | #                                                                                                                                                                                                                                                                                                                                                                                                                                                                                                                                                                                                                                                                                                                                                                                                                                                                                                                                                                                                                                      | #    | #    | #         | #     | #    | #    | -                                                                                           | ----  | ----                 | #                                                                                                                                             | #    | #    | #         | #     | #    |      |
| Rsa1.0_01324.1.g25760.t1 | #                                                                                                                                                                                                                                                                                                                                                                                                                                                                                                                                                                                                                                                                                                                                                                                                                                                                                                                                                                                                                                      | #    | #    | #         | #     | #    | #    | -                                                                                           | ----  | ----                 | #                                                                                                                                             | #    | #    | #         | #     | #    |      |
| Rsa1.0_01324.1.g25761.t4 | gb AAC33226.1  putative non-LTR retroelement reverse transcriptase [Arabidopsis thaliana]                                                                                                                                                                                                                                                                                                                                                                                                                                                                                                                                                                                                                                                                                                                                                                                                                                                                                                                                              | 1523 | 1529 | 0         | 100.4 | 33.3 | 46.2 | putative non-LTR retroelement reverse transcriptase                                         | gbpln | Arabidopsis thaliana | AT3G24255.1   Symbols:   RNA-directed DNA polymerase (reverse transcriptase)-related family protein   chr3:8789471-8793208 FORWARD LENGTH=746 | 1523 | 746  | 1.00E-52  | 49.0  | 8.5  | 11.6 |
| Rsa1.0_01324.1.g25762.t1 | emb CAB39638.1  RNA-directed DNA polymerase-like protein [Arabidopsis thaliana] gi 7267666 emb CAB78094.1  RNA-directed DNA polymerase-like protein [Arabidopsis thaliana]                                                                                                                                                                                                                                                                                                                                                                                                                                                                                                                                                                                                                                                                                                                                                                                                                                                             | 1785 | 1274 | 0         | 71.4  | 38.5 | 49.1 | RNA-directed DNA polymerase-like protein                                                    | gbpln | Arabidopsis thaliana | AT4G29090.1   Symbols:   Ribonuclease H-like superfamily protein   chr4:14333528-14335255 FORWARD LENGTH=575                                  | 1785 | 575  | 8.00E-64  | 32.2  | 9.5  | 15.0 |
| Rsa1.0_01324.1.g25763.t5 | gb AAD17398.1  putative non-LTR retroelement reverse transcriptase [Arabidopsis thaliana]                                                                                                                                                                                                                                                                                                                                                                                                                                                                                                                                                                                                                                                                                                                                                                                                                                                                                                                                              | 886  | 1225 | 7.00E-62  | 138.3 | 14.9 | 21.2 | putative non-LTR retroelement reverse transcriptase                                         | gbpln | Arabidopsis thaliana | #                                                                                                                                             | #    | #    | #         | #     | #    |      |
| Rsa1.0_01324.1.g25764.t1 | gb ABD65615.1  hypothetical protein 23.t00033 [Brassica oleracea]                                                                                                                                                                                                                                                                                                                                                                                                                                                                                                                                                                                                                                                                                                                                                                                                                                                                                                                                                                      | 150  | 326  | 5.00E-12  | 217.3 | 28.7 | 43.3 | hypothetical protein 23.t00033                                                              | gbpln | Brassica oleracea    | #                                                                                                                                             | #    | #    | #         | #     | #    |      |
| Rsa1.0_01325.1.g25765.t2 | #                                                                                                                                                                                                                                                                                                                                                                                                                                                                                                                                                                                                                                                                                                                                                                                                                                                                                                                                                                                                                                      | #    | #    | #         | #     | #    | #    | -                                                                                           | ----  | ----                 | #                                                                                                                                             | #    | #    | #         | #     | #    |      |
| Rsa1.0_01325.1.g25766.t1 | sp Q06209.2 CH14_BRANA RecName: Full=Basic endochitinase CHB4; Flags: Precursor gi 17799 emb CAA43708.1  chitinase [Brassica napus] gi 218436742 dbj BAH03380.1  chitinase [Brassica rapa subsp. chinensis] gi 244539521 dbj BAH82668.1  class IV chitinase [Brassica rapa subsp. chinensis]                                                                                                                                                                                                                                                                                                                                                                                                                                                                                                                                                                                                                                                                                                                                           | 270  | 268  | 1.00E-139 | 99.3  | 95.2 | 95.9 | RecName: Full=Basic endochitinase CHB4; Flags: Precursor gi 17799 emb CAA43708.1  chitinase | gbpln | Brassica napus       | AT2G43590.1   Symbols:   Chitinase family protein   chr2:18081592-18082749 REVERSE LENGTH=264                                                 | 270  | 264  | 1.00E-129 | 97.8  | 87.8 | 90.7 |
| Rsa1.0_01325.1.g25767.t1 | #                                                                                                                                                                                                                                                                                                                                                                                                                                                                                                                                                                                                                                                                                                                                                                                                                                                                                                                                                                                                                                      | #    | #    | #         | #     | #    | #    | -                                                                                           | ----  | ----                 | #                                                                                                                                             | #    | #    | #         | #     | #    |      |
| Rsa1.0_01325.1.g25768.t1 | gb ABH07409.1  putative pol polyprotein [Brassica oleracea var. botrytis]                                                                                                                                                                                                                                                                                                                                                                                                                                                                                                                                                                                                                                                                                                                                                                                                                                                                                                                                                              | 585  | 1239 | 1.00E-149 | 211.8 | 42.1 | 48.5 | putative pol polyprotein                                                                    | gbpln | Brassica oleracea    | AT4G23160.1   Symbols: CRK8   cysteine-rich RLK (RECEPTOR-like protein kinase) 8   chr4:12129485-12134086 FORWARD LENGTH=1262                 | 585  | 1262 | 3.00E-46  | 215.7 | 16.6 | 25.5 |
| Rsa1.0_01325.1.g25769.t1 | gb EOA27703.1  hypothetical protein CARUB_v10023857mg [Capsella rubella]                                                                                                                                                                                                                                                                                                                                                                                                                                                                                                                                                                                                                                                                                                                                                                                                                                                                                                                                                               | 260  | 265  | 1.00E-112 | 101.9 | 75.4 | 83.5 | hypothetical protein CARUB_v10023857mg                                                      | gbpln | Capsella rubella     | AT2G43580.1   Symbols:   Chitinase family protein   chr2:18078817-18080013 REVERSE LENGTH=265                                                 | 260  | 265  | 1.00E-113 | 101.9 | 78.8 | 86.2 |
| Rsa1.0_01325.1.g25770.t1 | gb EOA26406.1  hypothetical protein CARUB_v10023814mg [Capsella rubella]                                                                                                                                                                                                                                                                                                                                                                                                                                                                                                                                                                                                                                                                                                                                                                                                                                                                                                                                                               | 278  | 279  | 1.00E-127 | 100.4 | 82.4 | 88.8 | hypothetical protein CARUB_v10023814mg                                                      | gbpln | Capsella rubella     | AT2G43570.1   Symbols: CHI   chitinase, putative   chr2:18076389-18077435 REVERSE LENGTH=277                                                  | 278  | 277  | 1.00E-104 | 99.6  | 69.4 | 78.4 |

|                          |                                                                                                                                                                                                                                                                                                                                                                                                                                                                                                                                                                                                                                                                                                                                                                                                                                                                                                                                                                                                  |      |      |           |       |      |      |                                                        |       |                      |                                                                                                                                                                       |      |      |           |       |      |      |
|--------------------------|--------------------------------------------------------------------------------------------------------------------------------------------------------------------------------------------------------------------------------------------------------------------------------------------------------------------------------------------------------------------------------------------------------------------------------------------------------------------------------------------------------------------------------------------------------------------------------------------------------------------------------------------------------------------------------------------------------------------------------------------------------------------------------------------------------------------------------------------------------------------------------------------------------------------------------------------------------------------------------------------------|------|------|-----------|-------|------|------|--------------------------------------------------------|-------|----------------------|-----------------------------------------------------------------------------------------------------------------------------------------------------------------------|------|------|-----------|-------|------|------|
| Rsa1.0_01326.1.g25771.t1 | refXP_002889707.1   hypothetical protein ARALYDRAFT_888100 [Arabidopsis lyrata subsp. lyrata] gi 297335549 gb EFH65966.1   hypothetical protein ARALYDRAFT_888100 [Arabidopsis lyrata subsp. lyrata]                                                                                                                                                                                                                                                                                                                                                                                                                                                                                                                                                                                                                                                                                                                                                                                             | 287  | 284  | 1.00E-155 | 99.0  | 89.5 | 95.5 | hypothetical protein ARALYDRAFT_888100                 | gbpln | Arabidopsis lyrata   | AT1G08650.1   Symbols: PPOK1, ATPPOK1   phosphoenolpyruvate carboxylase kinase 1   chr1:2752206-2753232 FORWARD LENGTH=284                                            | 287  | 284  | 1.00E-154 | 99.0  | 88.5 | 94.1 |
| Rsa1.0_01326.1.g25772.t4 | refXP_002892466.1   heat shock protein binding protein [Arabidopsis lyrata subsp. lyrata] gi 297338308 gb EFH68725.1   heat shock protein binding protein [Arabidopsis lyrata subsp. lyrata] ref NP_563822.1   threonine aldolase [Arabidopsis thaliana] gi 30680733 ref NP_849614.1   threonine aldolase [Arabidopsis thaliana] gi 30680739 ref NP_849615.1   threonine aldolase [Arabidopsis thaliana] gi 145322987 ref NP_001031001.2   threonine aldolase [Arabidopsis thaliana] gi 19347791 gb AAL86346.1   unknown protein [Arabidopsis thaliana] gi 21436111 gb AAM51302.1   unknown protein [Arabidopsis thaliana] gi 110739988 dbj BAF01898.1   hypothetical protein [Arabidopsis thaliana] gi 332190199 gb AEE28320.1   threonine aldolase [Arabidopsis thaliana] gi 332190200 gb AEE28321.1   threonine aldolase [Arabidopsis thaliana] gi 332190201 gb AEE28322.1   threonine aldolase [Arabidopsis thaliana] gi 332190202 gb AEE28323.1   threonine aldolase [Arabidopsis thaliana] | 237  | 294  | 5.00E-88  | 124.1 | 67.9 | 71.7 | heat shock protein binding protein                     | gbpln | Arabidopsis lyrata   | AT1G08640.1   Symbols: CJD1   Chloroplast J-like domain 1   chr1:2748714-2751209 REVERSE LENGTH=294                                                                   | 237  | 294  | 7.00E-90  | 124.1 | 67.1 | 72.2 |
| Rsa1.0_01326.1.g25773.t1 | ref NP_563822.1   threonine aldolase [Arabidopsis thaliana] gi 30680733 ref NP_849614.1   threonine aldolase [Arabidopsis thaliana] gi 30680739 ref NP_849615.1   threonine aldolase [Arabidopsis thaliana] gi 145322987 ref NP_001031001.2   threonine aldolase [Arabidopsis thaliana] gi 19347791 gb AAL86346.1   unknown protein [Arabidopsis thaliana] gi 21436111 gb AAM51302.1   unknown protein [Arabidopsis thaliana] gi 110739988 dbj BAF01898.1   hypothetical protein [Arabidopsis thaliana] gi 332190199 gb AEE28320.1   threonine aldolase [Arabidopsis thaliana] gi 332190200 gb AEE28321.1   threonine aldolase [Arabidopsis thaliana] gi 332190201 gb AEE28322.1   threonine aldolase [Arabidopsis thaliana] gi 332190202 gb AEE28323.1   threonine aldolase [Arabidopsis thaliana]                                                                                                                                                                                              | 328  | 358  | 1.00E-169 | 109.1 | 89.0 | 93.6 | threonine aldolase                                     | gbpln | Arabidopsis thaliana | AT1G08630.4   Symbols: THA1   threonine aldolase 1   chr1:2743948-2745685 REVERSE LENGTH=358                                                                          | 328  | 358  | 1.00E-171 | 109.1 | 89.0 | 93.6 |
| Rsa1.0_01326.1.g25774.t1 | refXP_002889706.1   transcription factor jumonji family protein [Arabidopsis lyrata subsp. lyrata] gi 297335548 gb EFH65965.1   transcription factor jumonji family protein [Arabidopsis lyrata subsp. lyrata]                                                                                                                                                                                                                                                                                                                                                                                                                                                                                                                                                                                                                                                                                                                                                                                   | 1177 | 1209 | 0         | 102.7 | 83.2 | 89.7 | transcription factor jumonji family protein            | gbpln | Arabidopsis lyrata   | AT1G08620.2   Symbols: PKDM7D   Transcription factor jumonji (jmm) family protein / zinc finger (CSH2 type) family protein   chr1:2737554-2743370 FORWARD LENGTH=1209 | 1177 | 1209 | 0         | 102.7 | 83.2 | 90.3 |
| Rsa1.0_01326.1.g25775.t1 | ref NP_172335.1   leucine-rich receptor-like protein kinase-like protein [Arabidopsis thaliana] gi 75262900 sp Q9FRS6.1 PXL1_ARATH RecName: Full=Leucine-rich repeat receptor-like protein kinase PXL1; AltName: Full=Protein PHLOEM INTERCALATED WITH XYLEM-LIKE 1; Flags: Precursor gi 9802553 gb AAF99755.1 AC003981_5 F22013.7 [Arabidopsis thaliana] gi 224589384 gb ACN59226.1   leucine-rich repeat receptor-like protein kinase [Arabidopsis thaliana] gi 332190191 gb AEE28312.1   leucine-rich repeat receptor-like protein kinase PXL1 [Arabidopsis thaliana]                                                                                                                                                                                                                                                                                                                                                                                                                         | 1029 | 1029 | 0         | 100.0 | 87.9 | 92.9 | leucine-rich receptor-like protein kinase-like protein | gbpln | Arabidopsis thaliana | AT1G08590.1   Symbols:   Leucine-rich receptor-like protein kinase family protein   chr1:2718859-2721948 FORWARD LENGTH=1029                                          | 1029 | 1029 | 0         | 100.0 | 87.9 | 92.9 |
| Rsa1.0_01326.1.g25776.t1 | refXP_002892462.1   SYP111 [Arabidopsis lyrata subsp. lyrata] gi 297338304 gb EFH68721.1   SYP111 [Arabidopsis lyrata subsp. lyrata]                                                                                                                                                                                                                                                                                                                                                                                                                                                                                                                                                                                                                                                                                                                                                                                                                                                             | 306  | 310  | 1.00E-136 | 101.3 | 85.0 | 92.5 | SYP111                                                 | gbpln | Arabidopsis lyrata   | AT1G08560.1   Symbols: SYP111, KN, ATSY111   syntaxin of plants 111   chr1:2709778-2710710 REVERSE LENGTH=310                                                         | 306  | 310  | 1.00E-137 | 101.3 | 84.6 | 92.8 |
| Rsa1.0_01326.1.g25777.t1 | emb CAB83106.1   sigma factor 2 [Sinapis alba]                                                                                                                                                                                                                                                                                                                                                                                                                                                                                                                                                                                                                                                                                                                                                                                                                                                                                                                                                   | 580  | 575  | 0         | 99.1  | 88.4 | 92.9 | sigma factor 2                                         | gbpln | Sinapis alba         | AT1G08540.1   Symbols: SIGB, SIG1, SIG2, SIGA, ATSIG1, ABC1, ATSIG2   RNAPolymerase sigma subunit 2   chr1:2703461-2706696 FORWARD LENGTH=572                         | 580  | 572  | 0         | 98.6  | 84.8 | 90.0 |
| Rsa1.0_01326.1.g25778.t1 | gb AGG14201.1   palmitoyl-ACP-thioesterase [Brassica napus]                                                                                                                                                                                                                                                                                                                                                                                                                                                                                                                                                                                                                                                                                                                                                                                                                                                                                                                                      | 415  | 415  | 0         | 100.0 | 93.7 | 97.3 | palmitoyl-ACP-thioesterase                             | gbpln | Brassica napus       | AT1G08510.1   Symbols: FATB   fatty acyl-ACP thioesterases B   chr1:2691546-2693409 REVERSE LENGTH=412                                                                | 415  | 412  | 0         | 99.3  | 84.8 | 91.6 |
| Rsa1.0_01326.1.g25779.t1 | gb EOA37063.1   hypothetical protein CARUB_v10010188mg [Capsella rubella]                                                                                                                                                                                                                                                                                                                                                                                                                                                                                                                                                                                                                                                                                                                                                                                                                                                                                                                        | 234  | 232  | 1.00E-97  | 99.1  | 76.5 | 84.2 | hypothetical protein CARUB_v10010188mg                 | gbpln | Capsella rubella     | AT1G08500.1   Symbols: ENODL18, ATENODL18   early nodulin-like protein 18   chr1:2689110-2689881 FORWARD LENGTH=228                                                   | 234  | 228  | 1.00E-96  | 97.4  | 76.9 | 82.1 |

|                          |                                                                                                                                                                                                                                                                                                                                                                                                                                                     |     |     |          |       |      |       |                                                                                                                    |       |                      |                                                                                                                                                                                                                                                                                                                                                                                                                                                                                    |     |     |          |       |      |      |
|--------------------------|-----------------------------------------------------------------------------------------------------------------------------------------------------------------------------------------------------------------------------------------------------------------------------------------------------------------------------------------------------------------------------------------------------------------------------------------------------|-----|-----|----------|-------|------|-------|--------------------------------------------------------------------------------------------------------------------|-------|----------------------|------------------------------------------------------------------------------------------------------------------------------------------------------------------------------------------------------------------------------------------------------------------------------------------------------------------------------------------------------------------------------------------------------------------------------------------------------------------------------------|-----|-----|----------|-------|------|------|
| Rsa1.0_01326.1.g25780.t2 | gb EOA37187.1  hypothetical protein CARUB_v10010583mg [Capsella rubella]                                                                                                                                                                                                                                                                                                                                                                            | 183 | 145 | 6.00E-58 | 79.2  | 64.5 | 68.9  | hypothetical protein CARUB_v10010583mg                                                                             | gbpln | Capsella rubella     | AT1G08480.1   Symbols:   unknown protein; FUNCTIONS IN: molecular_function unknown; INVOLVED IN: biological_process unknown; LOCATED IN: mitochondrion, plasma membrane, plastid, vacuole; EXPRESSED IN: 27 plant structures; EXPRESSED DURING: 15 growth stages; Has 39 Blast hits to 39 proteins in 13 species: Archae - 0; Bacteria - 0; Metazoa - 0; Fungi - 0; Plants - 39; Viruses - 0; Other Eukaryotes - 0 (source: NCBI BLink).   chr1:2684340-2685395 FORWARD LENGTH=142 | 183 | 142 | 3.00E-58 | 77.6  | 62.8 | 67.2 |
| Rsa1.0_01326.1.g25781.t1 | #                                                                                                                                                                                                                                                                                                                                                                                                                                                   | #   | #   | #        | #     | #    | -     | ----                                                                                                               | ----  | #                    | #                                                                                                                                                                                                                                                                                                                                                                                                                                                                                  | #   | #   | #        | #     |      |      |
| Rsa1.0_01327.1.g25782.t1 | ref XP_002873724.1  APG6/CLPB-P/CLPB3 [Arabidopsis lyrata subsp. lyrata] gi 297319561 gb EFH4983.1  APG6/CLPB-P/CLPB3 [Arabidopsis lyrata subsp. lyrata]                                                                                                                                                                                                                                                                                            | 250 | 972 | 2.00E-44 | 388.8 | 36.8 | 40.0  | APG6/CLPB-P/CLPB3                                                                                                  | gbpln | Arabidopsis lyrata   | AT5G15450.1   Symbols: APG6, CLPB3, CLPB-P   casein lytic proteinase B3   chr5:5014399-5018255 REVERSE LENGTH=968                                                                                                                                                                                                                                                                                                                                                                  | 250 | 968 | 9.00E-47 | 387.2 | 36.4 | 40.4 |
| Rsa1.0_01327.1.g25783.t1 | ref NP_172797.2  C2H2 and C2HC zinc finger protein [Arabidopsis thaliana] gi 75324672 sp Q6S592.1 JGL_ARATH RecName: Full=Zinc finger protein JAGGED-like; AltName: Full=Zinc finger protein NUBBIN gi 39726196 gb AAR30035.1  JAGGED-like [Arabidopsis thaliana] gi 332190891 gb AEE29012.1  zinc finger protein JAGGED-like/NUBBIN [Arabidopsis thaliana]                                                                                         | 191 | 207 | 1.00E-35 | 108.4 | 48.2 | 54.5  | C2H2 and C2HC zinc finger protein                                                                                  | gbpln | Arabidopsis thaliana | AT1G13400.1   Symbols: NUB, JGL   C2H2 and C2HC zinc fingers superfamily protein   chr1:4597784-4598911 FORWARD LENGTH=207                                                                                                                                                                                                                                                                                                                                                         | 191 | 207 | 4.00E-38 | 108.4 | 48.2 | 54.5 |
| Rsa1.0_01327.1.g25784.t1 | gb EOA39904.1  hypothetical protein CARUB_v10008584mg [Capsella rubella]                                                                                                                                                                                                                                                                                                                                                                            | 529 | 625 | 0        | 118.1 | 80.7 | 90.4  | hypothetical protein CARUB_v10008584mg                                                                             | gbpln | Capsella rubella     | AT1G13410.1   Symbols:   Tetratricopeptide repeat (TPR)-like superfamily protein   chr1:4601526-4603174 FORWARD LENGTH=474                                                                                                                                                                                                                                                                                                                                                         | 529 | 474 | 0        | 89.6  | 68.4 | 76.4 |
| Rsa1.0_01327.1.g25785.t1 | sp P04796.2 G3PC.SINAL RecName: Full=Glyceraldehyde-3-phosphate dehydrogenase, cytosolic gi 21143 emb CAA27844.1  unnamed protein product [Sinapis alba]                                                                                                                                                                                                                                                                                            | 338 | 338 | 0        | 100.0 | 99.4 | 100.0 | RecName: Full=Glyceraldehyde-3-phosphate dehydrogenase, cytosolic gi 21143 emb CAA27844.1  unnamed protein product | gbpln | Sinapis alba         | AT3G04120.1   Symbols: GAPC, GAPC-1, GAPC1   glyceraldehyde-3-phosphate dehydrogenase C subunit 1   chr3:1081077-1083131 FORWARD LENGTH=338                                                                                                                                                                                                                                                                                                                                        | 338 | 338 | 0        | 100.0 | 97.0 | 99.1 |
| Rsa1.0_01327.1.g25786.t1 | #                                                                                                                                                                                                                                                                                                                                                                                                                                                   | #   | #   | #        | #     | #    | -     | ----                                                                                                               | ----  | #                    | #                                                                                                                                                                                                                                                                                                                                                                                                                                                                                  | #   | #   | #        | #     |      |      |
| Rsa1.0_01327.1.g25787.t1 | ref XP_002892756.1  hypothetical protein ARALYDRAFT_312360 [Arabidopsis lyrata subsp. lyrata] gi 297338598 gb EFH69015.1  hypothetical protein ARALYDRAFT_312360 [Arabidopsis lyrata subsp. lyrata]                                                                                                                                                                                                                                                 | 383 | 772 | 0        | 201.6 | 81.5 | 90.3  | hypothetical protein ARALYDRAFT_312360                                                                             | gbpln | Arabidopsis lyrata   | AT1G13520.1   Symbols:   Protein of unknown function (DUF1262)   chr1:4631857-4633223 REVERSE LENGTH=387                                                                                                                                                                                                                                                                                                                                                                           | 383 | 387 | 0        | 101.0 | 83.6 | 90.9 |
| Rsa1.0_01327.1.g25788.t1 | ref NP_172692.1  LRR and NB-ARC domain-containing disease resistance protein [Arabidopsis thaliana] gi 46395647 sp P60838.1 DRL1_ARATH RecName: Full=Probable disease resistance protein At1g12280 gi 332190740 gb AEE2886.1  probable disease resistance protein [Arabidopsis thaliana]                                                                                                                                                            | 888 | 894 | 0        | 100.7 | 77.0 | 87.5  | LRR and NB-ARC domain-containing disease resistance protein                                                        | gbpln | Arabidopsis thaliana | AT1G12280.1   Symbols:   LRR and NB-ARC domains-containing disease resistance protein   chr1:4174875-4177559 REVERSE LENGTH=894                                                                                                                                                                                                                                                                                                                                                    | 888 | 894 | 0        | 100.7 | 77.0 | 87.5 |
| Rsa1.0_01327.1.g25789.t1 | ref NP_199182.1  sulfotransferase family protein [Arabidopsis thaliana] gi 75262427 sp Q9FG94.1 SOT1_ARATH RecName: Full=Cytosolic sulfotransferase 1; Short=AtSOT1 gi 101177937 dbj BAB11296.1  steroid sulfotransferase-like [Arabidopsis thaliana] gi 38566684 gb AAR24232.1  At5g43690 [Arabidopsis thaliana] gi 51536530 gb AAU05503.1  At5g43690 [Arabidopsis thaliana] gi 332007613 gb AED94996.1  sulfotransferase 1 [Arabidopsis thaliana] | 344 | 331 | 1.00E-94 | 96.2  | 54.1 | 63.1  | sulfotransferase family protein                                                                                    | gbpln | Arabidopsis thaliana | AT5G43690.1   Symbols:   P-loop containing nucleoside triphosphate hydrolases superfamily protein   chr5:17546273-17547268 FORWARD LENGTH=331                                                                                                                                                                                                                                                                                                                                      | 344 | 331 | 4.00E-97 | 96.2  | 54.1 | 63.1 |
| Rsa1.0_01327.1.g25790.t1 | #                                                                                                                                                                                                                                                                                                                                                                                                                                                   | #   | #   | #        | #     | #    | -     | ----                                                                                                               | ----  | #                    | #                                                                                                                                                                                                                                                                                                                                                                                                                                                                                  | #   | #   | #        | #     |      |      |
| Rsa1.0_01327.1.g25791.t1 | ref XP_002892776.1  hypothetical protein ARALYDRAFT_471542 [Arabidopsis lyrata subsp. lyrata] gi 297338618 gb EFH69035.1  hypothetical protein ARALYDRAFT_471542 [Arabidopsis lyrata subsp. lyrata]                                                                                                                                                                                                                                                 | 173 | 199 | 6.00E-56 | 115.0 | 78.6 | 84.4  | hypothetical protein ARALYDRAFT_471542                                                                             | gbpln | Arabidopsis lyrata   | AT1G13830.1   Symbols:   Carbohydrate-binding X8 domain superfamily protein   chr1:4739999-4740926 REVERSE LENGTH=197                                                                                                                                                                                                                                                                                                                                                              | 173 | 197 | 1.00E-49 | 113.9 | 72.3 | 78.6 |

|                          |                                                                                                                                                                                                                                                                                                                                                                                                                                                                                                                                                                                                                                                                                                                                                                                                                                                                                         |     |     |           |       |      |      |                                              |       |                      |                                                                                                                                               |     |     |           |       |      |      |
|--------------------------|-----------------------------------------------------------------------------------------------------------------------------------------------------------------------------------------------------------------------------------------------------------------------------------------------------------------------------------------------------------------------------------------------------------------------------------------------------------------------------------------------------------------------------------------------------------------------------------------------------------------------------------------------------------------------------------------------------------------------------------------------------------------------------------------------------------------------------------------------------------------------------------------|-----|-----|-----------|-------|------|------|----------------------------------------------|-------|----------------------|-----------------------------------------------------------------------------------------------------------------------------------------------|-----|-----|-----------|-------|------|------|
| Rsa1.0_01327.1.g25792.t1 | gb EOA38350.1  hypothetical protein CARUB_v10009863mg [Capsella rubella]                                                                                                                                                                                                                                                                                                                                                                                                                                                                                                                                                                                                                                                                                                                                                                                                                | 225 | 302 | 1.00E-111 | 134.2 | 88.0 | 95.6 | hypothetical protein CARUB_v10009863mg       | gbpln | Capsella rubella     | AT1G13870.1   Symbols: DRL1, AtKTI12   calmodulin binding-purine nucleotide binding   chr1:4747437-4748345 REVERSE LENGTH=302                 | 225 | 302 | 1.00E-111 | 134.2 | 86.7 | 93.8 |
| Rsa1.0_01327.1.g25793.t1 | ref XP_002890025.1  ELM2 domain-containing protein [Arabidopsis lyrata subsp. lyrata]   gi 297335887 gb EFH66284.1  ELM2 domain-containing protein [Arabidopsis lyrata subsp. lyrata]                                                                                                                                                                                                                                                                                                                                                                                                                                                                                                                                                                                                                                                                                                   | 439 | 423 | 1.00E-159 | 96.4  | 64.7 | 72.7 | ELM2 domain-containing protein               | gbpln | Arabidopsis lyrata   | AT1G13880.1   Symbols:   ELM2 domain-containing protein   chr1:4749603-4750967 FORWARD LENGTH=424                                             | 439 | 424 | 1.00E-157 | 96.6  | 62.9 | 72.0 |
| Rsa1.0_01327.1.g25794.t1 | ref XP_002892756.1  hypothetical protein ARALYDRAFT_312360 [Arabidopsis lyrata subsp. lyrata]   gi 297336589 gb EFH69015.1  hypothetical protein ARALYDRAFT_312360 [Arabidopsis lyrata subsp. lyrata]                                                                                                                                                                                                                                                                                                                                                                                                                                                                                                                                                                                                                                                                                   | 305 | 772 | 1.00E-127 | 253.1 | 73.8 | 81.6 | hypothetical protein ARALYDRAFT_312360       | gbpln | Arabidopsis lyrata   | AT1G13520.1   Symbols:   Protein of unknown function (DUF1262)   chr1:4631857-4633223 REVERSE LENGTH=387                                      | 305 | 387 | 1.00E-124 | 126.9 | 75.1 | 81.0 |
| Rsa1.0_01327.1.g25795.t1 | ref XP_002891048.1  hypothetical protein ARALYDRAFT_473526 [Arabidopsis lyrata subsp. lyrata]   gi 297336890 gb EFH67907.1  hypothetical protein ARALYDRAFT_473526 [Arabidopsis lyrata subsp. lyrata]                                                                                                                                                                                                                                                                                                                                                                                                                                                                                                                                                                                                                                                                                   | 180 | 798 | 6.00E-54  | 443.3 | 60.0 | 70.6 | hypothetical protein ARALYDRAFT_473526       | gbpln | Arabidopsis lyrata   | AT5G47280.1   Symbols: ADR1-L3   ADR1-like 3   chr5:19193157-19195559 FORWARD LENGTH=623                                                      | 180 | 623 | 4.00E-54  | 346.1 | 55.0 | 69.4 |
| Rsa1.0_01327.1.g25796.t1 | gb EOA36691.1  hypothetical protein CARUB_v10012096mg [Capsella rubella]                                                                                                                                                                                                                                                                                                                                                                                                                                                                                                                                                                                                                                                                                                                                                                                                                | 300 | 327 | 1.00E-116 | 109.0 | 66.3 | 81.7 | hypothetical protein CARUB_v10012096mg       | gbpln | Capsella rubella     | AT5G43690.1   Symbols:   P-loop containing nucleoside triphosphate hydrolases superfamily protein   chr5:17546273-17547268 FORWARD LENGTH=331 | 300 | 331 | 1.00E-118 | 110.3 | 67.0 | 80.7 |
| Rsa1.0_01328.1.g25797.t1 | ref NP_172472.1  amino acid permease 8 [Arabidopsis thaliana]   gi 75223207 sp O80592.1 AAP8_ARATH RecName: Full=Amino acid permease 8; AltName: Full=Amino acid transporter AAP8   gi 3540179 gb AAC34329.1  putative amino acid permease [Arabidopsis thaliana]   gi 332190407 gb AEE28528.1  amino acid permease 8 [Arabidopsis thaliana]                                                                                                                                                                                                                                                                                                                                                                                                                                                                                                                                            | 478 | 475 | 0         | 99.4  | 83.3 | 91.8 | amino acid permease 8                        | gbpln | Arabidopsis thaliana | AT1G10010.1   Symbols: AAP8, ATAAP8   amino acid permease 8   chr1:3265976-3268726 FORWARD LENGTH=475                                         | 478 | 475 | 0         | 99.4  | 83.3 | 91.8 |
| Rsa1.0_01328.1.g25798.t1 | ref XP_002892543.1  hypothetical protein ARALYDRAFT_888260 [Arabidopsis lyrata subsp. lyrata]   gi 297333355 gb EFH68802.1  hypothetical protein ARALYDRAFT_888260 [Arabidopsis lyrata subsp. lyrata]                                                                                                                                                                                                                                                                                                                                                                                                                                                                                                                                                                                                                                                                                   | 465 | 461 | 0         | 99.1  | 85.2 | 88.2 | hypothetical protein ARALYDRAFT_888260       | gbpln | Arabidopsis lyrata   | AT1G10020.1   Symbols:   Protein of unknown function (DUF1005)   chr1:3269939-3271732 REVERSE LENGTH=461                                      | 465 | 461 | 0         | 99.1  | 85.4 | 88.6 |
| Rsa1.0_01328.1.g25799.t1 | gb EOA36321.1  hypothetical protein CARUB_v10010632mg [Capsella rubella]                                                                                                                                                                                                                                                                                                                                                                                                                                                                                                                                                                                                                                                                                                                                                                                                                | 97  | 129 | 2.00E-43  | 133.0 | 89.7 | 92.8 | hypothetical protein CARUB_v10010632mg       | gbpln | Capsella rubella     | AT1G10030.1   Symbols: ERG28   homolog of yeast ergosterol28   chr1:3273972-3275631 FORWARD LENGTH=129                                        | 97  | 129 | 1.00E-44  | 133.0 | 87.6 | 89.7 |
| Rsa1.0_01328.1.g25800.t1 | ref XP_002889788.1  predicted protein [Arabidopsis lyrata subsp. lyrata]   gi 297335630 gb EFH66047.1  predicted protein [Arabidopsis lyrata subsp. lyrata]                                                                                                                                                                                                                                                                                                                                                                                                                                                                                                                                                                                                                                                                                                                             | 387 | 383 | 0         | 99.0  | 87.1 | 92.8 | predicted protein                            | gbpln | Arabidopsis lyrata   | AT1G10060.2   Symbols: ATBCAT-1, BCAT-1   branched-chain amino acid transaminase 1   chr1:3284445-3286837 FORWARD LENGTH=384                  | 387 | 384 | 0         | 99.2  | 87.3 | 93.3 |
| Rsa1.0_01328.1.g25801.t1 | ref NP_172478.1  branched-chain-amino-acid aminotransferase 2 [Arabidopsis thaliana]   gi 79317492 ref NP_001031015.1  branched-chain-amino-acid aminotransferase 2 [Arabidopsis thaliana]   gi 26391680 sp O9M439.1 BCAT2_ARATH RecName: Full=Branched-chain-amino-acid aminotransferase 2, chloroplastic; Short=Atbcat-2; Flags: Precursor   gi 13877745 gb AAK43950.1 AF370135.1 putative tat-binding protein [Arabidopsis thaliana]   gi 8249004 emb CAB93128.1  branched-chain amino acid transaminase [Arabidopsis thaliana]   gi 15293209 gb AAK93715.1  putative tat-binding protein [Arabidopsis thaliana]   gi 222424474 dbj BAH20192.1  AT1G10070 [Arabidopsis thaliana]   gi 332190416 gb AEE28537.1  branched-chain-amino-acid aminotransferase 2 [Arabidopsis thaliana]   gi 332190417 gb AEE28538.1  branched-chain-amino-acid aminotransferase 2 [Arabidopsis thaliana] | 387 | 388 | 0         | 100.3 | 88.4 | 95.1 | branched-chain-amino-acid aminotransferase 2 | gbpln | Arabidopsis thaliana | AT1G10070.2   Symbols: ATBCAT-2, BCAT-2   branched-chain amino acid transaminase 2   chr1:3288255-3290164 FORWARD LENGTH=388                  | 387 | 388 | 0         | 100.3 | 88.4 | 95.1 |

|                          |                                                                                                                                                                                                                                                                                                                                                                                                                                                                                                                                                                                                                                                                                                                                                                                                                                                                                          |      |      |           |       |      |      |                                              |       |                      |                                                                                                                                                           |      |      |           |       |      |      |
|--------------------------|------------------------------------------------------------------------------------------------------------------------------------------------------------------------------------------------------------------------------------------------------------------------------------------------------------------------------------------------------------------------------------------------------------------------------------------------------------------------------------------------------------------------------------------------------------------------------------------------------------------------------------------------------------------------------------------------------------------------------------------------------------------------------------------------------------------------------------------------------------------------------------------|------|------|-----------|-------|------|------|----------------------------------------------|-------|----------------------|-----------------------------------------------------------------------------------------------------------------------------------------------------------|------|------|-----------|-------|------|------|
| Rsa1.0_01328.1.g25802.t1 | gb EOA38044.1  hypothetical protein CARUB_v10009514mg [Capsella rubella]                                                                                                                                                                                                                                                                                                                                                                                                                                                                                                                                                                                                                                                                                                                                                                                                                 | 331  | 365  | 1.00E-150 | 110.3 | 86.4 | 89.7 | hypothetical protein CARUB_v10009514mg       | gbpln | Capsella rubella     | AT1G10120.1   Symbols:   basic helix-loop-helix (bHLH) DNA-binding superfamily protein   chr1:3304228-3305984 REVERSE LENGTH=366                          | 331  | 366  | 1.00E-144 | 110.6 | 82.2 | 85.5 |
| Rsa1.0_01328.1.g25803.t1 | ref XP_002889791.1  Ca2+-ATPase [Arabidopsis lyrata subsp. lyrata]   gi 297335633 gb EFH66050.1  Ca2+-ATPase [Arabidopsis lyrata subsp. lyrata]                                                                                                                                                                                                                                                                                                                                                                                                                                                                                                                                                                                                                                                                                                                                          | 997  | 992  | 0         | 99.5  | 93.2 | 95.5 | Ca2+-ATPase                                  | gbpln | Arabidopsis lyrata   | AT1G10130.1   Symbols: ECA3, ATECA3   endoplasmic reticulum-type calcium-transporting ATPase 3   chr1:3311139-3321941 FORWARD LENGTH=998                  | 997  | 998  | 0         | 100.1 | 93.0 | 95.2 |
| Rsa1.0_01328.1.g25804.t1 | ref NP_563861.1  uncharacterized protein [Arabidopsis thaliana]   gi 4914316 gb AAD32864.1 AC005489.2 F14N23.2 [Arabidopsis thaliana]   gi 21592444 gb AAM64395.1  unknown [Arabidopsis thaliana]   gi 107738163 gb ABF83653.1  At1g10140 [Arabidopsis thaliana]   gi 110740087 dbj BAF01945.1  hypothetical protein [Arabidopsis thaliana]   gi 332190425 gb AEE28546.1  uncharacterized protein AT1G10140 [Arabidopsis thaliana]                                                                                                                                                                                                                                                                                                                                                                                                                                                       | 172  | 167  | 2.00E-43  | 97.1  | 74.4 | 84.3 | uncharacterized protein                      | gbpln | Arabidopsis thaliana | AT1G10140.1   Symbols:   Uncharacterised conserved protein UCP031279   chr1:3322970-3323473 REVERSE LENGTH=167                                            | 172  | 167  | 9.00E-46  | 97.1  | 74.4 | 84.3 |
| Rsa1.0_01329.1.g25805.t1 | ref XP_002889791.1  Ca2+-ATPase [Arabidopsis lyrata subsp. lyrata]   gi 297335633 gb EFH66050.1  Ca2+-ATPase [Arabidopsis lyrata subsp. lyrata]                                                                                                                                                                                                                                                                                                                                                                                                                                                                                                                                                                                                                                                                                                                                          | 903  | 992  | 0         | 109.9 | 96.3 | 98.3 | Ca2+-ATPase                                  | gbpln | Arabidopsis lyrata   | AT1G10130.1   Symbols: ECA3, ATECA3   endoplasmic reticulum-type calcium-transporting ATPase 3   chr1:3311139-3321941 FORWARD LENGTH=998                  | 903  | 998  | 0         | 110.5 | 96.1 | 98.0 |
| Rsa1.0_01329.1.g25806.t1 | gb EOA38044.1  hypothetical protein CARUB_v10009514mg [Capsella rubella]                                                                                                                                                                                                                                                                                                                                                                                                                                                                                                                                                                                                                                                                                                                                                                                                                 | 316  | 365  | 1.00E-144 | 115.5 | 87.3 | 90.8 | hypothetical protein CARUB_v10009514mg       | gbpln | Capsella rubella     | AT1G10120.1   Symbols:   basic helix-loop-helix (bHLH) DNA-binding superfamily protein   chr1:3304228-3305984 REVERSE LENGTH=366                          | 316  | 366  | 1.00E-140 | 115.8 | 86.4 | 89.9 |
| Rsa1.0_01329.1.g25807.t1 | ref NP_172478.1  branched-chain-amino-acid aminotransferase 2 [Arabidopsis thaliana]   gi 79317492 ref NP_001031015.1  branched-chain-amino-acid aminotransferase 2 [Arabidopsis thaliana]   gi 26391680 sp Q9M439.1 BCAT2_ARAT H RecName: Full=Branched-chain-amino-acid aminotransferase 2, chloroplastic; Short=Atbcat-2; Flags: Precursor   gi 13877745 gb AAK43950.1 AF370135.1 putative tat-binding protein [Arabidopsis thaliana]   gi 8249004 emb CAB93128.1  branched-chain amino acid transaminase [Arabidopsis thaliana]   gi 15293209 gb AAK93715.1  putative tat-binding protein [Arabidopsis thaliana]   gi 222424474 dbj BAH20192.1  AT1G10070 [Arabidopsis thaliana]   gi 332190416 gb AEE28537.1  branched-chain-amino-acid aminotransferase 2 [Arabidopsis thaliana]   gi 332190417 gb AEE28538.1  branched-chain-amino-acid aminotransferase 2 [Arabidopsis thaliana] | 377  | 388  | 1.00E-179 | 102.9 | 81.2 | 87.0 | branched-chain-amino-acid aminotransferase 2 | gbpln | Arabidopsis thaliana | AT1G10070.2   Symbols: ATBCAT-2, BCAT-2   branched-chain amino acid transaminase 2   chr1:3288255-3290164 FORWARD LENGTH=388                              | 377  | 388  | 0         | 102.9 | 81.2 | 87.0 |
| Rsa1.0_01329.1.g25808.t1 | gb AAD26943.1  putative retroelement pol polyprotein [Arabidopsis thaliana]                                                                                                                                                                                                                                                                                                                                                                                                                                                                                                                                                                                                                                                                                                                                                                                                              | 1453 | 1454 | 0         | 100.1 | 68.3 | 82.7 | putative retroelement pol polyprotein        | gbpln | Arabidopsis thaliana | AT4G23160.1   Symbols: CRK8   cysteine-rich RLK (RECEPTOR-like protein kinase) 8   chr4:12129485-12134086 FORWARD LENGTH=1262                             | 1453 | 1262 | 1.00E-178 | 86.9  | 20.8 | 27.1 |
| Rsa1.0_01329.1.g25809.t1 | ref XP_002889787.1  glycosyl hydrolase family 10 protein [Arabidopsis lyrata subsp. lyrata]   gi 297335629 gb EFH66046.1  glycosyl hydrolase family 10 protein [Arabidopsis lyrata subsp. lyrata]                                                                                                                                                                                                                                                                                                                                                                                                                                                                                                                                                                                                                                                                                        | 1089 | 1063 | 0         | 97.6  | 84.8 | 90.4 | glycosyl hydrolase family 10 protein         | gbpln | Arabidopsis lyrata   | AT1G10050.1   Symbols:   glycosyl hydrolase family 10 protein / carbohydrate-binding domain-containing protein   chr1:3279270-3283444 FORWARD LENGTH=1063 | 1089 | 1063 | 0         | 97.6  | 83.3 | 89.4 |
| Rsa1.0_01329.1.g25810.t1 | ref XP_002887971.1  hypothetical protein ARALYDRAFT_893147 [Arabidopsis lyrata subsp. lyrata]   gi 297333812 gb EFH64230.1  hypothetical protein ARALYDRAFT_893147 [Arabidopsis lyrata subsp. lyrata]                                                                                                                                                                                                                                                                                                                                                                                                                                                                                                                                                                                                                                                                                    | 188  | 296  | 8.00E-28  | 157.4 | 39.9 | 59.6 | hypothetical protein ARALYDRAFT_893147       | gbpln | Arabidopsis lyrata   | #                                                                                                                                                         | #    | #    | #         | #     | #    | #    |
| Rsa1.0_01330.1.g25811.t1 | #                                                                                                                                                                                                                                                                                                                                                                                                                                                                                                                                                                                                                                                                                                                                                                                                                                                                                        | #    | #    | #         | #     | #    | #    | -                                            | ----  | ----                 | #                                                                                                                                                         | #    | #    | #         | #     | #    | #    |

|                           |                                                                                                                                                                                                                                                                                                    |      |      |           |       |      |       |                                                 |       |                            |                                                                                                                                                                                                                                                                                                                                                                                                                                                              |      |      |           |       |      |      |
|---------------------------|----------------------------------------------------------------------------------------------------------------------------------------------------------------------------------------------------------------------------------------------------------------------------------------------------|------|------|-----------|-------|------|-------|-------------------------------------------------|-------|----------------------------|--------------------------------------------------------------------------------------------------------------------------------------------------------------------------------------------------------------------------------------------------------------------------------------------------------------------------------------------------------------------------------------------------------------------------------------------------------------|------|------|-----------|-------|------|------|
| Rsa1.0_01330.1.g25812.t1  | refXP_002974570.1   hypothetical protein SELMODRAFT_442529 [Selaginella moellendorffii]   gi 300157465 gb EFJ24090.1   hypothetical protein SELMODRAFT_442529 [Selaginella moellendorffii]                                                                                                         | 663  | 516  | 3.00E-38  | 77.8  | 33.5 | 39.8  | hypothetical protein SELMODRAFT_442529          | gbpln | Selaginella moellendorffii | AT4G13390.1   Symbols:   Proline-rich extensin-like family protein   chr4:7783856-7785145 FORWARD LENGTH=429                                                                                                                                                                                                                                                                                                                                                 | 663  | 429  | 8.00E-41  | 64.7  | 47.8 | 51.9 |
| Rsa1.0_01330.1.g25813.t2  | refXP_003603826.1   Helicase-like protein [Medicago truncatula]   gi 355492874 gb AES74077.1   Helicase-like protein [Medicago truncatula]                                                                                                                                                         | 326  | 1679 | 4.00E-29  | 515.0 | 16.0 | 26.1  | Helicase-like protein                           | gbpln | Medicago truncatula        | #                                                                                                                                                                                                                                                                                                                                                                                                                                                            | #    | #    | #         | #     | #    | #    |
| Rsa1.0_01330.1.g25814.t1  | refXP_002881777.1   hypothetical protein ARALYDRAFT_483224 [Arabidopsis lyrata subsp. lyrata]   gi 297327616 gb EFH59036.1   hypothetical protein ARALYDRAFT_483224 [Arabidopsis lyrata subsp. lyrata]                                                                                             | 128  | 179  | 1.00E-24  | 139.8 | 49.2 | 52.3  | hypothetical protein ARALYDRAFT_483224          | gbpln | Arabidopsis lyrata         | AT2G41475.1   Symbols:   Embryo-specific protein 3. (ATS3)   chr2:17295259-17296329 REVERSE LENGTH=179                                                                                                                                                                                                                                                                                                                                                       | 128  | 179  | 6.00E-26  | 139.8 | 46.9 | 50.8 |
| Rsa1.0_01330.1.g25815.t1  | gb AAF69169.1 AC007915.21 F27F5.21 [Arabidopsis thaliana]                                                                                                                                                                                                                                          | 517  | 1023 | 1.00E-167 | 197.9 | 57.8 | 74.3  | F27F5.21                                        | gbpln | Arabidopsis thaliana       | AT4G29090.1   Symbols:   Ribonuclease H-like superfamily protein   chr4:14333528-14335255 FORWARD LENGTH=575                                                                                                                                                                                                                                                                                                                                                 | 517  | 575  | 3.00E-30  | 111.2 | 11.4 | 17.6 |
| Rsa1.0_01330.1.g25816.t5  | gb ABD64941.1 Ulp1 protease family protein [Brassica oleracea]                                                                                                                                                                                                                                     | 873  | 871  | 1.00E-61  | 99.8  | 16.2 | 22.8  | Ulp1 protease family protein                    | gbpln | Brassica oleracea          | AT2G07240.1   Symbols:   cysteine-type peptidases:cysteine-type peptidases   chr2:3007102-3011701 REVERSE LENGTH=874                                                                                                                                                                                                                                                                                                                                         | 873  | 874  | 1.00E-31  | 100.1 | 10.3 | 16.0 |
| Rsa1.0_01330.1.g25817.t1  | #                                                                                                                                                                                                                                                                                                  | #    | #    | #         | #     | #    | #     | -                                               | ----  | ----                       | #                                                                                                                                                                                                                                                                                                                                                                                                                                                            | #    | #    | #         | #     | #    | #    |
| Rsa1.0_01330.1.g25818.t1  | gb AAF99763.1 AC003981.13 F22O13.21 [Arabidopsis thaliana]   gi 9293930 dbj BAB01833.1   Mutator-like transposase [Arabidopsis thaliana]   gi 10177478 dbj BAB10869.1   mutator-like transposase [Arabidopsis thaliana]                                                                            | 955  | 915  | 1.00E-131 | 95.8  | 25.5 | 36.5  | F22O13.21                                       | gbpln | Arabidopsis thaliana       | AT1G64260.1   Symbols:   MuDR family transposase   chr1:23847756-23849915 FORWARD LENGTH=719                                                                                                                                                                                                                                                                                                                                                                 | 955  | 719  | 1.00E-29  | 75.3  | 12.5 | 22.5 |
| Rsa1.0_01330.1.g25819.t2  | ref NP_180252.2  uncharacterized protein [Arabidopsis thaliana]   gi 26452962 dbj BAC43557.1   unknown protein [Arabidopsis thaliana]   gi 28973431 gb AAO64040.1   unknown protein [Arabidopsis thaliana]   gi 330252802 gb AECO7896.1   uncharacterized protein AT2G26840 [Arabidopsis thaliana] | 426  | 273  | 1.00E-106 | 64.1  | 45.3 | 51.2  | uncharacterized protein                         | gbpln | Arabidopsis thaliana       | AT2G26840.1   Symbols:   unknown protein; FUNCTIONS IN: molecular_function unknown; INVOLVED IN: biological_process unknown; LOCATED IN: chloroplast; BEST Arabidopsis thaliana protein match is: unknown protein (TAIR:AT3G43910.1); Has 835 Blast hits to 835 proteins in 26 species: Archae - 0; Bacteria - 25; Metazoa - 0; Fungi - 0; Plants - 40; Viruses - 2; Other Eukaryotes - 768 (source: NCBI BLINK)   chr2:11447346-11448871 REVERSE LENGTH=273 | 426  | 273  | 1.00E-109 | 64.1  | 45.3 | 51.2 |
| Rsa1.0_01331.1.g25820.t10 | gb AAD29835.2  putative SNF2 subfamily transcription regulator [Arabidopsis thaliana]                                                                                                                                                                                                              | 3186 | 3571 | 0         | 112.1 | 44.9 | 49.5  | putative SNF2 subfamily transcription regulator | gbpln | Arabidopsis thaliana       | AT2G28290.2   Symbols: SYD, CHR3   P-loop containing nucleoside triphosphate hydrolases superfamily protein   chr2:12056771-12072950 FORWARD LENGTH=3529                                                                                                                                                                                                                                                                                                     | 3186 | 3529 | 0         | 110.8 | 45.0 | 49.6 |
| Rsa1.0_01331.1.g25821.t1  | refXP_002881627.1   hypothetical protein ARALYDRAFT_345680 [Arabidopsis lyrata subsp. lyrata]   gi 297327466 gb EFH57886.1   hypothetical protein ARALYDRAFT_345680 [Arabidopsis lyrata subsp. lyrata]                                                                                             | 368  | 346  | 1.00E-165 | 94.0  | 77.2 | 81.8  | hypothetical protein ARALYDRAFT_345680          | gbpln | Arabidopsis lyrata         | AT2G39040.1   Symbols:   Peroxidase superfamily protein   chr2:16299463-16301173 REVERSE LENGTH=350                                                                                                                                                                                                                                                                                                                                                          | 368  | 350  | 1.00E-162 | 95.1  | 75.0 | 79.9 |
| Rsa1.0_01331.1.g25822.t1  | refXP_002879780.1   hypothetical protein ARALYDRAFT_482921 [Arabidopsis lyrata subsp. lyrata]   gi 297325619 gb EFH56039.1   hypothetical protein ARALYDRAFT_482921 [Arabidopsis lyrata subsp. lyrata]                                                                                             | 229  | 235  | 1.00E-108 | 102.6 | 85.2 | 88.2  | hypothetical protein ARALYDRAFT_482921          | gbpln | Arabidopsis lyrata         | AT2G39020.1   Symbols:   Acyl-CoA N-acyltransferases (NAT) superfamily protein   chr2:16295392-16296102 FORWARD LENGTH=236                                                                                                                                                                                                                                                                                                                                   | 229  | 236  | 1.00E-110 | 103.1 | 84.3 | 87.8 |
| Rsa1.0_01331.1.g25823.t1  | gb ABL97985.1  water channel protein [Brassica rapa]                                                                                                                                                                                                                                               | 288  | 288  | 1.00E-164 | 100.0 | 98.6 | 100.0 | water channel protein                           | gbpln | Brassica rapa              | AT2G39010.1   Symbols: PIP2E, PIP2.6   plasma membrane intrinsic protein 2E   chr2:16291564-16293746 FORWARD LENGTH=289                                                                                                                                                                                                                                                                                                                                      | 288  | 289  | 1.00E-157 | 100.3 | 93.1 | 95.8 |
| Rsa1.0_01331.1.g25824.t2  | #                                                                                                                                                                                                                                                                                                  | #    | #    | #         | #     | #    | #     | -                                               | ----  | ----                       | AT2G39000.2   Symbols:   Acyl-CoA N-acyltransferases (NAT) superfamily protein   chr2:16286647-16287941 REVERSE LENGTH=228                                                                                                                                                                                                                                                                                                                                   | 100  | 228  | 8.00E-11  | 228.0 | 27.0 | 32.0 |
| Rsa1.0_01331.1.g25825.t1  | ref NP_001189709.1  O-acyltransferase (WSD1-like) family protein [Arabidopsis thaliana]   gi 330254528 gb AECO9622.1   O-acyltransferase (WSD1-like) family protein [Arabidopsis thaliana]                                                                                                         | 471  | 487  | 0         | 103.4 | 75.8 | 86.6  | O-acyltransferase (WSD1-like) family protein    | gbpln | Arabidopsis thaliana       | AT2G38995.2   Symbols:   O-acyltransferase (WSD1-like) family protein   chr2:16282139-16284700 FORWARD LENGTH=487                                                                                                                                                                                                                                                                                                                                            | 471  | 487  | 0         | 103.4 | 75.8 | 86.6 |



|                          |                                                                                                                                                                                                                                                                                                                                      |      |      |           |       |      |      |                                                            |       |                      |                                                                                                                                                                                                                                                                                                                                                   |      |      |           |       |      |      |
|--------------------------|--------------------------------------------------------------------------------------------------------------------------------------------------------------------------------------------------------------------------------------------------------------------------------------------------------------------------------------|------|------|-----------|-------|------|------|------------------------------------------------------------|-------|----------------------|---------------------------------------------------------------------------------------------------------------------------------------------------------------------------------------------------------------------------------------------------------------------------------------------------------------------------------------------------|------|------|-----------|-------|------|------|
| Rsa1.0_01332.1.g25826.t1 | gb EOA37859.1  hypothetical protein CARUB_v10011456mg [Capsella rubella]                                                                                                                                                                                                                                                             | 247  | 310  | 1.00E-117 | 125.5 | 81.8 | 90.3 | hypothetical protein CARUB_v10011456mg                     | gbpln | Capsella rubella     | AT1G27030.1   Symbols:   unknown protein; BEST Arabidopsis thaliana protein match is: unknown protein (TAIR:AT1G27020.1); Has 504 Blast hits to 502 proteins in 169 species: Archae - 0; Bacteria - 299; Metazoa - 0; Fungi - 0; Plants - 67; Viruses - 0; Other Eukaryotes - 138 (source: NCBI BLink).   chr1:9381842-9383712 FORWARD LENGTH=310 | 247  | 310  | 1.00E-111 | 125.5 | 76.9 | 88.3 |
| Rsa1.0_01332.1.g25827.t1 | ref XP_002890621.1  predicted protein [Arabidopsis lyrata subsp. lyrata]   gi 297336463 gb EFH66880.1  predicted protein [Arabidopsis lyrata subsp. lyrata]                                                                                                                                                                          | 559  | 578  | 0         | 103.4 | 79.6 | 89.1 | predicted protein                                          | gbpln | Arabidopsis lyrata   | AT1G27040.1   Symbols:   Major facilitator superfamily protein   chr1:9386893-9390018 REVERSE LENGTH=567                                                                                                                                                                                                                                          | 559  | 567  | 0         | 101.4 | 77.3 | 87.1 |
| Rsa1.0_01332.1.g25828.t1 | #                                                                                                                                                                                                                                                                                                                                    | #    | #    | #         | #     | #    | #    | -                                                          | ----  | ----                 | #                                                                                                                                                                                                                                                                                                                                                 | #    | #    | #         | #     | #    |      |
| Rsa1.0_01332.1.g25829.t1 | gb AAF79854.1 AC000348.7 T7N9.11 [Arabidopsis thaliana]                                                                                                                                                                                                                                                                              | 205  | 495  | 1.00E-71  | 241.5 | 76.6 | 81.5 | T7N9.11                                                    | gbpln | Arabidopsis thaliana | AT1G27050.1   Symbols: ATHB54, HB54   homeobox protein 54   chr1:9393706-9394408 FORWARD LENGTH=205                                                                                                                                                                                                                                               | 205  | 205  | 5.00E-73  | 100.0 | 76.6 | 81.5 |
| Rsa1.0_01332.1.g25830.t1 | gb EOA37541.1  hypothetical protein CARUB_v10011778mg [Capsella rubella]                                                                                                                                                                                                                                                             | 567  | 579  | 0         | 102.1 | 76.2 | 88.2 | hypothetical protein CARUB_v10011778mg                     | gbpln | Capsella rubella     | AT1G27080.1   Symbols: NRT1.6   nitrate transporter 1.6   chr1:9400664-9403789 FORWARD LENGTH=576                                                                                                                                                                                                                                                 | 567  | 576  | 0         | 101.6 | 77.1 | 89.1 |
| Rsa1.0_01332.1.g25831.t2 | gb EOA40157.1  hypothetical protein CARUB_v10008874mg [Capsella rubella]                                                                                                                                                                                                                                                             | 1095 | 515  | 1.00E-154 | 47.0  | 27.5 | 31.8 | hypothetical protein CARUB_v10008874mg                     | gbpln | Capsella rubella     | AT1G27100.1   Symbols:   Actin cross-linking protein   chr1:9407557-9411074 REVERSE LENGTH=519                                                                                                                                                                                                                                                    | 1095 | 519  | 1.00E-151 | 47.4  | 27.2 | 31.5 |
| Rsa1.0_01332.1.g25832.t1 | gb EOA40157.1  hypothetical protein CARUB_v10008874mg [Capsella rubella]                                                                                                                                                                                                                                                             | 867  | 515  | 1.00E-160 | 59.4  | 36.0 | 39.8 | hypothetical protein CARUB_v10008874mg                     | gbpln | Capsella rubella     | AT1G27100.1   Symbols:   Actin cross-linking protein   chr1:9407557-9411074 REVERSE LENGTH=519                                                                                                                                                                                                                                                    | 867  | 519  | 1.00E-158 | 59.9  | 35.6 | 39.3 |
| Rsa1.0_01332.1.g25833.t1 | #                                                                                                                                                                                                                                                                                                                                    | #    | #    | #         | #     | #    | #    | -                                                          | ----  | ----                 | #                                                                                                                                                                                                                                                                                                                                                 | #    | #    | #         | #     | #    |      |
| Rsa1.0_01333.1.g25834.t1 | ref NP_192059.4  AP2/B3-like transcriptional factor family protein [Arabidopsis thaliana]   gi 334302839 sp O82595.2 NGA4_ARAT_H RecName: Full=B3 domain-containing transcription factor NGA4; AltName: Full=Protein NGATHA 4   gi 332656633 gb AEE82033.1  AP2/B3-like transcriptional factor family protein [Arabidopsis thaliana] | 318  | 333  | 1.00E-110 | 104.7 | 70.4 | 79.9 | AP2/B3-like transcriptional factor family protein          | gbpln | Arabidopsis thaliana | AT4G01500.1   Symbols: NGA4   AP2/B3-like transcriptional factor family protein   chr4:639791-640792 FORWARD LENGTH=333                                                                                                                                                                                                                           | 318  | 333  | 1.00E-112 | 104.7 | 70.4 | 79.9 |
| Rsa1.0_01333.1.g25835.t1 | #                                                                                                                                                                                                                                                                                                                                    | #    | #    | #         | #     | #    | #    | -                                                          | ----  | ----                 | #                                                                                                                                                                                                                                                                                                                                                 | #    | #    | #         | #     | #    |      |
| Rsa1.0_01333.1.g25836.t1 | gb AAD26943.1  putative retroelement pol polyprotein [Arabidopsis thaliana]                                                                                                                                                                                                                                                          | 1448 | 1454 | 0         | 100.4 | 67.6 | 81.3 | putative retroelement pol polyprotein                      | gbpln | Arabidopsis thaliana | AT4G23160.1   Symbols: CRK8   cysteine-rich RLK (RECEPTOR-like protein kinase) 8   chr4:12129485-12134086 FORWARD LENGTH=1262                                                                                                                                                                                                                     | 1448 | 1262 | 1.00E-178 | 87.2  | 20.5 | 26.5 |
| Rsa1.0_01333.1.g25837.t1 | gb EOA23024.1  hypothetical protein CARUB_v10003789mg, partial [Capsella rubella]                                                                                                                                                                                                                                                    | 129  | 143  | 7.00E-49  | 110.9 | 79.8 | 83.7 | hypothetical protein CARUB_v10003789mg, partial            | gbpln | Capsella rubella     | AT4G01575.1   Symbols:   serine protease inhibitor, Kazal-type family protein   chr4:682040-682474 REVERSE LENGTH=144                                                                                                                                                                                                                             | 129  | 144  | 3.00E-50  | 111.6 | 80.6 | 86.0 |
| Rsa1.0_01333.1.g25838.t1 | ref XP_002874967.1  ATEXPA17 [Arabidopsis lyrata subsp. lyrata]   gi 297320804 gb EFH51226.1  ATEXPA17 [Arabidopsis lyrata subsp. lyrata]                                                                                                                                                                                            | 255  | 255  | 1.00E-139 | 100.0 | 93.3 | 97.3 | ATEXPA17                                                   | gbpln | Arabidopsis lyrata   | AT4G01630.1   Symbols: ATEXPA17, ATEXP17, ATHEXP ALPHA 1.13, EXPA17   expansin A17   chr4:700653-701527 FORWARD LENGTH=255                                                                                                                                                                                                                        | 255  | 255  | 1.00E-140 | 100.0 | 92.5 | 96.9 |
| Rsa1.0_01333.1.g25839.t1 | ref NP_192074.1  Polyketide cyclase / dehydrase and lipid transport protein [Arabidopsis thaliana]   gi 2682206 emb CAB77735.1  hypothetical protein [Arabidopsis thaliana]   gi 332656656 gb AEE82056.1  Polyketide cyclase / dehydrase and lipid transport protein [Arabidopsis thaliana]                                          | 281  | 288  | 1.00E-121 | 102.5 | 81.9 | 88.6 | Polyketide cyclase / dehydrase and lipid transport protein | gbpln | Arabidopsis thaliana | AT4G01650.1   Symbols:   Polyketide cyclase / dehydrase and lipid transport protein   chr4:704578-705866 REVERSE LENGTH=288                                                                                                                                                                                                                       | 281  | 288  | 1.00E-123 | 102.5 | 81.9 | 88.6 |
| Rsa1.0_01333.1.g25840.t2 | gb AAD15534.1  putative retroelement pol polyprotein [Arabidopsis thaliana]                                                                                                                                                                                                                                                          | 938  | 1664 | 0         | 177.4 | 41.6 | 50.9 | putative retroelement pol polyprotein                      | gbpln | Arabidopsis thaliana | AT4G23160.1   Symbols: CRK8   cysteine-rich RLK (RECEPTOR-like protein kinase) 8   chr4:12129485-12134086 FORWARD LENGTH=1262                                                                                                                                                                                                                     | 938  | 1262 | 4.00E-26  | 134.5 | 5.9  | 9.3  |
| Rsa1.0_01334.1.g25841.t1 | gb EOA35196.1  hypothetical protein CARUB_v10020346mg [Capsella rubella]                                                                                                                                                                                                                                                             | 168  | 425  | 8.00E-54  | 253.0 | 63.1 | 66.7 | hypothetical protein CARUB_v10020346mg                     | gbpln | Capsella rubella     | AT1G65320.1   Symbols:   Cystathionine beta-synthase (CBS) family protein   chr1:24260168-24262644 REVERSE LENGTH=425                                                                                                                                                                                                                             | 168  | 425  | 2.00E-54  | 253.0 | 61.9 | 66.7 |
| Rsa1.0_01334.1.g25842.t1 | ref NP_001077775.1  transcription elongation factor SPT6 [Arabidopsis thaliana]   gi 332196253 gb AEE34374.1  transcription elongation factor SPT6-like protein [Arabidopsis thaliana]                                                                                                                                               | 1738 | 1642 | 0         | 94.5  | 75.7 | 81.5 | transcription elongation factor SPT6                       | gbpln | Arabidopsis thaliana | AT1G65440.2   Symbols: GTB1   global transcription factor group B1   chr1:24306908-24314327 REVERSE LENGTH=1642                                                                                                                                                                                                                                   | 1738 | 1642 | 0         | 94.5  | 75.7 | 81.5 |

|                          |                                                                                                                                                                                                                                                                                                                                                                                                                                                                                                                                                                                                             |      |      |           |       |      |      |                                                                   |       |                      |                                                                                                                                               |      |     |           |       |      |      |
|--------------------------|-------------------------------------------------------------------------------------------------------------------------------------------------------------------------------------------------------------------------------------------------------------------------------------------------------------------------------------------------------------------------------------------------------------------------------------------------------------------------------------------------------------------------------------------------------------------------------------------------------------|------|------|-----------|-------|------|------|-------------------------------------------------------------------|-------|----------------------|-----------------------------------------------------------------------------------------------------------------------------------------------|------|-----|-----------|-------|------|------|
| Rsa1.0_01334.1.g25843.t1 | refXP_002886918.1   hypothetical protein ARALYDRAFT_315582 [Arabidopsis lyrata subsp. lyrata] gi 297332759 gb EFH63177.1                                                                                                                                                                                                                                                                                                                                                                                                                                                                                    | 165  | 450  | 3.00E-74  | 272.7 | 83.0 | 90.3 | hypothetical protein ARALYDRAFT_315582                            | gbpln | Arabidopsis lyrata   | AT1G65450.1   Symbols:   HXXXD-type acyl-transferase family protein   chr1:24315875-24318895 FORWARD LENGTH=450                               | 165  | 450 | 6.00E-75  | 272.7 | 80.0 | 89.7 |
| Rsa1.0_01334.1.g25844.t1 | hypothetical protein ARALYDRAFT_315582 [Arabidopsis lyrata subsp. lyrata] refXP_002886918.1   hypothetical protein ARALYDRAFT_315582 [Arabidopsis lyrata subsp. lyrata] gi 297332759 gb EFH63177.1                                                                                                                                                                                                                                                                                                                                                                                                          | 287  | 450  | 1.00E-143 | 156.8 | 86.8 | 92.3 | hypothetical protein ARALYDRAFT_315582                            | gbpln | Arabidopsis lyrata   | AT1G65450.1   Symbols:   HXXXD-type acyl-transferase family protein   chr1:24315875-24318895 FORWARD LENGTH=450                               | 287  | 450 | 1.00E-144 | 156.8 | 86.1 | 91.3 |
| Rsa1.0_01334.1.g25845.t2 | emb CAB39638.1  RNA-directed DNA polymerase-like protein [Arabidopsis thaliana] gi 7267666 emb CAB78094.1  RNA-directed DNA polymerase-like protein [Arabidopsis thaliana]                                                                                                                                                                                                                                                                                                                                                                                                                                  | 1830 | 1274 | 0         | 69.6  | 35.4 | 45.5 | RNA-directed DNA polymerase-like protein                          | gbpln | Arabidopsis thaliana | AT4G29090.1   Symbols:   Ribonuclease H-like superfamily protein   chr4:14333528-14335255 FORWARD LENGTH=575                                  | 1830 | 575 | 2.00E-58  | 31.4  | 9.4  | 14.7 |
| Rsa1.0_01334.1.g25846.t1 | ref NP_176725.1  chromatin assembly factor-1 (FASCIATA1) [Arabidopsis thaliana] gi 75213311 sp Q9SXY0.1 FAS1_ARATH RecName: Full=Chromatin assembly factor 1 subunit FAS1; Short=CAF-1 subunit FAS1; AltName: Full=CAF-1 p150 homolog; AltName: Full=Protein FASCIATA 1 gi 4887626 dbj BAA77811.1  FAS1 [Arabidopsis thaliana] gi 22022526 gb AAM83221.1  At1g65470/F5I14_33 [Arabidopsis thaliana] gi 332196258 gb AEE34379.1  chromatin assembly factor-1 (FASCIATA1) [Arabidopsis thaliana] gb ACM69283.1  flowering locus T [Sinapis alba] gi 222877040 gb ACM69284.1  flowering locus T [Sinapis alba] | 815  | 815  | 0         | 100.0 | 79.8 | 87.7 | chromatin assembly factor-1 (FASCIATA1)                           | gbpln | Arabidopsis thaliana | AT1G65470.1   Symbols: FAS1, NFB2   chromatin assembly factor-1 (FASCIATA1) (FAS1)   chr1:24319906-24323879 REVERSE LENGTH=815                | 815  | 815 | 0         | 100.0 | 79.8 | 87.7 |
| Rsa1.0_01334.1.g25847.t1 | gi 222877040 gb ACM69284.1  flowering locus T [Sinapis alba]                                                                                                                                                                                                                                                                                                                                                                                                                                                                                                                                                | 175  | 175  | 2.00E-92  | 100.0 | 94.9 | 98.3 | flowering locus T                                                 | gbpln | Sinapis alba         | AT1G65480.1   Symbols: FT   PEBP (phosphatidylethanolamine-binding protein) family protein   chr1:24331510-24333689 FORWARD LENGTH=175        | 175  | 175 | 4.00E-83  | 100.0 | 80.6 | 90.3 |
| Rsa1.0_01334.1.g25848.t1 | ref XP_002888422.1  calcium-binding EF hand family protein [Arabidopsis lyrata subsp. lyrata] gi 297334263 gb EFH64681.1  calcium-binding EF hand family protein [Arabidopsis lyrata subsp. lyrata]                                                                                                                                                                                                                                                                                                                                                                                                         | 753  | 747  | 0         | 99.2  | 90.8 | 94.0 | calcium-binding EF hand family protein                            | gbpln | Arabidopsis lyrata   | AT1G65540.1   Symbols:   LETM1-like protein   chr1:24362382-24366011 REVERSE LENGTH=736                                                       | 753  | 736 | 0         | 97.7  | 88.0 | 91.2 |
| Rsa1.0_01334.1.g25849.t1 | gb EOA34845.1  hypothetical protein CARUB_v10022424mg [Capsella rubella]                                                                                                                                                                                                                                                                                                                                                                                                                                                                                                                                    | 398  | 400  | 0         | 100.5 | 83.4 | 90.5 | hypothetical protein CARUB_v10022424mg                            | gbpln | Capsella rubella     | AT1G65570.1   Symbols:   Pectin lyase-like superfamily protein   chr1:24374098-24375846 REVERSE LENGTH=397                                    | 398  | 397 | 0         | 99.7  | 82.2 | 89.7 |
| Rsa1.0_01335.1.g25850.t1 | gb EOA39947.1  hypothetical protein CARUB_v10008637mg [Capsella rubella]                                                                                                                                                                                                                                                                                                                                                                                                                                                                                                                                    | 476  | 600  | 0         | 126.1 | 94.7 | 96.6 | hypothetical protein CARUB_v10008637mg                            | gbpln | Capsella rubella     | AT1G55490.2   Symbols: CPN60B, LEN1   chaperonin 60 beta   chr1:20715717-20718673 REVERSE LENGTH=600                                          | 476  | 600 | 0         | 126.1 | 94.5 | 96.6 |
| Rsa1.0_01335.1.g25851.t1 | ref XP_002891836.1  binding protein [Arabidopsis lyrata subsp. lyrata] gi 297337678 gb EFH68095.1  binding protein [Arabidopsis lyrata subsp. lyrata]                                                                                                                                                                                                                                                                                                                                                                                                                                                       | 313  | 335  | 1.00E-133 | 107.0 | 80.8 | 85.6 | binding protein                                                   | gbpln | Arabidopsis lyrata   | AT1G55480.1   Symbols: ZKT   protein containing PDZ domain, a K-box domain, and a TPR region   chr1:20713822-20715351 FORWARD LENGTH=335      | 313  | 335 | 1.00E-135 | 107.0 | 81.2 | 86.3 |
| Rsa1.0_01335.1.g25852.t1 | ref NP_564690.1  DNA/RNA-binding protein Kin17 conserved region-containing protein [Arabidopsis thaliana] gi 13430440 gb AAK25842.1 AF360132.1 unknown protein [Arabidopsis thaliana] gi 4204268 gb AAD10649.1  Similar to Kin17 protein [Arabidopsis thaliana] gi 15293155 gb AAK93688.1  unknown protein [Arabidopsis thaliana] gi 332195127 gb AEE33248.1  DNA/RNA-binding protein Kin17 conserved region-containing protein [Arabidopsis thaliana]                                                                                                                                                      | 391  | 411  | 0         | 105.1 | 85.2 | 94.1 | DNA/RNA-binding protein Kin17 conserved region-containing protein | gbpln | Arabidopsis thaliana | AT1G55460.1   Symbols:   DNA/RNA-binding protein Kin17 conserved region   chr1:20707567-20708802 FORWARD LENGTH=411                           | 391  | 411 | 0         | 105.1 | 85.2 | 94.1 |
| Rsa1.0_01335.1.g25853.t1 | ref XP_002894505.1  hypothetical protein ARALYDRAFT_892538 [Arabidopsis lyrata subsp. lyrata] gi 297340347 gb EFH70764.1                                                                                                                                                                                                                                                                                                                                                                                                                                                                                    | 336  | 311  | 1.00E-164 | 92.6  | 86.9 | 90.5 | hypothetical protein ARALYDRAFT_892538                            | gbpln | Arabidopsis lyrata   | AT1G55450.1   Symbols:   S-adenosyl-L-methionine-dependent methyltransferases superfamily protein   chr1:20705274-20706825 REVERSE LENGTH=311 | 336  | 311 | 1.00E-165 | 92.6  | 86.3 | 90.2 |

|                           |                                                                                                                                                                                                                                                                                                                                                                      |      |      |           |       |      |       |                                                     |       |                      |                                                                                                                                                                                                                                                                                                                                                                                                                                                                 |      |      |           |       |      |      |
|---------------------------|----------------------------------------------------------------------------------------------------------------------------------------------------------------------------------------------------------------------------------------------------------------------------------------------------------------------------------------------------------------------|------|------|-----------|-------|------|-------|-----------------------------------------------------|-------|----------------------|-----------------------------------------------------------------------------------------------------------------------------------------------------------------------------------------------------------------------------------------------------------------------------------------------------------------------------------------------------------------------------------------------------------------------------------------------------------------|------|------|-----------|-------|------|------|
| Rsa1.0_01335.1.g25854.t1  | ref XP_002894503.1  hypothetical protein ARALYDRAFT_892534 [Arabidopsis lyrata subsp. lyrata] gi 297340345 gb EFH70762.1  hypothetical protein ARALYDRAFT_892534 [Arabidopsis lyrata subsp. lyrata]                                                                                                                                                                  | 74   | 104  | 7.00E-19  | 140.5 | 64.9 | 78.4  | hypothetical protein ARALYDRAFT_892534              | gbpln | Arabidopsis lyrata   | AT1G55365.1   Symbols:   unknown protein; FUNCTIONS IN: molecular_function unknown; INVOLVED IN: biological_process unknown; LOCATED IN: endomembrane system; BEST Arabidopsis thaliana protein match is: unknown protein (TAIR:AT3G13500.1); Has 29 Blast hits to 29 proteins in 6 species: Archae - 0; Bacteria - 0; Metazoa - 0; Fungi - 0; Plants - 29; Viruses - 0; Other Eukaryotes - 0 (source: NCBI BLink).   chr1:20673983-20674363 REVERSE LENGTH=126 | 74   | 126  | 1.00E-20  | 170.3 | 63.5 | 78.4 |
| Rsa1.0_01335.1.g25855.t1  | #                                                                                                                                                                                                                                                                                                                                                                    | #    | #    | #         | #     | #    | #     | -                                                   | ----  | ----                 | #                                                                                                                                                                                                                                                                                                                                                                                                                                                               | #    | #    | #         | #     | #    |      |
| Rsa1.0_01335.1.g25856.t1  | gb AAG51568.1 AC027034.14 unknown protein; 25817-24837 [Arabidopsis thaliana]                                                                                                                                                                                                                                                                                        | 256  | 243  | 2.00E-89  | 94.9  | 68.8 | 72.7  | unknown protein; 25817-24837                        | gbpln | Arabidopsis thaliana | AT1G55340.1   Symbols:   Protein of unknown function (DUF1639)   chr1:20652605-20653469 FORWARD LENGTH=205                                                                                                                                                                                                                                                                                                                                                      | 256  | 205  | 5.00E-86  | 80.1  | 62.1 | 64.5 |
| Rsa1.0_01335.1.g25857.t1  | #                                                                                                                                                                                                                                                                                                                                                                    | #    | #    | #         | #     | #    | #     | -                                                   | ----  | ----                 | #                                                                                                                                                                                                                                                                                                                                                                                                                                                               | #    | #    | #         | #     | #    |      |
| Rsa1.0_01335.1.g25858.t1  | gb ABB97032.1  unknown [Brassica rapa]                                                                                                                                                                                                                                                                                                                               | 59   | 59   | 4.00E-14  | 100.0 | 93.2 | 96.6  | unknown                                             | gbpln | Brassica rapa        | AT3G13520.1   Symbols: AGP12, ATAGP12   arabinogalactan protein 12   chr3:4409087-4409269 FORWARD LENGTH=60                                                                                                                                                                                                                                                                                                                                                     | 59   | 60   | 3.00E-16  | 101.7 | 83.1 | 83.1 |
| Rsa1.0_01335.1.g25859.t19 | ref NP_001185237.1  RNA polymerase II transcription mediator [Arabidopsis thaliana] gi 332195107 gb AEE33228.1  RNA polymerase II transcription mediator [Arabidopsis thaliana]                                                                                                                                                                                      | 1986 | 2001 | 0         | 100.8 | 84.4 | 88.6  | RNA polymerase II transcription mediator            | gbpln | Arabidopsis thaliana | AT1G55325.2   Symbols: GCT   RNA polymerase II transcription mediators   chr1:20637594-20647714 FORWARD LENGTH=2001                                                                                                                                                                                                                                                                                                                                             | 1986 | 2001 | 0         | 100.8 | 84.4 | 88.6 |
| Rsa1.0_01335.1.g25860.t1  | #                                                                                                                                                                                                                                                                                                                                                                    | #    | #    | #         | #     | #    | #     | -                                                   | ----  | ----                 | #                                                                                                                                                                                                                                                                                                                                                                                                                                                               | #    | #    | #         | #     | #    |      |
| Rsa1.0_01336.1.g25861.t1  | gb AAD17409.1  putative retroelement pol polyprotein [Arabidopsis thaliana]                                                                                                                                                                                                                                                                                          | 190  | 1347 | 2.00E-76  | 708.9 | 71.6 | 84.7  | putative retroelement pol polyprotein               | gbpln | Arabidopsis thaliana | AT3G21000.1   Symbols:   Gag-Pol-related retrotransposon family protein   chr3:7363921-7365138 FORWARD LENGTH=405                                                                                                                                                                                                                                                                                                                                               | 190  | 405  | 5.00E-16  | 213.2 | 26.8 | 50.5 |
| Rsa1.0_01336.1.g25862.t1  | ref NP_201491.1  CC-NBS-LRR class disease resistance protein [Arabidopsis thaliana] gi 46395984 sp G9FKZ1.1 DRL42_ARAT H RecName: Full=Probable disease resistance protein At5g69000 gi 9758140 dbj BAB0632.1  disease resistance protein-like [Arabidopsis thaliana] gi 332010893 gb AED98276.1  CC-NBS-LRR class disease resistance protein [Arabidopsis thaliana] | 809  | 809  | 0         | 100.0 | 57.4 | 70.6  | CC-NBS-LRR class disease resistance protein         | gbpln | Arabidopsis thaliana | AT5G66900.1   Symbols:   Disease resistance protein (CC-NBS-LRR class) family   chr5:26714931-26717757 REVERSE LENGTH=809                                                                                                                                                                                                                                                                                                                                       | 809  | 809  | 0         | 100.0 | 57.4 | 70.6 |
| Rsa1.0_01336.1.g25863.t1  | ref XP_002877065.1  hypothetical protein ARALYDRAFT_905014 [Arabidopsis lyrata subsp. lyrata] gi 297322903 gb EFH53324.1  hypothetical protein ARALYDRAFT_905014 [Arabidopsis lyrata subsp. lyrata]                                                                                                                                                                  | 113  | 106  | 8.00E-27  | 93.8  | 58.4 | 75.2  | hypothetical protein ARALYDRAFT_905014              | gbpln | Arabidopsis lyrata   | AT5G40460.1   Symbols:   unknown protein; BEST Arabidopsis thaliana protein match is: unknown protein (TAIR:AT3G27630.1); Has 87 Blast hits to 87 proteins in 12 species: Archae - 0; Bacteria - 0; Metazoa - 0; Fungi - 0; Plants - 87; Viruses - 0; Other Eukaryotes - 0 (source: NCBI BLink).   chr5:16202465-16202803 FORWARD LENGTH=112                                                                                                                    | 113  | 112  | 2.00E-23  | 99.1  | 61.1 | 72.6 |
| Rsa1.0_01336.1.g25864.t3  | ref XP_002875393.1  hypothetical protein ARALYDRAFT_905015 [Arabidopsis lyrata subsp. lyrata] gi 297321231 gb EFH51652.1  hypothetical protein ARALYDRAFT_905015 [Arabidopsis lyrata subsp. lyrata]                                                                                                                                                                  | 1164 | 538  | 0         | 46.2  | 36.2 | 38.2  | hypothetical protein ARALYDRAFT_905015              | gbpln | Arabidopsis lyrata   | AT3G27640.1   Symbols:   Transducin/WD40 repeat-like superfamily protein   chr3:10232307-10235467 FORWARD LENGTH=535                                                                                                                                                                                                                                                                                                                                            | 1164 | 535  | 0         | 46.0  | 35.7 | 38.1 |
| Rsa1.0_01336.1.g25865.t1  | gb AAC95175.1  putative non-LTR retroelement reverse transcriptase [Arabidopsis thaliana]                                                                                                                                                                                                                                                                            | 1687 | 1352 | 0         | 80.1  | 35.3 | 49.0  | putative non-LTR retroelement reverse transcriptase | gbpln | Arabidopsis thaliana | AT3G24255.1   Symbols:   RNA-directed DNA polymerase (reverse transcriptase)-related family protein   chr3:8789471-8793208 FORWARD LENGTH=746                                                                                                                                                                                                                                                                                                                   | 1687 | 746  | 2.00E-85  | 44.2  | 10.3 | 14.2 |
| Rsa1.0_01336.1.g25866.t1  | gb EOA24946.1  hypothetical protein CARUB.v10018238mg [Capsella rubella]                                                                                                                                                                                                                                                                                             | 132  | 128  | 2.00E-64  | 97.0  | 90.2 | 91.7  | hypothetical protein CARUB.v10018238mg              | gbpln | Capsella rubella     | AT3G27650.1   Symbols: LBD25   LOB domain-containing protein 25   chr3:10238731-10240346 FORWARD LENGTH=159                                                                                                                                                                                                                                                                                                                                                     | 132  | 159  | 4.00E-66  | 120.5 | 88.6 | 90.2 |
| Rsa1.0_01336.1.g25867.t1  | ref XP_002875396.1  hypothetical protein ARALYDRAFT_484555 [Arabidopsis lyrata subsp. lyrata] gi 297321234 gb EFH51655.1  hypothetical protein ARALYDRAFT_484555 [Arabidopsis lyrata subsp. lyrata]                                                                                                                                                                  | 1844 | 1847 | 0         | 100.2 | 85.4 | 91.5  | hypothetical protein ARALYDRAFT_484555              | gbpln | Arabidopsis lyrata   | AT3G27670.1   Symbols: RST1   ARM repeat superfamily protein   chr3:10245338-10253158 FORWARD LENGTH=1841                                                                                                                                                                                                                                                                                                                                                       | 1844 | 1841 | 0         | 99.8  | 84.4 | 90.7 |
| Rsa1.0_01336.1.g25868.t1  | dbj BAJ33772.1  unnamed protein product [Thellungiella halophila]                                                                                                                                                                                                                                                                                                    | 266  | 266  | 1.00E-152 | 100.0 | 99.2 | 100.0 | unnamed protein product                             | ----  | ----                 | AT3G27690.1   Symbols: LHCB2.4, LHCB2.3, LHCB2   photosystem II light harvesting complex gene 2.3   chr3:10256002-10256921 FORWARD LENGTH=266                                                                                                                                                                                                                                                                                                                   | 266  | 266  | 1.00E-153 | 100.0 | 97.4 | 98.9 |

|                          |                                                                                                                                                                                                                                                                                                                                                                                                                                                                                                                                                                                                                                                                                                                                                                                                                                                                                                 |      |      |           |       |      |      |                                               |       |                      |                                                                                                                                                              |      |      |           |       |      |      |
|--------------------------|-------------------------------------------------------------------------------------------------------------------------------------------------------------------------------------------------------------------------------------------------------------------------------------------------------------------------------------------------------------------------------------------------------------------------------------------------------------------------------------------------------------------------------------------------------------------------------------------------------------------------------------------------------------------------------------------------------------------------------------------------------------------------------------------------------------------------------------------------------------------------------------------------|------|------|-----------|-------|------|------|-----------------------------------------------|-------|----------------------|--------------------------------------------------------------------------------------------------------------------------------------------------------------|------|------|-----------|-------|------|------|
| Rsa1.0_01336.1.g25869.t1 | refNP_189407.2 zinc finger CCCH domain-containing protein 41 [Arabidopsis thaliana] gi 30688891 refNP_851008.1 zinc finger CCCH domain-containing protein 41 [Arabidopsis thaliana] gi 75335571 sp Q9LVX1.1 C3H41_ARAT H RecName: Full=Zinc finger CCCH domain-containing protein 41; Short=AtC3H41 gi 9294475 dbj BAB02694.1 unnamed protein product [Arabidopsis thaliana] gi 23397275 gb AAAN31919.1 unknown protein [Arabidopsis thaliana] gi 225898683 dbj BAH30472.1 hypothetical protein [Arabidopsis thaliana] gi 332643832 gb AEE77353.1 zinc finger CCCH domain-containing protein 41 [Arabidopsis thaliana] gi 332643833 gb AEE77354.1 zinc finger CCCH domain-containing protein 41 [Arabidopsis thaliana] emb CAB39638.1 RNA-directed DNA polymerase-like protein [Arabidopsis thaliana] gi 7267666 emb CAB78094.1 RNA-directed DNA polymerase-like protein [Arabidopsis thaliana] | 884  | 908  | 0         | 102.7 | 80.3 | 86.4 | zinc finger CCCH domain-containing protein 41 | gbpln | Arabidopsis thaliana | AT3G27700.2   Symbols:   zinc finger (CCCH-type) family protein / RNA recognition motif (RRM)-containing protein   chr3:10257681-10261330 REVERSE LENGTH=908 | 884  | 908  | 0         | 102.7 | 80.3 | 86.4 |
| Rsa1.0_01336.1.g25870.t2 | emb CAB39638.1 RNA-directed DNA polymerase-like protein [Arabidopsis thaliana] gi 7267666 emb CAB78094.1 RNA-directed DNA polymerase-like protein [Arabidopsis thaliana]                                                                                                                                                                                                                                                                                                                                                                                                                                                                                                                                                                                                                                                                                                                        | 223  | 303  | 5.00E-33  | 571.3 | 35.9 | 54.7 | RNA-directed DNA polymerase-like protein      | gbpln | Arabidopsis thaliana | AT1G10000.1   Symbols:   Ribonuclease H-like superfamily protein   chr1:3263877-3264788 REVERSE LENGTH=303                                                   | 223  | 303  | 1.00E-31  | 135.9 | 35.0 | 53.4 |
| Rsa1.0_01337.1.g25871.t1 | #                                                                                                                                                                                                                                                                                                                                                                                                                                                                                                                                                                                                                                                                                                                                                                                                                                                                                               | #    | #    | #         | #     | #    | #    | -                                             | ----  | ----                 | #                                                                                                                                                            | #    | #    | #         | #     | #    |      |
| Rsa1.0_01337.1.g25872.t3 | gb ABV89614.1 universal stress protein family protein [Brassica rapa]                                                                                                                                                                                                                                                                                                                                                                                                                                                                                                                                                                                                                                                                                                                                                                                                                           | 117  | 213  | 1.00E-23  | 183.8 | 50.4 | 53.8 | universal stress protein family protein       | gbpln | Brassica rapa        | AT1G44760.1   Symbols:   Adenine nucleotide alpha hydrolases-like superfamily protein   chr1:16896894-16898427 REVERSE LENGTH=213                            | 117  | 213  | 4.00E-25  | 182.1 | 48.7 | 52.1 |
| Rsa1.0_01337.1.g25873.t1 | gb AAK43485.1 AC084807.10 polyprotein, putative [Arabidopsis thaliana] gi 225898008 dbj BAH30336.1 hypothetical protein [Arabidopsis thaliana]                                                                                                                                                                                                                                                                                                                                                                                                                                                                                                                                                                                                                                                                                                                                                  | 1063 | 1262 | 1.00E-93  | 118.7 | 18.1 | 54.3 | polyprotein, putative                         | gbpln | Arabidopsis thaliana | AT4G23160.1   Symbols: CRK8   cysteine-rich RLK (RECEPTOR-like protein kinase) 8   chr4:12129485-12134086 FORWARD LENGTH=1262                                | 1063 | 1262 | 1.00E-93  | 118.7 | 18.1 | 26.0 |
| Rsa1.0_01337.1.g25874.t1 | gb AAB87099.1 putative retroelement pol polyprotein [Arabidopsis thaliana]                                                                                                                                                                                                                                                                                                                                                                                                                                                                                                                                                                                                                                                                                                                                                                                                                      | 1312 | 1262 | 1.00E-107 | 96.2  | 16.2 | 53.2 | putative retroelement pol polyprotein         | gbpln | Arabidopsis thaliana | AT4G23160.1   Symbols: CRK8   cysteine-rich RLK (RECEPTOR-like protein kinase) 8   chr4:12129485-12134086 FORWARD LENGTH=1262                                | 1312 | 1262 | 1.00E-107 | 96.2  | 16.2 | 22.8 |
| Rsa1.0_01337.1.g25875.t1 | emb CAN60947.1 hypothetical protein VITISV_015758 [Vitis vinifera]                                                                                                                                                                                                                                                                                                                                                                                                                                                                                                                                                                                                                                                                                                                                                                                                                              | 264  | 355  | 1.00E-72  | 494.7 | 52.7 | 68.2 | hypothetical protein VITISV_015758            | gbpln | Vitis vinifera       | #                                                                                                                                                            | #    | #    | #         | #     | #    |      |
| Rsa1.0_01337.1.g25876.t1 | emb CAN77974.1 hypothetical protein VITISV_006175 [Vitis vinifera]                                                                                                                                                                                                                                                                                                                                                                                                                                                                                                                                                                                                                                                                                                                                                                                                                              | 355  | 1262 | 3.00E-20  | 355.5 | 23.4 | 76.6 | hypothetical protein VITISV_006175            | gbpln | Vitis vinifera       | AT4G23160.1   Symbols: CRK8   cysteine-rich RLK (RECEPTOR-like protein kinase) 8   chr4:12129485-12134086 FORWARD LENGTH=1262                                | 355  | 1262 | 3.00E-20  | 355.5 | 23.4 | 38.3 |
| Rsa1.0_01337.1.g25877.t1 | gb EOA40468.1 hypothetical protein CARUB_v10009193mg [Capsella rubella]                                                                                                                                                                                                                                                                                                                                                                                                                                                                                                                                                                                                                                                                                                                                                                                                                         | 279  | 361  | 3.00E-36  | 129.4 | 38.7 | 49.5 | hypothetical protein CARUB_v10009193mg        | gbpln | Capsella rubella     | AT1G26590.1   Symbols:   C2H2-like zinc finger protein   chr1:9189624-9190709 FORWARD LENGTH=361                                                             | 279  | 361  | 3.00E-36  | 129.4 | 38.7 | 46.2 |
| Rsa1.0_01337.1.g25878.t1 | ref XP_002893995.1  nodulin MtN21 family protein [Arabidopsis lyrata subsp. lyrata] gi 297339837 gb EFH70254.1 nodulin MtN21 family protein [Arabidopsis lyrata subsp. lyrata]                                                                                                                                                                                                                                                                                                                                                                                                                                                                                                                                                                                                                                                                                                                  | 391  | 370  | 0         | 94.6  | 84.1 | 89.8 | nodulin MtN21 family protein                  | gbpln | Arabidopsis lyrata   | AT1G44800.1   Symbols:   nodulin MtN21 /EamA-like transporter family protein   chr1:16914342-16916858 REVERSE LENGTH=370                                     | 391  | 370  | 0         | 94.6  | 83.9 | 89.5 |
| Rsa1.0_01337.1.g25879.t2 | gb AAG52949.1 gag/pol polyprotein [Arabidopsis thaliana]                                                                                                                                                                                                                                                                                                                                                                                                                                                                                                                                                                                                                                                                                                                                                                                                                                        | 273  | 1009 | 4.00E-17  | 475.9 | 20.8 | 74.7 | gag/pol polyprotein                           | gbpln | Arabidopsis thaliana | #                                                                                                                                                            | #    | #    | #         | #     | #    |      |
| Rsa1.0_01338.1.g25880.t1 | ref NP_181163.2  SAUR-like auxin-responsive protein [Arabidopsis thaliana] gi 21805705 gb AAM76758.1 hypothetical protein [Arabidopsis thaliana] gi 5005881 gb AAT69150.1 hypothetical protein At2g36210 [Arabidopsis thaliana] gi 330254123 gb AEC09217.1 SAUR-like auxin-responsive protein [Arabidopsis thaliana]                                                                                                                                                                                                                                                                                                                                                                                                                                                                                                                                                                            | 127  | 135  | 1.00E-58  | 106.3 | 87.4 | 94.5 | SAUR-like auxin-responsive protein            | gbpln | Arabidopsis thaliana | AT2G36210.1   Symbols:   SAUR-like auxin-responsive protein family   chr2:15186326-15186733 REVERSE LENGTH=135                                               | 127  | 135  | 1.00E-58  | 106.3 | 87.4 | 94.5 |
| Rsa1.0_01338.1.g25881.t1 | ref XP_002881430.1  hypothetical protein ARALYDRAFT_482593 [Arabidopsis lyrata subsp. lyrata] gi 297327269 gb EFH57689.1 hypothetical protein ARALYDRAFT_482593 [Arabidopsis lyrata subsp. lyrata]                                                                                                                                                                                                                                                                                                                                                                                                                                                                                                                                                                                                                                                                                              | 212  | 1009 | 4.00E-17  | 475.9 | 20.8 | 22.2 | hypothetical protein ARALYDRAFT_482593        | gbpln | Arabidopsis lyrata   | AT2G36200.1   Symbols:   P-loop containing nucleoside triphosphate hydrolases superfamily protein   chr2:15180078-15185189 REVERSE LENGTH=1009               | 212  | 1009 | 4.00E-17  | 475.9 | 20.8 | 21.7 |
| Rsa1.0_01338.1.g25882.t1 | ref XP_002881429.1  ATCWINV4 [Arabidopsis lyrata subsp. lyrata] gi 297327268 gb EFH57688.1 ATCWINV4 [Arabidopsis lyrata subsp. lyrata]                                                                                                                                                                                                                                                                                                                                                                                                                                                                                                                                                                                                                                                                                                                                                          | 540  | 591  | 0         | 109.4 | 85.9 | 93.5 | ATCWINV4                                      | gbpln | Arabidopsis lyrata   | AT2G36190.1   Symbols:   AtcwinV4, cwINV4   cell wall invertase 4   chr2:15174951-15177785 REVERSE LENGTH=591                                                | 540  | 591  | 0         | 109.4 | 85.0 | 92.4 |

|                          |                                                                                                                                                                                                                                                                                                                                                                                                        |      |      |           |       |       |       |                                                     |       |                      |                                                                                                                                                                                                                                                                                                                                                                                                                                                                |      |      |           |       |      |      |
|--------------------------|--------------------------------------------------------------------------------------------------------------------------------------------------------------------------------------------------------------------------------------------------------------------------------------------------------------------------------------------------------------------------------------------------------|------|------|-----------|-------|-------|-------|-----------------------------------------------------|-------|----------------------|----------------------------------------------------------------------------------------------------------------------------------------------------------------------------------------------------------------------------------------------------------------------------------------------------------------------------------------------------------------------------------------------------------------------------------------------------------------|------|------|-----------|-------|------|------|
| Rsa1.0_01338.1.g25883.t1 | ref XP_004156525.1  PREDICTED: ubiquitin-60S ribosomal protein L40-like [Cucumis sativus]                                                                                                                                                                                                                                                                                                              | 128  | 208  | 3.00E-69  | 162.5 | 100.0 | 100.0 | PREDICTED: ubiquitin-60S ribosomal protein L40-like | gbpln | Cucumis sativus      | AT3G52590.1   Symbols: UBO1, EMB2167, ERD16, HAP4   Ubiquitin extension protein 1   chr3:19505668-19506681 FORWARD LENGTH=128                                                                                                                                                                                                                                                                                                                                  | 128  | 128  | 6.00E-71  | 100.0 | 99.2 | 99.2 |
| Rsa1.0_01338.1.g25884.t1 | gb AAO41731.1  cytoplasmic ribosomal protein S14 [Brassica napus]                                                                                                                                                                                                                                                                                                                                      | 150  | 150  | 1.00E-80  | 100.0 | 99.3  | 100.0 | cytoplasmic ribosomal protein S14                   | gbpln | Brassica napus       | AT3G11510.1   Symbols:   Ribosomal protein S11 family protein   chr3:3623757-3624866 REVERSE LENGTH=150                                                                                                                                                                                                                                                                                                                                                        | 150  | 150  | 5.00E-75  | 100.0 | 89.3 | 92.0 |
| Rsa1.0_01338.1.g25885.t1 | gb AAC67331.1  putative non-LTR retroelement reverse transcriptase [Arabidopsis thaliana]                                                                                                                                                                                                                                                                                                              | 773  | 1449 | 2.00E-62  | 187.5 | 19.5  | 28.2  | putative non-LTR retroelement reverse transcriptase | gbpln | Arabidopsis thaliana | AT3G24255.1   Symbols:   RNA-directed DNA polymerase (reverse transcriptase)-related family protein   chr3:8789471-8793208 FORWARD LENGTH=746                                                                                                                                                                                                                                                                                                                  | 773  | 746  | 9.00E-21  | 96.5  | 9.4  | 13.1 |
| Rsa1.0_01338.1.g25886.t1 | gb AAF97969.1 AC000103.19 F21J9.30 [Arabidopsis thaliana]                                                                                                                                                                                                                                                                                                                                              | 1860 | 1270 | 0         | 68.3  | 36.5  | 47.4  | F21J9.30                                            | gbpln | Arabidopsis thaliana | AT4G29090.1   Symbols:   Ribonuclease H-like superfamily protein   chr4:14333528-14335255 FORWARD LENGTH=575                                                                                                                                                                                                                                                                                                                                                   | 1860 | 575  | 1.00E-98  | 30.9  | 11.0 | 16.3 |
| Rsa1.0_01338.1.g25887.t1 | ref XP_002881417.1  hypothetical protein ARALYDRAFT_902702 [Arabidopsis lyrata subsp. lyrata] gi 297327256 gb EFH57676.1  hypothetical protein ARALYDRAFT_902702 [Arabidopsis lyrata subsp. lyrata]                                                                                                                                                                                                    | 184  | 192  | 9.00E-71  | 104.3 | 77.2  | 84.8  | hypothetical protein ARALYDRAFT_902702              | gbpln | Arabidopsis lyrata   | AT2G35900.1   Symbols:   unknown protein; FUNCTIONS IN: molecular function unknown; INVOLVED IN: biological process unknown; LOCATED IN: nucleus; EXPRESSED IN: 20 plant structures; EXPRESSED DURING: 13 growth stages; Has 32 Blast hits to 32 proteins in 12 species: Archae - 0; Bacteria - 0; Metazoa - 0; Fungi - 0; Plants - 32; Viruses - 0; Other Eukaryotes - 0 (source: NCBI BLink).   chr2:15070203-15071540 REVERSE LENGTH=192                    | 184  | 192  | 4.00E-71  | 104.3 | 75.0 | 83.7 |
| Rsa1.0_01338.1.g25888.t1 | ref XP_002893723.1  predicted protein [Arabidopsis lyrata subsp. lyrata] gi 297339565 gb EFH69982.1  predicted protein [Arabidopsis lyrata subsp. lyrata]                                                                                                                                                                                                                                              | 368  | 385  | 1.00E-103 | 104.6 | 54.1  | 70.4  | predicted protein                                   | gbpln | Arabidopsis lyrata   | AT2G14710.1   Symbols:   F-box family protein   chr2:6298936-6300024 FORWARD LENGTH=362                                                                                                                                                                                                                                                                                                                                                                        | 368  | 362  | 1.00E-100 | 98.4  | 53.5 | 66.0 |
| Rsa1.0_01338.1.g25889.t1 | gb AAG51783.1 AC079679.3 reverse transcriptase, putative; 16838-20266 [Arabidopsis thaliana]                                                                                                                                                                                                                                                                                                           | 507  | 1142 | 1.00E-66  | 225.2 | 31.4  | 44.8  | reverse transcriptase, putative; 16838-20266        | gbpln | Arabidopsis thaliana | AT4G29090.1   Symbols:   Ribonuclease H-like superfamily protein   chr4:14333528-14335255 FORWARD LENGTH=575                                                                                                                                                                                                                                                                                                                                                   | 507  | 575  | 4.00E-40  | 113.4 | 25.2 | 41.0 |
| Rsa1.0_01338.1.g25890.t1 | ref NP_565829.1  TPX2 (targeting protein for Xklp2)-like protein [Arabidopsis thaliana] gi 16209720 gb AAL14415.1  At2g35880/F11F19.21 [Arabidopsis thaliana] gi 20197995 gb AAD21469.2  expressed protein [Arabidopsis thaliana] gi 22655282 gb AAM98231.1  unknown protein [Arabidopsis thaliana] gi 330254079 gb AEC09173.1  TPX2 (targeting protein for Xklp2)-like protein [Arabidopsis thaliana] | 422  | 432  | 1.00E-130 | 102.4 | 74.4  | 81.5  | TPX2 (targeting protein for Xklp2)-like protein     | gbpln | Arabidopsis thaliana | AT2G35880.1   Symbols:   TPX2 (targeting protein for Xklp2) protein family   chr2:15063204-15065259 REVERSE LENGTH=432                                                                                                                                                                                                                                                                                                                                         | 422  | 432  | 1.00E-133 | 102.4 | 74.4 | 81.5 |
| Rsa1.0_01338.1.g25891.t1 | gb EOA27118.1  hypothetical protein CARUB_v10023217mg [Capsella rubella]                                                                                                                                                                                                                                                                                                                               | 427  | 445  | 0         | 104.2 | 87.8  | 92.0  | hypothetical protein CARUB_v10023217mg              | gbpln | Capsella rubella     | AT2G35860.1   Symbols: FLA16   FASCICLIN-like arabinogalactan protein 16 precursor   chr2:15059859-15061810 FORWARD LENGTH=445                                                                                                                                                                                                                                                                                                                                 | 427  | 445  | 0         | 104.2 | 85.2 | 88.8 |
| Rsa1.0_01338.1.g25892.t1 | ref XP_002879580.1  hypothetical protein ARALYDRAFT_482556 [Arabidopsis lyrata subsp. lyrata] gi 297325419 gb EFH55839.1  hypothetical protein ARALYDRAFT_482556 [Arabidopsis lyrata subsp. lyrata]                                                                                                                                                                                                    | 91   | 82   | 7.00E-20  | 90.1  | 65.9  | 73.6  | hypothetical protein ARALYDRAFT_482556              | gbpln | Arabidopsis lyrata   | AT2G35850.1   Symbols:   unknown protein; FUNCTIONS IN: molecular function unknown; INVOLVED IN: biological process unknown; LOCATED IN: endomembrane system; BEST Arabidopsis thaliana protein match is: unknown protein (TAIR:AT3G52360.1); Has 42 Blast hits to 42 proteins in 9 species: Archae - 0; Bacteria - 0; Metazoa - 0; Fungi - 0; Plants - 42; Viruses - 0; Other Eukaryotes - 0 (source: NCBI BLink).   chr2:15056753-15056995 FORWARD LENGTH=80 | 91   | 80   | 9.00E-22  | 87.9  | 65.9 | 73.6 |
| Rsa1.0_01338.1.g25893.t3 | gb EOA26591.1  hypothetical protein CARUB_v10022650mg [Capsella rubella]                                                                                                                                                                                                                                                                                                                               | 819  | 821  | 0         | 100.2 | 86.4  | 90.7  | hypothetical protein CARUB_v10022650mg              | gbpln | Capsella rubella     | AT2G35800.1   Symbols:   mitochondrial substrate carrier family protein   chr2:15044437-15048352 FORWARD LENGTH=823                                                                                                                                                                                                                                                                                                                                            | 819  | 823  | 0         | 100.5 | 86.2 | 90.5 |
| Rsa1.0_01338.1.g25894.t1 | gb EOA28167.1  hypothetical protein CARUB_v10024357mg [Capsella rubella]                                                                                                                                                                                                                                                                                                                               | 112  | 112  | 9.00E-55  | 100.0 | 93.8  | 96.4  | hypothetical protein CARUB_v10024357mg              | gbpln | Capsella rubella     | AT2G35795.1   Symbols:   Chaperone DnaJ-domain superfamily protein   chr2:15042321-15043334 FORWARD LENGTH=112                                                                                                                                                                                                                                                                                                                                                 | 112  | 112  | 1.00E-56  | 100.0 | 92.9 | 95.5 |
| Rsa1.0_01339.1.g25895.t1 | ref XP_002881266.1  hypothetical protein ARALYDRAFT_482252 [Arabidopsis lyrata subsp. lyrata] gi 297327105 gb EFH57525.1  hypothetical protein ARALYDRAFT_482252 [Arabidopsis lyrata subsp. lyrata]                                                                                                                                                                                                    | 1119 | 1120 | 0         | 100.1 | 87.1  | 91.9  | hypothetical protein ARALYDRAFT_482252              | gbpln | Arabidopsis lyrata   | AT2G33170.1   Symbols:   Leucine-rich repeat receptor-like protein kinase family protein   chr2:14056371-14059829 REVERSE LENGTH=1124                                                                                                                                                                                                                                                                                                                          | 1119 | 1124 | 0         | 100.4 | 85.5 | 91.2 |

|                          |                                                                                                                                                                                                                                                                                                                                                                                                                                                                                                                                                                                                                                                                                                                                                                                                                                                                                                                                                                                                                                                                                                                                                                                                                                                                                                                                                                                                                                               |      |      |           |       |      |      |                                                                    |       |                      |                                                                                                                                                         |      |      |           |       |      |      |
|--------------------------|-----------------------------------------------------------------------------------------------------------------------------------------------------------------------------------------------------------------------------------------------------------------------------------------------------------------------------------------------------------------------------------------------------------------------------------------------------------------------------------------------------------------------------------------------------------------------------------------------------------------------------------------------------------------------------------------------------------------------------------------------------------------------------------------------------------------------------------------------------------------------------------------------------------------------------------------------------------------------------------------------------------------------------------------------------------------------------------------------------------------------------------------------------------------------------------------------------------------------------------------------------------------------------------------------------------------------------------------------------------------------------------------------------------------------------------------------|------|------|-----------|-------|------|------|--------------------------------------------------------------------|-------|----------------------|---------------------------------------------------------------------------------------------------------------------------------------------------------|------|------|-----------|-------|------|------|
| Rsa1.0_01339.1.g25896.t1 | ref NP_180874.1  glycosyl hydrolase and polygalacturonase domain-containing protein [Arabidopsis thaliana]<br>gi 2924778 gb AAC04907.1  putative polygalacturonase [Arabidopsis thaliana]<br>gi 330253698 gb AEC08792.1  glycosyl hydrolase and polygalacturonase domain-containing protein [Arabidopsis thaliana]<br>ref NP_180873.1  3--ketoacyl-CoA thiolase 2 [Arabidopsis thaliana]<br>gi 73919871 sp Q56WD9.2 THIK2_ARAT H RecName: Full=3--ketoacyl-CoA thiolase 2, peroxisomal; AltName: Full=Acetyl-CoA acyltransferase 2; AltName: Full=Beta-ketothiolase 2; AltName: Full=Peroxisomal 3--oxoacyl-CoA thiolase 2; AltName: Full=Peroxisome defective protein 1; Flags: Precursor<br>gi 11993853 gb AAG42910.1 AF327529.1 putative 3--ketoacyl-CoA thiolase [Arabidopsis thaliana]<br>gi 13194830 gb AAK15577.1 AF349530.1 putative 3--ketoacyl-CoA thiolase [Arabidopsis thaliana]<br>gi 2924779 gb AAC04908.1  3--ketoacyl-CoA thiolase [Arabidopsis thaliana]<br>gi 2981618 dbj BAA25248.1  3--ketoacyl-CoA thiolase [Arabidopsis thaliana]<br>gi 2981618 dbj BAA25249.1  3--ketoacyl-CoA thiolase [Arabidopsis thaliana]<br>gi 15450669 gb AAK96606.1  At2g33150/F25118.11 [Arabidopsis thaliana] gi 17380614 gb AAL36070.1  At2g33150/F25118.11 [Arabidopsis thaliana] gi 21593136 gb AAM65085.1  3--ketoacyl-CoA thiolase [Arabidopsis thaliana] gi 330253697 gb AEC08791.1  3--ketoacyl-CoA thiolase 2 [Arabidopsis thaliana] | 407  | 664  | 1.00E-174 | 163.1 | 72.2 | 83.5 | glycosyl hydrolase and polygalacturonase domain-containing protein | gbpln | Arabidopsis thaliana | AT2G33160.1   Symbols: glycoside hydrolase family 28 protein / polygalacturonase (pectinase) family protein   chr2:14053404-14056246 FORWARD LENGTH=664 | 407  | 664  | 1.00E-177 | 163.1 | 72.2 | 83.5 |
| Rsa1.0_01339.1.g25897.t1 | gi 13194830 gb AAK15577.1 AF349530.1 putative 3--ketoacyl-CoA thiolase [Arabidopsis thaliana]<br>gi 2924779 gb AAC04908.1  3--ketoacyl-CoA thiolase [Arabidopsis thaliana]<br>gi 2981618 dbj BAA25248.1  3--ketoacyl-CoA thiolase [Arabidopsis thaliana]<br>gi 2981618 dbj BAA25249.1  3--ketoacyl-CoA thiolase [Arabidopsis thaliana]<br>gi 15450669 gb AAK96606.1  At2g33150/F25118.11 [Arabidopsis thaliana] gi 17380614 gb AAL36070.1  At2g33150/F25118.11 [Arabidopsis thaliana] gi 21593136 gb AAM65085.1  3--ketoacyl-CoA thiolase [Arabidopsis thaliana] gi 330253697 gb AEC08791.1  3--ketoacyl-CoA thiolase 2 [Arabidopsis thaliana]                                                                                                                                                                                                                                                                                                                                                                                                                                                                                                                                                                                                                                                                                                                                                                                                | 462  | 462  | 0         | 100.0 | 95.0 | 98.3 | 3--ketoacyl-CoA thiolase 2                                         | gbpln | Arabidopsis thaliana | AT2G33150.1   Symbols: PKT3, PED1, KAT2   peroxisomal 3--ketoacyl-CoA thiolase 3   chr2:14047814-14050983 REVERSE LENGTH=462                            | 462  | 462  | 0         | 100.0 | 95.0 | 98.3 |
| Rsa1.0_01339.1.g25898.t1 | gb EOA27866.1  hypothetical protein CARUB_v10024024mg [Capsella rubella]                                                                                                                                                                                                                                                                                                                                                                                                                                                                                                                                                                                                                                                                                                                                                                                                                                                                                                                                                                                                                                                                                                                                                                                                                                                                                                                                                                      | 221  | 221  | 1.00E-105 | 100.0 | 88.7 | 96.4 | hypothetical protein CARUB_v10024024mg                             | gbpln | Capsella rubella     | AT2G33120.1   Symbols: SAR1, VAMP722, TVVAMP722   synaptobrevin-related protein 1   chr2:14043785-14045337 REVERSE LENGTH=221                           | 221  | 221  | 1.00E-107 | 100.0 | 89.1 | 96.4 |
| Rsa1.0_01339.1.g25899.t1 | ref XP_002881261.1  hypothetical protein ARALYDRAFT_482247 [Arabidopsis lyrata subsp. lyrata]<br>gi 297327100 gb EFH57520.1  hypothetical protein ARALYDRAFT_482247 [Arabidopsis lyrata subsp. lyrata]                                                                                                                                                                                                                                                                                                                                                                                                                                                                                                                                                                                                                                                                                                                                                                                                                                                                                                                                                                                                                                                                                                                                                                                                                                        | 1023 | 1036 | 0         | 101.3 | 94.6 | 97.1 | hypothetical protein ARALYDRAFT_482247                             | gbpln | Arabidopsis lyrata   | AT2G33100.1   Symbols: ATCSLD1, CSLD1   cellulose synthase-like D1   chr2:14036494-14040044 REVERSE LENGTH=1036                                         | 1023 | 1036 | 0         | 101.3 | 94.6 | 97.2 |
| Rsa1.0_01339.1.g25900.t1 | dbj BAF01195.1  putative leucine-rich repeat disease resistance protein [Arabidopsis thaliana]<br>ref NP_180863.1  ATP synthase subunit gamma [Arabidopsis thaliana]<br>gi 3334123 sp Q96250.1 ATPG3_ARATH RecName: Full=ATP synthase subunit gamma, mitochondrial; AltName: Full=F-ATPase gamma subunit; Flags: Precursor<br>gi 1655480 dbj BAA13599.1  gamma subunit of mitochondrial F1-ATPase [Arabidopsis thaliana]<br>gi 2924787 gb AAC04916.1  mitochondrial F1-ATPase, gamma subunit (ATP3_ARATH) [Arabidopsis thaliana]<br>gi 14517358 gb AAK62570.1  At2g33040/F25118.22 [Arabidopsis thaliana] gi 17065102 gb AAL32705.1  mitochondrial F1-ATPase, gamma subunit (ATP3_ARATH) [Arabidopsis thaliana]<br>gi 20196990 gb AAM14859.1  mitochondrial F1-ATPase, gamma subunit (ATP3_ARATH) [Arabidopsis thaliana]<br>gi 20857422 gb AAM26719.1  At2g33040/F25118.22 [Arabidopsis thaliana]<br>gi 21554962 gb AAM63740.1  mitochondrial F1-ATPase, gamma subunit (ATP3_ARATH) [Arabidopsis thaliana]<br>gi 330253683 gb AEC08777.1  ATP synthase subunit gamma [Arabidopsis thaliana]                                                                                                                                                                                                                                                                                                                                                   | 811  | 779  | 0         | 96.1  | 63.0 | 72.1 | putative leucine-rich repeat disease resistance protein            | gbpln | Arabidopsis thaliana | AT2G33020.1   Symbols: AtRLP24, RLP24   receptor like protein 24   chr2:14013874-14016516 REVERSE LENGTH=864                                            | 811  | 864  | 0         | 106.5 | 61.2 | 71.8 |
| Rsa1.0_01339.1.g25901.t1 | ref XP_002881261.1  hypothetical protein ARALYDRAFT_482247 [Arabidopsis lyrata subsp. lyrata]<br>gi 297327100 gb EFH57520.1  hypothetical protein ARALYDRAFT_482247 [Arabidopsis lyrata subsp. lyrata]                                                                                                                                                                                                                                                                                                                                                                                                                                                                                                                                                                                                                                                                                                                                                                                                                                                                                                                                                                                                                                                                                                                                                                                                                                        | 325  | 325  | 0         | 100.0 | 98.2 | 99.7 | ATP synthase subunit gamma                                         | gbpln | Arabidopsis thaliana | AT2G33040.1   Symbols: ATP3   gamma subunit of Mt ATP synthase   chr2:14018978-14021047 REVERSE LENGTH=325                                              | 325  | 325  | 0         | 100.0 | 98.2 | 99.7 |

|                          |                                                                                                                                                                                                                                                                                                                                                                                                                                                                                                                                                                                                                                                        |      |      |           |       |      |      |                                                         |       |                      |                                                                                                                                                                                                                                                                                                                                                       |      |     |           |       |      |      |
|--------------------------|--------------------------------------------------------------------------------------------------------------------------------------------------------------------------------------------------------------------------------------------------------------------------------------------------------------------------------------------------------------------------------------------------------------------------------------------------------------------------------------------------------------------------------------------------------------------------------------------------------------------------------------------------------|------|------|-----------|-------|------|------|---------------------------------------------------------|-------|----------------------|-------------------------------------------------------------------------------------------------------------------------------------------------------------------------------------------------------------------------------------------------------------------------------------------------------------------------------------------------------|------|-----|-----------|-------|------|------|
| Rsa1.0_01339.1.g25902.t1 | ref NP_189137.1  receptor like protein 41 [Arabidopsis thaliana]<br>gi 9293982 dbj BAB01885.1  leucine-rich repeat disease resistance protein-like [Arabidopsis thaliana]<br>gi 332643443 gb AEE76964.1  receptor like protein 41 [Arabidopsis thaliana]<br>gb AAC04914.1  putative leucine-rich repeat disease resistance protein [Arabidopsis thaliana]                                                                                                                                                                                                                                                                                              | 848  | 881  | 0         | 103.9 | 62.1 | 73.2 | receptor like protein 41                                | gbpln | Arabidopsis thaliana | AT3G25010.1   Symbols: AtRLP41, RLP41   receptor like protein 41   chr3:9110103-9112748 REVERSE LENGTH=881                                                                                                                                                                                                                                            | 848  | 881 | 0         | 103.9 | 62.1 | 73.2 |
| Rsa1.0_01339.1.g25903.t1 | gb EAO26884.1  hypothetical protein CARUB.v10022977mg [Capsella rubella]                                                                                                                                                                                                                                                                                                                                                                                                                                                                                                                                                                               | 829  | 800  | 0         | 96.5  | 60.0 | 68.6 | putative leucine-rich repeat disease resistance protein | gbpln | Arabidopsis thaliana | AT2G33060.1   Symbols: AtRLP27, RLP27   receptor like protein 27   chr2:14025661-14028087 FORWARD LENGTH=808                                                                                                                                                                                                                                          | 829  | 808 | 0         | 97.5  | 60.0 | 68.6 |
| Rsa1.0_01339.1.g25904.t1 | gb EAO26884.1  hypothetical protein CARUB.v10022977mg [Capsella rubella]                                                                                                                                                                                                                                                                                                                                                                                                                                                                                                                                                                               | 527  | 531  | 0         | 100.8 | 90.9 | 94.5 | hypothetical protein CARUB.v10022977mg                  | gbpln | Capsella rubella     | AT2G32990.1   Symbols: AtGH9B8, GH9B8   glycosyl hydrolase 9B8   chr2:14003361-14005844 FORWARD LENGTH=525                                                                                                                                                                                                                                            | 527  | 525 | 0         | 99.6  | 93.9 | 97.3 |
| Rsa1.0_01340.1.g25905.t1 | gb AAD20658.1  putative retroelement pol polyprotein [Arabidopsis thaliana]                                                                                                                                                                                                                                                                                                                                                                                                                                                                                                                                                                            | 321  | 1611 | 3.00E-30  | 501.9 | 19.9 | 35.2 | putative retroelement pol polyprotein                   | gbpln | Arabidopsis thaliana | #                                                                                                                                                                                                                                                                                                                                                     | #    | #   | #         | #     | #    | #    |
| Rsa1.0_01340.1.g25906.t1 | #                                                                                                                                                                                                                                                                                                                                                                                                                                                                                                                                                                                                                                                      | #    | #    | #         | #     | #    | #    | -                                                       | ----  | ----                 | #                                                                                                                                                                                                                                                                                                                                                     | #    | #   | #         | #     | #    | #    |
| Rsa1.0_01340.1.g25907.t1 | gb EAO24442.1  hypothetical protein CARUB.v10017699mg [Capsella rubella]                                                                                                                                                                                                                                                                                                                                                                                                                                                                                                                                                                               | 97   | 308  | 1.00E-46  | 317.5 | 93.8 | 94.8 | hypothetical protein CARUB.v10017699mg                  | gbpln | Capsella rubella     | AT2G02410.1   Symbols:   unknown protein; CONTAINS InterPro DOMAIN/s: Protein of unknown function DUF901 (InterPro:IPR010298). Has 1151 Blast hits to 1151 proteins in 597 species: Archae - 0; Bacteria - 1105; Metazoa - 0; Fungi - 0; Plants - 42; Viruses - 0; Other Eukaryotes - 4 (source: NCBI BLINK).   chr2:632713-634613 FORWARD LENGTH=308 | 97   | 308 | 6.00E-49  | 317.5 | 92.8 | 94.8 |
| Rsa1.0_01340.1.g25908.t1 | gb AFK13856.1  Ty3/gypsy retrotransposon protein [Beta vulgaris subsp. vulgaris]                                                                                                                                                                                                                                                                                                                                                                                                                                                                                                                                                                       | 1280 | 1631 | 0         | 127.4 | 53.3 | 71.0 | Ty3/gypsy retrotransposon protein                       | gbpln | Beta vulgaris        | ATMG00860.1   Symbols: ORF158   DNA/RNA polymerases superfamily protein   chrM:235916-236392 FORWARD LENGTH=158                                                                                                                                                                                                                                       | 1280 | 158 | 1.00E-36  | 12.3  | 5.9  | 7.2  |
| Rsa1.0_01340.1.g25909.t1 | ref NP_178346.2  uncharacterized protein [Arabidopsis thaliana]<br>gi 26449562 dbj BAC41907.1  unknown protein [Arabidopsis thaliana]<br>gi 28950879 gb AA063363.1  At2g02410 [Arabidopsis thaliana]<br>gi 330250483 gb AEC05577.1  uncharacterized protein AT2G02410 [Arabidopsis thaliana]                                                                                                                                                                                                                                                                                                                                                           | 201  | 308  | 5.00E-84  | 153.2 | 87.6 | 92.0 | uncharacterized protein                                 | gbpln | Arabidopsis thaliana | AT2G02410.1   Symbols:   unknown protein; CONTAINS InterPro DOMAIN/s: Protein of unknown function DUF901 (InterPro:IPR010298). Has 1151 Blast hits to 1151 proteins in 597 species: Archae - 0; Bacteria - 1105; Metazoa - 0; Fungi - 0; Plants - 42; Viruses - 0; Other Eukaryotes - 4 (source: NCBI BLINK).   chr2:632713-634613 FORWARD LENGTH=308 | 201  | 308 | 2.00E-86  | 153.2 | 87.6 | 92.0 |
| Rsa1.0_01340.1.g25910.t1 | gb AAO60042.1  glutathione S-transferase zeta [Brassica napus]                                                                                                                                                                                                                                                                                                                                                                                                                                                                                                                                                                                         | 268  | 221  | 1.00E-118 | 82.5  | 78.4 | 81.0 | glutathione S-transferase zeta                          | gbpln | Brassica napus       | AT2G02390.1   Symbols: ATGSTZ1, GST18, GSTZ1   glutathione S-transferase zeta 1   chr2:629015-630955 FORWARD LENGTH=221                                                                                                                                                                                                                               | 268  | 221 | 1.00E-113 | 82.5  | 72.4 | 78.0 |
| Rsa1.0_01340.1.g25911.t1 | ref NP_565283.1  SNARE associated Golgi protein [Arabidopsis thaliana]<br>gi 145328248 ref NP_001077870.1  SNARE associated Golgi protein [Arabidopsis thaliana]<br>gi 13605571 gb AAK32779.1 AF361611.1 At2g02370/T16F16.16 [Arabidopsis thaliana]<br>gi 16323326 gb AAL15376.1  At2g02370/T16F16.16 [Arabidopsis thaliana]<br>gi 20197339 gb AAC78519.2  expressed protein [Arabidopsis thaliana]<br>gi 23505925 gb AAN28822.1  At2g02370/T16F16.16 [Arabidopsis thaliana]<br>gi 330250476 gb AEC05570.1  SNARE associated Golgi protein [Arabidopsis thaliana]<br>gi 330250477 gb AEC05571.1  SNARE associated Golgi protein [Arabidopsis thaliana] | 325  | 320  | 1.00E-158 | 98.5  | 87.4 | 92.3 | SNARE associated Golgi protein                          | gbpln | Arabidopsis thaliana | AT2G02370.2   Symbols:   SNARE associated Golgi protein family   chr2:621841-623084 FORWARD LENGTH=320                                                                                                                                                                                                                                                | 325  | 320 | 1.00E-161 | 98.5  | 87.4 | 92.3 |
| Rsa1.0_01340.1.g25912.t1 | ref XP_002876816.1  phloem protein 2-B10 [Arabidopsis lyrata subsp. lyrata]<br>gi 297322654 gb EFH53075.1  phloem protein 2-B10 [Arabidopsis lyrata subsp. lyrata]                                                                                                                                                                                                                                                                                                                                                                                                                                                                                     | 302  | 273  | 1.00E-107 | 90.4  | 61.6 | 72.8 | phloem protein 2-B10                                    | gbpln | Arabidopsis lyrata   | AT2G02360.1   Symbols: AtPP2-B10, PP2-B10   phloem protein 2-B10   chr2:619699-620736 REVERSE LENGTH=272                                                                                                                                                                                                                                              | 302  | 272 | 1.00E-106 | 90.1  | 60.6 | 73.2 |

|                          |                                                                                                                                                                                                                                                                                                    |      |      |           |        |      |      |                                        |       |                      |                                                                                                                                     |      |      |           |       |      |      |  |  |  |  |
|--------------------------|----------------------------------------------------------------------------------------------------------------------------------------------------------------------------------------------------------------------------------------------------------------------------------------------------|------|------|-----------|--------|------|------|----------------------------------------|-------|----------------------|-------------------------------------------------------------------------------------------------------------------------------------|------|------|-----------|-------|------|------|--|--|--|--|
|                          | refNP_178341.1  F-box protein PP2-B10 [Arabidopsis thaliana]<br>gi 75268076 sp Q9ZVQ6.1 P2B10_ARAT<br>H RecName: Full=F-box protein PP2-B10; AltName: Full=Protein PHLOEM PROTEIN 2-LIKE B10; Short=AtPP2-B10 gi 3894168 gb AAC78518.1                                                             |      |      |           |        |      |      |                                        |       |                      |                                                                                                                                     |      |      |           |       |      |      |  |  |  |  |
| Rsa1.0_01340.1.g25913.t1 | putative phloem-specific lectin [Arabidopsis thaliana]<br>gi 107738391 gb ABF83689.1 <br>At2g02360 [Arabidopsis thaliana]<br>gi 110742667 dbj BAE99245.1  putative phloem-specific lectin [Arabidopsis thaliana] gi 330250475 gb AEC05569.1  F-box protein PP2-B10 [Arabidopsis thaliana]          | 262  | 272  | 3.00E-82  | 103.8  | 58.8 | 72.1 | F-box protein PP2-B10                  | gbpln | Arabidopsis thaliana | AT2G02360.1   Symbols: AtPP2-B10, PP2-B10   phloem protein 2-B10   chr2:619699-620736 REVERSE LENGTH=272                            | 262  | 272  | 9.00E-85  | 103.8 | 58.8 | 72.1 |  |  |  |  |
| Rsa1.0_01340.1.g25914.t1 | emb CAB40035.1  retrotransposon like protein [Arabidopsis thaliana]<br>gi 7267767 emb CAB81170.1  retrotransposon like protein [Arabidopsis thaliana]                                                                                                                                              | 1399 | 1515 | 0         | 108.3  | 38.1 | 46.2 | retrotransposon like protein           | gbpln | Arabidopsis thaliana | AT4G23160.1   Symbols: CRK8   cysteine-rich RLK (RECEPTOR-like protein kinase) 8   chr4:12129485-12134086 FORWARD LENGTH=1282       | 1399 | 1262 | 2.00E-94  | 90.2  | 12.2 | 19.5 |  |  |  |  |
| Rsa1.0_01340.1.g25915.t1 | refNP_178332.2  phloem protein 2-B2 [Arabidopsis thaliana]<br>gi 334302847 sp Q9ZVR5.2 PP2B2_ARA TH RecName: Full=Putative F-box protein PP2-B2; AltName: Full=Protein PHLOEM PROTEIN 2-LIKE B2; Short=AtPP2-B2<br>gi 330250467 gb AEC05561.1  phloem protein 2-B2 [Arabidopsis thaliana]          | 285  | 310  | 1.00E-120 | 108.8  | 71.2 | 85.3 | phloem protein 2-B2                    | gbpln | Arabidopsis thaliana | AT2G02250.1   Symbols: AtPP2-B2, PP2-B2   phloem protein 2-B2   chr2:594655-595825 REVERSE LENGTH=310                               | 285  | 310  | 1.00E-122 | 108.8 | 71.2 | 85.3 |  |  |  |  |
| Rsa1.0_01341.1.g25916.t2 | refNP_180882.2  myosin XI D [Arabidopsis thaliana]<br>gi 330253710 gb AEC08804.1  myosin XI D [Arabidopsis thaliana]                                                                                                                                                                               | 1749 | 1770 | 0         | 101.2  | 84.7 | 91.8 | myosin XI D                            | gbpln | Arabidopsis thaliana | AT2G33240.1   Symbols: XID, ATXID   myosin XI D   chr2:14086942-14096914 REVERSE LENGTH=1770                                        | 1749 | 1770 | 0         | 101.2 | 84.7 | 91.8 |  |  |  |  |
| Rsa1.0_01341.1.g25917.t1 | refNP_850204.2  Haloacid dehalogenase-like hydrolase [Arabidopsis thaliana]<br>gi 20196855 gb AAM14806.1  unknown protein [Arabidopsis thaliana]<br>gi 330253712 gb AEC08806.1  Haloacid dehalogenase-like hydrolase [Arabidopsis thaliana]                                                        | 260  | 245  | 1.00E-127 | 94.2   | 85.8 | 90.4 | Haloacid dehalogenase-like hydrolase   | gbpln | Arabidopsis thaliana | AT2G33255.1   Symbols:   Haloacid dehalogenase-like hydrolase (HAD) superfamily protein   chr2:14098795-14100358 FORWARD LENGTH=245 | 260  | 245  | 1.00E-130 | 94.2  | 85.8 | 90.4 |  |  |  |  |
| Rsa1.0_01341.1.g25918.t1 | dbj BAJ34122.1  unnamed protein product [Thellungiella halophila]                                                                                                                                                                                                                                  | 249  | 249  | 1.00E-107 | 100.0  | 90.0 | 92.4 | unnamed protein product                | ----  | ----                 | AT2G33310.3   Symbols: IAA13   auxin-induced protein 13   chr2:14114569-14115757 REVERSE LENGTH=246                                 | 249  | 246  | 1.00E-106 | 98.8  | 89.6 | 93.2 |  |  |  |  |
| Rsa1.0_01341.1.g25919.t1 | gb EOA21157.1  hypothetical protein CARUB_v10001503mg [Capsella rubella]                                                                                                                                                                                                                           | 154  | 314  | 2.00E-45  | 203.9  | 66.2 | 69.5 | hypothetical protein CARUB_v10001503mg | gbpln | Capsella rubella     | AT5G06130.2   Symbols:   chaperone protein dnaJ-related   chr5:1853754-1855763 REVERSE LENGTH=315                                   | 154  | 315  | 2.00E-47  | 204.5 | 66.2 | 70.8 |  |  |  |  |
| Rsa1.0_01341.1.g25920.t1 | # # # # # # # # # #                                                                                                                                                                                                                                                                                |      |      |           |        |      |      |                                        | ----  | ----                 | # # # # # # # #                                                                                                                     |      |      |           |       |      |      |  |  |  |  |
| Rsa1.0_01341.1.g25921.t1 | refXP_002888139.1  dynamin family protein [Arabidopsis lyrata subsp. lyrata] gi 297333980 gb EFH64398.1  dynamin family protein [Arabidopsis lyrata subsp. lyrata]                                                                                                                                 | 649  | 659  | 0         | 101.5  | 71.5 | 83.4 | dynamin family protein                 | gbpln | Arabidopsis lyrata   | AT1G60500.1   Symbols: DRP4C   Dynamin related protein 4C   chr1:22291582-22293822 FORWARD LENGTH=669                               | 649  | 669  | 0         | 103.1 | 69.5 | 82.0 |  |  |  |  |
| Rsa1.0_01341.1.g25922.t1 | refNP_180894.1  uncharacterized protein [Arabidopsis thaliana]<br>gi 2459419 gb AAB80654.1  hypothetical protein [Arabidopsis thaliana]<br>gi 219291116 gb ACL13991.1 <br>At2g33360 [Arabidopsis thaliana]<br>gi 330253728 gb AEC08822.1  uncharacterized protein AT2G33360 [Arabidopsis thaliana] | 541  | 603  | 0         | 111.5  | 74.9 | 82.1 | uncharacterized protein                | gbpln | Arabidopsis thaliana | AT2G33360.1   Symbols:   Protein of unknown function (DUF3527)   chr2:14140901-14142870 FORWARD LENGTH=603                          | 541  | 603  | 0         | 111.5 | 74.9 | 82.1 |  |  |  |  |
| Rsa1.0_01341.1.g25923.t1 | gb EOA27806.1  hypothetical protein CARUB_v10023959mg [Capsella rubella]                                                                                                                                                                                                                           | 133  | 239  | 6.00E-62  | 179.7  | 81.2 | 91.0 | hypothetical protein CARUB_v10023959mg | gbpln | Capsella rubella     | AT2G33380.1   Symbols: RD20, CLO-3   Caleosin-related family protein   chr2:14144984-14146374 REVERSE LENGTH=236                    | 133  | 236  | 3.00E-60  | 177.4 | 78.9 | 88.0 |  |  |  |  |
| Rsa1.0_01341.1.g25924.t1 | # # # # # # # # # #                                                                                                                                                                                                                                                                                |      |      |           |        |      |      |                                        | ----  | ----                 | # # # # # # # #                                                                                                                     |      |      |           |       |      |      |  |  |  |  |
| Rsa1.0_01341.1.g25925.t1 | gb ACG69528.1  caleosin CLO3-2 [Brassica napus]                                                                                                                                                                                                                                                    | 98   | 239  | 1.00E-42  | 243.9  | 82.7 | 85.7 | caleosin CLO3-2                        | gbpln | Brassica napus       | AT2G33380.1   Symbols: RD20, CLO-3   Caleosin-related family protein   chr2:14144984-14146374 REVERSE LENGTH=236                    | 98   | 236  | 1.00E-41  | 240.8 | 77.6 | 80.6 |  |  |  |  |
| Rsa1.0_01342.1.g25926.t1 | gb ACB59199.1  copia-like protein [Brassica oleracea]                                                                                                                                                                                                                                              | 95   | 975  | 3.00E-25  | 1026.3 | 63.2 | 69.5 | copia-like protein                     | gbpln | Brassica oleracea    | ATM00810.1   Symbols: ORF240B   DNA/RNA polymerases superfamily protein   chrM:227709-228431 REVERSE LENGTH=240                     | 95   | 240  | 2.00E-11  | 252.6 | 28.4 | 43.2 |  |  |  |  |
| Rsa1.0_01342.1.g25927.t1 | gb ABD65170.1  hypothetical protein 40.t00057 [Brassica oleracea]                                                                                                                                                                                                                                  | 242  | 255  | 3.00E-28  | 105.4  | 40.9 | 47.5 | hypothetical protein 40.t00057         | gbpln | Brassica oleracea    | AT3G47680.1   Symbols:   DNA binding   chr3:17577483-17578391 REVERSE LENGTH=302                                                    | 242  | 302  | 1.00E-15  | 124.8 | 19.0 | 27.3 |  |  |  |  |



|                          |                                                                                                                                                                                                                                                                                                                                                                                                                                                                                             |      |      |           |       |      |      |                                                        |       |                      |                                                                                                                                                                                                                                                                                                                                                                                     |      |      |           |       |      |      |
|--------------------------|---------------------------------------------------------------------------------------------------------------------------------------------------------------------------------------------------------------------------------------------------------------------------------------------------------------------------------------------------------------------------------------------------------------------------------------------------------------------------------------------|------|------|-----------|-------|------|------|--------------------------------------------------------|-------|----------------------|-------------------------------------------------------------------------------------------------------------------------------------------------------------------------------------------------------------------------------------------------------------------------------------------------------------------------------------------------------------------------------------|------|------|-----------|-------|------|------|
| Rsa1.0_01342.1.g25928.t1 | #                                                                                                                                                                                                                                                                                                                                                                                                                                                                                           | #    | #    | #         | #     | #    | #    | -                                                      | ----  | ----                 | #                                                                                                                                                                                                                                                                                                                                                                                   | #    | #    | #         | #     | #    |      |
| Rsa1.0_01342.1.g25929.t1 | #                                                                                                                                                                                                                                                                                                                                                                                                                                                                                           | #    | #    | #         | #     | #    | #    | -                                                      | ----  | ----                 | #                                                                                                                                                                                                                                                                                                                                                                                   | #    | #    | #         | #     | #    |      |
| Rsa1.0_01342.1.g25930.t2 | gb ABD65057.1  hypothetical protein 27.t00123 [Brassica oleracea]                                                                                                                                                                                                                                                                                                                                                                                                                           | 342  | 190  | 7.00E-19  | 55.6  | 17.8 | 21.1 | hypothetical protein 27.t00123                         | gbpln | Brassica oleracea    | #                                                                                                                                                                                                                                                                                                                                                                                   | #    | #    | #         | #     | #    |      |
| Rsa1.0_01342.1.g25931.t1 | #                                                                                                                                                                                                                                                                                                                                                                                                                                                                                           | #    | #    | #         | #     | #    | #    | -                                                      | ----  | ----                 | #                                                                                                                                                                                                                                                                                                                                                                                   | #    | #    | #         | #     | #    |      |
| Rsa1.0_01342.1.g25932.t1 | #                                                                                                                                                                                                                                                                                                                                                                                                                                                                                           | #    | #    | #         | #     | #    | #    | -                                                      | ----  | ----                 | #                                                                                                                                                                                                                                                                                                                                                                                   | #    | #    | #         | #     | #    |      |
| Rsa1.0_01343.1.g25933.t1 | gb EOA26734.1  hypothetical protein CARUB_v10022820mg [Capsella rubella]                                                                                                                                                                                                                                                                                                                                                                                                                    | 373  | 527  | 6.00E-82  | 141.3 | 47.5 | 60.6 | hypothetical protein CARUB_v10022820mg                 | gbpln | Capsella rubella     | AT4G05360.1   Symbols:   Zinc knuckle (CCHC-type) family protein   chr4:2728204-2732337 FORWARD LENGTH=735                                                                                                                                                                                                                                                                          | 373  | 735  | 5.00E-76  | 197.1 | 45.6 | 59.5 |
| Rsa1.0_01343.1.g25934.t1 | ref XP_002890788.1  hypothetical protein ARALYDRAFT_313572 [Arabidopsis lyrata subsp. lyrata] gi 297336630 gb EFH67047.1  hypothetical protein ARALYDRAFT_313572 [Arabidopsis lyrata subsp. lyrata]                                                                                                                                                                                                                                                                                         | 159  | 341  | 4.00E-30  | 214.5 | 59.7 | 76.1 | hypothetical protein ARALYDRAFT_313572                 | gbpln | Arabidopsis lyrata   | AT1G29041.1   Symbols:   unknown protein; FUNCTIONS IN: molecular function unknown; INVOLVED IN: biological process unknown; LOCATED IN: cellular component unknown; Has 4 Blast hits to 4 proteins in 2 species: Archae - 0; Bacteria - 0; Metazoa - 2; Fungi - 0; Plants - 2; Viruses - 0; Other Eukaryotes - 0 (source: NCBI BLink).   chr1:10135451-10135987 FORWARD LENGTH=178 | 159  | 178  | 7.00E-26  | 111.9 | 55.3 | 74.2 |
| Rsa1.0_01343.1.g25935.t1 | ref XP_002893546.1  hypothetical protein ARALYDRAFT_473111 [Arabidopsis lyrata subsp. lyrata] gi 297339388 gb EFH69805.1  hypothetical protein ARALYDRAFT_473111 [Arabidopsis lyrata subsp. lyrata]                                                                                                                                                                                                                                                                                         | 739  | 380  | 0         | 51.4  | 44.1 | 46.3 | hypothetical protein ARALYDRAFT_473111                 | gbpln | Arabidopsis lyrata   | AT1G29050.1   Symbols: TBL38   TRICHOME BIREFRINGENCE-LIKE 38   chr1:10136376-10139082 REVERSE LENGTH=380                                                                                                                                                                                                                                                                           | 739  | 380  | 0         | 51.4  | 43.7 | 46.0 |
| Rsa1.0_01343.1.g25936.t1 | gb AAG51783.1 ACO79679_3 reverse transcriptase, putative: 16838-20266 [Arabidopsis thaliana]                                                                                                                                                                                                                                                                                                                                                                                                | 1158 | 1142 | 0         | 98.6  | 50.9 | 64.9 | reverse transcriptase, putative: 16838-20266           | gbpln | Arabidopsis thaliana | AT4G29090.1   Symbols:   Ribonuclease H-like superfamily protein   chr4:14333528-14335255 FORWARD LENGTH=575                                                                                                                                                                                                                                                                        | 1158 | 575  | 2.00E-57  | 49.7  | 13.5 | 21.7 |
| Rsa1.0_01343.1.g25937.t1 | gb EOA29603.1  hypothetical protein CARUB_v10013521mg, partial [Capsella rubella]                                                                                                                                                                                                                                                                                                                                                                                                           | 541  | 498  | 7.00E-72  | 92.1  | 26.2 | 34.6 | hypothetical protein CARUB_v10013521mg, partial        | gbpln | Capsella rubella     | AT4G29090.1   Symbols:   Ribonuclease H-like superfamily protein   chr4:14333528-14335255 FORWARD LENGTH=575                                                                                                                                                                                                                                                                        | 541  | 336  | 8.00E-23  | 62.1  | 12.0 | 18.1 |
| Rsa1.0_01343.1.g25938.t1 | ref NP_567434.1  protein transport protein SFT1 [Arabidopsis thaliana] gi 75248462 sp Q8VXX9.1 BETL1_ARAT H RecName: Full=Bet1-like protein At4g14600 gi 18389246 gb AAL67066.1  unknown protein [Arabidopsis thaliana] gi 20259643 gb AAM14339.1  unknown protein [Arabidopsis thaliana] gi 21554084 gb AAM63165.1  unknown [Arabidopsis thaliana] gi 26452326 dbj BAC43249.1  unknown protein [Arabidopsis thaliana] gi 332658064 gb AEE83464.1  Bet1-like protein [Arabidopsis thaliana] | 65   | 137  | 3.00E-21  | 210.8 | 80.0 | 84.6 | protein transport protein SFT1                         | gbpln | Arabidopsis thaliana | AT4G14600.1   Symbols:   Target SNARE coiled-coil domain protein   chr4:8376562-8378078 FORWARD LENGTH=137                                                                                                                                                                                                                                                                          | 65   | 137  | 4.00E-24  | 210.8 | 80.0 | 84.6 |
| Rsa1.0_01343.1.g25939.t3 | dbj BAB02990.1  retroelement pol polyprotein-like [Arabidopsis thaliana]                                                                                                                                                                                                                                                                                                                                                                                                                    | 935  | 1250 | 1.00E-166 | 133.7 | 36.3 | 49.0 | retroelement pol polyprotein-like                      | gbpln | Arabidopsis thaliana | AT4G23160.1   Symbols: CRK8   cysteine-rich RLK (RECEPTOR-like protein kinase) 8   chr4:12129485-12134086 FORWARD LENGTH=1262                                                                                                                                                                                                                                                       | 935  | 1262 | 1.00E-32  | 135.0 | 8.8  | 13.5 |
| Rsa1.0_01343.1.g25940.t1 | gb AAD17352.1  contains similarity to retrovirus-related polyproteins [Arabidopsis thaliana] gi 7267379 emb CAB77940.1  putative polyprotein [Arabidopsis thaliana]                                                                                                                                                                                                                                                                                                                         | 1595 | 1366 | 0         | 85.6  | 33.0 | 46.3 | contains similarity to retrovirus-related polyproteins | gbpln | Arabidopsis thaliana | AT4G23160.1   Symbols: CRK8   cysteine-rich RLK (RECEPTOR-like protein kinase) 8   chr4:12129485-12134086 FORWARD LENGTH=1262                                                                                                                                                                                                                                                       | 1595 | 1262 | 1.00E-168 | 79.1  | 17.7 | 23.3 |
| Rsa1.0_01343.1.g25941.t1 | gb EOA39013.1  hypothetical protein CARUB_v10011567mg [Capsella rubella]                                                                                                                                                                                                                                                                                                                                                                                                                    | 229  | 342  | 7.00E-23  | 149.3 | 24.0 | 27.9 | hypothetical protein CARUB_v10011567mg                 | gbpln | Capsella rubella     | AT2G34080.1   Symbols:   Cysteine proteinases superfamily protein   chr2:14393431-14394777 REVERSE LENGTH=345                                                                                                                                                                                                                                                                       | 229  | 345  | 8.00E-24  | 150.7 | 22.7 | 27.1 |
| Rsa1.0_01344.1.g25942.t1 | ref XP_002890502.1  hypothetical protein ARALYDRAFT_335467 [Arabidopsis lyrata subsp. lyrata] gi 297336344 gb EFH6761.1  hypothetical protein ARALYDRAFT_335467 [Arabidopsis lyrata subsp. lyrata]                                                                                                                                                                                                                                                                                          | 465  | 525  | 1.00E-174 | 112.9 | 70.1 | 81.1 | hypothetical protein ARALYDRAFT_335467                 | gbpln | Arabidopsis lyrata   | AT1G22240.1   Symbols: APUM8, PUM8   pumilio 8   chr1:7853084-7854963 FORWARD LENGTH=515                                                                                                                                                                                                                                                                                            | 465  | 515  | 1.00E-175 | 110.8 | 69.7 | 80.4 |

|                          |                                                                                                                                                                                                                                                                                                                                                                                                                                                                                                                                                                                            |     |     |           |       |      |      |                                                   |       |                      |                                                                                                                                                                                                                                                                                                                                                                                                                                                                                             |     |     |           |       |      |      |
|--------------------------|--------------------------------------------------------------------------------------------------------------------------------------------------------------------------------------------------------------------------------------------------------------------------------------------------------------------------------------------------------------------------------------------------------------------------------------------------------------------------------------------------------------------------------------------------------------------------------------------|-----|-----|-----------|-------|------|------|---------------------------------------------------|-------|----------------------|---------------------------------------------------------------------------------------------------------------------------------------------------------------------------------------------------------------------------------------------------------------------------------------------------------------------------------------------------------------------------------------------------------------------------------------------------------------------------------------------|-----|-----|-----------|-------|------|------|
| Rsa1.0_01344.1.g25943.t1 | gb EOA36928.1  hypothetical protein CARUB_v10009798mg [Capsella rubella]                                                                                                                                                                                                                                                                                                                                                                                                                                                                                                                   | 318 | 315 | 1.00E-103 | 99.1  | 74.8 | 81.1 | hypothetical protein CARUB_v10009798mg            | gbpln | Capsella rubella     | AT1G22230.1   Symbols:   unknown protein; LOCATED IN: chloroplast; BEST Arabidopsis thaliana protein match is: unknown protein (TAIR:AT1G78110.1); Has 2358 Blast hits to 1759 proteins in 159 species: Archae - 2; Bacteria - 36; Metazoa - 1046; Fungi - 203; Plants - 157; Viruses - 72; Other Eukaryotes - 842 (source: NCBI BLINK).   chr1:7850093-7851037 FORWARD LENGTH=314                                                                                                          | 318 | 314 | 1.00E-102 | 98.7  | 74.2 | 82.7 |
| Rsa1.0_01344.1.g25944.t1 | gb EOA38282.1  hypothetical protein CARUB_v10009775mg [Capsella rubella]                                                                                                                                                                                                                                                                                                                                                                                                                                                                                                                   | 319 | 318 | 1.00E-134 | 99.7  | 78.1 | 89.3 | hypothetical protein CARUB_v10009775mg            | gbpln | Capsella rubella     | AT1G22220.1   Symbols:   F-box family protein   chr1:7846694-7847638 FORWARD LENGTH=314                                                                                                                                                                                                                                                                                                                                                                                                     | 319 | 314 | 1.00E-126 | 98.4  | 74.6 | 85.0 |
| Rsa1.0_01344.1.g25945.t1 | ref NP_564162.1  Endoplasmic reticulum vesicle transporter protein [Arabidopsis thaliana]<br>gi 9454530 gb AAF87853.1 AC073942.7 Contains similarity to a PRO0989 protein from Homo sapiens gi 7959731. EST gb AI995648 comes from this gene [Arabidopsis thaliana]<br>gi 13878151 gb AAK44153.1 AF370338.1 unknown protein [Arabidopsis thaliana]<br>gi 21281042 gb AM44956.1  unknown protein [Arabidopsis thaliana]<br>gi 21553754 gb AM62847.1  unknown [Arabidopsis thaliana]<br>gi 332192089 gb AEE30210.1  Endoplasmic reticulum vesicle transporter protein [Arabidopsis thaliana] | 425 | 386 | 0         | 90.8  | 83.3 | 87.3 | Endoplasmic reticulum vesicle transporter protein | gbpln | Arabidopsis thaliana | AT1G22200.1   Symbols:   Endoplasmic reticulum vesicle transporter protein   chr1:7837857-7840602 REVERSE LENGTH=386                                                                                                                                                                                                                                                                                                                                                                        | 425 | 386 | 0         | 90.8  | 83.3 | 87.3 |
| Rsa1.0_01344.1.g25946.t1 | ref XP_002890498.1  hypothetical protein ARALYDRAFT_472454 [Arabidopsis lyrata subsp. lyrata]<br>gi 297336340 gb EFH66757.1  hypothetical protein ARALYDRAFT_472454 [Arabidopsis lyrata subsp. lyrata]                                                                                                                                                                                                                                                                                                                                                                                     | 264 | 261 | 8.00E-93  | 98.9  | 74.2 | 78.8 | hypothetical protein ARALYDRAFT_472454            | gbpln | Arabidopsis lyrata   | AT1G22190.1   Symbols:   Integrase-type DNA-binding superfamily protein   chr1:7836245-7837030 FORWARD LENGTH=261                                                                                                                                                                                                                                                                                                                                                                           | 264 | 261 | 3.00E-88  | 98.9  | 68.6 | 75.8 |
| Rsa1.0_01344.1.g25947.t4 | #                                                                                                                                                                                                                                                                                                                                                                                                                                                                                                                                                                                          | #   | #   | #         | #     | #    | #    | -                                                 | ----  | ----                 | #                                                                                                                                                                                                                                                                                                                                                                                                                                                                                           | #   | #   | #         | #     | #    |      |
| Rsa1.0_01344.1.g25948.t2 | ref XP_002893212.1  hypothetical protein ARALYDRAFT_313100 [Arabidopsis lyrata subsp. lyrata]<br>gi 297339054 gb EFH69471.1  hypothetical protein ARALYDRAFT_313100 [Arabidopsis lyrata subsp. lyrata]                                                                                                                                                                                                                                                                                                                                                                                     | 434 | 454 | 2.00E-97  | 104.6 | 56.0 | 68.2 | hypothetical protein ARALYDRAFT_313100            | gbpln | Arabidopsis lyrata   | AT1G22120.1   Symbols:   unknown protein; Has 30201 Blast hits to 17322 proteins in 780 species: Archae - 12; Bacteria - 1396; Metazoa - 17338; Fungi - 3422; Plants - 5037; Viruses - 0; Other Eukaryotes - 2996 (source: NCBI BLINK).   chr1:7806655-7809632 REVERSE LENGTH=462                                                                                                                                                                                                           | 434 | 462 | 1.00E-92  | 106.5 | 53.0 | 66.4 |
| Rsa1.0_01344.1.g25949.t1 | ref NP_173630.1  structural constituent of ribosome [Arabidopsis thaliana]<br>gi 9280688 gb AAF86557.1 AC069252.16 F2E2.18 [Arabidopsis thaliana]<br>gi 52354139 gb AAU44390.1  hypothetical protein AT1G22110 [Arabidopsis thaliana]<br>gi 55740505 gb AAV63845.1  hypothetical protein At1g22110 [Arabidopsis thaliana]<br>gi 332192077 gb AEE30198.1  structural constituent of ribosome [Arabidopsis thaliana]                                                                                                                                                                         | 283 | 282 | 3.00E-70  | 99.6  | 69.6 | 77.4 | structural constituent of ribosome                | gbpln | Arabidopsis thaliana | AT1G22110.1   Symbols:   structural constituent of ribosome   chr1:7801625-7802473 REVERSE LENGTH=282                                                                                                                                                                                                                                                                                                                                                                                       | 283 | 282 | 8.00E-73  | 99.6  | 69.6 | 77.4 |
| Rsa1.0_01344.1.g25950.t1 | gb ABU96774.1  bZIP transcription factor [Brassica juncea]                                                                                                                                                                                                                                                                                                                                                                                                                                                                                                                                 | 384 | 386 | 0         | 100.5 | 93.0 | 95.6 | bZIP transcription factor                         | gbpln | Brassica juncea      | AT1G22070.1   Symbols: TGA3   TGA1A-related gene 3   chr1:7789651-7791821 FORWARD LENGTH=384                                                                                                                                                                                                                                                                                                                                                                                                | 384 | 384 | 0         | 100.0 | 84.1 | 90.4 |
| Rsa1.0_01344.1.g25951.t1 | gb EOA36270.1  hypothetical protein CARUB_v10010515mg [Capsella rubella]                                                                                                                                                                                                                                                                                                                                                                                                                                                                                                                   | 73  | 159 | 3.00E-22  | 217.8 | 75.3 | 82.2 | hypothetical protein CARUB_v10010515mg            | gbpln | Capsella rubella     | AT1G22065.1   Symbols:   unknown protein; FUNCTIONS IN: molecular,function unknown; INVOLVED IN: biological process unknown; LOCATED IN: cellular, component unknown; BEST Arabidopsis thaliana protein match is: unknown protein (TAIR:AT1G7885.1). Has 30201 Blast hits to 17322 proteins in 780 species: Archae - 12; Bacteria - 1396; Metazoa - 17338; Fungi - 3422; Plants - 5037; Viruses - 0; Other Eukaryotes - 2996 (source: NCBI BLINK).   chr1:7785889-7786107 FORWARD LENGTH=72 | 73  | 72  | 4.00E-21  | 98.6  | 74.0 | 82.2 |

|                          |                                                                                                                                                                                                                                                                                                                                                                                                                                                                                                                                                                                                                |      |      |           |       |      |      |                                                                 |       |                      |                                                                                                                                                                                                                                                                                                                                                                                                                                                                                                    |      |      |           |       |      |      |
|--------------------------|----------------------------------------------------------------------------------------------------------------------------------------------------------------------------------------------------------------------------------------------------------------------------------------------------------------------------------------------------------------------------------------------------------------------------------------------------------------------------------------------------------------------------------------------------------------------------------------------------------------|------|------|-----------|-------|------|------|-----------------------------------------------------------------|-------|----------------------|----------------------------------------------------------------------------------------------------------------------------------------------------------------------------------------------------------------------------------------------------------------------------------------------------------------------------------------------------------------------------------------------------------------------------------------------------------------------------------------------------|------|------|-----------|-------|------|------|
| Rsa1.0_01344.1.g25952.t1 | refXP_002893209.1   hypothetical protein ARALYDRAFT_889705 [Arabidopsis lyrata subsp. lyrata] gi 297339051 gb EFH69468.1   hypothetical protein ARALYDRAFT_889705 [Arabidopsis lyrata subsp. lyrata]                                                                                                                                                                                                                                                                                                                                                                                                           | 1946 | 2000 | 0         | 102.8 | 83.8 | 90.4 | hypothetical protein ARALYDRAFT_889705                          | gbpln | Arabidopsis lyrata   | AT1G22060.1   Symbols:   LOCATED IN: vacuole; EXPRESSED IN: 23 plant structures; EXPRESSED DURING: 13 growth stages; BEST Arabidopsis thaliana protein match is: FBD, F-box and Leucine Rich Repeat domains containing protein (TAIR:AT1G22000.1); Has 84739 Blast hits to 38714 proteins in 2257 species: Archae - 1436; Bacteria - 11314; Metazoa - 40747; Fungi - 7706; Plants - 4675; Viruses - 308; Other Eukaryotes - 18553 (source: NCBI BLink).   chr1:7773373-7780586 REVERSE LENGTH=1999 | 1946 | 1999 | 0         | 102.7 | 83.1 | 90.0 |
| Rsa1.0_01344.1.g25953.t1 | refXP_002890488.1   ubiquitin family protein [Arabidopsis lyrata subsp. lyrata] gi 297336330 gb EFH6747.1   ubiquitin family protein [Arabidopsis lyrata subsp. lyrata]                                                                                                                                                                                                                                                                                                                                                                                                                                        | 112  | 119  | 2.00E-46  | 106.3 | 82.1 | 87.5 | ubiquitin family protein                                        | gbpln | Arabidopsis lyrata   | AT1G22050.1   Symbols: MUB6   membrane-anchored ubiquitin-fold protein 6 precursor   chr1:7771897-7772843 FORWARD LENGTH=119                                                                                                                                                                                                                                                                                                                                                                       | 112  | 119  | 9.00E-49  | 106.3 | 80.4 | 86.6 |
| Rsa1.0_01344.1.g25954.t1 | refXP_002890487.1   kelch repeat-containing F-box family protein [Arabidopsis lyrata subsp. lyrata] gi 297336329 gb EFH6746.1   kelch repeat-containing F-box family protein [Arabidopsis lyrata subsp. lyrata] refNP_189531.1   receptor like protein 43 [Arabidopsis thaliana] gi 238479928 refNP_001154652.1   receptor like protein 43 [Arabidopsis thaliana] gi 9294230 dbj BAB02132.1   disease resistance protein-like [Arabidopsis thaliana] gi 332643980 gb AEE77501.1   receptor like protein 43 [Arabidopsis thaliana] gi 332643981 gb AEE77502.1   receptor like protein 43 [Arabidopsis thaliana] | 482  | 478  | 0         | 99.2  | 83.4 | 89.6 | kelch repeat-containing F-box family protein                    | gbpln | Arabidopsis lyrata   | AT1G22040.1   Symbols:   Galactose oxidase/kelch repeat superfamily protein   chr1:7768370-7769797 FORWARD LENGTH=475                                                                                                                                                                                                                                                                                                                                                                              | 482  | 475  | 0         | 98.5  | 83.2 | 89.8 |
| Rsa1.0_01344.1.g25955.t1 | refNP_189531.1   receptor like protein 43 [Arabidopsis thaliana] gi 238479928 refNP_001154652.1   receptor like protein 43 [Arabidopsis thaliana] gi 9294230 dbj BAB02132.1   disease resistance protein-like [Arabidopsis thaliana] gi 332643980 gb AEE77501.1   receptor like protein 43 [Arabidopsis thaliana] gi 332643981 gb AEE77502.1   receptor like protein 43 [Arabidopsis thaliana]                                                                                                                                                                                                                 | 746  | 711  | 1.00E-160 | 95.3  | 49.5 | 62.1 | receptor like protein 43                                        | gbpln | Arabidopsis thaliana | AT3G28890.2   Symbols: AtRLP43, RLP43   receptor like protein 43   chr3:10896706-10898841 REVERSE LENGTH=711                                                                                                                                                                                                                                                                                                                                                                                       | 746  | 711  | 1.00E-162 | 95.3  | 49.5 | 62.1 |
| Rsa1.0_01345.1.g25956.t1 | #                                                                                                                                                                                                                                                                                                                                                                                                                                                                                                                                                                                                              | #    | #    | #         | #     | #    | #    | -                                                               | ----  | ----                 | #                                                                                                                                                                                                                                                                                                                                                                                                                                                                                                  | #    | #    | #         | #     | #    |      |
| Rsa1.0_01345.1.g25957.t2 | gb EOA19360.1   hypothetical protein CARUB_v10000407mg [Capsella rubella]                                                                                                                                                                                                                                                                                                                                                                                                                                                                                                                                      | 648  | 662  | 0         | 102.2 | 74.1 | 82.9 | hypothetical protein CARUB_v10000407mg                          | gbpln | Capsella rubella     | AT4G11470.1   Symbols: CRK31   cysteine-rich RLK (RECEPTOR-like protein kinase) 31   chr4:6967729-6970161 FORWARD LENGTH=666                                                                                                                                                                                                                                                                                                                                                                       | 648  | 666  | 0         | 102.8 | 73.1 | 80.7 |
| Rsa1.0_01345.1.g25958.t1 | gb EMJ25392.1   hypothetical protein PRUPE_ppa017155mg, partial [Prunus persica] refXP_002862436.1   predicted protein [Arabidopsis lyrata subsp. lyrata] gi 297307949 gb EFH38694.1   predicted protein [Arabidopsis lyrata subsp. lyrata]                                                                                                                                                                                                                                                                                                                                                                    | 906  | 916  | 1.00E-131 | 101.1 | 31.3 | 47.9 | hypothetical protein PRUPE_ppa017155mg, partial                 | gbpln | Prunus persica       | AT4G29090.1   Symbols:   Ribonuclease H-like superfamily protein   chr4:14333528-14332555 FORWARD LENGTH=575                                                                                                                                                                                                                                                                                                                                                                                       | 906  | 575  | 9.00E-51  | 63.5  | 12.1 | 18.4 |
| Rsa1.0_01345.1.g25959.t1 | refXP_002862436.1   predicted protein [Arabidopsis lyrata subsp. lyrata] gi 297307949 gb EFH38694.1   predicted protein [Arabidopsis lyrata subsp. lyrata]                                                                                                                                                                                                                                                                                                                                                                                                                                                     | 565  | 530  | 9.00E-41  | 93.8  | 16.3 | 20.5 | predicted protein                                               | gbpln | Arabidopsis lyrata   | AT2G07760.1   Symbols:   Zinc knuckle (GCHC-type) family protein   chr2:3584420-3586278 REVERSE LENGTH=530                                                                                                                                                                                                                                                                                                                                                                                         | 565  | 530  | 4.00E-17  | 93.8  | 7.4  | 14.3 |
| Rsa1.0_01345.1.g25960.t1 | gb AAC28221.1   similar to reverse transcriptases (PFam: rvt.hmm, score: 60.13) [Arabidopsis thaliana] refXP_002872592.1   predicted protein [Arabidopsis lyrata subsp. lyrata] gi 297318429 gb EFH48851.1   predicted protein [Arabidopsis lyrata subsp. lyrata]                                                                                                                                                                                                                                                                                                                                              | 1112 | 1164 | 0         | 104.7 | 36.1 | 54.2 | similar to reverse transcriptases (PFam: rvt.hmm, score: 60.13) | gbpln | Arabidopsis thaliana | AT1G43760.1   Symbols:   DNase I-like superfamily protein   chr1:16528880-16531065 REVERSE LENGTH=626                                                                                                                                                                                                                                                                                                                                                                                              | 1112 | 626  | 4.00E-69  | 56.3  | 12.2 | 20.0 |
| Rsa1.0_01345.1.g25961.t1 | refXP_002872592.1   predicted protein [Arabidopsis lyrata subsp. lyrata] gi 297318429 gb EFH48851.1   predicted protein [Arabidopsis lyrata subsp. lyrata]                                                                                                                                                                                                                                                                                                                                                                                                                                                     | 1149 | 668  | 0         | 58.1  | 41.0 | 46.9 | predicted protein                                               | gbpln | Arabidopsis lyrata   | AT4G11480.1   Symbols: CRK32   cysteine-rich RLK (RECEPTOR-like protein kinase) 32   chr4:6971408-6973799 FORWARD LENGTH=656                                                                                                                                                                                                                                                                                                                                                                       | 1149 | 656  | 0         | 57.1  | 34.0 | 41.7 |
| Rsa1.0_01345.1.g25962.t1 | refXP_002872592.1   predicted protein [Arabidopsis lyrata subsp. lyrata] gi 297318429 gb EFH48851.1   predicted protein [Arabidopsis lyrata subsp. lyrata]                                                                                                                                                                                                                                                                                                                                                                                                                                                     | 131  | 668  | 2.00E-48  | 509.9 | 82.4 | 90.1 | predicted protein                                               | gbpln | Arabidopsis lyrata   | AT4G11530.1   Symbols: CRK34   cysteine-rich RLK (RECEPTOR-like protein kinase) 34   chr4:6987093-6989599 FORWARD LENGTH=669                                                                                                                                                                                                                                                                                                                                                                       | 131  | 669  | 6.00E-46  | 510.7 | 75.6 | 85.5 |
| Rsa1.0_01345.1.g25963.t1 | #                                                                                                                                                                                                                                                                                                                                                                                                                                                                                                                                                                                                              | #    | #    | #         | #     | #    | #    | -                                                               | ----  | ----                 | #                                                                                                                                                                                                                                                                                                                                                                                                                                                                                                  | #    | #    | #         | #     | #    |      |
| Rsa1.0_01345.1.g25964.t1 | refXP_002872595.1   predicted protein [Arabidopsis lyrata subsp. lyrata] gi 297318432 gb EFH48854.1   predicted protein [Arabidopsis lyrata subsp. lyrata]                                                                                                                                                                                                                                                                                                                                                                                                                                                     | 645  | 674  | 0         | 104.5 | 62.9 | 74.0 | predicted protein                                               | gbpln | Arabidopsis lyrata   | AT4G23190.1   Symbols: CRK11, AT-RLK3   cysteine-rich RLK (RECEPTOR-like protein kinase) 11   chr4:12141197-12143710 REVERSE LENGTH=667                                                                                                                                                                                                                                                                                                                                                            | 645  | 667  | 0         | 103.4 | 56.4 | 70.1 |
| Rsa1.0_01346.1.g25965.t1 | refXP_002893763.1   hypothetical protein ARALYDRAFT_473510 [Arabidopsis lyrata subsp. lyrata] gi 297339605 gb EFH70022.1   hypothetical protein ARALYDRAFT_473510 [Arabidopsis lyrata subsp. lyrata]                                                                                                                                                                                                                                                                                                                                                                                                           | 372  | 371  | 1.00E-179 | 99.7  | 83.1 | 88.4 | hypothetical protein ARALYDRAFT_473510                          | gbpln | Arabidopsis lyrata   | AT1G33340.1   Symbols:   ENTH/ANTH/VHS superfamily protein   chr1:12087628-12088752 FORWARD LENGTH=374                                                                                                                                                                                                                                                                                                                                                                                             | 372  | 374  | 1.00E-179 | 100.5 | 82.0 | 89.0 |

|                          |                                                                                                                                                                                                                                                                                                                                                                                                                                                                                                                                                                                                                                                              |      |      |           |       |      |      |                                                        |       |                      |                                                                                                                                                                                                                                                                                                                                                                        |      |      |           |       |      |      |
|--------------------------|--------------------------------------------------------------------------------------------------------------------------------------------------------------------------------------------------------------------------------------------------------------------------------------------------------------------------------------------------------------------------------------------------------------------------------------------------------------------------------------------------------------------------------------------------------------------------------------------------------------------------------------------------------------|------|------|-----------|-------|------|------|--------------------------------------------------------|-------|----------------------|------------------------------------------------------------------------------------------------------------------------------------------------------------------------------------------------------------------------------------------------------------------------------------------------------------------------------------------------------------------------|------|------|-----------|-------|------|------|
| Rsa1.0_01346.1.g25966.t2 | refNP_174601.2   Class I peptide chain release factor [Arabidopsis thaliana] gi 12322576 gb AAG51290.1 AC027035.13 unknown protein [Arabidopsis thaliana] gi 26450075 dbj BAC42157.1  putative peptide chain release factor [Arabidopsis thaliana] gi 29824307 gb AAP04114.1  putative peptide chain release factor [Arabidopsis thaliana] gi 332193463 gb AEE31584.1   Class I peptide chain release factor [Arabidopsis thaliana] refXP_002893770.1   proton-dependent oligopeptide transport family protein [Arabidopsis thaliana] gi 297339612 gb EFH70029.1   proton-dependent oligopeptide transport family protein [Arabidopsis lyrata subsp. lyrata] | 277  | 257  | 1.00E-103 | 92.8  | 72.9 | 79.1 | Class I peptide chain release factor                   | gbpln | Arabidopsis thaliana | AT1G33330.1   Symbols:   Class I peptide chain release factor   chr1:12084968-12086238 FORWARD LENGTH=257                                                                                                                                                                                                                                                              | 277  | 257  | 1.00E-105 | 92.8  | 72.9 | 79.1 |
| Rsa1.0_01346.1.g25967.t1 | refXP_002893770.1   proton-dependent oligopeptide transport family protein [Arabidopsis thaliana] gi 297339612 gb EFH70029.1   proton-dependent oligopeptide transport family protein [Arabidopsis lyrata subsp. lyrata]                                                                                                                                                                                                                                                                                                                                                                                                                                     | 600  | 599  | 0         | 99.8  | 91.7 | 94.7 | proton-dependent oligopeptide transport family protein | gbpln | Arabidopsis lyrata   | AT1G33440.1   Symbols:   Major facilitator superfamily protein   chr1:12127712-12130327 REVERSE LENGTH=601                                                                                                                                                                                                                                                             | 600  | 601  | 0         | 100.2 | 91.8 | 95.0 |
| Rsa1.0_01346.1.g25968.t1 | #                                                                                                                                                                                                                                                                                                                                                                                                                                                                                                                                                                                                                                                            | #    | #    | #         | #     | #    | #    | -                                                      | ----  | ----                 | #                                                                                                                                                                                                                                                                                                                                                                      | #    | #    | #         | #     | #    | #    |
| Rsa1.0_01346.1.g25969.t3 | dbj BAB10790.1  retroelement pol polyprotein-like [Arabidopsis thaliana] gb EOA32853.1  hypothetical protein CARUB_v10016179mg, partial [Capsella rubella]                                                                                                                                                                                                                                                                                                                                                                                                                                                                                                   | 593  | 1864 | 1.00E-17  | 314.3 | 9.3  | 14.0 | retroelement pol polyprotein-like                      | gbpln | Arabidopsis thaliana | #                                                                                                                                                                                                                                                                                                                                                                      | #    | #    | #         | #     | #    | #    |
| Rsa1.0_01346.1.g25970.t1 | dbj BAB10790.1  retroelement pol polyprotein-like [Arabidopsis thaliana] gb EOA32853.1  hypothetical protein CARUB_v10016179mg, partial [Capsella rubella]                                                                                                                                                                                                                                                                                                                                                                                                                                                                                                   | 130  | 312  | 3.00E-12  | 240.0 | 26.9 | 43.8 | hypothetical protein CARUB_v10016179mg, partial        | gbpln | Capsella rubella     | #                                                                                                                                                                                                                                                                                                                                                                      | #    | #    | #         | #     | #    | #    |
| Rsa1.0_01346.1.g25971.t1 | #                                                                                                                                                                                                                                                                                                                                                                                                                                                                                                                                                                                                                                                            | #    | #    | #         | #     | #    | #    | -                                                      | ----  | ----                 | #                                                                                                                                                                                                                                                                                                                                                                      | #    | #    | #         | #     | #    | #    |
| Rsa1.0_01347.1.g25972.t1 | #                                                                                                                                                                                                                                                                                                                                                                                                                                                                                                                                                                                                                                                            | #    | #    | #         | #     | #    | #    | -                                                      | ----  | ----                 | #                                                                                                                                                                                                                                                                                                                                                                      | #    | #    | #         | #     | #    | #    |
| Rsa1.0_01347.1.g25973.t1 | #                                                                                                                                                                                                                                                                                                                                                                                                                                                                                                                                                                                                                                                            | #    | #    | #         | #     | #    | #    | -                                                      | ----  | ----                 | #                                                                                                                                                                                                                                                                                                                                                                      | #    | #    | #         | #     | #    | #    |
| Rsa1.0_01347.1.g25974.t1 | #                                                                                                                                                                                                                                                                                                                                                                                                                                                                                                                                                                                                                                                            | #    | #    | #         | #     | #    | #    | -                                                      | ----  | ----                 | #                                                                                                                                                                                                                                                                                                                                                                      | #    | #    | #         | #     | #    | #    |
| Rsa1.0_01347.1.g25975.t1 | refXP_002872837.1   hypothetical protein ARALYDRAFT_490324 [Arabidopsis lyrata subsp. lyrata] gi 297318674 gb EFH49096.1   hypothetical protein ARALYDRAFT_490324 [Arabidopsis lyrata subsp. lyrata]                                                                                                                                                                                                                                                                                                                                                                                                                                                         | 232  | 259  | 5.00E-76  | 111.6 | 78.4 | 84.5 | hypothetical protein ARALYDRAFT_490324                 | gbpln | Arabidopsis lyrata   | AT4G02425.1   Symbols:   unknown protein; FUNCTIONS IN: molecular_function unknown; INVOLVED IN: biological_process unknown; LOCATED IN: chloroplast; Has 29 Blast hits to 28 proteins in 15 species: Archae - 0; Bacteria - 0; Metazoa - 8; Fungi - 0; Plants - 23; Viruses - 0; Other Eukaryotes - 0 (source: NCBI BLINK).   chr4:1067531-1068663 REVERSE LENGTH=262 | 232  | 262  | 2.00E-74  | 112.9 | 77.2 | 84.5 |
| Rsa1.0_01347.1.g25976.t1 | #                                                                                                                                                                                                                                                                                                                                                                                                                                                                                                                                                                                                                                                            | #    | #    | #         | #     | #    | #    | -                                                      | ----  | ----                 | #                                                                                                                                                                                                                                                                                                                                                                      | #    | #    | #         | #     | #    | #    |
| Rsa1.0_01347.1.g25977.t1 | refXP_002863767.1   hypothetical protein ARALYDRAFT_917496 [Arabidopsis lyrata subsp. lyrata] gi 297309602 gb EFH40026.1   hypothetical protein ARALYDRAFT_917496 [Arabidopsis lyrata subsp. lyrata]                                                                                                                                                                                                                                                                                                                                                                                                                                                         | 353  | 343  | 5.00E-44  | 97.2  | 26.3 | 33.7 | hypothetical protein ARALYDRAFT_917496                 | gbpln | Arabidopsis lyrata   | AT1G36675.1   Symbols:   glycine-rich protein   chr1:13867568-13869490 FORWARD LENGTH=268                                                                                                                                                                                                                                                                              | 353  | 268  | 8.00E-16  | 75.9  | 17.3 | 22.7 |
| Rsa1.0_01347.1.g25978.t1 | refXP_002874916.1   hypothetical protein ARALYDRAFT_327556 [Arabidopsis lyrata subsp. lyrata] gi 297320753 gb EFH51175.1   hypothetical protein ARALYDRAFT_327556 [Arabidopsis lyrata subsp. lyrata]                                                                                                                                                                                                                                                                                                                                                                                                                                                         | 223  | 281  | 3.00E-66  | 126.0 | 66.4 | 69.1 | hypothetical protein ARALYDRAFT_327556                 | gbpln | Arabidopsis lyrata   | AT1G02840.3   Symbols: SR1, ATSRP34, SRP34, SR34, At-SR34   RNA-binding (RRM/RBD/RNP motifs) family protein   chr1:626918-629583 FORWARD LENGTH=303                                                                                                                                                                                                                    | 223  | 303  | 1.00E-66  | 135.9 | 62.8 | 67.7 |
| Rsa1.0_01347.1.g25979.t1 | gb AAF69169.1 AC007915.21 F27F5.21 [Arabidopsis thaliana]                                                                                                                                                                                                                                                                                                                                                                                                                                                                                                                                                                                                    | 848  | 1023 | 6.00E-76  | 120.6 | 19.0 | 25.1 | F27F5.21                                               | gbpln | Arabidopsis thaliana | AT4G29090.1   Symbols:   Ribonuclease H-like superfamily protein   chr4:14333528-14335255 FORWARD LENGTH=575                                                                                                                                                                                                                                                           | 848  | 575  | 2.00E-26  | 67.8  | 8.6  | 14.4 |
| Rsa1.0_01348.1.g25980.t1 | gb ABD64987.1  hypothetical protein 26.t00003 [Brassica oleracea]                                                                                                                                                                                                                                                                                                                                                                                                                                                                                                                                                                                            | 389  | 330  | 2.00E-15  | 84.8  | 12.3 | 14.1 | hypothetical protein 26.t00003                         | gbpln | Brassica oleracea    | #                                                                                                                                                                                                                                                                                                                                                                      | #    | #    | #         | #     | #    | #    |
| Rsa1.0_01348.1.g25981.t1 | refXP_002871479.1   predicted protein [Arabidopsis lyrata subsp. lyrata] gi 297317316 gb EFH47738.1   predicted protein [Arabidopsis lyrata subsp. lyrata]                                                                                                                                                                                                                                                                                                                                                                                                                                                                                                   | 998  | 1102 | 0         | 110.4 | 71.7 | 80.8 | predicted protein                                      | gbpln | Arabidopsis lyrata   | AT5G11530.1   Symbols: EMF1   embryonic flower 1 (EMF1)   chr5:3697140-3700930 FORWARD LENGTH=1096                                                                                                                                                                                                                                                                     | 998  | 1096 | 0         | 109.8 | 69.5 | 79.4 |
| Rsa1.0_01348.1.g25982.t1 | refXP_002873518.1   FAD-binding domain-containing protein [Arabidopsis lyrata subsp. lyrata] gi 297319355 gb EFH49777.1   FAD-binding domain-containing protein [Arabidopsis lyrata subsp. lyrata] refXP_002873520.1   hypothetical protein ARALYDRAFT_487993 [Arabidopsis lyrata subsp. lyrata] gi 297319357 gb EFH49779.1   hypothetical protein ARALYDRAFT_487993 [Arabidopsis lyrata subsp. lyrata]                                                                                                                                                                                                                                                      | 584  | 584  | 0         | 100.0 | 88.9 | 94.5 | FAD-binding domain-containing protein                  | gbpln | Arabidopsis lyrata   | AT5G11540.1   Symbols:   D-arabinono-1,4-lactone oxidase family protein   chr5:3703002-3704981 REVERSE LENGTH=585                                                                                                                                                                                                                                                      | 584  | 585  | 0         | 100.2 | 88.2 | 94.7 |
| Rsa1.0_01348.1.g25983.t1 | refXP_002873520.1   hypothetical protein ARALYDRAFT_487993 [Arabidopsis lyrata subsp. lyrata] gi 297319357 gb EFH49779.1   hypothetical protein ARALYDRAFT_487993 [Arabidopsis lyrata subsp. lyrata]                                                                                                                                                                                                                                                                                                                                                                                                                                                         | 1314 | 982  | 0         | 74.7  | 68.3 | 71.9 | hypothetical protein ARALYDRAFT_487993                 | gbpln | Arabidopsis lyrata   | AT5G11560.1   Symbols:   catalytics   chr5:3709734-3713994 REVERSE LENGTH=982                                                                                                                                                                                                                                                                                          | 1314 | 982  | 0         | 74.7  | 68.1 | 71.8 |

|                          |                                                                                                                                                                                                                                                                                                                                                                                                                                                                                                                                                                              |     |      |           |       |      |      |                                                     |       |                      |                                                                                                                                               |     |     |           |       |      |      |
|--------------------------|------------------------------------------------------------------------------------------------------------------------------------------------------------------------------------------------------------------------------------------------------------------------------------------------------------------------------------------------------------------------------------------------------------------------------------------------------------------------------------------------------------------------------------------------------------------------------|-----|------|-----------|-------|------|------|-----------------------------------------------------|-------|----------------------|-----------------------------------------------------------------------------------------------------------------------------------------------|-----|-----|-----------|-------|------|------|
| Rsa1.0_01348.1.g25984.t1 | #                                                                                                                                                                                                                                                                                                                                                                                                                                                                                                                                                                            | #   | #    | #         | #     | #    | #    | #                                                   | -     | ----                 | ----                                                                                                                                          | #   | #   | #         | #     | #    | #    |
| Rsa1.0_01348.1.g25985.t1 | emb[CAB87718.1] putative protein [Arabidopsis thaliana]                                                                                                                                                                                                                                                                                                                                                                                                                                                                                                                      | 504 | 541  | 0         | 107.3 | 86.3 | 91.9 | putative protein                                    | gbpln | Arabidopsis thaliana | AT5G11580.1   Symbols:   Regulator of chromosome condensation (RCC1) family protein   chr5:3718913-3721125 FORWARD LENGTH=553                 | 504 | 553 | 0         | 109.7 | 86.3 | 91.9 |
| Rsa1.0_01348.1.g25986.t1 | #                                                                                                                                                                                                                                                                                                                                                                                                                                                                                                                                                                            | #   | #    | #         | #     | #    | #    | -                                                   | ----  | ----                 | #                                                                                                                                             | #   | #   | #         | #     | #    | #    |
| Rsa1.0_01349.1.g25987.t1 | gb[EOA38519.1] hypothetical protein CARUB_v10010308mg [Capsella rubella]                                                                                                                                                                                                                                                                                                                                                                                                                                                                                                     | 171 | 206  | 2.00E-22  | 120.5 | 36.3 | 48.0 | hypothetical protein CARUB_v10010308mg              | gbpln | Capsella rubella     | #                                                                                                                                             | #   | #   | #         | #     | #    | #    |
| Rsa1.0_01349.1.g25988.t1 | ref[XP_002885646.1] hypothetical protein ARALYDRAFT_479953 [Arabidopsis lyrata subsp. lyrata] gi 297331486 gb EFH61905.1  hypothetical protein ARALYDRAFT_479953 [Arabidopsis lyrata subsp. lyrata]                                                                                                                                                                                                                                                                                                                                                                          | 600 | 603  | 0         | 100.5 | 75.7 | 85.5 | hypothetical protein ARALYDRAFT_479953              | gbpln | Arabidopsis lyrata   | AT3G24440.1   Symbols: VRN5, VIL1   Fibronectin type III domain-containing protein   chr3:8876207-8878171 REVERSE LENGTH=602                  | 600 | 602 | 0         | 100.3 | 73.3 | 83.3 |
| Rsa1.0_01349.1.g25989.t1 | gb[AAC67331.1] putative non-LTR retroelement reverse transcriptase [Arabidopsis thaliana]                                                                                                                                                                                                                                                                                                                                                                                                                                                                                    | 710 | 1449 | 1.00E-63  | 204.1 | 21.3 | 31.3 | putative non-LTR retroelement reverse transcriptase | gbpln | Arabidopsis thaliana | AT3G24255.1   Symbols:   RNA-directed DNA polymerase (reverse transcriptase)-related family protein   chr3:8789471-8793208 FORWARD LENGTH=746 | 710 | 746 | 3.00E-49  | 105.1 | 14.6 | 20.3 |
| Rsa1.0_01349.1.g25990.t1 | ref[NP_189085.1] hydrolase, alpha/beta fold family protein [Arabidopsis thaliana] gi 11994705 dbj BAB02943.1  hydrolase-like protein [Arabidopsis thaliana] gi 51536428 gb AAU05452.1  At3g24420 [Arabidopsis thaliana] gi 53828585 gb AAU94402.1  At3g24420 [Arabidopsis thaliana] gi 110738305 dbj BAF01081.1  hypothetical protein [Arabidopsis thaliana] gi 332643375 gb AEE76896.1  hydrolase, alpha/beta fold family protein [Arabidopsis thaliana]                                                                                                                    | 273 | 273  | 1.00E-143 | 100.0 | 91.2 | 96.3 | hydrolase, alpha/beta fold family protein           | gbpln | Arabidopsis thaliana | AT3G24420.1   Symbols:   alpha/beta-Hydrolases superfamily protein   chr3:8863111-8864883 REVERSE LENGTH=273                                  | 273 | 273 | 2.33E-156 | 100.0 | 91.2 | 96.3 |
| Rsa1.0_01349.1.g25991.t1 | ref[NP_189078.2] syntaxin-32 [Arabidopsis thaliana] gi 28380163 sp Q9LK09.1 SYP32_ARAT H RecName: Full=Syntaxin-32; Short=AtSYP32 gi 11994697 dbj BAB02935.1  probable t-SNARE (soluble NSF attachment protein receptor) SED5; ER to Golgi transport [Arabidopsis thaliana] gi 28393777 gb AAO42298.1  putative syntaxin SYP32 [Arabidopsis thaliana] gi 30793955 gb AAP40429.1  putative syntaxin SYP32 [Arabidopsis thaliana] gi 332643371 gb AEE76892.1  syntaxin-32 [Arabidopsis thaliana]                                                                               | 339 | 347  | 1.00E-147 | 102.4 | 83.5 | 90.9 | syntaxin-32                                         | gbpln | Arabidopsis thaliana | AT3G24350.1   Symbols: SYP32, ATSYP32   syntaxin of plants 32   chr3:8837733-8839402 FORWARD LENGTH=347                                       | 339 | 347 | 1.00E-149 | 102.4 | 83.5 | 90.9 |
| Rsa1.0_01350.1.g25992.t1 | ref[NP_191084.1] uncharacterized protein [Arabidopsis thaliana] gi 297820286 ref XP_002878026.1  hypothetical protein ARALYDRAFT_485945 [Arabidopsis lyrata subsp. lyrata] gi 7019657 emb CAB75758.1  putative protein [Arabidopsis thaliana] gi 19310583 gb AAL85022.1  unknown protein [Arabidopsis thaliana] gi 24030411 gb AAN41364.1  unknown protein [Arabidopsis thaliana] gi 297323864 gb EFH54285.1  hypothetical protein ARALYDRAFT_485945 [Arabidopsis lyrata subsp. lyrata] gi 332645835 gb AEE79356.1  uncharacterized protein AT3G55240 [Arabidopsis thaliana] | 95  | 95   | 8.00E-45  | 100.0 | 95.8 | 98.9 | uncharacterized protein                             | gbpln | Arabidopsis lyrata   | AT3G55240.1   Symbols:   Plant protein 1589 of unknown function   chr3:20473876-20474705 REVERSE LENGTH=95                                    | 95  | 95  | 1.00E-47  | 100.0 | 95.8 | 98.9 |
| Rsa1.0_01350.1.g25993.t1 | ref[XP_002876289.1] hypothetical protein ARALYDRAFT_485944 [Arabidopsis lyrata subsp. lyrata] gi 297322127 gb EFH52548.1  hypothetical protein ARALYDRAFT_485944 [Arabidopsis lyrata subsp. lyrata]                                                                                                                                                                                                                                                                                                                                                                          | 309 | 297  | 1.00E-142 | 96.1  | 83.5 | 86.7 | hypothetical protein ARALYDRAFT_485944              | gbpln | Arabidopsis lyrata   | AT3G55230.1   Symbols:   Disease resistance-responsive (dirigent-like protein) family protein   chr3:20471824-20472744 FORWARD LENGTH=306     | 309 | 306 | 1.00E-138 | 99.0  | 87.4 | 91.3 |
| Rsa1.0_01350.1.g25994.t9 | #                                                                                                                                                                                                                                                                                                                                                                                                                                                                                                                                                                            | #   | #    | #         | #     | #    | #    | -                                                   | ----  | ----                 | #                                                                                                                                             | #   | #   | #         | #     | #    | #    |
| Rsa1.0_01350.1.g25995.t1 | #                                                                                                                                                                                                                                                                                                                                                                                                                                                                                                                                                                            | #   | #    | #         | #     | #    | #    | -                                                   | ----  | ----                 | #                                                                                                                                             | #   | #   | #         | #     | #    | #    |

|                          |                                                                                                                                                                                                                                                                                                                                                                                                                                                              |     |     |           |       |      |      |                                                                                                              |       |                      |                                                                                                                                 |     |     |           |       |      |      |
|--------------------------|--------------------------------------------------------------------------------------------------------------------------------------------------------------------------------------------------------------------------------------------------------------------------------------------------------------------------------------------------------------------------------------------------------------------------------------------------------------|-----|-----|-----------|-------|------|------|--------------------------------------------------------------------------------------------------------------|-------|----------------------|---------------------------------------------------------------------------------------------------------------------------------|-----|-----|-----------|-------|------|------|
| Rsa1.0_01350.1.g25996.t1 | ref NP_191075.2  exocyst complex component 7 [Arabidopsis thaliana]<br>gi 18377618 gb AAL66959.1  unknown protein [Arabidopsis thaliana]<br>gi 20465379 gb AAM20093.1  unknown protein [Arabidopsis thaliana]<br>gi 332645825 gb AEE79346.1  exocyst subunit exo70 family protein H1 [Arabidopsis thaliana]                                                                                                                                                  | 635 | 636 | 0         | 100.2 | 87.7 | 93.5 | exocyst complex component 7                                                                                  | gbpln | Arabidopsis thaliana | AT3G55150.1   Symbols: ATEXO70H1, EXO70H1   exocyst subunit exo70 family protein H1   chr3:20440655-20442565 REVERSE LENGTH=636 | 635 | 636 | 0         | 100.2 | 87.7 | 93.5 |
| Rsa1.0_01350.1.g25997.t1 | ref NP_191074.2  pectate lyase [Arabidopsis thaliana]<br>gi 190886519 gb ACE95182.1 <br>At3g55140 [Arabidopsis thaliana]<br>gi 192571722 gb ACF04906.1 <br>At3g55140 [Arabidopsis thaliana]<br>gi 332645823 gb AEE79344.1  pectate lyase [Arabidopsis thaliana]                                                                                                                                                                                              | 331 | 331 | 0         | 100.0 | 93.1 | 96.7 | pectate lyase                                                                                                | gbpln | Arabidopsis thaliana | AT3G55140.1   Symbols: Pectin lyase-like superfamily protein   chr3:20438819-20440225 FORWARD LENGTH=331                        | 331 | 331 | 0         | 100.0 | 93.1 | 96.7 |
| Rsa1.0_01350.1.g25998.t1 | gb EOA25071.1  hypothetical protein CARUB_v10018379mg [Capsella rubella]                                                                                                                                                                                                                                                                                                                                                                                     | 723 | 725 | 0         | 100.3 | 85.9 | 91.8 | hypothetical protein CARUB_v10018379mg                                                                       | gbpln | Capsella rubella     | AT3G55130.1   Symbols: ATWBC19, WBC19   white-brown complex homolog 19   chr3:20434111-20436288 REVERSE LENGTH=725              | 723 | 725 | 0         | 100.3 | 85.1 | 91.3 |
| Rsa1.0_01351.1.g25999.t1 | #                                                                                                                                                                                                                                                                                                                                                                                                                                                            | #   | #   | #         | #     | #    | #    | -                                                                                                            | ----  | ----                 | #                                                                                                                               | #   | #   | #         | #     | #    | #    |
| Rsa1.0_01351.1.g26000.t1 | ref NP_680210.2  alanyl-tRNA synthetase [Arabidopsis thaliana]<br>gi 322510075 sp Q9FFC7.2 SYAP_ARAT H RecName: Full=Probable alanine-tRNA ligase, chloroplastic; AltName: Full=Alanyl-tRNA synthetase; Short=AlaRS; AltName: Full=Protein EMBRYO DEFECTIVE 1030; AltName: Full=Protein EMBRYO DEFECTIVE 263; AltName: Full=Protein EMBRYO DEFECTIVE 86; Flags: Precursor<br>gi 332005698 gb AED93081.1  probable alanine-tRNA ligase [Arabidopsis thaliana] | 975 | 978 | 0         | 100.3 | 89.9 | 95.8 | alanyl-tRNA synthetase                                                                                       | gbpln | Arabidopsis thaliana | AT5G22800.1   Symbols: EMB86, EMB1030, EMB263   Alanyl-tRNA synthetase, class IIc   chr5:7616221-7619961 REVERSE LENGTH=978     | 975 | 978 | 0         | 100.3 | 89.9 | 95.8 |
| Rsa1.0_01351.1.g26001.t1 | sp Q9FFC6.3 GDL78_ARATH RecName: Full=GDSL esterase/lipase At5g22810; AltName: Full=Extracellular lipase At5g22810; Flags: Precursor                                                                                                                                                                                                                                                                                                                         | 362 | 362 | 0         | 100.0 | 89.5 | 94.5 | RecName: Full=GDSL esterase/lipase At5g22810; AltName: Full=Extracellular lipase At5g22810; Flags: Precursor | ----  | ----                 | AT5G22810.1   Symbols: GDSL-like Lipase/Acylhydrolase superfamily protein   chr5:7621568-7623367 FORWARD LENGTH=337             | 362 | 337 | 0         | 93.1  | 84.8 | 89.8 |
| Rsa1.0_01351.1.g26002.t1 | #                                                                                                                                                                                                                                                                                                                                                                                                                                                            | #   | #   | #         | #     | #    | #    | -                                                                                                            | ----  | ----                 | #                                                                                                                               | #   | #   | #         | #     | #    | #    |
| Rsa1.0_01351.1.g26003.t1 | ref NP_176495.1  pentatricopeptide repeat-containing protein [Arabidopsis thaliana]<br>gi 15169919 sp Q9CAN6.1 PPR97_ARAT H RecName: Full=Pentatricopeptide repeat-containing protein At1g63070, mitochondrial; Flags: Precursor<br>gi 12323265 gb AAG51617.1 AC010795.21 unknown protein; 38394-36551 [Arabidopsis thaliana]<br>gi 332195929 gb AEE34050.1  pentatricopeptide repeat-containing protein [Arabidopsis thaliana]                              | 507 | 590 | 0         | 116.4 | 66.3 | 79.1 | pentatricopeptide repeat-containing protein                                                                  | gbpln | Arabidopsis thaliana | AT1G63070.1   Symbols: pentatricopeptide (PPR) repeat-containing protein   chr1:23385324-23387167 REVERSE LENGTH=590            | 507 | 590 | 0         | 116.4 | 66.3 | 79.1 |
| Rsa1.0_01351.1.g26004.t1 | ref XP_002874094.1  predicted protein [Arabidopsis lyrata subsp. lyrata]<br>gi 297319931 gb EFH50353.1  predicted protein [Arabidopsis lyrata subsp. lyrata]                                                                                                                                                                                                                                                                                                 | 545 | 531 | 0         | 97.4  | 73.4 | 82.0 | predicted protein                                                                                            | gbpln | Arabidopsis lyrata   | AT5G22820.2   Symbols: ARM repeat superfamily protein   chr5:7623886-7626943 REVERSE LENGTH=534                                 | 545 | 534 | 0         | 98.0  | 73.4 | 81.8 |
| Rsa1.0_01351.1.g26005.t1 | gb EOA20351.1  hypothetical protein CARUB_v10000659mg [Capsella rubella]                                                                                                                                                                                                                                                                                                                                                                                     | 529 | 540 | 0         | 102.1 | 88.5 | 93.4 | hypothetical protein CARUB_v10000659mg                                                                       | gbpln | Capsella rubella     | AT5G22840.1   Symbols: Protein kinase superfamily protein   chr5:7631103-7633103 REVERSE LENGTH=536                             | 529 | 538 | 0         | 101.7 | 88.8 | 93.2 |
| Rsa1.0_01351.1.g26006.t1 | ref NP_197676.2  aspartyl protease family protein [Arabidopsis thaliana]<br>gi 110736370 dbj BAF00154.1  protease-like protein [Arabidopsis thaliana]<br>gi 332005704 gb AED93087.1  aspartyl protease family protein [Arabidopsis thaliana]                                                                                                                                                                                                                 | 505 | 493 | 0         | 97.6  | 90.3 | 94.5 | aspartyl protease family protein                                                                             | gbpln | Arabidopsis thaliana | AT5G22850.1   Symbols: Eukaryotic aspartyl protease family protein   chr5:7633711-7636298 REVERSE LENGTH=493                    | 505 | 493 | 0         | 97.6  | 90.3 | 94.5 |
| Rsa1.0_01351.1.g26007.t1 | ref XP_002874097.1  serine carboxypeptidase S28 family protein [Arabidopsis lyrata subsp. lyrata]<br>gi 297319934 gb EFH50356.1  serine carboxypeptidase S28 family protein [Arabidopsis lyrata subsp. lyrata]                                                                                                                                                                                                                                               | 467 | 501 | 0         | 107.3 | 79.9 | 85.9 | serine carboxypeptidase S28 family protein                                                                   | gbpln | Arabidopsis lyrata   | AT5G22860.1   Symbols: Serine carboxypeptidase S28 family protein   chr5:7639511-7642945 REVERSE LENGTH=502                     | 467 | 502 | 0         | 107.5 | 79.2 | 85.0 |
| Rsa1.0_01351.1.g26008.t1 | gb AAM61502.1  prolylcarboxypeptidase-like protein [Arabidopsis thaliana]                                                                                                                                                                                                                                                                                                                                                                                    | 453 | 502 | 1.00E-134 | 110.8 | 54.1 | 59.8 | prolylcarboxypeptidase-like protein                                                                          | gbpln | Arabidopsis thaliana | AT5G22860.1   Symbols: Serine carboxypeptidase S28 family protein   chr5:7639511-7642945 REVERSE LENGTH=502                     | 453 | 502 | 1.00E-136 | 110.8 | 53.9 | 59.8 |

|                          |                                                                                                                                                                                                                                                                                                                                                                                                                                                                                                                                                                                  |      |      |           |       |      |      |                                                 |       |                      |                                                                                                                                                                                                                                                                                                                                                         |      |      |           |       |      |      |
|--------------------------|----------------------------------------------------------------------------------------------------------------------------------------------------------------------------------------------------------------------------------------------------------------------------------------------------------------------------------------------------------------------------------------------------------------------------------------------------------------------------------------------------------------------------------------------------------------------------------|------|------|-----------|-------|------|------|-------------------------------------------------|-------|----------------------|---------------------------------------------------------------------------------------------------------------------------------------------------------------------------------------------------------------------------------------------------------------------------------------------------------------------------------------------------------|------|------|-----------|-------|------|------|
| Rsa1.0_01351.1.g26009.t1 | gb AAG51783.1 AC079679.3 reverse transcriptase, putative; 16838-20266 [Arabidopsis thaliana]                                                                                                                                                                                                                                                                                                                                                                                                                                                                                     | 451  | 1142 | 1.00E-101 | 253.2 | 38.4 | 49.2 | reverse transcriptase, putative; 16838-20266    | gbpln | Arabidopsis thaliana | AT1G43760.1   Symbols:   DNase I-like superfamily protein   chr1:16528880-16531065 REVERSE LENGTH=626                                                                                                                                                                                                                                                   | 451  | 626  | 9.00E-37  | 138.8 | 25.5 | 41.9 |
| Rsa1.0_01352.1.g26010.t1 | ref XP_002869407.1  hypothetical protein ARALYDRAFT_491771 [Arabidopsis lyrata subsp. lyrata] gi 297315243 gb EFH45666.1  hypothetical protein ARALYDRAFT_491771 [Arabidopsis lyrata subsp. lyrata]                                                                                                                                                                                                                                                                                                                                                                              | 163  | 173  | 9.00E-77  | 106.1 | 89.6 | 97.5 | hypothetical protein ARALYDRAFT_491771          | gbpln | Arabidopsis lyrata   | AT4G29870.1   Symbols:   Oligosaccharyltransferase complex/magnesium transporter family protein   chr4:14606012-14606530 FORWARD LENGTH=172                                                                                                                                                                                                             | 163  | 172  | 1.00E-77  | 105.5 | 89.6 | 96.3 |
| Rsa1.0_01352.1.g26011.t1 | gb EOA27289.1  hypothetical protein CARUB_v10023406mg [Capsella rubella]                                                                                                                                                                                                                                                                                                                                                                                                                                                                                                         | 390  | 386  | 0         | 99.0  | 86.2 | 90.8 | hypothetical protein CARUB_v10023406mg          | gbpln | Capsella rubella     | AT4G29860.1   Symbols: EMB2757, TAN   Transducin/WD40 repeat-like superfamily protein   chr4:14603296-14605704 REVERSE LENGTH=386                                                                                                                                                                                                                       | 390  | 386  | 0         | 99.0  | 85.6 | 90.3 |
| Rsa1.0_01352.1.g26012.t1 | ref NP_194714.1  uncharacterized protein [Arabidopsis thaliana] gi 4914409 emb CAB43660.1  putative protein [Arabidopsis thaliana] gi 7269884 emb CAB79743.1  putative protein [Arabidopsis thaliana] gi 89800369 gb AD57496.1  A14g29850 [Arabidopsis thaliana] gi 332660285 gb AEE85685.1  uncharacterized protein AT4G29850 [Arabidopsis thaliana] ref NP_194713.1  threonine synthase 1 [Arabidopsis thaliana] gi 20140904 sp Q9S7B5.1 THRC1_ARAT H RecName: Full=Threonine synthase 1, chloroplastic; AltName: Full=Protein METHIONINE OVER-ACCUMULATOR 2; Flags: Precursor | 103  | 103  | 7.00E-48  | 100.0 | 91.3 | 97.1 | uncharacterized protein                         | gbpln | Arabidopsis thaliana | AT4G29850.1   Symbols:   Eukaryotic protein of unknown function (DUF872)   chr4:14601818-14602874 REVERSE LENGTH=103                                                                                                                                                                                                                                    | 103  | 103  | 1.00E-50  | 100.0 | 91.3 | 97.1 |
| Rsa1.0_01352.1.g26013.t1 | gi 4850369 db BAA7707.1  threonine synthase [Arabidopsis thaliana] gi 4914408 emb CAB43659.1  threonine synthase [Arabidopsis thaliana] gi 7269883 emb CAB79742.1  threonine synthase [Arabidopsis thaliana] gi 332660284 gb AEE85684.1  threonine synthase 1 [Arabidopsis thaliana]                                                                                                                                                                                                                                                                                             | 500  | 526  | 0         | 105.2 | 90.8 | 93.2 | threonine synthase 1                            | gbpln | Arabidopsis thaliana | AT4G29840.1   Symbols: MTO2, TS   Pyridoxal-5'-phosphate-dependent enzyme family protein   chr4:14599434-14601014 REVERSE LENGTH=526                                                                                                                                                                                                                    | 500  | 526  | 0         | 105.2 | 90.8 | 93.2 |
| Rsa1.0_01352.1.g26014.t1 | gb EOA27427.1  hypothetical protein CARUB_v10023560mg, partial [Capsella rubella]                                                                                                                                                                                                                                                                                                                                                                                                                                                                                                | 321  | 343  | 1.00E-180 | 106.9 | 98.1 | 99.1 | hypothetical protein CARUB_v10023560mg, partial | gbpln | Capsella rubella     | AT4G29830.1   Symbols: VIP3   Transducin/WD40 repeat-like superfamily protein   chr4:14597728-14599157 FORWARD LENGTH=321                                                                                                                                                                                                                               | 321  | 321  | 0         | 100.0 | 98.1 | 99.7 |
| Rsa1.0_01352.1.g26015.t4 | gb EOA27858.1  hypothetical protein CARUB_v10024016mg [Capsella rubella]                                                                                                                                                                                                                                                                                                                                                                                                                                                                                                         | 220  | 222  | 1.00E-105 | 100.9 | 85.9 | 92.7 | hypothetical protein CARUB_v10024016mg          | gbpln | Capsella rubella     | AT4G29820.1   Symbols: CFIM-25, ATCFIM-25   homolog of CFIM-25   chr4:14596047-14597317 REVERSE LENGTH=222                                                                                                                                                                                                                                              | 220  | 222  | 1.00E-106 | 100.9 | 85.5 | 90.9 |
| Rsa1.0_01352.1.g26016.t1 | gb AD275456.1  mitogen-associated protein kinase kinase 1 [Brassica napus]                                                                                                                                                                                                                                                                                                                                                                                                                                                                                                       | 364  | 364  | 0         | 100.0 | 97.5 | 98.9 | mitogen-associated protein kinase kinase 1      | gbpln | Brassica napus       | AT4G29810.1   Symbols: ATMKK2, MKK2, MK1   MAP kinase kinase 2   chr4:14593299-14595241 REVERSE LENGTH=363                                                                                                                                                                                                                                              | 364  | 363  | 0         | 99.7  | 92.0 | 96.2 |
| Rsa1.0_01352.1.g26017.t1 | gb EOA26885.1  hypothetical protein CARUB_v10022979mg [Capsella rubella]                                                                                                                                                                                                                                                                                                                                                                                                                                                                                                         | 533  | 530  | 0         | 99.4  | 92.7 | 95.3 | hypothetical protein CARUB_v10022979mg          | gbpln | Capsella rubella     | AT4G29800.2   Symbols: PLP8   PATATIN-like protein 8   chr4:14590862-14592536 REVERSE LENGTH=526                                                                                                                                                                                                                                                        | 533  | 526  | 0         | 98.7  | 91.6 | 94.6 |
| Rsa1.0_01352.1.g26018.t3 | ref NP_194708.1  uncharacterized protein [Arabidopsis thaliana] gi 4914403 emb CAB43654.1  putative protein [Arabidopsis thaliana] gi 7269878 emb CAB79737.1  putative protein [Arabidopsis thaliana] gi 15810173 gb AAL06988.1  AT4g29790/F27B13_30 [Arabidopsis thaliana] gi 27363444 gb AAO11641.1  AT4g29790/F27B13_30 [Arabidopsis thaliana] gi 332660276 gb AEE85676.1  uncharacterized protein AT4G29790 [Arabidopsis thaliana]                                                                                                                                           | 1199 | 1211 | 0         | 101.0 | 83.8 | 90.2 | uncharacterized protein                         | gbpln | Arabidopsis thaliana | AT4G29790.1   Symbols:   unknown protein; BEST Arabidopsis thaliana protein match is: unknown protein (TAIR:AT2G19390.1); Has 538 Blast hits to 357 proteins in 124 species: Archae - 0; Bacteria - 74; Metazoa - 109; Fungi - 58; Plants - 105; Viruses - 2; Other Eukaryotes - 190 (source: NCBI BLINK).   chr4:14584228-14590123 FORWARD LENGTH=1211 | 1199 | 1211 | 0         | 101.0 | 83.8 | 90.2 |
| Rsa1.0_01352.1.g26019.t1 | ref NP_567834.2  uncharacterized protein [Arabidopsis thaliana] gi 27754582 gb AAO22738.1  unknown protein [Arabidopsis thaliana] gi 28973634 gb AAC64139.1  unknown protein [Arabidopsis thaliana] gi 332660275 gb AEE85675.1  uncharacterized protein AT4G29780 [Arabidopsis thaliana]                                                                                                                                                                                                                                                                                         | 528  | 540  | 0         | 102.3 | 85.6 | 91.3 | uncharacterized protein                         | gbpln | Arabidopsis thaliana | AT4G29780.1   Symbols:   unknown protein; BEST Arabidopsis thaliana protein match is: unknown protein (TAIR:AT5G12010.1); Has 945 Blast hits to 944 proteins in 87 species: Archae - 0; Bacteria - 0; Metazoa - 519; Fungi - 43; Plants - 365; Viruses - 0; Other Eukaryotes - 18 (source: NCBI BLINK).   chr4:14579859-14581481 FORWARD LENGTH=540     | 528  | 540  | 0         | 102.3 | 85.6 | 91.3 |
| Rsa1.0_01352.1.g26020.t1 | gb EOA20120.1  hypothetical protein CARUB_v10000398mg [Capsella rubella]                                                                                                                                                                                                                                                                                                                                                                                                                                                                                                         | 724  | 667  | 1.00E-140 | 92.1  | 39.2 | 51.1 | hypothetical protein CARUB_v10000398mg          | gbpln | Capsella rubella     | AT5G22355.1   Symbols:   Cysteine/Histidine-rich C1 domain family protein   chr5:7401762-7403756 FORWARD LENGTH=664                                                                                                                                                                                                                                     | 724  | 664  | 1.00E-141 | 91.7  | 40.6 | 51.5 |

|                          |                                                                                                                                                                                                                                                                                                                                                                                                                                                                                                                                                                                                                                                                                   |      |      |           |        |      |      |                                                                  |       |                      |                                                                                                                                               |      |      |           |        |      |      |
|--------------------------|-----------------------------------------------------------------------------------------------------------------------------------------------------------------------------------------------------------------------------------------------------------------------------------------------------------------------------------------------------------------------------------------------------------------------------------------------------------------------------------------------------------------------------------------------------------------------------------------------------------------------------------------------------------------------------------|------|------|-----------|--------|------|------|------------------------------------------------------------------|-------|----------------------|-----------------------------------------------------------------------------------------------------------------------------------------------|------|------|-----------|--------|------|------|
| Rsa1.0_01352.1.g26021.t1 | ref[XP_002867391.1] hypothetical protein ARALYDRAFT_491789 [Arabidopsis lyrata subsp. lyrata] gi 297313227 gb EFH43650.1]                                                                                                                                                                                                                                                                                                                                                                                                                                                                                                                                                         | 494  | 488  | 0         | 98.8   | 80.2 | 86.8 | hypothetical protein ARALYDRAFT_491789                           | gbpln | Arabidopsis lyrata   | AT4G29730.1   Symbols: NFC5, MS15   nucleosome/chromatin assembly factor group C5   chr4:14559255-14562522 REVERSE LENGTH=487                 | 494  | 487  | 0         | 98.6   | 76.9 | 84.6 |
| Rsa1.0_01352.1.g26022.t1 | gb AAO16558.1  putative polyamine oxidase [Brassica juncea]                                                                                                                                                                                                                                                                                                                                                                                                                                                                                                                                                                                                                       | 542  | 541  | 0         | 99.8   | 88.6 | 93.4 | putative polyamine oxidase                                       | gbpln | Brassica juncea      | AT4G29720.1   Symbols: ATPA05, PAO5   polyamine oxidase 5   chr4:14553456-1455057 REVERSE LENGTH=533                                          | 542  | 533  | 0         | 98.3   | 82.5 | 89.3 |
| Rsa1.0_01353.1.g26023.t1 | ref[XP_002866092.1] hypothetical protein ARALYDRAFT_495620 [Arabidopsis lyrata subsp. lyrata] gi 297311927 gb EFH42351.1] hypothetical protein ARALYDRAFT_495620 [Arabidopsis lyrata subsp. lyrata]                                                                                                                                                                                                                                                                                                                                                                                                                                                                               | 339  | 345  | 1.00E-141 | 101.8  | 74.6 | 81.7 | hypothetical protein ARALYDRAFT_495620                           | gbpln | Arabidopsis lyrata   | AT5G55350.1   Symbols:   MBOAT (membrane bound O-acyl transferase) family protein   chr5:22442356-22443393 REVERSE LENGTH=345                 | 339  | 345  | 1.00E-140 | 101.8  | 72.0 | 81.4 |
| Rsa1.0_01353.1.g26024.t1 | #                                                                                                                                                                                                                                                                                                                                                                                                                                                                                                                                                                                                                                                                                 | #    | #    | #         | #      | #    | #    | -                                                                | ----  | ----                 | #                                                                                                                                             | #    | #    | #         | #      | #    |      |
| Rsa1.0_01353.1.g26025.t1 | ref[XP_002866091.1] long-chain-alcohol O-fatty-acyltransferase family protein [Arabidopsis lyrata subsp. lyrata] gi 297311926 gb EFH42350.1] long-chain-alcohol O-fatty-acyltransferase family protein [Arabidopsis lyrata subsp. lyrata]                                                                                                                                                                                                                                                                                                                                                                                                                                         | 333  | 335  | 1.00E-161 | 100.6  | 84.7 | 91.6 | long-chain-alcohol O-fatty-acyltransferase family protein        | gbpln | Arabidopsis lyrata   | AT5G55340.1   Symbols:   MBOAT (membrane bound O-acyl transferase) family protein   chr5:22439985-22440986 REVERSE LENGTH=333                 | 333  | 333  | 1.00E-160 | 100.0  | 83.2 | 90.1 |
| Rsa1.0_01353.1.g26026.t1 | #                                                                                                                                                                                                                                                                                                                                                                                                                                                                                                                                                                                                                                                                                 | #    | #    | #         | #      | #    | #    | -                                                                | ----  | ----                 | #                                                                                                                                             | #    | #    | #         | #      | #    |      |
| Rsa1.0_01353.1.g26027.t1 | gb AAC33226.1  putative non-LTR retroelement reverse transcriptase [Arabidopsis thaliana]                                                                                                                                                                                                                                                                                                                                                                                                                                                                                                                                                                                         | 905  | 1529 | 0         | 169.0  | 44.5 | 63.1 | putative non-LTR retroelement reverse transcriptase              | gbpln | Arabidopsis thaliana | AT3G24255.1   Symbols:   RNA-directed DNA polymerase (reverse transcriptase)-related family protein   chr3:8789471-8793208 FORWARD LENGTH=746 | 905  | 746  | 5.00E-87  | 82.4   | 18.8 | 25.1 |
| Rsa1.0_01353.1.g26028.t1 | ref[NP_564315.1] nucleotide-diphospho-sugar transferase domain-containing protein [Arabidopsis thaliana] gi 334182926 ref[NP_001185108.1] nucleotide-diphospho-sugar transferase domain-containing protein [Arabidopsis thaliana] gi 10764852 gb AAG22832.1 AC007508.5 F1K23.9 [Arabidopsis thaliana] gi 15027991 gb AAK76526.1] unknown protein [Arabidopsis thaliana] gi 20259205 gb AAM14318.1] unknown protein [Arabidopsis thaliana] gi 332192896 gb AEE31017.1] nucleotide-diphospho-sugar transferase domain-containing protein [Arabidopsis thaliana] gi 332192898 gb AEE31019.1] nucleotide-diphospho-sugar transferase domain-containing protein [Arabidopsis thaliana] | 340  | 340  | 1.00E-153 | 100.0  | 78.2 | 85.3 | nucleotide-diphospho-sugar transferase domain-containing protein | gbpln | Arabidopsis thaliana | AT1G28710.3   Symbols:   Nucleotide-diphospho-sugar transferase family protein   chr1:10086850-10088025 REVERSE LENGTH=340                    | 340  | 340  | 1.00E-155 | 100.0  | 78.2 | 85.3 |
| Rsa1.0_01353.1.g26029.t1 | #                                                                                                                                                                                                                                                                                                                                                                                                                                                                                                                                                                                                                                                                                 | #    | #    | #         | #      | #    | #    | -                                                                | ----  | ----                 | #                                                                                                                                             | #    | #    | #         | #      | #    |      |
| Rsa1.0_01354.1.g26030.t2 | gb EOA29867.1  hypothetical protein CARUB_v10012964mg [Capsella rubella]                                                                                                                                                                                                                                                                                                                                                                                                                                                                                                                                                                                                          | 80   | 857  | 1.00E-13  | 1071.3 | 48.8 | 51.3 | hypothetical protein CARUB_v10012964mg                           | gbpln | Capsella rubella     | AT2G19210.1   Symbols:   Leucine-rich repeat transmembrane protein kinase protein   chr2:8335639-8339307 REVERSE LENGTH=881                   | 80   | 881  | 5.00E-16  | 1101.3 | 47.5 | 50.0 |
| Rsa1.0_01354.1.g26031.t1 | #                                                                                                                                                                                                                                                                                                                                                                                                                                                                                                                                                                                                                                                                                 | #    | #    | #         | #      | #    | #    | -                                                                | ----  | ----                 | #                                                                                                                                             | #    | #    | #         | #      | #    |      |
| Rsa1.0_01354.1.g26032.t4 | #                                                                                                                                                                                                                                                                                                                                                                                                                                                                                                                                                                                                                                                                                 | #    | #    | #         | #      | #    | #    | -                                                                | ----  | ----                 | #                                                                                                                                             | #    | #    | #         | #      | #    |      |
| Rsa1.0_01354.1.g26033.t1 | dbj BAB10319.1  unnamed protein product [Arabidopsis thaliana]                                                                                                                                                                                                                                                                                                                                                                                                                                                                                                                                                                                                                    | 67   | 598  | 1.00E-10  | 892.5  | 49.3 | 49.3 | unnamed protein product                                          | gbpln | Arabidopsis thaliana | AT5G48960.1   Symbols:   HAD-superfamily hydrolase, subfamily IG, 5'-nucleotidase   chr5:19849645-19853382 FORWARD LENGTH=642                 | 67   | 642  | 2.00E-13  | 958.2  | 49.3 | 49.3 |
| Rsa1.0_01354.1.g26034.t1 | gb ABH07409.1  putative pol polyprotein [Brassica oleracea var. botrytis]                                                                                                                                                                                                                                                                                                                                                                                                                                                                                                                                                                                                         | 1208 | 1239 | 0         | 102.6  | 48.3 | 62.4 | putative pol polyprotein                                         | gbpln | Brassica oleracea    | AT4G23160.1   Symbols: CRK8   cysteine-rich RLK (RECEPTOR-like protein kinase) 8   chr4:12129485-12134086 FORWARD LENGTH=1262                 | 1208 | 1262 | 1.00E-101 | 104.5  | 15.9 | 24.7 |
| Rsa1.0_01354.1.g26035.t1 | #                                                                                                                                                                                                                                                                                                                                                                                                                                                                                                                                                                                                                                                                                 | #    | #    | #         | #      | #    | #    | -                                                                | ----  | ----                 | #                                                                                                                                             | #    | #    | #         | #      | #    |      |



|                          |                                                                                                                                                                                                                                                                                                                                                                                                                                                                                                                                                                                                                                         |     |      |          |       |      |      |                                        |       |                      |                                                                                                                                                                                                                                                                                                                                                                                                                                                                                                                                                                                                                                          |     |     |          |       |      |      |
|--------------------------|-----------------------------------------------------------------------------------------------------------------------------------------------------------------------------------------------------------------------------------------------------------------------------------------------------------------------------------------------------------------------------------------------------------------------------------------------------------------------------------------------------------------------------------------------------------------------------------------------------------------------------------------|-----|------|----------|-------|------|------|----------------------------------------|-------|----------------------|------------------------------------------------------------------------------------------------------------------------------------------------------------------------------------------------------------------------------------------------------------------------------------------------------------------------------------------------------------------------------------------------------------------------------------------------------------------------------------------------------------------------------------------------------------------------------------------------------------------------------------------|-----|-----|----------|-------|------|------|
| Rsa1.0_01354.1.g26036.t1 | ref[NP_179337.1] RING-H2 finger protein ATL44 [Arabidopsis thaliana] gi 51316192 sp Q22755.1 ATL44_ARATH RecName: Full=RING-H2 finger protein ATL44; AltName: Full=RING-H2 zinc finger protein RHA3a gi 13877953 gb AAK44054.1 AF370239.1 putative RING zinc finger protein [Arabidopsis thaliana] gi 3790573 gb AAC68673.1  RING-H2 finger protein RHA3a [Arabidopsis thaliana] gi 4914367 gb AAD32903.1  putative RING zinc finger protein [Arabidopsis thaliana] gi 17065626 gb AAL33807.1  putative RING zinc finger protein [Arabidopsis thaliana] gi 330251537 gb AEC06631.1  RING-H2 finger protein ATL44 [Arabidopsis thaliana] | 184 | 185  | 3.00E-73 | 100.5 | 81.5 | 88.6 | RING-H2 finger protein ATL44           | gbpln | Arabidopsis thaliana | AT2G17450.1   Symbols: RHA3A   RING-H2 finger A3A   chr2:7576640-7577197 REVERSE LENGTH=185                                                                                                                                                                                                                                                                                                                                                                                                                                                                                                                                              | 184 | 185 | 1.00E-75 | 100.5 | 81.5 | 88.6 |
| Rsa1.0_01354.1.g26037.t1 | #                                                                                                                                                                                                                                                                                                                                                                                                                                                                                                                                                                                                                                       | #   | #    | #        | #     | #    | #    | -                                      | ----  | ----                 | #                                                                                                                                                                                                                                                                                                                                                                                                                                                                                                                                                                                                                                        | #   | #   | #        | #     | #    |      |
| Rsa1.0_01354.1.g26038.t1 | gb ABD64930.1  hypothetical protein 24.t00076 [Brassica oleracea]                                                                                                                                                                                                                                                                                                                                                                                                                                                                                                                                                                       | 513 | 407  | 6.00E-13 | 79.3  | 9.0  | 9.7  | hypothetical protein 24.t00076         | gbpln | Brassica oleracea    | #                                                                                                                                                                                                                                                                                                                                                                                                                                                                                                                                                                                                                                        | #   | #   | #        | #     | #    |      |
| Rsa1.0_01354.1.g26039.t1 | gb AAC69114.1  putative gag-protease polyprotein [Arabidopsis thaliana]                                                                                                                                                                                                                                                                                                                                                                                                                                                                                                                                                                 | 399 | 627  | 3.00E-32 | 157.1 | 21.3 | 36.6 | putative gag-protease polyprotein      | gbpln | Arabidopsis thaliana | #                                                                                                                                                                                                                                                                                                                                                                                                                                                                                                                                                                                                                                        | #   | #   | #        | #     | #    |      |
| Rsa1.0_01354.1.g26040.t1 | emb CAB10225.1  retrovirus-related like polyprotein [Arabidopsis thaliana] gi 7268152 emb CAB78488.1  retrovirus-related like polyprotein [Arabidopsis thaliana]                                                                                                                                                                                                                                                                                                                                                                                                                                                                        | 166 | 1489 | 4.00E-24 | 897.0 | 32.5 | 50.6 | retrovirus-related like polyprotein    | gbpln | Arabidopsis thaliana | AT1G21280.1   Symbols:   CONTAINS InterPro DOMAIN/s: Retrotransposon gag protein (InterPro:IPR005162); Has 707 Blast hits to 705 proteins in 25 species: Archae - 0; Bacteria - 0; Metazoa - 4; Fungi - 0; Plants - 703; Viruses - 0; Other Eukaryotes - 0 (source: NCBI BLINK).   chr1:7447690-7448403 REVERSE LENGTH=237                                                                                                                                                                                                                                                                                                               | 166 | 237 | 9.00E-14 | 142.8 | 21.7 | 38.0 |
| Rsa1.0_01355.1.g26041.t2 | ref XP_002893050.1  hypothetical protein ARALYDRAFT_889381 [Arabidopsis lyrata subsp. lyrata] gi 297338892 gb EFH69309.1  hypothetical protein ARALYDRAFT_889381 [Arabidopsis lyrata subsp. lyrata]                                                                                                                                                                                                                                                                                                                                                                                                                                     | 128 | 249  | 2.00E-46 | 194.5 | 73.4 | 82.0 | hypothetical protein ARALYDRAFT_889381 | gbpln | Arabidopsis lyrata   | AT4G16550.1   Symbols:   HSP20-like chaperone   chr4:9318442-9324254 REVERSE LENGTH=743                                                                                                                                                                                                                                                                                                                                                                                                                                                                                                                                                  | 128 | 743 | 3.00E-46 | 580.5 | 68.8 | 78.1 |
| Rsa1.0_01355.1.g26042.t1 | gb EOA16421.1  hypothetical protein CARUB_v10004575mg [Capsella rubella]                                                                                                                                                                                                                                                                                                                                                                                                                                                                                                                                                                | 238 | 505  | 2.00E-70 | 212.2 | 64.7 | 73.1 | hypothetical protein CARUB_v10004575mg | gbpln | Capsella rubella     | AT4G23210.2   Symbols: CRK13   cysteine-rich RLK (RECEPTOR-like protein kinase) 13   chr4:12149499-12151418 REVERSE LENGTH=524                                                                                                                                                                                                                                                                                                                                                                                                                                                                                                           | 238 | 524 | 5.00E-66 | 220.2 | 59.7 | 71.8 |
| Rsa1.0_01355.1.g26043.t1 | gb EOA17306.1  hypothetical protein CARUB_v10005579mg [Capsella rubella]                                                                                                                                                                                                                                                                                                                                                                                                                                                                                                                                                                | 255 | 250  | 8.00E-79 | 98.0  | 79.6 | 85.1 | hypothetical protein CARUB_v10005579mg | gbpln | Capsella rubella     | AT4G16530.1   Symbols:   Family of unknown function (DUF577)   chr4:9311355-9315554 FORWARD LENGTH=803                                                                                                                                                                                                                                                                                                                                                                                                                                                                                                                                   | 255 | 803 | 5.00E-68 | 314.9 | 75.3 | 81.6 |
| Rsa1.0_01355.1.g26044.t2 | gb EOA17672.1  hypothetical protein CARUB_v10006041mg [Capsella rubella]                                                                                                                                                                                                                                                                                                                                                                                                                                                                                                                                                                | 136 | 121  | 1.00E-58 | 89.0  | 83.1 | 86.0 | hypothetical protein CARUB_v10006041mg | gbpln | Capsella rubella     | AT4G16520.2   Symbols: ATG8F   Ubiquitin-like superfamily protein   chr4:9306882-9308113 REVERSE LENGTH=121                                                                                                                                                                                                                                                                                                                                                                                                                                                                                                                              | 136 | 121 | 3.00E-60 | 89.0  | 81.6 | 84.6 |
| Rsa1.0_01355.1.g26045.t1 | gb EOA18186.1  hypothetical protein CARUB_v10006665mg [Capsella rubella]                                                                                                                                                                                                                                                                                                                                                                                                                                                                                                                                                                | 81  | 86   | 3.00E-26 | 106.2 | 80.2 | 88.9 | hypothetical protein CARUB_v10006665mg | gbpln | Capsella rubella     | AT4G16515.1   Symbols: RGF6   Encodes a root meristem growth factor (RGF). Belongs to a family of functionally redundant homologous peptides that are secreted, tyrosine-sulfated, and expressed mainly in the stem cell area and the innermost layer of central columella cells. RGFs are required for maintenance of the root stem cell niche and transit amplifying cell proliferation. Members of this family include: At5g60810 (RGF1), At1g13620 (RGF2), At2g04025 (RGF3), At3g30350 (RGF4), At5g51451 (RGF5), At4g16515 (RGF6), At3g02240 (RGF7), At2g03830 (RGF8) and At5g64770 (RGF9).   chr4:9305386-9305646 REVERSE LENGTH=86 | 81  | 86  | 8.00E-25 | 106.2 | 76.5 | 86.4 |
| Rsa1.0_01355.1.g26046.t1 | #                                                                                                                                                                                                                                                                                                                                                                                                                                                                                                                                                                                                                                       | #   | #    | #        | #     | #    | #    | -                                      | ----  | ----                 | AT5G47550.1   Symbols:   Cystatin/monellin superfamily protein   chr5:19286596-19286964 REVERSE LENGTH=122                                                                                                                                                                                                                                                                                                                                                                                                                                                                                                                               | 116 | 122 | 7.00E-12 | 105.2 | 28.4 | 42.2 |
| Rsa1.0_01355.1.g26047.t1 | gb EOA15472.1  hypothetical protein CARUB_v10004447mg [Capsella rubella]                                                                                                                                                                                                                                                                                                                                                                                                                                                                                                                                                                | 582 | 582  | 0        | 100.0 | 92.6 | 96.4 | hypothetical protein CARUB_v10004447mg | gbpln | Capsella rubella     | AT4G16480.1   Symbols: ATINT4, INT4   inositol transporter 4   chr4:9291246-9293083 FORWARD LENGTH=582                                                                                                                                                                                                                                                                                                                                                                                                                                                                                                                                   | 582 | 582 | 0        | 100.0 | 93.1 | 96.2 |

|                          |                                                                                                                                                                                                                                                                                                                                                                                                                                                                                                                                    |     |     |          |       |      |      |                                        |       |                      |                                                                                                                                                                                                                                                                                                                                                                                                                                                                              |     |     |          |       |      |      |
|--------------------------|------------------------------------------------------------------------------------------------------------------------------------------------------------------------------------------------------------------------------------------------------------------------------------------------------------------------------------------------------------------------------------------------------------------------------------------------------------------------------------------------------------------------------------|-----|-----|----------|-------|------|------|----------------------------------------|-------|----------------------|------------------------------------------------------------------------------------------------------------------------------------------------------------------------------------------------------------------------------------------------------------------------------------------------------------------------------------------------------------------------------------------------------------------------------------------------------------------------------|-----|-----|----------|-------|------|------|
| Rsa1.0_01355.1.g26048.t1 | gb[EOA19029.1] hypothetical protein CARUB_v10007682mg [Capsella rubella]                                                                                                                                                                                                                                                                                                                                                                                                                                                           | 189 | 179 | 5.00E-45 | 94.7  | 66.7 | 76.2 | hypothetical protein CARUB_v10007682mg | gbpln | Capsella rubella     | AT4G16460.3   Symbols:   unknown protein; FUNCTIONS IN: molecular_function unknown; INVOLVED IN: biological_process unknown; LOCATED IN: cellular_component unknown; EXPRESSED IN: sperm cell, flower; EXPRESSED DURING: 4 anthesis; Has 30201 Blast hits to 17322 proteins in 780 species: Archae - 12; Bacteria - 1396; Metazoa - 17338; Fungi - 3422; Plants - 5037; Viruses - 0; Other Eukaryotes - 2996 (source: NCBI BLink).   chr4:9285629-9286494 FORWARD LENGTH=176 | 189 | 176 | 2.00E-45 | 93.1  | 67.7 | 77.2 |
| Rsa1.0_01355.1.g26049.t1 | gb[EOA17704.1] hypothetical protein CARUB_v10006076mg [Capsella rubella]                                                                                                                                                                                                                                                                                                                                                                                                                                                           | 110 | 108 | 2.00E-47 | 98.2  | 88.2 | 90.9 | hypothetical protein CARUB_v10006076mg | gbpln | Capsella rubella     | AT4G16450.2   Symbols:   unknown protein; FUNCTIONS IN: molecular_function unknown; INVOLVED IN: photorespiration; LOCATED IN: mitochondrion, mitochondrial membrane, mitochondrial respiratory chain complex I, respiratory chain complex I; EXPRESSED IN: 25 plant structures; EXPRESSED DURING: 15 growth stages.   chr4:9280132-9280541 FORWARD LENGTH=106                                                                                                               | 110 | 106 | 2.00E-49 | 96.4  | 87.3 | 90.0 |
| Rsa1.0_01355.1.g26050.t1 | gb[EOA19014.1] hypothetical protein CARUB_v10007665mg [Capsella rubella]                                                                                                                                                                                                                                                                                                                                                                                                                                                           | 126 | 125 | 2.00E-47 | 99.2  | 84.9 | 92.1 | hypothetical protein CARUB_v10007665mg | gbpln | Capsella rubella     | AT4G16447.1   Symbols:   unknown protein; Has 30201 Blast hits to 17322 proteins in 780 species: Archae - 12; Bacteria - 1396; Metazoa - 17338; Fungi - 3422; Plants - 5037; Viruses - 0; Other Eukaryotes - 2996 (source: NCBI BLink).   chr4:9278829-9279206 FORWARD LENGTH=125                                                                                                                                                                                            | 126 | 125 | 5.00E-46 | 99.2  | 82.5 | 91.3 |
| Rsa1.0_01355.1.g26051.t1 | emb[CAB10420.1] LET1 like protein [Arabidopsis thaliana] gi 7268394 emb CAB78686.1  LET1 like protein [Arabidopsis thaliana] ref NP_193376.1  transcription factor bHLH3 [Arabidopsis thaliana] gi 75318117 sp O23487.1 BH003 ARATH RecName: Full=Transcription factor bHLH3; AltName: Full=Basic helix-loop-helix protein 3; Short=AtbHLH3; Short=bHLH 3; AltName: Full=Transcription factor EN 34; AltName: Full=bHLH transcription factor bHLH003 gi 16226919 gb AAL16298.1 AF428368.1 AT4g16430/d14240w [Arabidopsis thaliana] | 366 | 578 | 3.00E-87 | 157.9 | 50.8 | 60.4 | LET1 like protein                      | gbpln | Arabidopsis thaliana | AT4G16442.1   Symbols:   Uncharacterised protein family (UPF0497)   chr4:9272042-9272970 REVERSE LENGTH=182                                                                                                                                                                                                                                                                                                                                                                  | 366 | 182 | 2.00E-73 | 49.7  | 36.1 | 42.3 |
| Rsa1.0_01355.1.g26052.t1 | gi 18026954 gb AAL55710.1 AF251688.1 putative transcription factor BHLH3 [Arabidopsis thaliana] gi 2244999 emb CAB10419.1  transcription factor like protein [Arabidopsis thaliana] gi 7268393 emb CAB78685.1  transcription factor like protein [Arabidopsis thaliana] gi 16323045 gb AAL15257.1  AT4g16430/d14240w [Arabidopsis thaliana] gi 25141207 gb AAN73298.1  AT4g16430/d14240w [Arabidopsis thaliana] gi 33265834 gb AEE83747.1  transcription factor bHLH3 [Arabidopsis thaliana]                                       | 453 | 467 | 0        | 103.1 | 78.8 | 85.7 | transcription factor bHLH3             | gbpln | Arabidopsis thaliana | AT4G16430.1   Symbols:   basic helix-loop-helix (bHLH) DNA-binding superfamily protein   chr4:9267599-9269002 FORWARD LENGTH=467                                                                                                                                                                                                                                                                                                                                             | 453 | 467 | 0        | 103.1 | 78.8 | 85.7 |
| Rsa1.0_01355.1.g26053.t3 | emb[CAB10418.1] transcriptional adaptor like protein [Arabidopsis thaliana] gi 7268392 emb CAB78684.1  transcriptional adaptor like protein [Arabidopsis thaliana]                                                                                                                                                                                                                                                                                                                                                                 | 131 | 480 | 4.00E-36 | 366.4 | 60.3 | 71.0 | transcriptional adaptor like protein   | gbpln | Arabidopsis thaliana | AT4G16420.1   Symbols: ADA2B, PRZ1   homolog of yeast ADA2 2B   chr4:9262805-9265775 REVERSE LENGTH=487                                                                                                                                                                                                                                                                                                                                                                      | 131 | 487 | 3.00E-37 | 371.8 | 58.8 | 70.2 |
| Rsa1.0_01355.1.g26054.t1 | ref NP_567494.1  uncharacterized protein [Arabidopsis thaliana] gi 17381194 gb AAL36409.1  unknown protein [Arabidopsis thaliana] gi 21436425 gb AAM51413.1  unknown protein [Arabidopsis thaliana] gi 33265834 gb AEE83743.1  uncharacterized protein AT4G16410 [Arabidopsis thaliana]                                                                                                                                                                                                                                            | 191 | 185 | 7.00E-64 | 96.9  | 71.2 | 80.1 | uncharacterized protein                | gbpln | Arabidopsis thaliana | AT4G16410.1   Symbols:   unknown protein; CONTAINS InterPro DOMAIN/s: Protein of unknown function DUF751 (InterPro:IPR008470); Has 30201 Blast hits to 17322 proteins in 780 species: Archae - 12; Bacteria - 1396; Metazoa - 17338; Fungi - 3422; Plants - 5037; Viruses - 0; Other Eukaryotes - 2996 (source: NCBI BLink).   chr4:9262019-9262576 REVERSE LENGTH=185                                                                                                       | 191 | 185 | 3.00E-66 | 96.9  | 71.2 | 80.1 |

|                          |                                                                                                                                                                                                     |     |      |           |       |      |      |                                        |       |                      |                                                                                                                                                                                                                                                                                                                                                                 |     |      |           |       |      |      |
|--------------------------|-----------------------------------------------------------------------------------------------------------------------------------------------------------------------------------------------------|-----|------|-----------|-------|------|------|----------------------------------------|-------|----------------------|-----------------------------------------------------------------------------------------------------------------------------------------------------------------------------------------------------------------------------------------------------------------------------------------------------------------------------------------------------------------|-----|------|-----------|-------|------|------|
| Rsa1.0_01355.1.g26055.t1 | emb[CAB10417.1] hypothetical protein [Arabidopsis thaliana] gi 7268389 emb CAB78682.1  hypothetical protein [Arabidopsis thaliana]                                                                  | 88  | 209  | 3.00E-33  | 237.5 | 75.0 | 90.9 | hypothetical protein                   | gbpln | Arabidopsis thaliana | AT4G16400.1   Symbols:   unknown protein; BEST Arabidopsis thaliana protein match is: unknown protein (TAIR:AT3G13175.1); Has 30201 Blast hits to 17322 proteins in 780 species: Archae - 12; Bacteria - 1396; Metazoa - 1738; Fungi - 342; Plants - 5037; Viruses - 0; Other Eukaryotes - 2996 (source: NCBI BLINK).   chr4:9260564-9262102 FORWARD LENGTH=218 | 88  | 218  | 8.00E-36  | 247.7 | 75.0 | 89.8 |
| Rsa1.0_01355.1.g26056.t1 | ref NP_974559.5  metal ion binding protein [Arabidopsis thaliana] gi 332658339 gb AEE83739.1  metal ion binding protein [Arabidopsis thaliana]                                                      | 255 | 254  | 2.00E-58  | 99.6  | 69.8 | 74.5 | metal ion binding protein              | gbpln | Arabidopsis thaliana | AT4G16380.1   Symbols:   Heavy metal transport/detoxification superfamily protein   chr4:9254638-9255955 FORWARD LENGTH=254                                                                                                                                                                                                                                     | 255 | 254  | 6.00E-61  | 99.6  | 69.8 | 74.5 |
| Rsa1.0_01355.1.g26057.t1 | gb ACP30598.1  disease resistance protein [Brassica rapa subsp. pekinensis]                                                                                                                         | 793 | 2301 | 0         | 290.2 | 57.3 | 71.9 | disease resistance protein             | gbpln | Brassica rapa        | AT4G23160.1   Symbols: CRK8   cysteine-rich RLK (RECEPTOR-like protein kinase) 8   chr2:12129485-12134086 FORWARD LENGTH=1262                                                                                                                                                                                                                                   | 793 | 1262 | 1.00E-116 | 159.1 | 24.6 | 37.5 |
| Rsa1.0_01356.1.g26058.t1 | gb AAC63839.1  unknown protein [Arabidopsis thaliana]                                                                                                                                               | 230 | 164  | 5.00E-73  | 71.3  | 60.0 | 61.3 | unknown protein                        | gbpln | Arabidopsis thaliana | AT2G31110.2   Symbols:   Plant protein of unknown function (DUF828)   chr2:13258522-13262071 REVERSE LENGTH=364                                                                                                                                                                                                                                                 | 230 | 364  | 7.00E-75  | 158.3 | 60.0 | 60.4 |
| Rsa1.0_01356.1.g26059.t1 | gb EOA27374.1  hypothetical protein CARUB_v10023492mg [Capsella rubella]                                                                                                                            | 213 | 364  | 1.00E-113 | 170.9 | 90.6 | 94.8 | hypothetical protein CARUB_v10023492mg | gbpln | Capsella rubella     | AT2G31110.2   Symbols:   Plant protein of unknown function (DUF828)   chr2:13258522-13262071 REVERSE LENGTH=364                                                                                                                                                                                                                                                 | 213 | 364  | 1.00E-114 | 170.9 | 90.6 | 93.9 |
| Rsa1.0_01356.1.g26060.t1 | sp O82274.2 PLA19_ARATH RecName: Full=Phospholipase A1-IIbeta                                                                                                                                       | 414 | 414  | 0         | 100.0 | 82.1 | 88.6 | RecName: Full=Phospholipase A1-IIbeta  | ----  | ----                 | AT2G31100.1   Symbols:   alpha/beta-Hydrolases superfamily protein   chr2:13256738-13258174 REVERSE LENGTH=414                                                                                                                                                                                                                                                  | 414 | 414  | 0         | 100.0 | 82.1 | 88.6 |
| Rsa1.0_01356.1.g26061.t1 | #                                                                                                                                                                                                   | #   | #    | #         | #     | #    | #    | -                                      | ----  | ----                 | #                                                                                                                                                                                                                                                                                                                                                               | #   | #    | #         | #     | #    |      |
| Rsa1.0_01356.1.g26062.t1 | gb EOA29350.1  hypothetical protein CARUB_v10025636mg [Capsella rubella]                                                                                                                            | 70  | 81   | 4.00E-24  | 115.7 | 78.6 | 85.7 | hypothetical protein CARUB_v10025636mg | gbpln | Capsella rubella     | AT2G31085.1   Symbols: CLE6   CLAVATA3/ESR-RELATED 6   chr2:13254263-13254508 FORWARD LENGTH=81                                                                                                                                                                                                                                                                 | 70  | 81   | 7.00E-25  | 115.7 | 72.9 | 84.3 |
| Rsa1.0_01356.1.g26063.t3 | #                                                                                                                                                                                                   | #   | #    | #         | #     | #    | #    | -                                      | ----  | ----                 | #                                                                                                                                                                                                                                                                                                                                                               | #   | #    | #         | #     | #    |      |
| Rsa1.0_01356.1.g26064.t1 | gb EOA26707.1  hypothetical protein CARUB_v10022794mg [Capsella rubella]                                                                                                                            | 592 | 664  | 0         | 112.2 | 93.8 | 97.0 | hypothetical protein CARUB_v10022794mg | gbpln | Capsella rubella     | AT2G31060.2   Symbols:   elongation factor family protein   chr2:13213496-13218544 REVERSE LENGTH=667                                                                                                                                                                                                                                                           | 592 | 667  | 0         | 112.7 | 92.6 | 96.6 |
| Rsa1.0_01356.1.g26065.t1 | ref XP_002879301.1  hypothetical protein ARALYDRAFT_902122 [Arabidopsis lyrata subsp. lyrata] gi 297325140 gb EFH55560.1  hypothetical protein ARALYDRAFT_902122 [Arabidopsis lyrata subsp. lyrata] | 211 | 195  | 6.00E-76  | 92.4  | 70.6 | 79.1 | hypothetical protein ARALYDRAFT_902122 | gbpln | Arabidopsis lyrata   | AT5G26330.1   Symbols:   Cupredoxin superfamily protein   chr5:9241614-9242635 REVERSE LENGTH=187                                                                                                                                                                                                                                                               | 211 | 187  | 2.00E-26  | 88.6  | 24.6 | 39.3 |
| Rsa1.0_01356.1.g26066.t1 | ref XP_002881149.1  hypothetical protein ARALYDRAFT_482029 [Arabidopsis lyrata subsp. lyrata] gi 297326988 gb EFH57408.1  hypothetical protein ARALYDRAFT_482029 [Arabidopsis lyrata subsp. lyrata] | 103 | 350  | 4.00E-31  | 339.8 | 74.8 | 80.6 | hypothetical protein ARALYDRAFT_482029 | gbpln | Arabidopsis lyrata   | AT2G31040.1   Symbols:   ATP synthase protein I --related   chr2:13209094-13211012 REVERSE LENGTH=350                                                                                                                                                                                                                                                           | 103 | 350  | 2.00E-33  | 339.8 | 73.8 | 79.6 |
| Rsa1.0_01356.1.g26067.t1 | gb ABK28201.1  unknown [Arabidopsis thaliana]                                                                                                                                                       | 83  | 84   | 2.00E-27  | 101.2 | 73.5 | 86.7 | unknown                                | gbpln | Arabidopsis thaliana | AT2G31035.1   Symbols:   BEST Arabidopsis thaliana protein match is: OSBP(oxyesterol binding protein)-related protein 1B (TAIR:AT2G31030.1); Has 7 Blast hits to 7 proteins in 2 species: Archae - 0; Bacteria - 0; Metazoa - 0; Fungi - 0; Plants - 7; Viruses - 0; Other Eukaryotes - 0 (source: NCBI BLINK).   chr2:13208667-13208918 FORWARD LENGTH=83      | 83  | 83   | 4.00E-30  | 100.0 | 73.5 | 86.7 |
| Rsa1.0_01356.1.g26068.t2 | ref XP_002879298.1  oxysterol-binding family protein [Arabidopsis lyrata subsp. lyrata] gi 297325137 gb EFH55555.1  oxysterol-binding family protein [Arabidopsis lyrata subsp. lyrata]             | 83  | 488  | 3.00E-29  | 588.0 | 73.5 | 88.0 | oxysterol-binding family protein       | gbpln | Arabidopsis lyrata   | AT2G31035.1   Symbols:   BEST Arabidopsis thaliana protein match is: OSBP(oxyesterol binding protein)-related protein 1B (TAIR:AT2G31030.1); Has 7 Blast hits to 7 proteins in 2 species: Archae - 0; Bacteria - 0; Metazoa - 0; Fungi - 0; Plants - 7; Viruses - 0; Other Eukaryotes - 0 (source: NCBI BLINK).   chr2:13208667-13208918 FORWARD LENGTH=83      | 83  | 83   | 1.00E-31  | 100.0 | 74.7 | 89.2 |
| Rsa1.0_01356.1.g26069.t1 | ref XP_002879296.1  kinase family protein [Arabidopsis lyrata subsp. lyrata] gi 297325135 gb EFH55555.1  kinase family protein [Arabidopsis lyrata subsp. lyrata]                                   | 519 | 764  | 2.33E-156 | 147.2 | 47.6 | 48.7 | kinase family protein                  | gbpln | Arabidopsis lyrata   | AT2G31010.2   Symbols:   Protein kinase superfamily protein   chr2:13194939-13199642 FORWARD LENGTH=775                                                                                                                                                                                                                                                         | 519 | 775  | 1.00E-149 | 149.3 | 47.6 | 48.6 |
| Rsa1.0_01357.1.g26070.t1 | gb ACG60669.1  copia-type polyprotein-like protein [Brassica oleracea var. albotrabra]                                                                                                              | 77  | 196  | 1.00E-31  | 254.5 | 85.7 | 92.2 | copia-type polyprotein-like protein    | gbpln | Brassica oleracea    | #                                                                                                                                                                                                                                                                                                                                                               | #   | #    | #         | #     | #    |      |

|                          |                                                                                                                                                                                                                   |      |      |           |       |      |      |                                                 |             |                      |                                                                                                                                                                                                                                                                                                                                                                                                                                                                                                                                    |      |      |           |       |      |      |
|--------------------------|-------------------------------------------------------------------------------------------------------------------------------------------------------------------------------------------------------------------|------|------|-----------|-------|------|------|-------------------------------------------------|-------------|----------------------|------------------------------------------------------------------------------------------------------------------------------------------------------------------------------------------------------------------------------------------------------------------------------------------------------------------------------------------------------------------------------------------------------------------------------------------------------------------------------------------------------------------------------------|------|------|-----------|-------|------|------|
| Rsa1.0_01357.1.g26071.t1 | dbj BAF00526.1  hypothetical protein [Arabidopsis thaliana]                                                                                                                                                       | 170  | 202  | 8.00E-75  | 118.8 | 81.8 | 85.9 | hypothetical protein                            | gbpln       | Arabidopsis thaliana | AT1G27385.1   Symbols:   unknown protein; FUNCTIONS IN: molecular_function unknown; INVOLVED IN: biological_process unknown; LOCATED IN: chloroplast; EXPRESSED IN: 24 plant structures; EXPRESSED DURING: 13 growth stages; CONTAINS InterPro DOMAIN/s: Protein of unknown function DUF493 (InterPro:IPR007454); Has 76 Blast hits to 76 proteins in 23 species; Archae - 0; Bacteria - 6; Metazoa - 0; Fungi - 0; Plants - 69; Viruses - 0; Other Eukaryotes - 1 (source: NCBI BLINK),   chr1:9511129-9512820 REVERSE LENGTH=202 | 170  | 202  | 9.00E-77  | 118.8 | 81.2 | 85.3 |
| Rsa1.0_01357.1.g26072.t1 | ref XP_002893465.1  F17L21.18 [Arabidopsis lyrata subsp. lyrata] gi 297339307 gb EFH69724.1  F17L21.18 [Arabidopsis lyrata subsp. lyrata]                                                                         | 214  | 205  | 6.00E-78  | 95.8  | 69.2 | 79.4 | F17L21.18                                       | gbpln       | Arabidopsis lyrata   | AT1G27390.1   Symbols: TOM20-2   translocase outer membrane 20-2   chr1:9513469-9514912 REVERSE LENGTH=210                                                                                                                                                                                                                                                                                                                                                                                                                         | 214  | 210  | 1.00E-69  | 98.1  | 64.0 | 75.2 |
| Rsa1.0_01357.1.g26073.t7 | gb ABD64941.1  Ulp1 protease family protein [Brassica oleracea]                                                                                                                                                   | 897  | 871  | 0         | 97.1  | 64.7 | 75.6 | Ulp1 protease family protein                    | gbpln       | Brassica oleracea    | AT2G07240.1   Symbols:   cysteine-type peptidases;cysteine-type peptidases   chr2:3007102-3011701 REVERSE LENGTH=874                                                                                                                                                                                                                                                                                                                                                                                                               | 897  | 874  | 1.00E-39  | 97.4  | 10.1 | 16.8 |
| Rsa1.0_01357.1.g26074.t3 | gb AAF99763.1 AC003981.13 F22O13.21 [Arabidopsis thaliana] gi 9293930 dbj BAB01833.1  Mutator-like transposase [Arabidopsis thaliana] gi 10177478 dbj BAB10869.1  mutator-like transposase [Arabidopsis thaliana] | 911  | 915  | 1.00E-130 | 100.4 | 26.7 | 38.1 | F22O13.21                                       | gbpln       | Arabidopsis thaliana | AT1G64260.1   Symbols:   MuDR family transposase   chr1:23847756-23849915 FORWARD LENGTH=719                                                                                                                                                                                                                                                                                                                                                                                                                                       | 911  | 719  | 9.00E-25  | 78.9  | 12.2 | 22.3 |
| Rsa1.0_01357.1.g26075.t1 | gb ABD65615.1  hypothetical protein 23.t00033 [Brassica oleracea]                                                                                                                                                 | 295  | 326  | 8.00E-11  | 110.5 | 11.9 | 23.1 | hypothetical protein 23.t00033                  | gbpln       | Brassica oleracea    | #                                                                                                                                                                                                                                                                                                                                                                                                                                                                                                                                  | #    | #    | #         | #     | #    |      |
| Rsa1.0_01357.1.g26076.t4 | gb AAB87099.1  putative retroelement pol polyprotein [Arabidopsis thaliana]                                                                                                                                       | 1297 | 1496 | 0         | 115.3 | 39.2 | 49.4 | putative retroelement pol polyprotein           | gbpln       | Arabidopsis thaliana | AT4G23160.1   Symbols: CRK8   cysteine-rich RLK (RECEPTOR-like protein kinase) 8   chr4:12129485-12134086 FORWARD LENGTH=1262                                                                                                                                                                                                                                                                                                                                                                                                      | 1297 | 1262 | 1.00E-138 | 97.3  | 18.7 | 26.3 |
| Rsa1.0_01357.1.g26077.t1 | #                                                                                                                                                                                                                 | #    | #    | #         | #     | #    | #    | -                                               | ----        | ----                 | #                                                                                                                                                                                                                                                                                                                                                                                                                                                                                                                                  | #    | #    | #         | #     | #    |      |
| Rsa1.0_01357.1.g26078.t1 | gb ADE80749.1  cold shock domain protein 2 [Eutrema salsugineum]                                                                                                                                                  | 177  | 201  | 6.00E-42  | 113.6 | 73.4 | 81.4 | cold shock domain protein 2                     | gbpln       | Eutrema salsugineum  | AT2G21060.1   Symbols: ATGRP2B, ATCSP4, GRP2B   glycine-rich protein 2B   chr2:9036983-9037588 REVERSE LENGTH=201                                                                                                                                                                                                                                                                                                                                                                                                                  | 177  | 201  | 3.00E-43  | 113.6 | 71.2 | 78.0 |
| Rsa1.0_01357.1.g26079.t2 | gb EOA35774.1  hypothetical protein CARUB_v10021005mg, partial [Capsella rubella]                                                                                                                                 | 240  | 185  | 2.00E-95  | 77.1  | 70.4 | 70.8 | hypothetical protein CARUB_v10021005mg, partial | gbpln       | Capsella rubella     | AT1G67430.1   Symbols:   Ribosomal protein L22a/L17e family protein   chr1:25262209-25263627 FORWARD LENGTH=175                                                                                                                                                                                                                                                                                                                                                                                                                    | 240  | 175  | 7.00E-98  | 72.9  | 70.4 | 70.8 |
| Rsa1.0_01357.1.g26080.t2 | ref XP_003555102.1  PREDICTED: uncharacterized protein LOC100796026 [Glycine max]                                                                                                                                 | 1425 | 1109 | 1.00E-120 | 77.8  | 18.0 | 25.0 | PREDICTED: uncharacterized protein LOC100796026 | gbenv/gbpln | Glycine max          | #                                                                                                                                                                                                                                                                                                                                                                                                                                                                                                                                  | #    | #    | #         | #     | #    |      |
| Rsa1.0_01358.1.g26081.t1 | gb ABW24665.1  pollen-specific polygalacturonase [Brassica rapa subsp. oleifera]                                                                                                                                  | 414  | 421  | 0         | 101.7 | 94.2 | 97.3 | pollen-specific polygalacturonase               | gbpln       | Brassica rapa        | AT1G02790.1   Symbols: PGA4   polygalacturonase 4   chr1:610681-612225 REVERSE LENGTH=422                                                                                                                                                                                                                                                                                                                                                                                                                                          | 414  | 422  | 0         | 101.9 | 80.9 | 89.4 |
| Rsa1.0_01358.1.g26082.t1 | gb EOA33828.1  hypothetical protein CARUB_v10021307mg [Capsella rubella]                                                                                                                                          | 71   | 515  | 7.00E-25  | 725.4 | 70.4 | 83.1 | hypothetical protein CARUB_v10021307mg          | gbpln       | Capsella rubella     | #                                                                                                                                                                                                                                                                                                                                                                                                                                                                                                                                  | #    | #    | #         | #     | #    |      |
| Rsa1.0_01358.1.g26083.t1 | gb ABW24665.1  pollen-specific polygalacturonase [Brassica rapa subsp. oleifera]                                                                                                                                  | 421  | 421  | 0         | 100.0 | 94.1 | 97.4 | pollen-specific polygalacturonase               | gbpln       | Brassica rapa        | AT1G02790.1   Symbols: PGA4   polygalacturonase 4   chr1:610681-612225 REVERSE LENGTH=422                                                                                                                                                                                                                                                                                                                                                                                                                                          | 421  | 422  | 0         | 100.2 | 80.8 | 89.1 |
| Rsa1.0_01358.1.g26084.t1 | ref XP_002873866.1  hypothetical protein ARALYDRAFT_909803 [Arabidopsis lyrata subsp. lyrata] gi 297319703 gb EFH50125.1  hypothetical protein ARALYDRAFT_909803 [Arabidopsis lyrata subsp. lyrata]               | 391  | 384  | 9.00E-74  | 98.2  | 46.5 | 60.1 | hypothetical protein ARALYDRAFT_909803          | gbpln       | Arabidopsis lyrata   | AT1G50870.1   Symbols:   F-box and associated interaction domains-containing protein   chr1:18855147-18856337 FORWARD LENGTH=396                                                                                                                                                                                                                                                                                                                                                                                                   | 391  | 396  | 5.00E-65  | 101.3 | 41.7 | 59.1 |
| Rsa1.0_01358.1.g26085.t1 | #                                                                                                                                                                                                                 | #    | #    | #         | #     | #    | #    | -                                               | ----        | ----                 | #                                                                                                                                                                                                                                                                                                                                                                                                                                                                                                                                  | #    | #    | #         | #     | #    |      |
| Rsa1.0_01358.1.g26086.t2 | gb EOA37762.1  hypothetical protein CARUB_v10012601mg [Capsella rubella]                                                                                                                                          | 157  | 544  | 1.00E-29  | 346.5 | 44.6 | 47.8 | hypothetical protein CARUB_v10012601mg          | gbpln       | Capsella rubella     | AT1G27980.1   Symbols: DPL1, ATDPL1   dihydrosphingosine phosphate lyase   chr1:9748812-9752618 FORWARD LENGTH=544                                                                                                                                                                                                                                                                                                                                                                                                                 | 157  | 544  | 1.00E-27  | 346.5 | 43.3 | 47.1 |
| Rsa1.0_01358.1.g26087.t1 | gb ABR45948.1  coronatine insensitive 1 [Arabidopsis thaliana]                                                                                                                                                    | 558  | 592  | 1.00E-118 | 106.1 | 41.9 | 62.0 | coronatine insensitive 1                        | gbpln       | Arabidopsis thaliana | AT2G39940.1   Symbols: COI1   RNI-like superfamily protein   chr2:16672848-16675486 REVERSE LENGTH=592                                                                                                                                                                                                                                                                                                                                                                                                                             | 558  | 592  | 1.00E-120 | 106.1 | 41.9 | 62.0 |



|                          |                                                                                                                                                                                                                                                                                                                                                                                                                                                                                                                                                                                                                                                   |     |      |           |       |      |      |                                                                              |       |                      |                                                                                                                                                |     |     |           |       |      |      |
|--------------------------|---------------------------------------------------------------------------------------------------------------------------------------------------------------------------------------------------------------------------------------------------------------------------------------------------------------------------------------------------------------------------------------------------------------------------------------------------------------------------------------------------------------------------------------------------------------------------------------------------------------------------------------------------|-----|------|-----------|-------|------|------|------------------------------------------------------------------------------|-------|----------------------|------------------------------------------------------------------------------------------------------------------------------------------------|-----|-----|-----------|-------|------|------|
| Rsa1.0_01359.1.g26099.t1 | emb CCD74489.1  Zinc knuckle (CCHC-type) family protein / Plant mobile domain protein family [Arabidopsis halleri subsp. halleri]                                                                                                                                                                                                                                                                                                                                                                                                                                                                                                                 | 108 | 700  | 5.00E-11  | 648.1 | 38.0 | 52.8 | Zinc knuckle (CCHC-type) family protein / Plant mobile domain protein family | gbpln | Arabidopsis halleri  | AT4G05360.1   Symbols:   Zinc knuckle (CCHC-type) family protein   chr4:2728204-2732337 FORWARD LENGTH=735                                     | 108 | 735 | 9.00E-13  | 680.6 | 38.9 | 51.9 |
| Rsa1.0_01360.1.g26100.t1 | gb EOA23949.1  hypothetical protein CARUB_v10017166mg [Capsella rubella]                                                                                                                                                                                                                                                                                                                                                                                                                                                                                                                                                                          | 454 | 472  | 0         | 104.0 | 86.8 | 92.7 | hypothetical protein CARUB_v10017166mg                                       | gbpln | Capsella rubella     | AT2G02870.3   Symbols:   Galactose oxidase/kelch repeat superfamily protein   chr2:838378-839781 FORWARD LENGTH=467                            | 454 | 467 | 0         | 102.9 | 87.7 | 92.3 |
| Rsa1.0_01360.1.g26101.t1 | gb AAD38033.1 AF149053.1 phytochrome kinase substrate 1 [Arabidopsis thaliana]                                                                                                                                                                                                                                                                                                                                                                                                                                                                                                                                                                    | 418 | 439  | 1.00E-159 | 105.0 | 76.8 | 84.7 | phytochrome kinase substrate 1                                               | gbpln | Arabidopsis thaliana | AT2G02950.1   Symbols: PKS1   phytochrome kinase substrate 1   chr2:855149-856468 REVERSE LENGTH=439                                           | 418 | 439 | 1.00E-161 | 105.0 | 76.8 | 84.4 |
| Rsa1.0_01360.1.g26102.t1 | gb ABD65076.1  SLL3 ORF2 protein, putative [Brassica oleracea]                                                                                                                                                                                                                                                                                                                                                                                                                                                                                                                                                                                    | 140 | 443  | 6.00E-18  | 316.4 | 32.9 | 38.6 | SLL3 ORF2 protein, putative                                                  | gbpln | Brassica oleracea    | #                                                                                                                                              | #   | #   | #         | #     | #    | #    |
| Rsa1.0_01360.1.g26103.t1 | gb EOA24478.1  hypothetical protein CARUB_v10017735mg [Capsella rubella]                                                                                                                                                                                                                                                                                                                                                                                                                                                                                                                                                                          | 294 | 298  | 1.00E-121 | 101.4 | 82.3 | 87.4 | hypothetical protein CARUB_v10017735mg                                       | gbpln | Capsella rubella     | AT2G02960.3   Symbols:   RING/FYVE/PHD zinc finger superfamily protein   chr2:862346-863980 REVERSE LENGTH=271                                 | 294 | 271 | 1.00E-116 | 92.2  | 78.2 | 81.6 |
| Rsa1.0_01360.1.g26104.t1 | ref NP_565293.1  GDA1/CD39 nucleoside phosphatase-like protein [Arabidopsis thaliana] gi 75099829 sp O80612.2 APY6_ARATH RecName: Full=Probable apyrase 6; Short=AtAPY6; AltName: Full=ATP-diphosphatase; AltName: Full=ATP-diphosphohydrolase; AltName: Full=Adenosine diphosphatase; Short=ADPase; AltName: Full=NTPDase; AltName: Full=Nucleoside triphosphate diphosphohydrolase 6 gi 20197095 gb AAC32915.2  putative nucleoside triphosphatase [Arabidopsis thaliana] gi 330250556 gb AEC05650.1  probable apyrase 6 [Arabidopsis thaliana] gi 339283650 gb AEJ38087.1  nucleoside triphosphate diphosphohydrolase 6 [Arabidopsis thaliana] | 554 | 555  | 0         | 100.2 | 83.9 | 91.5 | GDA1/CD39 nucleoside phosphatase-like protein                                | gbpln | Arabidopsis thaliana | AT2G02970.1   Symbols:   GDA1/CD39 nucleoside phosphatase family protein   chr2:862346-863980 REVERSE LENGTH=555                               | 554 | 555 | 0         | 100.2 | 83.9 | 91.5 |
| Rsa1.0_01360.1.g26105.t1 | #                                                                                                                                                                                                                                                                                                                                                                                                                                                                                                                                                                                                                                                 | #   | #    | #         | #     | #    | -    | ----                                                                         | ----  | #                    | #                                                                                                                                              | #   | #   | #         | #     | #    | #    |
| Rsa1.0_01360.1.g26106.t1 | #                                                                                                                                                                                                                                                                                                                                                                                                                                                                                                                                                                                                                                                 | #   | #    | #         | #     | #    | -    | ----                                                                         | ----  | #                    | #                                                                                                                                              | #   | #   | #         | #     | #    | #    |
| Rsa1.0_01360.1.g26107.t1 | gb EOA24693.1  hypothetical protein CARUB_v10017969mg [Capsella rubella]                                                                                                                                                                                                                                                                                                                                                                                                                                                                                                                                                                          | 228 | 230  | 1.00E-116 | 100.9 | 86.8 | 96.5 | hypothetical protein CARUB_v10017969mg                                       | gbpln | Capsella rubella     | AT2G02990.1   Symbols: RNS1, ATRNS1   ribonuclease 1   chr2:873714-874667 FORWARD LENGTH=230                                                   | 228 | 230 | 1.00E-115 | 100.9 | 87.3 | 96.9 |
| Rsa1.0_01360.1.g26108.t1 | #                                                                                                                                                                                                                                                                                                                                                                                                                                                                                                                                                                                                                                                 | #   | #    | #         | #     | #    | -    | ----                                                                         | ----  | #                    | #                                                                                                                                              | #   | #   | #         | #     | #    | #    |
| Rsa1.0_01360.1.g26109.t1 | gb EOA25885.1  hypothetical protein CARUB_v10019265mg [Capsella rubella]                                                                                                                                                                                                                                                                                                                                                                                                                                                                                                                                                                          | 284 | 285  | 1.00E-143 | 100.4 | 89.1 | 95.1 | hypothetical protein CARUB_v10019265mg                                       | gbpln | Capsella rubella     | AT2G03050.1   Symbols: EMB93, SOLDAT10   Mitochondrial transcription termination factor family protein   chr2:900094-900945 REVERSE LENGTH=283 | 284 | 283 | 1.00E-144 | 99.6  | 88.4 | 94.7 |
| Rsa1.0_01360.1.g26110.t1 | ref XP_002875185.1  predicted protein [Arabidopsis lyrata subsp. lyrata] gi 297321023 gb EFH51444.1  predicted protein [Arabidopsis lyrata subsp. lyrata]                                                                                                                                                                                                                                                                                                                                                                                                                                                                                         | 374 | 376  | 1.00E-178 | 100.5 | 82.1 | 89.3 | predicted protein                                                            | gbpln | Arabidopsis lyrata   | AT2G03060.2   Symbols: AGL30   AGAMOUS-like 30   chr2:901614-903569 FORWARD LENGTH=386                                                         | 374 | 386 | 1.00E-165 | 103.2 | 79.1 | 86.9 |
| Rsa1.0_01361.1.g26111.t1 | gb AAG51783.1 AC079679.3 reverse transcriptase, putative; 16838-20266 [Arabidopsis thaliana]                                                                                                                                                                                                                                                                                                                                                                                                                                                                                                                                                      | 354 | 1142 | 1.00E-91  | 322.6 | 49.2 | 63.0 | reverse transcriptase, putative; 16838-20266                                 | gbpln | Arabidopsis thaliana | AT4G20900.1   Symbols:   Ribonuclease H-like superfamily protein   chr4:14333528-14335255 FORWARD LENGTH=575                                   | 354 | 575 | 3.00E-39  | 162.4 | 28.8 | 50.3 |
| Rsa1.0_01361.1.g26112.t1 | ref NP_001189567.1  ribosomal RNA large subunit methyltransferase F [Arabidopsis thaliana] gi 330252026 gb AEC07120.1  ribosomal RNA large subunit methyltransferase F [Arabidopsis thaliana]                                                                                                                                                                                                                                                                                                                                                                                                                                                     | 452 | 513  | 0         | 113.5 | 81.2 | 86.5 | ribosomal RNA large subunit methyltransferase F                              | gbpln | Arabidopsis thaliana | AT2G21070.3   Symbols: FIO1   methyltransferases   chr2:9040940-9043500 FORWARD LENGTH=513                                                     | 452 | 513 | 0         | 113.5 | 81.2 | 86.5 |
| Rsa1.0_01361.1.g26113.t1 | #                                                                                                                                                                                                                                                                                                                                                                                                                                                                                                                                                                                                                                                 | #   | #    | #         | #     | #    | -    | ----                                                                         | ----  | #                    | #                                                                                                                                              | #   | #   | #         | #     | #    | #    |
| Rsa1.0_01361.1.g26114.t3 | gb EOA29035.1  hypothetical protein CARUB_v10025289mg [Capsella rubella]                                                                                                                                                                                                                                                                                                                                                                                                                                                                                                                                                                          | 593 | 597  | 0         | 100.7 | 83.6 | 91.6 | hypothetical protein CARUB_v10025289mg                                       | gbpln | Capsella rubella     | AT2G21090.1   Symbols:   Pentatricopeptide repeat (PPR-like) superfamily protein   chr2:9045695-9047488 REVERSE LENGTH=597                     | 593 | 597 | 0         | 100.7 | 82.5 | 90.6 |
| Rsa1.0_01361.1.g26115.t1 | ref NP_181951.3  uncharacterized protein [Arabidopsis thaliana] gi 330255299 gb AEC10393.1  uncharacterized protein AT2G44220 [Arabidopsis thaliana]                                                                                                                                                                                                                                                                                                                                                                                                                                                                                              | 410 | 403  | 1.00E-138 | 98.3  | 59.0 | 72.9 | uncharacterized protein                                                      | gbpln | Arabidopsis thaliana | AT2G44220.1   Symbols:   Protein of Unknown Function (DUF239)   chr2:18283803-18285690 FORWARD LENGTH=403                                      | 410 | 403 | 1.00E-141 | 98.3  | 59.0 | 72.9 |

|                          |                                                                                                                                                                                                                                                                                                                                                                                                                                                      |      |      |           |        |      |      |                                                                     |       |                      |                                                                                                                                        |      |      |           |        |      |      |
|--------------------------|------------------------------------------------------------------------------------------------------------------------------------------------------------------------------------------------------------------------------------------------------------------------------------------------------------------------------------------------------------------------------------------------------------------------------------------------------|------|------|-----------|--------|------|------|---------------------------------------------------------------------|-------|----------------------|----------------------------------------------------------------------------------------------------------------------------------------|------|------|-----------|--------|------|------|
| Rsa1.0_01361.1.g26116.t1 | refXP_002880360.1  hypothetical protein ARALYDRAFT_900523 [Arabidopsis lyrata subsp. lyrata] gi 297326199 gb EFH56619.1                                                                                                                                                                                                                                                                                                                              | 356  | 332  | 1.00E-106 | 93.3   | 72.8 | 77.8 | hypothetical protein ARALYDRAFT_900523                              | gbpln | Arabidopsis lyrata   | AT2G21140.1   Symbols: ATPRP2, PRP2   proline-rich protein 2   chr2:9060868-9062035 REVERSE LENGTH=321                                 | 356  | 321  | 1.00E-104 | 90.2   | 69.4 | 75.3 |
| Rsa1.0_01361.1.g26117.t3 | # # # # # # #                                                                                                                                                                                                                                                                                                                                                                                                                                        | -    | ---- | ----      | #      | #    | #    | #                                                                   | #     | #                    | #                                                                                                                                      | #    | #    | #         | #      | #    | #    |
| Rsa1.0_01362.1.g26118.t1 | gb EOA15441.1  hypothetical protein CARUB_v10004083mg [Capsella rubella]                                                                                                                                                                                                                                                                                                                                                                             | 184  | 948  | 4.00E-96  | 515.2  | 91.3 | 92.4 | hypothetical protein CARUB_v10004083mg                              | gbpln | Capsella rubella     | AT4G31490.1   Symbols:   Coatomer, beta subunit   chr4:15269460-15272693 FORWARD LENGTH=948                                            | 184  | 948  | 3.00E-97  | 515.2  | 90.2 | 91.3 |
| Rsa1.0_01362.1.g26119.t1 | gb EOA17791.1  hypothetical protein CARUB_v10006185mg [Capsella rubella]                                                                                                                                                                                                                                                                                                                                                                             | 197  | 2598 | 6.00E-44  | 1318.8 | 50.3 | 66.5 | hypothetical protein CARUB_v10006185mg                              | gbpln | Capsella rubella     | AT4G30990.2   Symbols:   ARM repeat superfamily protein   chr4:15084456-15097860 FORWARD LENGTH=2620                                   | 197  | 2620 | 5.00E-42  | 1329.9 | 46.7 | 65.5 |
| Rsa1.0_01362.1.g26120.t1 | # # # # # # #                                                                                                                                                                                                                                                                                                                                                                                                                                        | -    | ---- | ----      | #      | #    | #    | #                                                                   | #     | #                    | #                                                                                                                                      | #    | #    | #         | #      | #    | #    |
| Rsa1.0_01362.1.g26121.t1 | # # # # # # #                                                                                                                                                                                                                                                                                                                                                                                                                                        | -    | ---- | ----      | #      | #    | #    | #                                                                   | #     | #                    | #                                                                                                                                      | #    | #    | #         | #      | #    | #    |
| Rsa1.0_01362.1.g26122.t1 | # # # # # # #                                                                                                                                                                                                                                                                                                                                                                                                                                        | -    | ---- | ----      | #      | #    | #    | #                                                                   | #     | #                    | #                                                                                                                                      | #    | #    | #         | #      | #    | #    |
| Rsa1.0_01362.1.g26123.t1 | gb EOA36365.1  hypothetical protein CARUB_v10010751mg [Capsella rubella]                                                                                                                                                                                                                                                                                                                                                                             | 90   | 94   | 5.00E-32  | 104.4  | 80.0 | 81.1 | hypothetical protein CARUB_v10010751mg                              | gbpln | Capsella rubella     | AT1G26945.1   Symbols: KDR   basic helix-loop-helix (bHLH) DNA-binding superfamily protein   chr1:9351571-9352474 FORWARD LENGTH=94    | 90   | 94   | 3.00E-34  | 104.4  | 78.9 | 81.1 |
| Rsa1.0_01362.1.g26124.t1 | ref XP_002893370.1  peptidyl-prolyl cis-trans isomerase cyclophilin-type family protein [Arabidopsis lyrata subsp. lyrata] gi 297339212 gb EFH69629.1  peptidyl-prolyl cis-trans isomerase cyclophilin-type family protein [Arabidopsis lyrata subsp. lyrata]                                                                                                                                                                                        | 226  | 226  | 1.00E-120 | 100.0  | 92.5 | 96.0 | peptidyl-prolyl cis-trans isomerase cyclophilin-type family protein | gbpln | Arabidopsis lyrata   | AT1G26940.1   Symbols:   Cyclophilin-like peptidyl-prolyl cis-trans isomerase family protein   chr1:9343193-9344962 FORWARD LENGTH=226 | 226  | 226  | 1.00E-121 | 100.0  | 92.0 | 94.7 |
| Rsa1.0_01362.1.g26125.t1 | gb EOA40529.1  hypothetical protein CARUB_v10009257mg [Capsella rubella]                                                                                                                                                                                                                                                                                                                                                                             | 438  | 419  | 0         | 95.7   | 83.8 | 88.6 | hypothetical protein CARUB_v10009257mg                              | gbpln | Capsella rubella     | AT1G26930.1   Symbols:   Galactose oxidase/kelch repeat superfamily protein   chr1:9336211-9337476 REVERSE LENGTH=421                  | 438  | 421  | 0         | 96.1   | 82.4 | 88.6 |
| Rsa1.0_01363.1.g26126.t1 | gb EOA20109.1  hypothetical protein CARUB_v10000388mg, partial [Capsella rubella]                                                                                                                                                                                                                                                                                                                                                                    | 561  | 674  | 0         | 120.1  | 94.7 | 97.5 | hypothetical protein CARUB_v10000388mg, partial                     | gbpln | Capsella rubella     | AT5G04590.1   Symbols: SIR   sulfite reductase   chr5:1319404-1322298 FORWARD LENGTH=642                                               | 561  | 642  | 0         | 114.4  | 94.1 | 97.7 |
| Rsa1.0_01363.1.g26127.t1 | gb EOA30567.1  hypothetical protein CARUB_v10013694mg [Capsella rubella]                                                                                                                                                                                                                                                                                                                                                                             | 485  | 447  | 1.00E-170 | 92.2   | 69.3 | 77.3 | hypothetical protein CARUB_v10013694mg                              | gbpln | Capsella rubella     | AT3G10480.1   Symbols: ANAC050, NAC050   NAC domain containing protein 50   chr3:3264410-3266781 FORWARD LENGTH=447                    | 485  | 447  | 1.00E-165 | 92.2   | 68.0 | 77.1 |
| Rsa1.0_01363.1.g26128.t1 | gb EOA30567.1  hypothetical protein CARUB_v10013694mg [Capsella rubella]                                                                                                                                                                                                                                                                                                                                                                             | 462  | 447  | 0         | 96.8   | 75.5 | 83.8 | hypothetical protein CARUB_v10013694mg                              | gbpln | Capsella rubella     | AT3G10490.2   Symbols: ANAC052, NAC052   NAC domain containing protein 52   chr3:3268075-3270608 FORWARD LENGTH=451                    | 462  | 451  | 0         | 97.6   | 74.9 | 83.3 |
| Rsa1.0_01363.1.g26129.t1 | ref NP_567270.1  putative F-box only protein 15 [Arabidopsis thaliana] gi 75265492 sp Q9S9V1.1 FBX15_ARAT H RecName: Full=Putative F-box only protein 15 gi 5732058 gb AAD48957.1 AF149414.6 contains similarity to Pfam family PF00646 (F-box domain); score=11/3, E=0.23, N=1 [Arabidopsis thaliana] gi 7267227 emb CAB80834.1  AT4g04690 [Arabidopsis thaliana] gi 332657012 gb AEE82412.1  putative F-box only protein 15 [Arabidopsis thaliana] | 392  | 378  | 1.00E-76  | 96.4   | 44.9 | 57.9 | putative F-box only protein 15                                      | gbpln | Arabidopsis thaliana | AT4G04690.1   Symbols:   F-box and associated interaction domains-containing protein   chr4:2373999-2375135 REVERSE LENGTH=378         | 392  | 378  | 3.00E-79  | 96.4   | 44.9 | 57.9 |
| Rsa1.0_01363.1.g26130.t2 | gb AAB04606.1  carboxypeptidase Y-like protein [Arabidopsis thaliana] gi 445120 prf I1908426A carboxypeptidase Y                                                                                                                                                                                                                                                                                                                                     | 723  | 539  | 0         | 74.6   | 60.6 | 64.7 | carboxypeptidase Y-like protein                                     | gbpln | Arabidopsis thaliana | AT3G10410.1   Symbols: SCPL49, CPY   SERINE CARBOXYPEPTIDASE-LIKE 49   chr3:3235518-3238063 REVERSE LENGTH=516                         | 723  | 516  | 0         | 71.4   | 60.0 | 63.9 |
| Rsa1.0_01363.1.g26131.t1 | ref NP_187650.4  lysine-specific histone demethylase 1 [Arabidopsis thaliana] gi 332641378 gb AEE74899.1  lysine-specific histone demethylase 1 homolog 3 [Arabidopsis thaliana]                                                                                                                                                                                                                                                                     | 895  | 884  | 0         | 98.8   | 82.7 | 87.4 | lysine-specific histone demethylase 1                               | gbpln | Arabidopsis thaliana | AT3G10390.1   Symbols: FLD   Flavin containing amine oxidoreductase family protein   chr3:3229293-3232345 FORWARD LENGTH=884           | 895  | 884  | 0         | 98.8   | 82.7 | 87.4 |
| Rsa1.0_01363.1.g26132.t2 | ref XP_002884791.1  hypothetical protein ARALYDRAFT_897214 [Arabidopsis lyrata subsp. lyrata] gi 297330631 gb EFH61050.1  hypothetical protein ARALYDRAFT_897214 [Arabidopsis lyrata subsp. lyrata]                                                                                                                                                                                                                                                  | 1067 | 1053 | 0         | 98.7   | 87.9 | 91.1 | hypothetical protein ARALYDRAFT_897214                              | gbpln | Arabidopsis lyrata   | AT3G10380.1   Symbols: SEC8, ATSEC8   subunit of exocyst complex 8   chr3:3219922-3228356 REVERSE LENGTH=1053                          | 1067 | 1053 | 0         | 98.7   | 88.1 | 91.4 |

|                          |                                                                                                                                                                                                                                                                                                                                                                                                                                                                                                                                                                                                                                          |     |      |           |       |      |      |                                               |       |                      |                                                                                                                                                                                                                                                                                                                                                                                                                                                         |     |      |           |       |      |      |
|--------------------------|------------------------------------------------------------------------------------------------------------------------------------------------------------------------------------------------------------------------------------------------------------------------------------------------------------------------------------------------------------------------------------------------------------------------------------------------------------------------------------------------------------------------------------------------------------------------------------------------------------------------------------------|-----|------|-----------|-------|------|------|-----------------------------------------------|-------|----------------------|---------------------------------------------------------------------------------------------------------------------------------------------------------------------------------------------------------------------------------------------------------------------------------------------------------------------------------------------------------------------------------------------------------------------------------------------------------|-----|------|-----------|-------|------|------|
| Rsa1.0_01363.1.g26133.t1 | ref[XP_002884790.1] hypothetical protein ARALYDRAFT_897212 [Arabidopsis lyrata subsp. lyrata] gi 297330630 gb EFH61049.1                                                                                                                                                                                                                                                                                                                                                                                                                                                                                                                 | 935 | 1005 | 0         | 107.5 | 85.7 | 90.7 | hypothetical protein ARALYDRAFT_897212        | gbpln | Arabidopsis lyrata   | AT3G10360.1   Symbols: APUM4, PUM4   pumilio 4   chr3:3211276-3215144 REVERSE LENGTH=1003                                                                                                                                                                                                                                                                                                                                                               | 935 | 1003 | 0         | 107.3 | 85.5 | 90.8 |
| Rsa1.0_01363.1.g26134.t1 | ref[XP_002882661.1] transcription initiation factor IIB-2 [Arabidopsis lyrata subsp. lyrata] gi 297328501 gb EFH58920.1                                                                                                                                                                                                                                                                                                                                                                                                                                                                                                                  | 312 | 312  | 0         | 100.0 | 99.0 | 99.7 | transcription initiation factor IIB-2         | gbpln | Arabidopsis lyrata   | AT3G10330.1   Symbols:   Cyclin-like family protein   chr3:3199907-3201642 FORWARD LENGTH=312                                                                                                                                                                                                                                                                                                                                                           | 312 | 312  | 0         | 100.0 | 98.7 | 99.4 |
| Rsa1.0_01364.1.g26135.t1 | gb AAG51783.1 AC079679.3 reverse transcriptase, putative; 16838-20266 [Arabidopsis thaliana]                                                                                                                                                                                                                                                                                                                                                                                                                                                                                                                                             | 243 | 1142 | 8.00E-22  | 470.0 | 28.0 | 41.2 | reverse transcriptase, putative; 16838-20266  | gbpln | Arabidopsis thaliana | AT2G34320.1   Symbols:   Polynucleotidyl transferase, ribonuclease H-like superfamily protein   chr2:14484959-14485837 FORWARD LENGTH=292                                                                                                                                                                                                                                                                                                               | 243 | 292  | 3.00E-14  | 120.2 | 16.0 | 27.2 |
| Rsa1.0_01364.1.g26136.t5 | gb AFJ66169.1  hypothetical protein 11M19.13 [Arabidopsis halleri]                                                                                                                                                                                                                                                                                                                                                                                                                                                                                                                                                                       | 766 | 1273 | 9.00E-77  | 166.2 | 22.8 | 30.5 | hypothetical protein 11M19.13                 | gbpln | Arabidopsis halleri  | #                                                                                                                                                                                                                                                                                                                                                                                                                                                       | #   | #    | #         | #     | #    |      |
| Rsa1.0_01364.1.g26137.t1 | ref[XP_002864021.1] hypothetical protein ARALYDRAFT_331396 [Arabidopsis lyrata subsp. lyrata] gi 297309856 gb EFH40280.1                                                                                                                                                                                                                                                                                                                                                                                                                                                                                                                 | 463 | 707  | 0         | 152.7 | 80.6 | 89.8 | hypothetical protein ARALYDRAFT_331396        | gbpln | Arabidopsis lyrata   | AT5G49945.1   Symbols:   Protein of unknown function (DUF1682)   chr5:20317418-20319432 FORWARD LENGTH=480                                                                                                                                                                                                                                                                                                                                              | 463 | 480  | 0         | 103.7 | 79.5 | 87.3 |
| Rsa1.0_01364.1.g26138.t1 | ref[NP_568717.2] pyridoxin (pyridoxamine) 5'-phosphate oxidase [Arabidopsis thaliana] gi 75180502 sp Q9LTX3.1 PPOX1_ARAT H RecName: Full=Pyridoxine/pyridoxamine 5'-phosphate oxidase 1, chloroplastic; Short=AtPPOX1; Includes: RecName: Full=Pyridoxine/pyridoxamine 5'-phosphate oxidase; AltName: Full=PMP/PMP oxidase; Short=PNPOX; AltName: Full=Pyridoxal 5'-phosphate synthase; Includes: RecName: Full=Probable NAD(P)HX epimerase; Flags: Precursor gi 8777428 dbj BAA97018.1  unnamed protein product [Arabidopsis thaliana] gi 332008496 gb AED95879.1  pyridoxin (pyridoxamine) 5'-phosphate oxidase [Arabidopsis thaliana] | 460 | 530  | 0         | 115.2 | 89.6 | 95.0 | pyridoxin (pyridoxamine) 5'-phosphate oxidase | gbpln | Arabidopsis thaliana | AT5G49970.1   Symbols: ATPPOX, PDX3, PPOX   pyridoxin (pyridoxamine) 5'-phosphate oxidase   chr5:20329213-20332900 FORWARD LENGTH=530                                                                                                                                                                                                                                                                                                                   | 460 | 530  | 0         | 115.2 | 89.6 | 95.0 |
| Rsa1.0_01364.1.g26139.t1 | ref[XP_002865768.1] auxin F-box protein 5 [Arabidopsis lyrata subsp. lyrata] gi 297311603 gb EFH42027.1                                                                                                                                                                                                                                                                                                                                                                                                                                                                                                                                  | 624 | 608  | 0         | 97.4  | 87.8 | 91.0 | auxin F-box protein 5                         | gbpln | Arabidopsis lyrata   | AT5G49980.1   Symbols: AFB5   auxin F-box protein 5   chr5:20334420-20336531 REVERSE LENGTH=619                                                                                                                                                                                                                                                                                                                                                         | 624 | 619  | 0         | 99.2  | 88.3 | 92.0 |
| Rsa1.0_01364.1.g26140.t1 | gb EOA13509.1  hypothetical protein CARUB_v10026576mg [Capsella rubella]                                                                                                                                                                                                                                                                                                                                                                                                                                                                                                                                                                 | 408 | 386  | 0         | 94.6  | 91.2 | 92.4 | hypothetical protein CARUB_v10026576mg        | gbpln | Capsella rubella     | AT5G50000.1   Symbols:   Protein kinase superfamily protein   chr5:20342838-20345033 REVERSE LENGTH=385                                                                                                                                                                                                                                                                                                                                                 | 408 | 385  | 0         | 94.4  | 89.7 | 91.7 |
| Rsa1.0_01365.1.g26141.t1 | #                                                                                                                                                                                                                                                                                                                                                                                                                                                                                                                                                                                                                                        | #   | #    | #         | #     | #    | -    | ----                                          | ----  | ----                 | #                                                                                                                                                                                                                                                                                                                                                                                                                                                       | #   | #    | #         | #     | #    |      |
| Rsa1.0_01365.1.g26142.t1 | #                                                                                                                                                                                                                                                                                                                                                                                                                                                                                                                                                                                                                                        | #   | #    | #         | #     | #    | -    | ----                                          | ----  | ----                 | #                                                                                                                                                                                                                                                                                                                                                                                                                                                       | #   | #    | #         | #     | #    |      |
| Rsa1.0_01365.1.g26143.t3 | gb AAC28531.1  hypothetical protein [Arabidopsis thaliana]                                                                                                                                                                                                                                                                                                                                                                                                                                                                                                                                                                               | 423 | 439  | 1.00E-132 | 103.8 | 58.2 | 66.7 | hypothetical protein                          | gbpln | Arabidopsis thaliana | AT2G45940.1   Symbols:   Protein of unknown function (DUF295)   chr2:18903032-18904181 FORWARD LENGTH=352                                                                                                                                                                                                                                                                                                                                               | 423 | 352  | 1.00E-134 | 83.2  | 56.3 | 65.0 |
| Rsa1.0_01365.1.g26144.t1 | ref[NP_193344.5] uncharacterized protein [Arabidopsis thaliana] gi 332658281 gb AEB83691.1  uncharacterized protein AT4G16090 [Arabidopsis thaliana]                                                                                                                                                                                                                                                                                                                                                                                                                                                                                     | 355 | 268  | 9.00E-95  | 75.5  | 50.4 | 57.2 | uncharacterized protein                       | gbpln | Arabidopsis thaliana | AT4G16090.1   Symbols:   unknown protein; FUNCTIONS IN: molecular_function unknown; INVOLVED IN: biological_process unknown; LOCATED IN: mitochondrion; BEST Arabidopsis thaliana protein match is: unknown protein (TAIR:AT2G45930.1). Has 76 Blast hits to 76 proteins in 2 species: Archae - 0; Bacteria - 0; Metazoa - 0; Fungi - 0; Plants - 76; Viruses - 0; Other Eukaryotes - 0 (source: NCBI BLINK).   chr4:9103078-9103965 FORWARD LENGTH=268 | 355 | 268  | 2.00E-97  | 75.5  | 50.4 | 57.2 |
| Rsa1.0_01365.1.g26145.t1 | gb AAG51783.1 AC079679.3 reverse transcriptase, putative; 16838-20266 [Arabidopsis thaliana]                                                                                                                                                                                                                                                                                                                                                                                                                                                                                                                                             | 318 | 1142 | 8.00E-50  | 359.1 | 42.5 | 57.5 | reverse transcriptase, putative; 16838-20266  | gbpln | Arabidopsis thaliana | AT4G2090.1   Symbols:   Ribonuclease H-like superfamily protein   chr4:14333528-14335255 FORWARD LENGTH=575                                                                                                                                                                                                                                                                                                                                             | 318 | 575  | 5.00E-24  | 180.8 | 28.0 | 43.1 |



|                          |                                                                                                                                                                                                                                                                                                                                                               |      |      |           |       |      |      |                                             |       |                      |                                                                                                                                                                    |      |      |           |       |      |      |
|--------------------------|---------------------------------------------------------------------------------------------------------------------------------------------------------------------------------------------------------------------------------------------------------------------------------------------------------------------------------------------------------------|------|------|-----------|-------|------|------|---------------------------------------------|-------|----------------------|--------------------------------------------------------------------------------------------------------------------------------------------------------------------|------|------|-----------|-------|------|------|
| Rsa1.0_01365.1.g26146.t1 | refXP_002880209.1   hypothetical protein ARALYDRAFT_904046 [Arabidopsis lyrata subsp. lyrata] gi 297326048 gb EFH56468.1                                                                                                                                                                                                                                      | 744  | 352  | 1.00E-124 | 47.3  | 30.6 | 35.9 | hypothetical protein ARALYDRAFT_904046      | gbpln | Arabidopsis lyrata   | AT2G45940.1   Symbols:   Protein of unknown function (DUF295)   chr2:18903032-18904181 FORWARD LENGTH=352                                                          | 744  | 352  | 1.00E-126 | 47.3  | 30.5 | 35.2 |
| Rsa1.0_01365.1.g26147.t2 | hypothetical protein ARALYDRAFT_904046 [Arabidopsis lyrata subsp. lyrata] gb AAF79618.1 AC027665_19 F5M15.26 [Arabidopsis thaliana]                                                                                                                                                                                                                           | 275  | 1838 | 2.00E-43  | 668.4 | 34.5 | 45.8 | F5M15.26                                    | gbpln | Arabidopsis thaliana | #                                                                                                                                                                  | #    | #    | #         | #     | #    | #    |
| Rsa1.0_01365.1.g26148.t1 | ref NP_001190632.1  Chalcone-flavanone isomerase family protein [Arabidopsis thaliana] gi 332010800 gb AED98183.1  Chalcone-flavanone isomerase family protein [Arabidopsis thaliana]                                                                                                                                                                         | 163  | 545  | 1.00E-13  | 334.4 | 34.4 | 41.1 | Chalcone-flavanone isomerase family protein | gbpln | Arabidopsis thaliana | AT5G66230.2   Symbols:   Chalcone-flavanone isomerase family protein   chr5:26461177-26463873 FORWARD LENGTH=545                                                   | 163  | 545  | 4.00E-16  | 334.4 | 34.4 | 41.1 |
| Rsa1.0_01365.1.g26149.t1 | dbj BAB10876.1  polyprotein [Arabidopsis thaliana]                                                                                                                                                                                                                                                                                                            | 1408 | 1429 | 0         | 101.5 | 59.1 | 73.1 | polyprotein                                 | gbpln | Arabidopsis thaliana | AT4G23160.1   Symbols: CRK8   cysteine-rich RLK (RECEPTOR-like protein kinase) 8   chr4:12129485-12134086 FORWARD LENGTH=1262                                      | 1408 | 1262 | 1.00E-116 | 89.6  | 14.6 | 21.8 |
| Rsa1.0_01365.1.g26150.t1 | #                                                                                                                                                                                                                                                                                                                                                             | #    | #    | #         | #     | #    | #    | -                                           | ----  | ----                 | #                                                                                                                                                                  | #    | #    | #         | #     | #    | #    |
| Rsa1.0_01365.1.g26151.t1 | refXP_002882042.1   hypothetical protein ARALYDRAFT_483735 [Arabidopsis lyrata subsp. lyrata] gi 297327881 gb EFH58301.1   hypothetical protein ARALYDRAFT_483735 [Arabidopsis lyrata subsp. lyrata]                                                                                                                                                          | 341  | 334  | 1.00E-134 | 97.9  | 78.6 | 86.2 | hypothetical protein ARALYDRAFT_483735      | gbpln | Arabidopsis lyrata   | AT2G45950.1   Symbols: ASK20, SK20   SKP1-like 20   chr2:18904611-18906967 REVERSE LENGTH=342                                                                      | 341  | 342  | 1.00E-135 | 100.3 | 76.8 | 85.0 |
| Rsa1.0_01366.1.g26152.t1 | refXP_002866219.1   calmodulin-binding protein [Arabidopsis lyrata subsp. lyrata] gi 297312054 gb EFH42478.1   calmodulin-binding protein [Arabidopsis lyrata subsp. lyrata]                                                                                                                                                                                  | 227  | 646  | 4.00E-14  | 284.6 | 18.5 | 20.7 | calmodulin-binding protein                  | gbpln | Arabidopsis lyrata   | AT5G57580.1   Symbols:   Calmodulin-binding protein   chr5:23314994-23317683 REVERSE LENGTH=647                                                                    | 227  | 647  | 2.00E-16  | 285.0 | 18.1 | 20.3 |
| Rsa1.0_01366.1.g26153.t1 | gb ABH07409.1  putative pol polyprotein [Brassica oleracea var. botrytis]                                                                                                                                                                                                                                                                                     | 889  | 1239 | 0         | 139.4 | 42.1 | 48.1 | putative pol polyprotein                    | gbpln | Brassica oleracea    | AT4G23160.1   Symbols: CRK8   cysteine-rich RLK (RECEPTOR-like protein kinase) 8   chr4:12129485-12134086 FORWARD LENGTH=1262                                      | 889  | 1262 | 3.00E-24  | 142.0 | 7.9  | 11.0 |
| Rsa1.0_01366.1.g26154.t1 | gb EOA34747.1  hypothetical protein CARUB_v10022319mg [Capsella rubella]                                                                                                                                                                                                                                                                                      | 306  | 310  | 1.00E-103 | 101.3 | 61.8 | 74.5 | hypothetical protein CARUB_v10022319mg      | gbpln | Capsella rubella     | AT1G32600.1   Symbols:   F-box associated ubiquitination effector family protein   chr1:11794802-11795683 FORWARD LENGTH=293                                       | 306  | 293  | 1.00E-91  | 95.8  | 56.2 | 72.2 |
| Rsa1.0_01366.1.g26155.t1 | #                                                                                                                                                                                                                                                                                                                                                             | #    | #    | #         | #     | #    | #    | -                                           | ----  | ----                 | #                                                                                                                                                                  | #    | #    | #         | #     | #    | #    |
| Rsa1.0_01366.1.g26156.t1 | refXP_002876270.1   BME3/BME3-ZF [Arabidopsis lyrata subsp. lyrata] gi 297322108 gb EFH52529.1   BME3/BME3-ZF [Arabidopsis lyrata subsp. lyrata]                                                                                                                                                                                                              | 334  | 319  | 1.00E-128 | 95.5  | 82.6 | 87.7 | BME3/BME3-ZF                                | gbpln | Arabidopsis lyrata   | AT3G54810.1   Symbols: BME3-ZF, BME3, GATA8   Plant-specific GATA-type zinc finger transcription factor family protein   chr3:20296957-20298236 FORWARD LENGTH=322 | 334  | 322  | 1.00E-129 | 96.4  | 83.2 | 88.3 |
| Rsa1.0_01366.1.g26157.t4 | dbj BAB11308.1  copia-like retroelement pol polyprotein [Arabidopsis thaliana]                                                                                                                                                                                                                                                                                | 668  | 1013 | 1.00E-10  | 151.6 | 5.8  | 8.1  | copia-like retroelement pol polyprotein     | gbpln | Arabidopsis thaliana | #                                                                                                                                                                  | #    | #    | #         | #     | #    | #    |
| Rsa1.0_01367.1.g26158.t1 | gb AAF98418.1 AC026238_10 Hypothetical protein [Arabidopsis thaliana]                                                                                                                                                                                                                                                                                         | 684  | 742  | 0         | 108.5 | 87.6 | 92.7 | Hypothetical protein                        | gbpln | Arabidopsis thaliana | AT1G18560.1   Symbols:   BED zinc finger hAT family dimerisation domain   chr1:6385614-6388005 FORWARD LENGTH=690                                                  | 684  | 690  | 0         | 100.9 | 87.6 | 92.7 |
| Rsa1.0_01367.1.g26159.t1 | #                                                                                                                                                                                                                                                                                                                                                             | #    | #    | #         | #     | #    | #    | -                                           | ----  | ----                 | #                                                                                                                                                                  | #    | #    | #         | #     | #    | #    |
| Rsa1.0_01367.1.g26160.t2 | gb ACR48187.1  MYB domain protein 51-1 [Brassica rapa subsp. pekinensis]                                                                                                                                                                                                                                                                                      | 350  | 320  | 1.00E-133 | 91.4  | 77.1 | 82.0 | MYB domain protein 51-1                     | gbpln | Brassica rapa        | AT1G18570.1   Symbols: MYB51, AtMYB51, BW51A, BW51B, HIG1   myb domain protein 51   chr1:6389765-6391026 FORWARD LENGTH=352                                        | 350  | 352  | 1.00E-122 | 100.6 | 71.7 | 79.4 |
| Rsa1.0_01367.1.g26161.t1 | #                                                                                                                                                                                                                                                                                                                                                             | #    | #    | #         | #     | #    | #    | -                                           | ----  | ----                 | #                                                                                                                                                                  | #    | #    | #         | #     | #    | #    |
| Rsa1.0_01367.1.g26162.t1 | #                                                                                                                                                                                                                                                                                                                                                             | #    | #    | #         | #     | #    | #    | -                                           | ----  | ----                 | #                                                                                                                                                                  | #    | #    | #         | #     | #    | #    |
| Rsa1.0_01368.1.g26163.t1 | #                                                                                                                                                                                                                                                                                                                                                             | #    | #    | #         | #     | #    | #    | -                                           | ----  | ----                 | #                                                                                                                                                                  | #    | #    | #         | #     | #    | #    |
| Rsa1.0_01368.1.g26164.t1 | ref NP_567275.1  transducin/WD40 domain-containing protein [Arabidopsis thaliana] gi 16604679 gb AAL24132.1   putative WD-repeat membrane protein [Arabidopsis thaliana] gi 20465603 gb AAM20284.1   putative WD-repeat membrane protein [Arabidopsis thaliana] gi 332657045 gb AEE82445.1   transducin/WD40 domain-containing protein [Arabidopsis thaliana] | 1130 | 910  | 0         | 80.5  | 72.5 | 77.1 | transducin/WD40 domain-containing protein   | gbpln | Arabidopsis thaliana | AT4G04940.1   Symbols:   transducin family protein / WD-40 repeat family protein   chr4:2511212-2517052 REVERSE LENGTH=910                                         | 1130 | 910  | 0         | 80.5  | 72.5 | 77.1 |



|                          |                                                                                                                                                                                                                                                                                                               |      |      |           |       |      |      |                                                     |       |                      |                                                                                                                                                                                                                                                                                                                                                                                                                                                                                                                                                           |      |      |          |       |      |      |
|--------------------------|---------------------------------------------------------------------------------------------------------------------------------------------------------------------------------------------------------------------------------------------------------------------------------------------------------------|------|------|-----------|-------|------|------|-----------------------------------------------------|-------|----------------------|-----------------------------------------------------------------------------------------------------------------------------------------------------------------------------------------------------------------------------------------------------------------------------------------------------------------------------------------------------------------------------------------------------------------------------------------------------------------------------------------------------------------------------------------------------------|------|------|----------|-------|------|------|
| Rsa1.0_01370.1.g26178.t1 | gb AAF69169.1 AC007915.21 F27F5.21 [Arabidopsis thaliana]                                                                                                                                                                                                                                                     | 854  | 1023 | 1.00E-66  | 119.8 | 14.6 | 19.7 | F27F5.21                                            | gbpln | Arabidopsis thaliana | AT1G76660.1   Symbols:   FUNCTIONS IN: molecular function unknown; INVOLVED IN: biological_process unknown; LOCATED IN: plasma membrane; EXPRESSED IN: 22 plant structures; EXPRESSED DURING: 13 growth stages; BEST Arabidopsis thaliana protein match is: hydroxyproline-rich glycoprotein family protein (TAIR:AT5G52430.1); Has 353 Blast hits to 231 proteins in 60 species: Archae - 0; Bacteria - 6; Metazoa - 57; Fungi - 22; Plants - 125; Viruses - 4; Other Eukaryotes - 139 (source: NCBI BLINK).   chr1:28769157-28771036 REVERSE LENGTH=431 | 854  | 431  | 9.00E-31 | 50.5  | 10.4 | 13.0 |
| Rsa1.0_01370.1.g26179.t1 | gb AAF97279.1 AC010164.1 Hypothetical protein [Arabidopsis thaliana]                                                                                                                                                                                                                                          | 110  | 352  | 4.00E-14  | 320.0 | 39.1 | 60.0 | Hypothetical protein                                | gbpln | Arabidopsis thaliana | #                                                                                                                                                                                                                                                                                                                                                                                                                                                                                                                                                         | #    | #    | #        | #     | #    |      |
| Rsa1.0_01370.1.g26180.t1 | ref XP_002890242.1  hypothetical protein ARALYDRAFT_335032 [Arabidopsis lyrata subsp. lyrata]   gi 297336084 gb EFH66501.1  hypothetical protein ARALYDRAFT_335032 [Arabidopsis lyrata subsp. lyrata]                                                                                                         | 333  | 775  | 5.00E-32  | 232.7 | 31.2 | 45.9 | hypothetical protein ARALYDRAFT_335032              | gbpln | Arabidopsis lyrata   | AT2G07200.1   Symbols:   Cysteine proteinases superfamily protein   chr2:2989205-2989878 FORWARD LENGTH=151                                                                                                                                                                                                                                                                                                                                                                                                                                               | 333  | 151  | 3.00E-21 | 45.3  | 17.4 | 26.4 |
| Rsa1.0_01371.1.g26181.t1 | #                                                                                                                                                                                                                                                                                                             | #    | #    | #         | #     | #    | -    | ----                                                | ----  | #                    | #                                                                                                                                                                                                                                                                                                                                                                                                                                                                                                                                                         | #    | #    | #        | #     | #    |      |
| Rsa1.0_01371.1.g26182.t1 | #                                                                                                                                                                                                                                                                                                             | #    | #    | #         | #     | #    | -    | ----                                                | ----  | #                    | #                                                                                                                                                                                                                                                                                                                                                                                                                                                                                                                                                         | #    | #    | #        | #     | #    |      |
| Rsa1.0_01371.1.g26183.t1 | #                                                                                                                                                                                                                                                                                                             | #    | #    | #         | #     | #    | -    | ----                                                | ----  | #                    | #                                                                                                                                                                                                                                                                                                                                                                                                                                                                                                                                                         | #    | #    | #        | #     | #    |      |
| Rsa1.0_01371.1.g26184.t1 | #                                                                                                                                                                                                                                                                                                             | #    | #    | #         | #     | #    | -    | ----                                                | ----  | #                    | #                                                                                                                                                                                                                                                                                                                                                                                                                                                                                                                                                         | #    | #    | #        | #     | #    |      |
| Rsa1.0_01371.1.g26185.t1 | emb CAA54951.1  ribosomal protein S19 [Arabidopsis thaliana]   gi 459422 emb CAA54965.1  mitochondrial ribosomal protein S19, nuclear encoded [Arabidopsis thaliana]                                                                                                                                          | 206  | 212  | 6.00E-97  | 102.9 | 86.9 | 92.7 | ribosomal protein S19                               | gbpln | Arabidopsis thaliana | AT5G47320.1   Symbols: RPS19   ribosomal protein S19   chr5:19203801-19204951 FORWARD LENGTH=212                                                                                                                                                                                                                                                                                                                                                                                                                                                          | 206  | 212  | 1.00E-98 | 102.9 | 86.4 | 92.2 |
| Rsa1.0_01371.1.g26186.t2 | gb AAC63844.1  putative non-LTR retroelement reverse transcriptase [Arabidopsis thaliana]                                                                                                                                                                                                                     | 1699 | 1231 | 0         | 72.5  | 42.0 | 52.9 | putative non-LTR retroelement reverse transcriptase | gbpln | Arabidopsis thaliana | AT3G23810.1   Symbols: SAHH2, ATSAHH2   S'-adenosyl-L-homocysteine (SAH) hydrolase 2   chr3:8588013-8589671 REVERSE LENGTH=485                                                                                                                                                                                                                                                                                                                                                                                                                            | 1699 | 485  | 0        | 28.5  | 28.0 | 28.1 |
| Rsa1.0_01371.1.g26187.t1 | ref NP_566740.1  protein ralf-like 24 [Arabidopsis thaliana]   gi 75273714 sp Q9LK37.1 RLF24_ARATH RecName: Full=Protein RALF-like 24; Flags: Precursor   gi 9293954 dbj BAB01857.1  unnamed protein product [Arabidopsis thaliana]   gi 332643295 gb AEE76816.1  protein ralf-like 24 [Arabidopsis thaliana] | 118  | 118  | 2.00E-48  | 100.0 | 85.6 | 94.1 | protein ralf-like 24                                | gbpln | Arabidopsis thaliana | AT3G23805.1   Symbols: RALFL24   ralf-like 24   chr3:8586467-8586823 FORWARD LENGTH=118                                                                                                                                                                                                                                                                                                                                                                                                                                                                   | 118  | 118  | 4.00E-51 | 100.0 | 85.6 | 94.1 |
| Rsa1.0_01371.1.g26188.t1 | gb EOA32655.1  hypothetical protein CARUB_v10015952mg [Capsella rubella]                                                                                                                                                                                                                                      | 478  | 476  | 0         | 99.6  | 87.0 | 93.1 | hypothetical protein CARUB_v10015952mg              | gbpln | Capsella rubella     | AT3G23770.1   Symbols:   O-Glycosyl hydrolases family 17 protein   chr3:8565556-8567196 FORWARD LENGTH=476                                                                                                                                                                                                                                                                                                                                                                                                                                                | 478  | 476  | 0        | 99.6  | 84.7 | 89.1 |
| Rsa1.0_01372.1.g26189.t1 | ref XP_002887604.1  hypothetical protein ARALYDRAFT_476705 [Arabidopsis lyrata subsp. lyrata]   gi 297333445 gb EFH63863.1  hypothetical protein ARALYDRAFT_476705 [Arabidopsis lyrata subsp. lyrata]                                                                                                         | 108  | 108  | 3.00E-54  | 100.0 | 94.4 | 97.2 | hypothetical protein ARALYDRAFT_476705              | gbpln | Arabidopsis lyrata   | AT1G75580.1   Symbols:   SAUR-like auxin-responsive protein family   chr1:28377530-28377856 FORWARD LENGTH=108                                                                                                                                                                                                                                                                                                                                                                                                                                            | 108  | 108  | 2.00E-56 | 100.0 | 93.5 | 96.3 |
| Rsa1.0_01372.1.g26190.t1 | gb AAC62132.1  copia-like retroelement pol polyprotein [Arabidopsis thaliana]                                                                                                                                                                                                                                 | 608  | 1137 | 1.00E-141 | 187.0 | 49.8 | 67.1 | copia-like retroelement pol polyprotein             | gbpln | Arabidopsis thaliana | AT4G23160.1   Symbols: CRK8   cysteine-rich RLK (RECEPTOR-like protein kinase) 8   chr4:12129485-12134086 FORWARD LENGTH=1262                                                                                                                                                                                                                                                                                                                                                                                                                             | 608  | 1262 | 3.00E-36 | 207.6 | 18.3 | 29.3 |
| Rsa1.0_01372.1.g26191.t1 | ref NP_177687.1  glycine-rich protein [Arabidopsis thaliana]   gi 9369369 gb AAF87118.1 AC006434.14 F10A5.23 [Arabidopsis thaliana]   gi 33219761 gb AEE35732.1  glycine-rich protein [Arabidopsis thaliana]                                                                                                  | 144  | 167  | 5.00E-42  | 116.0 | 77.1 | 82.6 | glycine-rich protein                                | gbpln | Arabidopsis thaliana | AT1G75550.1   Symbols:   glycine-rich protein   chr1:28369437-28369940 REVERSE LENGTH=167                                                                                                                                                                                                                                                                                                                                                                                                                                                                 | 144  | 167  | 1.00E-44 | 116.0 | 77.1 | 82.6 |
| Rsa1.0_01372.1.g26192.t1 | #                                                                                                                                                                                                                                                                                                             | #    | #    | #         | #     | #    | -    | ----                                                | ----  | #                    | #                                                                                                                                                                                                                                                                                                                                                                                                                                                                                                                                                         | #    | #    | #        | #     | #    |      |
| Rsa1.0_01372.1.g26193.t1 | gb EOA35448.1  hypothetical protein CARUB_v10020651mg [Capsella rubella]                                                                                                                                                                                                                                      | 92   | 325  | 4.00E-27  | 353.3 | 72.8 | 80.4 | hypothetical protein CARUB_v10020651mg              | gbpln | Capsella rubella     | AT1G75540.1   Symbols: STH2   salt tolerance homolog 2   chr1:28366059-28367398 FORWARD LENGTH=331                                                                                                                                                                                                                                                                                                                                                                                                                                                        | 92   | 331  | 6.00E-29 | 359.8 | 71.7 | 77.2 |
| Rsa1.0_01372.1.g26194.t1 | gb AAG50806.1 AC079281.8 unknown protein [Arabidopsis thaliana]                                                                                                                                                                                                                                               | 1657 | 1213 | 0         | 73.2  | 26.5 | 38.9 | unknown protein                                     | gbpln | Arabidopsis thaliana | AT1G43760.1   Symbols:   DNase I-like superfamily protein   chr1:16528880-16531065 REVERSE LENGTH=626                                                                                                                                                                                                                                                                                                                                                                                                                                                     | 1657 | 626  | 1.00E-57 | 37.8  | 7.5  | 12.6 |
| Rsa1.0_01372.1.g26195.t1 | #                                                                                                                                                                                                                                                                                                             | #    | #    | #         | #     | #    | -    | ----                                                | ----  | #                    | #                                                                                                                                                                                                                                                                                                                                                                                                                                                                                                                                                         | #    | #    | #        | #     | #    |      |

|                          |                                                                                                                                                                                                                                                                                                                                                                                                                                                                                                                        |     |      |           |       |      |      |                                          |       |                      |                                                                                                                                                                |     |     |           |       |      |      |
|--------------------------|------------------------------------------------------------------------------------------------------------------------------------------------------------------------------------------------------------------------------------------------------------------------------------------------------------------------------------------------------------------------------------------------------------------------------------------------------------------------------------------------------------------------|-----|------|-----------|-------|------|------|------------------------------------------|-------|----------------------|----------------------------------------------------------------------------------------------------------------------------------------------------------------|-----|-----|-----------|-------|------|------|
| Rsa1.0_01373.1.g26196.t1 | refXP_002880160.1  hypothetical protein ARALYDRAFT_483647 [Arabidopsis lyrata subsp. lyrata] gi 297325999 gb EFH56419.1  hypothetical protein ARALYDRAFT_483647 [Arabidopsis lyrata subsp. lyrata]                                                                                                                                                                                                                                                                                                                     | 116 | 239  | 1.00E-23  | 206.0 | 46.6 | 53.4 | hypothetical protein ARALYDRAFT_483647   | gbpln | Arabidopsis lyrata   | AT2G45140.1   Symbols: PVA12   plant VAP homolog   2   chr2:18611029-18612971 FORWARD LENGTH=239                                                               | 116 | 239 | 4.00E-26  | 206.0 | 46.6 | 53.4 |
| Rsa1.0_01373.1.g26197.t6 | gb EOA29123.1  hypothetical protein CARUB_v10025390mg [Capsella rubella]                                                                                                                                                                                                                                                                                                                                                                                                                                               | 729 | 440  | 1.00E-180 | 60.4  | 45.1 | 47.6 | hypothetical protein CARUB_v10025390mg   | gbpln | Capsella rubella     | AT2G45150.3   Symbols:   cytidinediphosphate diacylglycerol synthase 4   chr2:18613519-18615347 FORWARD LENGTH=382                                             | 729 | 382 | 1.00E-174 | 52.4  | 43.9 | 46.1 |
| Rsa1.0_01373.1.g26198.t1 | gb EOA28527.1  hypothetical protein CARUB_v10024743mg [Capsella rubella]                                                                                                                                                                                                                                                                                                                                                                                                                                               | 597 | 638  | 0         | 106.9 | 79.9 | 86.1 | hypothetical protein CARUB_v10024743mg   | gbpln | Capsella rubella     | AT2G45160.1   Symbols: HAM1, ATHAM1, LOM1   GRAS family transcription factor   chr2:18618110-18620032 REVERSE LENGTH=640                                       | 597 | 640 | 0         | 107.2 | 78.7 | 86.6 |
| Rsa1.0_01373.1.g26199.t1 | emb CAB39638.1  RNA-directed DNA polymerase-like protein [Arabidopsis thaliana] gi 7267666 emb CAB78094.1  RNA-directed DNA polymerase-like protein [Arabidopsis thaliana]                                                                                                                                                                                                                                                                                                                                             | 341 | 1274 | 4.00E-47  | 373.6 | 33.4 | 46.6 | RNA-directed DNA polymerase-like protein | gbpln | Arabidopsis thaliana | AT1G10000.1   Symbols:   Ribonuclease H-like superfamily protein   chr1:3263877-3264788 REVERSE LENGTH=303                                                     | 341 | 303 | 2.00E-45  | 88.9  | 30.2 | 44.3 |
| Rsa1.0_01373.1.g26200.t1 | gb EOA28141.1  hypothetical protein CARUB_v10024330mg [Capsella rubella]                                                                                                                                                                                                                                                                                                                                                                                                                                               | 122 | 122  | 2.00E-59  | 100.0 | 93.4 | 98.4 | hypothetical protein CARUB_v10024330mg   | gbpln | Capsella rubella     | AT2G45170.2   Symbols: ATATG8E, ATG8E   AUTOPHAGY 8E   chr2:18624545-18625526 FORWARD LENGTH=122                                                               | 122 | 122 | 4.00E-61  | 100.0 | 91.8 | 97.5 |
| Rsa1.0_01373.1.g26201.t1 | emb CAB39638.1  RNA-directed DNA polymerase-like protein [Arabidopsis thaliana] gi 7267666 emb CAB78094.1  RNA-directed DNA polymerase-like protein [Arabidopsis thaliana]                                                                                                                                                                                                                                                                                                                                             | 295 | 1274 | 2.00E-61  | 431.9 | 41.4 | 57.6 | RNA-directed DNA polymerase-like protein | gbpln | Arabidopsis thaliana | AT1G10000.1   Symbols:   Ribonuclease H-like superfamily protein   chr1:3263877-3264788 REVERSE LENGTH=303                                                     | 295 | 303 | 8.00E-25  | 102.7 | 19.7 | 27.8 |
| Rsa1.0_01373.1.g26202.t1 | gb EOA28114.1  hypothetical protein CARUB_v10024298mg [Capsella rubella]                                                                                                                                                                                                                                                                                                                                                                                                                                               | 131 | 134  | 5.00E-48  | 102.3 | 90.8 | 95.4 | hypothetical protein CARUB_v10024298mg   | gbpln | Capsella rubella     | AT2G45180.1   Symbols:   Bifunctional inhibitor/lipid-transfer protein/seed storage 2S albumin superfamily protein   chr2:18626377-18626781 FORWARD LENGTH=134 | 131 | 134 | 8.00E-49  | 102.3 | 87.0 | 94.7 |
| Rsa1.0_01374.1.g26203.t1 | ref NP_200507.1  cytokinin dehydrogenase 3 [Arabidopsis thaliana] gi 20138027 sp Q9LTS3.1 CKX3_ARATH RecName: Full=Cytokinin dehydrogenase 3; AltName: Full=Cytokinin oxidase 3; Short=AtCKX3; Short=CKO 3; Flags: Precursor gi 11120510 gb AAG30906.1 AF303979.1 cytokinin oxidase [Arabidopsis thaliana] gi 8777437 db BAA97027.1  cytokinin oxidase [Arabidopsis thaliana] gi 190016002 gb ACE62889.1 At5g56970 [Arabidopsis thaliana] gi 332009445 gb AED96828.1  cytokinin dehydrogenase 3 [Arabidopsis thaliana] | 519 | 523  | 0         | 100.8 | 85.7 | 94.0 | cytokinin dehydrogenase 3                | gbpln | Arabidopsis thaliana | AT5G56970.1   Symbols: CKX3, ATCKX3   cytokinin oxidase 3   chr5:23044944-23048245 REVERSE LENGTH=523                                                          | 519 | 523 | 0         | 100.8 | 85.7 | 94.0 |
| Rsa1.0_01374.1.g26204.t1 | gb EOA13542.1  hypothetical protein CARUB_v10026605mg [Capsella rubella]                                                                                                                                                                                                                                                                                                                                                                                                                                               | 378 | 376  | 1.00E-165 | 99.5  | 90.5 | 96.6 | hypothetical protein CARUB_v10026605mg   | gbpln | Capsella rubella     | AT5G56950.1   Symbols: NFA03, NFA3, NAP1.3   nucleosome assembly protein 1.3   chr5:23032618-23035299 FORWARD LENGTH=374                                       | 378 | 374 | 1.00E-167 | 98.9  | 89.2 | 95.8 |
| Rsa1.0_01374.1.g26205.t2 | ref XP_002863022.1  ribosomal protein S16 family protein [Arabidopsis lyrata subsp. lyrata] gi 297793207 ref XP_002864488.1  ribosomal protein S16 family protein [Arabidopsis lyrata subsp. lyrata] gi 297308822 gb EFH39281.1  ribosomal protein S16 family protein [Arabidopsis lyrata subsp. lyrata] gi 297310323 gb EFH40747.1  ribosomal protein S16 family protein [Arabidopsis lyrata subsp. lyrata]                                                                                                           | 73  | 135  | 2.00E-26  | 184.9 | 84.9 | 87.7 | ribosomal protein S16 family protein     | gbpln | Arabidopsis lyrata   | AT5G56940.1   Symbols:   Ribosomal protein S16 family protein   chr5:23030879-23032200 FORWARD LENGTH=135                                                      | 73  | 135 | 7.00E-29  | 184.9 | 83.6 | 87.7 |
| Rsa1.0_01374.1.g26206.t1 | ref NP_850984.4  Heat shock protein 70 [Arabidopsis thaliana] gi 378548352 sp F4HQD4.1 HSP7P_ARATH RecName: Full=Heat shock 70 kDa protein 15; AltName: Full=Heat shock protein 70-15; Short=AtHsp70-15 gi 332198204 gb AEE36325.1  Heat shock protein 70 [Arabidopsis thaliana]                                                                                                                                                                                                                                       | 136 | 831  | 7.00E-47  | 611.0 | 64.7 | 66.2 | Heat shock protein 70                    | gbpln | Arabidopsis thaliana | AT1G79920.1   Symbols:   Heat shock protein 70 (Hsp 70) family protein   chr1:30058935-30062224 REVERSE LENGTH=831                                             | 136 | 831 | 2.00E-49  | 611.0 | 64.7 | 66.2 |
| Rsa1.0_01374.1.g26207.t1 | # # # # # # # -                                                                                                                                                                                                                                                                                                                                                                                                                                                                                                        |     |      |           |       |      |      |                                          |       |                      |                                                                                                                                                                |     |     |           |       |      |      |
| Rsa1.0_01375.1.g26208.t1 | ref XP_002876168.1  hypothetical protein ARALYDRAFT_485652 [Arabidopsis lyrata subsp. lyrata] gi 297322006 gb EFH54247.1  hypothetical protein ARALYDRAFT_485652 [Arabidopsis lyrata subsp. lyrata]                                                                                                                                                                                                                                                                                                                    | 134 | 169  | 1.00E-23  | 126.1 | 53.0 | 59.0 | hypothetical protein ARALYDRAFT_485652   | gbpln | Arabidopsis lyrata   | AT2G36320.1   Symbols:   A20/AN1-like zinc finger family protein   chr2:15229388-15229873 FORWARD LENGTH=161                                                   | 134 | 161 | 7.00E-26  | 120.1 | 50.0 | 55.2 |

|                          |                                                                                                                                                                                                                                                                                                                                                                                                                                                                                                                                                                                                                                                                                                                                                                                                                                                                                                                                                        |     |     |           |       |      |       |                                                      |       |                      |                                                                                                                                                                                                                                                                                                                                                      |     |     |           |       |      |      |
|--------------------------|--------------------------------------------------------------------------------------------------------------------------------------------------------------------------------------------------------------------------------------------------------------------------------------------------------------------------------------------------------------------------------------------------------------------------------------------------------------------------------------------------------------------------------------------------------------------------------------------------------------------------------------------------------------------------------------------------------------------------------------------------------------------------------------------------------------------------------------------------------------------------------------------------------------------------------------------------------|-----|-----|-----------|-------|------|-------|------------------------------------------------------|-------|----------------------|------------------------------------------------------------------------------------------------------------------------------------------------------------------------------------------------------------------------------------------------------------------------------------------------------------------------------------------------------|-----|-----|-----------|-------|------|------|
| Rsa1.0_01375.1.g26209.t1 | gb AAF63124.1 AC009526.9<br>Hypothetical protein [Arabidopsis thaliana]                                                                                                                                                                                                                                                                                                                                                                                                                                                                                                                                                                                                                                                                                                                                                                                                                                                                                | 491 | 408 | 2.00E-47  | 83.1  | 21.8 | 27.3  | Hypothetical protein                                 | gbpln | Arabidopsis thaliana | AT1G43722.1   Symbols:   unknown protein; BEST Arabidopsis thaliana protein match is: unknown protein (TAIR:AT5G28730.1). Has 924 Blast hits to 912 proteins in 109 species: Archae - 0; Bacteria - 0; Metazoa - 222; Fungi - 31; Plants - 661; Viruses - 0; Other Eukaryotes - 10 (source: NCBI BLINK).   chr1:16496403-16497377 FORWARD LENGTH=324 | 491 | 324 | 5.00E-50  | 66.0  | 21.8 | 27.3 |
| Rsa1.0_01375.1.g26210.t1 | ref XP_002877827.1  acyl-CoA oxidase 4 [Arabidopsis lyrata subsp. lyrata]<br>gi 297323665 gb EFH54086.1  acyl-CoA oxidase 4 [Arabidopsis lyrata subsp. lyrata]                                                                                                                                                                                                                                                                                                                                                                                                                                                                                                                                                                                                                                                                                                                                                                                         | 439 | 436 | 0         | 99.3  | 87.5 | 93.6  | acyl-CoA oxidase 4                                   | gbpln | Arabidopsis lyrata   | AT3G51840.1   Symbols: ACX4, ATSCX, ATG6   acyl-CoA oxidase 4   chr3:19225653-19229008 REVERSE LENGTH=436                                                                                                                                                                                                                                            | 439 | 436 | 0         | 99.3  | 87.5 | 93.2 |
| Rsa1.0_01375.1.g26211.t1 | #                                                                                                                                                                                                                                                                                                                                                                                                                                                                                                                                                                                                                                                                                                                                                                                                                                                                                                                                                      | #   | #   | #         | #     | #    | -     | ----                                                 | ----  | #                    | #                                                                                                                                                                                                                                                                                                                                                    | #   | #   | #         | #     | #    |      |
| Rsa1.0_01375.1.g26212.t1 | ref XP_002876106.1  calcium-dependent protein kinase 13 [Arabidopsis lyrata subsp. lyrata]<br>gi 297321944 gb EFH52365.1  calcium-dependent protein kinase 13 [Arabidopsis lyrata subsp. lyrata]                                                                                                                                                                                                                                                                                                                                                                                                                                                                                                                                                                                                                                                                                                                                                       | 528 | 528 | 0         | 100.0 | 97.0 | 98.5  | calcium-dependent protein kinase 13                  | gbpln | Arabidopsis lyrata   | AT3G51850.1   Symbols: CPK13   calcium-dependent protein kinase 13   chr3:19232667-19235526 FORWARD LENGTH=528                                                                                                                                                                                                                                       | 528 | 528 | 0         | 100.0 | 96.8 | 98.5 |
| Rsa1.0_01375.1.g26213.t1 | gb EOA11936.1  hypothetical protein CARUB_v10016547mg, partial [Capsella rubella]<br>ref NP_199548.1  homeobox-leucine zipper protein HAT2 [Arabidopsis thaliana]<br>gi 12643283 sp P46601.2 HAT2_ARATH<br>RecName: Full=Homeobox-leucine zipper protein HAT2; AltName: Full=Homeodomain-leucine zipper protein HAT2; Short=HD-ZIP protein 2<br>gi 16226634 gb AL:16219.1 AF428450.1<br>AT5g47370/MQL5.23 [Arabidopsis thaliana] gi 8809620 dbj BAA97171.1  homeobox-leucine zipper protein-like [Arabidopsis thaliana]<br>gi 15208392 dbj BAB63202.1  homeodomain leucine-zipper protein HAT2 [Arabidopsis thaliana]<br>gi 15450447 gb AAK96517.1  AT5g47370/MQL5.23 [Arabidopsis thaliana] gi 16974455 gb AAL31231.1  AT5g47370/MQL5.23 [Arabidopsis thaliana] gi 18857720 emb CAD24013.1  homeodomain-leucine zipper protein HAT2 [Arabidopsis thaliana]<br>gi 332008120 gb AED95503.1  homeobox-leucine zipper protein HAT2 [Arabidopsis thaliana] | 205 | 149 | 3.00E-24  | 72.7  | 24.9 | 35.1  | hypothetical protein CARUB_v10016547mg, partial      | gbpln | Capsella rubella     | #                                                                                                                                                                                                                                                                                                                                                    | #   | #   | #         | #     | #    |      |
| Rsa1.0_01376.1.g26214.t1 | AT5g47370/MQL5.23 [Arabidopsis thaliana] gi 8809620 dbj BAA97171.1  homeobox-leucine zipper protein-like [Arabidopsis thaliana]<br>gi 15208392 dbj BAB63202.1  homeodomain leucine-zipper protein HAT2 [Arabidopsis thaliana]<br>gi 15450447 gb AAK96517.1  AT5g47370/MQL5.23 [Arabidopsis thaliana] gi 16974455 gb AAL31231.1  AT5g47370/MQL5.23 [Arabidopsis thaliana] gi 18857720 emb CAD24013.1  homeodomain-leucine zipper protein HAT2 [Arabidopsis thaliana]<br>gi 332008120 gb AED95503.1  homeobox-leucine zipper protein HAT2 [Arabidopsis thaliana]                                                                                                                                                                                                                                                                                                                                                                                         | 354 | 283 | 1.00E-126 | 79.9  | 66.1 | 69.8  | homeobox-leucine zipper protein HAT2                 | gbpln | Arabidopsis thaliana | AT5G47370.1   Symbols: HAT2   Homeobox-leucine zipper protein 4 (HB-4) / HD-ZIP protein   chr5:19216482-19217647 REVERSE LENGTH=283                                                                                                                                                                                                                  | 354 | 283 | 1.00E-129 | 79.9  | 66.1 | 69.8 |
| Rsa1.0_01376.1.g26215.t1 | gb EOA13727.1  hypothetical protein CARUB_v10026804mg [Capsella rubella]                                                                                                                                                                                                                                                                                                                                                                                                                                                                                                                                                                                                                                                                                                                                                                                                                                                                               | 318 | 316 | 2.33E-156 | 99.4  | 78.3 | 85.2  | hypothetical protein CARUB_v10026804mg               | gbpln | Capsella rubella     | AT5G47330.1   Symbols:   alpha/beta-Hydrolases superfamily protein   chr5:19207170-19208711 FORWARD LENGTH=314                                                                                                                                                                                                                                       | 318 | 314 | 1.00E-147 | 98.7  | 77.0 | 87.1 |
| Rsa1.0_01376.1.g26216.t1 | gb ABD64947.1  ethylene responsive element binding factor, putative [Brassica oleracea]                                                                                                                                                                                                                                                                                                                                                                                                                                                                                                                                                                                                                                                                                                                                                                                                                                                                | 277 | 296 | 1.00E-133 | 106.9 | 88.8 | 94.2  | ethylene responsive element binding factor, putative | gbpln | Brassica oleracea    | AT5G47230.1   Symbols: ERF5, ATERF-5, ATERF5   ethylene responsive element binding factor 5   chr5:19180072-19180974 FORWARD LENGTH=300                                                                                                                                                                                                              | 277 | 300 | 1.00E-104 | 108.3 | 76.5 | 85.2 |
| Rsa1.0_01376.1.g26217.t1 | #                                                                                                                                                                                                                                                                                                                                                                                                                                                                                                                                                                                                                                                                                                                                                                                                                                                                                                                                                      | #   | #   | #         | #     | #    | -     | ----                                                 | ----  | #                    | #                                                                                                                                                                                                                                                                                                                                                    | #   | #   | #         | #     | #    |      |
| Rsa1.0_01376.1.g26218.t1 | gb ABD64951.1  ethylene responsive element binding factor, putative [Brassica oleracea]                                                                                                                                                                                                                                                                                                                                                                                                                                                                                                                                                                                                                                                                                                                                                                                                                                                                | 228 | 240 | 3.00E-96  | 105.3 | 85.1 | 90.4  | ethylene responsive element binding factor, putative | gbpln | Brassica oleracea    | AT5G47220.1   Symbols: ATERF2, ATERF-2, ERF2   ethylene responsive element binding factor 2   chr5:19172023-19172754 REVERSE LENGTH=243                                                                                                                                                                                                              | 228 | 243 | 8.00E-73  | 106.6 | 68.0 | 77.2 |
| Rsa1.0_01376.1.g26219.t1 | gb ABD64914.1  nuclear RNA binding protein, putative [Brassica oleracea]                                                                                                                                                                                                                                                                                                                                                                                                                                                                                                                                                                                                                                                                                                                                                                                                                                                                               | 372 | 336 | 1.00E-126 | 90.3  | 79.3 | 82.8  | nuclear RNA binding protein, putative                | gbpln | Brassica oleracea    | AT4G17520.1   Symbols:   Hyaluronan / mRNA binding family   chr4:9771496-9773313 FORWARD LENGTH=360                                                                                                                                                                                                                                                  | 372 | 360 | 2.00E-85  | 96.8  | 55.9 | 68.3 |
| Rsa1.0_01376.1.g26220.t1 | gb EOA14024.1  hypothetical protein CARUB_v10027156mg [Capsella rubella]                                                                                                                                                                                                                                                                                                                                                                                                                                                                                                                                                                                                                                                                                                                                                                                                                                                                               | 202 | 202 | 1.00E-115 | 100.0 | 99.0 | 100.0 | hypothetical protein CARUB_v10027156mg               | gbpln | Capsella rubella     | AT5G47200.1   Symbols: ATRABD2B, ATRAB1A, RAB1A   RAB GTPase homolog 1A   chr5:19167029-19168718 FORWARD LENGTH=202                                                                                                                                                                                                                                  | 202 | 202 | 1.00E-117 | 100.0 | 98.5 | 99.5 |
| Rsa1.0_01376.1.g26221.t2 | gb ABD64915.1  plastid ribosomal protein L19, putative [Brassica oleracea]                                                                                                                                                                                                                                                                                                                                                                                                                                                                                                                                                                                                                                                                                                                                                                                                                                                                             | 201 | 214 | 4.00E-40  | 106.5 | 47.3 | 48.3  | plastid ribosomal protein L19, putative              | gbpln | Brassica oleracea    | AT4G17560.1   Symbols:   Ribosomal protein L19 family protein   chr4:9780343-9781752 FORWARD LENGTH=225                                                                                                                                                                                                                                              | 201 | 225 | 2.00E-40  | 111.9 | 45.8 | 47.3 |

|                          |                                                                                                                                                                                                                                                                                                                                                                                                                                                                                                                                                                                                                                                                                                                                                                                                                                                                                                                                                                                                                                                      |      |      |           |       |       |       |                                                           |       |                      |                                                                                                                                                       |      |      |           |       |      |      |
|--------------------------|------------------------------------------------------------------------------------------------------------------------------------------------------------------------------------------------------------------------------------------------------------------------------------------------------------------------------------------------------------------------------------------------------------------------------------------------------------------------------------------------------------------------------------------------------------------------------------------------------------------------------------------------------------------------------------------------------------------------------------------------------------------------------------------------------------------------------------------------------------------------------------------------------------------------------------------------------------------------------------------------------------------------------------------------------|------|------|-----------|-------|-------|-------|-----------------------------------------------------------|-------|----------------------|-------------------------------------------------------------------------------------------------------------------------------------------------------|------|------|-----------|-------|------|------|
| Rsa1.0_01376.1.g26222.t1 | ref NP_199529.1  VAMP (vesicle-associated membrane protein) family protein [Arabidopsis thaliana] gi 30695123 ref NP_851144.1  VAMP (vesicle-associated membrane protein) family protein [Arabidopsis thaliana] gi 75180692 sp Q9LVU1.1 VAP21_ARAT H RecName: Full=Vesicle-associated protein 2-1; AltName: Full=Plant VAP homolog 21; Short=AtPVA21; AltName: Full=VAMP-associated protein 2-1 gi 8809600 dbj BAA97151.1  VAMP (vesicle-associated membrane protein)-associated protein-like [Arabidopsis thaliana] gi 14334974 gb AAK59664.1  putative VAMP (vesicle-associated membrane protein)-associated protein [Arabidopsis thaliana] gi 17104633 gb AAL34205.1  putative VAMP-associated protein [Arabidopsis thaliana] gi 21553413 gb AAM62506.1  VAMP (vesicle-associated membrane protein)-associated protein-like [Arabidopsis thaliana] gi 332008097 gb AED95480.1  VAMP (vesicle-associated membrane protein) family protein [Arabidopsis thaliana] gi 332008098 gb AED95481.1  vesicle-associated protein 2-1 [Arabidopsis thaliana] | 220  | 220  | 1.00E-110 | 100.0 | 89.5  | 94.1  | VAMP (vesicle-associated membrane protein) family protein | gbpln | Arabidopsis thaliana | AT5G47180.2   Symbols:   Plant VAMP (vesicle-associated membrane protein) family protein   chr5:19161384-19163265 REVERSE LENGTH=220                  | 220  | 220  | 1.00E-113 | 100.0 | 89.5 | 94.1 |
| Rsa1.0_01376.1.g26223.t1 | gb ABD64917.1  GATA zinc finger containing protein [Brassica oleracea]                                                                                                                                                                                                                                                                                                                                                                                                                                                                                                                                                                                                                                                                                                                                                                                                                                                                                                                                                                               | 485  | 466  | 0         | 96.1  | 85.2  | 89.7  | GATA zinc finger containing protein                       | gbpln | Brassica oleracea    | AT5G47140.1   Symbols: GATA27   GATA transcription factor 27   chr5:19145108-19147303 FORWARD LENGTH=470                                              | 485  | 470  | 1.00E-172 | 96.9  | 72.8 | 82.1 |
| Rsa1.0_01376.1.g26224.t1 | gb AAL50980.1 AF453321.1 bax inhibitor-like protein [Brassica oleracea]                                                                                                                                                                                                                                                                                                                                                                                                                                                                                                                                                                                                                                                                                                                                                                                                                                                                                                                                                                              | 293  | 246  | 1.00E-120 | 84.0  | 80.9  | 83.6  | bax inhibitor-like protein                                | gbpln | Brassica oleracea    | AT5G47120.1   Symbols: ATBI-1, BI-1, ATBI1, BI1   BAX inhibitor 1   chr5:19138071-19137585 FORWARD LENGTH=247                                         | 293  | 247  | 1.00E-115 | 84.3  | 74.1 | 77.1 |
| Rsa1.0_01376.1.g26225.t1 | gb ABD64919.1  Lili3 protein, putative [Brassica oleracea]                                                                                                                                                                                                                                                                                                                                                                                                                                                                                                                                                                                                                                                                                                                                                                                                                                                                                                                                                                                           | 268  | 248  | 1.00E-115 | 92.5  | 82.1  | 84.3  | Lili3 protein, putative                                   | gbpln | Brassica oleracea    | AT5G47110.1   Symbols: LIL3.2   Chlorophyll A-B binding family protein   chr5:19134218-19135238 REVERSE LENGTH=258                                    | 268  | 258  | 1.00E-114 | 96.3  | 81.7 | 87.3 |
| Rsa1.0_01377.1.g26226.t1 | gb EOA17202.1  hypothetical protein CARUB_v10005475mg [Capsella rubella]                                                                                                                                                                                                                                                                                                                                                                                                                                                                                                                                                                                                                                                                                                                                                                                                                                                                                                                                                                             | 282  | 274  | 1.00E-113 | 97.2  | 70.6  | 77.0  | hypothetical protein CARUB_v10005475mg                    | gbpln | Capsella rubella     | AT4G31150.2   Symbols:   endonuclease V family protein   chr4:15143907-15145469 REVERSE LENGTH=263                                                    | 282  | 263  | 1.00E-112 | 93.3  | 69.5 | 76.6 |
| Rsa1.0_01377.1.g26227.t1 | gb EOA15886.1  hypothetical protein CARUB_v10003973mg [Capsella rubella]                                                                                                                                                                                                                                                                                                                                                                                                                                                                                                                                                                                                                                                                                                                                                                                                                                                                                                                                                                             | 1881 | 1921 | 0         | 102.1 | 79.9  | 84.7  | hypothetical protein CARUB_v10003973mg                    | gbpln | Capsella rubella     | AT4G31160.1   Symbols: DCAF1   DDB1-CUL4 associated factor 1   chr4:15145936-15152939 FORWARD LENGTH=1883                                             | 1881 | 1883 | 0         | 100.1 | 81.2 | 86.5 |
| Rsa1.0_01377.1.g26228.t1 | ref XP_002867311.1  kinase family protein [Arabidopsis lyrata subsp. lyrata] gi 297313147 gb EFH43570.1  kinase family protein [Arabidopsis lyrata subsp. lyrata]                                                                                                                                                                                                                                                                                                                                                                                                                                                                                                                                                                                                                                                                                                                                                                                                                                                                                    | 412  | 412  | 0         | 100.0 | 94.4  | 98.3  | kinase family protein                                     | gbpln | Arabidopsis lyrata   | AT4G31170.3   Symbols:   Protein kinase superfamily protein   chr4:15153499-15154846 REVERSE LENGTH=412                                               | 412  | 412  | 0         | 100.0 | 94.2 | 98.1 |
| Rsa1.0_01377.1.g26229.t1 | emb CAA16530.1  hypothetical protein [Arabidopsis thaliana] gi 7270029 emb CAB79845.1  hypothetical protein [Arabidopsis thaliana]                                                                                                                                                                                                                                                                                                                                                                                                                                                                                                                                                                                                                                                                                                                                                                                                                                                                                                                   | 313  | 291  | 1.00E-100 | 93.0  | 64.9  | 78.0  | hypothetical protein                                      | gbpln | Arabidopsis thaliana | AT4G31270.1   Symbols:   sequence-specific DNA binding transcription factors   chr4:15183291-15184503 REVERSE LENGTH=294                              | 313  | 294  | 1.00E-101 | 93.9  | 64.9 | 78.0 |
| Rsa1.0_01377.1.g26230.t1 | ref XP_002869338.1  hypothetical protein ARALYDRAFT_491614 [Arabidopsis lyrata subsp. lyrata] gi 297315174 gb EFH45597.1  hypothetical protein ARALYDRAFT_491614 [Arabidopsis lyrata subsp. lyrata]                                                                                                                                                                                                                                                                                                                                                                                                                                                                                                                                                                                                                                                                                                                                                                                                                                                  | 224  | 227  | 1.00E-122 | 101.3 | 95.1  | 97.3  | hypothetical protein ARALYDRAFT_491614                    | gbpln | Arabidopsis lyrata   | AT4G31290.1   Symbols:   ChaC-like family protein   chr4:15186851-15188278 FORWARD LENGTH=227                                                         | 224  | 227  | 1.00E-124 | 101.3 | 94.6 | 96.9 |
| Rsa1.0_01377.1.g26231.t1 | gb EOA17355.1  hypothetical protein CARUB_v10005646mg [Capsella rubella]                                                                                                                                                                                                                                                                                                                                                                                                                                                                                                                                                                                                                                                                                                                                                                                                                                                                                                                                                                             | 233  | 233  | 1.00E-134 | 100.0 | 100.0 | 100.0 | hypothetical protein CARUB_v10005646mg                    | gbpln | Capsella rubella     | AT4G31300.3   Symbols: PBA1   N-terminal nucleophile aminohydrolases (Ntn hydrolases) superfamily protein   chr4:15188927-15190935 FORWARD LENGTH=233 | 233  | 233  | 1.00E-135 | 100.0 | 99.1 | 99.6 |
| Rsa1.0_01377.1.g26232.t1 | gb EOA18510.1  hypothetical protein CARUB_v10007062mg [Capsella rubella]                                                                                                                                                                                                                                                                                                                                                                                                                                                                                                                                                                                                                                                                                                                                                                                                                                                                                                                                                                             | 183  | 191  | 9.00E-83  | 104.4 | 85.2  | 90.7  | hypothetical protein CARUB_v10007062mg                    | gbpln | Capsella rubella     | AT4G31320.1   Symbols:   SAUR-like auxin-responsive protein family   chr4:15193993-15194562 REVERSE LENGTH=189                                        | 183  | 189  | 4.00E-82  | 103.3 | 81.4 | 89.1 |
| Rsa1.0_01377.1.g26233.t1 | ref XP_002869331.1  hypothetical protein ARALYDRAFT_913334 [Arabidopsis lyrata subsp. lyrata] gi 297315167 gb EFH45590.1  hypothetical protein ARALYDRAFT_913334 [Arabidopsis lyrata subsp. lyrata]                                                                                                                                                                                                                                                                                                                                                                                                                                                                                                                                                                                                                                                                                                                                                                                                                                                  | 80   | 179  | 2.00E-37  | 223.8 | 95.0  | 96.3  | hypothetical protein ARALYDRAFT_913334                    | gbpln | Arabidopsis lyrata   | AT4G31360.1   Symbols:   selenium binding   chr4:15221945-15223310 FORWARD LENGTH=186                                                                 | 80   | 186  | 9.00E-39  | 232.5 | 90.0 | 95.0 |

|                           |                                                                                                                                                                                                                                                                                                                                                                                                                                                                                                                                                                                                                                                                                                                                                                                                                                                                                                                                                                                                                                                                                                                                                                                                                                                                    |     |      |          |       |      |      |                                                    |       |                      |                                                                                                                                               |     |     |           |       |      |      |
|---------------------------|--------------------------------------------------------------------------------------------------------------------------------------------------------------------------------------------------------------------------------------------------------------------------------------------------------------------------------------------------------------------------------------------------------------------------------------------------------------------------------------------------------------------------------------------------------------------------------------------------------------------------------------------------------------------------------------------------------------------------------------------------------------------------------------------------------------------------------------------------------------------------------------------------------------------------------------------------------------------------------------------------------------------------------------------------------------------------------------------------------------------------------------------------------------------------------------------------------------------------------------------------------------------|-----|------|----------|-------|------|------|----------------------------------------------------|-------|----------------------|-----------------------------------------------------------------------------------------------------------------------------------------------|-----|-----|-----------|-------|------|------|
| Rsa1.0_01377.1.g26234.t1  | refNP_194865.1   FASCICLIN-like arabinogalactan protein 5 precursor [Arabidopsis thaliana] gi 75098797 sp Q49586.1 FLA5_ARATH RecName: Full=Fasciclin-like arabinogalactan protein 5; Flags: Precursor gi 2827532 emb CAA16540.1  predicted protein [Arabidopsis thaliana] gi 7270039 emb CAB79855.1  predicted protein [Arabidopsis thaliana] gi 109946441 gb ABG48399.1  At4g31370 [Arabidopsis thaliana] gi 332660501 gb AEE85901.1  FASCICLIN-like arabinogalactan protein 5 precursor [Arabidopsis thaliana] ref NP_197748.1  calmodulin-like domain protein kinase 9 [Arabidopsis thaliana] gi 75319661 sp Q42396.1 CDPKC_ARATH RecName: Full=Calcium-dependent protein kinase 12; AltName: Full=Calcium-dependent protein kinase isoform CDPK9; Short=AtCDPK9 gi 836938 gb AA67653.1  calcium-dependent protein kinase [Arabidopsis thaliana] gi 336946 gb AAA67657.1  calcium-dependent protein kinase [Arabidopsis thaliana] gi 8809701 db BAA97242.1  calcium-dependent protein kinase [Arabidopsis thaliana] gi 110738049 db BAF00959.1  calcium-dependent protein kinase [Arabidopsis thaliana] gi 11074232 gb ABH04489.1  At5g23580 [Arabidopsis thaliana] gi 332005803 gb AED93186.1  calmodulin-like domain protein kinase 9 [Arabidopsis thaliana] | 428 | 278  | 1.00E-98 | 65.0  | 43.7 | 48.8 | FASCICLIN-like arabinogalactan protein 5 precursor | gbpln | Arabidopsis thaliana | AT4G31370.1   Symbols: FLA5   FASCICLIN-like arabinogalactan protein 5 precursor   chr4:15223838-15224674 REVERSE LENGTH=278                  | 428 | 278 | 1.00E-101 | 65.0  | 43.7 | 48.8 |
| Rsa1.0_01377.1.g26235.t1  | ref XP_002894513.1  WRKY10 [Arabidopsis lyrata subsp. lyrata] gi 297340355 gb EFH70772.1  WRKY10 [Arabidopsis lyrata subsp. lyrata] db BAE98403.1  putative non-LTR reverse transcriptase [Arabidopsis thaliana]                                                                                                                                                                                                                                                                                                                                                                                                                                                                                                                                                                                                                                                                                                                                                                                                                                                                                                                                                                                                                                                   | 199 | 490  | 3.00E-45 | 246.2 | 48.7 | 53.8 | calmodulin-like domain protein kinase 9            | gbpln | Arabidopsis thaliana | AT5G23580.1   Symbols: CDPK9, ATCDPK9, CPK12, ATCPK12   calmodulin-like domain protein kinase 9   chr5:7950388-7952433 REVERSE LENGTH=490     | 199 | 490 | 1.00E-47  | 246.2 | 48.7 | 53.8 |
| Rsa1.0_01377.1.g26236.t1  | #                                                                                                                                                                                                                                                                                                                                                                                                                                                                                                                                                                                                                                                                                                                                                                                                                                                                                                                                                                                                                                                                                                                                                                                                                                                                  | #   | #    | #        | #     | #    | #    | -                                                  | ----  | ----                 | AT4G21790.1   Symbols: TOM1, ATTOM1   tobamovirus multiplication 1   chr4:11569924-11572163 FORWARD LENGTH=291                                | 117 | 291 | 4.00E-13  | 248.7 | 34.2 | 43.6 |
| Rsa1.0_01378.1.g26237.t1  | ref XP_002894513.1  WRKY10 [Arabidopsis lyrata subsp. lyrata] gi 297340355 gb EFH70772.1  WRKY10 [Arabidopsis lyrata subsp. lyrata]                                                                                                                                                                                                                                                                                                                                                                                                                                                                                                                                                                                                                                                                                                                                                                                                                                                                                                                                                                                                                                                                                                                                | 400 | 495  | 2.00E-80 | 123.8 | 49.3 | 71.3 | WRKY10                                             | gbpln | Arabidopsis lyrata   | AT1G55600.1   Symbols: WRKY10, ATWRKY10, MIN13   WRKY DNA-binding protein 10   chr1:20774049-20776293 REVERSE LENGTH=485                      | 400 | 485 | 2.00E-65  | 121.3 | 45.0 | 66.0 |
| Rsa1.0_01378.1.g26238.t1  | db BAE98403.1  putative non-LTR reverse transcriptase [Arabidopsis thaliana]                                                                                                                                                                                                                                                                                                                                                                                                                                                                                                                                                                                                                                                                                                                                                                                                                                                                                                                                                                                                                                                                                                                                                                                       | 276 | 278  | 5.00E-34 | 100.7 | 30.1 | 46.7 | putative non-LTR reverse transcriptase             | gbpln | Arabidopsis thaliana | AT5G18980.1   Symbols:   RNA-directed DNA polymerase (reverse transcriptase)-related family protein   chr5:6300535-6301422 REVERSE LENGTH=295 | 276 | 295 | 1.00E-28  | 106.9 | 25.7 | 44.6 |
| Rsa1.0_01378.1.g26239.t1  | #                                                                                                                                                                                                                                                                                                                                                                                                                                                                                                                                                                                                                                                                                                                                                                                                                                                                                                                                                                                                                                                                                                                                                                                                                                                                  | #   | #    | #        | #     | #    | #    | -                                                  | ----  | ----                 | #                                                                                                                                             | #   | #   | #         | #     | #    | #    |
| Rsa1.0_01378.1.g26240.t1  | #                                                                                                                                                                                                                                                                                                                                                                                                                                                                                                                                                                                                                                                                                                                                                                                                                                                                                                                                                                                                                                                                                                                                                                                                                                                                  | #   | #    | #        | #     | #    | #    | -                                                  | ----  | ----                 | #                                                                                                                                             | #   | #   | #         | #     | #    | #    |
| Rsa1.0_01378.1.g26241.t1  | gb ABD65062.1  hypothetical protein 27.400126 [Brassica oleracea]                                                                                                                                                                                                                                                                                                                                                                                                                                                                                                                                                                                                                                                                                                                                                                                                                                                                                                                                                                                                                                                                                                                                                                                                  | 198 | 578  | 1.00E-30 | 291.9 | 34.8 | 47.5 | hypothetical protein 27.400126                     | gbpln | Brassica oleracea    | AT1G20400.1   Symbols:   Protein of unknown function (DUF1204)   chr1:7072192-7075838 REVERSE LENGTH=944                                      | 198 | 944 | 1.00E-16  | 476.8 | 22.7 | 38.9 |
| Rsa1.0_01379.1.g26242.t2  | #                                                                                                                                                                                                                                                                                                                                                                                                                                                                                                                                                                                                                                                                                                                                                                                                                                                                                                                                                                                                                                                                                                                                                                                                                                                                  | #   | #    | #        | #     | #    | #    | -                                                  | ----  | ----                 | #                                                                                                                                             | #   | #   | #         | #     | #    | #    |
| Rsa1.0_01379.1.g26243.t2  | #                                                                                                                                                                                                                                                                                                                                                                                                                                                                                                                                                                                                                                                                                                                                                                                                                                                                                                                                                                                                                                                                                                                                                                                                                                                                  | #   | #    | #        | #     | #    | #    | -                                                  | ----  | ----                 | #                                                                                                                                             | #   | #   | #         | #     | #    | #    |
| Rsa1.0_01379.1.g26244.t1  | emb CAN72236.1  hypothetical protein VITISV_032806 [Vitis vinifera]                                                                                                                                                                                                                                                                                                                                                                                                                                                                                                                                                                                                                                                                                                                                                                                                                                                                                                                                                                                                                                                                                                                                                                                                | 337 | 513  | 2.00E-36 | 152.2 | 31.2 | 44.2 | hypothetical protein VITISV_032806                 | gbpln | Vitis vinifera       | ATMG00860.1   Symbols: ORF158   DNA/RNA polymerases superfamily protein   chrM:235916-236392 FORWARD LENGTH=158                               | 337 | 158 | 1.00E-12  | 46.9  | 9.8  | 14.2 |
| Rsa1.0_01379.1.g26245.t1  | gb EOA23731.1  hypothetical protein CARUB_v10016943mg [Capsella rubella]                                                                                                                                                                                                                                                                                                                                                                                                                                                                                                                                                                                                                                                                                                                                                                                                                                                                                                                                                                                                                                                                                                                                                                                           | 552 | 564  | 0        | 102.2 | 79.0 | 87.1 | hypothetical protein CARUB_v10016943mg             | gbpln | Capsella rubella     | AT3G45650.1   Symbols: NAXT1   nitrate excretion transporter1   chr3:16759253-16761266 FORWARD LENGTH=558                                     | 552 | 558 | 0         | 101.1 | 78.4 | 86.4 |
| Rsa1.0_01379.1.g26246.t1  | #                                                                                                                                                                                                                                                                                                                                                                                                                                                                                                                                                                                                                                                                                                                                                                                                                                                                                                                                                                                                                                                                                                                                                                                                                                                                  | #   | #    | #        | #     | #    | #    | -                                                  | ----  | ----                 | #                                                                                                                                             | #   | #   | #         | #     | #    | #    |
| Rsa1.0_01379.1.g26247.t1  | #                                                                                                                                                                                                                                                                                                                                                                                                                                                                                                                                                                                                                                                                                                                                                                                                                                                                                                                                                                                                                                                                                                                                                                                                                                                                  | #   | #    | #        | #     | #    | #    | -                                                  | ----  | ----                 | #                                                                                                                                             | #   | #   | #         | #     | #    | #    |
| Rsa1.0_01379.1.g26248.t1  | gb AAD20658.1  putative retroelement pol polyprotein [Arabidopsis thaliana]                                                                                                                                                                                                                                                                                                                                                                                                                                                                                                                                                                                                                                                                                                                                                                                                                                                                                                                                                                                                                                                                                                                                                                                        | 544 | 1611 | 2.00E-34 | 296.1 | 14.0 | 17.6 | putative retroelement pol polyprotein              | gbpln | Arabidopsis thaliana | #                                                                                                                                             | #   | #   | #         | #     | #    | #    |
| Rsa1.0_01380.1.g26249.t1  | #                                                                                                                                                                                                                                                                                                                                                                                                                                                                                                                                                                                                                                                                                                                                                                                                                                                                                                                                                                                                                                                                                                                                                                                                                                                                  | #   | #    | #        | #     | #    | #    | -                                                  | ----  | ----                 | #                                                                                                                                             | #   | #   | #         | #     | #    | #    |
| Rsa1.0_01380.1.g26250.t1  | ref XP_002866069.1  pyruvate decarboxylase-2 [Arabidopsis lyrata subsp. lyrata] gi 297311904 gb EFH442328.1  pyruvate decarboxylase-2 [Arabidopsis lyrata subsp. lyrata]                                                                                                                                                                                                                                                                                                                                                                                                                                                                                                                                                                                                                                                                                                                                                                                                                                                                                                                                                                                                                                                                                           | 607 | 607  | 0        | 100.0 | 93.7 | 97.5 | pyruvate decarboxylase-2                           | gbpln | Arabidopsis lyrata   | AT5G54960.1   Symbols: PDC2   pyruvate decarboxylase-2   chr5:22310858-22312681 REVERSE LENGTH=607                                            | 607 | 607 | 0         | 100.0 | 93.6 | 97.0 |
| Rsa1.0_01380.1.g26251.t16 | gb EOA15966.1  hypothetical protein CARUB_v10004061mg [Capsella rubella]                                                                                                                                                                                                                                                                                                                                                                                                                                                                                                                                                                                                                                                                                                                                                                                                                                                                                                                                                                                                                                                                                                                                                                                           | 885 | 995  | 0        | 112.4 | 56.7 | 68.7 | hypothetical protein CARUB_v10004061mg             | gbpln | Capsella rubella     | AT4G26970.1   Symbols: ACO2   aconitase 2   chr4:13543077-13548427 FORWARD LENGTH=995                                                         | 885 | 995 | 0         | 112.4 | 56.0 | 68.2 |

|                          |                                                                                                                                                                                                                                                                                                                                                                                                                                                                   |      |      |           |       |      |      |                                                     |       |                      |                                                                                                                                                                                                                                                             |      |     |           |       |      |      |
|--------------------------|-------------------------------------------------------------------------------------------------------------------------------------------------------------------------------------------------------------------------------------------------------------------------------------------------------------------------------------------------------------------------------------------------------------------------------------------------------------------|------|------|-----------|-------|------|------|-----------------------------------------------------|-------|----------------------|-------------------------------------------------------------------------------------------------------------------------------------------------------------------------------------------------------------------------------------------------------------|------|-----|-----------|-------|------|------|
| Rsa1.0_01380.1.g26252.t1 | dbj BAJ3427.1  unnamed protein product [Theilungiella halophila]                                                                                                                                                                                                                                                                                                                                                                                                  | 112  | 112  | 1.00E-52  | 100.0 | 89.3 | 95.5 | unnamed protein product                             | ----  | ----                 | AT5G54940.2   Symbols:   Translation initiation factor SU11 family protein   chr5:22308420-22308758 REVERSE LENGTH=112                                                                                                                                      | 112  | 112 | 3.00E-55  | 100.0 | 91.1 | 94.6 |
| Rsa1.0_01380.1.g26253.t1 | ref XP_002866066.1  AT hook motif-containing protein [Arabidopsis lyrata subsp. lyrata]<br>gi 297311901 gb EFH42325.1  AT hook motif-containing protein [Arabidopsis lyrata subsp. lyrata]                                                                                                                                                                                                                                                                        | 258  | 286  | 2.00E-92  | 110.9 | 76.0 | 84.1 | AT hook motif-containing protein                    | gbpln | Arabidopsis lyrata   | AT5G54930.1   Symbols:   AT hook motif-containing protein   chr5:22305897-22306839 REVERSE LENGTH=286                                                                                                                                                       | 258  | 286 | 9.00E-91  | 110.9 | 72.5 | 82.2 |
| Rsa1.0_01380.1.g26254.t1 | gb EOA14381.1  hypothetical protein CARUB_v10027574mg [Capsella rubella]                                                                                                                                                                                                                                                                                                                                                                                          | 518  | 618  | 1.00E-144 | 119.3 | 57.3 | 72.6 | hypothetical protein CARUB_v10027574mg              | gbpln | Capsella rubella     | AT5G56560.1   Symbols:   FBD, F-box and Leucine Rich Repeat domains containing protein   chr5:222899724-22901985 FORWARD LENGTH=607                                                                                                                         | 518  | 607 | 1.00E-139 | 117.2 | 55.4 | 71.2 |
| Rsa1.0_01380.1.g26255.t1 | ref XP_002866065.1  hypothetical protein ARALYDRAFT_495573 [Arabidopsis lyrata subsp. lyrata]<br>gi 297311900 gb EFH42324.1  hypothetical protein ARALYDRAFT_495573 [Arabidopsis lyrata subsp. lyrata]                                                                                                                                                                                                                                                            | 809  | 741  | 0         | 91.6  | 74.0 | 81.6 | hypothetical protein ARALYDRAFT_495573              | gbpln | Arabidopsis lyrata   | AT5G54910.1   Symbols:   DEA(D/H)-box RNA helicase family protein   chr5:15102239-15103651 REVERSE LENGTH=739                                                                                                                                               | 809  | 739 | 0         | 91.3  | 73.3 | 81.3 |
| Rsa1.0_01380.1.g26256.t1 | #                                                                                                                                                                                                                                                                                                                                                                                                                                                                 | #    | #    | #         | #     | #    | #    | -                                                   | ----  | ----                 | #                                                                                                                                                                                                                                                           | #    | #   | #         | #     | #    | #    |
| Rsa1.0_01381.1.g26257.t1 | gb ABD65065.1  hypothetical protein 27.t00043 [Brassica oleracea]                                                                                                                                                                                                                                                                                                                                                                                                 | 86   | 117  | 5.00E-13  | 136.0 | 64.0 | 76.7 | hypothetical protein 27.t00043                      | gbpln | Brassica oleracea    | #                                                                                                                                                                                                                                                           | #    | #   | #         | #     | #    | #    |
| Rsa1.0_01381.1.g26258.t1 | ref XP_002868819.1  seven in absentia family protein [Arabidopsis lyrata subsp. lyrata]<br>gi 297314655 gb EFH45078.1  seven in absentia family protein [Arabidopsis lyrata subsp. lyrata]                                                                                                                                                                                                                                                                        | 312  | 350  | 3.00E-89  | 112.2 | 50.3 | 62.8 | seven in absentia family protein                    | gbpln | Arabidopsis lyrata   | AT5G37930.1   Symbols:   Protein with RING/U-box and TRAF-like domains   chr5:15102239-15103651 REVERSE LENGTH=349                                                                                                                                          | 312  | 349 | 5.00E-86  | 111.9 | 47.4 | 58.3 |
| Rsa1.0_01381.1.g26259.t1 | #                                                                                                                                                                                                                                                                                                                                                                                                                                                                 | #    | #    | #         | #     | #    | #    | -                                                   | ----  | ----                 | #                                                                                                                                                                                                                                                           | #    | #   | #         | #     | #    | #    |
| Rsa1.0_01381.1.g26260.t1 | #                                                                                                                                                                                                                                                                                                                                                                                                                                                                 | #    | #    | #         | #     | #    | #    | -                                                   | ----  | ----                 | #                                                                                                                                                                                                                                                           | #    | #   | #         | #     | #    | #    |
| Rsa1.0_01381.1.g26261.t3 | gb AAD24831.1  putative non-LTR retroelement reverse transcriptase [Arabidopsis thaliana]                                                                                                                                                                                                                                                                                                                                                                         | 1226 | 1524 | 0         | 124.3 | 32.1 | 46.2 | putative non-LTR retroelement reverse transcriptase | gbpln | Arabidopsis thaliana | AT4G29090.1   Symbols:   Ribonuclease H-like superfamily protein   chr4:14333528-14335255 FORWARD LENGTH=575                                                                                                                                                | 1226 | 575 | 1.00E-61  | 46.9  | 10.0 | 14.9 |
| Rsa1.0_01381.1.g26262.t1 | ref NP_198623.1  RING/FYVE/PHD zinc finger-containing protein [Arabidopsis thaliana]<br>gi 8885610 dbj BAA97540.1  unnamed protein product [Arabidopsis thaliana]<br>gi 63025166 gb AA27056.1  At5g38070 [Arabidopsis thaliana]<br>gi 70905091 gb AA214071.1  At5g38070 [Arabidopsis thaliana]<br>gi 117958789 gb ABK59693.1  At5g38070 [Arabidopsis thaliana]<br>gi 332006881 gb AED94264.1  RING/FYVE/PHD zinc finger-containing protein [Arabidopsis thaliana] | 243  | 259  | 1.00E-106 | 106.6 | 81.9 | 89.7 | RING/FYVE/PHD zinc finger-containing protein        | gbpln | Arabidopsis thaliana | AT5G38070.1   Symbols:   RING/FYVE/PHD zinc finger superfamily protein   chr5:15190254-15191588 FORWARD LENGTH=259                                                                                                                                          | 243  | 259 | 1.00E-109 | 106.6 | 81.9 | 89.7 |
| Rsa1.0_01381.1.g26263.t1 | ref XP_002885632.1  hypothetical protein ARALYDRAFT_319134 [Arabidopsis lyrata subsp. lyrata]<br>gi 297331472 gb EFH61891.1  hypothetical protein ARALYDRAFT_319134 [Arabidopsis lyrata subsp. lyrata]                                                                                                                                                                                                                                                            | 410  | 357  | 1.00E-108 | 87.1  | 53.9 | 67.1 | hypothetical protein ARALYDRAFT_319134              | gbpln | Arabidopsis lyrata   | AT3G28223.1   Symbols:   F-box family protein   chr3:10527669-10528921 REVERSE LENGTH=391                                                                                                                                                                   | 410  | 391 | 5.00E-85  | 95.4  | 46.1 | 62.2 |
| Rsa1.0_01382.1.g26264.t1 | ref XP_002891736.1  F12M16.10 [Arabidopsis lyrata subsp. lyrata]<br>gi 297337578 gb EFH67995.1  F12M16.10 [Arabidopsis lyrata subsp. lyrata]                                                                                                                                                                                                                                                                                                                      | 447  | 510  | 1.00E-179 | 114.1 | 81.7 | 85.9 | F12M16.10                                           | gbpln | Arabidopsis lyrata   | AT1G53190.2   Symbols:   RING/U-box superfamily protein   chr1:19838072-19840003 FORWARD LENGTH=494                                                                                                                                                         | 447  | 494 | 1.00E-177 | 110.5 | 78.1 | 82.8 |
| Rsa1.0_01382.1.g26265.t1 | gb EOA39937.1  hypothetical protein CARUB_v10008627mg [Capsella rubella]                                                                                                                                                                                                                                                                                                                                                                                          | 104  | 603  | 5.00E-12  | 579.8 | 44.2 | 59.6 | hypothetical protein CARUB_v10008627mg              | gbpln | Capsella rubella     | AT1G53200.1   Symbols:   unknown protein; Has 21 Blast hits to 21 proteins in 9 species: Archae - 0; Bacteria - 2; Metazoa - 0; Fungi - 0; Plants - 19; Viruses - 0; Other Eukaryotes - 0 (source: NCBI BLINK).   chr1:19840486-19843169 REVERSE LENGTH=613 | 104  | 613 | 5.00E-11  | 589.4 | 38.5 | 54.8 |
| Rsa1.0_01382.1.g26266.t1 | #                                                                                                                                                                                                                                                                                                                                                                                                                                                                 | #    | #    | #         | #     | #    | #    | -                                                   | ----  | ----                 | #                                                                                                                                                                                                                                                           | #    | #   | #         | #     | #    | #    |
| Rsa1.0_01382.1.g26267.t1 | ref NP_564623.2  calcium-binding EF-hand domain-containing protein [Arabidopsis thaliana]<br>gi 20466169 gb AAM20402.1  unknown protein [Arabidopsis thaliana]<br>gi 332194787 gb AEE32908.1  calcium-binding EF-hand domain-containing protein [Arabidopsis thaliana]                                                                                                                                                                                            | 584  | 585  | 0         | 100.2 | 94.7 | 97.3 | calcium-binding EF-hand domain-containing protein   | gbpln | Arabidopsis thaliana | AT1G53210.1   Symbols:   sodium/calcium exchanger family protein / calcium-binding EF hand family protein   chr1:19844790-19847533 FORWARD LENGTH=585                                                                                                       | 584  | 585 | 0         | 100.2 | 94.7 | 97.3 |



|                          |                                                                                                                                                                                                                                                                                                                                                                                                                                                                                                |      |      |           |       |      |      |                                                                |       |                      |                                                                                                                                                                                                                                                                                                                                                                 |      |      |           |       |      |      |
|--------------------------|------------------------------------------------------------------------------------------------------------------------------------------------------------------------------------------------------------------------------------------------------------------------------------------------------------------------------------------------------------------------------------------------------------------------------------------------------------------------------------------------|------|------|-----------|-------|------|------|----------------------------------------------------------------|-------|----------------------|-----------------------------------------------------------------------------------------------------------------------------------------------------------------------------------------------------------------------------------------------------------------------------------------------------------------------------------------------------------------|------|------|-----------|-------|------|------|
| Rsa1.0_01382.1.g26268.t1 | gb EOA38168.1  hypothetical protein CARUB_v10009646mg [Capsella rubella]                                                                                                                                                                                                                                                                                                                                                                                                                       | 342  | 341  | 0         | 99.7  | 95.3 | 98.2 | hypothetical protein CARUB_v10009646mg                         | gbpln | Capsella rubella     | AT1G53240.1   Symbols: mMDH1   Lactate/malate dehydrogenase family protein   chr1:19854966-19856802 REVERSE LENGTH=341                                                                                                                                                                                                                                          | 342  | 341  | 0         | 99.7  | 94.2 | 98.0 |
| Rsa1.0_01382.1.g26269.t1 | gb EOA40513.1  hypothetical protein CARUB_v10009243mg [Capsella rubella] gi 482576327 gb EOA40514.1  hypothetical protein CARUB_v10009243mg [Capsella rubella]                                                                                                                                                                                                                                                                                                                                 | 417  | 422  | 1.00E-144 | 101.2 | 75.3 | 81.5 | hypothetical protein CARUB_v10009243mg                         | gbpln | Capsella rubella     | AT3G15010.2   Symbols:   RNA-binding (RRM/RBD/RNP motifs) family protein   chr3:5052844-5054058 FORWARD LENGTH=404                                                                                                                                                                                                                                              | 417  | 404  | 1.00E-137 | 96.9  | 70.0 | 77.5 |
| Rsa1.0_01382.1.g26270.t1 | ref XP_002891738.1  F12M16.15 [Arabidopsis lyrata subsp. lyrata] gi 297337580 gb EFH67997.1  F12M16.15 [Arabidopsis lyrata subsp. lyrata]                                                                                                                                                                                                                                                                                                                                                      | 369  | 357  | 1.00E-141 | 96.7  | 74.5 | 82.4 | F12M16.15                                                      | gbpln | Arabidopsis lyrata   | AT1G53250.1   Symbols:   unknown protein; BEST Arabidopsis thaliana protein match is: unknown protein (TAIR:AT1G53800.1); Has 11909 Blast hits to 7704 proteins in 757 species: Archae - 51; Bacteria - 1338; Metazoa - 4550; Fungi - 987; Plants - 464; Viruses - 24; Other Eukaryotes - 4495 (source: NCBI BLINK)   chr1:19857468-19859156 FORWARD LENGTH=371 | 369  | 371  | 1.00E-135 | 100.5 | 72.9 | 81.8 |
| Rsa1.0_01382.1.g26271.t1 | ref NP_190213.2  protein kinase-like protein [Arabidopsis thaliana] gi 26450306 dbj BAC42289.1  unknown protein [Arabidopsis thaliana] gi 33264462.1 gb AE78142.1  protein kinase-like protein [Arabidopsis thaliana]                                                                                                                                                                                                                                                                          | 523  | 471  | 2.00E-84  | 90.1  | 36.5 | 45.3 | protein kinase-like protein                                    | gbpln | Arabidopsis thaliana | AT3G46280.1   Symbols:   protein kinase-related   chr3:17005672-17008410 REVERSE LENGTH=471                                                                                                                                                                                                                                                                     | 523  | 471  | 4.00E-87  | 90.1  | 36.5 | 45.3 |
| Rsa1.0_01382.1.g26272.t1 | gb AAC69114.1  putative gag-protease polyprotein [Arabidopsis thaliana]                                                                                                                                                                                                                                                                                                                                                                                                                        | 235  | 627  | 5.00E-18  | 266.8 | 25.1 | 38.7 | putative gag-protease polyprotein                              | gbpln | Arabidopsis thaliana | #                                                                                                                                                                                                                                                                                                                                                               | #    | #    | #         | #     | #    | #    |
| Rsa1.0_01382.1.g26273.t1 | ref XP_002891738.1  F12M16.15 [Arabidopsis lyrata subsp. lyrata] gi 297337580 gb EFH67997.1  F12M16.15 [Arabidopsis lyrata subsp. lyrata]                                                                                                                                                                                                                                                                                                                                                      | 258  | 357  | 5.00E-86  | 138.4 | 65.1 | 73.6 | F12M16.15                                                      | gbpln | Arabidopsis lyrata   | AT1G53250.1   Symbols:   unknown protein; BEST Arabidopsis thaliana protein match is: unknown protein (TAIR:AT1G53800.1); Has 11909 Blast hits to 7704 proteins in 757 species: Archae - 51; Bacteria - 1338; Metazoa - 4550; Fungi - 987; Plants - 464; Viruses - 24; Other Eukaryotes - 4495 (source: NCBI BLINK)   chr1:19857468-19859156 FORWARD LENGTH=371 | 258  | 371  | 6.00E-77  | 143.8 | 63.2 | 71.7 |
| Rsa1.0_01382.1.g26274.t1 | ref NP_564626.1  4-methyl-5(b-hydroxyethyl)-thiazole monophosphate biosynthesis [Arabidopsis thaliana] gi 75192181 sp Q9MAH3.1 DJ1B_ARATH RecName: Full=Protein DJ-1 homolog B; Short=AtDJ1B; Flags: Precursor gi 7769869 gb AAF69547.1 AC008007.22 F12M16.18 [Arabidopsis thaliana] gi 15810459 gb AAL07117.1  unknown protein [Arabidopsis thaliana] gi 20259561 gb AAM14123.1  unknown protein [Arabidopsis thaliana] gi 332194795 gb AEE32916.1  DJ1-like protein B [Arabidopsis thaliana] | 393  | 438  | 0         | 111.5 | 90.6 | 94.7 | 4-methyl-5(b-hydroxyethyl)-thiazole monophosphate biosynthesis | gbpln | Arabidopsis thaliana | AT1G53280.1   Symbols:   Class I glutamine amidotransferase-like superfamily protein   chr1:19864942-19867341 REVERSE LENGTH=438                                                                                                                                                                                                                                | 393  | 438  | 0         | 111.5 | 90.6 | 94.7 |
| Rsa1.0_01382.1.g26275.t1 | emb CAC37623.1  copia-like polyprotein [Arabidopsis thaliana]                                                                                                                                                                                                                                                                                                                                                                                                                                  | 1428 | 1466 | 0         | 102.7 | 48.4 | 60.6 | copia-like polyprotein                                         | gbpln | Arabidopsis thaliana | AT4G23160.1   Symbols: CRK8   cysteine-rich RLK (RECEPTOR-like protein kinase) 8   chr4:12129485-12134086 FORWARD LENGTH=1262                                                                                                                                                                                                                                   | 1428 | 1262 | 6.00E-73  | 88.4  | 9.7  | 16.1 |
| Rsa1.0_01383.1.g26276.t1 | gb AAG51783.1 AC079679.3 reverse transcriptase, putative; 16838-20266 [Arabidopsis thaliana]                                                                                                                                                                                                                                                                                                                                                                                                   | 172  | 1142 | 3.00E-30  | 664.0 | 39.5 | 52.3 | reverse transcriptase, putative; 16838-20266                   | gbpln | Arabidopsis thaliana | AT4G29090.1   Symbols:   Ribonuclease H-like superfamily protein   chr4:14333528-14335255 FORWARD LENGTH=575                                                                                                                                                                                                                                                    | 172  | 575  | 1.00E-14  | 334.3 | 26.7 | 47.1 |
| Rsa1.0_01383.1.g26277.t1 | gb EOA34301.1  hypothetical protein CARUB_v10021819mg [Capsella rubella]                                                                                                                                                                                                                                                                                                                                                                                                                       | 410  | 383  | 1.00E-106 | 93.4  | 54.9 | 67.8 | hypothetical protein CARUB_v10021819mg                         | gbpln | Capsella rubella     | AT1G50980.1   Symbols:   F-box/RNI-like/FBD-like domains-containing protein   chr1:18900541-18902057 REVERSE LENGTH=370                                                                                                                                                                                                                                         | 410  | 370  | 3.00E-87  | 90.2  | 46.6 | 58.3 |
| Rsa1.0_01383.1.g26278.t1 | #                                                                                                                                                                                                                                                                                                                                                                                                                                                                                              | #    | #    | #         | #     | #    | -    | ----                                                           | ----  | ----                 | #                                                                                                                                                                                                                                                                                                                                                               | #    | #    | #         | #     | #    | #    |
| Rsa1.0_01383.1.g26279.t1 | gb EOA34301.1  hypothetical protein CARUB_v10021819mg [Capsella rubella]                                                                                                                                                                                                                                                                                                                                                                                                                       | 415  | 383  | 1.00E-102 | 92.3  | 52.3 | 65.3 | hypothetical protein CARUB_v10021819mg                         | gbpln | Capsella rubella     | AT1G50980.1   Symbols:   F-box/RNI-like/FBD-like domains-containing protein   chr1:18900541-18902057 REVERSE LENGTH=370                                                                                                                                                                                                                                         | 415  | 370  | 5.00E-85  | 89.2  | 46.3 | 57.3 |
| Rsa1.0_01383.1.g26280.t1 | #                                                                                                                                                                                                                                                                                                                                                                                                                                                                                              | #    | #    | #         | #     | #    | -    | ----                                                           | ----  | ----                 | #                                                                                                                                                                                                                                                                                                                                                               | #    | #    | #         | #     | #    | #    |
| Rsa1.0_01383.1.g26281.t1 | gb AAF19226.1 AC007505.2 Highly similar to Ta1-3 polyprotein [Arabidopsis thaliana]                                                                                                                                                                                                                                                                                                                                                                                                            | 1373 | 1356 | 0         | 98.8  | 51.1 | 68.1 | Highly similar to Ta1-3 polyprotein                            | gbpln | Arabidopsis thaliana | AT4G23160.1   Symbols: CRK8   cysteine-rich RLK (RECEPTOR-like protein kinase) 8   chr4:12129485-12134086 FORWARD LENGTH=1262                                                                                                                                                                                                                                   | 1373 | 1262 | 9.00E-81  | 91.9  | 12.7 | 19.6 |
| Rsa1.0_01384.1.g26282.t1 | #                                                                                                                                                                                                                                                                                                                                                                                                                                                                                              | #    | #    | #         | #     | #    | -    | ----                                                           | ----  | ----                 | #                                                                                                                                                                                                                                                                                                                                                               | #    | #    | #         | #     | #    | #    |
| Rsa1.0_01384.1.g26283.t1 | gb AAC33226.1  putative non-LTR retroelement reverse transcriptase [Arabidopsis thaliana]                                                                                                                                                                                                                                                                                                                                                                                                      | 257  | 1529 | 7.00E-35  | 594.9 | 34.2 | 50.6 | putative non-LTR retroelement reverse transcriptase            | gbpln | Arabidopsis thaliana | AT5G18880.1   Symbols:   RNA-directed DNA polymerase (reverse transcriptase)-related family protein   chr5:6300535-6301422 REVERSE LENGTH=295                                                                                                                                                                                                                   | 257  | 295  | 6.00E-37  | 114.8 | 35.4 | 51.4 |

|                           |                                                                                                                                                                                                                                                                   |      |      |          |       |       |       |                                                                              |       |                      |                                                                                                                                                                                                                                                                                                                                                                                                                                                                                              |      |      |          |       |      |      |
|---------------------------|-------------------------------------------------------------------------------------------------------------------------------------------------------------------------------------------------------------------------------------------------------------------|------|------|----------|-------|-------|-------|------------------------------------------------------------------------------|-------|----------------------|----------------------------------------------------------------------------------------------------------------------------------------------------------------------------------------------------------------------------------------------------------------------------------------------------------------------------------------------------------------------------------------------------------------------------------------------------------------------------------------------|------|------|----------|-------|------|------|
| Rsa1.0_01384.1.g26284.t1  | gb AAD17398.1  putative non-LTR retroelement reverse transcriptase [Arabidopsis thaliana]                                                                                                                                                                         | 329  | 1225 | 8.00E-33 | 372.3 | 21.3  | 31.6  | putative non-LTR retroelement reverse transcriptase                          | gbpln | Arabidopsis thaliana | #                                                                                                                                                                                                                                                                                                                                                                                                                                                                                            | #    | #    | #        | #     | #    | #    |
| Rsa1.0_01384.1.g26285.t2  | dbj BAJ33923.1  unnamed protein product [Theilungiella halophila]                                                                                                                                                                                                 | 695  | 676  | 0        | 97.3  | 88.1  | 92.1  | unnamed protein product                                                      | ----  | ----                 | AT3G52640.1   Symbols:   Zn-dependent exopeptidases superfamily protein   chr3:19515078-19520290 REVERSE LENGTH=676                                                                                                                                                                                                                                                                                                                                                                          | 695  | 676  | 0        | 97.3  | 86.2 | 91.1 |
| Rsa1.0_01384.1.g26286.t1  | ref XP_002877875.1  predicted protein [Arabidopsis lyrata subsp. lyrata] gi 297323713 gb EFH54134.1  predicted protein [Arabidopsis lyrata subsp. lyrata]                                                                                                         | 523  | 590  | 0        | 112.8 | 89.1  | 94.8  | predicted protein                                                            | gbpln | Arabidopsis lyrata   | AT3G52600.1   Symbols: AtcwiNV2, CWINV2   cell wall invertase 2   chr3:19507080-19509273 REVERSE LENGTH=590                                                                                                                                                                                                                                                                                                                                                                                  | 523  | 590  | 0        | 112.8 | 88.0 | 94.1 |
| Rsa1.0_01384.1.g26287.t1  | ref XP_004156525.1  PREDICTED: ubiquitin-60S ribosomal protein L40-like [Cucumis sativus]                                                                                                                                                                         | 128  | 208  | 3.00E-69 | 162.5 | 100.0 | 100.0 | PREDICTED: ubiquitin-60S ribosomal protein L40-like                          | gbpln | Cucumis sativus      | AT3G52590.1   Symbols: UBQ1, EMB2167, ERD16, HAP4   ubiquitin extension protein 1   chr3:19505668-19506681 FORWARD LENGTH=128                                                                                                                                                                                                                                                                                                                                                                | 128  | 128  | 6.00E-71 | 100.0 | 99.2 | 99.2 |
| Rsa1.0_01384.1.g26288.t3  | gb EOA15725.1  hypothetical protein CARUB_v10006633mg, partial [Capsella rubella]                                                                                                                                                                                 | 306  | 483  | 2.00E-29 | 157.8 | 21.6  | 33.3  | hypothetical protein CARUB_v10006633mg, partial                              | gbpln | Capsella rubella     | AT1G52950.1   Symbols:   Nucleic acid-binding, OB-fold-like protein   chr1:19725483-19728007 FORWARD LENGTH=566                                                                                                                                                                                                                                                                                                                                                                              | 306  | 566  | 1.00E-21 | 185.0 | 17.3 | 32.0 |
| Rsa1.0_01384.1.g26289.t1  | #                                                                                                                                                                                                                                                                 | #    | #    | #        | #     | #     | -     | ----                                                                         | ----  | ----                 | #                                                                                                                                                                                                                                                                                                                                                                                                                                                                                            | #    | #    | #        | #     | #    | #    |
| Rsa1.0_01384.1.g26290.t1  | dbj BAB01155.1  unnamed protein product [Arabidopsis thaliana] gi 49823524 gb AAT68745.1  hypothetical protein At3g17200 [Arabidopsis thaliana] gi 60547763 gb AAX23845.1  hypothetical protein At3g17200 [Arabidopsis thaliana]                                  | 156  | 310  | 2.00E-24 | 198.7 | 30.8  | 53.8  | unnamed protein product                                                      | gbpln | Arabidopsis thaliana | AT3G24255.1   Symbols:   RNA-directed DNA polymerase (reverse transcriptase)-related family protein   chr3:8789471-8793208 FORWARD LENGTH=746                                                                                                                                                                                                                                                                                                                                                | 156  | 746  | 2.00E-14 | 478.2 | 25.6 | 35.3 |
| Rsa1.0_01384.1.g26291.t1  | gb AAD21699.1  Contains reverse transcriptase domain (rvt) PF 00078 [Arabidopsis thaliana]                                                                                                                                                                        | 218  | 1253 | 1.00E-24 | 574.8 | 25.2  | 39.9  | Contains reverse transcriptase domain (rvt) PF 00078                         | gbpln | Arabidopsis thaliana | AT5G18980.1   Symbols:   RNA-directed DNA polymerase (reverse transcriptase)-related family protein   chr5:6300535-6301422 REVERSE LENGTH=295                                                                                                                                                                                                                                                                                                                                                | 218  | 295  | 4.00E-25 | 135.3 | 26.6 | 40.4 |
| Rsa1.0_01385.1.g26292.t1  | ref XP_002888577.1  CYP735A2 [Arabidopsis lyrata subsp. lyrata] gi 297334418 gb EFH64836.1  CYP735A2 [Arabidopsis lyrata subsp. lyrata]                                                                                                                           | 517  | 512  | 0        | 99.0  | 90.9  | 95.4  | CYP735A2                                                                     | gbpln | Arabidopsis lyrata   | AT1G67110.1   Symbols: CYP735A2   cytochrome P450, family 735, subfamily A, polypeptide 2   chr1:25061836-25065355 REVERSE LENGTH=512                                                                                                                                                                                                                                                                                                                                                        | 517  | 512  | 0        | 99.0  | 90.1 | 95.0 |
| Rsa1.0_01385.1.g26293.t10 | ref NP_176883.5  AAA ATPase containing von Willebrand factor type A domain-containing protein [Arabidopsis thaliana] gi 332196477 gb AEE34598.1  AAA ATPase containing von Willebrand factor type A domain-containing protein [Arabidopsis thaliana]              | 5390 | 5393 | 0        | 100.1 | 82.1  | 89.8  | AAA ATPase containing von Willebrand factor type A domain-containing protein | gbpln | Arabidopsis thaliana | AT1G67120.1   Symbols:   ATPases:nucleotide binding:ATP binding:nucleoside-triphosphatases:transcription factor binding   chr1:25069727-25095526 REVERSE LENGTH=5393                                                                                                                                                                                                                                                                                                                         | 5390 | 5393 | 0        | 100.1 | 82.1 | 89.8 |
| Rsa1.0_01385.1.g26294.t2  | #                                                                                                                                                                                                                                                                 | #    | #    | #        | #     | #     | -     | ----                                                                         | ----  | ----                 | #                                                                                                                                                                                                                                                                                                                                                                                                                                                                                            | #    | #    | #        | #     | #    | #    |
| Rsa1.0_01385.1.g26295.t1  | ref XP_002874768.1  protease inhibitor/seed storage/lipid transfer protein family protein [Arabidopsis lyrata subsp. lyrata] gi 297320605 gb EFH51027.1  protease inhibitor/seed storage/lipid transfer protein family protein [Arabidopsis lyrata subsp. lyrata] | 157  | 161  | 2.00E-32 | 102.5 | 52.2  | 66.9  | protease inhibitor/seed storage/lipid transfer protein family protein        | gbpln | Arabidopsis lyrata   | AT4G12360.1   Symbols:   Bifunctional inhibitor/lipid-transfer protein/seed storage 2S albumin superfamily protein   chr4:7328164-7329104 REVERSE LENGTH=161                                                                                                                                                                                                                                                                                                                                 | 157  | 161  | 2.00E-26 | 102.5 | 42.0 | 56.1 |
| Rsa1.0_01386.1.g26296.t1  | gb EOA33837.1  hypothetical protein CARUB_v10021318mg, partial [Capsella rubella]                                                                                                                                                                                 | 142  | 290  | 5.00E-12 | 204.2 | 34.5  | 47.9  | hypothetical protein CARUB_v10021318mg, partial                              | gbpln | Capsella rubella     | #                                                                                                                                                                                                                                                                                                                                                                                                                                                                                            | #    | #    | #        | #     | #    | #    |
| Rsa1.0_01386.1.g26297.t1  | ref NP_001118636.1  uncharacterized protein [Arabidopsis thaliana] gi 332642168 gb AEE75689.1  uncharacterized protein AT3G15534 [Arabidopsis thaliana]                                                                                                           | 68   | 68   | 2.00E-29 | 100.0 | 95.6  | 97.1  | uncharacterized protein                                                      | gbpln | Arabidopsis thaliana | AT3G15534.1   Symbols:   unknown protein; FUNCTIONS IN: molecular_function unknown; INVOLVED IN: biological_process unknown; LOCATED IN: cellular_component unknown; BEST Arabidopsis thaliana protein match is: unknown protein (TAIR:AT1GS2855.1); Has 30201 Blast hits to 17322 proteins in 780 species: Archaea - 12; Bacteria - 1396; Metazoa - 17338; Fungi - 3422; Plants - 5037; Viruses - 0; Other Eukaryotes - 2996 (source: NCBI BLINK).   chr3:5258876-5259082 FORWARD LENGTH=68 | 68   | 68   | 3.00E-32 | 100.0 | 95.6 | 97.1 |

|                          |                                                                                                                                                                                                                                                                                                                                                                                                                                                                                                                                                                                                                                                                                                                                                                                                                                                                                                                                      |      |      |           |       |      |      |                                                                  |       |                      |                                                                                                                                                                                                                                                                                                                            |      |      |           |       |      |      |
|--------------------------|--------------------------------------------------------------------------------------------------------------------------------------------------------------------------------------------------------------------------------------------------------------------------------------------------------------------------------------------------------------------------------------------------------------------------------------------------------------------------------------------------------------------------------------------------------------------------------------------------------------------------------------------------------------------------------------------------------------------------------------------------------------------------------------------------------------------------------------------------------------------------------------------------------------------------------------|------|------|-----------|-------|------|------|------------------------------------------------------------------|-------|----------------------|----------------------------------------------------------------------------------------------------------------------------------------------------------------------------------------------------------------------------------------------------------------------------------------------------------------------------|------|------|-----------|-------|------|------|
| Rsa1.0_01386.1.g26298.t1 | refNP_188173.1  auxin-responsive protein IAA19 [Arabidopsis thaliana] gi 17365900 sp O24409.2 IAA19_ARATH RecName: Full=Auxin-responsive protein IAA19; AltName: Full=Indoleacetic acid-induced protein 19; AltName: Full=Protein MASSUGU 2 gi 7021739 gb AAF35420.1  early auxin-induced protein, IAA19 [Arabidopsis thaliana] gi 15795119 gbj BAB02383.1  auxin-regulated protein, IAA19 [Arabidopsis thaliana] gi 49616371 gb AAT67082.1  IAA19 [Arabidopsis thaliana] gi 88193790 gb ABD42984.1  At3g15540 [Arabidopsis thaliana] gi 332642169 gb AEE75690.1  auxin-responsive protein IAA19 [Arabidopsis thaliana]                                                                                                                                                                                                                                                                                                              | 195  | 197  | 3.00E-97  | 101.0 | 90.3 | 94.4 | auxin-responsive protein IAA19                                   | gbpln | Arabidopsis thaliana | AT3G15540.1   Symbols: IAA19, MSG2   indole-3-acetic acid inducible 19   chr3:5264100-5265378 FORWARD LENGTH=197                                                                                                                                                                                                           | 195  | 197  | 1.00E-99  | 101.0 | 90.3 | 94.4 |
| Rsa1.0_01386.1.g26299.t1 | dbj BAA97099.1  retroelement pol polyprotein-like [Arabidopsis thaliana]                                                                                                                                                                                                                                                                                                                                                                                                                                                                                                                                                                                                                                                                                                                                                                                                                                                             | 553  | 1098 | 1.00E-165 | 198.6 | 56.6 | 69.4 | retroelement pol polyprotein-like                                | gbpln | Arabidopsis thaliana | AT1G21280.1   Symbols:   CONTAINS InterPro DOMAIN/s: Retrotransposon gag protein (InterPro:IPR005162); Has 707 Blast hits to 705 proteins in 25 species: Archae - 0; Bacteria - 0; Metazoa - 4; Fungi - 0; Plants - 703; Viruses - 0; Other Eukaryotes - 0 (source: NCBI BLINK).   chr1:7447690-7448403 REVERSE LENGTH=237 | 553  | 237  | 7.00E-25  | 42.9  | 12.7 | 21.2 |
| Rsa1.0_01386.1.g26300.t1 | gb ACG80686.1  En/Spm-related transposon protein [Brassica oleracea var. alboglabra]                                                                                                                                                                                                                                                                                                                                                                                                                                                                                                                                                                                                                                                                                                                                                                                                                                                 | 836  | 695  | 1.00E-63  | 83.1  | 13.4 | 15.7 | En/Spm-related transposon protein                                | gbpln | Brassica oleracea    | #                                                                                                                                                                                                                                                                                                                          | #    | #    | #         | #     | #    |      |
| Rsa1.0_01386.1.g26301.t1 | refNP_174124.1  2-oxoglutarate (2OG) and Fe(II)-dependent oxygenase-like protein [Arabidopsis thaliana] gi 12322993 gb AAG51483.1 AC069471.14 oxidoreductase, putative [Arabidopsis thaliana] gi 332192783 gb AEE30904.1  2-oxoglutarate (2OG) and Fe(II)-dependent oxygenase-like protein [Arabidopsis thaliana]                                                                                                                                                                                                                                                                                                                                                                                                                                                                                                                                                                                                                    | 323  | 322  | 1.00E-128 | 99.7  | 70.3 | 82.0 | 2-oxoglutarate (2OG) and Fe(II)-dependent oxygenase-like protein | gbpln | Arabidopsis thaliana | AT1G28030.1   Symbols:   2-oxoglutarate (2OG) and Fe(II)-dependent oxygenase superfamily protein   chr1:9771793-9773345 FORWARD LENGTH=322                                                                                                                                                                                 | 323  | 322  | 1.00E-130 | 99.7  | 70.3 | 82.0 |
| Rsa1.0_01386.1.g26302.t1 | gb EOA32639.1  hypothetical protein CARUB_v10015934mg [Capsella rubella]                                                                                                                                                                                                                                                                                                                                                                                                                                                                                                                                                                                                                                                                                                                                                                                                                                                             | 362  | 708  | 0         | 195.6 | 89.2 | 93.6 | hypothetical protein CARUB_v10015934mg                           | gbpln | Capsella rubella     | AT3G15550.1   Symbols:   unknown protein; Has 25732 Blast hits to 16979 proteins in 961 species: Archae - 144; Bacteria - 1801; Metazoa - 12681; Fungi - 1868; Plants - 912; Viruses - 94; Other Eukaryotes - 8232 (source: NCBI BLINK).   chr3:5267351-5270095 FORWARD LENGTH=729                                         | 362  | 729  | 0         | 201.4 | 88.4 | 93.9 |
| Rsa1.0_01387.1.g26303.t1 | refNP_199669.1  FK506-binding protein 2-2 [Arabidopsis thaliana] gi 23396587 sp Q38936.2 FK152_ARATH RecName: Full=Peptidyl-prolyl cis-trans isomerase FKBP15-2; Short=PPIase FKBP15-2; AltName: Full=15 kDa FK506-binding protein; Short=15 kDa FKBP; AltName: Full=FK506-binding protein 15-2; Short=AtFKBP15-2; AltName: Full=FK506-binding protein 2-2; AltName: Full=Immunophilin FKBP15-2; AltName: Full=Rotamase; Flags: Precursor gi 13877793 gb AAK43974.1 AF370159.1 putative peptidyl-prolyl cis-trans isomerase [Arabidopsis thaliana] gi 10177346 dbj BAB10691.1  peptidyl-prolyl cis-trans isomerase-like protein [Arabidopsis thaliana] gi 16323516 gb AAL15252.1  putative peptidyl-prolyl cis-trans isomerase [Arabidopsis thaliana] gi 2155433 gb AAM62526.1  peptidyl-prolyl cis-trans isomerase-like protein [Arabidopsis thaliana] gi 332008308 gb AED95691.1  FK506-binding protein 2-2 [Arabidopsis thaliana] | 165  | 163  | 7.00E-71  | 98.8  | 84.2 | 89.7 | FK506-binding protein 2-2                                        | gbpln | Arabidopsis thaliana | AT5G48580.1   Symbols: FKBP15-2   FK506- and rapamycin-binding protein 15 kD-2   chr5:19696156-19697304 REVERSE LENGTH=163                                                                                                                                                                                                 | 165  | 163  | 2.00E-73  | 98.8  | 84.2 | 89.7 |
| Rsa1.0_01387.1.g26304.t1 | dbj BAB02990.1  retroelement pol polyprotein-like [Arabidopsis thaliana]                                                                                                                                                                                                                                                                                                                                                                                                                                                                                                                                                                                                                                                                                                                                                                                                                                                             | 1261 | 1250 | 0         | 99.1  | 59.6 | 75.5 | retroelement pol polyprotein-like                                | gbpln | Arabidopsis thaliana | AT4G23160.1   Symbols: CRK8   cysteine-rich RLK (RECEPTOR-like protein kinase) 8   chr4:12129485-12134086 FORWARD LENGTH=1262                                                                                                                                                                                              | 1261 | 1262 | 3.00E-99  | 100.1 | 14.7 | 22.8 |

|                          |                                                                                                                                                                                                                                                                                                                                                                                                                                                                                     |     |      |           |       |      |      |                                                      |       |                      |                                                                                                                                  |     |      |           |       |      |      |
|--------------------------|-------------------------------------------------------------------------------------------------------------------------------------------------------------------------------------------------------------------------------------------------------------------------------------------------------------------------------------------------------------------------------------------------------------------------------------------------------------------------------------|-----|------|-----------|-------|------|------|------------------------------------------------------|-------|----------------------|----------------------------------------------------------------------------------------------------------------------------------|-----|------|-----------|-------|------|------|
| Rsa1.0_01387.1.g26305.t2 | gb EOA12366.1  hypothetical protein CARUB_v10025753mg [Capsella rubella]                                                                                                                                                                                                                                                                                                                                                                                                            | 451 | 1263 | 1.00E-63  | 280.0 | 42.8 | 56.3 | hypothetical protein CARUB_v10025753mg               | gbpln | Capsella rubella     | AT5G51630.1   Symbols:   Disease resistance protein (TIR-NBS-LRR class) family   chr5:20970069-20974666 FORWARD LENGTH=1229      | 451 | 1229 | 3.00E-62  | 272.5 | 35.7 | 49.9 |
| Rsa1.0_01387.1.g26306.t1 | ref NP_187383.1  GTP cyclohydrolase I [Arabidopsis thaliana] gi 6642638 gb AAAF20219.1 AC012395.6 GTP cyclohydrolase I [Arabidopsis thaliana] gi 20466832 gb AAM20733.1  GTP cyclohydrolase I [Arabidopsis thaliana] gi 30387557 gb AAP31944.1  At3g07270 [Arabidopsis thaliana] gi 332640999 gb AEE74520.1  GTP cyclohydrolase I [Arabidopsis thaliana]                                                                                                                            | 423 | 466  | 1.00E-172 | 110.2 | 73.8 | 85.8 | GTP cyclohydrolase I                                 | gbpln | Arabidopsis thaliana | AT3G07270.1   Symbols:   GTP cyclohydrolase I   chr3:2315451-2317059 FORWARD LENGTH=466                                          | 423 | 466  | 1.00E-175 | 110.2 | 73.8 | 85.8 |
| Rsa1.0_01387.1.g26307.t1 | gb AAF23577.1 AF112102.1 chalcone synthase [Fourreaa alpina]                                                                                                                                                                                                                                                                                                                                                                                                                        | 394 | 395  | 0         | 100.3 | 91.4 | 95.9 | chalcone synthase                                    | gbpln | Fourreaa alpina      | AT5G13930.1   Symbols: CHS, TT4, ATCHS   Chalcone and stilbene synthase family protein   chr5:4488762-4490035 FORWARD LENGTH=395 | 394 | 395  | 0         | 100.3 | 86.8 | 93.4 |
| Rsa1.0_01387.1.g26308.t1 | gb AAF23577.1 AF112102.1 chalcone synthase [Fourreaa alpina]                                                                                                                                                                                                                                                                                                                                                                                                                        | 161 | 395  | 1.00E-47  | 245.3 | 55.3 | 60.2 | chalcone synthase                                    | gbpln | Fourreaa alpina      | AT5G13930.1   Symbols: CHS, TT4, ATCHS   Chalcone and stilbene synthase family protein   chr5:4488762-4490035 FORWARD LENGTH=395 | 161 | 395  | 8.00E-46  | 245.3 | 52.8 | 55.3 |
| Rsa1.0_01387.1.g26309.t1 | ref NP_199674.1  cyclin-C1-2 [Arabidopsis thaliana] gi 75309141 sp Q9FJK7.1 CCC12_ARATH RecName: Full=Cyclin-C1-2; Short=OycC1.2 gi 10177353 db BAB10696.1  cyclin C-like protein [Arabidopsis thaliana] gi 21554107 gb AAM63187.1  cyclin C-like protein [Arabidopsis thaliana] gi 87116580 gb ABD19654.1  At5g48630 [Arabidopsis thaliana] gi 332008316 gb AED95699.1  cyclin-C1-2 [Arabidopsis thaliana]                                                                         | 253 | 253  | 1.00E-141 | 100.0 | 93.7 | 99.2 | cyclin-C1-2                                          | gbpln | Arabidopsis thaliana | AT5G48630.1   Symbols:   Cyclin family protein   chr5:19721663-19723200 REVERSE LENGTH=253                                       | 253 | 253  | 1.00E-143 | 100.0 | 93.7 | 99.2 |
| Rsa1.0_01387.1.g26310.t1 | gb EOA24625.1  hypothetical protein CARUB_v10017896mg [Capsella rubella]                                                                                                                                                                                                                                                                                                                                                                                                            | 243 | 252  | 1.00E-130 | 103.7 | 93.0 | 97.9 | hypothetical protein CARUB_v10017896mg               | gbpln | Capsella rubella     | AT5G48640.1   Symbols:   Cyclin family protein   chr5:19723653-19725641 REVERSE LENGTH=253                                       | 243 | 253  | 1.00E-130 | 104.1 | 93.0 | 97.5 |
| Rsa1.0_01387.1.g26311.t1 | gb AAM61659.1  unknown [Arabidopsis thaliana]                                                                                                                                                                                                                                                                                                                                                                                                                                       | 191 | 203  | 8.00E-56  | 106.3 | 72.3 | 78.0 | unknown                                              | gbpln | Arabidopsis thaliana | AT5G48655.3   Symbols:   RING/U-box superfamily protein   chr5:19731575-19732486 REVERSE LENGTH=203                              | 191 | 203  | 1.00E-57  | 106.3 | 69.6 | 77.0 |
| Rsa1.0_01387.1.g26312.t1 | gb EOA13977.1  hypothetical protein CARUB_v10027107mg [Capsella rubella]                                                                                                                                                                                                                                                                                                                                                                                                            | 219 | 217  | 9.00E-98  | 99.1  | 85.8 | 92.7 | hypothetical protein CARUB_v10027107mg               | gbpln | Capsella rubella     | AT5G48660.1   Symbols:   B-cell receptor-associated protein 31-like   chr5:19736986-19738327 FORWARD LENGTH=219                  | 219 | 219  | 4.00E-91  | 100.0 | 91.8 | 96.8 |
| Rsa1.0_01387.1.g26313.t1 | ref NP_001154770.1  protein XRI1 [Arabidopsis thaliana] gi 239977726 sp Q6NLW5.2 XRI1_ARATH RecName: Full=Protein XRI1; AltName: Full=Protein X-RAY INDUCED 1 gi 332008333 gb AED95716.1  protein XRI1 [Arabidopsis thaliana]                                                                                                                                                                                                                                                       | 304 | 300  | 1.00E-121 | 98.7  | 77.3 | 85.2 | protein XRI1                                         | gbpln | Arabidopsis thaliana | AT5G48720.2   Symbols: XRI, XRI1   x-ray induced transcript 1   chr5:19759233-19761621 FORWARD LENGTH=300                        | 304 | 300  | 1.00E-124 | 98.7  | 77.3 | 85.2 |
| Rsa1.0_01387.1.g26314.t1 | ref XP_002865669.1  60S ribosomal protein L13A [Arabidopsis lyrata subsp. lyrata] gi 297311504 gb EFH41928.1  60S ribosomal protein L13A [Arabidopsis lyrata subsp. lyrata]                                                                                                                                                                                                                                                                                                         | 206 | 206  | 1.00E-112 | 100.0 | 96.1 | 98.1 | 60S ribosomal protein L13A                           | gbpln | Arabidopsis lyrata   | AT5G48760.2   Symbols:   Ribosomal protein L13 family protein   chr5:19771315-19772686 REVERSE LENGTH=206                        | 206 | 206  | 1.00E-113 | 100.0 | 95.1 | 97.6 |
| Rsa1.0_01388.1.g26315.t2 | dbj BAJ33720.1  unnamed protein product [Thellungiella halophila]                                                                                                                                                                                                                                                                                                                                                                                                                   | 295 | 294  | 1.00E-135 | 99.7  | 88.8 | 91.9 | unnamed protein product                              | ----  | ----                 | AT1G78600.1   Symbols: LZFI, STH3, DBB3   light-regulated zinc finger protein 1   chr1:29567370-29568662 FORWARD LENGTH=299      | 295 | 299  | 1.00E-130 | 101.4 | 84.7 | 89.2 |
| Rsa1.0_01388.1.g26316.t1 | ref NP_177982.1  mechanosensitive channel of small conductance-like 6 [Arabidopsis thaliana] gi 75213461 sp Q9SYM1.1 MSL6_ARATH RecName: Full=Mechanosensitive ion channel protein 6; AltName: Full=Mechanosensitive channel of small conductance-like 6; AltName: Full=MscS-Like protein 6 gi 4836872 gb AAD30575.1 AC007260.6 Hypothetical protein [Arabidopsis thaliana] gi 332198006 gb AEE36127.1  mechanosensitive channel of small conductance-like 6 [Arabidopsis thaliana] | 865 | 856  | 0         | 99.0  | 85.0 | 90.4 | mechanosensitive channel of small conductance-like 6 | gbpln | Arabidopsis thaliana | AT1G78610.1   Symbols: MSL6   mechanosensitive channel of small conductance-like 6   chr1:29569226-29572126 REVERSE LENGTH=856   | 865 | 856  | 0         | 99.0  | 85.0 | 90.4 |
| Rsa1.0_01388.1.g26317.t1 | gb EOA35423.1  hypothetical protein CARUB_v10020623mg [Capsella rubella]                                                                                                                                                                                                                                                                                                                                                                                                            | 445 | 335  | 1.00E-103 | 75.3  | 41.8 | 42.9 | hypothetical protein CARUB_v10020623mg               | gbpln | Capsella rubella     | AT1G78620.2   Symbols:   Protein of unknown function DUF92, transmembrane   chr1:29573862-29575758 REVERSE LENGTH=342            | 445 | 342  | 1.00E-105 | 76.9  | 41.6 | 43.1 |

|                          |                                                                                                                                                                                                                                                                                                                                                                                                                                                                                                               |     |     |           |       |      |      |                                                      |       |                      |                                                                                                                                      |     |     |           |       |      |      |
|--------------------------|---------------------------------------------------------------------------------------------------------------------------------------------------------------------------------------------------------------------------------------------------------------------------------------------------------------------------------------------------------------------------------------------------------------------------------------------------------------------------------------------------------------|-----|-----|-----------|-------|------|------|------------------------------------------------------|-------|----------------------|--------------------------------------------------------------------------------------------------------------------------------------|-----|-----|-----------|-------|------|------|
| Rsa1.0_01388.1.g26318.t1 | refXP_002887748.1   EMB1473 [Arabidopsis lyrata subsp. lyrata] gi 297333599 gb EFH64007.1   EMB1473 [Arabidopsis lyrata subsp. lyrata]                                                                                                                                                                                                                                                                                                                                                                        | 244 | 242 | 1.00E-130 | 99.2  | 93.9 | 95.9 | EMB1473                                              | gbpln | Arabidopsis lyrata   | AT1G78630.1   Symbols: emb1473   Ribosomal protein L13 family protein   chr1:29575997-29577406 FORWARD LENGTH=241                    | 244 | 241 | 1.00E-123 | 98.8  | 91.8 | 93.9 |
| Rsa1.0_01388.1.g26319.t2 | refNP_565185.1   DNA-directed DNA polymerase [Arabidopsis thaliana] gi 4836868 gb AAD30571.1   AC007260.2 Hypothetical protein [Arabidopsis thaliana] gi 332198011 gb AEE36132.1   DNA-directed DNA polymerase [Arabidopsis thaliana]                                                                                                                                                                                                                                                                         | 753 | 509 | 1.00E-175 | 67.6  | 47.3 | 52.2 | DNA-directed DNA polymerase                          | gbpln | Arabidopsis thaliana | AT1G78650.1   Symbols: POLD3   DNA-directed DNA polymerases   chr1:29582987-29585508 FORWARD LENGTH=509                              | 753 | 509 | 1.00E-178 | 67.6  | 47.3 | 52.2 |
| Rsa1.0_01388.1.g26320.t1 | refXP_002886496.1   hypothetical protein ARALYDRAFT_893290 [Arabidopsis lyrata subsp. lyrata] gi 29733237 gb EFH62755.1   hypothetical protein ARALYDRAFT_893290 [Arabidopsis lyrata subsp. lyrata]                                                                                                                                                                                                                                                                                                           | 392 | 416 | 3.00E-97  | 106.1 | 51.8 | 66.6 | hypothetical protein ARALYDRAFT_893290               | gbpln | Arabidopsis lyrata   | AT2G31470.1   Symbols: DOR   F-box and associated interaction domains-containing protein   chr2:13407492-13408655 REVERSE LENGTH=387 | 392 | 387 | 4.00E-83  | 98.7  | 46.7 | 62.0 |
| Rsa1.0_01388.1.g26321.t1 | refNP_565186.2   gamma-glutamyl hydrolase 2 [Arabidopsis thaliana] gi 26454629 sp O65355.2 GGH_ARATH RecName: Full=Gamma-glutamyl hydrolase; AltName: Full=Conjugase; AltName: Full=GH; AltName: Full=Gamma-Glu-X carboxypeptidase; Flags: Precursor gi 17979073 gb AAL49804.1   putative gamma glutamyl hydrolase [Arabidopsis thaliana] gi 20465329 gb AAM20068.1   putative gamma glutamyl hydrolase [Arabidopsis thaliana] gi 332198016 gb AEE36137.1   gamma-glutamyl hydrolase 2 [Arabidopsis thaliana] | 381 | 347 | 1.00E-155 | 91.1  | 73.5 | 79.8 | gamma-glutamyl hydrolase 2                           | gbpln | Arabidopsis thaliana | AT1G78680.1   Symbols: ATGGH2, GGH2   gamma-glutamyl hydrolase 2   chr1:29593933-29596037 FORWARD LENGTH=347                         | 381 | 347 | 1.00E-158 | 91.1  | 73.5 | 79.8 |
| Rsa1.0_01388.1.g26322.t1 | refXP_002887753.1   phospholipid/glycerol acyltransferase family protein [Arabidopsis lyrata subsp. lyrata] gi 297333594 gb EFH64012.1   phospholipid/glycerol acyltransferase family protein [Arabidopsis lyrata subsp. lyrata]                                                                                                                                                                                                                                                                              | 678 | 284 | 1.00E-143 | 41.9  | 35.8 | 39.4 | phospholipid/glycerol acyltransferase family protein | gbpln | Arabidopsis lyrata   | AT1G78690.1   Symbols:   Phospholipid/glycerol acyltransferase family protein   chr1:29597002-29598409 FORWARD LENGTH=284            | 678 | 284 | 1.00E-140 | 41.9  | 35.3 | 38.3 |
| Rsa1.0_01388.1.g26323.t1 | refNP_177996.1   F-box/FBD/LRR-repeat protein [Arabidopsis thaliana] gi 75268062 sp Q9ZV93.1   FDL10_ARATH RecName: Full=F-box/FBD/LRR-repeat protein At1g78750 gi 3834319 gb AAC83035.1   Similar to gi 2244754   heat shock transcription factor HSF30 homolog from Arabidopsis thaliana chromosome 4 contig gb 297335 [Arabidopsis thaliana] gi 332198025 gb AEE36146.1   F-box/FBD/LRR-repeat protein [Arabidopsis thaliana]                                                                              | 471 | 458 | 1.00E-117 | 97.2  | 50.1 | 64.1 | F-box/FBD/LRR-repeat protein                         | gbpln | Arabidopsis thaliana | AT1G78750.1   Symbols:   F-box/RNI-like superfamily protein   chr1:29613122-29614695 REVERSE LENGTH=458                              | 471 | 458 | 1.00E-119 | 97.2  | 50.1 | 64.1 |
| Rsa1.0_01388.1.g26324.t1 | refNP_177121.1   F-box/LRR-repeat protein 13 [Arabidopsis thaliana] gi 75263128 sp Q9FWZ1.1   FBL13_ARATH RecName: Full=F-box/LRR-repeat protein 13 gi 10092292 gb AAG12704.1   AC021046.5 hypothetical protein: 7662-9196 [Arabidopsis thaliana] gi 12325183 gb AAG52534.1   AC013289.1 hypothetical protein: 7728-79262 [Arabidopsis thaliana] gi 91806059 gb ABE65758.1   F-box family protein [Arabidopsis thaliana] gi 332196836 gb AEE34957.1   F-box/LRR-repeat protein 13 [Arabidopsis thaliana]      | 449 | 451 | 1.00E-155 | 100.4 | 65.0 | 78.6 | F-box/LRR-repeat protein 13                          | gbpln | Arabidopsis thaliana | AT1G69630.1   Symbols:   F-box/RNI-like superfamily protein   chr1:26191640-26193174 REVERSE LENGTH=451                              | 449 | 451 | 1.00E-158 | 100.4 | 65.0 | 78.6 |
| Rsa1.0_01389.1.g26325.t1 | #                                                                                                                                                                                                                                                                                                                                                                                                                                                                                                             | #   | #   | #         | #     | #    | #    | -                                                    | ----  | ----                 | #                                                                                                                                    | #   | #   | #         | #     | #    | #    |
| Rsa1.0_01389.1.g26326.t1 | #                                                                                                                                                                                                                                                                                                                                                                                                                                                                                                             | #   | #   | #         | #     | #    | #    | -                                                    | ----  | ----                 | #                                                                                                                                    | #   | #   | #         | #     | #    | #    |
| Rsa1.0_01389.1.g26327.t1 | #                                                                                                                                                                                                                                                                                                                                                                                                                                                                                                             | #   | #   | #         | #     | #    | #    | -                                                    | ----  | ----                 | #                                                                                                                                    | #   | #   | #         | #     | #    | #    |

|                          |                                                                                                                                                                                                                                                                                                                                                                                                                                                                                                                                 |     |     |           |       |      |      |                                            |       |                      |                                                                                                                                                                                                                                                                                                 |     |     |           |       |      |      |
|--------------------------|---------------------------------------------------------------------------------------------------------------------------------------------------------------------------------------------------------------------------------------------------------------------------------------------------------------------------------------------------------------------------------------------------------------------------------------------------------------------------------------------------------------------------------|-----|-----|-----------|-------|------|------|--------------------------------------------|-------|----------------------|-------------------------------------------------------------------------------------------------------------------------------------------------------------------------------------------------------------------------------------------------------------------------------------------------|-----|-----|-----------|-------|------|------|
| Rsa1.0_01389.1.g26328.t1 | refNP_566958.3   RNA recognition motif-containing protein [Arabidopsis thaliana]<br>gi 79314769 refNP_001030841.1   RNA recognition motif-containing protein [Arabidopsis thaliana]<br>gi 17979394 gb AAL49922.1   unknown protein [Arabidopsis thaliana]<br>gi 22136722 gb AAM91680.1   unknown protein [Arabidopsis thaliana]<br>gi 332645382 gb AAE78903.1   RNA recognition motif-containing protein [Arabidopsis thaliana]<br>gi 332645383 gb AAE78904.1   RNA recognition motif-containing protein [Arabidopsis thaliana] | 261 | 253 | 1.00E-113 | 96.9  | 80.8 | 89.7 | RNA recognition motif-containing protein   | gbpln | Arabidopsis thaliana | AT3G52150.2   Symbols:   RNA-binding (RRM/RB0/RNP motifs) family protein   chr3:19342074-19343090 FORWARD LENGTH=253                                                                                                                                                                            | 261 | 253 | 1.00E-116 | 96.9  | 80.8 | 89.7 |
| Rsa1.0_01389.1.g26329.t1 | dbj BAD90706.1   plastid DNA-binding protein [Brassica napus]                                                                                                                                                                                                                                                                                                                                                                                                                                                                   | 490 | 476 | 1.00E-173 | 97.1  | 70.8 | 76.7 | plastid DNA-binding protein                | gbpln | Brassica napus       | AT3G52170.2   Symbols:   DNA binding   chr3:19347039-19349099 REVERSE LENGTH=499                                                                                                                                                                                                                | 490 | 499 | 1.00E-143 | 101.8 | 62.4 | 73.1 |
| Rsa1.0_01389.1.g26330.t1 | gb AAL27495.1 AF439823.1<br>AT3g52180/F4F15.290 [Arabidopsis thaliana] gi 23505915 gb AAN28817.1<br>At3g52180/F4F15.290 [Arabidopsis thaliana]                                                                                                                                                                                                                                                                                                                                                                                  | 392 | 379 | 0         | 96.7  | 82.7 | 86.7 | AT3g52180/F4F15.290                        | gbpln | Arabidopsis thaliana | AT3G52180.1   Symbols: ATPPKIS1, DSP4, SEX4, ATSEX4   dual specificity protein phosphatase (DsPTP1) family protein   chr3:19348884-19353459 REVERSE LENGTH=379                                                                                                                                  | 392 | 379 | 0         | 96.7  | 83.2 | 87.2 |
| Rsa1.0_01389.1.g26331.t1 | ref XP_002883579.1   predicted protein [Arabidopsis lyrata subsp. lyrata]<br>gi 297329419 gb EFH59838.1   predicted protein [Arabidopsis lyrata subsp. lyrata]                                                                                                                                                                                                                                                                                                                                                                  | 295 | 345 | 6.00E-79  | 116.9 | 59.3 | 74.9 | predicted protein                          | gbpln | Arabidopsis lyrata   | AT3G24850.1   Symbols:   Domain of unknown function (DUF133)   chr3:9071105-9072184 FORWARD LENGTH=359                                                                                                                                                                                          | 295 | 359 | 1.00E-70  | 121.7 | 47.1 | 57.6 |
| Rsa1.0_01389.1.g26332.t1 | refNP_566961.1   SEC12-like protein 1 [Arabidopsis thaliana]<br>gi 85687563 sp Q8GYE0.2 PHF1_ARATH<br>RecName: Full=SEC12-like protein 1; AltName: Full=Protein PHOSPHATE TRANSPORTER TRAFFIC FACILITATOR 1; Short=PHF-1<br>gi 4678949 emb CAB41339.1   putative protein [Arabidopsis thaliana]<br>gi 114050625 gb ABI49462.1   At3g52190 [Arabidopsis thaliana]<br>gi 332645390 gb AAE78911.1   SEC12-like protein 1 [Arabidopsis thaliana]                                                                                    | 397 | 398 | 0         | 100.3 | 92.2 | 96.5 | SEC12-like protein 1                       | gbpln | Arabidopsis thaliana | AT3G52190.1   Symbols: PHF1   phosphate transporter-traffic facilitator1   chr3:19354117-19356910 REVERSE LENGTH=398                                                                                                                                                                            | 397 | 398 | 0         | 100.3 | 92.2 | 96.5 |
| Rsa1.0_01389.1.g26333.t1 | gb EOA23635.1   hypothetical protein CARUB_v10016833mg [Capsella rubella]<br>gi 492559445 gb EOA23636.1   hypothetical protein CARUB_v10016833mg [Capsella rubella]                                                                                                                                                                                                                                                                                                                                                             | 641 | 636 | 0         | 99.2  | 87.7 | 91.7 | hypothetical protein CARUB_v10016833mg     | gbpln | Capsella rubella     | AT3G52200.1   Symbols: LTA3   Dihydroipoamide acetyltransferase, long form protein   chr3:19360317-19366091 FORWARD LENGTH=637                                                                                                                                                                  | 641 | 637 | 0         | 99.4  | 87.5 | 92.0 |
| Rsa1.0_01389.1.g26334.t1 | ref XP_002877850.1   hypothetical protein ARALYDRAFT_323774 [Arabidopsis lyrata subsp. lyrata]<br>gi 297323688 gb EFH54109.1   hypothetical protein ARALYDRAFT_323774 [Arabidopsis lyrata subsp. lyrata]                                                                                                                                                                                                                                                                                                                        | 668 | 688 | 0         | 103.0 | 74.6 | 85.2 | hypothetical protein ARALYDRAFT_323774     | gbpln | Arabidopsis lyrata   | AT3G52240.1   Symbols:   unknown protein; Has 220 Blast hits to 193 proteins in 66 species: Archae - 0; Bacteria - 15; Metazoa - 53; Fungi - 33; Plants - 66; Viruses - 0; Other Eukaryotes - 53 (source: NCBI BLINK).   chr3:19372902-19375799 REVERSE LENGTH=680                              | 668 | 680 | 0         | 101.8 | 71.6 | 82.6 |
| Rsa1.0_01389.1.g26335.t1 | gb EOA24074.1   hypothetical protein CARUB_v10017302mg [Capsella rubella]                                                                                                                                                                                                                                                                                                                                                                                                                                                       | 449 | 430 | 1.00E-170 | 95.8  | 77.1 | 84.4 | hypothetical protein CARUB_v10017302mg     | gbpln | Capsella rubella     | AT3G52290.1   Symbols: IQD3   IQ-domain 3   chr3:19394441-19396196 FORWARD LENGTH=430                                                                                                                                                                                                           | 449 | 430 | 1.00E-169 | 95.8  | 75.9 | 84.4 |
| Rsa1.0_01390.1.g26336.t1 | ref XP_002887845.1   hypothetical protein ARALYDRAFT_477244 [Arabidopsis lyrata subsp. lyrata]<br>gi 297333686 gb EFH64104.1   hypothetical protein ARALYDRAFT_477244 [Arabidopsis lyrata subsp. lyrata]                                                                                                                                                                                                                                                                                                                        | 309 | 300 | 4.00E-95  | 97.1  | 72.2 | 80.9 | hypothetical protein ARALYDRAFT_477244     | gbpln | Arabidopsis lyrata   | AT1G80130.1   Symbols:   Tetratricopeptide repeat (TPR)-like superfamily protein   chr1:30141250-30142478 REVERSE LENGTH=305                                                                                                                                                                    | 309 | 305 | 7.00E-95  | 98.7  | 66.7 | 75.4 |
| Rsa1.0_01390.1.g26337.t1 | ref NP_001077850.1   epidermal patterning factor-like protein 8 [Arabidopsis thaliana]<br>gi 122178729 sp Q1G3V9.1 EPFL8_ARATH<br>RecName: Full=EPIDERMAL PATTERNING FACTOR-like protein 8; Short=EPF-like protein 8; Flags: Precursor gi 98961733 gb ABF59196.1   unknown protein [Arabidopsis thaliana]<br>gi 332198240 gb AAE36361.1   epidermal patterning factor-like protein 8 [Arabidopsis thaliana]                                                                                                                     | 103 | 99  | 6.00E-30  | 96.1  | 62.1 | 74.8 | epidermal patterning factor-like protein 8 | gbpln | Arabidopsis thaliana | AT1G80133.1   Symbols:   unknown protein; LOCATED IN: endomembrane system; Has 154 Blast hits to 154 proteins in 15 species: Archae - 0; Bacteria - 0; Metazoa - 0; Fungi - 0; Plants - 154; Viruses - 0; Other Eukaryotes - 0 (source: NCBI BLINK).   chr1:30143868-30144255 REVERSE LENGTH=99 | 103 | 99  | 1.00E-32  | 96.1  | 62.1 | 74.8 |

|                           |                                                                                                                                                                                                                                                                                                                                                                                                                                                                                                                                                                                                                                                                                                                                                                                                                                                                                                                                                                     |      |     |           |       |      |      |                                                  |       |                      |                                                                                                                                                                                                                                                                                                                                                                                                                                                                                                                                                            |      |     |           |       |      |      |
|---------------------------|---------------------------------------------------------------------------------------------------------------------------------------------------------------------------------------------------------------------------------------------------------------------------------------------------------------------------------------------------------------------------------------------------------------------------------------------------------------------------------------------------------------------------------------------------------------------------------------------------------------------------------------------------------------------------------------------------------------------------------------------------------------------------------------------------------------------------------------------------------------------------------------------------------------------------------------------------------------------|------|-----|-----------|-------|------|------|--------------------------------------------------|-------|----------------------|------------------------------------------------------------------------------------------------------------------------------------------------------------------------------------------------------------------------------------------------------------------------------------------------------------------------------------------------------------------------------------------------------------------------------------------------------------------------------------------------------------------------------------------------------------|------|-----|-----------|-------|------|------|
| Rsa1.0_01390.1.g26338.t4  | ref XP_002889307.1  pentatricopeptide repeat-containing protein [Arabidopsis lyrata subsp. lyrata]<br>gi 297335148 gb EFH65566.1  pentatricopeptide repeat-containing protein [Arabidopsis lyrata subsp. lyrata]                                                                                                                                                                                                                                                                                                                                                                                                                                                                                                                                                                                                                                                                                                                                                    | 1242 | 397 | 1.00E-175 | 32.0  | 24.3 | 26.4 | pentatricopeptide repeat-containing protein      | gbpln | Arabidopsis lyrata   | AT1G80150.1   Symbols:   Tetratricopeptide repeat (TPR)-like superfamily protein   chr1:30148738-30149931 FORWARD LENGTH=397                                                                                                                                                                                                                                                                                                                                                                                                                               | 1242 | 397 | 1.00E-176 | 32.0  | 24.1 | 26.2 |
| Rsa1.0_01390.1.g26339.t1  | ref NP_565233.1  uncharacterized protein [Arabidopsis thaliana]<br>gi 5902372 gb AAD5474.1 AC009322_14 Unknown protein [Arabidopsis thaliana]<br>gi 14532496 gb AAK63976.1  At1g80180 F18B13.26 [Arabidopsis thaliana]<br>gi 1865537 gb AAL76141.1  At1g80180 F18B13.26 [Arabidopsis thaliana]<br>gi 21593069 gb AAM65017.1  unknown [Arabidopsis thaliana]<br>gi 332198246 gb AEE36367.1  uncharacterized protein AT1G80180 [Arabidopsis thaliana]                                                                                                                                                                                                                                                                                                                                                                                                                                                                                                                 | 115  | 138 | 3.00E-29  | 120.0 | 69.6 | 71.3 | uncharacterized protein                          | gbpln | Arabidopsis thaliana | AT1G80180.1   Symbols:   unknown protein; FUNCTIONS IN: molecular_function unknown; INVOLVED IN: biological_process unknown; LOCATED IN: plasma membrane; EXPRESSED IN: 21 plant structures; EXPRESSED DURING: 10 growth stages; BEST Arabidopsis thaliana protein match is: unknown protein (TAIR:AT1G15400.3); Has 30201 Blast hits to 17322 proteins in 780 species: Archae - 12; Bacteria - 1396; Metazoa - 17338; Fungi - 3422; Plants - 5037; Viruses - 0; Other Eukaryotes - 2996 (source: NCBI BLINK).   chr1:30157057-30157473 REVERSE LENGTH=138 | 115  | 138 | 5.00E-32  | 120.0 | 69.6 | 71.3 |
| Rsa1.0_01390.1.g26340.t1  | ref NP_178136.1  GINS complex subunit 1 [Arabidopsis thaliana]<br>gi 5902373 gb AAD5475.1 AC009322_15 Unknown protein [Arabidopsis thaliana]<br>gi 34365591 gb AAQ65107.1  At1g80190 [Arabidopsis thaliana]<br>gi 51969246 db BAD43315.1  At1g80190 [Arabidopsis thaliana]<br>gi 332198247 gb AEE36368.1  GINS complex subunit 1-like protein [Arabidopsis thaliana]                                                                                                                                                                                                                                                                                                                                                                                                                                                                                                                                                                                                | 220  | 201 | 2.00E-96  | 91.4  | 75.5 | 82.7 | GINS complex subunit 1                           | gbpln | Arabidopsis thaliana | AT1G80190.1   Symbols:   PSF1   partner of SLD five 1   chr1:30159476-30161115 FORWARD LENGTH=201                                                                                                                                                                                                                                                                                                                                                                                                                                                          | 220  | 201 | 5.00E-99  | 91.4  | 75.5 | 82.7 |
| Rsa1.0_01390.1.g26341.t1  | gb AAT69224.1  hypothetical protein At1g80200 [Arabidopsis thaliana]                                                                                                                                                                                                                                                                                                                                                                                                                                                                                                                                                                                                                                                                                                                                                                                                                                                                                                | 199  | 235 | 8.00E-61  | 118.1 | 68.8 | 80.9 | hypothetical protein At1g80200                   | gbpln | Arabidopsis thaliana | AT1G80200.1   Symbols:   unknown protein; FUNCTIONS IN: molecular_function unknown; INVOLVED IN: biological_process unknown; LOCATED IN: endomembrane system; BEST Arabidopsis thaliana protein match is: unknown protein (TAIR:AT5G11280.1); Has 49 Blast hits to 49 proteins in 13 species: Archae - 0; Bacteria - 0; Metazoa - 0; Fungi - 0; Plants - 49; Viruses - 0; Other Eukaryotes - 0 (source: NCBI BLINK).   chr1:30162034-30162999 FORWARD LENGTH=234                                                                                           | 199  | 234 | 5.00E-59  | 117.6 | 68.8 | 80.9 |
| Rsa1.0_01390.1.g26342.t1  | emb CCD74552.1  predicted protein [Arabidopsis halleri subsp. halleri]                                                                                                                                                                                                                                                                                                                                                                                                                                                                                                                                                                                                                                                                                                                                                                                                                                                                                              | 268  | 249 | 5.00E-58  | 92.9  | 44.8 | 54.9 | predicted protein                                | gbpln | Arabidopsis halleri  | AT1G15430.2   Symbols:   Protein of unknown function (DUF1644)   chr1:5305011-5305790 FORWARD LENGTH=259                                                                                                                                                                                                                                                                                                                                                                                                                                                   | 268  | 259 | 1.00E-51  | 96.6  | 37.7 | 47.0 |
| Rsa1.0_01390.1.g26343.t17 | ref XP_002889303.1  hypothetical protein ARALYDRAFT_316935 [Arabidopsis lyrata subsp. lyrata]<br>gi 297335144 gb EFH65562.1  hypothetical protein ARALYDRAFT_316935 [Arabidopsis lyrata subsp. lyrata]                                                                                                                                                                                                                                                                                                                                                                                                                                                                                                                                                                                                                                                                                                                                                              | 170  | 137 | 5.00E-36  | 80.6  | 47.6 | 52.4 | hypothetical protein ARALYDRAFT_316935           | gbpln | Arabidopsis lyrata   | AT1G80245.3   Symbols:   Spc97 / Spc98 family of spindle pole body (SBP) component   chr1:30174547-30175217 FORWARD LENGTH=127                                                                                                                                                                                                                                                                                                                                                                                                                             | 170  | 127 | 3.00E-37  | 74.7  | 47.1 | 52.4 |
| Rsa1.0_01390.1.g26344.t1  | ref XP_002887837.1  hydrolase, alpha/beta fold family protein [Arabidopsis lyrata subsp. lyrata]<br>gi 297333678 gb EFH64096.1  hydrolase, alpha/beta fold family protein [Arabidopsis lyrata subsp. lyrata]<br>ref NP_179573.1  vacuolar protein sorting-associated protein 32-1 [Arabidopsis thaliana]<br>gi 75100551 sp O82197.1 VP321_ARATH RecName: Full=Vacuolar protein sorting-associated protein 32 homolog 1; Short=AtVPS32-1; AltName: Full=Charged multivesicular body protein 4 homolog 1; AltName: Full=ESCRT-III complex subunit VPS32 homolog 1   gi 3687235 gb AAC62133.1  copia-like retroelement pol polyprotein [Arabidopsis thaliana]<br>gi 15028177 gb AAK76585.1  putative copia retroelement pol polyprotein [Arabidopsis thaliana]<br>gi 19310843 gb AAL85152.1  putative copia retroelement pol polyprotein [Arabidopsis thaliana]<br>gi 330251837 gb AEC06931.1  vacuolar protein sorting-associated protein 32-1 [Arabidopsis thaliana] | 613  | 639 | 0         | 104.2 | 80.3 | 87.9 | hydrolase, alpha/beta fold family protein        | gbpln | Arabidopsis lyrata   | AT1G80280.1   Symbols:   alpha/beta-Hydrolases superfamily protein   chr1:30183839-30186141 REVERSE LENGTH=647                                                                                                                                                                                                                                                                                                                                                                                                                                             | 613  | 647 | 0         | 105.5 | 82.2 | 89.4 |
| Rsa1.0_01391.1.g26345.t1  | ref NP_179573.1  vacuolar protein sorting-associated protein 32-1 [Arabidopsis thaliana]<br>gi 75100551 sp O82197.1 VP321_ARATH RecName: Full=Vacuolar protein sorting-associated protein 32 homolog 1; Short=AtVPS32-1; AltName: Full=Charged multivesicular body protein 4 homolog 1; AltName: Full=ESCRT-III complex subunit VPS32 homolog 1   gi 3687235 gb AAC62133.1  copia-like retroelement pol polyprotein [Arabidopsis thaliana]<br>gi 15028177 gb AAK76585.1  putative copia retroelement pol polyprotein [Arabidopsis thaliana]<br>gi 19310843 gb AAL85152.1  putative copia retroelement pol polyprotein [Arabidopsis thaliana]<br>gi 330251837 gb AEC06931.1  vacuolar protein sorting-associated protein 32-1 [Arabidopsis thaliana]                                                                                                                                                                                                                 | 214  | 213 | 1.00E-72  | 99.5  | 75.2 | 87.9 | vacuolar protein sorting-associated protein 32-1 | gbpln | Arabidopsis thaliana | AT2G19830.1   Symbols:   SNF7.2, VPS32   SNF7 family protein   chr2:8558101-8559389 REVERSE LENGTH=213                                                                                                                                                                                                                                                                                                                                                                                                                                                     | 214  | 213 | 4.00E-75  | 99.5  | 75.2 | 87.9 |

|                          |                                                                                                                                                                                                     |      |      |           |       |      |      |                                                     |       |                         |                                                                                                                                                                                                                                                                                                                                                                                                                                                                                                             |      |      |           |       |      |      |
|--------------------------|-----------------------------------------------------------------------------------------------------------------------------------------------------------------------------------------------------|------|------|-----------|-------|------|------|-----------------------------------------------------|-------|-------------------------|-------------------------------------------------------------------------------------------------------------------------------------------------------------------------------------------------------------------------------------------------------------------------------------------------------------------------------------------------------------------------------------------------------------------------------------------------------------------------------------------------------------|------|------|-----------|-------|------|------|
| Rsa1.0_01391.1.g26346.t1 | emb[CAB41922.1] putative protein (possibly fragment) [Arabidopsis thaliana] gi 7268014 emb[CAB78354.1] putative protein (possibly fragment) [Arabidopsis thaliana]                                  | 781  | 770  | 1.00E-139 | 98.6  | 31.1 | 40.2 | putative protein (possibly fragment)                | gbpln | Arabidopsis thaliana    | AT3G42170.1   Symbols:   BED zinc finger ;hAT family dimerisation domain   chr3:14321838-14323928 FORWARD LENGTH=696                                                                                                                                                                                                                                                                                                                                                                                        | 781  | 696  | 9.00E-36  | 89.1  | 15.5 | 26.6 |
| Rsa1.0_01391.1.g26347.t1 | dbj BAJ34229.1  unnamed protein product [Thellungiella halophila]                                                                                                                                   | 356  | 359  | 1.00E-180 | 100.8 | 88.8 | 91.3 | unnamed protein product                             | ----  | ----                    | AT2G19810.1   Symbols:   CCH-type zinc finger family protein   chr2:8550419-8551498 FORWARD LENGTH=359                                                                                                                                                                                                                                                                                                                                                                                                      | 356  | 359  | 1.00E-156 | 100.8 | 80.6 | 87.9 |
| Rsa1.0_01391.1.g26348.t1 | gb AAC33226.1  putative non-LTR retroelement reverse transcriptase [Arabidopsis thaliana]                                                                                                           | 365  | 1529 | 2.00E-42  | 418.9 | 26.6 | 39.2 | putative non-LTR retroelement reverse transcriptase | gbpln | Arabidopsis thaliana    | AT5G18880.1   Symbols:   RNA-directed DNA polymerase (reverse transcriptase)-related family protein   chr5:6300535-6301422 REVERSE LENGTH=295                                                                                                                                                                                                                                                                                                                                                               | 365  | 295  | 2.00E-35  | 80.8  | 22.7 | 33.7 |
| Rsa1.0_01391.1.g26349.t1 | #                                                                                                                                                                                                   | #    | #    | #         | #     | #    | #    | -                                                   | ----  | ----                    | #                                                                                                                                                                                                                                                                                                                                                                                                                                                                                                           | #    | #    | #         | #     | #    | #    |
| Rsa1.0_01391.1.g26350.t1 | gb ABD65090.1  hypothetical protein 27.t00116 [Brassica oleracea]                                                                                                                                   | 185  | 484  | 7.00E-31  | 261.6 | 34.6 | 43.8 | hypothetical protein 27.t00116                      | gbpln | Brassica oleracea       | #                                                                                                                                                                                                                                                                                                                                                                                                                                                                                                           | #    | #    | #         | #     | #    | #    |
| Rsa1.0_01392.1.g26351.t1 | #                                                                                                                                                                                                   | #    | #    | #         | #     | #    | #    | -                                                   | ----  | ----                    | #                                                                                                                                                                                                                                                                                                                                                                                                                                                                                                           | #    | #    | #         | #     | #    | #    |
| Rsa1.0_01392.1.g26352.t5 | gb ABH07409.1  putative pol polyprotein [Brassica oleracea var. botrytis]                                                                                                                           | 815  | 1239 | 1.00E-128 | 152.0 | 32.3 | 42.8 | putative pol polyprotein                            | gbpln | Brassica oleracea       | #                                                                                                                                                                                                                                                                                                                                                                                                                                                                                                           | #    | #    | #         | #     | #    | #    |
| Rsa1.0_01392.1.g26353.t1 | emb CAM31954.1  glucosyltransferase [Brassica napus]                                                                                                                                                | 483  | 482  | 0         | 99.8  | 94.2 | 96.7 | glucosyltransferase                                 | gbpln | Brassica napus          | AT4G01070.1   Symbols: GT72B1, UGT72B1   UDP-Glycosyltransferase superfamily protein   chr4:461858-463300 REVERSE LENGTH=480                                                                                                                                                                                                                                                                                                                                                                                | 483  | 480  | 0         | 99.4  | 82.0 | 89.9 |
| Rsa1.0_01392.1.g26354.t3 | gb AAF18630.1 AC006228.1 F5J5.1 [Arabidopsis thaliana]                                                                                                                                              | 462  | 1463 | 2.00E-32  | 316.7 | 30.3 | 47.0 | F5J5.1                                              | gbpln | Arabidopsis thaliana    | #                                                                                                                                                                                                                                                                                                                                                                                                                                                                                                           | #    | #    | #         | #     | #    | #    |
| Rsa1.0_01392.1.g26355.t8 | gb AAZ41811.1  O1P13-1 [Brassica rapa subsp. pekinensis]                                                                                                                                            | 1209 | 1545 | 0         | 127.8 | 63.6 | 76.8 | O1P13-1                                             | gbpln | Brassica rapa           | AT4G23160.1   Symbols: CRK8   cysteine-rich RLK (RECEPTOR-like protein kinase) 8   chr4:12129485-12134086 FORWARD LENGTH=1262                                                                                                                                                                                                                                                                                                                                                                               | 1209 | 1262 | 3.00E-78  | 104.4 | 14.5 | 20.3 |
| Rsa1.0_01392.1.g26356.t1 | #                                                                                                                                                                                                   | #    | #    | #         | #     | #    | #    | -                                                   | ----  | ----                    | #                                                                                                                                                                                                                                                                                                                                                                                                                                                                                                           | #    | #    | #         | #     | #    | #    |
| Rsa1.0_01392.1.g26357.t1 | #                                                                                                                                                                                                   | #    | #    | #         | #     | #    | #    | -                                                   | ----  | ----                    | #                                                                                                                                                                                                                                                                                                                                                                                                                                                                                                           | #    | #    | #         | #     | #    | #    |
| Rsa1.0_01392.1.g26358.t2 | gb ABD65035.1  hypothetical protein 26.t00052 [Brassica oleracea]                                                                                                                                   | 536  | 695  | 3.00E-84  | 129.7 | 35.4 | 43.8 | hypothetical protein 26.t00052                      | gbpln | Brassica oleracea       | AT4G03830.1   Symbols:   Protein of unknown function, DUF601   chr4:1790440-1792458 FORWARD LENGTH=578                                                                                                                                                                                                                                                                                                                                                                                                      | 536  | 578  | 2.00E-12  | 107.8 | 5.2  | 7.8  |
| Rsa1.0_01392.1.g26359.t1 | gb AAD2283.1  putative retroelement pol polyprotein [Arabidopsis thaliana]                                                                                                                          | 684  | 1787 | 1.00E-156 | 261.3 | 44.9 | 59.9 | putative retroelement pol polyprotein               | gbpln | Arabidopsis thaliana    | #                                                                                                                                                                                                                                                                                                                                                                                                                                                                                                           | #    | #    | #         | #     | #    | #    |
| Rsa1.0_01393.1.g26360.t1 | gb ACP30573.1  disease resistance protein [Brassica rapa subsp. pekinensis]                                                                                                                         | 181  | 1038 | 4.00E-12  | 573.5 | 41.4 | 47.5 | disease resistance protein                          | gbpln | Brassica rapa           | #                                                                                                                                                                                                                                                                                                                                                                                                                                                                                                           | #    | #    | #         | #     | #    | #    |
| Rsa1.0_01393.1.g26361.t1 | ref XP_002892277.1  TraB family protein [Arabidopsis lyrata subsp. lyrata] gi 297338119 gb EFH68536.1  TraB family protein [Arabidopsis lyrata subsp. lyrata]                                       | 110  | 372  | 5.00E-42  | 338.2 | 71.8 | 92.7 | TraB family protein                                 | gbpln | Arabidopsis lyrata      | AT1G05270.1   Symbols:   TraB family protein   chr1:1531806-1534305 REVERSE LENGTH=371                                                                                                                                                                                                                                                                                                                                                                                                                      | 110  | 371  | 3.00E-43  | 337.3 | 68.2 | 92.7 |
| Rsa1.0_01393.1.g26362.t1 | gb AAT72298.1  CBRCI35 [Capsella bursa-pastoris]                                                                                                                                                    | 326  | 326  | 1.00E-178 | 100.0 | 91.4 | 96.6 | CBRCI35                                             | gbpln | Capsella bursa-pastoris | AT1G05260.1   Symbols: RC13, RC13A   Peroxidase superfamily protein   chr1:1529827-1531271 FORWARD LENGTH=326                                                                                                                                                                                                                                                                                                                                                                                               | 326  | 326  | 1.00E-178 | 100.0 | 90.2 | 96.0 |
| Rsa1.0_01393.1.g26363.t1 | #                                                                                                                                                                                                   | #    | #    | #         | #     | #    | #    | -                                                   | ----  | ----                    | #                                                                                                                                                                                                                                                                                                                                                                                                                                                                                                           | #    | #    | #         | #     | #    | #    |
| Rsa1.0_01393.1.g26364.t1 | gb EOA39455.1  hypothetical protein CARUB_v10012652mg [Capsella rubella]                                                                                                                            | 340  | 320  | 1.00E-135 | 94.1  | 68.8 | 81.2 | hypothetical protein CARUB_v10012652mg              | gbpln | Capsella rubella        | AT1G05250.1   Symbols:   Peroxidase superfamily protein   chr1:1525924-1527169 REVERSE LENGTH=325                                                                                                                                                                                                                                                                                                                                                                                                           | 340  | 325  | 1.00E-124 | 95.6  | 61.2 | 72.9 |
| Rsa1.0_01393.1.g26365.t1 | gb EOA39455.1  hypothetical protein CARUB_v10012652mg [Capsella rubella]                                                                                                                            | 321  | 320  | 1.00E-164 | 99.7  | 88.5 | 92.8 | hypothetical protein CARUB_v10012652mg              | gbpln | Capsella rubella        | AT1G05250.1   Symbols:   Peroxidase superfamily protein   chr1:1525924-1527169 REVERSE LENGTH=325                                                                                                                                                                                                                                                                                                                                                                                                           | 321  | 325  | 1.00E-137 | 101.2 | 76.3 | 86.6 |
| Rsa1.0_01393.1.g26366.t2 | emb CAB39638.1  RNA-directed DNA polymerase-like protein [Arabidopsis thaliana] gi 7267666 emb CAB78094.1  RNA-directed DNA polymerase-like protein [Arabidopsis thaliana]                          | 2437 | 1274 | 0         | 52.3  | 26.1 | 34.9 | RNA-directed DNA polymerase-like protein            | gbpln | Arabidopsis thaliana    | AT2G34090.2   Symbols: MEE18   maternal effect embryo arrest 18   chr2:14396283-14399170 REVERSE LENGTH=471                                                                                                                                                                                                                                                                                                                                                                                                 | 2437 | 471  | 1.00E-130 | 19.3  | 9.8  | 10.2 |
| Rsa1.0_01393.1.g26367.t1 | ref XP_002881322.1  hypothetical protein ARALYDRAFT_321134 [Arabidopsis lyrata subsp. lyrata] gi 297327161 gb EFH57581.1  hypothetical protein ARALYDRAFT_321134 [Arabidopsis lyrata subsp. lyrata] | 342  | 345  | 9.00E-14  | 100.9 | 19.6 | 23.7 | hypothetical protein ARALYDRAFT_321134              | gbpln | Arabidopsis lyrata      | AT2G34100.2   Symbols:   unknown protein; FUNCTIONS IN: molecular function unknown; INVOLVED IN: biological process unknown; LOCATED IN: cellular component unknown; EXPRESSED IN: sperm cell, flower; EXPRESSED DURING: petal differentiation and expansion stage; Has 10185 Blast hits to 4535 proteins in 413 species: Archae - 41; Bacteria - 4951; Metazoa - 1579; Fungi - 1007; Plants - 277; Viruses - 100; Other Eukaryotes - 230 (source: NCBI BLINK).   chr2:14399705-14401655 REVERSE LENGTH=345 | 342  | 345  | 2.00E-15  | 100.9 | 9.9  | 12.0 |



|                           |                                                                                                                                                                                                                                                                                                                                       |      |      |           |       |      |      |                                                     |             |                      |                                                                                                                                                                                                                                                                                                                                             |      |      |          |       |      |      |
|---------------------------|---------------------------------------------------------------------------------------------------------------------------------------------------------------------------------------------------------------------------------------------------------------------------------------------------------------------------------------|------|------|-----------|-------|------|------|-----------------------------------------------------|-------------|----------------------|---------------------------------------------------------------------------------------------------------------------------------------------------------------------------------------------------------------------------------------------------------------------------------------------------------------------------------------------|------|------|----------|-------|------|------|
| Rsa1.0_01393.1.g26368.t1  | ref XP_002883131.1  calcium-binding EF hand family protein [Arabidopsis lyrata subsp. lyrata]<br>gi 297328971 gb EFH59390.1  calcium-binding EF hand family protein [Arabidopsis lyrata subsp. lyrata]                                                                                                                                | 175  | 175  | 3.00E-88  | 100.0 | 91.4 | 97.1 | calcium-binding EF hand family protein              | gbpln       | Arabidopsis lyrata   | AT3G18430.2   Symbols:   Calcium-binding EF-hand family protein   chr3:6326180-6327476 FORWARD LENGTH=175                                                                                                                                                                                                                                   | 175  | 175  | 2.00E-90 | 100.0 | 90.9 | 97.1 |
| Rsa1.0_01393.1.g26369.t1  | ref XP_002881325.1  predicted protein [Arabidopsis lyrata subsp. lyrata]<br>gi 297327164 gb EFH57584.1  predicted protein [Arabidopsis lyrata subsp. lyrata]                                                                                                                                                                          | 155  | 802  | 3.00E-43  | 517.4 | 61.3 | 64.5 | predicted protein                                   | gbpln       | Arabidopsis lyrata   | AT2G34150.1   Symbols:   ATRANGAP2, ATSCAR1, SCAR1, WAVE1   SCAR family protein   chr2:14419432-14422361 REVERSE LENGTH=700                                                                                                                                                                                                                 | 155  | 700  | 5.00E-43 | 451.6 | 58.7 | 61.9 |
| Rsa1.0_01394.1.g26370.t1  | gb EOA18841.1  hypothetical protein CARUB_v10007463mg [Capsella rubella]                                                                                                                                                                                                                                                              | 386  | 382  | 0         | 99.0  | 86.3 | 90.9 | hypothetical protein CARUB_v10007463mg              | gbpln       | Capsella rubella     | AT4G12840.2   Symbols:   Protein of unknown function (DUF707)   chr4:7533621-7536263 REVERSE LENGTH=395                                                                                                                                                                                                                                     | 386  | 395  | 0        | 102.3 | 85.0 | 91.7 |
| Rsa1.0_01394.1.g26371.t1  | ref NP_567394.1  hydrolase, alpha/beta fold family protein [Arabidopsis thaliana]<br>gi 15912319 gb AAL08293.1  AT4g12830/T20K19_180 [Arabidopsis thaliana]<br>gi 19699240 gb AAL90986.1  AT4g12830/T20K19_180 [Arabidopsis thaliana]<br>gi 332657790 gb AEE83190.1  hydrolase, alpha/beta fold family protein [Arabidopsis thaliana] | 393  | 393  | 0         | 100.0 | 89.6 | 94.7 | hydrolase, alpha/beta fold family protein           | gbpln       | Arabidopsis thaliana | AT4G12830.1   Symbols:   alpha/beta-Hydrolases superfamily protein   chr4:7531189-7533327 FORWARD LENGTH=393                                                                                                                                                                                                                                | 393  | 393  | 0        | 100.0 | 89.6 | 94.7 |
| Rsa1.0_01394.1.g26372.t2  | #                                                                                                                                                                                                                                                                                                                                     | #    | #    | #         | #     | #    | #    | -                                                   | ----        | ----                 | #                                                                                                                                                                                                                                                                                                                                           | #    | #    | #        | #     | #    |      |
| Rsa1.0_01394.1.g26373.t1  | gb ACG24344.1  photosystem I reaction center subunit XI [Zea mays]                                                                                                                                                                                                                                                                    | 219  | 219  | 1.00E-100 | 100.0 | 91.3 | 95.9 | photosystem I reaction center subunit XI            | gbenv/gbpln | Zea mays             | AT4G12800.1   Symbols:   PSAL   photosystem I subunit I   chr4:7521469-7522493 FORWARD LENGTH=219                                                                                                                                                                                                                                           | 219  | 219  | 3.00E-96 | 100.0 | 91.8 | 96.3 |
| Rsa1.0_01394.1.g26374.t2  | gb AAD36941.1 AF069441.1 hypothetical protein [Arabidopsis thaliana]<br>gi 7267197 emb CAB77908.1  hypothetical protein [Arabidopsis thaliana]                                                                                                                                                                                        | 353  | 735  | 3.00E-25  | 208.2 | 18.4 | 25.8 | hypothetical protein                                | gbpln       | Arabidopsis thaliana | AT2G06420.1   Symbols:   Domain of unknown function (DUF1985)   chr2:2539083-2539985 FORWARD LENGTH=249                                                                                                                                                                                                                                     | 353  | 249  | 6.00E-18 | 70.5  | 12.7 | 16.4 |
| Rsa1.0_01394.1.g26375.t1  | gb AAC34356.1  Hypothetical protein [Arabidopsis thaliana]                                                                                                                                                                                                                                                                            | 188  | 1250 | 9.00E-59  | 664.9 | 58.5 | 61.7 | Hypothetical protein                                | gbpln       | Arabidopsis thaliana | AT1G77260.1   Symbols:   S-adenosyl-L-methionine-dependent methyltransferases superfamily protein   chr1:29023961-29026699 REVERSE LENGTH=655                                                                                                                                                                                               | 188  | 655  | 1.00E-60 | 348.4 | 58.5 | 61.7 |
| Rsa1.0_01394.1.g26376.t1  | #                                                                                                                                                                                                                                                                                                                                     | #    | #    | #         | #     | #    | #    | -                                                   | ----        | ----                 | #                                                                                                                                                                                                                                                                                                                                           | #    | #    | #        | #     | #    |      |
| Rsa1.0_01394.1.g26377.t1  | emb CAN79264.1  hypothetical protein VITISV_034881 [Vitis vinifera]                                                                                                                                                                                                                                                                   | 689  | 1360 | 1.00E-122 | 197.4 | 37.7 | 49.6 | hypothetical protein VITISV_034881                  | gbpln       | Vitis vinifera       | AT4G23160.1   Symbols:   CRK8   cysteine-rich RLK (RECEPTOR-like protein kinase) 8   chr4:12129485-12134086 FORWARD LENGTH=1262                                                                                                                                                                                                             | 689  | 1262 | 1.00E-23 | 183.2 | 8.4  | 14.2 |
| Rsa1.0_01394.1.g26378.t1  | gb AAG51783.1 AC079679_3 reverse transcriptase, putative; 16838-20266 [Arabidopsis thaliana]                                                                                                                                                                                                                                          | 158  | 1142 | 7.00E-26  | 722.8 | 41.1 | 57.0 | reverse transcriptase, putative; 16838-20266        | gbpln       | Arabidopsis thaliana | AT3G32050.1   Symbols:   unknown protein; BEST Arabidopsis thaliana protein match is: unknown protein (TAIR:AT3G14780.1); Has 22 Blast hits to 22 proteins in 2 species: Archae - 0; Bacteria - 0; Metazoa - 0; Fungi - 0; Plants - 22; Viruses - 0; Other Eukaryotes - 0 (source: NCBI BLink).   chr3:13067626-13068582 REVERSE LENGTH=175 | 158  | 175  | 8.00E-11 | 110.8 | 17.7 | 22.2 |
| Rsa1.0_01395.1.g26379.t1  | gb AAC33226.1  putative non-LTR retroelement reverse transcriptase [Arabidopsis thaliana]                                                                                                                                                                                                                                             | 1438 | 1529 | 0         | 106.3 | 42.8 | 58.6 | putative non-LTR retroelement reverse transcriptase | gbpln       | Arabidopsis thaliana | AT3G24255.1   Symbols:   RNA-directed DNA polymerase (reverse transcriptase)-related family protein   chr3:8789471-8793208 FORWARD LENGTH=746                                                                                                                                                                                               | 1438 | 746  | 3.00E-87 | 51.9  | 12.2 | 15.9 |
| Rsa1.0_01395.1.g26380.t1  | #                                                                                                                                                                                                                                                                                                                                     | #    | #    | #         | #     | #    | #    | -                                                   | ----        | ----                 | #                                                                                                                                                                                                                                                                                                                                           | #    | #    | #        | #     | #    |      |
| Rsa1.0_01395.1.g26381.t1  | gb EMJ11389.1  hypothetical protein PRUPE_ppa017790mg [Prunus persica]                                                                                                                                                                                                                                                                | 1422 | 1485 | 0         | 104.4 | 45.0 | 60.4 | hypothetical protein PRUPE_ppa017790mg              | gbpln       | Prunus persica       | ATMG00860.1   Symbols:   ORF158   DNA/RNA polymerases superfamily protein   chrM:235916-236392 FORWARD LENGTH=158                                                                                                                                                                                                                           | 1422 | 158  | 5.00E-26 | 11.1  | 3.5  | 5.7  |
| Rsa1.0_01395.1.g26382.t1  | #                                                                                                                                                                                                                                                                                                                                     | #    | #    | #         | #     | #    | #    | -                                                   | ----        | ----                 | #                                                                                                                                                                                                                                                                                                                                           | #    | #    | #        | #     | #    |      |
| Rsa1.0_01396.1.g26383.t16 | ref XP_002891633.1  armadillo/beta-catenin repeat family protein [Arabidopsis lyrata subsp. lyrata]<br>gi 297337475 gb EFH67892.1  armadillo/beta-catenin repeat family protein [Arabidopsis lyrata subsp. lyrata]                                                                                                                    | 748  | 666  | 0         | 89.0  | 74.9 | 79.7 | armadillo/beta-catenin repeat family protein        | gbpln       | Arabidopsis lyrata   | AT1G51350.1   Symbols:   ARM repeat superfamily protein   chr1:19035851-19038738 FORWARD LENGTH=666                                                                                                                                                                                                                                         | 748  | 666  | 0        | 89.0  | 74.1 | 79.4 |
| Rsa1.0_01396.1.g26384.t1  | #                                                                                                                                                                                                                                                                                                                                     | #    | #    | #         | #     | #    | #    | -                                                   | ----        | ----                 | #                                                                                                                                                                                                                                                                                                                                           | #    | #    | #        | #     | #    |      |
| Rsa1.0_01396.1.g26385.t1  | gb AFL91695.1  RNA binding protein [Raphanus sativus var. raphanistroides]                                                                                                                                                                                                                                                            | 99   | 200  | 2.00E-35  | 202.0 | 76.8 | 83.8 | RNA binding protein                                 | gbpln       | Raphanus sativus     | AT1G51510.1   Symbols:   Y14   RNA-binding (RRM/RBD/RNP motifs) family protein   chr1:19103072-19104753 REVERSE LENGTH=202                                                                                                                                                                                                                  | 99   | 202  | 2.00E-34 | 204.0 | 72.7 | 82.8 |

|                          |                                                                                                                                                                                                                                                                                                                                                                                                                                                                                                                                                                                                                                                       |     |     |           |       |      |      |                                                           |       |                      |                                                                                                                                 |     |     |           |       |      |      |
|--------------------------|-------------------------------------------------------------------------------------------------------------------------------------------------------------------------------------------------------------------------------------------------------------------------------------------------------------------------------------------------------------------------------------------------------------------------------------------------------------------------------------------------------------------------------------------------------------------------------------------------------------------------------------------------------|-----|-----|-----------|-------|------|------|-----------------------------------------------------------|-------|----------------------|---------------------------------------------------------------------------------------------------------------------------------|-----|-----|-----------|-------|------|------|
| Rsa1.0_01396.1.g26386.t6 | refNP_197352.1  Aminotransferase-like, plant mobile domain family protein [Arabidopsis thaliana] gi 91805645 gb ABE65551.1  hypothetical protein AT518510 [Arabidopsis thaliana] gi 332005190 gb AED92573.1  Aminotransferase-like, plant mobile domain family protein [Arabidopsis thaliana]                                                                                                                                                                                                                                                                                                                                                         | 271 | 702 | 5.00E-22  | 259.0 | 24.0 | 28.4 | Aminotransferase-like, plant mobile domain family protein | gbpln | Arabidopsis thaliana | AT5G18510.1   Symbols:   Aminotransferase-like, plant mobile domain family protein   chr:5:6141778-6143886 REVERSE LENGTH=702   | 271 | 702 | 1.00E-24  | 259.0 | 24.0 | 28.4 |
| Rsa1.0_01396.1.g26387.t1 | refNP_175494.1  Plant mobile domain protein family [Arabidopsis thaliana] gi 12321786 gb AG50928.1 AC079284.3 hypothetical protein [Arabidopsis thaliana] gi 91805349 gb ABE65404.1  hypothetical protein At1g50790 [Arabidopsis thaliana] gi 332194470 gb AEE32591.1  Plant mobile domain protein family [Arabidopsis thaliana]                                                                                                                                                                                                                                                                                                                      | 765 | 812 | 1.00E-167 | 106.1 | 45.6 | 59.0 | Plant mobile domain protein family                        | gbpln | Arabidopsis thaliana | AT1G50790.1   Symbols:   Plant mobile domain protein family   chr:1:18824050-18826488 REVERSE LENGTH=812                        | 765 | 812 | 1.00E-169 | 106.1 | 45.6 | 59.0 |
| Rsa1.0_01396.1.g26388.t1 | gb EOA39656.1  hypothetical protein CARUB_v10008295mg [Capsella rubella]                                                                                                                                                                                                                                                                                                                                                                                                                                                                                                                                                                              | 205 | 850 | 1.00E-25  | 414.6 | 30.2 | 38.5 | hypothetical protein CARUB_v10008295mg                    | gbpln | Capsella rubella     | AT4G16050.1   Symbols:   Aminotransferase-like, plant mobile domain family protein   chr:4:9092243-9094243 FORWARD LENGTH=666   | 205 | 666 | 2.00E-27  | 324.9 | 44.4 | 58.0 |
| Rsa1.0_01396.1.g26389.t1 | gb EOA36539.1  hypothetical protein CARUB_v10011613mg [Capsella rubella]                                                                                                                                                                                                                                                                                                                                                                                                                                                                                                                                                                              | 880 | 545 | 1.00E-156 | 61.9  | 32.2 | 38.3 | hypothetical protein CARUB_v10011613mg                    | gbpln | Capsella rubella     | AT1G50820.1   Symbols:   Aminotransferase-like, plant mobile domain family protein   chr:1:18833275-18834861 REVERSE LENGTH=528 | 880 | 528 | 1.00E-156 | 60.0  | 32.5 | 40.3 |
| Rsa1.0_01396.1.g26390.t1 | gb EOA39011.1  hypothetical protein CARUB_v10011554mg, partial [Capsella rubella]                                                                                                                                                                                                                                                                                                                                                                                                                                                                                                                                                                     | 779 | 874 | 1.00E-154 | 112.2 | 42.0 | 57.3 | hypothetical protein CARUB_v10011554mg, partial           | gbpln | Capsella rubella     | AT1G50820.1   Symbols:   Aminotransferase-like, plant mobile domain family protein   chr:1:18833275-18834861 REVERSE LENGTH=528 | 779 | 528 | 1.00E-155 | 67.8  | 36.5 | 45.7 |
| Rsa1.0_01396.1.g26391.t1 | refXP_002894325.1  hypothetical protein ARALYDRAFT_474272 [Arabidopsis lyrata subsp. lyrata] gi 297340167 gb EFH70584.1  hypothetical protein ARALYDRAFT_474272 [Arabidopsis lyrata subsp. lyrata]                                                                                                                                                                                                                                                                                                                                                                                                                                                    | 562 | 560 | 0         | 99.6  | 91.1 | 95.2 | hypothetical protein ARALYDRAFT_474272                    | gbpln | Arabidopsis lyrata   | AT1G51590.1   Symbols: MNS1, MANIB   alpha-mannosidase 1   chr:1:19128315-19132132 REVERSE LENGTH=560                           | 562 | 560 | 0         | 99.6  | 91.1 | 94.1 |
| Rsa1.0_01396.1.g26392.t1 | #                                                                                                                                                                                                                                                                                                                                                                                                                                                                                                                                                                                                                                                     | #   | #   | #         | #     | #    | -    | -                                                         | ----  | ----                 | AT1G51600.2   Symbols: ZML2, TIFY2A, GAT28   ZIM-LIKE 2   chr:1:19133176-19135252 FORWARD LENGTH=302                            | 64  | 302 | 1.00E-11  | 471.9 | 56.3 | 60.9 |
| Rsa1.0_01396.1.g26393.t1 | gb EOA37777.1  hypothetical protein CARUB_v10012642mg [Capsella rubella]                                                                                                                                                                                                                                                                                                                                                                                                                                                                                                                                                                              | 798 | 457 | 0         | 57.3  | 44.2 | 46.0 | hypothetical protein CARUB_v10012642mg                    | gbpln | Capsella rubella     | AT1G51610.1   Symbols:   Cation efflux family protein   chr:1:19136625-19139621 FORWARD LENGTH=457                              | 798 | 457 | 0         | 57.3  | 43.4 | 45.6 |
| Rsa1.0_01396.1.g26394.t1 | gb EOA40507.1  hypothetical protein CARUB_v10009235mg [Capsella rubella]                                                                                                                                                                                                                                                                                                                                                                                                                                                                                                                                                                              | 418 | 423 | 0         | 101.2 | 92.8 | 96.2 | hypothetical protein CARUB_v10009235mg                    | gbpln | Capsella rubella     | AT1G51630.1   Symbols:   O-fucosyltransferase family protein   chr:1:19142141-19144082 REVERSE LENGTH=423                       | 418 | 423 | 0         | 101.2 | 92.3 | 95.7 |
| Rsa1.0_01397.1.g26395.t1 | refNP_173534.1  O-methyltransferase-like protein [Arabidopsis thaliana] gi 8886991 gb AAF80651.1 AC012190.7 Contains similarity to O-Methyltransferase 1 from Arabidopsis thaliana gb U70424. It is a member of O-methyltransferase family. ESTs gb A1994826, gb N65066 and gb N38589 come from this gene [Arabidopsis thaliana] gi 12744975 gb AAK06867.1 AF344316.1 putative O-methyltransferase [Arabidopsis thaliana] gi 15982844 gb AAL09769.1  At1g21100.T2211.7 [Arabidopsis thaliana] gi 23505107 gb AAN28913.1  At1g21100.T2211.7 [Arabidopsis thaliana] gi 332191943 gb AEE30064.1  O-methyltransferase-like protein [Arabidopsis thaliana] | 278 | 373 | 2.33E-156 | 134.2 | 93.2 | 96.0 | O-methyltransferase-like protein                          | gbpln | Arabidopsis thaliana | AT1G21100.1   Symbols:   O-methyltransferase family protein   chr:1:7386991-7388318 REVERSE LENGTH=373                          | 278 | 373 | 1.00E-148 | 134.2 | 93.2 | 96.0 |
| Rsa1.0_01397.1.g26396.t1 | refXP_002893153.1  hypothetical protein ARALYDRAFT_472352 [Arabidopsis lyrata subsp. lyrata] gi 297338895 gb EFH69412.1  hypothetical protein ARALYDRAFT_472352 [Arabidopsis lyrata subsp. lyrata]                                                                                                                                                                                                                                                                                                                                                                                                                                                    | 326 | 373 | 1.00E-165 | 114.4 | 89.0 | 92.3 | hypothetical protein ARALYDRAFT_472352                    | gbpln | Arabidopsis lyrata   | AT1G21100.1   Symbols:   O-methyltransferase family protein   chr:1:7386991-7388318 REVERSE LENGTH=373                          | 326 | 373 | 1.00E-167 | 114.4 | 87.7 | 91.7 |

|                          |                                                                                                                                                                                                                                                                                                                                                                                                                                                                                                                                                                                                                                                                                                                                                                                                                                                                                                                                                                                                                                                                                                                                                                                                                                                                                                                                                                                                                                                             |      |      |           |       |      |      |                                                                      |       |                      |                                                                                                                                                                                                                                                                                                                                                                                                                                          |      |      |           |       |      |      |
|--------------------------|-------------------------------------------------------------------------------------------------------------------------------------------------------------------------------------------------------------------------------------------------------------------------------------------------------------------------------------------------------------------------------------------------------------------------------------------------------------------------------------------------------------------------------------------------------------------------------------------------------------------------------------------------------------------------------------------------------------------------------------------------------------------------------------------------------------------------------------------------------------------------------------------------------------------------------------------------------------------------------------------------------------------------------------------------------------------------------------------------------------------------------------------------------------------------------------------------------------------------------------------------------------------------------------------------------------------------------------------------------------------------------------------------------------------------------------------------------------|------|------|-----------|-------|------|------|----------------------------------------------------------------------|-------|----------------------|------------------------------------------------------------------------------------------------------------------------------------------------------------------------------------------------------------------------------------------------------------------------------------------------------------------------------------------------------------------------------------------------------------------------------------------|------|------|-----------|-------|------|------|
| Rsa1.0_01397.1.g26397.t1 | refNP_173536.1   O-methyltransferase family protein [Arabidopsis thaliana] gi 8886989 gb AAF80649.1 AC012190.5 Contains similarity to O-Methyltransferase 1 from Arabidopsis thaliana gb U70424. It is a member of O-methyltransferase family. ESTs gb A1993288 and gb Z18076 come from this gene [Arabidopsis thaliana] gi 12744973 gb AAK06866.1 AF344315.1 putative ATPase [Arabidopsis thaliana] gi 332191945 gb AEE30066.1   O-methyltransferase family protein [Arabidopsis thaliana] ref NP_189952.1  vacuolar iron transporter-like protein [Arabidopsis thaliana] gi 75182792 sp O9M2C0.1 VITH4_ARAT H RecName: Full=Vacuolar iron transporter homolog 4; AltName: Full=Protein NODULIN-LIKE 4 gi 7362791 emb CAB83067.1  nodulin-like protein [Arabidopsis thaliana] gi 34365643 gb AAG5133.1  At3g43660 [Arabidopsis thaliana] gi 51970300 dbj BAD43842.1  nodulin-like protein [Arabidopsis thaliana] gi 332644295 gb AEE77816.1  vacuolar iron transporter homolog 4 [Arabidopsis thaliana] ref NP_173540.2  eukaryotic translation initiation factor 2-like protein [Arabidopsis thaliana] gi 225897954 dbj BAH30309.1  hypothetical protein [Arabidopsis thaliana] gi 332191950 gb AEE30071.1  eukaryotic translation initiation factor 2-like protein [Arabidopsis thaliana] gb EOA40426.1  hypothetical protein CARUB_v10009151mg [Capsella rubella] gi 482576240 gb EOA40427.1  hypothetical protein CARUB_v10009151mg [Capsella rubella] | 374  | 373  | 0         | 99.7  | 93.3 | 96.8 | O-methyltransferase family protein                                   | gbpln | Arabidopsis thaliana | AT1G21120.1   Symbols:   O-methyltransferase family protein   chr1:7395331-7396640 REVERSE LENGTH=373                                                                                                                                                                                                                                                                                                                                    | 374  | 373  | 0         | 99.7  | 93.3 | 96.8 |
| Rsa1.0_01397.1.g26398.t1 | ref NP_173540.2  eukaryotic translation initiation factor 2-like protein [Arabidopsis thaliana] gi 225897954 dbj BAH30309.1  hypothetical protein [Arabidopsis thaliana] gi 332191950 gb AEE30071.1  eukaryotic translation initiation factor 2-like protein [Arabidopsis thaliana] gb EOA40426.1  hypothetical protein CARUB_v10009151mg [Capsella rubella] gi 482576240 gb EOA40427.1  hypothetical protein CARUB_v10009151mg [Capsella rubella]                                                                                                                                                                                                                                                                                                                                                                                                                                                                                                                                                                                                                                                                                                                                                                                                                                                                                                                                                                                                          | 205  | 198  | 2.00E-82  | 96.6  | 75.1 | 83.4 | vacuolar iron transporter-like protein                               | gbpln | Arabidopsis thaliana | AT3G43660.1   Symbols:   Vacuolar iron transporter (VIT) family protein   chr3:15565332-1556928 FORWARD LENGTH=198                                                                                                                                                                                                                                                                                                                       | 205  | 198  | 6.00E-85  | 96.6  | 75.1 | 83.4 |
| Rsa1.0_01397.1.g26399.t1 | ref NP_173540.2  eukaryotic translation initiation factor 2-like protein [Arabidopsis thaliana] gi 225897954 dbj BAH30309.1  hypothetical protein [Arabidopsis thaliana] gi 332191950 gb AEE30071.1  eukaryotic translation initiation factor 2-like protein [Arabidopsis thaliana] gb EOA40426.1  hypothetical protein CARUB_v10009151mg [Capsella rubella] gi 482576240 gb EOA40427.1  hypothetical protein CARUB_v10009151mg [Capsella rubella]                                                                                                                                                                                                                                                                                                                                                                                                                                                                                                                                                                                                                                                                                                                                                                                                                                                                                                                                                                                                          | 1037 | 1092 | 0         | 105.3 | 66.1 | 79.1 | eukaryotic translation initiation factor 2-like protein              | gbpln | Arabidopsis thaliana | AT1G21160.1   Symbols:   eukaryotic translation initiation factor 2 (eIF-2) family protein   chr1:7408121-7412455 REVERSE LENGTH=1092                                                                                                                                                                                                                                                                                                    | 1037 | 1092 | 0         | 105.3 | 66.1 | 79.1 |
| Rsa1.0_01397.1.g26400.t1 | gb EOA40426.1  hypothetical protein CARUB_v10009151mg [Capsella rubella] gi 482576240 gb EOA40427.1  hypothetical protein CARUB_v10009151mg [Capsella rubella]                                                                                                                                                                                                                                                                                                                                                                                                                                                                                                                                                                                                                                                                                                                                                                                                                                                                                                                                                                                                                                                                                                                                                                                                                                                                                              | 345  | 442  | 1.00E-143 | 128.1 | 83.8 | 89.0 | hypothetical protein CARUB_v10009151mg                               | gbpln | Capsella rubella     | AT1G21200.1   Symbols:   sequence-specific DNA binding transcription factors   chr1:7421483-7422814 FORWARD LENGTH=443                                                                                                                                                                                                                                                                                                                   | 345  | 443  | 1.00E-140 | 128.4 | 82.9 | 87.8 |
| Rsa1.0_01397.1.g26401.t2 | gb EOA36812.1  hypothetical protein CARUB_v10008422mg [Capsella rubella]                                                                                                                                                                                                                                                                                                                                                                                                                                                                                                                                                                                                                                                                                                                                                                                                                                                                                                                                                                                                                                                                                                                                                                                                                                                                                                                                                                                    | 718  | 734  | 0         | 102.2 | 69.9 | 81.2 | hypothetical protein CARUB_v10008422mg                               | gbpln | Capsella rubella     | AT1G21250.1   Symbols: WAK1, PRO25   cell wall-associated kinase   chr1:7439512-7441892 FORWARD LENGTH=735<br>AT1G21280.1   Symbols:   CONTAINS InterPro DOMAIN/s: Retrotransposon gag protein (InterPro:IPR005162); Has 707 Blast hits to 705 proteins in 25 species: Archae - 0; Bacteria - 0; Metazoa - 4; Fungi - 0; Plants - 703; Viruses - 0; Other Eukaryotes - 0 (source: NCBI BLINK).   chr1:7447690-7448403 REVERSE LENGTH=237 | 718  | 735  | 0         | 102.4 | 68.8 | 80.8 |
| Rsa1.0_01397.1.g26402.t1 | gb AAS99677.1  At1g21220 [Arabidopsis thaliana] gi 48310400 gb AAT41813.1  At1g21220 [Arabidopsis thaliana]                                                                                                                                                                                                                                                                                                                                                                                                                                                                                                                                                                                                                                                                                                                                                                                                                                                                                                                                                                                                                                                                                                                                                                                                                                                                                                                                                 | 234  | 227  | 1.00E-76  | 97.0  | 60.7 | 76.1 | At1g21220                                                            | gbpln | Arabidopsis thaliana | AT1G21280.1   Symbols:   CONTAINS InterPro DOMAIN/s: Retrotransposon gag protein (InterPro:IPR005162); Has 707 Blast hits to 705 proteins in 25 species: Archae - 0; Bacteria - 0; Metazoa - 4; Fungi - 0; Plants - 703; Viruses - 0; Other Eukaryotes - 0 (source: NCBI BLINK).   chr1:7447690-7448403 REVERSE LENGTH=237                                                                                                               | 234  | 237  | 2.00E-66  | 101.3 | 53.0 | 68.4 |
| Rsa1.0_01397.1.g26403.t1 | gb EOA36812.1  hypothetical protein CARUB_v10008422mg [Capsella rubella]                                                                                                                                                                                                                                                                                                                                                                                                                                                                                                                                                                                                                                                                                                                                                                                                                                                                                                                                                                                                                                                                                                                                                                                                                                                                                                                                                                                    | 738  | 734  | 0         | 99.5  | 71.5 | 81.6 | hypothetical protein CARUB_v10008422mg                               | gbpln | Capsella rubella     | AT1G21230.1   Symbols: WAK5   wall associated kinase 5   chr1:7429980-7432346 FORWARD LENGTH=733                                                                                                                                                                                                                                                                                                                                         | 738  | 733  | 0         | 99.3  | 70.5 | 82.0 |
| Rsa1.0_01397.1.g26404.t1 | gb EOA19925.1  hypothetical protein CARUB_v10000175mg [Capsella rubella]                                                                                                                                                                                                                                                                                                                                                                                                                                                                                                                                                                                                                                                                                                                                                                                                                                                                                                                                                                                                                                                                                                                                                                                                                                                                                                                                                                                    | 149  | 896  | 2.00E-45  | 601.3 | 67.8 | 77.9 | hypothetical protein CARUB_v10000175mg                               | gbpln | Capsella rubella     | AT5G06220.1   Symbols:   LETM1-like protein   chr5:1880049-1885366 FORWARD LENGTH=832                                                                                                                                                                                                                                                                                                                                                    | 149  | 832  | 6.00E-47  | 558.4 | 68.5 | 75.2 |
| Rsa1.0_01397.1.g26405.t6 | ref NP_173577.2  zinc finger CCCH domain-containing protein [Arabidopsis thaliana] gi 332191999 gb AEE30120.1  zinc finger CCCH domain-containing protein [Arabidopsis thaliana] ref NP_173578.2  adenine nucleotide alpha hydrolases-domain containing protein kinase [Arabidopsis thaliana] gi 18086338 gb AAL57632.1  At1g21590/F24J8.9 [Arabidopsis thaliana] gi 22655342 gb AAM98263.1  At1g21590/F24J8.9 [Arabidopsis thaliana] gi 332192000 gb AEE30121.1  adenine nucleotide alpha hydrolases-domain containing protein kinase [Arabidopsis thaliana]                                                                                                                                                                                                                                                                                                                                                                                                                                                                                                                                                                                                                                                                                                                                                                                                                                                                                               | 1495 | 2166 | 0         | 144.9 | 40.9 | 46.9 | zinc finger CCCH domain-containing protein                           | gbpln | Arabidopsis thaliana | AT1G21580.1   Symbols:   Zinc finger C-x8-C-x5-C-x3-H type family protein   chr1:7557622-7565655 REVERSE LENGTH=2166                                                                                                                                                                                                                                                                                                                     | 1495 | 2166 | 0         | 144.9 | 40.9 | 46.9 |
| Rsa1.0_01397.1.g26406.t1 | ref NP_173578.2  adenine nucleotide alpha hydrolases-domain containing protein kinase [Arabidopsis thaliana] gi 18086338 gb AAL57632.1  At1g21590/F24J8.9 [Arabidopsis thaliana] gi 22655342 gb AAM98263.1  At1g21590/F24J8.9 [Arabidopsis thaliana] gi 332192000 gb AEE30121.1  adenine nucleotide alpha hydrolases-domain containing protein kinase [Arabidopsis thaliana]                                                                                                                                                                                                                                                                                                                                                                                                                                                                                                                                                                                                                                                                                                                                                                                                                                                                                                                                                                                                                                                                                | 707  | 756  | 0         | 106.9 | 79.9 | 89.4 | adenine nucleotide alpha hydrolases-domain containing protein kinase | gbpln | Arabidopsis thaliana | AT1G21590.1   Symbols:   Protein kinase protein with adenine nucleotide alpha hydrolases-like domain   chr1:7566613-7569694 REVERSE LENGTH=756                                                                                                                                                                                                                                                                                           | 707  | 756  | 0         | 106.9 | 79.9 | 89.4 |
| Rsa1.0_01397.1.g26407.t1 | dbj BAJ53190.1  JMS09K11.8 [Jatropha curcas]                                                                                                                                                                                                                                                                                                                                                                                                                                                                                                                                                                                                                                                                                                                                                                                                                                                                                                                                                                                                                                                                                                                                                                                                                                                                                                                                                                                                                | 286  | 332  | 3.00E-41  | 116.1 | 44.8 | 58.7 | JMS09K11.8                                                           | gbpln | Jatropha curcas      | AT1G21600.2   Symbols: PTAC6   plastid transcriptionally active 6   chr1:7571514-7573782 REVERSE LENGTH=328                                                                                                                                                                                                                                                                                                                              | 286  | 328  | 2.00E-33  | 114.7 | 25.5 | 28.3 |

|                          |                                                                                                                                                                                                                                                                                                                                                                         |      |      |           |       |      |      |                                                     |       |                      |                                                                                                                                                                                                                                                                                                                                                                                                                                                                                                                                                                     |      |      |           |       |      |      |
|--------------------------|-------------------------------------------------------------------------------------------------------------------------------------------------------------------------------------------------------------------------------------------------------------------------------------------------------------------------------------------------------------------------|------|------|-----------|-------|------|------|-----------------------------------------------------|-------|----------------------|---------------------------------------------------------------------------------------------------------------------------------------------------------------------------------------------------------------------------------------------------------------------------------------------------------------------------------------------------------------------------------------------------------------------------------------------------------------------------------------------------------------------------------------------------------------------|------|------|-----------|-------|------|------|
| Rsa1.0_01397.1.g26408.t1 | refNP_173582.2   calcium-binding EF-hand-containing protein [Arabidopsis thaliana] gi 332192007 gb AEE30128.1   calcium-binding EF-hand-containing protein [Arabidopsis thaliana]                                                                                                                                                                                       | 1199 | 1218 | 0         | 101.6 | 82.3 | 86.7 | calcium-binding EF-hand-containing protein          | gbpln | Arabidopsis thaliana | AT1G21630.1   Symbols:   Calcium-binding EF hand family protein   chr1:7581457-7587796 FORWARD LENGTH=1218                                                                                                                                                                                                                                                                                                                                                                                                                                                          | 1199 | 1218 | 0         | 101.6 | 82.3 | 86.7 |
| Rsa1.0_01397.1.g26409.t2 | refNP_001185059.1   preprotein translocase secA-like protein [Arabidopsis thaliana] gi 363805541 sp D8WUA4.1 SECA2_ARA TH RecName: Full=Protein translocase subunit SECA2, chloroplast; Flags: Precursor gi 298108793 gb ADI56650.1   plastid SecA2 [Arabidopsis thaliana] gi 332192013 gb AEE30134.1   preprotein translocase secA-like protein [Arabidopsis thaliana] | 1038 | 1058 | 0         | 101.9 | 93.0 | 96.5 | preprotein translocase secA-like protein            | gbpln | Arabidopsis thaliana | AT1G21650.2   Symbols: SECA2   Preprotein translocase SecA family protein   chr1:7592891-7600590 REVERSE LENGTH=1058                                                                                                                                                                                                                                                                                                                                                                                                                                                | 1038 | 1058 | 0         | 101.9 | 93.0 | 96.5 |
| Rsa1.0_01397.1.g26410.t1 | gb EOA35901.1   hypothetical protein CARUB_v10021156mg [Capsella rubella]                                                                                                                                                                                                                                                                                               | 121  | 121  | 2.00E-55  | 100.0 | 90.1 | 96.7 | hypothetical protein CARUB_v10021156mg              | gbpln | Capsella rubella     | AT1G77350.2   Symbols:   unknown protein; FUNCTIONS IN: molecular function unknown; INVOLVED IN: biological process unknown; LOCATED IN: endomembrane system; EXPRESSED IN: 23 plant structures; EXPRESSED DURING: 13 growth stages; CONTAINS InterPro DOMAIN/s: Protein of unknown function KRTCAP2 (InterPro:IPR018614); Has 35333 Blast hits to 34131 proteins in 2444 species: Archae - 798; Bacteria - 22429; Metazoa - 974; Fungi - 991; Plants - 531; Viruses - 0; Other Eukaryotes - 9610 (source: NCBI BLINK).   chr1:29070497-29071545 FORWARD LENGTH=122 | 121  | 122  | 2.00E-56  | 100.8 | 90.1 | 96.7 |
| Rsa1.0_01397.1.g26411.t2 | refXP_002890453.1   EMB1968 [Arabidopsis lyrata subsp. lyrata] gi 297336295 gb EFH66712.1   EMB1968 [Arabidopsis lyrata subsp. lyrata]                                                                                                                                                                                                                                  | 326  | 339  | 1.00E-175 | 104.0 | 92.0 | 96.0 | EMB1968                                             | gbpln | Arabidopsis lyrata   | AT1G21690.1   Symbols: EMB1968, RFC4   ATPase family associated with various cellular activities (AAA)   chr1:7615675-7618362 FORWARD LENGTH=339                                                                                                                                                                                                                                                                                                                                                                                                                    | 326  | 339  | 1.00E-176 | 104.0 | 91.1 | 95.7 |
| Rsa1.0_01397.1.g26412.t1 | gb EOA36733.1   hypothetical protein CARUB_v10012527mg, partial [Capsella rubella]                                                                                                                                                                                                                                                                                      | 810  | 833  | 0         | 102.8 | 76.4 | 81.7 | hypothetical protein CARUB_v10012527mg, partial     | gbpln | Capsella rubella     | AT1G21700.1   Symbols: ATSWI3C, CHB4, SWI3C   SWITCH/sucrose nonfermenting 3C   chr1:7620156-7623978 REVERSE LENGTH=807                                                                                                                                                                                                                                                                                                                                                                                                                                             | 810  | 807  | 0         | 99.6  | 76.2 | 81.7 |
| Rsa1.0_01398.1.g26413.t1 | refXP_002870037.1   hypothetical protein ARALYDRAFT_493003 [Arabidopsis lyrata subsp. lyrata] gi 297315873 gb EFH46296.1   hypothetical protein ARALYDRAFT_493003 [Arabidopsis lyrata subsp. lyrata]                                                                                                                                                                    | 84   | 636  | 7.00E-18  | 757.1 | 51.2 | 51.2 | hypothetical protein ARALYDRAFT_493003              | gbpln | Arabidopsis lyrata   | AT4G18570.1   Symbols:   Tetratricopeptide repeat (TPR)-like superfamily protein   chr4:10231439-10234534 FORWARD LENGTH=642                                                                                                                                                                                                                                                                                                                                                                                                                                        | 84   | 642  | 2.00E-20  | 764.3 | 50.0 | 51.2 |
| Rsa1.0_01398.1.g26414.t2 | gb EOA16130.1   hypothetical protein CARUB_v10004265mg [Capsella rubella]                                                                                                                                                                                                                                                                                               | 674  | 701  | 0         | 104.0 | 52.2 | 68.7 | hypothetical protein CARUB_v10004265mg              | gbpln | Capsella rubella     | AT3G42170.1   Symbols:   BED zinc finger hAT family dimerisation domain   chr3:14321838-14323928 FORWARD LENGTH=696                                                                                                                                                                                                                                                                                                                                                                                                                                                 | 674  | 696  | 2.00E-92  | 103.3 | 22.3 | 39.0 |
| Rsa1.0_01398.1.g26415.t1 | gb AAC33226.1   putative non-LTR retroelement reverse transcriptase [Arabidopsis thaliana]                                                                                                                                                                                                                                                                              | 311  | 1529 | 1.00E-54  | 491.6 | 37.6 | 55.3 | putative non-LTR retroelement reverse transcriptase | gbpln | Arabidopsis thaliana | AT3G24255.1   Symbols:   RNA-directed DNA polymerase (reverse transcriptase)-related family protein   chr3:8789471-8793208 FORWARD LENGTH=746                                                                                                                                                                                                                                                                                                                                                                                                                       | 311  | 746  | 2.00E-42  | 239.9 | 30.5 | 41.8 |
| Rsa1.0_01398.1.g26416.t1 | gb ABD65624.1   hypothetical protein Z3.t00036 [Brassica oleracea]                                                                                                                                                                                                                                                                                                      | 963  | 842  | 1.00E-158 | 87.4  | 41.0 | 54.0 | hypothetical protein Z3.t00036                      | gbpln | Brassica oleracea    | AT1G31150.1   Symbols:   Domain of unknown function (DUF985)   chr1:1120097-11122412 FORWARD LENGTH=673                                                                                                                                                                                                                                                                                                                                                                                                                                                             | 963  | 673  | 2.00E-35  | 69.9  | 11.9 | 17.9 |
| Rsa1.0_01398.1.g26417.t1 | gb ABD65615.1   hypothetical protein Z3.t00033 [Brassica oleracea]                                                                                                                                                                                                                                                                                                      | 371  | 326  | 2.00E-26  | 87.9  | 15.4 | 25.3 | hypothetical protein Z3.t00033                      | gbpln | Brassica oleracea    | #                                                                                                                                                                                                                                                                                                                                                                                                                                                                                                                                                                   | #    | #    | #         | #     | #    | #    |
| Rsa1.0_01398.1.g26418.t3 | gb ABD65090.1   hypothetical protein Z7.t00116 [Brassica oleracea]                                                                                                                                                                                                                                                                                                      | 216  | 484  | 1.00E-30  | 224.1 | 30.1 | 36.6 | hypothetical protein Z7.t00116                      | gbpln | Brassica oleracea    | #                                                                                                                                                                                                                                                                                                                                                                                                                                                                                                                                                                   | #    | #    | #         | #     | #    | #    |
| Rsa1.0_01398.1.g26419.t1 | gb EOA20474.1   hypothetical protein CARUB_v10000785mg [Capsella rubella]                                                                                                                                                                                                                                                                                               | 501  | 501  | 0         | 100.0 | 95.4 | 97.4 | hypothetical protein CARUB_v10000785mg              | gbpln | Capsella rubella     | AT4G09570.1   Symbols: CPK4, ATPCK4   calcium-dependent protein kinase 4   chr4:6049560-6052184 FORWARD LENGTH=501                                                                                                                                                                                                                                                                                                                                                                                                                                                  | 501  | 501  | 0         | 100.0 | 95.8 | 97.4 |
| Rsa1.0_01398.1.g26420.t1 | #                                                                                                                                                                                                                                                                                                                                                                       | #    | #    | #         | #     | #    | #    | -                                                   | ----  | ----                 | #                                                                                                                                                                                                                                                                                                                                                                                                                                                                                                                                                                   | #    | #    | #         | #     | #    | #    |
| Rsa1.0_01398.1.g26421.t1 | refXP_002886268.1   hypothetical protein ARALYDRAFT_900376 [Arabidopsis lyrata subsp. lyrata] gi 297332108 gb EFH62527.1   hypothetical protein ARALYDRAFT_900376 [Arabidopsis lyrata subsp. lyrata]                                                                                                                                                                    | 366  | 346  | 3.00E-80  | 94.5  | 49.2 | 62.6 | hypothetical protein ARALYDRAFT_900376              | gbpln | Arabidopsis lyrata   | AT4G38940.1   Symbols:   Galactose oxidase/kelch repeat superfamily protein   chr4:18152848-18153960 FORWARD LENGTH=370                                                                                                                                                                                                                                                                                                                                                                                                                                             | 366  | 370  | 5.00E-78  | 101.1 | 46.7 | 63.7 |
| Rsa1.0_01399.1.g26422.t1 | refXP_002883414.1   AtMYB15/AtY19/MYB15 [Arabidopsis lyrata subsp. lyrata] gi 297329254 gb EFH59673.1   AtMYB15/AtY19/MYB15 [Arabidopsis lyrata subsp. lyrata]                                                                                                                                                                                                          | 288  | 285  | 1.00E-135 | 99.0  | 82.3 | 87.2 | AtMYB15/AtY19/MYB15                                 | gbpln | Arabidopsis lyrata   | AT3G23250.1   Symbols: MYB15, ATY19, ATMYB15   myb domain protein 15   chr3:8309492-8310624 FORWARD LENGTH=285                                                                                                                                                                                                                                                                                                                                                                                                                                                      | 288  | 285  | 1.00E-136 | 99.0  | 80.9 | 87.2 |

|                          |                                                                                                                                                                                                                                                                                                                                                                                                                                                                                                                                                                                                                                                                                                                                                                                                                                                                                                                                                                                                                                                                                                                                    |     |      |           |       |      |      |                                                     |       |                      |                                                                                                                                                                                                                                                                                                                                            |     |      |          |       |      |      |
|--------------------------|------------------------------------------------------------------------------------------------------------------------------------------------------------------------------------------------------------------------------------------------------------------------------------------------------------------------------------------------------------------------------------------------------------------------------------------------------------------------------------------------------------------------------------------------------------------------------------------------------------------------------------------------------------------------------------------------------------------------------------------------------------------------------------------------------------------------------------------------------------------------------------------------------------------------------------------------------------------------------------------------------------------------------------------------------------------------------------------------------------------------------------|-----|------|-----------|-------|------|------|-----------------------------------------------------|-------|----------------------|--------------------------------------------------------------------------------------------------------------------------------------------------------------------------------------------------------------------------------------------------------------------------------------------------------------------------------------------|-----|------|----------|-------|------|------|
| Rsa1.0_01399.1.g26423.t1 | gb AAG51228.1 AC035249.3 Tam3-like transposon protein; 93317-95488 [Arabidopsis thaliana]<br>gi 12323055 gb AAG51515.1 AC068324.3 hAT-element transposase, putative [Arabidopsis thaliana]                                                                                                                                                                                                                                                                                                                                                                                                                                                                                                                                                                                                                                                                                                                                                                                                                                                                                                                                         | 533 | 723  | 1.00E-119 | 135.6 | 40.5 | 54.4 | Tam3-like transposon protein; 93317-95488           | gbpln | Arabidopsis thaliana | AT3G42170.1   Symbols:   BED zinc finger ;hAT family dimerisation domain   chr3:14321838-14323928 FORWARD LENGTH=696                                                                                                                                                                                                                       | 533 | 696  | 9.00E-30 | 130.6 | 16.9 | 29.3 |
| Rsa1.0_01399.1.g26424.t3 | gb ABH07409.1  putative pol polyprotein [Brassica oleracea var. botrytis]                                                                                                                                                                                                                                                                                                                                                                                                                                                                                                                                                                                                                                                                                                                                                                                                                                                                                                                                                                                                                                                          | 424 | 1239 | 1.00E-106 | 292.2 | 48.3 | 59.9 | putative pol polyprotein                            | gbpln | Brassica oleracea    | AT4G23160.1   Symbols: CRK8   cysteine-rich RLK (RECEPTOR-like protein kinase) 8   chr4:12129485-12134086 FORWARD LENGTH=1262                                                                                                                                                                                                              | 424 | 1262 | 8.00E-45 | 297.6 | 26.4 | 40.8 |
| Rsa1.0_01399.1.g26425.t1 | gb AAD24601.1  putative non-LTR retroelement reverse transcriptase [Arabidopsis thaliana]                                                                                                                                                                                                                                                                                                                                                                                                                                                                                                                                                                                                                                                                                                                                                                                                                                                                                                                                                                                                                                          | 400 | 1319 | 4.00E-49  | 329.8 | 28.8 | 41.0 | putative non-LTR retroelement reverse transcriptase | gbpln | Arabidopsis thaliana | AT2G34320.1   Symbols:   Polynucleotidyl transferase, ribonuclease H-like superfamily protein   chr2:14494959-14485837 FORWARD LENGTH=292                                                                                                                                                                                                  | 400 | 292  | 1.00E-29 | 73.0  | 22.5 | 33.3 |
| Rsa1.0_01399.1.g26426.t1 | gb EOA32154.1  hypothetical protein CARUB_v10015406mg [Capsella rubella]                                                                                                                                                                                                                                                                                                                                                                                                                                                                                                                                                                                                                                                                                                                                                                                                                                                                                                                                                                                                                                                           | 137 | 143  | 1.00E-55  | 104.4 | 89.1 | 94.9 | hypothetical protein CARUB_v10015406mg              | gbpln | Capsella rubella     | AT3G23230.1   Symbols:   Integrase-type DNA-binding superfamily protein   chr3:8289647-8290066 REVERSE LENGTH=139                                                                                                                                                                                                                          | 137 | 139  | 2.00E-54 | 101.5 | 88.3 | 93.4 |
| Rsa1.0_01399.1.g26427.t1 | gb EOA31669.1  hypothetical protein CARUB_v10014873mg [Capsella rubella]                                                                                                                                                                                                                                                                                                                                                                                                                                                                                                                                                                                                                                                                                                                                                                                                                                                                                                                                                                                                                                                           | 124 | 141  | 1.00E-38  | 113.7 | 71.0 | 77.4 | hypothetical protein CARUB_v10014873mg              | gbpln | Capsella rubella     | AT3G23220.1   Symbols:   Integrase-type DNA-binding superfamily protein   chr3:8287969-8288388 FORWARD LENGTH=139                                                                                                                                                                                                                          | 124 | 139  | 4.00E-33 | 112.1 | 67.7 | 72.6 |
| Rsa1.0_01400.1.g26428.t1 | ref XP_002873348.1  predicted protein [Arabidopsis lyrata subsp. lyrata]<br>gi 297319185 gb EFH49607.1  predicted protein [Arabidopsis lyrata subsp. lyrata]                                                                                                                                                                                                                                                                                                                                                                                                                                                                                                                                                                                                                                                                                                                                                                                                                                                                                                                                                                       | 231 | 252  | 2.00E-66  | 109.1 | 61.0 | 71.4 | predicted protein                                   | gbpln | Arabidopsis lyrata   | AT5G08240.1   Symbols:   unknown protein; BEST Arabidopsis thaliana protein match is: unknown protein (TAIR:AT5G23160.1); Has 69 Blast hits to 69 proteins in 10 species: Archae - 0; Bacteria - 1; Metazoa - 0; Fungi - 0; Plants - 68; Viruses - 0; Other Eukaryotes - 0 (source: NCBI BLink).   chr5:2651382-2652336 REVERSE LENGTH=258 | 231 | 258  | 4.00E-67 | 111.7 | 62.3 | 73.6 |
| Rsa1.0_01400.1.g26429.t1 | gb EOA20753.1  hypothetical protein CARUB_v10001081mg [Capsella rubella]                                                                                                                                                                                                                                                                                                                                                                                                                                                                                                                                                                                                                                                                                                                                                                                                                                                                                                                                                                                                                                                           | 134 | 411  | 9.00E-39  | 306.7 | 81.3 | 84.3 | hypothetical protein CARUB_v10001081mg              | gbpln | Capsella rubella     | AT5G08200.1   Symbols:   peptidoglycan-binding LysM domain-containing protein   chr5:2638385-2640508 FORWARD LENGTH=409                                                                                                                                                                                                                    | 134 | 409  | 9.00E-41 | 305.2 | 80.6 | 84.3 |
| Rsa1.0_01400.1.g26430.t1 | ref NP_196434.1  agmatine deiminase [Arabidopsis thaliana]<br>gi 73622159 sp Q8GWW7.2 AGUA_ARAT H RecName: Full=Agmatine deiminase; AltName: Full=Agmatine iminohydrolase; AltName: Full=Protein EMBRYO DEFECTIVE 1873<br>gi 8346554 emb CAB93718.1  putative protein [Arabidopsis thaliana]<br>gi 332003878 gb AED91261.1  agmatine deiminase [Arabidopsis thaliana]<br>ref NP_196433.1  serine/threonine protein kinase 3 [Arabidopsis thaliana]<br>gi 11782274 gb AAG40409.1 AF325057.1 AT5g08160 [Arabidopsis thaliana]<br>gi 2109293 gb AAB69123.1  serine/threonine protein kinase [Arabidopsis thaliana]<br>gi 8346553 emb CAB93717.1  serine/threonine protein kinase [Arabidopsis thaliana]<br>gi 24417498 gb AAN60359.1  unknown [Arabidopsis thaliana]<br>gi 94442405 gb ABF18990.1  At5g08160 [Arabidopsis thaliana]<br>gi 332003876 gb AED91259.1  serine/threonine protein kinase 3 [Arabidopsis thaliana]<br>ref XP_002873343.1  hypothetical protein ARALYDRAFT_908765 [Arabidopsis lyrata subsp. lyrata]<br>gi 297319180 gb EFH49602.1  hypothetical protein ARALYDRAFT_908765 [Arabidopsis lyrata subsp. lyrata] | 461 | 383  | 0         | 83.1  | 73.1 | 79.2 | agmatine deiminase                                  | gbpln | Arabidopsis thaliana | AT5G08170.1   Symbols: EMB1873, ATAIH   porphyromonas-type peptidyl-arginine deiminase family protein   chr5:2628663-2631047 REVERSE LENGTH=383                                                                                                                                                                                            | 461 | 383  | 0        | 83.1  | 73.1 | 79.2 |
| Rsa1.0_01400.1.g26431.t1 | ref NP_196433.1  serine/threonine protein kinase 3 [Arabidopsis thaliana]<br>gi 11782274 gb AAG40409.1 AF325057.1 AT5g08160 [Arabidopsis thaliana]<br>gi 2109293 gb AAB69123.1  serine/threonine protein kinase [Arabidopsis thaliana]<br>gi 8346553 emb CAB93717.1  serine/threonine protein kinase [Arabidopsis thaliana]<br>gi 24417498 gb AAN60359.1  unknown [Arabidopsis thaliana]<br>gi 94442405 gb ABF18990.1  At5g08160 [Arabidopsis thaliana]<br>gi 332003876 gb AED91259.1  serine/threonine protein kinase 3 [Arabidopsis thaliana]<br>ref XP_002873343.1  hypothetical protein ARALYDRAFT_908765 [Arabidopsis lyrata subsp. lyrata]<br>gi 297319180 gb EFH49602.1  hypothetical protein ARALYDRAFT_908765 [Arabidopsis lyrata subsp. lyrata]                                                                                                                                                                                                                                                                                                                                                                          | 346 | 347  | 0         | 100.3 | 94.2 | 96.8 | serine/threonine protein kinase 3                   | gbpln | Arabidopsis thaliana | AT5G08160.1   Symbols: ATPK3, PK3   serine/threonine protein kinase 3   chr5:2625903-2627942 REVERSE LENGTH=347                                                                                                                                                                                                                            | 346 | 347  | 0        | 100.3 | 94.2 | 96.8 |
| Rsa1.0_01400.1.g26432.t1 | ref XP_002873343.1  hypothetical protein ARALYDRAFT_908765 [Arabidopsis lyrata subsp. lyrata]<br>gi 297319180 gb EFH49602.1  hypothetical protein ARALYDRAFT_908765 [Arabidopsis lyrata subsp. lyrata]                                                                                                                                                                                                                                                                                                                                                                                                                                                                                                                                                                                                                                                                                                                                                                                                                                                                                                                             | 142 | 140  | 7.00E-25  | 98.6  | 59.9 | 66.9 | hypothetical protein ARALYDRAFT_908765              | gbpln | Arabidopsis lyrata   | AT5G08150.1   Symbols: SOB5   suppressor of phytochrome b 5   chr5:2622164-2622598 REVERSE LENGTH=144                                                                                                                                                                                                                                      | 142 | 144  | 3.00E-20 | 101.4 | 61.3 | 70.4 |
| Rsa1.0_01400.1.g26433.t2 | ref XP_002871317.1  predicted protein [Arabidopsis lyrata subsp. lyrata]<br>gi 297317154 gb EFH47576.1  predicted protein [Arabidopsis lyrata subsp. lyrata]                                                                                                                                                                                                                                                                                                                                                                                                                                                                                                                                                                                                                                                                                                                                                                                                                                                                                                                                                                       | 409 | 313  | 8.00E-29  | 76.5  | 21.3 | 29.8 | predicted protein                                   | gbpln | Arabidopsis lyrata   | AT5G03480.1   Symbols:   RNA-binding (RRM/RBD/RNP motifs) family protein   chr5:869208-870855 REVERSE LENGTH=321                                                                                                                                                                                                                           | 409 | 321  | 3.00E-25 | 78.5  | 18.6 | 26.7 |
| Rsa1.0_01400.1.g26434.t1 | gb EOA20721.1  hypothetical protein CARUB_v10001041mg [Capsella rubella]                                                                                                                                                                                                                                                                                                                                                                                                                                                                                                                                                                                                                                                                                                                                                                                                                                                                                                                                                                                                                                                           | 300 | 422  | 4.00E-77  | 140.7 | 69.0 | 80.7 | hypothetical protein CARUB_v10001041mg              | gbpln | Capsella rubella     | AT5G08139.1   Symbols:   RING/U-box superfamily protein   chr5:2616487-2617617 FORWARD LENGTH=376                                                                                                                                                                                                                                          | 300 | 376  | 3.00E-76 | 125.3 | 67.3 | 81.0 |

|                          |                                                                                                                                                                                                                                                                                                                                  |      |      |           |       |      |      |                                                     |       |                      |                                                                                                                                                                                                                                                                                                                                                                                                                                                                                                                                            |      |      |           |       |      |      |
|--------------------------|----------------------------------------------------------------------------------------------------------------------------------------------------------------------------------------------------------------------------------------------------------------------------------------------------------------------------------|------|------|-----------|-------|------|------|-----------------------------------------------------|-------|----------------------|--------------------------------------------------------------------------------------------------------------------------------------------------------------------------------------------------------------------------------------------------------------------------------------------------------------------------------------------------------------------------------------------------------------------------------------------------------------------------------------------------------------------------------------------|------|------|-----------|-------|------|------|
| Rsa1.0_01400.1.g26435.t1 | gb EOA20347.1  hypothetical protein CARUB_v10000655mg [Capsella rubella]                                                                                                                                                                                                                                                         | 474  | 541  | 1.00E-177 | 114.1 | 81.9 | 87.3 | hypothetical protein CARUB_v10000655mg              | gbpln | Capsella rubella     | AT5G08130.5   Symbols: BIM1   basic helix-loop-helix (bHLH) DNA-binding superfamily protein   chr5:2606655-2609571 REVERSE LENGTH=532                                                                                                                                                                                                                                                                                                                                                                                                      | 474  | 532  | 1.00E-172 | 112.2 | 78.1 | 84.6 |
| Rsa1.0_01400.1.g26436.t1 | dbj BAJ34155.1  unnamed protein product [Thellungiella halophila]                                                                                                                                                                                                                                                                | 311  | 315  | 1.00E-159 | 101.3 | 88.7 | 93.6 | unnamed protein product                             | ----  | ----                 | AT5G08100.1   Symbols:   N-terminal nucleophile aminohydrolases (Ntn hydrolases) superfamily protein   chr5:2593242-2594586 REVERSE LENGTH=315                                                                                                                                                                                                                                                                                                                                                                                             | 311  | 315  | 1.00E-155 | 101.3 | 85.5 | 92.3 |
| Rsa1.0_01400.1.g26437.t1 | ref NP_196426.1  uncharacterized protein [Arabidopsis thaliana] gi 3346546 emb CAB93710.1  hypothetical protein [Arabidopsis thaliana] gi 332003862 gb AED91245.1  uncharacterized protein AT5G08090 [Arabidopsis thaliana]                                                                                                      | 109  | 322  | 7.00E-17  | 295.4 | 44.0 | 62.4 | uncharacterized protein                             | gbpln | Arabidopsis thaliana | AT5G08090.1   Symbols:   unknown protein; Has 13 Blast hits to 13 proteins in 8 species: Archae - 0; Bacteria - 4; Metazoa - 6; Fungi - 2; Plants - 1; Viruses - 0; Other Eukaryotes - 1 (source: NCBI BLINK).   chr5:2591711-2592899 FORWARD LENGTH=322                                                                                                                                                                                                                                                                                   | 109  | 322  | 1.00E-19  | 295.4 | 44.0 | 62.4 |
| Rsa1.0_01400.1.g26438.t1 | ref NP_196426.1  uncharacterized protein [Arabidopsis thaliana] gi 3346546 emb CAB93710.1  hypothetical protein [Arabidopsis thaliana] gi 332003862 gb AED91245.1  uncharacterized protein AT5G08090 [Arabidopsis thaliana]                                                                                                      | 157  | 322  | 1.00E-17  | 205.1 | 28.7 | 35.7 | uncharacterized protein                             | gbpln | Arabidopsis thaliana | AT5G08090.1   Symbols:   unknown protein; Has 13 Blast hits to 13 proteins in 8 species: Archae - 0; Bacteria - 4; Metazoa - 6; Fungi - 2; Plants - 1; Viruses - 0; Other Eukaryotes - 0 (source: NCBI BLINK).   chr5:2591711-2592899 FORWARD LENGTH=322                                                                                                                                                                                                                                                                                   | 157  | 322  | 5.00E-20  | 205.1 | 28.7 | 35.7 |
| Rsa1.0_01400.1.g26439.t1 | gb EOA21213.1  hypothetical protein CARUB_v10001560mg [Capsella rubella]                                                                                                                                                                                                                                                         | 239  | 304  | 2.00E-90  | 127.2 | 93.3 | 96.7 | hypothetical protein CARUB_v10001560mg              | gbpln | Capsella rubella     | AT5G08080.1   Symbols: SYP132, ATSYP132   syntaxin of plants 132   chr5:2588532-2591106 FORWARD LENGTH=304                                                                                                                                                                                                                                                                                                                                                                                                                                 | 239  | 304  | 4.00E-91  | 127.2 | 91.6 | 96.2 |
| Rsa1.0_01401.1.g26440.t1 | #                                                                                                                                                                                                                                                                                                                                | #    | #    | #         | #     | #    | #    | -                                                   | ----  | ----                 | #                                                                                                                                                                                                                                                                                                                                                                                                                                                                                                                                          | #    | #    | #         | #     | #    |      |
| Rsa1.0_01401.1.g26441.t1 | gb EOA12297.1  hypothetical protein CARUB_v10007977mg [Capsella rubella]                                                                                                                                                                                                                                                         | 353  | 417  | 2.00E-51  | 118.1 | 35.4 | 54.7 | hypothetical protein CARUB_v10007977mg              | gbpln | Capsella rubella     | AT4G29090.1   Symbols:   Ribonuclease H-like superfamily protein   chr4:1433528-14335255 FORWARD LENGTH=575                                                                                                                                                                                                                                                                                                                                                                                                                                | 353  | 575  | 1.00E-36  | 162.9 | 28.6 | 47.0 |
| Rsa1.0_01401.1.g26442.t1 | ref XP_002887290.1  hypothetical protein ARALYDRAFT.476150 [Arabidopsis lyrata subsp. lyrata] gi 297333313 gb EFH63549.1  hypothetical protein ARALYDRAFT.476150 [Arabidopsis lyrata subsp. lyrata]                                                                                                                              | 85   | 86   | 6.00E-27  | 101.2 | 77.6 | 85.9 | hypothetical protein ARALYDRAFT.476150              | gbpln | Arabidopsis lyrata   | AT1G70270.1   Symbols:   unknown protein; BEST Arabidopsis thaliana protein match is: unknown protein (TAIR:AT1G23965.1); Has 20 Blast hits to 20 proteins in 7 species: Archae - 0; Bacteria - 0; Metazoa - 0; Fungi - 0; Plants - 20; Viruses - 0; Other Eukaryotes - 0 (source: NCBI BLINK).   chr1:26464427-26464687 FORWARD LENGTH=86                                                                                                                                                                                                 | 85   | 86   | 3.00E-28  | 101.2 | 75.3 | 84.7 |
| Rsa1.0_01401.1.g26443.t1 | ref NP_177183.2  nodulin MtN21 /EamA-like transporter protein [Arabidopsis thaliana] gi 460425434 sp F45D5.1 WTR11_ARAT H RecName: Full=WAT1-related protein At1g70260 gi 332196917 gb AEE35038.1  WAT1-related protein [Arabidopsis thaliana]                                                                                   | 345  | 375  | 0         | 108.7 | 89.9 | 95.9 | nodulin MtN21 /EamA-like transporter protein        | gbpln | Arabidopsis thaliana | AT1G70260.1   Symbols:   nodulin MtN21 /EamA-like transporter family protein   chr1:26457067-26459338 REVERSE LENGTH=375                                                                                                                                                                                                                                                                                                                                                                                                                   | 345  | 375  | 0         | 108.7 | 89.9 | 95.9 |
| Rsa1.0_01401.1.g26444.t1 | gb AAG52949.1  gag/pol polyprotein [Arabidopsis thaliana]                                                                                                                                                                                                                                                                        | 1770 | 1643 | 0         | 92.8  | 47.1 | 62.3 | gag/pol polyprotein                                 | gbpln | Arabidopsis thaliana | AT4G23160.1   Symbols: CRK8   cysteine-rich RLK (RECEPTOR-like protein kinase) 8   chr4:12129485-12134086 FORWARD LENGTH=1262                                                                                                                                                                                                                                                                                                                                                                                                              | 1770 | 1262 | 2.00E-82  | 71.3  | 9.3  | 14.1 |
| Rsa1.0_01401.1.g26445.t1 | gb AAF18631.1 AC006228.2 F5J5.2 [Arabidopsis thaliana]                                                                                                                                                                                                                                                                           | 434  | 463  | 2.00E-37  | 106.7 | 23.7 | 39.4 | F5J5.2                                              | gbpln | Arabidopsis thaliana | #                                                                                                                                                                                                                                                                                                                                                                                                                                                                                                                                          | #    | #    | #         | #     | #    |      |
| Rsa1.0_01401.1.g26446.t1 | #                                                                                                                                                                                                                                                                                                                                | #    | #    | #         | #     | #    | #    | -                                                   | ----  | ----                 | #                                                                                                                                                                                                                                                                                                                                                                                                                                                                                                                                          | #    | #    | #         | #     | #    |      |
| Rsa1.0_01401.1.g26447.t1 | ref NP_177175.2  Sterile alpha motif (SAM) domain-containing protein [Arabidopsis thaliana] gi 17473774 gb AAL38323.1  unknown protein [Arabidopsis thaliana] gi 32189311 gb AAP75810.1  At1g70180 [Arabidopsis thaliana] gi 332196908 gb AEE35029.1  Sterile alpha motif (SAM) domain-containing protein [Arabidopsis thaliana] | 550  | 460  | 1.00E-113 | 83.6  | 57.3 | 65.3 | Sterile alpha motif (SAM) domain-containing protein | gbpln | Arabidopsis thaliana | AT1G70180.2   Symbols:   Sterile alpha motif (SAM) domain-containing protein   chr1:26426768-26429097 FORWARD LENGTH=460                                                                                                                                                                                                                                                                                                                                                                                                                   | 550  | 460  | 1.00E-116 | 83.6  | 57.3 | 65.3 |
| Rsa1.0_01401.1.g26448.t1 | ref NP_564985.1  uncharacterized protein [Arabidopsis thaliana] gi 13430576 gb AAK25910.1 AF360200_1 unknown protein [Arabidopsis thaliana] gi 15293161 gb AAK3691.1  unknown protein [Arabidopsis thaliana] gi 332196905 gb AEE35026.1  uncharacterized protein AT1G70160 [Arabidopsis thaliana]                                | 526  | 523  | 0         | 99.4  | 90.1 | 93.2 | uncharacterized protein                             | gbpln | Arabidopsis thaliana | AT1G70160.1   Symbols:   unknown protein; FUNCTIONS IN: molecular_function unknown; INVOLVED IN: biological_process unknown; LOCATED IN: endomembrane system; EXPRESSED IN: 24 plant structures; EXPRESSED DURING: 15 growth stages; BEST Arabidopsis thaliana protein match is: unknown protein (TAIR:AT4G27020.1); Has 108 Blast hits to 108 proteins in 20 species: Archae - 0; Bacteria - 0; Metazoa - 0; Fungi - 0; Plants - 89; Viruses - 0; Other Eukaryotes - 19 (source: NCBI BLINK).   chr1:26420159-26422345 FORWARD LENGTH=523 | 526  | 523  | 0         | 99.4  | 90.1 | 93.2 |

|                          |                                                                                                                                                                                                                                                                                                                                                                                                                                                                                                                                                                                |      |      |          |       |      |      |                                              |       |                      |                                                                                                                                                                                                                                                                                                                                                                                           |      |      |          |       |      |      |
|--------------------------|--------------------------------------------------------------------------------------------------------------------------------------------------------------------------------------------------------------------------------------------------------------------------------------------------------------------------------------------------------------------------------------------------------------------------------------------------------------------------------------------------------------------------------------------------------------------------------|------|------|----------|-------|------|------|----------------------------------------------|-------|----------------------|-------------------------------------------------------------------------------------------------------------------------------------------------------------------------------------------------------------------------------------------------------------------------------------------------------------------------------------------------------------------------------------------|------|------|----------|-------|------|------|
| Rsa1.0_01401.1.g26449.t1 | refXP_002887278.1  hypothetical protein ARALYDRAFT_316004 [Arabidopsis lyrata subsp. lyrata] gi 297333119 gb EFH63537.1  hypothetical protein ARALYDRAFT_316004 [Arabidopsis lyrata subsp. lyrata]                                                                                                                                                                                                                                                                                                                                                                             | 144  | 179  | 6.00E-50 | 124.3 | 66.7 | 75.7 | hypothetical protein ARALYDRAFT_316004       | gbpln | Arabidopsis lyrata   | AT1G70040.1   Symbols:   Protein of unknown function (DUF1163)   chr1:26381233-26381908 FORWARD LENGTH=193                                                                                                                                                                                                                                                                                | 144  | 193  | 4.00E-46 | 134.0 | 59.7 | 70.8 |
| Rsa1.0_01402.1.g26450.t1 | refNP_001189636.1  uncharacterized protein [Arabidopsis thaliana] gi 330253251 gb AEC08345.1  uncharacterized protein AT2G30105 [Arabidopsis thaliana]                                                                                                                                                                                                                                                                                                                                                                                                                         | 363  | 367  | 0        | 101.1 | 88.2 | 93.7 | uncharacterized protein                      | gbpln | Arabidopsis thaliana | AT2G30105.1   Symbols:   CONTAINS InterPro DOMAIN/s: Leucine-rich repeat, typical subtype (InterPro:IPR003591), Leucine-rich repeat (InterPro:IPR001611), Ubiquitin (InterPro:IPR000626), Ubiquitin supergroup (InterPro:IPR019955); BEST Arabidopsis thaliana protein match is: Leucine-rich repeat (LRR) family protein (TAIR:AT5G07910.1).   chr2:12849855-12851908 FORWARD LENGTH=367 | 363  | 367  | 0        | 101.1 | 88.2 | 93.7 |
| Rsa1.0_01402.1.g26451.t1 | gb EOA14519.1  hypothetical protein CARUB_v10027748mg [Capsella rubella]                                                                                                                                                                                                                                                                                                                                                                                                                                                                                                       | 506  | 368  | 2.00E-76 | 72.7  | 33.6 | 45.3 | hypothetical protein CARUB_v10027748mg       | gbpln | Capsella rubella     | AT4G38940.1   Symbols:   Galactose oxidase/kelch repeat superfamily protein   chr4:18152848-18153960 FORWARD LENGTH=370                                                                                                                                                                                                                                                                   | 506  | 370  | 9.00E-66 | 73.1  | 30.6 | 42.5 |
| Rsa1.0_01402.1.g26452.t1 | gb EOA14519.1  hypothetical protein CARUB_v10027748mg [Capsella rubella]                                                                                                                                                                                                                                                                                                                                                                                                                                                                                                       | 359  | 368  | 1.00E-68 | 102.5 | 44.3 | 60.2 | hypothetical protein CARUB_v10027748mg       | gbpln | Capsella rubella     | AT4G38940.1   Symbols:   Galactose oxidase/kelch repeat superfamily protein   chr4:18152848-18153960 FORWARD LENGTH=370                                                                                                                                                                                                                                                                   | 359  | 370  | 2.00E-67 | 103.1 | 40.4 | 58.5 |
| Rsa1.0_01402.1.g26453.t1 | refNP_563963.1  FAD/NAD(P)-binding oxidoreductase [Arabidopsis thaliana] gi 5103813 gb AAD39643.1 AC007591.8 Contains a PF 00175 Oxidoreductase FAD/NADH-binding domain. ESTs gb H76345 and gb AA651465 come from this gene [Arabidopsis thaliana] gi 12744999 gb AAK06879.1 AF344328.1 unknown protein [Arabidopsis thaliana] gi 15451092 gb AAK96817.1  Unknown protein [Arabidopsis thaliana] gi 18377448 gb AAL66890.1  unknown protein [Arabidopsis thaliana] gi 332191150 gb AEE29271.1  FAD/NAD(P)-binding oxidoreductase [Arabidopsis thaliana]                        | 172  | 295  | 9.00E-34 | 171.5 | 38.4 | 44.8 | FAD/NAD(P)-binding oxidoreductase            | gbpln | Arabidopsis thaliana | AT1G15140.1   Symbols:   FAD/NAD(P)-binding oxidoreductase   chr1:5210403-5212137 REVERSE LENGTH=295                                                                                                                                                                                                                                                                                      | 172  | 295  | 4.00E-36 | 171.5 | 38.4 | 44.8 |
| Rsa1.0_01402.1.g26454.t1 | refXP_002866825.1  kelch repeat-containing F-box family protein [Arabidopsis lyrata subsp. lyrata] gi 297312661 gb EFH43084.1  kelch repeat-containing F-box family protein [Arabidopsis lyrata subsp. lyrata]                                                                                                                                                                                                                                                                                                                                                                 | 73   | 368  | 4.00E-11 | 504.1 | 43.8 | 57.5 | kelch repeat-containing F-box family protein | gbpln | Arabidopsis lyrata   | AT4G38940.1   Symbols:   Galactose oxidase/kelch repeat superfamily protein   chr4:18152848-18153960 FORWARD LENGTH=370                                                                                                                                                                                                                                                                   | 73   | 370  | 2.00E-13 | 506.8 | 42.5 | 56.2 |
| Rsa1.0_01402.1.g26455.t1 | refXP_002881085.1  hypothetical protein ARALYDRAFT_481921 [Arabidopsis lyrata subsp. lyrata] gi 297326924 gb EFH57344.1  hypothetical protein ARALYDRAFT_481921 [Arabidopsis lyrata subsp. lyrata]                                                                                                                                                                                                                                                                                                                                                                             | 1057 | 1083 | 0        | 102.5 | 91.3 | 95.6 | hypothetical protein ARALYDRAFT_481921       | gbpln | Arabidopsis lyrata   | AT2G30110.1   Symbols: ATUBA1, MOS5, UBA1   ubiquitin-activating enzyme 1   chr2:12852632-12857369 REVERSE LENGTH=1080                                                                                                                                                                                                                                                                    | 1057 | 1080 | 0        | 102.2 | 91.2 | 95.4 |
| Rsa1.0_01402.1.g26456.t1 | refXP_002862737.1  hypothetical protein ARALYDRAFT_920315 [Arabidopsis lyrata subsp. lyrata] gi 297308435 gb EFH38995.1  hypothetical protein ARALYDRAFT_920315 [Arabidopsis lyrata subsp. lyrata]                                                                                                                                                                                                                                                                                                                                                                             | 185  | 193  | 1.00E-80 | 104.3 | 78.9 | 82.7 | hypothetical protein ARALYDRAFT_920315       | gbpln | Arabidopsis lyrata   | AT1G07090.1   Symbols: LSH6   Protein of unknown function (DUF640)   chr1:2174202-2174792 REVERSE LENGTH=196                                                                                                                                                                                                                                                                              | 185  | 196  | 8.00E-73 | 105.9 | 73.5 | 81.1 |
| Rsa1.0_01402.1.g26457.t1 | refNP_565695.1  LOB domain-containing protein 12 [Arabidopsis thaliana] gi 29427828 sp Q8LBW3.2 LBD12_ARAT H RecName: Full=LOB domain-containing protein 12; AltName: Full=ASYMMETRIC LEAVES 2-like protein 5; Short=AS2-like protein 5 gi 3150407 gb AAC16959.1  expressed protein [Arabidopsis thaliana] gi 45330813 dbj BAD12425.1  ASYMMETRIC LEAVES2-like gene 5 protein [Arabidopsis thaliana] gi 219807086 dbj BAH10549.1  ASYMMETRIC LEAVES2-like 5 protein [Arabidopsis thaliana] gi 330253255 gb AEC08349.1  LOB domain-containing protein 12 [Arabidopsis thaliana] | 192  | 193  | 5.00E-85 | 100.5 | 93.8 | 95.3 | LOB domain-containing protein 12             | gbpln | Arabidopsis thaliana | AT2G30130.1   Symbols: ASL5, LBD12, PKK1   Lateral organ boundaries (LOB) domain family protein   chr2:12868740-12869684 FORWARD LENGTH=193                                                                                                                                                                                                                                               | 192  | 193  | 2.00E-87 | 100.5 | 93.8 | 95.3 |

|                          |                                                                                                                                                                                                                                                                                                                                                                                               |     |      |           |       |      |      |                                                          |       |                      |                                                                                                                                                                                                                                                                                                                                                                                                                                                 |     |      |           |       |      |      |
|--------------------------|-----------------------------------------------------------------------------------------------------------------------------------------------------------------------------------------------------------------------------------------------------------------------------------------------------------------------------------------------------------------------------------------------|-----|------|-----------|-------|------|------|----------------------------------------------------------|-------|----------------------|-------------------------------------------------------------------------------------------------------------------------------------------------------------------------------------------------------------------------------------------------------------------------------------------------------------------------------------------------------------------------------------------------------------------------------------------------|-----|------|-----------|-------|------|------|
| Rsa1.0_01403.1.g26458.t1 | ref NP_564386.1  uncharacterized protein [Arabidopsis thaliana] gi 17978974 gb AAL47448.1  At1g31940/F5M6.6 [Arabidopsis thaliana] gi 20334862 gb AAM16187.1  At1g31940/F5M6.6 [Arabidopsis thaliana] gi 21554317 gb AAM63422.1  unknown [Arabidopsis thaliana] gi 332193299 gb AEE31420.1  uncharacterized protein AT1G31940 [Arabidopsis thaliana]                                          | 146 | 158  | 2.00E-59  | 108.2 | 90.4 | 92.5 | uncharacterized protein                                  | gbpln | Arabidopsis thaliana | AT1G31940.1   Symbols:   unknown protein; LOCATED IN: plasma membrane; EXPRESSED IN: 22 plant structures; EXPRESSED DURING: 13 growth stages; BEST Arabidopsis thaliana protein match is: unknown protein (TAIRAT2G35585.1); Has 67 Blast hits to 67 proteins in 17 species: Archae - 0; Bacteria - 0; Metazoa - 0; Fungi - 0; Plants - 67; Viruses - 0; Other Eukaryotes - 0 (source: NCBI BLink).   chr1:11470293-11471154 REVERSE LENGTH=158 | 146 | 158  | 6.00E-62  | 108.2 | 90.4 | 92.5 |
| Rsa1.0_01403.1.g26459.t1 | gb ABK28020.1  unknown [Arabidopsis thaliana]                                                                                                                                                                                                                                                                                                                                                 | 83  | 86   | 1.00E-19  | 103.6 | 66.3 | 77.1 | unknown                                                  | gbpln | Arabidopsis thaliana | #                                                                                                                                                                                                                                                                                                                                                                                                                                               | #   | #    | #         | #     | #    |      |
| Rsa1.0_01403.1.g26460.t2 | gb EOA31957.1  hypothetical protein CARUB_v10015199mg [Capsella rubella]                                                                                                                                                                                                                                                                                                                      | 168 | 1115 | 4.00E-16  | 663.7 | 34.5 | 51.2 | hypothetical protein CARUB_v10015199mg                   | gbpln | Capsella rubella     | AT3G11910.1   Symbols: UBP13   ubiquitin-specific protease 13   chr3:3761758-3770290 REVERSE LENGTH=1115                                                                                                                                                                                                                                                                                                                                        | 168 | 1115 | 7.00E-18  | 663.7 | 33.9 | 51.2 |
| Rsa1.0_01403.1.g26461.t5 | #                                                                                                                                                                                                                                                                                                                                                                                             | #   | #    | #         | #     | #    | #    | -                                                        | ----  | ----                 | #                                                                                                                                                                                                                                                                                                                                                                                                                                               | #   | #    | #         | #     | #    |      |
| Rsa1.0_01403.1.g26462.t1 | gb EOA36802.1  hypothetical protein CARUB_v10008296mg [Capsella rubella]                                                                                                                                                                                                                                                                                                                      | 838 | 849  | 0         | 101.3 | 86.8 | 92.1 | hypothetical protein CARUB_v10008296mg                   | gbpln | Capsella rubella     | AT1G31930.3   Symbols: XLG3   extra-large GTP-binding protein 3   chr1:11465832-11468961 FORWARD LENGTH=848                                                                                                                                                                                                                                                                                                                                     | 838 | 848  | 0         | 101.2 | 87.5 | 92.8 |
| Rsa1.0_01403.1.g26463.t1 | ref NP_174474.1  pentatricopeptide repeat-containing protein [Arabidopsis thaliana] gi 75169173 sp Q9C6T2.1 PPR68_ARAT H RecName: Full=Pentatricopeptide repeat-containing protein At1g31920 gi 12321292 gb AA650713.1 AC079041_6 PPR-repeat protein, putative [Arabidopsis thaliana] gi 332193295 gb AEE31416.1  pentatricopeptide repeat-containing protein [Arabidopsis thaliana]          | 611 | 606  | 0         | 99.2  | 80.9 | 89.9 | pentatricopeptide repeat-containing protein              | gbpln | Arabidopsis thaliana | AT1G31920.1   Symbols:   Tetratricopeptide repeat (TPR)-like superfamily protein   chr1:11461864-11463684 REVERSE LENGTH=606                                                                                                                                                                                                                                                                                                                    | 611 | 606  | 0         | 99.2  | 80.9 | 89.9 |
| Rsa1.0_01403.1.g26464.t1 | ref NP_196125.1  cystatin/monellin-related protein [Arabidopsis thaliana] gi 10178045 dbj BAB11528.1  unnamed protein product [Arabidopsis thaliana] gi 14334522 gb AAK59458.1  unknown protein [Arabidopsis thaliana] gi 17104561 gb AAL34169.1  unknown protein [Arabidopsis thaliana] gi 332003440 gb AED90823.1  cystatin/monellin-related protein [Arabidopsis thaliana]                 | 142 | 172  | 4.00E-41  | 121.1 | 60.6 | 78.2 | cystatin/monellin-related protein                        | gbpln | Arabidopsis thaliana | AT5G05060.1   Symbols:   Cystatin/monellin superfamily protein   chr5:1494334-1494999 REVERSE LENGTH=172                                                                                                                                                                                                                                                                                                                                        | 142 | 172  | 9.00E-44  | 121.1 | 60.6 | 78.2 |
| Rsa1.0_01403.1.g26465.t1 | ref NP_174472.2  aquaporin NIP3-1 [Arabidopsis thaliana] gi 259016288 sp Q9C6T0.2 NIP31_ARAT H RecName: Full=Aquaporin NIP3-1; AltName: Full=NOD26-like intrinsic protein 3-1; Short=ANNIP3; gi 332193292 gb AEE31413.1  aquaporin NIP3-1 [Arabidopsis thaliana]                                                                                                                              | 323 | 323  | 1.00E-145 | 100.0 | 77.1 | 87.0 | aquaporin NIP3-1                                         | gbpln | Arabidopsis thaliana | AT1G31885.1   Symbols: NIP3;1   NOD26-like intrinsic protein 3;1   chr1:11450460-11451985 FORWARD LENGTH=323                                                                                                                                                                                                                                                                                                                                    | 323 | 323  | 1.00E-148 | 100.0 | 77.1 | 87.0 |
| Rsa1.0_01403.1.g26466.t1 | ref NP_174471.2  protein BREVIS RADIX [Arabidopsis thaliana] gi 229821711 sp Q17T15.2 BRX_ARATH RecName: Full=Protein BREVIS RADIX; Short=AtBRX gi 27754447 gb AAO22671.1  putative major intrinsic protein [Arabidopsis thaliana] gi 28393953 gb AAO42384.1  putative major intrinsic protein [Arabidopsis thaliana] gi 332193291 gb AEE31412.1  protein BREVIS RADIX [Arabidopsis thaliana] | 437 | 344  | 1.00E-164 | 78.7  | 63.4 | 68.4 | protein BREVIS RADIX                                     | gbpln | Arabidopsis thaliana | AT1G31880.1   Symbols: NLM9, BRX   DZC (Disease resistance/zinc finger/chromosome condensation-like region) domain containing protein   chr1:11447804-11450053 FORWARD LENGTH=344                                                                                                                                                                                                                                                               | 437 | 344  | 1.00E-167 | 78.7  | 63.4 | 68.4 |
| Rsa1.0_01403.1.g26467.t1 | #                                                                                                                                                                                                                                                                                                                                                                                             | #   | #    | #         | #     | #    | #    | -                                                        | ----  | ----                 | #                                                                                                                                                                                                                                                                                                                                                                                                                                               | #   | #    | #         | #     | #    |      |
| Rsa1.0_01403.1.g26468.t1 | gb AAG51754.1 AC068667_33 reverse transcriptase, putative; 100033-105622 [Arabidopsis thaliana]                                                                                                                                                                                                                                                                                               | 593 | 1557 | 2.00E-87  | 262.6 | 34.9 | 55.6 | reverse transcriptase, putative; 100033-105622           | gbpln | Arabidopsis thaliana | AT2G17920.1   Symbols:   nucleic acid binding/zinc ion binding   chr2:7782808-7783731 FORWARD LENGTH=307                                                                                                                                                                                                                                                                                                                                        | 593 | 307  | 6.00E-35  | 51.8  | 12.0 | 20.6 |
| Rsa1.0_01404.1.g26469.t1 | gb ACB59223.1  glutathione S-transferase [Brassica oleracea] ref XP_002885842.1  invertase/pectin methylesterase inhibitor family protein [Arabidopsis lyrata subsp. lyrata] gi 297331682 gb EFH62101.1  invertase/pectin methylesterase inhibitor family protein [Arabidopsis lyrata subsp. lyrata]                                                                                          | 102 | 523  | 1.00E-28  | 512.7 | 61.8 | 77.5 | glutathione S-transferase                                | gbpln | Brassica oleracea    | #                                                                                                                                                                                                                                                                                                                                                                                                                                               | #   | #    | #         | #     | #    |      |
| Rsa1.0_01404.1.g26470.t1 | ref XP_002885842.1  invertase/pectin methylesterase inhibitor family protein [Arabidopsis lyrata subsp. lyrata] gi 297331682 gb EFH62101.1  invertase/pectin methylesterase inhibitor family protein [Arabidopsis lyrata subsp. lyrata]                                                                                                                                                       | 156 | 194  | 3.00E-65  | 124.4 | 76.9 | 85.9 | invertase/pectin methylesterase inhibitor family protein | gbpln | Arabidopsis lyrata   | AT2G10970.1   Symbols:   Plant invertase/pectin methylesterase inhibitor superfamily protein   chr2:4332948-4333532 REVERSE LENGTH=194                                                                                                                                                                                                                                                                                                          | 156 | 194  | 1.00E-66  | 124.4 | 76.9 | 85.9 |
| Rsa1.0_01404.1.g26471.t1 | #                                                                                                                                                                                                                                                                                                                                                                                             | #   | #    | #         | #     | #    | #    | -                                                        | ----  | ----                 | #                                                                                                                                                                                                                                                                                                                                                                                                                                               | #   | #    | #         | #     | #    |      |
| Rsa1.0_01404.1.g26472.t2 | dbj BAB88750.1  gag protein [Silene latifolia]                                                                                                                                                                                                                                                                                                                                                | 690 | 196  | 5.00E-20  | 28.4  | 6.7  | 11.2 | gag protein                                              | gbpln | Silene latifolia     | #                                                                                                                                                                                                                                                                                                                                                                                                                                               | #   | #    | #         | #     | #    |      |



|                          |                                                                                                                                                                                                                                                                                                   |      |     |           |       |      |      |                                                 |       |                      |                                                                                                                                                                                                                                                                                                                                                                                                                                                                                                                                                                                                                                           |     |     |           |       |      |      |
|--------------------------|---------------------------------------------------------------------------------------------------------------------------------------------------------------------------------------------------------------------------------------------------------------------------------------------------|------|-----|-----------|-------|------|------|-------------------------------------------------|-------|----------------------|-------------------------------------------------------------------------------------------------------------------------------------------------------------------------------------------------------------------------------------------------------------------------------------------------------------------------------------------------------------------------------------------------------------------------------------------------------------------------------------------------------------------------------------------------------------------------------------------------------------------------------------------|-----|-----|-----------|-------|------|------|
| Rsa1.0_01404.1.g26473.t1 | emb CAN83240.1  hypothetical protein VITISV_021676 [Vitis vinifera]                                                                                                                                                                                                                               | 312  | 549 | 8.00E-30  | 176.0 | 29.8 | 46.8 | hypothetical protein VITISV_021676              | gbpln | Vitis vinifera       | #                                                                                                                                                                                                                                                                                                                                                                                                                                                                                                                                                                                                                                         | #   | #   | #         | #     | #    |      |
| Rsa1.0_01404.1.g26474.t2 | dbj BAB02259.1  retroelement pol polyprotein-like [Arabidopsis thaliana]                                                                                                                                                                                                                          | 1433 | 777 | 2.00E-66  | 54.2  | 9.2  | 12.7 | retroelement pol polyprotein-like               | gbpln | Arabidopsis thaliana | #                                                                                                                                                                                                                                                                                                                                                                                                                                                                                                                                                                                                                                         | #   | #   | #         | #     | #    |      |
| Rsa1.0_01404.1.g26475.t1 | dbj BAB88750.1  gag protein [Silene latifolia]                                                                                                                                                                                                                                                    | 169  | 196 | 8.00E-13  | 116.0 | 18.9 | 37.3 | gag protein                                     | gbpln | Silene latifolia     | #                                                                                                                                                                                                                                                                                                                                                                                                                                                                                                                                                                                                                                         | #   | #   | #         | #     | #    |      |
| Rsa1.0_01404.1.g26476.t2 | emb CAN67675.1  hypothetical protein VITISV_020901 [Vitis vinifera]                                                                                                                                                                                                                               | 542  | 508 | 6.00E-38  | 93.7  | 23.4 | 38.2 | hypothetical protein VITISV_020901              | gbpln | Vitis vinifera       | #                                                                                                                                                                                                                                                                                                                                                                                                                                                                                                                                                                                                                                         | #   | #   | #         | #     | #    |      |
| Rsa1.0_01404.1.g26477.t1 | #                                                                                                                                                                                                                                                                                                 | #    | #   | #         | #     | #    | #    | -                                               | ----  | ----                 | #                                                                                                                                                                                                                                                                                                                                                                                                                                                                                                                                                                                                                                         | #   | #   | #         | #     | #    |      |
| Rsa1.0_01404.1.g26478.t1 | ref XP_003633313.1  PREDICTED: uncharacterized protein LOC100854367 [Vitis vinifera]                                                                                                                                                                                                              | 2032 | 955 | 8.00E-98  | 47.0  | 11.5 | 17.1 | PREDICTED: uncharacterized protein LOC100854367 | gbpln | Vitis vinifera       | #                                                                                                                                                                                                                                                                                                                                                                                                                                                                                                                                                                                                                                         | #   | #   | #         | #     | #    |      |
| Rsa1.0_01405.1.g26479.t1 | gb EOA30423.1  hypothetical protein CARUB_v10013549mg [Capsella rubella]                                                                                                                                                                                                                          | 489  | 489 | 0         | 100.0 | 86.9 | 92.4 | hypothetical protein CARUB_v10013549mg          | gbpln | Capsella rubella     | AT3G01300.1   Symbols:   Protein kinase superfamily protein   chr3:90817-93335 REVERSE LENGTH=490                                                                                                                                                                                                                                                                                                                                                                                                                                                                                                                                         | 489 | 490 | 0         | 100.2 | 82.4 | 87.3 |
| Rsa1.0_01405.1.g26480.t1 | ref XP_002882188.1  band 7 family protein [Arabidopsis lyrata subsp. lyrata] gi 297328028 gb EFH58447.1  band 7 family protein [Arabidopsis lyrata subsp. lyrata]                                                                                                                                 | 286  | 287 | 1.00E-159 | 100.3 | 94.8 | 98.3 | band 7 family protein                           | gbpln | Arabidopsis lyrata   | AT3G01290.1   Symbols:   SPFH/Band 7/PHB domain-containing membrane-associated protein family   chr3:88252-89356 REVERSE LENGTH=285                                                                                                                                                                                                                                                                                                                                                                                                                                                                                                       | 286 | 285 | 1.00E-161 | 99.7  | 95.1 | 97.9 |
| Rsa1.0_01405.1.g26481.t1 | gb AAW22621.1  outer mitochondrial membrane protein porin 1 [Brassica napus]                                                                                                                                                                                                                      | 276  | 276 | 1.00E-143 | 100.0 | 91.3 | 96.7 | outer mitochondrial membrane protein porin 1    | gbpln | Brassica napus       | AT3G01280.1   Symbols:   VDACC1, ATVDAC1   voltage dependent anion channel 1   chr3:85754-87612 FORWARD LENGTH=276                                                                                                                                                                                                                                                                                                                                                                                                                                                                                                                        | 276 | 276 | 1.00E-135 | 100.0 | 83.0 | 94.6 |
| Rsa1.0_01405.1.g26482.t1 | ref NP_186774.1  uncharacterized protein [Arabidopsis thaliana] gi 6714463 gb AAF26149.1 AC008261.6 hypothetical protein [Arabidopsis thaliana] gi 194708802 gb ACF88485.1  At3g01250 [Arabidopsis thaliana] gi 332640108 gb AEE73629.1  uncharacterized protein AT3G01250 [Arabidopsis thaliana] | 161  | 164 | 3.00E-54  | 101.9 | 72.7 | 83.9 | uncharacterized protein                         | gbpln | Arabidopsis thaliana | AT3G01250.1   Symbols:   unknown protein; FUNCTIONS IN: molecular_function unknown; INVOLVED IN: biological_process unknown; LOCATED IN: endomembrane system; EXPRESSED IN: 9 plant structures; EXPRESSED DURING: L mature pollen stage, M germinated pollen stage, 4 anthesis, C globular stage, petal differentiation and expansion stage; Has 50 Blast hits to 50 proteins in 23 species: Archae - 0; Bacteria - 28; Metazoa - 15; Fungi - 0; Plants - 4; Viruses - 0; Other Eukaryotes - 3 (source: NCBI BLink).   chr3:79404-79898 FORWARD LENGTH=164                                                                                | 161 | 164 | 1.00E-56  | 101.9 | 72.7 | 83.9 |
| Rsa1.0_01405.1.g26483.t1 | ref XP_002882191.1  hypothetical protein ARALYDRAFT_477404 [Arabidopsis lyrata subsp. lyrata] gi 297328031 gb EFH58450.1  hypothetical protein ARALYDRAFT_477404 [Arabidopsis lyrata subsp. lyrata]                                                                                               | 157  | 129 | 6.00E-35  | 82.2  | 52.2 | 64.3 | hypothetical protein ARALYDRAFT_477404          | gbpln | Arabidopsis lyrata   | AT3G01240.1   Symbols:   unknown protein; FUNCTIONS IN: molecular_function unknown; INVOLVED IN: biological_process unknown; LOCATED IN: endomembrane system; EXPRESSED IN: 11 plant structures; EXPRESSED DURING: L mature pollen stage, M germinated pollen stage, 4 anthesis, C globular stage, petal differentiation and expansion stage; BEST Arabidopsis thaliana protein match is: unknown protein (TAIR:AT3G01230.1); Has 12 Blast hits to 12 proteins in 3 species: Archae - 0; Bacteria - 0; Metazoa - 0; Fungi - 0; Plants - 11; Viruses - 0; Other Eukaryotes - 1 (source: NCBI BLink).   chr3:78545-78937 REVERSE LENGTH=130 | 157 | 130 | 2.00E-37  | 82.8  | 51.6 | 65.6 |
| Rsa1.0_01405.1.g26484.t1 | ref XP_002882192.1  hypothetical protein ARALYDRAFT_896138 [Arabidopsis lyrata subsp. lyrata] gi 297328032 gb EFH58451.1  hypothetical protein ARALYDRAFT_896138 [Arabidopsis lyrata subsp. lyrata]                                                                                               | 126  | 126 | 3.00E-40  | 100.0 | 66.7 | 81.7 | hypothetical protein ARALYDRAFT_896138          | gbpln | Arabidopsis lyrata   | AT3G01230.1   Symbols:   unknown protein; FUNCTIONS IN: molecular_function unknown; INVOLVED IN: biological_process unknown; LOCATED IN: endomembrane system; BEST Arabidopsis thaliana protein match is: unknown protein (TAIR:AT3G01240.1); Has 11 Blast hits to 11 proteins in 2 species: Archae - 0; Bacteria - 0; Metazoa - 0; Fungi - 0; Plants - 11; Viruses - 0; Other Eukaryotes - 0 (source: NCBI BLink).   chr3:76937-77317 REVERSE LENGTH=126                                                                                                                                                                                 | 126 | 126 | 5.00E-41  | 100.0 | 64.3 | 81.7 |
| Rsa1.0_01405.1.g26485.t1 | ref XP_002884288.1  ATHB20 [Arabidopsis lyrata subsp. lyrata] gi 297330128 gb EFH60547.1  ATHB20 [Arabidopsis lyrata subsp. lyrata]                                                                                                                                                               | 304  | 283 | 1.00E-134 | 93.1  | 77.6 | 83.9 | ATHB20                                          | gbpln | Arabidopsis lyrata   | AT3G01220.1   Symbols:   ATHB20, HB20   homeobox protein 20   chr3:73599-75295 FORWARD LENGTH=286                                                                                                                                                                                                                                                                                                                                                                                                                                                                                                                                         | 304 | 286 | 1.00E-134 | 94.1  | 75.3 | 81.6 |
| Rsa1.0_01405.1.g26486.t1 | ref XP_002882193.1  hypothetical protein ARALYDRAFT_477409 [Arabidopsis lyrata subsp. lyrata] gi 297328033 gb EFH58452.1  hypothetical protein ARALYDRAFT_477409 [Arabidopsis lyrata subsp. lyrata]                                                                                               | 376  | 378 | 1.00E-173 | 100.5 | 81.4 | 88.0 | hypothetical protein ARALYDRAFT_477409          | gbpln | Arabidopsis lyrata   | AT3G01200.1   Symbols:   AtRP2, RP2   PPKD regulatory protein 2   chr3:69826-71348 REVERSE LENGTH=377                                                                                                                                                                                                                                                                                                                                                                                                                                                                                                                                     | 376 | 377 | 1.00E-175 | 100.3 | 80.6 | 88.6 |
| Rsa1.0_01405.1.g26487.t1 | gb EOA32852.1  hypothetical protein CARUB_v10016167mg, partial [Capsella rubella]                                                                                                                                                                                                                 | 319  | 318 | 1.00E-166 | 99.7  | 87.8 | 94.7 | hypothetical protein CARUB_v10016167mg, partial | gbpln | Capsella rubella     | AT3G01190.1   Symbols:   Peroxidase superfamily protein   chr3:67236-68477 REVERSE LENGTH=321                                                                                                                                                                                                                                                                                                                                                                                                                                                                                                                                             | 319 | 321 | 1.00E-167 | 100.6 | 87.8 | 94.0 |

|                          |                                                                                                                                                                                                                                                            |      |      |           |       |      |      |                                                        |       |                      |                                                                                                                                                                                                                                                                                                                                                                                                                                                                                                                                                                                                                                                                                                                                              |      |      |           |       |      |      |
|--------------------------|------------------------------------------------------------------------------------------------------------------------------------------------------------------------------------------------------------------------------------------------------------|------|------|-----------|-------|------|------|--------------------------------------------------------|-------|----------------------|----------------------------------------------------------------------------------------------------------------------------------------------------------------------------------------------------------------------------------------------------------------------------------------------------------------------------------------------------------------------------------------------------------------------------------------------------------------------------------------------------------------------------------------------------------------------------------------------------------------------------------------------------------------------------------------------------------------------------------------------|------|------|-----------|-------|------|------|
| Rsa1.0_01405.1.g26488.t1 | refXP_002882195.1  hypothetical protein ARALYDRAFT_477411 [Arabidopsis lyrata subsp. lyrata] gi 297328035 gb EFH58454.1                                                                                                                                    | 791  | 796  | 0         | 100.6 | 89.3 | 93.6 | hypothetical protein ARALYDRAFT_477411                 | gbpln | Arabidopsis lyrata   | AT3G01180.1   Symbols: AtSS2, SS2   starch synthase 2   chr3:62456-65678 REVERSE LENGTH=792                                                                                                                                                                                                                                                                                                                                                                                                                                                                                                                                                                                                                                                  | 791  | 792  | 0         | 100.1 | 86.9 | 92.2 |
| Rsa1.0_01405.1.g26489.t1 | gb EOA31860.1  hypothetical protein CARUB_v10015087mg [Capsella rubella]                                                                                                                                                                                   | 206  | 227  | 1.00E-90  | 110.2 | 83.0 | 90.3 | hypothetical protein CARUB_v10015087mg                 | gbpln | Capsella rubella     | AT3G01170.1   Symbols:   Ribosomal protein L34e superfamily protein   chr3:58043-58690 FORWARD LENGTH=215<br>AT3G01160.1   Symbols:   FUNCTIONS IN: molecular_function unknown; INVOLVED IN: biological_process unknown; LOCATED IN: cytosol, nucleus; EXPRESSED IN: 22 plant structures; EXPRESSED DURING: 13 growth stages; CONTAINS InterPro DOMAIN/s: NUC153 (InterPro:IPR012580); Has 36638 Blast hits to 21323 proteins in 1057 species: Archae - 109; Bacteria - 2369; Metazoa - 13796; Fungi - 4858; Plants - 1657; Viruses - 489; Other Eukaryotes - 13360 (source: NCBI BLINK).   chr3:54655-57449 REVERSE LENGTH=713                                                                                                              | 206  | 215  | 8.00E-93  | 104.4 | 82.5 | 89.3 |
| Rsa1.0_01405.1.g26490.t1 | refNP_566132.2  uncharacterized protein [Arabidopsis thaliana] gi 6714472 gb AAF26158.1 AC008261_15 hypothetical protein [Arabidopsis thaliana] gi 332640097 gb AEE73618.1  uncharacterized protein AT3G01160 [Arabidopsis thaliana]                       | 685  | 713  | 0         | 104.1 | 60.1 | 75.6 | uncharacterized protein                                | gbpln | Arabidopsis thaliana | AT3G01160.1   Symbols:   Ribosomal protein L34e superfamily protein   chr3:58043-58690 FORWARD LENGTH=215<br>AT3G01170.1   Symbols:   Ribosomal protein L34e superfamily protein   chr3:58043-58690 FORWARD LENGTH=215<br>AT3G01160.1   Symbols:   FUNCTIONS IN: molecular_function unknown; INVOLVED IN: biological_process unknown; LOCATED IN: cytosol, nucleus; EXPRESSED IN: 22 plant structures; EXPRESSED DURING: 13 growth stages; CONTAINS InterPro DOMAIN/s: NUC153 (InterPro:IPR012580); Has 36638 Blast hits to 21323 proteins in 1057 species: Archae - 109; Bacteria - 2369; Metazoa - 13796; Fungi - 4858; Plants - 1657; Viruses - 489; Other Eukaryotes - 13360 (source: NCBI BLINK).   chr3:54655-57449 REVERSE LENGTH=713 | 685  | 713  | 0         | 104.1 | 60.1 | 75.6 |
| Rsa1.0_01405.1.g26491.t1 | gb EOA30737.1  hypothetical protein CARUB_v10013877mg [Capsella rubella]                                                                                                                                                                                   | 399  | 399  | 0         | 100.0 | 93.2 | 95.7 | hypothetical protein CARUB_v10013877mg                 | gbpln | Capsella rubella     | AT3G01150.1   Symbols: PTB, ATPTB1, PTB1   polypyrimidine tract-binding protein 1   chr3:51732-54344 FORWARD LENGTH=399                                                                                                                                                                                                                                                                                                                                                                                                                                                                                                                                                                                                                      | 399  | 399  | 0         | 100.0 | 91.5 | 95.0 |
| Rsa1.0_01405.1.g26492.t1 | refNP_180368.1  aspartyl protease-like protein [Arabidopsis thaliana] gi 4510415 gb AAD21501.1  putative chloroplast nucleoid DNA binding protein [Arabidopsis thaliana] gi 330252975 gb AEC08069.1  aspartyl protease-like protein [Arabidopsis thaliana] | 452  | 396  | 1.00E-138 | 87.6  | 55.3 | 68.1 | aspartyl protease-like protein                         | gbpln | Arabidopsis thaliana | AT2G28010.1   Symbols:   Eukaryotic aspartyl protease family protein   chr2:11930579-11931769 REVERSE LENGTH=396                                                                                                                                                                                                                                                                                                                                                                                                                                                                                                                                                                                                                             | 452  | 396  | 1.00E-141 | 87.6  | 55.3 | 68.1 |
| Rsa1.0_01405.1.g26493.t1 | refXP_002882197.1  hypothetical protein ARALYDRAFT_477416 [Arabidopsis lyrata subsp. lyrata] gi 297328037 gb EFH58456.1  hypothetical protein ARALYDRAFT_477416 [Arabidopsis lyrata subsp. lyrata]                                                         | 318  | 390  | 1.00E-144 | 122.6 | 84.6 | 88.1 | hypothetical protein ARALYDRAFT_477416                 | gbpln | Arabidopsis lyrata   | AT3G01140.1   Symbols: MYB106, NOK, ATMYB106   myb domain protein 106   chr3:46619-48143 REVERSE LENGTH=388                                                                                                                                                                                                                                                                                                                                                                                                                                                                                                                                                                                                                                  | 318  | 388  | 1.00E-141 | 122.0 | 82.1 | 86.8 |
| Rsa1.0_01406.1.g26494.t1 | #                                                                                                                                                                                                                                                          | #    | #    | #         | #     | #    | -    | ----                                                   | ----  | ----                 | #                                                                                                                                                                                                                                                                                                                                                                                                                                                                                                                                                                                                                                                                                                                                            | #    | #    | #         | #     | #    | #    |
| Rsa1.0_01406.1.g26495.t1 | gb AAx92941.1  retrotransposon protein, putative, Ty1-copia sub-class [Oryza sativa Japonica Group] gi 7754875 gb ABA91548.1  retrotransposon protein, putative, Ty1-copia subclass [Oryza sativa Japonica Group]                                          | 1223 | 2340 | 0         | 191.3 | 31.4 | 40.7 | retrotransposon protein, putative, Ty1-copia sub-class | gbpln | Oryza sativa         | AT4G23160.1   Symbols: CRK8   cysteine-rich RLK (RECEPTOR-like protein kinase) 8   chr4:12129485-12134086 FORWARD LENGTH=1262                                                                                                                                                                                                                                                                                                                                                                                                                                                                                                                                                                                                                | 1223 | 1262 | 1.00E-77  | 103.2 | 14.2 | 22.2 |
| Rsa1.0_01406.1.g26496.t4 | gb AAF18630.1 AC006228.1 F5J5.1 [Arabidopsis thaliana]                                                                                                                                                                                                     | 778  | 1463 | 3.00E-83  | 188.0 | 24.7 | 33.8 | F5J5.1                                                 | gbpln | Arabidopsis thaliana | AT4G23160.1   Symbols: CRK8   cysteine-rich RLK (RECEPTOR-like protein kinase) 8   chr4:12129485-12134086 FORWARD LENGTH=1262                                                                                                                                                                                                                                                                                                                                                                                                                                                                                                                                                                                                                | 778  | 1262 | 7.00E-22  | 162.2 | 12.0 | 18.0 |
| Rsa1.0_01406.1.g26497.t1 | #                                                                                                                                                                                                                                                          | #    | #    | #         | #     | #    | -    | ----                                                   | ----  | ----                 | #                                                                                                                                                                                                                                                                                                                                                                                                                                                                                                                                                                                                                                                                                                                                            | #    | #    | #         | #     | #    | #    |
| Rsa1.0_01406.1.g26498.t1 | gb EOA36607.1  hypothetical protein CARUB_v10011815mg [Capsella rubella]                                                                                                                                                                                   | 77   | 80   | 1.00E-32  | 103.9 | 90.9 | 96.1 | hypothetical protein CARUB_v10011815mg                 | gbpln | Capsella rubella     | AT4G23160.1   Symbols: CRK8   cysteine-rich RLK (RECEPTOR-like protein kinase) 8   chr4:12129485-12134086 FORWARD LENGTH=1262                                                                                                                                                                                                                                                                                                                                                                                                                                                                                                                                                                                                                | 77   | 75   | 9.00E-32  | 97.4  | 79.2 | 81.8 |
| Rsa1.0_01406.1.g26499.t1 | gb EOA15725.1  hypothetical protein CARUB_v10006633mg, partial [Capsella rubella]                                                                                                                                                                          | 185  | 483  | 2.00E-18  | 261.1 | 35.1 | 47.0 | hypothetical protein CARUB_v10006633mg, partial        | gbpln | Capsella rubella     | #                                                                                                                                                                                                                                                                                                                                                                                                                                                                                                                                                                                                                                                                                                                                            | #    | #    | #         | #     | #    | #    |
| Rsa1.0_01406.1.g26500.t1 | gb ACP30591.1  disease resistance protein [Brassica rapa subsp. pekinensis]                                                                                                                                                                                | 215  | 1555 | 7.00E-24  | 723.3 | 25.6 | 38.1 | disease resistance protein                             | gbpln | Brassica rapa        | AT4G29090.1   Symbols:   Ribonuclease H-like superfamily protein   chr4:14333528-14335255 FORWARD LENGTH=575                                                                                                                                                                                                                                                                                                                                                                                                                                                                                                                                                                                                                                 | 215  | 575  | 9.00E-13  | 267.4 | 20.0 | 31.2 |
| Rsa1.0_01407.1.g26501.t1 | emb CAN66208.1  hypothetical protein VITISV_035070 [Vitis vinifera]                                                                                                                                                                                        | 854  | 1496 | 0         | 175.2 | 48.6 | 61.2 | hypothetical protein VITISV_035070                     | gbpln | Vitis vinifera       | AT4G23160.1   Symbols: CRK8   cysteine-rich RLK (RECEPTOR-like protein kinase) 8   chr4:12129485-12134086 FORWARD LENGTH=1262                                                                                                                                                                                                                                                                                                                                                                                                                                                                                                                                                                                                                | 854  | 1262 | 3.00E-65  | 147.8 | 17.9 | 28.9 |

|                          |                                                                                                                                                                                                                                                                                                                                                                                                                                                                                                                                                                      |     |      |           |       |      |      |                                                         |       |                      |                                                                                                                                                                                                                                                                                                                                                              |     |      |           |       |      |      |
|--------------------------|----------------------------------------------------------------------------------------------------------------------------------------------------------------------------------------------------------------------------------------------------------------------------------------------------------------------------------------------------------------------------------------------------------------------------------------------------------------------------------------------------------------------------------------------------------------------|-----|------|-----------|-------|------|------|---------------------------------------------------------|-------|----------------------|--------------------------------------------------------------------------------------------------------------------------------------------------------------------------------------------------------------------------------------------------------------------------------------------------------------------------------------------------------------|-----|------|-----------|-------|------|------|
| Rsa1.0_01407.1.g26502.t1 | ref NP_192966.5  copper amine oxidase family protein [Arabidopsis thaliana] gi 22654995 gb AAM98089.1  AT4g12290/T4C9_130 [Arabidopsis thaliana] gi 28416507 gb AAO42784.1  AT4g12290/T4C9_130 [Arabidopsis thaliana] gi 33265771 gb AEE83111.1  copper amine oxidase family protein [Arabidopsis thaliana]                                                                                                                                                                                                                                                          | 743 | 741  | 0         | 99.7  | 87.1 | 92.5 | copper amine oxidase family protein                     | gbpln | Arabidopsis thaliana | AT4G12290.1   Symbols:   Copper amine oxidase family protein   chr4:7304434-7306973 FORWARD LENGTH=741                                                                                                                                                                                                                                                       | 743 | 741  | 0         | 99.7  | 87.1 | 92.5 |
| Rsa1.0_01407.1.g26503.t1 | ref NP_192967.1  cytochrome P450, family 706, subfamily A, polypeptide 4 [Arabidopsis thaliana] gi 5281041 emb CAB45977.1  flavonoid 3', 5'-hydroxylase-like protein [Arabidopsis thaliana] gi 7267931 emb CAB78273.1  flavonoid 3', 5'-hydroxylase-like protein [Arabidopsis thaliana] gi 26452581 dbj BAC43375.1  putative flavonoid 3',5'-hydroxylase [Arabidopsis thaliana] gi 28973099 gb AAO63874.1  putative cytochrome p450 [Arabidopsis thaliana] gi 33265771 gb AEE83112.1  cytochrome P450, family 706, subfamily A, polypeptide 4 [Arabidopsis thaliana] | 519 | 516  | 0         | 99.4  | 84.8 | 91.3 | cytochrome P450, family 706, subfamily A, polypeptide 4 | gbpln | Arabidopsis thaliana | AT4G12300.1   Symbols:   CYP706A4   cytochrome P450, family 706, subfamily A, polypeptide 4   chr4:7308016-7309692 REVERSE LENGTH=516                                                                                                                                                                                                                        | 519 | 516  | 0         | 99.4  | 84.8 | 91.3 |
| Rsa1.0_01407.1.g26504.t1 | #                                                                                                                                                                                                                                                                                                                                                                                                                                                                                                                                                                    | #   | #    | #         | #     | #    | #    | -                                                       | ----  | ----                 | #                                                                                                                                                                                                                                                                                                                                                            | #   | #    | #         | #     | #    | #    |
| Rsa1.0_01407.1.g26505.t1 | #                                                                                                                                                                                                                                                                                                                                                                                                                                                                                                                                                                    | #   | #    | #         | #     | #    | #    | -                                                       | ----  | ----                 | #                                                                                                                                                                                                                                                                                                                                                            | #   | #    | #         | #     | #    | #    |
| Rsa1.0_01408.1.g26506.t1 | gb EOA29290.1  hypothetical protein CARUB_v10025565mg [Capsella rubella]                                                                                                                                                                                                                                                                                                                                                                                                                                                                                             | 370 | 371  | 0         | 100.3 | 92.4 | 96.5 | hypothetical protein CARUB_v10025565mg                  | gbpln | Capsella rubella     | AT2G41810.1   Symbols:   Protein of unknown function, DUF642   chr2:17439414-17441296 REVERSE LENGTH=370                                                                                                                                                                                                                                                     | 370 | 370  | 0         | 100.0 | 91.4 | 94.6 |
| Rsa1.0_01408.1.g26507.t1 | ref NP_181713.1  Leucine-rich repeat protein kinase-like protein [Arabidopsis thaliana] gi 75097645 sp O22938.1 Y2182 ARATH RecName: Full=Leucine-rich repeat receptor-like tyrosine-protein kinase At2g41820; Flags: Precursor gi 2335097 gb AAC02766.1  putative receptor-like protein kinase [Arabidopsis thaliana] gi 224589547 gb ACN59307.1  leucine-rich repeat receptor-like protein kinase [Arabidopsis thaliana] gi 330254942 gb AEC10036.1  leucine-rich repeat receptor-like tyrosine-protein kinase [Arabidopsis thaliana]                              | 890 | 890  | 0         | 100.0 | 90.6 | 94.0 | Leucine-rich repeat protein kinase-like protein         | gbpln | Arabidopsis thaliana | AT2G41820.1   Symbols:   Leucine-rich repeat protein kinase family protein   chr2:17447170-17449914 FORWARD LENGTH=890                                                                                                                                                                                                                                       | 890 | 890  | 0         | 100.0 | 90.6 | 94.0 |
| Rsa1.0_01408.1.g26508.t1 | ref XP_002881801.1  hypothetical protein ARALYDRAFT_483264 [Arabidopsis lyrata subsp. lyrata] gi 297327640 gb EFH58060.1  hypothetical protein ARALYDRAFT_483264 [Arabidopsis lyrata subsp. lyrata]                                                                                                                                                                                                                                                                                                                                                                  | 204 | 1025 | 4.00E-20  | 502.5 | 24.0 | 26.5 | hypothetical protein ARALYDRAFT_483264                  | gbpln | Arabidopsis lyrata   | AT2G41830.1   Symbols:   Uncharacterized protein   chr2:17450431-17456453 REVERSE LENGTH=1025                                                                                                                                                                                                                                                                | 204 | 1025 | 2.00E-22  | 502.5 | 24.0 | 26.5 |
| Rsa1.0_01408.1.g26509.t1 | gb EOA27653.1  hypothetical protein CARUB_v10023800mg [Capsella rubella]                                                                                                                                                                                                                                                                                                                                                                                                                                                                                             | 283 | 283  | 1.00E-124 | 100.0 | 77.7 | 79.9 | hypothetical protein CARUB_v10023800mg                  | gbpln | Capsella rubella     | AT1G58380.1   Symbols:   XW6   Ribosomal protein S5 family protein   chr1:21689115-21690085 FORWARD LENGTH=284                                                                                                                                                                                                                                               | 283 | 284  | 1.00E-123 | 100.4 | 75.6 | 78.4 |
| Rsa1.0_01408.1.g26510.t1 | emb CAC05657.1  endopolygalacturonase [Brassica napus] gi 9967520 emb CAC05658.1  endopolygalacturonase [Brassica napus]                                                                                                                                                                                                                                                                                                                                                                                                                                             | 435 | 434  | 0         | 99.8  | 86.7 | 93.1 | endopolygalacturonase                                   | gbpln | Brassica napus       | AT2G41850.1   Symbols:   PGAZAT, ADPG2   polygalacturonase abscission zone A, thaliana   chr2:17461918-17464059 REVERSE LENGTH=433                                                                                                                                                                                                                           | 435 | 433  | 0         | 99.5  | 82.5 | 90.1 |
| Rsa1.0_01408.1.g26511.t1 | ref XP_002881805.1  calcium-dependent protein kinase 14 [Arabidopsis lyrata subsp. lyrata] gi 297327644 gb EFH59064.1  calcium-dependent protein kinase 14 [Arabidopsis lyrata subsp. lyrata]                                                                                                                                                                                                                                                                                                                                                                        | 809 | 531  | 0         | 65.6  | 57.5 | 62.2 | calcium-dependent protein kinase 14                     | gbpln | Arabidopsis lyrata   | AT2G41860.1   Symbols:   CPK14   calcium-dependent protein kinase 14   chr2:17467646-17469786 REVERSE LENGTH=530                                                                                                                                                                                                                                             | 809 | 530  | 0         | 65.5  | 57.1 | 61.8 |
| Rsa1.0_01408.1.g26512.t1 | gb EOA28140.1  hypothetical protein CARUB_v10024329mg [Capsella rubella]                                                                                                                                                                                                                                                                                                                                                                                                                                                                                             | 61  | 123  | 9.00E-23  | 201.6 | 91.8 | 96.7 | hypothetical protein CARUB_v10024329mg                  | gbpln | Capsella rubella     | AT2G41905.1   Symbols:   BEST Arabidopsis thaliana protein match is: arabinogalactan protein 23 (TAIR:AT3G57690.1); Has 35333 Blast hits to 34131 proteins in 2444 species: Archaea - 798; Bacteria - 22429; Metazoa - 974; Fungi - 991; Plants - 531; Viruses - 0; Other Eukaryotes - 9610 (source: NCBI BLINK).   chr2:17495766-17495951 FORWARD LENGTH=61 | 61  | 61   | 2.00E-25  | 100.0 | 95.1 | 96.7 |
| Rsa1.0_01408.1.g26513.t1 | gb EOA21072.1  hypothetical protein CARUB_v10001410mg [Capsella rubella]                                                                                                                                                                                                                                                                                                                                                                                                                                                                                             | 362 | 330  | 1.00E-76  | 91.2  | 44.8 | 61.6 | hypothetical protein CARUB_v10001410mg                  | gbpln | Capsella rubella     | AT3G57740.1   Symbols:   Protein kinase superfamily protein   chr3:21392671-21393744 FORWARD LENGTH=357                                                                                                                                                                                                                                                      | 362 | 357  | 3.00E-74  | 98.6  | 48.6 | 59.9 |

|                           |                                                                                                                                                                                                                                                                                                                                                                                     |      |      |           |       |      |      |                                                |       |                      |                                                                                                                                                                                                                                                                                                                                                 |      |      |           |       |      |      |
|---------------------------|-------------------------------------------------------------------------------------------------------------------------------------------------------------------------------------------------------------------------------------------------------------------------------------------------------------------------------------------------------------------------------------|------|------|-----------|-------|------|------|------------------------------------------------|-------|----------------------|-------------------------------------------------------------------------------------------------------------------------------------------------------------------------------------------------------------------------------------------------------------------------------------------------------------------------------------------------|------|------|-----------|-------|------|------|
| Rsa1.0_01408.1.g26514.t1  | refNP_850360.2   protein kinase domain-containing protein [Arabidopsis thaliana]   gi 1871189 gb AAB63549.1   putative protein kinase [Arabidopsis thaliana]   gi 330254956 gb AEC10050.1   protein kinase domain-containing protein [Arabidopsis thaliana]                                                                                                                         | 320  | 351  | 1.00E-119 | 109.7 | 63.8 | 76.9 | protein kinase domain-containing protein       | gbpln | Arabidopsis thaliana | AT2G41930.1   Symbols:   Protein kinase superfamily protein   chr2:17501629-17502684 FORWARD LENGTH=351                                                                                                                                                                                                                                         | 320  | 351  | 1.00E-121 | 109.7 | 63.8 | 76.9 |
| Rsa1.0_01408.1.g26515.t1  | refNP_181725.1   zinc finger protein 8 [Arabidopsis thaliana]   gi 1871188 gb AAB63548.1   putative C2H2-type zinc finger protein [Arabidopsis thaliana]   gi 14517524 gb AAK62652.1   At2g41940/T6D20.16 [Arabidopsis thaliana]   gi 1581011 gb AAL06981.1   At2g41940/T6D20.16 [Arabidopsis thaliana]   gi 330254957 gb AEC10051.1   zinc finger protein 8 [Arabidopsis thaliana] | 248  | 257  | 1.00E-90  | 103.6 | 76.2 | 83.5 | zinc finger protein 8                          | gbpln | Arabidopsis thaliana | AT2G41940.1   Symbols: ZFP8   zinc finger protein 8   chr2:17507556-17508329 FORWARD LENGTH=257                                                                                                                                                                                                                                                 | 248  | 257  | 4.00E-93  | 103.6 | 76.2 | 83.5 |
| Rsa1.0_01409.1.g26516.t1  | refXP_002876726.1   hypothetical protein ARALYDRAFT_486864 [Arabidopsis lyrata subsp. lyrata]   gi 297322564 gb EFH52985.1   hypothetical protein ARALYDRAFT_486864 [Arabidopsis lyrata subsp. lyrata]                                                                                                                                                                              | 71   | 405  | 1.00E-14  | 570.4 | 53.5 | 56.3 | hypothetical protein ARALYDRAFT_486864         | gbpln | Arabidopsis lyrata   | AT3G63510.1   Symbols:   FMN-linked oxidoreductases superfamily protein   chr3:23450542-23452682 FORWARD LENGTH=419                                                                                                                                                                                                                             | 71   | 419  | 9.00E-17  | 590.1 | 52.1 | 56.3 |
| Rsa1.0_01409.1.g26517.t13 | refNP_567149.2   FMN-linked oxidoreductase-like protein protein [Arabidopsis thaliana]   gi 24030197 gb AANA1279.1   unknown protein [Arabidopsis thaliana]   gi 332646975 gb AEE80496.1   FMN-linked oxidoreductase-like protein protein [Arabidopsis thaliana]                                                                                                                    | 2277 | 419  | 1.00E-172 | 18.4  | 13.3 | 14.1 | FMN-linked oxidoreductase-like protein protein | gbpln | Arabidopsis thaliana | AT3G63510.1   Symbols:   FMN-linked oxidoreductases superfamily protein   chr3:23450542-23452682 FORWARD LENGTH=419                                                                                                                                                                                                                             | 2277 | 419  | 1.00E-175 | 18.4  | 13.3 | 14.1 |
| Rsa1.0_01409.1.g26518.t1  | refXP_002887355.1   UDP-glucose:glycoprotein glucosyltransferase [Arabidopsis lyrata subsp. lyrata]   gi 297333196 gb EFH63614.1   UDP-glucose:glycoprotein glucosyltransferase [Arabidopsis lyrata subsp. lyrata]                                                                                                                                                                  | 1619 | 1616 | 0         | 99.8  | 91.7 | 94.8 | UDP-glucose:glycoprotein glucosyltransferase   | gbpln | Arabidopsis lyrata   | AT1G71220.2   Symbols: EBS1   UDP-glucose:glycoprotein glucosyltransferases:transferases, transferring hexosyl groups:transferases, transferring glycosyl groups   chr1:26841664-26851730 FORWARD LENGTH=1614                                                                                                                                   | 1619 | 1614 | 0         | 99.7  | 91.0 | 94.5 |
| Rsa1.0_01409.1.g26519.t1  | refXP_002888826.1   hypothetical protein ARALYDRAFT_894959 [Arabidopsis lyrata subsp. lyrata]   gi 297334667 gb EFH65085.1   hypothetical protein ARALYDRAFT_894959 [Arabidopsis lyrata subsp. lyrata]                                                                                                                                                                              | 868  | 868  | 0         | 100.0 | 78.3 | 87.9 | hypothetical protein ARALYDRAFT_894959         | gbpln | Arabidopsis lyrata   | AT1G71210.1   Symbols:   Pentatricopeptide repeat (PPR) superfamily protein   chr1:26838850-26841489 REVERSE LENGTH=879                                                                                                                                                                                                                         | 868  | 879  | 0         | 101.3 | 77.0 | 86.9 |
| Rsa1.0_01409.1.g26520.t1  | refXP_002888825.1   predicted protein [Arabidopsis lyrata subsp. lyrata]   gi 297334666 gb EFH65084.1   predicted protein [Arabidopsis lyrata subsp. lyrata]                                                                                                                                                                                                                        | 208  | 235  | 2.00E-67  | 113.0 | 74.0 | 82.2 | predicted protein                              | gbpln | Arabidopsis lyrata   | AT1G71200.1   Symbols:   basic helix-loop-helix (bHLH) DNA-binding superfamily protein   chr1:26835973-26837308 REVERSE LENGTH=234                                                                                                                                                                                                              | 208  | 234  | 5.00E-68  | 112.5 | 72.1 | 80.3 |
| Rsa1.0_01409.1.g26521.t1  | #                                                                                                                                                                                                                                                                                                                                                                                   | #    | #    | #         | #     | #    | #    | -                                              | ----  | ----                 | AT1G71160.1   Symbols: KCS7   3-ketoacyl-CoA synthase 7   chr1:26828788-26830170 REVERSE LENGTH=460                                                                                                                                                                                                                                             | 118  | 460  | 2.00E-12  | 389.8 | 25.4 | 29.7 |
| Rsa1.0_01409.1.g26522.t1  | refNP_177271.1   uncharacterized protein [Arabidopsis thaliana]   gi 12323430 gb AAG51693.1   AC016972_12 unknown protein; 51945-53271 [Arabidopsis thaliana]   gi 49823492 gb AAT68729.1   hypothetical protein At1g71150 [Arabidopsis thaliana]   gi 332197045 gb AEE35166.1   uncharacterized protein AT1G71150 [Arabidopsis thaliana]                                           | 357  | 351  | 1.00E-148 | 98.3  | 76.2 | 82.6 | uncharacterized protein                        | gbpln | Arabidopsis thaliana | AT1G71150.1   Symbols:   unknown protein; BEST Arabidopsis thaliana protein match is: unknown protein (TAIR:AT1G22970.1); Has 105 Blast hits to 103 proteins in 41 species: Archae - 0; Bacteria - 2; Metazoa - 42; Fungi - 6; Plants - 48; Viruses - 0; Other Eukaryotes - 7 (source: NCBI BLink).   chr1:26827189-26828515 FORWARD LENGTH=351 | 357  | 351  | 1.00E-151 | 98.3  | 76.2 | 82.6 |
| Rsa1.0_01409.1.g26523.t1  | gb EOA35095.1   hypothetical protein CARUB_v10020206mg [Capsella rubella]                                                                                                                                                                                                                                                                                                           | 490  | 485  | 0         | 99.0  | 84.3 | 90.4 | hypothetical protein CARUB_v10020206mg         | gbpln | Capsella rubella     | AT1G71140.1   Symbols:   MATE efflux family protein   chr1:26824762-26826748 FORWARD LENGTH=485                                                                                                                                                                                                                                                 | 490  | 485  | 0         | 99.0  | 80.4 | 88.8 |
| Rsa1.0_01409.1.g26524.t1  | #                                                                                                                                                                                                                                                                                                                                                                                   | #    | #    | #         | #     | #    | #    | -                                              | ----  | ----                 | #                                                                                                                                                                                                                                                                                                                                               | #    | #    | #         | #     | #    |      |

|                          |                                                                                                                                                                                                                                                       |     |     |           |       |      |      |                                                 |       |                      |                                                                                                                                                                                                                                                                                                                                                                                                                                                                                                                     |     |     |           |       |      |      |
|--------------------------|-------------------------------------------------------------------------------------------------------------------------------------------------------------------------------------------------------------------------------------------------------|-----|-----|-----------|-------|------|------|-------------------------------------------------|-------|----------------------|---------------------------------------------------------------------------------------------------------------------------------------------------------------------------------------------------------------------------------------------------------------------------------------------------------------------------------------------------------------------------------------------------------------------------------------------------------------------------------------------------------------------|-----|-----|-----------|-------|------|------|
| Rsa1.0_01409.1.g26525.t1 | ref XP_002887346.1  hypothetical protein ARALYDRAFT_476243 [Arabidopsis lyrata subsp. lyrata]  gi 297333137 gb EFH63605.1  hypothetical protein ARALYDRAFT_476243 [Arabidopsis lyrata subsp. lyrata]                                                  | 553 | 557 | 0         | 100.7 | 81.7 | 88.8 | hypothetical protein ARALYDRAFT_476243          | gbpln | Arabidopsis lyrata   | AT1G71110.1   Symbols:   unknown protein; FUNCTIONS IN: molecular_function unknown; INVOLVED IN: biological_process unknown; LOCATED IN: endomembrane system; BEST Arabidopsis thaliana protein match is: unknown protein (TAIR:AT2G12400.1); Has 173 Blast hits to 169 proteins in 21 species: Archae - 0; Bacteria - 0; Metazoa - 3; Fungi - 0; Plants - 165; Viruses - 0; Other Eukaryotes - 5 (source: NCBI BLINK).   chr1:26818244-26820852 FORWARD LENGTH=557                                                 | 553 | 557 | 0         | 100.7 | 80.3 | 88.4 |
| Rsa1.0_01410.1.g26526.t1 | gb ABD65000.1  hypothetical protein 26.t00020 [Brassica oleracea]                                                                                                                                                                                     | 342 | 302 | 5.00E-82  | 88.3  | 46.8 | 58.5 | hypothetical protein 26.t00020                  | gbpln | Brassica oleracea    | AT5G41220.1   Symbols: ATGSTT3, GST10C, GSTT3   glutathione S-transferase THETA 3   chr5:16494560-16496969 REVERSE LENGTH=590                                                                                                                                                                                                                                                                                                                                                                                       | 342 | 590 | 4.00E-44  | 172.5 | 28.1 | 38.3 |
| Rsa1.0_01410.1.g26527.t1 | ref XP_002887115.1  zinc finger family protein [Arabidopsis lyrata subsp. lyrata]  gi 297332956 gb EFH63374.1  zinc finger family protein [Arabidopsis lyrata subsp. lyrata]                                                                          | 372 | 375 | 1.00E-170 | 100.8 | 83.3 | 88.7 | zinc finger family protein                      | gbpln | Arabidopsis lyrata   | AT1G67340.1   Symbols:   HCP-like superfamily protein with MYND-type zinc finger   chr1:25230323-25231622 FORWARD LENGTH=379                                                                                                                                                                                                                                                                                                                                                                                        | 372 | 379 | 1.00E-170 | 101.9 | 81.7 | 88.4 |
| Rsa1.0_01410.1.g26528.t1 | gb EOA33466.1  hypothetical protein CARUB_v10021120mg, partial [Capsella rubella]                                                                                                                                                                     | 91  | 141 | 3.00E-43  | 154.9 | 93.4 | 97.8 | hypothetical protein CARUB_v10021120mg, partial | gbpln | Capsella rubella     | AT1G67350.2   Symbols:   unknown protein; FUNCTIONS IN: molecular_function unknown; INVOLVED IN: photorespiration; LOCATED IN: mitochondrial membrane, mitochondrial respiratory chain complex I, respiratory chain complex I; EXPRESSED IN: 24 plant structures; EXPRESSED DURING: 15 growth stages; Has 2 Blast hits to 2 proteins in 1 species: Archae - 0; Bacteria - 0; Metazoa - 0; Fungi - 0; Plants - 2; Viruses - 0; Other Eukaryotes - 0 (source: NCBI BLINK).   chr1:25235826-25236122 FORWARD LENGTH=98 | 91  | 98  | 1.00E-44  | 107.7 | 90.1 | 93.4 |
| Rsa1.0_01410.1.g26529.t1 | gb AAN37925.1 AF410429.1 aynaptic 1 [Brassica oleracea var. alboglabra]                                                                                                                                                                               | 600 | 599 | 0         | 99.8  | 92.3 | 96.0 | aynaptic 1                                      | gbpln | Brassica oleracea    | AT1G67370.1   Symbols: ASY1, ATASY1   DNA-binding HORMA family protein   chr1:25239347-25243713 REVERSE LENGTH=596                                                                                                                                                                                                                                                                                                                                                                                                  | 600 | 596 | 0         | 99.3  | 83.2 | 90.5 |
| Rsa1.0_01410.1.g26530.t3 | ref NP_001185342.1  Zn-dependent exopeptidase-like protein [Arabidopsis thaliana]  gi 332196522 gb AEE34643.1  Zn-dependent exopeptidase-like protein [Arabidopsis thaliana]                                                                          | 875 | 922 | 0         | 105.4 | 87.2 | 92.9 | Zn-dependent exopeptidase-like protein          | gbpln | Arabidopsis thaliana | AT1G67420.2   Symbols:   Zn-dependent exopeptidases superfamily protein   chr1:25255264-25260358 FORWARD LENGTH=922                                                                                                                                                                                                                                                                                                                                                                                                 | 875 | 922 | 0         | 105.4 | 87.2 | 92.9 |
| Rsa1.0_01410.1.g26531.t1 | #                                                                                                                                                                                                                                                     | #   | #   | #         | #     | #    | #    | -                                               | ----  | ----                 | #                                                                                                                                                                                                                                                                                                                                                                                                                                                                                                                   | #   | #   | #         | #     | #    |      |
| Rsa1.0_01410.1.g26532.t1 | gb EOA35774.1  hypothetical protein CARUB_v10021005mg, partial [Capsella rubella]                                                                                                                                                                     | 202 | 185 | 1.00E-101 | 91.6  | 89.1 | 91.1 | hypothetical protein CARUB_v10021005mg, partial | gbpln | Capsella rubella     | AT1G67430.1   Symbols:   Ribosomal protein L22p/L17e family protein   chr1:25262209-25263627 FORWARD LENGTH=175                                                                                                                                                                                                                                                                                                                                                                                                     | 202 | 175 | 1.00E-100 | 86.6  | 85.1 | 86.1 |
| Rsa1.0_01410.1.g26533.t1 | ref NP_176911.2  Minichromosome maintenance (MCM2/3/5) protein [Arabidopsis thaliana]  gi 66792692 gb AAAY56448.1  At1g67440 [Arabidopsis thaliana]  gi 332196525 gb AEE34646.1  Minichromosome maintenance (MCM2/3/5) protein [Arabidopsis thaliana] | 488 | 433 | 0         | 88.7  | 73.8 | 79.1 | Minichromosome maintenance (MCM2/3/5) protein   | gbpln | Arabidopsis thaliana | AT1G67440.1   Symbols: emb1688   Minichromosome maintenance (MCM2/3/5) family protein   chr1:25263905-25265551 REVERSE LENGTH=433                                                                                                                                                                                                                                                                                                                                                                                   | 488 | 433 | 0         | 88.7  | 73.8 | 79.1 |
| Rsa1.0_01410.1.g26534.t1 | gb EOA35305.1  hypothetical protein CARUB_v10020480mg [Capsella rubella]  gi 482571118 gb EOA35306.1  hypothetical protein CARUB_v10020480mg [Capsella rubella]                                                                                       | 298 | 376 | 1.00E-151 | 126.2 | 85.6 | 92.6 | hypothetical protein CARUB_v10020480mg          | gbpln | Capsella rubella     | AT1G67480.2   Symbols:   Galactose oxidase/kelch repeat superfamily protein   chr1:25277294-25278529 FORWARD LENGTH=376                                                                                                                                                                                                                                                                                                                                                                                             | 298 | 376 | 1.00E-151 | 126.2 | 85.9 | 91.3 |
| Rsa1.0_01411.1.g26535.t1 | gb AAZ66922.1  117M18.3 [Brassica rapa]                                                                                                                                                                                                               | 85  | 87  | 5.00E-17  | 102.4 | 69.4 | 84.7 | 117M18.3                                        | gbpln | Brassica rapa        | AT5G09980.1   Symbols: PROPEP4   elicitor peptide 4 precursor   chr5:3122790-3123728 FORWARD LENGTH=81                                                                                                                                                                                                                                                                                                                                                                                                              | 85  | 81  | 2.00E-12  | 95.3  | 56.5 | 68.2 |
| Rsa1.0_01411.1.g26536.t1 | ref XP_002871398.1  hypothetical protein ARALYDRAFT_487822 [Arabidopsis lyrata subsp. lyrata]  gi 297317235 gb EFH47657.1  hypothetical protein ARALYDRAFT_487822 [Arabidopsis lyrata subsp. lyrata]                                                  | 85  | 85  | 2.00E-17  | 100.0 | 64.7 | 77.6 | hypothetical protein ARALYDRAFT_487822          | gbpln | Arabidopsis lyrata   | AT5G09990.1   Symbols: PROPEP5   elicitor peptide 5 precursor   chr5:3124623-3124976 FORWARD LENGTH=86                                                                                                                                                                                                                                                                                                                                                                                                              | 85  | 86  | 7.00E-19  | 101.2 | 62.4 | 76.5 |
| Rsa1.0_01411.1.g26537.t1 | ref NP_974759.1  uncharacterized protein [Arabidopsis thaliana]  gi 332004094 gb AED91477.1  uncharacterized protein AT5G09995 [Arabidopsis thaliana]                                                                                                 | 256 | 257 | 1.00E-102 | 100.4 | 79.3 | 84.0 | uncharacterized protein                         | gbpln | Arabidopsis thaliana | AT5G09995.2   Symbols:   unknown protein; BEST Arabidopsis thaliana protein match is: unknown protein (TAIR:AT1G08530.1); Has 35333 Blast hits to 34131 proteins in 2444 species: Archae - 798; Bacteria - 22429; Metazoa - 974; Fungi - 991; Plants - 531; Viruses - 0; Other Eukaryotes - 9610 (source: NCBI BLINK).   chr5:3125185-3126302 REVERSE LENGTH=257                                                                                                                                                    | 256 | 257 | 1.00E-104 | 100.4 | 79.3 | 84.0 |

|                          |                                                                                                                                                                                                     |      |      |           |       |      |      |                                                 |       |                      |                                                                                                                                                                                                                                                                                                                                                                                                                                                                                                                                                        |      |      |           |       |      |      |
|--------------------------|-----------------------------------------------------------------------------------------------------------------------------------------------------------------------------------------------------|------|------|-----------|-------|------|------|-------------------------------------------------|-------|----------------------|--------------------------------------------------------------------------------------------------------------------------------------------------------------------------------------------------------------------------------------------------------------------------------------------------------------------------------------------------------------------------------------------------------------------------------------------------------------------------------------------------------------------------------------------------------|------|------|-----------|-------|------|------|
| Rsa1.0_01411.1.g26538.t1 | gb[EOA22624.1] hypothetical protein CARUB_v10003293mg [Capsella rubella]                                                                                                                            | 140  | 144  | 6.00E-47  | 102.9 | 70.7 | 78.6 | hypothetical protein CARUB_v10003293mg          | gbpln | Capsella rubella     | AT5G10000.1   Symbols: ATFD4, FD4   ferredoxin 4   chr5:3126709-3127155 FORWARD LENGTH=148                                                                                                                                                                                                                                                                                                                                                                                                                                                             | 140  | 148  | 4.00E-48  | 105.7 | 68.6 | 77.9 |
| Rsa1.0_01411.1.g26539.t1 | gb[AAZ66923.1] 117M18.4 [Brassica rapa]                                                                                                                                                             | 435  | 424  | 0         | 97.5  | 81.6 | 87.8 | 117M18.4                                        | gbpln | Brassica rapa        | AT5G10010.1   Symbols:   unknown protein; FUNCTIONS IN: molecular function unknown; INVOLVED IN: biological process unknown; LOCATED IN: nucleolus; EXPRESSED IN: 25 plant structures; EXPRESSED DURING: 15 growth stages; BEST Arabidopsis thaliana protein match is: unknown protein (TAIR:AT5G64910.1); Has 33260 Blast hits to 16857 proteins in 1270 species: Archae - 88; Bacteria - 3040; Metazoa - 11915; Fungi - 3137; Plants - 1371; Viruses - 424; Other Eukaryotes - 13285 (source: NCBI BLINK).   chr5:3128098-3131452 FORWARD LENGTH=434 | 435  | 434  | 1.00E-173 | 99.8  | 74.0 | 85.1 |
| Rsa1.0_01411.1.g26540.t1 | ref[XP_002871400.1] hypothetical protein ARALYDRAFT_487827 [Arabidopsis lyrata subsp. lyrata] gi 297317237 gb EFH47659.1  hypothetical protein ARALYDRAFT_487827 [Arabidopsis lyrata subsp. lyrata] | 1059 | 1051 | 0         | 99.2  | 85.1 | 91.4 | hypothetical protein ARALYDRAFT_487827          | gbpln | Arabidopsis lyrata   | AT5G10020.1   Symbols:   Leucine-rich receptor-like protein kinase family protein   chr5:3133514-3136949 FORWARD LENGTH=1048                                                                                                                                                                                                                                                                                                                                                                                                                           | 1059 | 1048 | 0         | 99.0  | 83.2 | 89.7 |
| Rsa1.0_01411.1.g26541.t1 | gb[AAZ67587.1] 80A08.2 [Brassica rapa subsp. pekinensis]                                                                                                                                            | 366  | 364  | 0         | 99.5  | 93.4 | 96.7 | 80A08.2                                         | gbpln | Brassica rapa        | AT5G10030.2   Symbols: TGA4   TGACG motif-binding factor 4   chr5:3137648-3139295 REVERSE LENGTH=364                                                                                                                                                                                                                                                                                                                                                                                                                                                   | 366  | 364  | 0         | 99.5  | 87.7 | 93.2 |
| Rsa1.0_01411.1.g26542.t1 | gb[AAZ67588.1] 80A08.3 [Brassica rapa subsp. pekinensis]                                                                                                                                            | 74   | 74   | 3.00E-26  | 100.0 | 82.4 | 90.5 | 80A08.3                                         | gbpln | Brassica rapa        | AT5G10040.1   Symbols:   unknown protein; BEST Arabidopsis thaliana protein match is: unknown protein (TAIR:AT5G65207.1); Has 1807 Blast hits to 1807 proteins in 277 species: Archae - 0; Bacteria - 0; Metazoa - 736; Fungi - 347; Plants - 385; Viruses - 0; Other Eukaryotes - 339 (source: NCBI BLINK).   chr5:3143723-3143986 FORWARD LENGTH=87                                                                                                                                                                                                  | 74   | 87   | 6.00E-15  | 117.6 | 60.8 | 71.6 |
| Rsa1.0_01411.1.g26543.t1 | gb[AAK59619.1] putative RNA helicase [Arabidopsis thaliana]                                                                                                                                         | 229  | 563  | 8.00E-23  | 245.9 | 27.5 | 28.4 | putative RNA helicase                           | gbpln | Arabidopsis thaliana | AT5G08620.1   Symbols: STRS2, ATRH25   DEA(D/H)-box RNA helicase family protein   chr5:2794540-2797548 FORWARD LENGTH=563                                                                                                                                                                                                                                                                                                                                                                                                                              | 229  | 563  | 3.00E-25  | 245.9 | 27.5 | 28.4 |
| Rsa1.0_01411.1.g26544.t1 | gb[AAZ67589.1] 80A08.4 [Brassica rapa subsp. pekinensis]                                                                                                                                            | 294  | 449  | 1.00E-142 | 152.7 | 89.1 | 93.5 | 80A08.4                                         | gbpln | Brassica rapa        | AT5G10070.1   Symbols:   RNase L inhibitor protein-related   chr5:3148684-3150324 REVERSE LENGTH=264                                                                                                                                                                                                                                                                                                                                                                                                                                                   | 294  | 264  | 1.00E-122 | 89.8  | 75.2 | 78.9 |
| Rsa1.0_01411.1.g26545.t1 | gb[AAZ67590.1] 80A08.5 [Brassica rapa subsp. pekinensis]                                                                                                                                            | 527  | 632  | 0         | 119.9 | 84.4 | 90.9 | 80A08.5                                         | gbpln | Brassica rapa        | AT5G10080.1   Symbols:   Eukaryotic aspartyl protease family protein   chr5:3150843-3153380 FORWARD LENGTH=528                                                                                                                                                                                                                                                                                                                                                                                                                                         | 527  | 528  | 0         | 100.2 | 78.0 | 85.4 |
| Rsa1.0_01411.1.g26546.t1 | gb[AAZ67592.1] 80A08.7 [Brassica rapa subsp. pekinensis]                                                                                                                                            | 549  | 560  | 0         | 102.0 | 92.9 | 95.1 | 80A08.7                                         | gbpln | Brassica rapa        | AT5G10090.1   Symbols: TPR13   Tetratricopeptide repeat (TPR)-like superfamily protein   chr5:3153722-3155745 REVERSE LENGTH=594                                                                                                                                                                                                                                                                                                                                                                                                                       | 549  | 594  | 0         | 108.2 | 83.1 | 90.3 |
| Rsa1.0_01411.1.g26547.t1 | gb[AAZ67593.1] 80A08.8 [Brassica rapa subsp. pekinensis]                                                                                                                                            | 266  | 365  | 1.00E-140 | 137.2 | 92.1 | 95.9 | 80A08.8                                         | gbpln | Brassica rapa        | AT5G10100.1   Symbols: TPPI   Haloacid dehalogenase-like hydrolase (HAD) superfamily protein   chr5:3157980-3160275 FORWARD LENGTH=369                                                                                                                                                                                                                                                                                                                                                                                                                 | 266  | 369  | 1.00E-113 | 138.7 | 77.4 | 86.5 |
| Rsa1.0_01412.1.g26548.t1 | gb[ABD36807.1] glutathione S-transferase [Brassica napus]                                                                                                                                           | 217  | 217  | 1.00E-121 | 100.0 | 98.2 | 98.6 | glutathione S-transferase                       | gbpln | Brassica napus       | AT1G78370.1   Symbols: ATGSTU20, GSTU20   glutathione S-transferase TAU 20   chr1:29484428-29485204 REVERSE LENGTH=217                                                                                                                                                                                                                                                                                                                                                                                                                                 | 217  | 217  | 1.00E-113 | 100.0 | 88.9 | 94.5 |
| Rsa1.0_01412.1.g26549.t1 | gb[AAF71799.1]AC013430.8 F3F9.13 [Arabidopsis thaliana]                                                                                                                                             | 218  | 439  | 1.00E-113 | 201.4 | 87.6 | 93.6 | F3F9.13                                         | gbpln | Arabidopsis thaliana | AT1G78340.1   Symbols: ATGSTU22, GSTU22   glutathione S-transferase TAU 22   chr1:29473046-29473797 REVERSE LENGTH=218                                                                                                                                                                                                                                                                                                                                                                                                                                 | 218  | 218  | 1.00E-115 | 100.0 | 88.5 | 94.5 |
| Rsa1.0_01412.1.g26550.t1 | gb[EOA35683.1] hypothetical protein CARUB_v10020906mg, partial [Capsella rubella]                                                                                                                   | 220  | 225  | 1.00E-108 | 102.3 | 85.5 | 92.7 | hypothetical protein CARUB_v10020906mg, partial | gbpln | Capsella rubella     | AT1G78320.1   Symbols: ATGSTU23, GSTU23   glutathione S-transferase TAU 23   chr1:29467581-29468358 REVERSE LENGTH=220                                                                                                                                                                                                                                                                                                                                                                                                                                 | 220  | 220  | 1.00E-109 | 100.0 | 84.5 | 92.7 |
| Rsa1.0_01412.1.g26551.t1 | gb[AAK26634.1]AF342780.1 GF14 omega [Brassica napus]                                                                                                                                                | 260  | 260  | 1.00E-147 | 100.0 | 98.5 | 98.8 | GF14 omega                                      | gbpln | Brassica napus       | AT1G78300.1   Symbols: GRF2, 14-3-3 OMEGA, GF14 OMEGA   general regulatory factor 2   chr1:29461883-29463052 FORWARD LENGTH=259                                                                                                                                                                                                                                                                                                                                                                                                                        | 260  | 259  | 1.00E-145 | 99.6  | 95.0 | 97.7 |
| Rsa1.0_01412.1.g26552.t1 | gb[EOA35386.1] hypothetical protein CARUB_v10020582mg [Capsella rubella]                                                                                                                            | 342  | 345  | 1.00E-160 | 100.9 | 83.6 | 87.7 | hypothetical protein CARUB_v10020582mg          | gbpln | Capsella rubella     | AT1G78290.3   Symbols:   Protein kinase superfamily protein   chr1:29457457-29458909 REVERSE LENGTH=343                                                                                                                                                                                                                                                                                                                                                                                                                                                | 342  | 343  | 1.00E-161 | 100.3 | 79.2 | 83.0 |
| Rsa1.0_01412.1.g26553.t1 | gb[AAB87099.1] putative retroelement pol polyprotein [Arabidopsis thaliana]                                                                                                                         | 1449 | 1496 | 0         | 103.2 | 54.9 | 69.9 | putative retroelement pol polyprotein           | gbpln | Arabidopsis thaliana | AT4G23160.1   Symbols: CRK8   cysteine-rich RLK (RECEPTOR-like protein kinase) 8   chr4:12129485-12134086 FORWARD LENGTH=1262                                                                                                                                                                                                                                                                                                                                                                                                                          | 1449 | 1262 | 1.00E-128 | 87.1  | 16.3 | 24.6 |

|                          |                                                                                                                                                                                                                                                                                                                                                                                                                                                                                                                                                                                                                                                                                                                                                                                                                                                                                                                                     |     |     |           |       |      |      |                                                         |       |                      |                                                                                                                                                                                                                                                                                                                                                                                                                                                                                                                |     |     |           |       |      |      |
|--------------------------|-------------------------------------------------------------------------------------------------------------------------------------------------------------------------------------------------------------------------------------------------------------------------------------------------------------------------------------------------------------------------------------------------------------------------------------------------------------------------------------------------------------------------------------------------------------------------------------------------------------------------------------------------------------------------------------------------------------------------------------------------------------------------------------------------------------------------------------------------------------------------------------------------------------------------------------|-----|-----|-----------|-------|------|------|---------------------------------------------------------|-------|----------------------|----------------------------------------------------------------------------------------------------------------------------------------------------------------------------------------------------------------------------------------------------------------------------------------------------------------------------------------------------------------------------------------------------------------------------------------------------------------------------------------------------------------|-----|-----|-----------|-------|------|------|
| Rsa1.0_01412.1.g26554.t1 | refNP_974169.1  RNA recognition motif-containing protein [Arabidopsis thaliana] gi 110736924 dbj BAF00419.1  hypothetical protein [Arabidopsis thaliana] gi 332197967 gb AJEE36088.1  RNA recognition motif-containing protein [Arabidopsis thaliana]                                                                                                                                                                                                                                                                                                                                                                                                                                                                                                                                                                                                                                                                               | 269 | 271 | 3.00E-92  | 100.7 | 79.2 | 84.8 | RNA recognition motif-containing protein                | gbpln | Arabidopsis thaliana | AT1G78260.2   Symbols:   RNA-binding (RRM/RBD/RNP motifs) family protein   chr1:29447317-29449246 FORWARD LENGTH=271                                                                                                                                                                                                                                                                                                                                                                                           | 269 | 271 | 9.00E-95  | 100.7 | 79.2 | 84.8 |
| Rsa1.0_01412.1.g26555.t1 | #                                                                                                                                                                                                                                                                                                                                                                                                                                                                                                                                                                                                                                                                                                                                                                                                                                                                                                                                   | #   | #   | #         | #     | #    | #    | -                                                       | ----  | ----                 | #                                                                                                                                                                                                                                                                                                                                                                                                                                                                                                              | #   | #   | #         | #     | #    |      |
| Rsa1.0_01412.1.g26556.t1 | #                                                                                                                                                                                                                                                                                                                                                                                                                                                                                                                                                                                                                                                                                                                                                                                                                                                                                                                                   | #   | #   | #         | #     | #    | #    | -                                                       | ----  | ----                 | #                                                                                                                                                                                                                                                                                                                                                                                                                                                                                                              | #   | #   | #         | #     | #    |      |
| Rsa1.0_01412.1.g26557.t1 | gb ABV89659.1  dehydration-responsive protein-related [Brassica rapa]                                                                                                                                                                                                                                                                                                                                                                                                                                                                                                                                                                                                                                                                                                                                                                                                                                                               | 670 | 662 | 0         | 98.8  | 86.3 | 92.2 | dehydration-responsive protein-related                  | gbpln | Brassica rapa        | AT1G78240.2   Symbols: TSD2, QUA2   S-adenosyl-L-methionine-dependent methyltransferases superfamily protein   chr1:29433173-29435815 REVERSE LENGTH=684                                                                                                                                                                                                                                                                                                                                                       | 670 | 664 | 0         | 102.1 | 85.7 | 91.9 |
| Rsa1.0_01413.1.g26558.t1 | #                                                                                                                                                                                                                                                                                                                                                                                                                                                                                                                                                                                                                                                                                                                                                                                                                                                                                                                                   | #   | #   | #         | #     | #    | #    | -                                                       | ----  | ----                 | #                                                                                                                                                                                                                                                                                                                                                                                                                                                                                                              | #   | #   | #         | #     | #    |      |
| Rsa1.0_01413.1.g26559.t1 | refNP_181105.2  LRR receptor-like serine/threonine-protein kinase FEI 2 [Arabidopsis thaliana] gi 334184705 ref NP_001189684.1  LRR receptor-like serine/threonine-protein kinase FEI 2 [Arabidopsis thaliana] gi 263419018 sp COLGL9.1 FEI2_ARATH RecName: Full=LRR receptor-like serine/threonine-protein kinase FEI 2; Flags: Precursor gi 224589541 gb ACN59304.1  leucine-rich repeat receptor-like protein kinase [Arabidopsis thaliana] gi 330254037 gb AEC09131.1  LRR receptor-like serine/threonine-protein kinase FEI 2 [Arabidopsis thaliana] gi 330254038 gb AEC09132.1  LRR receptor-like serine/threonine-protein kinase FEI 2 [Arabidopsis thaliana] ref NP_850251.1  aspartyl protease-like protein [Arabidopsis thaliana] gi 122215044 sp Q3EBM5.1 ASPR1_ARATH RecName: Full=Probable aspartic protease At2g35615; Flags: Precursor gi 330254036 gb AEC09130.1  probable aspartic protease [Arabidopsis thaliana] | 596 | 589 | 0         | 98.8  | 86.7 | 91.8 | LRR receptor-like serine/threonine-protein kinase FEI 2 | gbpln | Arabidopsis thaliana | AT2G35620.2   Symbols: FEI2   Leucine-rich repeat protein kinase family protein   chr2:14961187-14964640 REVERSE LENGTH=589                                                                                                                                                                                                                                                                                                                                                                                    | 596 | 589 | 0         | 98.8  | 86.7 | 91.8 |
| Rsa1.0_01413.1.g26560.t1 | ref NP_850251.1  aspartyl protease-like protein [Arabidopsis thaliana] gi 122215044 sp Q3EBM5.1 ASPR1_ARATH RecName: Full=Probable aspartic protease At2g35615; Flags: Precursor gi 330254036 gb AEC09130.1  probable aspartic protease [Arabidopsis thaliana]                                                                                                                                                                                                                                                                                                                                                                                                                                                                                                                                                                                                                                                                      | 447 | 447 | 0         | 100.0 | 83.0 | 89.7 | aspartyl protease-like protein                          | gbpln | Arabidopsis thaliana | AT2G35615.1   Symbols:   Eukaryotic aspartyl protease family protein   chr2:14958391-14960734 FORWARD LENGTH=447                                                                                                                                                                                                                                                                                                                                                                                               | 447 | 447 | 0         | 100.0 | 83.0 | 89.7 |
| Rsa1.0_01413.1.g26561.t1 | ref XP_002881405.1  hypothetical protein ARALYDRAFT_902667 [Arabidopsis lyrata subsp. lyrata] gi 297327244 gb EFH57664.1  hypothetical protein ARALYDRAFT_902667 [Arabidopsis lyrata subsp. lyrata]                                                                                                                                                                                                                                                                                                                                                                                                                                                                                                                                                                                                                                                                                                                                 | 85  | 86  | 8.00E-39  | 101.2 | 89.4 | 96.5 | hypothetical protein ARALYDRAFT_902667                  | gbpln | Arabidopsis lyrata   | AT2G35612.1   Symbols:   FUNCTIONS IN: molecular_function unknown; INVOLVED IN: biological_process unknown; LOCATED IN: endomembrane system; EXPRESSED IN: flower; BEST Arabidopsis thaliana protein match is: Copper amine oxidase family protein (TAIR:AT1G31670.1); Has 35333 Blast hits to 34131 proteins in 2444 species: Archae - 798; Bacteria - 22429; Metazoa - 974; Fungi - 991; Plants - 531; Viruses - 0; Other Eukaryotes = 9610 (source: NCBI BLink).   chr2:14955241-14955501 REVERSE LENGTH=86 | 85  | 86  | 1.00E-40  | 101.2 | 87.1 | 94.1 |
| Rsa1.0_01413.1.g26562.t1 | gb EOA26720.1  hypothetical protein CARUB_v10022808mg [Capsella rubella]                                                                                                                                                                                                                                                                                                                                                                                                                                                                                                                                                                                                                                                                                                                                                                                                                                                            | 671 | 645 | 0         | 96.1  | 86.4 | 90.6 | hypothetical protein CARUB_v10022808mg                  | gbpln | Capsella rubella     | AT2G35610.1   Symbols: XEG113   xyloglucanase 113   chr2:14947617-14951106 REVERSE LENGTH=644                                                                                                                                                                                                                                                                                                                                                                                                                  | 671 | 644 | 0         | 96.0  | 86.7 | 90.2 |
| Rsa1.0_01413.1.g26563.t1 | ref XP_002881403.1  hypothetical protein ARALYDRAFT_902664 [Arabidopsis lyrata subsp. lyrata] gi 297327242 gb EFH57662.1  hypothetical protein ARALYDRAFT_902664 [Arabidopsis lyrata subsp. lyrata]                                                                                                                                                                                                                                                                                                                                                                                                                                                                                                                                                                                                                                                                                                                                 | 310 | 330 | 1.00E-148 | 106.5 | 84.8 | 91.0 | hypothetical protein ARALYDRAFT_902664                  | gbpln | Arabidopsis lyrata   | AT2G35600.1   Symbols: ATBRXL1, BRXL1   BREVIS RADIX-like 1   chr2:14941092-14943281 REVERSE LENGTH=331                                                                                                                                                                                                                                                                                                                                                                                                        | 310 | 331 | 1.00E-144 | 106.8 | 84.5 | 90.3 |
| Rsa1.0_01413.1.g26564.t1 | ref XP_002879558.1  hypothetical protein ARALYDRAFT_902663 [Arabidopsis lyrata subsp. lyrata] gi 297325397 gb EFH55817.1  hypothetical protein ARALYDRAFT_902663 [Arabidopsis lyrata subsp. lyrata]                                                                                                                                                                                                                                                                                                                                                                                                                                                                                                                                                                                                                                                                                                                                 | 147 | 155 | 3.00E-39  | 105.4 | 59.9 | 66.7 | hypothetical protein ARALYDRAFT_902663                  | gbpln | Arabidopsis lyrata   | AT2G35585.1   Symbols:   unknown protein; BEST Arabidopsis thaliana protein match is: unknown protein (TAIR:AT1G31940.1); Has 67 Blast hits to 67 proteins in 17 species: Archae - 0; Bacteria - 0; Metazoa - 0; Fungi - 0; Plants - 67; Viruses - 0; Other Eukaryotes = 0 (source: NCBI BLink).   chr2:14936889-14937873 FORWARD LENGTH=156                                                                                                                                                                   | 147 | 156 | 4.00E-40  | 106.1 | 57.8 | 63.3 |
| Rsa1.0_01413.1.g26565.t1 | gb EOA27264.1  hypothetical protein CARUB_v10023384mg [Capsella rubella]                                                                                                                                                                                                                                                                                                                                                                                                                                                                                                                                                                                                                                                                                                                                                                                                                                                            | 349 | 392 | 1.00E-113 | 112.3 | 61.3 | 73.6 | hypothetical protein CARUB_v10023384mg                  | gbpln | Capsella rubella     | AT2G35580.1   Symbols:   Serine protease inhibitor (SERPIN) family protein   chr2:14933828-14935482 REVERSE LENGTH=374                                                                                                                                                                                                                                                                                                                                                                                         | 349 | 374 | 1.00E-102 | 107.2 | 58.5 | 69.9 |

|                          |                                                                                                                                                                                                                                                                                                                                                                                                                                                                                                                                                                                                                                                                                                                                                                                                                                                                                                                                                                                                                                                                                                                                                                                   |     |     |           |       |       |       |                                                              |       |                      |                                                                                                                                                        |     |     |           |       |       |       |
|--------------------------|-----------------------------------------------------------------------------------------------------------------------------------------------------------------------------------------------------------------------------------------------------------------------------------------------------------------------------------------------------------------------------------------------------------------------------------------------------------------------------------------------------------------------------------------------------------------------------------------------------------------------------------------------------------------------------------------------------------------------------------------------------------------------------------------------------------------------------------------------------------------------------------------------------------------------------------------------------------------------------------------------------------------------------------------------------------------------------------------------------------------------------------------------------------------------------------|-----|-----|-----------|-------|-------|-------|--------------------------------------------------------------|-------|----------------------|--------------------------------------------------------------------------------------------------------------------------------------------------------|-----|-----|-----------|-------|-------|-------|
| Rsa1.0_01413.1.g26566.t1 | gb EOA29382.1  hypothetical protein CARUB_v10025669mg [Capsella rubella]                                                                                                                                                                                                                                                                                                                                                                                                                                                                                                                                                                                                                                                                                                                                                                                                                                                                                                                                                                                                                                                                                                          | 377 | 377 | 1.00E-135 | 100.0 | 67.9  | 80.6  | hypothetical protein CARUB_v10025669mg                       | gbpln | Capsella rubella     | AT2G35580.1   Symbols:   Serine protease inhibitor (SERPIN) family protein   chr2:14933828-14935482 REVERSE LENGTH=374                                 | 377 | 374 | 1.00E-115 | 99.2  | 61.0  | 72.9  |
| Rsa1.0_01413.1.g26567.t2 | ref NP_181097.2  DNAJ heat shock N-terminal domain-containing protein [Arabidopsis thaliana] gi 330254025 gb AE009119.1  DNAJ heat shock N-terminal domain-containing protein [Arabidopsis thaliana]                                                                                                                                                                                                                                                                                                                                                                                                                                                                                                                                                                                                                                                                                                                                                                                                                                                                                                                                                                              | 463 | 590 | 1.00E-145 | 127.4 | 66.7  | 77.3  | DNAJ heat shock N-terminal domain-containing protein         | gbpln | Arabidopsis thaliana | AT2G35540.1   Symbols:   DNAJ heat shock N-terminal domain-containing protein   chr2:14927158-14928930 FORWARD LENGTH=590                              | 463 | 590 | 1.00E-148 | 127.4 | 66.7  | 77.3  |
| Rsa1.0_01413.1.g26568.t3 | gb EOA26810.1  hypothetical protein CARUB_v10022903mg [Capsella rubella]                                                                                                                                                                                                                                                                                                                                                                                                                                                                                                                                                                                                                                                                                                                                                                                                                                                                                                                                                                                                                                                                                                          | 567 | 572 | 0         | 100.9 | 67.2  | 78.0  | hypothetical protein CARUB_v10022903mg                       | gbpln | Capsella rubella     | AT2G35510.1   Symbols: SRO1   similar to RCD one 1   chr2:14916898-14919198 REVERSE LENGTH=566                                                         | 567 | 568 | 0         | 100.2 | 67.2  | 76.5  |
| Rsa1.0_01413.1.g26569.t1 | gb EOA27282.1  hypothetical protein CARUB_v10023400mg [Capsella rubella] ref NP_191788.1  ADP-ribosylation factor A1E [Arabidopsis thaliana] gi 334186204 ref NP_001190161.1  ADP-ribosylation factor A1E [Arabidopsis thaliana] gi 334186206 ref NP_001190162.1  ADP-ribosylation factor A1E [Arabidopsis thaliana] gi 297824803 ref XP_002880284.1  ADP-ribosylation factor A1E [Arabidopsis lyrata subsp. lyrata] gi 13926302 gb AAK49618.1 AF372902.1 AT3G62290/T17J13.250 [Arabidopsis thaliana] gi 6899939 emb CAB71889.1  ADP-ribosylation factor-like protein [Arabidopsis thaliana] gi 16323248 gb AAL15358.1  AT3G62290/T17J13.250 [Arabidopsis thaliana] gi 21553518 gb AAM6261.1  ADP-ribosylation factor-like protein [Arabidopsis thaliana] gi 119720788 gb ABL97964.1  ADP-ribosylation factor-like protein [Brassica rapa] gi 297326123 gb EFH56543.1  ADP-ribosylation factor A1E [Arabidopsis lyrata subsp. lyrata] gi 33264681 gb AEE80332.1  ADP-ribosylation factor A1E [Arabidopsis thaliana] gi 332646812 gb AEE80333.1  ADP-ribosylation factor A1E [Arabidopsis thaliana] gi 332646813 gb AEE80334.1  ADP-ribosylation factor A1E [Arabidopsis thaliana] | 384 | 388 | 0         | 101.0 | 91.9  | 95.3  | hypothetical protein CARUB_v10023400mg                       | gbpln | Capsella rubella     | AT2G35500.1   Symbols: SKL2   shikimate kinase like 2   chr2:14914038-14915909 FORWARD LENGTH=387                                                      | 384 | 387 | 0         | 100.8 | 90.4  | 93.5  |
| Rsa1.0_01414.1.g26570.t1 | gi 16323248 gb AAL15358.1  AT3G62290/T17J13.250 [Arabidopsis thaliana] gi 21553518 gb AAM6261.1  ADP-ribosylation factor-like protein [Arabidopsis thaliana] gi 119720788 gb ABL97964.1  ADP-ribosylation factor-like protein [Brassica rapa] gi 297326123 gb EFH56543.1  ADP-ribosylation factor A1E [Arabidopsis lyrata subsp. lyrata] gi 33264681 gb AEE80332.1  ADP-ribosylation factor A1E [Arabidopsis thaliana] gi 332646812 gb AEE80333.1  ADP-ribosylation factor A1E [Arabidopsis thaliana] gi 332646813 gb AEE80334.1  ADP-ribosylation factor A1E [Arabidopsis thaliana]                                                                                                                                                                                                                                                                                                                                                                                                                                                                                                                                                                                              | 181 | 181 | 1.00E-102 | 100.0 | 100.0 | 100.0 | ADP-ribosylation factor A1E                                  | gbpln | Arabidopsis lyrata   | AT3G62290.3   Symbols: ARFA1E   ADP-ribosylation factor A1E   chr3:23052287-23053545 FORWARD LENGTH=181                                                | 181 | 181 | 1.00E-105 | 100.0 | 100.0 | 100.0 |
| Rsa1.0_01414.1.g26571.t2 | #                                                                                                                                                                                                                                                                                                                                                                                                                                                                                                                                                                                                                                                                                                                                                                                                                                                                                                                                                                                                                                                                                                                                                                                 | #   | #   | #         | #     | #     | #     | #                                                            | -     | ----                 | ----                                                                                                                                                   | #   | #   | #         | #     | #     | #     |
| Rsa1.0_01414.1.g26572.t2 | ref NP_182247.1  putative pre-mRNA-splicing factor ATP-dependent RNA helicase [Arabidopsis thaliana] gi 3913425 sp O22899.1 DHX15_ARATH RecName: Full=Probable pre-mRNA-splicing factor ATP-dependent RNA helicase gi 2275203 gb AAB63825.1  putative pre-mRNA splicing factor RNA helicase [Arabidopsis thaliana] gi 22135845 gb AAM91108.1  At2g47250/T813.9 [Arabidopsis thaliana] gi 28416499 gb AAO42780.1  At2g47250/T813.9 [Arabidopsis thaliana] gi 330255726 gb AEC10820.1  putative pre-mRNA-splicing factor ATP-dependent RNA helicase [Arabidopsis thaliana]                                                                                                                                                                                                                                                                                                                                                                                                                                                                                                                                                                                                          | 767 | 729 | 0         | 95.0  | 89.0  | 92.0  | putative pre-mRNA-splicing factor ATP-dependent RNA helicase | gbpln | Arabidopsis thaliana | AT2G47250.1   Symbols:   RNA helicase family protein   chr2:19399923-19402981 REVERSE LENGTH=729                                                       | 767 | 729 | 0         | 95.0  | 89.0  | 92.0  |
| Rsa1.0_01414.1.g26573.t1 | dbj BAF01862.1  beta-galactosidase like protein [Arabidopsis thaliana]                                                                                                                                                                                                                                                                                                                                                                                                                                                                                                                                                                                                                                                                                                                                                                                                                                                                                                                                                                                                                                                                                                            | 120 | 578 | 6.00E-49  | 481.7 | 78.3  | 80.8  | beta-galactosidase like protein                              | gbpln | Arabidopsis thaliana | AT4G36360.2   Symbols: BGAL3   beta-galactosidase 3   chr4:17176840-17181143 REVERSE LENGTH=855                                                        | 120 | 855 | 2.00E-51  | 712.5 | 78.3  | 80.8  |
| Rsa1.0_01414.1.g26574.t1 | gb EOA29119.1  hypothetical protein CARUB_v10025386mg [Capsella rubella]                                                                                                                                                                                                                                                                                                                                                                                                                                                                                                                                                                                                                                                                                                                                                                                                                                                                                                                                                                                                                                                                                                          | 101 | 102 | 9.00E-42  | 101.0 | 87.1  | 94.1  | hypothetical protein CARUB_v10025386mg                       | gbpln | Capsella rubella     | AT2G47270.1   Symbols: UPB1   sequence-specific DNA binding transcription factors/transcription regulators   chr2:19411741-19412049 REVERSE LENGTH=102 | 101 | 102 | 2.00E-44  | 101.0 | 86.1  | 95.0  |
| Rsa1.0_01414.1.g26575.t2 | gb EOA27835.1  hypothetical protein CARUB_v10023992mg [Capsella rubella]                                                                                                                                                                                                                                                                                                                                                                                                                                                                                                                                                                                                                                                                                                                                                                                                                                                                                                                                                                                                                                                                                                          | 496 | 230 | 1.00E-100 | 46.4  | 38.7  | 42.7  | hypothetical protein CARUB_v10023992mg                       | gbpln | Capsella rubella     | AT2G47320.1   Symbols:   Cyclophilin-like peptidyl-prolyl cis-trans isomerase family protein   chr2:19427711-19428839 FORWARD LENGTH=230               | 496 | 230 | 1.00E-100 | 46.4  | 37.7  | 41.9  |



|                          |                                                                                                                                                                                                                                                                                                                                                                                                                                                                                                                                   |      |      |           |        |      |      |                                                |       |                      |                                                                                                                                                                                    |      |     |           |       |      |      |
|--------------------------|-----------------------------------------------------------------------------------------------------------------------------------------------------------------------------------------------------------------------------------------------------------------------------------------------------------------------------------------------------------------------------------------------------------------------------------------------------------------------------------------------------------------------------------|------|------|-----------|--------|------|------|------------------------------------------------|-------|----------------------|------------------------------------------------------------------------------------------------------------------------------------------------------------------------------------|------|-----|-----------|-------|------|------|
| Rsa1.0_01414.1.g26576.t1 | ref[XP_002882116.1] hypothetical protein ARALYDRAFT_483908 [Arabidopsis lyrata subsp. lyrata] gi 297327955 gb EFH58375.1                                                                                                                                                                                                                                                                                                                                                                                                          | 67   | 739  | 5.00E-13  | 1103.0 | 71.6 | 83.6 | hypothetical protein ARALYDRAFT_483908         | gbpln | Arabidopsis lyrata   | #                                                                                                                                                                                  | #    | #   | #         | #     | #    |      |
| Rsa1.0_01414.1.g26577.t1 | hypothetical protein ARALYDRAFT_483908 [Arabidopsis lyrata subsp. lyrata]                                                                                                                                                                                                                                                                                                                                                                                                                                                         | #    | #    | #         | #      | #    | #    | -                                              | ----  | ----                 | #                                                                                                                                                                                  | #    | #   | #         | #     | #    |      |
| Rsa1.0_01414.1.g26578.t1 | ref[XP_002880296.1] hypothetical protein ARALYDRAFT_904210 [Arabidopsis lyrata subsp. lyrata] gi 297326135 gb EFH56555.1                                                                                                                                                                                                                                                                                                                                                                                                          | 475  | 487  | 1.00E-180 | 102.5  | 75.2 | 81.9 | hypothetical protein ARALYDRAFT_904210         | gbpln | Arabidopsis lyrata   | AT2G47350.1   Symbols:   HIT zinc finger ;PAPA-1-like conserved region   chr2:19434588-19437045 FORWARD LENGTH=486                                                                 | 475  | 486 | 1.00E-177 | 102.3 | 73.7 | 79.8 |
| Rsa1.0_01414.1.g26579.t1 | hypothetical protein ARALYDRAFT_904210 [Arabidopsis lyrata subsp. lyrata]<br>ref[XP_002862722.1] cytochrome c oxidase subunit VC family protein [Arabidopsis lyrata subsp. lyrata] gi 297817580 ref[XP_002876673.1] cytochrome c oxidase subunit VC family protein [Arabidopsis lyrata subsp. lyrata] gi 297309410 gb EFH38980.1  cytochrome c oxidase subunit VC family protein [Arabidopsis lyrata subsp. lyrata] gi 297322511 gb EFH52932.1  cytochrome c oxidase subunit VC family protein [Arabidopsis lyrata subsp. lyrata] | 64   | 64   | 2.00E-27  | 100.0  | 92.2 | 98.4 | cytochrome c oxidase subunit VC family protein | gbpln | Arabidopsis lyrata   | AT5G61310.4   Symbols:   Cytochrome c oxidase subunit Vc family protein   chr5:24653543-24653737 REVERSE LENGTH=64                                                                 | 64   | 64  | 1.00E-27  | 100.0 | 82.8 | 92.2 |
| Rsa1.0_01414.1.g26580.t1 | gb EOA28136.1  hypothetical protein CARUB_v10024325mg [Capsella rubella]                                                                                                                                                                                                                                                                                                                                                                                                                                                          | 125  | 124  | 7.00E-57  | 99.2   | 88.0 | 92.8 | hypothetical protein CARUB_v10024325mg         | gbpln | Capsella rubella     | AT2G47400.1   Symbols: CP12-1, CP12   CP12 domain-containing protein 1   chr2:16658136-16660267 FORWARD LENGTH=124                                                                 | 125  | 124 | 8.00E-55  | 99.2  | 88.8 | 92.8 |
| Rsa1.0_01414.1.g26581.t1 | ref[NP_182264.1] dimethyladenosine transferase [Arabidopsis thaliana] gi 2529685 gb AAC62868.1  putative dimethyladenosine transferase [Arabidopsis thaliana] gi 14532650 gb AAK64053.1  putative dimethyladenosine transferase [Arabidopsis thaliana] gi 21280901 gb AAM44912.1  putative dimethyladenosine transferase [Arabidopsis thaliana] gi 330255745 gb AEC10839.1  dimethyladenosine transferase [Arabidopsis thaliana]                                                                                                  | 140  | 353  | 3.00E-61  | 252.1  | 87.1 | 87.1 | dimethyladenosine transferase                  | gbpln | Arabidopsis thaliana | AT2G47420.1   Symbols:   Ribosomal RNA adenine dimethylase family protein   chr2:19457574-19458777 FORWARD LENGTH=353                                                              | 140  | 353 | 9.00E-64  | 252.1 | 87.1 | 87.1 |
| Rsa1.0_01415.1.g26582.t1 | #                                                                                                                                                                                                                                                                                                                                                                                                                                                                                                                                 | #    | #    | #         | #      | #    | #    | -                                              | ----  | ----                 | #                                                                                                                                                                                  | #    | #   | #         | #     | #    |      |
| Rsa1.0_01415.1.g26583.t1 | gb EOA28804.1  hypothetical protein CARUB_v10025036mg [Capsella rubella]                                                                                                                                                                                                                                                                                                                                                                                                                                                          | 58   | 200  | 2.00E-15  | 344.8  | 69.0 | 72.4 | hypothetical protein CARUB_v10025036mg         | gbpln | Capsella rubella     | AT2G39900.1   Symbols:   GATA type zinc finger transcription factor family protein   chr2:16658136-16660267 FORWARD LENGTH=200                                                     | 58   | 200 | 8.00E-18  | 344.8 | 65.5 | 75.9 |
| Rsa1.0_01415.1.g26584.t1 | ref[XP_002870177.1] ATOEP16-2/ATOEP16-S [Arabidopsis lyrata subsp. lyrata] gi 297316013 gb EFH446436.1  ATOEP16-2/ATOEP16-S [Arabidopsis lyrata subsp. lyrata]                                                                                                                                                                                                                                                                                                                                                                    | 184  | 178  | 1.00E-88  | 96.7   | 89.1 | 92.9 | ATOEP16-2/ATOEP16-S                            | gbpln | Arabidopsis lyrata   | AT4G16160.2   Symbols:   ATOEP16-2, ATOEP16-S   Mitochondrial import inner membrane translocase subunit Tim17/Tim22/Tim23 family protein   chr4:9157545-9158738 FORWARD LENGTH=178 | 184  | 178 | 2.00E-90  | 96.7  | 88.6 | 92.4 |
| Rsa1.0_01415.1.g26585.t1 | ref[NP_193350.5] calmodulin-binding transcription activator 5 [Arabidopsis thaliana] gi 85718631 sp O23463.2 CMTA5_ARAT H RecName: Full=Calmodulin-binding transcription activator 5; AltName: Full=Ethylene-induced calmodulin-binding protein f. Short=EICBP.f. AltName: Full=Signal-responsive protein 6 gi 332658303 gb AEE83703.1  calmodulin-binding transcription activator 5 [Arabidopsis thaliana]                                                                                                                       | 938  | 923  | 0         | 98.4   | 85.8 | 91.2 | calmodulin-binding transcription activator 5   | gbpln | Arabidopsis thaliana | AT4G16150.1   Symbols:   calmodulin binding/transcription regulators   chr4:9148225-9153045 FORWARD LENGTH=923                                                                     | 938  | 923 | 0         | 98.4  | 85.8 | 91.2 |
| Rsa1.0_01415.1.g26586.t1 | #                                                                                                                                                                                                                                                                                                                                                                                                                                                                                                                                 | #    | #    | #         | #      | #    | #    | -                                              | ----  | ----                 | #                                                                                                                                                                                  | #    | #   | #         | #     | #    |      |
| Rsa1.0_01415.1.g26587.t1 | emb CAB39638.1  RNA-directed DNA polymerase-like protein [Arabidopsis thaliana] gi 7267666 emb CAB78094.1  RNA-directed DNA polymerase-like protein [Arabidopsis thaliana]                                                                                                                                                                                                                                                                                                                                                        | 2033 | 1274 | 0         | 62.7   | 35.7 | 44.9 | RNA-directed DNA polymerase-like protein       | gbpln | Arabidopsis thaliana | AT4G20900.1   Symbols:   Ribonuclease H-like superfamily protein   chr4:14333528-14335255 FORWARD LENGTH=575                                                                       | 2033 | 575 | 8.00E-62  | 28.3  | 8.0  | 12.7 |
| Rsa1.0_01415.1.g26588.t5 | #                                                                                                                                                                                                                                                                                                                                                                                                                                                                                                                                 | #    | #    | #         | #      | #    | #    | -                                              | ----  | ----                 | #                                                                                                                                                                                  | #    | #   | #         | #     | #    |      |

|                          |                                                                                                                                                                                                                                                                                                                                                                                                                                                                                                                                                                                                                                                                                                                                                                                                                                                                                                                                                                                                                                                                                                                                                                                                                               |     |     |          |       |      |      |                                                                   |       |                      |                                                                                                                                                          |     |     |          |       |      |      |
|--------------------------|-------------------------------------------------------------------------------------------------------------------------------------------------------------------------------------------------------------------------------------------------------------------------------------------------------------------------------------------------------------------------------------------------------------------------------------------------------------------------------------------------------------------------------------------------------------------------------------------------------------------------------------------------------------------------------------------------------------------------------------------------------------------------------------------------------------------------------------------------------------------------------------------------------------------------------------------------------------------------------------------------------------------------------------------------------------------------------------------------------------------------------------------------------------------------------------------------------------------------------|-----|-----|----------|-------|------|------|-------------------------------------------------------------------|-------|----------------------|----------------------------------------------------------------------------------------------------------------------------------------------------------|-----|-----|----------|-------|------|------|
| Rsa1.0_01416.1.g26589.t1 | ref NP_187255.1  ribosomal protein L12/ ATP-dependent Clp protease adaptor protein [Arabidopsis thaliana] gi 42572277 ref NP_974234.1  ribosomal protein L12/ ATP-dependent Clp protease adaptor protein [Arabidopsis thaliana] gi 145331982 ref NP_001078113.1  ribosomal protein L12/ ATP-dependent Clp protease adaptor protein [Arabidopsis thaliana] gi 7658342 gb AAF66132.1  hypothetical protein; 10657-10097 [Arabidopsis thaliana] gi 17381070 gb AAL36347.1  unknown protein [Arabidopsis thaliana] gi 2046571 gb AAM20324.1  unknown protein [Arabidopsis thaliana] gi 332640813 gb AEE74334.1  ribosomal protein L12/ ATP-dependent Clp protease adaptor protein [Arabidopsis thaliana] gi 332640814 gb AEE74335.1  ribosomal protein L12/ ATP-dependent Clp protease adaptor protein [Arabidopsis thaliana] gi 332640815 gb AEE74336.1  ribosomal protein L12/ ATP-dependent Clp protease adaptor protein [Arabidopsis thaliana] ref NP_175241.2  TRX domain-containing protein [Arabidopsis thaliana] gi 40822802 gb AAR92240.1  At1g48070 [Arabidopsis thaliana] gi 45752670 gb AAS76233.1  At1g48070 [Arabidopsis thaliana] gi 332194123 gb AEE32244.1  TRX domain-containing protein [Arabidopsis thaliana] | 105 | 186 | 2.00E-14 | 177.1 | 38.1 | 41.9 | ribosomal protein L12/ ATP-dependent Clp protease adaptor protein | gbpln | Arabidopsis thaliana | AT3G06040.3   Symbols:   Ribosomal protein L12/ ATP-dependent Clp protease adaptor protein ClpS family protein   chr3:1824516-1825076 REVERSE LENGTH=186 | 105 | 186 | 4.00E-17 | 177.1 | 38.1 | 41.9 |
| Rsa1.0_01416.1.g26590.t1 | ref NP_175241.2  TRX domain-containing protein [Arabidopsis thaliana] gi 40822802 gb AAR92240.1  At1g48070 [Arabidopsis thaliana] gi 45752670 gb AAS76233.1  At1g48070 [Arabidopsis thaliana] gi 332194123 gb AEE32244.1  TRX domain-containing protein [Arabidopsis thaliana]                                                                                                                                                                                                                                                                                                                                                                                                                                                                                                                                                                                                                                                                                                                                                                                                                                                                                                                                                | 285 | 144 | 1.00E-32 | 50.5  | 27.0 | 34.0 | TRX domain-containing protein                                     | gbpln | Arabidopsis thaliana | AT1G48070.1   Symbols:   Thioredoxin superfamily protein   chr1:17730568-17731103 REVERSE LENGTH=144                                                     | 285 | 144 | 3.00E-35 | 50.5  | 27.0 | 34.0 |
| Rsa1.0_01416.1.g26591.t1 | gb EOA37655.1  hypothetical protein CARUB_v10012196mg [Capsella rubella]                                                                                                                                                                                                                                                                                                                                                                                                                                                                                                                                                                                                                                                                                                                                                                                                                                                                                                                                                                                                                                                                                                                                                      | 586 | 578 | 0        | 98.6  | 87.4 | 92.2 | hypothetical protein CARUB_v10012196mg                            | gbpln | Capsella rubella     | AT1G52980.1   Symbols:   GTP-binding family protein   chr1:19737493-19740201 FORWARD LENGTH=576                                                          | 586 | 576 | 0        | 98.3  | 88.7 | 93.9 |
| Rsa1.0_01416.1.g26592.t1 | ref XP_002891724.1  zinc finger family protein [Arabidopsis lyrata subsp. lyrata] gi 297337566 gb EFH67983.1  zinc finger family protein [Arabidopsis lyrata subsp. lyrata] ref NP_001185207.1  Ubiquitin-conjugating enzyme family protein [Arabidopsis thaliana] gi 205828971 sp Q8GY87.2 UBC26_ARA TH RecName: Full=Probable ubiquitin-conjugating enzyme E2 26; AltName: Full=Ubiquitin carrier protein 26 gi 9454541 gb AAF87864.1 AC022520.8 Similar to ubiquitin-conjugating enzymes [Arabidopsis thaliana] gi 51970226 dbj BAD43805.1  putative ubiquitin-conjugating enzyme [Arabidopsis thaliana] gi 66354460 gb AAY44865.1  ubiquitinating enzyme [Arabidopsis thaliana] gi 332194757 gb AEE32878.1  Ubiquitin-conjugating enzyme family protein [Arabidopsis thaliana] ref NP_175711.1  Cytochrome C oxidase copper chaperone (COX17) [Arabidopsis thaliana] gi 14794886 gb AAK73497.1 AF349685.1 copper chaperone COX17-2 [Arabidopsis thaliana] gi 332194758 gb AEE32879.1  Cytochrome C oxidase copper chaperone (COX17) [Arabidopsis thaliana]                                                                                                                                                                | 177 | 177 | 5.00E-78 | 100.0 | 83.6 | 89.8 | zinc finger family protein                                        | gbpln | Arabidopsis lyrata   | AT1G53010.1   Symbols:   RING/U-box superfamily protein   chr1:19747847-19748383 FORWARD LENGTH=178                                                      | 177 | 178 | 5.00E-79 | 100.6 | 83.1 | 89.3 |
| Rsa1.0_01416.1.g26593.t1 | ref NP_001185207.1  Ubiquitin-conjugating enzyme family protein [Arabidopsis thaliana] gi 205828971 sp Q8GY87.2 UBC26_ARA TH RecName: Full=Probable ubiquitin-conjugating enzyme E2 26; AltName: Full=Ubiquitin carrier protein 26 gi 9454541 gb AAF87864.1 AC022520.8 Similar to ubiquitin-conjugating enzymes [Arabidopsis thaliana] gi 51970226 dbj BAD43805.1  putative ubiquitin-conjugating enzyme [Arabidopsis thaliana] gi 66354460 gb AAY44865.1  ubiquitinating enzyme [Arabidopsis thaliana] gi 332194757 gb AEE32878.1  Ubiquitin-conjugating enzyme family protein [Arabidopsis thaliana] ref NP_175711.1  Cytochrome C oxidase copper chaperone (COX17) [Arabidopsis thaliana] gi 14794886 gb AAK73497.1 AF349685.1 copper chaperone COX17-2 [Arabidopsis thaliana] gi 332194758 gb AEE32879.1  Cytochrome C oxidase copper chaperone (COX17) [Arabidopsis thaliana]                                                                                                                                                                                                                                                                                                                                            | 521 | 543 | 0        | 104.2 | 68.5 | 77.9 | Ubiquitin-conjugating enzyme family protein                       | gbpln | Arabidopsis thaliana | AT1G53025.1   Symbols:   Ubiquitin-conjugating enzyme family protein   chr1:19757072-19759474 REVERSE LENGTH=543                                         | 521 | 543 | 0        | 104.2 | 68.5 | 77.9 |
| Rsa1.0_01416.1.g26594.t1 | ref NP_175711.1  Cytochrome C oxidase copper chaperone (COX17) [Arabidopsis thaliana] gi 14794886 gb AAK73497.1 AF349685.1 copper chaperone COX17-2 [Arabidopsis thaliana] gi 332194758 gb AEE32879.1  Cytochrome C oxidase copper chaperone (COX17) [Arabidopsis thaliana]                                                                                                                                                                                                                                                                                                                                                                                                                                                                                                                                                                                                                                                                                                                                                                                                                                                                                                                                                   | 75  | 72  | 7.00E-28 | 96.0  | 85.3 | 90.7 | Cytochrome C oxidase copper chaperone (COX17)                     | gbpln | Arabidopsis thaliana | AT1G53030.1   Symbols:   Cytochrome C oxidase copper chaperone (COX17)   chr1:19760224-19760442 REVERSE LENGTH=72                                        | 75  | 72  | 1.00E-30 | 96.0  | 85.3 | 90.7 |

|                          |                                                                                                                                                                                                                                                                                                                                                                                                |      |      |           |       |      |      |                                        |       |                      |                                                                                                                                                                                                                                                                                                                                                                                                                                                                                                                                       |      |      |           |       |      |      |
|--------------------------|------------------------------------------------------------------------------------------------------------------------------------------------------------------------------------------------------------------------------------------------------------------------------------------------------------------------------------------------------------------------------------------------|------|------|-----------|-------|------|------|----------------------------------------|-------|----------------------|---------------------------------------------------------------------------------------------------------------------------------------------------------------------------------------------------------------------------------------------------------------------------------------------------------------------------------------------------------------------------------------------------------------------------------------------------------------------------------------------------------------------------------------|------|------|-----------|-------|------|------|
| Rsa1.0_01416.1.g26595.t1 | ref NP_564621.1  uncharacterized protein [Arabidopsis thaliana] gi 14190517 gb AAK55739.1 AF380658.1 At1g53031 [Arabidopsis thaliana] gi 15809782 gb AAL06819.1 At1g53031 [Arabidopsis thaliana] gi 26453132 dbj BA043642.1  unknown protein [Arabidopsis thaliana] gi 332194759 gb AEE32880.1  uncharacterized protein AT1G53035 [Arabidopsis thaliana]                                       | 150  | 150  | 5.00E-78  | 100.0 | 95.3 | 98.0 | uncharacterized protein                | gbpln | Arabidopsis thaliana | AT1G53035.1   Symbols:   unknown protein; FUNCTIONS IN: molecular_function unknown; INVOLVED IN: biological_process unknown; LOCATED IN: endomembrane system; EXPRESSED IN: 23 plant structures; EXPRESSED DURING: 13 growth stages; BEST Arabidopsis thaliana protein match is: unknown protein (TAIRAT3G15358.1); Has 49 Blast hits to 49 proteins in 9 species: Archae - 0; Bacteria - 0; Metazoa - 0; Fungi - 0; Plants - 49; Viruses - 0; Other Eukaryotes - 0 (source: NCBI BLink).   chr1:19761866-19762318 REVERSE LENGTH=150 | 150  | 150  | 2.00E-80  | 100.0 | 95.3 | 98.0 |
| Rsa1.0_01416.1.g26596.t2 | ref NP_175712.2  uncharacterized protein [Arabidopsis thaliana] gi 42571845 ref NP_974013.1  uncharacterized protein [Arabidopsis thaliana] gi 110738523 dbj BAF01187.1  hypothetical protein [Arabidopsis thaliana] gi 332194761 gb AEE32882.1  uncharacterized protein AT1G53040 [Arabidopsis thaliana] gi 332194762 gb AEE32883.1  uncharacterized protein AT1G53040 [Arabidopsis thaliana] | 529  | 540  | 0         | 102.1 | 90.0 | 94.1 | uncharacterized protein                | gbpln | Arabidopsis thaliana | AT1G53040.2   Symbols:   Protein of unknown function (DUF1616)   chr1:19764567-19766870 REVERSE LENGTH=540                                                                                                                                                                                                                                                                                                                                                                                                                            | 529  | 540  | 0         | 102.1 | 90.0 | 94.1 |
| Rsa1.0_01416.1.g26597.t1 | gb EOA38429.1  hypothetical protein CARUB_v10010019mg [Capsella rubella]                                                                                                                                                                                                                                                                                                                       | 274  | 268  | 1.00E-114 | 97.8  | 75.2 | 85.4 | hypothetical protein CARUB_v10010019mg | gbpln | Capsella rubella     | AT1G53070.1   Symbols:   Legume lectin family protein   chr1:19778371-19779189 FORWARD LENGTH=272                                                                                                                                                                                                                                                                                                                                                                                                                                     | 274  | 272  | 1.00E-114 | 99.3  | 78.5 | 88.3 |
| Rsa1.0_01416.1.g26598.t1 | #                                                                                                                                                                                                                                                                                                                                                                                              | #    | #    | #         | #     | #    | -    | ----                                   | ----  | #                    | #                                                                                                                                                                                                                                                                                                                                                                                                                                                                                                                                     | #    | #    | #         | #     | #    |      |
| Rsa1.0_01416.1.g26599.t2 | gb EOA38429.1  hypothetical protein CARUB_v10010019mg [Capsella rubella]                                                                                                                                                                                                                                                                                                                       | 274  | 268  | 1.00E-112 | 97.8  | 75.5 | 86.1 | hypothetical protein CARUB_v10010019mg | gbpln | Capsella rubella     | AT1G53070.1   Symbols:   Legume lectin family protein   chr1:19778371-19779189 FORWARD LENGTH=272                                                                                                                                                                                                                                                                                                                                                                                                                                     | 274  | 272  | 1.00E-113 | 99.3  | 79.2 | 87.6 |
| Rsa1.0_01417.1.g26600.t1 | #                                                                                                                                                                                                                                                                                                                                                                                              | #    | #    | #         | #     | #    | -    | ----                                   | ----  | #                    | #                                                                                                                                                                                                                                                                                                                                                                                                                                                                                                                                     | #    | #    | #         | #     | #    |      |
| Rsa1.0_01417.1.g26601.t2 | dbj BAA97287.1  retroelement pol polyprotein-like [Arabidopsis thaliana]                                                                                                                                                                                                                                                                                                                       | 973  | 1491 | 1.00E-162 | 153.2 | 30.3 | 39.3 | retroelement pol polyprotein-like      | gbpln | Arabidopsis thaliana | AT4G23160.1   Symbols: CRK8   cysteine-rich RLK (RECEPTOR-like protein kinase) 8   chr4:12129485-12134086 FORWARD LENGTH=1262                                                                                                                                                                                                                                                                                                                                                                                                         | 973  | 1262 | 2.00E-51  | 129.7 | 9.4  | 13.8 |
| Rsa1.0_01417.1.g26602.t1 | ref NP_177684.1  SH1-related sequence 5 [Arabidopsis thaliana] gi 9369370 gb AAF87119.1 AC006434_15 F10A5.26 [Arabidopsis thaliana] gi 55978789 gb AAV68856.1  hypothetical protein AT1G75520 [Arabidopsis thaliana] gi 60547683 gb AAX23805.1  hypothetical protein At1g75520 [Arabidopsis thaliana] gi 332197608 gb AEE35729.1  SH1-related sequence 5 [Arabidopsis thaliana]                | 334  | 346  | 1.00E-147 | 103.6 | 84.4 | 90.1 | SH1-related sequence 5                 | gbpln | Arabidopsis thaliana | AT1G75520.1   Symbols: SRS5   SH1-related sequence 5   chr1:28351779-28353179 REVERSE LENGTH=346                                                                                                                                                                                                                                                                                                                                                                                                                                      | 334  | 346  | 1.00E-150 | 103.6 | 84.4 | 90.1 |
| Rsa1.0_01417.1.g26603.t1 | ref XP_002889029.1  predicted protein [Arabidopsis lyrata subsp. lyrata] gi 297334870 gb EFH65288.1  predicted protein [Arabidopsis lyrata subsp. lyrata]                                                                                                                                                                                                                                      | 268  | 260  | 1.00E-106 | 97.0  | 72.4 | 82.1 | predicted protein                      | gbpln | Arabidopsis lyrata   | AT1G75510.1   Symbols:   Transcription initiation factor IIF, beta subunit   chr1:28347254-28348629 REVERSE LENGTH=261                                                                                                                                                                                                                                                                                                                                                                                                                | 268  | 261  | 1.00E-103 | 97.4  | 70.5 | 79.1 |
| Rsa1.0_01417.1.g26604.t1 | #                                                                                                                                                                                                                                                                                                                                                                                              | #    | #    | #         | #     | #    | -    | ----                                   | ----  | #                    | #                                                                                                                                                                                                                                                                                                                                                                                                                                                                                                                                     | #    | #    | #         | #     | #    |      |
| Rsa1.0_01417.1.g26605.t1 | ref XP_002889028.1  nodulin MtN21 family protein [Arabidopsis lyrata subsp. lyrata] gi 297334869 gb EFH65287.1  nodulin MtN21 family protein [Arabidopsis lyrata subsp. lyrata]                                                                                                                                                                                                                | 389  | 391  | 0         | 100.5 | 97.2 | 97.9 | nodulin MtN21 family protein           | gbpln | Arabidopsis lyrata   | AT1G75500.2   Symbols: WAT1   Walls Are Thin 1   chr1:28338282-28340091 REVERSE LENGTH=389                                                                                                                                                                                                                                                                                                                                                                                                                                            | 389  | 389  | 0         | 100.0 | 96.1 | 97.4 |
| Rsa1.0_01417.1.g26606.t1 | emb CAB40035.1  retrotransposon like protein [Arabidopsis thaliana] gi 7267767 emb CAB81170.1  retrotransposon like protein [Arabidopsis thaliana]                                                                                                                                                                                                                                             | 1376 | 1515 | 0         | 110.1 | 57.4 | 72.6 | retrotransposon like protein           | gbpln | Arabidopsis thaliana | AT4G23160.1   Symbols: CRK8   cysteine-rich RLK (RECEPTOR-like protein kinase) 8   chr4:12129485-12134086 FORWARD LENGTH=1262                                                                                                                                                                                                                                                                                                                                                                                                         | 1376 | 1262 | 1.00E-118 | 91.7  | 14.5 | 21.2 |
| Rsa1.0_01418.1.g26607.t1 | gb ABD64941.1  Ulp1 protease family protein [Brassica oleracea]                                                                                                                                                                                                                                                                                                                                | 496  | 871  | 4.00E-54  | 175.6 | 27.0 | 38.5 | Ulp1 protease family protein           | gbpln | Brassica oleracea    | AT2G07240.1   Symbols:   cysteine-type peptidases:cysteine-type peptidases   chr2:3007102-3011701 REVERSE LENGTH=874                                                                                                                                                                                                                                                                                                                                                                                                                  | 496  | 874  | 2.00E-34  | 176.2 | 17.7 | 24.0 |
| Rsa1.0_01418.1.g26608.t1 | gb EOA19720.1  hypothetical protein CARUB_v10003767mg [Capsella rubella]                                                                                                                                                                                                                                                                                                                       | 252  | 252  | 1.00E-134 | 100.0 | 97.2 | 98.8 | hypothetical protein CARUB_v10003767mg | gbpln | Capsella rubella     | AT4G01470.1   Symbols: GAMMA-TIP3, TIP1.3, ATTIP1.3   tonoplast intrinsic protein 1.3   chr4:625092-625850 REVERSE LENGTH=252                                                                                                                                                                                                                                                                                                                                                                                                         | 252  | 252  | 1.00E-135 | 100.0 | 96.8 | 98.4 |
| Rsa1.0_01418.1.g26609.t2 | gb EOA38508.1  hypothetical protein CARUB_v10010288mg [Capsella rubella]                                                                                                                                                                                                                                                                                                                       | 210  | 212  | 1.00E-110 | 101.0 | 92.4 | 94.8 | hypothetical protein CARUB_v10010288mg | gbpln | Capsella rubella     | AT1G01050.1   Symbols: AtPPa1, PPa1   pyrophosphorylase 1   chr1:31382-32670 REVERSE LENGTH=212                                                                                                                                                                                                                                                                                                                                                                                                                                       | 210  | 212  | 1.00E-113 | 101.0 | 92.9 | 96.2 |

|                          |                                                                                                                                                                                                         |     |      |           |       |      |      |                                                      |       |                      |                                                                                                                                               |     |      |           |       |      |      |
|--------------------------|---------------------------------------------------------------------------------------------------------------------------------------------------------------------------------------------------------|-----|------|-----------|-------|------|------|------------------------------------------------------|-------|----------------------|-----------------------------------------------------------------------------------------------------------------------------------------------|-----|------|-----------|-------|------|------|
| Rsa1.0_01418.1.g26610.t1 | gb AAD21699.1  Contains reverse transcriptase domain (rvt) PF 00078 [Arabidopsis thaliana]                                                                                                              | 261 | 1253 | 1.00E-33  | 480.1 | 36.0 | 52.1 | Contains reverse transcriptase domain (rvt) PF 00078 | gbpln | Arabidopsis thaliana | AT3G24255.1   Symbols:   RNA-directed DNA polymerase (reverse transcriptase)-related family protein   chr3:8789471-8793208 FORWARD LENGTH=746 | 261 | 746  | 6.00E-23  | 285.8 | 18.4 | 26.8 |
| Rsa1.0_01418.1.g26611.t1 | gb AAD08951.1  putative reverse transcriptase [Arabidopsis thaliana] gi 20197043 gb AAM14892.1  putative reverse transcriptase [Arabidopsis thaliana]                                                   | 628 | 1412 | 1.00E-178 | 224.8 | 50.5 | 67.8 | putative reverse transcriptase                       | gbpln | Arabidopsis thaliana | AT3G24255.1   Symbols:   RNA-directed DNA polymerase (reverse transcriptase)-related family protein   chr3:8789471-8793208 FORWARD LENGTH=746 | 628 | 746  | 3.00E-75  | 118.8 | 25.8 | 34.7 |
| Rsa1.0_01418.1.g26612.t1 | #                                                                                                                                                                                                       | #   | #    | #         | #     | #    | #    | -                                                    | ----  | ----                 | #                                                                                                                                             | #   | #    | #         | #     | #    | #    |
| Rsa1.0_01418.1.g26613.t1 | #                                                                                                                                                                                                       | #   | #    | #         | #     | #    | #    | -                                                    | ----  | ----                 | #                                                                                                                                             | #   | #    | #         | #     | #    | #    |
| Rsa1.0_01418.1.g26614.t1 | ref XP_002874976.1  hypothetical protein ARALYDRAFT_912083 [Arabidopsis lyrata subsp. lyrata] gi 297320813 gb EFH51235.1  hypothetical protein ARALYDRAFT_912083 [Arabidopsis lyrata subsp. lyrata]     | 302 | 332  | 1.00E-112 | 109.9 | 71.5 | 81.8 | hypothetical protein ARALYDRAFT_912083               | gbpln | Arabidopsis lyrata   | AT4G01500.1   Symbols: NGA4   AP2/B3-like transcriptional factor family protein   chr4:639791-640792 FORWARD LENGTH=333                       | 302 | 333  | 1.00E-112 | 110.3 | 68.2 | 80.5 |
| Rsa1.0_01418.1.g26615.t1 | gb AAG51228.1 AC035249.3 Tam3-like transposon protein; 93317-95488 [Arabidopsis thaliana] gi 12323055 gb AAG51515.1 AC068324.3 hAT-element transposase, putative [Arabidopsis thaliana]                 | 662 | 723  | 0         | 109.2 | 55.4 | 72.1 | Tam3-like transposon protein; 93317-95488            | gbpln | Arabidopsis thaliana | AT3G42170.1   Symbols:   BED zinc finger hAT family dimerisation domain   chr3:14321838-14323928 FORWARD LENGTH=696                           | 662 | 696  | 1.00E-39  | 105.1 | 23.9 | 42.7 |
| Rsa1.0_01419.1.g26616.t1 | #                                                                                                                                                                                                       | #   | #    | #         | #     | #    | #    | -                                                    | ----  | ----                 | #                                                                                                                                             | #   | #    | #         | #     | #    | #    |
| Rsa1.0_01419.1.g26617.t1 | ref XP_002887591.1  bZIP transcription factor family protein [Arabidopsis lyrata subsp. lyrata] gi 297333432 gb EFH63850.1  bZIP transcription factor family protein [Arabidopsis lyrata subsp. lyrata] | 177 | 173  | 5.00E-72  | 97.7  | 80.8 | 85.3 | bZIP transcription factor family protein             | gbpln | Arabidopsis lyrata   | AT1G75390.1   Symbols: AtbZIP44, bZIP44   basic leucine-zipper 44   chr1:28292224-28292745 FORWARD LENGTH=173                                 | 177 | 173  | 2.00E-73  | 97.7  | 80.2 | 84.7 |
| Rsa1.0_01419.1.g26618.t1 | gb AAC63678.1  putative non-LTR retroelement reverse transcriptase [Arabidopsis thaliana]                                                                                                               | 272 | 1216 | 5.00E-18  | 447.1 | 25.4 | 38.6 | putative non-LTR retroelement reverse transcriptase  | gbpln | Arabidopsis thaliana | #                                                                                                                                             | #   | #    | #         | #     | #    | #    |
| Rsa1.0_01419.1.g26619.t1 | emb CAB39638.1  RNA-directed DNA polymerase-like protein [Arabidopsis thaliana] gi 7267666 emb CAB78094.1  RNA-directed DNA polymerase-like protein [Arabidopsis thaliana]                              | 951 | 1274 | 0         | 134.0 | 46.9 | 63.8 | RNA-directed DNA polymerase-like protein             | gbpln | Arabidopsis thaliana | AT4G29090.1   Symbols:   Ribonuclease H-like superfamily protein   chr4:14333528-14335255 FORWARD LENGTH=575                                  | 951 | 575  | 2.00E-58  | 60.5  | 17.0 | 27.3 |
| Rsa1.0_01419.1.g26620.t2 | gb EOA34909.1  hypothetical protein CARUB_v10019999mg [Capsella rubella]                                                                                                                                | 357 | 612  | 1.00E-155 | 171.4 | 80.4 | 87.7 | hypothetical protein CARUB_v10019999mg               | gbpln | Capsella rubella     | AT1G75370.1   Symbols:   Sec14p-like phosphatidylinositol transfer family protein   chr1:28276657-28279798 REVERSE LENGTH=612                 | 357 | 612  | 1.00E-154 | 171.4 | 80.7 | 85.4 |
| Rsa1.0_01419.1.g26621.t1 | #                                                                                                                                                                                                       | #   | #    | #         | #     | #    | #    | -                                                    | ----  | ----                 | #                                                                                                                                             | #   | #    | #         | #     | #    | #    |
| Rsa1.0_01419.1.g26622.t1 | gb EOA33528.1  hypothetical protein CARUB_v10019936mg [Capsella rubella]                                                                                                                                | 651 | 647  | 0         | 99.4  | 86.5 | 92.5 | hypothetical protein CARUB_v10019936mg               | gbpln | Capsella rubella     | AT1G75200.1   Symbols:   flavodoxin family protein / radical SAM domain-containing protein   chr1:28220849-28223597 REVERSE LENGTH=647        | 651 | 647  | 0         | 99.4  | 85.3 | 90.9 |
| Rsa1.0_01419.1.g26623.t1 | gb EOA35457.1  hypothetical protein CARUB_v10020666mg [Capsella rubella] gi 482571270 gb EOA35458.1  hypothetical protein CARUB_v10020666mg [Capsella rubella]                                          | 319 | 318  | 1.00E-154 | 99.7  | 88.1 | 92.8 | hypothetical protein CARUB_v10020666mg               | gbpln | Capsella rubella     | AT1G75180.3   Symbols:   Erythronate-4-phosphate dehydrogenase family protein   chr1:28216150-28217911 REVERSE LENGTH=315                     | 319 | 315  | 1.00E-153 | 98.7  | 86.5 | 91.2 |
| Rsa1.0_01419.1.g26624.t1 | gb EOA35962.1  hypothetical protein CARUB_v10021223mg [Capsella rubella]                                                                                                                                | 88  | 86   | 3.00E-26  | 97.7  | 78.4 | 85.2 | hypothetical protein CARUB_v10021223mg               | gbpln | Capsella rubella     | AT1G61570.1   Symbols: TIM13   translocase of the inner mitochondrial membrane 13   chr1:22718897-22719473 REVERSE LENGTH=87                  | 88  | 87   | 2.00E-26  | 98.9  | 69.3 | 80.7 |
| Rsa1.0_01419.1.g26625.t1 | ref XP_002875878.1  aminoacyl-t-RNA synthetase [Arabidopsis lyrata subsp. lyrata] gi 297321716 gb EFH52137.1  aminoacyl-t-RNA synthetase [Arabidopsis lyrata subsp. lyrata]                             | 716 | 1083 | 0         | 151.3 | 62.0 | 63.8 | aminoacyl-t-RNA synthetase                           | gbpln | Arabidopsis lyrata   | AT3G48110.1   Symbols: EDD1, EDD   glycine-tRNA ligases   chr3:17763111-17770964 FORWARD LENGTH=1067                                          | 716 | 1067 | 0         | 149.0 | 62.0 | 63.7 |
| Rsa1.0_01419.1.g26626.t1 | ref NP_177652.2  uncharacterized protein [Arabidopsis thaliana] gi 332197557 gb AEE35678.1  uncharacterized protein AT1G75160 [Arabidopsis thaliana]                                                    | 165 | 395  | 3.00E-85  | 239.4 | 88.5 | 95.2 | uncharacterized protein                              | gbpln | Arabidopsis thaliana | AT1G75160.1   Symbols:   Protein of unknown function (DUF820)   chr1:28209534-28211624 FORWARD LENGTH=395                                     | 165 | 395  | 1.00E-87  | 239.4 | 88.5 | 95.2 |
| Rsa1.0_01419.1.g26627.t1 | gb EOA21466.1  hypothetical protein CARUB_v10001858mg [Capsella rubella]                                                                                                                                | 113 | 236  | 1.00E-28  | 208.8 | 61.1 | 69.9 | hypothetical protein CARUB_v10001858mg               | gbpln | Capsella rubella     | AT5G23420.1   Symbols: HMGB6   high-mobility group box 6   chr5:7888712-7890111 REVERSE LENGTH=241                                            | 113 | 241  | 6.00E-18  | 213.3 | 53.1 | 67.3 |
| Rsa1.0_01419.1.g26628.t1 | ref XP_002887574.1  hypothetical protein ARALYDRAFT_895383 [Arabidopsis lyrata subsp. lyrata] gi 297333415 gb EFH63833.1  hypothetical protein ARALYDRAFT_895383 [Arabidopsis lyrata subsp. lyrata]     | 272 | 395  | 1.00E-121 | 145.2 | 80.5 | 82.7 | hypothetical protein ARALYDRAFT_895383               | gbpln | Arabidopsis lyrata   | AT1G75160.1   Symbols:   Protein of unknown function (DUF820)   chr1:28209534-28211624 FORWARD LENGTH=395                                     | 272 | 395  | 1.00E-123 | 145.2 | 80.1 | 82.4 |

| Rsa1.0_01419.1.g26629.t1 | #                                                                                                                                                                                                                                                                                                                                                                                                                                                                             | #   | #   | #         | #     | #    | #    | -                                                     | ----  | ----                 | #                                                                                                                                                                                                                                                                                                                                                                                                                                                      | #   | #   | #         | #     | #    |      |
|--------------------------|-------------------------------------------------------------------------------------------------------------------------------------------------------------------------------------------------------------------------------------------------------------------------------------------------------------------------------------------------------------------------------------------------------------------------------------------------------------------------------|-----|-----|-----------|-------|------|------|-------------------------------------------------------|-------|----------------------|--------------------------------------------------------------------------------------------------------------------------------------------------------------------------------------------------------------------------------------------------------------------------------------------------------------------------------------------------------------------------------------------------------------------------------------------------------|-----|-----|-----------|-------|------|------|
| Rsa1.0_01419.1.g26630.t1 | ref NP_177650.1  uncharacterized protein [Arabidopsis thaliana] gi 332278241 sp Q9FRK5.3 Y1514_ARAT H RecName: Full=Uncharacterized membrane protein At1g75140 gi 10092281 gb AA025814.1 AC025814.18 unknown protein; 62105-63958 [Arabidopsis thaliana] gi 332197555 gb AEE35676.1  uncharacterized protein AT1G75140 [Arabidopsis thaliana]                                                                                                                                 | 576 | 617 | 0         | 107.1 | 73.3 | 83.0 | uncharacterized protein                               | gbpln | Arabidopsis thaliana | AT1G75140.1   Symbols:   unknown protein; LOCATED IN: endoplasmic reticulum; EXPRESSED IN: 24 plant structures; EXPRESSED DURING: 13 growth stages; BEST Arabidopsis thaliana protein match is: unknown protein (TAIR:AT1G19370.1). Has 51 Blast hits to 49 proteins in 18 species: Archae - 0; Bacteria - 0; Metazoa - 0; Fungi - 0; Plants - 46; Viruses - 0; Other Eukaryotes - 5 (source: NCBI BLink).   chr1:28202166-28204019 REVERSE LENGTH=617 | 576 | 617 | 0         | 107.1 | 73.3 | 83.0 |
| Rsa1.0_01419.1.g26631.t1 | ref NP_565102.1  Nucleotide-diphospho-sugar transferase family protein [Arabidopsis thaliana] gi 12323891 gb AAG51917.1 AC013258.11 unknown protein; 7482-9019 [Arabidopsis thaliana] gi 14517393 gb AAK62587.1  At1g75110/F9E10.4 [Arabidopsis thaliana] gi 20857366 gb AAM26715.1  At1g75110/F9E10.4 [Arabidopsis thaliana] gi 332197552 gb AEE35673.1  Nucleotide-diphospho-sugar transferase family protein [Arabidopsis thaliana]                                        | 428 | 428 | 0         | 100.0 | 86.4 | 93.9 | Nucleotide-diphospho-sugar transferase family protein | gbpln | Arabidopsis thaliana | AT1G75110.1   Symbols: RRA2   Nucleotide-diphospho-sugar transferase family protein   chr1:28194348-28195885 REVERSE LENGTH=428                                                                                                                                                                                                                                                                                                                        | 428 | 428 | 0         | 100.0 | 86.4 | 93.9 |
| Rsa1.0_01419.1.g26632.t1 | gb EOA33700.1  hypothetical protein CARUB_v10019884mg [Capsella rubella]                                                                                                                                                                                                                                                                                                                                                                                                      | 569 | 701 | 0         | 123.2 | 73.6 | 81.7 | hypothetical protein CARUB_v10019884mg                | gbpln | Capsella rubella     | AT1G75100.1   Symbols: JAC1   J-domain protein required for chloroplast accumulation response 1   chr1:28191108-28193769 REVERSE LENGTH=651                                                                                                                                                                                                                                                                                                            | 569 | 651 | 0         | 114.4 | 74.3 | 82.2 |
| Rsa1.0_01419.1.g26633.t1 | gb AAL57684.1  At1g75080/F9E10.7 [Arabidopsis thaliana] gi 20147315 gb AAM10371.1  At1g75080/F9E10.7 [Arabidopsis thaliana]                                                                                                                                                                                                                                                                                                                                                   | 333 | 336 | 1.00E-153 | 100.9 | 94.0 | 96.1 | At1g75080/F9E10.7                                     | gbpln | Arabidopsis thaliana | AT1G75080.2   Symbols: BZR1   Brassinosteroid signalling positive regulator (BZR1) family protein   chr1:28185709-28187063 FORWARD LENGTH=336                                                                                                                                                                                                                                                                                                          | 333 | 336 | 1.00E-155 | 100.9 | 93.7 | 96.1 |
| Rsa1.0_01419.1.g26634.t1 | ref XP_002887572.1  hypothetical protein ARALYDRAFT_316436 [Arabidopsis lyrata subsp. lyrata] gi 297333413 gb EFH63831.1  hypothetical protein ARALYDRAFT_316436 [Arabidopsis lyrata subsp. lyrata]                                                                                                                                                                                                                                                                           | 201 | 245 | 1.00E-93  | 121.9 | 89.6 | 93.5 | hypothetical protein ARALYDRAFT_316436                | gbpln | Arabidopsis lyrata   | AT1G75050.1   Symbols:   Pathogenesis-related thaumatin superfamily protein   chr1:28180116-28181062 FORWARD LENGTH=246                                                                                                                                                                                                                                                                                                                                | 201 | 246 | 1.00E-92  | 122.4 | 87.6 | 93.0 |
| Rsa1.0_01419.1.g26635.t1 | ref XP_002887572.1  hypothetical protein ARALYDRAFT_316436 [Arabidopsis lyrata subsp. lyrata] gi 297333413 gb EFH63831.1  hypothetical protein ARALYDRAFT_316436 [Arabidopsis lyrata subsp. lyrata]                                                                                                                                                                                                                                                                           | 244 | 245 | 4.00E-99  | 100.4 | 72.1 | 82.4 | hypothetical protein ARALYDRAFT_316436                | gbpln | Arabidopsis lyrata   | AT1G75050.1   Symbols:   Pathogenesis-related thaumatin superfamily protein   chr1:28180116-28181062 FORWARD LENGTH=246                                                                                                                                                                                                                                                                                                                                | 244 | 246 | 1.00E-100 | 100.8 | 72.1 | 82.4 |
| Rsa1.0_01420.1.g26636.t1 | ref NP_193095.2  uncharacterized protein [Arabidopsis thaliana] gi 308191636 sp Q9T0H9.2 GDT12_ARA TH RecName: Full=GDT1-like protein 2, chloroplastic; Flags: Precursor gi 332657899 gb AEE83299.1  uncharacterized protein AT4G13590 [Arabidopsis thaliana] ref XP_002870373.1  disease resistance-responsive family protein [Arabidopsis lyrata subsp. lyrata] gi 297316209 gb EFH46632.1  disease resistance-responsive family protein [Arabidopsis lyrata subsp. lyrata] | 351 | 359 | 1.00E-168 | 102.3 | 90.0 | 95.2 | uncharacterized protein                               | gbpln | Arabidopsis thaliana | AT4G13590.1   Symbols:   Uncharacterized protein family (UPF0016)   chr4:7901369-7903792 REVERSE LENGTH=359                                                                                                                                                                                                                                                                                                                                            | 351 | 359 | 1.00E-171 | 102.3 | 90.0 | 95.2 |
| Rsa1.0_01420.1.g26638.t1 | ref XP_002870373.1  disease resistance-responsive family protein [Arabidopsis lyrata subsp. lyrata] gi 297316209 gb EFH46632.1  disease resistance-responsive family protein [Arabidopsis lyrata subsp. lyrata]                                                                                                                                                                                                                                                               | 244 | 244 | 1.00E-132 | 100.0 | 97.5 | 98.0 | disease resistance-responsive family protein          | gbpln | Arabidopsis lyrata   | AT4G13580.1   Symbols:   Disease resistance-responsive (dirigent-like protein) family protein   chr4:7900427-7901161 FORWARD LENGTH=244                                                                                                                                                                                                                                                                                                                | 244 | 244 | 1.00E-134 | 100.0 | 97.1 | 97.1 |
| Rsa1.0_01420.1.g26639.t1 | gb EOA30761.1  hypothetical protein CARUB_v10013903mg [Capsella rubella]                                                                                                                                                                                                                                                                                                                                                                                                      | 328 | 392 | 1.00E-60  | 119.5 | 52.1 | 69.2 | hypothetical protein CARUB_v10013903mg                | gbpln | Capsella rubella     | AT1G61730.1   Symbols:   DNA-binding storekeeper protein-related transcriptional regulator   chr1:22793447-22794577 REVERSE LENGTH=376                                                                                                                                                                                                                                                                                                                 | 328 | 376 | 4.00E-61  | 114.6 | 48.2 | 63.1 |
| Rsa1.0_01420.1.g26640.t1 | #                                                                                                                                                                                                                                                                                                                                                                                                                                                                             | #   | #   | #         | #     | #    | #    | -                                                     | ----  | ----                 | #                                                                                                                                                                                                                                                                                                                                                                                                                                                      | #   | #   | #         | #     | #    |      |
| Rsa1.0_01420.1.g26641.t1 | #                                                                                                                                                                                                                                                                                                                                                                                                                                                                             | #   | #   | #         | #     | #    | #    | -                                                     | ----  | ----                 | #                                                                                                                                                                                                                                                                                                                                                                                                                                                      | #   | #   | #         | #     | #    |      |
| Rsa1.0_01420.1.g26642.t1 | #                                                                                                                                                                                                                                                                                                                                                                                                                                                                             | #   | #   | #         | #     | #    | #    | -                                                     | ----  | ----                 | #                                                                                                                                                                                                                                                                                                                                                                                                                                                      | #   | #   | #         | #     | #    |      |
|                          |                                                                                                                                                                                                                                                                                                                                                                                                                                                                               |     |     |           |       |      |      |                                                       |       |                      | AT3G24860.1   Symbols:   Homeodomain-like superfamily protein   chr3:9073642-9074574 FORWARD LENGTH=310                                                                                                                                                                                                                                                                                                                                                | 98  | 310 | 3.00E-13  | 316.3 | 44.9 | 52.0 |

|                          |                                                                                                                                                                                                                                                                                                                                                                                                                                                                            |     |      |           |       |      |      |                                                 |       |                      |                                                                                                                                                                                                                                                                                                                                                                                                                                                                             |     |     |           |       |      |      |
|--------------------------|----------------------------------------------------------------------------------------------------------------------------------------------------------------------------------------------------------------------------------------------------------------------------------------------------------------------------------------------------------------------------------------------------------------------------------------------------------------------------|-----|------|-----------|-------|------|------|-------------------------------------------------|-------|----------------------|-----------------------------------------------------------------------------------------------------------------------------------------------------------------------------------------------------------------------------------------------------------------------------------------------------------------------------------------------------------------------------------------------------------------------------------------------------------------------------|-----|-----|-----------|-------|------|------|
| Rsa1.0_01420.1.g26643.t1 | ref[NP_193087.1] ammonium transporter 1;1 [Arabidopsis thaliana] gi 1703292 sp P54144.1 AMT11_ARATH RecName: Full=Ammonium transporter 1 member 1; Short=ATAMT1;1 gi 551219 emb CAA53473.1 amt1 [Arabidopsis thaliana] gi 4678377 emb CAB41109.1  ammonium transport protein (AMT1) [Arabidopsis thaliana] gi 7268054 emb CAB78393.1  ammonium transport protein (AMT1) [Arabidopsis thaliana] gi 332657887 gb AEE83287.1  ammonium transporter 1;1 [Arabidopsis thaliana] | 503 | 501  | 0         | 99.6  | 91.8 | 95.4 | ammonium transporter 1;1                        | gbpln | Arabidopsis thaliana | AT4G13510.1   Symbols: AMT1;1, ATAMT1, ATAMT1;1   ammonium transporter 1;1   chr4:7858220-7859725 FORWARD LENGTH=501                                                                                                                                                                                                                                                                                                                                                        | 503 | 501 | 0         | 99.6  | 91.8 | 95.4 |
| Rsa1.0_01420.1.g26644.t1 | #                                                                                                                                                                                                                                                                                                                                                                                                                                                                          | #   | #    | #         | #     | #    | #    | -                                               | ----  | ----                 | #                                                                                                                                                                                                                                                                                                                                                                                                                                                                           | #   | #   | #         | #     | #    |      |
| Rsa1.0_01421.1.g26645.t1 | gb EOA28640.1  hypothetical protein CARUB_v10024862mg, partial [Capsella rubella]                                                                                                                                                                                                                                                                                                                                                                                          | 387 | 490  | 1.00E-46  | 126.6 | 30.7 | 50.9 | hypothetical protein CARUB_v10024862mg, partial | gbpln | Capsella rubella     | AT1G52950.1   Symbols:   Nucleic acid-binding, OB-fold-like protein   chr1:19725483-19728007 FORWARD LENGTH=566                                                                                                                                                                                                                                                                                                                                                             | 387 | 566 | 2.00E-47  | 146.3 | 28.9 | 48.8 |
| Rsa1.0_01421.1.g26646.t1 | gb AAC23765.1  Mutator-like transposase [Arabidopsis thaliana]                                                                                                                                                                                                                                                                                                                                                                                                             | 424 | 784  | 1.00E-138 | 184.9 | 54.7 | 72.9 | Mutator-like transposase                        | gbpln | Arabidopsis thaliana | AT1G64260.1   Symbols:   MuDR family transposase   chr1:23847756-23849915 FORWARD LENGTH=719                                                                                                                                                                                                                                                                                                                                                                                | 424 | 719 | 6.00E-16  | 169.6 | 20.8 | 38.9 |
| Rsa1.0_01421.1.g26647.t1 | #                                                                                                                                                                                                                                                                                                                                                                                                                                                                          | #   | #    | #         | #     | #    | #    | -                                               | ----  | ----                 | #                                                                                                                                                                                                                                                                                                                                                                                                                                                                           | #   | #   | #         | #     | #    |      |
| Rsa1.0_01421.1.g26648.t1 | ref XP_002863918.1  hypothetical protein ARALYDRAFT_357086 [Arabidopsis lyrata subsp. lyrata] gi 297309753 gb EFH40177.1  hypothetical protein ARALYDRAFT_357086 [Arabidopsis lyrata subsp. lyrata]                                                                                                                                                                                                                                                                        | 129 | 123  | 8.00E-15  | 95.3  | 34.1 | 42.6 | hypothetical protein ARALYDRAFT_357086          | gbpln | Arabidopsis lyrata   | #                                                                                                                                                                                                                                                                                                                                                                                                                                                                           | #   | #   | #         | #     | #    |      |
| Rsa1.0_01421.1.g26649.t3 | ref XP_002868430.1  hypothetical protein ARALYDRAFT_493625 [Arabidopsis lyrata subsp. lyrata] gi 297314266 gb EFH44689.1  hypothetical protein ARALYDRAFT_493625 [Arabidopsis lyrata subsp. lyrata]                                                                                                                                                                                                                                                                        | 241 | 445  | 7.00E-80  | 184.6 | 73.4 | 82.2 | hypothetical protein ARALYDRAFT_493625          | gbpln | Arabidopsis lyrata   | AT5G35670.1   Symbols: iqd33   IQ-domain 33   chr5:13856170-13857910 FORWARD LENGTH=442                                                                                                                                                                                                                                                                                                                                                                                     | 241 | 442 | 3.00E-71  | 183.4 | 68.9 | 78.8 |
| Rsa1.0_01421.1.g26650.t1 | ref XP_002870440.1  hypothetical protein ARALYDRAFT_915692 [Arabidopsis lyrata subsp. lyrata] gi 297316276 gb EFH446699.1  hypothetical protein ARALYDRAFT_915692 [Arabidopsis lyrata subsp. lyrata]                                                                                                                                                                                                                                                                       | 145 | 145  | 3.00E-72  | 100.0 | 93.8 | 97.2 | hypothetical protein ARALYDRAFT_915692          | gbpln | Arabidopsis lyrata   | AT2G04520.1   Symbols:   Nucleic acid-binding, OB-fold-like protein   chr2:1574802-1575239 REVERSE LENGTH=145                                                                                                                                                                                                                                                                                                                                                               | 145 | 145 | 5.00E-73  | 100.0 | 97.9 | 99.3 |
| Rsa1.0_01421.1.g26651.t1 | gb AAG51783.1 AC079679_3 reverse transcriptase, putative; 16838-20266 [Arabidopsis thaliana]                                                                                                                                                                                                                                                                                                                                                                               | 185 | 1142 | 1.00E-61  | 617.3 | 57.8 | 77.8 | reverse transcriptase, putative; 16838-20266    | gbpln | Arabidopsis thaliana | AT4G29090.1   Symbols:   Ribonuclease H-like superfamily protein   chr4:14333528-14335255 FORWARD LENGTH=575                                                                                                                                                                                                                                                                                                                                                                | 185 | 575 | 9.00E-20  | 310.8 | 20.5 | 29.2 |
| Rsa1.0_01421.1.g26652.t1 | gb EOA16232.1  hypothetical protein CARUB_v10004374mg [Capsella rubella]                                                                                                                                                                                                                                                                                                                                                                                                   | 558 | 626  | 0         | 112.2 | 78.9 | 87.5 | hypothetical protein CARUB_v10004374mg          | gbpln | Capsella rubella     | AT5G35690.1   Symbols:   CONTAINS InterPro DOMAIN/s: WLM (InterPro:IPRO13536), PUB domain (InterPro:IPRO18997), PUG domain (InterPro:IPRO06567); BEST Arabidopsis thaliana protein match is: zinc ion binding (TAIR:AT1G55915.1); Has 30201 Blast hits to 17322 proteins in 780 species: Archae - 12; Bacteria - 1396; Metazoa - 17338; Fungi - 3422; Plants - 5037; Viruses - 0; Other Eukaryotes - 2996 (source: NCBI BLINK).   chr5:13865027-13868117 REVERSE LENGTH=603 | 558 | 603 | 0         | 108.1 | 78.7 | 86.0 |
| Rsa1.0_01421.1.g26653.t1 | #                                                                                                                                                                                                                                                                                                                                                                                                                                                                          | #   | #    | #         | #     | #    | #    | -                                               | ----  | ----                 | #                                                                                                                                                                                                                                                                                                                                                                                                                                                                           | #   | #   | #         | #     | #    |      |
| Rsa1.0_01421.1.g26654.t2 | ref NP_198420.1  fimbrin-like protein 2 [Arabidopsis thaliana] gi 59797968 sp Q9FKJ0.1 FIMB2_ARATH RecName: Full=Fimbrin-like protein 2 gi 9758643 dbj BAB09267.1  fimbrin [Arabidopsis thaliana] gi 15027847 gb AAK76454.1  putative fimbrin protein [Arabidopsis thaliana] gi 23296651 gb AANI13139.1  putative fimbrin protein [Arabidopsis thaliana] gi 332006624 gb AED94007.1  fimbrin-like protein 2 [Arabidopsis thaliana]                                         | 690 | 687  | 0         | 99.6  | 92.2 | 95.5 | fimbrin-like protein 2                          | gbpln | Arabidopsis thaliana | AT5G35700.1   Symbols: FIM2, FIM5   fimbrin-like protein 2   chr5:13872833-13876432 REVERSE LENGTH=687                                                                                                                                                                                                                                                                                                                                                                      | 690 | 687 | 0         | 99.6  | 92.2 | 95.5 |
| Rsa1.0_01422.1.g26655.t1 | ref XP_002890679.1  cytochrome B561 family protein [Arabidopsis lyrata subsp. lyrata] gi 297336521 gb EFH66938.1  cytochrome B561 family protein [Arabidopsis lyrata subsp. lyrata]                                                                                                                                                                                                                                                                                        | 232 | 236  | 1.00E-104 | 101.7 | 85.8 | 91.8 | cytochrome B561 family protein                  | gbpln | Arabidopsis lyrata   | AT1G26100.1   Symbols:   Cytochrome b561/ferric reductase transmembrane protein family   chr1:9022716-9024081 REVERSE LENGTH=236                                                                                                                                                                                                                                                                                                                                            | 232 | 236 | 1.00E-106 | 101.7 | 84.9 | 91.4 |

|                          |                                                                                                                                                                                                                                                                                                                                                                                                                 |     |     |           |       |      |      |                                                                   |       |                      |                                                                                                                                                                                                                                                                                                                                                                 |     |     |           |       |      |      |
|--------------------------|-----------------------------------------------------------------------------------------------------------------------------------------------------------------------------------------------------------------------------------------------------------------------------------------------------------------------------------------------------------------------------------------------------------------|-----|-----|-----------|-------|------|------|-------------------------------------------------------------------|-------|----------------------|-----------------------------------------------------------------------------------------------------------------------------------------------------------------------------------------------------------------------------------------------------------------------------------------------------------------------------------------------------------------|-----|-----|-----------|-------|------|------|
| Rsa1.0_01422.1.g26656.t1 | gb EOA36601.1  hypothetical protein CARUB_v10011801mg [Capsella rubella]                                                                                                                                                                                                                                                                                                                                        | 407 | 456 | 1.00E-168 | 112.0 | 80.3 | 84.8 | hypothetical protein CARUB_v10011801mg                            | gbpln | Capsella rubella     | AT1G26090.1   Symbols:   P-loop containing nucleoside triphosphate hydrolases superfamily protein   chr1:9020509-9022619 FORWARD LENGTH=455                                                                                                                                                                                                                     | 407 | 455 | 1.00E-168 | 111.8 | 77.9 | 84.8 |
| Rsa1.0_01422.1.g26657.t1 | ref XP_002870549.1  predicted protein [Arabidopsis lyrata subsp. lyrata] gi 297316385 gb EFH46808.1  predicted protein [Arabidopsis lyrata subsp. lyrata]                                                                                                                                                                                                                                                       | 605 | 614 | 1.00E-169 | 101.5 | 52.4 | 69.6 | predicted protein                                                 | gbpln | Arabidopsis lyrata   | AT5G37650.1   Symbols:   Family of unknown function (DUF577)   chr5:14954011-14955834 REVERSE LENGTH=607                                                                                                                                                                                                                                                        | 605 | 607 | 1.00E-162 | 100.3 | 51.2 | 68.3 |
| Rsa1.0_01422.1.g26658.t1 | ref NP_173930.1  coiled-coil domain-containing protein 130 [Arabidopsis thaliana] gi 12320741 gb AAG50519.1 AC084221.1 unknown protein [Arabidopsis thaliana] gi 44681478 gb AAS47679.1  At1g25682 [Arabidopsis thaliana] gi 62320731 dbj BAD95398.1  hypothetical protein [Arabidopsis thaliana] gi 332192524 gb AEE30645.1  uncharacterized protein AT1G25682 [Arabidopsis thaliana]                          | 314 | 310 | 1.00E-164 | 98.7  | 90.4 | 94.3 | coiled-coil domain-containing protein 130                         | gbpln | Arabidopsis thaliana | AT1G25682.1   Symbols:   Family of unknown function (DUF572)   chr1:9002532-9004550 REVERSE LENGTH=310                                                                                                                                                                                                                                                          | 314 | 310 | 1.00E-166 | 98.7  | 90.4 | 94.3 |
| Rsa1.0_01422.1.g26659.t1 | gb EOA36601.1  hypothetical protein CARUB_v10011801mg [Capsella rubella]                                                                                                                                                                                                                                                                                                                                        | 435 | 456 | 0         | 104.8 | 83.0 | 87.8 | hypothetical protein CARUB_v10011801mg                            | gbpln | Capsella rubella     | AT1G26090.1   Symbols:   P-loop containing nucleoside triphosphate hydrolases superfamily protein   chr1:9020509-9022619 FORWARD LENGTH=455                                                                                                                                                                                                                     | 435 | 455 | 0         | 104.6 | 81.6 | 88.7 |
| Rsa1.0_01422.1.g26660.t1 | ref XP_002890678.1  hypothetical protein ARALYDRAFT.472806 [Arabidopsis lyrata subsp. lyrata] gi 297336520 gb EFH66937.1  hypothetical protein ARALYDRAFT.472806 [Arabidopsis lyrata subsp. lyrata]                                                                                                                                                                                                             | 698 | 604 | 0         | 86.5  | 62.0 | 65.2 | hypothetical protein ARALYDRAFT.472806                            | gbpln | Arabidopsis lyrata   | AT1G26110.2   Symbols: DCP5   decapping 5   chr1:9028656-9027556 REVERSE LENGTH=605                                                                                                                                                                                                                                                                             | 698 | 605 | 0         | 86.7  | 61.3 | 64.6 |
| Rsa1.0_01422.1.g26661.t1 | gb EOA40307.1  hypothetical protein CARUB_v10009035mg [Capsella rubella]                                                                                                                                                                                                                                                                                                                                        | 456 | 473 | 0         | 103.7 | 86.4 | 92.5 | hypothetical protein CARUB_v10009035mg                            | gbpln | Capsella rubella     | AT1G26120.1   Symbols: ICME-LIKE1   alpha/beta-Hydrolases superfamily protein   chr1:9028656-9031402 REVERSE LENGTH=476                                                                                                                                                                                                                                         | 456 | 476 | 0         | 104.4 | 86.4 | 92.8 |
| Rsa1.0_01422.1.g26662.t1 | ref XP_002890673.1  metal-dependent phosphohydrolase HD domain-containing protein [Arabidopsis lyrata subsp. lyrata] gi 297336515 gb EFH66932.1  metal-dependent phosphohydrolase HD domain-containing protein [Arabidopsis lyrata subsp. lyrata]                                                                                                                                                               | 366 | 254 | 1.00E-106 | 69.4  | 54.6 | 57.4 | metal-dependent phosphohydrolase HD domain-containing protein     | gbpln | Arabidopsis lyrata   | AT1G26160.1   Symbols:   Metal-dependent phosphohydrolase   chr1:9044784-9046945 REVERSE LENGTH=258                                                                                                                                                                                                                                                             | 366 | 258 | 1.00E-108 | 70.5  | 54.4 | 56.8 |
| Rsa1.0_01422.1.g26663.t2 | ref NP_173943.2  uncharacterized protein [Arabidopsis thaliana] gi 18252157 gb AAL61911.1  unknown protein [Arabidopsis thaliana] gi 21386935 gb AAM47871.1  unknown protein [Arabidopsis thaliana] gi 332192537 gb AEE30658.1  uncharacterized protein AT1G26180 [Arabidopsis thaliana]                                                                                                                        | 316 | 289 | 1.00E-130 | 91.5  | 78.5 | 82.6 | uncharacterized protein                                           | gbpln | Arabidopsis thaliana | AT1G26180.1   Symbols:   unknown protein; CONTAINS InterPro DOMAIN/s: Protein of unknown function DUF232, membrane (InterPro:IPRO18710); Has 285 Blast hits to 285 proteins in 90 species: Archae - 0; Bacteria - 140; Metazoa - 0; Fungi - 0; Plants - 40; Viruses - 0; Other Eukaryotes - 105 (source: NCBI BLINK).   chr1:9054824-9056526 FORWARD LENGTH=289 | 316 | 289 | 1.00E-133 | 91.5  | 78.5 | 82.6 |
| Rsa1.0_01422.1.g26664.t1 | ref NP_173944.1  phosphoribulokinase/uridine kinase-like protein [Arabidopsis thaliana] gi 12321172 gb AAG50674.1 AC079829.7 hypothetical protein [Arabidopsis thaliana] gi 20259437 gb AAM14039.1  unknown protein [Arabidopsis thaliana] gi 21436169 gb AAM51372.1  unknown protein [Arabidopsis thaliana] gi 332192538 gb AEE30659.1  phosphoribulokinase/uridine kinase-like protein [Arabidopsis thaliana] | 630 | 674 | 0         | 107.0 | 89.4 | 95.1 | phosphoribulokinase/uridine kinase-like protein                   | gbpln | Arabidopsis thaliana | AT1G26190.1   Symbols:   Phosphoribulokinase / Uridine kinase family   chr1:9057285-9060433 REVERSE LENGTH=674                                                                                                                                                                                                                                                  | 630 | 674 | 0         | 107.0 | 89.4 | 95.1 |
| Rsa1.0_01422.1.g26665.t2 | ref NP_001154368.1  TRAM, LAG1 and CLN8 (TLC) lipid-sensing domain containing protein [Arabidopsis thaliana] gi 332192539 gb AEE30660.1  TRAM, LAG1 and CLN8 (TLC) lipid-sensing domain containing protein [Arabidopsis thaliana]                                                                                                                                                                               | 309 | 312 | 1.00E-147 | 101.0 | 83.2 | 91.3 | TRAM, LAG1 and CLN8 (TLC) lipid-sensing domain containing protein | gbpln | Arabidopsis thaliana | AT1G26200.1   Symbols:   TRAM, LAG1 and CLN8 (TLC) lipid-sensing domain containing protein   chr1:9063471-9064914 REVERSE LENGTH=312                                                                                                                                                                                                                            | 309 | 312 | 1.00E-150 | 101.0 | 83.2 | 91.3 |
| Rsa1.0_01422.1.g26666.t1 | ref XP_002893412.1  hypothetical protein ARALYDRAFT.472797 [Arabidopsis lyrata subsp. lyrata] gi 297339254 gb EFH69671.1  hypothetical protein ARALYDRAFT.472797 [Arabidopsis lyrata subsp. lyrata]                                                                                                                                                                                                             | 145 | 148 | 9.00E-36  | 102.1 | 78.6 | 83.4 | hypothetical protein ARALYDRAFT.472797                            | gbpln | Arabidopsis lyrata   | AT1G26210.1   Symbols: ATSOFL1, SOFL1   SOB five-like 1   chr1:9067524-9067970 FORWARD LENGTH=148                                                                                                                                                                                                                                                               | 145 | 148 | 3.00E-35  | 102.1 | 77.2 | 83.4 |

|                          |                                                                                                                                                                                                                                                                                                                                                                |     |      |           |       |      |      |                                              |       |                      |                                                                                                                                                                                                                                                                                                                                                                    |     |     |           |       |      |      |
|--------------------------|----------------------------------------------------------------------------------------------------------------------------------------------------------------------------------------------------------------------------------------------------------------------------------------------------------------------------------------------------------------|-----|------|-----------|-------|------|------|----------------------------------------------|-------|----------------------|--------------------------------------------------------------------------------------------------------------------------------------------------------------------------------------------------------------------------------------------------------------------------------------------------------------------------------------------------------------------|-----|-----|-----------|-------|------|------|
| Rsa1.0_01422.1.g26667.t1 | ref[XP_002893411.1] hypothetical protein ARALYDRAFT_472794 [Arabidopsis lyrata subsp. lyrata] gi 297339253 gb EFH69670.1                                                                                                                                                                                                                                       | 231 | 197  | 2.00E-79  | 85.3  | 65.4 | 70.6 | hypothetical protein ARALYDRAFT_472794       | gbpln | Arabidopsis lyrata   | AT1G26220.1   Symbols:   Acyl-CoA N-acyltransferases (NAT) superfamily protein   chr1:9071157-9071750 FORWARD LENGTH=197                                                                                                                                                                                                                                           | 231 | 197 | 3.00E-81  | 85.3  | 64.9 | 69.7 |
| Rsa1.0_01423.1.g26668.t1 | hypothetical protein ARALYDRAFT_472794 [Arabidopsis lyrata subsp. lyrata]                                                                                                                                                                                                                                                                                      |     |      |           |       |      |      |                                              |       |                      |                                                                                                                                                                                                                                                                                                                                                                    |     |     |           |       |      |      |
| Rsa1.0_01423.1.g26669.t2 | gb ACG60672.1  unknown protein [Brassica oleracea var. alboglabra]                                                                                                                                                                                                                                                                                             | 49  | 288  | 4.00E-12  | 587.8 | 73.5 | 85.7 | unknown protein                              | gbpln | Brassica oleracea    | #                                                                                                                                                                                                                                                                                                                                                                  | #   | #   | #         | #     | #    | #    |
| Rsa1.0_01423.1.g26669.t2 | gb EOA25556.1  hypothetical protein CARUB_v10018901mg [Capsella rubella]                                                                                                                                                                                                                                                                                       | 427 | 453  | 1.00E-161 | 106.1 | 79.9 | 88.8 | hypothetical protein CARUB_v10018901mg       | gbpln | Capsella rubella     | AT3G53040.1   Symbols:   late embryogenesis abundant protein, putative / LEA protein, putative   chr3:19664797-19664405 REVERSE LENGTH=479                                                                                                                                                                                                                         | 427 | 479 | 1.00E-154 | 112.2 | 79.9 | 90.2 |
| Rsa1.0_01423.1.g26670.t1 | ref[XP_002877897.1] hypothetical protein ARALYDRAFT_485676 [Arabidopsis lyrata subsp. lyrata] gi 297323735 gb EFH54156.1                                                                                                                                                                                                                                       | 245 | 296  | 1.00E-114 | 120.8 | 79.6 | 86.5 | hypothetical protein ARALYDRAFT_485676       | gbpln | Arabidopsis lyrata   | AT3G53010.1   Symbols:   Domain of unknown function (DUF303)   chr3:19656603-19657928 REVERSE LENGTH=297                                                                                                                                                                                                                                                           | 245 | 297 | 1.00E-115 | 121.2 | 80.0 | 86.9 |
| Rsa1.0_01423.1.g26671.t1 | hypothetical protein ARALYDRAFT_485676 [Arabidopsis lyrata subsp. lyrata]                                                                                                                                                                                                                                                                                      |     |      |           |       |      |      |                                              |       |                      |                                                                                                                                                                                                                                                                                                                                                                    |     |     |           |       |      |      |
| Rsa1.0_01423.1.g26671.t1 | emb CAB39638.1  RNA-directed DNA polymerase-like protein [Arabidopsis thaliana] gi 7267666 emb CAB78094.1                                                                                                                                                                                                                                                      | 401 | 1274 | 3.00E-90  | 317.7 | 46.9 | 61.6 | RNA-directed DNA polymerase-like protein     | gbpln | Arabidopsis thaliana | AT4G29090.1   Symbols:   Ribonuclease H-like superfamily protein   chr4:14333528-14335255 FORWARD LENGTH=575                                                                                                                                                                                                                                                       | 401 | 575 | 3.00E-31  | 143.4 | 16.0 | 21.4 |
| Rsa1.0_01423.1.g26672.t1 | RNA-directed DNA polymerase-like protein [Arabidopsis thaliana]                                                                                                                                                                                                                                                                                                |     |      |           |       |      |      |                                              |       |                      |                                                                                                                                                                                                                                                                                                                                                                    |     |     |           |       |      |      |
| Rsa1.0_01423.1.g26672.t1 | gb EOA23794.1  hypothetical protein CARUB_v10017008mg [Capsella rubella]                                                                                                                                                                                                                                                                                       | 527 | 527  | 0         | 100.0 | 97.7 | 99.4 | hypothetical protein CARUB_v10017008mg       | gbpln | Capsella rubella     | AT3G52990.1   Symbols:   Pyruvate kinase family protein   chr3:19649046-19652237 FORWARD LENGTH=527                                                                                                                                                                                                                                                                | 527 | 527 | 0         | 100.0 | 97.5 | 99.4 |
| Rsa1.0_01423.1.g26673.t1 | gb AAG51783.1 AC079679_3 reverse transcriptase, putative: 16838-20266 [Arabidopsis thaliana]                                                                                                                                                                                                                                                                   | 242 | 1142 | 1.00E-57  | 471.9 | 43.0 | 58.3 | reverse transcriptase, putative: 16838-20266 | gbpln | Arabidopsis thaliana | ATMG00310.1   Symbols:   ORF154   RNA-directed DNA polymerase (reverse transcriptase)-related family protein   chrM:90883-91347 REVERSE LENGTH=154                                                                                                                                                                                                                 | 242 | 154 | 7.00E-27  | 63.6  | 24.8 | 34.7 |
| Rsa1.0_01423.1.g26674.t1 | ref[XP_002877896.1] CYP76G1 [Arabidopsis lyrata subsp. lyrata] gi 297323734 gb EFH54155.1  CYP76G1 [Arabidopsis lyrata subsp. lyrata]                                                                                                                                                                                                                          | 535 | 516  | 0         | 96.4  | 87.1 | 91.6 | CYP76G1                                      | gbpln | Arabidopsis lyrata   | AT3G52970.1   Symbols:   CYP76G1   cytochrome P450, family 76, subfamily G, polypeptide 1   chr3:19641400-19643259 REVERSE LENGTH=516                                                                                                                                                                                                                              | 535 | 516 | 0         | 96.4  | 87.1 | 92.0 |
| Rsa1.0_01423.1.g26675.t1 | ref[XP_00289590.1] hypothetical protein ARALYDRAFT_887817 [Arabidopsis lyrata subsp. lyrata] gi 297335432 gb EFH65849.1                                                                                                                                                                                                                                        | 208 | 341  | 8.00E-50  | 163.9 | 63.0 | 72.1 | hypothetical protein ARALYDRAFT_887817       | gbpln | Arabidopsis lyrata   | #                                                                                                                                                                                                                                                                                                                                                                  | #   | #   | #         | #     | #    | #    |
| Rsa1.0_01424.1.g26676.t1 | ref[NP_201337.1] uncharacterized protein [Arabidopsis thaliana] gi 9759614 dbj BAB11556.1  unnamed protein product [Arabidopsis thaliana] gi 34146816 gb AA062416.1  At5g65340 [Arabidopsis thaliana] gi 51969418 dbj BAD43401.1  putative protein [Arabidopsis thaliana] gi 332010658 gb AED98041.1  uncharacterized protein AT5G65340 [Arabidopsis thaliana] | 248 | 253  | 1.00E-115 | 102.0 | 85.1 | 93.1 | uncharacterized protein                      | gbpln | Arabidopsis thaliana | AT5G65340.1   Symbols:   Protein of unknown function, DUF617   chr5:26113684-26114445 REVERSE LENGTH=253                                                                                                                                                                                                                                                           | 248 | 253 | 1.00E-118 | 102.0 | 85.1 | 93.1 |
| Rsa1.0_01424.1.g26677.t1 | ref[XP_002866663.1] hypothetical protein ARALYDRAFT_496763 [Arabidopsis lyrata subsp. lyrata] gi 297312498 gb EFH42922.1  hypothetical protein ARALYDRAFT_496763 [Arabidopsis lyrata subsp. lyrata]                                                                                                                                                            | 148 | 150  | 3.00E-47  | 101.4 | 79.7 | 87.2 | hypothetical protein ARALYDRAFT_496763       | gbpln | Arabidopsis lyrata   | AT5G65300.1   Symbols:   unknown protein; Has 30201 Blast hits to 17322 proteins in 780 species: Archae - 12; Bacteria - 1396; Metazoa - 17338; Fungi - 3422; Plants - 5037; Viruses - 0; Other Eukaryotes - 2996 (source: NCBI BLINK).   chr5:26095266-26095718 REVERSE LENGTH=150                                                                                | 148 | 150 | 8.00E-40  | 101.4 | 74.3 | 82.4 |
| Rsa1.0_01424.1.g26678.t5 | gb EOA13950.1  hypothetical protein CARUB_v10027070mg [Capsella rubella]                                                                                                                                                                                                                                                                                       | 224 | 226  | 1.00E-120 | 100.9 | 94.2 | 96.9 | hypothetical protein CARUB_v10027070mg       | gbpln | Capsella rubella     | AT5G65270.1   Symbols:   AtRABA4a, RABA4a   RAB GTPase homolog A4A   chr5:26083437-26084550 FORWARD LENGTH=226                                                                                                                                                                                                                                                     | 224 | 226 | 1.00E-122 | 100.9 | 94.2 | 96.9 |
| Rsa1.0_01424.1.g26679.t1 | ref[XP_002866658.1] hypothetical protein ARALYDRAFT_496747 [Arabidopsis lyrata subsp. lyrata] gi 297312493 gb EFH42917.1  hypothetical protein ARALYDRAFT_496747 [Arabidopsis lyrata subsp. lyrata]                                                                                                                                                            | 73  | 72   | 4.00E-17  | 98.6  | 63.0 | 75.3 | hypothetical protein ARALYDRAFT_496747       | gbpln | Arabidopsis lyrata   | AT5G65207.1   Symbols:   unknown protein; BEST Arabidopsis thaliana protein match is: unknown protein (TAIR:AT5G10040.1). Has 30201 Blast hits to 17322 proteins in 780 species: Archae - 12; Bacteria - 1396; Metazoa - 17338; Fungi - 3422; Plants - 5037; Viruses - 0; Other Eukaryotes - 2996 (source: NCBI BLINK).   chr5:26052364-26052585 REVERSE LENGTH=73 | 73  | 73  | 1.00E-17  | 100.0 | 60.3 | 75.3 |



|                          |                                                                                                                                                                                                                                                                                                                                                       |     |     |           |       |      |      |                                             |       |                      |                                                                                                                                                                                                                                                                                                                                                                     |     |     |           |       |      |      |
|--------------------------|-------------------------------------------------------------------------------------------------------------------------------------------------------------------------------------------------------------------------------------------------------------------------------------------------------------------------------------------------------|-----|-----|-----------|-------|------|------|---------------------------------------------|-------|----------------------|---------------------------------------------------------------------------------------------------------------------------------------------------------------------------------------------------------------------------------------------------------------------------------------------------------------------------------------------------------------------|-----|-----|-----------|-------|------|------|
| Rsa1.0_01424.1.g26680.t2 | ref NP_201321.1  VQ motif-containing protein [Arabidopsis thaliana] gi 10178179 dbj BAB11653.1  unnamed protein product [Arabidopsis thaliana] gi 44917435 gb AAS49042.1  At5g65170 [Arabidopsis thaliana] gi 46931270 gb AAT06439.1  At5g65170 [Arabidopsis thaliana] gi 332010630 gb AED98013.1  VQ motif-containing protein [Arabidopsis thaliana] | 479 | 362 | 1.00E-106 | 75.6  | 49.5 | 53.4 | VQ motif-containing protein                 | gbpln | Arabidopsis thaliana | AT5G65170.1   Symbols:   VQ motif-containing protein   chr5:26041218-26042306 FORWARD LENGTH=362                                                                                                                                                                                                                                                                    | 479 | 362 | 1.00E-109 | 75.6  | 49.5 | 53.4 |
| Rsa1.0_01424.1.g26681.t1 | #                                                                                                                                                                                                                                                                                                                                                     | #   | #   | #         | #     | #    | #    | -                                           | ----  | ----                 | #                                                                                                                                                                                                                                                                                                                                                                   | #   | #   | #         | #     | #    | #    |
| Rsa1.0_01424.1.g26682.t1 | #                                                                                                                                                                                                                                                                                                                                                     | #   | #   | #         | #     | #    | #    | -                                           | ----  | ----                 | #                                                                                                                                                                                                                                                                                                                                                                   | #   | #   | #         | #     | #    | #    |
| Rsa1.0_01424.1.g26683.t1 | ref XP_002864940.1  hypothetical protein ARALYDRAFT_358710 [Arabidopsis lyrata subsp. lyrata] gi 297310775 gb EFH41199.1  hypothetical protein ARALYDRAFT_358710 [Arabidopsis lyrata subsp. lyrata]                                                                                                                                                   | 290 | 321 | 3.00E-92  | 110.7 | 72.8 | 80.7 | hypothetical protein ARALYDRAFT_358710      | gbpln | Arabidopsis lyrata   | AT5G65120.1   Symbols:   unknown protein; BEST Arabidopsis thaliana protein match is: unknown protein (TAIR:AT5G10110.1); Has 30201 Blast hits to 17322 proteins in 780 species: Archae - 12; Bacteria - 1396; Metazoa - 17338; Fungi - 3422; Plants - 5037; Viruses - 0; Other Eukaryotes - 2996 (source: NCBI BLINK).   chr5:26013274-26014504 FORWARD LENGTH=317 | 290 | 317 | 1.00E-91  | 109.3 | 69.7 | 80.3 |
| Rsa1.0_01424.1.g26684.t1 | dbj BAJ33887.1  unnamed protein product [Thelelungella halophila]                                                                                                                                                                                                                                                                                     | 680 | 688 | 0         | 101.2 | 92.4 | 96.6 | unnamed protein product                     | ----  | ----                 | AT5G65110.1   Symbols: ACX2, ATACX2   acyl-CoA oxidase 2   chr5:26009821-26012482 REVERSE LENGTH=692                                                                                                                                                                                                                                                                | 680 | 692 | 0         | 101.8 | 90.4 | 95.4 |
| Rsa1.0_01424.1.g26685.t1 | ref XP_002866646.1  nucleotide-sugar transporter family protein [Arabidopsis lyrata subsp. lyrata] gi 297312481 gb EFH42905.1  nucleotide-sugar transporter family protein [Arabidopsis lyrata subsp. lyrata]                                                                                                                                         | 444 | 325 | 1.00E-159 | 73.2  | 67.1 | 69.8 | nucleotide-sugar transporter family protein | gbpln | Arabidopsis lyrata   | AT5G65000.1   Symbols:   Nucleotide-sugar transporter family protein   chr5:25965123-25967307 REVERSE LENGTH=325                                                                                                                                                                                                                                                    | 444 | 325 | 1.00E-162 | 73.2  | 66.9 | 69.6 |
| Rsa1.0_01425.1.g26686.t1 | dbj BAB08885.1  retroelement pol polyprotein-like [Arabidopsis thaliana]                                                                                                                                                                                                                                                                              | 171 | 370 | 1.00E-40  | 216.4 | 46.8 | 60.2 | retroelement pol polyprotein-like           | gbpln | Arabidopsis thaliana | AT1G21280.1   Symbols:   CONTAINS InterPro DOMAIN/s: Retrotransposon gag protein (InterPro:IPR005162); Has 707 Blast hits to 705 proteins in 25 species: Archae - 0; Bacteria - 0; Metazoa - 4; Fungi - 0; Plants - 703; Viruses - 0; Other Eukaryotes - 0 (source: NCBI BLINK).   chr1:7447690-7448403 REVERSE LENGTH=237                                          | 171 | 237 | 1.00E-16  | 138.6 | 26.9 | 43.3 |
| Rsa1.0_01425.1.g26687.t1 | ref XP_002866916.1  hypothetical protein ARALYDRAFT_490803 [Arabidopsis lyrata subsp. lyrata] gi 297312752 gb EFH43175.1  hypothetical protein ARALYDRAFT_490803 [Arabidopsis lyrata subsp. lyrata]                                                                                                                                                   | 246 | 239 | 1.00E-102 | 97.2  | 77.2 | 82.9 | hypothetical protein ARALYDRAFT_490803      | gbpln | Arabidopsis lyrata   | AT4G38090.1   Symbols:   Ribosomal protein S5 domain 2-like superfamily protein   chr4:17883757-17884702 REVERSE LENGTH=234                                                                                                                                                                                                                                         | 246 | 234 | 1.00E-103 | 95.1  | 76.8 | 82.5 |
| Rsa1.0_01425.1.g26688.t1 | ref NP_566995.1  diphosphomevalonate decarboxylase [Arabidopsis thaliana] gi 332645683 gb AEE79204.1  diphosphomevalonate decarboxylase [Arabidopsis thaliana]                                                                                                                                                                                        | 419 | 419 | 0         | 100.0 | 94.7 | 97.4 | diphosphomevalonate decarboxylase           | gbpln | Arabidopsis thaliana | AT3G54250.1   Symbols:   GHMP kinase family protein   chr3:20082468-20084688 REVERSE LENGTH=419                                                                                                                                                                                                                                                                     | 419 | 419 | 0         | 100.0 | 94.7 | 97.4 |
| Rsa1.0_01425.1.g26689.t1 | ref NP_566996.1  protein trichome birefringence-like 36 [Arabidopsis thaliana] gi 15451108 gb AAK96825.1  putative protein [Arabidopsis thaliana] gi 20148379 gb AAM10080.1  putative protein [Arabidopsis thaliana] gi 332645684 gb AEE79205.1  protein trichome birefringence-like 36 [Arabidopsis thaliana]                                        | 373 | 379 | 0         | 101.6 | 86.9 | 91.7 | protein trichome birefringence-like 36      | gbpln | Arabidopsis thaliana | AT3G54260.1   Symbols: TBL36   TRICHOME BIREFRINGENCE-LIKE 36   chr3:20085097-20086745 REVERSE LENGTH=379                                                                                                                                                                                                                                                           | 373 | 379 | 0         | 101.6 | 86.9 | 91.7 |
| Rsa1.0_01425.1.g26690.t1 | ref NP_680429.1  uncharacterized protein [Arabidopsis thaliana] gi 44917523 gb AAS49086.1  At5g53895 [Arabidopsis thaliana] gi 332009041 gb AED96424.1  uncharacterized protein AT5G53895 [Arabidopsis thaliana]                                                                                                                                      | 134 | 129 | 2.00E-42  | 96.3  | 76.1 | 84.3 | uncharacterized protein                     | gbpln | Arabidopsis thaliana | AT5G53895.1   Symbols:   unknown protein; BEST Arabidopsis thaliana protein match is: unknown protein (TAIR:AT4G27530.1); Has 30201 Blast hits to 17322 proteins in 780 species: Archae - 12; Bacteria - 1396; Metazoa - 17338; Fungi - 3422; Plants - 5037; Viruses - 0; Other Eukaryotes - 2996 (source: NCBI BLINK).   chr5:21880626-21881116 FORWARD LENGTH=129 | 134 | 129 | 4.00E-45  | 96.3  | 76.1 | 84.3 |

|                          |                                                                                                                                                                                                                                                                                                                                                                                                                                                                 |      |      |           |       |      |       |                                                                                    |       |                      |                                                                                                                                                                                                                                                                                                                                                                                                                                                                                                                               |     |      |           |       |      |      |
|--------------------------|-----------------------------------------------------------------------------------------------------------------------------------------------------------------------------------------------------------------------------------------------------------------------------------------------------------------------------------------------------------------------------------------------------------------------------------------------------------------|------|------|-----------|-------|------|-------|------------------------------------------------------------------------------------|-------|----------------------|-------------------------------------------------------------------------------------------------------------------------------------------------------------------------------------------------------------------------------------------------------------------------------------------------------------------------------------------------------------------------------------------------------------------------------------------------------------------------------------------------------------------------------|-----|------|-----------|-------|------|------|
| Rsa1.0_01425.1.g26691.t1 | ref NP_566997.1  uncharacterized protein [Arabidopsis thaliana]<br>gi 20260600 gb AAM13198.1  unknown protein [Arabidopsis thaliana]<br>gi 31711834 gb AAP68273.1  At3g54290 [Arabidopsis thaliana]<br>gi 332645688 gb AAE79209.1  uncharacterized protein AT3G54290 [Arabidopsis thaliana]                                                                                                                                                                     | 329  | 350  | 1.00E-145 | 106.4 | 80.5 | 90.0  | uncharacterized protein                                                            | gbpln | Arabidopsis thaliana | AT3G54290.1   Symbols:   FUNCTIONS IN: molecular_function unknown; INVOLVED IN: N-terminal protein myristoylation; LOCATED IN: chloroplast; EXPRESSED IN: 23 plant structures; EXPRESSED DURING: 13 growth stages; CONTAINS InterPro DOMAIN/s: Haemerythrin/HHE cation-binding motif (InterPro:IPR012312); Has 59 Blast hits to 59 proteins in 14 species: Archae - 0; Bacteria - 2; Metazoa - 0; Fungi - 0; Plants - 56; Viruses - 0; Other Eukaryotes - 1 (source: NCBI BLINK).   chr3:20104623-20105845 REVERSE LENGTH=350 | 329 | 350  | 1.00E-148 | 106.4 | 80.5 | 90.0 |
| Rsa1.0_01425.1.g26692.t1 | ref XP_002877968.1  ATVAMP727 [Arabidopsis lyrata subsp. lyrata]<br>gi 297323806 gb EFH54227.1  ATVAMP727 [Arabidopsis lyrata subsp. lyrata]                                                                                                                                                                                                                                                                                                                    | 243  | 240  | 1.00E-127 | 98.8  | 94.2 | 96.7  | ATVAMP727                                                                          | gbpln | Arabidopsis lyrata   | AT3G54300.2   Symbols: ATVAMP727, VAMP727   vesicle-associated membrane protein 727   chr3:20108355-20110127 REVERSE LENGTH=240                                                                                                                                                                                                                                                                                                                                                                                               | 243 | 240  | 1.00E-129 | 98.8  | 93.4 | 96.3 |
| Rsa1.0_01425.1.g26693.t1 | #                                                                                                                                                                                                                                                                                                                                                                                                                                                               | #    | #    | #         | #     | #    | -     | ----                                                                               | ----  | #                    | #                                                                                                                                                                                                                                                                                                                                                                                                                                                                                                                             | #   | #    | #         | #     | #    |      |
| Rsa1.0_01425.1.g26694.t1 | gb AAF28894.1 AF124814.1 APETALA3 [Brassica napus]<br>gi 48375197 gb AAT42251.1  floral homeotic protein APETALA3 [Brassica rapa subsp. chinensis]<br>gi 87133586 gb ABD24435.1  APETALA3-4 [Brassica napus]                                                                                                                                                                                                                                                    | 302  | 224  | 1.00E-117 | 74.2  | 68.2 | 69.5  | APETALA3                                                                           | gbpln | Brassica napus       | AT3G54340.1   Symbols: AP3, ATAP3   K-box region and MADS-box transcription factor family protein   chr3:20119428-20121087 REVERSE LENGTH=232                                                                                                                                                                                                                                                                                                                                                                                 | 302 | 232  | 1.00E-112 | 76.8  | 64.9 | 67.5 |
| Rsa1.0_01425.1.g26695.t1 | #                                                                                                                                                                                                                                                                                                                                                                                                                                                               | #    | #    | #         | #     | #    | -     | ----                                                                               | ----  | #                    | #                                                                                                                                                                                                                                                                                                                                                                                                                                                                                                                             | #   | #    | #         | #     | #    |      |
| Rsa1.0_01426.1.g26696.t1 | ref NP_192607.2  bifunctional inhibitor/lipid-transfer protein/seed storage 2S albumin-like protein [Arabidopsis thaliana]<br>gi 84778464 dbj BAE73259.1  xyloglucanase protein 3 [Arabidopsis thaliana]<br>gi 332657267 gb AAE82667.1  bifunctional inhibitor/lipid-transfer protein/seed storage 2S albumin-like protein [Arabidopsis thaliana]                                                                                                               | 139  | 208  | 2.00E-12  | 149.6 | 36.0 | 41.7  | bifunctional inhibitor/lipid-transfer protein/seed storage 2S albumin-like protein | gbpln | Arabidopsis thaliana | AT4G08670.1   Symbols:   Bifunctional inhibitor/lipid-transfer protein/seed storage 2S albumin superfamily protein   chr4:5536765-5538210 REVERSE LENGTH=208                                                                                                                                                                                                                                                                                                                                                                  | 139 | 208  | 5.00E-15  | 149.6 | 36.0 | 41.7 |
| Rsa1.0_01426.1.g26697.t1 | #                                                                                                                                                                                                                                                                                                                                                                                                                                                               | #    | #    | #         | #     | #    | -     | ----                                                                               | ----  | #                    | #                                                                                                                                                                                                                                                                                                                                                                                                                                                                                                                             | #   | #    | #         | #     | #    |      |
| Rsa1.0_01426.1.g26698.t1 | #                                                                                                                                                                                                                                                                                                                                                                                                                                                               | #    | #    | #         | #     | #    | -     | ----                                                                               | ----  | #                    | #                                                                                                                                                                                                                                                                                                                                                                                                                                                                                                                             | #   | #    | #         | #     | #    |      |
| Rsa1.0_01426.1.g26699.t3 | gb AAD20433.1  putative retroelement pol polyprotein [Arabidopsis thaliana]                                                                                                                                                                                                                                                                                                                                                                                     | 1555 | 889  | 1.00E-165 | 57.2  | 21.6 | 29.1  | putative retroelement pol polyprotein                                              | gbpln | Arabidopsis thaliana | #                                                                                                                                                                                                                                                                                                                                                                                                                                                                                                                             | #   | #    | #         | #     | #    |      |
| Rsa1.0_01426.1.g26700.t1 | gb ABD65035.1  hypothetical protein 26.t00052 [Brassica oleracea]                                                                                                                                                                                                                                                                                                                                                                                               | 662  | 695  | 0         | 105.0 | 59.7 | 70.7  | hypothetical protein 26.t00052                                                     | gbpln | Brassica oleracea    | AT3G43148.1   Symbols:   FUNCTIONS IN: molecular_function unknown; INVOLVED IN: biological_process unknown; LOCATED IN: cellular_component unknown; BEST Arabidopsis thaliana protein match is: myosin heavy chain-related (TAIR:AT5G32590.1); Has 145 Blast hits to 140 proteins in 36 species: Archae - 0; Bacteria - 9; Metazoa - 37; Fungi - 11; Plants - 72; Viruses - 1; Other Eukaryotes - 15 (source: NCBI BLINK).   chr3:15139955-15143123 FORWARD LENGTH=673                                                        | 662 | 673  | 1.00E-17  | 101.7 | 9.2  | 14.4 |
| Rsa1.0_01426.1.g26701.t1 | ref NP_189946.1  aldehyde oxidase 2 [Arabidopsis thaliana]<br>gi 62898865 sp Q7G192.2 ALDO2_ARAT H RecName: Full=Indole-3-acetaldehyde oxidase; Short=IAA oxidase; AltName: Full=Aldehyde oxidase 2; Short=AO-2; Short=ATAO-2; Short=AtAO3<br>gi 3172025 dbj BAA28625.1  aldehyde oxidase [Arabidopsis thaliana]<br>gi 9967509 emb CAC05634.1  aldehyde oxidase [Arabidopsis thaliana]<br>gi 332644291 gb AAE77812.1  aldehyde oxidase 2 [Arabidopsis thaliana] | 137  | 1321 | 4.00E-37  | 964.2 | 57.7 | 65.0  | aldehyde oxidase 2                                                                 | gbpln | Arabidopsis thaliana | AT3G43600.1   Symbols: AAO2, AO3, atAO-2, Aogamma, AtAO3   aldehyde oxidase 2   chr3:15512778-15517375 REVERSE LENGTH=1321                                                                                                                                                                                                                                                                                                                                                                                                    | 137 | 1321 | 1.00E-39  | 964.2 | 57.7 | 65.0 |
| Rsa1.0_01426.1.g26702.t1 | gb EOA31081.1  hypothetical protein CARUB_v10014232mg [Capsella rubella]                                                                                                                                                                                                                                                                                                                                                                                        | 290  | 310  | 3.00E-94  | 106.9 | 67.6 | 83.4  | hypothetical protein CARUB_v10014232mg                                             | gbpln | Capsella rubella     | AT5G48670.1   Symbols: FEM111, AGL80   AGAMOUS-like 80   chr5:19738825-19739790 REVERSE LENGTH=321                                                                                                                                                                                                                                                                                                                                                                                                                            | 290 | 321  | 6.00E-93  | 110.7 | 66.6 | 79.7 |
| Rsa1.0_01426.1.g26703.t1 | gb ABL97959.1  ribosomal protein L7Ae-like [Brassica rapa]                                                                                                                                                                                                                                                                                                                                                                                                      | 128  | 128  | 8.00E-67  | 100.0 | 99.2 | 100.0 | ribosomal protein L7Ae-like                                                        | gbpln | Brassica rapa        | AT5G20160.1   Symbols:   Ribosomal protein L7Ae/L30e/S12e/Gadd45 family protein   chr5:6804075-6805102 REVERSE LENGTH=128                                                                                                                                                                                                                                                                                                                                                                                                     | 128 | 128  | 4.00E-60  | 100.0 | 96.1 | 97.7 |

|                          |                                                                                                                                                                                                                                                                                                                                                                                                                                                                                                                                                                             |      |      |           |       |      |      |                                                                                |       |                      |                                                                                                                                                                                                                                                                                                                                                                                                                                             |      |      |           |       |      |      |
|--------------------------|-----------------------------------------------------------------------------------------------------------------------------------------------------------------------------------------------------------------------------------------------------------------------------------------------------------------------------------------------------------------------------------------------------------------------------------------------------------------------------------------------------------------------------------------------------------------------------|------|------|-----------|-------|------|------|--------------------------------------------------------------------------------|-------|----------------------|---------------------------------------------------------------------------------------------------------------------------------------------------------------------------------------------------------------------------------------------------------------------------------------------------------------------------------------------------------------------------------------------------------------------------------------------|------|------|-----------|-------|------|------|
| Rsa1.0_01427.1.g26704.t1 | ref NP_564065.1  uncharacterized protein [Arabidopsis thaliana]<br>gi 6730701 gb AAF27096.1 AC011809.5 Unknown protein [Arabidopsis thaliana]<br>gi 15810347 gb AL07061.1  unknown protein [Arabidopsis thaliana]<br>gi 20465593 gb AAM20279.1  unknown protein [Arabidopsis thaliana]<br>gi 332191650 gb AEE29771.1  uncharacterized protein AT1G18850 [Arabidopsis thaliana]                                                                                                                                                                                              | 141  | 399  | 1.00E-14  | 283.0 | 43.3 | 51.8 | uncharacterized protein                                                        | gbpln | Arabidopsis thaliana | AT1G18850.1   Symbols:   unknown protein; FUNCTIONS IN: molecular_function unknown; INVOLVED IN: biological_process unknown; LOCATED IN: nucleolus; EXPRESSED IN: 22 plant structures; EXPRESSED DURING: 13 growth stages; Has 40 Blast hits to 40 proteins in 13 species: Archae - 0; Bacteria - 0; Metazoa - 0; Fungi - 0; Plants - 40; Viruses - 0; Other Eukaryotes - 0 (source: NCBI BLINK).   chr1:6504928-6506127 REVERSE LENGTH=399 | 141  | 399  | 4.00E-17  | 283.0 | 43.3 | 51.8 |
| Rsa1.0_01427.1.g26705.t3 | #                                                                                                                                                                                                                                                                                                                                                                                                                                                                                                                                                                           | #    | #    | #         | #     | #    | #    | -                                                                              | ----  | ----                 | #                                                                                                                                                                                                                                                                                                                                                                                                                                           | #    | #    | #         | #     | #    |      |
| Rsa1.0_01427.1.g26706.t1 | gb AAC28189.1  contains similarity to Arabidopsis thaliana retrotransposon Athila (GB:X81801) [Arabidopsis thaliana]                                                                                                                                                                                                                                                                                                                                                                                                                                                        | 324  | 940  | 1.00E-32  | 290.1 | 24.7 | 35.2 | contains similarity to Arabidopsis thaliana retrotransposon Athila (GB:X81801) | gbpln | Arabidopsis thaliana | #                                                                                                                                                                                                                                                                                                                                                                                                                                           | #    | #    | #         | #     | #    |      |
| Rsa1.0_01427.1.g26707.t1 | gb AAC28189.1  contains similarity to Arabidopsis thaliana retrotransposon Athila (GB:X81801) [Arabidopsis thaliana]                                                                                                                                                                                                                                                                                                                                                                                                                                                        | 569  | 940  | 2.00E-16  | 165.2 | 8.6  | 15.5 | contains similarity to Arabidopsis thaliana retrotransposon Athila (GB:X81801) | gbpln | Arabidopsis thaliana | #                                                                                                                                                                                                                                                                                                                                                                                                                                           | #    | #    | #         | #     | #    |      |
| Rsa1.0_01427.1.g26708.t1 | #                                                                                                                                                                                                                                                                                                                                                                                                                                                                                                                                                                           | #    | #    | #         | #     | #    | #    | -                                                                              | ----  | ----                 | #                                                                                                                                                                                                                                                                                                                                                                                                                                           | #    | #    | #         | #     | #    |      |
| Rsa1.0_01427.1.g26709.t1 | #                                                                                                                                                                                                                                                                                                                                                                                                                                                                                                                                                                           | #    | #    | #         | #     | #    | #    | -                                                                              | ----  | ----                 | #                                                                                                                                                                                                                                                                                                                                                                                                                                           | #    | #    | #         | #     | #    |      |
| Rsa1.0_01427.1.g26710.t1 | #                                                                                                                                                                                                                                                                                                                                                                                                                                                                                                                                                                           | #    | #    | #         | #     | #    | #    | -                                                                              | ----  | ----                 | #                                                                                                                                                                                                                                                                                                                                                                                                                                           | #    | #    | #         | #     | #    |      |
| Rsa1.0_01427.1.g26711.t1 | gb AAF99763.1 AC003981.13 F22O13.21 [Arabidopsis thaliana]<br>gi 9293930 db BAB01833.1  Mutator-like transposase [Arabidopsis thaliana]<br>gi 10177478 db BAB10869.1  mutator-like transposase [Arabidopsis thaliana]<br>ref XP_002893018.1  hypothetical protein ARALYDRAFT_472107 [Arabidopsis lyrata subsp. lyrata]                                                                                                                                                                                                                                                      | 348  | 915  | 8.00E-55  | 262.9 | 35.6 | 51.1 | F22O13.21                                                                      | gbpln | Arabidopsis thaliana | #                                                                                                                                                                                                                                                                                                                                                                                                                                           | #    | #    | #         | #     | #    |      |
| Rsa1.0_01427.1.g26712.t1 | ref XP_002893018.1  hypothetical protein ARALYDRAFT_472107 [Arabidopsis lyrata subsp. lyrata]<br>gi 297338860 gb EFH69277.1  hypothetical protein ARALYDRAFT_472107 [Arabidopsis lyrata subsp. lyrata]                                                                                                                                                                                                                                                                                                                                                                      | 87   | 88   | 2.00E-37  | 101.1 | 90.8 | 94.3 | hypothetical protein ARALYDRAFT_472107                                         | gbpln | Arabidopsis lyrata   | AT1G18835.1   Symbols: MIF3   mini zinc finger   chr1:6496106-6496372 REVERSE LENGTH=88                                                                                                                                                                                                                                                                                                                                                     | 87   | 88   | 1.00E-35  | 101.1 | 89.7 | 94.3 |
| Rsa1.0_01428.1.g26713.t8 | db BAB01217.1  Ta11 non-LTR retroelement protein-like [Arabidopsis thaliana] gi 67633664 gb AA778756.1  putative zinc finger protein [Arabidopsis thaliana]                                                                                                                                                                                                                                                                                                                                                                                                                 | 786  | 487  | 2.00E-61  | 62.0  | 20.9 | 29.9 | Ta11 non-LTR retroelement protein-like                                         | gbpln | Arabidopsis thaliana | AT5G19270.1   Symbols:   unknown protein; BEST Arabidopsis thaliana protein match is: unknown protein (TAIR:AT4G03566.1); Has 30201 Blast hits to 17322 proteins in 780 species: Archae - 12; Bacteria - 1396; Metazoa - 17338; Fungi - 3422; Plants - 5037; Viruses - 0; Other Eukaryotes - 2996 (source: NCBI BLINK).   chr5:6485617-6487009 REVERSE LENGTH=365                                                                           | 786  | 365  | 7.00E-17  | 46.4  | 6.5  | 9.5  |
| Rsa1.0_01428.1.g26714.t1 | gb EOA31093.1  hypothetical protein CARUB_v10014242mg [Capsella rubella]                                                                                                                                                                                                                                                                                                                                                                                                                                                                                                    | 298  | 307  | 1.00E-113 | 103.0 | 70.8 | 82.9 | hypothetical protein CARUB_v10014242mg                                         | gbpln | Capsella rubella     | AT3G24860.1   Symbols:   Homeodomain-like superfamily protein   chr3:9073642-9074574 FORWARD LENGTH=310                                                                                                                                                                                                                                                                                                                                     | 298  | 310  | 1.00E-108 | 104.0 | 66.8 | 77.9 |
| Rsa1.0_01428.1.g26715.t5 | ref NP_189132.2  Helicase/SANT-associated, DNA binding protein [Arabidopsis thaliana]<br>gi 332643436 gb AEE76957.1  Helicase/SANT-associated, DNA binding protein [Arabidopsis thaliana]                                                                                                                                                                                                                                                                                                                                                                                   | 1887 | 1957 | 0         | 103.7 | 75.4 | 83.0 | Helicase/SANT-associated, DNA binding protein                                  | gbpln | Arabidopsis thaliana | AT3G24880.1   Symbols:   Helicase/SANT-associated, DNA binding protein   chr3:9086457-9095537 REVERSE LENGTH=1957                                                                                                                                                                                                                                                                                                                           | 1887 | 1957 | 0         | 103.7 | 75.4 | 83.0 |
| Rsa1.0_01428.1.g26716.t1 | #                                                                                                                                                                                                                                                                                                                                                                                                                                                                                                                                                                           | #    | #    | #         | #     | #    | #    | -                                                                              | ----  | ----                 | #                                                                                                                                                                                                                                                                                                                                                                                                                                           | #    | #    | #         | #     | #    |      |
| Rsa1.0_01428.1.g26717.t1 | #                                                                                                                                                                                                                                                                                                                                                                                                                                                                                                                                                                           | #    | #    | #         | #     | #    | #    | -                                                                              | ----  | ----                 | #                                                                                                                                                                                                                                                                                                                                                                                                                                           | #    | #    | #         | #     | #    |      |
| Rsa1.0_01428.1.g26718.t1 | ref NP_189139.1  RING/U-box domain-containing protein [Arabidopsis thaliana]<br>gi 79313365 ref NP_001030762.1  RING/U-box domain-containing protein [Arabidopsis thaliana]<br>gi 9293985 db BAB01888.1  unnamed protein product [Arabidopsis thaliana]<br>gi 48958487 gb AAT47796.1  At3g25030 [Arabidopsis thaliana]<br>gi 51536564 gb AAU05520.1  At3g25030 [Arabidopsis thaliana]<br>gi 332643448 gb AEE76969.1  RING/U-box domain-containing protein [Arabidopsis thaliana]<br>gi 332643449 gb AEE76970.1  RING/U-box domain-containing protein [Arabidopsis thaliana] | 267  | 250  | 6.00E-95  | 93.6  | 71.2 | 80.1 | RING/U-box domain-containing protein                                           | gbpln | Arabidopsis thaliana | AT3G25030.2   Symbols:   RING/U-box superfamily protein   chr3:9122650-9123402 FORWARD LENGTH=250                                                                                                                                                                                                                                                                                                                                           | 267  | 250  | 2.00E-97  | 93.6  | 71.2 | 80.1 |
| Rsa1.0_01429.1.g26719.t1 | #                                                                                                                                                                                                                                                                                                                                                                                                                                                                                                                                                                           | #    | #    | #         | #     | #    | #    | -                                                                              | ----  | ----                 | #                                                                                                                                                                                                                                                                                                                                                                                                                                           | #    | #    | #         | #     | #    |      |
| Rsa1.0_01429.1.g26720.t1 | gb AAG51783.1 AC079679.3 reverse transcriptase, putative; 16838-20266 [Arabidopsis thaliana]                                                                                                                                                                                                                                                                                                                                                                                                                                                                                | 610  | 1142 | 1.00E-172 | 187.2 | 50.5 | 63.1 | reverse transcriptase, putative; 16838-20266                                   | gbpln | Arabidopsis thaliana | AT1G43760.1   Symbols:   DNase I-like superfamily protein   chr1:16528880-16531065 REVERSE LENGTH=626                                                                                                                                                                                                                                                                                                                                       | 610  | 626  | 2.00E-23  | 102.6 | 14.3 | 24.8 |

|                          |                                                                                                                                                                                                                                                                                                                                                                                                                                                                                                                                                                                                                                                                                                                                                                                                       |      |      |           |       |      |      |                                                          |       |                      |                                                                                                                                                                                                                                                                             |      |      |           |       |      |      |
|--------------------------|-------------------------------------------------------------------------------------------------------------------------------------------------------------------------------------------------------------------------------------------------------------------------------------------------------------------------------------------------------------------------------------------------------------------------------------------------------------------------------------------------------------------------------------------------------------------------------------------------------------------------------------------------------------------------------------------------------------------------------------------------------------------------------------------------------|------|------|-----------|-------|------|------|----------------------------------------------------------|-------|----------------------|-----------------------------------------------------------------------------------------------------------------------------------------------------------------------------------------------------------------------------------------------------------------------------|------|------|-----------|-------|------|------|
| Rsa1.0_01429.1.g26721.t1 | #                                                                                                                                                                                                                                                                                                                                                                                                                                                                                                                                                                                                                                                                                                                                                                                                     | #    | #    | #         | #     | #    | #    | -                                                        | ----  | ----                 | #                                                                                                                                                                                                                                                                           | #    | #    | #         | #     | #    |      |
| Rsa1.0_01429.1.g26722.t1 | gb AAF79687.1 AC022314_28 F9C16.9 [Arabidopsis thaliana]                                                                                                                                                                                                                                                                                                                                                                                                                                                                                                                                                                                                                                                                                                                                              | 781  | 946  | 0         | 121.1 | 49.3 | 65.7 | F9C16.9                                                  | gbpln | Arabidopsis thaliana | AT1G64260.1   Symbols:   MuDR family transposase   chr1:23847756-23849915 FORWARD LENGTH=719                                                                                                                                                                                | 781  | 719  | 4.00E-23  | 92.1  | 14.6 | 28.3 |
| Rsa1.0_01429.1.g26723.t1 | gb AAF18641.1 AC006228_12 F5J5.16 [Arabidopsis thaliana]                                                                                                                                                                                                                                                                                                                                                                                                                                                                                                                                                                                                                                                                                                                                              | 687  | 1024 | 2.00E-54  | 149.1 | 22.9 | 31.7 | F5J5.16                                                  | gbpln | Arabidopsis thaliana | #                                                                                                                                                                                                                                                                           | #    | #    | #         | #     | #    |      |
| Rsa1.0_01429.1.g26724.t1 | #                                                                                                                                                                                                                                                                                                                                                                                                                                                                                                                                                                                                                                                                                                                                                                                                     | #    | #    | #         | #     | #    | #    | -                                                        | ----  | ----                 | #                                                                                                                                                                                                                                                                           | #    | #    | #         | #     | #    |      |
| Rsa1.0_01429.1.g26725.t1 | dbj BAF01102.1  putative proline-rich protein [Arabidopsis thaliana]                                                                                                                                                                                                                                                                                                                                                                                                                                                                                                                                                                                                                                                                                                                                  | 309  | 315  | 1.00E-81  | 101.9 | 78.3 | 83.2 | putative proline-rich protein                            | gbpln | Arabidopsis thaliana | AT1G28290.2   Symbols: AGP31   arabinogalactan protein 31   chr1:9889331-9890843 REVERSE LENGTH=315                                                                                                                                                                         | 309  | 315  | 6.00E-81  | 101.9 | 78.6 | 83.5 |
| Rsa1.0_01429.1.g26726.t1 | #                                                                                                                                                                                                                                                                                                                                                                                                                                                                                                                                                                                                                                                                                                                                                                                                     | #    | #    | #         | #     | #    | #    | -                                                        | ----  | ----                 | #                                                                                                                                                                                                                                                                           | #    | #    | #         | #     | #    |      |
| Rsa1.0_01429.1.g26727.t1 | dbj BAB02990.1  retroelement pol polyprotein-like [Arabidopsis thaliana]                                                                                                                                                                                                                                                                                                                                                                                                                                                                                                                                                                                                                                                                                                                              | 1014 | 1250 | 0         | 123.3 | 46.8 | 59.1 | retroelement pol polyprotein-like                        | gbpln | Arabidopsis thaliana | AT4G23160.1   Symbols: CRK8   cysteine-rich RLK (RECEPTOR-like protein kinase) 8   chr4:12129485-12134086 FORWARD LENGTH=1262                                                                                                                                               | 1014 | 1262 | 8.00E-52  | 124.5 | 14.6 | 23.0 |
| Rsa1.0_01429.1.g26728.t2 | gb AAG51783.1 AC079679_3 reverse transcriptase, putative; 16838-20266 [Arabidopsis thaliana]                                                                                                                                                                                                                                                                                                                                                                                                                                                                                                                                                                                                                                                                                                          | 165  | 1142 | 7.00E-20  | 692.1 | 33.3 | 49.1 | reverse transcriptase, putative; 16838-20266             | gbpln | Arabidopsis thaliana | #                                                                                                                                                                                                                                                                           | #    | #    | #         | #     | #    |      |
| Rsa1.0_01430.1.g26729.t1 | ref NP_190260.1  protein kinase family protein [Arabidopsis thaliana] gi 75266317 sp Q9STF0.1 LRKS3_ARAT H RecName: Full=Receptor like protein kinase S.3; Short=LecRK-S.3 gi 5541683 emb CAB51189.1  receptor like protein kinase [Arabidopsis thaliana] gi 332644680 gb AEE78201.1  receptor like protein kinase S.3 [Arabidopsis thaliana]                                                                                                                                                                                                                                                                                                                                                                                                                                                         | 329  | 337  | 1.00E-175 | 102.4 | 93.9 | 96.0 | protein kinase family protein                            | gbpln | Arabidopsis thaliana | AT3G46760.1   Symbols:   Protein kinase superfamily protein   chr3:17222027-17223040 FORWARD LENGTH=337                                                                                                                                                                     | 329  | 337  | 1.00E-178 | 102.4 | 93.9 | 96.0 |
| Rsa1.0_01430.1.g26730.t1 | gb EOA25635.1  hypothetical protein CARUB_v10018984mg [Capsella rubella]                                                                                                                                                                                                                                                                                                                                                                                                                                                                                                                                                                                                                                                                                                                              | 343  | 389  | 1.00E-141 | 113.4 | 80.2 | 87.5 | hypothetical protein CARUB_v10018984mg                   | gbpln | Capsella rubella     | AT3G46750.1   Symbols:   unknown protein; Has 2631 Blast hits to 1984 proteins in 271 species: Archae - 6; Bacteria - 163; Metazoa - 1232; Fungi - 253; Plants - 141; Viruses - 8; Other Eukaryotes - 828 (source: NCBI BLink).   chr3:17219944-17221461 FORWARD LENGTH=388 | 343  | 388  | 1.00E-142 | 113.1 | 79.3 | 86.3 |
| Rsa1.0_01430.1.g26731.t2 | gb ABD65636.1  hypothetical protein Z3.t00055 [Brassica oleracea]                                                                                                                                                                                                                                                                                                                                                                                                                                                                                                                                                                                                                                                                                                                                     | 259  | 414  | 2.00E-13  | 159.8 | 21.2 | 26.3 | hypothetical protein Z3.t00055                           | gbpln | Brassica oleracea    | #                                                                                                                                                                                                                                                                           | #    | #    | #         | #     | #    |      |
| Rsa1.0_01430.1.g26732.t1 | #                                                                                                                                                                                                                                                                                                                                                                                                                                                                                                                                                                                                                                                                                                                                                                                                     | #    | #    | #         | #     | #    | #    | -                                                        | ----  | ----                 | #                                                                                                                                                                                                                                                                           | #    | #    | #         | #     | #    |      |
| Rsa1.0_01430.1.g26733.t1 | ref XP_002877506.1  UDP-glucuronosyl/UDP-glucosyl transferase family protein [Arabidopsis lyrata subsp. lyrata] gi 297323344 gb EFH53765.1  UDP-glucuronosyl/UDP-glucosyl transferase family protein [Arabidopsis lyrata subsp. lyrata] ref NP_566885.1  UDP-glucosyl transferase 76E12 [Arabidopsis thaliana] gi 75249778 sp Q94AB5.1 U7E12_ARAT H RecName: Full=UDP-glycosyltransferase 76E12 gi 15081809 gb AAK82559.1  AT3g46660/F12A12_180 [Arabidopsis thaliana] gi 21539473 gb AAM53289.1  glucosyltransferase-like protein [Arabidopsis thaliana] gi 23198296 gb AAN15675.1  glucosyltransferase-like protein [Arabidopsis thaliana] gi 27363270 gb AAO11554.1  At3g46660/F12A12_180 [Arabidopsis thaliana] gi 332644669 gb AEE78190.1  UDP-glucosyl transferase 76E12 [Arabidopsis thaliana] | 269  | 452  | 9.00E-66  | 168.0 | 59.5 | 74.0 | UDP-glucuronosyl/UDP-glucosyl transferase family protein | gbpln | Arabidopsis lyrata   | AT3G46680.1   Symbols:   UDP-Glycosyltransferase superfamily protein   chr3:17195318-17196743 REVERSE LENGTH=449                                                                                                                                                            | 269  | 449  | 2.00E-67  | 166.9 | 59.1 | 72.5 |
| Rsa1.0_01430.1.g26734.t1 | glucosyltransferase-like protein [Arabidopsis thaliana] gi 21539473 gb AAM53289.1  glucosyltransferase-like protein [Arabidopsis thaliana] gi 23198296 gb AAN15675.1  glucosyltransferase-like protein [Arabidopsis thaliana] gi 27363270 gb AAO11554.1  At3g46660/F12A12_180 [Arabidopsis thaliana] gi 332644669 gb AEE78190.1  UDP-glucosyl transferase 76E12 [Arabidopsis thaliana]                                                                                                                                                                                                                                                                                                                                                                                                                | 360  | 458  | 1.00E-83  | 127.2 | 43.1 | 48.9 | UDP-glucosyl transferase 76E12                           | gbpln | Arabidopsis thaliana | AT3G46660.1   Symbols: UGT76E12   UDP-glucosyl transferase 76E12   chr3:17189406-17190862 REVERSE LENGTH=458                                                                                                                                                                | 360  | 458  | 3.00E-86  | 127.2 | 43.1 | 48.9 |

|                          |                                                                                                                                                                                                                                                                                                                                                                                                                                                                                                                                                                |     |      |           |       |      |      |                                                 |       |                      |                                                                                                                                                                                                                                                                                                                                                                                                                                                                                                                                             |     |      |           |       |      |      |
|--------------------------|----------------------------------------------------------------------------------------------------------------------------------------------------------------------------------------------------------------------------------------------------------------------------------------------------------------------------------------------------------------------------------------------------------------------------------------------------------------------------------------------------------------------------------------------------------------|-----|------|-----------|-------|------|------|-------------------------------------------------|-------|----------------------|---------------------------------------------------------------------------------------------------------------------------------------------------------------------------------------------------------------------------------------------------------------------------------------------------------------------------------------------------------------------------------------------------------------------------------------------------------------------------------------------------------------------------------------------|-----|------|-----------|-------|------|------|
| Rsa1.0_01430.1.g26735.t1 | refNP_190248.1  protein phytoclock 1 [Arabidopsis thaliana] gi 79314533 refNP_001030823.1  protein phytoclock 1 [Arabidopsis thaliana] gi 6523067 emb CAB62334.1  putative protein [Arabidopsis thaliana] gi 30102630 gb AAP21233.1  At3g46640 [Arabidopsis thaliana] gi 71067050 dbj BAE16277.1  PHYTOCLOCK 1 [Arabidopsis thaliana] gi 110743672 dbj BAE99673.1  hypothetical protein [Arabidopsis thaliana] gi 332644665 gb AEE78186.1  protein phytoclock 1 [Arabidopsis thaliana] gi 332644666 gb AEE78187.1  protein phytoclock 1 [Arabidopsis thaliana] | 293 | 323  | 1.00E-120 | 110.2 | 82.3 | 86.7 | protein phytoclock 1                            | gbpln | Arabidopsis thaliana | AT3G46640.2   Symbols: PCL1   Homeodomain-like superfamily protein   chr3:17183248-17184219 FORWARD LENGTH=323                                                                                                                                                                                                                                                                                                                                                                                                                              | 293 | 323  | 1.00E-122 | 110.2 | 82.3 | 86.7 |
| Rsa1.0_01430.1.g26736.t1 | #                                                                                                                                                                                                                                                                                                                                                                                                                                                                                                                                                              | #   | #    | #         | #     | #    | #    | -                                               | ----  | ----                 | #                                                                                                                                                                                                                                                                                                                                                                                                                                                                                                                                           | #   | #    | #         | #     | #    | #    |
| Rsa1.0_01430.1.g26737.t1 | #                                                                                                                                                                                                                                                                                                                                                                                                                                                                                                                                                              | #   | #    | #         | #     | #    | #    | -                                               | ----  | ----                 | #                                                                                                                                                                                                                                                                                                                                                                                                                                                                                                                                           | #   | #    | #         | #     | #    | #    |
| Rsa1.0_01430.1.g26738.t1 | #                                                                                                                                                                                                                                                                                                                                                                                                                                                                                                                                                              | #   | #    | #         | #     | #    | #    | -                                               | ----  | ----                 | #                                                                                                                                                                                                                                                                                                                                                                                                                                                                                                                                           | #   | #    | #         | #     | #    | #    |
| Rsa1.0_01430.1.g26739.t1 | refNP_192445.1  Zinc knuckle (CCHC-type) family protein [Arabidopsis thaliana] gi 7267296 emb CAB81078.1  putative protein [Arabidopsis thaliana] gi 332657109 gb AEE82509.1  Zinc knuckle (CCHC-type) family protein [Arabidopsis thaliana]                                                                                                                                                                                                                                                                                                                   | 334 | 735  | 4.00E-48  | 220.1 | 40.7 | 52.4 | Zinc knuckle (CCHC-type) family protein         | gbpln | Arabidopsis thaliana | AT4G05360.1   Symbols:   Zinc knuckle (CCHC-type) family protein   chr4:2728204-2732337 FORWARD LENGTH=735                                                                                                                                                                                                                                                                                                                                                                                                                                  | 334 | 735  | 9.00E-51  | 220.1 | 40.7 | 52.4 |
| Rsa1.0_01430.1.g26740.t1 | dbj BAJ33797.1  unnamed protein product [Thellungiella halophila]                                                                                                                                                                                                                                                                                                                                                                                                                                                                                              | 609 | 592  | 0         | 97.2  | 82.9 | 88.0 | unnamed protein product                         | ----  | ----                 | AT3G46600.1   Symbols:   GRAS family transcription factor   chr3:17158048-17159799 FORWARD LENGTH=583                                                                                                                                                                                                                                                                                                                                                                                                                                       | 609 | 583  | 0         | 95.7  | 81.8 | 87.0 |
| Rsa1.0_01431.1.g26741.t1 | gb ABK28243.1  unknown [Arabidopsis thaliana]                                                                                                                                                                                                                                                                                                                                                                                                                                                                                                                  | 366 | 297  | 3.00E-70  | 81.1  | 35.8 | 48.9 | unknown                                         | gbpln | Arabidopsis thaliana | AT4G04650.1   Symbols:   RNA-directed DNA polymerase (reverse transcriptase)-related family protein   chr4:2353989-2355213 REVERSE LENGTH=332                                                                                                                                                                                                                                                                                                                                                                                               | 366 | 332  | 1.00E-72  | 90.7  | 35.8 | 48.9 |
| Rsa1.0_01431.1.g26742.t1 | #                                                                                                                                                                                                                                                                                                                                                                                                                                                                                                                                                              | #   | #    | #         | #     | #    | #    | -                                               | ----  | ----                 | #                                                                                                                                                                                                                                                                                                                                                                                                                                                                                                                                           | #   | #    | #         | #     | #    | #    |
| Rsa1.0_01431.1.g26743.t1 | gb AAG51783.1 AC079679_3 reverse transcriptase, putative; 16838-20266 [Arabidopsis thaliana]                                                                                                                                                                                                                                                                                                                                                                                                                                                                   | 213 | 1142 | 3.00E-41  | 536.2 | 45.5 | 59.6 | reverse transcriptase, putative; 16838-20266    | gbpln | Arabidopsis thaliana | AT2G34320.1   Symbols:   Polynucleotidyl transferase, ribonuclease H-like superfamily protein   chr2:14484959-14485837 FORWARD LENGTH=292                                                                                                                                                                                                                                                                                                                                                                                                   | 213 | 292  | 5.00E-22  | 137.1 | 30.0 | 50.7 |
| Rsa1.0_01431.1.g26744.t1 | refXP_002884043.1  hypothetical protein ARALYDRAFT_480607 [Arabidopsis lyrata subsp. lyrata] gi 297329883 gb EFH60302.1  hypothetical protein ARALYDRAFT_480607 [Arabidopsis lyrata subsp. lyrata]                                                                                                                                                                                                                                                                                                                                                             | 146 | 142  | 3.00E-32  | 97.3  | 54.1 | 57.5 | hypothetical protein ARALYDRAFT_480607          | gbpln | Arabidopsis lyrata   | AT2G17240.1   Symbols:   unknown protein; FUNCTIONS IN: molecular_function unknown; INVOLVED IN: biological_process unknown; LOCATED IN: chloroplast; EXPRESSED IN: 23 plant structures; EXPRESSED DURING: 14 growth stages; BEST Arabidopsis thaliana protein match is: unknown protein (TAIR:AT3G24506.1); Has 2795 Blast hits to 943 proteins in 155 species: Archae - 0; Bacteria - 388; Metazoa - 809; Fungi - 72; Plants - 153; Viruses - 54; Other Eukaryotes - 1319 (source: NCBI BLink).   chr2:7498178-7498996 FORWARD LENGTH=140 | 146 | 140  | 8.00E-30  | 95.9  | 54.1 | 56.8 |
| Rsa1.0_01431.1.g26745.t1 | refNP_179316.2  CCAAT-binding factor [Arabidopsis thaliana] gi 330251509 gb AEC06603.1  CCAAT-binding factor [Arabidopsis thaliana]                                                                                                                                                                                                                                                                                                                                                                                                                            | 619 | 577  | 0         | 93.2  | 78.2 | 85.3 | CCAAT-binding factor                            | gbpln | Arabidopsis thaliana | AT2G17250.1   Symbols: EMB2762   CCAAT-binding factor   chr2:7499573-7502957 FORWARD LENGTH=577                                                                                                                                                                                                                                                                                                                                                                                                                                             | 619 | 577  | 0         | 93.2  | 78.2 | 85.3 |
| Rsa1.0_01431.1.g26746.t1 | gb AAF21901.1 AF109392_1 ligand gated channel-like protein [Brassica napus]                                                                                                                                                                                                                                                                                                                                                                                                                                                                                    | 908 | 912  | 0         | 100.4 | 95.6 | 97.7 | ligand gated channel-like protein               | gbpln | Brassica napus       | AT2G17260.1   Symbols: GLR2, ATGLR2, GLR3.1, ATGLR3.1   glutamate receptor 2   chr2:7504780-7508266 FORWARD LENGTH=951                                                                                                                                                                                                                                                                                                                                                                                                                      | 908 | 951  | 0         | 104.7 | 87.8 | 93.8 |
| Rsa1.0_01431.1.g26747.t1 | refXP_002884047.1  mitochondrial substrate carrier family protein [Arabidopsis lyrata subsp. lyrata] gi 297329887 gb EFH60306.1  mitochondrial substrate carrier family protein [Arabidopsis lyrata subsp. lyrata]                                                                                                                                                                                                                                                                                                                                             | 309 | 309  | 1.00E-173 | 100.0 | 95.1 | 98.4 | mitochondrial substrate carrier family protein  | gbpln | Arabidopsis lyrata   | AT2G17270.1   Symbols: PHT3.3   phosphate transporter 3.3   chr2:7510456-7512118 FORWARD LENGTH=309                                                                                                                                                                                                                                                                                                                                                                                                                                         | 309 | 309  | 1.00E-174 | 100.0 | 94.2 | 97.7 |
| Rsa1.0_01431.1.g26748.t1 | refNP_190293.1  leucine-rich repeat protein kinase-like protein [Arabidopsis thaliana] gi 6522590 emb CAB61955.1  receptor kinase-like protein [Arabidopsis thaliana] gi 33264472.1 gb AEE78242.1  leucine-rich repeat protein kinase-like protein [Arabidopsis thaliana]                                                                                                                                                                                                                                                                                      | 997 | 1009 | 0         | 101.2 | 70.8 | 81.9 | leucine-rich repeat protein kinase-like protein | gbpln | Arabidopsis thaliana | AT3G47090.1   Symbols:   Leucine-rich repeat protein kinase family protein   chr3:17341512-17344645 REVERSE LENGTH=1009                                                                                                                                                                                                                                                                                                                                                                                                                     | 997 | 1009 | 0         | 101.2 | 70.8 | 81.9 |
| Rsa1.0_01431.1.g26749.t1 | gb AAZ32753.1  putative calcium dependent kinase 6 [Brassica napus]                                                                                                                                                                                                                                                                                                                                                                                                                                                                                            | 551 | 535  | 0         | 97.1  | 90.9 | 92.6 | putative calcium dependent kinase 6             | gbpln | Brassica napus       | AT2G17290.1   Symbols: CPK6, ATCDPK3, ATCPK6   Calcium-dependent protein kinase family protein   chr2:7517005-7519239 FORWARD LENGTH=544                                                                                                                                                                                                                                                                                                                                                                                                    | 551 | 544  | 0         | 98.7  | 88.9 | 92.4 |

|                          |                                                                                                                                                                                                                                                                                           |     |      |           |       |      |      |                                                                            |       |                      |                                                                                                                                                                                                                                                                                                                                                                                                                                                                                                                                |     |     |           |       |      |      |
|--------------------------|-------------------------------------------------------------------------------------------------------------------------------------------------------------------------------------------------------------------------------------------------------------------------------------------|-----|------|-----------|-------|------|------|----------------------------------------------------------------------------|-------|----------------------|--------------------------------------------------------------------------------------------------------------------------------------------------------------------------------------------------------------------------------------------------------------------------------------------------------------------------------------------------------------------------------------------------------------------------------------------------------------------------------------------------------------------------------|-----|-----|-----------|-------|------|------|
| Rsa1.0_01431.1.g26750.t1 | ref NP_179322.1  uncharacterized protein [Arabidopsis thaliana] gi 45476533 gb AA505932.1  At2g17300 [Arabidopsis thaliana] gi 46359819 gb AS58773.1  At2g17300 [Arabidopsis thaliana] gi 330251516 gb AEC06610.1  uncharacterized protein AT2G17300 [Arabidopsis thaliana]               | 142 | 139  | 2.00E-34  | 97.9  | 77.5 | 83.1 | uncharacterized protein                                                    | gbpln | Arabidopsis thaliana | AT2G17300.1   Symbols:   unknown protein; FUNCTIONS IN: molecular_function unknown; INVOLVED IN: biological_process unknown; LOCATED IN: chloroplast; EXPRESSED IN: 20 plant structures; EXPRESSED DURING: 13 growth stages; BEST Arabidopsis thaliana protein match is: unknown protein (TAIR:AT4G35320.1); Has 42 Blast hits to 42 proteins in 10 species: Archaea - 0; Bacteria - 0; Metazoa - 0; Fungi - 0; Plants - 42; Viruses - 0; Other Eukaryotes - 0 (source: NCBI BLINK).   chr2:7522465-7522884 REVERSE LENGTH=139 | 142 | 139 | 6.00E-37  | 97.9  | 77.5 | 83.1 |
| Rsa1.0_01431.1.g26751.t1 | #                                                                                                                                                                                                                                                                                         | #   | #    | #         | #     | #    | #    | -                                                                          | ----  | ----                 | #                                                                                                                                                                                                                                                                                                                                                                                                                                                                                                                              | #   | #   | #         | #     | #    |      |
| Rsa1.0_01431.1.g26752.t1 | ref XP_002884053.1  3-hydroxy-3-methylglutaryl-CoA reductase 2 [Arabidopsis lyrata subsp. lyrata] gi 297329893 gb EFH60312.1  3-hydroxy-3-methylglutaryl-CoA reductase 2 [Arabidopsis lyrata subsp. lyrata]                                                                               | 558 | 564  | 0         | 101.1 | 81.2 | 88.0 | 3-hydroxy-3-methylglutaryl-CoA reductase 2                                 | gbpln | Arabidopsis lyrata   | AT2G17370.1   Symbols: HMG2, HMGR2   3-hydroxy-3-methylglutaryl-CoA reductase 2   chr2:7550007-7551981 FORWARD LENGTH=562                                                                                                                                                                                                                                                                                                                                                                                                      | 558 | 562 | 0         | 100.7 | 79.2 | 87.6 |
| Rsa1.0_01431.1.g26753.t1 | #                                                                                                                                                                                                                                                                                         | #   | #    | #         | #     | #    | #    | -                                                                          | ----  | ----                 | #                                                                                                                                                                                                                                                                                                                                                                                                                                                                                                                              | #   | #   | #         | #     | #    |      |
| Rsa1.0_01431.1.g26754.t1 | ref XP_002884054.1  hypothetical protein ARALYDRAFT_480622 [Arabidopsis lyrata subsp. lyrata] gi 297329894 gb EFH60313.1  hypothetical protein ARALYDRAFT_480622 [Arabidopsis lyrata subsp. lyrata] gi 482567420 gb EOA31609.1  hypothetical protein CARUB_v10014806mg [Capsella rubella] | 182 | 161  | 1.00E-87  | 88.5  | 87.9 | 87.9 | hypothetical protein ARALYDRAFT_480622                                     | gbpln | Arabidopsis lyrata   | AT2G17380.1   Symbols: AP19   associated protein 19   chr2:7553122-7554887 FORWARD LENGTH=161                                                                                                                                                                                                                                                                                                                                                                                                                                  | 182 | 161 | 2.00E-89  | 88.5  | 87.4 | 87.4 |
| Rsa1.0_01431.1.g26755.t1 | #                                                                                                                                                                                                                                                                                         | #   | #    | #         | #     | #    | #    | -                                                                          | ----  | ----                 | #                                                                                                                                                                                                                                                                                                                                                                                                                                                                                                                              | #   | #   | #         | #     | #    |      |
| Rsa1.0_01431.1.g26756.t1 | #                                                                                                                                                                                                                                                                                         | #   | #    | #         | #     | #    | #    | -                                                                          | ----  | ----                 | #                                                                                                                                                                                                                                                                                                                                                                                                                                                                                                                              | #   | #   | #         | #     | #    |      |
| Rsa1.0_01431.1.g26757.t1 | gb AAG10812.1 AC018460.6 Putative retroelement polyprotein [Arabidopsis thaliana]                                                                                                                                                                                                         | 294 | 1404 | 1.00E-84  | 477.6 | 49.0 | 53.1 | Putative retroelement polyprotein                                          | gbpln | Arabidopsis thaliana | #                                                                                                                                                                                                                                                                                                                                                                                                                                                                                                                              | #   | #   | #         | #     | #    |      |
| Rsa1.0_01432.1.g26758.t1 | ref XP_002876566.1  CYCP3.2 [Arabidopsis lyrata subsp. lyrata] gi 297322404 gb EFH52825.1  CYCP3.2 [Arabidopsis lyrata subsp. lyrata]                                                                                                                                                     | 230 | 227  | 1.00E-112 | 98.7  | 86.1 | 91.7 | CYCP3.2                                                                    | gbpln | Arabidopsis lyrata   | AT3G60550.1   Symbols: CYCP3.2   cyclin p3.2   chr3:22379846-22380641 FORWARD LENGTH=230                                                                                                                                                                                                                                                                                                                                                                                                                                       | 230 | 230 | 1.00E-111 | 100.0 | 87.0 | 92.6 |
| Rsa1.0_01432.1.g26759.t1 | ref XP_002874461.1  hypothetical protein ARALYDRAFT_351855 [Arabidopsis lyrata subsp. lyrata] gi 297320298 gb EFH50720.1  hypothetical protein ARALYDRAFT_351855 [Arabidopsis lyrata subsp. lyrata]                                                                                       | 512 | 446  | 3.00E-13  | 87.1  | 10.5 | 13.9 | hypothetical protein ARALYDRAFT_351855                                     | gbpln | Arabidopsis lyrata   | #                                                                                                                                                                                                                                                                                                                                                                                                                                                                                                                              | #   | #   | #         | #     | #    |      |
| Rsa1.0_01432.1.g26760.t1 | #                                                                                                                                                                                                                                                                                         | #   | #    | #         | #     | #    | #    | -                                                                          | ----  | ----                 | #                                                                                                                                                                                                                                                                                                                                                                                                                                                                                                                              | #   | #   | #         | #     | #    |      |
| Rsa1.0_01432.1.g26761.t1 | dbj BAJ34282.1  unnamed protein product [Thellungiella halophila]                                                                                                                                                                                                                         | 243 | 247  | 1.00E-103 | 101.6 | 86.8 | 91.4 | unnamed protein product                                                    | ----  | ----                 | AT3G60530.1   Symbols: GATA4   GATA transcription factor 4   chr3:22373348-22374147 FORWARD LENGTH=240                                                                                                                                                                                                                                                                                                                                                                                                                         | 243 | 240 | 2.00E-94  | 98.8  | 80.7 | 87.2 |
| Rsa1.0_01432.1.g26762.t1 | ref XP_002457629.1  hypothetical protein SORBIDRAFT_03g010730 [Sorghum bicolor] gi 241929604 gb EES02749.1  hypothetical protein SORBIDRAFT_03g010730 [Sorghum bicolor]                                                                                                                   | 97  | 240  | 1.00E-10  | 247.4 | 36.1 | 45.4 | hypothetical protein SORBIDRAFT_03g010730                                  | gbpln | Sorghum bicolor      | AT3G12490.1   Symbols: ATCYSB, ATCYS6, CYSB   cystatin B   chr3:3960523-3961777 REVERSE LENGTH=201                                                                                                                                                                                                                                                                                                                                                                                                                             | 97  | 201 | 1.00E-12  | 207.2 | 34.0 | 41.2 |
| Rsa1.0_01432.1.g26763.t1 | #                                                                                                                                                                                                                                                                                         | #   | #    | #         | #     | #    | #    | -                                                                          | ----  | ----                 | #                                                                                                                                                                                                                                                                                                                                                                                                                                                                                                                              | #   | #   | #         | #     | #    |      |
| Rsa1.0_01432.1.g26764.t1 | #                                                                                                                                                                                                                                                                                         | #   | #    | #         | #     | #    | #    | -                                                                          | ----  | ----                 | #                                                                                                                                                                                                                                                                                                                                                                                                                                                                                                                              | #   | #   | #         | #     | #    |      |
| Rsa1.0_01432.1.g26765.t1 | ref NP_197389.1  RNA-directed DNA polymerase (reverse transcriptase)-related family protein [Arabidopsis thaliana] gi 332005241 gb AED92624.1  RNA-directed DNA polymerase (reverse transcriptase)-related family protein [Arabidopsis thaliana]                                          | 184 | 295  | 2.00E-31  | 160.3 | 45.1 | 59.8 | RNA-directed DNA polymerase (reverse transcriptase)-related family protein | gbpln | Arabidopsis thaliana | AT5G18880.1   Symbols:   RNA-directed DNA polymerase (reverse transcriptase)-related family protein   chr5:6300535-6301422 REVERSE LENGTH=295                                                                                                                                                                                                                                                                                                                                                                                  | 184 | 295 | 9.00E-34  | 160.3 | 45.1 | 59.8 |
| Rsa1.0_01433.1.g26766.t1 | gb ADG45874.1  UDP-glucosyltransferase [Isatis tinctoria]                                                                                                                                                                                                                                 | 479 | 476  | 0         | 99.4  | 83.1 | 90.8 | UDP-glucosyltransferase                                                    | gbpln | Isatis tinctoria     | AT4G15550.1   Symbols: IAGLU   indole-3-acetate beta-D-glucosyltransferase   chr4:8877877-8879301 REVERSE LENGTH=474                                                                                                                                                                                                                                                                                                                                                                                                           | 479 | 474 | 0         | 99.0  | 77.2 | 88.7 |

|                          |                                                                                                                                                                                                                                                                                                                    |      |      |           |       |      |      |                                          |       |                      |                                                                                                                                                                                                                                                                                                                                                                                                                                                 |      |      |           |       |      |      |
|--------------------------|--------------------------------------------------------------------------------------------------------------------------------------------------------------------------------------------------------------------------------------------------------------------------------------------------------------------|------|------|-----------|-------|------|------|------------------------------------------|-------|----------------------|-------------------------------------------------------------------------------------------------------------------------------------------------------------------------------------------------------------------------------------------------------------------------------------------------------------------------------------------------------------------------------------------------------------------------------------------------|------|------|-----------|-------|------|------|
| Rsa1.0_01433.1.g26767.t9 | gb[EOA17272.1] hypothetical protein CARUB_v10005545mg [Capsella rubella]                                                                                                                                                                                                                                           | 282  | 257  | 1.00E-106 | 91.1  | 68.1 | 74.8 | hypothetical protein CARUB_v10005545mg   | gbpln | Capsella rubella     | AT4G15563.1   Symbols:   unknown protein; Has 36 Blast hits to 36 proteins in 12 species: Archae - 0; Bacteria - 0; Metazoa - 0; Fungi - 0; Plants - 36; Viruses - 0; Other Eukaryotes - 0 (source: NCBI BLINK).   chr4:8891771-8892348 FORWARD LENGTH=167                                                                                                                                                                                      | 282  | 167  | 6.00E-68  | 59.2  | 44.3 | 47.9 |
| Rsa1.0_01433.1.g26768.t1 | ref[NP_193292.3] protein MAGATAMA 3 [Arabidopsis thaliana] gi 384950687 sp B6SFA4.1 MAA3_ARAT_H RecName: Full=Probable helicase MAGATAMA 3; AltName: Full=SEN1-like protein gi 209574484 gb AC163222.1 MAA3 [Arabidopsis thaliana] gi 332658227 gb AEE83627.1  probable helicase MAGATAMA 3 [Arabidopsis thaliana] | 815  | 818  | 0         | 100.4 | 77.4 | 87.1 | protein MAGATAMA 3                       | gbpln | Arabidopsis thaliana | AT4G15570.1   Symbols: MAA3   P-loop containing nucleoside triphosphate hydrolases superfamily protein   chr4:8893043-8898858 FORWARD LENGTH=818                                                                                                                                                                                                                                                                                                | 815  | 818  | 0         | 100.4 | 77.4 | 87.1 |
| Rsa1.0_01433.1.g26769.t1 | ref[NP_974004.1] O-methyltransferase-like 2 protein [Arabidopsis thaliana] gi 332194624 gb AEE32745.1  O-methyltransferase-like 2 protein [Arabidopsis thaliana]                                                                                                                                                   | 145  | 363  | 5.00E-51  | 250.3 | 69.0 | 79.3 | O-methyltransferase-like 2 protein       | gbpln | Arabidopsis thaliana | AT1G51990.2   Symbols:   O-methyltransferase family protein   chr1:19330949-19332667 FORWARD LENGTH=363                                                                                                                                                                                                                                                                                                                                         | 145  | 363  | 1.00E-53  | 250.3 | 69.0 | 79.3 |
| Rsa1.0_01433.1.g26770.t1 | ref[NP_175611.1] O-methyltransferase-like 2 protein [Arabidopsis thaliana] gi 4220447 gb AAD12674.1  Strong similarity to gb X74814 cafeic acid 3-O-methyl transferase from Eucalyptus gunnii [Arabidopsis thaliana] gi 332194623 gb AEE32744.1  O-methyltransferase-like 2 protein [Arabidopsis thaliana]         | 367  | 363  | 1.00E-153 | 98.9  | 71.4 | 83.7 | O-methyltransferase-like 2 protein       | gbpln | Arabidopsis thaliana | AT1G51990.1   Symbols:   O-methyltransferase family protein   chr1:19330949-19332667 FORWARD LENGTH=363                                                                                                                                                                                                                                                                                                                                         | 367  | 363  | 1.00E-156 | 98.9  | 71.4 | 83.7 |
| Rsa1.0_01433.1.g26771.t1 | gb[EOA17718.1] hypothetical protein CARUB_v10006099mg [Capsella rubella]                                                                                                                                                                                                                                           | 102  | 102  | 4.00E-51  | 100.0 | 97.1 | 97.1 | hypothetical protein CARUB_v10006099mg   | gbpln | Capsella rubella     | AT4G15680.1   Symbols:   Thioredoxin superfamily protein   chr4:8931813-8932121 FORWARD LENGTH=102                                                                                                                                                                                                                                                                                                                                              | 102  | 102  | 1.00E-53  | 100.0 | 95.1 | 98.0 |
| Rsa1.0_01433.1.g26772.t4 | emb[CAB39638.1] RNA-directed DNA polymerase-like protein [Arabidopsis thaliana] gi 7267666 emb CAB78094.1  RNA-directed DNA polymerase-like protein [Arabidopsis thaliana]                                                                                                                                         | 1320 | 1274 | 0         | 96.5  | 41.8 | 52.3 | RNA-directed DNA polymerase-like protein | gbpln | Arabidopsis thaliana | AT4G15680.1   Symbols:   Thioredoxin superfamily protein   chr4:8931813-8932121 FORWARD LENGTH=102                                                                                                                                                                                                                                                                                                                                              | 1320 | 102  | 6.00E-51  | 7.7   | 7.3  | 7.3  |
| Rsa1.0_01433.1.g26773.t1 | ref[XP_002870217.1] glutaredoxin family protein [Arabidopsis lyrata subsp. lyrata] gi 297316053 gb EFH46476.1  glutaredoxin family protein [Arabidopsis lyrata subsp. lyrata]                                                                                                                                      | 96   | 102  | 1.00E-46  | 106.3 | 93.8 | 96.9 | glutaredoxin family protein              | gbpln | Arabidopsis lyrata   | AT4G15680.1   Symbols:   Thioredoxin superfamily protein   chr4:8931813-8932121 FORWARD LENGTH=102                                                                                                                                                                                                                                                                                                                                              | 96   | 102  | 7.00E-49  | 106.3 | 91.7 | 96.9 |
| Rsa1.0_01433.1.g26774.t1 | ref[NP_193308.2] CW-type zinc-finger protein [Arabidopsis thaliana] gi 26450789 dbj BAC42503.1  unknown protein [Arabidopsis thaliana] gi 30102754 gb AAP21295.1  At4g15730 [Arabidopsis thaliana] gi 332658241 gb AEE83641.1  CW-type zinc-finger protein [Arabidopsis thaliana]                                  | 963  | 1059 | 0         | 110.0 | 45.8 | 52.9 | CW-type zinc-finger protein              | gbpln | Arabidopsis thaliana | AT4G15730.1   Symbols:   CW-type Zinc Finger   chr4:8951887-8957214 REVERSE LENGTH=1059                                                                                                                                                                                                                                                                                                                                                         | 963  | 1059 | 0         | 110.0 | 45.8 | 52.9 |
| Rsa1.0_01434.1.g26775.t1 | gb[EOA31605.1] hypothetical protein CARUB_v10014801mg [Capsella rubella]                                                                                                                                                                                                                                           | 160  | 163  | 6.00E-63  | 101.9 | 81.9 | 88.8 | hypothetical protein CARUB_v10014801mg   | gbpln | Capsella rubella     | AT3G12630.1   Symbols:   A20/AN1-like zinc finger family protein   chr3:4012707-4013189 FORWARD LENGTH=160                                                                                                                                                                                                                                                                                                                                      | 160  | 160  | 5.00E-62  | 100.0 | 81.3 | 88.1 |
| Rsa1.0_01434.1.g26776.t1 | ref[XP_002882784.1] predicted protein [Arabidopsis lyrata subsp. lyrata] gi 297328624 gb EFH59043.1  predicted protein [Arabidopsis lyrata subsp. lyrata]                                                                                                                                                          | 625  | 664  | 0         | 106.2 | 76.3 | 84.2 | predicted protein                        | gbpln | Arabidopsis lyrata   | AT3G12640.1   Symbols:   RNA binding (RRM/RBD/RNP motifs) family protein   chr3:4014455-4017675 FORWARD LENGTH=638                                                                                                                                                                                                                                                                                                                              | 625  | 638  | 0         | 102.1 | 72.5 | 80.6 |
| Rsa1.0_01434.1.g26777.t1 | gb[EOA32788.1] hypothetical protein CARUB_v10016097mg [Capsella rubella]                                                                                                                                                                                                                                           | 236  | 238  | 1.00E-100 | 100.8 | 79.2 | 87.3 | hypothetical protein CARUB_v10016097mg   | gbpln | Capsella rubella     | AT3G12650.1   Symbols:   unknown protein; FUNCTIONS IN: molecular_function unknown; INVOLVED IN: biological_process unknown; LOCATED IN: mitochondrion; EXPRESSED IN: 23 plant structures; EXPRESSED DURING: 15 growth stages; Has 31 Blast hits to 31 proteins in 12 species: Archae - 0; Bacteria - 0; Metazoa - 0; Fungi - 0; Plants - 31; Viruses - 0; Other Eukaryotes - 0 (source: NCBI BLINK).   chr3:4017881-4018597 REVERSE LENGTH=238 | 236  | 238  | 3.00E-96  | 100.8 | 77.5 | 85.6 |
| Rsa1.0_01434.1.g26778.t1 | gb[ABK28554.1] unknown [Arabidopsis thaliana]                                                                                                                                                                                                                                                                      | 268  | 256  | 6.00E-61  | 95.5  | 53.7 | 65.3 | unknown                                  | gbpln | Arabidopsis thaliana | AT3G12660.1   Symbols: FLA14   FASCICLIN-like arabinogalactan protein 14 precursor   chr3:4019060-4019827 FORWARD LENGTH=255                                                                                                                                                                                                                                                                                                                    | 268  | 255  | 2.00E-63  | 95.1  | 53.7 | 65.3 |

|                           |                                                                                                                                                                                                                                                                                                         |      |      |           |       |      |      |                                                 |       |                      |                                                                                                                                                                                                                                                                                                                                                                                                                                                                                                                                          |      |      |           |       |      |      |
|---------------------------|---------------------------------------------------------------------------------------------------------------------------------------------------------------------------------------------------------------------------------------------------------------------------------------------------------|------|------|-----------|-------|------|------|-------------------------------------------------|-------|----------------------|------------------------------------------------------------------------------------------------------------------------------------------------------------------------------------------------------------------------------------------------------------------------------------------------------------------------------------------------------------------------------------------------------------------------------------------------------------------------------------------------------------------------------------------|------|------|-----------|-------|------|------|
| Rsa1.0_01434.1.g26779.t1  | gb AAB71467.1  Similar to Saccharomyces RAD16 [gb X78993  [Arabidopsis thaliana]                                                                                                                                                                                                                        | 210  | 822  | 9.00E-35  | 391.4 | 34.8 | 37.1 | Similar to Saccharomyces RAD16 [gb X78993       | gbpln | Arabidopsis thaliana | AT1G05120.1   Symbols:   Helicase protein with RING/U-box domain   chr1:1471624-1476067 REVERSE LENGTH=833                                                                                                                                                                                                                                                                                                                                                                                                                               | 210  | 833  | 4.00E-37  | 396.7 | 34.8 | 37.1 |
| Rsa1.0_01434.1.g26780.t1  | gb EOA30178.1  hypothetical protein CARUB_v10013294mg [Capsella rubella]                                                                                                                                                                                                                                | 615  | 592  | 0         | 96.3  | 88.9 | 92.2 | hypothetical protein CARUB_v10013294mg          | gbpln | Capsella rubella     | AT3G12670.1   Symbols: emb2742   CTP synthase family protein   chr3:4020351-4024086 REVERSE LENGTH=591                                                                                                                                                                                                                                                                                                                                                                                                                                   | 615  | 591  | 0         | 96.1  | 89.4 | 92.2 |
| Rsa1.0_01434.1.g26781.t1  | gb EOA30566.1  hypothetical protein CARUB_v10013693mg [Capsella rubella]                                                                                                                                                                                                                                | 481  | 448  | 0         | 93.1  | 71.3 | 80.0 | hypothetical protein CARUB_v10013693mg          | gbpln | Capsella rubella     | AT3G12700.1   Symbols:   Eukaryotic aspartyl protease family protein   chr3:4037136-4039043 FORWARD LENGTH=461                                                                                                                                                                                                                                                                                                                                                                                                                           | 481  | 461  | 0         | 95.8  | 71.3 | 78.4 |
| Rsa1.0_01434.1.g26782.t1  | #                                                                                                                                                                                                                                                                                                       | #    | #    | #         | #     | #    | #    | -                                               | ----  | ----                 | #                                                                                                                                                                                                                                                                                                                                                                                                                                                                                                                                        | #    | #    | #         | #     | #    |      |
| Rsa1.0_01434.1.g26783.t1  | gb EOA30935.1  hypothetical protein CARUB_v10014082mg [Capsella rubella]                                                                                                                                                                                                                                | 349  | 349  | 1.00E-170 | 100.0 | 81.4 | 87.1 | hypothetical protein CARUB_v10014082mg          | gbpln | Capsella rubella     | AT3G12740.1   Symbols: ALIS1   ALA-interacting subunit 1   chr3:4049739-4051561 FORWARD LENGTH=350                                                                                                                                                                                                                                                                                                                                                                                                                                       | 349  | 350  | 1.00E-168 | 100.3 | 79.4 | 86.0 |
| Rsa1.0_01434.1.g26784.t4  | ref NP_566436.1  uncharacterized protein [Arabidopsis thaliana]   gi 11994418 dbj BAB02420.1  unnamed protein product [Arabidopsis thaliana]   gi 23297357 gb AANI2949.1  unknown protein [Arabidopsis thaliana]   gi 332641722 gb AEE75243.1  uncharacterized protein AT3G12760 [Arabidopsis thaliana] | 315  | 250  | 1.00E-128 | 79.4  | 72.4 | 76.2 | uncharacterized protein                         | gbpln | Arabidopsis thaliana | AT3G12760.1   Symbols:   CONTAINS InterPro DOMAIN/s: Defective-in-cullin neddylation protein (InterPro:IPR014764). Protein of unknown function DUF298 (InterPro:IPR005176). UBA-like (InterPro:IPR009060). BEST Arabidopsis thaliana protein match is: Domain of unknown function (DUF298) (TAIR:AT1G15860.2); Has 857 Blast hits to 855 proteins in 202 species: Archae - 0; Bacteria - 0; Metazoa - 482; Fungi - 154; Plants - 139; Viruses - 0; Other Eukaryotes - 82 (source: NCBI BLINK).   chr3:4054963-4056826 FORWARD LENGTH=250 | 315  | 250  | 1.00E-130 | 79.4  | 72.4 | 76.2 |
| Rsa1.0_01434.1.g26785.t1  | dbj BAB02422.1  unnamed protein product [Arabidopsis thaliana]                                                                                                                                                                                                                                          | 415  | 390  | 1.00E-108 | 94.0  | 48.4 | 60.0 | unnamed protein product                         | gbpln | Arabidopsis thaliana | AT3G12775.1   Symbols:   ubiquitin-conjugating enzyme family protein   chr3:4059772-4060944 FORWARD LENGTH=362                                                                                                                                                                                                                                                                                                                                                                                                                           | 415  | 362  | 1.00E-101 | 87.2  | 44.8 | 54.7 |
| Rsa1.0_01434.1.g26786.t1  | gb EOA30457.1  hypothetical protein CARUB_v10013582mg [Capsella rubella]                                                                                                                                                                                                                                | 480  | 481  | 0         | 100.2 | 93.3 | 96.0 | hypothetical protein CARUB_v10013582mg          | gbpln | Capsella rubella     | AT3G12780.1   Symbols: PGK1   phosphoglycerate kinase 1   chr3:4061127-4063140 REVERSE LENGTH=481                                                                                                                                                                                                                                                                                                                                                                                                                                        | 480  | 481  | 0         | 100.2 | 93.3 | 95.4 |
| Rsa1.0_01434.1.g26787.t1  | gb EOA29809.1  hypothetical protein CARUB_v10012903mg [Capsella rubella]                                                                                                                                                                                                                                | 836  | 964  | 0         | 115.3 | 66.3 | 74.9 | hypothetical protein CARUB_v10012903mg          | gbpln | Capsella rubella     | AT3G11010.1   Symbols: ARRLP34, RLP34   receptor like protein 34   chr3:3450988-3453672 REVERSE LENGTH=384                                                                                                                                                                                                                                                                                                                                                                                                                               | 836  | 894  | 0         | 106.9 | 66.9 | 75.0 |
| Rsa1.0_01434.1.g26788.t1  | gb EOA31122.1  hypothetical protein CARUB_v10014282mg [Capsella rubella]                                                                                                                                                                                                                                | 73   | 298  | 2.00E-31  | 408.2 | 90.4 | 97.3 | hypothetical protein CARUB_v10014282mg          | gbpln | Capsella rubella     | AT3G12800.1   Symbols: SDRB, DECR   short-chain dehydrogenase-reductase B   chr3:4063463-4064757 REVERSE LENGTH=298                                                                                                                                                                                                                                                                                                                                                                                                                      | 73   | 298  | 1.00E-33  | 408.2 | 89.0 | 97.3 |
| Rsa1.0_01435.1.g26789.t1  | ref XP_002891526.1  hypothetical protein ARALYDRAFT_337115 [Arabidopsis lyrata subsp. lyrata]   gi 297337368 gb EFH67785.1  hypothetical protein ARALYDRAFT_337115 [Arabidopsis lyrata subsp. lyrata]                                                                                                   | 361  | 824  | 2.00E-30  | 228.3 | 23.5 | 30.2 | hypothetical protein ARALYDRAFT_337115          | gbpln | Arabidopsis lyrata   | AT2G07190.1   Symbols:   Domain of unknown function (DUF1985)   chr2:2987367-2988945 FORWARD LENGTH=452                                                                                                                                                                                                                                                                                                                                                                                                                                  | 361  | 452  | 3.00E-30  | 125.2 | 21.9 | 33.0 |
| Rsa1.0_01435.1.g26790.t1  | gb EOA38027.1  hypothetical protein CARUB_v10009497mg [Capsella rubella]                                                                                                                                                                                                                                | 356  | 369  | 1.00E-171 | 103.7 | 87.1 | 92.1 | hypothetical protein CARUB_v10009497mg          | gbpln | Capsella rubella     | AT1G09540.1   Symbols: MYB61, ATMYB61   myb domain protein 61   chr1:3086333-3087689 FORWARD LENGTH=366                                                                                                                                                                                                                                                                                                                                                                                                                                  | 356  | 366  | 1.00E-165 | 102.8 | 87.6 | 91.0 |
| Rsa1.0_01435.1.g26791.t3  | gb EOA38926.1  hypothetical protein CARUB_v10011324mg [Capsella rubella]                                                                                                                                                                                                                                | 409  | 391  | 1.00E-138 | 95.6  | 62.6 | 72.1 | hypothetical protein CARUB_v10011324mg          | gbpln | Capsella rubella     | AT1G09550.1   Symbols:   Pectinacetyltransferase family protein   chr1:3089733-3092254 REVERSE LENGTH=388                                                                                                                                                                                                                                                                                                                                                                                                                                | 409  | 388  | 1.00E-139 | 94.9  | 62.8 | 71.6 |
| Rsa1.0_01435.1.g26792.t1  | ref XP_002889758.1  predicted protein [Arabidopsis lyrata subsp. lyrata]   gi 297335600 gb EFH66017.1  predicted protein [Arabidopsis lyrata subsp. lyrata]                                                                                                                                             | 220  | 219  | 1.00E-102 | 99.5  | 85.5 | 92.3 | predicted protein                               | gbpln | Arabidopsis lyrata   | AT1G09560.1   Symbols: GLP5   germin-like protein 5   chr1:3093896-3094639 FORWARD LENGTH=219                                                                                                                                                                                                                                                                                                                                                                                                                                            | 220  | 219  | 1.00E-104 | 99.5  | 85.9 | 92.7 |
| Rsa1.0_01435.1.g26793.t1  | gb EOA38463.1  hypothetical protein CARUB_v10010159mg, partial [Capsella rubella]                                                                                                                                                                                                                       | 213  | 238  | 1.00E-101 | 111.7 | 80.8 | 92.0 | hypothetical protein CARUB_v10010159mg, partial | gbpln | Capsella rubella     | AT1G09580.1   Symbols:   emp24/gp25L/p24 family/GOLD family protein   chr1:3104657-3106092 FORWARD LENGTH=217                                                                                                                                                                                                                                                                                                                                                                                                                            | 213  | 217  | 1.00E-102 | 101.9 | 79.8 | 91.1 |
| Rsa1.0_01435.1.g26794.t1  | ref XP_002889760.1  60S ribosomal protein L21 [Arabidopsis lyrata subsp. lyrata]   gi 297335602 gb EFH66019.1  60S ribosomal protein L21 [Arabidopsis lyrata subsp. lyrata]                                                                                                                             | 164  | 164  | 1.00E-88  | 100.0 | 98.2 | 98.8 | 60S ribosomal protein L21                       | gbpln | Arabidopsis lyrata   | AT1G09690.1   Symbols:   Translation protein SH3-like family protein   chr1:3136407-3137430 REVERSE LENGTH=164                                                                                                                                                                                                                                                                                                                                                                                                                           | 164  | 164  | 2.00E-90  | 100.0 | 97.0 | 98.2 |
| Rsa1.0_01435.1.g26795.t1  | gb AAC33218.1  Similar to cdc2 protein kinases [Arabidopsis thaliana]                                                                                                                                                                                                                                   | 952  | 967  | 0         | 101.6 | 78.0 | 84.2 | Similar to cdc2 protein kinases                 | gbpln | Arabidopsis thaliana | AT1G09600.1   Symbols:   Protein kinase superfamily protein   chr1:3108617-3111318 FORWARD LENGTH=714                                                                                                                                                                                                                                                                                                                                                                                                                                    | 952  | 714  | 0         | 75.0  | 51.7 | 56.0 |
| Rsa1.0_01435.1.g26796.t14 | ref XP_002892512.1  ATP binding protein [Arabidopsis lyrata subsp. lyrata]   gi 297338354 gb EFH68771.1  ATP binding protein [Arabidopsis lyrata subsp. lyrata]                                                                                                                                         | 1185 | 1091 | 0         | 92.1  | 70.5 | 74.6 | ATP binding protein                             | gbpln | Arabidopsis lyrata   | AT1G09620.1   Symbols:   ATP binding/leucine-tRNA ligases;aminoacyl-tRNA ligases;nucleotide binding;ATP binding;aminoacyl-tRNA ligases   chr1:3113077-3116455 REVERSE LENGTH=1091                                                                                                                                                                                                                                                                                                                                                        | 1185 | 1091 | 0         | 92.1  | 67.8 | 72.9 |



|                           |                                                                                                                                                                                                                                                                                                                                                                                                                                                                                                                                                                                                                    |      |      |           |       |      |      |                                                         |       |                      |                                                                                                                                               |      |     |           |       |      |      |
|---------------------------|--------------------------------------------------------------------------------------------------------------------------------------------------------------------------------------------------------------------------------------------------------------------------------------------------------------------------------------------------------------------------------------------------------------------------------------------------------------------------------------------------------------------------------------------------------------------------------------------------------------------|------|------|-----------|-------|------|------|---------------------------------------------------------|-------|----------------------|-----------------------------------------------------------------------------------------------------------------------------------------------|------|-----|-----------|-------|------|------|
| Rsa1.0_01435.1.g26797.t1  | ref[XP_002889762.1] hypothetical protein ARALYDRAFT_471063 [Arabidopsis lyrata subsp. lyrata] gi 297335604 gb EFH66021.1                                                                                                                                                                                                                                                                                                                                                                                                                                                                                           | 413  | 414  | 0         | 100.2 | 87.7 | 94.2 | hypothetical protein ARALYDRAFT_471063                  | gbpln | Arabidopsis lyrata   | AT1G09640.1   Symbols:   Translation elongation factor EF1B, gamma chain   chr1:3120162-3122152 FORWARD LENGTH=414                            | 413  | 414 | 0         | 100.2 | 86.7 | 94.2 |
| Rsa1.0_01435.1.g26798.t2  | hypothetical protein ARALYDRAFT_471063 [Arabidopsis lyrata subsp. lyrata] ref[NP_563848.1] elongation factor EF-1 gamma subunit [Arabidopsis thaliana] gi 13626364 sp O04487.1 EF1G1_ARATH RecName: Full=Probable elongation factor 1-gamma 1; Short=EF-1-gamma 1; AltName: Full=eEF-1B gamma 1 gi 2160158 gb AAB60721.1  Similar to elongation factor 1-gamma (gb EF1G_XENLA). ESTs gb T20564.gb T45940.gb T04527 come from this gene [Arabidopsis thaliana] gi 222424502 dbj BAH20206.1  AT1G09640 [Arabidopsis thaliana] gi 33219035 gb AEE28472.1  elongation factor EF-1 gamma subunit [Arabidopsis thaliana] | 413  | 414  | 0         | 100.2 | 85.7 | 93.0 | elongation factor EF-1 gamma subunit                    | gbpln | Arabidopsis thaliana | AT1G09640.1   Symbols:   Translation elongation factor EF1B, gamma chain   chr1:3120162-3122152 FORWARD LENGTH=414                            | 413  | 414 | 0         | 100.2 | 85.7 | 93.0 |
| Rsa1.0_01435.1.g26799.t1  | ref[XP_002877446.1] predicted protein [Arabidopsis lyrata subsp. lyrata] gi 297323284 gb EFH53705.1  predicted protein [Arabidopsis lyrata subsp. lyrata]                                                                                                                                                                                                                                                                                                                                                                                                                                                          | 127  | 132  | 4.00E-14  | 103.9 | 39.4 | 55.9 | predicted protein                                       | gbpln | Arabidopsis lyrata   | #                                                                                                                                             | #    | #   | #         | #     | #    | #    |
| Rsa1.0_01436.1.g26800.t10 | gb EOA38142.1  hypothetical protein CARUB_v10009614mg [Capsella rubella]                                                                                                                                                                                                                                                                                                                                                                                                                                                                                                                                           | 488  | 346  | 1.00E-152 | 70.9  | 57.8 | 63.9 | hypothetical protein CARUB_v10009614mg                  | gbpln | Capsella rubella     | AT1G54180.1   Symbols: ATBRXL3, BRX-LIKE3   BREVIS RADIX-like 3   chr1:20227697-20229728 FORWARD LENGTH=370                                   | 488  | 370 | 1.00E-149 | 75.8  | 58.2 | 64.1 |
| Rsa1.0_01436.1.g26801.t2  | ref[XP_002894481.1] ctc-interacting domain 3 [Arabidopsis lyrata subsp. lyrata] gi 297340323 gb EFH70740.1  ctc-interacting domain 3 [Arabidopsis lyrata subsp. lyrata]                                                                                                                                                                                                                                                                                                                                                                                                                                            | 590  | 587  | 0         | 99.5  | 70.7 | 78.1 | ctc-interacting domain 3                                | gbpln | Arabidopsis lyrata   | AT1G54170.1   Symbols: CID3   CTC-interacting domain 3   chr1:20221353-20224919 REVERSE LENGTH=587                                            | 590  | 587 | 0         | 99.5  | 67.6 | 76.3 |
| Rsa1.0_01436.1.g26802.t1  | #                                                                                                                                                                                                                                                                                                                                                                                                                                                                                                                                                                                                                  | #    | #    | #         | #     | #    | #    | -                                                       | ----  | ----                 | #                                                                                                                                             | #    | #   | #         | #     | #    | #    |
| Rsa1.0_01436.1.g26803.t1  | dbj BAB09379.1  non-LTR retroelement reverse transcriptase-like protein [Arabidopsis thaliana]                                                                                                                                                                                                                                                                                                                                                                                                                                                                                                                     | 1415 | 1223 | 0         | 86.4  | 41.2 | 54.9 | non-LTR retroelement reverse transcriptase-like protein | gbpln | Arabidopsis thaliana | AT3G24255.1   Symbols:   RNA-directed DNA polymerase (reverse transcriptase)-related family protein   chr3:8789471-8793208 FORWARD LENGTH=746 | 1415 | 746 | 7.00E-80  | 52.7  | 10.8 | 14.5 |
| Rsa1.0_01436.1.g26804.t1  | ref[NP_175818.1] nuclear transcription factor Y subunit A-5 [Arabidopsis thaliana] gi 75213441 sp Q9SYH4.1 NFYA5_ARATH RecName: Full=Nuclear transcription factor Y subunit A-5; Short=AtNF-YA-5 gi 4587559 gb AAD25790.1 AC006577_26 Contains similarity to gb Y13722 Hap2c Transcription factor from Arabidopsis thaliana [Arabidopsis thaliana] gi 14423440 gb AAK62402.1 AF386957_1 Unknown protein [Arabidopsis thaliana] gi 20148233 gb AAM10007.1  unknown protein [Arabidopsis thaliana] gi 332194935 gb AEE33056.1  nuclear transcription factor Y subunit A-5 [Arabidopsis thaliana]                     | 281  | 308  | 2.00E-96  | 109.6 | 74.0 | 79.0 | nuclear transcription factor Y subunit A-5              | gbpln | Arabidopsis thaliana | AT1G54160.1   Symbols: NFYA5, NF-YA5   nuclear factor Y, subunit A5   chr1:20217581-20218706 REVERSE LENGTH=308                               | 281  | 308 | 4.00E-99  | 109.6 | 74.0 | 79.0 |
| Rsa1.0_01436.1.g26805.t1  | ref[XP_002891793.1] zinc finger family protein [Arabidopsis lyrata subsp. lyrata] gi 297337635 gb EFH68052.1  zinc finger family protein [Arabidopsis lyrata subsp. lyrata] ref[NP_564652.2] RELA/SPOT homolog 3 [Arabidopsis thaliana] gi 4587556 gb AAD25787.1 AC006577_23 Similar to gi 1653162 (p)ppGpp 3-pyrophosphohydrolase from Synechocystis sp genome db D90911. EST gb W43807 comes from this gene [Arabidopsis thaliana] gi 110742595 dbj BAE99211.1  RSH3 [Arabidopsis thaliana] gi 332194932 gb AEE33053.1  RELA/SPOT homolog 3 [Arabidopsis thaliana]                                               | 384  | 378  | 1.00E-155 | 98.4  | 73.4 | 83.1 | zinc finger family protein                              | gbpln | Arabidopsis lyrata   | AT1G54150.1   Symbols:   E3 Ubiquitin ligase family protein   chr1:20215480-20217303 FORWARD LENGTH=383                                       | 384  | 383 | 1.00E-157 | 99.7  | 73.7 | 83.1 |
| Rsa1.0_01436.1.g26806.t1  | ref[NP_564652.2] RELA/SPOT homolog 3 [Arabidopsis thaliana] gi 4587556 gb AAD25787.1 AC006577_23 Similar to gi 1653162 (p)ppGpp 3-pyrophosphohydrolase from Synechocystis sp genome db D90911. EST gb W43807 comes from this gene [Arabidopsis thaliana] gi 110742595 dbj BAE99211.1  RSH3 [Arabidopsis thaliana] gi 332194932 gb AEE33053.1  RELA/SPOT homolog 3 [Arabidopsis thaliana]                                                                                                                                                                                                                           | 652  | 715  | 0         | 109.7 | 86.5 | 92.5 | RELA/SPOT homolog 3                                     | gbpln | Arabidopsis thaliana | AT1G54130.1   Symbols: RSH3, AT-RSH3, ATRSH3   RELA/SPOT homolog 3   chr1:20211177-20213761 FORWARD LENGTH=715                                | 652  | 715 | 0         | 109.7 | 86.5 | 92.5 |

|                           |                                                                                                                                                                                                                                                                                                                                                                                                                                                                                                                                                                                   |      |      |          |       |      |      |                                              |       |                      |                                                                                                                                                               |      |      |           |       |      |      |
|---------------------------|-----------------------------------------------------------------------------------------------------------------------------------------------------------------------------------------------------------------------------------------------------------------------------------------------------------------------------------------------------------------------------------------------------------------------------------------------------------------------------------------------------------------------------------------------------------------------------------|------|------|----------|-------|------|------|----------------------------------------------|-------|----------------------|---------------------------------------------------------------------------------------------------------------------------------------------------------------|------|------|-----------|-------|------|------|
| Rsa1.0_01436.1.g26807.t1  | gb AAG51783.1 AC079679.3 reverse transcriptase, putative; 16838-20266 [Arabidopsis thaliana]                                                                                                                                                                                                                                                                                                                                                                                                                                                                                      | 274  | 1142 | 5.00E-66 | 416.8 | 47.4 | 63.5 | reverse transcriptase, putative; 16838-20266 | gbpln | Arabidopsis thaliana | AT4G29090.1   Symbols:   Ribonuclease H-like superfamily protein   chr4:14333528-14335255 FORWARD LENGTH=575                                                  | 274  | 575  | 4.00E-28  | 209.9 | 29.9 | 50.7 |
| Rsa1.0_01437.1.g26808.t1  | gb ACG60672.1  unknown protein [Brassica oleracea var. alboglabra]                                                                                                                                                                                                                                                                                                                                                                                                                                                                                                                | 163  | 288  | 7.00E-30 | 176.7 | 44.8 | 66.3 | unknown protein                              | gbpln | Brassica oleracea    | #                                                                                                                                                             | #    | #    | #         | #     | #    | #    |
| Rsa1.0_01437.1.g26809.t1  | ref XP_002864686.1  MADS-box protein [Arabidopsis lyrata subsp. lyrata] gi 297310521 gb EFH40945.1  MADS-box protein [Arabidopsis lyrata subsp. lyrata]                                                                                                                                                                                                                                                                                                                                                                                                                           | 191  | 291  | 1.00E-40 | 152.4 | 50.3 | 64.9 | MADS-box protein                             | gbpln | Arabidopsis lyrata   | AT5G60440.1   Symbols: AGL62   AGAMOUS-like 62   chr5:24306329-24307520 FORWARD LENGTH=299                                                                    | 191  | 299  | 4.00E-39  | 156.5 | 48.2 | 63.9 |
| Rsa1.0_01437.1.g26810.t3  | #                                                                                                                                                                                                                                                                                                                                                                                                                                                                                                                                                                                 | #    | #    | #        | #     | #    | #    | -                                            | ----  | ----                 | #                                                                                                                                                             | #    | #    | #         | #     | #    | #    |
| Rsa1.0_01437.1.g26811.t1  | ref XP_002864686.1  MADS-box protein [Arabidopsis lyrata subsp. lyrata] gi 297310521 gb EFH40945.1  MADS-box protein [Arabidopsis lyrata subsp. lyrata]                                                                                                                                                                                                                                                                                                                                                                                                                           | 265  | 291  | 1.00E-60 | 109.8 | 53.6 | 71.7 | MADS-box protein                             | gbpln | Arabidopsis lyrata   | AT5G60440.1   Symbols: AGL62   AGAMOUS-like 62   chr5:24306329-24307520 FORWARD LENGTH=299                                                                    | 265  | 299  | 2.00E-62  | 112.8 | 54.0 | 71.3 |
| Rsa1.0_01437.1.g26812.t1  | #                                                                                                                                                                                                                                                                                                                                                                                                                                                                                                                                                                                 | #    | #    | #        | #     | #    | #    | -                                            | ----  | ----                 | #                                                                                                                                                             | #    | #    | #         | #     | #    | #    |
| Rsa1.0_01437.1.g26813.t1  | emb CAB10225.1  retrovirus-related like polyprotein [Arabidopsis thaliana] gi 2681152 emb CAB78488.1  retrovirus-related like polyprotein [Arabidopsis thaliana]                                                                                                                                                                                                                                                                                                                                                                                                                  | 1534 | 1489 | 0        | 97.1  | 55.3 | 70.3 | retrovirus-related like polyprotein          | gbpln | Arabidopsis thaliana | AT4G23160.1   Symbols: CRK8   cysteine-rich RLK (RECEPTOR-like protein kinase) 8   chr4:12129485-12134086 FORWARD LENGTH=1262                                 | 1534 | 1262 | 1.00E-164 | 82.3  | 18.5 | 23.9 |
| Rsa1.0_01437.1.g26814.t2  | ref XP_002864685.1  ATSIZ1/SIZ1 [Arabidopsis lyrata subsp. lyrata] gi 297310520 gb EFH40944.1  ATSIZ1/SIZ1 [Arabidopsis lyrata subsp. lyrata]                                                                                                                                                                                                                                                                                                                                                                                                                                     | 882  | 898  | 0        | 101.8 | 84.0 | 90.0 | ATSIZ1/SIZ1                                  | gbpln | Arabidopsis lyrata   | AT5G60410.5   Symbols: ATSIZ1, SIZ1   DNA-binding protein with MIZ/SP-RING zinc finger, PHD-finger and SAP domain   chr5:24295226-24300792 FORWARD LENGTH=885 | 882  | 885  | 0         | 100.3 | 83.2 | 89.1 |
| Rsa1.0_01437.1.g26815.t1  | #                                                                                                                                                                                                                                                                                                                                                                                                                                                                                                                                                                                 | #    | #    | #        | #     | #    | #    | -                                            | ----  | ----                 | #                                                                                                                                                             | #    | #    | #         | #     | #    | #    |
| Rsa1.0_01438.1.g26816.t1  | ref XP_002876790.1  hypothetical protein ARALYDRAFT_904415 [Arabidopsis lyrata subsp. lyrata] gi 297322628 gb EFH53049.1  hypothetical protein ARALYDRAFT_904415 [Arabidopsis lyrata subsp. lyrata]                                                                                                                                                                                                                                                                                                                                                                               | 337  | 592  | 4.00E-88 | 175.7 | 46.9 | 47.2 | hypothetical protein ARALYDRAFT_904415       | gbpln | Arabidopsis lyrata   | AT2G01970.1   Symbols:   Endomembrane protein 70 protein family   chr2:452197-454819 REVERSE LENGTH=592                                                       | 337  | 592  | 5.00E-89  | 175.7 | 46.3 | 46.9 |
| Rsa1.0_01438.1.g26817.t28 | gb ACA50526.1  putative salt overly sensitive 1 [Brassica napus]                                                                                                                                                                                                                                                                                                                                                                                                                                                                                                                  | 1158 | 1142 | 0        | 98.6  | 92.9 | 94.6 | putative salt overly sensitive 1             | gbpln | Brassica napus       | AT2G01980.1   Symbols: SOS1, ATSOS1, ATNHX7   sodium proton exchanger, putative (NHX7) (SOS1)   chr2:457070-463145 FORWARD LENGTH=1146                        | 1158 | 1146 | 0         | 99.0  | 81.2 | 87.9 |
| Rsa1.0_01438.1.g26818.t1  | gb ACQ90595.1  putative glutamate decarboxylase [Eutrema halophilum]                                                                                                                                                                                                                                                                                                                                                                                                                                                                                                              | 493  | 493  | 0        | 100.0 | 97.0 | 98.6 | putative glutamate decarboxylase             | gbpln | Eutrema halophilum   | AT2G02010.1   Symbols: GAD4   glutamate decarboxylase 4   chr2:474375-476495 REVERSE LENGTH=493                                                               | 493  | 493  | 0         | 100.0 | 95.7 | 97.2 |
| Rsa1.0_01438.1.g26819.t1  | #                                                                                                                                                                                                                                                                                                                                                                                                                                                                                                                                                                                 | #    | #    | #        | #     | #    | #    | -                                            | ----  | ----                 | #                                                                                                                                                             | #    | #    | #         | #     | #    | #    |
| Rsa1.0_01438.1.g26820.t1  | gb ACQ90596.1  putative peptide transporter [Eutrema halophilum]                                                                                                                                                                                                                                                                                                                                                                                                                                                                                                                  | 576  | 631  | 0        | 109.5 | 76.4 | 85.6 | putative peptide transporter                 | gbpln | Eutrema halophilum   | AT1G62200.1   Symbols:   Major facilitator superfamily protein   chr1:22982147-22984334 REVERSE LENGTH=590                                                    | 576  | 590  | 0         | 102.4 | 74.0 | 86.1 |
| Rsa1.0_01438.1.g26821.t1  | ref NP_178313.1  peptide transporter PTR2 [Arabidopsis thaliana] gi 1172704 sp P46032.1 PTR2_ARATH RecName: Full=Peptide transporter PTR2; AltName: Full=Histidine-transporting protein gi 13937185 gb AAK50086.1 AF372946_1 At2g02040/F14H20.11 [Arabidopsis thaliana] gi 633940 gb AAB00858.1  transport protein [Arabidopsis thaliana] gi 4406786 gb AAD20096.1  histidine transport protein (PTR2-B) [Arabidopsis thaliana] gi 23506067 gb AAN28893.1  At2g02040/F14H20.11 [Arabidopsis thaliana] gi 330250444 gb AEC05538.1  peptide transporter PTR2 [Arabidopsis thaliana] | 583  | 585  | 0        | 100.3 | 95.0 | 97.9 | peptide transporter PTR2                     | gbpln | Arabidopsis thaliana | AT2G02040.1   Symbols: ATPTR2-B, NTR1, PTR2-B, PTR2, ATPTR2   peptide transporter 2   chr2:487542-489707 FORWARD LENGTH=585                                   | 583  | 585  | 0         | 100.3 | 95.0 | 97.9 |
| Rsa1.0_01438.1.g26822.t1  | gb ACQ90599.1  putative NADH dehydrogenase [Eutrema halophilum]                                                                                                                                                                                                                                                                                                                                                                                                                                                                                                                   | 103  | 102  | 3.00E-51 | 99.0  | 98.1 | 99.0 | putative NADH dehydrogenase                  | gbpln | Eutrema halophilum   | AT2G02050.1   Symbols:   NADH-ubiquinone oxidoreductase B18 subunit, putative   chr2:490024-490335 FORWARD LENGTH=103                                         | 103  | 103  | 2.00E-49  | 100.0 | 88.3 | 93.2 |
| Rsa1.0_01438.1.g26823.t1  | #                                                                                                                                                                                                                                                                                                                                                                                                                                                                                                                                                                                 | #    | #    | #        | #     | #    | #    | -                                            | ----  | ----                 | #                                                                                                                                                             | #    | #    | #         | #     | #    | #    |
| Rsa1.0_01439.1.g26824.t3  | ref XP_002876038.1  transducin family protein [Arabidopsis lyrata subsp. lyrata] gi 297321876 gb EFH52297.1  transducin family protein [Arabidopsis lyrata subsp. lyrata]                                                                                                                                                                                                                                                                                                                                                                                                         | 1440 | 1579 | 0        | 109.7 | 67.0 | 69.5 | transducin family protein                    | gbpln | Arabidopsis lyrata   | AT3G50590.1   Symbols:   Transducin/WD40 repeat-like superfamily protein   chr3:18771292-18779220 FORWARD LENGTH=1614                                         | 1440 | 1614 | 0         | 112.1 | 67.2 | 69.8 |

|                          |                                                                                                                                                                                                                                                                                            |     |     |           |       |      |      |                                                          |       |                      |                                                                                                                                                            |     |     |           |       |      |      |
|--------------------------|--------------------------------------------------------------------------------------------------------------------------------------------------------------------------------------------------------------------------------------------------------------------------------------------|-----|-----|-----------|-------|------|------|----------------------------------------------------------|-------|----------------------|------------------------------------------------------------------------------------------------------------------------------------------------------------|-----|-----|-----------|-------|------|------|
| Rsa1.0_01439.1.g26825.t1 | refXP_002870946.1   hypothetical protein ARALYDRAFT_486978 [Arabidopsis lyrata subsp. lyrata] gi 297316783 gb EFH47205.1                                                                                                                                                                   | 99  | 546 | 2.00E-16  | 551.5 | 57.6 | 67.7 | hypothetical protein ARALYDRAFT_486978                   | gbpln | Arabidopsis lyrata   | AT5G02010.1   Symbols: ATROPGEF7, ROPGEF7   RHO guanyl-nucleotide exchange factor 7   chr5:383493-385698 FORWARD LENGTH=546                                | 99  | 546 | 9.00E-14  | 551.5 | 52.5 | 63.6 |
| Rsa1.0_01439.1.g26826.t1 | hypothetical protein ARALYDRAFT_486978 [Arabidopsis lyrata subsp. lyrata] refXP_002877752.1   hypothetical protein ARALYDRAFT_485404 [Arabidopsis lyrata subsp. lyrata] gi 297323590 gb EFH54011.1                                                                                         | 231 | 189 | 1.00E-75  | 81.8  | 63.6 | 73.2 | hypothetical protein ARALYDRAFT_485404                   | gbpln | Arabidopsis lyrata   | AT3G50570.1   Symbols:   hydroxyproline-rich glycoprotein family protein   chr3:18766918-18767487 REVERSE LENGTH=189                                       | 231 | 189 | 6.00E-72  | 81.8  | 64.1 | 71.4 |
| Rsa1.0_01439.1.g26827.t1 | hypothetical protein ARALYDRAFT_485404 [Arabidopsis lyrata subsp. lyrata] gb EOA24556.1   hypothetical protein CARUB_v10017814mg [Capsella rubella]                                                                                                                                        | 273 | 275 | 1.00E-137 | 100.7 | 94.5 | 96.3 | hypothetical protein CARUB_v10017814mg                   | gbpln | Capsella rubella     | AT3G50560.1   Symbols:   NAD(P)-binding Rossmann-fold superfamily protein   chr3:18761247-18763835 REVERSE LENGTH=272                                      | 273 | 272 | 1.00E-137 | 99.6  | 93.4 | 94.9 |
| Rsa1.0_01439.1.g26828.t1 | refXP_002876036.1   hypothetical protein ARALYDRAFT_485401 [Arabidopsis lyrata subsp. lyrata] gi 297321874 gb EFH52295.1                                                                                                                                                                   | 601 | 597 | 0         | 99.3  | 92.3 | 94.3 | hypothetical protein ARALYDRAFT_485401                   | gbpln | Arabidopsis lyrata   | AT3G50530.1   Symbols: CRK   CDPK-related kinase   chr3:18753833-18756487 FORWARD LENGTH=601                                                               | 601 | 601 | 0         | 100.0 | 91.8 | 94.3 |
| Rsa1.0_01440.1.g26829.t2 | hypothetical protein ARALYDRAFT_485401 [Arabidopsis lyrata subsp. lyrata] refXP_002884859.1   hypothetical protein ARALYDRAFT_478516 [Arabidopsis lyrata subsp. lyrata] gi 297330699 gb EFH61118.1                                                                                         | 395 | 625 | 1.00E-175 | 158.2 | 82.3 | 89.4 | hypothetical protein ARALYDRAFT_478516                   | gbpln | Arabidopsis lyrata   | AT3G11710.1   Symbols: ATKRS-1   lysyl-tRNA synthetase 1   chr3:3702359-3705613 REVERSE LENGTH=626                                                         | 395 | 626 | 1.00E-176 | 158.5 | 80.0 | 88.9 |
| Rsa1.0_01440.1.g26830.t1 | hypothetical protein ARALYDRAFT_478516 [Arabidopsis lyrata subsp. lyrata] refXP_002884860.1   hypothetical protein ARALYDRAFT_478517 [Arabidopsis lyrata subsp. lyrata] gi 297330700 gb EFH61119.1                                                                                         | 537 | 545 | 0         | 101.5 | 66.1 | 78.6 | hypothetical protein ARALYDRAFT_478517                   | gbpln | Arabidopsis lyrata   | AT3G11720.3   Symbols:   Polyketide cyclase/dehydrase and lipid transport superfamily protein   chr3:3705991-3708721 REVERSE LENGTH=596                    | 537 | 596 | 0         | 111.0 | 65.9 | 78.6 |
| Rsa1.0_01440.1.g26831.t1 | hypothetical protein ARALYDRAFT_478517 [Arabidopsis lyrata subsp. lyrata] refXP_002884863.1   hypothetical protein ARALYDRAFT_478521 [Arabidopsis lyrata subsp. lyrata] gi 297330703 gb EFH61122.1                                                                                         | 153 | 146 | 2.00E-58  | 95.4  | 78.4 | 84.3 | hypothetical protein ARALYDRAFT_478521                   | gbpln | Arabidopsis lyrata   | AT3G11750.1   Symbols: FOLB1   Dihydroneopterin aldolase   chr3:3715071-3715904 REVERSE LENGTH=146                                                         | 153 | 146 | 8.00E-60  | 95.4  | 76.5 | 83.0 |
| Rsa1.0_01440.1.g26832.t1 | hypothetical protein ARALYDRAFT_478521 [Arabidopsis lyrata subsp. lyrata] refNP_187783.1   DnaQ-like 3'-5' exonuclease domain-containing protein [Arabidopsis thaliana] gi 6671933 gb AAF23193.1 AC016795.6                                                                                | 201 | 200 | 2.00E-99  | 99.5  | 88.1 | 92.5 | DnaQ-like 3'-5' exonuclease domain-containing protein    | gbpln | Arabidopsis thaliana | AT3G11770.1   Symbols:   Polynucleotidyl transferase, ribonuclease H-like superfamily protein   chr3:3721490-3722092 REVERSE LENGTH=200                    | 201 | 200 | 1.00E-102 | 99.5  | 88.1 | 92.5 |
| Rsa1.0_01440.1.g26833.t1 | unknown protein [Arabidopsis thaliana] gi 27808516 gb AAO24538.1  At3g11770 [Arabidopsis thaliana] gi 110736243 dbj BAF00092.1                                                                                                                                                             | #   | #   | #         | #     | #    | -    | ----                                                     | ----  | #                    | #                                                                                                                                                          | #   | #   | #         | #     | #    |      |
| Rsa1.0_01440.1.g26834.t1 | hypothetical protein [Arabidopsis thaliana] gi 332641574 gb AEE75095.1   DnaQ-like 3'-5' exonuclease domain-containing protein [Arabidopsis thaliana] refNP_566400.1   MD-2-related lipid recognition domain-containing protein [Arabidopsis thaliana] gi 6671934 gb AAF23194.1 AC016795.7 | 133 | 153 | 2.00E-46  | 115.0 | 68.4 | 76.7 | MD-2-related lipid recognition domain-containing protein | gbpln | Arabidopsis thaliana | AT3G11780.1   Symbols:   MD-2-related lipid recognition domain-containing protein / ML domain-containing protein   chr3:3724326-3725476 REVERSE LENGTH=153 | 133 | 153 | 4.00E-49  | 115.0 | 68.4 | 76.7 |

|                          |                                                                                                                                                                                                                                                                                                                                                                                                                                                                                                                                                                                                                                                                                                                                                                          |     |      |           |       |      |      |                                                 |       |                      |                                                                                                                                                                                                                                                                                                                                                                                                                                                                                                                                       |     |     |           |       |      |      |
|--------------------------|--------------------------------------------------------------------------------------------------------------------------------------------------------------------------------------------------------------------------------------------------------------------------------------------------------------------------------------------------------------------------------------------------------------------------------------------------------------------------------------------------------------------------------------------------------------------------------------------------------------------------------------------------------------------------------------------------------------------------------------------------------------------------|-----|------|-----------|-------|------|------|-------------------------------------------------|-------|----------------------|---------------------------------------------------------------------------------------------------------------------------------------------------------------------------------------------------------------------------------------------------------------------------------------------------------------------------------------------------------------------------------------------------------------------------------------------------------------------------------------------------------------------------------------|-----|-----|-----------|-------|------|------|
| Rsa1.0_01440.1.g26835.t2 | gb EOA31323.1  hypothetical protein CARUB_v10014494mg [Capsella rubella]                                                                                                                                                                                                                                                                                                                                                                                                                                                                                                                                                                                                                                                                                                 | 289 | 244  | 1.00E-113 | 84.4  | 73.0 | 79.9 | hypothetical protein CARUB_v10014494mg          | gbpln | Capsella rubella     | AT3G11800.1   Symbols:   unknown protein; FUNCTIONS IN: molecular_function unknown; INVOLVED IN: biological_process unknown; LOCATED IN: endomembrane system; EXPRESSED IN: 24 plant structures; EXPRESSED DURING: 15 growth stages; BEST Arabidopsis thaliana protein match is: unknown protein (TAIR:AT3G44150.1); Has 74 Blast hits to 73 proteins in 18 species: Archae - 0; Bacteria - 0; Metazoa - 0; Fungi - 0; Plants - 72; Viruses - 0; Other Eukaryotes - 2 (source: NCBI BLINK).   chr3:3726154-3727562 FORWARD LENGTH=246 | 289 | 246 | 1.00E-113 | 85.1  | 71.6 | 79.6 |
| Rsa1.0_01440.1.g26836.t1 | gb EOA32683.1  hypothetical protein CARUB_v10015981mg [Capsella rubella]                                                                                                                                                                                                                                                                                                                                                                                                                                                                                                                                                                                                                                                                                                 | 317 | 333  | 5.00E-66  | 105.0 | 48.6 | 60.9 | hypothetical protein CARUB_v10015981mg          | gbpln | Capsella rubella     | AT2G40210.1   Symbols: AGL48   AGAMOUS-like 48   chr2:16793213-16794328 REVERSE LENGTH=371                                                                                                                                                                                                                                                                                                                                                                                                                                            | 317 | 371 | 5.00E-64  | 117.0 | 47.3 | 63.7 |
| Rsa1.0_01440.1.g26837.t1 | ref XP_002884867.1  SYP121 [Arabidopsis lyrata subsp. lyrata]   gi 297330707 gb EFH61126.1  SYP121 [Arabidopsis lyrata subsp. lyrata]   ref NP_187789.1  TCP-1/cpn60 chaperonin family protein [Arabidopsis thaliana]   gi 6671939 gb AAF23199.1 AC016795_12 putative T-complex protein 1, ETA subunit [Arabidopsis thaliana]   gi 17979243 gb AAL49938.1  AT3g11830/F26K24.12 [Arabidopsis thaliana]   gi 20857172 gb AAM26704.1  AT3g11830/F26K24.12 [Arabidopsis thaliana]   gi 332641584 gb AEE75105.1  TCP-1/cpn60 chaperonin family protein [Arabidopsis thaliana]   ref XP_002884868.1  U-box domain-containing protein 24 [Arabidopsis lyrata subsp. lyrata]   gi 297330708 gb EFH61127.1  U-box domain-containing protein 24 [Arabidopsis lyrata subsp. lyrata] | 336 | 342  | 1.00E-149 | 101.8 | 87.2 | 90.8 | SYP121                                          | gbpln | Arabidopsis lyrata   | AT3G11820.1   Symbols: SYP121, AT-SYR1, ATSYR121, SYR1, ATSYR1, PEN1   syntaxin of plants 121   chr3:3729540-3730868 REVERSE LENGTH=346                                                                                                                                                                                                                                                                                                                                                                                               | 336 | 346 | 1.00E-145 | 103.0 | 89.0 | 93.2 |
| Rsa1.0_01440.1.g26838.t1 | gi 17979243 gb AAL49938.1  AT3g11830/F26K24.12 [Arabidopsis thaliana]   gi 20857172 gb AAM26704.1  AT3g11830/F26K24.12 [Arabidopsis thaliana]   gi 332641584 gb AEE75105.1  TCP-1/cpn60 chaperonin family protein [Arabidopsis thaliana]   ref XP_002884868.1  U-box domain-containing protein 24 [Arabidopsis lyrata subsp. lyrata]                                                                                                                                                                                                                                                                                                                                                                                                                                     | 547 | 557  | 0         | 101.8 | 94.7 | 95.4 | TCP-1/cpn60 chaperonin family protein           | gbpln | Arabidopsis thaliana | AT3G11830.1   Symbols:   TCP-1/cpn60 chaperonin family protein   chr3:3732734-3736156 FORWARD LENGTH=557                                                                                                                                                                                                                                                                                                                                                                                                                              | 547 | 557 | 0         | 101.8 | 94.7 | 95.4 |
| Rsa1.0_01440.1.g26839.t1 | ref XP_002884868.1  U-box domain-containing protein 24 [Arabidopsis lyrata subsp. lyrata]   gi 297330708 gb EFH61127.1  U-box domain-containing protein 24 [Arabidopsis lyrata subsp. lyrata]                                                                                                                                                                                                                                                                                                                                                                                                                                                                                                                                                                            | 473 | 463  | 0         | 97.9  | 78.6 | 88.4 | U-box domain-containing protein 24              | gbpln | Arabidopsis lyrata   | AT3G11840.1   Symbols: PUB24   plant U-box 24   chr3:3736578-3738250 REVERSE LENGTH=470                                                                                                                                                                                                                                                                                                                                                                                                                                               | 473 | 470 | 0         | 99.4  | 77.2 | 86.7 |
| Rsa1.0_01440.1.g26840.t2 | gb EOA32454.1  hypothetical protein CARUB_v10015730mg [Capsella rubella]                                                                                                                                                                                                                                                                                                                                                                                                                                                                                                                                                                                                                                                                                                 | 348 | 543  | 1.00E-28  | 156.0 | 17.8 | 27.6 | hypothetical protein CARUB_v10015730mg          | gbpln | Capsella rubella     | AT1G52950.1   Symbols:   Nucleic acid-binding, OB-fold-like protein   chr1:19725483-19728007 FORWARD LENGTH=566                                                                                                                                                                                                                                                                                                                                                                                                                       | 348 | 566 | 4.00E-24  | 162.6 | 15.2 | 27.9 |
| Rsa1.0_01440.1.g26841.t1 | gb EOA28640.1  hypothetical protein CARUB_v10024862mg, partial [Capsella rubella]                                                                                                                                                                                                                                                                                                                                                                                                                                                                                                                                                                                                                                                                                        | 522 | 490  | 1.00E-88  | 93.9  | 36.2 | 56.3 | hypothetical protein CARUB_v10024862mg, partial | gbpln | Capsella rubella     | AT1G52950.1   Symbols:   Nucleic acid-binding, OB-fold-like protein   chr1:19725483-19728007 FORWARD LENGTH=566                                                                                                                                                                                                                                                                                                                                                                                                                       | 522 | 566 | 3.00E-84  | 108.4 | 32.2 | 55.6 |
| Rsa1.0_01440.1.g26842.t1 | gb ABD65063.1  hypothetical protein 27.t00041 [Brassica oleracea]                                                                                                                                                                                                                                                                                                                                                                                                                                                                                                                                                                                                                                                                                                        | 195 | 198  | 4.00E-45  | 101.5 | 52.8 | 70.3 | hypothetical protein 27.t00041                  | gbpln | Brassica oleracea    | AT2G35280.1   Symbols:   F-box family protein   chr2:14859709-14860200 REVERSE LENGTH=163                                                                                                                                                                                                                                                                                                                                                                                                                                             | 195 | 163 | 2.00E-14  | 83.6  | 17.9 | 29.7 |
| Rsa1.0_01440.1.g26843.t1 | emb CAB91581.1  putative protein [Arabidopsis thaliana]   ref NP_177294.1  endoglucanase 9 [Arabidopsis thaliana]   gi 75169715 sp Q9C9H5.1 GUN9_ARATH RecName: Full=Endoglucanase 9; AltName: Full=Cellulase 3; Short=AtCEL3; AltName: Full=Endo-1,4-beta glucanase 9; Flags: Precursor   gi 12323721 gb AAG51817.1 AC016163_6 putative beta-glucanase; 74324-76084 [Arabidopsis thaliana]   gi 11074336 gb ABH04566.1  At g11380 [Arabidopsis thaliana]   gi 332197074 gb AEE35195.1  endoglucanase 9 [Arabidopsis thaliana]                                                                                                                                                                                                                                           | 768 | 1752 | 0         | 228.1 | 41.1 | 54.3 | putative protein                                | gbpln | Arabidopsis thaliana | # # # # # #                                                                                                                                                                                                                                                                                                                                                                                                                                                                                                                           | #   | #   | #         | #     | #    | #    |
| Rsa1.0_01441.1.g26844.t1 | ref NP_177294.1  endoglucanase 9 [Arabidopsis thaliana]   gi 12323721 gb AAG51817.1 AC016163_6 putative beta-glucanase; 74324-76084 [Arabidopsis thaliana]   gi 11074336 gb ABH04566.1  At g11380 [Arabidopsis thaliana]   gi 332197074 gb AEE35195.1  endoglucanase 9 [Arabidopsis thaliana]                                                                                                                                                                                                                                                                                                                                                                                                                                                                            | 449 | 484  | 1.00E-115 | 107.8 | 49.7 | 56.3 | endoglucanase 9                                 | gbpln | Arabidopsis thaliana | AT1G71380.1   Symbols: ATGH9B3, ATCEL3, CEL3   cellulase 3   chr1:26899989-26901749 REVERSE LENGTH=484                                                                                                                                                                                                                                                                                                                                                                                                                                | 449 | 484 | 1.00E-118 | 107.8 | 49.7 | 56.3 |
| Rsa1.0_01441.1.g26845.t1 | #                                                                                                                                                                                                                                                                                                                                                                                                                                                                                                                                                                                                                                                                                                                                                                        | #   | #    | #         | #     | #    | -    | ---                                             | ---   | #                    | #                                                                                                                                                                                                                                                                                                                                                                                                                                                                                                                                     | #   | #   | #         | #     | #    |      |

|                          |                                                                                                                                                                                                                                                                                                                                                                                                                                                                                                                                                                                                                                                                                                                                                                                                                                                                                                                                                                                           |     |     |           |        |      |      |                                                         |       |                      |                                                                                                                                       |     |      |           |        |      |      |
|--------------------------|-------------------------------------------------------------------------------------------------------------------------------------------------------------------------------------------------------------------------------------------------------------------------------------------------------------------------------------------------------------------------------------------------------------------------------------------------------------------------------------------------------------------------------------------------------------------------------------------------------------------------------------------------------------------------------------------------------------------------------------------------------------------------------------------------------------------------------------------------------------------------------------------------------------------------------------------------------------------------------------------|-----|-----|-----------|--------|------|------|---------------------------------------------------------|-------|----------------------|---------------------------------------------------------------------------------------------------------------------------------------|-----|------|-----------|--------|------|------|
| Rsa1.0_01441.1.g26846.t2 | ref NP_177294.1  endoglucanase 9 [Arabidopsis thaliana] gi 75169715 sp Q9C9H5.1 GUN9_ARATH RecName: Full=Endoglucanase 9; AltName: Full=Cellulase 3; Short=AtCEL3; AltName: Full=Endo-1,4-beta glucanase 9; Flags: Precursor gi 12323721 gb AA51817.1 AC016163_6 putative beta-glucanase; 74324-76084 [Arabidopsis thaliana] gi 111074386 gb ABH04566.1  At g71380 [Arabidopsis thaliana] gi 332197074 gb AEE35195.1  endoglucanase 9 [Arabidopsis thaliana]                                                                                                                                                                                                                                                                                                                                                                                                                                                                                                                              | 449 | 484 | 1.00E-175 | 107.8  | 72.8 | 84.0 | endoglucanase 9                                         | gbpln | Arabidopsis thaliana | AT1G71380.1   Symbols: ATGH9B3, ATCEL3, CEL3   cellulase 3   chr1:26899989-26901749 REVERSE LENGTH=484                                | 449 | 484  | 1.00E-178 | 107.8  | 72.8 | 84.0 |
| Rsa1.0_01441.1.g26847.t1 | ref XP_002888846.1  hypothetical protein ARALYDRAFT_339396 [Arabidopsis lyrata subsp. lyrata] gi 297334687 gb EFH65105.1  hypothetical protein ARALYDRAFT_339396 [Arabidopsis lyrata subsp. lyrata]                                                                                                                                                                                                                                                                                                                                                                                                                                                                                                                                                                                                                                                                                                                                                                                       | 672 | 685 | 0         | 101.9  | 78.7 | 86.3 | hypothetical protein ARALYDRAFT_339396                  | gbpln | Arabidopsis lyrata   | AT1G71770.2   Symbols: PAB5   poly(A)-binding protein 5   chr1:26990777-26993489 REVERSE LENGTH=682                                   | 672 | 682  | 0         | 101.5  | 76.2 | 84.4 |
| Rsa1.0_01441.1.g26848.t1 | gb EOA34351.1  hypothetical protein CARUB_v10021875mg [Capsella rubella]                                                                                                                                                                                                                                                                                                                                                                                                                                                                                                                                                                                                                                                                                                                                                                                                                                                                                                                  | 461 | 458 | 0         | 99.3   | 80.0 | 85.0 | hypothetical protein CARUB_v10021875mg                  | gbpln | Capsella rubella     | AT1G71800.1   Symbols: CSTF64   cleavage stimulating factor 64   chr1:26999606-27001850 FORWARD LENGTH=461                            | 461 | 461  | 0         | 100.0  | 77.0 | 82.6 |
| Rsa1.0_01441.1.g26849.t1 | # # # # # # # # - - - -                                                                                                                                                                                                                                                                                                                                                                                                                                                                                                                                                                                                                                                                                                                                                                                                                                                                                                                                                                   | #   | #   | #         | #      | #    | #    | -                                                       | ----  | ----                 | # # # # # # # #                                                                                                                       | #   | #    | #         | #      | #    | #    |
| Rsa1.0_01441.1.g26850.t1 | ref NP_850465.1  cytochrome P450, family 709, subfamily B, polypeptide 1 [Arabidopsis thaliana] gi 330255683 gb AEG10777.1  cytochrome P450, family 709, subfamily B, polypeptide 1 [Arabidopsis thaliana] ref NP_176909.1  DELLA protein RGL1 [Arabidopsis thaliana] gi 75169613 sp Q9C8Y3.1 RGL1_ARATH RecName: Full=DELLA protein RGL1; AltName: Full=GRAS family protein 9; Short=AtGRAS-9; AltName: Full=RGAL-like protein 1; Short=RGAL-like protein gi 12324404 gb AAG52171.1 AC020665_16 gibberellin regulatory protein, putative; 49974-51509 [Arabidopsis thaliana] gi 15777857 gb AA05911.1  RGL1 protein [Arabidopsis thaliana] gi 17979049 gb AAL49792.1  putative gibberellin regulatory protein [Arabidopsis thaliana] gi 20465941 gb AAM20156.1  putative gibberellin regulatory protein [Arabidopsis thaliana] gi 332196378 gb AEE34499.1  DELLA protein RGL1 [Arabidopsis thaliana] ref NP_849849.1  pentatricopeptide repeat-containing protein [Arabidopsis thaliana] | 239 | 403 | 1.00E-105 | 168.6  | 74.9 | 89.1 | cytochrome P450, family 709, subfamily B, polypeptide 1 | gbpln | Arabidopsis thaliana | AT2G46960.1   Symbols: CYP709B1   cytochrome P450, family 709, subfamily B, polypeptide 1   chr2:19292295-19293765 REVERSE LENGTH=403 | 239 | 403  | 1.00E-108 | 168.6  | 74.9 | 89.1 |
| Rsa1.0_01442.1.g26851.t1 | ref NP_849849.1  pentatricopeptide repeat-containing protein [Arabidopsis thaliana] gi 122215314 sp Q3ECH5.1 PP107_ARATH RecName: Full=Pentatricopeptide repeat-containing protein At1g66345, mitochondrial; Flags: Precursor gi 332196377 gb AEE34498.1  pentatricopeptide repeat-containing protein [Arabidopsis thaliana] ref XP_002888495.1  hypothetical protein ARALYDRAFT_475736 [Arabidopsis lyrata subsp. lyrata] gi 297334336 gb EFH64754.1  hypothetical protein ARALYDRAFT_475736 [Arabidopsis lyrata subsp. lyrata]                                                                                                                                                                                                                                                                                                                                                                                                                                                          | 464 | 511 | 0         | 110.1  | 86.0 | 90.5 | DELLA protein RGL1                                      | gbpln | Arabidopsis thaliana | AT1G66350.1   Symbols: RGL1, RGL   RGA-like 1   chr1:24748327-24749862 FORWARD LENGTH=511                                             | 464 | 511  | 0         | 110.1  | 86.0 | 90.5 |
| Rsa1.0_01442.1.g26852.t1 | ref XP_002887020.1  glycosyl hydrolase family 17 protein [Arabidopsis lyrata subsp. lyrata] gi 297332861 gb EFH63279.1  glycosyl hydrolase family 17 protein [Arabidopsis lyrata subsp. lyrata]                                                                                                                                                                                                                                                                                                                                                                                                                                                                                                                                                                                                                                                                                                                                                                                           | 543 | 544 | 0         | 100.2  | 73.5 | 86.6 | pentatricopeptide repeat-containing protein             | gbpln | Arabidopsis thaliana | AT1G66345.1   Symbols:   Pentatricopeptide repeat (PPR) superfamily protein   chr1:24737719-24739353 FORWARD LENGTH=544               | 543 | 544  | 0         | 100.2  | 73.5 | 86.6 |
| Rsa1.0_01442.1.g26853.t1 | ref XP_002887020.1  glycosyl hydrolase family 17 protein [Arabidopsis lyrata subsp. lyrata] gi 297332861 gb EFH63279.1  glycosyl hydrolase family 17 protein [Arabidopsis lyrata subsp. lyrata]                                                                                                                                                                                                                                                                                                                                                                                                                                                                                                                                                                                                                                                                                                                                                                                           | 609 | 416 | 1.00E-177 | 68.3   | 56.5 | 59.4 | hypothetical protein ARALYDRAFT_475736                  | gbpln | Arabidopsis lyrata   | AT1G66330.2   Symbols:   senescence-associated family protein   chr1:24729880-24732144 REVERSE LENGTH=417                             | 609 | 417  | 1.00E-179 | 68.5   | 56.3 | 59.1 |
| Rsa1.0_01442.1.g26854.t1 | ref XP_002887020.1  glycosyl hydrolase family 17 protein [Arabidopsis lyrata subsp. lyrata] gi 297332861 gb EFH63279.1  glycosyl hydrolase family 17 protein [Arabidopsis lyrata subsp. lyrata]                                                                                                                                                                                                                                                                                                                                                                                                                                                                                                                                                                                                                                                                                                                                                                                           | 504 | 503 | 0         | 99.8   | 88.9 | 92.7 | glycosyl hydrolase family 17 protein                    | gbpln | Arabidopsis lyrata   | AT1G66250.1   Symbols:   O-Glycosyl hydrolases family 17 protein   chr1:24693063-24695416 FORWARD LENGTH=505                          | 504 | 505  | 0         | 100.2  | 87.9 | 92.7 |
| Rsa1.0_01442.1.g26855.t2 | gb ABD65057.1  hypothetical protein 27.t00123 [Brassica oleracea]                                                                                                                                                                                                                                                                                                                                                                                                                                                                                                                                                                                                                                                                                                                                                                                                                                                                                                                         | 609 | 190 | 5.00E-13  | 31.2   | 6.7  | 7.6  | hypothetical protein 27.t00123                          | gbpln | Brassica oleracea    | # # # # # # # #                                                                                                                       | #   | #    | #         | #      | #    | #    |
| Rsa1.0_01442.1.g26856.t1 | # # # # # # # # - - - -                                                                                                                                                                                                                                                                                                                                                                                                                                                                                                                                                                                                                                                                                                                                                                                                                                                                                                                                                                   | #   | #   | #         | #      | #    | #    | -                                                       | ----  | ----                 | # # # # # # # #                                                                                                                       | #   | #    | #         | #      | #    | #    |
| Rsa1.0_01442.1.g26857.t1 | gb AAB84334.1  hypothetical protein [Arabidopsis thaliana]                                                                                                                                                                                                                                                                                                                                                                                                                                                                                                                                                                                                                                                                                                                                                                                                                                                                                                                                | 82  | 960 | 9.00E-25  | 1170.7 | 65.9 | 69.5 | hypothetical protein                                    | gbpln | Arabidopsis thaliana | AT2G41520.2   Symbols: TPR15   Heat shock protein DnaJ with tetratricopeptide repeat   chr2:17317662-17322705 FORWARD LENGTH=1077     | 82  | 1077 | 2.00E-27  | 1313.4 | 65.9 | 69.5 |

|                          |                                                                                                                                                                                                                                                                                   |      |      |           |       |      |      |                                                           |       |                      |                                                                                                                                                                                                                                                                                                                                                                                                                                                                                 |      |      |           |       |      |      |
|--------------------------|-----------------------------------------------------------------------------------------------------------------------------------------------------------------------------------------------------------------------------------------------------------------------------------|------|------|-----------|-------|------|------|-----------------------------------------------------------|-------|----------------------|---------------------------------------------------------------------------------------------------------------------------------------------------------------------------------------------------------------------------------------------------------------------------------------------------------------------------------------------------------------------------------------------------------------------------------------------------------------------------------|------|------|-----------|-------|------|------|
| Rsa1.0_01443.1.g26858.t8 | gb ABW81018.1  gag-pol polymerase [Arabidopsis lyrata subsp. lyrata]                                                                                                                                                                                                              | 588  | 672  | 3.00E-24  | 114.3 | 8.5  | 12.6 | gag-pol polymerase                                        | gbpln | Arabidopsis lyrata   | #                                                                                                                                                                                                                                                                                                                                                                                                                                                                               | #    | #    | #         | #     | #    |      |
| Rsa1.0_01443.1.g26859.t1 | gb ABD65091.1  hypothetical protein 31.t00049 [Brassica oleracea]                                                                                                                                                                                                                 | 479  | 530  | 3.00E-97  | 110.6 | 42.2 | 57.6 | hypothetical protein 31.t00049                            | gbpln | Brassica oleracea    | #                                                                                                                                                                                                                                                                                                                                                                                                                                                                               | #    | #    | #         | #     | #    |      |
| Rsa1.0_01443.1.g26860.t3 | gb AAF18538.1 AC006551_24 Very similar to retrotransposon reverse transcriptase [Arabidopsis thaliana]                                                                                                                                                                            | 1132 | 1231 | 1.00E-66  | 108.7 | 11.9 | 16.8 | Very similar to retrotransposon reverse transcriptase     | gbpln | Arabidopsis thaliana | AT4G29090.1   Symbols:   Ribonuclease H-like superfamily protein   chr4:14333528-14335255 FORWARD LENGTH=575                                                                                                                                                                                                                                                                                                                                                                    | 1132 | 575  | 6.00E-37  | 50.8  | 9.0  | 14.8 |
| Rsa1.0_01443.1.g26861.t4 | ref NP_174767.2  ATP-dependent protease La (LON) domain-containing protein [Arabidopsis thaliana] gi 51968886 dbj BAD43135.1  unknown protein [Arabidopsis thaliana] gi 332193662 gb AEE31783.1  ATP-dependent protease La (LON) domain-containing protein [Arabidopsis thaliana] | 459  | 316  | 1.00E-129 | 68.8  | 54.2 | 58.6 | ATP-dependent protease La (LON) domain-containing protein | gbpln | Arabidopsis thaliana | AT1G35340.1   Symbols:   ATP-dependent protease La (LON) domain protein   chr1:12977768-12979749 FORWARD LENGTH=316                                                                                                                                                                                                                                                                                                                                                             | 459  | 316  | 1.00E-131 | 68.8  | 54.2 | 58.6 |
| Rsa1.0_01444.1.g26862.t1 | ref XP_002888445.1  hypothetical protein ARALYDRAFT.315605 [Arabidopsis lyrata subsp. lyrata] gi 297334286 gb EFH64704.1  hypothetical protein ARALYDRAFT.315605 [Arabidopsis lyrata subsp. lyrata]                                                                               | 428  | 590  | 5.00E-75  | 137.9 | 57.9 | 66.8 | hypothetical protein ARALYDRAFT.315605                    | gbpln | Arabidopsis lyrata   | AT1G65710.1   Symbols:   unknown protein; INVOLVED IN: N-terminal protein myristoylation; EXPRESSED IN: cultured cell; BEST Arabidopsis thaliana protein match is: unknown protein (TAIR:AT5G37010.1); Has 2241 Blast hits to 1776 proteins in 164 species: Archae - 0; Bacteria - 29; Metazoa - 1759; Fungi - 94; Plants - 93; Viruses - 17; Other Eukaryotes - 249 (source: NCBI BLink).   chr1:24437057-24438424 REVERSE LENGTH=455                                          | 428  | 455  | 3.00E-73  | 106.3 | 61.7 | 69.9 |
| Rsa1.0_01444.1.g26863.t1 | dbj BAJ34575.1  unnamed protein product [Thellungiella halophila]                                                                                                                                                                                                                 | 189  | 188  | 1.00E-88  | 99.5  | 83.6 | 89.4 | unnamed protein product                                   | ----  | ----                 | AT1G55210.2   Symbols:   Disease resistance-responsive (dirigent-like protein) family protein   chr1:20598057-20598620 REVERSE LENGTH=187                                                                                                                                                                                                                                                                                                                                       | 189  | 187  | 2.00E-87  | 98.9  | 81.5 | 88.9 |
| Rsa1.0_01444.1.g26864.t2 | gb EOA36362.1  hypothetical protein CARUB_v10010738mg [Capsella rubella]                                                                                                                                                                                                          | 110  | 97   | 2.00E-28  | 88.2  | 61.8 | 74.5 | hypothetical protein CARUB_v10010738mg                    | gbpln | Capsella rubella     | AT1G55205.2   Symbols:   unknown protein; FUNCTIONS IN: molecular_function unknown; INVOLVED IN: biological_process unknown; LOCATED IN: chloroplast; BEST Arabidopsis thaliana protein match is: unknown protein (TAIR:AT3G13674.1); Has 30201 Blast hits to 17322 proteins in 780 species: Archae - 12; Bacteria - 1396; Metazoa - 17338; Fungi - 3422; Plants - 5037; Viruses - 0; Other Eukaryotes - 2996 (source: NCBI BLink).   chr1:20594584-20595094 FORWARD LENGTH=103 | 110  | 103  | 5.00E-27  | 93.6  | 67.3 | 79.1 |
| Rsa1.0_01444.1.g26865.t1 | ref XP_002894494.1  kinase family protein [Arabidopsis lyrata subsp. lyrata] gi 297340336 gb EFH70753.1  kinase family protein [Arabidopsis lyrata subsp. lyrata]                                                                                                                 | 599  | 672  | 0         | 112.2 | 85.3 | 90.2 | kinase family protein                                     | gbpln | Arabidopsis lyrata   | AT1G55200.1   Symbols:   Protein kinase protein with adenine nucleotide alpha hydrolases-like domain   chr1:20589309-20592049 REVERSE LENGTH=676                                                                                                                                                                                                                                                                                                                                | 599  | 676  | 0         | 112.9 | 85.1 | 90.8 |
| Rsa1.0_01444.1.g26866.t1 | gb ABD65636.1  hypothetical protein 23.t00055 [Brassica oleracea]                                                                                                                                                                                                                 | 243  | 414  | 8.00E-43  | 170.4 | 46.1 | 51.0 | hypothetical protein 23.t00055                            | gbpln | Brassica oleracea    | #                                                                                                                                                                                                                                                                                                                                                                                                                                                                               | #    | #    | #         | #     | #    |      |
| Rsa1.0_01444.1.g26867.t1 | #                                                                                                                                                                                                                                                                                 | #    | #    | #         | #     | #    | #    | -                                                         | ----  | ----                 | #                                                                                                                                                                                                                                                                                                                                                                                                                                                                               | #    | #    | #         | #     | #    |      |
| Rsa1.0_01444.1.g26868.t1 | gb EOA40568.1  hypothetical protein CARUB_v10009297mg [Capsella rubella]                                                                                                                                                                                                          | 412  | 412  | 0         | 100.0 | 98.3 | 99.8 | hypothetical protein CARUB_v10009297mg                    | gbpln | Capsella rubella     | AT3G13920.1   Symbols: EIF4A1, RH4, TIF4A1   eukaryotic translation initiation factor 4A1   chr3:4592635-4594128 REVERSE LENGTH=412                                                                                                                                                                                                                                                                                                                                             | 412  | 412  | 0         | 100.0 | 97.3 | 99.5 |
| Rsa1.0_01444.1.g26869.t1 | gb AAF19226.1 AC007505_2 Highly similar to Ta1-3 polyprotein [Arabidopsis thaliana]                                                                                                                                                                                               | 835  | 1356 | 1.00E-176 | 162.4 | 44.6 | 63.4 | Highly similar to Ta1-3 polyprotein                       | gbpln | Arabidopsis thaliana | ATM003000.1   Symbols: ORF145A   Gag-Pol-related retrotransposon family protein   chrM:89617-90054 REVERSE LENGTH=145                                                                                                                                                                                                                                                                                                                                                           | 835  | 145  | 6.00E-28  | 17.4  | 6.2  | 9.6  |
| Rsa1.0_01444.1.g26870.t1 | dbj BAB09923.1  copia-like retrotransposable element [Arabidopsis thaliana]                                                                                                                                                                                                       | 317  | 1342 | 1.00E-107 | 423.3 | 56.2 | 74.4 | copia-like retrotransposable element                      | gbpln | Arabidopsis thaliana | AT4G23160.1   Symbols: CRK8   cysteine-rich RLK (RECEPTOR-like protein kinase) 8   chr4:12129485-12134086 FORWARD LENGTH=1262                                                                                                                                                                                                                                                                                                                                                   | 317  | 1262 | 1.00E-31  | 398.1 | 25.6 | 43.8 |
| Rsa1.0_01444.1.g26871.t1 | gb AAG51858.1 AC010926_21 putative DNA-binding protein; 27830-29933 [Arabidopsis thaliana]                                                                                                                                                                                        | 69   | 289  | 5.00E-17  | 418.8 | 59.4 | 75.4 | putative DNA-binding protein; 27830-29933                 | gbpln | Arabidopsis thaliana | AT1G72740.1   Symbols:   Homeodomain-like/winged-helix DNA-binding family protein   chr1:27380499-27382687 REVERSE LENGTH=287                                                                                                                                                                                                                                                                                                                                                   | 69   | 287  | 8.00E-20  | 415.9 | 59.4 | 75.4 |

|                           |                                                                                                                                                                                                                                                                                                                                                                                                                                                                                                                                                                                      |      |      |           |       |      |      |                                                     |       |                      |                                                                                                                                        |      |      |           |       |      |      |
|---------------------------|--------------------------------------------------------------------------------------------------------------------------------------------------------------------------------------------------------------------------------------------------------------------------------------------------------------------------------------------------------------------------------------------------------------------------------------------------------------------------------------------------------------------------------------------------------------------------------------|------|------|-----------|-------|------|------|-----------------------------------------------------|-------|----------------------|----------------------------------------------------------------------------------------------------------------------------------------|------|------|-----------|-------|------|------|
| Rsa1.0_01444.1.g26872.t1  | refNP_974022.1  ribosomal protein L18ae family protein [Arabidopsis thaliana]<br>gi 238478859 refNP_001154424.1  ribosomal protein L18ae family protein [Arabidopsis thaliana]<br>gi 623191776 dbj BA093772.1  hypothetical protein [Arabidopsis thaliana] gi 332194943 gb AEE33064.1  ribosomal protein L18ae family protein [Arabidopsis thaliana]<br>gi 332194945 gb AEE33066.1  ribosomal protein L18ae family protein [Arabidopsis thaliana]                                                                                                                                    | 102  | 102  | 2.00E-33  | 100.0 | 85.3 | 92.2 | ribosomal protein L18ae family protein              | gbpln | Arabidopsis thaliana | AT1G54217.3   Symbols: Ribosomal protein L18ae family   chr1:20244346-20245005 REVERSE LENGTH=102                                      | 102  | 102  | 4.00E-36  | 100.0 | 85.3 | 92.2 |
| Rsa1.0_01444.1.g26873.t1  | refNP_850086.2  proteasome component ECM29 [Arabidopsis thaliana] gi 330252792 gb AEC07886.1  ARM repeat superfamily protein [Arabidopsis thaliana]                                                                                                                                                                                                                                                                                                                                                                                                                                  | 1859 | 1826 | 0         | 98.2  | 85.2 | 89.6 | proteasome component ECM29                          | gbpln | Arabidopsis thaliana | AT2G26780.1   Symbols:   ARM repeat superfamily protein   chr2:11410125-11423598 FORWARD LENGTH=1826                                   | 1859 | 1826 | 0         | 98.2  | 85.2 | 89.6 |
| Rsa1.0_01444.1.g26874.t1  | refNP_001046391.2  Os02g0236500 [Oryza sativa Japonica Group] gi 255670750 dbj BAF08305.2  Os02g0236500 [Oryza sativa Japonica Group]                                                                                                                                                                                                                                                                                                                                                                                                                                                | 687  | 918  | 1.00E-166 | 133.6 | 44.5 | 62.6 | Os02g0236500                                        | gbpln | Oryza sativa         | AT4G10200.1   Symbols:   TTF-type zinc finger protein with HAT dimerisation domain   chr4:6353172-6355591 FORWARD LENGTH=733           | 687  | 733  | 1.00E-162 | 106.7 | 47.0 | 61.4 |
| Rsa1.0_01445.1.g26875.t22 | refNP_565750.1  cyclin-dependent kinase inhibitor 4 [Arabidopsis thaliana] gi 152032532 sp Q8GYJ3.2 KRP4_ARAT H RecName: Full=Cyclin-dependent kinase inhibitor 4; AltName: Full=Inhibitor/interactor of CDK protein 7; AltName: Full=KIP-related protein 4 gi 11907566 gb AA041215.1 AF123315.1 cyclin-dependent kinase inhibitor [Arabidopsis thaliana]<br>gi 20197065 gb AAC04492.2  expressed protein [Arabidopsis thaliana] gi 193885151 gb ACF28389.1  At2g32710 [Arabidopsis thaliana] gi 330253634 gb AEC08728.1  cyclin-dependent kinase inhibitor 4 [Arabidopsis thaliana] | 110  | 289  | 3.00E-38  | 262.7 | 74.5 | 79.1 | cyclin-dependent kinase inhibitor 4                 | gbpln | Arabidopsis thaliana | AT2G32710.1   Symbols: KRP4, ACK2, ICK7   Cyclin-dependent kinase inhibitor family protein   chr2:13873496-13875350 FORWARD LENGTH=289 | 110  | 289  | 5.00E-41  | 262.7 | 74.5 | 79.1 |
| Rsa1.0_01445.1.g26876.t1  | gb AAB82639.1  putative non-LTR retroelement reverse transcriptase [Arabidopsis thaliana]                                                                                                                                                                                                                                                                                                                                                                                                                                                                                            | 1891 | 1374 | 0         | 72.7  | 40.1 | 53.6 | putative non-LTR retroelement reverse transcriptase | gbpln | Arabidopsis thaliana | AT4G29090.1   Symbols:   Ribonuclease H-like superfamily protein   chr4:14333528-14335255 FORWARD LENGTH=575                           | 1891 | 575  | 1.00E-173 | 30.4  | 14.7 | 21.0 |
| Rsa1.0_01445.1.g26877.t1  | #                                                                                                                                                                                                                                                                                                                                                                                                                                                                                                                                                                                    | #    | #    | #         | #     | #    | #    | -                                                   | ----  | ----                 | AT2G02790.1   Symbols: IQD29   IQ-domain 29   chr2:788708-790946 FORWARD LENGTH=636                                                    | 71   | 636  | 7.00E-11  | 895.8 | 43.7 | 46.5 |
| Rsa1.0_01445.1.g26878.t2  | refNP_181004.2  PIN domain-containing MEE21 protein [Arabidopsis thaliana] gi 21805693 gb AAM76754.1  hypothetical protein [Arabidopsis thaliana] gi 61742637 gb AAX55139.1  hypothetical protein At2g34570 [Arabidopsis thaliana] gi 330253898 gb AEC08992.1  PIN domain-containing MEE21 protein [Arabidopsis thaliana]                                                                                                                                                                                                                                                            | 196  | 281  | 3.00E-22  | 143.4 | 33.2 | 42.3 | PIN domain-containing MEE21 protein                 | gbpln | Arabidopsis thaliana | AT2G34570.1   Symbols: MEE21   PIN domain-like family protein   chr2:14563048-14564681 REVERSE LENGTH=281                              | 196  | 281  | 1.00E-24  | 143.4 | 33.2 | 42.3 |
| Rsa1.0_01445.1.g26879.t1  | refNP_001154548.1  glycine-rich protein 23 [Arabidopsis thaliana] gi 330253625 gb AEC08719.1  glycine-rich protein 23 [Arabidopsis thaliana]                                                                                                                                                                                                                                                                                                                                                                                                                                         | 201  | 172  | 1.00E-10  | 85.6  | 14.4 | 15.9 | glycine-rich protein 23                             | gbpln | Arabidopsis thaliana | AT2G32690.4   Symbols: ATGRP23, GRP23   glycine-rich protein 23   chr2:13863934-13864539 REVERSE LENGTH=172                            | 201  | 172  | 3.00E-13  | 85.6  | 14.4 | 15.9 |
| Rsa1.0_01445.1.g26880.t1  | refNP_180861.1  receptor like protein 24 [Arabidopsis thaliana] gi 2924789 gb AAC04918.1  putative leucine-rich repeat disease resistance protein [Arabidopsis thaliana] gi 20196994 gb AAM14862.1  putative leucine-rich repeat disease resistance protein [Arabidopsis thaliana] gi 330253681 gb AEC08775.1  receptor like protein 24 [Arabidopsis thaliana]                                                                                                                                                                                                                       | 795  | 864  | 0         | 108.7 | 61.1 | 73.6 | receptor like protein 24                            | gbpln | Arabidopsis thaliana | AT2G33020.1   Symbols: AtRLP24, RLP24   receptor like protein 24   chr2:14013874-14016516 REVERSE LENGTH=864                           | 795  | 864  | 0         | 108.7 | 61.1 | 73.6 |
| Rsa1.0_01445.1.g26881.t2  | gb EOA39215.1  hypothetical protein CARUB_v10012187mg [Capsella rubella]                                                                                                                                                                                                                                                                                                                                                                                                                                                                                                             | 258  | 220  | 1.00E-110 | 85.3  | 77.5 | 82.2 | hypothetical protein CARUB_v10012187mg              | gbpln | Capsella rubella     | AT1G04760.1   Symbols: ATVAMP726, VAMP726   vesicle-associated membrane protein 726   chr1:1334760-1336070 FORWARD LENGTH=220          | 258  | 220  | 1.00E-108 | 85.3  | 78.7 | 82.6 |

|                          |                                                                                                                                                                                                                                                                                                                                                                                                                                                                                                                                                                                                                                                                                                                                        |      |      |           |       |       |       |                                                 |             |                      |                                                                                                                                    |      |      |           |       |       |       |
|--------------------------|----------------------------------------------------------------------------------------------------------------------------------------------------------------------------------------------------------------------------------------------------------------------------------------------------------------------------------------------------------------------------------------------------------------------------------------------------------------------------------------------------------------------------------------------------------------------------------------------------------------------------------------------------------------------------------------------------------------------------------------|------|------|-----------|-------|-------|-------|-------------------------------------------------|-------------|----------------------|------------------------------------------------------------------------------------------------------------------------------------|------|------|-----------|-------|-------|-------|
| Rsa1.0_01445.1.g26882.t1 | ref NP_180823.3  Lycopen beta/epsilon cyclase protein [Arabidopsis thaliana] gi 110742020 dbj BAE98947.1  hypothetical protein [Arabidopsis thaliana] gi 330253614 gb AEC08708.1  Lycopen beta/epsilon cyclase protein [Arabidopsis thaliana]                                                                                                                                                                                                                                                                                                                                                                                                                                                                                          | 607  | 585  | 0         | 96.4  | 83.7  | 86.8  | Lycopen beta/epsilon cyclase protein            | gbpln       | Arabidopsis thaliana | AT2G32640.1   Symbols:   Lycopen beta/epsilon cyclase protein   chr2:13847197-13850811 REVERSE LENGTH=585                          | 607  | 585  | 0         | 96.4  | 83.7  | 86.8  |
| Rsa1.0_01445.1.g26883.t1 | gb EOA29389.1  hypothetical protein CARUB_v10025677mg [Capsella rubella]                                                                                                                                                                                                                                                                                                                                                                                                                                                                                                                                                                                                                                                               | 610  | 627  | 0         | 102.8 | 79.2  | 89.7  | hypothetical protein CARUB_v10025677mg          | gbpln       | Capsella rubella     | AT2G32630.1   Symbols:   Pentatricopeptide repeat (PPR-like) superfamily protein   chr2:13844834-13846708 FORWARD LENGTH=624       | 610  | 624  | 0         | 102.3 | 78.2  | 87.2  |
| Rsa1.0_01446.1.g26884.t1 | #                                                                                                                                                                                                                                                                                                                                                                                                                                                                                                                                                                                                                                                                                                                                      | #    | #    | #         | #     | #     | -     | ----                                            | ----        | #                    | #                                                                                                                                  | #    | #    | #         | #     | #     |       |
| Rsa1.0_01446.1.g26885.t1 | #                                                                                                                                                                                                                                                                                                                                                                                                                                                                                                                                                                                                                                                                                                                                      | #    | #    | #         | #     | #     | -     | ----                                            | ----        | #                    | #                                                                                                                                  | #    | #    | #         | #     | #     |       |
| Rsa1.0_01446.1.g26886.t1 | ref XP_002887102.1  predicted protein [Arabidopsis lyrata subsp. lyrata] gi 297332943 gb EFH63361.1  predicted protein [Arabidopsis lyrata subsp. lyrata]                                                                                                                                                                                                                                                                                                                                                                                                                                                                                                                                                                              | 249  | 233  | 1.00E-102 | 93.6  | 81.1  | 83.1  | predicted protein                               | gbpln       | Arabidopsis lyrata   | AT1G67100.1   Symbols: LBD40   LOB domain-containing protein 40   chr1:25053801-25054659 FORWARD LENGTH=233                        | 249  | 233  | 1.00E-100 | 93.6  | 82.7  | 85.1  |
| Rsa1.0_01446.1.g26887.t1 | gb AAG51783.1 AC079679.3 reverse transcriptase, putative; 16838-20266 [Arabidopsis thaliana]                                                                                                                                                                                                                                                                                                                                                                                                                                                                                                                                                                                                                                           | 346  | 1142 | 9.00E-97  | 330.1 | 50.3  | 69.1  | reverse transcriptase, putative; 16838-20266    | gbpln       | Arabidopsis thaliana | AT4G29090.1   Symbols:   Ribonuclease H-like superfamily protein   chr4:14333528-14335255 FORWARD LENGTH=575                       | 346  | 575  | 2.00E-37  | 166.2 | 28.6  | 47.7  |
| Rsa1.0_01446.1.g26888.t1 | ref NP_198659.1  ribulose biphosphate carboxylase small chain 1B [Arabidopsis thaliana] gi 132090 sp P10796.1 RBS1B_ARATH RecName: Full=Ribulose biphosphate carboxylase small chain 1B, chloroplastic; Short=RuBisCO small subunit 1B; Flags: Precursor gi 15294184 gb AAK95269.1 AF410283.1 F1O19.10/F1O19.10 [Arabidopsis thaliana] gi 16193 emb CAA32700.1  ribulose biphosphate carboxylase [Arabidopsis thaliana] gi 9758821 dbj BAB09355.1  ribulose biphosphate carboxylase small chain 1b precursor (RuBisCO small subunit 1b) [Arabidopsis thaliana] gi 23505787 gb AAN28753.1  At5g38430/F1O19.10 [Arabidopsis thaliana] gi 332006932 gb AED94315.1  ribulose biphosphate carboxylase small chain 1B [Arabidopsis thaliana] | 170  | 181  | 1.00E-69  | 106.5 | 73.5  | 80.0  | ribulose biphosphate carboxylase small chain 1B | gbpln       | Arabidopsis thaliana | AT5G38430.1   Symbols:   Ribulose biphosphate carboxylase (small chain) family protein   chr5:15384350-15385155 REVERSE LENGTH=181 | 170  | 181  | 5.00E-72  | 106.5 | 73.5  | 80.0  |
| Rsa1.0_01446.1.g26889.t1 | #                                                                                                                                                                                                                                                                                                                                                                                                                                                                                                                                                                                                                                                                                                                                      | #    | #    | #         | #     | #     | -     | ----                                            | ----        | #                    | #                                                                                                                                  | #    | #    | #         | #     | #     |       |
| Rsa1.0_01447.1.g26890.t1 | gb AAF19226.1 AC007505.2 Highly similar to Ta1-3 polyprotein [Arabidopsis thaliana]                                                                                                                                                                                                                                                                                                                                                                                                                                                                                                                                                                                                                                                    | 802  | 1356 | 1.00E-170 | 169.1 | 34.9  | 45.1  | Highly similar to Ta1-3 polyprotein             | gbpln       | Arabidopsis thaliana | AT1G75620.1   Symbols:   glyoxal oxidase-related protein   chr1:28394951-28396594 REVERSE LENGTH=547                               | 802  | 547  | 1.00E-143 | 68.2  | 30.3  | 35.5  |
| Rsa1.0_01447.1.g26891.t1 | gb AFW86017.1  histone H3 [Zea mays]                                                                                                                                                                                                                                                                                                                                                                                                                                                                                                                                                                                                                                                                                                   | 136  | 227  | 1.00E-72  | 166.9 | 100.0 | 100.0 | histone H3                                      | gbenv/gbpln | Zea mays             | AT4G40030.2   Symbols:   Histone superfamily protein   chr4:18555840-18556827 REVERSE LENGTH=164                                   | 136  | 164  | 9.00E-75  | 120.6 | 100.0 | 100.0 |
| Rsa1.0_01447.1.g26892.t1 | #                                                                                                                                                                                                                                                                                                                                                                                                                                                                                                                                                                                                                                                                                                                                      | #    | #    | #         | #     | #     | -     | ----                                            | ----        | #                    | #                                                                                                                                  | #    | #    | #         | #     | #     |       |
| Rsa1.0_01447.1.g26893.t1 | gb AAF69169.1 AC007915.21 F27F5.21 [Arabidopsis thaliana]                                                                                                                                                                                                                                                                                                                                                                                                                                                                                                                                                                                                                                                                              | 458  | 1023 | 2.00E-95  | 223.4 | 40.0  | 52.8  | F27F5.21                                        | gbpln       | Arabidopsis thaliana | AT4G29090.1   Symbols:   Ribonuclease H-like superfamily protein   chr4:14333528-14335255 FORWARD LENGTH=575                       | 458  | 575  | 4.00E-29  | 125.5 | 11.4  | 17.2  |
| Rsa1.0_01447.1.g26894.t1 | dbj BAJ34271.1  unnamed protein product [Theilungiella halophila]                                                                                                                                                                                                                                                                                                                                                                                                                                                                                                                                                                                                                                                                      | 152  | 152  | 1.00E-65  | 100.0 | 86.8  | 90.8  | unnamed protein product                         | ----        | ----                 | AT1G75590.1   Symbols:   SAUR-like auxin-responsive protein family   chr1:28383250-28383714 REVERSE LENGTH=154                     | 152  | 154  | 2.00E-66  | 101.3 | 86.8  | 91.4  |
| Rsa1.0_01447.1.g26895.t2 | emb CAN79321.1  hypothetical protein VITISV_018984 [Vitis vinifera]                                                                                                                                                                                                                                                                                                                                                                                                                                                                                                                                                                                                                                                                    | 1995 | 1521 | 0         | 76.2  | 32.0  | 44.4  | hypothetical protein VITISV_018984              | gbpln       | Vitis vinifera       | AT4G23160.1   Symbols: CRK8   cysteine-rich RLK (RECEPTOR-like protein kinase) 8   chr4:12129485-12134086 FORWARD LENGTH=1262      | 1995 | 1262 | 2.00E-60  | 63.3  | 6.5   | 10.5  |
| Rsa1.0_01448.1.g26896.t1 | ref XP_002869328.1  hypothetical protein ARALYDRAFT_491601 [Arabidopsis lyrata subsp. lyrata] gi 297315164 gb EFH45587.1  hypothetical protein ARALYDRAFT_491601 [Arabidopsis lyrata subsp. lyrata]                                                                                                                                                                                                                                                                                                                                                                                                                                                                                                                                    | 134  | 344  | 2.00E-42  | 256.7 | 66.4  | 73.9  | hypothetical protein ARALYDRAFT_491601          | gbpln       | Arabidopsis lyrata   | AT4G31400.1   Symbols: CTF7   damaged DNA binding;DNA-directed DNA polymerases   chr4:15237411-15239266 FORWARD LENGTH=345         | 134  | 345  | 4.00E-43  | 257.5 | 67.9  | 74.6  |
| Rsa1.0_01448.1.g26897.t1 | gb AAG51247.1 AC055769.6 copia-type polyprotein, putative; 28768-32772 [Arabidopsis thaliana]                                                                                                                                                                                                                                                                                                                                                                                                                                                                                                                                                                                                                                          | 1338 | 1334 | 0         | 99.7  | 53.7  | 70.9  | copia-type polyprotein, putative; 28768-32772   | gbpln       | Arabidopsis thaliana | AT4G23160.1   Symbols: CRK8   cysteine-rich RLK (RECEPTOR-like protein kinase) 8   chr4:12129485-12134086 FORWARD LENGTH=1262      | 1338 | 1262 | 1.00E-101 | 94.3  | 14.3  | 22.2  |



|                          |                                                                                                                                                                                                                                                                                                                          |      |      |           |       |      |       |                                                     |       |                      |                                                                                                                                                       |      |     |           |       |      |      |
|--------------------------|--------------------------------------------------------------------------------------------------------------------------------------------------------------------------------------------------------------------------------------------------------------------------------------------------------------------------|------|------|-----------|-------|------|-------|-----------------------------------------------------|-------|----------------------|-------------------------------------------------------------------------------------------------------------------------------------------------------|------|-----|-----------|-------|------|------|
| Rsa1.0_01448.1.g26898.t1 | ref[XP_002869328.1] hypothetical protein ARALYDRAFT_491601 [Arabidopsis lyrata subsp. lyrata] gi 297315164 gb EFH45587.1                                                                                                                                                                                                 | 209  | 344  | 1.00E-79  | 164.6 | 72.7 | 79.4  | hypothetical protein ARALYDRAFT_491601              | gbpln | Arabidopsis lyrata   | AT4G31400.1   Symbols: CTF7   damaged DNA binding;DNA-directed DNA polymerases   chr4:15237411-15239266 FORWARD LENGTH=345                            | 209  | 345 | 9.00E-79  | 165.1 | 72.2 | 78.9 |
| Rsa1.0_01448.1.g26899.t1 | ref[NP_194866.2] protein kinase family protein [Arabidopsis thaliana] gi 55978825 gb AAV68874.1  hypothetical protein AT4G31380 [Arabidopsis thaliana] gi 60547875 gb AAX23901.1  hypothetical protein AT4g31380 [Arabidopsis thaliana] gi 332660502 gb AEE85902.1  protein kinase family protein [Arabidopsis thaliana] | 123  | 181  | 6.00E-51  | 147.2 | 89.4 | 94.3  | protein kinase family protein                       | gbpln | Arabidopsis thaliana | AT4G31380.1   Symbols: FLP1   PPF1-like protein 1   chr4:15229837-15230382 FORWARD LENGTH=181                                                         | 123  | 181 | 1.00E-53  | 147.2 | 89.4 | 94.3 |
| Rsa1.0_01448.1.g26900.t1 | gb EOA19145.1  hypothetical protein CARUB_v10007817mg [Capsella rubella]                                                                                                                                                                                                                                                 | 302  | 286  | 1.00E-105 | 94.7  | 69.9 | 78.1  | hypothetical protein CARUB_v10007817mg              | gbpln | Capsella rubella     | AT4G31370.1   Symbols: FLA5   FASCICLIN-like arabinogalactan protein 5 precursor   chr4:15223838-15224674 REVERSE LENGTH=278                          | 302  | 278 | 2.00E-99  | 92.1  | 61.6 | 71.5 |
| Rsa1.0_01448.1.g26901.t1 | gb EOA16656.1  hypothetical protein CARUB_v10004835mg [Capsella rubella]                                                                                                                                                                                                                                                 | 161  | 434  | 3.00E-39  | 269.6 | 46.6 | 49.1  | hypothetical protein CARUB_v10004835mg              | gbpln | Capsella rubella     | AT4G31340.2   Symbols:   myosin heavy chain-related   chr4:15205662-15208895 FORWARD LENGTH=420                                                       | 161  | 420 | 1.00E-41  | 260.9 | 46.6 | 48.4 |
| Rsa1.0_01448.1.g26902.t1 | ref[NP_567872.1] uncharacterized protein [Arabidopsis thaliana] gi 13507569 gb AAK28647.1 AF360350.1 unknown protein [Arabidopsis thaliana] gi 15293233 gb AAK93727.1  unknown protein [Arabidopsis thaliana] gi 332660492 gb AEE85892.1  uncharacterized protein AT4G31330 [Arabidopsis thaliana]                       | 241  | 239  | 1.00E-123 | 99.2  | 89.2 | 94.6  | uncharacterized protein                             | gbpln | Arabidopsis thaliana | AT4G31330.1   Symbols:   Protein of unknown function. DJF599   chr4:15202354-15203151 FORWARD LENGTH=239                                              | 241  | 239 | 1.00E-125 | 99.2  | 89.2 | 94.6 |
| Rsa1.0_01448.1.g26903.t1 | emb CAB39638.1  RNA-directed DNA polymerase-like protein [Arabidopsis thaliana] gi 7267666 emb CAB78094.1  RNA-directed DNA polymerase-like protein [Arabidopsis thaliana]                                                                                                                                               | 318  | 1274 | 3.00E-52  | 400.6 | 37.7 | 55.3  | RNA-directed DNA polymerase-like protein            | gbpln | Arabidopsis thaliana | AT1G10000.1   Symbols:   Ribonuclease H-like superfamily protein   chr1:3263877-3264788 REVERSE LENGTH=303                                            | 318  | 303 | 2.00E-43  | 95.3  | 33.6 | 48.1 |
| Rsa1.0_01448.1.g26904.t1 | gb EOA18510.1  hypothetical protein CARUB_v10007062mg [Capsella rubella]                                                                                                                                                                                                                                                 | 191  | 191  | 1.00E-86  | 100.0 | 83.8 | 90.1  | hypothetical protein CARUB_v10007062mg              | gbpln | Capsella rubella     | AT4G31320.1   Symbols:   SAUR-like auxin-responsive protein family   chr4:15193993-15194562 REVERSE LENGTH=189                                        | 191  | 189 | 4.00E-86  | 99.0  | 79.1 | 88.0 |
| Rsa1.0_01448.1.g26905.t1 | gb AAC33226.1  putative non-LTR retroelement reverse transcriptase [Arabidopsis thaliana]                                                                                                                                                                                                                                | 1624 | 1529 | 0         | 94.2  | 46.3 | 62.8  | putative non-LTR retroelement reverse transcriptase | gbpln | Arabidopsis thaliana | AT3G24255.1   Symbols:   RNA-directed DNA polymerase (reverse transcriptase)-related family protein   chr3:8789471-8793208 FORWARD LENGTH=746         | 1624 | 746 | 1.00E-115 | 45.9  | 12.7 | 16.1 |
| Rsa1.0_01448.1.g26906.t2 | ref[XP_002869336.1] hypothetical protein ARALYDRAFT_491611 [Arabidopsis lyrata subsp. lyrata] gi 297315172 gb EFH45595.1  hypothetical protein ARALYDRAFT_491611 [Arabidopsis lyrata subsp. lyrata]                                                                                                                      | 175  | 172  | 9.00E-79  | 98.3  | 83.4 | 92.6  | hypothetical protein ARALYDRAFT_491611              | gbpln | Arabidopsis lyrata   | AT4G31310.1   Symbols:   AIG2-like (avirulence induced gene) family protein   chr4:15191325-15192337 FORWARD LENGTH=172                               | 175  | 172 | 2.00E-78  | 98.3  | 80.0 | 90.9 |
| Rsa1.0_01448.1.g26907.t1 | gb EOA17355.1  hypothetical protein CARUB_v10005646mg [Capsella rubella]                                                                                                                                                                                                                                                 | 233  | 233  | 1.00E-133 | 100.0 | 99.1 | 100.0 | hypothetical protein CARUB_v10005646mg              | gbpln | Capsella rubella     | AT4G31300.3   Symbols: PBA1   N-terminal nucleophile aminohydrolases (Ntn hydrolases) superfamily protein   chr4:15188927-15190935 FORWARD LENGTH=233 | 233  | 233 | 1.00E-134 | 100.0 | 98.3 | 99.6 |
| Rsa1.0_01448.1.g26908.t1 | ref[XP_002867309.1] kinase family protein [Arabidopsis lyrata subsp. lyrata] gi 297313145 gb EFH43568.1  kinase family protein [Arabidopsis lyrata subsp. lyrata]                                                                                                                                                        | 771  | 765  | 0         | 99.2  | 83.4 | 92.1  | kinase family protein                               | gbpln | Arabidopsis lyrata   | AT4G31230.1   Symbols:   Protein kinase protein with adenine nucleotide alpha hydrolases-like domain   chr4:15173071-15176109 REVERSE LENGTH=764      | 771  | 764 | 0         | 99.1  | 82.1 | 90.9 |
| Rsa1.0_01449.1.g26909.t1 | #                                                                                                                                                                                                                                                                                                                        | #    | #    | #         | #     | #    | -     | ----                                                | ----  | ----                 | #                                                                                                                                                     | #    | #   | #         | #     | #    |      |
| Rsa1.0_01449.1.g26910.t1 | #                                                                                                                                                                                                                                                                                                                        | #    | #    | #         | #     | #    | -     | ----                                                | ----  | ----                 | #                                                                                                                                                     | #    | #   | #         | #     | #    |      |
| Rsa1.0_01449.1.g26911.t5 | gb ABD65100.1  hypothetical protein 31.t00077 [Brassica oleracea]                                                                                                                                                                                                                                                        | 412  | 391  | 9.00E-57  | 94.9  | 31.6 | 36.7  | hypothetical protein 31.t00077                      | gbpln | Brassica oleracea    | #                                                                                                                                                     | #    | #   | #         | #     | #    |      |
| Rsa1.0_01449.1.g26912.t1 | #                                                                                                                                                                                                                                                                                                                        | #    | #    | #         | #     | #    | -     | ----                                                | ----  | ----                 | #                                                                                                                                                     | #    | #   | #         | #     | #    |      |

|                          |                                                                                                                                                                                                                                                                                                                                                                                                                                                                                                       |      |      |           |        |      |      |                                                                 |       |                      |                                                                                                                                     |      |      |           |        |      |      |
|--------------------------|-------------------------------------------------------------------------------------------------------------------------------------------------------------------------------------------------------------------------------------------------------------------------------------------------------------------------------------------------------------------------------------------------------------------------------------------------------------------------------------------------------|------|------|-----------|--------|------|------|-----------------------------------------------------------------|-------|----------------------|-------------------------------------------------------------------------------------------------------------------------------------|------|------|-----------|--------|------|------|
| Rsa1.0_01449.1.g26913.t2 | refNP_179692.1  phospholipase-like protein (PEARLI 4) domain-containing protein [Arabidopsis thaliana] gi 4803947 gb AAD29820.1  pEARLI 4 protein [Arabidopsis thaliana] gi 16648887 gb AAL24295.1  pEARLI 4 protein [Arabidopsis thaliana] gi 20197697 gb AAM15210.1  pEARLI 4 protein [Arabidopsis thaliana] gi 23197604 gb AAN15329.1  pEARLI 4 protein [Arabidopsis thaliana] gi 33025201.1 gb AEC07105.1  phospholipase-like protein (PEARLI 4) domain-containing protein [Arabidopsis thaliana] | 523  | 748  | 1.00E-134 | 143.0  | 61.4 | 74.6 | phospholipase-like protein (PEARLI 4) domain-containing protein | gbpln | Arabidopsis thaliana | AT2G20960.1   Symbols: pEARLI4   Arabidopsis phospholipase-like protein (PEARLI 4) family   chr2:9007089-9009611 FORWARD LENGTH=748 | 523  | 748  | 1.00E-137 | 143.0  | 61.4 | 74.6 |
| Rsa1.0_01449.1.g26914.t1 | refNP_179694.2  minichromosome maintenance protein 10 [Arabidopsis thaliana] gi 52354259 gb AAU44450.1  hypothetical protein AT2G20980 [Arabidopsis thaliana] gi 60547717 gb AAX23822.1  hypothetical protein At2g20980 [Arabidopsis thaliana] gi 33025201.4 gb AEC07108.1  minichromosome maintenance protein 10 [Arabidopsis thaliana]                                                                                                                                                              | 394  | 396  | 1.00E-180 | 100.5  | 82.7 | 87.1 | minichromosome maintenance protein 10                           | gbpln | Arabidopsis thaliana | AT2G20980.1   Symbols: MCM10   minichromosome maintenance 10   chr2:9011854-9013856 REVERSE LENGTH=396                              | 394  | 396  | 0         | 100.5  | 82.7 | 87.1 |
| Rsa1.0_01449.1.g26915.t1 | #                                                                                                                                                                                                                                                                                                                                                                                                                                                                                                     | #    | #    | #         | #      | #    | #    | -                                                               | ----  | ----                 | #                                                                                                                                   | #    | #    | #         | #      | #    |      |
| Rsa1.0_01449.1.g26916.t1 | emb CAB39638.1  RNA-directed DNA polymerase-like protein [Arabidopsis thaliana] gi 7267666 emb CAB78094.1  RNA-directed DNA polymerase-like protein [Arabidopsis thaliana]                                                                                                                                                                                                                                                                                                                            | 1757 | 1274 | 0         | 72.5   | 34.3 | 46.1 | RNA-directed DNA polymerase-like protein                        | gbpln | Arabidopsis thaliana | AT4G2090.1   Symbols:   Ribonuclease H-like superfamily protein   chr4:14333528-14335255 FORWARD LENGTH=575                         | 1757 | 575  | 1.00E-60  | 32.7   | 9.1  | 14.8 |
| Rsa1.0_01449.1.g26917.t1 | gb EOA27008.1  hypothetical protein CARUB_v10023108mg [Capsella rubella]                                                                                                                                                                                                                                                                                                                                                                                                                              | 483  | 483  | 0         | 100.0  | 96.5 | 98.1 | hypothetical protein CARUB_v10023108mg                          | gbpln | Capsella rubella     | AT2G21050.1   Symbols: LAX2   like AUXIN RESISTANT 2   chr2:9034289-9036439 FORWARD LENGTH=483                                      | 483  | 483  | 0         | 100.0  | 96.5 | 98.1 |
| Rsa1.0_01450.1.g26918.t5 | gb EOA25292.1  hypothetical protein CARUB_v10018607mg [Capsella rubella]                                                                                                                                                                                                                                                                                                                                                                                                                              | 2592 | 2587 | 0         | 99.8   | 70.3 | 80.6 | hypothetical protein CARUB_v10018607mg                          | gbpln | Capsella rubella     | AT4G30990.1   Symbols:   ARM repeat superfamily protein   chr4:15084456-15097860 FORWARD LENGTH=2599                                | 2592 | 2599 | 0         | 100.3  | 61.7 | 75.7 |
| Rsa1.0_01450.1.g26919.t1 | ref XP_002890615.1  hypothetical protein ARALYDRAFT_889991 [Arabidopsis lyrata subsp. lyrata] gi 297336457 gb EFH66874.1  hypothetical protein ARALYDRAFT_889991 [Arabidopsis lyrata subsp. lyrata]                                                                                                                                                                                                                                                                                                   | 577  | 575  | 0         | 99.7   | 80.9 | 88.2 | hypothetical protein ARALYDRAFT_889991                          | gbpln | Arabidopsis lyrata   | AT1G27200.1   Symbols:   Domain of unknown function (DUF23)   chr1:9449812-9451539 REVERSE LENGTH=575                               | 577  | 575  | 0         | 99.7   | 81.6 | 87.9 |
| Rsa1.0_01450.1.g26920.t1 | gb EOA17996.1  hypothetical protein CARUB_v10006430mg, partial [Capsella rubella]                                                                                                                                                                                                                                                                                                                                                                                                                     | 1151 | 1227 | 0         | 106.6  | 69.6 | 80.4 | hypothetical protein CARUB_v10006430mg, partial                 | gbpln | Capsella rubella     | AT4G19510.1   Symbols:   Disease resistance protein (TIR-NBS-LRR class)   chr4:10633685-10637841 FORWARD LENGTH=1210                | 1151 | 1210 | 0         | 105.1  | 64.7 | 76.5 |
| Rsa1.0_01450.1.g26921.t1 | gb EOA29845.1  hypothetical protein CARUB_v10012938mg [Capsella rubella]                                                                                                                                                                                                                                                                                                                                                                                                                              | 81   | 896  | 9.00E-12  | 1106.2 | 38.3 | 38.3 | hypothetical protein CARUB_v10012938mg                          | gbpln | Capsella rubella     | AT3G09090.3   Symbols: DEX1   defective in exine formation protein (DEX1)   chr3:2782833-2787552 REVERSE LENGTH=891                 | 81   | 891  | 1.00E-14  | 1100.0 | 38.3 | 38.3 |
| Rsa1.0_01450.1.g26922.t1 | #                                                                                                                                                                                                                                                                                                                                                                                                                                                                                                     | #    | #    | #         | #      | #    | #    | -                                                               | ----  | ----                 | #                                                                                                                                   | #    | #    | #         | #      | #    |      |
| Rsa1.0_01450.1.g26923.t5 | gb EOA39486.1  hypothetical protein CARUB_v10008094mg [Capsella rubella] gi 482575300 gb EOA39487.1  hypothetical protein CARUB_v10008094mg [Capsella rubella]                                                                                                                                                                                                                                                                                                                                        | 2142 | 1371 | 0         | 64.0   | 46.2 | 53.6 | hypothetical protein CARUB_v10008094mg                          | gbpln | Capsella rubella     | AT1G27170.1   Symbols:   transmembrane receptors:ATP binding   chr1:9434718-9439219 FORWARD LENGTH=1384                             | 2142 | 1384 | 0         | 64.6   | 45.6 | 52.9 |
| Rsa1.0_01450.1.g26924.t1 | #                                                                                                                                                                                                                                                                                                                                                                                                                                                                                                     | #    | #    | #         | #      | #    | #    | -                                                               | ----  | ----                 | #                                                                                                                                   | #    | #    | #         | #      | #    |      |
| Rsa1.0_01450.1.g26925.t2 | gb EOA39486.1  hypothetical protein CARUB_v10008094mg [Capsella rubella] gi 482575300 gb EOA39487.1  hypothetical protein CARUB_v10008094mg [Capsella rubella]                                                                                                                                                                                                                                                                                                                                        | 173  | 1371 | 8.00E-38  | 792.5  | 52.0 | 66.5 | hypothetical protein CARUB_v10008094mg                          | gbpln | Capsella rubella     | AT1G27180.1   Symbols:   disease resistance protein (TIR-NBS-LRR class), putative   chr1:9439859-9445818 FORWARD LENGTH=1556        | 173  | 1556 | 7.00E-38  | 899.4  | 51.4 | 67.6 |

|                          |                                                                                                                                                                                                                                                                                                                                                                                                                                                                                                                                                                                                                                                                                                                                                                                            |      |      |           |       |      |      |                                        |       |                      |                                                                                                                                                                                                                                                                                                                                              |      |      |           |       |      |      |
|--------------------------|--------------------------------------------------------------------------------------------------------------------------------------------------------------------------------------------------------------------------------------------------------------------------------------------------------------------------------------------------------------------------------------------------------------------------------------------------------------------------------------------------------------------------------------------------------------------------------------------------------------------------------------------------------------------------------------------------------------------------------------------------------------------------------------------|------|------|-----------|-------|------|------|----------------------------------------|-------|----------------------|----------------------------------------------------------------------------------------------------------------------------------------------------------------------------------------------------------------------------------------------------------------------------------------------------------------------------------------------|------|------|-----------|-------|------|------|
| Rsa1.0_01450.1.g26926.t1 | refNP_564272.1  uncharacterized protein [Arabidopsis thaliana] gi 325530321 sp Q94K98.2 Y1720_ARAT H RecName: Full=UPF0392 protein At1g27200 gi 8778872 gb AAF79871.1 AC000348_24 T7N9.26 [Arabidopsis thaliana] gi 23297605 gb AANI2989.1  unknown protein [Arabidopsis thaliana] gi 332192672 gb AEE30793.1  uncharacterized protein AT1G27200 [Arabidopsis thaliana] gi 385137870 gb AFI41196.1  DUF23/GT0, partial [Arabidopsis thaliana]                                                                                                                                                                                                                                                                                                                                              | 164  | 575  | 1.00E-85  | 350.6 | 89.6 | 97.0 | uncharacterized protein                | gbpln | Arabidopsis thaliana | AT1G27200.1   Symbols:   Domain of unknown function (DUF23)   chr1:9449812-9451539 REVERSE LENGTH=575                                                                                                                                                                                                                                        | 164  | 575  | 4.00E-88  | 350.6 | 89.6 | 97.0 |
| Rsa1.0_01450.1.g26927.t1 | gb EOA39486.1  hypothetical protein CARUB_v10008094mg [Capsella rubella] gi 482575300 gb EOA39487.1  hypothetical protein CARUB_v10008094mg [Capsella rubella]                                                                                                                                                                                                                                                                                                                                                                                                                                                                                                                                                                                                                             | 349  | 1371 | 1.00E-119 | 392.8 | 66.2 | 78.8 | hypothetical protein CARUB_v10008094mg | gbpln | Capsella rubella     | AT1G27180.1   Symbols:   disease resistance protein (TIR-NBS-LRR class), putative   chr1:9439859-9445818 FORWARD LENGTH=1556                                                                                                                                                                                                                 | 349  | 1556 | 1.00E-113 | 445.8 | 64.8 | 77.7 |
| Rsa1.0_01450.1.g26928.t1 | # # # # # # # - ----                                                                                                                                                                                                                                                                                                                                                                                                                                                                                                                                                                                                                                                                                                                                                                       |      |      |           |       |      |      |                                        |       |                      | AT1G26910.1   Symbols: RPL10B   Ribosomal protein L16p/L10e family protein   chr1:9321709-9322813 FORWARD LENGTH=221                                                                                                                                                                                                                         | 58   | 221  | 6.00E-11  | 381.0 | 50.0 | 55.2 |
| Rsa1.0_01450.1.g26929.t1 | refNP_174010.1  60S ribosomal protein L34-1 [Arabidopsis thaliana] gi 297850990 ref XP_002893376.1  hypothetical protein ARALYDRAFT_472716 [Arabidopsis lyrata subsp. lyrata] gi 2500376 sp Q42351.1 RL341_ARATH RecName: Full=60S ribosomal protein L34-1 gi 4262177 gb AAD14494.1  60s ribosomal protein L34 [Arabidopsis thaliana] gi 19310599 gb AAL85030.1  putative 60s ribosomal protein L34 [Arabidopsis thaliana] gi 21436403 gb AAM51402.1  putative 60S ribosomal protein L34 [Arabidopsis thaliana] gi 297339218 gb EFH69635.1  hypothetical protein ARALYDRAFT_472716 [Arabidopsis lyrata subsp. lyrata] gi 332192632 gb AEE30753.1  60S ribosomal protein L34-1 [Arabidopsis thaliana] gi 482571901 gb EOA36088.1  hypothetical protein CARUB_v10010667mg [Capsella rubella] | 120  | 120  | 3.00E-56  | 100.0 | 91.7 | 95.8 | 60S ribosomal protein L34-1            | gbpln | Arabidopsis lyrata   | AT1G26880.1   Symbols:   Ribosomal protein L34e superfamily protein   chr1:9315640-9316681 REVERSE LENGTH=120                                                                                                                                                                                                                                | 120  | 120  | 5.00E-59  | 100.0 | 91.7 | 95.8 |
| Rsa1.0_01450.1.g26930.t1 | ref XP_002890630.1  hypothetical protein ARALYDRAFT_335709 [Arabidopsis lyrata subsp. lyrata] gi 297336472 gb EFH66889.1  hypothetical protein ARALYDRAFT_335709 [Arabidopsis lyrata subsp. lyrata]                                                                                                                                                                                                                                                                                                                                                                                                                                                                                                                                                                                        | 419  | 416  | 0         | 99.3  | 84.7 | 89.5 | hypothetical protein ARALYDRAFT_335709 | gbpln | Arabidopsis lyrata   | AT1G26870.1   Symbols: FEZ, ANAC009   NAC (No Apical Meristem) domain transcriptional regulator superfamily protein   chr1:9312856-9314983 FORWARD LENGTH=425                                                                                                                                                                                | 419  | 425  | 0         | 101.4 | 84.5 | 89.3 |
| Rsa1.0_01451.1.g26931.t1 | gb EOA33759.1  hypothetical protein CARUB_v10019954mg [Capsella rubella]                                                                                                                                                                                                                                                                                                                                                                                                                                                                                                                                                                                                                                                                                                                   | 623  | 633  | 0         | 101.6 | 85.7 | 91.2 | hypothetical protein CARUB_v10019954mg | gbpln | Capsella rubella     | AT1G71020.1   Symbols:   ARM repeat superfamily protein   chr1:26790825-26793105 REVERSE LENGTH=628                                                                                                                                                                                                                                          | 623  | 628  | 0         | 100.8 | 84.1 | 90.0 |
| Rsa1.0_01451.1.g26932.t1 | gb EOA35754.1  hypothetical protein CARUB_v10020986mg [Capsella rubella]                                                                                                                                                                                                                                                                                                                                                                                                                                                                                                                                                                                                                                                                                                                   | 194  | 193  | 3.00E-74  | 99.5  | 80.4 | 89.2 | hypothetical protein CARUB_v10020986mg | gbpln | Capsella rubella     | AT1G71015.1   Symbols:   unknown protein; BEST Arabidopsis thaliana protein match is: unknown protein (TAIR:AT2G01340.1). Has 85 Blast hits to 85 proteins in 12 species: Archae - 0; Bacteria - 0; Metazoa - 0; Fungi - 0; Plants - 85; Viruses - 0; Other Eukaryotes - 0 (source: NCBI BLINK).   chr1:26789389-26790061 REVERSE LENGTH=195 | 194  | 195  | 4.00E-75  | 100.5 | 79.4 | 87.1 |
| Rsa1.0_01451.1.g26933.t1 | gb EOA33480.1  hypothetical protein CARUB_v10019654mg [Capsella rubella] gi 482569293 gb EOA33481.1  hypothetical protein CARUB_v10019654mg [Capsella rubella]                                                                                                                                                                                                                                                                                                                                                                                                                                                                                                                                                                                                                             | 551  | 1651 | 0         | 299.6 | 74.8 | 80.9 | hypothetical protein CARUB_v10019654mg | gbpln | Capsella rubella     | AT1G71010.1   Symbols: FAB1C   FORMS APLPOID AND BINUCLEATE CELLS 1C   chr1:26782839-26788712 FORWARD LENGTH=1648                                                                                                                                                                                                                            | 551  | 1648 | 0         | 299.1 | 74.6 | 80.6 |
| Rsa1.0_01451.1.g26934.t1 | gb AAF19226.1 AC007505_2 Highly similar to Ta1-3 polyprotein [Arabidopsis thaliana]                                                                                                                                                                                                                                                                                                                                                                                                                                                                                                                                                                                                                                                                                                        | 1321 | 1356 | 0         | 102.6 | 55.6 | 74.0 | Highly similar to Ta1-3 polyprotein    | gbpln | Arabidopsis thaliana | AT4G23160.1   Symbols: CRK8   cysteine-rich RLK (RECEPTOR-like protein kinase) 8   chr4:12129485-12134086 FORWARD LENGTH=1262                                                                                                                                                                                                                | 1321 | 1262 | 2.00E-85  | 95.5  | 14.2 | 21.0 |

|                          |                                                                                                                                                                                                                                                                                                                                                                                                                                                                                                                                                                                                            |     |      |          |        |      |      |                                                 |       |                      |                                                                                                                                                                                                                                                                                                                                                                                                                                                                                                                                                                  |     |      |          |        |      |      |
|--------------------------|------------------------------------------------------------------------------------------------------------------------------------------------------------------------------------------------------------------------------------------------------------------------------------------------------------------------------------------------------------------------------------------------------------------------------------------------------------------------------------------------------------------------------------------------------------------------------------------------------------|-----|------|----------|--------|------|------|-------------------------------------------------|-------|----------------------|------------------------------------------------------------------------------------------------------------------------------------------------------------------------------------------------------------------------------------------------------------------------------------------------------------------------------------------------------------------------------------------------------------------------------------------------------------------------------------------------------------------------------------------------------------------|-----|------|----------|--------|------|------|
| Rsa1.0_01451.1.g26935.t1 | ref[XP_002887343.1] predicted protein [Arabidopsis lyrata subsp. lyrata] gi 297333184 gb EFH63602.1  predicted protein [Arabidopsis lyrata subsp. lyrata]                                                                                                                                                                                                                                                                                                                                                                                                                                                  | 60  | 1653 | 9.00E-24 | 2755.0 | 83.3 | 90.0 | predicted protein                               | gbpln | Arabidopsis lyrata   | AT1G71010.1   Symbols: FAB1C   FORMS APL0ID AND BINUCLEATE CELLS 1C   chr1:26782839-26788712 FORWARD LENGTH=1648                                                                                                                                                                                                                                                                                                                                                                                                                                                 | 60  | 1648 | 7.00E-26 | 2746.7 | 81.7 | 90.0 |
| Rsa1.0_01451.1.g26936.t1 | # # # # # # # # - ----                                                                                                                                                                                                                                                                                                                                                                                                                                                                                                                                                                                     |     |      |          |        |      |      |                                                 |       |                      | # # # # # # #                                                                                                                                                                                                                                                                                                                                                                                                                                                                                                                                                    |     |      |          |        |      |      |
| Rsa1.0_01451.1.g26937.t1 | gb EOA35811.1  hypothetical protein CARUB_v10021047mg [Capsella rubella]                                                                                                                                                                                                                                                                                                                                                                                                                                                                                                                                   | 170 | 168  | 1.00E-76 | 98.8   | 81.8 | 88.2 | hypothetical protein CARUB_v10021047mg          | gbpln | Capsella rubella     | AT1G71000.1   Symbols:   Chaperone DnaJ-domain superfamily protein   chr1:26769336-26770111 REVERSE LENGTH=165                                                                                                                                                                                                                                                                                                                                                                                                                                                   | 170 | 165  | 3.00E-75 | 97.1   | 80.0 | 86.5 |
| Rsa1.0_01451.1.g26938.t1 | ref[XP_002888811.1] hypothetical protein ARALYDRAFT_476229 [Arabidopsis lyrata subsp. lyrata] gi 297334652 gb EFH65070.1  hypothetical protein ARALYDRAFT_476229 [Arabidopsis lyrata subsp. lyrata]                                                                                                                                                                                                                                                                                                                                                                                                        | 131 | 134  | 2.00E-33 | 102.3  | 76.3 | 81.7 | hypothetical protein ARALYDRAFT_476229          | gbpln | Arabidopsis lyrata   | AT1G70990.1   Symbols:   proline-rich family protein   chr1:26767520-26768050 REVERSE LENGTH=176                                                                                                                                                                                                                                                                                                                                                                                                                                                                 | 131 | 176  | 9.00E-34 | 134.4  | 73.3 | 80.2 |
| Rsa1.0_01451.1.g26939.t1 | ref[NP_565006.1] hydroxyproline-rich glycoprotein family protein [Arabidopsis thaliana] gi 21536546 gb AAM60878.1  unknown [Arabidopsis thaliana] gi 332197026 gb AEE35147.1  hydroxyproline-rich glycoprotein family protein [Arabidopsis thaliana]                                                                                                                                                                                                                                                                                                                                                       | 90  | 135  | 7.00E-15 | 150.0  | 48.9 | 56.7 | hydroxyproline-rich glycoprotein family protein | gbpln | Arabidopsis thaliana | AT1G70985.1   Symbols:   hydroxyproline-rich glycoprotein family protein   chr1:26764774-26765181 REVERSE LENGTH=135                                                                                                                                                                                                                                                                                                                                                                                                                                             | 90  | 135  | 1.00E-17 | 150.0  | 48.9 | 56.7 |
| Rsa1.0_01452.1.g26940.t1 | # # # # # # # # - ----                                                                                                                                                                                                                                                                                                                                                                                                                                                                                                                                                                                     |     |      |          |        |      |      |                                                 |       |                      | # # # # # # #                                                                                                                                                                                                                                                                                                                                                                                                                                                                                                                                                    |     |      |          |        |      |      |
| Rsa1.0_01452.1.g26941.t1 | gb EOA20468.1  hypothetical protein CARUB_v10000781mg [Capsella rubella]                                                                                                                                                                                                                                                                                                                                                                                                                                                                                                                                   | 502 | 502  | 0        | 100.0  | 95.0 | 98.6 | hypothetical protein CARUB_v10000781mg          | gbpln | Capsella rubella     | AT5G17330.1   Symbols: GAD, GAD1   glutamate decarboxylase   chr5:57111141-5714839 FORWARD LENGTH=502                                                                                                                                                                                                                                                                                                                                                                                                                                                            | 502 | 502  | 0        | 100.0  | 94.6 | 97.8 |
| Rsa1.0_01452.1.g26942.t1 | gb AAD24197.1 AF136223.1 M3.4 protein [Brassica napus]                                                                                                                                                                                                                                                                                                                                                                                                                                                                                                                                                     | 208 | 218  | 1.00E-72 | 104.8  | 76.9 | 79.8 | M3.4 protein                                    | gbpln | Brassica napus       | AT5G17340.1   Symbols:   Putative membrane lipoprotein   chr5:5715736-5716218 REVERSE LENGTH=160                                                                                                                                                                                                                                                                                                                                                                                                                                                                 | 208 | 160  | 7.00E-35 | 76.9   | 38.0 | 47.6 |
| Rsa1.0_01452.1.g26943.t1 | gb AAD24197.1 AF136223.1 M3.4 protein [Brassica napus]                                                                                                                                                                                                                                                                                                                                                                                                                                                                                                                                                     | 142 | 218  | 5.00E-36 | 153.5  | 60.6 | 71.1 | M3.4 protein                                    | gbpln | Brassica napus       | AT5G17340.1   Symbols:   Putative membrane lipoprotein   chr5:5715736-5716218 REVERSE LENGTH=160                                                                                                                                                                                                                                                                                                                                                                                                                                                                 | 142 | 160  | 5.00E-22 | 112.7  | 48.6 | 65.5 |
| Rsa1.0_01452.1.g26944.t1 | ref[XP_002871762.1] hypothetical protein ARALYDRAFT_488600 [Arabidopsis lyrata subsp. lyrata] gi 297317599 gb EFH48021.1  hypothetical protein ARALYDRAFT_488600 [Arabidopsis lyrata subsp. lyrata]                                                                                                                                                                                                                                                                                                                                                                                                        | 182 | 184  | 4.00E-73 | 101.1  | 84.6 | 91.2 | hypothetical protein ARALYDRAFT_488600          | gbpln | Arabidopsis lyrata   | AT5G17350.1   Symbols:   unknown protein; FUNCTIONS IN: molecular, function unknown; INVOLVED IN: N-terminal protein myristoylation; LOCATED IN: cellular, component unknown; EXPRESSED IN: 15 plant structures; EXPRESSED DURING: 8 growth stages; BEST Arabidopsis thaliana protein match is: unknown protein (TAIR:AT3G03280.1); Has 1807 Blast hits to 1807 proteins in 277 species: Archae - 0; Bacteria - 0; Metazoa - 736; Fungi - 347; Plants - 385; Viruses - 0; Other Eukaryotes - 339 (source: NCBI BLINK).   chr5:5718853-5719404 FORWARD LENGTH=183 | 182 | 183  | 8.00E-74 | 100.5  | 85.2 | 91.2 |
| Rsa1.0_01452.1.g26945.t1 | gb EOA22180.1  hypothetical protein CARUB_v10002751mg [Capsella rubella]                                                                                                                                                                                                                                                                                                                                                                                                                                                                                                                                   | 172 | 177  | 1.00E-58 | 102.9  | 77.3 | 86.6 | hypothetical protein CARUB_v10002751mg          | gbpln | Capsella rubella     | AT5G17360.1   Symbols:   BEST Arabidopsis thaliana protein match is: DNA LIGASE 6 (TAIR:AT1G66730.1); Has 1807 Blast hits to 1807 proteins in 277 species: Archae - 0; Bacteria - 0; Metazoa - 736; Fungi - 347; Plants - 385; Viruses - 0; Other Eukaryotes - 339 (source: NCBI BLINK).   chr5:5720620-5721147 FORWARD LENGTH=175                                                                                                                                                                                                                               | 172 | 175  | 2.00E-53 | 101.7  | 74.4 | 86.6 |
| Rsa1.0_01452.1.g26946.t1 | ref[NP_197240.1] 2-hydroxyacyl-CoA lyase [Arabidopsis thaliana] gi 175174050 sp Q9LF46.1 HACL_ARATH RecName: Full=2-hydroxyacyl-CoA lyase; AltName: Full=2-hydroxyphytanoyl-CoA lyase; Short=2-HPCL; AltName: Full=Oxalyl-CoA decarboxylase gi 9755761 emb CAC01733.1  2-hydroxyphytanoyl-CoA lyase-like protein [Arabidopsis thaliana] gi 20466616 gb AAM20625.1  2-hydroxyphytanoyl-CoA lyase-like protein [Arabidopsis thaliana] gi 23198152 gb AAN15603.1  2-hydroxyphytanoyl-CoA lyase-like protein [Arabidopsis thaliana] gi 332005036 gb AED92419.1  2-hydroxyacyl-CoA lyase [Arabidopsis thaliana] | 572 | 572  | 0        | 100.0  | 91.3 | 95.5 | 2-hydroxyacyl-CoA lyase                         | gbpln | Arabidopsis thaliana | AT5G17380.1   Symbols:   Thiamine pyrophosphate dependent pyruvate decarboxylase family protein   chr5:5724920-5726720 REVERSE LENGTH=572                                                                                                                                                                                                                                                                                                                                                                                                                        | 572 | 572  | 0        | 100.0  | 91.3 | 95.5 |

|                          |                                                                                                                                                                                                                                                                                                                                                                                                                                                                                                                                                                                                                                                                                                                                                                                                                                                                                                                                                                                                                                                                                                                                                                                                                                                                                                                                                                                                                                            |     |     |           |       |      |      |                                                                            |       |                      |                                                                                                                                                                                                                                                                                |     |     |           |       |      |      |
|--------------------------|--------------------------------------------------------------------------------------------------------------------------------------------------------------------------------------------------------------------------------------------------------------------------------------------------------------------------------------------------------------------------------------------------------------------------------------------------------------------------------------------------------------------------------------------------------------------------------------------------------------------------------------------------------------------------------------------------------------------------------------------------------------------------------------------------------------------------------------------------------------------------------------------------------------------------------------------------------------------------------------------------------------------------------------------------------------------------------------------------------------------------------------------------------------------------------------------------------------------------------------------------------------------------------------------------------------------------------------------------------------------------------------------------------------------------------------------|-----|-----|-----------|-------|------|------|----------------------------------------------------------------------------|-------|----------------------|--------------------------------------------------------------------------------------------------------------------------------------------------------------------------------------------------------------------------------------------------------------------------------|-----|-----|-----------|-------|------|------|
| Rsa1.0_01452.1.g26947.t1 | refNP_197241.1  universal stress protein (USP) family protein [Arabidopsis thaliana]<br>gi 9755762 emb CAC01734.1  putative protein [Arabidopsis thaliana]<br>gi 332005037 gb AED92420.1  universal stress protein (USP) family protein [Arabidopsis thaliana]                                                                                                                                                                                                                                                                                                                                                                                                                                                                                                                                                                                                                                                                                                                                                                                                                                                                                                                                                                                                                                                                                                                                                                             | 291 | 285 | 1.00E-115 | 97.9  | 83.5 | 87.3 | universal stress protein (USP) family protein                              | gbpln | Arabidopsis thaliana | AT5G17390.1   Symbols:   Adenine nucleotide alpha hydrolases-like superfamily transporter   chr5:5727640-5728688 FORWARD LENGTH=285                                                                                                                                            | 291 | 285 | 1.00E-118 | 97.9  | 83.5 | 87.3 |
| Rsa1.0_01452.1.g26948.t1 | dbj BAF00609.1  ADP/ATP translocase-like protein [Arabidopsis thaliana]                                                                                                                                                                                                                                                                                                                                                                                                                                                                                                                                                                                                                                                                                                                                                                                                                                                                                                                                                                                                                                                                                                                                                                                                                                                                                                                                                                    | 228 | 146 | 3.00E-23  | 64.0  | 25.9 | 29.8 | ADP/ATP translocase-like protein                                           | gbpln | Arabidopsis thaliana | AT5G17400.1   Symbols: ER-ANT1   endoplasmic reticulum-adenine nucleotide transporter 1   chr5:5729015-5730104 REVERSE LENGTH=306                                                                                                                                              | 228 | 306 | 2.00E-25  | 134.2 | 25.9 | 29.8 |
| Rsa1.0_01452.1.g26949.t1 | #                                                                                                                                                                                                                                                                                                                                                                                                                                                                                                                                                                                                                                                                                                                                                                                                                                                                                                                                                                                                                                                                                                                                                                                                                                                                                                                                                                                                                                          | #   | #   | #         | #     | #    | #    | -                                                                          | ----  | ----                 | #                                                                                                                                                                                                                                                                              | #   | #   | #         | #     | #    | #    |
| Rsa1.0_01452.1.g26950.t2 | sp Q8LSN2.1 BBM2_BRANA RecName: Full=AP2-like ethylene-responsive transcription factor BBM2; Short=BnBBM2; AltName: Full=Protein BABY BOOM 2<br>gi 21069053 gb AAM33901.1 AF317905.1 AP2/EREBP transcription factor BABY BOOM2 [Brassica napus]                                                                                                                                                                                                                                                                                                                                                                                                                                                                                                                                                                                                                                                                                                                                                                                                                                                                                                                                                                                                                                                                                                                                                                                            | 567 | 579 | 0         | 102.1 | 86.6 | 91.4 | transcription factor BBM2; Short=BnBBM2; AltName: Full=Protein BABY BOOM 2 | gbpln | Brassica napus       | AT5G17430.1   Symbols: BBM   Integrase-type DNA-binding superfamily protein   chr5:5742542-5745568 REVERSE LENGTH=584                                                                                                                                                          | 567 | 584 | 0         | 103.0 | 79.4 | 86.1 |
| Rsa1.0_01452.1.g26951.t2 | refNP_568347.1  LUC7 related protein [Arabidopsis thaliana]<br>gi 15450599 gb AAK96571.1  AT5g17440/K3M16.10 [Arabidopsis thaliana] gi 17380624 gb AAL36075.1  AT5g17440/K3M16.10 [Arabidopsis thaliana] gi 332005043 gb AED92426.1  LUC7 related protein [Arabidopsis thaliana]                                                                                                                                                                                                                                                                                                                                                                                                                                                                                                                                                                                                                                                                                                                                                                                                                                                                                                                                                                                                                                                                                                                                                           | 428 | 404 | 1.00E-174 | 94.4  | 80.4 | 81.5 | LUC7 related protein                                                       | gbpln | Arabidopsis thaliana | AT5G17440.1   Symbols:   LUC7 related protein   chr5:5749849-5753415 FORWARD LENGTH=404                                                                                                                                                                                        | 428 | 404 | 1.00E-176 | 94.4  | 80.4 | 81.5 |
| Rsa1.0_01452.1.g26952.t1 | gb EOA22986.1  hypothetical protein CARUB_v10003727mg [Capsella rubella]                                                                                                                                                                                                                                                                                                                                                                                                                                                                                                                                                                                                                                                                                                                                                                                                                                                                                                                                                                                                                                                                                                                                                                                                                                                                                                                                                                   | 73  | 73  | 9.00E-32  | 100.0 | 93.2 | 95.9 | hypothetical protein CARUB_v10003727mg                                     | gbpln | Capsella rubella     | AT3G03341.1   Symbols:   unknown protein; Has 30201 Blast hits to 17322 proteins in 780 species: Archae - 12; Bacteria - 1396; Metazoa - 17338; Fungi - 3422; Plants - 5037; Viruses - 0; Other Eukaryotes - 2996 (source: NCBI BLINK).   chr3:790338-790556 REVERSE LENGTH=72 | 73  | 72  | 5.00E-29  | 98.6  | 80.8 | 84.9 |
| Rsa1.0_01453.1.g26953.t5 | refNP_191175.2  Sodium bile acid symporter family protein [Arabidopsis thaliana]<br>gi 403399721 sp F4ZC4.1 BASS4_ARAT H RecName: Full=Probable sodium/metabolite cotransporter BASS4, chloroplastic; AltName: Full=Bile acid transporter 4; AltName: Full=Bile acid-sodium symporter family protein 4; Flags: Precursor<br>gi 332645967 gb AEE79488.1  probable sodium/metabolite cotransporter BASS4 [Arabidopsis thaliana]<br>refNP_191174.1  translation initiation factor eIF-3 subunit 8 [Arabidopsis thaliana]<br>gi 334186011 ref NP_001190102.1  translation initiation factor eIF-3 subunit 8 [Arabidopsis thaliana]<br>gi 23503063 sp O49160.2 EIF3C_ARATH RecName: Full=Eukaryotic translation initiation factor 3 subunit C; Short=eIF3c; AltName: Full=Eukaryotic translation initiation factor 3 subunit 8; AltName: Full=eIF3 p10; AltName: Full=p105 gi 7572913 emb CAB87414.1  PROBABLE EUKARYOTIC TRANSLATION INITIATION FACTOR 3 SUBUNIT 8 [Arabidopsis thaliana]<br>gi 17381100 gb AAL36362.1  putative eukaryotic translation initiation factor 3 subunit 8 [Arabidopsis thaliana]<br>gi 25054977 gb AAN71960.1  putative eukaryotic translation initiation factor 3 subunit 8 [Arabidopsis thaliana]<br>gi 332645965 gb AEE79486.1  translation initiation factor eIF-3 subunit 8 [Arabidopsis thaliana]<br>gi 332645966 gb AEE79487.1  eukaryotic translation initiation factor 3 subunit C [Arabidopsis thaliana] | 253 | 436 | 1.00E-105 | 172.3 | 84.2 | 90.1 | Sodium bile acid symporter family protein                                  | gbpln | Arabidopsis thaliana | AT3G56160.1   Symbols:   Sodium Bile acid symporter family   chr3:20837733-20841541 REVERSE LENGTH=436                                                                                                                                                                         | 253 | 436 | 1.00E-108 | 172.3 | 84.2 | 90.1 |
| Rsa1.0_01453.1.g26954.t1 | refNP_191174.1  translation initiation factor eIF-3 subunit 8 [Arabidopsis thaliana]<br>gi 334186011 ref NP_001190102.1  translation initiation factor eIF-3 subunit 8 [Arabidopsis thaliana]<br>gi 23503063 sp O49160.2 EIF3C_ARATH RecName: Full=Eukaryotic translation initiation factor 3 subunit C; Short=eIF3c; AltName: Full=Eukaryotic translation initiation factor 3 subunit 8; AltName: Full=eIF3 p10; AltName: Full=p105 gi 7572913 emb CAB87414.1  PROBABLE EUKARYOTIC TRANSLATION INITIATION FACTOR 3 SUBUNIT 8 [Arabidopsis thaliana]<br>gi 17381100 gb AAL36362.1  putative eukaryotic translation initiation factor 3 subunit 8 [Arabidopsis thaliana]<br>gi 25054977 gb AAN71960.1  putative eukaryotic translation initiation factor 3 subunit 8 [Arabidopsis thaliana]<br>gi 332645965 gb AEE79486.1  translation initiation factor eIF-3 subunit 8 [Arabidopsis thaliana]<br>gi 332645966 gb AEE79487.1  eukaryotic translation initiation factor 3 subunit C [Arabidopsis thaliana]                                                                                                                                                                                                                                                                                                                                                                                                                                  | 896 | 900 | 0         | 100.4 | 87.3 | 93.0 | translation initiation factor eIF-3 subunit 8                              | gbpln | Arabidopsis thaliana | AT3G56150.2   Symbols: EIF3C   eukaryotic translation initiation factor 3C   chr3:20833790-20836820 REVERSE LENGTH=900                                                                                                                                                         | 896 | 900 | 0         | 100.4 | 87.3 | 93.0 |

|                          |                                                                                                                                                                                                                                                                                                                                                                                      |      |      |           |       |      |      |                                                              |       |                      |                                                                                                                                                                                                                                                                                                                                                                   |      |     |           |       |      |      |
|--------------------------|--------------------------------------------------------------------------------------------------------------------------------------------------------------------------------------------------------------------------------------------------------------------------------------------------------------------------------------------------------------------------------------|------|------|-----------|-------|------|------|--------------------------------------------------------------|-------|----------------------|-------------------------------------------------------------------------------------------------------------------------------------------------------------------------------------------------------------------------------------------------------------------------------------------------------------------------------------------------------------------|------|-----|-----------|-------|------|------|
| Rsa1.0_01453.1.g26955.t1 | gb EOA12870.1  hypothetical protein CARUB_v10025839mg [Capsella rubella]                                                                                                                                                                                                                                                                                                             | 922  | 926  | 0         | 100.4 | 80.0 | 87.7 | hypothetical protein CARUB_v10025839mg                       | gbpln | Capsella rubella     | AT5G51350.1   Symbols:   Leucine-rich repeat transmembrane protein kinase family protein   chr5:20867860-20870621 REVERSE LENGTH=895                                                                                                                                                                                                                              | 922  | 895 | 0         | 97.1  | 76.9 | 85.1 |
| Rsa1.0_01453.1.g26956.t1 | ref XP_002876350.1  biotin/lipoyl attachment domain-containing protein [Arabidopsis lyrata subsp. lyrata]   gi 297322188 gb EFH52609.1  biotin/lipoyl attachment domain-containing protein [Arabidopsis lyrata subsp. lyrata]                                                                                                                                                        | 265  | 281  | 1.00E-115 | 106.0 | 79.6 | 89.1 | biotin/lipoyl attachment domain-containing protein           | gbpln | Arabidopsis lyrata   | AT3G56130.4   Symbols:   biotin/lipoyl attachment domain-containing protein   chr3:20826852-20829007 FORWARD LENGTH=274                                                                                                                                                                                                                                           | 265  | 274 | 1.00E-116 | 103.4 | 79.2 | 87.5 |
| Rsa1.0_01453.1.g26957.t1 | gb EOA25608.1  hypothetical protein CARUB_v10018956mg [Capsella rubella]                                                                                                                                                                                                                                                                                                             | 473  | 462  | 0         | 97.7  | 82.5 | 89.0 | hypothetical protein CARUB_v10018956mg                       | gbpln | Capsella rubella     | AT3G56120.1   Symbols:   S-adenosyl-L-methionine-dependent methyltransferases superfamily protein   chr3:20823243-20826357 FORWARD LENGTH=468                                                                                                                                                                                                                     | 473  | 468 | 0         | 98.9  | 82.9 | 89.4 |
| Rsa1.0_01453.1.g26958.t1 | ref XP_002878068.1  prenylated rab acceptor family protein [Arabidopsis lyrata subsp. lyrata]   gi 297323906 gb EFH54327.1  prenylated rab acceptor family protein [Arabidopsis lyrata subsp. lyrata]   emb CAB39638.1  RNA-directed DNA polymerase-like protein [Arabidopsis thaliana]   gi 7267666 emb CAB78094.1  RNA-directed DNA polymerase-like protein [Arabidopsis thaliana] | 203  | 209  | 2.00E-92  | 103.0 | 86.7 | 91.6 | prenylated rab acceptor family protein                       | gbpln | Arabidopsis lyrata   | AT3G56110.2   Symbols:   PRA1.B1   prenylated RAB acceptor 1.B1   chr3:20822228-20822857 REVERSE LENGTH=209                                                                                                                                                                                                                                                       | 203  | 209 | 4.00E-94  | 103.0 | 86.2 | 91.6 |
| Rsa1.0_01453.1.g26959.t1 | emb CAB39638.1  RNA-directed DNA polymerase-like protein [Arabidopsis thaliana]   gi 7267666 emb CAB78094.1  RNA-directed DNA polymerase-like protein [Arabidopsis thaliana]                                                                                                                                                                                                         | 1866 | 1274 | 0         | 68.3  | 30.2 | 41.9 | RNA-directed DNA polymerase-like protein                     | gbpln | Arabidopsis thaliana | AT4G29090.1   Symbols:   Ribonuclease H-like superfamily protein   chr4:14333528-14335255 FORWARD LENGTH=575                                                                                                                                                                                                                                                      | 1866 | 575 | 2.00E-74  | 30.8  | 9.9  | 14.5 |
| Rsa1.0_01453.1.g26960.t1 | dbj BAJ34006.1  unnamed protein product [Thellungiella halophila]                                                                                                                                                                                                                                                                                                                    | 259  | 263  | 1.00E-133 | 101.5 | 93.4 | 96.1 | unnamed protein product                                      | ----  | ----                 | AT3G56090.1   Symbols:   ATF3, FER3   ferritin 3   chr3:20814350-20815984 REVERSE LENGTH=259                                                                                                                                                                                                                                                                      | 259  | 259 | 1.00E-118 | 100.0 | 88.0 | 92.7 |
| Rsa1.0_01453.1.g26961.t1 | gb EOA24828.1  hypothetical protein CARUB_v10018115mg [Capsella rubella]                                                                                                                                                                                                                                                                                                             | 176  | 175  | 5.00E-90  | 99.4  | 90.3 | 94.9 | hypothetical protein CARUB_v10018115mg                       | gbpln | Capsella rubella     | AT3G56070.2   Symbols:   ROC2   rotamase cyclophilin 2   chr3:20806987-20807517 REVERSE LENGTH=176                                                                                                                                                                                                                                                                | 176  | 176 | 4.00E-89  | 100.0 | 88.6 | 92.6 |
| Rsa1.0_01453.1.g26962.t2 | ref NP_567032.1  Glucose-methanol-choline (GMC) oxidoreductase family protein [Arabidopsis thaliana]   gi 15982755 gb AAL09718.1  AT3g56060/F18O21_20 [Arabidopsis thaliana]   gi 332645951 gb AEE79472.1  Glucose-methanol-choline (GMC) oxidoreductase family protein [Arabidopsis thaliana]                                                                                       | 567  | 577  | 0         | 101.8 | 84.5 | 91.7 | Glucose-methanol-choline (GMC) oxidoreductase family protein | gbpln | Arabidopsis thaliana | AT3G56060.1   Symbols:   Glucose-methanol-choline (GMC) oxidoreductase family protein   chr3:20803328-20805983 REVERSE LENGTH=577                                                                                                                                                                                                                                 | 567  | 577 | 0         | 101.8 | 84.5 | 91.7 |
| Rsa1.0_01453.1.g26963.t1 | gb EOA25148.1  hypothetical protein CARUB_v10018458mg [Capsella rubella]                                                                                                                                                                                                                                                                                                             | 185  | 581  | 1.00E-88  | 314.1 | 82.2 | 93.0 | hypothetical protein CARUB_v10018458mg                       | gbpln | Capsella rubella     | AT3G56060.1   Symbols:   Glucose-methanol-choline (GMC) oxidoreductase family protein   chr3:20803328-20805983 REVERSE LENGTH=577                                                                                                                                                                                                                                 | 185  | 577 | 7.00E-90  | 311.9 | 81.6 | 90.8 |
| Rsa1.0_01453.1.g26964.t2 | gb EOA21081.1  hypothetical protein CARUB_v10001419mg [Capsella rubella]                                                                                                                                                                                                                                                                                                             | 211  | 329  | 6.00E-20  | 155.9 | 29.9 | 39.8 | hypothetical protein CARUB_v10001419mg                       | gbpln | Capsella rubella     | AT4G17700.1   Symbols:   unknown protein; BEST Arabidopsis thaliana protein match is: unknown protein (TAIR:AT4G17990.1); Has 30201 Blast hits to 17322 proteins in 780 species: Archae - 12; Bacteria - 1396; Metazoa - 17338; Fungi - 3422; Plants - 5037; Viruses - 0; Other Eukaryotes - 2996 (source: NCBI BLINK).   chr4:9854322-9855227 FORWARD LENGTH=164 | 211  | 164 | 1.00E-16  | 77.7  | 22.3 | 30.8 |
| Rsa1.0_01454.1.g26965.t1 | dbj BAA97087.1  copia-type pol polyprotein-like [Arabidopsis thaliana]                                                                                                                                                                                                                                                                                                               | 171  | 1123 | 1.00E-66  | 656.7 | 70.8 | 80.1 | copia-type pol polyprotein-like                              | gbpln | Arabidopsis thaliana | # # # # # # #                                                                                                                                                                                                                                                                                                                                                     |      |     |           |       |      |      |
| Rsa1.0_01454.1.g26966.t1 | gb EOA33009.1  hypothetical protein CARUB_v10016339mg, partial [Capsella rubella]                                                                                                                                                                                                                                                                                                    | 98   | 188  | 9.00E-15  | 191.8 | 38.8 | 57.1 | hypothetical protein CARUB_v10016339mg, partial              | gbpln | Capsella rubella     | AT5G19270.1   Symbols:   unknown protein; BEST Arabidopsis thaliana protein match is: unknown protein (TAIR:AT4G03566.1); Has 30201 Blast hits to 17322 proteins in 780 species: Archae - 12; Bacteria - 1396; Metazoa - 17338; Fungi - 3422; Plants - 5037; Viruses - 0; Other Eukaryotes - 2996 (source: NCBI BLINK).   chr5:6485617-6487009 REVERSE LENGTH=365 | 98   | 365 | 1.00E-15  | 372.4 | 36.7 | 52.0 |
| Rsa1.0_01454.1.g26967.t2 | gb AAF79797.1 AC020646_20 T3E20.30 [Arabidopsis thaliana]                                                                                                                                                                                                                                                                                                                            | 1455 | 1397 | 0         | 96.0  | 45.2 | 59.8 | T3E20.30                                                     | gbpln | Arabidopsis thaliana | ATM00860.1   Symbols:   ORF158   DNA/RNA polymerases superfamily protein   chrM:235916-236392 FORWARD LENGTH=158                                                                                                                                                                                                                                                  | 1455 | 158 | 7.00E-38  | 10.9  | 5.1  | 6.4  |
| Rsa1.0_01454.1.g26968.t1 | gb ABD65038.1  nuclear RNA binding protein, putative [Brassica oleracea]                                                                                                                                                                                                                                                                                                             | 342  | 336  | 1.00E-121 | 98.2  | 86.0 | 87.4 | nuclear RNA binding protein, putative                        | gbpln | Brassica oleracea    | AT4G17520.1   Symbols:   Hyaluronan / mRNA binding family   chr4:9771496-9773313 FORWARD LENGTH=360                                                                                                                                                                                                                                                               | 342  | 360 | 8.00E-91  | 105.3 | 62.6 | 74.3 |
| Rsa1.0_01454.1.g26969.t1 | gb EOA14024.1  hypothetical protein CARUB_v10027156mg [Capsella rubella]                                                                                                                                                                                                                                                                                                             | 311  | 202  | 1.00E-111 | 65.0  | 62.7 | 63.7 | hypothetical protein CARUB_v10027156mg                       | gbpln | Capsella rubella     | AT5G47200.1   Symbols:   ATRABD2B, ATRAB1A, RAB1A   RAB GTPase homolog 1A   chr5:19167029-19168718 FORWARD LENGTH=202                                                                                                                                                                                                                                             | 311  | 202 | 1.00E-113 | 65.0  | 62.4 | 63.3 |
| Rsa1.0_01454.1.g26970.t1 | # # # # # # # #                                                                                                                                                                                                                                                                                                                                                                      | #    | #    | #         | #     | #    | -    | ----                                                         | ----  | ----                 | AT1G21720.1   Symbols:   PBC1   proteasome beta subunit C1   chr1:7626394-7628070 FORWARD LENGTH=204                                                                                                                                                                                                                                                              | 96   | 204 | 7.00E-11  | 212.5 | 29.2 | 33.3 |

|                           |                                                                                                                      |      |      |           |       |      |      |                                                                                |       |                      |                                                                                                                                                                                                                                                                                                                                                                                                                                                                                     |      |      |           |       |      |      |
|---------------------------|----------------------------------------------------------------------------------------------------------------------|------|------|-----------|-------|------|------|--------------------------------------------------------------------------------|-------|----------------------|-------------------------------------------------------------------------------------------------------------------------------------------------------------------------------------------------------------------------------------------------------------------------------------------------------------------------------------------------------------------------------------------------------------------------------------------------------------------------------------|------|------|-----------|-------|------|------|
| Rsa1.0_01454.1.g26971.t2  | gb AAD19773.1  putative retroelement pol polyprotein [Arabidopsis thaliana]                                          | 1278 | 1335 | 0         | 104.5 | 56.7 | 75.0 | putative retroelement pol polyprotein                                          | gbpln | Arabidopsis thaliana | AT4G23160.1   Symbols: CRK8   cysteine-rich RLK (RECEPTOR-like protein kinase) 8   chr4:12129485-12134086 FORWARD LENGTH=1262                                                                                                                                                                                                                                                                                                                                                       | 1278 | 1262 | 4.00E-74  | 98.7  | 13.3 | 20.8 |
| Rsa1.0_01454.1.g26972.t1  | gb ABD65040.1  vesicle-associated membrane protein, putative [Brassica oleracea]                                     | 218  | 228  | 1.00E-118 | 104.6 | 97.2 | 98.6 | vesicle-associated membrane protein, putative                                  | gbpln | Brassica oleracea    | AT5G47180.2   Symbols:   Plant VAMP (vesicle-associated membrane protein) family protein   chr5:19161384-19163265 REVERSE LENGTH=220                                                                                                                                                                                                                                                                                                                                                | 218  | 220  | 1.00E-119 | 100.9 | 95.0 | 97.2 |
| Rsa1.0_01454.1.g26973.t1  | gb ABD65041.1  SET-related protein [Brassica oleracea]                                                               | 243  | 283  | 5.00E-86  | 116.5 | 72.4 | 81.9 | SET-related protein                                                            | gbpln | Brassica oleracea    | AT5G47150.1   Symbols:   YDG/SRA domain-containing protein   chr5:19150807-19151793 FORWARD LENGTH=328                                                                                                                                                                                                                                                                                                                                                                              | 243  | 328  | 1.00E-85  | 135.0 | 42.8 | 56.0 |
| Rsa1.0_01454.1.g26974.t1  | gb ABD65041.1  SET-related protein [Brassica oleracea]                                                               | 285  | 283  | 1.00E-132 | 99.3  | 84.2 | 90.5 | SET-related protein                                                            | gbpln | Brassica oleracea    | AT5G47150.1   Symbols:   YDG/SRA domain-containing protein   chr5:19150807-19151793 FORWARD LENGTH=328                                                                                                                                                                                                                                                                                                                                                                              | 285  | 328  | 1.00E-87  | 115.1 | 59.3 | 75.1 |
| Rsa1.0_01454.1.g26975.t1  | db BAB01350.1  Mutator-like transposase [Arabidopsis thaliana]                                                       | 334  | 811  | 2.00E-64  | 242.8 | 42.8 | 63.2 | Mutator-like transposase                                                       | gbpln | Arabidopsis thaliana | #                                                                                                                                                                                                                                                                                                                                                                                                                                                                                   | #    | #    | #         | #     | #    | #    |
| Rsa1.0_01455.1.g26976.t1  | ref XP_002870473.1  predicted protein [Arabidopsis lyrata subsp. lyrata]                                             | 323  | 502  | 1.00E-175 | 155.4 | 92.3 | 95.4 | predicted protein                                                              | gbpln | Arabidopsis lyrata   | AT5G36220.1   Symbols: CYP81D1, CYP91A1   cytochrome p450 81d1   chr5:14253827-14256015 REVERSE LENGTH=502                                                                                                                                                                                                                                                                                                                                                                          | 323  | 502  | 1.00E-174 | 155.4 | 89.8 | 94.4 |
| Rsa1.0_01455.1.g26977.t2  | gb AAD20658.1  putative retroelement pol polyprotein [Arabidopsis thaliana]                                          | 381  | 1611 | 7.00E-14  | 422.8 | 12.1 | 21.3 | putative retroelement pol polyprotein                                          | gbpln | Arabidopsis thaliana | #                                                                                                                                                                                                                                                                                                                                                                                                                                                                                   | #    | #    | #         | #     | #    | #    |
| Rsa1.0_01455.1.g26978.t3  | #                                                                                                                    | #    | #    | #         | #     | #    | #    | -                                                                              | ----  | ----                 | #                                                                                                                                                                                                                                                                                                                                                                                                                                                                                   | #    | #    | #         | #     | #    | #    |
| Rsa1.0_01455.1.g26979.t1  | #                                                                                                                    | #    | #    | #         | #     | #    | #    | -                                                                              | ----  | ----                 | #                                                                                                                                                                                                                                                                                                                                                                                                                                                                                   | #    | #    | #         | #     | #    | #    |
| Rsa1.0_01455.1.g26980.t3  | gb AAC28189.1  contains similarity to Arabidopsis thaliana retrotransposon Athila (GB:X81801) [Arabidopsis thaliana] | 941  | 940  | 1.00E-89  | 99.9  | 17.6 | 23.1 | contains similarity to Arabidopsis thaliana retrotransposon Athila (GB:X81801) | gbpln | Arabidopsis thaliana | #                                                                                                                                                                                                                                                                                                                                                                                                                                                                                   | #    | #    | #         | #     | #    | #    |
| Rsa1.0_01455.1.g26981.t14 | gb AAD17398.1  putative non-LTR retroelement reverse transcriptase [Arabidopsis thaliana]                            | 1902 | 1225 | 0         | 64.4  | 24.9 | 35.3 | putative non-LTR retroelement reverse transcriptase                            | gbpln | Arabidopsis thaliana | AT5G36170.1   Symbols: HCF109, ATPRFB   high chlorophyll fluorescent 109   chr5:14236093-14237974 REVERSE LENGTH=456                                                                                                                                                                                                                                                                                                                                                                | 1902 | 456  | 0         | 24.0  | 20.1 | 21.4 |
| Rsa1.0_01455.1.g26982.t1  | #                                                                                                                    | #    | #    | #         | #     | #    | #    | -                                                                              | ----  | ----                 | #                                                                                                                                                                                                                                                                                                                                                                                                                                                                                   | #    | #    | #         | #     | #    | #    |
| Rsa1.0_01455.1.g26983.t1  | #                                                                                                                    | #    | #    | #         | #     | #    | #    | -                                                                              | ----  | ----                 | #                                                                                                                                                                                                                                                                                                                                                                                                                                                                                   | #    | #    | #         | #     | #    | #    |
| Rsa1.0_01455.1.g26984.t1  | ref NP_176667.1  uncharacterized protein [Arabidopsis thaliana]                                                      | 294  | 304  | 1.00E-106 | 103.4 | 66.0 | 80.6 | uncharacterized protein                                                        | gbpln | Arabidopsis thaliana | AT1G64870.1   Symbols:   unknown protein; BEST Arabidopsis thaliana protein match is: unknown protein (TAIR:AT3G45200.1); Has 99 Blast hits to 91 proteins in 10 species: Archae - 0; Bacteria - 0; Metazoa - 0; Fungi - 0; Plants - 99; Viruses - 0; Other Eukaryotes - 0 (source: NCBI BLINK).   chr1:24102917-24103831 FORWARD LENGTH=304                                                                                                                                        | 294  | 304  | 1.00E-109 | 103.4 | 66.0 | 80.6 |
| Rsa1.0_01456.1.g26985.t4  | ref NP_191500.2  non-specific serine/threonine protein kinase [Arabidopsis thaliana]                                 | 1283 | 1241 | 0         | 96.7  | 85.3 | 89.8 | non-specific serine/threonine protein kinase                                   | gbpln | Arabidopsis thaliana | AT3G59410.1   Symbols: GCN2   protein kinase family protein   chr3:21950575-21959151 FORWARD LENGTH=1241                                                                                                                                                                                                                                                                                                                                                                            | 1283 | 1241 | 0         | 96.7  | 85.3 | 89.8 |
| Rsa1.0_01456.1.g26986.t1  | ref XP_002878271.1  hypothetical protein ARALYDRAFT_486409 [Arabidopsis lyrata subsp. lyrata]                        | 886  | 894  | 0         | 100.9 | 89.1 | 93.0 | hypothetical protein ARALYDRAFT_486409                                         | gbpln | Arabidopsis lyrata   | AT3G59420.1   Symbols: ACR4, CR4   crinkly4   chr3:21959871-21962558 REVERSE LENGTH=895                                                                                                                                                                                                                                                                                                                                                                                             | 886  | 895  | 0         | 101.0 | 88.8 | 92.7 |
| Rsa1.0_01456.1.g26987.t1  | ref NP_191502.1  uncharacterized protein [Arabidopsis thaliana]                                                      | 413  | 451  | 1.00E-156 | 109.2 | 76.8 | 84.0 | uncharacterized protein                                                        | gbpln | Arabidopsis thaliana | AT3G59430.2   Symbols:   unknown protein; FUNCTIONS IN: molecular_function unknown; INVOLVED IN: biological_process unknown; LOCATED IN: cellular_component unknown; EXPRESSED IN: 21 plant structures; EXPRESSED DURING: 10 growth stages; Has 3533 Blast hits to 34131 proteins in 2444 species: Archae - 798; Bacteria - 22429; Metazoa - 974; Fungi - 991; Plants - 531; Viruses - 0; Other Eukaryotes - 9610 (source: NCBI BLINK).   chr3:21964484-21966497 REVERSE LENGTH=451 | 413  | 451  | 1.00E-158 | 109.2 | 76.8 | 84.0 |

|                          |                                                                                                                                                                                                                                                                                                                                                   |      |      |           |        |      |      |                                                         |       |                      |                                                                                                                           |      |      |           |        |      |      |
|--------------------------|---------------------------------------------------------------------------------------------------------------------------------------------------------------------------------------------------------------------------------------------------------------------------------------------------------------------------------------------------|------|------|-----------|--------|------|------|---------------------------------------------------------|-------|----------------------|---------------------------------------------------------------------------------------------------------------------------|------|------|-----------|--------|------|------|
| Rsa1.0_01456.1.g26988.t1 | gb EOA24726.1  hypothetical protein CARUB_v10018003mg, partial [Capsella rubella]                                                                                                                                                                                                                                                                 | 197  | 216  | 6.00E-99  | 109.6  | 92.9 | 94.9 | hypothetical protein CARUB_v10018003mg, partial         | gbpln | Capsella rubella     | AT3G59440.1   Symbols:   Calcium-binding EF-hand family protein   chr3:21970423-21971010 FORWARD LENGTH=195               | 197  | 195  | 8.00E-98  | 99.0   | 89.8 | 91.4 |
| Rsa1.0_01456.1.g26989.t1 | gb EOA24572.1  hypothetical protein CARUB_v10017836mg [Capsella rubella]                                                                                                                                                                                                                                                                          | 289  | 269  | 1.00E-127 | 93.1   | 79.9 | 85.1 | hypothetical protein CARUB_v10017836mg                  | gbpln | Capsella rubella     | AT3G59470.2   Symbols:   Far-red impaired responsive (FAR1) family protein   chr3:21979009-21980097 REVERSE LENGTH=251    | 289  | 251  | 1.00E-126 | 86.9   | 77.2 | 80.3 |
| Rsa1.0_01456.1.g26990.t1 | ref XP_002876506.1  pfkB-type carbohydrate kinase family protein [Arabidopsis lyrata subsp. lyrata] gi 297322344 gb EFH52765.1  pfkB-type carbohydrate kinase family protein [Arabidopsis lyrata subsp. lyrata]                                                                                                                                   | 326  | 326  | 1.00E-180 | 100.0  | 94.8 | 97.5 | pfkB-type carbohydrate kinase family protein            | gbpln | Arabidopsis lyrata   | AT3G59480.1   Symbols:   pfkB-like carbohydrate kinase family protein   chr3:21983103-21984440 FORWARD LENGTH=326         | 326  | 326  | 0         | 100.0  | 94.5 | 97.2 |
| Rsa1.0_01456.1.g26991.t1 | ref NP_175139.1  receptor like protein 6 [Arabidopsis thaliana] gi 12321005 gb AAG50623.1 AC083835_8 disease resistance protein, putative [Arabidopsis thaliana] gi 332193999 gb AEE32120.1  receptor like protein 6 [Arabidopsis thaliana]                                                                                                       | 950  | 994  | 0         | 104.6  | 65.3 | 76.8 | receptor like protein 6                                 | gbpln | Arabidopsis thaliana | AT1G45616.1   Symbols: AtRLP6, RLP6   receptor like protein 6   chr1:17183550-17186534 REVERSE LENGTH=994                 | 950  | 994  | 0         | 104.6  | 65.3 | 76.8 |
| Rsa1.0_01456.1.g26992.t2 | ref NP_175225.1  receptor like protein 7 [Arabidopsis thaliana] gi 12323625 gb AAG51781.1 AC079679_1 disease resistance protein, putative; 3954-7013 [Arabidopsis thaliana] gi 332194104 gb AEE32225.1  receptor like protein 7 [Arabidopsis thaliana]                                                                                            | 1105 | 1019 | 0         | 92.2   | 40.5 | 50.4 | receptor like protein 7                                 | gbpln | Arabidopsis thaliana | AT1G47890.1   Symbols: AtRLP7, RLP7   receptor like protein 7   chr1:17643976-17647035 FORWARD LENGTH=1019                | 1105 | 1019 | 0         | 92.2   | 40.5 | 50.4 |
| Rsa1.0_01456.1.g26993.t1 | gb EOA24578.1  hypothetical protein CARUB_v10017840mg [Capsella rubella]                                                                                                                                                                                                                                                                          | 272  | 269  | 1.00E-144 | 98.9   | 92.6 | 95.2 | hypothetical protein CARUB_v10017840mg                  | gbpln | Capsella rubella     | AT3G59500.1   Symbols:   Integral membrane HRF1 family protein   chr3:21987110-21988169 FORWARD LENGTH=269                | 272  | 269  | 2.33E-156 | 98.9   | 92.3 | 95.2 |
| Rsa1.0_01457.1.g26994.t1 | #                                                                                                                                                                                                                                                                                                                                                 | #    | #    | #         | #      | #    | #    | -                                                       | ----  | ----                 | #                                                                                                                         | #    | #    | #         | #      | #    | #    |
| Rsa1.0_01457.1.g26995.t1 | gb EOA39448.1  hypothetical protein CARUB_v10012624mg [Capsella rubella]                                                                                                                                                                                                                                                                          | 499  | 626  | 1.00E-135 | 125.5  | 52.1 | 54.5 | hypothetical protein CARUB_v10012624mg                  | gbpln | Capsella rubella     | AT1G48930.1   Symbols: AtGH9C1, GH9C1   glycosyl hydrolase 9C1   chr1:18101782-18104587 REVERSE LENGTH=627                | 499  | 627  | 1.00E-135 | 125.7  | 51.7 | 54.3 |
| Rsa1.0_01457.1.g26996.t1 | ref XP_002891463.1  hypothetical protein ARALYDRAFT_474037 [Arabidopsis lyrata subsp. lyrata] gi 297337305 gb EFH67722.1  hypothetical protein ARALYDRAFT_474037 [Arabidopsis lyrata subsp. lyrata]                                                                                                                                               | 476  | 550  | 2.00E-88  | 115.5  | 34.5 | 39.7 | hypothetical protein ARALYDRAFT_474037                  | gbpln | Arabidopsis lyrata   | AT3G18610.1   Symbols: PARLL1, ATNUC-L2, NUC-L2   nucleolin like 2   chr3:6404270-6407822 REVERSE LENGTH=636              | 476  | 636  | 3.00E-71  | 133.6  | 32.1 | 41.4 |
| Rsa1.0_01457.1.g26997.t1 | #                                                                                                                                                                                                                                                                                                                                                 | #    | #    | #         | #      | #    | #    | -                                                       | ----  | ----                 | #                                                                                                                         | #    | #    | #         | #      | #    | #    |
| Rsa1.0_01457.1.g26998.t1 | ref XP_002891461.1  flavin-containing monooxygenase family protein [Arabidopsis lyrata subsp. lyrata] gi 297337303 gb EFH67720.1  flavin-containing monooxygenase family protein [Arabidopsis lyrata subsp. lyrata]                                                                                                                               | 94   | 382  | 2.00E-39  | 406.4  | 80.9 | 89.4 | flavin-containing monooxygenase family protein          | gbpln | Arabidopsis lyrata   | AT1G48910.1   Symbols: YUC10   Flavin-containing monooxygenase family protein   chr1:18091681-18093774 FORWARD LENGTH=383 | 94   | 383  | 5.00E-41  | 407.4  | 79.8 | 87.2 |
| Rsa1.0_01458.1.g26999.t1 | #                                                                                                                                                                                                                                                                                                                                                 | #    | #    | #         | #      | #    | #    | -                                                       | ----  | ----                 | #                                                                                                                         | #    | #    | #         | #      | #    | #    |
| Rsa1.0_01458.1.g27000.t1 | dbj BAJ34241.1  unnamed protein product [Thellungiella halophila]                                                                                                                                                                                                                                                                                 | 798  | 800  | 0         | 100.3  | 80.5 | 85.8 | unnamed protein product                                 | ----  | ----                 | AT2G33050.1   Symbols: AtRLP26, RLP26   receptor like protein 26   chr2:14021870-14024272 FORWARD LENGTH=800              | 798  | 800  | 0         | 100.3  | 72.6 | 80.1 |
| Rsa1.0_01458.1.g27001.t1 | ref NP_180865.2  receptor like protein 27 [Arabidopsis thaliana] gi 330253685 gb AEC08779.1  receptor like protein 27 [Arabidopsis thaliana]                                                                                                                                                                                                      | 803  | 808  | 0         | 100.6  | 74.6 | 84.1 | receptor like protein 27                                | gbpln | Arabidopsis thaliana | AT2G33060.1   Symbols: AtRLP27, RLP27   receptor like protein 27   chr2:14025661-14028087 FORWARD LENGTH=808              | 803  | 808  | 0         | 100.6  | 74.6 | 84.1 |
| Rsa1.0_01458.1.g27002.t1 | #                                                                                                                                                                                                                                                                                                                                                 | #    | #    | #         | #      | #    | #    | -                                                       | ----  | ----                 | #                                                                                                                         | #    | #    | #         | #      | #    | #    |
| Rsa1.0_01458.1.g27003.t1 | gb AAF79835.1 AC026875_15 T6D22.19 [Arabidopsis thaliana]                                                                                                                                                                                                                                                                                         | 374  | 745  | 9.00E-45  | 199.2  | 24.3 | 33.4 | T6D22.19                                                | gbpln | Arabidopsis thaliana | #                                                                                                                         | #    | #    | #         | #      | #    | #    |
| Rsa1.0_01458.1.g27004.t1 | gb AAC04914.1  putative leucine-rich repeat disease resistance protein [Arabidopsis thaliana]                                                                                                                                                                                                                                                     | 811  | 800  | 0         | 98.6   | 64.4 | 75.7 | putative leucine-rich repeat disease resistance protein | gbpln | Arabidopsis thaliana | AT2G33060.1   Symbols: AtRLP27, RLP27   receptor like protein 27   chr2:14025661-14028087 FORWARD LENGTH=808              | 811  | 808  | 0         | 99.6   | 64.4 | 75.7 |
| Rsa1.0_01458.1.g27005.t1 | ref NP_180865.2  receptor like protein 27 [Arabidopsis thaliana] gi 330253685 gb AEC08779.1  receptor like protein 27 [Arabidopsis thaliana]                                                                                                                                                                                                      | 783  | 808  | 0         | 103.2  | 63.5 | 74.2 | receptor like protein 27                                | gbpln | Arabidopsis thaliana | AT2G33060.1   Symbols: AtRLP27, RLP27   receptor like protein 27   chr2:14025661-14028087 FORWARD LENGTH=808              | 783  | 808  | 0         | 103.2  | 63.5 | 74.2 |
| Rsa1.0_01458.1.g27006.t1 | ref NP_180669.1  cellulose synthase-like protein D1 [Arabidopsis thaliana] gi 75219583 sp C49323.1 CSLD1_ARAT H RecName: Full=Cellulose synthase-like protein D1; Short=AtCsd1 gi 2924781 gb AAC04910.1  putative cellulose synthase [Arabidopsis thaliana] gi 330253691 gb AEC08785.1  cellulose synthase-like protein D1 [Arabidopsis thaliana] | 95   | 1036 | 1.00E-42  | 1090.5 | 92.6 | 95.8 | cellulose synthase-like protein D1                      | gbpln | Arabidopsis thaliana | AT2G33100.1   Symbols: ATCSLD1, CSLD1   cellulose synthase-like D1   chr2:14036494-14040044 REVERSE LENGTH=1036           | 95   | 1036 | 2.00E-45  | 1090.5 | 92.6 | 95.8 |



|                          |                                                                                                                                                                                                                                                                                                                                                                                                                                                                                                                                                                                                                                                                                                                                                                                                                                                                                                                                                                                                                                                                                                 |      |      |           |       |      |      |                                        |       |                      |                                                                                                                                           |      |      |           |       |      |      |
|--------------------------|-------------------------------------------------------------------------------------------------------------------------------------------------------------------------------------------------------------------------------------------------------------------------------------------------------------------------------------------------------------------------------------------------------------------------------------------------------------------------------------------------------------------------------------------------------------------------------------------------------------------------------------------------------------------------------------------------------------------------------------------------------------------------------------------------------------------------------------------------------------------------------------------------------------------------------------------------------------------------------------------------------------------------------------------------------------------------------------------------|------|------|-----------|-------|------|------|----------------------------------------|-------|----------------------|-------------------------------------------------------------------------------------------------------------------------------------------|------|------|-----------|-------|------|------|
| Rsa1.0_01458.1.g27007.t1 | refNP_180865.2   receptor like protein 27 [Arabidopsis thaliana] gi 330253685 gb AEC08779.1   receptor like protein 27 [Arabidopsis thaliana]                                                                                                                                                                                                                                                                                                                                                                                                                                                                                                                                                                                                                                                                                                                                                                                                                                                                                                                                                   | 755  | 808  | 0         | 107.0 | 73.6 | 83.2 | receptor like protein 27               | gbpln | Arabidopsis thaliana | AT2G33060.1   Symbols: AtRLP27, RLP27   receptor like protein 27   chr2:14025661-14028087 FORWARD LENGTH=808                              | 755  | 808  | 0         | 107.0 | 73.6 | 83.2 |
| Rsa1.0_01458.1.g27008.t1 | refNP_180869.1   cellulose synthase-like protein D1 [Arabidopsis thaliana] gi 75219583 sp O49323.1 CSLD1_ARAT H RecName: Full=Cellulose synthase-like protein D1; Short=AtCsD1 gi 2924781 gb AAC04910.1   putative cellulose synthase [Arabidopsis thaliana] gi 330253691 gb AEC08785.1   cellulose synthase-like protein D1 [Arabidopsis thaliana]                                                                                                                                                                                                                                                                                                                                                                                                                                                                                                                                                                                                                                                                                                                                             | 1035 | 1036 | 0         | 100.1 | 93.4 | 96.8 | cellulose synthase-like protein D1     | gbpln | Arabidopsis thaliana | AT2G33100.1   Symbols: ATCSLD1, CSLD1   cellulose synthase-like D1   chr2:14036494-14040044 REVERSE LENGTH=1036                           | 1035 | 1036 | 0         | 100.1 | 93.4 | 96.8 |
| Rsa1.0_01458.1.g27009.t1 | gb EOA27866.1   hypothetical protein CARUB_v10024024mg [Capsella rubella]                                                                                                                                                                                                                                                                                                                                                                                                                                                                                                                                                                                                                                                                                                                                                                                                                                                                                                                                                                                                                       | 223  | 221  | 1.00E-125 | 99.1  | 97.3 | 97.8 | hypothetical protein CARUB_v10024024mg | gbpln | Capsella rubella     | AT2G33120.1   Symbols: SAR1, VAMP722, ATVAMP722   synaptobrevin-related protein 1   chr2:14043785-14045337 REVERSE LENGTH=221             | 223  | 221  | 1.00E-128 | 99.1  | 96.9 | 97.8 |
| Rsa1.0_01458.1.g27010.t1 | refNP_180873.1   3-ketoacyl-CoA thiolase 2 [Arabidopsis thaliana] gi 73919871 sp Q56WD9.2 THIK2_ARAT H RecName: Full=3-ketoacyl-CoA thiolase 2, peroxisomal; AltName: Full=Acetyl-CoA acyltransferase 2; AltName: Full=Beta-ketothiolase 2; AltName: Full=Peroxisomal 3-oxoacyl-CoA thiolase 2; AltName: Full=Peroxisome defective protein 1; Flags: Precursor gi 11993853 gb AAG42910.1 AF327529.1 putative 3-ketoacyl-CoA thiolase [Arabidopsis thaliana] gi 13194830 gb AAK15577.1 AF349530.1 putative 3-ketoacyl-CoA thiolase [Arabidopsis thaliana] gi 2924779 gb AAC04908.1   3-ketoacyl-CoA thiolase [Arabidopsis thaliana] gi 2981616 dbj BAA25248.1   3-ketoacyl-CoA thiolase [Arabidopsis thaliana] gi 2981618 dbj BAA25249.1   3-ketoacyl-CoA thiolase [Arabidopsis thaliana] gi 15450669 gb AAK36806.1   At2g33150/F25118.11 [Arabidopsis thaliana] gi 17380614 gb AAL36070.1   At2g33150/F25118.11 [Arabidopsis thaliana] gi 21593136 gb AAM85085.1   3-ketoacyl-CoA thiolase [Arabidopsis thaliana] gi 330253697 gb AEC08791.1   3-ketoacyl-CoA thiolase 2 [Arabidopsis thaliana] | 464  | 462  | 0         | 99.6  | 96.3 | 98.1 | 3-ketoacyl-CoA thiolase 2              | gbpln | Arabidopsis thaliana | AT2G33150.1   Symbols: PKT3, PED1, KAT2   peroxisomal 3-ketoacyl-CoA thiolase 3   chr2:14047814-14050983 REVERSE LENGTH=462               | 464  | 462  | 0         | 99.6  | 96.3 | 98.1 |
| Rsa1.0_01458.1.g27011.t2 | refXP_002889521.1   kinase family protein [Arabidopsis lyrata subsp. lyrata] gi 297335363 gb EFH65780.1   kinase family protein [Arabidopsis lyrata subsp. lyrata]                                                                                                                                                                                                                                                                                                                                                                                                                                                                                                                                                                                                                                                                                                                                                                                                                                                                                                                              | 843  | 1043 | 1.00E-172 | 123.7 | 34.6 | 38.2 | kinase family protein                  | gbpln | Arabidopsis lyrata   | AT1G04700.1   Symbols:   PB1 domain-containing protein tyrosine kinase   chr1:1316919-1320653 FORWARD LENGTH=1042                         | 843  | 1042 | 1.00E-173 | 123.6 | 34.6 | 38.0 |
| Rsa1.0_01458.1.g27012.t2 | gb EOA26453.1   hypothetical protein CARUB_v10022500mg [Capsella rubella]                                                                                                                                                                                                                                                                                                                                                                                                                                                                                                                                                                                                                                                                                                                                                                                                                                                                                                                                                                                                                       | 1885 | 1752 | 0         | 92.9  | 52.0 | 57.2 | hypothetical protein CARUB_v10022500mg | gbpln | Capsella rubella     | AT2G33240.1   Symbols: XID, ATXID   myosin XI D   chr2:14086942-14096914 REVERSE LENGTH=1770                                              | 1885 | 1770 | 0         | 93.9  | 53.3 | 57.6 |
| Rsa1.0_01458.1.g27013.t1 | gb ACT33452.1   SU(VAR)3-9-like protein 2 [Brassica rapa subsp. pekinensis]                                                                                                                                                                                                                                                                                                                                                                                                                                                                                                                                                                                                                                                                                                                                                                                                                                                                                                                                                                                                                     | 600  | 635  | 1.00E-156 | 105.8 | 45.0 | 55.7 | SU(VAR)3-9-like protein 2              | gbpln | Brassica rapa        | AT2G33290.1   Symbols: SUVH2, SDG3, ATSUVH2   SU(VAR)3-9 homolog 2   chr2:14110078-14112033 FORWARD LENGTH=651                            | 600  | 651  | 1.00E-149 | 108.5 | 46.8 | 60.7 |
| Rsa1.0_01458.1.g27014.t2 | dbj BAJ34122.1   unnamed protein product [Theilungiella halophila]                                                                                                                                                                                                                                                                                                                                                                                                                                                                                                                                                                                                                                                                                                                                                                                                                                                                                                                                                                                                                              | 61   | 249  | 1.00E-27  | 408.2 | 95.1 | 96.7 | unnamed protein product                | ----- | -----                | AT2G33102.2   Symbols: IAA13   auxin-induced protein 13   chr2:14114569-14115757 REVERSE LENGTH=247                                       | 61   | 247  | 2.00E-29  | 404.9 | 93.4 | 96.7 |
| Rsa1.0_01459.1.g27015.t1 | refXP_002893897.1   predicted protein [Arabidopsis lyrata subsp. lyrata] gi 297339739 gb EFH70156.1   predicted protein [Arabidopsis lyrata subsp. lyrata]                                                                                                                                                                                                                                                                                                                                                                                                                                                                                                                                                                                                                                                                                                                                                                                                                                                                                                                                      | 372  | 492  | 3.00E-34  | 132.3 | 21.8 | 33.3 | predicted protein                      | gbpln | Arabidopsis lyrata   | AT1G36510.1   Symbols:   Nucleic acid-binding proteins superfamily   chr1:13761926-13764265 FORWARD LENGTH=351                            | 372  | 351  | 8.00E-28  | 94.4  | 22.6 | 35.5 |
| Rsa1.0_01459.1.g27016.t1 | gb ABV89621.1   Lag1 longevity assurance-like 3 [Brassica rapa]                                                                                                                                                                                                                                                                                                                                                                                                                                                                                                                                                                                                                                                                                                                                                                                                                                                                                                                                                                                                                                 | 68   | 251  | 2.00E-26  | 369.1 | 88.2 | 92.6 | Lag1 longevity assurance-like 3        | gbpln | Brassica rapa        | AT3G25540.1   Symbols: LAG1   TRAM, LAG1 and CLN8 (TLC) lipid-sensing domain containing protein   chr3:9274752-9276261 FORWARD LENGTH=310 | 68   | 310  | 7.00E-25  | 455.9 | 83.8 | 88.2 |
| Rsa1.0_01459.1.g27017.t1 | gb EOA25599.1   hypothetical protein CARUB_v10018947mg [Capsella rubella]                                                                                                                                                                                                                                                                                                                                                                                                                                                                                                                                                                                                                                                                                                                                                                                                                                                                                                                                                                                                                       | 170  | 169  | 2.00E-55  | 99.4  | 71.8 | 81.8 | hypothetical protein CARUB_v10018947mg | gbpln | Capsella rubella     | AT2G04038.1   Symbols: AtbZIP48, bZIP48   basic leucine-zipper 48   chr2:1331919-1332419 FORWARD LENGTH=166                               | 170  | 166  | 7.00E-56  | 97.6  | 72.4 | 79.4 |



|                          |                                                                                                                                                                                                                                                                                                                                                                                                                                                                                                                                                               |     |     |           |       |      |      |                                                  |       |                      |                                                                                                                                                                                                                                                                                                                                                                                                                                                                                                                                          |     |     |           |       |      |      |
|--------------------------|---------------------------------------------------------------------------------------------------------------------------------------------------------------------------------------------------------------------------------------------------------------------------------------------------------------------------------------------------------------------------------------------------------------------------------------------------------------------------------------------------------------------------------------------------------------|-----|-----|-----------|-------|------|------|--------------------------------------------------|-------|----------------------|------------------------------------------------------------------------------------------------------------------------------------------------------------------------------------------------------------------------------------------------------------------------------------------------------------------------------------------------------------------------------------------------------------------------------------------------------------------------------------------------------------------------------------------|-----|-----|-----------|-------|------|------|
| Rsa1.0_01460.1.g27028.t1 | ref NP_567790.1  manganese tracking factor for mitochondrial SOD2 [Arabidopsis thaliana] gi 75306049 sp Q944H5.1 MTM1_ARATH RecName: Full=Mitochondrial carrier protein MTM1; AltName: Full=Manganese tracking factor for mitochondrial SOD2 gi 16226567 gb AAL16202.1 AF428433.1 AT4g27940/T13J8.50 [Arabidopsis thaliana] gi 21553497 gb AAM62590.1  unknown [Arabidopsis thaliana] gi 21928061 gb AAM78059.1  AT4g27940/T13J8.50 [Arabidopsis thaliana] gi 33266001 gb AEE85411.1  manganese tracking factor for mitochondrial SOD2 [Arabidopsis thaliana] | 415 | 413 | 0         | 99.5  | 80.7 | 86.5 | manganese tracking factor for mitochondrial SOD2 | gbpln | Arabidopsis thaliana | AT4G27940.1   Symbols: ATMTM1, MTM1   manganese tracking factor for mitochondrial SOD2   chr4:13904745-13907036 FORWARD LENGTH=413                                                                                                                                                                                                                                                                                                                                                                                                       | 415 | 413 | 0         | 99.5  | 80.7 | 86.5 |
| Rsa1.0_01460.1.g27029.t1 | ref XP_002869531.1  predicted protein [Arabidopsis lyrata subsp. lyrata] gi 297315367 gb EFH45790.1  predicted protein [Arabidopsis lyrata subsp. lyrata]                                                                                                                                                                                                                                                                                                                                                                                                     | 202 | 182 | 9.00E-79  | 90.1  | 73.8 | 79.2 | predicted protein                                | gbpln | Arabidopsis lyrata   | AT4G27920.1   Symbols: PYL10, RCAR4   PYR1-like 10   chr4:13901220-13901939 FORWARD LENGTH=183                                                                                                                                                                                                                                                                                                                                                                                                                                           | 202 | 183 | 3.00E-80  | 90.6  | 69.3 | 80.2 |
| Rsa1.0_01460.1.g27030.t1 | gb EOA18541.1  hypothetical protein CARUB_v10007095mg [Capsella rubella]                                                                                                                                                                                                                                                                                                                                                                                                                                                                                      | 291 | 301 | 1.00E-119 | 103.4 | 78.4 | 88.7 | hypothetical protein CARUB_v10007095mg           | gbpln | Capsella rubella     | AT4G27890.1   Symbols:   HSP20-like chaperones superfamily protein   chr4:13886033-13887220 FORWARD LENGTH=293                                                                                                                                                                                                                                                                                                                                                                                                                           | 291 | 293 | 1.00E-121 | 100.7 | 78.0 | 90.0 |
| Rsa1.0_01460.1.g27031.t1 | gb EOA17008.1  hypothetical protein CARUB_v10005243mg [Capsella rubella]                                                                                                                                                                                                                                                                                                                                                                                                                                                                                      | 322 | 324 | 1.00E-169 | 100.6 | 90.7 | 94.4 | hypothetical protein CARUB_v10005243mg           | gbpln | Capsella rubella     | AT4G27880.1   Symbols:   Protein with RING/U-box and TRAF-like domains   chr4:13883623-13884927 FORWARD LENGTH=327                                                                                                                                                                                                                                                                                                                                                                                                                       | 322 | 327 | 1.00E-170 | 101.6 | 91.6 | 94.7 |
| Rsa1.0_01460.1.g27032.t2 | ref XP_002869536.1  hypothetical protein ARALYDRAFT_328905 [Arabidopsis lyrata subsp. lyrata] gi 297315372 gb EFH45795.1  hypothetical protein ARALYDRAFT_328905 [Arabidopsis lyrata subsp. lyrata]                                                                                                                                                                                                                                                                                                                                                           | 863 | 777 | 0         | 90.0  | 60.6 | 70.2 | hypothetical protein ARALYDRAFT_328905           | gbpln | Arabidopsis lyrata   | AT4G27870.1   Symbols:   Vacuolar iron transporter (VIT) family protein   chr4:13878983-13882679 FORWARD LENGTH=761                                                                                                                                                                                                                                                                                                                                                                                                                      | 863 | 761 | 0         | 88.2  | 57.0 | 66.2 |
| Rsa1.0_01460.1.g27033.t1 | ref NP_001190855.1  vacuolar iron transporter-like protein [Arabidopsis thaliana] gi 33260002 gb AEE85402.1  vacuolar iron transporter-like protein [Arabidopsis thaliana]                                                                                                                                                                                                                                                                                                                                                                                    | 603 | 596 | 0         | 98.8  | 64.3 | 73.8 | vacuolar iron transporter-like protein           | gbpln | Arabidopsis thaliana | AT4G27860.2   Symbols:   vacuolar iron transporter (VIT) family protein   chr4:13873808-13876240 FORWARD LENGTH=596                                                                                                                                                                                                                                                                                                                                                                                                                      | 603 | 596 | 0         | 98.8  | 64.3 | 73.8 |
| Rsa1.0_01460.1.g27034.t1 | dbj BAA97156.1  unnamed protein product [Arabidopsis thaliana]                                                                                                                                                                                                                                                                                                                                                                                                                                                                                                | 234 | 329 | 2.00E-21  | 140.6 | 30.8 | 40.2 | unnamed protein product                          | gbpln | Arabidopsis thaliana | #                                                                                                                                                                                                                                                                                                                                                                                                                                                                                                                                        | #   | #   | #         | #     | #    | #    |
| Rsa1.0_01461.1.g27035.t1 | ref XP_002874843.1  hypothetical protein ARALYDRAFT_911810 [Arabidopsis lyrata subsp. lyrata] gi 297320690 gb EFH51102.1  hypothetical protein ARALYDRAFT_911810 [Arabidopsis lyrata subsp. lyrata]                                                                                                                                                                                                                                                                                                                                                           | 291 | 610 | 2.00E-96  | 209.6 | 60.5 | 70.1 | hypothetical protein ARALYDRAFT_911810           | gbpln | Arabidopsis lyrata   | AT4G05460.1   Symbols:   RNI-like superfamily protein   chr4:2761106-2762400 REVERSE LENGTH=302                                                                                                                                                                                                                                                                                                                                                                                                                                          | 291 | 302 | 3.00E-92  | 103.8 | 58.1 | 67.0 |
| Rsa1.0_01461.1.g27036.t1 | ref NP_192819.1  uncharacterized protein [Arabidopsis thaliana] gi 4539355 emb CAB40049.1  putative protein [Arabidopsis thaliana] gi 7267779 emb CAB81182.1  putative protein [Arabidopsis thaliana] gi 17380756 gb AAL36208.1  unknown protein [Arabidopsis thaliana] gi 21595220 gb AAM66082.1  unknown [Arabidopsis thaliana] gi 21689817 gb AAM67552.1  unknown protein [Arabidopsis thaliana] gi 332657531 gb AEE82931.1  uncharacterized protein AT4G10810 [Arabidopsis thaliana]                                                                      | 86  | 81  | 3.00E-29  | 94.2  | 82.6 | 86.0 | uncharacterized protein                          | gbpln | Arabidopsis thaliana | AT4G10810.1   Symbols:   unknown protein; FUNCTIONS IN: molecular function unknown; INVOLVED IN: biological process unknown; LOCATED IN: chloroplast; EXPRESSED IN: 23 plant structures; EXPRESSED DURING: 15 growth stages; BEST Arabidopsis thaliana protein match is: unknown protein (TAIR:AT4G24026.1); Has 1807 Blast hits to 1807 proteins in 277 species: Archae - 0; Bacteria - 0; Metazoa - 736; Fungi - 347; Plants - 385; Viruses - 0; Other Eukaryotes - 339 (source: NCBI BLINK).   chr4:6645986-6646231 REVERSE LENGTH=81 | 86  | 81  | 6.00E-32  | 94.2  | 82.6 | 86.0 |
| Rsa1.0_01461.1.g27037.t1 | ref NP_192817.1  UBX domain-containing protein [Arabidopsis thaliana] gi 7267777 emb CAB81180.1  predicted protein of unknown function [Arabidopsis thaliana] gi 332657529 gb AEE82929.1  UBX domain-containing protein [Arabidopsis thaliana]                                                                                                                                                                                                                                                                                                                | 468 | 480 | 0         | 102.6 | 84.8 | 88.5 | UBX domain-containing protein                    | gbpln | Arabidopsis thaliana | AT4G10790.1   Symbols:   UBX domain-containing protein   chr4:6640752-6643035 REVERSE LENGTH=480                                                                                                                                                                                                                                                                                                                                                                                                                                         | 468 | 480 | 0         | 102.6 | 84.8 | 88.5 |
| Rsa1.0_01461.1.g27038.t2 | #                                                                                                                                                                                                                                                                                                                                                                                                                                                                                                                                                             | #   | #   | #         | #     | #    | -    | ----                                             | ----  | ----                 | #                                                                                                                                                                                                                                                                                                                                                                                                                                                                                                                                        | #   | #   | #         | #     | #    |      |
| Rsa1.0_01461.1.g27039.t5 | ref XP_002874646.1  EMB1706 [Arabidopsis lyrata subsp. lyrata] gi 297320483 gb EFH50905.1  EMB1706 [Arabidopsis lyrata subsp. lyrata]                                                                                                                                                                                                                                                                                                                                                                                                                         | 449 | 689 | 3.00E-41  | 153.5 | 24.9 | 28.5 | EMB1706                                          | gbpln | Arabidopsis lyrata   | AT4G10760.1   Symbols: EMB1706, MTA   mRNAadenosine methylase   chr4:6619947-6623312 REVERSE LENGTH=685                                                                                                                                                                                                                                                                                                                                                                                                                                  | 449 | 685 | 7.00E-44  | 152.6 | 24.9 | 28.5 |

|                          |                                                                                                                                                                                                                                                                                                                                                                                                                                                                                                                                                                                                                                                                                                                                                                                                                               |      |      |           |       |      |      |                                                                                |       |                      |                                                                                                                                                                                                                                                                                                                                                  |      |      |          |       |      |      |
|--------------------------|-------------------------------------------------------------------------------------------------------------------------------------------------------------------------------------------------------------------------------------------------------------------------------------------------------------------------------------------------------------------------------------------------------------------------------------------------------------------------------------------------------------------------------------------------------------------------------------------------------------------------------------------------------------------------------------------------------------------------------------------------------------------------------------------------------------------------------|------|------|-----------|-------|------|------|--------------------------------------------------------------------------------|-------|----------------------|--------------------------------------------------------------------------------------------------------------------------------------------------------------------------------------------------------------------------------------------------------------------------------------------------------------------------------------------------|------|------|----------|-------|------|------|
| Rsa1.0_01461.1.g27040.t1 | ref NP_192809.1  FACT complex subunit SPT16 [Arabidopsis thaliana] gi 75220257 sp O82491.1 SPT16_ARATH RecName: Full=FACT complex subunit SPT16; AltName: Full=Facilitates chromatin transcription complex subunit SPT16 gi 3600033 gb AAC35521.1  contains similarity to the N terminal domain of the E1 protein (Pfam: E1_N_hmm, score: 12.36) [Arabidopsis thaliana] gi 7267769 emb CAB81172.1  putative transcriptional regulator [Arabidopsis thaliana] gi 225898771 dbj BAH30516.1  hypothetical protein [Arabidopsis thaliana] gi 332657519 gb AEE82919.1  FACT complex subunit SPT16 [Arabidopsis thaliana] ref XP_002867679.1  hydrolase, alpha/beta fold family protein [Arabidopsis lyrata subsp. lyrata] gi 297313515 gb EFH43938.1  hydrolase, alpha/beta fold family protein [Arabidopsis lyrata subsp. lyrata] | 1085 | 1074 | 0         | 99.0  | 87.4 | 93.3 | FACT complex subunit SPT16                                                     | gbpln | Arabidopsis thaliana | AT4G10710.1   Symbols: SPT16   global transcription factor C   chr4:6602226-6605450 REVERSE LENGTH=1074                                                                                                                                                                                                                                          | 1085 | 1074 | 0        | 99.0  | 87.4 | 93.3 |
| Rsa1.0_01461.1.g27041.t1 | ref XP_002867679.1  hydrolase, alpha/beta fold family protein [Arabidopsis lyrata subsp. lyrata] gi 297313515 gb EFH43938.1  hydrolase, alpha/beta fold family protein [Arabidopsis lyrata subsp. lyrata] ref NP_192802.2  protein IQ-domain 16 [Arabidopsis thaliana] gi 33589696 gb AAQ22614.1  At4g10640 [Arabidopsis thaliana] gi 110736628 dbj BAF00278.1  hypothetical protein [Arabidopsis thaliana] gi 332657512 gb AEE82912.1  protein IQ-domain 16 [Arabidopsis thaliana]                                                                                                                                                                                                                                                                                                                                           | 486  | 498  | 0         | 102.5 | 79.4 | 88.1 | hydrolase, alpha/beta fold family protein                                      | gbpln | Arabidopsis lyrata   | AT4G24140.1   Symbols:   alpha/beta-Hydrolases superfamily protein   chr4:12530032-12533664 REVERSE LENGTH=498                                                                                                                                                                                                                                   | 486  | 498  | 0        | 102.5 | 79.2 | 88.3 |
| Rsa1.0_01461.1.g27042.t1 | ref NP_192802.2  protein IQ-domain 16 [Arabidopsis thaliana] gi 33589696 gb AAQ22614.1  At4g10640 [Arabidopsis thaliana] gi 110736628 dbj BAF00278.1  hypothetical protein [Arabidopsis thaliana] gi 332657512 gb AEE82912.1  protein IQ-domain 16 [Arabidopsis thaliana]                                                                                                                                                                                                                                                                                                                                                                                                                                                                                                                                                     | 422  | 423  | 0         | 100.2 | 79.4 | 86.0 | protein IQ-domain 16                                                           | gbpln | Arabidopsis thaliana | AT4G10640.1   Symbols: IQD16   IQ-domain 16   chr4:6571999-6574312 FORWARD LENGTH=423                                                                                                                                                                                                                                                            | 422  | 423  | 0        | 100.2 | 79.4 | 86.0 |
| Rsa1.0_01461.1.g27043.t1 | #                                                                                                                                                                                                                                                                                                                                                                                                                                                                                                                                                                                                                                                                                                                                                                                                                             | #    | #    | #         | #     | #    | #    | -                                                                              | ----  | ----                 | #                                                                                                                                                                                                                                                                                                                                                | #    | #    | #        | #     | #    |      |
| Rsa1.0_01461.1.g27044.t1 | gb ABD64940.1  hypothetical protein 24.100018 [Brassica oleracea]                                                                                                                                                                                                                                                                                                                                                                                                                                                                                                                                                                                                                                                                                                                                                             | 292  | 380  | 3.00E-73  | 130.1 | 52.1 | 67.8 | hypothetical protein 24.100018                                                 | gbpln | Brassica oleracea    | AT3G47680.1   Symbols:   DNA binding   chr3:17577483-17578391 REVERSE LENGTH=302                                                                                                                                                                                                                                                                 | 292  | 302  | 9.00E-52 | 103.4 | 41.1 | 59.6 |
| Rsa1.0_01461.1.g27045.t2 | gb ACB59212.1  unknown protein [Brassica oleracea]                                                                                                                                                                                                                                                                                                                                                                                                                                                                                                                                                                                                                                                                                                                                                                            | 286  | 610  | 3.00E-56  | 213.3 | 48.6 | 58.4 | unknown protein                                                                | gbpln | Brassica oleracea    | AT2G13770.1   Symbols:   CONTAINS InterPro DOMAIN/s: Putative harbinger transposase-derived nuclease (InterPro:IPR006912); Has 451 Blast hits to 352 proteins in 33 species: Archae - 0; Bacteria - 0; Metazoa - 28; Fungi - 8; Plants - 388; Viruses - 0; Other Eukaryotes - 27 (source: NCBI BLINK).   chr2:5736603-5737847 FORWARD LENGTH=343 | 286  | 343  | 2.00E-17 | 119.9 | 16.1 | 19.6 |
| Rsa1.0_01462.1.g27046.t1 | pir  T00833 RNA-directed DNA polymerase homolog T13L16.7 - Arabidopsis thaliana (fragment)                                                                                                                                                                                                                                                                                                                                                                                                                                                                                                                                                                                                                                                                                                                                    | 790  | 1365 | 1.00E-126 | 172.8 | 28.9 | 39.4 | RNA-directed DNA polymerase homolog T13L16.7 - Arabidopsis thaliana (fragment) | ----  | ----                 | AT4G2090.1   Symbols:   Ribonuclease H-like superfamily protein   chr4:14333528-14335255 FORWARD LENGTH=575                                                                                                                                                                                                                                      | 790  | 575  | 7.00E-58 | 72.8  | 15.8 | 23.9 |
| Rsa1.0_01462.1.g27047.t1 | ref XP_002881569.1  hypothetical protein ARALYDRAFT_482825 [Arabidopsis lyrata subsp. lyrata] gi 297327408 gb EFH57828.1  hypothetical protein ARALYDRAFT_482825 [Arabidopsis lyrata subsp. lyrata]                                                                                                                                                                                                                                                                                                                                                                                                                                                                                                                                                                                                                           | 466  | 463  | 0         | 99.4  | 87.6 | 92.3 | hypothetical protein ARALYDRAFT_482825                                         | gbpln | Arabidopsis lyrata   | AT2G38170.1   Symbols: CAX1, ATCAX1, RC14   cation exchanger 1   chr2:15989429-15993178 REVERSE LENGTH=463                                                                                                                                                                                                                                       | 466  | 463  | 0        | 99.4  | 86.9 | 92.5 |
| Rsa1.0_01462.1.g27048.t2 | #                                                                                                                                                                                                                                                                                                                                                                                                                                                                                                                                                                                                                                                                                                                                                                                                                             | #    | #    | #         | #     | #    | #    | -                                                                              | ----  | ----                 | #                                                                                                                                                                                                                                                                                                                                                | #    | #    | #        | #     | #    |      |
| Rsa1.0_01462.1.g27049.t1 | ref XP_002881568.1  hypothetical protein ARALYDRAFT_903014 [Arabidopsis lyrata subsp. lyrata] gi 297327407 gb EFH57827.1  hypothetical protein ARALYDRAFT_903014 [Arabidopsis lyrata subsp. lyrata]                                                                                                                                                                                                                                                                                                                                                                                                                                                                                                                                                                                                                           | 396  | 404  | 0         | 102.0 | 82.1 | 91.4 | hypothetical protein ARALYDRAFT_903014                                         | gbpln | Arabidopsis lyrata   | AT2G38152.1   Symbols:   alpha 1,4-glycosyltransferase family protein   chr2:15984062-15985278 REVERSE LENGTH=380                                                                                                                                                                                                                                | 396  | 380  | 0        | 96.0  | 79.3 | 87.1 |
| Rsa1.0_01462.1.g27050.t1 | ref XP_002881567.1  predicted protein [Arabidopsis lyrata subsp. lyrata] gi 297327406 gb EFH57826.1  predicted protein [Arabidopsis lyrata subsp. lyrata]                                                                                                                                                                                                                                                                                                                                                                                                                                                                                                                                                                                                                                                                     | 404  | 750  | 0         | 185.6 | 79.0 | 86.6 | predicted protein                                                              | gbpln | Arabidopsis lyrata   | AT2G38150.1   Symbols:   alpha 1,4-glycosyltransferase family protein   chr2:15981700-15982917 REVERSE LENGTH=405                                                                                                                                                                                                                                | 404  | 405  | 0        | 100.2 | 79.0 | 88.4 |
| Rsa1.0_01462.1.g27051.t1 | gb EOA29429.1  hypothetical protein CARUB_v10025723mg [Capsella rubella]                                                                                                                                                                                                                                                                                                                                                                                                                                                                                                                                                                                                                                                                                                                                                      | 119  | 118  | 1.00E-35  | 99.2  | 85.7 | 90.8 | hypothetical protein CARUB_v10025723mg                                         | gbpln | Capsella rubella     | AT2G38140.1   Symbols: PSRP4   plastid-specific ribosomal protein 4   chr2:15980948-15981459 FORWARD LENGTH=118                                                                                                                                                                                                                                  | 119  | 118  | 1.00E-36 | 99.2  | 84.0 | 89.9 |

|                          |                                                                                                                                                                                                                                                                                                                                                                                                                                                                 |      |      |           |       |      |      |                                                      |       |                      |                                                                                                                                                                                                                                                                                                                                                                   |      |      |           |       |      |      |
|--------------------------|-----------------------------------------------------------------------------------------------------------------------------------------------------------------------------------------------------------------------------------------------------------------------------------------------------------------------------------------------------------------------------------------------------------------------------------------------------------------|------|------|-----------|-------|------|------|------------------------------------------------------|-------|----------------------|-------------------------------------------------------------------------------------------------------------------------------------------------------------------------------------------------------------------------------------------------------------------------------------------------------------------------------------------------------------------|------|------|-----------|-------|------|------|
| Rsa1.0_01462.1.g27052.t2 | refXP_002881566.1  hypothetical protein ARALYDRAFT_321517 [Arabidopsis lyrata subsp. lyrata] gi 297327405 gb EFH57825.1  hypothetical protein ARALYDRAFT_321517 [Arabidopsis lyrata subsp. lyrata]                                                                                                                                                                                                                                                              | 200  | 190  | 3.00E-90  | 95.0  | 81.5 | 88.0 | hypothetical protein ARALYDRAFT_321517               | gbpln | Arabidopsis lyrata   | AT2G38130.2   Symbols: ATMAK3   Acyl-CoA N-acyltransferases (NAT) superfamily protein   chr2:15978639-15980145 REVERSE LENGTH=190                                                                                                                                                                                                                                 | 200  | 190  | 3.00E-88  | 95.0  | 77.5 | 84.5 |
| Rsa1.0_01462.1.g27053.t1 | gb ACZ67478.1  auxin resistant 1 protein [Brassica rapa subsp. oleifera]                                                                                                                                                                                                                                                                                                                                                                                        | 493  | 493  | 0         | 100.0 | 97.6 | 98.6 | auxin resistant 1 protein                            | gbpln | Brassica rapa        | AT2G38120.1   Symbols: AUX1, WAV5, PIR1, MAP1   Transmembrane amino acid transporter family protein   chr2:15973493-15976792 FORWARD LENGTH=485                                                                                                                                                                                                                   | 493  | 485  | 0         | 98.4  | 93.3 | 95.7 |
| Rsa1.0_01463.1.g27054.t1 | refNP_177373.1  trypsin inhibitor (Kunitz) domain-containing protein [Arabidopsis thaliana] gi 12323668 gb AAG51801.1 AC067754.17 drought induced protein, putative: 79797-80444 [Arabidopsis thaliana] gi 21536624 gb AAM60956.1  drought induced protein, putative [Arabidopsis thaliana] gi 94442485 gb ABF19030.1  At1g72290 [Arabidopsis thaliana] gi 332197178 gb AEE35299.1  trypsin inhibitor (Kunitz) domain-containing protein [Arabidopsis thaliana] | 209  | 215  | 6.00E-38  | 102.9 | 46.9 | 61.7 | trypsin inhibitor (Kunitz) domain-containing protein | gbpln | Arabidopsis thaliana | AT1G72290.1   Symbols:   Kunitz family trypsin and protease inhibitor protein   chr1:27215852-27216499 FORWARD LENGTH=215                                                                                                                                                                                                                                         | 209  | 215  | 2.00E-40  | 102.9 | 46.9 | 61.7 |
| Rsa1.0_01463.1.g27055.t1 | dbj BAM14713.1  water soluble chlorophyll protein [Brassica oleracea var. gemmifera]                                                                                                                                                                                                                                                                                                                                                                            | 221  | 218  | 2.00E-41  | 98.6  | 50.7 | 62.4 | water soluble chlorophyll protein                    | gbpln | Brassica oleracea    | AT1G72290.1   Symbols:   Kunitz family trypsin and protease inhibitor protein   chr1:27215852-27216499 FORWARD LENGTH=215                                                                                                                                                                                                                                         | 221  | 215  | 2.00E-37  | 97.3  | 43.9 | 57.5 |
| Rsa1.0_01463.1.g27056.t1 | #                                                                                                                                                                                                                                                                                                                                                                                                                                                               | #    | #    | #         | #     | #    | -    | -                                                    | ----  | ----                 | #                                                                                                                                                                                                                                                                                                                                                                 | #    | #    | #         | #     | #    | #    |
| Rsa1.0_01463.1.g27057.t1 | #                                                                                                                                                                                                                                                                                                                                                                                                                                                               | #    | #    | #         | #     | #    | -    | -                                                    | ----  | ----                 | #                                                                                                                                                                                                                                                                                                                                                                 | #    | #    | #         | #     | #    | #    |
| Rsa1.0_01463.1.g27058.t1 | refXP_002888867.1  hypothetical protein ARALYDRAFT_476358 [Arabidopsis lyrata subsp. lyrata] gi 297334708 gb EFH65126.1  hypothetical protein ARALYDRAFT_476358 [Arabidopsis lyrata subsp. lyrata]                                                                                                                                                                                                                                                              | 1087 | 1096 | 0         | 100.8 | 84.4 | 90.2 | hypothetical protein ARALYDRAFT_476358               | gbpln | Arabidopsis lyrata   | AT1G72300.1   Symbols:   Leucine-rich receptor-like protein kinase family protein   chr1:27217679-27220966 REVERSE LENGTH=1095                                                                                                                                                                                                                                    | 1087 | 1095 | 0         | 100.7 | 83.7 | 90.2 |
| Rsa1.0_01463.1.g27059.t1 | refXP_002887428.1  hypothetical protein ARALYDRAFT_476359 [Arabidopsis lyrata subsp. lyrata] gi 297332689 gb EFH63687.1  hypothetical protein ARALYDRAFT_476359 [Arabidopsis lyrata subsp. lyrata]                                                                                                                                                                                                                                                              | 320  | 324  | 1.00E-123 | 101.3 | 77.5 | 85.0 | hypothetical protein ARALYDRAFT_476359               | gbpln | Arabidopsis lyrata   | AT1G72310.1   Symbols: ATL3   RING/U-box superfamily protein   chr1:27226405-27227379 FORWARD LENGTH=324                                                                                                                                                                                                                                                          | 320  | 324  | 1.00E-121 | 101.3 | 75.6 | 84.7 |
| Rsa1.0_01464.1.g27060.t1 | refXP_002875819.1  predicted protein [Arabidopsis lyrata subsp. lyrata] gi 297321657 gb EFH52078.1  predicted protein [Arabidopsis lyrata subsp. lyrata]                                                                                                                                                                                                                                                                                                        | 426  | 457  | 2.00E-75  | 107.3 | 43.0 | 55.4 | predicted protein                                    | gbpln | Arabidopsis lyrata   | AT4G12100.1   Symbols:   Cullin family protein   chr4:7246453-7248127 REVERSE LENGTH=434                                                                                                                                                                                                                                                                          | 426  | 434  | 1.00E-46  | 101.9 | 32.6 | 45.5 |
| Rsa1.0_01464.1.g27061.t1 | gb AEX31284.1  phytoene synthase [Brassica rapa]                                                                                                                                                                                                                                                                                                                                                                                                                | 404  | 414  | 0         | 102.5 | 90.6 | 95.0 | phytoene synthase                                    | gbpln | Brassica rapa        | AT5G17230.2   Symbols: PSY   PHYTOENE SYNTHASE   chr5:5659839-5662087 REVERSE LENGTH=422                                                                                                                                                                                                                                                                          | 404  | 422  | 0         | 104.5 | 86.4 | 91.8 |
| Rsa1.0_01464.1.g27062.t1 | gb EOA20368.1  hypothetical protein CARUB_v10000682mg [Capsella rubella]                                                                                                                                                                                                                                                                                                                                                                                        | 718  | 533  | 4.00E-84  | 74.2  | 29.8 | 34.3 | hypothetical protein CARUB_v10000682mg               | gbpln | Capsella rubella     | AT5G17160.1   Symbols:   unknown protein; BEST Arabidopsis thaliana protein match is: unknown protein (TAIR:AT3G03130.1). Has 14330 Blast hits to 10381 proteins in 896 species: Archae - 94; Bacteria - 2881; Metazoa - 4019; Fungi - 1576; Plants - 515; Viruses - 110; Other Eukaryotes - 5135 (source: NCBI BLINK).   chr5:5639843-5642427 REVERSE LENGTH=569 | 718  | 569  | 4.00E-84  | 79.2  | 32.3 | 37.6 |
| Rsa1.0_01464.1.g27063.t1 | gb EOA19671.1  hypothetical protein CARUB_v10003324mg [Capsella rubella]                                                                                                                                                                                                                                                                                                                                                                                        | 400  | 232  | 9.00E-46  | 58.0  | 27.0 | 36.0 | hypothetical protein CARUB_v10003324mg               | gbpln | Capsella rubella     | AT5G17090.1   Symbols:   Cystatin/monellin superfamily protein   chr5:5621604-5622475 REVERSE LENGTH=230                                                                                                                                                                                                                                                          | 400  | 230  | 1.00E-42  | 57.5  | 22.3 | 27.5 |
| Rsa1.0_01464.1.g27064.t1 | gb EOA19671.1  hypothetical protein CARUB_v10003324mg [Capsella rubella]                                                                                                                                                                                                                                                                                                                                                                                        | 223  | 232  | 1.00E-52  | 104.0 | 52.5 | 67.7 | hypothetical protein CARUB_v10003324mg               | gbpln | Capsella rubella     | AT5G17120.1   Symbols:   Cystatin/monellin superfamily protein   chr5:5628529-5629324 REVERSE LENGTH=207                                                                                                                                                                                                                                                          | 223  | 207  | 3.00E-46  | 92.8  | 41.3 | 51.6 |
| Rsa1.0_01464.1.g27065.t1 | gb EOA19671.1  hypothetical protein CARUB_v10003324mg [Capsella rubella]                                                                                                                                                                                                                                                                                                                                                                                        | 304  | 232  | 1.00E-50  | 76.3  | 37.2 | 47.4 | hypothetical protein CARUB_v10003324mg               | gbpln | Capsella rubella     | AT5G17120.1   Symbols:   Cystatin/monellin superfamily protein   chr5:5628529-5629324 REVERSE LENGTH=207                                                                                                                                                                                                                                                          | 304  | 207  | 3.00E-43  | 68.1  | 26.6 | 35.9 |
| Rsa1.0_01464.1.g27066.t1 | gb EOA19671.1  hypothetical protein CARUB_v10003324mg [Capsella rubella]                                                                                                                                                                                                                                                                                                                                                                                        | 149  | 232  | 6.00E-33  | 155.7 | 49.0 | 59.1 | hypothetical protein CARUB_v10003324mg               | gbpln | Capsella rubella     | AT5G17090.1   Symbols:   Cystatin/monellin superfamily protein   chr5:5621604-5622475 REVERSE LENGTH=230                                                                                                                                                                                                                                                          | 149  | 230  | 5.00E-31  | 154.4 | 45.6 | 57.0 |
| Rsa1.0_01464.1.g27067.t1 | #                                                                                                                                                                                                                                                                                                                                                                                                                                                               | #    | #    | #         | #     | #    | -    | -                                                    | ----  | ----                 | #                                                                                                                                                                                                                                                                                                                                                                 | #    | #    | #         | #     | #    | #    |
| Rsa1.0_01464.1.g27068.t1 | gb EOA19671.1  hypothetical protein CARUB_v10003324mg [Capsella rubella]                                                                                                                                                                                                                                                                                                                                                                                        | 97   | 232  | 1.00E-26  | 239.2 | 58.8 | 69.1 | hypothetical protein CARUB_v10003324mg               | gbpln | Capsella rubella     | AT5G17150.1   Symbols:   Cystatin/monellin superfamily protein   chr5:5638801-5639592 REVERSE LENGTH=202                                                                                                                                                                                                                                                          | 97   | 202  | 2.00E-25  | 208.2 | 54.6 | 69.1 |
| Rsa1.0_01464.1.g27069.t1 | #                                                                                                                                                                                                                                                                                                                                                                                                                                                               | #    | #    | #         | #     | #    | -    | -                                                    | ----  | ----                 | #                                                                                                                                                                                                                                                                                                                                                                 | #    | #    | #         | #     | #    | #    |

| Rsa1.0_01464.1.g27070.t1  | #                                                                                                                                                                                                                                                                                                                                                                                                                                                                      | #    | #    | #         | #     | #     | #     | -                                                         | ----  | ----                 | #                                                                                                                                            | #    | #    | #         | #      | #    |      |
|---------------------------|------------------------------------------------------------------------------------------------------------------------------------------------------------------------------------------------------------------------------------------------------------------------------------------------------------------------------------------------------------------------------------------------------------------------------------------------------------------------|------|------|-----------|-------|-------|-------|-----------------------------------------------------------|-------|----------------------|----------------------------------------------------------------------------------------------------------------------------------------------|------|------|-----------|--------|------|------|
| Rsa1.0_01464.1.g27071.t1  | gb EOA19671.1  hypothetical protein CARUB_v10003324mg [Capsella rubella]                                                                                                                                                                                                                                                                                                                                                                                               | 244  | 232  | 6.00E-38  | 95.1  | 43.9  | 56.1  | hypothetical protein CARUB_v10003324mg                    | gbpln | Capsella rubella     | AT5G17090.1   Symbols:   Cystatin/monellin superfamily protein   chr5:5621604-5622475 REVERSE LENGTH=230                                     | 244  | 230  | 8.00E-33  | 94.3   | 29.9 | 37.3 |
| Rsa1.0_01465.1.g27072.t1  | dbj BAA12711.1  VM23 [Raphanus sativus]                                                                                                                                                                                                                                                                                                                                                                                                                                | 253  | 253  | 1.00E-137 | 100.0 | 100.0 | 100.0 | VM23                                                      | gbpln | Raphanus sativus     | AT3G26520.1   Symbols: TIP2, SITIP, GAMMA-TIP2, TIP1;2   tonoplast intrinsic protein 2   chr3:9722770-9723703 REVERSE LENGTH=253             | 253  | 253  | 1.00E-128 | 100.0  | 90.9 | 94.9 |
| Rsa1.0_01465.1.g27073.t2  | dbj BAF00918.1  putative reverse transcriptase [Arabidopsis thaliana]                                                                                                                                                                                                                                                                                                                                                                                                  | 931  | 910  | 1.00E-133 | 97.7  | 27.4  | 40.0  | putative reverse transcriptase                            | gbpln | Arabidopsis thaliana | AT1G43760.1   Symbols:   DNase I-like superfamily protein   chr1:16528880-16531065 REVERSE LENGTH=626                                        | 931  | 626  | 5.00E-63  | 67.2   | 14.2 | 23.0 |
| Rsa1.0_01465.1.g27074.t1  | #                                                                                                                                                                                                                                                                                                                                                                                                                                                                      | #    | #    | #         | #     | #     | #     | -                                                         | ----  | ----                 | #                                                                                                                                            | #    | #    | #         | #      | #    |      |
| Rsa1.0_01465.1.g27075.t1  | gb EOA25649.1  hypothetical protein CARUB_v10018998mg [Capsella rubella]                                                                                                                                                                                                                                                                                                                                                                                               | 185  | 194  | 3.00E-67  | 104.9 | 88.1  | 93.0  | hypothetical protein CARUB_v10018998mg                    | gbpln | Capsella rubella     | AT3G26510.4   Symbols:   Octicosapeptide/Phox/Bem1p family protein   chr3:9711886-9712588 REVERSE LENGTH=196                                 | 185  | 196  | 8.00E-67  | 105.9  | 87.0 | 90.3 |
| Rsa1.0_01465.1.g27076.t1  | ref NP_189280.1  Phototropic-responsive NPH3 family protein [Arabidopsis thaliana]   gi 75273418 sp Q9LIM6.1 y3649_ARATH RecName: Full=BTB/POZ domain-containing protein At3g26490   gi 9294308 dbj BAB02210.1  unnamed protein product [Arabidopsis thaliana]   gi 332643645 gb AEE77168.1  Phototropic-responsive NPH3 family protein [Arabidopsis thaliana]   ref NP_001154500.1  TTF-type zinc finger protein with HAT dimerisation domain [Arabidopsis thaliana]  | 568  | 588  | 0         | 103.5 | 84.5  | 91.7  | Phototropic-responsive NPH3 family protein                | gbpln | Arabidopsis thaliana | AT3G26490.1   Symbols:   Phototropic-responsive NPH3 family protein   chr3:9704142-9706161 FORWARD LENGTH=588                                | 568  | 588  | 0         | 103.5  | 84.5 | 91.7 |
| Rsa1.0_01465.1.g27077.t1  | gi 330259920 gb AEC06014.1  TTF-type zinc finger protein with HAT dimerisation domain [Arabidopsis thaliana]                                                                                                                                                                                                                                                                                                                                                           | 301  | 564  | 1.00E-118 | 187.4 | 71.1  | 83.1  | TTF-type zinc finger protein with HAT dimerisation domain | gbpln | Arabidopsis thaliana | AT2G06541.2   Symbols:   TTF-type zinc finger protein with HAT dimerisation domain   chr2:2598222-2600326 REVERSE LENGTH=564                 | 301  | 564  | 1.00E-121 | 187.4  | 71.1 | 83.1 |
| Rsa1.0_01465.1.g27078.t1  | gb EOA33131.1  hypothetical protein CARUB_v10016470mg [Capsella rubella]                                                                                                                                                                                                                                                                                                                                                                                               | 289  | 723  | 1.00E-100 | 250.2 | 66.8  | 82.7  | hypothetical protein CARUB_v10016470mg                    | gbpln | Capsella rubella     | AT2G06541.2   Symbols:   TTF-type zinc finger protein with HAT dimerisation domain   chr2:2598222-2600326 REVERSE LENGTH=564                 | 289  | 564  | 4.00E-92  | 195.2  | 60.6 | 77.9 |
| Rsa1.0_01466.1.g27079.t1  | gb EOA22636.1  hypothetical protein CARUB_v10003306mg [Capsella rubella]                                                                                                                                                                                                                                                                                                                                                                                               | 670  | 664  | 0         | 99.1  | 81.5  | 90.9  | hypothetical protein CARUB_v10003306mg                    | gbpln | Capsella rubella     | AT5G04940.2   Symbols: SUVH1   SU(VAR)3-9 homolog 1   chr5:1454616-1456628 REVERSE LENGTH=670                                                | 670  | 670  | 0         | 100.0  | 80.9 | 88.7 |
| Rsa1.0_01466.1.g27080.t1  | ref NP_568146.1  phospholipid-transporting ATPase 1 [Arabidopsis thaliana]   gi 12229646 sp P98204.1 ALA1_ARATH RecName: Full=Phospholipid-transporting ATPase 1; Short=AtALA1; AltName: Full=Aminophospholipid flippase 1   gi 9909198 gb AAG01899.1 AF175769_1 aminophospholipid flippase [Arabidopsis thaliana]   gi 10178032 dbj BAB11515.1  ATPase [Arabidopsis thaliana]   gi 332003422 gb AED90805.1  phospholipid-transporting ATPase 1 [Arabidopsis thaliana] | 1150 | 1158 | 0         | 100.7 | 92.7  | 95.7  | phospholipid-transporting ATPase 1                        | gbpln | Arabidopsis thaliana | AT5G04930.1   Symbols: ALA1   aminophospholipid ATPase 1   chr5:1445509-1449568 FORWARD LENGTH=1158                                          | 1150 | 1158 | 0         | 100.7  | 92.7 | 95.7 |
| Rsa1.0_01466.1.g27081.t10 | gb AAF02824.1 AC009400_20 hypothetical protein [Arabidopsis thaliana]                                                                                                                                                                                                                                                                                                                                                                                                  | 96   | 634  | 3.00E-12  | 660.4 | 50.0  | 55.2  | hypothetical protein                                      | gbpln | Arabidopsis thaliana | AT3G10180.1   Symbols:   P-loop containing nucleoside triphosphate hydrolases superfamily protein   chr3:3146393-3154644 REVERSE LENGTH=1273 | 96   | 1273 | 5.00E-15  | 1326.0 | 50.0 | 55.2 |
| Rsa1.0_01466.1.g27082.t1  | ref XP_002871120.1  hypothetical protein ARALYDRAFT_487275 [Arabidopsis lyrata subsp. lyrata]   gi 297316957 gb EFH47379.1  hypothetical protein ARALYDRAFT_487275 [Arabidopsis lyrata subsp. lyrata]   ref XP_002871119.1  glycosyl hydrolase family 3 protein [Arabidopsis lyrata subsp. lyrata]                                                                                                                                                                     | 371  | 366  | 1.00E-110 | 98.7  | 63.3  | 72.8  | hypothetical protein ARALYDRAFT_487275                    | gbpln | Arabidopsis lyrata   | AT5G04890.1   Symbols: RTM2   HSP20-like chaperones superfamily protein   chr5:1427217-1428390 FORWARD LENGTH=366                            | 371  | 366  | 7.00E-91  | 98.7   | 59.8 | 69.3 |
| Rsa1.0_01466.1.g27083.t1  | ref XP_002871119.1  glycosyl hydrolase family 3 protein [Arabidopsis lyrata subsp. lyrata]   gi 297316956 gb EFH47378.1  glycosyl hydrolase family 3 protein [Arabidopsis lyrata subsp. lyrata]                                                                                                                                                                                                                                                                        | 669  | 668  | 0         | 99.9  | 89.8  | 95.2  | glycosyl hydrolase family 3 protein                       | gbpln | Arabidopsis lyrata   | AT5G04885.1   Symbols:   Glycosyl hydrolase family protein   chr5:1423369-1426628 FORWARD LENGTH=665                                         | 669  | 665  | 0         | 99.4   | 87.6 | 94.3 |
| Rsa1.0_01466.1.g27084.t1  | gb ABE73345.1  putative calcium-dependent protein kinase 2 [Isatis tinctoria]   gi 92110524 gb ABE73346.1  putative calcium-dependent protein kinase 2 [Isatis tinctoria]                                                                                                                                                                                                                                                                                              | 603  | 625  | 0         | 103.6 | 91.5  | 94.7  | putative calcium-dependent protein kinase 2               | gbpln | Isatis tinctoria     | AT5G04870.1   Symbols: CPK1, ATCPK1   calcium dependent protein kinase 1   chr5:1417015-1419877 REVERSE LENGTH=610                           | 603  | 610  | 0         | 101.2  | 89.6 | 92.7 |

|                          |                                                                                                                                                                                                                                                                                                                                                                                                                                                                                                                                                                                                                                                                                                                                                                                                                                                                                                            |      |      |           |       |       |       |                                             |       |                      |                                                                                                                                                                                                                                                                                                                                                                     |      |      |           |       |      |      |
|--------------------------|------------------------------------------------------------------------------------------------------------------------------------------------------------------------------------------------------------------------------------------------------------------------------------------------------------------------------------------------------------------------------------------------------------------------------------------------------------------------------------------------------------------------------------------------------------------------------------------------------------------------------------------------------------------------------------------------------------------------------------------------------------------------------------------------------------------------------------------------------------------------------------------------------------|------|------|-----------|-------|-------|-------|---------------------------------------------|-------|----------------------|---------------------------------------------------------------------------------------------------------------------------------------------------------------------------------------------------------------------------------------------------------------------------------------------------------------------------------------------------------------------|------|------|-----------|-------|------|------|
| Rsa1.0_01466.1.g27085.t1 | gb EOA21471.1  hypothetical protein CARUB_v10001863mg [Capsella rubella]                                                                                                                                                                                                                                                                                                                                                                                                                                                                                                                                                                                                                                                                                                                                                                                                                                   | 238  | 235  | 1.00E-121 | 98.7  | 92.4  | 95.4  | hypothetical protein CARUB_v10001863mg      | gbpln | Capsella rubella     | AT5G04850.1   Symbols: VPS60.2   SNF7 family protein   chr5:1408246-1409806 REVERSE LENGTH=235                                                                                                                                                                                                                                                                      | 238  | 235  | 1.00E-122 | 98.7  | 91.2 | 95.0 |
| Rsa1.0_01466.1.g27086.t1 | gb EOA21611.1  hypothetical protein CARUB_v10002023mg [Capsella rubella]                                                                                                                                                                                                                                                                                                                                                                                                                                                                                                                                                                                                                                                                                                                                                                                                                                   | 194  | 194  | 3.00E-93  | 100.0 | 86.1  | 91.8  | hypothetical protein CARUB_v10002023mg      | gbpln | Capsella rubella     | AT5G04830.2   Symbols:   Nuclear transport factor 2 (NTF2) family protein   chr5:1402294-1403671 REVERSE LENGTH=178                                                                                                                                                                                                                                                 | 194  | 178  | 1.00E-91  | 91.8  | 80.4 | 85.1 |
| Rsa1.0_01466.1.g27087.t1 | ref XP_002871113.1  binding protein [Arabidopsis lyrata subsp. lyrata] gi 297316950 gb EFH47372.1  binding protein [Arabidopsis lyrata subsp. lyrata]<br>ref NP_196097.1  cationic amino acid transporter 6 [Arabidopsis thaliana] gi 75311713 sp g9LZ20.1 CAAT6_ARAT H RecName: Full=Cationic amino acid transporter 6, chloroplastic; Flags: Precursor<br>gi 13430548 gb AAK25896.1 AF360186.1 putative amino acid transport protein [Arabidopsis thaliana]<br>gi 7413539 emb CAB86019.1  amino acid transport-like protein [Arabidopsis thaliana] gi 9758452 dbj BA08981.1  amino acid transporter-like protein [Arabidopsis thaliana] gi 14532754 gb AAK64078.1  putative amino acid transport protein [Arabidopsis thaliana] gi 21553707 gb AAM62800.1  amino acid transport-like protein [Arabidopsis thaliana] gi 332003399 gb AED90782.1  cationic amino acid transporter 6 [Arabidopsis thaliana] | 754  | 637  | 0         | 84.5  | 68.6  | 74.4  | binding protein                             | gbpln | Arabidopsis lyrata   | AT5G04780.1   Symbols:   Pentatricopeptide repeat (PPR) superfamily protein   chr5:1384540-1386447 FORWARD LENGTH=635                                                                                                                                                                                                                                               | 754  | 635  | 0         | 84.2  | 68.0 | 74.1 |
| Rsa1.0_01466.1.g27088.t1 | ref XP_002886385.1  hypothetical protein ARALYDRAFT_893060 [Arabidopsis lyrata subsp. lyrata] gi 297332226 gb EFH62644.1  hypothetical protein ARALYDRAFT_893060 [Arabidopsis lyrata subsp. lyrata]<br>ref XP_002873623.1  aba-overly sensitive 1 [Arabidopsis lyrata subsp. lyrata] gi 297319460 gb EFH49882.1  aba-overly sensitive 1 [Arabidopsis lyrata subsp. lyrata]<br>ref XP_002884202.1  hypothetical protein ARALYDRAFT_480870 [Arabidopsis lyrata subsp. lyrata] gi 297330042 gb EFH60461.1  hypothetical protein ARALYDRAFT_480870 [Arabidopsis lyrata subsp. lyrata]<br>ref NP_001185303.1  Peptidase M1 family protein [Arabidopsis thaliana] gi 332196026 gb AEE34147.1  Peptidase M1 family protein [Arabidopsis thaliana]                                                                                                                                                                 | 480  | 583  | 0         | 121.5 | 92.3  | 95.2  | cationic amino acid transporter 6           | gbpln | Arabidopsis thaliana | AT5G04770.1   Symbols: ATCAT6, CAT6   cationic amino acid transporter 6   chr5:1379118-1382304 FORWARD LENGTH=583                                                                                                                                                                                                                                                   | 480  | 583  | 0         | 121.5 | 92.3 | 95.2 |
| Rsa1.0_01467.1.g27089.t1 | ref XP_002873623.1  aba-overly sensitive 1 [Arabidopsis lyrata subsp. lyrata] gi 297332226 gb EFH62644.1  hypothetical protein ARALYDRAFT_893060 [Arabidopsis lyrata subsp. lyrata]<br>ref XP_002884202.1  hypothetical protein ARALYDRAFT_480870 [Arabidopsis lyrata subsp. lyrata] gi 297330042 gb EFH60461.1  hypothetical protein ARALYDRAFT_480870 [Arabidopsis lyrata subsp. lyrata]<br>ref NP_001185303.1  Peptidase M1 family protein [Arabidopsis thaliana] gi 332196026 gb AEE34147.1  Peptidase M1 family protein [Arabidopsis thaliana]                                                                                                                                                                                                                                                                                                                                                        | 295  | 294  | 1.00E-140 | 99.7  | 80.3  | 91.5  | hypothetical protein ARALYDRAFT_893060      | gbpln | Arabidopsis lyrata   | AT1G63780.1   Symbols: IMP4   Ribosomal RNA processing Erix domain protein   chr1:23665045-23667243 REVERSE LENGTH=294                                                                                                                                                                                                                                              | 295  | 294  | 1.00E-139 | 99.7  | 78.3 | 91.5 |
| Rsa1.0_01467.1.g27090.t1 | ref XP_002873623.1  aba-overly sensitive 1 [Arabidopsis lyrata subsp. lyrata] gi 297319460 gb EFH49882.1  aba-overly sensitive 1 [Arabidopsis lyrata subsp. lyrata]<br>ref XP_002884202.1  hypothetical protein ARALYDRAFT_480870 [Arabidopsis lyrata subsp. lyrata] gi 297330042 gb EFH60461.1  hypothetical protein ARALYDRAFT_480870 [Arabidopsis lyrata subsp. lyrata]<br>ref NP_001185303.1  Peptidase M1 family protein [Arabidopsis thaliana] gi 332196026 gb AEE34147.1  Peptidase M1 family protein [Arabidopsis thaliana]                                                                                                                                                                                                                                                                                                                                                                        | 198  | 1317 | 2.00E-46  | 665.2 | 55.1  | 59.6  | aba-overly sensitive 1                      | gbpln | Arabidopsis lyrata   | AT5G13680.1   Symbols: ELO2, ABO1   IKI3 family protein   chr5:4410522-4415471 REVERSE LENGTH=1319                                                                                                                                                                                                                                                                  | 198  | 1319 | 7.00E-49  | 666.2 | 54.5 | 59.1 |
| Rsa1.0_01467.1.g27091.t1 | ref XP_002873623.1  aba-overly sensitive 1 [Arabidopsis lyrata subsp. lyrata] gi 297319460 gb EFH49882.1  aba-overly sensitive 1 [Arabidopsis lyrata subsp. lyrata]<br>ref XP_002884202.1  hypothetical protein ARALYDRAFT_480870 [Arabidopsis lyrata subsp. lyrata] gi 297330042 gb EFH60461.1  hypothetical protein ARALYDRAFT_480870 [Arabidopsis lyrata subsp. lyrata]<br>ref NP_001185303.1  Peptidase M1 family protein [Arabidopsis thaliana] gi 332196026 gb AEE34147.1  Peptidase M1 family protein [Arabidopsis thaliana]                                                                                                                                                                                                                                                                                                                                                                        | 421  | 421  | 0         | 100.0 | 96.4  | 98.3  | hypothetical protein ARALYDRAFT_480870      | gbpln | Arabidopsis lyrata   | AT2G20420.1   Symbols:   ATP citrate lyase (ACL) family protein   chr2:8805574-8807858 FORWARD LENGTH=421                                                                                                                                                                                                                                                           | 421  | 421  | 0         | 100.0 | 95.5 | 98.6 |
| Rsa1.0_01467.1.g27092.t1 | ref NP_001185303.1  Peptidase M1 family protein [Arabidopsis thaliana] gi 332196026 gb AEE34147.1  Peptidase M1 family protein [Arabidopsis thaliana]                                                                                                                                                                                                                                                                                                                                                                                                                                                                                                                                                                                                                                                                                                                                                      | 1005 | 1013 | 0         | 100.8 | 91.4  | 95.4  | Peptidase M1 family protein                 | gbpln | Arabidopsis thaliana | AT1G63770.5   Symbols:   Peptidase M1 family protein   chr1:23657791-23664243 REVERSE LENGTH=1013                                                                                                                                                                                                                                                                   | 1005 | 1013 | 0         | 100.8 | 91.4 | 95.4 |
| Rsa1.0_01467.1.g27093.t4 | emb CAZ40338.1  putative disease resistance protein [Raphanus sativus]                                                                                                                                                                                                                                                                                                                                                                                                                                                                                                                                                                                                                                                                                                                                                                                                                                     | 1006 | 2100 | 0         | 208.7 | 89.1  | 89.2  | putative disease resistance protein         | gbpln | Raphanus sativus     | AT1G63730.1   Symbols:   Disease resistance protein (TIR-NBS-LRR class) family   chr1:23641770-23645132 FORWARD LENGTH=966                                                                                                                                                                                                                                          | 1006 | 966  | 0         | 96.0  | 63.1 | 74.2 |
| Rsa1.0_01467.1.g27094.t1 | gb AAN72085.1  putative aminopeptidase [Arabidopsis thaliana] gi 34098843 gb AA056804.1  At1g63770 [Arabidopsis thaliana] gi 82003356 gb AAX59049.1  M1 aminopeptidase [Arabidopsis thaliana]                                                                                                                                                                                                                                                                                                                                                                                                                                                                                                                                                                                                                                                                                                              | 153  | 883  | 1.00E-39  | 577.1 | 60.1  | 70.6  | putative aminopeptidase                     | gbpln | Arabidopsis thaliana | AT1G63770.5   Symbols:   Peptidase M1 family protein   chr1:23657791-23664243 REVERSE LENGTH=1013                                                                                                                                                                                                                                                                   | 153  | 1013 | 5.00E-42  | 662.1 | 50.3 | 53.6 |
| Rsa1.0_01467.1.g27095.t1 | emb CAZ40337.1  hypothetical protein [Raphanus sativus]                                                                                                                                                                                                                                                                                                                                                                                                                                                                                                                                                                                                                                                                                                                                                                                                                                                    | 347  | 342  | 1.00E-175 | 98.6  | 94.8  | 95.1  | hypothetical protein                        | gbpln | Raphanus sativus     | AT1G63720.1   Symbols:   BEST Arabidopsis thaliana protein match is: hydroxyproline-rich glycoprotein family protein (TAIR:AT5G52430.1); Has 490 Blast hits to 394 proteins in 96 species: Archae - 0; Bacteria - 2; Metazoa - 132; Fungi - 88; Plants - 175; Viruses - 14; Other Eukaryotes - 79 (source: NCBI BLINK).   chr1:23636122-23637348 REVERSE LENGTH=358 | 347  | 358  | 1.00E-120 | 103.2 | 74.1 | 83.0 |
| Rsa1.0_01467.1.g27096.t1 | gb AAP86200.1  pentatricopeptide repeat-containing protein [Raphanus sativus]                                                                                                                                                                                                                                                                                                                                                                                                                                                                                                                                                                                                                                                                                                                                                                                                                              | 143  | 654  | 2.00E-77  | 457.3 | 100.0 | 100.0 | pentatricopeptide repeat-containing protein | gbpln | Raphanus sativus     | AT1G64100.2   Symbols:   pentatricopeptide (PPR) repeat-containing protein   chr1:23791585-23795563 FORWARD LENGTH=806                                                                                                                                                                                                                                              | 143  | 806  | 2.00E-34  | 563.6 | 46.2 | 54.5 |

|                          |                                                                                                                                                                                                                |     |     |           |       |      |      |                                        |       |                      |                                                                                                                                                                                                                                                                                                                                                                                                                                                                                      |     |     |           |       |      |      |
|--------------------------|----------------------------------------------------------------------------------------------------------------------------------------------------------------------------------------------------------------|-----|-----|-----------|-------|------|------|----------------------------------------|-------|----------------------|--------------------------------------------------------------------------------------------------------------------------------------------------------------------------------------------------------------------------------------------------------------------------------------------------------------------------------------------------------------------------------------------------------------------------------------------------------------------------------------|-----|-----|-----------|-------|------|------|
| Rsa1.0_01468.1.g27097.t1 | gb[EOA32480.1] hypothetical protein CARUB_v10015759mg [Capsella rubella]                                                                                                                                       | 329 | 350 | 8.00E-88  | 106.4 | 49.8 | 69.6 | hypothetical protein CARUB_v10015759mg | gbpln | Capsella rubella     | AT2G17305.1   Symbols:   CONTAINS InterPro DOMAIN/s: FBD (InterPro:IPR013596), FBD-like (InterPro:IPR006566); BEST Arabidopsis thaliana protein match is: F-box family protein (TAIR:AT3G62230.1); Has 81 Blast hits to 54 proteins in 5 species: Archae - 0; Bacteria - 0; Metazoa - 0; Fungi - 0; Plants - 81; Viruses - 0; Other Eukaryotes - 0 (source: NCBI BLINK).   chr2:7527676-7528853 FORWARD LENGTH=271                                                                   | 329 | 271 | 1.00E-88  | 82.4  | 44.7 | 62.0 |
| Rsa1.0_01468.1.g27098.t1 | gb[EOA16821.1] hypothetical protein CARUB_v10004791mg [Capsella rubella]                                                                                                                                       | 451 | 452 | 0         | 100.2 | 95.1 | 97.3 | hypothetical protein CARUB_v10004791mg | gbpln | Capsella rubella     | AT3G42050.1   Symbols:   vacuolar ATP synthase subunit H family protein   chr3:14228846-14232228 REVERSE LENGTH=441                                                                                                                                                                                                                                                                                                                                                                  | 451 | 441 | 0         | 97.8  | 92.0 | 94.9 |
| Rsa1.0_01468.1.g27099.t1 | gb[EOA17260.1] hypothetical protein CARUB_v10005534mg [Capsella rubella]                                                                                                                                       | 260 | 259 | 1.00E-123 | 99.6  | 85.4 | 88.8 | hypothetical protein CARUB_v10005534mg | gbpln | Capsella rubella     | AT4G34180.1   Symbols:   Cyclase family protein   chr4:16370060-16371383 REVERSE LENGTH=255                                                                                                                                                                                                                                                                                                                                                                                          | 260 | 255 | 1.00E-121 | 98.1  | 83.8 | 88.5 |
| Rsa1.0_01468.1.g27100.t1 | ref[NP_567987.1] uncharacterized protein [Arabidopsis thaliana] gi 21593821 gb AAM65788.1  unknown [Arabidopsis thaliana] gi 332661153 gb AEE86553.1  uncharacterized protein AT4G35725 [Arabidopsis thaliana] | 75  | 123 | 2.00E-11  | 164.0 | 60.0 | 68.0 | uncharacterized protein                | gbpln | Arabidopsis thaliana | AT4G35725.1   Symbols:   unknown protein; FUNCTIONS IN: molecular_function unknown; INVOLVED IN: biological_process unknown; LOCATED IN: endomembrane system; EXPRESSED IN: embryo, sepal; EXPRESSED DURING: 4 anthesis, C globular stage; Has 30201 Blast hits to 17322 proteins in 780 species: Archae - 12; Bacteria - 1396; Metazoa - 17338; Fungi - 3422; Plants - 5037; Viruses - 0; Other Eukaryotes - 2996 (source: NCBI BLINK).   chr4:16930028-16930485 REVERSE LENGTH=123 | 75  | 123 | 4.00E-14  | 164.0 | 60.0 | 68.0 |
| Rsa1.0_01468.1.g27101.t1 | ref[NP_567987.1] uncharacterized protein [Arabidopsis thaliana] gi 21593821 gb AAM65788.1  unknown [Arabidopsis thaliana] gi 332661153 gb AEE86553.1  uncharacterized protein AT4G35725 [Arabidopsis thaliana] | 81  | 123 | 2.00E-16  | 151.9 | 59.3 | 69.1 | uncharacterized protein                | gbpln | Arabidopsis thaliana | AT4G35725.1   Symbols:   unknown protein; FUNCTIONS IN: molecular_function unknown; INVOLVED IN: biological_process unknown; LOCATED IN: endomembrane system; EXPRESSED IN: embryo, sepal; EXPRESSED DURING: 4 anthesis, C globular stage; Has 30201 Blast hits to 17322 proteins in 780 species: Archae - 12; Bacteria - 1396; Metazoa - 17338; Fungi - 3422; Plants - 5037; Viruses - 0; Other Eukaryotes - 2996 (source: NCBI BLINK).   chr4:16930028-16930485 REVERSE LENGTH=123 | 81  | 123 | 3.00E-19  | 151.9 | 59.3 | 69.1 |
| Rsa1.0_01468.1.g27102.t1 | ref[XP_002867129.1] hypothetical protein ARALYDRAFT_491252 [Arabidopsis lyrata subsp. lyrata] gi 297312965 gb EFH43388.1  hypothetical protein ARALYDRAFT_491252 [Arabidopsis lyrata subsp. lyrata]            | 599 | 603 | 0         | 100.7 | 91.5 | 94.8 | hypothetical protein ARALYDRAFT_491252 | gbpln | Arabidopsis lyrata   | AT4G34200.1   Symbols:   EDA9   D-3-phosphoglycerate dehydrogenase   chr4:16374041-16376561 REVERSE LENGTH=603                                                                                                                                                                                                                                                                                                                                                                       | 599 | 603 | 0         | 100.7 | 91.3 | 94.3 |
| Rsa1.0_01468.1.g27103.t1 | gb[EOA24678.1] hypothetical protein CARUB_v10017951mg [Capsella rubella]                                                                                                                                       | 240 | 239 | 1.00E-117 | 99.6  | 87.9 | 94.6 | hypothetical protein CARUB_v10017951mg | gbpln | Capsella rubella     | AT3G57230.1   Symbols:   AGL16   AGAMOUS-like 16   chr3:21177710-21180671 FORWARD LENGTH=240                                                                                                                                                                                                                                                                                                                                                                                         | 240 | 240 | 1.00E-117 | 100.0 | 86.7 | 92.5 |



|                          |                                                                                                                                                                                                                                                                                                                                                                                                                                                                                                                                                                                                                                                                                                                                                                                                                                                                                                                                                                                                                                                                                                                                                                                                                 |     |     |           |       |      |      |                                                                                                                       |       |                      |                                                                                                                                                                                                                                                                                                                                            |     |     |           |       |      |      |
|--------------------------|-----------------------------------------------------------------------------------------------------------------------------------------------------------------------------------------------------------------------------------------------------------------------------------------------------------------------------------------------------------------------------------------------------------------------------------------------------------------------------------------------------------------------------------------------------------------------------------------------------------------------------------------------------------------------------------------------------------------------------------------------------------------------------------------------------------------------------------------------------------------------------------------------------------------------------------------------------------------------------------------------------------------------------------------------------------------------------------------------------------------------------------------------------------------------------------------------------------------|-----|-----|-----------|-------|------|------|-----------------------------------------------------------------------------------------------------------------------|-------|----------------------|--------------------------------------------------------------------------------------------------------------------------------------------------------------------------------------------------------------------------------------------------------------------------------------------------------------------------------------------|-----|-----|-----------|-------|------|------|
| Rsa1.0_01468.1.g27104.t1 | ref[NP_195149.1] cinnamyl alcohol dehydrogenase 5 [Arabidopsis thaliana] gi 13626131 sp O49482.1 CADH5_ARAT H RecName: Full=Cinnamyl alcohol dehydrogenase 5; Short=AtCAD5; AltName: Full=Cinnamyl alcohol dehydrogenase D gi 134104089 pdb 2CF5 A Chain A, Crystal Structures Of The Arabidopsis Cinnamyl Alcohol Dehydrogenases, Atcad5 gi 134104090 pdb 2CF6 A Chain A, Crystal Structures Of The Arabidopsis Cinnamyl Alcohol Dehydrogenases Atcad5 gi 2911039 emb CAA17549.1  cinnamyl alcohol dehydrogenase-like protein [Arabidopsis thaliana] gi 7270373 emb CAB80140.1  cinnamyl alcohol dehydrogenase-like protein [Arabidopsis thaliana] gi 14334456 gb AAK59426.1  putative cinnamyl alcohol dehydrogenase [Arabidopsis thaliana] gi 21280925 gb AAM44967.1  putative cinnamyl alcohol dehydrogenase [Arabidopsis thaliana] gi 31880043 gb AAP59435.1  cinnamyl alcohol dehydrogenase [Arabidopsis thaliana] gi 33266094 gb AEE86344.1  cinnamyl alcohol dehydrogenase 5 [Arabidopsis thaliana] ref[XP_002869164.1] hypothetical protein ARALYDRAFT_328320 [Arabidopsis lyrata subsp. lyrata] gi 297315000 gb EFH45423.1  hypothetical protein ARALYDRAFT_328320 [Arabidopsis lyrata subsp. lyrata] | 357 | 357 | 1.00E-173 | 100.0 | 93.8 | 98.3 | cinnamyl alcohol dehydrogenase 5                                                                                      | gbpln | Arabidopsis thaliana | AT4G34230.1   Symbols: CAD5, ATCAD5, CAD-5   cinnamyl alcohol dehydrogenase 5   chr4:16386898-16388666 REVERSE LENGTH=357                                                                                                                                                                                                                  | 357 | 357 | 1.00E-175 | 100.0 | 93.8 | 98.3 |
| Rsa1.0_01468.1.g27105.t1 | ref[XP_002869164.1] hypothetical protein ARALYDRAFT_328320 [Arabidopsis lyrata subsp. lyrata] gi 297315000 gb EFH45423.1  hypothetical protein ARALYDRAFT_328320 [Arabidopsis lyrata subsp. lyrata]                                                                                                                                                                                                                                                                                                                                                                                                                                                                                                                                                                                                                                                                                                                                                                                                                                                                                                                                                                                                             | 492 | 467 | 0         | 94.9  | 82.9 | 86.4 | hypothetical protein ARALYDRAFT_328320                                                                                | gbpln | Arabidopsis lyrata   | AT1G73700.1   Symbols:   MATE efflux family protein   chr1:27717554-27719630 REVERSE LENGTH=476                                                                                                                                                                                                                                            | 492 | 476 | 0         | 96.7  | 74.6 | 83.1 |
| Rsa1.0_01469.1.g27106.t5 | dbj BAB09523.1  unnamed protein product [Arabidopsis thaliana]                                                                                                                                                                                                                                                                                                                                                                                                                                                                                                                                                                                                                                                                                                                                                                                                                                                                                                                                                                                                                                                                                                                                                  | 212 | 275 | 2.00E-82  | 129.7 | 75.9 | 83.0 | unnamed protein product                                                                                               | gbpln | Arabidopsis thaliana | AT5G09680.2   Symbols: RLF   reduced lateral root formation   chr5:2999362-3000185 REVERSE LENGTH=211                                                                                                                                                                                                                                      | 212 | 211 | 1.00E-84  | 99.5  | 75.9 | 83.0 |
| Rsa1.0_01469.1.g27107.t1 | ref[XP_002873415.1] hypothetical protein ARALYDRAFT_908918 [Arabidopsis lyrata subsp. lyrata] gi 297319252 gb EFH49674.1  hypothetical protein ARALYDRAFT_908918 [Arabidopsis lyrata subsp. lyrata]                                                                                                                                                                                                                                                                                                                                                                                                                                                                                                                                                                                                                                                                                                                                                                                                                                                                                                                                                                                                             | 492 | 546 | 0         | 111.0 | 75.6 | 82.3 | hypothetical protein ARALYDRAFT_908918                                                                                | gbpln | Arabidopsis lyrata   | AT5G09670.1   Symbols:   Ioricin-related   chr5:2996109-2997749 REVERSE LENGTH=546                                                                                                                                                                                                                                                         | 492 | 546 | 0         | 111.0 | 75.6 | 81.3 |
| Rsa1.0_01469.1.g27108.t1 | sp Q9XFW3.1 MDHG2_BRANA RecName: Full=Malate dehydrogenase 2, glyoxysomal; Flags: Precursor gi 4995091 emb CAB43995.1  malate dehydrogenase 2 [Brassica napus]                                                                                                                                                                                                                                                                                                                                                                                                                                                                                                                                                                                                                                                                                                                                                                                                                                                                                                                                                                                                                                                  | 358 | 358 | 0         | 100.0 | 99.2 | 99.7 | RecName: Full=Malate dehydrogenase 2, glyoxysomal; Flags: Precursor gi 4995091 emb CAB43995.1  malate dehydrogenase 2 | gbpln | Brassica napus       | AT5G09660.1   Symbols: PMDH2   peroxisomal NAD-malate dehydrogenase 2   chr5:2993645-2995551 REVERSE LENGTH=354                                                                                                                                                                                                                            | 358 | 354 | 0         | 98.9  | 95.8 | 97.8 |
| Rsa1.0_01469.1.g27109.t1 | gb EOA31114.1  hypothetical protein CARUB_v10014274mg [Capsella rubella]                                                                                                                                                                                                                                                                                                                                                                                                                                                                                                                                                                                                                                                                                                                                                                                                                                                                                                                                                                                                                                                                                                                                        | 296 | 300 | 1.00E-149 | 101.4 | 89.2 | 92.6 | hypothetical protein CARUB_v10014274mg                                                                                | gbpln | Capsella rubella     | AT5G09650.1   Symbols: AtPPa6, PPa6   pyrophosphorylase 6   chr5:2991331-2993117 REVERSE LENGTH=300                                                                                                                                                                                                                                        | 296 | 300 | 1.00E-150 | 101.4 | 88.5 | 92.6 |
| Rsa1.0_01469.1.g27110.t1 | emb CAM91991.1  sinapoylglucose:choline sinapoyltransferase [Brassica napus var. napus]                                                                                                                                                                                                                                                                                                                                                                                                                                                                                                                                                                                                                                                                                                                                                                                                                                                                                                                                                                                                                                                                                                                         | 413 | 466 | 0         | 112.8 | 81.6 | 84.3 | sinapoylglucose:choline sinapoyltransferase                                                                           | gbpln | Brassica napus       | AT5G09640.1   Symbols: SNG2, SCPL19   serine carboxypeptidase-like 19   chr5:2988373-2990966 FORWARD LENGTH=465                                                                                                                                                                                                                            | 413 | 465 | 1.00E-171 | 112.6 | 74.1 | 79.9 |
| Rsa1.0_01469.1.g27111.t1 | gb EOA21533.1  hypothetical protein CARUB_v10001939mg [Capsella rubella]                                                                                                                                                                                                                                                                                                                                                                                                                                                                                                                                                                                                                                                                                                                                                                                                                                                                                                                                                                                                                                                                                                                                        | 214 | 216 | 8.00E-89  | 100.9 | 78.0 | 84.6 | hypothetical protein CARUB_v10001939mg                                                                                | gbpln | Capsella rubella     | AT5G09600.3   Symbols: SDH3-1   succinate dehydrogenase 3-1   chr5:2979220-2980527 FORWARD LENGTH=213                                                                                                                                                                                                                                      | 214 | 213 | 7.00E-89  | 99.5  | 77.1 | 85.0 |
| Rsa1.0_01469.1.g27112.t1 | dbj BAJ34398.1  unnamed protein product [Thellungiella halophila]                                                                                                                                                                                                                                                                                                                                                                                                                                                                                                                                                                                                                                                                                                                                                                                                                                                                                                                                                                                                                                                                                                                                               | 652 | 683 | 0         | 104.8 | 94.6 | 97.4 | unnamed protein product                                                                                               | ----  | ----                 | AT5G09590.1   Symbols: MTHSC70-2, HSC70-5   mitochondrial HSO70 2   chr5:2975721-2978508 FORWARD LENGTH=682                                                                                                                                                                                                                                | 652 | 682 | 0         | 104.6 | 92.9 | 96.9 |
| Rsa1.0_01469.1.g27113.t1 | ref[NP_196520.1] uncharacterized protein [Arabidopsis thaliana] gi 7671431 emb CAB89372.1  putative protein [Arabidopsis thaliana] gi 98961675 gb ABF59167.1  unknown protein [Arabidopsis thaliana] gi 332004029 gb AED91412.1  uncharacterized protein AT5G09580 [Arabidopsis thaliana]                                                                                                                                                                                                                                                                                                                                                                                                                                                                                                                                                                                                                                                                                                                                                                                                                                                                                                                       | 353 | 393 | 1.00E-152 | 111.3 | 77.9 | 87.3 | uncharacterized protein                                                                                               | gbpln | Arabidopsis thaliana | AT5G09580.1   Symbols:   unknown protein; BEST Arabidopsis thaliana protein match is: unknown protein (TAIR:AT1G53345.1); Has 53 Blast hits to 53 proteins in 12 species: Archae - 0; Bacteria - 2; Metazoa - 0; Fungi - 0; Plants - 50; Viruses - 0; Other Eukaryotes - 1 (source: NCBI BLink).   chr5:2972639-2974438 FORWARD LENGTH=393 | 353 | 393 | 1.00E-154 | 111.3 | 77.9 | 87.3 |

|                          |                                                                                                                                                                                                                                                                                                                                                                                                                                                                                                                                                                                                                                                                                                                                                                                                                                                                                                                                                                                                                                                                                                                                                                                                                                                                |     |     |           |       |      |      |                                        |       |                      |                                                                                                                                                                                                                                                                                                                                                             |     |     |           |       |      |      |
|--------------------------|----------------------------------------------------------------------------------------------------------------------------------------------------------------------------------------------------------------------------------------------------------------------------------------------------------------------------------------------------------------------------------------------------------------------------------------------------------------------------------------------------------------------------------------------------------------------------------------------------------------------------------------------------------------------------------------------------------------------------------------------------------------------------------------------------------------------------------------------------------------------------------------------------------------------------------------------------------------------------------------------------------------------------------------------------------------------------------------------------------------------------------------------------------------------------------------------------------------------------------------------------------------|-----|-----|-----------|-------|------|------|----------------------------------------|-------|----------------------|-------------------------------------------------------------------------------------------------------------------------------------------------------------------------------------------------------------------------------------------------------------------------------------------------------------------------------------------------------------|-----|-----|-----------|-------|------|------|
| Rsa1.0_01469.1.g27114.t3 | refXP_002885880.1  hypothetical protein ARALYDRAFT_899583 [Arabidopsis lyrata subsp. lyrata] gi 297331720 gb EFH62139.1  hypothetical protein ARALYDRAFT_899583 [Arabidopsis lyrata subsp. lyrata]                                                                                                                                                                                                                                                                                                                                                                                                                                                                                                                                                                                                                                                                                                                                                                                                                                                                                                                                                                                                                                                             | 567 | 183 | 5.00E-13  | 32.3  | 11.1 | 17.1 | hypothetical protein ARALYDRAFT_899583 | gbpln | Arabidopsis lyrata   | AT3G60040.1   Symbols:   F-box family protein   chr:2:22175937-22179728 REVERSE LENGTH=838                                                                                                                                                                                                                                                                  | 567 | 838 | 6.00E-13  | 147.8 | 8.6  | 12.0 |
| Rsa1.0_01469.1.g27115.t1 | gb EOA22581.1  hypothetical protein CARUB_v10003247mg [Capsella rubella]                                                                                                                                                                                                                                                                                                                                                                                                                                                                                                                                                                                                                                                                                                                                                                                                                                                                                                                                                                                                                                                                                                                                                                                       | 445 | 445 | 0         | 100.0 | 97.3 | 98.2 | hypothetical protein CARUB_v10003247mg | gbpln | Capsella rubella     | AT5G09550.1   Symbols:   GDP dissociation inhibitor family protein / Rab GTPase activator family protein   chr5:2963850-2966465 FORWARD LENGTH=445                                                                                                                                                                                                          | 445 | 445 | 0         | 100.0 | 96.9 | 98.0 |
| Rsa1.0_01470.1.g27116.t3 | emb CAN70013.1  hypothetical protein VITISV_017116 [Vitis vinifera]                                                                                                                                                                                                                                                                                                                                                                                                                                                                                                                                                                                                                                                                                                                                                                                                                                                                                                                                                                                                                                                                                                                                                                                            | 468 | 947 | 1.00E-65  | 202.4 | 36.1 | 54.7 | hypothetical protein VITISV_017116     | gbpln | Vitis vinifera       | ATMG00300.1   Symbols: ORF145A   Gag-Pol-related retrotransposon family protein   chrM:89617-90054 REVERSE LENGTH=145                                                                                                                                                                                                                                       | 468 | 145 | 2.00E-26  | 31.0  | 11.1 | 16.2 |
| Rsa1.0_01470.1.g27117.t1 | gb EOA28140.1  hypothetical protein CARUB_v10024329mg [Capsella rubella]                                                                                                                                                                                                                                                                                                                                                                                                                                                                                                                                                                                                                                                                                                                                                                                                                                                                                                                                                                                                                                                                                                                                                                                       | 61  | 123 | 1.00E-17  | 201.6 | 83.6 | 93.4 | hypothetical protein CARUB_v10024329mg | gbpln | Capsella rubella     | AT2G41905.1   Symbols:   BEST Arabidopsis thaliana protein match is: arabinogalactan protein 23 (TAIR:AT3G57690.1); Has 35333 Blast hits to 34131 proteins in 2444 species: Archae - 798; Bacteria - 22429; Metazoa - 974; Fungi - 991; Plants - 531; Viruses - 0; Other Eukaryotes - 9610 (source: NCBI BLINK).   chr2:17495766-17495951 FORWARD LENGTH=61 | 61  | 61  | 3.00E-20  | 100.0 | 86.9 | 93.4 |
| Rsa1.0_01470.1.g27118.t1 | #                                                                                                                                                                                                                                                                                                                                                                                                                                                                                                                                                                                                                                                                                                                                                                                                                                                                                                                                                                                                                                                                                                                                                                                                                                                              | #   | #   | #         | #     | #    | #    | -                                      | ----  | ----                 | #                                                                                                                                                                                                                                                                                                                                                           | #   | #   | #         | #     | #    |      |
| Rsa1.0_01470.1.g27119.t1 | gb ABD65118.1  hypothetical protein 31.t00031 [Brassica oleracea]                                                                                                                                                                                                                                                                                                                                                                                                                                                                                                                                                                                                                                                                                                                                                                                                                                                                                                                                                                                                                                                                                                                                                                                              | 290 | 467 | 1.00E-36  | 161.0 | 31.4 | 41.4 | hypothetical protein 31.t00031         | gbpln | Brassica oleracea    | AT1G52950.1   Symbols:   Nucleic acid-binding, OB-fold-like protein   chr1:19725483-19728007 FORWARD LENGTH=566                                                                                                                                                                                                                                             | 290 | 566 | 9.00E-20  | 195.2 | 16.2 | 27.9 |
| Rsa1.0_01470.1.g27120.t1 | refXP_002876436.1  hypothetical protein ARALYDRAFT_486225 [Arabidopsis lyrata subsp. lyrata] gi 297322274 gb EFH52695.1  hypothetical protein ARALYDRAFT_486225 [Arabidopsis lyrata subsp. lyrata]                                                                                                                                                                                                                                                                                                                                                                                                                                                                                                                                                                                                                                                                                                                                                                                                                                                                                                                                                                                                                                                             | 336 | 334 | 1.00E-165 | 99.4  | 84.5 | 92.3 | hypothetical protein ARALYDRAFT_486225 | gbpln | Arabidopsis lyrata   | AT3G57750.2   Symbols:   Protein kinase superfamily protein   chr3:21394050-21395054 FORWARD LENGTH=334                                                                                                                                                                                                                                                     | 336 | 334 | 1.00E-167 | 99.4  | 84.8 | 92.3 |
| Rsa1.0_01470.1.g27121.t1 | refXP_002876437.1  kinase family protein [Arabidopsis lyrata subsp. lyrata] gi 297322275 gb EFH52696.1  kinase family protein [Arabidopsis lyrata subsp. lyrata]                                                                                                                                                                                                                                                                                                                                                                                                                                                                                                                                                                                                                                                                                                                                                                                                                                                                                                                                                                                                                                                                                               | 372 | 377 | 1.00E-180 | 101.3 | 83.3 | 90.3 | kinase family protein                  | gbpln | Arabidopsis lyrata   | AT3G57760.3   Symbols:   Protein kinase superfamily protein   chr3:21395983-21397119 FORWARD LENGTH=378                                                                                                                                                                                                                                                     | 372 | 378 | 1.00E-174 | 101.6 | 82.5 | 89.2 |
| Rsa1.0_01471.1.g27122.t1 | #                                                                                                                                                                                                                                                                                                                                                                                                                                                                                                                                                                                                                                                                                                                                                                                                                                                                                                                                                                                                                                                                                                                                                                                                                                                              | #   | #   | #         | #     | #    | #    | -                                      | ----  | ----                 | #                                                                                                                                                                                                                                                                                                                                                           | #   | #   | #         | #     | #    |      |
| Rsa1.0_01471.1.g27123.t1 | ref NP_177044.1  nudix hydrolase 1 [Arabidopsis thaliana] gi 88565931 sp Q9CA40.1 NUDT1_ARAT H RecName: Full=Nudix hydrolase 1; Short=AtNUDT1; AltName: Full=7,8-dihydro-8-oxoguanine-triphosphatase; AltName: Full=8-oxo-dGTP diphosphatase; Short=8-oxo-dGTPase; AltName: Full=Dihydroneopterin triphosphate pyrophosphohydrolase; Short=DHNTP pyrophosphohydrolase; AltName: Full=NADH pyrophosphatase gi 12324137 gb AAG52038.1 AC011914.8 putative mutT protein; 68398-67881 [Arabidopsis thaliana] gi 21593739 gb AAM65706.1  putative mutT protein [Arabidopsis thaliana] gi 26450213 dbj BAC42225.1  putative mutT protein [Arabidopsis thaliana] gi 28827456 gb AAO50572.1  putative mutT protein [Arabidopsis thaliana] gi 51971967 dbj BAD44648.1  mutT like protein [Arabidopsis thaliana] gi 332196715 gb AEE34836.1  nudix hydrolase 1 [Arabidopsis thaliana] ref NP_564941.1  protein IDA [Arabidopsis thaliana] gi 75154765 sp Q8LAD7.1 IDA_ARATH RecName: Full=Protein IDA; AltName: Full=Protein INFLORESCENCE DEFICIENT IN ABSCISSION; Flags: Precursor gi 21593468 gb AAM65435.1  unknown [Arabidopsis thaliana] gi 94807658 gb ABF47126.1 At1g68765 [Arabidopsis thaliana] gi 332196716 gb AEE34837.1  protein IDA [Arabidopsis thaliana] | 144 | 147 | 6.00E-62  | 102.1 | 78.5 | 88.2 | nudix hydrolase 1                      | gbpln | Arabidopsis thaliana | AT1G68760.1   Symbols: ATNUDT1, ATNUDX1, NUDX1   nudix hydrolase 1   chr1:25829090-25829607 FORWARD LENGTH=147                                                                                                                                                                                                                                              | 144 | 147 | 2.00E-64  | 102.1 | 78.5 | 88.2 |
| Rsa1.0_01471.1.g27124.t1 | ref NP_564941.1  protein IDA [Arabidopsis thaliana] gi 75154765 sp Q8LAD7.1 IDA_ARATH RecName: Full=Protein IDA; AltName: Full=Protein INFLORESCENCE DEFICIENT IN ABSCISSION; Flags: Precursor gi 21593468 gb AAM65435.1  unknown [Arabidopsis thaliana] gi 94807658 gb ABF47126.1 At1g68765 [Arabidopsis thaliana] gi 332196716 gb AEE34837.1  protein IDA [Arabidopsis thaliana]                                                                                                                                                                                                                                                                                                                                                                                                                                                                                                                                                                                                                                                                                                                                                                                                                                                                             | 72  | 77  | 6.00E-17  | 106.9 | 75.0 | 87.5 | protein IDA                            | gbpln | Arabidopsis thaliana | AT1G68765.1   Symbols: IDA   Putative membrane lipoprotein   chr1:25830157-25830390 REVERSE LENGTH=77                                                                                                                                                                                                                                                       | 72  | 77  | 1.00E-19  | 106.9 | 75.0 | 87.5 |

|                          |                                                                                                                                                                                                                                                                                                                                                                                                                                                                      |      |      |           |       |      |      |                                                                                                                                                     |       |                      |                                                                                                                                              |      |      |           |       |      |      |
|--------------------------|----------------------------------------------------------------------------------------------------------------------------------------------------------------------------------------------------------------------------------------------------------------------------------------------------------------------------------------------------------------------------------------------------------------------------------------------------------------------|------|------|-----------|-------|------|------|-----------------------------------------------------------------------------------------------------------------------------------------------------|-------|----------------------|----------------------------------------------------------------------------------------------------------------------------------------------|------|------|-----------|-------|------|------|
| Rsa1.0_01471.1.g27125.t1 | ref NP_177046.1  little nucleic3 protein [Arabidopsis thaliana] gi 12324133 gb AAG52034.1 AC011914_4 putative nuclear matrix constituent protein 1 (NMCP1); 58331-62556 [Arabidopsis thaliana] gi 332196718 gb AEE34839.1  little nucleic3 protein [Arabidopsis thaliana]                                                                                                                                                                                            | 997  | 1085 | 0         | 108.8 | 58.1 | 71.0 | little nucleic3 protein                                                                                                                             | gbpln | Arabidopsis thaliana | AT1G68790.1   Symbols: LINC3   little nucleic3   chr1:25834932-25839157 REVERSE LENGTH=1085                                                  | 997  | 1085 | 0         | 108.8 | 58.1 | 71.0 |
| Rsa1.0_01471.1.g27126.t2 | pir  S65812 RNA-directed DNA polymerase (EC 2.7.7.49) (clone DW15) - Arabidopsis thaliana retrotransposon Ta11-1 gi 976278 gb AAA75254.1  reverse transcriptase [Arabidopsis thaliana]                                                                                                                                                                                                                                                                               | 1462 | 1333 | 0         | 91.2  | 41.3 | 56.2 | RNA-directed DNA polymerase (EC 2.7.7.49) (clone DW15) - Arabidopsis thaliana retrotransposon Ta11-1 gi 976278 gb AAA75254.1  reverse transcriptase | gbpln | Arabidopsis thaliana | AT4G29090.1   Symbols:   Ribonuclease H-like superfamily protein   chr4:14333528-14335255 FORWARD LENGTH=575                                 | 1462 | 575  | 2.00E-95  | 39.3  | 13.3 | 19.9 |
| Rsa1.0_01471.1.g27127.t1 | ref NP_564943.1  protein CLAVATA3/ESR-related 12 [Arabidopsis thaliana] gi 122196653 sp Q29PU4.1 CLE12_ARATH RecName: Full=CLAVATA3/ESR (CLE)-related protein 12; Contains: RecName: Full=CLE12p; Flags: Precursor gi 89111846 gb ABD60695.1  At1g68795 [Arabidopsis thaliana] gi 332196719 gb AEE34840.1  protein CLAVATA3/ESR-related 12 [Arabidopsis thaliana]                                                                                                    | 115  | 118  | 1.00E-23  | 102.6 | 67.8 | 72.2 | protein CLAVATA3/ESR-related 12                                                                                                                     | gbpln | Arabidopsis thaliana | AT1G68795.1   Symbols: CLE12   CLAVATA3/ESR-RELATED 12   chr1:25841079-25841435 REVERSE LENGTH=118                                           | 115  | 118  | 2.00E-26  | 102.6 | 67.8 | 72.2 |
| Rsa1.0_01471.1.g27128.t1 | gb EOA26043.1  hypothetical protein CARUB.v10019457mg, partial [Capsella rubella]                                                                                                                                                                                                                                                                                                                                                                                    | 348  | 489  | 4.00E-48  | 140.5 | 25.9 | 27.3 | hypothetical protein CARUB.v10019457mg, partial                                                                                                     | gbpln | Capsella rubella     | AT3G53520.1   Symbols: UXS1, ATUXS1   UDP-glucuronic acid decarboxylase 1   chr3:19841635-19844057 FORWARD LENGTH=435                        | 348  | 435  | 2.00E-50  | 125.0 | 25.9 | 27.3 |
| Rsa1.0_01471.1.g27129.t1 | #                                                                                                                                                                                                                                                                                                                                                                                                                                                                    | #    | #    | #         | #     | #    | -    | -                                                                                                                                                   | ----  | ----                 | #                                                                                                                                            | #    | #    | #         | #     | #    | #    |
| Rsa1.0_01472.1.g27130.t1 | #                                                                                                                                                                                                                                                                                                                                                                                                                                                                    | #    | #    | #         | #     | #    | #    | -                                                                                                                                                   | ----  | ----                 | AT3G60450.1   Symbols:   Phosphoglycerate mutase family protein   chr3:22340982-22342187 FORWARD LENGTH=274                                  | 114  | 274  | 1.00E-12  | 240.4 | 28.1 | 30.7 |
| Rsa1.0_01472.1.g27131.t1 | ref NP_199009.2  RabGAP/TBC domain-containing protein [Arabidopsis thaliana] gi 51971014 dbj BAD44199.1  GTPase activator protein of Rab-like small GTPases-like protein [Arabidopsis thaliana] gi 332007362 gb AED94745.1  RabGAP/TBC domain-containing protein [Arabidopsis thaliana]                                                                                                                                                                              | 337  | 549  | 3.00E-38  | 162.9 | 26.7 | 30.0 | RabGAP/TBC domain-containing protein                                                                                                                | gbpln | Arabidopsis thaliana | AT5G41940.1   Symbols:   Ypt/Rab-GAP domain of gyp1p superfamily protein   chr5:16782039-16785451 FORWARD LENGTH=549                         | 337  | 549  | 8.00E-41  | 162.9 | 26.7 | 30.0 |
| Rsa1.0_01472.1.g27132.t2 | ref XP_002883443.1  hypothetical protein ARALYDRAFT_342502 [Arabidopsis lyrata subsp. lyrata] gi 297329283 gb EFH59702.1  hypothetical protein ARALYDRAFT_342502 [Arabidopsis lyrata subsp. lyrata]                                                                                                                                                                                                                                                                  | 323  | 454  | 7.00E-13  | 140.6 | 14.9 | 20.4 | hypothetical protein ARALYDRAFT_342502                                                                                                              | gbpln | Arabidopsis lyrata   | AT3G62850.1   Symbols:   zinc finger protein-related   chr3:23237487-23239155 REVERSE LENGTH=472                                             | 323  | 472  | 1.00E-10  | 146.1 | 11.5 | 18.0 |
| Rsa1.0_01472.1.g27133.t1 | ref NP_195459.1  cytochrome P450 81F1 [Arabidopsis thaliana] gi 12643629 sp O65790.2 C81F1_ARATH RecName: Full=Cytochrome P450 81F1 gi 4468809 emb CAE38210.1  cytochrome P450 monooxygenase (CYP91A2) [Arabidopsis thaliana] gi 7270725 emb CAB80408.1  cytochrome P450 monooxygenase (CYP91A2) [Arabidopsis thaliana] gi 14532440 gb AAK63948.1  AT4g37430/F6G17.80 [Arabidopsis thaliana] gi 332661392 gb AEE86792.1  cytochrome P450 81F1 [Arabidopsis thaliana] | 400  | 500  | 1.00E-151 | 125.0 | 64.5 | 70.8 | cytochrome P450 81F1                                                                                                                                | gbpln | Arabidopsis thaliana | AT4G37430.1   Symbols: CYP91A2, CYP81F1   cytochrome P450, family 91, subfamily A, polypeptide 2   chr4:17597242-17598829 FORWARD LENGTH=500 | 400  | 500  | 1.00E-154 | 125.0 | 64.5 | 70.8 |

|                          |                                                                                                                                                                                                                                                                                                                                                                                                                                                                                                                                                 |      |      |          |       |      |      |                                                                             |       |                      |                                                                                                                                                  |      |     |          |       |      |      |
|--------------------------|-------------------------------------------------------------------------------------------------------------------------------------------------------------------------------------------------------------------------------------------------------------------------------------------------------------------------------------------------------------------------------------------------------------------------------------------------------------------------------------------------------------------------------------------------|------|------|----------|-------|------|------|-----------------------------------------------------------------------------|-------|----------------------|--------------------------------------------------------------------------------------------------------------------------------------------------|------|-----|----------|-------|------|------|
| Rsa1.0_01472.1.g27134.t1 | refNP_195459.1  cytochrome P450 81F1 [Arabidopsis thaliana] gi 12643629 sp O65790.2 C81F1_ARATH RecName: Full=Cytochrome P450 81F1 gi 4468809 emb CAB38210.1  cytochrome P450 monooxygenase (CYP91A2) [Arabidopsis thaliana] gi 7270724 emb CAB80408.1  cytochrome P450 monooxygenase (CYP91A2) [Arabidopsis thaliana] gi 14532440 gb AAK63948.1  AT4g37430/F6G17.80 [Arabidopsis thaliana] gi 332661392 gb AEE86792.1  cytochrome P450 81F1 [Arabidopsis thaliana]                                                                             | 498  | 500  | 0        | 100.4 | 83.9 | 93.8 | cytochrome P450 81F1                                                        | gbpln | Arabidopsis thaliana | AT4G37430.1   Symbols: CYP91A2, CYP81F1   cytochrome P450, family 91, subfamily A, polypeptide 2   chr4:17597242-17598829 FORWARD LENGTH=500     | 498  | 500 | 0        | 100.4 | 83.9 | 93.8 |
| Rsa1.0_01472.1.g27135.t1 | refNP_195458.1  uncharacterized protein [Arabidopsis thaliana] gi 4468808 emb CAB38209.1  putative protein [Arabidopsis thaliana] gi 7270724 emb CAB80407.1  putative protein [Arabidopsis thaliana] gi 332661391 gb AEE86791.1  uncharacterized protein AT4G37420 [Arabidopsis thaliana]                                                                                                                                                                                                                                                       | 584  | 588  | 0        | 100.7 | 81.3 | 86.3 | uncharacterized protein                                                     | gbpln | Arabidopsis thaliana | AT4G37420.1   Symbols:   Domain of unknown function (DUF23)   chr4:17593123-17594889 FORWARD LENGTH=588                                          | 584  | 588 | 0        | 100.7 | 81.3 | 86.3 |
| Rsa1.0_01472.1.g27136.t1 | refXP_002868991.1  CYP81F3 [Arabidopsis lyrata subsp. lyrata] gi 297314827 gb EFH45250.1  CYP81F3 [Arabidopsis lyrata subsp. lyrata]                                                                                                                                                                                                                                                                                                                                                                                                            | 498  | 499  | 0        | 100.2 | 89.6 | 95.0 | CYP81F3                                                                     | gbpln | Arabidopsis lyrata   | AT4G37400.1   Symbols: CYP81F3   cytochrome P450, family 81, subfamily F, polypeptide 2   chr4:17584096-17586197 FORWARD LENGTH=501              | 498  | 501 | 0        | 100.6 | 89.8 | 95.4 |
| Rsa1.0_01472.1.g27137.t1 | gb EOA16267.1  hypothetical protein CARUB_v10004412mg [Capsella rubella]                                                                                                                                                                                                                                                                                                                                                                                                                                                                        | 593  | 603  | 0        | 101.7 | 94.8 | 97.6 | hypothetical protein CARUB_v10004412mg                                      | gbpln | Capsella rubella     | AT4G37390.1   Symbols: YDK1, GH3.2, BRU6, GH3-2, AUR3   Auxin-responsive GH3 family protein   chr4:17579722-17581768 FORWARD LENGTH=603          | 593  | 603 | 0        | 101.7 | 94.1 | 97.3 |
| Rsa1.0_01473.1.g27138.t1 | gb ACP30609.1  disease resistance protein [Brassica rapa subsp. pekinensis]                                                                                                                                                                                                                                                                                                                                                                                                                                                                     | 1055 | 2726 | 0        | 258.4 | 51.0 | 67.4 | disease resistance protein                                                  | gbpln | Brassica rapa        | ATMG00860.1   Symbols: ORF158   DNA/RNA polymerases superfamily protein   chrM:235916-236392 FORWARD LENGTH=158                                  | 1055 | 158 | 8.00E-35 | 15.0  | 6.6  | 8.5  |
| Rsa1.0_01473.1.g27139.t1 | #                                                                                                                                                                                                                                                                                                                                                                                                                                                                                                                                               | #    | #    | #        | #     | #    | #    | -                                                                           | ----  | ----                 | AT3G54470.1   Symbols:   uridine 5'-monophosphate synthase / UMP synthase (PYRE-F) (UMPS)   chr3:20168285-20170245 REVERSE LENGTH=476            | 123  | 476 | 5.00E-11 | 387.0 | 25.2 | 27.6 |
| Rsa1.0_01473.1.g27140.t1 | gb ABD65606.1  hypothetical protein 23.t100002 [Brassica oleracea]                                                                                                                                                                                                                                                                                                                                                                                                                                                                              | 373  | 433  | 4.00E-43 | 116.1 | 34.3 | 51.5 | hypothetical protein 23.t100002                                             | gbpln | Brassica oleracea    | #                                                                                                                                                | #    | #   | #        | #     | #    | #    |
| Rsa1.0_01473.1.g27141.t1 | #                                                                                                                                                                                                                                                                                                                                                                                                                                                                                                                                               | #    | #    | #        | #     | #    | #    | -                                                                           | ----  | ----                 | #                                                                                                                                                | #    | #   | #        | #     | #    | #    |
| Rsa1.0_01473.1.g27142.t1 | #                                                                                                                                                                                                                                                                                                                                                                                                                                                                                                                                               | #    | #    | #        | #     | #    | #    | -                                                                           | ----  | ----                 | #                                                                                                                                                | #    | #   | #        | #     | #    | #    |
| Rsa1.0_01473.1.g27143.t1 | refNP_173247.1  G1 to S phase transition protein [Arabidopsis thaliana] gi 79318119 refNP_001031063.1  G1 to S phase transition protein [Arabidopsis thaliana] gi 21539549 gb AAM53327.1  putative guanine nucleotide regulatory protein [Arabidopsis thaliana] gi 31711944 gb AAP68328.1  At1g18070 [Arabidopsis thaliana] gi 332191549 gb AEE29670.1  G1 to S phase transition protein [Arabidopsis thaliana] gi 332191550 gb AEE29671.1  Translation elongation factor EF1A/initiation factor IF2gamma family protein [Arabidopsis thaliana] | 506  | 532  | 0        | 105.1 | 85.0 | 92.3 | G1 to S phase transition protein                                            | gbpln | Arabidopsis thaliana | AT1G18070.2   Symbols:   Translation elongation factor EF1A/initiation factor IF2gamma family protein   chr1:6214236-6218211 REVERSE LENGTH=532  | 506  | 532 | 0        | 105.1 | 85.0 | 92.3 |
| Rsa1.0_01473.1.g27144.t2 | refNP_201199.1  Protein kinase protein with adenine nucleotide alpha hydrolases-like domain [Arabidopsis thaliana] gi 8777307 dbj BAA96897.1  unnamed protein product [Arabidopsis thaliana] gi 20260318 gb AAM13057.1  unknown protein [Arabidopsis thaliana] gi 31711746 gb AAP68229.1  At5g63940 [Arabidopsis thaliana] gi 332010435 gb AED97818.1  Protein kinase protein with adenine nucleotide alpha hydrolases-like domain [Arabidopsis thaliana]                                                                                       | 681  | 705  | 0        | 103.5 | 88.7 | 93.5 | Protein kinase protein with adenine nucleotide alpha hydrolases-like domain | gbpln | Arabidopsis thaliana | AT5G63940.1   Symbols:   Protein kinase protein with adenine nucleotide alpha hydrolases-like domain   chr5:25588254-25591229 FORWARD LENGTH=705 | 681  | 705 | 0        | 103.5 | 88.7 | 93.5 |
| Rsa1.0_01473.1.g27145.t1 | gb EOA12873.1  hypothetical protein CARUB_v10025845mg [Capsella rubella]                                                                                                                                                                                                                                                                                                                                                                                                                                                                        | 938  | 919  | 0        | 98.0  | 88.7 | 92.8 | hypothetical protein CARUB_v10025845mg                                      | gbpln | Capsella rubella     | AT5G63920.1   Symbols: TOP3A, AtTOP3alpha   topoisomerase 3alpha   chr5:25574533-25581230 FORWARD LENGTH=926                                     | 938  | 926 | 0        | 98.7  | 89.1 | 93.3 |

|                          |                                                                                                                                       |      |      |           |       |      |      |                                                             |       |                      |                                                                                                                                                      |      |     |           |       |      |      |
|--------------------------|---------------------------------------------------------------------------------------------------------------------------------------|------|------|-----------|-------|------|------|-------------------------------------------------------------|-------|----------------------|------------------------------------------------------------------------------------------------------------------------------------------------------|------|-----|-----------|-------|------|------|
| Rsa1.0_01473.1.g27146.t1 | refXP_002887884.1  hypothetical protein ARALYDRAFT_892963 [Arabidopsis lyrata subsp. lyrata] gi 297333725 gb EFH64143.1               | 396  | 443  | 1.00E-104 | 111.9 | 55.3 | 67.7 | hypothetical protein ARALYDRAFT_892963                      | gbpln | Arabidopsis lyrata   | AT3G27900.1   Symbols:   Protein of unknown function (DUF1184)   chr3:10352905-10353639 REVERSE LENGTH=244                                           | 396  | 244 | 3.00E-32  | 61.6  | 26.0 | 34.3 |
| Rsa1.0_01473.1.g27147.t1 | #                                                                                                                                     | #    | #    | #         | #     | #    | #    | -                                                           | ----  | ----                 | #                                                                                                                                                    | #    | #   | #         | #     | #    |      |
| Rsa1.0_01474.1.g27148.t1 | refXP_002887811.1  hypothetical protein ARALYDRAFT_477170 [Arabidopsis lyrata subsp. lyrata] gi 297333652 gb EFH64070.1               | 305  | 305  | 1.00E-169 | 100.0 | 96.7 | 99.7 | hypothetical protein ARALYDRAFT_477170                      | gbpln | Arabidopsis lyrata   | AT1G80760.1   Symbols: NIP6.1, NIP6, NLM7   NOD26-like intrinsic protein 6;1   chr1:30350640-30352015 REVERSE LENGTH=305                             | 305  | 305 | 1.00E-170 | 100.0 | 95.7 | 99.0 |
| Rsa1.0_01474.1.g27149.t3 | gb AFK13856.1  Ty3/gypsy retrotransposon protein [Beta vulgaris subsp. vulgaris]                                                      | 1752 | 1631 | 0         | 93.1  | 43.6 | 57.1 | Ty3/gypsy retrotransposon protein                           | gbpln | Beta vulgaris        | ATMG00860.1   Symbols: ORF158   DNA/RNA polymerases superfamily protein   chrM:235916-236392 FORWARD LENGTH=158                                      | 1752 | 158 | 5.00E-37  | 9.0   | 4.1  | 5.4  |
| Rsa1.0_01474.1.g27150.t1 | refXP_002889273.1  PDE318 [Arabidopsis lyrata subsp. lyrata] gi 297335114 gb EFH65532.1                                               | 227  | 449  | 1.00E-87  | 197.8 | 81.1 | 89.0 | PDE318                                                      | gbpln | Arabidopsis lyrata   | AT1G80770.1   Symbols: PDE318   P-loop containing nucleoside triphosphate hydrolases superfamily protein   chr1:30355266-30357786 FORWARD LENGTH=451 | 227  | 451 | 9.00E-88  | 198.7 | 78.4 | 89.0 |
| Rsa1.0_01474.1.g27151.t1 | refXP_002887521.1  predicted protein [Arabidopsis lyrata subsp. lyrata] gi 297333362 gb EFH63780.1                                    | 207  | 211  | 1.00E-48  | 101.9 | 50.2 | 67.6 | predicted protein                                           | gbpln | Arabidopsis lyrata   | AT1G80990.1   Symbols:   XH domain-containing protein   chr1:30424421-30425192 FORWARD LENGTH=229                                                    | 207  | 229 | 3.00E-13  | 110.6 | 27.1 | 42.0 |
| Rsa1.0_01474.1.g27152.t1 | ref NP_001185452.1  putative CCR4-associated factor 1-6 [Arabidopsis thaliana] gi 332198329 gb AEE36450.1                             | 299  | 286  | 1.00E-145 | 95.7  | 83.9 | 87.3 | putative CCR4-associated factor 1-6                         | gbpln | Arabidopsis thaliana | AT1G80780.3   Symbols:   Polynucleotidyl transferase, ribonuclease H-like superfamily protein   chr1:30359517-30359583 FORWARD LENGTH=286            | 299  | 286 | 1.00E-148 | 95.7  | 83.9 | 87.3 |
| Rsa1.0_01474.1.g27153.t1 | gb AAF14668.1 AC011713.16 ESTs g Z34732. gb R89948 and gb Z33946 come from this gene [Arabidopsis thaliana]                           | 872  | 780  | 0         | 89.4  | 49.0 | 55.8 | ESTs gb Z34732, gb R89948 and gb Z33946 come from this gene | gbpln | Arabidopsis thaliana | AT1G80810.2   Symbols:   Tudor/PWPF/MT superfamily protein   chr1:30365575-30368898 FORWARD LENGTH=774                                               | 872  | 774 | 0         | 88.8  | 46.6 | 53.6 |
| Rsa1.0_01474.1.g27154.t1 | #                                                                                                                                     | #    | #    | #         | #     | #    | #    | -                                                           | ----  | ----                 | #                                                                                                                                                    | #    | #   | #         | #     | #    |      |
| Rsa1.0_01474.1.g27155.t1 | gb AEK27168.1  cinnamoyl-CoA reductase 2-1A [Brassica rapa subsp. oleifera] gi 340026102 gb AEK27169.1                                | 337  | 332  | 1.00E-180 | 98.5  | 90.8 | 91.4 | cinnamoyl-CoA reductase 2-1A                                | gbpln | Brassica rapa        | AT1G80820.1   Symbols: CCR2, ATCCR2   cinnamoyl coa reductase   chr1:30370646-30372460 FORWARD LENGTH=332                                            | 337  | 332 | 1.00E-169 | 98.5  | 88.1 | 89.9 |
| Rsa1.0_01474.1.g27156.t1 | refXP_002887809.1  NRAMP1 [Arabidopsis lyrata subsp. lyrata] gi 297333650 gb EFH64068.1                                               | 509  | 526  | 0         | 103.3 | 87.2 | 94.5 | NRAMP1                                                      | gbpln | Arabidopsis lyrata   | AT1G80830.1   Symbols: NRAMP1, PMIT1, ATNRAMP1   natural resistance-associated macrophage protein 1   chr1:30373066-30375644 REVERSE LENGTH=532      | 509  | 532 | 0         | 104.5 | 86.4 | 93.7 |
| Rsa1.0_01474.1.g27157.t1 | gb AC114400.1  WRKY40-1 transcription factor [Brassica napus]                                                                         | 295  | 301  | 1.00E-150 | 102.0 | 92.5 | 96.6 | WRKY40-1 transcription factor                               | gbpln | Brassica napus       | AT1G80840.1   Symbols: WRKY40, ATWRKY40   WRKY DNA-binding protein 40   chr1:30383834-30385356 FORWARD LENGTH=302                                    | 295  | 302 | 1.00E-147 | 102.4 | 88.1 | 93.2 |
| Rsa1.0_01474.1.g27158.t1 | gb EOA35462.1  hypothetical protein CARUB_v10020671mg [Capsella rubella]                                                              | 323  | 318  | 1.00E-135 | 98.5  | 83.6 | 88.9 | hypothetical protein CARUB_v10020671mg                      | gbpln | Capsella rubella     | AT1G80850.1   Symbols:   DNA glycosylase superfamily protein   chr1:30385607-30387272 REVERSE LENGTH=327                                             | 323  | 327 | 1.00E-137 | 101.2 | 84.5 | 89.8 |
| Rsa1.0_01475.1.g27159.t1 | gb ADD09861.1  chloride channel C [Eutrema halophilum]                                                                                | 807  | 775  | 0         | 96.0  | 88.5 | 91.8 | chloride channel C                                          | gbpln | Eutrema halophilum   | AT5G49890.1   Symbols: CLC-C, ATCLC-C   chloride channel C   chr5:20288489-20292143 REVERSE LENGTH=779                                               | 807  | 779 | 0         | 96.5  | 87.6 | 91.3 |
| Rsa1.0_01475.1.g27160.t1 | gb AAD20646.1  putative TNP2-like transposon protein [Arabidopsis thaliana]                                                           | 220  | 1040 | 7.00E-44  | 472.7 | 41.8 | 49.5 | putative TNP2-like transposon protein                       | gbpln | Arabidopsis thaliana | #                                                                                                                                                    | #    | #   | #         | #     | #    |      |
| Rsa1.0_01475.1.g27161.t1 | gb AAD20646.1  putative TNP2-like transposon protein [Arabidopsis thaliana]                                                           | 252  | 1040 | 2.00E-35  | 412.7 | 38.1 | 50.4 | putative TNP2-like transposon protein                       | gbpln | Arabidopsis thaliana | #                                                                                                                                                    | #    | #   | #         | #     | #    |      |
| Rsa1.0_01475.1.g27162.t1 | refXP_002865763.1  hypothetical protein ARALYDRAFT_331392 [Arabidopsis lyrata subsp. lyrata] gi 297311598 gb EFH42022.1               | 952  | 956  | 0         | 100.4 | 91.1 | 95.1 | hypothetical protein ARALYDRAFT_331392                      | gbpln | Arabidopsis lyrata   | AT5G49900.1   Symbols:   Beta-glucosidase, GBA2 type family protein   chr5:20297235-20302019 REVERSE LENGTH=957                                      | 952  | 957 | 0         | 100.5 | 91.5 | 95.5 |
| Rsa1.0_01475.1.g27163.t1 | refXP_002865764.1  octicosapeptide/Phox/Bem1p domain-containing protein [Arabidopsis lyrata subsp. lyrata] gi 297311599 gb EFH42023.1 | 276  | 285  | 1.00E-100 | 103.3 | 72.5 | 80.8 | octicosapeptide/Phox/Bem1p domain-containing protein        | gbpln | Arabidopsis lyrata   | AT5G49920.1   Symbols:   Octicosapeptide/Phox/Bem1p family protein   chr5:20306637-20307583 REVERSE LENGTH=288                                       | 276  | 288 | 1.00E-101 | 104.3 | 73.2 | 82.6 |

|                          |                                                                                                                                                                                                                                                                                                                                                                                                                                                                                                                                                            |      |      |           |       |      |      |                                            |       |                      |                                                                                                                                            |      |      |           |       |      |      |
|--------------------------|------------------------------------------------------------------------------------------------------------------------------------------------------------------------------------------------------------------------------------------------------------------------------------------------------------------------------------------------------------------------------------------------------------------------------------------------------------------------------------------------------------------------------------------------------------|------|------|-----------|-------|------|------|--------------------------------------------|-------|----------------------|--------------------------------------------------------------------------------------------------------------------------------------------|------|------|-----------|-------|------|------|
| Rsa1.0_01475.1.g27164.t1 | refXP_002865765.1   EMB1441 [Arabidopsis lyrata subsp. lyrata] gi 297311600 gb EFH42024.1   EMB1441 [Arabidopsis lyrata subsp. lyrata]                                                                                                                                                                                                                                                                                                                                                                                                                     | 1094 | 1080 | 0         | 98.7  | 88.1 | 92.1 | EMB1441                                    | gbpln | Arabidopsis lyrata   | AT5G49930.1   Symbols: emb1441   zinc knuckle (CCHC-type) family protein   chr5:203406260-20312736 REVERSE LENGTH=1080                     | 1094 | 1080 | 0         | 98.7  | 88.0 | 92.0 |
| Rsa1.0_01476.1.g27165.t1 | refXP_002878520.1   hypothetical protein ARALYDRAFT_349401 [Arabidopsis lyrata subsp. lyrata] gi 297324358 gb EFH54779.1   hypothetical protein ARALYDRAFT_349401 [Arabidopsis lyrata subsp. lyrata]                                                                                                                                                                                                                                                                                                                                                       | 1147 | 1169 | 0         | 101.9 | 73.3 | 80.6 | hypothetical protein ARALYDRAFT_349401     | gbpln | Arabidopsis lyrata   | AT3G63500.2   Symbols:   Protein of unknown function (DUF1423)   chr3:23446331-23449991 REVERSE LENGTH=1162                                | 1147 | 1162 | 0         | 101.3 | 71.9 | 80.1 |
| Rsa1.0_01476.1.g27166.t1 | #                                                                                                                                                                                                                                                                                                                                                                                                                                                                                                                                                          | #    | #    | #         | #     | #    | #    | -                                          | ----  | ----                 | #                                                                                                                                          | #    | #    | #         | #     | #    | #    |
| Rsa1.0_01476.1.g27167.t3 | refXP_002888823.1   beta-ketoacyl-CoA synthase family protein [Arabidopsis lyrata subsp. lyrata] gi 297334664 gb EFH65082.1   beta-ketoacyl-CoA synthase family protein [Arabidopsis lyrata subsp. lyrata]                                                                                                                                                                                                                                                                                                                                                 | 452  | 460  | 0         | 101.8 | 85.4 | 93.1 | beta-ketoacyl-CoA synthase family protein  | gbpln | Arabidopsis lyrata   | AT1G71160.1   Symbols: KCS7   3-ketoacyl-CoA synthase 7   chr1:26828788-26830170 REVERSE LENGTH=460                                        | 452  | 460  | 0         | 101.8 | 83.2 | 92.3 |
| Rsa1.0_01476.1.g27168.t1 | gb EOA35095.1   hypothetical protein CARUB_v10020206mg [Capsella rubella]                                                                                                                                                                                                                                                                                                                                                                                                                                                                                  | 489  | 485  | 0         | 99.2  | 82.6 | 90.0 | hypothetical protein CARUB_v10020206mg     | gbpln | Capsella rubella     | AT1G71140.1   Symbols:   MATE efflux family protein   chr1:26824762-26826748 FORWARD LENGTH=485                                            | 489  | 485  | 0         | 99.2  | 81.2 | 89.6 |
| Rsa1.0_01476.1.g27169.t1 | #                                                                                                                                                                                                                                                                                                                                                                                                                                                                                                                                                          | #    | #    | #         | #     | #    | #    | -                                          | ----  | ----                 | #                                                                                                                                          | #    | #    | #         | #     | #    | #    |
| Rsa1.0_01476.1.g27170.t1 | gb AAG03119.1 AC004133_13 F5A9.24 [Arabidopsis thaliana]                                                                                                                                                                                                                                                                                                                                                                                                                                                                                                   | 131  | 1254 | 1.00E-12  | 957.3 | 32.1 | 45.8 | F5A9.24                                    | gbpln | Arabidopsis thaliana | #                                                                                                                                          | #    | #    | #         | #     | #    | #    |
| Rsa1.0_01476.1.g27171.t1 | ref NP_177227.5  protein TIFY 7 [Arabidopsis thaliana] gi 342187044 sp Q8W4J8.2 TIF7_ARATH RecName: Full=Protein TIFY 7; AltName: Full=Jasmonate ZIM domain-containing protein 9 gi 332196990 gb AEE35101.1   protein TIFY 7 [Arabidopsis thaliana]                                                                                                                                                                                                                                                                                                        | 224  | 267  | 3.00E-66  | 119.2 | 68.3 | 78.1 | protein TIFY 7                             | gbpln | Arabidopsis thaliana | AT1G70700.1   Symbols: JAZ9, TIFY7   TIFY domain/Divergent CCT motif family protein   chr1:26654951-26656804 FORWARD LENGTH=267            | 224  | 267  | 9.00E-69  | 119.2 | 68.3 | 78.1 |
| Rsa1.0_01476.1.g27172.t3 | ref NP_563963.1  FAD/NAD(P)-binding oxidoreductase [Arabidopsis thaliana] gi 5103813 gb AAD39643.1 AC007591_8 Contains a PF 00175 Oxidoreductase FAD/NADH-binding domain, EST's gb H76345 and gb AA651465 come from this gene [Arabidopsis thaliana] gi 12744999 gb AAK06878.1 AF344328_1 unknown protein [Arabidopsis thaliana] gi 15451092 gb AAK96817.1  Unknown protein [Arabidopsis thaliana] gi 18377448 gb AAL66890.1  unknown protein [Arabidopsis thaliana] gi 332191150 gb AEE29271.1   FAD/NAD(P)-binding oxidoreductase [Arabidopsis thaliana] | 203  | 295  | 9.00E-31  | 145.3 | 31.0 | 35.5 | FAD/NAD(P)-binding oxidoreductase          | gbpln | Arabidopsis thaliana | AT1G15140.1   Symbols:   FAD/NAD(P)-binding oxidoreductase   chr1:5210403-5212137 REVERSE LENGTH=295                                       | 203  | 295  | 3.00E-33  | 145.3 | 31.0 | 35.5 |
| Rsa1.0_01476.1.g27173.t1 | ref NP_564995.1  Caleosin-related family protein [Arabidopsis thaliana] gi 75333639 sp Q9CAB7.1 PXC4_ARATH RecName: Full=Probable peroxxygenase 4; Short=AtPXC4; AltName: Full=Caleosin-4 gi 12324758 gb AAG52340.1 AC011663_19 unknown protein; 59759-58619 [Arabidopsis thaliana] gi 15810177 gb AAL06990.1  At g70670/F5A18_15 [Arabidopsis thaliana] gi 23505789 gb AAN28754.1  At g70670/F5A18_15 [Arabidopsis thaliana] gi 332196977 gb AEE35098.1  Caleosin-related family protein [Arabidopsis thaliana]                                           | 242  | 195  | 3.00E-92  | 80.6  | 68.2 | 71.9 | Caleosin-related family protein            | gbpln | Arabidopsis thaliana | AT1G70670.1   Symbols:   Caleosin-related family protein   chr1:26644830-26645970 FORWARD LENGTH=195                                       | 242  | 195  | 8.00E-95  | 80.6  | 68.2 | 71.9 |
| Rsa1.0_01476.1.g27174.t1 | ref NP_173742.1  MAK16 protein-like protein [Arabidopsis thaliana] gi 332192246 gb AEE30367.1  MAK16 protein-like protein [Arabidopsis thaliana]                                                                                                                                                                                                                                                                                                                                                                                                           | 304  | 303  | 1.00E-107 | 99.7  | 75.0 | 82.6 | MAK16 protein-like protein                 | gbpln | Arabidopsis thaliana | AT1G23280.1   Symbols:   MAK16 protein-related   chr1:8260865-8262650 REVERSE LENGTH=303                                                   | 304  | 303  | 1.00E-109 | 99.7  | 75.0 | 82.6 |
| Rsa1.0_01476.1.g27175.t3 | refXP_002887316.1   ATTAP1 [Arabidopsis lyrata subsp. lyrata] gi 297333157 gb EFH63575.1   ATTAP1 [Arabidopsis lyrata subsp. lyrata]                                                                                                                                                                                                                                                                                                                                                                                                                       | 767  | 700  | 0         | 91.3  | 79.0 | 84.4 | ATTAP1                                     | gbpln | Arabidopsis lyrata   | AT1G70610.1   Symbols: ATTAP1, TAP1   transporter associated with antigen processing protein 1   chr1:26622086-26626331 FORWARD LENGTH=700 | 767  | 700  | 0         | 91.3  | 79.1 | 84.0 |
| Rsa1.0_01476.1.g27176.t1 | gb ABM30196.1  ribosomal large subunit structural protein [Brassica juncea]                                                                                                                                                                                                                                                                                                                                                                                                                                                                                | 146  | 146  | 3.00E-76  | 100.0 | 96.6 | 99.3 | ribosomal large subunit structural protein | gbpln | Brassica juncea      | AT1G70600.1   Symbols:   Ribosomal protein L18e/L15 superfamily protein   chr1:26621168-26621608 REVERSE LENGTH=146                        | 146  | 146  | 1.00E-78  | 100.0 | 96.6 | 98.6 |

|                          |                                                                                                                                                                                                                                                                                                                                                                                                                                                                                                                                                                                                                                                                                                                                                     |     |     |           |       |      |      |                                                      |       |                      |                                                                                                                                      |     |     |           |       |      |      |
|--------------------------|-----------------------------------------------------------------------------------------------------------------------------------------------------------------------------------------------------------------------------------------------------------------------------------------------------------------------------------------------------------------------------------------------------------------------------------------------------------------------------------------------------------------------------------------------------------------------------------------------------------------------------------------------------------------------------------------------------------------------------------------------------|-----|-----|-----------|-------|------|------|------------------------------------------------------|-------|----------------------|--------------------------------------------------------------------------------------------------------------------------------------|-----|-----|-----------|-------|------|------|
| Rsa1.0_01476.1.g27177.t1 | gb ABM30196.1  ribosomal large subunit structural protein [Brassica juncea]                                                                                                                                                                                                                                                                                                                                                                                                                                                                                                                                                                                                                                                                         | 411 | 146 | 1.00E-38  | 35.5  | 19.2 | 20.0 | ribosomal large subunit structural protein           | gbpln | Brassica juncea      | AT1G70600.1   Symbols:   Ribosomal protein L18e/L15 superfamily protein   chr1:2621168-2621608 REVERSE LENGTH=146                    | 411 | 146 | 2.00E-40  | 35.5  | 19.0 | 19.7 |
| Rsa1.0_01476.1.g27178.t1 | ref NP_680115.1  cysteine/histidine-rich C1 domain-containing protein [Arabidopsis thaliana] gi 332644891 gb AE78412.1  cysteine/histidine-rich C1 domain-containing protein [Arabidopsis thaliana]                                                                                                                                                                                                                                                                                                                                                                                                                                                                                                                                                 | 541 | 619 | 1.00E-138 | 114.4 | 50.3 | 63.6 | cysteine/histidine-rich C1 domain-containing protein | gbpln | Arabidopsis thaliana | AT3G48400.1   Symbols:   Cysteine/Histidine-rich C1 domain family protein   chr3:17923678-17925589 FORWARD LENGTH=619                | 541 | 619 | 1.00E-141 | 114.4 | 50.3 | 63.6 |
| Rsa1.0_01476.1.g27179.t1 | ref NP_11206.1  ADP-ribosylation factor 2 [Arabidopsis thaliana] gi 18395248 ref NP_564195.1  ADP-ribosylation factor 2 [Arabidopsis thaliana] gi 30698721 ref NP_850975.1  ADP-ribosylation factor 2 [Arabidopsis thaliana] gi 42572059 ref NP_974120.1  ADP-ribosylation factor 2 [Arabidopsis thaliana] gi 297845410 ref XP_002890586.1  hypothetical protein ARALYDRAFT.472612 [Arabidopsis lyrata subsp. lyrata] gi 378548287 sp PODH91.1 ARF2B_ARA TH RecName: Full=ADP-ribosylation factor 2-B; Short=AtARF2; AltName: Full=ARF1-like protein U5 gi 378548311 sp Q9LQC8.2 ARF2A_ARA TH RecName: Full=ADP-ribosylation factor 2-A; Short=AtARF2                                                                                               | 181 | 181 | 1.00E-95  | 100.0 | 92.8 | 96.7 | ADP-ribosylation factor 2                            | gbpln | Arabidopsis lyrata   | AT1G70490.2   Symbols:   ATARFA1D, ARFA1D   Ras-related small GTP-binding family protein   chr1:26564162-26565152 REVERSE LENGTH=181 | 181 | 181 | 4.00E-98  | 100.0 | 92.8 | 96.7 |
| Rsa1.0_01476.1.g27180.t1 | #                                                                                                                                                                                                                                                                                                                                                                                                                                                                                                                                                                                                                                                                                                                                                   | #   | #   | #         | #     | #    | #    | -                                                    | ----  | ----                 | #                                                                                                                                    | #   | #   | #         | #     | #    | #    |
| Rsa1.0_01476.1.g27181.t1 | gb AAF79253.1 AC023279_2_F12K21.4 [Arabidopsis thaliana]                                                                                                                                                                                                                                                                                                                                                                                                                                                                                                                                                                                                                                                                                            | 211 | 857 | 1.00E-74  | 406.2 | 61.6 | 73.5 | F12K21.4                                             | gbpln | Arabidopsis thaliana | #                                                                                                                                    | #   | #   | #         | #     | #    | #    |
| Rsa1.0_01476.1.g27182.t1 | ref NP_850976.1  MLP-like protein 34 [Arabidopsis thaliana] gi 79321108 ref NP_001031265.1  MLP-like protein 34 [Arabidopsis thaliana] gi 21542143 sp Q9SSK7.1 MLP34_ARA TH RecName: Full=MLP-like protein 34 gi 59024011 gb AAD55503.1 AC009148_13 Unknown protein [Arabidopsis thaliana] gi 13926294 gb AAK49615.1 AF372899_1 At1g70850/F15H11.10 [Arabidopsis thaliana] gi 16197688 emb CAC83579.1  major latex-like protein [Arabidopsis thaliana] gi 16323244 gb AAL15356.1  At1g70850/F15H11.10 [Arabidopsis thaliana] gi 110740285 dbj BAF02039.1  hypothetical protein [Arabidopsis thaliana] gi 332197006 gb AEE35127.1  MLP-like protein 34 [Arabidopsis thaliana] gi 332197008 gb AEE35129.1  MLP-like protein 34 [Arabidopsis thaliana] | 147 | 316 | 2.00E-57  | 215.0 | 77.6 | 85.0 | MLP-like protein 34                                  | gbpln | Arabidopsis thaliana | AT1G70850.3   Symbols:   MLP34   MLP-like protein 34   chr1:26715429-26716744 REVERSE LENGTH=316                                     | 147 | 316 | 5.00E-60  | 215.0 | 77.6 | 85.0 |
| Rsa1.0_01477.1.g27183.t1 | ref XP_002865764.1  octicosapeptide/Phox/Bem1p domain-containing protein [Arabidopsis lyrata subsp. lyrata] gi 2973111599 gb EFH42023.1  octicosapeptide/Phox/Bem1p domain-containing protein [Arabidopsis lyrata subsp. lyrata]                                                                                                                                                                                                                                                                                                                                                                                                                                                                                                                    | 275 | 285 | 1.00E-107 | 103.6 | 74.2 | 82.9 | octicosapeptide/Phox/Bem1p domain-containing protein | gbpln | Arabidopsis lyrata   | AT5G49920.1   Symbols:   Octicosapeptide/Phox/Bem1p family protein   chr5:20306637-20307583 REVERSE LENGTH=288                       | 275 | 288 | 1.00E-100 | 104.7 | 72.4 | 82.9 |
| Rsa1.0_01477.1.g27184.t1 | #                                                                                                                                                                                                                                                                                                                                                                                                                                                                                                                                                                                                                                                                                                                                                   | #   | #   | #         | #     | #    | #    | -                                                    | ----  | ----                 | #                                                                                                                                    | #   | #   | #         | #     | #    | #    |
| Rsa1.0_01477.1.g27185.t1 | #                                                                                                                                                                                                                                                                                                                                                                                                                                                                                                                                                                                                                                                                                                                                                   | #   | #   | #         | #     | #    | #    | -                                                    | ----  | ----                 | #                                                                                                                                    | #   | #   | #         | #     | #    | #    |
| Rsa1.0_01477.1.g27186.t1 | #                                                                                                                                                                                                                                                                                                                                                                                                                                                                                                                                                                                                                                                                                                                                                   | #   | #   | #         | #     | #    | #    | -                                                    | ----  | ----                 | #                                                                                                                                    | #   | #   | #         | #     | #    | #    |
| Rsa1.0_01477.1.g27187.t1 | #                                                                                                                                                                                                                                                                                                                                                                                                                                                                                                                                                                                                                                                                                                                                                   | #   | #   | #         | #     | #    | #    | -                                                    | ----  | ----                 | #                                                                                                                                    | #   | #   | #         | #     | #    | #    |

|                          |                                                                                                                                                                                                                                                                                                                                        |      |      |           |       |      |      |                                                                                                                                        |       |                         |                                                                                                                                                   |      |     |           |       |      |      |
|--------------------------|----------------------------------------------------------------------------------------------------------------------------------------------------------------------------------------------------------------------------------------------------------------------------------------------------------------------------------------|------|------|-----------|-------|------|------|----------------------------------------------------------------------------------------------------------------------------------------|-------|-------------------------|---------------------------------------------------------------------------------------------------------------------------------------------------|------|-----|-----------|-------|------|------|
| Rsa1.0_01477.1.g27188.t1 | gb ADD09861.1  chloride channel C [Eutrema halophilum]                                                                                                                                                                                                                                                                                 | 775  | 775  | 0         | 100.0 | 94.6 | 97.8 | chloride channel C                                                                                                                     | gbpln | Eutrema halophilum      | AT5G49890.1   Symbols: CLC-C, ATCLC-C   chloride channel C   chr5:20288489-20292143 REVERSE LENGTH=779                                            | 775  | 779 | 0         | 100.5 | 94.1 | 97.4 |
| Rsa1.0_01478.1.g27189.t3 | ref NP_179764.4  uncharacterized protein [Arabidopsis thaliana] gi 330252120 gb AEC07214.1  uncharacterized protein AT2G21720 [Arabidopsis thaliana]                                                                                                                                                                                   | 730  | 734  | 0         | 100.5 | 77.8 | 84.5 | uncharacterized protein                                                                                                                | gbpln | Arabidopsis thaliana    | AT2G21720.1   Symbols:   Plant protein of unknown function (DUF639)   chr2:9273696-9276802 FORWARD LENGTH=734                                     | 730  | 734 | 0         | 100.5 | 77.8 | 84.5 |
| Rsa1.0_01478.1.g27190.t1 | ref NP_001190964.1  phenylalanyl-tRNA synthetase alpha chain [Arabidopsis thaliana] gi 332661651 gb AEE87051.1  probable phenylalanine-tRNA ligase alpha subunit [Arabidopsis thaliana]                                                                                                                                                | 818  | 485  | 0         | 59.3  | 46.6 | 51.3 | phenylalanyl-tRNA synthetase alpha chain                                                                                               | gbpln | Arabidopsis thaliana    | AT4G39280.2   Symbols:   phenylalanyl-tRNA synthetase, putative / phenylalanine-tRNA ligase, putative   chr4:18280292-18284831 REVERSE LENGTH=485 | 818  | 485 | 0         | 59.3  | 46.6 | 51.3 |
| Rsa1.0_01478.1.g27191.t1 | # # # # # # # #                                                                                                                                                                                                                                                                                                                        | #    | #    | #         | #     | #    | #    | -                                                                                                                                      | ----  | ----                    | #                                                                                                                                                 | #    | #   | #         | #     | #    | #    |
| Rsa1.0_01478.1.g27192.t1 | ref NP_180542.1  putative F-box/kelch-repeat protein [Arabidopsis thaliana] gi 75100652 sp O82375.1 FBK39_ARATH RecName: Full=Putative F-box/kelch-repeat protein A229810 gi 3582323 gb AAC35220.1  hypothetical protein [Arabidopsis thaliana] gi 330253213 gb AEC08307.1  putative F-box/kelch-repeat protein [Arabidopsis thaliana] | 384  | 383  | 4.00E-87  | 99.7  | 47.9 | 62.5 | putative F-box/kelch-repeat protein                                                                                                    | gbpln | Arabidopsis thaliana    | AT2G29810.1   Symbols:   Galactose oxidase/kelch repeat superfamily protein   chr2:12726102-12727253 REVERSE LENGTH=383                           | 384  | 383 | 1.00E-89  | 99.7  | 47.9 | 62.5 |
| Rsa1.0_01478.1.g27193.t1 | sp P49311.1 GRP2_SINAL RecName: Full=Glycine-rich RNA-binding protein GRP2A gi 496237 gb AA59213.1  homology with RNA-binding proteins in meristematic tissue [Sinapis alba]                                                                                                                                                           | 170  | 169  | 3.00E-42  | 99.4  | 47.6 | 49.4 | RecName: Full=Glycine-rich RNA-binding protein GRP2A gi 496237 gb AA59213.1  homology with RNA-binding proteins in meristematic tissue | gbpln | Sinapis alba            | AT2G21660.2   Symbols: ATGRP7, CCR2   cold, circadian rhythm, and rna binding 2   chr2:9265477-9266316 REVERSE LENGTH=159                         | 170  | 159 | 2.00E-41  | 93.5  | 44.1 | 49.4 |
| Rsa1.0_01478.1.g27194.t1 | gb AAG51783.1 AC079679_3 reverse transcriptase, putative; 16838-20266 [Arabidopsis thaliana]                                                                                                                                                                                                                                           | 1096 | 1142 | 0         | 104.2 | 48.7 | 63.7 | reverse transcriptase, putative; 16838-20266                                                                                           | gbpln | Arabidopsis thaliana    | AT4G29090.1   Symbols:   Ribonuclease H-like superfamily protein   chr4:14333528-14335255 FORWARD LENGTH=575                                      | 1096 | 575 | 6.00E-98  | 52.5  | 18.5 | 27.2 |
| Rsa1.0_01479.1.g27195.t1 | db BA97087.1  copia-type pol polyprotein-like [Arabidopsis thaliana]                                                                                                                                                                                                                                                                   | 130  | 1123 | 1.00E-53  | 863.8 | 76.2 | 88.5 | copia-type pol polyprotein-like                                                                                                        | gbpln | Arabidopsis thaliana    | # # # # # #                                                                                                                                       | #    | #   | #         | #     | #    | #    |
| Rsa1.0_01479.1.g27196.t3 | gb AAG51783.1 AC079679_3 reverse transcriptase, putative; 16838-20266 [Arabidopsis thaliana]                                                                                                                                                                                                                                           | 1572 | 1142 | 1.00E-164 | 72.6  | 19.0 | 26.4 | reverse transcriptase, putative; 16838-20266                                                                                           | gbpln | Arabidopsis thaliana    | AT4G29090.1   Symbols:   Ribonuclease H-like superfamily protein   chr4:14333528-14335255 FORWARD LENGTH=575                                      | 1572 | 575 | 1.00E-83  | 36.6  | 11.8 | 18.5 |
| Rsa1.0_01479.1.g27197.t1 | # # # # # # # #                                                                                                                                                                                                                                                                                                                        | #    | #    | #         | #     | #    | #    | -                                                                                                                                      | ----  | ----                    | #                                                                                                                                                 | #    | #   | #         | #     | #    | #    |
| Rsa1.0_01479.1.g27198.t1 | gb ABW81182.1  gag-pol-polyprotein3-gypsy-like [Arabidopsis cebennensis]                                                                                                                                                                                                                                                               | 471  | 297  | 5.00E-41  | 63.1  | 19.7 | 28.5 | gag-pol-polyprotein3-gypsy-like                                                                                                        | gbpln | Arabidopsis cebennensis | # # # # # #                                                                                                                                       | #    | #   | #         | #     | #    | #    |
| Rsa1.0_01479.1.g27199.t9 | gb ABD65091.1  hypothetical protein 31.t00049 [Brassica oleracea]                                                                                                                                                                                                                                                                      | 1113 | 530  | 2.00E-53  | 47.6  | 14.3 | 21.1 | hypothetical protein 31.t00049                                                                                                         | gbpln | Brassica oleracea       | # # # # # #                                                                                                                                       | #    | #   | #         | #     | #    | #    |
| Rsa1.0_01479.1.g27200.t1 | # # # # # # # #                                                                                                                                                                                                                                                                                                                        | #    | #    | #         | #     | #    | #    | -                                                                                                                                      | ----  | ----                    | #                                                                                                                                                 | #    | #   | #         | #     | #    | #    |
| Rsa1.0_01479.1.g27201.t3 | ref NP_175064.2  pentatricopeptide repeat-containing protein-like protein [Arabidopsis thaliana] gi 332193889 gb AEE32010.1  pentatricopeptide repeat-containing protein-like protein [Arabidopsis thaliana]                                                                                                                           | 827  | 621  | 0         | 75.1  | 44.3 | 50.3 | pentatricopeptide repeat-containing protein-like protein                                                                               | gbpln | Arabidopsis thaliana    | AT1G43980.1   Symbols:   Tetratricopeptide repeat (TPR)-like superfamily protein   chr1:16687637-16689502 REVERSE LENGTH=621                      | 827  | 621 | 0         | 75.1  | 44.3 | 50.3 |
| Rsa1.0_01480.1.g27202.t1 | gb AAD28647.1  putative Ta11-like non-LTR retroelement protein [Arabidopsis thaliana]                                                                                                                                                                                                                                                  | 601  | 627  | 1.00E-16  | 104.3 | 10.6 | 14.1 | putative Ta11-like non-LTR retroelement protein                                                                                        | gbpln | Arabidopsis thaliana    | # # # # # #                                                                                                                                       | #    | #   | #         | #     | #    | #    |
| Rsa1.0_01480.1.g27203.t1 | ref XP_002876294.1  short-chain dehydrogenase/reductase family protein [Arabidopsis lyrata subsp. lyrata] gi 297322132 gb EFH52553.1  short-chain dehydrogenase/reductase family protein [Arabidopsis lyrata subsp. lyrata]                                                                                                            | 284  | 280  | 1.00E-138 | 98.6  | 85.2 | 93.0 | short-chain dehydrogenase/reductase family protein                                                                                     | gbpln | Arabidopsis lyrata      | AT3G55290.1   Symbols:   NAD(P)-binding Rossmann-fold superfamily protein   chr3:20502653-20503730 FORWARD LENGTH=280                             | 284  | 280 | 1.00E-139 | 98.6  | 83.8 | 92.3 |
| Rsa1.0_01480.1.g27204.t1 | ref XP_002876294.1  short-chain dehydrogenase/reductase family protein [Arabidopsis lyrata subsp. lyrata] gi 297322132 gb EFH52553.1  short-chain dehydrogenase/reductase family protein [Arabidopsis lyrata subsp. lyrata]                                                                                                            | 318  | 280  | 1.00E-119 | 88.1  | 67.9 | 74.5 | short-chain dehydrogenase/reductase family protein                                                                                     | gbpln | Arabidopsis lyrata      | AT3G55290.1   Symbols:   NAD(P)-binding Rossmann-fold superfamily protein   chr3:20502653-20503730 FORWARD LENGTH=280                             | 318  | 280 | 1.00E-120 | 88.1  | 67.3 | 73.9 |
| Rsa1.0_01480.1.g27205.t1 | gb ABB97038.1  unknown [Brassica rapa]                                                                                                                                                                                                                                                                                                 | 154  | 154  | 3.00E-78  | 100.0 | 98.7 | 99.4 | unknown                                                                                                                                | gbpln | Brassica rapa           | AT3G55280.2   Symbols: RPL23AB   ribosomal protein L23AB   chr3:20500667-20501519 FORWARD LENGTH=154                                              | 154  | 154 | 2.00E-60  | 100.0 | 94.2 | 96.1 |
| Rsa1.0_01480.1.g27206.t1 | ref XP_002876292.1  map kinase phosphatase [Arabidopsis lyrata subsp. lyrata] gi 297322130 gb EFH52551.1  map kinase phosphatase [Arabidopsis lyrata subsp. lyrata]                                                                                                                                                                    | 741  | 786  | 0         | 106.1 | 82.5 | 88.3 | map kinase phosphatase                                                                                                                 | gbpln | Arabidopsis lyrata      | AT3G55270.1   Symbols: MKP1, ATMKP1   mitogen-activated protein kinase phosphatase 1   chr3:20496775-20499408 FORWARD LENGTH=784                  | 741  | 784 | 0         | 105.8 | 81.8 | 87.7 |



|                          |                                                                                                                                                                                                                                                                                                                                                                                                                                                                                                                                                                                       |     |      |           |       |      |      |                                                                       |       |                      |                                                                                                                                                                                                                                                                                                                                                                                                                                                                             |     |      |           |       |      |      |
|--------------------------|---------------------------------------------------------------------------------------------------------------------------------------------------------------------------------------------------------------------------------------------------------------------------------------------------------------------------------------------------------------------------------------------------------------------------------------------------------------------------------------------------------------------------------------------------------------------------------------|-----|------|-----------|-------|------|------|-----------------------------------------------------------------------|-------|----------------------|-----------------------------------------------------------------------------------------------------------------------------------------------------------------------------------------------------------------------------------------------------------------------------------------------------------------------------------------------------------------------------------------------------------------------------------------------------------------------------|-----|------|-----------|-------|------|------|
| Rsa1.0_01480.1.g27207.t1 | ref[NP_567017.2] beta-hexosaminidase 1 [Arabidopsis thaliana] gi 426020918 sp A7WM73.1 HEXO1_ARATH RecName: Full=Beta-hexosaminidase 1; AltName: Full=Beta-GlcNAcase 1; AltName: Full=Beta-N-acetylhexosaminidase 1; AltName: Full=Beta-hexosaminidase 2; Short=AtHEX2; AltName: Full=N-acetyl-beta-glucosaminidase 1; Flags: Precursor gi 157154097 emb CAM35467.1  beta-N-acetylhexosaminidase [Arabidopsis thaliana] gi 332645839 gb AEE79360.1  beta-hexosaminidase 1 [Arabidopsis thaliana]                                                                                      | 547 | 541  | 0         | 98.9  | 89.8 | 94.1 | beta-hexosaminidase 1                                                 | gbpln | Arabidopsis thaliana | AT3G55260.1   Symbols: HEXO1, ATHEX2   beta-hexosaminidase 1   chr3:20489317-20492858 FORWARD LENGTH=541                                                                                                                                                                                                                                                                                                                                                                    | 547 | 541  | 0         | 98.9  | 89.8 | 94.1 |
| Rsa1.0_01480.1.g27208.t1 | ref[XP_002876290.1] hypothetical protein ARALYDRAFT_348614 [Arabidopsis lyrata subsp. lyrata] gi 29732128 gb EFH52549.1  hypothetical protein ARALYDRAFT_348614 [Arabidopsis lyrata subsp. lyrata]                                                                                                                                                                                                                                                                                                                                                                                    | 282 | 277  | 1.00E-141 | 98.2  | 90.4 | 93.6 | hypothetical protein ARALYDRAFT_348614                                | gbpln | Arabidopsis lyrata   | AT3G55250.1   Symbols:   unknown protein; FUNCTIONS IN: molecular_function unknown; INVOLVED IN: biological_process unknown; LOCATED IN: mitochondrion, chloroplast, nucleus; EXPRESSED DURING: 13 plant structures; EXPRESSED DURING: 13 growth stages; Has 46 Blast hits to 46 proteins in 17 species: Archae - 0; Bacteria - 0; Metazoa - 0; Fungi - 0; Plants - 46; Viruses - 0; Other Eukaryotes - 0 (source: NCBI BLINK).   chr3:20478302-20480324 FORWARD LENGTH=277 | 282 | 277  | 1.00E-135 | 98.2  | 87.9 | 91.8 |
| Rsa1.0_01481.1.g27209.t1 | # # # # # # # # - ---- ---- # # # # # #                                                                                                                                                                                                                                                                                                                                                                                                                                                                                                                                               |     |      |           |       |      |      |                                                                       |       |                      |                                                                                                                                                                                                                                                                                                                                                                                                                                                                             |     |      |           |       |      |      |
| Rsa1.0_01481.1.g27210.t1 | ref[NP_565844.1] zinc finger A20 and AN1 domain-containing stress-associated protein 4 [Arabidopsis thaliana] gi 73921295 sp Q9SJM6.1 SAP4_ARATH RecName: Full=Zinc finger A20 and AN1 domain-containing stress-associated protein 4; Short=AtSAP4 gi 4510345 gb AAD21434.1  expressed protein [Arabidopsis thaliana] gi 21592464 gb AM64415.1  zinc finger-like protein [Arabidopsis thaliana] gi 114050557 gb AB149428.1  At2g36320 [Arabidopsis thaliana] gi 330254138 gb AEC09232.1  zinc finger A20 and AN1 domain-containing stress-associated protein 4 [Arabidopsis thaliana] | 167 | 161  | 6.00E-68  | 96.4  | 79.6 | 86.2 | zinc finger A20 and AN1 domain-containing stress-associated protein 4 | gbpln | Arabidopsis thaliana | AT2G36320.1   Symbols:   A20/AN1-like zinc finger family protein   chr2:15229388-15229873 FORWARD LENGTH=161                                                                                                                                                                                                                                                                                                                                                                | 167 | 161  | 2.00E-70  | 96.4  | 79.6 | 86.2 |
| Rsa1.0_01481.1.g27211.t1 | ref[XP_002879603.1] hydrolase, acting on ester bonds [Arabidopsis lyrata subsp. lyrata] gi 297325442 gb EFH55862.1  hydrolase, acting on ester bonds [Arabidopsis lyrata subsp. lyrata]                                                                                                                                                                                                                                                                                                                                                                                               | 348 | 356  | 1.00E-131 | 102.3 | 64.7 | 75.9 | hydrolase, acting on ester bonds                                      | gbpln | Arabidopsis lyrata   | AT2G36325.1   Symbols:   GDSL-like Lipase/Acylhydrolase superfamily protein   chr2:15231409-15233224 FORWARD LENGTH=356                                                                                                                                                                                                                                                                                                                                                     | 348 | 356  | 1.00E-127 | 102.3 | 62.4 | 73.3 |
| Rsa1.0_01481.1.g27212.t1 | ref[XP_002890339.1] hypothetical protein ARALYDRAFT_904279 [Arabidopsis lyrata subsp. lyrata] gi 297326178 gb EFH56598.1  hypothetical protein ARALYDRAFT_904279 [Arabidopsis lyrata subsp. lyrata]                                                                                                                                                                                                                                                                                                                                                                                   | 622 | 613  | 0         | 98.6  | 84.7 | 89.9 | hypothetical protein ARALYDRAFT_904279                                | gbpln | Arabidopsis lyrata   | AT2G48010.1   Symbols: RKF3   receptor-like kinase in in flowers 3   chr2:19641465-19643318 FORWARD LENGTH=617                                                                                                                                                                                                                                                                                                                                                              | 622 | 617  | 0         | 99.2  | 83.9 | 90.2 |
| Rsa1.0_01481.1.g27213.t1 | ref[XP_002879608.1] ATPDR6/PDR6 [Arabidopsis lyrata subsp. lyrata] gi 297325447 gb EFH55867.1  ATPDR6/PDR6 [Arabidopsis lyrata subsp. lyrata]                                                                                                                                                                                                                                                                                                                                                                                                                                         | 735 | 1452 | 0         | 197.6 | 73.6 | 77.4 | ATPDR6/PDR6                                                           | gbpln | Arabidopsis lyrata   | AT2G36410.1   Symbols: PDR6, ATPDR6   pleiotropic drug resistance 6   chr2:15257583-15263627 FORWARD LENGTH=1453                                                                                                                                                                                                                                                                                                                                                            | 735 | 1453 | 0         | 197.7 | 72.5 | 76.9 |
| Rsa1.0_01481.1.g27214.t1 | dbj BAC42083.1  unknown protein [Arabidopsis thaliana]                                                                                                                                                                                                                                                                                                                                                                                                                                                                                                                                | 378 | 398  | 1.00E-158 | 105.3 | 84.4 | 88.1 | unknown protein                                                       | gbpln | Arabidopsis thaliana | AT2G36400.1   Symbols: AtGRF3, GRF3   growth-regulating factor 3   chr2:15270300-15272617 REVERSE LENGTH=398                                                                                                                                                                                                                                                                                                                                                                | 378 | 398  | 1.00E-155 | 105.3 | 83.1 | 86.8 |
| Rsa1.0_01481.1.g27215.t1 | gb EOA28004.1  hypothetical protein CARUB_v10024181mg [Capsella rubella]                                                                                                                                                                                                                                                                                                                                                                                                                                                                                                              | 176 | 170  | 2.00E-69  | 96.6  | 80.1 | 87.5 | hypothetical protein CARUB_v10024181mg                                | gbpln | Capsella rubella     | AT2G36410.1   Symbols:   Family of unknown function (DUF662)   chr2:15279041-15280270 FORWARD LENGTH=195                                                                                                                                                                                                                                                                                                                                                                    | 176 | 195  | 4.00E-55  | 110.8 | 66.5 | 81.8 |
| Rsa1.0_01481.1.g27216.t1 | gb EOA27598.1  hypothetical protein CARUB_v10023738mg [Capsella rubella]                                                                                                                                                                                                                                                                                                                                                                                                                                                                                                              | 304 | 298  | 1.00E-149 | 98.0  | 84.9 | 90.5 | hypothetical protein CARUB_v10023738mg                                | gbpln | Capsella rubella     | AT3G53000.1   Symbols: AtPP2-A15, PP2-A15   phloem protein 2-A15   chr3:19654278-19655801 FORWARD LENGTH=300                                                                                                                                                                                                                                                                                                                                                                | 304 | 300  | 1.00E-134 | 98.7  | 77.3 | 85.9 |
| Rsa1.0_01481.1.g27217.t1 | gb EOA27054.1  hypothetical protein CARUB_v10023149mg [Capsella rubella]                                                                                                                                                                                                                                                                                                                                                                                                                                                                                                              | 158 | 467  | 4.00E-56  | 295.6 | 84.2 | 86.1 | hypothetical protein CARUB_v10023149mg                                | gbpln | Capsella rubella     | AT2G36630.1   Symbols:   Sulfite exporter TauE/SaE family protein   chr2:15352767-15355050 REVERSE LENGTH=459                                                                                                                                                                                                                                                                                                                                                               | 158 | 459  | 1.00E-58  | 290.5 | 85.4 | 87.3 |

|                          |                                                                                                                                                                                                                                                                                                                                                                                                                                                                                                                                                                                                                                                                                                                     |     |     |           |       |      |      |                                        |       |                      |                                                                                                                                                                                                                                                                                                                                                        |     |     |           |       |      |      |
|--------------------------|---------------------------------------------------------------------------------------------------------------------------------------------------------------------------------------------------------------------------------------------------------------------------------------------------------------------------------------------------------------------------------------------------------------------------------------------------------------------------------------------------------------------------------------------------------------------------------------------------------------------------------------------------------------------------------------------------------------------|-----|-----|-----------|-------|------|------|----------------------------------------|-------|----------------------|--------------------------------------------------------------------------------------------------------------------------------------------------------------------------------------------------------------------------------------------------------------------------------------------------------------------------------------------------------|-----|-----|-----------|-------|------|------|
| Rsa1.0_01481.1.g27218.t1 | gb EOA28539.1  hypothetical protein CARUB_v10024756mg [Capsella rubella]                                                                                                                                                                                                                                                                                                                                                                                                                                                                                                                                                                                                                                            | 496 | 496 | 0         | 100.0 | 77.0 | 87.7 | hypothetical protein CARUB_v10024756mg | gbpln | Capsella rubella     | AT2G36780.1   Symbols:   UDP-Glycosyltransferase superfamily protein   chr2:15417618-15419108 REVERSE LENGTH=496                                                                                                                                                                                                                                       | 496 | 496 | 0         | 100.0 | 75.8 | 86.9 |
| Rsa1.0_01481.1.g27219.t1 | ref NP_181215.1  UDP-glucosyl transferase 73C [Arabidopsis thaliana] gi 75315658 sp Q9ZQ97.1 U73C4_ARAT H RecName: Full=UDP-glycosyltransferase 73C4 gi 4415922 gb AAD20153.1  putative glucosyl transferase [Arabidopsis thaliana] gi 20856890 gb AAM26689.1  At2g36770/F13K3.17 [Arabidopsis thaliana] gi 25090305 gb AAN72273.1  At2g36770/F13K3.17 [Arabidopsis thaliana] gi 330254202 gb AEC09296.1  UDP-glucosyl transferase 73C4 [Arabidopsis thaliana]                                                                                                                                                                                                                                                      | 497 | 496 | 0         | 99.8  | 81.7 | 92.2 | UDP-glucosyl transferase 73C           | gbpln | Arabidopsis thaliana | AT2G36770.1   Symbols:   UDP-Glycosyltransferase superfamily protein   chr2:15415227-15416717 REVERSE LENGTH=496                                                                                                                                                                                                                                       | 497 | 496 | 0         | 99.8  | 81.7 | 92.2 |
| Rsa1.0_01481.1.g27220.t1 | #                                                                                                                                                                                                                                                                                                                                                                                                                                                                                                                                                                                                                                                                                                                   | #   | #   | #         | #     | #    | #    | -                                      | ----  | ----                 | #                                                                                                                                                                                                                                                                                                                                                      | #   | #   | #         | #     | #    |      |
| Rsa1.0_01481.1.g27221.t1 | ref XP_002891469.1  don-glucosyltransferase [Arabidopsis lyrata subsp. lyrata] gi 297327308 gb EFH57728.1  don-glucosyltransferase [Arabidopsis lyrata subsp. lyrata]                                                                                                                                                                                                                                                                                                                                                                                                                                                                                                                                               | 496 | 496 | 0         | 100.0 | 87.7 | 94.2 | don-glucosyltransferase                | gbpln | Arabidopsis lyrata   | AT2G36800.1   Symbols: DOGT1, UGT73C5   don-glucosyltransferase 1   chr2:15423493-15424980 REVERSE LENGTH=495                                                                                                                                                                                                                                          | 496 | 495 | 0         | 99.8  | 85.5 | 92.5 |
| Rsa1.0_01481.1.g27222.t1 | ref NP_181224.1  xyloglucan:xyloglucosyl transferase [Arabidopsis thaliana] gi 38605514 sp Q9S JL9.1 XTH32_ARAT H RecName: Full=Probable xyloglucan endotransglucosylase/hydrolase protein 32; Short=At-XTH32; Short=XTH-32; Flags: Precursor gi 4883603 gb AAD31572.1  xyloglucan endotransglucosylase, putative [Arabidopsis thaliana] gi 15027967 gb AAK76514.1  putative xyloglucan endo-transglycosylase [Arabidopsis thaliana] gi 21595304 gb AAM66089.1  putative xyloglucan endo-transglycosylase [Arabidopsis thaliana] gi 22136872 gb AAM91780.1  putative xyloglucan endo-transglycosylase [Arabidopsis thaliana] gi 330254214 gb AEC09308.1  xyloglucan:xyloglucosyl transferase [Arabidopsis thaliana] | 299 | 299 | 1.00E-160 | 100.0 | 90.0 | 96.3 | xyloglucan:xyloglucosyl transferase    | gbpln | Arabidopsis thaliana | AT2G36870.1   Symbols: XTH32   xyloglucan endotransglucosylase/hydrolase 32   chr2:15472869-15474630 REVERSE LENGTH=299                                                                                                                                                                                                                                | 299 | 299 | 1.00E-163 | 100.0 | 90.0 | 96.3 |
| Rsa1.0_01482.1.g27223.t1 | ref NP_192825.1  uncharacterized protein [Arabidopsis thaliana] gi 3513732 gb AAC33948.1  F8M12.4 gene product [Arabidopsis thaliana] gi 4539361 emb CAB40055.1  putative protein [Arabidopsis thaliana] gi 7287785 emb CAB81188.1  putative protein [Arabidopsis thaliana] gi 332657539 gb AEE82938.1  uncharacterized protein AT4G10870 [Arabidopsis thaliana]                                                                                                                                                                                                                                                                                                                                                    | 169 | 173 | 3.00E-18  | 102.4 | 41.4 | 54.4 | uncharacterized protein                | gbpln | Arabidopsis thaliana | AT4G10870.1   Symbols:   unknown protein; BEST Arabidopsis thaliana protein match is: unknown protein (TAIR:AT4G10880.1); Has 1807 Blast hits to 1807 proteins in 277 species: Archae - 0; Bacteria - 0; Metazoa - 736; Fungi - 347; Plants - 385; Viruses - 0; Other Eukaryotes - 339 (source: NCBI BLINK).   chr4:6683555-6684076 REVERSE LENGTH=173 | 169 | 173 | 1.00E-20  | 102.4 | 41.4 | 54.4 |
| Rsa1.0_01482.1.g27224.t1 | ref XP_002865380.1  hypothetical protein ARALYDRAFT_917203 [Arabidopsis lyrata subsp. lyrata] gi 297311215 gb EFH41639.1  hypothetical protein ARALYDRAFT_917203 [Arabidopsis lyrata subsp. lyrata]                                                                                                                                                                                                                                                                                                                                                                                                                                                                                                                 | 229 | 238 | 1.00E-108 | 103.9 | 85.6 | 91.3 | hypothetical protein ARALYDRAFT_917203 | gbpln | Arabidopsis lyrata   | AT5G44170.1   Symbols:   S-adenosyl-L-methionine-dependent methyltransferases superfamily protein   chr5:17780394-17781098 FORWARD LENGTH=234                                                                                                                                                                                                          | 229 | 234 | 1.00E-111 | 102.2 | 84.3 | 91.7 |
| Rsa1.0_01482.1.g27225.t1 | gb AAN60339.1  unknown [Arabidopsis thaliana]                                                                                                                                                                                                                                                                                                                                                                                                                                                                                                                                                                                                                                                                       | 252 | 247 | 1.00E-101 | 98.0  | 71.8 | 81.0 | unknown                                | gbpln | Arabidopsis thaliana | AT5G44130.1   Symbols: FLA13   FASCICLIN-like arabinogalactan protein 13 precursor   chr5:17761128-17761871 FORWARD LENGTH=247                                                                                                                                                                                                                         | 252 | 247 | 7.00E-99  | 98.0  | 79.4 | 86.1 |
| Rsa1.0_01482.1.g27226.t1 | ref XP_002863610.1  hypothetical protein ARALYDRAFT_494585 [Arabidopsis lyrata subsp. lyrata] gi 297309445 gb EFH39869.1  hypothetical protein ARALYDRAFT_494585 [Arabidopsis lyrata subsp. lyrata]                                                                                                                                                                                                                                                                                                                                                                                                                                                                                                                 | 283 | 282 | 1.00E-143 | 99.6  | 93.6 | 97.2 | hypothetical protein ARALYDRAFT_494585 | gbpln | Arabidopsis lyrata   | AT5G44110.1   Symbols: ATPOP1, ATNAP2, POP1   P-loop containing nucleoside triphosphate hydrolases superfamily protein   chr5:17754222-17755672 REVERSE LENGTH=282                                                                                                                                                                                     | 283 | 282 | 1.00E-145 | 99.6  | 93.3 | 96.8 |

|                           |                                                                                                                                                                                                                                                                                                                                                                                                                                                                                                                                               |      |      |           |       |      |      |                                                     |       |                      |                                                                                                                                                                                                                                                                                                                                                          |      |     |           |       |      |      |
|---------------------------|-----------------------------------------------------------------------------------------------------------------------------------------------------------------------------------------------------------------------------------------------------------------------------------------------------------------------------------------------------------------------------------------------------------------------------------------------------------------------------------------------------------------------------------------------|------|------|-----------|-------|------|------|-----------------------------------------------------|-------|----------------------|----------------------------------------------------------------------------------------------------------------------------------------------------------------------------------------------------------------------------------------------------------------------------------------------------------------------------------------------------------|------|-----|-----------|-------|------|------|
| Rsa1.0_01482.1.g27227.t1  | ref XP_002863242.1  hypothetical protein ARALYDRAFT_358968 [Arabidopsis lyrata subsp. lyrata] gi 297309076 gb EFH39501.1  hypothetical protein ARALYDRAFT_358968 [Arabidopsis lyrata subsp. lyrata]                                                                                                                                                                                                                                                                                                                                           | 155  | 192  | 9.00E-63  | 123.9 | 76.8 | 84.5 | hypothetical protein ARALYDRAFT_358968              | gbpln | Arabidopsis lyrata   | AT4G13440.1   Symbols:   Calcium-binding EF-hand family protein   chr4:7810215-7810679 FORWARD LENGTH=154                                                                                                                                                                                                                                                | 155  | 154 | 3.00E-65  | 99.4  | 76.8 | 84.5 |
| Rsa1.0_01482.1.g27228.t23 | ref NP_178162.2  F-box/RNI-like/FBD-like domain-containing protein [Arabidopsis thaliana] gi 332198288 gb AE36409.1  F-box/FBD/LRR-repeat protein [Arabidopsis thaliana]                                                                                                                                                                                                                                                                                                                                                                      | 463  | 481  | 1.00E-130 | 103.9 | 53.6 | 70.4 | F-box/RNI-like/FBD-like domain-containing protein   | gbpln | Arabidopsis thaliana | AT1G80470.1   Symbols:   F-box/RNI-like/FBD-like domains-containing protein   chr1:30256185-30257916 FORWARD LENGTH=481                                                                                                                                                                                                                                  | 463  | 481 | 1.00E-133 | 103.9 | 53.6 | 70.4 |
| Rsa1.0_01482.1.g27229.t1  | dbj BAB85602.1  phytochelatin synthase 1 [Brassica juncea]                                                                                                                                                                                                                                                                                                                                                                                                                                                                                    | 171  | 485  | 2.00E-34  | 283.6 | 44.4 | 52.0 | phytochelatin synthase 1                            | gbpln | Brassica juncea      | AT5G44070.1   Symbols: CAD1, ARA8, ATPCS1, PCS1   phytochelatin synthase 1 (PCS1)   chr5:17734876-17737672 FORWARD LENGTH=485                                                                                                                                                                                                                            | 171  | 485 | 4.00E-35  | 283.6 | 43.3 | 52.0 |
| Rsa1.0_01482.1.g27230.t1  | ref NP_199219.1  uncharacterized protein [Arabidopsis thaliana] gi 9758565 dbj BAB09066.1  unnamed protein product [Arabidopsis thaliana] gi 26451331 dbj BAC42766.1  unknown protein [Arabidopsis thaliana] gi 28973277 gb AA063963.1  unknown protein [Arabidopsis thaliana] gi 91805689 gb ABE65573.1  unknown [Arabidopsis thaliana] gi 332007670 gb AED95053.1  uncharacterized protein AT5G44060 [Arabidopsis thaliana]                                                                                                                 | 150  | 150  | 4.00E-53  | 100.0 | 76.7 | 81.3 | uncharacterized protein                             | gbpln | Arabidopsis thaliana | AT5G44060.1   Symbols:   unknown protein; BEST Arabidopsis thaliana protein match is: unknown protein (TAIR:AT1G04000.1). Has 1807 Blast hits to 1807 proteins in 277 species: Archae - 0; Bacteria - 0; Metazoa - 736; Fungi - 347; Plants - 385; Viruses - 0; Other Eukaryotes - 339 (source: NCBI OLink).   chr5:17731209-17731661 FORWARD LENGTH=150 | 150  | 150 | 1.00E-55  | 100.0 | 76.7 | 81.3 |
| Rsa1.0_01483.1.g27231.t1  | #                                                                                                                                                                                                                                                                                                                                                                                                                                                                                                                                             | #    | #    | #         | #     | #    | #    | -                                                   | ----  | ----                 | #                                                                                                                                                                                                                                                                                                                                                        | #    | #   | #         | #     | #    | #    |
| Rsa1.0_01483.1.g27232.t1  | ref NP_175260.1  CBL-interacting serine/threonine-protein kinase 17 [Arabidopsis thaliana] gi 75332093 sp Q94C40.1 CIPKH_ARAT H RecName: Full=CBL-interacting serine/threonine-protein kinase 17; AltName: Full=SNF1-related kinase 3.21; AltName: Full=SOS2-like protein kinase PKS20 gi 14571553 gb AAK64513.1  CBL-interacting protein kinase 17 [Arabidopsis thaliana] gi 116325942 gb ABJ98572.1  At1g48260 [Arabidopsis thaliana] gi 332194148 gb AEE32269.1  CBL-interacting serine/threonine-protein kinase 17 [Arabidopsis thaliana] | 425  | 432  | 0         | 101.6 | 82.1 | 90.8 | CBL-interacting serine/threonine-protein kinase 17  | gbpln | Arabidopsis thaliana | AT1G48260.1   Symbols: CIPK17, SnRK3.21   CBL-interacting protein kinase 17   chr1:17814226-17817226 REVERSE LENGTH=432                                                                                                                                                                                                                                  | 425  | 432 | 0         | 101.6 | 82.1 | 90.8 |
| Rsa1.0_01483.1.g27233.t1  | gb AAC33226.1  putative non-LTR retroelement reverse transcriptase [Arabidopsis thaliana]                                                                                                                                                                                                                                                                                                                                                                                                                                                     | 697  | 1529 | 0         | 219.4 | 57.0 | 74.3 | putative non-LTR retroelement reverse transcriptase | gbpln | Arabidopsis thaliana | AT3G24255.1   Symbols:   RNA-directed DNA polymerase (reverse transcriptase)-related family protein   chr3:8789471-8793208 FORWARD LENGTH=746                                                                                                                                                                                                            | 697  | 746 | 1.00E-115 | 107.0 | 29.7 | 38.3 |
| Rsa1.0_01483.1.g27234.t3  | gb AAC33226.1  putative non-LTR retroelement reverse transcriptase [Arabidopsis thaliana]                                                                                                                                                                                                                                                                                                                                                                                                                                                     | 1446 | 1529 | 0         | 105.7 | 46.5 | 63.4 | putative non-LTR retroelement reverse transcriptase | gbpln | Arabidopsis thaliana | AT3G24255.1   Symbols:   RNA-directed DNA polymerase (reverse transcriptase)-related family protein   chr3:8789471-8793208 FORWARD LENGTH=746                                                                                                                                                                                                            | 1446 | 746 | 1.00E-67  | 51.6  | 10.2 | 14.5 |
| Rsa1.0_01483.1.g27235.t1  | ref NP_175257.1  nodulin MtN21 /EamA-like transporter protein [Arabidopsis thaliana] gi 325530209 sp Q9LNH5.2 PT148_ARA TH RecName: Full=Probable sugar phosphate/phosphate translocator At1g48230 gi 332194146 gb AEE32267.1  probable sugar phosphate/phosphate translocator [Arabidopsis thaliana]                                                                                                                                                                                                                                         | 367  | 367  | 0         | 100.0 | 95.6 | 97.5 | nodulin MtN21 /EamA-like transporter protein        | gbpln | Arabidopsis thaliana | AT1G48230.1   Symbols:   nodulin MtN21 /EamA-like transporter family protein   chr1:17806264-17808604 FORWARD LENGTH=367                                                                                                                                                                                                                                 | 367  | 367 | 0         | 100.0 | 95.6 | 97.5 |
| Rsa1.0_01483.1.g27236.t1  | #                                                                                                                                                                                                                                                                                                                                                                                                                                                                                                                                             | #    | #    | #         | #     | #    | #    | -                                                   | ----  | ----                 | #                                                                                                                                                                                                                                                                                                                                                        | #    | #   | #         | #     | #    | #    |
| Rsa1.0_01483.1.g27237.t1  | #                                                                                                                                                                                                                                                                                                                                                                                                                                                                                                                                             | #    | #    | #         | #     | #    | #    | -                                                   | ----  | ----                 | #                                                                                                                                                                                                                                                                                                                                                        | #    | #   | #         | #     | #    | #    |
| Rsa1.0_01483.1.g27238.t1  | gb AAF79618.1 AC027665_19 F5M15.26 [Arabidopsis thaliana]                                                                                                                                                                                                                                                                                                                                                                                                                                                                                     | 1538 | 1838 | 0         | 119.5 | 43.6 | 55.9 | F5M15.26                                            | gbpln | Arabidopsis thaliana | #                                                                                                                                                                                                                                                                                                                                                        | #    | #   | #         | #     | #    | #    |
| Rsa1.0_01483.1.g27239.t1  | gb AAF79618.1 AC027665_19 F5M15.26 [Arabidopsis thaliana]                                                                                                                                                                                                                                                                                                                                                                                                                                                                                     | 901  | 1838 | 0         | 204.0 | 41.7 | 52.2 | F5M15.26                                            | gbpln | Arabidopsis thaliana | #                                                                                                                                                                                                                                                                                                                                                        | #    | #   | #         | #     | #    | #    |

|                          |                                                                                                                                                                                                                                                                                                                                                                                                                                                                                                                                                                                                                                                                                                                                                                                                                                                                                                                                                                                                                                                                                                             |     |     |           |       |      |      |                                             |       |                      |                                                                                                                                             |     |     |           |       |      |      |
|--------------------------|-------------------------------------------------------------------------------------------------------------------------------------------------------------------------------------------------------------------------------------------------------------------------------------------------------------------------------------------------------------------------------------------------------------------------------------------------------------------------------------------------------------------------------------------------------------------------------------------------------------------------------------------------------------------------------------------------------------------------------------------------------------------------------------------------------------------------------------------------------------------------------------------------------------------------------------------------------------------------------------------------------------------------------------------------------------------------------------------------------------|-----|-----|-----------|-------|------|------|---------------------------------------------|-------|----------------------|---------------------------------------------------------------------------------------------------------------------------------------------|-----|-----|-----------|-------|------|------|
| Rsa1.0_01484.1.g27240.t1 | <p>ref NP_200637.1  regulatory particle triple-A ATPase 3 [Arabidopsis thaliana]</p> <p>gi 297793353 ref XP_002864561.1  hypothetical protein ARALYDRAFT_495939 [Arabidopsis lyrata subsp. lyrata]</p> <p>gi 28558168 sp Q9SEI4.1 PRSB6_ARAT H RecName: Full=26S protease regulatory subunit 6B homolog; AltName: Full=26S protease subunit 6B homolog; AltName: Full=26S proteasome AAA-ATPase subunit RPT3; AltName: Full=Protein BMAA insensitive morphology 409; AltName: Full=Regulatory particle triple-A ATPase subunit 3</p> <p>gi 6652882 gb AAF22523.1 AF123392.1 26S proteasome AAA-ATPase subunit RPT3 [Arabidopsis thaliana]</p> <p>gi 8777330 dbj BAA96920.1  26S proteasome AAA-ATPase subunit RPT3 [Arabidopsis thaliana]</p> <p>gi 17979231 gb AAL49932.1  AT4g10340/F24G24.140 [Arabidopsis thaliana]</p> <p>gi 56382019 gb AAV85728.1  At5g58290 [Arabidopsis thaliana]</p> <p>gi 297310396 gb EFH40820.1  hypothetical protein ARALYDRAFT_495939 [Arabidopsis lyrata subsp. lyrata]</p> <p>gi 332009646 gb AED97029.1  regulatory particle triple-A ATPase 3 [Arabidopsis thaliana]</p> | 284 | 408 | 1.00E-154 | 143.7 | 97.9 | 98.9 | regulatory particle triple-A ATPase 3       | gbpln | Arabidopsis lyrata   | AT5G58290.1   Symbols: RPT3   regulatory particle triple-A ATPase 3   chr5:23569155-23571116 FORWARD LENGTH=408                             | 284 | 408 | 1.00E-157 | 143.7 | 97.9 | 98.9 |
| Rsa1.0_01484.1.g27240.t1 | <p>gb EOA14841.1  hypothetical protein CARUB_v10028155mg [Capsella rubella]</p>                                                                                                                                                                                                                                                                                                                                                                                                                                                                                                                                                                                                                                                                                                                                                                                                                                                                                                                                                                                                                             | 525 | 556 | 0         | 105.9 | 80.8 | 91.2 | hypothetical protein CARUB_v10028155mg      | gbpln | Capsella rubella     | AT5G58320.2   Symbols: Kinase interacting (KIP1-like) family protein   chr5:23577728-23579641 FORWARD LENGTH=558                            | 525 | 558 | 0         | 106.3 | 79.4 | 91.0 |
| Rsa1.0_01484.1.g27242.t1 | <p>ref NP_851214.1  lactate/malate dehydrogenase family protein [Arabidopsis thaliana]</p> <p>gi 23297668 gb AANI3004.1  NADP-dependent malate dehydrogenase [Arabidopsis thaliana]</p> <p>gi 110740830 dbj BAE98512.1  NADP-dependent malate dehydrogenase [Arabidopsis thaliana]</p> <p>gi 332009655 gb AED97038.1  lactate/malate dehydrogenase family protein [Arabidopsis thaliana]</p> <p>ref XP_002864565.1  hypothetical protein ARALYDRAFT_495950 [Arabidopsis lyrata subsp. lyrata]</p> <p>gi 297310400 gb EFH40824.1  hypothetical protein ARALYDRAFT_495950 [Arabidopsis lyrata subsp. lyrata]</p>                                                                                                                                                                                                                                                                                                                                                                                                                                                                                              | 445 | 443 | 0         | 99.6  | 93.9 | 96.4 | lactate/malate dehydrogenase family protein | gbpln | Arabidopsis thaliana | AT5G58330.1   Symbols: lactate/malate dehydrogenase family protein   chr5:23580010-23582287 REVERSE LENGTH=443                              | 445 | 443 | 0         | 99.6  | 93.9 | 96.4 |
| Rsa1.0_01484.1.g27243.t1 | <p>ref NP_200644.1  ovate family protein 3 [Arabidopsis thaliana]</p> <p>gi 8777337 dbj BAA96927.1  unnamed protein product [Arabidopsis thaliana]</p> <p>gi 67633890 gb AA78869.1  ovate family protein [Arabidopsis thaliana]</p> <p>gi 332009659 gb AED97042.1  ovate family protein 3 [Arabidopsis thaliana]</p> <p>ref XP_002864570.1  predicted protein [Arabidopsis lyrata subsp. lyrata]</p> <p>gi 297310405 gb EFH40829.1  predicted protein [Arabidopsis lyrata subsp. lyrata]</p>                                                                                                                                                                                                                                                                                                                                                                                                                                                                                                                                                                                                                | 832 | 571 | 0         | 68.6  | 54.3 | 57.7 | hypothetical protein ARALYDRAFT_495950      | gbpln | Arabidopsis lyrata   | AT5G58350.1   Symbols: WNK4, ZIK2   with no lysine (K) kinase 4   chr5:23585505-23587681 FORWARD LENGTH=571                                 | 832 | 571 | 0         | 68.6  | 52.3 | 56.5 |
| Rsa1.0_01484.1.g27244.t1 | <p>ref XP_002864571.1  hypothetical protein ARALYDRAFT_495954 [Arabidopsis lyrata subsp. lyrata]</p> <p>gi 297310406 gb EFH40830.1  hypothetical protein ARALYDRAFT_495954 [Arabidopsis lyrata subsp. lyrata]</p>                                                                                                                                                                                                                                                                                                                                                                                                                                                                                                                                                                                                                                                                                                                                                                                                                                                                                           | 338 | 296 | 7.00E-84  | 87.6  | 59.2 | 66.9 | ovate family protein 3                      | gbpln | Arabidopsis thaliana | AT5G58360.1   Symbols: ATOFP3, OFP3   ovate family protein 3   chr5:23590079-23590969 REVERSE LENGTH=296                                    | 338 | 296 | 2.00E-86  | 87.6  | 59.2 | 66.9 |
| Rsa1.0_01484.1.g27245.t1 | <p>ref XP_002864571.1  hypothetical protein ARALYDRAFT_495954 [Arabidopsis lyrata subsp. lyrata]</p> <p>gi 297310405 gb EFH40829.1  predicted protein [Arabidopsis lyrata subsp. lyrata]</p>                                                                                                                                                                                                                                                                                                                                                                                                                                                                                                                                                                                                                                                                                                                                                                                                                                                                                                                | 488 | 467 | 0         | 95.7  | 75.0 | 79.9 | predicted protein                           | gbpln | Arabidopsis lyrata   | AT5G58370.2   Symbols: P-loop containing nucleoside triphosphate hydrolases superfamily protein   chr5:23593358-23595645 FORWARD LENGTH=465 | 488 | 465 | 0         | 95.3  | 74.6 | 80.3 |
| Rsa1.0_01484.1.g27246.t1 | <p>ref XP_002864571.1  hypothetical protein ARALYDRAFT_495954 [Arabidopsis lyrata subsp. lyrata]</p> <p>gi 297310406 gb EFH40830.1  hypothetical protein ARALYDRAFT_495954 [Arabidopsis lyrata subsp. lyrata]</p>                                                                                                                                                                                                                                                                                                                                                                                                                                                                                                                                                                                                                                                                                                                                                                                                                                                                                           | 94  | 85  | 9.00E-26  | 90.4  | 64.9 | 70.2 | hypothetical protein ARALYDRAFT_495954      | gbpln | Arabidopsis lyrata   | AT5G58375.1   Symbols: Methyltransferase-related protein   chr5:23596369-23596705 FORWARD LENGTH=85                                         | 94  | 85  | 1.00E-27  | 90.4  | 63.8 | 69.1 |
| Rsa1.0_01484.1.g27247.t1 | <p>gb EOA12435.1  hypothetical protein CARUB_v10028322mg [Capsella rubella]</p>                                                                                                                                                                                                                                                                                                                                                                                                                                                                                                                                                                                                                                                                                                                                                                                                                                                                                                                                                                                                                             | 458 | 472 | 0         | 103.1 | 86.7 | 92.4 | hypothetical protein CARUB_v10028322mg      | gbpln | Capsella rubella     | AT5G58380.1   Symbols: CIPK10, PKS2, SIP1, SNRK3.8   SOS3-interacting protein 1   chr5:23597092-23598531 REVERSE LENGTH=479                 | 458 | 479 | 0         | 104.6 | 86.0 | 91.9 |

|                          |                                                                                                                                                                                                                                                                                                                                                                                                                                                                                                                                                                    |      |      |           |       |      |      |                                                                      |       |                      |                                                                                                                                               |      |      |           |       |      |      |
|--------------------------|--------------------------------------------------------------------------------------------------------------------------------------------------------------------------------------------------------------------------------------------------------------------------------------------------------------------------------------------------------------------------------------------------------------------------------------------------------------------------------------------------------------------------------------------------------------------|------|------|-----------|-------|------|------|----------------------------------------------------------------------|-------|----------------------|-----------------------------------------------------------------------------------------------------------------------------------------------|------|------|-----------|-------|------|------|
| Rsa1.0_01484.1.g27248.t2 | refXP_002864573.1   binding protein [Arabidopsis lyrata subsp. lyrata] gi 297310408 gb EFH40832.1   binding protein [Arabidopsis lyrata subsp. lyrata]                                                                                                                                                                                                                                                                                                                                                                                                             | 2185 | 1871 | 0         | 85.6  | 71.4 | 76.9 | binding protein                                                      | gbpln | Arabidopsis lyrata   | AT5G58410.1   Symbols:   HEAT/U-box domain-containing protein   chr5:23609663-23617343 FORWARD LENGTH=1873                                    | 2185 | 1873 | 0         | 85.7  | 70.6 | 76.8 |
| Rsa1.0_01484.1.g27249.t1 | refXP_002864575.1   hypothetical protein ARALYDRAFT_358061 [Arabidopsis lyrata subsp. lyrata] gi 297310410 gb EFH40834.1   hypothetical protein ARALYDRAFT_358061 [Arabidopsis lyrata subsp. lyrata]                                                                                                                                                                                                                                                                                                                                                               | 366  | 1018 | 0         | 278.1 | 91.5 | 97.0 | hypothetical protein ARALYDRAFT_358061                               | gbpln | Arabidopsis lyrata   | AT5G58450.1   Symbols:   Tetratricopeptide repeat (TPR)-like superfamily protein   chr5:23626826-23632071 FORWARD LENGTH=1065                 | 366  | 1065 | 0         | 291.0 | 91.3 | 96.7 |
| Rsa1.0_01485.1.g27250.t2 | refXP_002882022.1   CYP76C3 [Arabidopsis lyrata subsp. lyrata] gi 297327861 gb EFH58281.1   CYP76C3 [Arabidopsis lyrata subsp. lyrata]                                                                                                                                                                                                                                                                                                                                                                                                                             | 769  | 513  | 1.00E-169 | 66.7  | 38.6 | 46.0 | CYP76C3                                                              | gbpln | Arabidopsis lyrata   | AT2G45590.1   Symbols: CYP76C3   cytochrome P450, family 76, subfamily C, polypeptide 3   chr2:18782388-18784286 REVERSE LENGTH=515           | 769  | 515  | 1.00E-168 | 67.0  | 39.5 | 48.1 |
| Rsa1.0_01485.1.g27251.t1 | refXP_002880185.1   kinase family protein [Arabidopsis lyrata subsp. lyrata] gi 297326024 gb EFH56444.1   kinase family protein [Arabidopsis lyrata subsp. lyrata]                                                                                                                                                                                                                                                                                                                                                                                                 | 546  | 681  | 0         | 124.7 | 73.1 | 77.3 | kinase family protein                                                | gbpln | Arabidopsis lyrata   | AT2G45590.1   Symbols:   Protein kinase superfamily protein   chr2:18786725-18788776 FORWARD LENGTH=683                                       | 546  | 683  | 0         | 125.1 | 72.2 | 76.7 |
| Rsa1.0_01485.1.g27252.t1 | refXP_002880188.1   hypothetical protein ARALYDRAFT_483698 [Arabidopsis lyrata subsp. lyrata] gi 297326027 gb EFH56447.1   hypothetical protein ARALYDRAFT_483698 [Arabidopsis lyrata subsp. lyrata]                                                                                                                                                                                                                                                                                                                                                               | 814  | 757  | 0         | 93.0  | 69.5 | 74.9 | hypothetical protein ARALYDRAFT_483698                               | gbpln | Arabidopsis lyrata   | AT2G45620.1   Symbols:   Nucleotidyltransferase family protein   chr2:18792943-18795750 FORWARD LENGTH=764                                    | 814  | 764  | 0         | 93.9  | 67.2 | 73.5 |
| Rsa1.0_01485.1.g27253.t1 | gb AFM77891.1   MADS-box protein AGL20/SOC1 [Brassica napus]                                                                                                                                                                                                                                                                                                                                                                                                                                                                                                       | 206  | 213  | 1.00E-106 | 103.4 | 92.7 | 94.7 | MADS-box protein AGL20/SOC1                                          | gbpln | Brassica napus       | AT2G45660.1   Symbols: AGL20, SOC1, ATSOG1   AGAMOUS-like 20   chr2:18807799-18810193 REVERSE LENGTH=214                                      | 206  | 214  | 1.00E-100 | 103.9 | 92.2 | 94.7 |
| Rsa1.0_01485.1.g27254.t1 | refNP_566051.1   lysophosphatidylcholine acyltransferase / lyso-PAF acetyltransferase [Arabidopsis thaliana] gi 20197054 gb AAM14898.1   unknown protein; alternative splicing isoform [Arabidopsis thaliana] gi 51971062 dbj BAD44223.1   unknown protein [Arabidopsis thaliana] gi 330255490 gb AEC10584.1   calcineurin B subunit-related protein [Arabidopsis thaliana]                                                                                                                                                                                        | 538  | 539  | 0         | 100.2 | 83.8 | 91.3 | lysophosphatidylcholine acyltransferase / lyso-PAF acetyltransferase | gbpln | Arabidopsis thaliana | AT2G45670.1   Symbols:   calcineurin B subunit-related   chr2:18815070-18818382 REVERSE LENGTH=539                                            | 538  | 539  | 0         | 100.2 | 83.8 | 91.3 |
| Rsa1.0_01485.1.g27255.t1 | gb EOA28195.1   hypothetical protein CARUB_v10024387mg [Capsella rubella]                                                                                                                                                                                                                                                                                                                                                                                                                                                                                          | 99   | 101  | 7.00E-45  | 102.0 | 91.9 | 97.0 | hypothetical protein CARUB_v10024387mg                               | gbpln | Capsella rubella     | AT2G45695.1   Symbols:   Ubiquitin related modifier 1   chr2:18826043-18826744 FORWARD LENGTH=101                                             | 99   | 101  | 3.00E-47  | 102.0 | 89.9 | 97.0 |
| Rsa1.0_01485.1.g27256.t1 | refNP_182094.1   sterile alpha motif (SAM) domain-containing protein [Arabidopsis thaliana] gi 3386625 gb AAC28555.1   hypothetical protein [Arabidopsis thaliana] gi 20197051 gb AAM14896.1   hypothetical protein [Arabidopsis thaliana] gi 28973723 gb AAO64178.1   unknown protein [Arabidopsis thaliana] gi 29824257 gb AAP04089.1   unknown protein [Arabidopsis thaliana] gi 110736829 dbj BAF00373.1   hypothetical protein [Arabidopsis thaliana] gi 330255495 gb AEC10589.1   sterile alpha motif (SAM) domain-containing protein [Arabidopsis thaliana] | 723  | 723  | 0         | 100.0 | 79.5 | 86.2 | sterile alpha motif (SAM) domain-containing protein                  | gbpln | Arabidopsis thaliana | AT2G45700.1   Symbols:   sterile alpha motif (SAM) domain-containing protein   chr2:18827216-18830505 REVERSE LENGTH=723                      | 723  | 723  | 0         | 100.0 | 79.5 | 86.2 |
| Rsa1.0_01485.1.g27257.t1 | gb EOA24972.1   hypothetical protein CARUB_v10018269mg, partial [Capsella rubella]                                                                                                                                                                                                                                                                                                                                                                                                                                                                                 | 84   | 115  | 4.00E-41  | 136.9 | 95.2 | 97.6 | hypothetical protein CARUB_v10018269mg, partial                      | gbpln | Capsella rubella     | AT3G61110.1   Symbols: ARS27A, RS27A   ribosomal protein S27   chr3:22611710-22612632 FORWARD LENGTH=86                                       | 84   | 86   | 7.00E-43  | 102.4 | 94.0 | 97.6 |
| Rsa1.0_01485.1.g27258.t1 | gb ABV72578.1   dehydration-responsive family protein S51 [Brassica rapa]                                                                                                                                                                                                                                                                                                                                                                                                                                                                                          | 633  | 632  | 0         | 99.8  | 90.8 | 94.2 | dehydration-responsive family protein S51                            | gbpln | Brassica rapa        | AT2G45750.1   Symbols:   S-adenosyl-L-methionine-dependent methyltransferases superfamily protein   chr2:18842655-18845343 FORWARD LENGTH=631 | 633  | 631  | 0         | 99.7  | 88.3 | 92.9 |
| Rsa1.0_01485.1.g27259.t1 | gb ADK63418.1   C3HC4 type zinc finger protein [Brassica rapa]                                                                                                                                                                                                                                                                                                                                                                                                                                                                                                     | 316  | 363  | 3.00E-98  | 114.9 | 59.5 | 66.1 | C3HC4 type zinc finger protein                                       | gbpln | Brassica rapa        | AT3G61180.1   Symbols:   RING/U-box superfamily protein   chr3:22645680-22647290 FORWARD LENGTH=379                                           | 316  | 379  | 7.00E-85  | 119.9 | 58.9 | 73.4 |

|                          |                                                                                                                                                                                                                                                                                                                                                                                                                                            |      |      |           |       |      |      |                                                                                |       |                      |                                                                                                                                           |      |      |           |       |      |      |
|--------------------------|--------------------------------------------------------------------------------------------------------------------------------------------------------------------------------------------------------------------------------------------------------------------------------------------------------------------------------------------------------------------------------------------------------------------------------------------|------|------|-----------|-------|------|------|--------------------------------------------------------------------------------|-------|----------------------|-------------------------------------------------------------------------------------------------------------------------------------------|------|------|-----------|-------|------|------|
| Rsa1.0_01485.1.g27260.t1 | refNP_182100.2  BON1-associated protein 2 [Arabidopsis thaliana]<br>gi 75103850 sp Q58FX0.1 BAP2_ARATH<br>RecName: Full=BON1-associated protein 2; AltName: Full=Protein BON1-ASSOCIATED PROTEIN 1-LIKE<br>gi 61742689 gb AAx55165.1  hypothetical protein At2g45760 [Arabidopsis thaliana]<br>gi 94442457 gb ABF19016.1  At2g45760 [Arabidopsis thaliana]<br>gi 330255504 gb AEC10598.1  BON1-associated protein 2 [Arabidopsis thaliana] | 205  | 207  | 7.00E-72  | 101.0 | 72.2 | 80.0 | BON1-associated protein 2                                                      | gbpln | Arabidopsis thaliana | AT2G45760.1   Symbols: BAP2, BAL   BON association protein 2   chr2:18847125-18847748 REVERSE LENGTH=207                                  | 205  | 207  | 2.00E-74  | 101.0 | 72.2 | 80.0 |
| Rsa1.0_01485.1.g27261.t1 | #                                                                                                                                                                                                                                                                                                                                                                                                                                          | #    | #    | #         | #     | #    | #    | -                                                                              | ----  | ----                 | #                                                                                                                                         | #    | #    | #         | #     | #    |      |
| Rsa1.0_01486.1.g27262.t1 | gb ABW81018.1  gag-pol polymerase [Arabidopsis lyrata subsp. lyrata]                                                                                                                                                                                                                                                                                                                                                                       | 273  | 672  | 1.00E-41  | 246.2 | 29.7 | 44.3 | gag-pol polymerase                                                             | gbpln | Arabidopsis lyrata   | #                                                                                                                                         | #    | #    | #         | #     | #    |      |
| Rsa1.0_01486.1.g27263.t3 | gb AAG51783.1 AC079679_3 reverse transcriptase, putative; 16838-20266 [Arabidopsis thaliana]                                                                                                                                                                                                                                                                                                                                               | 748  | 1142 | 4.00E-87  | 152.7 | 27.3 | 39.0 | reverse transcriptase, putative; 16838-20266                                   | gbpln | Arabidopsis thaliana | AT2G34320.1   Symbols:   Polynucleotidyl transferase, ribonuclease H-like superfamily protein   chr2:14484959-14485837 FORWARD LENGTH=292 | 748  | 292  | 2.00E-29  | 39.0  | 10.6 | 18.0 |
| Rsa1.0_01486.1.g27264.t1 | gb AAG51783.1 AC079679_3 reverse transcriptase, putative; 16838-20266 [Arabidopsis thaliana]                                                                                                                                                                                                                                                                                                                                               | 397  | 1142 | 1.00E-156 | 287.7 | 65.7 | 78.3 | reverse transcriptase, putative; 16838-20266                                   | gbpln | Arabidopsis thaliana | AT1G43760.1   Symbols:   DNAse I-like superfamily protein   chr1:16528880-16531065 REVERSE LENGTH=626                                     | 397  | 626  | 4.00E-18  | 157.7 | 12.3 | 17.9 |
| Rsa1.0_01486.1.g27265.t1 | gb AAD19784.1  putative retroelement pol polyprotein [Arabidopsis thaliana]                                                                                                                                                                                                                                                                                                                                                                | 1412 | 1501 | 0         | 106.3 | 58.2 | 73.0 | putative retroelement pol polyprotein                                          | gbpln | Arabidopsis thaliana | AT4G23160.1   Symbols: CRK8   cysteine-rich RLK (RECEPTOR-like protein kinase) 8   chr4:12129485-12134086 FORWARD LENGTH=1262             | 1412 | 1262 | 1.00E-131 | 89.4  | 15.9 | 22.7 |
| Rsa1.0_01486.1.g27266.t1 | gb AAD22286.1  putative non-LTR retroelement reverse transcriptase [Arabidopsis thaliana]                                                                                                                                                                                                                                                                                                                                                  | 160  | 1311 | 1.00E-10  | 819.4 | 31.3 | 43.1 | putative non-LTR retroelement reverse transcriptase                            | gbpln | Arabidopsis thaliana | AT4G09490.1   Symbols:   Polynucleotidyl transferase, ribonuclease H-like superfamily protein   chr4:6015583-6016575 REVERSE LENGTH=170   | 160  | 170  | 4.00E-12  | 106.3 | 30.0 | 43.8 |
| Rsa1.0_01486.1.g27267.t1 | #                                                                                                                                                                                                                                                                                                                                                                                                                                          | #    | #    | #         | #     | #    | #    | -                                                                              | ----  | ----                 | #                                                                                                                                         | #    | #    | #         | #     | #    |      |
| Rsa1.0_01486.1.g27268.t5 | gb AAC28189.1  contains similarity to Arabidopsis thaliana retrotransposon Athila (GB:X81801) [Arabidopsis thaliana]                                                                                                                                                                                                                                                                                                                       | 1645 | 940  | 2.00E-66  | 57.1  | 8.5  | 11.3 | contains similarity to Arabidopsis thaliana retrotransposon Athila (GB:X81801) | gbpln | Arabidopsis thaliana | #                                                                                                                                         | #    | #    | #         | #     | #    |      |
| Rsa1.0_01487.1.g27269.t1 | ref XP_002867281.1  hypothetical protein ARALYDRAFT_491566 [Arabidopsis lyrata subsp. lyrata]<br>gi 297313117 gb EFH43540.1  hypothetical protein ARALYDRAFT_491566 [Arabidopsis lyrata subsp. lyrata]                                                                                                                                                                                                                                     | 323  | 311  | 1.00E-169 | 96.3  | 92.0 | 93.2 | hypothetical protein ARALYDRAFT_491566                                         | gbpln | Arabidopsis lyrata   | AT4G31750.1   Symbols: WIN2   HOPW1-1-interacting 2   chr4:15364657-15367207 REVERSE LENGTH=311                                           | 323  | 311  | 1.00E-171 | 96.3  | 91.6 | 93.2 |
| Rsa1.0_01487.1.g27270.t1 | ref XP_002869314.1  ATSLY1 [Arabidopsis lyrata subsp. lyrata]<br>gi 297315150 gb EFH45573.1  ATSLY1 [Arabidopsis lyrata subsp. lyrata]                                                                                                                                                                                                                                                                                                     | 570  | 606  | 0         | 106.3 | 74.9 | 84.7 | ATSLY1                                                                         | gbpln | Arabidopsis lyrata   | AT2G17980.1   Symbols: ATSLY1   Sec1/munc18-like (SM) proteins superfamily   chr2:7824352-7826404 FORWARD LENGTH=627                      | 570  | 627  | 0         | 110.0 | 68.9 | 81.1 |
| Rsa1.0_01487.1.g27271.t1 | ref XP_002874162.1  hypothetical protein ARALYDRAFT_910422 [Arabidopsis lyrata subsp. lyrata]<br>gi 297319999 gb EFH50421.1  hypothetical protein ARALYDRAFT_910422 [Arabidopsis lyrata subsp. lyrata]                                                                                                                                                                                                                                     | 368  | 357  | 1.00E-125 | 97.0  | 66.6 | 77.2 | hypothetical protein ARALYDRAFT_910422                                         | gbpln | Arabidopsis lyrata   | AT5G24040.1   Symbols:   Protein of unknown function (DUF295)   chr5:8126045-8127336 REVERSE LENGTH=373                                   | 368  | 373  | 1.00E-123 | 101.4 | 59.2 | 73.9 |
| Rsa1.0_01487.1.g27272.t1 | ref XP_002869317.1  hypothetical protein ARALYDRAFT_353659 [Arabidopsis lyrata subsp. lyrata]<br>gi 297315153 gb EFH45576.1  hypothetical protein ARALYDRAFT_353659 [Arabidopsis lyrata subsp. lyrata]                                                                                                                                                                                                                                     | 381  | 339  | 1.00E-162 | 89.0  | 73.2 | 77.4 | hypothetical protein ARALYDRAFT_353659                                         | gbpln | Arabidopsis lyrata   | AT1G77520.1   Symbols:   O-methyltransferase family protein   chr1:29130557-29132007 FORWARD LENGTH=381                                   | 381  | 381  | 1.00E-163 | 100.0 | 70.6 | 81.6 |
| Rsa1.0_01487.1.g27273.t1 | gb AAF18643.1 AC006228_14 F5J5.14 [Arabidopsis thaliana]                                                                                                                                                                                                                                                                                                                                                                                   | 274  | 743  | 1.00E-47  | 271.2 | 44.2 | 65.7 | F5J5.14                                                                        | gbpln | Arabidopsis thaliana | #                                                                                                                                         | #    | #    | #         | #     | #    |      |
| Rsa1.0_01487.1.g27274.t1 | dbj BAJ33661.1  unnamed protein product [Thellungiella halophila]                                                                                                                                                                                                                                                                                                                                                                          | 244  | 134  | 4.00E-47  | 54.9  | 46.3 | 49.6 | unnamed protein product                                                        | ----  | ----                 | AT4G31720.1   Symbols: TAFII15, TAF10, STG1   TBP-associated factor II 15   chr4:15354223-15355704 REVERSE LENGTH=134                     | 244  | 134  | 7.00E-44  | 54.9  | 48.0 | 49.6 |
| Rsa1.0_01487.1.g27275.t1 | ref XP_002867283.1  hypothetical protein ARALYDRAFT_913296 [Arabidopsis lyrata subsp. lyrata]<br>gi 297313119 gb EFH43542.1  hypothetical protein ARALYDRAFT_913296 [Arabidopsis lyrata subsp. lyrata]                                                                                                                                                                                                                                     | 847  | 394  | 1.00E-138 | 46.5  | 30.7 | 37.2 | hypothetical protein ARALYDRAFT_913296                                         | gbpln | Arabidopsis lyrata   | AT4G00260.1   Symbols: MEE45   Transcriptional factor B3 family protein   chr4:114971-117051 FORWARD LENGTH=528                           | 847  | 528  | 1.00E-94  | 62.3  | 25.3 | 33.2 |

|                          |                                                                                                                                                                                                                                                                                                                                                                                                                                                                                                 |     |     |           |       |      |      |                                        |       |                      |                                                                                                                                                                                                                                                                       |     |     |           |       |      |      |
|--------------------------|-------------------------------------------------------------------------------------------------------------------------------------------------------------------------------------------------------------------------------------------------------------------------------------------------------------------------------------------------------------------------------------------------------------------------------------------------------------------------------------------------|-----|-----|-----------|-------|------|------|----------------------------------------|-------|----------------------|-----------------------------------------------------------------------------------------------------------------------------------------------------------------------------------------------------------------------------------------------------------------------|-----|-----|-----------|-------|------|------|
| Rsa1.0_01487.1.g27276.t1 | refNP_177876.1   O-methyltransferase family protein [Arabidopsis thaliana] gi 12323395 gb AAG51676.1 AC010704_20 putative caffeic acid 3-O-methyltransferase; A1078-42528 [Arabidopsis thaliana] gi 332197867 gb AE35988.1   O-methyltransferase family protein [Arabidopsis thaliana]                                                                                                                                                                                                          | 382 | 381 | 1.00E-160 | 99.7  | 70.7 | 83.5 | O-methyltransferase family protein     | gbpln | Arabidopsis thaliana | AT1G77520.1   Symbols:   O-methyltransferase family protein   chr1:29130557-29132007 FORWARD LENGTH=381                                                                                                                                                               | 382 | 381 | 1.00E-163 | 99.7  | 70.7 | 83.5 |
| Rsa1.0_01487.1.g27277.t1 | gb EOA16311.1  hypothetical protein CARUB_v10004462mg [Capsella rubella]                                                                                                                                                                                                                                                                                                                                                                                                                        | 110 | 574 | 1.00E-27  | 521.8 | 53.6 | 62.7 | hypothetical protein CARUB_v10004462mg | gbpln | Capsella rubella     | AT2G24690.1   Symbols:   Transcriptional factor B3 family protein   chr2:10499551-10503110 REVERSE LENGTH=777                                                                                                                                                         | 110 | 777 | 4.00E-21  | 706.4 | 38.2 | 53.6 |
| Rsa1.0_01487.1.g27278.t1 | gb EOA40281.1  hypothetical protein CARUB_v10009009mg [Capsella rubella]                                                                                                                                                                                                                                                                                                                                                                                                                        | 461 | 480 | 0         | 104.1 | 85.0 | 92.6 | hypothetical protein CARUB_v10009009mg | gbpln | Capsella rubella     | AT1G44100.1   Symbols: AAP5   amino acid permease 5   chr1:16764651-16767223 REVERSE LENGTH=480                                                                                                                                                                       | 461 | 480 | 0         | 104.1 | 82.2 | 91.5 |
| Rsa1.0_01487.1.g27279.t1 | gb AAD24567.1 AF120335_1 putative transposase [Arabidopsis thaliana]                                                                                                                                                                                                                                                                                                                                                                                                                            | 472 | 577 | 1.00E-154 | 122.2 | 54.9 | 71.6 | putative transposase                   | gbpln | Arabidopsis thaliana | AT3G42170.1   Symbols:   BED zinc finger hAT family dimerisation domain   chr3:14321838-14323928 FORWARD LENGTH=696                                                                                                                                                   | 472 | 696 | 3.00E-52  | 147.5 | 25.2 | 44.7 |
| Rsa1.0_01488.1.g27280.t1 | dbj BAJ33830.1  unnamed protein product [Thellungiella halophila]                                                                                                                                                                                                                                                                                                                                                                                                                               | 349 | 351 | 0         | 100.6 | 91.4 | 96.3 | unnamed protein product                | ----  | ----                 | AT5G16970.1   Symbols: AT-AER, AER   alkaline reductase   chr5:5576291-5578001 REVERSE LENGTH=345                                                                                                                                                                     | 349 | 345 | 1.00E-175 | 98.9  | 84.5 | 90.5 |
| Rsa1.0_01488.1.g27281.t1 | refNP_197197.1   uncharacterized protein [Arabidopsis thaliana] gi 13926247 gb AAK49597.1 AF372881_1 AT5g16950/F2K13.100 [Arabidopsis thaliana] gi 9755696 emb CAC01708.1  putative protein [Arabidopsis thaliana] gi 16323228 gb AAL15348.1 AT5g16950/F2K13.100 [Arabidopsis thaliana] gi 332004979 gb AED92362.1   uncharacterized protein AT5G16950 [Arabidopsis thaliana]                                                                                                                   | 106 | 99  | 5.00E-40  | 93.4  | 79.2 | 86.8 | uncharacterized protein                | gbpln | Arabidopsis thaliana | AT5G16950.1   Symbols:   unknown protein; Has 1807 Blast hits to 1807 proteins in 277 species: Archae - 0; Bacteria - 0; Metazoa - 736; Fungi - 347; Plants - 385; Viruses - 0; Other Eukaryotes - 339 (source: NCBI BLINK).   chr5:5572640-5572939 FORWARD LENGTH=99 | 106 | 99  | 8.00E-43  | 93.4  | 79.2 | 86.8 |
| Rsa1.0_01488.1.g27282.t1 | refNP_197196.1   carbon-sulfur lyase [Arabidopsis thaliana] gi 238481283 ref NP_001154714.1  carbon-sulfur lyase [Arabidopsis thaliana] gi 9755695 emb CAC01707.1  putative protein [Arabidopsis thaliana] gi 26451264 dbj BAC42734.1  unknown protein [Arabidopsis thaliana] gi 28973067 gb AA063868.1  unknown protein [Arabidopsis thaliana] gi 332004977 gb AED92360.1   carbon-sulfur lyase [Arabidopsis thaliana] gi 332004978 gb AED92361.1   carbon-sulfur lyase [Arabidopsis thaliana] | 137 | 135 | 1.00E-66  | 98.5  | 86.9 | 93.4 | carbon-sulfur lyase                    | gbpln | Arabidopsis thaliana | AT5G16940.2   Symbols:   carbon-sulfur lyases   chr5:5571797-5572204 REVERSE LENGTH=135                                                                                                                                                                               | 137 | 135 | 3.00E-69  | 98.5  | 86.9 | 93.4 |
| Rsa1.0_01488.1.g27283.t1 | ref XP_002871740.1  VHS domain-containing protein [Arabidopsis lyrata subsp. lyrata] gi 297317577 gb EFH47999.1  VHS domain-containing protein [Arabidopsis lyrata subsp. lyrata]                                                                                                                                                                                                                                                                                                               | 407 | 406 | 0         | 99.8  | 88.2 | 93.4 | VHS domain-containing protein          | gbpln | Arabidopsis lyrata   | AT5G16880.2   Symbols:   Target of Myb protein 1   chr5:5549658-5551274 FORWARD LENGTH=407                                                                                                                                                                            | 407 | 407 | 0         | 100.0 | 88.9 | 94.3 |
| Rsa1.0_01488.1.g27284.t1 | gb EOA30133.1  hypothetical protein CARUB_v10013239mg [Capsella rubella]                                                                                                                                                                                                                                                                                                                                                                                                                        | 614 | 618 | 0         | 100.7 | 85.2 | 93.0 | hypothetical protein CARUB_v10013239mg | gbpln | Capsella rubella     | AT2G20790.1   Symbols:   clathrin adaptor complexes medium subunit family protein   chr2:8950162-8952613 REVERSE LENGTH=613                                                                                                                                           | 614 | 613 | 0         | 99.8  | 85.3 | 92.5 |
| Rsa1.0_01488.1.g27285.t1 | gb EOA19437.1  hypothetical protein CARUB_v10001749mg [Capsella rubella]                                                                                                                                                                                                                                                                                                                                                                                                                        | 265 | 260 | 1.00E-116 | 98.1  | 83.8 | 89.4 | hypothetical protein CARUB_v10001749mg | gbpln | Capsella rubella     | AT5G16840.3   Symbols: BPA1   binding partner of acd1 1   chr5:5536042-5538026 FORWARD LENGTH=257                                                                                                                                                                     | 265 | 257 | 1.00E-119 | 97.0  | 84.2 | 89.1 |
| Rsa1.0_01488.1.g27286.t2 | gb ABB83612.1  syntaxin-like protein [Brassica oleracea]                                                                                                                                                                                                                                                                                                                                                                                                                                        | 258 | 276 | 1.00E-115 | 107.0 | 87.2 | 89.9 | syntaxin-like protein                  | gbpln | Brassica oleracea    | AT5G16830.1   Symbols: SYP21, ATSYP21, PEP12, ATPEP12, PEP12P   syntaxin of plants 21   chr5:5533076-5535152 REVERSE LENGTH=279                                                                                                                                       | 258 | 279 | 1.00E-104 | 108.1 | 77.5 | 85.7 |
| Rsa1.0_01488.1.g27287.t1 | ref XP_002875819.1  predicted protein [Arabidopsis lyrata subsp. lyrata] gi 297321657 gb EFH52078.1  predicted protein [Arabidopsis lyrata subsp. lyrata]                                                                                                                                                                                                                                                                                                                                       | 305 | 457 | 2.00E-28  | 149.8 | 23.0 | 28.5 | predicted protein                      | gbpln | Arabidopsis lyrata   | AT4G12100.1   Symbols:   Cullin family protein   chr4:7246453-7248127 REVERSE LENGTH=434                                                                                                                                                                              | 305 | 434 | 2.00E-15  | 142.3 | 17.4 | 25.2 |

|                          |                                                                                                                                                                                                                                                                                                                                                                                                    |      |      |           |       |      |      |                                                                    |       |                      |                                                                                                                                                                                                                                                                                                                                                                                                                                                                                                                                            |      |      |           |       |      |      |
|--------------------------|----------------------------------------------------------------------------------------------------------------------------------------------------------------------------------------------------------------------------------------------------------------------------------------------------------------------------------------------------------------------------------------------------|------|------|-----------|-------|------|------|--------------------------------------------------------------------|-------|----------------------|--------------------------------------------------------------------------------------------------------------------------------------------------------------------------------------------------------------------------------------------------------------------------------------------------------------------------------------------------------------------------------------------------------------------------------------------------------------------------------------------------------------------------------------------|------|------|-----------|-------|------|------|
| Rsa1.0_01488.1.g27288.t1 | gb EOA37895.1  hypothetical protein CARUB_v10009363mg, partial [Capsella rubella]                                                                                                                                                                                                                                                                                                                  | 340  | 396  | 1.00E-139 | 116.5 | 87.1 | 94.1 | hypothetical protein CARUB_v10009363mg, partial                    | gbpln | Capsella rubella     | AT1G45688.1   Symbols:   unknown protein; FUNCTIONS IN: molecular_function unknown; INVOLVED IN: biological_process unknown; LOCATED IN: plasma membrane; EXPRESSED IN: 22 plant structures; EXPRESSED DURING: 13 growth stages; BEST Arabidopsis thaliana protein match is: unknown protein (TAIR:AT5G42860.1); Has 258 Blast hits to 242 proteins in 39 species: Archae - 0; Bacteria - 11; Metazoa - 10; Fungi - 14; Plants - 198; Viruses - 17; Other Eukaryotes - 8 (source: NCBI BLink).   chr1:17191502-17192870 FORWARD LENGTH=342 | 340  | 342  | 1.00E-141 | 100.6 | 89.4 | 94.1 |
| Rsa1.0_01488.1.g27289.t1 | #                                                                                                                                                                                                                                                                                                                                                                                                  | #    | #    | #         | #     | #    | #    | -                                                                  | ----  | ----                 | #                                                                                                                                                                                                                                                                                                                                                                                                                                                                                                                                          | #    | #    | #         | #     | #    |      |
| Rsa1.0_01488.1.g27290.t1 | #                                                                                                                                                                                                                                                                                                                                                                                                  | #    | #    | #         | #     | #    | #    | -                                                                  | ----  | ----                 | #                                                                                                                                                                                                                                                                                                                                                                                                                                                                                                                                          | #    | #    | #         | #     | #    |      |
| Rsa1.0_01489.1.g27291.t1 | dbj BAJ33752.1  unnamed protein product [Thellungiella halophila]                                                                                                                                                                                                                                                                                                                                  | 383  | 393  | 0         | 102.6 | 87.2 | 92.4 | unnamed protein product                                            | ----  | ----                 | AT3G63260.1   Symbols: ATMRK1   Protein kinase superfamily protein   chr3:23373090-23374747 REVERSE LENGTH=391                                                                                                                                                                                                                                                                                                                                                                                                                             | 383  | 391  | 0         | 102.1 | 85.4 | 91.1 |
| Rsa1.0_01489.1.g27292.t1 | ref NP_567144.1  uncharacterized protein [Arabidopsis thaliana] gi 13878075 gb AAK44115.1 AF370300.1 unknown protein [Arabidopsis thaliana] gi 17104745 gb AAL34261.1  unknown protein [Arabidopsis thaliana] gi 332646938 gb AEE80459.1  uncharacterized protein AT3G63270 [Arabidopsis thaliana]                                                                                                 | 385  | 396  | 0         | 102.9 | 84.7 | 89.4 | uncharacterized protein                                            | gbpln | Arabidopsis thaliana | AT3G63270.1   Symbols:   CONTAINS InterPro DOMAIN/s: Putative harbinger transposase-derived nuclease (InterPro:IPR006912); BEST Arabidopsis thaliana protein match is: PIF / Ping-Pong family of plant transposases (TAIR:AT3G53550.1); Has 30201 Blast hits to 17322 proteins in 780 species: Archae - 12; Bacteria - 1396; Metazoa - 17038; Fungi - 3422; Plants - 5037; Viruses - 0; Other Eukaryotes - 2996 (source: NCBI BLink).   chr3:23375932-23377398 REVERSE LENGTH=396                                                          | 385  | 396  | 0         | 102.9 | 84.7 | 89.4 |
| Rsa1.0_01489.1.g27293.t4 | gb EOA25915.1  hypothetical protein CARUB_v10019295mg [Capsella rubella]                                                                                                                                                                                                                                                                                                                           | 395  | 431  | 1.00E-159 | 109.1 | 75.2 | 82.5 | hypothetical protein CARUB_v10019295mg                             | gbpln | Capsella rubella     | AT3G63290.1   Symbols:   2-oxoglutarate (2OG) and Fe(II)-dependent oxygenase superfamily protein   chr3:23381713-23383059 FORWARD LENGTH=403                                                                                                                                                                                                                                                                                                                                                                                               | 395  | 403  | 1.00E-156 | 102.0 | 72.7 | 81.8 |
| Rsa1.0_01489.1.g27294.t1 | ref NP_191889.2  protein forked1 [Arabidopsis thaliana] gi 17064860 gb AAL32584.1  putative protein [Arabidopsis thaliana] gi 25083965 gb AAN72103.1  putative protein [Arabidopsis thaliana] gi 332646943 gb AEE80464.1  protein forked1 [Arabidopsis thaliana]                                                                                                                                   | 490  | 498  | 0         | 101.6 | 88.2 | 94.3 | protein forked1                                                    | gbpln | Arabidopsis thaliana | AT3G63300.1   Symbols: FKD1   FORKED 1   chr3:23385033-23387625 FORWARD LENGTH=498                                                                                                                                                                                                                                                                                                                                                                                                                                                         | 490  | 498  | 0         | 101.6 | 88.2 | 94.3 |
| Rsa1.0_01489.1.g27295.t1 | gb EOA25588.1  hypothetical protein CARUB_v10018936mg [Capsella rubella]                                                                                                                                                                                                                                                                                                                           | 239  | 239  | 1.00E-120 | 100.0 | 92.5 | 96.7 | hypothetical protein CARUB_v10018936mg                             | gbpln | Capsella rubella     | AT3G63310.1   Symbols: BIL4   Bax inhibitor-1 family protein   chr3:23387938-23388882 REVERSE LENGTH=239                                                                                                                                                                                                                                                                                                                                                                                                                                   | 239  | 239  | 1.00E-121 | 100.0 | 91.6 | 95.8 |
| Rsa1.0_01489.1.g27296.t1 | ref NP_567145.2  putative protein phosphatase 2C 51 [Arabidopsis thaliana] gi 332646947 gb AEE80468.1  putative protein phosphatase 2C 51 [Arabidopsis thaliana]                                                                                                                                                                                                                                   | 1051 | 1041 | 0         | 99.0  | 82.7 | 87.6 | putative protein phosphatase 2C 51                                 | gbpln | Arabidopsis thaliana | AT3G63340.1   Symbols:   Protein phosphatase 2C family protein   chr3:23392181-23397999 REVERSE LENGTH=1041                                                                                                                                                                                                                                                                                                                                                                                                                                | 1051 | 1041 | 0         | 99.0  | 82.7 | 87.6 |
| Rsa1.0_01489.1.g27297.t1 | sp Q9M1V3.2 PP296_ARATH RecName: Full=Penatricopeptide repeat-containing protein At3g63370                                                                                                                                                                                                                                                                                                         | 997  | 960  | 0         | 96.3  | 78.3 | 84.6 | RecName: Full=Penatricopeptide repeat-containing protein At3g63370 | ----  | ----                 | AT3G63370.1   Symbols: OTP86   Tetratricopeptide repeat (TPR)-like superfamily protein   chr3:23402080-23405180 FORWARD LENGTH=884                                                                                                                                                                                                                                                                                                                                                                                                         | 997  | 884  | 0         | 88.7  | 69.6 | 75.6 |
| Rsa1.0_01489.1.g27298.t1 | ref NP_191897.1  Ca2+-transporting ATPase [Arabidopsis thaliana] gi 12229659 sp Q9LY77.1 ACA12_ARATH RecName: Full=Calcium-transporting ATPase 12, plasma membrane-type; AltName: Full=Ca(2+)-ATPase isoform 12 gi 7573321 emb CAB87791.1  Ca2+-transporting ATPase-like protein [Arabidopsis thaliana] gi 332646952 gb AEE80473.1  putative calcium-transporting ATPase 12 [Arabidopsis thaliana] | 1030 | 1033 | 0         | 100.3 | 94.2 | 97.6 | Ca2+-transporting ATPase                                           | gbpln | Arabidopsis thaliana | AT3G63380.1   Symbols:   ATPase E1-E2 type family protein / haloacid dehalogenase-like hydrolase family protein   chr3:23407112-23410213 REVERSE LENGTH=1033                                                                                                                                                                                                                                                                                                                                                                               | 1030 | 1033 | 0         | 100.3 | 94.2 | 97.6 |
| Rsa1.0_01489.1.g27299.t1 | dbj BAH57223.1  AT3G63400 [Arabidopsis thaliana]                                                                                                                                                                                                                                                                                                                                                   | 578  | 570  | 1.00E-169 | 98.6  | 70.8 | 78.2 | AT3G63400                                                          | gbpln | Arabidopsis thaliana | AT3G63400.3   Symbols:   Cyclophilin-like peptidyl-prolyl cis-trans isomerase family protein   chr3:23412449-23415435 FORWARD LENGTH=570                                                                                                                                                                                                                                                                                                                                                                                                   | 578  | 570  | 1.00E-171 | 98.6  | 70.6 | 78.2 |
| Rsa1.0_01489.1.g27300.t2 | ref XP_002876721.1  G-protein gamma-subunit 1 [Arabidopsis lyrata subsp. lyrata] gi 297322555 gb EFH52980.1  G-protein gamma-subunit 1 [Arabidopsis lyrata subsp. lyrata]                                                                                                                                                                                                                          | 97   | 96   | 5.00E-32  | 99.0  | 77.3 | 80.4 | G-protein gamma-subunit 1                                          | gbpln | Arabidopsis lyrata   | AT3G63420.2   Symbols: AGG1, ATAGG1, GG1   Ggamma-subunit 1   chr3:23417383-23418405 FORWARD LENGTH=98                                                                                                                                                                                                                                                                                                                                                                                                                                     | 97   | 98   | 6.00E-34  | 101.0 | 73.2 | 76.3 |



|                          |                                                                                                                                                                                                                                                                                                                                                                                                                                                                                          |      |      |           |       |      |      |                                           |       |                         |                                                                                                                                        |      |      |           |       |      |      |
|--------------------------|------------------------------------------------------------------------------------------------------------------------------------------------------------------------------------------------------------------------------------------------------------------------------------------------------------------------------------------------------------------------------------------------------------------------------------------------------------------------------------------|------|------|-----------|-------|------|------|-------------------------------------------|-------|-------------------------|----------------------------------------------------------------------------------------------------------------------------------------|------|------|-----------|-------|------|------|
| Rsa1.0_01489.1.g27301.t1 | ref[XP_002878518.1] EMB2221<br>[Arabidopsis lyrata subsp. lyrata]<br>gi 297324356 gb EFH54777.1  EMB2221<br>[Arabidopsis lyrata subsp. lyrata]                                                                                                                                                                                                                                                                                                                                           | 1113 | 1104 | 0         | 99.2  | 88.6 | 93.1 | EMB2221                                   | gbpln | Arabidopsis<br>lyrata   | AT3G63460.1   Symbols:   transducin family<br>protein / WD-40 repeat family protein  <br>chr3:23431009-23437241 REVERSE<br>LENGTH=1104 | 1113 | 1104 | 0         | 99.2  | 88.5 | 92.8 |
| Rsa1.0_01490.1.g27302.t1 | gb EOA14817.1  hypothetical protein<br>CARUB_v10028132mg [Capsella rubella]                                                                                                                                                                                                                                                                                                                                                                                                              | 130  | 628  | 5.00E-32  | 483.1 | 60.0 | 63.1 | hypothetical protein<br>CARUB_v10028132mg | gbpln | Capsella<br>rubella     | AT5G51820.1   Symbols: PGM, ATPGMP,<br>PGM1, STF1   phosphoglucomutase  <br>chr5:21063531-21067933 REVERSE<br>LENGTH=623               | 130  | 623  | 2.00E-34  | 479.2 | 59.2 | 63.8 |
| Rsa1.0_01490.1.g27303.t1 | ref[NP_199994.1] gibberellin 20 oxidase<br>2 [Arabidopsis thaliana]<br>gi 50390167 sp O39111.1 GAOX2_ARAT<br>H ResName: Full=Gibberellin 20 oxidase<br>2; AltName: Full=GA 20-oxidase 2;<br>AltName: Full=Gibberellin C-20 oxidase<br>2 gi 1109697 emb CAA58294.1 <br>gibberellin 20-oxidase [Arabidopsis<br>thaliana] gi 10177880 dbj BAB11250.1 <br>gibberellin 20-oxidase [Arabidopsis<br>thaliana] gi 332008746 gb AED96129.1 <br>gibberellin 20 oxidase 2 [Arabidopsis<br>thaliana] | 379  | 378  | 0         | 99.7  | 89.7 | 94.7 | gibberellin 20 oxidase 2                  | gbpln | Arabidopsis<br>thaliana | AT5G51810.1   Symbols: GA20OX2, AT2353,<br>ATGA20OX2   gibberellin 20 oxidase 2  <br>chr5:21055389-21056746 REVERSE<br>LENGTH=378      | 379  | 378  | 0         | 99.7  | 89.7 | 94.7 |
| Rsa1.0_01490.1.g27304.t1 | #                                                                                                                                                                                                                                                                                                                                                                                                                                                                                        | #    | #    | #         | #     | #    | -    | ----                                      | ----  | ----                    | #                                                                                                                                      | #    | #    | #         | #     | #    | #    |
| Rsa1.0_01490.1.g27305.t1 | gb AAF69172.1 AC007915_24 F27F5.11<br>[Arabidopsis thaliana]                                                                                                                                                                                                                                                                                                                                                                                                                             | 468  | 1313 | 1.00E-15  | 280.6 | 14.1 | 21.2 | F27F5.11                                  | gbpln | Arabidopsis<br>thaliana | #                                                                                                                                      | #    | #    | #         | #     | #    | #    |
| Rsa1.0_01490.1.g27306.t1 | #                                                                                                                                                                                                                                                                                                                                                                                                                                                                                        | #    | #    | #         | #     | #    | -    | ----                                      | ----  | ----                    | #                                                                                                                                      | #    | #    | #         | #     | #    | #    |
| Rsa1.0_01491.1.g27307.t2 | gb AAX55106.1  hypothetical protein<br>At2g05290 [Arabidopsis thaliana]                                                                                                                                                                                                                                                                                                                                                                                                                  | 232  | 383  | 8.00E-18  | 165.1 | 24.1 | 35.8 | hypothetical protein<br>At2g05290         | gbpln | Arabidopsis<br>thaliana | #                                                                                                                                      | #    | #    | #         | #     | #    | #    |
| Rsa1.0_01491.1.g27308.t1 | #                                                                                                                                                                                                                                                                                                                                                                                                                                                                                        | #    | #    | #         | #     | #    | -    | ----                                      | ----  | ----                    | #                                                                                                                                      | #    | #    | #         | #     | #    | #    |
| Rsa1.0_01491.1.g27309.t1 | ref[NP_001077941.1] uncharacterized<br>protein [Arabidopsis thaliana]<br>gi 330252178 gb AEC07272.1 <br>uncharacterized protein AT2G22155<br>[Arabidopsis thaliana]                                                                                                                                                                                                                                                                                                                      | 156  | 101  | 7.00E-19  | 64.7  | 29.5 | 39.1 | uncharacterized<br>protein                | gbpln | Arabidopsis<br>thaliana | AT2G22155.1   Symbols:   Encodes a ECA1<br>gametogenesis related family protein  <br>chr2:9423869-9424174 FORWARD<br>LENGTH=101        | 156  | 101  | 2.00E-21  | 64.7  | 29.5 | 39.1 |
| Rsa1.0_01491.1.g27310.t1 | gb EOA29032.1  hypothetical protein<br>CARUB_v10025286mg [Capsella rubella]                                                                                                                                                                                                                                                                                                                                                                                                              | 570  | 551  | 0         | 96.7  | 70.7 | 77.9 | hypothetical protein<br>CARUB_v10025286mg | gbpln | Capsella<br>rubella     | AT2G22140.1   Symbols: ATEME1B, EME1B  <br>essential meiotic endonuclease 1B  <br>chr2:9414895-9418584 REVERSE<br>LENGTH=551           | 570  | 551  | 0         | 96.7  | 69.5 | 76.3 |
| Rsa1.0_01491.1.g27311.t1 | ref[XP_002878591.1] binding protein<br>[Arabidopsis lyrata subsp. lyrata]<br>gi 297324430 gb EFH54850.1  binding<br>protein [Arabidopsis lyrata subsp.<br>lyrata]                                                                                                                                                                                                                                                                                                                        | 2156 | 2154 | 0         | 99.9  | 95.8 | 98.4 | binding protein                           | gbpln | Arabidopsis<br>lyrata   | AT2G22125.1   Symbols: CSI1   binding  <br>chr2:9406793-9414223 FORWARD<br>LENGTH=2150                                                 | 2156 | 2150 | 0         | 99.7  | 95.6 | 98.0 |
| Rsa1.0_01491.1.g27312.t1 | #                                                                                                                                                                                                                                                                                                                                                                                                                                                                                        | #    | #    | #         | #     | #    | -    | ----                                      | ----  | ----                    | #                                                                                                                                      | #    | #    | #         | #     | #    | #    |
| Rsa1.0_01491.1.g27313.t1 | #                                                                                                                                                                                                                                                                                                                                                                                                                                                                                        | #    | #    | #         | #     | #    | -    | ----                                      | ----  | ----                    | #                                                                                                                                      | #    | #    | #         | #     | #    | #    |
| Rsa1.0_01491.1.g27314.t1 | gb EOA27501.1  hypothetical protein<br>CARUB_v10023640mg [Capsella rubella]                                                                                                                                                                                                                                                                                                                                                                                                              | 323  | 323  | 1.00E-175 | 100.0 | 95.4 | 98.5 | hypothetical protein<br>CARUB_v10023640mg | gbpln | Capsella<br>rubella     | AT2G22120.2   Symbols:   RING/FYVE/PHD<br>zinc finger superfamily protein  <br>chr2:9394026-9396979 FORWARD<br>LENGTH=363              | 323  | 363  | 1.00E-176 | 112.4 | 95.0 | 97.8 |
| Rsa1.0_01492.1.g27315.t1 | ref[XP_002864843.1] zinc finger (CCH-<br>type) family protein [Arabidopsis lyrata<br>subsp. lyrata]<br>gi 297310678 gb EFH41102.1  zinc finger<br>(CCH-type) family protein<br>[Arabidopsis lyrata subsp. lyrata]                                                                                                                                                                                                                                                                        | 404  | 434  | 1.00E-162 | 107.4 | 78.5 | 86.6 | zinc finger (CCH-<br>type) family protein | gbpln | Arabidopsis<br>lyrata   | AT5G63260.1   Symbols:   Zinc finger C-x8-<br>C-x5-C-x3-H type family protein  <br>chr5:25361900-25364453 FORWARD<br>LENGTH=435        | 404  | 435  | 1.00E-164 | 107.7 | 77.2 | 85.9 |
| Rsa1.0_01492.1.g27316.t1 | ref[XP_002866545.1] predicted protein<br>[Arabidopsis lyrata subsp. lyrata]<br>gi 297312380 gb EFH42804.1  predicted<br>protein [Arabidopsis lyrata subsp.<br>lyrata]                                                                                                                                                                                                                                                                                                                    | 90   | 80   | 6.00E-24  | 88.9  | 66.7 | 70.0 | predicted protein                         | gbpln | Arabidopsis<br>lyrata   | AT5G63270.1   Symbols:   RPM1-interacting<br>protein 4 (RIN4) family protein  <br>chr5:25365498-25365949 REVERSE<br>LENGTH=80          | 90   | 80   | 3.00E-25  | 88.9  | 64.4 | 68.9 |

|                          |                                                                                                                                                                                                                                                                                                                                                                                                                                                                                                                                                                                                                                                                                                                                                                                                                                                                                                |      |      |           |       |      |      |                                                |       |                      |                                                                                                                                                                                                                                                                                                                                                 |      |     |           |       |      |      |
|--------------------------|------------------------------------------------------------------------------------------------------------------------------------------------------------------------------------------------------------------------------------------------------------------------------------------------------------------------------------------------------------------------------------------------------------------------------------------------------------------------------------------------------------------------------------------------------------------------------------------------------------------------------------------------------------------------------------------------------------------------------------------------------------------------------------------------------------------------------------------------------------------------------------------------|------|------|-----------|-------|------|------|------------------------------------------------|-------|----------------------|-------------------------------------------------------------------------------------------------------------------------------------------------------------------------------------------------------------------------------------------------------------------------------------------------------------------------------------------------|------|-----|-----------|-------|------|------|
| Rsa1.0_01492.1.g27317.t1 | ref[NP_568970.2] nucleoside diphosphate kinase II [Arabidopsis thaliana]<br>gi 12644076 sp O64903.2 NDK2_ARATH<br>RecName: Full=Nucleoside diphosphate kinase II, chloroplastic; Short=NDK II; Short=NDP kinase II; Short=NDPK II; Short=NDPK Ia; Flags: Precursor<br>gi 6065740 emb CAB58230.1  nucleotide diphosphate kinase Ia [Arabidopsis thaliana] gi 10177312 dbj BAB10573.1  nucleotide diphosphate kinase Ia [Arabidopsis thaliana]<br>gi 16209700 gb AAL14407.1  AT5g63310/MDC12.28 [Arabidopsis thaliana] gi 17529114 gb AAL38767.1  putative nucleotide diphosphate kinase Ia [Arabidopsis thaliana]<br>gi 21436481 gb AAM51441.1  putative nucleotide diphosphate kinase Ia [Arabidopsis thaliana]<br>gi 110742634 dbj BAE99229.1  nucleoside diphosphate kinase Ia [Arabidopsis thaliana]<br>gi 332010348 gb AED97731.1  nucleoside diphosphate kinase II [Arabidopsis thaliana] | 356  | 231  | 1.00E-104 | 64.9  | 56.5 | 59.0 | nucleoside diphosphate kinase II               | gbpln | Arabidopsis thaliana | AT5G63310.1   Symbols: NDPK2, NDPK1A, NDPK IA IA, NDPK IA, ATNDPK2   nucleoside diphosphate kinase 2   chr5:25372122-25373838 REVERSE LENGTH=231                                                                                                                                                                                                | 356  | 231 | 1.00E-107 | 64.9  | 56.5 | 59.0 |
| Rsa1.0_01492.1.g27318.t1 | ref[XP_002866549.1] hypothetical protein ARALYDRAFT_496519 [Arabidopsis lyrata subsp. lyrata] gi 297312384 gb EFH42808.1  hypothetical protein ARALYDRAFT_496519 [Arabidopsis lyrata subsp. lyrata]                                                                                                                                                                                                                                                                                                                                                                                                                                                                                                                                                                                                                                                                                            | 296  | 304  | 1.00E-121 | 102.7 | 82.1 | 87.2 | hypothetical protein ARALYDRAFT_496519         | gbpln | Arabidopsis lyrata   | AT5G63350.1   Symbols:   unknown protein; BEST Arabidopsis thaliana protein match is: unknown protein (TAIR:AT3G48510.1). Has 103 Blast hits to 102 proteins in 13 species: Archae - 0; Bacteria - 0; Metazoa - 2; Fungi - 0; Plants - 101; Viruses - 0; Other Eukaryotes - 0 (source: NCBI BLink).   chr5:25380216-25381124 REVERSE LENGTH=302 | 296  | 302 | 1.00E-110 | 102.0 | 80.4 | 86.1 |
| Rsa1.0_01492.1.g27319.t1 | #                                                                                                                                                                                                                                                                                                                                                                                                                                                                                                                                                                                                                                                                                                                                                                                                                                                                                              | #    | #    | #         | #     | #    | -    | ----                                           | ----  | #                    | #                                                                                                                                                                                                                                                                                                                                               | #    | #   | #         | #     | #    |      |
| Rsa1.0_01492.1.g27320.t1 | gb AAM82604.1 AF525305.2 putative AP endonuclease/reverse transcriptase [Brassica napus]                                                                                                                                                                                                                                                                                                                                                                                                                                                                                                                                                                                                                                                                                                                                                                                                       | 1401 | 1214 | 0         | 86.7  | 32.2 | 46.8 | putative AP endonuclease/reverse transcriptase | gbpln | Brassica napus       | AT1G43760.1   Symbols:   DNAse I-like superfamily protein   chr1:16528890-16531065 REVERSE LENGTH=626                                                                                                                                                                                                                                           | 1401 | 626 | 2.00E-81  | 44.7  | 11.5 | 17.9 |
| Rsa1.0_01492.1.g27321.t1 | ref[XP_002866552.1] hypothetical protein ARALYDRAFT_332561 [Arabidopsis lyrata subsp. lyrata] gi 297312387 gb EFH42811.1  hypothetical protein ARALYDRAFT_332561 [Arabidopsis lyrata subsp. lyrata]                                                                                                                                                                                                                                                                                                                                                                                                                                                                                                                                                                                                                                                                                            | 561  | 559  | 0         | 99.6  | 87.0 | 91.8 | hypothetical protein ARALYDRAFT_332561         | gbpln | Arabidopsis lyrata   | AT5G63390.1   Symbols:   O-fucosyltransferase family protein   chr5:25390512-25392591 REVERSE LENGTH=559                                                                                                                                                                                                                                        | 561  | 559 | 0         | 99.6  | 87.3 | 92.3 |
| Rsa1.0_01492.1.g27322.t1 | ref[XP_002864846.1] EMB2746 [Arabidopsis lyrata subsp. lyrata] gi 297310681 gb EFH41105.1  EMB2746 [Arabidopsis lyrata subsp. lyrata]                                                                                                                                                                                                                                                                                                                                                                                                                                                                                                                                                                                                                                                                                                                                                          | 906  | 927  | 0         | 102.3 | 89.8 | 94.2 | EMB2746                                        | gbpln | Arabidopsis lyrata   | AT5G63420.1   Symbols: emb2746   RNA-metabolising metallo-beta-lactamase family protein   chr5:25400515-25405807 FORWARD LENGTH=911                                                                                                                                                                                                             | 906  | 911 | 0         | 100.6 | 89.5 | 93.9 |
| Rsa1.0_01492.1.g27323.t2 | gb EOA13932.1  hypothetical protein CARUB_v10027050mg [Capsella rubella]                                                                                                                                                                                                                                                                                                                                                                                                                                                                                                                                                                                                                                                                                                                                                                                                                       | 254  | 232  | 1.00E-127 | 91.3  | 89.0 | 91.3 | hypothetical protein CARUB_v10027050mg         | gbpln | Capsella rubella     | AT5G63440.2   Symbols:   Protein of unknown function (DUF167)   chr5:25406360-25408195 FORWARD LENGTH=232                                                                                                                                                                                                                                       | 254  | 232 | 1.00E-129 | 91.3  | 88.6 | 90.9 |
| Rsa1.0_01492.1.g27324.t1 | gb AAM60854.1  cytochrome P450-like protein [Arabidopsis thaliana]                                                                                                                                                                                                                                                                                                                                                                                                                                                                                                                                                                                                                                                                                                                                                                                                                             | 507  | 508  | 0         | 100.2 | 84.4 | 90.5 | cytochrome P450-like protein                   | gbpln | Arabidopsis thaliana | AT5G63450.1   Symbols: CYP94B1   cytochrome P450, family 94, subfamily B, polypeptide 1   chr5:25408987-25410519 REVERSE LENGTH=510                                                                                                                                                                                                             | 507  | 510 | 0         | 100.6 | 84.8 | 91.5 |
| Rsa1.0_01493.1.g27325.t1 | ref[XP_002883665.1] F-box family protein [Arabidopsis lyrata subsp. lyrata] gi 297329505 gb EFH59924.1  F-box family protein [Arabidopsis lyrata subsp. lyrata]                                                                                                                                                                                                                                                                                                                                                                                                                                                                                                                                                                                                                                                                                                                                | 287  | 398  | 2.00E-69  | 138.7 | 54.7 | 70.0 | F-box family protein                           | gbpln | Arabidopsis lyrata   | AT2G04810.1   Symbols:   Protein of unknown function (DUF295)   chr2:1688773-1689966 FORWARD LENGTH=397                                                                                                                                                                                                                                         | 287  | 397 | 5.00E-68  | 138.3 | 53.0 | 67.6 |
| Rsa1.0_01493.1.g27326.t1 | gb EOA20295.1  hypothetical protein CARUB_v10000603mg [Capsella rubella]                                                                                                                                                                                                                                                                                                                                                                                                                                                                                                                                                                                                                                                                                                                                                                                                                       | 557  | 559  | 0         | 100.4 | 95.9 | 97.7 | hypothetical protein CARUB_v10000603mg         | gbpln | Capsella rubella     | AT5G08690.1   Symbols:   ATP synthase alpha/beta family protein   chr5:2821992-2824683 FORWARD LENGTH=559                                                                                                                                                                                                                                       | 557  | 559 | 0         | 100.4 | 92.6 | 93.9 |
| Rsa1.0_01493.1.g27327.t1 | ref[XP_002873374.1] DDT domain-containing protein [Arabidopsis lyrata subsp. lyrata] gi 297319211 gb EFH49633.1  DDT domain-containing protein [Arabidopsis lyrata subsp. lyrata]                                                                                                                                                                                                                                                                                                                                                                                                                                                                                                                                                                                                                                                                                                              | 714  | 722  | 0         | 101.1 | 82.9 | 89.6 | DDT domain-containing protein                  | gbpln | Arabidopsis lyrata   | AT5G08630.1   Symbols:   DDT domain-containing protein   chr5:2798575-2802138 REVERSE LENGTH=723                                                                                                                                                                                                                                                | 714  | 723 | 0         | 101.3 | 82.4 | 89.9 |
| Rsa1.0_01493.1.g27328.t1 | ref[XP_002871349.1] hypothetical protein ARALYDRAFT_908839 [Arabidopsis lyrata subsp. lyrata] gi 297317186 gb EFH47608.1  hypothetical protein ARALYDRAFT_908839 [Arabidopsis lyrata subsp. lyrata]                                                                                                                                                                                                                                                                                                                                                                                                                                                                                                                                                                                                                                                                                            | 327  | 351  | 1.00E-157 | 107.3 | 87.8 | 92.4 | hypothetical protein ARALYDRAFT_908839         | gbpln | Arabidopsis lyrata   | AT5G08590.1   Symbols: ASK2, SNRK2-1, SNRK2.1, SRK2G   SNF1-related protein kinase 2.1   chr5:2783537-2785869 FORWARD LENGTH=353                                                                                                                                                                                                                | 327  | 353 | 1.00E-160 | 108.0 | 87.8 | 92.4 |

|                          |                                                                                                                                                                                                                                                                                                                                                                                                                                                                                                                                                                                                                                                                                       |      |      |           |       |      |      |                                                                    |       |                      |                                                                                                                                   |      |      |           |       |      |      |
|--------------------------|---------------------------------------------------------------------------------------------------------------------------------------------------------------------------------------------------------------------------------------------------------------------------------------------------------------------------------------------------------------------------------------------------------------------------------------------------------------------------------------------------------------------------------------------------------------------------------------------------------------------------------------------------------------------------------------|------|------|-----------|-------|------|------|--------------------------------------------------------------------|-------|----------------------|-----------------------------------------------------------------------------------------------------------------------------------|------|------|-----------|-------|------|------|
| Rsa1.0_01493.1.g27329.t2 | refXP_002873373.1   calcium-binding EF hand family protein [Arabidopsis lyrata subsp. lyrata]<br>gi 297319210 gb EFH49632.1   calcium-binding EF hand family protein [Arabidopsis lyrata subsp. lyrata]<br>refXP_002871348.1   hypothetical protein ARALYDRAFT_487699 [Arabidopsis lyrata subsp. lyrata]<br>gi 297317185 gb EFH47607.1   hypothetical protein ARALYDRAFT_487699 [Arabidopsis lyrata subsp. lyrata]<br>refXP_002871347.1   positive transcription elongation factor/ zinc ion binding protein [Arabidopsis lyrata subsp. lyrata]<br>gi 297317184 gb EFH47606.1   positive transcription elongation factor/ zinc ion binding protein [Arabidopsis lyrata subsp. lyrata] | 513  | 391  | 1.00E-115 | 76.2  | 43.9 | 46.4 | calcium-binding EF hand family protein                             | gbpln | Arabidopsis lyrata   | AT5G08580.1   Symbols:   Calcium-binding EF hand family protein   chr5:2780976-2782961 REVERSE LENGTH=391                         | 513  | 391  | 1.00E-117 | 76.2  | 43.7 | 46.2 |
| Rsa1.0_01493.1.g27330.t1 | refXP_002871348.1   hypothetical protein ARALYDRAFT_487699 [Arabidopsis lyrata subsp. lyrata]<br>gi 297317185 gb EFH47607.1   hypothetical protein ARALYDRAFT_487699 [Arabidopsis lyrata subsp. lyrata]<br>refXP_002871347.1   positive transcription elongation factor/ zinc ion binding protein [Arabidopsis lyrata subsp. lyrata]<br>gi 297317184 gb EFH47606.1   positive transcription elongation factor/ zinc ion binding protein [Arabidopsis lyrata subsp. lyrata]                                                                                                                                                                                                            | 510  | 510  | 0         | 100.0 | 95.3 | 97.5 | hypothetical protein ARALYDRAFT_487699                             | gbpln | Arabidopsis lyrata   | AT5G08570.1   Symbols:   Pyruvate kinase family protein   chr5:2778433-2780300 FORWARD LENGTH=510                                 | 510  | 510  | 0         | 100.0 | 94.9 | 97.3 |
| Rsa1.0_01493.1.g27331.t1 | refXP_002871347.1   positive transcription elongation factor/ zinc ion binding protein [Arabidopsis lyrata subsp. lyrata]<br>gi 297317184 gb EFH47606.1   positive transcription elongation factor/ zinc ion binding protein [Arabidopsis lyrata subsp. lyrata]                                                                                                                                                                                                                                                                                                                                                                                                                       | 116  | 116  | 2.00E-55  | 100.0 | 86.2 | 94.0 | positive transcription elongation factor/ zinc ion binding protein | gbpln | Arabidopsis lyrata   | AT5G08565.1   Symbols:   Transcription initiation Spt4-like protein   chr5:2775964-2777154 FORWARD LENGTH=116                     | 116  | 116  | 4.00E-58  | 100.0 | 87.1 | 92.2 |
| Rsa1.0_01493.1.g27332.t1 | gb EOA15427.1   hypothetical protein CARUB_v10003965mg [Capsella rubella]                                                                                                                                                                                                                                                                                                                                                                                                                                                                                                                                                                                                             | 2253 | 2083 | 0         | 92.5  | 55.4 | 61.7 | hypothetical protein CARUB_v10003965mg                             | gbpln | Capsella rubella     | AT4G17330.1   Symbols:   ATG2484-1, G2484-1   G2484-1 protein   chr4:9689263-9697172 REVERSE LENGTH=2037                          | 2253 | 2037 | 0         | 90.4  | 55.0 | 61.5 |
| Rsa1.0_01493.1.g27333.t1 | gb AAG51046.1 AC069473.8 gypsy/Ty-3 retroelement polyprotein; 69905-74404 [Arabidopsis thaliana]<br>gi 109991336 dbj BA03109.1   retroelement pol polyprotein [Arabidopsis thaliana]                                                                                                                                                                                                                                                                                                                                                                                                                                                                                                  | 1497 | 1499 | 0         | 100.1 | 61.9 | 75.3 | gypsy/Ty-3 retroelement polyprotein; 69905-74404                   | gbpln | Arabidopsis thaliana | ATMG00860.1   Symbols:   ORF158   DNA/RNA polymerases superfamily protein   chrM:235916-236392 FORWARD LENGTH=158                 | 1497 | 158  | 2.00E-30  | 10.6  | 4.2  | 5.5  |
| Rsa1.0_01493.1.g27334.t2 | refXP_004287287.1   PREDICTED: topless-related protein 4-like [Fragaria vesca subsp. vesca]                                                                                                                                                                                                                                                                                                                                                                                                                                                                                                                                                                                           | 582  | 1120 | 1.00E-130 | 192.4 | 39.9 | 50.5 | PREDICTED: topless-related protein 4-like                          | gbpln | Fragaria vesca       | AT1G80490.1   Symbols:   TPR1   TOPLESS-related 1   chr1:30261094-3026446 REVERSE LENGTH=1119                                     | 582  | 1119 | 1.00E-123 | 192.3 | 35.7 | 46.6 |
| Rsa1.0_01493.1.g27335.t1 | gb ACP30622.1   disease resistance protein [Brassica rapa subsp. pekinensis]                                                                                                                                                                                                                                                                                                                                                                                                                                                                                                                                                                                                          | 223  | 1459 | 1.00E-97  | 654.3 | 80.7 | 88.8 | disease resistance protein                                         | gbpln | Brassica rapa        | AT5G18370.1   Symbols:   Disease resistance protein (TIR-NBS-LRR class) family   chr5:6085036-6088926 REVERSE LENGTH=1210         | 223  | 1210 | 2.00E-76  | 542.6 | 60.1 | 76.7 |
| Rsa1.0_01494.1.g27336.t2 | refXP_002873609.1   proton-dependent oligopeptide transport family protein [Arabidopsis lyrata subsp. lyrata]<br>gi 297319446 gb EFH49868.1   proton-dependent oligopeptide transport family protein [Arabidopsis lyrata subsp. lyrata]                                                                                                                                                                                                                                                                                                                                                                                                                                               | 626  | 625  | 0         | 99.8  | 94.7 | 97.0 | proton-dependent oligopeptide transport family protein             | gbpln | Arabidopsis lyrata   | AT5G13400.1   Symbols:   Major facilitator superfamily protein   chr5:4296854-4299079 REVERSE LENGTH=624                          | 626  | 624  | 0         | 99.7  | 93.9 | 96.5 |
| Rsa1.0_01494.1.g27337.t2 | refXP_002871567.1   hypothetical protein ARALYDRAFT_488158 [Arabidopsis lyrata subsp. lyrata]<br>gi 297317404 gb EFH47826.1   hypothetical protein ARALYDRAFT_488158 [Arabidopsis lyrata subsp. lyrata]                                                                                                                                                                                                                                                                                                                                                                                                                                                                               | 1096 | 1123 | 0         | 102.5 | 92.1 | 96.6 | hypothetical protein ARALYDRAFT_488158                             | gbpln | Arabidopsis lyrata   | AT5G13390.1   Symbols:   NEF1   no exine formation 1   chr5:4292809-4296572 FORWARD LENGTH=1123                                   | 1096 | 1123 | 0         | 102.5 | 91.6 | 96.2 |
| Rsa1.0_01494.1.g27338.t1 | ref NP_196841.2   auxin-responsive GH3 family protein [Arabidopsis thaliana]<br>gi 26449584 dbj BAC41918.1   putative auxin responsive protein [Arabidopsis thaliana]<br>gi 29028956 gb AAO64857.1   At5g13370 [Arabidopsis thaliana]<br>gi 332004504 gb AED91887.1   auxin-responsive GH3 family protein [Arabidopsis thaliana]                                                                                                                                                                                                                                                                                                                                                      | 577  | 595  | 0         | 103.1 | 79.0 | 90.6 | auxin-responsive GH3 family protein                                | gbpln | Arabidopsis thaliana | AT5G13370.1   Symbols:   Auxin-responsive GH3 family protein   chr5:4286996-4289424 FORWARD LENGTH=595                            | 577  | 595  | 0         | 103.1 | 79.0 | 90.6 |
| Rsa1.0_01494.1.g27339.t2 | gb AAD19773.1   putative retroelement pol polyprotein [Arabidopsis thaliana]                                                                                                                                                                                                                                                                                                                                                                                                                                                                                                                                                                                                          | 1297 | 1335 | 0         | 102.9 | 53.0 | 69.5 | putative retroelement pol polyprotein                              | gbpln | Arabidopsis thaliana | AT4G23160.1   Symbols:   CRK8   cysteine-rich RLK (RECEPTOR-like protein kinase) 8   chr4:12129485-12134086 FORWARD LENGTH=1262   | 1297 | 1262 | 4.00E-60  | 97.3  | 12.4 | 19.0 |
| Rsa1.0_01494.1.g27340.t1 | dbj BAJ34121.1   unnamed protein product [Thellungiella halophila]                                                                                                                                                                                                                                                                                                                                                                                                                                                                                                                                                                                                                    | 244  | 231  | 9.00E-76  | 94.7  | 73.0 | 78.7 | unnamed protein product                                            | ----  | ----                 | AT5G13330.1   Symbols:   Rap2.6L   related to AP2 6l   chr5:4272384-4274461 FORWARD LENGTH=212                                    | 244  | 212  | 6.00E-68  | 86.9  | 56.6 | 61.5 |
| Rsa1.0_01494.1.g27341.t1 | gb EOA20271.1   hypothetical protein CARUB_v10000575mg [Capsella rubella]                                                                                                                                                                                                                                                                                                                                                                                                                                                                                                                                                                                                             | 570  | 574  | 0         | 100.7 | 85.6 | 92.3 | hypothetical protein CARUB_v10000575mg                             | gbpln | Capsella rubella     | AT5G13320.1   Symbols:   PBS3, GDG1, WIN3, GH3.12   Auxin-responsive GH3 family protein   chr5:4268902-4270896 FORWARD LENGTH=575 | 570  | 575  | 0         | 100.9 | 84.4 | 91.4 |
| Rsa1.0_01494.1.g27342.t1 | refXP_002873606.1   predicted protein [Arabidopsis lyrata subsp. lyrata]<br>gi 297319443 gb EFH49865.1   predicted protein [Arabidopsis lyrata subsp. lyrata]                                                                                                                                                                                                                                                                                                                                                                                                                                                                                                                         | 389  | 402  | 1.00E-161 | 103.3 | 79.4 | 84.1 | predicted protein                                                  | gbpln | Arabidopsis lyrata   | AT5G13290.2   Symbols:   SOL2, CRN   Protein kinase superfamily protein   chr5:4252924-4254215 REVERSE LENGTH=401                 | 389  | 401  | 1.00E-161 | 103.1 | 77.9 | 84.1 |

|                          |                                                                                                                                                                                                                                                                                                                                                  |      |      |          |       |      |      |                                          |       |                      |                                                                                                                                                                                                                                                                                                                                              |      |      |           |       |      |      |
|--------------------------|--------------------------------------------------------------------------------------------------------------------------------------------------------------------------------------------------------------------------------------------------------------------------------------------------------------------------------------------------|------|------|----------|-------|------|------|------------------------------------------|-------|----------------------|----------------------------------------------------------------------------------------------------------------------------------------------------------------------------------------------------------------------------------------------------------------------------------------------------------------------------------------------|------|------|-----------|-------|------|------|
| Rsa1.0_01494.1.g27343.t1 | emb[CAB39638.1] RNA-directed DNA polymerase-like protein [Arabidopsis thaliana] gi 7267666 emb[CAB78094.1] RNA-directed DNA polymerase-like protein [Arabidopsis thaliana]                                                                                                                                                                       | 723  | 1274 | 1.00E-68 | 176.2 | 22.1 | 34.7 | RNA-directed DNA polymerase-like protein | gbpln | Arabidopsis thaliana | AT1G10000.1   Symbols:   Ribonuclease H-like superfamily protein   chr1:3263877-3264788 REVERSE LENGTH=303                                                                                                                                                                                                                                   | 723  | 303  | 6.00E-47  | 41.9  | 14.5 | 21.2 |
| Rsa1.0_01494.1.g27344.t1 | gb EOA22271.1  hypothetical protein CARUB_v10002867mg [Capsella rubella]                                                                                                                                                                                                                                                                         | 263  | 333  | 9.00E-73 | 126.6 | 51.7 | 68.1 | hypothetical protein CARUB_v10002867mg   | gbpln | Capsella rubella     | AT5G17080.1   Symbols:   Cysteine proteinases superfamily protein   chr5:5619594-5620949 FORWARD LENGTH=298                                                                                                                                                                                                                                  | 263  | 298  | 2.00E-51  | 113.3 | 41.4 | 60.5 |
| Rsa1.0_01495.1.g27345.t1 | ref XP_002881431.1  hypothetical protein ARALYDRAFT_902732 [Arabidopsis lyrata subsp. lyrata] gi 297327270 gb EFH57690.1  hypothetical protein ARALYDRAFT_902732 [Arabidopsis lyrata subsp. lyrata]                                                                                                                                              | 123  | 134  | 4.00E-44 | 108.9 | 79.7 | 87.0 | hypothetical protein ARALYDRAFT_902732   | gbpln | Arabidopsis lyrata   | AT2G36210.1   Symbols:   SAUR-like auxin-responsive protein family   chr2:15186326-15186733 REVERSE LENGTH=135                                                                                                                                                                                                                               | 123  | 135  | 2.00E-46  | 109.8 | 77.2 | 87.0 |
| Rsa1.0_01495.1.g27346.t1 | ref XP_002881431.1  hypothetical protein ARALYDRAFT_902732 [Arabidopsis lyrata subsp. lyrata] gi 297327270 gb EFH57690.1  hypothetical protein ARALYDRAFT_902732 [Arabidopsis lyrata subsp. lyrata]                                                                                                                                              | 123  | 134  | 2.00E-44 | 108.9 | 77.2 | 86.2 | hypothetical protein ARALYDRAFT_902732   | gbpln | Arabidopsis lyrata   | AT2G36210.1   Symbols:   SAUR-like auxin-responsive protein family   chr2:15186326-15186733 REVERSE LENGTH=135                                                                                                                                                                                                                               | 123  | 135  | 3.00E-47  | 109.8 | 76.4 | 86.2 |
| Rsa1.0_01495.1.g27347.t1 | emb CAN73924.1  hypothetical protein VITISV_041509 [Vitis vinifera]                                                                                                                                                                                                                                                                              | 1381 | 1434 | 0        | 103.8 | 38.5 | 55.0 | hypothetical protein VITISV_041509       | gbpln | Vitis vinifera       | AT4G23160.1   Symbols: CRK8   cysteine-rich RLK (RECEPTOR-like protein kinase) 8   chr4:12129485-12134086 FORWARD LENGTH=1262                                                                                                                                                                                                                | 1381 | 1262 | 1.00E-114 | 91.4  | 15.4 | 21.1 |
| Rsa1.0_01495.1.g27348.t1 | gb AAM61505.1  unknown [Arabidopsis thaliana]                                                                                                                                                                                                                                                                                                    | 246  | 263  | 1.00E-74 | 106.9 | 73.2 | 78.5 | unknown                                  | gbpln | Arabidopsis thaliana | AT2G36220.1   Symbols:   unknown protein; BEST Arabidopsis thaliana protein match is: unknown protein (TAIR:AT3G52710.1); Has 74 Blast hits to 74 proteins in 10 species: Archae - 0; Bacteria - 0; Metazoa - 0; Fungi - 0; Plants - 74; Viruses - 0; Other Eukaryotes - 0 (source: NCBI BLink).   chr2:15192556-15193347 FORWARD LENGTH=263 | 246  | 263  | 4.00E-76  | 106.9 | 73.2 | 78.9 |
| Rsa1.0_01495.1.g27349.t1 | ref XP_002881433.1  hypothetical protein ARALYDRAFT_902736 [Arabidopsis lyrata subsp. lyrata] gi 297327272 gb EFH57692.1  hypothetical protein ARALYDRAFT_902736 [Arabidopsis lyrata subsp. lyrata]                                                                                                                                              | 477  | 479  | 0        | 100.4 | 89.5 | 93.1 | hypothetical protein ARALYDRAFT_902736   | gbpln | Arabidopsis lyrata   | AT2G36250.2   Symbols: FTSZ2-1, ATFTSZ2-1   Tubulin/FtsZ family protein   chr2:15197661-15199932 REVERSE LENGTH=478                                                                                                                                                                                                                          | 477  | 478  | 0         | 100.2 | 89.5 | 92.9 |
| Rsa1.0_01495.1.g27350.t1 | ref NP_565840.1  protein abscisic acid-insensitive 5 [Arabidopsis thaliana] gi 75313519 sp Q9SJN0.1 ABI5, ARATH RecName: Full=Protein ABSCEISIC ACID-INSENSITIVE 5; AltName: Full=Dc3 promoter-binding factor 1; Short=AtDPPBF1; AltName: Full=Protein GROWTH-INSENSITIVITY TO ABA 1; AltName: Full=bZIP transcription factor 39; Short=AtbZIP39 | 138  | 442  | 5.00E-67 | 320.3 | 93.5 | 96.4 | protein abscisic acid-insensitive 5      | gbpln | Arabidopsis thaliana | AT2G36270.1   Symbols: ABI5, GIA1   Basic-leucine zipper (bZIP) transcription factor family protein   chr2:15204980-15206571 REVERSE LENGTH=442                                                                                                                                                                                              | 138  | 442  | 1.00E-69  | 320.3 | 93.5 | 96.4 |
| Rsa1.0_01495.1.g27351.t1 | gi 4510349 gb AAD21438.1  abscisic acid insensitive 5 (ABI5) [Arabidopsis thaliana] gi 13346151 gb AAK19599.1  bZIP protein [Arabidopsis thaliana] gi 111074502 gb ABH04624.1  At2g36270 [Arabidopsis thaliana] gi 330254132 gb AEC08226.1  protein abscisic acid-insensitive 5 [Arabidopsis thaliana]                                           | 1445 | 1475 | 0        | 102.1 | 50.0 | 65.7 | retroelement pol polyprotein-like        | gbpln | Arabidopsis thaliana | AT4G23160.1   Symbols: CRK8   cysteine-rich RLK (RECEPTOR-like protein kinase) 8   chr4:12129485-12134086 FORWARD LENGTH=1262                                                                                                                                                                                                                | 1445 | 1262 | 0         | 87.3  | 24.7 | 29.3 |
| Rsa1.0_01495.1.g27352.t1 | dbj BAB10503.1  retroelement pol polyprotein-like [Arabidopsis thaliana]                                                                                                                                                                                                                                                                         | 236  | 425  | 1.00E-74 | 180.1 | 76.3 | 81.8 | ABA insensitive 5-like protein           | gbpln | Brassica oleracea    | AT2G36270.1   Symbols: ABI5, GIA1   Basic-leucine zipper (bZIP) transcription factor family protein   chr2:15204980-15206571 REVERSE LENGTH=442                                                                                                                                                                                              | 236  | 442  | 4.00E-61  | 187.3 | 72.5 | 78.0 |
| Rsa1.0_01495.1.g27353.t1 | gb EAOA26311.1  hypothetical protein CARUB_v10024924mg [Capsella rubella]                                                                                                                                                                                                                                                                        | 118  | 115  | 2.00E-30 | 97.5  | 63.6 | 73.7 | hypothetical protein CARUB_v10024924mg   | gbpln | Capsella rubella     | AT2G36295.1   Symbols:   unknown protein; Has 35333 Blast hits to 34131 proteins in 2444 species: Archae - 798; Bacteria - 22429; Metazoa - 974; Fungi - 991; Plants - 531; Viruses - 0; Other Eukaryotes - 9610 (source: NCBI BLink).   chr2:15211755-15212096 FORWARD LENGTH=113                                                           | 118  | 113  | 5.00E-27  | 95.8  | 59.3 | 66.9 |

|                          |                                                                                                                                                                                                                                                                                                                                                                                                                                                                                                                    |      |      |           |       |      |      |                                                     |       |                      |                                                                                                                                                                                                                                                                                                                                                |      |      |           |       |      |      |
|--------------------------|--------------------------------------------------------------------------------------------------------------------------------------------------------------------------------------------------------------------------------------------------------------------------------------------------------------------------------------------------------------------------------------------------------------------------------------------------------------------------------------------------------------------|------|------|-----------|-------|------|------|-----------------------------------------------------|-------|----------------------|------------------------------------------------------------------------------------------------------------------------------------------------------------------------------------------------------------------------------------------------------------------------------------------------------------------------------------------------|------|------|-----------|-------|------|------|
| Rsa1.0_01495.1.g27354.t1 | refXP_002881437.1  hypothetical protein ARALYDRAFT_482602 [Arabidopsis lyrata subsp. lyrata] gi 297327276 gb EFH57696.1  hypothetical protein ARALYDRAFT_482602 [Arabidopsis lyrata subsp. lyrata]                                                                                                                                                                                                                                                                                                                 | 196  | 255  | 3.00E-75  | 130.1 | 76.0 | 82.7 | hypothetical protein ARALYDRAFT_482602              | gbpln | Arabidopsis lyrata   | AT3G52760.1   Symbols:   Integral membrane Yip1 family protein   chr3:19553932-19554705 REVERSE LENGTH=257                                                                                                                                                                                                                                     | 196  | 257  | 4.00E-77  | 131.1 | 77.0 | 84.7 |
| Rsa1.0_01495.1.g27355.t2 | gb AAB87099.1  putative retroelement pol polyprotein [Arabidopsis thaliana]                                                                                                                                                                                                                                                                                                                                                                                                                                        | 1412 | 1496 | 0         | 105.9 | 57.7 | 71.4 | putative retroelement pol polyprotein               | gbpln | Arabidopsis thaliana | AT4G23160.1   Symbols: CRK8   cysteine-rich RLK (RECEPTOR-like protein kinase) 8   chr4:12129485-12134086 FORWARD LENGTH=1262                                                                                                                                                                                                                  | 1412 | 1262 | 1.00E-141 | 89.4  | 16.8 | 23.7 |
| Rsa1.0_01496.1.g27356.t1 | gb EOA36979.1  hypothetical protein CARUB_v10009943mg [Capsella rubella]                                                                                                                                                                                                                                                                                                                                                                                                                                           | 276  | 283  | 1.00E-88  | 102.5 | 66.3 | 79.3 | hypothetical protein CARUB_v10009943mg              | gbpln | Capsella rubella     | AT1G30190.1   Symbols:   unknown protein; BEST Arabidopsis thaliana protein match is: unknown protein (TAIR:AT2G34610.1). Has 56 Blast hits to 56 proteins in 13 species: Archae - 0; Bacteria - 0; Metazoa - 0; Fungi - 0; Plants - 44; Viruses - 0; Other Eukaryotes - 12 (source: NCBI BLINK).   chr1:10618966-10619802 FORWARD LENGTH=278  | 276  | 278  | 8.00E-90  | 100.7 | 66.7 | 79.7 |
| Rsa1.0_01496.1.g27357.t2 | refXP_002893607.1  ATINT2 [Arabidopsis lyrata subsp. lyrata] gi 297339449 gb EFH69866.1  ATINT2 [Arabidopsis lyrata subsp. lyrata] ref NP_564352.1  uncharacterized protein [Arabidopsis thaliana] gi 12320849 gb AAG50559.1 AC073506.1 hypothetical protein [Arabidopsis thaliana] gi 16323184 gb AAL15326.1  At1g30260/F12P21.9 [Arabidopsis thaliana] gi 21436007 gb AAM51581.1  At1g30260/F12P21.9 [Arabidopsis thaliana] gi 332193079 gb AEE31200.1  uncharacterized protein AT1G30260 [Arabidopsis thaliana] | 695  | 580  | 6.00E-13  | 83.5  | 5.3  | 6.0  | ATINT2                                              | gbpln | Arabidopsis lyrata   | AT1G30220.1   Symbols: ATINT2, INT2   inositol transporter 2   chr1:10632957-10635439 REVERSE LENGTH=580                                                                                                                                                                                                                                       | 695  | 580  | 8.00E-14  | 83.5  | 4.9  | 5.9  |
| Rsa1.0_01496.1.g27358.t1 | ref NP_564352.1  uncharacterized protein [Arabidopsis thaliana] gi 12320849 gb AAG50559.1 AC073506.1 hypothetical protein [Arabidopsis thaliana] gi 16323184 gb AAL15326.1  At1g30260/F12P21.9 [Arabidopsis thaliana] gi 21436007 gb AAM51581.1  At1g30260/F12P21.9 [Arabidopsis thaliana] gi 332193079 gb AEE31200.1  uncharacterized protein AT1G30260 [Arabidopsis thaliana]                                                                                                                                    | 92   | 97   | 2.00E-25  | 105.4 | 82.6 | 85.9 | uncharacterized protein                             | gbpln | Arabidopsis thaliana | AT1G30260.1   Symbols:   BEST Arabidopsis thaliana protein match is: Galactosyltransferase family protein (TAIR:AT4G21060.1); Has 30 Blast hits to 30 proteins in 8 species: Archae - 0; Bacteria - 0; Metazoa - 0; Fungi - 0; Plants - 30; Viruses - 0; Other Eukaryotes - 0 (source: NCBI BLINK).   chr1:10651159-10651452 FORWARD LENGTH=97 | 92   | 97   | 3.00E-28  | 105.4 | 82.6 | 85.9 |
| Rsa1.0_01496.1.g27359.t5 | gb AAG51754.1 AC068667.33 reverse transcriptase, putative; 100033-105622 [Arabidopsis thaliana]                                                                                                                                                                                                                                                                                                                                                                                                                    | 259  | 1557 | 2.00E-26  | 601.2 | 36.7 | 56.8 | reverse transcriptase, putative; 100033-105622      | gbpln | Arabidopsis thaliana | AT4G29090.1   Symbols:   Ribonuclease H-like superfamily protein   chr4:14333528-14335255 FORWARD LENGTH=575                                                                                                                                                                                                                                   | 259  | 575  | 5.00E-13  | 222.0 | 20.5 | 34.0 |
| Rsa1.0_01496.1.g27360.t1 | # # # # # # # # # # # # # # # # # # # # # #                                                                                                                                                                                                                                                                                                                                                                                                                                                                        |      |      |           |       |      |      |                                                     |       |                      |                                                                                                                                                                                                                                                                                                                                                |      |      |           |       |      |      |
| Rsa1.0_01496.1.g27361.t1 | gb EOA39265.1  hypothetical protein CARUB_v10012271mg [Capsella rubella]                                                                                                                                                                                                                                                                                                                                                                                                                                           | 476  | 484  | 0         | 101.7 | 90.8 | 94.3 | hypothetical protein CARUB_v10012271mg              | gbpln | Capsella rubella     | AT1G30270.1   Symbols: CIPK23, SnRK3.23, ACPK23, LKS1   CBL-interacting protein kinase 23   chr1:10655270-10658524 FORWARD LENGTH=482                                                                                                                                                                                                          | 476  | 482  | 0         | 101.3 | 92.0 | 95.0 |
| Rsa1.0_01496.1.g27362.t1 | refXP_002893610.1  heat shock protein binding protein [Arabidopsis lyrata subsp. lyrata] gi 297339452 gb EFH69869.1  heat shock protein binding protein [Arabidopsis lyrata subsp. lyrata]                                                                                                                                                                                                                                                                                                                         | 439  | 455  | 1.00E-170 | 103.6 | 80.6 | 88.4 | heat shock protein binding protein                  | gbpln | Arabidopsis lyrata   | AT1G30280.1   Symbols:   Chaperone DnaJ-domain superfamily protein   chr1:10662851-10664570 REVERSE LENGTH=455                                                                                                                                                                                                                                 | 439  | 455  | 1.00E-168 | 103.6 | 79.7 | 87.5 |
| Rsa1.0_01497.1.g27363.t1 | gb AAD17398.1  putative non-LTR retroelement reverse transcriptase [Arabidopsis thaliana]                                                                                                                                                                                                                                                                                                                                                                                                                          | 700  | 1225 | 1.00E-132 | 175.0 | 41.7 | 57.6 | putative non-LTR retroelement reverse transcriptase | gbpln | Arabidopsis thaliana | AT4G29090.1   Symbols:   Ribonuclease H-like superfamily protein   chr4:14333528-14335255 FORWARD LENGTH=575                                                                                                                                                                                                                                   | 700  | 575  | 7.00E-45  | 82.1  | 19.1 | 29.6 |
| Rsa1.0_01497.1.g27364.t1 | gb EOA30132.1  hypothetical protein CARUB_v10013233mg, partial [Capsella rubella]                                                                                                                                                                                                                                                                                                                                                                                                                                  | 187  | 619  | 3.00E-21  | 331.0 | 30.5 | 33.7 | hypothetical protein CARUB_v10013233mg, partial     | gbpln | Capsella rubella     | AT3G13490.1   Symbols: OVA5, ATKRS-2   Lysyl-tRNA synthetase, class II   chr3:4395984-4399302 REVERSE LENGTH=602                                                                                                                                                                                                                               | 187  | 602  | 2.00E-22  | 321.9 | 29.9 | 32.6 |
| Rsa1.0_01497.1.g27365.t1 | ref NP_198579.2  condensin complex subunit 3 [Arabidopsis thaliana] gi 332006829 gb AED94212.1  embryo defective protein 2656 [Arabidopsis thaliana]                                                                                                                                                                                                                                                                                                                                                               | 1047 | 1051 | 0         | 100.4 | 86.2 | 92.1 | condensin complex subunit 3                         | gbpln | Arabidopsis thaliana | AT5G37630.1   Symbols: EMB2656   ARM repeat superfamily protein   chr5:14947407-14952546 FORWARD LENGTH=1051                                                                                                                                                                                                                                   | 1047 | 1051 | 0         | 100.4 | 86.2 | 92.1 |
| Rsa1.0_01497.1.g27366.t2 | refXP_002892277.1  TraB family protein [Arabidopsis lyrata subsp. lyrata] gi 297338119 gb EFH68536.1  TraB family protein [Arabidopsis lyrata subsp. lyrata]                                                                                                                                                                                                                                                                                                                                                       | 178  | 372  | 2.00E-35  | 209.0 | 53.4 | 60.1 | TraB family protein                                 | gbpln | Arabidopsis lyrata   | AT1G05270.1   Symbols:   TraB family protein   chr1:1531806-1534305 REVERSE LENGTH=371                                                                                                                                                                                                                                                         | 178  | 371  | 2.00E-37  | 208.4 | 52.8 | 59.6 |
| Rsa1.0_01497.1.g27367.t1 | db BAA04996.1  glutamine synthetase [Raphanus sativus]                                                                                                                                                                                                                                                                                                                                                                                                                                                             | 356  | 356  | 0         | 100.0 | 98.6 | 99.4 | glutamine synthetase                                | gbpln | Raphanus sativus     | AT5G37600.1   Symbols: ATGSR1, GLN1;1, GSR 1, ATGLN1;1   glutamine synthase clone R1   chr5:14933574-14935656 REVERSE LENGTH=356                                                                                                                                                                                                               | 356  | 356  | 0         | 100.0 | 96.1 | 98.9 |
| Rsa1.0_01498.1.g27368.t1 | refXP_002876953.1  CYP71B21 [Arabidopsis lyrata subsp. lyrata] gi 297322791 gb EFH53212.1  CYP71B21 [Arabidopsis lyrata subsp. lyrata]                                                                                                                                                                                                                                                                                                                                                                             | 96   | 499  | 4.00E-24  | 519.8 | 55.2 | 57.3 | CYP71B21                                            | gbpln | Arabidopsis lyrata   | AT3G28190.1   Symbols: CYP71B21   cytochrome P450, family 71, subfamily B, polypeptide 21   chr3:9583475-9585083 REVERSE LENGTH=499                                                                                                                                                                                                            | 96   | 499  | 2.00E-26  | 519.8 | 55.2 | 57.3 |

|                          |                                                                                                                                                                                                                                                                                                                                                                                                                                                                                                                                                      |     |      |           |       |      |      |                                                                            |       |                      |                                                                                                                                                 |     |      |           |       |      |      |
|--------------------------|------------------------------------------------------------------------------------------------------------------------------------------------------------------------------------------------------------------------------------------------------------------------------------------------------------------------------------------------------------------------------------------------------------------------------------------------------------------------------------------------------------------------------------------------------|-----|------|-----------|-------|------|------|----------------------------------------------------------------------------|-------|----------------------|-------------------------------------------------------------------------------------------------------------------------------------------------|-----|------|-----------|-------|------|------|
| Rsa1.0_01498.1.g27369.t1 | refNP_198850.1   PWWP domain-containing protein [Arabidopsis thaliana]   gi10178144 dbj BAB11589.1   unnamed protein product [Arabidopsis thaliana]   gi332007152 gb AED94535.1   PWWP domain-containing protein [Arabidopsis thaliana]                                                                                                                                                                                                                                                                                                              | 327 | 1008 | 6.00E-23  | 308.3 | 20.8 | 25.1 | PWWP domain-containing protein                                             | gbpln | Arabidopsis thaliana | AT5G40340.1   Symbols:   Tudor/PWWP/MBT superfamily protein   chr5:16131654-16134680 REVERSE LENGTH=1008                                        | 327 | 1008 | 1.00E-25  | 308.3 | 20.8 | 25.1 |
| Rsa1.0_01498.1.g27370.t1 | #                                                                                                                                                                                                                                                                                                                                                                                                                                                                                                                                                    | #   | #    | #         | #     | #    | #    | -                                                                          | ----  | ----                 | #                                                                                                                                               | #   | #    | #         | #     | #    |      |
| Rsa1.0_01498.1.g27371.t1 | refXP_002876952.1   CYP71B19 [Arabidopsis lyrata subsp. lyrata]   gi297322790 gb EFH53211.1   CYP71B19 [Arabidopsis lyrata subsp. lyrata]                                                                                                                                                                                                                                                                                                                                                                                                            | 500 | 502  | 0         | 100.4 | 86.2 | 92.6 | CYP71B19                                                                   | gbpln | Arabidopsis lyrata   | AT3G26170.1   Symbols: CYP71B19   cytochrome P450, family 71, subfamily B, polypeptide 19   chr3:9573542-9575129 REVERSE LENGTH=502             | 500 | 502  | 0         | 100.4 | 85.4 | 92.8 |
| Rsa1.0_01498.1.g27372.t1 | gb EOA25800.1   hypothetical protein CARUB_v10019167mg [Capsella rubella]                                                                                                                                                                                                                                                                                                                                                                                                                                                                            | 195 | 511  | 2.00E-58  | 262.1 | 57.4 | 64.1 | hypothetical protein CARUB_v10019167mg                                     | gbpln | Capsella rubella     | AT3G26140.1   Symbols:   Cellulase (glycosyl hydrolase family 5) protein   chr3:9559742-9563070 REVERSE LENGTH=508                              | 195 | 508  | 6.00E-58  | 260.5 | 55.4 | 63.6 |
| Rsa1.0_01498.1.g27373.t1 | dbj BAB01438.1   unnamed protein product [Arabidopsis thaliana]                                                                                                                                                                                                                                                                                                                                                                                                                                                                                      | 598 | 708  | 0         | 118.4 | 78.9 | 85.6 | unnamed protein product                                                    | gbpln | Arabidopsis thaliana | AT3G26120.1   Symbols: TEL1   terminal EAR1-like 1   chr3:9546398-9549186 FORWARD LENGTH=615                                                    | 598 | 615  | 0         | 102.8 | 78.9 | 85.6 |
| Rsa1.0_01498.1.g27374.t1 | refXP_002875308.1   hypothetical protein ARALYDRAFT.484375 [Arabidopsis lyrata subsp. lyrata]   gi297321146 gb EFH51567.1   hypothetical protein ARALYDRAFT.484375 [Arabidopsis lyrata subsp. lyrata]                                                                                                                                                                                                                                                                                                                                                | 118 | 128  | 4.00E-25  | 108.5 | 65.3 | 72.9 | hypothetical protein ARALYDRAFT.484375                                     | gbpln | Arabidopsis lyrata   | AT3G26110.1   Symbols:   Anther-specific protein ags1-like   chr3:9541573-9541959 FORWARD LENGTH=128                                            | 118 | 128  | 4.00E-21  | 108.5 | 61.0 | 72.0 |
| Rsa1.0_01498.1.g27375.t1 | refXP_002875307.1   regulator of chromosome condensation family protein [Arabidopsis lyrata subsp. lyrata]   gi297321145 gb EFH51566.1   regulator of chromosome condensation family protein [Arabidopsis lyrata subsp. lyrata]                                                                                                                                                                                                                                                                                                                      | 535 | 533  | 0         | 99.6  | 88.6 | 93.5 | regulator of chromosome condensation family protein                        | gbpln | Arabidopsis lyrata   | AT3G26100.2   Symbols:   Regulator of chromosome condensation (RCG1) family protein   chr3:9538063-9540149 FORWARD LENGTH=532                   | 535 | 532  | 0         | 99.4  | 87.9 | 93.5 |
| Rsa1.0_01499.1.g27376.t1 | #                                                                                                                                                                                                                                                                                                                                                                                                                                                                                                                                                    | #   | #    | #         | #     | #    | #    | -                                                                          | ----  | ----                 | #                                                                                                                                               | #   | #    | #         | #     | #    |      |
| Rsa1.0_01499.1.g27377.t1 | refXP_002893808.1   At1g34065 [Arabidopsis lyrata subsp. lyrata]   gi297339650 gb EFH70067.1   At1g34065 [Arabidopsis lyrata subsp. lyrata]                                                                                                                                                                                                                                                                                                                                                                                                          | 324 | 321  | 1.00E-163 | 99.1  | 89.2 | 93.2 | At1g34065                                                                  | gbpln | Arabidopsis lyrata   | AT1G34065.1   Symbols: SAMC2   S-adenosylmethionine carrier 2   chr1:12398717-12401036 REVERSE LENGTH=345                                       | 324 | 345  | 1.00E-165 | 106.5 | 88.3 | 92.6 |
| Rsa1.0_01499.1.g27378.t1 | refXP_002891076.1   predicted protein [Arabidopsis lyrata subsp. lyrata]   gi297336918 gb EFH67335.1   predicted protein [Arabidopsis lyrata subsp. lyrata]                                                                                                                                                                                                                                                                                                                                                                                          | 441 | 352  | 1.00E-173 | 79.8  | 66.0 | 72.3 | predicted protein                                                          | gbpln | Arabidopsis lyrata   | AT4G09760.1   Symbols:   Protein kinase superfamily protein   chr4:6148955-6151150 REVERSE LENGTH=346                                           | 441 | 346  | 1.00E-159 | 78.5  | 59.4 | 68.0 |
| Rsa1.0_01499.1.g27379.t1 | #                                                                                                                                                                                                                                                                                                                                                                                                                                                                                                                                                    | #   | #    | #         | #     | #    | #    | -                                                                          | ----  | ----                 | #                                                                                                                                               | #   | #    | #         | #     | #    |      |
| Rsa1.0_01499.1.g27380.t1 | #                                                                                                                                                                                                                                                                                                                                                                                                                                                                                                                                                    | #   | #    | #         | #     | #    | #    | -                                                                          | ----  | ----                 | #                                                                                                                                               | #   | #    | #         | #     | #    |      |
| Rsa1.0_01499.1.g27381.t1 | refNP_190057.1   uncharacterized protein [Arabidopsis thaliana]   gi16967119 emb CAB72473.1   putative protein [Arabidopsis thaliana]   gi30725352 gb AAP37698.1   At3g44710 [Arabidopsis thaliana]   gi110743781 dbj BAE99726.1   hypothetical protein [Arabidopsis thaliana]   gi332644413 gb AEE77934.1   uncharacterized protein AT3G44710 [Arabidopsis thaliana]                                                                                                                                                                                | 458 | 504  | 1.00E-155 | 110.0 | 62.0 | 78.4 | uncharacterized protein                                                    | gbpln | Arabidopsis thaliana | AT3G44710.1   Symbols:   Plant protein of unknown function (DUF247)   chr3:16251942-16253456 REVERSE LENGTH=504                                 | 458 | 504  | 1.00E-158 | 110.0 | 62.0 | 78.4 |
| Rsa1.0_01500.1.g27382.t1 | #                                                                                                                                                                                                                                                                                                                                                                                                                                                                                                                                                    | #   | #    | #         | #     | #    | #    | -                                                                          | ----  | ----                 | #                                                                                                                                               | #   | #    | #         | #     | #    |      |
| Rsa1.0_01500.1.g27383.t1 | refNP_683459.2   Core-2/1-branching beta-1,6-N-acetylglucosaminyltransferase family protein [Arabidopsis thaliana]   gi49823486 gb AAT68726.1   hypothetical protein At1g62305 [Arabidopsis thaliana]   gi58743302 gb AAW81729.1   At1g62305 [Arabidopsis thaliana]   gi60547649 gb AAX23788.1   hypothetical protein At1g62305 [Arabidopsis thaliana]   gi61656151 gb AAX49378.1   At1g62305 [Arabidopsis thaliana]   gi332195830 gb AEE33951.1   Core-2/1-branching beta-1,6-N-acetylglucosaminyltransferase family protein [Arabidopsis thaliana] | 401 | 378  | 1.00E-179 | 94.3  | 79.1 | 84.0 | Core-2/1-branching beta-1,6-N-acetylglucosaminyltransferase family protein | gbpln | Arabidopsis thaliana | AT1G62305.1   Symbols:   Core-2/1-branching beta-1,6-N-acetylglucosaminyltransferase family protein   chr1:23026989-23029189 REVERSE LENGTH=378 | 401 | 378  | 0         | 94.3  | 79.1 | 84.0 |
| Rsa1.0_01500.1.g27384.t1 | #                                                                                                                                                                                                                                                                                                                                                                                                                                                                                                                                                    | #   | #    | #         | #     | #    | #    | -                                                                          | ----  | ----                 | #                                                                                                                                               | #   | #    | #         | #     | #    |      |

|                           |                                                                                                                                                                                                                                                                                                                                                                                                                                                                                                       |      |      |           |       |      |      |                                          |       |                      |                                                                                                                               |      |      |           |       |      |      |
|---------------------------|-------------------------------------------------------------------------------------------------------------------------------------------------------------------------------------------------------------------------------------------------------------------------------------------------------------------------------------------------------------------------------------------------------------------------------------------------------------------------------------------------------|------|------|-----------|-------|------|------|------------------------------------------|-------|----------------------|-------------------------------------------------------------------------------------------------------------------------------|------|------|-----------|-------|------|------|
| Rsa1.0_01500.1.g27385.t2  | dbj BAB70678.1  subtilisin-like serine protease [Arabidopsis thaliana]                                                                                                                                                                                                                                                                                                                                                                                                                                | 1429 | 832  | 0         | 58.2  | 46.5 | 50.9 | subtilisin-like serine protease          | gbpln | Arabidopsis thaliana | AT1G62340.1   Symbols: ALE1, ALE   PA-domain containing subtilase family protein   chr1:23051123-23055656 REVERSE LENGTH=832  | 1429 | 832  | 0         | 58.2  | 46.3 | 50.5 |
| Rsa1.0_01500.1.g27386.t7  | ref NP_188660.3  pumilio 5 [Arabidopsis thaliana]<br>gi 313471415 sp Q9LJX4.2 PUM5_ARATH RecName: Full=Pumilio homolog 5; Short=APUM-5; Short=APUM5<br>gi 332642831 gb AEE76352.1  pumilio 5 [Arabidopsis thaliana]                                                                                                                                                                                                                                                                                   | 125  | 961  | 1.00E-40  | 768.8 | 63.2 | 66.4 | pumilio 5                                | gbpln | Arabidopsis thaliana | AT3G20250.1   Symbols: APUM5, PUM5   pumilio 5   chr3:7059098-7062660 REVERSE LENGTH=961                                      | 125  | 961  | 2.00E-43  | 768.8 | 63.2 | 66.4 |
| Rsa1.0_01500.1.g27387.t16 | emb CAA19715.1  putative protein [Arabidopsis thaliana]<br>gi 7269574 emb CAB79576.1  putative protein [Arabidopsis thaliana]                                                                                                                                                                                                                                                                                                                                                                         | 1690 | 1318 | 0         | 78.0  | 33.1 | 40.8 | putative protein                         | gbpln | Arabidopsis thaliana | AT4G23160.1   Symbols: CRK8   cysteine-rich RLK (RECEPTOR-like protein kinase) 8   chr4:12129485-12134086 FORWARD LENGTH=1262 | 1690 | 1262 | 8.00E-72  | 74.7  | 9.3  | 14.0 |
| Rsa1.0_01500.1.g27388.t1  | ref XP_002888031.1  hypothetical protein ARALYDRAFT_893249 [Arabidopsis lyrata subsp. lyrata]<br>gi 297333872 gb EFH64290.1  hypothetical protein ARALYDRAFT_893249 [Arabidopsis lyrata subsp. lyrata]                                                                                                                                                                                                                                                                                                | 212  | 202  | 3.00E-76  | 95.3  | 73.1 | 79.7 | hypothetical protein ARALYDRAFT_893249   | gbpln | Arabidopsis lyrata   | AT1G62370.1   Symbols:   RING/U-box superfamily protein   chr1:23072575-23073189 FORWARD LENGTH=204                           | 212  | 204  | 5.00E-77  | 96.2  | 72.2 | 79.7 |
| Rsa1.0_01501.1.g27389.t1  | gb AAG50806.1 AC079281.8 unknown protein [Arabidopsis thaliana]                                                                                                                                                                                                                                                                                                                                                                                                                                       | 1492 | 1213 | 0         | 81.3  | 24.5 | 36.9 | unknown protein                          | gbpln | Arabidopsis thaliana | AT1G43760.1   Symbols:   DNAse I-like superfamily protein   chr1:16528880-16531065 REVERSE LENGTH=626                         | 1492 | 626  | 7.00E-62  | 42.0  | 9.8  | 16.4 |
| Rsa1.0_01501.1.g27390.t1  | emb CAB39638.1  RNA-directed DNA polymerase-like protein [Arabidopsis thaliana]<br>gi 7267666 emb CAB78094.1  RNA-directed DNA polymerase-like protein [Arabidopsis thaliana]                                                                                                                                                                                                                                                                                                                         | 1850 | 1274 | 0         | 68.9  | 32.6 | 44.3 | RNA-directed DNA polymerase-like protein | gbpln | Arabidopsis thaliana | AT4G29090.1   Symbols:   Ribonuclease H-like superfamily protein   chr4:14333528-14335255 FORWARD LENGTH=575                  | 1850 | 575  | 3.00E-68  | 31.1  | 9.2  | 14.4 |
| Rsa1.0_01501.1.g27391.t1  | #                                                                                                                                                                                                                                                                                                                                                                                                                                                                                                     | #    | #    | #         | #     | #    | -    | ----                                     | ----  | #                    | #                                                                                                                             | #    | #    | #         | #     | #    |      |
| Rsa1.0_01501.1.g27392.t1  | ref XP_002891635.1  hypothetical protein ARALYDRAFT_892105 [Arabidopsis lyrata subsp. lyrata]<br>gi 297337477 gb EFH67894.1  hypothetical protein ARALYDRAFT_892105 [Arabidopsis lyrata subsp. lyrata]                                                                                                                                                                                                                                                                                                | 364  | 253  | 4.00E-66  | 69.5  | 35.4 | 45.3 | hypothetical protein ARALYDRAFT_892105   | gbpln | Arabidopsis lyrata   | AT2G31670.1   Symbols:   Stress responsive alpha-beta barrel domain protein   chr2:13472699-13473490 REVERSE LENGTH=263       | 364  | 263  | 2.00E-68  | 72.3  | 35.7 | 45.1 |
| Rsa1.0_01501.1.g27393.t1  | ref NP_175549.1  DEAD-box ATP-dependent RNA helicase 34 [Arabidopsis thaliana]<br>gi 108861889 sp Q9C8J1.2 RH34_ARATH RecName: Full=DEAD-box ATP-dependent RNA helicase 34<br>gi 4836949 gb AAD30651.1 AC006085.24 RNA helicase [Arabidopsis thaliana]<br>gi 16604541 gb AAL24276.1  At1g51380/F11M15.24 [Arabidopsis thaliana]<br>gi 18958046 gb AAL79596.1  At1g51380/F11M15.24 [Arabidopsis thaliana]<br>gi 332194539 gb AEE32660.1  DEAD-box ATP-dependent RNA helicase 34 [Arabidopsis thaliana] | 406  | 392  | 0         | 96.6  | 89.9 | 93.8 | DEAD-box ATP-dependent RNA helicase 34   | gbpln | Arabidopsis thaliana | AT1G51380.1   Symbols:   DEA(D/H)-box RNA helicase family protein   chr1:19047960-19049967 FORWARD LENGTH=392                 | 406  | 392  | 0         | 96.6  | 89.9 | 93.8 |
| Rsa1.0_01501.1.g27394.t1  | ref XP_002872983.1  zinc finger family protein [Arabidopsis lyrata subsp. lyrata]<br>gi 297318820 gb EFH49242.1  zinc finger family protein [Arabidopsis lyrata subsp. lyrata]                                                                                                                                                                                                                                                                                                                        | 456  | 494  | 1.00E-160 | 108.3 | 74.1 | 80.5 | zinc finger family protein               | gbpln | Arabidopsis lyrata   | AT5G01980.1   Symbols:   RING/U-box superfamily protein   chr5:375542-377023 FORWARD LENGTH=493                               | 456  | 493  | 1.00E-163 | 108.1 | 74.1 | 80.0 |
| Rsa1.0_01501.1.g27395.t3  | gb EOA33008.1  hypothetical protein CARUB_v10016338mg [Capsella rubella]                                                                                                                                                                                                                                                                                                                                                                                                                              | 456  | 430  | 0         | 94.3  | 83.8 | 87.5 | hypothetical protein CARUB_v10016338mg   | gbpln | Capsella rubella     | AT5G01990.1   Symbols:   Auxin efflux carrier family protein   chr5:377373-379600 REVERSE LENGTH=431                          | 456  | 431  | 0         | 94.5  | 82.5 | 86.0 |
| Rsa1.0_01502.1.g27396.t2  | #                                                                                                                                                                                                                                                                                                                                                                                                                                                                                                     | #    | #    | #         | #     | #    | -    | ----                                     | ----  | #                    | #                                                                                                                             | #    | #    | #         | #     |      |      |
| Rsa1.0_01502.1.g27397.t1  | ref XP_002868643.1  ubiquitin family protein [Arabidopsis lyrata subsp. lyrata]<br>gi 297314479 gb EFH44902.1  ubiquitin family protein [Arabidopsis lyrata subsp. lyrata]                                                                                                                                                                                                                                                                                                                            | 168  | 162  | 1.00E-64  | 96.4  | 85.1 | 87.5 | ubiquitin family protein                 | gbpln | Arabidopsis lyrata   | AT5G40630.1   Symbols:   Ubiquitin-like superfamily protein   chr5:16271402-16272429 REVERSE LENGTH=165                       | 168  | 165  | 9.00E-67  | 98.2  | 84.5 | 86.9 |
| Rsa1.0_01502.1.g27398.t2  | ref NP_001078680.1  putative DNA repair protein RAD23-4 [Arabidopsis thaliana]<br>gi 332006939 gb AED94322.1  putative DNA repair protein RAD23-4 [Arabidopsis thaliana]                                                                                                                                                                                                                                                                                                                              | 236  | 332  | 6.00E-12  | 140.7 | 17.8 | 21.6 | putative DNA repair protein RAD23-4      | gbpln | Arabidopsis thaliana | AT5G38470.2   Symbols: RAD23D   Rad23 UV excision repair protein family   chr5:15404720-15407251 FORWARD LENGTH=332           | 236  | 332  | 2.00E-14  | 140.7 | 17.8 | 21.6 |

|                          |                                                                                                                                                                                                                                                                                                                                                                                                                                                                                                                                                                                                                        |      |      |           |       |      |      |                                                        |       |                      |                                                                                                                                                                                                                                                                                                                                                                                                                                                    |      |      |           |       |      |      |
|--------------------------|------------------------------------------------------------------------------------------------------------------------------------------------------------------------------------------------------------------------------------------------------------------------------------------------------------------------------------------------------------------------------------------------------------------------------------------------------------------------------------------------------------------------------------------------------------------------------------------------------------------------|------|------|-----------|-------|------|------|--------------------------------------------------------|-------|----------------------|----------------------------------------------------------------------------------------------------------------------------------------------------------------------------------------------------------------------------------------------------------------------------------------------------------------------------------------------------------------------------------------------------------------------------------------------------|------|------|-----------|-------|------|------|
| Rsa1.0_01502.1.g27399.t1 | gb[EOA16295.1] hypothetical protein CARUB_v10004439mg [Capsella rubella]                                                                                                                                                                                                                                                                                                                                                                                                                                                                                                                                               | 760  | 585  | 0         | 77.0  | 69.1 | 72.5 | hypothetical protein CARUB_v10004439mg                 | gbpln | Capsella rubella     | AT5G40640.1   Symbols:   unknown protein; LOCATED IN: plasma membrane; EXPRESSED IN: 19 plant structures; EXPRESSED DURING: 7 growth stages; BEST Arabidopsis thaliana protein match is: unknown protein (TAIR:AT3G27390.1); Has 104 Blast hits to 102 proteins in 14 species: Archae - 0; Bacteria - 0; Metazoa - 2; Fungi - 0; Plants - 101; Viruses - 0; Other Eukaryotes - 1 (source: NCBI BLINK).   chr5:16277345-16280258 FORWARD LENGTH=586 | 760  | 586  | 0         | 77.1  | 68.8 | 72.1 |
| Rsa1.0_01502.1.g27400.t1 | #                                                                                                                                                                                                                                                                                                                                                                                                                                                                                                                                                                                                                      | #    | #    | #         | #     | #    | #    | -                                                      | ----  | ----                 | #                                                                                                                                                                                                                                                                                                                                                                                                                                                  | #    | #    | #         | #     | #    |      |
| Rsa1.0_01502.1.g27401.t1 | ref[XP_002868641.1] hypothetical protein ARALYDRAFT_493916 [Arabidopsis lyrata subsp. lyrata] gi 297314477 gb EFH44900.1  hypothetical protein ARALYDRAFT_493916 [Arabidopsis lyrata subsp. lyrata] ref[NP_198883.1] cystinosin [Arabidopsis thaliana] gi 13124057 sp P57758.1 CTNS_ARATH RecName: Full=Cystinosin homolog gi 9758095 dbj BAB08539.1  unnamed protein product [Arabidopsis thaliana] gi 15529266 gb AAK97727.1  AT5g40670/MNF13_190 [Arabidopsis thaliana] gi 16974419 gb AAL31135.1  AT5g40670/MNF13_190 [Arabidopsis thaliana] gi 332007197 gb AED94580.1  cystinosin homolog [Arabidopsis thaliana] | 364  | 328  | 1.00E-156 | 90.1  | 79.4 | 84.3 | hypothetical protein ARALYDRAFT_493916                 | gbpln | Arabidopsis lyrata   | AT5G40660.1   Symbols:   ATP12 protein-related   chr5:16283650-16285161 REVERSE LENGTH=325                                                                                                                                                                                                                                                                                                                                                         | 364  | 325  | 1.00E-158 | 89.3  | 78.3 | 84.1 |
| Rsa1.0_01502.1.g27402.t1 | ref[NP_198883.1] cystinosin [Arabidopsis thaliana] gi 13124057 sp P57758.1 CTNS_ARATH RecName: Full=Cystinosin homolog gi 9758095 dbj BAB08539.1  unnamed protein product [Arabidopsis thaliana] gi 15529266 gb AAK97727.1  AT5g40670/MNF13_190 [Arabidopsis thaliana] gi 16974419 gb AAL31135.1  AT5g40670/MNF13_190 [Arabidopsis thaliana] gi 332007197 gb AED94580.1  cystinosin homolog [Arabidopsis thaliana]                                                                                                                                                                                                     | 270  | 270  | 1.00E-144 | 100.0 | 91.9 | 96.3 | cystinosin                                             | gbpln | Arabidopsis thaliana | AT5G40670.1   Symbols:   PQ-loop repeat family protein / transmembrane family protein   chr5:16285968-16287591 FORWARD LENGTH=270                                                                                                                                                                                                                                                                                                                  | 270  | 270  | 1.00E-147 | 100.0 | 91.9 | 96.3 |
| Rsa1.0_01502.1.g27403.t1 | ref[XP_002870685.1] hypothetical protein ARALYDRAFT_493913 [Arabidopsis lyrata subsp. lyrata] gi 297316521 gb EFH46944.1  hypothetical protein ARALYDRAFT_493913 [Arabidopsis lyrata subsp. lyrata]                                                                                                                                                                                                                                                                                                                                                                                                                    | 210  | 213  | 4.00E-89  | 101.4 | 85.7 | 91.4 | hypothetical protein ARALYDRAFT_493913                 | gbpln | Arabidopsis lyrata   | AT5G40690.1   Symbols:   CONTAINS InterPro DOMAIN/s: EF-Hand 1, calcium-binding site (InterPro:IPR018247); BEST Arabidopsis thaliana protein match is: unknown protein (TAIR:AT2G41730.1); Has 1807 Blast hits to 1807 proteins in 277 species: Archae - 0; Bacteria - 0; Metazoa - 736; Fungi - 347; Plants - 385; Viruses - 0; Other Eukaryotes - 339 (source: NCBI BLINK).   chr5:16290770-16291402 FORWARD LENGTH=210                          | 210  | 210  | 1.00E-84  | 100.0 | 83.8 | 91.4 |
| Rsa1.0_01502.1.g27404.t1 | ref[NP_198886.2] uncharacterized protein [Arabidopsis thaliana] gi 9758098 dbj BAB08542.1  unnamed protein product [Arabidopsis thaliana] gi 332007200 gb AED94583.1  uncharacterized protein AT5G40700 [Arabidopsis thaliana]                                                                                                                                                                                                                                                                                                                                                                                         | 288  | 302  | 3.00E-84  | 104.9 | 65.3 | 72.6 | uncharacterized protein                                | gbpln | Arabidopsis thaliana | AT5G40700.1   Symbols:   unknown protein; BEST Arabidopsis thaliana protein match is: unknown protein (TAIR:AT3G27350.1); Has 35333 Blast hits to 34131 proteins in 2444 species: Archae - 798; Bacteria - 22429; Metazoa - 974; Fungi - 991; Plants - 531; Viruses - 0; Other Eukaryotes - 9610 (source: NCBI BLINK).   chr5:16292047-16293443 REVERSE LENGTH=302                                                                                 | 288  | 302  | 9.00E-87  | 104.9 | 65.3 | 72.6 |
| Rsa1.0_01503.1.g27405.t1 | ref[NP_179383.3] transformation/transcription domain-associated protein [Arabidopsis thaliana] gi 330251608 gb AEC06702.1  phosphatidylinositol 3- and 4-kinase family protein with FAT domain [Arabidopsis thaliana]                                                                                                                                                                                                                                                                                                                                                                                                  | 3859 | 3858 | 0         | 100.0 | 95.3 | 97.3 | transformation/transcription domain-associated protein | gbpln | Arabidopsis thaliana | AT2G17930.1   Symbols:   Phosphatidylinositol 3- and 4-kinase family protein with FAT domain   chr2:7784455-7802230 REVERSE LENGTH=3858                                                                                                                                                                                                                                                                                                            | 3859 | 3858 | 0         | 100.0 | 95.3 | 97.3 |
| Rsa1.0_01503.1.g27406.t2 | ref[XP_002886134.1] hypothetical protein ARALYDRAFT_480688 [Arabidopsis lyrata subsp. lyrata] gi 297331974 gb EFH62393.1  hypothetical protein ARALYDRAFT_480688 [Arabidopsis lyrata subsp. lyrata]                                                                                                                                                                                                                                                                                                                                                                                                                    | 325  | 158  | 3.00E-47  | 48.6  | 36.6 | 39.4 | hypothetical protein ARALYDRAFT_480688                 | gbpln | Arabidopsis lyrata   | AT2G17880.1   Symbols:   Chaperone DnaJ-domain superfamily protein   chr2:7767176-7767658 REVERSE LENGTH=160                                                                                                                                                                                                                                                                                                                                       | 325  | 160  | 1.00E-48  | 49.2  | 36.3 | 39.1 |
| Rsa1.0_01503.1.g27407.t1 | gb[EOA31014.1] hypothetical protein CARUB_v10014159mg [Capsella rubella]                                                                                                                                                                                                                                                                                                                                                                                                                                                                                                                                               | 351  | 330  | 8.00E-63  | 94.0  | 49.0 | 59.8 | hypothetical protein CARUB_v10014159mg                 | gbpln | Capsella rubella     | AT2G17787.1   Symbols:   unknown protein; BEST Arabidopsis thaliana protein match is: unknown protein (TAIR:AT4G35940.2); Has 35333 Blast hits to 34131 proteins in 2444 species: Archae - 798; Bacteria - 22429; Metazoa - 974; Fungi - 991; Plants - 531; Viruses - 0; Other Eukaryotes - 9610 (source: NCBI BLINK).   chr2:7731374-7732853 FORWARD LENGTH=324                                                                                   | 351  | 324  | 6.00E-63  | 92.3  | 50.1 | 61.5 |
| Rsa1.0_01503.1.g27408.t1 | gb[AAK43485.1 AC084807_10 polyprotein, putative [Arabidopsis thaliana] gi 225898008 dbj BAH30336.1  hypothetical protein [Arabidopsis thaliana]                                                                                                                                                                                                                                                                                                                                                                                                                                                                        | 1421 | 1459 | 0         | 102.7 | 59.6 | 74.2 | polyprotein, putative                                  | gbpln | Arabidopsis thaliana | AT4G23160.1   Symbols:   CRK8   cysteine-rich RLK (RECEPTOR-like protein kinase) 8   chr4:12129485-12134086 FORWARD LENGTH=1262                                                                                                                                                                                                                                                                                                                    | 1421 | 1262 | 1.00E-114 | 88.8  | 14.1 | 21.0 |



|                          |                                                                                                                                                                                                                                                                                                                                                                                                               |     |     |           |       |      |      |                                         |       |                      |                                                                                                                                    |     |     |           |       |      |      |
|--------------------------|---------------------------------------------------------------------------------------------------------------------------------------------------------------------------------------------------------------------------------------------------------------------------------------------------------------------------------------------------------------------------------------------------------------|-----|-----|-----------|-------|------|------|-----------------------------------------|-------|----------------------|------------------------------------------------------------------------------------------------------------------------------------|-----|-----|-----------|-------|------|------|
| Rsa1.0_01503.1.g27409.t1 | gb AAK32909.1 AF367322.1<br>AT4g35920/F4B14.190 [Arabidopsis thaliana] gi 221317178 gb AAM91434.1 AT4g35920/F4B14.190 [Arabidopsis thaliana]                                                                                                                                                                                                                                                                  | 113 | 440 | 2.00E-49  | 389.4 | 85.8 | 90.3 | AT4g35920/F4B14.190                     | gbpln | Arabidopsis thaliana | AT4G35920.2   Symbols: MCA1   PLAC8 family protein   chr4:17012106-17014192 REVERSE LENGTH=421                                     | 113 | 421 | 3.00E-52  | 372.6 | 85.8 | 90.3 |
| Rsa1.0_01504.1.g27410.t1 | gb AAM64382.1  unknown [Arabidopsis thaliana]                                                                                                                                                                                                                                                                                                                                                                 | 367 | 372 | 1.00E-165 | 101.4 | 84.2 | 89.6 | unknown                                 | gbpln | Arabidopsis thaliana | AT2G16900.1   Symbols:   high-affinity nickel-transport family protein   chr2:7285824-7287188 FORWARD LENGTH=372                   | 367 | 372 | 1.00E-166 | 101.4 | 83.7 | 89.1 |
| Rsa1.0_01504.1.g27411.t1 | ref NP_001031359.1  transportin 1 [Arabidopsis thaliana]<br>gi 75244583 sp Q8H0U4.1 TNPO1_ARATH RecName: Full=Transportin-1; Short=AtTRN1; AltName: Full=Importin beta-2; AltName: Full=Karyopherin beta-2 gi 25083223 gb AAN27052.1  putative transportin [Arabidopsis thaliana] gi 31711774 gb AAP68243.1 At2g16950 [Arabidopsis thaliana] gi 330251468 gb AEC06562.1  transportin 1 [Arabidopsis thaliana] | 931 | 891 | 0         | 95.7  | 87.6 | 91.4 | transportin 1                           | gbpln | Arabidopsis thaliana | AT2G16950.2   Symbols: TRN1, ATTRN1   transportin 1   chr2:7353939-7360637 FORWARD LENGTH=891                                      | 931 | 891 | 0         | 95.7  | 87.6 | 91.4 |
| Rsa1.0_01504.1.g27412.t1 | ref NP_565400.1  F-box/LRR-repeat protein 10 [Arabidopsis thaliana] gi 75337079 sp Q9SDA8.1 FBL10_ARATH RecName: Full=F-box/LRR-repeat protein 10<br>gi 13605809 gb AAK32890.1 AF367303.1 At2g17020 [Arabidopsis thaliana] gi 22137200 gb AAM91445.1 At2g17020/At2g17020 [Arabidopsis thaliana] gi 330251479 gb AEC06573.1 F-box/LRR-repeat protein 10 [Arabidopsis thaliana]                                 | 716 | 656 | 0         | 91.6  | 75.4 | 81.6 | F-box/LRR-repeat protein 10             | gbpln | Arabidopsis thaliana | AT2G17020.1   Symbols:   F-box/RNI-like superfamily protein   chr2:7396559-7398787 REVERSE LENGTH=656                              | 716 | 656 | 0         | 91.6  | 75.4 | 81.6 |
| Rsa1.0_01504.1.g27413.t1 | dbj BAJ34393.1  unnamed protein product [Theleungiella halophila]                                                                                                                                                                                                                                                                                                                                             | 285 | 285 | 2.33E-156 | 100.0 | 89.5 | 94.4 | unnamed protein product                 | ----  | ----                 | AT2G17040.1   Symbols: anac036, NAC036   NAC domain containing protein 36   chr2:7407123-7408120 FORWARD LENGTH=276                | 285 | 276 | 1.00E-136 | 96.8  | 83.5 | 88.8 |
| Rsa1.0_01504.1.g27414.t1 | ref XP_002886095.1  kinase family protein [Arabidopsis lyrata subsp. lyrata] gi 297331933 gb EFH62354.1  kinase family protein [Arabidopsis lyrata subsp. lyrata]                                                                                                                                                                                                                                             | 462 | 468 | 0         | 101.3 | 68.2 | 84.2 | kinase family protein                   | gbpln | Arabidopsis lyrata   | AT2G17090.1   Symbols: SSP   Protein kinase protein with tetratricopeptide repeat domain   chr2:7435088-7437298 REVERSE LENGTH=465 | 462 | 465 | 0         | 100.6 | 67.7 | 83.1 |
| Rsa1.0_01504.1.g27415.t1 | ref NP_179311.1  ubiquitin-like protein [Arabidopsis thaliana] gi 4584343 gb AAD25138.1  putative ubiquitin-like protein [Arabidopsis thaliana] gi 23296306 gb AAN13037.1  putative ubiquitin protein [Arabidopsis thaliana] gi 110735104 gb ABG89122.1  Dsk2a [synthetic construct] gi 330251503 gb AEC06597.1  UBL/UBA protein DSK2b [Arabidopsis thaliana]                                                 | 557 | 551 | 0         | 98.9  | 85.3 | 90.1 | ubiquitin-like protein                  | gbpln | Arabidopsis thaliana | AT2G17200.1   Symbols: DSK2   ubiquitin family protein   chr2:7482133-7485090 REVERSE LENGTH=551                                   | 557 | 551 | 0         | 98.9  | 85.3 | 90.1 |
| Rsa1.0_01504.1.g27416.t1 | gb AAD14492.1  Hypothetical protein [Arabidopsis thaliana]                                                                                                                                                                                                                                                                                                                                                    | 164 | 240 | 5.00E-24  | 146.3 | 39.0 | 50.6 | Hypothetical protein                    | gbpln | Arabidopsis thaliana | AT4G29090.1   Symbols:   Ribonuclease H-like superfamily protein   chr4:14333528-14332555 FORWARD LENGTH=575                       | 164 | 575 | 1.00E-10  | 350.6 | 27.4 | 40.2 |
| Rsa1.0_01504.1.g27417.t1 | ref XP_002886105.1  hypothetical protein ARALYDRAFT_480605 [Arabidopsis lyrata subsp. lyrata] gi 297331945 gb EFH62364.1  hypothetical protein ARALYDRAFT_480605 [Arabidopsis lyrata subsp. lyrata]                                                                                                                                                                                                           | 397 | 414 | 0         | 104.3 | 84.6 | 89.4 | hypothetical protein ARALYDRAFT_480605  | gbpln | Arabidopsis lyrata   | AT2G17220.2   Symbols:   Protein kinase superfamily protein   chr2:7487866-7489768 REVERSE LENGTH=413                              | 397 | 413 | 0         | 104.0 | 85.1 | 89.7 |
| Rsa1.0_01504.1.g27418.t1 | ref XP_002884044.1  hypothetical protein ARALYDRAFT_480608 [Arabidopsis lyrata subsp. lyrata] gi 297329884 gb EFH60303.1  hypothetical protein ARALYDRAFT_480608 [Arabidopsis lyrata subsp. lyrata]                                                                                                                                                                                                           | 598 | 582 | 0         | 97.3  | 83.3 | 90.3 | hypothetical protein ARALYDRAFT_480608  | gbpln | Arabidopsis lyrata   | AT2G17250.1   Symbols: EMB2762   CCAAT-binding factor   chr2:7499573-7502957 FORWARD LENGTH=577                                    | 598 | 577 | 0         | 96.5  | 81.6 | 88.1 |
| Rsa1.0_01504.1.g27419.t1 | ref NP_179357.1  RPM1-interacting protein 4-like protein [Arabidopsis thaliana] gi 11762120 gb AAG40338.1 AF324986.1 At2g17660 [Arabidopsis thaliana] gi 115646839 gb ABJ17136.1 At2g17660 [Arabidopsis thaliana] gi 330251568 gb AEC06662.1  RPM1-interacting protein 4-like protein [Arabidopsis thaliana]                                                                                                  | 69  | 69  | 4.00E-29  | 100.0 | 89.9 | 97.1 | RPM1-interacting protein 4-like protein | gbpln | Arabidopsis thaliana | AT2G17660.1   Symbols:   RPM1-interacting protein 4 (RIN4) family protein   chr2:7673359-7673568 FORWARD LENGTH=69                 | 69  | 69  | 7.00E-32  | 100.0 | 89.9 | 97.1 |

|                          |                                                                                                                                                                                                                                                                                                                                                                                                                                                                                       |      |      |           |       |      |      |                                                    |       |                      |                                                                                                                                     |      |      |           |       |      |      |
|--------------------------|---------------------------------------------------------------------------------------------------------------------------------------------------------------------------------------------------------------------------------------------------------------------------------------------------------------------------------------------------------------------------------------------------------------------------------------------------------------------------------------|------|------|-----------|-------|------|------|----------------------------------------------------|-------|----------------------|-------------------------------------------------------------------------------------------------------------------------------------|------|------|-----------|-------|------|------|
| Rsa1.0_01504.1.g27420.t1 | gb AAM62704.1  unknown [Arabidopsis thaliana]                                                                                                                                                                                                                                                                                                                                                                                                                                         | 463  | 463  | 0         | 100.0 | 74.3 | 85.3 | unknown                                            | gbpln | Arabidopsis thaliana | AT2G17670.1   Symbols:   Tetratricopeptide repeat (TPR)-like superfamily protein   chr2:7674420-7675811 FORWARD LENGTH=463          | 463  | 463  | 0         | 100.0 | 74.1 | 85.1 |
| Rsa1.0_01504.1.g27421.t1 | ref NP_179359.1  uncharacterized protein [Arabidopsis thaliana]   gi 25347770 pir B84555 hypothetical protein At2g17680 [imported] - Arabidopsis thaliana   gi 50058923 gb AAT69206.1  hypothetical protein At2g17680 [Arabidopsis thaliana]   gi 330251571 gb AEC06665.1  uncharacterized protein AT2G17680 [Arabidopsis thaliana]                                                                                                                                                   | 288  | 292  | 1.00E-121 | 101.4 | 76.0 | 87.5 | uncharacterized protein                            | gbpln | Arabidopsis thaliana | AT2G17680.1   Symbols:   Arabidopsis protein of unknown function (DUF241)   chr2:7679241-7680119 FORWARD LENGTH=292                 | 288  | 292  | 1.00E-123 | 101.4 | 76.0 | 87.5 |
| Rsa1.0_01504.1.g27422.t2 | gb EOA30274.1  hypothetical protein CARUB_v10013395mg [Capsella rubella]                                                                                                                                                                                                                                                                                                                                                                                                              | 1150 | 546  | 0         | 47.5  | 44.1 | 45.8 | hypothetical protein CARUB_v10013395mg             | gbpln | Capsella rubella     | AT2G17700.1   Symbols:   ACT-like protein tyrosine kinase family protein   chr2:7685778-7689278 REVERSE LENGTH=546                  | 1150 | 546  | 0         | 47.5  | 43.8 | 45.5 |
| Rsa1.0_01504.1.g27423.t2 | ref NP_175139.1  receptor like protein 6 [Arabidopsis thaliana]   gi 12321005 gb AAG50623.1 AC083835_8 disease resistance protein, putative [Arabidopsis thaliana]   gi 332193999 gb AEE32120.1  receptor like protein 6 [Arabidopsis thaliana]   emb CAB40035.1  retrotransposon like protein [Arabidopsis thaliana]   gi 7267767 emb CAB81170.1  retrotransposon like protein [Arabidopsis thaliana]                                                                                | 493  | 994  | 2.00E-75  | 201.6 | 35.1 | 43.6 | receptor like protein 6                            | gbpln | Arabidopsis thaliana | AT1G45616.1   Symbols:   AtRLP6, RLP6   receptor like protein 6   chr1:17183550-17186534 REVERSE LENGTH=994                         | 493  | 994  | 5.00E-78  | 201.6 | 35.1 | 43.6 |
| Rsa1.0_01504.1.g27424.t1 | emb CAB40035.1  retrotransposon like protein [Arabidopsis thaliana]   gi 7267767 emb CAB81170.1  retrotransposon like protein [Arabidopsis thaliana]                                                                                                                                                                                                                                                                                                                                  | 1380 | 1515 | 0         | 109.8 | 56.9 | 71.0 | retrotransposon like protein                       | gbpln | Arabidopsis thaliana | AT4G23160.1   Symbols:   CRK8   cysteine-rich RLK (RECEPTOR-like protein kinase) 8   chr4:12129485-12134086 FORWARD LENGTH=1262     | 1380 | 1262 | 1.00E-102 | 91.4  | 13.7 | 20.7 |
| Rsa1.0_01504.1.g27425.t1 | #                                                                                                                                                                                                                                                                                                                                                                                                                                                                                     | #    | #    | #         | #     | #    | #    | -                                                  | ----  | ----                 | #                                                                                                                                   | #    | #    | #         | #     | #    | #    |
| Rsa1.0_01505.1.g27426.t1 | gb EOA12907.1  hypothetical protein CARUB_v10025883mg [Capsella rubella]                                                                                                                                                                                                                                                                                                                                                                                                              | 576  | 833  | 0         | 144.6 | 81.3 | 87.2 | hypothetical protein CARUB_v10025883mg             | gbpln | Capsella rubella     | AT5G57590.1   Symbols:   BIO1   adenosylmethionine-8-amino-7-oxononanoate transaminases   chr5:23318593-23322687 REVERSE LENGTH=833 | 576  | 833  | 0         | 144.6 | 81.6 | 87.8 |
| Rsa1.0_01505.1.g27427.t4 | gb AAG50652.1 AC073433_4 transposase, putative [Arabidopsis thaliana]                                                                                                                                                                                                                                                                                                                                                                                                                 | 306  | 659  | 3.00E-42  | 215.4 | 32.7 | 43.5 | transposase, putative                              | gbpln | Arabidopsis thaliana | #                                                                                                                                   | #    | #    | #         | #     | #    | #    |
| Rsa1.0_01505.1.g27428.t1 | ref NP_568860.1  CBL-interacting serine/threonine-protein kinase 21 [Arabidopsis thaliana]   gi 75332106 sp Q94CG0.1 CIPKL_ARAT H RecName: Full=CBL-interacting serine/threonine-protein kinase 21; AltName: Full=SNF1-related kinase 3.4; AltName: Full=SOS2-like protein kinase PKS23   gi 14334390 gb AAK59696.1  CBL-interacting protein kinase 21 [Arabidopsis thaliana]   gi 332009545 gb AED96928.1  CBL-interacting serine/threonine-protein kinase 21 [Arabidopsis thaliana] | 441  | 416  | 0         | 94.3  | 87.8 | 90.9 | CBL-interacting serine/threonine-protein kinase 21 | gbpln | Arabidopsis thaliana | AT5G57630.1   Symbols:   CIPK21, SnRK3.4   CBL-interacting protein kinase 21   chr5:23341092-23343143 REVERSE LENGTH=416            | 441  | 416  | 0         | 94.3  | 87.8 | 90.9 |
| Rsa1.0_01505.1.g27429.t3 | gb AAF97969.1 AC000103_19 F21J9.30 [Arabidopsis thaliana]                                                                                                                                                                                                                                                                                                                                                                                                                             | 731  | 1270 | 1.00E-137 | 173.7 | 43.8 | 57.7 | F21J9.30                                           | gbpln | Arabidopsis thaliana | AT4G29090.1   Symbols:   Ribonuclease H-like superfamily protein   chr4:14333528-14335255 FORWARD LENGTH=575                        | 731  | 575  | 1.00E-45  | 78.7  | 15.7 | 23.5 |
| Rsa1.0_01505.1.g27430.t1 | #                                                                                                                                                                                                                                                                                                                                                                                                                                                                                     | #    | #    | #         | #     | #    | #    | -                                                  | ----  | ----                 | #                                                                                                                                   | #    | #    | #         | #     | #    | #    |
| Rsa1.0_01505.1.g27431.t2 | ref NP_200572.1  GCK domain-containing protein [Arabidopsis thaliana]   gi 9758326 db BAB08800.1  unnamed protein product [Arabidopsis thaliana]   gi 52354575 gb AAU44608.1  hypothetical protein AT5G57640 [Arabidopsis thaliana]   gi 60547959 gb AAX23943.1  hypothetical protein At5g57640 [Arabidopsis thaliana]   gi 332009546 gb AED96929.1  GCK domain-containing protein [Arabidopsis thaliana]                                                                             | 246  | 226  | 1.00E-16  | 91.9  | 27.2 | 33.7 | GCK domain-containing protein                      | gbpln | Arabidopsis thaliana | AT5G57640.1   Symbols:   GCK domain-containing protein   chr5:23344766-23345446 FORWARD LENGTH=226                                  | 246  | 226  | 3.00E-19  | 91.9  | 27.2 | 33.7 |
| Rsa1.0_01505.1.g27432.t1 | gb EOA13987.1  hypothetical protein CARUB_v10027120mg [Capsella rubella]                                                                                                                                                                                                                                                                                                                                                                                                              | 242  | 215  | 4.00E-40  | 88.8  | 47.9 | 63.2 | hypothetical protein CARUB_v10027120mg             | gbpln | Capsella rubella     | AT5G57640.1   Symbols:   GCK domain-containing protein   chr5:23344766-23345446 FORWARD LENGTH=226                                  | 242  | 226  | 3.00E-40  | 93.4  | 46.7 | 60.3 |
| Rsa1.0_01505.1.g27433.t1 | gb AAM08751.1 AC025098_18 Putative copia-type polyprotein [Oryza sativa Japonica Group]                                                                                                                                                                                                                                                                                                                                                                                               | 1209 | 1803 | 0         | 149.1 | 42.5 | 57.6 | Putative copia-type polyprotein                    | gbpln | Oryza sativa         | AT4G23160.1   Symbols:   CRK8   cysteine-rich RLK (RECEPTOR-like protein kinase) 8   chr4:12129485-12134086 FORWARD LENGTH=1262     | 1209 | 1262 | 1.00E-113 | 104.4 | 17.2 | 26.1 |

|                          |                                                                                                                                                                                                                                                                                                                                                                                                                                                                                                                                                                                                                         |      |      |           |       |      |      |                                                        |       |                      |                                                                                                                                                                                                                                                                                                                                                                   |      |      |           |       |      |      |
|--------------------------|-------------------------------------------------------------------------------------------------------------------------------------------------------------------------------------------------------------------------------------------------------------------------------------------------------------------------------------------------------------------------------------------------------------------------------------------------------------------------------------------------------------------------------------------------------------------------------------------------------------------------|------|------|-----------|-------|------|------|--------------------------------------------------------|-------|----------------------|-------------------------------------------------------------------------------------------------------------------------------------------------------------------------------------------------------------------------------------------------------------------------------------------------------------------------------------------------------------------|------|------|-----------|-------|------|------|
| Rsa1.0_01505.1.g27434.t1 | refXP_002864523.1   xylose isomerase family protein [Arabidopsis lyrata subsp. lyrata] gi 297310358 gb EFH40782.1   xylose isomerase family protein [Arabidopsis lyrata subsp. lyrata]                                                                                                                                                                                                                                                                                                                                                                                                                                  | 477  | 477  | 0         | 100.0 | 94.5 | 97.7 | xylose isomerase family protein                        | gbpln | Arabidopsis lyrata   | AT5G57655.2   Symbols:   xylose isomerase family protein   chr5:23347030-23349805 FORWARD LENGTH=477                                                                                                                                                                                                                                                              | 477  | 477  | 0         | 100.0 | 94.3 | 97.3 |
| Rsa1.0_01505.1.g27435.t1 | #                                                                                                                                                                                                                                                                                                                                                                                                                                                                                                                                                                                                                       | #    | #    | #         | #     | #    | -    |                                                        | ----  | ----                 | #                                                                                                                                                                                                                                                                                                                                                                 | #    | #    | #         | #     | #    |      |
| Rsa1.0_01506.1.g27436.t1 | refXP_002871700.1   predicted protein [Arabidopsis lyrata subsp. lyrata] gi 297317537 gb EFH47959.1   predicted protein [Arabidopsis lyrata subsp. lyrata]                                                                                                                                                                                                                                                                                                                                                                                                                                                              | 248  | 338  | 1.00E-109 | 136.3 | 83.1 | 88.7 | predicted protein                                      | gbpln | Arabidopsis lyrata   | AT5G16030.1   Symbols:   unknown protein; BEST Arabidopsis thaliana protein match is: unknown protein (TAIR:AT3G02500.1); Has 30201 Blast hits to 17322 proteins in 780 species: Archae - 12; Bacteria - 1396; Metazoa - 17338; Fungi - 3422; Plants - 5037; Viruses - 0; Other Eukaryotes - 2996 (source: NCBI BLINK).   chr5:5238242-5240578 FORWARD LENGTH=339 | 248  | 339  | 1.00E-110 | 136.7 | 82.3 | 88.3 |
| Rsa1.0_01506.1.g27437.t6 | ref NP_197105.1  3-oxo-5-alpha-steroid 4-dehydrogenase family protein [Arabidopsis thaliana] gi 14190513 gb AAK55737.1 AF380656.1 At5g16010/FIN13.150 [Arabidopsis thaliana] gi 9755647 emb CAC01800.1   steroid 3-oxo-reductase-like protein [Arabidopsis thaliana] gi 24797018 gb AAN64521.1   At5g16010/FIN13.150 [Arabidopsis thaliana] gi 332004851 gb AED92234.1   3-oxo-5-alpha-steroid 4-dehydrogenase family protein [Arabidopsis thaliana] gb ACV74393.1   cold resistance protein 1 [Brassica oleracea var. viridis] gi 258548930 gb ACV74394.1   cold resistance protein 1 [Brassica oleracea var. viridis] | 485  | 268  | 1.00E-112 | 55.3  | 42.3 | 47.8 | 3-oxo-5-alpha-steroid 4-dehydrogenase family protein   | gbpln | Arabidopsis thaliana | AT5G16010.1   Symbols:   3-oxo-5-alpha-steroid 4-dehydrogenase family protein   chr5:5227982-5229012 FORWARD LENGTH=268                                                                                                                                                                                                                                           | 485  | 268  | 1.00E-114 | 55.3  | 42.3 | 47.8 |
| Rsa1.0_01506.1.g27438.t1 | gi 258548932 gb ACV74395.1   cold resistance protein 1 [Brassica oleracea var. botrytis] gi 258548934 gb ACV74396.1   cold resistance protein 1 [Brassica oleracea var. capitata]                                                                                                                                                                                                                                                                                                                                                                                                                                       | 65   | 65   | 4.00E-22  | 100.0 | 87.7 | 92.3 | cold resistance protein 1                              | gbpln | Brassica oleracea    | #                                                                                                                                                                                                                                                                                                                                                                 | #    | #    | #         | #     | #    |      |
| Rsa1.0_01506.1.g27439.t1 | ref NP_197098.2  Rossmann-fold NAD(P)-binding domain-containing protein [Arabidopsis thaliana] gi 332004843 gb AED92226.1   Rossmann-fold NAD(P)-binding domain-containing protein [Arabidopsis thaliana]                                                                                                                                                                                                                                                                                                                                                                                                               | 183  | 364  | 5.00E-68  | 198.9 | 67.2 | 77.6 | Rossmann-fold NAD(P)-binding domain-containing protein | gbpln | Arabidopsis thaliana | AT5G15940.1   Symbols:   NAD(P)-binding Rossmann-fold superfamily protein   chr5:5202801-5204715 FORWARD LENGTH=364                                                                                                                                                                                                                                               | 183  | 364  | 2.00E-70  | 198.9 | 67.2 | 77.6 |
| Rsa1.0_01506.1.g27440.t1 | emb CAN68863.1  hypothetical protein VITISV_013500 [Vitis vinifera]                                                                                                                                                                                                                                                                                                                                                                                                                                                                                                                                                     | 1331 | 1112 | 0         | 83.5  | 42.5 | 54.7 | hypothetical protein VITISV_013500                     | gbpln | Vitis vinifera       | AT4G23160.1   Symbols: CRK8   cysteine-rich RLK (RECEPTOR-like protein kinase) 8   chr4:12129485-12134086 FORWARD LENGTH=1262                                                                                                                                                                                                                                     | 1331 | 1262 | 1.00E-109 | 94.8  | 16.5 | 23.5 |
| Rsa1.0_01506.1.g27441.t2 | gb EOA20857.1  hypothetical protein CARUB_v10001194mg [Capsella rubella]                                                                                                                                                                                                                                                                                                                                                                                                                                                                                                                                                | 168  | 376  | 3.00E-62  | 223.8 | 72.0 | 81.5 | hypothetical protein CARUB_v10001194mg                 | gbpln | Capsella rubella     | AT5G15940.1   Symbols:   NAD(P)-binding Rossmann-fold superfamily protein   chr5:5202801-5204715 FORWARD LENGTH=364                                                                                                                                                                                                                                               | 168  | 364  | 2.00E-64  | 216.7 | 70.8 | 82.7 |
| Rsa1.0_01506.1.g27442.t1 | refXP_002871692.1   hypothetical protein ARALYDRAFT_488442 [Arabidopsis lyrata subsp. lyrata] gi 297317529 gb EFH47951.1   hypothetical protein ARALYDRAFT_488442 [Arabidopsis lyrata subsp. lyrata]                                                                                                                                                                                                                                                                                                                                                                                                                    | 359  | 354  | 0         | 98.6  | 90.8 | 95.3 | hypothetical protein ARALYDRAFT_488442                 | gbpln | Arabidopsis lyrata   | AT5G15930.1   Symbols: PAM1   plant adhesion molecule 1   chr5:5200329-5202250 FORWARD LENGTH=356                                                                                                                                                                                                                                                                 | 359  | 356  | 0         | 99.2  | 90.8 | 95.0 |
| Rsa1.0_01506.1.g27443.t3 | ref NP_568323.1  dehydrogenase-related protein [Arabidopsis thaliana] gi 15292961 gb AAK93591.1   unknown protein [Arabidopsis thaliana] gi 21280841 gb AAM44918.1   unknown protein [Arabidopsis thaliana] gi 332004840 gb AED92223.1   dehydrogenase-related protein [Arabidopsis thaliana]                                                                                                                                                                                                                                                                                                                           | 259  | 269  | 1.00E-115 | 103.9 | 90.7 | 94.6 | dehydrogenase-related protein                          | gbpln | Arabidopsis thaliana | AT5G15910.1   Symbols:   NAD(P)-binding Rossmann-fold superfamily protein   chr5:5193207-5195202 FORWARD LENGTH=269                                                                                                                                                                                                                                               | 259  | 269  | 1.00E-117 | 103.9 | 90.7 | 94.6 |
| Rsa1.0_01506.1.g27444.t1 | gb AAP42646.1  putative beta-glucan elicitor receptor [Brassica napus]                                                                                                                                                                                                                                                                                                                                                                                                                                                                                                                                                  | 672  | 752  | 0         | 111.9 | 81.3 | 89.6 | putative beta-glucan elicitor receptor                 | gbpln | Brassica napus       | AT5G15870.1   Symbols:   glycosyl hydrolase family 81 protein   chr5:5182641-5184878 REVERSE LENGTH=745                                                                                                                                                                                                                                                           | 672  | 745  | 0         | 110.9 | 79.9 | 88.4 |
| Rsa1.0_01506.1.g27445.t1 | refXP_002873025.1   hypothetical protein ARALYDRAFT_486965 [Arabidopsis lyrata subsp. lyrata] gi 297318892 gb EFH49284.1   hypothetical protein ARALYDRAFT_486965 [Arabidopsis lyrata subsp. lyrata]                                                                                                                                                                                                                                                                                                                                                                                                                    | 518  | 503  | 1.00E-163 | 97.1  | 59.7 | 73.4 | hypothetical protein ARALYDRAFT_486965                 | gbpln | Arabidopsis lyrata   | AT5G01150.1   Symbols:   Protein of unknown function (DUF874)   chr5:51988-53649 FORWARD LENGTH=501                                                                                                                                                                                                                                                               | 518  | 501  | 1.00E-154 | 96.7  | 58.3 | 70.7 |

|                          |                                                                                                                                                                                                                                    |      |      |           |       |       |       |                                                                 |       |                      |                                                                                                                                                                                                                                                                                                                                              |      |      |          |       |      |      |
|--------------------------|------------------------------------------------------------------------------------------------------------------------------------------------------------------------------------------------------------------------------------|------|------|-----------|-------|-------|-------|-----------------------------------------------------------------|-------|----------------------|----------------------------------------------------------------------------------------------------------------------------------------------------------------------------------------------------------------------------------------------------------------------------------------------------------------------------------------------|------|------|----------|-------|------|------|
| Rsa1.0_01507.1.g27446.t1 | gb AAG51754.1 AC068667.33 reverse transcriptase, putative; 100033-105622 [Arabidopsis thaliana]                                                                                                                                    | 1028 | 1557 | 0         | 151.5 | 45.4  | 59.3  | reverse transcriptase, putative; 100033-105622                  | gbpln | Arabidopsis thaliana | AT5G36228.1   Symbols:   nucleic acid binding/zinc ion binding   chr5:14271691-14272776 FORWARD LENGTH=361                                                                                                                                                                                                                                   | 1028 | 361  | 2.00E-32 | 35.1  | 6.8  | 11.4 |
| Rsa1.0_01507.1.g27447.t1 | gb EOA12297.1  hypothetical protein CARUB_v10007977mg [Capsella rubella]                                                                                                                                                           | 349  | 417  | 1.00E-53  | 119.5 | 40.4  | 58.2  | hypothetical protein CARUB_v10007977mg                          | gbpln | Capsella rubella     | AT4G29090.1   Symbols:   Ribonuclease H-like superfamily protein   chr4:14333528-14335255 FORWARD LENGTH=575                                                                                                                                                                                                                                 | 349  | 575  | 6.00E-35 | 164.8 | 27.8 | 43.8 |
| Rsa1.0_01507.1.g27448.t1 | ref NP_567362.1  subtilisin-like protease [Arabidopsis thaliana] gi 22136594 gb AAM91616.1  putative subtilisin serine protease [Arabidopsis thaliana] gi 332657496 gb AEE82896.1  subtilisin-like protease [Arabidopsis thaliana] | 787  | 778  | 0         | 98.9  | 75.6  | 84.2  | subtilisin-like protease                                        | gbpln | Arabidopsis thaliana | AT4G10550.1   Symbols:   Subtilase family protein   chr4:6516613-6519767 REVERSE LENGTH=778                                                                                                                                                                                                                                                  | 787  | 778  | 0        | 98.9  | 75.6 | 84.2 |
| Rsa1.0_01507.1.g27449.t1 | gb EOA19618.1  hypothetical protein CARUB_v10002928mg [Capsella rubella]                                                                                                                                                           | 752  | 910  | 0         | 121.0 | 68.8  | 80.2  | hypothetical protein CARUB_v10002928mg                          | gbpln | Capsella rubella     | AT4G10570.1   Symbols: UBP9   ubiquitin-specific protease 9   chr4:6523657-6528058 REVERSE LENGTH=923                                                                                                                                                                                                                                        | 752  | 923  | 0        | 122.7 | 68.4 | 80.7 |
| Rsa1.0_01507.1.g27450.t1 | ref NP_192811.4  protein kinase-like protein [Arabidopsis thaliana] gi 332657522 gb AEE82922.1  protein kinase-like protein [Arabidopsis thaliana]                                                                                 | 886  | 711  | 0         | 80.2  | 60.9  | 65.2  | protein kinase-like protein                                     | gbpln | Arabidopsis thaliana | AT4G10730.1   Symbols:   Protein kinase superfamily protein   chr4:6609793-6614786 REVERSE LENGTH=711                                                                                                                                                                                                                                        | 886  | 711  | 0        | 80.2  | 60.9 | 65.2 |
| Rsa1.0_01507.1.g27451.t1 | #                                                                                                                                                                                                                                  | #    | #    | #         | #     | #     | #     | -                                                               | ----  | ----                 | #                                                                                                                                                                                                                                                                                                                                            | #    | #    | #        | #     | #    | #    |
| Rsa1.0_01507.1.g27452.t2 | gb AAD32898.1  putative retroelement pol polyprotein [Arabidopsis thaliana]                                                                                                                                                        | 1307 | 1307 | 0         | 100.0 | 57.8  | 73.2  | putative retroelement pol polyprotein                           | gbpln | Arabidopsis thaliana | AT4G23160.1   Symbols: CRK8   cysteine-rich RLK (RECEPTOR-like protein kinase) 8   chr4:12129485-12134086 FORWARD LENGTH=1262                                                                                                                                                                                                                | 1307 | 1262 | 9.00E-95 | 96.6  | 14.9 | 22.4 |
| Rsa1.0_01507.1.g27453.t1 | gb AAC28221.1  similar to reverse transcriptases (PFam: rvt.hmm, score: 60.13) [Arabidopsis thaliana]                                                                                                                              | 443  | 1164 | 1.00E-75  | 262.8 | 32.1  | 48.1  | similar to reverse transcriptases (PFam: rvt.hmm, score: 60.13) | gbpln | Arabidopsis thaliana | AT3G24255.1   Symbols:   RNA-directed DNA polymerase (reverse transcriptase)-related family protein   chr3:8789471-8793208 FORWARD LENGTH=746                                                                                                                                                                                                | 443  | 746  | 2.00E-55 | 168.4 | 27.8 | 40.9 |
| Rsa1.0_01508.1.g27454.t1 | emb CAB89379.1  putative protein [Arabidopsis thaliana]                                                                                                                                                                            | 141  | 804  | 2.00E-17  | 570.2 | 31.9  | 32.6  | putative protein                                                | gbpln | Arabidopsis thaliana | AT5G10630.2   Symbols:   Translation elongation factor EFlA/initiation factor IF2gamma family protein   chr5:3360561-3364414 FORWARD LENGTH=668                                                                                                                                                                                              | 141  | 668  | 5.00E-20 | 473.8 | 31.9 | 32.6 |
| Rsa1.0_01508.1.g27455.t1 | ref XP_002887337.1  hypothetical protein ARALYDRAFT_476226 [Arabidopsis lyrata subsp. lyrata] gi 297333178 gb EFH63596.1  hypothetical protein ARALYDRAFT_476226 [Arabidopsis lyrata subsp. lyrata]                                | 205  | 208  | 8.00E-73  | 101.5 | 79.5  | 85.9  | hypothetical protein ARALYDRAFT_476226                          | gbpln | Arabidopsis lyrata   | AT1G70920.1   Symbols: ATHB18, HB18   homeobox-leucine zipper protein 18   chr1:26736126-26738419 FORWARD LENGTH=206                                                                                                                                                                                                                         | 205  | 206  | 6.00E-73 | 100.5 | 78.5 | 84.9 |
| Rsa1.0_01508.1.g27456.t1 | ref XP_002862565.1  predicted protein [Arabidopsis lyrata subsp. lyrata] gi 297308168 gb EFH38823.1  predicted protein [Arabidopsis lyrata subsp. lyrata]                                                                          | 297  | 87   | 5.00E-13  | 29.3  | 12.1  | 13.1  | predicted protein                                               | gbpln | Arabidopsis lyrata   | AT1G70900.1   Symbols:   unknown protein; BEST Arabidopsis thaliana protein match is: unknown protein (TAIR:AT1G23110.4); Has 57 Blast hits to 57 proteins in 14 species: Archae - 0; Bacteria - 0; Metazoa - 0; Fungi - 0; Plants - 57; Viruses - 0; Other Eukaryotes - 0 (source: NCBI BLink).   chr1:26732456-26733637 FORWARD LENGTH=244 | 297  | 244  | 3.00E-15 | 82.2  | 12.5 | 13.1 |
| Rsa1.0_01508.1.g27457.t1 | gb AAF97298.1 AC007843.1 Hypothetical protein [Arabidopsis thaliana]                                                                                                                                                               | 316  | 362  | 9.00E-82  | 114.6 | 51.6  | 67.4  | Hypothetical protein                                            | gbpln | Arabidopsis thaliana | #                                                                                                                                                                                                                                                                                                                                            | #    | #    | #        | #     | #    | #    |
| Rsa1.0_01508.1.g27458.t2 | gb AAB82639.1  putative non-LTR retroelement reverse transcriptase [Arabidopsis thaliana]                                                                                                                                          | 1012 | 1374 | 1.00E-113 | 135.8 | 21.5  | 31.0  | putative non-LTR retroelement reverse transcriptase             | gbpln | Arabidopsis thaliana | AT1G43760.1   Symbols:   DNase I-like superfamily protein   chr1:16528880-16531065 REVERSE LENGTH=626                                                                                                                                                                                                                                        | 1012 | 626  | 3.00E-33 | 61.9  | 9.9  | 15.8 |
| Rsa1.0_01508.1.g27459.t1 | gb EOA35840.1  hypothetical protein CARUB_v10021082mg [Capsella rubella]                                                                                                                                                           | 137  | 158  | 3.00E-46  | 115.3 | 73.0  | 80.3  | hypothetical protein CARUB_v10021082mg                          | gbpln | Capsella rubella     | AT1G70830.3   Symbols: MLP28   MLP-like protein 28   chr1:26710203-26711395 REVERSE LENGTH=201                                                                                                                                                                                                                                               | 137  | 201  | 6.00E-47 | 146.7 | 70.1 | 83.9 |
| Rsa1.0_01508.1.g27460.t1 | gb EOA34647.1  hypothetical protein CARUB_v1002227mg [Capsella rubella]                                                                                                                                                            | 146  | 149  | 4.00E-74  | 102.1 | 95.2  | 99.3  | hypothetical protein CARUB_v1002227mg                           | gbpln | Capsella rubella     | AT1G70870.1   Symbols:   Polyketide cyclase/dehydrase and lipid transport superfamily protein   chr1:26721020-26721563 REVERSE LENGTH=139                                                                                                                                                                                                    | 146  | 139  | 7.00E-61 | 95.2  | 80.1 | 84.9 |
| Rsa1.0_01508.1.g27461.t1 | gb EOA34244.1  hypothetical protein CARUB_v10021755mg [Capsella rubella]                                                                                                                                                           | 138  | 159  | 3.00E-60  | 115.2 | 84.1  | 93.5  | hypothetical protein CARUB_v10021755mg                          | gbpln | Capsella rubella     | AT1G70880.1   Symbols:   Polyketide cyclase/dehydrase and lipid transport superfamily protein   chr1:26723086-26723717 REVERSE LENGTH=159                                                                                                                                                                                                    | 138  | 159  | 5.00E-59 | 115.2 | 80.4 | 89.9 |
| Rsa1.0_01509.1.g27462.t1 | gb EOA24063.1  hypothetical protein CARUB_v10017283mg [Capsella rubella]                                                                                                                                                           | 436  | 435  | 0         | 99.8  | 90.6  | 94.5  | hypothetical protein CARUB_v10017283mg                          | gbpln | Capsella rubella     | AT3G27925.1   Symbols: DEGPI, Deg1   DegP protease 1   chr3:10366659-10368864 REVERSE LENGTH=439                                                                                                                                                                                                                                             | 436  | 439  | 0        | 100.7 | 87.2 | 90.8 |
| Rsa1.0_01509.1.g27463.t1 | dbj BAM44633.1  glabrous 1 [Raphanus sativus var. niger]                                                                                                                                                                           | 210  | 210  | 1.00E-122 | 100.0 | 100.0 | 100.0 | glabrous 1                                                      | gbpln | Raphanus sativus     | AT3G27920.1   Symbols: GL1, ATMYB0, ATGL1, MYB0   myb domain protein 0   chr3:10361945-10363506 REVERSE LENGTH=228                                                                                                                                                                                                                           | 210  | 228  | 2.00E-80 | 108.6 | 73.3 | 83.3 |
| Rsa1.0_01509.1.g27464.t1 | sp Q9LK86.2 FBK71_ARATH RecName: Full=Putative F-box/kelch-repeat protein At3g27910                                                                                                                                                | 343  | 384  | 1.00E-117 | 112.0 | 63.6  | 77.3  | RecName: Full=Putative F-box/kelch-repeat protein At3g27910     | ----  | ----                 | AT4G39240.1   Symbols:   Galactose oxidase/kelch repeat superfamily protein   chr4:18269599-18270726 REVERSE LENGTH=375                                                                                                                                                                                                                      | 343  | 375  | 3.00E-89 | 109.3 | 51.3 | 65.9 |

|                          |                                                                                                                                                                                                                                                                                                                                                                                                                                                                                                                                                                                                                                                                                                                                                                                                                                                           |      |      |          |       |      |      |                                                 |       |                      |                                                                                                                                                              |      |      |           |       |      |      |
|--------------------------|-----------------------------------------------------------------------------------------------------------------------------------------------------------------------------------------------------------------------------------------------------------------------------------------------------------------------------------------------------------------------------------------------------------------------------------------------------------------------------------------------------------------------------------------------------------------------------------------------------------------------------------------------------------------------------------------------------------------------------------------------------------------------------------------------------------------------------------------------------------|------|------|----------|-------|------|------|-------------------------------------------------|-------|----------------------|--------------------------------------------------------------------------------------------------------------------------------------------------------------|------|------|-----------|-------|------|------|
| Rsa1.0_01509.1.g27465.t1 | gb EOA25131.1  hypothetical protein CARUB_v10018440mg [Capsella rubella]                                                                                                                                                                                                                                                                                                                                                                                                                                                                                                                                                                                                                                                                                                                                                                                  | 196  | 196  | 9.00E-98 | 100.0 | 91.3 | 98.0 | hypothetical protein CARUB_v10018440mg          | gbpln | Capsella rubella     | AT3G27890.1   Symbols: NQR   NADPH:quinone oxidoreductase   chr3:10350807-10351938 REVERSE LENGTH=196                                                        | 196  | 196  | 3.00E-99  | 100.0 | 91.8 | 97.4 |
| Rsa1.0_01509.1.g27466.t1 | ref NP_566827.1  uncharacterized protein [Arabidopsis thaliana] gi 11994493 dbj BAB02534.1  unnamed protein product [Arabidopsis thaliana] gi 21553599 gb AAM62692.1  unknown [Arabidopsis thaliana] gi 110741968 dbj BAE98924.1  hypothetical protein [Arabidopsis thaliana] gi 11074300 gb ABH04523.1  At3g27880 [Arabidopsis thaliana] gi 332643854 gb AEE77375.1  uncharacterized protein AT3G27880 [Arabidopsis thaliana] ref NP_189425.2  phospholipid-translocating ATPase [Arabidopsis thaliana] gi 12229655 sp Q9LK90.1 ALA8_ARATH RecName: Full=Putative phospholipid-transporting ATPase 8; Short=AtALA8; AltName: Full=Aminophospholipid flippase 8 gi 11994492 dbj BAB02533.1  P-type transporting ATPase-like protein [Arabidopsis thaliana] gi 332643853 gb AEE77374.1  putative phospholipid-transporting ATPase 8 [Arabidopsis thaliana] | 249  | 242  | 2.00E-61 | 97.2  | 64.7 | 75.5 | uncharacterized protein                         | gbpln | Arabidopsis thaliana | AT3G27880.1   Symbols:   Protein of unknown function (DUF1645)   chr3:10338429-10339157 FORWARD LENGTH=242                                                   | 249  | 242  | 5.00E-64  | 97.2  | 64.7 | 75.5 |
| Rsa1.0_01509.1.g27467.t1 | ref XP_002875407.1  hypothetical protein ARALYDRAFT_484576 [Arabidopsis lyrata subsp. lyrata] gi 297321245 gb EFH51666.1  hypothetical protein ARALYDRAFT_484576 [Arabidopsis lyrata subsp. lyrata]                                                                                                                                                                                                                                                                                                                                                                                                                                                                                                                                                                                                                                                       | 1185 | 1189 | 0        | 100.3 | 89.7 | 95.1 | phospholipid-translocating ATPase               | gbpln | Arabidopsis thaliana | AT3G27870.1   Symbols:   ATPase E1-E2 type family protein / haloacid dehalogenase-like hydrolase family protein   chr3:10330950-10335288 FORWARD LENGTH=1189 | 1185 | 1189 | 0         | 100.3 | 89.7 | 95.1 |
| Rsa1.0_01509.1.g27468.t1 | ref XP_002875407.1  hypothetical protein ARALYDRAFT_484576 [Arabidopsis lyrata subsp. lyrata] gi 297321245 gb EFH51666.1  hypothetical protein ARALYDRAFT_484576 [Arabidopsis lyrata subsp. lyrata]                                                                                                                                                                                                                                                                                                                                                                                                                                                                                                                                                                                                                                                       | 610  | 661  | 0        | 108.4 | 60.7 | 76.7 | hypothetical protein ARALYDRAFT_484576          | gbpln | Arabidopsis lyrata   | AT3G27860.1   Symbols:   Tudor/PWWP/MBT superfamily protein   chr3:10326128-10328066 FORWARD LENGTH=652                                                      | 610  | 652  | 1.00E-168 | 106.9 | 58.0 | 73.1 |
| Rsa1.0_01509.1.g27469.t1 | gb EOA24784.1  hypothetical protein CARUB_v10018063mg [Capsella rubella]                                                                                                                                                                                                                                                                                                                                                                                                                                                                                                                                                                                                                                                                                                                                                                                  | 201  | 191  | 6.00E-57 | 95.0  | 68.7 | 72.6 | hypothetical protein CARUB_v10018063mg          | gbpln | Capsella rubella     | AT3G27830.1   Symbols: RPL12-A, RPL12   ribosomal protein L12-A   chr3:10318576-10319151 FORWARD LENGTH=191                                                  | 201  | 191  | 2.00E-59  | 95.0  | 68.7 | 72.1 |
| Rsa1.0_01509.1.g27470.t1 | gb EOA24744.1  hypothetical protein CARUB_v10018021mg, partial [Capsella rubella]                                                                                                                                                                                                                                                                                                                                                                                                                                                                                                                                                                                                                                                                                                                                                                         | 192  | 211  | 7.00E-72 | 109.9 | 85.4 | 89.1 | hypothetical protein CARUB_v10018021mg, partial | gbpln | Capsella rubella     | AT3G27830.1   Symbols: RPL12-A, RPL12   ribosomal protein L12-A   chr3:10318576-10319151 FORWARD LENGTH=191                                                  | 192  | 191  | 1.00E-73  | 99.5  | 85.9 | 90.1 |
| Rsa1.0_01509.1.g27471.t1 | gb EOA23892.1  hypothetical protein CARUB_v10017107mg [Capsella rubella]                                                                                                                                                                                                                                                                                                                                                                                                                                                                                                                                                                                                                                                                                                                                                                                  | 496  | 488  | 0        | 98.4  | 89.7 | 95.6 | hypothetical protein CARUB_v10017107mg          | gbpln | Capsella rubella     | AT3G27820.1   Symbols: ATMDAR4, MDAR4   monodehydroascorbate reductase 4   chr3:10315249-10317881 FORWARD LENGTH=488                                         | 496  | 488  | 0         | 98.4  | 89.7 | 96.0 |
| Rsa1.0_01510.1.g27472.t1 | dbj BAF91403.1  S-locus receptor kinase (kinase domain) [Brassica oleracea] ref XP_002887071.1  ATP dependent DNA ligase family protein [Arabidopsis lyrata subsp. lyrata] gi 297332912 gb EFH63330.1  ATP dependent DNA ligase family protein [Arabidopsis lyrata subsp. lyrata]                                                                                                                                                                                                                                                                                                                                                                                                                                                                                                                                                                         | 394  | 424  | 0        | 107.6 | 94.4 | 97.0 | S-locus receptor kinase (kinase domain)         | gbpln | Brassica oleracea    | AT4G21380.1   Symbols: ARK3, RK3   receptor kinase 3   chr4:11389219-11393090 REVERSE LENGTH=850                                                             | 394  | 850  | 1.00E-155 | 215.7 | 70.1 | 81.0 |
| Rsa1.0_01510.1.g27473.t1 | ref XP_002887071.1  ATP dependent DNA ligase family protein [Arabidopsis lyrata subsp. lyrata] gi 297332912 gb EFH63330.1  ATP dependent DNA ligase family protein [Arabidopsis lyrata subsp. lyrata]                                                                                                                                                                                                                                                                                                                                                                                                                                                                                                                                                                                                                                                     | 1418 | 1413 | 0        | 99.6  | 80.5 | 86.5 | ATP dependent DNA ligase family protein         | gbpln | Arabidopsis lyrata   | AT1G66730.1   Symbols: AtLIG6, LIG6   DNA LIGASE 6   chr1:24884991-24891823 FORWARD LENGTH=1396                                                              | 1418 | 1396 | 0         | 98.4  | 80.3 | 86.7 |
| Rsa1.0_01510.1.g27474.t1 | gb EOA35744.1  hypothetical protein CARUB_v10020977mg [Capsella rubella] gi 482571557 gb EOA35745.1  hypothetical protein CARUB_v10020977mg [Capsella rubella]                                                                                                                                                                                                                                                                                                                                                                                                                                                                                                                                                                                                                                                                                            | 217  | 198  | 8.00E-88 | 91.2  | 79.7 | 82.9 | hypothetical protein CARUB_v10020977mg          | gbpln | Capsella rubella     | AT1G66740.1   Symbols: AtSP7, SP7, SGA2, ASF1A   ASF1 like histone chaperone   chr1:24892586-24893548 FORWARD LENGTH=196                                     | 217  | 196  | 4.00E-89  | 90.3  | 77.0 | 81.6 |

|                          |                                                                                                                                                                                                                                                                                                                                                                                                                                                                                                                                                                                                                                                                        |      |      |           |       |      |      |                                                                                                                                                      |       |                      |                                                                                                                                       |      |      |           |       |      |      |
|--------------------------|------------------------------------------------------------------------------------------------------------------------------------------------------------------------------------------------------------------------------------------------------------------------------------------------------------------------------------------------------------------------------------------------------------------------------------------------------------------------------------------------------------------------------------------------------------------------------------------------------------------------------------------------------------------------|------|------|-----------|-------|------|------|------------------------------------------------------------------------------------------------------------------------------------------------------|-------|----------------------|---------------------------------------------------------------------------------------------------------------------------------------|------|------|-----------|-------|------|------|
| Rsa1.0_01510.1.g27475.t1 | ref NP_176847.1  cyclin-dependent kinase D-2 [Arabidopsis thaliana] gi 75333580 sp g9C9M7.1 CDKD2_ARAT H RecName: Full=Cyclin-dependent kinase D-2; Short=CDKD2; AltName: Full=CDK-activating kinase 4-A; Short=CAK4-A; gi 12597763 gb AAG60076.1 AC013288.10 cell division protein kinase, putative [Arabidopsis thaliana] gi 20521157 dbj BAE91558.1 cdk-activating kinase 4 [Arabidopsis thaliana] gi 22531034 gb AAM97021.1  cell division protein kinase, putative [Arabidopsis thaliana] gi 23197980 gb AANI5517.1  cell division protein kinase, putative [Arabidopsis thaliana] gi 332196430 gb AEE34551.1  cyclin-dependent kinase D-2 [Arabidopsis thaliana] | 347  | 348  | 0         | 100.3 | 97.1 | 98.6 | cyclin-dependent kinase D-2                                                                                                                          | gbpln | Arabidopsis thaliana | AT1G66750.1   Symbols: CDKD1:2, CAK4AT, AT:CDKD.2, CDKD.2, CAK4   CDK-activating kinase 4   chr1:24894775-24897015 FORWARD LENGTH=348 | 347  | 348  | 0         | 100.3 | 97.1 | 98.6 |
| Rsa1.0_01510.1.g27476.t1 | #                                                                                                                                                                                                                                                                                                                                                                                                                                                                                                                                                                                                                                                                      | #    | #    | #         | #     | #    | -    | ----                                                                                                                                                 | ----  | #                    | #                                                                                                                                     | #    | #    | #         | #     | #    |      |
| Rsa1.0_01510.1.g27477.t7 | ref NP_176662.1  MATE efflux family protein [Arabidopsis thaliana] gi 91806023 gb ABE65740.1  MATE efflux family protein [Arabidopsis thaliana] gi 332196173 gb AEE34294.1  MATE efflux family protein [Arabidopsis thaliana]                                                                                                                                                                                                                                                                                                                                                                                                                                          | 494  | 502  | 0         | 101.6 | 77.1 | 88.5 | MATE efflux family protein                                                                                                                           | gbpln | Arabidopsis thaliana | AT1G64820.1   Symbols:   MATE efflux family protein   chr1:24088605-24090558 FORWARD LENGTH=502                                       | 494  | 502  | 0         | 101.6 | 77.1 | 88.5 |
| Rsa1.0_01510.1.g27478.t1 | ref XP_002886769.1  predicted protein [Arabidopsis lyrata subsp. lyrata] gi 297332610 gb EFH63028.1  predicted protein [Arabidopsis lyrata subsp. lyrata]                                                                                                                                                                                                                                                                                                                                                                                                                                                                                                              | 261  | 500  | 1.00E-115 | 191.6 | 80.8 | 89.7 | predicted protein                                                                                                                                    | gbpln | Arabidopsis lyrata   | AT1G64820.1   Symbols:   MATE efflux family protein   chr1:24088605-24090558 FORWARD LENGTH=502                                       | 261  | 502  | 1.00E-116 | 192.3 | 79.7 | 90.4 |
| Rsa1.0_01510.1.g27479.t1 | gb EOA36857.1  hypothetical protein CARUB_v10008903mg [Capsella rubella]                                                                                                                                                                                                                                                                                                                                                                                                                                                                                                                                                                                               | 680  | 536  | 6.00E-91  | 78.8  | 32.2 | 44.7 | hypothetical protein CARUB_v10008903mg                                                                                                               | gbpln | Capsella rubella     | AT2G07760.1   Symbols:   Zinc knuckle (CCHC-type) family protein   chr2:3584420-3586278 REVERSE LENGTH=530                            | 680  | 530  | 1.00E-49  | 77.9  | 15.7 | 21.5 |
| Rsa1.0_01510.1.g27480.t1 | ref XP_002887076.1  mate efflux family protein [Arabidopsis lyrata subsp. lyrata] gi 297332917 gb EFH63335.1  mate efflux family protein [Arabidopsis lyrata subsp. lyrata]                                                                                                                                                                                                                                                                                                                                                                                                                                                                                            | 111  | 493  | 6.00E-40  | 444.1 | 74.8 | 82.0 | mate efflux family protein                                                                                                                           | gbpln | Arabidopsis lyrata   | AT1G64820.1   Symbols:   MATE efflux family protein   chr1:24088605-24090558 FORWARD LENGTH=502                                       | 111  | 502  | 4.00E-39  | 452.3 | 69.4 | 81.1 |
| Rsa1.0_01510.1.g27481.t1 | ref XP_002886769.1  predicted protein [Arabidopsis lyrata subsp. lyrata] gi 297332610 gb EFH63028.1  predicted protein [Arabidopsis lyrata subsp. lyrata]                                                                                                                                                                                                                                                                                                                                                                                                                                                                                                              | 427  | 500  | 1.00E-126 | 117.1 | 52.9 | 73.1 | predicted protein                                                                                                                                    | gbpln | Arabidopsis lyrata   | AT1G66760.1   Symbols:   MATE efflux family protein   chr1:24902110-24904054 FORWARD LENGTH=466                                       | 427  | 466  | 1.00E-160 | 109.1 | 65.6 | 80.3 |
| Rsa1.0_01511.1.g27482.t1 | ref NP_197812.1  phosphatidylinositol 3- and 4-kinase family protein / ubiquitin family protein [Arabidopsis thaliana] gi 10177083 dbj BAB10389.1  ubiquitin [Arabidopsis thaliana] gi 110741569 dbj BAE98733.1  ubiquitin [Arabidopsis thaliana] gi 332005891 gb AED93274.1  phosphatidylinositol 3- and 4-kinase family protein / ubiquitin family protein [Arabidopsis thaliana]                                                                                                                                                                                                                                                                                    | 427  | 574  | 1.00E-180 | 134.4 | 69.8 | 74.2 | phosphatidylinositol 3- and 4-kinase family protein / ubiquitin family protein                                                                       | gbpln | Arabidopsis thaliana | AT5G24240.1   Symbols:   Phosphatidylinositol 3- and 4-kinase .Ubiquitin family protein   chr5:8231110-8232925 REVERSE LENGTH=574     | 427  | 574  | 0         | 134.4 | 69.8 | 74.2 |
| Rsa1.0_01511.1.g27483.t1 | gb EOA20957.1  hypothetical protein CARUB_v10001289mg [Capsella rubella]                                                                                                                                                                                                                                                                                                                                                                                                                                                                                                                                                                                               | 366  | 353  | 2.00E-97  | 96.4  | 50.3 | 66.1 | hypothetical protein CARUB_v10001289mg                                                                                                               | gbpln | Capsella rubella     | AT5G24220.1   Symbols:   Lipase class 3-related protein   chr5:8225861-8227551 FORWARD LENGTH=376                                     | 366  | 376  | 5.00E-94  | 102.7 | 48.4 | 65.3 |
| Rsa1.0_01511.1.g27484.t1 | #                                                                                                                                                                                                                                                                                                                                                                                                                                                                                                                                                                                                                                                                      | #    | #    | #         | #     | #    | -    | ----                                                                                                                                                 | ----  | #                    | #                                                                                                                                     | #    | #    | #         | #     | #    |      |
| Rsa1.0_01511.1.g27485.t1 | dbj BAB09923.1  copia-like retrotransposable element [Arabidopsis thaliana]                                                                                                                                                                                                                                                                                                                                                                                                                                                                                                                                                                                            | 1369 | 1342 | 0         | 98.0  | 47.1 | 65.0 | copia-like retrotransposable element                                                                                                                 | gbpln | Arabidopsis thaliana | AT4G23160.1   Symbols: CRK8   cysteine-rich RLK (RECEPTOR-like protein kinase) 8   chr4:12129485-12134086 FORWARD LENGTH=1262         | 1369 | 1262 | 1.00E-75  | 92.2  | 11.5 | 19.4 |
| Rsa1.0_01511.1.g27486.t1 | gb EOA20957.1  hypothetical protein CARUB_v10001289mg [Capsella rubella]                                                                                                                                                                                                                                                                                                                                                                                                                                                                                                                                                                                               | 355  | 353  | 8.00E-96  | 99.4  | 51.8 | 66.5 | hypothetical protein CARUB_v10001289mg                                                                                                               | gbpln | Capsella rubella     | AT5G24220.1   Symbols:   Lipase class 3-related protein   chr5:8225861-8227551 FORWARD LENGTH=376                                     | 355  | 376  | 2.00E-93  | 105.9 | 50.4 | 66.8 |
| Rsa1.0_01511.1.g27487.t1 | sp O65727.1 ERGI1_BRANA RecName: Full=Squalene monooxygenase 1.1; AltName: Full=Squalene epoxidase 1.1; Short=SE 1.1 gi 3123354 emb CAA06773.1  squalene epoxidase homologue [Brassica napus]                                                                                                                                                                                                                                                                                                                                                                                                                                                                          | 518  | 506  | 0         | 97.7  | 90.3 | 93.1 | RecName: Full=Squalene monooxygenase 1.1; AltName: Full=Squalene epoxidase 1.1; Short=SE 1.1 gi 3123354 emb CAA06773.1  squalene epoxidase homologue | gbpln | Brassica napus       | AT5G24150.1   Symbols: SQP1, SQE5   FAD/NAD(P)-binding oxidoreductase family protein   chr5:8172594-8175395 REVERSE LENGTH=516        | 518  | 516  | 0         | 99.6  | 84.7 | 92.7 |

|                          |                                                                                                                                                                                                                                                                                                                                                                                                                                                                                                                                                                                                                                                                                                                                                                                                                                                                                                                                                                                                                                                                                                                                                                                                                                                                           |      |      |           |       |      |       |                                                        |       |                      |                                                                                                                                            |      |      |           |       |      |       |
|--------------------------|---------------------------------------------------------------------------------------------------------------------------------------------------------------------------------------------------------------------------------------------------------------------------------------------------------------------------------------------------------------------------------------------------------------------------------------------------------------------------------------------------------------------------------------------------------------------------------------------------------------------------------------------------------------------------------------------------------------------------------------------------------------------------------------------------------------------------------------------------------------------------------------------------------------------------------------------------------------------------------------------------------------------------------------------------------------------------------------------------------------------------------------------------------------------------------------------------------------------------------------------------------------------------|------|------|-----------|-------|------|-------|--------------------------------------------------------|-------|----------------------|--------------------------------------------------------------------------------------------------------------------------------------------|------|------|-----------|-------|------|-------|
| Rsa1.0_01511.1.g27488.t1 | ref XP_002874170.1  hypothetical protein ARALYDRAFT_489269 [Arabidopsis lyrata subsp. lyrata] gi 297320007 gb EFH50429.1                                                                                                                                                                                                                                                                                                                                                                                                                                                                                                                                                                                                                                                                                                                                                                                                                                                                                                                                                                                                                                                                                                                                                  | 515  | 517  | 0         | 100.4 | 86.6 | 92.0  | hypothetical protein ARALYDRAFT_489269                 | gbpln | Arabidopsis lyrata   | AT5G24120.1   Symbols: SIGE, SIG5, ATSIG5   sigma factor E   chr1:8157794-8159746 REVERSE LENGTH=517                                       | 515  | 517  | 0         | 100.4 | 86.0 | 90.9  |
| Rsa1.0_01511.1.g27489.t1 | hypothetical protein ARALYDRAFT_489269 [Arabidopsis lyrata subsp. lyrata] emb CAB39638.1  RNA-directed DNA polymerase-like protein [Arabidopsis thaliana] gi 7267666 emb CAB78094.1  RNA-directed DNA polymerase-like protein [Arabidopsis thaliana]                                                                                                                                                                                                                                                                                                                                                                                                                                                                                                                                                                                                                                                                                                                                                                                                                                                                                                                                                                                                                      | 1407 | 1274 | 0         | 90.5  | 25.5 | 34.3  | RNA-directed DNA polymerase-like protein               | gbpln | Arabidopsis thaliana | AT1G43760.1   Symbols:   DNase I-like superfamily protein   chr1:16528880-16531065 REVERSE LENGTH=626                                      | 1407 | 626  | 1.00E-41  | 44.5  | 8.4  | 13.9  |
| Rsa1.0_01512.1.g27490.t1 | gb EOA39186.1  hypothetical protein CARUB_v10012153mg [Capsella rubella]                                                                                                                                                                                                                                                                                                                                                                                                                                                                                                                                                                                                                                                                                                                                                                                                                                                                                                                                                                                                                                                                                                                                                                                                  | 125  | 508  | 2.00E-33  | 406.4 | 61.6 | 72.0  | hypothetical protein CARUB_v10012153mg                 | gbpln | Capsella rubella     | AT1G21060.1   Symbols:   Protein of unknown function, DUF547   chr1:7371799-7374085 FORWARD LENGTH=505                                     | 125  | 505  | 3.00E-32  | 404.0 | 57.6 | 71.2  |
| Rsa1.0_01512.1.g27491.t1 | gb EOA21233.1  hypothetical protein CARUB_v10001580mg [Capsella rubella]                                                                                                                                                                                                                                                                                                                                                                                                                                                                                                                                                                                                                                                                                                                                                                                                                                                                                                                                                                                                                                                                                                                                                                                                  | 299  | 298  | 1.00E-169 | 99.7  | 97.3 | 98.7  | hypothetical protein CARUB_v10001580mg                 | gbpln | Capsella rubella     | AT5G19760.1   Symbols:   Mitochondrial substrate carrier family protein   chr5:6679591-6681845 REVERSE LENGTH=298                          | 299  | 298  | 1.00E-167 | 99.7  | 94.0 | 96.3  |
| Rsa1.0_01512.1.g27492.t1 | # # # # # # # # # #                                                                                                                                                                                                                                                                                                                                                                                                                                                                                                                                                                                                                                                                                                                                                                                                                                                                                                                                                                                                                                                                                                                                                                                                                                                       |      |      |           |       |      |       | -                                                      | ----  | ----                 | # # # # # # #                                                                                                                              |      |      |           |       |      |       |
| Rsa1.0_01512.1.g27493.t1 | ref NP_197478.1  tubulin alpha-3/alpha-5 chain [Arabidopsis thaliana] gi 15241179 ref NP_197479.1  tubulin alpha-3/alpha-5 chain [Arabidopsis thaliana] gi 297808045 ref XP_002871906.1  tubulin alpha-3 [Arabidopsis lyrata subsp. lyrata] gi 297812159 ref XP_002873963.1  tubulin alpha-3 [Arabidopsis lyrata subsp. lyrata] gi 408407916 sp Q56WH1.2 TBA3.ARAT H RecName: Full=Tubulin alpha-3 chain gi 408407918 sp B9DHHQ0.2 TBA5.ARAT H RecName: Full=Tubulin alpha-5 chain gi 13605805 gb AAK32888.1 AF367301.1 AT5g19770/T29J13.190 [Arabidopsis thaliana] gi 166912 gb AAA32888.1  alpha-tubulin [Arabidopsis thaliana] gi 166918 gb AAA32891.1  alpha-5 tubulin [Arabidopsis thaliana] gi 14532776 gb AAK64169.1  putative tubulin alpha-5 chain [Arabidopsis thaliana] gi 17473826 gb AAL38340.1  unknown protein [Arabidopsis thaliana] gi 19310733 gb AAL85097.1  putative tubulin alpha-5 chain [Arabidopsis thaliana] gi 23397154 gb AAN31860.1  putative tubulin alpha-5 chain [Arabidopsis thaliana] gi 23397156 gb AAN31861.1  putative tubulin alpha-5 chain [Arabidopsis thaliana] gi 23505949 gb AAN28834.1  putative tubulin alpha-5 chain [Arabidopsis thaliana] gi 23505949 gb AAN28834.1  putative tubulin alpha-5 chain [Arabidopsis thaliana] | 450  | 450  | 0         | 100.0 | 99.8 | 100.0 | tubulin alpha-3/alpha-5 chain                          | gbpln | Arabidopsis lyrata   | AT5G19780.1   Symbols: TUA5   tubulin alpha-5   chr5:6687212-6688926 FORWARD LENGTH=450                                                    | 450  | 450  | 0         | 100.0 | 99.8 | 100.0 |
| Rsa1.0_01512.1.g27494.t1 | gb EOA22165.1  hypothetical protein CARUB_v10002733mg [Capsella rubella]                                                                                                                                                                                                                                                                                                                                                                                                                                                                                                                                                                                                                                                                                                                                                                                                                                                                                                                                                                                                                                                                                                                                                                                                  | 252  | 252  | 1.00E-104 | 100.0 | 81.3 | 88.5  | hypothetical protein CARUB_v10002733mg                 | gbpln | Capsella rubella     | AT5G19790.1   Symbols: RAP2.11   related to AP2.11   chr5:6689271-6690032 REVERSE LENGTH=253                                               | 252  | 253  | 1.00E-104 | 100.4 | 81.0 | 88.5  |
| Rsa1.0_01512.1.g27495.t1 | # # # # # # # # # #                                                                                                                                                                                                                                                                                                                                                                                                                                                                                                                                                                                                                                                                                                                                                                                                                                                                                                                                                                                                                                                                                                                                                                                                                                                       |      |      |           |       |      |       | -                                                      | ----  | ----                 | # # # # # # #                                                                                                                              |      |      |           |       |      |       |
| Rsa1.0_01512.1.g27496.t1 | gb EOA19838.1  hypothetical protein CARUB_v10000085mg [Capsella rubella]                                                                                                                                                                                                                                                                                                                                                                                                                                                                                                                                                                                                                                                                                                                                                                                                                                                                                                                                                                                                                                                                                                                                                                                                  | 1114 | 1116 | 0         | 100.2 | 95.2 | 98.3  | hypothetical protein CARUB_v10000085mg                 | gbpln | Capsella rubella     | AT5G19820.1   Symbols: emb2734   ARM repeat superfamily protein   chr5:6695731-6701247 REVERSE LENGTH=1116                                 | 1114 | 1116 | 0         | 100.2 | 94.7 | 98.0  |
| Rsa1.0_01512.1.g27497.t1 | ref XP_002871909.1  transcription factor jumonji domain-containing protein [Arabidopsis lyrata subsp. lyrata] gi 297317746 gb EFH48168.1  transcription factor jumonji domain-containing protein [Arabidopsis lyrata subsp. lyrata]                                                                                                                                                                                                                                                                                                                                                                                                                                                                                                                                                                                                                                                                                                                                                                                                                                                                                                                                                                                                                                       | 109  | 505  | 2.00E-18  | 463.3 | 50.5 | 59.6  | transcription factor jumonji domain-containing protein | gbpln | Arabidopsis lyrata   | AT5G19840.1   Symbols:   2-oxoglutarate (2OG) and Fe(II)-dependent oxygenase superfamily protein   chr5:6705372-6709382 FORWARD LENGTH=505 | 109  | 505  | 1.00E-20  | 463.3 | 49.5 | 59.6  |
| Rsa1.0_01512.1.g27498.t1 | gb EOA22088.1  hypothetical protein CARUB_v10002631mg [Capsella rubella]                                                                                                                                                                                                                                                                                                                                                                                                                                                                                                                                                                                                                                                                                                                                                                                                                                                                                                                                                                                                                                                                                                                                                                                                  | 199  | 204  | 2.00E-92  | 102.5 | 86.4 | 93.0  | hypothetical protein CARUB_v10002631mg                 | gbpln | Capsella rubella     | AT5G19855.1   Symbols:   Chaperonin-like RbcX protein   chr5:6712166-6713445 REVERSE LENGTH=203                                            | 199  | 203  | 5.00E-94  | 102.0 | 83.9 | 91.0  |
| Rsa1.0_01512.1.g27499.t1 | gb EOA22521.1  hypothetical protein CARUB_v10003176mg [Capsella rubella]                                                                                                                                                                                                                                                                                                                                                                                                                                                                                                                                                                                                                                                                                                                                                                                                                                                                                                                                                                                                                                                                                                                                                                                                  | 215  | 170  | 6.00E-67  | 79.1  | 60.5 | 65.6  | hypothetical protein CARUB_v10003176mg                 | gbpln | Capsella rubella     | AT5G19860.1   Symbols:   Protein of unknown function, DUF538   chr5:6714533-6715837 REVERSE LENGTH=181                                     | 215  | 181  | 1.00E-66  | 84.2  | 62.8 | 67.4  |
| Rsa1.0_01512.1.g27500.t1 | gb EOA22866.1  hypothetical protein CARUB_v10003597mg [Capsella rubella]                                                                                                                                                                                                                                                                                                                                                                                                                                                                                                                                                                                                                                                                                                                                                                                                                                                                                                                                                                                                                                                                                                                                                                                                  | 281  | 302  | 1.00E-141 | 107.5 | 90.0 | 95.4  | hypothetical protein CARUB_v10003597mg                 | gbpln | Capsella rubella     | AT5G19870.1   Symbols:   Family of unknown function (DUF716)   chr5:6716182-6717012 REVERSE LENGTH=276                                     | 281  | 276  | 1.00E-143 | 98.2  | 90.0 | 95.7  |
| Rsa1.0_01513.1.g27501.t5 | gb EOA19782.1  hypothetical protein CARUB_v10000037mg [Capsella rubella]                                                                                                                                                                                                                                                                                                                                                                                                                                                                                                                                                                                                                                                                                                                                                                                                                                                                                                                                                                                                                                                                                                                                                                                                  | 1378 | 1456 | 0         | 105.7 | 78.9 | 85.1  | hypothetical protein CARUB_v10000037mg                 | gbpln | Capsella rubella     | AT5G01400.1   Symbols: ESP4   HEAT repeat-containing protein   chr5:162803-171072 REVERSE LENGTH=1467                                      | 1378 | 1467 | 0         | 106.5 | 76.9 | 83.4  |

|                          |                                                                                                                                                                                                                                                                                                                                                                                                                                                    |      |     |           |       |      |      |                                               |       |                      |                                                                                                                                                |      |     |           |       |      |      |
|--------------------------|----------------------------------------------------------------------------------------------------------------------------------------------------------------------------------------------------------------------------------------------------------------------------------------------------------------------------------------------------------------------------------------------------------------------------------------------------|------|-----|-----------|-------|------|------|-----------------------------------------------|-------|----------------------|------------------------------------------------------------------------------------------------------------------------------------------------|------|-----|-----------|-------|------|------|
| Rsa1.0_01513.1.g27502.t1 | gb[EOA21182.1] hypothetical protein CARUB_v10001526mg [Capsella rubella]                                                                                                                                                                                                                                                                                                                                                                           | 298  | 309 | 1.00E-157 | 103.7 | 93.6 | 96.3 | hypothetical protein CARUB_v10001526mg        | gbpln | Capsella rubella     | AT5G01410.1   Symbols: PDX1, ATPDX1.3, RSR4, PDX1.3, ATPDX1   Aldolase-type TIM barrel family protein   chr5:172576-173505 REVERSE LENGTH=309  | 298  | 309 | 1.00E-158 | 103.7 | 93.0 | 96.0 |
| Rsa1.0_01513.1.g27503.t1 | #                                                                                                                                                                                                                                                                                                                                                                                                                                                  | #    | #   | #         | #     | #    | #    | -                                             | ----  | ----                 | #                                                                                                                                              | #    | #   | #         | #     | #    |      |
| Rsa1.0_01513.1.g27504.t2 | ref[XP_002870921.1] hypothetical protein ARALYDRAFT_486934 [Arabidopsis lyrata subsp. lyrata] gi 297316758 gb EFH47180.1  hypothetical protein ARALYDRAFT_486934 [Arabidopsis lyrata subsp. lyrata]                                                                                                                                                                                                                                                | 513  | 405 | 1.00E-132 | 78.9  | 51.3 | 57.7 | hypothetical protein ARALYDRAFT_486934        | gbpln | Arabidopsis lyrata   | AT5G01420.1   Symbols:   Glutaredoxin family protein   chr5:174886-176091 REVERSE LENGTH=401                                                   | 513  | 401 | 1.00E-129 | 78.2  | 49.3 | 56.9 |
| Rsa1.0_01513.1.g27505.t1 | ref[XP_002873011.1] hypothetical protein ARALYDRAFT_486928 [Arabidopsis lyrata subsp. lyrata] gi 297318848 gb EFH49270.1  hypothetical protein ARALYDRAFT_486928 [Arabidopsis lyrata subsp. lyrata]                                                                                                                                                                                                                                                | 249  | 245 | 1.00E-120 | 98.4  | 83.9 | 91.2 | hypothetical protein ARALYDRAFT_486928        | gbpln | Arabidopsis lyrata   | AT5G01470.2   Symbols:   S-adenosyl-L-methionine-dependent methyltransferases superfamily protein   chr5:190953-192462 FORWARD LENGTH=245      | 249  | 245 | 1.00E-121 | 98.4  | 83.1 | 90.4 |
| Rsa1.0_01513.1.g27506.t1 | gb[EOA29494.1] hypothetical protein CARUB_v10012960mg [Capsella rubella]                                                                                                                                                                                                                                                                                                                                                                           | 1258 | 864 | 0         | 68.7  | 59.1 | 61.9 | hypothetical protein CARUB_v10012960mg        | gbpln | Capsella rubella     | AT2G04660.1   Symbols: APC2   anaphase-promoting complex/cyclosome 2   chr2:1624933-1629039 FORWARD LENGTH=865                                 | 1258 | 865 | 0         | 68.8  | 59.6 | 62.0 |
| Rsa1.0_01513.1.g27507.t1 | dbj BAJ33665.1  unnamed protein product [Thellungiella halophila]                                                                                                                                                                                                                                                                                                                                                                                  | 286  | 288 | 1.00E-148 | 100.7 | 90.9 | 92.0 | unnamed protein product                       | ----  | ----                 | AT3G08940.2   Symbols: LHCb4.2   light harvesting complex photosystem II   chr3:2717717-2718665 FORWARD LENGTH=287                             | 286  | 287 | 1.00E-148 | 100.3 | 87.8 | 90.9 |
| Rsa1.0_01513.1.g27508.t1 | ref[NP_195775.1] Lectin-domain containing receptor kinase A4.2 [Arabidopsis thaliana] gi 75335729 sp O9M020.1 LRK63 ARATH RecName: Full=Lectin-domain containing receptor kinase VL3: Short=LecRK-VL3; AltName: Full=Lectin receptor kinase A4.2; Flags: Precursor gi 7327814 emb CAB82271.1  receptor like protein kinase [Arabidopsis thaliana] gi 332002976 gb AED90359.1  Lectin-domain containing receptor kinase A4.2 [Arabidopsis thaliana] | 694  | 688 | 0         | 99.1  | 75.8 | 85.3 | Lectin-domain containing receptor kinase A4.2 | gbpln | Arabidopsis thaliana | AT5G01550.1   Symbols: LECRKA4.2   lectin receptor kinase a4.1   chr5:214517-216583 REVERSE LENGTH=688                                         | 694  | 688 | 0         | 99.1  | 75.8 | 85.3 |
| Rsa1.0_01513.1.g27509.t1 | ref[XP_002870903.1] protein phosphatase type 2C [Arabidopsis lyrata subsp. lyrata] gi 297316740 gb EFH47162.1  protein phosphatase type 2C [Arabidopsis lyrata subsp. lyrata]                                                                                                                                                                                                                                                                      | 360  | 382 | 0         | 106.1 | 86.7 | 94.4 | protein phosphatase type 2C                   | gbpln | Arabidopsis lyrata   | AT5G01700.2   Symbols:   Protein phosphatase 2C family protein   chr5:260848-262492 REVERSE LENGTH=382                                         | 360  | 382 | 0         | 106.1 | 86.9 | 93.6 |
| Rsa1.0_01513.1.g27510.t1 | ref[XP_002870902.1] hypothetical protein ARALYDRAFT_486898 [Arabidopsis lyrata subsp. lyrata] gi 297316739 gb EFH47161.1  hypothetical protein ARALYDRAFT_486898 [Arabidopsis lyrata subsp. lyrata]                                                                                                                                                                                                                                                | 492  | 513 | 0         | 104.3 | 84.3 | 91.3 | hypothetical protein ARALYDRAFT_486898        | gbpln | Arabidopsis lyrata   | AT5G01710.1   Symbols:   methyltransferases   chr5:263709-265250 REVERSE LENGTH=513                                                            | 492  | 513 | 0         | 104.3 | 83.3 | 89.6 |
| Rsa1.0_01514.1.g27511.t1 | #                                                                                                                                                                                                                                                                                                                                                                                                                                                  | #    | #   | #         | #     | #    | #    | -                                             | ----  | ----                 | #                                                                                                                                              | #    | #   | #         | #     | #    |      |
| Rsa1.0_01514.1.g27512.t1 | ref[XP_002876246.1] hypothetical protein ARALYDRAFT_485817 [Arabidopsis lyrata subsp. lyrata] gi 297322084 gb EFH52505.1  hypothetical protein ARALYDRAFT_485817 [Arabidopsis lyrata subsp. lyrata]                                                                                                                                                                                                                                                | 214  | 235 | 1.00E-73  | 109.8 | 72.4 | 88.8 | hypothetical protein ARALYDRAFT_485817        | gbpln | Arabidopsis lyrata   | AT3G54200.1   Symbols:   Late embryogenesis abundant (LEA) hydroxyproline-rich glycoprotein family   chr3:20065731-20066438 FORWARD LENGTH=235 | 214  | 235 | 2.00E-63  | 109.8 | 68.2 | 85.5 |
| Rsa1.0_01514.1.g27513.t1 | #                                                                                                                                                                                                                                                                                                                                                                                                                                                  | #    | #   | #         | #     | #    | #    | -                                             | ----  | ----                 | #                                                                                                                                              | #    | #   | #         | #     | #    |      |
| Rsa1.0_01514.1.g27514.t1 | ref[XP_002876247.1] hypothetical protein ARALYDRAFT_485819 [Arabidopsis lyrata subsp. lyrata] gi 297322085 gb EFH52506.1  hypothetical protein ARALYDRAFT_485819 [Arabidopsis lyrata subsp. lyrata]                                                                                                                                                                                                                                                | 593  | 646 | 0         | 108.9 | 75.5 | 78.4 | hypothetical protein ARALYDRAFT_485819        | gbpln | Arabidopsis lyrata   | AT3G54220.1   Symbols: SCR, SGR1   GRAS family transcription factor   chr3:20070550-20072625 FORWARD LENGTH=653                                | 593  | 653 | 0         | 110.1 | 74.9 | 77.7 |
| Rsa1.0_01514.1.g27515.t3 | dbj BAF00918.1  putative reverse transcriptase [Arabidopsis thaliana]                                                                                                                                                                                                                                                                                                                                                                              | 1199 | 910 | 1.00E-107 | 75.9  | 15.8 | 19.9 | putative reverse transcriptase                | gbpln | Arabidopsis thaliana | AT4G04650.1   Symbols:   RNA-directed DNA polymerase (reverse transcriptase)-related family protein   chr4:2353999-2355213 REVERSE LENGTH=332  | 1199 | 332 | 4.00E-78  | 27.7  | 11.0 | 15.3 |
| Rsa1.0_01514.1.g27516.t1 | ref[XP_002876249.1] hydrolase, alpha/beta fold family protein [Arabidopsis lyrata subsp. lyrata] gi 297322087 gb EFH52508.1  hydrolase, alpha/beta fold family protein [Arabidopsis lyrata subsp. lyrata]                                                                                                                                                                                                                                          | 350  | 350 | 0         | 100.0 | 88.0 | 93.7 | hydrolase, alpha/beta fold family protein     | gbpln | Arabidopsis lyrata   | AT3G54240.1   Symbols:   alpha/beta-Hydrolases superfamily protein   chr3:20080926-20082145 FORWARD LENGTH=350                                 | 350  | 350 | 0         | 100.0 | 87.7 | 94.0 |



|                           |                                                                                                                                                                                                                                                                                                                                                                                                    |      |      |           |       |      |      |                                              |       |                      |                                                                                                                                                                                                                                                                                                                                                           |      |      |           |       |      |      |
|---------------------------|----------------------------------------------------------------------------------------------------------------------------------------------------------------------------------------------------------------------------------------------------------------------------------------------------------------------------------------------------------------------------------------------------|------|------|-----------|-------|------|------|----------------------------------------------|-------|----------------------|-----------------------------------------------------------------------------------------------------------------------------------------------------------------------------------------------------------------------------------------------------------------------------------------------------------------------------------------------------------|------|------|-----------|-------|------|------|
| Rsa1.0_01514.1.g27517.t1  | refNP_566995.1  diphosphomevalonate decarboxylase [Arabidopsis thaliana] gi 332645683 gb AE79204.1  diphosphomevalonate decarboxylase [Arabidopsis thaliana]                                                                                                                                                                                                                                       | 419  | 419  | 0         | 100.0 | 90.9 | 95.2 | diphosphomevalonate decarboxylase            | gbpln | Arabidopsis thaliana | AT3G54250.1   Symbols:   GHMP kinase family protein   chr3:20082468-20084688 REVERSE LENGTH=419                                                                                                                                                                                                                                                           | 419  | 419  | 0         | 100.0 | 90.9 | 95.2 |
| Rsa1.0_01514.1.g27518.t1  | gb AAG51783.1 AC079679.3 reverse transcriptase, putative: 16838-20266 [Arabidopsis thaliana]                                                                                                                                                                                                                                                                                                       | 160  | 1142 | 9.00E-33  | 713.8 | 50.0 | 63.8 | reverse transcriptase, putative: 16838-20266 | gbpln | Arabidopsis thaliana | AT2G22440.1   Symbols:   BEST Arabidopsis thaliana protein match is: Ribonuclease H-like superfamily protein (TAIR:AT4G29090.1); Has 208 Blast hits to 191 proteins in 10 species: Archae - 0; Bacteria - 0; Metazoa - 0; Fungi - 0; Plants - 208; Viruses - 0; Other Eukaryotes - 0 (source: NCBI BLINK).   chr2:9528910-9529917 FORWARD LENGTH=256      | 160  | 256  | 1.00E-15  | 160.0 | 30.0 | 43.1 |
| Rsa1.0_01514.1.g27519.t2  | refXP_002878937.1  CYP711A1 [Arabidopsis lyrata subsp. lyrata] gi 297324776 gb EFH55196.1  CYP711A1 [Arabidopsis lyrata subsp. lyrata]                                                                                                                                                                                                                                                             | 552  | 522  | 0         | 94.6  | 71.4 | 75.4 | CYP711A1                                     | gbpln | Arabidopsis lyrata   | AT2G26170.2   Symbols: CYP711A1   cytochrome P450, family 711, subfamily A, polypeptide 1   chr2:11141703-11143270 FORWARD LENGTH=439                                                                                                                                                                                                                     | 552  | 439  | 0         | 79.5  | 71.2 | 75.2 |
| Rsa1.0_01515.1.g27520.t1  | dbj BAJ34311.1  unnamed protein product [Thellungiella halophila]                                                                                                                                                                                                                                                                                                                                  | 545  | 554  | 0         | 101.7 | 84.4 | 92.7 | unnamed protein product                      | ----  | ----                 | AT5G18070.1   Symbols: DRT101   phosphoglucosamine mutase-related   chr5:5981117-5982787 FORWARD LENGTH=556                                                                                                                                                                                                                                               | 545  | 556  | 0         | 102.0 | 82.8 | 92.7 |
| Rsa1.0_01515.1.g27521.t1  | gb EOA22896.1  hypothetical protein CARUB_v10003628mg [Capsella rubella]                                                                                                                                                                                                                                                                                                                           | 92   | 90   | 3.00E-37  | 97.8  | 83.7 | 91.3 | hypothetical protein CARUB_v10003628mg       | gbpln | Capsella rubella     | AT5G18030.1   Symbols:   SAUR-like auxin-responsive protein family   chr5:5968527-5968793 FORWARD LENGTH=88                                                                                                                                                                                                                                               | 92   | 88   | 4.00E-39  | 95.7  | 82.6 | 90.2 |
| Rsa1.0_01515.1.g27522.t1  | # # # # # # # #                                                                                                                                                                                                                                                                                                                                                                                    | #    | #    | #         | #     | #    | #    | -                                            | ----  | ----                 | # # # # # # # #                                                                                                                                                                                                                                                                                                                                           | #    | #    | #         | #     | #    | #    |
| Rsa1.0_01515.1.g27523.t1  | gb EOA19546.1  hypothetical protein CARUB_v10002518mg [Capsella rubella]                                                                                                                                                                                                                                                                                                                           | 97   | 90   | 1.00E-36  | 92.8  | 81.4 | 86.6 | hypothetical protein CARUB_v10002518mg       | gbpln | Capsella rubella     | AT5G18080.1   Symbols:   SAUR-like auxin-responsive protein family   chr5:5983840-5984112 FORWARD LENGTH=90                                                                                                                                                                                                                                               | 97   | 90   | 2.00E-37  | 92.8  | 78.4 | 84.5 |
| Rsa1.0_01515.1.g27524.t1  | gb EOA22896.1  hypothetical protein CARUB_v10003628mg [Capsella rubella]                                                                                                                                                                                                                                                                                                                           | 92   | 90   | 4.00E-38  | 97.8  | 85.9 | 92.4 | hypothetical protein CARUB_v10003628mg       | gbpln | Capsella rubella     | AT5G18030.1   Symbols:   SAUR-like auxin-responsive protein family   chr5:5968527-5968793 FORWARD LENGTH=88                                                                                                                                                                                                                                               | 92   | 88   | 8.00E-40  | 95.7  | 84.8 | 91.3 |
| Rsa1.0_01515.1.g27525.t1  | dbj BAA25434.1  SAUR [Raphanus sativus]                                                                                                                                                                                                                                                                                                                                                            | 92   | 95   | 4.00E-38  | 103.3 | 90.2 | 92.4 | SAUR                                         | gbpln | Raphanus sativus     | AT5G18020.1   Symbols:   SAUR-like auxin-responsive protein family   chr5:5966305-5966580 REVERSE LENGTH=91                                                                                                                                                                                                                                               | 92   | 91   | 6.00E-40  | 98.9  | 84.8 | 89.1 |
| Rsa1.0_01515.1.g27526.t1  | dbj BAA25434.1  SAUR [Raphanus sativus]                                                                                                                                                                                                                                                                                                                                                            | 97   | 95   | 7.00E-34  | 97.9  | 74.2 | 85.6 | SAUR                                         | gbpln | Raphanus sativus     | AT5G18020.1   Symbols:   SAUR-like auxin-responsive protein family   chr5:5966305-5966580 REVERSE LENGTH=91                                                                                                                                                                                                                                               | 97   | 91   | 2.00E-34  | 93.8  | 74.2 | 82.5 |
| Rsa1.0_01515.1.g27527.t1  | dbj BAA25434.1  SAUR [Raphanus sativus]                                                                                                                                                                                                                                                                                                                                                            | 64   | 95   | 2.00E-17  | 148.4 | 82.8 | 90.6 | SAUR                                         | gbpln | Raphanus sativus     | AT5G18020.1   Symbols:   SAUR-like auxin-responsive protein family   chr5:5966305-5966580 REVERSE LENGTH=91                                                                                                                                                                                                                                               | 64   | 91   | 8.00E-19  | 142.2 | 73.4 | 85.9 |
| Rsa1.0_01515.1.g27528.t1  | refXP_002871787.1  cobalamin-independent methionine synthase [Arabidopsis lyrata subsp. lyrata] gi 297317624 gb EFH48046.1  cobalamin-independent methionine synthase [Arabidopsis lyrata subsp. lyrata]                                                                                                                                                                                           | 909  | 765  | 0         | 84.2  | 75.6 | 76.6 | cobalamin-independent methionine synthase    | gbpln | Arabidopsis lyrata   | AT5G17920.2   Symbols: ATCIMS   Cobalamin-independent synthase family protein   chr5:5935771-5939195 FORWARD LENGTH=765                                                                                                                                                                                                                                   | 909  | 765  | 0         | 84.2  | 75.4 | 76.5 |
| Rsa1.0_01515.1.g27529.t1  | refNP_197293.1  uncharacterized protein [Arabidopsis thaliana] gi 334187738 refNP_001190328.1  uncharacterized protein [Arabidopsis thaliana] gi 10177893 dbj BAB11225.1  unnamed protein product [Arabidopsis thaliana] gi 332005101 gb AED92484.1  uncharacterized protein AT5G17910 [Arabidopsis thaliana] gi 332005102 gb AED92485.1  uncharacterized protein AT5G17910 [Arabidopsis thaliana] | 1526 | 1342 | 0         | 87.9  | 59.2 | 68.7 | uncharacterized protein                      | gbpln | Arabidopsis thaliana | AT5G17910.2   Symbols:   unknown protein; FUNCTIONS IN: molecular function unknown; INVOLVED IN: biological process unknown; LOCATED IN: mitochondrion; EXPRESSED IN: 23 plant structures; EXPRESSED DURING: 15 growth stages; BEST Arabidopsis thaliana protein match is: unknown protein (TAIR:AT2G29620.1).   chr5:5927906-5932292 FORWARD LENGTH=1342 | 1526 | 1342 | 0         | 87.9  | 59.2 | 68.7 |
| Rsa1.0_01515.1.g27530.t18 | gb EMJ12921.1  hypothetical protein PRUPE_ppa005985mg [Prunus persica]                                                                                                                                                                                                                                                                                                                             | 485  | 433  | 1.00E-142 | 89.3  | 64.1 | 75.7 | hypothetical protein PRUPE_ppa005985mg       | gbpln | Prunus persica       | AT4G08580.1   Symbols:   microfibrillar-associated protein-related   chr4:5462190-5463718 FORWARD LENGTH=435                                                                                                                                                                                                                                              | 485  | 435  | 1.00E-133 | 89.7  | 50.5 | 52.4 |
| Rsa1.0_01516.1.g27531.t1  | # # # # # # # #                                                                                                                                                                                                                                                                                                                                                                                    | #    | #    | #         | #     | #    | #    | -                                            | ----  | ----                 | # # # # # # # #                                                                                                                                                                                                                                                                                                                                           | #    | #    | #         | #     | #    | #    |
| Rsa1.0_01516.1.g27532.t6  | # # # # # # # #                                                                                                                                                                                                                                                                                                                                                                                    | #    | #    | #         | #     | #    | #    | -                                            | ----  | ----                 | # # # # # # # #                                                                                                                                                                                                                                                                                                                                           | #    | #    | #         | #     | #    | #    |
| Rsa1.0_01516.1.g27533.t1  | emb CAN83959.1  hypothetical protein VITISV_013448 [Vitis vinifera]                                                                                                                                                                                                                                                                                                                                | 1248 | 878  | 0         | 70.4  | 30.9 | 43.1 | hypothetical protein VITISV_013448           | gbpln | Vitis vinifera       | #                                                                                                                                                                                                                                                                                                                                                         | #    | #    | #         | #     | #    | #    |
| Rsa1.0_01516.1.g27534.t3  | gb AAF63106.1 AC006423.7 Hypothetical protein [Arabidopsis thaliana]                                                                                                                                                                                                                                                                                                                               | 561  | 570  | 6.00E-22  | 101.6 | 22.5 | 39.0 | Hypothetical protein                         | gbpln | Arabidopsis thaliana | #                                                                                                                                                                                                                                                                                                                                                         | #    | #    | #         | #     | #    | #    |
| Rsa1.0_01516.1.g27535.t6  | refXP_003638451.1  hypothetical protein MTR_132s0010, partial [Medicago truncatula] gi 355504386 gb AES5589.1  hypothetical protein MTR_132s0010, partial [Medicago truncatula]                                                                                                                                                                                                                    | 750  | 1458 | 7.00E-64  | 194.4 | 22.8 | 26.3 | hypothetical protein MTR_132s0010, partial   | gbpln | Medicago truncatula  | #                                                                                                                                                                                                                                                                                                                                                         | #    | #    | #         | #     | #    | #    |

|                          |                                                                                                                                                                                                                                                                                                                                                                                               |     |      |           |       |      |      |                                                                      |       |                      |                                                                                                                                                                                                                                                             |     |     |           |       |      |      |
|--------------------------|-----------------------------------------------------------------------------------------------------------------------------------------------------------------------------------------------------------------------------------------------------------------------------------------------------------------------------------------------------------------------------------------------|-----|------|-----------|-------|------|------|----------------------------------------------------------------------|-------|----------------------|-------------------------------------------------------------------------------------------------------------------------------------------------------------------------------------------------------------------------------------------------------------|-----|-----|-----------|-------|------|------|
| Rsa1.0_01516.1.g27536.t3 | refXP_00233318.1  predicted protein [Populus trichocarpa]  gi22836199 gb EEE74620.1  predicted protein [Populus trichocarpa]                                                                                                                                                                                                                                                                  | 228 | 63   | 5.00E-11  | 27.6  | 19.3 | 20.2 | predicted protein                                                    | gbpln | Populus trichocarpa  | #                                                                                                                                                                                                                                                           | #   | #   | #         | #     | #    | #    |
| Rsa1.0_01516.1.g27537.t3 | #                                                                                                                                                                                                                                                                                                                                                                                             | #   | #    | #         | #     | #    | -    | ----                                                                 | ----  | #                    | #                                                                                                                                                                                                                                                           | #   | #   | #         | #     | #    | #    |
| Rsa1.0_01516.1.g27538.t1 | refNP_192292.1  uncharacterized protein [Arabidopsis thaliana]  gi7267138 emb CAB80806.1  hypothetical protein [Arabidopsis thaliana]  gi332656955 gb AEE82355.1  uncharacterized protein AT4G03830 [Arabidopsis thaliana]                                                                                                                                                                    | 476 | 578  | 1.00E-12  | 121.4 | 9.0  | 14.1 | uncharacterized protein                                              | gbpln | Arabidopsis thaliana | AT4G03830.1   Symbols:   Protein of unknown function, DUF601   chr4:1790440-1792458 FORWARD LENGTH=578                                                                                                                                                      | 476 | 578 | 3.00E-15  | 121.4 | 9.0  | 14.1 |
| Rsa1.0_01516.1.g27539.t1 | #                                                                                                                                                                                                                                                                                                                                                                                             | #   | #    | #         | #     | #    | -    | ----                                                                 | ----  | #                    | #                                                                                                                                                                                                                                                           | #   | #   | #         | #     | #    | #    |
| Rsa1.0_01517.1.g27540.t1 | refXP_002893652.1  protein binding protein [Arabidopsis lyrata subsp. lyrata]  gi297339494 gb EFH69911.1  protein binding protein [Arabidopsis lyrata subsp. lyrata]                                                                                                                                                                                                                          | 696 | 725  | 0         | 104.2 | 67.5 | 78.2 | protein binding protein                                              | gbpln | Arabidopsis lyrata   | AT1G30860.1   Symbols:   RING/U-box superfamily protein   chr1:10986696-10989246 REVERSE LENGTH=730                                                                                                                                                         | 696 | 730 | 0         | 104.9 | 66.5 | 76.9 |
| Rsa1.0_01517.1.g27541.t1 | gb EOA36410.1  hypothetical protein CARUB_v10010885mg [Capsella rubella]                                                                                                                                                                                                                                                                                                                      | 347 | 352  | 1.00E-166 | 101.4 | 84.1 | 89.6 | hypothetical protein CARUB_v10010885mg                               | gbpln | Capsella rubella     | AT1G30870.1   Symbols:   Peroxidase superfamily protein   chr1:10991535-10992885 FORWARD LENGTH=349                                                                                                                                                         | 347 | 349 | 1.00E-162 | 100.6 | 80.1 | 88.5 |
| Rsa1.0_01517.1.g27542.t1 | gb EOA36340.1  hypothetical protein CARUB_v10010686mg [Capsella rubella]                                                                                                                                                                                                                                                                                                                      | 120 | 118  | 7.00E-44  | 98.3  | 85.8 | 90.8 | hypothetical protein CARUB_v10010686mg                               | gbpln | Capsella rubella     | AT1G30880.1   Symbols:   unknown protein; Has 24 Blast hits to 24 proteins in 8 species: Archae - 0; Bacteria - 0; Metazoa - 2; Fungi - 0; Plants - 22; Viruses - 0; Other Eukaryotes - 0 (source: NCBI BLINK).   chr1:10993379-10994056 REVERSE LENGTH=120 | 120 | 120 | 3.00E-34  | 100.0 | 87.5 | 91.7 |
| Rsa1.0_01517.1.g27543.t1 | refNP_174375.1  vacuolar sorting receptor 6 [Arabidopsis thaliana]  gi374095475 sp Q9FYH7.3 VSR6_ARATH RecName: Full=Vacuolar-sorting receptor 6; Short=AtVSR6; AltName: Full=BP80-like protein d; Short=AtBP80d; AltName: Full=Epidermal growth factor receptor-like protein 6; Short=ATELP6; Flags: Precursor gi332193170 gb AEE31291.1  vacuolar sorting receptor 6 [Arabidopsis thaliana] | 629 | 631  | 0         | 100.3 | 94.0 | 96.8 | vacuolar sorting receptor 6                                          | gbpln | Arabidopsis thaliana | AT1G30900.1   Symbols: VSR6, VSR3.3, BP80-3.3   VACUOLAR SORTING RECEPTOR 6   chr1:10997275-11000543 FORWARD LENGTH=631                                                                                                                                     | 629 | 631 | 0         | 100.3 | 94.0 | 96.8 |
| Rsa1.0_01517.1.g27544.t1 | refXP_002893669.1  GTP-binding protein [Arabidopsis lyrata subsp. lyrata]  gi29733951.1 gb EFH69928.1  GTP-binding protein [Arabidopsis lyrata subsp. lyrata]                                                                                                                                                                                                                                 | 420 | 435  | 0         | 103.6 | 86.7 | 91.9 | GTP-binding protein                                                  | gbpln | Arabidopsis lyrata   | AT1G30960.1   Symbols:   GTP-binding family protein   chr1:11037755-11039977 REVERSE LENGTH=437                                                                                                                                                             | 420 | 437 | 0         | 104.0 | 86.7 | 91.7 |
| Rsa1.0_01517.1.g27545.t1 | gb AAM62833.1  putative zinc finger protein [Arabidopsis thaliana]                                                                                                                                                                                                                                                                                                                            | 356 | 367  | 1.00E-164 | 103.1 | 86.2 | 89.3 | putative zinc finger protein                                         | gbpln | Arabidopsis thaliana | AT1G30970.1   Symbols: SUF4   zinc finger (C2H2 type) family protein   chr1:11040613-11043593 REVERSE LENGTH=367                                                                                                                                            | 356 | 367 | 1.00E-166 | 103.1 | 86.0 | 89.3 |
| Rsa1.0_01517.1.g27546.t1 | gb AAG51754.1 AC068667_33 reverse transcriptase, putative: 100033-105622 [Arabidopsis thaliana]                                                                                                                                                                                                                                                                                               | 345 | 1557 | 8.00E-14  | 451.3 | 16.8 | 26.4 | reverse transcriptase, putative: 100033-105622                       | gbpln | Arabidopsis thaliana | AT1G30974.1   Symbols:   Plant thionin family protein   chr1:11047031-11047270 FORWARD LENGTH=79                                                                                                                                                            | 345 | 79  | 8.00E-16  | 22.9  | 9.9  | 11.9 |
| Rsa1.0_01518.1.g27547.t1 | #                                                                                                                                                                                                                                                                                                                                                                                             | #   | #    | #         | #     | #    | -    | ----                                                                 | ----  | #                    | #                                                                                                                                                                                                                                                           | #   | #   | #         | #     | #    | #    |
| Rsa1.0_01518.1.g27548.t1 | gb ABD64940.1  hypothetical protein 24.t00018 [Brassica oleracea]                                                                                                                                                                                                                                                                                                                             | 162 | 380  | 9.00E-28  | 234.6 | 46.3 | 61.7 | hypothetical protein 24.t00018                                       | gbpln | Brassica oleracea    | AT1G347680.1   Symbols:   DNA binding   chr3:17577483-17578391 REVERSE LENGTH=302                                                                                                                                                                           | 162 | 302 | 9.00E-25  | 186.4 | 36.4 | 46.3 |
| Rsa1.0_01518.1.g27549.t1 | gb EOA38733.1  hypothetical protein CARUB_v10010875mg [Capsella rubella]                                                                                                                                                                                                                                                                                                                      | 735 | 462  | 0         | 62.9  | 45.6 | 51.3 | hypothetical protein CARUB_v10010875mg                               | gbpln | Capsella rubella     | AT1G33590.1   Symbols:   Leucine-rich repeat (LRR) family protein   chr1:12177788-12179221 FORWARD LENGTH=477                                                                                                                                               | 735 | 477 | 0         | 64.9  | 42.6 | 50.5 |
| Rsa1.0_01518.1.g27550.t1 | refNP_177852.2  adenine nucleotide alpha hydrolases-domain containing protein kinase [Arabidopsis thaliana]  gi332197836 gb AEE35957.1  adenine nucleotide alpha hydrolases-domain containing protein kinase [Arabidopsis thaliana]                                                                                                                                                           | 661 | 794  | 0         | 120.1 | 80.5 | 88.7 | adenine nucleotide alpha hydrolases-domain containing protein kinase | gbpln | Arabidopsis thaliana | AT1G77280.1   Symbols:   Protein kinase protein with adenine nucleotide alpha hydrolases-like domain   chr1:29031468-29035882 REVERSE LENGTH=794                                                                                                            | 661 | 794 | 0         | 120.1 | 80.5 | 88.7 |
| Rsa1.0_01518.1.g27551.t1 | refNP_174618.1  F-box protein [Arabidopsis thaliana]  gi75268383 sp Q9C800.1 FB34_ARATH RecName: Full=Putative F-box protein At1g33530  gi12322373 gb AAG51205.1 AC051630.2  hypothetical protein: 83642-85072 [Arabidopsis thaliana]  gi332193482 gb AEE31603.1  F-box protein [Arabidopsis thaliana]                                                                                        | 405 | 441  | 1.00E-117 | 108.9 | 59.3 | 74.3 | F-box protein                                                        | gbpln | Arabidopsis thaliana | AT1G33530.1   Symbols:   F-box family protein   chr1:12159884-12161314 FORWARD LENGTH=441                                                                                                                                                                   | 405 | 441 | 1.00E-120 | 108.9 | 59.3 | 74.3 |
| Rsa1.0_01518.1.g27552.t1 | dbj BAJ34354.1  unnamed protein product [Thellungiella halophila]                                                                                                                                                                                                                                                                                                                             | 437 | 453  | 0         | 103.7 | 82.8 | 90.8 | unnamed protein product                                              | ----  | ----                 | AT1G33520.1   Symbols: MOS2   D111/G-patch domain-containing protein   chr1:12157488-12158876 REVERSE LENGTH=462                                                                                                                                            | 437 | 462 | 0         | 105.7 | 80.8 | 89.7 |

|                          |                                                                                                                                                                                                                                                                                                                                                                                            |     |     |           |       |      |      |                                              |       |                         |                                                                                                                                                                                                                                                                                                        |     |     |           |       |      |      |
|--------------------------|--------------------------------------------------------------------------------------------------------------------------------------------------------------------------------------------------------------------------------------------------------------------------------------------------------------------------------------------------------------------------------------------|-----|-----|-----------|-------|------|------|----------------------------------------------|-------|-------------------------|--------------------------------------------------------------------------------------------------------------------------------------------------------------------------------------------------------------------------------------------------------------------------------------------------------|-----|-----|-----------|-------|------|------|
| Rsa1.0_01518.1.g27553.t1 | gb AAG51223.1 AC051630.20<br>hypothetical protein; 76532-78443<br>[Arabidopsis thaliana]                                                                                                                                                                                                                                                                                                   | 276 | 254 | 1.00E-121 | 92.0  | 80.1 | 87.3 | hypothetical protein;<br>76532-78443         | gbpln | Arabidopsis<br>thaliana | AT1G33500.1   Symbols:   unknown protein;<br>Has 30201 Blast hits to 17322 proteins in<br>780 species: Archae - 12; Bacteria - 1396;<br>Metazoa - 17338; Fungi - 3422; Plants -<br>5037; Viruses - 0; Other Eukaryotes - 2996<br>(source: NCBI BLINK).   chr1:12152774-<br>12154680 FORWARD LENGTH=276 | 276 | 276 | 1.00E-111 | 100.0 | 73.6 | 80.8 |
| Rsa1.0_01518.1.g27554.t2 | refNP_973958.1  RNA recognition<br>motif-containing protein [Arabidopsis<br>thaliana] gi 14532532 gb AAK63994.1 <br>At1g33470/F10C21.14 [Arabidopsis<br>thaliana] gi 18655391 gb AAL76151.1 <br>At1g33470/F10C21.14 [Arabidopsis<br>thaliana] gi 332193476 gb AEE31597.1 <br>RNA recognition motif-containing<br>protein [Arabidopsis thaliana]                                            | 244 | 244 | 1.00E-119 | 100.0 | 88.5 | 92.6 | RNA recognition motif-<br>containing protein | gbpln | Arabidopsis<br>thaliana | AT1G33470.2   Symbols:   RNA-binding<br>(RRM/RBD/RNP motifs) family protein  <br>chr1:12144632-12146040 FORWARD<br>LENGTH=244                                                                                                                                                                          | 244 | 244 | 1.00E-121 | 100.0 | 88.5 | 92.6 |
| Rsa1.0_01518.1.g27555.t1 | gb EOA37022.1  hypothetical protein<br>CARUB_v10010074mg [Capsella rubella]                                                                                                                                                                                                                                                                                                                | 208 | 254 | 1.00E-71  | 122.1 | 71.6 | 79.3 | hypothetical protein<br>CARUB_v10010074mg    | gbpln | Capsella<br>rubella     | AT4G10150.1   Symbols:   RING/U-box<br>superfamily protein   chr4:6328136-6329558<br>FORWARD LENGTH=236                                                                                                                                                                                                | 208 | 236 | 1.00E-70  | 113.5 | 63.0 | 78.4 |
| Rsa1.0_01518.1.g27556.t1 | # # # # # # # #                                                                                                                                                                                                                                                                                                                                                                            |     |     |           |       |      |      | -                                            | ----  | ----                    | # # # # # # #                                                                                                                                                                                                                                                                                          |     |     |           |       |      |      |
| Rsa1.0_01518.1.g27557.t1 | refNP_188377.1  F-box associated<br>protein [Arabidopsis thaliana]<br>gi 332642440 gb AEE75961.1  F-box<br>associated protein [Arabidopsis<br>thaliana]                                                                                                                                                                                                                                    | 397 | 438 | 3.00E-69  | 110.3 | 44.1 | 59.7 | F-box associated<br>protein                  | gbpln | Arabidopsis<br>thaliana | AT3G17500.1   Symbols:   F-box family<br>protein   chr3:5986685-5988498 FORWARD<br>LENGTH=438                                                                                                                                                                                                          | 397 | 438 | 7.00E-72  | 110.3 | 44.1 | 59.7 |
| Rsa1.0_01519.1.g27558.t1 | gb AAM62950.1  unknown [Arabidopsis<br>thaliana]                                                                                                                                                                                                                                                                                                                                           | 227 | 235 | 3.00E-99  | 103.5 | 83.7 | 90.7 | unknown                                      | gbpln | Arabidopsis<br>thaliana | AT5G07020.1   Symbols:   proline-rich family<br>protein   chr5:2180669-2182284 REVERSE<br>LENGTH=235                                                                                                                                                                                                   | 227 | 235 | 3.00E-99  | 103.5 | 79.7 | 86.8 |
| Rsa1.0_01519.1.g27559.t1 | gb EOA20615.1  hypothetical protein<br>CARUB_v10000927mg [Capsella rubella]                                                                                                                                                                                                                                                                                                                | 439 | 457 | 0         | 104.1 | 91.6 | 97.5 | hypothetical protein<br>CARUB_v10000927mg    | gbpln | Capsella<br>rubella     | AT5G07030.1   Symbols:   Eukaryotic<br>aspartyl protease family protein  <br>chr5:2183600-2185717 REVERSE<br>LENGTH=455                                                                                                                                                                                | 439 | 455 | 0         | 103.6 | 91.6 | 97.0 |
| Rsa1.0_01519.1.g27560.t1 | refNP_196321.1  putative RING-H2<br>finger protein ATL69 [Arabidopsis<br>thaliana]<br>gi 68565291 sp Q9FL42.1 ATL69_ARATH<br>RecName: Full=Putative RING-H2 finger<br>protein ATL69<br>gi 9759560 dbj BAB11162.1  C3HC4-<br>type RING zinc finger protein-like<br>[Arabidopsis thaliana]<br>gi 332003718 gb AED91101.1  putative<br>RING-H2 finger protein ATL69<br>[Arabidopsis thaliana] | 157 | 159 | 3.00E-72  | 101.3 | 88.5 | 93.0 | putative RING-H2<br>finger protein ATL69     | gbpln | Arabidopsis<br>thaliana | AT5G07040.1   Symbols:   RING/U-box<br>superfamily protein   chr5:2190344-2190823<br>FORWARD LENGTH=159                                                                                                                                                                                                | 157 | 159 | 9.00E-75  | 101.3 | 88.5 | 93.0 |
| Rsa1.0_01519.1.g27561.t1 | refXP_002873292.1  hypothetical<br>protein ARALYDRAFT_487525<br>[Arabidopsis lyrata subsp. lyrata]<br>gi 297319129 gb EFH49551.1 <br>hypothetical protein<br>ARALYDRAFT_487525 [Arabidopsis<br>lyrata subsp. lyrata]                                                                                                                                                                       | 402 | 404 | 0         | 100.5 | 88.3 | 92.5 | hypothetical protein<br>ARALYDRAFT_487525    | gbpln | Arabidopsis<br>lyrata   | AT5G07050.1   Symbols:   nodulin MtN21<br>/EamA-like transporter family protein  <br>chr5:2191533-2193416 REVERSE<br>LENGTH=402                                                                                                                                                                        | 402 | 402 | 0         | 100.0 | 88.3 | 93.3 |
| Rsa1.0_01519.1.g27562.t2 | refXP_002873294.1  hypothetical<br>protein ARALYDRAFT_325322<br>[Arabidopsis lyrata subsp. lyrata]<br>gi 297319131 gb EFH49553.1 <br>hypothetical protein<br>ARALYDRAFT_325322 [Arabidopsis<br>lyrata subsp. lyrata]                                                                                                                                                                       | 301 | 301 | 1.00E-104 | 100.0 | 75.7 | 81.7 | hypothetical protein<br>ARALYDRAFT_325322    | gbpln | Arabidopsis<br>lyrata   | AT3G12480.1   Symbols: NF-YC11   nuclear<br>factor Y, subunit C11   chr3:3958065-<br>3960278 FORWARD LENGTH=293                                                                                                                                                                                        | 301 | 293 | 3.00E-83  | 97.3  | 60.1 | 66.8 |
| Rsa1.0_01519.1.g27563.t2 | refXP_002866260.1  cbl-interacting<br>protein kinase 10 [Arabidopsis lyrata<br>subsp. lyrata]<br>gi 297312095 gb EFH42519.1  cbl-<br>interacting protein kinase 10<br>[Arabidopsis lyrata subsp. lyrata]                                                                                                                                                                                   | 463 | 462 | 0         | 99.8  | 68.7 | 80.6 | cbl-interacting protein<br>kinase 10         | gbpln | Arabidopsis<br>lyrata   | AT5G58380.1   Symbols: CIPK10, PKS2,<br>SIP1, SNRK3.8   SOS3-interacting protein 1  <br>chr5:23597092-23598531 REVERSE<br>LENGTH=479                                                                                                                                                                   | 463 | 479 | 0         | 103.5 | 68.3 | 80.8 |
| Rsa1.0_01519.1.g27564.t1 | gb EOA22250.1  hypothetical protein<br>CARUB_v10002839mg [Capsella rubella]                                                                                                                                                                                                                                                                                                                | 570 | 455 | 0         | 79.8  | 66.3 | 72.1 | hypothetical protein<br>CARUB_v10002839mg    | gbpln | Capsella<br>rubella     | AT5G07070.1   Symbols: CIPK2, SnRK3.2  <br>CBL-interacting protein kinase 2  <br>chr5:2196743-2198113 REVERSE<br>LENGTH=456                                                                                                                                                                            | 570 | 456 | 0         | 80.0  | 65.4 | 71.2 |

|                          |                                                                                                                                                                                                                                                                                                                                                                                                                                                                             |      |      |           |       |      |      |                                                            |       |                      |                                                                                                                                              |      |     |           |       |      |      |
|--------------------------|-----------------------------------------------------------------------------------------------------------------------------------------------------------------------------------------------------------------------------------------------------------------------------------------------------------------------------------------------------------------------------------------------------------------------------------------------------------------------------|------|------|-----------|-------|------|------|------------------------------------------------------------|-------|----------------------|----------------------------------------------------------------------------------------------------------------------------------------------|------|-----|-----------|-------|------|------|
| Rsa1.0_01519.1.g27565.t1 | refNP_196325.1   HXXXD-type acyl-transferase-like protein [Arabidopsis thaliana] gi 7546686 emb CAB87264.1  putative protein [Arabidopsis thaliana] gi 9759564 dbj BAB11166.1  hypersensitivity related protein-like [Arabidopsis thaliana] gi 15810289 gb AAL07032.1  unknown protein [Arabidopsis thaliana] gi 21436093 gb AAM51247.1  unknown protein [Arabidopsis thaliana] gi 332003723 gb AED91106.1  HXXXD-type acyl-transferase-like protein [Arabidopsis thaliana] | 448  | 450  | 0         | 100.4 | 80.8 | 89.5 | HXXXD-type acyl-transferase-like protein                   | gbpln | Arabidopsis thaliana | AT5G07080.1   Symbols:   HXXXD-type acyl-transferase family protein   chr5:2200353-2201975 FORWARD LENGTH=450                                | 448  | 450 | 0         | 100.4 | 80.8 | 89.5 |
| Rsa1.0_01519.1.g27566.t1 | gb EOA31247.1  hypothetical protein CARUB_v10014418mg [Capsella rubella]                                                                                                                                                                                                                                                                                                                                                                                                    | 262  | 262  | 1.00E-149 | 100.0 | 97.7 | 99.6 | hypothetical protein CARUB_v10014418mg                     | gbpln | Capsella rubella     | AT5G07090.1   Symbols:   Ribosomal protein S4 (RPS4A) family protein   chr5:2202410-2203805 FORWARD LENGTH=262                               | 262  | 262 | 1.00E-150 | 100.0 | 96.6 | 99.6 |
| Rsa1.0_01519.1.g27567.t1 | refNP_196329.2  sorting nexin 2B [Arabidopsis thaliana] gi 363805551 sp B9DFS6.1 SNX2B_ARA TH RecName: Full=Sorting nexin 2B gi 222423233 dbj BAH19593.1  AT5G07120 [Arabidopsis thaliana] gi 332003729 gb AED91112.1  sorting nexin 2B [Arabidopsis thaliana]                                                                                                                                                                                                              | 566  | 572  | 0         | 101.1 | 83.6 | 89.6 | sorting nexin 2B                                           | gbpln | Arabidopsis thaliana | AT5G07120.1   Symbols: SNX2b   sorting nexin 2B   chr5:2207065-2209355 REVERSE LENGTH=572                                                    | 566  | 572 | 0         | 101.1 | 83.6 | 89.6 |
| Rsa1.0_01519.1.g27568.t1 | gb EOA22079.1  hypothetical protein CARUB_v10002622mg [Capsella rubella]                                                                                                                                                                                                                                                                                                                                                                                                    | 133  | 568  | 1.00E-49  | 427.1 | 70.7 | 75.2 | hypothetical protein CARUB_v10002622mg                     | gbpln | Capsella rubella     | AT5G07130.1   Symbols: LAC13   laccase 13   chr5:2210567-2212525 FORWARD LENGTH=569                                                          | 133  | 569 | 2.00E-51  | 427.8 | 70.7 | 75.9 |
| Rsa1.0_01520.1.g27569.t5 | refNP_190233.2  iron ion binding / oxidoreductase / oxidoreductase protein [Arabidopsis thaliana] gi 332644644 gb AEI78165.1  iron ion binding / oxidoreductase / oxidoreductase protein [Arabidopsis thaliana]                                                                                                                                                                                                                                                             | 308  | 330  | 1.00E-102 | 107.1 | 59.4 | 65.9 | iron ion binding / oxidoreductase / oxidoreductase protein | gbpln | Arabidopsis thaliana | AT3G46490.1   Symbols:   2-oxoglutarate (2OG) and Fe(II)-dependent oxygenase superfamily protein   chr3:17115629-17119451 FORWARD LENGTH=330 | 308  | 330 | 1.00E-105 | 107.1 | 59.4 | 65.9 |
| Rsa1.0_01520.1.g27570.t1 | refNP_191181.1  transcription regulator [Arabidopsis thaliana] gi 7572920 emb CAB87421.1  putative protein [Arabidopsis thaliana] gi 28466843 gb AAO44030.1  At3g56220 [Arabidopsis thaliana] gi 110736048 dbj BAE99996.1  hypothetical protein [Arabidopsis thaliana] gi 332645977 gb AEE79498.1  transcription regulator [Arabidopsis thaliana]                                                                                                                           | 157  | 156  | 8.00E-64  | 99.4  | 79.6 | 87.9 | transcription regulator                                    | gbpln | Arabidopsis thaliana | AT3G56220.1   Symbols:   transcription regulators   chr3:20858941-20860302 FORWARD LENGTH=156                                                | 157  | 156 | 3.00E-66  | 99.4  | 79.6 | 87.9 |
| Rsa1.0_01520.1.g27571.t1 | gb EOA23128.1  hypothetical protein CARUB_v100024710mg, partial [Capsella rubella]                                                                                                                                                                                                                                                                                                                                                                                          | 225  | 488  | 2.00E-17  | 216.9 | 20.4 | 23.1 | hypothetical protein CARUB_v100024710mg, partial           | gbpln | Capsella rubella     | #                                                                                                                                            | #    | #   | #         | #     | #    | #    |
| Rsa1.0_01520.1.g27572.t1 | gb AAD21699.1  Contains reverse transcriptase domain (rvt) PF 00078 [Arabidopsis thaliana]                                                                                                                                                                                                                                                                                                                                                                                  | 1019 | 1253 | 1.00E-174 | 123.0 | 37.0 | 54.4 | Contains reverse transcriptase domain (rvt) PF 00078       | gbpln | Arabidopsis thaliana | AT1G43760.1   Symbols:   DNase I-like superfamily protein   chr1:16528890-16531065 REVERSE LENGTH=626                                        | 1019 | 626 | 6.00E-61  | 61.4  | 13.2 | 21.1 |
| Rsa1.0_01520.1.g27573.t1 | refXP_002862436.1  predicted protein [Arabidopsis lyrata subsp. lyrata] gi 297307949 gb EFH38694.1  predicted protein [Arabidopsis lyrata subsp. lyrata]                                                                                                                                                                                                                                                                                                                    | 618  | 530  | 2.00E-38  | 85.8  | 17.5 | 25.7 | predicted protein                                          | gbpln | Arabidopsis lyrata   | AT2G07760.1   Symbols:   Zinc knuckle (CCHC-type) family protein   chr2:3584420-3586278 REVERSE LENGTH=530                                   | 618  | 530 | 2.00E-13  | 85.8  | 6.3  | 10.8 |
| Rsa1.0_01520.1.g27574.t3 | refNP_001030872.1  alpha-soluble NSF attachment protein 2 [Arabidopsis thaliana] gi 332645971 gb AEE79492.1  alpha-soluble NSF attachment protein 2 [Arabidopsis thaliana]                                                                                                                                                                                                                                                                                                  | 209  | 240  | 2.00E-95  | 114.8 | 84.2 | 88.5 | alpha-soluble NSF attachment protein 2                     | gbpln | Arabidopsis thaliana | AT3G56190.2   Symbols: ALPHA-SNAP2, ASNAP   alpha-soluble NSF attachment protein 2   chr3:20846119-20848213 REVERSE LENGTH=240               | 209  | 240 | 5.00E-98  | 114.8 | 84.2 | 88.5 |
| Rsa1.0_01520.1.g27575.t1 | emb CAB87417.1  putative protein [Arabidopsis thaliana]                                                                                                                                                                                                                                                                                                                                                                                                                     | 208  | 208  | 1.00E-105 | 100.0 | 86.5 | 94.7 | putative protein                                           | gbpln | Arabidopsis thaliana | AT3G56180.1   Symbols:   Protein of unknown function (DUF567)   chr3:20844765-20845548 FORWARD LENGTH=204                                    | 208  | 204 | 1.00E-104 | 98.1  | 84.6 | 92.8 |
| Rsa1.0_01520.1.g27576.t1 | refXP_002876351.1  hypothetical protein ARALYDRAFT_486055 [Arabidopsis lyrata subsp. lyrata] gi 297322189 gb EFH52610.1  hypothetical protein ARALYDRAFT_486055 [Arabidopsis lyrata subsp. lyrata]                                                                                                                                                                                                                                                                          | 740  | 744  | 0         | 100.5 | 91.2 | 94.7 | hypothetical protein ARALYDRAFT_486055                     | gbpln | Arabidopsis lyrata   | AT3G56140.1   Symbols:   Protein of unknown function (DUF399 and DUF3411)   chr3:20829407-20832669 FORWARD LENGTH=745                        | 740  | 745 | 0         | 100.7 | 90.1 | 93.9 |
| Rsa1.0_01520.1.g27577.t1 | refXP_002878068.1  prenylated rab acceptor family protein [Arabidopsis lyrata subsp. lyrata] gi 297323906 gb EFH54327.1  prenylated rab acceptor family protein [Arabidopsis lyrata subsp. lyrata]                                                                                                                                                                                                                                                                          | 209  | 209  | 3.00E-93  | 100.0 | 90.9 | 96.2 | prenyated rab acceptor family protein                      | gbpln | Arabidopsis lyrata   | AT3G56110.2   Symbols: PRA1.B1   prenylated RAB acceptor 1.B1   chr3:20822228-20822857 REVERSE LENGTH=209                                    | 209  | 209 | 6.00E-95  | 100.0 | 90.4 | 96.2 |
| Rsa1.0_01521.1.g27578.t1 | #                                                                                                                                                                                                                                                                                                                                                                                                                                                                           | #    | #    | #         | #     | #    | -    | ----                                                       | ----  | ----                 | #                                                                                                                                            | #    | #   | #         | #     | #    |      |

|                          |                                                                                                                                                                                                     |      |      |           |       |      |      |                                                     |       |                      |                                                                                                                                                                                                                                                                                                                                                  |      |     |           |       |      |      |
|--------------------------|-----------------------------------------------------------------------------------------------------------------------------------------------------------------------------------------------------|------|------|-----------|-------|------|------|-----------------------------------------------------|-------|----------------------|--------------------------------------------------------------------------------------------------------------------------------------------------------------------------------------------------------------------------------------------------------------------------------------------------------------------------------------------------|------|-----|-----------|-------|------|------|
| Rsa1.0_01521.1.g27579.t1 | #                                                                                                                                                                                                   | #    | #    | #         | #     | #    | #    | -                                                   | ----  | ----                 | #                                                                                                                                                                                                                                                                                                                                                | #    | #   | #         | #     | #    |      |
| Rsa1.0_01521.1.g27580.t1 | gb ADY76580.1  translocon at inner membrane of chloroplasts 21 [Brassica napus]                                                                                                                     | 285  | 294  | 1.00E-143 | 103.2 | 94.4 | 96.1 | translocon at inner membrane of chloroplasts 21     | gbpln | Brassica napus       | AT2G15290.1   Symbols: ATTIC21, TIC21, CIA5, PIC1   translocon at inner membrane of chloroplasts 21   chr2:6642512-6644011 REVERSE LENGTH=296                                                                                                                                                                                                    | 285  | 296 | 1.00E-139 | 103.9 | 90.9 | 94.7 |
| Rsa1.0_01521.1.g27581.t1 | #                                                                                                                                                                                                   | #    | #    | #         | #     | #    | #    | -                                                   | ----  | ----                 | #                                                                                                                                                                                                                                                                                                                                                | #    | #   | #         | #     | #    |      |
| Rsa1.0_01521.1.g27582.t1 | gb AAD17398.1  putative non-LTR retroelement reverse transcriptase [Arabidopsis thaliana]                                                                                                           | 941  | 1225 | 0         | 130.2 | 40.3 | 53.9 | putative non-LTR retroelement reverse transcriptase | gbpln | Arabidopsis thaliana | AT1G43760.1   Symbols:   DNAse I-like superfamily protein   chr1:16528880-16531065 REVERSE LENGTH=626                                                                                                                                                                                                                                            | 941  | 626 | 2.00E-26  | 66.5  | 11.5 | 19.1 |
| Rsa1.0_01521.1.g27583.t1 | ref XP_002883895.1  RBP36A [Arabidopsis lyrata subsp. lyrata] gi 297329735 gb EFH60154.1  RBP36A [Arabidopsis lyrata subsp. lyrata]                                                                 | 320  | 319  | 1.00E-173 | 99.7  | 93.1 | 95.9 | RBP36A                                              | gbpln | Arabidopsis lyrata   | AT2G15430.1   Symbols: RBP36A, RPB35.5A, NRPB3, NRPD3, NRPE3A   DNA-directed RNA polymerase family protein   chr2:6733661-6735482 FORWARD LENGTH=319                                                                                                                                                                                             | 320  | 319 | 1.00E-175 | 99.7  | 93.1 | 95.9 |
| Rsa1.0_01521.1.g27584.t1 | #                                                                                                                                                                                                   | #    | #    | #         | #     | #    | #    | -                                                   | ----  | ----                 | #                                                                                                                                                                                                                                                                                                                                                | #    | #   | #         | #     | #    |      |
| Rsa1.0_01521.1.g27585.t1 | gb ABD65170.1  hypothetical protein 40.t00057 [Brassica oleracea]                                                                                                                                   | 96   | 255  | 2.00E-16  | 265.6 | 51.0 | 65.6 | hypothetical protein 40.t00057                      | gbpln | Brassica oleracea    | #                                                                                                                                                                                                                                                                                                                                                | #    | #   | #         | #     | #    |      |
| Rsa1.0_01521.1.g27586.t1 | gb ABD64939.1  hypothetical protein 24.t00017 [Brassica oleracea]                                                                                                                                   | 194  | 442  | 3.00E-61  | 227.8 | 63.9 | 72.2 | hypothetical protein 24.t00017                      | gbpln | Brassica oleracea    | AT2G13770.1   Symbols:   CONTAINS InterPro DOMAIN/s: Putative harbinger transposase-derived nuclease (InterPro:IPR006912); Has 451 Blast hits to 352 proteins in 33 species: Archae - 0; Bacteria - 0; Metazoa - 28; Fungi - 8; Plants - 388; Viruses - 0; Other Eukaryotes - 27 (source: NCBI BLINK);   chr2:5736603-5737847 FORWARD LENGTH=343 | 194  | 343 | 5.00E-26  | 176.8 | 34.0 | 45.9 |
| Rsa1.0_01521.1.g27587.t1 | ref XP_002883897.1  UDP-glucosyl transferase 73B5 [Arabidopsis lyrata subsp. lyrata] gi 297329737 gb EFH60156.1  UDP-glucosyl transferase 73B5 [Arabidopsis lyrata subsp. lyrata]                   | 485  | 484  | 0         | 99.8  | 88.7 | 94.0 | UDP-glucosyl transferase 73B5                       | gbpln | Arabidopsis lyrata   | AT2G15480.1   Symbols: UGT73B5   UDP-glucosyl transferase 73B5   chr2:6758817-6760452 FORWARD LENGTH=484                                                                                                                                                                                                                                         | 485  | 484 | 0         | 99.8  | 87.8 | 93.4 |
| Rsa1.0_01521.1.g27588.t1 | gb ABE65512.1  hypothetical protein At4g04650 [Arabidopsis thaliana]                                                                                                                                | 268  | 296  | 1.00E-14  | 110.4 | 17.2 | 27.2 | hypothetical protein At4g04650                      | gbpln | Arabidopsis thaliana | AT4G04650.1   Symbols:   RNA-directed DNA polymerase (reverse transcriptase)-related family protein   chr4:2353989-2355213 REVERSE LENGTH=332                                                                                                                                                                                                    | 268  | 332 | 3.00E-17  | 123.9 | 17.2 | 27.2 |
| Rsa1.0_01521.1.g27589.t1 | emb CAB39638.1  RNA-directed DNA polymerase-like protein [Arabidopsis thaliana] gi 7267666 emb CAB78094.1  RNA-directed DNA polymerase-like protein [Arabidopsis thaliana]                          | 1202 | 1274 | 0         | 106.0 | 55.8 | 71.4 | RNA-directed DNA polymerase-like protein            | gbpln | Arabidopsis thaliana | AT4G29090.1   Symbols:   Ribonuclease H-like superfamily protein   chr4:14333528-14335255 FORWARD LENGTH=575                                                                                                                                                                                                                                     | 1202 | 575 | 1.00E-64  | 47.8  | 14.1 | 22.0 |
| Rsa1.0_01521.1.g27590.t1 | dbj BAB02259.1  retroelement pol polyprotein-like [Arabidopsis thaliana]                                                                                                                            | 560  | 777  | 2.00E-14  | 138.8 | 7.3  | 10.2 | retroelement pol polyprotein-like                   | gbpln | Arabidopsis thaliana | #                                                                                                                                                                                                                                                                                                                                                | #    | #   | #         | #     | #    |      |
| Rsa1.0_01521.1.g27591.t1 | gb EGV96854.1  Keratin-associated protein 4-3 [Cricetulus griseus]                                                                                                                                  | 185  | 224  | 1.00E-11  | 121.1 | 28.1 | 34.6 | Keratin-associated protein 4-3                      | gbrod | Cricetulus griseus   | #                                                                                                                                                                                                                                                                                                                                                | #    | #   | #         | #     | #    |      |
| Rsa1.0_01521.1.g27592.t8 | gb AAF99785.1 AC012463.2 T2E6.4 [Arabidopsis thaliana]                                                                                                                                              | 590  | 740  | 3.00E-96  | 125.4 | 30.2 | 45.4 | T2E6.4                                              | gbpln | Arabidopsis thaliana | AT3G24255.1   Symbols:   RNA-directed DNA polymerase (reverse transcriptase)-related family protein   chr3:8789471-8793208 FORWARD LENGTH=746                                                                                                                                                                                                    | 590  | 746 | 2.00E-31  | 126.4 | 13.2 | 19.3 |
| Rsa1.0_01521.1.g27593.t1 | ref XP_002883899.1  hypothetical protein ARALYDRAFT_899764 [Arabidopsis lyrata subsp. lyrata] gi 297329739 gb EFH60158.1  hypothetical protein ARALYDRAFT_899764 [Arabidopsis lyrata subsp. lyrata] | 641  | 655  | 0         | 102.2 | 87.4 | 90.6 | hypothetical protein ARALYDRAFT_899764              | gbpln | Arabidopsis lyrata   | AT4G34110.1   Symbols: PAB2, PABP2, ATPAB2   poly(A) binding protein 2   chr4:16336732-16339892 FORWARD LENGTH=629                                                                                                                                                                                                                               | 641  | 629 | 0         | 98.1  | 78.3 | 86.0 |
| Rsa1.0_01522.1.g27594.t1 | ref XP_002884714.1  predicted protein [Arabidopsis lyrata subsp. lyrata] gi 297330554 gb EFH60973.1  predicted protein [Arabidopsis lyrata subsp. lyrata]                                           | 385  | 492  | 1.00E-138 | 127.8 | 69.6 | 81.0 | predicted protein                                   | gbpln | Arabidopsis lyrata   | AT3G09110.1   Symbols:   Protein of unknown function (DUF674)   chr3:2794850-2795963 REVERSE LENGTH=343                                                                                                                                                                                                                                          | 385  | 343 | 1.00E-110 | 89.1  | 52.5 | 62.9 |
| Rsa1.0_01522.1.g27595.t1 | ref XP_002885806.1  predicted protein [Arabidopsis lyrata subsp. lyrata] gi 297331646 gb EFH62065.1  predicted protein [Arabidopsis lyrata subsp. lyrata]                                           | 761  | 752  | 0         | 98.8  | 89.4 | 94.0 | predicted protein                                   | gbpln | Arabidopsis lyrata   | AT2G05920.1   Symbols:   Subtilase family protein   chr2:2269831-2272207 REVERSE LENGTH=754                                                                                                                                                                                                                                                      | 761  | 754 | 0         | 99.1  | 88.3 | 92.6 |
| Rsa1.0_01522.1.g27596.t1 | #                                                                                                                                                                                                   | #    | #    | #         | #     | #    | #    | -                                                   | ----  | ----                 | #                                                                                                                                                                                                                                                                                                                                                | #    | #   | #         | #     | #    |      |
| Rsa1.0_01522.1.g27597.t5 | gb AAF79618.1 AC027665_19 F5M15.26 [Arabidopsis thaliana]                                                                                                                                           | 1082 | 1838 | 1.00E-165 | 169.9 | 32.3 | 44.5 | F5M15.26                                            | gbpln | Arabidopsis thaliana | #                                                                                                                                                                                                                                                                                                                                                | #    | #   | #         | #     | #    |      |
| Rsa1.0_01522.1.g27598.t1 | gb AAD29768.1 AF076243_15 putative polyprotein [Arabidopsis thaliana] gi 7267198 emb CAB77909.1  putative polyprotein [Arabidopsis thaliana]                                                        | 286  | 1017 | 8.00E-57  | 355.6 | 46.9 | 58.7 | putative polyprotein                                | gbpln | Arabidopsis thaliana | #                                                                                                                                                                                                                                                                                                                                                | #    | #   | #         | #     | #    |      |
| Rsa1.0_01522.1.g27599.t1 | #                                                                                                                                                                                                   | #    | #    | #         | #     | #    | #    | -                                                   | ----  | ----                 | #                                                                                                                                                                                                                                                                                                                                                | #    | #   | #         | #     | #    |      |
| Rsa1.0_01522.1.g27600.t1 | gb ABD65022.1  hypothetical protein 26.t00077 [Brassica oleracea]                                                                                                                                   | 139  | 242  | 7.00E-31  | 174.1 | 51.8 | 59.7 | hypothetical protein 26.t00077                      | gbpln | Brassica oleracea    | #                                                                                                                                                                                                                                                                                                                                                | #    | #   | #         | #     | #    |      |

|                          |                                                                                                                                                                                                                                                                                                                                                                                                                                                                                                                                                                                                                    |      |      |           |        |      |      |                                                     |       |                      |                                                                                                                                                                                                                                                                                                                                                                                                                                                                     |      |     |           |       |      |      |
|--------------------------|--------------------------------------------------------------------------------------------------------------------------------------------------------------------------------------------------------------------------------------------------------------------------------------------------------------------------------------------------------------------------------------------------------------------------------------------------------------------------------------------------------------------------------------------------------------------------------------------------------------------|------|------|-----------|--------|------|------|-----------------------------------------------------|-------|----------------------|---------------------------------------------------------------------------------------------------------------------------------------------------------------------------------------------------------------------------------------------------------------------------------------------------------------------------------------------------------------------------------------------------------------------------------------------------------------------|------|-----|-----------|-------|------|------|
| Rsa1.0_01522.1.g27601.t1 | gb EOA37510.1  hypothetical protein CARUB_v10011684mg. partial [Capsella rubella]                                                                                                                                                                                                                                                                                                                                                                                                                                                                                                                                  | 675  | 273  | 5.00E-25  | 40.4   | 7.9  | 11.6 | hypothetical protein CARUB_v10011684mg. partial     | gbpln | Capsella rubella     | AT3G31430.1   Symbols:   unknown protein; FUNCTIONS IN: molecular_function unknown; INVOLVED IN: biological_process unknown; LOCATED IN: endomembrane system; BEST Arabidopsis thaliana protein match is: unknown protein (TAIR:AT5G18636.1); Has 295 Blast hits to 291 proteins in 12 species: Archae - 0; Bacteria - 0; Metazoa - 0; Fungi - 0; Plants - 295; Viruses - 0; Other Eukaryotes - 0 (source: NCBI BLink).   chr3:12795861-12796871 REVERSE LENGTH=336 | 675  | 336 | 3.00E-14  | 49.8  | 7.0  | 10.7 |
| Rsa1.0_01522.1.g27602.t1 | ref XP_002885808.1  hypothetical protein ARALYDRAFT_899389 [Arabidopsis lyrata subsp. lyrata] gi 297331648 gb EFH62067.1  hypothetical protein ARALYDRAFT_899389 [Arabidopsis lyrata subsp. lyrata]                                                                                                                                                                                                                                                                                                                                                                                                                | 464  | 472  | 0         | 101.7  | 89.0 | 93.8 | hypothetical protein ARALYDRAFT_899389              | gbpln | Arabidopsis lyrata   | AT2G05940.1   Symbols:   Protein kinase superfamily protein   chr2:2287514-2289270 REVERSE LENGTH=462                                                                                                                                                                                                                                                                                                                                                               | 464  | 462 | 0         | 99.6  | 87.5 | 91.8 |
| Rsa1.0_01522.1.g27603.t1 | gb ABW81060.1  GagPol3 [Arabidopsis lyrata subsp. lyrata]                                                                                                                                                                                                                                                                                                                                                                                                                                                                                                                                                          | 152  | 1103 | 6.00E-37  | 725.7  | 53.3 | 66.4 | GagPol3                                             | gbpln | Arabidopsis lyrata   | #                                                                                                                                                                                                                                                                                                                                                                                                                                                                   | #    | #   | #         | #     | #    |      |
| Rsa1.0_01522.1.g27604.t3 | emb CCD74471.1  myosin heavy chain-like protein [Arabidopsis halleri subsp. halleri]                                                                                                                                                                                                                                                                                                                                                                                                                                                                                                                               | 503  | 788  | 8.00E-22  | 156.7  | 13.5 | 20.5 | myosin heavy chain-like protein                     | gbpln | Arabidopsis halleri  | AT5G32590.1   Symbols:   myosin heavy chain-related   chr5:12221589-12224322 REVERSE LENGTH=761                                                                                                                                                                                                                                                                                                                                                                     | 503  | 761 | 2.00E-20  | 151.3 | 12.5 | 19.5 |
| Rsa1.0_01522.1.g27605.t1 | gb AAG10812.1 AC018460_6 Putative retroelement polyprotein [Arabidopsis thaliana]                                                                                                                                                                                                                                                                                                                                                                                                                                                                                                                                  | 138  | 1404 | 3.00E-23  | 1017.4 | 37.0 | 47.8 | Putative retroelement polyprotein                   | gbpln | Arabidopsis thaliana | #                                                                                                                                                                                                                                                                                                                                                                                                                                                                   | #    | #   | #         | #     | #    |      |
| Rsa1.0_01523.1.g27606.t1 | #                                                                                                                                                                                                                                                                                                                                                                                                                                                                                                                                                                                                                  | #    | #    | #         | #      | #    | -    | ----                                                | ----  | ----                 | #                                                                                                                                                                                                                                                                                                                                                                                                                                                                   | #    | #   | #         | #     | #    |      |
| Rsa1.0_01523.1.g27607.t1 | #                                                                                                                                                                                                                                                                                                                                                                                                                                                                                                                                                                                                                  | #    | #    | #         | #      | #    | -    | ----                                                | ----  | ----                 | #                                                                                                                                                                                                                                                                                                                                                                                                                                                                   | #    | #   | #         | #     | #    |      |
| Rsa1.0_01523.1.g27608.t1 | #                                                                                                                                                                                                                                                                                                                                                                                                                                                                                                                                                                                                                  | #    | #    | #         | #      | #    | -    | ----                                                | ----  | ----                 | #                                                                                                                                                                                                                                                                                                                                                                                                                                                                   | #    | #   | #         | #     | #    |      |
| Rsa1.0_01523.1.g27609.t1 | ref NP_565813.1  putative mannan synthase 7 [Arabidopsis thaliana] gi 75216274 sp Q9ZQN8.2 CSLA7_ARAT H RecName: Full=Probable mannan synthase 7; AltName: Full=Cellulose synthase-like protein A7; Short=ALCSA7 gi 16604559 gb AAL24081.1  putative glucosyltransferase [Arabidopsis thaliana] gi 20197522 gb AAD15455.2  putative glucosyltransferase [Arabidopsis thaliana] gi 22136794 gb AAM91741.1  putative glucosyltransferase [Arabidopsis thaliana] gi 28551964 emb CAD32548.1  glycosyltransferase [Arabidopsis thaliana] gi 330254042 gb AEC09136.1  putative mannan synthase 7 [Arabidopsis thaliana] | 501  | 556  | 0         | 111.0  | 84.2 | 90.2 | putative mannan synthase 7                          | gbpln | Arabidopsis thaliana | AT2G35650.1   Symbols: ATCSLA07, CSLA07, ATCSLA7, CSLA7   cellulose synthase like   chr2:14985625-14988187 FORWARD LENGTH=556                                                                                                                                                                                                                                                                                                                                       | 501  | 556 | 0         | 111.0 | 84.2 | 90.2 |
| Rsa1.0_01523.1.g27610.t1 | #                                                                                                                                                                                                                                                                                                                                                                                                                                                                                                                                                                                                                  | #    | #    | #         | #      | #    | -    | ----                                                | ----  | ----                 | #                                                                                                                                                                                                                                                                                                                                                                                                                                                                   | #    | #   | #         | #     | #    |      |
| Rsa1.0_01523.1.g27611.t1 | gb EOA28974.1  hypothetical protein CARUB_v10025226mg [Capsella rubella]                                                                                                                                                                                                                                                                                                                                                                                                                                                                                                                                           | 446  | 440  | 0         | 98.7   | 86.8 | 91.9 | hypothetical protein CARUB_v10025226mg              | gbpln | Capsella rubella     | AT2G35660.1   Symbols: CTF2A   FAD/NAD(P)-binding oxidoreductase family protein   chr2:14988499-14990320 FORWARD LENGTH=439                                                                                                                                                                                                                                                                                                                                         | 446  | 439 | 0         | 98.4  | 85.4 | 91.9 |
| Rsa1.0_01523.1.g27612.t2 | db BAJ34185.1  unnamed protein product [Theillungiella halophila]                                                                                                                                                                                                                                                                                                                                                                                                                                                                                                                                                  | 364  | 334  | 1.00E-154 | 91.8   | 75.5 | 83.0 | unnamed protein product                             | ----  | ----                 | AT2G35680.1   Symbols:   Phosphotyrosine protein phosphatases superfamily protein   chr2:14997004-14998590 REVERSE LENGTH=337                                                                                                                                                                                                                                                                                                                                       | 364  | 337 | 1.00E-156 | 92.6  | 74.5 | 83.0 |
| Rsa1.0_01523.1.g27613.t5 | gb AAD17398.1  putative non-LTR retroelement reverse transcriptase [Arabidopsis thaliana]                                                                                                                                                                                                                                                                                                                                                                                                                                                                                                                          | 1533 | 1225 | 0         | 79.9   | 23.9 | 30.9 | putative non-LTR retroelement reverse transcriptase | gbpln | Arabidopsis thaliana | AT3G09510.1   Symbols:   Ribonuclease H-like superfamily protein   chr3:2921804-2923258 FORWARD LENGTH=484                                                                                                                                                                                                                                                                                                                                                          | 1533 | 484 | 6.00E-35  | 31.6  | 6.7  | 9.1  |
| Rsa1.0_01523.1.g27614.t1 | ref XP_002879568.1  hypothetical protein ARALYDRAFT_482537 [Arabidopsis lyrata subsp. lyrata] gi 297325407 gb EFH55827.1  hypothetical protein ARALYDRAFT_482537 [Arabidopsis lyrata subsp. lyrata]                                                                                                                                                                                                                                                                                                                                                                                                                | 198  | 189  | 9.00E-70  | 95.5   | 73.2 | 79.3 | hypothetical protein ARALYDRAFT_482537              | gbpln | Arabidopsis lyrata   | AT2G35700.1   Symbols: ATERF38, ERF38   ERF family protein 38   chr2:15005205-15005789 FORWARD LENGTH=194                                                                                                                                                                                                                                                                                                                                                           | 198  | 194 | 3.00E-64  | 98.0  | 73.2 | 79.8 |

|                          |                                                                                                                                                                                                                                                                                                                                                                                                                                                                                                                                                                                                                                                                                                                                                                                                                                                                  |      |      |           |       |      |      |                                        |       |                      |                                                                                                                                                           |      |      |           |       |      |      |
|--------------------------|------------------------------------------------------------------------------------------------------------------------------------------------------------------------------------------------------------------------------------------------------------------------------------------------------------------------------------------------------------------------------------------------------------------------------------------------------------------------------------------------------------------------------------------------------------------------------------------------------------------------------------------------------------------------------------------------------------------------------------------------------------------------------------------------------------------------------------------------------------------|------|------|-----------|-------|------|------|----------------------------------------|-------|----------------------|-----------------------------------------------------------------------------------------------------------------------------------------------------------|------|------|-----------|-------|------|------|
| Rsa1.0_01524.1.g27615.t1 | refNP_566720.1   Pyruvate kinase family protein [Arabidopsis thaliana]   gi75311203   sp Q9LJK0.1   PKP1_ARATH RecName: Full=Plastidial pyruvate kinase 1, chloroplastic; Short=PK1; Short=PKp1; AltName: Full=Pyruvate kinase II; AltName: Full=Pyruvate kinase isozyme A; Short=PKP-ALPHA; Flags: Precursor   gi11994727   dbj BAB03043.1   pyruvate kinase [Arabidopsis thaliana]   gi15983775   gb AAL10484.1   AT3g22960/F5N5_15 [Arabidopsis thaliana]   gi16604372   gb AAL24192.1   AT3g22960/F5N5_15 [Arabidopsis thaliana]   gi26983820   gb AAN86162.1   putative pyruvate kinase [Arabidopsis thaliana]   gi332643176   gb AEE76697.1   Pyruvate kinase family protein [Arabidopsis thaliana]   refNP_173742.1   MAK16 protein-like protein [Arabidopsis thaliana]   gi332192246   gb AEE30367.1   MAK16 protein-like protein [Arabidopsis thaliana] | 571  | 596  | 0         | 104.4 | 92.5 | 96.0 | Pyruvate kinase family protein         | gbpln | Arabidopsis thaliana | AT3G22960.1   Symbols: PKP1, PKP-ALPHA   Pyruvate kinase family protein   chr3:8139369-8141771 FORWARD LENGTH=596                                         | 571  | 596  | 0         | 104.4 | 92.5 | 96.0 |
| Rsa1.0_01524.1.g27616.t1 | refNP_173742.1   MAK16 protein-like protein [Arabidopsis thaliana]   gi332192246   gb AEE30367.1   MAK16 protein-like protein [Arabidopsis thaliana]                                                                                                                                                                                                                                                                                                                                                                                                                                                                                                                                                                                                                                                                                                             | 298  | 303  | 1.00E-102 | 101.7 | 72.5 | 83.2 | MAK16 protein-like protein             | gbpln | Arabidopsis thaliana | AT1G23280.1   Symbols:   MAK16 protein-related   chr1:8260865-8262650 REVERSE LENGTH=303                                                                  | 298  | 303  | 1.00E-105 | 101.7 | 72.5 | 83.2 |
| Rsa1.0_01524.1.g27617.t1 | gb ACX43275.1   GTP binding protein gamma subunit [Brassica napus]                                                                                                                                                                                                                                                                                                                                                                                                                                                                                                                                                                                                                                                                                                                                                                                               | 100  | 100  | 4.00E-50  | 100.0 | 98.0 | 98.0 | GTP binding protein gamma subunit      | gbpln | Brassica napus       | AT3G22942.1   Symbols: AGG2   G-protein gamma subunit 2   chr3:8134475-8135667 FORWARD LENGTH=100                                                         | 100  | 100  | 3.00E-43  | 100.0 | 92.0 | 93.0 |
| Rsa1.0_01524.1.g27618.t1 | refNP_188933.1   calmodulin-like protein 11 [Arabidopsis thaliana]   gi75335042   sp Q9LJK5.1   CML11_ARATH RecName: Full=Calmodulin-like protein 11   gi16226344   gb AAL16141.1   AF428309.1   AT3g22930/F5N5_10 [Arabidopsis thaliana]   gi11994722   dbj BAB03038.1   unnamed protein product [Arabidopsis thaliana]   gi21436047   gb AAM51601.1   AT3g22930/F5N5_10 [Arabidopsis thaliana]   gi332643171   gb AEE76692.1   calmodulin-like protein 11 [Arabidopsis thaliana]                                                                                                                                                                                                                                                                                                                                                                               | 154  | 173  | 1.00E-73  | 112.3 | 89.6 | 92.9 | calmodulin-like protein 11             | gbpln | Arabidopsis thaliana | AT3G22930.1   Symbols: CML11   calmodulin-like 11   chr3:8124286-8125835 REVERSE LENGTH=173                                                               | 154  | 173  | 5.00E-76  | 112.3 | 89.6 | 92.9 |
| Rsa1.0_01524.1.g27619.t2 | emb CAA11417.1   ATP sulfurylase [Brassica juncea]                                                                                                                                                                                                                                                                                                                                                                                                                                                                                                                                                                                                                                                                                                                                                                                                               | 298  | 461  | 1.00E-173 | 154.7 | 98.7 | 99.3 | ATP sulfurylase                        | gbpln | Brassica juncea      | AT3G22890.1   Symbols: APS1   ATP sulfurylase 1   chr3:8112837-8114734 FORWARD LENGTH=463                                                                 | 298  | 463  | 1.00E-172 | 155.4 | 95.6 | 98.0 |
| Rsa1.0_01524.1.g27620.t1 | gb AAF99727.1   AC004557.6 F17L21.7 [Arabidopsis thaliana]                                                                                                                                                                                                                                                                                                                                                                                                                                                                                                                                                                                                                                                                                                                                                                                                       | 787  | 1534 | 0         | 194.9 | 57.8 | 68.4 | F17L21.7                               | gbpln | Arabidopsis thaliana | AT4G23160.1   Symbols: CRK8   cysteine-rich RLK (RECEPTOR-like protein kinase) 8   chr4:12129485-12134086 FORWARD LENGTH=1262                             | 787  | 1262 | 1.00E-109 | 160.4 | 25.9 | 38.5 |
| Rsa1.0_01524.1.g27621.t1 | emb CAA11417.1   ATP sulfurylase [Brassica juncea]                                                                                                                                                                                                                                                                                                                                                                                                                                                                                                                                                                                                                                                                                                                                                                                                               | 166  | 461  | 2.00E-81  | 277.7 | 92.8 | 95.2 | ATP sulfurylase                        | gbpln | Brassica juncea      | AT3G22890.1   Symbols: APS1   ATP sulfurylase 1   chr3:8112837-8114734 FORWARD LENGTH=463                                                                 | 166  | 463  | 2.00E-76  | 278.9 | 87.3 | 94.0 |
| Rsa1.0_01524.1.g27622.t1 | gb EOA30955.1   hypothetical protein CARUB_v10014101mg [Capsella rubella]                                                                                                                                                                                                                                                                                                                                                                                                                                                                                                                                                                                                                                                                                                                                                                                        | 324  | 344  | 1.00E-169 | 106.2 | 92.6 | 97.5 | hypothetical protein CARUB_v10014101mg | gbpln | Capsella rubella     | AT3G22880.1   Symbols: ATDMC1, DMC1, ARLIM15   DNA repair (Rad51) family protein   chr3:8097948-8100740 REVERSE LENGTH=344                                | 324  | 344  | 1.00E-167 | 106.2 | 92.0 | 96.6 |
| Rsa1.0_01524.1.g27623.t1 | gb EOA32838.1   hypothetical protein CARUB_v10016151mg [Capsella rubella]                                                                                                                                                                                                                                                                                                                                                                                                                                                                                                                                                                                                                                                                                                                                                                                        | 183  | 248  | 7.00E-94  | 135.5 | 90.2 | 95.1 | hypothetical protein CARUB_v10016151mg | gbpln | Capsella rubella     | AT3G22850.1   Symbols:   Aluminium induced protein with YGL and LRDR motifs   chr3:8089067-8090275 FORWARD LENGTH=248                                     | 183  | 248  | 3.00E-93  | 135.5 | 86.3 | 93.4 |
| Rsa1.0_01525.1.g27624.t1 | ref XP_002889143.1   hypothetical protein ARALYDRAFT_476911 [Arabidopsis lyrata subsp. lyrata]   gi297334984   gb EFH65402.1   hypothetical protein ARALYDRAFT_476911 [Arabidopsis lyrata subsp. lyrata]                                                                                                                                                                                                                                                                                                                                                                                                                                                                                                                                                                                                                                                         | 361  | 369  | 0         | 102.2 | 92.2 | 96.1 | hypothetical protein ARALYDRAFT_476911 | gbpln | Arabidopsis lyrata   | AT1G77470.1   Symbols: RFC3, RFC5   replication factor C subunit 3   chr1:29112194-29114323 REVERSE LENGTH=369                                            | 361  | 369  | 0         | 102.2 | 90.6 | 95.3 |
| Rsa1.0_01525.1.g27625.t1 | gb EOA33479.1   hypothetical protein CARUB_v10019648mg [Capsella rubella]                                                                                                                                                                                                                                                                                                                                                                                                                                                                                                                                                                                                                                                                                                                                                                                        | 2212 | 2137 | 0         | 96.6  | 87.1 | 91.2 | hypothetical protein CARUB_v10019648mg | gbpln | Capsella rubella     | AT1G77460.2   Symbols:   Armadillo/beta-catenin-like repeat ; C2 calcium/lipid-binding domain (CaLB) protein   chr1:29104378-29111580 FORWARD LENGTH=2136 | 2212 | 2136 | 0         | 96.6  | 86.6 | 90.7 |
| Rsa1.0_01525.1.g27626.t2 | gb EOA35294.1   hypothetical protein CARUB_v10020464mg [Capsella rubella]                                                                                                                                                                                                                                                                                                                                                                                                                                                                                                                                                                                                                                                                                                                                                                                        | 346  | 382  | 1.00E-164 | 110.4 | 79.5 | 88.4 | hypothetical protein CARUB_v10020464mg | gbpln | Capsella rubella     | AT1G77420.1   Symbols:   alpha/beta-Hydrolases superfamily protein   chr1:29093641-29095442 FORWARD LENGTH=382                                            | 346  | 382  | 1.00E-166 | 110.4 | 80.1 | 87.9 |
| Rsa1.0_01525.1.g27627.t1 | #                                                                                                                                                                                                                                                                                                                                                                                                                                                                                                                                                                                                                                                                                                                                                                                                                                                                | #    | #    | #         | #     | #    | #    | -                                      | ----  | ----                 | #                                                                                                                                                         | #    | #    | #         | #     | #    |      |

|                          |                                                                                                                                                                                                                                                                                                                                                                                                                                                                                                                                                                                                                                   |      |      |           |       |      |      |                                                   |       |                      |                                                                                                                                                                                                                                                                                                                                                      |      |      |           |       |      |      |
|--------------------------|-----------------------------------------------------------------------------------------------------------------------------------------------------------------------------------------------------------------------------------------------------------------------------------------------------------------------------------------------------------------------------------------------------------------------------------------------------------------------------------------------------------------------------------------------------------------------------------------------------------------------------------|------|------|-----------|-------|------|------|---------------------------------------------------|-------|----------------------|------------------------------------------------------------------------------------------------------------------------------------------------------------------------------------------------------------------------------------------------------------------------------------------------------------------------------------------------------|------|------|-----------|-------|------|------|
| Rsa1.0_01525.1.g27628.t1 | refNP_565154.1<br>aminocyclopropanecarboxylate oxidase<br>[Arabidopsis thaliana]<br>gi1122446564 sp Q0WQPW4.1 ACCO5_AR<br>ATH RecName: Full=1-aminocyclopropane-1-carboxylate oxidase 5; Short=ACC oxidase 5; Short=ATACO5<br>gi110737793 dbj BAF00835.1<br>hypothetical protein [Arabidopsis thaliana] gi111074356 gb ABH04551.1<br>At1g77330 [Arabidopsis thaliana]<br>gi332197844 gb AEE35965.1   1-aminocyclopropane-1-carboxylate oxidase 5 [Arabidopsis thaliana]<br>refNP_200585.3 uncharacterized protein [Arabidopsis thaliana]<br>gi332009565 gb AED96948.1<br>uncharacterized protein AT5G57770 [Arabidopsis thaliana] | 312  | 307  | 1.00E-163 | 98.4  | 90.4 | 93.6 | aminocyclopropanecarboxylate oxidase              | gbpln | Arabidopsis thaliana | AT1G77330.1   Symbols:   2-oxoglutarate (2OG) and Fe(II)-dependent oxygenase superfamily protein   chr1:29063215-29064447 REVERSE LENGTH=307                                                                                                                                                                                                         | 312  | 307  | 1.00E-165 | 98.4  | 90.4 | 93.6 |
| Rsa1.0_01525.1.g27629.t1 | refNP_200585.3 uncharacterized protein [Arabidopsis thaliana]<br>gi332009565 gb AED96948.1<br>uncharacterized protein AT5G57770 [Arabidopsis thaliana]                                                                                                                                                                                                                                                                                                                                                                                                                                                                            | 102  | 406  | 1.00E-12  | 398.0 | 33.3 | 38.2 | uncharacterized protein                           | gbpln | Arabidopsis thaliana | AT5G57770.1   Symbols:   Plant protein of unknown function (DUF828) with plant pleckstrin homology-like region   chr5:23401094-23403112 REVERSE LENGTH=406                                                                                                                                                                                           | 102  | 406  | 2.00E-15  | 398.0 | 33.3 | 38.2 |
| Rsa1.0_01525.1.g27630.t1 | #                                                                                                                                                                                                                                                                                                                                                                                                                                                                                                                                                                                                                                 | #    | #    | #         | #     | #    | -    | ----                                              | ----  | ----                 | #                                                                                                                                                                                                                                                                                                                                                    | #    | #    | #         | #     | #    |      |
| Rsa1.0_01525.1.g27631.t2 | refNP_177855.4 uncharacterized protein [Arabidopsis thaliana]<br>gi332197841 gb AEE35962.1<br>uncharacterized protein AT1G77310 [Arabidopsis thaliana]                                                                                                                                                                                                                                                                                                                                                                                                                                                                            | 671  | 717  | 0         | 106.9 | 69.3 | 78.5 | uncharacterized protein                           | gbpln | Arabidopsis thaliana | AT1G77310.1   Symbols:   BEST Arabidopsis thaliana protein match is: wound-responsive family protein (TAIR:AT1G21610.1). Has 493 Blast hits to 482 proteins in 163 species: Archae - 0; Bacteria - 100; Metazoa - 172; Fungi - 66; Plants - 65; Viruses - 7; Other Eukaryotes - 83 (source: NCBI BLINK).   chr1:29051671-29056179 FORWARD LENGTH=717 | 671  | 717  | 0         | 106.9 | 69.3 | 78.5 |
| Rsa1.0_01526.1.g27632.t1 | refXP_002882022.1   CYP76C3<br>[Arabidopsis lyrata subsp. lyrata]<br>gi297327861 gb EFH58281.1   CYP76C3<br>[Arabidopsis lyrata subsp. lyrata]                                                                                                                                                                                                                                                                                                                                                                                                                                                                                    | 485  | 513  | 0         | 105.8 | 78.6 | 87.4 | CYP76C3                                           | gbpln | Arabidopsis lyrata   | AT2G45580.1   Symbols: CYP76C3   cytochrome P450, family 76, subfamily C, polypeptide 3   chr2:18782388-18784286 REVERSE LENGTH=515                                                                                                                                                                                                                  | 485  | 513  | 0         | 106.2 | 77.7 | 87.0 |
| Rsa1.0_01526.1.g27633.t1 | #                                                                                                                                                                                                                                                                                                                                                                                                                                                                                                                                                                                                                                 | #    | #    | #         | #     | #    | -    | ----                                              | ----  | ----                 | #                                                                                                                                                                                                                                                                                                                                                    | #    | #    | #         | #     | #    |      |
| Rsa1.0_01526.1.g27634.t1 | refNP_182078.1   beige-related and WD-40 repeat-containing protein [Arabidopsis thaliana]<br>gi2979554 gb AAC06163.1   unknown protein [Arabidopsis thaliana]<br>gi330255473 gb AEC10567.1   beige-related and WD-40 repeat-containing protein [Arabidopsis thaliana]                                                                                                                                                                                                                                                                                                                                                             | 2967 | 2946 | 0         | 99.3  | 90.9 | 94.6 | beige-related and WD-40 repeat-containing protein | gbpln | Arabidopsis thaliana | AT2G45540.1   Symbols:   WD-40 repeat family protein / beige-related   chr2:18757881-18772229 REVERSE LENGTH=2946                                                                                                                                                                                                                                    | 2967 | 2946 | 0         | 99.3  | 90.9 | 94.6 |
| Rsa1.0_01526.1.g27635.t1 | #                                                                                                                                                                                                                                                                                                                                                                                                                                                                                                                                                                                                                                 | #    | #    | #         | #     | #    | -    | ----                                              | ----  | ----                 | #                                                                                                                                                                                                                                                                                                                                                    | #    | #    | #         | #     | #    |      |
| Rsa1.0_01526.1.g27636.t1 | refXP_002880182.1   CYP704A2<br>[Arabidopsis lyrata subsp. lyrata]<br>gi29732602 gb EFH56441.1   CYP704A2<br>[Arabidopsis lyrata subsp. lyrata]                                                                                                                                                                                                                                                                                                                                                                                                                                                                                   | 513  | 511  | 0         | 99.6  | 87.3 | 93.4 | CYP704A2                                          | gbpln | Arabidopsis lyrata   | AT2G45510.1   Symbols: CYP704A2   cytochrome P450, family 704, subfamily A, polypeptide 2   chr2:18753085-18754944 FORWARD LENGTH=511                                                                                                                                                                                                                | 513  | 511  | 0         | 99.6  | 86.4 | 92.8 |
| Rsa1.0_01526.1.g27637.t7 | refXP_002882017.1   predicted protein [Arabidopsis lyrata subsp. lyrata]<br>gi297327856 gb EFH58276.1   predicted protein [Arabidopsis lyrata subsp. lyrata]                                                                                                                                                                                                                                                                                                                                                                                                                                                                      | 567  | 491  | 0         | 86.6  | 74.3 | 78.8 | predicted protein                                 | gbpln | Arabidopsis lyrata   | AT2G45500.1   Symbols:   AAA-type ATPase family protein   chr2:18749973-18752636 REVERSE LENGTH=491                                                                                                                                                                                                                                                  | 567  | 491  | 0         | 86.6  | 73.9 | 78.1 |
| Rsa1.0_01526.1.g27638.t1 | gb AAM66074.1   endosperm-specific protein-like protein [Arabidopsis thaliana]                                                                                                                                                                                                                                                                                                                                                                                                                                                                                                                                                    | 416  | 420  | 0         | 101.0 | 87.3 | 94.2 | endosperm-specific protein-like protein           | gbpln | Arabidopsis thaliana | AT2G45470.1   Symbols: FLA8, AGP8   FASCIOLIN-like arabinogalactan protein 8   chr2:18742797-18744059 REVERSE LENGTH=420                                                                                                                                                                                                                             | 416  | 420  | 0         | 101.0 | 87.0 | 94.2 |
| Rsa1.0_01526.1.g27639.t1 | gb EOA26547.1   hypothetical protein CARUB_v10022606mg [Capsella rubella]                                                                                                                                                                                                                                                                                                                                                                                                                                                                                                                                                         | 852  | 897  | 0         | 105.3 | 76.6 | 85.9 | hypothetical protein CARUB_v10022606mg            | gbpln | Capsella rubella     | AT2G45460.2   Symbols:   SMAD/FHA domain-containing protein   chr2:18737054-18741690 REVERSE LENGTH=902                                                                                                                                                                                                                                              | 852  | 902  | 0         | 105.9 | 78.4 | 86.7 |
| Rsa1.0_01526.1.g27640.t1 | refXP_002882013.1   expressed protein [Arabidopsis lyrata subsp. lyrata]<br>gi297327852 gb EFH58272.1   expressed protein [Arabidopsis lyrata subsp. lyrata]                                                                                                                                                                                                                                                                                                                                                                                                                                                                      | 92   | 92   | 2.00E-27  | 100.0 | 83.7 | 94.6 | expressed protein                                 | gbpln | Arabidopsis lyrata   | AT3G60890.2   Symbols: ZPR2   protein binding   chr3:22497024-22497442 REVERSE LENGTH=106                                                                                                                                                                                                                                                            | 92   | 106  | 1.00E-18  | 115.2 | 59.8 | 77.2 |



|                          |                                                                                                                                                                                                                                                                                                                                                                                                                                                                                                                                                                        |      |      |          |       |      |      |                                              |       |                      |                                                                                                                                                 |      |      |          |       |      |      |
|--------------------------|------------------------------------------------------------------------------------------------------------------------------------------------------------------------------------------------------------------------------------------------------------------------------------------------------------------------------------------------------------------------------------------------------------------------------------------------------------------------------------------------------------------------------------------------------------------------|------|------|----------|-------|------|------|----------------------------------------------|-------|----------------------|-------------------------------------------------------------------------------------------------------------------------------------------------|------|------|----------|-------|------|------|
| Rsa1.0_01526.1.g27641.t1 | refNP_182068.1  dihydrodipicolinate synthase [Arabidopsis thaliana]<br>gi 14547964 sp Q9FV08.2 DAPA2_ARAT H RecName: Full=4-hydroxy-tetrahydrodipicolinate synthase 2, chloroplastic; Short=HTPA synthase 2; Flags: Precursor<br>gi 2583111 gb AAB82620.1  putative dihydrodipicolinate synthase [Arabidopsis thaliana]<br>gi 28466961 gb AAO44089.1  At2g45440 [Arabidopsis thaliana]<br>gi 110735769 dbj BAE99862.1  putative dihydrodipicolinate synthase [Arabidopsis thaliana]<br>gi 330255460 gb AEC10554.1  dihydrodipicolinate synthase [Arabidopsis thaliana] | 366  | 365  | 0        | 99.7  | 89.9 | 95.1 | dihydrodipicolinate synthase                 | gbpln | Arabidopsis thaliana | AT2G45440.1   Symbols: DHDP2   dihydrodipicolinate synthase   chr2:18731294-18732867 FORWARD LENGTH=365                                         | 366  | 365  | 0        | 99.7  | 89.9 | 95.1 |
| Rsa1.0_01527.1.g27642.t2 | gb EOA37093.1  hypothetical protein CARUB_v10010274mg [Capsella rubella]                                                                                                                                                                                                                                                                                                                                                                                                                                                                                               | 193  | 216  | 3.00E-65 | 111.9 | 70.5 | 80.3 | hypothetical protein CARUB_v10010274mg       | gbpln | Capsella rubella     | AT1G59590.1   Symbols: ZCF37   ZCF37   chr1:21887860-21888495 FORWARD LENGTH=211                                                                | 193  | 211  | 2.00E-57 | 109.3 | 62.7 | 74.6 |
| Rsa1.0_01527.1.g27643.t1 | # # # # # # # # - ----                                                                                                                                                                                                                                                                                                                                                                                                                                                                                                                                                 |      |      |          |       |      |      |                                              |       |                      | AT3G27080.1   Symbols: TOM20-3   translocase of outer membrane 20 kDa subunit 3   chr3:9985212-9986560 REVERSE LENGTH=202                       | 112  | 202  | 1.00E-11 | 180.4 | 25.9 | 35.7 |
| Rsa1.0_01527.1.g27644.t1 | refXP_002882294.1  armadillo/beta-catenin repeat family protein [Arabidopsis lyrata subsp. lyrata]<br>gi 297328134 gb EFH58553.1  armadillo/beta-catenin repeat family protein [Arabidopsis lyrata subsp. lyrata]                                                                                                                                                                                                                                                                                                                                                      | 331  | 408  | 2.00E-65 | 123.3 | 38.4 | 39.3 | armadillo/beta-catenin repeat family protein | gbpln | Arabidopsis lyrata   | AT3G03440.1   Symbols:   ARM repeat superfamily protein   chr3:815709-818568 FORWARD LENGTH=408                                                 | 331  | 408  | 4.00E-67 | 123.3 | 38.1 | 39.0 |
| Rsa1.0_01527.1.g27645.t1 | refXP_002892557.1  predicted protein [Arabidopsis lyrata subsp. lyrata]<br>gi 297338399 gb EFH68816.1  predicted protein [Arabidopsis lyrata subsp. lyrata]                                                                                                                                                                                                                                                                                                                                                                                                            | 202  | 412  | 1.00E-62 | 204.0 | 65.8 | 71.3 | predicted protein                            | gbpln | Arabidopsis lyrata   | AT1G10280.1   Symbols:   Core-2/l-branching beta-1,6-N-acetylglucosaminyltransferase family protein   chr1:3366795-3368739 REVERSE LENGTH=412   | 202  | 412  | 6.00E-65 | 204.0 | 65.8 | 71.3 |
| Rsa1.0_01527.1.g27646.t5 | gb AAF22291.1 AF180732.1 dynamin-like protein 6 [Arabidopsis thaliana]                                                                                                                                                                                                                                                                                                                                                                                                                                                                                                 | 915  | 914  | 0        | 99.9  | 93.4 | 97.3 | dynamin-like protein 6                       | gbpln | Arabidopsis thaliana | AT1G10290.1   Symbols: ADL6, DRP2A   dynamin-like protein 6   chr1:3370774-3377120 FORWARD LENGTH=914                                           | 915  | 914  | 0        | 99.9  | 93.3 | 97.2 |
| Rsa1.0_01527.1.g27647.t2 | refXP_002872263.1  serine-type peptidase/ trypsin [Arabidopsis lyrata subsp. lyrata]<br>gi 297318100 gb EFH48522.1  serine-type peptidase/ trypsin [Arabidopsis lyrata subsp. lyrata]                                                                                                                                                                                                                                                                                                                                                                                  | 327  | 428  | 6.00E-41 | 130.9 | 28.7 | 41.6 | serine-type peptidase/ trypsin               | gbpln | Arabidopsis lyrata   | AT5G27660.1   Symbols:   Trypsin family protein with PDZ domain   chr5:9789835-9792235 REVERSE LENGTH=428                                       | 327  | 428  | 9.00E-43 | 130.9 | 28.1 | 41.6 |
| Rsa1.0_01527.1.g27648.t1 | gb EOA20680.1  hypothetical protein CARUB_v10000993mg [Capsella rubella]                                                                                                                                                                                                                                                                                                                                                                                                                                                                                               | 324  | 435  | 4.00E-38 | 134.3 | 28.1 | 40.1 | hypothetical protein CARUB_v10000993mg       | gbpln | Capsella rubella     | AT5G27660.1   Symbols:   Trypsin family protein with PDZ domain   chr5:9789835-9792235 REVERSE LENGTH=428                                       | 324  | 428  | 1.00E-39 | 132.1 | 27.8 | 39.5 |
| Rsa1.0_01528.1.g27649.t1 | dbj BAA97087.1  copia-type pol polyprotein-like [Arabidopsis thaliana]                                                                                                                                                                                                                                                                                                                                                                                                                                                                                                 | 228  | 1123 | 1.00E-97 | 492.5 | 75.9 | 86.0 | copia-type pol polyprotein-like              | gbpln | Arabidopsis thaliana | AT4G23160.1   Symbols: CRK8   cysteine-rich RLK (RECEPTOR-like protein kinase) 8   chr4:12129485-12134086 FORWARD LENGTH=1262                   | 228  | 1262 | 3.00E-11 | 553.5 | 30.3 | 43.9 |
| Rsa1.0_01528.1.g27650.t1 | refNP_001185315.1  DNA mismatch repair protein MutS2 [Arabidopsis thaliana]<br>gi 6227005 gb AAF06041.1 AC009360.6 Contains similarity to gb D90908 DNA mismatch repair protein MutS2 from Synechocystis sp. and is a member of PF00488 Muts family of mismatch repair proteins [Arabidopsis thaliana]<br>gi 332196205 gb AEE34326.1  DNA mismatch repair protein MutS2 [Arabidopsis thaliana]                                                                                                                                                                         | 1133 | 876  | 0        | 77.3  | 61.8 | 68.6 | DNA mismatch repair protein MutS2            | gbpln | Arabidopsis thaliana | AT1G65070.2   Symbols:   DNA mismatch repair protein MutS, type 2   chr1:24173047-24176244 REVERSE LENGTH=876                                   | 1133 | 876  | 0        | 77.3  | 61.8 | 68.6 |
| Rsa1.0_01528.1.g27651.t1 | refNP_176688.3  ALBINO3-like protein 2 [Arabidopsis thaliana]<br>gi 38372237 sp Q8L718.2 ALB32_ARATH RecName: Full=ALBINO3-like protein 2, chloroplastic; Short=Ath5; Flags: Precursor<br>gi 6227006 gb AAF06042.1 AC009360.7 F16G16.8 [Arabidopsis thaliana]<br>gi 332196206 gb AEE34327.1  ALBINO3-like protein 2 [Arabidopsis thaliana]                                                                                                                                                                                                                             | 585  | 525  | 0        | 89.7  | 72.8 | 75.9 | ALBINO3-like protein 2                       | gbpln | Arabidopsis thaliana | AT1G65080.1   Symbols:   Membrane insertion protein, OxaA/YidC with tetratricopeptide repeat domain   chr1:24176619-24180729 FORWARD LENGTH=525 | 585  | 525  | 0        | 89.7  | 72.8 | 75.9 |

|                          |                                                                                                                                                                                                                                                                 |      |      |           |       |      |      |                                        |       |                      |                                                                                                                                                                                                                                                                                                                                                                                                                                                                                    |      |      |           |       |      |      |
|--------------------------|-----------------------------------------------------------------------------------------------------------------------------------------------------------------------------------------------------------------------------------------------------------------|------|------|-----------|-------|------|------|----------------------------------------|-------|----------------------|------------------------------------------------------------------------------------------------------------------------------------------------------------------------------------------------------------------------------------------------------------------------------------------------------------------------------------------------------------------------------------------------------------------------------------------------------------------------------------|------|------|-----------|-------|------|------|
| Rsa1.0_01528.1.g27652.t2 | ref[XP_002888307.1] hypothetical protein ARALYDRAFT_338601 [Arabidopsis lyrata subsp. lyrata] gi 2973324148 gb EFH64566.1  hypothetical protein ARALYDRAFT_338601 [Arabidopsis lyrata subsp. lyrata]                                                            | 329  | 326  | 1.00E-100 | 99.1  | 68.1 | 76.6 | hypothetical protein ARALYDRAFT_338601 | gbpln | Arabidopsis lyrata   | AT1G65090.2   Symbols:   unknown protein; FUNCTIONS IN: molecular_function unknown; INVOLVED IN: biological_process unknown; LOCATED IN: cellular_component unknown; BEST Arabidopsis thaliana protein match is: unknown protein (TAIR:AT5G36100.1); Has 1234 Blast hits to 904 proteins in 178 species: Archae = 0; Bacteria = 58; Metazoa = 431; Fungi = 95; Plants = 83; Viruses = 38; Other Eukaryotes = 529 (source: NCBI BLink).   chr1:24180973-24182668 REVERSE LENGTH=379 | 329  | 379  | 1.00E-101 | 115.2 | 69.6 | 79.9 |
| Rsa1.0_01528.1.g27653.t1 | ref[XP_002886801.1] hypothetical protein ARALYDRAFT_315473 [Arabidopsis lyrata subsp. lyrata] gi 297332642 gb EFH63060.1  hypothetical protein ARALYDRAFT_315473 [Arabidopsis lyrata subsp. lyrata]                                                             | 258  | 247  | 1.00E-109 | 95.7  | 84.1 | 89.5 | hypothetical protein ARALYDRAFT_315473 | gbpln | Arabidopsis lyrata   | AT2G44870.1   Symbols:   unknown protein; FUNCTIONS IN: molecular_function unknown; INVOLVED IN: biological_process unknown; LOCATED IN: chloroplast; EXPRESSED IN: 22 plant structures; EXPRESSED DURING: 15 growth stages; Has 39 Blast hits to 39 proteins in 18 species: Archae = 0; Bacteria = 2; Metazoa = 0; Fungi = 0; Plants = 37; Viruses = 0; Other Eukaryotes = 0 (source: NCBI BLink).   chr2:18503250-18504422 FORWARD LENGTH=248                                    | 258  | 248  | 1.00E-106 | 96.1  | 82.6 | 88.4 |
| Rsa1.0_01528.1.g27654.t3 | ref[XP_002874833.1] hypothetical protein ARALYDRAFT_911781 [Arabidopsis lyrata subsp. lyrata] gi 297320670 gb EFH51092.1  hypothetical protein ARALYDRAFT_911781 [Arabidopsis lyrata subsp. lyrata]                                                             | 906  | 418  | 0         | 46.1  | 35.4 | 38.9 | hypothetical protein ARALYDRAFT_911781 | gbpln | Arabidopsis lyrata   | AT4G05120.1   Symbols: ENT3, FUR1, ATENT3   Major facilitator superfamily protein   chr:2632886-2634824 REVERSE LENGTH=418                                                                                                                                                                                                                                                                                                                                                         | 906  | 418  | 0         | 46.1  | 35.0 | 38.7 |
| Rsa1.0_01528.1.g27655.t1 | #                                                                                                                                                                                                                                                               | #    | #    | #         | #     | #    | #    | -                                      | ----  | ----                 | #                                                                                                                                                                                                                                                                                                                                                                                                                                                                                  | #    | #    | #         | #     | #    |      |
| Rsa1.0_01528.1.g27656.t1 | gb AAD32898.1  putative retroelement pol polyprotein [Arabidopsis thaliana]                                                                                                                                                                                     | 1283 | 1307 | 0         | 101.9 | 57.9 | 72.0 | putative retroelement pol polyprotein  | gbpln | Arabidopsis thaliana | AT4G23160.1   Symbols: CRK8   cysteine-rich RLK (RECEPTOR-like protein kinase) 8   chr4:12129485-12134086 FORWARD LENGTH=1262                                                                                                                                                                                                                                                                                                                                                      | 1283 | 1262 | 2.00E-67  | 98.4  | 11.4 | 19.0 |
| Rsa1.0_01528.1.g27657.t1 | ref[XP_002877546.1] hypothetical protein ARALYDRAFT_347817 [Arabidopsis lyrata subsp. lyrata] gi 297323384 gb EFH53805.1  hypothetical protein ARALYDRAFT_347817 [Arabidopsis lyrata subsp. lyrata]                                                             | 1031 | 1022 | 0         | 99.1  | 71.3 | 81.8 | hypothetical protein ARALYDRAFT_347817 | gbpln | Arabidopsis lyrata   | AT3G47110.1   Symbols:   Leucine-rich repeat protein kinase family protein   chr3:17347103-17350296 REVERSE LENGTH=1025                                                                                                                                                                                                                                                                                                                                                            | 1031 | 1025 | 0         | 99.4  | 69.8 | 80.8 |
| Rsa1.0_01529.1.g27658.t1 | gb ABD65150.1  hypothetical protein 40.t00029 [Brassica oleracea]                                                                                                                                                                                               | 312  | 311  | 1.00E-133 | 99.7  | 82.7 | 86.5 | hypothetical protein 40.t00029         | gbpln | Brassica oleracea    | AT4G17680.1   Symbols:   SBP (S-ribonuclease binding protein) family protein   chr4:9842903-9844095 REVERSE LENGTH=314                                                                                                                                                                                                                                                                                                                                                             | 312  | 314  | 1.00E-103 | 100.6 | 67.6 | 76.3 |
| Rsa1.0_01529.1.g27659.t1 | gb ABD65149.1  hypothetical protein 40.t00027 [Brassica oleracea]                                                                                                                                                                                               | 173  | 168  | 3.00E-70  | 97.1  | 89.6 | 90.8 | hypothetical protein 40.t00027         | gbpln | Brassica oleracea    | AT4G17670.1   Symbols:   Protein of unknown function (DUF581)   chr4:9833948-9834663 REVERSE LENGTH=159                                                                                                                                                                                                                                                                                                                                                                            | 173  | 159  | 4.00E-53  | 91.9  | 72.8 | 80.3 |
| Rsa1.0_01529.1.g27660.t1 | ref[XP_002870094.1] hypothetical protein ARALYDRAFT_354992 [Arabidopsis lyrata subsp. lyrata] gi 297315930 gb EFH46353.1  hypothetical protein ARALYDRAFT_354992 [Arabidopsis lyrata subsp. lyrata]                                                             | 1406 | 1299 | 0         | 92.4  | 69.2 | 75.6 | hypothetical protein ARALYDRAFT_354992 | gbpln | Arabidopsis lyrata   | AT4G17616.1   Symbols:   Pentatricopeptide repeat (PPR) superfamily protein   chr4:9819608-9821632 FORWARD LENGTH=674                                                                                                                                                                                                                                                                                                                                                              | 1406 | 674  | 0         | 47.9  | 37.5 | 41.7 |
| Rsa1.0_01529.1.g27661.t1 | emb CAB10540.1  hypothetical protein [Arabidopsis thaliana] gi 2686512 emb CAB78763.1  hypothetical protein [Arabidopsis thaliana]                                                                                                                              | 241  | 350  | 1.00E-103 | 145.2 | 81.7 | 88.0 | hypothetical protein                   | gbpln | Arabidopsis thaliana | AT4G17600.1   Symbols: LIL3.1   Chlorophyll A-B binding family protein   chr4:9803759-9804714 FORWARD LENGTH=262                                                                                                                                                                                                                                                                                                                                                                   | 241  | 262  | 1.00E-105 | 108.7 | 81.7 | 88.0 |
| Rsa1.0_01529.1.g27662.t2 | gb EOA19009.1  hypothetical protein CARUB_v10007660mg [Capsella rubella]                                                                                                                                                                                        | 150  | 391  | 1.00E-26  | 260.7 | 46.7 | 60.7 | hypothetical protein CARUB_v10007660mg | gbpln | Capsella rubella     | AT5G47120.1   Symbols: ATBI-1, BI-1, ATBI1, BI1   BAX inhibitor 1   chr5:19136071-19137585 FORWARD LENGTH=247                                                                                                                                                                                                                                                                                                                                                                      | 150  | 247  | 7.00E-28  | 164.7 | 46.0 | 61.3 |
| Rsa1.0_01529.1.g27663.t1 | gb ABD65148.1  transporter, putative [Brassica oleracea]                                                                                                                                                                                                        | 358  | 527  | 0         | 147.2 | 92.5 | 94.1 | transporter, putative                  | gbpln | Brassica oleracea    | AT4G17550.1   Symbols:   Major facilitator superfamily protein   chr4:977938-9779738 REVERSE LENGTH=544                                                                                                                                                                                                                                                                                                                                                                            | 358  | 544  | 1.00E-173 | 152.0 | 86.3 | 91.6 |
| Rsa1.0_01530.1.g27664.t1 | ref[XP_002885241.1] transducin family protein [Arabidopsis lyrata subsp. lyrata] gi 297331081 gb EFH61500.1  transducin family protein [Arabidopsis lyrata subsp. lyrata] gi 482566910 gb EOA31099.1  hypothetical protein CARUB_v10014252mg [Capsella rubella] | 305  | 305  | 1.00E-179 | 100.0 | 98.0 | 99.3 | transducin family protein              | gbpln | Arabidopsis lyrata   | AT3G18140.1   Symbols:   Transducin/WD40 repeat-like superfamily protein   chr3:6212743-6214567 REVERSE LENGTH=305                                                                                                                                                                                                                                                                                                                                                                 | 305  | 305  | 1.00E-180 | 100.0 | 97.4 | 98.7 |

|                           |                                                                                                                                                                                                                                                                                                                                                                       |      |      |           |       |      |      |                                                   |       |                      |                                                                                                                                                                                                                                                                                                                                                  |      |      |           |       |      |      |
|---------------------------|-----------------------------------------------------------------------------------------------------------------------------------------------------------------------------------------------------------------------------------------------------------------------------------------------------------------------------------------------------------------------|------|------|-----------|-------|------|------|---------------------------------------------------|-------|----------------------|--------------------------------------------------------------------------------------------------------------------------------------------------------------------------------------------------------------------------------------------------------------------------------------------------------------------------------------------------|------|------|-----------|-------|------|------|
| Rsa1.0_01530.1.g27665.t1  | gb AAW62966.1  chloroplast embryo-defective 1270 [Arabidopsis thaliana]                                                                                                                                                                                                                                                                                               | 1751 | 1429 | 0         | 81.6  | 73.8 | 77.4 | chloroplast embryo-defective 1270                 | gbpln | Arabidopsis thaliana | AT3G18110.1   Symbols: EMB1270   Pentatricopeptide repeat (PPR) superfamily protein   chr3:6204940-6209691 REVERSE LENGTH=1440                                                                                                                                                                                                                   | 1751 | 1440 | 0         | 82.2  | 73.8 | 77.4 |
| Rsa1.0_01530.1.g27666.t17 | ref XP_002883109.1  MYB4R1 [Arabidopsis lyrata subsp. lyrata]   g 297328949 gb EFH59368.1  MYB4R1 [Arabidopsis lyrata subsp. lyrata]                                                                                                                                                                                                                                  | 900  | 809  | 0         | 89.9  | 64.1 | 74.4 | MYB4R1                                            | gbpln | Arabidopsis lyrata   | AT3G18100.1   Symbols: MYB4R1, A1MYB4R1   myb domain protein 4r1   chr3:6200689-6204583 FORWARD LENGTH=847                                                                                                                                                                                                                                       | 900  | 847  | 0         | 94.1  | 64.9 | 75.2 |
| Rsa1.0_01530.1.g27667.t1  | gb EOA30146.1  hypothetical protein CARUB_v10013253mg [Capsella rubella]                                                                                                                                                                                                                                                                                              | 585  | 609  | 0         | 104.1 | 91.5 | 96.2 | hypothetical protein CARUB_v10013253mg            | gbpln | Capsella rubella     | AT3G18060.1   Symbols:   transducin family protein / WD-40 repeat family protein   chr3:6183880-6186788 FORWARD LENGTH=609                                                                                                                                                                                                                       | 585  | 609  | 0         | 104.1 | 90.8 | 95.7 |
| Rsa1.0_01530.1.g27668.t1  | gb ABD65099.1  hypothetical protein 31.t00074 [Brassica oleracea]                                                                                                                                                                                                                                                                                                     | 261  | 258  | 7.00E-58  | 98.9  | 51.7 | 68.2 | hypothetical protein 31.t00074                    | gbpln | Brassica oleracea    | AT3G47680.1   Symbols:   DNA binding   chr3:17577483-17578391 REVERSE LENGTH=302                                                                                                                                                                                                                                                                 | 261  | 302  | 8.00E-48  | 115.7 | 44.1 | 62.8 |
| Rsa1.0_01530.1.g27669.t1  | gb ABD64939.1  hypothetical protein 24.t00017 [Brassica oleracea]                                                                                                                                                                                                                                                                                                     | 394  | 442  | 1.00E-143 | 112.2 | 65.0 | 77.9 | hypothetical protein 24.t00017                    | gbpln | Brassica oleracea    | AT2G13770.1   Symbols:   CONTAINS InterPro DOMAIN/s: Putative harbinger transposase-derived nuclease (InterPro:IPR006912); Has 451 Blast hits to 352 proteins in 33 species: Archae - 0; Bacteria - 0; Metazoa - 28; Fungi - 8; Plants - 388; Viruses - 0; Other Eukaryotes - 27 (source: NCBI BLINK).   chr2:5736603-5737847 FORWARD LENGTH=343 | 394  | 343  | 3.00E-64  | 87.1  | 34.8 | 45.2 |
| Rsa1.0_01530.1.g27670.t1  | ref NP_566596.1  uncharacterized protein [Arabidopsis thaliana]   g 9294060 db BAB02017.1  unnamed protein product [Arabidopsis thaliana]   g 15451206 gb AAK96874.1  Unknown protein [Arabidopsis thaliana]   g 23197698 gb AAN15376.1  Unknown protein [Arabidopsis thaliana]   g 332642519 gb AEE76040.1  uncharacterized protein AT3G18050 [Arabidopsis thaliana] | 337  | 335  | 1.00E-154 | 99.4  | 83.1 | 89.3 | uncharacterized protein                           | gbpln | Arabidopsis thaliana | AT3G18050.1   Symbols:   unknown protein; BEST Arabidopsis thaliana protein match is: unknown protein (TAIR:AT4G28100.1); Has 67 Blast hits to 66 proteins in 12 species: Archae - 0; Bacteria - 0; Metazoa - 0; Fungi - 0; Plants - 67; Viruses - 0; Other Eukaryotes - 0 (source: NCBI BLINK).   chr3:6180931-6182593 FORWARD LENGTH=335       | 337  | 335  | 1.00E-157 | 99.4  | 83.1 | 89.3 |
| Rsa1.0_01530.1.g27671.t1  | gb EOA30100.1  hypothetical protein CARUB_v10013210mg [Capsella rubella]                                                                                                                                                                                                                                                                                              | 603  | 628  | 0         | 104.1 | 90.9 | 95.7 | hypothetical protein CARUB_v10013210mg            | gbpln | Capsella rubella     | AT3G18040.1   Symbols: MPK9   MAP kinase 9   chr3:6174800-6178150 FORWARD LENGTH=510                                                                                                                                                                                                                                                             | 603  | 510  | 0         | 84.6  | 78.6 | 80.8 |
| Rsa1.0_01531.1.g27672.t1  | gb EOA37955.1  hypothetical protein CARUB_v10009422mg [Capsella rubella]                                                                                                                                                                                                                                                                                              | 174  | 384  | 1.00E-64  | 220.7 | 71.3 | 78.7 | hypothetical protein CARUB_v10009422mg            | gbpln | Capsella rubella     | AT1G29050.1   Symbols: TBL38   TRICHOME BIREFRINGENCE-LIKE 38   chr1:10136376-10139082 REVERSE LENGTH=380                                                                                                                                                                                                                                        | 174  | 380  | 8.00E-66  | 218.4 | 72.4 | 77.0 |
| Rsa1.0_01531.1.g27673.t1  | ref XP_002893546.1  hypothetical protein ARALYDRAFT_473111 [Arabidopsis lyrata subsp. lyrata]   g 297339388 gb EFH69805.1  hypothetical protein ARALYDRAFT_473111 [Arabidopsis lyrata subsp. lyrata]                                                                                                                                                                  | 168  | 380  | 3.00E-88  | 226.2 | 91.1 | 95.2 | hypothetical protein ARALYDRAFT_473111            | gbpln | Arabidopsis lyrata   | AT1G29050.1   Symbols: TBL38   TRICHOME BIREFRINGENCE-LIKE 38   chr1:10136376-10139082 REVERSE LENGTH=380                                                                                                                                                                                                                                        | 168  | 380  | 2.00E-89  | 226.2 | 89.3 | 94.6 |
| Rsa1.0_01531.1.g27674.t1  | ref NP_174197.2  EF-hand, calcium binding motif-containing protein [Arabidopsis thaliana]   g 332192908 gb AEE31029.1  EF-hand, calcium binding motif-containing protein [Arabidopsis thaliana]                                                                                                                                                                       | 585  | 564  | 0         | 96.4  | 70.9 | 83.1 | EF-hand, calcium binding motif-containing protein | gbpln | Arabidopsis thaliana | AT1G29020.1   Symbols:   Calcium-binding EF-hand family protein   chr1:10120497-10122902 REVERSE LENGTH=564                                                                                                                                                                                                                                      | 585  | 564  | 0         | 96.4  | 70.9 | 83.1 |
| Rsa1.0_01531.1.g27675.t1  | ref NP_174196.2  uncharacterized protein [Arabidopsis thaliana]   g 6691220 gb AAF24558.1 AC007508.21 F1K23.3 [Arabidopsis thaliana]   g 91805881 gb ABE65669.1  unknown [Arabidopsis thaliana]   g 332192907 gb AEE31028.1  uncharacterized protein AT1G29010 [Arabidopsis thaliana]                                                                                 | 254  | 300  | 3.00E-81  | 118.1 | 68.1 | 77.6 | uncharacterized protein                           | gbpln | Arabidopsis thaliana | AT1G29010.1   Symbols:   unknown protein; BEST Arabidopsis thaliana protein match is: unknown protein (TAIR:AT2G34010.1); Has 18 Blast hits to 17 proteins in 3 species: Archae - 0; Bacteria - 0; Metazoa - 0; Fungi - 0; Plants - 18; Viruses - 0; Other Eukaryotes - 0 (source: NCBI BLINK).   chr1:10117715-10118973 FORWARD LENGTH=300      | 254  | 300  | 1.00E-83  | 118.1 | 68.1 | 77.6 |
| Rsa1.0_01531.1.g27676.t1  | #                                                                                                                                                                                                                                                                                                                                                                     | #    | #    | #         | #     | #    | -    | ----                                              | ----  | #                    | #                                                                                                                                                                                                                                                                                                                                                | #    | #    | #         | #     | #    |      |
| Rsa1.0_01531.1.g27677.t1  | #                                                                                                                                                                                                                                                                                                                                                                     | #    | #    | #         | #     | #    | -    | ----                                              | ----  | #                    | #                                                                                                                                                                                                                                                                                                                                                | #    | #    | #         | #     | #    |      |
| Rsa1.0_01531.1.g27678.t2  | gb EOA14807.1  hypothetical protein CARUB_v10028114mg [Capsella rubella]                                                                                                                                                                                                                                                                                              | 162  | 335  | 1.00E-37  | 206.8 | 48.8 | 60.5 | hypothetical protein CARUB_v10028114mg            | gbpln | Capsella rubella     | AT5G64920.1   Symbols: CIP8   COP1-interacting protein 8   chr5:25944338-25945342 REVERSE LENGTH=334                                                                                                                                                                                                                                             | 162  | 334  | 4.00E-37  | 206.2 | 47.5 | 58.6 |
| Rsa1.0_01531.1.g27679.t1  | gb EOA38764.1  hypothetical protein CARUB_v10010950mg [Capsella rubella]                                                                                                                                                                                                                                                                                              | 117  | 118  | 2.00E-35  | 100.9 | 67.5 | 78.6 | hypothetical protein CARUB_v10010950mg            | gbpln | Capsella rubella     | AT1G28815.1   Symbols:   unknown protein; Has 5 Blast hits to 5 proteins in 2 species: Archae - 0; Bacteria - 0; Metazoa - 0; Fungi - 0; Plants - 5; Viruses - 0; Other Eukaryotes - 0 (source: NCBI BLINK).   chr1:10095812-10096244 FORWARD LENGTH=115                                                                                         | 117  | 115  | 2.00E-32  | 98.3  | 62.4 | 76.1 |

|                           |                                                                                                                                                                                                                                                             |      |      |           |       |      |      |                                                                                              |       |                      |                                                                                                                                      |      |      |          |       |      |      |
|---------------------------|-------------------------------------------------------------------------------------------------------------------------------------------------------------------------------------------------------------------------------------------------------------|------|------|-----------|-------|------|------|----------------------------------------------------------------------------------------------|-------|----------------------|--------------------------------------------------------------------------------------------------------------------------------------|------|------|----------|-------|------|------|
| Rsa1.0_01531.1.g27680.t1  | gb EOA23054.1  hypothetical protein CARUB_v10003824mg [Capsella rubella]                                                                                                                                                                                    | 171  | 307  | 3.00E-18  | 179.5 | 40.9 | 52.0 | hypothetical protein CARUB_v10003824mg                                                       | gbpln | Capsella rubella     | AT5G28180.1   Symbols:   Galactose oxidase/kelch repeat superfamily protein   chr5:10162783-10163943 FORWARD LENGTH=352              | 171  | 352  | 7.00E-19 | 205.8 | 41.5 | 55.0 |
| Rsa1.0_01531.1.g27681.t1  | sp P52425.1 GPDA CUPLA RecName: Full=Glycerol-3-phosphate dehydrogenase [NAD(+)] gi 840731 emb CAA56125.1  glycerol-3-phosphate dehydrogenase (NAD+) [Cuphea lanceolata]                                                                                    | 81   | 372  | 5.00E-16  | 459.3 | 60.5 | 67.9 | RecName: Full=Glycerol-3-phosphate dehydrogenase                                             | gbpln | Cuphea lanceolata    | AT5G40610.1   Symbols:   NAD-dependent glycerol-3-phosphate dehydrogenase family protein   chr5:16265071-16267258 REVERSE LENGTH=400 | 81   | 400  | 4.00E-18 | 493.8 | 61.7 | 71.6 |
| Rsa1.0_01532.1.g27682.t1  | ref NP_001078362.1  ECA1 gametogenesis related family protein [Arabidopsis thaliana] gi 332657363 gb AEE82763.1  ECA1 gametogenesis related family protein [Arabidopsis thaliana] gi 371782144 emb CCE46138.1  cysteine rich peptide [Arabidopsis thaliana] | 120  | 122  | 1.00E-34  | 101.7 | 62.5 | 74.2 | ECA1 gametogenesis related family protein                                                    | gbpln | Arabidopsis thaliana | AT4G09545.1   Symbols:   ECA1 gametogenesis related family protein   chr4:6037569-6037937 FORWARD LENGTH=122                         | 120  | 122  | 2.00E-37 | 101.7 | 62.5 | 74.2 |
| Rsa1.0_01532.1.g27683.t1  | emb CAB81573.1  putative protein [Arabidopsis thaliana]                                                                                                                                                                                                     | 185  | 510  | 4.00E-28  | 275.7 | 40.5 | 59.5 | putative protein                                                                             | gbpln | Arabidopsis thaliana | #                                                                                                                                    | #    | #    | #        | #     | #    | #    |
| Rsa1.0_01532.1.g27684.t1  | ref NP_001078362.1  ECA1 gametogenesis related family protein [Arabidopsis thaliana] gi 332657363 gb AEE82763.1  ECA1 gametogenesis related family protein [Arabidopsis thaliana] gi 371782144 emb CCE46138.1  cysteine rich peptide [Arabidopsis thaliana] | 111  | 122  | 2.00E-33  | 109.9 | 64.9 | 76.6 | ECA1 gametogenesis related family protein                                                    | gbpln | Arabidopsis thaliana | AT4G09545.1   Symbols:   ECA1 gametogenesis related family protein   chr4:6037569-6037937 FORWARD LENGTH=122                         | 111  | 122  | 4.00E-36 | 109.9 | 64.9 | 76.6 |
| Rsa1.0_01532.1.g27685.t1  | gb ABD65636.1  hypothetical protein Z3.t00055 [Brassica oleracea]                                                                                                                                                                                           | 378  | 414  | 2.00E-77  | 109.5 | 53.2 | 60.3 | hypothetical protein Z3.t00055                                                               | gbpln | Brassica oleracea    | #                                                                                                                                    | #    | #    | #        | #     | #    | #    |
| Rsa1.0_01532.1.g27686.t10 | gb AAF06087.1 AC007918.11 Similar to gi 4325351 T25H8.2 TNP2 protein homolog from Arabidopsis thaliana BAC gb AF128394 [Arabidopsis thaliana]                                                                                                               | 375  | 1121 | 2.00E-62  | 298.9 | 41.1 | 57.6 | Similar to gi 4325351 T25H8.2 TNP2 protein homolog from Arabidopsis thaliana BAC gb AF128394 | gbpln | Arabidopsis thaliana | #                                                                                                                                    | #    | #    | #        | #     | #    | #    |
| Rsa1.0_01532.1.g27687.t5  | ref NP_175242.7  calcium-dependent lipid-binding-like protein [Arabidopsis thaliana] gi 332194125 gb AEE32246.1  calcium-dependent lipid-binding-like protein [Arabidopsis thaliana]                                                                        | 4230 | 4146 | 0         | 98.0  | 88.0 | 92.2 | calcium-dependent lipid-binding-like protein                                                 | gbpln | Arabidopsis thaliana | AT1G48090.1   Symbols:   calcium-dependent lipid-binding family protein   chr1:1732582-17758194 REVERSE LENGTH=4146                  | 4230 | 4146 | 0        | 98.0  | 88.0 | 92.2 |
| Rsa1.0_01533.1.g27688.t4  | ref XP_002893241.1  hypothetical protein ARALYDRAFT_472501 [Arabidopsis lyrata subsp. lyrata] gi 297339083 gb EFH69500.1  hypothetical protein ARALYDRAFT_472501 [Arabidopsis lyrata subsp. lyrata]                                                         | 1288 | 911  | 0         | 70.7  | 64.4 | 67.9 | hypothetical protein ARALYDRAFT_472501                                                       | gbpln | Arabidopsis lyrata   | AT1G22620.1   Symbols:   ATSAC1   Phosphoinositide phosphatase family protein   chr1:7997869-8002787 REVERSE LENGTH=912              | 1288 | 912  | 0        | 70.8  | 64.1 | 67.9 |
| Rsa1.0_01533.1.g27689.t1  | ref NP_973886.1  protein AGAMOUS-like 87 [Arabidopsis thaliana] gi 32402464 gb AAN52814.1  MADS-box protein AGL87 [Arabidopsis thaliana] gi 332192137 gb AEE30258.1  protein AGAMOUS-like 87 [Arabidopsis thaliana]                                         | 162  | 163  | 1.00E-61  | 100.6 | 70.4 | 87.0 | protein AGAMOUS-like 87                                                                      | gbpln | Arabidopsis thaliana | AT1G22590.2   Symbols:   AGL87   AGAMOUS-like 87   chr1:7983511-7984002 FORWARD LENGTH=163                                           | 162  | 163  | 4.00E-64 | 100.6 | 70.4 | 87.0 |
| Rsa1.0_01533.1.g27690.t1  | ref XP_002874461.1  hypothetical protein ARALYDRAFT_351855 [Arabidopsis lyrata subsp. lyrata] gi 297320298 gb EFH50720.1  hypothetical protein ARALYDRAFT_351855 [Arabidopsis lyrata subsp. lyrata]                                                         | 279  | 446  | 7.00E-13  | 159.9 | 20.8 | 28.3 | hypothetical protein ARALYDRAFT_351855                                                       | gbpln | Arabidopsis lyrata   | #                                                                                                                                    | #    | #    | #        | #     | #    | #    |
| Rsa1.0_01533.1.g27691.t2  | dbj BAJ34104.1  unnamed protein product [Theilungella halophila]                                                                                                                                                                                            | 169  | 383  | 5.00E-17  | 226.6 | 28.4 | 31.4 | unnamed protein product                                                                      | ----  | ----                 | AT1G48040.1   Symbols:   Protein phosphatase 2C family protein   chr1:1720064-17721698 REVERSE LENGTH=383                            | 169  | 383  | 2.00E-18 | 226.6 | 27.8 | 30.8 |
| Rsa1.0_01533.1.g27692.t1  | emb CAB40051.1  putative protein [Arabidopsis thaliana] gi 7267781 emb CAB81184.1  putative protein [Arabidopsis thaliana]                                                                                                                                  | 744  | 1294 | 1.00E-110 | 173.9 | 30.9 | 44.5 | putative protein                                                                             | gbpln | Arabidopsis thaliana | AT3G09510.1   Symbols:   Ribonuclease H-like superfamily protein   chr3:2921804-2923258 FORWARD LENGTH=484                           | 744  | 484  | 1.00E-31 | 65.1  | 11.0 | 15.6 |
| Rsa1.0_01534.1.g27693.t1  | ref NP_001078624.1  Putative membrane lipoprotein [Arabidopsis thaliana] gi 332006179 gb AED93561.1  Putative membrane lipoprotein [Arabidopsis thaliana]                                                                                                   | 75   | 100  | 5.00E-12  | 133.3 | 49.3 | 60.0 | Putative membrane lipoprotein                                                                | gbpln | Arabidopsis thaliana | AT5G26673.1   Symbols:   Putative membrane lipoprotein   chr5:9278309-9279611 FORWARD LENGTH=100                                     | 75   | 100  | 9.00E-15 | 133.3 | 49.3 | 60.0 |
| Rsa1.0_01534.1.g27694.t1  | emb CAA09196.1  RNA helicase [Arabidopsis thaliana]                                                                                                                                                                                                         | 111  | 748  | 2.00E-20  | 673.9 | 73.9 | 74.8 | RNA helicase                                                                                 | gbpln | Arabidopsis thaliana | AT5G26742.1   Symbols:   emb1138   DEAD box RNA helicase (RH3)   chr5:9285540-9286871 REVERSE LENGTH=747                             | 111  | 747  | 1.00E-10 | 673.0 | 24.3 | 24.3 |

|                          |                                                                                                                                                                                                                                                                                                                                                                                                                                                                                 |      |      |           |       |      |      |                                                                                |       |                      |                                                                                                                                                                                                                                                                                                                                          |      |     |           |       |      |      |
|--------------------------|---------------------------------------------------------------------------------------------------------------------------------------------------------------------------------------------------------------------------------------------------------------------------------------------------------------------------------------------------------------------------------------------------------------------------------------------------------------------------------|------|------|-----------|-------|------|------|--------------------------------------------------------------------------------|-------|----------------------|------------------------------------------------------------------------------------------------------------------------------------------------------------------------------------------------------------------------------------------------------------------------------------------------------------------------------------------|------|-----|-----------|-------|------|------|
| Rsa1.0_01534.1.g27695.t1 | ref XP_002872219.1  hypothetical protein ARALYDRAFT_489488 [Arabidopsis lyrata subsp. lyrata] gi 297318056 gb EFH48478.1                                                                                                                                                                                                                                                                                                                                                        | 103  | 102  | 1.00E-22  | 99.0  | 75.7 | 82.5 | hypothetical protein ARALYDRAFT_489488                                         | gbpln | Arabidopsis lyrata   | AT5G26731.1   Symbols:   unknown protein; Has 30201 Blast hits to 17322 proteins in 780 species: Archae - 12; Bacteria - 1396; Metazoa - 17338; Fungi - 3422; Plants - 5037; Viruses - 0; Other Eukaryotes - 2996 (source: NCBI BLINK).   chr5:9295676-9295975 FORWARD LENGTH=99                                                         | 103  | 99  | 2.00E-23  | 96.1  | 64.1 | 71.8 |
| Rsa1.0_01534.1.g27696.t1 | gb EOA19657.1  hypothetical protein CARUB_v10003200mg [Capsella rubella]                                                                                                                                                                                                                                                                                                                                                                                                        | 146  | 271  | 6.00E-56  | 185.6 | 74.0 | 87.0 | hypothetical protein CARUB_v10003200mg                                         | gbpln | Capsella rubella     | AT5G26730.1   Symbols:   Fasciclin-like arabinogalactan family protein   chr5:9300422-9301990 FORWARD LENGTH=268                                                                                                                                                                                                                         | 146  | 268 | 6.00E-57  | 183.6 | 69.9 | 82.9 |
| Rsa1.0_01534.1.g27697.t1 | ref NP_850974.1  glutamyl-tRNA synthetase [Arabidopsis thaliana] gi 3435196 gb AAC36469.1  glutamyl-tRNA synthetase [Arabidopsis thaliana] gi 20466252 gb AAM20443.1  glutamyl-tRNA synthetase [Arabidopsis thaliana] gi 23198080 gb AAN15567.1  glutamyl-tRNA synthetase [Arabidopsis thaliana] gi 110740992 dbj BAE98590.1  glutamyl-tRNA synthetase [Arabidopsis thaliana] gi 332006190 gb AED93573.1  glutamyl/glutamyl-tRNA synthetase, class Ic [Arabidopsis thaliana]    | 796  | 719  | 0         | 90.3  | 77.0 | 82.7 | glutamyl-tRNA synthetase                                                       | gbpln | Arabidopsis thaliana | AT5G26710.1   Symbols:   Glutamyl/glutamyl-tRNA synthetase, class Ic   chr5:9305673-9308247 FORWARD LENGTH=719                                                                                                                                                                                                                           | 796  | 719 | 0         | 90.3  | 77.0 | 82.7 |
| Rsa1.0_01534.1.g27698.t1 | gb EOA22223.1  hypothetical protein CARUB_v10002810mg [Capsella rubella]                                                                                                                                                                                                                                                                                                                                                                                                        | 218  | 216  | 2.00E-95  | 99.1  | 79.8 | 91.7 | hypothetical protein CARUB_v10002810mg                                         | gbpln | Capsella rubella     | AT5G26700.1   Symbols:   RmlC-like cupins superfamily protein   chr5:9308439-9309548 REVERSE LENGTH=213                                                                                                                                                                                                                                  | 218  | 213 | 9.00E-98  | 97.7  | 80.7 | 88.1 |
| Rsa1.0_01534.1.g27699.t1 | # # # # # # # # - ----                                                                                                                                                                                                                                                                                                                                                                                                                                                          |      |      |           |       |      |      |                                                                                |       |                      | AT5G26680.2   Symbols:   5'-3' exonuclease family protein   chr5:9311882-9315458 REVERSE LENGTH=383                                                                                                                                                                                                                                      | 87   | 383 | 2.00E-11  | 440.2 | 37.9 | 37.9 |
| Rsa1.0_01534.1.g27700.t1 | ref XP_002872227.1  hypothetical protein ARALYDRAFT_489494 [Arabidopsis lyrata subsp. lyrata] gi 297318064 gb EFH48486.1  hypothetical protein ARALYDRAFT_489494 [Arabidopsis lyrata subsp. lyrata] ref NP_850879.1  transcription factor MYB86 [Arabidopsis thaliana] gi 56749347 sp C8LPH6.1  MYB86, ARATH RecName: Full=Transcription factor MYB86; AltName: Full=Myb homolog 4; Short=AtMyb4; AltName: Full=Myb-related protein 86; Short=AtMYB86 gi 20466622 gb AAM20628.1 | 416  | 416  | 0         | 100.0 | 90.6 | 94.7 | hypothetical protein ARALYDRAFT_489494                                         | gbpln | Arabidopsis lyrata   | AT5G26670.1   Symbols:   Pectinacetyltransferase family protein   chr5:9318456-9320816 FORWARD LENGTH=416                                                                                                                                                                                                                                | 416  | 416 | 0         | 100.0 | 90.9 | 95.4 |
| Rsa1.0_01534.1.g27701.t1 | transcription factor ATMYB4 [Arabidopsis thaliana] gi 30984580 gb AAP42753.1  At5g26655 [Arabidopsis thaliana] gi 41619424 gb AAS10099.1  MYB transcription factor [Arabidopsis thaliana] gi 332006197 gb AED93580.1  transcription factor MYB86 [Arabidopsis thaliana]                                                                                                                                                                                                         | 345  | 352  | 1.00E-159 | 102.0 | 85.8 | 91.3 | transcription factor MYB86                                                     | gbpln | Arabidopsis thaliana | AT5G26660.1   Symbols:   ATMYB86, MYB86   myb domain protein 86   chr5:9331775-9333044 REVERSE LENGTH=352                                                                                                                                                                                                                                | 345  | 352 | 1.00E-162 | 102.0 | 85.8 | 91.3 |
| Rsa1.0_01534.1.g27702.t1 | dbj BAF00918.1  putative reverse transcriptase [Arabidopsis thaliana]                                                                                                                                                                                                                                                                                                                                                                                                           | 1497 | 910  | 0         | 60.8  | 26.6 | 36.5 | putative reverse transcriptase                                                 | gbpln | Arabidopsis thaliana | AT1G43760.1   Symbols:   DNase I-like superfamily protein   chr1:16528880-16531065 REVERSE LENGTH=626                                                                                                                                                                                                                                    | 1497 | 626 | 6.00E-77  | 41.8  | 10.8 | 16.5 |
| Rsa1.0_01534.1.g27703.t1 | # # # # # # # # - ----                                                                                                                                                                                                                                                                                                                                                                                                                                                          |      |      |           |       |      |      |                                                                                |       |                      | # # # # # # # #                                                                                                                                                                                                                                                                                                                          |      |     |           |       |      |      |
| Rsa1.0_01534.1.g27704.t1 | gb ABE65560.1  hypothetical protein At5g26620 [Arabidopsis thaliana]                                                                                                                                                                                                                                                                                                                                                                                                            | 83   | 88   | 3.00E-29  | 106.0 | 80.7 | 90.4 | hypothetical protein At5g26620                                                 | gbpln | Arabidopsis thaliana | AT5G26620.1   Symbols:   unknown protein; BEST Arabidopsis thaliana protein match is: unknown protein (TAIR:AT3G05858.1); Has 48 Blast hits to 48 proteins in 8 species: Archae - 0; Bacteria - 0; Metazoa - 0; Fungi - 0; Plants - 48; Viruses - 0; Other Eukaryotes - 0 (source: NCBI BLINK).   chr5:9366697-9366963 REVERSE LENGTH=74 | 83   | 74  | 2.00E-27  | 89.2  | 71.1 | 78.3 |
| Rsa1.0_01535.1.g27705.t1 | # # # # # # # # - ----                                                                                                                                                                                                                                                                                                                                                                                                                                                          |      |      |           |       |      |      |                                                                                |       |                      | # # # # # # # #                                                                                                                                                                                                                                                                                                                          |      |     |           |       |      |      |
| Rsa1.0_01535.1.g27706.t1 | gb AAC28189.1  contains similarity to Arabidopsis thaliana retrotransposon Athila (GB:X81801) [Arabidopsis thaliana]                                                                                                                                                                                                                                                                                                                                                            | 301  | 940  | 1.00E-63  | 312.3 | 44.9 | 63.8 | contains similarity to Arabidopsis thaliana retrotransposon Athila (GB:X81801) | gbpln | Arabidopsis thaliana | #                                                                                                                                                                                                                                                                                                                                        | #    | #   | #         | #     | #    | #    |
| Rsa1.0_01535.1.g27707.t1 | gb ABA98030.2  retrotransposon protein, putative, Ty1-copia subclass [Oryza sativa Japonica Group]                                                                                                                                                                                                                                                                                                                                                                              | 377  | 1310 | 3.00E-42  | 347.5 | 31.8 | 47.7 | retrotransposon protein, putative, Ty1-copia subclass                          | gbpln | Oryza sativa         | #                                                                                                                                                                                                                                                                                                                                        | #    | #   | #         | #     | #    | #    |
| Rsa1.0_01535.1.g27708.t1 | ref XP_002864014.1  leucine-rich repeat family protein [Arabidopsis lyrata subsp. lyrata] gi 297309844 gb EFH40273.1  leucine-rich repeat family protein [Arabidopsis lyrata subsp. lyrata]                                                                                                                                                                                                                                                                                     | 953  | 953  | 0         | 100.0 | 85.1 | 91.5 | leucine-rich repeat family protein                                             | gbpln | Arabidopsis lyrata   | AT5G49760.1   Symbols:   Leucine-rich repeat protein kinase family protein   chr5:20216679-20221052 FORWARD LENGTH=953                                                                                                                                                                                                                   | 953  | 953 | 0         | 100.0 | 84.8 | 91.3 |

|                          |                                                                                                                                                                                                                                                                                                                                                                                                                                                                                                                                                                                                                                                                                                                                                                                                                                                                                                                                                                                                                                                                                                                              |     |     |           |       |      |      |                                                             |       |                      |                                                                                                                                                                                                                                                                                                                                                                                                                                                                                     |     |     |           |       |      |      |
|--------------------------|------------------------------------------------------------------------------------------------------------------------------------------------------------------------------------------------------------------------------------------------------------------------------------------------------------------------------------------------------------------------------------------------------------------------------------------------------------------------------------------------------------------------------------------------------------------------------------------------------------------------------------------------------------------------------------------------------------------------------------------------------------------------------------------------------------------------------------------------------------------------------------------------------------------------------------------------------------------------------------------------------------------------------------------------------------------------------------------------------------------------------|-----|-----|-----------|-------|------|------|-------------------------------------------------------------|-------|----------------------|-------------------------------------------------------------------------------------------------------------------------------------------------------------------------------------------------------------------------------------------------------------------------------------------------------------------------------------------------------------------------------------------------------------------------------------------------------------------------------------|-----|-----|-----------|-------|------|------|
| Rsa1.0_01535.1.g27709.t1 | #                                                                                                                                                                                                                                                                                                                                                                                                                                                                                                                                                                                                                                                                                                                                                                                                                                                                                                                                                                                                                                                                                                                            | #   | #   | #         | #     | #    | #    | -                                                           | ----  | ----                 | #                                                                                                                                                                                                                                                                                                                                                                                                                                                                                   | #   | #   | #         | #     | #    |      |
| Rsa1.0_01535.1.g27710.t1 | #                                                                                                                                                                                                                                                                                                                                                                                                                                                                                                                                                                                                                                                                                                                                                                                                                                                                                                                                                                                                                                                                                                                            | #   | #   | #         | #     | #    | #    | -                                                           | ----  | ----                 | #                                                                                                                                                                                                                                                                                                                                                                                                                                                                                   | #   | #   | #         | #     | #    |      |
| Rsa1.0_01535.1.g27711.t2 | #                                                                                                                                                                                                                                                                                                                                                                                                                                                                                                                                                                                                                                                                                                                                                                                                                                                                                                                                                                                                                                                                                                                            | #   | #   | #         | #     | #    | #    | -                                                           | ----  | ----                 | #                                                                                                                                                                                                                                                                                                                                                                                                                                                                                   | #   | #   | #         | #     | #    |      |
| Rsa1.0_01535.1.g27712.t1 | ref XP_002864014.1  leucine-rich repeat family protein [Arabidopsis lyrata subsp. lyrata]  gi297309849 gb EFH40273.1  leucine-rich repeat family protein [Arabidopsis lyrata subsp. lyrata]                                                                                                                                                                                                                                                                                                                                                                                                                                                                                                                                                                                                                                                                                                                                                                                                                                                                                                                                  | 919 | 953 | 0         | 103.7 | 80.1 | 87.4 | leucine-rich repeat family protein                          | gbpln | Arabidopsis lyrata   | AT5G49760.1   Symbols:   Leucine-rich repeat protein kinase family protein   chr5:20216679-2021052 FORWARD LENGTH=953                                                                                                                                                                                                                                                                                                                                                               | 919 | 953 | 0         | 103.7 | 79.4 | 87.3 |
| Rsa1.0_01536.1.g27713.t1 | gb EOA30360.1  hypothetical protein CARUB_v10013481mg [Capsella rubella]                                                                                                                                                                                                                                                                                                                                                                                                                                                                                                                                                                                                                                                                                                                                                                                                                                                                                                                                                                                                                                                     | 532 | 511 | 0         | 96.1  | 76.9 | 82.7 | hypothetical protein CARUB_v10013481mg                      | gbpln | Capsella rubella     | AT2G15860.1   Symbols:   unknown protein; FUNCTIONS IN: molecular_function unknown; INVOLVED IN: biological_process unknown; LOCATED IN: cellular_component unknown; EXPRESSED IN: 24 plant structures; EXPRESSED DURING: 13 growth stages; Has 30201 Blast hits to 17322 proteins in 780 species: Archae - 12; Bacteria - 1396; Metazoa - 17338; Fungi - 3422; Plants - 5037; Viruses - 0; Other Eukaryotes - 2996 (source: NCBI BLINK).   chr2:6905712-6909282 REVERSE LENGTH=512 | 532 | 512 | 0         | 96.2  | 76.1 | 82.7 |
| Rsa1.0_01536.1.g27714.t1 | gb EOA34479.1  hypothetical protein CARUB_v10022019mg [Capsella rubella]                                                                                                                                                                                                                                                                                                                                                                                                                                                                                                                                                                                                                                                                                                                                                                                                                                                                                                                                                                                                                                                     | 318 | 312 | 9.00E-84  | 98.1  | 50.6 | 65.4 | hypothetical protein CARUB_v10022019mg                      | gbpln | Capsella rubella     | AT1G65140.1   Symbols:   Ubiquitin carboxyl-terminal hydrolase family protein   chr1:24201620-24203226 FORWARD LENGTH=317                                                                                                                                                                                                                                                                                                                                                           | 318 | 317 | 2.00E-80  | 99.7  | 50.3 | 64.5 |
| Rsa1.0_01536.1.g27715.t1 | ref NP_179188.1  Pollen-specific leucine-rich repeat extensin-like protein 3 [Arabidopsis thaliana]  gi175338652 sp Q9XIL9.1 PLRX3_ARATH RecName: Full=Pollen-specific leucine-rich repeat extensin-like protein 3; Short=AtPEX3; Short=Pollen-specific LRR/EXTENSIN3; AltName: Full=Cell wall hydroxyproline-rich glycoprotein; Flags: Precursor  gi5306245 gb AAD41978.1  unknown protein [Arabidopsis thaliana]  gi330251349 gb AEC06443.1  Pollen-specific leucine-rich repeat extensin-like protein 3 [Arabidopsis thaliana]  ref NP_565383.1  maternal effect embryo arrest 14 protein [Arabidopsis thaliana]  gi11692922 gb AAG40064.1 AF324713.1 At2g15890 [Arabidopsis thaliana]  gi12642940 gb AAK00412.1 AF339730.1 unknown protein [Arabidopsis thaliana]  gi5306244 gb AAD41977.1  expressed protein [Arabidopsis thaliana]  gi17473579 gb AAL38262.1  unknown protein [Arabidopsis thaliana]  gi21592568 gb AAM64517.1  unknown [Arabidopsis thaliana]  gi30725564 gb AAP37804.1  At2g15890 [Arabidopsis thaliana]  gi330251350 gb AEC06444.1  maternal effect embryo arrest 14 protein [Arabidopsis thaliana] | 865 | 727 | 0         | 84.0  | 44.2 | 46.8 | Pollen-specific leucine-rich repeat extensin-like protein 3 | gbpln | Arabidopsis thaliana | AT2G15880.1   Symbols:   Leucine-rich repeat (LRR) family protein   chr2:6918039-6920319 REVERSE LENGTH=727                                                                                                                                                                                                                                                                                                                                                                         | 865 | 727 | 0         | 84.0  | 44.2 | 46.8 |
| Rsa1.0_01536.1.g27716.t1 | ref NP_565383.1  maternal effect embryo arrest 14 protein [Arabidopsis thaliana]  gi11692922 gb AAG40064.1 AF324713.1 At2g15890 [Arabidopsis thaliana]  gi12642940 gb AAK00412.1 AF339730.1 unknown protein [Arabidopsis thaliana]  gi5306244 gb AAD41977.1  expressed protein [Arabidopsis thaliana]  gi17473579 gb AAL38262.1  unknown protein [Arabidopsis thaliana]  gi21592568 gb AAM64517.1  unknown [Arabidopsis thaliana]  gi30725564 gb AAP37804.1  At2g15890 [Arabidopsis thaliana]  gi330251350 gb AEC06444.1  maternal effect embryo arrest 14 protein [Arabidopsis thaliana]                                                                                                                                                                                                                                                                                                                                                                                                                                                                                                                                    | 201 | 203 | 6.00E-81  | 101.0 | 81.1 | 90.0 | maternal effect embryo arrest 14 protein                    | gbpln | Arabidopsis thaliana | AT2G15890.1   Symbols: MEE14   maternal effect embryo arrest 14   chr2:6921196-6921978 REVERSE LENGTH=203                                                                                                                                                                                                                                                                                                                                                                           | 201 | 203 | 2.00E-83  | 101.0 | 81.1 | 90.0 |
| Rsa1.0_01536.1.g27717.t1 | gb EOA32338.1  hypothetical protein CARUB_v10015605mg, partial [Capsella rubella]                                                                                                                                                                                                                                                                                                                                                                                                                                                                                                                                                                                                                                                                                                                                                                                                                                                                                                                                                                                                                                            | 242 | 247 | 1.00E-111 | 102.1 | 81.4 | 86.0 | hypothetical protein CARUB_v10015605mg, partial             | gbpln | Capsella rubella     | AT2G15910.1   Symbols:   CSL zinc finger domain-containing protein   chr2:6932917-6935333 REVERSE LENGTH=367                                                                                                                                                                                                                                                                                                                                                                        | 242 | 367 | 1.00E-109 | 151.7 | 81.4 | 85.5 |
| Rsa1.0_01536.1.g27718.t1 | ref NP_179191.1  CSL zinc finger domain-containing protein [Arabidopsis thaliana]  gi5306242 gb AAD41975.1  unknown protein [Arabidopsis thaliana]  gi330251353 gb AEC06447.1  CSL zinc finger domain-containing protein [Arabidopsis thaliana]                                                                                                                                                                                                                                                                                                                                                                                                                                                                                                                                                                                                                                                                                                                                                                                                                                                                              | 84  | 367 | 1.00E-37  | 436.9 | 88.1 | 91.7 | CSL zinc finger domain-containing protein                   | gbpln | Arabidopsis thaliana | AT2G15910.1   Symbols:   CSL zinc finger domain-containing protein   chr2:6932917-6935333 REVERSE LENGTH=367                                                                                                                                                                                                                                                                                                                                                                        | 84  | 367 | 2.00E-40  | 436.9 | 88.1 | 91.7 |
| Rsa1.0_01536.1.g27719.t1 | db BAJ34348.1  unnamed protein product [Thellungiella halophila]                                                                                                                                                                                                                                                                                                                                                                                                                                                                                                                                                                                                                                                                                                                                                                                                                                                                                                                                                                                                                                                             | 74  | 76  | 4.00E-27  | 102.7 | 82.4 | 90.5 | unnamed protein product                                     | ----  | ----                 | AT2G15960.1   Symbols:   unknown protein; Has 14 Blast hits to 14 proteins in 5 species: Archae - 0; Bacteria - 0; Metazoa - 0; Fungi - 0; Plants - 14; Viruses - 0; Other Eukaryotes - 0 (source: NCBI BLINK).   chr2:6947353-6947586 FORWARD LENGTH=77                                                                                                                                                                                                                            | 74  | 77  | 8.00E-26  | 104.1 | 82.4 | 89.2 |
| Rsa1.0_01536.1.g27720.t1 | gb ABV89655.1  cold regulated 413 plasma membrane 1 [Brassica rapa]                                                                                                                                                                                                                                                                                                                                                                                                                                                                                                                                                                                                                                                                                                                                                                                                                                                                                                                                                                                                                                                          | 197 | 197 | 1.00E-106 | 100.0 | 97.5 | 98.5 | cold regulated 413 plasma membrane 1                        | gbpln | Brassica rapa        | AT2G15970.1   Symbols: COR413-PM1, WCOR413, WCOR413-LIKE, ATCOR413-PM1, FL3-5A3, ATCYP19   cold regulated 413 plasma membrane 1   chr2:6950163-6951012 FORWARD LENGTH=197                                                                                                                                                                                                                                                                                                           | 197 | 197 | 8.00E-85  | 100.0 | 80.7 | 89.3 |

|                          |                                                                                                                                                                                                                                                                                                                                                                                                                                                                                                                                                                                                                                                                                                                                                          |     |     |           |       |      |      |                                             |       |                      |                                                                                                                            |     |     |           |       |      |      |
|--------------------------|----------------------------------------------------------------------------------------------------------------------------------------------------------------------------------------------------------------------------------------------------------------------------------------------------------------------------------------------------------------------------------------------------------------------------------------------------------------------------------------------------------------------------------------------------------------------------------------------------------------------------------------------------------------------------------------------------------------------------------------------------------|-----|-----|-----------|-------|------|------|---------------------------------------------|-------|----------------------|----------------------------------------------------------------------------------------------------------------------------|-----|-----|-----------|-------|------|------|
| Rsa1.0_01536.1.g27721.t1 | refXP_002872780.1  hypothetical protein ARALYDRAFT_911862 [Arabidopsis lyrata subsp. lyrata] gi 297318617 gb EFH49039.1  hypothetical protein ARALYDRAFT_911862 [Arabidopsis lyrata subsp. lyrata]                                                                                                                                                                                                                                                                                                                                                                                                                                                                                                                                                       | 592 | 591 | 0         | 99.8  | 84.1 | 90.4 | hypothetical protein ARALYDRAFT_911862      | gbpln | Arabidopsis lyrata   | AT4G03400.1   Symbols: DFL2, GH3-10   Auxin-responsive GH3 family protein   chr4:1497675-1499729 REVERSE LENGTH=591        | 592 | 591 | 0         | 99.8  | 83.8 | 90.2 |
| Rsa1.0_01536.1.g27722.t1 | gb EOA31069.1  hypothetical protein CARUB_v10014221mg [Capsella rubella]                                                                                                                                                                                                                                                                                                                                                                                                                                                                                                                                                                                                                                                                                 | 305 | 314 | 1.00E-121 | 103.0 | 80.3 | 86.2 | hypothetical protein CARUB_v10014221mg      | gbpln | Capsella rubella     | AT2G16070.2   Symbols: PDV2   plastid division2   chr2:6984072-6985356 REVERSE LENGTH=307                                  | 305 | 307 | 1.00E-122 | 100.7 | 80.0 | 88.2 |
| Rsa1.0_01536.1.g27723.t1 | refXP_002866147.1  F-box family protein [Arabidopsis lyrata subsp. lyrata] gi 297311982 gb EFH42406.1  F-box family protein [Arabidopsis lyrata subsp. lyrata]                                                                                                                                                                                                                                                                                                                                                                                                                                                                                                                                                                                           | 351 | 423 | 1.00E-36  | 120.5 | 37.9 | 54.1 | F-box family protein                        | gbpln | Arabidopsis lyrata   | AT5G56420.2   Symbols:   F-box/RNI-like/FBD-like domains-containing protein   chr5:22850863-22852334 REVERSE LENGTH=422    | 351 | 422 | 9.00E-38  | 120.2 | 36.8 | 53.8 |
| Rsa1.0_01536.1.g27724.t1 | refXP_002893862.1  bet v I allergen family protein [Arabidopsis lyrata subsp. lyrata] gi 297339704 gb EFH70121.1  bet v I allergen family protein [Arabidopsis lyrata subsp. lyrata]                                                                                                                                                                                                                                                                                                                                                                                                                                                                                                                                                                     | 151 | 152 | 2.00E-59  | 100.7 | 74.8 | 84.8 | bet v I allergen family protein             | gbpln | Arabidopsis lyrata   | AT1G35260.1   Symbols: MLP165   MLP-like protein 165   chr1:12937059-12937689 REVERSE LENGTH=152                           | 151 | 152 | 5.00E-61  | 100.7 | 73.5 | 84.8 |
| Rsa1.0_01536.1.g27725.t2 | refXP_002886213.1  hypothetical protein ARALYDRAFT_480795 [Arabidopsis lyrata subsp. lyrata] gi 297332053 gb EFH62472.1  hypothetical protein ARALYDRAFT_480795 [Arabidopsis lyrata subsp. lyrata]                                                                                                                                                                                                                                                                                                                                                                                                                                                                                                                                                       | 568 | 907 | 0         | 159.7 | 75.4 | 81.0 | hypothetical protein ARALYDRAFT_480795      | gbpln | Arabidopsis lyrata   | AT2G16250.1   Symbols:   Leucine-rich repeat protein kinase family protein   chr2:7039682-7042933 REVERSE LENGTH=915       | 568 | 915 | 0         | 161.1 | 73.4 | 80.5 |
| Rsa1.0_01537.1.g27726.t1 | gb EOA37197.1  hypothetical protein CARUB_v10010654mg [Capsella rubella]                                                                                                                                                                                                                                                                                                                                                                                                                                                                                                                                                                                                                                                                                 | 124 | 124 | 1.00E-60  | 100.0 | 87.9 | 96.0 | hypothetical protein CARUB_v10010654mg      | gbpln | Capsella rubella     | AT1G09815.1   Symbols: POLD4   polymerase delta 4   chr1:3189460-3190050 FORWARD LENGTH=124                                | 124 | 124 | 9.00E-63  | 100.0 | 86.3 | 95.2 |
| Rsa1.0_01537.1.g27727.t1 | ref NP_172453.1  pentatricopeptide repeat-containing protein [Arabidopsis thaliana] gi 75276860 sp O04504.1 PPR27_ARATH RecName: Full=Pentatricopeptide repeat-containing protein At1g09820 gi 2160173 gb AAB60736.1  Similar to N. tabacum salt-inducible protein (gb U08285) [Arabidopsis thaliana] gi 332190378 gb AEE28499.1  pentatricopeptide repeat-containing protein [Arabidopsis thaliana]                                                                                                                                                                                                                                                                                                                                                     | 606 | 606 | 0         | 100.0 | 80.7 | 90.3 | pentatricopeptide repeat-containing protein | gbpln | Arabidopsis thaliana | AT1G09820.1   Symbols:   Pentatricopeptide repeat (PPR-like) superfamily protein   chr1:3190584-3192414 REVERSE LENGTH=606 | 606 | 606 | 0         | 100.0 | 80.7 | 90.3 |
| Rsa1.0_01537.1.g27728.t1 | ref NP_172454.1  phosphoribosylamine--glycine ligase [Arabidopsis thaliana] gi 12644306 sp P52420.2 PUR2_ARATH RecName: Full=Phosphoribosylamine--glycine ligase, chloroplastic; AltName: Full=Glycinamide ribonucleotide synthetase; Short=GARS; AltName: Full=Phosphoribosylglycinamide synthetase; Flags: Precursor gi 2160174 gb AAB60737.1  Identical to A. thaliana PUR2 (gb X74766). ESTs gi ATTS3927.gb N96446 come from this gene [Arabidopsis thaliana] gi 15292773 gb AAK92755.1  putative phosphoribosylglycinamide synthetase [Arabidopsis thaliana] gi 20259251 gb AAM14361.1  putative phosphoribosylglycinamide synthetase [Arabidopsis thaliana] gi 332190379 gb AEE28500.1  phosphoribosylamine--glycine ligase [Arabidopsis thaliana] | 529 | 532 | 0         | 100.6 | 87.5 | 92.4 | phosphoribosylamine--glycine ligase         | gbpln | Arabidopsis thaliana | AT1G09830.1   Symbols:   Glycinamide ribonucleotide (GAR) synthetase   chr1:3192783-3194936 REVERSE LENGTH=532             | 529 | 532 | 0         | 100.6 | 87.5 | 92.4 |
| Rsa1.0_01537.1.g27729.t1 | refXP_002892530.1  hypothetical protein ARALYDRAFT_471093 [Arabidopsis lyrata subsp. lyrata] gi 297338372 gb EFH68789.1  hypothetical protein ARALYDRAFT_471093 [Arabidopsis lyrata subsp. lyrata]                                                                                                                                                                                                                                                                                                                                                                                                                                                                                                                                                       | 546 | 421 | 0         | 77.1  | 72.0 | 73.8 | hypothetical protein ARALYDRAFT_471093      | gbpln | Arabidopsis lyrata   | AT1G09840.6   Symbols: ATSK41, SK41   shaggy-like protein kinase 41   chr1:3196114-3199524 REVERSE LENGTH=421              | 546 | 421 | 0         | 77.1  | 72.0 | 73.6 |
| Rsa1.0_01537.1.g27730.t1 | refXP_002889773.1  hypothetical protein ARALYDRAFT_471096 [Arabidopsis lyrata subsp. lyrata] gi 297335615 gb EFH66032.1  hypothetical protein ARALYDRAFT_471096 [Arabidopsis lyrata subsp. lyrata]                                                                                                                                                                                                                                                                                                                                                                                                                                                                                                                                                       | 446 | 439 | 0         | 98.4  | 87.0 | 90.4 | hypothetical protein ARALYDRAFT_471096      | gbpln | Arabidopsis lyrata   | AT1G09850.1   Symbols: XBCP3   xylem bark cysteine peptidase 3   chr1:3201848-3203875 FORWARD LENGTH=437                   | 446 | 437 | 0         | 98.0  | 83.9 | 87.2 |
| Rsa1.0_01537.1.g27731.t1 | gb EOA37380.1  hypothetical protein CARUB_v10011209mg [Capsella rubella]                                                                                                                                                                                                                                                                                                                                                                                                                                                                                                                                                                                                                                                                                 | 386 | 383 | 1.00E-159 | 99.2  | 81.3 | 87.6 | hypothetical protein CARUB_v10011209mg      | gbpln | Capsella rubella     | AT1G09860.1   Symbols: ATPUP16, PUP16   purine permease 16   chr1:3204136-3205287 REVERSE LENGTH=383                       | 386 | 383 | 1.00E-161 | 99.2  | 81.1 | 87.0 |

|                          |                                                                                                                                                                                                                                                                                                                                                       |      |      |           |       |      |      |                                                 |       |                      |                                                                                                                                      |      |      |           |       |      |      |
|--------------------------|-------------------------------------------------------------------------------------------------------------------------------------------------------------------------------------------------------------------------------------------------------------------------------------------------------------------------------------------------------|------|------|-----------|-------|------|------|-------------------------------------------------|-------|----------------------|--------------------------------------------------------------------------------------------------------------------------------------|------|------|-----------|-------|------|------|
| Rsa1.0_01537.1.g27732.t1 | refXP_002889774.1   histidine acid phosphatase family protein [Arabidopsis lyrata subsp. lyrata]   gi 297335616 gb EFH66033.1   histidine acid phosphatase family protein [Arabidopsis lyrata subsp. lyrata]                                                                                                                                          | 487  | 487  | 0         | 100.0 | 92.0 | 95.1 | histidine acid phosphatase family protein       | gbpln | Arabidopsis lyrata   | AT1G09870.1   Symbols:   histidine acid phosphatase family protein   chr1:3205817-3208444 FORWARD LENGTH=487                         | 487  | 487  | 0         | 100.0 | 91.8 | 94.7 |
| Rsa1.0_01537.1.g27733.t1 | refXP_002892532.1   predicted protein [Arabidopsis lyrata subsp. lyrata]   gi 297338374 gb EFH68791.1   predicted protein [Arabidopsis lyrata subsp. lyrata]                                                                                                                                                                                          | 695  | 664  | 0         | 95.5  | 82.4 | 89.6 | predicted protein                               | gbpln | Arabidopsis lyrata   | AT1G09880.1   Symbols:   Rhamnogalacturonate lyase family protein   chr1:3208828-3211653 REVERSE LENGTH=631                          | 695  | 631  | 0         | 90.8  | 77.7 | 84.6 |
| Rsa1.0_01537.1.g27734.t1 | refXP_002892533.1   hypothetical protein ARALYDRAFT_334271 [Arabidopsis lyrata subsp. lyrata]   gi 297338375 gb EFH68792.1   hypothetical protein ARALYDRAFT_334271 [Arabidopsis lyrata subsp. lyrata]                                                                                                                                                | 633  | 633  | 0         | 100.0 | 94.0 | 97.9 | hypothetical protein ARALYDRAFT_334271          | gbpln | Arabidopsis lyrata   | AT1G09890.1   Symbols:   Rhamnogalacturonate lyase family protein   chr1:3214237-3217386 REVERSE LENGTH=617                          | 633  | 617  | 0         | 97.5  | 91.0 | 95.3 |
| Rsa1.0_01537.1.g27735.t1 | refXP_002889775.1   pentatricopeptide repeat-containing protein [Arabidopsis lyrata subsp. lyrata]   gi 297335617 gb EFH66034.1   pentatricopeptide repeat-containing protein [Arabidopsis lyrata subsp. lyrata]                                                                                                                                      | 597  | 598  | 0         | 100.2 | 90.6 | 95.1 | pentatricopeptide repeat-containing protein     | gbpln | Arabidopsis lyrata   | AT1G09900.1   Symbols:   Pentatricopeptide repeat (PPR-like) superfamily protein   chr1:3218133-3219929 FORWARD LENGTH=598           | 597  | 598  | 0         | 100.2 | 89.8 | 94.8 |
| Rsa1.0_01537.1.g27736.t1 | refNP_172462.2   rhamnogalacturonate lyase-like protein [Arabidopsis thaliana]   gi 332190392 gb AEE28513.1   rhamnogalacturonate lyase-like protein [Arabidopsis thaliana]                                                                                                                                                                           | 684  | 675  | 0         | 98.7  | 89.8 | 92.7 | rhamnogalacturonate lyase-like protein          | gbpln | Arabidopsis thaliana | AT1G09910.1   Symbols:   Rhamnogalacturonate lyase family protein   chr1:3220151-3224451 REVERSE LENGTH=675                          | 684  | 675  | 0         | 98.7  | 89.8 | 92.7 |
| Rsa1.0_01537.1.g27737.t1 | gb EOA38541.1   hypothetical protein CARUB_v10010346mg [Capsella rubella]                                                                                                                                                                                                                                                                             | 200  | 197  | 1.00E-98  | 98.5  | 85.5 | 93.0 | hypothetical protein CARUB_v10010346mg          | gbpln | Capsella rubella     | AT1G09920.1   Symbols:   TRAF-type zinc finger-related   chr1:3224863-3226860 REVERSE LENGTH=192                                     | 200  | 192  | 2.00E-97  | 96.0  | 83.5 | 90.0 |
| Rsa1.0_01537.1.g27738.t1 | refXP_002892536.1   hypothetical protein ARALYDRAFT_312036 [Arabidopsis lyrata subsp. lyrata]   gi 297338378 gb EFH68795.1   hypothetical protein ARALYDRAFT_312036 [Arabidopsis lyrata subsp. lyrata]                                                                                                                                                | 192  | 259  | 1.00E-61  | 134.9 | 63.5 | 74.5 | hypothetical protein ARALYDRAFT_312036          | gbpln | Arabidopsis lyrata   | AT1G09932.1   Symbols:   Phosphoglycerate mutase family protein   chr1:3230716-3233027 REVERSE LENGTH=260                            | 192  | 260  | 4.00E-59  | 135.4 | 60.9 | 71.9 |
| Rsa1.0_01537.1.g27739.t1 | gb EOA40544.1   hypothetical protein CARUB_v10009272mg [Capsella rubella]                                                                                                                                                                                                                                                                             | 341  | 416  | 1.00E-129 | 122.0 | 72.7 | 85.0 | hypothetical protein CARUB_v10009272mg          | gbpln | Capsella rubella     | AT1G10150.1   Symbols:   Carbohydrate-binding protein   chr1:3326160-3327404 FORWARD LENGTH=414                                      | 341  | 414  | 1.00E-128 | 121.4 | 71.0 | 83.3 |
| Rsa1.0_01537.1.g27740.t1 | refNP_683296.1   phloem protein 2-A10 [Arabidopsis thaliana]   gi 332190427 gb AEE28548.1   phloem protein 2-A10 [Arabidopsis thaliana]                                                                                                                                                                                                               | 188  | 184  | 2.00E-90  | 97.9  | 85.1 | 91.5 | phloem protein 2-A10                            | gbpln | Arabidopsis thaliana | AT1G10155.1   Symbols:   ATPP2-A10, PP2-A10   phloem protein 2-A10   chr1:3327637-3328448 REVERSE LENGTH=184                         | 188  | 184  | 9.00E-93  | 97.9  | 85.1 | 91.5 |
| Rsa1.0_01537.1.g27741.t1 | refXP_002892551.1   NF-X1 type zinc finger family protein [Arabidopsis lyrata subsp. lyrata]   gi 297338393 gb EFH68810.1   NF-X1 type zinc finger family protein [Arabidopsis lyrata subsp. lyrata]                                                                                                                                                  | 1112 | 1134 | 0         | 102.0 | 85.1 | 89.5 | NF-X1 type zinc finger family protein           | gbpln | Arabidopsis lyrata   | AT1G10170.1   Symbols:   ATNFXL1, NFXL1   NF-X-like 1   chr1:3333925-3337491 REVERSE LENGTH=1188                                     | 1112 | 1188 | 0         | 106.8 | 85.2 | 90.3 |
| Rsa1.0_01537.1.g27742.t1 | gb EOA25215.1   hypothetical protein CARUB_v10018528mg, partial [Capsella rubella]                                                                                                                                                                                                                                                                    | 118  | 103  | 1.00E-21  | 87.3  | 41.5 | 56.8 | hypothetical protein CARUB_v10018528mg, partial | gbpln | Capsella rubella     | AT5G66870.1   Symbols:   ASL1, LBD36   ASYMMETRIC LEAVES 2-like 1   chr5:26706621-26707562 FORWARD LENGTH=313                        | 118  | 313  | 6.00E-21  | 265.3 | 39.0 | 58.5 |
| Rsa1.0_01537.1.g27743.t1 | #                                                                                                                                                                                                                                                                                                                                                     | #    | #    | #         | #     | #    | -    | ----                                            | ----  | ----                 | #                                                                                                                                    | #    | #    | #         | #     | #    |      |
| Rsa1.0_01537.1.g27744.t1 | refNP_172491.1   transcription factor lim1 [Arabidopsis thaliana]   gi 13926190 gb AAK49575.1   AF370569.1 similar to transcription factor SF3 (pir) S37856 [Arabidopsis thaliana]   gi 21553513 gb AAM62606.1   putative transcription factor [Arabidopsis thaliana]   gi 332190431 gb AEE28552.1   transcription factor lim1 [Arabidopsis thaliana] | 191  | 190  | 1.00E-105 | 99.5  | 98.4 | 99.0 | transcription factor lim1                       | gbpln | Arabidopsis thaliana | AT1G10200.1   Symbols:   WLIM1   GATA type zinc finger transcription factor family protein   chr1:3346677-3347763 REVERSE LENGTH=190 | 191  | 190  | 1.00E-108 | 99.5  | 98.4 | 99.0 |



|                          |                                                                                                                                                                                                                                                                                                                                                                                                                                                                                                                                                                                                                                                                                                                                                                                                                                                                                                                                                               |      |      |           |       |      |      |                                              |       |                      |                                                                                                                                                                                                                                                            |      |      |           |       |      |      |
|--------------------------|---------------------------------------------------------------------------------------------------------------------------------------------------------------------------------------------------------------------------------------------------------------------------------------------------------------------------------------------------------------------------------------------------------------------------------------------------------------------------------------------------------------------------------------------------------------------------------------------------------------------------------------------------------------------------------------------------------------------------------------------------------------------------------------------------------------------------------------------------------------------------------------------------------------------------------------------------------------|------|------|-----------|-------|------|------|----------------------------------------------|-------|----------------------|------------------------------------------------------------------------------------------------------------------------------------------------------------------------------------------------------------------------------------------------------------|------|------|-----------|-------|------|------|
| Rsa1.0_01537.1.g27745.t2 | refNP_172492.1   mitogen-activated protein kinase 1 [Arabidopsis thaliana] gi 79317509 refNP_001031017.1   mitogen-activated protein kinase 1 [Arabidopsis thaliana] gi 21431792 sp G39021.2 MPK1_ARATH RecName: Full=Mitogen-activated protein kinase 1; Short=ATMPK1; Short=MAP kinase 1 gi 4914323 gb AAD32871.1 AC005489.9 F14N23.9 [Arabidopsis thaliana] gi 16649135 gb AAL24419.1   putative mitogen-activated protein kinase homolog 7 [Arabidopsis thaliana] gi 23197708 gb AAAN15381.1   putative mitogen-activated protein kinase homolog 7 [Arabidopsis thaliana] gi 332190432 gb AEE28553.1   mitogen-activated protein kinase 1 [Arabidopsis thaliana] gi 332190433 gb AEE28554.1   mitogen-activated protein kinase 1 [Arabidopsis thaliana]                                                                                                                                                                                                   | 180  | 370  | 9.00E-94  | 205.6 | 91.7 | 94.4 | mitogen-activated protein kinase 1           | gbpln | Arabidopsis thaliana | AT1G10210.2   Symbols: ATMPK1, MPK1   mitogen-activated protein kinase 1   chr1:3349579-3350776 FORWARD LENGTH=370                                                                                                                                         | 180  | 370  | 4.00E-96  | 205.6 | 91.7 | 94.4 |
| Rsa1.0_01537.1.g27746.t1 | gb EOA37093.1   hypothetical protein CARUB_v10010274mg [Capsella rubella]                                                                                                                                                                                                                                                                                                                                                                                                                                                                                                                                                                                                                                                                                                                                                                                                                                                                                     | 208  | 216  | 9.00E-71  | 103.8 | 73.6 | 84.1 | hypothetical protein CARUB_v10010274mg       | gbpln | Capsella rubella     | AT1G59590.1   Symbols: ZCF37   ZCF37   chr1:21887860-21888495 FORWARD LENGTH=211                                                                                                                                                                           | 208  | 211  | 6.00E-60  | 101.4 | 57.7 | 70.7 |
| Rsa1.0_01538.1.g27747.t1 | ref XP_002888655.1   hypothetical protein ARALYDRAFT_894597 [Arabidopsis lyrata subsp. lyrata] gi 297334496 gb EFH64914.1   hypothetical protein ARALYDRAFT_894597 [Arabidopsis lyrata subsp. lyrata]                                                                                                                                                                                                                                                                                                                                                                                                                                                                                                                                                                                                                                                                                                                                                         | 198  | 251  | 4.00E-33  | 126.8 | 56.1 | 67.2 | hypothetical protein ARALYDRAFT_894597       | gbpln | Arabidopsis lyrata   | AT1G68340.1   Symbols:   Protein of unknown function (DUF1639)   chr1:25614440-25615335 REVERSE LENGTH=246                                                                                                                                                 | 198  | 246  | 2.00E-32  | 124.2 | 52.0 | 66.2 |
| Rsa1.0_01538.1.g27748.t1 | #                                                                                                                                                                                                                                                                                                                                                                                                                                                                                                                                                                                                                                                                                                                                                                                                                                                                                                                                                             | #    | #    | #         | #     | #    | #    | -                                            | ----  | ----                 | #                                                                                                                                                                                                                                                          | #    | #    | #         | #     | #    |      |
| Rsa1.0_01538.1.g27749.t1 | gb ACP0609.1   disease resistance protein [Brassica rapa subsp. pekinensis]                                                                                                                                                                                                                                                                                                                                                                                                                                                                                                                                                                                                                                                                                                                                                                                                                                                                                   | 1310 | 2726 | 0         | 208.1 | 54.5 | 72.1 | disease resistance protein                   | gbpln | Brassica rapa        | ATMG00860.1   Symbols: ORF158   DNA/RNA polymerases superfamily protein   chrM:235916-236392 FORWARD LENGTH=158                                                                                                                                            | 1310 | 158  | 2.00E-34  | 12.1  | 5.3  | 6.6  |
| Rsa1.0_01538.1.g27750.t1 | emb CAB39638.1   RNA-directed DNA polymerase-like protein [Arabidopsis thaliana] gi 7267666 emb CAB78094.1   RNA-directed DNA polymerase-like protein [Arabidopsis thaliana]                                                                                                                                                                                                                                                                                                                                                                                                                                                                                                                                                                                                                                                                                                                                                                                  | 1999 | 1274 | 0         | 63.7  | 26.1 | 36.3 | RNA-directed DNA polymerase-like protein     | gbpln | Arabidopsis thaliana | AT4G2090.1   Symbols:   Ribonuclease H-like superfamily protein   chr4:14333528-14335255 FORWARD LENGTH=575                                                                                                                                                | 1999 | 575  | 3.00E-63  | 28.8  | 8.1  | 12.4 |
| Rsa1.0_01538.1.g27751.t1 | emb CAC41366.1   enoyl-[acyl-carrier protein] reductase [Brassica napus]                                                                                                                                                                                                                                                                                                                                                                                                                                                                                                                                                                                                                                                                                                                                                                                                                                                                                      | 368  | 385  | 0         | 104.6 | 97.0 | 97.6 | enoyl-                                       | gbpln | Brassica napus       | AT2G05990.2   Symbols: MOD1, ENR1   NAD(P)-binding Rossmann-fold superfamily protein   chr2:2322876-2324867 FORWARD LENGTH=390                                                                                                                             | 368  | 390  | 0         | 106.0 | 91.0 | 95.1 |
| Rsa1.0_01539.1.g27752.t1 | gb ABD65112.1   hypothetical protein 31.t00014 [Brassica oleracea]                                                                                                                                                                                                                                                                                                                                                                                                                                                                                                                                                                                                                                                                                                                                                                                                                                                                                            | 82   | 122  | 2.00E-16  | 148.8 | 50.0 | 62.2 | hypothetical protein 31.t00014               | gbpln | Brassica oleracea    | #                                                                                                                                                                                                                                                          | #    | #    | #         | #     | #    |      |
| Rsa1.0_01539.1.g27753.t1 | dbj BAJ34000.1   unnamed protein product [Thellungiella halophila]                                                                                                                                                                                                                                                                                                                                                                                                                                                                                                                                                                                                                                                                                                                                                                                                                                                                                            | 268  | 274  | 1.00E-112 | 102.2 | 81.7 | 85.8 | unnamed protein product                      | ----  | ----                 | AT1G08570.1   Symbols: ACHT4   atypical CYS HIS rich thioredoxin 4   chr1:2713059-2714312 FORWARD LENGTH=275                                                                                                                                               | 268  | 275  | 1.00E-113 | 102.6 | 78.0 | 82.8 |
| Rsa1.0_01539.1.g27754.t1 | ref NP_172334.1   uncharacterized protein [Arabidopsis thaliana] gi 9802580 gb AAF99782.1 AC003981.32 F22O13.6 [Arabidopsis thaliana] gi 38454044 gb AAR20716.1   At1g08580 [Arabidopsis thaliana] gi 41349904 gb AAS00337.1   At1g08580 [Arabidopsis thaliana] gi 332190190 gb AEE28311.1   uncharacterized protein AT1G08580 [Arabidopsis thaliana] ref NP_001184937.1   DEAD-like helicase domain-containing protein [Arabidopsis thaliana] gi 334182393 ref NP_001184938.1   DEAD-like helicase domain-containing protein [Arabidopsis thaliana] gi 334182395 ref NP_001184939.1   DEAD-like helicase domain-containing protein [Arabidopsis thaliana] gi 332190183 gb AEE28314.1   DEAD-like helicase domain-containing protein [Arabidopsis thaliana] gi 332190194 gb AEE28315.1   DEAD-like helicase domain-containing protein [Arabidopsis thaliana] gi 332190195 gb AEE28316.1   DEAD-like helicase domain-containing protein [Arabidopsis thaliana] | 123  | 123  | 3.00E-43  | 100.0 | 88.6 | 92.7 | uncharacterized protein                      | gbpln | Arabidopsis thaliana | AT1G08580.1   Symbols:   unknown protein; Has 39 Blast hits to 39 proteins in 15 species: Archae - 0; Bacteria - 0; Metazoa - 0; Fungi - 0; Plants - 35; Viruses - 0; Other Eukaryotes - 4 (source: NCBI BLINK).   chr1:2715296-2716351 REVERSE LENGTH=123 | 123  | 123  | 6.00E-46  | 100.0 | 88.6 | 92.7 |
| Rsa1.0_01539.1.g27755.t1 | ref NP_001184937.1   DEAD-like helicase domain-containing protein [Arabidopsis thaliana] gi 334182393 ref NP_001184938.1   DEAD-like helicase domain-containing protein [Arabidopsis thaliana] gi 334182395 ref NP_001184939.1   DEAD-like helicase domain-containing protein [Arabidopsis thaliana] gi 332190183 gb AEE28314.1   DEAD-like helicase domain-containing protein [Arabidopsis thaliana] gi 332190194 gb AEE28315.1   DEAD-like helicase domain-containing protein [Arabidopsis thaliana] gi 332190195 gb AEE28316.1   DEAD-like helicase domain-containing protein [Arabidopsis thaliana]                                                                                                                                                                                                                                                                                                                                                       | 1391 | 1479 | 0         | 106.3 | 71.2 | 80.0 | DEAD-like helicase domain-containing protein | gbpln | Arabidopsis thaliana | AT1G08600.2   Symbols: ATRX   P-loop containing nucleoside triphosphate hydrolases superfamily protein   chr1:2724562-2733431 FORWARD LENGTH=1479                                                                                                          | 1391 | 1479 | 0         | 106.3 | 71.2 | 80.0 |

|                          |                                                                                                                                                                                                                  |     |     |           |       |      |      |                                             |       |                    |                                                                                                                                                 |     |     |           |       |      |      |
|--------------------------|------------------------------------------------------------------------------------------------------------------------------------------------------------------------------------------------------------------|-----|-----|-----------|-------|------|------|---------------------------------------------|-------|--------------------|-------------------------------------------------------------------------------------------------------------------------------------------------|-----|-----|-----------|-------|------|------|
| Rsa1.0_01539.1.g27756.t1 | refXP_002892464.1   pentatricopeptide repeat-containing protein [Arabidopsis lyrata subsp. lyrata]   gi 297338306 gb EFH68723.1   pentatricopeptide repeat-containing protein [Arabidopsis lyrata subsp. lyrata] | 534 | 555 | 0         | 103.9 | 77.3 | 89.0 | pentatricopeptide repeat-containing protein | gbpln | Arabidopsis lyrata | AT1G08610.1   Symbols:   Pentatricopeptide repeat (PPR) superfamily protein   chr1:2733788-2735467 REVERSE LENGTH=559                           | 534 | 559 | 0         | 104.7 | 74.0 | 86.0 |
| Rsa1.0_01539.1.g27757.t1 | #                                                                                                                                                                                                                | #   | #   | #         | #     | #    | #    | -                                           | ----  | ----               | #                                                                                                                                               | #   | #   | #         | #     | #    |      |
| Rsa1.0_01539.1.g27758.t2 | refXP_002892465.1   hypothetical protein ARALYDRAFT_470930 [Arabidopsis lyrata subsp. lyrata]   gi 297338307 gb EFH68724.1   hypothetical protein ARALYDRAFT_470930 [Arabidopsis lyrata subsp. lyrata]           | 357 | 358 | 0         | 100.3 | 91.6 | 95.8 | hypothetical protein ARALYDRAFT_470930      | gbpln | Arabidopsis lyrata | AT1G08630.4   Symbols: THA1   threonine aldolase 1   chr1:2743948-2745685 REVERSE LENGTH=358                                                    | 357 | 358 | 0         | 100.3 | 90.5 | 95.8 |
| Rsa1.0_01539.1.g27759.t4 | refXP_002892467.1   glycosyl transferase family 29 protein [Arabidopsis lyrata subsp. lyrata]   gi 297338309 gb EFH68726.1   glycosyl transferase family 29 protein [Arabidopsis lyrata subsp. lyrata]           | 490 | 474 | 0         | 96.7  | 82.2 | 86.5 | glycosyl transferase family 29 protein      | gbpln | Arabidopsis lyrata | AT1G08680.1   Symbols: MGP2   MALE GAMETOPHYTE DEFECTIVE 2   chr1:2757116-2759677 REVERSE LENGTH=474                                            | 490 | 474 | 0         | 96.7  | 82.2 | 86.5 |
| Rsa1.0_01539.1.g27760.t1 | gb ABD65112.1   hypothetical protein 31.t00014 [Brassica oleracea]                                                                                                                                               | 137 | 122 | 7.00E-32  | 89.1  | 54.7 | 67.9 | hypothetical protein 31.t00014              | gbpln | Brassica oleracea  | #                                                                                                                                               | #   | #   | #         | #     | #    |      |
| Rsa1.0_01540.1.g27761.t2 | refXP_002877961.1   hypothetical protein ARALYDRAFT_906825 [Arabidopsis lyrata subsp. lyrata]   gi 297323799 gb EFH54220.1   hypothetical protein ARALYDRAFT_906825 [Arabidopsis lyrata subsp. lyrata]           | 471 | 467 | 0         | 99.2  | 96.6 | 97.7 | hypothetical protein ARALYDRAFT_906825      | gbpln | Arabidopsis lyrata | AT3G54190.1   Symbols:   Transducin/WD40 repeat-like superfamily protein   chr3:20061759-20063880 REVERSE LENGTH=467                            | 471 | 467 | 0         | 99.2  | 95.8 | 97.7 |
| Rsa1.0_01540.1.g27762.t3 | refXP_002876244.1   predicted protein [Arabidopsis lyrata subsp. lyrata]   gi 297322082 gb EFH52503.1   predicted protein [Arabidopsis lyrata subsp. lyrata]                                                     | 380 | 336 | 1.00E-143 | 88.4  | 73.4 | 79.5 | predicted protein                           | gbpln | Arabidopsis lyrata | AT3G54170.1   Symbols: ATFIP37, FIP37   FKBP12 interacting protein 37   chr3:20056848-20059396 FORWARD LENGTH=330                               | 380 | 330 | 1.00E-135 | 86.8  | 70.5 | 76.8 |
| Rsa1.0_01540.1.g27763.t1 | gb EOA25633.1   hypothetical protein CARUB_v10018982mg [Capsella rubella]                                                                                                                                        | 310 | 311 | 1.00E-155 | 100.3 | 85.2 | 93.2 | hypothetical protein CARUB_v10018982mg      | gbpln | Capsella rubella   | AT3G54150.1   Symbols:   S-adenosyl-L-methionine-dependent methyltransferases superfamily protein   chr3:20050802-20052742 REVERSE LENGTH=323   | 310 | 323 | 1.00E-154 | 104.2 | 83.2 | 91.3 |
| Rsa1.0_01540.1.g27764.t1 | gb EOA25617.1   hypothetical protein CARUB_v10018965mg [Capsella rubella]                                                                                                                                        | 284 | 281 | 1.00E-128 | 98.9  | 85.9 | 93.7 | hypothetical protein CARUB_v10018965mg      | gbpln | Capsella rubella   | AT3G54130.1   Symbols:   Josephin family protein   chr3:20042895-20044429 REVERSE LENGTH=280                                                    | 284 | 280 | 1.00E-128 | 98.6  | 84.5 | 91.5 |
| Rsa1.0_01540.1.g27765.t1 | gb EOA25084.1   hypothetical protein CARUB_v10018392mg [Capsella rubella]                                                                                                                                        | 203 | 203 | 3.00E-82  | 100.0 | 78.8 | 87.2 | hypothetical protein CARUB_v10018392mg      | gbpln | Capsella rubella   | AT3G54120.1   Symbols:   Reticulon family protein   chr3:20041269-20042133 REVERSE LENGTH=203                                                   | 203 | 203 | 1.00E-81  | 100.0 | 79.3 | 87.7 |
| Rsa1.0_01540.1.g27766.t1 | gb EOA24448.1   hypothetical protein CARUB_v10017704mg [Capsella rubella]                                                                                                                                        | 305 | 306 | 1.00E-166 | 100.3 | 93.8 | 97.4 | hypothetical protein CARUB_v10017704mg      | gbpln | Capsella rubella   | AT3G54110.1   Symbols: ATPUMP1, UCP, PUMP1, ATUCP1, UCP1   plant uncoupling mitochondrial protein 1   chr3:20038890-20040996 FORWARD LENGTH=306 | 305 | 306 | 1.00E-168 | 100.3 | 94.1 | 97.4 |
| Rsa1.0_01540.1.g27767.t2 | #                                                                                                                                                                                                                | #   | #   | #         | #     | #    | #    | -                                           | ----  | ----               | #                                                                                                                                               | #   | #   | #         | #     | #    |      |
| Rsa1.0_01540.1.g27768.t2 | refXP_002877955.1   hypothetical protein ARALYDRAFT_906813 [Arabidopsis lyrata subsp. lyrata]   gi 297323793 gb EFH54214.1   hypothetical protein ARALYDRAFT_906813 [Arabidopsis lyrata subsp. lyrata]           | 648 | 637 | 0         | 98.3  | 85.5 | 90.9 | hypothetical protein ARALYDRAFT_906813      | gbpln | Arabidopsis lyrata | AT3G54100.1   Symbols:   O-fucosyltransferase family protein   chr3:20034451-20037874 REVERSE LENGTH=638                                        | 648 | 638 | 0         | 98.5  | 84.1 | 90.1 |
| Rsa1.0_01540.1.g27769.t1 | gb EOA23931.1   hypothetical protein CARUB_v10017145mg [Capsella rubella]                                                                                                                                        | 461 | 475 | 0         | 103.0 | 88.5 | 94.4 | hypothetical protein CARUB_v10017145mg      | gbpln | Capsella rubella   | AT3G54090.1   Symbols: FLN1   fructokinase-like 1   chr3:20028145-20029835 FORWARD LENGTH=471                                                   | 461 | 471 | 0         | 102.2 | 87.6 | 94.8 |
| Rsa1.0_01540.1.g27770.t1 | gb EOA25032.1   hypothetical protein CARUB_v10018338mg [Capsella rubella]                                                                                                                                        | 101 | 78  | 6.00E-31  | 77.2  | 63.4 | 71.3 | hypothetical protein CARUB_v10018338mg      | gbpln | Capsella rubella   | AT3G54085.2   Symbols:   Yos1-like protein   chr3:20026790-20027016 REVERSE LENGTH=78                                                           | 101 | 78  | 1.00E-32  | 77.2  | 62.4 | 69.3 |
| Rsa1.0_01540.1.g27771.t1 | refXP_002876239.1   hypothetical protein ARALYDRAFT_348499 [Arabidopsis lyrata subsp. lyrata]   gi 297322077 gb EFH52498.1   hypothetical protein ARALYDRAFT_348499 [Arabidopsis lyrata subsp. lyrata]           | 329 | 436 | 2.00E-96  | 132.5 | 64.4 | 73.3 | hypothetical protein ARALYDRAFT_348499      | gbpln | Arabidopsis lyrata | AT3G54080.1   Symbols:   Concanavalin A-like lectin family protein   chr3:20025397-20026449 FORWARD LENGTH=350                                  | 329 | 350 | 4.00E-90  | 106.4 | 59.6 | 69.0 |
| Rsa1.0_01540.1.g27772.t1 | gb EOA24108.1   hypothetical protein CARUB_v10017339mg [Capsella rubella]                                                                                                                                        | 416 | 415 | 0         | 99.8  | 91.3 | 95.7 | hypothetical protein CARUB_v10017339mg      | gbpln | Capsella rubella   | AT3G54050.2   Symbols: HCEF1   high cyclic electron flow 1   chr3:20016951-20018527 FORWARD LENGTH=417                                          | 416 | 417 | 0         | 100.2 | 85.8 | 88.9 |

|                          |                                                                                                                                                                                                                                                                                                                                                                                                                                  |     |     |           |       |      |      |                                                    |       |                      |                                                                                                                                                                                                                                                                                                                                                                                                                                                                                                                                                                              |     |     |           |       |      |      |
|--------------------------|----------------------------------------------------------------------------------------------------------------------------------------------------------------------------------------------------------------------------------------------------------------------------------------------------------------------------------------------------------------------------------------------------------------------------------|-----|-----|-----------|-------|------|------|----------------------------------------------------|-------|----------------------|------------------------------------------------------------------------------------------------------------------------------------------------------------------------------------------------------------------------------------------------------------------------------------------------------------------------------------------------------------------------------------------------------------------------------------------------------------------------------------------------------------------------------------------------------------------------------|-----|-----|-----------|-------|------|------|
| Rsa1.0_01540.1.g27773.t1 | refXP_002877953.1  hypothetical protein ARALYDRAFT_485800 [Arabidopsis lyrata subsp. lyrata] gi 297323791 gb EFH54212.1  hypothetical protein ARALYDRAFT_485800 [Arabidopsis lyrata subsp. lyrata]                                                                                                                                                                                                                               | 182 | 183 | 3.00E-89  | 100.5 | 89.6 | 95.6 | hypothetical protein ARALYDRAFT_485800             | gbpln | Arabidopsis lyrata   | AT3G54040.1   Symbols:   PARI protein   chr3:20014032-20015299 REVERSE LENGTH=183                                                                                                                                                                                                                                                                                                                                                                                                                                                                                            | 182 | 183 | 4.00E-89  | 100.5 | 85.7 | 95.1 |
| Rsa1.0_01541.1.g27774.t1 | refXP_002867688.1  glycoside hydrolase family 28 protein [Arabidopsis lyrata subsp. lyrata] gi 297315524 gb EFH43947.1  glycoside hydrolase family 28 protein [Arabidopsis lyrata subsp. lyrata]                                                                                                                                                                                                                                 | 240 | 444 | 1.00E-116 | 185.0 | 84.6 | 90.4 | glycoside hydrolase family 28 protein              | gbpln | Arabidopsis lyrata   | AT4G23820.1   Symbols:   Pectin lyase-like superfamily protein   chr4:12397217-12400050 REVERSE LENGTH=444                                                                                                                                                                                                                                                                                                                                                                                                                                                                   | 240 | 444 | 1.00E-118 | 185.0 | 84.6 | 90.0 |
| Rsa1.0_01541.1.g27775.t1 | refXP_002869762.1  hypothetical protein ARALYDRAFT_492485 [Arabidopsis lyrata subsp. lyrata] gi 297315598 gb EFH46021.1  hypothetical protein ARALYDRAFT_492485 [Arabidopsis lyrata subsp. lyrata]                                                                                                                                                                                                                               | 606 | 590 | 0         | 97.4  | 77.1 | 85.3 | hypothetical protein ARALYDRAFT_492485             | gbpln | Arabidopsis lyrata   | AT4G23840.1   Symbols:   Leucine-rich repeat (LRR) family protein   chr4:12400379-12403190 FORWARD LENGTH=597                                                                                                                                                                                                                                                                                                                                                                                                                                                                | 606 | 597 | 0         | 98.5  | 77.1 | 85.1 |
| Rsa1.0_01541.1.g27776.t1 | ref NP_194118.1  uncharacterized protein [Arabidopsis thaliana] gi 4972091 emb CAB43887.1  putative protein [Arabidopsis thaliana] gi 7269236 emb CAB81305.1  putative protein [Arabidopsis thaliana] gi 15450916 gb AAK96729.1  putative protein [Arabidopsis thaliana] gi 25084175 gb AAN72191.1  putative protein [Arabidopsis thaliana] gi 332659416 gb AEE84816.1  uncharacterized protein AT4G23870 [Arabidopsis thaliana] | 113 | 116 | 9.00E-38  | 102.7 | 85.8 | 92.9 | uncharacterized protein                            | gbpln | Arabidopsis thaliana | AT4G23870.1   Symbols:   unknown protein; BEST Arabidopsis thaliana protein match is: unknown protein (TAIR:AT4G11020.1); Has 12 Blast hits to 12 proteins in 4 species: Archae - 0; Bacteria - 0; Metazoa - 0; Fungi - 0; Plants - 12; Viruses - 0; Other Eukaryotes - 0 (source: NCBI BLink).   chr4:12414409-12414759 FORWARD LENGTH=116                                                                                                                                                                                                                                  | 113 | 116 | 1.00E-40  | 102.7 | 85.8 | 92.9 |
| Rsa1.0_01541.1.g27777.t1 | gb EOA17457.1  hypothetical protein CARUB_v10005780mg [Capsella rubella]                                                                                                                                                                                                                                                                                                                                                         | 199 | 197 | 7.00E-76  | 99.0  | 72.9 | 81.4 | hypothetical protein CARUB_v10005780mg             | gbpln | Capsella rubella     | AT4G23880.1   Symbols:   unknown protein; Has 73 Blast hits to 69 proteins in 22 species: Archae - 0; Bacteria - 4; Metazoa - 9; Fungi - 2; Plants - 18; Viruses - 0; Other Eukaryotes - 40 (source: NCBI BLink).   chr4:12415789-12416388 REVERSE LENGTH=199                                                                                                                                                                                                                                                                                                                | 199 | 199 | 4.00E-73  | 100.0 | 72.9 | 82.4 |
| Rsa1.0_01541.1.g27778.t1 | refXP_002869758.1  hypothetical protein ARALYDRAFT_914208 [Arabidopsis lyrata subsp. lyrata] gi 297315594 gb EFH46017.1  hypothetical protein ARALYDRAFT_914208 [Arabidopsis lyrata subsp. lyrata]                                                                                                                                                                                                                               | 174 | 76  | 4.00E-11  | 43.7  | 21.8 | 22.4 | hypothetical protein ARALYDRAFT_914208             | gbpln | Arabidopsis lyrata   | AT4G23885.1   Symbols:   unknown protein; BEST Arabidopsis thaliana protein match is: unknown protein (TAIR:AT5G24165.1); Has 30201 Blast hits to 17322 proteins in 780 species: Archae - 12; Bacteria - 1396; Metazoa - 17338; Fungi - 3422; Plants - 5037; Viruses - 0; Other Eukaryotes - 2996 (source: NCBI BLink).   chr4:12419472-12420240 FORWARD LENGTH=77                                                                                                                                                                                                           | 174 | 77  | 1.00E-12  | 44.3  | 20.1 | 21.3 |
| Rsa1.0_01541.1.g27779.t1 | gb EOA18489.1  hypothetical protein CARUB_v10007040mg [Capsella rubella]                                                                                                                                                                                                                                                                                                                                                         | 73  | 248 | 1.00E-30  | 339.7 | 91.8 | 94.5 | hypothetical protein CARUB_v10007040mg             | gbpln | Capsella rubella     | AT4G23890.1   Symbols:   unknown protein; FUNCTIONS IN: molecular_function unknown; INVOLVED IN: biological_process unknown; LOCATED IN: chloroplast thylakoid membrane, chloroplast; EXPRESSED IN: 22 plant structures; EXPRESSED DURING: 13 growth stages; CONTAINS InterPro DOMAIN/s: Protein of unknown function DUF3252 (InterPro:IPRO21659); Has 287 Blast hits to 287 proteins in 81 species: Archae - 0; Bacteria - 118; Metazoa - 12; Fungi - 6; Plants - 40; Viruses - 0; Other Eukaryotes - 111 (source: NCBI BLink).   chr4:12420593-12421345 REVERSE LENGTH=250 | 73  | 250 | 2.00E-33  | 342.5 | 91.8 | 94.5 |
| Rsa1.0_01541.1.g27780.t1 | ref NP_974602.1  Pleckstrin homology (PH) domain-containing protein [Arabidopsis thaliana] gi 145333884 ref NP_001078437.1  Pleckstrin homology (PH) domain-containing protein [Arabidopsis thaliana] gi 332659421 gb AEE84821.1  Pleckstrin homology (PH) domain-containing protein [Arabidopsis thaliana] gi 332659422 gb AEE84822.1  Pleckstrin homology (PH) domain-containing protein [Arabidopsis thaliana]                | 253 | 247 | 1.00E-111 | 97.6  | 82.2 | 89.3 | Pleckstrin homology (PH) domain-containing protein | gbpln | Arabidopsis thaliana | AT4G23895.2   Symbols:   Pleckstrin homology (PH) domain-containing protein   chr4:12422883-12424146 FORWARD LENGTH=247                                                                                                                                                                                                                                                                                                                                                                                                                                                      | 253 | 247 | 1.00E-114 | 97.6  | 82.2 | 89.3 |

|                          |                                                                                                                                                                                                                                                                                                                                                                                                                                                                                                                                                                                                                                                                             |      |      |           |       |      |      |                                             |       |                      |                                                                                                                                                                                                                                                                                                                                                                                                                                                                                                                                                                                                   |     |     |          |       |      |      |
|--------------------------|-----------------------------------------------------------------------------------------------------------------------------------------------------------------------------------------------------------------------------------------------------------------------------------------------------------------------------------------------------------------------------------------------------------------------------------------------------------------------------------------------------------------------------------------------------------------------------------------------------------------------------------------------------------------------------|------|------|-----------|-------|------|------|---------------------------------------------|-------|----------------------|---------------------------------------------------------------------------------------------------------------------------------------------------------------------------------------------------------------------------------------------------------------------------------------------------------------------------------------------------------------------------------------------------------------------------------------------------------------------------------------------------------------------------------------------------------------------------------------------------|-----|-----|----------|-------|------|------|
| Rsa1.0_01541.1.g27781.t2 | ref XP_002869754.1  UDP-D-glucose/UDP-D-galactose 4-epimerase 2 [Arabidopsis lyrata subsp. lyrata] gi 297315590 gb EFH46013.1  UDP-D-glucose/UDP-D-galactose 4-epimerase 2 [Arabidopsis lyrata subsp. lyrata]                                                                                                                                                                                                                                                                                                                                                                                                                                                               | 348  | 350  | 0         | 100.6 | 92.2 | 95.1 | UDP-D-glucose/UDP-D-galactose 4-epimerase 2 | gbpln | Arabidopsis lyrata   | AT4G23920.2   Symbols: UGE2, ATUGE2   UDP-D-glucose/UDP-D-galactose 4-epimerase 2   chr4:12431416-12433666 FORWARD LENGTH=350                                                                                                                                                                                                                                                                                                                                                                                                                                                                     | 348 | 350 | 0        | 100.6 | 91.1 | 94.8 |
| Rsa1.0_01541.1.g27782.t1 | gb AFD01308.1  auxin response factor 9 [Brassica rapa subsp. pekinensis]                                                                                                                                                                                                                                                                                                                                                                                                                                                                                                                                                                                                    | 638  | 629  | 0         | 98.6  | 92.8 | 94.7 | auxin response factor 9                     | gbpln | Brassica rapa        | AT4G23980.2   Symbols: ARF9   auxin response factor 9   chr4:12451592-12454737 FORWARD LENGTH=636                                                                                                                                                                                                                                                                                                                                                                                                                                                                                                 | 638 | 636 | 0        | 99.7  | 81.8 | 88.7 |
| Rsa1.0_01542.1.g27783.t1 | #                                                                                                                                                                                                                                                                                                                                                                                                                                                                                                                                                                                                                                                                           | #    | #    | #         | #     | #    | -    | -                                           | ----  | ----                 | #                                                                                                                                                                                                                                                                                                                                                                                                                                                                                                                                                                                                 | #   | #   | #        | #     | #    | #    |
| Rsa1.0_01542.1.g27784.t1 | #                                                                                                                                                                                                                                                                                                                                                                                                                                                                                                                                                                                                                                                                           | #    | #    | #         | #     | #    | -    | -                                           | ----  | ----                 | #                                                                                                                                                                                                                                                                                                                                                                                                                                                                                                                                                                                                 | #   | #   | #        | #     | #    | #    |
| Rsa1.0_01542.1.g27785.t1 | emb CAN71052.1  hypothetical protein VITISV_003719 [Vitis vinifera]                                                                                                                                                                                                                                                                                                                                                                                                                                                                                                                                                                                                         | 258  | 944  | 2.00E-47  | 365.9 | 39.1 | 48.1 | hypothetical protein VITISV_003719          | gbpln | Vitis vinifera       | #                                                                                                                                                                                                                                                                                                                                                                                                                                                                                                                                                                                                 | #   | #   | #        | #     | #    | #    |
| Rsa1.0_01542.1.g27786.t1 | gb ABD65073.1  hypothetical protein 27.t00059 [Brassica oleracea]                                                                                                                                                                                                                                                                                                                                                                                                                                                                                                                                                                                                           | 178  | 341  | 2.00E-45  | 191.6 | 49.4 | 59.6 | hypothetical protein 27.t00059              | gbpln | Brassica oleracea    | #                                                                                                                                                                                                                                                                                                                                                                                                                                                                                                                                                                                                 | #   | #   | #        | #     | #    | #    |
| Rsa1.0_01542.1.g27787.t1 | gb ABW81060.1  GagPol3 [Arabidopsis lyrata subsp. lyrata]                                                                                                                                                                                                                                                                                                                                                                                                                                                                                                                                                                                                                   | 1106 | 1103 | 1.00E-169 | 99.7  | 29.7 | 36.0 | GagPol3                                     | gbpln | Arabidopsis lyrata   | #                                                                                                                                                                                                                                                                                                                                                                                                                                                                                                                                                                                                 | #   | #   | #        | #     | #    | #    |
| Rsa1.0_01542.1.g27788.t1 | gb ABD65035.1  hypothetical protein 26.t00052 [Brassica oleracea]                                                                                                                                                                                                                                                                                                                                                                                                                                                                                                                                                                                                           | 669  | 695  | 1.00E-173 | 103.9 | 55.9 | 68.8 | hypothetical protein 26.t00052              | gbpln | Brassica oleracea    | AT1G51172.1   Symbols:   unknown protein; FUNCTIONS IN: molecular.function unknown; INVOLVED IN: biological.process unknown; LOCATED IN: cellular.component unknown; CONTAINS InterPro DOMAIN/s: Protein of unknown function DUF601 (InterPro:IPR006736); BEST Arabidopsis thaliana protein match is: Protein of unknown function, DUF601 (TAIR:AT1G46696.1); Has 1849 Blast hits to 1554 proteins in 272 species: Archaee - 15; Bacteria - 116; Metazoa - 677; Fungi - 267; Plants - 154; Viruses - 11; Other Eukaryotes - 609 (source: NCBI BLINK).   chr1:18963205-18965571 FORWARD LENGTH=681 | 669 | 681 | 1.00E-14 | 101.8 | 4.9  | 8.2  |
| Rsa1.0_01542.1.g27789.t1 | gb AAF79618.1 AC027665_19 F5M15.26 [Arabidopsis thaliana]                                                                                                                                                                                                                                                                                                                                                                                                                                                                                                                                                                                                                   | 1168 | 1838 | 1.00E-165 | 157.4 | 25.0 | 32.4 | F5M15.26                                    | gbpln | Arabidopsis thaliana | #                                                                                                                                                                                                                                                                                                                                                                                                                                                                                                                                                                                                 | #   | #   | #        | #     | #    | #    |
| Rsa1.0_01542.1.g27790.t5 | gb AAF79618.1 AC027665_19 F5M15.26 [Arabidopsis thaliana]                                                                                                                                                                                                                                                                                                                                                                                                                                                                                                                                                                                                                   | 1779 | 1838 | 1.00E-166 | 103.3 | 18.5 | 24.6 | F5M15.26                                    | gbpln | Arabidopsis thaliana | #                                                                                                                                                                                                                                                                                                                                                                                                                                                                                                                                                                                                 | #   | #   | #        | #     | #    | #    |
| Rsa1.0_01542.1.g27791.t1 | #                                                                                                                                                                                                                                                                                                                                                                                                                                                                                                                                                                                                                                                                           | #    | #    | #         | #     | #    | -    | -                                           | ----  | ----                 | #                                                                                                                                                                                                                                                                                                                                                                                                                                                                                                                                                                                                 | #   | #   | #        | #     | #    | #    |
| Rsa1.0_01543.1.g27792.t1 | gb EOA16045.1  hypothetical protein CARUB_v10004170mg [Capsella rubella]                                                                                                                                                                                                                                                                                                                                                                                                                                                                                                                                                                                                    | 792  | 792  | 0         | 100.0 | 81.2 | 96.0 | hypothetical protein CARUB_v10004170mg      | gbpln | Capsella rubella     | AT4G14990.1   Symbols:   Topoisomerase II-associated protein PAT1   chr4:8566259-8569511 REVERSE LENGTH=787                                                                                                                                                                                                                                                                                                                                                                                                                                                                                       | 792 | 787 | 0        | 99.4  | 81.1 | 85.6 |
| Rsa1.0_01543.1.g27793.t1 | ref NP_193236.1  60S ribosomal protein L27-3 [Arabidopsis thaliana] gi 3123264 sp P51419.2 RL273.ARATH RecName: Full=60S ribosomal protein L27-3 gi 2244857 emb CAB10279.1  ribosomal protein [Arabidopsis thaliana] gi 7268246 emb CAB78542.1  ribosomal protein [Arabidopsis thaliana] gi 17381062 gb AAL36343.1  putative ribosomal protein [Arabidopsis thaliana] gi 20466061 gb AAM20365.1  putative ribosomal protein [Arabidopsis thaliana] gi 21553620 gb AAM62713.1  ribosomal protein [Arabidopsis thaliana] gi 110736737 dbj BAF00331.1  ribosomal protein [Arabidopsis thaliana] gi 332658135 gb AEE83535.1  60S ribosomal protein L27-3 [Arabidopsis thaliana] | 135  | 135  | 2.00E-69  | 100.0 | 96.3 | 99.3 | 60S ribosomal protein L27-3                 | gbpln | Arabidopsis thaliana | AT4G15000.1   Symbols:   Ribosomal L27e protein family   chr4:8571896-8572303 FORWARD LENGTH=135                                                                                                                                                                                                                                                                                                                                                                                                                                                                                                  | 135 | 135 | 5.00E-72 | 100.0 | 96.3 | 99.3 |

|                          |                                                                                                                                                                                                                                                                                                                                                                                                                                                                                                                                                                                                                                                                                                                                                                                                                |     |     |           |       |      |      |                                                  |       |                      |                                                                                                                                                                                                                                                                                                                                                                                                                                                                                                                                                                                                            |     |     |           |       |      |      |
|--------------------------|----------------------------------------------------------------------------------------------------------------------------------------------------------------------------------------------------------------------------------------------------------------------------------------------------------------------------------------------------------------------------------------------------------------------------------------------------------------------------------------------------------------------------------------------------------------------------------------------------------------------------------------------------------------------------------------------------------------------------------------------------------------------------------------------------------------|-----|-----|-----------|-------|------|------|--------------------------------------------------|-------|----------------------|------------------------------------------------------------------------------------------------------------------------------------------------------------------------------------------------------------------------------------------------------------------------------------------------------------------------------------------------------------------------------------------------------------------------------------------------------------------------------------------------------------------------------------------------------------------------------------------------------------|-----|-----|-----------|-------|------|------|
| Rsa1.0_01543.1.g27794.t1 | ref NP_567453.1  Mitochondrial substrate carrier family protein [Arabidopsis thaliana]   gi 42572913 ref NP_974553.1  Mitochondrial substrate carrier family protein [Arabidopsis thaliana]   gi 42572915 ref NP_974554.1  Mitochondrial substrate carrier family protein [Arabidopsis thaliana]   gi 15451218 gb AAK96880.1  Unknown protein [Arabidopsis thaliana]   gi 30725620 gb AAP37832.1  At4g15610 [Arabidopsis thaliana]   gi 222424236 dbj BAH20076.1  AT4G15010 [Arabidopsis thaliana]   gi 332658137 gb AEE83537.1  Mitochondrial substrate carrier family protein [Arabidopsis thaliana]   gi 332658138 gb AEE83538.1  Mitochondrial substrate carrier family protein [Arabidopsis thaliana]   gi 332658139 gb AEE83539.1  Mitochondrial substrate carrier family protein [Arabidopsis thaliana] | 379 | 378 | 0         | 99.7  | 91.6 | 95.5 | Mitochondrial substrate carrier family protein   | gbpln | Arabidopsis thaliana | AT4G15010.2   Symbols:   Mitochondrial substrate carrier family protein   chr4:8573125-8574864 REVERSE LENGTH=378                                                                                                                                                                                                                                                                                                                                                                                                                                                                                          | 379 | 378 | 0         | 99.7  | 91.6 | 95.5 |
| Rsa1.0_01543.1.g27795.t1 | gb AAM98154.1  putative protein [Arabidopsis thaliana]                                                                                                                                                                                                                                                                                                                                                                                                                                                                                                                                                                                                                                                                                                                                                         | 773 | 768 | 0         | 99.4  | 77.5 | 85.8 | putative protein                                 | gbpln | Arabidopsis thaliana | AT4G15020.2   Symbols:   hAT transposon superfamily   chr4:8575806-8578372 FORWARD LENGTH=768<br>AT4G15030.1   Symbols:   CONTAINS InterPro DOMAIN/s: Folate-sensitive fragile site protein Fra10Ac1 (InterPro:IPR019129);<br>Has 8455 Blast hits to 5700 proteins in 376 species: Archae - 6; Bacteria - 264; Metazoa - 3820; Fungi - 744; Plants - 645; Viruses - 76; Other Eukaryotes - 2900 (source: NCBI BLINK).   chr4:8578989-8581180 FORWARD LENGTH=278                                                                                                                                            | 773 | 768 | 0         | 99.4  | 77.4 | 85.8 |
| Rsa1.0_01543.1.g27796.t1 | ref XP_002870265.1  predicted protein [Arabidopsis lyrata subsp. lyrata]   gi 297316101 gb EFH46524.1  predicted protein [Arabidopsis lyrata subsp. lyrata]                                                                                                                                                                                                                                                                                                                                                                                                                                                                                                                                                                                                                                                    | 290 | 245 | 3.00E-98  | 84.5  | 68.3 | 72.1 | predicted protein                                | gbpln | Arabidopsis lyrata   | AT1G10190.1   Symbols:   Protein of Unknown Function (DUF239)   chr1:3343765-3345591 REVERSE LENGTH=396                                                                                                                                                                                                                                                                                                                                                                                                                                                                                                    | 290 | 278 | 1.00E-100 | 95.9  | 67.2 | 70.7 |
| Rsa1.0_01543.1.g27797.t1 | ref XP_002868235.1  predicted protein [Arabidopsis lyrata subsp. lyrata]   gi 297314071 gb EFH44494.1  predicted protein [Arabidopsis lyrata subsp. lyrata]                                                                                                                                                                                                                                                                                                                                                                                                                                                                                                                                                                                                                                                    | 403 | 403 | 1.00E-152 | 100.0 | 63.0 | 78.4 | predicted protein                                | gbpln | Arabidopsis lyrata   | AT4G00315.1   Symbols:   F-box/RNI-like/FBD-like domains-containing protein   chr4:137404-138888 FORWARD LENGTH=441                                                                                                                                                                                                                                                                                                                                                                                                                                                                                        | 403 | 396 | 1.00E-149 | 98.3  | 61.0 | 75.7 |
| Rsa1.0_01543.1.g27798.t1 | gb EOA18357.1  hypothetical protein CARUB_v10006878mg, partial [Capsella rubella]                                                                                                                                                                                                                                                                                                                                                                                                                                                                                                                                                                                                                                                                                                                              | 436 | 567 | 1.00E-114 | 130.0 | 53.7 | 66.3 | hypothetical protein CARUB_v10006878mg, partial  | gbpln | Capsella rubella     | AT4G15080.1   Symbols:   DHHC-type zinc finger family protein   chr4:8609085-8612229 REVERSE LENGTH=718                                                                                                                                                                                                                                                                                                                                                                                                                                                                                                    | 436 | 441 | 1.00E-111 | 101.1 | 52.8 | 69.3 |
| Rsa1.0_01543.1.g27799.t1 | gb EOA16119.1  hypothetical protein CARUB_v10004251mg [Capsella rubella]                                                                                                                                                                                                                                                                                                                                                                                                                                                                                                                                                                                                                                                                                                                                       | 720 | 715 | 0         | 99.3  | 85.0 | 90.6 | hypothetical protein CARUB_v10004251mg           | gbpln | Capsella rubella     | AT4G15090.1   Symbols: FAR1   FRS (FAR1 Related Sequences) transcription factor family   chr4:8614806-8617870 FORWARD LENGTH=827                                                                                                                                                                                                                                                                                                                                                                                                                                                                           | 720 | 718 | 0         | 99.7  | 84.9 | 90.4 |
| Rsa1.0_01543.1.g27800.t1 | gb EOA19229.1  hypothetical protein CARUB_v100041781mg, partial [Capsella rubella]                                                                                                                                                                                                                                                                                                                                                                                                                                                                                                                                                                                                                                                                                                                             | 111 | 118 | 5.00E-15  | 106.3 | 36.9 | 40.5 | hypothetical protein CARUB_v100041781mg, partial | gbpln | Capsella rubella     | AT4G15120.1   Symbols:   VQ motif-containing protein   chr4:8634779-8635360 FORWARD LENGTH=193                                                                                                                                                                                                                                                                                                                                                                                                                                                                                                             | 111 | 827 | 5.00E-15  | 745.0 | 49.5 | 64.9 |
| Rsa1.0_01543.1.g27801.t1 | ref NP_567458.1  VQ motif-containing protein [Arabidopsis thaliana]   gi 2244869 emb CAB10291.1  hypothetical protein [Arabidopsis thaliana]   gi 7268255 emb CAB78554.1  hypothetical protein [Arabidopsis thaliana]   gi 26450073 dbj BAC42156.1  unknown protein [Arabidopsis thaliana]   gi 28973003 gb AAO63826.1  unknown protein [Arabidopsis thaliana]   gi 332658158 gb AEE83558.1  VQ motif-containing protein [Arabidopsis thaliana]                                                                                                                                                                                                                                                                                                                                                                | 181 | 193 | 1.00E-44  | 106.6 | 72.4 | 84.0 | VQ motif-containing protein                      | gbpln | Arabidopsis thaliana | AT4G15130.1   Symbols: ATCCT2, CCT2   phosphorylcholine cytidyltransferase2   chr4:8637793-8639388 FORWARD LENGTH=304<br>AT3G50800.1   Symbols:   unknown protein; FUNCTIONS IN: molecular function unknown; INVOLVED IN: N-terminal protein myristoylation; LOCATED IN: cellular component unknown; BEST Arabidopsis thaliana protein match is: unknown protein (TAIR:AT5G66580.1); Has 249 Blast hits to 249 proteins in 14 species: Archae - 0; Bacteria - 0; Metazoa - 0; Fungi - 0; Plants - 249; Viruses - 0; Other Eukaryotes - 0 (source: NCBI BLINK).   chr3:18882444-18882902 REVERSE LENGTH=152 | 181 | 193 | 4.00E-47  | 106.6 | 72.4 | 84.0 |
| Rsa1.0_01543.1.g27802.t1 | gb EOA17119.1  hypothetical protein CARUB_v10005379mg [Capsella rubella]                                                                                                                                                                                                                                                                                                                                                                                                                                                                                                                                                                                                                                                                                                                                       | 226 | 294 | 5.00E-98  | 130.1 | 81.4 | 90.3 | hypothetical protein CARUB_v10005379mg           | gbpln | Capsella rubella     | AT4G15130.1   Symbols: ATCCT2, CCT2   phosphorylcholine cytidyltransferase2   chr4:8637793-8639388 FORWARD LENGTH=304<br>AT3G50800.1   Symbols:   unknown protein; FUNCTIONS IN: molecular function unknown; INVOLVED IN: N-terminal protein myristoylation; LOCATED IN: cellular component unknown; BEST Arabidopsis thaliana protein match is: unknown protein (TAIR:AT5G66580.1); Has 249 Blast hits to 249 proteins in 14 species: Archae - 0; Bacteria - 0; Metazoa - 0; Fungi - 0; Plants - 249; Viruses - 0; Other Eukaryotes - 0 (source: NCBI BLINK).   chr3:18882444-18882902 REVERSE LENGTH=152 | 226 | 304 | 1.00E-97  | 134.5 | 81.9 | 92.5 |
| Rsa1.0_01544.1.g27803.t1 | ref XP_002877772.1  hypothetical protein ARALYDRAFT_906415 [Arabidopsis lyrata subsp. lyrata]   gi 297323610 gb EFH54031.1  hypothetical protein ARALYDRAFT_906415 [Arabidopsis lyrata subsp. lyrata]                                                                                                                                                                                                                                                                                                                                                                                                                                                                                                                                                                                                          | 156 | 154 | 2.00E-56  | 98.7  | 82.7 | 86.5 | hypothetical protein ARALYDRAFT_906415           | gbpln | Arabidopsis lyrata   | AT4G15130.1   Symbols: ATCCT2, CCT2   phosphorylcholine cytidyltransferase2   chr4:8637793-8639388 FORWARD LENGTH=304<br>AT3G50800.1   Symbols:   unknown protein; FUNCTIONS IN: molecular function unknown; INVOLVED IN: N-terminal protein myristoylation; LOCATED IN: cellular component unknown; BEST Arabidopsis thaliana protein match is: unknown protein (TAIR:AT5G66580.1); Has 249 Blast hits to 249 proteins in 14 species: Archae - 0; Bacteria - 0; Metazoa - 0; Fungi - 0; Plants - 249; Viruses - 0; Other Eukaryotes - 0 (source: NCBI BLINK).   chr3:18882444-18882902 REVERSE LENGTH=152 | 156 | 152 | 5.00E-58  | 97.4  | 81.4 | 85.9 |

| Rsa1.0_01544.1.g27804.t1 | #                                                                                                                                                                                                                                                                                                                                                                                                                                                                                                                                                                                                                                                            | #   | #   | #         | #     | #    | #    | #                                                   | #     | #                    | #                                                                                                                                         | #   | #   | #         | #     | #    | #    |
|--------------------------|--------------------------------------------------------------------------------------------------------------------------------------------------------------------------------------------------------------------------------------------------------------------------------------------------------------------------------------------------------------------------------------------------------------------------------------------------------------------------------------------------------------------------------------------------------------------------------------------------------------------------------------------------------------|-----|-----|-----------|-------|------|------|-----------------------------------------------------|-------|----------------------|-------------------------------------------------------------------------------------------------------------------------------------------|-----|-----|-----------|-------|------|------|
| Rsa1.0_01544.1.g27805.t1 | gb[EOA24769.1] hypothetical protein CARUB_v10018048mg [Capsella rubella]                                                                                                                                                                                                                                                                                                                                                                                                                                                                                                                                                                                     | 179 | 202 | 4.00E-78  | 112.8 | 86.6 | 89.9 | hypothetical protein CARUB_v10018048mg              | gbpln | Capsella rubella     | AT3G50770.1   Symbols: CML41   calmodulin-like 41   chr3:18873987-18874604 FORWARD LENGTH=205                                             | 179 | 205 | 1.00E-77  | 114.5 | 84.4 | 89.4 |
| Rsa1.0_01544.1.g27806.t1 | ref[NP_190645.3] putative galacturonosyltransferase-like 2 [Arabidopsis thaliana] gi 75193862 sp Q9S7G2.1 GATL2_ARAT H RecName: Full=Probable galacturonosyltransferase-like 2 gi 4835227 emb CAB42905.1  glycosyltransferase-like protein [Arabidopsis thaliana] gi 6561979 emb CAB62445.1  putative protein [Arabidopsis thaliana] gi 44917561 gb AAS49105.1  At3g50760 [Arabidopsis thaliana] gi 62320344 dbj BAD94712.1  hypothetical protein [Arabidopsis thaliana] gi 332645185 gb AEE78706.1  putative galacturonosyltransferase-like 2 [Arabidopsis thaliana] gb ABD64958.1  ethylene responsive element binding factor -related [Brassica oleracea] | 342 | 341 | 0         | 99.7  | 90.9 | 95.3 | putative galacturonosyltransferase-like 2           | gbpln | Arabidopsis thaliana | AT3G50760.1   Symbols: GATL2   galacturonosyltransferase-like 2   chr3:18668074-18669099 FORWARD LENGTH=341                               | 342 | 341 | 0         | 99.7  | 90.9 | 95.3 |
| Rsa1.0_01544.1.g27807.t1 | ref[XP_002878187.1] hypothetical protein ARALYDRAFT_348875 [Arabidopsis lyrata subsp. lyrata] gi 297324025 gb EFH54446.1  hypothetical protein ARALYDRAFT_348875 [Arabidopsis lyrata subsp. lyrata]                                                                                                                                                                                                                                                                                                                                                                                                                                                          | 171 | 954 | 1.00E-21  | 557.9 | 33.9 | 41.5 | ethylene responsive element binding factor -related | gbpln | Brassica oleracea    | #                                                                                                                                         | #   | #   | #         | #     | #    | #    |
| Rsa1.0_01544.1.g27808.t1 | ref[XP_002878187.1] hypothetical protein ARALYDRAFT_348875 [Arabidopsis lyrata subsp. lyrata] gi 297324025 gb EFH54446.1  hypothetical protein ARALYDRAFT_348875 [Arabidopsis lyrata subsp. lyrata]                                                                                                                                                                                                                                                                                                                                                                                                                                                          | 205 | 309 | 5.00E-31  | 150.7 | 35.6 | 42.0 | hypothetical protein ARALYDRAFT_348875              | gbpln | Arabidopsis lyrata   | AT3G58090.1   Symbols:   Disease resistance-responsive (dirigent-like protein) family protein   chr3:21512479-21513905 REVERSE LENGTH=271 | 205 | 271 | 3.00E-27  | 132.2 | 34.6 | 40.0 |
| Rsa1.0_01544.1.g27809.t1 | #                                                                                                                                                                                                                                                                                                                                                                                                                                                                                                                                                                                                                                                            | #   | #   | #         | #     | #    | #    | -                                                   | ----  | ----                 | #                                                                                                                                         | #   | #   | #         | #     | #    | #    |
| Rsa1.0_01544.1.g27810.t1 | emb[CAB62318.1] putative protein [Arabidopsis thaliana]                                                                                                                                                                                                                                                                                                                                                                                                                                                                                                                                                                                                      | 424 | 466 | 1.00E-177 | 109.9 | 76.9 | 86.1 | putative protein                                    | gbpln | Arabidopsis thaliana | AT3G50390.1   Symbols:   Transducin/WD40 repeat-like superfamily protein   chr3:18702137-18703546 FORWARD LENGTH=469                      | 424 | 469 | 1.00E-180 | 110.6 | 76.9 | 86.1 |
| Rsa1.0_01544.1.g27811.t1 | gb AAU44488.1  hypothetical protein AT3G50170 [Arabidopsis thaliana]                                                                                                                                                                                                                                                                                                                                                                                                                                                                                                                                                                                         | 513 | 541 | 0         | 105.5 | 77.0 | 86.0 | hypothetical protein AT3G50170                      | gbpln | Arabidopsis thaliana | AT3G50170.1   Symbols:   Plant protein of unknown function (DUF247)   chr3:18601857-18603738 REVERSE LENGTH=541                           | 513 | 541 | 0         | 105.5 | 76.8 | 85.8 |
| Rsa1.0_01544.1.g27812.t1 | gb[EOA23207.1] hypothetical protein CARUB_v10019135mg [Capsella rubella]                                                                                                                                                                                                                                                                                                                                                                                                                                                                                                                                                                                     | 593 | 553 | 0         | 93.3  | 68.3 | 75.2 | hypothetical protein CARUB_v10019135mg              | gbpln | Capsella rubella     | AT3G50140.1   Symbols:   Plant protein of unknown function (DUF247)   chr3:18592472-18594562 REVERSE LENGTH=539                           | 593 | 539 | 0         | 90.9  | 66.9 | 75.0 |
| Rsa1.0_01544.1.g27813.t1 | ref[XP_002877730.1] predicted protein [Arabidopsis lyrata subsp. lyrata] gi 297323568 gb EFH53989.1  predicted protein [Arabidopsis lyrata subsp. lyrata]                                                                                                                                                                                                                                                                                                                                                                                                                                                                                                    | 581 | 564 | 0         | 97.1  | 75.7 | 80.9 | predicted protein                                   | gbpln | Arabidopsis lyrata   | AT3G50130.1   Symbols:   Plant protein of unknown function (DUF247)   chr3:18589111-18591222 REVERSE LENGTH=564                           | 581 | 564 | 0         | 97.1  | 74.9 | 80.9 |
| Rsa1.0_01544.1.g27814.t1 | gb[EOA23237.1] hypothetical protein CARUB_v10016996mg [Capsella rubella]                                                                                                                                                                                                                                                                                                                                                                                                                                                                                                                                                                                     | 531 | 532 | 0         | 100.2 | 88.7 | 95.5 | hypothetical protein CARUB_v10016996mg              | gbpln | Capsella rubella     | AT3G50120.1   Symbols:   Plant protein of unknown function (DUF247)   chr3:18585157-18587246 REVERSE LENGTH=531                           | 531 | 531 | 0         | 100.0 | 88.9 | 95.1 |
| Rsa1.0_01545.1.g27815.t1 | gb[EOA13275.1] hypothetical protein CARUB_v10026304mg [Capsella rubella]                                                                                                                                                                                                                                                                                                                                                                                                                                                                                                                                                                                     | 189 | 486 | 3.00E-86  | 257.1 | 81.5 | 90.5 | hypothetical protein CARUB_v10026304mg              | gbpln | Capsella rubella     | AT5G65380.1   Symbols:   MATE efflux family protein   chr5:26123241-26126352 REVERSE LENGTH=486                                           | 189 | 486 | 2.00E-88  | 257.1 | 82.5 | 89.9 |
| Rsa1.0_01545.1.g27816.t1 | ref[NP_201341.1] mate efflux domain-containing protein [Arabidopsis thaliana] gi 14030731 gb AAK53040.1 AF375456_1 AT5g65380/MNA5_11 [Arabidopsis thaliana] gi 9759618 dbj BAB11560.1  unnamed protein product [Arabidopsis thaliana] gi 23506079 gb AAN28899.1  AT5g65380/MNA5_11 [Arabidopsis thaliana] gi 332010662 gb AED98045.1  mate efflux domain-containing protein [Arabidopsis thaliana]                                                                                                                                                                                                                                                           | 486 | 486 | 0         | 100.0 | 88.9 | 93.8 | mate efflux domain-containing protein               | gbpln | Arabidopsis thaliana | AT5G65380.1   Symbols:   MATE efflux family protein   chr5:26123241-26126352 REVERSE LENGTH=486                                           | 486 | 486 | 0         | 100.0 | 88.9 | 93.8 |
| Rsa1.0_01545.1.g27817.t1 | #                                                                                                                                                                                                                                                                                                                                                                                                                                                                                                                                                                                                                                                            | #   | #   | #         | #     | #    | #    | -                                                   | ----  | ----                 | #                                                                                                                                         | #   | #   | #         | #     | #    | #    |
| Rsa1.0_01545.1.g27818.t1 | #                                                                                                                                                                                                                                                                                                                                                                                                                                                                                                                                                                                                                                                            | #   | #   | #         | #     | #    | #    | -                                                   | ----  | ----                 | #                                                                                                                                         | #   | #   | #         | #     | #    | #    |
| Rsa1.0_01545.1.g27819.t1 | dbj BAJ34581.1  unnamed protein product [Thellungiella halophila]                                                                                                                                                                                                                                                                                                                                                                                                                                                                                                                                                                                            | 298 | 286 | 1.00E-106 | 96.0  | 78.9 | 80.5 | unnamed protein product                             | ----  | ----                 | AT5G65410.1   Symbols: ATHB25_ZFHD2, HB25_ZHD1   homeobox protein 25   chr5:26136179-26137018 FORWARD LENGTH=279                          | 298 | 279 | 8.00E-98  | 93.6  | 76.5 | 77.5 |
| Rsa1.0_01545.1.g27820.t1 | gb[EOA13734.1] hypothetical protein CARUB_v10026812mg [Capsella rubella]                                                                                                                                                                                                                                                                                                                                                                                                                                                                                                                                                                                     | 316 | 312 | 1.00E-149 | 98.7  | 84.8 | 89.9 | hypothetical protein CARUB_v10026812mg              | gbpln | Capsella rubella     | AT5G65420.1   Symbols: CYGD4.1   CYCLIN D4.1   chr5:26141592-26143750 REVERSE LENGTH=308                                                  | 316 | 308 | 2.33E-156 | 97.5  | 83.2 | 88.3 |

|                          |                                                                                                                                                                                                                                                                                                                                                                                                                                                                                                                                                                                                                                                                                                                                  |     |      |           |       |      |      |                                         |       |                      |                                                                                                                                                                                                                                                                                                                                                                                                                                                                                                                   |     |      |           |       |      |      |
|--------------------------|----------------------------------------------------------------------------------------------------------------------------------------------------------------------------------------------------------------------------------------------------------------------------------------------------------------------------------------------------------------------------------------------------------------------------------------------------------------------------------------------------------------------------------------------------------------------------------------------------------------------------------------------------------------------------------------------------------------------------------|-----|------|-----------|-------|------|------|-----------------------------------------|-------|----------------------|-------------------------------------------------------------------------------------------------------------------------------------------------------------------------------------------------------------------------------------------------------------------------------------------------------------------------------------------------------------------------------------------------------------------------------------------------------------------------------------------------------------------|-----|------|-----------|-------|------|------|
| Rsa1.0.01545.1.g27821.t1 | ref[NP_851274.1] 14-3-3-like protein GF14 kappa [Arabidopsis thaliana] gi 12643286 sp P48348.2 14338_ARATH RecName: Full=14-3-3-like protein GF14 kappa; AltName: Full=General regulatory factor 8 gi 5802794 gb AAD51783.1 AF145300.1 14-3-3 protein GF14 kappa [Arabidopsis thaliana] gi 15293125 gb AAK93673.1  putative 14-3-3 protein GF14kappa grf8 [Arabidopsis thaliana] gi 19310701 gb AAL85081.1  putative 14-3-3 protein GF14kappa [Arabidopsis thaliana] gi 21537301 gb AAM61642.1  14-3-3 protein GF14kappa (grf8) [Arabidopsis thaliana] gi 332010669 gb AED98052.1  14-3-3-like protein GF14 kappa [Arabidopsis thaliana]                                                                                         | 248 | 248  | 1.00E-137 | 100.0 | 96.0 | 98.4 | 14-3-3-like protein GF14 kappa          | gbpln | Arabidopsis thaliana | AT5G65430.1   Symbols: GRF8, 14-3-3KAPPA, GF14 KAPPA   general regulatory factor 8   chr5:26148546-26150255 REVERSE LENGTH=248                                                                                                                                                                                                                                                                                                                                                                                    | 248 | 248  | 1.00E-139 | 100.0 | 96.0 | 98.4 |
| Rsa1.0.01545.1.g27822.t1 | ref[XP_002864956.1] hypothetical protein ARALYDRAFT_332760 [Arabidopsis lyrata subsp. lyrata] gi 297310791 gb EFH41215.1  hypothetical protein ARALYDRAFT_332760 [Arabidopsis lyrata subsp. lyrata]                                                                                                                                                                                                                                                                                                                                                                                                                                                                                                                              | 744 | 1091 | 0         | 146.6 | 52.6 | 54.3 | hypothetical protein ARALYDRAFT_332760  | gbpln | Arabidopsis lyrata   | AT5G65440.1   Symbols:   unknown protein; INVOLVED IN: biological_process unknown; LOCATED IN: plasma membrane; EXPRESSED IN: 22 plant structures; EXPRESSED DURING: 13 growth stages; BEST Arabidopsis thaliana protein match is: unknown protein (TAIR:AT4G24610.1). Has 30201 Blast hits to 17322 proteins in 780 species: Archae - 12; Bacteria - 1396; Metazoa - 17338; Fungi - 3422; Plants - 5037; Viruses - 0; Other Eukaryotes - 2996 (source: NCBI BLINK).   chr5:26152015-26156896 FORWARD LENGTH=1050 | 744 | 1050 | 0         | 141.1 | 51.7 | 54.3 |
| Rsa1.0.01545.1.g27823.t1 | ref[XP_002864957.1] hypothetical protein ARALYDRAFT_332761 [Arabidopsis lyrata subsp. lyrata] gi 297310792 gb EFH41216.1  hypothetical protein ARALYDRAFT_332761 [Arabidopsis lyrata subsp. lyrata]                                                                                                                                                                                                                                                                                                                                                                                                                                                                                                                              | 511 | 731  | 0         | 143.1 | 70.1 | 80.6 | hypothetical protein ARALYDRAFT_332761  | gbpln | Arabidopsis lyrata   | AT5G65450.1   Symbols: UBP17   ubiquitin-specific protease 17   chr5:26157863-26161096 FORWARD LENGTH=731                                                                                                                                                                                                                                                                                                                                                                                                         | 511 | 731  | 0         | 143.1 | 70.8 | 79.3 |
| Rsa1.0.01546.1.g27824.t1 | #                                                                                                                                                                                                                                                                                                                                                                                                                                                                                                                                                                                                                                                                                                                                | #   | #    | #         | #     | #    | #    | -                                       | ----  | ----                 | #                                                                                                                                                                                                                                                                                                                                                                                                                                                                                                                 | #   | #    | #         | #     | #    |      |
| Rsa1.0.01546.1.g27825.t1 | ref[NP_174690.1] lectin protein kinase-like protein [Arabidopsis thaliana] gi 75338630 sp Q9XID3.1 Y1343_ARATH RecName: Full=G-type lectin S-receptor-like serine/threonine-protein kinase At1g34300; Flags: Precursor gi 5091617 gb AAD39605.1 AC007454.4 Contains similarity to gi 479356 protein kinase PK1 from Zea mays, is a member of the PF 00954 S-locus glycoprotein family and contains a PF 00069 Eukaryotic protein kinase domain [Arabidopsis thaliana] gi 19699084 gb AAL90909.1  At1g34300/F23M19.5 [Arabidopsis thaliana] gi 24111429 gb AAN46865.1  At1g34300/F23M19.5 [Arabidopsis thaliana] gi 332193573 gb AEE31694.1  G-type lectin S-receptor-like serine/threonine-protein kinase [Arabidopsis thaliana] | 772 | 829  | 0         | 107.4 | 60.9 | 74.0 | lectin protein kinase-like protein      | gbpln | Arabidopsis thaliana | AT1G34300.1   Symbols:   lectin protein kinase family protein   chr1:12503450-12505939 FORWARD LENGTH=829                                                                                                                                                                                                                                                                                                                                                                                                         | 772 | 829  | 0         | 107.4 | 60.9 | 74.0 |
| Rsa1.0.01546.1.g27826.t1 | gb EMJ23759.1  hypothetical protein PRUPE_ppa008371 [Prunus persica]                                                                                                                                                                                                                                                                                                                                                                                                                                                                                                                                                                                                                                                             | 145 | 335  | 7.00E-16  | 231.0 | 26.2 | 28.3 | hypothetical protein PRUPE_ppa008371.mg | gbpln | Prunus persica       | AT5G55190.1   Symbols: RAN3, ATRAN3   RAN GTPase 3   chr5:22392285-22393957 FORWARD LENGTH=221                                                                                                                                                                                                                                                                                                                                                                                                                    | 145 | 221  | 3.00E-18  | 152.4 | 26.2 | 28.3 |
| Rsa1.0.01546.1.g27827.t1 | gb AAN08437.1  hypothetical protein [Arabidopsis thaliana]                                                                                                                                                                                                                                                                                                                                                                                                                                                                                                                                                                                                                                                                       | 720 | 538  | 1.00E-136 | 74.7  | 37.8 | 46.4 | hypothetical protein                    | gbpln | Arabidopsis thaliana | AT2G43220.1   Symbols:   Cysteine/Histidine-rich C1 domain family protein   chr2:17964340-17965956 FORWARD LENGTH=538                                                                                                                                                                                                                                                                                                                                                                                             | 720 | 538  | 1.00E-139 | 74.7  | 37.8 | 46.4 |
| Rsa1.0.01546.1.g27828.t1 | ref[XP_002872455.1] hypothetical protein ARALYDRAFT_489817 [Arabidopsis lyrata subsp. lyrata] gi 297318292 gb EFH48714.1  hypothetical protein ARALYDRAFT_489817 [Arabidopsis lyrata subsp. lyrata]                                                                                                                                                                                                                                                                                                                                                                                                                                                                                                                              | 234 | 233  | 1.00E-114 | 99.6  | 86.8 | 94.0 | hypothetical protein ARALYDRAFT_489817  | gbpln | Arabidopsis lyrata   | AT4G09650.1   Symbols: ATPD   ATP synthase delta-subunit gene   chr4:6100799-6101503 FORWARD LENGTH=234                                                                                                                                                                                                                                                                                                                                                                                                           | 234 | 234  | 1.00E-114 | 100.0 | 86.3 | 93.6 |

|                          |                                                                                                                                                                                                                                                                                                                                                                                                                                                                                                                                                                                                                                              |      |      |           |       |      |      |                                              |       |                      |                                                                                                                                                                                                                                                                        |      |      |           |       |      |      |
|--------------------------|----------------------------------------------------------------------------------------------------------------------------------------------------------------------------------------------------------------------------------------------------------------------------------------------------------------------------------------------------------------------------------------------------------------------------------------------------------------------------------------------------------------------------------------------------------------------------------------------------------------------------------------------|------|------|-----------|-------|------|------|----------------------------------------------|-------|----------------------|------------------------------------------------------------------------------------------------------------------------------------------------------------------------------------------------------------------------------------------------------------------------|------|------|-----------|-------|------|------|
| Rsa1.0_01546.1.g27829.t1 | refNP_567007.1  glutamate carboxypeptidase II [Arabidopsis thaliana]<br>gi 332278204 sp Q9M1S8.3 GCP2_ARAT<br>H RecName: Full=Probable glutamate carboxypeptidase 2; AltName: Full=Probable glutamate carboxypeptidase II<br>gi 209529809 gb ACI49799.1  At3g54720 [Arabidopsis thaliana]<br>gi 332645749 gb AEE79270.1  probable glutamate carboxypeptidase II [Arabidopsis thaliana]                                                                                                                                                                                                                                                       | 124  | 705  | 4.00E-27  | 568.5 | 54.0 | 56.5 | glutamate carboxypeptidase II                | gbpln | Arabidopsis thaliana | AT3G54720.1   Symbols: AMP1, COP2, HPT, PT, MFO1   Peptidase M28 family protein   chr3:20254852-20257815 REVERSE LENGTH=705                                                                                                                                            | 124  | 705  | 7.00E-30  | 568.5 | 54.0 | 56.5 |
| Rsa1.0_01546.1.g27830.t1 | gb EOA20906.1  hypothetical protein CARUB_v10001242mg [Capsella rubella]                                                                                                                                                                                                                                                                                                                                                                                                                                                                                                                                                                     | 362  | 362  | 0         | 100.0 | 92.0 | 96.7 | hypothetical protein CARUB_v10001242mg       | gbpln | Capsella rubella     | AT4G09670.1   Symbols:   Oxidoreductase family protein   chr4:6107382-6109049 REVERSE LENGTH=362                                                                                                                                                                       | 362  | 362  | 0         | 100.0 | 90.9 | 96.1 |
| Rsa1.0_01546.1.g27831.t1 | #                                                                                                                                                                                                                                                                                                                                                                                                                                                                                                                                                                                                                                            | #    | #    | #         | #     | #    | #    | -                                            | ----  | ----                 | #                                                                                                                                                                                                                                                                      | #    | #    | #         | #     | #    | #    |
| Rsa1.0_01547.1.g27832.t1 | gb AAG51783.1 AC079679_3 reverse transcriptase, putative; 16838-20266 [Arabidopsis thaliana]                                                                                                                                                                                                                                                                                                                                                                                                                                                                                                                                                 | 554  | 1142 | 1.00E-170 | 206.1 | 51.8 | 69.3 | reverse transcriptase, putative; 16838-20266 | gbpln | Arabidopsis thaliana | AT4G29090.1   Symbols:   Ribonuclease H-like superfamily protein   chr4:14333528-14335255 FORWARD LENGTH=575<br>AT4G19500.2   Symbols:   nucleoside-triphosphatases;transmembrane receptors;nucleotide binding;ATP binding   chr4:10627364-10631532 FORWARD LENGTH=834 | 554  | 575  | 3.00E-32  | 103.8 | 13.7 | 21.1 |
| Rsa1.0_01547.1.g27833.t1 | gb ACP30588.1  disease resistance protein [Brassica rapa subsp. pekinensis]                                                                                                                                                                                                                                                                                                                                                                                                                                                                                                                                                                  | 1270 | 1108 | 0         | 87.2  | 42.0 | 48.7 | disease resistance protein                   | gbpln | Brassica rapa        | AT4G19520.1   Symbols:   disease resistance protein (TIR-NBS-LRR class) family   chr4:10639488-10647070 REVERSE LENGTH=1744                                                                                                                                            | 1270 | 834  | 0         | 65.7  | 32.1 | 41.3 |
| Rsa1.0_01547.1.g27834.t1 | refNP_193687.3  TIR-NBS-LRR class disease resistance protein [Arabidopsis thaliana] gi 332658794 gb AEE84194.1  TIR-NBS-LRR class disease resistance protein [Arabidopsis thaliana]                                                                                                                                                                                                                                                                                                                                                                                                                                                          | 1034 | 1744 | 0         | 168.7 | 57.5 | 69.9 | TIR-NBS-LRR class disease resistance protein | gbpln | Arabidopsis thaliana | AT4G19520.1   Symbols:   disease resistance protein (TIR-NBS-LRR class) family   chr4:10639488-10647070 REVERSE LENGTH=1744                                                                                                                                            | 1034 | 1744 | 0         | 168.7 | 57.5 | 69.9 |
| Rsa1.0_01547.1.g27835.t1 | db BAA97083.1  unnamed protein product [Arabidopsis thaliana]                                                                                                                                                                                                                                                                                                                                                                                                                                                                                                                                                                                | 519  | 583  | 2.00E-27  | 112.3 | 24.1 | 40.1 | unnamed protein product                      | gbpln | Arabidopsis thaliana | #                                                                                                                                                                                                                                                                      | #    | #    | #         | #     | #    | #    |
| Rsa1.0_01547.1.g27836.t2 | gb ABD65057.1  hypothetical protein 27.100123 [Brassica oleracea]                                                                                                                                                                                                                                                                                                                                                                                                                                                                                                                                                                            | 874  | 190  | 1.00E-32  | 21.7  | 11.7 | 13.5 | hypothetical protein 27.100123               | gbpln | Brassica oleracea    | #                                                                                                                                                                                                                                                                      | #    | #    | #         | #     | #    | #    |
| Rsa1.0_01548.1.g27837.t1 | gb EOA26734.1  hypothetical protein CARUB_v10022820mg [Capsella rubella]                                                                                                                                                                                                                                                                                                                                                                                                                                                                                                                                                                     | 375  | 527  | 1.00E-35  | 140.5 | 22.1 | 28.0 | hypothetical protein CARUB_v10022820mg       | gbpln | Capsella rubella     | AT4G05380.1   Symbols:   Zinc knuckle (GCHC-type) family protein   chr4:2728204-2732337 FORWARD LENGTH=735                                                                                                                                                             | 375  | 735  | 1.00E-37  | 196.0 | 25.1 | 31.2 |
| Rsa1.0_01548.1.g27838.t1 | #                                                                                                                                                                                                                                                                                                                                                                                                                                                                                                                                                                                                                                            | #    | #    | #         | #     | #    | #    | -                                            | ----  | ----                 | #                                                                                                                                                                                                                                                                      | #    | #    | #         | #     | #    | #    |
| Rsa1.0_01548.1.g27839.t2 | #                                                                                                                                                                                                                                                                                                                                                                                                                                                                                                                                                                                                                                            | #    | #    | #         | #     | #    | #    | -                                            | ----  | ----                 | #                                                                                                                                                                                                                                                                      | #    | #    | #         | #     | #    | #    |
| Rsa1.0_01548.1.g27840.t1 | refNP_199499.3  homeobox-leucine zipper protein HDG5 [Arabidopsis thaliana]<br>gi 3322510124 sp Q9FJS2.3 HDG5_ARAT<br>H RecName: Full=Homeobox-leucine zipper protein HDG5; AltName: Full=HD-ZIP protein HDG5; AltName: Full=Homeodomain GLABRA 2-like protein 5; AltName: Full=Homeodomain transcription factor HDG5; AltName: Full=Protein HOMEODOMAIN GLABROUS 5<br>gi 332008060 gb AED95443.1  homeobox-leucine zipper protein HDG5 [Arabidopsis thaliana]<br>emb CAB39638.1  RNA-directed DNA polymerase-like protein [Arabidopsis thaliana] gi 7267666 emb CAB78094.1  RNA-directed DNA polymerase-like protein [Arabidopsis thaliana] | 825  | 826  | 0         | 100.1 | 86.3 | 91.9 | homeobox-leucine zipper protein HDG5         | gbpln | Arabidopsis thaliana | AT5G46880.1   Symbols: HB-7, HDG5   homeobox-7   chr5:19031540-19035388 FORWARD LENGTH=826                                                                                                                                                                             | 825  | 826  | 0         | 100.1 | 86.3 | 91.9 |
| Rsa1.0_01548.1.g27841.t1 | emb CAB39638.1  RNA-directed DNA polymerase-like protein [Arabidopsis thaliana] gi 7267666 emb CAB78094.1  RNA-directed DNA polymerase-like protein [Arabidopsis thaliana]                                                                                                                                                                                                                                                                                                                                                                                                                                                                   | 1760 | 1274 | 0         | 72.4  | 19.7 | 26.4 | RNA-directed DNA polymerase-like protein     | gbpln | Arabidopsis thaliana | AT1G43760.1   Symbols:   DNAse I-like superfamily protein   chr1:16528880-16531065 REVERSE LENGTH=626                                                                                                                                                                  | 1760 | 626  | 7.00E-41  | 35.6  | 6.5  | 10.8 |
| Rsa1.0_01548.1.g27842.t1 | gb EOA15138.1  hypothetical protein CARUB_v10028513mg [Capsella rubella]                                                                                                                                                                                                                                                                                                                                                                                                                                                                                                                                                                     | 128  | 129  | 3.00E-46  | 100.8 | 75.8 | 86.7 | hypothetical protein CARUB_v10028513mg       | gbpln | Capsella rubella     | AT5G46890.1   Symbols:   Bifunctional inhibitor/lipid-transfer protein/seed storage 2S albumin superfamily protein   chr5:19036437-19036820 REVERSE LENGTH=127                                                                                                         | 128  | 127  | 1.00E-41  | 99.2  | 75.0 | 86.7 |
| Rsa1.0_01549.1.g27843.t1 | db BAJ34051.1  unnamed protein product [Thellungiella halophila]                                                                                                                                                                                                                                                                                                                                                                                                                                                                                                                                                                             | 248  | 251  | 1.00E-130 | 101.2 | 92.3 | 95.2 | unnamed protein product                      | ----  | ----                 | AT5G20700.1   Symbols:   Protein of unknown function (DUF581)   chr5:7006178-7007003 REVERSE LENGTH=248                                                                                                                                                                | 248  | 248  | 1.00E-124 | 100.0 | 87.9 | 92.3 |
| Rsa1.0_01549.1.g27844.t1 | gb EOA23063.1  hypothetical protein CARUB_v10003833mg [Capsella rubella]                                                                                                                                                                                                                                                                                                                                                                                                                                                                                                                                                                     | 645  | 660  | 0         | 102.3 | 77.5 | 87.0 | hypothetical protein CARUB_v10003833mg       | gbpln | Capsella rubella     | AT5G20690.1   Symbols:   Leucine-rich repeat protein kinase family protein   chr5:7002453-7004551 FORWARD LENGTH=659                                                                                                                                                   | 645  | 659  | 0         | 102.2 | 76.9 | 87.0 |
| Rsa1.0_01549.1.g27845.t1 | gb EOA20311.1  hypothetical protein CARUB_v10000619mg [Capsella rubella]                                                                                                                                                                                                                                                                                                                                                                                                                                                                                                                                                                     | 556  | 536  | 0         | 96.4  | 80.0 | 87.9 | hypothetical protein CARUB_v10000619mg       | gbpln | Capsella rubella     | AT5G20680.3   Symbols:   TRICHOME BIREFRINGENCE-LIKE 16   chr5:6998946-7001596 FORWARD LENGTH=551                                                                                                                                                                      | 556  | 551  | 0         | 99.1  | 79.7 | 88.3 |



|                          |                                                                                                                                                                                                                                                                                                                                                                                                                                                                                                                                                                                                                                          |      |      |           |       |      |      |                                                                                      |       |                      |                                                                                                                                                                                                                                                                                                                                                                                                                                                                                                                        |      |      |           |       |      |      |
|--------------------------|------------------------------------------------------------------------------------------------------------------------------------------------------------------------------------------------------------------------------------------------------------------------------------------------------------------------------------------------------------------------------------------------------------------------------------------------------------------------------------------------------------------------------------------------------------------------------------------------------------------------------------------|------|------|-----------|-------|------|------|--------------------------------------------------------------------------------------|-------|----------------------|------------------------------------------------------------------------------------------------------------------------------------------------------------------------------------------------------------------------------------------------------------------------------------------------------------------------------------------------------------------------------------------------------------------------------------------------------------------------------------------------------------------------|------|------|-----------|-------|------|------|
| Rsa1.0_01549.1.g27846.t1 | refNP_197567.1  uncharacterized protein [Arabidopsis thaliana] gi 149944295 gb ABR46190.1  At5g20670 [Arabidopsis thaliana] gi 332005491 gb AED92874.1  uncharacterized protein AT5G20670 [Arabidopsis thaliana]                                                                                                                                                                                                                                                                                                                                                                                                                         | 156  | 153  | 6.00E-67  | 98.1  | 87.8 | 91.0 | uncharacterized protein                                                              | gbpln | Arabidopsis thaliana | AT5G20670.1   Symbols:   Protein of unknown function (DUF1677)   chr5:6993332-6993793 REVERSE LENGTH=153                                                                                                                                                                                                                                                                                                                                                                                                               | 156  | 153  | 2.00E-69  | 98.1  | 87.8 | 91.0 |
| Rsa1.0_01549.1.g27847.t1 | gb EOA21677.1  hypothetical protein CARUB_v10002100mg, partial [Capsella rubella]                                                                                                                                                                                                                                                                                                                                                                                                                                                                                                                                                        | 144  | 173  | 4.00E-68  | 120.1 | 88.2 | 93.1 | hypothetical protein CARUB_v10002100mg, partial                                      | gbpln | Capsella rubella     | AT5G20650.1   Symbols: COPT5   copper transporter 5   chr5:6985481-6985921 REVERSE LENGTH=146                                                                                                                                                                                                                                                                                                                                                                                                                          | 144  | 146  | 2.00E-69  | 101.4 | 86.8 | 91.7 |
| Rsa1.0_01549.1.g27848.t1 | #                                                                                                                                                                                                                                                                                                                                                                                                                                                                                                                                                                                                                                        | #    | #    | #         | #     | #    | #    | -                                                                                    | ----  | ----                 | #                                                                                                                                                                                                                                                                                                                                                                                                                                                                                                                      | #    | #    | #         | #     | #    | #    |
| Rsa1.0_01549.1.g27849.t1 | #                                                                                                                                                                                                                                                                                                                                                                                                                                                                                                                                                                                                                                        | #    | #    | #         | #     | #    | #    | -                                                                                    | ----  | ----                 | #                                                                                                                                                                                                                                                                                                                                                                                                                                                                                                                      | #    | #    | #         | #     | #    | #    |
| Rsa1.0_01549.1.g27850.t1 | sp P45854.1 GLP1_SINAL RecName: Full=Germin-like protein 1; Flags: Precursor gi 683488 emb CAA59257.1  Glp1 [Sinapis alba]                                                                                                                                                                                                                                                                                                                                                                                                                                                                                                               | 211  | 211  | 1.00E-107 | 100.0 | 94.3 | 95.3 | RecName: Full=Germin-like protein 1; Flags: Precursor gi 683488 emb CAA59257.1  Glp1 | gbpln | Sinapis alba         | AT5G20630.1   Symbols: GLP3, GLP3A, GLP3B, ATGER3, GER3   germin 3   chr5:6975315-6975950 REVERSE LENGTH=211                                                                                                                                                                                                                                                                                                                                                                                                           | 211  | 211  | 1.00E-107 | 100.0 | 91.0 | 94.8 |
| Rsa1.0_01549.1.g27851.t1 | refNP_197561.1  uncharacterized protein [Arabidopsis thaliana] gi 332005483 gb AED92866.1  uncharacterized protein AT5G20610 [Arabidopsis thaliana]                                                                                                                                                                                                                                                                                                                                                                                                                                                                                      | 1123 | 1164 | 0         | 103.7 | 77.7 | 86.3 | uncharacterized protein                                                              | gbpln | Arabidopsis thaliana | AT5G20610.1   Symbols:   unknown protein; BEST Arabidopsis thaliana protein match is: unknown protein (TAIR:AT5G26160.1). Has 918 Blast hits to 759 proteins in 180 species: Archae - 6; Bacteria - 105; Metazoa - 264; Fungi - 89; Plants - 167; Viruses - 5; Other Eukaryotes - 282 (source: NCBI BLink).   chr5:6969184-6972794 FORWARD LENGTH=1164                                                                                                                                                                 | 1123 | 1164 | 0         | 103.7 | 77.7 | 86.3 |
| Rsa1.0_01549.1.g27852.t1 | refNP_197560.2  uncharacterized protein [Arabidopsis thaliana] gi 19310469 gb AAL84969.1  AT5g20600/F7C8_190 [Arabidopsis thaliana] gi 28416463 gb AAO42762.1  AT5g20600/F7C8_190 [Arabidopsis thaliana] gi 110738085 dbj BAF00976.1  hypothetical protein [Arabidopsis thaliana] gi 332005482 gb AED92865.1  uncharacterized protein AT5G20600 [Arabidopsis thaliana]                                                                                                                                                                                                                                                                   | 535  | 532  | 0         | 99.4  | 77.8 | 86.0 | uncharacterized protein                                                              | gbpln | Arabidopsis thaliana | AT5G20600.1   Symbols:   FUNCTIONS IN: molecular_function unknown; INVOLVED IN: rRNA processing; LOCATED IN: preribosome, small subunit precursor; EXPRESSED IN: 22 plant structures; EXPRESSED DURING: 13 growth stages; CONTAINS InterPro DOMAIN/s: Nucleolar_Nop52 (InterPro:IPR010301). Has 543 Blast hits to 530 proteins in 201 species: Archae - 0; Bacteria - 10; Metazoa - 211; Fungi - 164; Plants - 46; Viruses - 0; Other Eukaryotes - 112 (source: NCBI BLink).   chr5:6966345-6967943 REVERSE LENGTH=532 | 535  | 532  | 0         | 99.4  | 77.8 | 86.0 |
| Rsa1.0_01549.1.g27853.t1 | dbj BAE98654.1  hypothetical protein [Arabidopsis thaliana]                                                                                                                                                                                                                                                                                                                                                                                                                                                                                                                                                                              | 187  | 329  | 4.00E-84  | 175.9 | 78.1 | 82.4 | hypothetical protein                                                                 | gbpln | Arabidopsis thaliana | AT5G20590.1   Symbols: TBL5   TRICHOME BIREFRINGENCE-LIKE 5   chr5:6963517-6966006 FORWARD LENGTH=485                                                                                                                                                                                                                                                                                                                                                                                                                  | 187  | 485  | 4.00E-86  | 259.4 | 78.1 | 82.4 |
| Rsa1.0_01550.1.g27854.t1 | dbj BAB09379.1  non-LTR retroelement reverse transcriptase-like protein [Arabidopsis thaliana]                                                                                                                                                                                                                                                                                                                                                                                                                                                                                                                                           | 1082 | 1223 | 0         | 113.0 | 53.3 | 70.0 | non-LTR retroelement reverse transcriptase-like protein                              | gbpln | Arabidopsis thaliana | AT3G24255.1   Symbols:   RNA-directed DNA polymerase (reverse transcriptase)-related family protein   chr3:8789471-8793208 FORWARD LENGTH=746                                                                                                                                                                                                                                                                                                                                                                          | 1082 | 746  | 1.00E-100 | 68.9  | 17.0 | 23.4 |
| Rsa1.0_01550.1.g27855.t1 | refNP_190870.1  60S ribosomal protein L24-2 [Arabidopsis thaliana] gi 26454659 sp P38666.2 RL242_ARATH RecName: Full=60S ribosomal protein L24-2; AltName: Full=Protein SHORT VALVE 1 gi 7529726 emb CAB86906.1  60S ribosomal protein-like [Arabidopsis thaliana] gi 16648706 gb AAL25545.1  AT3g53020/F8J2_190 [Arabidopsis thaliana] gi 20260562 gb AAM13179.1  60S ribosomal protein-like [Arabidopsis thaliana] gi 30102870 gb AAP21353.1  At3g53020 [Arabidopsis thaliana] gi 80750876 dbj BAE48150.1  ribosomal protein L24 [Arabidopsis thaliana] gi 332645505 gb AEE79026.1  60S ribosomal protein L24-2 [Arabidopsis thaliana] | 162  | 163  | 1.00E-67  | 100.6 | 85.2 | 88.3 | 60S ribosomal protein L24-2                                                          | gbpln | Arabidopsis thaliana | AT3G53020.1   Symbols: STV1, RPL24B, RPL24   Ribosomal protein L24e family protein   chr3:19660749-19661912 REVERSE LENGTH=163                                                                                                                                                                                                                                                                                                                                                                                         | 162  | 163  | 4.00E-70  | 100.6 | 85.2 | 88.3 |
| Rsa1.0_01550.1.g27856.t1 | emb CAB86903.1  pyruvate kinase-like protein [Arabidopsis thaliana]                                                                                                                                                                                                                                                                                                                                                                                                                                                                                                                                                                      | 412  | 514  | 1.00E-145 | 124.8 | 61.4 | 62.1 | pyruvate kinase-like protein                                                         | gbpln | Arabidopsis thaliana | AT3G52990.2   Symbols:   Pyruvate kinase family protein   chr3:19649336-19652237 FORWARD LENGTH=474                                                                                                                                                                                                                                                                                                                                                                                                                    | 412  | 474  | 1.00E-148 | 115.0 | 61.4 | 62.1 |
| Rsa1.0_01550.1.g27857.t1 | #                                                                                                                                                                                                                                                                                                                                                                                                                                                                                                                                                                                                                                        | #    | #    | #         | #     | #    | #    | -                                                                                    | ----  | ----                 | #                                                                                                                                                                                                                                                                                                                                                                                                                                                                                                                      | #    | #    | #         | #     | #    | #    |
| Rsa1.0_01550.1.g27858.t1 | #                                                                                                                                                                                                                                                                                                                                                                                                                                                                                                                                                                                                                                        | #    | #    | #         | #     | #    | #    | -                                                                                    | ----  | ----                 | #                                                                                                                                                                                                                                                                                                                                                                                                                                                                                                                      | #    | #    | #         | #     | #    | #    |
| Rsa1.0_01550.1.g27859.t1 | #                                                                                                                                                                                                                                                                                                                                                                                                                                                                                                                                                                                                                                        | #    | #    | #         | #     | #    | #    | -                                                                                    | ----  | ----                 | #                                                                                                                                                                                                                                                                                                                                                                                                                                                                                                                      | #    | #    | #         | #     | #    | #    |
| Rsa1.0_01550.1.g27860.t1 | gb ACP30609.1  disease resistance protein [Brassica rapa subsp. pekinensis]                                                                                                                                                                                                                                                                                                                                                                                                                                                                                                                                                              | 1314 | 2726 | 0         | 207.5 | 55.7 | 72.4 | disease resistance protein                                                           | gbpln | Brassica rapa        | ATMG00860.1   Symbols: ORF158   DNA/RNA polymerases superfamily protein   chrM:235916-236392 FORWARD LENGTH=158                                                                                                                                                                                                                                                                                                                                                                                                        | 1314 | 158  | 7.00E-20  | 12.0  | 4.2  | 5.3  |
| Rsa1.0_01551.1.g27861.t1 | dbj BA85462.1  transposon-like ORF [Brassica rapa]                                                                                                                                                                                                                                                                                                                                                                                                                                                                                                                                                                                       | 612  | 703  | 1.00E-153 | 114.9 | 48.7 | 56.5 | transposon-like ORF                                                                  | gbpln | Brassica rapa        | #                                                                                                                                                                                                                                                                                                                                                                                                                                                                                                                      | #    | #    | #         | #     | #    | #    |

|                           |                                                                                                                                                                                                                                                                                                                                                                                                                                                                                                                                        |      |      |           |       |      |      |                                                     |       |                      |                                                                                                                                                                                                                                                                                                                                                                  |      |      |           |       |      |      |
|---------------------------|----------------------------------------------------------------------------------------------------------------------------------------------------------------------------------------------------------------------------------------------------------------------------------------------------------------------------------------------------------------------------------------------------------------------------------------------------------------------------------------------------------------------------------------|------|------|-----------|-------|------|------|-----------------------------------------------------|-------|----------------------|------------------------------------------------------------------------------------------------------------------------------------------------------------------------------------------------------------------------------------------------------------------------------------------------------------------------------------------------------------------|------|------|-----------|-------|------|------|
| Rsa1.0_01551.1.g27862.t1  | refXP_002865377.1   hypothetical protein ARALYDRAFT_494572 [Arabidopsis lyrata subsp. lyrata] gi 297311212 gb EFH41636.1   hypothetical protein ARALYDRAFT_494572 [Arabidopsis lyrata subsp. lyrata]                                                                                                                                                                                                                                                                                                                                   | 202  | 199  | 1.00E-68  | 98.5  | 68.8 | 77.2 | hypothetical protein ARALYDRAFT_494572              | gbpln | Arabidopsis lyrata   | AT5G44210.1   Symbols: ERF9, ATERF9, ATERF-9   erf domain protein 9   chr5:17806742-17807344 FORWARD LENGTH=200                                                                                                                                                                                                                                                  | 202  | 200  | 2.00E-67  | 99.0  | 67.3 | 76.7 |
| Rsa1.0_01551.1.g27863.t1  | #                                                                                                                                                                                                                                                                                                                                                                                                                                                                                                                                      | #    | #    | #         | #     | #    | -    | ----                                                | ----  | #                    | #                                                                                                                                                                                                                                                                                                                                                                | #    | #    | #         | #     | #    |      |
| Rsa1.0_01551.1.g27864.t1  | #                                                                                                                                                                                                                                                                                                                                                                                                                                                                                                                                      | #    | #    | #         | #     | #    | -    | ----                                                | ----  | #                    | #                                                                                                                                                                                                                                                                                                                                                                | #    | #    | #         | #     | #    |      |
| Rsa1.0_01551.1.g27865.t4  | gb ABD64958.1  ethylene responsive element binding factor -related [Brassica oleracea]                                                                                                                                                                                                                                                                                                                                                                                                                                                 | 580  | 954  | 3.00E-36  | 164.5 | 19.8 | 26.4 | ethylene responsive element binding factor -related | gbpln | Brassica oleracea    | AT5G32590.1   Symbols:   myosin heavy chain-related   chr5:12221589-12224322 REVERSE LENGTH=761                                                                                                                                                                                                                                                                  | 580  | 761  | 1.00E-10  | 131.2 | 7.2  | 12.1 |
| Rsa1.0_01551.1.g27866.t2  | #                                                                                                                                                                                                                                                                                                                                                                                                                                                                                                                                      | #    | #    | #         | #     | #    | -    | ----                                                | ----  | #                    | #                                                                                                                                                                                                                                                                                                                                                                | #    | #    | #         | #     | #    |      |
| Rsa1.0_01552.1.g27867.t1  | #                                                                                                                                                                                                                                                                                                                                                                                                                                                                                                                                      | #    | #    | #         | #     | #    | -    | ----                                                | ----  | #                    | #                                                                                                                                                                                                                                                                                                                                                                | #    | #    | #         | #     | #    |      |
| Rsa1.0_01552.1.g27868.t1  | gb AAG51783.1 AC079679.3 reverse transcriptase, putative; 16838-20266 [Arabidopsis thaliana]                                                                                                                                                                                                                                                                                                                                                                                                                                           | 1100 | 1142 | 0         | 103.8 | 36.1 | 46.7 | reverse transcriptase, putative; 16838-20266        | gbpln | Arabidopsis thaliana | AT1G43760.1   Symbols:   DNase I-like superfamily protein   chr1:16528880-16531065 REVERSE LENGTH=626                                                                                                                                                                                                                                                            | 1100 | 626  | 1.00E-37  | 56.9  | 10.3 | 17.8 |
| Rsa1.0_01552.1.g27869.t16 | gb EOA31734.1  hypothetical protein CARUB_v10014948mg [Capsella rubella]                                                                                                                                                                                                                                                                                                                                                                                                                                                               | 119  | 119  | 5.00E-55  | 100.0 | 91.6 | 95.8 | hypothetical protein CARUB_v10014948mg              | gbpln | Capsella rubella     | AT3G20510.1   Symbols:   Transmembrane proteins 14C   chr3:7160884-7161991 FORWARD LENGTH=119                                                                                                                                                                                                                                                                    | 119  | 119  | 1.00E-57  | 100.0 | 91.6 | 95.8 |
| Rsa1.0_01552.1.g27870.t1  | ref XP_002883254.1  POLGAMMA1 [Arabidopsis lyrata subsp. lyrata] gi 297329094 gb EFH59513.1   POLGAMMA1 [Arabidopsis lyrata subsp. lyrata]                                                                                                                                                                                                                                                                                                                                                                                             | 1196 | 1044 | 0         | 87.3  | 72.4 | 78.2 | POLGAMMA1                                           | gbpln | Arabidopsis lyrata   | AT3G20540.1   Symbols: POLGAMMA1   polymerase gamma 1   chr3:7168261-7173357 FORWARD LENGTH=1034                                                                                                                                                                                                                                                                 | 1196 | 1034 | 0         | 86.5  | 72.1 | 77.3 |
| Rsa1.0_01552.1.g27871.t1  | ref XP_002883257.1  hypothetical protein ARALYDRAFT_898483 [Arabidopsis lyrata subsp. lyrata] gi 297329097 gb EFH59516.1   hypothetical protein ARALYDRAFT_898483 [Arabidopsis lyrata subsp. lyrata]                                                                                                                                                                                                                                                                                                                                   | 127  | 130  | 1.00E-48  | 102.4 | 79.5 | 88.2 | hypothetical protein ARALYDRAFT_898483              | gbpln | Arabidopsis lyrata   | AT3G20557.1   Symbols:   unknown protein; BEST Arabidopsis thaliana protein match is: unknown protein (TAIR:AT1G50930.1). Has 35333 Blast hits to 34131 proteins in 2444 species: Archae - 798; Bacteria - 22429; Metazoa - 974; Fungi - 991; Plants - 531; Viruses - 0; Other Eukaryotes - 9610 (source: NCBI BLINK).   chr3:7180140-7180731 FORWARD LENGTH=130 | 127  | 130  | 1.00E-48  | 102.4 | 78.0 | 85.8 |
| Rsa1.0_01552.1.g27872.t1  | ref NP_566664.1  protein PDI-like 5-3 [Arabidopsis thaliana] gi 75273652 sp Q9LJU2.1 PDI53_ARATH RecName: Full=Protein disulfide-isomerase 5-3; Short=AtPDIL5-3; AltName: Full=Protein disulfide-isomerase 12; Short=PD12; AltName: Full=Protein disulfide-isomerase 8-1; Short=AtPDIL8-1; Flags: Precursor gi 11994143 dbj BAB01164.1   unnamed protein product [Arabidopsis thaliana] gi 15215847 gb AAK91468.1   AT3g20560/K10D20.9 [Arabidopsis thaliana] gi 332642877 gb AEE76398.1   protein PDI-like 5-3 [Arabidopsis thaliana] | 517  | 483  | 0         | 93.4  | 73.1 | 80.5 | protein PDI-like 5-3                                | gbpln | Arabidopsis thaliana | AT3G20560.1   Symbols: ATPDIL5-3, PDI12, ATPD112, PDIL5-3   PDI-like 5-3   chr3:7182182-7186390 FORWARD LENGTH=483                                                                                                                                                                                                                                               | 517  | 483  | 0         | 93.4  | 73.1 | 80.5 |
| Rsa1.0_01552.1.g27873.t1  | gb ABB97040.1  unknown [Brassica rapa]                                                                                                                                                                                                                                                                                                                                                                                                                                                                                                 | 208  | 204  | 8.00E-91  | 98.1  | 86.5 | 89.9 | unknown                                             | gbpln | Brassica rapa        | AT3G20570.1   Symbols: ENODL9, AENODL9   early nodulin-like protein 9   chr3:7186754-7187453 REVERSE LENGTH=203                                                                                                                                                                                                                                                  | 208  | 203  | 9.00E-81  | 97.6  | 79.8 | 86.1 |
| Rsa1.0_01552.1.g27874.t1  | ref NP_188694.2  COBRA-like protein 10 [Arabidopsis thaliana] gi 34222649 sp Q9LJU0.1 CBL10_ARATH RecName: Full=COBRA-like protein 10; Flags: Precursor gi 11994145 dbj BAB01166.1   unnamed protein product [Arabidopsis thaliana] gi 26452233 dbj BAC43204.1   GPI-anchored protein [Arabidopsis thaliana] gi 29029016 gb AAO64887.1   At3g20580 [Arabidopsis thaliana] gi 332642879 gb AEE76400.1   COBRA-like protein 10 [Arabidopsis thaliana]                                                                                    | 248  | 672  | 1.00E-101 | 271.0 | 77.8 | 83.1 | COBRA-like protein 10                               | gbpln | Arabidopsis thaliana | AT3G20580.1   Symbols: COBL10   COBRA-like protein 10 precursor   chr3:7188063-7190416 REVERSE LENGTH=672                                                                                                                                                                                                                                                        | 248  | 672  | 1.00E-104 | 271.0 | 77.8 | 83.1 |
| Rsa1.0_01552.1.g27875.t1  | gb EOA31419.1  hypothetical protein CARUB_v10014599mg [Capsella rubella]                                                                                                                                                                                                                                                                                                                                                                                                                                                               | 209  | 218  | 5.00E-70  | 104.3 | 66.0 | 78.5 | hypothetical protein CARUB_v10014599mg              | gbpln | Capsella rubella     | AT3G20600.1   Symbols: NDR1   Late embryogenesis abundant (LEA) hydroxyproline-rich glycoprotein family   chr3:7194877-7195536 FORWARD LENGTH=219                                                                                                                                                                                                                | 209  | 219  | 2.00E-71  | 104.8 | 65.6 | 78.0 |

|                          |                                                                                                                                                                                                        |     |     |           |       |      |       |                                          |       |                      |                                                                                                                                                                                                                                                                                                                                                                                                                                                                                                                                        |     |     |           |       |      |      |
|--------------------------|--------------------------------------------------------------------------------------------------------------------------------------------------------------------------------------------------------|-----|-----|-----------|-------|------|-------|------------------------------------------|-------|----------------------|----------------------------------------------------------------------------------------------------------------------------------------------------------------------------------------------------------------------------------------------------------------------------------------------------------------------------------------------------------------------------------------------------------------------------------------------------------------------------------------------------------------------------------------|-----|-----|-----------|-------|------|------|
| Rsa1.0_01552.1.g27876.t1 | dbj BAF00669.1  retrotransposon like protein [Arabidopsis thaliana]                                                                                                                                    | 517 | 392 | 2.00E-91  | 75.8  | 34.0 | 43.1  | retrotransposon like protein             | gbpln | Arabidopsis thaliana | AT1G34070.1   Symbols:   CONTAINS InterPro DOMAIN/s: Retrotransposon gag protein (InterPro:IPR005162); BEST Arabidopsis thaliana protein match is: unknown protein (TAIR:AT5G48050.1); Has 648 Blast hits to 647 proteins in 29 species: Archae - 0; Bacteria - 0; Metazoa - 16; Fungi - 25; Plants - 607; Viruses - 0; Other Eukaryotes - 0 (source: NCBI BLink).   chr1:12402283-12403209 FORWARD LENGTH=308                                                                                                                         | 517 | 308 | 2.00E-16  | 59.6  | 14.3 | 25.3 |
| Rsa1.0_01553.1.g27877.t1 | ref XP_002882419.1  rubber elongation factor family protein [Arabidopsis lyrata subsp. lyrata] g 297328259 gb EFH58678.1  rubber elongation factor family protein [Arabidopsis lyrata subsp. lyrata]   | 246 | 246 | 1.00E-122 | 100.0 | 93.5 | 97.6  | rubber elongation factor family protein  | gbpln | Arabidopsis lyrata   | AT3G05500.1   Symbols:   Rubber elongation factor protein (REF)   chr3:1593540-1594802 FORWARD LENGTH=246                                                                                                                                                                                                                                                                                                                                                                                                                              | 246 | 246 | 1.00E-124 | 100.0 | 93.1 | 97.6 |
| Rsa1.0_01553.1.g27878.t1 | ref XP_002882421.1  alpha subunit of F-actin capping protein [Arabidopsis lyrata subsp. lyrata] g 297328261 gb EFH58680.1  alpha subunit of F-actin capping protein [Arabidopsis lyrata subsp. lyrata] | 324 | 308 | 1.00E-160 | 95.1  | 86.7 | 90.1  | alpha subunit of F-actin capping protein | gbpln | Arabidopsis lyrata   | AT3G05520.2   Symbols:   Subunits of heterodimeric actin filament capping protein Capz superfamily   chr3:1598611-1601437 FORWARD LENGTH=382                                                                                                                                                                                                                                                                                                                                                                                           | 324 | 382 | 1.00E-155 | 117.9 | 83.0 | 86.1 |
| Rsa1.0_01553.1.g27879.t1 | dbj BAB21595.1  Tat binding protein like protein [Brassica rapa]                                                                                                                                       | 351 | 424 | 1.00E-162 | 120.8 | 80.3 | 81.2  | Tat binding protein like protein         | gbpln | Brassica rapa        | AT3G05530.1   Symbols: RPT5A, ATS6A.2   regulatory particle triple-A ATPase 5A   chr3:1603540-1605993 FORWARD LENGTH=424                                                                                                                                                                                                                                                                                                                                                                                                               | 351 | 424 | 1.00E-164 | 120.8 | 80.1 | 80.9 |
| Rsa1.0_01553.1.g27880.t1 | ref XP_002882423.1  hypothetical protein ARALYDRAFT_477844 [Arabidopsis lyrata subsp. lyrata] g 297328263 gb EFH58682.1  hypothetical protein ARALYDRAFT_477844 [Arabidopsis lyrata subsp. lyrata]     | 427 | 428 | 1.00E-157 | 100.2 | 78.7 | 85.5  | hypothetical protein ARALYDRAFT_477844   | gbpln | Arabidopsis lyrata   | AT3G05545.1   Symbols:   RING/U-box superfamily protein   chr3:1609436-1612133 FORWARD LENGTH=425                                                                                                                                                                                                                                                                                                                                                                                                                                      | 427 | 425 | 1.00E-157 | 99.5  | 78.0 | 84.1 |
| Rsa1.0_01553.1.g27881.t1 | dbj BAJ34418.1  unnamed protein product [Thellungiella halophila]                                                                                                                                      | 124 | 124 | 1.00E-55  | 100.0 | 96.8 | 100.0 | unnamed protein product                  | ----  | ----                 | AT3G05560.3   Symbols:   Ribosomal L22e protein family   chr3:1614641-1615204 FORWARD LENGTH=124                                                                                                                                                                                                                                                                                                                                                                                                                                       | 124 | 124 | 5.00E-58  | 100.0 | 96.8 | 99.2 |
| Rsa1.0_01553.1.g27882.t1 | gb EOA32863.1  hypothetical protein CARUB_v10016176mg [Capsella rubella]                                                                                                                               | 150 | 207 | 5.00E-36  | 138.0 | 52.7 | 72.0  | hypothetical protein CARUB_v10016176mg   | gbpln | Capsella rubella     | AT2G33720.1   Symbols:   AP2/B3-like transcriptional factor family protein   chr2:14263776-14264989 FORWARD LENGTH=326                                                                                                                                                                                                                                                                                                                                                                                                                 | 150 | 326 | 6.00E-22  | 217.3 | 36.7 | 51.3 |
| Rsa1.0_01553.1.g27883.t2 | ref XP_002882426.1  hypothetical protein ARALYDRAFT_896643 [Arabidopsis lyrata subsp. lyrata] g 297328266 gb EFH58685.1  hypothetical protein ARALYDRAFT_896643 [Arabidopsis lyrata subsp. lyrata]     | 357 | 271 | 2.00E-65  | 75.9  | 39.5 | 49.6  | hypothetical protein ARALYDRAFT_896643   | gbpln | Arabidopsis lyrata   | AT5G27830.1   Symbols:   FUNCTIONS IN: molecular function unknown; INVOLVED IN: response to oxidative stress; LOCATED IN: endomembrane system; EXPRESSED IN: 22 plant structures; EXPRESSED DURING: 13 growth stages; CONTAINS InterPro DOMAIN/s: Folate receptor, conserved region (InterPro:IPR018143); Has 1807 Blast hits to 1807 proteins in 277 species: Archae - 0; Bacteria - 0; Metazoa - 736; Fungi - 347; Plants - 385; Viruses - 0; Other Eukaryotes - 339 (source: NCBI BLink).   chr5:9861344-9862742 FORWARD LENGTH=300 | 357 | 300 | 2.00E-51  | 84.0  | 32.2 | 42.9 |
| Rsa1.0_01553.1.g27884.t1 | ref XP_002882426.1  hypothetical protein ARALYDRAFT_896643 [Arabidopsis lyrata subsp. lyrata] g 297328266 gb EFH58685.1  hypothetical protein ARALYDRAFT_896643 [Arabidopsis lyrata subsp. lyrata]     | 254 | 271 | 1.00E-57  | 106.7 | 52.0 | 61.4  | hypothetical protein ARALYDRAFT_896643   | gbpln | Arabidopsis lyrata   | AT5G27830.4   Symbols:   FUNCTIONS IN: molecular function unknown; INVOLVED IN: response to oxidative stress; EXPRESSED IN: 22 plant structures; EXPRESSED DURING: 13 growth stages; CONTAINS InterPro DOMAIN/s: Folate receptor, conserved region (InterPro:IPR018143).   chr5:9861203-9862742 FORWARD LENGTH=322                                                                                                                                                                                                                     | 254 | 322 | 2.00E-45  | 126.8 | 42.5 | 51.2 |
| Rsa1.0_01553.1.g27885.t1 | gb EOA31060.1  hypothetical protein CARUB_v10014212mg [Capsella rubella]                                                                                                                               | 318 | 318 | 1.00E-176 | 100.0 | 94.0 | 98.4  | hypothetical protein CARUB_v10014212mg   | gbpln | Capsella rubella     | AT3G05580.1   Symbols:   Calcineurin-like metallo-phosphoesterase superfamily protein   chr3:1618216-1619850 REVERSE LENGTH=318                                                                                                                                                                                                                                                                                                                                                                                                        | 318 | 318 | 1.00E-178 | 100.0 | 93.4 | 98.4 |
| Rsa1.0_01553.1.g27886.t1 | ref XP_002882427.1  hypothetical protein ARALYDRAFT_477850 [Arabidopsis lyrata subsp. lyrata] g 297328267 gb EFH58686.1  hypothetical protein ARALYDRAFT_477850 [Arabidopsis lyrata subsp. lyrata]     | 187 | 187 | 1.00E-100 | 100.0 | 97.3 | 99.5  | hypothetical protein ARALYDRAFT_477850   | gbpln | Arabidopsis lyrata   | AT3G05590.1   Symbols: RPL18   ribosomal protein L18   chr3:1621511-1622775 FORWARD LENGTH=187                                                                                                                                                                                                                                                                                                                                                                                                                                         | 187 | 187 | 1.00E-102 | 100.0 | 97.3 | 98.9 |
| Rsa1.0_01553.1.g27887.t1 | ref XP_002884519.1  pectinesterase family protein [Arabidopsis lyrata subsp. lyrata] g 297330359 gb EFH60778.1  pectinesterase family protein [Arabidopsis lyrata subsp. lyrata]                       | 622 | 671 | 0         | 107.9 | 84.2 | 92.8  | pectinesterase family protein            | gbpln | Arabidopsis lyrata   | AT3G05610.1   Symbols:   Plant invertase/pectin methyltransferase inhibitor superfamily   chr3:1625876-1627976 REVERSE LENGTH=669                                                                                                                                                                                                                                                                                                                                                                                                      | 622 | 669 | 0         | 107.6 | 82.5 | 90.8 |

|                          |                                                                                                                                                                                                                                                                                                                                                                                                                                                                                                                                                                                       |      |      |           |       |      |       |                                        |       |                      |                                                                                                                             |      |      |           |       |      |       |
|--------------------------|---------------------------------------------------------------------------------------------------------------------------------------------------------------------------------------------------------------------------------------------------------------------------------------------------------------------------------------------------------------------------------------------------------------------------------------------------------------------------------------------------------------------------------------------------------------------------------------|------|------|-----------|-------|------|-------|----------------------------------------|-------|----------------------|-----------------------------------------------------------------------------------------------------------------------------|------|------|-----------|-------|------|-------|
| Rsa1.0_01553.1.g27888.t1 | refXP_002882429.1   hypothetical protein ARALYDRAFT_477854 [Arabidopsis lyrata subsp. lyrata] gi 297328269 gb EFH58688.1   hypothetical protein ARALYDRAFT_477854 [Arabidopsis lyrata subsp. lyrata]                                                                                                                                                                                                                                                                                                                                                                                  | 1050 | 1057 | 0         | 100.7 | 89.8 | 95.0  | hypothetical protein ARALYDRAFT_477854 | gbpln | Arabidopsis lyrata   | AT3G05630.1   Symbols: PLDP2, PDLZ2, PLDZETA2   phospholipase D P2   chr3:1635321-1640105 FORWARD LENGTH=1046               | 1050 | 1046 | 0         | 99.6  | 89.5 | 95.2  |
| Rsa1.0_01553.1.g27889.t1 | refXP_002884522.1   hypothetical protein ARALYDRAFT_477856 [Arabidopsis lyrata subsp. lyrata] gi 297330362 gb EFH60781.1   hypothetical protein ARALYDRAFT_477856 [Arabidopsis lyrata subsp. lyrata]                                                                                                                                                                                                                                                                                                                                                                                  | 349  | 357  | 0         | 102.3 | 87.4 | 94.3  | hypothetical protein ARALYDRAFT_477856 | gbpln | Arabidopsis lyrata   | AT3G05640.2   Symbols:   Protein phosphatase 2C family protein   chr3:1640610-1642227 REVERSE LENGTH=358                    | 349  | 358  | 0         | 102.6 | 86.8 | 94.6  |
| Rsa1.0_01554.1.g27890.t1 | #                                                                                                                                                                                                                                                                                                                                                                                                                                                                                                                                                                                     | #    | #    | #         | #     | #    | -     | ----                                   | ----  | ----                 | #                                                                                                                           | #    | #    | #         | #     | #    |       |
| Rsa1.0_01554.1.g27891.t1 | gb ACQ90589.1  putative C2H2 zinc finger protein [Eutrema halophilum]                                                                                                                                                                                                                                                                                                                                                                                                                                                                                                                 | 447  | 442  | 0         | 98.9  | 85.0 | 89.3  | putative C2H2 zinc finger protein      | gbpln | Eutrema halophilum   | AT2G01940.1   Symbols: SGR5, ATIDD15   C2H2-like zinc finger protein   chr2:432652-434917 FORWARD LENGTH=445                | 447  | 445  | 0         | 99.6  | 84.3 | 88.4  |
| Rsa1.0_01554.1.g27892.t1 | gb ADQ43184.1  leucine-rich receptor kinase [Eutrema parvulum]                                                                                                                                                                                                                                                                                                                                                                                                                                                                                                                        | 1208 | 1141 | 0         | 94.5  | 86.8 | 90.9  | leucine-rich receptor kinase           | gbpln | Eutrema parvulum     | AT2G01950.1   Symbols: VH1, BRL2   BRI-like 2   chr2:440805-444236 REVERSE LENGTH=1143                                      | 1208 | 1143 | 0         | 94.6  | 86.3 | 90.3  |
| Rsa1.0_01554.1.g27893.t1 | refNP_178306.1   putative endomembrane protein 70 [Arabidopsis thaliana] gi 4406780 gb AAD20090.1   putative endosomal protein [Arabidopsis thaliana] gi 1660450 gb AAL24256.1   At2g01970/F14H20.4 [Arabidopsis thaliana] gi 110741070 dbj BAE98629.1   putative endosomal protein [Arabidopsis thaliana] gi 330250434 gb AEC05528.1   putative endomembrane protein 70 [Arabidopsis thaliana]                                                                                                                                                                                       | 270  | 592  | 1.00E-155 | 219.3 | 99.3 | 100.0 | putative endomembrane protein 70       | gbpln | Arabidopsis thaliana | AT2G01970.1   Symbols:   Endomembrane protein 70 protein family   chr2:452197-454819 REVERSE LENGTH=592                     | 270  | 592  | 1.00E-157 | 219.3 | 99.3 | 100.0 |
| Rsa1.0_01554.1.g27894.t1 | #                                                                                                                                                                                                                                                                                                                                                                                                                                                                                                                                                                                     | #    | #    | #         | #     | #    | -     | ----                                   | ----  | ----                 | #                                                                                                                           | #    | #    | #         | #     | #    |       |
| Rsa1.0_01554.1.g27895.t1 | refNP_178313.1   peptide transporter PTR2 [Arabidopsis thaliana] gi 1172704 sp P46032.1 PTR2_ARATH RecName: Full=Peptide transporter PTR2; AltName: Full=Histidine-transporting protein gi 13937185 gb AAK50086.1 AF372946.1 At2g02040/F14H20.11 [Arabidopsis thaliana] gi 633940 gb AAB00858.1   transport protein [Arabidopsis thaliana] gi 4406786 gb AAD20096.1   histidine transport protein (PTR2-B) [Arabidopsis thaliana] gi 23506067 gb AAN28893.1   At2g02040/F14H20.11 [Arabidopsis thaliana] gi 330250444 gb AEC05538.1   peptide transporter PTR2 [Arabidopsis thaliana] | 583  | 585  | 0         | 100.3 | 95.5 | 99.0  | peptide transporter PTR2               | gbpln | Arabidopsis thaliana | AT2G02040.1   Symbols: ATPTR2-B, NTR1, PTR2-B, PTR2, ATPTR2   peptide transporter 2   chr2:487542-489707 FORWARD LENGTH=585 | 583  | 585  | 0         | 100.3 | 95.5 | 99.0  |
| Rsa1.0_01555.1.g27896.t1 | #                                                                                                                                                                                                                                                                                                                                                                                                                                                                                                                                                                                     | #    | #    | #         | #     | #    | -     | ----                                   | ----  | ----                 | #                                                                                                                           | #    | #    | #         | #     | #    |       |
| Rsa1.0_01555.1.g27897.t1 | refXP_002878408.1   predicted protein [Arabidopsis lyrata subsp. lyrata] gi 297324246 gb EFH54667.1   predicted protein [Arabidopsis lyrata subsp. lyrata]                                                                                                                                                                                                                                                                                                                                                                                                                            | 696  | 359  | 1.00E-137 | 51.6  | 35.8 | 40.4  | predicted protein                      | gbpln | Arabidopsis lyrata   | AT3G61730.1   Symbols: RMF   reduced male fertility   chr3:22848427-22850475 REVERSE LENGTH=354                             | 696  | 354  | 1.00E-134 | 50.9  | 34.9 | 39.5  |
| Rsa1.0_01555.1.g27898.t1 | gb EOA25290.1  hypothetical protein CARUB_v10018605mg [Capsella rubella]                                                                                                                                                                                                                                                                                                                                                                                                                                                                                                              | 644  | 656  | 0         | 101.9 | 86.0 | 92.7  | hypothetical protein CARUB_v10018605mg | gbpln | Capsella rubella     | AT3G61680.1   Symbols:   alpha/beta-Hydrolases superfamily protein   chr3:22824630-22826926 FORWARD LENGTH=649              | 644  | 649  | 0         | 100.8 | 84.8 | 91.9  |
| Rsa1.0_01555.1.g27899.t1 | refXP_002878398.1   hypothetical protein ARALYDRAFT_324601 [Arabidopsis lyrata subsp. lyrata] gi 297324236 gb EFH54657.1   hypothetical protein ARALYDRAFT_324601 [Arabidopsis lyrata subsp. lyrata]                                                                                                                                                                                                                                                                                                                                                                                  | 276  | 271  | 4.00E-84  | 98.2  | 64.1 | 75.4  | hypothetical protein ARALYDRAFT_324601 | gbpln | Arabidopsis lyrata   | AT2G46400.1   Symbols: WRKY46, ATWRKY46   WRKY DNA-binding protein 46   chr2:19043676-19044754 REVERSE LENGTH=295           | 276  | 295  | 3.00E-70  | 106.9 | 54.7 | 72.5  |

|                          |                                                                                                                                                                                                                                                                                                                                                                                                                                                                                                                                                                                                                                        |      |      |           |       |      |      |                                                      |       |                      |                                                                                                                                               |      |     |           |       |      |      |
|--------------------------|----------------------------------------------------------------------------------------------------------------------------------------------------------------------------------------------------------------------------------------------------------------------------------------------------------------------------------------------------------------------------------------------------------------------------------------------------------------------------------------------------------------------------------------------------------------------------------------------------------------------------------------|------|------|-----------|-------|------|------|------------------------------------------------------|-------|----------------------|-----------------------------------------------------------------------------------------------------------------------------------------------|------|-----|-----------|-------|------|------|
| Rsa1.0_01555.1.g27900.t1 | ref NP_191723.1  arabinogalactan protein 20 [Arabidopsis thaliana]<br>gi 75183616 sp Q9M373.1 AGP20_ARAT H RecName: Full=Arabinogalactan peptide 20; Short=AG-peptide 20; Flags: Precursor gi 6850855 emb CAB71094.1  putative protein [Arabidopsis thaliana] gi 21536871 gb AM61203.1  unknown [Arabidopsis thaliana] gi 98960995 gb ABF58981.1  At3g61640 [Arabidopsis thaliana] gi 332646714 gb AEE80235.1  arabinogalactan protein 20 [Arabidopsis thaliana]                                                                                                                                                                       | 65   | 74   | 2.00E-19  | 113.8 | 80.0 | 86.2 | arabinogalactan protein 20                           | gbpln | Arabidopsis thaliana | AT3G61640.1   Symbols: AGP20, AtAGP20   arabinogalactan protein 20   chr3:22810283-22810629 REVERSE LENGTH=74                                 | 65   | 74  | 3.00E-22  | 113.8 | 80.0 | 86.2 |
| Rsa1.0_01555.1.g27901.t1 | ref NP_191718.1  F-box/kelch-repeat protein [Arabidopsis thaliana]<br>gi 334186190 ref NP_001190155.1  F-box/kelch-repeat protein [Arabidopsis thaliana]<br>gi 75183486 sp Q9M310.1 FBK77_ARAT H RecName: Full=F-box/kelch-repeat protein At3g61590<br>gi 14423514 gb AAK62439.1 AF386994.1 putative protein [Arabidopsis thaliana] gi 6850850 emb CAB71069.1  putative protein [Arabidopsis thaliana] gi 23197692 gb AANI15373.1  putative protein [Arabidopsis thaliana] gi 332646706 gb AEE80227.1  F-box/kelch-repeat protein [Arabidopsis thaliana] gi 332646707 gb AEE80228.1  F-box/kelch-repeat protein [Arabidopsis thaliana] | 417  | 411  | 0         | 98.6  | 84.4 | 90.4 | F-box/kelch-repeat protein                           | gbpln | Arabidopsis thaliana | AT3G61590.2   Symbols: HWS   Galactose oxidase/kelch repeat superfamily protein   chr3:22792914-22794149 FORWARD LENGTH=411                   | 417  | 411 | 0         | 98.6  | 84.4 | 90.4 |
| Rsa1.0_01555.1.g27902.t1 | gb AEW24952.1  delta8-sphingolipid desaturase [Brassica rapa]                                                                                                                                                                                                                                                                                                                                                                                                                                                                                                                                                                          | 449  | 449  | 0         | 100.0 | 98.7 | 99.6 | delta8-sphingolipid desaturase                       | gbpln | Brassica rapa        | AT3G61580.1   Symbols:   Fatty acid/sphingolipid desaturase   chr3:22786253-22787602 FORWARD LENGTH=449                                       | 449  | 449 | 0         | 100.0 | 88.9 | 94.2 |
| Rsa1.0_01555.1.g27903.t1 | gb ABV21212.1  Ty1 Copia-element protein [Arabidopsis thaliana]                                                                                                                                                                                                                                                                                                                                                                                                                                                                                                                                                                        | 460  | 438  | 1.00E-76  | 95.2  | 34.8 | 50.0 | Ty1 Copia-element protein                            | gbpln | Arabidopsis thaliana | AT3G24255.1   Symbols:   RNA-directed DNA polymerase (reverse transcriptase)-related family protein   chr3:8789471-8793208 FORWARD LENGTH=746 | 460  | 746 | 1.00E-51  | 162.2 | 26.1 | 39.6 |
| Rsa1.0_01555.1.g27904.t1 | ref XP_002878369.1  hypothetical protein ARALYDRAFT_486595 [Arabidopsis lyrata subsp. lyrata] gi 297324207 gb EFH54628.1  hypothetical protein ARALYDRAFT_486595 [Arabidopsis lyrata subsp. lyrata] emb CAB39638.1  RNA-directed DNA polymerase-like protein [Arabidopsis thaliana] gi 7267666 emb CAB78094.1  RNA-directed DNA polymerase-like protein [Arabidopsis thaliana]                                                                                                                                                                                                                                                         | 168  | 179  | 5.00E-57  | 106.5 | 68.5 | 79.8 | hypothetical protein ARALYDRAFT_486595               | gbpln | Arabidopsis lyrata   | AT3G61190.1   Symbols: BAP1   BON association protein 1   chr3:22650837-22651415 REVERSE LENGTH=192                                           | 168  | 192 | 6.00E-59  | 114.3 | 69.6 | 80.4 |
| Rsa1.0_01555.1.g27905.t1 | emb CAB39638.1  RNA-directed DNA polymerase-like protein [Arabidopsis thaliana] gi 7267666 emb CAB78094.1  RNA-directed DNA polymerase-like protein [Arabidopsis thaliana]                                                                                                                                                                                                                                                                                                                                                                                                                                                             | 1215 | 1274 | 0         | 104.9 | 42.6 | 59.6 | RNA-directed DNA polymerase-like protein             | gbpln | Arabidopsis thaliana | AT4G29090.1   Symbols:   Ribonuclease H-like superfamily protein   chr4:14333528-14335255 FORWARD LENGTH=575                                  | 1215 | 575 | 2.00E-67  | 47.3  | 13.8 | 21.8 |
| Rsa1.0_01555.1.g27906.t1 | gb AAD17395.1  putative non-LTR retroelement reverse transcriptase [Arabidopsis thaliana]                                                                                                                                                                                                                                                                                                                                                                                                                                                                                                                                              | 314  | 1138 | 9.00E-44  | 362.4 | 31.2 | 45.5 | putative non-LTR retroelement reverse transcriptase  | gbpln | Arabidopsis thaliana | AT4G29090.1   Symbols:   Ribonuclease H-like superfamily protein   chr4:14333528-14335255 FORWARD LENGTH=575                                  | 314  | 575 | 8.00E-38  | 183.1 | 25.8 | 42.4 |
| Rsa1.0_01555.1.g27907.t1 | ref XP_002875792.1  predicted protein [Arabidopsis lyrata subsp. lyrata] gi 297321630 gb EFH52051.1  predicted protein [Arabidopsis lyrata subsp. lyrata]                                                                                                                                                                                                                                                                                                                                                                                                                                                                              | 137  | 764  | 5.00E-14  | 557.7 | 26.3 | 36.5 | predicted protein                                    | gbpln | Arabidopsis lyrata   | AT5G18880.1   Symbols:   RNA-directed DNA polymerase (reverse transcriptase)-related family protein   chr5:6300535-6301422 REVERSE LENGTH=295 | 137  | 295 | 3.00E-16  | 215.3 | 24.8 | 35.0 |
| Rsa1.0_01556.1.g27908.t1 | ref XP_002884040.1  peptidoglycan-binding LysM domain-containing protein [Arabidopsis lyrata subsp. lyrata] gi 297329880 gb EFH60299.1  peptidoglycan-binding LysM domain-containing protein [Arabidopsis lyrata subsp. lyrata]                                                                                                                                                                                                                                                                                                                                                                                                        | 142  | 356  | 3.00E-43  | 250.7 | 63.4 | 74.6 | peptidoglycan-binding LysM domain-containing protein | gbpln | Arabidopsis lyrata   | AT2G17120.1   Symbols: LYM2   lysm domain GPI-anchored protein 2 precursor   chr2:7459156-7460649 FORWARD LENGTH=350                          | 142  | 350 | 2.00E-45  | 246.5 | 62.7 | 74.6 |
| Rsa1.0_01556.1.g27909.t1 | gb ADZ96432.1  transcription factor LAS [Brassica oleracea]                                                                                                                                                                                                                                                                                                                                                                                                                                                                                                                                                                            | 338  | 439  | 1.00E-170 | 129.9 | 93.5 | 95.6 | transcription factor LAS                             | gbpln | Brassica oleracea    | AT1G55880.1   Symbols: LAS, SCL18   GRAS family transcription factor   chr1:20764106-20765443 FORWARD LENGTH=445                              | 338  | 445 | 1.00E-164 | 131.7 | 88.8 | 91.7 |
| Rsa1.0_01556.1.g27910.t1 | #                                                                                                                                                                                                                                                                                                                                                                                                                                                                                                                                                                                                                                      | #    | #    | #         | #     | #    | -    | ----                                                 | ----  | #                    | #                                                                                                                                             | #    | #   | #         | #     | #    |      |
| Rsa1.0_01556.1.g27911.t1 | #                                                                                                                                                                                                                                                                                                                                                                                                                                                                                                                                                                                                                                      | #    | #    | #         | #     | #    | -    | ----                                                 | ----  | #                    | #                                                                                                                                             | #    | #   | #         | #     | #    |      |

|                          |                                                                                                                                                                                                                                                                                                                                                                                                                                                                                                                                                                                                                                                                                                                                            |      |      |           |       |      |      |                                        |       |                      |                                                                                                                                                                                                                                                                                                                                                                                                                                                                 |      |      |           |       |      |      |
|--------------------------|--------------------------------------------------------------------------------------------------------------------------------------------------------------------------------------------------------------------------------------------------------------------------------------------------------------------------------------------------------------------------------------------------------------------------------------------------------------------------------------------------------------------------------------------------------------------------------------------------------------------------------------------------------------------------------------------------------------------------------------------|------|------|-----------|-------|------|------|----------------------------------------|-------|----------------------|-----------------------------------------------------------------------------------------------------------------------------------------------------------------------------------------------------------------------------------------------------------------------------------------------------------------------------------------------------------------------------------------------------------------------------------------------------------------|------|------|-----------|-------|------|------|
| Rsa1.0_01556.1.g27912.t1 | refXP_002891844.1   hypothetical protein ARALYDRAFT_892557 [Arabidopsis lyrata subsp. lyrata] gi 297337686 gb EFH68103.1                                                                                                                                                                                                                                                                                                                                                                                                                                                                                                                                                                                                                   | 555  | 555  | 0         | 100.0 | 93.5 | 96.2 | hypothetical protein ARALYDRAFT_892557 | gbpln | Arabidopsis lyrata   | AT1G55570.1   Symbols: sks12   SKU5 similar   2   chr1:20757882-20759771 FORWARD LENGTH=555                                                                                                                                                                                                                                                                                                                                                                     | 555  | 555  | 0         | 100.0 | 92.8 | 96.2 |
| Rsa1.0_01556.1.g27913.t1 | hypothetical protein ARALYDRAFT_892557 [Arabidopsis lyrata subsp. lyrata] refXP_002892644.1   hypothetical protein ARALYDRAFT_888450 [Arabidopsis lyrata subsp. lyrata] gi 297338486 gb EFH68903.1                                                                                                                                                                                                                                                                                                                                                                                                                                                                                                                                         | 144  | 169  | 1.00E-32  | 117.4 | 53.5 | 70.1 | hypothetical protein ARALYDRAFT_888450 | gbpln | Arabidopsis lyrata   | AT1G11470.1   Symbols:   Pentatricopeptide repeat (PPR) superfamily protein   chr1:3859874-3860522 REVERSE LENGTH=150                                                                                                                                                                                                                                                                                                                                           | 144  | 150  | 2.00E-18  | 104.2 | 38.9 | 53.5 |
| Rsa1.0_01556.1.g27914.t1 | hypothetical protein ARALYDRAFT_888450 [Arabidopsis lyrata subsp. lyrata] refXP_002892632.1   F-box family protein [Arabidopsis lyrata subsp. lyrata] gi 297338474 gb EFH68891.1  F-box family protein [Arabidopsis lyrata subsp. lyrata]                                                                                                                                                                                                                                                                                                                                                                                                                                                                                                  | 268  | 309  | 4.00E-32  | 115.3 | 23.9 | 28.4 | F-box family protein                   | gbpln | Arabidopsis lyrata   | AT1G11270.2   Symbols:   F-box and associated interaction domains-containing protein   chr1:3785715-3786653 REVERSE LENGTH=312                                                                                                                                                                                                                                                                                                                                  | 268  | 312  | 3.00E-32  | 116.4 | 22.8 | 26.5 |
| Rsa1.0_01556.1.g27915.t1 | gb EOA38105.1  hypothetical protein CARUB_v10009573mg [Capsella rubella]                                                                                                                                                                                                                                                                                                                                                                                                                                                                                                                                                                                                                                                                   | 443  | 355  | 1.00E-151 | 80.1  | 62.8 | 69.5 | hypothetical protein CARUB_v10009573mg | gbpln | Capsella rubella     | AT1G55370.2   Symbols: NDF5   NDH-dependent cyclic electron flow 5   chr1:20674852-20676071 FORWARD LENGTH=354                                                                                                                                                                                                                                                                                                                                                  | 443  | 354  | 1.00E-143 | 79.9  | 60.0 | 69.1 |
| Rsa1.0_01556.1.g27916.t1 | refXP_002894503.1   hypothetical protein ARALYDRAFT_892534 [Arabidopsis lyrata subsp. lyrata] gi 297340345 gb EFH70762.1                                                                                                                                                                                                                                                                                                                                                                                                                                                                                                                                                                                                                   | 135  | 104  | 2.00E-28  | 77.0  | 42.2 | 49.6 | hypothetical protein ARALYDRAFT_892534 | gbpln | Arabidopsis lyrata   | AT1G55365.1   Symbols:   unknown protein; FUNCTIONS IN: molecular_function unknown; INVOLVED IN: biological_process unknown; LOCATED IN: endomembrane system; BEST Arabidopsis thaliana protein match is: unknown protein (TAIR:AT3G13500.1). Has 29 Blast hits to 29 proteins in 6 species: Archae - 0; Bacteria - 0; Metazoa - 0; Fungi - 0; Plants - 29; Viruses - 0; Other Eukaryotes - 0 (source: NCBI BLINK).   chr1:20673983-20674363 REVERSE LENGTH=126 | 135  | 126  | 1.00E-30  | 93.3  | 50.4 | 60.7 |
| Rsa1.0_01556.1.g27917.t1 | #                                                                                                                                                                                                                                                                                                                                                                                                                                                                                                                                                                                                                                                                                                                                          | #    | #    | #         | #     | #    | #    | -                                      | ----  | ----                 | #                                                                                                                                                                                                                                                                                                                                                                                                                                                               | #    | #    | #         | #     | #    |      |
| Rsa1.0_01556.1.g27918.t1 | ref NP_175932.2  calpain-type cysteine protease [Arabidopsis thaliana] gi 30695926 ref NP_850965.1  calpain-type cysteine protease [Arabidopsis thaliana] gi 30695928 ref NP_850966.1  calpain-type cysteine protease [Arabidopsis thaliana] gi 30695930 ref NP_850967.1  calpain-type cysteine protease [Arabidopsis thaliana] gi 20268660 gb AAL38186.1  calpain-like protein [Arabidopsis thaliana] gi 33219511 gb AEE33232.1  calpain-type cysteine protease [Arabidopsis thaliana] gi 33219512 gb AEE33233.1  calpain-type cysteine protease [Arabidopsis thaliana] gi 33219513 gb AEE33234.1  calpain-type cysteine protease [Arabidopsis thaliana] gi 33219514 gb AEE33235.1  calpain-type cysteine protease [Arabidopsis thaliana] | 2163 | 2151 | 0         | 99.4  | 93.7 | 96.7 | calpain-type cysteine protease         | gbpln | Arabidopsis thaliana | AT1G55350.4   Symbols: DEK1, ATDEK1   calpain-type cysteine protease family   chr1:20654463-20664501 REVERSE LENGTH=2151                                                                                                                                                                                                                                                                                                                                        | 2163 | 2151 | 0         | 99.4  | 93.7 | 96.7 |
| Rsa1.0_01556.1.g27919.t2 | refXP_002891830.1   hypothetical protein ARALYDRAFT_474592 [Arabidopsis lyrata subsp. lyrata] gi 297337672 gb EFH68089.1                                                                                                                                                                                                                                                                                                                                                                                                                                                                                                                                                                                                                   | 220  | 205  | 1.00E-86  | 93.2  | 76.8 | 80.0 | hypothetical protein ARALYDRAFT_474592 | gbpln | Arabidopsis lyrata   | AT1G55340.1   Symbols:   Protein of unknown function (DUF1639)   chr1:206652605-20653469 FORWARD LENGTH=205                                                                                                                                                                                                                                                                                                                                                     | 220  | 205  | 3.00E-87  | 93.2  | 75.0 | 79.1 |
| Rsa1.0_01557.1.g27920.t1 | emb CAA52069.1  acyl-ACP thioesterase [Brassica napus]                                                                                                                                                                                                                                                                                                                                                                                                                                                                                                                                                                                                                                                                                     | 257  | 366  | 1.00E-147 | 142.4 | 96.9 | 98.4 | acyl-ACP thioesterase                  | gbpln | Brassica napus       | AT4G13050.1   Symbols:   Acyl-ACP thioesterase   chr4:7617739-7619355 FORWARD LENGTH=367                                                                                                                                                                                                                                                                                                                                                                        | 257  | 367  | 1.00E-142 | 142.8 | 92.6 | 96.1 |
| Rsa1.0_01557.1.g27921.t1 | ref NP_00119398.1  F-box/kelch-repeat protein [Arabidopsis thaliana] gi 75170771 sp Q9F170.1 FK122_ARATH RecName: Full=F-box/kelch-repeat protein At5g49000 gi 10177190 dbj BAB10324.1  unnamed protein product [Arabidopsis thaliana] gi 119360043 gb ABL66750.1  At5g49000 [Arabidopsis thaliana] gi 332008372 gb AED95755.1  F-box/kelch-repeat protein [Arabidopsis thaliana]                                                                                                                                                                                                                                                                                                                                                          | 355  | 372  | 3.00E-90  | 104.8 | 51.8 | 70.7 | F-box/kelch-repeat protein             | gbpln | Arabidopsis thaliana | AT5G49000.2   Symbols:   Galactose oxidase/kelch repeat superfamily protein   chr5:19864527-19865645 FORWARD LENGTH=372                                                                                                                                                                                                                                                                                                                                         | 355  | 372  | 7.00E-93  | 104.8 | 51.8 | 70.7 |

|                          |                                                                                                                                                                                                                                                                                                                                                                                                                                                                                                                                                                                                                                                                                                                                                                                                                        |      |      |           |       |      |      |                                                      |       |                      |                                                                                                                                                                                                                                                                                                                                                                                                                                     |      |      |           |       |      |      |
|--------------------------|------------------------------------------------------------------------------------------------------------------------------------------------------------------------------------------------------------------------------------------------------------------------------------------------------------------------------------------------------------------------------------------------------------------------------------------------------------------------------------------------------------------------------------------------------------------------------------------------------------------------------------------------------------------------------------------------------------------------------------------------------------------------------------------------------------------------|------|------|-----------|-------|------|------|------------------------------------------------------|-------|----------------------|-------------------------------------------------------------------------------------------------------------------------------------------------------------------------------------------------------------------------------------------------------------------------------------------------------------------------------------------------------------------------------------------------------------------------------------|------|------|-----------|-------|------|------|
| Rsa1.0_01557.1.g27922.t1 | gb ACP30598.1  disease resistance protein [Brassica rapa subsp. pekinensis]                                                                                                                                                                                                                                                                                                                                                                                                                                                                                                                                                                                                                                                                                                                                            | 1441 | 2301 | 0         | 159.7 | 59.2 | 73.8 | disease resistance protein                           | gbpln | Brassica rapa        | AT4G23160.1   Symbols: CRK8   cysteine-rich RLK (RECEPTOR-like protein kinase) 8   chr4:12129485-12134086 FORWARD LENGTH=1262                                                                                                                                                                                                                                                                                                       | 1441 | 1262 | 1.00E-107 | 87.6  | 13.5 | 19.3 |
| Rsa1.0_01557.1.g27923.t1 | ref NP_189132.2  Helicase/SANT-associated DNA binding protein [Arabidopsis thaliana]   gi 332643436 gb AEE76957.1  Helicase/SANT-associated DNA binding protein [Arabidopsis thaliana]                                                                                                                                                                                                                                                                                                                                                                                                                                                                                                                                                                                                                                 | 1902 | 1957 | 0         | 102.9 | 60.9 | 72.3 | Helicase/SANT-associated DNA binding protein         | gbpln | Arabidopsis thaliana | AT3G24890.1   Symbols:   Helicase/SANT-associated DNA binding protein   chr3:9086457-9095537 REVERSE LENGTH=1957                                                                                                                                                                                                                                                                                                                    | 1902 | 1957 | 0         | 102.9 | 60.9 | 72.3 |
| Rsa1.0_01558.1.g27924.t1 | ref NP_565613.1  uncharacterized protein [Arabidopsis thaliana]   gi 15294292 gb AAK95323.1 AF410337.1 At2g25920/F17H15.5 [Arabidopsis thaliana]   gi 20197362 gb AAC42240.2  expressed protein [Arabidopsis thaliana]   gi 23507801 gb AAN38704.1  At2g25920/F17H15.5 [Arabidopsis thaliana]   gi 330252679 gb AEC07773.1  uncharacterized protein AT2G25920 [Arabidopsis thaliana]                                                                                                                                                                                                                                                                                                                                                                                                                                   | 122  | 280  | 2.00E-20  | 229.5 | 45.9 | 53.3 | uncharacterized protein                              | gbpln | Arabidopsis thaliana | AT2G25920.1   Symbols:   BEST Arabidopsis thaliana protein match is: 3'-5' exonuclease domain-containing protein / K homology domain-containing protein / KH domain-containing protein (TAIR:AT2G25910.2); Has 131 Blast hits to 125 proteins in 54 species: Archae - 0; Bacteria - 50; Metazoa - 12; Fungi - 12; Plants - 41; Viruses - 0; Other Eukaryotes - 16 (source: NCBI BLINK).   chr2:11054425-11055916 REVERSE LENGTH=280 | 122  | 280  | 3.00E-23  | 229.5 | 45.9 | 53.3 |
| Rsa1.0_01558.1.g27925.t1 | gb EOA32134.1  hypothetical protein CARUB.v10015385mg, partial [Capsella rubella]                                                                                                                                                                                                                                                                                                                                                                                                                                                                                                                                                                                                                                                                                                                                      | 262  | 581  | 2.00E-75  | 221.8 | 58.8 | 66.8 | hypothetical protein CARUB.v10015385mg, partial      | gbpln | Capsella rubella     | #                                                                                                                                                                                                                                                                                                                                                                                                                                   | #    | #    | #         | #     | #    | #    |
| Rsa1.0_01558.1.g27926.t1 | ref NP_192120.4  transcription coactivator protein [Arabidopsis thaliana]   gi 363548502 sp O04251.3 v4211_ARAT H RecName: Full=BRCT domain-containing protein At4g02110   gi 332656725 gb AEE82125.1  BRCT domain-containing protein [Arabidopsis thaliana]                                                                                                                                                                                                                                                                                                                                                                                                                                                                                                                                                           | 1292 | 1329 | 0         | 102.9 | 69.5 | 78.8 | transcription coactivator protein                    | gbpln | Arabidopsis thaliana | AT4G02110.1   Symbols:   transcription coactivators   chr4:935191-940191 FORWARD LENGTH=1329                                                                                                                                                                                                                                                                                                                                        | 1292 | 1329 | 0         | 102.9 | 69.5 | 78.8 |
| Rsa1.0_01558.1.g27927.t1 | ref XP_002867921.1  hypothetical protein ARALYDRAFT_492890 [Arabidopsis lyrata subsp. lyrata]   gi 297313757 gb EFH44180.1  hypothetical protein ARALYDRAFT_492890 [Arabidopsis lyrata subsp. lyrata]                                                                                                                                                                                                                                                                                                                                                                                                                                                                                                                                                                                                                  | 369  | 371  | 1.00E-140 | 100.5 | 66.7 | 79.4 | hypothetical protein ARALYDRAFT_492890               | gbpln | Arabidopsis lyrata   | AT4G19760.1   Symbols:   Glycosyl hydrolase family protein with chitinase insertion domain   chr4:10750381-10752028 FORWARD LENGTH=369                                                                                                                                                                                                                                                                                              | 369  | 369  | 1.00E-137 | 100.0 | 67.5 | 79.1 |
| Rsa1.0_01558.1.g27928.t1 | #                                                                                                                                                                                                                                                                                                                                                                                                                                                                                                                                                                                                                                                                                                                                                                                                                      | #    | #    | #         | #     | #    | -    | ----                                                 | ----  | ----                 | #                                                                                                                                                                                                                                                                                                                                                                                                                                   | #    | #    | #         | #     | #    |      |
| Rsa1.0_01558.1.g27929.t1 | ref XP_002874939.1  DNAJ heat shock N-terminal domain-containing protein [Arabidopsis lyrata subsp. lyrata]   gi 297320776 gb EFH51198.1  DNAJ heat shock N-terminal domain-containing protein [Arabidopsis lyrata subsp. lyrata]                                                                                                                                                                                                                                                                                                                                                                                                                                                                                                                                                                                      | 543  | 544  | 0         | 100.2 | 89.3 | 93.0 | DNAJ heat shock N-terminal domain-containing protein | gbpln | Arabidopsis lyrata   | AT4G02100.1   Symbols:   Heat shock protein DnaJ with tetratricopeptide repeat   chr4:930228-932049 FORWARD LENGTH=546                                                                                                                                                                                                                                                                                                              | 543  | 546  | 0         | 100.6 | 88.6 | 92.6 |
| Rsa1.0_01558.1.g27930.t1 | gb AAG10817.1 AC011808.5 Putative retroelement polyprotein [Arabidopsis thaliana]                                                                                                                                                                                                                                                                                                                                                                                                                                                                                                                                                                                                                                                                                                                                      | 1470 | 1413 | 0         | 96.1  | 65.4 | 78.2 | Putative retroelement polyprotein                    | gbpln | Arabidopsis thaliana | AT4G23160.1   Symbols: CRK8   cysteine-rich RLK (RECEPTOR-like protein kinase) 8   chr4:12129485-12134086 FORWARD LENGTH=1262                                                                                                                                                                                                                                                                                                       | 1470 | 1262 | 0         | 85.9  | 22.1 | 27.8 |
| Rsa1.0_01558.1.g27931.t1 | ref NP_192117.1  GTP-binding protein SAR1A [Arabidopsis thaliana]   gi 3334323 sp O04834.1 SAR1A_ARATH RecName: Full=GTP-binding protein SAR1A   gi 1314860 gb AAA99827.1  Sar1 homolog [Arabidopsis thaliana]   gi 2104532 gb AAC78700.1  SAR1/GTP-binding secretory factor [Arabidopsis thaliana]   gi 2104550 gb AAB57799.1  AGAA.4 [Arabidopsis thaliana]   gi 7268592 emb CAB80701.1  SAR1/GTP-binding secretory factor [Arabidopsis thaliana]   gi 17529144 gb AAL38798.1  putative SAR1/GTP-binding secretory factor [Arabidopsis thaliana]   gi 20465729 gb AAM20333.1  putative SAR1/GTP-binding secretory factor [Arabidopsis thaliana]   gi 21618030 gb AAM67080.1  SAR1/GTP-binding secretory factor [Arabidopsis thaliana]   gi 332656722 gb AEE82122.1  GTP-binding protein SAR1A [Arabidopsis thaliana] | 193  | 193  | 1.00E-107 | 100.0 | 97.9 | 99.5 | GTP-binding protein SAR1A                            | gbpln | Arabidopsis thaliana | AT4G02080.1   Symbols: ASAR1, ATSARA1C, ATSAR2, SAR2   secretion-associated RAS super family 2   chr4:921554-922547 FORWARD LENGTH=193                                                                                                                                                                                                                                                                                              | 193  | 193  | 1.00E-110 | 100.0 | 97.9 | 99.5 |

|                          |                                                                                                                                                                                                                                  |     |      |           |       |      |      |                                                         |       |                      |                                                                                                                                                                                                                                                                                                                                                                                                                                                                    |     |     |           |       |      |      |
|--------------------------|----------------------------------------------------------------------------------------------------------------------------------------------------------------------------------------------------------------------------------|-----|------|-----------|-------|------|------|---------------------------------------------------------|-------|----------------------|--------------------------------------------------------------------------------------------------------------------------------------------------------------------------------------------------------------------------------------------------------------------------------------------------------------------------------------------------------------------------------------------------------------------------------------------------------------------|-----|-----|-----------|-------|------|------|
| Rsa1.0_01559.1.g27932.t1 | refXP_002873346.1 ribosomal protein L7Ae/L30e/S12e/Gadd45 family protein [Arabidopsis lyrata subsp. lyrata] gi 297319183 gb EFH49605.1                                                                                           | 155 | 156  | 6.00E-76  | 100.6 | 92.3 | 99.4 | ribosomal protein L7Ae/L30e/S12e/Gad d45 family protein | gbpln | Arabidopsis lyrata   | AT5G08180.2   Symbols:   Ribosomal protein L7Ae/L30e/S12e/Gadd45 family protein   chr5:2631843-2633374 REVERSE LENGTH=156                                                                                                                                                                                                                                                                                                                                          | 155 | 156 | 2.00E-77  | 100.6 | 91.0 | 98.7 |
| Rsa1.0_01559.1.g27933.t1 | refXP_002873343.1 hypothetical protein ARALYDRAFT_908765 [Arabidopsis lyrata subsp. lyrata] gi 297319180 gb EFH49602.1                                                                                                           | 133 | 140  | 1.00E-30  | 105.3 | 72.9 | 83.5 | hypothetical protein ARALYDRAFT_908765                  | gbpln | Arabidopsis lyrata   | AT5G08150.1   Symbols: SOB5   suppressor of phytochrome b 5   chr5:2622164-2622598 REVERSE LENGTH=144                                                                                                                                                                                                                                                                                                                                                              | 133 | 144 | 1.00E-25  | 108.3 | 69.2 | 81.2 |
| Rsa1.0_01559.1.g27934.t2 | gb AAB38778.1  myosin heavy chain-like protein [Arabidopsis thaliana]                                                                                                                                                            | 200 | 209  | 9.00E-45  | 104.5 | 46.5 | 55.0 | myosin heavy chain-like protein                         | gbpln | Arabidopsis thaliana | AT5G08120.1   Symbols: MPB2C   movement protein binding protein 2C   chr5:2600743-2602678 REVERSE LENGTH=326                                                                                                                                                                                                                                                                                                                                                       | 200 | 326 | 7.00E-47  | 163.0 | 46.5 | 55.0 |
| Rsa1.0_01559.1.g27935.t1 | emb CAB39638.1  RNA-directed DNA polymerase-like protein [Arabidopsis thaliana] gi 267666 emb CAB78094.1  RNA-directed DNA polymerase-like protein [Arabidopsis thaliana]                                                        | 190 | 1274 | 2.00E-26  | 670.5 | 42.1 | 59.5 | RNA-directed DNA polymerase-like protein                | gbpln | Arabidopsis thaliana | AT1G10000.1   Symbols:   Ribonuclease H-like superfamily protein   chr1:3263877-3264788 REVERSE LENGTH=303                                                                                                                                                                                                                                                                                                                                                         | 190 | 303 | 5.00E-24  | 159.5 | 41.1 | 56.3 |
| Rsa1.0_01559.1.g27936.t1 | dbj BAJ33766.1  unnamed protein product [Theilungiella halophila]                                                                                                                                                                | 843 | 843  | 0         | 100.0 | 97.9 | 99.5 | unnamed protein product                                 | ----  | ----                 | AT1G56070.1   Symbols: LOS1   Ribosomal protein S5/Elongation factor G/III/V family protein   chr1:20968245-20971077 REVERSE LENGTH=843                                                                                                                                                                                                                                                                                                                            | 843 | 843 | 0         | 100.0 | 96.7 | 98.3 |
| Rsa1.0_01559.1.g27937.t1 | dbj BAB01155.1  unnamed protein product [Arabidopsis thaliana] gi 49823524 gb AAT68745.1  hypothetical protein At3g17200 [Arabidopsis thaliana] gi 60547763 gb AAx23845.1  hypothetical protein At3g17200 [Arabidopsis thaliana] | 250 | 310  | 9.00E-52  | 124.0 | 38.8 | 54.8 | unnamed protein product                                 | gbpln | Arabidopsis thaliana | AT3G24255.1   Symbols:   RNA-directed DNA polymerase (reverse transcriptase)-related family protein   chr3:8789471-8793208 FORWARD LENGTH=746                                                                                                                                                                                                                                                                                                                      | 250 | 746 | 5.00E-42  | 298.4 | 31.6 | 44.4 |
| Rsa1.0_01559.1.g27938.t1 | gb EOA21213.1  hypothetical protein CARUB_v10001560mg [Capsella rubella]                                                                                                                                                         | 303 | 304  | 1.00E-141 | 100.3 | 95.0 | 99.3 | hypothetical protein CARUB_v10001560mg                  | gbpln | Capsella rubella     | AT5G08080.1   Symbols: SYP132, AT5YP132   syntaxin of plants 132   chr5:2588532-2591106 FORWARD LENGTH=304                                                                                                                                                                                                                                                                                                                                                         | 303 | 304 | 1.00E-141 | 100.3 | 94.1 | 98.3 |
| Rsa1.0_01559.1.g27939.t1 | refXP_002871305.1 hypothetical protein ARALYDRAFT_487638 [Arabidopsis lyrata subsp. lyrata] gi 297317142 gb EFH47564.1  hypothetical protein ARALYDRAFT_487638 [Arabidopsis lyrata subsp. lyrata]                                | 131 | 131  | 2.00E-59  | 100.0 | 80.2 | 91.6 | hypothetical protein ARALYDRAFT_487638                  | gbpln | Arabidopsis lyrata   | AT5G08060.1   Symbols:   unknown protein; FUNCTIONS IN: molecular_function unknown; INVOLVED IN: biological_process unknown; LOCATED IN: mitochondrion; EXPRESSED IN: 24 plant structures; EXPRESSED DURING: 16 growth stages; Has 42 Blast hits to 42 proteins in 17 species: Archae - 0; Bacteria - 0; Metazoa - 0; Fungi - 0; Plants - 41; Viruses - 0; Other Eukaryotes - 1 (source: NCBI BLink).   chr5:2580588-2580983 FORWARD LENGTH=131                    | 131 | 131 | 6.00E-62  | 100.0 | 80.2 | 91.6 |
| Rsa1.0_01559.1.g27940.t1 | #                                                                                                                                                                                                                                | #   | #    | #         | #     | #    | #    | -                                                       | ----  | ----                 | #                                                                                                                                                                                                                                                                                                                                                                                                                                                                  | #   | #   | #         | #     | #    | #    |
| Rsa1.0_01559.1.g27941.t1 | refXP_002871297.1 hypothetical protein ARALYDRAFT_487629 [Arabidopsis lyrata subsp. lyrata] gi 297317134 gb EFH47556.1  hypothetical protein ARALYDRAFT_487629 [Arabidopsis lyrata subsp. lyrata]                                | 107 | 107  | 4.00E-54  | 100.0 | 95.3 | 97.2 | hypothetical protein ARALYDRAFT_487629                  | gbpln | Arabidopsis lyrata   | AT5G07960.1   Symbols:   unknown protein; CONTAINS InterPro DOMAIN/s: Uncharacterised protein family UPF0139 (InterPro:IPR005351); Has 193 Blast hits to 193 proteins in 75 species: Archae - 0; Bacteria - 0; Metazoa - 130; Fungi - 0; Plants - 52; Viruses - 0; Other Eukaryotes - 11 (source: NCBI BLink).   chr5:2542350-2543253 FORWARD LENGTH=107                                                                                                           | 107 | 107 | 9.00E-57  | 100.0 | 94.4 | 96.3 |
| Rsa1.0_01559.1.g27942.t1 | refNP_568186.1 uncharacterized protein [Arabidopsis thaliana] gi 21593576 gb AAM65543.1  unknown [Arabidopsis thaliana] gi 332003845 gb AED91228.1  uncharacterized protein AT5G07950 [Arabidopsis thaliana]                     | 312 | 303  | 1.00E-108 | 97.1  | 64.7 | 74.4 | uncharacterized protein                                 | gbpln | Arabidopsis thaliana | AT5G07950.1   Symbols:   unknown protein; FUNCTIONS IN: molecular_function unknown; INVOLVED IN: biological_process unknown; LOCATED IN: chloroplast; EXPRESSED IN: 20 plant structures; EXPRESSED DURING: 9 growth stages; Has 30201 Blast hits to 17322 proteins in 780 species: Archae - 12; Bacteria - 1396; Metazoa - 1738; Fungi - 3422; Plants - 5037; Viruses - 0; Other Eukaryotes - 2996 (source: NCBI BLink).   chr5:2540530-2542047 REVERSE LENGTH=303 | 312 | 303 | 1.00E-111 | 97.1  | 64.7 | 74.4 |



|                          |                                                                                                                                                                                                                                                                                                                                                                                                  |      |      |           |       |      |      |                                                      |       |                      |                                                                                                                                                                                                                                                                                                                                                                                                                                                                                                                                          |      |      |           |       |      |      |
|--------------------------|--------------------------------------------------------------------------------------------------------------------------------------------------------------------------------------------------------------------------------------------------------------------------------------------------------------------------------------------------------------------------------------------------|------|------|-----------|-------|------|------|------------------------------------------------------|-------|----------------------|------------------------------------------------------------------------------------------------------------------------------------------------------------------------------------------------------------------------------------------------------------------------------------------------------------------------------------------------------------------------------------------------------------------------------------------------------------------------------------------------------------------------------------------|------|------|-----------|-------|------|------|
| Rsa1.0_01559.1.g27943.t2 | refXP_002871296.1   hypothetical protein ARALYDRAFT_487627 [Arabidopsis lyrata subsp. lyrata] gi 297317133 gb EFH47555.1   hypothetical protein ARALYDRAFT_487627 [Arabidopsis lyrata subsp. lyrata]                                                                                                                                                                                             | 1405 | 1523 | 0         | 108.4 | 72.8 | 81.9 | hypothetical protein ARALYDRAFT_487627               | gbpln | Arabidopsis lyrata   | AT5G07940.2   Symbols:   FUNCTIONS IN: molecular_function unknown; INVOLVED IN: biological_process unknown; LOCATED IN: cellular_component unknown; EXPRESSED IN: pollen tube; BEST Arabidopsis thaliana protein match is: dentin sialophosphoprotein-related (TAIR:AT5G07980.1),   chr5:2534720-2540086 FORWARD LENGTH=1526                                                                                                                                                                                                             | 1405 | 1526 | 0         | 108.6 | 73.5 | 82.3 |
| Rsa1.0_01559.1.g27944.t1 | #                                                                                                                                                                                                                                                                                                                                                                                                | #    | #    | #         | #     | #    | #    | -                                                    | ----  | ----                 | #                                                                                                                                                                                                                                                                                                                                                                                                                                                                                                                                        | #    | #    | #         | #     | #    |      |
| Rsa1.0_01559.1.g27945.t1 | ref NP_196410.1  MEI2 C-terminal RRM only like 2 [Arabidopsis thaliana] gi 5662307 emb CAB62605.1  putative protein [Arabidopsis thaliana] gi 10176727 dbj BA08957.1  unnamed protein product [Arabidopsis thaliana] gi 332003839 gb AED91222.1  MEI2 C-terminal RRM only like 2 [Arabidopsis thaliana]                                                                                          | 277  | 282  | 2.00E-73  | 101.8 | 56.0 | 68.6 | MEI2 C-terminal RRM only like 2                      | gbpln | Arabidopsis thaliana | AT5G07930.1   Symbols: MCT2   MEI2 C-terminal RRM only like 2   chr5:2530865-2532216 FORWARD LENGTH=282                                                                                                                                                                                                                                                                                                                                                                                                                                  | 277  | 282  | 5.00E-76  | 101.8 | 56.0 | 68.6 |
| Rsa1.0_01560.1.g27946.t8 | dbj BAB09923.1  copia-like retrotransposable element [Arabidopsis thaliana]                                                                                                                                                                                                                                                                                                                      | 790  | 1342 | 5.00E-62  | 169.9 | 13.8 | 17.7 | copia-like retrotransposable element                 | gbpln | Arabidopsis thaliana | AT4G23160.1   Symbols: CRK8   cysteine-rich RLK (RECEPTOR-like protein kinase) 8   chr4:12129485-12134086 FORWARD LENGTH=1262                                                                                                                                                                                                                                                                                                                                                                                                            | 790  | 1262 | 1.00E-19  | 159.7 | 6.5  | 9.1  |
| Rsa1.0_01560.1.g27947.t1 | gb EOA37301.1  hypothetical protein CARUB_v10010954mg [Capsella rubella]                                                                                                                                                                                                                                                                                                                         | 802  | 815  | 0         | 101.6 | 78.8 | 86.8 | hypothetical protein CARUB_v10010954mg               | gbpln | Capsella rubella     | AT1G11280.3   Symbols:   S-locus lectin protein kinase family protein   chr1:3787456-3790621 REVERSE LENGTH=808                                                                                                                                                                                                                                                                                                                                                                                                                          | 802  | 808  | 0         | 100.7 | 79.2 | 87.4 |
| Rsa1.0_01560.1.g27948.t1 | ref XP_002878862.1  DNAJ heat shock N-terminal domain-containing protein [Arabidopsis lyrata subsp. lyrata] gi 297324701 gb EFH5121.1  DNAJ heat shock N-terminal domain-containing protein [Arabidopsis lyrata subsp. lyrata]                                                                                                                                                                   | 634  | 664  | 0         | 104.7 | 73.5 | 83.4 | DNAJ heat shock N-terminal domain-containing protein | gbpln | Arabidopsis lyrata   | AT2G25560.1   Symbols:   DNAJ heat shock N-terminal domain-containing protein   chr2:10881790-10883760 FORWARD LENGTH=656                                                                                                                                                                                                                                                                                                                                                                                                                | 634  | 656  | 0         | 103.5 | 70.3 | 80.8 |
| Rsa1.0_01560.1.g27949.t1 | ref XP_002878866.1  hypothetical protein ARALYDRAFT_344161 [Arabidopsis lyrata subsp. lyrata] gi 297324705 gb EFH5125.1  hypothetical protein ARALYDRAFT_344161 [Arabidopsis lyrata subsp. lyrata]                                                                                                                                                                                               | 315  | 377  | 1.00E-119 | 119.7 | 76.2 | 84.8 | hypothetical protein ARALYDRAFT_344161               | gbpln | Arabidopsis lyrata   | AT4G32440.1   Symbols:   Plant Tudor-like RNA-binding protein   chr4:15657295-15658692 FORWARD LENGTH=377                                                                                                                                                                                                                                                                                                                                                                                                                                | 315  | 377  | 1.00E-106 | 119.7 | 68.6 | 79.4 |
| Rsa1.0_01560.1.g27950.t1 | gb EOA25748.1  hypothetical protein CARUB_v10019110mg [Capsella rubella]                                                                                                                                                                                                                                                                                                                         | 346  | 360  | 3.00E-91  | 104.0 | 53.2 | 65.6 | hypothetical protein CARUB_v10019110mg               | gbpln | Capsella rubella     | AT2G44630.1   Symbols:   Galactose oxidase/kelch repeat superfamily protein   chr2:18415829-18416947 REVERSE LENGTH=372                                                                                                                                                                                                                                                                                                                                                                                                                  | 346  | 372  | 4.00E-90  | 107.5 | 54.9 | 65.9 |
| Rsa1.0_01560.1.g27951.t1 | ref NP_181998.1  F-box/kelch-repeat protein [Arabidopsis thaliana] gi 142995062 sp Q84RE1.2 FBK48_ARAT H RecName: Full=F-box/kelch-repeat protein At2g44700 gi 3341690 gb AAC27472.1  hypothetical protein [Arabidopsis thaliana] gi 55740615 gb AAV63900.1  hypothetical protein At2g44700 [Arabidopsis thaliana] gi 330255363 gb AEC10457.1  F-box/kelch-repeat protein [Arabidopsis thaliana] | 350  | 368  | 1.00E-91  | 105.1 | 53.1 | 66.6 | F-box/kelch-repeat protein                           | gbpln | Arabidopsis thaliana | AT2G44700.1   Symbols:   Galactose oxidase/kelch repeat superfamily protein   chr2:18431015-18432121 FORWARD LENGTH=368                                                                                                                                                                                                                                                                                                                                                                                                                  | 350  | 368  | 3.00E-94  | 105.1 | 53.1 | 66.6 |
| Rsa1.0_01560.1.g27952.t1 | ref NP_850062.1  uncharacterized protein [Arabidopsis thaliana] gi 45752742 gb AAS76269.1  At2g25605 [Arabidopsis thaliana] gi 6232091 dbj BAD93906.1  hypothetical protein [Arabidopsis thaliana] gi 330252629 gb AEC07723.1  uncharacterized protein AT2G25605 [Arabidopsis thaliana]                                                                                                          | 197  | 200  | 8.00E-96  | 101.5 | 90.9 | 93.4 | uncharacterized protein                              | gbpln | Arabidopsis thaliana | AT2G25605.1   Symbols:   unknown protein; FUNCTIONS IN: molecular_function unknown; INVOLVED IN: biological_process unknown; LOCATED IN: chloroplast; Has 75 Blast hits to 75 proteins in 20 species: Archae - 2; Bacteria - 4; Metazoa - 0; Fungi - 0; Plants - 36; Viruses - 0; Other Eukaryotes - 33 (source: NCBI BLINK).   chr2:10899541-10900875 FORWARD LENGTH=200                                                                                                                                                                | 197  | 200  | 3.00E-98  | 101.5 | 90.9 | 93.4 |
| Rsa1.0_01560.1.g27953.t1 | ref NP_850063.1  uncharacterized protein [Arabidopsis thaliana] gi 20197506 gb AAM15100.1  Expressed protein [Arabidopsis thaliana] gi 21593816 gb AAM65783.1  unknown [Arabidopsis thaliana] gi 110742673 dbj BAE99248.1  hypothetical protein [Arabidopsis thaliana] gi 330252633 gb AEC07727.1  uncharacterized protein AT2G25625 [Arabidopsis thaliana]                                      | 148  | 152  | 3.00E-55  | 102.7 | 75.0 | 84.5 | uncharacterized protein                              | gbpln | Arabidopsis thaliana | AT2G25625.1   Symbols:   unknown protein; FUNCTIONS IN: molecular_function unknown; INVOLVED IN: biological_process unknown; LOCATED IN: chloroplast; EXPRESSED IN: 10 plant structures; EXPRESSED DURING: LP.06 six leaves visible, LP.04 four leaves visible, 4 anthesis, petal differentiation and expansion stage; Has 24 Blast hits to 24 proteins in 9 species: Archae - 0; Bacteria - 0; Metazoa - 0; Fungi - 0; Plants - 24; Viruses - 0; Other Eukaryotes - 0 (source: NCBI BLINK).   chr2:10906562-10907099 FORWARD LENGTH=152 | 148  | 152  | 7.00E-58  | 102.7 | 75.0 | 84.5 |

|                           |                                                                                                                                                                                                                  |      |      |           |       |      |      |                                                            |       |                      |                                                                                                                                                                                                                                                                                                                                                                                                      |      |     |           |       |      |      |
|---------------------------|------------------------------------------------------------------------------------------------------------------------------------------------------------------------------------------------------------------|------|------|-----------|-------|------|------|------------------------------------------------------------|-------|----------------------|------------------------------------------------------------------------------------------------------------------------------------------------------------------------------------------------------------------------------------------------------------------------------------------------------------------------------------------------------------------------------------------------------|------|-----|-----------|-------|------|------|
| Rsa1.0_01560.1.g27954.t2  | refNP_180135.2   SPOC domain / Transcription elongation factor S-II protein [Arabidopsis thaliana] gi 330252635 gb AE07729.1   SPOC domain / Transcription elongation factor S-II protein [Arabidopsis thaliana] | 826  | 745  | 0         | 90.2  | 57.6 | 64.6 | SPOC domain / Transcription elongation factor S-II protein | gbpln | Arabidopsis thaliana | AT2G25640.1   Symbols:   SPOC domain / Transcription elongation factor S-II protein   chr2:10910836-10913908 FORWARD LENGTH=745                                                                                                                                                                                                                                                                      | 826  | 745 | 0         | 90.2  | 57.6 | 64.6 |
| Rsa1.0_01561.1.g27955.t1  | gb EOA36086.1  hypothetical protein CARUB_v10010474mg [Capsella rubella]                                                                                                                                         | 171  | 170  | 4.00E-59  | 99.4  | 63.7 | 69.6 | hypothetical protein CARUB_v10010474mg                     | gbpln | Capsella rubella     | AT1G18210.2   Symbols:   Calcium-binding EF-hand family protein   chr1:6268273-6268785 REVERSE LENGTH=170                                                                                                                                                                                                                                                                                            | 171  | 170 | 1.00E-60  | 99.4  | 62.0 | 67.8 |
| Rsa1.0_01561.1.g27956.t1  | gb EOA36627.1  hypothetical protein CARUB_v10011865mg [Capsella rubella]                                                                                                                                         | 370  | 228  | 1.00E-109 | 61.6  | 54.6 | 56.8 | hypothetical protein CARUB_v10011865mg                     | gbpln | Capsella rubella     | AT1G18200.1   Symbols:   ATRABA6b, RABA6b   RAB GTPase homolog A6B   chr1:6265416-6266659 REVERSE LENGTH=229                                                                                                                                                                                                                                                                                         | 370  | 229 | 1.00E-111 | 61.9  | 53.8 | 56.8 |
| Rsa1.0_01561.1.g27957.t1  | ref XP_002892985.1  predicted protein [Arabidopsis lyrata subsp. lyrata] gi 297338827 gb EFH69244.1   predicted protein [Arabidopsis lyrata subsp. lyrata]                                                       | 590  | 579  | 0         | 98.1  | 89.7 | 93.1 | predicted protein                                          | gbpln | Arabidopsis lyrata   | AT1G18150.3   Symbols:   ATPMK8   Protein kinase superfamily protein   chr1:6244641-6247582 REVERSE LENGTH=589                                                                                                                                                                                                                                                                                       | 590  | 589 | 0         | 99.8  | 90.3 | 94.6 |
| Rsa1.0_01561.1.g27958.t1  | ref XP_002892984.1  hypothetical protein ARALYDRAFT_889226 [Arabidopsis lyrata subsp. lyrata] gi 297338826 gb EFH69243.1   hypothetical protein ARALYDRAFT_889226 [Arabidopsis lyrata subsp. lyrata]             | 578  | 581  | 0         | 100.5 | 88.4 | 93.8 | hypothetical protein ARALYDRAFT_889226                     | gbpln | Arabidopsis lyrata   | AT1G18140.1   Symbols:   LAC1, ATLAC1   lacase 1   chr1:6238986-6241393 REVERSE LENGTH=581                                                                                                                                                                                                                                                                                                           | 578  | 581 | 0         | 100.5 | 89.3 | 93.6 |
| Rsa1.0_01561.1.g27959.t1  | ref XP_002890260.1  hypothetical protein ARALYDRAFT_889222 [Arabidopsis lyrata subsp. lyrata] gi 297336102 gb EFH66519.1   hypothetical protein ARALYDRAFT_889222 [Arabidopsis lyrata subsp. lyrata]             | 588  | 577  | 0         | 98.1  | 78.7 | 83.7 | hypothetical protein ARALYDRAFT_889222                     | gbpln | Arabidopsis lyrata   | AT1G18090.2   Symbols:   5'-3' exonuclease family protein   chr1:6224539-6227715 FORWARD LENGTH=577                                                                                                                                                                                                                                                                                                  | 588  | 577 | 0         | 98.1  | 77.4 | 82.8 |
| Rsa1.0_01561.1.g27960.t1  | gb EOA38237.1  hypothetical protein CARUB_v10009720mg [Capsella rubella]                                                                                                                                         | 328  | 328  | 0         | 100.0 | 95.4 | 97.9 | hypothetical protein CARUB_v10009720mg                     | gbpln | Capsella rubella     | AT1G18080.1   Symbols:   ATARCA, RACK1A.AT, RACK1A   Transducin/WD40 repeat-like superfamily protein   chr1:6222325-6223901 FORWARD LENGTH=327                                                                                                                                                                                                                                                       | 328  | 327 | 0         | 99.7  | 95.1 | 97.6 |
| Rsa1.0_01561.1.g27961.t20 | gb EOA37322.1  hypothetical protein CARUB_v10011009mg [Capsella rubella]                                                                                                                                         | 226  | 230  | 1.00E-111 | 101.8 | 87.2 | 94.7 | hypothetical protein CARUB_v10011009mg                     | gbpln | Capsella rubella     | AT1G18060.1   Symbols:   unknown protein; INVOLVED IN: biological_process unknown; LOCATED IN: chloroplast; EXPRESSED IN: 22 plant structures; EXPRESSED DURING: 13 growth stages; Has 74 Blast hits to 74 proteins in 29 species: Archae - 0; Bacteria - 19; Metazoa - 0; Fungi - 0; Plants - 49; Viruses - 0; Other Eukaryotes - 6 (source: NCBI BLINK).   chr1:6212065-6213314 REVERSE LENGTH=226 | 226  | 226 | 1.00E-104 | 100.0 | 78.3 | 85.4 |
| Rsa1.0_01561.1.g27962.t1  | ref XP_002892978.1  cyclin-dependent kinase D1_3 [Arabidopsis lyrata subsp. lyrata] gi 297338820 gb EFH69237.1   cyclin-dependent kinase D1_3 [Arabidopsis lyrata subsp. lyrata]                                 | 425  | 393  | 0         | 92.5  | 83.3 | 87.5 | cyclin-dependent kinase D1_3                               | gbpln | Arabidopsis lyrata   | AT1G18040.1   Symbols:   CDKD1.3, AT;ODCKD.3, CAK2AT   cyclin-dependent kinase D1.3   chr1:6207128-6209299 REVERSE LENGTH=391                                                                                                                                                                                                                                                                        | 425  | 391 | 0         | 92.0  | 82.4 | 86.4 |
| Rsa1.0_01561.1.g27963.t1  | ref XP_002892977.1  nucleotidyltransferase family protein [Arabidopsis lyrata subsp. lyrata] gi 297338819 gb EFH69236.1   nucleotidyltransferase family protein [Arabidopsis lyrata subsp. lyrata]               | 690  | 716  | 0         | 103.8 | 87.0 | 93.2 | nucleotidyltransferase family protein                      | gbpln | Arabidopsis lyrata   | AT1G17980.1   Symbols:   PAPS1   poly(A) polymerase 1   chr1:6187742-6191418 REVERSE LENGTH=713                                                                                                                                                                                                                                                                                                      | 690  | 713 | 0         | 103.3 | 84.2 | 91.2 |
| Rsa1.0_01561.1.g27964.t1  | gb EOA38056.1  hypothetical protein CARUB_v10009526mg [Capsella rubella]                                                                                                                                         | 366  | 363  | 1.00E-140 | 99.2  | 75.7 | 81.7 | hypothetical protein CARUB_v10009526mg                     | gbpln | Capsella rubella     | AT1G17970.1   Symbols:   RING/U-box superfamily protein   chr1:6185032-6187202 FORWARD LENGTH=368                                                                                                                                                                                                                                                                                                    | 366  | 368 | 1.00E-131 | 100.5 | 73.0 | 81.4 |
| Rsa1.0_01561.1.g27965.t1  | #                                                                                                                                                                                                                | #    | #    | #         | #     | #    | -    | -                                                          | ----  | ----                 | #                                                                                                                                                                                                                                                                                                                                                                                                    | #    | #   | #         | #     | #    | #    |
| Rsa1.0_01562.1.g27966.t1  | #                                                                                                                                                                                                                | #    | #    | #         | #     | #    | -    | -                                                          | ----  | ----                 | #                                                                                                                                                                                                                                                                                                                                                                                                    | #    | #   | #         | #     | #    | #    |
| Rsa1.0_01562.1.g27967.t3  | #                                                                                                                                                                                                                | #    | #    | #         | #     | #    | -    | -                                                          | ----  | ----                 | #                                                                                                                                                                                                                                                                                                                                                                                                    | #    | #   | #         | #     | #    | #    |
| Rsa1.0_01562.1.g27968.t1  | gb EOA35193.1  hypothetical protein CARUB_v10020343mg [Capsella rubella]                                                                                                                                         | 415  | 425  | 1.00E-170 | 102.4 | 69.9 | 81.4 | hypothetical protein CARUB_v10020343mg                     | gbpln | Capsella rubella     | AT1G57590.1   Symbols:   Pectinacetyltransferase family protein   chr1:21327458-21329707 REVERSE LENGTH=444                                                                                                                                                                                                                                                                                          | 415  | 444 | 1.00E-172 | 107.0 | 69.4 | 81.0 |
| Rsa1.0_01562.1.g27969.t1  | gb EOA15316.1  hypothetical protein CARUB_v100277371mg, partial [Capsella rubella]                                                                                                                               | 437  | 413  | 1.00E-59  | 94.5  | 30.9 | 46.7 | hypothetical protein CARUB_v100277371mg, partial           | gbpln | Capsella rubella     | AT1G52950.1   Symbols:   Nucleic acid-binding, OB-fold-like protein   chr1:19725483-19728007 FORWARD LENGTH=566                                                                                                                                                                                                                                                                                      | 437  | 566 | 1.00E-37  | 129.5 | 21.7 | 37.8 |
| Rsa1.0_01562.1.g27970.t2  | ref XP_003631153.1  ATP-dependent DNA helicase PIF1 [Medicago truncatula] gi 355525175 gb AET05629.1   ATP-dependent DNA helicase PIF1 [Medicago truncatula]                                                     | 1351 | 1050 | 0         | 77.7  | 29.1 | 40.9 | ATP-dependent DNA helicase PIF1                            | gbpln | Medicago truncatula  | AT3G51690.1   Symbols:   PIF1 helicase   chr3:19176731-19178107 REVERSE LENGTH=331                                                                                                                                                                                                                                                                                                                   | 1351 | 331 | 3.00E-67  | 24.5  | 11.1 | 15.3 |

|                          |                                                                                                                                                                                                                                                                                                                                                                                                                                                                                                                                                                                                                                                                                                                                                                                                                                                                                                                                                                                          |      |      |           |       |      |      |                                              |       |                      |                                                                                                                                                                                                                                                                                                                                                                       |      |     |           |       |      |      |
|--------------------------|------------------------------------------------------------------------------------------------------------------------------------------------------------------------------------------------------------------------------------------------------------------------------------------------------------------------------------------------------------------------------------------------------------------------------------------------------------------------------------------------------------------------------------------------------------------------------------------------------------------------------------------------------------------------------------------------------------------------------------------------------------------------------------------------------------------------------------------------------------------------------------------------------------------------------------------------------------------------------------------|------|------|-----------|-------|------|------|----------------------------------------------|-------|----------------------|-----------------------------------------------------------------------------------------------------------------------------------------------------------------------------------------------------------------------------------------------------------------------------------------------------------------------------------------------------------------------|------|-----|-----------|-------|------|------|
| Rsa1.0_01562.1.g27971.t1 | ref[XP_002892284.1] thiF family protein [Arabidopsis lyrata subsp. lyrata] gi 297338126 gb EFH68543.1  thiF family protein [Arabidopsis lyrata subsp. lyrata]                                                                                                                                                                                                                                                                                                                                                                                                                                                                                                                                                                                                                                                                                                                                                                                                                            | 144  | 447  | 2.00E-23  | 310.4 | 49.3 | 58.3 | thiF family protein                          | gbpln | Arabidopsis lyrata   | AT1G05350.1   Symbols:   NAD(P)-binding Rossmann-fold superfamily protein   chr1:1560891-1564005 REVERSE LENGTH=431                                                                                                                                                                                                                                                   | 144  | 431 | 6.00E-25  | 299.3 | 43.1 | 48.6 |
| Rsa1.0_01562.1.g27972.t1 | # # # # # # # # - ----                                                                                                                                                                                                                                                                                                                                                                                                                                                                                                                                                                                                                                                                                                                                                                                                                                                                                                                                                                   |      |      |           |       |      |      |                                              |       |                      | # # # # # # #                                                                                                                                                                                                                                                                                                                                                         |      |     |           |       |      |      |
| Rsa1.0_01562.1.g27973.t1 | ref[XP_002878329.1] armadillo/beta-catenin repeat family protein [Arabidopsis lyrata subsp. lyrata] gi 297324167 gb EFH54588.1  armadillo/beta-catenin repeat family protein [Arabidopsis lyrata subsp. lyrata]                                                                                                                                                                                                                                                                                                                                                                                                                                                                                                                                                                                                                                                                                                                                                                          | 160  | 928  | 2.00E-15  | 580.0 | 27.5 | 33.1 | armadillo/beta-catenin repeat family protein | gbpln | Arabidopsis lyrata   | AT3G60350.1   Symbols: ARABIDILLO-2, ARABIDILLO2   ARABIDILLO-2   chr3:22306806-22310596 REVERSE LENGTH=928                                                                                                                                                                                                                                                           | 160  | 928 | 4.00E-17  | 580.0 | 25.0 | 32.5 |
| Rsa1.0_01563.1.g27974.t1 | gb AAD32898.1  putative retroelement pol polyprotein [Arabidopsis thaliana]                                                                                                                                                                                                                                                                                                                                                                                                                                                                                                                                                                                                                                                                                                                                                                                                                                                                                                              | 1747 | 1307 | 0         | 74.8  | 47.9 | 59.4 | putative retroelement pol polyprotein        | gbpln | Arabidopsis thaliana | AT3G61390.2   Symbols:   RING/U-box superfamily protein   chr3:22716418-22718270 FORWARD LENGTH=435                                                                                                                                                                                                                                                                   | 1747 | 435 | 1.00E-132 | 24.9  | 14.6 | 16.5 |
| Rsa1.0_01563.1.g27975.t1 | ref[XP_002876611.1] hypothetical protein ARALYDRAFT_486614 [Arabidopsis lyrata subsp. lyrata] gi 297322449 gb EFH52870.1  hypothetical protein ARALYDRAFT_486614 [Arabidopsis lyrata subsp. lyrata]                                                                                                                                                                                                                                                                                                                                                                                                                                                                                                                                                                                                                                                                                                                                                                                      | 286  | 295  | 6.00E-98  | 103.1 | 72.4 | 80.8 | hypothetical protein ARALYDRAFT_486614       | gbpln | Arabidopsis lyrata   | AT3G61410.1   Symbols:   BEST Arabidopsis thaliana protein match is: U-box domain-containing protein kinase family protein (TAIR:AT2G45910.1); Has 232 Blast hits to 229 proteins in 13 species: Archae - 0; Bacteria - 0; Metazoa - 13; Fungi - 0; Plants - 218; Viruses - 0; Other Eukaryotes - 1 (source: NCBI BLINK).   chr3:22721112-22722452 FORWARD LENGTH=294 | 286  | 294 | 2.00E-98  | 102.8 | 69.6 | 77.6 |
| Rsa1.0_01563.1.g27976.t1 | gb EOA24331.1  hypothetical protein CARUB_v10017571mg [Capsella rubella]                                                                                                                                                                                                                                                                                                                                                                                                                                                                                                                                                                                                                                                                                                                                                                                                                                                                                                                 | 286  | 343  | 1.00E-163 | 119.9 | 98.6 | 99.3 | hypothetical protein CARUB_v10017571mg       | gbpln | Capsella rubella     | AT3G61430.2   Symbols: PIP1A, ATPIP1, PIP1, PIP1;1   plasma membrane intrinsic protein 1A   chr3:22733657-22735113 FORWARD LENGTH=286                                                                                                                                                                                                                                 | 286  | 286 | 1.00E-164 | 100.0 | 98.6 | 99.0 |
| Rsa1.0_01563.1.g27977.t1 | ref[NP_191703.1] cysteine synthase C1 [Arabidopsis thaliana] gi 75193637 sp Q9S757.1 CYSC1_ARATH RecName: Full=Bifunctional L-3-cyanoalanine synthase/cysteine synthase C1, mitochondrial; AltName: Full=Beta-substituted Ala synthase 3;1; Short=ARATH-Bsas3;1; AltName: Full=Cysteine synthase C1; Short=AtCYSC1; AltName: Full=O-acetylserine (thiol)-lyase 5; Flags: Precursor gi 4996616 dbj BAA78560.1  cysteine synthase [Arabidopsis thaliana] gi 5824334 emb CAB54830.1  cysteine synthase [Arabidopsis thaliana] gi 6850835 emb CAB71074.1  cysteine synthase AtcysC1 [Arabidopsis thaliana] gi 20260390 gb AAM13093.1  cysteine synthase AtcysC1 [Arabidopsis thaliana] gi 21592815 gb AAM64764.1  cysteine synthase AtcysC1 [Arabidopsis thaliana] gi 22136208 gb AAM91182.1  cysteine synthase AtcysC1 [Arabidopsis thaliana] gi 110741540 dbj BAE98719.1  cysteine synthase [Arabidopsis thaliana] gi 332646682 gb AEE80203.1  cysteine synthase C1 [Arabidopsis thaliana] | 368  | 368  | 0         | 100.0 | 91.8 | 95.9 | cysteine synthase C1                         | gbpln | Arabidopsis thaliana | AT3G61440.1   Symbols: ATCYSC1, ARATH:BSAS3;1, CYSC1   cysteine synthase C1   chr3:22735885-22737792 FORWARD LENGTH=368                                                                                                                                                                                                                                               | 368  | 368 | 0         | 100.0 | 91.8 | 95.9 |
| Rsa1.0_01563.1.g27978.t1 | # # # # # # # # - ----                                                                                                                                                                                                                                                                                                                                                                                                                                                                                                                                                                                                                                                                                                                                                                                                                                                                                                                                                                   |      |      |           |       |      |      |                                              |       |                      | # # # # # # #                                                                                                                                                                                                                                                                                                                                                         |      |     |           |       |      |      |

|                          |                                                                                                                                                                                                                                                                                                                                                                                                                                                                                                                                                                                                                                                                                                                                                                                                                                                                                                                              |      |      |           |       |      |      |                                                     |             |                      |                                                                                                                                                                                                                                                                                                                                                |      |      |           |       |      |      |
|--------------------------|------------------------------------------------------------------------------------------------------------------------------------------------------------------------------------------------------------------------------------------------------------------------------------------------------------------------------------------------------------------------------------------------------------------------------------------------------------------------------------------------------------------------------------------------------------------------------------------------------------------------------------------------------------------------------------------------------------------------------------------------------------------------------------------------------------------------------------------------------------------------------------------------------------------------------|------|------|-----------|-------|------|------|-----------------------------------------------------|-------------|----------------------|------------------------------------------------------------------------------------------------------------------------------------------------------------------------------------------------------------------------------------------------------------------------------------------------------------------------------------------------|------|------|-----------|-------|------|------|
| Rsa1.0_01563.1.g27979.t1 | refNP_191705.1  brassinosteroid-responsive RING-H2 [Arabidopsis thaliana]<br>gi 297820998 refXP_002878382.1  brassinosteroid-responsive ring-H2 [Arabidopsis lyrata subsp. lyrata]<br>gi 4689366 gb AAD27870.1 AF134155.1 BRH1 RING finger protein [Arabidopsis thaliana] gi 6850837 emb CAB71076.1  RING finger protein [Arabidopsis thaliana] gi 17644157 gb AAL38776.1  putative RING finger protein [Arabidopsis thaliana]<br>gi 21436189 gb AAM51382.1  putative RING finger protein [Arabidopsis thaliana] gi 21554590 gb AAM63625.1  RING finger protein [Arabidopsis thaliana] gi 297324220 gb EFH54641.1  brassinosteroid-responsive ring-H2 [Arabidopsis lyrata subsp. lyrata]<br>gi 332646687 gb AEE80208.1  brassinosteroid-responsive RING-H2 [Arabidopsis thaliana]<br>refNP_001147224.1  chlorophyll a-b binding protein [Zea mays]<br>gi 195608716 gb ACG26198.1  chlorophyll a-b binding protein [Zea mays] | 166  | 170  | 2.00E-79  | 102.4 | 89.8 | 94.6 | brassinosteroid-responsive RING-H2                  | gbpln       | Arabidopsis lyrata   | AT3G61460.1   Symbols: BRH1   brassinosteroid-responsive RING-H2   chr3:22741701-22742213 REVERSE LENGTH=170                                                                                                                                                                                                                                   | 166  | 170  | 6.00E-82  | 102.4 | 89.8 | 94.6 |
| Rsa1.0_01563.1.g27980.t2 | refNP_001147224.1  chlorophyll a-b binding protein [Zea mays]<br>gi 195608716 gb ACG26198.1  chlorophyll a-b binding protein [Zea mays]                                                                                                                                                                                                                                                                                                                                                                                                                                                                                                                                                                                                                                                                                                                                                                                      | 533  | 256  | 1.00E-137 | 48.0  | 44.3 | 44.5 | chlorophyll a-b binding protein                     | gbenv/gbpln | Zea mays             | AT3G61470.1   Symbols: LHCA2   photosystem I light harvesting complex gene 2   chr3:22745736-22747032 FORWARD LENGTH=257                                                                                                                                                                                                                       | 533  | 257  | 1.00E-129 | 48.2  | 40.9 | 41.8 |
| Rsa1.0_01563.1.g27981.t1 | gb EOA24745.1  hypothetical protein CARUB_v10018022mg [Capsella rubella]                                                                                                                                                                                                                                                                                                                                                                                                                                                                                                                                                                                                                                                                                                                                                                                                                                                     | 217  | 211  | 1.00E-86  | 97.2  | 74.7 | 77.9 | hypothetical protein CARUB_v10018022mg              | gbpln       | Capsella rubella     | AT3G61550.1   Symbols:   RING/U-box superfamily protein   chr3:22776444-22777082 FORWARD LENGTH=212                                                                                                                                                                                                                                            | 217  | 212  | 2.00E-86  | 97.7  | 73.7 | 78.8 |
| Rsa1.0_01564.1.g27982.t1 | gb AAB82639.1  putative non-LTR retroelement reverse transcriptase [Arabidopsis thaliana]                                                                                                                                                                                                                                                                                                                                                                                                                                                                                                                                                                                                                                                                                                                                                                                                                                    | 889  | 1374 | 2.00E-82  | 154.6 | 21.8 | 31.4 | putative non-LTR retroelement reverse transcriptase | gbpln       | Arabidopsis thaliana | AT4G29090.1   Symbols:   Ribonuclease H-like superfamily protein   chr4:14333528-14335255 FORWARD LENGTH=575                                                                                                                                                                                                                                   | 889  | 575  | 4.00E-25  | 64.7  | 8.9  | 15.2 |
| Rsa1.0_01564.1.g27983.t2 | gb AFN85666.1  glucanase 1 [Brassica rapa subsp. pekinensis]                                                                                                                                                                                                                                                                                                                                                                                                                                                                                                                                                                                                                                                                                                                                                                                                                                                                 | 86   | 341  | 4.00E-24  | 396.5 | 62.8 | 74.4 | glucanase 1                                         | gbpln       | Brassica rapa        | AT3G57240.1   Symbols: BG3   beta-1,3-glucanase 3   chr3:21181916-21183045 REVERSE LENGTH=341                                                                                                                                                                                                                                                  | 86   | 341  | 3.00E-24  | 396.5 | 57.0 | 68.6 |
| Rsa1.0_01564.1.g27984.t1 | gb AAX76839.1  beta-1,3-glucanase [Brassica rapa subsp. chinensis]                                                                                                                                                                                                                                                                                                                                                                                                                                                                                                                                                                                                                                                                                                                                                                                                                                                           | 344  | 363  | 1.00E-165 | 105.5 | 85.8 | 92.2 | beta-1,3-glucanase                                  | gbpln       | Brassica rapa        | AT3G57260.1   Symbols: BGL2, PR2, BG2, PR-2   beta-1,3-glucanase 2   chr3:21188709-21189822 REVERSE LENGTH=339                                                                                                                                                                                                                                 | 344  | 339  | 1.00E-109 | 98.5  | 61.3 | 76.2 |
| Rsa1.0_01564.1.g27985.t1 | refXP_002878144.1  hypothetical protein ARALYDRAFT_486171 [Arabidopsis lyrata subsp. lyrata]<br>gi 297323982 gb EFH54403.1  hypothetical protein ARALYDRAFT_486171 [Arabidopsis lyrata subsp. lyrata]                                                                                                                                                                                                                                                                                                                                                                                                                                                                                                                                                                                                                                                                                                                        | 441  | 441  | 0         | 100.0 | 95.5 | 98.0 | hypothetical protein ARALYDRAFT_486171              | gbpln       | Arabidopsis lyrata   | AT3G57290.1   Symbols: EIF3E, TIF3E1, ATEIF3E-1, INT-6, ATINT6, INT6   eukaryotic translation initiation factor 3E   chr3:21196786-21199073 REVERSE LENGTH=441                                                                                                                                                                                 | 441  | 441  | 0         | 100.0 | 93.9 | 97.5 |
| Rsa1.0_01564.1.g27986.t1 | refNP_191295.4  uncharacterized protein [Arabidopsis thaliana]<br>gi 50198814 gb AAT70440.1  At3g57360 [Arabidopsis thaliana]<br>gi 51972142 gb AAU15175.1  At3g57360 [Arabidopsis thaliana]<br>gi 332646125 gb AEE79646.1  uncharacterized protein AT3G57360 [Arabidopsis thaliana]                                                                                                                                                                                                                                                                                                                                                                                                                                                                                                                                                                                                                                         | 243  | 254  | 1.00E-104 | 104.5 | 82.3 | 88.1 | uncharacterized protein                             | gbpln       | Arabidopsis thaliana | AT3G57360.1   Symbols:   unknown protein; BEST Arabidopsis thaliana protein match is: unknown protein (TAIR:AT3G02370.2). Has 122 Blast hits to 122 proteins in 54 species: Archae - 0; Bacteria - 0; Metazoa - 74; Fungi - 4; Plants - 41; Viruses - 0; Other Eukaryotes - 3 (source: NCBI BLink)   chr3:21225571-21226621 FORWARD LENGTH=254 | 243  | 254  | 1.00E-107 | 104.5 | 82.3 | 88.1 |
| Rsa1.0_01564.1.g27987.t1 | refXP_002881787.1  hypothetical protein ARALYDRAFT_903484 [Arabidopsis lyrata subsp. lyrata]<br>gi 297327626 gb EFH58046.1  hypothetical protein ARALYDRAFT_903484 [Arabidopsis lyrata subsp. lyrata]                                                                                                                                                                                                                                                                                                                                                                                                                                                                                                                                                                                                                                                                                                                        | 203  | 312  | 2.00E-16  | 153.7 | 27.6 | 43.8 | hypothetical protein ARALYDRAFT_903484              | gbpln       | Arabidopsis lyrata   | AT2G41630.1   Symbols: TFIIB   transcription factor IIB   chr2:17355555-17357400 REVERSE LENGTH=312                                                                                                                                                                                                                                            | 203  | 312  | 4.00E-18  | 153.7 | 27.1 | 43.8 |
| Rsa1.0_01565.1.g27988.t1 | gb EOA24130.1  hypothetical protein CARUB_v10017363mg [Capsella rubella]                                                                                                                                                                                                                                                                                                                                                                                                                                                                                                                                                                                                                                                                                                                                                                                                                                                     | 150  | 408  | 2.00E-71  | 272.0 | 86.0 | 95.3 | hypothetical protein CARUB_v10017363mg              | gbpln       | Capsella rubella     | AT3G48460.1   Symbols:   GDSL-like Lipase/Acylhydrolase superfamily protein   chr3:17949496-17951082 FORWARD LENGTH=381                                                                                                                                                                                                                        | 150  | 381  | 3.00E-71  | 254.0 | 82.7 | 95.3 |
| Rsa1.0_01565.1.g27989.t2 | gb EOA23443.1  hypothetical protein CARUB_v10016628mg [Capsella rubella]                                                                                                                                                                                                                                                                                                                                                                                                                                                                                                                                                                                                                                                                                                                                                                                                                                                     | 1055 | 1011 | 0         | 95.8  | 82.0 | 88.1 | hypothetical protein CARUB_v10016628mg              | gbpln       | Capsella rubella     | AT3G48470.1   Symbols: EMB2423   embryo defective 2423   chr3:17951689-17956754 FORWARD LENGTH=1027                                                                                                                                                                                                                                            | 1055 | 1027 | 0         | 97.3  | 79.8 | 87.0 |
| Rsa1.0_01565.1.g27990.t3 | gb EOA24353.1  hypothetical protein CARUB_v10017593mg, partial [Capsella rubella]                                                                                                                                                                                                                                                                                                                                                                                                                                                                                                                                                                                                                                                                                                                                                                                                                                            | 275  | 328  | 1.00E-100 | 119.3 | 68.7 | 80.7 | hypothetical protein CARUB_v10017593mg, partial     | gbpln       | Capsella rubella     | AT3G48480.1   Symbols:   Cysteine proteinases superfamily protein   chr3:17957326-17959062 REVERSE LENGTH=298                                                                                                                                                                                                                                  | 275  | 298  | 3.00E-99  | 108.4 | 69.5 | 78.2 |

|                          |                                                                                                                                                                                                                                                                                                                                                                                                                                                                                                             |      |      |           |       |      |      |                                                        |       |                      |                                                                                                                                                                                                                                                                                                                                              |      |      |           |       |      |      |
|--------------------------|-------------------------------------------------------------------------------------------------------------------------------------------------------------------------------------------------------------------------------------------------------------------------------------------------------------------------------------------------------------------------------------------------------------------------------------------------------------------------------------------------------------|------|------|-----------|-------|------|------|--------------------------------------------------------|-------|----------------------|----------------------------------------------------------------------------------------------------------------------------------------------------------------------------------------------------------------------------------------------------------------------------------------------------------------------------------------------|------|------|-----------|-------|------|------|
| Rsa1.0_01565.1.g27991.t1 | refNP_193153.3  pentatricopeptide repeat-containing protein [Arabidopsis thaliana]<br>gi 223635637 sp Q5XEY7.2 PP309_ARATH RecName: Full=Pentatricopeptide repeat-containing protein At4g14170 gi 332657989 gb AE83389.1  pentatricopeptide repeat-containing protein [Arabidopsis thaliana]                                                                                                                                                                                                                | 477  | 477  | 0         | 100.0 | 78.2 | 86.2 | pentatricopeptide repeat-containing protein            | gbpln | Arabidopsis thaliana | AT4G14170.1   Symbols:   Pentatricopeptide repeat (PPR) superfamily protein   chr4:8176709-8178142 REVERSE LENGTH=477                                                                                                                                                                                                                        | 477  | 477  | 0         | 100.0 | 78.2 | 86.2 |
| Rsa1.0_01565.1.g27992.t1 | refXP_002877614.1  hypothetical protein ARALYDRAFT_485209 [Arabidopsis lyrata subsp. lyrata]<br>gi 297323452 gb EFH53873.1  hypothetical protein ARALYDRAFT_485209 [Arabidopsis lyrata subsp. lyrata]                                                                                                                                                                                                                                                                                                       | 302  | 293  | 1.00E-107 | 97.0  | 73.2 | 81.5 | hypothetical protein ARALYDRAFT_485209                 | gbpln | Arabidopsis lyrata   | AT3G48510.1   Symbols:   unknown protein; BEST Arabidopsis thaliana protein match is: unknown protein (TAIR:AT5G63350.1); Has 98 Blast hits to 98 proteins in 11 species: Archae - 0; Bacteria - 0; Metazoa - 0; Fungi - 0; Plants - 98; Viruses - 0; Other Eukaryotes - 0 (source: NCBI BLink).   chr3:17967568-17968452 REVERSE LENGTH=294 | 302  | 294  | 1.00E-108 | 97.4  | 73.5 | 80.8 |
| Rsa1.0_01565.1.g27993.t1 | #                                                                                                                                                                                                                                                                                                                                                                                                                                                                                                           | #    | #    | #         | #     | #    | #    | -                                                      | ----  | ----                 | #                                                                                                                                                                                                                                                                                                                                            | #    | #    | #         | #     | #    | #    |
| Rsa1.0_01565.1.g27992.t1 | gb AAF23831.1 AC007234.3 F1E22.12 [Arabidopsis thaliana]                                                                                                                                                                                                                                                                                                                                                                                                                                                    | 473  | 1055 | 1.00E-148 | 223.0 | 53.9 | 70.4 | F1E22.12                                               | gbpln | Arabidopsis thaliana | AT5G42905.1   Symbols:   Polynucleotidyl transferase, ribonuclease H-like superfamily protein   chr5:17201414-17202323 REVERSE LENGTH=258                                                                                                                                                                                                    | 473  | 258  | 2.00E-57  | 54.5  | 24.3 | 29.8 |
| Rsa1.0_01565.1.g27995.t1 | gb EOA23627.1  hypothetical protein CARUB_v10016824mg [Capsella rubella]                                                                                                                                                                                                                                                                                                                                                                                                                                    | 564  | 593  | 0         | 105.1 | 81.4 | 86.7 | hypothetical protein CARUB_v10016824mg                 | gbpln | Capsella rubella     | AT5G63370.4   Symbols:   Protein kinase superfamily protein   chr5:25384954-25386792 REVERSE LENGTH=612                                                                                                                                                                                                                                      | 564  | 612  | 0         | 108.5 | 65.1 | 77.7 |
| Rsa1.0_01565.1.g27996.t1 | refNP_190421.1  cytochrome P450, family 94, subfamily B, polypeptide 3 [Arabidopsis thaliana]<br>gi 6523083 emb CAB62341.1  cytochrome P450-like protein [Arabidopsis thaliana]<br>gi 51536434 gb AAU05455.1  At3g48520 [Arabidopsis thaliana]<br>gi 53628589 gb AAU0404.1  At3g48520 [Arabidopsis thaliana]<br>gi 11074078 db BAE98488.1  cytochrome P450 like protein [Arabidopsis thaliana]<br>gi 332644905 gb AAE78426.1  cytochrome P450, family 94, subfamily B, polypeptide 3 [Arabidopsis thaliana] | 491  | 506  | 0         | 103.1 | 87.4 | 91.6 | cytochrome P450, family 94, subfamily B, polypeptide 3 | gbpln | Arabidopsis thaliana | AT3G48520.1   Symbols: CYP94B3   cytochrome P450, family 94, subfamily B, polypeptide 3   chr3:17975104-17976624 REVERSE LENGTH=506                                                                                                                                                                                                          | 491  | 506  | 0         | 103.1 | 87.4 | 91.6 |
| Rsa1.0_01565.1.g27997.t1 | gb ABH07409.1  putative pol polyprotein [Brassica oleracea var. botrytis]                                                                                                                                                                                                                                                                                                                                                                                                                                   | 506  | 1239 | 0         | 244.9 | 81.4 | 92.1 | putative pol polyprotein                               | gbpln | Brassica oleracea    | AT4G23160.1   Symbols: CRK8   cysteine-rich RLK (RECEPTOR-like protein kinase) 8   chr4:12129485-12134086 FORWARD LENGTH=1262                                                                                                                                                                                                                | 506  | 1262 | 2.00E-93  | 249.4 | 34.4 | 52.8 |
| Rsa1.0_01565.1.g27998.t1 | gb EOA30279.1  hypothetical protein CARUB_v10013406mg [Capsella rubella]                                                                                                                                                                                                                                                                                                                                                                                                                                    | 544  | 539  | 0         | 99.1  | 85.5 | 92.3 | hypothetical protein CARUB_v10013406mg                 | gbpln | Capsella rubella     | AT2G05160.1   Symbols:   CCH-type zinc fingerfamily protein with RNA-binding domain   chr2:1859011-1860931 REVERSE LENGTH=536                                                                                                                                                                                                                | 544  | 536  | 0         | 98.5  | 82.2 | 90.6 |
| Rsa1.0_01565.1.g27999.t1 | refXP_002885794.1  DNAJ heat shock N-terminal domain-containing protein [Arabidopsis lyrata subsp. lyrata]<br>gi 297331634 gb EFH62053.1  DNAJ heat shock N-terminal domain-containing protein [Arabidopsis lyrata subsp. lyrata]                                                                                                                                                                                                                                                                           | 691  | 700  | 0         | 101.3 | 85.1 | 90.6 | DNAJ heat shock N-terminal domain-containing protein   | gbpln | Arabidopsis lyrata   | AT2G05230.1   Symbols:   DNAJ heat shock N-terminal domain-containing protein   chr2:1899818-1901938 REVERSE LENGTH=706                                                                                                                                                                                                                      | 691  | 706  | 0         | 102.2 | 84.4 | 89.6 |
| Rsa1.0_01565.1.g28000.t1 | refNP_178601.2  beta-1,2-N-acetylglucosaminyltransferase II [Arabidopsis thaliana]<br>gi 10183645 emb CAC08806.1  beta-1,2-N-acetylglucosaminyltransferase II [Arabidopsis thaliana]<br>gi 330250822 gb AAE05916.1  beta-1,2-N-acetylglucosaminyltransferase II [Arabidopsis thaliana]                                                                                                                                                                                                                      | 434  | 430  | 0         | 99.1  | 80.0 | 87.6 | beta-1,2-N-acetylglucosaminyltransferase II            | gbpln | Arabidopsis thaliana | AT2G05320.1   Symbols:   beta-1,2-N-acetylglucosaminyltransferase II   chr2:1936016-1937308 FORWARD LENGTH=430                                                                                                                                                                                                                               | 434  | 430  | 0         | 99.1  | 80.0 | 87.6 |
| Rsa1.0_01566.1.g28001.t6 | refNP_198055.3  Topless-related protein 3 [Arabidopsis thaliana]<br>gi 75327840 sp Q84JM4.1 TPR3_ARATH RecName: Full=Topless-related protein 3 gi 28383287 gb AAO42071.1  unknown protein [Arabidopsis thaliana]<br>gi 28827708 gb AAO50698.1  unknown protein [Arabidopsis thaliana]<br>gi 332006259 gb AED93642.1  Topless-related protein 3 [Arabidopsis thaliana]                                                                                                                                       | 1304 | 1108 | 0         | 85.0  | 68.6 | 73.2 | Topless-related protein 3                              | gbpln | Arabidopsis thaliana | AT5G27030.1   Symbols: TPR3   TOPLESS-related 3   chr5:9508913-9515263 REVERSE LENGTH=1108                                                                                                                                                                                                                                                   | 1304 | 1108 | 0         | 85.0  | 68.6 | 73.2 |

|                           |                                                                                                                                                                                                                     |      |      |           |       |      |      |                                          |       |                      |                                                                                                                                                                                                                                                                                                                                                                                                                                              |      |      |           |       |      |      |
|---------------------------|---------------------------------------------------------------------------------------------------------------------------------------------------------------------------------------------------------------------|------|------|-----------|-------|------|------|------------------------------------------|-------|----------------------|----------------------------------------------------------------------------------------------------------------------------------------------------------------------------------------------------------------------------------------------------------------------------------------------------------------------------------------------------------------------------------------------------------------------------------------------|------|------|-----------|-------|------|------|
| Rsa1.0_01566.1.g28002.t10 | ref NP_568491.1  kinesin 4 [Arabidopsis thaliana]   gi 34921410 sp O81635.2 ATK4_ARATH RecName: Full=Kinesin-4; AltName: Full=Kinesin-like protein D   gi 332006256 gb AED93639.1  kinesin 4 [Arabidopsis thaliana] | 956  | 987  | 0         | 103.2 | 79.1 | 85.6 | kinesin 4                                | gbpln | Arabidopsis thaliana | AT5G27000.1   Symbols: ATK4, KATD   kinesin 4   chr5:9498099-9502951 FORWARD LENGTH=987                                                                                                                                                                                                                                                                                                                                                      | 956  | 987  | 0         | 103.2 | 79.1 | 85.6 |
| Rsa1.0_01566.1.g28003.t1  | # # # # # # # # -                                                                                                                                                                                                   |      |      |           |       |      |      |                                          | ----  | ----                 | # # # # # # # #                                                                                                                                                                                                                                                                                                                                                                                                                              |      |      |           |       |      |      |
| Rsa1.0_01566.1.g28004.t1  | gb EOA21513.1  hypothetical protein CARUB_v10001910mg [Capsella rubella]                                                                                                                                            | 224  | 222  | 3.00E-82  | 99.1  | 74.1 | 82.1 | hypothetical protein CARUB_v10001910mg   | gbpln | Capsella rubella     | AT5G26990.1   Symbols:   Drought-responsive family protein   chr5:9491366-9493639 FORWARD LENGTH=222                                                                                                                                                                                                                                                                                                                                         | 224  | 222  | 5.00E-80  | 99.1  | 75.0 | 82.6 |
| Rsa1.0_01566.1.g28005.t1  | gb EOA21136.1  hypothetical protein CARUB_v10001480mg [Capsella rubella]   gi 482556945 gb EOA21137.1  hypothetical protein CARUB_v10001480mg [Capsella rubella]                                                    | 328  | 318  | 1.00E-138 | 97.0  | 76.2 | 86.0 | hypothetical protein CARUB_v10001480mg   | gbpln | Capsella rubella     | AT5G26940.4   Symbols:   Polynucleotidyl transferase, ribonuclease H-like superfamily protein   chr5:9481429-9482647 FORWARD LENGTH=316                                                                                                                                                                                                                                                                                                      | 328  | 316  | 1.00E-139 | 96.3  | 76.8 | 85.1 |
| Rsa1.0_01566.1.g28006.t2  | gb EOA19384.1  hypothetical protein CARUB_v10000582mg [Capsella rubella]                                                                                                                                            | 676  | 571  | 0         | 84.5  | 51.8 | 62.6 | hypothetical protein CARUB_v10000582mg   | gbpln | Capsella rubella     | AT5G26920.1   Symbols: CBP60G   Cam-binding protein 60-like G   chr5:9475860-9478448 FORWARD LENGTH=563                                                                                                                                                                                                                                                                                                                                      | 676  | 563  | 0         | 83.3  | 50.9 | 61.2 |
| Rsa1.0_01567.1.g28007.t1  | db BAJ34270.1  unnamed protein product [Thellungiella halophila]                                                                                                                                                    | 445  | 459  | 0         | 103.1 | 83.6 | 91.5 | unnamed protein product                  | ----  | ----                 | AT5G52180.1   Symbols:   LOCATED IN: endomembrane system; EXPRESSED IN: 22 plant structures; EXPRESSED DURING: 13 growth stages; CONTAINS InterPro DOMAINs: Transmembrane protein 161AB, predicted (InterPro:IPRO19395); Has 82 Blast hits to 82 proteins in 35 species: Archae - 0; Bacteria - 0; Metazoa - 47; Fungi - 0; Plants - 33; Viruses - 0; Other Eukaryotes - 2 (source: NCBI BLink).   chr5:21200165-21201541 REVERSE LENGTH=458 | 445  | 458  | 0         | 102.9 | 82.2 | 90.6 |
| Rsa1.0_01567.1.g28008.t1  | gb EOA14997.1  hypothetical protein CARUB_v10028346mg [Capsella rubella]                                                                                                                                            | 689  | 683  | 0         | 99.1  | 77.4 | 86.4 | hypothetical protein CARUB_v10028346mg   | gbpln | Capsella rubella     | AT5G52170.1   Symbols: HDG7   homeodomain GLABROUS 7   chr5:21196974-21199959 FORWARD LENGTH=682                                                                                                                                                                                                                                                                                                                                             | 689  | 682  | 0         | 99.0  | 77.5 | 85.6 |
| Rsa1.0_01567.1.g28009.t3  | gb EOA23500.1  hypothetical protein CARUB_v10016692mg [Capsella rubella]                                                                                                                                            | 291  | 819  | 4.00E-47  | 281.4 | 39.2 | 44.7 | hypothetical protein CARUB_v10016692mg   | gbpln | Capsella rubella     | AT3G49650.1   Symbols:   P-loop containing nucleoside triphosphate hydrolases superfamily protein   chr3:18405260-18409402 REVERSE LENGTH=813                                                                                                                                                                                                                                                                                                | 291  | 813  | 4.00E-49  | 279.4 | 35.7 | 37.8 |
| Rsa1.0_01567.1.g28010.t1  | gb AAD32898.1  putative retroelement pol polyprotein [Arabidopsis thaliana]                                                                                                                                         | 1450 | 1307 | 0         | 90.1  | 54.5 | 69.4 | putative retroelement pol polyprotein    | gbpln | Arabidopsis thaliana | AT4G23160.1   Symbols: CRK8   cysteine-rich RLK (RECEPTOR-like protein kinase) 8   chr4:12129485-12134086 FORWARD LENGTH=1262                                                                                                                                                                                                                                                                                                                | 1450 | 1262 | 5.00E-99  | 87.0  | 13.2 | 21.3 |
| Rsa1.0_01567.1.g28011.t1  | gb ABA70759.1  baby boom interacting protein 1B [Brassica napus]                                                                                                                                                    | 275  | 711  | 8.00E-82  | 258.5 | 58.5 | 63.6 | baby boom interacting protein 1B         | gbpln | Brassica napus       | AT1G73360.1   Symbols: HDG11, EDT1, ATHDG11   homeodomain GLABROUS 11   chr1:27578893-27581820 REVERSE LENGTH=722                                                                                                                                                                                                                                                                                                                            | 275  | 722  | 7.00E-67  | 262.5 | 53.1 | 58.2 |
| Rsa1.0_01567.1.g28012.t1  | gb EOA14892.1  hypothetical protein CARUB_v10028221mg [Capsella rubella]                                                                                                                                            | 95   | 96   | 2.00E-31  | 101.1 | 71.6 | 82.1 | hypothetical protein CARUB_v10028221mg   | gbpln | Capsella rubella     | AT5G52160.1   Symbols:   Bifunctional inhibitor/lipid-transfer protein/seed storage 2S albumin superfamily protein   chr5:21195140-21195430 FORWARD LENGTH=96                                                                                                                                                                                                                                                                                | 95   | 96   | 7.00E-30  | 101.1 | 60.0 | 64.2 |
| Rsa1.0_01567.1.g28013.t2  | ref XP_002865896.1  protein binding protein [Arabidopsis lyrata subsp. lyrata]   gi 297311731 gb EFH42155.1  protein binding protein [Arabidopsis lyrata subsp. lyrata]                                             | 233  | 280  | 4.00E-57  | 120.2 | 58.4 | 69.1 | protein binding protein                  | gbpln | Arabidopsis lyrata   | AT5G52140.1   Symbols:   RING/U-box superfamily protein   chr5:21184566-21186872 REVERSE LENGTH=280                                                                                                                                                                                                                                                                                                                                          | 233  | 280  | 5.00E-52  | 120.2 | 54.1 | 64.8 |
| Rsa1.0_01568.1.g28014.t1  | # # # # # # # # -                                                                                                                                                                                                   |      |      |           |       |      |      |                                          | ----  | ----                 | # # # # # # # #                                                                                                                                                                                                                                                                                                                                                                                                                              |      |      |           |       |      |      |
| Rsa1.0_01568.1.g28015.t1  | gb EOA23460.1  hypothetical protein CARUB_v10016649mg [Capsella rubella]                                                                                                                                            | 920  | 947  | 0         | 102.9 | 79.1 | 88.0 | hypothetical protein CARUB_v10016649mg   | gbpln | Capsella rubella     | AT2G01820.1   Symbols:   Leucine-rich repeat protein kinase family protein   chr2:357664-360681 REVERSE LENGTH=943                                                                                                                                                                                                                                                                                                                           | 920  | 943  | 0         | 102.5 | 78.0 | 87.6 |
| Rsa1.0_01568.1.g28016.t4  | # # # # # # # # -                                                                                                                                                                                                   |      |      |           |       |      |      |                                          | ----  | ----                 | # # # # # # # #                                                                                                                                                                                                                                                                                                                                                                                                                              |      |      |           |       |      |      |
| Rsa1.0_01568.1.g28017.t1  | gb AAZ41811.1  O1P13-1 [Brassica rapa subsp. pekinensis]                                                                                                                                                            | 787  | 1545 | 1.00E-154 | 196.3 | 36.2 | 43.1 | O1P13-1                                  | gbpln | Brassica rapa        | AT4G23160.1   Symbols: CRK8   cysteine-rich RLK (RECEPTOR-like protein kinase) 8   chr4:12129485-12134086 FORWARD LENGTH=1262                                                                                                                                                                                                                                                                                                                | 787  | 1262 | 3.00E-57  | 160.4 | 14.2 | 22.1 |
| Rsa1.0_01568.1.g28018.t1  | # # # # # # # # -                                                                                                                                                                                                   |      |      |           |       |      |      |                                          | ----  | ----                 | # # # # # # # #                                                                                                                                                                                                                                                                                                                                                                                                                              |      |      |           |       |      |      |
| Rsa1.0_01568.1.g28019.t1  | emb CAB39638.1  RNA-directed DNA polymerase-like protein [Arabidopsis thaliana]   gi 7267666 emb CAB78094.1  RNA-directed DNA polymerase-like protein [Arabidopsis thaliana]                                        | 262  | 1274 | 1.00E-38  | 486.3 | 38.5 | 54.6 | RNA-directed DNA polymerase-like protein | gbpln | Arabidopsis thaliana | AT1G10000.1   Symbols:   Ribonuclease H-like superfamily protein   chr1:3263877-3264788 REVERSE LENGTH=303                                                                                                                                                                                                                                                                                                                                   | 262  | 303  | 3.00E-34  | 115.6 | 33.6 | 48.1 |

|                          |                                                                                                                                                                                                                                                                                                                                                                                                                                                                                                                                                                                |     |     |          |       |      |      |                                                                |       |                      |                                                                                                                                                                                                                                                                                                                                                                                                                                               |     |     |           |       |      |      |
|--------------------------|--------------------------------------------------------------------------------------------------------------------------------------------------------------------------------------------------------------------------------------------------------------------------------------------------------------------------------------------------------------------------------------------------------------------------------------------------------------------------------------------------------------------------------------------------------------------------------|-----|-----|----------|-------|------|------|----------------------------------------------------------------|-------|----------------------|-----------------------------------------------------------------------------------------------------------------------------------------------------------------------------------------------------------------------------------------------------------------------------------------------------------------------------------------------------------------------------------------------------------------------------------------------|-----|-----|-----------|-------|------|------|
| Rsa1.0_01568.1.g28020.t1 | refXP_002875095.1  endoxyloglucan transferase [Arabidopsis lyrata subsp. lyrata] gi 297320933 gb EFH51354.1  endoxyloglucan transferase [Arabidopsis lyrata subsp. lyrata]                                                                                                                                                                                                                                                                                                                                                                                                     | 333 | 333 | 0        | 100.0 | 91.6 | 95.5 | endoxyloglucan transferase                                     | gbpln | Arabidopsis lyrata   | AT2G01850.1   Symbols: EXGT-A3, XTH27, ATXTH27   endoxyloglucan transferase A3   chr2:385374-387138 FORWARD LENGTH=333                                                                                                                                                                                                                                                                                                                        | 333 | 333 | 1.00E-179 | 100.0 | 88.6 | 93.7 |
| Rsa1.0_01569.1.g28021.t1 | ref NP_179096.1  gibberellin-regulated protein [Arabidopsis thaliana] gi 75100623 sp O82328.1 GASA7_ARATH RecName: Full=Gibberellin-regulated protein 7; AltName: Full=GAST1 protein homolog 7; Flags: Precursor gi 3650032 gb AAC61287.1  similar to gibberellin-regulated proteins [Arabidopsis thaliana] gi 27754546 gb AAO22720.1  putative gibberellin-regulated protein [Arabidopsis thaliana] gi 28394019 gb AAO42417.1  putative gibberellin-regulated protein [Arabidopsis thaliana] gi 330251254 gb AEC06348.1  gibberellin-regulated protein [Arabidopsis thaliana] | 77  | 108 | 2.00E-20 | 140.3 | 58.4 | 71.4 | gibberellin-regulated protein                                  | gbpln | Arabidopsis thaliana | AT2G14900.1   Symbols:   Gibberellin-regulated family protein   chr2:6404210-6405043 FORWARD LENGTH=108                                                                                                                                                                                                                                                                                                                                       | 77  | 108 | 4.00E-23  | 140.3 | 58.4 | 71.4 |
| Rsa1.0_01569.1.g28022.t1 | gb EOA30442.1  hypothetical protein CARUB_v10013565mg [Capsella rubella]                                                                                                                                                                                                                                                                                                                                                                                                                                                                                                       | 452 | 484 | 0        | 107.1 | 92.5 | 96.0 | hypothetical protein CARUB_v10013565mg                         | gbpln | Capsella rubella     | AT3G19540.1   Symbols:   Protein of unknown function (DUF620)   chr3:6780762-6782633 FORWARD LENGTH=485                                                                                                                                                                                                                                                                                                                                       | 452 | 485 | 0         | 107.3 | 92.5 | 95.8 |
| Rsa1.0_01569.1.g28023.t1 | refXP_002885314.1  hypothetical protein ARALYDRAFT_479468 [Arabidopsis lyrata subsp. lyrata] gi 297331154 gb EFH61573.1  hypothetical protein ARALYDRAFT_479468 [Arabidopsis lyrata subsp. lyrata]                                                                                                                                                                                                                                                                                                                                                                             | 210 | 110 | 3.00E-30 | 52.4  | 34.3 | 39.0 | hypothetical protein ARALYDRAFT_479468                         | gbpln | Arabidopsis lyrata   | AT3G19550.1   Symbols:   unknown protein; FUNCTIONS IN: molecular function unknown; INVOLVED IN: biological process unknown; LOCATED IN: mitochondrion; EXPRESSED IN: 15 plant structures; EXPRESSED DURING: 9 growth stages; Has 36 Blast hits to 36 proteins in 8 species: Archae - 0; Bacteria - 0; Metazoa - 0; Fungi - 0; Plants - 36; Viruses - 0; Other Eukaryotes - 0 (source: NCBI BLINK).   chr3:6787462-6788165 REVERSE LENGTH=110 | 210 | 110 | 7.00E-32  | 52.4  | 32.9 | 37.6 |
| Rsa1.0_01569.1.g28024.t1 | ref NP_188589.1  Amino acid permease family protein [Arabidopsis thaliana] gi 75311166 sp Q9LH39.1 PHSD_ARATH RecName: Full=Probable polyamine transporter At3g19553 gi 9294126 db BAB01977.1  unnamed protein product [Arabidopsis thaliana] gi 332642736 gb AEE76257.1  Amino acid permease family protein [Arabidopsis thaliana]                                                                                                                                                                                                                                            | 479 | 479 | 0        | 100.0 | 91.6 | 95.0 | Amino acid permease family protein                             | gbpln | Arabidopsis thaliana | AT3G19553.1   Symbols:   Amino acid permease family protein   chr3:6790988-6792507 REVERSE LENGTH=479                                                                                                                                                                                                                                                                                                                                         | 479 | 479 | 0         | 100.0 | 91.6 | 95.0 |
| Rsa1.0_01569.1.g28025.t2 | ref NP_850614.1  uncharacterized protein [Arabidopsis thaliana] gi 26451622 db BAC42908.1  unknown protein [Arabidopsis thaliana] gi 28973259 gb AAO63954.1  unknown protein [Arabidopsis thaliana] gi 332642739 gb AEE76260.1  uncharacterized protein AT3G19570 [Arabidopsis thaliana]                                                                                                                                                                                                                                                                                       | 615 | 644 | 0        | 104.7 | 75.1 | 82.1 | uncharacterized protein                                        | gbpln | Arabidopsis thaliana | AT3G19570.2   Symbols: SCO3, QWRF1   Family of unknown function (DUF566)   chr3:6797778-6801344 FORWARD LENGTH=644                                                                                                                                                                                                                                                                                                                            | 615 | 644 | 0         | 104.7 | 75.1 | 82.1 |
| Rsa1.0_01569.1.g28026.t1 | gb ABI74621.1  C2H2 zinc finger protein 1 [Eutrema halophilum] gi 312282663 db BAJ34197.1  unnamed protein product [Thellungiella halophila]                                                                                                                                                                                                                                                                                                                                                                                                                                   | 257 | 276 | 5.00E-76 | 107.4 | 76.7 | 83.3 | C2H2 zinc finger protein 1                                     | gbpln | Eutrema halophilum   | AT3G19580.2   Symbols: AZF2, ZF2   zinc-finger protein 2   chr3:6803293-6804114 REVERSE LENGTH=273                                                                                                                                                                                                                                                                                                                                            | 257 | 273 | 3.00E-74  | 106.2 | 75.5 | 81.7 |
| Rsa1.0_01569.1.g28027.t1 | gb EOA30976.1  hypothetical protein CARUB_v10014121mg [Capsella rubella]                                                                                                                                                                                                                                                                                                                                                                                                                                                                                                       | 341 | 339 | 0        | 99.4  | 92.4 | 95.9 | hypothetical protein CARUB_v10014121mg                         | gbpln | Capsella rubella     | AT3G19590.1   Symbols: BUB3.1   Transducin/WD40 repeat-like superfamily protein   chr3:6805798-6808374 FORWARD LENGTH=340                                                                                                                                                                                                                                                                                                                     | 341 | 340 | 0         | 99.7  | 92.4 | 95.6 |
| Rsa1.0_01569.1.g28028.t1 | ref NP_001118664.1  haloacid dehalogenase-like hydrolase domain-containing protein [Arabidopsis thaliana] gi 9294424 db BAB02544.1  unnamed protein product [Arabidopsis thaliana] gi 332642743 gb AEE76264.1  haloacid dehalogenase-like hydrolase domain-containing protein [Arabidopsis thaliana]                                                                                                                                                                                                                                                                           | 235 | 307 | 2.00E-76 | 130.6 | 66.8 | 75.7 | haloacid dehalogenase-like hydrolase domain-containing protein | gbpln | Arabidopsis thaliana | AT3G19595.1   Symbols:   Haloacid dehalogenase-like hydrolase (HAD) superfamily protein   chr3:6808585-6809508 REVERSE LENGTH=307                                                                                                                                                                                                                                                                                                             | 235 | 307 | 7.00E-79  | 130.6 | 66.8 | 75.7 |
| Rsa1.0_01569.1.g28029.t1 | refXP_002885318.1  hypothetical protein ARALYDRAFT_479477 [Arabidopsis lyrata subsp. lyrata] gi 297331158 gb EFH61577.1  hypothetical protein ARALYDRAFT_479477 [Arabidopsis lyrata subsp. lyrata]                                                                                                                                                                                                                                                                                                                                                                             | 81  | 613 | 2.00E-13 | 756.8 | 49.4 | 54.3 | hypothetical protein ARALYDRAFT_479477                         | gbpln | Arabidopsis lyrata   | AT3G19610.1   Symbols:   Plant protein of unknown function (DUF936)   chr3:6812493-6814660 REVERSE LENGTH=640                                                                                                                                                                                                                                                                                                                                 | 81  | 640 | 2.00E-15  | 790.1 | 48.1 | 53.1 |

|                          |                                                                                                                                                                                                                                                                                                                                                                                                                                                        |     |      |           |        |      |      |                                                            |       |                      |                                                                                                                                                                                                                                                                                                                                                                                                             |     |     |           |       |      |      |
|--------------------------|--------------------------------------------------------------------------------------------------------------------------------------------------------------------------------------------------------------------------------------------------------------------------------------------------------------------------------------------------------------------------------------------------------------------------------------------------------|-----|------|-----------|--------|------|------|------------------------------------------------------------|-------|----------------------|-------------------------------------------------------------------------------------------------------------------------------------------------------------------------------------------------------------------------------------------------------------------------------------------------------------------------------------------------------------------------------------------------------------|-----|-----|-----------|-------|------|------|
| Rsa1.0_01569.1.g28030.t1 | gb EOA33039.1  hypothetical protein CARUB_v10016371mg [Capsella rubella]                                                                                                                                                                                                                                                                                                                                                                               | 100 | 93   | 2.00E-32  | 93.0   | 75.0 | 77.0 | hypothetical protein CARUB_v10016371mg                     | gbpln | Capsella rubella     | AT3G19615.1   Symbols:   unknown protein; FUNCTIONS IN: molecular.function unknown; INVOLVED IN: biological.process unknown; LOCATED IN: cellular.component unknown; Has 10 Blast hits to 10 proteins in 5 species: Archae - 0; Bacteria - 0; Metazoa - 0; Fungi - 0; Plants - 10; Viruses - 0; Other Eukaryotes - 0 (source: NCBI BLink).   chr3:6815073-6815354 REVERSE LENGTH=93                         | 100 | 93  | 1.00E-34  | 93.0  | 73.0 | 77.0 |
| Rsa1.0_01570.1.g28031.t1 | gb AAF79677.1 AC022314_18 F9C16.26 [Arabidopsis thaliana]                                                                                                                                                                                                                                                                                                                                                                                              | 165 | 1902 | 3.00E-19  | 1152.7 | 27.9 | 42.4 | F9C16.26                                                   | gbpln | Arabidopsis thaliana | AT4G05095.1   Symbols:   BEST Arabidopsis thaliana protein match is: RNA-directed DNA polymerase (reverse transcriptase)-related family protein (TAIR:AT4G04650.1); Has 30201 Blast hits to 17322 proteins in 780 species: Archae - 12; Bacteria - 1396; Metazoa - 17338; Fungi - 3422; Plants - 5037; Viruses - 0; Other Eukaryotes - 2996 (source: NCBI BLink).   chr4:2613798-2614214 REVERSE LENGTH=138 | 165 | 138 | 1.00E-18  | 83.6  | 24.8 | 41.2 |
| Rsa1.0_01570.1.g28032.t1 | gb ABL97978.1  metal ion binding [Brassica rapa]                                                                                                                                                                                                                                                                                                                                                                                                       | 135 | 139  | 2.00E-38  | 103.0  | 65.9 | 77.8 | metal ion binding                                          | gbpln | Brassica rapa        | AT5G52760.1   Symbols:   Copper transport protein family   chr5:2138619-21387540 FORWARD LENGTH=126                                                                                                                                                                                                                                                                                                         | 135 | 126 | 1.00E-30  | 93.3  | 58.5 | 71.1 |
| Rsa1.0_01570.1.g28033.t1 | gb EOA27224.1  hypothetical protein CARUB_v10023333mg [Capsella rubella]                                                                                                                                                                                                                                                                                                                                                                               | 453 | 407  | 1.00E-175 | 89.8   | 71.3 | 76.4 | hypothetical protein CARUB_v10023333mg                     | gbpln | Capsella rubella     | AT2G25840.2   Symbols:   OVA4   Nucleotidyl transferase superfamily protein   chr2:11021924-11025158 FORWARD LENGTH=412                                                                                                                                                                                                                                                                                     | 453 | 412 | 1.00E-163 | 90.9  | 64.5 | 68.9 |
| Rsa1.0_01570.1.g28034.t1 | ref XP_004297977.1  PREDICTED: uncharacterized protein LOC101305167 [Fragaria vesca subsp. vesca]                                                                                                                                                                                                                                                                                                                                                      | 764 | 934  | 0         | 122.3  | 45.0 | 59.4 | PREDICTED: uncharacterized protein LOC101305167            | gbpln | Fragaria vesca       | AT4G10200.1   Symbols:   TTF-type zinc finger protein with HAT dimerisation domain   chr4:6353172-6355591 FORWARD LENGTH=733                                                                                                                                                                                                                                                                                | 764 | 733 | 1.00E-161 | 95.9  | 42.3 | 55.2 |
| Rsa1.0_01570.1.g28035.t1 | gb EOA13610.1  hypothetical protein CARUB_v10026677mg, partial [Capsella rubella]                                                                                                                                                                                                                                                                                                                                                                      | 322 | 355  | 1.00E-145 | 110.2  | 85.7 | 91.0 | hypothetical protein CARUB_v10026677mg, partial            | gbpln | Capsella rubella     | AT5G52600.2   Symbols:   Homeodomain-like superfamily protein   chr5:21359423-21362037 REVERSE LENGTH=331                                                                                                                                                                                                                                                                                                   | 322 | 331 | 1.00E-147 | 102.8 | 86.6 | 90.7 |
| Rsa1.0_01570.1.g28036.t1 | gb EOA13969.1  hypothetical protein CARUB_v10027094mg, partial [Capsella rubella]                                                                                                                                                                                                                                                                                                                                                                      | 180 | 220  | 4.00E-77  | 122.2  | 88.3 | 90.6 | hypothetical protein CARUB_v10027094mg, partial            | gbpln | Capsella rubella     | AT4G25740.1   Symbols:   RNA binding Plectin/S10 domain-containing protein   chr4:13107488-13108751 REVERSE LENGTH=177                                                                                                                                                                                                                                                                                      | 180 | 177 | 1.00E-69  | 98.3  | 88.3 | 91.1 |
| Rsa1.0_01570.1.g28037.t1 | gb AAF14064.1 AF048841.1 MYB82 [Arabidopsis thaliana]                                                                                                                                                                                                                                                                                                                                                                                                  | 195 | 201  | 7.00E-84  | 103.1  | 82.1 | 88.7 | MYB82                                                      | gbpln | Arabidopsis thaliana | AT5G52600.1   Symbols:   AtMYB82, MYB82   myb domain protein 82   chr5:21343197-21343968 REVERSE LENGTH=201                                                                                                                                                                                                                                                                                                 | 195 | 201 | 3.00E-86  | 103.1 | 82.1 | 88.7 |
| Rsa1.0_01570.1.g28038.t2 | ref XP_002865917.1  hypothetical protein ARALYDRAFT_918304 [Arabidopsis lyrata subsp. lyrata]   gi 297311752 gb EFH42176.1  hypothetical protein ARALYDRAFT_918304 [Arabidopsis lyrata subsp. lyrata]                                                                                                                                                                                                                                                  | 591 | 464  | 0         | 78.5   | 66.7 | 71.2 | hypothetical protein ARALYDRAFT_918304                     | gbpln | Arabidopsis lyrata   | AT5G52540.1   Symbols:   Protein of unknown function (DUF819)   chr5:21321672-21323702 REVERSE LENGTH=461                                                                                                                                                                                                                                                                                                   | 591 | 461 | 0         | 78.0  | 66.7 | 71.6 |
| Rsa1.0_01571.1.g28039.t1 | gb EOA25193.1  hypothetical protein CARUB_v10018504mg [Capsella rubella]                                                                                                                                                                                                                                                                                                                                                                               | 98  | 92   | 1.00E-17  | 93.9   | 56.1 | 69.4 | hypothetical protein CARUB_v10018504mg                     | gbpln | Capsella rubella     | AT3G59930.1   Symbols:   Encodes a defensin-like (DEFL) family protein.   chr3:22139772-22140127 REVERSE LENGTH=80                                                                                                                                                                                                                                                                                          | 98  | 80  | 1.00E-14  | 81.6  | 48.0 | 60.2 |
| Rsa1.0_01571.1.g28040.t1 | gb EOA16735.1  hypothetical protein CARUB_v10004938mg [Capsella rubella]                                                                                                                                                                                                                                                                                                                                                                               | 406 | 410  | 0         | 101.0  | 85.5 | 91.9 | hypothetical protein CARUB_v10004938mg                     | gbpln | Capsella rubella     | AT5G41060.1   Symbols:   DHHC-type zinc finger family protein   chr5:16435602-16437540 FORWARD LENGTH=410                                                                                                                                                                                                                                                                                                   | 406 | 410 | 0         | 101.0 | 83.7 | 91.9 |
| Rsa1.0_01571.1.g28041.t1 | gb EOA16772.1  hypothetical protein CARUB_v10004991mg [Capsella rubella]                                                                                                                                                                                                                                                                                                                                                                               | 376 | 393  | 1.00E-134 | 104.5  | 71.8 | 78.7 | hypothetical protein CARUB_v10004991mg                     | gbpln | Capsella rubella     | AT5G41070.1   Symbols:   DRB5   dsRNA-binding protein 5   chr5:16438547-16439916 FORWARD LENGTH=393                                                                                                                                                                                                                                                                                                         | 376 | 393 | 1.00E-130 | 104.5 | 70.7 | 79.0 |
| Rsa1.0_01571.1.g28042.t1 | ref XP_002870654.1  glycerophosphoryl diester phosphodiesterase family protein [Arabidopsis lyrata subsp. lyrata]   gi 2973116490 gb EFH46913.1  glycerophosphoryl diester phosphodiesterase family protein [Arabidopsis lyrata subsp. lyrata]   ref XP_002878091.1  hypothetical protein ARALYDRAFT_324164 [Arabidopsis lyrata subsp. lyrata]   gi 297323929 gb EFH54350.1  hypothetical protein ARALYDRAFT_324164 [Arabidopsis lyrata subsp. lyrata] | 376 | 375  | 0         | 99.7   | 87.0 | 93.6 | glycerophosphoryl diester phosphodiesterase family protein | gbpln | Arabidopsis lyrata   | AT5G41080.1   Symbols:   PLC-like phosphodiesterases superfamily protein   chr5:16441858-16443835 FORWARD LENGTH=374                                                                                                                                                                                                                                                                                        | 376 | 374 | 0         | 99.5  | 86.2 | 92.3 |
| Rsa1.0_01571.1.g28043.t1 | ref XP_002878091.1  hypothetical protein ARALYDRAFT_324164 [Arabidopsis lyrata subsp. lyrata]   gi 297323929 gb EFH54350.1  hypothetical protein ARALYDRAFT_324164 [Arabidopsis lyrata subsp. lyrata]                                                                                                                                                                                                                                                  | 261 | 167  | 2.00E-29  | 64.0   | 25.3 | 32.6 | hypothetical protein ARALYDRAFT_324164                     | gbpln | Arabidopsis lyrata   | AT3G56520.1   Symbols:   NAC (No Apical Meristem) domain transcriptional regulator superfamily protein   chr3:20947107-20947731 REVERSE LENGTH=175                                                                                                                                                                                                                                                          | 261 | 175 | 3.00E-31  | 67.0  | 24.5 | 30.3 |



|                          |                                                                                                                                                                                                                                                                                                                                                                                                                                                                                                                                                                                                                                              |      |      |           |       |      |      |                                               |       |                      |                                                                                                                                                                                                                                                                                                                            |      |     |           |       |      |      |
|--------------------------|----------------------------------------------------------------------------------------------------------------------------------------------------------------------------------------------------------------------------------------------------------------------------------------------------------------------------------------------------------------------------------------------------------------------------------------------------------------------------------------------------------------------------------------------------------------------------------------------------------------------------------------------|------|------|-----------|-------|------|------|-----------------------------------------------|-------|----------------------|----------------------------------------------------------------------------------------------------------------------------------------------------------------------------------------------------------------------------------------------------------------------------------------------------------------------------|------|-----|-----------|-------|------|------|
| Rsa1.0_01571.1.g28044.t1 | ref NP_172436.1  F-box/LRR and kelch-repeat containing protein [Arabidopsis thaliana]<br>gi 75218978 sp O04488.1 FBLK1_ARATH<br>RecName: Full=F-box/LRR-repeat/kelch-repeat protein At1g09650<br>gi 2160159 gb AA80722.1  F21M12.4<br>gene product [Arabidopsis thaliana]<br>gi 110738143 db BAF01003.1 <br>hypothetical protein [Arabidopsis thaliana]<br>gi 332190354 gb AEE28475.1 <br>F-box/LRR and kelch-repeat containing protein [Arabidopsis thaliana]                                                                                                                                                                               | 251  | 382  | 1.00E-62  | 152.2 | 54.2 | 64.9 | F-box/LRR and kelch-repeat containing protein | gbpln | Arabidopsis thaliana | AT1G09650.1   Symbols:   F-box and associated interaction domains-containing protein   chr1:3125978-3127126 FORWARD LENGTH=382                                                                                                                                                                                             | 251  | 382 | 4.00E-65  | 152.2 | 54.2 | 64.9 |
| Rsa1.0_01571.1.g28045.t1 | ref NP_174428.1  pentatricopeptide repeat-containing protein [Arabidopsis thaliana]<br>gi 75169458 sp Q9C866.1 PPR65_ARATH<br>RecName: Full=Pentatricopeptide repeat-containing protein At1g31430<br>gi 12322531 gb AAG51260.1 AC027135.1<br>PPR-repeat protein [Arabidopsis thaliana]<br>gi 332193234 gb AEE31355.1 <br>pentatricopeptide repeat-containing protein [Arabidopsis thaliana]                                                                                                                                                                                                                                                  | 379  | 570  | 8.00E-36  | 150.4 | 33.8 | 41.4 | pentatricopeptide repeat-containing protein   | gbpln | Arabidopsis thaliana | AT1G31430.1   Symbols:   Pentatricopeptide repeat (PPR-like) superfamily protein   chr1:11254025-11255737 REVERSE LENGTH=570                                                                                                                                                                                               | 379  | 570 | 2.00E-38  | 150.4 | 33.8 | 41.4 |
| Rsa1.0_01571.1.g28046.t1 | gb EOA28508.1  hypothetical protein CARUB_v10024723mg [Capsella rubella]                                                                                                                                                                                                                                                                                                                                                                                                                                                                                                                                                                     | 283  | 384  | 5.00E-74  | 135.7 | 50.5 | 52.7 | hypothetical protein CARUB_v10024723mg        | gbpln | Capsella rubella     | AT2G41670.1   Symbols:   P-loop containing nucleoside triphosphate hydrolases superfamily protein   chr2:17374118-17376177 FORWARD LENGTH=386                                                                                                                                                                              | 283  | 386 | 9.00E-75  | 136.4 | 49.8 | 51.9 |
| Rsa1.0_01571.1.g28047.t5 | gb AAC28216.1  T24M8.9 gene product [Arabidopsis thaliana]<br>gi 7267147 emb CAB80815.1  putative protein [Arabidopsis thaliana]<br>ref NP_564790.3  ankyrin repeat-containing protein [Arabidopsis thaliana]<br>gi 14334426 gb AAK59411.1  unknown protein [Arabidopsis thaliana]<br>gi 27754742 gb AAO22814.1  unknown protein [Arabidopsis thaliana]<br>gi 332195798 gb AEE33919.1  ankyrin repeat-containing protein [Arabidopsis thaliana]                                                                                                                                                                                              | 397  | 463  | 6.00E-20  | 116.6 | 12.1 | 17.1 | T24M8.9 gene product                          | gbpln | Arabidopsis thaliana | AT2G07760.1   Symbols:   Zinc knuckle (CCHC-type) family protein   chr2:3584420-3586278 REVERSE LENGTH=530                                                                                                                                                                                                                 | 397  | 530 | 1.00E-13  | 133.5 | 9.6  | 15.4 |
| Rsa1.0_01572.1.g28048.t1 | gi 27754742 gb AAO22814.1  unknown protein [Arabidopsis thaliana]<br>gi 332195798 gb AEE33919.1  ankyrin repeat-containing protein [Arabidopsis thaliana]                                                                                                                                                                                                                                                                                                                                                                                                                                                                                    | 616  | 624  | 0         | 101.3 | 84.9 | 88.6 | ankyrin repeat-containing protein             | gbpln | Arabidopsis thaliana | AT1G62050.1   Symbols:   Ankyrin repeat family protein   chr1:22936323-22938874 REVERSE LENGTH=624                                                                                                                                                                                                                         | 616  | 624 | 0         | 101.3 | 84.9 | 88.6 |
| Rsa1.0_01572.1.g28049.t1 | dbj BAA97287.1  retroelement pol polyprotein-like [Arabidopsis thaliana]                                                                                                                                                                                                                                                                                                                                                                                                                                                                                                                                                                     | 195  | 1491 | 7.00E-68  | 764.6 | 60.5 | 77.9 | retroelement pol polyprotein-like             | gbpln | Arabidopsis thaliana | AT1G21280.1   Symbols:   CONTAINS InterPro DOMAIN/s: Retrotransposon gag protein (InterPro:IPR005162); Has 707 Blast hits to 705 proteins in 25 species: Archae - 0; Bacteria - 0; Metazoa - 4; Fungi - 0; Plants - 703; Viruses - 0; Other Eukaryotes - 0 (source: NCBI BLINK).   chr1:7447690-7448403 REVERSE LENGTH=237 | 195  | 237 | 1.00E-27  | 121.5 | 30.8 | 49.7 |
| Rsa1.0_01572.1.g28050.t1 | gb EOA35216.1  hypothetical protein CARUB_v10020367mg [Capsella rubella]                                                                                                                                                                                                                                                                                                                                                                                                                                                                                                                                                                     | 387  | 417  | 1.00E-140 | 107.8 | 66.9 | 82.2 | hypothetical protein CARUB_v10020367mg        | gbpln | Capsella rubella     | AT1G61990.1   Symbols:   Mitochondrial transcription termination factor family protein   chr1:22911453-22912697 FORWARD LENGTH=414                                                                                                                                                                                         | 387  | 414 | 1.00E-139 | 107.0 | 65.6 | 81.4 |
| Rsa1.0_01572.1.g28051.t1 | gb ABD65076.1  SLL3 ORF2 protein, putative [Brassica oleracea]                                                                                                                                                                                                                                                                                                                                                                                                                                                                                                                                                                               | 364  | 443  | 2.00E-20  | 121.7 | 19.2 | 24.7 | SLL3 ORF2 protein, putative                   | gbpln | Brassica oleracea    | #                                                                                                                                                                                                                                                                                                                          | #    | #   | #         | #     | #    |      |
| Rsa1.0_01572.1.g28052.t2 | #                                                                                                                                                                                                                                                                                                                                                                                                                                                                                                                                                                                                                                            | #    | #    | #         | #     | #    | #    | -                                             | ----  | ----                 | AT1G20200.1   Symbols: EMB2719, HAP15   PAM domain (PCI/PINT associated module) protein   chr1:7001409-7004154 REVERSE LENGTH=488                                                                                                                                                                                          | 159  | 488 | 6.00E-11  | 306.9 | 17.6 | 20.8 |
| Rsa1.0_01572.1.g28053.t1 | gb ABD65163.1  hypothetical protein 40.t00048 [Brassica oleracea]<br>ref NP_176386.2  calcium-dependent protein kinase 19 [Arabidopsis thaliana]<br>gi 122231654 sp Q1PFH8.1 CDPKJ_ARATH<br>RecName: Full=Calcium-dependent protein kinase 19<br>gi 91806009 gb ABE65733.1  calcium-dependent protein kinase/GDPK [Arabidopsis thaliana]<br>gi 332195765 gb AEE33906.1  calcium-dependent protein kinase 19 [Arabidopsis thaliana]<br>ref XP_002868389.1  hypothetical protein ARALYDRAFT_493566 [Arabidopsis lyrata subsp. lyrata]<br>gi 297314225 gb EFH44648.1  hypothetical protein ARALYDRAFT_493566 [Arabidopsis lyrata subsp. lyrata] | 201  | 569  | 1.00E-10  | 283.1 | 27.9 | 38.8 | hypothetical protein 40.t00048                | gbpln | Brassica oleracea    | #                                                                                                                                                                                                                                                                                                                          | #    | #   | #         | #     | #    |      |
| Rsa1.0_01572.1.g28054.t1 | ref NP_176386.2  calcium-dependent protein kinase 19 [Arabidopsis thaliana]<br>gi 122231654 sp Q1PFH8.1 CDPKJ_ARATH<br>RecName: Full=Calcium-dependent protein kinase 19<br>gi 91806009 gb ABE65733.1  calcium-dependent protein kinase/GDPK [Arabidopsis thaliana]<br>gi 332195765 gb AEE33906.1  calcium-dependent protein kinase 19 [Arabidopsis thaliana]<br>ref XP_002868389.1  hypothetical protein ARALYDRAFT_493566 [Arabidopsis lyrata subsp. lyrata]<br>gi 297314225 gb EFH44648.1  hypothetical protein ARALYDRAFT_493566 [Arabidopsis lyrata subsp. lyrata]                                                                      | 1451 | 551  | 0         | 38.0  | 31.4 | 33.2 | calcium-dependent protein kinase 19           | gbpln | Arabidopsis thaliana | AT1G61950.1   Symbols: CPK19   calcium-dependent protein kinase 19   chr1:22899417-22901941 FORWARD LENGTH=551                                                                                                                                                                                                             | 1451 | 551 | 0         | 38.0  | 31.4 | 33.2 |
| Rsa1.0_01572.1.g28055.t1 | ref XP_002868389.1  hypothetical protein ARALYDRAFT_493566 [Arabidopsis lyrata subsp. lyrata]<br>gi 297314225 gb EFH44648.1  hypothetical protein ARALYDRAFT_493566 [Arabidopsis lyrata subsp. lyrata]                                                                                                                                                                                                                                                                                                                                                                                                                                       | 124  | 264  | 1.00E-11  | 212.9 | 36.3 | 40.3 | hypothetical protein ARALYDRAFT_493566        | gbpln | Arabidopsis lyrata   | AT5G32440.3   Symbols:   Ubiquitin system component Cue protein   chr5:12077014-12078396 FORWARD LENGTH=265                                                                                                                                                                                                                | 124  | 265 | 7.00E-14  | 213.7 | 33.9 | 37.9 |
| Rsa1.0_01572.1.g28056.t2 | #                                                                                                                                                                                                                                                                                                                                                                                                                                                                                                                                                                                                                                            | #    | #    | #         | #     | #    | #    | -                                             | ----  | ----                 | #                                                                                                                                                                                                                                                                                                                          | #    | #   | #         | #     | #    |      |

|                          |                                                                                                                                                                                                                                                                                                            |   |      |      |           |        |      |      |                                                                        |       |                      |                                                                                                                                                                                                                                                                                                                            |      |      |           |       |      |      |
|--------------------------|------------------------------------------------------------------------------------------------------------------------------------------------------------------------------------------------------------------------------------------------------------------------------------------------------------|---|------|------|-----------|--------|------|------|------------------------------------------------------------------------|-------|----------------------|----------------------------------------------------------------------------------------------------------------------------------------------------------------------------------------------------------------------------------------------------------------------------------------------------------------------------|------|------|-----------|-------|------|------|
| Rsa1.0_01572.1.g28057.t1 | #                                                                                                                                                                                                                                                                                                          | # | #    | #    | #         | #      | #    | #    | -                                                                      | ----  | ----                 | #                                                                                                                                                                                                                                                                                                                          | #    | #    | #         | #     | #    |      |
| Rsa1.0_01572.1.g28058.t1 | emb CAN62506.1  hypothetical protein VITISV_010654 [Vitis vinifera]                                                                                                                                                                                                                                        |   | 225  | 458  | 1.00E-21  | 203.6  | 28.9 | 46.2 | hypothetical protein VITISV_010654                                     | gbpln | Vitis vinifera       | #                                                                                                                                                                                                                                                                                                                          | #    | #    | #         | #     | #    |      |
| Rsa1.0_01573.1.g28059.t1 | #                                                                                                                                                                                                                                                                                                          | # | #    | #    | #         | #      | #    | #    | -                                                                      | ----  | ----                 | #                                                                                                                                                                                                                                                                                                                          | #    | #    | #         | #     | #    |      |
| Rsa1.0_01573.1.g28060.t1 | dbj BAJ34214.1  unnamed protein product [Theilungiella halophila]                                                                                                                                                                                                                                          |   | 614  | 638  | 0         | 103.9  | 78.3 | 86.3 | unnamed protein product                                                | ----  | ----                 | AT5G23570.1   Symbols: SGS3, ATSGS3   XS domain-containing protein / XS zinc finger domain-containing protein-related   chr5:7943621-7945874 FORWARD LENGTH=625                                                                                                                                                            | 614  | 625  | 0         | 101.8 | 75.1 | 84.2 |
| Rsa1.0_01573.1.g28061.t1 | ref NP_680213.1  transmembrane CLPTM1 family protein [Arabidopsis thaliana] gi 17381232 gb AAL36035.1  AT5g08500/MAH20.6 [Arabidopsis thaliana] gi 23506007 gb AAN28863.1  At5g08500/MAH20.6 [Arabidopsis thaliana] gi 332005802 gb AED93185.1  transmembrane CLPTM1 family protein [Arabidopsis thaliana] |   | 590  | 593  | 0         | 100.5  | 92.0 | 95.6 | transmembrane CLPTM1 family protein                                    | gbpln | Arabidopsis thaliana | AT5G23575.1   Symbols:   Transmembrane CLPTM1 family protein   chr5:7946563-7950041 FORWARD LENGTH=593                                                                                                                                                                                                                     | 590  | 593  | 0         | 100.5 | 92.0 | 95.6 |
| Rsa1.0_01573.1.g28062.t1 | gb EOA20507.1  hypothetical protein CARUB_v10000821mg [Capsella rubella]                                                                                                                                                                                                                                   |   | 491  | 490  | 0         | 99.8   | 89.0 | 94.7 | hypothetical protein CARUB_v10000821mg                                 | gbpln | Capsella rubella     | AT5G23580.1   Symbols: CDPK9, ATCDPK9, CPK12, ATCPK12   calmodulin-like domain protein kinase 9   chr5:7950388-7952433 REVERSE LENGTH=490                                                                                                                                                                                  | 491  | 490  | 0         | 99.8  | 88.8 | 94.3 |
| Rsa1.0_01573.1.g28063.t1 | ref XP_002872065.1  predicted protein [Arabidopsis lyrata subsp. lyrata] gi 297317902 gb EFH48324.1  predicted protein [Arabidopsis lyrata subsp. lyrata]                                                                                                                                                  |   | 327  | 327  | 2.00E-88  | 100.0  | 54.1 | 68.5 | predicted protein                                                      | gbpln | Arabidopsis lyrata   | AT5G23650.1   Symbols:   Homeodomain-like transcriptional regulator   chr5:7969812-7971019 FORWARD LENGTH=337                                                                                                                                                                                                              | 327  | 337  | 4.00E-87  | 103.1 | 53.2 | 67.0 |
| Rsa1.0_01573.1.g28064.t1 | ref XP_002877428.1  hypothetical protein ARALYDRAFT_484952 [Arabidopsis lyrata subsp. lyrata] gi 297323266 gb EFH53687.1  hypothetical protein ARALYDRAFT_484952 [Arabidopsis lyrata subsp. lyrata]                                                                                                        |   | 287  | 285  | 1.00E-138 | 99.3   | 84.7 | 90.6 | hypothetical protein ARALYDRAFT_484952                                 | gbpln | Arabidopsis lyrata   | AT5G23660.1   Symbols: MTN3, SWEET12, ATSWEEP12   homolog of Medicago truncatula MTN3   chr5:7971936-7973796 REVERSE LENGTH=285                                                                                                                                                                                            | 287  | 285  | 1.00E-140 | 99.3  | 84.0 | 90.2 |
| Rsa1.0_01573.1.g28065.t2 | gb AAD19784.1  putative retroelement pol polyprotein [Arabidopsis thaliana]                                                                                                                                                                                                                                |   | 934  | 1501 | 0         | 160.7  | 54.8 | 71.4 | putative retroelement pol polyprotein                                  | gbpln | Arabidopsis thaliana | AT1G21280.1   Symbols:   CONTAINS InterPro DOMAIN/s: Retrotransposon gag protein (InterPro:IPR005162); Has 707 Blast hits to 705 proteins in 25 species: Archae - 0; Bacteria - 0; Metazoa - 4; Fungi - 0; Plants - 703; Viruses - 0; Other Eukaryotes - 0 (source: NCBI BLINK).   chr1:7447690-7448403 REVERSE LENGTH=237 | 934  | 237  | 1.00E-29  | 25.4  | 7.6  | 12.5 |
| Rsa1.0_01573.1.g28066.t1 | gb AAD19784.1  putative retroelement pol polyprotein [Arabidopsis thaliana]                                                                                                                                                                                                                                |   | 423  | 1501 | 0         | 354.8  | 72.6 | 86.1 | putative retroelement pol polyprotein                                  | gbpln | Arabidopsis thaliana | AT4G23160.1   Symbols: CRK8   cysteine-rich RLK (RECEPTOR-like protein kinase) 8   chr4:12128485-12134086 FORWARD LENGTH=1262                                                                                                                                                                                              | 423  | 1262 | 1.00E-111 | 298.3 | 44.4 | 62.4 |
| Rsa1.0_01574.1.g28067.t5 | gb AAD30632.1 AC006085_5 Hypothetical protein [Arabidopsis thaliana]                                                                                                                                                                                                                                       |   | 995  | 1295 | 1.00E-130 | 130.2  | 28.0 | 39.3 | Hypothetical protein                                                   | gbpln | Arabidopsis thaliana | #                                                                                                                                                                                                                                                                                                                          | #    | #    | #         | #     | #    |      |
| Rsa1.0_01574.1.g28068.t4 | #                                                                                                                                                                                                                                                                                                          | # | #    | #    | #         | #      | #    | #    | -                                                                      | ----  | ----                 | #                                                                                                                                                                                                                                                                                                                          | #    | #    | #         | #     | #    |      |
| Rsa1.0_01574.1.g28069.t3 | #                                                                                                                                                                                                                                                                                                          | # | #    | #    | #         | #      | #    | #    | -                                                                      | ----  | ----                 | #                                                                                                                                                                                                                                                                                                                          | #    | #    | #         | #     | #    |      |
| Rsa1.0_01574.1.g28070.t1 | #                                                                                                                                                                                                                                                                                                          | # | #    | #    | #         | #      | #    | #    | -                                                                      | ----  | ----                 | #                                                                                                                                                                                                                                                                                                                          | #    | #    | #         | #     | #    |      |
| Rsa1.0_01574.1.g28071.t2 | ref XP_002878995.1  SPX domain-containing protein [Arabidopsis lyrata subsp. lyrata] gi 297324834 gb EFH55254.1  SPX domain-containing protein [Arabidopsis lyrata subsp. lyrata]                                                                                                                          |   | 310  | 288  | 1.00E-126 | 92.9   | 79.7 | 85.5 | SPX domain-containing protein                                          | gbpln | Arabidopsis lyrata   | AT2G26660.1   Symbols: ATSPX2, SPX2   SPX domain gene 2   chr2:11338932-11340703 FORWARD LENGTH=287                                                                                                                                                                                                                        | 310  | 287  | 1.00E-128 | 92.6  | 80.0 | 85.5 |
| Rsa1.0_01574.1.g28072.t1 | gb AAG51783.1 AC079679_3 reverse transcriptase, putative; 16838-20266 [Arabidopsis thaliana]                                                                                                                                                                                                               |   | 97   | 1142 | 2.00E-17  | 1177.3 | 45.4 | 58.8 | reverse transcriptase, putative; 16838-20266                           | gbpln | Arabidopsis thaliana | #                                                                                                                                                                                                                                                                                                                          | #    | #    | #         | #     | #    |      |
| Rsa1.0_01574.1.g28073.t1 | #                                                                                                                                                                                                                                                                                                          | # | #    | #    | #         | #      | #    | #    | -                                                                      | ----  | ----                 | #                                                                                                                                                                                                                                                                                                                          | #    | #    | #         | #     | #    |      |
| Rsa1.0_01574.1.g28074.t2 | #                                                                                                                                                                                                                                                                                                          | # | #    | #    | #         | #      | #    | #    | -                                                                      | ----  | ----                 | #                                                                                                                                                                                                                                                                                                                          | #    | #    | #         | #     | #    |      |
| Rsa1.0_01574.1.g28075.t1 | emb CAN77967.1  hypothetical protein VITISV_027331 [Vitis vinifera]                                                                                                                                                                                                                                        |   | 312  | 491  | 7.00E-16  | 157.4  | 17.9 | 30.1 | hypothetical protein VITISV_027331                                     | gbpln | Vitis vinifera       | #                                                                                                                                                                                                                                                                                                                          | #    | #    | #         | #     | #    |      |
| Rsa1.0_01574.1.g28076.t9 | gb AAC69377.1  putative retroelement pol polyprotein [Arabidopsis thaliana]                                                                                                                                                                                                                                |   | 1767 | 1328 | 0         | 75.2   | 26.8 | 35.2 | putative retroelement pol polyprotein                                  | gbpln | Arabidopsis thaliana | ATMG00860.1   Symbols: ORF158   DNA/RNA polymerases superfamily protein   chrM:235916-236392 FORWARD LENGTH=158                                                                                                                                                                                                            | 1767 | 158  | 1.00E-24  | 8.9   | 3.4  | 4.9  |
| Rsa1.0_01575.1.g28077.t1 | ref XP_002887353.1  6-phosphogluconate dehydrogenase NAD-binding domain-containing protein [Arabidopsis lyrata subsp. lyrata] gi 297333194 gb EFH63612.1  6-phosphogluconate dehydrogenase NAD-binding domain-containing protein [Arabidopsis lyrata subsp. lyrata]                                        |   | 307  | 299  | 1.00E-133 | 97.4   | 82.4 | 88.3 | 6-phosphogluconate dehydrogenase NAD-binding domain-containing protein | gbpln | Arabidopsis lyrata   | AT1G71170.1   Symbols:   6-phosphogluconate dehydrogenase family protein   chr1:26830673-26831572 FORWARD LENGTH=299                                                                                                                                                                                                       | 307  | 299  | 1.00E-130 | 97.4  | 81.8 | 88.3 |

|                          |                                                                                                                                                                                                                                                                                                                                                                                                                                                                                                                                                                                                                                                                                                                                                                                                                                                                                                                                                                                                                                                                                                                                                                                                                  |      |      |           |       |      |      |                                                 |       |                      |                                                                                                                                                                         |      |      |           |       |      |      |
|--------------------------|------------------------------------------------------------------------------------------------------------------------------------------------------------------------------------------------------------------------------------------------------------------------------------------------------------------------------------------------------------------------------------------------------------------------------------------------------------------------------------------------------------------------------------------------------------------------------------------------------------------------------------------------------------------------------------------------------------------------------------------------------------------------------------------------------------------------------------------------------------------------------------------------------------------------------------------------------------------------------------------------------------------------------------------------------------------------------------------------------------------------------------------------------------------------------------------------------------------|------|------|-----------|-------|------|------|-------------------------------------------------|-------|----------------------|-------------------------------------------------------------------------------------------------------------------------------------------------------------------------|------|------|-----------|-------|------|------|
| Rsa1.0_01575.1.g28078.t1 | refNP_189164.1  Ribonuclease H-like protein [Arabidopsis thaliana] gi 9294184 dbj BAB02086.1  reverse transcriptase-like protein [Arabidopsis thaliana] gi 332643482 gb AEE77003.1  Ribonuclease H-like protein [Arabidopsis thaliana]                                                                                                                                                                                                                                                                                                                                                                                                                                                                                                                                                                                                                                                                                                                                                                                                                                                                                                                                                                           | 328  | 343  | 7.00E-85  | 104.6 | 46.3 | 66.8 | Ribonuclease H-like protein                     | gbpln | Arabidopsis thaliana | AT3G25270.1   Symbols:   Ribonuclease H-like superfamily protein   chr3:9203934-9204965 REVERSE LENGTH=343                                                              | 328  | 343  | 2.00E-87  | 104.6 | 46.3 | 66.8 |
| Rsa1.0_01575.1.g28079.t1 | gb EOA33322.1  hypothetical protein CARUB_v10021968mg [Capsella rubella]                                                                                                                                                                                                                                                                                                                                                                                                                                                                                                                                                                                                                                                                                                                                                                                                                                                                                                                                                                                                                                                                                                                                         | 444  | 460  | 0         | 103.6 | 89.2 | 96.6 | hypothetical protein CARUB_v10021968mg          | gbpln | Capsella rubella     | AT1G71160.1   Symbols: KCS7   3-ketoacyl-CoA synthase 7   chr1:26828788-26830170 REVERSE LENGTH=460                                                                     | 444  | 460  | 0         | 103.6 | 88.3 | 95.9 |
| Rsa1.0_01575.1.g28080.t1 | # # # # # # # # # # # # # # # #                                                                                                                                                                                                                                                                                                                                                                                                                                                                                                                                                                                                                                                                                                                                                                                                                                                                                                                                                                                                                                                                                                                                                                                  |      |      |           |       |      |      |                                                 | ----  | ----                 | # # # # # # # # # #                                                                                                                                                     |      |      |           |       |      |      |
| Rsa1.0_01575.1.g28081.t1 | refNP_177270.1  MATE efflux family protein [Arabidopsis thaliana] gi 12323428 gb AAG51691.1 AC016972_10 hypothetical protein; 49518-51504 [Arabidopsis thaliana] gi 332197044 gb AEE35165.1  MATE efflux family protein [Arabidopsis thaliana]                                                                                                                                                                                                                                                                                                                                                                                                                                                                                                                                                                                                                                                                                                                                                                                                                                                                                                                                                                   | 482  | 485  | 0         | 100.6 | 80.7 | 89.0 | MATE efflux family protein                      | gbpln | Arabidopsis thaliana | AT1G71140.1   Symbols:   MATE efflux family protein   chr1:26824762-26826748 FORWARD LENGTH=485                                                                         | 482  | 485  | 0         | 100.6 | 80.7 | 89.0 |
| Rsa1.0_01575.1.g28082.t1 | gb EOA35095.1  hypothetical protein CARUB_v10020206mg [Capsella rubella] refNP_565012.1  ethylene-responsive transcription factor ERF070 [Arabidopsis thaliana] gi 75333560 sp Q9C995.1 ERF70_ARAT H RecName: Full=Ethylene-responsive transcription factor ERF070 gi 12323426 gb AAG51689.1 AC016972_8 hypothetical protein; 47633-48118 [Arabidopsis thaliana] gi 51969298 dbj BAD43341.1  unknown protein [Arabidopsis thaliana] gi 51969500 dbj BAD43446.1  unknown protein [Arabidopsis thaliana] gi 51969622 dbj BAD43503.1  unknown protein [Arabidopsis thaliana] gi 51969690 dbj BAD43537.1  unknown protein [Arabidopsis thaliana] gi 51970004 dbj BAD43694.1  unknown protein [Arabidopsis thaliana] gi 51970228 dbj BAD43806.1  unknown protein [Arabidopsis thaliana] gi 51970430 dbj BAD43907.1  unknown protein [Arabidopsis thaliana] gi 51970702 dbj BAD44043.1  unknown protein [Arabidopsis thaliana] gi 98961105 gb ABF59036.1  At1g71130 [Arabidopsis thaliana] gi 332197043 gb AEE35164.1  ethylene-responsive transcription factor ERF070 [Arabidopsis thaliana] ref XP_002887145.1  hypothetical protein ARALYDRAFT_475882 [Arabidopsis lyrata subsp. lyrata] gi 297332986 gb EFH63404.1 | 482  | 485  | 0         | 100.6 | 84.6 | 91.1 | hypothetical protein CARUB_v10020206mg          | gbpln | Capsella rubella     | AT1G71140.1   Symbols:   MATE efflux family protein   chr1:26824762-26826748 FORWARD LENGTH=485                                                                         | 482  | 485  | 0         | 100.6 | 83.4 | 91.1 |
| Rsa1.0_01575.1.g28083.t1 | hypothetical protein ARALYDRAFT_475882 [Arabidopsis lyrata subsp. lyrata]                                                                                                                                                                                                                                                                                                                                                                                                                                                                                                                                                                                                                                                                                                                                                                                                                                                                                                                                                                                                                                                                                                                                        | 167  | 161  | 7.00E-58  | 96.4  | 74.9 | 83.8 | ethylene-responsive transcription factor ERF070 | gbpln | Arabidopsis thaliana | AT1G71130.1   Symbols:   Integrase-type DNA-binding superfamily protein   chr1:26822877-26823362 FORWARD LENGTH=161                                                     | 167  | 161  | 3.00E-60  | 96.4  | 74.9 | 83.8 |
| Rsa1.0_01576.1.g28084.t1 | hypothetical protein ARALYDRAFT_475882 [Arabidopsis lyrata subsp. lyrata]                                                                                                                                                                                                                                                                                                                                                                                                                                                                                                                                                                                                                                                                                                                                                                                                                                                                                                                                                                                                                                                                                                                                        | 518  | 527  | 0         | 101.7 | 65.4 | 79.5 | hypothetical protein ARALYDRAFT_475882          | gbpln | Arabidopsis lyrata   | AT1G67780.1   Symbols:   Zinc-finger domain of monoamine-oxidase A repressor R1 protein   chr1:25412816-25415530 FORWARD LENGTH=512                                     | 518  | 512  | 1.00E-178 | 98.8  | 64.7 | 78.2 |
| Rsa1.0_01576.1.g28085.t1 | gb AEW29768.1  TOP1 [Calepina irregularis]                                                                                                                                                                                                                                                                                                                                                                                                                                                                                                                                                                                                                                                                                                                                                                                                                                                                                                                                                                                                                                                                                                                                                                       | 342  | 354  | 1.00E-131 | 103.5 | 72.5 | 81.9 | TCP1                                            | gbpln | Calepina irregularis | AT1G67260.1   Symbols: TCP1   TCP family transcription factor   chr1:25168228-25169307 REVERSE LENGTH=359                                                               | 342  | 359  | 1.00E-124 | 105.0 | 69.0 | 78.9 |
| Rsa1.0_01576.1.g28086.t1 | gb EOA33467.1  hypothetical protein CARUB_v10021121mg [Capsella rubella]                                                                                                                                                                                                                                                                                                                                                                                                                                                                                                                                                                                                                                                                                                                                                                                                                                                                                                                                                                                                                                                                                                                                         | 170  | 141  | 1.00E-63  | 82.9  | 73.5 | 79.4 | hypothetical protein CARUB_v10021121mg          | gbpln | Capsella rubella     | AT1G67250.1   Symbols:   Proteasome maturation factor UMP1   chr1:25163808-25164967 REVERSE LENGTH=141                                                                  | 170  | 141  | 7.00E-65  | 82.9  | 71.8 | 78.2 |
| Rsa1.0_01576.1.g28087.t1 | refNP_176892.1  protein little nuclei1 [Arabidopsis thaliana] gi 332196494 gb AE34615.1  protein little nuclei1 [Arabidopsis thaliana] ref XP_002887112.1  hypothetical protein ARALYDRAFT_894451 [Arabidopsis lyrata subsp. lyrata] gi 297332953 gb EFH63371.1                                                                                                                                                                                                                                                                                                                                                                                                                                                                                                                                                                                                                                                                                                                                                                                                                                                                                                                                                  | 1076 | 1132 | 0         | 105.2 | 78.2 | 87.7 | protein little nuclei1                          | gbpln | Arabidopsis thaliana | AT1G67230.1   Symbols: LINC1   little nuclei1   chr1:25151561-25156032 REVERSE LENGTH=1132                                                                              | 1076 | 1132 | 0         | 105.2 | 78.2 | 87.7 |
| Rsa1.0_01576.1.g28088.t1 | hypothetical protein ARALYDRAFT_894451 [Arabidopsis lyrata subsp. lyrata]                                                                                                                                                                                                                                                                                                                                                                                                                                                                                                                                                                                                                                                                                                                                                                                                                                                                                                                                                                                                                                                                                                                                        | 1053 | 1022 | 0         | 97.1  | 60.4 | 72.2 | hypothetical protein ARALYDRAFT_894451          | gbpln | Arabidopsis lyrata   | AT1G67220.1   Symbols: HAC02, HAC2, ATHPCAT1   histone acetyltransferase of the CBP family 2   chr1:25145587-25150450 FORWARD LENGTH=1367                               | 1053 | 1367 | 0         | 129.8 | 50.8 | 59.5 |
| Rsa1.0_01576.1.g28089.t1 | gb EOA35180.1  hypothetical protein CARUB_v10020325mg [Capsella rubella]                                                                                                                                                                                                                                                                                                                                                                                                                                                                                                                                                                                                                                                                                                                                                                                                                                                                                                                                                                                                                                                                                                                                         | 434  | 431  | 1.00E-169 | 99.3  | 76.5 | 82.5 | hypothetical protein CARUB_v10020325mg          | gbpln | Capsella rubella     | AT1G67210.1   Symbols:   Proline-rich spliceosome-associated (PSP) family protein / zinc knuckle (CCHC-type) family protein   chr1:25141339-25143774 FORWARD LENGTH=405 | 434  | 405  | 1.00E-157 | 93.3  | 70.7 | 77.9 |

|                          |                                                                                                                                                                                                                                                                                                                                                                                                                                                                                                                                         |      |      |           |       |      |      |                                                        |       |                      |                                                                                                                                           |      |     |           |       |      |      |
|--------------------------|-----------------------------------------------------------------------------------------------------------------------------------------------------------------------------------------------------------------------------------------------------------------------------------------------------------------------------------------------------------------------------------------------------------------------------------------------------------------------------------------------------------------------------------------|------|------|-----------|-------|------|------|--------------------------------------------------------|-------|----------------------|-------------------------------------------------------------------------------------------------------------------------------------------|------|-----|-----------|-------|------|------|
| Rsa1.0_01577.1.g28090.t1 | gb[EOA12330.1] hypothetical protein CARUB_v10007925mg, partial [Capsella rubella]                                                                                                                                                                                                                                                                                                                                                                                                                                                       | 393  | 539  | 3.00E-46  | 137.2 | 22.1 | 31.0 | hypothetical protein CARUB_v10007925mg, partial        | gbpln | Capsella rubella     | AT3G42170.1   Symbols:   BED zinc finger ;hAT family dimerisation domain   chr3:14321838-14323928 FORWARD LENGTH=696                      | 393  | 696 | 3.00E-12  | 177.1 | 14.2 | 22.6 |
| Rsa1.0_01577.1.g28091.t1 | gb AAG51228.1 AC035249.3 Tam3-like transposon protein: 93317-95488 [Arabidopsis thaliana] gi 12323055 gb AAG51515.1 AC068324.3 hAT-element transposase, putative [Arabidopsis thaliana]                                                                                                                                                                                                                                                                                                                                                 | 671  | 723  | 0         | 107.7 | 55.6 | 71.7 | Tam3-like transposon protein: 93317-95488              | gbpln | Arabidopsis thaliana | AT3G42170.1   Symbols:   BED zinc finger ;hAT family dimerisation domain   chr3:14321838-14323928 FORWARD LENGTH=696                      | 671  | 696 | 2.00E-45  | 103.7 | 21.9 | 38.2 |
| Rsa1.0_01577.1.g28092.t6 | #                                                                                                                                                                                                                                                                                                                                                                                                                                                                                                                                       | #    | #    | #         | #     | #    | -    | ----                                                   | ----  | ----                 | #                                                                                                                                         | #    | #   | #         | #     | #    | #    |
| Rsa1.0_01577.1.g28093.t1 | #                                                                                                                                                                                                                                                                                                                                                                                                                                                                                                                                       | #    | #    | #         | #     | #    | -    | ----                                                   | ----  | ----                 | #                                                                                                                                         | #    | #   | #         | #     | #    | #    |
| Rsa1.0_01577.1.g28094.t1 | #                                                                                                                                                                                                                                                                                                                                                                                                                                                                                                                                       | #    | #    | #         | #     | #    | -    | ----                                                   | ----  | ----                 | #                                                                                                                                         | #    | #   | #         | #     | #    | #    |
| Rsa1.0_01577.1.g28095.t1 | gb AAF18641.1 AC006228.12 F5J5.16 [Arabidopsis thaliana]                                                                                                                                                                                                                                                                                                                                                                                                                                                                                | 717  | 1024 | 2.00E-82  | 142.8 | 26.1 | 33.9 | F5J5.16                                                | gbpln | Arabidopsis thaliana | #                                                                                                                                         | #    | #   | #         | #     | #    | #    |
| Rsa1.0_01577.1.g28096.t1 | #                                                                                                                                                                                                                                                                                                                                                                                                                                                                                                                                       | #    | #    | #         | #     | #    | -    | ----                                                   | ----  | ----                 | #                                                                                                                                         | #    | #   | #         | #     | #    | #    |
| Rsa1.0_01578.1.g28097.t1 | #                                                                                                                                                                                                                                                                                                                                                                                                                                                                                                                                       | #    | #    | #         | #     | #    | -    | ----                                                   | ----  | ----                 | #                                                                                                                                         | #    | #   | #         | #     | #    | #    |
| Rsa1.0_01578.1.g28098.t2 | gb[EOA38210.1] hypothetical protein CARUB_v10009689mg [Capsella rubella]                                                                                                                                                                                                                                                                                                                                                                                                                                                                | 1204 | 333  | 1.00E-140 | 27.7  | 20.8 | 23.2 | hypothetical protein CARUB_v10009689mg                 | gbpln | Capsella rubella     | AT1G23560.1   Symbols:   Domain of unknown function [DUF220]   chr1:8352802-8354145 REVERSE LENGTH=332                                    | 1204 | 332 | 1.00E-140 | 27.6  | 20.3 | 22.3 |
| Rsa1.0_01578.1.g28099.t2 | gb ACG60686.1 En/Spm-related transposon protein [Brassica oleracea var. alboglabra]                                                                                                                                                                                                                                                                                                                                                                                                                                                     | 620  | 695  | 1.00E-158 | 112.1 | 48.1 | 51.3 | En/Spm-related transposon protein                      | gbpln | Brassica oleracea    | #                                                                                                                                         | #    | #   | #         | #     | #    | #    |
| Rsa1.0_01578.1.g28100.t1 | gb AAG51783.1 AC079679.3 reverse transcriptase, putative: 16838-20266 [Arabidopsis thaliana]                                                                                                                                                                                                                                                                                                                                                                                                                                            | 213  | 1142 | 1.00E-42  | 536.2 | 46.5 | 60.1 | reverse transcriptase, putative: 16838-20266           | gbpln | Arabidopsis thaliana | AT2G34320.1   Symbols:   Polynucleotidyl transferase, ribonuclease H-like superfamily protein   chr2:14484959-14485837 FORWARD LENGTH=292 | 213  | 292 | 8.00E-22  | 137.1 | 30.0 | 50.7 |
| Rsa1.0_01578.1.g28101.t3 | ref NP_173785.1  beta carbonic anhydrase 3 [Arabidopsis thaliana] gi 4056455 gb AAC98028.1  Similar to gb L19255 carbonic anhydrase from Nicotiana tabacum and a member of the prokaryotic-type carbonic anhydrase family PF 00484. EST gb Z235745 comes from this gene [Arabidopsis thaliana] gi 19698837 gb AAL91154.1  putative carbonic anhydrase [Arabidopsis thaliana] gi 21386933 gb AAM47870.1  putative carbonic anhydrase [Arabidopsis thaliana] gi 332192305 gb AEE30426.1  beta carbonic anhydrase 3 [Arabidopsis thaliana] | 266  | 258  | 1.00E-133 | 97.0  | 85.7 | 94.0 | beta carbonic anhydrase 3                              | gbpln | Arabidopsis thaliana | AT1G23730.1   Symbols:   ATBCA3, BOA3   beta carbonic anhydrase 3   chr1:8395965-8398014 FORWARD LENGTH=258                               | 266  | 258 | 1.00E-135 | 97.0  | 85.7 | 94.0 |
| Rsa1.0_01578.1.g28102.t1 | #                                                                                                                                                                                                                                                                                                                                                                                                                                                                                                                                       | #    | #    | #         | #     | #    | -    | ----                                                   | ----  | ----                 | #                                                                                                                                         | #    | #   | #         | #     | #    | #    |
| Rsa1.0_01578.1.g28103.t1 | #                                                                                                                                                                                                                                                                                                                                                                                                                                                                                                                                       | #    | #    | #         | #     | #    | -    | ----                                                   | ----  | ----                 | #                                                                                                                                         | #    | #   | #         | #     | #    | #    |
| Rsa1.0_01578.1.g28104.t1 | ref NP_564202.1  OB-fold nucleic acid binding domain-containing protein [Arabidopsis thaliana] gi 4056457 gb AAC98030.1  ESTs gb 234051 and gb F13722 come from this gene [Arabidopsis thaliana] gi 21553633 gb AAM62726.1  unknown protein [Arabidopsis thaliana] gi 27754651 gb AO22770.1  unknown protein [Arabidopsis thaliana] gi 28394047 gb AO42431.1  unknown protein [Arabidopsis thaliana] gi 332192307 gb AEE30428.1  OB-fold nucleic acid binding domain-containing protein [Arabidopsis thaliana]                          | 136  | 137  | 3.00E-68  | 100.7 | 92.6 | 97.1 | OB-fold nucleic acid binding domain-containing protein | gbpln | Arabidopsis thaliana | AT1G23750.1   Symbols:   Nucleic acid-binding, OB-fold-like protein   chr1:8400638-8401171 FORWARD LENGTH=137                             | 136  | 137 | 6.00E-71  | 100.7 | 92.6 | 97.1 |
| Rsa1.0_01578.1.g28105.t1 | gb[EOA37583.1] hypothetical protein CARUB_v10011933mg [Capsella rubella]                                                                                                                                                                                                                                                                                                                                                                                                                                                                | 468  | 481  | 1.00E-164 | 102.8 | 67.1 | 79.5 | hypothetical protein CARUB_v10011933mg                 | gbpln | Capsella rubella     | AT1G23780.1   Symbols:   F-box family protein   chr1:8407053-8408480 REVERSE LENGTH=475                                                   | 468  | 475 | 1.00E-152 | 101.5 | 65.4 | 77.6 |
| Rsa1.0_01578.1.g28106.t1 | ref NP_173794.2  spermidine synthase 1 [Arabidopsis thaliana] gi 332192315 gb AEE30436.1  spermidine synthase 1 [Arabidopsis thaliana]                                                                                                                                                                                                                                                                                                                                                                                                  | 297  | 378  | 1.00E-148 | 127.3 | 90.6 | 94.9 | spermidine synthase 1                                  | gbpln | Arabidopsis thaliana | AT1G23820.1   Symbols:   SPDS1   spermidine synthase 1   chr1:8420278-8422724 FORWARD LENGTH=378                                          | 297  | 378 | 1.00E-151 | 127.3 | 90.6 | 94.9 |
| Rsa1.0_01578.1.g28107.t1 | #                                                                                                                                                                                                                                                                                                                                                                                                                                                                                                                                       | #    | #    | #         | #     | #    | -    | ----                                                   | ----  | ----                 | #                                                                                                                                         | #    | #   | #         | #     | #    | #    |
| Rsa1.0_01579.1.g28108.t2 | gb[EOA26734.1] hypothetical protein CARUB_v10022820mg [Capsella rubella]                                                                                                                                                                                                                                                                                                                                                                                                                                                                | 510  | 527  | 1.00E-103 | 103.3 | 47.3 | 58.0 | hypothetical protein CARUB_v10022820mg                 | gbpln | Capsella rubella     | AT4G05360.1   Symbols:   Zinc knuckle (COHC-type) family protein   chr4:2728204-2732337 FORWARD LENGTH=735                                | 510  | 735 | 2.00E-59  | 144.1 | 28.2 | 38.0 |
| Rsa1.0_01579.1.g28109.t1 | gb[EOA12533.1] hypothetical protein CARUB_v10026514mg [Capsella rubella]                                                                                                                                                                                                                                                                                                                                                                                                                                                                | 398  | 407  | 1.00E-144 | 102.3 | 77.4 | 84.7 | hypothetical protein CARUB_v10026514mg                 | gbpln | Capsella rubella     | AT5G62280.1   Symbols:   AT hook motif DNA-binding family protein   chr5:25009331-25011348 FORWARD LENGTH=404                             | 398  | 404 | 1.00E-138 | 101.5 | 72.4 | 77.1 |

|                          |                                                                                                                                                                                                      |      |      |           |       |      |      |                                                 |       |                      |                                                                                                                                           |      |      |           |       |      |      |
|--------------------------|------------------------------------------------------------------------------------------------------------------------------------------------------------------------------------------------------|------|------|-----------|-------|------|------|-------------------------------------------------|-------|----------------------|-------------------------------------------------------------------------------------------------------------------------------------------|------|------|-----------|-------|------|------|
| Rsa1.0_01579.1.g28110.t1 | gb EOA15100.1  hypothetical protein CARUB_v10028468mg [Capsella rubella]                                                                                                                             | 541  | 540  | 0         | 99.8  | 85.0 | 90.9 | hypothetical protein CARUB_v10028468mg          | gbpln | Capsella rubella     | AT5G62250.1   Symbols: MAP65-9   microtubule-associated protein 65-9   chr5:25005756-25008096 FORWARD LENGTH=549                          | 541  | 549  | 0         | 101.5 | 85.0 | 91.9 |
| Rsa1.0_01579.1.g28111.t1 | ref XP_002866481.1  hypothetical protein ARALYDRAFT_496400 [Arabidopsis lyrata subsp. lyrata]   g 297312316 gb EFH42740.1  hypothetical protein ARALYDRAFT_496400 [Arabidopsis lyrata subsp. lyrata] | 371  | 379  | 1.00E-142 | 102.2 | 73.9 | 80.9 | hypothetical protein ARALYDRAFT_496400          | gbpln | Arabidopsis lyrata   | AT5G62240.1   Symbols:   Cell cycle regulated microtubule associated protein   chr5:25002541-25004569 REVERSE LENGTH=377                  | 371  | 377  | 1.00E-133 | 101.6 | 70.4 | 79.0 |
| Rsa1.0_01579.1.g28112.t1 | gb EOA12485.1  hypothetical protein CARUB_v10026032mg [Capsella rubella]                                                                                                                             | 656  | 668  | 0         | 101.8 | 69.4 | 77.0 | hypothetical protein CARUB_v10026032mg          | gbpln | Capsella rubella     | AT5G62190.1   Symbols: PRH75   DEAD box RNA helicase (PRH75)   chr5:24980542-24983879 REVERSE LENGTH=671                                  | 656  | 671  | 0         | 102.3 | 68.6 | 75.8 |
| Rsa1.0_01579.1.g28113.t1 | gb EOA39029.1  hypothetical protein CARUB_v10011599mg [Capsella rubella]                                                                                                                             | 323  | 329  | 1.00E-144 | 101.9 | 76.5 | 85.4 | hypothetical protein CARUB_v10011599mg          | gbpln | Capsella rubella     | AT5G62180.1   Symbols: AtCXE20, CXE20   carboxyesterase 20   chr5:24978866-24979849 REVERSE LENGTH=327                                    | 323  | 327  | 1.00E-147 | 101.2 | 75.5 | 86.1 |
| Rsa1.0_01579.1.g28114.t1 | #                                                                                                                                                                                                    | #    | #    | #         | #     | #    | #    | -                                               | ----  | ----                 | #                                                                                                                                         | #    | #    | #         | #     | #    | #    |
| Rsa1.0_01579.1.g28115.t1 | gb EOA13406.1  hypothetical protein CARUB_v10026444mg, partial [Capsella rubella]                                                                                                                    | 432  | 430  | 1.00E-109 | 99.5  | 54.2 | 63.2 | hypothetical protein CARUB_v10026444mg, partial | gbpln | Capsella rubella     | AT5G62660.1   Symbols:   F-box and associated interaction domains-containing protein   chr5:25156326-25157465 REVERSE LENGTH=379          | 432  | 379  | 1.00E-106 | 87.7  | 48.4 | 58.3 |
| Rsa1.0_01579.1.g28116.t3 | #                                                                                                                                                                                                    | #    | #    | #         | #     | #    | #    | -                                               | ----  | ----                 | #                                                                                                                                         | #    | #    | #         | #     | #    | #    |
| Rsa1.0_01579.1.g28117.t1 | #                                                                                                                                                                                                    | #    | #    | #         | #     | #    | #    | -                                               | ----  | ----                 | #                                                                                                                                         | #    | #    | #         | #     | #    | #    |
| Rsa1.0_01580.1.g28118.t1 | gb AAD32898.1  putative retroelement pol polyprotein [Arabidopsis thaliana]                                                                                                                          | 1389 | 1307 | 0         | 94.1  | 58.9 | 74.0 | putative retroelement pol polyprotein           | gbpln | Arabidopsis thaliana | AT4G23160.1   Symbols: CRK8   cysteine-rich RLK (RECEPTOR-like protein kinase) 8   chr4:12129485-12134086 FORWARD LENGTH=1262             | 1389 | 1262 | 2.00E-98  | 90.9  | 13.8 | 21.2 |
| Rsa1.0_01580.1.g28119.t1 | #                                                                                                                                                                                                    | #    | #    | #         | #     | #    | #    | -                                               | ----  | ----                 | #                                                                                                                                         | #    | #    | #         | #     | #    | #    |
| Rsa1.0_01580.1.g28120.t1 | gb ABD64959.1  ethylene responsive element binding factor [Brassica oleracea]                                                                                                                        | 304  | 307  | 2.33E-156 | 101.0 | 88.2 | 92.1 | ethylene responsive element binding factor      | gbpln | Brassica oleracea    | AT5G47230.1   Symbols: ERF5, ATERF-5, ATERF5   ethylene responsive element binding factor 5   chr5:19180072-19180974 FORWARD LENGTH=300   | 304  | 300  | 1.00E-112 | 98.7  | 75.3 | 80.3 |
| Rsa1.0_01580.1.g28121.t1 | gb ABD64957.1  hydrolase, NUDIX family protein [Brassica oleracea]                                                                                                                                   | 361  | 366  | 0         | 101.4 | 95.6 | 97.2 | hydrolase, NUDIX family protein                 | gbpln | Brassica oleracea    | AT5G47240.1   Symbols: atrnudt8, NUDT8   nudix hydrolase homolog 8   chr5:19183806-19185467 FORWARD LENGTH=369                            | 361  | 369  | 1.00E-180 | 102.2 | 86.1 | 92.2 |
| Rsa1.0_01580.1.g28122.t1 | gb ABD64953.1  hypothetical protein 25.t00041 [Brassica oleracea]                                                                                                                                    | 242  | 243  | 1.00E-136 | 100.4 | 97.5 | 99.2 | hypothetical protein 25.t00041                  | gbpln | Brassica oleracea    | AT5G47310.1   Symbols:   PPPDE putative thiol peptidase family protein   chr5:19201325-19202674 FORWARD LENGTH=245                        | 242  | 245  | 1.00E-122 | 101.2 | 90.1 | 94.6 |
| Rsa1.0_01580.1.g28123.t1 | gb ABD64963.1  palmitoyl protein thioesterase family protein [Brassica oleracea]                                                                                                                     | 367  | 328  | 1.00E-148 | 89.4  | 71.4 | 71.4 | palmitoyl protein thioesterase family protein   | gbpln | Brassica oleracea    | AT5G47330.1   Symbols:   alpha/beta-Hydrolases superfamily protein   chr5:19207170-19208711 FORWARD LENGTH=314                            | 367  | 314  | 1.00E-125 | 85.6  | 57.8 | 64.0 |
| Rsa1.0_01580.1.g28124.t1 | gb ABD64952.1  hypothetical protein 25.t00038 [Brassica oleracea]                                                                                                                                    | 266  | 217  | 2.00E-62  | 81.6  | 53.4 | 60.9 | hypothetical protein 25.t00038                  | gbpln | Brassica oleracea    | AT2G01560.1   Symbols:   Plant protein 1589 of unknown function   chr2:250392-251806 REVERSE LENGTH=301                                   | 266  | 301  | 9.00E-19  | 113.2 | 33.8 | 53.0 |
| Rsa1.0_01580.1.g28125.t1 | gb ABD64962.1  PPR repeat containing protein [Brassica oleracea]                                                                                                                                     | 162  | 345  | 6.00E-47  | 213.0 | 64.2 | 65.4 | PPR repeat containing protein                   | gbpln | Brassica oleracea    | AT5G47360.1   Symbols:   Tetratricopeptide repeat (TPR)-like superfamily protein   chr5:19214445-19215878 REVERSE LENGTH=477              | 162  | 477  | 3.00E-43  | 294.4 | 55.6 | 61.1 |
| Rsa1.0_01581.1.g28126.t1 | gb EOA27612.1  hypothetical protein CARUB_v10023753mg [Capsella rubella]                                                                                                                             | 306  | 295  | 1.00E-139 | 96.4  | 81.4 | 85.9 | hypothetical protein CARUB_v10023753mg          | gbpln | Capsella rubella     | AT2G32080.2   Symbols: PUR ALPHA-1   purin-rich alpha 1   chr2:13642716-13644036 REVERSE LENGTH=295                                       | 306  | 295  | 1.00E-140 | 96.4  | 81.4 | 84.6 |
| Rsa1.0_01581.1.g28127.t1 | gb EOA27677.1  hypothetical protein CARUB_v10023830mg [Capsella rubella]                                                                                                                             | 275  | 275  | 1.00E-151 | 100.0 | 92.4 | 97.5 | hypothetical protein CARUB_v10023830mg          | gbpln | Capsella rubella     | AT2G32070.1   Symbols:   Polynucleotidyl transferase, ribonuclease H-like superfamily protein   chr2:13640829-13641656 REVERSE LENGTH=275 | 275  | 275  | 1.00E-153 | 100.0 | 92.4 | 97.5 |
| Rsa1.0_01581.1.g28128.t1 | gb EOA27677.1  hypothetical protein CARUB_v10023830mg [Capsella rubella]                                                                                                                             | 271  | 275  | 1.00E-105 | 101.5 | 71.2 | 81.2 | hypothetical protein CARUB_v10023830mg          | gbpln | Capsella rubella     | AT2G32070.1   Symbols:   Polynucleotidyl transferase, ribonuclease H-like superfamily protein   chr2:13640829-13641656 REVERSE LENGTH=275 | 271  | 275  | 1.00E-107 | 101.5 | 71.6 | 81.2 |
| Rsa1.0_01581.1.g28129.t1 | gb EOA36301.1  hypothetical protein CARUB_v10010589mg [Capsella rubella]                                                                                                                             | 169  | 142  | 1.00E-70  | 84.0  | 79.9 | 80.5 | hypothetical protein CARUB_v10010589mg          | gbpln | Capsella rubella     | AT2G32060.2   Symbols:   Ribosomal protein L7Ae/L30e/S12e/Gadd45 family protein   chr2:13639228-13640104 REVERSE LENGTH=144               | 169  | 144  | 7.00E-62  | 85.2  | 65.7 | 71.0 |

|                          |                                                                                                                                                                                                                                                                                                                                                                                                                                                                                                                                      |      |      |           |       |      |      |                           |       |                      |                                                                                                                                      |      |      |           |       |      |      |
|--------------------------|--------------------------------------------------------------------------------------------------------------------------------------------------------------------------------------------------------------------------------------------------------------------------------------------------------------------------------------------------------------------------------------------------------------------------------------------------------------------------------------------------------------------------------------|------|------|-----------|-------|------|------|---------------------------|-------|----------------------|--------------------------------------------------------------------------------------------------------------------------------------|------|------|-----------|-------|------|------|
| Rsa1.0_01581.1.g28130.t1 | refNP_565734.1  major facilitator protein [Arabidopsis thaliana] gi 75206588 sp Q9SKZ5.2 FBT1_ARATH RecName: Full=Folate-biopterin transporter 1, chloroplastic; Flags: Precursor gi 19698919 gb AAL91195.1  unknown protein [Arabidopsis thaliana] gi 20197619 gb AAD15400.2  expressed protein [Arabidopsis thaliana] gi 21553656 gb AAM62749.1  unknown [Arabidopsis thaliana] gi 28059039 gb AAO29981.1  unknown protein [Arabidopsis thaliana] gi 33025353 gb AEC08625.1  folate-biopterin transporter 1 [Arabidopsis thaliana] | 553  | 560  | 0         | 101.3 | 91.0 | 93.7 | major facilitator protein | gbpln | Arabidopsis thaliana | AT2G32040.1   Symbols:   Major facilitator superfamily protein   chr2:13635116-13637592 FORWARD LENGTH=560                           | 553  | 560  | 0         | 101.3 | 91.0 | 93.7 |
| Rsa1.0_01581.1.g28131.t1 | refXP_002881211.1  hypothetical protein ARALYDRAFT_902251 [Arabidopsis lyrata subsp. lyrata] gi 297327050 gb EFH57470.1  hypothetical protein ARALYDRAFT_902251 [Arabidopsis lyrata subsp. lyrata]                                                                                                                                                                                                                                                                                                                                   | 184  | 183  | 9.00E-90  | 99.5  | 88.6 | 92.9 | hypothetical protein      | gbpln | Arabidopsis lyrata   | AT2G32020.1   Symbols:   Acyl-CoA N-acyltransferases (NAT) superfamily protein   chr2:13631193-13631744 REVERSE LENGTH=183           | 184  | 183  | 8.00E-91  | 99.5  | 87.5 | 92.9 |
| Rsa1.0_01581.1.g28132.t1 | refNP_180705.1  F-box protein DOR [Arabidopsis thaliana] gi 229807544 sp Q5BPS3.2 DOR_ARATH RecName: Full=F-box protein DOR; AltName: Full=Protein DROUGHT TOLERANCE REPRESSOR gi 4589954 gb AAD26472.1  hypothetical protein [Arabidopsis thaliana] gi 330253458 gb AEC08552.1  F-box protein DOR [Arabidopsis thaliana]                                                                                                                                                                                                            | 390  | 387  | 3.00E-79  | 99.2  | 46.7 | 62.6 | F-box protein DOR         | gbpln | Arabidopsis thaliana | AT2G31470.1   Symbols: DOR   F-box and associated interaction domains-containing protein   chr2:13407492-13408655 REVERSE LENGTH=387 | 390  | 387  | 7.00E-82  | 99.2  | 46.7 | 62.6 |
| Rsa1.0_01581.1.g28133.t1 | refNP_180705.1  F-box protein DOR [Arabidopsis thaliana] gi 229807544 sp Q5BPS3.2 DOR_ARATH RecName: Full=F-box protein DOR; AltName: Full=Protein DROUGHT TOLERANCE REPRESSOR gi 4589954 gb AAD26472.1  hypothetical protein [Arabidopsis thaliana] gi 330253458 gb AEC08552.1  F-box protein DOR [Arabidopsis thaliana]                                                                                                                                                                                                            | 404  | 387  | 8.00E-91  | 95.8  | 50.2 | 64.6 | F-box protein DOR         | gbpln | Arabidopsis thaliana | AT2G31470.1   Symbols: DOR   F-box and associated interaction domains-containing protein   chr2:13407492-13408655 REVERSE LENGTH=387 | 404  | 387  | 2.00E-93  | 95.8  | 50.2 | 64.6 |
| Rsa1.0_01581.1.g28134.t1 | refXP_002886496.1  hypothetical protein ARALYDRAFT_893290 [Arabidopsis lyrata subsp. lyrata] gi 297323237 gb EFH62755.1  hypothetical protein ARALYDRAFT_893290 [Arabidopsis lyrata subsp. lyrata]                                                                                                                                                                                                                                                                                                                                   | 405  | 416  | 7.00E-86  | 102.7 | 48.6 | 63.0 | hypothetical protein      | gbpln | Arabidopsis lyrata   | AT2G31470.1   Symbols: DOR   F-box and associated interaction domains-containing protein   chr2:13407492-13408655 REVERSE LENGTH=387 | 405  | 387  | 2.00E-88  | 95.6  | 47.2 | 59.8 |
| Rsa1.0_01581.1.g28135.t1 | refXP_002881208.1  exostosin family protein [Arabidopsis lyrata subsp. lyrata] gi 297327047 gb EFH57467.1  exostosin family protein [Arabidopsis lyrata subsp. lyrata]                                                                                                                                                                                                                                                                                                                                                               | 477  | 458  | 0         | 96.0  | 70.9 | 78.6 | exostosin family protein  | gbpln | Arabidopsis lyrata   | AT2G31990.1   Symbols:   Exostosin family protein   chr2:13611500-13613551 REVERSE LENGTH=479                                        | 477  | 479  | 0         | 100.4 | 72.7 | 83.0 |
| Rsa1.0_01581.1.g28136.t1 | refXP_002879356.1  hypothetical protein ARALYDRAFT_482124 [Arabidopsis lyrata subsp. lyrata] gi 297325195 gb EFH55615.1  hypothetical protein ARALYDRAFT_482124 [Arabidopsis lyrata subsp. lyrata]                                                                                                                                                                                                                                                                                                                                   | 2096 | 1936 | 0         | 92.4  | 85.2 | 87.5 | hypothetical protein      | gbpln | Arabidopsis lyrata   | AT2G31960.2   Symbols: GSL03   glucan synthase-like 3   chr2:13589545-13600066 FORWARD LENGTH=1950                                   | 2096 | 1950 | 0         | 93.0  | 86.2 | 88.5 |
| Rsa1.0_01582.1.g28137.t1 | gb EOA22705.1  hypothetical protein CARUB_v10003411mg [Capsella rubella]                                                                                                                                                                                                                                                                                                                                                                                                                                                             | 703  | 652  | 1.00E-178 | 92.7  | 43.1 | 51.6 | hypothetical protein      | gbpln | Capsella rubella     | AT5G10530.1   Symbols:   Concanavalin A-like lectin protein kinase family protein   chr5:3324978-3326933 REVERSE LENGTH=651          | 703  | 651  | 1.00E-179 | 92.6  | 42.1 | 51.4 |
| Rsa1.0_01582.1.g28138.t1 | gb EOA14568.1  hypothetical protein CARUB_v10027807mg [Capsella rubella]                                                                                                                                                                                                                                                                                                                                                                                                                                                             | 223  | 611  | 5.00E-79  | 274.0 | 63.7 | 73.1 | hypothetical protein      | gbpln | Capsella rubella     | AT5G10530.1   Symbols:   Concanavalin A-like lectin protein kinase family protein   chr5:3324978-3326933 REVERSE LENGTH=651          | 223  | 651  | 4.00E-71  | 291.9 | 60.1 | 70.9 |
| Rsa1.0_01582.1.g28139.t1 | gb EOA28640.1  hypothetical protein CARUB_v10024862mg, partial [Capsella rubella]                                                                                                                                                                                                                                                                                                                                                                                                                                                    | 202  | 490  | 1.00E-16  | 242.6 | 29.7 | 45.0 | hypothetical protein      | gbpln | Capsella rubella     | AT1G52950.1   Symbols:   Nucleic acid-binding, OB-fold-like protein   chr1:19725483-19728007 FORWARD LENGTH=566                      | 202  | 566  | 3.00E-17  | 280.2 | 22.8 | 39.1 |
| Rsa1.0_01582.1.g28140.t2 | dbj BAB09502.1  transposon protein-like [Arabidopsis thaliana]                                                                                                                                                                                                                                                                                                                                                                                                                                                                       | 303  | 1089 | 4.00E-48  | 359.4 | 36.0 | 48.2 | transposon protein-like   | gbpln | Arabidopsis thaliana | #                                                                                                                                    | #    | #    | #         | #     | #    |      |

|                          |                                                                                                                                                                                                                                                                                                                                                                                                                                                                                                                                                                                                                                                                                                                                                                                                                                                                                                                                                                                                                                                                                                           |     |      |           |       |      |       |                                                         |       |                      |                                                                                                                                               |     |      |           |       |      |       |
|--------------------------|-----------------------------------------------------------------------------------------------------------------------------------------------------------------------------------------------------------------------------------------------------------------------------------------------------------------------------------------------------------------------------------------------------------------------------------------------------------------------------------------------------------------------------------------------------------------------------------------------------------------------------------------------------------------------------------------------------------------------------------------------------------------------------------------------------------------------------------------------------------------------------------------------------------------------------------------------------------------------------------------------------------------------------------------------------------------------------------------------------------|-----|------|-----------|-------|------|-------|---------------------------------------------------------|-------|----------------------|-----------------------------------------------------------------------------------------------------------------------------------------------|-----|------|-----------|-------|------|-------|
| Rsa1.0_01582.1.g28141.t1 | ref[XP_002890830.1] NLI interacting factor family protein [Arabidopsis lyrata subsp. lyrata] gi 297336672 gb EFH67089.1  NLI interacting factor family protein [Arabidopsis lyrata subsp. lyrata]                                                                                                                                                                                                                                                                                                                                                                                                                                                                                                                                                                                                                                                                                                                                                                                                                                                                                                         | 129 | 221  | 7.00E-53  | 171.3 | 84.5 | 89.9  | NLI interacting factor family protein                   | gbpln | Arabidopsis lyrata   | AT1G29780.1   Symbols:   Haloacid dehalogenase-like hydrolase (HAD) superfamily protein   chr1:10426850-10427615 FORWARD LENGTH=221           | 129 | 221  | 2.00E-54  | 171.3 | 82.9 | 89.1  |
| Rsa1.0_01582.1.g28142.t1 | ref[XP_002890829.1] NLI interacting factor family protein [Arabidopsis lyrata subsp. lyrata] gi 297336671 gb EFH67088.1  NLI interacting factor family protein [Arabidopsis lyrata subsp. lyrata]                                                                                                                                                                                                                                                                                                                                                                                                                                                                                                                                                                                                                                                                                                                                                                                                                                                                                                         | 268 | 277  | 1.00E-124 | 103.4 | 84.3 | 91.4  | NLI interacting factor family protein                   | gbpln | Arabidopsis lyrata   | AT1G29770.1   Symbols:   Haloacid dehalogenase-like hydrolase (HAD) superfamily protein   chr1:10424806-10425642 FORWARD LENGTH=278           | 268 | 278  | 1.00E-124 | 103.7 | 83.6 | 90.7  |
| Rsa1.0_01582.1.g28143.t1 | ref[NP_174267.4] Leucine-rich repeat transmembrane protein kinase [Arabidopsis thaliana] gi 332193002 gb AEE31123.1  Leucine-rich repeat transmembrane protein kinase [Arabidopsis thaliana]                                                                                                                                                                                                                                                                                                                                                                                                                                                                                                                                                                                                                                                                                                                                                                                                                                                                                                              | 903 | 1078 | 0         | 119.4 | 86.7 | 92.5  | Leucine-rich repeat transmembrane protein kinase        | gbpln | Arabidopsis thaliana | AT1G29740.1   Symbols:   Leucine-rich repeat transmembrane protein kinase   chr1:10407379-10412997 REVERSE LENGTH=1078                        | 903 | 1078 | 0         | 119.4 | 86.7 | 92.5  |
| Rsa1.0_01583.1.g28144.t1 | #                                                                                                                                                                                                                                                                                                                                                                                                                                                                                                                                                                                                                                                                                                                                                                                                                                                                                                                                                                                                                                                                                                         | #   | #    | #         | #     | #    | -     | ---                                                     | ---   | ---                  | #                                                                                                                                             | #   | #    | #         | #     | #    |       |
| Rsa1.0_01583.1.g28145.t1 | gb AAZ66937.1  117M18.18 [Brassica rapa]                                                                                                                                                                                                                                                                                                                                                                                                                                                                                                                                                                                                                                                                                                                                                                                                                                                                                                                                                                                                                                                                  | 242 | 249  | 1.00E-127 | 102.9 | 95.5 | 97.1  | 117M18.18                                               | gbpln | Brassica rapa        | AT5G10360.1   Symbols: EMB3010, RPS6B   Ribosomal protein S6e   chr5:3258734-3260142 REVERSE LENGTH=249                                       | 242 | 249  | 1.00E-125 | 102.9 | 92.6 | 95.0  |
| Rsa1.0_01583.1.g28146.t1 | gb ADG03803.1  galactinol synthase [Brassica napus]                                                                                                                                                                                                                                                                                                                                                                                                                                                                                                                                                                                                                                                                                                                                                                                                                                                                                                                                                                                                                                                       | 313 | 342  | 1.00E-167 | 109.3 | 93.9 | 97.8  | galactinol synthase                                     | gbpln | Brassica napus       | AT2G47180.1   Symbols: AtGolS1, GolS1   galactinol synthase 1   chr2:19369049-19370372 REVERSE LENGTH=344                                     | 313 | 344  | 1.00E-152 | 109.9 | 87.2 | 91.7  |
| Rsa1.0_01583.1.g28147.t1 | ref[NP_191788.1] ADP-ribosylation factor A1E [Arabidopsis thaliana] gi 334186204 ref[NP_001190161.1] ADP-ribosylation factor A1E [Arabidopsis thaliana] gi 334186206 ref[NP_001190162.1] ADP-ribosylation factor A1E [Arabidopsis thaliana] gi 297824803 ref[XP_002880284.1] ADP-ribosylation factor A1E [Arabidopsis lyrata subsp. lyrata] gi 13926302 gb AAK49618.1 AF372902.1 AT3G62290/T17J13.250 [Arabidopsis thaliana] gi 6899939 emb CAB71889.1  ADP-ribosylation factor-like protein [Arabidopsis thaliana] gi 16323248 gb AAL15358.1  AT3G62290/T17J13.250 [Arabidopsis thaliana] gi 21553518 gb AAM62611.1  ADP-ribosylation factor-like protein [Arabidopsis thaliana] gi 119720788 gb ABL97964.1  ADP-ribosylation factor-like protein [Brassica rapa] gi 297326123 gb EFH56543.1  ADP-ribosylation factor A1E [Arabidopsis lyrata subsp. lyrata] gi 33264681 gb AEE80332.1  ADP-ribosylation factor A1E [Arabidopsis thaliana] gi 332646812 gb AEE80333.1  ADP-ribosylation factor A1E [Arabidopsis thaliana] gi 332646813 gb AEE80334.1  ADP-ribosylation factor A1E [Arabidopsis thaliana] | 181 | 181  | 1.00E-102 | 100.0 | 99.4 | 100.0 | ADP-ribosylation factor A1E                             | gbpln | Arabidopsis lyrata   | AT3G62290.3   Symbols: ARFA1E   ADP-ribosylation factor A1E   chr3:23052287-23053545 FORWARD LENGTH=181                                       | 181 | 181  | 1.00E-104 | 100.0 | 99.4 | 100.0 |
| Rsa1.0_01583.1.g28148.t1 | dbj BAB09379.1  non-LTR retroelement reverse transcriptase-like protein [Arabidopsis thaliana]                                                                                                                                                                                                                                                                                                                                                                                                                                                                                                                                                                                                                                                                                                                                                                                                                                                                                                                                                                                                            | 697 | 1223 | 0         | 175.5 | 59.8 | 74.0  | non-LTR retroelement reverse transcriptase-like protein | gbpln | Arabidopsis thaliana | AT3G24255.1   Symbols:   RNA-directed DNA polymerase (reverse transcriptase)-related family protein   chr3:8789471-8793208 FORWARD LENGTH=746 | 697 | 746  | 1.00E-117 | 107.0 | 29.8 | 38.9  |
| Rsa1.0_01583.1.g28149.t1 | gb ADF30179.1  boron transporter [Brassica napus] gi 294713700 gb ADF30187.1  boron transporter [Brassica napus]                                                                                                                                                                                                                                                                                                                                                                                                                                                                                                                                                                                                                                                                                                                                                                                                                                                                                                                                                                                          | 697 | 701  | 0         | 100.6 | 97.6 | 98.9  | boron transporter                                       | gbpln | Brassica napus       | AT2G47160.1   Symbols: BOR1   HCO3-transporter family   chr2:19357740-19360787 REVERSE LENGTH=704                                             | 697 | 704  | 0         | 101.0 | 96.3 | 98.9  |
| Rsa1.0_01583.1.g28150.t1 | emb CB137899.3  unnamed protein product [Vitis vinifera]                                                                                                                                                                                                                                                                                                                                                                                                                                                                                                                                                                                                                                                                                                                                                                                                                                                                                                                                                                                                                                                  | 465 | 541  | 2.00E-80  | 116.3 | 45.8 | 63.2  | unnamed protein product                                 | gbpln | Vitis vinifera       | AT5G66200.1   Symbols: ARO2   armadillo repeat only 2   chr5:26453648-26455603 REVERSE LENGTH=651                                             | 465 | 651  | 3.00E-56  | 140.0 | 25.8 | 33.3  |

|                          |                                                                                                                                                                                                                                                                                                                                                                                                                                                                                                                   |      |      |           |       |      |      |                                                                           |       |                      |                                                                                                                                                                                                                                                                                                                                                                                                                                                                                            |      |     |           |       |      |      |
|--------------------------|-------------------------------------------------------------------------------------------------------------------------------------------------------------------------------------------------------------------------------------------------------------------------------------------------------------------------------------------------------------------------------------------------------------------------------------------------------------------------------------------------------------------|------|------|-----------|-------|------|------|---------------------------------------------------------------------------|-------|----------------------|--------------------------------------------------------------------------------------------------------------------------------------------------------------------------------------------------------------------------------------------------------------------------------------------------------------------------------------------------------------------------------------------------------------------------------------------------------------------------------------------|------|-----|-----------|-------|------|------|
| Rsa1.0_01583.1.g28151.t1 | refNP_182228.1   plant invertase/pectin methylesterase inhibitor domain-containing protein [Arabidopsis thaliana] gi 3522940 gb AAC34222.1   putative pectinesterase [Arabidopsis thaliana] gi 26451376 dbj BAC42788.1   putative pectinesterase [Arabidopsis thaliana] gi 91806367 gb ABE65911.1   invertase/pectin methylesterase inhibitor family protein [Arabidopsis thaliana] gi 330255698 gb AEC10792.1   plant invertase/pectin methylesterase inhibitor domain-containing protein [Arabidopsis thaliana] | 216  | 216  | 1.00E-105 | 100.0 | 85.6 | 91.7 | plant invertase/pectin methylesterase inhibitor domain-containing protein | gbpln | Arabidopsis thaliana | AT2G47050.1   Symbols:   Plant invertase/pectin methylesterase inhibitor superfamily protein   chr2:19331927-19332577 REVERSE LENGTH=216                                                                                                                                                                                                                                                                                                                                                   | 216  | 216 | 1.00E-108 | 100.0 | 85.6 | 91.7 |
| Rsa1.0_01584.1.g28152.t1 | #                                                                                                                                                                                                                                                                                                                                                                                                                                                                                                                 | #    | #    | #         | #     | #    | -    | ----                                                                      | ----  | #                    | #                                                                                                                                                                                                                                                                                                                                                                                                                                                                                          | #    | #   | #         | #     | #    |      |
| Rsa1.0_01584.1.g28153.t4 | gb AAD36950.1 AF069441.10 putative transposon protein [Arabidopsis thaliana] gi 7267188 emb CAB77899.1   putative transposon protein [Arabidopsis thaliana]                                                                                                                                                                                                                                                                                                                                                       | 757  | 1011 | 5.00E-16  | 133.6 | 6.5  | 8.2  | putative transposon protein                                               | gbpln | Arabidopsis thaliana | AT4G07350.1   Symbols:   unknown protein; BEST Arabidopsis thaliana protein match is: unknown protein (TAIR:AT1G40129.1); Has 30201 Blast hits to 17322 proteins in 780 species: Archae - 12; Bacteria - 1396; Metazoa - 17338; Fungi - 3422; Plants - 5037; Viruses - 0; Other Eukaryotes - 2996 (source: NCBI BLINK).   chr4:4172609-4175227 REVERSE LENGTH=330                                                                                                                          | 757  | 330 | 1.00E-18  | 43.6  | 7.3  | 9.4  |
| Rsa1.0_01584.1.g28154.t1 | #                                                                                                                                                                                                                                                                                                                                                                                                                                                                                                                 | #    | #    | #         | #     | #    | -    | ----                                                                      | ----  | #                    | #                                                                                                                                                                                                                                                                                                                                                                                                                                                                                          | #    | #   | #         | #     | #    |      |
| Rsa1.0_01584.1.g28155.t1 | #                                                                                                                                                                                                                                                                                                                                                                                                                                                                                                                 | #    | #    | #         | #     | #    | -    | ----                                                                      | ----  | #                    | #                                                                                                                                                                                                                                                                                                                                                                                                                                                                                          | #    | #   | #         | #     | #    |      |
| Rsa1.0_01584.1.g28156.t1 | #                                                                                                                                                                                                                                                                                                                                                                                                                                                                                                                 | #    | #    | #         | #     | #    | -    | ----                                                                      | ----  | #                    | #                                                                                                                                                                                                                                                                                                                                                                                                                                                                                          | #    | #   | #         | #     | #    |      |
| Rsa1.0_01584.1.g28157.t1 | gb EOA16045.1  hypothetical protein CARUB_v10004170mg [Capsella rubella]                                                                                                                                                                                                                                                                                                                                                                                                                                          | 131  | 792  | 3.00E-37  | 604.6 | 68.7 | 71.0 | hypothetical protein CARUB_v10004170mg                                    | gbpln | Capsella rubella     | AT4G14990.1   Symbols:   Topoisomerase II-associated protein PAT1   chr4:8566259-8569511 REVERSE LENGTH=787                                                                                                                                                                                                                                                                                                                                                                                | 131  | 787 | 6.00E-34  | 600.8 | 59.5 | 62.6 |
| Rsa1.0_01584.1.g28158.t1 | gb EOA16045.1  hypothetical protein CARUB_v10004170mg [Capsella rubella]                                                                                                                                                                                                                                                                                                                                                                                                                                          | 710  | 792  | 0         | 111.5 | 85.4 | 90.4 | hypothetical protein CARUB_v10004170mg                                    | gbpln | Capsella rubella     | AT4G14990.1   Symbols:   Topoisomerase II-associated protein PAT1   chr4:8566259-8569511 REVERSE LENGTH=787                                                                                                                                                                                                                                                                                                                                                                                | 710  | 787 | 0         | 110.8 | 84.8 | 89.0 |
| Rsa1.0_01584.1.g28159.t2 | gb AAD17395.1  putative non-LTR retroelement reverse transcriptase [Arabidopsis thaliana]                                                                                                                                                                                                                                                                                                                                                                                                                         | 1634 | 1138 | 0         | 69.6  | 27.8 | 39.1 | putative non-LTR retroelement reverse transcriptase                       | gbpln | Arabidopsis thaliana | AT4G29090.1   Symbols:   Ribonuclease H-like superfamily protein   chr4:14333528-14335255 FORWARD LENGTH=575                                                                                                                                                                                                                                                                                                                                                                               | 1634 | 575 | 6.00E-69  | 35.2  | 9.7  | 15.7 |
| Rsa1.0_01584.1.g28160.t1 | #                                                                                                                                                                                                                                                                                                                                                                                                                                                                                                                 | #    | #    | #         | #     | #    | -    | ----                                                                      | ----  | #                    | #                                                                                                                                                                                                                                                                                                                                                                                                                                                                                          | #    | #   | #         | #     | #    |      |
| Rsa1.0_01584.1.g28161.t1 | #                                                                                                                                                                                                                                                                                                                                                                                                                                                                                                                 | #    | #    | #         | #     | #    | -    | ----                                                                      | ----  | #                    | #                                                                                                                                                                                                                                                                                                                                                                                                                                                                                          | #    | #   | #         | #     | #    |      |
| Rsa1.0_01584.1.g28162.t1 | #                                                                                                                                                                                                                                                                                                                                                                                                                                                                                                                 | #    | #    | #         | #     | #    | -    | ----                                                                      | ----  | #                    | #                                                                                                                                                                                                                                                                                                                                                                                                                                                                                          | #    | #   | #         | #     | #    |      |
| Rsa1.0_01585.1.g28163.t1 | #                                                                                                                                                                                                                                                                                                                                                                                                                                                                                                                 | #    | #    | #         | #     | #    | -    | ----                                                                      | ----  | #                    | #                                                                                                                                                                                                                                                                                                                                                                                                                                                                                          | #    | #   | #         | #     | #    |      |
| Rsa1.0_01585.1.g28164.t5 | refNP_201456.2   Maf-like protein [Arabidopsis thaliana] gi 332010845 gb AED98228.1   Maf-like protein [Arabidopsis thaliana] refNP_201457.1   Phototropic-responsive NPH3 family protein [Arabidopsis thaliana] gi 338819810 sp Q94A73.2 Y5656_ARAT H RecName: Full=BTB/POZ domain-containing protein At5g66560 gi 332010846 gb AED98229.1   Phototropic-responsive NPH3 family protein [Arabidopsis thaliana]                                                                                                   | 239  | 207  | 4.00E-87  | 86.6  | 69.0 | 77.0 | Maf-like protein                                                          | gbpln | Arabidopsis thaliana | AT5G66550.1   Symbols:   Maf-like protein   chr5:26559752-26561162 REVERSE LENGTH=207                                                                                                                                                                                                                                                                                                                                                                                                      | 239  | 207 | 1.00E-89  | 86.6  | 69.0 | 77.0 |
| Rsa1.0_01585.1.g28165.t1 | gi 338819810 sp Q94A73.2 Y5656_ARAT H RecName: Full=BTB/POZ domain-containing protein At5g66560 gi 332010846 gb AED98229.1   Phototropic-responsive NPH3 family protein [Arabidopsis thaliana]                                                                                                                                                                                                                                                                                                                    | 694  | 668  | 0         | 96.3  | 82.6 | 87.0 | Phototropic-responsive NPH3 family protein                                | gbpln | Arabidopsis thaliana | AT5G66560.1   Symbols:   Phototropic-responsive NPH3 family protein   chr5:26564368-26566662 FORWARD LENGTH=668                                                                                                                                                                                                                                                                                                                                                                            | 694  | 668 | 0         | 96.3  | 82.6 | 87.0 |
| Rsa1.0_01585.1.g28166.t1 | gb AAT65501.1  photosystem II protein [Brassica oleracea]                                                                                                                                                                                                                                                                                                                                                                                                                                                         | 332  | 347  | 0         | 104.5 | 96.4 | 97.9 | photosystem II protein                                                    | gbpln | Brassica oleracea    | AT5G66570.1   Symbols:   PSBO-1, OEE1, OEE33, OE33, PSBO1, MSP-1   PS II oxygen-evolving complex 1   chr5:26568744-26570124 FORWARD LENGTH=332                                                                                                                                                                                                                                                                                                                                             | 332  | 332 | 0         | 100.0 | 94.9 | 97.9 |
| Rsa1.0_01585.1.g28167.t1 | gb EOA14145.1  hypothetical protein CARUB_v10027290mg [Capsella rubella]                                                                                                                                                                                                                                                                                                                                                                                                                                          | 157  | 156  | 3.00E-59  | 99.4  | 80.9 | 89.8 | hypothetical protein CARUB_v10027290mg                                    | gbpln | Capsella rubella     | AT5G66580.1   Symbols:   unknown protein; FUNCTIONS IN: molecular function unknown; INVOLVED IN: N-terminal protein myristoylation; LOCATED IN: cellular component unknown; BEST Arabidopsis thaliana protein match is: unknown protein (TAIR:AT3G50800.1); Has 1807 Blast hits to 1807 proteins in 277 species: Archae - 0; Bacteria - 0; Metazoa - 736; Fungi - 347; Plants - 385; Viruses - 0; Other Eukaryotes - 339 (source: NCBI BLINK).   chr5:26572724-26573194 FORWARD LENGTH=156 | 157  | 156 | 1.00E-60  | 99.4  | 79.0 | 88.5 |



|                          |                                                                                                                                                                                                                                                                                                                                                                                                                                                                                      |      |      |           |       |      |      |                                              |       |                      |                                                                                                                                                     |      |     |           |       |      |      |
|--------------------------|--------------------------------------------------------------------------------------------------------------------------------------------------------------------------------------------------------------------------------------------------------------------------------------------------------------------------------------------------------------------------------------------------------------------------------------------------------------------------------------|------|------|-----------|-------|------|------|----------------------------------------------|-------|----------------------|-----------------------------------------------------------------------------------------------------------------------------------------------------|------|-----|-----------|-------|------|------|
| Rsa1.0_01585.1.g28168.t1 | refNP_201461.1  uncharacterized protein [Arabidopsis thaliana] gi 186532816 ref NP_001119511.1  uncharacterized protein [Arabidopsis thaliana] gi 10177541 dbj BAB10936.1  unnamed protein product [Arabidopsis thaliana] gi 61742773 gb AAX55207.1  hypothetical protein AT5g66600 [Arabidopsis thaliana] gi 332010850 gb AED98233.1  uncharacterized protein AT5G66600 [Arabidopsis thaliana] gi 332010852 gb AED98235.1  uncharacterized protein AT5G66600 [Arabidopsis thaliana] | 608  | 614  | 0         | 101.0 | 85.4 | 90.8 | uncharacterized protein                      | gbpln | Arabidopsis thaliana | AT5G66600.3   Symbols:   Protein of unknown function, DUF547   chr5:26575105-26578315 REVERSE LENGTH=614                                            | 608  | 614 | 0         | 101.0 | 85.4 | 90.8 |
| Rsa1.0_01585.1.g28169.t1 | gb EOA14276.1  hypothetical protein CARUB_v10027438mg [Capsella rubella]                                                                                                                                                                                                                                                                                                                                                                                                             | 101  | 97   | 1.00E-28  | 96.0  | 65.3 | 78.2 | hypothetical protein CARUB_v10027438mg       | gbpln | Capsella rubella     | #                                                                                                                                                   | #    | #   | #         | #     | #    |      |
| Rsa1.0_01585.1.g28170.t6 | gb AAF79687.1 AC022314_28 F9C16.9 [Arabidopsis thaliana]                                                                                                                                                                                                                                                                                                                                                                                                                             | 1326 | 946  | 0         | 71.3  | 30.4 | 35.8 | F9C16.9                                      | gbpln | Arabidopsis thaliana | AT5G66620.1   Symbols: DAR6   DA1-related protein 6   chr5:26588585-26592006 FORWARD LENGTH=644                                                     | 1326 | 644 | 0         | 48.6  | 26.4 | 32.0 |
| Rsa1.0_01585.1.g28171.t1 | gb AAO24595.1  At5g66630 [Arabidopsis thaliana] gi 110743610 dbj BAE99642.1  hypothetical protein [Arabidopsis thaliana]                                                                                                                                                                                                                                                                                                                                                             | 715  | 702  | 0         | 98.2  | 60.3 | 72.4 | At5g66630                                    | gbpln | Arabidopsis thaliana | AT5G66630.1   Symbols: DAR5   DA1-related protein 5   chr5:26592720-26595691 FORWARD LENGTH=702                                                     | 715  | 702 | 0         | 98.2  | 60.3 | 72.4 |
| Rsa1.0_01586.1.g28172.t1 | dbj BAA85452.1  S-locus protein 3 [Brassica rapa]                                                                                                                                                                                                                                                                                                                                                                                                                                    | 113  | 249  | 2.00E-55  | 220.4 | 93.8 | 96.5 | S-locus protein 3                            | gbpln | Brassica rapa        | AT1G66510.2   Symbols:   AAR2 protein family   chr1:24812881-24815804 FORWARD LENGTH=399                                                            | 113  | 399 | 6.00E-56  | 353.1 | 88.5 | 93.8 |
| Rsa1.0_01586.1.g28173.t6 | emb CAB89182.1  SIAH1 protein [Brassica napus var. napus]                                                                                                                                                                                                                                                                                                                                                                                                                            | 833  | 351  | 1.00E-132 | 42.1  | 33.6 | 37.0 | SIAH1 protein                                | gbpln | Brassica napus       | AT1G66620.1   Symbols:   Protein with RING/U-box and TRAF-like domains   chr1:24852806-24854044 REVERSE LENGTH=313                                  | 833  | 313 | 4.00E-94  | 37.6  | 20.2 | 24.7 |
| Rsa1.0_01586.1.g28174.t1 | #                                                                                                                                                                                                                                                                                                                                                                                                                                                                                    | #    | #    | #         | #     | #    | -    | ----                                         | ----  | #                    | #                                                                                                                                                   | #    | #   | #         | #     | #    |      |
| Rsa1.0_01586.1.g28175.t1 | #                                                                                                                                                                                                                                                                                                                                                                                                                                                                                    | #    | #    | #         | #     | #    | -    | ----                                         | ----  | #                    | #                                                                                                                                                   | #    | #   | #         | #     | #    |      |
| Rsa1.0_01586.1.g28176.t1 | refNP_176835.1  E3 ubiquitin-protein ligase SINA-like 2 [Arabidopsis thaliana] gi 75169112 sp Q9C6H3.1 SINL2_ARATH RecName: Full=E3 ubiquitin-protein ligase SINA-like 2; AltName: Full=Seven in absentia-like protein 2 gi 12322296 gb AAG51178.1 AC079285_11 hypothetical protein [Arabidopsis thaliana] gi 332196416 gb AEE34537.1  E3 ubiquitin-protein ligase SINA-like 2 [Arabidopsis thaliana]                                                                                | 306  | 313  | 1.00E-107 | 102.3 | 61.4 | 73.9 | E3 ubiquitin-protein ligase SINA-like 2      | gbpln | Arabidopsis thaliana | AT1G66620.1   Symbols:   Protein with RING/U-box and TRAF-like domains   chr1:24852806-24854044 REVERSE LENGTH=313                                  | 306  | 313 | 1.00E-110 | 102.3 | 61.4 | 73.9 |
| Rsa1.0_01586.1.g28177.t1 | gb AAG51783.1 AC079679_3 reverse transcriptase, putative; 16838-20266 [Arabidopsis thaliana]                                                                                                                                                                                                                                                                                                                                                                                         | 387  | 1142 | 4.00E-56  | 295.1 | 30.0 | 39.8 | reverse transcriptase, putative; 16838-20266 | gbpln | Arabidopsis thaliana | AT4G29090.1   Symbols:   Ribonuclease H-like superfamily protein   chr4:14333528-14335255 FORWARD LENGTH=575                                        | 387  | 575 | 1.00E-30  | 148.6 | 14.2 | 19.4 |
| Rsa1.0_01586.1.g28178.t1 | emb CAB89183.1  AtPP protein [Brassica napus var. napus]                                                                                                                                                                                                                                                                                                                                                                                                                             | 353  | 353  | 1.00E-178 | 100.0 | 89.2 | 93.8 | AtPP protein                                 | gbpln | Brassica napus       | AT1G66700.1   Symbols: PXMT1   S-adenosyl-L-methionine-dependent methyltransferases superfamily protein   chr1:24873460-24874690 REVERSE LENGTH=353 | 353  | 353 | 1.00E-170 | 100.0 | 79.9 | 88.4 |
| Rsa1.0_01586.1.g28179.t1 | ref XP_002888526.1  hypothetical protein ARALYDRAFT_894342 [Arabidopsis lyrata subsp. lyrata] gi 297334367 gb EFH64785.1  hypothetical protein ARALYDRAFT_894342 [Arabidopsis lyrata subsp. lyrata]                                                                                                                                                                                                                                                                                  | 366  | 342  | 2.00E-85  | 93.4  | 45.1 | 56.3 | hypothetical protein ARALYDRAFT_894342       | gbpln | Arabidopsis lyrata   | AT1G66660.2   Symbols:   Protein with RING/U-box and TRAF-like domains   chr1:24862056-24863332 REVERSE LENGTH=348                                  | 366  | 348 | 8.00E-83  | 95.1  | 49.2 | 63.1 |
| Rsa1.0_01586.1.g28180.t1 | emb CAC80640.1  ClpP putative protein [Brassica napus]                                                                                                                                                                                                                                                                                                                                                                                                                               | 312  | 313  | 1.00E-166 | 100.3 | 90.4 | 93.3 | ClpP putative protein                        | gbpln | Brassica napus       | AT1G66670.1   Symbols: CLPP3, NCLPP3   CLP protease proteolytic subunit 3   chr1:24863995-24865646 REVERSE LENGTH=309                               | 312  | 309 | 1.00E-153 | 99.0  | 84.9 | 90.7 |
| Rsa1.0_01586.1.g28181.t1 | dbj BAA77395.1  SLL2-S9-protein [Brassica rapa]                                                                                                                                                                                                                                                                                                                                                                                                                                      | 338  | 337  | 0         | 99.7  | 98.5 | 99.4 | SLL2-S9-protein                              | gbpln | Brassica rapa        | AT1G66680.1   Symbols: AR401   S-adenosyl-L-methionine-dependent methyltransferases superfamily protein   chr1:24866352-24868888 REVERSE LENGTH=358 | 338  | 358 | 1.00E-175 | 105.9 | 93.8 | 96.2 |
| Rsa1.0_01586.1.g28182.t1 | dbj BAC24068.1  S-locus glycoprotein [Brassica oleracea]                                                                                                                                                                                                                                                                                                                                                                                                                             | 442  | 428  | 0         | 96.8  | 82.8 | 88.9 | S-locus glycoprotein                         | gbpln | Brassica oleracea    | AT4G21380.1   Symbols: ARK3, RK3   receptor kinase 3   chr4:11389219-11393090 REVERSE LENGTH=850                                                    | 442  | 850 | 1.00E-154 | 192.3 | 60.4 | 70.8 |
| Rsa1.0_01587.1.g28183.t1 | #                                                                                                                                                                                                                                                                                                                                                                                                                                                                                    | #    | #    | #         | #     | #    | -    | ----                                         | ----  | #                    | #                                                                                                                                                   | #    | #   | #         | #     | #    |      |
| Rsa1.0_01587.1.g28184.t1 | #                                                                                                                                                                                                                                                                                                                                                                                                                                                                                    | #    | #    | #         | #     | #    | -    | ----                                         | ----  | #                    | #                                                                                                                                                   | #    | #   | #         | #     | #    |      |

|                          |                                                                                                                                                                                                                                                                                                                                                                                                                                                                  |     |     |           |       |      |      |                                                   |       |                      |                                                                                                                                                                                                                                                                                                                                             |     |     |           |       |      |      |
|--------------------------|------------------------------------------------------------------------------------------------------------------------------------------------------------------------------------------------------------------------------------------------------------------------------------------------------------------------------------------------------------------------------------------------------------------------------------------------------------------|-----|-----|-----------|-------|------|------|---------------------------------------------------|-------|----------------------|---------------------------------------------------------------------------------------------------------------------------------------------------------------------------------------------------------------------------------------------------------------------------------------------------------------------------------------------|-----|-----|-----------|-------|------|------|
| Rsa1.0_01587.1.g28185.t1 | gb ADO95301.1  14-3-3-like protein GF14 Upsilon [Eutrema salsugineum]                                                                                                                                                                                                                                                                                                                                                                                            | 212 | 268 | 5.00E-54  | 126.4 | 57.1 | 74.5 | 14-3-3-like protein GF14 Upsilon                  | gbpln | Eutrema salsugineum  | AT3G02520.1   Symbols: GRF7, GF14 NU   general regulatory factor 7   chr3:526800-527915 REVERSE LENGTH=265                                                                                                                                                                                                                                  | 212 | 265 | 3.00E-53  | 125.0 | 54.7 | 73.1 |
| Rsa1.0_01587.1.g28186.t1 | dbj BAJ34283.1  unnamed protein product [Theellungiella halophila]                                                                                                                                                                                                                                                                                                                                                                                               | 393 | 395 | 0         | 100.5 | 86.0 | 92.6 | unnamed protein product                           | ----  | ----                 | AT3G48160.2   Symbols: DEL1, E2L3, E2FE   DP-E2F-like 1   chr3:17783641-17785846 FORWARD LENGTH=403                                                                                                                                                                                                                                         | 393 | 403 | 1.00E-174 | 102.5 | 81.4 | 89.8 |
| Rsa1.0_01587.1.g28187.t1 | ref XP_002863741.1  hypothetical protein ARALYDRAFT_917455 [Arabidopsis lyrata subsp. lyrata] gi 297309576 gb EFH40000.1  hypothetical protein ARALYDRAFT_917455 [Arabidopsis lyrata subsp. lyrata]                                                                                                                                                                                                                                                              | 197 | 390 | 1.00E-35  | 198.0 | 43.7 | 56.9 | hypothetical protein ARALYDRAFT_917455            | gbpln | Arabidopsis lyrata   | AT5G18880.1   Symbols:   RNA-directed DNA polymerase (reverse transcriptase)-related family protein   chr5:6300535-6301422 REVERSE LENGTH=295                                                                                                                                                                                               | 197 | 295 | 2.00E-21  | 149.7 | 33.0 | 52.3 |
| Rsa1.0_01587.1.g28188.t1 | gb EOA23715.1  hypothetical protein CARUB_v10016922mg [Capsella rubella]                                                                                                                                                                                                                                                                                                                                                                                         | 170 | 579 | 7.00E-52  | 340.6 | 60.6 | 67.6 | hypothetical protein CARUB_v10016922mg            | gbpln | Capsella rubella     | AT3G48150.1   Symbols: APC8, CDC23   anaphase-promoting complex subunit 8   chr3:1779800-17782565 REVERSE LENGTH=579                                                                                                                                                                                                                        | 170 | 579 | 5.00E-53  | 340.6 | 59.4 | 67.1 |
| Rsa1.0_01588.1.g28189.t1 | ref XP_002882118.1  serine-type peptidase [Arabidopsis lyrata subsp. lyrata] gi 297327957 gb EFH58377.1  serine-type peptidase [Arabidopsis lyrata subsp. lyrata]                                                                                                                                                                                                                                                                                                | 948 | 962 | 0         | 101.5 | 93.7 | 95.8 | serine-type peptidase                             | gbpln | Arabidopsis lyrata   | AT2G47390.1   Symbols:   Prelyl oligopeptidase family protein   chr2:19442278-19446253 REVERSE LENGTH=961                                                                                                                                                                                                                                   | 948 | 961 | 0         | 101.4 | 92.6 | 95.1 |
| Rsa1.0_01588.1.g28190.t1 | #                                                                                                                                                                                                                                                                                                                                                                                                                                                                | #   | #   | #         | #     | #    | #    | -                                                 | ----  | ----                 | #                                                                                                                                                                                                                                                                                                                                           | #   | #   | #         | #     | #    | #    |
| Rsa1.0_01588.1.g28191.t1 | ref NP_565392.1  calcium-dependent phosphotriesterase-like protein [Arabidopsis thaliana] gi 4581119 gb AAD24609.1  expressed protein [Arabidopsis thaliana] gi 21537036 gb AAM61377.1  unknown [Arabidopsis thaliana] gi 26451541 dbj BAC42868.1  unknown protein [Arabidopsis thaliana] gi 28973387 gb AAO64018.1  unknown protein [Arabidopsis thaliana] gi 330251441 gb AEC06535.1  calcium-dependent phosphotriesterase-like protein [Arabidopsis thaliana] | 327 | 327 | 1.00E-156 | 100.0 | 85.6 | 92.7 | calcium-dependent phosphotriesterase-like protein | gbpln | Arabidopsis thaliana | AT2G16760.1   Symbols:   Calcium-dependent phosphotriesterase superfamily protein   chr2:7275739-727122 FORWARD LENGTH=327                                                                                                                                                                                                                  | 327 | 327 | 1.00E-159 | 100.0 | 85.6 | 92.7 |
| Rsa1.0_01588.1.g28192.t1 | ref XP_002880297.1  hypothetical protein ARALYDRAFT_904211 [Arabidopsis lyrata subsp. lyrata] gi 297326136 gb EFH56556.1  hypothetical protein ARALYDRAFT_904211 [Arabidopsis lyrata subsp. lyrata]                                                                                                                                                                                                                                                              | 309 | 305 | 1.00E-117 | 98.7  | 79.3 | 86.7 | hypothetical protein ARALYDRAFT_904211            | gbpln | Arabidopsis lyrata   | AT2G47360.1   Symbols:   unknown protein; BEST Arabidopsis thaliana protein match is: unknown protein (TAIR:AT1G02570.1); Has 58 Blast hits to 55 proteins in 6 species: Archae - 0; Bacteria - 0; Metazoa - 0; Fungi - 0; Plants - 58; Viruses - 0; Other Eukaryotes - 0 (source: NCBI BLink).   chr2:19437820-19438731 FORWARD LENGTH=303 | 309 | 303 | 1.00E-117 | 98.1  | 79.0 | 85.8 |
| Rsa1.0_01588.1.g28193.t1 | ref NP_850472.1  flowering time control protein-like protein [Arabidopsis thaliana] gi 50897178 gb AAT85728.1  At2g47310 [Arabidopsis thaliana] gi 53793649 gb AAU93571.1  At2g47310 [Arabidopsis thaliana] gi 110738579 dbj BAF01215.1  putative FGA-related protein [Arabidopsis thaliana] gi 330255732 gb AEC10826.1  flowering time control protein-like protein [Arabidopsis thaliana]                                                                      | 428 | 512 | 1.00E-97  | 119.6 | 47.4 | 52.3 | flowering time control protein-like protein       | gbpln | Arabidopsis thaliana | AT2G47310.1   Symbols:   flowering time control protein-related / FCA gamma-related   chr2:19423791-19426846 FORWARD LENGTH=512                                                                                                                                                                                                             | 428 | 512 | 1.00E-100 | 119.6 | 47.4 | 52.3 |
| Rsa1.0_01588.1.g28194.t1 | ref XP_002862591.1  transcription factor/ transcription regulator [Arabidopsis lyrata subsp. lyrata] gi 297828465 ref XP_002882115.1  transcription factor/ transcription regulator [Arabidopsis lyrata subsp. lyrata] gi 297308212 gb EFH38649.1  transcription factor/ transcription regulator [Arabidopsis lyrata subsp. lyrata] gi 297327954 gb EFH58374.1  transcription factor/ transcription regulator [Arabidopsis lyrata subsp. lyrata]                 | 104 | 103 | 2.00E-42  | 99.0  | 84.6 | 92.3 | transcription factor/ transcription regulator     | gbpln | Arabidopsis lyrata   | AT2G47270.1   Symbols: UPB1   sequence-specific DNA binding transcription factor;transcription regulators   chr2:19411741-19412049 REVERSE LENGTH=102                                                                                                                                                                                       | 104 | 102 | 4.00E-44  | 98.1  | 81.7 | 91.3 |
| Rsa1.0_01588.1.g28195.t1 | #                                                                                                                                                                                                                                                                                                                                                                                                                                                                | #   | #   | #         | #     | #    | #    | -                                                 | ----  | ----                 | #                                                                                                                                                                                                                                                                                                                                           | #   | #   | #         | #     | #    | #    |
| Rsa1.0_01588.1.g28196.t1 | ref XP_002882114.1  predicted protein [Arabidopsis lyrata subsp. lyrata] gi 297327953 gb EFH58373.1  predicted protein [Arabidopsis lyrata subsp. lyrata]                                                                                                                                                                                                                                                                                                        | 331 | 337 | 1.00E-127 | 101.8 | 78.5 | 84.3 | predicted protein                                 | gbpln | Arabidopsis lyrata   | AT2G47260.1   Symbols: WRKY23, ATWRKY23   WRKY DNA-binding protein 23   chr2:19405045-19406446 REVERSE LENGTH=337                                                                                                                                                                                                                           | 331 | 337 | 1.00E-118 | 101.8 | 76.4 | 82.8 |

|                          |                                                                                                                                                                                                                                                                                                                                                                                                                                                                                                                                                                                                                                                                                                                                                                                                                                                                                                                                                                                                                                                                                                                                                                                                                                                                                                                                                                                                                                                |     |     |           |       |      |      |                                        |       |                      |                                                                                                                                                                                                                                                                                                                                                                                                                                                                             |     |      |           |       |      |      |
|--------------------------|------------------------------------------------------------------------------------------------------------------------------------------------------------------------------------------------------------------------------------------------------------------------------------------------------------------------------------------------------------------------------------------------------------------------------------------------------------------------------------------------------------------------------------------------------------------------------------------------------------------------------------------------------------------------------------------------------------------------------------------------------------------------------------------------------------------------------------------------------------------------------------------------------------------------------------------------------------------------------------------------------------------------------------------------------------------------------------------------------------------------------------------------------------------------------------------------------------------------------------------------------------------------------------------------------------------------------------------------------------------------------------------------------------------------------------------------|-----|-----|-----------|-------|------|------|----------------------------------------|-------|----------------------|-----------------------------------------------------------------------------------------------------------------------------------------------------------------------------------------------------------------------------------------------------------------------------------------------------------------------------------------------------------------------------------------------------------------------------------------------------------------------------|-----|------|-----------|-------|------|------|
|                          | refNP_182246.1   long chain acyl-CoA synthetase 1 [Arabidopsis thaliana]   gi 79324939 refNP_001031554.1   long chain acyl-CoA synthetase 1 [Arabidopsis thaliana]   gi 75097627 sp O22898.1 LACS1_ARAT H RecName: Full=Long chain acyl-CoA synthetase 1; AltName: Full=Protein ECERIFERUM 8   gi 20805863 gb AAM28868.1 AF503751.1   long chain acyl-CoA synthetase 1 [Arabidopsis thaliana]   gi 2275202 gb AAB63824.1   putative acyl-CoA synthetase [Arabidopsis thaliana]   gi 15912205 gb AAL08236.1   AtZg47240/T8113.8 [Arabidopsis thaliana]   gi 22137266 gb AAM91478.1   AtZg47240/T8113.8 [Arabidopsis thaliana]   gi 222424060 dtj BAH19991.1   AT2G47240 [Arabidopsis thaliana]   gi 330255724 gb AEC10818.1   long chain acyl-CoA synthetase 1 [Arabidopsis thaliana]   gi 330255725 gb AEC10819.1   long chain acyl-CoA synthetase 1 [Arabidopsis thaliana]   refXP_002890288.1   predicted protein [Arabidopsis lyrata subsp. lyrata]   gi 297326127 gb EFH56547.1   predicted protein [Arabidopsis lyrata subsp. lyrata]   refXP_002880287.1   myb family transcription factor [Arabidopsis lyrata subsp. lyrata]   gi 297326126 gb EFH56546.1   myb family transcription factor [Arabidopsis lyrata subsp. lyrata]   refXP_002882113.1   hypothetical protein ARALYDRAFT_322367 [Arabidopsis lyrata subsp. lyrata]   gi 297327952 gb EFH58372.1   hypothetical protein ARALYDRAFT_322367 [Arabidopsis lyrata subsp. lyrata] | 660 | 660 | 0         | 100.0 | 90.9 | 96.2 | long chain acyl-CoA synthetase 1       | gbpln | Arabidopsis thaliana | AT2G47240.2   Symbols: LACS1   AMP-dependent synthetase and ligase family protein   chr2:19393835-19397616 FORWARD LENGTH=660                                                                                                                                                                                                                                                                                                                                               | 660 | 660  | 0         | 100.0 | 90.9 | 96.2 |
| Rsa1.0_01588.1.g28197.t1 |                                                                                                                                                                                                                                                                                                                                                                                                                                                                                                                                                                                                                                                                                                                                                                                                                                                                                                                                                                                                                                                                                                                                                                                                                                                                                                                                                                                                                                                |     |     |           |       |      |      |                                        |       |                      |                                                                                                                                                                                                                                                                                                                                                                                                                                                                             |     |      |           |       |      |      |
| Rsa1.0_01588.1.g28198.t1 |                                                                                                                                                                                                                                                                                                                                                                                                                                                                                                                                                                                                                                                                                                                                                                                                                                                                                                                                                                                                                                                                                                                                                                                                                                                                                                                                                                                                                                                |     |     |           |       |      |      |                                        |       |                      |                                                                                                                                                                                                                                                                                                                                                                                                                                                                             |     |      |           |       |      |      |
| Rsa1.0_01588.1.g28199.t1 |                                                                                                                                                                                                                                                                                                                                                                                                                                                                                                                                                                                                                                                                                                                                                                                                                                                                                                                                                                                                                                                                                                                                                                                                                                                                                                                                                                                                                                                |     |     |           |       |      |      |                                        |       |                      |                                                                                                                                                                                                                                                                                                                                                                                                                                                                             |     |      |           |       |      |      |
| Rsa1.0_01588.1.g28200.t1 |                                                                                                                                                                                                                                                                                                                                                                                                                                                                                                                                                                                                                                                                                                                                                                                                                                                                                                                                                                                                                                                                                                                                                                                                                                                                                                                                                                                                                                                |     |     |           |       |      |      |                                        |       |                      |                                                                                                                                                                                                                                                                                                                                                                                                                                                                             |     |      |           |       |      |      |
| Rsa1.0_01589.1.g28201.t1 | #                                                                                                                                                                                                                                                                                                                                                                                                                                                                                                                                                                                                                                                                                                                                                                                                                                                                                                                                                                                                                                                                                                                                                                                                                                                                                                                                                                                                                                              | #   | #   | #         | #     | #    | #    | -                                      | ----  | ----                 | #                                                                                                                                                                                                                                                                                                                                                                                                                                                                           | #   | #    | #         | #     | #    | #    |
| Rsa1.0_01589.1.g28202.t2 | gb AFP57436.1   putative metallothionein type 4 [Brassica napus]                                                                                                                                                                                                                                                                                                                                                                                                                                                                                                                                                                                                                                                                                                                                                                                                                                                                                                                                                                                                                                                                                                                                                                                                                                                                                                                                                                               | 84  | 86  | 2.00E-33  | 102.4 | 92.9 | 96.4 | putative metallothionein type 4        | gbpln | Brassica napus       | AT2G23240.2   Symbols:   Plant EC metallothionein-like protein, family 15   chr2:9895995-9896325 REVERSE LENGTH=84                                                                                                                                                                                                                                                                                                                                                          | 84  | 84   | 1.00E-26  | 100.0 | 75.0 | 82.1 |
| Rsa1.0_01589.1.g28203.t1 | refXP_002879963.1   hypothetical protein ARALYDRAFT_903544 [Arabidopsis lyrata subsp. lyrata]   gi 297325802 gb EFH56222.1   hypothetical protein ARALYDRAFT_903544 [Arabidopsis lyrata subsp. lyrata]                                                                                                                                                                                                                                                                                                                                                                                                                                                                                                                                                                                                                                                                                                                                                                                                                                                                                                                                                                                                                                                                                                                                                                                                                                         | 327 | 298 | 1.00E-119 | 91.1  | 74.9 | 78.3 | hypothetical protein ARALYDRAFT_903544 | gbpln | Arabidopsis lyrata   | AT2G41990.1   Symbols:   CONTAINS InterPro DOMAIN/s: Late embryogenesis abundant protein, group 2 (InterPro:IPR004864); BEST Arabidopsis thaliana protein match is: Late embryogenesis abundant (LEA) hydroxyproline-rich glycoprotein family (TAIR:AT4G35170.1); Has 172 Blast hits to 168 proteins in 15 species: Archae - 0; Bacteria - 0; Metazoa - 0; Fungi - 172; Viruses - 0; Other Eukaryotes - 0 (source: NCBI BLINK);   chr2:17527396-17528527 FORWARD LENGTH=297 | 327 | 297  | 1.00E-121 | 90.8  | 73.7 | 78.6 |
| Rsa1.0_01589.1.g28204.t1 | #                                                                                                                                                                                                                                                                                                                                                                                                                                                                                                                                                                                                                                                                                                                                                                                                                                                                                                                                                                                                                                                                                                                                                                                                                                                                                                                                                                                                                                              | #   | #   | #         | #     | #    | #    | -                                      | ----  | ----                 | #                                                                                                                                                                                                                                                                                                                                                                                                                                                                           | #   | #    | #         | #     | #    | #    |
| Rsa1.0_01589.1.g28205.t1 | emb CAN63034.1   hypothetical protein VITISV_044052 [Vitis vinifera]                                                                                                                                                                                                                                                                                                                                                                                                                                                                                                                                                                                                                                                                                                                                                                                                                                                                                                                                                                                                                                                                                                                                                                                                                                                                                                                                                                           | 771 | 820 | 1.00E-133 | 106.4 | 36.6 | 49.4 | hypothetical protein VITISV_044052     | gbpln | Vitis vinifera       | AT4G23160.1   Symbols: CRK8   cysteine-rich RLK (RECEPTOR-like protein kinase) 8   chr4:12129485-12134086 FORWARD LENGTH=1262                                                                                                                                                                                                                                                                                                                                               | 771 | 1262 | 3.00E-23  | 163.7 | 9.7  | 14.8 |
| Rsa1.0_01589.1.g28206.t1 | #                                                                                                                                                                                                                                                                                                                                                                                                                                                                                                                                                                                                                                                                                                                                                                                                                                                                                                                                                                                                                                                                                                                                                                                                                                                                                                                                                                                                                                              | #   | #   | #         | #     | #    | #    | -                                      | ----  | ----                 | #                                                                                                                                                                                                                                                                                                                                                                                                                                                                           | #   | #    | #         | #     | #    | #    |
| Rsa1.0_01589.1.g28207.t3 | gb EOA27633.1   hypothetical protein CARUB_v10023781mg [Capsella rubella]                                                                                                                                                                                                                                                                                                                                                                                                                                                                                                                                                                                                                                                                                                                                                                                                                                                                                                                                                                                                                                                                                                                                                                                                                                                                                                                                                                      | 408 | 287 | 1.00E-123 | 70.3  | 57.1 | 61.0 | hypothetical protein CARUB_v10023781mg | gbpln | Capsella rubella     | AT2G20920.1   Symbols:   Protein of unknown function (DUF3353)   chr2:8998728-8999789 FORWARD LENGTH=287                                                                                                                                                                                                                                                                                                                                                                    | 408 | 287  | 1.00E-123 | 70.3  | 56.6 | 60.0 |
| Rsa1.0_01590.1.g28208.t1 | gb EOA24062.1   hypothetical protein CARUB_v10017282mg [Capsella rubella]                                                                                                                                                                                                                                                                                                                                                                                                                                                                                                                                                                                                                                                                                                                                                                                                                                                                                                                                                                                                                                                                                                                                                                                                                                                                                                                                                                      | 425 | 435 | 0         | 102.4 | 89.2 | 94.1 | hypothetical protein CARUB_v10017282mg | gbpln | Capsella rubella     | AT3G52820.1   Symbols: ATPAP22, PAP22   purple acid phosphatase 22   chr3:19574236-19576938 REVERSE LENGTH=434                                                                                                                                                                                                                                                                                                                                                              | 425 | 434  | 0         | 102.1 | 87.3 | 92.9 |
| Rsa1.0_01590.1.g28209.t2 | dbj BAD95408.1   hypothetical protein [Arabidopsis thaliana]                                                                                                                                                                                                                                                                                                                                                                                                                                                                                                                                                                                                                                                                                                                                                                                                                                                                                                                                                                                                                                                                                                                                                                                                                                                                                                                                                                                   | 278 | 478 | 8.00E-69  | 171.9 | 45.7 | 65.5 | hypothetical protein                   | gbpln | Arabidopsis thaliana | AT3G24255.1   Symbols:   RNA-directed DNA polymerase (reverse transcriptase)-related family protein   chr3:8789471-8793208 FORWARD LENGTH=746                                                                                                                                                                                                                                                                                                                               | 278 | 746  | 5.00E-60  | 268.3 | 39.9 | 55.8 |

|                          |                                                                                                                                                                                                                                                                                                                                                                                                                                                                                                                                                                                                      |     |     |           |       |      |      |                                                                       |       |                      |                                                                                                                                                                                                                                                                                                                                              |     |     |           |       |      |      |
|--------------------------|------------------------------------------------------------------------------------------------------------------------------------------------------------------------------------------------------------------------------------------------------------------------------------------------------------------------------------------------------------------------------------------------------------------------------------------------------------------------------------------------------------------------------------------------------------------------------------------------------|-----|-----|-----------|-------|------|------|-----------------------------------------------------------------------|-------|----------------------|----------------------------------------------------------------------------------------------------------------------------------------------------------------------------------------------------------------------------------------------------------------------------------------------------------------------------------------------|-----|-----|-----------|-------|------|------|
| Rsa1.0_01590.1.g28210.t1 | ref[NP_565844.1] zinc finger A20 and AN1 domain-containing stress-associated protein 4 [Arabidopsis thaliana]<br>gi 73921295 sp Q9SJM6.1 SAP4_ARATH RecName: Full=Zinc finger A20 and AN1 domain-containing stress-associated protein 4; Short=ATSAP4<br>gi 4510345 gb AAD21434.1  expressed protein [Arabidopsis thaliana]<br>gi 21592464 gb AM64415.1  zinc finger-like protein [Arabidopsis thaliana]<br>gi 114050557 gb ABI49428.1  At2g36320 [Arabidopsis thaliana]<br>gi 330254138 gb AEC09232.1  zinc finger A20 and AN1 domain-containing stress-associated protein 4 [Arabidopsis thaliana] | 176 | 161 | 6.00E-65  | 91.5  | 69.9 | 77.8 | zinc finger A20 and AN1 domain-containing stress-associated protein 4 | gbpln | Arabidopsis thaliana | AT2G36320.1   Symbols:   A20/AN1-like zinc finger family protein   chr2:15229388-15229873 FORWARD LENGTH=161                                                                                                                                                                                                                                 | 176 | 161 | 2.00E-67  | 91.5  | 69.9 | 77.8 |
| Rsa1.0_01590.1.g28211.t1 | gb EOA25380.1  hypothetical protein CARUB_v10018720mg [Capsella rubella]                                                                                                                                                                                                                                                                                                                                                                                                                                                                                                                             | 426 | 429 | 0         | 100.7 | 82.6 | 90.8 | hypothetical protein CARUB_v10018720mg                                | gbpln | Capsella rubella     | AT3G52780.1   Symbols: ATPAP20, PAP20   Purple acid phosphatases superfamily protein   chr3:19561525-19564195 REVERSE LENGTH=427                                                                                                                                                                                                             | 426 | 427 | 0         | 100.2 | 81.5 | 91.5 |
| Rsa1.0_01590.1.g28212.t1 | gb EOA25012.1  hypothetical protein CARUB_v10018310mg, partial [Capsella rubella]                                                                                                                                                                                                                                                                                                                                                                                                                                                                                                                    | 70  | 95  | 9.00E-22  | 135.7 | 84.3 | 90.0 | hypothetical protein CARUB_v10018310mg, partial                       | gbpln | Capsella rubella     | AT3G52770.1   Symbols: ZPR3   protein binding   chr3:19557891-19558094 REVERSE LENGTH=67                                                                                                                                                                                                                                                     | 70  | 67  | 7.00E-19  | 95.7  | 64.3 | 67.1 |
| Rsa1.0_01590.1.g28213.t1 | gb EOA23950.1  hypothetical protein CARUB_v10017167mg [Capsella rubella]                                                                                                                                                                                                                                                                                                                                                                                                                                                                                                                             | 469 | 472 | 0         | 100.6 | 87.2 | 92.1 | hypothetical protein CARUB_v10017167mg                                | gbpln | Capsella rubella     | AT3G52750.1   Symbols: FTSZ2-2   Tubulin/FtsZ family protein   chr3:19549841-19552435 REVERSE LENGTH=473                                                                                                                                                                                                                                     | 469 | 473 | 0         | 100.9 | 85.7 | 91.7 |
| Rsa1.0_01590.1.g28214.t1 | ref[NP_566972.1] uncharacterized protein [Arabidopsis thaliana]<br>gi 17386128 gb AAL38610.1 AF446877.1 AT3g52740/F3C22.140 [Arabidopsis thaliana] gi 7669948 emb CACAB89235.1  putative protein [Arabidopsis thaliana]<br>gi 15450655 gb AAK96999.1  AT3g52740/F3C22.140 [Arabidopsis thaliana] gi 332645467 gb AEE78988.1  uncharacterized protein AT3G52740 [Arabidopsis thaliana]                                                                                                                                                                                                                | 139 | 140 | 1.00E-55  | 100.7 | 82.0 | 89.2 | uncharacterized protein                                               | gbpln | Arabidopsis thaliana | AT3G52740.1   Symbols:   unknown protein; BEST Arabidopsis thaliana protein match is: unknown protein (TAIR:AT3G44450.1); Has 65 Blast hits to 65 proteins in 13 species: Archae - 0; Bacteria - 0; Metazoa - 0; Fungi - 0; Plants - 65; Viruses - 0; Other Eukaryotes - 0 (source: NCBI BLink).   chr3:19546446-19546868 REVERSE LENGTH=140 | 139 | 140 | 3.00E-58  | 100.7 | 82.0 | 89.2 |
| Rsa1.0_01591.1.g28215.t1 | ref[XP_002893723.1] predicted protein [Arabidopsis lyrata subsp. lyrata]<br>gi 297339565 gb EFH69982.1  predicted protein [Arabidopsis lyrata subsp. lyrata]                                                                                                                                                                                                                                                                                                                                                                                                                                         | 408 | 385 | 1.00E-136 | 94.4  | 58.8 | 70.8 | predicted protein                                                     | gbpln | Arabidopsis lyrata   | AT1G32430.1   Symbols:   F-box and associated interaction domains-containing protein   chr1:11704932-11706325 REVERSE LENGTH=380                                                                                                                                                                                                             | 408 | 380 | 1.00E-123 | 93.1  | 54.4 | 68.6 |
| Rsa1.0_01591.1.g28216.t1 | # # # # # # # #                                                                                                                                                                                                                                                                                                                                                                                                                                                                                                                                                                                      |     |     |           |       |      |      | -                                                                     | ----  | ----                 | # # # # # # #                                                                                                                                                                                                                                                                                                                                |     |     |           |       |      |      |
| Rsa1.0_01591.1.g28217.t1 | gb EOA30347.1  hypothetical protein CARUB_v10013470mg [Capsella rubella]                                                                                                                                                                                                                                                                                                                                                                                                                                                                                                                             | 516 | 515 | 0         | 99.8  | 87.0 | 93.4 | hypothetical protein CARUB_v10013470mg                                | gbpln | Capsella rubella     | AT3G10570.1   Symbols: CYP77A6   cytochrome P450, family 77, subfamily A, polypeptide 6   chr3:3302156-3303697 FORWARD LENGTH=513                                                                                                                                                                                                            | 516 | 513 | 0         | 99.4  | 86.2 | 91.9 |
| Rsa1.0_01591.1.g28218.t4 | ref[XP_002882684.1] hypothetical protein ARALYDRAFT_478393 [Arabidopsis lyrata subsp. lyrata]<br>gi 297328524 gb EFH58943.1  hypothetical protein ARALYDRAFT_478393 [Arabidopsis lyrata subsp. lyrata]                                                                                                                                                                                                                                                                                                                                                                                               | 332 | 334 | 1.00E-140 | 100.6 | 78.6 | 86.1 | hypothetical protein ARALYDRAFT_478393                                | gbpln | Arabidopsis lyrata   | AT3G10572.1   Symbols:   3-phosphoinositide-dependent protein kinase-1, putative   chr3:3304346-3306306 FORWARD LENGTH=333                                                                                                                                                                                                                   | 332 | 333 | 1.00E-142 | 100.3 | 77.7 | 85.5 |
| Rsa1.0_01591.1.g28219.t2 | ref[NP_564870.1] homolog of anti-oxidant 1 [Arabidopsis thaliana]<br>gi 14532548 gb AAK64002.1  At1g66240/T6J19.6 [Arabidopsis thaliana] gi 1865540 gb AAL76156.1  At1g66240/T6J19.6 [Arabidopsis thaliana] gi 332196360 gb AEE34481.1  homolog of anti-oxidant 1 [Arabidopsis thaliana]                                                                                                                                                                                                                                                                                                             | 87  | 106 | 4.00E-29  | 121.8 | 71.3 | 77.0 | homolog of anti-oxidant 1                                             | gbpln | Arabidopsis thaliana | AT1G66240.1   Symbols: ATX1, ATATX1   homolog of anti-oxidant 1   chr1:24686445-24687327 REVERSE LENGTH=106                                                                                                                                                                                                                                  | 87  | 106 | 6.00E-32  | 121.8 | 71.3 | 77.0 |
| Rsa1.0_01591.1.g28220.t1 | ref[NP_683474.1] uncharacterized protein [Arabidopsis thaliana]<br>gi 91805373 gb ABE65416.1  hypothetical protein At1g66245 [Arabidopsis thaliana]<br>gi 332196363 gb AEE34484.1  uncharacterized protein AT1G66245 [Arabidopsis thaliana]                                                                                                                                                                                                                                                                                                                                                          | 274 | 287 | 1.00E-88  | 104.7 | 75.2 | 84.7 | uncharacterized protein                                               | gbpln | Arabidopsis thaliana | AT1G66245.1   Symbols:   unknown protein; Has 390 Blast hits to 336 proteins in 78 species: Archae - 0; Bacteria - 22; Metazoa - 81; Fungi - 35; Plants - 39; Viruses - 2; Other Eukaryotes - 211 (source: NCBI BLink).   chr1:24690444-24691307 FORWARD LENGTH=287                                                                          | 274 | 287 | 4.00E-91  | 104.7 | 75.2 | 84.7 |

|                          |                                                                                                                                                                                                                                                                                                                                                                                                                                                                                                                                                                                                                                                                                                                                                                                                                                                 |     |     |           |       |      |      |                                                     |       |                      |                                                                                                                                               |     |     |           |       |      |      |
|--------------------------|-------------------------------------------------------------------------------------------------------------------------------------------------------------------------------------------------------------------------------------------------------------------------------------------------------------------------------------------------------------------------------------------------------------------------------------------------------------------------------------------------------------------------------------------------------------------------------------------------------------------------------------------------------------------------------------------------------------------------------------------------------------------------------------------------------------------------------------------------|-----|-----|-----------|-------|------|------|-----------------------------------------------------|-------|----------------------|-----------------------------------------------------------------------------------------------------------------------------------------------|-----|-----|-----------|-------|------|------|
| Rsa1.0_01591.1.g28221.t1 | refNP_192683.1   SANT DNA-binding domain-containing protein [Arabidopsis thaliana] gi 267587 emb CAB78068.1  putative protein [Arabidopsis thaliana] gi 21689645 gb AAM67444.1  unknown protein [Arabidopsis thaliana] gi 332657349 gb AEE82749.1   SANT DNA-binding domain-containing protein [Arabidopsis thaliana]                                                                                                                                                                                                                                                                                                                                                                                                                                                                                                                           | 177 | 200 | 2.00E-38  | 113.0 | 51.4 | 63.8 | SANT DNA-binding domain-containing protein          | gbpln | Arabidopsis thaliana | AT4G09450.1   Symbols:   Duplicated homeodomain-like superfamily protein   chr4:5983277-5984500 FORWARD LENGTH=200                            | 177 | 200 | 7.00E-41  | 113.0 | 51.4 | 63.8 |
| Rsa1.0_01591.1.g28222.t1 | refXP_002882688.1   40S ribosomal protein S17 [Arabidopsis lyrata subsp. lyrata] gi 297328528 gb EFH58947.1   40S ribosomal protein S17 [Arabidopsis lyrata subsp. lyrata]                                                                                                                                                                                                                                                                                                                                                                                                                                                                                                                                                                                                                                                                      | 139 | 138 | 1.00E-66  | 99.3  | 92.1 | 93.5 | 40S ribosomal protein S17                           | gbpln | Arabidopsis lyrata   | AT3G10610.1   Symbols:   Ribosomal S17 family protein   chr3:3319459-3319881 FORWARD LENGTH=140                                               | 139 | 140 | 3.00E-68  | 100.7 | 90.6 | 93.5 |
| Rsa1.0_01591.1.g28223.t1 | refXP_002863885.1   regulator of chromosome condensation family protein [Arabidopsis lyrata subsp. lyrata] gi 297309720 gb EFH40144.1   regulator of chromosome condensation family protein [Arabidopsis lyrata subsp. lyrata]                                                                                                                                                                                                                                                                                                                                                                                                                                                                                                                                                                                                                  | 661 | 454 | 0         | 68.7  | 51.0 | 56.1 | regulator of chromosome condensation family protein | gbpln | Arabidopsis lyrata   | AT5G48330.2   Symbols:   Regulator of chromosome condensation (RCC1) family protein   chr5:19585989-19587729 FORWARD LENGTH=454               | 661 | 454 | 1.00E-180 | 68.7  | 51.1 | 56.6 |
| Rsa1.0_01591.1.g28224.t1 | refNP_187677.1   calmodulin-domain protein kinase cdpk isoform 2 [Arabidopsis thaliana] gi 75319416 sp Q38870.1 CDPK2_ARAT H RecName: Full=Calcium-dependent protein kinase 2; AltName: Full=Calmodulin-domain protein kinase CDPK isoform 2 gi 9837343 gb AAG00535.1 AF286222.1 calcium-dependent protein kinase isoform 2 [Arabidopsis thaliana] gi 12322803 gb AAG51400.1 AC011560.32 calmodulin-domain protein kinase CDPK isoform 2; 13099-15758 [Arabidopsis thaliana] gi 1399271 gb AAB03244.1  calmodulin-domain protein kinase CDPK isoform 2 [Arabidopsis thaliana] gi 8567800 gb AAF76372.1  calmodulin-domain protein kinase CDPK isoform 2 [Arabidopsis thaliana] gi 209529779 gb ACI49784.1  At3g10660 [Arabidopsis thaliana] gi 332641419 gb AEE74940.1   calmodulin-domain protein kinase cdpk isoform 2 [Arabidopsis thaliana] | 634 | 646 | 0         | 101.9 | 89.9 | 93.5 | calmodulin-domain protein kinase cdpk isoform 2     | gbpln | Arabidopsis thaliana | AT3G10660.1   Symbols: CPK2, ATPCK2   calmodulin-domain protein kinase cdpk isoform 2   chr3:3331599-3334268 REVERSE LENGTH=646               | 634 | 646 | 0         | 101.9 | 89.9 | 93.5 |
| Rsa1.0_01591.1.g28225.t1 | gb EOA30977.1  hypothetical protein CARUB_v10014123mg [Capsella rubella]                                                                                                                                                                                                                                                                                                                                                                                                                                                                                                                                                                                                                                                                                                                                                                        | 333 | 338 | 1.00E-157 | 101.5 | 88.3 | 91.3 | hypothetical protein CARUB_v10014123mg              | gbpln | Capsella rubella     | AT3G10670.1   Symbols: ATNAP7, NAP7   non-intrinsic ABC protein 7   chr3:3335325-3337304 REVERSE LENGTH=338                                   | 333 | 338 | 1.00E-159 | 101.5 | 88.9 | 91.0 |
| Rsa1.0_01591.1.g28226.t1 | refXP_002882690.1   hypothetical protein ARALYDRAFT_341204 [Arabidopsis lyrata subsp. lyrata] gi 297328530 gb EFH58949.1   hypothetical protein ARALYDRAFT_341204 [Arabidopsis lyrata subsp. lyrata]                                                                                                                                                                                                                                                                                                                                                                                                                                                                                                                                                                                                                                            | 515 | 489 | 1.00E-140 | 95.0  | 56.5 | 68.9 | hypothetical protein ARALYDRAFT_341204              | gbpln | Arabidopsis lyrata   | AT3G10680.1   Symbols:   HSP20-like chaperones superfamily protein   chr3:3337773-3339345 FORWARD LENGTH=490                                  | 515 | 490 | 1.00E-142 | 95.1  | 56.5 | 69.3 |
| Rsa1.0_01591.1.g28227.t5 | gb AAF19579.1 AC011708_22 galactokinase-like protein [Arabidopsis thaliana]                                                                                                                                                                                                                                                                                                                                                                                                                                                                                                                                                                                                                                                                                                                                                                     | 415 | 412 | 1.00E-178 | 99.3  | 81.0 | 87.0 | galactokinase-like protein                          | gbpln | Arabidopsis thaliana | AT3G10700.1   Symbols: GalAK   galacturonic acid kinase   chr3:3346789-3350863 REVERSE LENGTH=424                                             | 415 | 424 | 1.00E-175 | 102.2 | 80.2 | 86.0 |
| Rsa1.0_01591.1.g28228.t1 | gb EOA32419.1  hypothetical protein CARUB_v10015693mg [Capsella rubella]                                                                                                                                                                                                                                                                                                                                                                                                                                                                                                                                                                                                                                                                                                                                                                        | 461 | 457 | 0         | 99.1  | 75.3 | 85.0 | hypothetical protein CARUB_v10015693mg              | gbpln | Capsella rubella     | AT3G10730.1   Symbols: SUN2, ATSUN2   SAD1/UNC-84 domain protein 2   chr3:3358556-3360522 REVERSE LENGTH=455                                  | 461 | 455 | 0         | 98.7  | 75.7 | 84.8 |
| Rsa1.0_01591.1.g28229.t1 | gb EOA32148.1  hypothetical protein CARUB_v10015399mg, partial [Capsella rubella]                                                                                                                                                                                                                                                                                                                                                                                                                                                                                                                                                                                                                                                                                                                                                               | 428 | 419 | 7.00E-83  | 97.9  | 47.9 | 61.4 | hypothetical protein CARUB_v10015399mg, partial     | gbpln | Capsella rubella     | AT1G05080.1   Symbols:   F-box/RNI-like/FBD-like domains-containing protein   chr1:1459091-1460579 FORWARD LENGTH=439                         | 428 | 439 | 8.00E-71  | 102.6 | 42.1 | 59.3 |
| Rsa1.0_01591.1.g28230.t1 | gb EOA33837.1  hypothetical protein CARUB_v10021318mg, partial [Capsella rubella]                                                                                                                                                                                                                                                                                                                                                                                                                                                                                                                                                                                                                                                                                                                                                               | 166 | 290 | 6.00E-31  | 174.7 | 41.6 | 57.2 | hypothetical protein CARUB_v10021318mg, partial     | gbpln | Capsella rubella     | AT4G04650.1   Symbols:   RNA-directed DNA polymerase (reverse transcriptase)-related family protein   chr4:2353989-2355213 REVERSE LENGTH=332 | 166 | 332 | 4.00E-25  | 200.0 | 35.5 | 53.0 |
| Rsa1.0_01591.1.g28231.t1 | gb EOA18354.1  hypothetical protein CARUB_v10006874mg, partial [Capsella rubella]                                                                                                                                                                                                                                                                                                                                                                                                                                                                                                                                                                                                                                                                                                                                                               | 386 | 430 | 1.00E-70  | 111.4 | 44.8 | 60.1 | hypothetical protein CARUB_v10006874mg, partial     | gbpln | Capsella rubella     | AT1G05080.1   Symbols:   F-box/RNI-like/FBD-like domains-containing protein   chr1:1459091-1460579 FORWARD LENGTH=439                         | 386 | 439 | 4.00E-61  | 113.7 | 43.5 | 58.0 |
| Rsa1.0_01591.1.g28232.t1 | gb EOA30989.1  hypothetical protein CARUB_v10014134mg [Capsella rubella]                                                                                                                                                                                                                                                                                                                                                                                                                                                                                                                                                                                                                                                                                                                                                                        | 224 | 335 | 5.00E-91  | 149.6 | 90.2 | 94.2 | hypothetical protein CARUB_v10014134mg              | gbpln | Capsella rubella     | AT3G10760.1   Symbols:   Homeodomain-like superfamily protein   chr3:3369814-3370821 FORWARD LENGTH=335                                       | 224 | 335 | 2.00E-83  | 149.6 | 86.2 | 90.6 |

|                          |                                                                                                                                                                                                                                                                                                             |      |      |           |       |      |      |                                        |       |                      |                                                                                                                                                                                                                                                                                         |      |      |           |       |      |      |
|--------------------------|-------------------------------------------------------------------------------------------------------------------------------------------------------------------------------------------------------------------------------------------------------------------------------------------------------------|------|------|-----------|-------|------|------|----------------------------------------|-------|----------------------|-----------------------------------------------------------------------------------------------------------------------------------------------------------------------------------------------------------------------------------------------------------------------------------------|------|------|-----------|-------|------|------|
| Rsa1.0_01592.1.g28233.t1 | refNP_197954.1  Exostosin family protein [Arabidopsis thaliana] gi 110738111 dbj BAF00988.1  hypothetical protein [Arabidopsis thaliana] gi 332006108 gb AED93491.1  Exostosin family protein [Arabidopsis thaliana]                                                                                        | 610  | 654  | 0         | 107.2 | 79.0 | 86.9 | Exostosin family protein               | gbpln | Arabidopsis thaliana | AT5G25820.1   Symbols:   Exostosin family protein   chr5:8997248-8999574 REVERSE LENGTH=654                                                                                                                                                                                             | 610  | 654  | 0         | 107.2 | 79.0 | 86.9 |
| Rsa1.0_01592.1.g28234.t1 | refNP_197955.1  GATA transcription factor 12 [Arabidopsis thaliana] gi 71660770 sp P69781.1 GAT12_ARATH RecName: Full=GATA transcription factor 12 gi 225898931 dbj BAH30596.1  hypothetical protein [Arabidopsis thaliana] gi 332006109 gb AED93492.1  GATA transcription factor 12 [Arabidopsis thaliana] | 310  | 331  | 1.00E-111 | 106.8 | 73.2 | 82.3 | GATA transcription factor 12           | gbpln | Arabidopsis thaliana | AT5G25830.1   Symbols:   GATA12   GATA transcription factor 12   chr5:9004398-9005502 REVERSE LENGTH=331                                                                                                                                                                                | 310  | 331  | 1.00E-114 | 106.8 | 73.2 | 82.3 |
| Rsa1.0_01592.1.g28235.t1 | gb AAM63896.1  unknown [Arabidopsis thaliana]                                                                                                                                                                                                                                                               | 176  | 173  | 2.00E-82  | 98.3  | 86.9 | 90.9 | unknown                                | gbpln | Arabidopsis thaliana | AT5G25840.1   Symbols:   Protein of unknown function (DUF1677)   chr5:9010909-9011430 REVERSE LENGTH=173                                                                                                                                                                                | 176  | 173  | 1.00E-84  | 98.3  | 86.9 | 90.9 |
| Rsa1.0_01592.1.g28236.t1 | gb ADB93665.1  indole-3-acetic acid inducible 28 [Arabidopsis thaliana] gi 28479453 gb ADB93669.1  indole-3-acetic acid inducible 28 [Arabidopsis thaliana]                                                                                                                                                 | 147  | 168  | 1.00E-61  | 114.3 | 84.4 | 91.8 | indole-3-acetic acid inducible 28      | gbpln | Arabidopsis thaliana | AT5G25890.1   Symbols:   IAA28, IAR2   indole-3-acetic acid inducible 28   chr5:9033480-9034554 FORWARD LENGTH=175                                                                                                                                                                      | 147  | 175  | 3.00E-64  | 119.0 | 84.4 | 91.8 |
| Rsa1.0_01592.1.g28237.t1 | gb AAD40130.1 AF149413.11 T1N24.10 gene product [Arabidopsis thaliana]                                                                                                                                                                                                                                      | 156  | 375  | 4.00E-61  | 240.4 | 73.1 | 87.8 | T1N24.10 gene product                  | gbpln | Arabidopsis thaliana | AT5G26050.1   Symbols:   Plant self-incompatibility protein S1 family   chr5:9103395-9103877 REVERSE LENGTH=160                                                                                                                                                                         | 156  | 160  | 8.00E-63  | 102.6 | 73.1 | 87.8 |
| Rsa1.0_01592.1.g28238.t1 | ref XP_002874298.1  hypothetical protein ARALYDRAFT_489454 [Arabidopsis lyrata subsp. lyrata] gi 297320135 gb EFH50557.1  hypothetical protein ARALYDRAFT_489454 [Arabidopsis lyrata subsp. lyrata]                                                                                                         | 193  | 326  | 6.00E-66  | 168.9 | 61.7 | 68.4 | hypothetical protein ARALYDRAFT_489454 | gbpln | Arabidopsis lyrata   | AT5G26090.1   Symbols:   Plant self-incompatibility protein S1 family   chr5:9109026-9113235 REVERSE LENGTH=401                                                                                                                                                                         | 193  | 401  | 2.00E-68  | 207.8 | 61.1 | 68.4 |
| Rsa1.0_01592.1.g28239.t1 | gb AAD40131.1 AF149413.12 T1N24.11 gene product [Arabidopsis thaliana]                                                                                                                                                                                                                                      | 303  | 258  | 1.00E-74  | 85.1  | 43.6 | 49.5 | T1N24.11 gene product                  | gbpln | Arabidopsis thaliana | AT5G26090.1   Symbols:   Plant self-incompatibility protein S1 family   chr5:9109026-9113235 REVERSE LENGTH=401                                                                                                                                                                         | 303  | 401  | 1.00E-75  | 132.3 | 42.9 | 48.8 |
| Rsa1.0_01592.1.g28240.t2 | gb EOA24760.1  hypothetical protein CARUB_v10018038mg [Capsella rubella] gi 482560570 gb EOA24761.1  hypothetical protein CARUB_v10018038mg [Capsella rubella]                                                                                                                                              | 190  | 205  | 1.00E-88  | 107.9 | 87.9 | 92.6 | hypothetical protein CARUB_v10018038mg | gbpln | Capsella rubella     | AT5G11950.2   Symbols:   Putative lysine decarboxylase family protein   chr5:3855072-3856815 FORWARD LENGTH=216                                                                                                                                                                         | 190  | 216  | 7.00E-87  | 113.7 | 83.7 | 91.6 |
| Rsa1.0_01593.1.g28241.t1 | ref XP_002868537.1  hypothetical protein ARALYDRAFT_355725 [Arabidopsis lyrata subsp. lyrata] gi 297314373 gb EFH44796.1  hypothetical protein ARALYDRAFT_355725 [Arabidopsis lyrata subsp. lyrata]                                                                                                         | 599  | 1370 | 1.00E-128 | 228.7 | 50.4 | 59.1 | hypothetical protein ARALYDRAFT_355725 | gbpln | Arabidopsis lyrata   | AT2G33435.1   Symbols:   RNA-binding (RRM/RBD/RNP motifs) family protein   chr2:14166037-14169492 FORWARD LENGTH=979                                                                                                                                                                    | 599  | 979  | 1.00E-112 | 163.4 | 48.6 | 57.4 |
| Rsa1.0_01593.1.g28242.t1 | ref XP_002872140.1  CYP71B11 [Arabidopsis lyrata subsp. lyrata] gi 297317977 gb EFH48399.1  CYP71B11 [Arabidopsis lyrata subsp. lyrata]                                                                                                                                                                     | 496  | 496  | 0         | 100.0 | 79.8 | 90.7 | CYP71B11                               | gbpln | Arabidopsis lyrata   | AT5G25120.1   Symbols:   CYP71B11   cytochrome p450, family 71, subfamily B, polypeptide 11   chr5:8662851-8664432 FORWARD LENGTH=496                                                                                                                                                   | 496  | 496  | 0         | 100.0 | 78.8 | 90.1 |
| Rsa1.0_01593.1.g28243.t2 | dbj BAB02990.1  retroelement pol polyprotein-like [Arabidopsis thaliana]                                                                                                                                                                                                                                    | 1128 | 1250 | 0         | 110.8 | 56.6 | 73.0 | retroelement pol polyprotein-like      | gbpln | Arabidopsis thaliana | AT4G23160.1   Symbols:   CRK8   cysteine-rich RLK (RECEPTOR-like protein kinase) 8   chr4:12129485-12134086 FORWARD LENGTH=1262                                                                                                                                                         | 1128 | 1262 | 4.00E-83  | 111.9 | 14.9 | 23.2 |
| Rsa1.0_01593.1.g28244.t1 | ref NP_001189662.1  uncharacterized protein [Arabidopsis thaliana] gi 330253675 gb AEC08769.1  uncharacterized protein AT2G32970 [Arabidopsis thaliana]                                                                                                                                                     | 678  | 690  | 0         | 101.8 | 82.6 | 92.2 | uncharacterized protein                | gbpln | Arabidopsis thaliana | AT2G32970.2   Symbols:   unknown protein; FUNCTIONS IN: molecular function unknown; INVOLVED IN: biological process unknown; LOCATED IN: cellular component unknown; EXPRESSED IN: 24 plant structures; EXPRESSED DURING: 15 growth stages.   chr2:13991744-13995065 REVERSE LENGTH=690 | 678  | 690  | 0         | 101.8 | 82.6 | 92.2 |
| Rsa1.0_01593.1.g28245.t1 | ref XP_002881256.1  hypothetical protein ARALYDRAFT_345055 [Arabidopsis lyrata subsp. lyrata] gi 297327095 gb EFH57515.1  hypothetical protein ARALYDRAFT_345055 [Arabidopsis lyrata subsp. lyrata]                                                                                                         | 287  | 291  | 1.00E-141 | 101.4 | 89.2 | 92.3 | hypothetical protein ARALYDRAFT_345055 | gbpln | Arabidopsis lyrata   | AT2G32980.1   Symbols:   unknown protein; Has 158 Blast hits to 154 proteins in 73 species: Archaea - 0; Bacteria - 61; Metazoa - 0; Fungi - 0; Plants - 55; Viruses - 28; Other Eukaryotes - 14 (source: NCBI BLINK).   chr2:13997569-13999715 REVERSE LENGTH=296                      | 287  | 296  | 1.00E-141 | 103.1 | 88.2 | 92.0 |

|                          |                                                                                                                                                                                                                                                                                                                                                                                                                                                                                                                                                                                                                                                                                                                                                                                                                                                                                                                                                                                                                                                                                                                                                                                                                                                                                                                                                                                                                                                                                                                                                                                                                                                                                                                                                                                                                                                                                                                                     |     |     |           |       |      |      |                                        |       |                      |                                                                                                                     |     |     |           |       |      |      |  |
|--------------------------|-------------------------------------------------------------------------------------------------------------------------------------------------------------------------------------------------------------------------------------------------------------------------------------------------------------------------------------------------------------------------------------------------------------------------------------------------------------------------------------------------------------------------------------------------------------------------------------------------------------------------------------------------------------------------------------------------------------------------------------------------------------------------------------------------------------------------------------------------------------------------------------------------------------------------------------------------------------------------------------------------------------------------------------------------------------------------------------------------------------------------------------------------------------------------------------------------------------------------------------------------------------------------------------------------------------------------------------------------------------------------------------------------------------------------------------------------------------------------------------------------------------------------------------------------------------------------------------------------------------------------------------------------------------------------------------------------------------------------------------------------------------------------------------------------------------------------------------------------------------------------------------------------------------------------------------|-----|-----|-----------|-------|------|------|----------------------------------------|-------|----------------------|---------------------------------------------------------------------------------------------------------------------|-----|-----|-----------|-------|------|------|--|
| Rsa1.0_01593.1.g28246.t1 | ref NP_193213.5  TESMIN/TSO1-like CXC 2 [Arabidopsis thaliana] gi 395455099 sp F4JF5.1 TCX2_ARATH RecName: Full=Protein tesmin/TSO1-like CXC 2; Short=ATCX2; AltName: Full=Protein TSO1-like 2; Short=Protein SOL2 gi 332658096 gb AEE83496.1  TESMIN/TSO1-like CXC 2 [Arabidopsis thaliana]                                                                                                                                                                                                                                                                                                                                                                                                                                                                                                                                                                                                                                                                                                                                                                                                                                                                                                                                                                                                                                                                                                                                                                                                                                                                                                                                                                                                                                                                                                                                                                                                                                        | 535 | 674 | 4.00E-47  | 126.0 | 18.5 | 22.8 | TESMIN/TSO1-like CXC 2                 | gbpln | Arabidopsis thaliana | AT4G14770.1   Symbols: TCX2, ATTCX2   TESMIN/TSO1-like CXC 2   chr4:8481522-8484825 REVERSE LENGTH=674              | 535 | 674 | 1.00E-49  | 126.0 | 18.5 | 22.8 |  |
| Rsa1.0_01593.1.g28247.t1 | # # # # # # # # # # # # # # # #                                                                                                                                                                                                                                                                                                                                                                                                                                                                                                                                                                                                                                                                                                                                                                                                                                                                                                                                                                                                                                                                                                                                                                                                                                                                                                                                                                                                                                                                                                                                                                                                                                                                                                                                                                                                                                                                                                     |     |     |           |       |      |      |                                        |       |                      |                                                                                                                     |     |     |           |       |      |      |  |
| Rsa1.0_01593.1.g28248.t1 | ref NP_180863.1  ATP synthase subunit gamma [Arabidopsis thaliana] gi 3334123 sp Q96250.1 ATPG3_ARATH RecName: Full=ATP synthase subunit gamma, mitochondrial; AltName: Full=F-ATPase gamma subunit; Flags: Precursor gi 1655480 dbj BAA13599.1  gamma subunit of mitochondrial F1-ATPase [Arabidopsis thaliana] gi 2924787 gb AAC04916.1  mitochondrial F1-ATPase, gamma subunit (ATP3_ARATH) [Arabidopsis thaliana] gi 14517358 gb AAK62570.1  At2g33040/F25118.22 [Arabidopsis thaliana] gi 17065102 gb AAL32705.1  mitochondrial F1-ATPase, gamma subunit (ATP3_ARATH) [Arabidopsis thaliana] gi 20196990 gb AAM14859.1  mitochondrial F1-ATPase, gamma subunit (ATP3_ARATH) [Arabidopsis thaliana] gi 20857422 gb AAM26719.1  At2g33040/F25118.22 [Arabidopsis thaliana] gi 21554962 gb AAM63740.1  mitochondrial F1-ATPase, gamma subunit (ATP3_ARATH) [Arabidopsis thaliana] gi 330253683 gb AEC08777.1  ATP synthase subunit gamma [Arabidopsis thaliana] ref NP_180863.1  ATP synthase subunit gamma [Arabidopsis thaliana] gi 3334123 sp Q96250.1 ATPG3_ARATH RecName: Full=ATP synthase subunit gamma, mitochondrial; AltName: Full=F-ATPase gamma subunit; Flags: Precursor gi 1655480 dbj BAA13599.1  gamma subunit of mitochondrial F1-ATPase [Arabidopsis thaliana] gi 2924787 gb AAC04916.1  mitochondrial F1-ATPase, gamma subunit (ATP3_ARATH) [Arabidopsis thaliana] gi 14517358 gb AAK62570.1  At2g33040/F25118.22 [Arabidopsis thaliana] gi 17065102 gb AAL32705.1  mitochondrial F1-ATPase, gamma subunit (ATP3_ARATH) [Arabidopsis thaliana] gi 20196990 gb AAM14859.1  mitochondrial F1-ATPase, gamma subunit (ATP3_ARATH) [Arabidopsis thaliana] gi 20857422 gb AAM26719.1  At2g33040/F25118.22 [Arabidopsis thaliana] gi 21554962 gb AAM63740.1  mitochondrial F1-ATPase, gamma subunit (ATP3_ARATH) [Arabidopsis thaliana] gi 330253683 gb AEC08777.1  ATP synthase subunit gamma [Arabidopsis thaliana] | 158 | 325 | 1.00E-64  | 205.7 | 85.4 | 91.8 | ATP synthase subunit gamma             | gbpln | Arabidopsis thaliana | AT2G33040.1   Symbols: ATP3   gamma subunit of Mt ATP synthase   chr2:14018978-14021047 REVERSE LENGTH=325          | 158 | 325 | 4.00E-67  | 205.7 | 85.4 | 91.8 |  |
| Rsa1.0_01593.1.g28249.t1 | ref NP_180863.1  ATP synthase subunit gamma [Arabidopsis thaliana] gi 3334123 sp Q96250.1 ATPG3_ARATH RecName: Full=ATP synthase subunit gamma, mitochondrial; AltName: Full=F-ATPase gamma subunit; Flags: Precursor gi 1655480 dbj BAA13599.1  gamma subunit of mitochondrial F1-ATPase [Arabidopsis thaliana] gi 2924787 gb AAC04916.1  mitochondrial F1-ATPase, gamma subunit (ATP3_ARATH) [Arabidopsis thaliana] gi 14517358 gb AAK62570.1  At2g33040/F25118.22 [Arabidopsis thaliana] gi 17065102 gb AAL32705.1  mitochondrial F1-ATPase, gamma subunit (ATP3_ARATH) [Arabidopsis thaliana] gi 20196990 gb AAM14859.1  mitochondrial F1-ATPase, gamma subunit (ATP3_ARATH) [Arabidopsis thaliana] gi 20857422 gb AAM26719.1  At2g33040/F25118.22 [Arabidopsis thaliana] gi 21554962 gb AAM63740.1  mitochondrial F1-ATPase, gamma subunit (ATP3_ARATH) [Arabidopsis thaliana] gi 330253683 gb AEC08777.1  ATP synthase subunit gamma [Arabidopsis thaliana]                                                                                                                                                                                                                                                                                                                                                                                                                                                                                                                                                                                                                                                                                                                                                                                                                                                                                                                                                                   | 266 | 325 | 1.00E-149 | 122.2 | 97.7 | 99.6 | ATP synthase subunit gamma             | gbpln | Arabidopsis thaliana | AT2G33040.1   Symbols: ATP3   gamma subunit of Mt ATP synthase   chr2:14018978-14021047 REVERSE LENGTH=325          | 266 | 325 | 1.00E-152 | 122.2 | 97.7 | 99.6 |  |
| Rsa1.0_01594.1.g28250.t1 | gb EOA32164.1  hypothetical protein CARUB_v10015420mg [Capsella rubella]                                                                                                                                                                                                                                                                                                                                                                                                                                                                                                                                                                                                                                                                                                                                                                                                                                                                                                                                                                                                                                                                                                                                                                                                                                                                                                                                                                                                                                                                                                                                                                                                                                                                                                                                                                                                                                                            | 142 | 219 | 4.00E-32  | 154.2 | 46.5 | 59.9 | hypothetical protein CARUB_v10015420mg | gbpln | Capsella rubella     | AT3G11402.2   Symbols:   Cysteine/Histidine-rich C1 domain family protein   chr3:3573516-3577765 FORWARD LENGTH=910 | 142 | 219 | 3.00E-18  | 154.2 | 46.5 | 59.9 |  |
| Rsa1.0_01594.1.g28251.t1 | ref NP_179593.1  putative RING-H2 finger protein ATL12 [Arabidopsis thaliana] gi 68565334 sp Q9SL78.1 ATL12_ARATH RecName: Full=Putative RING-H2 finger protein ATL12; Flags: Precursor gi 4580469 gb AAD24393.1  putative RING zinc finger protein [Arabidopsis thaliana] gi 330251863 gb AEC06957.1  putative RING-H2 finger protein ATL12 [Arabidopsis thaliana]                                                                                                                                                                                                                                                                                                                                                                                                                                                                                                                                                                                                                                                                                                                                                                                                                                                                                                                                                                                                                                                                                                                                                                                                                                                                                                                                                                                                                                                                                                                                                                 | 402 | 390 | 1.00E-151 | 97.0  | 69.7 | 79.4 | putative RING-H2 finger protein ATL12  | gbpln | Arabidopsis thaliana | AT2G20030.1   Symbols:   RING/U-box superfamily protein   chr2:8647813-8648985 FORWARD LENGTH=390                   | 402 | 390 | 1.00E-154 | 97.0  | 69.7 | 79.4 |  |

|                          |                                                                                                                                                                                                                                                                                                                                                                                                                                                                                                                                                                                                                                                                                                                                                                       |     |     |           |       |      |      |                                                              |       |                      |                                                                                                                                                                                                                                                                                                                                                                                                                                                                             |     |      |           |       |      |      |
|--------------------------|-----------------------------------------------------------------------------------------------------------------------------------------------------------------------------------------------------------------------------------------------------------------------------------------------------------------------------------------------------------------------------------------------------------------------------------------------------------------------------------------------------------------------------------------------------------------------------------------------------------------------------------------------------------------------------------------------------------------------------------------------------------------------|-----|-----|-----------|-------|------|------|--------------------------------------------------------------|-------|----------------------|-----------------------------------------------------------------------------------------------------------------------------------------------------------------------------------------------------------------------------------------------------------------------------------------------------------------------------------------------------------------------------------------------------------------------------------------------------------------------------|-----|------|-----------|-------|------|------|
| Rsa1.0_01594.1.g28252.t1 | gb AAM62769.1  50S ribosomal protein L4 [Arabidopsis thaliana]                                                                                                                                                                                                                                                                                                                                                                                                                                                                                                                                                                                                                                                                                                        | 512 | 300 | 1.00E-148 | 58.6  | 50.8 | 54.1 | 50S ribosomal protein L4                                     | gbpln | Arabidopsis thaliana | AT2G20060.1   Symbols:   Ribosomal protein L4/L1 family   chr2:8659384-8661227 FORWARD LENGTH=300                                                                                                                                                                                                                                                                                                                                                                           | 512 | 300  | 1.00E-151 | 58.6  | 50.6 | 54.1 |
| Rsa1.0_01594.1.g28253.t1 | ref XP_002873363.1  hypothetical protein ARALYDRAFT_908813 [Arabidopsis lyrata subsp. lyrata] gi 297319200 gb EFH49622.1  hypothetical protein ARALYDRAFT_908813 [Arabidopsis lyrata subsp. lyrata]                                                                                                                                                                                                                                                                                                                                                                                                                                                                                                                                                                   | 258 | 275 | 1.00E-69  | 106.6 | 56.2 | 68.6 | hypothetical protein ARALYDRAFT_908813                       | gbpln | Arabidopsis lyrata   | AT1G76810.1   Symbols:   eukaryotic translation initiation factor 2 (eIF-2) family protein   chr1:28831366-28836310 REVERSE LENGTH=1294                                                                                                                                                                                                                                                                                                                                     | 258 | 1294 | 4.00E-48  | 501.6 | 39.9 | 55.4 |
| Rsa1.0_01594.1.g28254.t1 | gb EOA32941.1  hypothetical protein CARUB_v10016269mg [Capsella rubella]                                                                                                                                                                                                                                                                                                                                                                                                                                                                                                                                                                                                                                                                                              | 182 | 180 | 1.00E-66  | 98.9  | 79.7 | 89.0 | hypothetical protein CARUB_v10016269mg                       | gbpln | Capsella rubella     | AT2G20080.1   Symbols:   unknown protein; FUNCTIONS IN: molecular,function unknown; INVOLVED IN: biological_process unknown; LOCATED IN: chloroplast; BEST Arabidopsis thaliana protein match is: unknown protein (TAIRAT4G28840.1); Has 35333 Blast hits to 34131 proteins in 2444 species: Archae - 798; Bacteria - 22429; Metazoa - 974; Fungi - 991; Plants - 531; Viruses - 0; Other Eukaryotes - 9610 (source: NCBI BLink).   chr2:8663115-8664735 REVERSE LENGTH=178 | 182 | 178  | 5.00E-69  | 97.8  | 80.8 | 86.8 |
| Rsa1.0_01594.1.g28255.t1 | gb ABD65090.1  hypothetical protein 27.t00116 [Brassica oleracea] ref NP_567749.1  Got1/Sft2-like vesicle transport protein [Arabidopsis thaliana] gi 88196739 gb ABD43012.1  At4g26550 [Arabidopsis thaliana] gi 332659817 gb AEE85217.1  Got1/Sft2-like vesicle transport protein [Arabidopsis thaliana]                                                                                                                                                                                                                                                                                                                                                                                                                                                            | 275 | 484 | 2.00E-24  | 176.0 | 28.7 | 39.3 | hypothetical protein 27.t00116                               | gbpln | Brassica oleracea    | #                                                                                                                                                                                                                                                                                                                                                                                                                                                                           | #   | #    | #         | #     | #    |      |
| Rsa1.0_01595.1.g28256.t1 | ref NP_567750.1  FKBP-like peptidyl-prolyl cis-trans isomerase family protein [Arabidopsis thaliana] gi 75306033 sp Q944B0.1 FK161_ARATH RecName: Full=Peptidyl-prolyl cis-trans isomerase FKBP16-1, chloroplastic; Short=PPIase FKBP16-1; AltName: Full=FK506-binding protein 16-1; Short=AtFKBP16-1; AltName: Full=immunophilin FKBP16-1; AltName: Full=Rotamase; Flags: Precursor gi 16612240 gb AAL27493.1 AF439821.1 AT4g26550/M3E9.20 [Arabidopsis thaliana] gi 21928091 gb AAM78074.1  AT4g26550/M3E9.20 [Arabidopsis thaliana] gi 26450730 dbj BAC42474.1  unknown protein [Arabidopsis thaliana] gi 332659818 gb AEE85218.1  FKBP-like peptidyl-prolyl cis-trans isomerase family protein [Arabidopsis thaliana]                                             | 230 | 225 | 1.00E-114 | 97.8  | 91.7 | 95.2 | Got1/Sft2-like vesicle transport protein                     | gbpln | Arabidopsis thaliana | AT4G26550.1   Symbols:   Got1/Sft2-like vesicle transport protein family   chr4:13402755-13404208 REVERSE LENGTH=225                                                                                                                                                                                                                                                                                                                                                        | 230 | 225  | 1.00E-116 | 97.8  | 91.7 | 95.2 |
| Rsa1.0_01595.1.g28257.t1 | ref NP_194387.1  calcineurin B-like 3 [Arabidopsis thaliana] gi 56748808 sp Q8LEM7.2 CNBL3_ARATH RecName: Full=Calcineurin B-like protein 3; AltName: Full=SOS3-like calcium-binding protein 6 gi 3309086 gb AAC2601.0  calcineurin B-like protein 3 [Arabidopsis thaliana] gi 4938495 emb CAB43853.1  calcineurin B-like protein 3 [Arabidopsis thaliana] gi 7269509 emb CAB79512.1  calcineurin B-like protein 3 [Arabidopsis thaliana] gi 18253013 gb AAL62433.1  calcineurin B-like protein 3 [Arabidopsis thaliana] gi 22136404 gb AAM91280.1  calcineurin B-like protein 3 [Arabidopsis thaliana] gi 332659820 gb AEE85220.1  calcineurin B-like 3 [Arabidopsis thaliana] gi 482553189 gb EOA17382.1  hypothetical protein CARUB_v10005674mg [Capsella rubella] | 191 | 207 | 5.00E-79  | 108.4 | 79.1 | 84.3 | FKBP-like peptidyl-prolyl cis-trans isomerase family protein | gbpln | Arabidopsis thaliana | AT4G26555.1   Symbols:   FKBP-like peptidyl-prolyl cis-trans isomerase family protein   chr4:13404622-13406178 REVERSE LENGTH=207                                                                                                                                                                                                                                                                                                                                           | 191 | 207  | 2.00E-81  | 108.4 | 79.1 | 84.3 |
| Rsa1.0_01595.1.g28258.t1 | ref NP_194387.1  calcineurin B-like 3 [Arabidopsis thaliana] gi 56748808 sp Q8LEM7.2 CNBL3_ARATH RecName: Full=Calcineurin B-like protein 3; AltName: Full=SOS3-like calcium-binding protein 6 gi 3309086 gb AAC2601.0  calcineurin B-like protein 3 [Arabidopsis thaliana] gi 4938495 emb CAB43853.1  calcineurin B-like protein 3 [Arabidopsis thaliana] gi 7269509 emb CAB79512.1  calcineurin B-like protein 3 [Arabidopsis thaliana] gi 18253013 gb AAL62433.1  calcineurin B-like protein 3 [Arabidopsis thaliana] gi 22136404 gb AAM91280.1  calcineurin B-like protein 3 [Arabidopsis thaliana] gi 332659820 gb AEE85220.1  calcineurin B-like 3 [Arabidopsis thaliana] gi 482553189 gb EOA17382.1  hypothetical protein CARUB_v10005674mg [Capsella rubella] | 226 | 226 | 1.00E-125 | 100.0 | 96.9 | 99.1 | calcineurin B-like 3                                         | gbpln | Arabidopsis thaliana | AT4G26570.1   Symbols:   ATCBL3, CBL3   calcineurin B-like 3   chr4:13408608-13409998 REVERSE LENGTH=226                                                                                                                                                                                                                                                                                                                                                                    | 226 | 226  | 1.00E-127 | 100.0 | 96.9 | 99.1 |



|                          |                                                                                                                                                                                                                                                                                                                                                                                                                                                                                                                                            |      |      |           |       |      |      |                                          |       |                      |                                                                                                                                                                                                                                                                                                                                                                          |      |      |           |       |      |      |
|--------------------------|--------------------------------------------------------------------------------------------------------------------------------------------------------------------------------------------------------------------------------------------------------------------------------------------------------------------------------------------------------------------------------------------------------------------------------------------------------------------------------------------------------------------------------------------|------|------|-----------|-------|------|------|------------------------------------------|-------|----------------------|--------------------------------------------------------------------------------------------------------------------------------------------------------------------------------------------------------------------------------------------------------------------------------------------------------------------------------------------------------------------------|------|------|-----------|-------|------|------|
| Rsa1.0_01595.1.g28259.t1 | refNP_194389.1  oligopeptide transporter 5 [Arabidopsis thaliana] gi 67460976 sp Q9SUA4.1 OPT5_ARATH RecName: Full=Oligopeptide transporter 5; Short=AtOPT5 gi 13430760 gb AAK26002.1 AF360292.1 putative isp4 protein [Arabidopsis thaliana] gi 493849 emb CAB43855.1  isp4 like protein [Arabidopsis thaliana] gi 7269511 emb CAB79514.1  isp4 like protein [Arabidopsis thaliana] gi 15293229 gb AAK93725.1  putative isp4 protein [Arabidopsis thaliana] gi 332659824 gb AEE85224.1  oligopeptide transporter 5 [Arabidopsis thaliana] | 754  | 753  | 0         | 99.9  | 84.4 | 91.1 | oligopeptide transporter 5               | gbpln | Arabidopsis thaliana | AT4G26590.1   Symbols: ATOPT5, OPT5   oligopeptide transporter 5   chr4:13414134-13416850 REVERSE LENGTH=753                                                                                                                                                                                                                                                             | 754  | 753  | 0         | 99.9  | 84.4 | 91.1 |
| Rsa1.0_01595.1.g28260.t7 | dbj BAJ34003.1  unnamed protein product [Thellungiella halophila]                                                                                                                                                                                                                                                                                                                                                                                                                                                                          | 586  | 560  | 2.00E-40  | 95.6  | 15.9 | 17.6 | unnamed protein product                  | ----  | ----                 | AT4G26640.2   Symbols: WRKY20, AtWRKY20   WRKY family transcription factor family protein   chr4:13437298-13440693 REVERSE LENGTH=557                                                                                                                                                                                                                                    | 586  | 557  | 1.00E-40  | 95.1  | 14.3 | 16.7 |
| Rsa1.0_01595.1.g28261.t1 | refNP_567753.1  RNA recognition motif-containing protein [Arabidopsis thaliana] gi 16930503 gb AAL31937.1 AF419605.1 AT4g26650/T15N24_100 [Arabidopsis thaliana] gi 20453245 gb AAM19861.1  AT4g26650/T15N24_100 [Arabidopsis thaliana] gi 332659832 gb AEE85232.1  RNA recognition motif-containing protein [Arabidopsis thaliana]                                                                                                                                                                                                        | 481  | 455  | 0         | 94.6  | 82.7 | 86.9 | RNA recognition motif-containing protein | gbpln | Arabidopsis thaliana | AT4G26650.1   Symbols:   RNA-binding (RRM/RBD/RNP motifs) family protein   chr4:13445552-13447592 FORWARD LENGTH=455                                                                                                                                                                                                                                                     | 481  | 455  | 0         | 94.6  | 82.7 | 86.9 |
| Rsa1.0_01595.1.g28262.t2 | refXP_002867546.1  MRH5/SHV3 [Arabidopsis lyrata subsp. lyrata] gi 297313382 gb EFH43805.1  MRH5/SHV3 [Arabidopsis lyrata subsp. lyrata]                                                                                                                                                                                                                                                                                                                                                                                                   | 759  | 756  | 0         | 99.6  | 82.1 | 89.1 | MRH5/SHV3                                | gbpln | Arabidopsis lyrata   | AT4G26690.1   Symbols: SHV3, MRH5, GPDL2   PLC-like phosphodiesterase family protein   chr4:13456793-13459890 REVERSE LENGTH=759                                                                                                                                                                                                                                         | 759  | 759  | 0         | 100.0 | 81.2 | 89.3 |
| Rsa1.0_01595.1.g28263.t1 | gb ACP30609.1  disease resistance protein [Brassica rapa subsp. pekinensis]                                                                                                                                                                                                                                                                                                                                                                                                                                                                | 1531 | 2726 | 0         | 178.1 | 54.9 | 73.2 | disease resistance protein               | gbpln | Brassica rapa        | ATMG00860.1   Symbols: ORF158   DNA/RNA polymerases superfamily protein   chrM:235916-236392 FORWARD LENGTH=158                                                                                                                                                                                                                                                          | 1531 | 158  | 3.00E-40  | 10.3  | 5.0  | 6.5  |
| Rsa1.0_01595.1.g28264.t1 | refXP_002869593.1  hypothetical protein ARALYDRAFT_492129 [Arabidopsis lyrata subsp. lyrata] gi 297315429 gb EFH45852.1  hypothetical protein ARALYDRAFT_492129 [Arabidopsis lyrata subsp. lyrata]                                                                                                                                                                                                                                                                                                                                         | 243  | 231  | 1.00E-115 | 95.1  | 81.5 | 88.9 | hypothetical protein ARALYDRAFT_492129   | gbpln | Arabidopsis lyrata   | AT2G16030.1   Symbols:   S-adenosyl-L-methionine-dependent methyltransferases superfamily protein   chr2:6974196-6974891 REVERSE LENGTH=231                                                                                                                                                                                                                              | 243  | 231  | 1.00E-116 | 95.1  | 80.2 | 88.5 |
| Rsa1.0_01595.1.g28265.t1 | refXP_002867545.1  protein phosphatase x-1 [Arabidopsis lyrata subsp. lyrata] gi 297313381 gb EFH43804.1  protein phosphatase x-1 [Arabidopsis lyrata subsp. lyrata]                                                                                                                                                                                                                                                                                                                                                                       | 305  | 305  | 1.00E-175 | 100.0 | 96.1 | 98.0 | protein phosphatase x-1                  | gbpln | Arabidopsis lyrata   | AT4G26720.1   Symbols: PPX1, PPX-1   protein phosphatase X 1   chr4:13470397-13472154 REVERSE LENGTH=305                                                                                                                                                                                                                                                                 | 305  | 305  | 1.00E-177 | 100.0 | 95.7 | 97.7 |
| Rsa1.0_01595.1.g28266.t1 | refXP_002869594.1  ATP synthase subunit H family protein [Arabidopsis lyrata subsp. lyrata] gi 297315430 gb EFH45853.1  ATP synthase subunit H family protein [Arabidopsis lyrata subsp. lyrata]                                                                                                                                                                                                                                                                                                                                           | 70   | 70   | 3.00E-29  | 100.0 | 94.3 | 97.1 | ATP synthase subunit H family protein    | gbpln | Arabidopsis lyrata   | AT4G26710.2   Symbols:   ATPase, V0 complex, subunit E   chr4:13468705-13469668 FORWARD LENGTH=70                                                                                                                                                                                                                                                                        | 70   | 70   | 6.00E-31  | 100.0 | 91.4 | 95.7 |
| Rsa1.0_01595.1.g28267.t1 | refXP_002892884.1  hypothetical protein ARALYDRAFT_312568 [Arabidopsis lyrata subsp. lyrata] gi 297338726 gb EFH69143.1  hypothetical protein ARALYDRAFT_312568 [Arabidopsis lyrata subsp. lyrata]                                                                                                                                                                                                                                                                                                                                         | 289  | 308  | 5.00E-59  | 106.6 | 57.1 | 65.7 | hypothetical protein ARALYDRAFT_312568   | gbpln | Arabidopsis lyrata   | AT1G15800.1   Symbols:   unknown protein; BEST Arabidopsis thaliana protein match is: unknown protein (TAIR:AT1G80610.1); Has 56 Blast hits to 52 proteins in 9 species: Archae - 0; Bacteria - 0; Metazoa - 0; Fungi - 0; Plants - 56; Viruses - 0; Other Eukaryotes - 0 (source: NCBI BLink).   chr1:5441425-5443584 REVERSE LENGTH=207                                | 289  | 207  | 6.00E-31  | 71.6  | 24.2 | 29.4 |
| Rsa1.0_01595.1.g28268.t1 | refXP_002892882.1  hypothetical protein ARALYDRAFT_471776 [Arabidopsis lyrata subsp. lyrata] gi 297338724 gb EFH69141.1  hypothetical protein ARALYDRAFT_471776 [Arabidopsis lyrata subsp. lyrata]                                                                                                                                                                                                                                                                                                                                         | 141  | 1343 | 1.00E-31  | 952.5 | 51.8 | 61.7 | hypothetical protein ARALYDRAFT_471776   | gbpln | Arabidopsis lyrata   | AT1G15780.1   Symbols:   unknown protein; BEST Arabidopsis thaliana protein match is: unknown protein (TAIR:AT2G10440.1); Has 103701 Blast hits to 43153 proteins in 1828 species: Archae - 30; Bacteria - 7385; Metazoa - 38639; Fungi - 11531; Plants - 7727; Viruses - 307; Other Eukaryotes - 38082 (source: NCBI BLink).   chr1:5430446-5435921 REVERSE LENGTH=1335 | 141  | 1335 | 1.00E-33  | 946.8 | 48.9 | 56.7 |

|                          |                                                                                                                                                                                                     |      |      |           |       |      |      |                                                     |       |                      |                                                                                                                                                                                                                                                                                                                                                                                                               |      |      |           |       |      |      |
|--------------------------|-----------------------------------------------------------------------------------------------------------------------------------------------------------------------------------------------------|------|------|-----------|-------|------|------|-----------------------------------------------------|-------|----------------------|---------------------------------------------------------------------------------------------------------------------------------------------------------------------------------------------------------------------------------------------------------------------------------------------------------------------------------------------------------------------------------------------------------------|------|------|-----------|-------|------|------|
| Rsa1.0_01595.1.g28269.t2 | emb CAH67061.1  H0112G12.6 [Oryza sativa Indica Group]                                                                                                                                              | 960  | 811  | 1.00E-152 | 84.5  | 28.3 | 35.7 | H0112G12.6                                          | gbpln | Oryza sativa         | AT1G34070.1   Symbols:   CONTAINS InterPro DOMAIN/s: Retrotransposon gag protein (InterPro:IPR005162); BEST Arabidopsis thaliana protein match is: unknown protein (TAIRAT5G48050.1); Has 648 Blast hits to 647 proteins in 29 species: Archae - 0; Bacteria - 0; Metazoa - 16; Fungi - 25; Plants - 607; Viruses - 0; Other Eukaryotes - 0 (source: NCBI BLink).   chr1:12402283-12403209 FORWARD LENGTH=308 | 960  | 308  | 5.00E-77  | 32.1  | 15.0 | 19.4 |
| Rsa1.0_01595.1.g28270.t4 | ref XP_002892882.1  hypothetical protein ARALYDRAFT_471776 [Arabidopsis lyrata subsp. lyrata] gi 297338724 gb EFH69141.1  hypothetical protein ARALYDRAFT_471776 [Arabidopsis lyrata subsp. lyrata] | 1307 | 1343 | 0         | 102.8 | 81.0 | 86.9 | hypothetical protein ARALYDRAFT_471776              | gbpln | Arabidopsis lyrata   | AT1G15780.1   Symbols:   unknown protein; BEST Arabidopsis thaliana protein match is: unknown protein (TAIRAT2G10440.1); Has 103701 Blast hits to 43153 proteins in 1828 species: Archae - 30; Bacteria - 7385; Metazoa - 38639; Fungi - 11531; Plants - 7727; Viruses - 307; Other Eukaryotes - 38082 (source: NCBI BLink).   chr1:5430446-5435921 REVERSE LENGTH=1335                                       | 1307 | 1335 | 0         | 102.1 | 29.6 | 31.1 |
| Rsa1.0_01595.1.g28271.t1 | gb AAF79348.1 AC007887.7 F15O4.13 [Arabidopsis thaliana]                                                                                                                                            | 505  | 1887 | 1.00E-14  | 373.7 | 7.7  | 10.5 | F15O4.13                                            | gbpln | Arabidopsis thaliana | #                                                                                                                                                                                                                                                                                                                                                                                                             | #    | #    | #         | #     | #    |      |
| Rsa1.0_01596.1.g28272.t1 | #                                                                                                                                                                                                   | #    | #    | #         | #     | #    | -    | ----                                                | ----  | ----                 | #                                                                                                                                                                                                                                                                                                                                                                                                             | #    | #    | #         | #     | #    |      |
| Rsa1.0_01596.1.g28273.t1 | #                                                                                                                                                                                                   | #    | #    | #         | #     | #    | -    | ----                                                | ----  | ----                 | #                                                                                                                                                                                                                                                                                                                                                                                                             | #    | #    | #         | #     | #    |      |
| Rsa1.0_01596.1.g28274.t1 | gb AAM15254.1  putative retroelement pol polyprotein [Arabidopsis thaliana]                                                                                                                         | 484  | 930  | 2.00E-46  | 192.1 | 25.2 | 36.4 | putative retroelement pol polyprotein               | gbpln | Arabidopsis thaliana | #                                                                                                                                                                                                                                                                                                                                                                                                             | #    | #    | #         | #     | #    |      |
| Rsa1.0_01596.1.g28275.t1 | gb EOA16183.1  hypothetical protein CARUB_v10004321mg [Capsella rubella]                                                                                                                            | 249  | 660  | 2.00E-88  | 265.1 | 67.5 | 77.5 | hypothetical protein CARUB_v10004321mg              | gbpln | Capsella rubella     | AT4G23180.1   Symbols: CRK10, RLK4   cysteine-rich RIK (RECEPTOR-like protein kinase) 10   chr4:12138171-12140780 FORWARD LENGTH=669                                                                                                                                                                                                                                                                          | 249  | 669  | 2.00E-85  | 268.7 | 63.1 | 70.7 |
| Rsa1.0_01596.1.g28276.t1 | ref XP_002863244.1  hypothetical protein ARALYDRAFT_332986 [Arabidopsis lyrata subsp. lyrata] gi 297309078 gb EFH39503.1  hypothetical protein ARALYDRAFT_332986 [Arabidopsis lyrata subsp. lyrata] | 438  | 418  | 0         | 95.4  | 85.8 | 89.0 | hypothetical protein ARALYDRAFT_332986              | gbpln | Arabidopsis lyrata   | AT4G13360.1   Symbols:   ATP-dependent caseinolytic (Clp) protease/crotonase family protein   chr4:77751333-7777701 FORWARD LENGTH=421                                                                                                                                                                                                                                                                        | 438  | 421  | 0         | 96.1  | 84.7 | 88.1 |
| Rsa1.0_01596.1.g28277.t1 | ref XP_002863137.1  hypothetical protein ARALYDRAFT_497045 [Arabidopsis lyrata subsp. lyrata] gi 297308971 gb EFH39396.1  hypothetical protein ARALYDRAFT_497045 [Arabidopsis lyrata subsp. lyrata] | 536  | 672  | 0         | 125.4 | 80.2 | 88.1 | hypothetical protein ARALYDRAFT_497045              | gbpln | Arabidopsis lyrata   | AT4G13370.1   Symbols:   Plant protein of unknown function (DUF936)   chr4:7777916-7780334 REVERSE LENGTH=673                                                                                                                                                                                                                                                                                                 | 536  | 673  | 0         | 125.6 | 79.5 | 87.5 |
| Rsa1.0_01597.1.g28278.t1 | gb EOA26975.1  hypothetical protein CARUB_v10023072mg [Capsella rubella] gi 482562786 gb EOA26976.1  hypothetical protein CARUB_v10023072mg [Capsella rubella]                                      | 331  | 497  | 0         | 150.2 | 92.4 | 96.7 | hypothetical protein CARUB_v10023072mg              | gbpln | Capsella rubella     | AT2G39220.1   Symbols: PLP6, PLA IIB   PATATIN-like protein 6   chr2:16375055-16376663 REVERSE LENGTH=499                                                                                                                                                                                                                                                                                                     | 331  | 499  | 1.00E-180 | 150.8 | 92.4 | 95.5 |
| Rsa1.0_01597.1.g28279.t2 | ref XP_002881640.1  RNA binding protein [Arabidopsis lyrata subsp. lyrata] gi 297327479 gb EFH57899.1  RNA binding protein [Arabidopsis lyrata subsp. lyrata]                                       | 2963 | 1181 | 0         | 39.9  | 34.5 | 35.9 | RNA binding protein                                 | gbpln | Arabidopsis lyrata   | AT2G39260.1   Symbols:   binding:RNA binding   chr2:16392288-16399588 REVERSE LENGTH=1181                                                                                                                                                                                                                                                                                                                     | 2963 | 1181 | 0         | 39.9  | 34.2 | 35.7 |
| Rsa1.0_01597.1.g28280.t2 | gb AAC63678.1  putative non-LTR retroelement reverse transcriptase [Arabidopsis thaliana]                                                                                                           | 473  | 1216 | 7.00E-87  | 257.1 | 46.5 | 60.7 | putative non-LTR retroelement reverse transcriptase | gbpln | Arabidopsis thaliana | AT3G24255.1   Symbols:   RNA-directed DNA polymerase (reverse transcriptase)-related family protein   chr3:8789471-8793208 FORWARD LENGTH=746                                                                                                                                                                                                                                                                 | 473  | 746  | 8.00E-42  | 157.7 | 20.7 | 26.2 |
| Rsa1.0_01598.1.g28281.t2 | gb ABD64939.1  hypothetical protein 24.t00017 [Brassica oleracea]                                                                                                                                   | 587  | 442  | 1.00E-78  | 75.3  | 24.7 | 29.8 | hypothetical protein 24.t00017                      | gbpln | Brassica oleracea    | AT2G13770.1   Symbols:   CONTAINS InterPro DOMAIN/s: Putative harbinger transposase-derived nuclease (InterPro:IPR006912); Has 451 Blast hits to 352 proteins in 33 species: Archae - 0; Bacteria - 0; Metazoa - 28; Fungi - 8; Plants - 388; Viruses - 0; Other Eukaryotes - 27 (source: NCBI BLink).   chr2:5736603-5737847 FORWARD LENGTH=343                                                              | 587  | 343  | 6.00E-33  | 58.4  | 10.2 | 13.5 |
| Rsa1.0_01598.1.g28282.t1 | #                                                                                                                                                                                                   | #    | #    | #         | #     | #    | -    | ----                                                | ----  | ----                 | #                                                                                                                                                                                                                                                                                                                                                                                                             | #    | #    | #         | #     | #    |      |
| Rsa1.0_01598.1.g28283.t2 | gb AAG50806.1 AC079281.8 unknown protein [Arabidopsis thaliana]                                                                                                                                     | 2498 | 1213 | 0         | 48.6  | 26.7 | 34.1 | unknown protein                                     | gbpln | Arabidopsis thaliana | AT5G46240.1   Symbols: KAT1   potassium channel in Arabidopsis thaliana 1   chr5:18743652-18746561 REVERSE LENGTH=677                                                                                                                                                                                                                                                                                         | 2498 | 677  | 0         | 27.1  | 23.2 | 24.3 |
| Rsa1.0_01598.1.g28284.t1 | gb EOA14036.1  hypothetical protein CARUB_v10027170mg [Capsella rubella]                                                                                                                            | 144  | 197  | 2.00E-63  | 136.8 | 76.4 | 91.0 | hypothetical protein CARUB_v10027170mg              | gbpln | Capsella rubella     | AT5G46230.1   Symbols:   Protein of unknown function, DUF538   chr5:18742593-18743024 REVERSE LENGTH=143                                                                                                                                                                                                                                                                                                      | 144  | 143  | 3.00E-62  | 99.3  | 73.6 | 88.9 |
| Rsa1.0_01598.1.g28285.t1 | #                                                                                                                                                                                                   | #    | #    | #         | #     | #    | -    | ----                                                | ----  | ----                 | #                                                                                                                                                                                                                                                                                                                                                                                                             | #    | #    | #         | #     | #    |      |

|                          |                                                                                                                                                                                                                                                                                                                                                  |     |      |           |       |      |      |                                                     |       |                      |                                                                                                                                                                                                                                                             |     |     |           |       |      |      |
|--------------------------|--------------------------------------------------------------------------------------------------------------------------------------------------------------------------------------------------------------------------------------------------------------------------------------------------------------------------------------------------|-----|------|-----------|-------|------|------|-----------------------------------------------------|-------|----------------------|-------------------------------------------------------------------------------------------------------------------------------------------------------------------------------------------------------------------------------------------------------------|-----|-----|-----------|-------|------|------|
| Rsa1.0_01598.1.g28286.t1 | dbj BAA97290.1  non-LTR retroelement reverse transcriptase-like [Arabidopsis thaliana]                                                                                                                                                                                                                                                           | 476 | 1072 | 1.00E-114 | 225.2 | 45.8 | 60.3 | non-LTR retroelement reverse transcriptase-like     | gbpln | Arabidopsis thaliana | AT1G60720.1   Symbols:   RNA-directed DNA polymerase (reverse transcriptase)-related family protein   chr1:22357072-22357941 FORWARD LENGTH=289                                                                                                             | 476 | 289 | 3.00E-67  | 60.7  | 27.3 | 36.6 |
| Rsa1.0_01598.1.g28287.t1 | ref XP_002873095.1  predicted protein [Arabidopsis lyrata subsp. lyrata]   gi 297318932 gb EFH49354.1  predicted protein [Arabidopsis lyrata subsp. lyrata]                                                                                                                                                                                      | 251 | 227  | 2.00E-12  | 90.4  | 19.5 | 26.3 | predicted protein                                   | gbpln | Arabidopsis lyrata   | AT5G03495.1   Symbols:   RNA-binding (RRM/RBD/RNP motifs) family protein   chr5:873804-875025 REVERSE LENGTH=226                                                                                                                                            | 251 | 226 | 9.00E-14  | 90.0  | 19.1 | 29.1 |
| Rsa1.0_01598.1.g28288.t1 | ref XP_002879895.1  phosphatidylinositol 3--and 4-kinase family protein [Arabidopsis lyrata subsp. lyrata]   gi 297325734 gb EFH56154.1  phosphatidylinositol 3--and 4-kinase family protein [Arabidopsis lyrata subsp. lyrata]                                                                                                                  | 126 | 542  | 4.00E-44  | 430.2 | 71.4 | 78.6 | phosphatidylinositol 3--and 4-kinase family protein | gbpln | Arabidopsis lyrata   | AT2G40850.1   Symbols:   ATP14K GAMMA 1, P14K GAMMA 1   phosphoinositide 4--kinase gamma 1   chr2:17051575-17053260 FORWARD LENGTH=561                                                                                                                      | 126 | 561 | 4.00E-46  | 445.2 | 70.6 | 77.8 |
| Rsa1.0_01598.1.g28289.t1 | #                                                                                                                                                                                                                                                                                                                                                | #   | #    | #         | #     | #    | #    | -                                                   | ----  | ----                 | #                                                                                                                                                                                                                                                           | #   | #   | #         | #     | #    | #    |
| Rsa1.0_01599.1.g28290.t1 | gb AAG50806.1 AC079281.8 unknown protein [Arabidopsis thaliana]                                                                                                                                                                                                                                                                                  | 644 | 1213 | 1.00E-116 | 188.4 | 38.0 | 53.3 | unknown protein                                     | gbpln | Arabidopsis thaliana | AT3G24255.1   Symbols:   RNA-directed DNA polymerase (reverse transcriptase)-related family protein   chr3:8789471-8793208 FORWARD LENGTH=746                                                                                                               | 644 | 746 | 4.00E-38  | 115.8 | 17.2 | 25.3 |
| Rsa1.0_01599.1.g28291.t1 | ref XP_002866360.1  hypothetical protein ARALYDRAFT_919236 [Arabidopsis lyrata subsp. lyrata]   gi 297312195 gb EFH42619.1  hypothetical protein ARALYDRAFT_919236 [Arabidopsis lyrata subsp. lyrata]                                                                                                                                            | 237 | 241  | 3.00E-97  | 101.7 | 83.5 | 90.3 | hypothetical protein ARALYDRAFT_919236              | gbpln | Arabidopsis lyrata   | AT5G59990.1   Symbols:   CCT motif family protein   chr5:24151206-24153084 REVERSE LENGTH=241                                                                                                                                                               | 237 | 241 | 5.00E-92  | 101.7 | 84.0 | 90.7 |
| Rsa1.0_01599.1.g28292.t1 | ref NP_001154789.1  ribonuclease P subunit Rpp30 [Arabidopsis thaliana]   gi 332009879 gb AED97262.1  ribonuclease P subunit Rpp30 [Arabidopsis thaliana]                                                                                                                                                                                        | 648 | 705  | 0         | 108.8 | 69.8 | 79.6 | ribonuclease P subunit Rpp30                        | gbpln | Arabidopsis thaliana | AT5G59980.2   Symbols:   Polymerase/histidinol phosphatase-like   chr5:24147207-24149783 FORWARD LENGTH=705                                                                                                                                                 | 648 | 705 | 0         | 108.8 | 69.8 | 79.6 |
| Rsa1.0_01600.1.g28293.t1 | gb EOA37264.1  hypothetical protein CARUB_v10010834mg [Capsella rubella]                                                                                                                                                                                                                                                                         | 441 | 448  | 0         | 101.6 | 80.5 | 87.1 | hypothetical protein CARUB_v10010834mg              | gbpln | Capsella rubella     | AT1G26761.1   Symbols:   Arabinanase/levansucrase/invertase   chr1:9250269-9251603 REVERSE LENGTH=444                                                                                                                                                       | 441 | 444 | 0         | 100.7 | 81.2 | 86.8 |
| Rsa1.0_01600.1.g28294.t1 | ref NP_173998.2  SET domain protein 35 [Arabidopsis thaliana]   gi 332192607 gb AEE30728.1  SET domain protein 35 [Arabidopsis thaliana]                                                                                                                                                                                                         | 539 | 545  | 0         | 101.1 | 82.0 | 90.5 | SET domain protein 35                               | gbpln | Arabidopsis thaliana | AT1G26760.1   Symbols:   ATXR1, SDG35   SET domain protein 35   chr1:9248304-9249941 REVERSE LENGTH=545                                                                                                                                                     | 539 | 545 | 0         | 101.1 | 82.0 | 90.5 |
| Rsa1.0_01600.1.g28295.t1 | gb EOA38546.1  hypothetical protein CARUB_v10010351mg [Capsella rubella]                                                                                                                                                                                                                                                                         | 224 | 195  | 6.00E-71  | 87.1  | 67.0 | 75.9 | hypothetical protein CARUB_v10010351mg              | gbpln | Capsella rubella     | AT1G26750.1   Symbols:   unknown protein; Has 44 Blast hits to 44 proteins in 16 species: Archaea - 0; Bacteria - 0; Metazoa - 0; Fungi - 0; Plants - 44; Viruses - 0; Other Eukaryotes - 0 (source: NCBI BLINK).   chr1:9246857-9248053 FORWARD LENGTH=195 | 224 | 195 | 1.00E-71  | 87.1  | 66.1 | 74.6 |
| Rsa1.0_01600.1.g28296.t1 | gb EOA38665.1  hypothetical protein CARUB_v10010602mg [Capsella rubella]                                                                                                                                                                                                                                                                         | 172 | 140  | 8.00E-55  | 81.4  | 68.6 | 71.5 | hypothetical protein CARUB_v10010602mg              | gbpln | Capsella rubella     | AT1G26740.1   Symbols:   Ribosomal L32p protein family   chr1:9245280-9246555 REVERSE LENGTH=134                                                                                                                                                            | 172 | 134 | 1.00E-55  | 77.9  | 66.3 | 70.3 |
| Rsa1.0_01600.1.g28297.t1 | ref NP_173995.1  phosphate transporter PHO1-7 [Arabidopsis thaliana]   gi 75127837 sp Q6R8G3.1 PHO17_ARAT H RecName: Full=Phosphate transporter PHO1 homolog 7; AltName: Short=ALPHO1;H7   gi 41079282 gb AAR99489.1  PHO1-like protein [Arabidopsis thaliana]   gi 332192604 gb AEE30725.1  phosphate transporter PHO1-7 [Arabidopsis thaliana] | 737 | 750  | 0         | 101.8 | 81.8 | 90.0 | phosphate transporter PHO1-7                        | gbpln | Arabidopsis thaliana | AT1G26730.1   Symbols:   EXS (ERD1/XPRI1/SYG1) family protein   chr1:9241435-9244650 FORWARD LENGTH=750                                                                                                                                                     | 737 | 750 | 0         | 101.8 | 81.8 | 90.0 |
| Rsa1.0_01600.1.g28298.t1 | ref XP_002893385.1  hypothetical protein ARALYDRAFT_472736 [Arabidopsis lyrata subsp. lyrata]   gi 297339227 gb EFH69644.1  hypothetical protein ARALYDRAFT_472736 [Arabidopsis lyrata subsp. lyrata]                                                                                                                                            | 560 | 555  | 0         | 99.1  | 87.9 | 92.7 | hypothetical protein ARALYDRAFT_472736              | gbpln | Arabidopsis lyrata   | AT1G26700.1   Symbols:   MLO14, ATML014   Seven transmembrane MLO family protein   chr1:9228300-9232237 FORWARD LENGTH=554                                                                                                                                  | 560 | 554 | 0         | 98.9  | 86.8 | 91.6 |
| Rsa1.0_01600.1.g28299.t1 | ref XP_002890648.1  predicted protein [Arabidopsis lyrata subsp. lyrata]   gi 297336490 gb EFH68907.1  predicted protein [Arabidopsis lyrata subsp. lyrata]                                                                                                                                                                                      | 214 | 214  | 1.00E-107 | 100.0 | 87.9 | 93.5 | predicted protein                                   | gbpln | Arabidopsis lyrata   | AT1G26690.1   Symbols:   emp24/gp25L/p24 family/GOLD family protein   chr1:9224299-9225682 REVERSE LENGTH=214                                                                                                                                               | 214 | 214 | 1.00E-109 | 100.0 | 87.4 | 93.5 |
| Rsa1.0_01600.1.g28300.t1 | ref XP_002893387.1  T24P13.6 [Arabidopsis lyrata subsp. lyrata]   gi 297339229 gb EFH69646.1  T24P13.6 [Arabidopsis lyrata subsp. lyrata]                                                                                                                                                                                                        | 528 | 1003 | 1.00E-140 | 190.0 | 54.0 | 68.9 | T24P13.6                                            | gbpln | Arabidopsis lyrata   | AT1G26680.1   Symbols:   transcriptional factor B3 family protein   chr1:9219552-9223193 FORWARD LENGTH=920                                                                                                                                                 | 528 | 920 | 1.00E-130 | 174.2 | 51.9 | 65.2 |

|                          |                                                                                                                                                                                                                                                                                                                                                                                                      |     |      |           |       |      |      |                                                                             |       |                         |                                                                                                                                                                                                                                                                                                                                                                               |     |     |           |       |      |      |
|--------------------------|------------------------------------------------------------------------------------------------------------------------------------------------------------------------------------------------------------------------------------------------------------------------------------------------------------------------------------------------------------------------------------------------------|-----|------|-----------|-------|------|------|-----------------------------------------------------------------------------|-------|-------------------------|-------------------------------------------------------------------------------------------------------------------------------------------------------------------------------------------------------------------------------------------------------------------------------------------------------------------------------------------------------------------------------|-----|-----|-----------|-------|------|------|
| Rsa1.0_01600.1.g28301.t1 | refXP_002893387.1  T24P13.6<br>[Arabidopsis lyrata subsp. lyrata]<br>gi 297339229 gb EFH69646.1  T24P13.6<br>[Arabidopsis lyrata subsp. lyrata]                                                                                                                                                                                                                                                      | 537 | 1003 | 1.00E-128 | 186.8 | 49.5 | 66.1 | T24P13.6                                                                    | gbpln | Arabidopsis<br>lyrata   | AT1G26680.1   Symbols:   transcriptional<br>factor B3 family protein   chr1:9219552-<br>9223193 FORWARD LENGTH=920                                                                                                                                                                                                                                                            | 537 | 920 | 1.00E-125 | 171.3 | 47.5 | 63.7 |
| Rsa1.0_01600.1.g28302.t1 | refXP_002893387.1  T24P13.6<br>[Arabidopsis lyrata subsp. lyrata]<br>gi 297339229 gb EFH69646.1  T24P13.6<br>[Arabidopsis lyrata subsp. lyrata]                                                                                                                                                                                                                                                      | 534 | 1003 | 1.00E-125 | 187.8 | 50.2 | 65.2 | T24P13.6                                                                    | gbpln | Arabidopsis<br>lyrata   | AT1G26680.1   Symbols:   transcriptional<br>factor B3 family protein   chr1:9219552-<br>9223193 FORWARD LENGTH=920                                                                                                                                                                                                                                                            | 534 | 920 | 1.00E-121 | 172.3 | 48.5 | 61.8 |
| Rsa1.0_01600.1.g28303.t1 | refXP_002890649.1  hypothetical<br>protein ARALYDRAFT_890071<br>[Arabidopsis lyrata subsp. lyrata]<br>gi 297336491 gb EFH69608.1 <br>hypothetical protein<br>ARALYDRAFT_890071 [Arabidopsis<br>lyrata subsp. lyrata]                                                                                                                                                                                 | 181 | 175  | 3.00E-42  | 96.7  | 56.4 | 68.0 | hypothetical protein<br>ARALYDRAFT_890071                                   | gbpln | Arabidopsis<br>lyrata   | AT2G27260.1   Symbols:   Late<br>embryogenesis abundant (LEA)<br>hydroxyproline-rich glycoprotein family  <br>chr2:11669769-11670500 FORWARD<br>LENGTH=243                                                                                                                                                                                                                    | 181 | 243 | 8.00E-18  | 134.3 | 28.2 | 48.1 |
| Rsa1.0_01600.1.g28304.t2 | refNP_564253.2  Prefoldin chaperone<br>subunit family protein [Arabidopsis<br>thaliana] gi 17381132 gb AAL36378.1 <br>unknown protein [Arabidopsis thaliana]<br>gi 20465553 gb AAM20259.1  unknown<br>protein [Arabidopsis thaliana]<br>gi 332192594 gb AEE30715.1  Prefoldin<br>chaperone subunit family protein<br>[Arabidopsis thaliana]                                                          | 178 | 152  | 6.00E-66  | 85.4  | 74.2 | 78.1 | Prefoldin chaperone<br>subunit family protein                               | gbpln | Arabidopsis<br>thaliana | AT1G26660.1   Symbols:   Prefoldin<br>chaperone subunit family protein  <br>chr1:9212298-9213765 FORWARD<br>LENGTH=152                                                                                                                                                                                                                                                        | 178 | 152 | 2.00E-68  | 85.4  | 74.2 | 78.1 |
| Rsa1.0_01601.1.g28305.t1 | gb EMJ01464.1  hypothetical protein<br>PRUPE_ppa015000mg [Prunus persica]                                                                                                                                                                                                                                                                                                                            | 160 | 1493 | 1.00E-31  | 933.1 | 43.8 | 64.4 | hypothetical protein<br>PRUPE_ppa015000mg                                   | gbpln | Prunus<br>persica       | #                                                                                                                                                                                                                                                                                                                                                                             | #   | #   | #         | #     | #    | #    |
| Rsa1.0_01601.1.g28306.t1 | gb AAG51783.1 AC079679.3 reverse<br>transcriptase, putative; 16838-20266<br>[Arabidopsis thaliana]                                                                                                                                                                                                                                                                                                   | 217 | 1142 | 6.00E-22  | 526.3 | 26.3 | 36.4 | reverse transcriptase,<br>putative; 16838-20266                             | gbpln | Arabidopsis<br>thaliana | #                                                                                                                                                                                                                                                                                                                                                                             | #   | #   | #         | #     | #    | #    |
| Rsa1.0_01601.1.g28307.t1 | refXP_002891300.1  hypothetical<br>protein ARALYDRAFT_473826<br>[Arabidopsis lyrata subsp. lyrata]<br>gi 297337142 gb EFH67559.1 <br>hypothetical protein<br>ARALYDRAFT_473826 [Arabidopsis<br>lyrata subsp. lyrata]                                                                                                                                                                                 | 304 | 285  | 1.00E-101 | 93.8  | 65.8 | 77.0 | hypothetical protein<br>ARALYDRAFT_473826                                   | gbpln | Arabidopsis<br>lyrata   | AT1G44890.1   Symbols:   BEST Arabidopsis<br>thaliana protein match is: homolog of yeast<br>oxidase assembly 1 (OXA1)<br>(TAIR:AT5G62050.1); Has 40 Blast hits to 40<br>proteins in 7 species: Archae - 0; Bacteria -<br>0; Metazoa - 0; Fungi - 0; Plants - 39;<br>Viruses - 0; Other Eukaryotes - 1 (source:<br>NCBI BLINK).   chr1:16963358-16964818<br>FORWARD LENGTH=281 | 304 | 281 | 4.00E-99  | 92.4  | 65.1 | 76.0 |
| Rsa1.0_01601.1.g28308.t1 | refNP_175105.2  YbaK/aminocyl-tRNA<br>synthetase-associated domain-<br>containing protein [Arabidopsis thaliana]<br>gi 26451543 dbj BAC42869.1  unknown<br>protein [Arabidopsis thaliana]<br>gi 28973135 gb AA063892.1  unknown<br>protein [Arabidopsis thaliana]<br>gi 332193936 gb AEE32057.1 <br>YbaK/aminocyl-tRNA synthetase-<br>associated domain-containing protein<br>[Arabidopsis thaliana] | 306 | 307  | 1.00E-137 | 100.3 | 82.0 | 88.6 | YbaK/aminocyl-tRNA<br>synthetase-associated<br>domain-containing<br>protein | gbpln | Arabidopsis<br>thaliana | AT1G44835.1   Symbols:   YbaK/aminocyl-<br>tRNA synthetase-associated domain  <br>chr1:16939909-16942337 FORWARD<br>LENGTH=307                                                                                                                                                                                                                                                | 306 | 307 | 1.00E-139 | 100.3 | 82.0 | 88.6 |
| Rsa1.0_01601.1.g28309.t7 | gb EOA23804.1  hypothetical protein<br>CARUB_v10017017mg, partial [Capsella<br>rubella]                                                                                                                                                                                                                                                                                                              | 478 | 521  | 2.00E-39  | 109.0 | 20.1 | 26.4 | hypothetical protein<br>CARUB_v10017017mg,<br>partial                       | gbpln | Capsella<br>rubella     | AT5G40595.1   Symbols:   unknown protein;<br>Has 30201 Blast hits to 17322 proteins in<br>780 species: Archae - 12; Bacteria - 1396;<br>Metazoa - 17338; Fungi - 3422; Plants -<br>5037; Viruses - 0; Other Eukaryotes - 2996<br>(source: NCBI BLINK).   chr5:16253510-<br>16254079 FORWARD LENGTH=141                                                                        | 478 | 141 | 8.00E-15  | 29.5  | 8.4  | 12.3 |
| Rsa1.0_01601.1.g28310.t2 | gb AAG51783.1 AC079679.3 reverse<br>transcriptase, putative; 16838-20266<br>[Arabidopsis thaliana]                                                                                                                                                                                                                                                                                                   | 647 | 1142 | 9.00E-87  | 176.5 | 27.0 | 34.5 | reverse transcriptase,<br>putative; 16838-20266                             | gbpln | Arabidopsis<br>thaliana | AT4G29090.1   Symbols:   Ribonuclease H-<br>like superfamily protein   chr4:14333528-<br>14335255 FORWARD LENGTH=575                                                                                                                                                                                                                                                          | 647 | 575 | 5.00E-31  | 88.9  | 14.5 | 25.0 |
| Rsa1.0_01601.1.g28311.t1 | #                                                                                                                                                                                                                                                                                                                                                                                                    | #   | #    | #         | #     | #    | #    | -                                                                           | ----  | ----                    | #                                                                                                                                                                                                                                                                                                                                                                             | #   | #   | #         | #     | #    | #    |
| Rsa1.0_01602.1.g28312.t1 | refNP_187113.1  Alba DNA/RNA-<br>binding protein [Arabidopsis thaliana]<br>gi 6175166 gb AAF04892.1 AC011437.7<br>unknown protein [Arabidopsis thaliana]<br>gi 38454036 gb AAR20712.1  At3g04620<br>[Arabidopsis thaliana]<br>gi 38604012 gb AAR24749.1  At3g04620<br>[Arabidopsis thaliana]<br>gi 332640586 gb AEE74107.1  Alba<br>DNA/RNA-binding protein [Arabidopsis<br>thaliana]                | 164 | 164  | 2.00E-63  | 100.0 | 87.2 | 90.9 | Alba DNA/RNA-<br>binding protein                                            | gbpln | Arabidopsis<br>thaliana | AT3G04620.1   Symbols:   Alba DNA/RNA-<br>binding protein   chr3:1255660-1256739<br>REVERSE LENGTH=164                                                                                                                                                                                                                                                                        | 164 | 164 | 7.00E-66  | 100.0 | 87.2 | 90.9 |
| Rsa1.0_01602.1.g28313.t1 | gb EOA30196.1  hypothetical protein<br>CARUB_v10013313mg [Capsella rubella]                                                                                                                                                                                                                                                                                                                          | 544 | 582  | 0         | 107.0 | 75.4 | 84.9 | hypothetical protein<br>CARUB_v10013313mg                                   | gbpln | Capsella<br>rubella     | AT4G03460.1   Symbols:   Ankyrin repeat<br>family protein   chr4:1536404-1540111<br>REVERSE LENGTH=677                                                                                                                                                                                                                                                                        | 544 | 677 | 1.00E-45  | 124.4 | 29.0 | 45.0 |
| Rsa1.0_01602.1.g28314.t1 | gb EOA29585.1  hypothetical protein<br>CARUB_v10013041mg [Capsella rubella]                                                                                                                                                                                                                                                                                                                          | 740 | 750  | 0         | 101.4 | 90.7 | 95.3 | hypothetical protein<br>CARUB_v10013041mg                                   | gbpln | Capsella<br>rubella     | AT1G64260.1   Symbols:   MuDR family<br>transposase   chr1:23847756-23849915<br>FORWARD LENGTH=719                                                                                                                                                                                                                                                                            | 740 | 719 | 1.00E-41  | 97.2  | 17.8 | 31.4 |

|                          |                                                                                                                                                                                                        |      |      |           |       |      |      |                                                |       |                      |                                                                                                                                                                                                                                                                                                                                                                                                                                                                                                                               |      |     |           |       |      |      |
|--------------------------|--------------------------------------------------------------------------------------------------------------------------------------------------------------------------------------------------------|------|------|-----------|-------|------|------|------------------------------------------------|-------|----------------------|-------------------------------------------------------------------------------------------------------------------------------------------------------------------------------------------------------------------------------------------------------------------------------------------------------------------------------------------------------------------------------------------------------------------------------------------------------------------------------------------------------------------------------|------|-----|-----------|-------|------|------|
| Rsa1.0_01602.1.g28315.t1 | gb ACT33454.1  histone deacetylase 1 [Brassica rapa subsp. pekinensis]                                                                                                                                 | 505  | 502  | 0         | 99.4  | 96.4 | 98.0 | histone deacetylase 1                          | gbpln | Brassica rapa        | AT4G38130.1   Symbols: HD1, ATHD1, HDA1, RPD3A, HDA19, ATHDA19   histone deacetylase 1   chr4:17896493-17899057 REVERSE LENGTH=501                                                                                                                                                                                                                                                                                                                                                                                            | 505  | 501 | 0         | 99.2  | 94.9 | 96.2 |
| Rsa1.0_01602.1.g28316.t1 | dbj BAB08360.1  Ta11-like non-LTR retroelement protein-like [Arabidopsis thaliana]                                                                                                                     | 645  | 655  | 0         | 101.6 | 57.2 | 68.8 | Ta11-like non-LTR retroelement protein-like    | gbpln | Arabidopsis thaliana | AT5G59920.1   Symbols: ULJ3   Cysteine/Histidine-rich C1 domain family protein   chr5:24128756-24130888 FORWARD LENGTH=710                                                                                                                                                                                                                                                                                                                                                                                                    | 645  | 710 | 0         | 110.1 | 55.7 | 66.8 |
| Rsa1.0_01602.1.g28317.t1 | dbj BAB08360.1  Ta11-like non-LTR retroelement protein-like [Arabidopsis thaliana]                                                                                                                     | 643  | 655  | 0         | 101.9 | 56.1 | 69.1 | Ta11-like non-LTR retroelement protein-like    | gbpln | Arabidopsis thaliana | AT5G59920.1   Symbols: ULJ3   Cysteine/Histidine-rich C1 domain family protein   chr5:24128756-24130888 FORWARD LENGTH=710                                                                                                                                                                                                                                                                                                                                                                                                    | 643  | 710 | 0         | 110.4 | 54.4 | 66.9 |
| Rsa1.0_01602.1.g28318.t1 | ref XP_002882364.1  tRNA synthetase class I family protein [Arabidopsis lyrata subsp. lyrata]<br>gi 297328204 gb EFH58623.1  tRNA synthetase class I family protein [Arabidopsis lyrata subsp. lyrata] | 405  | 402  | 0         | 99.3  | 94.8 | 97.5 | tRNA synthetase class I family protein         | gbpln | Arabidopsis lyrata   | AT3G04600.2   Symbols:   Nucleotidyl transferase superfamily protein   chr3:1243152-1245958 FORWARD LENGTH=402                                                                                                                                                                                                                                                                                                                                                                                                                | 405  | 402 | 0         | 99.3  | 94.3 | 96.5 |
| Rsa1.0_01602.1.g28319.t1 | gb EOA30721.1  hypothetical protein CARUB_v10013864mg [Capsella rubella]                                                                                                                               | 394  | 402  | 1.00E-142 | 102.0 | 78.9 | 84.8 | hypothetical protein CARUB_v10013864mg         | gbpln | Capsella rubella     | AT3G04590.2   Symbols:   AT hook motif DNA-binding family protein   chr3:1239245-1241603 REVERSE LENGTH=411                                                                                                                                                                                                                                                                                                                                                                                                                   | 394  | 411 | 1.00E-134 | 104.3 | 76.6 | 82.2 |
| Rsa1.0_01602.1.g28320.t1 | gb EOA29937.1  hypothetical protein CARUB_v10013030mg [Capsella rubella]                                                                                                                               | 765  | 766  | 0         | 100.1 | 94.6 | 97.6 | hypothetical protein CARUB_v10013030mg         | gbpln | Capsella rubella     | AT3G04580.2   Symbols: EIN4   Signal transduction histidine kinase, hybrid-type, ethylene sensor   chr3:1235576-1237965 REVERSE LENGTH=766                                                                                                                                                                                                                                                                                                                                                                                    | 765  | 766 | 0         | 100.1 | 94.6 | 97.6 |
| Rsa1.0_01602.1.g28321.t1 | #                                                                                                                                                                                                      | #    | #    | #         | #     | #    | #    | -                                              | ----  | ----                 | #                                                                                                                                                                                                                                                                                                                                                                                                                                                                                                                             | #    | #   | #         | #     | #    |      |
| Rsa1.0_01602.1.g28322.t1 | gb AA98677.1  putative DNA-binding protein [Noccaea caerulescens]                                                                                                                                      | 312  | 312  | 1.00E-113 | 100.0 | 93.3 | 95.8 | putative DNA-binding protein                   | gbpln | Noccaea caerulescens | AT3G04570.1   Symbols: AHL19   AT-hook motif nuclear-localized protein 19   chr3:1231221-1232168 FORWARD LENGTH=315                                                                                                                                                                                                                                                                                                                                                                                                           | 312  | 315 | 1.00E-114 | 101.0 | 90.4 | 92.3 |
| Rsa1.0_01602.1.g28323.t1 | gb EOA32167.1  hypothetical protein CARUB_v10015423mg [Capsella rubella]                                                                                                                               | 392  | 446  | 0         | 113.8 | 82.7 | 91.8 | hypothetical protein CARUB_v10015423mg         | gbpln | Capsella rubella     | AT3G04550.1   Symbols:   unknown protein; INVOLVED IN: biological_process unknown; LOCATED IN: chloroplast stroma, chloroplast; EXPRESSED IN: 22 plant structures; EXPRESSED DURING: 13 growth stages; BEST Arabidopsis thaliana protein match is: unknown protein (TAIR:AT5G28500.1); Has 110 Blast hits to 110 proteins in 51 species: Archae - 0; Bacteria - 67; Metazoa - 1; Fungi - 0; Plants - 41; Viruses - 0; Other Eukaryotes - 1 (source: NCBI BLINK).   chr3:1225961-1227310 FORWARD LENGTH=449                    | 392  | 449 | 0         | 114.5 | 83.2 | 90.6 |
| Rsa1.0_01603.1.g28324.t1 | ref XP_002882955.1  hypothetical protein ARALYDRAFT.479016 [Arabidopsis lyrata subsp. lyrata]<br>gi 297328795 gb EFH59214.1  hypothetical protein ARALYDRAFT.479016 [Arabidopsis lyrata subsp. lyrata] | 196  | 177  | 3.00E-63  | 90.3  | 78.1 | 80.1 | hypothetical protein ARALYDRAFT.479016         | gbpln | Arabidopsis lyrata   | AT3G15640.1   Symbols:   Rubredoxin-like superfamily protein   chr3:529273-5301371 FORWARD LENGTH=176                                                                                                                                                                                                                                                                                                                                                                                                                         | 196  | 176 | 6.00E-65  | 89.8  | 78.6 | 80.1 |
| Rsa1.0_01603.1.g28325.t1 | gb AAG51754.1 AC068667.33 reverse transcriptase, putative; 100033-105622 [Arabidopsis thaliana]                                                                                                        | 1763 | 1557 | 0         | 88.3  | 38.9 | 51.8 | reverse transcriptase, putative; 100033-105622 | gbpln | Arabidopsis thaliana | AT4G29090.1   Symbols:   Ribonuclease H-like superfamily protein   chr4:14333528-14335255 FORWARD LENGTH=575                                                                                                                                                                                                                                                                                                                                                                                                                  | 1763 | 575 | 2.00E-93  | 32.6  | 10.7 | 16.5 |
| Rsa1.0_01603.1.g28326.t1 | gb EOA38678.1  hypothetical protein CARUB_v10010650mg [Capsella rubella]                                                                                                                               | 114  | 126  | 3.00E-30  | 110.5 | 64.0 | 77.2 | hypothetical protein CARUB_v10010650mg         | gbpln | Capsella rubella     | AT3G15630.1   Symbols:   unknown protein; FUNCTIONS IN: molecular_function unknown; INVOLVED IN: biological_process unknown; LOCATED IN: chloroplast; EXPRESSED IN: 24 plant structures; EXPRESSED DURING: 15 growth stages; BEST Arabidopsis thaliana protein match is: unknown protein (TAIR:AT1G52720.1); Has 61 Blast hits to 61 proteins in 13 species: Archae - 0; Bacteria - 0; Metazoa - 0; Fungi - 0; Plants - 61; Viruses - 0; Other Eukaryotes - 0 (source: NCBI BLINK).   chr3:5297188-5297511 REVERSE LENGTH=107 | 114  | 107 | 8.00E-33  | 93.9  | 68.4 | 74.6 |
| Rsa1.0_01603.1.g28327.t1 | gb EOA30559.1  hypothetical protein CARUB_v10013684mg [Capsella rubella]                                                                                                                               | 407  | 453  | 0         | 111.3 | 87.0 | 92.6 | hypothetical protein CARUB_v10013684mg         | gbpln | Capsella rubella     | AT3G15570.1   Symbols:   Phototropic-responsive NPH3 family protein   chr3:5270267-5271700 REVERSE LENGTH=452                                                                                                                                                                                                                                                                                                                                                                                                                 | 407  | 452 | 0         | 111.1 | 85.7 | 90.9 |
| Rsa1.0_01603.1.g28328.t1 | gb EOA31503.1  hypothetical protein CARUB_v10014689mg [Capsella rubella]                                                                                                                               | 194  | 197  | 1.00E-97  | 101.5 | 91.8 | 93.3 | hypothetical protein CARUB_v10014689mg         | gbpln | Capsella rubella     | AT3G15540.1   Symbols: IAA19, MSG2   indole-3-acetic acid inducible 19   chr3:5264100-5265378 FORWARD LENGTH=197                                                                                                                                                                                                                                                                                                                                                                                                              | 194  | 197 | 1.00E-100 | 101.5 | 91.2 | 93.8 |
| Rsa1.0_01603.1.g28329.t1 | dbj BAJ34312.1  unnamed protein product [Theilingiella halophila]                                                                                                                                      | 351  | 364  | 1.00E-151 | 103.7 | 85.2 | 89.5 | unnamed protein product                        | ----  | ----                 | AT3G15510.1   Symbols: ATNAC2, ANAC056, NARS1, NAC2   NAC domain containing protein 2   chr3:5243696-5245037 FORWARD LENGTH=364                                                                                                                                                                                                                                                                                                                                                                                               | 351  | 364 | 1.00E-152 | 103.7 | 84.3 | 90.0 |

|                          |                                                                                                                                                                                                                                                                                                                                                                                                                                                                                                                                                                                                                                                                                                                                                                                                                                                                                                                                                |      |      |           |       |      |      |                                                          |       |                      |                                                                                                                                                                                                                                                                                                                                                                                |     |      |           |       |      |      |
|--------------------------|------------------------------------------------------------------------------------------------------------------------------------------------------------------------------------------------------------------------------------------------------------------------------------------------------------------------------------------------------------------------------------------------------------------------------------------------------------------------------------------------------------------------------------------------------------------------------------------------------------------------------------------------------------------------------------------------------------------------------------------------------------------------------------------------------------------------------------------------------------------------------------------------------------------------------------------------|------|------|-----------|-------|------|------|----------------------------------------------------------|-------|----------------------|--------------------------------------------------------------------------------------------------------------------------------------------------------------------------------------------------------------------------------------------------------------------------------------------------------------------------------------------------------------------------------|-----|------|-----------|-------|------|------|
| Rsa1.0_01603.1.g28330.t1 | gb AAC32226.1  putative non-LTR retroelement reverse transcriptase [Arabidopsis thaliana]                                                                                                                                                                                                                                                                                                                                                                                                                                                                                                                                                                                                                                                                                                                                                                                                                                                      | 938  | 1529 | 0         | 163.0 | 38.4 | 48.8 | putative non-LTR retroelement reverse transcriptase      | gbpln | Arabidopsis thaliana | AT3G15500.1   Symbols: ATNAC3, ANAC055, NAC055, NAC3   NAC domain containing protein 3   chr:3:5234731-5235882 FORWARD LENGTH=317                                                                                                                                                                                                                                              | 938 | 317  | 1.00E-115 | 33.8  | 23.9 | 25.8 |
| Rsa1.0_01603.1.g28331.t1 | gb EOA32735.1  hypothetical protein CARUB_v10016040mg [Capsella rubella]                                                                                                                                                                                                                                                                                                                                                                                                                                                                                                                                                                                                                                                                                                                                                                                                                                                                       | 317  | 317  | 1.00E-170 | 100.0 | 90.5 | 95.6 | hypothetical protein CARUB_v10016040mg                   | gbpln | Capsella rubella     | AT3G15460.1   Symbols:   Ribosomal RNA processing Brix domain protein   chr:3:5214279-5216188 REVERSE LENGTH=315                                                                                                                                                                                                                                                               | 317 | 315  | 1.00E-166 | 99.4  | 88.0 | 93.4 |
| Rsa1.0_01603.1.g28332.t1 | ref NP_974321.1  uncharacterized protein [Arabidopsis thaliana]<br>gi 42572453 ref NP_974322.1  uncharacterized protein [Arabidopsis thaliana]<br>gi 79313241 ref NP_001030700.1  uncharacterized protein [Arabidopsis thaliana]<br>gi 145332587 ref NP_001078159.1  uncharacterized protein [Arabidopsis thaliana] gi 21593726 gb AAM65693.1  unknown [Arabidopsis thaliana]<br>gi 111074242 gb ABH04494.1  AT3g15395 [Arabidopsis thaliana]<br>gi 222423962 dbj BAH19943.1  AT3G15395 [Arabidopsis thaliana]<br>gi 22242431 dbj BAH20112.1  AT3G15395 [Arabidopsis thaliana]<br>gi 332642143 gb AEE75664.1  uncharacterized protein AT3G15395 [Arabidopsis thaliana]<br>gi 332642144 gb AEE75665.1  uncharacterized protein AT3G15395 [Arabidopsis thaliana]<br>gi 332642145 gb AEE75666.1  uncharacterized protein AT3G15395 [Arabidopsis thaliana]<br>gi 332642146 gb AEE75667.1  uncharacterized protein AT3G15395 [Arabidopsis thaliana] | 63   | 59   | 5.00E-20  | 93.7  | 76.2 | 85.7 | uncharacterized protein                                  | gbpln | Arabidopsis thaliana | AT3G15395.4   Symbols:   unknown protein; FUNCTIONS IN: molecular function unknown; INVOLVED IN: biological process unknown; LOCATED IN: endomembrane system; Has 31 Blast hits to 31 proteins in 11 species: Archae - 0; Bacteria - 0; Metazoa - 0; Fungi - 0; Plants - 31; Viruses - 0; Other Eukaryotes - 0 (source: NCBI BLINK).   chr:3:5201014-5201307 FORWARD LENGTH=59 | 63  | 59   | 8.00E-23  | 93.7  | 76.2 | 85.7 |
| Rsa1.0_01603.1.g28333.t1 | gb EOA32479.1  hypothetical protein CARUB_v10015755mg [Capsella rubella]                                                                                                                                                                                                                                                                                                                                                                                                                                                                                                                                                                                                                                                                                                                                                                                                                                                                       | 569  | 700  | 0         | 123.0 | 92.8 | 95.6 | hypothetical protein CARUB_v10015755mg                   | gbpln | Capsella rubella     | AT3G15380.1   Symbols:   Plasma-membrane choline transporter family protein   chr:3:5193319-5196435 FORWARD LENGTH=700                                                                                                                                                                                                                                                         | 569 | 700  | 0         | 123.0 | 91.9 | 95.6 |
| Rsa1.0_01604.1.g28334.t4 | gb EOA27544.1  hypothetical protein CARUB_v10023683mg [Capsella rubella]                                                                                                                                                                                                                                                                                                                                                                                                                                                                                                                                                                                                                                                                                                                                                                                                                                                                       | 104  | 311  | 8.00E-26  | 299.0 | 72.1 | 82.7 | hypothetical protein CARUB_v10023683mg                   | gbpln | Capsella rubella     | AT2G43140.1   Symbols:   basic helix-loop-helix (bHLH) DNA-binding superfamily protein   chr:2:17932376-17935639 REVERSE LENGTH=297                                                                                                                                                                                                                                            | 104 | 297  | 7.00E-27  | 285.6 | 76.0 | 83.7 |
| Rsa1.0_01604.1.g28335.t1 | emb CAB40067.1  putative retrotransposon polyprotein [Arabidopsis thaliana]<br>gi 7267797 emb CAB81200.1  putative retrotransposon polyprotein [Arabidopsis thaliana]                                                                                                                                                                                                                                                                                                                                                                                                                                                                                                                                                                                                                                                                                                                                                                          | 363  | 1203 | 1.00E-115 | 331.4 | 59.0 | 75.5 | putative retrotransposon polyprotein                     | gbpln | Arabidopsis thaliana | AT4G23160.1   Symbols: CRK8   cysteine-rich RLK (RECEPTOR-like protein kinase) 8   chr:4:12129485-12134086 FORWARD LENGTH=1262                                                                                                                                                                                                                                                 | 363 | 1262 | 1.00E-108 | 347.7 | 54.5 | 71.1 |
| Rsa1.0_01604.1.g28336.t1 | ref XP_004253404.1  PREDICTED: uncharacterized protein LOC101249447, partial [Solanum lycopersicum]                                                                                                                                                                                                                                                                                                                                                                                                                                                                                                                                                                                                                                                                                                                                                                                                                                            | 1037 | 485  | 3.00E-46  | 46.8  | 11.8 | 13.4 | PREDICTED: uncharacterized protein LOC101249447, partial | gbpln | Solanum lycopersicum | # # # # # # #                                                                                                                                                                                                                                                                                                                                                                  | #   | #    | #         | #     | #    | #    |

|                          |                                                                                                                                                                                                                                                                                                                                                                                                                                                                                                                                                                                                                                                                                                                                                                                                                                                                                                                                                                         |     |      |           |       |      |      |                                                                  |       |                      |                                                                                                                                            |     |     |           |       |      |      |
|--------------------------|-------------------------------------------------------------------------------------------------------------------------------------------------------------------------------------------------------------------------------------------------------------------------------------------------------------------------------------------------------------------------------------------------------------------------------------------------------------------------------------------------------------------------------------------------------------------------------------------------------------------------------------------------------------------------------------------------------------------------------------------------------------------------------------------------------------------------------------------------------------------------------------------------------------------------------------------------------------------------|-----|------|-----------|-------|------|------|------------------------------------------------------------------|-------|----------------------|--------------------------------------------------------------------------------------------------------------------------------------------|-----|-----|-----------|-------|------|------|
| Rsa1.0_01604.1.g28337.t1 | ref[NP_850386.1] clathrin interactor EPSIN 2 [Arabidopsis thaliana]<br>gi 30689274 ref[NP_850387.1] clathrin interactor EPSIN 2 [Arabidopsis thaliana] gi 42571203 ref[NP_973675.1] clathrin interactor EPSIN 2 [Arabidopsis thaliana]<br>gi 75116590 sp O67Y19.1 EPN2_ARATH RecName: Full=Clathrin interactor EPSIN 2; AltName: Full=EPSIN-related 2 gi 51970954 dbj BAD44169.1  unknown protein [Arabidopsis thaliana]<br>gi 51971100 dbj BAD44242.1  unknown protein [Arabidopsis thaliana]<br>gi 62319865 dbj BAD93910.1  hypothetical protein [Arabidopsis thaliana] gi 62319867 dbj BAD93914.1  hypothetical protein [Arabidopsis thaliana] gi 110740368 dbj BAF02079.1  hypothetical protein [Arabidopsis thaliana] gi 330255122 gb AEC10216.1  clathrin interactor EPSIN 2 [Arabidopsis thaliana] gi 330255123 gb AEC10217.1  clathrin interactor EPSIN 2 [Arabidopsis thaliana] gi 330255124 gb AEC10218.1  clathrin interactor EPSIN 2 [Arabidopsis thaliana] | 937 | 895  | 0         | 95.5  | 81.0 | 84.3 | clathrin interactor EPSIN 2                                      | gbpln | Arabidopsis thaliana | AT2G43160.1   Symbols:   ENTH/VHS family protein   chr2:17948884-17953267 FORWARD LENGTH=895                                               | 937 | 895 | 0         | 95.5  | 81.0 | 84.3 |
| Rsa1.0_01604.1.g28338.t1 | gb EOA27022.1  hypothetical protein CARUB_v10023119mg [Capsella rubella]                                                                                                                                                                                                                                                                                                                                                                                                                                                                                                                                                                                                                                                                                                                                                                                                                                                                                                | 476 | 477  | 0         | 100.2 | 81.7 | 90.3 | hypothetical protein CARUB_v10023119mg                           | gbpln | Capsella rubella     | AT2G43180.1   Symbols:   Phosphoenolpyruvate carboxylase family protein   chr2:17953719-17955774 REVERSE LENGTH=479                        | 476 | 479 | 0         | 100.6 | 82.8 | 89.3 |
| Rsa1.0_01605.1.g28339.t1 | ref XP_002890037.1  F16A14.28 [Arabidopsis lyrata subsp. lyrata] gi 297335879 gb EFH66296.1  F16A14.28 [Arabidopsis lyrata subsp. lyrata]                                                                                                                                                                                                                                                                                                                                                                                                                                                                                                                                                                                                                                                                                                                                                                                                                               | 584 | 1125 | 0         | 192.6 | 72.6 | 82.2 | F16A14.28                                                        | gbpln | Arabidopsis lyrata   | AT1G14080.1   Symbols: FUT6, ATFUT6   fucosyltransferase 6   chr1:4822580-4824218 FORWARD LENGTH=519                                       | 584 | 519 | 0         | 88.9  | 71.6 | 80.3 |
| Rsa1.0_01605.1.g28340.t2 | ref NP_001077531.1  fucosyltransferase 8 [Arabidopsis thaliana] gi 334302812 sp Q9X178.2 FUT8_ARATH RecName: Full=Probable fucosyltransferase 8; Short=ATFUT8 gi 332190985 gb AEE29106.1  fucosyltransferase 8 [Arabidopsis thaliana]                                                                                                                                                                                                                                                                                                                                                                                                                                                                                                                                                                                                                                                                                                                                   | 669 | 516  | 0         | 77.1  | 53.8 | 60.4 | fucosyltransferase 8                                             | gbpln | Arabidopsis thaliana | AT1G14100.1   Symbols: FUT8   fucosyltransferase 8   chr1:4827961-4829587 FORWARD LENGTH=516                                               | 669 | 516 | 0         | 77.1  | 53.8 | 60.4 |
| Rsa1.0_01605.1.g28341.t1 | ref NP_172864.1  2-oxoglutarate (2OG) and Fe(II)-dependent oxygenase-like protein [Arabidopsis thaliana] gi 5080788 gb AAD39298.1 AC007576_21 Very similar to adventitious rooting related oxygenase [Arabidopsis thaliana] gi 21553384 dbj AAM62477.1  dioxygenase-like protein [Arabidopsis thaliana] gi 24030341 gb AAN41336.1  putative dioxygenase [Arabidopsis thaliana] gi 332190987 gb AEE29108.1  2-oxoglutarate (2OG) and Fe(II)-dependent oxygenase-like protein [Arabidopsis thaliana]                                                                                                                                                                                                                                                                                                                                                                                                                                                                      | 229 | 312  | 1.00E-87  | 136.2 | 65.5 | 82.1 | 2-oxoglutarate (2OG) and Fe(II)-dependent oxygenase-like protein | gbpln | Arabidopsis thaliana | AT1G14120.1   Symbols:   2-oxoglutarate (2OG) and Fe(II)-dependent oxygenase superfamily protein   chr1:4833648-4834833 REVERSE LENGTH=312 | 229 | 312 | 4.00E-90  | 136.2 | 65.5 | 82.1 |
| Rsa1.0_01605.1.g28342.t1 | ref NP_172865.1  2-oxoglutarate (2OG) and Fe(II)-dependent oxygenase-like protein [Arabidopsis thaliana] gi 5080789 gb AAD39299.1 AC007576_22 Very similar to adventitious rooting related oxygenase [Arabidopsis thaliana] gi 26451604 dbj BAC42899.1  putative dioxygenase [Arabidopsis thaliana] gi 28973391 gb AAO64020.1  putative dioxygenase [Arabidopsis thaliana] gi 332190988 gb AEE29109.1  2-oxoglutarate (2OG) and Fe(II)-dependent oxygenase-like protein [Arabidopsis thaliana]                                                                                                                                                                                                                                                                                                                                                                                                                                                                          | 303 | 308  | 1.00E-148 | 101.7 | 84.2 | 90.8 | 2-oxoglutarate (2OG) and Fe(II)-dependent oxygenase-like protein | gbpln | Arabidopsis thaliana | AT1G14130.1   Symbols:   2-oxoglutarate (2OG) and Fe(II)-dependent oxygenase superfamily protein   chr1:4836041-4837040 REVERSE LENGTH=308 | 303 | 308 | 1.00E-151 | 101.7 | 84.2 | 90.8 |
| Rsa1.0_01605.1.g28343.t1 | ref XP_002890040.1  hypothetical protein ARALYDRAFT_471574 [Arabidopsis lyrata subsp. lyrata] gi 297335882 gb EFH66299.1  hypothetical protein ARALYDRAFT_471574 [Arabidopsis lyrata subsp. lyrata]                                                                                                                                                                                                                                                                                                                                                                                                                                                                                                                                                                                                                                                                                                                                                                     | 188 | 189  | 5.00E-91  | 100.5 | 86.7 | 93.1 | hypothetical protein ARALYDRAFT_471574                           | gbpln | Arabidopsis lyrata   | AT1G14150.1   Symbols: PQL1, PQL2   PsbQ-like 2   chr1:4839885-4840632 FORWARD LENGTH=190                                                  | 188 | 190 | 8.00E-90  | 101.1 | 85.6 | 90.4 |

|                          |                                                                                                                                                                                                                                                                                                                                                                                                                                                                                                                                                                                                                                                                                                                                                                                                       |      |      |           |       |      |      |                                                          |       |                      |                                                                                                                               |      |      |           |       |      |      |
|--------------------------|-------------------------------------------------------------------------------------------------------------------------------------------------------------------------------------------------------------------------------------------------------------------------------------------------------------------------------------------------------------------------------------------------------------------------------------------------------------------------------------------------------------------------------------------------------------------------------------------------------------------------------------------------------------------------------------------------------------------------------------------------------------------------------------------------------|------|------|-----------|-------|------|------|----------------------------------------------------------|-------|----------------------|-------------------------------------------------------------------------------------------------------------------------------|------|------|-----------|-------|------|------|
| Rsa1.0_01605.1.g28344.t1 | ref NP_001117282.1  RNA-binding KH domain-containing protein [Arabidopsis thaliana]<br>gi 5080792 gb AAD39302.1 AC007576.25 Unknown protein [Arabidopsis thaliana]<br>gi 332190995 gb AEE29116.1  RNA-binding KH domain-containing protein [Arabidopsis thaliana]                                                                                                                                                                                                                                                                                                                                                                                                                                                                                                                                     | 473  | 479  | 0         | 101.3 | 86.7 | 93.2 | RNA-binding KH domain-containing protein                 | gbpln | Arabidopsis thaliana | AT1G14170.3   Symbols:   RNA-binding KH domain-containing protein   chr1:4843463-4845253 REVERSE LENGTH=479                   | 473  | 479  | 0         | 101.3 | 86.7 | 93.2 |
| Rsa1.0_01605.1.g28345.t1 | gb EOA38108.1  hypothetical protein CARUB_v10009576mg [Capsella rubella]                                                                                                                                                                                                                                                                                                                                                                                                                                                                                                                                                                                                                                                                                                                              | 241  | 354  | 9.00E-73  | 146.9 | 55.2 | 63.1 | hypothetical protein CARUB_v10009576mg                   | gbpln | Capsella rubella     | AT1G14180.1   Symbols:   RING/U-box superfamily protein   chr1:4847828-4848970 FORWARD LENGTH=348                             | 241  | 348  | 6.00E-72  | 144.4 | 56.0 | 62.7 |
| Rsa1.0_01605.1.g28346.t1 | gb EOA36716.1  hypothetical protein CARUB_v10012348mg [Capsella rubella]                                                                                                                                                                                                                                                                                                                                                                                                                                                                                                                                                                                                                                                                                                                              | 205  | 205  | 1.00E-62  | 100.0 | 66.8 | 79.0 | hypothetical protein CARUB_v10012348mg                   | gbpln | Capsella rubella     | AT1G14200.1   Symbols:   RING/U-box superfamily protein   chr1:4854532-4855071 REVERSE LENGTH=179                             | 205  | 179  | 2.00E-56  | 87.3  | 59.0 | 73.7 |
| Rsa1.0_01605.1.g28347.t1 | ref NP_172877.1  GDA1/CD39 nucleoside phosphatase family protein [Arabidopsis thaliana]<br>gi 75127157 sp Q6NQA8.1 APY5_ARATH<br>RefName: Full=Probable apyrase 5;<br>Short=AtAPY5; AltName: Full=ATP-diphosphatase; AltName: Full=ATP-diphosphohydrolase; AltName: Full=Adenosine diphosphatase;<br>Short=ADPase; AltName: Full=NTPDase; AltName: Full=Nucleoside triphosphate diphosphohydrolase 5<br>gi 34365723 gb AAQ65173.1  At1g14250 [Arabidopsis thaliana]<br>gi 51968412 dbj BAD42898.1  hypothetical protein [Arabidopsis thaliana]<br>gi 51969180 dbj BAD43282.1  hypothetical protein [Arabidopsis thaliana]<br>gi 332191010 gb AEE29131.1  probable apyrase 5 [Arabidopsis thaliana]<br>gi 339283648 gb AEJ38086.1  nucleoside triphosphate diphosphohydrolase 5 [Arabidopsis thaliana] | 469  | 488  | 0         | 104.1 | 74.0 | 84.9 | GDA1/CD39 nucleoside phosphatase family protein          | gbpln | Arabidopsis thaliana | AT1G14250.1   Symbols:   GDA1/CD39 nucleoside phosphatase family protein   chr1:4868675-4871203 FORWARD LENGTH=488            | 469  | 488  | 0         | 104.1 | 74.0 | 84.9 |
| Rsa1.0_01605.1.g28348.t1 | dbj BAA97287.1  retroelement pol polyprotein-like [Arabidopsis thaliana]                                                                                                                                                                                                                                                                                                                                                                                                                                                                                                                                                                                                                                                                                                                              | 1201 | 1491 | 0         | 124.1 | 58.5 | 71.8 | retroelement pol polyprotein-like                        | gbpln | Arabidopsis thaliana | AT4G23160.1   Symbols: CRK8   cysteine-rich RLK (RECEPTOR-like protein kinase) 8   chr4:12129485-12134086 FORWARD LENGTH=1262 | 1201 | 1262 | 1.00E-57  | 105.1 | 8.9  | 12.7 |
| Rsa1.0_01606.1.g28349.t1 | gb AFX68809.1  tetrapyrrole-binding protein [Brassica oleracea]                                                                                                                                                                                                                                                                                                                                                                                                                                                                                                                                                                                                                                                                                                                                       | 255  | 256  | 1.00E-109 | 100.4 | 89.4 | 92.5 | tetrapyrrole-binding protein                             | gbpln | Brassica oleracea    | AT3G59400.1   Symbols: GUN4   enzyme binding:tetrapyrrole binding   chr3:21948881-21949678 REVERSE LENGTH=265                 | 255  | 265  | 1.00E-94  | 103.9 | 75.3 | 83.1 |
| Rsa1.0_01606.1.g28350.t1 | ref XP_002878266.1  UDP-galactose transporter 6 [Arabidopsis lyrata subsp. lyrata]<br>gi 297324104 gb EFH54525.1  UDP-galactose transporter 6 [Arabidopsis lyrata subsp. lyrata]                                                                                                                                                                                                                                                                                                                                                                                                                                                                                                                                                                                                                      | 426  | 405  | 0         | 95.1  | 87.1 | 91.1 | UDP-galactose transporter 6                              | gbpln | Arabidopsis lyrata   | AT3G59360.2   Symbols: UTR6, ATUTR6   UDP-galactose transporter 6   chr3:21935826-21939642 REVERSE LENGTH=405                 | 426  | 405  | 0         | 95.1  | 86.2 | 90.4 |
| Rsa1.0_01606.1.g28351.t1 | ref XP_002876497.1  hypothetical protein ARALYDRAFT_486400 [Arabidopsis lyrata subsp. lyrata]<br>gi 297322335 gb EFH52756.1  hypothetical protein ARALYDRAFT_486400 [Arabidopsis lyrata subsp. lyrata]                                                                                                                                                                                                                                                                                                                                                                                                                                                                                                                                                                                                | 404  | 405  | 0         | 100.2 | 91.1 | 94.8 | hypothetical protein ARALYDRAFT_486400                   | gbpln | Arabidopsis lyrata   | AT3G59350.3   Symbols:   Protein kinase superfamily protein   chr3:21932930-21934883 FORWARD LENGTH=408                       | 404  | 408  | 0         | 101.0 | 91.1 | 94.3 |
| Rsa1.0_01606.1.g28352.t1 | ref NP_567080.1  pentatricopeptide repeat-containing protein-like protein [Arabidopsis thaliana]<br>gi 15292858 gb AAK92800.1  unknown protein [Arabidopsis thaliana]<br>gi 20258901 gb AAM14144.1  unknown protein [Arabidopsis thaliana]<br>gi 332646380 gb AEE79901.1  pentatricopeptide repeat-containing protein-like protein [Arabidopsis thaliana]                                                                                                                                                                                                                                                                                                                                                                                                                                             | 457  | 459  | 0         | 100.4 | 92.3 | 95.6 | pentatricopeptide repeat-containing protein-like protein | gbpln | Arabidopsis thaliana | AT3G59300.1   Symbols:   Pentatricopeptide repeat (PPR) superfamily protein   chr3:21916667-21921877 FORWARD LENGTH=459       | 457  | 459  | 0         | 100.4 | 92.3 | 95.6 |
| Rsa1.0_01606.1.g28353.t1 | # # # # # # # # - ----                                                                                                                                                                                                                                                                                                                                                                                                                                                                                                                                                                                                                                                                                                                                                                                |      |      |           |       |      |      |                                                          |       |                      | # # # # # # #                                                                                                                 |      |      |           |       |      |      |
| Rsa1.0_01606.1.g28354.t1 | gb EOA24964.1  hypothetical protein CARUB_v10018261mg [Capsella rubella]                                                                                                                                                                                                                                                                                                                                                                                                                                                                                                                                                                                                                                                                                                                              | 116  | 116  | 6.00E-56  | 100.0 | 92.2 | 95.7 | hypothetical protein CARUB_v10018261mg                   | gbpln | Capsella rubella     | AT3G59280.1   Symbols: TXR1   Protein Transporter, Pam16   chr3:21909266-21910519 REVERSE LENGTH=116                          | 116  | 116  | 1.00E-56  | 100.0 | 87.9 | 95.7 |
| Rsa1.0_01606.1.g28355.t1 | ref XP_002876494.1  hypothetical protein ARALYDRAFT_324401 [Arabidopsis lyrata subsp. lyrata]<br>gi 297322332 gb EFH52753.1  hypothetical protein ARALYDRAFT_324401 [Arabidopsis lyrata subsp. lyrata]                                                                                                                                                                                                                                                                                                                                                                                                                                                                                                                                                                                                | 284  | 285  | 1.00E-127 | 100.4 | 76.8 | 88.4 | hypothetical protein ARALYDRAFT_324401                   | gbpln | Arabidopsis lyrata   | AT3G59260.1   Symbols:   pirin, putative   chr3:21903839-21905188 FORWARD LENGTH=271                                          | 284  | 271  | 1.00E-120 | 95.4  | 71.5 | 80.6 |



|                          |                                                                                                                                                                                                                                                                                                                                                                                                                                                                                                                                                                                                                                                                                                                                                                                                                                                                            |      |      |           |       |      |      |                                          |       |                      |                                                                                                                                                                                                                                                                                                                                                   |      |      |           |       |      |      |
|--------------------------|----------------------------------------------------------------------------------------------------------------------------------------------------------------------------------------------------------------------------------------------------------------------------------------------------------------------------------------------------------------------------------------------------------------------------------------------------------------------------------------------------------------------------------------------------------------------------------------------------------------------------------------------------------------------------------------------------------------------------------------------------------------------------------------------------------------------------------------------------------------------------|------|------|-----------|-------|------|------|------------------------------------------|-------|----------------------|---------------------------------------------------------------------------------------------------------------------------------------------------------------------------------------------------------------------------------------------------------------------------------------------------------------------------------------------------|------|------|-----------|-------|------|------|
| Rsa1.0_01606.1.g28356.t1 | refNP_191481.1  pirin [Arabidopsis thaliana]<br>gi 14195011 sp Q9LX49.1 PRN1_ARATH<br>RecName: Full=Pirin-1; AltName: Full=AtPirin1<br>gi 19070663 gb AAL83949.1 AF353716.1<br>pirin [Arabidopsis thaliana]<br>gi 7801672 emb CAB91592.1  pirin-like protein [Arabidopsis thaliana]<br>gi 109946467 gb ABG48412.1 <br>At3g59220 [Arabidopsis thaliana]<br>gi 332646372 gb AEE79893.1  pirin [Arabidopsis thaliana]<br>refNP_191479.1  F-box/LRR-repeat protein [Arabidopsis thaliana]<br>gi 75264308 sp Q9LX51.1 FBL64_ARATH<br>RecName: Full=F-box/LRR-repeat protein At3g59200<br>gi 7801670 emb CAB91590.1  putative protein [Arabidopsis thaliana]<br>gi 26450835 dbj BAC42525.1  unknown protein [Arabidopsis thaliana]<br>gi 29028916 gb AAO64837.1  At3g59200 [Arabidopsis thaliana]<br>gi 332646367 gb AEE79888.1  F-box/LRR-repeat protein [Arabidopsis thaliana] | 288  | 287  | 1.00E-136 | 99.7  | 82.3 | 89.6 | pirin                                    | gbpln | Arabidopsis thaliana | AT3G59220.1   Symbols: PRN, PRN1, ATPIRIN1   pirin   chr3:21894205-21895501<br>FORWARD LENGTH=287                                                                                                                                                                                                                                                 | 288  | 287  | 1.00E-139 | 99.7  | 82.3 | 89.6 |
| Rsa1.0_01606.1.g28357.t1 | gi 26450835 dbj BAC42525.1  unknown protein [Arabidopsis thaliana]<br>gi 29028916 gb AAO64837.1  At3g59200 [Arabidopsis thaliana]<br>gi 332646367 gb AEE79888.1  F-box/LRR-repeat protein [Arabidopsis thaliana]                                                                                                                                                                                                                                                                                                                                                                                                                                                                                                                                                                                                                                                           | 484  | 520  | 1.00E-177 | 107.4 | 67.4 | 78.3 | F-box/LRR-repeat protein                 | gbpln | Arabidopsis thaliana | AT3G59200.1   Symbols:   F-box/RNI-like superfamily protein   chr1:21631947-21889214 FORWARD LENGTH=520                                                                                                                                                                                                                                           | 484  | 520  | 1.00E-179 | 107.4 | 67.4 | 78.3 |
| Rsa1.0_01606.1.g28358.t2 | gb EOA23806.1  hypothetical protein CARUB_v10017021mg [Capsella rubella]                                                                                                                                                                                                                                                                                                                                                                                                                                                                                                                                                                                                                                                                                                                                                                                                   | 506  | 520  | 1.00E-125 | 102.8 | 51.4 | 65.8 | hypothetical protein CARUB_v10017021mg   | gbpln | Capsella rubella     | AT1G58310.1   Symbols:   F-box/RNI-like superfamily protein   chr1:21631947-21633642 FORWARD LENGTH=505                                                                                                                                                                                                                                           | 506  | 505  | 1.00E-127 | 99.8  | 51.8 | 67.0 |
| Rsa1.0_01607.1.g28359.t1 | #                                                                                                                                                                                                                                                                                                                                                                                                                                                                                                                                                                                                                                                                                                                                                                                                                                                                          | #    | #    | #         | #     | #    | -    | ----                                     | ----  | ----                 | #                                                                                                                                                                                                                                                                                                                                                 | #    | #    | #         | #     | #    |      |
| Rsa1.0_01607.1.g28360.t1 | #                                                                                                                                                                                                                                                                                                                                                                                                                                                                                                                                                                                                                                                                                                                                                                                                                                                                          | #    | #    | #         | #     | #    | -    | ----                                     | ----  | ----                 | #                                                                                                                                                                                                                                                                                                                                                 | #    | #    | #         | #     | #    |      |
| Rsa1.0_01607.1.g28361.t1 | emb CAN79085.1  hypothetical protein VITISV_027044 [Vitis vinifera]                                                                                                                                                                                                                                                                                                                                                                                                                                                                                                                                                                                                                                                                                                                                                                                                        | 334  | 1000 | 1.00E-52  | 299.4 | 36.2 | 47.0 | hypothetical protein VITISV_027044       | gbpln | Vitis vinifera       | #                                                                                                                                                                                                                                                                                                                                                 | #    | #    | #         | #     | #    |      |
| Rsa1.0_01607.1.g28362.t1 | #                                                                                                                                                                                                                                                                                                                                                                                                                                                                                                                                                                                                                                                                                                                                                                                                                                                                          | #    | #    | #         | #     | #    | -    | ----                                     | ----  | ----                 | #                                                                                                                                                                                                                                                                                                                                                 | #    | #    | #         | #     | #    |      |
| Rsa1.0_01607.1.g28363.t5 | #                                                                                                                                                                                                                                                                                                                                                                                                                                                                                                                                                                                                                                                                                                                                                                                                                                                                          | #    | #    | #         | #     | #    | -    | ----                                     | ----  | ----                 | #                                                                                                                                                                                                                                                                                                                                                 | #    | #    | #         | #     | #    |      |
| Rsa1.0_01607.1.g28364.t1 | #                                                                                                                                                                                                                                                                                                                                                                                                                                                                                                                                                                                                                                                                                                                                                                                                                                                                          | #    | #    | #         | #     | #    | -    | ----                                     | ----  | ----                 | #                                                                                                                                                                                                                                                                                                                                                 | #    | #    | #         | #     | #    |      |
| Rsa1.0_01607.1.g28365.t1 | gb AAF18641.1 AC006228.12 F5J5.16 [Arabidopsis thaliana]                                                                                                                                                                                                                                                                                                                                                                                                                                                                                                                                                                                                                                                                                                                                                                                                                   | 812  | 1024 | 8.00E-50  | 126.1 | 21.4 | 35.3 | F5J5.16                                  | gbpln | Arabidopsis thaliana | #                                                                                                                                                                                                                                                                                                                                                 | #    | #    | #         | #     | #    |      |
| Rsa1.0_01607.1.g28366.t1 | #                                                                                                                                                                                                                                                                                                                                                                                                                                                                                                                                                                                                                                                                                                                                                                                                                                                                          | #    | #    | #         | #     | #    | -    | ----                                     | ----  | ----                 | #                                                                                                                                                                                                                                                                                                                                                 | #    | #    | #         | #     | #    |      |
| Rsa1.0_01607.1.g28367.t1 | gb AAF79618.1 AC027665.19 F5M15.26 [Arabidopsis thaliana]                                                                                                                                                                                                                                                                                                                                                                                                                                                                                                                                                                                                                                                                                                                                                                                                                  | 1387 | 1838 | 0         | 132.5 | 32.2 | 46.0 | F5M15.26                                 | gbpln | Arabidopsis thaliana | #                                                                                                                                                                                                                                                                                                                                                 | #    | #    | #         | #     | #    |      |
| Rsa1.0_01607.1.g28368.t1 | #                                                                                                                                                                                                                                                                                                                                                                                                                                                                                                                                                                                                                                                                                                                                                                                                                                                                          | #    | #    | #         | #     | #    | -    | ----                                     | ----  | ----                 | #                                                                                                                                                                                                                                                                                                                                                 | #    | #    | #         | #     | #    |      |
| Rsa1.0_01607.1.g28369.t1 | #                                                                                                                                                                                                                                                                                                                                                                                                                                                                                                                                                                                                                                                                                                                                                                                                                                                                          | #    | #    | #         | #     | #    | -    | ----                                     | ----  | ----                 | #                                                                                                                                                                                                                                                                                                                                                 | #    | #    | #         | #     | #    |      |
| Rsa1.0_01608.1.g28370.t1 | refNP_189510.2  putative protein kinase [Arabidopsis thaliana]<br>gi 193788736 gb ACF20467.1 <br>At3g28690 [Arabidopsis thaliana]<br>gi 332643954 gb AEE77475.1  putative protein kinase [Arabidopsis thaliana]<br>ref XP_002883993.1  kinase family protein [Arabidopsis lyrata subsp. lyrata]<br>gi 297329833 gb EFH60252.1  kinase family protein [Arabidopsis lyrata subsp. lyrata]                                                                                                                                                                                                                                                                                                                                                                                                                                                                                    | 137  | 376  | 3.00E-16  | 274.5 | 31.4 | 32.8 | putative protein kinase                  | gbpln | Arabidopsis thaliana | AT3G28690.1   Symbols:   Protein kinase superfamily protein   chr3:10756002-10757494 FORWARD LENGTH=376                                                                                                                                                                                                                                           | 137  | 376  | 7.00E-19  | 274.5 | 31.4 | 32.8 |
| Rsa1.0_01608.1.g28371.t1 | ref XP_002883994.1  hypothetical protein ARALYDRAFT_343256 [Arabidopsis lyrata subsp. lyrata]<br>gi 297329834 gb EFH60253.1  hypothetical protein ARALYDRAFT_343256 [Arabidopsis lyrata subsp. lyrata]                                                                                                                                                                                                                                                                                                                                                                                                                                                                                                                                                                                                                                                                     | 817  | 797  | 0         | 97.6  | 82.1 | 88.7 | kinase family protein                    | gbpln | Arabidopsis lyrata   | AT2G19410.1   Symbols:   U-box domain-containing protein kinase family protein   chr2:8404901-8409012 REVERSE LENGTH=801                                                                                                                                                                                                                          | 817  | 801  | 0         | 98.0  | 82.0 | 88.1 |
| Rsa1.0_01608.1.g28372.t2 | ref XP_002883994.1  hypothetical protein ARALYDRAFT_343256 [Arabidopsis lyrata subsp. lyrata]<br>gi 297329834 gb EFH60253.1  hypothetical protein ARALYDRAFT_343256 [Arabidopsis lyrata subsp. lyrata]                                                                                                                                                                                                                                                                                                                                                                                                                                                                                                                                                                                                                                                                     | 622  | 527  | 0         | 84.7  | 73.2 | 76.0 | hypothetical protein ARALYDRAFT_343256   | gbpln | Arabidopsis lyrata   | AT2G19400.1   Symbols:   AGC (cAMP-dependent, cGMP-dependent and protein kinase C) kinase family protein   chr2:8399523-8402481 REVERSE LENGTH=527                                                                                                                                                                                                | 622  | 527  | 0         | 84.7  | 72.3 | 75.6 |
| Rsa1.0_01608.1.g28373.t1 | emb CAB39638.1  RNA-directed DNA polymerase-like protein [Arabidopsis thaliana]<br>gi 7267666 emb CAB78094.1  RNA-directed DNA polymerase-like protein [Arabidopsis thaliana]                                                                                                                                                                                                                                                                                                                                                                                                                                                                                                                                                                                                                                                                                              | 363  | 1274 | 1.00E-55  | 351.0 | 37.7 | 53.2 | RNA-directed DNA polymerase-like protein | gbpln | Arabidopsis thaliana | AT4G29090.1   Symbols:   Ribonuclease H-like superfamily protein   chr4:14333528-14335255 FORWARD LENGTH=575                                                                                                                                                                                                                                      | 363  | 575  | 4.00E-30  | 158.4 | 29.2 | 45.7 |
| Rsa1.0_01608.1.g28374.t1 | ref XP_002883995.1  hypothetical protein ARALYDRAFT_480532 [Arabidopsis lyrata subsp. lyrata]<br>gi 297329835 gb EFH60254.1  hypothetical protein ARALYDRAFT_480532 [Arabidopsis lyrata subsp. lyrata]                                                                                                                                                                                                                                                                                                                                                                                                                                                                                                                                                                                                                                                                     | 1228 | 1212 | 0         | 98.7  | 79.2 | 85.6 | hypothetical protein ARALYDRAFT_480532   | gbpln | Arabidopsis lyrata   | AT2G19390.1   Symbols:   unknown protein; BEST Arabidopsis thaliana protein match is: unknown protein (TAIR:AT4G29790.1); Has 203 Blast hits to 188 proteins in 60 species: Archae - 0; Bacteria - 11; Metazoa - 24; Fungi - 34; Plants - 93; Viruses - 0; Other Eukaryotes - 41 (source: NCBI BLINK).   chr2:8390136-8396477 REVERSE LENGTH=1211 | 1228 | 1211 | 0         | 98.6  | 77.9 | 85.1 |

|                          |                                                                                                                                                                                                                                                                                                                                                                                 |      |      |           |       |      |      |                                                      |       |                            |                                                                                                                                |      |     |           |       |      |      |
|--------------------------|---------------------------------------------------------------------------------------------------------------------------------------------------------------------------------------------------------------------------------------------------------------------------------------------------------------------------------------------------------------------------------|------|------|-----------|-------|------|------|------------------------------------------------------|-------|----------------------------|--------------------------------------------------------------------------------------------------------------------------------|------|-----|-----------|-------|------|------|
| Rsa1.0_01608.1.g28375.t1 | ref XP_002886044.1  nucleic acid binding protein [Arabidopsis lyrata subsp. lyrata] gi 297331884 gb EFH62303.1  nucleic acid binding protein [Arabidopsis lyrata subsp. lyrata]                                                                                                                                                                                                 | 277  | 283  | 1.00E-112 | 102.2 | 79.4 | 87.0 | nucleic acid binding protein                         | gbpln | Arabidopsis lyrata         | AT2G19385.1   Symbols:   zinc ion binding   chr2:8387149-8388581 FORWARD LENGTH=275                                            | 277  | 275 | 1.00E-110 | 99.3  | 76.5 | 87.4 |
| Rsa1.0_01608.1.g28376.t1 | ref XP_002886047.1  hypothetical protein ARALYDRAFT_480536 [Arabidopsis lyrata subsp. lyrata] gi 297331887 gb EFH62306.1  hypothetical protein ARALYDRAFT_480536 [Arabidopsis lyrata subsp. lyrata]                                                                                                                                                                             | 89   | 103  | 5.00E-27  | 115.7 | 67.4 | 70.8 | hypothetical protein ARALYDRAFT_480536               | gbpln | Arabidopsis lyrata         | AT2G19350.1   Symbols:   Eukaryotic protein of unknown function (DUF872)   chr2:8376329-8377097 FORWARD LENGTH=103             | 89   | 103 | 8.00E-29  | 115.7 | 66.3 | 68.5 |
| Rsa1.0_01608.1.g28377.t1 | ref NP_178545.1  cysteine/histidine-rich C1 domain-containing protein [Arabidopsis thaliana] gi 4544429 gb AAD2338.1  unknown protein [Arabidopsis thaliana] gi 55740549 gb AAV63867.1  hypothetical protein At2g04680 [Arabidopsis thaliana] gi 33025076.1 gb AEC05855.1  cysteine/histidine-rich C1 domain-containing protein [Arabidopsis thaliana]                          | 557  | 657  | 1.00E-168 | 118.0 | 59.1 | 68.2 | cysteine/histidine-rich C1 domain-containing protein | gbpln | Arabidopsis thaliana       | AT2G04680.1   Symbols:   Cysteine/Histidine-rich C1 domain family protein   chr2:1640188-1642161 FORWARD LENGTH=657            | 557  | 657 | 1.00E-171 | 118.0 | 59.1 | 68.2 |
| Rsa1.0_01608.1.g28378.t1 | emb CAA66376.1  light repressible receptor protein kinase [Arabidopsis thaliana]                                                                                                                                                                                                                                                                                                | 489  | 876  | 1.00E-171 | 179.1 | 61.8 | 74.0 | light repressible receptor protein kinase            | gbpln | Arabidopsis thaliana       | AT4G29990.1   Symbols:   Leucine-rich repeat transmembrane protein kinase protein   chr4:14665802-14669438 REVERSE LENGTH=876  | 489  | 876 | 1.00E-173 | 179.1 | 61.6 | 74.0 |
| Rsa1.0_01608.1.g28379.t1 | gb EOA30726.1  hypothetical protein CARUB_v10013863mg [Capsella rubella]                                                                                                                                                                                                                                                                                                        | 385  | 402  | 3.00E-94  | 104.4 | 50.4 | 65.7 | hypothetical protein CARUB_v10013863mg               | gbpln | Capsella rubella           | AT3G18720.1   Symbols:   F-box family protein   chr3:6444433-6445751 REVERSE LENGTH=380                                        | 385  | 380 | 7.00E-91  | 98.7  | 50.1 | 64.7 |
| Rsa1.0_01609.1.g28380.t1 | gb EOA29601.1  hypothetical protein CARUB_v10013401mg, partial [Capsella rubella]                                                                                                                                                                                                                                                                                               | 504  | 543  | 0         | 107.7 | 82.5 | 88.9 | hypothetical protein CARUB_v10013401mg, partial      | gbpln | Capsella rubella           | AT3G13810.1   Symbols:   AtIDD11, IDD11   indeterminate(ID)-domain 11   chr3:4544941-4547300 FORWARD LENGTH=513                | 504  | 513 | 0         | 101.8 | 83.3 | 89.3 |
| Rsa1.0_01609.1.g28381.t1 | gb AAG50806.1 AC079281_8 unknown protein [Arabidopsis thaliana]                                                                                                                                                                                                                                                                                                                 | 1852 | 1213 | 0         | 65.5  | 21.1 | 28.6 | unknown protein                                      | gbpln | Arabidopsis thaliana       | AT3G13680.1   Symbols:   F-box and associated interaction domains-containing protein   chr3:4477534-4478721 REVERSE LENGTH=395 | 1852 | 395 | 9.00E-93  | 21.3  | 10.2 | 12.9 |
| Rsa1.0_01609.1.g28382.t1 | #                                                                                                                                                                                                                                                                                                                                                                               | #    | #    | #         | #     | #    | -    | ----                                                 | ----  | ----                       | #                                                                                                                              | #    | #   | #         | #     | #    | #    |
| Rsa1.0_01609.1.g28383.t1 | gb EOA30760.1  hypothetical protein CARUB_v10013902mg [Capsella rubella]                                                                                                                                                                                                                                                                                                        | 340  | 392  | 5.00E-91  | 115.3 | 52.9 | 67.4 | hypothetical protein CARUB_v10013902mg               | gbpln | Capsella rubella           | AT3G13680.1   Symbols:   F-box and associated interaction domains-containing protein   chr3:4477534-4478721 REVERSE LENGTH=395 | 340  | 395 | 3.00E-89  | 116.2 | 52.9 | 65.3 |
| Rsa1.0_01609.1.g28384.t1 | #                                                                                                                                                                                                                                                                                                                                                                               | #    | #    | #         | #     | #    | -    | ----                                                 | ----  | ----                       | #                                                                                                                              | #    | #   | #         | #     | #    | #    |
| Rsa1.0_01609.1.g28385.t1 | gb EOA30999.1  hypothetical protein CARUB_v10014142mg [Capsella rubella]                                                                                                                                                                                                                                                                                                        | 261  | 334  | 1.00E-113 | 128.0 | 82.4 | 88.9 | hypothetical protein CARUB_v10014142mg               | gbpln | Capsella rubella           | AT3G13850.1   Symbols:   LBD22   LOB domain-containing protein 22   chr3:4559910-4560716 FORWARD LENGTH=268                    | 261  | 268 | 1.00E-114 | 102.7 | 82.8 | 91.6 |
| Rsa1.0_01609.1.g28386.t1 | gb EGG05881.1  hypothetical protein MELLADRAFT_87680 [Melampsora larici-populina 98AG31]                                                                                                                                                                                                                                                                                        | 468  | 535  | 2.33E-156 | 114.3 | 61.1 | 73.7 | hypothetical protein MELLADRAFT_87680                | gbpln | Melampsora larici-populina | AT4G05320.4   Symbols:   UBQ10   polyubiquitin 10   chr4:2718559-2719932 FORWARD LENGTH=457                                    | 468  | 457 | 1.00E-147 | 97.6  | 60.5 | 73.1 |
| Rsa1.0_01609.1.g28387.t1 | ref NP_188004.1  pentatricopeptide repeat-containing protein [Arabidopsis thaliana] gi 75273848 sp Q9LRV9.1 PP228_ARAT H RecName: Full=Pentatricopeptide repeat-containing protein At3g13880 gi 9294611 dbj BAB02912.1  probable selenium-binding protein [Arabidopsis thaliana] gi 332641909 gb AEE75430.1  pentatricopeptide repeat-containing protein [Arabidopsis thaliana] | 747  | 748  | 0         | 100.1 | 76.2 | 85.5 | pentatricopeptide repeat-containing protein          | gbpln | Arabidopsis thaliana       | AT3G13880.1   Symbols:   Tetratricopeptide repeat (TPR)-like superfamily protein   chr3:4572180-4574426 FORWARD LENGTH=748     | 747  | 748 | 0         | 100.1 | 76.2 | 85.5 |
| Rsa1.0_01609.1.g28388.t2 | gb EOA32487.1  hypothetical protein CARUB_v10015767mg [Capsella rubella]                                                                                                                                                                                                                                                                                                        | 361  | 357  | 1.00E-141 | 98.9  | 80.3 | 84.8 | hypothetical protein CARUB_v10015767mg               | gbpln | Capsella rubella           | AT3G13890.1   Symbols:   MYB26, ATMYB26, MS35   myb domain protein 26   chr3:4576744-4578027 REVERSE LENGTH=367                | 361  | 367 | 1.00E-141 | 101.7 | 81.7 | 85.6 |
| Rsa1.0_01610.1.g28389.t2 | ref XP_002886534.1  hypothetical protein ARALYDRAFT_315221 [Arabidopsis lyrata subsp. lyrata] gi 297332375 gb EFH62793.1  hypothetical protein ARALYDRAFT_315221 [Arabidopsis lyrata subsp. lyrata]                                                                                                                                                                             | 602  | 586  | 0         | 97.3  | 82.1 | 88.9 | hypothetical protein ARALYDRAFT_315221               | gbpln | Arabidopsis lyrata         | AT1G61560.1   Symbols:   MLO6, ATMLO6   Seven transmembrane MLO family protein   chr1:22708875-22712032 REVERSE LENGTH=583     | 602  | 583 | 0         | 96.8  | 80.7 | 88.2 |
| Rsa1.0_01610.1.g28390.t1 | gb EOA35572.1  hypothetical protein CARUB_v10020781mg [Capsella rubella]                                                                                                                                                                                                                                                                                                        | 271  | 273  | 1.00E-138 | 100.7 | 95.2 | 97.8 | hypothetical protein CARUB_v10020781mg               | gbpln | Capsella rubella           | AT1G61520.3   Symbols:   LHCA3   photosystem I light harvesting complex gene 3   chr1:22700152-22701149 FORWARD LENGTH=273     | 271  | 273 | 1.00E-140 | 100.7 | 94.5 | 97.0 |

|                          |                                                                                                                                                                                                                                                                                                                                                                                                                                                                                                                                                                                                                                                                                       |      |      |           |       |      |      |                                                 |       |                      |                                                                                                                                                                                                                                                                |      |      |           |       |      |      |
|--------------------------|---------------------------------------------------------------------------------------------------------------------------------------------------------------------------------------------------------------------------------------------------------------------------------------------------------------------------------------------------------------------------------------------------------------------------------------------------------------------------------------------------------------------------------------------------------------------------------------------------------------------------------------------------------------------------------------|------|------|-----------|-------|------|------|-------------------------------------------------|-------|----------------------|----------------------------------------------------------------------------------------------------------------------------------------------------------------------------------------------------------------------------------------------------------------|------|------|-----------|-------|------|------|
| Rsa1.0_01610.1.g28391.t1 | ref XP_002886541.1  hypothetical protein ARALYDRAFT.475177 [Arabidopsis lyrata subsp. lyrata] gi 297332382 gb EFH62800.1                                                                                                                                                                                                                                                                                                                                                                                                                                                                                                                                                              | 800  | 804  | 0         | 100.5 | 78.3 | 87.9 | hypothetical protein ARALYDRAFT.475177          | gbpln | Arabidopsis lyrata   | AT1G61500.1   Symbols:   S-locus lectin protein kinase family protein   chr1:22689729-22692881 REVERSE LENGTH=804                                                                                                                                              | 800  | 804  | 0         | 100.5 | 79.4 | 87.1 |
| Rsa1.0_01610.1.g28392.t1 | ref XP_002877808.1  F-box family protein [Arabidopsis lyrata subsp. lyrata] gi 297323646 gb EFH54067.1  F-box family protein [Arabidopsis lyrata subsp. lyrata]                                                                                                                                                                                                                                                                                                                                                                                                                                                                                                                       | 447  | 446  | 1.00E-152 | 99.8  | 64.4 | 78.1 | F-box family protein                            | gbpln | Arabidopsis lyrata   | AT3G51530.1   Symbols:   F-box/RNI-like/FBD-like domains-containing protein   chr3:19112873-19114497 REVERSE LENGTH=455                                                                                                                                        | 447  | 455  | 1.00E-147 | 101.8 | 62.2 | 75.2 |
| Rsa1.0_01610.1.g28393.t5 | ref XP_002886541.1  hypothetical protein ARALYDRAFT.475177 [Arabidopsis lyrata subsp. lyrata] gi 297332382 gb EFH62800.1                                                                                                                                                                                                                                                                                                                                                                                                                                                                                                                                                              | 690  | 804  | 0         | 116.5 | 73.9 | 84.8 | hypothetical protein ARALYDRAFT.475177          | gbpln | Arabidopsis lyrata   | AT1G61490.1   Symbols:   S-locus lectin protein kinase family protein   chr1:22685154-22688267 REVERSE LENGTH=804                                                                                                                                              | 690  | 804  | 0         | 116.5 | 74.8 | 85.1 |
| Rsa1.0_01610.1.g28394.t2 | ref XP_002886541.1  hypothetical protein ARALYDRAFT.475177 [Arabidopsis lyrata subsp. lyrata] gi 297332382 gb EFH62800.1                                                                                                                                                                                                                                                                                                                                                                                                                                                                                                                                                              | 808  | 804  | 0         | 99.5  | 76.9 | 87.1 | hypothetical protein ARALYDRAFT.475177          | gbpln | Arabidopsis lyrata   | AT1G61480.1   Symbols:   S-locus lectin protein kinase family protein   chr1:22681420-22684404 REVERSE LENGTH=809                                                                                                                                              | 808  | 809  | 0         | 100.1 | 77.0 | 86.4 |
| Rsa1.0_01611.1.g28395.t1 | gb AAF20931.1 AF206721_1 ascorbate oxidase [Brassica juncea]                                                                                                                                                                                                                                                                                                                                                                                                                                                                                                                                                                                                                          | 572  | 574  | 0         | 100.3 | 81.8 | 89.7 | ascorbate oxidase                               | gbpln | Brassica juncea      | AT5G21100.1   Symbols:   Plant L-ascorbate oxidase   chr5:7168312-7170719 FORWARD LENGTH=573                                                                                                                                                                   | 572  | 573  | 0         | 100.2 | 80.9 | 90.0 |
| Rsa1.0_01611.1.g28396.t1 | gb EOA22050.1  hypothetical protein CARUB_v10002590mg, partial [Capsella rubella]                                                                                                                                                                                                                                                                                                                                                                                                                                                                                                                                                                                                     | 153  | 254  | 4.00E-29  | 166.0 | 41.2 | 58.8 | hypothetical protein CARUB_v10002590mg, partial | gbpln | Capsella rubella     | AT2G34320.1   Symbols:   Polynucleotidyl transferase, ribonuclease H-like superfamily protein   chr2:14484959-14485837 FORWARD LENGTH=292                                                                                                                      | 153  | 292  | 1.00E-30  | 190.8 | 39.9 | 57.5 |
| Rsa1.0_01611.1.g28397.t1 | gb ABW81051.1  tn7 reverse transcriptase [Arabidopsis lyrata subsp. lyrata]                                                                                                                                                                                                                                                                                                                                                                                                                                                                                                                                                                                                           | 327  | 441  | 1.00E-72  | 134.9 | 45.6 | 66.1 | tn7 reverse transcriptase                       | gbpln | Arabidopsis lyrata   | AT3G24255.1   Symbols:   RNA-directed DNA polymerase (reverse transcriptase)-related family protein   chr3:8789471-8793208 FORWARD LENGTH=746                                                                                                                  | 327  | 746  | 2.00E-52  | 228.1 | 35.5 | 50.2 |
| Rsa1.0_01611.1.g28398.t1 | # # # # # # # #                                                                                                                                                                                                                                                                                                                                                                                                                                                                                                                                                                                                                                                                       |      |      |           |       |      |      | -                                               | ----  | ----                 | # # # # # # #                                                                                                                                                                                                                                                  |      |      |           |       |      |      |
| Rsa1.0_01611.1.g28399.t1 | ref NP_197608.1  leucine-rich repeat-containing protein [Arabidopsis thaliana] gi 11762126 gb AAG40341.1 AF324989_1 AT5g21090 [Arabidopsis thaliana] gi 13899097 gb AAK48970.1 AF370543_1 Unknown protein [Arabidopsis thaliana] gi 20148427 gb AM10104.1  unknown protein [Arabidopsis thaliana] gi 27311823 gb AAO00877.1  Unknown protein [Arabidopsis thaliana] gi 29294060 gb AAO73897.1  leucine rich repeat protein (LRP), putative [Arabidopsis thaliana] gi 30023686 gb AAP13376.1  At5g21090 [Arabidopsis thaliana] gi 222424256 dbj BAH20085.1  AT5G21090 [Arabidopsis thaliana] gi 332005547 gb AED92930.1  leucine-rich repeat-containing protein [Arabidopsis thaliana] | 219  | 218  | 1.00E-101 | 99.5  | 84.0 | 89.0 | leucine-rich repeat-containing protein          | gbpln | Arabidopsis thaliana | AT5G21090.1   Symbols:   Leucine-rich repeat (LRR) family protein   chr5:7164758-7166904 FORWARD LENGTH=218                                                                                                                                                    | 219  | 218  | 1.00E-104 | 99.5  | 84.0 | 89.0 |
| Rsa1.0_01611.1.g28400.t2 | gb EOA19872.1  hypothetical protein CARUB_v10000121mg [Capsella rubella]                                                                                                                                                                                                                                                                                                                                                                                                                                                                                                                                                                                                              | 1022 | 1026 | 0         | 100.4 | 88.9 | 93.5 | hypothetical protein CARUB_v10000121mg          | gbpln | Capsella rubella     | AT5G21080.1   Symbols:   Uncharacterized protein   chr5:7158035-7162906 REVERSE LENGTH=1025                                                                                                                                                                    | 1022 | 1025 | 0         | 100.3 | 88.0 | 92.7 |
| Rsa1.0_01611.1.g28401.t1 | ref NP_197606.1  uncharacterized protein [Arabidopsis thaliana] gi 15809944 gb AAL06899.1  AT5g21070/T10F18_100 [Arabidopsis thaliana] gi 18958048 gb AAL79597.1  AT5g21070/T10F18_100 [Arabidopsis thaliana] gi 332005545 gb AED92928.1  uncharacterized protein AT5G21070 [Arabidopsis thaliana]                                                                                                                                                                                                                                                                                                                                                                                    | 225  | 225  | 1.00E-118 | 100.0 | 96.4 | 97.8 | uncharacterized protein                         | gbpln | Arabidopsis thaliana | AT5G21070.1   Symbols:   unknown protein; Has 115 Blast hits to 115 proteins in 34 species: Archae - 1; Bacteria - 36; Metazoa - 0; Fungi - 0; Plants - 60; Viruses - 0; Other Eukaryotes - 18 (source: NCBI BLINK).   chr5:7156356-7157490 FORWARD LENGTH=225 | 225  | 225  | 1.00E-120 | 100.0 | 96.4 | 97.8 |
| Rsa1.0_01611.1.g28402.t1 | ref XP_002863374.1  hypothetical protein ARALYDRAFT.494276 [Arabidopsis lyrata subsp. lyrata] gi 297309209 gb EFH39633.1                                                                                                                                                                                                                                                                                                                                                                                                                                                                                                                                                              | 111  | 888  | 7.00E-23  | 800.0 | 48.6 | 49.5 | hypothetical protein ARALYDRAFT.494276          | gbpln | Arabidopsis lyrata   | AT5G47040.1   Symbols:   LON2   lon protease 2   chr5:19093356-19098678 REVERSE LENGTH=888                                                                                                                                                                     | 111  | 888  | 1.00E-25  | 800.0 | 48.6 | 49.5 |

|                          |                                                                                                                                                                                                                                                                                                                                                                                                                                                                                                                                                                                                                                    |      |      |           |       |      |      |                                                  |             |                        |                                                                                                                                                |      |     |           |       |      |      |
|--------------------------|------------------------------------------------------------------------------------------------------------------------------------------------------------------------------------------------------------------------------------------------------------------------------------------------------------------------------------------------------------------------------------------------------------------------------------------------------------------------------------------------------------------------------------------------------------------------------------------------------------------------------------|------|------|-----------|-------|------|------|--------------------------------------------------|-------------|------------------------|------------------------------------------------------------------------------------------------------------------------------------------------|------|-----|-----------|-------|------|------|
| Rsa1.0_01611.1.g28403.t1 | ref[XP_002871964.1] BTB-POZ and math domain 5 [Arabidopsis lyrata subsp. lyrata]<br>gi 297317801 gb EFH48223.1  BTB-POZ and math domain 5 [Arabidopsis lyrata subsp. lyrata]                                                                                                                                                                                                                                                                                                                                                                                                                                                       | 413  | 410  | 0         | 99.3  | 85.2 | 91.8 | BTB-POZ and math domain 5                        | gbpln       | Arabidopsis lyrata     | AT5G21010.1   Symbols: ATBPM5, BPM5   BTB-POZ and MATH domain 5   chr5:7136062-7138374 FORWARD LENGTH=410                                      | 413  | 410 | 0         | 99.3  | 84.5 | 91.0 |
| Rsa1.0_01612.1.g28404.t1 | emb[CAB46045.1] retrotransposon like protein [Arabidopsis thaliana]<br>gi 7268441 emb CAB80961.1  retrotransposon like protein [Arabidopsis thaliana]                                                                                                                                                                                                                                                                                                                                                                                                                                                                              | 203  | 687  | 2.00E-57  | 338.4 | 58.1 | 78.8 | retrotransposon like protein                     | gbpln       | Arabidopsis thaliana   | #                                                                                                                                              | #    | #   | #         | #     | #    | #    |
| Rsa1.0_01612.1.g28405.t1 | #                                                                                                                                                                                                                                                                                                                                                                                                                                                                                                                                                                                                                                  | #    | #    | #         | #     | #    | -    | ----                                             | ----        | #                      | #                                                                                                                                              | #    | #   | #         | #     | #    | #    |
| Rsa1.0_01612.1.g28406.t1 | #                                                                                                                                                                                                                                                                                                                                                                                                                                                                                                                                                                                                                                  | #    | #    | #         | #     | #    | -    | ----                                             | ----        | #                      | #                                                                                                                                              | #    | #   | #         | #     | #    | #    |
| Rsa1.0_01612.1.g28407.t1 | gb AAG51046.1 AC069473.8 gypsy/Ty-3 retroelement polyprotein; 69905-74404 [Arabidopsis thaliana]<br>gi 10998138 dbj BAB03109.1  retroelement pol polyprotein [Arabidopsis thaliana]                                                                                                                                                                                                                                                                                                                                                                                                                                                | 1436 | 1499 | 0         | 104.4 | 61.0 | 75.3 | gypsy/Ty-3 retroelement polyprotein; 69905-74404 | gbpln       | Arabidopsis thaliana   | ATMG00860.1   Symbols: ORF158   DNA/RNA polymerases superfamily protein   chrM:235916-236392 FORWARD LENGTH=158                                | 1436 | 158 | 9.00E-34  | 11.0  | 4.7  | 6.1  |
| Rsa1.0_01612.1.g28408.t1 | #                                                                                                                                                                                                                                                                                                                                                                                                                                                                                                                                                                                                                                  | #    | #    | #         | #     | #    | -    | ----                                             | ----        | #                      | #                                                                                                                                              | #    | #   | #         | #     | #    | #    |
| Rsa1.0_01612.1.g28409.t1 | gb AAG51783.1 AC079679.3 reverse transcriptase, putative; 16838-20266 [Arabidopsis thaliana]<br>ref NP_179998.1  myrcene/ocimene synthase [Arabidopsis thaliana]<br>gi 75216785 sp Q9ZUH4.1 TPSA_ARATH RecName: Full=Tricyclene synthase, chloroplastic; AltName: Full=(E)-beta-ocimene synthase Oe23; AltName: Full=Myrcene synthase 1; AltName: Full=Terpenoid synthase 10; Short=AtTPS10; Flags: Precursor gi 4115381 gb AAD03382.1  putative limonene cyclase [Arabidopsis thaliana]<br>gi 194306688 gb ACF41947.1  At2g24210 [Arabidopsis thaliana]<br>gi 330252449 gb AEC07543.1  terpene synthase 10 [Arabidopsis thaliana] | 1097 | 1142 | 0         | 104.1 | 49.0 | 63.6 | reverse transcriptase, putative; 16838-20266     | gbpln       | Arabidopsis thaliana   | AT4G29090.1   Symbols:   Ribonuclease H-like superfamily protein   chr4:14333528-14335255 FORWARD LENGTH=575                                   | 1097 | 575 | 1.00E-43  | 52.4  | 13.1 | 20.6 |
| Rsa1.0_01612.1.g28410.t1 | ref NP_179998.1  myrcene/ocimene synthase [Arabidopsis thaliana]<br>gi 75216785 sp Q9ZUH4.1 TPSA_ARATH RecName: Full=Tricyclene synthase, chloroplastic; AltName: Full=(E)-beta-ocimene synthase Oe23; AltName: Full=Myrcene synthase 1; AltName: Full=Terpenoid synthase 10; Short=AtTPS10; Flags: Precursor gi 4115381 gb AAD03382.1  putative limonene cyclase [Arabidopsis thaliana]<br>gi 194306688 gb ACF41947.1  At2g24210 [Arabidopsis thaliana]<br>gi 330252449 gb AEC07543.1  terpene synthase 10 [Arabidopsis thaliana]                                                                                                 | 244  | 591  | 6.00E-85  | 242.2 | 65.6 | 77.9 | myrcene/ocimene synthase                         | gbpln       | Arabidopsis thaliana   | AT2G24210.1   Symbols: TPS10   terpene synthase 10   chr2:10294330-10297401 FORWARD LENGTH=591                                                 | 244  | 591 | 2.00E-87  | 242.2 | 65.6 | 77.9 |
| Rsa1.0_01612.1.g28411.t1 | ref XP_002878522.1  hypothetical protein ARALYDRAFT_907941 [Arabidopsis lyrata subsp. lyrata]<br>gi 297324360 gb EFH54781.1  hypothetical protein ARALYDRAFT_907941 [Arabidopsis lyrata subsp. lyrata]                                                                                                                                                                                                                                                                                                                                                                                                                             | 237  | 229  | 1.00E-113 | 96.6  | 86.9 | 91.6 | hypothetical protein ARALYDRAFT_907941           | gbpln       | Arabidopsis lyrata     | AT3G63540.1   Symbols:   Mog1/PsbP/DUF1795-like photosystem II reaction center PsbP family protein   chr3:23458372-23459803 REVERSE LENGTH=143 | 237  | 143 | 5.00E-75  | 60.3  | 55.7 | 58.2 |
| Rsa1.0_01612.1.g28412.t5 | emb CAH66022.1  OSIGBa0105019.1 [Oryza sativa Indica Group]                                                                                                                                                                                                                                                                                                                                                                                                                                                                                                                                                                        | 494  | 944  | 3.00E-31  | 191.1 | 26.9 | 39.5 | OSIGBa0105019.1                                  | gbpln       | Oryza sativa           | #                                                                                                                                              | #    | #   | #         | #     | #    | #    |
| Rsa1.0_01612.1.g28413.t1 | ref XP_002880584.1  hypothetical protein ARALYDRAFT_481301 [Arabidopsis lyrata subsp. lyrata]<br>gi 297326423 gb EFH56843.1  hypothetical protein ARALYDRAFT_481301 [Arabidopsis lyrata subsp. lyrata]                                                                                                                                                                                                                                                                                                                                                                                                                             | 280  | 279  | 1.00E-129 | 99.6  | 90.0 | 94.6 | hypothetical protein ARALYDRAFT_481301           | gbpln       | Arabidopsis lyrata     | AT2G24450.1   Symbols: FLA3   FASCICLIN-like arabinogalactan protein 3 precursor   chr2:10393019-10393861 REVERSE LENGTH=280                   | 280  | 280 | 1.00E-125 | 100.0 | 88.2 | 93.2 |
| Rsa1.0_01612.1.g28414.t1 | #                                                                                                                                                                                                                                                                                                                                                                                                                                                                                                                                                                                                                                  | #    | #    | #         | #     | #    | -    | ----                                             | ----        | #                      | #                                                                                                                                              | #    | #   | #         | #     | #    | #    |
| Rsa1.0_01612.1.g28415.t1 | ref XP_001537841.1  predicted protein [Ajellomyces capsulatus NAM1]<br>gi 150415449 gb EDN10802.1  predicted protein [Ajellomyces capsulatus NAM1]                                                                                                                                                                                                                                                                                                                                                                                                                                                                                 | 334  | 801  | 2.00E-18  | 239.8 | 24.9 | 38.0 | predicted protein                                | gbenv/gbpln | Ajellomyces capsulatus | #                                                                                                                                              | #    | #   | #         | #     | #    | #    |
| Rsa1.0_01613.1.g28416.t1 | gb EOA12558.1  hypothetical protein CARUB_v10026825mg [Capsella rubella]                                                                                                                                                                                                                                                                                                                                                                                                                                                                                                                                                           | 309  | 309  | 1.00E-119 | 100.0 | 66.3 | 78.6 | hypothetical protein CARUB_v10026825mg           | gbpln       | Capsella rubella       | AT5G63590.1   Symbols: FLS3, ATFLS3   flavonol synthase 3   chr5:25457172-25458427 REVERSE LENGTH=308                                          | 309  | 308 | 1.00E-121 | 99.7  | 65.4 | 77.7 |
| Rsa1.0_01613.1.g28417.t1 | ref XP_002864854.1  hypothetical protein ARALYDRAFT_332577 [Arabidopsis lyrata subsp. lyrata]<br>gi 297310689 gb EFH41113.1  hypothetical protein ARALYDRAFT_332577 [Arabidopsis lyrata subsp. lyrata]                                                                                                                                                                                                                                                                                                                                                                                                                             | 254  | 539  | 3.00E-53  | 212.2 | 63.0 | 72.8 | hypothetical protein ARALYDRAFT_332577           | gbpln       | Arabidopsis lyrata     | AT5G63550.2   Symbols:   DEK domain-containing chromatin associated protein   chr5:25444805-25447934 FORWARD LENGTH=531                        | 254  | 531 | 2.00E-53  | 209.1 | 63.4 | 70.5 |

|                          |                                                                                                                                                                                                                                                                                                                                                                                                                                                                                                                                                                                                                                                                                                                                                                                                                                                                                                                                                                                                                                                                                                                                                                                                                                                                                                                                                                                                 |     |     |           |       |      |      |                                        |       |                      |                                                                                                                                                                       |     |     |           |       |      |      |
|--------------------------|-------------------------------------------------------------------------------------------------------------------------------------------------------------------------------------------------------------------------------------------------------------------------------------------------------------------------------------------------------------------------------------------------------------------------------------------------------------------------------------------------------------------------------------------------------------------------------------------------------------------------------------------------------------------------------------------------------------------------------------------------------------------------------------------------------------------------------------------------------------------------------------------------------------------------------------------------------------------------------------------------------------------------------------------------------------------------------------------------------------------------------------------------------------------------------------------------------------------------------------------------------------------------------------------------------------------------------------------------------------------------------------------------|-----|-----|-----------|-------|------|------|----------------------------------------|-------|----------------------|-----------------------------------------------------------------------------------------------------------------------------------------------------------------------|-----|-----|-----------|-------|------|------|
| Rsa1.0_01613.1.g28418.t3 | ref NP_201164.1  flavonol synthase 3 [Arabidopsis thaliana] gi 75309039 sp Q9FFQ5.1 FLS3_ARATH RecName: Full=Flavonol synthase 3 gi 10177040 dbj BAB10452.1  flavonol synthase [Arabidopsis thaliana] gi 27808572 gb AA024566.1  AT5g63590 [Arabidopsis thaliana] gi 110736555 dbj BAF00243.1  flavonol synthase [Arabidopsis thaliana] gi 332010389 gb AED97772.1  flavonol synthase 3 [Arabidopsis thaliana] ref XP_002864854.1  hypothetical protein ARALYDRAFT_332577 [Arabidopsis lyrata subsp. lyrata] gi 297310689 gb EFH41113.1  hypothetical protein ARALYDRAFT_332577 [Arabidopsis lyrata subsp. lyrata]                                                                                                                                                                                                                                                                                                                                                                                                                                                                                                                                                                                                                                                                                                                                                                              | 334 | 308 | 2.00E-83  | 92.2  | 50.6 | 61.7 | flavonol synthase 3                    | gbpln | Arabidopsis thaliana | AT5G63590.1   Symbols: FLS3, ATFLS3   flavonol synthase 3   chr5:25457172-25458427 REVERSE LENGTH=308                                                                 | 334 | 308 | 4.00E-86  | 92.2  | 50.6 | 61.7 |
| Rsa1.0_01613.1.g28419.t1 | ref XP_002864854.1  hypothetical protein ARALYDRAFT_332577 [Arabidopsis lyrata subsp. lyrata] gi 297310689 gb EFH41113.1  hypothetical protein ARALYDRAFT_332577 [Arabidopsis lyrata subsp. lyrata]                                                                                                                                                                                                                                                                                                                                                                                                                                                                                                                                                                                                                                                                                                                                                                                                                                                                                                                                                                                                                                                                                                                                                                                             | 179 | 539 | 3.00E-31  | 301.1 | 36.9 | 40.8 | hypothetical protein ARALYDRAFT_332577 | gbpln | Arabidopsis lyrata   | AT5G63550.2   Symbols:   DEK domain-containing chromatin associated protein   chr5:25444805-25447934 FORWARD LENGTH=531                                               | 179 | 531 | 6.00E-33  | 296.6 | 36.3 | 40.8 |
| Rsa1.0_01613.1.g28420.t1 | #                                                                                                                                                                                                                                                                                                                                                                                                                                                                                                                                                                                                                                                                                                                                                                                                                                                                                                                                                                                                                                                                                                                                                                                                                                                                                                                                                                                               | #   | #   | #         | #     | #    | #    | -                                      | ----  | ----                 | #                                                                                                                                                                     | #   | #   | #         | #     | #    | #    |
| Rsa1.0_01613.1.g28421.t1 | #                                                                                                                                                                                                                                                                                                                                                                                                                                                                                                                                                                                                                                                                                                                                                                                                                                                                                                                                                                                                                                                                                                                                                                                                                                                                                                                                                                                               | #   | #   | #         | #     | #    | #    | -                                      | ----  | ----                 | #                                                                                                                                                                     | #   | #   | #         | #     | #    | #    |
| Rsa1.0_01613.1.g28422.t1 | ref XP_002885669.1  hypothetical protein ARALYDRAFT_319176 [Arabidopsis lyrata subsp. lyrata] gi 297331509 gb EFH61928.1  hypothetical protein ARALYDRAFT_319176 [Arabidopsis lyrata subsp. lyrata] ref NP_201093.1  Rac-like GTP-binding protein ARAC10 [Arabidopsis thaliana] gi 297793877 ref XP_002864823.1  hypothetical protein ARALYDRAFT_496470 [Arabidopsis lyrata subsp. lyrata] gi 51701730 sp O82481.1 RAC10_ARATH RecName: Full=Rac-like GTP-binding protein ARAC10; AltName: Full=GTPase protein ROP11 gi 7211193 gb AAF40238.1 AF115467.1 Arac10 [Arabidopsis thaliana] gi 3702964 gb AAC63014.1  rac GTP binding protein Arac10 [Arabidopsis thaliana] gi 10177466 dbj BAB10857.1  rac GTP binding protein Arac10 [Arabidopsis thaliana] gi 27754724 gb AAO22805.1  putative GTP binding protein Arac10 [Arabidopsis thaliana] gi 28394091 gb AAO42453.1  putative GTP binding protein Arac10 [Arabidopsis thaliana] gi 51971983 dbj BAD44656.1  Arac10 [Arabidopsis thaliana] gi 297310658 gb EFH41082.1  hypothetical protein ARALYDRAFT_496470 [Arabidopsis lyrata subsp. lyrata] gi 332010284 gb AED97667.1  Rac-like GTP-binding protein ARAC10 [Arabidopsis thaliana] ref XP_002864822.1  hypothetical protein ARALYDRAFT_496469 [Arabidopsis lyrata subsp. lyrata] gi 297310657 gb EFH41081.1  hypothetical protein ARALYDRAFT_496469 [Arabidopsis lyrata subsp. lyrata] | 593 | 467 | 1.00E-110 | 78.8  | 37.9 | 47.6 | hypothetical protein ARALYDRAFT_319176 | gbpln | Arabidopsis lyrata   | AT3G62850.1   Symbols:   zinc finger protein-related   chr3:23237487-23239155 REVERSE LENGTH=472                                                                      | 593 | 472 | 1.00E-110 | 79.6  | 36.6 | 45.9 |
| Rsa1.0_01613.1.g28423.t1 | ref NP_201093.1  Rac-like GTP-binding protein ARAC10 [Arabidopsis thaliana] gi 297793877 ref XP_002864823.1  hypothetical protein ARALYDRAFT_496470 [Arabidopsis lyrata subsp. lyrata] gi 51701730 sp O82481.1 RAC10_ARATH RecName: Full=Rac-like GTP-binding protein ARAC10; AltName: Full=GTPase protein ROP11 gi 7211193 gb AAF40238.1 AF115467.1 Arac10 [Arabidopsis thaliana] gi 3702964 gb AAC63014.1  rac GTP binding protein Arac10 [Arabidopsis thaliana] gi 10177466 dbj BAB10857.1  rac GTP binding protein Arac10 [Arabidopsis thaliana] gi 27754724 gb AAO22805.1  putative GTP binding protein Arac10 [Arabidopsis thaliana] gi 28394091 gb AAO42453.1  putative GTP binding protein Arac10 [Arabidopsis thaliana] gi 51971983 dbj BAD44656.1  Arac10 [Arabidopsis thaliana] gi 297310658 gb EFH41082.1  hypothetical protein ARALYDRAFT_496470 [Arabidopsis lyrata subsp. lyrata] gi 332010284 gb AED97667.1  Rac-like GTP-binding protein ARAC10 [Arabidopsis thaliana] ref XP_002864822.1  hypothetical protein ARALYDRAFT_496469 [Arabidopsis lyrata subsp. lyrata] gi 297310657 gb EFH41081.1  hypothetical protein ARALYDRAFT_496469 [Arabidopsis lyrata subsp. lyrata]                                                                                                                                                                                                     | 193 | 215 | 2.00E-96  | 111.4 | 97.9 | 99.5 | Rac-like GTP-binding protein ARAC10    | gbpln | Arabidopsis lyrata   | AT5G62880.1   Symbols: ARAC10, ATRAC10, ATROP11, RAC10   Rac-like 10   chr5:25237236-25238939 FORWARD LENGTH=215                                                      | 193 | 215 | 6.00E-99  | 111.4 | 97.9 | 99.5 |
| Rsa1.0_01613.1.g28424.t1 | ref XP_002864822.1  hypothetical protein ARALYDRAFT_496469 [Arabidopsis lyrata subsp. lyrata] gi 297310657 gb EFH41081.1  hypothetical protein ARALYDRAFT_496469 [Arabidopsis lyrata subsp. lyrata]                                                                                                                                                                                                                                                                                                                                                                                                                                                                                                                                                                                                                                                                                                                                                                                                                                                                                                                                                                                                                                                                                                                                                                                             | 159 | 360 | 2.00E-54  | 226.4 | 75.5 | 82.4 | hypothetical protein ARALYDRAFT_496469 | gbpln | Arabidopsis lyrata   | AT5G62865.1   Symbols:   unknown protein; BEST Arabidopsis thaliana protein match is: unknown protein (TAIR:AT3G48020.1).   chr5:25234064-25234567 FORWARD LENGTH=167 | 159 | 167 | 7.00E-50  | 105.0 | 76.1 | 84.3 |
| Rsa1.0_01613.1.g28425.t1 | gb EOA37836.1  hypothetical protein CARUB_v10012023mg [Capsella rubella] ref NP_201091.2  nodulin MtN3-like protein [Arabidopsis thaliana] gi 322967651 sp Q9FM10.2 SWET5_ARATH RecName: Full=Bidirectional sugar transporter SWEET5; Short=AtSWEET5; AltName: Full=Protein VEGETATIVE CELL EXPRESSED 1; Short=AtVEX1 gi 332010281 gb AED97664.1  bidirectional sugar transporter SWEET5 [Arabidopsis thaliana]                                                                                                                                                                                                                                                                                                                                                                                                                                                                                                                                                                                                                                                                                                                                                                                                                                                                                                                                                                                 | 400 | 389 | 5.00E-52  | 97.3  | 38.5 | 53.0 | hypothetical protein CARUB_v10012023mg | gbpln | Capsella rubella     | AT5G50220.1   Symbols:   F-box family protein   chr5:20446068-20447200 REVERSE LENGTH=357                                                                             | 400 | 357 | 1.00E-46  | 89.3  | 36.5 | 50.0 |
| Rsa1.0_01613.1.g28426.t1 | ref NP_201091.2  nodulin MtN3-like protein [Arabidopsis thaliana] gi 322967651 sp Q9FM10.2 SWET5_ARATH RecName: Full=Bidirectional sugar transporter SWEET5; Short=AtSWEET5; AltName: Full=Protein VEGETATIVE CELL EXPRESSED 1; Short=AtVEX1 gi 332010281 gb AED97664.1  bidirectional sugar transporter SWEET5 [Arabidopsis thaliana]                                                                                                                                                                                                                                                                                                                                                                                                                                                                                                                                                                                                                                                                                                                                                                                                                                                                                                                                                                                                                                                          | 240 | 240 | 1.00E-107 | 100.0 | 77.9 | 88.3 | nodulin MtN3-like protein              | gbpln | Arabidopsis thaliana | AT5G62850.1   Symbols: AtVEX1, SWEET5, AtSWEET5   Nodulin MtN3 family protein   chr5:25230204-25231527 REVERSE LENGTH=240                                             | 240 | 240 | 1.00E-110 | 100.0 | 77.9 | 88.3 |

|                          |                                                                                                                                                                                                                                                                                                                                        |      |      |           |        |      |      |                                                   |       |                      |                                                                                                                                                        |      |      |           |       |      |      |
|--------------------------|----------------------------------------------------------------------------------------------------------------------------------------------------------------------------------------------------------------------------------------------------------------------------------------------------------------------------------------|------|------|-----------|--------|------|------|---------------------------------------------------|-------|----------------------|--------------------------------------------------------------------------------------------------------------------------------------------------------|------|------|-----------|-------|------|------|
| Rsa1.0_01613.1.g28427.t1 | refNP_201091.2  nodulin MtN3-like protein [Arabidopsis thaliana] gi 322967651 sp Q9FM10.2 SWET5_ARA TH RecName: Full=Bidirectional sugar transporter SWEET5; Short=AtSWEET5; AltName: Full=Protein VEGETATIVE CELL EXPRESSED 1; Short=AtVEX1 gi 332010281 gb AED97664.1  bidirectional sugar transporter SWEET5 [Arabidopsis thaliana] | 240  | 240  | 1.00E-116 | 100.0  | 83.8 | 90.8 | nodulin MtN3-like protein                         | gbpln | Arabidopsis thaliana | AT5G62850.1   Symbols: AtVEX1, SWEET5, AtSWEET5   Nodulin MtN3 family protein   chr5:25230204-25231527 REVERSE LENGTH=240                              | 240  | 240  | 1.00E-119 | 100.0 | 83.8 | 90.8 |
| Rsa1.0_01613.1.g28428.t1 | gb EOA12737.1  hypothetical protein CARUB_v10028245mg [Capsella rubella]                                                                                                                                                                                                                                                               | 276  | 297  | 1.00E-108 | 107.6  | 78.3 | 86.2 | hypothetical protein CARUB_v10028245mg            | gbpln | Capsella rubella     | AT5G62820.1   Symbols:   Uncharacterised protein family (UPF0497)   chr5:25223828-25224898 REVERSE LENGTH=297                                          | 276  | 297  | 1.00E-110 | 107.6 | 77.2 | 84.1 |
| Rsa1.0_01613.1.g28429.t1 | gb EOA13719.1  hypothetical protein CARUB_v10026788mg [Capsella rubella]                                                                                                                                                                                                                                                               | 262  | 287  | 1.00E-140 | 109.5  | 94.7 | 96.6 | hypothetical protein CARUB_v10026788mg            | gbpln | Capsella rubella     | AT5G62740.1   Symbols: HIR1, ATHIR1   SPFH/Band 7/PHB domain-containing membrane-associated protein family   chr5:25201320-25202535 FORWARD LENGTH=286 | 262  | 286  | 1.00E-141 | 109.2 | 92.7 | 96.6 |
| Rsa1.0_01613.1.g28430.t1 | # # # # # # # #                                                                                                                                                                                                                                                                                                                        |      |      |           |        |      |      | -                                                 | ----  | ----                 |                                                                                                                                                        | #    | #    | #         | #     | #    | #    |
| Rsa1.0_01614.1.g28431.t2 | gb EOA13068.1  hypothetical protein CARUB_v10026072mg [Capsella rubella]                                                                                                                                                                                                                                                               | 493  | 637  | 1.00E-144 | 129.2  | 63.1 | 75.3 | hypothetical protein CARUB_v10026072mg            | gbpln | Capsella rubella     | AT5G46550.1   Symbols:   DNA-binding bromodomain-containing protein   chr5:18884439-18886503 REVERSE LENGTH=494                                        | 493  | 494  | 1.00E-129 | 100.2 | 56.8 | 69.2 |
| Rsa1.0_01614.1.g28432.t1 | dbj BAJ34635.1  unnamed protein product [Thellungiella halophila]                                                                                                                                                                                                                                                                      | 201  | 206  | 1.00E-58  | 102.5  | 57.2 | 70.6 | unnamed protein product                           | ----  | ----                 |                                                                                                                                                        | 201  | 206  | 2.00E-58  | 102.5 | 53.7 | 71.1 |
| Rsa1.0_01614.1.g28433.t1 | gb EOA14092.1  hypothetical protein CARUB_v10027229mg, partial [Capsella rubella]                                                                                                                                                                                                                                                      | 157  | 176  | 2.00E-77  | 112.1  | 91.7 | 94.9 | hypothetical protein CARUB_v10027229mg, partial   | gbpln | Capsella rubella     | AT2G34690.1   Symbols: ACD11   Glycolipid transfer protein (GLTP) family protein   chr2:14630425-14631779 FORWARD LENGTH=206                           | 157  | 157  | 1.00E-79  | 100.0 | 91.1 | 95.5 |
| Rsa1.0_01614.1.g28434.t1 | ref XP_002865179.1  predicted protein [Arabidopsis lyrata subsp. lyrata] gi 297311014 gb EFH41438.1  predicted protein [Arabidopsis lyrata subsp. lyrata]                                                                                                                                                                              | 1139 | 1113 | 0         | 97.7   | 62.8 | 76.9 | predicted protein                                 | gbpln | Arabidopsis lyrata   | AT4G08450.1   Symbols:   Disease resistance protein (TIR-NBS-LRR class) family   chr4:5365610-5371101 FORWARD LENGTH=1234                              | 1139 | 1234 | 0         | 108.3 | 54.5 | 70.3 |
| Rsa1.0_01614.1.g28435.t1 | dbj BAB01217.1  Ta11 non-LTR retroelement protein-like [Arabidopsis thaliana] gi 67633664 gb AAAY78756.1  putative zinc finger protein [Arabidopsis thaliana]                                                                                                                                                                          | 195  | 487  | 5.00E-30  | 249.7  | 39.0 | 51.3 | Ta11 non-LTR retroelement protein-like            | gbpln | Arabidopsis thaliana | #                                                                                                                                                      | #    | #    | #         | #     | #    | #    |
| Rsa1.0_01614.1.g28436.t1 | ref XP_002865177.1  predicted protein [Arabidopsis lyrata subsp. lyrata] gi 297311012 gb EFH41436.1  predicted protein [Arabidopsis lyrata subsp. lyrata]                                                                                                                                                                              | 126  | 199  | 4.00E-39  | 157.9  | 60.3 | 77.8 | predicted protein                                 | gbpln | Arabidopsis lyrata   | AT2G34690.1   Symbols: ACD11   Glycolipid transfer protein (GLTP) family protein   chr2:14630425-14631779 FORWARD LENGTH=206                           | 126  | 206  | 4.00E-41  | 163.5 | 57.1 | 78.6 |
| Rsa1.0_01614.1.g28437.t1 | emb CAB39638.1  RNA-directed DNA polymerase-like protein [Arabidopsis thaliana] gi 7267666 emb CAB78094.1  RNA-directed DNA polymerase-like protein [Arabidopsis thaliana]                                                                                                                                                             | 124  | 1274 | 3.00E-38  | 1027.4 | 65.3 | 75.0 | RNA-directed DNA polymerase-like protein          | gbpln | Arabidopsis thaliana | #                                                                                                                                                      | #    | #    | #         | #     | #    | #    |
| Rsa1.0_01615.1.g28438.t1 | dbj BAB02146.1  copia retroelement pol polyprotein-like [Arabidopsis thaliana]                                                                                                                                                                                                                                                         | 930  | 526  | 5.00E-70  | 56.6   | 18.7 | 24.5 | copia retroelement pol polyprotein-like           | gbpln | Arabidopsis thaliana | #                                                                                                                                                      | #    | #    | #         | #     | #    | #    |
| Rsa1.0_01615.1.g28439.t1 | gb AAD22283.1  putative retroelement pol polyprotein [Arabidopsis thaliana]                                                                                                                                                                                                                                                            | 176  | 1787 | 8.00E-18  | 1015.3 | 26.7 | 38.6 | putative retroelement pol polyprotein             | gbpln | Arabidopsis thaliana | #                                                                                                                                                      | #    | #    | #         | #     | #    | #    |
| Rsa1.0_01615.1.g28440.t1 | gb AAM93462.1  putative reverse transcriptase [Oryza sativa Japonica Group]                                                                                                                                                                                                                                                            | 442  | 566  | 4.00E-30  | 128.1  | 16.7 | 25.8 | putative reverse transcriptase                    | gbpln | Oryza sativa         | ATMG00310.1   Symbols: ORF154   RNA-directed DNA polymerase (reverse transcriptase)-related family protein   chrM:90883-91347 REVERSE LENGTH=154       | 442  | 154  | 8.00E-12  | 34.8  | 7.2  | 11.5 |
| Rsa1.0_01615.1.g28441.t1 | # # # # # # # #                                                                                                                                                                                                                                                                                                                        |      |      |           |        |      |      | -                                                 | ----  | ----                 | #                                                                                                                                                      | #    | #    | #         | #     | #    | #    |
| Rsa1.0_01615.1.g28442.t1 | gb AAM15254.1  putative retroelement pol polyprotein [Arabidopsis thaliana]                                                                                                                                                                                                                                                            | 335  | 930  | 3.00E-45  | 277.6  | 32.5 | 43.3 | putative retroelement pol polyprotein             | gbpln | Arabidopsis thaliana | #                                                                                                                                                      | #    | #    | #         | #     | #    | #    |
| Rsa1.0_01615.1.g28443.t1 | gb AAC69377.1  putative retroelement pol polyprotein [Arabidopsis thaliana]                                                                                                                                                                                                                                                            | 815  | 1328 | 2.00E-18  | 162.9  | 9.4  | 12.5 | putative retroelement pol polyprotein             | gbpln | Arabidopsis thaliana | #                                                                                                                                                      | #    | #    | #         | #     | #    | #    |
| Rsa1.0_01615.1.g28444.t1 | emb CAN81728.1  hypothetical protein VITISV_004185 [Vitis vinifera]                                                                                                                                                                                                                                                                    | 1111 | 1601 | 1.00E-119 | 144.1  | 24.7 | 37.7 | hypothetical protein VITISV_004185                | gbpln | Vitis vinifera       | #                                                                                                                                                      | #    | #    | #         | #     | #    | #    |
| Rsa1.0_01615.1.g28445.t1 | # # # # # # # #                                                                                                                                                                                                                                                                                                                        |      |      |           |        |      |      | -                                                 | ----  | ----                 | #                                                                                                                                                      | #    | #    | #         | #     | #    | #    |
| Rsa1.0_01616.1.g28446.t1 | ref NP_175273.1  F-box/RNI-like/FBD-like domain-containing protein [Arabidopsis thaliana] gi 5733869 gb AAD49757.1 AC007932.5 Contains F-box domain PF00646 [Arabidopsis thaliana] gi 332194164 gb AEE32285.1  F-box/LRR-repeat protein [Arabidopsis thaliana]                                                                         | 213  | 513  | 8.00E-70  | 240.8  | 60.6 | 72.8 | F-box/RNI-like/FBD-like domain-containing protein | gbpln | Arabidopsis thaliana | AT1G48400.1   Symbols:   F-box/RNI-like/FBD-like domains-containing protein   chr1:17882136-17883855 REVERSE LENGTH=513                                | 213  | 513  | 3.00E-72  | 240.8 | 60.6 | 72.8 |

|                          |                                                                                                                                                                                                                                                                                                                                                                                             |      |      |           |       |      |      |                                                                                                                 |       |                      |                                                                                                                                                        |      |      |           |       |      |      |
|--------------------------|---------------------------------------------------------------------------------------------------------------------------------------------------------------------------------------------------------------------------------------------------------------------------------------------------------------------------------------------------------------------------------------------|------|------|-----------|-------|------|------|-----------------------------------------------------------------------------------------------------------------|-------|----------------------|--------------------------------------------------------------------------------------------------------------------------------------------------------|------|------|-----------|-------|------|------|
| Rsa1.0_01616.1.g28447.t2 | sp Q56XW8.2 FBL30_ARATH RecName: Full=F-box/LRR-repeat protein At1g48400                                                                                                                                                                                                                                                                                                                    | 326  | 487  | 4.00E-95  | 149.4 | 62.6 | 74.8 | RecName: Full=F-box/LRR-repeat protein At1g48400                                                                | ----  | ----                 | AT1G48400.1   Symbols:   F-box/RNI-like/FBD-like domains-containing protein   chr1:17882136-17883855 REVERSE LENGTH=513                                | 326  | 513  | 3.00E-97  | 157.4 | 62.6 | 74.8 |
| Rsa1.0_01616.1.g28448.t1 | dbj BAB09379.1  non-LTR retroelement reverse transcriptase-like protein [Arabidopsis thaliana]                                                                                                                                                                                                                                                                                              | 1615 | 1223 | 0         | 75.7  | 41.3 | 54.1 | non-LTR retroelement reverse transcriptase-like protein                                                         | gbpln | Arabidopsis thaliana | AT3G24255.1   Symbols:   RNA-directed DNA polymerase (reverse transcriptase)-related family protein   chr3:8789471-8793208 FORWARD LENGTH=746          | 1615 | 746  | 1.00E-122 | 46.2  | 13.0 | 17.6 |
| Rsa1.0_01616.1.g28449.t1 | ref NP_175273.1  F-box/RNI-like/FBD-like domain-containing protein [Arabidopsis thaliana] gi 5733869 gb AAD49757.1 AC007932.5 Contains F-box domain PF 00646 [Arabidopsis thaliana] gi 332194164 gb AEE32285.1  F-box/LRR-repeat protein [Arabidopsis thaliana]                                                                                                                             | 133  | 513  | 3.00E-42  | 385.7 | 65.4 | 73.7 | F-box/RNI-like/FBD-like domain-containing protein                                                               | gbpln | Arabidopsis thaliana | AT1G48400.1   Symbols:   F-box/RNI-like/FBD-like domains-containing protein   chr1:17882136-17883855 REVERSE LENGTH=513                                | 133  | 513  | 7.00E-45  | 385.7 | 65.4 | 73.7 |
| Rsa1.0_01616.1.g28450.t1 | ref XP_002894079.1  hypothetical protein ARALYDRAFT_336913 [Arabidopsis lyrata subsp. lyrata] gi 29733992.1 gb EFH70338.1  hypothetical protein ARALYDRAFT_336913 [Arabidopsis lyrata subsp. lyrata]                                                                                                                                                                                        | 1002 | 1058 | 0         | 105.6 | 82.4 | 89.9 | hypothetical protein ARALYDRAFT_336913                                                                          | gbpln | Arabidopsis lyrata   | AT1G47900.1   Symbols:   Plant protein of unknown function (DUF869)   chr1:17647340-17651035 REVERSE LENGTH=1054                                       | 1002 | 1054 | 0         | 105.2 | 81.8 | 90.4 |
| Rsa1.0_01616.1.g28451.t1 | gb AAM90621.1 AF400001.1 E2F-related transcription factor 2 [Noccaea caerulea]                                                                                                                                                                                                                                                                                                              | 373  | 386  | 1.00E-162 | 103.5 | 82.0 | 87.4 | E2F-related transcription factor 2                                                                              | gbpln | Noccaea caerulea     | AT1G47870.1   Symbols: E2FC, ATE2F2, ATE2FC   winged-helix DNA-binding transcription factor family protein   chr1:17634937-17637557 FORWARD LENGTH=396 | 373  | 396  | 1.00E-155 | 106.2 | 78.8 | 86.3 |
| Rsa1.0_01616.1.g28452.t1 | #                                                                                                                                                                                                                                                                                                                                                                                           | #    | #    | #         | #     | #    | -    | -                                                                                                               | ----  | ----                 | #                                                                                                                                                      | #    | #    | #         | #     | #    | #    |
| Rsa1.0_01617.1.g28453.t1 | #                                                                                                                                                                                                                                                                                                                                                                                           | #    | #    | #         | #     | #    | -    | -                                                                                                               | ----  | ----                 | #                                                                                                                                                      | #    | #    | #         | #     | #    | #    |
| Rsa1.0_01617.1.g28454.t1 | #                                                                                                                                                                                                                                                                                                                                                                                           | #    | #    | #         | #     | #    | -    | -                                                                                                               | ----  | ----                 | #                                                                                                                                                      | #    | #    | #         | #     | #    | #    |
| Rsa1.0_01617.1.g28455.t1 | dbj BAB09379.1  non-LTR retroelement reverse transcriptase-like protein [Arabidopsis thaliana]                                                                                                                                                                                                                                                                                              | 1590 | 1223 | 0         | 76.9  | 33.6 | 45.7 | non-LTR retroelement reverse transcriptase-like protein                                                         | gbpln | Arabidopsis thaliana | AT3G24255.1   Symbols:   RNA-directed DNA polymerase (reverse transcriptase)-related family protein   chr3:8789471-8793208 FORWARD LENGTH=746          | 1590 | 746  | 2.00E-87  | 46.9  | 10.8 | 14.8 |
| Rsa1.0_01617.1.g28456.t1 | gb AAD21778.1  putative non-LTR retroelement reverse transcriptase [Arabidopsis thaliana]                                                                                                                                                                                                                                                                                                   | 1502 | 1715 | 0         | 114.2 | 31.7 | 48.9 | putative non-LTR retroelement reverse transcriptase                                                             | gbpln | Arabidopsis thaliana | AT4G29090.1   Symbols:   Ribonuclease H-like superfamily protein   chr4:14333528-14335255 FORWARD LENGTH=575                                           | 1502 | 575  | 6.00E-47  | 38.3  | 8.2  | 14.0 |
| Rsa1.0_01617.1.g28457.t1 | ref NP_199965.1  plant invertase/pectin methylesterase inhibitor domain-containing protein [Arabidopsis thaliana] gi 9758194 dbj BAB08668.1  ripening-related protein-like [Arabidopsis thaliana] gi 67633876 gb AAAY78862.1  invertase [Arabidopsis thaliana] gi 332008710 gb AED96093.1  plant invertase/pectin methylesterase inhibitor domain-containing protein [Arabidopsis thaliana] | 169  | 204  | 6.00E-78  | 120.7 | 85.2 | 90.5 | plant invertase/pectin methylesterase inhibitor domain-containing protein                                       | gbpln | Arabidopsis thaliana | AT5G51520.1   Symbols:   Plant invertase/pectin methylesterase inhibitor superfamily protein   chr5:20925980-20926594 FORWARD LENGTH=204               | 169  | 204  | 2.00E-80  | 120.7 | 85.2 | 90.5 |
| Rsa1.0_01617.1.g28458.t1 | sp O04067.1 AGL9_SINAL RecName: Full=Agamous-like MADS-box protein AGL9 homolog; AltName: Full=MADS D gi 161721 emb CAA69916.1  MADS D [Sinapis alba]                                                                                                                                                                                                                                       | 152  | 254  | 3.00E-14  | 167.1 | 26.3 | 28.9 | RecName: Full=Agamous-like MADS-box protein AGL9 homolog; AltName: Full=MADS D gi 161721 emb CAA69916.1  MADS D | gbpln | Sinapis alba         | AT1G24260.2   Symbols: SEP3, AGL9   K-box region and MADS-box transcription factor family protein   chr1:8593790-8595862 REVERSE LENGTH=251            | 152  | 251  | 3.00E-13  | 165.1 | 23.0 | 25.0 |
| Rsa1.0_01617.1.g28459.t1 | emb CCD74510.1  unknown, partial [Arabidopsis halleri subsp. halleri]                                                                                                                                                                                                                                                                                                                       | 276  | 300  | 7.00E-24  | 108.7 | 19.6 | 31.9 | unknown, partial                                                                                                | gbpln | Arabidopsis halleri  | AT4G09490.1   Symbols:   Polynucleotidyl transferase, ribonuclease H-like superfamily protein   chr4:6015583-6016575 REVERSE LENGTH=170                | 276  | 170  | 2.00E-12  | 61.6  | 20.3 | 29.3 |
| Rsa1.0_01617.1.g28460.t1 | ref NP_199969.1  leucine-rich repeat protein kinase-like protein [Arabidopsis thaliana] gi 9758198 dbj BAB08672.1  receptor-like protein kinase [Arabidopsis thaliana] gi 224589719 gb ACN59391.1  leucine-rich repeat receptor-like protein kinase [Arabidopsis thaliana] gi 332008715 gb AED96098.1  leucine-rich repeat protein kinase-like protein [Arabidopsis thaliana]               | 274  | 680  | 1.00E-128 | 248.2 | 84.3 | 89.1 | leucine-rich repeat protein kinase-like protein                                                                 | gbpln | Arabidopsis thaliana | AT5G51560.1   Symbols:   Leucine-rich repeat protein kinase family protein   chr5:20945807-20948613 FORWARD LENGTH=680                                 | 274  | 680  | 1.00E-130 | 248.2 | 84.3 | 89.1 |
| Rsa1.0_01617.1.g28461.t1 | ref XP_002865868.1  hypothetical protein ARALYDRAFT_495229 [Arabidopsis lyrata subsp. lyrata] gi 297311703 gb EFH42127.1  hypothetical protein ARALYDRAFT_495229 [Arabidopsis lyrata subsp. lyrata]                                                                                                                                                                                         | 188  | 418  | 3.00E-73  | 222.3 | 85.6 | 88.3 | hypothetical protein ARALYDRAFT_495229                                                                          | gbpln | Arabidopsis lyrata   | AT5G51590.1   Symbols:   AT hook motif DNA-binding family protein   chr5:20956863-20958929 REVERSE LENGTH=419                                          | 188  | 419  | 6.00E-71  | 222.9 | 84.0 | 87.2 |

|                          |                                                                                                                                                                                                                                                                                                                                                                                                                                                                                                                                                                                                                                                                                                                                                                                                                                                                                                                                                                                                                                                      |     |     |           |       |      |       |                                        |       |                      |                                                                                                                                                                                                                                                                                                                                                                                                                                                                                                                                                                               |     |     |           |       |      |      |
|--------------------------|------------------------------------------------------------------------------------------------------------------------------------------------------------------------------------------------------------------------------------------------------------------------------------------------------------------------------------------------------------------------------------------------------------------------------------------------------------------------------------------------------------------------------------------------------------------------------------------------------------------------------------------------------------------------------------------------------------------------------------------------------------------------------------------------------------------------------------------------------------------------------------------------------------------------------------------------------------------------------------------------------------------------------------------------------|-----|-----|-----------|-------|------|-------|----------------------------------------|-------|----------------------|-------------------------------------------------------------------------------------------------------------------------------------------------------------------------------------------------------------------------------------------------------------------------------------------------------------------------------------------------------------------------------------------------------------------------------------------------------------------------------------------------------------------------------------------------------------------------------|-----|-----|-----------|-------|------|------|
| Rsa1.0_01618.1.g28462.t1 | gb ABF17873.1  cinnamate 4-hydroxylase isoform 1 [Brassica napus] gi 94323525 gb ABF17874.1  cinnamate 4-hydroxylase isoform 1 [Brassica napus]                                                                                                                                                                                                                                                                                                                                                                                                                                                                                                                                                                                                                                                                                                                                                                                                                                                                                                      | 114 | 505 | 2.00E-61  | 443.0 | 99.1 | 100.0 | cinnamate 4-hydroxylase isoform 1      | gbpln | Brassica napus       | AT2G30490.1   Symbols: ATC4H, C4H, CYP73A5, REF3   cinnamate-4-hydroxylase   chr2:12993861-12995683 REVERSE LENGTH=505                                                                                                                                                                                                                                                                                                                                                                                                                                                        | 114 | 505 | 3.00E-61  | 443.0 | 93.9 | 97.4 |
| Rsa1.0_01618.1.g28463.t9 | ref XP_002881113.1  hypothetical protein ARALYDRAFT_320802 [Arabidopsis lyrata subsp. lyrata] gi 297326952 gb EFH57372.1  hypothetical protein ARALYDRAFT_320802 [Arabidopsis lyrata subsp. lyrata]                                                                                                                                                                                                                                                                                                                                                                                                                                                                                                                                                                                                                                                                                                                                                                                                                                                  | 735 | 701 | 0         | 95.4  | 69.4 | 76.3  | hypothetical protein ARALYDRAFT_320802 | gbpln | Arabidopsis lyrata   | AT2G30480.3   Symbols:   unknown protein; FUNCTIONS IN: molecular_function unknown; INVOLVED IN: biological_process unknown; LOCATED IN: cellular_component unknown; EXPRESSED IN: 12 plant structures; EXPRESSED DURING: 4 anthesis, F mature embryo stage, petal differentiation and expansion stage, E expanded cotyledon stage, D bilateral stage; Has 189 Blast hits to 180 proteins in 63 species: Archae - 0; Bacteria - 43; Metazoa - 86; Fungi - 6; Plants - 19; Viruses - 0; Other Eukaryotes - 35 (source: NCBI BLINK)   chr2:12988326-12992930 REVERSE LENGTH=705 | 735 | 705 | 0         | 95.9  | 68.0 | 75.1 |
| Rsa1.0_01618.1.g28464.t1 | dbj BAJ34588.1  unnamed protein product [Theilungiella halophila]                                                                                                                                                                                                                                                                                                                                                                                                                                                                                                                                                                                                                                                                                                                                                                                                                                                                                                                                                                                    | 814 | 809 | 0         | 99.4  | 78.0 | 84.3  | unnamed protein product                | ----  | ----                 | AT2G30470.1   Symbols: HSI2, VAL1   high-level expression of sugar-inducible gene 2   chr2:12980904-12984724 REVERSE LENGTH=790                                                                                                                                                                                                                                                                                                                                                                                                                                               | 814 | 790 | 0         | 97.1  | 72.7 | 80.3 |
| Rsa1.0_01618.1.g28465.t1 | ref NP_565699.1  tubulin-specific chaperone A [Arabidopsis thaliana] gi 334184582 ref NP_001189640.1  tubulin-specific chaperone A [Arabidopsis thaliana] gi 21542453 sp O04350.2 TBCA_ARATH RecName: Full=Tubulin-specific chaperone A; AltName: Full=TCP1-chaperonin cofactor A; AltName: Full=Tubulin-folding cofactor A; Short=CFA gi 20514257 gb AAM22957.1 AF486848.1 tubulin folding cofactor A [Arabidopsis thaliana] gi 15293037 gb AAK93629.1  putative TCP1-chaperonin cofactor A isolog [Arabidopsis thaliana] gi 20196887 gb AAM14821.1  TCP1-chaperonin cofactor A isolog [Arabidopsis thaliana] gi 20198325 gb AAB63093.2  TCP1-chaperonin cofactor A isolog [Arabidopsis thaliana] gi 20259135 gb AAM14283.1  putative TOP1-chaperonin cofactor A protein [Arabidopsis thaliana] gi 21553949 gb AAM63030.1  TCP1-chaperonin cofactor A isolog [Arabidopsis thaliana] gi 330253289 gb AEC08383.1  tubulin-specific chaperone A [Arabidopsis thaliana] gi 330253290 gb AEC08384.1  tubulin-specific chaperone A [Arabidopsis thaliana] | 110 | 113 | 2.00E-49  | 102.7 | 90.9 | 93.6  | tubulin-specific chaperone A           | gbpln | Arabidopsis thaliana | AT2G30410.2   Symbols: KIS   tubulin folding cofactor A (KIESEL)   chr2:12959812-12960552 FORWARD LENGTH=113                                                                                                                                                                                                                                                                                                                                                                                                                                                                  | 110 | 113 | 4.00E-52  | 102.7 | 90.9 | 93.6 |
| Rsa1.0_01618.1.g28466.t1 | gb EOA27511.1  hypothetical protein CARUB_v10023651mg [Capsella rubella]                                                                                                                                                                                                                                                                                                                                                                                                                                                                                                                                                                                                                                                                                                                                                                                                                                                                                                                                                                             | 322 | 320 | 1.00E-113 | 99.4  | 71.7 | 80.7  | hypothetical protein CARUB_v10023651mg | gbpln | Capsella rubella     | AT2G30400.1   Symbols: ATOFP2, OFP2   ovate family protein 2   chr2:12956592-12957554 FORWARD LENGTH=320                                                                                                                                                                                                                                                                                                                                                                                                                                                                      | 322 | 320 | 1.00E-113 | 99.4  | 76.1 | 84.5 |
| Rsa1.0_01618.1.g28467.t1 | ref XP_002881107.1  ATOFP17/OFP17 [Arabidopsis lyrata subsp. lyrata] gi 297326946 gb EFH57366.1  ATOFP17/OFP17 [Arabidopsis lyrata subsp. lyrata]                                                                                                                                                                                                                                                                                                                                                                                                                                                                                                                                                                                                                                                                                                                                                                                                                                                                                                    | 202 | 195 | 9.00E-86  | 96.5  | 81.2 | 86.1  | ATOFP17/OFP17                          | gbpln | Arabidopsis lyrata   | AT2G30395.1   Symbols: ATOFP17, OFP17   ovate family protein 17   chr2:12954409-12955083 REVERSE LENGTH=195                                                                                                                                                                                                                                                                                                                                                                                                                                                                   | 202 | 195 | 2.00E-85  | 96.5  | 79.2 | 84.7 |
| Rsa1.0_01618.1.g28468.t1 | gb EOA28584.1  hypothetical protein CARUB_v10024802mg [Capsella rubella]                                                                                                                                                                                                                                                                                                                                                                                                                                                                                                                                                                                                                                                                                                                                                                                                                                                                                                                                                                             | 418 | 423 | 0         | 101.2 | 76.3 | 87.3  | hypothetical protein CARUB_v10024802mg | gbpln | Capsella rubella     | AT2G30380.1   Symbols:   Plant protein of unknown function (DUF641)   chr2:12948284-12950573 FORWARD LENGTH=519                                                                                                                                                                                                                                                                                                                                                                                                                                                               | 418 | 519 | 1.00E-137 | 124.2 | 58.4 | 66.0 |
| Rsa1.0_01618.1.g28469.t1 | ref XP_002881104.1  hypothetical protein ARALYDRAFT_481948 [Arabidopsis lyrata subsp. lyrata] gi 297326943 gb EFH57363.1  hypothetical protein ARALYDRAFT_481948 [Arabidopsis lyrata subsp. lyrata]                                                                                                                                                                                                                                                                                                                                                                                                                                                                                                                                                                                                                                                                                                                                                                                                                                                  | 444 | 434 | 0         | 97.7  | 83.6 | 89.2  | hypothetical protein ARALYDRAFT_481948 | gbpln | Arabidopsis lyrata   | AT2G30360.1   Symbols: CIPK11, PKS5, SIP4, SNRK3.22   SOS3-interacting protein 4   chr2:12937265-12938572 REVERSE LENGTH=435                                                                                                                                                                                                                                                                                                                                                                                                                                                  | 444 | 435 | 0         | 98.0  | 82.0 | 88.3 |
| Rsa1.0_01618.1.g28470.t1 | gb ABV21212.1  Ty1_Copia-element protein [Arabidopsis thaliana]                                                                                                                                                                                                                                                                                                                                                                                                                                                                                                                                                                                                                                                                                                                                                                                                                                                                                                                                                                                      | 334 | 438 | 5.00E-71  | 131.1 | 38.6 | 53.9  | Ty1_Copia-element protein              | gbpln | Arabidopsis thaliana | AT1G60720.1   Symbols:   RNA-directed DNA polymerase (reverse transcriptase)-related family protein   chr1:22357072-22357941 FORWARD LENGTH=289                                                                                                                                                                                                                                                                                                                                                                                                                               | 334 | 289 | 7.00E-67  | 86.5  | 36.5 | 53.3 |



|                          |                                                                                                                                                                                                                                                                                                                                                                                                                                                                                  |      |      |           |       |      |      |                                                      |       |                      |                                                                                                                                                                                                                                                                                                                                                                                                                                                                    |      |      |           |       |      |      |
|--------------------------|----------------------------------------------------------------------------------------------------------------------------------------------------------------------------------------------------------------------------------------------------------------------------------------------------------------------------------------------------------------------------------------------------------------------------------------------------------------------------------|------|------|-----------|-------|------|------|------------------------------------------------------|-------|----------------------|--------------------------------------------------------------------------------------------------------------------------------------------------------------------------------------------------------------------------------------------------------------------------------------------------------------------------------------------------------------------------------------------------------------------------------------------------------------------|------|------|-----------|-------|------|------|
| Rsa1.0_01618.1.g28471.t1 | gb EOA27181.1  hypothetical protein CARUB_v10023282mg [Capsella rubella]                                                                                                                                                                                                                                                                                                                                                                                                         | 426  | 423  | 1.00E-155 | 99.3  | 65.5 | 78.4 | hypothetical protein CARUB_v10023282mg               | gbpln | Capsella rubella     | AT2G43260.1   Symbols:   F-box and associated interaction domains-containing protein   chr2:17983744-17985089 REVERSE LENGTH=420                                                                                                                                                                                                                                                                                                                                   | 426  | 420  | 1.00E-150 | 98.6  | 65.3 | 77.7 |
| Rsa1.0_01619.1.g28472.t1 | #                                                                                                                                                                                                                                                                                                                                                                                                                                                                                | #    | #    | #         | #     | #    | #    | -                                                    | ----  | ----                 | #                                                                                                                                                                                                                                                                                                                                                                                                                                                                  | #    | #    | #         | #     | #    | #    |
| Rsa1.0_01619.1.g28473.t1 | dbj BAB11196.1  mutator-like transposase [Arabidopsis thaliana]                                                                                                                                                                                                                                                                                                                                                                                                                  | 704  | 797  | 1.00E-122 | 113.2 | 38.9 | 56.3 | mutator-like transposase                             | gbpln | Arabidopsis thaliana | AT1G64260.1   Symbols:   MuDR family transposase   chr1:23847756-23849915 FORWARD LENGTH=719                                                                                                                                                                                                                                                                                                                                                                       | 704  | 719  | 3.00E-24  | 102.1 | 17.3 | 27.7 |
| Rsa1.0_01619.1.g28474.t1 | gb ACG60684.1  maize transposon MuDR-like protein [Brassica oleracea var. albotrabra]                                                                                                                                                                                                                                                                                                                                                                                            | 427  | 622  | 2.00E-32  | 145.7 | 24.6 | 40.3 | maize transposon MuDR-like protein                   | gbpln | Brassica oleracea    | #                                                                                                                                                                                                                                                                                                                                                                                                                                                                  | #    | #    | #         | #     | #    | #    |
| Rsa1.0_01619.1.g28475.t1 | gb ABD65084.1  hypothetical protein 27.t00096 [Brassica oleracea]                                                                                                                                                                                                                                                                                                                                                                                                                | 108  | 645  | 4.00E-33  | 597.2 | 57.4 | 65.7 | hypothetical protein 27.t00096                       | gbpln | Brassica oleracea    | #                                                                                                                                                                                                                                                                                                                                                                                                                                                                  | #    | #    | #         | #     | #    | #    |
| Rsa1.0_01619.1.g28476.t1 | gb ABD65034.1  Ulp1 protease family protein [Brassica oleracea]                                                                                                                                                                                                                                                                                                                                                                                                                  | 407  | 863  | 3.00E-98  | 212.0 | 50.1 | 58.7 | Ulp1 protease family protein                         | gbpln | Brassica oleracea    | AT5G45570.1   Symbols:   Ulp1 protease family protein   chr5:18472301-18475574 FORWARD LENGTH=921                                                                                                                                                                                                                                                                                                                                                                  | 407  | 921  | 1.00E-17  | 226.3 | 18.7 | 27.8 |
| Rsa1.0_01619.1.g28477.t1 | emb CAB83070.1  putative protein [Arabidopsis thaliana]<br>gi 110736914 dbj BAF00414.1  hypothetical protein [Arabidopsis thaliana]                                                                                                                                                                                                                                                                                                                                              | 467  | 539  | 1.00E-22  | 115.4 | 15.2 | 26.1 | putative protein                                     | gbpln | Arabidopsis thaliana | #                                                                                                                                                                                                                                                                                                                                                                                                                                                                  | #    | #    | #         | #     | #    | #    |
| Rsa1.0_01619.1.g28478.t1 | emb CAB86685.1  putative protein [Arabidopsis thaliana]                                                                                                                                                                                                                                                                                                                                                                                                                          | 165  | 303  | 4.00E-12  | 183.6 | 26.1 | 43.6 | putative protein                                     | gbpln | Arabidopsis thaliana | AT3G32260.1   Symbols:   Nucleic acid-binding proteins superfamily   chr3:13219168-13221456 FORWARD LENGTH=309                                                                                                                                                                                                                                                                                                                                                     | 165  | 309  | 8.00E-14  | 187.3 | 32.7 | 49.7 |
| Rsa1.0_01619.1.g28479.t1 | #                                                                                                                                                                                                                                                                                                                                                                                                                                                                                | #    | #    | #         | #     | #    | #    | -                                                    | ----  | ----                 | #                                                                                                                                                                                                                                                                                                                                                                                                                                                                  | #    | #    | #         | #     | #    | #    |
| Rsa1.0_01619.1.g28480.t1 | #                                                                                                                                                                                                                                                                                                                                                                                                                                                                                | #    | #    | #         | #     | #    | #    | -                                                    | ----  | ----                 | #                                                                                                                                                                                                                                                                                                                                                                                                                                                                  | #    | #    | #         | #     | #    | #    |
| Rsa1.0_01619.1.g28481.t1 | gb EOA37460.1  hypothetical protein CARUB_v10011570mg, partial [Capsella rubella]                                                                                                                                                                                                                                                                                                                                                                                                | 160  | 488  | 4.00E-17  | 305.0 | 26.3 | 28.8 | hypothetical protein CARUB_v10011570mg, partial      | gbpln | Capsella rubella     | AT1G24485.3   Symbols:   FUNCTIONS IN: molecular_function unknown; INVOLVED IN: biological_process unknown; LOCATED IN: endomembrane system; BEST Arabidopsis thaliana protein match is: protein kinase-related (TAIR:AT3G46280.1); Has 1310 Blast hits to 1260 proteins in 183 species: Archae - 0; Bacteria - 258; Metazoa - 162; Fungi - 42; Plants - 688; Viruses - 16; Other Eukaryotes - 144 (source: NCBI BLINK).   chr1:8678858-8681894 FORWARD LENGTH=574 | 160  | 574  | 6.00E-17  | 358.8 | 24.4 | 25.6 |
| Rsa1.0_01620.1.g28482.t1 | ref XP_002874931.1  ATXDH1 [Arabidopsis lyrata subsp. lyrata]<br>gi 297320768 gb EFH51190.1  ATXDH1 [Arabidopsis lyrata subsp. lyrata]                                                                                                                                                                                                                                                                                                                                           | 1360 | 1365 | 0         | 100.4 | 90.4 | 95.1 | ATXDH1                                               | gbpln | Arabidopsis lyrata   | AT4G34890.1   Symbols:   ATXDH1, XDH1   xanthine dehydrogenase 1   chr4:16618736-16624983 REVERSE LENGTH=1361                                                                                                                                                                                                                                                                                                                                                      | 1360 | 1361 | 0         | 100.1 | 86.3 | 92.5 |
| Rsa1.0_01620.1.g28483.t1 | ref NP_192085.1  cysteine/histidine-rich C1 domain-containing protein [Arabidopsis thaliana]<br>gi 4558545 gb AAD22638.1 AC007138.2 putative CHP-rich zinc finger protein [Arabidopsis thaliana]<br>gi 3859600 gb AAC72866.1  T15B16.6 gene product [Arabidopsis thaliana]<br>gi 7268219 emb CAB77746.1  putative CHP-rich zinc finger protein [Arabidopsis thaliana]<br>gi 332656674 gb AEE82074.1  cysteine/histidine-rich C1 domain-containing protein [Arabidopsis thaliana] | 711  | 667  | 0         | 93.8  | 59.2 | 69.2 | cysteine/histidine-rich C1 domain-containing protein | gbpln | Arabidopsis thaliana | AT4G01760.1   Symbols:   Cysteine/Histidine-rich C1 domain family protein   chr4:759131-761134 REVERSE LENGTH=667                                                                                                                                                                                                                                                                                                                                                  | 711  | 667  | 0         | 93.8  | 59.2 | 69.2 |
| Rsa1.0_01620.1.g28484.t1 | ref XP_002872850.1  hypothetical protein ARALYDRAFT_490353 [Arabidopsis lyrata subsp. lyrata]<br>gi 297318687 gb EFH49109.1  hypothetical protein ARALYDRAFT_490353 [Arabidopsis lyrata subsp. lyrata]                                                                                                                                                                                                                                                                           | 321  | 323  | 1.00E-171 | 100.6 | 91.9 | 96.6 | hypothetical protein ARALYDRAFT_490353               | gbpln | Arabidopsis lyrata   | AT4G02195.1   Symbols:   SYP42, TLG2B, ATSYP42, ATTLG2B   syntaxin of plants 42   chr4:970099-972192 REVERSE LENGTH=323                                                                                                                                                                                                                                                                                                                                            | 321  | 323  | 1.00E-173 | 100.6 | 92.2 | 96.9 |
| Rsa1.0_01620.1.g28485.t1 | gb EOA20736.1  hypothetical protein CARUB_v10001058mg [Capsella rubella]                                                                                                                                                                                                                                                                                                                                                                                                         | 415  | 418  | 1.00E-156 | 100.7 | 72.8 | 80.5 | hypothetical protein CARUB_v10001058mg               | gbpln | Capsella rubella     | AT4G02220.1   Symbols:   zinc finger (MYND type) family protein / programmed cell death 2 C-terminal domain-containing protein   chr4:976728-978902 FORWARD LENGTH=418                                                                                                                                                                                                                                                                                             | 415  | 418  | 1.00E-158 | 100.7 | 73.5 | 81.7 |
| Rsa1.0_01621.1.g28486.t2 | gb EOA12799.1  hypothetical protein CARUB_v10025754mg [Capsella rubella]                                                                                                                                                                                                                                                                                                                                                                                                         | 441  | 1259 | 1.00E-141 | 285.5 | 55.8 | 59.2 | hypothetical protein CARUB_v10025754mg               | gbpln | Capsella rubella     | AT5G54440.1   Symbols:   CLUB, AtTRS130   CLUB   chr5:22100056-22107695 FORWARD LENGTH=1259                                                                                                                                                                                                                                                                                                                                                                        | 441  | 1259 | 1.00E-143 | 285.5 | 53.7 | 55.3 |
| Rsa1.0_01621.1.g28487.t1 | #                                                                                                                                                                                                                                                                                                                                                                                                                                                                                | #    | #    | #         | #     | #    | #    | -                                                    | ----  | ----                 | #                                                                                                                                                                                                                                                                                                                                                                                                                                                                  | #    | #    | #         | #     | #    | #    |

|                          |                                                                                                                                                                                                                                                                                                                                                                                                                                                |     |      |          |       |      |      |                                                                                |             |                      |                                                                                                                                                                                                                                                                                                                                                      |     |     |          |       |      |      |
|--------------------------|------------------------------------------------------------------------------------------------------------------------------------------------------------------------------------------------------------------------------------------------------------------------------------------------------------------------------------------------------------------------------------------------------------------------------------------------|-----|------|----------|-------|------|------|--------------------------------------------------------------------------------|-------------|----------------------|------------------------------------------------------------------------------------------------------------------------------------------------------------------------------------------------------------------------------------------------------------------------------------------------------------------------------------------------------|-----|-----|----------|-------|------|------|
| Rsa1.0_01621.1.g28488.t1 | ref NP_200443.1  expansin A14 [Arabidopsis thaliana] gi 20137960 sp Q9FMA0.1 EXP14_ARAT H RecName: Full=Expansin-A14; Short=AtEXPA14; AltName: Full=Alpha-expansin-14; Short=At-EXP14; Short=AtEx14; AltName: Full=Ath-ExpAlpha-1.5; Flags: Precursor gi 10177830 dbj BAB11259.1  expansin [Arabidopsis thaliana] gi 110740362 dbj BAF02076.1  Expansin [Arabidopsis thaliana] gi 332009365 gb AED96748.1  expansin A14 [Arabidopsis thaliana] | 64  | 255  | 2.00E-12 | 398.4 | 62.5 | 68.8 | expansin A14                                                                   | gbpln       | Arabidopsis thaliana | AT5G56320.1   Symbols: ATEXPA14, EXP14, ATEXP14, ATHEXP ALPHA 1.5, EXPA14   expansin A14   chr5:22808854-22809906 FORWARD LENGTH=255                                                                                                                                                                                                                 | 64  | 255 | 2.00E-15 | 398.4 | 62.5 | 68.8 |
| Rsa1.0_01621.1.g28489.t1 | #                                                                                                                                                                                                                                                                                                                                                                                                                                              | #   | #    | #        | #     | #    | -    |                                                                                | ----        | ----                 | #                                                                                                                                                                                                                                                                                                                                                    | #   | #   | #        | #     | #    |      |
| Rsa1.0_01622.1.g28490.t1 | #                                                                                                                                                                                                                                                                                                                                                                                                                                              | #   | #    | #        | #     | #    | -    |                                                                                | ----        | ----                 | #                                                                                                                                                                                                                                                                                                                                                    | #   | #   | #        | #     | #    |      |
| Rsa1.0_01622.1.g28491.t1 | ref NP_001147031.1  RING-H2 finger protein ATL5A [Zea mays] gi 195606664 gb ACG25162.1  RING-H2 finger protein ATL5A [Zea mays]                                                                                                                                                                                                                                                                                                                | 163 | 165  | 2.00E-68 | 101.2 | 89.0 | 90.8 | RING-H2 finger protein ATL5A                                                   | gbenv/gbpln | Zea mays             | AT5G42200.1   Symbols:   RING/U-box superfamily protein   chr5:16860523-16861014 FORWARD LENGTH=163                                                                                                                                                                                                                                                  | 163 | 163 | 3.00E-69 | 100.0 | 79.8 | 85.3 |
| Rsa1.0_01622.1.g28492.t1 | gb AAF79809.1 AC020646_32 T32E20.9 [Arabidopsis thaliana]                                                                                                                                                                                                                                                                                                                                                                                      | 397 | 1586 | 9.00E-27 | 399.5 | 21.9 | 26.4 | T32E20.9                                                                       | gbpln       | Arabidopsis thaliana | #                                                                                                                                                                                                                                                                                                                                                    | #   | #   | #        | #     | #    |      |
| Rsa1.0_01622.1.g28493.t1 | #                                                                                                                                                                                                                                                                                                                                                                                                                                              | #   | #    | #        | #     | #    | -    |                                                                                | ----        | ----                 | #                                                                                                                                                                                                                                                                                                                                                    | #   | #   | #        | #     | #    |      |
| Rsa1.0_01622.1.g28494.t1 | #                                                                                                                                                                                                                                                                                                                                                                                                                                              | #   | #    | #        | #     | #    | -    |                                                                                | ----        | ----                 | #                                                                                                                                                                                                                                                                                                                                                    | #   | #   | #        | #     | #    |      |
| Rsa1.0_01622.1.g28495.t3 | gb AAF18641.1 AC006228_12 F5J5.16 [Arabidopsis thaliana]                                                                                                                                                                                                                                                                                                                                                                                       | 892 | 1024 | 9.00E-59 | 114.8 | 18.4 | 26.9 | F5J5.16                                                                        | gbpln       | Arabidopsis thaliana | #                                                                                                                                                                                                                                                                                                                                                    | #   | #   | #        | #     | #    |      |
| Rsa1.0_01622.1.g28496.t1 | gb AAC28189.1  contains similarity to Arabidopsis thaliana retrotransposon Athila (GB:X81801) [Arabidopsis thaliana]                                                                                                                                                                                                                                                                                                                           | 254 | 940  | 3.00E-30 | 370.1 | 27.2 | 35.8 | contains similarity to Arabidopsis thaliana retrotransposon Athila (GB:X81801) | gbpln       | Arabidopsis thaliana | #                                                                                                                                                                                                                                                                                                                                                    | #   | #   | #        | #     | #    |      |
| Rsa1.0_01622.1.g28497.t1 | gb AAM15254.1  putative retroelement pol polyprotein [Arabidopsis thaliana]                                                                                                                                                                                                                                                                                                                                                                    | 362 | 930  | 4.00E-37 | 256.9 | 26.2 | 37.3 | putative retroelement pol polyprotein                                          | gbpln       | Arabidopsis thaliana | #                                                                                                                                                                                                                                                                                                                                                    | #   | #   | #        | #     | #    |      |
| Rsa1.0_01622.1.g28498.t1 | #                                                                                                                                                                                                                                                                                                                                                                                                                                              | #   | #    | #        | #     | #    | -    |                                                                                | ----        | ----                 | #                                                                                                                                                                                                                                                                                                                                                    | #   | #   | #        | #     | #    |      |
| Rsa1.0_01622.1.g28499.t1 | gb EMJ13768.1  hypothetical protein PRUPE_ppa015570mg, partial [Prunus persica]                                                                                                                                                                                                                                                                                                                                                                | 205 | 541  | 7.00E-26 | 263.9 | 40.0 | 52.2 | hypothetical protein PRUPE_ppa015570mg, partial                                | gbpln       | Prunus persica       | #                                                                                                                                                                                                                                                                                                                                                    | #   | #   | #        | #     | #    |      |
| Rsa1.0_01622.1.g28500.t1 | #                                                                                                                                                                                                                                                                                                                                                                                                                                              | #   | #    | #        | #     | #    | -    |                                                                                | ----        | ----                 | #                                                                                                                                                                                                                                                                                                                                                    | #   | #   | #        | #     | #    |      |
| Rsa1.0_01623.1.g28501.t1 | gb ABD65636.1  hypothetical protein Z3.t00055 [Brassica oleracea]                                                                                                                                                                                                                                                                                                                                                                              | 588 | 414  | 6.00E-38 | 70.4  | 13.3 | 15.6 | hypothetical protein Z3.t00055                                                 | gbpln       | Brassica oleracea    | AT2G22440.1   Symbols:   BEST Arabidopsis thaliana protein match is: Ribonuclease H-like superfamily protein (TAIR:AT4G29090.1); Has 208 Blast hits to 191 proteins in 10 species: Archae - 0; Bacteria - 0; Metazoa - 0; Fungi - 0; Plants - 208; Viruses - 0; Other Eukaryotes - 0 (source: NCBI BLink).   chr2:9528910-9529917 FORWARD LENGTH=256 | 588 | 256 | 7.00E-15 | 43.5  | 6.3  | 9.9  |
| Rsa1.0_01623.1.g28502.t2 | gb ACB98704.1  phospholipase D gamma 1 [Brassica oleracea var. capitata]                                                                                                                                                                                                                                                                                                                                                                       | 613 | 859  | 0        | 140.1 | 73.1 | 81.1 | phospholipase D gamma 1                                                        | gbpln       | Brassica oleracea    | AT4G11840.1   Symbols: PLDGAMMA3   phospholipase D gamma 3   chr4:7122152-7125882 REVERSE LENGTH=866                                                                                                                                                                                                                                                 | 613 | 866 | 0        | 141.3 | 72.8 | 80.8 |
| Rsa1.0_01623.1.g28503.t1 | gb AAF69169.1 AC007915_21 F27F5.21 [Arabidopsis thaliana]                                                                                                                                                                                                                                                                                                                                                                                      | 253 | 1023 | 4.00E-75 | 404.3 | 56.1 | 67.6 | F27F5.21                                                                       | gbpln       | Arabidopsis thaliana | AT1G43760.1   Symbols:   DNase I-like superfamily protein   chr1:16528880-16531065 REVERSE LENGTH=626                                                                                                                                                                                                                                                | 253 | 626 | 2.00E-15 | 247.4 | 16.2 | 22.5 |
| Rsa1.0_01623.1.g28504.t1 | #                                                                                                                                                                                                                                                                                                                                                                                                                                              | #   | #    | #        | #     | #    | -    |                                                                                | ----        | ----                 | #                                                                                                                                                                                                                                                                                                                                                    | #   | #   | #        | #     | #    |      |
| Rsa1.0_01623.1.g28505.t1 | ref XP_002874728.1  PLDGAMMA1 [Arabidopsis lyrata subsp. lyrata] gi 297320565 gb EFH50987.1  PLDGAMMA1 [Arabidopsis lyrata subsp. lyrata]                                                                                                                                                                                                                                                                                                      | 490 | 859  | 0        | 175.3 | 80.8 | 90.2 | PLDGAMMA1                                                                      | gbpln       | Arabidopsis lyrata   | AT4G11840.1   Symbols: PLDGAMMA3   phospholipase D gamma 3   chr4:7122152-7125882 REVERSE LENGTH=866                                                                                                                                                                                                                                                 | 490 | 866 | 0        | 176.7 | 80.6 | 89.6 |

|                          |                                                                                                                                                                                                                                                                                                                                                                                                                                                                                                                                                                                                                                                                                                                           |      |     |           |       |      |      |                                                                                |       |                      |                                                                                                                                                                                                                                                                                                                                                                                                                                                                                                                                                                                                        |     |     |           |       |      |      |
|--------------------------|---------------------------------------------------------------------------------------------------------------------------------------------------------------------------------------------------------------------------------------------------------------------------------------------------------------------------------------------------------------------------------------------------------------------------------------------------------------------------------------------------------------------------------------------------------------------------------------------------------------------------------------------------------------------------------------------------------------------------|------|-----|-----------|-------|------|------|--------------------------------------------------------------------------------|-------|----------------------|--------------------------------------------------------------------------------------------------------------------------------------------------------------------------------------------------------------------------------------------------------------------------------------------------------------------------------------------------------------------------------------------------------------------------------------------------------------------------------------------------------------------------------------------------------------------------------------------------------|-----|-----|-----------|-------|------|------|
| Rsa1.0_01624.1.g28506.t2 | ref NP_179461.1  Preprotein translocase subunit secY [Arabidopsis thaliana] gi 12643748 sp Q38885.2 SCY1_ARATH RecName: Full=Preprotein translocase subunit SCY1, chloroplastic; AltName: Full=CpSecY; Flags: Precursor gi 15983352 gb AAL11544.1 AF424550.1 At2g18710/MSF3.9 [Arabidopsis thaliana] gi 4185137 gb AAD08940.1 putative preprotein translocase SECY protein [Arabidopsis thaliana] gi 16604410 gb AAL24211.1 At2g18710/MSF3.9 [Arabidopsis thaliana] gi 17473607 gb AAL38269.1 putative preprotein translocase SECY protein [Arabidopsis thaliana] gi 27363258 gb AAO11548.1 At2g18710/MSF3.9 [Arabidopsis thaliana] gi 330251702 gb AEC06796.1 Preprotein translocase subunit secY [Arabidopsis thaliana] | 553  | 551 | 0         | 99.6  | 91.0 | 92.6 | Preprotein translocase subunit secY                                            | gbpln | Arabidopsis thaliana | AT2G18710.1   Symbols: SCY1   SECY homolog 1   chr2:8112231-8114452 REVERSE LENGTH=551                                                                                                                                                                                                                                                                                                                                                                                                                                                                                                                 | 553 | 551 | 0         | 99.6  | 91.0 | 92.6 |
| Rsa1.0_01624.1.g28507.t1 | gb EOA32326.1  hypothetical protein CARUB.v10015598mg [Capsella rubella]                                                                                                                                                                                                                                                                                                                                                                                                                                                                                                                                                                                                                                                  | 487  | 315 | 1.00E-112 | 64.7  | 43.5 | 50.3 | hypothetical protein CARUB.v10015598mg                                         | gbpln | Capsella rubella     | AT2G18680.1   Symbols:   unknown protein; FUNCTIONS IN: molecular function unknown; INVOLVED IN: biological process unknown; LOCATED IN: endomembrane system; EXPRESSED IN: male gametophyte, pollen tube; EXPRESSED DURING: L mature pollen stage. M germinated pollen stage; BEST Arabidopsis thaliana protein match is: unknown protein (TAIR:AT2G18690.1); Has 30201 Blast hits to 17322 proteins in 780 species: Archae - 12; Bacteria - 1396; Metazoa - 17338; Fungi - 3422; Plants - 5037; Viruses - 0; Other Eukaryotes - 2996 (source: NCBI BLINK).   chr2:8094780-8095643 FORWARD LENGTH=287 | 487 | 287 | 1.00E-106 | 58.9  | 42.5 | 49.7 |
| Rsa1.0_01624.1.g28508.t1 | gb AAZ67609.1  80A08_24 [Brassica rapa subsp. pekinensis]                                                                                                                                                                                                                                                                                                                                                                                                                                                                                                                                                                                                                                                                 | 267  | 475 | 5.00E-40  | 177.9 | 38.6 | 43.8 | 80A08_24                                                                       | gbpln | Brassica rapa        | #                                                                                                                                                                                                                                                                                                                                                                                                                                                                                                                                                                                                      | #   | #   | #         | #     | #    |      |
| Rsa1.0_01624.1.g28509.t3 | gb AAC28189.1  contains similarity to Arabidopsis thaliana retrotransposon Athila (GB:X81801) [Arabidopsis thaliana]                                                                                                                                                                                                                                                                                                                                                                                                                                                                                                                                                                                                      | 1039 | 940 | 6.00E-44  | 90.5  | 12.7 | 18.1 | contains similarity to Arabidopsis thaliana retrotransposon Athila (GB:X81801) | gbpln | Arabidopsis thaliana | #                                                                                                                                                                                                                                                                                                                                                                                                                                                                                                                                                                                                      | #   | #   | #         | #     | #    |      |
| Rsa1.0_01624.1.g28510.t1 | #                                                                                                                                                                                                                                                                                                                                                                                                                                                                                                                                                                                                                                                                                                                         | #    | #   | #         | #     | #    | -    | -                                                                              | ----  | ----                 | #                                                                                                                                                                                                                                                                                                                                                                                                                                                                                                                                                                                                      | #   | #   | #         | #     | #    |      |
| Rsa1.0_01624.1.g28511.t2 | ref NP_849979.1  EG45-like domain-containing protein 2 [Arabidopsis thaliana] gi 20138450 sp Q9ZV52.2 EGC2_ARATH RecName: Full=EG45-like domain containing protein 2; AltName: Full=Plant natriuretic peptide A; Short=AtEXPR3; Short=AtPNP-A; Short=AtH-ExpGamma-1.2; Flags: Precursor gi 17529070 gb AAL38745.1 unknown protein [Arabidopsis thaliana] gi 23296798 gb AAN13172.1  unknown protein [Arabidopsis thaliana] gi 330251696 gb AEC06790.1  EG45-like domain-containing protein 2 [Arabidopsis thaliana]                                                                                                                                                                                                       | 133  | 130 | 6.00E-57  | 97.7  | 80.5 | 87.2 | EG45-like domain-containing protein 2                                          | gbpln | Arabidopsis thaliana | AT2G18660.1   Symbols: PNP-A   plant natriuretic peptide A   chr2:8091032-8091644 REVERSE LENGTH=130                                                                                                                                                                                                                                                                                                                                                                                                                                                                                                   | 133 | 130 | 1.00E-59  | 97.7  | 80.5 | 87.2 |
| Rsa1.0_01624.1.g28512.t1 | ref NP_974219.1  tryptophanyl-tRNA synthetase [Arabidopsis thaliana] gi 332640583 gb AE74104.1  tryptophanyl-tRNA synthetase [Arabidopsis thaliana]                                                                                                                                                                                                                                                                                                                                                                                                                                                                                                                                                                       | 103  | 402 | 2.00E-30  | 390.3 | 61.2 | 70.9 | tryptophanyl-tRNA synthetase                                                   | gbpln | Arabidopsis thaliana | AT3G04600.2   Symbols:   Nucleotidyl transferase superfamily protein   chr3:1243152-1245958 FORWARD LENGTH=402                                                                                                                                                                                                                                                                                                                                                                                                                                                                                         | 103 | 402 | 4.00E-33  | 390.3 | 61.2 | 70.9 |
| Rsa1.0_01624.1.g28513.t1 | ref XP_002886188.1  hypothetical protein ARALYDRAFT_480768 [Arabidopsis lyrata subsp. lyrata] gi 297332028 gb EFH62447.1  hypothetical protein ARALYDRAFT_480768 [Arabidopsis lyrata subsp. lyrata]                                                                                                                                                                                                                                                                                                                                                                                                                                                                                                                       | 414  | 413 | 1.00E-151 | 99.8  | 74.2 | 81.9 | hypothetical protein ARALYDRAFT_480768                                         | gbpln | Arabidopsis lyrata   | AT2G18650.1   Symbols: MEE16   RING/U-box superfamily protein   chr2:8086860-8088131 REVERSE LENGTH=423                                                                                                                                                                                                                                                                                                                                                                                                                                                                                                | 414 | 423 | 1.00E-149 | 102.2 | 71.7 | 80.0 |
| Rsa1.0_01625.1.g28514.t2 | ref XP_002872902.1  hypothetical protein ARALYDRAFT_912111 [Arabidopsis lyrata subsp. lyrata] gi 297318739 gb EFH49161.1  hypothetical protein ARALYDRAFT_912111 [Arabidopsis lyrata subsp. lyrata]                                                                                                                                                                                                                                                                                                                                                                                                                                                                                                                       | 346  | 356 | 2.33E-156 | 102.9 | 75.1 | 84.1 | hypothetical protein ARALYDRAFT_912111                                         | gbpln | Arabidopsis lyrata   | AT4G01220.1   Symbols:   Nucleotide-diphospho-sugar transferase family protein   chr4:513431-515648 REVERSE LENGTH=360                                                                                                                                                                                                                                                                                                                                                                                                                                                                                 | 346 | 360 | 1.00E-145 | 104.0 | 69.4 | 77.7 |
| Rsa1.0_01625.1.g28515.t1 | gb EOA40179.1  hypothetical protein CARUB.v10008895mg [Capsella rubella]                                                                                                                                                                                                                                                                                                                                                                                                                                                                                                                                                                                                                                                  | 460  | 509 | 0         | 110.7 | 92.8 | 95.7 | hypothetical protein CARUB.v10008895mg                                         | gbpln | Capsella rubella     | AT1G30560.1   Symbols:   Major facilitator superfamily protein   chr1:10824761-10826293 FORWARD LENGTH=510                                                                                                                                                                                                                                                                                                                                                                                                                                                                                             | 460 | 510 | 0         | 110.9 | 91.7 | 95.7 |

|                          |                                                                                                                                                                                                                                                                                                       |     |      |           |       |      |      |                                              |       |                      |                                                                                                                                               |     |     |           |       |      |      |
|--------------------------|-------------------------------------------------------------------------------------------------------------------------------------------------------------------------------------------------------------------------------------------------------------------------------------------------------|-----|------|-----------|-------|------|------|----------------------------------------------|-------|----------------------|-----------------------------------------------------------------------------------------------------------------------------------------------|-----|-----|-----------|-------|------|------|
| Rsa1.0_01625.1.g28516.t1 | refXP_002893633.1   hypothetical protein ARALYDRAFT_336158 [Arabidopsis lyrata subsp. lyrata] gi 297339475 gb EFH69892.1                                                                                                                                                                              | 228 | 233  | 1.00E-104 | 102.2 | 76.8 | 86.4 | hypothetical protein ARALYDRAFT_336158       | gbpln | Arabidopsis lyrata   | AT1G30550.1   Symbols:   S-adenosyl-L-methionine-dependent methyltransferases superfamily protein   chr1:10820838-10823641 REVERSE LENGTH=455 | 228 | 455 | 1.00E-106 | 199.6 | 76.8 | 85.5 |
| Rsa1.0_01625.1.g28517.t1 | refXP_002879925.1   F-box family protein [Arabidopsis lyrata subsp. lyrata] gi 297325764 gb EFH56184.1   F-box family protein [Arabidopsis lyrata subsp. lyrata]                                                                                                                                      | 397 | 371  | 9.00E-63  | 93.5  | 39.0 | 57.7 | F-box family protein                         | gbpln | Arabidopsis lyrata   | AT2G41360.1   Symbols:   Galactose oxidase/kelch repeat superfamily protein   chr2:17234374-17235956 FORWARD LENGTH=387                       | 397 | 387 | 7.00E-50  | 97.5  | 33.0 | 47.6 |
| Rsa1.0_01625.1.g28518.t1 | gb AAG51783.1 AC079679.3 reverse transcriptase, putative; 16838-20266 [Arabidopsis thaliana]                                                                                                                                                                                                          | 510 | 1142 | 1.00E-131 | 223.9 | 45.1 | 64.3 | reverse transcriptase, putative; 16838-20266 | gbpln | Arabidopsis thaliana | AT4G29090.1   Symbols:   Ribonuclease H-like superfamily protein   chr4:14333528-14335255 FORWARD LENGTH=575                                  | 510 | 575 | 1.00E-83  | 112.7 | 33.1 | 49.0 |
| Rsa1.0_01625.1.g28519.t1 | refXP_002868284.1   hypothetical protein ARALYDRAFT_915427 [Arabidopsis lyrata subsp. lyrata] gi 297314120 gb EFH44543.1                                                                                                                                                                              | 158 | 158  | 2.00E-74  | 100.0 | 93.7 | 98.7 | hypothetical protein ARALYDRAFT_915427       | gbpln | Arabidopsis lyrata   | AT4G14420.1   Symbols:   HR-like lesion-inducing protein-related   chr4:8302171-8303738 REVERSE LENGTH=158                                    | 158 | 158 | 8.00E-77  | 100.0 | 93.0 | 98.1 |
| Rsa1.0_01625.1.g28520.t1 | #                                                                                                                                                                                                                                                                                                     | #   | #    | #         | #     | #    | #    | -                                            | ----  | ----                 | #                                                                                                                                             | #   | #   | #         | #     | #    | #    |
| Rsa1.0_01625.1.g28521.t1 | refXP_002868282.1   enoyl-CoA hydratase/isomerase family protein [Arabidopsis lyrata subsp. lyrata] gi 297314118 gb EFH44541.1   enoyl-CoA hydratase/isomerase family protein [Arabidopsis lyrata subsp. lyrata]                                                                                      | 240 | 240  | 1.00E-112 | 100.0 | 86.3 | 94.6 | enoyl-CoA hydratase/isomerase family protein | gbpln | Arabidopsis lyrata   | AT4G14430.1   Symbols:   IBR10, ATEC12, EC12, ECHIB, PEC12   indole-3-butyric acid response 10   chr4:8304910-8305632 REVERSE LENGTH=240      | 240 | 240 | 1.00E-109 | 100.0 | 85.4 | 93.8 |
| Rsa1.0_01625.1.g28522.t1 | gb EOA17630.1  hypothetical protein CARUB_v10005995mg [Capsella rubella]                                                                                                                                                                                                                              | 132 | 135  | 3.00E-64  | 102.3 | 93.9 | 98.5 | hypothetical protein CARUB_v10005995mg       | gbpln | Capsella rubella     | AT4G14455.1   Symbols:   ATBET12, BET12, ATBS14B, BS14B   Target SNARE coiled-coil domain protein   chr4:8310482-8311938 FORWARD LENGTH=130   | 132 | 130 | 9.00E-67  | 98.5  | 93.2 | 98.5 |
| Rsa1.0_01625.1.g28523.t1 | refNP_193184.1   protein kinase family protein [Arabidopsis thaliana] gi 2244804 emb CAB10227.1   kinase like protein [Arabidopsis thaliana] gi 7268154 emb CAB78490.1   kinase like protein [Arabidopsis thaliana] gi 332658049 gb AEE83449.1   protein kinase family protein [Arabidopsis thaliana] | 478 | 487  | 0         | 101.9 | 88.9 | 94.6 | protein kinase family protein                | gbpln | Arabidopsis thaliana | AT4G14480.1   Symbols:   Protein kinase superfamily protein   chr4:8330081-8331544 REVERSE LENGTH=487                                         | 478 | 487 | 0         | 101.9 | 88.9 | 94.6 |
| Rsa1.0_01626.1.g28524.t1 | refXP_002882841.1   hypothetical protein ARALYDRAFT_478773 [Arabidopsis lyrata subsp. lyrata] gi 297328681 gb EFH59100.1                                                                                                                                                                              | 249 | 245  | 1.00E-109 | 98.4  | 87.1 | 92.8 | hypothetical protein ARALYDRAFT_478773       | gbpln | Arabidopsis lyrata   | AT3G13740.1   Symbols:   Ribonuclease III family protein   chr3:4504310-4505937 FORWARD LENGTH=247                                            | 249 | 247 | 1.00E-110 | 99.2  | 86.3 | 90.8 |
| Rsa1.0_01626.1.g28525.t1 | db BAJ86270.1  predicted protein [Hordeum vulgare subsp. vulgare]                                                                                                                                                                                                                                     | 188 | 300  | 2.00E-35  | 159.6 | 44.7 | 50.0 | predicted protein                            | gbpln | Hordeum vulgare      | AT5G62700.1   Symbols:   TUB3   tubulin beta chain 3   chr5:25184501-25186426 FORWARD LENGTH=450                                              | 188 | 450 | 7.00E-38  | 239.4 | 37.8 | 38.8 |
| Rsa1.0_01626.1.g28526.t1 | refXP_002882842.1   hypothetical protein ARALYDRAFT_897617 [Arabidopsis lyrata subsp. lyrata] gi 297328682 gb EFH59101.1                                                                                                                                                                              | 840 | 847  | 0         | 100.8 | 96.1 | 98.1 | hypothetical protein ARALYDRAFT_897617       | gbpln | Arabidopsis lyrata   | AT3G13750.1   Symbols:   BGAL1   beta galactosidase 1   chr3:4511192-4515756 FORWARD LENGTH=847                                               | 840 | 847 | 0         | 100.8 | 95.8 | 98.1 |
| Rsa1.0_01626.1.g28527.t1 | refXP_002882843.1   pentatricopeptide repeat-containing protein [Arabidopsis lyrata subsp. lyrata] gi 297328683 gb EFH59102.1                                                                                                                                                                         | 583 | 627  | 0         | 107.5 | 88.5 | 95.0 | pentatricopeptide repeat-containing protein  | gbpln | Arabidopsis lyrata   | AT3G13770.1   Symbols:   Pentatricopeptide repeat (PPR) superfamily protein   chr3:4519647-4521533 FORWARD LENGTH=628                         | 583 | 628 | 0         | 107.7 | 88.2 | 94.7 |
| Rsa1.0_01626.1.g28528.t1 | gb EOA30083.1  hypothetical protein CARUB_v10013189mg [Capsella rubella]                                                                                                                                                                                                                              | 643 | 641  | 0         | 99.7  | 98.0 | 98.6 | hypothetical protein CARUB_v10013189mg       | gbpln | Capsella rubella     | AT3G13772.1   Symbols:   TMN7, AtTMN7   transmembrane nine 7   chr3:4521712-4524394 REVERSE LENGTH=641                                        | 643 | 641 | 0         | 99.7  | 96.9 | 97.5 |
| Rsa1.0_01626.1.g28529.t1 | refXP_002882845.1   hypothetical protein ARALYDRAFT_897622 [Arabidopsis lyrata subsp. lyrata] gi 297328685 gb EFH59104.1                                                                                                                                                                              | 306 | 288  | 2.00E-94  | 94.1  | 67.3 | 72.5 | hypothetical protein ARALYDRAFT_897622       | gbpln | Arabidopsis lyrata   | AT3G13780.1   Symbols:   SMAD/FHA domain-containing protein   chr3:4525108-4526214 FORWARD LENGTH=309                                         | 306 | 309 | 7.00E-87  | 101.0 | 65.7 | 72.9 |

|                          |                                                                                                                                                                                                                                                                                                        |      |      |           |       |      |      |                                                                                                    |       |                      |                                                                                                                                           |      |      |           |       |      |      |
|--------------------------|--------------------------------------------------------------------------------------------------------------------------------------------------------------------------------------------------------------------------------------------------------------------------------------------------------|------|------|-----------|-------|------|------|----------------------------------------------------------------------------------------------------|-------|----------------------|-------------------------------------------------------------------------------------------------------------------------------------------|------|------|-----------|-------|------|------|
| Rsa1.0_01626.1.g28530.t2 | ref XP_002882846.1  NAP1.4 [Arabidopsis lyrata subsp. lyrata] gi 297328686 gb EFH59105.1  NAP1.4 [Arabidopsis lyrata subsp. lyrata]                                                                                                                                                                    | 315  | 336  | 1.00E-110 | 106.7 | 73.7 | 81.3 | NAP1.4                                                                                             | gbpln | Arabidopsis lyrata   | AT3G13782.1   Symbols: NFA04, NAP1.4, NFA4   nucleosome assembly protein1;4   chr3:4526660-45283984 FORWARD LENGTH=317                    | 315  | 317  | 1.00E-105 | 100.6 | 70.5 | 76.5 |
| Rsa1.0_01626.1.g28531.t1 | gb EOA30217.1  hypothetical protein CARUB_v10013339mg [Capsella rubella]                                                                                                                                                                                                                               | 569  | 570  | 0         | 100.2 | 80.8 | 89.5 | hypothetical protein CARUB_v10013339mg                                                             | gbpln | Capsella rubella     | AT3G13784.1   Symbols: AtcwiNV5, CWINV5   cell wall invertase 5   chr3:4528529-4530669 REVERSE LENGTH=569                                 | 569  | 569  | 0         | 100.0 | 80.1 | 89.5 |
| Rsa1.0_01626.1.g28532.t1 | ref XP_002884989.1  beta-fructofuranosidase [Arabidopsis lyrata subsp. lyrata] gi 297330829 gb EFH61248.1  beta-fructofuranosidase [Arabidopsis lyrata subsp. lyrata]                                                                                                                                  | 580  | 581  | 0         | 100.2 | 93.1 | 96.4 | beta-fructofuranosidase                                                                            | gbpln | Arabidopsis lyrata   | AT3G13790.2   Symbols: ATBFRUCT1   Glycosyl hydrolases family 32 protein   chr3:4533084-4535831 REVERSE LENGTH=581                        | 580  | 581  | 0         | 100.2 | 93.3 | 96.4 |
| Rsa1.0_01626.1.g28533.t1 | #                                                                                                                                                                                                                                                                                                      | #    | #    | #         | #     | #    | #    | -                                                                                                  | ----  | ----                 | #                                                                                                                                         | #    | #    | #         | #     | #    | #    |
| Rsa1.0_01627.1.g28534.t1 | pir T05892 hypothetical protein F6H11.110 - Arabidopsis thaliana gi 2827709 emb CAA16682.1  predicted protein [Arabidopsis thaliana]                                                                                                                                                                   | 457  | 1421 | 6.00E-33  | 310.9 | 20.4 | 24.9 | hypothetical protein F6H11.110 - Arabidopsis thaliana gi 2827709 emb CAA16682.1  predicted protein | gbpln | Arabidopsis thaliana | AT5G65770.3   Symbols: LINC4   little nuclei4   chr5:26311587-26315610 FORWARD LENGTH=1010                                                | 457  | 1010 | 2.00E-35  | 221.0 | 20.4 | 24.9 |
| Rsa1.0_01627.1.g28535.t1 | #                                                                                                                                                                                                                                                                                                      | #    | #    | #         | #     | #    | #    | -                                                                                                  | ----  | ----                 | #                                                                                                                                         | #    | #    | #         | #     | #    | #    |
| Rsa1.0_01627.1.g28536.t1 | ref NP_174618.1  F-box protein [Arabidopsis thaliana] gi 75268383 sp Q9C800.1 FB34_ARATH RecName: Full=Putative F-box protein At1g33530 gi 12322373 gb AAG51205.1 AC051630_2 hypothetical protein; 83642-85072 [Arabidopsis thaliana] gi 332193482 gb AEE31603.1  F-box protein [Arabidopsis thaliana] | 337  | 441  | 1.00E-104 | 130.9 | 61.4 | 72.4 | F-box protein                                                                                      | gbpln | Arabidopsis thaliana | AT1G33530.1   Symbols:   F-box family protein   chr1:12159884-12161314 FORWARD LENGTH=441                                                 | 337  | 441  | 1.00E-107 | 130.9 | 61.4 | 72.4 |
| Rsa1.0_01627.1.g28537.t1 | ref XP_002308618.1  predicted protein [Populus trichocarpa] gi 222854594 gb EEE92141.1  predicted protein [Populus trichocarpa]                                                                                                                                                                        | 97   | 449  | 1.00E-19  | 462.9 | 51.5 | 56.7 | predicted protein                                                                                  | gbpln | Populus trichocarpa  | AT5G11520.1   Symbols: ASP3, YLS4   aspartate aminotransferase 3   chr5:3685257-3687721 REVERSE LENGTH=449                                | 97   | 449  | 8.00E-22  | 462.9 | 53.6 | 59.8 |
| Rsa1.0_01627.1.g28538.t1 | gb AAD32898.1  putative retroelement pol polyprotein [Arabidopsis thaliana]                                                                                                                                                                                                                            | 1325 | 1307 | 0         | 98.6  | 58.0 | 72.7 | putative retroelement pol polyprotein                                                              | gbpln | Arabidopsis thaliana | AT4G23160.1   Symbols: CRK8   cysteine-rich RLK (RECEPTOR-like protein kinase) 8   chr4:12129485-12134086 FORWARD LENGTH=1262             | 1325 | 1262 | 5.00E-98  | 95.2  | 14.3 | 22.2 |
| Rsa1.0_01627.1.g28539.t1 | emb CAN60947.1  hypothetical protein VITISV_015758 [Vitis vinifera]                                                                                                                                                                                                                                    | 161  | 1306 | 2.00E-64  | 811.2 | 70.2 | 83.9 | hypothetical protein VITISV_015758                                                                 | gbpln | Vitis vinifera       | AT4G23160.1   Symbols: CRK8   cysteine-rich RLK (RECEPTOR-like protein kinase) 8   chr4:12129485-12134086 FORWARD LENGTH=1262             | 161  | 1262 | 3.00E-16  | 783.9 | 28.0 | 39.8 |
| Rsa1.0_01627.1.g28540.t1 | gb AAG51046.1 AC069473_8 gypsy/Ty-3 retroelement polyprotein; 69905-74404 [Arabidopsis thaliana] gi 10998138 dbj BAB03109.1  retroelement pol polyprotein [Arabidopsis thaliana]                                                                                                                       | 1467 | 1499 | 0         | 102.2 | 61.3 | 75.6 | gypsy/Ty-3 retroelement polyprotein; 69905-74404                                                   | gbpln | Arabidopsis thaliana | ATMG00860.1   Symbols: ORF158   DNA/RNA polymerases superfamily protein   chrM:235916-236392 FORWARD LENGTH=158                           | 1467 | 158  | 3.00E-11  | 10.8  | 2.2  | 2.8  |
| Rsa1.0_01627.1.g28541.t1 | #                                                                                                                                                                                                                                                                                                      | #    | #    | #         | #     | #    | #    | -                                                                                                  | ----  | ----                 | #                                                                                                                                         | #    | #    | #         | #     | #    | #    |
| Rsa1.0_01628.1.g28542.t1 | gb EOA12952.1  hypothetical protein CARUB_v10025934mg [Capsella rubella]                                                                                                                                                                                                                               | 503  | 758  | 0         | 150.7 | 73.4 | 78.9 | hypothetical protein CARUB_v10025934mg                                                             | gbpln | Capsella rubella     | AT1G64260.1   Symbols:   MuDR family transposase   chr1:23847156-23849915 FORWARD LENGTH=719                                              | 503  | 719  | 2.00E-26  | 142.9 | 21.3 | 34.6 |
| Rsa1.0_01628.1.g28543.t1 | ref XP_002878847.1  low-molecular-weight cysteine-rich 81 [Arabidopsis lyrata subsp. lyrata] gi 297324686 gb EFH55106.1  low-molecular-weight cysteine-rich 81 [Arabidopsis lyrata subsp. lyrata]                                                                                                      | 80   | 79   | 1.00E-20  | 98.8  | 65.0 | 72.5 | low-molecular-weight cysteine-rich 81                                                              | gbpln | Arabidopsis lyrata   | AT2G25295.1   Symbols: LCR81   low-molecular-weight cysteine-rich 81   chr2:10769933-10770421 FORWARD LENGTH=79                           | 80   | 79   | 1.00E-22  | 98.8  | 63.8 | 75.0 |
| Rsa1.0_01628.1.g28544.t1 | ref XP_002863930.1  hypothetical protein ARALYDRAFT_917829 [Arabidopsis lyrata subsp. lyrata] gi 297309765 gb EFH40189.1  hypothetical protein ARALYDRAFT_917829 [Arabidopsis lyrata subsp. lyrata]                                                                                                    | 1116 | 1133 | 0         | 101.5 | 84.1 | 91.9 | hypothetical protein ARALYDRAFT_917829                                                             | gbpln | Arabidopsis lyrata   | AT5G48940.1   Symbols:   Leucine-rich repeat transmembrane protein kinase family protein   chr5:19839785-19843744 FORWARD LENGTH=1135     | 1116 | 1135 | 0         | 101.7 | 83.7 | 91.2 |
| Rsa1.0_01628.1.g28545.t1 | #                                                                                                                                                                                                                                                                                                      | #    | #    | #         | #     | #    | #    | -                                                                                                  | ----  | ----                 | #                                                                                                                                         | #    | #    | #         | #     | #    | #    |
| Rsa1.0_01628.1.g28546.t1 | sp P0C8S1.1 RP8L2_ARATH RecName: Full=Probable disease resistance RPP8-like protein 2                                                                                                                                                                                                                  | 905  | 906  | 0         | 100.1 | 64.5 | 77.3 | RecName: Full=Probable disease resistance RPP8-like protein 2                                      | ----  | ----                 | AT5G43470.2   Symbols: RPP8, HRT, ROY1   Disease resistance protein (CC-NBS-LRR class) family   chr5:17463130-17466658 REVERSE LENGTH=908 | 905  | 908  | 0         | 100.3 | 61.7 | 77.2 |
| Rsa1.0_01628.1.g28547.t1 | gb EOA14875.1  hypothetical protein CARUB_v10028201mg [Capsella rubella]                                                                                                                                                                                                                               | 652  | 646  | 0         | 99.1  | 82.5 | 93.1 | hypothetical protein CARUB_v10028201mg                                                             | gbpln | Capsella rubella     | AT5G48910.1   Symbols: LPA66   Pentatricopeptide repeat (PPR) superfamily protein   chr5:19832969-19834909 REVERSE LENGTH=646             | 652  | 646  | 0         | 99.1  | 81.3 | 90.2 |

|                          |                                                                                                                                                                                                                                                                                                                                                                                                                                     |      |      |           |       |      |      |                                          |       |                      |                                                                                                                                                                                                                                                                                                                            |      |     |           |       |      |      |
|--------------------------|-------------------------------------------------------------------------------------------------------------------------------------------------------------------------------------------------------------------------------------------------------------------------------------------------------------------------------------------------------------------------------------------------------------------------------------|------|------|-----------|-------|------|------|------------------------------------------|-------|----------------------|----------------------------------------------------------------------------------------------------------------------------------------------------------------------------------------------------------------------------------------------------------------------------------------------------------------------------|------|-----|-----------|-------|------|------|
| Rsa1.0_01628.1.g28548.t1 | ref NP_199700.1  C2H2-like zinc finger protein [Arabidopsis thaliana]<br>gi 9758888 dbj BAB09442.1  unnamed protein product [Arabidopsis thaliana]<br>gi 332008356 gb AED95739.1  C2H2-like zinc finger protein [Arabidopsis thaliana]                                                                                                                                                                                              | 170  | 173  | 8.00E-65  | 101.8 | 77.6 | 85.9 | C2H2-like zinc finger protein            | gbpln | Arabidopsis thaliana | AT5G48890.1   Symbols:   C2H2-like zinc finger protein   chr5:19820353-19820874 FORWARD LENGTH=173                                                                                                                                                                                                                         | 170  | 173 | 3.00E-67  | 101.8 | 77.6 | 85.9 |
| Rsa1.0_01628.1.g28549.t1 | gb AAG09097.1 AC009323.8 Putative retroelement polyprotein [Arabidopsis thaliana]                                                                                                                                                                                                                                                                                                                                                   | 819  | 1486 | 0         | 181.4 | 57.8 | 70.9 | Putative retroelement polyprotein        | gbpln | Arabidopsis thaliana | AT1G21280.1   Symbols:   CONTAINS InterPro DOMAIN/s: Retrotransposon gag protein (InterPro:IPR005162); Has 707 Blast hits to 705 proteins in 25 species: Archae - 0; Bacteria - 0; Metazoa - 4; Fungi - 0; Plants - 703; Viruses - 0; Other Eukaryotes - 0 (source: NCBI BLINK).   chr1:7447690-7448403 REVERSE LENGTH=237 | 819  | 237 | 6.00E-25  | 28.9  | 7.8  | 12.7 |
| Rsa1.0_01628.1.g28550.t1 | ref XP_002865684.1  male sterility MS5 family protein [Arabidopsis lyrata subsp. lyrata]<br>gi 297311519 gb EFH41943.1  male sterility MS5 family protein [Arabidopsis lyrata subsp. lyrata]<br>ref XP_002863331.1  hypothetical protein ARALYDRAFT_916628 [Arabidopsis lyrata subsp. lyrata]<br>gi 297309166 gb EFH39590.1  hypothetical protein ARALYDRAFT_916628 [Arabidopsis lyrata subsp. lyrata]                              | 306  | 306  | 1.00E-158 | 100.0 | 91.2 | 96.7 | male sterility MS5 family protein        | gbpln | Arabidopsis lyrata   | AT5G48850.1   Symbols: ATSDI1   Tetratricopeptide repeat (TPR)-like superfamily protein   chr5:19805576-19807699 REVERSE LENGTH=306                                                                                                                                                                                        | 306  | 306 | 1.00E-160 | 100.0 | 91.2 | 96.4 |
| Rsa1.0_01628.1.g28551.t1 | ref XP_002863331.1  hypothetical protein ARALYDRAFT_916628 [Arabidopsis lyrata subsp. lyrata]<br>gi 297309166 gb EFH39590.1  hypothetical protein ARALYDRAFT_916628 [Arabidopsis lyrata subsp. lyrata]                                                                                                                                                                                                                              | 159  | 243  | 1.00E-10  | 152.8 | 30.2 | 43.4 | hypothetical protein ARALYDRAFT_916628   | gbpln | Arabidopsis lyrata   | AT5G47590.1   Symbols:   Heat shock protein HSP20/alpha crystallin family   chr5:19297945-19299099 REVERSE LENGTH=264                                                                                                                                                                                                      | 159  | 264 | 1.00E-10  | 166.0 | 29.6 | 41.5 |
| Rsa1.0_01629.1.g28552.t1 | gb EOA37530.1  hypothetical protein CARUB_v10011737mg [Capsella rubella]                                                                                                                                                                                                                                                                                                                                                            | 459  | 512  | 1.00E-162 | 111.5 | 65.1 | 79.3 | hypothetical protein CARUB_v10011737mg   | gbpln | Capsella rubella     | AT1G12270.1   Symbols: Hop1   stress-inducible protein, putative   chr1:4172105-4174575 FORWARD LENGTH=572                                                                                                                                                                                                                 | 459  | 572 | 1.00E-135 | 124.6 | 50.3 | 59.3 |
| Rsa1.0_01629.1.g28553.t1 | ref NP_172690.1  NAC domain-containing protein 7 [Arabidopsis thaliana]<br>gi 230065075 sp Q9FWX2.2 NAC7_ARATH RecName: Full=NAC domain-containing protein 7; Short=ANAC007; AltName: Full=Protein EMBRYO DEFECTIVE 2749; AltName: Full=Protein VASCULAR RELATED NAC-DOMAIN 4<br>gi 119935909 gb ABM06031.1  At1g12260 [Arabidopsis thaliana]<br>gi 332190738 gb AAE28859.1  NAC domain-containing protein 7 [Arabidopsis thaliana] | 392  | 395  | 0         | 100.8 | 87.0 | 91.1 | NAC domain-containing protein 7          | gbpln | Arabidopsis thaliana | AT1G12260.1   Symbols: VND4, EMB2749, ANAC007, NAC007   NAC 007   chr1:4163058-4164486 REVERSE LENGTH=395                                                                                                                                                                                                                  | 392  | 395 | 0         | 100.8 | 87.0 | 91.1 |
| Rsa1.0_01629.1.g28554.t1 | ref XP_002889925.1  hypothetical protein ARALYDRAFT_471375 [Arabidopsis lyrata subsp. lyrata]<br>gi 297335767 gb EFH66184.1  hypothetical protein ARALYDRAFT_471375 [Arabidopsis lyrata subsp. lyrata]                                                                                                                                                                                                                              | 280  | 280  | 1.00E-127 | 100.0 | 88.2 | 91.8 | hypothetical protein ARALYDRAFT_471375   | gbpln | Arabidopsis lyrata   | AT1G12250.1   Symbols:   Pentapeptide repeat-containing protein   chr1:4159287-4161269 FORWARD LENGTH=280                                                                                                                                                                                                                  | 280  | 280 | 1.00E-129 | 100.0 | 87.9 | 91.1 |
| Rsa1.0_01629.1.g28555.t1 | gb AAG36942.1 AF274298.1 acid invertase [Brassica oleracea]                                                                                                                                                                                                                                                                                                                                                                         | 660  | 663  | 0         | 100.5 | 93.9 | 97.1 | acid invertase                           | gbpln | Brassica oleracea    | AT1G12240.1   Symbols: ATBETAFRUCT4, VAC-INV   Glycosyl hydrolases family 32 protein   chr1:4153699-4157457 FORWARD LENGTH=664                                                                                                                                                                                             | 660  | 664 | 0         | 100.6 | 87.6 | 93.3 |
| Rsa1.0_01629.1.g28556.t4 | gb ACP30559.1  disease resistance protein [Brassica rapa subsp. pekinensis]                                                                                                                                                                                                                                                                                                                                                         | 1075 | 786  | 0         | 73.1  | 46.3 | 53.2 | disease resistance protein               | gbpln | Brassica rapa        | AT4G10780.1   Symbols:   LRR and NB-ARC domains-containing disease resistance protein   chr4:6634779-6637457 REVERSE LENGTH=892                                                                                                                                                                                            | 1075 | 892 | 0         | 83.0  | 46.1 | 56.4 |
| Rsa1.0_01629.1.g28557.t1 | emb CAB39638.1  RNA-directed DNA polymerase-like protein [Arabidopsis thaliana]<br>gi 7267666 emb CAB78094.1  RNA-directed DNA polymerase-like protein [Arabidopsis thaliana]                                                                                                                                                                                                                                                       | 396  | 1274 | 5.00E-57  | 321.7 | 33.1 | 51.3 | RNA-directed DNA polymerase-like protein | gbpln | Arabidopsis thaliana | AT1G10000.1   Symbols:   Ribonuclease H-like superfamily protein   chr1:3263877-3264788 REVERSE LENGTH=303                                                                                                                                                                                                                 | 396  | 303 | 1.00E-44  | 76.5  | 27.0 | 38.9 |
| Rsa1.0_01629.1.g28558.t1 | gb EOA40340.1  hypothetical protein CARUB_v10009065mg [Capsella rubella]                                                                                                                                                                                                                                                                                                                                                            | 334  | 464  | 1.00E-178 | 138.9 | 89.2 | 94.6 | hypothetical protein CARUB_v10009065mg   | gbpln | Capsella rubella     | AT1G12200.1   Symbols:   Flavin-binding monooxygenase family protein   chr1:4137627-4139835 FORWARD LENGTH=465                                                                                                                                                                                                             | 334  | 465 | 1.00E-177 | 139.2 | 88.9 | 93.4 |
| Rsa1.0_01629.1.g28559.t1 | ref XP_002892679.1  F-box family protein [Arabidopsis lyrata subsp. lyrata]<br>gi 297338521 gb EFH68938.1  F-box family protein [Arabidopsis lyrata subsp. lyrata]                                                                                                                                                                                                                                                                  | 322  | 370  | 9.00E-90  | 114.9 | 55.3 | 68.9 | F-box family protein                     | gbpln | Arabidopsis lyrata   | AT1G12190.1   Symbols:   F-box and associated interaction domains-containing protein   chr1:4132967-4134094 REVERSE LENGTH=375                                                                                                                                                                                             | 322  | 375 | 7.00E-92  | 116.5 | 55.6 | 67.4 |
| Rsa1.0_01630.1.g28560.t1 | gb EAY92309.1  hypothetical protein Osl_14032 [Oryza sativa Indica Group]                                                                                                                                                                                                                                                                                                                                                           | 183  | 354  | 5.00E-87  | 193.4 | 84.7 | 85.8 | hypothetical protein Osl_14032           | gbpln | Oryza sativa         | AT1G10630.1   Symbols: ATARFA1F, ARFA1F   ADP-ribosylation factor A1F   chr1:3513189-3514230 REVERSE LENGTH=181                                                                                                                                                                                                            | 183  | 181 | 8.00E-89  | 98.9  | 85.2 | 85.2 |

|                          |                                                                                                                                                                                                                                                                                                                                                                                                                                                                                                                                                                                                                            |      |      |           |       |      |      |                                                          |       |                      |                                                                                                                                                                                                                                                                                                                                                                    |      |     |           |       |      |      |
|--------------------------|----------------------------------------------------------------------------------------------------------------------------------------------------------------------------------------------------------------------------------------------------------------------------------------------------------------------------------------------------------------------------------------------------------------------------------------------------------------------------------------------------------------------------------------------------------------------------------------------------------------------------|------|------|-----------|-------|------|------|----------------------------------------------------------|-------|----------------------|--------------------------------------------------------------------------------------------------------------------------------------------------------------------------------------------------------------------------------------------------------------------------------------------------------------------------------------------------------------------|------|-----|-----------|-------|------|------|
| Rsa1.0_01630.1.g28561.t2 | gb[EOA38890.1] hypothetical protein CARUB_v10011268mg [Capsella rubella]                                                                                                                                                                                                                                                                                                                                                                                                                                                                                                                                                   | 457  | 1077 | 0         | 235.7 | 86.0 | 91.2 | hypothetical protein CARUB_v10011268mg                   | gbpln | Capsella rubella     | AT1G23460.1   Symbols:   Pectin lyase-like superfamily protein   chr1:8327382-8329622 FORWARD LENGTH=460                                                                                                                                                                                                                                                           | 457  | 460 | 0         | 100.7 | 85.6 | 89.9 |
| Rsa1.0_01630.1.g28562.t1 | gb[EOA38498.1] hypothetical protein CARUB_v10010266mg [Capsella rubella]                                                                                                                                                                                                                                                                                                                                                                                                                                                                                                                                                   | 219  | 217  | 1.00E-108 | 99.1  | 88.1 | 93.2 | hypothetical protein CARUB_v10010266mg                   | gbpln | Capsella rubella     | AT1G23440.1   Symbols:   Peptidase C15, pyroglutamyl peptidase I-like   chr1:8321940-8324019 FORWARD LENGTH=217                                                                                                                                                                                                                                                    | 219  | 217 | 1.00E-110 | 99.1  | 88.1 | 91.8 |
| Rsa1.0_01630.1.g28563.t2 | gb[AAG51783.1]AC0079679_3 reverse transcriptase, putative; 16838-20266 [Arabidopsis thaliana]                                                                                                                                                                                                                                                                                                                                                                                                                                                                                                                              | 1032 | 1142 | 1.00E-176 | 110.7 | 32.0 | 44.0 | reverse transcriptase, putative; 16838-20266             | gbpln | Arabidopsis thaliana | AT1G43760.1   Symbols:   DNase I-like superfamily protein   chr1:16528880-16531065 REVERSE LENGTH=626                                                                                                                                                                                                                                                              | 1032 | 626 | 7.00E-38  | 60.7  | 10.8 | 17.9 |
| Rsa1.0_01630.1.g28564.t1 | gb[AAF79582.1]AC007945_2 F28C11.6 [Arabidopsis thaliana]<br>gi 9295696 gb AAF7002.1 AC005292_11 F26F24.29 [Arabidopsis thaliana]                                                                                                                                                                                                                                                                                                                                                                                                                                                                                           | 230  | 262  | 1.00E-113 | 113.9 | 91.3 | 93.9 | F28C11.6                                                 | gbpln | Arabidopsis thaliana | AT1G23420.1   Symbols:   INO   Plant-specific transcription factor YABBY family protein   chr1:8317423-8319104 FORWARD LENGTH=231                                                                                                                                                                                                                                  | 230  | 231 | 1.00E-115 | 100.4 | 91.3 | 93.9 |
| Rsa1.0_01630.1.g28565.t1 | gb[EOA39306.1] hypothetical protein CARUB_v10012327mg [Capsella rubella]                                                                                                                                                                                                                                                                                                                                                                                                                                                                                                                                                   | 156  | 156  | 1.00E-84  | 100.0 | 98.7 | 99.4 | hypothetical protein CARUB_v10012327mg                   | gbpln | Capsella rubella     | AT1G23410.1   Symbols:   Ribosomal protein S27a / Ubiquitin family protein   chr1:8314940-8315410 FORWARD LENGTH=156                                                                                                                                                                                                                                               | 156  | 156 | 1.00E-76  | 100.0 | 97.4 | 98.7 |
| Rsa1.0_01630.1.g28566.t1 | ref XP_002893281.1  invertase/pectin methylesterase inhibitor family protein [Arabidopsis lyrata subsp. lyrata]<br>gi 297339123 gb EFH69540.1  invertase/pectin methylesterase inhibitor family protein [Arabidopsis lyrata subsp. lyrata]<br>ref NP_568530.1  EXS (ERD1/XPR1/SYG1) domain protein [Arabidopsis thaliana]<br>gi 17979075 gb AAL49805.1  unknown protein [Arabidopsis thaliana]<br>gi 21554193 gb AAM63272.1  unknown [Arabidopsis thaliana]<br>gi 25055013 gb AAN71970.1  unknown protein [Arabidopsis thaliana]<br>gi 332006626 gb AED94009.1  EXS (ERD1/XPR1/SYG1) domain protein [Arabidopsis thaliana] | 327  | 161  | 3.00E-25  | 49.2  | 18.0 | 19.9 | invertase/pectin methylesterase inhibitor family protein | gbpln | Arabidopsis lyrata   | AT1G23350.1   Symbols:   Plant invertase/pectin methylesterase inhibitor superfamily protein   chr1:8293696-8294175 REVERSE LENGTH=159                                                                                                                                                                                                                             | 327  | 159 | 1.00E-26  | 48.6  | 17.1 | 19.9 |
| Rsa1.0_01631.1.g28567.t1 | gi 17979075 gb AAL49805.1  unknown protein [Arabidopsis thaliana]<br>gi 21554193 gb AAM63272.1  unknown [Arabidopsis thaliana]<br>gi 25055013 gb AAN71970.1  unknown protein [Arabidopsis thaliana]<br>gi 332006626 gb AED94009.1  EXS (ERD1/XPR1/SYG1) domain protein [Arabidopsis thaliana]                                                                                                                                                                                                                                                                                                                              | 451  | 457  | 0         | 101.3 | 86.9 | 90.9 | EXS (ERD1/XPR1/SYG1) domain protein                      | gbpln | Arabidopsis thaliana | AT5G35730.1   Symbols:   EXS (ERD1/XPR1/SYG1) family protein   chr5:13893941-13896821 FORWARD LENGTH=457                                                                                                                                                                                                                                                           | 451  | 457 | 0         | 101.3 | 86.9 | 90.9 |
| Rsa1.0_01631.1.g28568.t1 | #                                                                                                                                                                                                                                                                                                                                                                                                                                                                                                                                                                                                                          | #    | #    | #         | #     | #    | #    | -                                                        | ----  | ----                 | #                                                                                                                                                                                                                                                                                                                                                                  | #    | #   | #         | #     | #    | #    |
| Rsa1.0_01631.1.g28569.t1 | ref XP_002868433.1  hypothetical protein ARALYDRAFT_915700 [Arabidopsis lyrata subsp. lyrata]<br>gi 297314269 gb EFH44692.1  hypothetical protein ARALYDRAFT_915700 [Arabidopsis lyrata subsp. lyrata]                                                                                                                                                                                                                                                                                                                                                                                                                     | 99   | 100  | 1.00E-38  | 101.0 | 80.8 | 87.9 | hypothetical protein ARALYDRAFT_915700                   | gbpln | Arabidopsis lyrata   | AT5G35732.1   Symbols:   unknown protein; BEST Arabidopsis thaliana protein match is: unknown protein (TAIR:AT2G04795.1); Has 35333 Blast hits to 34131 proteins in 2444 species: Archae - 798; Bacteria - 22429; Metazoa - 974; Fungi - 991; Plants - 531; Viruses - 0; Other Eukaryotes - 9610 (source: NCBI BLINK).   chr5:13897961-13898263 FORWARD LENGTH=100 | 99   | 100 | 3.00E-41  | 101.0 | 79.8 | 88.9 |
| Rsa1.0_01631.1.g28570.t1 | #                                                                                                                                                                                                                                                                                                                                                                                                                                                                                                                                                                                                                          | #    | #    | #         | #     | #    | #    | -                                                        | ----  | ----                 | #                                                                                                                                                                                                                                                                                                                                                                  | #    | #   | #         | #     | #    | #    |
| Rsa1.0_01631.1.g28571.t1 | #                                                                                                                                                                                                                                                                                                                                                                                                                                                                                                                                                                                                                          | #    | #    | #         | #     | #    | #    | -                                                        | ----  | ----                 | #                                                                                                                                                                                                                                                                                                                                                                  | #    | #   | #         | #     | #    | #    |
| Rsa1.0_01631.1.g28572.t2 | dbj BAB10790.1  retroelement polypeptide-like [Arabidopsis thaliana]                                                                                                                                                                                                                                                                                                                                                                                                                                                                                                                                                       | 737  | 1864 | 2.00E-54  | 252.9 | 13.6 | 17.5 | retroelement polypeptide-like                            | gbpln | Arabidopsis thaliana | #                                                                                                                                                                                                                                                                                                                                                                  | #    | #   | #         | #     | #    | #    |
| Rsa1.0_01632.1.g28573.t1 | ref XP_002864303.1  calcium ion binding protein [Arabidopsis lyrata subsp. lyrata]<br>gi 297310138 gb EFH40562.1  calcium ion binding protein [Arabidopsis lyrata subsp. lyrata]                                                                                                                                                                                                                                                                                                                                                                                                                                           | 520  | 437  | 0         | 84.0  | 70.6 | 73.5 | calcium ion binding protein                              | gbpln | Arabidopsis lyrata   | AT5G54130.2   Symbols:   Calcium-binding endonuclease/exonuclease/phosphatase family   chr5:21962900-21965279 FORWARD LENGTH=436                                                                                                                                                                                                                                   | 520  | 436 | 0         | 83.8  | 70.2 | 73.3 |
| Rsa1.0_01632.1.g28574.t1 | dbj BAJ34304.1  unnamed protein product [Thellungiella halophila]                                                                                                                                                                                                                                                                                                                                                                                                                                                                                                                                                          | 266  | 271  | 1.00E-113 | 101.9 | 85.0 | 92.1 | unnamed protein product                                  | ----  | ----                 | AT5G54110.1   Symbols:   ATMAMI. MAMI   membrane-associated mannitol-induced   chr5:21958356-21960367 FORWARD LENGTH=266                                                                                                                                                                                                                                           | 266  | 266 | 1.00E-113 | 100.0 | 82.7 | 90.2 |
| Rsa1.0_01632.1.g28575.t1 | gb[EOA23245.1] hypothetical protein CARUB_v10017305mg [Capsella rubella]                                                                                                                                                                                                                                                                                                                                                                                                                                                                                                                                                   | 92   | 429  | 1.00E-23  | 466.3 | 60.9 | 66.3 | hypothetical protein CARUB_v10017305mg                   | gbpln | Capsella rubella     | AT3G51280.1   Symbols:   Tetratricopeptide repeat (TPR)-like superfamily protein   chr3:19037229-19038781 FORWARD LENGTH=430                                                                                                                                                                                                                                       | 92   | 430 | 5.00E-26  | 467.4 | 60.9 | 66.3 |
| Rsa1.0_01632.1.g28576.t1 | ref XP_002866018.1  band 7 family protein [Arabidopsis lyrata subsp. lyrata]<br>gi 297311853 gb EFH42277.1  band 7 family protein [Arabidopsis lyrata subsp. lyrata]                                                                                                                                                                                                                                                                                                                                                                                                                                                       | 401  | 404  | 1.00E-160 | 100.7 | 73.1 | 82.0 | band 7 family protein                                    | gbpln | Arabidopsis lyrata   | AT4G27585.1   Symbols:   SPFH/Band 7/PHB domain-containing membrane-associated protein family   chr4:13766984-13769832 REVERSE LENGTH=411                                                                                                                                                                                                                          | 401  | 411 | 1.00E-159 | 102.5 | 72.3 | 80.5 |
| Rsa1.0_01632.1.g28577.t2 | gb[EOA16742.1] hypothetical protein CARUB_v10004943mg [Capsella rubella]                                                                                                                                                                                                                                                                                                                                                                                                                                                                                                                                                   | 397  | 408  | 1.00E-160 | 102.8 | 73.0 | 80.1 | hypothetical protein CARUB_v10004943mg                   | gbpln | Capsella rubella     | AT4G27585.1   Symbols:   SPFH/Band 7/PHB domain-containing membrane-associated protein family   chr4:13766984-13769832 REVERSE LENGTH=411                                                                                                                                                                                                                          | 397  | 411 | 1.00E-159 | 103.5 | 71.5 | 79.1 |
| Rsa1.0_01632.1.g28578.t1 | gb[EOA16742.1] hypothetical protein CARUB_v10004943mg [Capsella rubella]                                                                                                                                                                                                                                                                                                                                                                                                                                                                                                                                                   | 156  | 408  | 4.00E-49  | 261.5 | 66.0 | 72.4 | hypothetical protein CARUB_v10004943mg                   | gbpln | Capsella rubella     | AT4G27585.1   Symbols:   SPFH/Band 7/PHB domain-containing membrane-associated protein family   chr4:13766984-13769832 REVERSE LENGTH=411                                                                                                                                                                                                                          | 156  | 411 | 4.00E-50  | 263.5 | 64.7 | 71.8 |

|                          |                                                                                                                                                                                                                                                                                             |     |     |           |       |      |      |                                                                                                                                                                     |       |                      |                                                                                                                                                                                                                                                                                                                                                                                                                                                                                                                                                                                                                                                                                     |     |     |           |       |      |      |
|--------------------------|---------------------------------------------------------------------------------------------------------------------------------------------------------------------------------------------------------------------------------------------------------------------------------------------|-----|-----|-----------|-------|------|------|---------------------------------------------------------------------------------------------------------------------------------------------------------------------|-------|----------------------|-------------------------------------------------------------------------------------------------------------------------------------------------------------------------------------------------------------------------------------------------------------------------------------------------------------------------------------------------------------------------------------------------------------------------------------------------------------------------------------------------------------------------------------------------------------------------------------------------------------------------------------------------------------------------------------|-----|-----|-----------|-------|------|------|
| Rsa1.0_01632.1.g28579.t1 | gb EOA14373.1  hypothetical protein CARUB_v10027559mg [Capsella rubella]                                                                                                                                                                                                                    | 116 | 130 | 1.00E-30  | 112.1 | 81.0 | 84.5 | hypothetical protein CARUB_v10027559mg                                                                                                                              | gbpln | Capsella rubella     | AT5G54095.1   Symbols:   unknown protein; FUNCTIONS IN: molecular function unknown; INVOLVED IN: N-terminal protein myristoylation; LOCATED IN: cellular_component unknown; EXPRESSED IN: 9 plant structures; EXPRESSED DURING: L mature pollen stage, M germinated pollen stage, 4 anthesis, C globular stage, petal differentiation and expansion stage; BEST Arabidopsis thaliana protein match is: unknown protein (TAIRAT4G27580.1); Has 30201 Blast hits to 17322 proteins in 780 species: Archae - 12; Bacteria - 1396; Metazoa - 17338; Fungi - 3422; Plants - 5037; Viruses - 0; Other Eukaryotes - 2996 (source: NCBI BLINK).   chr5:21952868-21953369 REVERSE LENGTH=135 | 116 | 135 | 3.00E-18  | 116.4 | 69.8 | 74.1 |
| Rsa1.0_01632.1.g28580.t1 | ref NP_200220.2  DNA mismatch repair protein MutS, type 2 [Arabidopsis thaliana] gi 332009066 gb AED96449.1  DNA mismatch repair protein MutS, type 2 [Arabidopsis thaliana]                                                                                                                | 819 | 796 | 0         | 97.2  | 81.0 | 88.6 | DNA mismatch repair protein MutS, type 2                                                                                                                            | gbpln | Arabidopsis thaliana | AT5G54090.1   Symbols:   DNA mismatch repair protein MutS, type 2   chr5:21948283-21952550 REVERSE LENGTH=796                                                                                                                                                                                                                                                                                                                                                                                                                                                                                                                                                                       | 819 | 796 | 0         | 97.2  | 81.0 | 88.6 |
| Rsa1.0_01632.1.g28581.t1 | gb AAM65958.1  homogentisate 1,2-dioxygenase [Arabidopsis thaliana]                                                                                                                                                                                                                         | 459 | 461 | 0         | 100.4 | 92.2 | 95.0 | homogentisate 1,2-dioxygenase                                                                                                                                       | gbpln | Arabidopsis thaliana | AT5G54080.2   Symbols: HGO   homogentisate 1,2-dioxygenase   chr5:21945920-21948070 FORWARD LENGTH=461                                                                                                                                                                                                                                                                                                                                                                                                                                                                                                                                                                              | 459 | 461 | 0         | 100.4 | 91.1 | 94.6 |
| Rsa1.0_01632.1.g28582.t1 | #                                                                                                                                                                                                                                                                                           | #   | #   | #         | #     | #    | #    | -                                                                                                                                                                   | ----  | ----                 | #                                                                                                                                                                                                                                                                                                                                                                                                                                                                                                                                                                                                                                                                                   | #   | #   | #         | #     | #    |      |
| Rsa1.0_01632.1.g28583.t1 | ref NP_200198.1  early nodulin-like protein 1 [Arabidopsis thaliana] gi 10177249 dbj BAB10717.1  unnamed protein product [Arabidopsis thaliana] gi 10994641 gb ABG48384.1  At5g53870 [Arabidopsis thaliana] gi 332009038 gb AED96421.1  early nodulin-like protein 1 [Arabidopsis thaliana] | 384 | 370 | 2.00E-74  | 96.4  | 52.3 | 65.4 | early nodulin-like protein 1                                                                                                                                        | gbpln | Arabidopsis thaliana | AT5G53870.1   Symbols: ENODL1, ATENODL1   early nodulin-like protein 1   chr5:21870033-21871228 REVERSE LENGTH=370                                                                                                                                                                                                                                                                                                                                                                                                                                                                                                                                                                  | 384 | 370 | 5.00E-77  | 96.4  | 52.3 | 65.4 |
| Rsa1.0_01632.1.g28584.t1 | ref XP_002865999.1  hypothetical protein ARALYDRAFT_331733 [Arabidopsis lyrata subsp. lyrata] gi 297311834 gb EFH42258.1  hypothetical protein ARALYDRAFT_331733 [Arabidopsis lyrata subsp. lyrata]                                                                                         | 509 | 519 | 0         | 102.0 | 93.3 | 97.4 | hypothetical protein ARALYDRAFT_331733                                                                                                                              | gbpln | Arabidopsis lyrata   | AT5G53850.2   Symbols:   haloacid dehalogenase-like hydrolase family protein   chr5:21861155-21864817 REVERSE LENGTH=507                                                                                                                                                                                                                                                                                                                                                                                                                                                                                                                                                            | 509 | 507 | 0         | 99.6  | 89.6 | 94.5 |
| Rsa1.0_01632.1.g28585.t1 | ref XP_002864285.1  VQ motif-containing protein [Arabidopsis lyrata subsp. lyrata] gi 297310120 gb EFH40544.1  VQ motif-containing protein [Arabidopsis lyrata subsp. lyrata]                                                                                                               | 226 | 240 | 4.00E-98  | 106.2 | 88.9 | 93.8 | VQ motif-containing protein                                                                                                                                         | gbpln | Arabidopsis lyrata   | AT5G53830.1   Symbols:   VQ motif-containing protein   chr5:21857057-21857788 FORWARD LENGTH=243                                                                                                                                                                                                                                                                                                                                                                                                                                                                                                                                                                                    | 226 | 243 | 1.00E-100 | 107.5 | 88.1 | 92.5 |
| Rsa1.0_01632.1.g28586.t1 | gb AAC98699.1  pollen coat protein homolog [Brassica rapa subsp. oleifera]                                                                                                                                                                                                                  | 65  | 67  | 3.00E-23  | 103.1 | 96.9 | 98.5 | pollen coat protein homolog                                                                                                                                         | gbpln | Brassica rapa        | AT5G53820.1   Symbols:   Late embryogenesis abundant protein (LEA) family protein   chr5:21853475-21853866 FORWARD LENGTH=67                                                                                                                                                                                                                                                                                                                                                                                                                                                                                                                                                        | 65  | 67  | 1.00E-23  | 103.1 | 87.7 | 95.4 |
| Rsa1.0_01632.1.g28587.t1 | #                                                                                                                                                                                                                                                                                           | #   | #   | #         | #     | #    | #    | -                                                                                                                                                                   | ----  | ----                 | #                                                                                                                                                                                                                                                                                                                                                                                                                                                                                                                                                                                                                                                                                   | #   | #   | #         | #     | #    |      |
| Rsa1.0_01632.1.g28588.t1 | ref XP_002864281.1  hypothetical protein ARALYDRAFT_357630 [Arabidopsis lyrata subsp. lyrata] gi 297310116 gb EFH40540.1  hypothetical protein ARALYDRAFT_357630 [Arabidopsis lyrata subsp. lyrata]                                                                                         | 188 | 184 | 6.00E-26  | 97.9  | 32.4 | 37.8 | hypothetical protein ARALYDRAFT_357630                                                                                                                              | gbpln | Arabidopsis lyrata   | AT4G01540.2   Symbols: ANAC068, NTM1   NAC with transmembrane motif1   chr4:670483-672629 REVERSE LENGTH=423                                                                                                                                                                                                                                                                                                                                                                                                                                                                                                                                                                        | 188 | 423 | 9.00E-20  | 225.0 | 28.2 | 38.8 |
| Rsa1.0_01632.1.g28589.t1 | ref XP_002864273.1  hypothetical protein ARALYDRAFT_495454 [Arabidopsis lyrata subsp. lyrata] gi 297310108 gb EFH40532.1  hypothetical protein ARALYDRAFT_495454 [Arabidopsis lyrata subsp. lyrata]                                                                                         | 414 | 530 | 0         | 128.0 | 80.7 | 86.0 | hypothetical protein ARALYDRAFT_495454                                                                                                                              | gbpln | Arabidopsis lyrata   | AT5G53770.1   Symbols:   Nucleotidyltransferase family protein   chr5:21826733-21829858 FORWARD LENGTH=530                                                                                                                                                                                                                                                                                                                                                                                                                                                                                                                                                                          | 414 | 530 | 0         | 128.0 | 79.7 | 85.5 |
| Rsa1.0_01633.1.g28590.t2 | gb AAZ66937.1  117M18_18 [Brassica rapa]                                                                                                                                                                                                                                                    | 442 | 249 | 1.00E-134 | 56.3  | 54.3 | 55.0 | 117M18_18                                                                                                                                                           | gbpln | Brassica rapa        | AT5G10360.1   Symbols: EMB3010, RPS6B   Ribosomal protein S6e   chr5:3258734-3260142 REVERSE LENGTH=249                                                                                                                                                                                                                                                                                                                                                                                                                                                                                                                                                                             | 442 | 249 | 1.00E-132 | 56.3  | 52.7 | 53.8 |
| Rsa1.0_01633.1.g28591.t1 | sp O65098.1 REM1_BRAOB RecName: Full=B3 domain-containing protein REM1; AltName: Full=Protein REPRODUCTIVE MERISTEM 1; Short=BoREM1 gi 3170424 gb AAC18082.1  reproductive meristem gene 1 [Brassica oleracea var. botrytis]                                                                | 504 | 497 | 1.00E-150 | 98.6  | 61.5 | 72.2 | RecName: Full=B3 domain-containing protein REM1; AltName: Full=Protein REPRODUCTIVE MERISTEM 1; Short=BoREM1 gi 3170424 gb AAC18082.1  reproductive meristem gene 1 | gbpln | Brassica oleracea    | AT4G31610.1   Symbols: REM1, ATREM1   Transcriptional factor B3 family protein   chr4:15317700-15319776 FORWARD LENGTH=517                                                                                                                                                                                                                                                                                                                                                                                                                                                                                                                                                          | 504 | 517 | 1.00E-138 | 102.6 | 56.5 | 68.5 |



|                          |                                                                                                                                                                                                                                                                                                                                          |      |      |           |       |      |      |                                                     |       |                      |                                                                                                                                               |      |      |           |       |      |      |
|--------------------------|------------------------------------------------------------------------------------------------------------------------------------------------------------------------------------------------------------------------------------------------------------------------------------------------------------------------------------------|------|------|-----------|-------|------|------|-----------------------------------------------------|-------|----------------------|-----------------------------------------------------------------------------------------------------------------------------------------------|------|------|-----------|-------|------|------|
| Rsa1.0_01633.1.g28592.t1 | gb EOA17002.1  hypothetical protein CARUB_v10005245mg [Capsella rubella]                                                                                                                                                                                                                                                                 | 324  | 323  | 1.00E-169 | 99.7  | 94.1 | 96.6 | hypothetical protein CARUB_v10005245mg              | gbpln | Capsella rubella     | AT4G31600.1   Symbols:   UDP-N-acetylglucosamine (UAA) transporter family   chr4:15315232-15316909 REVERSE LENGTH=323                         | 324  | 323  | 1.00E-170 | 99.7  | 92.9 | 95.7 |
| Rsa1.0_01633.1.g28593.t1 | ref XP_002867294.1  WRKY transcription factor 11 [Arabidopsis lyrata subsp. lyrata] gi 297313130 gb EFH43553.1  WRKY transcription factor 11 [Arabidopsis lyrata subsp. lyrata]                                                                                                                                                          | 332  | 335  | 1.00E-145 | 100.9 | 80.1 | 88.0 | WRKY transcription factor 11                        | gbpln | Arabidopsis lyrata   | AT4G31550.1   Symbols: WRKY11, ATWRKY11   WRKY DNA-binding protein 11   chr4:15290065-15291458 REVERSE LENGTH=325                             | 332  | 325  | 1.00E-141 | 97.9  | 78.6 | 85.2 |
| Rsa1.0_01633.1.g28594.t1 | ref XP_002880609.1  hypothetical protein ARALYDRAFT_901029 [Arabidopsis lyrata subsp. lyrata] gi 297326448 gb EFH56868.1  hypothetical protein ARALYDRAFT_901029 [Arabidopsis lyrata subsp. lyrata]                                                                                                                                      | 621  | 464  | 5.00E-84  | 74.7  | 29.0 | 38.3 | hypothetical protein ARALYDRAFT_901029              | gbpln | Arabidopsis lyrata   | AT3G18150.1   Symbols:   RNI-like superfamily protein   chr3:6217929-6219500 FORWARD LENGTH=456                                               | 621  | 456  | 6.00E-80  | 73.4  | 27.4 | 36.6 |
| Rsa1.0_01633.1.g28595.t1 | emb CAN66566.1  hypothetical protein VITISV_018543 [Vitis vinifera]                                                                                                                                                                                                                                                                      | 136  | 287  | 1.00E-32  | 211.0 | 53.7 | 64.7 | hypothetical protein VITISV_018543                  | gbpln | Vitis vinifera       | # # # # # #                                                                                                                                   |      |      |           |       |      |      |
| Rsa1.0_01633.1.g28596.t5 | ref XP_002880609.1  hypothetical protein ARALYDRAFT_901029 [Arabidopsis lyrata subsp. lyrata] gi 297326448 gb EFH56868.1  hypothetical protein ARALYDRAFT_901029 [Arabidopsis lyrata subsp. lyrata]                                                                                                                                      | 346  | 464  | 6.00E-47  | 134.1 | 35.5 | 45.7 | hypothetical protein ARALYDRAFT_901029              | gbpln | Arabidopsis lyrata   | AT3G18150.1   Symbols:   RNI-like superfamily protein   chr3:6217929-6219500 FORWARD LENGTH=456                                               | 346  | 456  | 9.00E-49  | 131.8 | 35.3 | 46.0 |
| Rsa1.0_01633.1.g28597.t1 | gb EOA15465.1  hypothetical protein CARUB_v10004281mg [Capsella rubella]                                                                                                                                                                                                                                                                 | 677  | 686  | 0         | 101.3 | 90.8 | 95.1 | hypothetical protein CARUB_v10004281mg              | gbpln | Capsella rubella     | AT4G31540.1   Symbols: ATEXO70G1, EXO70G1   exocyst subunit exo70 family protein G1   chr4:15284739-15286802 REVERSE LENGTH=687               | 677  | 687  | 0         | 101.5 | 90.5 | 95.1 |
| Rsa1.0_01634.1.g28598.t1 | ref XP_002869061.1  hypothetical protein ARALYDRAFT_912790 [Arabidopsis lyrata subsp. lyrata] gi 297314897 gb EFH45320.1  hypothetical protein ARALYDRAFT_912790 [Arabidopsis lyrata subsp. lyrata]                                                                                                                                      | 65   | 61   | 6.00E-22  | 93.8  | 87.7 | 92.3 | hypothetical protein ARALYDRAFT_912790              | gbpln | Arabidopsis lyrata   | AT4G35783.1   Symbols: RTFL6, DVL17   ROTUNDIFOLIA like 6   chr4:16952612-16952800 FORWARD LENGTH=62                                          | 65   | 62   | 3.00E-23  | 95.4  | 83.1 | 86.2 |
| Rsa1.0_01634.1.g28599.t2 | ref XP_002867054.1  hypothetical protein ARALYDRAFT_912788 [Arabidopsis lyrata subsp. lyrata] gi 297312890 gb EFH43313.1  hypothetical protein ARALYDRAFT_912788 [Arabidopsis lyrata subsp. lyrata]                                                                                                                                      | 240  | 160  | 2.00E-45  | 66.7  | 45.8 | 50.4 | hypothetical protein ARALYDRAFT_912788              | gbpln | Arabidopsis lyrata   | AT4G35785.5   Symbols:   RNA-binding (RRM/RBD/RNP motifs) family protein   chr4:16953404-16955127 REVERSE LENGTH=244                          | 240  | 244  | 3.00E-42  | 101.7 | 46.3 | 51.3 |
| Rsa1.0_01634.1.g28600.t1 | dbj BAJ34379.1  unnamed protein product [Thellungiella halophila]                                                                                                                                                                                                                                                                        | 873  | 860  | 0         | 98.5  | 91.6 | 95.6 | unnamed protein product                             | ----  | ----                 | AT4G35790.1   Symbols: ATPLDELTA, PLDELTA   phospholipase D delta   chr4:16955774-16959875 REVERSE LENGTH=868                                 | 873  | 868  | 0         | 99.4  | 88.0 | 95.2 |
| Rsa1.0_01634.1.g28601.t1 | gb EOA15888.1  hypothetical protein CARUB_v10003976mg [Capsella rubella]                                                                                                                                                                                                                                                                 | 1882 | 1838 | 0         | 97.7  | 89.6 | 92.2 | hypothetical protein CARUB_v10003976mg              | gbpln | Capsella rubella     | AT5G60040.1   Symbols: NRPC1   nuclear RNA polymerase C1   chr5:24173590-24183269 FORWARD LENGTH=1376                                         | 1882 | 1376 | 1.00E-163 | 73.1  | 19.2 | 27.4 |
| Rsa1.0_01634.1.g28602.t1 | ref XP_002869059.1  oxidoreductase [Arabidopsis lyrata subsp. lyrata] gi 297314895 gb EFH45318.1  oxidoreductase [Arabidopsis lyrata subsp. lyrata]                                                                                                                                                                                      | 263  | 290  | 1.00E-120 | 110.3 | 81.0 | 88.6 | oxidoreductase                                      | gbpln | Arabidopsis lyrata   | AT4G35810.1   Symbols:   2-oxoglutarate (2OG) and Fe(II)-dependent oxygenase superfamily protein   chr4:16968921-16970358 FORWARD LENGTH=290  | 263  | 290  | 1.00E-119 | 110.3 | 75.3 | 84.0 |
| Rsa1.0_01634.1.g28603.t1 | ref NP_195307.1  oxidoreductase, 2OG-Fe(II) oxygenase family protein [Arabidopsis thaliana] gi 3805848 emb CAA21468.1  putative protein [Arabidopsis thaliana] gi 7270534 emb CAB81491.1  putative protein [Arabidopsis thaliana] gi 332661175 gb AEE86575.1  oxidoreductase, 2OG-Fe(II) oxygenase family protein [Arabidopsis thaliana] | 287  | 272  | 1.00E-87  | 94.8  | 58.9 | 70.7 | oxidoreductase, 2OG-Fe(II) oxygenase family protein | gbpln | Arabidopsis thaliana | AT4G35820.1   Symbols:   2-oxoglutarate (2OG) and Fe(II)-dependent oxygenase superfamily protein   chr4:16971221-16972429 FORWARD LENGTH=272  | 287  | 272  | 3.00E-90  | 94.8  | 58.9 | 70.7 |
| Rsa1.0_01634.1.g28604.t1 | dbj BAD95408.1  hypothetical protein [Arabidopsis thaliana]                                                                                                                                                                                                                                                                              | 106  | 478  | 4.00E-15  | 450.9 | 45.3 | 59.4 | hypothetical protein                                | gbpln | Arabidopsis thaliana | AT3G24255.1   Symbols:   RNA-directed DNA polymerase (reverse transcriptase)-related family protein   chr3:8789471-8793208 FORWARD LENGTH=746 | 106  | 746  | 1.00E-11  | 703.8 | 28.3 | 38.7 |
| Rsa1.0_01634.1.g28605.t1 | # # # # # # # #                                                                                                                                                                                                                                                                                                                          | #    | #    | #         | #     | #    | #    | -                                                   | ----  | ----                 | # # # # # # #                                                                                                                                 | #    | #    | #         | #     | #    | #    |

|                          |                                                                                                                                                                                                                                                                                                                                                                                                                                                                                                                                                                                                                                                                                                                                                                                                                                                                                                                                                                                                                                                                                                                             |      |     |           |       |      |      |                                                     |       |                      |                                                                                                                                              |      |     |           |       |      |      |
|--------------------------|-----------------------------------------------------------------------------------------------------------------------------------------------------------------------------------------------------------------------------------------------------------------------------------------------------------------------------------------------------------------------------------------------------------------------------------------------------------------------------------------------------------------------------------------------------------------------------------------------------------------------------------------------------------------------------------------------------------------------------------------------------------------------------------------------------------------------------------------------------------------------------------------------------------------------------------------------------------------------------------------------------------------------------------------------------------------------------------------------------------------------------|------|-----|-----------|-------|------|------|-----------------------------------------------------|-------|----------------------|----------------------------------------------------------------------------------------------------------------------------------------------|------|-----|-----------|-------|------|------|
| Rsa1.0_01634.1.g28606.t1 | refNP_195307.1  oxidoreductase, 2OG-Fe(II) oxygenase family protein [Arabidopsis thaliana] gi 3805848 emb CAA21468.1  putative protein [Arabidopsis thaliana] gi 7270534 emb CAB81491.1  putative protein [Arabidopsis thaliana] gi 332661175 gb AEE86575.1  oxidoreductase, 2OG-Fe(II) oxygenase family protein [Arabidopsis thaliana] refNP_195308.1  aconitate hydratase 1 [Arabidopsis thaliana] gi 13124706 sp Q42560.2 ACO1_ARATH RecName: Full=Aconitate hydratase 1; Short=Aconitase 1; AltName: Full=Citrate hydro-lyase 1 gi 3805849 emb CAA21469.1  cytoplasmatic aconitate hydratase (citrate hydro-lyase)(aconitase)(EC 4.2.1.3) [Arabidopsis thaliana] gi 7270535 emb CAB81492.1  cytoplasmatic aconitate hydratase (citrate hydro-lyase)(aconitase)(EC 4.2.1.3) [Arabidopsis thaliana] gi 17065392 gb AAL32850.1  Unknown protein [Arabidopsis thaliana] gi 332661176 gb AEE86576.1  aconitate hydratase 1 [Arabidopsis thaliana] refXP_002669057.1  zinc finger family protein [Arabidopsis lyrata subsp. lyrata] gi 297314893 gb EFH45316.1  zinc finger family protein [Arabidopsis lyrata subsp. lyrata] | 294  | 272 | 8.00E-87  | 92.5  | 58.2 | 69.7 | oxidoreductase, 2OG-Fe(II) oxygenase family protein | gbpln | Arabidopsis thaliana | AT4G35820.1   Symbols:   2-oxoglutarate (2OG) and Fe(II)-dependent oxygenase superfamily protein   chr4:16971221-16972429 FORWARD LENGTH=272 | 294  | 272 | 2.00E-89  | 92.5  | 58.2 | 69.7 |
| Rsa1.0_01634.1.g28607.t1 | refNP_195307.1  oxidoreductase, 2OG-Fe(II) oxygenase family protein [Arabidopsis thaliana] gi 3805848 emb CAA21468.1  putative protein [Arabidopsis thaliana] gi 7270534 emb CAB81491.1  putative protein [Arabidopsis thaliana] gi 332661175 gb AEE86575.1  oxidoreductase, 2OG-Fe(II) oxygenase family protein [Arabidopsis thaliana] refNP_195308.1  aconitate hydratase 1 [Arabidopsis thaliana] gi 13124706 sp Q42560.2 ACO1_ARATH RecName: Full=Aconitate hydratase 1; Short=Aconitase 1; AltName: Full=Citrate hydro-lyase 1 gi 3805849 emb CAA21469.1  cytoplasmatic aconitate hydratase (citrate hydro-lyase)(aconitase)(EC 4.2.1.3) [Arabidopsis thaliana] gi 7270535 emb CAB81492.1  cytoplasmatic aconitate hydratase (citrate hydro-lyase)(aconitase)(EC 4.2.1.3) [Arabidopsis thaliana] gi 17065392 gb AAL32850.1  Unknown protein [Arabidopsis thaliana] gi 332661176 gb AEE86576.1  aconitate hydratase 1 [Arabidopsis thaliana] refXP_002669057.1  zinc finger family protein [Arabidopsis lyrata subsp. lyrata] gi 297314893 gb EFH45316.1  zinc finger family protein [Arabidopsis lyrata subsp. lyrata] | 898  | 898 | 0         | 100.0 | 97.6 | 99.2 | aconitate hydratase 1                               | gbpln | Arabidopsis thaliana | AT4G35830.1   Symbols: ACO1   aconitase 1   chr4:16973007-16977949 REVERSE LENGTH=898                                                        | 898  | 898 | 0         | 100.0 | 97.6 | 99.2 |
| Rsa1.0_01634.1.g28608.t1 | refNP_195307.1  oxidoreductase, 2OG-Fe(II) oxygenase family protein [Arabidopsis thaliana] gi 3805848 emb CAA21468.1  putative protein [Arabidopsis thaliana] gi 7270534 emb CAB81491.1  putative protein [Arabidopsis thaliana] gi 332661175 gb AEE86575.1  oxidoreductase, 2OG-Fe(II) oxygenase family protein [Arabidopsis thaliana] refNP_195308.1  aconitate hydratase 1 [Arabidopsis thaliana] gi 13124706 sp Q42560.2 ACO1_ARATH RecName: Full=Aconitate hydratase 1; Short=Aconitase 1; AltName: Full=Citrate hydro-lyase 1 gi 3805849 emb CAA21469.1  cytoplasmatic aconitate hydratase (citrate hydro-lyase)(aconitase)(EC 4.2.1.3) [Arabidopsis thaliana] gi 7270535 emb CAB81492.1  cytoplasmatic aconitate hydratase (citrate hydro-lyase)(aconitase)(EC 4.2.1.3) [Arabidopsis thaliana] gi 17065392 gb AAL32850.1  Unknown protein [Arabidopsis thaliana] gi 332661176 gb AEE86576.1  aconitate hydratase 1 [Arabidopsis thaliana] refXP_002669057.1  zinc finger family protein [Arabidopsis lyrata subsp. lyrata] gi 297314893 gb EFH45316.1  zinc finger family protein [Arabidopsis lyrata subsp. lyrata] | 238  | 236 | 1.00E-123 | 99.2  | 91.2 | 95.4 | zinc finger family protein                          | gbpln | Arabidopsis lyrata   | AT4G35840.1   Symbols:   RING/U-box superfamily protein   chr4:16981083-16982266 FORWARD LENGTH=236                                          | 238  | 236 | 1.00E-125 | 99.2  | 89.9 | 95.4 |
| Rsa1.0_01634.1.g28609.t1 | refNP_195307.1  oxidoreductase, 2OG-Fe(II) oxygenase family protein [Arabidopsis thaliana] gi 3805848 emb CAA21468.1  putative protein [Arabidopsis thaliana] gi 7270534 emb CAB81491.1  putative protein [Arabidopsis thaliana] gi 332661175 gb AEE86575.1  oxidoreductase, 2OG-Fe(II) oxygenase family protein [Arabidopsis thaliana] refNP_195308.1  aconitate hydratase 1 [Arabidopsis thaliana] gi 13124706 sp Q42560.2 ACO1_ARATH RecName: Full=Aconitate hydratase 1; Short=Aconitase 1; AltName: Full=Citrate hydro-lyase 1 gi 3805849 emb CAA21469.1  cytoplasmatic aconitate hydratase (citrate hydro-lyase)(aconitase)(EC 4.2.1.3) [Arabidopsis thaliana] gi 7270535 emb CAB81492.1  cytoplasmatic aconitate hydratase (citrate hydro-lyase)(aconitase)(EC 4.2.1.3) [Arabidopsis thaliana] gi 17065392 gb AAL32850.1  Unknown protein [Arabidopsis thaliana] gi 332661176 gb AEE86576.1  aconitate hydratase 1 [Arabidopsis thaliana] refXP_002669057.1  zinc finger family protein [Arabidopsis lyrata subsp. lyrata] gi 297314893 gb EFH45316.1  zinc finger family protein [Arabidopsis lyrata subsp. lyrata] | 453  | 444 | 0         | 98.0  | 85.0 | 92.7 | hypothetical protein CARUB_v10004808mg              | gbpln | Capsella rubella     | AT4G35850.1   Symbols:   Pentatricopeptide repeat (PPR) superfamily protein   chr4:16983638-16986681 FORWARD LENGTH=444                      | 453  | 444 | 0         | 98.0  | 85.0 | 92.7 |
| Rsa1.0_01634.1.g28610.t1 | refNP_195307.1  oxidoreductase, 2OG-Fe(II) oxygenase family protein [Arabidopsis thaliana] gi 3805848 emb CAA21468.1  putative protein [Arabidopsis thaliana] gi 7270534 emb CAB81491.1  putative protein [Arabidopsis thaliana] gi 332661175 gb AEE86575.1  oxidoreductase, 2OG-Fe(II) oxygenase family protein [Arabidopsis thaliana] refNP_195308.1  aconitate hydratase 1 [Arabidopsis thaliana] gi 13124706 sp Q42560.2 ACO1_ARATH RecName: Full=Aconitate hydratase 1; Short=Aconitase 1; AltName: Full=Citrate hydro-lyase 1 gi 3805849 emb CAA21469.1  cytoplasmatic aconitate hydratase (citrate hydro-lyase)(aconitase)(EC 4.2.1.3) [Arabidopsis thaliana] gi 7270535 emb CAB81492.1  cytoplasmatic aconitate hydratase (citrate hydro-lyase)(aconitase)(EC 4.2.1.3) [Arabidopsis thaliana] gi 17065392 gb AAL32850.1  Unknown protein [Arabidopsis thaliana] gi 332661176 gb AEE86576.1  aconitate hydratase 1 [Arabidopsis thaliana] refXP_002669057.1  zinc finger family protein [Arabidopsis lyrata subsp. lyrata] gi 297314893 gb EFH45316.1  zinc finger family protein [Arabidopsis lyrata subsp. lyrata] | 211  | 211 | 1.00E-119 | 100.0 | 98.1 | 99.1 | hypothetical protein CARUB_v10005728mg              | gbpln | Capsella rubella     | AT4G35860.1   Symbols: ATRABB1B, ATGB2, ATRAB2C, GB2   GTP-binding 2   chr4:16987118-16988839 REVERSE LENGTH=211                             | 211  | 211 | 1.00E-120 | 100.0 | 97.2 | 98.6 |
| Rsa1.0_01635.1.g28611.t2 | refNP_195307.1  oxidoreductase, 2OG-Fe(II) oxygenase family protein [Arabidopsis thaliana] gi 3805848 emb CAA21468.1  putative protein [Arabidopsis thaliana] gi 7270534 emb CAB81491.1  putative protein [Arabidopsis thaliana] gi 332661175 gb AEE86575.1  oxidoreductase, 2OG-Fe(II) oxygenase family protein [Arabidopsis thaliana] refNP_195308.1  aconitate hydratase 1 [Arabidopsis thaliana] gi 13124706 sp Q42560.2 ACO1_ARATH RecName: Full=Aconitate hydratase 1; Short=Aconitase 1; AltName: Full=Citrate hydro-lyase 1 gi 3805849 emb CAA21469.1  cytoplasmatic aconitate hydratase (citrate hydro-lyase)(aconitase)(EC 4.2.1.3) [Arabidopsis thaliana] gi 7270535 emb CAB81492.1  cytoplasmatic aconitate hydratase (citrate hydro-lyase)(aconitase)(EC 4.2.1.3) [Arabidopsis thaliana] gi 17065392 gb AAL32850.1  Unknown protein [Arabidopsis thaliana] gi 332661176 gb AEE86576.1  aconitate hydratase 1 [Arabidopsis thaliana] refXP_002669057.1  zinc finger family protein [Arabidopsis lyrata subsp. lyrata] gi 297314893 gb EFH45316.1  zinc finger family protein [Arabidopsis lyrata subsp. lyrata] | 789  | 781 | 0         | 99.0  | 86.7 | 91.9 | chloride channel protein CLC-f                      | gbpln | Arabidopsis thaliana | AT1G55620.2   Symbols: CLC-F, ATCLC-F   chloride channel F   chr1:20787338-20790990 REVERSE LENGTH=781                                       | 789  | 781 | 0         | 99.0  | 86.7 | 91.9 |
| Rsa1.0_01635.1.g28612.t1 | refNP_195307.1  oxidoreductase, 2OG-Fe(II) oxygenase family protein [Arabidopsis thaliana] gi 3805848 emb CAA21468.1  putative protein [Arabidopsis thaliana] gi 7270534 emb CAB81491.1  putative protein [Arabidopsis thaliana] gi 332661175 gb AEE86575.1  oxidoreductase, 2OG-Fe(II) oxygenase family protein [Arabidopsis thaliana] refNP_195308.1  aconitate hydratase 1 [Arabidopsis thaliana] gi 13124706 sp Q42560.2 ACO1_ARATH RecName: Full=Aconitate hydratase 1; Short=Aconitase 1; AltName: Full=Citrate hydro-lyase 1 gi 3805849 emb CAA21469.1  cytoplasmatic aconitate hydratase (citrate hydro-lyase)(aconitase)(EC 4.2.1.3) [Arabidopsis thaliana] gi 7270535 emb CAB81492.1  cytoplasmatic aconitate hydratase (citrate hydro-lyase)(aconitase)(EC 4.2.1.3) [Arabidopsis thaliana] gi 17065392 gb AAL32850.1  Unknown protein [Arabidopsis thaliana] gi 332661176 gb AEE86576.1  aconitate hydratase 1 [Arabidopsis thaliana] refXP_002669057.1  zinc finger family protein [Arabidopsis lyrata subsp. lyrata] gi 297314893 gb EFH45316.1  zinc finger family protein [Arabidopsis lyrata subsp. lyrata] | 148  | 148 | 6.00E-78  | 100.0 | 94.6 | 98.0 | nucleoside diphosphate kinase 1                     | gbpln | Brassica rapa        | AT4G09320.1   Symbols: NDPK1   Nucleoside diphosphate kinase family protein   chr4:5923424-5924366 FORWARD LENGTH=169                        | 148  | 169 | 9.00E-76  | 114.2 | 87.2 | 95.9 |
| Rsa1.0_01635.1.g28613.t1 | refNP_195307.1  oxidoreductase, 2OG-Fe(II) oxygenase family protein [Arabidopsis thaliana] gi 3805848 emb CAA21468.1  putative protein [Arabidopsis thaliana] gi 7270534 emb CAB81491.1  putative protein [Arabidopsis thaliana] gi 332661175 gb AEE86575.1  oxidoreductase, 2OG-Fe(II) oxygenase family protein [Arabidopsis thaliana] refNP_195308.1  aconitate hydratase 1 [Arabidopsis thaliana] gi 13124706 sp Q42560.2 ACO1_ARATH RecName: Full=Aconitate hydratase 1; Short=Aconitase 1; AltName: Full=Citrate hydro-lyase 1 gi 3805849 emb CAA21469.1  cytoplasmatic aconitate hydratase (citrate hydro-lyase)(aconitase)(EC 4.2.1.3) [Arabidopsis thaliana] gi 7270535 emb CAB81492.1  cytoplasmatic aconitate hydratase (citrate hydro-lyase)(aconitase)(EC 4.2.1.3) [Arabidopsis thaliana] gi 17065392 gb AAL32850.1  Unknown protein [Arabidopsis thaliana] gi 332661176 gb AEE86576.1  aconitate hydratase 1 [Arabidopsis thaliana] refXP_002669057.1  zinc finger family protein [Arabidopsis lyrata subsp. lyrata] gi 297314893 gb EFH45316.1  zinc finger family protein [Arabidopsis lyrata subsp. lyrata] | 162  | 161 | 1.00E-77  | 99.4  | 93.2 | 95.1 | hypothetical protein CARUB_v10011889mg              | gbpln | Capsella rubella     | AT1G55670.1   Symbols: PSAG   photosystem I subunit G   chr1:20802874-20803356 REVERSE LENGTH=160                                            | 162  | 160 | 1.00E-76  | 98.8  | 90.7 | 93.2 |
| Rsa1.0_01635.1.g28614.t2 | refNP_195307.1  oxidoreductase, 2OG-Fe(II) oxygenase family protein [Arabidopsis thaliana] gi 3805848 emb CAA21468.1  putative protein [Arabidopsis thaliana] gi 7270534 emb CAB81491.1  putative protein [Arabidopsis thaliana] gi 332661175 gb AEE86575.1  oxidoreductase, 2OG-Fe(II) oxygenase family protein [Arabidopsis thaliana] refNP_195308.1  aconitate hydratase 1 [Arabidopsis thaliana] gi 13124706 sp Q42560.2 ACO1_ARATH RecName: Full=Aconitate hydratase 1; Short=Aconitase 1; AltName: Full=Citrate hydro-lyase 1 gi 3805849 emb CAA21469.1  cytoplasmatic aconitate hydratase (citrate hydro-lyase)(aconitase)(EC 4.2.1.3) [Arabidopsis thaliana] gi 7270535 emb CAB81492.1  cytoplasmatic aconitate hydratase (citrate hydro-lyase)(aconitase)(EC 4.2.1.3) [Arabidopsis thaliana] gi 17065392 gb AAL32850.1  Unknown protein [Arabidopsis thaliana] gi 332661176 gb AEE86576.1  aconitate hydratase 1 [Arabidopsis thaliana] refXP_002669057.1  zinc finger family protein [Arabidopsis lyrata subsp. lyrata] gi 297314893 gb EFH45316.1  zinc finger family protein [Arabidopsis lyrata subsp. lyrata] | 1094 | 621 | 0         | 56.8  | 46.5 | 50.7 | sec.4-like phosphatidylinositol transfer protein    | gbpln | Arabidopsis thaliana | AT1G55690.3   Symbols:   Sec14p-like phosphatidylinositol transfer family protein   chr1:20808712-20811831 REVERSE LENGTH=621                | 1094 | 621 | 0         | 56.8  | 46.5 | 50.7 |

|                          |                                                                                                                                                                                                                                                                                                                                                                                                                                                                                                                                                                                                                                                                                                                                                                           |      |      |           |       |      |      |                                                         |       |                      |                                                                                                                                                                                                                                                                                 |      |     |           |       |      |      |
|--------------------------|---------------------------------------------------------------------------------------------------------------------------------------------------------------------------------------------------------------------------------------------------------------------------------------------------------------------------------------------------------------------------------------------------------------------------------------------------------------------------------------------------------------------------------------------------------------------------------------------------------------------------------------------------------------------------------------------------------------------------------------------------------------------------|------|------|-----------|-------|------|------|---------------------------------------------------------|-------|----------------------|---------------------------------------------------------------------------------------------------------------------------------------------------------------------------------------------------------------------------------------------------------------------------------|------|-----|-----------|-------|------|------|
| Rsa1.0_01635.1.g28615.t1 | ref[NP_175969.2] vacuolar cation/proton exchanger 5 [Arabidopsis thaliana] gi 79320047 ref[NP_001031196.1] vacuolar cation/proton exchanger 5 [Arabidopsis thaliana] gi 75154113 sp O8L783.1 CAX5_ARATH RecName: Full=Vacuolar cation/proton exchanger 5; AltName: Full=Ca(2+)/H(+) antiporter CAX5; AltName: Full=Ca(2+)/H(+) exchanger 5; AltName: Full=Protein CATION EXCHANGER 5 gi 22531156 gb AAM97082.1  H+/Ca2+ antiporter, putative [Arabidopsis thaliana] gi 30387539 gb AAP31935.1  At1g55730 [Arabidopsis thaliana] gi 222424383 dbj BAH20147.1  AT1G55730 [Arabidopsis thaliana] gi 332195169 gb AEE33290.1  vacuolar cation/proton exchanger 5 [Arabidopsis thaliana] gi 332195170 gb AEE33291.1  vacuolar cation/proton exchanger 5 [Arabidopsis thaliana] | 411  | 441  | 0         | 107.3 | 86.1 | 92.7 | vacuolar cation/proton exchanger 5                      | gbpln | Arabidopsis thaliana | AT1G55730.2   Symbols: ATCAX5, CAX5   cation exchanger 5   chr1:20831387-20833941 REVERSE LENGTH=441                                                                                                                                                                            | 411  | 441 | 0         | 107.3 | 86.1 | 92.7 |
| Rsa1.0_01635.1.g28616.t1 | gb EOA36445.1  hypothetical protein CARUB_v10011004mg [Capsella rubella]                                                                                                                                                                                                                                                                                                                                                                                                                                                                                                                                                                                                                                                                                                  | 687  | 761  | 0         | 110.8 | 90.8 | 96.5 | hypothetical protein CARUB_v10011004mg                  | gbpln | Capsella rubella     | AT1G55740.1   Symbols: AtSIP1, SIP1   seed imbibition 1   chr1:20835507-20838707 REVERSE LENGTH=754                                                                                                                                                                             | 687  | 754 | 0         | 109.8 | 91.0 | 95.8 |
| Rsa1.0_01636.1.g28617.t2 | ref[XP_002872697.1] predicted protein [Arabidopsis lyrata subsp. lyrata] gi 297318534 gb EFH48956.1  predicted protein [Arabidopsis lyrata subsp. lyrata]                                                                                                                                                                                                                                                                                                                                                                                                                                                                                                                                                                                                                 | 388  | 659  | 0         | 169.8 | 81.7 | 91.2 | predicted protein                                       | gbpln | Arabidopsis lyrata   | AT4G04570.1   Symbols: CRK40   cysteine-rich RLK (RECEPTOR-like protein kinase) 40   chr4:2290045-2292717 FORWARD LENGTH=654                                                                                                                                                    | 388  | 654 | 0         | 168.6 | 82.5 | 90.5 |
| Rsa1.0_01636.1.g28618.t1 | ref[XP_002872699.1] kinase family protein [Arabidopsis lyrata subsp. lyrata] gi 297318536 gb EFH48958.1  kinase family protein [Arabidopsis lyrata subsp. lyrata]                                                                                                                                                                                                                                                                                                                                                                                                                                                                                                                                                                                                         | 304  | 629  | 1.00E-150 | 206.9 | 81.6 | 90.5 | kinase family protein                                   | gbpln | Arabidopsis lyrata   | AT4G04570.1   Symbols: CRK40   cysteine-rich RLK (RECEPTOR-like protein kinase) 40   chr4:2290045-2292717 FORWARD LENGTH=654                                                                                                                                                    | 304  | 654 | 1.00E-152 | 215.1 | 81.6 | 90.1 |
| Rsa1.0_01636.1.g28619.t1 | # # # # # # # # # #                                                                                                                                                                                                                                                                                                                                                                                                                                                                                                                                                                                                                                                                                                                                                       |      |      |           |       |      |      | -                                                       | ----  | ----                 | # # # # # # # #                                                                                                                                                                                                                                                                 |      |     |           |       |      |      |
| Rsa1.0_01636.1.g28620.t1 | gb AAF97969.1 AC000103_19 F21J9.30 [Arabidopsis thaliana]                                                                                                                                                                                                                                                                                                                                                                                                                                                                                                                                                                                                                                                                                                                 | 1818 | 1270 | 0         | 69.9  | 38.0 | 49.0 | F21J9.30                                                | gbpln | Arabidopsis thaliana | AT4G29090.1   Symbols:   Ribonuclease H-like superfamily protein   chr4:14333528-14335255 FORWARD LENGTH=575                                                                                                                                                                    | 1818 | 575 | 2.00E-96  | 31.6  | 10.1 | 16.0 |
| Rsa1.0_01636.1.g28621.t1 | gb EOA20576.1  hypothetical protein CARUB_v1000087mg [Capsella rubella]                                                                                                                                                                                                                                                                                                                                                                                                                                                                                                                                                                                                                                                                                                   | 501  | 468  | 0         | 93.4  | 79.8 | 84.0 | hypothetical protein CARUB_v1000087mg                   | gbpln | Capsella rubella     | AT4G04610.1   Symbols: APR1, APR, PRH19, ATAPR1   APS reductase 1   chr4:2325069-2326718 FORWARD LENGTH=465                                                                                                                                                                     | 501  | 465 | 0         | 92.8  | 77.6 | 81.2 |
| Rsa1.0_01636.1.g28622.t1 | ref[XP_002874804.1] hypothetical protein ARALYDRAFT_911718 [Arabidopsis lyrata subsp. lyrata] gi 297320641 gb EFH51063.1  hypothetical protein ARALYDRAFT_911718 [Arabidopsis lyrata subsp. lyrata]                                                                                                                                                                                                                                                                                                                                                                                                                                                                                                                                                                       | 172  | 171  | 5.00E-59  | 99.4  | 79.7 | 87.8 | hypothetical protein ARALYDRAFT_911718                  | gbpln | Arabidopsis lyrata   | AT4G04614.1   Symbols:   unknown protein; Has 35333 Blast hits to 34131 proteins in 2444 species: Archae - 798; Bacteria - 22429; Metazoa - 974; Fungi - 991; Plants - 531; Viruses - 0; Other Eukaryotes - 9610 (source: NCBI BLINK)   chr4:2327308-2327914 REVERSE LENGTH=176 | 172  | 176 | 2.00E-59  | 102.3 | 81.4 | 90.1 |
| Rsa1.0_01636.1.g28623.t1 | ref[XP_002884981.1] F-box family protein [Arabidopsis lyrata subsp. lyrata] gi 297330821 gb EFH61240.1  F-box family protein [Arabidopsis lyrata subsp. lyrata]                                                                                                                                                                                                                                                                                                                                                                                                                                                                                                                                                                                                           | 373  | 400  | 4.00E-88  | 107.2 | 53.1 | 67.8 | F-box family protein                                    | gbpln | Arabidopsis lyrata   | AT3G13680.1   Symbols:   F-box and associated interaction domains-containing protein   chr3:4477534-4478721 REVERSE LENGTH=395                                                                                                                                                  | 373  | 395 | 7.00E-89  | 105.9 | 51.5 | 67.0 |
| Rsa1.0_01636.1.g28624.t1 | ref[NP_188019.1] F-box associated ubiquitination effector family protein [Arabidopsis thaliana] gi 332641936 gb AEE75457.1  F-box associated ubiquitination effector family protein [Arabidopsis thaliana]                                                                                                                                                                                                                                                                                                                                                                                                                                                                                                                                                                | 105  | 200  | 8.00E-16  | 190.5 | 45.7 | 58.1 | F-box associated ubiquitination effector family protein | gbpln | Arabidopsis thaliana | AT3G14030.1   Symbols:   F-box associated ubiquitination effector family protein   chr3:4646272-4646971 REVERSE LENGTH=200                                                                                                                                                      | 105  | 200 | 1.00E-18  | 190.5 | 45.7 | 58.1 |
| Rsa1.0_01636.1.g28625.t1 | ref[XP_002874805.1] hypothetical protein ARALYDRAFT_911720 [Arabidopsis lyrata subsp. lyrata] gi 297320642 gb EFH51064.1  hypothetical protein ARALYDRAFT_911720 [Arabidopsis lyrata subsp. lyrata]                                                                                                                                                                                                                                                                                                                                                                                                                                                                                                                                                                       | 120  | 120  | 8.00E-60  | 100.0 | 94.2 | 95.8 | hypothetical protein ARALYDRAFT_911720                  | gbpln | Arabidopsis lyrata   | AT4G21980.2   Symbols: APG8A, ATG8A   Ubiquitin-like superfamily protein   chr4:11655868-11656809 FORWARD LENGTH=137                                                                                                                                                            | 120  | 137 | 4.00E-61  | 114.2 | 91.7 | 95.0 |
| Rsa1.0_01637.1.g28626.t1 | gb EOA33239.1  hypothetical protein CARUB_v10021571mg [Capsella rubella]                                                                                                                                                                                                                                                                                                                                                                                                                                                                                                                                                                                                                                                                                                  | 209  | 212  | 1.00E-33  | 101.4 | 39.7 | 50.2 | hypothetical protein CARUB_v10021571mg                  | gbpln | Capsella rubella     | AT1G77830.1   Symbols:   RING/U-box superfamily protein   chr1:29267160-29267752 REVERSE LENGTH=185                                                                                                                                                                             | 209  | 185 | 3.00E-23  | 88.5  | 34.0 | 45.5 |
| Rsa1.0_01637.1.g28627.t1 | gb AAM82604.1 AF525305.2 putative AP endonuclease/reverse transcriptase [Brassica napus]                                                                                                                                                                                                                                                                                                                                                                                                                                                                                                                                                                                                                                                                                  | 1700 | 1214 | 0         | 71.4  | 27.2 | 39.6 | putative AP endonuclease/reverse transcriptase          | gbpln | Brassica napus       | AT1G43760.1   Symbols:   DNase I-like superfamily protein   chr1:16528880-16531065 REVERSE LENGTH=626                                                                                                                                                                           | 1700 | 626 | 1.00E-79  | 36.8  | 9.4  | 14.8 |
| Rsa1.0_01637.1.g28628.t1 | gb AFX60924.1  high-affinity sulfate transporter 1:2b [Brassica juncea]                                                                                                                                                                                                                                                                                                                                                                                                                                                                                                                                                                                                                                                                                                   | 652  | 652  | 0         | 100.0 | 98.5 | 99.2 | high-affinity sulfate transporter 1:2b                  | gbpln | Brassica juncea      | AT1G78000.2   Symbols: SULTR1:2, SEL1   sulfate transporter 1:2   chr1:29329889-29332877 FORWARD LENGTH=653                                                                                                                                                                     | 652  | 653 | 0         | 100.2 | 93.6 | 96.9 |

|                          |                                                                                                                                                                                                                                                                                                                                                                            |      |      |           |       |      |      |                                                                 |       |                      |                                                                                                                                                                             |      |      |           |       |      |      |
|--------------------------|----------------------------------------------------------------------------------------------------------------------------------------------------------------------------------------------------------------------------------------------------------------------------------------------------------------------------------------------------------------------------|------|------|-----------|-------|------|------|-----------------------------------------------------------------|-------|----------------------|-----------------------------------------------------------------------------------------------------------------------------------------------------------------------------|------|------|-----------|-------|------|------|
| Rsa1.0_01637.1.g28629.t1 | gb AAC28221.1  similar to reverse transcriptases (PFam: rvt.hmm, score: 60.13) [Arabidopsis thaliana]                                                                                                                                                                                                                                                                      | 318  | 1164 | 4.00E-40  | 366.0 | 31.1 | 50.9 | similar to reverse transcriptases (PFam: rvt.hmm, score: 60.13) | gbpln | Arabidopsis thaliana | AT4G04650.1   Symbols:   RNA-directed DNA polymerase (reverse transcriptase)-related family protein   chr4:2353989-2355213 REVERSE LENGTH=332                               | 318  | 332  | 9.00E-37  | 104.4 | 27.4 | 43.1 |
| Rsa1.0_01637.1.g28630.t1 | ref NP_565167.1  uncharacterized protein [Arabidopsis thaliana]<br>gi 6573767 gb AAF17687.1 AC009243.14 F28K19.24 [Arabidopsis thaliana]<br>gi 17380852 gb AAL36238.1  unknown protein [Arabidopsis thaliana]<br>gi 21436411 gb AAM51406.1  unknown protein [Arabidopsis thaliana]<br>gi 332197937 gb AEE36058.1  uncharacterized protein AT1G78020 [Arabidopsis thaliana] | 162  | 162  | 3.00E-65  | 100.0 | 80.2 | 84.6 | uncharacterized protein                                         | gbpln | Arabidopsis thaliana | AT1G78020.1   Symbols:   Protein of unknown function (DUF581)   chr1:29338787-29339491 FORWARD LENGTH=162                                                                   | 162  | 162  | 9.00E-68  | 100.0 | 80.2 | 84.6 |
| Rsa1.0_01637.1.g28631.t1 | #                                                                                                                                                                                                                                                                                                                                                                          | #    | #    | #         | #     | #    | #    | -                                                               | ----  | ----                 | #                                                                                                                                                                           | #    | #    | #         | #     | #    | #    |
| Rsa1.0_01638.1.g28632.t1 | dbj BAA85453.1  S-locus protein 4 [Brassica rapa]                                                                                                                                                                                                                                                                                                                          | 413  | 413  | 0         | 100.0 | 81.8 | 86.2 | S-locus protein 4                                               | gbpln | Brassica rapa        | AT5G43620.1   Symbols:   Pre-mRNA cleavage complex II   chr5:17522653-17523885 FORWARD LENGTH=410                                                                           | 413  | 410  | 1.00E-110 | 99.3  | 60.0 | 69.5 |
| Rsa1.0_01638.1.g28633.t1 | gb EOA35687.1  hypothetical protein CARUB_v10020914mg [Capsella rubella]                                                                                                                                                                                                                                                                                                   | 223  | 223  | 1.00E-94  | 100.0 | 81.6 | 89.2 | hypothetical protein CARUB_v10020914mg                          | gbpln | Capsella rubella     | AT1G66480.1   Symbols:   plastid movement impaired 2   chr1:24805770-24807405 REVERSE LENGTH=225                                                                            | 223  | 225  | 8.00E-96  | 100.9 | 82.1 | 89.2 |
| Rsa1.0_01638.1.g28634.t1 | ref XP_002887043.1  basic helix-loop-helix family protein [Arabidopsis lyrata subsp. lyrata]<br>gi 297332884 gb EFH63302.1  basic helix-loop-helix family protein [Arabidopsis lyrata subsp. lyrata]                                                                                                                                                                       | 290  | 296  | 1.00E-117 | 102.1 | 83.8 | 87.2 | basic helix-loop-helix family protein                           | gbpln | Arabidopsis lyrata   | AT1G66470.1   Symbols:   RHD6   ROOT HAIR DEFECTIVE6   chr1:24795326-24796598 FORWARD LENGTH=298                                                                            | 290  | 298  | 1.00E-114 | 102.8 | 82.8 | 86.2 |
| Rsa1.0_01638.1.g28635.t1 | emb CAB40035.1  retrotransposon like protein [Arabidopsis thaliana]<br>gi 7267767 emb CAB81170.1  retrotransposon like protein [Arabidopsis thaliana]<br>ref NP_564875.2  fructokinase [Arabidopsis thaliana]<br>gi 12322265 gb AAG51160.1 AC074025.10 fructokinase, putative [Arabidopsis thaliana]                                                                       | 1395 | 1515 | 0         | 108.6 | 54.8 | 68.6 | retrotransposon like protein                                    | gbpln | Arabidopsis thaliana | AT4G23180.1   Symbols:   CRK8   cysteine-rich RLK (RECEPTOR-like protein kinase) 8   chr4:12129485-12134086 FORWARD LENGTH=1262                                             | 1395 | 1262 | 1.00E-113 | 90.5  | 13.7 | 21.1 |
| Rsa1.0_01638.1.g28636.t1 | gi 12324405 gb AAG5172.1 AC020665.17 fructokinase, putative; 80047-82040 [Arabidopsis thaliana]<br>gi 332196387 gb AEE34508.1  pfkB-like carbohydrate kinase family protein [Arabidopsis thaliana]<br>ref XP_002888501.1  kinase family protein [Arabidopsis lyrata subsp. lyrata]                                                                                         | 398  | 384  | 0         | 96.5  | 88.7 | 92.7 | fructokinase                                                    | gbpln | Arabidopsis thaliana | AT1G66430.1   Symbols:   pfkB-like carbohydrate kinase family protein   chr1:24776400-24780393 FORWARD LENGTH=384                                                           | 398  | 384  | 0         | 96.5  | 88.7 | 92.7 |
| Rsa1.0_01638.1.g28637.t1 | gi 297334342 gb EFH64760.1  kinase family protein [Arabidopsis lyrata subsp. lyrata]                                                                                                                                                                                                                                                                                       | 482  | 468  | 0         | 97.1  | 79.7 | 86.3 | kinase family protein                                           | gbpln | Arabidopsis lyrata   | AT1G66460.1   Symbols:   Protein kinase superfamily protein   chr1:24789894-24791988 REVERSE LENGTH=467                                                                     | 482  | 467  | 0         | 96.9  | 77.6 | 85.1 |
| Rsa1.0_01639.1.g28638.t1 | #                                                                                                                                                                                                                                                                                                                                                                          | #    | #    | #         | #     | #    | #    | -                                                               | ----  | ----                 | #                                                                                                                                                                           | #    | #    | #         | #     | #    | #    |
| Rsa1.0_01639.1.g28639.t1 | ref XP_002869949.1  C2 domain-containing protein [Arabidopsis lyrata subsp. lyrata]<br>gi 297315785 gb EFH46208.1  C2 domain-containing protein [Arabidopsis lyrata subsp. lyrata]                                                                                                                                                                                         | 759  | 776  | 0         | 102.2 | 80.6 | 89.1 | C2 domain-containing protein                                    | gbpln | Arabidopsis lyrata   | AT4G20080.1   Symbols:   Calcium-dependent lipid-binding (CaLB domain) plant phosphoribosyltransferase family protein   chr4:10865295-10867619 FORWARD LENGTH=774           | 759  | 774  | 0         | 102.0 | 78.8 | 87.9 |
| Rsa1.0_01639.1.g28640.t1 | ref XP_002863545.1  responsive-to-antagonist1 [Arabidopsis lyrata subsp. lyrata]<br>gi 297309380 gb EFH39804.1  responsive-to-antagonist1 [Arabidopsis lyrata subsp. lyrata]                                                                                                                                                                                               | 1006 | 1004 | 0         | 99.8  | 87.4 | 93.2 | responsive-to-antagonist1                                       | gbpln | Arabidopsis lyrata   | AT5G44790.1   Symbols:   RAN1, HMA7   copper-exporting ATPase / responsive-to-antagonist 1 / copper-transporting ATPase (RAN1)   chr5:18075846-18079817 REVERSE LENGTH=1001 | 1006 | 1001 | 0         | 99.5  | 86.9 | 92.6 |
| Rsa1.0_01639.1.g28641.t1 | ref NP_199293.3  chromatin remodeling 4 protein [Arabidopsis thaliana]<br>gi 332007781 gb AED95164.1  chromatin remodeling 4 protein [Arabidopsis thaliana]                                                                                                                                                                                                                | 2229 | 2223 | 0         | 99.7  | 81.2 | 87.1 | chromatin remodeling 4 protein                                  | gbpln | Arabidopsis thaliana | AT5G44800.1   Symbols:   CHR4, PKR1   chromatin remodeling 4   chr5:18083659-18092162 REVERSE LENGTH=2223                                                                   | 2229 | 2223 | 0         | 99.7  | 81.2 | 87.1 |
| Rsa1.0_01639.1.g28642.t1 | #                                                                                                                                                                                                                                                                                                                                                                          | #    | #    | #         | #     | #    | #    | -                                                               | ----  | ----                 | #                                                                                                                                                                           | #    | #    | #         | #     | #    | #    |
| Rsa1.0_01639.1.g28643.t1 | gb EOA17780.1  hypothetical protein CARUB_v10006184mg [Capsella rubella]                                                                                                                                                                                                                                                                                                   | 608  | 558  | 0         | 91.8  | 62.7 | 73.7 | hypothetical protein CARUB_v10006184mg                          | gbpln | Capsella rubella     | AT3G54070.1   Symbols:   Ankyrin repeat family protein   chr3:20021330-20023603 REVERSE LENGTH=574                                                                          | 608  | 574  | 1.00E-154 | 94.4  | 49.0 | 65.1 |
| Rsa1.0_01639.1.g28644.t1 | dbj BAB86292.1  nucleoside diphosphate kinase 1 [Brassica rapa]<br>gi 19744165 dbj BAB86841.1  NDPK I [Brassica rapa]                                                                                                                                                                                                                                                      | 148  | 148  | 2.00E-79  | 100.0 | 96.6 | 98.6 | nucleoside diphosphate kinase 1                                 | gbpln | Brassica rapa        | AT4G09320.1   Symbols:   NDPK1   Nucleoside diphosphate kinase family protein   chr4:5923424-5924366 FORWARD LENGTH=169                                                     | 148  | 169  | 7.00E-78  | 114.2 | 89.9 | 97.3 |

|                          |                                                                                                                                                                                                                                                                                                                                                                                                           |      |      |           |       |      |      |                                                                     |       |                      |                                                                                                                                                     |      |      |           |       |      |      |
|--------------------------|-----------------------------------------------------------------------------------------------------------------------------------------------------------------------------------------------------------------------------------------------------------------------------------------------------------------------------------------------------------------------------------------------------------|------|------|-----------|-------|------|------|---------------------------------------------------------------------|-------|----------------------|-----------------------------------------------------------------------------------------------------------------------------------------------------|------|------|-----------|-------|------|------|
| Rsa1.0_01639.1.g28645.t4 | refXP_002865318.1   Toll-Interleukin-Resistance domain-containing protein [Arabidopsis lyrata subsp. lyrata] gi 297311153 gb EFH41577.1   Toll-Interleukin-Resistance domain-containing protein [Arabidopsis lyrata subsp. lyrata]                                                                                                                                                                        | 328  | 242  | 9.00E-45  | 73.8  | 33.5 | 46.6 | Toll-Interleukin-Resistance domain-containing protein               | gbpln | Arabidopsis lyrata   | AT5G44910.1   Symbols:   Toll-Interleukin-Resistance (TIR) domain family protein   chr5:18137354-18138235 FORWARD LENGTH=241                        | 328  | 241  | 4.00E-45  | 73.5  | 32.3 | 44.5 |
| Rsa1.0_01640.1.g28646.t1 | refXP_002891059.1   hypothetical protein ARALYDRAFT_890960 [Arabidopsis lyrata subsp. lyrata] gi 297336901 gb EFH67318.1   hypothetical protein ARALYDRAFT_890960 [Arabidopsis lyrata subsp. lyrata]                                                                                                                                                                                                      | 171  | 174  | 1.00E-71  | 101.8 | 83.6 | 88.9 | hypothetical protein ARALYDRAFT_890960                              | gbpln | Arabidopsis lyrata   | AT1G33760.1   Symbols:   Integrase-type DNA-binding superfamily protein   chr1:12237944-12238498 FORWARD LENGTH=184                                 | 171  | 184  | 3.00E-71  | 107.6 | 81.3 | 89.5 |
| Rsa1.0_01640.1.g28647.t2 | refNP_189068.2   RNA-directed DNA polymerase (reverse transcriptase)-related protein [Arabidopsis thaliana] gi 332643359 gb AE76880.1   RNA-directed DNA polymerase (reverse transcriptase)-related protein [Arabidopsis thaliana]                                                                                                                                                                        | 393  | 746  | 6.00E-12  | 189.8 | 10.7 | 14.0 | RNA-directed DNA polymerase (reverse transcriptase)-related protein | gbpln | Arabidopsis thaliana | AT3G24255.1   Symbols:   RNA-directed DNA polymerase (reverse transcriptase)-related family protein   chr3:8789471-8793208 FORWARD LENGTH=746       | 393  | 746  | 1.00E-14  | 189.8 | 10.7 | 14.0 |
| Rsa1.0_01640.1.g28648.t1 | #                                                                                                                                                                                                                                                                                                                                                                                                         | #    | #    | #         | #     | #    | #    | -                                                                   | ----  | ----                 | #                                                                                                                                                   | #    | #    | #         | #     | #    | #    |
| Rsa1.0_01640.1.g28649.t1 | #                                                                                                                                                                                                                                                                                                                                                                                                         | #    | #    | #         | #     | #    | #    | -                                                                   | ----  | ----                 | #                                                                                                                                                   | #    | #    | #         | #     | #    | #    |
| Rsa1.0_01640.1.g28650.t1 | refNP_194638.1   Ribonuclease H-like protein [Arabidopsis thaliana] gi 4972055 emb CAB43923.1   putative protein [Arabidopsis thaliana] gi 7269807 emb CAB79667.1   putative protein [Arabidopsis thaliana] gi 67633766 gb AA78807.1   putative reverse transcriptase/RNA-dependent DNA polymerase [Arabidopsis thaliana] gi 332660185 gb AEE85585.1   Ribonuclease H-like protein [Arabidopsis thaliana] | 139  | 575  | 4.00E-25  | 413.7 | 38.8 | 55.4 | Ribonuclease H-like protein                                         | gbpln | Arabidopsis thaliana | AT4G20900.1   Symbols:   Ribonuclease H-like superfamily protein   chr4:14333528-14335255 FORWARD LENGTH=575                                        | 139  | 575  | 1.00E-27  | 413.7 | 38.8 | 55.4 |
| Rsa1.0_01640.1.g28651.t1 | #                                                                                                                                                                                                                                                                                                                                                                                                         | #    | #    | #         | #     | #    | #    | -                                                                   | ----  | ----                 | #                                                                                                                                                   | #    | #    | #         | #     | #    | #    |
| Rsa1.0_01640.1.g28652.t1 | emb CAC37623.1   copia-like polyprotein [Arabidopsis thaliana]                                                                                                                                                                                                                                                                                                                                            | 1403 | 1466 | 0         | 104.5 | 56.2 | 70.8 | copia-like polyprotein                                              | gbpln | Arabidopsis thaliana | AT4G23160.1   Symbols: CRK8   cysteine-rich RLK (RECEPTOR-like protein kinase) 8   chr4:12129485-12134086 FORWARD LENGTH=1262                       | 1403 | 1262 | 6.00E-94  | 90.0  | 12.4 | 19.0 |
| Rsa1.0_01640.1.g28653.t1 | refNP_174597.2   patatin-like phospholipase domain-containing protein [Arabidopsis thaliana] gi 38603808 gb AAR24649.1   At1g33270 [Arabidopsis thaliana] gi 110742517 dbj BAE99176.1   hypothetical protein [Arabidopsis thaliana] gi 332193457 gb AEE31578.1   patatin-like phospholipase domain-containing protein [Arabidopsis thaliana]                                                              | 983  | 369  | 1.00E-168 | 37.5  | 30.7 | 33.4 | patatin-like phospholipase domain-containing protein                | gbpln | Arabidopsis thaliana | AT1G33270.1   Symbols:   Acyl transferase/acyl hydrolase/lysophospholipase superfamily protein   chr1:12068324-12070157 REVERSE LENGTH=369          | 983  | 369  | 1.00E-171 | 37.5  | 30.7 | 33.4 |
| Rsa1.0_01641.1.g28654.t1 | refXP_002894512.1   F-box family protein [Arabidopsis lyrata subsp. lyrata] gi 297340354 gb EFH70771.1   F-box family protein [Arabidopsis lyrata subsp. lyrata]                                                                                                                                                                                                                                          | 599  | 606  | 0         | 101.2 | 89.6 | 95.0 | F-box family protein                                                | gbpln | Arabidopsis lyrata   | AT1G55590.1   Symbols:   RNI-like superfamily protein   chr1:20769476-20771756 REVERSE LENGTH=607                                                   | 599  | 607  | 0         | 101.3 | 89.8 | 94.8 |
| Rsa1.0_01641.1.g28655.t1 | refXP_002876989.1   hypothetical protein ARALYDRAFT_484449 [Arabidopsis lyrata subsp. lyrata] gi 297322827 gb EFH53248.1   hypothetical protein ARALYDRAFT_484449 [Arabidopsis lyrata subsp. lyrata]                                                                                                                                                                                                      | 54   | 494  | 3.00E-11  | 914.8 | 64.8 | 68.5 | hypothetical protein ARALYDRAFT_484449                              | gbpln | Arabidopsis lyrata   | AT3G26744.4   Symbols: ICE1, ATICE1, SCRM   basic helix-loop-helix (bHLH) DNA-binding superfamily protein   chr3:9832953-9834790 REVERSE LENGTH=494 | 54   | 494  | 6.00E-14  | 914.8 | 64.8 | 68.5 |
| Rsa1.0_01641.1.g28656.t1 | refXP_002894513.1   WRKY10 [Arabidopsis lyrata subsp. lyrata] gi 297340355 gb EFH70772.1   WRKY10 [Arabidopsis lyrata subsp. lyrata]                                                                                                                                                                                                                                                                      | 511  | 495  | 1.00E-83  | 96.9  | 40.5 | 54.6 | WRKY10                                                              | gbpln | Arabidopsis lyrata   | AT1G55600.1   Symbols: WRKY10, ATWRKY10, MINI3   WRKY DNA-binding protein 10   chr1:20774049-20776293 REVERSE LENGTH=485                            | 511  | 485  | 2.00E-77  | 94.9  | 39.3 | 52.4 |

|                          |                                                                                                                                                                                                                                                                                                                                                                                                                                                                                                                                                                                                                                                                                                                                                                                                                                                                                                                                                                                       |      |      |           |       |      |                                             |                                           |                      |                                                                                                                         |                                                                                                                                                                                                                                                                                                                                                                                                                                                                                                                                        |      |      |           |       |      |      |
|--------------------------|---------------------------------------------------------------------------------------------------------------------------------------------------------------------------------------------------------------------------------------------------------------------------------------------------------------------------------------------------------------------------------------------------------------------------------------------------------------------------------------------------------------------------------------------------------------------------------------------------------------------------------------------------------------------------------------------------------------------------------------------------------------------------------------------------------------------------------------------------------------------------------------------------------------------------------------------------------------------------------------|------|------|-----------|-------|------|---------------------------------------------|-------------------------------------------|----------------------|-------------------------------------------------------------------------------------------------------------------------|----------------------------------------------------------------------------------------------------------------------------------------------------------------------------------------------------------------------------------------------------------------------------------------------------------------------------------------------------------------------------------------------------------------------------------------------------------------------------------------------------------------------------------------|------|------|-----------|-------|------|------|
| Rsa1.0_01641.1.g28657.t1 | refNP_564698.1  chloride channel protein CLC-f [Arabidopsis thaliana] gi 41688504 sp Q8RXR2.2 CLCF_ARATH RecName: Full=Chloride channel protein CLC-f; Short=AtCLC-f; AltName: Full=CBS domain-containing protein CBSCLC1 gi 14039802 gb AAK53391.1 AF366368.1 CLC-f chloride channel protein [Arabidopsis thaliana] gi 13619402 emb CAC36386.1  hypothetical protein [Arabidopsis thaliana] gi 332195154 gb AEE33275.1  chloride channel protein CLC-f [Arabidopsis thaliana] refNP_175959.1  pentatricopeptide repeat-containing protein [Arabidopsis thaliana] gi 75140283 sp Q7X6A5.1 PPR81_ARATH RecName: Full=Pentatricopeptide repeat-containing protein At1g55630 gi 30793841 gb AAP40373.1  unknown protein [Arabidopsis thaliana] gi 30794021 gb AAP40457.1  unknown protein [Arabidopsis thaliana] gi 110739296 dbj BAF01561.1  hypothetical protein [Arabidopsis thaliana] gi 332195155 gb AEE33276.1  pentatricopeptide repeat-containing protein [Arabidopsis thaliana] | 777  | 781  | 0         | 100.5 | 90.7 | 94.7                                        | chloride channel protein CLC-f            | gbpln                | Arabidopsis thaliana                                                                                                    | AT1G55620.2   Symbols: CLC-F, ATCLC-F   chloride channel F   chr1:20787338-20790990 REVERSE LENGTH=781                                                                                                                                                                                                                                                                                                                                                                                                                                 | 777  | 781  | 0         | 100.5 | 90.7 | 94.7 |
| Rsa1.0_01641.1.g28658.t1 | refNP_175959.1  pentatricopeptide repeat-containing protein [Arabidopsis thaliana] gi 75140283 sp Q7X6A5.1 PPR81_ARATH RecName: Full=Pentatricopeptide repeat-containing protein At1g55630 gi 30793841 gb AAP40373.1  unknown protein [Arabidopsis thaliana] gi 30794021 gb AAP40457.1  unknown protein [Arabidopsis thaliana] gi 110739296 dbj BAF01561.1  hypothetical protein [Arabidopsis thaliana] gi 332195155 gb AEE33276.1  pentatricopeptide repeat-containing protein [Arabidopsis thaliana]                                                                                                                                                                                                                                                                                                                                                                                                                                                                                | 469  | 477  | 0         | 101.7 | 87.4 | pentatricopeptide repeat-containing protein | gbpln                                     | Arabidopsis thaliana | AT1G55630.1   Symbols:   Pentatricopeptide repeat (PPR) superfamily protein   chr1:20791817-20793250 REVERSE LENGTH=477 | 469                                                                                                                                                                                                                                                                                                                                                                                                                                                                                                                                    | 477  | 0    | 101.7     | 87.4  | 93.6 |      |
| Rsa1.0_01641.1.g28659.t1 | #                                                                                                                                                                                                                                                                                                                                                                                                                                                                                                                                                                                                                                                                                                                                                                                                                                                                                                                                                                                     | #    | #    | #         | #     | #    | -                                           | ----                                      | ----                 | #                                                                                                                       | #                                                                                                                                                                                                                                                                                                                                                                                                                                                                                                                                      | #    | #    | #         | #     | #    |      |
| Rsa1.0_01641.1.g28660.t1 | refXP_002894553.1  hypothetical protein ARALYDRAFT_474673 [Arabidopsis lyrata subsp. lyrata] gi 297340395 gb EFH70812.1  hypothetical protein ARALYDRAFT_474673 [Arabidopsis lyrata subsp. lyrata]                                                                                                                                                                                                                                                                                                                                                                                                                                                                                                                                                                                                                                                                                                                                                                                    | 70   | 71   | 9.00E-25  | 101.4 | 80.0 | 90.0                                        | hypothetical protein ARALYDRAFT_474673    | gbpln                | Arabidopsis lyrata                                                                                                      | AT1G56060.1   Symbols:   unknown protein; BEST Arabidopsis thaliana protein match is: unknown protein (TAIR:AT2G32210.1); Has 180 Blast hits to 180 proteins in 22 species: Archae - 0; Bacteria - 0; Metazoa - 0; Fungi - 10; Plants - 170; Viruses - 0; Other Eukaryotes - 0 (source: NCBI BLink).   chr1:20966737-20967133 REVERSE LENGTH=71                                                                                                                                                                                        | 70   | 71   | 1.00E-26  | 101.4 | 78.6 | 88.6 |
| Rsa1.0_01641.1.g28661.t1 | gb AAG50806.1 AC079281.8 unknown protein [Arabidopsis thaliana]                                                                                                                                                                                                                                                                                                                                                                                                                                                                                                                                                                                                                                                                                                                                                                                                                                                                                                                       | 1624 | 1213 | 0         | 74.7  | 25.9 | 38.3                                        | unknown protein                           | gbpln                | Arabidopsis thaliana                                                                                                    | AT5G18880.1   Symbols:   RNA-directed DNA polymerase (reverse transcriptase)-related family protein   chr5:6300535-6301422 REVERSE LENGTH=295                                                                                                                                                                                                                                                                                                                                                                                          | 1624 | 295  | 1.00E-80  | 18.2  | 8.9  | 12.1 |
| Rsa1.0_01641.1.g28662.t1 | #                                                                                                                                                                                                                                                                                                                                                                                                                                                                                                                                                                                                                                                                                                                                                                                                                                                                                                                                                                                     | #    | #    | #         | #     | #    | -                                           | ----                                      | ----                 | #                                                                                                                       | #                                                                                                                                                                                                                                                                                                                                                                                                                                                                                                                                      | #    | #    | #         | #     | #    |      |
| Rsa1.0_01641.1.g28663.t1 | gb EOA21184.1  hypothetical protein CARUB_v10001529mg [Capsella rubella]                                                                                                                                                                                                                                                                                                                                                                                                                                                                                                                                                                                                                                                                                                                                                                                                                                                                                                              | 309  | 309  | 1.00E-175 | 100.0 | 96.8 | 99.4                                        | hypothetical protein CARUB_v10001529mg    | gbpln                | Capsella rubella                                                                                                        | AT5G01230.1   Symbols:   S-adenosyl-L-methionine-dependent methyltransferases superfamily protein   chr5:92789-95380 REVERSE LENGTH=309                                                                                                                                                                                                                                                                                                                                                                                                | 309  | 309  | 1.00E-178 | 100.0 | 97.1 | 99.4 |
| Rsa1.0_01641.1.g28664.t1 | refNP_176004.2  uncharacterized protein [Arabidopsis thaliana] gi 114050585 gb ABI49442.1  At1g56080 [Arabidopsis thaliana] gi 332195218 gb AEE33339.1  uncharacterized protein AT1G56080 [Arabidopsis thaliana]                                                                                                                                                                                                                                                                                                                                                                                                                                                                                                                                                                                                                                                                                                                                                                      | 315  | 310  | 1.00E-139 | 98.4  | 81.9 | 87.6                                        | uncharacterized protein                   | gbpln                | Arabidopsis thaliana                                                                                                    | AT1G56080.1   Symbols:   unknown protein; FUNCTIONS IN: molecular_function unknown; INVOLVED IN: biological_process unknown; LOCATED IN: plasma membrane; EXPRESSED IN: 12 plant structures; EXPRESSED DURING: 6 growth stages; BEST Arabidopsis thaliana protein match is: unknown protein (TAIR:AT1G16520.1); Has 196 Blast hits to 193 proteins in 50 species: Archae - 2; Bacteria - 0; Metazoa - 9; Fungi - 2; Plants - 132; Viruses - 0; Other Eukaryotes - 51 (source: NCBI BLink).   chr1:20974457-20976215 REVERSE LENGTH=310 | 315  | 310  | 1.00E-142 | 98.4  | 81.9 | 87.6 |
| Rsa1.0_01641.1.g28665.t2 | refNP_189790.2  transducin/WD40 domain-containing protein [Arabidopsis thaliana] gi 332644192 gb AEE77713.1  transducin/WD40 domain-containing protein [Arabidopsis thaliana]                                                                                                                                                                                                                                                                                                                                                                                                                                                                                                                                                                                                                                                                                                                                                                                                         | 1184 | 1345 | 0         | 113.6 | 90.7 | 94.8                                        | transducin/WD40 domain-containing protein | gbpln                | Arabidopsis thaliana                                                                                                    | AT3G33530.1   Symbols:   Transducin family protein / WD-40 repeat family protein   chr3:14085354-14093449 FORWARD LENGTH=1345                                                                                                                                                                                                                                                                                                                                                                                                          | 1184 | 1345 | 0         | 113.6 | 90.7 | 94.8 |
| Rsa1.0_01642.1.g28666.t1 | refXP_002885396.1  predicted protein [Arabidopsis lyrata subsp. lyrata] gi 297331236 gb EFH61655.1  predicted protein [Arabidopsis lyrata subsp. lyrata]                                                                                                                                                                                                                                                                                                                                                                                                                                                                                                                                                                                                                                                                                                                                                                                                                              | 329  | 347  | 5.00E-57  | 105.5 | 49.5 | 61.1                                        | predicted protein                         | gbpln                | Arabidopsis lyrata                                                                                                      | AT3G20710.1   Symbols:   F-box family protein   chr3:7237911-7238999 REVERSE LENGTH=362                                                                                                                                                                                                                                                                                                                                                                                                                                                | 329  | 362  | 1.00E-55  | 110.0 | 45.3 | 61.7 |
| Rsa1.0_01642.1.g28667.t1 | refXP_002885400.1  hypothetical protein ARALYDRAFT_898505 [Arabidopsis lyrata subsp. lyrata] gi 297331240 gb EFH61659.1  hypothetical protein ARALYDRAFT_898505 [Arabidopsis lyrata subsp. lyrata]                                                                                                                                                                                                                                                                                                                                                                                                                                                                                                                                                                                                                                                                                                                                                                                    | 381  | 364  | 1.00E-68  | 95.5  | 45.1 | 57.0                                        | hypothetical protein ARALYDRAFT_898505    | gbpln                | Arabidopsis lyrata                                                                                                      | AT3G16740.1   Symbols:   F-box and associated interaction domains-containing protein   chr3:5699476-5700651 FORWARD LENGTH=391                                                                                                                                                                                                                                                                                                                                                                                                         | 381  | 391  | 4.00E-68  | 102.6 | 44.9 | 59.8 |

|                          |                                                                                                                                                                                                                                                                                                                                                                                                                                                                                                                                                                                                                                                                                 |      |      |          |       |      |      |                                                                                |       |                      |                                                                                                                                                                                                                                                                                                                                                                                                                                                                                            |      |     |          |       |      |      |
|--------------------------|---------------------------------------------------------------------------------------------------------------------------------------------------------------------------------------------------------------------------------------------------------------------------------------------------------------------------------------------------------------------------------------------------------------------------------------------------------------------------------------------------------------------------------------------------------------------------------------------------------------------------------------------------------------------------------|------|------|----------|-------|------|------|--------------------------------------------------------------------------------|-------|----------------------|--------------------------------------------------------------------------------------------------------------------------------------------------------------------------------------------------------------------------------------------------------------------------------------------------------------------------------------------------------------------------------------------------------------------------------------------------------------------------------------------|------|-----|----------|-------|------|------|
| Rsa1.0_01642.1.g28668.t1 | gb[EOA29533.1] hypothetical protein CARUB_v10014905mg [Capsella rubella]                                                                                                                                                                                                                                                                                                                                                                                                                                                                                                                                                                                                        | 135  | 132  | 7.00E-66 | 97.8  | 96.3 | 97.0 | hypothetical protein CARUB_v10014905mg                                         | gbpln | Capsella rubella     | AT3G20670.1   Symbols: HTA13   histone H2A 13   chr3:7229472-7229963 FORWARD LENGTH=132                                                                                                                                                                                                                                                                                                                                                                                                    | 135  | 132 | 5.00E-67 | 97.8  | 94.1 | 96.3 |
| Rsa1.0_01642.1.g28669.t1 | pir T00833 RNA-directed DNA polymerase homolog T13L16.7 - Arabidopsis thaliana (fragment)                                                                                                                                                                                                                                                                                                                                                                                                                                                                                                                                                                                       | 1621 | 1365 | 0        | 84.2  | 31.6 | 42.3 | RNA-directed DNA polymerase homolog T13L16.7 - Arabidopsis thaliana (fragment) | ----  | ----                 | AT3G20660.1   Symbols: AtOCT4, 4-Oct   organic cation/carnitine transporter4   chr3:7225271-7228510 REVERSE LENGTH=526                                                                                                                                                                                                                                                                                                                                                                     | 1621 | 526 | 0        | 32.4  | 27.5 | 29.8 |
| Rsa1.0_01642.1.g28670.t1 | ref NP_188701.2  mRNA cap guanine-N7 methyltransferase 1 [Arabidopsis thaliana] gi 75273309 sp O9LHQ7.1 MCES1_ARAT_H RecName: Full=mRNA cap guanine-N7 methyltransferase 1; AltName: Full=mRNA (guanine-N(7))-methyltransferase 1; AltName: Full=mRNA cap methyltransferase 1 gi 9294344 dbj BAB02241.1  mRNA cap methyltransferase-like protein [Arabidopsis thaliana] gi 28973781 gb AAO64206.1  unknown protein [Arabidopsis thaliana] gi 29824183 gb AAP04052.1  unknown protein [Arabidopsis thaliana] gi 110736712 dbj BAF00319.1  hypothetical protein [Arabidopsis thaliana] gi 332642886 gb AEE76407.1  mRNA cap guanine-N7 methyltransferase 1 [Arabidopsis thaliana] | 371  | 370  | 0        | 99.7  | 96.8 | 98.7 | mRNA cap guanine-N7 methyltransferase 1                                        | gbpln | Arabidopsis thaliana | AT3G20650.1   Symbols:   mRNA capping enzyme family protein   chr3:7221168-7223939 REVERSE LENGTH=370                                                                                                                                                                                                                                                                                                                                                                                      | 371  | 370 | 0        | 99.7  | 96.8 | 98.7 |
| Rsa1.0_01643.1.g28671.t1 | #                                                                                                                                                                                                                                                                                                                                                                                                                                                                                                                                                                                                                                                                               | #    | #    | #        | #     | #    | #    | -                                                                              | ----  | ----                 | #                                                                                                                                                                                                                                                                                                                                                                                                                                                                                          | #    | #   | #        | #     | #    | #    |
| Rsa1.0_01643.1.g28672.t1 | gb AAD17398.1  putative non-LTR retroelement reverse transcriptase [Arabidopsis thaliana]                                                                                                                                                                                                                                                                                                                                                                                                                                                                                                                                                                                       | 251  | 1225 | 1.00E-23 | 488.0 | 25.9 | 38.6 | putative non-LTR retroelement reverse transcriptase                            | gbpln | Arabidopsis thaliana | AT2G22440.1   Symbols:   BEST Arabidopsis thaliana protein match is: Ribonuclease H-like superfamily protein (TAIR:AT4G29090.1); Has 208 Blast hits to 191 proteins in 10 species: Archae - 0; Bacteria - 0; Metazoa - 0; Fungi - 0; Plants - 208; Viruses - 0; Other Eukaryotes - 0 (source: NCBI BLink).   chr2:9528910-9529917 FORWARD LENGTH=256                                                                                                                                       | 251  | 256 | 2.00E-16 | 102.0 | 15.1 | 23.1 |
| Rsa1.0_01643.1.g28673.t1 | gb AAF69169.1 AC007915_21 F27F5.21 [Arabidopsis thaliana]                                                                                                                                                                                                                                                                                                                                                                                                                                                                                                                                                                                                                       | 426  | 1023 | 3.00E-52 | 240.1 | 27.9 | 38.3 | F27F5.21                                                                       | gbpln | Arabidopsis thaliana | AT4G29090.1   Symbols:   Ribonuclease H-like superfamily protein   chr4:14333528-14335255 FORWARD LENGTH=575                                                                                                                                                                                                                                                                                                                                                                               | 426  | 575 | 4.00E-14 | 135.0 | 10.6 | 16.7 |
| Rsa1.0_01643.1.g28674.t1 | emb CAE45640.1  putative AP2 domain transcription factor [Arabidopsis thaliana]                                                                                                                                                                                                                                                                                                                                                                                                                                                                                                                                                                                                 | 222  | 220  | 2.00E-39 | 99.1  | 57.7 | 62.6 | putative AP2 domain transcription factor                                       | gbpln | Arabidopsis thaliana | AT5G50080.1   Symbols: ERF110   ethylene response factor 110   chr5:20365948-20366835 FORWARD LENGTH=220                                                                                                                                                                                                                                                                                                                                                                                   | 222  | 220 | 1.00E-40 | 99.1  | 56.8 | 62.6 |
| Rsa1.0_01643.1.g28675.t1 | gb AAG51783.1 AC079679_3 reverse transcriptase, putative; 16838-20266 [Arabidopsis thaliana]                                                                                                                                                                                                                                                                                                                                                                                                                                                                                                                                                                                    | 145  | 1142 | 5.00E-23 | 787.6 | 41.4 | 55.9 | reverse transcriptase, putative; 16838-20266                                   | gbpln | Arabidopsis thaliana | AT4G29090.1   Symbols:   Ribonuclease H-like superfamily protein   chr4:14333528-14335255 FORWARD LENGTH=575                                                                                                                                                                                                                                                                                                                                                                               | 145  | 575 | 5.00E-16 | 396.6 | 26.9 | 53.1 |
| Rsa1.0_01643.1.g28676.t1 | gb ABD65636.1  hypothetical protein 23.t00055 [Brassica oleracea]                                                                                                                                                                                                                                                                                                                                                                                                                                                                                                                                                                                                               | 335  | 414  | 2.00E-62 | 123.6 | 49.3 | 56.1 | hypothetical protein 23.t00055                                                 | gbpln | Brassica oleracea    | #                                                                                                                                                                                                                                                                                                                                                                                                                                                                                          | #    | #   | #        | #     | #    | #    |
| Rsa1.0_01643.1.g28677.t4 | gb AAD20646.1  putative TNP2-like transposon protein [Arabidopsis thaliana]                                                                                                                                                                                                                                                                                                                                                                                                                                                                                                                                                                                                     | 571  | 1040 | 2.00E-38 | 182.1 | 14.5 | 18.4 | putative TNP2-like transposon protein                                          | gbpln | Arabidopsis thaliana | #                                                                                                                                                                                                                                                                                                                                                                                                                                                                                          | #    | #   | #        | #     | #    | #    |
| Rsa1.0_01643.1.g28678.t1 | ref XP_002864034.1  hypothetical protein ARALYDRAFT_918012 [Arabidopsis lyrata subsp. lyrata] gi 297309869 gb EFH40293.1  hypothetical protein ARALYDRAFT_918012 [Arabidopsis lyrata subsp. lyrata]                                                                                                                                                                                                                                                                                                                                                                                                                                                                             | 157  | 159  | 7.00E-72 | 101.3 | 89.2 | 93.6 | hypothetical protein ARALYDRAFT_918012                                         | gbpln | Arabidopsis lyrata   | AT5G50090.1   Symbols:   unknown protein; FUNCTIONS IN: molecular function unknown; INVOLVED IN: N-terminal protein myristoylation; LOCATED IN: cellular component unknown; BEST Arabidopsis thaliana protein match is: unknown protein (TAIR:AT5G62900.1); Has 1807 Blast hits to 1807 proteins in 277 species: Archae - 0; Bacteria - 0; Metazoa - 736; Fungi - 347; Plants - 385; Viruses - 0; Other Eukaryotes - 339 (source: NCBI BLink).   chr5:20369961-20370878 FORWARD LENGTH=159 | 157  | 159 | 5.00E-69 | 101.3 | 87.9 | 94.3 |
| Rsa1.0_01644.1.g28679.t2 | #                                                                                                                                                                                                                                                                                                                                                                                                                                                                                                                                                                                                                                                                               | #    | #    | #        | #     | #    | #    | -                                                                              | ----  | ----                 | #                                                                                                                                                                                                                                                                                                                                                                                                                                                                                          | #    | #   | #        | #     | #    | #    |
| Rsa1.0_01644.1.g28680.t1 | ref XP_002878329.1  armadillo/beta-catenin repeat family protein [Arabidopsis lyrata subsp. lyrata] gi 297324187 gb EFH54588.1  armadillo/beta-catenin repeat family protein [Arabidopsis lyrata subsp. lyrata]                                                                                                                                                                                                                                                                                                                                                                                                                                                                 | 857  | 928  | 0        | 108.3 | 53.1 | 66.3 | armadillo/beta-catenin repeat family protein                                   | gbpln | Arabidopsis lyrata   | AT3G60350.1   Symbols: ARABIDILLO-2, ARABIDILLO2   ARABIDILLO-2   chr3:22306806-22310596 REVERSE LENGTH=928                                                                                                                                                                                                                                                                                                                                                                                | 857  | 928 | 0        | 108.3 | 53.8 | 66.5 |
| Rsa1.0_01644.1.g28681.t1 | ref XP_004233663.1  PREDICTED: uncharacterized protein LOC101263375 [Solanum lycopersicum]                                                                                                                                                                                                                                                                                                                                                                                                                                                                                                                                                                                      | 159  | 282  | 5.00E-11 | 177.4 | 27.0 | 40.3 | PREDICTED: uncharacterized protein LOC101263375                                | gbpln | Solanum lycopersicum | AT3G61090.1   Symbols:   Putative endonuclease or glycosyl hydrolase   chr3:22609094-22609822 REVERSE LENGTH=180                                                                                                                                                                                                                                                                                                                                                                           | 159  | 180 | 2.00E-12 | 113.2 | 32.7 | 44.7 |

|                          |                                                                                                                                                                                                                                                                                                                                                                                                                                                |      |      |           |        |      |      |                                                                                            |       |                      |                                                                                                                                                                                                                                                                                                                                                                  |      |      |           |        |      |      |
|--------------------------|------------------------------------------------------------------------------------------------------------------------------------------------------------------------------------------------------------------------------------------------------------------------------------------------------------------------------------------------------------------------------------------------------------------------------------------------|------|------|-----------|--------|------|------|--------------------------------------------------------------------------------------------|-------|----------------------|------------------------------------------------------------------------------------------------------------------------------------------------------------------------------------------------------------------------------------------------------------------------------------------------------------------------------------------------------------------|------|------|-----------|--------|------|------|
| Rsa1.0_01644.1.g28682.t1 | gb AAG51783.1 AC079679.3 reverse transcriptase, putative; 16838-20266 [Arabidopsis thaliana]                                                                                                                                                                                                                                                                                                                                                   | 752  | 1142 | 1.00E-149 | 151.9  | 37.9 | 48.9 | reverse transcriptase, putative; 16838-20266                                               | gbpln | Arabidopsis thaliana | AT4G29090.1   Symbols:   Ribonuclease H-like superfamily protein   chr4:14333528-14335255 FORWARD LENGTH=575                                                                                                                                                                                                                                                     | 752  | 575  | 7.00E-41  | 76.5   | 17.8 | 27.8 |
| Rsa1.0_01644.1.g28683.t1 | ref NP_001117499.2  Nuclear pore complex protein [Arabidopsis thaliana] gi 332195142 gb AE33263.1  Nuclear pore complex protein [Arabidopsis thaliana]                                                                                                                                                                                                                                                                                         | 136  | 1819 | 2.00E-37  | 1337.5 | 51.5 | 54.4 | Nuclear pore complex protein                                                               | gbpln | Arabidopsis thaliana | AT1G55540.2   Symbols: emb1011   Nuclear pore complex protein   chr1:20734759-20743049 REVERSE LENGTH=1819                                                                                                                                                                                                                                                       | 136  | 1819 | 4.00E-40  | 1337.5 | 51.5 | 54.4 |
| Rsa1.0_01644.1.g28684.t2 | ref NP_192110.2  protein kinase family protein [Arabidopsis thaliana] gi 21928159 gb AM78107.1  AT4g02010/T10M13.2 [Arabidopsis thaliana] gi 32815639 gb AAP8328.1  AT4g02010/T10M13.2 [Arabidopsis thaliana] gi 33265671 gb AEE82111.1  protein kinase family protein [Arabidopsis thaliana]                                                                                                                                                  | 237  | 725  | 3.00E-31  | 305.9  | 40.1 | 46.0 | protein kinase family protein                                                              | gbpln | Arabidopsis thaliana | AT4G02010.1   Symbols:   Protein kinase superfamily protein   chr4:881457-885222 FORWARD LENGTH=725                                                                                                                                                                                                                                                              | 237  | 725  | 1.00E-33  | 305.9  | 40.1 | 46.0 |
| Rsa1.0_01644.1.g28685.t1 | gb EOA22498.1  hypothetical protein CARUB_v10003153mg, partial [Capsella rubella]                                                                                                                                                                                                                                                                                                                                                              | 173  | 380  | 6.00E-15  | 219.7  | 35.3 | 49.1 | hypothetical protein CARUB_v10003153mg, partial                                            | gbpln | Capsella rubella     | AT2G42550.1   Symbols:   Protein kinase superfamily protein   chr2:17713196-17714230 FORWARD LENGTH=344                                                                                                                                                                                                                                                          | 173  | 344  | 3.00E-17  | 198.8  | 33.5 | 47.4 |
| Rsa1.0_01644.1.g28686.t1 | #                                                                                                                                                                                                                                                                                                                                                                                                                                              | #    | #    | #         | #      | #    | #    | -                                                                                          | ----  | ----                 | #                                                                                                                                                                                                                                                                                                                                                                | #    | #    | #         | #      | #    | #    |
| Rsa1.0_01645.1.g28687.t1 | sp Q9SH27.1 LOR4_ARATH RecName: Full=Protein LURP-one-related 4 gi 6633839 gb AAF1969.1 AC008047.5 F2K11.21 [Arabidopsis thaliana]                                                                                                                                                                                                                                                                                                             | 182  | 215  | 3.00E-93  | 118.1  | 89.0 | 94.5 | RecName: Full=Protein LURP-one-related 4 gi 6633839 gb AAF1969.1 AC008047.5 F2K11.21       | gbpln | Arabidopsis thaliana | AT1G63410.1   Symbols:   Protein of unknown function (DUF567)   chr1:23510075-23511997 REVERSE LENGTH=208                                                                                                                                                                                                                                                        | 182  | 208  | 1.00E-95  | 114.3  | 89.0 | 94.5 |
| Rsa1.0_01645.1.g28688.t1 | sp Q9FYJ1.1 FB24_ARATH RecName: Full=Putative F-box protein At1g31000 gi 9755376 gb AAF98183.1 AC000107.6 F17F8.8 [Arabidopsis thaliana]                                                                                                                                                                                                                                                                                                       | 396  | 365  | 2.00E-81  | 92.2   | 49.5 | 62.4 | RecName: Full=Putative F-box protein At1g31000 gi 9755376 gb AAF98183.1 AC000107.6 F17F8.8 | gbpln | Arabidopsis thaliana | AT1G31000.1   Symbols:   F-box and associated interaction domains-containing protein   chr1:11053377-11054561 REVERSE LENGTH=363                                                                                                                                                                                                                                 | 396  | 363  | 7.00E-84  | 91.7   | 49.2 | 61.9 |
| Rsa1.0_01645.1.g28689.t1 | gb EOA34293.1  hypothetical protein CARUB_v10021808mg, partial [Capsella rubella]                                                                                                                                                                                                                                                                                                                                                              | 620  | 654  | 0         | 105.5  | 82.9 | 90.3 | hypothetical protein CARUB_v10021808mg, partial                                            | gbpln | Capsella rubella     | AT1G63450.1   Symbols: RHS8   root hair specific 8   chr1:23532523-23534517 FORWARD LENGTH=664                                                                                                                                                                                                                                                                   | 620  | 664  | 0         | 107.1  | 78.4 | 88.1 |
| Rsa1.0_01645.1.g28690.t1 | ref NP_176536.2  AT hook motif DNA-binding family protein [Arabidopsis thaliana] gi 26451696 dbj BAC42943.1  putative DNA-binding protein [Arabidopsis thaliana] gi 28973281 gb AA063965.1  putative DNA-binding protein [Arabidopsis thaliana] gi 119657354 tpd FAA00276.1  TPA: AT-hook motif nuclear localized protein 5 [Arabidopsis thaliana] gi 332195982 gb AEE34103.1  AT hook motif DNA-binding family protein [Arabidopsis thaliana] | 385  | 378  | 1.00E-148 | 98.2   | 78.2 | 84.7 | AT hook motif DNA-binding family protein                                                   | gbpln | Arabidopsis thaliana | AT1G63470.1   Symbols:   AT hook motif DNA-binding family protein   chr1:23536831-23538863 REVERSE LENGTH=378                                                                                                                                                                                                                                                    | 385  | 378  | 1.00E-151 | 98.2   | 78.2 | 84.7 |
| Rsa1.0_01645.1.g28691.t2 | gb AAC28197.1  contains similarity to reverse transcriptases [Arabidopsis thaliana] gi 7267156 emb CAB77868.1  putative reverse transcriptase [Arabidopsis thaliana]                                                                                                                                                                                                                                                                           | 1770 | 1077 | 1.00E-147 | 60.8   | 16.7 | 21.9 | contains similarity to reverse transcriptases                                              | gbpln | Arabidopsis thaliana | AT1G10000.1   Symbols:   Ribonuclease H-like superfamily protein   chr1:3263877-3264788 REVERSE LENGTH=303                                                                                                                                                                                                                                                       | 1770 | 303  | 1.00E-46  | 17.1   | 6.3  | 8.9  |
| Rsa1.0_01645.1.g28692.t1 | #                                                                                                                                                                                                                                                                                                                                                                                                                                              | #    | #    | #         | #      | #    | #    | -                                                                                          | ----  | ----                 | #                                                                                                                                                                                                                                                                                                                                                                | #    | #    | #         | #      | #    | #    |
| Rsa1.0_01645.1.g28693.t1 | ref XP_002887955.1  kinase family protein [Arabidopsis lyrata subsp. lyrata] gi 297333796 gb EFH64214.1  kinase family protein [Arabidopsis lyrata subsp. lyrata]                                                                                                                                                                                                                                                                              | 486  | 487  | 0         | 100.2  | 95.5 | 96.9 | kinase family protein                                                                      | gbpln | Arabidopsis lyrata   | AT1G63500.1   Symbols:   Protein kinase protein with tetratricopeptide repeat domain   chr1:23556015-23558403 FORWARD LENGTH=487                                                                                                                                                                                                                                 | 486  | 487  | 0         | 100.2  | 95.3 | 96.9 |
| Rsa1.0_01645.1.g28694.t1 | #                                                                                                                                                                                                                                                                                                                                                                                                                                              | #    | #    | #         | #      | #    | #    | -                                                                                          | ----  | ----                 | #                                                                                                                                                                                                                                                                                                                                                                | #    | #    | #         | #      | #    | #    |
| Rsa1.0_01646.1.g28695.t1 | #                                                                                                                                                                                                                                                                                                                                                                                                                                              | #    | #    | #         | #      | #    | #    | -                                                                                          | ----  | ----                 | #                                                                                                                                                                                                                                                                                                                                                                | #    | #    | #         | #      | #    | #    |
| Rsa1.0_01646.1.g28696.t1 | #                                                                                                                                                                                                                                                                                                                                                                                                                                              | #    | #    | #         | #      | #    | #    | -                                                                                          | ----  | ----                 | #                                                                                                                                                                                                                                                                                                                                                                | #    | #    | #         | #      | #    | #    |
| Rsa1.0_01646.1.g28697.t1 | gb AAM61481.1  unknown [Arabidopsis thaliana]                                                                                                                                                                                                                                                                                                                                                                                                  | 568  | 440  | 1.00E-145 | 77.5   | 51.4 | 60.7 | unknown                                                                                    | gbpln | Arabidopsis thaliana | AT5G44785.1   Symbols: OSB3   organellar single-stranded DNA binding protein 3   chr5:18070877-18073010 REVERSE LENGTH=440                                                                                                                                                                                                                                       | 568  | 440  | 1.00E-147 | 77.5   | 51.2 | 60.6 |
| Rsa1.0_01646.1.g28698.t1 | ref XP_002865325.1  hypothetical protein ARALYDRAFT_494504 [Arabidopsis lyrata subsp. lyrata] gi 297311160 gb EFH41584.1  hypothetical protein ARALYDRAFT_494504 [Arabidopsis lyrata subsp. lyrata]                                                                                                                                                                                                                                            | 706  | 751  | 0         | 106.4  | 68.4 | 76.3 | hypothetical protein ARALYDRAFT_494504                                                     | gbpln | Arabidopsis lyrata   | AT5G44780.1   Symbols:   unknown protein; BEST Arabidopsis thaliana protein match is: unknown protein (TAIR:AT4G20020.2); Has 9661 Blast hits to 6233 proteins in 635 species: Archae - 4; Bacteria - 1116; Metazoa - 4251; Fungi - 1510; Plants - 1359; Viruses - 43; Other Eukaryotes - 1378 (source: NCBI BLINK).   chr5:18068100-18070544 FORWARD LENGTH=723 | 706  | 723  | 0         | 102.4  | 63.0 | 72.0 |



|                          |                                                                                                                                                                                                                                                                                                                                                                                                                                                                                                                                                                                                                                                                                           |      |      |           |       |      |       |                                                                                                                 |       |                      |                                                                                                                                                                                                                                                                                                                                                          |      |      |           |       |      |       |
|--------------------------|-------------------------------------------------------------------------------------------------------------------------------------------------------------------------------------------------------------------------------------------------------------------------------------------------------------------------------------------------------------------------------------------------------------------------------------------------------------------------------------------------------------------------------------------------------------------------------------------------------------------------------------------------------------------------------------------|------|------|-----------|-------|------|-------|-----------------------------------------------------------------------------------------------------------------|-------|----------------------|----------------------------------------------------------------------------------------------------------------------------------------------------------------------------------------------------------------------------------------------------------------------------------------------------------------------------------------------------------|------|------|-----------|-------|------|-------|
| Rsa1.0_01646.1.g28699.t2 | refNP_199288.4  DNA repair protein REV1 [Arabidopsis thaliana] gi 59796995 dbj BAD89586.1  deoxycytidyl transferase [Arabidopsis thaliana] gi 332007773 gb AED95156.1  DNA repair protein REV1 [Arabidopsis thaliana]                                                                                                                                                                                                                                                                                                                                                                                                                                                                     | 1071 | 1101 | 0         | 102.8 | 81.1 | 87.8  | DNA repair protein REV1                                                                                         | gbpln | Arabidopsis thaliana | AT5G44750.1   Symbols: REV1, ATREV1   DNA-directed DNA polymerases   chr5:18052669-18059581 FORWARD LENGTH=1101                                                                                                                                                                                                                                          | 1071 | 1101 | 0         | 102.8 | 81.1 | 87.8  |
| Rsa1.0_01646.1.g28700.t2 | refNP_568638.2  DNA polymerase eta subunit [Arabidopsis thaliana] gi 23954185 emb CAC94893.1  putative DNA polymerase eta [Arabidopsis thaliana] gi 332007772 gb AED95155.1  Y-family DNA polymerase H [Arabidopsis thaliana]                                                                                                                                                                                                                                                                                                                                                                                                                                                             | 668  | 672  | 0         | 100.6 | 83.7 | 90.3  | DNA polymerase eta subunit                                                                                      | gbpln | Arabidopsis thaliana | AT5G44740.2   Symbols: POLH   Y-family DNA polymerase H   chr5:18047903-18051779 REVERSE LENGTH=672                                                                                                                                                                                                                                                      | 668  | 672  | 0         | 100.6 | 83.7 | 90.3  |
| Rsa1.0_01647.1.g28701.t1 | #                                                                                                                                                                                                                                                                                                                                                                                                                                                                                                                                                                                                                                                                                         | #    | #    | #         | #     | #    | -     | ----                                                                                                            | ----  | #                    | #                                                                                                                                                                                                                                                                                                                                                        | #    | #    | #         | #     | #    | #     |
| Rsa1.0_01647.1.g28702.t1 | sp Q9FIF0.3 LRK22_ARATH RecName: Full=Putative L-type lectin-domain containing receptor kinase II.2; Short=LecRK-II.2; Flags: Precursor                                                                                                                                                                                                                                                                                                                                                                                                                                                                                                                                                   | 425  | 694  | 0         | 163.3 | 79.5 | 89.4  | RecName: Full=Putative L-type lectin-domain containing receptor kinase II.2; Short=LecRK-II.2; Flags: Precursor | ----  | ----                 | AT5G59260.1   Symbols:   Concanavalin A-like lectin protein kinase family protein   chr5:23907901-23909925 REVERSE LENGTH=674                                                                                                                                                                                                                            | 425  | 674  | 0         | 158.6 | 76.0 | 85.9  |
| Rsa1.0_01647.1.g28703.t1 | gb EOA13270.1  hypothetical protein CARUB_v10026298mg [Capsella rubella]                                                                                                                                                                                                                                                                                                                                                                                                                                                                                                                                                                                                                  | 490  | 489  | 0         | 99.8  | 93.9 | 96.5  | hypothetical protein CARUB_v10026298mg                                                                          | gbpln | Capsella rubella     | AT5G59010.1   Symbols:   Protein kinase protein with tetratricopeptide repeat domain   chr5:23820578-23823099 REVERSE LENGTH=489                                                                                                                                                                                                                         | 490  | 489  | 0         | 99.8  | 93.3 | 96.5  |
| Rsa1.0_01647.1.g28704.t1 | gb AAM61470.1  unknown [Arabidopsis thaliana]                                                                                                                                                                                                                                                                                                                                                                                                                                                                                                                                                                                                                                             | 221  | 231  | 1.00E-79  | 104.5 | 80.5 | 91.4  | unknown                                                                                                         | gbpln | Arabidopsis thaliana | AT5G59000.1   Symbols:   RING/FYVE/PHD zinc finger superfamily protein   chr5:23818768-23820018 FORWARD LENGTH=231                                                                                                                                                                                                                                       | 221  | 231  | 3.00E-81  | 104.5 | 80.1 | 91.0  |
| Rsa1.0_01647.1.g28705.t1 | gb AAC67205.1  putative retroelement pol polyprotein [Arabidopsis thaliana]                                                                                                                                                                                                                                                                                                                                                                                                                                                                                                                                                                                                               | 785  | 1413 | 0         | 180.0 | 56.9 | 70.6  | putative retroelement pol polyprotein                                                                           | gbpln | Arabidopsis thaliana | AT4G23160.1   Symbols: CRK8   cysteine-rich RLK (RECEPTOR-like protein kinase) 8   chr4:12129485-12134086 FORWARD LENGTH=1262                                                                                                                                                                                                                            | 785  | 1262 | 3.00E-59  | 160.8 | 15.3 | 21.5  |
| Rsa1.0_01647.1.g28706.t1 | gb AAD19784.1  putative retroelement pol polyprotein [Arabidopsis thaliana]                                                                                                                                                                                                                                                                                                                                                                                                                                                                                                                                                                                                               | 243  | 1501 | 5.00E-97  | 617.7 | 65.8 | 84.0  | putative retroelement pol polyprotein                                                                           | gbpln | Arabidopsis thaliana | AT4G23160.1   Symbols: CRK8   cysteine-rich RLK (RECEPTOR-like protein kinase) 8   chr4:12129485-12134086 FORWARD LENGTH=1262                                                                                                                                                                                                                            | 243  | 1262 | 6.00E-49  | 519.3 | 34.6 | 52.7  |
| Rsa1.0_01647.1.g28707.t6 | gb AAC33226.1  putative non-LTR retroelement reverse transcriptase [Arabidopsis thaliana]                                                                                                                                                                                                                                                                                                                                                                                                                                                                                                                                                                                                 | 1222 | 1529 | 0         | 125.1 | 37.2 | 51.9  | putative non-LTR retroelement reverse transcriptase                                                             | gbpln | Arabidopsis thaliana | AT3G24255.1   Symbols:   RNA-directed DNA polymerase (reverse transcriptase)-related family protein   chr3:8789471-8793208 FORWARD LENGTH=746                                                                                                                                                                                                            | 1222 | 746  | 3.00E-46  | 61.0  | 8.8  | 12.7  |
| Rsa1.0_01647.1.g28708.t2 | refNP_200707.1  uncharacterized protein [Arabidopsis thaliana] gi 9759230 dbj BAB09642.1  unnamed protein product [Arabidopsis thaliana] gi 15450824 gb AAK96683.1  Unknown protein [Arabidopsis thaliana] gi 20148679 gb AAM10230.1  unknown protein [Arabidopsis thaliana] gi 332009744 gb AED97127.1  uncharacterized protein AT5G58990 [Arabidopsis thaliana]                                                                                                                                                                                                                                                                                                                         | 59   | 148  | 3.00E-11  | 250.8 | 61.0 | 64.4  | uncharacterized protein                                                                                         | gbpln | Arabidopsis thaliana | AT5G58990.1   Symbols:   unknown protein; BEST Arabidopsis thaliana protein match is: unknown protein (TAIR:AT5G52370.1). Has 1807 Blast hits to 1807 proteins in 277 species: Archae - 0; Bacteria - 0; Metazoa - 736; Fungi - 347; Plants - 385; Viruses - 0; Other Eukaryotes - 339 (source: NCBI BLINK).   chr5:23815028-23815819 FORWARD LENGTH=148 | 59   | 148  | 4.00E-14  | 250.8 | 61.0 | 64.4  |
| Rsa1.0_01647.1.g28709.t1 | gb EOA12569.1  hypothetical protein CARUB_v10026845mg [Capsella rubella]                                                                                                                                                                                                                                                                                                                                                                                                                                                                                                                                                                                                                  | 305  | 305  | 1.00E-170 | 100.0 | 96.1 | 98.0  | hypothetical protein CARUB_v10026845mg                                                                          | gbpln | Capsella rubella     | AT5G58970.1   Symbols: ATUCP2, UCP2   uncoupling protein 2   chr5:23808642-23811018 REVERSE LENGTH=305                                                                                                                                                                                                                                                   | 305  | 305  | 1.00E-172 | 100.0 | 95.4 | 98.0  |
| Rsa1.0_01647.1.g28710.t1 | refNP_200704.2  uncharacterized protein [Arabidopsis thaliana] gi 79331394 refNP_001032100.1  uncharacterized protein [Arabidopsis thaliana] gi 9759227 dbj BAB09639.1  unnamed protein product [Arabidopsis thaliana] gi 19715645 gb AAL91642.1  AT5G58960/k19m22.160 [Arabidopsis thaliana] gi 27363240 gb AAO11539.1  AT5G58960/k19m22.160 [Arabidopsis thaliana] gi 89001398 gb ABD59217.1  gravitropic in the light 1 [Arabidopsis thaliana] gi 222424191 dbj BAH20054.1  AT5G58960 [Arabidopsis thaliana] gi 332009739 gb AED97122.1  uncharacterized protein AT5G58960 [Arabidopsis thaliana] gi 332009740 gb AED97123.1  uncharacterized protein AT5G58960 [Arabidopsis thaliana] | 106  | 484  | 7.00E-56  | 456.6 | 97.2 | 100.0 | uncharacterized protein                                                                                         | gbpln | Arabidopsis thaliana | AT5G58960.3   Symbols: GIL1   Plant protein of unknown function (DUF641)   chr5:23806906-23808360 FORWARD LENGTH=484                                                                                                                                                                                                                                     | 106  | 484  | 1.00E-58  | 456.6 | 97.2 | 100.0 |

|                          |                                                                                                                                                                                                     |      |      |           |        |      |      |                                        |       |                      |                                                                                                                                                                                                                                                            |      |      |           |        |      |      |
|--------------------------|-----------------------------------------------------------------------------------------------------------------------------------------------------------------------------------------------------|------|------|-----------|--------|------|------|----------------------------------------|-------|----------------------|------------------------------------------------------------------------------------------------------------------------------------------------------------------------------------------------------------------------------------------------------------|------|------|-----------|--------|------|------|
| Rsa1.0_01648.1.g28711.t2 | gb EOA31227.1  hypothetical protein CARUB_v10014393mg [Capsella rubella] gi 482567039 gb EOA31228.1  hypothetical protein CARUB_v10014393mg [Capsella rubella]                                      | 198  | 268  | 8.00E-25  | 135.4  | 36.9 | 47.0 | hypothetical protein CARUB_v10014393mg | gbpln | Capsella rubella     | AT3G04310.1   Symbols:   unknown protein; Has 44 Blast hits to 44 proteins in 12 species: Archae - 0; Bacteria - 0; Metazoa - 0; Fungi - 0; Plants - 44; Viruses - 0; Other Eukaryotes - 0 (source: NCBI BLINK).   chr3:1141581-1142528 REVERSE LENGTH=269 | 198  | 269  | 1.00E-26  | 135.9  | 36.4 | 46.0 |
| Rsa1.0_01648.1.g28712.t1 | gb EOA26319.1  hypothetical protein CARUB_v10025210mg [Capsella rubella]                                                                                                                            | 288  | 292  | 1.00E-119 | 101.4  | 75.3 | 86.1 | hypothetical protein CARUB_v10025210mg | gbpln | Capsella rubella     | AT2G22180.1   Symbols:   hydroxyproline-rich glycoprotein family protein   chr2:9428969-9429844 FORWARD LENGTH=291                                                                                                                                         | 288  | 291  | 1.00E-120 | 101.0  | 79.5 | 87.5 |
| Rsa1.0_01648.1.g28713.t1 | ref XP_002880432.1  lipid-associated family protein [Arabidopsis lyrata subsp. lyrata] gi 297328271 gb EFH56691.1  lipid-associated family protein [Arabidopsis lyrata subsp. lyrata]               | 182  | 183  | 1.00E-91  | 100.5  | 88.5 | 95.6 | lipid-associated family protein        | gbpln | Arabidopsis lyrata   | AT2G22170.1   Symbols:   Lipase/lipoxygenase, PLAT/LH2 family protein   chr2:9427010-9427742 REVERSE LENGTH=183                                                                                                                                            | 182  | 183  | 1.00E-93  | 100.5  | 87.9 | 95.1 |
| Rsa1.0_01648.1.g28714.t2 | #                                                                                                                                                                                                   | #    | #    | #         | #      | #    | -    | ----                                   | ----  | #                    | #                                                                                                                                                                                                                                                          | #    | #    | #         | #      | #    |      |
| Rsa1.0_01648.1.g28715.t1 | ref XP_002878591.1  binding protein [Arabidopsis lyrata subsp. lyrata] gi 297324430 gb EFH54850.1  binding protein [Arabidopsis lyrata subsp. lyrata]                                               | 2151 | 2154 | 0         | 100.1  | 96.0 | 98.7 | binding protein                        | gbpln | Arabidopsis lyrata   | AT2G22125.1   Symbols: CSI1   binding   chr2:9406793-9414223 FORWARD LENGTH=2150                                                                                                                                                                           | 2151 | 2150 | 0         | 100.0  | 95.8 | 98.3 |
| Rsa1.0_01648.1.g28716.t1 | #                                                                                                                                                                                                   | #    | #    | #         | #      | #    | -    | ----                                   | ----  | #                    | #                                                                                                                                                                                                                                                          | #    | #    | #         | #      | #    |      |
| Rsa1.0_01648.1.g28717.t1 | gb EOA27501.1  hypothetical protein CARUB_v10023640mg [Capsella rubella]                                                                                                                            | 323  | 323  | 1.00E-174 | 100.0  | 94.7 | 97.8 | hypothetical protein CARUB_v10023640mg | gbpln | Capsella rubella     | AT2G22120.2   Symbols:   RING/FYVE/PHD zinc finger superfamily protein   chr2:9394028-9396979 FORWARD LENGTH=363                                                                                                                                           | 323  | 363  | 1.00E-177 | 112.4  | 95.0 | 97.8 |
| Rsa1.0_01648.1.g28718.t1 | gb EOA28652.1  hypothetical protein CARUB_v10024874mg [Capsella rubella]                                                                                                                            | 369  | 410  | 1.00E-100 | 111.1  | 55.6 | 64.2 | hypothetical protein CARUB_v10024874mg | gbpln | Capsella rubella     | AT2G22100.1   Symbols:   RNA-binding (RRM/RBD/RNP motifs) family protein   chr2:9392397-9393545 REVERSE LENGTH=382                                                                                                                                         | 369  | 382  | 4.00E-94  | 103.5  | 52.8 | 60.4 |
| Rsa1.0_01648.1.g28719.t1 | #                                                                                                                                                                                                   | #    | #    | #         | #      | #    | -    | ----                                   | ----  | #                    | #                                                                                                                                                                                                                                                          | #    | #    | #         | #      | #    |      |
| Rsa1.0_01648.1.g28720.t1 | ref XP_002879925.1  F-box family protein [Arabidopsis lyrata subsp. lyrata] gi 297325764 gb EFH56184.1  F-box family protein [Arabidopsis lyrata subsp. lyrata]                                     | 199  | 371  | 2.00E-16  | 186.4  | 28.6 | 37.7 | F-box family protein                   | gbpln | Arabidopsis lyrata   | #                                                                                                                                                                                                                                                          | #    | #    | #         | #      | #    |      |
| Rsa1.0_01649.1.g28721.t1 | ref NP_683294.2  phosphoglycerate mutase-like protein [Arabidopsis thaliana] gi 332190397 gb AEE28518.1  phosphoglycerate mutase-like protein [Arabidopsis thaliana]                                | 233  | 231  | 1.00E-121 | 99.1   | 90.6 | 94.8 | phosphoglycerate mutase-like protein   | gbpln | Arabidopsis thaliana | AT1G09935.1   Symbols:   Phosphoglycerate mutase family protein   chr1:3234060-3235530 REVERSE LENGTH=231                                                                                                                                                  | 233  | 231  | 1.00E-123 | 99.1   | 90.6 | 94.8 |
| Rsa1.0_01649.1.g28722.t1 | dbj BAJ34167.1  unnamed protein product [Theilungiella halophila]                                                                                                                                   | 970  | 975  | 0         | 100.5  | 84.3 | 90.9 | unnamed protein product                | ----  | ----                 | AT1G09970.1   Symbols: LRR XI-23, RLK7   Leucine-rich receptor-like protein kinase family protein   chr1:3252408-3255428 FORWARD LENGTH=976                                                                                                                | 970  | 976  | 0         | 100.6  | 82.5 | 90.0 |
| Rsa1.0_01649.1.g28723.t1 | ref XP_002892542.1  hypothetical protein ARALYDRAFT_888257 [Arabidopsis lyrata subsp. lyrata] gi 297338384 gb EFH68801.1  hypothetical protein ARALYDRAFT_888257 [Arabidopsis lyrata subsp. lyrata] | 73   | 802  | 3.00E-19  | 1098.6 | 65.8 | 78.1 | hypothetical protein ARALYDRAFT_888257 | gbpln | Arabidopsis lyrata   | AT1G09980.2   Symbols:   Putative serine esterase family protein   chr1:3256541-3260866 REVERSE LENGTH=801                                                                                                                                                 | 73   | 801  | 1.00E-21  | 1097.3 | 64.4 | 78.1 |
| Rsa1.0_01649.1.g28724.t1 | gb EOA40355.1  hypothetical protein CARUB_v10009083mg [Capsella rubella]                                                                                                                            | 449  | 460  | 0         | 102.4  | 88.2 | 92.0 | hypothetical protein CARUB_v10009083mg | gbpln | Capsella rubella     | AT1G10020.1   Symbols:   Protein of unknown function (DUF1005)   chr1:3269939-3271732 REVERSE LENGTH=461                                                                                                                                                   | 449  | 461  | 0         | 102.7  | 87.3 | 90.9 |
| Rsa1.0_01649.1.g28725.t1 | gb EOA36321.1  hypothetical protein CARUB_v10010632mg [Capsella rubella]                                                                                                                            | 129  | 129  | 2.00E-65  | 100.0  | 96.9 | 98.4 | hypothetical protein CARUB_v10010632mg | gbpln | Capsella rubella     | AT1G10030.1   Symbols: ERG28   homolog of yeast ergosterol28   chr1:3273972-3275631 FORWARD LENGTH=129                                                                                                                                                     | 129  | 129  | 2.00E-67  | 100.0  | 96.1 | 96.9 |
| Rsa1.0_01649.1.g28726.t1 | gb EOA40539.1  hypothetical protein CARUB_v10009269mg [Capsella rubella]                                                                                                                            | 380  | 417  | 1.00E-175 | 109.7  | 81.3 | 87.9 | hypothetical protein CARUB_v10009269mg | gbpln | Capsella rubella     | AT1G10040.2   Symbols:   alpha/beta-Hydrolases superfamily protein   chr1:3276124-3278464 REVERSE LENGTH=408                                                                                                                                               | 380  | 408  | 1.00E-171 | 107.4  | 80.8 | 87.4 |

|                          |                                                                                                                                                                                                                                                                                                                                                                                                                                                                                                                                                                                                                                                                                                                                                                                                                                                                          |     |      |           |        |      |      |                                                 |       |                      |                                                                                                                                         |     |      |           |        |      |      |
|--------------------------|--------------------------------------------------------------------------------------------------------------------------------------------------------------------------------------------------------------------------------------------------------------------------------------------------------------------------------------------------------------------------------------------------------------------------------------------------------------------------------------------------------------------------------------------------------------------------------------------------------------------------------------------------------------------------------------------------------------------------------------------------------------------------------------------------------------------------------------------------------------------------|-----|------|-----------|--------|------|------|-------------------------------------------------|-------|----------------------|-----------------------------------------------------------------------------------------------------------------------------------------|-----|------|-----------|--------|------|------|
| Rsa1.0_01649.1.g28727.t1 | ref[NP_849629.1] branched-chain-amino-acid aminotransferase 1 [Arabidopsis thaliana] gi 26391635 sp Q93Y32.2 BCAT1_ARAT H RecName: Full=Branched-chain-amino-acid aminotransferase 1, mitochondrial; Short=Atbcat-1; Flags: Precursor gi 3540185 gb AAC34335.1  Highly Similar to branched-chain amino acid aminotransferase [Arabidopsis thaliana] gi 8249008 emb CAB93130.1  branched-chain amino acid transaminase [Arabidopsis thaliana] gi 222423010 dbj BAH19488.1  AT1G10060 [Arabidopsis thaliana] gi 332190414 gb AEE28535.1  branched-chain-amino-acid aminotransferase 1 [Arabidopsis thaliana]                                                                                                                                                                                                                                                               | 345 | 384  | 1.00E-168 | 111.3  | 87.8 | 93.3 | branched-chain-amino-acid aminotransferase 1    | gbpln | Arabidopsis thaliana | AT1G10060.2   Symbols: ATBCAT-1, BCAT-1   branched-chain amino acid transaminase 1   chr1:3284445-3286837 FORWARD LENGTH=384            | 345 | 384  | 1.00E-170 | 111.3  | 87.8 | 93.3 |
| Rsa1.0_01649.1.g28728.t1 | ref[NP_172478.1] branched-chain-amino-acid aminotransferase 2 [Arabidopsis thaliana] gi 79317492 ref NP_001031015.1  branched-chain-amino-acid aminotransferase 2 [Arabidopsis thaliana] gi 26391680 sp Q9M439.1 BCAT2_ARAT H RecName: Full=Branched-chain-amino-acid aminotransferase 2, chloroplastic; Short=Atbcat-2; Flags: Precursor gi 13877745 gb AAK43950.1 AF370135.1 putative tat-binding protein [Arabidopsis thaliana] gi 8249004 emb CAB93128.1  branched-chain amino acid transaminase [Arabidopsis thaliana] gi 15293209 gb AAK93715.1  putative tat-binding protein [Arabidopsis thaliana] gi 222424474 dbj BAH20192.1  AT1G10070 [Arabidopsis thaliana] gi 332190416 gb AEE28537.1  branched-chain-amino-acid aminotransferase 2 [Arabidopsis thaliana] gi 332190417 gb AEE28538.1  branched-chain-amino-acid aminotransferase 2 [Arabidopsis thaliana] | 380 | 388  | 0         | 102.1  | 92.9 | 97.4 | branched-chain-amino-acid aminotransferase 2    | gbpln | Arabidopsis thaliana | AT1G10070.2   Symbols: ATBCAT-2, BCAT-2   branched-chain amino acid transaminase 2   chr1:3288255-3290164 FORWARD LENGTH=388            | 380 | 388  | 0         | 102.1  | 92.9 | 97.4 |
| Rsa1.0_01650.1.g28729.t1 | ref[XP_002883129.1] EMB1865 [Arabidopsis lyrata subsp. lyrata] gi 297328969 gb EFH59388.1  EMB1865 [Arabidopsis lyrata subsp. lyrata]                                                                                                                                                                                                                                                                                                                                                                                                                                                                                                                                                                                                                                                                                                                                    | 70  | 846  | 8.00E-20  | 1208.6 | 64.3 | 65.7 | EMB1865                                         | gbpln | Arabidopsis lyrata   | AT3G18390.1   Symbols: EMB1865   CRS1 / YhbY (CRM) domain-containing protein   chr3:6313572-6317584 FORWARD LENGTH=848                  | 70  | 848  | 3.00E-22  | 1211.4 | 64.3 | 64.3 |
| Rsa1.0_01650.1.g28730.t2 | gb AFJ66169.1  hypothetical protein 11M19.13 [Arabidopsis halleri]                                                                                                                                                                                                                                                                                                                                                                                                                                                                                                                                                                                                                                                                                                                                                                                                       | 952 | 1273 | 0         | 133.7  | 45.8 | 61.4 | hypothetical protein 11M19.13                   | gbpln | Arabidopsis halleri  | AT4G23160.1   Symbols: CRK8   cysteine-rich RLK (RECEPTOR-like protein kinase) 8   chr4:12129485-12134086 FORWARD LENGTH=1262           | 952 | 1262 | 1.00E-60  | 132.6  | 13.9 | 21.7 |
| Rsa1.0_01650.1.g28731.t1 | gb AAG51783.1 AC079679.3 reverse transcriptase, putative; 16838-20266 [Arabidopsis thaliana]                                                                                                                                                                                                                                                                                                                                                                                                                                                                                                                                                                                                                                                                                                                                                                             | 832 | 1142 | 1.00E-176 | 137.3  | 39.3 | 52.2 | reverse transcriptase, putative; 16838-20266    | gbpln | Arabidopsis thaliana | AT4G29090.1   Symbols:   Ribonuclease H-like superfamily protein   chr4:14333528-14335255 FORWARD LENGTH=575                            | 832 | 575  | 9.00E-28  | 69.1   | 9.5  | 14.7 |
| Rsa1.0_01650.1.g28732.t1 | gb EOA29603.1  hypothetical protein CARUB_v10013521mg, partial [Capsella rubella]                                                                                                                                                                                                                                                                                                                                                                                                                                                                                                                                                                                                                                                                                                                                                                                        | 470 | 498  | 6.00E-13  | 106.0  | 11.7 | 19.8 | hypothetical protein CARUB_v10013521mg, partial | gbpln | Capsella rubella     | #                                                                                                                                       | #   | #    | #         | #      | #    | #    |
| Rsa1.0_01650.1.g28733.t1 | emb CAA09731.1  receptor-like protein kinase, RLK3 [Arabidopsis thaliana]                                                                                                                                                                                                                                                                                                                                                                                                                                                                                                                                                                                                                                                                                                                                                                                                | 669 | 667  | 0         | 99.7   | 75.0 | 83.0 | receptor-like protein kinase, RLK3              | gbpln | Arabidopsis thaliana | AT4G23190.1   Symbols: CRK11, AT-RLK3   cysteine-rich RLK (RECEPTOR-like protein kinase) 11   chr4:12141197-12143710 REVERSE LENGTH=667 | 669 | 667  | 0         | 99.7   | 75.3 | 83.0 |
| Rsa1.0_01650.1.g28734.t1 | ref[XP_002893765.1] hypothetical protein ARALYDRAFT_890918 [Arabidopsis lyrata subsp. lyrata] gi 297339607 gb EFH70024.1  hypothetical protein ARALYDRAFT_890918 [Arabidopsis lyrata subsp. lyrata]                                                                                                                                                                                                                                                                                                                                                                                                                                                                                                                                                                                                                                                                      | 89  | 93   | 1.00E-35  | 104.5  | 86.5 | 92.1 | hypothetical protein ARALYDRAFT_890918          | gbpln | Arabidopsis lyrata   | AT4G10265.1   Symbols:   Wound-responsive family protein   chr4:6373226-6373477 REVERSE LENGTH=83                                       | 89  | 83   | 2.00E-29  | 93.3   | 68.5 | 78.7 |
| Rsa1.0_01650.1.g28735.t1 | ref[XP_002893765.1] hypothetical protein ARALYDRAFT_890918 [Arabidopsis lyrata subsp. lyrata] gi 297339607 gb EFH70024.1  hypothetical protein ARALYDRAFT_890918 [Arabidopsis lyrata subsp. lyrata]                                                                                                                                                                                                                                                                                                                                                                                                                                                                                                                                                                                                                                                                      | 89  | 93   | 3.00E-34  | 104.5  | 84.3 | 92.1 | hypothetical protein ARALYDRAFT_890918          | gbpln | Arabidopsis lyrata   | AT4G10270.1   Symbols:   Wound-responsive family protein   chr4:6374805-6375077 FORWARD LENGTH=90                                       | 89  | 90   | 2.00E-28  | 101.1  | 69.7 | 82.0 |
| Rsa1.0_01650.1.g28736.t1 | #                                                                                                                                                                                                                                                                                                                                                                                                                                                                                                                                                                                                                                                                                                                                                                                                                                                                        | #   | #    | #         | #      | #    | #    | -                                               | ----  | ----                 | #                                                                                                                                       | #   | #    | #         | #      | #    | #    |

|                          |                                                                                                                                                                                                                                                                                                                                                                                                                                                                                                                                                                                                                                                                                                                                                                                                                                       |      |     |           |       |      |      |                                                 |       |                      |                                                                                                                                                                                                                                                                   |      |     |           |       |      |      |
|--------------------------|---------------------------------------------------------------------------------------------------------------------------------------------------------------------------------------------------------------------------------------------------------------------------------------------------------------------------------------------------------------------------------------------------------------------------------------------------------------------------------------------------------------------------------------------------------------------------------------------------------------------------------------------------------------------------------------------------------------------------------------------------------------------------------------------------------------------------------------|------|-----|-----------|-------|------|------|-------------------------------------------------|-------|----------------------|-------------------------------------------------------------------------------------------------------------------------------------------------------------------------------------------------------------------------------------------------------------------|------|-----|-----------|-------|------|------|
| Rsa1.0_01650.1.g28737.t1 | refXP_002893765.1   hypothetical protein ARALYDRAFT_890918 [Arabidopsis lyrata subsp. lyrata] gi 297339607 gb EFH70024.1   hypothetical protein ARALYDRAFT_890918 [Arabidopsis lyrata subsp. lyrata]                                                                                                                                                                                                                                                                                                                                                                                                                                                                                                                                                                                                                                  | 89   | 93  | 3.00E-34  | 104.5 | 83.1 | 92.1 | hypothetical protein ARALYDRAFT_890918          | gbpln | Arabidopsis lyrata   | AT4G10265.1   Symbols:   Wound-responsive family protein   chr4:6373226-6373477 REVERSE LENGTH=83                                                                                                                                                                 | 89   | 83  | 9.00E-30  | 93.3  | 69.7 | 79.8 |
| Rsa1.0_01650.1.g28738.t1 | gb ACG60672.1   unknown protein [Brassica oleracea var. abloglabra]                                                                                                                                                                                                                                                                                                                                                                                                                                                                                                                                                                                                                                                                                                                                                                   | 163  | 288 | 7.00E-44  | 176.7 | 58.3 | 69.3 | unknown protein                                 | gbpln | Brassica oleracea    | #                                                                                                                                                                                                                                                                 | #    | #   | #         | #     | #    | #    |
| Rsa1.0_01651.1.g28739.t2 | gb EOA27544.1   hypothetical protein CARUB_v10023683mg [Capsella rubella]                                                                                                                                                                                                                                                                                                                                                                                                                                                                                                                                                                                                                                                                                                                                                             | 318  | 311 | 1.00E-115 | 97.8  | 73.6 | 79.9 | hypothetical protein CARUB_v10023683mg          | gbpln | Capsella rubella     | AT2G43140.2   Symbols:   basic helix-loop-helix (bHLH) DNA-binding superfamily protein   chr2:17931680-17935639 REVERSE LENGTH=309                                                                                                                                | 318  | 309 | 1.00E-101 | 97.2  | 71.7 | 78.0 |
| Rsa1.0_01651.1.g28740.t1 | refXP_002881887.1   hypothetical protein ARALYDRAFT_903694 [Arabidopsis lyrata subsp. lyrata] gi 297327726 gb EFH58146.1   hypothetical protein ARALYDRAFT_903694 [Arabidopsis lyrata subsp. lyrata]                                                                                                                                                                                                                                                                                                                                                                                                                                                                                                                                                                                                                                  | 213  | 213 | 1.00E-114 | 100.0 | 94.8 | 98.1 | hypothetical protein ARALYDRAFT_903694          | gbpln | Arabidopsis lyrata   | AT2G43130.1   Symbols: ARA4, ATRAB11F, ATRAB5C, ARA-4, RABA5C   P-loop containing nucleoside triphosphate hydrolases superfamily protein   chr2:17929899-17930904 REVERSE LENGTH=214                                                                              | 213  | 214 | 1.00E-116 | 100.5 | 94.4 | 97.2 |
| Rsa1.0_01651.1.g28741.t1 | refXP_002880027.1   predicted protein [Arabidopsis lyrata subsp. lyrata] gi 297325866 gb EFH56286.1   predicted protein [Arabidopsis lyrata subsp. lyrata]                                                                                                                                                                                                                                                                                                                                                                                                                                                                                                                                                                                                                                                                            | 297  | 322 | 1.00E-161 | 108.4 | 92.6 | 94.9 | predicted protein                               | gbpln | Arabidopsis lyrata   | AT2G43120.1   Symbols:   Rmlc-like cupins superfamily protein   chr2:17927339-17928871 FORWARD LENGTH=321                                                                                                                                                         | 297  | 321 | 1.00E-163 | 108.1 | 91.9 | 96.0 |
| Rsa1.0_01651.1.g28742.t1 | #                                                                                                                                                                                                                                                                                                                                                                                                                                                                                                                                                                                                                                                                                                                                                                                                                                     | #    | #   | #         | #     | #    | #    | -                                               | ----  | ----                 | #                                                                                                                                                                                                                                                                 | #    | #   | #         | #     | #    | #    |
| Rsa1.0_01651.1.g28743.t1 | refXP_002880026.1   hypothetical protein ARALYDRAFT_483412 [Arabidopsis lyrata subsp. lyrata] gi 297325865 gb EFH56285.1   hypothetical protein ARALYDRAFT_483412 [Arabidopsis lyrata subsp. lyrata]                                                                                                                                                                                                                                                                                                                                                                                                                                                                                                                                                                                                                                  | 281  | 284 | 1.00E-114 | 101.1 | 79.4 | 88.3 | hypothetical protein ARALYDRAFT_483412          | gbpln | Arabidopsis lyrata   | AT2G43110.1   Symbols:   unknown protein; Has 212 Blast hits to 211 proteins in 96 species: Archae - 0; Bacteria - 6; Metazoa - 62; Fungi - 91; Plants - 31; Viruses - 0; Other Eukaryotes - 22 (source: NCBI BLINK).   chr2:17922067-17924291 FORWARD LENGTH=288 | 281  | 288 | 1.00E-115 | 102.5 | 77.6 | 87.2 |
| Rsa1.0_01651.1.g28744.t1 | refNP_181838.1   isopropylmalate isomerase 2 [Arabidopsis thaliana] gi 3763919 gb AAC64299.1   3-isopropylmalate dehydratase, small subunit [Arabidopsis thaliana] gi 16974633 gb AAL31219.1   At2g43100/MFL8.4 [Arabidopsis thaliana] gi 17380708 gb AAL36184.1   putative 3-isopropylmalate dehydratase small subunit [Arabidopsis thaliana] gi 20197631 gb AAM15160.1   3-isopropylmalate dehydratase, small subunit [Arabidopsis thaliana] gi 21436289 gb AAM51283.1   putative 3-isopropylmalate dehydratase small subunit [Arabidopsis thaliana] gi 330255115 gb AEC10209.1   isopropylmalate isomerase 2 [Arabidopsis thaliana] refNP_001189737.1   Aconitase/3-isopropylmalate dehydratase protein [Arabidopsis thaliana] gi 330255114 gb AEC10208.1   Aconitase/3-isopropylmalate dehydratase protein [Arabidopsis thaliana] | 256  | 256 | 1.00E-108 | 100.0 | 75.8 | 84.4 | isopropylmalate isomerase 2                     | gbpln | Arabidopsis thaliana | AT2G43100.1   Symbols: IPMI2, ATLEUD1   isopropylmalate isomerase 2   chr2:17920685-17921455 FORWARD LENGTH=256                                                                                                                                                   | 256  | 256 | 1.00E-111 | 100.0 | 75.8 | 84.4 |
| Rsa1.0_01651.1.g28745.t1 | refNP_001189737.1   Aconitase/3-isopropylmalate dehydratase protein [Arabidopsis thaliana] gi 330255114 gb AEC10208.1   Aconitase/3-isopropylmalate dehydratase protein [Arabidopsis thaliana]                                                                                                                                                                                                                                                                                                                                                                                                                                                                                                                                                                                                                                        | 215  | 222 | 3.00E-84  | 103.3 | 78.6 | 82.8 | Aconitase/3-isopropylmalate dehydratase protein | gbpln | Arabidopsis thaliana | AT2G43090.2   Symbols:   Aconitase/3-isopropylmalate dehydratase protein   chr2:17918957-17919712 FORWARD LENGTH=222                                                                                                                                              | 215  | 222 | 1.00E-86  | 103.3 | 78.6 | 82.8 |
| Rsa1.0_01651.1.g28746.t1 | gb EOA27648.1   hypothetical protein CARUB_v10023796mg [Capsella rubella]                                                                                                                                                                                                                                                                                                                                                                                                                                                                                                                                                                                                                                                                                                                                                             | 87   | 283 | 2.00E-42  | 325.3 | 94.3 | 95.4 | hypothetical protein CARUB_v10023796mg          | gbpln | Capsella rubella     | AT2G43080.1   Symbols: AT-P4H-1   P4H isoform 1   chr2:17915755-17918599 FORWARD LENGTH=283                                                                                                                                                                       | 87   | 283 | 1.00E-44  | 325.3 | 93.1 | 95.4 |
| Rsa1.0_01651.1.g28747.t1 | gb AAM14939.1   unknown protein [Arabidopsis thaliana] gi 20197629 gb AAM15159.1   unknown protein [Arabidopsis thaliana]                                                                                                                                                                                                                                                                                                                                                                                                                                                                                                                                                                                                                                                                                                             | 238  | 543 | 1.00E-108 | 228.2 | 86.6 | 92.0 | unknown protein                                 | gbpln | Arabidopsis thaliana | AT2G43070.1   Symbols: SPPL3, ATSPPL3   SIGNAL PEPTIDE PEPTIDASE-LIKE 3   chr2:17911233-17914776 REVERSE LENGTH=540                                                                                                                                               | 238  | 540 | 1.00E-111 | 226.9 | 86.6 | 92.0 |
| Rsa1.0_01652.1.g28748.t3 | refXP_002893071.1   hypothetical protein ARALYDRAFT_335233 [Arabidopsis lyrata subsp. lyrata] gi 297338913 gb EFH69330.1   hypothetical protein ARALYDRAFT_335233 [Arabidopsis lyrata subsp. lyrata]                                                                                                                                                                                                                                                                                                                                                                                                                                                                                                                                                                                                                                  | 1163 | 986 | 0         | 84.8  | 68.6 | 74.0 | hypothetical protein ARALYDRAFT_335233          | gbpln | Arabidopsis lyrata   | AT1G19835.2   Symbols:   Plant protein of unknown function (DUF869)   chr1:6856212-6859513 REVERSE LENGTH=982                                                                                                                                                     | 1163 | 982 | 0         | 84.4  | 68.2 | 73.4 |
| Rsa1.0_01652.1.g28749.t1 | #                                                                                                                                                                                                                                                                                                                                                                                                                                                                                                                                                                                                                                                                                                                                                                                                                                     | #    | #   | #         | #     | #    | #    | -                                               | ----  | ----                 | #                                                                                                                                                                                                                                                                 | #    | #   | #         | #     | #    | #    |
| Rsa1.0_01652.1.g28750.t1 | #                                                                                                                                                                                                                                                                                                                                                                                                                                                                                                                                                                                                                                                                                                                                                                                                                                     | #    | #   | #         | #     | #    | #    | -                                               | ----  | ----                 | #                                                                                                                                                                                                                                                                 | #    | #   | #         | #     | #    | #    |
| Rsa1.0_01652.1.g28751.t2 | refXP_002893072.1   auxin-responsive family protein [Arabidopsis lyrata subsp. lyrata] gi 297338914 gb EFH69331.1   auxin-responsive family protein [Arabidopsis lyrata subsp. lyrata]                                                                                                                                                                                                                                                                                                                                                                                                                                                                                                                                                                                                                                                | 693  | 153 | 4.00E-64  | 22.1  | 19.6 | 20.9 | auxin-responsive family protein                 | gbpln | Arabidopsis lyrata   | AT1G19840.1   Symbols:   SAUR-like auxin-responsive protein family   chr1:6872794-6873255 REVERSE LENGTH=153                                                                                                                                                      | 693  | 153 | 2.00E-66  | 22.1  | 19.5 | 20.9 |

|                           |                                                                                                                                                                                                                                                                                                                                                                               |      |      |           |       |      |      |                                            |       |                      |                                                                                                                                                                                                                                                                                                                                                                                                                                                                     |      |     |           |       |      |      |
|---------------------------|-------------------------------------------------------------------------------------------------------------------------------------------------------------------------------------------------------------------------------------------------------------------------------------------------------------------------------------------------------------------------------|------|------|-----------|-------|------|------|--------------------------------------------|-------|----------------------|---------------------------------------------------------------------------------------------------------------------------------------------------------------------------------------------------------------------------------------------------------------------------------------------------------------------------------------------------------------------------------------------------------------------------------------------------------------------|------|-----|-----------|-------|------|------|
| Rsa1.0_01652.1.g28752.t1  | #                                                                                                                                                                                                                                                                                                                                                                             | #    | #    | #         | #     | #    | #    | #                                          | -     | ----                 | ----                                                                                                                                                                                                                                                                                                                                                                                                                                                                | #    | #   | #         | #     | #    | #    |
| Rsa1.0_01653.1.g28753.t1  | #                                                                                                                                                                                                                                                                                                                                                                             | #    | #    | #         | #     | #    | #    | #                                          | -     | ----                 | ----                                                                                                                                                                                                                                                                                                                                                                                                                                                                | #    | #   | #         | #     | #    | #    |
| Rsa1.0_01653.1.g28754.t1  | #                                                                                                                                                                                                                                                                                                                                                                             | #    | #    | #         | #     | #    | #    | #                                          | -     | ----                 | ----                                                                                                                                                                                                                                                                                                                                                                                                                                                                | #    | #   | #         | #     | #    | #    |
| Rsa1.0_01653.1.g28755.t15 | gb ABD65017.1  hypothetical protein 26.t00072 [Brassica oleracea]                                                                                                                                                                                                                                                                                                             | 1257 | 821  | 1.00E-108 | 65.3  | 18.8 | 23.0 | hypothetical protein 26.t00072             | gbpln | Brassica oleracea    | AT1G31150.1   Symbols:   Domain of unknown function (DUF1985)   chr1:11120097-11122412 FORWARD LENGTH=673                                                                                                                                                                                                                                                                                                                                                           | 1257 | 673 | 3.00E-12  | 53.5  | 4.9  | 8.7  |
| Rsa1.0_01653.1.g28756.t1  | gb AAC62785.1  F1104.11 [Arabidopsis thaliana] gi 7268192 emb CAB77719.1  putative transposon protein [Arabidopsis thaliana]                                                                                                                                                                                                                                                  | 136  | 577  | 5.00E-43  | 424.3 | 55.1 | 74.3 | F1104.11                                   | gbpln | Arabidopsis thaliana | AT3G31430.1   Symbols:   unknown protein; FUNCTIONS IN: molecular function unknown; INVOLVED IN: biological process unknown; LOCATED IN: endomembrane system; BEST Arabidopsis thaliana protein match is: unknown protein (TAIR:AT5G18636.1); Has 295 Blast hits to 291 proteins in 12 species: Archae - 0; Bacteria - 0; Metazoa - 0; Fungi - 0; Plants - 295; Viruses - 0; Other Eukaryotes - 0 (source: NCBI BLINK).   chr3:12795861-12796871 REVERSE LENGTH=336 | 136  | 336 | 2.00E-14  | 247.1 | 27.2 | 44.1 |
| Rsa1.0_01653.1.g28757.t4  | gb AAF79618.1 AC027665_19 F5M15.26 [Arabidopsis thaliana]                                                                                                                                                                                                                                                                                                                     | 2624 | 1838 | 0         | 70.0  | 15.1 | 20.1 | F5M15.26                                   | gbpln | Arabidopsis thaliana | #                                                                                                                                                                                                                                                                                                                                                                                                                                                                   | #    | #   | #         | #     | #    |      |
| Rsa1.0_01653.1.g28758.t1  | emb CAN70566.1  hypothetical protein VITISV_010970 [Vitis vinifera]                                                                                                                                                                                                                                                                                                           | 181  | 1027 | 3.00E-36  | 567.4 | 46.4 | 58.6 | hypothetical protein VITISV_010970         | gbpln | Vitis vinifera       | #                                                                                                                                                                                                                                                                                                                                                                                                                                                                   | #    | #   | #         | #     | #    |      |
| Rsa1.0_01654.1.g28759.t1  | #                                                                                                                                                                                                                                                                                                                                                                             | #    | #    | #         | #     | #    | #    | -                                          | ----  | ----                 | #                                                                                                                                                                                                                                                                                                                                                                                                                                                                   | #    | #   | #         | #     | #    |      |
| Rsa1.0_01654.1.g28760.t1  | gb EOA21743.1  hypothetical protein CARUB_v10002191mg [Capsella rubella]                                                                                                                                                                                                                                                                                                      | 152  | 152  | 3.00E-61  | 100.0 | 76.3 | 84.9 | hypothetical protein CARUB_v10002191mg     | gbpln | Capsella rubella     | AT5G06480.1   Symbols:   Immunoglobulin E-set superfamily protein   chr5:1976219-1977231 REVERSE LENGTH=153                                                                                                                                                                                                                                                                                                                                                         | 152  | 153 | 2.00E-57  | 100.7 | 73.0 | 83.6 |
| Rsa1.0_01654.1.g28761.t1  | gb EOA22998.1  hypothetical protein CARUB_v10003745mg [Capsella rubella]                                                                                                                                                                                                                                                                                                      | 198  | 191  | 1.00E-74  | 96.5  | 71.2 | 80.8 | hypothetical protein CARUB_v10003745mg     | gbpln | Capsella rubella     | AT5G06490.1   Symbols:   RING/U-box superfamily protein   chr5:1977996-1978589 REVERSE LENGTH=197                                                                                                                                                                                                                                                                                                                                                                   | 198  | 197 | 1.00E-75  | 99.5  | 73.7 | 83.8 |
| Rsa1.0_01654.1.g28762.t1  | ref NP_196268.1  protein agamous-like 96 [Arabidopsis thaliana] gi 10178106 dbj BAB11399.1  unnamed protein product [Arabidopsis thaliana] gi 67633788 gb AAY78818.1  MADS-box family protein [Arabidopsis thaliana] gi 332003641 gb AED91024.1  protein agamous-like 96 [Arabidopsis thaliana]                                                                               | 252  | 242  | 6.00E-53  | 96.0  | 46.4 | 63.5 | protein agamous-like 96                    | gbpln | Arabidopsis thaliana | AT5G06500.1   Symbols:   AGL96   AGAMOUS-like 96   chr5:1982444-1983172 FORWARD LENGTH=242                                                                                                                                                                                                                                                                                                                                                                          | 252  | 242 | 2.00E-55  | 96.0  | 46.4 | 63.5 |
| Rsa1.0_01654.1.g28763.t1  | ref XP_002322764.1  white-brown-complex ABC transporter family [Populus trichocarpa] gi 222867394 gb EEF04525.1  white-brown-complex ABC transporter family [Populus trichocarpa]                                                                                                                                                                                             | 505  | 744  | 0         | 147.3 | 77.4 | 88.9 | white-brown-complex ABC transporter family | gbpln | Populus trichocarpa  | AT5G06530.1   Symbols:   ABC-2 type transporter family protein   chr5:1990060-1994605 REVERSE LENGTH=751                                                                                                                                                                                                                                                                                                                                                            | 505  | 751 | 1.00E-155 | 148.7 | 53.7 | 56.6 |
| Rsa1.0_01654.1.g28764.t1  | dbj BAB09502.1  transposon protein-like [Arabidopsis thaliana]                                                                                                                                                                                                                                                                                                                | 1094 | 1089 | 0         | 99.5  | 47.6 | 62.7 | transposon protein-like                    | gbpln | Arabidopsis thaliana | #                                                                                                                                                                                                                                                                                                                                                                                                                                                                   | #    | #   | #         | #     | #    |      |
| Rsa1.0_01654.1.g28765.t2  | gb ABD65053.1  S-locus linked 3 (SLL3) protein, putative [Brassica oleracea]                                                                                                                                                                                                                                                                                                  | 376  | 462  | 4.00E-35  | 122.9 | 27.9 | 40.7 | S-locus linked 3 (SLL3) protein, putative  | gbpln | Brassica oleracea    | #                                                                                                                                                                                                                                                                                                                                                                                                                                                                   | #    | #   | #         | #     | #    |      |
| Rsa1.0_01654.1.g28766.t1  | gb EOA20021.1  hypothetical protein CARUB_v10000295mg [Capsella rubella]                                                                                                                                                                                                                                                                                                      | 145  | 752  | 3.00E-52  | 518.6 | 82.8 | 87.6 | hypothetical protein CARUB_v10000295mg     | gbpln | Capsella rubella     | AT5G06530.1   Symbols:   ABC-2 type transporter family protein   chr5:1990060-1994605 REVERSE LENGTH=751                                                                                                                                                                                                                                                                                                                                                            | 145  | 751 | 3.00E-51  | 517.9 | 81.4 | 86.9 |
| Rsa1.0_01654.1.g28767.t1  | ref NP_196274.1  uncharacterized protein [Arabidopsis thaliana] gi 13430752 gb AAK25998.1 AF360288.1 unknown protein [Arabidopsis thaliana] gi 10178112 dbj BAB11405.1  unnamed protein product [Arabidopsis thaliana] gi 15293221 gb AAK93721.1  unknown protein [Arabidopsis thaliana] gi 332003651 gb AED91034.1  uncharacterized protein AT5G06560 [Arabidopsis thaliana] | 418  | 518  | 1.00E-157 | 123.9 | 73.9 | 85.2 | uncharacterized protein                    | gbpln | Arabidopsis thaliana | AT5G06560.1   Symbols:   Protein of unknown function, DUF593   chr5:2003678-2005543 REVERSE LENGTH=518                                                                                                                                                                                                                                                                                                                                                              | 418  | 518 | 1.00E-159 | 123.9 | 73.9 | 85.2 |
| Rsa1.0_01655.1.g28768.t1  | ref XP_002872465.1  hypothetical protein ARALYDRAFT_352054 [Arabidopsis lyrata subsp. lyrata] gi 297318302 gb EEF48724.1  hypothetical protein ARALYDRAFT_352054 [Arabidopsis lyrata subsp. lyrata]                                                                                                                                                                           | 179  | 190  | 7.00E-87  | 106.1 | 86.6 | 93.3 | hypothetical protein ARALYDRAFT_352054     | gbpln | Arabidopsis lyrata   | AT4G09830.1   Symbols:   Uncharacterised conserved protein UCPO09193   chr4:6188866-6190591 FORWARD LENGTH=191                                                                                                                                                                                                                                                                                                                                                      | 179  | 191 | 4.00E-87  | 106.7 | 86.0 | 92.7 |

|                          |                                                                                                                                                                                                                                                                                                                                                                                            |     |      |           |       |      |      |                                                     |       |                      |                                                                                                                                                                                                                                                                                                                                                                                                                                                                        |     |     |           |       |      |      |
|--------------------------|--------------------------------------------------------------------------------------------------------------------------------------------------------------------------------------------------------------------------------------------------------------------------------------------------------------------------------------------------------------------------------------------|-----|------|-----------|-------|------|------|-----------------------------------------------------|-------|----------------------|------------------------------------------------------------------------------------------------------------------------------------------------------------------------------------------------------------------------------------------------------------------------------------------------------------------------------------------------------------------------------------------------------------------------------------------------------------------------|-----|-----|-----------|-------|------|------|
| Rsa1.0_01655.1.g28769.t1 | ref NP_192719.1  Nucleotide-sugar transporter family protein [Arabidopsis thaliana] gi 453891 emb CAB39648.1  hypothetical protein [Arabidopsis thaliana] gi 7267676 emb CAB78104.1  hypothetical protein [Arabidopsis thaliana] gi 38603966 gb AAR24728.1  At4g09810 [Arabidopsis thaliana] gi 33265740 gb AEE82801.1  Nucleotide-sugar transporter family protein [Arabidopsis thaliana] | 336 | 335  | 0         | 99.7  | 94.0 | 97.3 | Nucleotide-sugar transporter family protein         | gbpln | Arabidopsis thaliana | AT4G09810.1   Symbols:   Nucleotide-sugar transporter family protein   chr4:6175415-6176892 REVERSE LENGTH=335                                                                                                                                                                                                                                                                                                                                                         | 336 | 335 | 0         | 99.7  | 94.0 | 97.3 |
| Rsa1.0_01655.1.g28770.t2 | gb EOA21645.1  hypothetical protein CARUB_v10002063mg, partial [Capsella rubella]                                                                                                                                                                                                                                                                                                          | 178 | 183  | 5.00E-79  | 102.8 | 83.7 | 84.8 | hypothetical protein CARUB_v10002063mg, partial     | gbpln | Capsella rubella     | AT4G09800.1   Symbols: RPS18C   S18 ribosomal protein   chr4:6173818-6174963 FORWARD LENGTH=152                                                                                                                                                                                                                                                                                                                                                                        | 178 | 152 | 2.00E-81  | 85.4  | 84.3 | 85.4 |
| Rsa1.0_01655.1.g28771.t4 | emb CAB78060.1  putative protein [Arabidopsis thaliana]                                                                                                                                                                                                                                                                                                                                    | 704 | 666  | 7.00E-68  | 94.6  | 19.3 | 29.0 | putative protein                                    | gbpln | Arabidopsis thaliana | AT2G06420.1   Symbols:   Domain of unknown function (DUF1985)   chr2:2539083-2539985 FORWARD LENGTH=249                                                                                                                                                                                                                                                                                                                                                                | 704 | 249 | 1.00E-33  | 35.4  | 12.1 | 17.5 |
| Rsa1.0_01655.1.g28772.t1 | emb CAB45792.1  putative protein [Arabidopsis thaliana] gi 7267462 emb CAB81158.1  putative protein [Arabidopsis thaliana]                                                                                                                                                                                                                                                                 | 150 | 320  | 1.00E-11  | 213.3 | 24.7 | 33.3 | putative protein                                    | gbpln | Arabidopsis thaliana | #                                                                                                                                                                                                                                                                                                                                                                                                                                                                      | #   | #   | #         | #     | #    | #    |
| Rsa1.0_01655.1.g28773.t1 | gb AAC33226.1  putative non-LTR retroelement reverse transcriptase [Arabidopsis thaliana]                                                                                                                                                                                                                                                                                                  | 320 | 1529 | 3.00E-46  | 477.8 | 33.1 | 45.0 | putative non-LTR retroelement reverse transcriptase | gbpln | Arabidopsis thaliana | AT5G18880.1   Symbols:   RNA-directed DNA polymerase (reverse transcriptase)-related family protein   chr5:6300535-6301422 REVERSE LENGTH=295                                                                                                                                                                                                                                                                                                                          | 320 | 295 | 1.00E-33  | 92.2  | 26.3 | 42.5 |
| Rsa1.0_01655.1.g28774.t1 | gb ABE65398.1  hypothetical protein At1g43570 [Arabidopsis thaliana]                                                                                                                                                                                                                                                                                                                       | 133 | 348  | 2.00E-29  | 261.7 | 45.1 | 64.7 | hypothetical protein At1g43570                      | gbpln | Arabidopsis thaliana | AT3G24255.1   Symbols:   RNA-directed DNA polymerase (reverse transcriptase)-related family protein   chr3:8789471-8793208 FORWARD LENGTH=746                                                                                                                                                                                                                                                                                                                          | 133 | 746 | 2.00E-20  | 560.9 | 39.8 | 51.1 |
| Rsa1.0_01655.1.g28775.t1 | dbj BAB10790.1  retroelement pol polyprotein-like [Arabidopsis thaliana]                                                                                                                                                                                                                                                                                                                   | 895 | 1864 | 1.00E-116 | 208.3 | 33.5 | 50.6 | retroelement pol polyprotein-like                   | gbpln | Arabidopsis thaliana | #                                                                                                                                                                                                                                                                                                                                                                                                                                                                      | #   | #   | #         | #     | #    | #    |
| Rsa1.0_01655.1.g28776.t1 | gb AAF19546.1 AC007190_14 F23N19.13 [Arabidopsis thaliana]                                                                                                                                                                                                                                                                                                                                 | 177 | 633  | 3.00E-38  | 357.6 | 48.6 | 61.6 | F23N19.13                                           | gbpln | Arabidopsis thaliana | AT3G42170.1   Symbols:   BED zinc finger ;hAT family dimerisation domain   chr3:14321838-14323928 FORWARD LENGTH=696                                                                                                                                                                                                                                                                                                                                                   | 177 | 696 | 5.00E-17  | 393.2 | 23.2 | 33.9 |
| Rsa1.0_01656.1.g28777.t1 | gb AEC10965.1  50S ribosomal protein L29 [Camellia sinensis]                                                                                                                                                                                                                                                                                                                               | 60  | 178  | 2.00E-15  | 296.7 | 68.3 | 73.3 | 50S ribosomal protein L29                           | gbpln | Camellia sinensis    | AT5G65220.1   Symbols:   Ribosomal L29 family protein   chr5:26061301-26062506 FORWARD LENGTH=173                                                                                                                                                                                                                                                                                                                                                                      | 60  | 173 | 4.00E-17  | 288.3 | 91.7 | 96.7 |
| Rsa1.0_01656.1.g28778.t1 | gb EOA12555.1  hypothetical protein CARUB_v10026822mg [Capsella rubella]                                                                                                                                                                                                                                                                                                                   | 302 | 310  | 1.00E-122 | 102.6 | 81.5 | 86.4 | hypothetical protein CARUB_v10026822mg              | gbpln | Capsella rubella     | AT5G65230.1   Symbols:   AtMYB53, MYB53   myb domain protein 53   chr5:26068290-26069408 FORWARD LENGTH=310                                                                                                                                                                                                                                                                                                                                                            | 302 | 310 | 1.00E-123 | 102.6 | 83.4 | 86.8 |
| Rsa1.0_01656.1.g28779.t1 | gb EOA15267.1  hypothetical protein CARUB_v10028666mg [Capsella rubella]                                                                                                                                                                                                                                                                                                                   | 610 | 608  | 0         | 99.7  | 90.2 | 94.9 | hypothetical protein CARUB_v10028666mg              | gbpln | Capsella rubella     | AT5G65240.1   Symbols:   Leucine-rich repeat protein kinase family protein   chr5:26074980-26077650 REVERSE LENGTH=607                                                                                                                                                                                                                                                                                                                                                 | 610 | 607 | 0         | 99.5  | 90.8 | 94.9 |
| Rsa1.0_01656.1.g28780.t1 | ref XP_002866660.1  hypothetical protein ARALYDRAFT_496756 [Arabidopsis lyrata subsp. lyrata] gi 297312495 gb EFH42919.1  hypothetical protein ARALYDRAFT_496756 [Arabidopsis lyrata subsp. lyrata]                                                                                                                                                                                        | 295 | 299  | 5.00E-98  | 101.4 | 75.3 | 86.1 | hypothetical protein ARALYDRAFT_496756              | gbpln | Arabidopsis lyrata   | AT5G65250.1   Symbols:   unknown protein; FUNCTIONS IN: molecular_function unknown; INVOLVED IN: biological_process unknown; LOCATED IN: chloroplast; EXPRESSED IN: 22 plant structures; EXPRESSED DURING: 13 growth stages; Has 30201 Blast hits to 17322 proteins in 780 species: Archae - 12; Bacteria - 1396; Metazoa - 17338; Fungi - 3422; Plants - 5037; Viruses - 0; Other Eukaryotes - 2996 (source: NCBI BLINK).   chr5:26078699-26080051 REVERSE LENGTH=300 | 295 | 300 | 1.00E-100 | 101.7 | 72.5 | 83.7 |
| Rsa1.0_01656.1.g28781.t3 | gb EOA12395.1  hypothetical protein CARUB_v10027046mg, partial [Capsella rubella]                                                                                                                                                                                                                                                                                                          | 93  | 233  | 1.00E-30  | 250.5 | 80.6 | 86.0 | hypothetical protein CARUB_v10027046mg, partial     | gbpln | Capsella rubella     | AT5G10350.1   Symbols:   RNA-binding (RRM/RBD/RNP motifs) family protein   chr5:3255674-3257746 REVERSE LENGTH=217                                                                                                                                                                                                                                                                                                                                                     | 93  | 217 | 9.00E-28  | 233.3 | 69.9 | 81.7 |
| Rsa1.0_01656.1.g28782.t1 | emb CAB77741.1  putative actin polymerization factor [Arabidopsis thaliana]                                                                                                                                                                                                                                                                                                                | 119 | 159  | 4.00E-25  | 133.6 | 63.0 | 71.4 | putative actin polymerization factor                | gbpln | Arabidopsis thaliana | AT4G01710.1   Symbols:   CRK, ARPCS   ARP2/3 complex 16 kDa subunit (p16-Arc)   chr4:735776-736450 FORWARD LENGTH=132                                                                                                                                                                                                                                                                                                                                                  | 119 | 132 | 8.00E-28  | 110.9 | 63.0 | 71.4 |
| Rsa1.0_01656.1.g28783.t1 | ref NP_201331.1  protein GCR2-like 1 [Arabidopsis thaliana] gi 10178190 dbj BAB11664.1  G protein-coupled receptor-like protein [Arabidopsis thaliana] gi 16604356 gb AL24184.1  AT5g65280/MQN23.23 [Arabidopsis thaliana] gi 332010650 gb AED98033.1  protein GCR2-like 1 [Arabidopsis thaliana]                                                                                          | 439 | 433  | 0         | 98.6  | 86.1 | 90.7 | protein GCR2-like 1                                 | gbpln | Arabidopsis thaliana | AT5G65280.1   Symbols:   GCL1   GCR2-like 1   chr5:26086129-26088069 REVERSE LENGTH=433                                                                                                                                                                                                                                                                                                                                                                                | 439 | 433 | 0         | 98.6  | 86.1 | 90.7 |

|                           |                                                                                                                                                                                                                                                                                                                                               |      |      |           |       |      |      |                                            |       |                      |                                                                                                                                                                                                                                                                                                                                              |      |      |           |       |      |      |
|---------------------------|-----------------------------------------------------------------------------------------------------------------------------------------------------------------------------------------------------------------------------------------------------------------------------------------------------------------------------------------------|------|------|-----------|-------|------|------|--------------------------------------------|-------|----------------------|----------------------------------------------------------------------------------------------------------------------------------------------------------------------------------------------------------------------------------------------------------------------------------------------------------------------------------------------|------|------|-----------|-------|------|------|
| Rsa1.0_01656.1.g28784.t1  | refXP_002866663.1   hypothetical protein ARALYDRAFT_496763 [Arabidopsis lyrata subsp. lyrata] gi 297312498 gb EFH42922.1                                                                                                                                                                                                                      | 144  | 150  | 3.00E-38  | 104.2 | 73.6 | 81.3 | hypothetical protein ARALYDRAFT_496763     | gbpln | Arabidopsis lyrata   | AT5G65300.1   Symbols:   unknown protein; Has 30201 Blast hits to 17322 proteins in 780 species: Archae - 12; Bacteria - 1396; Metazoa - 17338; Fungi - 3422; Plants - 5037; Viruses - 0; Other Eukaryotes - 2996 (source: NCBI BLINK).   chr5:26095266-26095718 REVERSE LENGTH=150                                                          | 144  | 150  | 2.00E-31  | 104.2 | 70.1 | 78.5 |
| Rsa1.0_01656.1.g28785.t1  | # # # # # # # # - ----                                                                                                                                                                                                                                                                                                                        |      |      |           |       |      |      |                                            |       |                      | # # # # # # #                                                                                                                                                                                                                                                                                                                                |      |      |           |       |      |      |
| Rsa1.0_01656.1.g28786.t2  | gb EOA13730.1   hypothetical protein CARUB_v10026808mg [Capsella rubella]                                                                                                                                                                                                                                                                     | 305  | 315  | 1.00E-126 | 103.3 | 80.3 | 85.6 | hypothetical protein CARUB_v10026808mg     | gbpln | Capsella rubella     | AT5G65310.1   Symbols: ATHB5, ATHB-5, HB5   homeobox protein 5   chr3:26102457-26104217 REVERSE LENGTH=312                                                                                                                                                                                                                                   | 305  | 312  | 1.00E-128 | 102.3 | 80.7 | 86.9 |
| Rsa1.0_01657.1.g28787.t10 | refXP_002892146.1   hypothetical protein ARALYDRAFT_311407 [Arabidopsis lyrata subsp. lyrata] gi 297337988 gb EFH68405.1                                                                                                                                                                                                                      | 3616 | 3606 | 0         | 99.7  | 91.7 | 95.1 | hypothetical protein ARALYDRAFT_311407     | gbpln | Arabidopsis lyrata   | AT1G03060.1   Symbols: SPI   Beige/BEACH domain ;WD domain, G-beta repeat protein   chr1:712971-726891 REVERSE LENGTH=3601                                                                                                                                                                                                                   | 3616 | 3601 | 0         | 99.6  | 91.3 | 94.7 |
| Rsa1.0_01657.1.g28788.t1  | refXP_002892145.1   hypothetical protein ARALYDRAFT_470283 [Arabidopsis lyrata subsp. lyrata] gi 297337987 gb EFH68404.1                                                                                                                                                                                                                      | 265  | 264  | 1.00E-119 | 99.6  | 78.9 | 86.4 | hypothetical protein ARALYDRAFT_470283     | gbpln | Arabidopsis lyrata   | AT1G03055.1   Symbols:   unknown protein; BEST Arabidopsis thaliana protein match is: unknown protein (TAIR:AT1G64680.1); Has 143 Blast hits to 143 proteins in 26 species: Archae - 0; Bacteria - 6; Metazoa - 0; Fungi - 0; Plants - 122; Viruses - 0; Other Eukaryotes - 15 (source: NCBI BLINK).   chr1:710102-711763 REVERSE LENGTH=264 | 265  | 264  | 1.00E-118 | 99.6  | 77.4 | 85.3 |
| Rsa1.0_01657.1.g28789.t1  | ref NP_171804.1   putative clathrin assembly protein [Arabidopsis thaliana] gi 46396022 sp Q9SA65.1   CAP4_ARATH RecName: Full=Putative clathrin assembly protein At1g03050 gi 4587573 gb AAD25804.1   AC006550_12                                                                                                                            | 592  | 599  | 0         | 101.2 | 87.8 | 94.3 | putative clathrin assembly protein         | gbpln | Arabidopsis thaliana | AT1G03050.1   Symbols:   ENTH/ANTH/VHS superfamily protein   chr1:707726-709860 FORWARD LENGTH=599                                                                                                                                                                                                                                           | 592  | 599  | 0         | 101.2 | 87.8 | 94.3 |
| Rsa1.0_01657.1.g28790.t1  | Similar to clathrin assembly protein gb AF041374 (CALM) from Rattus norvegicus [Arabidopsis thaliana] gi 9180573   gb ABE55594.1   clathrin assembly protein-like [Arabidopsis thaliana] gi 332189399 gb AEE27520.1   putative clathrin assembly protein [Arabidopsis thaliana]                                                               |      |      |           |       |      |      |                                            |       |                      |                                                                                                                                                                                                                                                                                                                                              |      |      |           |       |      |      |
| Rsa1.0_01657.1.g28790.t1  | refXP_002892143.1   glutaredoxin family protein [Arabidopsis lyrata subsp. lyrata] gi 297337985 gb EFH68402.1                                                                                                                                                                                                                                 | 102  | 102  | 1.00E-48  | 100.0 | 91.2 | 95.1 | glutaredoxin family protein                | gbpln | Arabidopsis lyrata   | AT1G03020.1   Symbols:   Thioredoxin superfamily protein   chr1:698207-698515 REVERSE LENGTH=102                                                                                                                                                                                                                                             | 102  | 102  | 2.00E-49  | 100.0 | 88.2 | 93.1 |
| Rsa1.0_01657.1.g28791.t1  | ref NP_171800.1   Phototropic-responsive NPH3 family protein [Arabidopsis thaliana] gi 75200292 sp Q9SA69.1   Y1301_ARATH RecName: Full=BTB/POZ domain-containing protein At1g03010 gi 4587577 gb AAD25808.1   AC006550_16                                                                                                                    | 637  | 634  | 0         | 99.5  | 89.2 | 94.8 | Phototropic-responsive NPH3 family protein | gbpln | Arabidopsis thaliana | AT1G03010.1   Symbols:   Phototropic-responsive NPH3 family protein   chr1:693480-696188 FORWARD LENGTH=634                                                                                                                                                                                                                                  | 637  | 634  | 0         | 99.5  | 89.2 | 94.8 |
| Rsa1.0_01657.1.g28792.t1  | F1003.17 [Arabidopsis thaliana] gi 332189393 gb AEE27514.1   Phototropic-responsive NPH3 family protein [Arabidopsis thaliana]                                                                                                                                                                                                                |      |      |           |       |      |      |                                            |       |                      |                                                                                                                                                                                                                                                                                                                                              |      |      |           |       |      |      |
| Rsa1.0_01657.1.g28792.t1  | gb ABD65090.1   hypothetical protein 27.t00116 [Brassica oleracea]                                                                                                                                                                                                                                                                            | 113  | 484  | 5.00E-18  | 428.3 | 43.4 | 57.5 | hypothetical protein 27.t00116             | gbpln | Brassica oleracea    | #                                                                                                                                                                                                                                                                                                                                            | #    | #    | #         | #     | #    | #    |
| Rsa1.0_01658.1.g28793.t3  | refXP_002884143.1   hypothetical protein ARALYDRAFT_900245 [Arabidopsis lyrata subsp. lyrata] gi 297329983 gb EFH60402.1                                                                                                                                                                                                                      | 1054 | 472  | 0         | 44.8  | 32.2 | 35.9 | hypothetical protein ARALYDRAFT_900245     | gbpln | Arabidopsis lyrata   | AT2G18590.1   Symbols:   Major facilitator superfamily protein   chr2:8069988-8072866 FORWARD LENGTH=473                                                                                                                                                                                                                                     | 1054 | 473  | 0         | 44.9  | 30.5 | 34.5 |
| Rsa1.0_01658.1.g28794.t1  | ref NP_849978.2   UDP-glycosyltransferase-like protein [Arabidopsis thaliana] gi 75315911   sp Q9ZU72.1   U72D1_ARATH RecName: Full=UDP-glycosyltransferase 72D1 gi 4218002 gb AAD12210.1   putative flavonol 3-O-glucosyltransferase [Arabidopsis thaliana] gi 330251688 gb AEC06782.1   UDP-glycosyltransferase 72D1 [Arabidopsis thaliana] | 467  | 470  | 0         | 100.6 | 77.5 | 88.7 | UDP-glycosyltransferase-like protein       | gbpln | Arabidopsis thaliana | AT2G18570.1   Symbols:   UDP-Glycosyltransferase superfamily protein   chr2:8063429-8064841 FORWARD LENGTH=470                                                                                                                                                                                                                               | 467  | 470  | 0         | 100.6 | 77.5 | 88.7 |

|                          |                                                                                                                                                                                                                                                                                                                                         |     |      |          |       |      |      |                                                     |       |                      |                                                                                                                                                                                                                                                                                                                                                        |     |     |          |       |      |      |
|--------------------------|-----------------------------------------------------------------------------------------------------------------------------------------------------------------------------------------------------------------------------------------------------------------------------------------------------------------------------------------|-----|------|----------|-------|------|------|-----------------------------------------------------|-------|----------------------|--------------------------------------------------------------------------------------------------------------------------------------------------------------------------------------------------------------------------------------------------------------------------------------------------------------------------------------------------------|-----|-----|----------|-------|------|------|
| Rsa1.0_01658.1.g28795.t1 | gb AAC95175.1  putative non-LTR retroelement reverse transcriptase [Arabidopsis thaliana]                                                                                                                                                                                                                                               | 245 | 1352 | 3.00E-19 | 551.8 | 34.3 | 46.5 | putative non-LTR retroelement reverse transcriptase | gbpln | Arabidopsis thaliana | AT3G24255.1   Symbols:   RNA-directed DNA polymerase (reverse transcriptase)-related family protein   chr3:8789471-8793208 FORWARD LENGTH=746                                                                                                                                                                                                          | 245 | 746 | 6.00E-12 | 304.5 | 17.6 | 22.0 |
| Rsa1.0_01658.1.g28796.t1 | gb EMJ11389.1  hypothetical protein PRUPE_ppa017790mg [Prunus persica]                                                                                                                                                                                                                                                                  | 787 | 1485 | 0        | 188.7 | 42.7 | 49.7 | hypothetical protein PRUPE_ppa017790mg              | gbpln | Prunus persica       | #                                                                                                                                                                                                                                                                                                                                                      | #   | #   | #        | #     | #    | #    |
| Rsa1.0_01658.1.g28797.t1 | ref XP_002867363.1  predicted protein [Arabidopsis lyrata subsp. lyrata]<br>gi 297313199 gb EFH43622.1  predicted protein [Arabidopsis lyrata subsp. lyrata]                                                                                                                                                                            | 335 | 232  | 1.00E-46 | 69.3  | 31.6 | 41.8 | predicted protein                                   | gbpln | Arabidopsis lyrata   | AT5G27260.1   Symbols:   unknown protein; BEST Arabidopsis thaliana protein match is: unknown protein (TAIR:AT2G29880.1); Has 1807 Blast hits to 1807 proteins in 277 species: Archae - 0; Bacteria - 0; Metazoa - 736; Fungi - 347; Plants - 385; Viruses - 0; Other Eukaryotes - 339 (source: NCBI BLink).   chr5:9603943-9604930 FORWARD LENGTH=303 | 335 | 303 | 7.00E-42 | 90.4  | 29.0 | 43.6 |
| Rsa1.0_01659.1.g28798.t1 | gb EOA40500.1  hypothetical protein CARUB_v10009226mg, partial [Capsella rubella]                                                                                                                                                                                                                                                       | 111 | 425  | 1.00E-43 | 382.9 | 83.8 | 89.2 | hypothetical protein CARUB_v10009226mg, partial     | gbpln | Capsella rubella     | AT1G30840.2   Symbols: PUP4   purine permease 4   chr1:10974581-10975729 FORWARD LENGTH=382                                                                                                                                                                                                                                                            | 111 | 382 | 3.00E-35 | 344.1 | 75.7 | 80.2 |
| Rsa1.0_01659.1.g28799.t7 | ref XP_002890909.1  hypothetical protein ARALYDRAFT_473326 [Arabidopsis lyrata subsp. lyrata]<br>gi 297336751 gb EFH67168.1  hypothetical protein ARALYDRAFT_473326 [Arabidopsis lyrata subsp. lyrata]                                                                                                                                  | 118 | 118  | 1.00E-53 | 100.0 | 90.7 | 93.2 | hypothetical protein ARALYDRAFT_473326              | gbpln | Arabidopsis lyrata   | AT1G30845.1   Symbols:   unknown protein; Has 120 Blast hits to 120 proteins in 67 species: Archae - 0; Bacteria - 0; Metazoa - 35; Fungi - 37; Plants - 23; Viruses - 0; Other Eukaryotes - 25 (source: NCBI BLink).   chr1:10979856-10980427 FORWARD LENGTH=118                                                                                      | 118 | 118 | 3.00E-46 | 100.0 | 84.7 | 90.7 |
| Rsa1.0_01659.1.g28800.t1 | #                                                                                                                                                                                                                                                                                                                                       | #   | #    | #        | #     | #    | -    | ----                                                | ----  | ----                 | #                                                                                                                                                                                                                                                                                                                                                      | #   | #   | #        | #     | #    | #    |
| Rsa1.0_01659.1.g28801.t1 | #                                                                                                                                                                                                                                                                                                                                       | #   | #    | #        | #     | #    | -    | ----                                                | ----  | ----                 | #                                                                                                                                                                                                                                                                                                                                                      | #   | #   | #        | #     | #    | #    |
| Rsa1.0_01659.1.g28802.t1 | ref NP_564376.1  myo-inositol monophosphatase like 1 [Arabidopsis thaliana]<br>gi 332278187 sp Q94F00.2 IMPL1_ARAT H RecName: Full=Phosphatase IMPL1, chloroplastic; AltName: Full=Protein MYO-INOSITOL MONOPHOSPHATASE-LIKE 1; Flags: Precursor gi 332193206 gb AEE31327.1  myo-inositol monophosphatase like 1 [Arabidopsis thaliana] | 379 | 371  | 0        | 97.9  | 89.7 | 93.7 | myo-inositol monophosphatase like 1                 | gbpln | Arabidopsis thaliana | AT1G31190.1   Symbols: IMPL1   myo-inositol monophosphatase like 1   chr1:11144861-11146800 FORWARD LENGTH=371                                                                                                                                                                                                                                         | 379 | 371 | 0        | 97.9  | 89.7 | 93.7 |
| Rsa1.0_01659.1.g28803.t1 | ref NP_174405.1  protein PHLOEM protein 2-LIKE A9 [Arabidopsis thaliana]<br>gi 75200001 sp Q9SA16.1 P2A09_ARAT H RecName: Full=Protein PHLOEM PROTEIN 2-LIKE A9; Short=AtPP2-A9<br>gi 4512617 gb AAD21686.1  F28K20.16 [Arabidopsis thaliana]<br>gi 332193207 gb AEE31328.1  protein PHLOEM protein 2-LIKE A9 [Arabidopsis thaliana]    | 176 | 180  | 5.00E-82 | 102.3 | 86.9 | 92.6 | protein PHLOEM protein 2-LIKE A9                    | gbpln | Arabidopsis thaliana | AT1G31200.1   Symbols: ATPP2-A9, PP2-A9   phloem protein 2-A9   chr1:11146923-11147678 REVERSE LENGTH=180                                                                                                                                                                                                                                              | 176 | 180 | 2.00E-84 | 102.3 | 86.9 | 92.6 |
| Rsa1.0_01659.1.g28804.t1 | ref XP_002882207.1  predicted protein [Arabidopsis lyrata subsp. lyrata]<br>gi 297328047 gb EFH58466.1  predicted protein [Arabidopsis lyrata subsp. lyrata]                                                                                                                                                                            | 109 | 470  | 3.00E-39 | 431.2 | 76.1 | 85.3 | predicted protein                                   | gbpln | Arabidopsis lyrata   | AT3G02120.1   Symbols:   hydroxyproline-rich glycoprotein family protein   chr3:377122-377577 FORWARD LENGTH=126                                                                                                                                                                                                                                       | 109 | 126 | 4.00E-38 | 115.6 | 73.4 | 84.4 |



|                          |                                                                                                                                                                                                                                                                                                                                                                                                                                                                                                                                                                                                                                                                                                                                                                                                                                                                                                                                  |     |     |           |       |      |      |                                                 |       |                         |                                                                                                                                               |     |     |           |       |      |      |  |  |
|--------------------------|----------------------------------------------------------------------------------------------------------------------------------------------------------------------------------------------------------------------------------------------------------------------------------------------------------------------------------------------------------------------------------------------------------------------------------------------------------------------------------------------------------------------------------------------------------------------------------------------------------------------------------------------------------------------------------------------------------------------------------------------------------------------------------------------------------------------------------------------------------------------------------------------------------------------------------|-----|-----|-----------|-------|------|------|-------------------------------------------------|-------|-------------------------|-----------------------------------------------------------------------------------------------------------------------------------------------|-----|-----|-----------|-------|------|------|--|--|
|                          | <p>ref[NP_174407.1]<br/> phosphoribosylglycinamide<br/> formyltransferase [Arabidopsis thaliana]<br/> gi 14917033 sp P52422.2 PUR3_ARATH<br/> RecName:<br/> Full=Phosphoribosylglycinamide<br/> formyltransferase, chloroplastic;<br/> AltName: Full=5'-<br/> phosphoribosylglycinamide<br/> transformylase; AltName: Full=GAR<br/> transformylase; Short=GART; Flags:<br/> Precursor gi 4512619 gb AAD21688.1 <br/> This gene is a member of the formyl<br/> transferase family PF100551 and may be<br/> a pseudogene of gb X74767</p>                                                                                                                                                                                                                                                                                                                                                                                          |     |     |           |       |      |      |                                                 |       |                         |                                                                                                                                               |     |     |           |       |      |      |  |  |
| Rsa1.0_01659.1.g28805.t1 | <p>phosphoribosylglycinamide formyl<br/> transferase (PUR3) from Arabidopsis<br/> thaliana since our sequence differs from<br/> PUR3 by an insertion of an A at bp 225<br/> and a deletion of an A at bp 1276<br/> [Arabidopsis thaliana]<br/> gi 4753662 emb CAA52779.2 <br/> phosphoribosylglycinamide<br/> formyltransferase [Arabidopsis thaliana]<br/> gi 28392982 gb AAO41926.1  putative<br/> phosphoribosylglycinamide<br/> formyltransferase [Arabidopsis thaliana]<br/> gi 29824209 gb AAP04065.1  putative<br/> phosphoribosylglycinamide<br/> formyltransferase [Arabidopsis thaliana]<br/> gi 332193208 gb AEE31329.1 <br/> phosphoribosylglycinamide<br/> formyltransferase [Arabidopsis thaliana]</p>                                                                                                                                                                                                             | 287 | 292 | 1.00E-134 | 101.7 | 85.7 | 90.9 | phosphoribosylglycinam<br>ide formyltransferase | gbpln | Arabidopsis<br>thaliana | AT1G31220.1   Symbols:   Formyl transferase<br>  chr1:11157064-11158408 FORWARD<br>LENGTH=292                                                 | 287 | 292 | 1.00E-137 | 101.7 | 85.7 | 90.9 |  |  |
| Rsa1.0_01659.1.g28806.t1 | <p>gb EOA39622.1  hypothetical protein<br/> CARUB_v10008251mg [Capsella rubella]</p>                                                                                                                                                                                                                                                                                                                                                                                                                                                                                                                                                                                                                                                                                                                                                                                                                                             | 914 | 911 | 0         | 99.7  | 93.3 | 96.7 | hypothetical protein<br>CARUB_v10008251mg       | gbpln | Capsella<br>rubella     | AT1G31230.1   Symbols: AK-HSDH I, AK-<br>HSDH   aspartate kinase-homoserine<br>dehydrogenase i   chr1:11158744-11163055<br>REVERSE LENGTH=911 | 914 | 911 | 0         | 99.7  | 92.8 | 96.4 |  |  |
| Rsa1.0_01659.1.g28807.t1 | <p>ref XP_002891123.1  hypothetical<br/> protein ARALYDRAFT_891076<br/> [Arabidopsis lyrata subsp. lyrata]<br/> gi 297336965 gb EFH67382.1 <br/> hypothetical protein<br/> ARALYDRAFT_891076 [Arabidopsis<br/> lyrata subsp. lyrata]</p>                                                                                                                                                                                                                                                                                                                                                                                                                                                                                                                                                                                                                                                                                         | 281 | 276 | 3.00E-83  | 98.2  | 66.5 | 74.4 | hypothetical protein<br>ARALYDRAFT_891076       | gbpln | Arabidopsis<br>lyrata   | AT1G31240.1   Symbols:   Bromodomain<br>transcription factor   chr1:11164065-<br>11164898 REVERSE LENGTH=277                                  | 281 | 277 | 3.00E-81  | 98.6  | 64.8 | 73.7 |  |  |
| Rsa1.0_01659.1.g28808.t1 | <p>ref NP_174411.2  putative zinc<br/> transporter 10 [Arabidopsis thaliana]<br/> gi 37090222 sp Q9W245.2 ZIP10_ARATH<br/> RecName: Full=Probable zinc<br/> transporter 10; AltName: Full=ZRT/IRT-<br/> like protein 10; Flags: Precursor<br/> gi 8692132 gb AAF24597.1 AC007654_13<br/> T19E23.6 [Arabidopsis thaliana]<br/> gi 332193212 gb AEE31333.1  putative<br/> zinc transporter 10 [Arabidopsis<br/> thaliana]</p>                                                                                                                                                                                                                                                                                                                                                                                                                                                                                                      | 370 | 364 | 0         | 98.4  | 85.4 | 91.4 | putative zinc<br>transporter 10                 | gbpln | Arabidopsis<br>thaliana | AT1G31260.1   Symbols: ZIP10   zinc<br>transporter 10 precursor   chr1:11175559-<br>11177362 REVERSE LENGTH=364                               | 370 | 364 | 0         | 98.4  | 85.4 | 91.4 |  |  |
| Rsa1.0_01660.1.g28809.t1 | <p>ref NP_194980.1  YUCCA family<br/> monooxygenase [Arabidopsis thaliana]<br/> gi 75213680 sp Q9SY8.1 YUC1_ARATH<br/> RecName: Full=Probable indole-3-<br/> pyruvate monooxygenase YUCCA1;<br/> AltName: Full=Flavin-containing<br/> monooxygenase YUCCA1<br/> gi 4914451 emb CAB43691.1 <br/> dimethylaniline monooxygenase-like<br/> protein [Arabidopsis thaliana]<br/> gi 7270159 emb CAB79971.1 <br/> dimethylaniline monooxygenase-like<br/> protein [Arabidopsis thaliana]<br/> gi 1655352 gb AAL23750.1  flavin-<br/> containing monooxygenase YUCCA<br/> [Arabidopsis thaliana]<br/> gi 332660675 gb AEE86075.1  flavin-<br/> containing monooxygenase YUCCA1<br/> [Arabidopsis thaliana]<br/> ref XP_002880688.1  H+-transporting<br/> two-sector ATPase [Arabidopsis lyrata<br/> subsp. lyrata]<br/> gi 297326527 gb EFH56947.1  H+-<br/> transporting two-sector ATPase<br/> [Arabidopsis lyrata subsp. lyrata]</p> | 415 | 414 | 0         | 99.8  | 87.5 | 92.5 | YUCCA family<br>monooxygenase                   | gbpln | Arabidopsis<br>thaliana | AT4G32540.1   Symbols: YUC, YUC1  <br>Flavin-binding monooxygenase family protein<br>  chr4:15700904-15702870 FORWARD<br>LENGTH=414           | 415 | 414 | 0         | 99.8  | 87.5 | 92.5 |  |  |
| Rsa1.0_01660.1.g28810.t1 | <p>ref XP_002880688.1  H+-transporting<br/> two-sector ATPase [Arabidopsis lyrata<br/> subsp. lyrata]<br/> gi 297326527 gb EFH56947.1  H+-<br/> transporting two-sector ATPase<br/> [Arabidopsis lyrata subsp. lyrata]</p>                                                                                                                                                                                                                                                                                                                                                                                                                                                                                                                                                                                                                                                                                                       | 177 | 179 | 8.00E-89  | 101.1 | 98.9 | 99.4 | H+-transporting two-<br>sector ATPase           | gbpln | Arabidopsis<br>lyrata   | AT2G25610.1   Symbols:   ATPase, F0/V0<br>complex, subunit C protein   chr2:10901585-<br>10902494 REVERSE LENGTH=178                          | 177 | 178 | 3.00E-91  | 100.6 | 98.3 | 99.4 |  |  |

|                          |                                                                                                                                                                                                                                                                                                                                                                                                                                     |      |      |           |       |      |       |                                                                            |       |                      |                                                                                                                                                                                                                                                                                                                                                                                                                                                                                                                                                      |      |     |           |       |      |      |
|--------------------------|-------------------------------------------------------------------------------------------------------------------------------------------------------------------------------------------------------------------------------------------------------------------------------------------------------------------------------------------------------------------------------------------------------------------------------------|------|------|-----------|-------|------|-------|----------------------------------------------------------------------------|-------|----------------------|------------------------------------------------------------------------------------------------------------------------------------------------------------------------------------------------------------------------------------------------------------------------------------------------------------------------------------------------------------------------------------------------------------------------------------------------------------------------------------------------------------------------------------------------------|------|-----|-----------|-------|------|------|
| Rsa1.0_01660.1.g28811.t1 | gb EOA16417.1  hypothetical protein CARUB_v10004571mg [Capsella rubella]                                                                                                                                                                                                                                                                                                                                                            | 542  | 529  | 0         | 97.6  | 87.5 | 91.7  | hypothetical protein CARUB_v10004571mg                                     | gbpln | Capsella rubella     | AT4G32520.2   Symbols: SHM3   serine hydroxymethyltransferase 3   chr4:15688642-15692334 REVERSE LENGTH=529                                                                                                                                                                                                                                                                                                                                                                                                                                          | 542  | 529 | 0         | 97.6  | 86.5 | 91.3 |
| Rsa1.0_01660.1.g28812.t1 | ref NP_194970.1  tudor-like RNA-binding protein [Arabidopsis thaliana] gi 4049346 emb CAA22571.1  putative protein [Arabidopsis thaliana] gi 7270148 emb CAB79961.1  putative protein [Arabidopsis thaliana] gi 27765060 gb AAO23651.1  At4g32440 [Arabidopsis thaliana] gi 110742940 dbj BAE99365.1  hypothetical protein [Arabidopsis thaliana] gi 332660659 gb AEE86059.1  tudor-like RNA-binding protein [Arabidopsis thaliana] | 350  | 377  | 1.00E-145 | 107.7 | 77.7 | 86.3  | tudor-like RNA-binding protein                                             | gbpln | Arabidopsis thaliana | AT4G32440.1   Symbols:   Plant Tudor-like RNA-binding protein   chr4:15657295-15658692 FORWARD LENGTH=377                                                                                                                                                                                                                                                                                                                                                                                                                                            | 350  | 377 | 1.00E-148 | 107.7 | 77.7 | 86.3 |
| Rsa1.0_01661.1.g28813.t1 | dbj BAD44345.1  retrotransposon like protein [Arabidopsis thaliana]                                                                                                                                                                                                                                                                                                                                                                 | 292  | 383  | 5.00E-62  | 131.2 | 43.8 | 55.1  | retrotransposon like protein                                               | gbpln | Arabidopsis thaliana | #                                                                                                                                                                                                                                                                                                                                                                                                                                                                                                                                                    | #    | #   | #         | #     | #    | #    |
| Rsa1.0_01661.1.g28814.t1 | #                                                                                                                                                                                                                                                                                                                                                                                                                                   | #    | #    | #         | #     | #    | #     | -                                                                          | ----  | ----                 | #                                                                                                                                                                                                                                                                                                                                                                                                                                                                                                                                                    | #    | #   | #         | #     | #    | #    |
| Rsa1.0_01661.1.g28815.t5 | gb AAC33226.1  putative non-LTR retroelement reverse transcriptase [Arabidopsis thaliana]                                                                                                                                                                                                                                                                                                                                           | 1431 | 1529 | 0         | 106.8 | 29.6 | 41.2  | putative non-LTR retroelement reverse transcriptase                        | gbpln | Arabidopsis thaliana | AT1G60460.3   Symbols:   unknown protein; FUNCTIONS IN: molecular_function unknown; INVOLVED IN: biological_process unknown; LOCATED IN: endomembrane system; EXPRESSED IN: 6 plant structures; EXPRESSED DURING: petal differentiation and expansion stage, E expanded cotyledon stage, D bilateral stage; Has 35333 Blast hits to 34131 proteins in 2444 species: Archae - 798; Bacteria - 22429; Metazoa - 974; Fungi - 991; Plants - 531; Viruses - 0; Other Eukaryotes - 9610 (source: NCBI BLink).   chr1:22275600-22278565 FORWARD LENGTH=473 | 1431 | 473 | 0         | 33.1  | 25.0 | 27.8 |
| Rsa1.0_01661.1.g28816.t1 | ref XP_002898143.1  DC1 domain-containing protein [Arabidopsis lyrata subsp. lyrata] gi 297333894 gb EFH64402.1  DC1 domain-containing protein [Arabidopsis lyrata subsp. lyrata]                                                                                                                                                                                                                                                   | 580  | 578  | 0         | 99.7  | 87.8 | 94.3  | DC1 domain-containing protein                                              | gbpln | Arabidopsis lyrata   | AT1G60420.1   Symbols:   DC1 domain-containing protein   chr1:22261978-22264243 FORWARD LENGTH=578                                                                                                                                                                                                                                                                                                                                                                                                                                                   | 580  | 578 | 0         | 99.7  | 86.9 | 93.6 |
| Rsa1.0_01661.1.g28817.t1 | gb EOA18856.1  hypothetical protein CARUB_v10007477mg, partial [Capsella rubella]                                                                                                                                                                                                                                                                                                                                                   | 324  | 377  | 4.00E-76  | 116.4 | 49.4 | 64.5  | hypothetical protein CARUB_v10007477mg, partial                            | gbpln | Capsella rubella     | AT5G45190.1   Symbols:   Cyclin family protein   chr5:18277808-18280733 REVERSE LENGTH=579                                                                                                                                                                                                                                                                                                                                                                                                                                                           | 324  | 579 | 2.00E-73  | 178.7 | 43.5 | 57.7 |
| Rsa1.0_01662.1.g28818.t1 | gb EOA37691.1  hypothetical protein CARUB_v10012343mg [Capsella rubella]                                                                                                                                                                                                                                                                                                                                                            | 549  | 549  | 0         | 100.0 | 83.1 | 90.7  | hypothetical protein CARUB_v10012343mg                                     | gbpln | Capsella rubella     | AT1G19900.1   Symbols:   glyoxal oxidase-related protein   chr1:6907038-6908684 REVERSE LENGTH=548                                                                                                                                                                                                                                                                                                                                                                                                                                                   | 549  | 548 | 0         | 99.8  | 79.6 | 88.2 |
| Rsa1.0_01662.1.g28819.t1 | gb AAC13599.1  similar to reverse transcriptase (Pfam: transcript_fact.hmm, score: 72.31) [Arabidopsis thaliana]                                                                                                                                                                                                                                                                                                                    | 890  | 928  | 1.00E-178 | 104.3 | 37.9 | 56.3  | similar to reverse transcriptase (Pfam: transcript_fact.hmm, score: 72.31) | gbpln | Arabidopsis thaliana | AT1G43760.1   Symbols:   DNase I-like superfamily protein   chr1:16528890-16531065 REVERSE LENGTH=626                                                                                                                                                                                                                                                                                                                                                                                                                                                | 890  | 626 | 2.00E-60  | 70.3  | 14.0 | 21.9 |
| Rsa1.0_01662.1.g28820.t1 | #                                                                                                                                                                                                                                                                                                                                                                                                                                   | #    | #    | #         | #     | #    | #     | -                                                                          | ----  | ----                 | #                                                                                                                                                                                                                                                                                                                                                                                                                                                                                                                                                    | #    | #   | #         | #     | #    | #    |
| Rsa1.0_01662.1.g28821.t1 | ref XP_002513751.1  vacuolar ATP synthase proteolipid subunit 1, 2, 3, putative [Ricinus communis] gi 223546837 gb EEF48334.1  vacuolar ATP synthase proteolipid subunit 1, 2, 3, putative [Ricinus communis]                                                                                                                                                                                                                       | 165  | 169  | 2.00E-84  | 102.4 | 99.4 | 100.0 | vacuolar ATP synthase proteolipid subunit 1, 2, 3, putative                | gbpln | Ricinus communis     | AT1G19910.1   Symbols: AVA-P2, AVA-2PE, ATVHA-O2   ATPase, FO/V0 complex, subunit C protein   chr1:6913317-6914322 FORWARD LENGTH=165                                                                                                                                                                                                                                                                                                                                                                                                                | 165  | 165 | 1.00E-86  | 100.0 | 99.4 | 99.4 |
| Rsa1.0_01662.1.g28822.t1 | ref XP_002893081.1  glycosyl hydrolase family 9 protein [Arabidopsis lyrata subsp. lyrata] gi 297338923 gb EFH69340.1  glycosyl hydrolase family 9 protein [Arabidopsis lyrata subsp. lyrata]                                                                                                                                                                                                                                       | 518  | 516  | 0         | 99.6  | 87.8 | 94.4  | glycosyl hydrolase family 9 protein                                        | gbpln | Arabidopsis lyrata   | AT1G19940.1   Symbols: AtGH9B5, GH9B5   glycosyl hydrolase 9B5   chr1:6918323-6920268 REVERSE LENGTH=515                                                                                                                                                                                                                                                                                                                                                                                                                                             | 518  | 515 | 0         | 99.4  | 88.0 | 94.2 |
| Rsa1.0_01662.1.g28823.t1 | #                                                                                                                                                                                                                                                                                                                                                                                                                                   | #    | #    | #         | #     | #    | #     | -                                                                          | ----  | ----                 | #                                                                                                                                                                                                                                                                                                                                                                                                                                                                                                                                                    | #    | #   | #         | #     | #    | #    |
| Rsa1.0_01662.1.g28824.t1 | #                                                                                                                                                                                                                                                                                                                                                                                                                                   | #    | #    | #         | #     | #    | #     | -                                                                          | ----  | ----                 | #                                                                                                                                                                                                                                                                                                                                                                                                                                                                                                                                                    | #    | #   | #         | #     | #    | #    |
| Rsa1.0_01662.1.g28825.t1 | ref XP_002893082.1  hypothetical protein ARALYDRAFT_312925 [Arabidopsis lyrata subsp. lyrata] gi 297338924 gb EFH69341.1  hypothetical protein ARALYDRAFT_312925 [Arabidopsis lyrata subsp. lyrata]                                                                                                                                                                                                                                 | 523  | 281  | 1.00E-128 | 53.7  | 43.0 | 47.8  | hypothetical protein ARALYDRAFT_312925                                     | gbpln | Arabidopsis lyrata   | AT1G19970.1   Symbols:   ER lumen protein retaining receptor family protein   chr1:6931194-6932597 REVERSE LENGTH=272                                                                                                                                                                                                                                                                                                                                                                                                                                | 523  | 272 | 1.00E-124 | 52.0  | 40.5 | 45.1 |
| Rsa1.0_01662.1.g28826.t1 | ref XP_002890362.1  hypothetical protein ARALYDRAFT_312926 [Arabidopsis lyrata subsp. lyrata] gi 297336204 gb EFH66621.1  hypothetical protein ARALYDRAFT_312926 [Arabidopsis lyrata subsp. lyrata]                                                                                                                                                                                                                                 | 312  | 656  | 1.00E-109 | 210.3 | 71.5 | 81.7  | hypothetical protein ARALYDRAFT_312926                                     | gbpln | Arabidopsis lyrata   | AT1G19980.1   Symbols:   cytomatrix protein-related   chr1:6933162-6934643 FORWARD LENGTH=342                                                                                                                                                                                                                                                                                                                                                                                                                                                        | 312  | 342 | 1.00E-108 | 109.6 | 71.2 | 82.1 |

| Rsa1.0_01662.1.g28827.t2                                                                                                                                                                                                                                                                                                                                                                                                                                                                                                                                                                                                                                                                                                                                              | #   | #    | #         | #     | #    | #    | #                                                 | -     | ----                 | ----                                                                                                                                                                                                                                                                                                                                                                                                                                                                                                                                             | #   | #   | #         | #     | #    | #    |
|-----------------------------------------------------------------------------------------------------------------------------------------------------------------------------------------------------------------------------------------------------------------------------------------------------------------------------------------------------------------------------------------------------------------------------------------------------------------------------------------------------------------------------------------------------------------------------------------------------------------------------------------------------------------------------------------------------------------------------------------------------------------------|-----|------|-----------|-------|------|------|---------------------------------------------------|-------|----------------------|--------------------------------------------------------------------------------------------------------------------------------------------------------------------------------------------------------------------------------------------------------------------------------------------------------------------------------------------------------------------------------------------------------------------------------------------------------------------------------------------------------------------------------------------------|-----|-----|-----------|-------|------|------|
| refXP_002882839.1   predicted protein [Arabidopsis lyrata subsp. lyrata] gi 297328679 gb EFH59098.1   predicted protein [Arabidopsis lyrata subsp. lyrata]                                                                                                                                                                                                                                                                                                                                                                                                                                                                                                                                                                                                            |     |      |           |       |      |      |                                                   |       |                      |                                                                                                                                                                                                                                                                                                                                                                                                                                                                                                                                                  |     |     |           |       |      |      |
| refNP_187713.1   dehydration-responsive element-binding protein 2B [Arabidopsis thaliana] gi 48427910 sp O82133.1 DRE2B_ARAT H RecName: Full=Dehydration-responsive element-binding protein 2B; Short=Protein DREB2B gi 6016692 gb AAF01519.1 AC009991_15 DREB2B transcription factor [Arabidopsis thaliana] gi 3738232 dbj BAA33795.1  DREB2B [Arabidopsis thaliana] gi 4126708 dbj BAA36706.1  DREB2B [Arabidopsis thaliana] gi 26449820 dbj BAC42033.1  putative DREB2B transcription factor [Arabidopsis thaliana] gi 30725376 gb AAP37710.1  At3g11020 [Arabidopsis thaliana] gi 332641473 gb AEE74994.1  dehydration-responsive element-binding protein 2B [Arabidopsis thaliana] gi 471180477 gb AGI05189.1  DRE/CRT-binding protein 2B [Arabidopsis thaliana] |     |      |           |       |      |      |                                                   |       |                      |                                                                                                                                                                                                                                                                                                                                                                                                                                                                                                                                                  |     |     |           |       |      |      |
| Rsa1.0_01662.1.g28828.t1                                                                                                                                                                                                                                                                                                                                                                                                                                                                                                                                                                                                                                                                                                                                              | 147 | 339  | 2.00E-32  | 230.6 | 61.9 | 71.4 | predicted protein                                 | gbpln | Arabidopsis lyrata   | AT3G11060.1   Symbols:   unknown protein; FUNCTIONS IN: molecular_function unknown; INVOLVED IN: biological_process unknown; LOCATED IN: endomembrane system; EXPRESSED IN: flower; EXPRESSED DURING: petal differentiation and expansion stage; BEST Arabidopsis thaliana protein match is: unknown protein (TAIR:AT3G06545.1); Has 12 Blast hits to 12 proteins in 2 species: Archae - 0; Bacteria - 0; Metazoa - 0; Fungi - 0; Plants - 12; Viruses - 0; Other Eukaryotes - 0 (source: NCBI BLINK).   chr3:3466303-3466944 REVERSE LENGTH=213 | 147 | 213 | 2.00E-33  | 144.9 | 59.9 | 71.4 |
| Rsa1.0_01662.1.g28829.t4                                                                                                                                                                                                                                                                                                                                                                                                                                                                                                                                                                                                                                                                                                                                              | 170 | 330  | 1.00E-19  | 194.1 | 37.6 | 40.6 | dehydration-responsive element-binding protein 2B | gbpln | Arabidopsis thaliana | AT3G11020.1   Symbols: DREB2B, DREB2   DRE/CRT-binding protein 2B   chr3:3456009-3457001 FORWARD LENGTH=330                                                                                                                                                                                                                                                                                                                                                                                                                                      | 170 | 330 | 4.00E-22  | 194.1 | 37.6 | 40.6 |
| Rsa1.0_01662.1.g28830.t1                                                                                                                                                                                                                                                                                                                                                                                                                                                                                                                                                                                                                                                                                                                                              | #   | #    | #         | #     | #    | #    | #                                                 | -     | ----                 | ----                                                                                                                                                                                                                                                                                                                                                                                                                                                                                                                                             | #   | #   | #         | #     | #    | #    |
| refNP_195988.1   trihelix DNA binding transcription factor [Arabidopsis thaliana] gi 75311735 sp Q9LZS0.1 PTL_ARATH RecName: Full=Trihelix transcription factor PTL; AltName: Full=Trihelix DNA-binding protein PETAL LOSS gi 7340653 emb CAB82933.1  GT2-like protein [Arabidopsis thaliana] gi 332003258 gb AED90641.1  trihelix transcription factor PTLED96690 [Arabidopsis thaliana]                                                                                                                                                                                                                                                                                                                                                                             |     |      |           |       |      |      |                                                   |       |                      |                                                                                                                                                                                                                                                                                                                                                                                                                                                                                                                                                  |     |     |           |       |      |      |
| Rsa1.0_01663.1.g28831.t1                                                                                                                                                                                                                                                                                                                                                                                                                                                                                                                                                                                                                                                                                                                                              | 571 | 591  | 0         | 103.5 | 86.3 | 90.9 | trihelix DNA binding transcription factor         | gbpln | Arabidopsis thaliana | AT5G03680.1   Symbols: PTL   Duplicated homeodomain-like superfamily protein   chr5:957858-960760 FORWARD LENGTH=591                                                                                                                                                                                                                                                                                                                                                                                                                             | 571 | 591 | 0         | 103.5 | 86.3 | 90.9 |
| Rsa1.0_01663.1.g28832.t1                                                                                                                                                                                                                                                                                                                                                                                                                                                                                                                                                                                                                                                                                                                                              | 95  | 359  | 1.00E-31  | 377.9 | 82.1 | 87.4 | hypothetical protein CARUB_v10001255mg            | gbpln | Capsella rubella     | AT5G03690.1   Symbols:   Aldolase superfamily protein   chr5:963389-964982 REVERSE LENGTH=393                                                                                                                                                                                                                                                                                                                                                                                                                                                    | 95  | 393 | 6.00E-34  | 413.7 | 81.1 | 87.4 |
| Rsa1.0_01663.1.g28833.t1                                                                                                                                                                                                                                                                                                                                                                                                                                                                                                                                                                                                                                                                                                                                              | 807 | 815  | 0         | 101.0 | 90.6 | 93.8 | unnamed protein product                           | ----  | ----                 | AT5G03730.1   Symbols: CTR1, SIS1, AtCTR1   Protein kinase superfamily protein   chr5:974958-979660 REVERSE LENGTH=821                                                                                                                                                                                                                                                                                                                                                                                                                           | 807 | 821 | 0         | 101.7 | 88.6 | 92.6 |
| Rsa1.0_01663.1.g28834.t1                                                                                                                                                                                                                                                                                                                                                                                                                                                                                                                                                                                                                                                                                                                                              | 482 | 532  | 0         | 110.4 | 96.5 | 97.9 | unnamed protein product                           | ----  | ----                 | AT5G03760.1   Symbols: ATCSLA09, CSLA09, ATCSLA9, CSLA9, RAT4   Nucleotide-diphospho-sugar transferases superfamily protein   chr5:985910-990087 REVERSE LENGTH=533                                                                                                                                                                                                                                                                                                                                                                              | 482 | 533 | 0         | 110.6 | 95.0 | 97.7 |
| Rsa1.0_01663.1.g28835.t2                                                                                                                                                                                                                                                                                                                                                                                                                                                                                                                                                                                                                                                                                                                                              | 175 | 236  | 1.00E-71  | 134.9 | 82.3 | 89.1 | homeodomain-like protein                          | gbpln | Arabidopsis thaliana | AT5G03790.1   Symbols: ATHB51, LMI1, HB51   homeobox 51   chr5:1004985-1006373 FORWARD LENGTH=235                                                                                                                                                                                                                                                                                                                                                                                                                                                | 175 | 235 | 6.00E-74  | 134.3 | 82.3 | 89.1 |
| Rsa1.0_01663.1.g28836.t1                                                                                                                                                                                                                                                                                                                                                                                                                                                                                                                                                                                                                                                                                                                                              | 271 | 562  | 1.00E-149 | 207.4 | 93.4 | 97.0 | hypothetical protein CARUB_v10000598mg, partial   | gbpln | Capsella rubella     | AT5G03795.1   Symbols:   Exostosin family protein   chr5:1007554-1010373 REVERSE LENGTH=518                                                                                                                                                                                                                                                                                                                                                                                                                                                      | 271 | 518 | 1.00E-151 | 191.1 | 93.4 | 96.7 |
| Rsa1.0_01664.1.g28837.t1                                                                                                                                                                                                                                                                                                                                                                                                                                                                                                                                                                                                                                                                                                                                              | #   | #    | #         | #     | #    | #    | -                                                 | ----  | ----                 | #                                                                                                                                                                                                                                                                                                                                                                                                                                                                                                                                                | #   | #   | #         | #     | #    | #    |
| Rsa1.0_01664.1.g28838.t1                                                                                                                                                                                                                                                                                                                                                                                                                                                                                                                                                                                                                                                                                                                                              | #   | #    | #         | #     | #    | #    | -                                                 | ----  | ----                 | #                                                                                                                                                                                                                                                                                                                                                                                                                                                                                                                                                | #   | #   | #         | #     | #    | #    |
| Rsa1.0_01664.1.g28839.t1                                                                                                                                                                                                                                                                                                                                                                                                                                                                                                                                                                                                                                                                                                                                              | #   | #    | #         | #     | #    | #    | -                                                 | ----  | ----                 | #                                                                                                                                                                                                                                                                                                                                                                                                                                                                                                                                                | #   | #   | #         | #     | #    | #    |
| Rsa1.0_01664.1.g28840.t1                                                                                                                                                                                                                                                                                                                                                                                                                                                                                                                                                                                                                                                                                                                                              | 258 | 1137 | 2.00E-66  | 440.7 | 54.3 | 73.3 | copa-like retroelement pol polyprotein            | gbpln | Arabidopsis thaliana | #                                                                                                                                                                                                                                                                                                                                                                                                                                                                                                                                                | #   | #   | #         | #     | #    | #    |

|                          |                                                                                                                                                                                                                                                                                                                                                                                                                                                                                                                                                                                                                                                                                                                          |      |      |           |       |      |      |                                                                                |       |                      |                                                                                                                                                                                                                                                                                                                                                                                                                                                                                                                                                                                                  |      |      |          |       |      |      |
|--------------------------|--------------------------------------------------------------------------------------------------------------------------------------------------------------------------------------------------------------------------------------------------------------------------------------------------------------------------------------------------------------------------------------------------------------------------------------------------------------------------------------------------------------------------------------------------------------------------------------------------------------------------------------------------------------------------------------------------------------------------|------|------|-----------|-------|------|------|--------------------------------------------------------------------------------|-------|----------------------|--------------------------------------------------------------------------------------------------------------------------------------------------------------------------------------------------------------------------------------------------------------------------------------------------------------------------------------------------------------------------------------------------------------------------------------------------------------------------------------------------------------------------------------------------------------------------------------------------|------|------|----------|-------|------|------|
| Rsa1.0_01664.1.g28841.t1 | ref NP_564087.2  RAD-like 5 protein [Arabidopsis thaliana] gi 75328898 sp Q8GW75.1 RADL5_ARAT H RecName: Full=Protein RADIALIS-like 5; Short=AtRL5; Short=Protein RAD-like 5; AltName: Full=Protein RADIALIS-LIKE SAINT/MYB 4; Short=Protein RSM4 gi 26453068 dbj BAC43610.1  putative myb-related protein [Arabidopsis thaliana] gi 28973505 gb AAO64077.1  putative myb family transcription factor [Arabidopsis thaliana] gi 41618974 gb AAS09994.1  MYB transcription factor [Arabidopsis thaliana] gi 87133605 gb ABD24443.1  RAD-like protein 5 [Arabidopsis thaliana] gi 332191741 gb AEE29862.1  protein RADIALIS-like 5 [Arabidopsis thaliana]                                                                  | 90   | 100  | 1.00E-35  | 111.1 | 80.0 | 83.3 | RAD-like 5 protein                                                             | gbpln | Arabidopsis thaliana | AT1G19510.1   Symbols: ATRL5, RSM4, RL5   RAD-like 5   chr1:6756483-6757290 REVERSE LENGTH=100                                                                                                                                                                                                                                                                                                                                                                                                                                                                                                   | 90   | 100  | 2.00E-38 | 111.1 | 80.0 | 83.3 |
| Rsa1.0_01664.1.g28842.t1 | gb ABD65035.1  hypothetical protein 26.t00052 [Brassica oleracea]                                                                                                                                                                                                                                                                                                                                                                                                                                                                                                                                                                                                                                                        | 492  | 695  | 1.00E-117 | 141.3 | 51.8 | 61.0 | hypothetical protein 26.t00052                                                 | gbpln | Brassica oleracea    | AT1G51172.1   Symbols:   unknown protein; FUNCTIONS IN: molecular_function unknown; INVOLVED IN: biological_process unknown; LOCATED IN: cellular_component unknown; CONTAINS InterPro DOMAIN/s: Protein of unknown function DUF601 (InterPro:IPR006736). BEST Arabidopsis thaliana protein match is: Protein of unknown function, DUF601 (TAIR:AT1G46696.1); Has 1849 Blast hits to 1554 proteins in 272 species: Archae - 15; Bacteria - 116; Metazoa - 677; Fungi - 267; Plants - 154; Viruses - 11; Other Eukaryotes - 609 (source: NCBI BLINK).   chr1:18963205-18965571 FORWARD LENGTH=681 | 492  | 681  | 2.00E-21 | 138.4 | 10.0 | 16.7 |
| Rsa1.0_01665.1.g28843.t1 | gb AAD32898.1  putative retroelement pol polyprotein [Arabidopsis thaliana]                                                                                                                                                                                                                                                                                                                                                                                                                                                                                                                                                                                                                                              | 1350 | 1307 | 0         | 96.8  | 57.7 | 73.6 | putative retroelement pol polyprotein                                          | gbpln | Arabidopsis thaliana | AT4G23160.1   Symbols: CRK8   cysteine-rich RLK (RECEPTOR-like protein kinase) 8   chr4:12129485-12134086 FORWARD LENGTH=1262                                                                                                                                                                                                                                                                                                                                                                                                                                                                    | 1350 | 1262 | 4.00E-96 | 93.5  | 13.3 | 20.4 |
| Rsa1.0_01665.1.g28844.t1 | gb AAG51783.1 AC079679.3 reverse transcriptase, putative; 16838-20266 [Arabidopsis thaliana]                                                                                                                                                                                                                                                                                                                                                                                                                                                                                                                                                                                                                             | 414  | 1142 | 1.00E-125 | 275.8 | 55.3 | 70.8 | reverse transcriptase, putative; 16838-20266                                   | gbpln | Arabidopsis thaliana | AT4G29090.1   Symbols:   Ribonuclease H-like superfamily protein   chr4:14333528-14335255 FORWARD LENGTH=575                                                                                                                                                                                                                                                                                                                                                                                                                                                                                     | 414  | 575  | 2.00E-50 | 138.9 | 34.1 | 50.7 |
| Rsa1.0_01665.1.g28845.t1 | gb ABW81018.1  gag-pol polymerase [Arabidopsis lyrata subsp. lyrata]                                                                                                                                                                                                                                                                                                                                                                                                                                                                                                                                                                                                                                                     | 347  | 672  | 5.00E-33  | 193.7 | 27.7 | 42.7 | gag-pol polymerase                                                             | gbpln | Arabidopsis lyrata   | #                                                                                                                                                                                                                                                                                                                                                                                                                                                                                                                                                                                                | #    | #    | #        | #     | #    |      |
| Rsa1.0_01665.1.g28846.t2 | gb AAD22283.1  putative retroelement pol polyprotein [Arabidopsis thaliana]                                                                                                                                                                                                                                                                                                                                                                                                                                                                                                                                                                                                                                              | 468  | 1787 | 6.00E-96  | 381.8 | 45.9 | 63.0 | putative retroelement pol polyprotein                                          | gbpln | Arabidopsis thaliana | #                                                                                                                                                                                                                                                                                                                                                                                                                                                                                                                                                                                                | #    | #    | #        | #     | #    |      |
| Rsa1.0_01665.1.g28847.t1 | #                                                                                                                                                                                                                                                                                                                                                                                                                                                                                                                                                                                                                                                                                                                        | #    | #    | #         | #     | #    | -    | -                                                                              | ----  | ----                 | #                                                                                                                                                                                                                                                                                                                                                                                                                                                                                                                                                                                                | #    | #    | #        | #     | #    |      |
| Rsa1.0_01665.1.g28848.t1 | gb AAC28189.1  contains similarity to Arabidopsis thaliana retrotransposon Athila (GB:X81801) [Arabidopsis thaliana]                                                                                                                                                                                                                                                                                                                                                                                                                                                                                                                                                                                                     | 249  | 940  | 1.00E-14  | 377.5 | 19.3 | 24.5 | contains similarity to Arabidopsis thaliana retrotransposon Athila (GB:X81801) | gbpln | Arabidopsis thaliana | #                                                                                                                                                                                                                                                                                                                                                                                                                                                                                                                                                                                                | #    | #    | #        | #     | #    |      |
| Rsa1.0_01665.1.g28849.t1 | #                                                                                                                                                                                                                                                                                                                                                                                                                                                                                                                                                                                                                                                                                                                        | #    | #    | #         | #     | #    | -    | -                                                                              | ----  | ----                 | #                                                                                                                                                                                                                                                                                                                                                                                                                                                                                                                                                                                                | #    | #    | #        | #     | #    |      |
| Rsa1.0_01665.1.g28850.t1 | #                                                                                                                                                                                                                                                                                                                                                                                                                                                                                                                                                                                                                                                                                                                        | #    | #    | #         | #     | #    | -    | -                                                                              | ----  | ----                 | #                                                                                                                                                                                                                                                                                                                                                                                                                                                                                                                                                                                                | #    | #    | #        | #     | #    |      |
| Rsa1.0_01666.1.g28851.t1 | ref NP_567934.1  LL-diaminopimelate aminotransferase [Arabidopsis thaliana] gi 75163801 sp Q93ZN9.1 DAPAT_ARAT H RecName: Full=LL-diaminopimelate aminotransferase, chloroplastic; Short=AtDAP-AT; Short=DAP-AT; Short=DAP-aminotransferase; Short=LL-DAP-aminotransferase; AltName: Full=Protein ABERRANT GROWTH AND DEATH 2; Flags: Precursor gi 15912291 gb AAL08279.1  AT4g33680/T16L1_170 [Arabidopsis thaliana] gi 17529044 gb AAL38732.1  unknown protein [Arabidopsis thaliana] gi 21436149 gb AAM51321.1  unknown protein [Arabidopsis thaliana] gi 41323503 gb AAR99909.1  aminotransferase AGD2 [Arabidopsis thaliana] gi 332600865 gb AEE86265.1  LL-diaminopimelate aminotransferase [Arabidopsis thaliana] | 763  | 461  | 0         | 60.4  | 56.1 | 58.1 | LL-diaminopimelate aminotransferase                                            | gbpln | Arabidopsis thaliana | AT4G33680.1   Symbols: AGD2   Pyridoxal phosphate (PLP)-dependent transferases superfamily protein   chr4:16171847-16174630 REVERSE LENGTH=461                                                                                                                                                                                                                                                                                                                                                                                                                                                   | 763  | 461  | 0        | 60.4  | 56.1 | 58.1 |

|                          |                                                                                                                                                                                                                                                                                                                                                                                                                                                                                                                                                                        |     |      |           |       |      |      |                                                     |       |                      |                                                                                                                                                                                                                                                                                                                                                                                                                                                                                                                                                                                                    |     |     |           |       |      |      |
|--------------------------|------------------------------------------------------------------------------------------------------------------------------------------------------------------------------------------------------------------------------------------------------------------------------------------------------------------------------------------------------------------------------------------------------------------------------------------------------------------------------------------------------------------------------------------------------------------------|-----|------|-----------|-------|------|------|-----------------------------------------------------|-------|----------------------|----------------------------------------------------------------------------------------------------------------------------------------------------------------------------------------------------------------------------------------------------------------------------------------------------------------------------------------------------------------------------------------------------------------------------------------------------------------------------------------------------------------------------------------------------------------------------------------------------|-----|-----|-----------|-------|------|------|
| Rsa1.0_01666.1.g28852.t1 | ref NP_567931.1  dynamin-related protein 3A [Arabidopsis thaliana] gi 60392233 sp Q8S944.2 DRP3A_ARAT H RecName: Full=Dynamin-related protein 3A; AltName: Full=Dynamin-like protein 2; AltName: Full=Dynamin-like protein 2a gi 3549667 emb CAA20578.1  Arabidopsis dynamin-like protein ADL2 [Arabidopsis thaliana] gi 7270313 emb CAB80082.1  Arabidopsis dynamin-like protein ADL2 [Arabidopsis thaliana] gi 19032335 dbj BAB85643.1  dynamin like protein 2a [Arabidopsis thaliana] gi 332660860 gb AEE86260.1  dynamin-related protein 3A [Arabidopsis thaliana] | 812 | 808  | 0         | 99.5  | 86.0 | 92.0 | dynamin-related protein 3A                          | gbpln | Arabidopsis thaliana | AT4G33650.1   Symbols: ADL2, DRP3A   dynamin-related protein 3A   chr4:16161073-16166587 FORWARD LENGTH=808                                                                                                                                                                                                                                                                                                                                                                                                                                                                                        | 812 | 808 | 0         | 99.5  | 86.0 | 92.0 |
| Rsa1.0_01666.1.g28853.t1 | gb EOA16153.1  hypothetical protein CARUB_v10004291mg [Capsella rubella]                                                                                                                                                                                                                                                                                                                                                                                                                                                                                               | 731 | 676  | 0         | 92.5  | 81.4 | 86.9 | hypothetical protein CARUB_v10004291mg              | gbpln | Capsella rubella     | AT4G33630.2   Symbols: EX1   Protein of unknown function (DUF3506)   chr4:16155560-16159094 FORWARD LENGTH=684                                                                                                                                                                                                                                                                                                                                                                                                                                                                                     | 731 | 684 | 0         | 93.6  | 82.5 | 88.1 |
| Rsa1.0_01666.1.g28854.t1 | gb AAF79324.1 AC002304_17 F14J16.29 [Arabidopsis thaliana]                                                                                                                                                                                                                                                                                                                                                                                                                                                                                                             | 164 | 143  | 5.00E-30  | 87.2  | 53.0 | 68.3 | F14J16.29                                           | gbpln | Arabidopsis thaliana | # # # # # # #                                                                                                                                                                                                                                                                                                                                                                                                                                                                                                                                                                                      |     |     |           |       |      |      |
| Rsa1.0_01666.1.g28855.t1 | ref NP_195086.4  uncharacterized protein [Arabidopsis thaliana] gi 26451329 dbj BAC42765.1  unknown protein [Arabidopsis thaliana] gi 332660852 gb AEE86252.1  uncharacterized protein AT4G33600 [Arabidopsis thaliana]                                                                                                                                                                                                                                                                                                                                                | 709 | 470  | 0         | 66.3  | 53.5 | 56.4 | uncharacterized protein                             | gbpln | Arabidopsis thaliana | AT4G33600.1   Symbols:   unknown protein; FUNCTIONS IN: molecular_function unknown; INVOLVED IN: biological_process unknown; LOCATED IN: endomembrane system; EXPRESSED IN: 6 plant structures; EXPRESSED DURING: 4 anthesis, C globular stage, petal differentiation and expansion stage; BEST Arabidopsis thaliana protein match is: unknown protein (TAIR:AT4G33590.1); Has 131 Blast hits to 131 proteins in 40 species: Archae - 0; Bacteria - 9; Metazoa - 12; Fungi - 24; Plants - 58; Viruses - 0; Other Eukaryotes - 28 (source: NCBI BLink).   chr4:16144452-16145864 REVERSE LENGTH=470 | 709 | 470 | 0         | 66.3  | 53.5 | 56.4 |
| Rsa1.0_01666.1.g28856.t1 | ref NP_567928.1  beta carbonic anhydrase 5 [Arabidopsis thaliana] gi 14334478 gb AAK59437.1  putative carbonate dehydratase [Arabidopsis thaliana] gi 21594039 gb AAM65957.1  carbonate dehydratase-like protein [Arabidopsis thaliana] gi 2168975.1 gb AAM67519.1  putative carbonate dehydratase [Arabidopsis thaliana] gi 62321082 dbj BAD94173.1  carbonate dehydratase - like protein [Arabidopsis thaliana] gi 332660848 gb AEE86248.1  beta carbonic anhydrase 5 [Arabidopsis thaliana]                                                                         | 304 | 301  | 1.00E-139 | 99.0  | 79.9 | 87.5 | beta carbonic anhydrase 5                           | gbpln | Arabidopsis thaliana | AT4G33580.1   Symbols: ATBCA5, BCA5   beta carbonic anhydrase 5   chr4:16139406-16141363 FORWARD LENGTH=301                                                                                                                                                                                                                                                                                                                                                                                                                                                                                        | 304 | 301 | 1.00E-142 | 99.0  | 79.9 | 87.5 |
| Rsa1.0_01666.1.g28857.t1 | gb AAD20714.1  putative non-LTR retroelement reverse transcriptase [Arabidopsis thaliana]                                                                                                                                                                                                                                                                                                                                                                                                                                                                              | 364 | 1750 | 5.00E-51  | 480.8 | 27.5 | 36.5 | putative non-LTR retroelement reverse transcriptase | gbpln | Arabidopsis thaliana | AT3G31430.1   Symbols:   unknown protein; FUNCTIONS IN: molecular_function unknown; INVOLVED IN: biological_process unknown; LOCATED IN: endomembrane system; BEST Arabidopsis thaliana protein match is: unknown protein (TAIR:AT5G18636.1); Has 295 Blast hits to 291 proteins in 12 species: Archae - 0; Bacteria - 0; Metazoa - 0; Fungi - 0; Plants - 295; Viruses - 0; Other Eukaryotes - 0 (source: NCBI BLink).   chr3:12795861-12796871 REVERSE LENGTH=336                                                                                                                                | 364 | 336 | 9.00E-35  | 92.3  | 19.5 | 31.6 |
| Rsa1.0_01666.1.g28858.t4 | ref NP_567916.2  F-box/LRR-repeat protein 15 [Arabidopsis thaliana] gi 124007179 sp Q9SMY8.2 FBL15_ARA TH RecName: Full=F-box/LRR-repeat protein 15 gi 332660791 gb AEE86191.1  F-box/LRR-repeat protein 15 [Arabidopsis thaliana]                                                                                                                                                                                                                                                                                                                                     | 909 | 990  | 0         | 108.9 | 75.9 | 83.7 | F-box/LRR-repeat protein 15                         | gbpln | Arabidopsis thaliana | AT4G33210.1   Symbols: SLOMO   F-box family protein   chr4:16015971-16020697 REVERSE LENGTH=990                                                                                                                                                                                                                                                                                                                                                                                                                                                                                                    | 909 | 990 | 0         | 108.9 | 75.9 | 83.7 |
| Rsa1.0_01666.1.g28859.t1 | ref XP_002863741.1  hypothetical protein ARALYDRAFT_917455 [Arabidopsis lyrata subsp. lyrata] gi 297309576 gb EFH40000.1  hypothetical protein ARALYDRAFT_917455 [Arabidopsis lyrata subsp. lyrata]                                                                                                                                                                                                                                                                                                                                                                    | 299 | 390  | 6.00E-38  | 130.4 | 26.8 | 36.8 | hypothetical protein ARALYDRAFT_917455              | gbpln | Arabidopsis lyrata   | AT5G18880.1   Symbols:   RNA-directed DNA polymerase (reverse transcriptase)-related family protein   chr5:6300535-6301422 REVERSE LENGTH=295                                                                                                                                                                                                                                                                                                                                                                                                                                                      | 299 | 295 | 2.00E-33  | 98.7  | 29.8 | 45.5 |

|                          |                                                                                                                                                                                                                                                                                                                                                                                                                                  |     |      |           |       |      |      |                                              |       |                      |                                                                                                                                                                                                                                                                                                                                                              |     |     |           |       |      |      |
|--------------------------|----------------------------------------------------------------------------------------------------------------------------------------------------------------------------------------------------------------------------------------------------------------------------------------------------------------------------------------------------------------------------------------------------------------------------------|-----|------|-----------|-------|------|------|----------------------------------------------|-------|----------------------|--------------------------------------------------------------------------------------------------------------------------------------------------------------------------------------------------------------------------------------------------------------------------------------------------------------------------------------------------------------|-----|-----|-----------|-------|------|------|
| Rsa1.0_01666.1.g28860.t1 | refNP_567916.2   F-box/LRR-repeat protein 15 [Arabidopsis thaliana] gi 124007179 sp Q9SMY8.2 FBL15_ARA TH RecName: Full=F-box/LRR-repeat protein 15 gi 332660791 gb AAE86191.1   F-box/LRR-repeat protein 15 [Arabidopsis thaliana]                                                                                                                                                                                              | 839 | 990  | 0         | 118.0 | 77.4 | 85.9 | F-box/LRR-repeat protein 15                  | gbpln | Arabidopsis thaliana | AT4G33210.1   Symbols: SLOMO   F-box family protein   chr4:16015971-16020697 REVERSE LENGTH=990                                                                                                                                                                                                                                                              | 839 | 990 | 0         | 118.0 | 77.4 | 85.9 |
| Rsa1.0_01666.1.g28861.t1 | #                                                                                                                                                                                                                                                                                                                                                                                                                                | #   | #    | #         | #     | #    | #    | -                                            | ----  | ----                 | #                                                                                                                                                                                                                                                                                                                                                            | #   | #   | #         | #     | #    |      |
| Rsa1.0_01666.1.g28862.t1 | refXP_002869223.1   hypothetical protein ARALYDRAFT_913110 [Arabidopsis lyrata subsp. lyrata] gi 297315059 gb EFH45482.1   hypothetical protein ARALYDRAFT_913110 [Arabidopsis lyrata subsp. lyrata]                                                                                                                                                                                                                             | 91  | 91   | 1.00E-41  | 100.0 | 91.2 | 93.4 | hypothetical protein ARALYDRAFT_913110       | gbpln | Arabidopsis lyrata   | AT4G33100.1   Symbols:   CONTAINS InterPro DOMAIN/s: Mitochondrial distribution/morphology family 35/apoptosis (InterPro:IPR007918); Has 214 Blast hits to 214 proteins in 102 species: Archae - 0; Bacteria - 0; Metazoa - 110; Fungi - 69; Plants - 29; Viruses - 0; Other Eukaryotes - 6 (source: NCBI BLINK).   chr4:15971701-15972342 FORWARD LENGTH=92 | 91  | 92  | 4.00E-43  | 101.1 | 91.2 | 93.4 |
| Rsa1.0_01666.1.g28863.t2 | refNP_195035.2   aminopeptidase M1 [Arabidopsis thaliana] gi 1747351.1 gb AAL38379.1   AT4g33090/F4110_20 [Arabidopsis thaliana] gi 24209879 gb AAN41401.1   aminopeptidase M [Arabidopsis thaliana] gi 29028734 gb AAO64746.1   At4g33090/F4110_20 [Arabidopsis thaliana] gi 11074247 dbj BAE99157.1   aminopeptidase like protein [Arabidopsis thaliana] gi 332660772 gb AAE86172.1   aminopeptidase M1 [Arabidopsis thaliana] | 871 | 879  | 0         | 100.9 | 92.4 | 96.2 | aminopeptidase M1                            | gbpln | Arabidopsis thaliana | AT4G33090.1   Symbols: APM1, ATAPM1   aminopeptidase M1   chr4:15965915-15970418 REVERSE LENGTH=879                                                                                                                                                                                                                                                          | 871 | 879 | 0         | 100.9 | 92.4 | 96.2 |
| Rsa1.0_01666.1.g28864.t1 | gb EOA16526.1  hypothetical protein CARUB_v10004685mg [Capsella rubella]                                                                                                                                                                                                                                                                                                                                                         | 485 | 487  | 0         | 100.4 | 90.1 | 93.8 | hypothetical protein CARUB_v10004685mg       | gbpln | Capsella rubella     | AT4G33050.3   Symbols: EDA39   calmodulin-binding family protein   chr4:15944604-15946736 REVERSE LENGTH=488                                                                                                                                                                                                                                                 | 485 | 488 | 0         | 100.6 | 89.1 | 93.6 |
| Rsa1.0_01667.1.g28865.t1 | #                                                                                                                                                                                                                                                                                                                                                                                                                                | #   | #    | #         | #     | #    | #    | -                                            | ----  | ----                 | #                                                                                                                                                                                                                                                                                                                                                            | #   | #   | #         | #     | #    |      |
| Rsa1.0_01667.1.g28866.t1 | gb EOA25207.1  hypothetical protein CARUB_v10018520mg [Capsella rubella]                                                                                                                                                                                                                                                                                                                                                         | 228 | 223  | 8.00E-36  | 97.8  | 37.3 | 51.8 | hypothetical protein CARUB_v10018520mg       | gbpln | Capsella rubella     | AT3G57960.1   Symbols:   Emsy N Terminus (ENT) domain-containing protein   chr3:21463091-21464194 FORWARD LENGTH=223                                                                                                                                                                                                                                         | 228 | 223 | 6.00E-31  | 97.8  | 32.9 | 46.5 |
| Rsa1.0_01667.1.g28867.t1 | refXP_002878181.1   hypothetical protein ARALYDRAFT_486249 [Arabidopsis lyrata subsp. lyrata] gi 297324019 gb EFH54440.1   hypothetical protein ARALYDRAFT_486249 [Arabidopsis lyrata subsp. lyrata]                                                                                                                                                                                                                             | 347 | 357  | 2.33E-156 | 102.9 | 81.3 | 89.3 | hypothetical protein ARALYDRAFT_486249       | gbpln | Arabidopsis lyrata   | AT3G57990.1   Symbols:   unknown protein; Has 1497 Blast hits to 1323 proteins in 52 species: Archae - 0; Bacteria - 4; Metazoa - 23; Fungi - 34; Plants - 61; Viruses - 0; Other Eukaryotes - 1375 (source: NCBI BLINK).   chr3:21470244-21471347 REVERSE LENGTH=367                                                                                        | 347 | 367 | 1.00E-145 | 105.8 | 82.1 | 92.5 |
| Rsa1.0_01667.1.g28868.t1 | refXP_002876449.1   VQ motif-containing protein [Arabidopsis lyrata subsp. lyrata] gi 297322287 gb EFH52708.1   VQ motif-containing protein [Arabidopsis lyrata subsp. lyrata]                                                                                                                                                                                                                                                   | 173 | 175  | 1.00E-62  | 101.2 | 77.5 | 86.1 | VQ motif-containing protein                  | gbpln | Arabidopsis lyrata   | AT3G58000.1   Symbols:   VQ motif-containing protein   chr3:21474950-21475477 FORWARD LENGTH=175                                                                                                                                                                                                                                                             | 173 | 175 | 2.00E-55  | 101.2 | 75.7 | 85.0 |
| Rsa1.0_01667.1.g28869.t1 | refXP_002878182.1   hypothetical protein ARALYDRAFT_486251 [Arabidopsis lyrata subsp. lyrata] gi 297324020 gb EFH54441.1   hypothetical protein ARALYDRAFT_486251 [Arabidopsis lyrata subsp. lyrata]                                                                                                                                                                                                                             | 327 | 308  | 1.00E-134 | 94.2  | 80.1 | 84.1 | hypothetical protein ARALYDRAFT_486251       | gbpln | Arabidopsis lyrata   | AT3G58010.1   Symbols: PGL34   plastoglobulin 34kD   chr3:21475949-21477463 REVERSE LENGTH=308                                                                                                                                                                                                                                                               | 327 | 308 | 1.00E-132 | 94.2  | 78.3 | 84.1 |
| Rsa1.0_01667.1.g28870.t1 | #                                                                                                                                                                                                                                                                                                                                                                                                                                | #   | #    | #         | #     | #    | #    | -                                            | ----  | ----                 | #                                                                                                                                                                                                                                                                                                                                                            | #   | #   | #         | #     | #    |      |
| Rsa1.0_01667.1.g28871.t2 | gb AAG51783.1 AC079679.3 reverse transcriptase, putative; 16838-20266 [Arabidopsis thaliana]                                                                                                                                                                                                                                                                                                                                     | 695 | 1142 | 0         | 164.3 | 55.3 | 69.8 | reverse transcriptase, putative; 16838-20266 | gbpln | Arabidopsis thaliana | AT4G29090.1   Symbols:   Ribonuclease H-like superfamily protein   chr4:14333528-14335255 FORWARD LENGTH=575                                                                                                                                                                                                                                                 | 695 | 575 | 4.00E-50  | 82.7  | 22.3 | 34.5 |
| Rsa1.0_01667.1.g28872.t1 | gb EOA24053.1  hypothetical protein CARUB_v10017271mg [Capsella rubella]                                                                                                                                                                                                                                                                                                                                                         | 441 | 437  | 0         | 99.1  | 85.7 | 90.7 | hypothetical protein CARUB_v10017271mg       | gbpln | Capsella rubella     | AT3G58030.4   Symbols:   RING/U-box superfamily protein   chr3:21485527-21486837 FORWARD LENGTH=436                                                                                                                                                                                                                                                          | 441 | 436 | 0         | 98.9  | 84.6 | 90.2 |
| Rsa1.0_01667.1.g28873.t1 | refXP_002876454.1   seven in absentia family protein [Arabidopsis lyrata subsp. lyrata] gi 297322292 gb EFH52713.1   seven in absentia family protein [Arabidopsis lyrata subsp. lyrata]                                                                                                                                                                                                                                         | 311 | 309  | 1.00E-176 | 99.4  | 94.9 | 96.5 | seven in absentia family protein             | gbpln | Arabidopsis lyrata   | AT3G58040.1   Symbols: SINAT2   seven in absentia of Arabidopsis 2   chr3:21489612-21491085 FORWARD LENGTH=308                                                                                                                                                                                                                                               | 311 | 308 | 1.00E-178 | 99.0  | 94.9 | 96.1 |
| Rsa1.0_01667.1.g28874.t1 | gb EOA24117.1  hypothetical protein CARUB_v10017350mg [Capsella rubella]                                                                                                                                                                                                                                                                                                                                                         | 405 | 412  | 0         | 101.7 | 86.9 | 95.1 | hypothetical protein CARUB_v10017350mg       | gbpln | Capsella rubella     | AT3G58060.1   Symbols:   Cation efflux family protein   chr3:21497778-21499676 REVERSE LENGTH=411                                                                                                                                                                                                                                                            | 405 | 411 | 0         | 101.5 | 87.2 | 94.6 |

|                          |                                                                                                                                                                                                                                                                                                                                                                                                                                                                                                                                                                                  |     |     |           |       |      |       |                                                           |       |                      |                                                                                                                                                                                                                                                                                                                                                                                                                                |     |     |           |       |      |       |
|--------------------------|----------------------------------------------------------------------------------------------------------------------------------------------------------------------------------------------------------------------------------------------------------------------------------------------------------------------------------------------------------------------------------------------------------------------------------------------------------------------------------------------------------------------------------------------------------------------------------|-----|-----|-----------|-------|------|-------|-----------------------------------------------------------|-------|----------------------|--------------------------------------------------------------------------------------------------------------------------------------------------------------------------------------------------------------------------------------------------------------------------------------------------------------------------------------------------------------------------------------------------------------------------------|-----|-----|-----------|-------|------|-------|
| Rsa1.0_01668.1.g28875.t1 | ref[XP_002893192.1] predicted protein [Arabidopsis lyrata subsp. lyrata] gi 297339034 gb EFH69451.1  predicted protein [Arabidopsis lyrata subsp. lyrata]                                                                                                                                                                                                                                                                                                                                                                                                                        | 234 | 172 | 7.00E-18  | 73.5  | 29.9 | 37.2  | predicted protein                                         | gbpln | Arabidopsis lyrata   | #                                                                                                                                                                                                                                                                                                                                                                                                                              | #   | #   | #         | #     | #    | #     |
| Rsa1.0_01668.1.g28876.t1 | gb EOA40483.1  hypothetical protein CARUB_v10009218mg [Capsella rubella]                                                                                                                                                                                                                                                                                                                                                                                                                                                                                                         | 421 | 426 | 0         | 101.2 | 85.7 | 91.4  | hypothetical protein CARUB_v10009218mg                    | gbpln | Capsella rubella     | AT1G21920.1   Symbols:   Histone H3 K4-specific methyltransferase SET7/9 family protein   chr1:7704454-7705866 REVERSE LENGTH=417                                                                                                                                                                                                                                                                                              | 421 | 417 | 1.00E-172 | 99.0  | 83.6 | 91.0  |
| Rsa1.0_01668.1.g28877.t1 | ref[XP_002890471.1] AP2 domain-containing transcription factor family protein [Arabidopsis lyrata subsp. lyrata] gi 297336313 gb EFH66730.1  AP2 domain-containing transcription factor family protein [Arabidopsis lyrata subsp. lyrata]                                                                                                                                                                                                                                                                                                                                        | 217 | 229 | 1.00E-73  | 105.5 | 80.6 | 84.8  | AP2 domain-containing transcription factor family protein | gbpln | Arabidopsis lyrata   | AT1G21910.1   Symbols: DREB26   Integrase-type DNA-binding superfamily protein   chr1:7696655-7697347 FORWARD LENGTH=230                                                                                                                                                                                                                                                                                                       | 217 | 230 | 1.00E-75  | 106.0 | 79.3 | 86.2  |
| Rsa1.0_01668.1.g28878.t1 | ref[XP_002893188.1] emp24/gp25L/p24 family protein [Arabidopsis lyrata subsp. lyrata] gi 297339030 gb EFH69447.1  emp24/gp25L/p24 family protein [Arabidopsis lyrata subsp. lyrata]                                                                                                                                                                                                                                                                                                                                                                                              | 206 | 216 | 6.00E-96  | 104.9 | 81.6 | 87.4  | emp24/gp25L/p24 family protein                            | gbpln | Arabidopsis lyrata   | AT1G21900.1   Symbols:   emp24/gp25L/p24 family/GOLD family protein   chr1:7691165-7692327 REVERSE LENGTH=216                                                                                                                                                                                                                                                                                                                  | 206 | 216 | 2.00E-94  | 104.9 | 81.1 | 87.9  |
| Rsa1.0_01668.1.g28879.t1 | ref[NP_564153.1] LysM domain-containing GPI-anchored protein 1 [Arabidopsis thaliana] gi 38258218 sp Q932H0.1 LYM1_ARATH RecName: Full=LysM domain-containing GPI-anchored protein 1; Flags: Precursor gi 1582270 gb AAL09782.1  At1g21880/T26F17.5 [Arabidopsis thaliana] gi 53749174 gb AAU90072.1  At1g21880 [Arabidopsis thaliana] gi 332192047 gb AAE30168.1  LysM domain-containing GPI-anchored protein 1 [Arabidopsis thaliana]                                                                                                                                          | 411 | 416 | 0         | 101.2 | 85.6 | 92.5  | LysM domain-containing GPI-anchored protein 1             | gbpln | Arabidopsis thaliana | AT1G21880.2   Symbols: LYM1   lysm domain GPI-anchored protein 1 precursor   chr1:7680689-7682526 FORWARD LENGTH=416                                                                                                                                                                                                                                                                                                           | 411 | 416 | 0         | 101.2 | 85.6 | 92.5  |
| Rsa1.0_01668.1.g28880.t1 | ref[XP_002890469.1] hypothetical protein ARALYDRAFT_313079 [Arabidopsis lyrata subsp. lyrata] gi 297336313 gb EFH66728.1  hypothetical protein ARALYDRAFT_313079 [Arabidopsis lyrata subsp. lyrata]                                                                                                                                                                                                                                                                                                                                                                              | 343 | 341 | 0         | 99.4  | 94.2 | 96.5  | hypothetical protein ARALYDRAFT_313079                    | gbpln | Arabidopsis lyrata   | AT1G21870.1   Symbols: GONST5   golgi nucleotide sugar transporter 5   chr1:7678208-7679697 FORWARD LENGTH=341                                                                                                                                                                                                                                                                                                                 | 343 | 341 | 0         | 99.4  | 92.1 | 95.6  |
| Rsa1.0_01668.1.g28881.t1 | ref[XP_002893185.1] hypothetical protein ARALYDRAFT_313074 [Arabidopsis lyrata subsp. lyrata] gi 297339027 gb EFH69444.1  hypothetical protein ARALYDRAFT_313074 [Arabidopsis lyrata subsp. lyrata]                                                                                                                                                                                                                                                                                                                                                                              | 201 | 205 | 8.00E-80  | 102.0 | 87.6 | 93.0  | hypothetical protein ARALYDRAFT_313074                    | gbpln | Arabidopsis lyrata   | AT1G21830.1   Symbols:   unknown protein; CONTAINS InterPro DOMAIN/s: Protein of unknown function DUF740 (InterPro:IPR008004); BEST Arabidopsis thaliana protein match is: unknown protein (TAIRAT1G44608.1); Has 49 Blast hits to 49 proteins in 12 species: Archae - 0; Bacteria - 0; Metazoa - 0; Fungi - 0; Plants - 49; Viruses - 0; Other Eukaryotes - 0 (source: NCBI BLink).   chr1:7661429-7662521 REVERSE LENGTH=206 | 201 | 206 | 1.00E-79  | 102.5 | 86.6 | 93.0  |
| Rsa1.0_01668.1.g28882.t1 | ref[XP_002890462.1] hypothetical protein ARALYDRAFT_889647 [Arabidopsis lyrata subsp. lyrata] gi 297336304 gb EFH66721.1  hypothetical protein ARALYDRAFT_889647 [Arabidopsis lyrata subsp. lyrata]                                                                                                                                                                                                                                                                                                                                                                              | 488 | 501 | 0         | 102.7 | 86.3 | 91.0  | hypothetical protein ARALYDRAFT_889647                    | gbpln | Arabidopsis lyrata   | AT1G21750.1   Symbols: ATPDIL1-1, ATPDIS, PDIS, PDIL1-1   PDI-like 1-1   chr1:7645767-7648514 FORWARD LENGTH=501                                                                                                                                                                                                                                                                                                               | 488 | 501 | 0         | 102.7 | 86.1 | 90.6  |
| Rsa1.0_01668.1.g28883.t1 | #                                                                                                                                                                                                                                                                                                                                                                                                                                                                                                                                                                                | #   | #   | #         | #     | #    | -     | ----                                                      | ----  | #                    | #                                                                                                                                                                                                                                                                                                                                                                                                                              | #   | #   | #         | #     | #    |       |
| Rsa1.0_01668.1.g28884.t1 | ref[NP_564149.1] proteasome subunit beta type-3-A [Arabidopsis thaliana] gi 28855823 sp Q9X105.2 PSB3A_ARATH RecName: Full=Proteasome subunit beta type-3-A; AltName: Full=20S proteasome beta subunit C-1; AltName: Full=Proteasome component T gi 17473525 gb AAL38246.1  proteasome subunit [Arabidopsis thaliana] gi 21387087 gb AAM47947.1  proteasome subunit [Arabidopsis thaliana] gi 110740894 dbj BAE98543.1  20S proteasome beta subunit PBC2 like protein [Arabidopsis thaliana] gi 332192025 gb AAE30146.1  proteasome subunit beta type-3-A [Arabidopsis thaliana] | 204 | 204 | 1.00E-116 | 100.0 | 99.0 | 100.0 | proteasome subunit beta type-3-A                          | gbpln | Arabidopsis thaliana | AT1G21720.1   Symbols: PBC1   proteasome beta subunit C1   chr1:7626394-7628070 FORWARD LENGTH=204                                                                                                                                                                                                                                                                                                                             | 204 | 204 | 1.00E-118 | 100.0 | 99.0 | 100.0 |
| Rsa1.0_01669.1.g28885.t1 | #                                                                                                                                                                                                                                                                                                                                                                                                                                                                                                                                                                                | #   | #   | #         | #     | #    | -     | ----                                                      | ----  | #                    | #                                                                                                                                                                                                                                                                                                                                                                                                                              | #   | #   | #         | #     | #    |       |

|                          |                                                                                                                                                                                                                                                                                                                                                                                                                                                                                                 |      |      |           |       |      |      |                                                 |       |                      |                                                                                                                                               |      |     |           |       |      |      |
|--------------------------|-------------------------------------------------------------------------------------------------------------------------------------------------------------------------------------------------------------------------------------------------------------------------------------------------------------------------------------------------------------------------------------------------------------------------------------------------------------------------------------------------|------|------|-----------|-------|------|------|-------------------------------------------------|-------|----------------------|-----------------------------------------------------------------------------------------------------------------------------------------------|------|-----|-----------|-------|------|------|
| Rsa1.0_01669.1.g28886.t1 | refXP_002887748.1   EMB1473 [Arabidopsis lyrata subsp. lyrata] gi 297333589 gb EFH64007.1   EMB1473 [Arabidopsis lyrata subsp. lyrata]                                                                                                                                                                                                                                                                                                                                                          | 244  | 242  | 1.00E-125 | 99.2  | 89.3 | 93.4 | EMB1473                                         | gbpln | Arabidopsis lyrata   | AT1G78630.1   Symbols: emb1473   Ribosomal protein L13 family protein   chr1:29575997-29577406 FORWARD LENGTH=241                             | 244  | 241 | 1.00E-118 | 98.8  | 89.8 | 93.9 |
| Rsa1.0_01669.1.g28887.t2 | dbj BAJ33720.1  unnamed protein product [Theilingiella halophila]                                                                                                                                                                                                                                                                                                                                                                                                                               | 295  | 294  | 1.00E-138 | 99.7  | 88.8 | 92.5 | unnamed protein product                         | ----  | ----                 | AT1G78600.1   Symbols: LZF1, STH3, DBB3   light-regulated zinc finger protein 1   chr1:29567370-29568662 FORWARD LENGTH=299                   | 295  | 299 | 1.00E-131 | 101.4 | 84.4 | 88.5 |
| Rsa1.0_01669.1.g28888.t1 | refXP_002889200.1   trehalose-6-phosphate synthase [Arabidopsis lyrata subsp. lyrata] gi 297335041 gb EFH65459.1   trehalose-6-phosphate synthase [Arabidopsis lyrata subsp. lyrata]                                                                                                                                                                                                                                                                                                            | 415  | 955  | 1.00E-176 | 230.1 | 83.1 | 87.7 | trehalose-6-phosphate synthase                  | gbpln | Arabidopsis lyrata   | AT1G78580.1   Symbols: ATTPS1, TPS1   trehalose-6-phosphate synthase   chr1:29552495-29557482 REVERSE LENGTH=942                              | 415  | 942 | 1.00E-177 | 227.0 | 83.4 | 88.4 |
| Rsa1.0_01669.1.g28889.t2 | gb EOA18136.1  hypothetical protein CARUB_v10006599mg [Capsella rubella]                                                                                                                                                                                                                                                                                                                                                                                                                        | 527  | 465  | 1.00E-127 | 88.2  | 44.8 | 57.7 | hypothetical protein CARUB_v10006599mg          | gbpln | Capsella rubella     | AT1G67390.1   Symbols:   F-box family protein   chr1:25244690-25247139 FORWARD LENGTH=479                                                     | 527  | 479 | 3.00E-86  | 90.9  | 35.5 | 52.4 |
| Rsa1.0_01669.1.g28890.t1 | emb CAB39638.1  RNA-directed DNA polymerase-like protein [Arabidopsis thaliana] gi 7267666 emb CAB78094.1  RNA-directed DNA polymerase-like protein [Arabidopsis thaliana]                                                                                                                                                                                                                                                                                                                      | 526  | 1274 | 2.00E-80  | 242.2 | 37.3 | 52.7 | RNA-directed DNA polymerase-like protein        | gbpln | Arabidopsis thaliana | AT4G29090.1   Symbols:   Ribonuclease H-like superfamily protein   chr4:14333528-14335255 FORWARD LENGTH=575                                  | 526  | 575 | 9.00E-44  | 109.3 | 27.0 | 46.8 |
| Rsa1.0_01669.1.g28891.t1 | dbj BAM73281.1  gibberellin 2 oxidase 1 [Raphanus sativus]                                                                                                                                                                                                                                                                                                                                                                                                                                      | 320  | 331  | 1.00E-158 | 103.4 | 86.3 | 91.3 | gibberellin 2 oxidase 1                         | gbpln | Raphanus sativus     | AT1G78440.1   Symbols: ATGA2OX1, GA2OX1   Arabidopsis thaliana gibberellin 2-oxidase 1   chr1:29511772-29512990 REVERSE LENGTH=329            | 320  | 329 | 1.00E-154 | 102.8 | 82.8 | 89.7 |
| Rsa1.0_01670.1.g28892.t1 | refXP_002866884.1   predicted protein [Arabidopsis lyrata subsp. lyrata] gi 297312720 gb EFH43143.1   predicted protein [Arabidopsis lyrata subsp. lyrata]                                                                                                                                                                                                                                                                                                                                      | 121  | 132  | 6.00E-47  | 109.1 | 79.3 | 88.4 | predicted protein                               | gbpln | Arabidopsis lyrata   | AT4G39795.1   Symbols:   Protein of unknown function (DUF581)   chr4:18466621-18467325 FORWARD LENGTH=126                                     | 121  | 126 | 1.00E-44  | 104.1 | 73.6 | 83.5 |
| Rsa1.0_01670.1.g28893.t1 | ref NP_200334.1  microtubule-associated proteins 65-1 [Arabidopsis thaliana] gi 75171506 sp Q9FLP0.1 MA651_ARATH RecName: Full=65-kDa microtubule-associated protein 1; Short=ATMAP65-1 gi 9758120 dbj BAB08592.1  unnamed protein product [Arabidopsis thaliana] gi 28416713 gb AAO42887.1  At5g55230 [Arabidopsis thaliana] gi 110735819 dbj BAE99886.1  hypothetical protein [Arabidopsis thaliana] gi 332009219 gb AED96602.1  microtubule-associated proteins 65-1 [Arabidopsis thaliana]  | 225  | 587  | 9.00E-35  | 260.9 | 32.4 | 35.1 | microtubule-associated proteins 65-1            | gbpln | Arabidopsis thaliana | AT5G55230.1   Symbols: ATMAP65-1, MAP65-1   microtubule-associated proteins 65-1   chr2:22402716-22405182 FORWARD LENGTH=587                  | 225  | 587 | 3.00E-37  | 260.9 | 32.4 | 35.1 |
| Rsa1.0_01670.1.g28894.t1 | refXP_002868929.1   predicted protein [Arabidopsis lyrata subsp. lyrata] gi 297314765 gb EFH45188.1   predicted protein [Arabidopsis lyrata subsp. lyrata]                                                                                                                                                                                                                                                                                                                                      | 631  | 661  | 0         | 104.8 | 79.9 | 86.4 | predicted protein                               | gbpln | Arabidopsis lyrata   | AT4G39780.1   Symbols:   Protein of unknown function (DUF581)   chr4:18462316-18464584 REVERSE LENGTH=657                                     | 631  | 657 | 0         | 104.1 | 79.6 | 85.6 |
| Rsa1.0_01670.1.g28895.t1 | ref NP_195688.1  ethylene-responsive transcription factor ERF060 [Arabidopsis thaliana] gi 75219968 sp O65665.1 ERF60_ARATH RecName: Full=Ethylene-responsive transcription factor ERF060 gi 3080447 emb CAA18764.1  putative protein [Arabidopsis thaliana] gi 7270962 emb CAB80641.1  putative protein [Arabidopsis thaliana] gi 106879185 gb ABF82622.1  At4g39780 [Arabidopsis thaliana] gi 332661718 gb AEE87118.1  ethylene-responsive transcription factor ERF060 [Arabidopsis thaliana] | 276  | 272  | 1.00E-122 | 98.6  | 78.6 | 85.5 | ethylene-responsive transcription factor ERF060 | gbpln | Arabidopsis thaliana | AT4G39780.1   Symbols:   Integrase-type DNA-binding superfamily protein   chr4:18458216-18459034 REVERSE LENGTH=272                           | 276  | 272 | 1.00E-124 | 98.6  | 78.6 | 85.5 |
| Rsa1.0_01670.1.g28896.t1 | refXP_002868927.1   predicted protein [Arabidopsis lyrata subsp. lyrata] gi 297314763 gb EFH45186.1   predicted protein [Arabidopsis lyrata subsp. lyrata]                                                                                                                                                                                                                                                                                                                                      | 417  | 349  | 1.00E-179 | 83.7  | 72.9 | 76.0 | predicted protein                               | gbpln | Arabidopsis lyrata   | AT4G39770.1   Symbols: TPPH   Haloacid dehalogenase-like hydrolase (HAD) superfamily protein   chr4:18449138-18451218 REVERSE LENGTH=349      | 417  | 349 | 1.00E-180 | 83.7  | 71.9 | 75.5 |
| Rsa1.0_01671.1.g28898.t1 | gb AAG51783.1 AC079679.3 reverse transcriptase, putative; 16838-20266 [Arabidopsis thaliana]                                                                                                                                                                                                                                                                                                                                                                                                    | 343  | 1142 | 2.00E-39  | 332.9 | 26.2 | 34.4 | reverse transcriptase, putative; 16838-20266    | gbpln | Arabidopsis thaliana | AT4G29090.1   Symbols:   Ribonuclease H-like superfamily protein   chr4:14333528-14335255 FORWARD LENGTH=575                                  | 343  | 575 | 1.00E-19  | 167.6 | 19.0 | 29.4 |
| Rsa1.0_01671.1.g28899.t5 | emb CAB39638.1  RNA-directed DNA polymerase-like protein [Arabidopsis thaliana] gi 7267666 emb CAB78094.1  RNA-directed DNA polymerase-like protein [Arabidopsis thaliana]                                                                                                                                                                                                                                                                                                                      | 1754 | 1274 | 1.00E-167 | 72.6  | 20.9 | 29.6 | RNA-directed DNA polymerase-like protein        | gbpln | Arabidopsis thaliana | AT3G24255.1   Symbols:   RNA-directed DNA polymerase (reverse transcriptase)-related family protein   chr3:8789471-8793208 FORWARD LENGTH=746 | 1754 | 746 | 3.00E-37  | 42.5  | 4.7  | 6.4  |



|                          |                                                                                                                                                                                                                                       |      |      |           |       |      |      |                                                      |       |                      |                                                                                                                                                                                                                                                                                   |     |     |           |       |      |      |
|--------------------------|---------------------------------------------------------------------------------------------------------------------------------------------------------------------------------------------------------------------------------------|------|------|-----------|-------|------|------|------------------------------------------------------|-------|----------------------|-----------------------------------------------------------------------------------------------------------------------------------------------------------------------------------------------------------------------------------------------------------------------------------|-----|-----|-----------|-------|------|------|
| Rsa1.0_01671.1.g28900.t1 | gb AAF79618.1 AC027665_19 F5M15.26 [Arabidopsis thaliana]                                                                                                                                                                             | 1634 | 1838 | 0         | 112.5 | 37.5 | 54.5 | F5M15.26                                             | gbpln | Arabidopsis thaliana | #                                                                                                                                                                                                                                                                                 | #   | #   | #         | #     | #    | #    |
| Rsa1.0_01671.1.g28901.t1 | #                                                                                                                                                                                                                                     | #    | #    | #         | #     | #    | -    | ----                                                 | ----  | #                    | #                                                                                                                                                                                                                                                                                 | #   | #   | #         | #     | #    | #    |
| Rsa1.0_01671.1.g28902.t1 | #                                                                                                                                                                                                                                     | #    | #    | #         | #     | #    | -    | ----                                                 | ----  | #                    | #                                                                                                                                                                                                                                                                                 | #   | #   | #         | #     | #    | #    |
| Rsa1.0_01671.1.g28903.t1 | gb AAD25646.1  putative retroelement pol polyprotein [Arabidopsis thaliana]                                                                                                                                                           | 307  | 1461 | 2.00E-81  | 475.9 | 52.1 | 67.4 | putative retroelement pol polyprotein                | gbpln | Arabidopsis thaliana | #                                                                                                                                                                                                                                                                                 | #   | #   | #         | #     | #    | #    |
| Rsa1.0_01671.1.g28904.t1 | gb AAF79618.1 AC027665_19 F5M15.26 [Arabidopsis thaliana]                                                                                                                                                                             | 988  | 1838 | 0         | 186.0 | 53.8 | 68.5 | F5M15.26                                             | gbpln | Arabidopsis thaliana | #                                                                                                                                                                                                                                                                                 | #   | #   | #         | #     | #    | #    |
| Rsa1.0_01671.1.g28905.t1 | #                                                                                                                                                                                                                                     | #    | #    | #         | #     | #    | -    | ----                                                 | ----  | #                    | #                                                                                                                                                                                                                                                                                 | #   | #   | #         | #     | #    | #    |
| Rsa1.0_01671.1.g28906.t1 | #                                                                                                                                                                                                                                     | #    | #    | #         | #     | #    | -    | ----                                                 | ----  | #                    | #                                                                                                                                                                                                                                                                                 | #   | #   | #         | #     | #    | #    |
| Rsa1.0_01672.1.g28907.t1 | ref XP_002893783.1  predicted protein [Arabidopsis lyrata subsp. lyrata] gi 297329262 gb EFH70042.1  predicted protein [Arabidopsis lyrata subsp. lyrata]                                                                             | 215  | 276  | 1.00E-17  | 128.4 | 31.2 | 42.3 | predicted protein                                    | gbpln | Arabidopsis lyrata   | AT5G03495.1   Symbols:   RNA-binding (RRM/RBD/RNP motifs) family protein   chr5:873804-875025 REVERSE LENGTH=226                                                                                                                                                                  | 215 | 226 | 9.00E-17  | 105.1 | 31.6 | 43.7 |
| Rsa1.0_01672.1.g28908.t1 | ref XP_002883446.1  predicted protein [Arabidopsis lyrata subsp. lyrata] gi 297329266 gb EFH59705.1  predicted protein [Arabidopsis lyrata subsp. lyrata]                                                                             | 212  | 319  | 2.00E-13  | 150.5 | 27.8 | 36.8 | predicted protein                                    | gbpln | Arabidopsis lyrata   | AT5G53700.1   Symbols:   RNA-binding (RRM/RBD/RNP motifs) family protein   chr5:21801221-21802546 FORWARD LENGTH=251                                                                                                                                                              | 212 | 251 | 5.00E-11  | 118.4 | 28.3 | 41.0 |
| Rsa1.0_01672.1.g28909.t1 | ref NP_851236.1  evolutionarily conserved C-terminal region 3 protein [Arabidopsis thaliana] gi 332010029 gb AED97412.1  evolutionarily conserved C-terminal region 3 protein [Arabidopsis thaliana]                                  | 196  | 495  | 1.00E-43  | 252.6 | 44.9 | 48.5 | evolutionarily conserved C-terminal region 3 protein | gbpln | Arabidopsis thaliana | AT5G61020.1   Symbols: ECT3   evolutionarily conserved C-terminal region 3   chr5:24557485-24559780 REVERSE LENGTH=495                                                                                                                                                            | 196 | 495 | 5.00E-46  | 252.6 | 44.9 | 48.5 |
| Rsa1.0_01672.1.g28910.t2 | gb EOA28853.1  hypothetical protein CARUB_v10025097mg, partial [Capsella rubella]                                                                                                                                                     | 544  | 600  | 1.00E-117 | 110.3 | 42.8 | 56.8 | hypothetical protein CARUB_v10025097mg, partial      | gbpln | Capsella rubella     | AT3G17450.1   Symbols:   hAT dimerisation domain-containing protein   chr3:5972793-5975684 REVERSE LENGTH=877                                                                                                                                                                     | 544 | 877 | 7.00E-52  | 161.2 | 23.9 | 38.2 |
| Rsa1.0_01672.1.g28911.t1 | gb AAG10810.1 AC018460_4 Hypothetical protein [Arabidopsis thaliana] gi 12320956 gb AAG50601.1 AC079605_6 hypothetical protein [Arabidopsis thaliana]                                                                                 | 100  | 484  | 1.00E-38  | 484.0 | 72.0 | 90.0 | Hypothetical protein                                 | gbpln | Arabidopsis thaliana | #                                                                                                                                                                                                                                                                                 | #   | #   | #         | #     | #    | #    |
| Rsa1.0_01672.1.g28912.t1 | #                                                                                                                                                                                                                                     | #    | #    | #         | #     | #    | -    | ----                                                 | ----  | #                    | #                                                                                                                                                                                                                                                                                 | #   | #   | #         | #     | #    | #    |
| Rsa1.0_01673.1.g28913.t1 | gb EOA38204.1  hypothetical protein CARUB_v10009681mg [Capsella rubella]                                                                                                                                                              | 331  | 335  | 1.00E-153 | 101.2 | 86.1 | 90.6 | hypothetical protein CARUB_v10009681mg               | gbpln | Capsella rubella     | AT1G33780.1   Symbols:   Protein of unknown function (DUF179)   chr1:12244799-122446034 REVERSE LENGTH=325                                                                                                                                                                        | 331 | 325 | 2.33E-156 | 98.2  | 85.5 | 90.0 |
| Rsa1.0_01673.1.g28914.t2 | gb EOA39920.1  hypothetical protein CARUB_v10008607mg [Capsella rubella]                                                                                                                                                              | 618  | 616  | 0         | 99.7  | 84.1 | 89.6 | hypothetical protein CARUB_v10008607mg               | gbpln | Capsella rubella     | AT1G33770.1   Symbols:   Protein kinase superfamily protein   chr1:12242126-12244462 FORWARD LENGTH=614                                                                                                                                                                           | 618 | 614 | 0         | 99.4  | 85.6 | 89.8 |
| Rsa1.0_01673.1.g28915.t1 | ref NP_174637.1  protein kinase-like protein [Arabidopsis thaliana] gi 9665093 gb AAF97284.1 AC010164_6 Putative protein kinase [Arabidopsis thaliana] gi 332193501 gb AEE31622.1  protein kinase-like protein [Arabidopsis thaliana] | 78   | 614  | 3.00E-24  | 787.2 | 80.8 | 84.6 | protein kinase-like protein                          | gbpln | Arabidopsis thaliana | AT1G33770.1   Symbols:   Protein kinase superfamily protein   chr1:12242126-12244462 FORWARD LENGTH=614                                                                                                                                                                           | 78  | 614 | 5.00E-27  | 787.2 | 80.8 | 84.6 |
| Rsa1.0_01673.1.g28916.t1 | #                                                                                                                                                                                                                                     | #    | #    | #         | #     | #    | -    | ----                                                 | ----  | #                    | #                                                                                                                                                                                                                                                                                 | #   | #   | #         | #     | #    | #    |
| Rsa1.0_01673.1.g28917.t2 | ref XP_004292625.1  PREDICTED: uncharacterized protein LOC101299743 [Fragaria vesca subsp. vesca]                                                                                                                                     | 638  | 746  | 1.00E-156 | 116.9 | 46.4 | 60.2 | PREDICTED: uncharacterized protein LOC101299743      | gbpln | Fragaria vesca       | AT4G15020.2   Symbols:   hAT transposon superfamily   chr4:8575806-8578372 FORWARD LENGTH=768                                                                                                                                                                                     | 638 | 768 | 9.00E-54  | 120.4 | 25.9 | 40.1 |
| Rsa1.0_01673.1.g28918.t1 | gb EOA39596.1  hypothetical protein CARUB_v10008221mg, partial [Capsella rubella]                                                                                                                                                     | 951  | 952  | 0         | 100.1 | 91.9 | 96.0 | hypothetical protein CARUB_v10008221mg, partial      | gbpln | Capsella rubella     | AT1G33700.2   Symbols:   Beta-glucosidase, GBA2 type family protein   chr1:12208853-12213571 REVERSE LENGTH=947                                                                                                                                                                   | 951 | 947 | 0         | 99.6  | 90.5 | 95.4 |
| Rsa1.0_01674.1.g28919.t1 | #                                                                                                                                                                                                                                     | #    | #    | #         | #     | #    | -    | ----                                                 | ----  | #                    | #                                                                                                                                                                                                                                                                                 | #   | #   | #         | #     | #    | #    |
| Rsa1.0_01674.1.g28920.t1 | ref NP_974572.1  uncharacterized protein [Arabidopsis thaliana] gi 332658751 gb AEE84151.1  uncharacterized protein AT4G19160 [Arabidopsis thaliana]                                                                                  | 445  | 453  | 1.00E-154 | 101.8 | 69.4 | 79.8 | uncharacterized protein                              | gbpln | Arabidopsis thaliana | AT4G19160.2   Symbols:   unknown protein; Has 3533 Blast hits to 34131 proteins in 2444 species: Archae - 798; Bacteria - 22429; Metazoa - 974; Fungi - 991; Plants - 531; Viruses - 0; Other Eukaryotes - 9610 (source: NCBI BLINK).   chr4:10477772-10479947 FORWARD LENGTH=453 | 445 | 453 | 1.00E-157 | 101.8 | 69.4 | 79.8 |
| Rsa1.0_01674.1.g28921.t1 | #                                                                                                                                                                                                                                     | #    | #    | #         | #     | #    | -    | ----                                                 | ----  | #                    | #                                                                                                                                                                                                                                                                                 | #   | #   | #         | #     | #    | #    |
| Rsa1.0_01674.1.g28922.t1 | dbj BAJ34120.1  unnamed protein product [Thellungiella halophila]                                                                                                                                                                     | 578  | 602  | 0         | 104.2 | 87.5 | 93.8 | unnamed protein product                              | ----  | ----                 | AT4G19170.1   Symbols: NCED4, CCD4   nine-cis-epoxycarotenoid dioxygenase 4   chr4:10481835-10483622 FORWARD LENGTH=595                                                                                                                                                           | 578 | 595 | 0         | 102.9 | 83.4 | 89.3 |
| Rsa1.0_01674.1.g28923.t2 | ref XP_002867949.1  integral membrane family protein [Arabidopsis lyrata subsp. lyrata] gi 297313785 gb EFH44208.1  integral membrane family protein [Arabidopsis lyrata subsp. lyrata]                                               | 268  | 398  | 1.00E-132 | 148.5 | 88.1 | 92.2 | integral membrane family protein                     | gbpln | Arabidopsis lyrata   | AT4G19185.1   Symbols:   nodulin MtN21 /EamA-like transporter family protein   chr4:10489201-10491488 REVERSE LENGTH=398                                                                                                                                                          | 268 | 398 | 1.00E-134 | 148.5 | 87.3 | 92.2 |

|                          |                                                                                                                                                                                                                                                                                                                                                                                                                                                                                                                                                                                                                          |      |      |           |       |      |      |                                                                        |       |                      |                                                                                                                                                       |      |      |           |       |      |      |
|--------------------------|--------------------------------------------------------------------------------------------------------------------------------------------------------------------------------------------------------------------------------------------------------------------------------------------------------------------------------------------------------------------------------------------------------------------------------------------------------------------------------------------------------------------------------------------------------------------------------------------------------------------------|------|------|-----------|-------|------|------|------------------------------------------------------------------------|-------|----------------------|-------------------------------------------------------------------------------------------------------------------------------------------------------|------|------|-----------|-------|------|------|
| Rsa1.0_01674.1.g28924.t1 | emb[CAA16708.1] putative protein [Arabidopsis thaliana] gi 7268714 emb CAB78921.1  putative protein [Arabidopsis thaliana]                                                                                                                                                                                                                                                                                                                                                                                                                                                                                               | 604  | 1260 | 0         | 208.6 | 80.3 | 88.7 | putative protein                                                       | gbpln | Arabidopsis thaliana | AT4G19191.1   Symbols:   Tetratricopeptide repeat (TPR)-like superfamily protein   chr4:10496228-10498192 FORWARD LENGTH=654                          | 604  | 654  | 0         | 108.3 | 80.3 | 88.7 |
| Rsa1.0_01674.1.g28925.t1 | ref[XP_002869995.1] expressed protein [Arabidopsis lyrata subsp. lyrata] gi 297315831 gb EFH48254.1  expressed protein [Arabidopsis lyrata subsp. lyrata]                                                                                                                                                                                                                                                                                                                                                                                                                                                                | 183  | 171  | 7.00E-19  | 93.4  | 52.5 | 53.0 | expressed protein                                                      | gbpln | Arabidopsis lyrata   | #                                                                                                                                                     | #    | #    | #         | #     | #    | #    |
| Rsa1.0_01674.1.g28926.t1 | gb[EOA18927.1] hypothetical protein CARUB_v10007560mg [Capsella rubella]                                                                                                                                                                                                                                                                                                                                                                                                                                                                                                                                                 | 605  | 605  | 0         | 100.0 | 98.0 | 98.8 | hypothetical protein CARUB_v10007560mg                                 | gbpln | Capsella rubella     | AT4G19210.1   Symbols: ATRLI2, RL12   RNase I inhibitor protein 2   chr4:10501906-10504776 FORWARD LENGTH=605                                         | 605  | 605  | 0         | 100.0 | 97.7 | 99.0 |
| Rsa1.0_01674.1.g28927.t1 | gb[AAG10817.1]AC011808.5 Putative retroelement polyprotein [Arabidopsis thaliana]                                                                                                                                                                                                                                                                                                                                                                                                                                                                                                                                        | 1358 | 1413 | 0         | 104.1 | 66.9 | 78.1 | Putative retroelement polyprotein                                      | gbpln | Arabidopsis thaliana | AT4G23160.1   Symbols: CRK8   cysteine-rich RLK (RECEPTOR-like protein kinase) 8   chr4:12129485-12134086 FORWARD LENGTH=1262                         | 1358 | 1262 | 0         | 92.9  | 23.3 | 29.3 |
| Rsa1.0_01674.1.g28928.t1 | #                                                                                                                                                                                                                                                                                                                                                                                                                                                                                                                                                                                                                        | #    | #    | #         | #     | #    | -    | ----                                                                   | ----  | ----                 | #                                                                                                                                                     | #    | #    | #         | #     | #    | #    |
| Rsa1.0_01674.1.g28929.t1 | pir[H85073 probable transposon protein [imported] - Arabidopsis thaliana gi 5032279 gb AAD3822.1 AF147264.10 may be a pseudogene [Arabidopsis thaliana] gi 7267351 emb CAB81124.1  putative transposon protein [Arabidopsis thaliana]                                                                                                                                                                                                                                                                                                                                                                                    | 779  | 483  | 0         | 62.0  | 44.3 | 52.6 | probable transposon protein                                            | gbpln | Arabidopsis thaliana | AT3G42170.1   Symbols:   BED zinc finger hAT family dimerisation domain   chr3:14321838-14323928 FORWARD LENGTH=696                                   | 779  | 696  | 7.00E-79  | 89.3  | 24.0 | 38.8 |
| Rsa1.0_01674.1.g28930.t1 | ref[XP_002867929.1] hypothetical protein ARALYDRAFT_492902 [Arabidopsis lyrata subsp. lyrata] gi 297313765 gb EFH44188.1  hypothetical protein ARALYDRAFT_492902 [Arabidopsis lyrata subsp. lyrata]                                                                                                                                                                                                                                                                                                                                                                                                                      | 268  | 268  | 1.00E-133 | 100.0 | 86.2 | 92.2 | hypothetical protein ARALYDRAFT_492902                                 | gbpln | Arabidopsis lyrata   | AT4G19645.2   Symbols:   TRAM, LAG1 and CLN8 (TLC) lipid-sensing domain containing protein   chr4:10689941-10691298 REVERSE LENGTH=268                | 268  | 268  | 1.00E-131 | 100.0 | 83.6 | 90.7 |
| Rsa1.0_01674.1.g28931.t1 | gb[EOA27577.1] hypothetical protein CARUB_v10023716mg [Capsella rubella]                                                                                                                                                                                                                                                                                                                                                                                                                                                                                                                                                 | 309  | 302  | 1.00E-120 | 97.7  | 69.3 | 82.2 | hypothetical protein CARUB_v10023716mg                                 | gbpln | Capsella rubella     | AT4G02850.1   Symbols:   phenazine biosynthesis PhzC/PhzF family protein   chr4:1266535-1268569 REVERSE LENGTH=306                                    | 309  | 306  | 1.00E-122 | 99.0  | 68.6 | 83.8 |
| Rsa1.0_01674.1.g28932.t1 | ref[XP_002874893.1] pentatricopeptide repeat-containing protein [Arabidopsis lyrata subsp. lyrata] gi 297320730 gb EFH51152.1  pentatricopeptide repeat-containing protein [Arabidopsis lyrata subsp. lyrata]                                                                                                                                                                                                                                                                                                                                                                                                            | 528  | 525  | 0         | 99.4  | 86.2 | 92.8 | pentatricopeptide repeat-containing protein                            | gbpln | Arabidopsis lyrata   | AT4G02820.1   Symbols:   Pentatricopeptide repeat (PPR) superfamily protein   chr4:1258581-1260265 FORWARD LENGTH=532                                 | 528  | 532  | 0         | 100.8 | 84.5 | 92.0 |
| Rsa1.0_01674.1.g28933.t1 | gb[EOA15357.1] hypothetical protein CARUB_v10005280mg [Capsella rubella]                                                                                                                                                                                                                                                                                                                                                                                                                                                                                                                                                 | 234  | 317  | 6.00E-89  | 135.5 | 75.6 | 83.3 | hypothetical protein CARUB_v10005280mg                                 | gbpln | Capsella rubella     | AT4G19700.1   Symbols: RING   SBP (S-ribonuclease binding protein) family protein   chr4:10713633-10714635 REVERSE LENGTH=304                         | 234  | 304  | 1.00E-86  | 129.9 | 74.4 | 81.6 |
| Rsa1.0_01674.1.g28934.t1 | #                                                                                                                                                                                                                                                                                                                                                                                                                                                                                                                                                                                                                        | #    | #    | #         | #     | #    | -    | ----                                                                   | ----  | ----                 | #                                                                                                                                                     | #    | #    | #         | #     | #    | #    |
| Rsa1.0_01674.1.g28935.t1 | #                                                                                                                                                                                                                                                                                                                                                                                                                                                                                                                                                                                                                        | #    | #    | #         | #     | #    | -    | ----                                                                   | ----  | ----                 | #                                                                                                                                                     | #    | #    | #         | #     | #    | #    |
| Rsa1.0_01675.1.g28936.t1 | gb[EOA24380.1] hypothetical protein CARUB_v10017617mg [Capsella rubella]                                                                                                                                                                                                                                                                                                                                                                                                                                                                                                                                                 | 201  | 330  | 5.00E-70  | 164.2 | 78.6 | 87.6 | hypothetical protein CARUB_v10017617mg                                 | gbpln | Capsella rubella     | AT3G58120.1   Symbols: ATBZIP61, BZIP61   Basic-leucine zipper (bZIP) transcription factor family protein   chr3:21521289-21523078 REVERSE LENGTH=329 | 201  | 329  | 6.00E-70  | 163.7 | 80.1 | 88.6 |
| Rsa1.0_01675.1.g28937.t5 | ref[NP_191372.2] N-acetylglucosaminylphosphatidylinositol de-N-acetylase family protein [Arabidopsis thaliana] gi 79315492 ref[NP_001030882.1] N-acetylglucosaminylphosphatidylinositol de-N-acetylase family protein [Arabidopsis thaliana] gi 50198821 gb AAT70443.1  At3g58130 [Arabidopsis thaliana] gi 51972138 gb AAU15173.1  At3g58130 [Arabidopsis thaliana] gi 332646224 gb AEE79745.1  N-acetylglucosaminylphosphatidylinositol de-N-acetylase family protein [Arabidopsis thaliana] gi 332646225 gb AEE79746.1  N-acetylglucosaminylphosphatidylinositol de-N-acetylase family protein [Arabidopsis thaliana] | 238  | 257  | 1.00E-101 | 108.0 | 73.5 | 81.5 | N-acetylglucosaminylphosphatidylinositol de-N-acetylase family protein | gbpln | Arabidopsis thaliana | AT3G58130.2   Symbols:   N-acetylglucosaminylphosphatidylinositol de-N-acetylase family protein   chr3:21527946-21529654 FORWARD LENGTH=257           | 238  | 257  | 1.00E-104 | 108.0 | 73.5 | 81.5 |
| Rsa1.0_01675.1.g28938.t1 | gb[EOA24075.1] hypothetical protein CARUB_v10017303mg [Capsella rubella]                                                                                                                                                                                                                                                                                                                                                                                                                                                                                                                                                 | 432  | 430  | 0         | 99.5  | 91.0 | 94.7 | hypothetical protein CARUB_v10017303mg                                 | gbpln | Capsella rubella     | AT3G58140.1   Symbols:   phenylalanyl-tRNA synthetase class IIc family protein   chr3:21529988-21532386 REVERSE LENGTH=429                            | 432  | 429  | 0         | 99.3  | 89.8 | 93.8 |

|                          |                                                                                                                                                                                                                                                                                                                                                                                                                                                                                                                                                                                                                                                  |     |     |           |       |      |      |                                        |       |                      |                                                                                                                                                                   |     |     |           |       |      |      |
|--------------------------|--------------------------------------------------------------------------------------------------------------------------------------------------------------------------------------------------------------------------------------------------------------------------------------------------------------------------------------------------------------------------------------------------------------------------------------------------------------------------------------------------------------------------------------------------------------------------------------------------------------------------------------------------|-----|-----|-----------|-------|------|------|----------------------------------------|-------|----------------------|-------------------------------------------------------------------------------------------------------------------------------------------------------------------|-----|-----|-----------|-------|------|------|
| Rsa1.0_01675.1.g28939.t6 | ref NP_191376.1  Bet1-like SNARE 1-1 [Arabidopsis thaliana]<br>gi 27805428 sp Q9M2J9.1 BET11_ARAT H RecName: Full=Bet1-like SNARE 1-1; Short=AtBET11; AltName: Full=Bet1/Sft1-like SNARE 14a; Short=AtBS14a<br>gi 14030603 gb AAK52976.1 AF368175.1 Bet1/Sft1-like SNARE AtBS14a [Arabidopsis thaliana]<br>gi 6735329 emb CAB68155.1  putative protein [Arabidopsis thaliana]<br>gi 26449796 dbj BAC42021.1  unknown protein [Arabidopsis thaliana]<br>gi 28416841 gb AAO42951.1  At3g58170 [Arabidopsis thaliana]<br>gi 332646229 gb AEE79750.1  Bet1-like SNARE 1-1 [Arabidopsis thaliana]                                                     | 198 | 122 | 1.00E-53  | 61.6  | 52.5 | 54.0 | Bet1-like SNARE 1-1                    | gbpln | Arabidopsis thaliana | AT3G58170.1   Symbols: ATBS14A, ATBET11, BET11, BS14A   BET1P/SFT1P-like protein 14A   chr3:21542632-21543775 REVERSE LENGTH=122                                  | 198 | 122 | 4.00E-56  | 61.6  | 52.5 | 54.0 |
| Rsa1.0_01675.1.g28940.t1 | gb EOA25554.1  hypothetical protein CARUB_v10018899mg [Capsella rubella]                                                                                                                                                                                                                                                                                                                                                                                                                                                                                                                                                                         | 317 | 310 | 1.00E-158 | 97.8  | 89.3 | 93.4 | hypothetical protein CARUB_v10018899mg | gbpln | Capsella rubella     | AT3G58180.1   Symbols:   ARM repeat superfamily protein   chr3:21544189-21545981 FORWARD LENGTH=314                                                               | 317 | 314 | 1.00E-159 | 99.1  | 88.3 | 93.4 |
| Rsa1.0_01675.1.g28941.t1 | ref NP_191378.1  LOB domain-containing protein 29 [Arabidopsis thaliana]<br>gi 29428017 sp Q9M2J7.1 LBD29_ARAT H RecName: Full=LOB domain-containing protein 29; AltName: Full=ASYMMETRIC LEAVES 2-like protein 16; Short=AS2-like protein 16<br>gi 17227168 gb AAL38038.1 AF447893.1 LOB DOMAIN 29 [Arabidopsis thaliana]<br>gi 6735331 emb CAB68157.1  putative protein [Arabidopsis thaliana]<br>gi 19442495 gb ABF19035.1  At3g58190 [Arabidopsis thaliana]<br>gi 219807108 dbj BAH10560.1  ASYMMETRIC LEAVES2-like 16 protein [Arabidopsis thaliana]<br>gi 332646231 gb AEE79752.1  LOB domain-containing protein 29 [Arabidopsis thaliana] | 222 | 218 | 4.00E-99  | 98.2  | 85.1 | 90.5 | LOB domain-containing protein 29       | gbpln | Arabidopsis thaliana | AT3G58190.1   Symbols: LBD29, ASL16   lateral organ boundaries-domain 29   chr3:21548716-21549488 REVERSE LENGTH=218                                              | 222 | 218 | 1.00E-101 | 98.2  | 85.1 | 90.5 |
| Rsa1.0_01675.1.g28942.t1 | gb EOA25991.1  hypothetical protein CARUB_v10019380mg [Capsella rubella]                                                                                                                                                                                                                                                                                                                                                                                                                                                                                                                                                                         | 292 | 330 | 3.00E-67  | 113.0 | 51.7 | 69.2 | hypothetical protein CARUB_v10019380mg | gbpln | Capsella rubella     | AT3G58210.1   Symbols:   TRAF-like family protein   chr3:21562645-21564067 REVERSE LENGTH=330                                                                     | 292 | 330 | 5.00E-61  | 113.0 | 51.4 | 69.5 |
| Rsa1.0_01675.1.g28943.t1 | ref XP_002878213.1  predicted protein [Arabidopsis lyrata subsp. lyrata]<br>gi 297324051 gb EFH54472.1  predicted protein [Arabidopsis lyrata subsp. lyrata]                                                                                                                                                                                                                                                                                                                                                                                                                                                                                     | 241 | 305 | 1.00E-71  | 126.6 | 60.2 | 72.2 | predicted protein                      | gbpln | Arabidopsis lyrata   | AT3G58340.1   Symbols:   TRAF-like family protein   chr3:21589071-21590401 REVERSE LENGTH=325                                                                     | 241 | 325 | 9.00E-74  | 134.9 | 61.0 | 73.0 |
| Rsa1.0_01675.1.g28944.t1 | ref NP_191400.1  TRAF-like family protein [Arabidopsis thaliana]<br>gi 6735353 emb CAB68179.1  putative protein [Arabidopsis thaliana]<br>gi 332646257 gb AEE79778.1  TRAF-like family protein [Arabidopsis thaliana]                                                                                                                                                                                                                                                                                                                                                                                                                            | 296 | 328 | 3.00E-68  | 110.8 | 55.1 | 67.9 | TRAF-like family protein               | gbpln | Arabidopsis thaliana | AT3G58410.1   Symbols:   TRAF-like family protein   chr3:21604871-21606229 REVERSE LENGTH=328                                                                     | 296 | 328 | 8.00E-71  | 110.8 | 55.1 | 67.9 |
| Rsa1.0_01675.1.g28945.t1 | ref XP_002878218.1  hypothetical protein ARALYDRAFT_907321 [Arabidopsis lyrata subsp. lyrata]<br>gi 297324056 gb EFH54477.1  hypothetical protein ARALYDRAFT_907321 [Arabidopsis lyrata subsp. lyrata]                                                                                                                                                                                                                                                                                                                                                                                                                                           | 307 | 323 | 1.00E-85  | 105.2 | 61.2 | 76.5 | hypothetical protein ARALYDRAFT_907321 | gbpln | Arabidopsis lyrata   | AT3G58410.1   Symbols:   TRAF-like family protein   chr3:21604871-21606229 REVERSE LENGTH=328                                                                     | 307 | 328 | 2.00E-87  | 106.8 | 59.3 | 72.6 |
| Rsa1.0_01675.1.g28946.t1 | ref NP_001190126.1  rhomboid-like protein 15 [Arabidopsis thaliana]<br>gi 332646264 gb AEE79785.1  rhomboid-like protein 15 [Arabidopsis thaliana]                                                                                                                                                                                                                                                                                                                                                                                                                                                                                               | 324 | 426 | 1.00E-166 | 131.5 | 90.4 | 94.4 | rhomboid-like protein 15               | gbpln | Arabidopsis thaliana | AT3G58460.2   Symbols: RBL15   RHOMBROID-like protein 15   chr3:21623374-21626642 REVERSE LENGTH=426                                                              | 324 | 426 | 1.00E-169 | 131.5 | 90.4 | 94.4 |
| Rsa1.0_01676.1.g28947.t1 | ref NP_190817.1  heat shock protein-like protein [Arabidopsis thaliana]<br>gi 4886278 emb CAB43425.1  putative protein [Arabidopsis thaliana]<br>gi 44917467 gb AAS49058.1  At3g52490 [Arabidopsis thaliana]<br>gi 332645430 gb AEE78951.1  heat shock protein-like protein [Arabidopsis thaliana]                                                                                                                                                                                                                                                                                                                                               | 786 | 815 | 0         | 103.7 | 85.1 | 90.2 | heat shock protein-like protein        | gbpln | Arabidopsis thaliana | AT3G52490.1   Symbols:   Double Clip-N motif-containing P-loop nucleoside triphosphate hydrolases superfamily protein   chr3:19455850-19458721 REVERSE LENGTH=815 | 786 | 815 | 0         | 103.7 | 85.1 | 90.2 |
| Rsa1.0_01676.1.g28948.t1 | #                                                                                                                                                                                                                                                                                                                                                                                                                                                                                                                                                                                                                                                | #   | #   | #         | #     | #    | -    | ----                                   | ----  | #                    | #                                                                                                                                                                 | #   | #   | #         | #     | #    |      |
| Rsa1.0_01676.1.g28949.t1 | gb ABB36904.1  hairpin-induced 1-like protein NHL18B [Brassica napus]                                                                                                                                                                                                                                                                                                                                                                                                                                                                                                                                                                            | 208 | 208 | 1.00E-113 | 100.0 | 95.2 | 98.1 | hairpin-induced 1-like protein NHL18B  | gbpln | Brassica napus       | AT3G52470.1   Symbols:   Late embryogenesis abundant (LEA) hydroxyproline-rich glycoprotein family   chr3:19450750-19451376 FORWARD LENGTH=208                    | 208 | 208 | 1.00E-105 | 100.0 | 85.6 | 91.8 |

|                          |                                                                                                                                                                                                                                                                                                                                                                                                                                                                                                                                                                                                                                                                                                                                                                                                                                                                                                     |      |      |           |       |      |      |                                                 |       |                      |                                                                                                                                                              |      |      |           |        |      |      |
|--------------------------|-----------------------------------------------------------------------------------------------------------------------------------------------------------------------------------------------------------------------------------------------------------------------------------------------------------------------------------------------------------------------------------------------------------------------------------------------------------------------------------------------------------------------------------------------------------------------------------------------------------------------------------------------------------------------------------------------------------------------------------------------------------------------------------------------------------------------------------------------------------------------------------------------------|------|------|-----------|-------|------|------|-------------------------------------------------|-------|----------------------|--------------------------------------------------------------------------------------------------------------------------------------------------------------|------|------|-----------|--------|------|------|
| Rsa1.0_01676.1.g28950.t1 | dbj BAA96887.1  copia-like retroelement pol polyprotein [Arabidopsis thaliana]                                                                                                                                                                                                                                                                                                                                                                                                                                                                                                                                                                                                                                                                                                                                                                                                                      | 253  | 1140 | 9.00E-25  | 450.6 | 37.5 | 57.3 | copia-like retroelement pol polyprotein         | gbpln | Arabidopsis thaliana | #                                                                                                                                                            | #    | #    | #         | #      | #    |      |
| Rsa1.0_01677.1.g28951.t1 | gb EOA33660.1  hypothetical protein CARUB_v10019828mg [Capsella rubella]                                                                                                                                                                                                                                                                                                                                                                                                                                                                                                                                                                                                                                                                                                                                                                                                                            | 770  | 784  | 0         | 101.8 | 91.4 | 94.9 | hypothetical protein CARUB_v10019828mg          | gbpln | Capsella rubella     | AT1G68740.1   Symbols: PHO1:H1   EXS (ERD1/XPR1/SYG1) family protein   chr1:25812735-25816574 REVERSE LENGTH=784                                             | 770  | 784  | 0         | 101.8  | 91.6 | 94.7 |
| Rsa1.0_01677.1.g28952.t1 | ref NP_177038.1  phospholipid-translocating ATPase [Arabidopsis thaliana]<br>gi 12229673 sp O9SX33.1 ALA9_ARATH<br>RecName: Full=Putative phospholipid-translocating ATPase 9; Short=AtALA9; AltName: Full=Aminophospholipid flippase 9<br>gi 5734708 gb AAD49973.1 AC008075.6<br>Similar to gb AF067820 ATPase II from Homo sapiens and is a member of PF 00122 E1-E2 ATPases family [Arabidopsis thaliana]<br>gi 332196709 gb AEE34830.1  putative phospholipid-translocating ATPase 9 [Arabidopsis thaliana]<br>ref NP_173940.2  proline-rich extensin-like receptor kinase 10 [Arabidopsis thaliana]<br>gi 310947343 sp Q9C660.2 PEK10_ARATH<br>RecName: Full=Proline-rich receptor-like protein kinase PERK10; AltName: Full=Proline-rich extensin-like receptor kinase 10; Short=AtPERK10<br>gi 332192534 gb AEE30655.1  proline-rich extensin-like receptor kinase 10 [Arabidopsis thaliana] | 1203 | 1200 | 0         | 99.8  | 91.6 | 95.3 | phospholipid-translocating ATPase               | gbpln | Arabidopsis thaliana | AT1G68710.1   Symbols:   ATPase E1-E2 type family protein / haloacid dehalogenase-like hydrolase family protein   chr1:25793498-25797975 REVERSE LENGTH=1200 | 1203 | 1200 | 0         | 99.8   | 91.6 | 95.3 |
| Rsa1.0_01677.1.g28953.t4 | gi 310947343 sp Q9C660.2 PEK10_ARATH<br>RecName: Full=Proline-rich receptor-like protein kinase PERK10; AltName: Full=Proline-rich extensin-like receptor kinase 10; Short=AtPERK10<br>gi 332192534 gb AEE30655.1  proline-rich extensin-like receptor kinase 10 [Arabidopsis thaliana]                                                                                                                                                                                                                                                                                                                                                                                                                                                                                                                                                                                                             | 852  | 762  | 0         | 89.4  | 37.4 | 43.2 | proline-rich extensin-like receptor kinase 10   | gbpln | Arabidopsis thaliana | AT1G26150.1   Symbols: ATPERK10, PERK10   proline-rich extensin-like receptor kinase 10   chr1:9039790-9042873 REVERSE LENGTH=762                            | 852  | 762  | 0         | 89.4   | 37.4 | 43.2 |
| Rsa1.0_01677.1.g28954.t1 | gb AAD49976.1 AC008075.9 F24J5.9 [Arabidopsis thaliana]                                                                                                                                                                                                                                                                                                                                                                                                                                                                                                                                                                                                                                                                                                                                                                                                                                             | 325  | 353  | 1.00E-106 | 108.6 | 68.9 | 75.7 | F24J5.9                                         | gbpln | Arabidopsis thaliana | AT1G68670.1   Symbols:   myb-like transcription factor family protein   chr1:25782344-25783873 FORWARD LENGTH=354                                            | 325  | 354  | 1.00E-109 | 108.9  | 68.9 | 75.7 |
| Rsa1.0_01678.1.g28955.t1 | ref NP_567339.1  putative purine permease 13 [Arabidopsis thaliana]<br>gi 75158986 sp Q8RY83.1 PUP13_ARATH<br>RecName: Full=Probable purine permease 13; Short=AtPUP13<br>gi 18491201 gb AAL69503.1  unknown protein [Arabidopsis thaliana]<br>gi 20465911 gb AAM20108.1  unknown protein [Arabidopsis thaliana]<br>gi 21593430 gb AAM65397.1  purine permease-like protein [Arabidopsis thaliana]<br>gi 332657272 gb AEE82672.1  putative purine permease 13 [Arabidopsis thaliana]                                                                                                                                                                                                                                                                                                                                                                                                                | 163  | 361  | 8.00E-44  | 221.5 | 59.5 | 68.7 | putative purine permease 13                     | gbpln | Arabidopsis thaliana | AT4G08700.1   Symbols: ATPUP13   Drug/metabolite transporter superfamily protein   chr4:5565998-5567286 REVERSE LENGTH=361                                   | 163  | 361  | 3.00E-46  | 221.5  | 59.5 | 68.7 |
| Rsa1.0_01678.1.g28956.t1 | gb ABD65028.1  hypothetical protein 26.t00082 [Brassica oleracea]                                                                                                                                                                                                                                                                                                                                                                                                                                                                                                                                                                                                                                                                                                                                                                                                                                   | 164  | 220  | 6.00E-24  | 134.1 | 35.4 | 40.9 | hypothetical protein 26.t00082                  | gbpln | Brassica oleracea    | AT1G14800.1   Symbols:   Nucleic acid-binding, OB-fold-like protein   chr1:5099572-5102558 FORWARD LENGTH=384                                                | 164  | 384  | 3.00E-12  | 234.1  | 21.3 | 28.7 |
| Rsa1.0_01678.1.g28957.t1 | #                                                                                                                                                                                                                                                                                                                                                                                                                                                                                                                                                                                                                                                                                                                                                                                                                                                                                                   | #    | #    | #         | #     | #    | -    | -                                               | ----  | ----                 | AT2G36380.1   Symbols: PDR6, ATPDR6   pleiotropic drug resistance 6   chr2:15257583-15263627 FORWARD LENGTH=1453                                             | 86   | 1453 | 2.00E-12  | 1689.5 | 36.0 | 45.3 |
| Rsa1.0_01678.1.g28958.t2 | gb EOA38871.1  hypothetical protein CARUB_v10011236mg, partial [Capsella rubella]                                                                                                                                                                                                                                                                                                                                                                                                                                                                                                                                                                                                                                                                                                                                                                                                                   | 385  | 301  | 1.00E-79  | 78.2  | 42.9 | 53.5 | hypothetical protein CARUB_v10011236mg, partial | gbpln | Capsella rubella     | AT1G1910.1   Symbols: APA1, ATAPA1   aspartic proteinase A1   chr1:4017119-4019874 REVERSE LENGTH=506                                                        | 385  | 506  | 7.00E-62  | 131.4  | 34.8 | 46.5 |
| Rsa1.0_01678.1.g28959.t1 | gb AAG51228.1 AC035249.3 Tam3-like transposon protein: 93317-95488 [Arabidopsis thaliana]<br>gi 12323053 gb AAG51515.1 AC068324.3 hAT-element transposase, putative [Arabidopsis thaliana]                                                                                                                                                                                                                                                                                                                                                                                                                                                                                                                                                                                                                                                                                                          | 596  | 723  | 1.00E-120 | 121.3 | 44.8 | 60.4 | Tam3-like transposon protein: 93317-95488       | gbpln | Arabidopsis thaliana | AT3G42170.1   Symbols:   BED zinc finger :hAT family dimerisation domain   chr3:14321838-14323928 FORWARD LENGTH=696                                         | 596  | 696  | 5.00E-17  | 116.8  | 14.9 | 28.2 |
| Rsa1.0_01678.1.g28960.t1 | dbj BAA85462.1  transposon-like ORF [Brassica rapa]                                                                                                                                                                                                                                                                                                                                                                                                                                                                                                                                                                                                                                                                                                                                                                                                                                                 | 212  | 703  | 1.00E-101 | 331.6 | 87.3 | 91.0 | transposon-like ORF                             | gbpln | Brassica rapa        | #                                                                                                                                                            | #    | #    | #         | #      | #    |      |
| Rsa1.0_01678.1.g28961.t1 | gb AAD32898.1  putative retroelement pol polyprotein [Arabidopsis thaliana]                                                                                                                                                                                                                                                                                                                                                                                                                                                                                                                                                                                                                                                                                                                                                                                                                         | 1247 | 1307 | 0         | 104.8 | 53.2 | 66.8 | putative retroelement pol polyprotein           | gbpln | Arabidopsis thaliana | AT4G23160.1   Symbols: CRK8   cysteine-rich RLK (RECEPTOR-like protein kinase) 8   chr4:12129485-12134086 FORWARD LENGTH=1262                                | 1247 | 1262 | 4.00E-83  | 101.2  | 14.4 | 21.7 |
| Rsa1.0_01678.1.g28962.t1 | gb EOA18522.1  hypothetical protein CARUB_v10007075mg [Capsella rubella]                                                                                                                                                                                                                                                                                                                                                                                                                                                                                                                                                                                                                                                                                                                                                                                                                            | 407  | 401  | 1.00E-122 | 98.5  | 57.0 | 70.0 | hypothetical protein CARUB_v10007075mg          | gbpln | Capsella rubella     | AT4G22180.1   Symbols:   F-box family protein with a domain of unknown function (DUF295)   chr4:11738574-11739782 FORWARD LENGTH=402                         | 407  | 402  | 1.00E-120 | 98.8   | 56.8 | 71.5 |

|                          |                                                                                                                                                                                                     |     |      |           |       |      |      |                                                  |       |                      |                                                                                                                                                                                                                                                                                                                                              |     |     |           |       |      |      |
|--------------------------|-----------------------------------------------------------------------------------------------------------------------------------------------------------------------------------------------------|-----|------|-----------|-------|------|------|--------------------------------------------------|-------|----------------------|----------------------------------------------------------------------------------------------------------------------------------------------------------------------------------------------------------------------------------------------------------------------------------------------------------------------------------------------|-----|-----|-----------|-------|------|------|
| Rsa1.0_01678.1.g28963.t2 | gb AAC61291.1  Ac-like transposase [Arabidopsis thaliana]                                                                                                                                           | 727 | 730  | 0         | 100.4 | 52.3 | 69.7 | Ac-like transposase                              | gbpln | Arabidopsis thaliana | AT3G42170.1   Symbols:   BED zinc finger hAT family dimerisation domain   chr3:14321838-14323928 FORWARD LENGTH=696                                                                                                                                                                                                                          | 727 | 696 | 2.00E-52  | 95.7  | 22.7 | 42.1 |
| Rsa1.0_01678.1.g28964.t1 | gb AAG51046.1 AC069473.8 gypsy/Ty-3 retroelement polyprotein; 69905-74404 [Arabidopsis thaliana] gi 10998138 dbj BAB03109.1  retroelement pol polyprotein [Arabidopsis thaliana]                    | 247 | 1499 | 1.00E-14  | 606.9 | 15.8 | 19.8 | gypsy/Ty-3 retroelement polyprotein; 69905-74404 | gbpln | Arabidopsis thaliana | #                                                                                                                                                                                                                                                                                                                                            | #   | #   | #         | #     | #    | #    |
| Rsa1.0_01678.1.g28965.t1 | ref XP_002874507.1  arginase [Arabidopsis lyrata subsp. lyrata] gi 297320344 gb EFH50766.1  arginase [Arabidopsis lyrata subsp. lyrata]                                                             | 341 | 342  | 0         | 100.3 | 94.7 | 98.8 | arginase                                         | gbpln | Arabidopsis lyrata   | AT4G08900.1   Symbols:   arginase   chr4:5703499-5705180 FORWARD LENGTH=342                                                                                                                                                                                                                                                                  | 341 | 342 | 0         | 100.3 | 93.8 | 97.9 |
| Rsa1.0_01679.1.g28966.t1 | ref XP_002885406.1  kinase family protein [Arabidopsis lyrata subsp. lyrata] gi 297331246 gb EFH61665.1  kinase family protein [Arabidopsis lyrata subsp. lyrata]                                   | 403 | 408  | 0         | 101.2 | 86.1 | 91.1 | kinase family protein                            | gbpln | Arabidopsis lyrata   | AT3G20830.1   Symbols:   AGC (cAMP-dependent, cGMP-dependent and protein kinase C) kinase family protein   chr3:7285024-7286250 REVERSE LENGTH=408                                                                                                                                                                                           | 403 | 408 | 0         | 101.2 | 85.4 | 89.8 |
| Rsa1.0_01679.1.g28967.t1 | dbj BAJ33628.1  unnamed protein product [Thelungiella halophila]                                                                                                                                    | 365 | 365  | 0         | 100.0 | 93.7 | 96.4 | unnamed protein product                          | ----  | ----                 | AT3G20820.1   Symbols:   Leucine-rich repeat (LRR) family protein   chr3:7280930-7282027 FORWARD LENGTH=365                                                                                                                                                                                                                                  | 365 | 365 | 0         | 100.0 | 90.1 | 93.4 |
| Rsa1.0_01679.1.g28968.t1 | gb AEK21797.1 jmjC domain-containing histone demethylases [Brassica rapa subsp. oleifera]                                                                                                           | 421 | 414  | 0         | 98.3  | 95.5 | 96.4 | jmjC domain-containing histone demethylases      | gbpln | Brassica rapa        | AT3G20810.1   Symbols:   JMJD5   2-oxoglutarate (ZOG) and Fe(II)-dependent oxygenase superfamily protein   chr3:7275814-7278144 FORWARD LENGTH=418                                                                                                                                                                                           | 421 | 418 | 0         | 99.3  | 90.3 | 94.3 |
| Rsa1.0_01679.1.g28969.t1 | gb EOA30908.1  hypothetical protein CARUB_v10014055mg, partial [Capsella rubella]                                                                                                                   | 313 | 356  | 1.00E-175 | 113.7 | 98.4 | 99.0 | hypothetical protein CARUB_v10014055mg, partial  | gbpln | Capsella rubella     | AT3G20800.1   Symbols:   Cell differentiation, Rcd1-like protein   chr3:7271412-7273897 REVERSE LENGTH=316                                                                                                                                                                                                                                   | 313 | 316 | 1.00E-176 | 101.0 | 97.4 | 98.1 |
| Rsa1.0_01679.1.g28970.t1 | ref XP_002883268.1  oxidoreductase family protein [Arabidopsis lyrata subsp. lyrata] gi 297329108 gb EFH59527.1  oxidoreductase family protein [Arabidopsis lyrata subsp. lyrata]                   | 362 | 360  | 0         | 99.4  | 89.0 | 94.5 | oxidoreductase family protein                    | gbpln | Arabidopsis lyrata   | AT3G20790.1   Symbols:   NAD(P)-binding Rossmann-fold superfamily protein   chr3:7268802-7271099 FORWARD LENGTH=355                                                                                                                                                                                                                          | 362 | 355 | 0         | 98.1  | 87.6 | 93.4 |
| Rsa1.0_01679.1.g28971.t6 | gb EOA30031.1  hypothetical protein CARUB_v10013135mg [Capsella rubella]                                                                                                                            | 667 | 670  | 0         | 100.4 | 94.3 | 96.3 | hypothetical protein CARUB_v10013135mg           | gbpln | Capsella rubella     | AT3G20780.1   Symbols:   ATTOP6B, BIN3, HYP6, RHL3, TOP6B   topoisomerase 6 subunit B   chr3:7264025-7268498 REVERSE LENGTH=670                                                                                                                                                                                                              | 667 | 670 | 0         | 100.4 | 94.2 | 96.1 |
| Rsa1.0_01679.1.g28972.t1 | gb EOA30103.1  hypothetical protein CARUB_v10013213mg [Capsella rubella]                                                                                                                            | 648 | 627  | 0         | 96.8  | 86.1 | 90.0 | hypothetical protein CARUB_v10013213mg           | gbpln | Capsella rubella     | AT3G20770.1   Symbols:   EIN3, AtEIN3   Ethylene insensitive 3 family protein   chr3:7260702-7262588 REVERSE LENGTH=628                                                                                                                                                                                                                      | 648 | 628 | 0         | 96.9  | 85.2 | 88.9 |
| Rsa1.0_01680.1.g28973.t1 | ref XP_002870703.1  hypothetical protein ARALYDRAFT_916192 [Arabidopsis lyrata subsp. lyrata] gi 297316539 gb EFH46962.1  hypothetical protein ARALYDRAFT_916192 [Arabidopsis lyrata subsp. lyrata] | 106 | 112  | 4.00E-38  | 105.7 | 82.1 | 87.7 | hypothetical protein ARALYDRAFT_916192           | gbpln | Arabidopsis lyrata   | AT5G40460.1   Symbols:   unknown protein; BEST Arabidopsis thaliana protein match is: unknown protein (TAIR:AT3G27630.1); Has 87 Blast hits to 87 proteins in 12 species: Archae - 0; Bacteria - 0; Metazoa - 0; Fungi - 0; Plants - 87; Viruses - 0; Other Eukaryotes - 0 (source: NCBI BLINK).   chr5:16202465-16202803 FORWARD LENGTH=112 | 106 | 112 | 7.00E-41  | 105.7 | 80.2 | 86.8 |
| Rsa1.0_01680.1.g28974.t3 | gb AAK25747.2 AF334814.1 putative transcription factor MYB115 [Arabidopsis thaliana]                                                                                                                | 339 | 359  | 3.00E-43  | 105.9 | 30.7 | 37.8 | putative transcription factor MYB115             | gbpln | Arabidopsis thaliana | AT5G40360.1   Symbols:   MYB115, AtMYB115   myb domain protein 115   chr5:16145220-16146579 FORWARD LENGTH=359                                                                                                                                                                                                                               | 339 | 359 | 1.00E-45  | 105.9 | 30.7 | 37.8 |
| Rsa1.0_01680.1.g28975.t1 | #                                                                                                                                                                                                   | #   | #    | #         | #     | #    | -    | ----                                             | ----  | ----                 | #                                                                                                                                                                                                                                                                                                                                            | #   | #   | #         | #     | #    | #    |
| Rsa1.0_01680.1.g28976.t1 | ref XP_002870704.1  ATMKK3 MITOGEN-ACTIVATED kinase [Arabidopsis lyrata subsp. lyrata] gi 297316540 gb EFH46963.1  ATMKK3 MITOGEN-ACTIVATED kinase [Arabidopsis lyrata subsp. lyrata]               | 518 | 520  | 0         | 100.4 | 92.9 | 96.9 | ATMKK3 MITOGEN-ACTIVATED kinase                  | gbpln | Arabidopsis lyrata   | AT5G40440.1   Symbols:   ATMKK3, MKK3   mitogen-activated protein kinase 3   chr5:16182149-16184513 FORWARD LENGTH=520                                                                                                                                                                                                                       | 518 | 520 | 0         | 100.4 | 92.5 | 96.3 |
| Rsa1.0_01680.1.g28977.t1 | gb ACG69509.1  oleosin S4-3 [Brassica napus]                                                                                                                                                        | 220 | 220  | 3.00E-85  | 100.0 | 90.9 | 92.3 | oleosin S4-3                                     | gbpln | Brassica napus       | AT5G40420.1   Symbols:   OLEO2, OLE2   oleosin 2   chr5:16173622-16174740 REVERSE LENGTH=199                                                                                                                                                                                                                                                 | 220 | 199 | 4.00E-76  | 90.5  | 75.5 | 82.3 |
| Rsa1.0_01680.1.g28978.t1 | ref XP_002870709.1  binding protein [Arabidopsis lyrata subsp. lyrata] gi 297316545 gb EFH46968.1  binding protein [Arabidopsis lyrata subsp. lyrata]                                               | 619 | 608  | 0         | 98.2  | 76.1 | 85.3 | binding protein                                  | gbpln | Arabidopsis lyrata   | AT5G40400.1   Symbols:   Pentatricopeptide repeat (PPR) superfamily protein   chr5:16166444-16168276 FORWARD LENGTH=610                                                                                                                                                                                                                      | 619 | 610 | 0         | 98.5  | 75.9 | 84.5 |
| Rsa1.0_01680.1.g28979.t1 | ref XP_002870710.1  hypothetical protein ARALYDRAFT_493949 [Arabidopsis lyrata subsp. lyrata] gi 297316546 gb EFH46969.1  hypothetical protein ARALYDRAFT_493949 [Arabidopsis lyrata subsp. lyrata] | 777 | 785  | 0         | 101.0 | 89.2 | 95.6 | hypothetical protein ARALYDRAFT_493949           | gbpln | Arabidopsis lyrata   | AT5G40390.1   Symbols:   SIP1   Raffinose synthase family protein   chr5:16161720-16165085 FORWARD LENGTH=783                                                                                                                                                                                                                                | 777 | 783 | 0         | 100.8 | 88.4 | 95.1 |

|                          |                                                                                                                                                                                                                                                                                                                                                                                                                                                                                             |      |      |           |       |      |      |                                                             |       |                      |                                                                                                |     |           |          |       |      |      |
|--------------------------|---------------------------------------------------------------------------------------------------------------------------------------------------------------------------------------------------------------------------------------------------------------------------------------------------------------------------------------------------------------------------------------------------------------------------------------------------------------------------------------------|------|------|-----------|-------|------|------|-------------------------------------------------------------|-------|----------------------|------------------------------------------------------------------------------------------------|-----|-----------|----------|-------|------|------|
| Rsa1.0_01681.1.g28980.t2 | gb ABD65084.1  hypothetical protein 27.t00096 [Brassica oleracea]                                                                                                                                                                                                                                                                                                                                                                                                                           | 408  | 645  | 1.00E-29  | 158.1 | 31.4 | 41.2 | hypothetical protein 27.t00096                              | gbpln | Brassica oleracea    | #                                                                                              | #   | #         | #        | #     | #    |      |
| Rsa1.0_01681.1.g28981.t1 | #                                                                                                                                                                                                                                                                                                                                                                                                                                                                                           | #    | #    | #         | #     | #    | #    | -                                                           | ----  | ----                 | AT1G28200.1   Symbols: FIP1   FH interacting protein   chr1:9850395-9852300 REVERSE LENGTH=259 | 46  | 259       | 8.00E-12 | 563.0 | 63.0 | 69.6 |
| Rsa1.0_01681.1.g28982.t7 | dbj BAG72148.1  hypothetical protein [Lotus japonicus] gi 208609062 dbj BAG72153.1  hypothetical protein [Lotus japonicus] ref XP_002888009.1  predicted protein [Arabidopsis lyrata subsp. lyrata]                                                                                                                                                                                                                                                                                         | 1469 | 1558 | 0         | 106.1 | 38.1 | 54.8 | hypothetical protein                                        | gbpln | Lotus japonicus      | 1469                                                                                           | 158 | 5.00E-22  | 10.8     | 3.3   | 4.2  |      |
| Rsa1.0_01681.1.g28983.t1 | gi 297333850 gb EFH64268.1  predicted protein [Arabidopsis lyrata subsp. lyrata]                                                                                                                                                                                                                                                                                                                                                                                                            | 591  | 654  | 0         | 110.7 | 84.6 | 91.2 | predicted protein                                           | gbpln | Arabidopsis lyrata   | 591                                                                                            | 648 | 0         | 109.6    | 81.6  | 88.7 |      |
| Rsa1.0_01681.1.g28984.t1 | gb AAG52313.1 AC021666_2 Mutator-like transposase; 53847-56139 [Arabidopsis thaliana]                                                                                                                                                                                                                                                                                                                                                                                                       | 432  | 583  | 7.00E-27  | 135.0 | 17.6 | 23.1 | Mutator-like transposase; 53847-56139                       | gbpln | Arabidopsis thaliana | #                                                                                              | #   | #         | #        | #     | #    |      |
| Rsa1.0_01681.1.g28985.t4 | gb ACG60684.1  maize transposon MuDR-like protein [Brassica oleracea var. aboglabra]                                                                                                                                                                                                                                                                                                                                                                                                        | 528  | 622  | 3.00E-55  | 117.8 | 33.1 | 49.8 | maize transposon MuDR-like protein                          | gbpln | Brassica oleracea    | 528                                                                                            | 719 | 5.00E-12  | 136.2    | 8.5   | 14.4 |      |
| Rsa1.0_01681.1.g28986.t4 | gb ABD65085.1  Ulp1 protease family protein [Brassica oleracea]                                                                                                                                                                                                                                                                                                                                                                                                                             | 594  | 640  | 2.00E-45  | 107.7 | 24.1 | 34.8 | Ulp1 protease family protein                                | gbpln | Brassica oleracea    | #                                                                                              | #   | #         | #        | #     | #    |      |
| Rsa1.0_01682.1.g28987.t1 | gb EOA22505.1  hypothetical protein CARUB_v10003160mg, partial [Capsella rubella]                                                                                                                                                                                                                                                                                                                                                                                                           | 221  | 213  | 5.00E-36  | 96.4  | 39.8 | 55.7 | hypothetical protein CARUB_v10003160mg, partial             | gbpln | Capsella rubella     | 221                                                                                            | 330 | 2.00E-32  | 149.3    | 37.6  | 49.3 |      |
| Rsa1.0_01682.1.g28988.t1 | ref NP_680202.1  uncharacterized protein [Arabidopsis thaliana] gi 13374875 emb CAC34509.1  putative protein [Arabidopsis thaliana] gi 332005508 gb AED92991.1  uncharacterized protein AT5G22160 [Arabidopsis thaliana]                                                                                                                                                                                                                                                                    | 214  | 353  | 4.00E-40  | 165.0 | 47.7 | 59.8 | uncharacterized protein                                     | gbpln | Arabidopsis thaliana | 214                                                                                            | 353 | 1.00E-42  | 165.0    | 47.7  | 59.8 |      |
| Rsa1.0_01682.1.g28989.t1 | ref XP_002874051.1  pyridine nucleotide-disulfide oxidoreductase family protein [Arabidopsis lyrata subsp. lyrata] gi 297319888 gb EFH50310.1  pyridine nucleotide-disulfide oxidoreductase family protein [Arabidopsis lyrata subsp. lyrata]                                                                                                                                                                                                                                               | 333  | 365  | 1.00E-163 | 109.6 | 87.1 | 92.5 | pyridine nucleotide-disulfide oxidoreductase family protein | gbpln | Arabidopsis lyrata   | 333                                                                                            | 365 | 1.00E-164 | 109.6    | 86.8  | 92.5 |      |
| Rsa1.0_01682.1.g28990.t1 | gb EOA22260.1  hypothetical protein CARUB_v10002848mg [Capsella rubella]                                                                                                                                                                                                                                                                                                                                                                                                                    | 352  | 378  | 1.00E-135 | 107.4 | 76.4 | 84.4 | hypothetical protein CARUB_v10002848mg                      | gbpln | Capsella rubella     | 352                                                                                            | 383 | 1.00E-136 | 108.8    | 77.3  | 84.4 |      |
| Rsa1.0_01682.1.g28991.t1 | gb ABV21212.1  Ty1 Copia-element protein [Arabidopsis thaliana]                                                                                                                                                                                                                                                                                                                                                                                                                             | 396  | 438  | 6.00E-50  | 110.6 | 29.8 | 42.7 | Ty1 Copia-element protein                                   | gbpln | Arabidopsis thaliana | 396                                                                                            | 295 | 3.00E-37  | 74.5     | 24.7  | 35.6 |      |
| Rsa1.0_01682.1.g28992.t1 | #                                                                                                                                                                                                                                                                                                                                                                                                                                                                                           | #    | #    | #         | #     | #    | #    | -                                                           | ----  | ----                 | #                                                                                              | #   | #         | #        | #     | #    |      |
| Rsa1.0_01682.1.g28993.t1 | ref NP_680195.2  uncharacterized protein [Arabidopsis thaliana] gi 334187828 ref NP_001190360.1  uncharacterized protein [Arabidopsis thaliana] gi 122175037 sp Q0V865.1 FAFL_ARAT H RecName: Full=Protein FAF-like, chloroplastic; Flags: Precursor gi 111074178 gb ABH04462.1  At5g22090 [Arabidopsis thaliana] gi 332005598 gb AED92981.1  uncharacterized protein AT5G22090 [Arabidopsis thaliana] gi 332005599 gb AED92982.1  uncharacterized protein AT5G22090 [Arabidopsis thaliana] | 444  | 463  | 1.00E-163 | 104.3 | 77.5 | 85.6 | uncharacterized protein                                     | gbpln | Arabidopsis thaliana | 444                                                                                            | 463 | 1.00E-166 | 104.3    | 77.5  | 85.6 |      |
| Rsa1.0_01682.1.g28994.t1 | #                                                                                                                                                                                                                                                                                                                                                                                                                                                                                           | #    | #    | #         | #     | #    | #    | -                                                           | ----  | ----                 | #                                                                                              | #   | #         | #        | #     | #    |      |

|                          |                                                                                                                                                                                                                                                                                                                                                                                                                                                                                                                                                                                                      |     |      |           |        |      |      |                                                                            |       |                      |                                                                                                                                                                                                                                                                                                                                                                    |     |     |           |       |      |      |
|--------------------------|------------------------------------------------------------------------------------------------------------------------------------------------------------------------------------------------------------------------------------------------------------------------------------------------------------------------------------------------------------------------------------------------------------------------------------------------------------------------------------------------------------------------------------------------------------------------------------------------------|-----|------|-----------|--------|------|------|----------------------------------------------------------------------------|-------|----------------------|--------------------------------------------------------------------------------------------------------------------------------------------------------------------------------------------------------------------------------------------------------------------------------------------------------------------------------------------------------------------|-----|-----|-----------|-------|------|------|
| Rsa1.0_01682.1.g28996.t1 | refNP_680193.2   Core-2/1-branching beta-1,6-N-acetylglucosaminyltransferase family protein [Arabidopsis thaliana] gi 13374866 emb CAC34500.1  putative protein [Arabidopsis thaliana] gi 22531074 gb AAM97041.1  unknown protein [Arabidopsis thaliana] gi 23197924 gb AAN15489.1  unknown protein [Arabidopsis thaliana] gi 26452044 dbj BAC43112.1  unknown protein [Arabidopsis thaliana] gi 110736125 dbj BAF00034.1  hypothetical protein [Arabidopsis thaliana] gi 332005595 gb AED92978.1  Core-2/1-branching beta-1,6-N-acetylglucosaminyltransferase family protein [Arabidopsis thaliana] | 362 | 362  | 1.00E-176 | 100.0  | 84.8 | 92.3 | Core-2/1-branching beta-1,6-N-acetylglucosaminyltransferase family protein | gbpln | Arabidopsis thaliana | AT5G22070.1   Symbols:   Core-2/1-branching beta-1,6-N-acetylglucosaminyltransferase family protein   chr5:7308255-7309343 FORWARD LENGTH=362                                                                                                                                                                                                                      | 362 | 362 | 1.00E-179 | 100.0 | 84.8 | 92.3 |
| Rsa1.0_01682.1.g28996.t1 | gb AAF18538.1 AC006551_24 Very similar to retrotransposon reverse transcriptase [Arabidopsis thaliana]                                                                                                                                                                                                                                                                                                                                                                                                                                                                                               | 210 | 1231 | 2.00E-43  | 586.2  | 45.2 | 62.4 | Very similar to retrotransposon reverse transcriptase                      | gbpln | Arabidopsis thaliana | AT5G19270.1   Symbols:   unknown protein; BEST Arabidopsis thaliana protein match is: unknown protein (TAIR:AT4G03566.1); Has 30201 Blast hits to 17322 proteins in 780 species: Archaea - 12; Bacteria - 1396; Metazoa - 17338; Fungi - 3422; Plants - 5037; Viruses - 0; Other Eukaryotes - 2996 (source: NCBI BLINK);   chr5:6485617-6487009 REVERSE LENGTH=365 | 210 | 365 | 3.00E-21  | 173.8 | 24.8 | 38.6 |
| Rsa1.0_01682.1.g28997.t1 | refNP_568412.1   chaperone protein dnaJ 2 [Arabidopsis thaliana] gi 21431768 sp P42825.2 DNAJ2_ARATH RecName: Full=Chaperone protein dnaJ 2; Short=AtDJA2; Flags: Precursor gi 13374865 emb CAC34499.1  DNAJ PROTEIN HOMOLOG ATJ [Arabidopsis thaliana] gi 26451807 dbj BAC42997.1  putative DnaJ protein homolog ATJ [Arabidopsis thaliana] gi 11074426 gb ABH04586.1  At5g22060 [Arabidopsis thaliana] gi 332005594 gb AED92977.1  chaperone protein dnaJ 2 [Arabidopsis thaliana]                                                                                                                 | 420 | 419  | 0         | 99.8   | 86.2 | 92.1 | chaperone protein dnaJ 2                                                   | gbpln | Arabidopsis thaliana | AT5G22060.1   Symbols: ATJ2, J2   DNAJ homologue 2   chr5:7303798-7305668 REVERSE LENGTH=419                                                                                                                                                                                                                                                                       | 420 | 419 | 0         | 99.8  | 86.2 | 92.1 |
| Rsa1.0_01682.1.g28998.t1 | refXP_002871985.1   kinase family protein [Arabidopsis lyrata subsp. lyrata] gi 297317822 gb EFH48244.1   kinase family protein [Arabidopsis lyrata subsp. lyrata]                                                                                                                                                                                                                                                                                                                                                                                                                                   | 132 | 307  | 6.00E-63  | 232.6  | 85.6 | 94.7 | kinase family protein                                                      | gbpln | Arabidopsis lyrata   | AT5G22050.2   Symbols:   Protein kinase superfamily protein   chr5:7301467-7303209 FORWARD LENGTH=307                                                                                                                                                                                                                                                              | 132 | 307 | 2.00E-65  | 232.6 | 85.6 | 93.9 |
| Rsa1.0_01683.1.g28999.t3 | # # # # # # # # # #                                                                                                                                                                                                                                                                                                                                                                                                                                                                                                                                                                                  | #   | #    | #         | #      | #    | -    |                                                                            | ----  | ----                 | #                                                                                                                                                                                                                                                                                                                                                                  | #   | #   | #         | #     | #    |      |
| Rsa1.0_01683.1.g29000.t1 | gb AAF79618.1 AC027665_19 F5M15.26 [Arabidopsis thaliana]                                                                                                                                                                                                                                                                                                                                                                                                                                                                                                                                            | 131 | 1838 | 5.00E-32  | 1403.1 | 51.1 | 67.9 | F5M15.26                                                                   | gbpln | Arabidopsis thaliana | #                                                                                                                                                                                                                                                                                                                                                                  | #   | #   | #         | #     | #    |      |
| Rsa1.0_01683.1.g29001.t1 | # # # # # # # # # #                                                                                                                                                                                                                                                                                                                                                                                                                                                                                                                                                                                  | #   | #    | #         | #      | #    | -    |                                                                            | ----  | ----                 | #                                                                                                                                                                                                                                                                                                                                                                  | #   | #   | #         | #     | #    |      |
| Rsa1.0_01683.1.g29002.t1 | # # # # # # # # # #                                                                                                                                                                                                                                                                                                                                                                                                                                                                                                                                                                                  | #   | #    | #         | #      | #    | -    |                                                                            | ----  | ----                 | #                                                                                                                                                                                                                                                                                                                                                                  | #   | #   | #         | #     | #    |      |
| Rsa1.0_01683.1.g29003.t1 | refXP_002893670.1   hypothetical protein ARALYDRAFT_473343 [Arabidopsis lyrata subsp. lyrata] gi 297339512 gb EFH69929.1   hypothetical protein ARALYDRAFT_473343 [Arabidopsis lyrata subsp. lyrata]                                                                                                                                                                                                                                                                                                                                                                                                 | 348 | 364  | 1.00E-163 | 104.6  | 85.6 | 89.1 | hypothetical protein ARALYDRAFT_473343                                     | gbpln | Arabidopsis lyrata   | AT1G30970.1   Symbols: SUF4   zinc finger (O2H2 type) family protein   chr1:11040613-11043593 REVERSE LENGTH=367                                                                                                                                                                                                                                                   | 348 | 367 | 1.00E-162 | 105.5 | 85.1 | 88.5 |
| Rsa1.0_01683.1.g29004.t1 | gb EOA37584.1  hypothetical protein CARUB_v10011934mg [Capsella rubella]                                                                                                                                                                                                                                                                                                                                                                                                                                                                                                                             | 438 | 442  | 0         | 100.9  | 91.1 | 93.8 | hypothetical protein CARUB_v10011934mg                                     | gbpln | Capsella rubella     | AT1G30950.1   Symbols: UFO   F-box family protein   chr1:11036180-11037508 FORWARD LENGTH=442                                                                                                                                                                                                                                                                      | 438 | 442 | 0         | 100.9 | 90.6 | 93.6 |
| Rsa1.0_01683.1.g29005.t1 | gb AAG60150.1 AC074360_15 En/Spm-like transposon protein, putative [Arabidopsis thaliana]                                                                                                                                                                                                                                                                                                                                                                                                                                                                                                            | 336 | 1431 | 6.00E-40  | 425.9  | 31.8 | 48.2 | En/Spm-like transposon protein, putative                                   | gbpln | Arabidopsis thaliana | #                                                                                                                                                                                                                                                                                                                                                                  | #   | #   | #         | #     | #    |      |
| Rsa1.0_01684.1.g29006.t1 | refXP_002863741.1   hypothetical protein ARALYDRAFT_917455 [Arabidopsis lyrata subsp. lyrata] gi 297309576 gb EFH40000.1   hypothetical protein ARALYDRAFT_917455 [Arabidopsis lyrata subsp. lyrata]                                                                                                                                                                                                                                                                                                                                                                                                 | 241 | 390  | 7.00E-40  | 161.8  | 39.8 | 53.9 | hypothetical protein ARALYDRAFT_917455                                     | gbpln | Arabidopsis lyrata   | AT5G18880.1   Symbols:   RNA-directed DNA polymerase (reverse transcriptase)-related family protein   chr5:6300535-6301422 REVERSE LENGTH=295                                                                                                                                                                                                                      | 241 | 295 | 2.00E-29  | 122.4 | 34.4 | 53.5 |
| Rsa1.0_01684.1.g29007.t2 | refXP_002863741.1   hypothetical protein ARALYDRAFT_917455 [Arabidopsis lyrata subsp. lyrata] gi 297309576 gb EFH40000.1   hypothetical protein ARALYDRAFT_917455 [Arabidopsis lyrata subsp. lyrata]                                                                                                                                                                                                                                                                                                                                                                                                 | 500 | 390  | 1.00E-106 | 78.0   | 42.2 | 54.0 | hypothetical protein ARALYDRAFT_917455                                     | gbpln | Arabidopsis lyrata   | AT3G24255.1   Symbols:   RNA-directed DNA polymerase (reverse transcriptase)-related family protein   chr3:8789471-8793208 FORWARD LENGTH=746                                                                                                                                                                                                                      | 500 | 746 | 8.00E-45  | 149.2 | 24.0 | 35.4 |

|                          |                                                                                                                                                                                                                                                                                                                                               |      |      |           |       |      |      |                                                                     |       |                      |                                                                                                                                                                                                                                                                                                                            |      |      |           |       |      |      |
|--------------------------|-----------------------------------------------------------------------------------------------------------------------------------------------------------------------------------------------------------------------------------------------------------------------------------------------------------------------------------------------|------|------|-----------|-------|------|------|---------------------------------------------------------------------|-------|----------------------|----------------------------------------------------------------------------------------------------------------------------------------------------------------------------------------------------------------------------------------------------------------------------------------------------------------------------|------|------|-----------|-------|------|------|
| Rsa1.0_01684.1.g29008.t3 | ref NP_179449.5  major facilitator protein [Arabidopsis thaliana] gi 330251689 gb AE06783.1  major facilitator protein [Arabidopsis thaliana]                                                                                                                                                                                                 | 470  | 473  | 0         | 100.6 | 82.3 | 89.8 | major facilitator protein                                           | gbpln | Arabidopsis thaliana | AT2G18590.1   Symbols:   Major facilitator superfamily protein   chr2:8069988-8072866 FORWARD LENGTH=473                                                                                                                                                                                                                   | 470  | 473  | 0         | 100.6 | 82.3 | 89.8 |
| Rsa1.0_01684.1.g29009.t1 | gb AAD12028.1  putative non-LTR retroelement reverse transcriptase [Arabidopsis thaliana]                                                                                                                                                                                                                                                     | 154  | 1447 | 6.00E-15  | 939.6 | 29.9 | 38.3 | putative non-LTR retroelement reverse transcriptase                 | gbpln | Arabidopsis thaliana | #                                                                                                                                                                                                                                                                                                                          | #    | #    | #         | #     | #    | #    |
| Rsa1.0_01685.1.g29010.t1 | gb AAK19600.1 AF334207.1 bZIP protein DPBF2 [Arabidopsis thaliana]                                                                                                                                                                                                                                                                            | 214  | 331  | 8.00E-90  | 154.7 | 78.5 | 84.6 | bZIP protein DPBF2                                                  | gbpln | Arabidopsis thaliana | AT3G44460.1   Symbols: DPBF2, AtbZIP67   Basic-leucine zipper (bZIP) transcription factor family protein   chr3:16080115-16081722 REVERSE LENGTH=331                                                                                                                                                                       | 214  | 331  | 2.00E-91  | 154.7 | 78.0 | 84.1 |
| Rsa1.0_01685.1.g29011.t1 | ref NP_001190008.1  alpha/beta-hydrolases family protein [Arabidopsis thaliana] gi 332644388 gb AEE77909.1  alpha/beta-hydrolases family protein [Arabidopsis thaliana]                                                                                                                                                                       | 328  | 325  | 1.00E-164 | 99.1  | 85.1 | 89.0 | alpha/beta-hydrolases family protein                                | gbpln | Arabidopsis thaliana | AT3G44510.2   Symbols:   alpha/beta-Hydrolases superfamily protein   chr3:16108251-16111139 REVERSE LENGTH=325                                                                                                                                                                                                             | 328  | 325  | 1.00E-167 | 99.1  | 85.1 | 89.0 |
| Rsa1.0_01685.1.g29012.t1 | sp Q9LXN4.2 HIRA ARATH RecName: Full=Protein HIRA; AltName: Full=Histone regulator protein                                                                                                                                                                                                                                                    | 1024 | 1024 | 0         | 100.0 | 84.5 | 90.4 | RecName: Full=Protein HIRA; AltName: Full=Histone regulator protein | ----  | ----                 | AT3G44530.2   Symbols: HIRA   homolog of histone chaperone HIRA   chr3:16116026-16121247 FORWARD LENGTH=1040                                                                                                                                                                                                               | 1024 | 1040 | 0         | 101.6 | 84.4 | 90.3 |
| Rsa1.0_01685.1.g29013.t2 | #                                                                                                                                                                                                                                                                                                                                             | #    | #    | #         | #     | #    | #    | -                                                                   | ----  | ----                 | #                                                                                                                                                                                                                                                                                                                          | #    | #    | #         | #     | #    | #    |
| Rsa1.0_01685.1.g29014.t1 | ref NP_190041.2  putative fatty acyl-CoA reductase 5 [Arabidopsis thaliana] gi 122223793 sp Q0WRB0.1 FACR5 ARATH RecName: Full=Probable fatty acyl-CoA reductase 5 gi 110736755 db BAF00339.1  acyl CoA reductase -like protein [Arabidopsis thaliana] gi 332644393 gb AEE77914.1  putative fatty acyl-CoA reductase 5 [Arabidopsis thaliana] | 503  | 496  | 0         | 98.6  | 84.5 | 92.2 | putative fatty acyl-CoA reductase 5                                 | gbpln | Arabidopsis thaliana | AT3G44550.1   Symbols: FAR5   fatty acid reductase 5   chr3:16138060-16141409 FORWARD LENGTH=496                                                                                                                                                                                                                           | 503  | 496  | 0         | 98.6  | 84.5 | 92.2 |
| Rsa1.0_01685.1.g29015.t1 | ref XP_002877347.1  peptidyl-prolyl cis-trans isomerase cyclophilin-type family protein [Arabidopsis lyrata subsp. lyrata] gi 297323185 gb EFH53606.1  peptidyl-prolyl cis-trans isomerase cyclophilin-type family protein [Arabidopsis lyrata subsp. lyrata]                                                                                 | 1020 | 631  | 0         | 61.9  | 52.7 | 55.2 | peptidyl-prolyl cis-trans isomerase cyclophilin-type family protein | gbpln | Arabidopsis lyrata   | AT3G44600.1   Symbols: CYP71   cyclophilin71   chr3:16165368-16169201 REVERSE LENGTH=631                                                                                                                                                                                                                                   | 1020 | 631  | 0         | 61.9  | 52.5 | 54.9 |
| Rsa1.0_01685.1.g29016.t1 | #                                                                                                                                                                                                                                                                                                                                             | #    | #    | #         | #     | #    | #    | -                                                                   | ----  | ----                 | #                                                                                                                                                                                                                                                                                                                          | #    | #    | #         | #     | #    | #    |
| Rsa1.0_01685.1.g29017.t2 | gb EOA25094.1  hypothetical protein CARUB_v10018402mg [Capsella rubella]                                                                                                                                                                                                                                                                      | 88   | 542  | 9.00E-26  | 615.9 | 67.0 | 77.3 | hypothetical protein CARUB_v10018402mg                              | gbpln | Capsella rubella     | AT3G45060.1   Symbols: ATNRT2.6, NRT2.6   high affinity nitrate transporter 2.6   chr3:16477671-16479386 REVERSE LENGTH=542                                                                                                                                                                                                | 88   | 542  | 1.00E-26  | 615.9 | 62.5 | 73.9 |
| Rsa1.0_01685.1.g29018.t1 | gb EOA25094.1  hypothetical protein CARUB_v10018402mg [Capsella rubella]                                                                                                                                                                                                                                                                      | 543  | 542  | 0         | 99.8  | 89.7 | 95.2 | hypothetical protein CARUB_v10018402mg                              | gbpln | Capsella rubella     | AT3G45060.1   Symbols: ATNRT2.6, NRT2.6   high affinity nitrate transporter 2.6   chr3:16477671-16479386 REVERSE LENGTH=542                                                                                                                                                                                                | 543  | 542  | 0         | 99.8  | 82.9 | 90.4 |
| Rsa1.0_01685.1.g29019.t1 | gb AAG50806.1 AC079281.8 unknown protein [Arabidopsis thaliana]                                                                                                                                                                                                                                                                               | 1780 | 1213 | 0         | 68.1  | 25.6 | 37.7 | unknown protein                                                     | gbpln | Arabidopsis thaliana | AT1G43760.1   Symbols:   DNase I-like superfamily protein   chr1:16528880-16531065 REVERSE LENGTH=626                                                                                                                                                                                                                      | 1780 | 626  | 4.00E-65  | 35.2  | 7.6  | 12.2 |
| Rsa1.0_01686.1.g29020.t1 | #                                                                                                                                                                                                                                                                                                                                             | #    | #    | #         | #     | #    | #    | -                                                                   | ----  | ----                 | #                                                                                                                                                                                                                                                                                                                          | #    | #    | #         | #     | #    | #    |
| Rsa1.0_01686.1.g29021.t1 | gb ABK28247.1  unknown [Arabidopsis thaliana]                                                                                                                                                                                                                                                                                                 | 385  | 372  | 1.00E-17  | 96.6  | 11.9 | 18.4 | unknown                                                             | gbpln | Arabidopsis thaliana | #                                                                                                                                                                                                                                                                                                                          | #    | #    | #         | #     | #    | #    |
| Rsa1.0_01686.1.g29022.t1 | #                                                                                                                                                                                                                                                                                                                                             | #    | #    | #         | #     | #    | #    | -                                                                   | ----  | ----                 | #                                                                                                                                                                                                                                                                                                                          | #    | #    | #         | #     | #    | #    |
| Rsa1.0_01686.1.g29023.t2 | gb AAD19784.1  putative retroelement pol polyprotein [Arabidopsis thaliana]                                                                                                                                                                                                                                                                   | 1429 | 1501 | 0         | 105.0 | 58.3 | 73.1 | putative retroelement pol polyprotein                               | gbpln | Arabidopsis thaliana | AT4G23160.1   Symbols: CRK8   cysteine-rich RLK (RECEPTOR-like protein kinase) 8   chr4:12129485-12134086 FORWARD LENGTH=1262                                                                                                                                                                                              | 1429 | 1262 | 1.00E-138 | 88.3  | 16.4 | 23.3 |
| Rsa1.0_01686.1.g29024.t1 | #                                                                                                                                                                                                                                                                                                                                             | #    | #    | #         | #     | #    | #    | -                                                                   | ----  | ----                 | #                                                                                                                                                                                                                                                                                                                          | #    | #    | #         | #     | #    | #    |
| Rsa1.0_01686.1.g29025.t1 | gb AAC67205.1  putative retroelement pol polyprotein [Arabidopsis thaliana]                                                                                                                                                                                                                                                                   | 405  | 1413 | 1.00E-96  | 348.9 | 47.4 | 64.7 | putative retroelement pol polyprotein                               | gbpln | Arabidopsis thaliana | AT1G21280.1   Symbols:   CONTAINS InterPro DOMAIN/s: Retrotransposon gag protein (InterPro:IPR005162); Has 707 Blast hits to 705 proteins in 25 species: Archae - 0; Bacteria - 0; Metazoa - 4; Fungi - 0; Plants - 703; Viruses - 0; Other Eukaryotes - 0 (source: NCBI BLINK).   chr1:7447690-7448403 REVERSE LENGTH=237 | 405  | 237  | 5.00E-28  | 58.5  | 17.8 | 27.4 |
| Rsa1.0_01686.1.g29026.t1 | gb AAG51237.1 AC035249_12 unknown protein; 55998-51558 [Arabidopsis thaliana]                                                                                                                                                                                                                                                                 | 194  | 593  | 5.00E-30  | 305.7 | 32.5 | 41.2 | unknown protein; 55998-51558                                        | gbpln | Arabidopsis thaliana | AT1G36970.1   Symbols:   Domain of unknown function (DUF1955)   chr1:14016395-14018356 REVERSE LENGTH=439                                                                                                                                                                                                                  | 194  | 439  | 8.00E-30  | 226.3 | 32.0 | 42.8 |
| Rsa1.0_01686.1.g29027.t1 | gb EOA20114.1  hypothetical protein CARUB_v10000393mg, partial [Capsella rubella]                                                                                                                                                                                                                                                             | 93   | 670  | 1.00E-25  | 720.4 | 65.6 | 77.4 | hypothetical protein CARUB_v10000393mg, partial                     | gbpln | Capsella rubella     | AT5G10900.1   Symbols:   Calcineurin-like metallo-phosphoesterase superfamily protein   chr5:3436413-3439221 REVERSE LENGTH=600                                                                                                                                                                                            | 93   | 600  | 2.00E-22  | 645.2 | 65.6 | 78.5 |



|                           |                                                                                                                                                                                                                                                         |      |      |           |        |      |      |                                              |       |                      |                                                                                                                                                                                                                                                                 |      |     |           |       |      |      |
|---------------------------|---------------------------------------------------------------------------------------------------------------------------------------------------------------------------------------------------------------------------------------------------------|------|------|-----------|--------|------|------|----------------------------------------------|-------|----------------------|-----------------------------------------------------------------------------------------------------------------------------------------------------------------------------------------------------------------------------------------------------------------|------|-----|-----------|-------|------|------|
| Rsa1.0_01686.1.g29028.t5  | gb AAF97969.1 AC000103_19 F21J9.30 [Arabidopsis thaliana]                                                                                                                                                                                               | 1978 | 1270 | 0         | 64.2   | 34.5 | 45.7 | F21J9.30                                     | gbpln | Arabidopsis thaliana | AT4G29090.1   Symbols:   Ribonuclease H-like superfamily protein   chr4:14333528-14335255 FORWARD LENGTH=575                                                                                                                                                    | 1978 | 575 | 1.00E-90  | 29.1  | 9.5  | 14.7 |
| Rsa1.0_01687.1.g29029.t1  | gb AAB80009.1  heat shock cognate protein HSC70 [Brassica napus]                                                                                                                                                                                        | 668  | 645  | 0         | 96.6   | 92.8 | 95.4 | heat shock cognate protein HSC70             | gbpln | Brassica napus       | AT5G02500.1   Symbols:   HSC70-1, HSP70-1, AT-HSC70-1, HSC70   heat shock cognate protein 70-1   chr5:554055-556334 REVERSE LENGTH=651                                                                                                                          | 668  | 651 | 0         | 97.5  | 92.5 | 95.2 |
| Rsa1.0_01687.1.g29030.t1  | ref NP_001078285.1  uncharacterized protein [Arabidopsis thaliana]   gi 7258378 emb CAE77594.1  putative protein [Arabidopsis thaliana]   gi 332645755 gb AEE79276.1  uncharacterized protein AT3G54740 [Arabidopsis thaliana]                          | 351  | 438  | 1.00E-144 | 124.8  | 80.1 | 88.3 | uncharacterized protein                      | gbpln | Arabidopsis thaliana | AT3G54740.2   Symbols:   Protein of unknown function, DUF593   chr3:20262949-20264466 FORWARD LENGTH=438                                                                                                                                                        | 351  | 438 | 1.00E-147 | 124.8 | 80.1 | 88.3 |
| Rsa1.0_01687.1.g29031.t1  | ref XP_002877997.1  hypothetical protein ARALYDRAFT_485881 [Arabidopsis lyrata subsp. lyrata]   gi 297323835 gb EFH54256.1  hypothetical protein ARALYDRAFT_485881 [Arabidopsis lyrata subsp. lyrata]                                                   | 584  | 608  | 0         | 104.1  | 78.9 | 86.0 | hypothetical protein ARALYDRAFT_485881       | gbpln | Arabidopsis lyrata   | AT3G54750.1   Symbols:   unknown protein; Has 145 Blast hits to 145 proteins in 60 species: Archae - 0; Bacteria - 0; Metazoa - 99; Fungi - 0; Plants - 40; Viruses - 0; Other Eukaryotes - 6 (source: NCBI BLINK).   chr3:20264833-20268416 REVERSE LENGTH=589 | 584  | 589 | 0         | 100.9 | 75.9 | 84.2 |
| Rsa1.0_01687.1.g29032.t1  | ref XP_002877998.1  hypothetical protein ARALYDRAFT_348567 [Arabidopsis lyrata subsp. lyrata]   gi 297323836 gb EFH54257.1  hypothetical protein ARALYDRAFT_348567 [Arabidopsis lyrata subsp. lyrata]                                                   | 329  | 836  | 1.00E-27  | 254.1  | 43.2 | 54.7 | hypothetical protein ARALYDRAFT_348567       | gbpln | Arabidopsis lyrata   | AT3G54760.1   Symbols:   dentin sialophosphoprotein-related   chr3:20269659-20272037 REVERSE LENGTH=792                                                                                                                                                         | 329  | 792 | 8.00E-27  | 240.7 | 40.7 | 49.5 |
| Rsa1.0_01687.1.g29033.t1  | ref NP_191036.1  dentin sialophosphoprotein-related protein [Arabidopsis thaliana]   gi 7258390 emb CAE77596.1  Putative protein [Arabidopsis thaliana]   gi 332645759 gb AEE79280.1  dentin sialophosphoprotein-related protein [Arabidopsis thaliana] | 659  | 792  | 0         | 120.2  | 66.2 | 74.2 | dentin sialophosphoprotein-related protein   | gbpln | Arabidopsis thaliana | AT3G54760.1   Symbols:   dentin sialophosphoprotein-related   chr3:20269659-20272037 REVERSE LENGTH=792                                                                                                                                                         | 659  | 792 | 0         | 120.2 | 66.2 | 74.2 |
| Rsa1.0_01687.1.g29034.t2  | ref XP_002878000.1  armadillo/beta-catenin repeat family protein [Arabidopsis lyrata subsp. lyrata]   gi 297323838 gb EFH54259.1  armadillo/beta-catenin repeat family protein [Arabidopsis lyrata subsp. lyrata]                                       | 747  | 760  | 0         | 101.7  | 84.3 | 88.6 | armadillo/beta-catenin repeat family protein | gbpln | Arabidopsis lyrata   | AT3G54790.1   Symbols:   ARM repeat superfamily protein   chr3:20281830-20284363 REVERSE LENGTH=760                                                                                                                                                             | 747  | 760 | 0         | 101.7 | 83.5 | 88.0 |
| Rsa1.0_01687.1.g29035.t14 | gb EOA25157.1  hypothetical protein CARUB_v10018468mg [Capsella rubella]                                                                                                                                                                                | 757  | 731  | 0         | 96.6   | 83.2 | 88.1 | hypothetical protein CARUB_v10018468mg       | gbpln | Capsella rubella     | AT3G54800.2   Symbols:   Pleckstrin homology (PH) and lipid-binding START domains-containing protein   chr3:20286378-20289880 FORWARD LENGTH=733                                                                                                                | 757  | 733 | 0         | 96.8  | 82.3 | 88.0 |
| Rsa1.0_01688.1.g29036.t1  | # # # # # # # # # # # # # # # #                                                                                                                                                                                                                         |      |      |           |        |      |      |                                              | ----  | ----                 | # # # # # # # # # # # # # # # #                                                                                                                                                                                                                                 |      |     |           |       |      |      |
| Rsa1.0_01688.1.g29037.t1  | ref NP_198758.2  cyclin-dependent kinase CDC2C [Arabidopsis thaliana]   gi 209529775 gb ACI49782.1  At5g39420 [Arabidopsis thaliana]   gi 332007048 gb AED9443.1  cyclin-dependent kinase CDC2C [Arabidopsis thaliana]                                  | 664  | 644  | 0         | 97.0   | 83.7 | 89.9 | cyclin-dependent kinase CDC2C                | gbpln | Arabidopsis thaliana | AT5G39420.1   Symbols:   cdc2cAt   CDC2C   chr5:15772232-15774929 FORWARD LENGTH=644                                                                                                                                                                            | 664  | 644 | 0         | 97.0  | 83.7 | 89.9 |
| Rsa1.0_01688.1.g29038.t1  | gb ABD65034.1  Ulp1 protease family protein [Brassica oleracea]                                                                                                                                                                                         | 259  | 863  | 2.00E-37  | 333.2  | 33.2 | 37.8 | Ulp1 protease family protein                 | gbpln | Brassica oleracea    | #                                                                                                                                                                                                                                                               | #    | #   | #         | #     | #    | #    |
| Rsa1.0_01688.1.g29039.t1  | gb AAD22283.1  putative retroelement pol polyprotein [Arabidopsis thaliana]                                                                                                                                                                             | 208  | 1787 | 2.00E-42  | 859.1  | 44.2 | 54.3 | putative retroelement pol polyprotein        | gbpln | Arabidopsis thaliana | #                                                                                                                                                                                                                                                               | #    | #   | #         | #     | #    | #    |
| Rsa1.0_01688.1.g29040.t1  | gb AAD22283.1  putative retroelement pol polyprotein [Arabidopsis thaliana]                                                                                                                                                                             | 142  | 1787 | 7.00E-48  | 1258.5 | 61.3 | 78.9 | putative retroelement pol polyprotein        | gbpln | Arabidopsis thaliana | #                                                                                                                                                                                                                                                               | #    | #   | #         | #     | #    | #    |
| Rsa1.0_01688.1.g29041.t1  | # # # # # # # # # # # # # # # #                                                                                                                                                                                                                         |      |      |           |        |      |      |                                              | ----  | ----                 | #                                                                                                                                                                                                                                                               | #    | #   | #         | #     | #    | #    |
| Rsa1.0_01688.1.g29042.t1  | db BAJ34483.1  unnamed protein product [Thellungiella halophila]                                                                                                                                                                                        | 221  | 220  | 1.00E-114 | 99.5   | 92.3 | 96.8 | unnamed protein product                      | ----  | ----                 | AT5G39510.1   Symbols:   VTI11, ATVTI1A, ATVTI1, ZIG, SGR4, VTI1A, ZIG1   Vesicle transport v-SNARE family protein   chr5:15822035-15823591 FORWARD LENGTH=221                                                                                                  | 221  | 221 | 1.00E-104 | 100.0 | 87.8 | 95.5 |
| Rsa1.0_01689.1.g29043.t1  | ref XP_002899929.1  predicted protein [Arabidopsis lyrata subsp. lyrata]   gi 297335771 gb EFH6188.1  predicted protein [Arabidopsis lyrata subsp. lyrata]                                                                                              | 181  | 317  | 3.00E-85  | 175.1  | 92.8 | 95.6 | predicted protein                            | gbpln | Arabidopsis lyrata   | AT1G12350.1   Symbols:   ATCOAB, COAB   4-phospho-panto--thencysteine synthetase   chr1:4198870-4200633 FORWARD LENGTH=317                                                                                                                                      | 181  | 317 | 2.00E-86  | 175.1 | 91.2 | 94.5 |
| Rsa1.0_01689.1.g29044.t2  | gb EOA20156.1  hypothetical protein CARUB_v10000448mg [Capsella rubella]                                                                                                                                                                                | 425  | 637  | 1.00E-138 | 149.9  | 63.3 | 66.1 | hypothetical protein CARUB_v10000448mg       | gbpln | Capsella rubella     | AT5G02030.1   Symbols:   LSN, PNY, HB-6, BLR, RPL, BLH9, VAN   POX (plant homeobox) family protein   chr5:395754-398872 FORWARD LENGTH=575                                                                                                                      | 425  | 575 | 1.00E-134 | 135.3 | 65.2 | 68.2 |

|                          |                                                                                                                                                                                                                                                                                                                                                                           |      |      |           |       |      |      |                                                         |       |                      |                                                                                                                                             |      |      |           |        |      |      |
|--------------------------|---------------------------------------------------------------------------------------------------------------------------------------------------------------------------------------------------------------------------------------------------------------------------------------------------------------------------------------------------------------------------|------|------|-----------|-------|------|------|---------------------------------------------------------|-------|----------------------|---------------------------------------------------------------------------------------------------------------------------------------------|------|------|-----------|--------|------|------|
| Rsa1.0_01689.1.g29045.t1 | gb EOA27991.1  hypothetical protein CARUB_v10024167mg, partial [Capsella rubella]                                                                                                                                                                                                                                                                                         | 133  | 175  | 4.00E-13  | 131.6 | 40.6 | 57.9 | hypothetical protein CARUB_v10024167mg, partial         | gbpln | Capsella rubella     | AT5G23840.1   Symbols: MD-2-related lipid recognition domain-containing protein   chr5:8035874-8036777 FORWARD LENGTH=167                   | 133  | 167  | 1.00E-12  | 125.6  | 33.8 | 54.1 |
| Rsa1.0_01689.1.g29046.t1 | #                                                                                                                                                                                                                                                                                                                                                                         | #    | #    | #         | #     | #    | #    | -                                                       | ----  | ----                 | AT3G13300.2   Symbols: VCS   Transducin/WD40 repeat-like superfamily protein   chr3:4304085-4309949 FORWARD LENGTH=1309                     | 65   | 1309 | 8.00E-11  | 2013.8 | 50.8 | 60.0 |
| Rsa1.0_01689.1.g29047.t1 | ref NP_195724.1  laccase 8 [Arabidopsis thaliana]<br>gi 75174096 sp Q9LFD2.1 LAC8_ARATH<br>RecName: Full=Laccase-8; AltName: Full=Benzenediol:oxygen oxidoreductase 8; AltName: Full=Urishiol oxidase 8; Flags: Precursor gi 6759427 emb CAB69832.1  laccase-like protein [Arabidopsis thaliana] gi 332002908 gb AED90291.1  laccase 8 [Arabidopsis thaliana]             | 564  | 584  | 0         | 103.5 | 79.4 | 89.4 | laccase 8                                               | gbpln | Arabidopsis thaliana | AT5G01040.1   Symbols: LAC8   laccase 8   chr5:13394-16142 REVERSE LENGTH=584                                                               | 564  | 584  | 0         | 103.5  | 79.4 | 89.4 |
| Rsa1.0_01689.1.g29048.t1 | #                                                                                                                                                                                                                                                                                                                                                                         | #    | #    | #         | #     | #    | #    | -                                                       | ----  | ----                 | #                                                                                                                                           | #    | #    | #         | #      | #    |      |
| Rsa1.0_01690.1.g29049.t1 | ref NP_568405.1  serine/threonine-protein kinase TOUSLED [Arabidopsis thaliana]<br>gi 75319457 sp Q39238.1 TSL_ARATH<br>RecName: Full=Serine/threonine-protein kinase TOUSLED<br>gi 433052 sp AA32874.1  protein kinase [Arabidopsis thaliana]<br>gi 332005524 gb AED92907.1  serine/threonine-protein kinase TOUSLED [Arabidopsis thaliana]                              | 687  | 688  | 0         | 100.1 | 87.3 | 93.2 | serine/threonine-protein kinase TOUSLED                 | gbpln | Arabidopsis thaliana | AT5G20930.1   Symbols: TSL   Protein kinase superfamily protein   chr5:7098213-7102970 FORWARD LENGTH=688                                   | 687  | 688  | 0         | 100.1  | 87.3 | 93.2 |
| Rsa1.0_01690.1.g29050.t2 | gb EOA19371.1  hypothetical protein CARUB_v10000466mg [Capsella rubella]                                                                                                                                                                                                                                                                                                  | 725  | 624  | 0         | 86.1  | 78.2 | 80.0 | hypothetical protein CARUB_v10000466mg                  | gbpln | Capsella rubella     | AT5G20950.2   Symbols: Glycosyl hydrolase family protein   chr5:7107609-7110775 REVERSE LENGTH=624                                          | 725  | 624  | 0         | 86.1   | 78.3 | 81.4 |
| Rsa1.0_01690.1.g29051.t1 | #                                                                                                                                                                                                                                                                                                                                                                         | #    | #    | #         | #     | #    | #    | -                                                       | ----  | ----                 | #                                                                                                                                           | #    | #    | #         | #      | #    |      |
| Rsa1.0_01690.1.g29052.t1 | #                                                                                                                                                                                                                                                                                                                                                                         | #    | #    | #         | #     | #    | #    | -                                                       | ----  | ----                 | #                                                                                                                                           | #    | #    | #         | #      | #    |      |
| Rsa1.0_01690.1.g29053.t1 | dbj BAE93767.1  aldehyde oxidase [Brassica rapa subsp. pekinensis]                                                                                                                                                                                                                                                                                                        | 1329 | 1360 | 0         | 102.3 | 94.0 | 96.3 | aldehyde oxidase                                        | gbpln | Brassica rapa        | AT5G20960.2   Symbols: AAO1, AO1, ATAO, AT-AO1, AOalpha, ATA01   aldehyde oxidase 1   chr5:7116783-7122338 FORWARD LENGTH=1368              | 1329 | 1368 | 0         | 102.9  | 85.6 | 92.8 |
| Rsa1.0_01690.1.g29054.t1 | ref NP_197597.1  heat shock family protein [Arabidopsis thaliana]<br>gi 332005531 gb AED92914.1  heat shock family protein [Arabidopsis thaliana]                                                                                                                                                                                                                         | 166  | 249  | 2.00E-52  | 150.0 | 69.3 | 81.9 | heat shock family protein                               | gbpln | Arabidopsis thaliana | AT5G20970.1   Symbols: HSP20-like chaperones superfamily protein   chr5:7123132-7124001 FORWARD LENGTH=249                                  | 166  | 249  | 7.00E-55  | 150.0  | 69.3 | 81.9 |
| Rsa1.0_01690.1.g29055.t1 | ref NP_566733.1  UBX domain-containing protein [Arabidopsis thaliana]<br>gi 9294517 dbj BAB02779.1  unnamed protein product [Arabidopsis thaliana]<br>gi 62319637 dbj BAD95135.1  hypothetical protein [Arabidopsis thaliana] gi 9896109 gb ABF59029.1  At3g23605 [Arabidopsis thaliana] gi 332643262 gb AEE76783.1  UBX domain-containing protein [Arabidopsis thaliana] | 141  | 152  | 1.00E-42  | 107.8 | 68.1 | 78.7 | UBX domain-containing protein                           | gbpln | Arabidopsis thaliana | AT3G23605.1   Symbols: Ubiquitin-like superfamily protein   chr3:8476675-8477133 FORWARD LENGTH=152                                         | 141  | 152  | 3.00E-45  | 107.8  | 68.1 | 78.7 |
| Rsa1.0_01690.1.g29056.t3 | emb CAD40363.2  OS.JNBA0093P23.9 [Oryza sativa Japonica Group]                                                                                                                                                                                                                                                                                                            | 1247 | 944  | 0         | 75.7  | 29.1 | 39.3 | OS.JNBA0093P23.9                                        | gbpln | Oryza sativa         | AT4G23160.1   Symbols: CRK8   cysteine-rich RLK (RECEPTOR-like protein kinase) 8   chr4:12129485-12134086 FORWARD LENGTH=1262               | 1247 | 1262 | 3.00E-34  | 101.2  | 8.7  | 13.5 |
| Rsa1.0_01690.1.g29057.t1 | #                                                                                                                                                                                                                                                                                                                                                                         | #    | #    | #         | #     | #    | #    | -                                                       | ----  | ----                 | #                                                                                                                                           | #    | #    | #         | #      | #    |      |
| Rsa1.0_01690.1.g29058.t3 | dbj BAB09379.1  non-LTR retroelement reverse transcriptase-like protein [Arabidopsis thaliana]                                                                                                                                                                                                                                                                            | 1472 | 1223 | 0         | 83.1  | 29.9 | 40.5 | non-LTR retroelement reverse transcriptase-like protein | gbpln | Arabidopsis thaliana | AT3G24255.1   Symbols: RNA-directed DNA polymerase (reverse transcriptase)-related family protein   chr3:8789471-8793208 FORWARD LENGTH=746 | 1472 | 746  | 3.00E-74  | 50.7   | 10.6 | 13.7 |
| Rsa1.0_01691.1.g29059.t1 | ref XP_002872853.1  ATIMPALPHA3/MOS6 [Arabidopsis lyrata subsp. lyrata]<br>gi 297318690 gb EFH49112.1  ATIMPALPHA3/MOS6 [Arabidopsis lyrata subsp. lyrata]                                                                                                                                                                                                                | 509  | 534  | 0         | 104.9 | 82.7 | 91.0 | ATIMPALPHA3/MOS6                                        | gbpln | Arabidopsis lyrata   | AT4G02150.1   Symbols: MOS6, ATIMPALPHA3, IMPA-3   ARM repeat superfamily protein   chr4:950884-953602 REVERSE LENGTH=531                   | 509  | 531  | 0         | 104.3  | 80.7 | 89.6 |
| Rsa1.0_01691.1.g29060.t1 | ref XP_002872855.1  hypothetical protein ARALYDRAFT_490360 [Arabidopsis lyrata subsp. lyrata]<br>gi 297318692 gb EFH49114.1  hypothetical protein ARALYDRAFT_490360 [Arabidopsis lyrata subsp. lyrata]                                                                                                                                                                    | 352  | 346  | 1.00E-175 | 98.3  | 87.5 | 90.6 | hypothetical protein ARALYDRAFT_490360                  | gbpln | Arabidopsis lyrata   | AT4G02130.3   Symbols: GATL6, LGT10   galacturonosyltransferase 6   chr4:945764-946804 REVERSE LENGTH=346                                   | 352  | 346  | 1.00E-175 | 98.3   | 85.8 | 90.3 |

|                          |                                                                                                                                                                                                                                                                                                                                                                                                                                                                                                                                                                                                                           |      |      |           |       |      |      |                                           |       |                            |                                                                                                                                                                                                                                                                                                                                                                   |      |      |           |       |      |      |
|--------------------------|---------------------------------------------------------------------------------------------------------------------------------------------------------------------------------------------------------------------------------------------------------------------------------------------------------------------------------------------------------------------------------------------------------------------------------------------------------------------------------------------------------------------------------------------------------------------------------------------------------------------------|------|------|-----------|-------|------|------|-------------------------------------------|-------|----------------------------|-------------------------------------------------------------------------------------------------------------------------------------------------------------------------------------------------------------------------------------------------------------------------------------------------------------------------------------------------------------------|------|------|-----------|-------|------|------|
| Rsa1.0_01691.1.g29061.t3 | gb[EOA20304.1] hypothetical protein CARUB_v10000612mg [Capsella rubella]                                                                                                                                                                                                                                                                                                                                                                                                                                                                                                                                                  | 575  | 556  | 0         | 96.7  | 90.8 | 92.5 | hypothetical protein CARUB_v10000612mg    | gbpln | Capsella rubella           | AT4G02120.1   Symbols:   CTP synthase family protein   chr4:940873-944097 FORWARD LENGTH=556                                                                                                                                                                                                                                                                      | 575  | 556  | 0         | 96.7  | 89.4 | 91.7 |
| Rsa1.0_01691.1.g29062.t1 | #                                                                                                                                                                                                                                                                                                                                                                                                                                                                                                                                                                                                                         | #    | #    | #         | #     | #    | #    | -                                         | ----  | ----                       | #                                                                                                                                                                                                                                                                                                                                                                 | #    | #    | #         | #     | #    |      |
| Rsa1.0_01691.1.g29063.t1 | gb[ABD65633.1] hypothetical protein 23.t00050 [Brassica oleracea]                                                                                                                                                                                                                                                                                                                                                                                                                                                                                                                                                         | 298  | 260  | 3.00E-44  | 87.2  | 28.5 | 35.6 | hypothetical protein 23.t00050            | gbpln | Brassica oleracea          | AT3G47680.1   Symbols:   DNA binding   chr3:17577483-17578391 REVERSE LENGTH=302                                                                                                                                                                                                                                                                                  | 298  | 302  | 1.00E-17  | 101.3 | 21.8 | 32.2 |
| Rsa1.0_01691.1.g29064.t1 | gb[AAK43485.1]AC084807.10 polyprotein, putative [Arabidopsis thaliana] gi225898008[db][BAH30336.1] hypothetical protein [Arabidopsis thaliana]                                                                                                                                                                                                                                                                                                                                                                                                                                                                            | 1247 | 1459 | 0         | 117.0 | 55.3 | 70.7 | polyprotein, putative                     | gbpln | Arabidopsis thaliana       | AT4G23160.1   Symbols: CRK8   cysteine-rich RLK (RECEPTOR-like protein kinase) 8   chr4:12129485-12134086 FORWARD LENGTH=1262                                                                                                                                                                                                                                     | 1247 | 1262 | 1.00E-104 | 101.2 | 14.6 | 21.5 |
| Rsa1.0_01691.1.g29065.t1 | gb[ABD64939.1] hypothetical protein 24.t00017 [Brassica oleracea]                                                                                                                                                                                                                                                                                                                                                                                                                                                                                                                                                         | 136  | 442  | 3.00E-41  | 325.0 | 57.4 | 64.0 | hypothetical protein 24.t00017            | gbpln | Brassica oleracea          | AT2G13770.1   Symbols:   CONTAINS InterPro DOMAIN/s: Putative harbinger transposase-derived nuclease (InterPro:IPRO06912); Has 451 Blast hits to 352 proteins in 33 species: Archae - 0; Bacteria - 0; Metazoa - 28; Fungi - 8; Plants - 388; Viruses - 0; Other Eukaryotes - 27 (source: NCBI BLINK).   chr2:5736603-5737847 FORWARD LENGTH=343                  | 136  | 343  | 1.00E-14  | 252.2 | 25.0 | 33.8 |
| Rsa1.0_01692.1.g29066.t1 | ref[XP_002873565.1] hypothetical protein ARALYDRAFT_909210 [Arabidopsis lyrata subsp. lyrata] gi297319402[gb][EFH49824.1] hypothetical protein ARALYDRAFT_909210 [Arabidopsis lyrata subsp. lyrata]                                                                                                                                                                                                                                                                                                                                                                                                                       | 286  | 220  | 1.00E-100 | 76.9  | 63.6 | 69.2 | hypothetical protein ARALYDRAFT_909210    | gbpln | Arabidopsis lyrata         | AT5G12340.1   Symbols:   unknown protein; BEST Arabidopsis thaliana protein match is: unknown protein (TAIR:AT1G28190.1); Has 30201 Blast hits to 17322 proteins in 780 species: Archae - 12; Bacteria - 1396; Metazoa - 17338; Fungi - 3422; Plants - 5037; Viruses - 0; Other Eukaryotes - 2996 (source: NCBI BLINK).   chr5:3992948-3993610 REVERSE LENGTH=220 | 286  | 220  | 1.00E-101 | 76.9  | 62.9 | 68.5 |
| Rsa1.0_01692.1.g29067.t1 | #                                                                                                                                                                                                                                                                                                                                                                                                                                                                                                                                                                                                                         | #    | #    | #         | #     | #    | #    | -                                         | ----  | ----                       | #                                                                                                                                                                                                                                                                                                                                                                 | #    | #    | #         | #     | #    |      |
| Rsa1.0_01692.1.g29068.t1 | gb[ADA60975.1] lateral root primordium 1 [Brassica rapa subsp. pekinensis]                                                                                                                                                                                                                                                                                                                                                                                                                                                                                                                                                | 397  | 380  | 1.00E-170 | 95.7  | 87.9 | 89.9 | lateral root primordium 1                 | gbpln | Brassica rapa              | AT5G12330.4   Symbols: LRP1   Lateral root primordium (LRP) protein-related   chr5:3987677-3989408 REVERSE LENGTH=407                                                                                                                                                                                                                                             | 397  | 407  | 1.00E-153 | 102.5 | 80.9 | 88.9 |
| Rsa1.0_01692.1.g29069.t1 | ref[XP_002873561.1] hypothetical protein ARALYDRAFT_488073 [Arabidopsis lyrata subsp. lyrata] gi297319398[gb][EFH49820.1] hypothetical protein ARALYDRAFT_488073 [Arabidopsis lyrata subsp. lyrata]                                                                                                                                                                                                                                                                                                                                                                                                                       | 589  | 602  | 0         | 102.2 | 87.9 | 94.1 | hypothetical protein ARALYDRAFT_488073    | gbpln | Arabidopsis lyrata         | AT5G12290.1   Symbols: DGS1   dg1 suppressor 1   chr5:3974374-3978066 REVERSE LENGTH=602                                                                                                                                                                                                                                                                          | 589  | 602  | 0         | 102.2 | 86.8 | 93.5 |
| Rsa1.0_01692.1.g29070.t2 | ref[XP_002873560.1] oxidoreductase [Arabidopsis lyrata subsp. lyrata] gi297319397[gb][EFH49819.1] oxidoreductase [Arabidopsis lyrata subsp. lyrata]                                                                                                                                                                                                                                                                                                                                                                                                                                                                       | 166  | 359  | 6.00E-72  | 216.3 | 80.1 | 86.1 | oxidoreductase                            | gbpln | Arabidopsis lyrata         | AT5G12270.1   Symbols:   2-oxoglutarate (2OG) and Fe(II)-dependent oxygenase superfamily protein   chr5:3970131-3971301 REVERSE LENGTH=360                                                                                                                                                                                                                        | 166  | 360  | 2.00E-73  | 216.9 | 79.5 | 83.7 |
| Rsa1.0_01692.1.g29071.t1 | #                                                                                                                                                                                                                                                                                                                                                                                                                                                                                                                                                                                                                         | #    | #    | #         | #     | #    | #    | -                                         | ----  | ----                       | #                                                                                                                                                                                                                                                                                                                                                                 | #    | #    | #         | #     | #    |      |
| Rsa1.0_01692.1.g29072.t1 | #                                                                                                                                                                                                                                                                                                                                                                                                                                                                                                                                                                                                                         | #    | #    | #         | #     | #    | #    | -                                         | ----  | ----                       | #                                                                                                                                                                                                                                                                                                                                                                 | #    | #    | #         | #     | #    |      |
| Rsa1.0_01692.1.g29073.t1 | ref[XP_002873560.1] oxidoreductase [Arabidopsis lyrata subsp. lyrata] gi297319397[gb][EFH49819.1] oxidoreductase [Arabidopsis lyrata subsp. lyrata]                                                                                                                                                                                                                                                                                                                                                                                                                                                                       | 164  | 359  | 1.00E-62  | 218.9 | 71.3 | 81.7 | oxidoreductase                            | gbpln | Arabidopsis lyrata         | AT5G12270.1   Symbols:   2-oxoglutarate (2OG) and Fe(II)-dependent oxygenase superfamily protein   chr5:3970131-3971301 REVERSE LENGTH=360                                                                                                                                                                                                                        | 164  | 360  | 5.00E-64  | 219.5 | 72.0 | 81.1 |
| Rsa1.0_01693.1.g29074.t1 | gb[EGG05881.1] hypothetical protein MELLADRAFT_87680 [Melampsora larici-populina 9BAG31]                                                                                                                                                                                                                                                                                                                                                                                                                                                                                                                                  | 325  | 535  | 1.00E-103 | 164.6 | 65.5 | 77.5 | hypothetical protein MELLADRAFT_87680     | gbpln | Melampsora larici-populina | AT4G05320.4   Symbols: UBO10   polyubiquitin 10   chr4:2718559-2719932 FORWARD LENGTH=457                                                                                                                                                                                                                                                                         | 325  | 457  | 1.00E-105 | 140.6 | 65.2 | 77.2 |
| Rsa1.0_01693.1.g29075.t1 | ref[NP_565381.1] Peptidyl-prolyl cis-trans isomerase CYP40 [Arabidopsis thaliana] gi17533353[sp][O9C566.1] [CYP40_ARAT H RecName: Full=Peptidyl-prolyl cis-trans isomerase CYP40; Short=PP1ase CYP40; AltName: Full=Cyclophilin of 40 kDa; Short=Cyclophilin-40; AltName: Full=Protein SQUINT; AltName: Full=Rotamase CYP40 gi1342983[gb][AAK02067.1] cyclophilin-40 [Arabidopsis thaliana] gi20197802[gb][AAD41985.2] expressed protein [Arabidopsis thaliana] gi115311455[gb][ABI93908.1] At2g15790 [Arabidopsis thaliana] gi330251344[gb][AEC06438.1] Peptidyl-prolyl cis-trans isomerase CYP40 [Arabidopsis thaliana] | 74   | 361  | 3.00E-26  | 487.8 | 85.1 | 90.5 | Peptidyl-prolyl cis-trans isomerase CYP40 | gbpln | Arabidopsis thaliana       | AT2G15790.1   Symbols: SQN, CYP40   peptidyl-prolyl cis-trans isomerase / cyclophilin-40 (CYP40) / rotamase   chr2:6878144-6880743 REVERSE LENGTH=361                                                                                                                                                                                                             | 74   | 361  | 5.00E-29  | 487.8 | 85.1 | 90.5 |

|                          |                                                                                                                                                                                                                                                                                                                                                                                                                                                                                                                                           |     |      |           |       |      |      |                                                     |       |                      |                                                                                                                                                                                                                                                                                                                                            |     |     |           |       |      |      |
|--------------------------|-------------------------------------------------------------------------------------------------------------------------------------------------------------------------------------------------------------------------------------------------------------------------------------------------------------------------------------------------------------------------------------------------------------------------------------------------------------------------------------------------------------------------------------------|-----|------|-----------|-------|------|------|-----------------------------------------------------|-------|----------------------|--------------------------------------------------------------------------------------------------------------------------------------------------------------------------------------------------------------------------------------------------------------------------------------------------------------------------------------------|-----|-----|-----------|-------|------|------|
| Rsa1.0_01693.1.g29076.t1 | gb AAC3226.1  putative non-LTR retroelement reverse transcriptase [Arabidopsis thaliana]                                                                                                                                                                                                                                                                                                                                                                                                                                                  | 884 | 1529 | 0         | 173.0 | 34.6 | 47.3 | putative non-LTR retroelement reverse transcriptase | gbpln | Arabidopsis thaliana | AT3G24255.1   Symbols:   RNA-directed DNA polymerase (reverse transcriptase)-related family protein   chr3:8789471-8793208 FORWARD LENGTH=746                                                                                                                                                                                              | 884 | 746 | 1.00E-107 | 84.4  | 22.7 | 31.6 |
| Rsa1.0_01693.1.g29077.t1 | gb EOA32516.1  hypothetical protein CARUB_v10015796mg, partial [Capsella rubella]                                                                                                                                                                                                                                                                                                                                                                                                                                                         | 189 | 211  | 2.00E-92  | 111.6 | 89.4 | 94.7 | hypothetical protein CARUB_v10015796mg, partial     | gbpln | Capsella rubella     | AT2G15690.1   Symbols:   Calcium-binding EF-hand family protein   chr2:6831024-6831587 FORWARD LENGTH=187                                                                                                                                                                                                                                  | 189 | 187 | 3.00E-91  | 98.9  | 84.1 | 92.6 |
| Rsa1.0_01693.1.g29078.t1 | gb ACD13218.1  nitrite reductase [Brassica rapa subsp. chinensis]                                                                                                                                                                                                                                                                                                                                                                                                                                                                         | 585 | 593  | 0         | 101.4 | 92.0 | 95.0 | nitrite reductase                                   | gbpln | Brassica rapa        | AT2G15620.1   Symbols:   NIR1, NIR, ATHNIR   nitrite reductase 1   chr2:6810552-6812666 FORWARD LENGTH=586                                                                                                                                                                                                                                 | 585 | 586 | 0         | 100.2 | 88.7 | 94.9 |
| Rsa1.0_01693.1.g29079.t1 | ref XP_002883904.1  hypothetical protein ARALYDRAFT_480419 [Arabidopsis lyrata subsp. lyrata]   gi 297329744 gb EFH60163.1  hypothetical protein ARALYDRAFT_480419 [Arabidopsis lyrata subsp. lyrata]                                                                                                                                                                                                                                                                                                                                     | 147 | 155  | 3.00E-57  | 105.4 | 73.5 | 87.1 | hypothetical protein ARALYDRAFT_480419              | gbpln | Arabidopsis lyrata   | AT2G15590.2   Symbols:   Protein of unknown function (DUF1685)   chr2:6801950-6802506 FORWARD LENGTH=155                                                                                                                                                                                                                                   | 147 | 155 | 1.00E-57  | 105.4 | 71.4 | 86.4 |
| Rsa1.0_01693.1.g29080.t7 | gb EOA16155.1  hypothetical protein CARUB_v10004296mg [Capsella rubella]                                                                                                                                                                                                                                                                                                                                                                                                                                                                  | 122 | 673  | 7.00E-61  | 551.6 | 83.6 | 91.8 | hypothetical protein CARUB_v10004296mg              | gbpln | Capsella rubella     | AT2G15530.3   Symbols:   RING/U-box superfamily protein   chr2:6774150-6777068 FORWARD LENGTH=704                                                                                                                                                                                                                                          | 122 | 704 | 2.00E-63  | 577.0 | 86.9 | 93.4 |
| Rsa1.0_01694.1.g29081.t1 | #                                                                                                                                                                                                                                                                                                                                                                                                                                                                                                                                         | #   | #    | #         | #     | #    | #    | -                                                   | ----  | ----                 | #                                                                                                                                                                                                                                                                                                                                          | #   | #   | #         | #     | #    | #    |
| Rsa1.0_01694.1.g29082.t1 | gb AAD20658.1  putative retroelement pol polyprotein [Arabidopsis thaliana]                                                                                                                                                                                                                                                                                                                                                                                                                                                               | 810 | 1611 | 8.00E-78  | 198.9 | 17.2 | 22.2 | putative retroelement pol polyprotein               | gbpln | Arabidopsis thaliana | #                                                                                                                                                                                                                                                                                                                                          | #   | #   | #         | #     | #    | #    |
| Rsa1.0_01694.1.g29083.t1 | gb AAD15359.1  putative Athila retroelement ORF1 protein [Arabidopsis thaliana]                                                                                                                                                                                                                                                                                                                                                                                                                                                           | 707 | 532  | 2.00E-19  | 75.2  | 12.9 | 17.5 | putative Athila retroelement ORF1 protein           | gbpln | Arabidopsis thaliana | #                                                                                                                                                                                                                                                                                                                                          | #   | #   | #         | #     | #    | #    |
| Rsa1.0_01694.1.g29084.t1 | gb ABD65035.1  hypothetical protein 26.t00052 [Brassica oleracea]                                                                                                                                                                                                                                                                                                                                                                                                                                                                         | 657 | 695  | 1.00E-160 | 105.8 | 54.9 | 66.7 | hypothetical protein 26.t00052                      | gbpln | Brassica oleracea    | #                                                                                                                                                                                                                                                                                                                                          | #   | #   | #         | #     | #    | #    |
| Rsa1.0_01694.1.g29085.t1 | #                                                                                                                                                                                                                                                                                                                                                                                                                                                                                                                                         | #   | #    | #         | #     | #    | #    | -                                                   | ----  | ----                 | #                                                                                                                                                                                                                                                                                                                                          | #   | #   | #         | #     | #    | #    |
| Rsa1.0_01694.1.g29086.t1 | gb ABW81018.1  gag-pol polymerase [Arabidopsis lyrata subsp. lyrata]                                                                                                                                                                                                                                                                                                                                                                                                                                                                      | 353 | 672  | 1.00E-46  | 190.4 | 29.7 | 43.6 | gag-pol polymerase                                  | gbpln | Arabidopsis lyrata   | #                                                                                                                                                                                                                                                                                                                                          | #   | #   | #         | #     | #    | #    |
| Rsa1.0_01694.1.g29087.t1 | gb ABD65062.1  hypothetical protein 27.t00126 [Brassica oleracea]                                                                                                                                                                                                                                                                                                                                                                                                                                                                         | 449 | 578  | 6.00E-92  | 128.7 | 42.3 | 55.5 | hypothetical protein 27.t00126                      | gbpln | Brassica oleracea    | AT2G15420.1   Symbols:   myosin heavy chain-related   chr2:6723948-6728183 REVERSE LENGTH=957                                                                                                                                                                                                                                              | 449 | 957 | 2.00E-14  | 213.1 | 8.7  | 13.4 |
| Rsa1.0_01695.1.g29088.t1 | ref NP_188490.1  DEAD-box ATP-dependent RNA helicase 51 [Arabidopsis thaliana]   gi 75335038 sp Q9LIH9.1 RH51_ARATH RecName: Full=DEAD-box ATP-dependent RNA helicase 51   gi 9294321 db BAB02218.1  DEAD-box ATP-dependent RNA helicase [Arabidopsis thaliana]   gi 17979083 gb AAL49809.1  putative DEAD box helicase protein [Arabidopsis thaliana]   gi 20465335 gb AAM20071.1  putative DEAD box helicase protein [Arabidopsis thaliana]   gi 332642600 gb AEE76121.1  DEAD-box ATP-dependent RNA helicase 51 [Arabidopsis thaliana] | 568 | 568  | 0         | 100.0 | 84.3 | 92.6 | DEAD-box ATP-dependent RNA helicase 51              | gbpln | Arabidopsis thaliana | AT3G18600.1   Symbols:   P-loop containing nucleoside triphosphate hydrolases superfamily protein   chr3:6399724-6403007 REVERSE LENGTH=568                                                                                                                                                                                                | 568 | 568 | 0         | 100.0 | 84.3 | 92.6 |
| Rsa1.0_01695.1.g29089.t1 | gb ABL97946.1  copper ion binding/electron transporter [Brassica rapa]                                                                                                                                                                                                                                                                                                                                                                                                                                                                    | 178 | 203  | 6.00E-67  | 114.0 | 76.4 | 86.0 | copper ion binding/electron transporter             | gbpln | Brassica rapa        | AT3G18590.1   Symbols:   ENODL5, ATENODL5   early nodulin-like protein 5   chr3:6398670-6399337 FORWARD LENGTH=188                                                                                                                                                                                                                         | 178 | 188 | 8.00E-64  | 105.6 | 77.5 | 86.5 |
| Rsa1.0_01695.1.g29090.t1 | ref NP_188488.1  single-strand DNA-binding protein [Arabidopsis thaliana]   gi 9294319 db BAB02216.1  unnamed protein product [Arabidopsis thaliana]   gi 332642598 gb AEE76119.1  single-strand DNA-binding protein [Arabidopsis thaliana]                                                                                                                                                                                                                                                                                               | 221 | 217  | 1.00E-102 | 98.2  | 86.4 | 90.5 | single-strand DNA-binding protein                   | gbpln | Arabidopsis thaliana | AT3G18580.1   Symbols:   Nucleic acid-binding, OB-fold-like protein   chr3:6396940-6398068 REVERSE LENGTH=217                                                                                                                                                                                                                              | 221 | 217 | 1.00E-104 | 98.2  | 86.4 | 90.5 |
| Rsa1.0_01695.1.g29091.t1 | gb EOA33015.1  hypothetical protein CARUB_v10016346mg [Capsella rubella]                                                                                                                                                                                                                                                                                                                                                                                                                                                                  | 164 | 166  | 3.00E-61  | 101.2 | 79.3 | 84.1 | hypothetical protein CARUB_v10016346mg              | gbpln | Capsella rubella     | AT3G18570.1   Symbols:   Oleosin family protein   chr3:6396072-6396572 REVERSE LENGTH=166                                                                                                                                                                                                                                                  | 164 | 166 | 5.00E-63  | 101.2 | 78.0 | 84.1 |
| Rsa1.0_01695.1.g29092.t1 | ref XP_002883140.1  hypothetical protein ARALYDRAFT_898225 [Arabidopsis lyrata subsp. lyrata]   gi 297328980 gb EFH59399.1  hypothetical protein ARALYDRAFT_898225 [Arabidopsis lyrata subsp. lyrata]                                                                                                                                                                                                                                                                                                                                     | 194 | 195  | 2.00E-76  | 100.5 | 78.9 | 88.1 | hypothetical protein ARALYDRAFT_898225              | gbpln | Arabidopsis lyrata   | AT3G18560.1   Symbols:   unknown protein; BEST Arabidopsis thaliana protein match is: unknown protein (TAIR:AT1G49000.1); Has 95 Blast hits to 95 proteins in 13 species: Archae - 0; Bacteria - 0; Metazoa - 0; Fungi - 0; Plants - 95; Viruses - 0; Other Eukaryotes - 0 (source: NCBI BLink).   chr3:6393984-6394571 FORWARD LENGTH=195 | 194 | 195 | 4.00E-75  | 100.5 | 80.4 | 88.7 |

|                          |                                                                                                                                                                                                                                                                                                                                                                                                                                                                                                                                                                                                                                                                                                                                                                                                                                                                                                                                                                                                                                                                                                                                                                                                                                                                                                                                                                                                                                                                                          |     |     |           |       |      |      |                                                      |       |                      |                                                                                                                                                                                                                                                                                                                                                                                                                                                                                                                             |     |     |           |       |      |      |
|--------------------------|------------------------------------------------------------------------------------------------------------------------------------------------------------------------------------------------------------------------------------------------------------------------------------------------------------------------------------------------------------------------------------------------------------------------------------------------------------------------------------------------------------------------------------------------------------------------------------------------------------------------------------------------------------------------------------------------------------------------------------------------------------------------------------------------------------------------------------------------------------------------------------------------------------------------------------------------------------------------------------------------------------------------------------------------------------------------------------------------------------------------------------------------------------------------------------------------------------------------------------------------------------------------------------------------------------------------------------------------------------------------------------------------------------------------------------------------------------------------------------------|-----|-----|-----------|-------|------|------|------------------------------------------------------|-------|----------------------|-----------------------------------------------------------------------------------------------------------------------------------------------------------------------------------------------------------------------------------------------------------------------------------------------------------------------------------------------------------------------------------------------------------------------------------------------------------------------------------------------------------------------------|-----|-----|-----------|-------|------|------|
| Rsa1.0_01695.1.g29093.t1 | ref NP_188485.2  transcription factor TCP18 [Arabidopsis thaliana]<br>gi 187653897 sp A1YKT1.1 TCP18_ARATH RecName: Full=Transcription factor TCP18; AltName: Full=Protein BRANCHED 1; AltName: Full=Protein TEOSINTE BRANCHED 1-LIKE 1<br>gi 119873500 gb ABM05498.1  teosinte branched 1-like 1 protein [Arabidopsis thaliana] gi 332642594 gb AEE76115.1  transcription factor TCP18 [Arabidopsis thaliana]                                                                                                                                                                                                                                                                                                                                                                                                                                                                                                                                                                                                                                                                                                                                                                                                                                                                                                                                                                                                                                                                           | 436 | 433 | 1.00E-151 | 99.3  | 68.8 | 79.1 | transcription factor TCP18                           | gbpln | Arabidopsis thaliana | AT3G18550.1   Symbols: BRC1, TCP18, ATTCP18   TCP family transcription factor   chr3:6383769-6385604 FORWARD LENGTH=433                                                                                                                                                                                                                                                                                                                                                                                                     | 436 | 433 | 1.00E-153 | 99.3  | 68.8 | 79.1 |
| Rsa1.0_01695.1.g29094.t1 | # # # # # # # # - ---- # # # # # # #                                                                                                                                                                                                                                                                                                                                                                                                                                                                                                                                                                                                                                                                                                                                                                                                                                                                                                                                                                                                                                                                                                                                                                                                                                                                                                                                                                                                                                                     |     |     |           |       |      |      |                                                      |       |                      |                                                                                                                                                                                                                                                                                                                                                                                                                                                                                                                             |     |     |           |       |      |      |
| Rsa1.0_01696.1.g29095.t1 | ref XP_002875348.1  esterase/lipase/thioesterase family protein [Arabidopsis lyrata subsp. lyrata] gi 297321186 gb EFH51607.1  esterase/lipase/thioesterase family protein [Arabidopsis lyrata subsp. lyrata]                                                                                                                                                                                                                                                                                                                                                                                                                                                                                                                                                                                                                                                                                                                                                                                                                                                                                                                                                                                                                                                                                                                                                                                                                                                                            | 708 | 695 | 0         | 98.2  | 78.4 | 87.0 | esterase/lipase/thioesterase family protein          | gbpln | Arabidopsis lyrata   | AT3G26840.1   Symbols:   Esterase/lipase/thioesterase family protein   chr3:9892808-9896154 FORWARD LENGTH=701                                                                                                                                                                                                                                                                                                                                                                                                              | 708 | 701 | 0         | 99.0  | 79.1 | 87.0 |
| Rsa1.0_01696.1.g29096.t1 | gb EOA25978.1  hypothetical protein CARUB_v10019367mg [Capsella rubella]                                                                                                                                                                                                                                                                                                                                                                                                                                                                                                                                                                                                                                                                                                                                                                                                                                                                                                                                                                                                                                                                                                                                                                                                                                                                                                                                                                                                                 | 134 | 136 | 1.00E-36  | 101.5 | 58.2 | 70.9 | hypothetical protein CARUB_v10019367mg               | gbpln | Capsella rubella     | AT3G27680.1   Symbols:   Plant self-incompatibility protein S1 family   chr3:10254886-10255290 REVERSE LENGTH=134                                                                                                                                                                                                                                                                                                                                                                                                           | 134 | 134 | 8.00E-33  | 100.0 | 53.7 | 67.9 |
| Rsa1.0_01696.1.g29097.t1 | ref XP_002875348.1  esterase/lipase/thioesterase family protein [Arabidopsis lyrata subsp. lyrata] gi 297321186 gb EFH51607.1  esterase/lipase/thioesterase family protein [Arabidopsis lyrata subsp. lyrata]<br>ref NP_366803.1  uncharacterized protein [Arabidopsis thaliana] gi 30688542 ref NP_850637.1  uncharacterized protein [Arabidopsis thaliana]<br>gi 79313770 ref NP_001030777.1  uncharacterized protein [Arabidopsis thaliana]<br>gi 186510468 ref NP_001118709.1  uncharacterized protein [Arabidopsis thaliana]<br>gi 186510470 ref NP_001118710.1  uncharacterized protein [Arabidopsis thaliana] gi 15293103 gb AAK93662.1  unknown protein [Arabidopsis thaliana] gi 21436343 gb AAM51341.1  unknown protein [Arabidopsis thaliana] gi 222424697 dbj BAH20302.1  AT3G26890 [Arabidopsis thaliana] gi 332643708 gb AEE77229.1  uncharacterized protein AT3G26890 [Arabidopsis thaliana] gi 332643709 gb AEE77230.1  uncharacterized protein AT3G26890 [Arabidopsis thaliana] gi 332643710 gb AEE77231.1  uncharacterized protein AT3G26890 [Arabidopsis thaliana] gi 332643711 gb AEE77232.1  uncharacterized protein AT3G26890 [Arabidopsis thaliana] gi 332643712 gb AEE77233.1  uncharacterized protein AT3G26890 [Arabidopsis thaliana]<br>ref XP_002877001.1  hydroxyproline-rich glycoprotein family protein [Arabidopsis lyrata subsp. lyrata] gi 297322839 gb EFH53260.1  hydroxyproline-rich glycoprotein family protein [Arabidopsis lyrata subsp. lyrata] | 209 | 695 | 2.00E-21  | 332.5 | 34.0 | 39.7 | esterase/lipase/thioesterase family protein          | gbpln | Arabidopsis lyrata   | AT3G26840.1   Symbols:   Esterase/lipase/thioesterase family protein   chr3:9892808-9896154 FORWARD LENGTH=701                                                                                                                                                                                                                                                                                                                                                                                                              | 209 | 701 | 8.00E-23  | 335.4 | 33.0 | 39.7 |
| Rsa1.0_01696.1.g29098.t1 | gi 21436343 gb AAM51341.1  unknown protein [Arabidopsis thaliana] gi 222424697 dbj BAH20302.1  AT3G26890 [Arabidopsis thaliana] gi 332643708 gb AEE77229.1  uncharacterized protein AT3G26890 [Arabidopsis thaliana] gi 332643709 gb AEE77230.1  uncharacterized protein AT3G26890 [Arabidopsis thaliana] gi 332643710 gb AEE77231.1  uncharacterized protein AT3G26890 [Arabidopsis thaliana] gi 332643711 gb AEE77232.1  uncharacterized protein AT3G26890 [Arabidopsis thaliana] gi 332643712 gb AEE77233.1  uncharacterized protein AT3G26890 [Arabidopsis thaliana]<br>ref XP_002877001.1  hydroxyproline-rich glycoprotein family protein [Arabidopsis lyrata subsp. lyrata] gi 297322839 gb EFH53260.1  hydroxyproline-rich glycoprotein family protein [Arabidopsis lyrata subsp. lyrata]                                                                                                                                                                                                                                                                                                                                                                                                                                                                                                                                                                                                                                                                                        | 615 | 649 | 0         | 105.5 | 82.4 | 88.0 | uncharacterized protein                              | gbpln | Arabidopsis thaliana | AT3G26890.5   Symbols:   unknown protein; FUNCTIONS IN: molecular_function unknown; INVOLVED IN: biological_process unknown; EXPRESSED IN: 24 plant structures; EXPRESSED DURING: 15 growth stages; BEST Arabidopsis thaliana protein match is: unknown protein (TAIR:AT5G41110.1); Has 30201 Blast hits to 17322 proteins in 780 species: Archae - 12; Bacteria - 1396; Metazoa - 17338; Fungi - 3422; Plants - 5037; Viruses - 0; Other Eukaryotes - 2996 (source: NCBI BLINK).   chr3:9907456-9910463 REVERSE LENGTH=649 | 615 | 649 | 0         | 105.5 | 82.4 | 88.0 |
| Rsa1.0_01696.1.g29099.t2 | ref XP_002877001.1  hydroxyproline-rich glycoprotein family protein [Arabidopsis lyrata subsp. lyrata] gi 297322839 gb EFH53260.1  hydroxyproline-rich glycoprotein family protein [Arabidopsis lyrata subsp. lyrata]                                                                                                                                                                                                                                                                                                                                                                                                                                                                                                                                                                                                                                                                                                                                                                                                                                                                                                                                                                                                                                                                                                                                                                                                                                                                    | 604 | 616 | 0         | 102.0 | 80.1 | 88.1 | hydroxyproline-rich glycoprotein family protein      | gbpln | Arabidopsis lyrata   | AT3G26910.2   Symbols:   hydroxyproline-rich glycoprotein family protein   chr3:9915304-9918511 REVERSE LENGTH=614                                                                                                                                                                                                                                                                                                                                                                                                          | 604 | 614 | 0         | 101.7 | 77.5 | 87.1 |
| Rsa1.0_01696.1.g29100.t3 | sp Q9LJF9.3 FDL44_ARATH RecName: Full=F-box/FBD/LRR-repeat protein At3g26920                                                                                                                                                                                                                                                                                                                                                                                                                                                                                                                                                                                                                                                                                                                                                                                                                                                                                                                                                                                                                                                                                                                                                                                                                                                                                                                                                                                                             | 388 | 434 | 3.00E-97  | 111.9 | 52.6 | 70.4 | RecName: Full=F-box/FBD/LRR-repeat protein At3g26920 | ----  | ----                 | AT3G49020.1   Symbols:   FBD, F-box and Leucine Rich Repeat domains containing protein   chr3:18169079-18170660 FORWARD LENGTH=447                                                                                                                                                                                                                                                                                                                                                                                          | 388 | 447 | 6.00E-86  | 115.2 | 50.0 | 64.4 |
| Rsa1.0_01696.1.g29101.t1 | gb EOA23519.1  hypothetical protein CARUB_v10016713mg [Capsella rubella]                                                                                                                                                                                                                                                                                                                                                                                                                                                                                                                                                                                                                                                                                                                                                                                                                                                                                                                                                                                                                                                                                                                                                                                                                                                                                                                                                                                                                 | 782 | 779 | 0         | 99.6  | 92.8 | 96.2 | hypothetical protein CARUB_v10016713mg               | gbpln | Capsella rubella     | AT3G27170.1   Symbols: CLC-B, ATCLC-B   chloride channel B   chr3:10024147-10026921 FORWARD LENGTH=780                                                                                                                                                                                                                                                                                                                                                                                                                      | 782 | 780 | 0         | 99.7  | 92.8 | 95.9 |

|                          |                                                                                                                                                                                                                                                                                                              |     |     |           |       |      |      |                                                                            |       |                      |                                                                                                                                                                                                                                                                                                                                                                                                                                                                                                                                              |     |     |           |       |      |      |
|--------------------------|--------------------------------------------------------------------------------------------------------------------------------------------------------------------------------------------------------------------------------------------------------------------------------------------------------------|-----|-----|-----------|-------|------|------|----------------------------------------------------------------------------|-------|----------------------|----------------------------------------------------------------------------------------------------------------------------------------------------------------------------------------------------------------------------------------------------------------------------------------------------------------------------------------------------------------------------------------------------------------------------------------------------------------------------------------------------------------------------------------------|-----|-----|-----------|-------|------|------|
| Rsa1.0_01696.1.g29102.t1 | refNP_189354.2   S-adenosylmethionine-dependent methyltransferase-domain containing protein [Arabidopsis thaliana] g 190341123 gb ACE74720.1  At3g27180 [Arabidopsis thaliana] g 332643755 gb AEE77276.1   S-adenosylmethionine-dependent methyltransferase-domain containing protein [Arabidopsis thaliana] | 516 | 518 | 0         | 100.4 | 91.9 | 95.7 | S-adenosylmethionine-dependent methyltransferase-domain containing protein | gbpln | Arabidopsis thaliana | AT3G27180.1   Symbols:   S-adenosyl-L-methionine-dependent methyltransferases superfamily protein   chr3:10027163-10030062 REVERSE LENGTH=518                                                                                                                                                                                                                                                                                                                                                                                                | 516 | 518 | 0         | 100.4 | 91.9 | 95.7 |
| Rsa1.0_01696.1.g29103.t1 | refXP_002863819.1   lectin protein kinase family protein [Arabidopsis lyrata subsp. lyrata] g 297309654 gb EFH40078.1   lectin protein kinase family protein [Arabidopsis lyrata subsp. lyrata]                                                                                                              | 680 | 689 | 0         | 101.3 | 83.1 | 88.7 | lectin protein kinase family protein                                       | gbpln | Arabidopsis lyrata   | AT5G42120.1   Symbols:   Concanavalin A-like lectin protein kinase family protein   chr5:16833073-16835148 REVERSE LENGTH=691                                                                                                                                                                                                                                                                                                                                                                                                                | 680 | 691 | 0         | 101.6 | 82.1 | 88.8 |
| Rsa1.0_01696.1.g29104.t1 | gb EOA23905.1   hypothetical protein CARUB_v10017120mg [Capsella rubella]                                                                                                                                                                                                                                    | 484 | 483 | 0         | 99.8  | 93.8 | 96.5 | hypothetical protein CARUB_v10017120mg                                     | gbpln | Capsella rubella     | AT3G27190.1   Symbols: UKL2   uridine kinase-like 2   chr3:10039504-10042917 REVERSE LENGTH=483                                                                                                                                                                                                                                                                                                                                                                                                                                              | 484 | 483 | 0         | 99.8  | 93.4 | 96.7 |
| Rsa1.0_01696.1.g29105.t1 | gb EOA24837.1   hypothetical protein CARUB_v10018126mg [Capsella rubella]                                                                                                                                                                                                                                    | 187 | 171 | 4.00E-66  | 91.4  | 77.0 | 82.9 | hypothetical protein CARUB_v10018126mg                                     | gbpln | Capsella rubella     | AT3G27200.1   Symbols:   Cupredoxin superfamily protein   chr3:10043738-10044340 REVERSE LENGTH=174                                                                                                                                                                                                                                                                                                                                                                                                                                          | 187 | 174 | 4.00E-65  | 93.0  | 70.6 | 77.5 |
| Rsa1.0_01696.1.g29106.t1 | refXP_002877027.1   hypothetical protein ARALYDRAFT_484504 [Arabidopsis lyrata subsp. lyrata] g 297322865 gb EFH53286.1   hypothetical protein ARALYDRAFT_484504 [Arabidopsis lyrata subsp. lyrata]                                                                                                          | 252 | 241 | 3.00E-70  | 95.6  | 67.9 | 74.6 | hypothetical protein ARALYDRAFT_484504                                     | gbpln | Arabidopsis lyrata   | AT3G27210.1   Symbols:   unknown protein; FUNCTIONS IN: molecular_function unknown; INVOLVED IN: N-terminal protein myristoylation; LOCATED IN: plasma membrane; EXPRESSED IN: 22 plant structures; EXPRESSED DURING: 13 growth stages; BEST Arabidopsis thaliana protein match is: unknown protein (TAIRAT5G40860.1); Has 133 Blast hits to 98 proteins in 25 species: Archae - 0; Bacteria - 6; Metazoa - 32; Fungi - 7; Plants - 70; Viruses - 0; Other Eukaryotes - 18 (source: NCBI BLink).   chr3:10045458-10047222 REVERSE LENGTH=234 | 252 | 234 | 7.00E-71  | 92.9  | 69.0 | 74.6 |
| Rsa1.0_01696.1.g29107.t1 | refXP_002877044.1   hypothetical protein ARALYDRAFT_904974 [Arabidopsis lyrata subsp. lyrata] g 297322882 gb EFH53303.1   hypothetical protein ARALYDRAFT_904974 [Arabidopsis lyrata subsp. lyrata]                                                                                                          | 137 | 157 | 1.00E-10  | 114.6 | 36.5 | 51.8 | hypothetical protein ARALYDRAFT_904974                                     | gbpln | Arabidopsis lyrata   | #                                                                                                                                                                                                                                                                                                                                                                                                                                                                                                                                            | #   | #   | #         | #     | #    | #    |
| Rsa1.0_01696.1.g29108.t1 | refXP_002877046.1   hypothetical protein ARALYDRAFT_322865 [Arabidopsis lyrata subsp. lyrata] g 297322884 gb EFH53305.1   hypothetical protein ARALYDRAFT_322865 [Arabidopsis lyrata subsp. lyrata]                                                                                                          | 76  | 76  | 9.00E-19  | 100.0 | 63.2 | 73.7 | hypothetical protein ARALYDRAFT_322865                                     | gbpln | Arabidopsis lyrata   | #                                                                                                                                                                                                                                                                                                                                                                                                                                                                                                                                            | #   | #   | #         | #     | #    | #    |
| Rsa1.0_01696.1.g29109.t1 | dbj BAJ34353.1   unnamed protein product [Thellungiella halophila]                                                                                                                                                                                                                                           | 277 | 279 | 1.00E-143 | 100.7 | 91.7 | 94.9 | unnamed protein product                                                    | ----  | ----                 | AT5G40650.1   Symbols: SDH2-2   succinate dehydrogenase 2-2   chr5:16281462-16283296 FORWARD LENGTH=280                                                                                                                                                                                                                                                                                                                                                                                                                                      | 277 | 280 | 1.00E-142 | 101.1 | 88.8 | 93.1 |
| Rsa1.0_01696.1.g29110.t1 | refNP_189375.2   uncharacterized protein [Arabidopsis thaliana] g 332278120 sp Q8GUM4.2 Y3739_ARA TH RecName: Full=Uncharacterized membrane protein At3g27390 g 332643790 gb AEE77311.1   uncharacterized protein AT3G27390 [Arabidopsis thaliana]                                                           | 591 | 588 | 0         | 99.5  | 85.1 | 92.4 | uncharacterized protein                                                    | gbpln | Arabidopsis thaliana | AT3G27390.1   Symbols:   unknown protein; FUNCTIONS IN: molecular_function unknown; INVOLVED IN: biological_process unknown; LOCATED IN: plasma membrane; EXPRESSED IN: 23 plant structures; EXPRESSED DURING: 13 growth stages; BEST Arabidopsis thaliana protein match is: unknown protein (TAIRAT5G40640.1); Has 101 Blast hits to 99 proteins in 12 species: Archae - 0; Bacteria - 0; Metazoa - 0; Fungi - 0; Plants - 101; Viruses - 0; Other Eukaryotes - 0 (source: NCBI BLink).   chr3:10133372-10136111 REVERSE LENGTH=588         | 591 | 588 | 0         | 99.5  | 85.1 | 92.4 |
| Rsa1.0_01696.1.g29111.t1 | refXP_002875382.1   predicted protein [Arabidopsis lyrata subsp. lyrata] g 297321220 gb EFH51641.1   predicted protein [Arabidopsis lyrata subsp. lyrata]                                                                                                                                                    | 412 | 412 | 0         | 100.0 | 91.0 | 95.4 | predicted protein                                                          | gbpln | Arabidopsis lyrata   | AT3G27400.1   Symbols:   Pectin lyase-like superfamily protein   chr3:10140323-10143023 FORWARD LENGTH=412                                                                                                                                                                                                                                                                                                                                                                                                                                   | 412 | 412 | 0         | 100.0 | 91.5 | 95.1 |
| Rsa1.0_01696.1.g29112.t1 | refNP_189377.1   uncharacterized protein [Arabidopsis thaliana] g 7939513 dbj BAA95716.1   unnamed protein product [Arabidopsis thaliana] g 67633670 gb AY78759.1   unknown [Arabidopsis thaliana] g 332643792 gb AEE77313.1   uncharacterized protein AT3G27410 [Arabidopsis thaliana]                      | 124 | 132 | 1.00E-26  | 106.5 | 70.2 | 78.2 | uncharacterized protein                                                    | gbpln | Arabidopsis thaliana | AT3G27410.1   Symbols:   unknown protein; Has 10 Blast hits to 10 proteins in 2 species: Archae - 0; Bacteria - 0; Metazoa - 0; Fungi - 0; Plants - 10; Viruses - 0; Other Eukaryotes - 0 (source: NCBI BLink).   chr3:10145244-10145642 REVERSE LENGTH=132                                                                                                                                                                                                                                                                                  | 124 | 132 | 2.00E-29  | 106.5 | 70.2 | 78.2 |

|                          |                                                                                                                                                                                                                                                                                                                                                                                                                                                                                                                           |      |      |           |       |      |      |                                                     |       |                      |                                                                                                                                                                                                                                                                                                                                                                                                               |      |     |           |       |      |      |
|--------------------------|---------------------------------------------------------------------------------------------------------------------------------------------------------------------------------------------------------------------------------------------------------------------------------------------------------------------------------------------------------------------------------------------------------------------------------------------------------------------------------------------------------------------------|------|------|-----------|-------|------|------|-----------------------------------------------------|-------|----------------------|---------------------------------------------------------------------------------------------------------------------------------------------------------------------------------------------------------------------------------------------------------------------------------------------------------------------------------------------------------------------------------------------------------------|------|-----|-----------|-------|------|------|
| Rsa1.0_01696.1.g29113.t1 | ref NP_001118719.1  uncharacterized protein [Arabidopsis thaliana] gi 7939514 dbj BAA95717.1  unnamed protein product [Arabidopsis thaliana] gi 98961621 gb ABF59140.1  unknown protein [Arabidopsis thaliana] gi 332643793 gb AEE77314.1  uncharacterized protein AT3G27415 [Arabidopsis thaliana]                                                                                                                                                                                                                       | 249  | 175  | 3.00E-36  | 70.3  | 52.2 | 56.2 | uncharacterized protein                             | gbpln | Arabidopsis thaliana | AT3G27415.1   Symbols:   unknown protein; FUNCTIONS IN: molecular_function unknown; INVOLVED IN: biological_process unknown; LOCATED IN: cellular_component unknown; Has 30201 Blast hits to 17322 proteins in 780 species: Archae - 12; Bacteria - 1396; Metazoa - 17338; Fungi - 3422; Plants - 5037; Viruses - 0; Other Eukaryotes - 2996 (source: NCBI BLINK)   chr3:10147375-10147902 FORWARD LENGTH=175 | 249  | 175 | 8.00E-39  | 70.3  | 52.2 | 56.2 |
| Rsa1.0_01696.1.g29114.t1 | ref XP_002875387.1  hypothetical protein ARALYDRAFT_904988 [Arabidopsis lyrata subsp. lyrata] gi 297321225 gb EFH51646.1  hypothetical protein ARALYDRAFT_904988 [Arabidopsis lyrata subsp. lyrata]                                                                                                                                                                                                                                                                                                                       | 269  | 273  | 1.00E-152 | 101.5 | 97.4 | 98.1 | hypothetical protein ARALYDRAFT_904988              | gbpln | Arabidopsis lyrata   | AT3G27430.2   Symbols: PBB1   N-terminal nucleophile aminohydrolases (Ntn hydrolases) superfamily protein   chr3:10152910-10155052 FORWARD LENGTH=273                                                                                                                                                                                                                                                         | 269  | 273 | 1.00E-154 | 101.5 | 97.0 | 98.1 |
| Rsa1.0_01696.1.g29115.t1 | ref XP_002882056.1  TGF-beta receptor interacting protein 1 [Arabidopsis lyrata subsp. lyrata] gi 297327895 gb EFH58315.1  TGF-beta receptor interacting protein 1 [Arabidopsis lyrata subsp. lyrata] ref NP_189382.2  SGF29 tudor-like domain-containing protein [Arabidopsis thaliana] gi 19347735 gb AAL86293.1  unknown protein [Arabidopsis thaliana] gi 21689749 gb AAM67518.1  unknown protein [Arabidopsis thaliana] gi 33264380 gb AEE77322.1  SGF29 tudor-like domain-containing protein [Arabidopsis thaliana] | 328  | 328  | 1.00E-172 | 100.0 | 86.9 | 95.7 | TGF-beta receptor interacting protein 1             | gbpln | Arabidopsis lyrata   | AT2G46290.1   Symbols:   Transducin/WD40 repeat-like superfamily protein   chr2:19005910-19007797 REVERSE LENGTH=355                                                                                                                                                                                                                                                                                          | 328  | 355 | 1.00E-173 | 108.2 | 85.7 | 96.0 |
| Rsa1.0_01696.1.g29116.t1 | ref NP_189382.2  SGF29 tudor-like domain-containing protein [Arabidopsis thaliana] gi 19347735 gb AAL86293.1  unknown protein [Arabidopsis thaliana] gi 21689749 gb AAM67518.1  unknown protein [Arabidopsis thaliana] gi 33264380 gb AEE77322.1  SGF29 tudor-like domain-containing protein [Arabidopsis thaliana]                                                                                                                                                                                                       | 270  | 270  | 1.00E-148 | 100.0 | 95.2 | 98.5 | SGF29 tudor-like domain-containing protein          | gbpln | Arabidopsis thaliana | AT3G27460.1   Symbols:   SGF29 tudor-like domain   chr3:10159537-10161994 REVERSE LENGTH=270                                                                                                                                                                                                                                                                                                                  | 270  | 270 | 1.00E-151 | 100.0 | 95.2 | 98.5 |
| Rsa1.0_01697.1.g29117.t1 | gb AAC32226.1  putative non-LTR retroelement reverse transcriptase [Arabidopsis thaliana]                                                                                                                                                                                                                                                                                                                                                                                                                                 | 754  | 1529 | 0         | 202.8 | 51.6 | 67.8 | putative non-LTR retroelement reverse transcriptase | gbpln | Arabidopsis thaliana | AT3G24255.1   Symbols:   RNA-directed DNA polymerase (reverse transcriptase)-related family protein   chr3:8789471-8793208 FORWARD LENGTH=746                                                                                                                                                                                                                                                                 | 754  | 746 | 1.00E-71  | 98.9  | 17.6 | 23.6 |
| Rsa1.0_01697.1.g29118.t1 | gb AAZ30035.1  putative calcium-dependent protein kinase [Isatis tinctoria] gi 94958384 gb ABF47341.1  calcium-dependent protein kinase [Isatis tinctoria] gi 95020533 gb ABF50790.1  calcium-dependent protein kinase [Isatis tinctoria]                                                                                                                                                                                                                                                                                 | 634  | 537  | 0         | 84.7  | 77.8 | 79.7 | putative calcium-dependent protein kinase           | gbpln | Isatis tinctoria     | AT3G57530.1   Symbols: CPK32, ATPCK32, CDPK32   calcium-dependent protein kinase 32   chr3:21296898-21299351 REVERSE LENGTH=538                                                                                                                                                                                                                                                                               | 634  | 538 | 0         | 84.9  | 77.0 | 79.2 |
| Rsa1.0_01697.1.g29119.t1 | gb AAG50806.1 AC079281.8 unknown protein [Arabidopsis thaliana]                                                                                                                                                                                                                                                                                                                                                                                                                                                           | 1798 | 1213 | 0         | 67.5  | 23.7 | 34.5 | unknown protein                                     | gbpln | Arabidopsis thaliana | AT1G43760.1   Symbols:   DNase I-like superfamily protein   chr1:16528880-16531065 REVERSE LENGTH=626                                                                                                                                                                                                                                                                                                         | 1798 | 626 | 2.00E-61  | 34.8  | 7.2  | 12.0 |
| Rsa1.0_01697.1.g29120.t1 | emb CAD21651.2  endo polygalacturonase [Brassica rapa subsp. rapa]                                                                                                                                                                                                                                                                                                                                                                                                                                                        | 106  | 433  | 7.00E-50  | 408.5 | 92.5 | 97.2 | endo polygalacturonase                              | gbpln | Brassica rapa        | AT3G57510.1   Symbols: ADPG1   Pectin lyase-like superfamily protein   chr3:21283546-21285842 REVERSE LENGTH=431                                                                                                                                                                                                                                                                                              | 106  | 431 | 3.00E-48  | 406.6 | 83.0 | 92.5 |
| Rsa1.0_01698.1.g29121.t1 | ref XP_002890318.1  hypothetical protein ARALYDRAFT_472131 [Arabidopsis lyrata subsp. lyrata] gi 297336180 gb EFH66577.1  hypothetical protein ARALYDRAFT_472131 [Arabidopsis lyrata subsp. lyrata]                                                                                                                                                                                                                                                                                                                       | 188  | 755  | 3.00E-27  | 401.6 | 39.9 | 47.3 | hypothetical protein ARALYDRAFT_472131              | gbpln | Arabidopsis lyrata   | AT1G19110.1   Symbols:   inter-alpha-trypsin inhibitor heavy chain-related   chr1:6602270-6605766 FORWARD LENGTH=754                                                                                                                                                                                                                                                                                          | 188  | 754 | 1.00E-28  | 401.1 | 28.7 | 30.3 |
| Rsa1.0_01698.1.g29122.t1 | #                                                                                                                                                                                                                                                                                                                                                                                                                                                                                                                         | #    | #    | #         | #     | #    | -    | ----                                                | ----  | #                    | #                                                                                                                                                                                                                                                                                                                                                                                                             | #    | #   | #         | #     | #    |      |
| Rsa1.0_01698.1.g29123.t1 | #                                                                                                                                                                                                                                                                                                                                                                                                                                                                                                                         | #    | #    | #         | #     | #    | -    | ----                                                | ----  | #                    | #                                                                                                                                                                                                                                                                                                                                                                                                             | #    | #   | #         | #     | #    |      |
| Rsa1.0_01698.1.g29124.t1 | ref NP_001185147.1  uncharacterized protein [Arabidopsis thaliana] gi 332193796 gb AEE31917.1  uncharacterized protein AT1G42430 [Arabidopsis thaliana]                                                                                                                                                                                                                                                                                                                                                                   | 379  | 409  | 0         | 107.9 | 88.7 | 92.1 | uncharacterized protein                             | gbpln | Arabidopsis thaliana | AT1G42430.2   Symbols:   unknown protein; FUNCTIONS IN: molecular_function unknown; INVOLVED IN: biological_process unknown; LOCATED IN: cellular_component unknown; BEST Arabidopsis thaliana protein match is: unknown protein (TAIR:AT3G5760.3)   chr1:15891512-15894322 FORWARD LENGTH=409                                                                                                                | 379  | 409 | 0         | 107.9 | 88.7 | 92.1 |
| Rsa1.0_01699.1.g29125.t1 | #                                                                                                                                                                                                                                                                                                                                                                                                                                                                                                                         | #    | #    | #         | #     | #    | -    | ----                                                | ----  | #                    | #                                                                                                                                                                                                                                                                                                                                                                                                             | #    | #   | #         | #     | #    |      |
| Rsa1.0_01699.1.g29126.t1 | ref XP_002865452.1  tetratricopeptide repeat-containing protein [Arabidopsis lyrata subsp. lyrata] gi 297311287 gb EFH41711.1  tetratricopeptide repeat-containing protein [Arabidopsis lyrata subsp. lyrata]                                                                                                                                                                                                                                                                                                             | 597  | 582  | 0         | 97.5  | 82.4 | 88.8 | tetratricopeptide repeat-containing protein         | gbpln | Arabidopsis lyrata   | AT5G43120.1   Symbols:   ARM-repeat/Tetratricopeptide repeat (TPR)-like protein   chr5:17312602-17314368 FORWARD LENGTH=588                                                                                                                                                                                                                                                                                   | 597  | 588 | 0         | 98.5  | 81.2 | 87.9 |
| Rsa1.0_01699.1.g29127.t1 | #                                                                                                                                                                                                                                                                                                                                                                                                                                                                                                                         | #    | #    | #         | #     | #    | -    | ----                                                | ----  | #                    | #                                                                                                                                                                                                                                                                                                                                                                                                             | #    | #   | #         | #     | #    |      |

|                          |                                                                                                                                                                                                                                                                                                                                                                                                                                                                                                                                                                                                                                                                                                                                                                                                                                                                                                                                                                                                                                                                                                                                                                                                                 |     |      |           |       |      |      |                                        |       |                      |                                                                                                                                                                                                                                                                                                                                                                  |     |      |          |       |      |      |
|--------------------------|-----------------------------------------------------------------------------------------------------------------------------------------------------------------------------------------------------------------------------------------------------------------------------------------------------------------------------------------------------------------------------------------------------------------------------------------------------------------------------------------------------------------------------------------------------------------------------------------------------------------------------------------------------------------------------------------------------------------------------------------------------------------------------------------------------------------------------------------------------------------------------------------------------------------------------------------------------------------------------------------------------------------------------------------------------------------------------------------------------------------------------------------------------------------------------------------------------------------|-----|------|-----------|-------|------|------|----------------------------------------|-------|----------------------|------------------------------------------------------------------------------------------------------------------------------------------------------------------------------------------------------------------------------------------------------------------------------------------------------------------------------------------------------------------|-----|------|----------|-------|------|------|
| Rsa1.0_01699.1.g29128.t1 | refNP_199124.3  aspartyl protease family protein [Arabidopsis thaliana] gi 332007527 gb AED94910.1  aspartyl protease family protein [Arabidopsis thaliana]                                                                                                                                                                                                                                                                                                                                                                                                                                                                                                                                                                                                                                                                                                                                                                                                                                                                                                                                                                                                                                                     | 652 | 631  | 0         | 96.8  | 86.0 | 92.2 | aspartyl protease family protein       | gbpln | Arabidopsis thaliana | AT5G43100.1   Symbols:   Eukaryotic aspartyl protease family protein   chr5:17299264-17302718 FORWARD LENGTH=631                                                                                                                                                                                                                                                 | 652 | 631  | 0        | 96.8  | 86.0 | 92.2 |
| Rsa1.0_01699.1.g29129.t1 | # # # # # # # # -                                                                                                                                                                                                                                                                                                                                                                                                                                                                                                                                                                                                                                                                                                                                                                                                                                                                                                                                                                                                                                                                                                                                                                                               |     |      |           |       |      |      |                                        | ----  | ----                 | #                                                                                                                                                                                                                                                                                                                                                                | #   | #    | #        | #     | #    | #    |
| Rsa1.0_01699.1.g29130.t1 | refNP_199125.2  pumilio 14 [Arabidopsis thaliana] gi 75339252 sp Q4P5D1.1 PUM14_ARAT H RecName: Full=Pumilio homolog 14; Short=APUM-14; Short=AtPUM14 gi 67633854 gb AA778851.1  pumilio/Puf RNA-binding domain-containing protein [Arabidopsis thaliana] gi 332007528 gb AED94911.1  pumilio 14 [Arabidopsis thaliana]                                                                                                                                                                                                                                                                                                                                                                                                                                                                                                                                                                                                                                                                                                                                                                                                                                                                                         | 476 | 518  | 5.00E-87  | 108.8 | 44.3 | 60.7 | pumilio 14                             | gbpln | Arabidopsis thaliana | AT5G43110.1   Symbols: APUM14, PUM14   pumilio 14   chr5:17309842-17311937 FORWARD LENGTH=518                                                                                                                                                                                                                                                                    | 476 | 518  | 1.00E-89 | 108.8 | 44.3 | 60.7 |
| Rsa1.0_01699.1.g29131.t4 | gb AAD28663.1  hypothetical protein [Arabidopsis thaliana]                                                                                                                                                                                                                                                                                                                                                                                                                                                                                                                                                                                                                                                                                                                                                                                                                                                                                                                                                                                                                                                                                                                                                      | 884 | 356  | 6.00E-11  | 40.3  | 8.7  | 14.6 | hypothetical protein                   | gbpln | Arabidopsis thaliana | #                                                                                                                                                                                                                                                                                                                                                                | #   | #    | #        | #     | #    | #    |
| Rsa1.0_01699.1.g29132.t1 | # # # # # # # # -                                                                                                                                                                                                                                                                                                                                                                                                                                                                                                                                                                                                                                                                                                                                                                                                                                                                                                                                                                                                                                                                                                                                                                                               |     |      |           |       |      |      |                                        | ----  | ----                 | #                                                                                                                                                                                                                                                                                                                                                                | #   | #    | #        | #     | #    | #    |
| Rsa1.0_01700.1.g29133.t1 | # # # # # # # # -                                                                                                                                                                                                                                                                                                                                                                                                                                                                                                                                                                                                                                                                                                                                                                                                                                                                                                                                                                                                                                                                                                                                                                                               |     |      |           |       |      |      |                                        | ----  | ----                 | #                                                                                                                                                                                                                                                                                                                                                                | #   | #    | #        | #     | #    | #    |
| Rsa1.0_01700.1.g29134.t2 | gb AAD32898.1  putative retroelement pol polyprotein [Arabidopsis thaliana]                                                                                                                                                                                                                                                                                                                                                                                                                                                                                                                                                                                                                                                                                                                                                                                                                                                                                                                                                                                                                                                                                                                                     | 568 | 1307 | 1.00E-155 | 230.1 | 55.8 | 69.2 | putative retroelement pol polyprotein  | gbpln | Arabidopsis thaliana | AT4G23160.1   Symbols: CRK8   cysteine-rich RLK (RECEPTOR-like protein kinase) 8   chr4:12129485-12134086 FORWARD LENGTH=1262                                                                                                                                                                                                                                    | 568 | 1262 | 4.00E-19 | 222.2 | 8.6  | 12.1 |
| Rsa1.0_01700.1.g29135.t1 | # # # # # # # # -                                                                                                                                                                                                                                                                                                                                                                                                                                                                                                                                                                                                                                                                                                                                                                                                                                                                                                                                                                                                                                                                                                                                                                                               |     |      |           |       |      |      |                                        | ----  | ----                 | #                                                                                                                                                                                                                                                                                                                                                                | #   | #    | #        | #     | #    | #    |
| Rsa1.0_01700.1.g29136.t1 | # # # # # # # # -                                                                                                                                                                                                                                                                                                                                                                                                                                                                                                                                                                                                                                                                                                                                                                                                                                                                                                                                                                                                                                                                                                                                                                                               |     |      |           |       |      |      |                                        | ----  | ----                 | #                                                                                                                                                                                                                                                                                                                                                                | #   | #    | #        | #     | #    | #    |
| Rsa1.0_01700.1.g29137.t1 | refXP_002890295.1  AtMYB47 [Arabidopsis lyrata subsp. lyrata] gi 297336137 gb EFH66554.1  AtMYB47 [Arabidopsis lyrata subsp. lyrata]                                                                                                                                                                                                                                                                                                                                                                                                                                                                                                                                                                                                                                                                                                                                                                                                                                                                                                                                                                                                                                                                            | 254 | 271  | 5.00E-93  | 106.7 | 73.2 | 80.3 | AtMYB47                                | gbpln | Arabidopsis lyrata   | AT1G18710.1   Symbols: AtMYB47, MYB47   myb domain protein 47   chr1:6450781-6452986 FORWARD LENGTH=267                                                                                                                                                                                                                                                          | 254 | 267  | 3.00E-90 | 105.1 | 72.8 | 80.7 |
| Rsa1.0_01700.1.g29138.t1 | gb EOA21531.1  hypothetical protein CARUB_v10001936mg [Capsella rubella]                                                                                                                                                                                                                                                                                                                                                                                                                                                                                                                                                                                                                                                                                                                                                                                                                                                                                                                                                                                                                                                                                                                                        | 216 | 217  | 7.00E-69  | 100.5 | 58.3 | 73.1 | hypothetical protein CARUB_v10001936mg | gbpln | Capsella rubella     | AT5G01750.2   Symbols:   Protein of unknown function (DUF567)   chr5:290034-291109 FORWARD LENGTH=217                                                                                                                                                                                                                                                            | 216 | 217  | 7.00E-70 | 100.5 | 56.5 | 73.6 |
| Rsa1.0_01700.1.g29139.t1 | gb AAK62788.1 AC027036_9 polyprotein, putative [Arabidopsis thaliana] gi 18265373 dbj BAB84015.1  polyprotein [Arabidopsis thaliana] refNP_194233.1  uncharacterized protein [Arabidopsis thaliana] gi 42573033 refNP_974613.1  uncharacterized protein [Arabidopsis thaliana] gi 4455246 emb CAB36745.1  putative protein [Arabidopsis thaliana] gi 7269353 emb CAB79412.1  putative protein [Arabidopsis thaliana] gi 21553767 gb AAM62860.1  unknown [Arabidopsis thaliana] gi 89000969 gb ABD59074.1  At4g25030 [Arabidopsis thaliana] gi 110736875 dbj BAF00395.1  hypothetical protein [Arabidopsis thaliana] gi 222424032 dbj BAH19977.1  AT4G25030 [Arabidopsis thaliana] gi 332659593 gb AEE84993.1  uncharacterized protein AT4G25030 [Arabidopsis thaliana] gi 332659594 gb AEE84994.1  uncharacterized protein AT4G25030 [Arabidopsis thaliana] refNP_179441.1  splicing factor 3B subunit 4 [Arabidopsis thaliana] gi 4218014 gb AAD12222.1  putative spliceosome associated protein [Arabidopsis thaliana] gi 23297611 gb AAN12991.1  putative spliceosome-associated protein [Arabidopsis thaliana] gi 330251682 gb AEC06776.1  splicing factor 3B subunit 4-like protein [Arabidopsis thaliana] | 191 | 1466 | 1.00E-43  | 767.5 | 46.6 | 59.2 | polyprotein, putative                  | gbpln | Arabidopsis thaliana | #                                                                                                                                                                                                                                                                                                                                                                | #   | #    | #        | #     | #    | #    |
| Rsa1.0_01701.1.g29140.t1 | refNP_194234.1  uncharacterized protein [Arabidopsis thaliana] gi 75181563 sp Q9M0L3.1 CSPLR_ARAT H RecName: Full=CASP-like protein At4g25040 gi 7269354 emb CAB79413.1  putative protein [Arabidopsis thaliana] gi 332659595 gb AEE84995.1  CASP-like protein [Arabidopsis thaliana]                                                                                                                                                                                                                                                                                                                                                                                                                                                                                                                                                                                                                                                                                                                                                                                                                                                                                                                           | 112 | 344  | 1.00E-47  | 307.1 | 87.5 | 93.8 | uncharacterized protein                | gbpln | Arabidopsis thaliana | AT4G25030.2   Symbols:   unknown protein; BEST Arabidopsis thaliana protein match is: unknown protein (TAIR:AT5G4510.3); Has 35333 Blast hits to 34131 proteins in 2444 species: Archae - 798; Bacteria - 22429; Metazoa - 974; Fungi - 991; Plants - 531; Viruses - 0; Other Eukaryotes - 9610 (source: NCBI BLINK)   chr4:12865336-12866638 FORWARD LENGTH=344 | 112 | 344  | 2.00E-50 | 307.1 | 87.5 | 93.8 |
| Rsa1.0_01701.1.g29141.t2 | refNP_179441.1  splicing factor 3B subunit 4 [Arabidopsis thaliana] gi 4218014 gb AAD12222.1  putative spliceosome associated protein [Arabidopsis thaliana] gi 23297611 gb AAN12991.1  putative spliceosome-associated protein [Arabidopsis thaliana] gi 330251682 gb AEC06776.1  splicing factor 3B subunit 4-like protein [Arabidopsis thaliana]                                                                                                                                                                                                                                                                                                                                                                                                                                                                                                                                                                                                                                                                                                                                                                                                                                                             | 198 | 363  | 3.00E-18  | 183.3 | 22.2 | 24.2 | splicing factor 3B subunit 4           | gbpln | Arabidopsis thaliana | AT2G18510.1   Symbols: emb2444   RNA-binding (RRM/RBD/RNP motifs) family protein   chr2:8031554-8033517 REVERSE LENGTH=363                                                                                                                                                                                                                                       | 198 | 363  | 1.00E-20 | 183.3 | 22.2 | 24.2 |
| Rsa1.0_01701.1.g29142.t2 | refNP_194234.1  uncharacterized protein [Arabidopsis thaliana] gi 75181563 sp Q9M0L3.1 CSPLR_ARAT H RecName: Full=CASP-like protein At4g25040 gi 7269354 emb CAB79413.1  putative protein [Arabidopsis thaliana] gi 332659595 gb AEE84995.1  CASP-like protein [Arabidopsis thaliana]                                                                                                                                                                                                                                                                                                                                                                                                                                                                                                                                                                                                                                                                                                                                                                                                                                                                                                                           | 169 | 170  | 6.00E-70  | 100.6 | 81.7 | 89.9 | uncharacterized protein                | gbpln | Arabidopsis thaliana | AT4G25040.1   Symbols:   Uncharacterised protein family (UPF0497)   chr4:12868320-12869319 FORWARD LENGTH=170                                                                                                                                                                                                                                                    | 169 | 170  | 2.00E-72 | 100.6 | 81.7 | 89.9 |



|                          |                                                                                                                                                                                                                                                                                                                                                                                                                                                                                                                                                                                                                                                                                                                                                                                                                                                                                                                                                                                                                                                                                                                                                                                                                                                                                                                                                                                                                                                                                                                                           |     |     |           |       |      |      |                                                                                   |       |                      |                                                                                                                                                                                                                                                                                                                                                                                                   |     |     |           |       |      |      |
|--------------------------|-------------------------------------------------------------------------------------------------------------------------------------------------------------------------------------------------------------------------------------------------------------------------------------------------------------------------------------------------------------------------------------------------------------------------------------------------------------------------------------------------------------------------------------------------------------------------------------------------------------------------------------------------------------------------------------------------------------------------------------------------------------------------------------------------------------------------------------------------------------------------------------------------------------------------------------------------------------------------------------------------------------------------------------------------------------------------------------------------------------------------------------------------------------------------------------------------------------------------------------------------------------------------------------------------------------------------------------------------------------------------------------------------------------------------------------------------------------------------------------------------------------------------------------------|-----|-----|-----------|-------|------|------|-----------------------------------------------------------------------------------|-------|----------------------|---------------------------------------------------------------------------------------------------------------------------------------------------------------------------------------------------------------------------------------------------------------------------------------------------------------------------------------------------------------------------------------------------|-----|-----|-----------|-------|------|------|
| Rsa1.0_01701.1.g29143.t1 | gb EOA16168.1  hypothetical protein CARUB_v10004304mg, partial [Capsella rubella]                                                                                                                                                                                                                                                                                                                                                                                                                                                                                                                                                                                                                                                                                                                                                                                                                                                                                                                                                                                                                                                                                                                                                                                                                                                                                                                                                                                                                                                         | 647 | 670 | 0         | 103.6 | 73.7 | 82.7 | hypothetical protein CARUB_v10004304mg, partial                                   | gbpln | Capsella rubella     | AT4G25070.1   Symbols:   unknown protein; EXPRESSED IN: cultured cell; BEST Arabidopsis thaliana protein match is: unknown protein (TAIR:AT3G48860.2); Has 14837 Blast hits to 10961 proteins in 1163 species: Archae - 189; Bacteria - 1924; Metazoa - 7665; Fungi - 1127; Plants - 653; Viruses - 80; Other Eukaryotes - 3199 (source: NCBI BLINK).   chr4:12872482-12876468 FORWARD LENGTH=765 | 647 | 765 | 0         | 118.2 | 64.5 | 75.3 |
| Rsa1.0_01701.1.g29144.t1 | ref NP_194238.1  magnesium-protoporphyrin IX methyltransferase [Arabidopsis thaliana] gi 30686748 ref NP_849438.1  magnesium-protoporphyrin IX methyltransferase [Arabidopsis thaliana] gi 30686750 ref NP_849439.1  magnesium-protoporphyrin IX methyltransferase [Arabidopsis thaliana] gi 334186906 ref NP_001190832.1  magnesium-protoporphyrin IX methyltransferase [Arabidopsis thaliana] gi 4455251 emb CAB36750.1  magnesium-protoporphyrin IX methyltransferase-like protein [Arabidopsis thaliana] gi 7269358 emb CAB79417.1  magnesium-protoporphyrin IX methyltransferase-like protein [Arabidopsis thaliana] gi 14334514 gb AAK59454.1  putative magnesium-protoporphyrin IX methyltransferase [Arabidopsis thaliana] gi 17104553 gb AAL34165.1  putative magnesium-protoporphyrin IX methyltransferase [Arabidopsis thaliana] gi 22242282 dbj BAH19398.1  AT4G25080 [Arabidopsis thaliana] gi 332659600 gb AEE85000.1  magnesium-protoporphyrin IX methyltransferase [Arabidopsis thaliana] gi 332659601 gb AEE85001.1  magnesium-protoporphyrin IX methyltransferase [Arabidopsis thaliana] ref NP_199915.1  protein crumpled leaf [Arabidopsis thaliana] gi 13877867 gb AAK44011.1 AF370196.1 unknown protein [Arabidopsis thaliana] gi 9758249 dbj BAB08748.1  unnamed protein product [Arabidopsis thaliana] gi 21281135 gb AM44980.1  unknown protein [Arabidopsis thaliana] gi 45504116 dbj BAD12566.1  CRUMPLED LEAF [Arabidopsis thaliana] gi 332008639 gb AED96022.1  protein crumpled leaf [Arabidopsis thaliana] | 313 | 312 | 1.00E-159 | 99.7  | 91.1 | 94.2 | magnesium-protoporphyrin IX methyltransferase                                     | gbpln | Arabidopsis thaliana | AT4G25080.5   Symbols: CHLM   magnesium-protoporphyrin IX methyltransferase   chr4:12877015-12878128 FORWARD LENGTH=312                                                                                                                                                                                                                                                                           | 313 | 312 | 1.00E-161 | 99.7  | 91.1 | 94.2 |
| Rsa1.0_01701.1.g29145.t1 | ref XP_002867625.1  hypothetical protein ARALYDRAFT_492323 [Arabidopsis lyrata subsp. lyrata] gi 297313461 gb EFH43884.1  hypothetical protein ARALYDRAFT_492323 [Arabidopsis lyrata subsp. lyrata]                                                                                                                                                                                                                                                                                                                                                                                                                                                                                                                                                                                                                                                                                                                                                                                                                                                                                                                                                                                                                                                                                                                                                                                                                                                                                                                                       | 552 | 269 | 1.00E-136 | 48.7  | 42.4 | 45.8 | protein crumpled leaf                                                             | gbpln | Arabidopsis thaliana | AT5G51020.1   Symbols: CRL   crumpled leaf   chr5:20745560-20747165 REVERSE LENGTH=269                                                                                                                                                                                                                                                                                                            | 552 | 269 | 1.00E-139 | 48.7  | 42.4 | 45.8 |
| Rsa1.0_01701.1.g29146.t1 | emb CAA62760.1  PMSR protein [Brassica napus]                                                                                                                                                                                                                                                                                                                                                                                                                                                                                                                                                                                                                                                                                                                                                                                                                                                                                                                                                                                                                                                                                                                                                                                                                                                                                                                                                                                                                                                                                             | 645 | 421 | 0         | 65.3  | 53.5 | 57.2 | hypothetical protein ARALYDRAFT_492323                                            | gbpln | Arabidopsis lyrata   | AT4G25110.1   Symbols: AtMC2, MC2   metacaspase 2   chr4:12887738-12889953 REVERSE LENGTH=418                                                                                                                                                                                                                                                                                                     | 645 | 418 | 0         | 64.8  | 52.4 | 55.8 |
| Rsa1.0_01701.1.g29147.t1 | sp P29110.1 OLEO3_BRANA RecName: Full=Oleosin Bn-III; Short=BnIII gi 17839 emb CAA43941.1  oleosin Bn-III [Brassica napus] gi 196122088 gb ACG69519.1  oleosin S3-7 [Brassica napus] gi 742387 prf 2009397A oleosin                                                                                                                                                                                                                                                                                                                                                                                                                                                                                                                                                                                                                                                                                                                                                                                                                                                                                                                                                                                                                                                                                                                                                                                                                                                                                                                       | 256 | 257 | 1.00E-137 | 100.4 | 91.8 | 96.1 | PMSR protein                                                                      | gbpln | Brassica napus       | AT4G25130.1   Symbols: PMSR4   peptide met sulfoxide reductase 4   chr4:12898802-12899998 REVERSE LENGTH=258                                                                                                                                                                                                                                                                                      | 256 | 258 | 1.00E-124 | 100.8 | 82.0 | 90.6 |
| Rsa1.0_01701.1.g29148.t1 | RefName: Full=Oleosin Bn-III; Short=BnIII gi 17839 emb CAA43941.1  oleosin Bn-III [Brassica napus] gi 196122088 gb ACG69519.1  oleosin S3-7 [Brassica napus] gi 742387 prf 2009397A oleosin                                                                                                                                                                                                                                                                                                                                                                                                                                                                                                                                                                                                                                                                                                                                                                                                                                                                                                                                                                                                                                                                                                                                                                                                                                                                                                                                               | 198 | 195 | 8.00E-95  | 98.5  | 93.4 | 96.0 | RecName: Full=Oleosin Bn-III; Short=BnIII gi 17839 emb CAA43941.1  oleosin Bn-III | gbpln | Brassica napus       | AT4G25140.1   Symbols: OLEO1, OLE1   oleosin 1   chr4:12900498-12901259 FORWARD LENGTH=173                                                                                                                                                                                                                                                                                                        | 198 | 173 | 2.00E-72  | 87.4  | 79.3 | 82.3 |
| Rsa1.0_01701.1.g29149.t1 | gb EOA17259.1  hypothetical protein CARUB_v10005533mg [Capsella rubella]                                                                                                                                                                                                                                                                                                                                                                                                                                                                                                                                                                                                                                                                                                                                                                                                                                                                                                                                                                                                                                                                                                                                                                                                                                                                                                                                                                                                                                                                  | 269 | 260 | 1.00E-125 | 96.7  | 81.4 | 89.2 | hypothetical protein CARUB_v10005533mg                                            | gbpln | Capsella rubella     | AT4G25150.1   Symbols:   HAD superfamily, subfamily IIIB acid phosphatase   chr4:12901736-12902882 REVERSE LENGTH=260                                                                                                                                                                                                                                                                             | 269 | 260 | 1.00E-125 | 96.7  | 80.7 | 89.6 |
| Rsa1.0_01701.1.g29150.t1 | gb EOA16012.1  hypothetical protein CARUB_v10004133mg [Capsella rubella]                                                                                                                                                                                                                                                                                                                                                                                                                                                                                                                                                                                                                                                                                                                                                                                                                                                                                                                                                                                                                                                                                                                                                                                                                                                                                                                                                                                                                                                                  | 839 | 830 | 0         | 98.9  | 87.1 | 93.2 | hypothetical protein CARUB_v10004133mg                                            | gbpln | Capsella rubella     | AT4G25160.1   Symbols:   U-box domain-containing protein kinase family protein   chr4:12903360-12906669 REVERSE LENGTH=835                                                                                                                                                                                                                                                                        | 839 | 835 | 0         | 99.5  | 87.4 | 93.0 |

|                          |                                                                                                                                                                                                                                                                                                                                                                                                                                                                                                                                |     |      |           |       |      |      |                                                     |       |                      |                                                                                                                                    |     |     |           |       |      |      |
|--------------------------|--------------------------------------------------------------------------------------------------------------------------------------------------------------------------------------------------------------------------------------------------------------------------------------------------------------------------------------------------------------------------------------------------------------------------------------------------------------------------------------------------------------------------------|-----|------|-----------|-------|------|------|-----------------------------------------------------|-------|----------------------|------------------------------------------------------------------------------------------------------------------------------------|-----|-----|-----------|-------|------|------|
| Rsa1.0_01701.1.g29151.t1 | gb[EOA16577.1] hypothetical protein CARUB_v10004742mg [Capsella rubella]                                                                                                                                                                                                                                                                                                                                                                                                                                                       | 185 | 467  | 2.00E-54  | 252.4 | 61.1 | 74.1 | hypothetical protein CARUB_v10004742mg              | gbpln | Capsella rubella     | AT4G25340.2   Symbols: FKBP53   FK506 BINDING PROTEIN 53   chr4:12959863-12962632 REVERSE LENGTH=444                               | 185 | 444 | 6.00E-56  | 240.0 | 61.1 | 71.9 |
| Rsa1.0_01701.1.g29152.t1 | gb[EOA18179.1] hypothetical protein CARUB_v10006657mg [Capsella rubella]                                                                                                                                                                                                                                                                                                                                                                                                                                                       | 613 | 532  | 0         | 86.8  | 67.9 | 73.1 | hypothetical protein CARUB_v10006657mg              | gbpln | Capsella rubella     | AT4G25360.2   Symbols:   TRICHOME BIREFRINGENCE-LIKE 18   chr4:12970187-12972404 FORWARD LENGTH=533                                | 613 | 533 | 0         | 86.9  | 68.0 | 73.7 |
| Rsa1.0_01701.1.g29153.t1 | ref[XP_002863680.1] predicted protein [Arabidopsis lyrata subsp. lyrata] gi 297309515 gb EFH45931.1  predicted protein [Arabidopsis lyrata subsp. lyrata]                                                                                                                                                                                                                                                                                                                                                                      | 110 | 231  | 2.00E-15  | 210.0 | 35.5 | 41.8 | predicted protein                                   | gbpln | Arabidopsis lyrata   | AT2G27490.2   Symbols: ATCOAE   dephospho-CoA kinase family   chr2:11748087-11749009 REVERSE LENGTH=232                            | 110 | 232 | 6.00E-18  | 210.9 | 35.5 | 40.0 |
| Rsa1.0_01701.1.g29154.t1 | ref[XP_002869672.1] basix helix-loop-helix family protein [Arabidopsis lyrata subsp. lyrata] gi 297315508 gb EFH45931.1  basix helix-loop-helix family protein [Arabidopsis lyrata subsp. lyrata]                                                                                                                                                                                                                                                                                                                              | 209 | 222  | 2.00E-86  | 106.2 | 86.1 | 91.9 | basix helix-loop-helix family protein               | gbpln | Arabidopsis lyrata   | AT4G25410.1   Symbols:   basix helix-loop-helix (bHLH) DNA-binding superfamily protein   chr4:12985772-12987149 FORWARD LENGTH=230 | 209 | 230 | 9.00E-89  | 110.0 | 83.7 | 90.4 |
| Rsa1.0_01702.1.g29155.t1 | #                                                                                                                                                                                                                                                                                                                                                                                                                                                                                                                              | #   | #    | #         | #     | #    | #    | -                                                   | ----  | ----                 | #                                                                                                                                  | #   | #   | #         | #     | #    |      |
| Rsa1.0_01702.1.g29156.t1 | ref[XP_002884989.1] beta-fructofuranosidase [Arabidopsis lyrata subsp. lyrata] gi 297330829 gb EFH61248.1  beta-fructofuranosidase [Arabidopsis lyrata subsp. lyrata]                                                                                                                                                                                                                                                                                                                                                          | 580 | 581  | 0         | 100.2 | 92.8 | 96.6 | beta-fructofuranosidase                             | gbpln | Arabidopsis lyrata   | AT3G13790.2   Symbols: ATBFRUCT1   Glycosyl hydrolases family 32 protein   chr3:4533084-4535831 REVERSE LENGTH=581                 | 580 | 581 | 0         | 100.2 | 94.0 | 97.2 |
| Rsa1.0_01702.1.g29157.t1 | gb[AAB82639.1] putative non-LTR retroelement reverse transcriptase [Arabidopsis thaliana]                                                                                                                                                                                                                                                                                                                                                                                                                                      | 219 | 1374 | 7.00E-47  | 627.4 | 41.6 | 53.4 | putative non-LTR retroelement reverse transcriptase | gbpln | Arabidopsis thaliana | AT4G29090.1   Symbols:   Ribonuclease H-like superfamily protein   chr4:14333528-14335255 FORWARD LENGTH=575                       | 219 | 575 | 2.00E-46  | 262.6 | 39.7 | 53.0 |
| Rsa1.0_01702.1.g29158.t1 | gb[EOA32993.1] hypothetical protein CARUB_v10016323mg [Capsella rubella]                                                                                                                                                                                                                                                                                                                                                                                                                                                       | 846 | 846  | 0         | 100.0 | 96.2 | 97.9 | hypothetical protein CARUB_v10016323mg              | gbpln | Capsella rubella     | AT3G13750.1   Symbols: BGAL1   beta galactosidase 1   chr3:4511192-4515756 FORWARD LENGTH=847                                      | 846 | 847 | 0         | 100.1 | 95.9 | 98.0 |
| Rsa1.0_01702.1.g29159.t1 | #                                                                                                                                                                                                                                                                                                                                                                                                                                                                                                                              | #   | #    | #         | #     | #    | #    | -                                                   | ----  | ----                 | #                                                                                                                                  | #   | #   | #         | #     | #    |      |
| Rsa1.0_01702.1.g29160.t1 | ref[NP_566462.1] 3-epi-6-deoxocathasterone 23-monoxygenase [Arabidopsis thaliana] gi 75306559 sp Q94IA6.1 C90D1_ARATH RecName: Full=3-epi-6-deoxocathasterone 23-monoxygenase; AltName: Full=Cytochrome P450 90D1 gi 14971017 dbj BAB62109.1  CYP90D [Arabidopsis thaliana] gi 28393374 gb AAO42111.1  putative cytochrome P450 [Arabidopsis thaliana] gi 28827564 gb AAO50626.1  putative cytochrome P450 [Arabidopsis thaliana] gi 332641883 gb AEE75404.1  3-epi-6-deoxocathasterone 23-monoxygenase [Arabidopsis thaliana] | 492 | 491  | 0         | 99.8  | 87.0 | 90.7 | 3-epi-6-deoxocathasterone 23-monoxygenase           | gbpln | Arabidopsis thaliana | AT3G13730.1   Symbols: CYP90D1   cytochrome P450, family 90, subfamily D, polypeptide 1   chr3:4498330-4500836 REVERSE LENGTH=491  | 492 | 491 | 0         | 99.8  | 87.0 | 90.7 |
| Rsa1.0_01703.1.g29161.t1 | #                                                                                                                                                                                                                                                                                                                                                                                                                                                                                                                              | #   | #    | #         | #     | #    | #    | -                                                   | ----  | ----                 | #                                                                                                                                  | #   | #   | #         | #     | #    |      |
| Rsa1.0_01703.1.g29162.t1 | ref[XP_002872013.1] prephenate dehydratase family protein [Arabidopsis lyrata subsp. lyrata] gi 297317850 gb EFH48272.1  prephenate dehydratase family protein [Arabidopsis lyrata subsp. lyrata]                                                                                                                                                                                                                                                                                                                              | 431 | 433  | 0         | 100.5 | 91.2 | 94.0 | prephenate dehydratase family protein               | gbpln | Arabidopsis lyrata   | AT5G22630.1   Symbols: ADT5   arogenate dehydratase 5   chr5:7524645-7525922 FORWARD LENGTH=425                                    | 431 | 425 | 0         | 98.6  | 89.8 | 92.3 |
| Rsa1.0_01703.1.g29163.t1 | gb[EOA20513.1] hypothetical protein CARUB_v10000827mg [Capsella rubella]                                                                                                                                                                                                                                                                                                                                                                                                                                                       | 439 | 489  | 0         | 111.4 | 82.7 | 89.1 | hypothetical protein CARUB_v10000827mg              | gbpln | Capsella rubella     | AT5G22620.2   Symbols:   phosphoglycerate/bisphosphoglycerate mutase family protein   chr5:7517731-7520223 REVERSE LENGTH=482      | 439 | 482 | 0         | 109.8 | 81.5 | 87.9 |
| Rsa1.0_01703.1.g29164.t1 | gb[EOA19749.1] hypothetical protein CARUB_v10003892mg [Capsella rubella]                                                                                                                                                                                                                                                                                                                                                                                                                                                       | 470 | 457  | 1.00E-119 | 97.2  | 52.6 | 67.4 | hypothetical protein CARUB_v10003892mg              | gbpln | Capsella rubella     | AT5G22730.1   Symbols:   F-box/RNI-like/FBD-like domains-containing protein   chr5:7551632-7553219 REVERSE LENGTH=466              | 470 | 466 | 1.00E-104 | 99.1  | 47.7 | 63.2 |
| Rsa1.0_01703.1.g29165.t1 | ref[XP_002874078.1] WRKY DNA-binding protein 38 [Arabidopsis lyrata subsp. lyrata] gi 297319915 gb EFH50337.1  WRKY DNA-binding protein 38 [Arabidopsis lyrata subsp. lyrata]                                                                                                                                                                                                                                                                                                                                                  | 290 | 292  | 4.00E-97  | 100.7 | 66.2 | 76.9 | WRKY DNA-binding protein 38                         | gbpln | Arabidopsis lyrata   | AT5G22570.1   Symbols: WRKY38, ATWRKY38   WRKY DNA-binding protein 38   chr5:7495608-7496707 REVERSE LENGTH=289                    | 290 | 289 | 1.00E-90  | 99.7  | 62.1 | 73.1 |
| Rsa1.0_01703.1.g29166.t1 | gb[EOA20175.1] hypothetical protein CARUB_v10000472mg [Capsella rubella]                                                                                                                                                                                                                                                                                                                                                                                                                                                       | 129 | 622  | 4.00E-23  | 482.2 | 39.5 | 41.9 | hypothetical protein CARUB_v10000472mg              | gbpln | Capsella rubella     | AT5G22510.1   Symbols: INV-E, At-A/N-InvE   alkaline/neutral invertase   chr5:7474974-7477479 REVERSE LENGTH=617                   | 129 | 617 | 1.00E-25  | 478.3 | 38.8 | 41.9 |

|                          |                                                                                                                                                                                                                                                                                                                                                       |      |      |           |       |      |      |                                                        |       |                      |                                                                                                                                                                                                                                                                                                                                                 |      |      |           |       |      |      |
|--------------------------|-------------------------------------------------------------------------------------------------------------------------------------------------------------------------------------------------------------------------------------------------------------------------------------------------------------------------------------------------------|------|------|-----------|-------|------|------|--------------------------------------------------------|-------|----------------------|-------------------------------------------------------------------------------------------------------------------------------------------------------------------------------------------------------------------------------------------------------------------------------------------------------------------------------------------------|------|------|-----------|-------|------|------|
| Rsa1.0_01704.1.g29167.t1 | refNP_567046.1  Transmembrane proteins 14C [Arabidopsis thaliana] gi 14517381 gb AAK62581.1  AT3G57280/F28O9.130 [Arabidopsis thaliana] gi 15450539 gb AAK96447.1  AT3G57280/F28O9.130 [Arabidopsis thaliana] gi 21553454 gb AAM62547.1  unknown [Arabidopsis thaliana] gi 332646114 gb AEE79635.1  Transmembrane proteins 14C [Arabidopsis thaliana] | 235  | 226  | 2.00E-97  | 96.2  | 83.0 | 87.2 | Transmembrane proteins 14C                             | gbpln | Arabidopsis thaliana | AT3G57280.1   Symbols:   Transmembrane proteins 14C   chr3:21193960-21195547 FORWARD LENGTH=226                                                                                                                                                                                                                                                 | 235  | 226  | 1.00E-100 | 96.2  | 83.0 | 87.2 |
| Rsa1.0_01704.1.g29168.t1 | refXP_002878144.1  hypothetical protein ARALYDRAFT_486171 [Arabidopsis lyrata subsp. lyrata] gi 297323982 gb EFH54403.1  hypothetical protein ARALYDRAFT_486171 [Arabidopsis lyrata subsp. lyrata]                                                                                                                                                    | 444  | 441  | 0         | 99.3  | 95.3 | 97.7 | hypothetical protein ARALYDRAFT_486171                 | gbpln | Arabidopsis lyrata   | AT3G57290.1   Symbols: EIF3E, TIF3E1, ATEIF3E-1, INT-6, ATINT6, INT6   eukaryotic translation initiation factor 3E   chr3:21196786-21199073 REVERSE LENGTH=441                                                                                                                                                                                  | 444  | 441  | 0         | 99.3  | 93.0 | 96.6 |
| Rsa1.0_01704.1.g29169.t1 | refNP_191289.2  DNA helicase INO80 complex-like 1 [Arabidopsis thaliana] gi 238065093 sp Q8FXS6.2 INO80 ARAT H RecName: Full=DNA helicase INO80; Short=AIINO80; AltName: Full=Putative DNA helicase INO80 complex homolog 1 gi 332646116 gb AEE79637.1  DNA helicase INO80 complex-like 1 [Arabidopsis thaliana]                                      | 1531 | 1507 | 0         | 98.4  | 85.2 | 90.9 | DNA helicase INO80 complex-like 1                      | gbpln | Arabidopsis thaliana | AT3G57300.1   Symbols: INO80, ATINO80   INO80 ortholog   chr3:21199612-21207635 FORWARD LENGTH=1507                                                                                                                                                                                                                                             | 1531 | 1507 | 0         | 98.4  | 85.2 | 90.9 |
| Rsa1.0_01704.1.g29170.t1 | emb CAA68234.1  calmodulin-stimulated calcium-ATPase [Brassica oleracea]                                                                                                                                                                                                                                                                              | 985  | 1025 | 0         | 104.1 | 94.4 | 97.3 | calmodulin-stimulated calcium-ATPase                   | gbpln | Brassica oleracea    | AT3G57330.1   Symbols: ACA11   autoinhibited Ca2+-ATPase 11   chr3:21211655-21216375 REVERSE LENGTH=1025                                                                                                                                                                                                                                        | 985  | 1025 | 0         | 104.1 | 94.1 | 96.9 |
| Rsa1.0_01704.1.g29171.t1 | refXP_002876412.1  hypothetical protein ARALYDRAFT_486177 [Arabidopsis lyrata subsp. lyrata] gi 297322250 gb EFH52671.1  hypothetical protein ARALYDRAFT_486177 [Arabidopsis lyrata subsp. lyrata]                                                                                                                                                    | 368  | 365  | 1.00E-165 | 99.2  | 81.5 | 91.3 | hypothetical protein ARALYDRAFT_486177                 | gbpln | Arabidopsis lyrata   | AT3G57340.2   Symbols:   Heat shock protein DnaJ, N-terminal with domain of unknown function (DUF1977)   chr3:21219175-21220278 FORWARD LENGTH=367                                                                                                                                                                                              | 368  | 367  | 1.00E-165 | 99.7  | 81.0 | 90.8 |
| Rsa1.0_01704.1.g29172.t1 | gb EOA25570.1  hypothetical protein CARUB_v10018922mg [Capsella rubella]                                                                                                                                                                                                                                                                              | 861  | 863  | 0         | 100.2 | 86.8 | 93.6 | hypothetical protein CARUB_v10018922mg                 | gbpln | Capsella rubella     | AT2G41620.1   Symbols:   Nucleoporin interacting component (Nup93/Nic96-like) family protein   chr2:17350419-17354997 REVERSE LENGTH=861                                                                                                                                                                                                        | 861  | 861  | 0         | 100.0 | 85.4 | 93.6 |
| Rsa1.0_01704.1.g29173.t1 | gb EOA24554.1  hypothetical protein CARUB_v10017811mg [Capsella rubella]                                                                                                                                                                                                                                                                              | 254  | 275  | 1.00E-118 | 108.3 | 83.5 | 91.3 | hypothetical protein CARUB_v10017811mg                 | gbpln | Capsella rubella     | AT3G57360.1   Symbols:   unknown protein; BEST Arabidopsis thaliana protein match is: unknown protein (TAIR:AT3G02370.2); Has 122 Blast hits to 122 proteins in 54 species: Archae - 0; Bacteria - 0; Metazoa - 74; Fungi - 4; Plants - 41; Viruses - 0; Other Eukaryotes - 3 (source: NCBI BLink).   chr3:21225571-21226621 FORWARD LENGTH=254 | 254  | 254  | 1.00E-118 | 100.0 | 83.1 | 89.4 |
| Rsa1.0_01705.1.g29174.t1 | #                                                                                                                                                                                                                                                                                                                                                     | #    | #    | #         | #     | #    | #    | -                                                      | ----  | ----                 | #                                                                                                                                                                                                                                                                                                                                               | #    | #    | #         | #     | #    |      |
| Rsa1.0_01705.1.g29175.t1 | gb EOA19862.1  hypothetical protein CARUB_v10000113mg [Capsella rubella]                                                                                                                                                                                                                                                                              | 1040 | 1049 | 0         | 100.9 | 91.4 | 95.8 | hypothetical protein CARUB_v10000113mg                 | gbpln | Capsella rubella     | AT5G11110.1   Symbols: SPS1, ATSPS2F, KNS2, SPS2F   sucrose phosphate synthase 2F   chr5:3536426-3540901 FORWARD LENGTH=1047                                                                                                                                                                                                                    | 1040 | 1047 | 0         | 100.7 | 90.0 | 94.8 |
| Rsa1.0_01705.1.g29176.t1 | dbj BAH57203.1  AT5G11170 [Arabidopsis thaliana]                                                                                                                                                                                                                                                                                                      | 177  | 177  | 8.00E-93  | 100.0 | 93.2 | 96.0 | AT5G11170                                              | gbpln | Arabidopsis thaliana | AT5G11170.2   Symbols:   DEAD/DEAH box RNA helicase family protein   chr5:3554272-3556646 FORWARD LENGTH=344                                                                                                                                                                                                                                    | 177  | 344  | 4.00E-92  | 194.4 | 89.3 | 91.5 |
| Rsa1.0_01705.1.g29177.t1 | refXP_004291460.1  PREDICTED: DEAD-box ATP-dependent RNA helicase 56-like [Fragaria vesca subsp. vesca]                                                                                                                                                                                                                                               | 80   | 447  | 5.00E-24  | 558.8 | 68.8 | 82.5 | PREDICTED: DEAD-box ATP-dependent RNA helicase 56-like | gbpln | Fragaria vesca       | AT5G11200.2   Symbols:   DEAD/DEAH box RNA helicase family protein   chr5:3567389-3570686 FORWARD LENGTH=486                                                                                                                                                                                                                                    | 80   | 486  | 9.00E-26  | 607.5 | 85.0 | 90.0 |
| Rsa1.0_01705.1.g29178.t1 | gb EOA22882.1  hypothetical protein CARUB_v10003614mg [Capsella rubella]                                                                                                                                                                                                                                                                              | 350  | 349  | 0         | 99.7  | 90.0 | 95.1 | hypothetical protein CARUB_v10003614mg                 | gbpln | Capsella rubella     | AT4G32390.1   Symbols:   Nucleotide-sugar transporter family protein   chr4:15636550-15637602 FORWARD LENGTH=350                                                                                                                                                                                                                                | 350  | 350  | 1.00E-180 | 100.0 | 86.6 | 95.4 |
| Rsa1.0_01705.1.g29179.t1 | gb ACP30584.1  disease resistance protein [Brassica rapa subsp. pekinensis]                                                                                                                                                                                                                                                                           | 947  | 980  | 0         | 103.5 | 60.6 | 62.6 | disease resistance protein                             | gbpln | Brassica rapa        | AT5G11250.1   Symbols:   Disease resistance protein (TIR-NBS-LRR class)   chr5:3587978-3591960 REVERSE LENGTH=1189                                                                                                                                                                                                                              | 947  | 1189 | 0         | 125.6 | 39.3 | 47.3 |
| Rsa1.0_01705.1.g29180.t1 | #                                                                                                                                                                                                                                                                                                                                                     | #    | #    | #         | #     | #    | #    | -                                                      | ----  | ----                 | #                                                                                                                                                                                                                                                                                                                                               | #    | #    | #         | #     | #    |      |

|                          |                                                                                                                                                                                                                                                                                                                                                                                                                                                                                                                                                                                                                                                                                                                                                                                                                       |     |     |          |       |      |      |                                             |       |                      |                                                                                                                                                                                                                                                                                                                                                                                                                                                                   |     |     |           |       |      |      |
|--------------------------|-----------------------------------------------------------------------------------------------------------------------------------------------------------------------------------------------------------------------------------------------------------------------------------------------------------------------------------------------------------------------------------------------------------------------------------------------------------------------------------------------------------------------------------------------------------------------------------------------------------------------------------------------------------------------------------------------------------------------------------------------------------------------------------------------------------------------|-----|-----|----------|-------|------|------|---------------------------------------------|-------|----------------------|-------------------------------------------------------------------------------------------------------------------------------------------------------------------------------------------------------------------------------------------------------------------------------------------------------------------------------------------------------------------------------------------------------------------------------------------------------------------|-----|-----|-----------|-------|------|------|
| Rsa1.0_01705.1.g29181.t1 | gb EOA21558.1  hypothetical protein CARUB_v10001967mg [Capsella rubella]                                                                                                                                                                                                                                                                                                                                                                                                                                                                                                                                                                                                                                                                                                                                              | 537 | 209 | 1.00E-99 | 38.9  | 33.1 | 36.3 | hypothetical protein CARUB_v10001967mg      | gbpln | Capsella rubella     | AT5G11280.1   Symbols:   unknown protein; BEST Arabidopsis thaliana protein match is: unknown protein (TAIR:AT1G80200.1); Has 30201 Blast hits to 17322 proteins in 780 species: Archae - 12; Bacteria - 1396; Metazoa - 17338; Fungi - 3422; Plants - 5037; Viruses - 0; Other Eukaryotes - 2996 (source: NCBI BLink).   chr5:3597321-3598347 FORWARD LENGTH=209                                                                                                 | 537 | 209 | 1.00E-101 | 38.9  | 32.8 | 35.9 |
| Rsa1.0_01705.1.g29182.t5 | ref XP_002890058.1  hypothetical protein ARALYDRAFT_334745 [Arabidopsis lyrata subsp. lyrata] gi 297335900 gb EFH66317.1  hypothetical protein ARALYDRAFT_334745 [Arabidopsis lyrata subsp. lyrata]                                                                                                                                                                                                                                                                                                                                                                                                                                                                                                                                                                                                                   | 287 | 310 | 3.00E-29 | 108.0 | 23.7 | 28.2 | hypothetical protein ARALYDRAFT_334745      | gbpln | Arabidopsis lyrata   | AT1G14688.1   Symbols:   FUNCTIONS IN: molecular_function unknown; INVOLVED IN: biological_process unknown; LOCATED IN: cellular_component unknown; CONTAINS InterPro DOMAIN/s: E3 Ubiquitin ligase (InterPro:IPR022170); Has 30201 Blast hits to 17322 proteins in 780 species: Archae - 12; Bacteria - 1396; Metazoa - 17338; Fungi - 3422; Plants - 5037; Viruses - 0; Other Eukaryotes - 2996 (source: NCBI BLink).   chr1:5049654-5050983 REVERSE LENGTH=170 | 287 | 170 | 2.00E-21  | 59.2  | 17.1 | 23.3 |
| Rsa1.0_01705.1.g29183.t1 | ref XP_002890061.1  expressed protein [Arabidopsis lyrata subsp. lyrata] gi 297335903 gb EFH66320.1  expressed protein [Arabidopsis lyrata subsp. lyrata]                                                                                                                                                                                                                                                                                                                                                                                                                                                                                                                                                                                                                                                             | 243 | 211 | 7.00E-37 | 86.8  | 40.3 | 54.7 | expressed protein                           | gbpln | Arabidopsis lyrata   | AT1G63900.1   Symbols: DAL1   E3 Ubiquitin ligase family protein   chr1:23717056-23719086 FORWARD LENGTH=343                                                                                                                                                                                                                                                                                                                                                      | 243 | 343 | 2.00E-15  | 141.2 | 29.6 | 42.4 |
| Rsa1.0_01706.1.g29184.t1 | #                                                                                                                                                                                                                                                                                                                                                                                                                                                                                                                                                                                                                                                                                                                                                                                                                     | #   | #   | #        | #     | #    | #    | -                                           | ----  | ----                 | #                                                                                                                                                                                                                                                                                                                                                                                                                                                                 | #   | #   | #         | #     | #    |      |
| Rsa1.0_01706.1.g29185.t1 | gb EOA36809.1  hypothetical protein CARUB_v10008388mg [Capsella rubella]                                                                                                                                                                                                                                                                                                                                                                                                                                                                                                                                                                                                                                                                                                                                              | 646 | 757 | 0        | 117.2 | 58.2 | 67.5 | hypothetical protein CARUB_v10008388mg      | gbpln | Capsella rubella     | AT1G03780.2   Symbols: TPX2   targeting protein for XKL2   chr1:947785-951696 REVERSE LENGTH=756                                                                                                                                                                                                                                                                                                                                                                  | 646 | 758 | 0         | 117.3 | 58.0 | 66.7 |
| Rsa1.0_01706.1.g29186.t1 | ref NP_199241.2  putative E3 ubiquitin-protein ligase RING1a [Arabidopsis thaliana] gi 302425246 sp Q9FKW0.2 RING1A_ARATH RecName: Full=Putative E3 ubiquitin-protein ligase RING1a; AltName: Full=Polycomb complex protein RING1a; Short=ATRING1a; AltName: Full=Ring finger protein 434 gi 332007702 gb AED95085.1  putative E3 ubiquitin-protein ligase RING1a [Arabidopsis thaliana]                                                                                                                                                                                                                                                                                                                                                                                                                              | 500 | 522 | 0        | 104.4 | 77.2 | 85.2 | putative E3 ubiquitin-protein ligase RING1a | gbpln | Arabidopsis thaliana | AT5G44290.1   Symbols: ATRING1A, RING1A   RING1A   chr5:17836115-17839114 REVERSE LENGTH=522                                                                                                                                                                                                                                                                                                                                                                      | 500 | 522 | 0         | 104.4 | 77.2 | 85.2 |
| Rsa1.0_01706.1.g29187.t2 | ref NP_186790.2  RNase H domain-containing protein [Arabidopsis thaliana] gi 145331720 ref NP_001078087.1  RNase H domain-containing protein [Arabidopsis thaliana] gi 332640141 gb AEE73662.1  RNase H domain-containing protein [Arabidopsis thaliana] gi 332640142 gb AEE73663.1  RNase H domain-containing protein [Arabidopsis thaliana]                                                                                                                                                                                                                                                                                                                                                                                                                                                                         | 544 | 294 | 8.00E-45 | 54.0  | 16.7 | 19.5 | RNase H domain-containing protein           | gbpln | Arabidopsis thaliana | AT3G01410.2   Symbols:   Polynucleotidyl transferase, ribonuclease H-like superfamily protein   chr3:153650-155439 REVERSE LENGTH=294                                                                                                                                                                                                                                                                                                                             | 544 | 294 | 2.00E-47  | 54.0  | 16.7 | 19.5 |
| Rsa1.0_01706.1.g29188.t1 | ref NP_199242.1  protein kinase-like protein [Arabidopsis thaliana] gi 79329869 ref NP_001032009.1  protein kinase-like protein [Arabidopsis thaliana] gi 79329882 ref NP_001032010.1  protein kinase-like protein [Arabidopsis thaliana] gi 145334725 ref NP_001078708.1  protein kinase-like protein [Arabidopsis thaliana] gi 10176884 db BAB10114.1  cyclin-dependent protein kinase-like protein [Arabidopsis thaliana] gi 222424232 db BAH20074.1  AT5G44290 [Arabidopsis thaliana] gi 332007704 gb AED95087.1  protein kinase-like protein [Arabidopsis thaliana] gi 332007705 gb AED95088.1  protein kinase-like protein [Arabidopsis thaliana] gi 332007706 gb AED95089.1  protein kinase-like protein [Arabidopsis thaliana] gi 332007707 gb AED95090.1  protein kinase-like protein [Arabidopsis thaliana] | 593 | 644 | 0        | 108.6 | 82.5 | 89.4 | protein kinase-like protein                 | gbpln | Arabidopsis thaliana | AT5G44290.4   Symbols:   Protein kinase superfamily protein   chr5:17840750-17843190 REVERSE LENGTH=644                                                                                                                                                                                                                                                                                                                                                           | 593 | 644 | 0         | 108.6 | 82.5 | 89.4 |

|                          |                                                                                                                                                                                                               |      |      |           |       |      |      |                                                 |       |                      |                                                                                                                                                                                                                                                                                                                                                                     |     |     |           |       |      |      |
|--------------------------|---------------------------------------------------------------------------------------------------------------------------------------------------------------------------------------------------------------|------|------|-----------|-------|------|------|-------------------------------------------------|-------|----------------------|---------------------------------------------------------------------------------------------------------------------------------------------------------------------------------------------------------------------------------------------------------------------------------------------------------------------------------------------------------------------|-----|-----|-----------|-------|------|------|
| Rsa1.0_01707.1.g29189.t1 | refXP_002864941.1   hypothetical protein ARALYDRAFT_919839 [Arabidopsis lyrata subsp. lyrata] g 297310776 gb EFH41200.1   hypothetical protein ARALYDRAFT_919839 [Arabidopsis lyrata subsp. lyrata]           | 275  | 286  | 1.00E-104 | 104.0 | 73.5 | 80.0 | hypothetical protein ARALYDRAFT_919839          | gbpln | Arabidopsis lyrata   | AT5G65130.1   Symbols:   Integrase-type DNA-binding superfamily protein   chr5:26017403-26018236 FORWARD LENGTH=277                                                                                                                                                                                                                                                 | 275 | 277 | 1.00E-104 | 100.7 | 72.7 | 80.7 |
| Rsa1.0_01707.1.g29190.t1 | gb AAM61366.1   unknown [Arabidopsis thaliana]                                                                                                                                                                | 330  | 317  | 1.00E-118 | 96.1  | 72.1 | 80.9 | unknown                                         | gbpln | Arabidopsis thaliana | AT5G65120.1   Symbols:   unknown protein; BEST Arabidopsis thaliana protein match is: unknown protein (TAIR:AT5G10110.1); Has 30201 Blast hits to 17322 proteins in 780 species: Archae - 12; Bacteria - 1396; Metazoa - 17338; Fungi - 3422; Plants - 5037; Viruses - 0; Other Eukaryotes - 2996 (source: NCBI BLINK).   chr5:26013274-26014504 FORWARD LENGTH=317 | 330 | 317 | 1.00E-119 | 96.1  | 71.8 | 80.6 |
| Rsa1.0_01707.1.g29191.t1 | gb EOA12483.1   hypothetical protein CARUB_v10025999mg [Capsella rubella]                                                                                                                                     | 473  | 692  | 0         | 146.3 | 89.6 | 93.0 | hypothetical protein CARUB_v10025999mg          | gbpln | Capsella rubella     | AT5G65110.1   Symbols: ACX2, ATACX2   acyl-CoA oxidase 2   chr5:26009821-26012482 REVERSE LENGTH=692                                                                                                                                                                                                                                                                | 473 | 692 | 0         | 146.3 | 87.7 | 92.2 |
| Rsa1.0_01707.1.g29192.t1 | refXP_002866649.1   ethylene insensitive 3 family protein [Arabidopsis lyrata subsp. lyrata] g 297312484 gb EFH42908.1   ethylene insensitive 3 family protein [Arabidopsis lyrata subsp. lyrata]             | 476  | 540  | 0         | 113.4 | 84.9 | 89.7 | ethylene insensitive 3 family protein           | gbpln | Arabidopsis lyrata   | AT5G65100.1   Symbols:   Ethylene insensitive 3 family protein   chr5:26006835-26008508 REVERSE LENGTH=557                                                                                                                                                                                                                                                          | 476 | 557 | 0         | 117.0 | 83.8 | 89.5 |
| Rsa1.0_01707.1.g29193.t1 | refXP_002864939.1   hypothetical protein ARALYDRAFT_332725 [Arabidopsis lyrata subsp. lyrata] g 297310774 gb EFH41198.1   hypothetical protein ARALYDRAFT_332725 [Arabidopsis lyrata subsp. lyrata]           | 497  | 527  | 0         | 106.0 | 92.8 | 95.6 | hypothetical protein ARALYDRAFT_332725          | gbpln | Arabidopsis lyrata   | AT5G65090.1   Symbols: MRH3, BST1, DERA   DNase I-like superfamily protein   chr5:26004282-26006656 FORWARD LENGTH=529                                                                                                                                                                                                                                              | 497 | 529 | 0         | 106.4 | 91.8 | 95.2 |
| Rsa1.0_01707.1.g29194.t1 | gb EOA13539.1   hypothetical protein CARUB_v10026602mg, partial [Capsella rubella]                                                                                                                            | 359  | 376  | 1.00E-106 | 104.7 | 61.6 | 71.9 | hypothetical protein CARUB_v10026602mg, partial | gbpln | Capsella rubella     | AT5G64980.1   Symbols:   unknown protein; BEST Arabidopsis thaliana protein match is: unknown protein (TAIR:AT4G02880.1); Has 1807 Blast hits to 1807 proteins in 277 species: Archae - 0; Bacteria - 0; Metazoa - 736; Fungi - 347; Plants - 385; Viruses - 0; Other Eukaryotes - 339 (source: NCBI BLINK).   chr5:25960947-25963000 REVERSE LENGTH=344            | 359 | 344 | 1.00E-106 | 95.8  | 63.2 | 71.9 |
| Rsa1.0_01707.1.g29195.t1 | db BAJ33863.1   unnamed protein product [Thellungiella halophila]                                                                                                                                             | 200  | 196  | 4.00E-73  | 98.0  | 70.0 | 84.5 | unnamed protein product                         | ----  | ----                 | AT5G65070.1   Symbols: MAF4, FCL4, AGL69   K-box region and MADS-box transcription factor family protein   chr5:25992310-25995930 FORWARD LENGTH=200                                                                                                                                                                                                                | 200 | 200 | 2.00E-75  | 100.0 | 72.5 | 83.0 |
| Rsa1.0_01707.1.g29196.t1 | refXP_002866647.1   hypothetical protein ARALYDRAFT_332722 [Arabidopsis lyrata subsp. lyrata] g 297312482 gb EFH42906.1   hypothetical protein ARALYDRAFT_332722 [Arabidopsis lyrata subsp. lyrata]           | 199  | 202  | 1.00E-82  | 101.5 | 79.9 | 87.4 | hypothetical protein ARALYDRAFT_332722          | gbpln | Arabidopsis lyrata   | AT5G65030.1   Symbols:   unknown protein; BEST Arabidopsis thaliana protein match is: unknown protein (TAIR:AT5G10210.1); Has 1807 Blast hits to 1807 proteins in 277 species: Archae - 0; Bacteria - 0; Metazoa - 736; Fungi - 347; Plants - 385; Viruses - 0; Other Eukaryotes - 339 (source: NCBI BLINK).   chr5:25975697-25976305 REVERSE LENGTH=202            | 199 | 202 | 2.00E-82  | 101.5 | 78.4 | 85.4 |
| Rsa1.0_01707.1.g29197.t3 | gb AFL69958.1   annexin E1 [Brassica oleracea var. capitata]                                                                                                                                                  | 365  | 316  | 1.00E-176 | 86.6  | 85.8 | 86.6 | annexin E1                                      | gbpln | Brassica oleracea    | AT5G65020.1   Symbols: ANNAT2   annexin 2   chr5:25973915-25975554 FORWARD LENGTH=317                                                                                                                                                                                                                                                                               | 365 | 317 | 1.00E-169 | 86.8  | 81.4 | 84.9 |
| Rsa1.0_01707.1.g29198.t1 | gb EOA13040.1   hypothetical protein CARUB_v10026039mg [Capsella rubella]                                                                                                                                     | 568  | 660  | 0         | 116.2 | 94.0 | 97.5 | hypothetical protein CARUB_v10026039mg          | gbpln | Capsella rubella     | AT5G65010.1   Symbols: ASN2   asparagine synthetase 2   chr5:25969224-25972278 FORWARD LENGTH=578                                                                                                                                                                                                                                                                   | 568 | 578 | 0         | 101.8 | 93.1 | 96.1 |
| Rsa1.0_01707.1.g29199.t1 | refXP_002866646.1   nucleotide-sugar transporter family protein [Arabidopsis lyrata subsp. lyrata] g 297312481 gb EFH42905.1   nucleotide-sugar transporter family protein [Arabidopsis lyrata subsp. lyrata] | 328  | 325  | 1.00E-160 | 99.1  | 93.3 | 97.9 | nucleotide-sugar transporter family protein     | gbpln | Arabidopsis lyrata   | AT5G65000.1   Symbols:   Nucleotide-sugar transporter family protein   chr5:25965123-25967307 REVERSE LENGTH=325                                                                                                                                                                                                                                                    | 328 | 325 | 1.00E-161 | 99.1  | 92.4 | 97.0 |
| Rsa1.0_01707.1.g29200.t1 | db BAF34637.1   chromomethylase [Brassica rapa]                                                                                                                                                               | 786  | 805  | 0         | 102.4 | 87.0 | 93.4 | chromomethylase                                 | gbpln | Brassica rapa        | AT1G69770.1   Symbols: CMT3   chromomethylase 3   chr1:26248496-26253519 REVERSE LENGTH=839                                                                                                                                                                                                                                                                         | 786 | 839 | 0         | 106.7 | 63.5 | 77.6 |
| Rsa1.0_01708.1.g29201.t1 | gb AAF79618.1 AC027665_19 F5M15.26 [Arabidopsis thaliana]                                                                                                                                                     | 2010 | 1838 | 1.00E-108 | 91.4  | 8.6  | 10.6 | F5M15.26                                        | gbpln | Arabidopsis thaliana | #                                                                                                                                                                                                                                                                                                                                                                   | #   | #   | #         | #     | #    |      |
| Rsa1.0_01708.1.g29202.t1 | #                                                                                                                                                                                                             | #    | #    | #         | #     | #    | -    | ----                                            | ----  | ----                 | #                                                                                                                                                                                                                                                                                                                                                                   | #   | #   | #         | #     | #    |      |
| Rsa1.0_01708.1.g29203.t1 | #                                                                                                                                                                                                             | #    | #    | #         | #     | #    | -    | ----                                            | ----  | ----                 | #                                                                                                                                                                                                                                                                                                                                                                   | #   | #   | #         | #     | #    |      |
| Rsa1.0_01708.1.g29204.t1 | gb ABW81018.1   gag-pol polymerase [Arabidopsis lyrata subsp. lyrata]                                                                                                                                         | 440  | 672  | 5.00E-32  | 152.7 | 22.0 | 33.0 | gag-pol polymerase                              | gbpln | Arabidopsis lyrata   | #                                                                                                                                                                                                                                                                                                                                                                   | #   | #   | #         | #     | #    |      |
| Rsa1.0_01708.1.g29205.t1 | gb ABD65062.1   hypothetical protein 27.t00126 [Brassica oleracea]                                                                                                                                            | 477  | 578  | 3.00E-96  | 121.2 | 43.6 | 59.7 | hypothetical protein 27.t00126                  | gbpln | Brassica oleracea    | #                                                                                                                                                                                                                                                                                                                                                                   | #   | #   | #         | #     | #    |      |

|                          |                                                                                                                                                                                                                                                                                                                                                                                                                                                                                                                         |     |      |           |       |      |      |                                                                            |       |                      |                                                                                                                                                                                                                                                                                                                                                                                                                                                                                 |     |     |           |       |      |      |
|--------------------------|-------------------------------------------------------------------------------------------------------------------------------------------------------------------------------------------------------------------------------------------------------------------------------------------------------------------------------------------------------------------------------------------------------------------------------------------------------------------------------------------------------------------------|-----|------|-----------|-------|------|------|----------------------------------------------------------------------------|-------|----------------------|---------------------------------------------------------------------------------------------------------------------------------------------------------------------------------------------------------------------------------------------------------------------------------------------------------------------------------------------------------------------------------------------------------------------------------------------------------------------------------|-----|-----|-----------|-------|------|------|
| Rsa1.0_01708.1.g29206.t2 | gb AAF18641.1 AC006228.12 F5J5.16 [Arabidopsis thaliana]                                                                                                                                                                                                                                                                                                                                                                                                                                                                | 746 | 1024 | 4.00E-62  | 137.3 | 30.3 | 44.4 | F5J5.16                                                                    | gbpln | Arabidopsis thaliana | #                                                                                                                                                                                                                                                                                                                                                                                                                                                                               | #   | #   | #         | #     | #    | #    |
| Rsa1.0_01709.1.g29207.t1 | #                                                                                                                                                                                                                                                                                                                                                                                                                                                                                                                       | #   | #    | #         | #     | #    | -    | -                                                                          | ----  | ----                 | #                                                                                                                                                                                                                                                                                                                                                                                                                                                                               | #   | #   | #         | #     | #    | #    |
| Rsa1.0_01709.1.g29208.t1 | ref XP_002890525.1  hypothetical protein ARALYDRAFT_335508 [Arabidopsis lyrata subsp. lyrata] gi 297336367 gb EFH6784.1  hypothetical protein ARALYDRAFT_335508 [Arabidopsis lyrata subsp. lyrata]                                                                                                                                                                                                                                                                                                                      | 601 | 603  | 0         | 100.3 | 79.2 | 88.4 | hypothetical protein ARALYDRAFT_335508                                     | gbpln | Arabidopsis lyrata   | AT1G22660.1   Symbols:   Polynucleotide adenylyltransferase family protein   chr1:8017410-8021538 FORWARD LENGTH=605                                                                                                                                                                                                                                                                                                                                                            | 601 | 605 | 0         | 100.7 | 77.4 | 87.0 |
| Rsa1.0_01709.1.g29209.t1 | gb EOA36954.1  hypothetical protein CARUB_v10009887mg [Capsella rubella]                                                                                                                                                                                                                                                                                                                                                                                                                                                | 286 | 296  | 1.00E-128 | 103.5 | 87.8 | 93.0 | hypothetical protein CARUB_v10009887mg                                     | gbpln | Capsella rubella     | AT1G22700.2   Symbols:   Tetratricopeptide repeat (TPR)-like superfamily protein   chr1:8028323-8029878 REVERSE LENGTH=296                                                                                                                                                                                                                                                                                                                                                      | 286 | 296 | 1.00E-129 | 103.5 | 87.1 | 92.7 |
| Rsa1.0_01709.1.g29210.t2 | #                                                                                                                                                                                                                                                                                                                                                                                                                                                                                                                       | #   | #    | #         | #     | #    | -    | -                                                                          | ----  | ----                 | #                                                                                                                                                                                                                                                                                                                                                                                                                                                                               | #   | #   | #         | #     | #    | #    |
| Rsa1.0_01709.1.g29211.t1 | gb ACB47398.1  sucrose transporter [Brassica napus]                                                                                                                                                                                                                                                                                                                                                                                                                                                                     | 512 | 508  | 0         | 99.2  | 95.9 | 97.7 | sucrose transporter                                                        | gbpln | Brassica napus       | AT1G22710.1   Symbols: SUC2, SUT1, ATSUC2   sucrose-proton symporter 2   chr1:8030911-8032970 REVERSE LENGTH=512                                                                                                                                                                                                                                                                                                                                                                | 512 | 512 | 0         | 100.0 | 94.5 | 97.9 |
| Rsa1.0_01709.1.g29212.t1 | gb AAC69114.1  putative gag-protease polyprotein [Arabidopsis thaliana]                                                                                                                                                                                                                                                                                                                                                                                                                                                 | 388 | 627  | 1.00E-33  | 161.6 | 27.6 | 44.1 | putative gag-protease polyprotein                                          | gbpln | Arabidopsis thaliana | #                                                                                                                                                                                                                                                                                                                                                                                                                                                                               | #   | #   | #         | #     | #    | #    |
| Rsa1.0_01710.1.g29213.t1 | ref NP_175330.1  uncharacterized protein [Arabidopsis thaliana] gi 7770334 gb AAF69704.1 AC016041.9 F27J15.21 [Arabidopsis thaliana] gi 45476547 gb AAS65939.1  At1g49000 [Arabidopsis thaliana] gi 46359837 gb AAS88782.1  At1g49000 [Arabidopsis thaliana] gi 332194258 gb AEE32379.1  uncharacterized protein AT1G49000 [Arabidopsis thaliana]                                                                                                                                                                       | 153 | 156  | 5.00E-45  | 102.0 | 71.2 | 76.5 | uncharacterized protein                                                    | gbpln | Arabidopsis thaliana | AT1G49000.1   Symbols:   unknown protein; FUNCTIONS IN: molecular_function unknown; INVOLVED IN: biological_process unknown; LOCATED IN: chloroplast; EXPRESSED IN: stem; BEST Arabidopsis thaliana protein match is: unknown protein (TAIR:AT3G18560.1); Has 105 Blast hits to 105 proteins in 13 species: Archae - 0; Bacteria - 0; Metazoa - 0; Fungi - 0; Plants - 105; Viruses - 0; Other Eukaryotes - 0 (source: NCBI BLINK).   chr1:18123559-18124029 REVERSE LENGTH=156 | 153 | 156 | 2.00E-47  | 102.0 | 71.2 | 76.5 |
| Rsa1.0_01710.1.g29214.t1 | ref XP_002891470.1  hypothetical protein ARALYDRAFT_474043 [Arabidopsis lyrata subsp. lyrata] gi 297337312 gb EFH67729.1  hypothetical protein ARALYDRAFT_474043 [Arabidopsis lyrata subsp. lyrata]                                                                                                                                                                                                                                                                                                                     | 162 | 168  | 4.00E-56  | 103.7 | 76.5 | 80.9 | hypothetical protein ARALYDRAFT_474043                                     | gbpln | Arabidopsis lyrata   | AT1G48990.1   Symbols:   Oleosin family protein   chr1:18121470-18121979 FORWARD LENGTH=169                                                                                                                                                                                                                                                                                                                                                                                     | 162 | 169 | 4.00E-55  | 104.3 | 77.2 | 82.1 |
| Rsa1.0_01710.1.g29215.t1 | gb AAC33961.1  contains similarity to reverse transcriptase (Pfam: rvt.hmm, score: 42.57) [Arabidopsis thaliana]                                                                                                                                                                                                                                                                                                                                                                                                        | 537 | 1662 | 1.00E-78  | 309.5 | 30.0 | 44.7 | contains similarity to reverse transcriptase (Pfam: rvt.hmm, score: 42.57) | gbpln | Arabidopsis thaliana | AT2G02650.1   Symbols:   Ribonuclease H-like superfamily protein   chr2:735411-736546 FORWARD LENGTH=365                                                                                                                                                                                                                                                                                                                                                                        | 537 | 365 | 3.00E-24  | 68.0  | 8.6  | 12.1 |
| Rsa1.0_01710.1.g29216.t1 | #                                                                                                                                                                                                                                                                                                                                                                                                                                                                                                                       | #   | #    | #         | #     | #    | -    | -                                                                          | ----  | ----                 | #                                                                                                                                                                                                                                                                                                                                                                                                                                                                               | #   | #   | #         | #     | #    | #    |
| Rsa1.0_01710.1.g29217.t1 | dbj BAA94096.1  SLR1 binding pollen coat protein [Brassica juncea]                                                                                                                                                                                                                                                                                                                                                                                                                                                      | 116 | 83   | 1.00E-10  | 71.6  | 30.2 | 37.1 | SLR1 binding pollen coat protein                                           | gbpln | Brassica juncea      | #                                                                                                                                                                                                                                                                                                                                                                                                                                                                               | #   | #   | #         | #     | #    | #    |
| Rsa1.0_01710.1.g29218.t1 | gb ACP30591.1  disease resistance protein [Brassica rapa subsp. pekinensis]                                                                                                                                                                                                                                                                                                                                                                                                                                             | 190 | 1555 | 2.00E-28  | 818.4 | 43.2 | 54.7 | disease resistance protein                                                 | gbpln | Brassica rapa        | AT2G06845.1   Symbols:   Beta-galactosidase related protein   chr2:2754666-2756008 FORWARD LENGTH=315                                                                                                                                                                                                                                                                                                                                                                           | 190 | 315 | 4.00E-16  | 165.8 | 33.2 | 44.7 |
| Rsa1.0_01710.1.g29219.t1 | #                                                                                                                                                                                                                                                                                                                                                                                                                                                                                                                       | #   | #    | #         | #     | #    | -    | -                                                                          | ----  | ----                 | #                                                                                                                                                                                                                                                                                                                                                                                                                                                                               | #   | #   | #         | #     | #    | #    |
| Rsa1.0_01710.1.g29220.t1 | #                                                                                                                                                                                                                                                                                                                                                                                                                                                                                                                       | #   | #    | #         | #     | #    | -    | -                                                                          | ----  | ----                 | #                                                                                                                                                                                                                                                                                                                                                                                                                                                                               | #   | #   | #         | #     | #    | #    |
| Rsa1.0_01710.1.g29221.t1 | gb AAF24531.1 AC007534.12 F7F22.17 [Arabidopsis thaliana]                                                                                                                                                                                                                                                                                                                                                                                                                                                               | 190 | 1799 | 5.00E-61  | 946.8 | 59.5 | 76.8 | F7F22.17                                                                   | gbpln | Arabidopsis thaliana | #                                                                                                                                                                                                                                                                                                                                                                                                                                                                               | #   | #   | #         | #     | #    | #    |
| Rsa1.0_01711.1.g29222.t1 | #                                                                                                                                                                                                                                                                                                                                                                                                                                                                                                                       | #   | #    | #         | #     | #    | -    | -                                                                          | ----  | ----                 | #                                                                                                                                                                                                                                                                                                                                                                                                                                                                               | #   | #   | #         | #     | #    | #    |
| Rsa1.0_01711.1.g29223.t1 | gb AAF69169.1 AC007915.21 F27F5.21 [Arabidopsis thaliana]                                                                                                                                                                                                                                                                                                                                                                                                                                                               | 422 | 1023 | 2.00E-46  | 242.4 | 20.4 | 25.4 | F27F5.21                                                                   | gbpln | Arabidopsis thaliana | ATMG01250.1   Symbols: ORF102   RNA-directed DNA polymerase (reverse transcriptase)   chrM:310514-310882 FORWARD LENGTH=122                                                                                                                                                                                                                                                                                                                                                     | 422 | 122 | 2.00E-12  | 28.9  | 6.9  | 10.4 |
| Rsa1.0_01711.1.g29224.t1 | ref NP_564190.1  polyketide cyclase/dehydrase and lipid transport-like protein [Arabidopsis thaliana] gi 2829899 gb AAC00607.1  similar to ripening-induced protein, gp A_J001449 2465015 and major latex protein, gp X91961 1107495 [Arabidopsis thaliana] gi 14517378 gb AAK62560.1  At1g23130/T26J12.10 [Arabidopsis thaliana] gi 15450533 gb AAK96444.1  At1g23130/T26J12.10 [Arabidopsis thaliana] gi 33219222 gb AEE30343.1  polyketide cyclase/dehydrase and lipid transport-like protein [Arabidopsis thaliana] | 157 | 160  | 2.00E-48  | 101.9 | 59.2 | 77.1 | polyketide cyclase/dehydrase and lipid transport-like protein              | gbpln | Arabidopsis thaliana | AT1G23130.1   Symbols:   Polyketide cyclase/dehydrase and lipid transport superfamily protein   chr1:8200434-8200997 FORWARD LENGTH=160                                                                                                                                                                                                                                                                                                                                         | 157 | 160 | 5.00E-51  | 101.9 | 59.2 | 77.1 |

|                          |                                                                                                                                                                                                                                                                                |     |      |           |       |      |      |                                                        |                      |                                                                                                                                                                                                                                                                                                                                                                                                                     |                                                                                                                                                                                                                                                            |     |           |           |       |      |      |
|--------------------------|--------------------------------------------------------------------------------------------------------------------------------------------------------------------------------------------------------------------------------------------------------------------------------|-----|------|-----------|-------|------|------|--------------------------------------------------------|----------------------|---------------------------------------------------------------------------------------------------------------------------------------------------------------------------------------------------------------------------------------------------------------------------------------------------------------------------------------------------------------------------------------------------------------------|------------------------------------------------------------------------------------------------------------------------------------------------------------------------------------------------------------------------------------------------------------|-----|-----------|-----------|-------|------|------|
| Rsa1.0_01711.1.g29225.t1 | gb[EOA39878.1] hypothetical protein CARUB_v10008554mg, partial [Capsella rubella]                                                                                                                                                                                              | 729 | 641  | 0         | 87.9  | 62.8 | 67.8 | hypothetical protein CARUB_v10008554mg, gbpln partial  | Capsella rubella     | AT1G23170.2   Symbols:   Protein of unknown function DUF2359, transmembrane   chr1:8212724-8215516 FORWARD LENGTH=615                                                                                                                                                                                                                                                                                               | 729                                                                                                                                                                                                                                                        | 615 | 0         | 84.4      | 62.3  | 66.8 |      |
| Rsa1.0_01712.1.g29226.t1 | ref[XP_002882903.1] hypothetical protein ARALYDRAFT_478916 [Arabidopsis lyrata subsp. lyrata] gi 297328743 gb EFH59162.1                                                                                                                                                       | 419 | 418  | 0         | 99.8  | 90.2 | 95.5 | hypothetical protein ARALYDRAFT_478916 gbpln           | Arabidopsis lyrata   | AT3G14930.2   Symbols: HEME1   Uroporphyrinogen decarboxylase   chr3:5020675-5022577 FORWARD LENGTH=418                                                                                                                                                                                                                                                                                                             | 419                                                                                                                                                                                                                                                        | 418 | 0         | 99.8      | 88.3  | 94.3 |      |
| Rsa1.0_01712.1.g29227.t1 | ref[XP_002882901.1] hypothetical protein ARALYDRAFT_478912 [Arabidopsis lyrata subsp. lyrata] gi 297328741 gb EFH59160.1                                                                                                                                                       | 457 | 455  | 0         | 99.6  | 94.5 | 97.8 | hypothetical protein ARALYDRAFT_478912 gbpln           | Arabidopsis lyrata   | AT3G14910.1   Symbols:   unknown protein; Has 158 Blast hits to 158 proteins in 77 species; Archae - 0; Bacteria - 0; Metazoa - 104; Fungi - 0; Plants - 33; Viruses - 0; Other Eukaryotes - 21 (source: NCBI BLink).   chr3:5015432-5017566 FORWARD LENGTH=455                                                                                                                                                     | 457                                                                                                                                                                                                                                                        | 455 | 0         | 99.6      | 94.1  | 97.4 |      |
| Rsa1.0_01712.1.g29228.t1 | ref[NP_188108.1] uncharacterized protein [Arabidopsis thaliana] gi 8777473 dbj BAA97053.1  unnamed protein product [Arabidopsis thaliana] gi 110742615 bjb BAE99220.1                                                                                                          | 612 | 611  | 0         | 99.8  | 86.8 | 91.2 | uncharacterized protein gbpln                          | Arabidopsis thaliana | hypothetical protein [Arabidopsis thaliana] gi 332642065 gb AEE75586.1  uncharacterized protein AT3G14900 [Arabidopsis thaliana]                                                                                                                                                                                                                                                                                    | 13 growth stages; Has 17135 Blast hits to 10204 proteins in 644 species; Archae - 47; Bacteria - 1884; Metazoa - 5536; Fungi - 2506; Plants - 1043; Viruses - 361; Other Eukaryotes - 5958 (source: NCBI BLink).   chr3:5013442-5015277 REVERSE LENGTH=611 | 612 | 611       | 0         | 99.8  | 86.8 | 91.2 |
| Rsa1.0_01712.1.g29229.t2 | gb[EOA30020.1] hypothetical protein CARUB_v10013122mg [Capsella rubella]                                                                                                                                                                                                       | 661 | 682  | 0         | 103.2 | 68.4 | 78.5 | hypothetical protein CARUB_v10013122mg gbpln           | Capsella rubella     | AT3G14890.1   Symbols:   phosphoesterase   chr3:5008751-5013060 FORWARD LENGTH=694                                                                                                                                                                                                                                                                                                                                  | 661                                                                                                                                                                                                                                                        | 694 | 0         | 105.0     | 69.7  | 79.0 |      |
| Rsa1.0_01712.1.g29230.t1 | ref[NP_001118628.1] uncharacterized protein [Arabidopsis thaliana] gi 67633634 gb AA78741.1  DNA-binding protein-related [Arabidopsis thaliana] gi 332642062 gb AEE75583.1  uncharacterized protein AT3G14880 [Arabidopsis thaliana]                                           | 237 | 237  | 1.00E-115 | 100.0 | 86.1 | 92.0 | uncharacterized protein gbpln                          | Arabidopsis thaliana | FUNCTIONS IN: molecular function unknown; INVOLVED IN: embryo development; LOCATED IN: chloroplast; EXPRESSED IN: 19 plant structures; EXPRESSED DURING: 13 growth stages; Has 17135 Blast hits to 10204 proteins in 644 species; Archae - 47; Bacteria - 1884; Metazoa - 5536; Fungi - 2506; Plants - 1043; Viruses - 361; Other Eukaryotes - 5958 (source: NCBI BLink).   chr3:5006565-5007689 FORWARD LENGTH=237 | 237                                                                                                                                                                                                                                                        | 237 | 1.00E-117 | 100.0     | 86.1  | 92.0 |      |
| Rsa1.0_01712.1.g29231.t1 | gb[EOA30524.1] hypothetical protein CARUB_v10013646mg [Capsella rubella]                                                                                                                                                                                                       | 438 | 463  | 0         | 105.7 | 76.9 | 87.0 | hypothetical protein CARUB_v10013646mg gbpln           | Capsella rubella     | AT3G14870.1   Symbols:   Plant protein of unknown function (DUF641)   chr3:5004159-5005586 FORWARD LENGTH=475                                                                                                                                                                                                                                                                                                       | 438                                                                                                                                                                                                                                                        | 475 | 0         | 108.4     | 76.9  | 85.8 |      |
| Rsa1.0_01712.1.g29232.t1 | ref[NP_974315.1] NHL domain-containing protein [Arabidopsis thaliana] gi 332642057 gb AEE75578.1  NHL domain-containing protein [Arabidopsis thaliana]                                                                                                                         | 117 | 493  | 3.00E-18  | 421.4 | 42.7 | 48.7 | NHL domain-containing protein gbpln                    | Arabidopsis thaliana | AT3G14860.2   Symbols:   NHL domain-containing protein   chr3:4998591-5000894 REVERSE LENGTH=493                                                                                                                                                                                                                                                                                                                    | 117                                                                                                                                                                                                                                                        | 493 | 5.00E-21  | 421.4     | 42.7  | 48.7 |      |
| Rsa1.0_01712.1.g29233.t1 | ref[XP_002882897.1] hypothetical protein ARALYDRAFT_478900 [Arabidopsis lyrata subsp. lyrata] gi 297328737 gb EFH59156.1                                                                                                                                                       | 338 | 350  | 1.00E-161 | 103.6 | 84.9 | 91.1 | hypothetical protein ARALYDRAFT_478900 gbpln           | Arabidopsis lyrata   | hypothetical protein ARALYDRAFT_478900 [Arabidopsis lyrata subsp. lyrata]                                                                                                                                                                                                                                                                                                                                           | AT3G14850.2   Symbols: TBL41   TRICHOME BIREFRINGENCE-LIKE 41   chr3:4995615-4997611 FORWARD LENGTH=356                                                                                                                                                    | 338 | 356       | 1.00E-157 | 105.3 | 82.0 | 90.5 |
| Rsa1.0_01712.1.g29234.t1 | ref[NP_188102.5] Leucine-rich repeat transmembrane protein kinase [Arabidopsis thaliana] gi 313471762 sp COLGN2.1 Y3148_ARAT H RecName: Full=Probable leucine-rich repeat receptor-like serine/threonine-protein kinase At3g14840; Flags: Precursor gi 224589567 gb ACN59317.1 | 912 | 1020 | 0         | 111.8 | 77.6 | 87.5 | Leucine-rich repeat transmembrane protein gbpln kinase | Arabidopsis thaliana | leucine-rich repeat receptor-like protein kinase [Arabidopsis thaliana] gi 332642053 gb AEE75574.1  Leucine-rich repeat transmembrane protein kinase [Arabidopsis thaliana]                                                                                                                                                                                                                                         | AT3G14840.2   Symbols:   Leucine-rich repeat transmembrane protein kinase   chr3:4988271-4993891 FORWARD LENGTH=1020                                                                                                                                       | 912 | 1020      | 0         | 111.8 | 77.6 | 87.5 |

|                          |                                                                                                                                                                                                                                                                                                                                                                                                                                                                                                                                                                                                                                                                                                                                                                                                                                                                                                                                                |      |      |           |       |      |      |                                                               |       |                            |                                                                                                                                                                |      |     |           |       |      |      |
|--------------------------|------------------------------------------------------------------------------------------------------------------------------------------------------------------------------------------------------------------------------------------------------------------------------------------------------------------------------------------------------------------------------------------------------------------------------------------------------------------------------------------------------------------------------------------------------------------------------------------------------------------------------------------------------------------------------------------------------------------------------------------------------------------------------------------------------------------------------------------------------------------------------------------------------------------------------------------------|------|------|-----------|-------|------|------|---------------------------------------------------------------|-------|----------------------------|----------------------------------------------------------------------------------------------------------------------------------------------------------------|------|-----|-----------|-------|------|------|
| Rsa1.0_01712.1.g29235.t1 | refNP_188080.1  cytochrome P450, family 72, subfamily A, polypeptide 8 [Arabidopsis thaliana]<br>gi 9294384 dbj BAB02394.1  cytochrome P450 [Arabidopsis thaliana]<br>gi 15529169 gb AAK97679.1  AT3g14620/MIE1.12 [Arabidopsis thaliana] gi 332642027 gb AEE75548.1  cytochrome P450, family 72, subfamily A, polypeptide 8 [Arabidopsis thaliana]<br>refNP_188079.1  cytochrome P450, family 72, subfamily A, polypeptide 7 [Arabidopsis thaliana]<br>gi 9294383 dbj BAB02393.1  cytochrome P450 [Arabidopsis thaliana]<br>gi 18252155 gb AAL61910.1  cytochrome P450 [Arabidopsis thaliana]<br>gi 28059362 gb AAO30051.1  cytochrome P450 [Arabidopsis thaliana]<br>gi 332642026 gb AEE75547.1  cytochrome P450, family 72, subfamily A, polypeptide 7 [Arabidopsis thaliana]                                                                                                                                                               | 515  | 515  | 0         | 100.0 | 83.5 | 90.1 | cytochrome P450, family 72, subfamily A, polypeptide 8        | gbpln | Arabidopsis thaliana       | AT3G14620.1   Symbols: CYP72A8   cytochrome P450, family 72, subfamily A, polypeptide 8   chr3:4914978-4916853 FORWARD LENGTH=515                              | 515  | 515 | 0         | 100.0 | 83.5 | 90.1 |
| Rsa1.0_01712.1.g29236.t1 | refXP_002976838.1  hypothetical protein SELMODRAFT_151539 [Selaginella moellendorffii]<br>gi 300155316 gb EFJ21948.1  hypothetical protein SELMODRAFT_151539 [Selaginella moellendorffii]                                                                                                                                                                                                                                                                                                                                                                                                                                                                                                                                                                                                                                                                                                                                                      | 511  | 512  | 0         | 100.2 | 84.0 | 92.2 | cytochrome P450, family 72, subfamily A, polypeptide 7        | gbpln | Arabidopsis thaliana       | AT3G14610.1   Symbols: CYP72A7   cytochrome P450, family 72, subfamily A, polypeptide 7   chr3:4912565-4914503 FORWARD LENGTH=512                              | 511  | 512 | 0         | 100.2 | 84.0 | 92.2 |
| Rsa1.0_01713.1.g29237.t1 | refNP_564567.1  oligopeptidase B [Arabidopsis thaliana]<br>gi 5734786 gb AAD50051.1 AC007980.16 Similar to oligopeptidases [Arabidopsis thaliana] gi 19310465 gb AA184967.1  At1g50380/F1413.27 [Arabidopsis thaliana] gi 33219442 gb AEE32542.1  prolyl oligopeptidase family protein [Arabidopsis thaliana]                                                                                                                                                                                                                                                                                                                                                                                                                                                                                                                                                                                                                                  | 149  | 562  | 3.00E-34  | 377.2 | 50.3 | 69.8 | hypothetical protein SELMODRAFT_151539                        | gbpln | Selaginella moellendorffii | AT1G22660.1   Symbols:   Polynucleotide adenyllyltransferase family protein   chr1:8017410-8021538 FORWARD LENGTH=605                                          | 149  | 605 | 2.00E-33  | 406.0 | 51.7 | 70.5 |
| Rsa1.0_01713.1.g29238.t1 | refXP_002868287.1  hypothetical protein ARALYDRAFT_493466 [Arabidopsis lyrata subsp. lyrata]<br>gi 297314123 gb EFH44546.1  hypothetical protein ARALYDRAFT_493466 [Arabidopsis lyrata subsp. lyrata]<br>refNP_188632.1  phytochrome-associated serine/threonine protein phosphatase 3 [Arabidopsis thaliana]<br>gi 75311171 sp Q9LHE7.1 FYPP3_ARAT H RecName: Full=Phytochrome-associated serine/threonine-protein phosphatase 3; Short=AtFYPP3; AltName: Full=Protein EMBRYO DEFECTIVE 2736<br>gi 14582206 gb AAK69404.1 AF275664.1 serine/threonine protein phosphatase [Arabidopsis thaliana]<br>gi 11994773 dbj BAB03163.1  phosphoprotein phosphatase [Arabidopsis thaliana]<br>gi 17381249 gb AAL36043.1  AT3g19980/MZE19.3 [Arabidopsis thaliana] gi 20453363 gb AAM19930.1  AT3g19980/MZE19.3 [Arabidopsis thaliana] gi 332642794 gb AEE76315.1  phytochrome-associated serine/threonine protein phosphatase 3 [Arabidopsis thaliana] | 710  | 710  | 0         | 100.0 | 90.6 | 95.2 | oligopeptidase B                                              | gbpln | Arabidopsis thaliana       | AT1G50380.1   Symbols:   Prolyl oligopeptidase family protein   chr1:18662480-18666185 FORWARD LENGTH=710                                                      | 710  | 710 | 0         | 100.0 | 90.6 | 95.2 |
| Rsa1.0_01713.1.g29239.t6 | gb ABD65117.1  hypothetical protein 31.t00030 [Brassica oleracea]                                                                                                                                                                                                                                                                                                                                                                                                                                                                                                                                                                                                                                                                                                                                                                                                                                                                              | 1449 | 1471 | 0         | 101.5 | 30.5 | 38.6 | hypothetical protein 31.t00030                                | gbpln | Brassica oleracea          | AT1G52950.1   Symbols:   Nucleic acid-binding, OB-fold-like protein   chr1:19725483-19728007 FORWARD LENGTH=566                                                | 1449 | 566 | 3.00E-39  | 39.1  | 9.8  | 15.9 |
| Rsa1.0_01713.1.g29240.t1 | #                                                                                                                                                                                                                                                                                                                                                                                                                                                                                                                                                                                                                                                                                                                                                                                                                                                                                                                                              | #    | #    | #         | #     | #    | -    | ----                                                          | ----  | #                          | #                                                                                                                                                              | #    | #   | #         | #     | #    |      |
| Rsa1.0_01713.1.g29241.t1 | refNP_188632.1  phytochrome-associated serine/threonine protein phosphatase 3 [Arabidopsis thaliana]<br>gi 75311171 sp Q9LHE7.1 FYPP3_ARAT H RecName: Full=Phytochrome-associated serine/threonine-protein phosphatase 3; Short=AtFYPP3; AltName: Full=Protein EMBRYO DEFECTIVE 2736<br>gi 14582206 gb AAK69404.1 AF275664.1 serine/threonine protein phosphatase [Arabidopsis thaliana]<br>gi 11994773 dbj BAB03163.1  phosphoprotein phosphatase [Arabidopsis thaliana]<br>gi 17381249 gb AAL36043.1  AT3g19980/MZE19.3 [Arabidopsis thaliana] gi 20453363 gb AAM19930.1  AT3g19980/MZE19.3 [Arabidopsis thaliana] gi 332642794 gb AEE76315.1  phytochrome-associated serine/threonine protein phosphatase 3 [Arabidopsis thaliana]                                                                                                                                                                                                          | 329  | 372  | 1.00E-103 | 113.1 | 64.1 | 76.3 | hypothetical protein ARALYDRAFT_493466                        | gbpln | Arabidopsis lyrata         | AT4G14365.1   Symbols: XBAT34   XB3 ortholog 4 in Arabidopsis thaliana   chr4:8271660-8273685 REVERSE LENGTH=376                                               | 329  | 376 | 1.00E-103 | 114.3 | 62.9 | 76.3 |
| Rsa1.0_01713.1.g29242.t1 | refNP_188632.1  phytochrome-associated serine/threonine protein phosphatase 3 [Arabidopsis thaliana]<br>gi 75311171 sp Q9LHE7.1 FYPP3_ARAT H RecName: Full=Phytochrome-associated serine/threonine-protein phosphatase 3; Short=AtFYPP3; AltName: Full=Protein EMBRYO DEFECTIVE 2736<br>gi 14582206 gb AAK69404.1 AF275664.1 serine/threonine protein phosphatase [Arabidopsis thaliana]<br>gi 11994773 dbj BAB03163.1  phosphoprotein phosphatase [Arabidopsis thaliana]<br>gi 17381249 gb AAL36043.1  AT3g19980/MZE19.3 [Arabidopsis thaliana] gi 20453363 gb AAM19930.1  AT3g19980/MZE19.3 [Arabidopsis thaliana] gi 332642794 gb AEE76315.1  phytochrome-associated serine/threonine protein phosphatase 3 [Arabidopsis thaliana]                                                                                                                                                                                                          | 300  | 303  | 1.00E-160 | 101.0 | 89.7 | 91.0 | phytochrome-associated serine/threonine protein phosphatase 3 | gbpln | Arabidopsis thaliana       | AT3G19980.1   Symbols: ATFYPP3, EMB2736, STPP, FYPP3   flower-specific, phytochrome-associated protein phosphatase 3   chr3:6962008-6964761 FORWARD LENGTH=303 | 300  | 303 | 1.00E-162 | 101.0 | 89.7 | 91.0 |



|                          |                                                                                                                                                                                                                                                                                                                                                                                                                                                                                    |      |      |           |       |      |      |                                                     |       |                      |                                                                                                                                                                                                                                                                                                                                                                                                                                                                                                                                                               |      |      |           |       |      |      |
|--------------------------|------------------------------------------------------------------------------------------------------------------------------------------------------------------------------------------------------------------------------------------------------------------------------------------------------------------------------------------------------------------------------------------------------------------------------------------------------------------------------------|------|------|-----------|-------|------|------|-----------------------------------------------------|-------|----------------------|---------------------------------------------------------------------------------------------------------------------------------------------------------------------------------------------------------------------------------------------------------------------------------------------------------------------------------------------------------------------------------------------------------------------------------------------------------------------------------------------------------------------------------------------------------------|------|------|-----------|-------|------|------|
| Rsa1.0_01713.1.g29243.t1 | refNP_180705.1   F-box protein DOR [Arabidopsis thaliana]   g 229807544 sp Q5BPS3.2 DOR_ARATH RecName: Full=F-box protein DOR; AltName: Full=Protein DROUGHT TOLERANCE REPRESSOR   g 4589954 gb AAD26472.1  hypothetical protein [Arabidopsis thaliana]   g 330253458 gb AEC08552.1  F-box protein DOR [Arabidopsis thaliana]                                                                                                                                                      | 280  | 387  | 5.00E-66  | 138.2 | 52.9 | 66.8 | F-box protein DOR                                   | gbpln | Arabidopsis thaliana | AT2G31470.1   Symbols: DOR   F-box and associated interaction domains-containing protein   chr2:13407492-13408655 REVERSE LENGTH=387                                                                                                                                                                                                                                                                                                                                                                                                                          | 280  | 387  | 1.00E-68  | 138.2 | 52.9 | 66.8 |
| Rsa1.0_01714.1.g29244.t1 | #                                                                                                                                                                                                                                                                                                                                                                                                                                                                                  | #    | #    | #         | #     | #    | -    | ----                                                | ----  | #                    | #                                                                                                                                                                                                                                                                                                                                                                                                                                                                                                                                                             | #    | #    | #         | #     | #    | #    |
| Rsa1.0_01714.1.g29245.t1 | gb AAF97969.1 AC000103.19 F21J9.30 [Arabidopsis thaliana]                                                                                                                                                                                                                                                                                                                                                                                                                          | 843  | 1270 | 0         | 150.7 | 48.8 | 64.3 | F21J9.30                                            | gbpln | Arabidopsis thaliana | AT4G29090.1   Symbols:   Ribonuclease H-like superfamily protein   chr4:14333528-14335255 FORWARD LENGTH=575                                                                                                                                                                                                                                                                                                                                                                                                                                                  | 843  | 575  | 1.00E-68  | 68.2  | 17.4 | 29.5 |
| Rsa1.0_01714.1.g29246.t1 | #                                                                                                                                                                                                                                                                                                                                                                                                                                                                                  | #    | #    | #         | #     | #    | -    | ----                                                | ----  | #                    | #                                                                                                                                                                                                                                                                                                                                                                                                                                                                                                                                                             | #    | #    | #         | #     | #    | #    |
| Rsa1.0_01714.1.g29247.t1 | #                                                                                                                                                                                                                                                                                                                                                                                                                                                                                  | #    | #    | #         | #     | #    | -    | ----                                                | ----  | #                    | #                                                                                                                                                                                                                                                                                                                                                                                                                                                                                                                                                             | #    | #    | #         | #     | #    | #    |
| Rsa1.0_01714.1.g29248.t2 | refXP_002868599.1   hypothetical protein ARALYDRAFT_493840 [Arabidopsis lyrata subsp. lyrata]   g 297314435 gb EFH44858.1  hypothetical protein ARALYDRAFT_493840 [Arabidopsis lyrata subsp. lyrata]                                                                                                                                                                                                                                                                               | 277  | 308  | 1.00E-107 | 111.2 | 75.1 | 81.6 | hypothetical protein ARALYDRAFT_493840              | gbpln | Arabidopsis lyrata   | AT5G41380.1   Symbols:   CCT motif family protein   chr5:16562129-16563553 REVERSE LENGTH=307                                                                                                                                                                                                                                                                                                                                                                                                                                                                 | 277  | 307  | 1.00E-107 | 110.8 | 72.9 | 80.5 |
| Rsa1.0_01714.1.g29249.t1 | #                                                                                                                                                                                                                                                                                                                                                                                                                                                                                  | #    | #    | #         | #     | #    | -    | ----                                                | ----  | #                    | #                                                                                                                                                                                                                                                                                                                                                                                                                                                                                                                                                             | #    | #    | #         | #     | #    | #    |
| Rsa1.0_01714.1.g29250.t1 | #                                                                                                                                                                                                                                                                                                                                                                                                                                                                                  | #    | #    | #         | #     | #    | -    | ----                                                | ----  | #                    | #                                                                                                                                                                                                                                                                                                                                                                                                                                                                                                                                                             | #    | #    | #         | #     | #    | #    |
| Rsa1.0_01715.1.g29251.t1 | #                                                                                                                                                                                                                                                                                                                                                                                                                                                                                  | #    | #    | #         | #     | #    | -    | ----                                                | ----  | #                    | #                                                                                                                                                                                                                                                                                                                                                                                                                                                                                                                                                             | #    | #    | #         | #     | #    | #    |
| Rsa1.0_01715.1.g29252.t1 | gb EOA19792.1  hypothetical protein CARUB_v10000037mg [Capsella rubella]                                                                                                                                                                                                                                                                                                                                                                                                           | 166  | 1456 | 2.00E-16  | 877.1 | 32.5 | 36.1 | hypothetical protein CARUB_v10000037mg              | gbpln | Capsella rubella     | AT5G01400.1   Symbols: ESP4   HEAT repeat-containing protein   chr5:162803-171072 REVERSE LENGTH=1467                                                                                                                                                                                                                                                                                                                                                                                                                                                         | 166  | 1467 | 4.00E-17  | 883.7 | 33.1 | 37.3 |
| Rsa1.0_01715.1.g29253.t1 | gb EOA32723.1  hypothetical protein CARUB_v10016027mg [Capsella rubella]                                                                                                                                                                                                                                                                                                                                                                                                           | 72   | 72   | 4.00E-14  | 100.0 | 69.4 | 80.6 | hypothetical protein CARUB_v10016027mg              | gbpln | Capsella rubella     | AT2G19030.1   Symbols: RALFL11   ralf-like 11   chr2:8247783-8248001 FORWARD LENGTH=72                                                                                                                                                                                                                                                                                                                                                                                                                                                                        | 72   | 72   | 2.00E-16  | 100.0 | 69.4 | 79.2 |
| Rsa1.0_01715.1.g29254.t1 | refXP_002886247.1   GDSL-motif lipase/hydrolase family protein [Arabidopsis lyrata subsp. lyrata]   g 297332087 gb EFH62506.1  GDSL-motif lipase/hydrolase family protein [Arabidopsis lyrata subsp. lyrata]                                                                                                                                                                                                                                                                       | 349  | 345  | 1.00E-152 | 98.9  | 71.3 | 84.0 | GDSL-motif lipase/hydrolase family protein          | gbpln | Arabidopsis lyrata   | AT2G19010.1   Symbols:   GDSL-like Lipase/Acylhydrolase superfamily protein   chr2:8243089-8245378 FORWARD LENGTH=344                                                                                                                                                                                                                                                                                                                                                                                                                                         | 349  | 344  | 1.00E-151 | 98.6  | 69.9 | 81.9 |
| Rsa1.0_01715.1.g29255.t1 | gb AAC33226.1  putative non-LTR retroelement reverse transcriptase [Arabidopsis thaliana]                                                                                                                                                                                                                                                                                                                                                                                          | 1342 | 1529 | 0         | 113.9 | 34.8 | 51.3 | putative non-LTR retroelement reverse transcriptase | gbpln | Arabidopsis thaliana | AT3G24255.1   Symbols:   RNA-directed DNA polymerase (reverse transcriptase)-related family protein   chr3:8789471-8793208 FORWARD LENGTH=746                                                                                                                                                                                                                                                                                                                                                                                                                 | 1342 | 746  | 9.00E-69  | 55.6  | 9.7  | 13.4 |
| Rsa1.0_01715.1.g29256.t1 | refNP_565445.1   uncharacterized protein [Arabidopsis thaliana]   g 3176702 gb AAD12018.1  expressed protein [Arabidopsis thaliana]   g 20197040 gb AAM14889.1  expressed protein [Arabidopsis thaliana]   g 21592504 gb AAM64454.1  unknown [Arabidopsis thaliana]   g 91806202 gb ABE65829.1  unknown [Arabidopsis thaliana]   g 109946531 gb ABG48444.1  At2g19000 [Arabidopsis thaliana]   g 330251743 gb AEC06837.1  uncharacterized protein AT2G19000 [Arabidopsis thaliana] | 129  | 125  | 4.00E-30  | 96.9  | 56.6 | 62.0 | uncharacterized protein                             | gbpln | Arabidopsis thaliana | AT2G19000.1   Symbols:   unknown protein; FUNCTIONS IN: molecular function unknown; INVOLVED IN: biological process unknown; LOCATED IN: endomembrane system; EXPRESSED IN: 9 plant structures; EXPRESSED DURING: L mature pollen stage, M germinated pollen stage, 4 anthesis, C globular stage, petal differentiation and expansion stage; Has 71 Blast hits to 71 proteins in 12 species: Archae - 0; Bacteria - 0; Metazoa - 2; Fungi - 0; Plants - 69; Viruses - 0; Other Eukaryotes - 0 (source: NCBI BLink).   chr2:8241189-8241566 FORWARD LENGTH=125 | 129  | 125  | 8.00E-33  | 96.9  | 56.6 | 62.0 |
| Rsa1.0_01715.1.g29257.t1 | #                                                                                                                                                                                                                                                                                                                                                                                                                                                                                  | #    | #    | #         | #     | #    | -    | ----                                                | ----  | #                    | #                                                                                                                                                                                                                                                                                                                                                                                                                                                                                                                                                             | #    | #    | #         | #     | #    | #    |
| Rsa1.0_01715.1.g29258.t5 | refXP_002889154.1   ribonuclease II family protein [Arabidopsis lyrata subsp. lyrata]   g 297334995 gb EFH65413.1  ribonuclease II family protein [Arabidopsis lyrata subsp. lyrata]                                                                                                                                                                                                                                                                                               | 312  | 1062 | 4.00E-13  | 340.4 | 11.5 | 14.1 | ribonuclease II family protein                      | gbpln | Arabidopsis lyrata   | AT1G77680.1   Symbols:   Ribonuclease II/R family protein   chr1:29192188-29195963 REVERSE LENGTH=1055                                                                                                                                                                                                                                                                                                                                                                                                                                                        | 312  | 1055 | 4.00E-15  | 338.1 | 11.2 | 14.1 |
| Rsa1.0_01716.1.g29259.t1 | #                                                                                                                                                                                                                                                                                                                                                                                                                                                                                  | #    | #    | #         | #     | #    | -    | ----                                                | ----  | #                    | #                                                                                                                                                                                                                                                                                                                                                                                                                                                                                                                                                             | #    | #    | #         | #     | #    | #    |
| Rsa1.0_01716.1.g29260.t1 | gb EOA30837.1  hypothetical protein CARUB_v10013982mg [Capsella rubella]                                                                                                                                                                                                                                                                                                                                                                                                           | 376  | 370  | 1.00E-167 | 98.4  | 91.5 | 95.2 | hypothetical protein CARUB_v10013982mg              | gbpln | Capsella rubella     | AT2G20280.1   Symbols:   Zinc finger C-x8-C-x5-C-x3-H type family protein   chr2:8740054-8742349 REVERSE LENGTH=371                                                                                                                                                                                                                                                                                                                                                                                                                                           | 376  | 371  | 1.00E-169 | 98.7  | 91.8 | 95.2 |
| Rsa1.0_01716.1.g29261.t1 | refXP_002883935.1   hypothetical protein ARALYDRAFT_899837 [Arabidopsis lyrata subsp. lyrata]   g 297329775 gb EFH60194.1  hypothetical protein ARALYDRAFT_899837 [Arabidopsis lyrata subsp. lyrata]                                                                                                                                                                                                                                                                               | 181  | 187  | 2.00E-53  | 103.3 | 70.2 | 78.5 | hypothetical protein ARALYDRAFT_899837              | gbpln | Arabidopsis lyrata   | AT2G20270.1   Symbols:   Thioredoxin superfamily protein   chr2:8738001-8739617 REVERSE LENGTH=179                                                                                                                                                                                                                                                                                                                                                                                                                                                            | 181  | 179  | 6.00E-53  | 98.9  | 65.7 | 75.7 |

|                          |                                                                                                                                                                                                                                                                                                                                                                                                  |      |      |           |       |      |      |                                        |       |                      |                                                                                                                                    |      |      |           |       |      |      |
|--------------------------|--------------------------------------------------------------------------------------------------------------------------------------------------------------------------------------------------------------------------------------------------------------------------------------------------------------------------------------------------------------------------------------------------|------|------|-----------|-------|------|------|----------------------------------------|-------|----------------------|------------------------------------------------------------------------------------------------------------------------------------|------|------|-----------|-------|------|------|
| Rsa1.0_01716.1.g29262.t1 | refNP_179614.1   uncharacterized protein [Arabidopsis thaliana] gi 4512711 gb AAD21764.1   unknown protein [Arabidopsis thaliana] gi 330251890 gb AEC06984.1   uncharacterized protein AT2G20240 [Arabidopsis thaliana]                                                                                                                                                                          | 700  | 713  | 0         | 101.9 | 71.6 | 79.3 | uncharacterized protein                | gbpln | Arabidopsis thaliana | AT2G20240.1   Symbols:   Protein of unknown function (DUF3741)   chr2:8727778-8730086 REVERSE LENGTH=713                           | 700  | 713  | 0         | 101.9 | 71.6 | 79.3 |
| Rsa1.0_01716.1.g29263.t1 | refXP_002885992.1   hypothetical protein ARALYDRAFT_480447 [Arabidopsis lyrata subsp. lyrata] gi 297331832 gb EFH62251.1   hypothetical protein ARALYDRAFT_480447 [Arabidopsis lyrata subsp. lyrata]                                                                                                                                                                                             | 250  | 270  | 1.00E-114 | 108.0 | 84.4 | 90.4 | hypothetical protein ARALYDRAFT_480447 | gbpln | Arabidopsis lyrata   | AT2G20230.1   Symbols:   Tetraspanin family protein   chr2:8725762-8727388 FORWARD LENGTH=270                                      | 250  | 270  | 1.00E-108 | 108.0 | 82.8 | 88.8 |
| Rsa1.0_01716.1.g29264.t2 | refNP_194360.1   Arginyl-tRNA synthetase, class Ic [Arabidopsis thaliana] gi 2632105 emb CAB11468.1   arginyl-tRNA synthetase [Arabidopsis thaliana] gi 4539426 emb CAB38959.1   arginyl-tRNA synthetase [Arabidopsis thaliana] gi 7269482 emb CAB79485.1   arginyl-tRNA synthetase [Arabidopsis thaliana] gi 332659782 gb AEE85182.1   Arginyl-tRNA synthetase, class Ic [Arabidopsis thaliana] | 505  | 642  | 0         | 127.1 | 68.7 | 81.8 | Arginyl-tRNA synthetase, class Ic      | gbpln | Arabidopsis thaliana | AT4G26300.1   Symbols: emb1027   Arginyl-tRNA synthetase, class Ic   chr4:13308400-13313109 REVERSE LENGTH=642                     | 505  | 642  | 0         | 127.1 | 68.7 | 81.8 |
| Rsa1.0_01717.1.g29265.t1 | refXP_002868593.1   hypothetical protein ARALYDRAFT_916060 [Arabidopsis lyrata subsp. lyrata] gi 297314429 gb EFH44852.1   hypothetical protein ARALYDRAFT_916060 [Arabidopsis lyrata subsp. lyrata]                                                                                                                                                                                             | 736  | 522  | 0         | 70.9  | 60.6 | 64.0 | hypothetical protein ARALYDRAFT_916060 | gbpln | Arabidopsis lyrata   | AT5G41460.1   Symbols:   Protein of unknown function (DUF604)   chr5:16589724-16592197 REVERSE LENGTH=524                          | 736  | 524  | 0         | 71.2  | 60.7 | 64.1 |
| Rsa1.0_01717.1.g29266.t1 | refXP_002870635.1   hypothetical protein ARALYDRAFT_493835 [Arabidopsis lyrata subsp. lyrata] gi 297316471 gb EFH46894.1   hypothetical protein ARALYDRAFT_493835 [Arabidopsis lyrata subsp. lyrata]                                                                                                                                                                                             | 171  | 277  | 8.00E-69  | 162.0 | 71.9 | 83.0 | hypothetical protein ARALYDRAFT_493835 | gbpln | Arabidopsis lyrata   | AT5G41470.1   Symbols:   Nuclear transport factor 2 (NTF2) family protein   chr5:16593953-16595419 FORWARD LENGTH=277              | 171  | 277  | 4.00E-68  | 162.0 | 69.0 | 82.5 |
| Rsa1.0_01717.1.g29267.t1 | #                                                                                                                                                                                                                                                                                                                                                                                                | #    | #    | #         | #     | #    | #    | -                                      | ----  | ----                 | #                                                                                                                                  | #    | #    | #         | #     | #    | #    |
| Rsa1.0_01717.1.g29268.t2 | refXP_002868589.1   predicted protein [Arabidopsis lyrata subsp. lyrata] gi 297314425 gb EFH44848.1   predicted protein [Arabidopsis lyrata subsp. lyrata]                                                                                                                                                                                                                                       | 1052 | 1456 | 0         | 138.4 | 47.1 | 56.8 | predicted protein                      | gbpln | Arabidopsis lyrata   | AT5G41540.1   Symbols:   Disease resistance protein (TIR-NBS-LRR class) family   chr5:16612659-16616063 REVERSE LENGTH=1038        | 1052 | 1038 | 0         | 98.7  | 46.7 | 57.0 |
| Rsa1.0_01717.1.g29269.t1 | refXP_002868585.1   zinc ion binding protein [Arabidopsis lyrata subsp. lyrata] gi 297314421 gb EFH44844.1   zinc ion binding protein [Arabidopsis lyrata subsp. lyrata]                                                                                                                                                                                                                         | 619  | 760  | 0         | 122.8 | 60.9 | 68.0 | zinc ion binding protein               | gbpln | Arabidopsis lyrata   | AT5G41580.1   Symbols:   RING/U-box superfamily protein   chr5:16626563-16630659 REVERSE LENGTH=760                                | 619  | 760  | 0         | 122.8 | 59.3 | 66.7 |
| Rsa1.0_01717.1.g29270.t1 | refXP_002870617.1   hypothetical protein ARALYDRAFT_916024 [Arabidopsis lyrata subsp. lyrata] gi 297316453 gb EFH46876.1   hypothetical protein ARALYDRAFT_916024 [Arabidopsis lyrata subsp. lyrata]                                                                                                                                                                                             | 614  | 704  | 0         | 114.7 | 92.8 | 96.7 | hypothetical protein ARALYDRAFT_916024 | gbpln | Arabidopsis lyrata   | AT5G41770.1   Symbols:   crooked neck protein, putative / cell cycle protein, putative   chr5:16718021-16720936 FORWARD LENGTH=705 | 614  | 705  | 0         | 114.8 | 92.2 | 96.4 |
| Rsa1.0_01717.1.g29271.t1 | refNP_198993.1   myosin heavy chain-like protein [Arabidopsis thaliana] gi 10177362 dbj BAB10653.1   unnamed protein product [Arabidopsis thaliana] gi 91806972 gb ABE66213.1   myosin heavy chain-like [Arabidopsis thaliana] gi 332007345 gb AED94728.1   myosin heavy chain-like protein [Arabidopsis thaliana]                                                                               | 504  | 537  | 0         | 106.5 | 71.4 | 83.3 | myosin heavy chain-like protein        | gbpln | Arabidopsis thaliana | AT5G41780.1   Symbols:   myosin heavy chain-related   chr5:16723075-16724833 FORWARD LENGTH=537                                    | 504  | 537  | 0         | 106.5 | 71.4 | 83.3 |
| Rsa1.0_01717.1.g29272.t6 | refNP_198994.2   COP1-interactive protein 1 [Arabidopsis thaliana] gi 332007346 gb AED94729.1   COP1-interactive protein 1 [Arabidopsis thaliana]                                                                                                                                                                                                                                                | 2960 | 1586 | 0         | 53.6  | 40.4 | 46.6 | COP1-interactive protein 1             | gbpln | Arabidopsis thaliana | AT5G41790.1   Symbols: CIP1   COP1-interactive protein 1   chr5:16727530-16732391 FORWARD LENGTH=1586                              | 2960 | 1586 | 0         | 53.6  | 40.4 | 46.6 |

|                          |                                                                                                                                                                                                                                                                                                                                                                                                                                                                                                                                                                                                                                                                                                                                                                                                                                                                                                                                                                                                                                                                                                                                                                                                                                                                                                                                                                                                                                                                                                                                                                                                                                                                                                                                                                                                                                                                                                                                                                                                                                                                                                                                                                                                                                                                                                                                                                                                                                                                                                                                                           |      |      |           |       |      |      |                                                     |       |                      |                                                                                                                          |      |     |           |       |      |      |
|--------------------------|-----------------------------------------------------------------------------------------------------------------------------------------------------------------------------------------------------------------------------------------------------------------------------------------------------------------------------------------------------------------------------------------------------------------------------------------------------------------------------------------------------------------------------------------------------------------------------------------------------------------------------------------------------------------------------------------------------------------------------------------------------------------------------------------------------------------------------------------------------------------------------------------------------------------------------------------------------------------------------------------------------------------------------------------------------------------------------------------------------------------------------------------------------------------------------------------------------------------------------------------------------------------------------------------------------------------------------------------------------------------------------------------------------------------------------------------------------------------------------------------------------------------------------------------------------------------------------------------------------------------------------------------------------------------------------------------------------------------------------------------------------------------------------------------------------------------------------------------------------------------------------------------------------------------------------------------------------------------------------------------------------------------------------------------------------------------------------------------------------------------------------------------------------------------------------------------------------------------------------------------------------------------------------------------------------------------------------------------------------------------------------------------------------------------------------------------------------------------------------------------------------------------------------------------------------------|------|------|-----------|-------|------|------|-----------------------------------------------------|-------|----------------------|--------------------------------------------------------------------------------------------------------------------------|------|-----|-----------|-------|------|------|
| Rsa1.0_01717.1.g29273.t1 | refNP_568597.1   Transmembrane amino acid transporter family protein [Arabidopsis thaliana] gi 75245603 sp Q8L4X4.1 GAT2_ARATH RecName: Full=Probable GABA transporter 2 gi 20466438 gb AAM20536.1   amino acid permease-like protein [Arabidopsis thaliana] gi 22136372 gb AAM91264.1   amino acid permease-like protein [Arabidopsis thaliana] gi 332007347 gb AED94730.1   Transmembrane amino acid transporter family protein [Arabidopsis thaliana] refNP_188935.1   ADP-ribosylation factor C1 [Arabidopsis thaliana] gi 334185556 refNP_001189951.1   ADP-ribosylation factor C1 [Arabidopsis thaliana] gi 297788976 refXP_002862508.1   ADP-ribosylation factor C1 [Arabidopsis lyrata subsp. lyrata] gi 11994726 dbj EAB03042.1   unnamed protein product [Arabidopsis thaliana] gi 17381004 gb AAL36314.1   putative ADP-ribosylation factor [Arabidopsis thaliana] gi 20465873 gb AAM20041.1   putative ADP-ribosylation factor [Arabidopsis thaliana] gi 21592454 gb AAM64405.1   ADP-ribosylation factor, putative [Arabidopsis thaliana] gi 297308070 gb EFH38766.1   ADP-ribosylation factor C1 [Arabidopsis lyrata subsp. lyrata] gi 332643174 gb AEE76695.1   ADP-ribosylation factor C1 [Arabidopsis thaliana] gi 332643175 gb AEE76696.1   ADP-ribosylation factor C1 [Arabidopsis thaliana] refNP_193199.1   germin-like protein subfamily 1 member 8 [Arabidopsis thaliana] gi 18203238 sp Q9LEA7.2 GL18_ARATH RecName: Full=Germin-like protein subfamily 1 member 8; Flags: Precursor gi 2244819 emb CAB10242.1   germin precursor oxalate oxidase [Arabidopsis thaliana] gi 7268169 emb CAB78505.1   germin precursor oxalate oxidase [Arabidopsis thaliana] gi 62320424 dbj BAD94883.1   germin precursor oxalate oxidase [Arabidopsis thaliana] gi 117168223 gb ABK32194.1   At4g14630 [Arabidopsis thaliana] gi 332658069 gb AEE83469.1   germin-like protein subfamily 1 member 8 [Arabidopsis thaliana] refNP_193199.1   germin-like protein subfamily 1 member 8 [Arabidopsis thaliana] gi 18203238 sp Q9LEA7.2 GL18_ARATH RecName: Full=Germin-like protein subfamily 1 member 8; Flags: Precursor gi 2244819 emb CAB10242.1   germin precursor oxalate oxidase [Arabidopsis thaliana] gi 7268169 emb CAB78505.1   germin precursor oxalate oxidase [Arabidopsis thaliana] gi 62320424 dbj BAD94883.1   germin precursor oxalate oxidase [Arabidopsis thaliana] gi 117168223 gb ABK32194.1   At4g14630 [Arabidopsis thaliana] gi 332658069 gb AEE83469.1   germin-like protein subfamily 1 member 8 [Arabidopsis thaliana] | 452  | 452  | 0         | 100.0 | 94.9 | 98.0 | Transmembrane amino acid transporter family protein | gbpln | Arabidopsis thaliana | AT5G41800.1   Symbols:   Transmembrane amino acid transporter family protein   chr5:16733842-16735888 FORWARD LENGTH=452 | 452  | 452 | 0         | 100.0 | 94.9 | 98.0 |
| Rsa1.0_01718.1.g29274.t1 | putative ADP-ribosylation factor [Arabidopsis thaliana] gi 20465873 gb AAM20041.1   putative ADP-ribosylation factor [Arabidopsis thaliana] gi 21592454 gb AAM64405.1   ADP-ribosylation factor, putative [Arabidopsis thaliana] gi 297308070 gb EFH38766.1   ADP-ribosylation factor C1 [Arabidopsis lyrata subsp. lyrata] gi 332643174 gb AEE76695.1   ADP-ribosylation factor C1 [Arabidopsis thaliana] gi 332643175 gb AEE76696.1   ADP-ribosylation factor C1 [Arabidopsis thaliana] refNP_193199.1   germin-like protein subfamily 1 member 8 [Arabidopsis thaliana] gi 18203238 sp Q9LEA7.2 GL18_ARATH RecName: Full=Germin-like protein subfamily 1 member 8; Flags: Precursor gi 2244819 emb CAB10242.1   germin precursor oxalate oxidase [Arabidopsis thaliana] gi 7268169 emb CAB78505.1   germin precursor oxalate oxidase [Arabidopsis thaliana] gi 62320424 dbj BAD94883.1   germin precursor oxalate oxidase [Arabidopsis thaliana] gi 117168223 gb ABK32194.1   At4g14630 [Arabidopsis thaliana] gi 332658069 gb AEE83469.1   germin-like protein subfamily 1 member 8 [Arabidopsis thaliana] refNP_193199.1   germin-like protein subfamily 1 member 8 [Arabidopsis thaliana] gi 18203238 sp Q9LEA7.2 GL18_ARATH RecName: Full=Germin-like protein subfamily 1 member 8; Flags: Precursor gi 2244819 emb CAB10242.1   germin precursor oxalate oxidase [Arabidopsis thaliana] gi 7268169 emb CAB78505.1   germin precursor oxalate oxidase [Arabidopsis thaliana] gi 62320424 dbj BAD94883.1   germin precursor oxalate oxidase [Arabidopsis thaliana] gi 117168223 gb ABK32194.1   At4g14630 [Arabidopsis thaliana] gi 332658069 gb AEE83469.1   germin-like protein subfamily 1 member 8 [Arabidopsis thaliana]                                                                                                                                                                                                                                                                                                                                                                                                                                                                                                                                                                                                                                                                                                                                                                                                                       | 109  | 183  | 1.00E-23  | 167.9 | 49.5 | 52.3 | ADP-ribosylation factor C1                          | gbpln | Arabidopsis lyrata   | AT3G22950.2   Symbols: ARFC1   ADP-ribosylation factor C1   chr3:8136364-8137513 REVERSE LENGTH=183                      | 109  | 183 | 2.00E-26  | 167.9 | 49.5 | 52.3 |
| Rsa1.0_01718.1.g29275.t1 | germin precursor oxalate oxidase [Arabidopsis thaliana] gi 7268169 emb CAB78505.1   germin precursor oxalate oxidase [Arabidopsis thaliana] gi 62320424 dbj BAD94883.1   germin precursor oxalate oxidase [Arabidopsis thaliana] gi 117168223 gb ABK32194.1   At4g14630 [Arabidopsis thaliana] gi 332658069 gb AEE83469.1   germin-like protein subfamily 1 member 8 [Arabidopsis thaliana] refNP_193199.1   germin-like protein subfamily 1 member 8 [Arabidopsis thaliana] gi 18203238 sp Q9LEA7.2 GL18_ARATH RecName: Full=Germin-like protein subfamily 1 member 8; Flags: Precursor gi 2244819 emb CAB10242.1   germin precursor oxalate oxidase [Arabidopsis thaliana] gi 7268169 emb CAB78505.1   germin precursor oxalate oxidase [Arabidopsis thaliana] gi 62320424 dbj BAD94883.1   germin precursor oxalate oxidase [Arabidopsis thaliana] gi 117168223 gb ABK32194.1   At4g14630 [Arabidopsis thaliana] gi 332658069 gb AEE83469.1   germin-like protein subfamily 1 member 8 [Arabidopsis thaliana]                                                                                                                                                                                                                                                                                                                                                                                                                                                                                                                                                                                                                                                                                                                                                                                                                                                                                                                                                                                                                                                                                                                                                                                                                                                                                                                                                                                                                                                                                                                                          | 220  | 222  | 1.00E-105 | 100.9 | 85.9 | 91.4 | germin-like protein subfamily 1 member 8            | gbpln | Arabidopsis thaliana | AT4G14630.1   Symbols: GLP9   germin-like protein 9   chr4:8392920-8393680 FORWARD LENGTH=222                            | 220  | 222 | 1.00E-107 | 100.9 | 85.9 | 91.4 |
| Rsa1.0_01718.1.g29276.t1 | germin precursor oxalate oxidase [Arabidopsis thaliana] gi 7268169 emb CAB78505.1   germin precursor oxalate oxidase [Arabidopsis thaliana] gi 62320424 dbj BAD94883.1   germin precursor oxalate oxidase [Arabidopsis thaliana] gi 117168223 gb ABK32194.1   At4g14630 [Arabidopsis thaliana] gi 332658069 gb AEE83469.1   germin-like protein subfamily 1 member 8 [Arabidopsis thaliana]                                                                                                                                                                                                                                                                                                                                                                                                                                                                                                                                                                                                                                                                                                                                                                                                                                                                                                                                                                                                                                                                                                                                                                                                                                                                                                                                                                                                                                                                                                                                                                                                                                                                                                                                                                                                                                                                                                                                                                                                                                                                                                                                                               | 220  | 222  | 1.00E-109 | 100.9 | 90.0 | 93.6 | germin-like protein subfamily 1 member 8            | gbpln | Arabidopsis thaliana | AT4G14630.1   Symbols: GLP9   germin-like protein 9   chr4:8392920-8393680 FORWARD LENGTH=222                            | 220  | 222 | 1.00E-111 | 100.9 | 90.0 | 93.6 |
| Rsa1.0_01718.1.g29277.t1 | #                                                                                                                                                                                                                                                                                                                                                                                                                                                                                                                                                                                                                                                                                                                                                                                                                                                                                                                                                                                                                                                                                                                                                                                                                                                                                                                                                                                                                                                                                                                                                                                                                                                                                                                                                                                                                                                                                                                                                                                                                                                                                                                                                                                                                                                                                                                                                                                                                                                                                                                                                         | #    | #    | #         | #     | #    | -    | ----                                                | ----  | #                    | #                                                                                                                        | #    | #   | #         | #     | #    |      |
| Rsa1.0_01718.1.g29278.t1 | gb AAD17398.1   putative non-LTR retroelement reverse transcriptase [Arabidopsis thaliana]                                                                                                                                                                                                                                                                                                                                                                                                                                                                                                                                                                                                                                                                                                                                                                                                                                                                                                                                                                                                                                                                                                                                                                                                                                                                                                                                                                                                                                                                                                                                                                                                                                                                                                                                                                                                                                                                                                                                                                                                                                                                                                                                                                                                                                                                                                                                                                                                                                                                | 1655 | 1225 | 0         | 74.0  | 34.2 | 46.2 | putative non-LTR retroelement reverse transcriptase | gbpln | Arabidopsis thaliana | AT4G29090.1   Symbols:   Ribonuclease H-like superfamily protein   chr4:14333528-14335255 FORWARD LENGTH=575             | 1655 | 575 | 8.00E-74  | 34.7  | 10.3 | 16.4 |
| Rsa1.0_01718.1.g29279.t1 | #                                                                                                                                                                                                                                                                                                                                                                                                                                                                                                                                                                                                                                                                                                                                                                                                                                                                                                                                                                                                                                                                                                                                                                                                                                                                                                                                                                                                                                                                                                                                                                                                                                                                                                                                                                                                                                                                                                                                                                                                                                                                                                                                                                                                                                                                                                                                                                                                                                                                                                                                                         | #    | #    | #         | #     | #    | -    | ----                                                | ----  | #                    | #                                                                                                                        | #    | #   | #         | #     | #    |      |

|                          |                                                                                                                                                                                                                                  |     |      |           |       |      |      |                                                      |       |                    |                                                                                                                                                                                                                                                                                                                                                                                                                                                                                                                                                                                                                                                   |     |      |           |       |      |      |
|--------------------------|----------------------------------------------------------------------------------------------------------------------------------------------------------------------------------------------------------------------------------|-----|------|-----------|-------|------|------|------------------------------------------------------|-------|--------------------|---------------------------------------------------------------------------------------------------------------------------------------------------------------------------------------------------------------------------------------------------------------------------------------------------------------------------------------------------------------------------------------------------------------------------------------------------------------------------------------------------------------------------------------------------------------------------------------------------------------------------------------------------|-----|------|-----------|-------|------|------|
| Rsa1.0_01718.1.g29280.t1 | gb EOA17773.1  hypothetical protein CARUB_v10006162mg [Capsella rubella]                                                                                                                                                         | 76  | 76   | 4.00E-31  | 100.0 | 86.8 | 93.4 | hypothetical protein CARUB_v10006162mg               | gbpln | Capsella rubella   | AT4G14615.1   Symbols:   unknown protein; FUNCTIONS IN: molecular function unknown; INVOLVED IN: biological_process unknown; LOCATED IN: endomembrane system; EXPRESSED IN: 24 plant structures; EXPRESSED DURING: 15 growth stages; CONTAINS InterPro DOMAIN/s: Protein of unknown function DUF2346 (InterPro:IPR018625); BEST Arabidopsis thaliana protein match is: unknown protein (TAIR:AT1G52825.1); Has 30201 Blast hits to 17322 proteins in 780 species: Archae - 12; Bacteria - 1396; Metazoa - 17338; Fungi - 3422; Plants - 5037; Viruses - 0; Other Eukaryotes - 2996 (source: NCBI BLink).   chr4:8383842-8384814 FORWARD LENGTH=76 | 76  | 76   | 7.00E-34  | 100.0 | 86.8 | 93.4 |
| Rsa1.0_01719.1.g29281.t2 | gb AAM10969.1  calmodulin-binding transcription activator [Brassica napus]                                                                                                                                                       | 982 | 1035 | 0         | 105.4 | 92.9 | 95.6 | calmodulin-binding transcription activator           | gbpln | Brassica napus     | AT5G09410.2   Symbols: EICBP.B, CAMTA1   ethylene induced calmodulin binding protein   chr5:2921457-2927291 FORWARD LENGTH=1007                                                                                                                                                                                                                                                                                                                                                                                                                                                                                                                   | 982 | 1007 | 0         | 102.5 | 82.1 | 89.4 |
| Rsa1.0_01719.1.g29282.t1 | gb EOA20818.1  hypothetical protein CARUB_v10001155mg [Capsella rubella]                                                                                                                                                         | 338 | 387  | 1.00E-133 | 114.5 | 77.8 | 87.3 | hypothetical protein CARUB_v10001155mg               | gbpln | Capsella rubella   | AT5G09390.1   Symbols:   CD2-binding protein-related   chr5:2913591-2915803 FORWARD LENGTH=351                                                                                                                                                                                                                                                                                                                                                                                                                                                                                                                                                    | 338 | 351  | 1.00E-133 | 103.8 | 75.7 | 88.8 |
| Rsa1.0_01719.1.g29283.t1 | gb EOA21342.1  hypothetical protein CARUB_v10001705mg [Capsella rubella]                                                                                                                                                         | 275 | 271  | 1.00E-120 | 98.5  | 78.5 | 87.6 | hypothetical protein CARUB_v10001705mg               | gbpln | Capsella rubella   | AT5G09380.1   Symbols:   RNA polymerase III RPC4   chr5:2911313-2913136 REVERSE LENGTH=272                                                                                                                                                                                                                                                                                                                                                                                                                                                                                                                                                        | 275 | 272  | 1.00E-117 | 98.9  | 76.4 | 86.9 |
| Rsa1.0_01719.1.g29284.t1 | ref XP_002873395.1  hypothetical protein ARALYDRAFT_487745 [Arabidopsis lyrata subsp. lyrata]   g 297319232 gb EFH49654.1  hypothetical protein ARALYDRAFT_487745 [Arabidopsis lyrata subsp. lyrata]                             | 427 | 411  | 1.00E-157 | 96.3  | 69.8 | 79.2 | hypothetical protein ARALYDRAFT_487745               | gbpln | Arabidopsis lyrata | AT5G09330.4   Symbols: VNI1   NAC domain containing protein 82   chr5:2892623-2894708 REVERSE LENGTH=489                                                                                                                                                                                                                                                                                                                                                                                                                                                                                                                                          | 427 | 489  | 1.00E-150 | 114.5 | 68.4 | 78.9 |
| Rsa1.0_01719.1.g29285.t1 | ref XP_002883202.1  vacuolar sorting protein 9 domain-containing protein [Arabidopsis lyrata subsp. lyrata]   g 297329042 gb EFH59461.1  vacuolar sorting protein 9 domain-containing protein [Arabidopsis lyrata subsp. lyrata] | 508 | 520  | 0         | 102.4 | 79.1 | 87.2 | vacuolar sorting protein 9 domain-containing protein | gbpln | Arabidopsis lyrata | AT3G19770.1   Symbols: ATVPS9A, VPS9A, VPS9   Vacuolar sorting protein 9 (VPS9) domain   chr3:6866916-6869114 FORWARD LENGTH=520                                                                                                                                                                                                                                                                                                                                                                                                                                                                                                                  | 508 | 520  | 0         | 102.4 | 78.1 | 87.0 |
| Rsa1.0_01719.1.g29286.t1 | ref XP_002873393.1  hypothetical protein ARALYDRAFT_908877 [Arabidopsis lyrata subsp. lyrata]   g 297319230 gb EFH49652.1  hypothetical protein ARALYDRAFT_908877 [Arabidopsis lyrata subsp. lyrata]                             | 143 | 146  | 3.00E-61  | 102.1 | 85.3 | 89.5 | hypothetical protein ARALYDRAFT_908877               | gbpln | Arabidopsis lyrata | AT5G09310.1   Symbols:   CONTAINS InterPro DOMAIN/s: Gamma-secretase aspartyl protease complex, presenilin enhancer-2 subunit (InterPro:IPR019379); Has 168 Blast hits to 168 proteins in 71 species: Archae - 0; Bacteria - 0; Metazoa - 126; Fungi - 0; Plants - 36; Viruses - 0; Other Eukaryotes - 6 (source: NCBI BLink).   chr5:2887403-2888501 REVERSE LENGTH=146                                                                                                                                                                                                                                                                          | 143 | 146  | 7.00E-62  | 102.1 | 86.7 | 92.3 |
| Rsa1.0_01719.1.g29287.t1 | gb EMJ25374.1  hypothetical protein PRUPE_ppa016917mg [Prunus persica]                                                                                                                                                           | 378 | 395  | 1.00E-149 | 104.5 | 65.3 | 79.1 | hypothetical protein PRUPE_ppa016917mg               | gbpln | Prunus persica     | AT5G09280.1   Symbols:   Pectin lyase-like superfamily protein   chr5:2880423-2881597 REVERSE LENGTH=297                                                                                                                                                                                                                                                                                                                                                                                                                                                                                                                                          | 378 | 297  | 1.00E-142 | 78.6  | 62.2 | 63.8 |
| Rsa1.0_01719.1.g29288.t1 | ref XP_002871365.1  hypothetical protein ARALYDRAFT_487736 [Arabidopsis lyrata subsp. lyrata]   g 297317202 gb EFH47624.1  hypothetical protein ARALYDRAFT_487736 [Arabidopsis lyrata subsp. lyrata]                             | 113 | 111  | 9.00E-52  | 98.2  | 85.8 | 92.9 | hypothetical protein ARALYDRAFT_487736               | gbpln | Arabidopsis lyrata | AT5G09270.2   Symbols:   unknown protein; Has 25 Blast hits to 25 proteins in 9 species: Archae - 0; Bacteria - 0; Metazoa - 0; Fungi - 0; Plants - 25; Viruses - 0; Other Eukaryotes - 0 (source: NCBI BLink).   chr5:2879680-2880015 FORWARD LENGTH=111                                                                                                                                                                                                                                                                                                                                                                                         | 113 | 111  | 1.00E-52  | 98.2  | 84.1 | 91.2 |
| Rsa1.0_01719.1.g29289.t2 | gb EOA21530.1  hypothetical protein CARUB_v10001935mg [Capsella rubella]                                                                                                                                                         | 228 | 217  | 5.00E-99  | 95.2  | 86.4 | 90.4 | hypothetical protein CARUB_v10001935mg               | gbpln | Capsella rubella   | AT5G09260.1   Symbols: VPS20.2   vacuolar protein sorting-associated protein 20.2   chr5:2876797-2878355 FORWARD LENGTH=216                                                                                                                                                                                                                                                                                                                                                                                                                                                                                                                       | 228 | 216  | 1.00E-100 | 94.7  | 84.6 | 89.9 |
| Rsa1.0_01719.1.g29290.t1 | ref XP_002873390.1  predicted protein [Arabidopsis lyrata subsp. lyrata]   g 297319227 gb EFH49649.1  predicted protein [Arabidopsis lyrata subsp. lyrata]                                                                       | 107 | 107  | 2.00E-49  | 100.0 | 90.7 | 98.1 | predicted protein                                    | gbpln | Arabidopsis lyrata | AT5G09250.1   Symbols: KIWI   ssDNA-binding transcriptional regulator   chr5:2875421-2876368 REVERSE LENGTH=107                                                                                                                                                                                                                                                                                                                                                                                                                                                                                                                                   | 107 | 107  | 5.00E-52  | 100.0 | 90.7 | 97.2 |
| Rsa1.0_01719.1.g29291.t1 | emb CAF22024.1  amino acid permease [Brassica napus]                                                                                                                                                                             | 485 | 487  | 0         | 100.4 | 95.5 | 98.6 | amino acid permease                                  | gbpln | Brassica napus     | AT5G09220.1   Symbols: AAP2   amino acid permease 2   chr5:2866867-2868863 FORWARD LENGTH=493                                                                                                                                                                                                                                                                                                                                                                                                                                                                                                                                                     | 485 | 493  | 0         | 101.6 | 92.4 | 97.1 |
| Rsa1.0_01719.1.g29292.t1 | #                                                                                                                                                                                                                                | #   | #    | #         | #     | #    | -    | ----                                                 | ----  | #                  | #                                                                                                                                                                                                                                                                                                                                                                                                                                                                                                                                                                                                                                                 | #   | #    | #         | #     | #    |      |

|                          |                                                                                                                                                                                                                                                                                                                                                                                                                                                                                                    |      |      |           |       |      |      |                                          |       |                      |                                                                                                                                                                                                                                                                                                                                                           |      |     |           |       |      |      |
|--------------------------|----------------------------------------------------------------------------------------------------------------------------------------------------------------------------------------------------------------------------------------------------------------------------------------------------------------------------------------------------------------------------------------------------------------------------------------------------------------------------------------------------|------|------|-----------|-------|------|------|------------------------------------------|-------|----------------------|-----------------------------------------------------------------------------------------------------------------------------------------------------------------------------------------------------------------------------------------------------------------------------------------------------------------------------------------------------------|------|-----|-----------|-------|------|------|
| Rsa1.0_01720.1.g29293.t1 | refNP_191571.4  beta glucosidase 27 [Arabidopsis thaliana] gi269969439 sp Q9M1D1.2 BGL27_ARA TH RecName: Full=beta-glucosidase 27; Short=AtBGLU27 gi332646492 gb AEE80013.1  beta glucosidase 27 [Arabidopsis thaliana]                                                                                                                                                                                                                                                                            | 531  | 540  | 0         | 101.7 | 90.0 | 93.2 | beta glucosidase 27                      | gbpln | Arabidopsis thaliana | AT3G60120.1   Symbols: BGLU27   beta glucosidase 27   chr3:22206238-22208952 FORWARD LENGTH=540                                                                                                                                                                                                                                                           | 531  | 540 | 0         | 101.7 | 90.0 | 93.2 |
| Rsa1.0_01720.1.g29294.t1 | refXP_002876536.1  hypothetical protein ARALYDRAFT_907533 [Arabidopsis lyrata subsp. lyrata] gi297322374 gb EFH52795.1  hypothetical protein ARALYDRAFT_907533 [Arabidopsis lyrata subsp. lyrata]                                                                                                                                                                                                                                                                                                  | 577  | 643  | 0         | 111.4 | 73.5 | 81.1 | hypothetical protein ARALYDRAFT_907533   | gbpln | Arabidopsis lyrata   | AT3G60110.1   Symbols:   DNA-binding bromodomain-containing protein   chr3:22197993-22201159 FORWARD LENGTH=641                                                                                                                                                                                                                                           | 577  | 641 | 0         | 111.1 | 70.4 | 78.5 |
| Rsa1.0_01720.1.g29295.t3 | gb EOA25974.1  hypothetical protein CARUB_v10019363mg [Capsella rubella]                                                                                                                                                                                                                                                                                                                                                                                                                           | 485  | 473  | 0         | 97.5  | 89.7 | 93.8 | hypothetical protein CARUB_v10019363mg   | gbpln | Capsella rubella     | AT3G60100.1   Symbols: CSY5   citrate synthase 5   chr3:22192888-22196246 FORWARD LENGTH=464                                                                                                                                                                                                                                                              | 485  | 464 | 0         | 95.7  | 87.6 | 91.8 |
| Rsa1.0_01720.1.g29296.t1 | refXP_002876534.1  VQ motif-containing protein [Arabidopsis lyrata subsp. lyrata] gi297322372 gb EFH52793.1  VQ motif-containing protein [Arabidopsis lyrata subsp. lyrata]                                                                                                                                                                                                                                                                                                                        | 158  | 157  | 2.00E-70  | 99.4  | 83.5 | 89.2 | VQ motif-containing protein              | gbpln | Arabidopsis lyrata   | AT3G60090.1   Symbols:   VQ motif-containing protein   chr3:22190858-22191331 FORWARD LENGTH=157                                                                                                                                                                                                                                                          | 158  | 157 | 6.00E-73  | 99.4  | 84.2 | 88.6 |
| Rsa1.0_01720.1.g29297.t1 | refXP_002891861.1  zinc ion binding protein [Arabidopsis lyrata subsp. lyrata] gi297337703 gb EFH68120.1  zinc ion binding protein [Arabidopsis lyrata subsp. lyrata]                                                                                                                                                                                                                                                                                                                              | 176  | 401  | 2.00E-47  | 227.8 | 57.4 | 60.8 | zinc ion binding protein                 | gbpln | Arabidopsis lyrata   | AT1G55915.1   Symbols:   zinc ion binding   chr1:20907663-20909429 FORWARD LENGTH=404                                                                                                                                                                                                                                                                     | 176  | 404 | 1.00E-48  | 229.5 | 56.3 | 61.4 |
| Rsa1.0_01721.1.g29298.t1 | refNP_190092.1  high affinity nitrate transporter 2.6 [Arabidopsis thaliana] gi75264330 sp Q9LXH0.1 NRT26_ARAT H RecName: Full=High affinity nitrate transporter 2.6; Short=AtNRT2.6 gi7671407 emb CAB89321.1  high-affinity nitrate transporter-like protein [Arabidopsis thaliana] gi44917451 gb AAS49050.1  At3g45060 [Arabidopsis thaliana] gi51536534 gb AAU05505.1  At3g45060 [Arabidopsis thaliana] gi332644466 gb AEE77987.1  high affinity nitrate transporter 2.6 [Arabidopsis thaliana] | 642  | 542  | 0         | 84.4  | 67.4 | 69.8 | high affinity nitrate transporter 2.6    | gbpln | Arabidopsis thaliana | AT3G45060.1   Symbols: ATNRT2.6, NRT2.6   high affinity nitrate transporter 2.6   chr3:16477671-16479386 REVERSE LENGTH=542                                                                                                                                                                                                                               | 642  | 542 | 0         | 84.4  | 67.4 | 69.8 |
| Rsa1.0_01721.1.g29299.t1 | dbj BAJ34078.1  unnamed protein product [Theilungiella halophila]                                                                                                                                                                                                                                                                                                                                                                                                                                  | 509  | 510  | 0         | 100.2 | 92.1 | 96.3 | unnamed protein product                  | ----  | ----                 | AT3G45010.1   Symbols: scp148   serine carboxypeptidase-like 48   chr3:16466328-16468845 FORWARD LENGTH=510                                                                                                                                                                                                                                               | 509  | 510 | 0         | 100.2 | 90.2 | 96.3 |
| Rsa1.0_01721.1.g29300.t1 | gb AEX07607.1  xyloglucosyl transferase 3, partial [Brassica juncea]                                                                                                                                                                                                                                                                                                                                                                                                                               | 292  | 292  | 1.00E-157 | 100.0 | 91.4 | 93.8 | xyloglucosyl transferase 3, partial      | gbpln | Brassica juncea      | AT3G44990.1   Symbols: XTR8, ATXTR8, XTH31   xyloglucan endo-transglycosylase-related 8   chr3:16447280-16448678 REVERSE LENGTH=293                                                                                                                                                                                                                       | 292  | 293 | 1.00E-150 | 100.3 | 88.4 | 93.2 |
| Rsa1.0_01721.1.g29301.t1 | gb EOA25184.1  hypothetical protein CARUB_v10018495mg [Capsella rubella]                                                                                                                                                                                                                                                                                                                                                                                                                           | 780  | 773  | 0         | 99.1  | 68.6 | 82.3 | hypothetical protein CARUB_v10018495mg   | gbpln | Capsella rubella     | AT3G44910.1   Symbols: ATCHX12, CHX12   cation/H+ exchanger 12   chr3:16392064-16394579 REVERSE LENGTH=770                                                                                                                                                                                                                                                | 780  | 770 | 0         | 98.7  | 65.8 | 79.2 |
| Rsa1.0_01722.1.g29302.t1 | # # # # # # # # # #                                                                                                                                                                                                                                                                                                                                                                                                                                                                                | #    | #    | #         | #     | #    | -    | ----                                     | ----  | #                    | #                                                                                                                                                                                                                                                                                                                                                         | #    | #   | #         | #     | #    | #    |
| Rsa1.0_01722.1.g29303.t1 | emb CAB39638.1  RNA-directed DNA polymerase-like protein [Arabidopsis thaliana] gi7267666 emb CAB78094.1  RNA-directed DNA polymerase-like protein [Arabidopsis thaliana]                                                                                                                                                                                                                                                                                                                          | 2189 | 1274 | 0         | 58.2  | 27.3 | 37.5 | RNA-directed DNA polymerase-like protein | gbpln | Arabidopsis thaliana | AT4G20900.1   Symbols:   Ribonuclease H-like superfamily protein   chr4:14333528-14335255 FORWARD LENGTH=575                                                                                                                                                                                                                                              | 2189 | 575 | 4.00E-73  | 26.3  | 7.9  | 12.5 |
| Rsa1.0_01722.1.g29304.t1 | # # # # # # # # # #                                                                                                                                                                                                                                                                                                                                                                                                                                                                                | #    | #    | #         | #     | #    | -    | ----                                     | ----  | #                    | #                                                                                                                                                                                                                                                                                                                                                         | #    | #   | #         | #     | #    | #    |
| Rsa1.0_01722.1.g29305.t1 | gb EOA18474.1  hypothetical protein CARUB_v10007020mg [Capsella rubella]                                                                                                                                                                                                                                                                                                                                                                                                                           | 694  | 700  | 0         | 100.9 | 56.9 | 61.2 | hypothetical protein CARUB_v10007020mg   | gbpln | Capsella rubella     | AT4G33970.1   Symbols:   Leucine-rich repeat (LRR) family protein   chr4:16279795-16281894 REVERSE LENGTH=699                                                                                                                                                                                                                                             | 694  | 699 | 0         | 100.7 | 56.6 | 62.1 |
| Rsa1.0_01722.1.g29306.t1 | refXP_002867141.1  hypothetical protein ARALYDRAFT_491275 [Arabidopsis lyrata subsp. lyrata] gi297312977 gb EFH43400.1  hypothetical protein ARALYDRAFT_491275 [Arabidopsis lyrata subsp. lyrata]                                                                                                                                                                                                                                                                                                  | 180  | 217  | 4.00E-47  | 120.6 | 72.2 | 77.8 | hypothetical protein ARALYDRAFT_491275   | gbpln | Arabidopsis lyrata   | AT4G33980.1   Symbols:   BEST Arabidopsis thaliana protein match is: cold regulated gene 27 (TAIR:AT5G42900.2); Has 30201 Blast hits to 17322 proteins in 780 species: Archae - 12; Bacteria - 1396; Metazoa - 17338; Fungi - 3422; Plants - 5037; Viruses - 0; Other Eukaryotes - 2996 (source: NCBI BLINK).   chr4:16283047-16284946 REVERSE LENGTH=218 | 180  | 218 | 3.00E-45  | 121.1 | 67.8 | 76.1 |
| Rsa1.0_01722.1.g29307.t1 | refXP_002867140.1  hypothetical protein ARALYDRAFT_913003 [Arabidopsis lyrata subsp. lyrata] gi297312976 gb EFH43399.1  hypothetical protein ARALYDRAFT_913003 [Arabidopsis lyrata subsp. lyrata]                                                                                                                                                                                                                                                                                                  | 156  | 155  | 6.00E-70  | 99.4  | 90.4 | 94.9 | hypothetical protein ARALYDRAFT_913003   | gbpln | Arabidopsis lyrata   | AT4G33985.1   Symbols:   Protein of unknown function (DUF685)   chr4:16288301-16288857 REVERSE LENGTH=154                                                                                                                                                                                                                                                 | 156  | 154 | 8.00E-69  | 98.7  | 87.0 | 92.9 |

|                          |                                                                                                                                                                                                                                                                                                                                                                          |      |      |           |       |      |      |                                                     |       |                      |                                                                                                                                                                                                                                                                                                                                                                                                                                                                                     |      |      |           |       |      |      |
|--------------------------|--------------------------------------------------------------------------------------------------------------------------------------------------------------------------------------------------------------------------------------------------------------------------------------------------------------------------------------------------------------------------|------|------|-----------|-------|------|------|-----------------------------------------------------|-------|----------------------|-------------------------------------------------------------------------------------------------------------------------------------------------------------------------------------------------------------------------------------------------------------------------------------------------------------------------------------------------------------------------------------------------------------------------------------------------------------------------------------|------|------|-----------|-------|------|------|
| Rsa1.0_01723.1.g29308.t1 | refXP_002892523.1   hypothetical protein ARALYDRAFT_334257 [Arabidopsis lyrata subsp. lyrata] gi 297338365 gb EFH68782.1   hypothetical protein ARALYDRAFT_334257 [Arabidopsis lyrata subsp. lyrata]                                                                                                                                                                     | 331  | 305  | 2.00E-62  | 92.1  | 38.7 | 52.3 | hypothetical protein ARALYDRAFT_334257              | gbpln | Arabidopsis lyrata   | AT2G42470.1   Symbols:   TRAF-like family protein   chr2:17679887-17685187 REVERSE LENGTH=898                                                                                                                                                                                                                                                                                                                                                                                       | 331  | 898  | 2.00E-57  | 271.3 | 41.1 | 60.1 |
| Rsa1.0_01723.1.g29309.t1 | dbj BAB10503.1  retroelement pol polyprotein-like [Arabidopsis thaliana]                                                                                                                                                                                                                                                                                                 | 1430 | 1475 | 0         | 103.1 | 54.6 | 68.6 | retroelement pol polyprotein-like                   | gbpln | Arabidopsis thaliana | AT4G23160.1   Symbols: CRK8   cysteine-rich RLK (RECEPTOR-like protein kinase) 8   chr4:12129485-12134086 FORWARD LENGTH=1262                                                                                                                                                                                                                                                                                                                                                       | 1430 | 1262 | 0         | 88.3  | 21.3 | 27.4 |
| Rsa1.0_01723.1.g29310.t1 | #                                                                                                                                                                                                                                                                                                                                                                        | #    | #    | #         | #     | #    | -    | -                                                   | ----  | ----                 | #                                                                                                                                                                                                                                                                                                                                                                                                                                                                                   | #    | #    | #         | #     | #    | #    |
| Rsa1.0_01723.1.g29311.t1 | gb AAB82639.1  putative non-LTR retroelement reverse transcriptase [Arabidopsis thaliana]                                                                                                                                                                                                                                                                                | 576  | 1374 | 2.00E-94  | 238.5 | 27.8 | 38.2 | putative non-LTR retroelement reverse transcriptase | gbpln | Arabidopsis thaliana | AT4G29090.1   Symbols:   Ribonuclease H-like superfamily protein   chr4:14333528-14335255 FORWARD LENGTH=575                                                                                                                                                                                                                                                                                                                                                                        | 576  | 575  | 1.00E-90  | 99.8  | 26.4 | 36.3 |
| Rsa1.0_01723.1.g29312.t1 | #                                                                                                                                                                                                                                                                                                                                                                        | #    | #    | #         | #     | #    | -    | -                                                   | ----  | ----                 | #                                                                                                                                                                                                                                                                                                                                                                                                                                                                                   | #    | #    | #         | #     | #    | #    |
| Rsa1.0_01724.1.g29313.t1 | gb EOA38973.1  hypothetical protein CARUB_v10011400mg [Capsella rubella]                                                                                                                                                                                                                                                                                                 | 819  | 783  | 0         | 95.6  | 62.1 | 74.2 | hypothetical protein CARUB_v10011400mg              | gbpln | Capsella rubella     | AT1G17340.1   Symbols:   Phosphoinositide phosphatase family protein   chr1:5934129-5938391 FORWARD LENGTH=785                                                                                                                                                                                                                                                                                                                                                                      | 819  | 785  | 0         | 95.8  | 60.4 | 73.7 |
| Rsa1.0_01724.1.g29314.t1 | gb EOA37028.1  hypothetical protein CARUB_v10010080mg [Capsella rubella]                                                                                                                                                                                                                                                                                                 | 224  | 253  | 1.00E-109 | 112.9 | 87.9 | 94.6 | hypothetical protein CARUB_v10010080mg              | gbpln | Capsella rubella     | AT1G17330.1   Symbols:   Metal-dependent phosphohydrolase   chr1:5929966-5931595 FORWARD LENGTH=222                                                                                                                                                                                                                                                                                                                                                                                 | 224  | 222  | 1.00E-112 | 99.1  | 89.7 | 94.2 |
| Rsa1.0_01724.1.g29315.t1 | refXP_002890217.1   alanine aminotransferase [Arabidopsis lyrata subsp. lyrata] gi 297336059 gb EFH66476.1   alanine aminotransferase [Arabidopsis lyrata subsp. lyrata]                                                                                                                                                                                                 | 534  | 542  | 0         | 101.5 | 89.1 | 94.8 | alanine aminotransferase                            | gbpln | Arabidopsis lyrata   | AT1G17290.1   Symbols: AlaAT1   alanine aminotransferase   chr1:5922771-5926093 FORWARD LENGTH=543                                                                                                                                                                                                                                                                                                                                                                                  | 534  | 543  | 0         | 101.7 | 88.6 | 94.6 |
| Rsa1.0_01724.1.g29316.t1 | refXP_002890216.1   hypothetical protein ARALYDRAFT_471933 [Arabidopsis lyrata subsp. lyrata] gi 297336058 gb EFH66475.1   hypothetical protein ARALYDRAFT_471933 [Arabidopsis lyrata subsp. lyrata]                                                                                                                                                                     | 76   | 94   | 1.00E-18  | 123.7 | 72.4 | 77.6 | hypothetical protein ARALYDRAFT_471933              | gbpln | Arabidopsis lyrata   | AT1G17285.1   Symbols:   unknown protein; FUNCTIONS IN: molecular_function unknown; INVOLVED IN: biological_process unknown; LOCATED IN: endomembrane system; BEST Arabidopsis thaliana protein match is: unknown protein (TAIR:AT1G17300.1); Has 35333 Blast hits to 34131 proteins in 2444 species: Archae - 798; Bacteria - 22429; Metazoa - 974; Fungi - 991; Plants - 531; Viruses - 0; Other Eukaryotes - 9610 (source: NCBI BLINK).   chr1:5920895-5921287 FORWARD LENGTH=95 | 76   | 95   | 3.00E-21  | 125.0 | 72.4 | 78.9 |
| Rsa1.0_01724.1.g29317.t2 | refXP_002892944.1   ubiquitin-conjugating enzyme 32 [Arabidopsis lyrata subsp. lyrata] gi 297338786 gb EFH69203.1   ubiquitin-conjugating enzyme 32 [Arabidopsis lyrata subsp. lyrata]                                                                                                                                                                                   | 244  | 237  | 1.00E-124 | 97.1  | 90.2 | 93.0 | ubiquitin-conjugating enzyme 32                     | gbpln | Arabidopsis lyrata   | AT1G17280.2   Symbols: UBC34   ubiquitin-conjugating enzyme 34   chr1:5917146-5919162 REVERSE LENGTH=237                                                                                                                                                                                                                                                                                                                                                                            | 244  | 237  | 1.00E-126 | 97.1  | 89.3 | 92.2 |
| Rsa1.0_01724.1.g29318.t1 | ref NP_566249.1  E3 ubiquitin-protein ligase ATL6 [Arabidopsis thaliana] gi 68565231 sp Q8RXX9.2 ATL6_ARATH RecName: Full=E3 ubiquitin-protein ligase ATL6; AltName: Full=RING-H2 finger protein ATL6; Flags: Precursor: gi 70905101 gb AAZ14076.1  At3g05200 [Arabidopsis thaliana] gi 332640683 gb AAE74204.1  E3 ubiquitin-protein ligase ATL6 [Arabidopsis thaliana] | 386  | 398  | 1.00E-178 | 103.1 | 83.9 | 91.2 | E3 ubiquitin-protein ligase ATL6                    | gbpln | Arabidopsis thaliana | AT3G05200.1   Symbols: ATL6   RING/U-box superfamily protein   chr3:1477377-1478573 FORWARD LENGTH=398                                                                                                                                                                                                                                                                                                                                                                              | 386  | 398  | 0         | 103.1 | 83.9 | 91.2 |
| Rsa1.0_01724.1.g29319.t3 | refXP_002882401.1   aminotransferase class IV family protein [Arabidopsis lyrata subsp. lyrata] gi 297328241 gb EFH58660.1   aminotransferase class IV family protein [Arabidopsis lyrata subsp. lyrata]                                                                                                                                                                 | 327  | 555  | 4.00E-73  | 169.7 | 56.9 | 65.7 | aminotransferase class IV family protein            | gbpln | Arabidopsis lyrata   | AT5G27410.2   Symbols:   D-aminoacid aminotransferase-like PLP-dependent enzymes superfamily protein   chr5:9676362-9682468 FORWARD LENGTH=936                                                                                                                                                                                                                                                                                                                                      | 327  | 936  | 2.00E-75  | 286.2 | 52.0 | 62.7 |
| Rsa1.0_01724.1.g29320.t1 | gb EOA30820.1  hypothetical protein CARUB_v10013963mg [Capsella rubella]                                                                                                                                                                                                                                                                                                 | 378  | 376  | 1.00E-150 | 99.5  | 73.0 | 80.4 | hypothetical protein CARUB_v10013963mg              | gbpln | Capsella rubella     | AT3G05180.1   Symbols:   GDSL-like Lipase/Acylhydrolase superfamily protein   chr3:1468599-1470529 REVERSE LENGTH=379                                                                                                                                                                                                                                                                                                                                                               | 378  | 379  | 1.00E-150 | 100.3 | 69.8 | 79.1 |
| Rsa1.0_01724.1.g29321.t1 | dbj BAF01531.1  hypothetical protein [Arabidopsis thaliana]                                                                                                                                                                                                                                                                                                              | 306  | 284  | 1.00E-156 | 92.8  | 86.3 | 89.9 | hypothetical protein                                | gbpln | Arabidopsis thaliana | AT3G05170.1   Symbols:   Phosphoglycerate mutase family protein   chr3:1466738-1468219 FORWARD LENGTH=316                                                                                                                                                                                                                                                                                                                                                                           | 306  | 316  | 1.00E-158 | 103.3 | 89.9 | 94.1 |

|                          |                                                                                                                                                                                                                                                                                                                                                                                                                                                                                                    |      |      |           |       |      |      |                                                               |       |                      |                                                                                                                                                                                                                                                                                                                                                                                                                                                                      |      |      |           |       |      |      |
|--------------------------|----------------------------------------------------------------------------------------------------------------------------------------------------------------------------------------------------------------------------------------------------------------------------------------------------------------------------------------------------------------------------------------------------------------------------------------------------------------------------------------------------|------|------|-----------|-------|------|------|---------------------------------------------------------------|-------|----------------------|----------------------------------------------------------------------------------------------------------------------------------------------------------------------------------------------------------------------------------------------------------------------------------------------------------------------------------------------------------------------------------------------------------------------------------------------------------------------|------|------|-----------|-------|------|------|
| Rsa1.0_01725.1.g29322.t1 | ref[NP_199295.2] Nucleotide-diphospho-sugar transferase family protein [Arabidopsis thaliana] gi 109946407 gb ABG48382.1  At5g44820 [Arabidopsis thaliana] gi 332007782 gb AED95165.1  Nucleotide-diphospho-sugar transferase family protein [Arabidopsis thaliana]                                                                                                                                                                                                                                | 464  | 367  | 1.00E-174 | 79.1  | 62.7 | 66.2 | Nucleotide-diphospho-sugar transferase family protein         | gbpln | Arabidopsis thaliana | AT5G44820.1   Symbols:   Nucleotide-diphospho-sugar transferase family protein   chr5:18095795-18097558 REVERSE LENGTH=367                                                                                                                                                                                                                                                                                                                                           | 464  | 367  | 1.00E-177 | 79.1  | 62.7 | 66.2 |
| Rsa1.0_01725.1.g29323.t1 | gb EOA21662.1  hypothetical protein CARUB_v10002083mg [Capsella rubella]                                                                                                                                                                                                                                                                                                                                                                                                                           | 220  | 178  | 2.00E-22  | 80.9  | 32.3 | 41.8 | hypothetical protein CARUB_v10002083mg                        | gbpln | Capsella rubella     | AT4G03150.1   Symbols:   unknown protein; FUNCTIONS IN: molecular function unknown; INVOLVED IN: biological process unknown; LOCATED IN: chloroplast; EXPRESSED IN: 20 plant structures; EXPRESSED DURING: 13 growth stages; Has 30201 Blast hits to 17322 proteins in 780 species: Archae - 12; Bacteria - 1396; Metazoa - 17338; Fungi - 3422; Plants - 5037; Viruses - 0; Other Eukaryotes - 2996 (source: NCBI BLink).   chr4:1393731-1394529 REVERSE LENGTH=185 | 220  | 185  | 7.00E-21  | 84.1  | 27.3 | 32.3 |
| Rsa1.0_01725.1.g29324.t1 | gb AAB81872.1  putative MuDR-like transposon protein [Arabidopsis thaliana] gi 7267508 emb CAB77991.1  putative MuDR-like transposon protein [Arabidopsis thaliana]                                                                                                                                                                                                                                                                                                                                | 469  | 714  | 8.00E-51  | 152.2 | 28.6 | 41.4 | putative MuDR-like transposon protein                         | gbpln | Arabidopsis thaliana | #                                                                                                                                                                                                                                                                                                                                                                                                                                                                    | #    | #    | #         | #     | #    |      |
| Rsa1.0_01725.1.g29325.t1 | gb AAF99727.1 AC004557_6 F17L21.7 [Arabidopsis thaliana]                                                                                                                                                                                                                                                                                                                                                                                                                                           | 1105 | 1534 | 0         | 138.8 | 67.3 | 79.8 | F17L21.7                                                      | gbpln | Arabidopsis thaliana | AT4G23160.1   Symbols: CRK8   cysteine-rich RLK (RECEPTOR-like protein kinase) 8   chr4:12129485-12134086 FORWARD LENGTH=1262                                                                                                                                                                                                                                                                                                                                        | 1105 | 1262 | 1.00E-88  | 114.2 | 16.7 | 25.2 |
| Rsa1.0_01725.1.g29326.t1 | gb EOA33803.1  hypothetical protein CARUB_v10021274mg [Capsella rubella]                                                                                                                                                                                                                                                                                                                                                                                                                           | 312  | 304  | 4.00E-90  | 97.4  | 53.5 | 65.1 | hypothetical protein CARUB_v10021274mg                        | gbpln | Capsella rubella     | AT2G40560.1   Symbols:   Protein kinase superfamily protein   chr2:16938705-16939616 REVERSE LENGTH=303                                                                                                                                                                                                                                                                                                                                                              | 312  | 303  | 5.00E-72  | 97.1  | 45.2 | 59.6 |
| Rsa1.0_01726.1.g29327.t1 | ref[NP_196346.1] MEI2-like protein 4 [Arabidopsis thaliana] gi 75335654 sp Q9LYN7.1 AML4_ARATH RecName: Full=Protein MEI2-like 4; Short=AML4; AltName: Full=MEI2-like protein 4 gi 7546707 emb CAB87285.1  MEI2-like protein [Arabidopsis thaliana] gi 110742203 dbj BAE99028.1  Mei2-like protein [Arabidopsis thaliana] gi 332003750 gb AED91133.1  MEI2-like protein 4 [Arabidopsis thaliana]                                                                                                   | 779  | 907  | 0         | 116.4 | 79.6 | 86.3 | MEI2-like protein 4                                           | gbpln | Arabidopsis thaliana | AT5G07290.1   Symbols: AML4, ML4   MEI2-like 4   chr5:2294248-2298491 FORWARD LENGTH=907                                                                                                                                                                                                                                                                                                                                                                             | 779  | 907  | 0         | 116.4 | 79.6 | 86.3 |
| Rsa1.0_01726.1.g29328.t1 | ref[NP_196344.2] E3 ubiquitin-protein ligase XBAT33 [Arabidopsis thaliana] gi 122239678 sp Q4FE45.1 XB33_ARATH RecName: Full=E3 ubiquitin-protein ligase XBAT33; AltName: Full=Ankyrin repeat domain and RING finger-containing protein XBAT33; AltName: Full=Protein XB3 homolog 3 gi 70905089 gb AAZ14070.1  At5g07270 [Arabidopsis thaliana] gi 117168057 gb ABK32111.1  At5g07270 [Arabidopsis thaliana] gi 332003748 gb AED91131.1  E3 ubiquitin-protein ligase XBAT33 [Arabidopsis thaliana] | 514  | 513  | 0         | 99.8  | 91.6 | 95.3 | E3 ubiquitin-protein ligase XBAT33                            | gbpln | Arabidopsis thaliana | AT5G07270.1   Symbols: XBAT33   XB3 ortholog 3 in Arabidopsis thaliana   chr5:2280821-2283384 FORWARD LENGTH=513                                                                                                                                                                                                                                                                                                                                                     | 514  | 513  | 0         | 99.8  | 91.6 | 95.3 |
| Rsa1.0_01726.1.g29329.t1 | ref[XP_002873302.1] hypothetical protein ARALYDRAFT_487547 [Arabidopsis lyrata subsp. lyrata] gi 297319139 gb EFH49561.1  hypothetical protein ARALYDRAFT_487547 [Arabidopsis lyrata subsp. lyrata]                                                                                                                                                                                                                                                                                                | 179  | 244  | 2.00E-24  | 136.3 | 41.9 | 54.2 | hypothetical protein ARALYDRAFT_487547                        | gbpln | Arabidopsis lyrata   | AT5G07225.1   Symbols:   RING/U-box superfamily protein   chr5:2268642-2270227 REVERSE LENGTH=234                                                                                                                                                                                                                                                                                                                                                                    | 179  | 234  | 8.00E-20  | 130.7 | 35.8 | 48.0 |
| Rsa1.0_01726.1.g29330.t1 | sp Q9LYP5.3 ARR21_ARATH RecName: Full=Putative two-component response regulator ARR21                                                                                                                                                                                                                                                                                                                                                                                                              | 598  | 613  | 5.00E-97  | 102.5 | 33.8 | 39.1 | RecName: Full=Putative two-component response regulator ARR21 | ----  | ----                 | AT5G07210.1   Symbols: ARR21, RR21   response regulator 21   chr5:2252237-2256018 FORWARD LENGTH=621                                                                                                                                                                                                                                                                                                                                                                 | 598  | 621  | 1.00E-99  | 103.8 | 33.8 | 39.1 |
| Rsa1.0_01726.1.g29331.t1 | ref[XP_002873300.1] YAP169 [Arabidopsis lyrata subsp. lyrata] gi 297319137 gb EFH49559.1  YAP169 [Arabidopsis lyrata subsp. lyrata]                                                                                                                                                                                                                                                                                                                                                                | 379  | 380  | 0         | 100.3 | 86.3 | 93.7 | YAP169                                                        | gbpln | Arabidopsis lyrata   | AT5G07200.1   Symbols: YAP169, GA20OX3, ATGA20OX3   gibberellin 20-oxidase 3   chr5:2243835-2245157 REVERSE LENGTH=380                                                                                                                                                                                                                                                                                                                                               | 379  | 380  | 0         | 100.3 | 85.2 | 92.6 |
| Rsa1.0_01726.1.g29332.t1 | gb AAK43838.1 AF370461.1 embryo-specific protein 3; AT53 [Arabidopsis thaliana] gi 17978805 gb AAL47396.1  embryo-specific protein 3 (ATS3) [Arabidopsis thaliana]                                                                                                                                                                                                                                                                                                                                 | 205  | 213  | 6.00E-70  | 103.9 | 75.6 | 83.9 | embryo-specific protein 3; ATS3                               | gbpln | Arabidopsis thaliana | AT5G07190.1   Symbols: ATS3   seed gene 3   chr5:2237610-2238488 FORWARD LENGTH=213                                                                                                                                                                                                                                                                                                                                                                                  | 205  | 213  | 5.00E-67  | 103.9 | 70.2 | 77.6 |

|                          |                                                                                                                                                                                                                                                                                                                                                                        |     |      |           |       |      |      |                                                |             |                      |                                                                                                                                         |     |      |           |       |      |      |
|--------------------------|------------------------------------------------------------------------------------------------------------------------------------------------------------------------------------------------------------------------------------------------------------------------------------------------------------------------------------------------------------------------|-----|------|-----------|-------|------|------|------------------------------------------------|-------------|----------------------|-----------------------------------------------------------------------------------------------------------------------------------------|-----|------|-----------|-------|------|------|
| Rsa1.0_01727.1.g29333.t1 | ref XP_002894200.1  predicted protein [Arabidopsis lyrata subsp. lyrata] gi 297340042 gb EFH70459.1  predicted protein [Arabidopsis lyrata subsp. lyrata]                                                                                                                                                                                                              | 665 | 717  | 2.00E-90  | 107.8 | 39.8 | 55.0 | predicted protein                              | gbpln       | Arabidopsis lyrata   | AT1G31150.1   Symbols:   Domain of unknown function (DUF1985)   chr1:11120097-11122412 FORWARD LENGTH=673                               | 665 | 673  | 8.00E-18  | 101.2 | 8.1  | 10.2 |
| Rsa1.0_01727.1.g29334.t1 | gb EOA28924.1  hypothetical protein CARUB_v10025181mg [Capsella rubella]                                                                                                                                                                                                                                                                                               | 479 | 386  | 1.00E-168 | 80.6  | 67.0 | 72.0 | hypothetical protein CARUB_v10025181mg         | gbpln       | Capsella rubella     | AT2G39550.1   Symbols: ATGGT-IB, GGB, PGT-1   Prenyltransferase family protein   chr2:16501666-16504144 FORWARD LENGTH=375              | 479 | 375  | 1.00E-171 | 78.3  | 66.6 | 70.6 |
| Rsa1.0_01727.1.g29335.t1 | ref NP_181488.1  Putative membrane lipoprotein [Arabidopsis thaliana] gi 3355485 gb AAC27847.1  hypothetical protein [Arabidopsis thaliana] gi 18700123 gb AAL77673.1  At2g39560/F12L6.22 [Arabidopsis thaliana] gi 21464575 gb AAM52242.1  At2g39560/F12L6.22 [Arabidopsis thaliana] gi 330254600 gb AEC09694.1  Putative membrane lipoprotein [Arabidopsis thaliana] | 238 | 233  | 4.00E-66  | 97.9  | 80.7 | 85.3 | Putative membrane lipoprotein                  | gbpln       | Arabidopsis thaliana | AT2G39560.1   Symbols:   Putative membrane lipoprotein   chr2:16505124-16505825 REVERSE LENGTH=233                                      | 238 | 233  | 1.00E-68  | 97.9  | 80.7 | 85.3 |
| Rsa1.0_01727.1.g29336.t1 | ref XP_002881667.1  glycosyl hydrolase family 17 protein [Arabidopsis lyrata subsp. lyrata] gi 297327506 gb EFH57926.1  glycosyl hydrolase family 17 protein [Arabidopsis lyrata subsp. lyrata]                                                                                                                                                                        | 778 | 549  | 0         | 70.6  | 44.5 | 49.2 | glycosyl hydrolase family 17 protein           | gbpln       | Arabidopsis lyrata   | AT2G39640.1   Symbols:   glycosyl hydrolase family 17 protein   chr2:16525171-16527012 REVERSE LENGTH=549                               | 778 | 549  | 0         | 70.6  | 43.8 | 48.6 |
| Rsa1.0_01727.1.g29337.t1 | emb CAC37623.1  copia-like polyprotein [Arabidopsis thaliana]                                                                                                                                                                                                                                                                                                          | 686 | 1466 | 0         | 213.7 | 60.6 | 72.2 | copia-like polyprotein                         | gbpln       | Arabidopsis thaliana | AT4G23160.1   Symbols: CRK8   cysteine-rich RLK (RECEPTOR-like protein kinase) 8   chr4:12129485-12134086 FORWARD LENGTH=1262           | 686 | 1262 | 1.00E-107 | 184.0 | 27.3 | 41.5 |
| Rsa1.0_01727.1.g29338.t3 | ref XP_002879808.1  botrytis-induced kinase1 [Arabidopsis lyrata subsp. lyrata] gi 297325647 gb EFH56067.1  botrytis-induced kinase1 [Arabidopsis lyrata subsp. lyrata]                                                                                                                                                                                                | 393 | 394  | 0         | 100.3 | 86.0 | 91.1 | botrytis-induced kinase1                       | gbpln       | Arabidopsis lyrata   | AT2G39660.1   Symbols: BIK1   botrytis-induced kinase1   chr2:16531943-16533601 FORWARD LENGTH=395                                      | 393 | 395  | 0         | 100.5 | 85.2 | 91.1 |
| Rsa1.0_01727.1.g29339.t1 | gb EOA27168.1  hypothetical protein CARUB_v10023268mg [Capsella rubella]                                                                                                                                                                                                                                                                                               | 428 | 428  | 0         | 100.0 | 89.0 | 92.5 | hypothetical protein CARUB_v10023268mg         | gbpln       | Capsella rubella     | AT2G39670.1   Symbols:   Radical SAM superfamily protein   chr2:16534303-16536986 FORWARD LENGTH=428                                    | 428 | 428  | 0         | 100.0 | 86.9 | 91.8 |
| Rsa1.0_01727.1.g29340.t1 | gb ACT67493.1  expansin A1 [Raphanus sativus]                                                                                                                                                                                                                                                                                                                          | 257 | 258  | 1.00E-142 | 100.4 | 96.9 | 98.4 | expansin A1                                    | gbpln       | Raphanus sativus     | AT2G39700.1   Symbols: ATEXPA4, ATEXP4, ATHEXP ALPHA 1.6, EXPA4   expansin A4   chr2:16544246-16545434 REVERSE LENGTH=257               | 257 | 257  | 1.00E-143 | 100.0 | 94.6 | 96.5 |
| Rsa1.0_01727.1.g29341.t1 | #                                                                                                                                                                                                                                                                                                                                                                      | #   | #    | #         | #     | #    | #    | -                                              | ----        | ----                 | #                                                                                                                                       | #   | #    | #         | #     | #    |      |
| Rsa1.0_01727.1.g29342.t1 | gb AAF22521.1 AF123390.1 26S proteasome AAA-ATPase subunit RPT1a [Arabidopsis thaliana]                                                                                                                                                                                                                                                                                | 70  | 426  | 2.00E-17  | 608.6 | 71.4 | 77.1 | 26S proteasome AAA-ATPase subunit RPT1a        | gbpln       | Arabidopsis thaliana | AT1G53750.1   Symbols: RPT1A   regulatory particle triple-A 1A   chr1:20065921-20068324 REVERSE LENGTH=426                              | 70  | 426  | 3.00E-20  | 608.6 | 71.4 | 77.1 |
| Rsa1.0_01728.1.g29343.t1 | ref XP_002873933.1  hypothetical protein ARALYDRAFT_488797 [Arabidopsis lyrata subsp. lyrata] gi 297319770 gb EFH50192.1  hypothetical protein ARALYDRAFT_488797 [Arabidopsis lyrata subsp. lyrata]                                                                                                                                                                    | 702 | 699  | 0         | 99.6  | 86.6 | 93.2 | hypothetical protein ARALYDRAFT_488797         | gbpln       | Arabidopsis lyrata   | AT5G19130.1   Symbols:   GPI transamidase component family protein / Gaa1-like family protein   chr5:6416128-6418993 REVERSE LENGTH=699 | 702 | 699  | 0         | 99.6  | 87.0 | 93.3 |
| Rsa1.0_01728.1.g29344.t1 | ref XP_002871863.1  pepsin A [Arabidopsis lyrata subsp. lyrata] gi 297317700 gb EFH48122.1  pepsin A [Arabidopsis lyrata subsp. lyrata]                                                                                                                                                                                                                                | 387 | 377  | 1.00E-156 | 97.4  | 77.0 | 83.2 | pepsin A                                       | gbpln       | Arabidopsis lyrata   | AT5G19120.1   Symbols:   Eukaryotic aspartyl protease family protein   chr5:6414585-6415745 FORWARD LENGTH=386                          | 387 | 386  | 1.00E-157 | 99.7  | 76.2 | 84.2 |
| Rsa1.0_01728.1.g29345.t2 | ref NP_197412.1  Eukaryotic aspartyl protease family protein [Arabidopsis thaliana] gi 332005271 gb AED92654.1  Eukaryotic aspartyl protease family protein [Arabidopsis thaliana]                                                                                                                                                                                     | 370 | 405  | 1.00E-107 | 109.5 | 61.1 | 73.5 | Eukaryotic aspartyl protease family protein    | gbpln       | Arabidopsis thaliana | AT5G19110.1   Symbols:   Eukaryotic aspartyl protease family protein   chr5:6411720-6413170 REVERSE LENGTH=405                          | 370 | 405  | 1.00E-109 | 109.5 | 61.1 | 73.5 |
| Rsa1.0_01728.1.g29346.t1 | ref NP_001241217.1  uncharacterized protein LOC100818868 precursor [Glycine max] gi 255644718 gb ACU22861.1  unknown [Glycine max]                                                                                                                                                                                                                                     | 432 | 450  | 1.00E-66  | 104.2 | 38.7 | 55.8 | uncharacterized protein LOC100818868 precursor | gbenv/gbpln | Glycine max          | AT1G03220.1   Symbols:   Eukaryotic aspartyl protease family protein   chr1:787143-788444 FORWARD LENGTH=433                            | 432 | 433  | 6.00E-49  | 100.2 | 35.6 | 50.5 |
| Rsa1.0_01728.1.g29347.t1 | gb AAM98191.1  unknown protein [Arabidopsis thaliana] gi 38603804 gb AAR24647.1  At2g23330 [Arabidopsis thaliana] gi 110742535 dbj BAE99183.1  putative retroelement pol polyprotein [Arabidopsis thaliana]                                                                                                                                                            | 272 | 776  | 3.00E-95  | 285.3 | 63.2 | 74.3 | unknown protein                                | gbpln       | Arabidopsis thaliana | AT4G23160.1   Symbols: CRK8   cysteine-rich RLK (RECEPTOR-like protein kinase) 8   chr4:12129485-12134086 FORWARD LENGTH=1262           | 272 | 1262 | 5.00E-55  | 464.0 | 36.8 | 52.6 |



|                          |                                                                                                                                                                                                                                                                                                                                                                                                                                                                                                                                                                                                                                                              |      |      |           |       |      |      |                                                                |       |                      |                                                                                                                                                                                                                                                                                                                                                                  |      |      |           |       |      |      |
|--------------------------|--------------------------------------------------------------------------------------------------------------------------------------------------------------------------------------------------------------------------------------------------------------------------------------------------------------------------------------------------------------------------------------------------------------------------------------------------------------------------------------------------------------------------------------------------------------------------------------------------------------------------------------------------------------|------|------|-----------|-------|------|------|----------------------------------------------------------------|-------|----------------------|------------------------------------------------------------------------------------------------------------------------------------------------------------------------------------------------------------------------------------------------------------------------------------------------------------------------------------------------------------------|------|------|-----------|-------|------|------|
| Rsa1.0_01728.1.g29348.t1 | ref[NP_850851.1] heavy metal transport/detoxification domain-containing protein [Arabidopsis thaliana] gi 23848131 ref[NP_001154719.1] heavy metal transport/detoxification domain-containing protein [Arabidopsis thaliana] gi 332005268 gb AE92651.1] heavy metal transport/detoxification domain-containing protein [Arabidopsis thaliana] gi 332005269 gb AE92652.1] heavy metal transport/detoxification domain-containing protein [Arabidopsis thaliana]                                                                                                                                                                                               | 576  | 465  | 4.00E-57  | 80.7  | 32.3 | 33.0 | heavy metal transport/detoxification domain-containing protein | gbpln | Arabidopsis thaliana | AT5G19090.3   Symbols:   Heavy metal transport/detoxification superfamily protein   chr5:6387910-6389855 FORWARD LENGTH=465                                                                                                                                                                                                                                      | 576  | 465  | 1.00E-59  | 80.7  | 32.3 | 33.0 |
| Rsa1.0_01728.1.g29349.t1 | gb AAG50806.1 AC079291.8 unknown protein [Arabidopsis thaliana]                                                                                                                                                                                                                                                                                                                                                                                                                                                                                                                                                                                              | 1806 | 1213 | 0         | 67.2  | 36.2 | 47.1 | unknown protein                                                | gbpln | Arabidopsis thaliana | AT1G43760.1   Symbols:   DNase I-like superfamily protein   chr1:16528880-16531065 REVERSE LENGTH=626                                                                                                                                                                                                                                                            | 1806 | 626  | 5.00E-75  | 34.7  | 8.8  | 13.7 |
| Rsa1.0_01729.1.g29350.t1 | ref[NP_181162.2] kinesin family member 11 [Arabidopsis thaliana] gi 322510039 sp P82266.2 K125_ARATH RecName: Full=Probable 125 kDa kinesin-related protein gi 33025412 gb AEC09215.1] kinesin family member 11 [Arabidopsis thaliana]                                                                                                                                                                                                                                                                                                                                                                                                                       | 902  | 1009 | 0         | 111.9 | 91.1 | 95.9 | kinesin family member 11                                       | gbpln | Arabidopsis thaliana | AT2G36200.1   Symbols:   P-loop containing nucleoside triphosphate hydrolases superfamily protein   chr2:15180078-15185189 REVERSE LENGTH=1009                                                                                                                                                                                                                   | 902  | 1009 | 0         | 111.9 | 91.1 | 95.9 |
| Rsa1.0_01729.1.g29351.t1 | ref[XP_002879611.1] hypothetical protein ARALYDRAFT.482620 [Arabidopsis lyrata subsp. lyrata] gi 297325450 gb EFH55870.1] hypothetical protein ARALYDRAFT.482620 [Arabidopsis lyrata subsp. lyrata]                                                                                                                                                                                                                                                                                                                                                                                                                                                          | 434  | 442  | 1.00E-166 | 101.8 | 80.6 | 86.4 | hypothetical protein ARALYDRAFT.482620                         | gbpln | Arabidopsis lyrata   | AT2G36420.1   Symbols:   unknown protein; BEST Arabidopsis thaliana protein match is: unknown protein (TAIR:AT5G03670.1). Has 10588 Blast hits to 6606 proteins in 440 species: Archae - 8; Bacteria - 365; Metazoa - 4146; Fungi - 1198; Plants - 483; Viruses - 212; Other Eukaryotes - 4176 (source: NCBI BLink).   chr2:15286498-15288990 FORWARD LENGTH=439 | 434  | 439  | 1.00E-166 | 101.2 | 79.7 | 85.7 |
| Rsa1.0_01729.1.g29352.t1 | gb EOA27098.1] hypothetical protein CARUB_v10023196mg [Capsella rubella]                                                                                                                                                                                                                                                                                                                                                                                                                                                                                                                                                                                     | 454  | 451  | 0         | 99.3  | 80.0 | 90.1 | hypothetical protein CARUB_v10023196mg                         | gbpln | Capsella rubella     | AT2G36430.1   Symbols:   Plant protein of unknown function (DUF247)   chr2:15290211-15291557 FORWARD LENGTH=448                                                                                                                                                                                                                                                  | 454  | 448  | 0         | 98.7  | 82.2 | 92.1 |
| Rsa1.0_01729.1.g29353.t1 | ref[XP_002879613.1] hypothetical protein ARALYDRAFT.482622 [Arabidopsis lyrata subsp. lyrata] gi 297325452 gb EFH55872.1] hypothetical protein ARALYDRAFT.482622 [Arabidopsis lyrata subsp. lyrata] ref[XP_002881444.1] AP2 domain-containing protein [Arabidopsis lyrata subsp. lyrata] gi 297327283 gb EFH57703.1] AP2 domain-containing protein [Arabidopsis lyrata subsp. lyrata]                                                                                                                                                                                                                                                                        | 81   | 76   | 2.00E-18  | 93.8  | 64.2 | 76.5 | hypothetical protein ARALYDRAFT.482622                         | gbpln | Arabidopsis lyrata   | AT2G36440.1   Symbols:   unknown protein; Has 3 Blast hits to 3 proteins in 2 species: Archae - 0; Bacteria - 0; Metazoa - 0; Fungi - 0; Plants - 3; Viruses - 0; Other Eukaryotes - 0 (source: NCBI BLink).   chr2:15292648-15292872 FORWARD LENGTH=74                                                                                                          | 81   | 74   | 5.00E-17  | 91.4  | 60.5 | 70.4 |
| Rsa1.0_01729.1.g29354.t1 | ref[XP_002881444.1] AP2 domain-containing protein [Arabidopsis lyrata subsp. lyrata] gi 297327283 gb EFH57703.1] AP2 domain-containing protein [Arabidopsis lyrata subsp. lyrata]                                                                                                                                                                                                                                                                                                                                                                                                                                                                            | 174  | 184  | 1.00E-67  | 105.7 | 82.2 | 90.2 | AP2 domain-containing protein                                  | gbpln | Arabidopsis lyrata   | AT2G36450.1   Symbols: HRD   Integrase-type DNA-binding superfamily protein   chr2:15294303-15294857 REVERSE LENGTH=184                                                                                                                                                                                                                                          | 174  | 184  | 1.00E-61  | 105.7 | 79.3 | 87.9 |
| Rsa1.0_01729.1.g29355.t1 | gb EOA27460.1] hypothetical protein CARUB_v10023598mg [Capsella rubella]                                                                                                                                                                                                                                                                                                                                                                                                                                                                                                                                                                                     | 93   | 331  | 7.00E-11  | 355.9 | 33.3 | 34.4 | hypothetical protein CARUB_v10023598mg                         | gbpln | Capsella rubella     | AT2G36470.1   Symbols:   Plant protein of unknown function (DUF866)   chr2:15299385-15300368 REVERSE LENGTH=327                                                                                                                                                                                                                                                  | 93   | 327  | 2.00E-13  | 351.6 | 32.3 | 33.3 |
| Rsa1.0_01729.1.g29356.t1 | gb EOA28814.1] hypothetical protein CARUB_v10025053mg [Capsella rubella]                                                                                                                                                                                                                                                                                                                                                                                                                                                                                                                                                                                     | 938  | 1037 | 0         | 110.6 | 76.5 | 83.7 | hypothetical protein CARUB_v10025053mg                         | gbpln | Capsella rubella     | AT2G36480.2   Symbols:   ENTH/VHS family protein   chr2:15302567-15306274 REVERSE LENGTH=844                                                                                                                                                                                                                                                                     | 938  | 844  | 0         | 90.0  | 66.6 | 71.9 |
| Rsa1.0_01729.1.g29357.t1 | ref[XP_002879635.1] ts1-kinase interacting protein 1 [Arabidopsis lyrata subsp. lyrata] gi 297325474 gb EFH55894.1] ts1-kinase interacting protein 1 [Arabidopsis lyrata subsp. lyrata] ref[NP_181234.1] UDP-glycosyltransferase-like protein [Arabidopsis thaliana] gi 75313513 sp Q9S_JL0.1 U86A1_ARATH RecName: Full=UDP-glycosyltransferase 86A1 gi 4863613 gb AAD31582.1] putative glucosyltransferase [Arabidopsis thaliana] gi 15809994 gb AAL06924.1] At2g36970/T1.J8.15 [Arabidopsis thaliana] gi 22137016 gb AAM91353.1] At2g36970/T1.J8.15 [Arabidopsis thaliana] gi 330254235 gb AEC09329.1] UDP-glycosyltransferase 86A1 [Arabidopsis thaliana] | 706  | 740  | 0         | 104.8 | 83.9 | 89.2 | ts1-kinase interacting protein 1                               | gbpln | Arabidopsis lyrata   | AT2G36960.3   Symbols: TKI1   TSL-kinase interacting protein 1   chr2:15523552-15527245 FORWARD LENGTH=744                                                                                                                                                                                                                                                       | 706  | 744  | 0         | 105.4 | 83.6 | 88.8 |
| Rsa1.0_01729.1.g29358.t1 | ref[NP_181234.1] UDP-glycosyltransferase-like protein [Arabidopsis thaliana] gi 75313513 sp Q9S_JL0.1 U86A1_ARATH RecName: Full=UDP-glycosyltransferase 86A1 gi 4863613 gb AAD31582.1] putative glucosyltransferase [Arabidopsis thaliana] gi 15809994 gb AAL06924.1] At2g36970/T1.J8.15 [Arabidopsis thaliana] gi 22137016 gb AAM91353.1] At2g36970/T1.J8.15 [Arabidopsis thaliana] gi 330254235 gb AEC09329.1] UDP-glycosyltransferase 86A1 [Arabidopsis thaliana]                                                                                                                                                                                         | 437  | 490  | 0         | 112.1 | 82.8 | 89.7 | UDP-glycosyltransferase-like protein                           | gbpln | Arabidopsis thaliana | AT2G36970.1   Symbols:   UDP-Glycosyltransferase superfamily protein   chr2:15529050-15530712 FORWARD LENGTH=490                                                                                                                                                                                                                                                 | 437  | 490  | 0         | 112.1 | 82.8 | 89.7 |

|                          |                                                                                                                                                                                                                                                                                                                                                                                                                                                                                                                                                                                                                                                                                                                                                                                                                                                                                                                                                                                                                                                                                                                                                                                                                                     |      |      |           |       |      |      |                                                 |       |                      |                                                                                                                                                                                                                                                              |      |      |           |       |      |      |
|--------------------------|-------------------------------------------------------------------------------------------------------------------------------------------------------------------------------------------------------------------------------------------------------------------------------------------------------------------------------------------------------------------------------------------------------------------------------------------------------------------------------------------------------------------------------------------------------------------------------------------------------------------------------------------------------------------------------------------------------------------------------------------------------------------------------------------------------------------------------------------------------------------------------------------------------------------------------------------------------------------------------------------------------------------------------------------------------------------------------------------------------------------------------------------------------------------------------------------------------------------------------------|------|------|-----------|-------|------|------|-------------------------------------------------|-------|----------------------|--------------------------------------------------------------------------------------------------------------------------------------------------------------------------------------------------------------------------------------------------------------|------|------|-----------|-------|------|------|
| Rsa1.0_01729.1.g29359.t1 | refNP_181234.1 UDP-glycosyltransferase-like protein [Arabidopsis thaliana] gi 75313513 sp Q9S.JL0.1 U86A1_ARAT H RecName: Full=UDP-glycosyltransferase 86A1 gi 4883613 gb AAD31582.1 putative glucosyltransferase [Arabidopsis thaliana] gi 15809994 gb AAL06924.1 At2g36970/T1J8.15 [Arabidopsis thaliana] gi 22137016 gb AAM91353.1 At2g36970/T1J8.15 [Arabidopsis thaliana] gi 330254235 gb AEC09329.1 UDP-glycosyltransferase 86A1 [Arabidopsis thaliana] refNP_181235.1 pentatricopeptide repeat-containing protein [Arabidopsis thaliana] gi 75206293 sp Q9S.JK9.1 PP189_ARAT H RecName: Full=Penatricopeptide repeat-containing protein At2g36980, mitochondrial; Flags: Precursor gi 4883614 gb AAD31583.1 hypothetical protein [Arabidopsis thaliana] gi 330254236 gb AEC09330.1 pentatricopeptide repeat-containing protein [Arabidopsis thaliana] refNP_181238.4 putative white-brown complex-protein 30 [Arabidopsis thaliana] gi 378405226 sp Q9S.JK6.3 WBC30_ARA TH RecName: Full=Putative white-brown complex homolog protein 30; AltName: Full=Putative non-intrinsic ABC protein 12; AltName: Full=WBC-related protein 1 gi 330254240 gb AEC09334.1 putative white-brown complex-protein 30 [Arabidopsis thaliana] | 479  | 490  | 0         | 102.3 | 88.3 | 93.3 | UDP-glycosyltransferase-like protein            | gbpln | Arabidopsis thaliana | AT2G36970.1   Symbols:   UDP-Glycosyltransferase superfamily protein   chr2:15529050-15530712 FORWARD LENGTH=490                                                                                                                                             | 479  | 490  | 0         | 102.3 | 88.3 | 93.3 |
| Rsa1.0_01729.1.g29360.t1 | refNP_181238.4 putative white-brown complex-protein 30 [Arabidopsis thaliana] gi 378405226 sp Q9S.JK6.3 WBC30_ARA TH RecName: Full=Putative white-brown complex homolog protein 30; AltName: Full=Putative non-intrinsic ABC protein 12; AltName: Full=WBC-related protein 1 gi 330254240 gb AEC09334.1 putative white-brown complex-protein 30 [Arabidopsis thaliana] refNP_181240.1 SAUR-like auxin-responsive protein [Arabidopsis thaliana] gi 4883619 gb AAD31588.1 putative auxin-induced protein [Arabidopsis thaliana] gi 67633592 gb AAY78720.1 auxin-responsive family protein [Arabidopsis thaliana] gi 330254245 gb AEC09339.1 SAUR-like auxin-responsive protein [Arabidopsis thaliana]                                                                                                                                                                                                                                                                                                                                                                                                                                                                                                                                | 618  | 625  | 0         | 101.1 | 83.7 | 91.4 | pentatricopeptide repeat-containing protein     | gbpln | Arabidopsis thaliana | AT2G36980.1   Symbols:   Tetratricopeptide repeat (TPR)-like superfamily protein   chr2:15531161-15533038 FORWARD LENGTH=625                                                                                                                                 | 618  | 625  | 0         | 101.1 | 83.7 | 91.4 |
| Rsa1.0_01729.1.g29361.t1 | refNP_181240.1 SAUR-like auxin-responsive protein [Arabidopsis thaliana] gi 4883619 gb AAD31588.1 putative auxin-induced protein [Arabidopsis thaliana] gi 67633592 gb AAY78720.1 auxin-responsive family protein [Arabidopsis thaliana] gi 330254245 gb AEC09339.1 SAUR-like auxin-responsive protein [Arabidopsis thaliana]                                                                                                                                                                                                                                                                                                                                                                                                                                                                                                                                                                                                                                                                                                                                                                                                                                                                                                       | 1052 | 1082 | 0         | 102.9 | 90.6 | 95.0 | putative white-brown complex-protein 30         | gbpln | Arabidopsis thaliana | AT2G37010.1   Symbols:   ATNAP12, NAP12   non-intrinsic ABC protein 12   chr2:15541720-15546159 FORWARD LENGTH=1082                                                                                                                                          | 1052 | 1082 | 0         | 102.9 | 90.6 | 95.0 |
| Rsa1.0_01729.1.g29362.t1 | refNP_181240.1 SAUR-like auxin-responsive protein [Arabidopsis thaliana] gi 4883619 gb AAD31588.1 putative auxin-induced protein [Arabidopsis thaliana] gi 67633592 gb AAY78720.1 auxin-responsive family protein [Arabidopsis thaliana] gi 330254245 gb AEC09339.1 SAUR-like auxin-responsive protein [Arabidopsis thaliana]                                                                                                                                                                                                                                                                                                                                                                                                                                                                                                                                                                                                                                                                                                                                                                                                                                                                                                       | 125  | 124  | 8.00E-49  | 99.2  | 76.0 | 85.6 | SAUR-like auxin-responsive protein              | gbpln | Arabidopsis thaliana | AT2G37030.1   Symbols:   SAUR-like auxin-responsive protein family   chr2:15553732-15554106 FORWARD LENGTH=124                                                                                                                                               | 125  | 124  | 2.00E-51  | 99.2  | 76.0 | 85.6 |
| Rsa1.0_01729.1.g29363.t1 | gb EOA28893.1 hypothetical protein CARUB_v10025139mg [Capsella rubella]                                                                                                                                                                                                                                                                                                                                                                                                                                                                                                                                                                                                                                                                                                                                                                                                                                                                                                                                                                                                                                                                                                                                                             | 456  | 437  | 1.00E-170 | 95.8  | 74.3 | 81.4 | hypothetical protein CARUB_v10025139mg          | gbpln | Capsella rubella     | AT2G37035.1   Symbols:   unknown protein; Has 26 Blast hits to 26 proteins in 11 species: Archae - 0; Bacteria - 0; Metazoa - 2; Fungi - 0; Plants - 23; Viruses - 0; Other Eukaryotes - 1 (source: NCBI BLINK).   chr2:15555374-15556780 REVERSE LENGTH=433 | 456  | 433  | 1.00E-169 | 95.0  | 74.6 | 82.7 |
| Rsa1.0_01730.1.g29364.t2 | gb AAM67260.1 alcohol dehydrogenase-like protein [Arabidopsis thaliana]                                                                                                                                                                                                                                                                                                                                                                                                                                                                                                                                                                                                                                                                                                                                                                                                                                                                                                                                                                                                                                                                                                                                                             | 145  | 384  | 1.00E-59  | 264.8 | 79.3 | 88.3 | alcohol dehydrogenase-like protein              | gbpln | Arabidopsis thaliana | AT4G22110.2   Symbols:   GroES-like zinc-binding dehydrogenase family protein   chr4:11711422-11713946 REVERSE LENGTH=389                                                                                                                                    | 145  | 389  | 2.00E-61  | 268.3 | 78.6 | 87.6 |
| Rsa1.0_01730.1.g29365.t1 | refXP_002867795.1 pectate lyase family protein [Arabidopsis lyrata subsp. lyrata] gi 297313631 gb EFH44054.1 pectate lyase family protein [Arabidopsis lyrata subsp. lyrata] refXP_002867796.1 WRKY DNA-binding protein 31 [Arabidopsis lyrata subsp. lyrata] gi 297313632 gb EFH44055.1 WRKY DNA-binding protein 31 [Arabidopsis lyrata subsp. lyrata]                                                                                                                                                                                                                                                                                                                                                                                                                                                                                                                                                                                                                                                                                                                                                                                                                                                                             | 394  | 394  | 0         | 100.0 | 90.4 | 93.4 | pectate lyase family protein                    | gbpln | Arabidopsis lyrata   | AT4G22080.1   Symbols:   RHS14   root hair specific 14   chr4:11700734-11702553 REVERSE LENGTH=394                                                                                                                                                           | 394  | 394  | 0         | 100.0 | 90.6 | 93.4 |
| Rsa1.0_01730.1.g29366.t1 | refXP_002867796.1 WRKY DNA-binding protein 31 [Arabidopsis lyrata subsp. lyrata] gi 297313632 gb EFH44055.1 WRKY DNA-binding protein 31 [Arabidopsis lyrata subsp. lyrata]                                                                                                                                                                                                                                                                                                                                                                                                                                                                                                                                                                                                                                                                                                                                                                                                                                                                                                                                                                                                                                                          | 531  | 538  | 0         | 101.3 | 88.3 | 92.7 | WRKY DNA-binding protein 31                     | gbpln | Arabidopsis lyrata   | AT4G22070.1   Symbols:   WRKY31, ATWRKY31   WRKY DNA-binding protein 31   chr4:11691381-11694234 REVERSE LENGTH=538                                                                                                                                          | 531  | 538  | 0         | 101.3 | 86.3 | 89.6 |
| Rsa1.0_01730.1.g29367.t1 | emb CAA18105.1 glycine-rich protein [Arabidopsis thaliana] gi 7269047 emb CAB79157.1 glycine-rich protein [Arabidopsis thaliana]                                                                                                                                                                                                                                                                                                                                                                                                                                                                                                                                                                                                                                                                                                                                                                                                                                                                                                                                                                                                                                                                                                    | 427  | 396  | 7.00E-18  | 92.7  | 9.8  | 10.8 | glycine-rich protein                            | gbpln | Arabidopsis thaliana | # # # # # # #                                                                                                                                                                                                                                                | #    | #    | #         | #     | #    | #    |
| Rsa1.0_01730.1.g29368.t1 | gb EOA15474.1 hypothetical protein CARUB_v10004445mg, partial [Capsella rubella]                                                                                                                                                                                                                                                                                                                                                                                                                                                                                                                                                                                                                                                                                                                                                                                                                                                                                                                                                                                                                                                                                                                                                    | 526  | 582  | 0         | 110.6 | 93.5 | 98.1 | hypothetical protein CARUB_v10004445mg, partial | gbpln | Capsella rubella     | AT4G22010.1   Symbols:   sks4   SKU5 similar 4   chr4:11663429-11666463 FORWARD LENGTH=541                                                                                                                                                                   | 526  | 541  | 0         | 102.9 | 93.5 | 97.5 |

|                          |                                                                                                                                                                                                                                                                                                                                                                                                                                                                                       |     |     |           |       |      |      |                                        |       |                      |                                                                                                                                                                                                                                                                                     |     |     |           |       |      |      |
|--------------------------|---------------------------------------------------------------------------------------------------------------------------------------------------------------------------------------------------------------------------------------------------------------------------------------------------------------------------------------------------------------------------------------------------------------------------------------------------------------------------------------|-----|-----|-----------|-------|------|------|----------------------------------------|-------|----------------------|-------------------------------------------------------------------------------------------------------------------------------------------------------------------------------------------------------------------------------------------------------------------------------------|-----|-----|-----------|-------|------|------|
| Rsa1.0_01730.1.g29369.t1 | refNP_567643.1  uncharacterized protein [Arabidopsis thaliana] gi2961345 emb CAA18103.1  hypothetical protein [Arabidopsis thaliana] gi7269045 emb CAB79155.1  hypothetical protein [Arabidopsis thaliana] gi17064892 gb AAL32600.1  Unknown protein [Arabidopsis thaliana] gi21554227 gb AAM63302.1  unknown [Arabidopsis thaliana] gi30102842 gb AAP21339.1  At4g22000 [Arabidopsis thaliana] gi332659141 gb AEE84541.1  uncharacterized protein AT4G22000 [Arabidopsis thaliana]   | 131 | 130 | 2.00E-57  | 99.2  | 86.3 | 86.3 | uncharacterized protein                | gbpln | Arabidopsis thaliana | AT4G22000.1   Symbols:   unknown protein; Has 30201 Blast hits to 17322 proteins in 780 species: Archae - 12; Bacteria - 1396; Metazoa - 17338; Fungi - 3422; Plants - 5037; Viruses - 0; Other Eukaryotes - 2996 (source: NCBI BLINK).   chr4:11659810-11660202 REVERSE LENGTH=130 | 131 | 130 | 3.00E-60  | 99.2  | 86.3 | 86.3 |
| Rsa1.0_01730.1.g29370.t1 | emb CAA04611.1  APS reductase [Brassica juncea]                                                                                                                                                                                                                                                                                                                                                                                                                                       | 467 | 464 | 0         | 99.4  | 95.1 | 96.4 | APS reductase                          | gbpln | Brassica juncea      | AT4G21990.1   Symbols: APR3, PRH-26, PRH26, ATAPR3   APS reductase 3   chr4:11657284-11658973 REVERSE LENGTH=458                                                                                                                                                                    | 467 | 458 | 0         | 98.1  | 90.8 | 94.0 |
| Rsa1.0_01730.1.g29371.t1 | refNP_001078424.1  autophagy-related protein 8a [Arabidopsis thaliana] gi332659138 gb AEE84538.1  autophagy-related protein 8a [Arabidopsis thaliana]                                                                                                                                                                                                                                                                                                                                 | 137 | 137 | 4.00E-69  | 100.0 | 92.0 | 97.1 | autophagy-related protein 8a           | gbpln | Arabidopsis thaliana | AT4G21980.2   Symbols: APG8A, ATG8A   Ubiquitin-like superfamily protein   chr4:11655868-11656809 FORWARD LENGTH=137                                                                                                                                                                | 137 | 137 | 1.00E-71  | 100.0 | 92.0 | 97.1 |
| Rsa1.0_01731.1.g29372.t1 | #                                                                                                                                                                                                                                                                                                                                                                                                                                                                                     | #   | #   | #         | #     | #    | #    | -                                      | ----  | ----                 | #                                                                                                                                                                                                                                                                                   | #   | #   | #         | #     | #    |      |
| Rsa1.0_01731.1.g29373.t1 | refNP_680195.2  uncharacterized protein [Arabidopsis thaliana] gi334187828 ref NP_001190360.1  uncharacterized protein [Arabidopsis thaliana] gi122175037 sp QOV865.1 FAFL_ARAT H RecName: Full=Protein FAF-like, chloroplastic; Flags: Precursor gi111074178 gb ABH04462.1  At5g22090 [Arabidopsis thaliana] gi332005598 gb AED92981.1  uncharacterized protein AT5G22090 [Arabidopsis thaliana] gi332005599 gb AED92982.1  uncharacterized protein AT5G22090 [Arabidopsis thaliana] | 452 | 463 | 1.00E-168 | 102.4 | 77.0 | 85.8 | uncharacterized protein                | gbpln | Arabidopsis thaliana | AT5G22090.2   Symbols:   Protein of unknown function (DUF3049)   chr5:7315003-7316394 REVERSE LENGTH=463                                                                                                                                                                            | 452 | 463 | 1.00E-170 | 102.4 | 77.0 | 85.8 |
| Rsa1.0_01731.1.g29374.t1 | gb EOA21400.1  hypothetical protein CARUB_v10001767mg [Capsella rubella]                                                                                                                                                                                                                                                                                                                                                                                                              | 243 | 246 | 1.00E-128 | 101.2 | 94.7 | 97.5 | hypothetical protein CARUB_v10001767mg | gbpln | Capsella rubella     | AT5G22080.1   Symbols:   Chaperone DnaJ-domain superfamily protein   chr5:7310600-7313540 REVERSE LENGTH=246                                                                                                                                                                        | 243 | 246 | 1.00E-120 | 101.2 | 95.9 | 97.1 |
| Rsa1.0_01731.1.g29375.t1 | refNP_568412.1  chaperone protein dnaJ 2 [Arabidopsis thaliana] gi21431768 sp P42825.2 DNAJ2_ARATH RecName: Full=Chaperone protein dnaJ 2; Short=AtDJ2; Flags: Precursor gi13374865 emb CAC34499.1  DNAJ PROTEIN HOMOLOG ATJ [Arabidopsis thaliana] gi26451907 dbj BAC42997.1  putative DnaJ protein homolog ATJ [Arabidopsis thaliana] gi111074426 gb ABH04586.1  At5g22060 [Arabidopsis thaliana] gi332005594 gb AED92977.1  chaperone protein dnaJ 2 [Arabidopsis thaliana]        | 424 | 419 | 0         | 98.8  | 89.2 | 94.6 | chaperone protein dnaJ 2               | gbpln | Arabidopsis thaliana | AT5G22060.1   Symbols: ATJ2, J2   DNAJ homologue 2   chr5:7303798-7305668 REVERSE LENGTH=419                                                                                                                                                                                        | 424 | 419 | 0         | 98.8  | 89.2 | 94.6 |
| Rsa1.0_01731.1.g29376.t1 | #                                                                                                                                                                                                                                                                                                                                                                                                                                                                                     | #   | #   | #         | #     | #    | #    | -                                      | ----  | ----                 | #                                                                                                                                                                                                                                                                                   | #   | #   | #         | #     | #    |      |
| Rsa1.0_01731.1.g29377.t2 | refNP_680188.1  replication factor C1 [Arabidopsis thaliana] gi13374860 emb CAC34494.1  replication factor C large subunit-like protein [Arabidopsis thaliana] gi148958527 gb AT47816.1  At5g22010 [Arabidopsis thaliana] gi332005585 gb AED92968.1  replication factor C1 [Arabidopsis thaliana]                                                                                                                                                                                     | 970 | 956 | 0         | 98.6  | 86.5 | 92.9 | replication factor C1                  | gbpln | Arabidopsis thaliana | AT5G22010.1   Symbols: AtRFC1, RFC1   replication factor C1   chr5:7280632-7287037 REVERSE LENGTH=956                                                                                                                                                                               | 970 | 956 | 0         | 98.6  | 86.5 | 92.9 |
| Rsa1.0_01731.1.g29378.t1 | refXP_002871983.1  hypothetical protein ARALYDRAFT_489047 [Arabidopsis lyrata subsp. lyrata] gi297317820 gb EFH48242.1  hypothetical protein ARALYDRAFT_489047 [Arabidopsis lyrata subsp. lyrata]                                                                                                                                                                                                                                                                                     | 443 | 376 | 1.00E-156 | 84.9  | 70.2 | 74.5 | hypothetical protein ARALYDRAFT_489047 | gbpln | Arabidopsis lyrata   | AT5G22000.3   Symbols: RHF2A   RING-H2 group F2A   chr5:7277436-7279553 FORWARD LENGTH=375                                                                                                                                                                                          | 443 | 375 | 1.00E-155 | 84.7  | 69.3 | 73.8 |

|                          |                                                                                                                                                                                                                                                                                                                                                                                                                                                                                                                                                                                                                                                    |     |      |           |       |      |      |                                                 |       |                      |                                                                                                                                                                                                                                                                                   |     |     |           |       |      |      |
|--------------------------|----------------------------------------------------------------------------------------------------------------------------------------------------------------------------------------------------------------------------------------------------------------------------------------------------------------------------------------------------------------------------------------------------------------------------------------------------------------------------------------------------------------------------------------------------------------------------------------------------------------------------------------------------|-----|------|-----------|-------|------|------|-------------------------------------------------|-------|----------------------|-----------------------------------------------------------------------------------------------------------------------------------------------------------------------------------------------------------------------------------------------------------------------------------|-----|-----|-----------|-------|------|------|
| Rsa1.0_01731.1.g29379.t1 | ref[XP_002871981.1] hypothetical protein ARALYDRAFT_489045 [Arabidopsis lyrata subsp. lyrata] gi 297317818 gb EFH48240.1                                                                                                                                                                                                                                                                                                                                                                                                                                                                                                                           | 186 | 558  | 1.00E-61  | 300.0 | 62.9 | 67.7 | hypothetical protein ARALYDRAFT_489045          | gbpln | Arabidopsis lyrata   | AT5G21990.1   Symbols: TPR7   Tetratricopeptide repeat (TPR)-like superfamily protein   chr5:7273395-7276318 FORWARD LENGTH=554                                                                                                                                                   | 186 | 554 | 1.00E-63  | 297.8 | 62.9 | 67.7 |
| Rsa1.0_01732.1.g29380.t1 | gb AAD32866.1 AC005489.4_F14N23.4 [Arabidopsis thaliana]                                                                                                                                                                                                                                                                                                                                                                                                                                                                                                                                                                                           | 138 | 1161 | 2.00E-30  | 841.3 | 46.4 | 60.9 | F14N23.4                                        | gbpln | Arabidopsis thaliana | AT2G02520.1   Symbols:   RNA-directed DNA polymerase (reverse transcriptase)-related family protein   chr2:676771-678145 REVERSE LENGTH=211                                                                                                                                       | 138 | 211 | 2.00E-32  | 152.9 | 46.4 | 63.8 |
| Rsa1.0_01732.1.g29381.t1 | gb EOA20775.1  hypothetical protein CARUB_v10001104mg [Capsella rubella]                                                                                                                                                                                                                                                                                                                                                                                                                                                                                                                                                                           | 402 | 405  | 1.00E-166 | 100.7 | 82.1 | 88.3 | hypothetical protein CARUB_v10001104mg          | gbpln | Capsella rubella     | AT5G16560.1   Symbols: KAN, KAN1   Homeodomain-like superfamily protein   chr5:5407365-5411092 REVERSE LENGTH=403                                                                                                                                                                 | 402 | 403 | 1.00E-165 | 100.2 | 81.3 | 88.1 |
| Rsa1.0_01732.1.g29382.t1 | ref[NP_568333.1] uncharacterized protein [Arabidopsis thaliana] gi 9759139 db BAB09624.1  unnamed protein product [Arabidopsis thaliana] gi 332004926 gb AED92309.1  uncharacterized protein AT5G16550 [Arabidopsis thaliana]                                                                                                                                                                                                                                                                                                                                                                                                                      | 276 | 249  | 9.00E-73  | 90.2  | 57.6 | 66.7 | uncharacterized protein                         | gbpln | Arabidopsis thaliana | AT5G16550.1   Symbols:   unknown protein; Has 30201 Blast hits to 17322 proteins in 780 species: Archae - 12; Bacteria - 1396; Metazoa - 17338; Fungi - 3422; Plants - 5037; Viruses - 0; Other Eukaryotes - 2996 (source: NCBI BLINK).   chr5:5405526-5406641 FORWARD LENGTH=249 | 276 | 249 | 2.00E-75  | 90.2  | 57.6 | 66.7 |
| Rsa1.0_01732.1.g29383.t1 | ref[NP_197157.4] putative auxin efflux carrier component 8 [Arabidopsis thaliana] gi 42558880 sp O9FFD0.2 PIN8_ARATH RecName: Full=Putative auxin efflux carrier component 8. Short=AuPIN8 gi 332004922 gb AED92305.1  putative auxin efflux carrier component 8 [Arabidopsis thaliana]                                                                                                                                                                                                                                                                                                                                                            | 348 | 351  | 0         | 100.9 | 90.5 | 95.7 | putative auxin efflux carrier component 8       | gbpln | Arabidopsis thaliana | AT5G16530.1   Symbols: PIN5   Auxin efflux carrier family protein   chr5:5400735-5402626 FORWARD LENGTH=351                                                                                                                                                                       | 348 | 351 | 0         | 100.9 | 90.5 | 95.7 |
| Rsa1.0_01732.1.g29384.t1 | gb EOA22043.1  hypothetical protein CARUB_v10002568mg [Capsella rubella]                                                                                                                                                                                                                                                                                                                                                                                                                                                                                                                                                                           | 348 | 348  | 0         | 100.0 | 92.8 | 98.0 | hypothetical protein CARUB_v10002568mg          | gbpln | Capsella rubella     | AT5G16510.2   Symbols:   Alpha-1,4-glucan-protein synthase family protein   chr5:5393296-5394342 FORWARD LENGTH=348                                                                                                                                                               | 348 | 348 | 0         | 100.0 | 91.7 | 97.4 |
| Rsa1.0_01732.1.g29385.t1 | gb EOA19370.1  hypothetical protein CARUB_v10000465mg [Capsella rubella]                                                                                                                                                                                                                                                                                                                                                                                                                                                                                                                                                                           | 596 | 625  | 0         | 104.9 | 89.9 | 94.3 | hypothetical protein CARUB_v10000465mg          | gbpln | Capsella rubella     | AT1G64260.1   Symbols:   MuDR family transposase   chr1:23847756-23849915 FORWARD LENGTH=719                                                                                                                                                                                      | 596 | 719 | 2.00E-37  | 120.6 | 21.3 | 38.4 |
| Rsa1.0_01732.1.g29386.t1 | ref[XP_002873780.1] predicted protein [Arabidopsis lyrata subsp. lyrata] gi 297319617 gb EFH50039.1  predicted protein [Arabidopsis lyrata subsp. lyrata]                                                                                                                                                                                                                                                                                                                                                                                                                                                                                          | 597 | 635  | 0         | 106.4 | 78.7 | 85.9 | predicted protein                               | gbpln | Arabidopsis lyrata   | AT5G16500.1   Symbols:   Protein kinase superfamily protein   chr5:5386733-5389003 REVERSE LENGTH=636                                                                                                                                                                             | 597 | 636 | 0         | 106.5 | 78.1 | 85.3 |
| Rsa1.0_01732.1.g29387.t1 | ref[XP_002873779.1] rop-interactive crib motif-containing protein 4 [Arabidopsis lyrata subsp. lyrata] gi 297319616 gb EFH50038.1  rop-interactive crib motif-containing protein 4 [Arabidopsis lyrata subsp. lyrata]                                                                                                                                                                                                                                                                                                                                                                                                                              | 152 | 153  | 2.00E-52  | 100.7 | 80.3 | 84.9 | rop-interactive crib motif-containing protein 4 | gbpln | Arabidopsis lyrata   | AT5G16490.1   Symbols: RIC4   ROP-interactive CRIB motif-containing protein 4   chr5:5384468-5385205 REVERSE LENGTH=153                                                                                                                                                           | 152 | 153 | 2.00E-53  | 100.7 | 77.6 | 85.5 |
| Rsa1.0_01732.1.g29388.t1 | ref[XP_002873778.1] hypothetical protein ARALYDRAFT_488502 [Arabidopsis lyrata subsp. lyrata] gi 297319615 gb EFH50037.1  hypothetical protein ARALYDRAFT_488502 [Arabidopsis lyrata subsp. lyrata]                                                                                                                                                                                                                                                                                                                                                                                                                                                | 206 | 203  | 1.00E-105 | 98.5  | 90.8 | 94.2 | hypothetical protein ARALYDRAFT_488502          | gbpln | Arabidopsis lyrata   | AT5G16480.1   Symbols:   Phosphotyrosine protein phosphatases superfamily protein   chr5:5381334-5382618 REVERSE LENGTH=204                                                                                                                                                       | 206 | 204 | 1.00E-106 | 99.0  | 89.8 | 94.2 |
| Rsa1.0_01732.1.g29389.t1 | ref[NP_197151.1] C2H2 type zinc finger protein [Arabidopsis thaliana] gi 297807673 ref[XP_002871720.1] zinc finger family protein [Arabidopsis lyrata subsp. lyrata] gi 9759129 db BAB09614.1  unnamed protein product [Arabidopsis thaliana] gi 27808636 gb AAO24598.1  At5g16470 [Arabidopsis thaliana] gi 110736298 db BAF00119.1  hypothetical protein [Arabidopsis thaliana] gi 297317557 gb EFH47979.1  zinc finger family protein [Arabidopsis lyrata subsp. lyrata] gi 332004914 gb AED92297.1  C2H2 type zinc finger protein [Arabidopsis thaliana] gi 482557657 gb EOA21849.1  hypothetical protein CARUB_v10002316mg [Capsella rubella] | 104 | 104  | 5.00E-50  | 100.0 | 97.1 | 98.1 | C2H2 type zinc finger protein                   | gbpln | Arabidopsis lyrata   | AT5G16470.1   Symbols:   zinc finger (C2H2 type) family protein   chr5:5379516-5379830 FORWARD LENGTH=104                                                                                                                                                                         | 104 | 104 | 9.00E-53  | 100.0 | 97.1 | 98.1 |

|                          |                                                                                                                                                                                                                           |      |      |           |       |      |      |                                                     |       |                      |                                                                                                                                                                                                                                                                                                                                                                                                                                                                                                                                                     |      |     |           |       |      |      |
|--------------------------|---------------------------------------------------------------------------------------------------------------------------------------------------------------------------------------------------------------------------|------|------|-----------|-------|------|------|-----------------------------------------------------|-------|----------------------|-----------------------------------------------------------------------------------------------------------------------------------------------------------------------------------------------------------------------------------------------------------------------------------------------------------------------------------------------------------------------------------------------------------------------------------------------------------------------------------------------------------------------------------------------------|------|-----|-----------|-------|------|------|
| Rsa1.0_01732.1.g29390.t1 | ref[XP_002305915.1] predicted protein [Populus trichocarpa] gi 118481835 gb ABK92854.1  unknown [Populus trichocarpa] gi 222848879 gb EEE86426.1  predicted protein [Populus trichocarpa]                                 | 324  | 254  | 1.00E-63  | 78.4  | 40.7 | 47.2 | predicted protein                                   | gbpln | Populus trichocarpa  | AT3G02700.1   Symbols:   NC domain-containing protein-related   chr3:581727-582813 REVERSE LENGTH=252                                                                                                                                                                                                                                                                                                                                                                                                                                               | 324  | 252 | 7.00E-63  | 77.8  | 40.7 | 48.8 |
| Rsa1.0_01733.1.g29391.t1 | #                                                                                                                                                                                                                         | #    | #    | #         | #     | #    | -    | ----                                                | ----  | #                    | #                                                                                                                                                                                                                                                                                                                                                                                                                                                                                                                                                   | #    | #   | #         | #     | #    |      |
| Rsa1.0_01733.1.g29392.t5 | dbj BAA97287.1  retroelement pol polyprotein-like [Arabidopsis thaliana]                                                                                                                                                  | 2024 | 1491 | 0         | 73.7  | 37.3 | 46.7 | retroelement pol polyprotein-like                   | gbpln | Arabidopsis thaliana | AT1G48660.1   Symbols:   Auxin-responsive GH3 family protein   chr1:17995948-17997972 REVERSE LENGTH=573<br>AT1G10530.1   Symbols:   unknown protein; FUNCTIONS IN: molecular_function unknown; INVOLVED IN: N-terminal protein myristoylation; BEST Arabidopsis thaliana protein match is: unknown protein (TAIR:AT1G60010.1); Has 143 Blast hits to 143 proteins in 14 species: Archae - 0; Bacteria - 0; Metazoa - 0; Fungi - 0; Plants - 143; Viruses - 0; Other Eukaryotes - 0 (source: NCBI BLINK).   chr1:3471805-3472526 REVERSE LENGTH=166 | 2024 | 573 | 0         | 28.3  | 17.8 | 21.9 |
| Rsa1.0_01733.1.g29393.t1 | gb EOA38625.1  hypothetical protein CARUB_v10010489mg [Capsella rubella]                                                                                                                                                  | 161  | 167  | 9.00E-69  | 103.7 | 81.4 | 87.0 | hypothetical protein CARUB_v10010489mg              | gbpln | Capsella rubella     | AT4G09490.1   Symbols:   Polynucleotidyl transferase, ribonuclease H-like superfamily protein   chr4:6015583-6016575 REVERSE LENGTH=170                                                                                                                                                                                                                                                                                                                                                                                                             | 161  | 166 | 5.00E-69  | 103.1 | 77.6 | 85.1 |
| Rsa1.0_01733.1.g29394.t1 | #                                                                                                                                                                                                                         | #    | #    | #         | #     | #    | -    | ----                                                | ----  | #                    | #                                                                                                                                                                                                                                                                                                                                                                                                                                                                                                                                                   | #    | #   | #         | #     | #    |      |
| Rsa1.0_01733.1.g29395.t1 | #                                                                                                                                                                                                                         | #    | #    | #         | #     | #    | -    | ----                                                | ----  | #                    | #                                                                                                                                                                                                                                                                                                                                                                                                                                                                                                                                                   | #    | #   | #         | #     | #    |      |
| Rsa1.0_01733.1.g29396.t1 | gb AAD22286.1  putative non-LTR retroelement reverse transcriptase [Arabidopsis thaliana]                                                                                                                                 | 176  | 1311 | 7.00E-16  | 744.9 | 27.3 | 37.5 | putative non-LTR retroelement reverse transcriptase | gbpln | Arabidopsis thaliana | AT1G10480.1   Symbols: ZFP5   zinc finger protein 5   chr1:3449734-3450369 FORWARD LENGTH=211                                                                                                                                                                                                                                                                                                                                                                                                                                                       | 176  | 170 | 8.00E-14  | 96.6  | 24.4 | 39.2 |
| Rsa1.0_01733.1.g29397.t1 | ref[XP_002889811.1] zinc finger protein 5, ZFP5 [Arabidopsis lyrata subsp. lyrata] gi 297335653 gb EFH66070.1  zinc finger protein 5, ZFP5 [Arabidopsis lyrata subsp. lyrata]                                             | 204  | 205  | 7.00E-83  | 100.5 | 85.3 | 92.6 | zinc finger protein 5, ZFP5                         | gbpln | Arabidopsis lyrata   | AT1G31150.1   Symbols:   Domain of unknown function (DUF1985)   chr1:1120097-1122412 FORWARD LENGTH=673                                                                                                                                                                                                                                                                                                                                                                                                                                             | 204  | 211 | 3.00E-82  | 103.4 | 82.8 | 90.7 |
| Rsa1.0_01733.1.g29398.t1 | gb ACQ44224.1  unknown [Arabis alpina]                                                                                                                                                                                    | 133  | 291  | 5.00E-34  | 218.8 | 54.9 | 72.9 | unknown                                             | gbpln | Arabis alpina        | AT1G05530.1   Symbols: UGT75B2   UDP-glucosyl transferase 75B2   chr1:1636496-1637863 REVERSE LENGTH=455                                                                                                                                                                                                                                                                                                                                                                                                                                            | 133  | 673 | 4.00E-11  | 506.0 | 29.3 | 51.9 |
| Rsa1.0_01734.1.g29399.t1 | gb AAD23707.1  putative retroelement pol polyprotein [Arabidopsis thaliana]                                                                                                                                               | 288  | 466  | 5.00E-88  | 161.8 | 61.1 | 70.8 | putative retroelement pol polyprotein               | gbpln | Arabidopsis thaliana | #                                                                                                                                                                                                                                                                                                                                                                                                                                                                                                                                                   | #    | #   | #         | #     | #    |      |
| Rsa1.0_01734.1.g29400.t3 | gb ABW81018.1  gag-pol polymerase [Arabidopsis lyrata subsp. lyrata]                                                                                                                                                      | 819  | 672  | 2.00E-40  | 82.1  | 11.8 | 17.0 | gag-pol polymerase                                  | gbpln | Arabidopsis lyrata   | #                                                                                                                                                                                                                                                                                                                                                                                                                                                                                                                                                   | #    | #   | #         | #     | #    |      |
| Rsa1.0_01734.1.g29401.t1 | #                                                                                                                                                                                                                         | #    | #    | #         | #     | #    | -    | ----                                                | ----  | #                    | #                                                                                                                                                                                                                                                                                                                                                                                                                                                                                                                                                   | #    | #   | #         | #     | #    |      |
| Rsa1.0_01734.1.g29402.t1 | gb AAG51783.1 AC079679_3 reverse transcriptase, putative: 16838-20266 [Arabidopsis thaliana]                                                                                                                              | 1167 | 1142 | 0         | 97.9  | 53.6 | 66.8 | reverse transcriptase, putative: 16838-20266        | gbpln | Arabidopsis thaliana | AT4G29090.1   Symbols:   Ribonuclease H-like superfamily protein   chr4:14333528-14335255 FORWARD LENGTH=575                                                                                                                                                                                                                                                                                                                                                                                                                                        | 1167 | 575 | 3.00E-61  | 49.3  | 12.8 | 19.8 |
| Rsa1.0_01734.1.g29403.t1 | dbj BAJ33712.1  unnamed protein product [Theellungiella halophila]                                                                                                                                                        | 471  | 456  | 0         | 96.8  | 73.0 | 83.7 | unnamed protein product                             | ----  | ----                 | AT1G60780.1   Symbols: HAP13   Clathrin adaptor complexes medium subunit family protein   chr1:22369289-22371885 REVERSE LENGTH=428                                                                                                                                                                                                                                                                                                                                                                                                                 | 471  | 455 | 0         | 96.6  | 76.0 | 85.4 |
| Rsa1.0_01734.1.g29404.t5 | gb ABD65062.1  hypothetical protein 27.t00126 [Brassica oleracea]                                                                                                                                                         | 678  | 578  | 2.00E-57  | 85.3  | 17.3 | 23.2 | hypothetical protein 27.t00126                      | gbpln | Brassica oleracea    | #                                                                                                                                                                                                                                                                                                                                                                                                                                                                                                                                                   | #    | #   | #         | #     | #    |      |
| Rsa1.0_01734.1.g29405.t1 | gb AAD25596.1  putative helicase [Arabidopsis thaliana]                                                                                                                                                                   | 138  | 1219 | 3.00E-33  | 883.3 | 50.0 | 68.8 | putative helicase                                   | gbpln | Arabidopsis thaliana | #                                                                                                                                                                                                                                                                                                                                                                                                                                                                                                                                                   | #    | #   | #         | #     | #    |      |
| Rsa1.0_01734.1.g29406.t1 | gb AAG51081.1 AC027032_1 hypothetical protein [Arabidopsis thaliana]                                                                                                                                                      | 224  | 1678 | 5.00E-72  | 749.1 | 58.0 | 71.4 | hypothetical protein                                | gbpln | Arabidopsis thaliana | #                                                                                                                                                                                                                                                                                                                                                                                                                                                                                                                                                   | #    | #   | #         | #     | #    |      |
| Rsa1.0_01735.1.g29407.t1 | #                                                                                                                                                                                                                         | #    | #    | #         | #     | #    | -    | ----                                                | ----  | #                    | #                                                                                                                                                                                                                                                                                                                                                                                                                                                                                                                                                   | #    | #   | #         | #     | #    |      |
| Rsa1.0_01735.1.g29408.t1 | gb EOA31501.1  hypothetical protein CARUB_v10014687mg [Capsella rubella]                                                                                                                                                  | 189  | 198  | 2.00E-20  | 104.8 | 27.0 | 27.0 | hypothetical protein CARUB_v10014687mg              | gbpln | Capsella rubella     | AT3G05000.1   Symbols:   Transport protein particle (TRAPP) component   chr3:1387444-1388697 REVERSE LENGTH=173                                                                                                                                                                                                                                                                                                                                                                                                                                     | 189  | 173 | 3.00E-22  | 91.5  | 29.6 | 31.7 |
| Rsa1.0_01735.1.g29409.t1 | ref[NP_188953.1] receptor like protein 38 [Arabidopsis thaliana] gi 9294202 dbj BAB02104.1  disease resistance protein [Arabidopsis thaliana] gi 332643199 gb AEE76720.1  receptor like protein 38 [Arabidopsis thaliana] | 764  | 784  | 0         | 102.6 | 67.8 | 80.0 | receptor like protein 38                            | gbpln | Arabidopsis thaliana | AT3G23120.1   Symbols: AtRLP38, RLP38   receptor like protein 38   chr3:8227222-8229576 REVERSE LENGTH=784                                                                                                                                                                                                                                                                                                                                                                                                                                          | 764  | 784 | 0         | 102.6 | 67.8 | 80.0 |
| Rsa1.0_01735.1.g29410.t2 | gb EOA32218.1  hypothetical protein CARUB_v10015477mg [Capsella rubella]                                                                                                                                                  | 745  | 743  | 0         | 99.7  | 55.2 | 63.5 | hypothetical protein CARUB_v10015477mg              | gbpln | Capsella rubella     | AT3G23120.1   Symbols: AtRLP38, RLP38   receptor like protein 38   chr3:8227222-8229576 REVERSE LENGTH=784                                                                                                                                                                                                                                                                                                                                                                                                                                          | 745  | 784 | 1.00E-166 | 105.2 | 50.2 | 60.4 |
| Rsa1.0_01735.1.g29411.t1 | dbj BAB02101.1  unnamed protein product [Arabidopsis thaliana]                                                                                                                                                            | 345  | 374  | 1.00E-136 | 108.4 | 75.9 | 82.3 | unnamed protein product                             | gbpln | Arabidopsis thaliana | AT3G23090.1   Symbols:   TPX2 (targeting protein for Xklo2) protein family   chr3:8214533-8216983 REVERSE LENGTH=338                                                                                                                                                                                                                                                                                                                                                                                                                                | 345  | 338 | 1.00E-138 | 98.0  | 75.9 | 82.3 |
| Rsa1.0_01735.1.g29412.t1 | #                                                                                                                                                                                                                         | #    | #    | #         | #     | #    | -    | ----                                                | ----  | #                    | #                                                                                                                                                                                                                                                                                                                                                                                                                                                                                                                                                   | #    | #   | #         | #     | #    |      |

|                          |                                                                                                                                                                                                                                                                                                                                                                                                  |      |      |           |       |      |      |                                        |       |                      |                                                                                                                                                                                                                                                                                                              |      |      |           |       |      |      |
|--------------------------|--------------------------------------------------------------------------------------------------------------------------------------------------------------------------------------------------------------------------------------------------------------------------------------------------------------------------------------------------------------------------------------------------|------|------|-----------|-------|------|------|----------------------------------------|-------|----------------------|--------------------------------------------------------------------------------------------------------------------------------------------------------------------------------------------------------------------------------------------------------------------------------------------------------------|------|------|-----------|-------|------|------|
| Rsa1.0_01735.1.g29413.t1 | refXP_002885543.1   hypothetical protein ARALYDRAFT_319027 [Arabidopsis lyrata subsp. lyrata] gi 297331383 gb EFH61802.1                                                                                                                                                                                                                                                                         | 419  | 427  | 1.00E-154 | 101.9 | 68.5 | 77.6 | hypothetical protein ARALYDRAFT_319027 | gbpln | Arabidopsis lyrata   | AT3G23080.1   Symbols:   Polyketide cyclase/dehydrase and lipid transport superfamily protein   chr3:8207612-8209181 REVERSE LENGTH=419                                                                                                                                                                      | 419  | 419  | 2.33E-156 | 100.0 | 68.5 | 76.6 |
| Rsa1.0_01735.1.g29414.t1 | hypothetical protein ARALYDRAFT_319027 [Arabidopsis lyrata subsp. lyrata] refXP_002883397.1   hypothetical protein ARALYDRAFT_898801 [Arabidopsis lyrata subsp. lyrata] gi 297329237 gb EFH59656.1                                                                                                                                                                                               | 822  | 873  | 0         | 106.2 | 79.7 | 87.1 | hypothetical protein ARALYDRAFT_898801 | gbpln | Arabidopsis lyrata   | AT3G23070.1   Symbols:   ATCFM3A, CFM3A   CRM family member 3A   chr3:8203548-8207243 FORWARD LENGTH=881                                                                                                                                                                                                     | 822  | 881  | 0         | 107.2 | 76.5 | 83.6 |
| Rsa1.0_01736.1.g29415.t1 | dbj BAB09923.1   copia-like retrotransposable element [Arabidopsis thaliana]                                                                                                                                                                                                                                                                                                                     | 1363 | 1342 | 0         | 98.5  | 49.7 | 68.3 | copia-like retrotransposable element   | gbpln | Arabidopsis thaliana | AT4G23160.1   Symbols:   CRK8   cysteine-rich RLK (RECEPTOR-like protein kinase) 8   chr4:12129485-12134086 FORWARD LENGTH=1262                                                                                                                                                                              | 1363 | 1262 | 2.00E-82  | 92.6  | 12.8 | 20.2 |
| Rsa1.0_01736.1.g29416.t1 | refXP_002874744.1   hypothetical protein ARALYDRAFT_490024 [Arabidopsis lyrata subsp. lyrata] gi 297320581 gb EFH51003.1                                                                                                                                                                                                                                                                         | 326  | 331  | 1.00E-114 | 101.5 | 89.3 | 91.4 | hypothetical protein ARALYDRAFT_490024 | gbpln | Arabidopsis lyrata   | AT4G12050.1   Symbols:   Predicted AT-hook DNA-binding family protein   chr4:7220139-7221158 REVERSE LENGTH=339                                                                                                                                                                                              | 326  | 339  | 1.00E-108 | 104.0 | 85.6 | 87.7 |
| Rsa1.0_01736.1.g29417.t1 | hypothetical protein ARALYDRAFT_490024 [Arabidopsis lyrata subsp. lyrata]                                                                                                                                                                                                                                                                                                                        | #    | #    | #         | #     | #    | #    | -                                      | ----  | ----                 | #                                                                                                                                                                                                                                                                                                            | #    | #    | #         | #     | #    | #    |
| Rsa1.0_01736.1.g29418.t3 | gb ABD65624.1   hypothetical protein 23.t00036 [Brassica oleracea]                                                                                                                                                                                                                                                                                                                               | 841  | 842  | 1.00E-107 | 100.1 | 37.7 | 55.4 | hypothetical protein 23.t00036         | gbpln | Brassica oleracea    | AT2G07240.1   Symbols:   cysteine-type peptidases;cysteine-type peptidases   chr2:3007102-3011701 REVERSE LENGTH=874                                                                                                                                                                                         | 841  | 874  | 3.00E-33  | 103.9 | 11.1 | 16.3 |
| Rsa1.0_01736.1.g29419.t1 | refXP_002867283.1   hypothetical protein ARALYDRAFT_913296 [Arabidopsis lyrata subsp. lyrata] gi 297313119 gb EFH43542.1                                                                                                                                                                                                                                                                         | 269  | 394  | 1.00E-71  | 146.5 | 50.2 | 67.3 | hypothetical protein ARALYDRAFT_913296 | gbpln | Arabidopsis lyrata   | AT2G24700.1   Symbols:   Transcriptional factor B3 family protein   chr2:10513049-10515288 REVERSE LENGTH=555                                                                                                                                                                                                | 269  | 555  | 1.00E-55  | 206.3 | 40.9 | 61.7 |
| Rsa1.0_01736.1.g29420.t1 | hypothetical protein ARALYDRAFT_913296 [Arabidopsis lyrata subsp. lyrata]                                                                                                                                                                                                                                                                                                                        | 98   | 152  | 8.00E-16  | 155.1 | 39.8 | 59.2 | hypothetical protein CARUB_v10027303mg | gbpln | Capsella rubella     | AT5G33393.1   Symbols:   unknown protein; LOCATED IN: chloroplast; Has 30201 Blast hits to 17322 proteins in 780 species: Archae - 12; Bacteria - 1396; Metazoa - 17338; Fungi - 3422; Plants - 5037; Viruses - 0; Other Eukaryotes - 2996 (source: NCBI BLink).   chr5:12656430-12658588 REVERSE LENGTH=435 | 98   | 435  | 7.00E-17  | 443.9 | 35.7 | 48.0 |
| Rsa1.0_01737.1.g29421.t1 | gb EOA14157.1   hypothetical protein CARUB_v10027303mg [Capsella rubella]                                                                                                                                                                                                                                                                                                                        | 368  | 554  | 2.33E-156 | 150.5 | 71.2 | 76.1 | hypothetical protein ARALYDRAFT_317476 | gbpln | Arabidopsis lyrata   | AT3G06140.1   Symbols:   RING/U-box superfamily protein   chr3:1856993-1858777 REVERSE LENGTH=359                                                                                                                                                                                                            | 368  | 359  | 1.00E-143 | 97.6  | 69.8 | 75.0 |
| Rsa1.0_01737.1.g29422.t1 | refXP_002884561.1   hypothetical protein ARALYDRAFT_317476 [Arabidopsis lyrata subsp. lyrata] gi 297330401 gb EFH60820.1                                                                                                                                                                                                                                                                         | 491  | 445  | 1.00E-68  | 90.6  | 39.9 | 42.2 | hypothetical protein ARALYDRAFT_477915 | gbpln | Arabidopsis lyrata   | AT3G06130.2   Symbols:   Heavy metal transport/detoxification superfamily protein   chr3:1853193-1854673 REVERSE LENGTH=349                                                                                                                                                                                  | 491  | 349  | 2.00E-67  | 71.1  | 40.9 | 43.6 |
| Rsa1.0_01737.1.g29423.t1 | hypothetical protein ARALYDRAFT_317476 [Arabidopsis lyrata subsp. lyrata] refXP_002884560.1   hypothetical protein ARALYDRAFT_477915 [Arabidopsis lyrata subsp. lyrata] gi 297330400 gb EFH60819.1                                                                                                                                                                                               | 191  | 202  | 1.00E-92  | 105.8 | 89.5 | 94.2 | hypothetical protein CARUB_v10012751mg | gbpln | Capsella rubella     | AT3G06120.1   Symbols:   MUTE   basic helix-loop-helix (bHLH) DNA-binding superfamily protein   chr3:1846531-1848016 FORWARD LENGTH=202                                                                                                                                                                      | 191  | 202  | 6.00E-93  | 105.8 | 90.1 | 93.2 |
| Rsa1.0_01737.1.g29424.t2 | gb EOA11961.1   hypothetical protein CARUB_v10012751mg [Capsella rubella]                                                                                                                                                                                                                                                                                                                        | 211  | 195  | 1.00E-88  | 92.4  | 76.8 | 83.4 | hypothetical protein CARUB_v10014699mg | gbpln | Capsella rubella     | AT3G06110.3   Symbols:   MKP2   MAPK phosphatase 2   chr3:1843517-1844577 FORWARD LENGTH=167                                                                                                                                                                                                                 | 211  | 167  | 2.00E-84  | 79.1  | 69.2 | 74.4 |
| Rsa1.0_01737.1.g29425.t1 | ref NP_566271.1   putative aquaporin NIP7-1 [Arabidopsis thaliana] gi 62512177 sp Q8LAI.2 NIP71_ARATH RecName: Full=Probable aquaporin NIP7-1; AltName: Full=NOD26-like intrinsic protein 7-1; Short=AtNIP7;1 gi 91806383 gb ABE65919.1   major intrinsic family protein/MIP family protein [Arabidopsis thaliana] gi 332640822 gb AEE74343.1   putative aquaporin NIP7-1 [Arabidopsis thaliana] | 272  | 275  | 1.00E-126 | 101.1 | 83.8 | 89.7 | putative aquaporin NIP7-1              | gbpln | Arabidopsis thaliana | AT3G06100.1   Symbols:   NLM6, NLM8, NIP7;1   NOD26-like intrinsic protein 7;1   chr3:1841388-1842934 REVERSE LENGTH=275                                                                                                                                                                                     | 272  | 275  | 1.00E-128 | 101.1 | 83.8 | 89.7 |

|                          |                                                                                                                                                                                                                                                                                                                                                                                                      |      |      |           |        |      |      |                                        |       |                      |                                                                                                                                                                                                                                                                                                                                                                                                                                                                                                                                  |      |      |           |        |      |      |
|--------------------------|------------------------------------------------------------------------------------------------------------------------------------------------------------------------------------------------------------------------------------------------------------------------------------------------------------------------------------------------------------------------------------------------------|------|------|-----------|--------|------|------|----------------------------------------|-------|----------------------|----------------------------------------------------------------------------------------------------------------------------------------------------------------------------------------------------------------------------------------------------------------------------------------------------------------------------------------------------------------------------------------------------------------------------------------------------------------------------------------------------------------------------------|------|------|-----------|--------|------|------|
| Rsa1.0_01737.1.g29426.t1 | ref NP_187260.1  uncharacterized protein [Arabidopsis thaliana]<br>gi 6862913 gb AAF30302.1 AC018907.2 hypothetical protein [Arabidopsis thaliana]<br>gi 93007369 gb ABE97187.1  hypothetical protein AT3G06090 [Arabidopsis thaliana]<br>gi 33264082.1 gb AEE74342.1  uncharacterized protein AT3G06090 [Arabidopsis thaliana]                                                                      | 78   | 79   | 3.00E-20  | 101.3  | 65.4 | 79.5 | uncharacterized protein                | gbpln | Arabidopsis thaliana | AT3G06090.1   Symbols:   unknown protein; FUNCTIONS IN: molecular_function unknown; INVOLVED IN: biological_process unknown; LOCATED IN: endomembrane system; EXPRESSED IN: flower, leaf, seed; EXPRESSED DURING: petal differentiation and expansion stage, LP.08 eight leaves visible, E expanded cotyledon stage; Has 7 Blast hits to 7 proteins in 2 species: Archae - 0; Bacteria - 0; Metazoa - 0; Fungi - 0; Plants - 7; Viruses - 0; Other Eukaryotes - 0 (source: NCBI BLINK).   chr3:1840773-1841012 FORWARD LENGTH=79 | 78   | 79   | 5.00E-23  | 101.3  | 65.4 | 79.5 |
| Rsa1.0_01738.1.g29427.t3 | gb AAD17409.1  putative retroelement pol polyprotein [Arabidopsis thaliana]                                                                                                                                                                                                                                                                                                                          | 1403 | 1347 | 0         | 96.0   | 41.8 | 54.9 | putative retroelement pol polyprotein  | gbpln | Arabidopsis thaliana | AT4G23160.1   Symbols: CRK8   cysteine-rich RLK (RECEPTOR-like protein kinase) 8   chr4:12129485-12134086 FORWARD LENGTH=1262                                                                                                                                                                                                                                                                                                                                                                                                    | 1403 | 1262 | 5.00E-99  | 90.0   | 12.6 | 20.3 |
| Rsa1.0_01738.1.g29428.t1 | ref XP_002878518.1  EMB2221 [Arabidopsis lyrata subsp. lyrata]<br>gi 297324356 gb EFH54777.1  EMB2221 [Arabidopsis lyrata subsp. lyrata]<br>ref XP_002884534.1  hypothetical protein ARALYDRAFT.477873 [Arabidopsis lyrata subsp. lyrata]<br>gi 297330374 gb EFH60793.1  hypothetical protein ARALYDRAFT.477873 [Arabidopsis lyrata subsp. lyrata]                                                   | 98   | 1104 | 6.00E-14  | 1126.5 | 45.9 | 50.0 | EMB2221                                | gbpln | Arabidopsis lyrata   | AT3G63460.2   Symbols:   transducin family protein / WD-40 repeat family protein   chr3:23431009-23437241 REVERSE LENGTH=1102                                                                                                                                                                                                                                                                                                                                                                                                    | 98   | 1102 | 1.00E-15  | 1124.5 | 44.9 | 49.0 |
| Rsa1.0_01738.1.g29429.t1 | ref XP_002884534.1  hypothetical protein ARALYDRAFT.477873 [Arabidopsis lyrata subsp. lyrata]<br>gi 297330374 gb EFH60793.1  hypothetical protein ARALYDRAFT.477873 [Arabidopsis lyrata subsp. lyrata]                                                                                                                                                                                               | 641  | 940  | 0         | 146.6  | 67.9 | 76.1 | hypothetical protein ARALYDRAFT.477873 | gbpln | Arabidopsis lyrata   | AT3G05790.1   Symbols: LON4   lon protease 4   chr3:1720154-1725182 REVERSE LENGTH=942                                                                                                                                                                                                                                                                                                                                                                                                                                           | 641  | 942  | 0         | 147.0  | 66.8 | 74.9 |
| Rsa1.0_01738.1.g29430.t1 | #                                                                                                                                                                                                                                                                                                                                                                                                    | #    | #    | #         | #      | #    | #    | -                                      | ----  | ----                 | #                                                                                                                                                                                                                                                                                                                                                                                                                                                                                                                                | #    | #    | #         | #      | #    |      |
| Rsa1.0_01738.1.g29431.t3 | db BAA85462.1  transposon-like ORF [Brassica rapa]                                                                                                                                                                                                                                                                                                                                                   | 350  | 703  | 1.00E-108 | 200.9  | 61.7 | 72.0 | transposon-like ORF                    | gbpln | Brassica rapa        | #                                                                                                                                                                                                                                                                                                                                                                                                                                                                                                                                | #    | #    | #         | #      | #    |      |
| Rsa1.0_01738.1.g29432.t1 | #                                                                                                                                                                                                                                                                                                                                                                                                    | #    | #    | #         | #      | #    | #    | -                                      | ----  | ----                 | AT2G17420.1   Symbols: NTRA, ATNTRA, NTR2   NADPH-dependent thioredoxin reductase A   chr2:7564357-7566219 FORWARD LENGTH=378                                                                                                                                                                                                                                                                                                                                                                                                    | 369  | 378  | 4.00E-11  | 102.4  | 12.5 | 16.5 |
| Rsa1.0_01738.1.g29433.t1 | ref XP_002884533.1  predicted protein [Arabidopsis lyrata subsp. lyrata]<br>gi 297330373 gb EFH60792.1  predicted protein [Arabidopsis lyrata subsp. lyrata]<br>ref XP_002884534.1  hypothetical protein ARALYDRAFT.477873 [Arabidopsis lyrata subsp. lyrata]<br>gi 297330374 gb EFH60793.1  hypothetical protein ARALYDRAFT.477873 [Arabidopsis lyrata subsp. lyrata]                               | 261  | 923  | 1.00E-110 | 353.6  | 77.4 | 86.6 | predicted protein                      | gbpln | Arabidopsis lyrata   | AT3G05780.1   Symbols: LON3   lon protease 3   chr3:1714941-1719608 REVERSE LENGTH=924                                                                                                                                                                                                                                                                                                                                                                                                                                           | 261  | 924  | 1.00E-112 | 354.0  | 76.6 | 86.6 |
| Rsa1.0_01738.1.g29434.t1 | ref XP_002884534.1  hypothetical protein ARALYDRAFT.477873 [Arabidopsis lyrata subsp. lyrata]<br>gi 297330374 gb EFH60793.1  hypothetical protein ARALYDRAFT.477873 [Arabidopsis lyrata subsp. lyrata]                                                                                                                                                                                               | 148  | 940  | 1.00E-29  | 635.1  | 47.3 | 55.4 | hypothetical protein ARALYDRAFT.477873 | gbpln | Arabidopsis lyrata   | AT3G05790.1   Symbols: LON4   lon protease 4   chr3:1720154-1725182 REVERSE LENGTH=942                                                                                                                                                                                                                                                                                                                                                                                                                                           | 148  | 942  | 3.00E-30  | 636.5  | 44.6 | 52.7 |
| Rsa1.0_01738.1.g29435.t1 | gb AAB87099.1  putative retroelement pol polyprotein [Arabidopsis thaliana]                                                                                                                                                                                                                                                                                                                          | 1442 | 1496 | 0         | 103.7  | 58.0 | 70.8 | putative retroelement pol polyprotein  | gbpln | Arabidopsis thaliana | AT4G23160.1   Symbols: CRK8   cysteine-rich RLK (RECEPTOR-like protein kinase) 8   chr4:12129485-12134086 FORWARD LENGTH=1262                                                                                                                                                                                                                                                                                                                                                                                                    | 1442 | 1262 | 1.00E-141 | 87.5   | 16.4 | 23.0 |
| Rsa1.0_01738.1.g29436.t2 | gb EMJ11389.1  hypothetical protein PRUPE_ppa017790mg [Prunus persica]                                                                                                                                                                                                                                                                                                                               | 1496 | 1485 | 0         | 99.3   | 42.6 | 58.4 | hypothetical protein PRUPE_ppa017790mg | gbpln | Prunus persica       | ATMG00860.1   Symbols: ORF158   DNA/RNA polymerases superfamily protein   chrM:235916-236392 FORWARD LENGTH=158                                                                                                                                                                                                                                                                                                                                                                                                                  | 1496 | 158  | 8.00E-25  | 10.6   | 3.3  | 5.4  |
| Rsa1.0_01739.1.g29437.t1 | gb AAD25819.1  hypothetical protein [Arabidopsis thaliana]                                                                                                                                                                                                                                                                                                                                           | 376  | 349  | 3.00E-88  | 92.8   | 50.3 | 59.8 | hypothetical protein                   | gbpln | Arabidopsis thaliana | AT2G22050.2   Symbols:   Galactose oxidase/kelch repeat superfamily protein   chr2:9376684-9377552 FORWARD LENGTH=258                                                                                                                                                                                                                                                                                                                                                                                                            | 376  | 258  | 7.00E-68  | 68.6   | 38.0 | 44.7 |
| Rsa1.0_01739.1.g29438.t2 | gb AEB33726.1  EARLY FLOWERING 3 [Brassica rapa]                                                                                                                                                                                                                                                                                                                                                     | 658  | 628  | 0         | 95.4   | 70.4 | 75.5 | EARLY FLOWERING 3                      | gbpln | Brassica rapa        | AT2G25930.1   Symbols: ELF3, PYK20   hydroxyproline-rich glycoprotein family protein   chr2:11059459-11063178 FORWARD LENGTH=695                                                                                                                                                                                                                                                                                                                                                                                                 | 658  | 695  | 1.00E-171 | 105.6  | 65.7 | 73.9 |
| Rsa1.0_01739.1.g29439.t1 | ref XP_002880728.1  alpha-vacuolar processing enzyme [Arabidopsis lyrata subsp. lyrata]<br>gi 297326567 gb EFH56987.1  alpha-vacuolar processing enzyme [Arabidopsis lyrata subsp. lyrata]<br>ref XP_002880729.1  hypothetical protein ARALYDRAFT.481452 [Arabidopsis lyrata subsp. lyrata]<br>gi 297326568 gb EFH56988.1  hypothetical protein ARALYDRAFT.481452 [Arabidopsis lyrata subsp. lyrata] | 488  | 479  | 0         | 98.2   | 84.4 | 90.8 | alpha-vacuolar processing enzyme       | gbpln | Arabidopsis lyrata   | AT2G25940.1   Symbols: ALPHA-VPE, ALPHAVPE   alpha-vacuolar processing enzyme   chr2:11063496-11066020 REVERSE LENGTH=478                                                                                                                                                                                                                                                                                                                                                                                                        | 488  | 478  | 0         | 98.0   | 83.0 | 91.0 |
| Rsa1.0_01739.1.g29440.t1 | ref XP_002880729.1  hypothetical protein ARALYDRAFT.481452 [Arabidopsis lyrata subsp. lyrata]<br>gi 297326568 gb EFH56988.1  hypothetical protein ARALYDRAFT.481452 [Arabidopsis lyrata subsp. lyrata]                                                                                                                                                                                               | 633  | 634  | 0         | 100.2  | 79.5 | 83.4 | hypothetical protein ARALYDRAFT.481452 | gbpln | Arabidopsis lyrata   | AT2G25970.1   Symbols:   KH domain-containing protein   chr2:11071844-11075604 REVERSE LENGTH=632                                                                                                                                                                                                                                                                                                                                                                                                                                | 633  | 632  | 0         | 99.8   | 79.0 | 83.1 |

|                          |                                                                                                                                                                                                                                                                                                                                                                                                                                                                                                                                                                             |      |      |           |       |      |      |                                              |       |                      |                                                                                                                                                                                                                                                                                                                                                                                                                                                                                                                                           |      |      |           |       |      |      |
|--------------------------|-----------------------------------------------------------------------------------------------------------------------------------------------------------------------------------------------------------------------------------------------------------------------------------------------------------------------------------------------------------------------------------------------------------------------------------------------------------------------------------------------------------------------------------------------------------------------------|------|------|-----------|-------|------|------|----------------------------------------------|-------|----------------------|-------------------------------------------------------------------------------------------------------------------------------------------------------------------------------------------------------------------------------------------------------------------------------------------------------------------------------------------------------------------------------------------------------------------------------------------------------------------------------------------------------------------------------------------|------|------|-----------|-------|------|------|
| Rsa1.0_01739.1.g29441.t1 | refNP_849854.1  MATE efflux family protein [Arabidopsis thaliana] gi 12597760 gb AAG60073.1 AC013288_7 MATE efflux family protein, putative [Arabidopsis thaliana] gi 332196432 gb AEE34553.1  MATE efflux family protein [Arabidopsis thaliana]                                                                                                                                                                                                                                                                                                                            | 483  | 482  | 0         | 99.8  | 84.7 | 94.2 | MATE efflux family protein                   | gbpln | Arabidopsis thaliana | AT1G66760.2   Symbols:   MATE efflux family protein   chr1:24902110-24904213 FORWARD LENGTH=482                                                                                                                                                                                                                                                                                                                                                                                                                                           | 483  | 482  | 0         | 99.8  | 84.7 | 94.2 |
| Rsa1.0_01739.1.g29442.t1 | emb CAN80895.1  hypothetical protein VITISV_031817 [Vitis vinifera]                                                                                                                                                                                                                                                                                                                                                                                                                                                                                                         | 184  | 324  | 2.00E-73  | 176.1 | 67.4 | 83.7 | hypothetical protein VITISV_031817           | gbpln | Vitis vinifera       | #                                                                                                                                                                                                                                                                                                                                                                                                                                                                                                                                         | #    | #    | #         | #     | #    |      |
| Rsa1.0_01739.1.g29443.t1 | gb ABA18104.1  putative plasma membrane ATPase [Capsella rubella] gi 482548056 gb EOA12258.1  hypothetical protein CARUB_v10008027mg [Capsella rubella]                                                                                                                                                                                                                                                                                                                                                                                                                     | 616  | 948  | 0         | 153.9 | 74.0 | 76.8 | putative plasma membrane ATPase              | gbpln | Capsella rubella     | AT3G42640.1   Symbols: AHA8, HA8   H(+)-ATPase 8   chr3:14724309-14728062 FORWARD LENGTH=948                                                                                                                                                                                                                                                                                                                                                                                                                                              | 616  | 948  | 0         | 153.9 | 74.2 | 76.6 |
| Rsa1.0_01740.1.g29444.t1 | gb EOA29874.1  hypothetical protein CARUB_v10012970mg [Capsella rubella]                                                                                                                                                                                                                                                                                                                                                                                                                                                                                                    | 107  | 840  | 3.00E-22  | 785.0 | 44.9 | 54.2 | hypothetical protein CARUB_v10012970mg       | gbpln | Capsella rubella     | AT3G19840.1   Symbols: ATPRP40C, PRP40C   pre-mRNA-processing protein 40C   chr3:6891226-6897227 FORWARD LENGTH=835                                                                                                                                                                                                                                                                                                                                                                                                                       | 107  | 835  | 2.00E-23  | 780.4 | 42.1 | 52.3 |
| Rsa1.0_01740.1.g29445.t1 | dbj BAJ34141.1  unnamed protein product [Thellungiella halophila]                                                                                                                                                                                                                                                                                                                                                                                                                                                                                                           | 542  | 561  | 0         | 103.5 | 84.9 | 93.9 | unnamed protein product                      | ----  | ----                 | AT3G19850.1   Symbols:   Phototropic-responsive NPH3 family protein   chr3:6898383-6901157 REVERSE LENGTH=554                                                                                                                                                                                                                                                                                                                                                                                                                             | 542  | 554  | 0         | 102.2 | 82.5 | 90.2 |
| Rsa1.0_01740.1.g29446.t1 | gb EOA13622.1  hypothetical protein CARUB_v10026692mg [Capsella rubella]                                                                                                                                                                                                                                                                                                                                                                                                                                                                                                    | 622  | 350  | 0         | 56.3  | 49.2 | 52.6 | hypothetical protein CARUB_v10026692mg       | gbpln | Capsella rubella     | AT5G50960.1   Symbols: NBP35, ATNBP35   nucleotide binding protein 35   chr5:20734267-20735824 FORWARD LENGTH=350                                                                                                                                                                                                                                                                                                                                                                                                                         | 622  | 350  | 0         | 56.3  | 48.4 | 52.6 |
| Rsa1.0_01740.1.g29447.t1 | ref XP_002883209.1  binding protein [Arabidopsis lyrata subsp. lyrata] gi 297329049 gb EFH59468.1  binding protein [Arabidopsis lyrata subsp. lyrata]                                                                                                                                                                                                                                                                                                                                                                                                                       | 1100 | 1118 | 0         | 101.6 | 82.5 | 91.2 | binding protein                              | gbpln | Arabidopsis lyrata   | AT3G19870.1   Symbols:   unknown protein; Has 84 Blast hits to 64 proteins in 35 species: Archae - 0; Bacteria - 0; Metazoa - 31; Fungi - 0; Plants - 24; Viruses - 0; Other Eukaryotes - 29 (source: NCBI BLINK).   chr3:6907481-6911115 FORWARD LENGTH=1090                                                                                                                                                                                                                                                                             | 1100 | 1090 | 0         | 99.1  | 79.5 | 88.0 |
| Rsa1.0_01740.1.g29448.t1 | gb EOA31982.1  hypothetical protein CARUB_v10015243mg [Capsella rubella]                                                                                                                                                                                                                                                                                                                                                                                                                                                                                                    | 416  | 416  | 1.00E-116 | 100.0 | 59.6 | 68.3 | hypothetical protein CARUB_v10015243mg       | gbpln | Capsella rubella     | AT3G20030.1   Symbols:   F-box and associated interaction domains-containing protein   chr3:6990254-6991462 FORWARD LENGTH=402                                                                                                                                                                                                                                                                                                                                                                                                            | 416  | 402  | 1.00E-115 | 96.6  | 56.3 | 66.8 |
| Rsa1.0_01740.1.g29449.t1 | ref XP_002885344.1  hypothetical protein ARALYDRAFT_898385 [Arabidopsis lyrata subsp. lyrata] gi 297331184 gb EFH61603.1  hypothetical protein ARALYDRAFT_898385 [Arabidopsis lyrata subsp. lyrata]                                                                                                                                                                                                                                                                                                                                                                         | 560  | 554  | 0         | 98.9  | 86.3 | 91.6 | hypothetical protein ARALYDRAFT_898385       | gbpln | Arabidopsis lyrata   | AT3G19895.1   Symbols:   RING/U-box superfamily protein   chr3:6917530-6921211 REVERSE LENGTH=554                                                                                                                                                                                                                                                                                                                                                                                                                                         | 560  | 554  | 0         | 98.9  | 85.7 | 91.1 |
| Rsa1.0_01740.1.g29450.t1 | ref XP_002885345.1  hypothetical protein ARALYDRAFT_479508 [Arabidopsis lyrata subsp. lyrata] gi 297331185 gb EFH61604.1  hypothetical protein ARALYDRAFT_479508 [Arabidopsis lyrata subsp. lyrata]                                                                                                                                                                                                                                                                                                                                                                         | 224  | 223  | 1.00E-108 | 99.6  | 88.4 | 92.9 | hypothetical protein ARALYDRAFT_479508       | gbpln | Arabidopsis lyrata   | AT3G19900.1   Symbols:   unknown protein; FUNCTIONS IN: molecular function unknown; INVOLVED IN: biological process unknown; LOCATED IN: chloroplast; EXPRESSED IN: 23 plant structures; EXPRESSED DURING: 13 growth stages; CONTAINS InterPro DOMAIN/s: Protein of unknown function DUF3067 (InterPro:IPRO21420); Has 276 Blast hits to 276 proteins in 83 species: Archae - 0; Bacteria - 112; Metazoa - 0; Fungi - 2; Plants - 59; Viruses - 0; Other Eukaryotes - 103 (source: NCBI BLINK).   chr3:6922852-6924557 REVERSE LENGTH=222 | 224  | 222  | 1.00E-106 | 99.1  | 85.7 | 91.1 |
| Rsa1.0_01740.1.g29451.t1 | ref NP_566651.1  E3 ubiquitin ligase BIG BROTHER-like protein [Arabidopsis thaliana] gi 75335434 sp Q9LT17.1 BBR_ARATH RecName: Full=E3 ubiquitin ligase BIG BROTHER-related; Short=AtBBR gi 1194203 dbj BAB01306.1  unnamed protein product [Arabidopsis thaliana] gi 15010579 gb AAK73948.1  AT3g19910 MPN9_15 [Arabidopsis thaliana] gi 15028363 gb AAK76658.1  unknown protein [Arabidopsis thaliana] gi 19310707 gb AAL85084.1  unknown protein [Arabidopsis thaliana] gi 332642786 gb AEE76307.1  E3 ubiquitin ligase BIG BROTHER-like protein [Arabidopsis thaliana] | 330  | 340  | 1.00E-126 | 103.0 | 79.1 | 87.6 | E3 ubiquitin ligase BIG BROTHER-like protein | gbpln | Arabidopsis thaliana | AT3G19910.1   Symbols:   RING/U-box superfamily protein   chr3:6926497-6929324 FORWARD LENGTH=340                                                                                                                                                                                                                                                                                                                                                                                                                                         | 330  | 340  | 1.00E-129 | 103.0 | 79.1 | 87.6 |



|                          |                                                                                                                                                                                                                                                                                                                                                                                                                                                                                                                                                                                                                                                          |     |     |          |       |      |      |                                                                                                                    |       |                      |                                                                                                                                                                                                                                                                                                                                               |     |     |          |       |      |      |
|--------------------------|----------------------------------------------------------------------------------------------------------------------------------------------------------------------------------------------------------------------------------------------------------------------------------------------------------------------------------------------------------------------------------------------------------------------------------------------------------------------------------------------------------------------------------------------------------------------------------------------------------------------------------------------------------|-----|-----|----------|-------|------|------|--------------------------------------------------------------------------------------------------------------------|-------|----------------------|-----------------------------------------------------------------------------------------------------------------------------------------------------------------------------------------------------------------------------------------------------------------------------------------------------------------------------------------------|-----|-----|----------|-------|------|------|
| Rsa1.0_01740.1.g29452.t1 | dbj BAC43081.1  unknown protein [Arabidopsis thaliana] gi 28951003 gb AA063425.1  At3g19920 [Arabidopsis thaliana]                                                                                                                                                                                                                                                                                                                                                                                                                                                                                                                                       | 208 | 416 | 2.00E-63 | 200.0 | 59.1 | 70.2 | unknown protein                                                                                                    | gbpln | Arabidopsis thaliana | AT3G19920.1   Symbols:   unknown protein; BEST Arabidopsis thaliana protein match is: unknown protein (TAIR:AT5G64230.1). Has 217 Blast hits to 217 proteins in 16 species: Archae - 0; Bacteria - 2; Metazoa - 0; Fungi - 0; Plants - 215; Viruses - 0; Other Eukaryotes - 0 (source: NCBI BLink).   chr3:6929840-6931771 REVERSE LENGTH=416 | 208 | 416 | 7.00E-66 | 200.0 | 59.1 | 70.2 |
| Rsa1.0_01740.1.g29453.t1 | ref NP_188627.1  sugar transport protein 4 [Arabidopsis thaliana] gi 75340022 sp Q39228.1 STP4_ARATH RecName: Full=Sugar transport protein 4; AltName: Full=Hexose transporter 4 gi 13605906 gb AAK32938.1 AF367352.1 AT3g19930/MPN9_17 [Arabidopsis thaliana] gi 16226824 gb AAL16272.1 AF428342.1 AT3g19930/MPN9_17 [Arabidopsis thaliana] gi 16524 emb CAA47325.1  sugar transport protein [Arabidopsis thaliana] gi 11994205 dbj BAB01308.1  monosaccharide transporter STP4 [Arabidopsis thaliana] gi 22137154 gb AAM91422.1  AT3g19930/MPN9_17 [Arabidopsis thaliana] gi 332642788 gb AEE76309.1  sugar transport protein 4 [Arabidopsis thaliana] | 514 | 514 | 0        | 100.0 | 93.2 | 97.5 | sugar transport protein 4                                                                                          | gbpln | Arabidopsis thaliana | AT3G19930.1   Symbols: STP4, ATSTP4   sugar transporter 4   chr3:6935048-6936841 FORWARD LENGTH=514                                                                                                                                                                                                                                           | 514 | 514 | 0        | 100.0 | 93.2 | 97.5 |
| Rsa1.0_01741.1.g29454.t1 | #                                                                                                                                                                                                                                                                                                                                                                                                                                                                                                                                                                                                                                                        | #   | #   | #        | #     | #    | #    | -                                                                                                                  | ----  | ----                 | #                                                                                                                                                                                                                                                                                                                                             | #   | #   | #        | #     | #    |      |
| Rsa1.0_01741.1.g29455.t5 | sp P04796.2 G3PC_SINAL RecName: Full=Glyceraldehyde-3-phosphate dehydrogenase, cytosolic gi 21143 emb CAA27844.1  unnamed protein product [Sinapis alba]                                                                                                                                                                                                                                                                                                                                                                                                                                                                                                 | 212 | 338 | 3.00E-24 | 159.4 | 35.4 | 44.3 | RecName: Full=Glyceraldehyde-3-phosphate dehydrogenase, cytosolic gi 21143 emb CAA27844.1  unnamed protein product | gbpln | Sinapis alba         | AT3G04120.1   Symbols: GAPC, GAPC-1, GAPC1   glyceraldehyde-3-phosphate dehydrogenase C subunit 1   chr3:1081077-1083131 FORWARD LENGTH=338                                                                                                                                                                                                   | 212 | 338 | 1.00E-25 | 159.4 | 26.4 | 29.7 |
| Rsa1.0_01741.1.g29456.t1 | ref XP_002870534.1  hypothetical protein ARALYDRAFT_493723 [Arabidopsis lyrata subsp. lyrata] gi 297316370 gb EFH46793.1  hypothetical protein ARALYDRAFT_493723 [Arabidopsis lyrata subsp. lyrata]                                                                                                                                                                                                                                                                                                                                                                                                                                                      | 97  | 225 | 6.00E-26 | 232.0 | 71.1 | 75.3 | hypothetical protein ARALYDRAFT_493723                                                                             | gbpln | Arabidopsis lyrata   | AT5G37475.1   Symbols:   Translation initiation factor eIF3 subunit   chr5:14866328-14867749 REVERSE LENGTH=225                                                                                                                                                                                                                               | 97  | 225 | 8.00E-28 | 232.0 | 68.0 | 75.3 |
| Rsa1.0_01741.1.g29457.t1 | dbj BAB02259.1  retroelement pol polyprotein-like [Arabidopsis thaliana]                                                                                                                                                                                                                                                                                                                                                                                                                                                                                                                                                                                 | 279 | 777 | 6.00E-21 | 278.5 | 30.5 | 53.0 | retroelement pol polyprotein-like                                                                                  | gbpln | Arabidopsis thaliana | #                                                                                                                                                                                                                                                                                                                                             | #   | #   | #        | #     | #    |      |
| Rsa1.0_01741.1.g29458.t3 | emb CAA69271.1  lectin receptor kinase [Arabidopsis thaliana]                                                                                                                                                                                                                                                                                                                                                                                                                                                                                                                                                                                            | 123 | 544 | 2.00E-46 | 442.3 | 75.6 | 83.7 | lectin receptor kinase                                                                                             | gbpln | Arabidopsis thaliana | AT1G48720.1   Symbols:   unknown protein; Has 229 Blast hits to 229 proteins in 10 species: Archae - 0; Bacteria - 0; Metazoa - 1; Fungi - 0; Plants - 228; Viruses - 0; Other Eukaryotes - 0 (source: NCBI BLink).   chr1:18018148-18018441 FORWARD LENGTH=97                                                                                | 123 | 97  | 2.00E-38 | 78.9  | 57.7 | 65.9 |
| Rsa1.0_01741.1.g29459.t1 | gb EOA25185.1  hypothetical protein CARUB_v10018496mg [Capsella rubella]                                                                                                                                                                                                                                                                                                                                                                                                                                                                                                                                                                                 | 264 | 418 | 7.00E-75 | 158.3 | 54.2 | 76.5 | hypothetical protein CARUB_v10018496mg                                                                             | gbpln | Capsella rubella     | AT1G19260.1   Symbols:   TTF-type zinc finger protein with HAT dimerisation domain   chr1:6657260-6659569 REVERSE LENGTH=769                                                                                                                                                                                                                  | 264 | 769 | 2.00E-74 | 291.3 | 54.9 | 76.5 |
| Rsa1.0_01742.1.g29460.t1 | #                                                                                                                                                                                                                                                                                                                                                                                                                                                                                                                                                                                                                                                        | #   | #   | #        | #     | #    | #    | -                                                                                                                  | ----  | ----                 | #                                                                                                                                                                                                                                                                                                                                             | #   | #   | #        | #     | #    |      |
| Rsa1.0_01742.1.g29461.t1 | ref NP_566617.1  F-box protein [Arabidopsis thaliana] gi 75273931 sp Q9LSA5.1 FBK62_ARATH RecName: Full=F-box/kelch-repeat protein At3g18720 gi 9293895 dbj BAB01798.1  unnamed protein product [Arabidopsis thaliana] gi 91806439 gb ABE65947.1  F-box family protein [Arabidopsis thaliana] gi 332642615 gb AEE76136.1  F-box protein [Arabidopsis thaliana]                                                                                                                                                                                                                                                                                           | 540 | 380 | 5.00E-70 | 70.4  | 30.2 | 36.3 | F-box protein                                                                                                      | gbpln | Arabidopsis thaliana | AT3G18720.1   Symbols:   F-box family protein   chr3:6444433-6445751 REVERSE LENGTH=380                                                                                                                                                                                                                                                       | 540 | 380 | 1.00E-72 | 70.4  | 30.2 | 36.3 |
| Rsa1.0_01742.1.g29462.t1 | pdb 4EPLA Chain A, Crystal Structure Of Arabidopsis Thaliana Gh3.11 (Jar1) In Complex With Ja-Ile                                                                                                                                                                                                                                                                                                                                                                                                                                                                                                                                                        | 578 | 581 | 0        | 100.5 | 89.4 | 95.5 | Chain A, Crystal Structure Of Arabidopsis Thaliana Gh3.11 (Jar1) In Complex With Ja-Ile                            | ----  | ----                 | AT2G46370.4   Symbols: JAR1   Auxin-responsive GH3 family protein   chr2:19034233-19036369 FORWARD LENGTH=586                                                                                                                                                                                                                                 | 578 | 586 | 0        | 101.4 | 89.4 | 95.5 |

|                          |                                                                                                                                                                                                                                                                                                                                                                                                                                                                                                                                                                                                                                                                              |     |     |           |       |       |       |                                        |             |                      |                                                                                                                                                                                                                                                                                                                                             |     |     |           |       |       |       |
|--------------------------|------------------------------------------------------------------------------------------------------------------------------------------------------------------------------------------------------------------------------------------------------------------------------------------------------------------------------------------------------------------------------------------------------------------------------------------------------------------------------------------------------------------------------------------------------------------------------------------------------------------------------------------------------------------------------|-----|-----|-----------|-------|-------|-------|----------------------------------------|-------------|----------------------|---------------------------------------------------------------------------------------------------------------------------------------------------------------------------------------------------------------------------------------------------------------------------------------------------------------------------------------------|-----|-----|-----------|-------|-------|-------|
| Rsa1.0_01742.1.g29463.t1 | ref[XP_002880237.1] hypothetical protein ARALYDRAFT_904092 [Arabidopsis lyrata subsp. lyrata] gi 297326076 gb EFH54696.1] hypothetical protein ARALYDRAFT_904092 [Arabidopsis lyrata subsp. lyrata]                                                                                                                                                                                                                                                                                                                                                                                                                                                                          | 128 | 127 | 1.00E-24  | 99.2  | 53.1  | 61.7  | hypothetical protein ARALYDRAFT_904092 | gbpln       | Arabidopsis lyrata   | AT2G46375.1   Symbols:   unknown protein; BEST Arabidopsis thaliana protein match is: unknown protein (TAIR:AT3G61660.1). Has 12 Blast hits to 12 proteins in 4 species: Archae - 0; Bacteria - 0; Metazoa - 0; Fungi - 0; Plants - 12; Viruses - 0; Other Eukaryotes - 0 (source: NCBI BLink).   chr2:19037958-19038329 FORWARD LENGTH=123 | 128 | 123 | 5.00E-27  | 96.1  | 48.4  | 57.0  |
| Rsa1.0_01742.1.g29464.t1 | ref[XP_002882061.1] hypothetical protein ARALYDRAFT_483794 [Arabidopsis lyrata subsp. lyrata] gi 297327900 gb EFH58320.1] hypothetical protein ARALYDRAFT_483794 [Arabidopsis lyrata subsp. lyrata]                                                                                                                                                                                                                                                                                                                                                                                                                                                                          | 292 | 293 | 1.00E-111 | 100.3 | 72.3  | 84.6  | hypothetical protein ARALYDRAFT_483794 | gbpln       | Arabidopsis lyrata   | AT2G46400.1   Symbols: WRKY46, ATWRKY46   WRKY DNA-binding protein 46   chr2:19043676-19044754 REVERSE LENGTH=295                                                                                                                                                                                                                           | 292 | 295 | 1.00E-111 | 101.0 | 71.9  | 84.2  |
| Rsa1.0_01743.1.g29465.t1 | ref[XP_002877441.1] hypothetical protein ARALYDRAFT_484970 [Arabidopsis lyrata subsp. lyrata] gi 297323279 gb EFH53700.1] hypothetical protein ARALYDRAFT_484970 [Arabidopsis lyrata subsp. lyrata]                                                                                                                                                                                                                                                                                                                                                                                                                                                                          | 385 | 397 | 1.00E-157 | 103.1 | 79.0  | 84.9  | hypothetical protein ARALYDRAFT_484970 | gbpln       | Arabidopsis lyrata   | AT3G45900.1   Symbols:   Ribonuclease P protein subunit P38-related   chr3:16874566-16875984 REVERSE LENGTH=389                                                                                                                                                                                                                             | 385 | 389 | 1.00E-153 | 101.0 | 76.9  | 83.4  |
| Rsa1.0_01743.1.g29466.t1 | tpg[DAA40122.1] TPA: histone H4.3 [Zea mays]                                                                                                                                                                                                                                                                                                                                                                                                                                                                                                                                                                                                                                 | 103 | 248 | 3.00E-52  | 240.8 | 100.0 | 100.0 | TPA: histone H4.3                      | gbenv/gbpln | Zea mays             | AT5G59970.1   Symbols:   Histone superfamily protein   chr5:24146352-24146663 REVERSE LENGTH=103                                                                                                                                                                                                                                            | 103 | 103 | 2.00E-52  | 100.0 | 100.0 | 100.0 |
| Rsa1.0_01743.1.g29467.t1 | ref[XP_002877448.1] hypothetical protein ARALYDRAFT_484979 [Arabidopsis lyrata subsp. lyrata] gi 297323286 gb EFH53707.1] hypothetical protein ARALYDRAFT_484979 [Arabidopsis lyrata subsp. lyrata] ret[INP_1/2256.1] 40S ribosomal protein S15a-1 [Arabidopsis thaliana] gi 15238544 ref[NP_200793.1] 40S ribosomal protein S15a-1 [Arabidopsis thaliana] gi 42571385 ref[NP_973783.1] 40S ribosomal protein S15a-1 [Arabidopsis thaliana] gi 297796939 ref[XP_002866354.1] RPS15A [Arabidopsis lyrata subsp. lyrata] gi 297815756 ref[XP_002875761.1] RPS15A [Arabidopsis lyrata subsp. lyrata] gi 297849076 ref[XP_002892419.1] RPS15A [Arabidopsis lyrata subsp. lyrata] | 130 | 137 | 1.00E-65  | 105.4 | 93.1  | 96.2  | hypothetical protein ARALYDRAFT_484979 | gbpln       | Arabidopsis lyrata   | AT3G46000.1   Symbols: ADF2   actin depolymerizing factor 2   chr3:16907743-16908822 REVERSE LENGTH=137                                                                                                                                                                                                                                     | 130 | 137 | 9.00E-68  | 105.4 | 92.3  | 96.2  |
| Rsa1.0_01743.1.g29468.t2 | gi 1173218 sp P42798.2 R15A1.ARATH RecName: Full=40S ribosomal protein S15a-1 gi 8439890 gb AAF75076.1 AC007583.12 Strong similarity to 40S ribosomal protein S15A from Arabidopsis thaliana gb L27461.EST gb R30315 comes from this gene [Arabidopsis thaliana] gi 12083302 gb AAG48810.1 AF332447.1 putative ribosomal protein S15 [Arabidopsis thaliana] gi 13430744 gb AAK25994.1 AF360284.1 putative ribosomal protein S15 [Arabidopsis thaliana] gi 14423370 gb AAK62367.1 AF386922.1 40S ribosomal protein S15A [Arabidopsis thaliana]                                                                                                                                | 161 | 130 | 5.00E-68  | 80.7  | 78.3  | 78.9  | 40S ribosomal protein S15a-1           | gbpln       | Arabidopsis lyrata   | AT5G59850.1   Symbols:   Ribosomal protein S8 family protein   chr5:24112499-24113084 REVERSE LENGTH=130                                                                                                                                                                                                                                    | 161 | 130 | 2.00E-70  | 80.7  | 78.3  | 78.9  |
| Rsa1.0_01743.1.g29469.t1 | dbj BAJ34629.1] unnamed protein product [Thellungiella halophila]                                                                                                                                                                                                                                                                                                                                                                                                                                                                                                                                                                                                            | 216 | 216 | 1.00E-121 | 100.0 | 98.1  | 99.5  | unnamed protein product                | ----        | ----                 | AT3G46060.3   Symbols: ARA3   RAB GTPase homolog 8A   chr3:16917908-16919740 FORWARD LENGTH=216                                                                                                                                                                                                                                             | 216 | 216 | 1.00E-117 | 100.0 | 93.1  | 94.9  |
| Rsa1.0_01743.1.g29470.t1 | ref[NP_190194.1] C2H2-type zinc finger protein [Arabidopsis thaliana] gi 75335605 sp Q9LX85.1 ZAT8.ARATH RecName: Full=Zinc finger protein ZAT8 gi 7798996 emb CAB90935.1] zinc finger-like protein [Arabidopsis thaliana] gi 225898695 dbj BAH30478.1] hypothetical protein [Arabidopsis thaliana] gi 332644589 gb AEE78110.1] zinc finger protein ZAT8 [Arabidopsis thaliana]                                                                                                                                                                                                                                                                                              | 219 | 164 | 4.00E-51  | 74.9  | 49.8  | 57.1  | C2H2-type zinc finger protein          | gbpln       | Arabidopsis thaliana | AT3G46080.1   Symbols:   C2H2-type zinc finger family protein   chr3:16922753-16923247 REVERSE LENGTH=164                                                                                                                                                                                                                                   | 219 | 164 | 1.00E-53  | 74.9  | 49.8  | 57.1  |

|                          |                                                                                                                                                                                                                                |      |      |           |       |      |      |                                              |       |                      |                                                                                                                                   |      |      |           |       |      |      |
|--------------------------|--------------------------------------------------------------------------------------------------------------------------------------------------------------------------------------------------------------------------------|------|------|-----------|-------|------|------|----------------------------------------------|-------|----------------------|-----------------------------------------------------------------------------------------------------------------------------------|------|------|-----------|-------|------|------|
| Rsa1.0_01743.1.g29471.t1 | refXP_002875766.1  hypothetical protein ARALYDRAFT_347705 [Arabidopsis lyrata subsp. lyrata] gi 297321604 gb EFH52025.1  hypothetical protein ARALYDRAFT_347705 [Arabidopsis lyrata subsp. lyrata]                             | 248  | 258  | 1.00E-114 | 104.0 | 87.9 | 92.7 | hypothetical protein ARALYDRAFT_347705       | gbpln | Arabidopsis lyrata   | AT3G46130.1   Symbols: ATMYB48, ATMYB48-3, MYB48   myb domain protein 48   chr3:16945433-16946376 FORWARD LENGTH=256              | 248  | 256  | 1.00E-114 | 103.2 | 86.7 | 92.7 |
| Rsa1.0_01743.1.g29472.t2 | dbj BAB10503.1  retroelement pol polyprotein-like [Arabidopsis thaliana]                                                                                                                                                       | 1310 | 1475 | 0         | 112.6 | 52.4 | 68.3 | retroelement pol polyprotein-like            | gbpln | Arabidopsis thaliana | AT4G23160.1   Symbols: CRK8   cysteine-rich RLK (RECEPTOR-like protein kinase) 8   chr4:12129485-12134086 FORWARD LENGTH=1262     | 1310 | 1262 | 0         | 96.3  | 27.8 | 33.0 |
| Rsa1.0_01743.1.g29473.t1 | refXP_002873380.1  IBR domain-containing protein [Arabidopsis lyrata subsp. lyrata] gi 297319217 gb EFH49639.1  IBR domain-containing protein [Arabidopsis lyrata subsp. lyrata]                                               | 455  | 497  | 1.00E-131 | 109.2 | 54.3 | 67.5 | IBR domain-containing protein                | gbpln | Arabidopsis lyrata   | AT5G08730.1   Symbols: ATARI16, AR116   IBR domain-containing protein   chr5:2845824-2847415 REVERSE LENGTH=500                   | 455  | 500  | 1.00E-127 | 109.9 | 52.1 | 66.8 |
| Rsa1.0_01743.1.g29474.t1 | ref NP_190202.1  protein kinase-related protein [Arabidopsis thaliana] gi 7793004 emb CAB99943.1  protein kinase-like [Arabidopsis thaliana] gi 332644602 gb AAE78123.1  protein kinase-related protein [Arabidopsis thaliana] | 386  | 393  | 3.00E-89  | 101.8 | 46.9 | 60.9 | protein kinase-related protein               | gbpln | Arabidopsis thaliana | AT3G46160.1   Symbols:   Protein kinase superfamily protein   chr3:16950955-16952136 FORWARD LENGTH=393                           | 386  | 393  | 8.00E-92  | 101.8 | 46.9 | 60.9 |
| Rsa1.0_01744.1.g29475.t1 | gb EOA14702.1  hypothetical protein CARUB_v10027979mg [Capsella rubella]                                                                                                                                                       | 292  | 286  | 3.00E-97  | 97.9  | 62.0 | 72.6 | hypothetical protein CARUB_v10027979mg       | gbpln | Capsella rubella     | AT5G58890.1   Symbols: AGL82   AGAMOUS-like 82   chr5:23780832-23781716 FORWARD LENGTH=294                                        | 292  | 294  | 7.00E-98  | 100.7 | 62.3 | 74.3 |
| Rsa1.0_01744.1.g29476.t1 | refXP_002866297.1  myb family transcription factor [Arabidopsis lyrata subsp. lyrata] gi 297312132 gb EFH42556.1  myb family transcription factor [Arabidopsis lyrata subsp. lyrata]                                           | 289  | 286  | 1.00E-145 | 99.0  | 87.9 | 91.3 | myb family transcription factor              | gbpln | Arabidopsis lyrata   | AT5G58900.1   Symbols:   Homeodomain-like transcriptional regulator   chr5:23783275-23784667 REVERSE LENGTH=288                   | 289  | 288  | 2.33E-156 | 99.7  | 87.2 | 92.4 |
| Rsa1.0_01744.1.g29477.t1 | #                                                                                                                                                                                                                              | #    | #    | #         | #     | #    | #    | -                                            | ----  | ----                 | #                                                                                                                                 | #    | #    | #         | #     | #    |      |
| Rsa1.0_01744.1.g29478.t1 | gb ABE66261.1  laccase/diphenol oxidase [Arabidopsis thaliana]                                                                                                                                                                 | 528  | 530  | 0         | 100.4 | 89.6 | 94.3 | laccase/diphenol oxidase                     | gbpln | Arabidopsis thaliana | AT5G58910.1   Symbols: LAC16   laccase 16   chr5:23789522-23791681 REVERSE LENGTH=523                                             | 528  | 523  | 0         | 99.1  | 88.4 | 93.0 |
| Rsa1.0_01744.1.g29479.t1 | gb EOA14859.1  hypothetical protein CARUB_v10028180mg [Capsella rubella]                                                                                                                                                       | 506  | 535  | 1.00E-161 | 105.7 | 74.9 | 82.6 | hypothetical protein CARUB_v10028180mg       | gbpln | Capsella rubella     | AT5G58930.1   Symbols:   Protein of unknown function (DUF740)   chr5:23794529-23796094 REVERSE LENGTH=521                         | 506  | 521  | 1.00E-162 | 103.0 | 71.3 | 79.4 |
| Rsa1.0_01745.1.g29480.t1 | gb AAM64688.1  unknown [Arabidopsis thaliana]                                                                                                                                                                                  | 102  | 192  | 8.00E-19  | 188.2 | 56.9 | 66.7 | unknown                                      | gbpln | Arabidopsis thaliana | AT2G18290.1   Symbols: APC10   anaphase promoting complex 10   chr2:7948522-7950096 REVERSE LENGTH=192                            | 102  | 192  | 1.00E-21  | 188.2 | 56.9 | 66.7 |
| Rsa1.0_01745.1.g29481.t1 | refXP_002886164.1  basic helix-loop-helix family protein [Arabidopsis lyrata subsp. lyrata] gi 297332004 gb EFH62423.1  basic helix-loop-helix family protein [Arabidopsis lyrata subsp. lyrata]                               | 333  | 337  | 1.00E-144 | 101.2 | 80.2 | 88.3 | basic helix-loop-helix family protein        | gbpln | Arabidopsis lyrata   | AT2G18300.2   Symbols:   basic helix-loop-helix (bHLH) DNA-binding superfamily protein   chr2:7953022-7954446 REVERSE LENGTH=337  | 333  | 337  | 2.33E-156 | 101.2 | 79.9 | 88.0 |
| Rsa1.0_01745.1.g29482.t1 | refXP_002883907.1  hypothetical protein ARALYDRAFT_899779 [Arabidopsis lyrata subsp. lyrata] gi 297329747 gb EFH60166.1  hypothetical protein ARALYDRAFT_899779 [Arabidopsis lyrata subsp. lyrata]                             | 207  | 312  | 5.00E-51  | 150.7 | 61.8 | 72.0 | hypothetical protein ARALYDRAFT_899779       | gbpln | Arabidopsis lyrata   | AT1G36675.1   Symbols:   glycine-rich protein   chr1:13867568-13869490 FORWARD LENGTH=268                                         | 207  | 268  | 3.00E-29  | 129.5 | 43.0 | 48.3 |
| Rsa1.0_01745.1.g29483.t3 | gb EOA31794.1  hypothetical protein CARUB_v10015016mg [Capsella rubella]                                                                                                                                                       | 316  | 82   | 5.00E-29  | 25.9  | 23.7 | 24.7 | hypothetical protein CARUB_v10015016mg       | gbpln | Capsella rubella     | AT2G18328.1   Symbols: ATRL4, RL4   RAD-like 4   chr2:7964478-7964711 FORWARD LENGTH=77                                           | 316  | 77   | 7.00E-26  | 24.4  | 16.1 | 18.0 |
| Rsa1.0_01746.1.g29484.t1 | gb AAF79374.1 AC007887.33 F1504.30 [Arabidopsis thaliana]                                                                                                                                                                      | 407  | 1180 | 2.00E-73  | 289.9 | 44.7 | 57.5 | F1504.30                                     | gbpln | Arabidopsis thaliana | #                                                                                                                                 | #    | #    | #         | #     | #    |      |
| Rsa1.0_01746.1.g29485.t2 | gb ABD65100.1  hypothetical protein 31.t00077 [Brassica oleracea]                                                                                                                                                              | 364  | 391  | 4.00E-69  | 107.4 | 33.5 | 38.5 | hypothetical protein 31.t00077               | gbpln | Brassica oleracea    | #                                                                                                                                 | #    | #    | #         | #     | #    |      |
| Rsa1.0_01746.1.g29486.t1 | gb AAG51783.1 AC079679.3 reverse transcriptase, putative; 16838-20266 [Arabidopsis thaliana]                                                                                                                                   | 653  | 1142 | 5.00E-97  | 174.9 | 28.6 | 40.9 | reverse transcriptase, putative; 16838-20266 | gbpln | Arabidopsis thaliana | AT1G56550.1   Symbols: RXGT1   RhamnoGalacturonan speci&#64257;c Xylosyltransferase 1   chr1:21185836-21188070 REVERSE LENGTH=383 | 653  | 383  | 2.00E-87  | 58.7  | 23.4 | 25.9 |
| Rsa1.0_01746.1.g29487.t1 | dbj BAJ34592.1  unnamed protein product [Thellungiella halophila]                                                                                                                                                              | 181  | 685  | 3.00E-59  | 378.5 | 60.8 | 63.0 | unnamed protein product                      | ----  | ----                 | AT2G18700.1   Symbols: ATTPS11, TPS11, ATTPSB   trehalose phosphatase/synthase 11   chr2:8109043-8111799 FORWARD LENGTH=862       | 181  | 862  | 3.00E-57  | 476.2 | 55.8 | 61.9 |

|                          |                                                                                                                                                                                                                   |      |      |           |       |      |      |                                                 |       |                      |                                                                                                                                                                                                                                                                                                                                                      |      |      |           |       |      |      |
|--------------------------|-------------------------------------------------------------------------------------------------------------------------------------------------------------------------------------------------------------------|------|------|-----------|-------|------|------|-------------------------------------------------|-------|----------------------|------------------------------------------------------------------------------------------------------------------------------------------------------------------------------------------------------------------------------------------------------------------------------------------------------------------------------------------------------|------|------|-----------|-------|------|------|
| Rsa1.0_01746.1.g29488.t2 | gb AAG51783.1 AC079679.3 reverse transcriptase, putative; 16838-20266 [Arabidopsis thaliana]                                                                                                                      | 1324 | 1142 | 0         | 86.3  | 24.8 | 29.5 | reverse transcriptase, putative; 16838-20266    | gbpln | Arabidopsis thaliana | AT1G43722.1   Symbols:   unknown protein; BEST Arabidopsis thaliana protein match is: unknown protein (TAIR:AT5G28730.1); Has 924 Blast hits to 912 proteins in 109 species: Archae - 0; Bacteria - 0; Metazoa - 222; Fungi - 31; Plants - 661; Viruses - 0; Other Eukaryotes - 10 (source: NCBI BLINK).   chr1:16496403-16497377 FORWARD LENGTH=324 | 1324 | 324  | 4.00E-35  | 24.5  | 6.3  | 9.1  |
| Rsa1.0_01747.1.g29489.t1 | #                                                                                                                                                                                                                 | #    | #    | #         | #     | #    | -    | ----                                            | ----  | #                    | #                                                                                                                                                                                                                                                                                                                                                    | #    | #    | #         | #     | #    |      |
| Rsa1.0_01747.1.g29490.t1 | gb EOA40319.1  hypothetical protein CARUB_v10009045mg [Capsella rubella]                                                                                                                                          | 497  | 469  | 0         | 94.4  | 77.5 | 85.5 | hypothetical protein CARUB_v10009045mg          | gbpln | Capsella rubella     | AT1G12160.1   Symbols:   Flavin-binding monoxygenase family protein   chr1:4126068-4128090 FORWARD LENGTH=468                                                                                                                                                                                                                                        | 497  | 468  | 0         | 94.2  | 78.3 | 85.9 |
| Rsa1.0_01747.1.g29491.t1 | ref XP_002892677.1  predicted protein [Arabidopsis lyrata subsp. lyrata] gi 297338519 gb EFH68936.1  predicted protein [Arabidopsis lyrata subsp. lyrata]                                                         | 548  | 548  | 0         | 100.0 | 87.8 | 93.4 | predicted protein                               | gbpln | Arabidopsis lyrata   | AT1G12150.1   Symbols:   Plant protein of unknown function (DUF827)   chr1:4123530-4125328 REVERSE LENGTH=548                                                                                                                                                                                                                                        | 548  | 548  | 0         | 100.0 | 87.4 | 93.2 |
| Rsa1.0_01747.1.g29492.t2 | ref XP_002889917.1  flavin-containing monoxygenase family protein [Arabidopsis lyrata subsp. lyrata] gi 297335759 gb EFH66176.1  flavin-containing monoxygenase family protein [Arabidopsis lyrata subsp. lyrata] | 546  | 459  | 0         | 84.1  | 71.1 | 77.3 | flavin-containing monoxygenase family protein   | gbpln | Arabidopsis lyrata   | AT1G12140.1   Symbols: FMO GS-OX5   flavin-monoxygenase glucosinolate S-oxygenase 5   chr1:4121386-4123366 FORWARD LENGTH=459                                                                                                                                                                                                                        | 546  | 459  | 0         | 84.1  | 70.7 | 77.7 |
| Rsa1.0_01747.1.g29493.t1 | gb EOA40154.1  hypothetical protein CARUB_v10008871mg, partial [Capsella rubella]                                                                                                                                 | 414  | 516  | 2.33E-156 | 124.6 | 76.3 | 83.6 | hypothetical protein CARUB_v10008871mg, partial | gbpln | Capsella rubella     | AT1G12120.1   Symbols:   Plant protein of unknown function (DUF863)   chr1:4114933-4116469 REVERSE LENGTH=483                                                                                                                                                                                                                                        | 414  | 483  | 1.00E-145 | 116.7 | 74.9 | 82.4 |
| Rsa1.0_01747.1.g29494.t1 | #                                                                                                                                                                                                                 | #    | #    | #         | #     | #    | -    | ----                                            | ----  | #                    | #                                                                                                                                                                                                                                                                                                                                                    | #    | #    | #         | #     | #    |      |
| Rsa1.0_01747.1.g29495.t1 | gb AEA35415.1  nitrate transporter [Brassica rapa subsp. chinensis]                                                                                                                                               | 275  | 589  | 1.00E-149 | 214.2 | 91.6 | 96.7 | nitrate transporter                             | gbpln | Brassica rapa        | AT1G12110.1   Symbols: NRT1.1, CHL1-1, NRT1, B-1, ATNRT1, CHL1   nitrate transporter 1.1   chr1:4105341-4109290 FORWARD LENGTH=590                                                                                                                                                                                                                   | 275  | 590  | 2.33E-156 | 214.5 | 90.2 | 94.5 |
| Rsa1.0_01747.1.g29496.t1 | gb AAD32898.1  putative retroelement pol polyprotein [Arabidopsis thaliana]                                                                                                                                       | 1206 | 1307 | 0         | 108.4 | 59.5 | 73.5 | putative retroelement pol polyprotein           | gbpln | Arabidopsis thaliana | AT4G23160.1   Symbols: CRK8   cysteine-rich RLK (RECEPTOR-like protein kinase) 8   chr4:12129485-12134086 FORWARD LENGTH=1262                                                                                                                                                                                                                        | 1206 | 1262 | 1.00E-99  | 104.6 | 16.3 | 26.1 |
| Rsa1.0_01747.1.g29497.t1 | gb AEA35415.1  nitrate transporter [Brassica rapa subsp. chinensis]                                                                                                                                               | 306  | 589  | 1.00E-163 | 192.5 | 94.8 | 97.4 | nitrate transporter                             | gbpln | Brassica rapa        | AT1G12110.1   Symbols: NRT1.1, CHL1-1, NRT1, B-1, ATNRT1, CHL1   nitrate transporter 1.1   chr1:4105341-4109290 FORWARD LENGTH=590                                                                                                                                                                                                                   | 306  | 590  | 1.00E-161 | 192.8 | 92.5 | 95.8 |
| Rsa1.0_01747.1.g29498.t1 | #                                                                                                                                                                                                                 | #    | #    | #         | #     | #    | -    | ----                                            | ----  | #                    | #                                                                                                                                                                                                                                                                                                                                                    | #    | #    | #         | #     | #    |      |
| Rsa1.0_01747.1.g29499.t1 | gb EOA39456.1  hypothetical protein CARUB_v10012658mg [Capsella rubella]                                                                                                                                          | 132  | 132  | 1.00E-62  | 100.0 | 92.4 | 96.2 | hypothetical protein CARUB_v10012658mg          | gbpln | Capsella rubella     | AT1G12100.1   Symbols:   Bifunctional inhibitor/lipid-transfer protein/seed storage 2S albumin superfamily protein   chr1:4095246-4095845 FORWARD LENGTH=132                                                                                                                                                                                         | 132  | 132  | 2.00E-53  | 100.0 | 79.5 | 85.6 |
| Rsa1.0_01748.1.g29500.t1 | #                                                                                                                                                                                                                 | #    | #    | #         | #     | #    | -    | ----                                            | ----  | #                    | #                                                                                                                                                                                                                                                                                                                                                    | #    | #    | #         | #     | #    |      |
| Rsa1.0_01748.1.g29501.t1 | ref XP_002878418.1  CYP78A9 [Arabidopsis lyrata subsp. lyrata] gi 297324256 gb EFH54677.1  CYP78A9 [Arabidopsis lyrata subsp. lyrata]                                                                             | 536  | 541  | 0         | 100.9 | 91.8 | 95.7 | CYP78A9                                         | gbpln | Arabidopsis lyrata   | AT3G61880.2   Symbols: CYP78A9   cytochrome p450 78a9   chr3:22905979-22907890 REVERSE LENGTH=555                                                                                                                                                                                                                                                    | 536  | 555  | 0         | 103.5 | 91.0 | 95.1 |
| Rsa1.0_01748.1.g29502.t1 | #                                                                                                                                                                                                                 | #    | #    | #         | #     | #    | -    | ----                                            | ----  | #                    | #                                                                                                                                                                                                                                                                                                                                                    | #    | #    | #         | #     | #    |      |
| Rsa1.0_01748.1.g29503.t1 | gb EOA24679.1  hypothetical protein CARUB_v10017952mg [Capsella rubella]                                                                                                                                          | 228  | 238  | 4.00E-88  | 104.4 | 79.8 | 91.2 | hypothetical protein CARUB_v10017952mg          | gbpln | Capsella rubella     | AT3G61890.1   Symbols: ATHB-12, ATHB12, HB-12   homeobox 12   chr3:22914346-22915239 REVERSE LENGTH=235                                                                                                                                                                                                                                              | 228  | 235  | 2.00E-89  | 103.1 | 81.6 | 92.5 |
| Rsa1.0_01748.1.g29504.t1 | dbj BAB10503.1  retroelement pol polyprotein-like [Arabidopsis thaliana]                                                                                                                                          | 1367 | 1475 | 0         | 107.9 | 55.7 | 69.9 | retroelement pol polyprotein-like               | gbpln | Arabidopsis thaliana | AT4G23160.1   Symbols: CRK8   cysteine-rich RLK (RECEPTOR-like protein kinase) 8   chr4:12129485-12134086 FORWARD LENGTH=1262                                                                                                                                                                                                                        | 1367 | 1262 | 1.00E-151 | 92.3  | 19.8 | 24.7 |
| Rsa1.0_01749.1.g29505.t1 | gb EOA38390.1  hypothetical protein CARUB_v10009956mg, partial [Capsella rubella]                                                                                                                                 | 253  | 280  | 1.00E-117 | 110.7 | 84.6 | 90.1 | hypothetical protein CARUB_v10009956mg, partial | gbpln | Capsella rubella     | AT1G11380.1   Symbols:   PLAC8 family protein   chr1:3832695-3833921 FORWARD LENGTH=254                                                                                                                                                                                                                                                              | 253  | 254  | 1.00E-116 | 100.4 | 84.6 | 89.3 |
| Rsa1.0_01749.1.g29506.t1 | gb EOA36827.1  hypothetical protein CARUB_v10008587mg [Capsella rubella]                                                                                                                                          | 619  | 624  | 0         | 100.8 | 89.5 | 93.9 | hypothetical protein CARUB_v10008587mg          | gbpln | Capsella rubella     | AT1G11390.1   Symbols:   Protein kinase superfamily protein   chr1:3834762-3837305 REVERSE LENGTH=624                                                                                                                                                                                                                                                | 619  | 624  | 0         | 100.8 | 89.8 | 93.9 |
| Rsa1.0_01749.1.g29507.t3 | gb EOA38471.1  hypothetical protein CARUB_v10010225mg [Capsella rubella] gi 482574285 gb EOA38472.1  hypothetical protein CARUB_v10010225mg [Capsella rubella]                                                    | 232  | 227  | 7.00E-88  | 97.8  | 74.6 | 81.0 | hypothetical protein CARUB_v10010225mg          | gbpln | Capsella rubella     | AT1G11400.3   Symbols: PYM   partner of Y14-MAGO   chr1:3838777-3839978 FORWARD LENGTH=204                                                                                                                                                                                                                                                           | 232  | 204  | 1.00E-81  | 87.9  | 70.3 | 75.0 |
| Rsa1.0_01749.1.g29508.t1 | gb EOA33511.1  hypothetical protein CARUB_v10019805mg, partial [Capsella rubella]                                                                                                                                 | 821  | 824  | 0         | 100.4 | 67.6 | 78.7 | hypothetical protein CARUB_v10019805mg, partial | gbpln | Capsella rubella     | AT1G80740.1   Symbols: CMT1, DMT4   chromomethylase 1   chr1:30342394-30346831 FORWARD LENGTH=791                                                                                                                                                                                                                                                    | 821  | 791  | 0         | 96.3  | 62.9 | 75.9 |

|                          |                                                                                                                                                                                                    |      |      |           |       |      |      |                                                                                |       |                      |                                                                                                                                                                                                                                                                                                                                                                  |      |      |           |       |      |      |
|--------------------------|----------------------------------------------------------------------------------------------------------------------------------------------------------------------------------------------------|------|------|-----------|-------|------|------|--------------------------------------------------------------------------------|-------|----------------------|------------------------------------------------------------------------------------------------------------------------------------------------------------------------------------------------------------------------------------------------------------------------------------------------------------------------------------------------------------------|------|------|-----------|-------|------|------|
| Rsa1.0_01749.1.g29509.t2 | refNP_172601.2  putative S-locus lectin protein kinase [Arabidopsis thaliana] gi 332190599 gb AE28720.1  G-type lectin S-receptor-like serine/threonine-protein kinase [Arabidopsis thaliana]      | 841  | 901  | 0         | 107.1 | 72.7 | 81.3 | putative S-locus lectin protein kinase                                         | gbpln | Arabidopsis thaliana | AT1G11340.1   Symbols:   S-locus lectin protein kinase family protein   chr1:3814116-3817420 REVERSE LENGTH=901                                                                                                                                                                                                                                                  | 841  | 901  | 0         | 107.1 | 72.7 | 81.3 |
| Rsa1.0_01749.1.g29510.t1 | refNP_172601.2  putative S-locus lectin protein kinase [Arabidopsis thaliana] gi 332190599 gb AE28720.1  G-type lectin S-receptor-like serine/threonine-protein kinase [Arabidopsis thaliana]      | 672  | 901  | 0         | 134.1 | 71.0 | 80.1 | putative S-locus lectin protein kinase                                         | gbpln | Arabidopsis thaliana | AT1G11340.1   Symbols:   S-locus lectin protein kinase family protein   chr1:3814116-3817420 REVERSE LENGTH=901                                                                                                                                                                                                                                                  | 672  | 901  | 0         | 134.1 | 71.0 | 80.1 |
| Rsa1.0_01749.1.g29511.t1 | #                                                                                                                                                                                                  | #    | #    | #         | #     | #    | -    | ----                                                                           | ----  | #                    | #                                                                                                                                                                                                                                                                                                                                                                | #    | #    | #         | #     | #    | #    |
| Rsa1.0_01749.1.g29512.t1 | refXP_002889866.1  hypothetical protein ARALYDRAFT_471279 [Arabidopsis lyrata subsp. lyrata] gi 297335708 gb EFH66125.1  hypothetical protein ARALYDRAFT_471279 [Arabidopsis lyrata subsp. lyrata] | 820  | 842  | 0         | 102.7 | 86.3 | 92.4 | hypothetical protein ARALYDRAFT_471279                                         | gbpln | Arabidopsis lyrata   | AT1G11410.1   Symbols:   S-locus lectin protein kinase family protein   chr1:3841286-3844284 FORWARD LENGTH=845                                                                                                                                                                                                                                                  | 820  | 845  | 0         | 103.0 | 85.6 | 92.3 |
| Rsa1.0_01749.1.g29513.t1 | #                                                                                                                                                                                                  | #    | #    | #         | #     | #    | -    | ----                                                                           | ----  | #                    | #                                                                                                                                                                                                                                                                                                                                                                | #    | #    | #         | #     | #    | #    |
| Rsa1.0_01749.1.g29514.t1 | gb AAM65001.1  DAG protein, putative [Arabidopsis thaliana]                                                                                                                                        | 236  | 232  | 1.00E-106 | 98.3  | 81.8 | 86.4 | DAG protein, putative                                                          | gbpln | Arabidopsis thaliana | AT1G11430.1   Symbols:   plastid developmental protein DAG, putative   chr1:3847273-3848938 FORWARD LENGTH=232                                                                                                                                                                                                                                                   | 236  | 232  | 1.00E-108 | 98.3  | 81.4 | 86.4 |
| Rsa1.0_01749.1.g29515.t1 | gb EOA38039.1  hypothetical protein CARUB_v10009508mg [Capsella rubella]                                                                                                                           | 336  | 366  | 1.00E-114 | 108.9 | 70.8 | 82.7 | hypothetical protein CARUB_v10009508mg                                         | gbpln | Capsella rubella     | AT1G11440.1   Symbols:   BEST Arabidopsis thaliana protein match is: glycine-rich protein (TAIR:AT3G29075.1); Has 19337 Blast hits to 8589 proteins in 488 species: Archae - 26; Bacteria - 641; Metazoa - 7852; Fungi - 2167; Plants - 955; Viruses - 616; Other Eukaryotes - 7080 (source: NCBI BLink).   chr1:3849418-3850509 FORWARD LENGTH=363              | 336  | 363  | 1.00E-111 | 108.0 | 71.7 | 83.3 |
| Rsa1.0_01750.1.g29516.t1 | #                                                                                                                                                                                                  | #    | #    | #         | #     | #    | -    | ----                                                                           | ----  | #                    | #                                                                                                                                                                                                                                                                                                                                                                | #    | #    | #         | #     | #    | #    |
| Rsa1.0_01750.1.g29517.t1 | dbj BAB01217.1  Ta11 non-LTR retroelement protein-like [Arabidopsis thaliana] gi 67633664 gb AA78756.1  putative zinc finger protein [Arabidopsis thaliana]                                        | 430  | 487  | 5.00E-86  | 113.3 | 45.3 | 64.2 | Ta11 non-LTR retroelement protein-like                                         | gbpln | Arabidopsis thaliana | AT5G18636.1   Symbols:   unknown protein; BEST Arabidopsis thaliana protein match is: unknown protein (TAIR:AT5G25200.1). Has 35333 Blast hits to 34131 proteins in 2444 species: Archae - 798; Bacteria - 22429; Metazoa - 974; Fungi - 991; Plants - 531; Viruses - 0; Other Eukaryotes - 9610 (source: NCBI BLink).   chr5:6211268-6212371 FORWARD LENGTH=367 | 430  | 367  | 9.00E-14  | 85.3  | 10.7 | 18.1 |
| Rsa1.0_01750.1.g29518.t1 | pir  T00833 RNA-directed DNA polymerase homolog T13L16.7 - Arabidopsis thaliana (fragment)                                                                                                         | 943  | 1365 | 0         | 144.8 | 38.3 | 50.9 | RNA-directed DNA polymerase homolog T13L16.7 - Arabidopsis thaliana (fragment) | ----  | ----                 | AT4G29090.1   Symbols:   Ribonuclease H-like superfamily protein   chr4:14333528-14335255 FORWARD LENGTH=575                                                                                                                                                                                                                                                     | 943  | 575  | 5.00E-45  | 61.0  | 13.5 | 19.6 |
| Rsa1.0_01750.1.g29519.t2 | gb EOA13819.1  hypothetical protein CARUB_v10026917mg [Capsella rubella]                                                                                                                           | 195  | 283  | 6.00E-55  | 145.1 | 56.9 | 61.5 | hypothetical protein CARUB_v10026917mg                                         | gbpln | Capsella rubella     | AT5G64670.1   Symbols:   Ribosomal protein L18e/L15 superfamily protein   chr5:25852535-25853880 REVERSE LENGTH=281                                                                                                                                                                                                                                              | 195  | 281  | 2.00E-56  | 144.1 | 55.9 | 61.5 |
| Rsa1.0_01750.1.g29520.t1 | refXP_002873981.1  hypothetical protein ARALYDRAFT_488911 [Arabidopsis lyrata subsp. lyrata] gi 297319818 gb EFH50240.1  hypothetical protein ARALYDRAFT_488911 [Arabidopsis lyrata subsp. lyrata] | 111  | 110  | 4.00E-56  | 99.1  | 94.6 | 98.2 | hypothetical protein ARALYDRAFT_488911                                         | gbpln | Arabidopsis lyrata   | AT5G20090.2   Symbols:   Uncharacterised protein family (UPF0041)   chr5:6787246-6788000 REVERSE LENGTH=110                                                                                                                                                                                                                                                      | 111  | 110  | 8.00E-59  | 99.1  | 93.7 | 98.2 |
| Rsa1.0_01750.1.g29521.t1 | gb EOA20671.1  hypothetical protein CARUB_v10009983mg [Capsella rubella]                                                                                                                           | 406  | 438  | 0         | 107.9 | 86.2 | 92.4 | hypothetical protein CARUB_v10009983mg                                         | gbpln | Capsella rubella     | AT5G20070.1   Symbols:   ATNUDT19, ATNUDX19, NUDX19   nudix hydrolase homolog 19   chr5:6779893-6782308 FORWARD LENGTH=438                                                                                                                                                                                                                                       | 406  | 438  | 0         | 107.9 | 84.7 | 92.4 |
| Rsa1.0_01750.1.g29522.t1 | refXP_002285029.2  PREDICTED: probable receptor-like protein kinase At5g20050 [Vitis vinifera]                                                                                                     | 721  | 720  | 0         | 99.9  | 65.2 | 77.9 | PREDICTED: probable receptor-like protein kinase At5g20050                     | gbpln | Vitis vinifera       | AT5G20050.1   Symbols:   Protein kinase superfamily protein   chr5:6774381-6775739 FORWARD LENGTH=452                                                                                                                                                                                                                                                            | 721  | 452  | 0         | 62.7  | 51.2 | 54.8 |
| Rsa1.0_01750.1.g29523.t1 | #                                                                                                                                                                                                  | #    | #    | #         | #     | #    | -    | ----                                                                           | ----  | #                    | #                                                                                                                                                                                                                                                                                                                                                                | #    | #    | #         | #     | #    | #    |
| Rsa1.0_01751.1.g29524.t1 | dbj BAD95408.1  hypothetical protein [Arabidopsis thaliana]                                                                                                                                        | 371  | 478  | 1.00E-119 | 128.8 | 51.8 | 73.0 | hypothetical protein                                                           | gbpln | Arabidopsis thaliana | AT3G24255.1   Symbols:   RNA-directed DNA polymerase (reverse transcriptase)-related family protein   chr3:8789471-8793208 FORWARD LENGTH=746                                                                                                                                                                                                                    | 371  | 746  | 2.00E-87  | 201.1 | 39.9 | 56.9 |
| Rsa1.0_01751.1.g29525.t2 | gb AAD32898.1  putative retroelement pol polyprotein [Arabidopsis thaliana]                                                                                                                        | 1081 | 1307 | 0         | 120.9 | 58.5 | 72.1 | putative retroelement pol polyprotein                                          | gbpln | Arabidopsis thaliana | AT4G23160.1   Symbols:   CRK8   cysteine-rich RLK (RECEPTOR-like protein kinase) 8   chr4:12129485-12134086 FORWARD LENGTH=1262                                                                                                                                                                                                                                  | 1081 | 1262 | 8.00E-59  | 116.7 | 12.7 | 21.3 |
| Rsa1.0_01751.1.g29526.t1 | gb EOA29920.1  hypothetical protein CARUB_v10013014mg [Capsella rubella]                                                                                                                           | 784  | 785  | 0         | 100.1 | 93.0 | 97.2 | hypothetical protein CARUB_v10013014mg                                         | gbpln | Capsella rubella     | AT3G23430.1   Symbols:   PHO1, ATPHO1   phosphate 1   chr3:8387818-8393242 REVERSE LENGTH=782                                                                                                                                                                                                                                                                    | 784  | 782  | 0         | 99.7  | 88.8 | 93.5 |

|                          |                                                                                                                                                                                                                                                                                                                                                                                                                                                                                                                                                                                                                                |      |      |           |       |       |       |                                                 |       |                      |                                                                                                                                               |      |      |           |       |      |      |
|--------------------------|--------------------------------------------------------------------------------------------------------------------------------------------------------------------------------------------------------------------------------------------------------------------------------------------------------------------------------------------------------------------------------------------------------------------------------------------------------------------------------------------------------------------------------------------------------------------------------------------------------------------------------|------|------|-----------|-------|-------|-------|-------------------------------------------------|-------|----------------------|-----------------------------------------------------------------------------------------------------------------------------------------------|------|------|-----------|-------|------|------|
| Rsa1.0_01751.1.g29527.t1 | gb AAK94425.1 AF398144.1_60S ribosomal protein L144 [Brassica rapa subsp. pkinensis]                                                                                                                                                                                                                                                                                                                                                                                                                                                                                                                                           | 105  | 119  | 2.00E-52  | 113.3 | 100.0 | 100.0 | 60S ribosomal protein L144                      | gbpln | Brassica rapa        | AT4G14320.1   Symbols:   Zinc-binding ribosomal protein family protein   chr4:8242684-8243805 REVERSE LENGTH=105                              | 105  | 105  | 4.00E-53  | 100.0 | 96.2 | 97.1 |
| Rsa1.0_01751.1.g29528.t1 | #                                                                                                                                                                                                                                                                                                                                                                                                                                                                                                                                                                                                                              | #    | #    | #         | #     | #     | #     | -                                               | ----  | ----                 | #                                                                                                                                             | #    | #    | #         | #     | #    | #    |
| Rsa1.0_01751.1.g29529.t1 | gb EOA32791.1  hypothetical protein CARUB_v10016101mg [Capsella rubella]                                                                                                                                                                                                                                                                                                                                                                                                                                                                                                                                                       | 162  | 205  | 1.00E-44  | 126.5 | 75.9  | 82.7  | hypothetical protein CARUB_v10016101mg          | gbpln | Capsella rubella     | AT3G23380.1   Symbols: RIC5   ROP-interactive CRIB motif-containing protein 5   chr3:8373947-8374708 FORWARD LENGTH=193                       | 162  | 193  | 2.00E-42  | 119.1 | 74.1 | 81.5 |
| Rsa1.0_01752.1.g29530.t1 | gb EOA16428.1  hypothetical protein CARUB_v10004579mg, partial [Capsella rubella]<br>ref NP_568596.1  Nucleotide-sugar transporter family protein [Arabidopsis thaliana]<br>gi 79329489 ref NP_001031992.1  Nucleotide-sugar transporter family protein [Arabidopsis thaliana]<br>gi 75156053 sp Q8LGE9.1 CSTR1_ARAT H RecName: Full=CMP-sialic acid transporter 1; Short=CMP-SA-Tr 1; Short=CMP-Sia-Tr 1<br>gi 21536568 gb AAM60900.1  CMP-sialic acid transporter-like protein [Arabidopsis thaliana]                                                                                                                        | 288  | 527  | 1.00E-42  | 183.0 | 36.8  | 48.6  | hypothetical protein CARUB_v10004579mg, partial | gbpln | Capsella rubella     | AT5G41540.1   Symbols:   Disease resistance protein (TIR-NBS-LRR class) family   chr5:16612659-16616063 REVERSE LENGTH=1038                   | 288  | 1038 | 6.00E-39  | 360.4 | 33.3 | 44.8 |
| Rsa1.0_01752.1.g29531.t1 | gi 28393785 gb AAO42302.1  putative CMP-sialic acid transporter [Arabidopsis thaliana]<br>gi 28973255 gb AAO63952.1  putative CMP-sialic acid transporter [Arabidopsis thaliana]<br>gi 332007339 gb AED94722.1  Nucleotide-sugar transporter family protein [Arabidopsis thaliana]<br>gi 332007340 gb AED94723.1  Nucleotide-sugar transporter family protein [Arabidopsis thaliana]                                                                                                                                                                                                                                           | 337  | 340  | 1.00E-176 | 100.9 | 92.3  | 96.1  | Nucleotide-sugar transporter family protein     | gbpln | Arabidopsis thaliana | AT5G41760.2   Symbols:   Nucleotide-sugar transporter family protein   chr5:16706978-16709204 FORWARD LENGTH=340                              | 337  | 340  | 1.00E-179 | 100.9 | 92.3 | 96.1 |
| Rsa1.0_01752.1.g29532.t1 | #                                                                                                                                                                                                                                                                                                                                                                                                                                                                                                                                                                                                                              | #    | #    | #         | #     | #     | #     | -                                               | ----  | ----                 | #                                                                                                                                             | #    | #    | #         | #     | #    | #    |
| Rsa1.0_01752.1.g29533.t1 | ref XP_002870617.1  hypothetical protein ARALYDRAFT_916024 [Arabidopsis lyrata subsp. lyrata]<br>gi 297316453 gb EFH46876.1  hypothetical protein ARALYDRAFT_916024 [Arabidopsis lyrata subsp. lyrata]<br>gb AAL75752.1 AC037197_10 Putative copia-type polyprotein [Oryza sativa Japonica Group]<br>gi 31429795 gb AAP51797.1  retrotransposon protein, putative, Ty1-copia subclass [Oryza sativa Japonica Group]<br>ref NP_198994.2  COP1-interactive protein 1 [Arabidopsis thaliana]<br>gi 332007346 gb AED94729.1  COP1-interactive protein 1 [Arabidopsis thaliana]                                                     | 762  | 704  | 0         | 92.4  | 84.9  | 89.0  | hypothetical protein ARALYDRAFT_916024          | gbpln | Arabidopsis lyrata   | AT5G41770.1   Symbols:   crooked neck protein, putative / cell cycle protein, putative   chr5:16718021-16720936 FORWARD LENGTH=705            | 762  | 705  | 0         | 92.5  | 85.3 | 89.2 |
| Rsa1.0_01752.1.g29534.t1 | ref NP_198994.2  COP1-interactive protein 1 [Arabidopsis thaliana]<br>gi 332007346 gb AED94729.1  COP1-interactive protein 1 [Arabidopsis thaliana]                                                                                                                                                                                                                                                                                                                                                                                                                                                                            | 1638 | 1586 | 0         | 96.8  | 69.8  | 81.6  | COP1-interactive protein 1                      | gbpln | Arabidopsis thaliana | AT5G41790.1   Symbols: CIP1   COP1-interactive protein 1   chr5:16727530-16732391 FORWARD LENGTH=1586                                         | 1638 | 1586 | 0         | 96.8  | 69.8 | 81.6 |
| Rsa1.0_01753.1.g29536.t1 | ref NP_189492.1  AAA-type ATPase family protein [Arabidopsis thaliana]<br>gi 9294101 dbj BAB01953.1  unnamed protein product [Arabidopsis thaliana]<br>gi 20466452 gb AAM20543.1  unknown protein [Arabidopsis thaliana]<br>gi 332643933 gb AEE77454.1  AAA-type ATPase family protein [Arabidopsis thaliana]<br>ref NP_189492.1  AAA-type ATPase family protein [Arabidopsis thaliana]<br>gi 9294101 dbj BAB01953.1  unnamed protein product [Arabidopsis thaliana]<br>gi 20466452 gb AAM20543.1  unknown protein [Arabidopsis thaliana]<br>gi 332643933 gb AEE77454.1  AAA-type ATPase family protein [Arabidopsis thaliana] | 284  | 530  | 1.00E-130 | 186.6 | 76.4  | 87.0  | AAA-type ATPase family protein                  | gbpln | Arabidopsis thaliana | AT3G28510.1   Symbols:   P-loop containing nucleoside triphosphate hydrolases superfamily protein   chr3:10685656-10687248 FORWARD LENGTH=530 | 284  | 530  | 1.00E-132 | 186.6 | 76.4 | 87.0 |
| Rsa1.0_01753.1.g29538.t1 | ref NP_189492.1  AAA-type ATPase family protein [Arabidopsis thaliana]<br>gi 9294101 dbj BAB01953.1  unnamed protein product [Arabidopsis thaliana]<br>gi 20466452 gb AAM20543.1  unknown protein [Arabidopsis thaliana]<br>gi 332643933 gb AEE77454.1  AAA-type ATPase family protein [Arabidopsis thaliana]                                                                                                                                                                                                                                                                                                                  | 230  | 530  | 1.00E-74  | 230.4 | 67.0  | 72.6  | AAA-type ATPase family protein                  | gbpln | Arabidopsis thaliana | AT3G28510.1   Symbols:   P-loop containing nucleoside triphosphate hydrolases superfamily protein   chr3:10685656-10687248 FORWARD LENGTH=530 | 230  | 530  | 3.00E-77  | 230.4 | 67.0 | 72.6 |
| Rsa1.0_01753.1.g29539.t1 | gb EOA23918.1  hypothetical protein CARUB_v10017133mg [Capsella rubella]                                                                                                                                                                                                                                                                                                                                                                                                                                                                                                                                                       | 477  | 477  | 0         | 100.0 | 89.3  | 93.1  | hypothetical protein CARUB_v10017133mg          | gbpln | Capsella rubella     | AT3G28690.2   Symbols:   Protein kinase superfamily protein   chr3:10755481-10757494 FORWARD LENGTH=453                                       | 477  | 453  | 0         | 95.0  | 86.0 | 88.5 |

|                          |                                                                                                                                                                                                                                                                                                                                                                                                                                                                                                                                                                                                                                                                                                                                                                                                                                                                                                                                                                                                                                                                                                                                                                                                                |      |      |           |       |      |      |                                        |       |                      |                                                                                                                                     |      |      |           |       |      |      |
|--------------------------|----------------------------------------------------------------------------------------------------------------------------------------------------------------------------------------------------------------------------------------------------------------------------------------------------------------------------------------------------------------------------------------------------------------------------------------------------------------------------------------------------------------------------------------------------------------------------------------------------------------------------------------------------------------------------------------------------------------------------------------------------------------------------------------------------------------------------------------------------------------------------------------------------------------------------------------------------------------------------------------------------------------------------------------------------------------------------------------------------------------------------------------------------------------------------------------------------------------|------|------|-----------|-------|------|------|----------------------------------------|-------|----------------------|-------------------------------------------------------------------------------------------------------------------------------------|------|------|-----------|-------|------|------|
| Rsa1.0_01753.1.g29540.t1 | ref[XP_002891255.1] NLI interacting factor family protein [Arabidopsis lyrata subsp. lyrata] gi 297337097 gb EFH67514.1  NLI interacting factor family protein [Arabidopsis lyrata subsp. lyrata]                                                                                                                                                                                                                                                                                                                                                                                                                                                                                                                                                                                                                                                                                                                                                                                                                                                                                                                                                                                                              | 166  | 210  | 4.00E-46  | 126.5 | 58.4 | 67.5 | NLI interacting factor family protein  | gbpln | Arabidopsis lyrata   | AT1G43610.1   Symbols:   Haloacid dehalogenase-like hydrolase (HAD) superfamily protein   chr1:16424578-16425345 FORWARD LENGTH=255 | 166  | 255  | 1.00E-46  | 153.6 | 56.6 | 64.5 |
| Rsa1.0_01753.1.g29541.t1 | ref[NP_001189996.1] V-type proton ATPase subunit d2 [Arabidopsis thaliana] gi 332643961 gb AJEE77482.1  V-type proton ATPase subunit d2 [Arabidopsis thaliana] ref[NP_189012.1] V-type proton ATPase subunit d1 [Arabidopsis thaliana] gi 297815166 ref[XP_002875466.1] hypothetical protein ARALYDRAFT_484647 [Arabidopsis lyrata subsp. lyrata] gi 297818484 ref[XP_002877125.1] hypothetical protein ARALYDRAFT_484645 [Arabidopsis lyrata subsp. lyrata] gi 12230764 sp Q9LJ15.1 VA0D1_ARATH RecName: Full=V-type proton ATPase subunit d1; Short=V-ATPase subunit d1; AltName: Full=Vacuolar H(+)-ATPase subunit d isoform 1; AltName: Full=Vacuolar proton pump subunit d1 gi 9294284 db BAB02186.1  vacuolar ATP synthase subunit AC39 [Arabidopsis thaliana] gi 14532480 gb AAK63968.1  AT3g28710/MZN14.20 [Arabidopsis thaliana] gi 18655357 gb AAL76134.1  AT3g28710/MZN14.20 [Arabidopsis thaliana] gi 23297057 gb AANI3080.1  putative adenosine triphosphatase [Arabidopsis thaliana] gi 297321304 gb EFH51725.1  hypothetical protein ARALYDRAFT_484647 [Arabidopsis lyrata subsp. lyrata] gi 297322963 gb EFH53384.1  hypothetical protein ARALYDRAFT_484645 [Arabidopsis lyrata subsp. lyrata] | 80   | 343  | 8.00E-29  | 428.8 | 76.3 | 77.5 | V-type proton ATPase subunit d2        | gbpln | Arabidopsis thaliana | AT3G28715.2   Symbols:   ATPase, V0/A0 complex, subunit C/D   chr3:10778025-10780350 FORWARD LENGTH=343                             | 80   | 343  | 1.00E-31  | 428.8 | 76.3 | 77.5 |
| Rsa1.0_01753.1.g29542.t2 | gi 9294284 db BAB02186.1  vacuolar ATP synthase subunit AC39 [Arabidopsis thaliana] gi 14532480 gb AAK63968.1  AT3g28710/MZN14.20 [Arabidopsis thaliana] gi 18655357 gb AAL76134.1  AT3g28710/MZN14.20 [Arabidopsis thaliana] gi 23297057 gb AANI3080.1  putative adenosine triphosphatase [Arabidopsis thaliana] gi 297321304 gb EFH51725.1  hypothetical protein ARALYDRAFT_484647 [Arabidopsis lyrata subsp. lyrata] gi 297322963 gb EFH53384.1  hypothetical protein ARALYDRAFT_484645 [Arabidopsis lyrata subsp. lyrata]                                                                                                                                                                                                                                                                                                                                                                                                                                                                                                                                                                                                                                                                                  | 267  | 351  | 1.00E-156 | 131.5 | 99.6 | 99.6 | V-type proton ATPase subunit d1        | gbpln | Arabidopsis lyrata   | AT3G28710.1   Symbols:   ATPase, V0/A0 complex, subunit C/D   chr3:10773144-10775594 REVERSE LENGTH=351                             | 267  | 351  | 1.00E-158 | 131.5 | 99.6 | 99.6 |
| Rsa1.0_01753.1.g29543.t1 | gb EOA23621.1  hypothetical protein CARUB_v10016819mg [Capsella rubella]                                                                                                                                                                                                                                                                                                                                                                                                                                                                                                                                                                                                                                                                                                                                                                                                                                                                                                                                                                                                                                                                                                                                       | 665  | 647  | 0         | 97.3  | 88.0 | 92.8 | hypothetical protein CARUB_v10016819mg | gbpln | Capsella rubella     | AT3G28730.1   Symbols:   ATHMG, SSRP1, NFD, HMG   high mobility group   chr3:10784954-10788498 FORWARD LENGTH=646                   | 665  | 646  | 0         | 97.1  | 85.6 | 91.3 |
| Rsa1.0_01753.1.g29544.t1 | ref[XP_002877127.1] cytochrome P450 family protein [Arabidopsis lyrata subsp. lyrata] gi 297322965 gb EFH53386.1  cytochrome P450 family protein [Arabidopsis lyrata subsp. lyrata]                                                                                                                                                                                                                                                                                                                                                                                                                                                                                                                                                                                                                                                                                                                                                                                                                                                                                                                                                                                                                            | 450  | 501  | 0         | 111.3 | 80.9 | 88.2 | cytochrome P450 family protein         | gbpln | Arabidopsis lyrata   | AT3G28740.1   Symbols:   CYP81D1   Cytochrome P450 superfamily protein   chr3:10788764-10790552 REVERSE LENGTH=509                  | 450  | 509  | 0         | 113.1 | 78.9 | 88.0 |
| Rsa1.0_01753.1.g29545.t1 | ref[XP_002877127.1] cytochrome P450 family protein [Arabidopsis lyrata subsp. lyrata] gi 297322965 gb EFH53386.1  cytochrome P450 family protein [Arabidopsis lyrata subsp. lyrata]                                                                                                                                                                                                                                                                                                                                                                                                                                                                                                                                                                                                                                                                                                                                                                                                                                                                                                                                                                                                                            | 211  | 501  | 3.00E-49  | 237.4 | 41.7 | 46.9 | cytochrome P450 family protein         | gbpln | Arabidopsis lyrata   | AT3G28740.1   Symbols:   CYP81D1   Cytochrome P450 superfamily protein   chr3:10788764-10790552 REVERSE LENGTH=509                  | 211  | 509  | 5.00E-51  | 241.2 | 41.7 | 46.4 |
| Rsa1.0_01753.1.g29546.t1 | gb EOA23379.1  hypothetical protein CARUB_v10016555mg [Capsella rubella]                                                                                                                                                                                                                                                                                                                                                                                                                                                                                                                                                                                                                                                                                                                                                                                                                                                                                                                                                                                                                                                                                                                                       | 2480 | 2419 | 1.00E-130 | 97.5  | 14.4 | 18.0 | hypothetical protein CARUB_v10016555mg | gbpln | Capsella rubella     | AT3G28770.1   Symbols:   Protein of unknown function (DUF1216)   chr3:10796716-10803237 FORWARD LENGTH=2081                         | 2480 | 2081 | 1.00E-131 | 83.9  | 13.9 | 17.2 |
| Rsa1.0_01753.1.g29547.t1 | #                                                                                                                                                                                                                                                                                                                                                                                                                                                                                                                                                                                                                                                                                                                                                                                                                                                                                                                                                                                                                                                                                                                                                                                                              | #    | #    | #         | #     | #    | #    | -                                      | ----  | ----                 | #                                                                                                                                   | #    | #    | #         | #     | #    |      |
| Rsa1.0_01754.1.g29548.t1 | #                                                                                                                                                                                                                                                                                                                                                                                                                                                                                                                                                                                                                                                                                                                                                                                                                                                                                                                                                                                                                                                                                                                                                                                                              | #    | #    | #         | #     | #    | #    | -                                      | ----  | ----                 | #                                                                                                                                   | #    | #    | #         | #     | #    |      |
| Rsa1.0_01754.1.g29549.t1 | #                                                                                                                                                                                                                                                                                                                                                                                                                                                                                                                                                                                                                                                                                                                                                                                                                                                                                                                                                                                                                                                                                                                                                                                                              | #    | #    | #         | #     | #    | #    | -                                      | ----  | ----                 | #                                                                                                                                   | #    | #    | #         | #     | #    |      |
| Rsa1.0_01754.1.g29550.t1 | #                                                                                                                                                                                                                                                                                                                                                                                                                                                                                                                                                                                                                                                                                                                                                                                                                                                                                                                                                                                                                                                                                                                                                                                                              | #    | #    | #         | #     | #    | #    | -                                      | ----  | ----                 | #                                                                                                                                   | #    | #    | #         | #     | #    |      |
| Rsa1.0_01754.1.g29551.t1 | ref[XP_002879182.1] hypothetical protein ARALYDRAFT_901825 [Arabidopsis lyrata subsp. lyrata] gi 297325021 gb EFH55441.1  hypothetical protein ARALYDRAFT_901825 [Arabidopsis lyrata subsp. lyrata]                                                                                                                                                                                                                                                                                                                                                                                                                                                                                                                                                                                                                                                                                                                                                                                                                                                                                                                                                                                                            | 153  | 154  | 1.00E-65  | 100.7 | 93.5 | 94.1 | hypothetical protein ARALYDRAFT_901825 | gbpln | Arabidopsis lyrata   | AT2G28720.1   Symbols:   Histone superfamily protein   chr2:12327043-12327498 FORWARD LENGTH=151                                    | 153  | 151  | 4.00E-67  | 98.7  | 91.5 | 92.8 |

|                          |                                                                                                                                                                                                                          |      |      |           |       |       |       |                                                     |             |                      |                                                                                                                                                                                                                                                                                                                                            |      |      |           |       |       |       |
|--------------------------|--------------------------------------------------------------------------------------------------------------------------------------------------------------------------------------------------------------------------|------|------|-----------|-------|-------|-------|-----------------------------------------------------|-------------|----------------------|--------------------------------------------------------------------------------------------------------------------------------------------------------------------------------------------------------------------------------------------------------------------------------------------------------------------------------------------|------|------|-----------|-------|-------|-------|
| Rsa1.0_01754.1.g29552.t1 | ref[XP_002879183.1] hypothetical protein ARALYDRAFT_481786 [Arabidopsis lyrata subsp. lyrata] g 297325022 gb EFH55442.1  hypothetical protein ARALYDRAFT_481786 [Arabidopsis lyrata subsp. lyrata]                       | 108  | 107  | 2.00E-32  | 99.1  | 67.6  | 77.8  | hypothetical protein ARALYDRAFT_481786              | gbpln       | Arabidopsis lyrata   | AT1G07795.1   Symbols:   unknown protein; BEST Arabidopsis thaliana protein match is: unknown protein (TAIR:AT2G28725.1). Has 38 Blast hits to 38 proteins in 11 species: Archae - 0; Bacteria - 0; Metazoa - 0; Fungi - 0; Plants - 38; Viruses - 0; Other Eukaryotes - 0 (source: NCBI BLink).   chr1:2414438-2414794 FORWARD LENGTH=118 | 108  | 118  | 7.00E-34  | 109.3 | 64.8  | 73.1  |
| Rsa1.0_01754.1.g29553.t1 | tpg[DAA40122.1] TPA: histone H4.3 [Zea mays]                                                                                                                                                                             | 103  | 248  | 3.00E-52  | 240.8 | 100.0 | 100.0 | TPA: histone H4.3                                   | gbenv/gbpln | Zea mays             | AT5G59970.1   Symbols:   Histone superfamily protein   chr5:24146352-24146663 REVERSE LENGTH=103                                                                                                                                                                                                                                           | 103  | 103  | 2.00E-52  | 100.0 | 100.0 | 100.0 |
| Rsa1.0_01754.1.g29554.t1 | #                                                                                                                                                                                                                        | #    | #    | #         | #     | #     | #     | -                                                   | ----        | ----                 | #                                                                                                                                                                                                                                                                                                                                          | #    | #    | #         | #     | #     |       |
| Rsa1.0_01754.1.g29555.t1 | gb AAB82639.1  putative non-LTR retroelement reverse transcriptase [Arabidopsis thaliana]                                                                                                                                | 1397 | 1374 | 0         | 98.4  | 48.3  | 63.9  | putative non-LTR retroelement reverse transcriptase | gbpln       | Arabidopsis thaliana | AT4G29090.1   Symbols:   Ribonuclease H-like superfamily protein   chr4:14333528-14335255 FORWARD LENGTH=575                                                                                                                                                                                                                               | 1397 | 575  | 1.00E-128 | 41.2  | 16.5  | 23.0  |
| Rsa1.0_01755.1.g29556.t1 | gb AAF79618.1 AC027665_19 F5M15.26 [Arabidopsis thaliana]                                                                                                                                                                | 297  | 1838 | 1.00E-15  | 618.9 | 17.5  | 25.9  | F5M15.26                                            | gbpln       | Arabidopsis thaliana | #                                                                                                                                                                                                                                                                                                                                          | #    | #    | #         | #     | #     |       |
| Rsa1.0_01755.1.g29557.t2 | #                                                                                                                                                                                                                        | #    | #    | #         | #     | #     | #     | -                                                   | ----        | ----                 | #                                                                                                                                                                                                                                                                                                                                          | #    | #    | #         | #     | #     |       |
| Rsa1.0_01755.1.g29558.t1 | gb AAF79618.1 AC027665_19 F5M15.26 [Arabidopsis thaliana]                                                                                                                                                                | 1199 | 1838 | 0         | 153.3 | 48.5  | 65.2  | F5M15.26                                            | gbpln       | Arabidopsis thaliana | #                                                                                                                                                                                                                                                                                                                                          | #    | #    | #         | #     | #     |       |
| Rsa1.0_01755.1.g29559.t1 | #                                                                                                                                                                                                                        | #    | #    | #         | #     | #     | #     | -                                                   | ----        | ----                 | #                                                                                                                                                                                                                                                                                                                                          | #    | #    | #         | #     | #     |       |
| Rsa1.0_01755.1.g29560.t1 | #                                                                                                                                                                                                                        | #    | #    | #         | #     | #     | #     | -                                                   | ----        | ----                 | #                                                                                                                                                                                                                                                                                                                                          | #    | #    | #         | #     | #     |       |
| Rsa1.0_01755.1.g29561.t1 | gb AAF79618.1 AC027665_19 F5M15.26 [Arabidopsis thaliana]                                                                                                                                                                | 411  | 1838 | 2.00E-87  | 447.2 | 36.5  | 42.3  | F5M15.26                                            | gbpln       | Arabidopsis thaliana | #                                                                                                                                                                                                                                                                                                                                          | #    | #    | #         | #     | #     |       |
| Rsa1.0_01755.1.g29562.t1 | dbj BAB03186.1  En/Spm transposon protein-like [Arabidopsis thaliana]                                                                                                                                                    | 908  | 1516 | 0         | 167.0 | 40.1  | 46.3  | En/Spm transposon protein-like                      | gbpln       | Arabidopsis thaliana | #                                                                                                                                                                                                                                                                                                                                          | #    | #    | #         | #     | #     |       |
| Rsa1.0_01756.1.g29563.t1 | #                                                                                                                                                                                                                        | #    | #    | #         | #     | #     | #     | -                                                   | ----        | ----                 | #                                                                                                                                                                                                                                                                                                                                          | #    | #    | #         | #     | #     |       |
| Rsa1.0_01756.1.g29564.t1 | gb AAC13582.1  similar to maize transposon MuDR (GB.M76978) [Arabidopsis thaliana] g 8843876 dbj BAA97402.1  mutator-like transposase [Arabidopsis thaliana]                                                             | 304  | 806  | 3.00E-66  | 265.1 | 38.8  | 45.7  | similar to maize transposon MuDR (GB.M76978)        | gbpln       | Arabidopsis thaliana | AT1G64260.1   Symbols:   MuDR family transposase   chr1:23847756-23849915 FORWARD LENGTH=719                                                                                                                                                                                                                                               | 304  | 719  | 5.00E-20  | 236.5 | 19.4  | 30.3  |
| Rsa1.0_01756.1.g29565.t1 | #                                                                                                                                                                                                                        | #    | #    | #         | #     | #     | #     | -                                                   | ----        | ----                 | #                                                                                                                                                                                                                                                                                                                                          | #    | #    | #         | #     | #     |       |
| Rsa1.0_01756.1.g29566.t1 | ref[XP_002865565.1] electron carrier/protein disulfide oxidoreductase [Arabidopsis lyrata subsp. lyrata] g 297311400 gb EFH41824.1  electron carrier/protein disulfide oxidoreductase [Arabidopsis lyrata subsp. lyrata] | 330  | 315  | 1.00E-161 | 95.5  | 85.8  | 90.3  | electron carrier/protein disulfide oxidoreductase   | gbpln       | Arabidopsis lyrata   | AT5G42150.1   Symbols:   Glutathione S-transferase family protein   chr5:16846247-16847909 FORWARD LENGTH=315                                                                                                                                                                                                                              | 330  | 315  | 1.00E-161 | 95.5  | 83.9  | 89.4  |
| Rsa1.0_01756.1.g29567.t1 | #                                                                                                                                                                                                                        | #    | #    | #         | #     | #     | #     | -                                                   | ----        | ----                 | #                                                                                                                                                                                                                                                                                                                                          | #    | #    | #         | #     | #     |       |
| Rsa1.0_01756.1.g29568.t1 | gb ABD65118.1  hypothetical protein 31.t00031 [Brassica oleracea]                                                                                                                                                        | 425  | 467  | 2.00E-95  | 109.9 | 44.5  | 62.6  | hypothetical protein 31.t00031                      | gbpln       | Brassica oleracea    | AT1G52950.1   Symbols:   Nucleic acid-binding, OB-fold-like protein   chr1:19725483-19728007 FORWARD LENGTH=566                                                                                                                                                                                                                            | 425  | 566  | 2.00E-29  | 133.2 | 27.3  | 47.1  |
| Rsa1.0_01756.1.g29569.t1 | gb EOA23204.1  hypothetical protein CARUB_v10019007mg [Capsella rubella]                                                                                                                                                 | 479  | 477  | 0         | 99.6  | 83.9  | 89.4  | hypothetical protein CARUB_v10019007mg              | gbpln       | Capsella rubella     | AT3G57790.1   Symbols:   Pectin lyase-like superfamily protein   chr3:21405387-21407088 REVERSE LENGTH=490                                                                                                                                                                                                                                 | 479  | 490  | 0         | 102.3 | 83.5  | 88.5  |
| Rsa1.0_01756.1.g29570.t1 | gb EOA14533.1  hypothetical protein CARUB_v10027765mg [Capsella rubella]                                                                                                                                                 | 498  | 509  | 0         | 102.2 | 82.5  | 91.0  | hypothetical protein CARUB_v10027765mg              | gbpln       | Capsella rubella     | AT5G42450.1   Symbols:   Pentatricopeptide repeat (PPR) superfamily protein   chr5:16977297-16978850 FORWARD LENGTH=517                                                                                                                                                                                                                    | 498  | 517  | 0         | 103.8 | 81.3  | 90.6  |
| Rsa1.0_01757.1.g29571.t1 | emb CAC37623.1  copia-like polyprotein [Arabidopsis thaliana]                                                                                                                                                            | 1264 | 1466 | 0         | 116.0 | 67.6  | 79.4  | copia-like polyprotein                              | gbpln       | Arabidopsis thaliana | AT4G23160.1   Symbols:   CRK8   cysteine-rich RLK (RECEPTOR-like protein kinase) 8   chr4:12129485-12134086 FORWARD LENGTH=1262                                                                                                                                                                                                            | 1264 | 1262 | 2.00E-81  | 99.8  | 12.1  | 18.1  |
| Rsa1.0_01757.1.g29572.t1 | #                                                                                                                                                                                                                        | #    | #    | #         | #     | #     | #     | -                                                   | ----        | ----                 | #                                                                                                                                                                                                                                                                                                                                          | #    | #    | #         | #     | #     |       |
| Rsa1.0_01757.1.g29573.t1 | dbj BAA97086.1  unnamed protein product [Arabidopsis thaliana]                                                                                                                                                           | 173  | 341  | 1.00E-46  | 197.1 | 53.2  | 72.3  | unnamed protein product                             | gbpln       | Arabidopsis thaliana | #                                                                                                                                                                                                                                                                                                                                          | #    | #    | #         | #     | #     |       |
| Rsa1.0_01757.1.g29574.t1 | gb EOA19271.1  hypothetical protein CARUB_v10000438mg [Capsella rubella]                                                                                                                                                 | 556  | 641  | 0         | 115.3 | 73.7  | 82.4  | hypothetical protein CARUB_v10000438mg              | gbpln       | Capsella rubella     | AT4G11440.1   Symbols:   Mitochondrial substrate carrier family protein   chr4:6955850-6955853 FORWARD LENGTH=628                                                                                                                                                                                                                          | 556  | 628  | 0         | 112.9 | 71.6  | 80.0  |
| Rsa1.0_01757.1.g29575.t2 | gb EOA20058.1  hypothetical protein CARUB_v10000333mg [Capsella rubella] g 482555867 gb EOA20059.1  hypothetical protein CARUB_v10000333mg [Capsella rubella]                                                            | 694  | 713  | 0         | 102.7 | 85.0  | 90.6  | hypothetical protein CARUB_v10000333mg              | gbpln       | Capsella rubella     | AT4G11450.1   Symbols:   Protein of unknown function (DUF3527)   chr4:6959065-6961223 REVERSE LENGTH=694                                                                                                                                                                                                                                   | 694  | 694  | 0         | 100.0 | 82.9  | 89.0  |
| Rsa1.0_01758.1.g29576.t1 | ref[XP_002889861.1] predicted protein [Arabidopsis lyrata subsp. lyrata] g 297335703 gb EFH66120.1  predicted protein [Arabidopsis lyrata subsp. lyrata]                                                                 | 442  | 820  | 0         | 185.5 | 78.3  | 84.4  | predicted protein                                   | gbpln       | Arabidopsis lyrata   | AT1G11300.1   Symbols:   protein serine/threonine kinases;protein kinases;ATP binding;sugar binding;kinases;carbohydrate binding   chr1:3794389-3800719 FORWARD LENGTH=1650                                                                                                                                                                | 442  | 1650 | 0         | 373.3 | 76.7  | 83.3  |



|                          |                                                                                                                                                                                                     |      |      |           |       |      |      |                                                                                                                                           |       |                      |                                                                                                                                  |     |     |           |       |      |      |
|--------------------------|-----------------------------------------------------------------------------------------------------------------------------------------------------------------------------------------------------|------|------|-----------|-------|------|------|-------------------------------------------------------------------------------------------------------------------------------------------|-------|----------------------|----------------------------------------------------------------------------------------------------------------------------------|-----|-----|-----------|-------|------|------|
| Rsa1.0_01758.1.g29577.t1 | ref[XP_002892631.1] predicted protein [Arabidopsis lyrata subsp. lyrata] gi 297338473 gb EFH68890.1  predicted protein [Arabidopsis lyrata subsp. lyrata]                                           | 822  | 822  | 0         | 100.0 | 83.9 | 90.5 | predicted protein                                                                                                                         | gbpln | Arabidopsis lyrata   | AT1G61360.1   Symbols:   S-locus lectin protein kinase family protein   chr1:22637867-22640974 REVERSE LENGTH=821                | 822 | 821 | 0         | 99.9  | 73.6 | 83.6 |
| Rsa1.0_01758.1.g29578.t2 | gb AAF82204.1 AC067971.12 Contains similarity to protein phosphatase 2C from Arabidopsis thaliana gb AF085279. It contains a protein phosphatase 2C domain PF 00481 [Arabidopsis thaliana]          | 434  | 405  | 2.00E-37  | 93.3  | 24.7 | 27.4 | Contains similarity to protein phosphatase 2C from Arabidopsis thaliana gb AF085279. It contains a protein phosphatase 2C domain PF 00481 | gbpln | Arabidopsis thaliana | AT1G07160.1   Symbols:   Protein phosphatase 2C family protein   chr1:2198155-2199678 REVERSE LENGTH=380                         | 434 | 380 | 6.00E-40  | 87.6  | 24.9 | 27.2 |
| Rsa1.0_01758.1.g29579.t1 | #                                                                                                                                                                                                   | #    | #    | #         | #     | #    | #    | -                                                                                                                                         | ----  | ----                 | #                                                                                                                                | #   | #   | #         | #     | #    | #    |
| Rsa1.0_01758.1.g29580.t1 | gb ABD65090.1  hypothetical protein 27.t00116 [Brassica oleracea]                                                                                                                                   | 532  | 484  | 2.00E-68  | 91.0  | 28.0 | 35.2 | hypothetical protein 27.t00116                                                                                                            | gbpln | Brassica oleracea    | #                                                                                                                                | #   | #   | #         | #     | #    | #    |
| Rsa1.0_01758.1.g29581.t1 | gb EOA23321.1  hypothetical protein CARUB.v10019219mg [Capsella rubella]                                                                                                                            | 401  | 444  | 3.00E-90  | 110.7 | 48.4 | 62.1 | hypothetical protein CARUB.v10019219mg                                                                                                    | gbpln | Capsella rubella     | AT2G40925.1   Symbols:   F-box and associated interaction domains-containing protein   chr2:17074905-17076116 REVERSE LENGTH=403 | 401 | 403 | 3.00E-66  | 100.5 | 40.6 | 55.9 |
| Rsa1.0_01758.1.g29582.t1 | #                                                                                                                                                                                                   | #    | #    | #         | #     | #    | #    | -                                                                                                                                         | ----  | ----                 | #                                                                                                                                | #   | #   | #         | #     | #    | #    |
| Rsa1.0_01758.1.g29583.t1 | ref[XP_002888093.1] SYP124 [Arabidopsis lyrata subsp. lyrata] gi 297333934 gb EFH64352.1  SYP124 [Arabidopsis lyrata subsp. lyrata]                                                                 | 298  | 303  | 1.00E-160 | 101.7 | 92.3 | 96.6 | SYP124                                                                                                                                    | gbpln | Arabidopsis lyrata   | AT1G61290.1   Symbols: SYP124, ATSYP124   syntaxin of plants 124   chr1:22605188-22606216 FORWARD LENGTH=303                     | 298 | 303 | 1.00E-161 | 101.7 | 91.3 | 96.6 |
| Rsa1.0_01758.1.g29584.t1 | ref[XP_002889856.1] hypothetical protein ARALYDRAFT_471255 [Arabidopsis lyrata subsp. lyrata] gi 297335698 gb EFH66115.1  hypothetical protein ARALYDRAFT_471255 [Arabidopsis lyrata subsp. lyrata] | 295  | 295  | 1.00E-152 | 100.0 | 86.4 | 94.6 | hypothetical protein ARALYDRAFT_471255                                                                                                    | gbpln | Arabidopsis lyrata   | AT1G11200.1   Symbols:   Protein of unknown function (DUF300)   chr1:3753896-3755459 FORWARD LENGTH=295                          | 295 | 295 | 1.00E-150 | 100.0 | 84.1 | 93.2 |
| Rsa1.0_01758.1.g29585.t1 | emb CBL29241.1  endonuclease precursor [Fourraea alpina]                                                                                                                                            | 105  | 305  | 7.00E-49  | 290.5 | 86.7 | 90.5 | endonuclease precursor                                                                                                                    | gbpln | Fourraea alpina      | AT1G11190.1   Symbols: BFN1, ENDO1   bifunctional nuclease i   chr1:3750338-3752696 REVERSE LENGTH=305                           | 105 | 305 | 3.00E-45  | 290.5 | 84.8 | 89.5 |
| Rsa1.0_01759.1.g29586.t1 | gb AAD15532.1  putative retroelement pol polyprotein [Arabidopsis thaliana]                                                                                                                         | 426  | 1274 | 4.00E-85  | 299.1 | 39.4 | 52.3 | putative retroelement pol polyprotein                                                                                                     | gbpln | Arabidopsis thaliana | AT5G45570.1   Symbols:   Ulp1 protease family protein   chr5:18472301-18475574 FORWARD LENGTH=921                                | 426 | 921 | 1.00E-45  | 216.2 | 24.4 | 34.3 |
| Rsa1.0_01759.1.g29587.t1 | gb AAD23022.1  En/Spm-like transposon protein [Arabidopsis thaliana]                                                                                                                                | 129  | 155  | 3.00E-20  | 120.2 | 44.2 | 58.1 | En/Spm-like transposon protein                                                                                                            | gbpln | Arabidopsis thaliana | #                                                                                                                                | #   | #   | #         | #     | #    | #    |
| Rsa1.0_01759.1.g29588.t1 | #                                                                                                                                                                                                   | #    | #    | #         | #     | #    | #    | -                                                                                                                                         | ----  | ----                 | #                                                                                                                                | #   | #   | #         | #     | #    | #    |
| Rsa1.0_01759.1.g29589.t1 | #                                                                                                                                                                                                   | #    | #    | #         | #     | #    | #    | -                                                                                                                                         | ----  | ----                 | #                                                                                                                                | #   | #   | #         | #     | #    | #    |
| Rsa1.0_01759.1.g29590.t1 | #                                                                                                                                                                                                   | #    | #    | #         | #     | #    | #    | -                                                                                                                                         | ----  | ----                 | #                                                                                                                                | #   | #   | #         | #     | #    | #    |
| Rsa1.0_01759.1.g29591.t2 | gb ACG06682.1  transposon-like ORF [Brassica oleracea var. aboglabra]                                                                                                                               | 332  | 704  | 1.00E-69  | 212.0 | 40.1 | 41.3 | transposon-like ORF                                                                                                                       | gbpln | Brassica oleracea    | #                                                                                                                                | #   | #   | #         | #     | #    | #    |
| Rsa1.0_01759.1.g29592.t1 | gb AAF79618.1 AC027665_19 F5M15.26 [Arabidopsis thaliana]                                                                                                                                           | 300  | 1838 | 2.00E-38  | 612.7 | 31.0 | 48.7 | F5M15.26                                                                                                                                  | gbpln | Arabidopsis thaliana | #                                                                                                                                | #   | #   | #         | #     | #    | #    |
| Rsa1.0_01759.1.g29593.t1 | gb AAD20433.1  putative retroelement pol polyprotein [Arabidopsis thaliana]                                                                                                                         | 138  | 889  | 3.00E-38  | 644.2 | 52.9 | 68.1 | putative retroelement pol polyprotein                                                                                                     | gbpln | Arabidopsis thaliana | #                                                                                                                                | #   | #   | #         | #     | #    | #    |
| Rsa1.0_01759.1.g29594.t1 | #                                                                                                                                                                                                   | #    | #    | #         | #     | #    | #    | -                                                                                                                                         | ----  | ----                 | #                                                                                                                                | #   | #   | #         | #     | #    | #    |
| Rsa1.0_01759.1.g29595.t1 | gb AAC28189.1  contains similarity to Arabidopsis thaliana retrotransposon Athila (GB:X81801) [Arabidopsis thaliana]                                                                                | 1192 | 940  | 7.00E-75  | 78.9  | 14.0 | 19.5 | contains similarity to Arabidopsis thaliana retrotransposon Athila (GB:X81801)                                                            | gbpln | Arabidopsis thaliana | #                                                                                                                                | #   | #   | #         | #     | #    | #    |
| Rsa1.0_01759.1.g29596.t1 | dbj BAB10790.1  retroelement pol polyprotein-like [Arabidopsis thaliana]                                                                                                                            | 345  | 1864 | 1.00E-100 | 540.3 | 51.0 | 63.5 | retroelement pol polyprotein-like                                                                                                         | gbpln | Arabidopsis thaliana | ATMG00750.1   Symbols: ORF119   GAG/POL/ENV polyprotein   chrM:220830-221189 FORWARD LENGTH=119                                  | 345 | 119 | 1.00E-13  | 34.5  | 8.4  | 11.3 |
| Rsa1.0_01760.1.g29597.t1 | gb EOA35686.1  hypothetical protein CARUB.v10020913mg, partial [Capsella rubella]                                                                                                                   | 192  | 223  | 2.00E-87  | 116.1 | 82.3 | 92.2 | hypothetical protein CARUB.v10020913mg, partial                                                                                           | gbpln | Capsella rubella     | AT1G54850.1   Symbols:   HSP20-like chaperones superfamily protein   chr1:20454440-20455994 FORWARD LENGTH=206                   | 192 | 206 | 4.00E-88  | 107.3 | 79.2 | 92.7 |

|                          |                                                                                                                                                                                                                                                                                                                                                                                                                                                                                                                                                                                                                                                                                                                                                                                                                                             |     |     |           |       |      |      |                                                                       |       |                      |                                                                                                                                                                         |     |     |           |       |      |      |
|--------------------------|---------------------------------------------------------------------------------------------------------------------------------------------------------------------------------------------------------------------------------------------------------------------------------------------------------------------------------------------------------------------------------------------------------------------------------------------------------------------------------------------------------------------------------------------------------------------------------------------------------------------------------------------------------------------------------------------------------------------------------------------------------------------------------------------------------------------------------------------|-----|-----|-----------|-------|------|------|-----------------------------------------------------------------------|-------|----------------------|-------------------------------------------------------------------------------------------------------------------------------------------------------------------------|-----|-----|-----------|-------|------|------|
| Rsa1.0_01760.1.g29598.t1 | refNP_001117518.1   1,4-dihydroxy-2-naphthoate octaprenyltransferase [Arabidopsis thaliana] gi 327488385 sp Q0WUA3.2 MENA_ARA TH RecName: Full=1,4-dihydroxy-2-naphthoate polyprenyltransferase, chloroplastic; AltName: Full=1,4-dihydroxy-2-naphthoate phytyltransferase; AltName: Full=Protein ABERRANT CHLOROPLAST DEVELOPMENT 4; AltName: Full=menA-like protein; Short=AtMENA; Flags: Precursor gi 332195581 gb AEE33702.1   1,4-dihydroxy-2-naphthoate polyprenyltransferase [Arabidopsis thaliana]                                                                                                                                                                                                                                                                                                                                  | 416 | 382 | 1.00E-177 | 91.8  | 76.9 | 82.9 | 1,4-dihydroxy-2-naphthoate octaprenyltransferase                      | gbpln | Arabidopsis thaliana | AT1G60600.2   Symbols: ABC4   UbiA prenyltransferase family protein   chr1:22324807-22326759 REVERSE LENGTH=382                                                         | 416 | 382 | 1.00E-179 | 91.8  | 76.9 | 82.9 |
| Rsa1.0_01760.1.g29599.t1 | refXP_002886605.1   protein binding protein [Arabidopsis lyrata subsp. lyrata] gi 297332446 gb EFH62864.1   protein binding protein [Arabidopsis lyrata subsp. lyrata]                                                                                                                                                                                                                                                                                                                                                                                                                                                                                                                                                                                                                                                                      | 339 | 338 | 1.00E-149 | 99.7  | 81.1 | 90.3 | protein binding protein                                               | gbpln | Arabidopsis lyrata   | AT1G60610.3   Symbols:   SBP (S-ribonuclease binding protein) family protein   chr1:22331225-2233370 REVERSE LENGTH=340                                                 | 339 | 340 | 1.00E-149 | 100.3 | 80.2 | 88.5 |
| Rsa1.0_01760.1.g29600.t1 | refXP_002888129.1   ATRPAC43 [Arabidopsis lyrata subsp. lyrata] gi 297333970 gb EFH64388.1   ATRPAC43 [Arabidopsis lyrata subsp. lyrata]                                                                                                                                                                                                                                                                                                                                                                                                                                                                                                                                                                                                                                                                                                    | 421 | 385 | 1.00E-170 | 91.4  | 71.3 | 79.8 | ATRPAC43                                                              | gbpln | Arabidopsis lyrata   | AT1G60620.1   Symbols: ATRPAC43, RPAC43   RNA polymerase I subunit 43   chr1:22331225-2233370 FORWARD LENGTH=385                                                        | 421 | 385 | 1.00E-167 | 91.4  | 68.9 | 79.8 |
| Rsa1.0_01760.1.g29601.t1 | emb CCD74528.1   NAC domain containing protein 23 [Arabidopsis halleri subsp. halleri]                                                                                                                                                                                                                                                                                                                                                                                                                                                                                                                                                                                                                                                                                                                                                      | 379 | 334 | 8.00E-63  | 88.1  | 39.6 | 54.9 | NAC domain containing protein 23                                      | gbpln | Arabidopsis halleri  | AT1G60280.1   Symbols: ANAC023, NAC023   NAC domain containing protein 23   chr1:22226885-22227928 REVERSE LENGTH=347                                                   | 379 | 347 | 1.00E-63  | 91.6  | 39.3 | 53.3 |
| Rsa1.0_01760.1.g29602.t1 | refXP_002532706.1   Transcription initiation factor TFIID subunit, putative [Ricinus communis] gi 223527552 gb EEF29673.1   Transcription initiation factor TFIID subunit, putative [Ricinus communis] refNP_176262.2   leucine-rich repeat protein kinase-like protein [Arabidopsis thaliana] gi 75147162 sp Q84MA9.1 Y1063_ARAT H RecName: Full=Inactive leucine-rich repeat receptor-like serine/threonine-protein kinase At1g60630; Flags: Precursor gi 30102660 gb AAP21248.1   At1g60630 [Arabidopsis thaliana] gi 110743167 dbj BAE99475.1   receptor kinase like protein [Arabidopsis thaliana] gi 224589453 gb ACN59260.1   leucine-rich repeat receptor-like protein kinase [Arabidopsis thaliana] gi 332195587 gb AEE33708.1   inactive leucine-rich repeat receptor-like serine/threonine-protein kinase [Arabidopsis thaliana] | 172 | 205 | 2.00E-39  | 119.2 | 55.2 | 75.0 | Transcription initiation factor TFIID subunit, putative               | gbpln | Ricinus communis     | AT1G20000.1   Symbols: TAF11b   TBP-associated factor 11B   chr1:6936898-6937666 REVERSE LENGTH=204                                                                     | 172 | 204 | 8.00E-41  | 118.6 | 57.0 | 71.5 |
| Rsa1.0_01760.1.g29603.t1 | At1g60630 [Arabidopsis thaliana] gi 110743167 dbj BAE99475.1   receptor kinase like protein [Arabidopsis thaliana] gi 224589453 gb ACN59260.1   leucine-rich repeat receptor-like protein kinase [Arabidopsis thaliana] gi 332195587 gb AEE33708.1   inactive leucine-rich repeat receptor-like serine/threonine-protein kinase [Arabidopsis thaliana]                                                                                                                                                                                                                                                                                                                                                                                                                                                                                      | 654 | 652 | 0         | 99.7  | 80.3 | 88.5 | leucine-rich repeat protein kinase-like protein                       | gbpln | Arabidopsis thaliana | AT1G60630.1   Symbols:   Leucine-rich repeat protein kinase family protein   chr1:22334754-22336785 REVERSE LENGTH=652                                                  | 654 | 652 | 0         | 99.7  | 80.3 | 88.5 |
| Rsa1.0_01760.1.g29604.t1 | refXP_002886603.1   predicted protein [Arabidopsis lyrata subsp. lyrata] gi 297332444 gb EFH62862.1   predicted protein [Arabidopsis lyrata subsp. lyrata]                                                                                                                                                                                                                                                                                                                                                                                                                                                                                                                                                                                                                                                                                  | 259 | 337 | 2.00E-48  | 130.1 | 60.2 | 68.7 | predicted protein                                                     | gbpln | Arabidopsis lyrata   | AT1G60640.5   Symbols:   unknown protein; FUNCTIONS IN: biological_process unknown; LOCATED IN: cellular_component unknown.   chr1:22337534-22339513 REVERSE LENGTH=298 | 259 | 298 | 2.00E-49  | 115.1 | 62.2 | 71.8 |
| Rsa1.0_01760.1.g29605.t1 | # # # # # # # - - - - # # # # # # #                                                                                                                                                                                                                                                                                                                                                                                                                                                                                                                                                                                                                                                                                                                                                                                                         |     |     |           |       |      |      |                                                                       |       |                      |                                                                                                                                                                         |     |     |           |       |      |      |
| Rsa1.0_01760.1.g29606.t1 | refXP_002886602.1   hypothetical protein ARALYDRAFT_893475 [Arabidopsis lyrata subsp. lyrata] gi 297332443 gb EFH62861.1   hypothetical protein ARALYDRAFT_893475 [Arabidopsis lyrata subsp. lyrata]                                                                                                                                                                                                                                                                                                                                                                                                                                                                                                                                                                                                                                        | 168 | 120 | 9.00E-46  | 71.4  | 53.0 | 57.7 | hypothetical protein ARALYDRAFT_893475                                | gbpln | Arabidopsis lyrata   | AT1G60660.1   Symbols: B5 #5, ATCB5LP, CB5LP   cytochrome B5-like protein   chr1:22342589-22342954 REVERSE LENGTH=121                                                   | 168 | 121 | 5.00E-48  | 72.0  | 54.2 | 58.9 |
| Rsa1.0_01760.1.g29607.t1 | gb EOA19642.1   hypothetical protein CARUB_v10003012mg [Capsella rubella]                                                                                                                                                                                                                                                                                                                                                                                                                                                                                                                                                                                                                                                                                                                                                                   | 366 | 390 | 2.00E-70  | 106.6 | 46.7 | 62.3 | hypothetical protein CARUB_v10003012mg                                | gbpln | Capsella rubella     | AT4G04690.1   Symbols:   F-box and associated interaction domains-containing protein   chr4:2373999-2375135 REVERSE LENGTH=378                                          | 366 | 378 | 8.00E-70  | 103.3 | 44.5 | 60.7 |
| Rsa1.0_01760.1.g29608.t1 | gb AAB71979.1   Hypothetical protein [Arabidopsis thaliana]                                                                                                                                                                                                                                                                                                                                                                                                                                                                                                                                                                                                                                                                                                                                                                                 | 248 | 249 | 1.00E-100 | 100.4 | 73.4 | 78.6 | Hypothetical protein                                                  | gbpln | Arabidopsis thaliana | AT1G60670.2   Symbols:   Protein of unknown function (DUF3755)   chr1:22344099-22347140 FORWARD LENGTH=254                                                              | 248 | 254 | 1.00E-102 | 102.4 | 73.4 | 78.6 |
| Rsa1.0_01760.1.g29609.t1 | gb AAB71982.1   Highly similar to auxin-induced protein (aldo-/keto reductase family) [Arabidopsis thaliana]                                                                                                                                                                                                                                                                                                                                                                                                                                                                                                                                                                                                                                                                                                                                | 193 | 342 | 2.00E-91  | 177.2 | 84.5 | 92.7 | Highly similar to auxin-induced protein (aldo-/keto reductase family) | gbpln | Arabidopsis thaliana | AT1G60730.3   Symbols:   NAD(P)-linked oxidoreductase superfamily protein   chr1:22358327-22360082 REVERSE LENGTH=365                                                   | 193 | 365 | 1.00E-93  | 189.1 | 84.5 | 92.7 |

|                          |                                                                                                                                                                                                                                                                                                                                                        |      |      |           |       |       |       |                                                 |       |                      |                                                                                                                                                                                                                                                                                                                                                                                                                                                                                                                                                                      |      |      |           |       |      |       |
|--------------------------|--------------------------------------------------------------------------------------------------------------------------------------------------------------------------------------------------------------------------------------------------------------------------------------------------------------------------------------------------------|------|------|-----------|-------|-------|-------|-------------------------------------------------|-------|----------------------|----------------------------------------------------------------------------------------------------------------------------------------------------------------------------------------------------------------------------------------------------------------------------------------------------------------------------------------------------------------------------------------------------------------------------------------------------------------------------------------------------------------------------------------------------------------------|------|------|-----------|-------|------|-------|
| Rsa1.0_01761.1.g29610.t1 | gb EOA12787.1  hypothetical protein CARUB_v10025731mg [Capsella rubella]                                                                                                                                                                                                                                                                               | 933  | 2732 | 0         | 292.8 | 46.5  | 57.9  | hypothetical protein CARUB_v10025731mg          | gbpln | Capsella rubella     | AT4G36150.1   Symbols:   Disease resistance protein (TIR-NBS-LRR class) family   chr4:17104776-17108711 FORWARD LENGTH=1179                                                                                                                                                                                                                                                                                                                                                                                                                                          | 933  | 1179 | 0         | 126.4 | 36.5 | 49.9  |
| Rsa1.0_01761.1.g29611.t1 | gb EOA13143.1  hypothetical protein CARUB_v10026159mg [Capsella rubella]                                                                                                                                                                                                                                                                               | 572  | 570  | 0         | 99.7  | 92.8  | 95.8  | hypothetical protein CARUB_v10026159mg          | gbpln | Capsella rubella     | AT5G45275.1   Symbols:   Major facilitator superfamily protein   chr5:18334476-18337240 REVERSE LENGTH=570                                                                                                                                                                                                                                                                                                                                                                                                                                                           | 572  | 570  | 0         | 99.7  | 92.8 | 95.5  |
| Rsa1.0_01761.1.g29612.t1 | gb EOA19916.1  hypothetical protein CARUB_v10000166mg [Capsella rubella]                                                                                                                                                                                                                                                                               | 125  | 922  | 6.00E-14  | 737.6 | 38.4  | 43.2  | hypothetical protein CARUB_v10000166mg          | gbpln | Capsella rubella     | AT5G21150.1   Symbols: AGO9   Argonaute family protein   chr5:7193472-7198113 FORWARD LENGTH=896                                                                                                                                                                                                                                                                                                                                                                                                                                                                     | 125  | 896  | 1.00E-14  | 716.8 | 35.2 | 42.4  |
| Rsa1.0_01761.1.g29613.t1 | gb ABD65636.1  hypothetical protein 23.t00055 [Brassica oleracea]                                                                                                                                                                                                                                                                                      | 185  | 414  | 8.00E-27  | 223.8 | 37.8  | 41.1  | hypothetical protein 23.t00055                  | gbpln | Brassica oleracea    | #                                                                                                                                                                                                                                                                                                                                                                                                                                                                                                                                                                    | #    | #    | #         | #     | #    |       |
| Rsa1.0_01761.1.g29614.t2 | ref XP_002863498.1  hypothetical protein ARALYDRAFT_356493 [Arabidopsis lyrata subsp. lyrata]   gi 297309333 gb EFH39757.1  hypothetical protein ARALYDRAFT_356493 [Arabidopsis lyrata subsp. lyrata]                                                                                                                                                  | 379  | 496  | 1.00E-109 | 130.9 | 57.5  | 72.3  | hypothetical protein ARALYDRAFT_356493          | gbpln | Arabidopsis lyrata   | AT5G27220.1   Symbols:   Frigida-like protein   chr5:9578757-9582752 FORWARD LENGTH=1181                                                                                                                                                                                                                                                                                                                                                                                                                                                                             | 379  | 1181 | 2.00E-33  | 311.6 | 24.0 | 35.1  |
| Rsa1.0_01761.1.g29615.t1 | ref XP_002877500.1  predicted protein [Arabidopsis lyrata subsp. lyrata]   gi 297323338 gb EFH53759.1  predicted protein [Arabidopsis lyrata subsp. lyrata]                                                                                                                                                                                            | 105  | 136  | 2.00E-18  | 129.5 | 44.8  | 60.0  | predicted protein                               | gbpln | Arabidopsis lyrata   | AT1G43730.1   Symbols:   RNA-directed DNA polymerase (reverse transcriptase)-related family protein   chr1:16508723-16509784 REVERSE LENGTH=320                                                                                                                                                                                                                                                                                                                                                                                                                      | 105  | 320  | 3.00E-13  | 304.8 | 34.3 | 48.6  |
| Rsa1.0_01762.1.g29616.t1 | ref XP_003632230.1  PREDICTED: calmodulin-related protein isoform 4 [Vitis vinifera]                                                                                                                                                                                                                                                                   | 149  | 180  | 2.00E-80  | 120.8 | 100.0 | 100.0 | PREDICTED: calmodulin-related protein isoform 4 | gbpln | Vitis vinifera       | AT2G27030.3   Symbols: CAM5   calmodulin 5   chr2:11532069-11534176 FORWARD LENGTH=181                                                                                                                                                                                                                                                                                                                                                                                                                                                                               | 149  | 181  | 2.00E-82  | 121.5 | 99.3 | 100.0 |
| Rsa1.0_01762.1.g29617.t2 | gb AGA95981.1  argonaute 4 [Brassica rapa subsp. pekinensis]                                                                                                                                                                                                                                                                                           | 1016 | 922  | 0         | 90.7  | 87.5  | 89.7  | argonaute 4                                     | gbpln | Brassica rapa        | AT2G27040.2   Symbols: AGO4   Argonaute family protein   chr2:11536795-11541503 REVERSE LENGTH=924                                                                                                                                                                                                                                                                                                                                                                                                                                                                   | 1016 | 924  | 0         | 90.9  | 80.1 | 85.8  |
| Rsa1.0_01762.1.g29618.t1 | ref NP_199404.3  GDSL esterase/lipase [Arabidopsis thaliana]   gi 75127073 sp Q6NMR9.1 GDL84 ARAT H RecName: Full=GDSL esterase/lipase At5g45920   gi 38454102 gb AAR20745.1  At5g45920 [Arabidopsis thaliana]   gi 44022121 gb AAS46640.1  At5g45920 [Arabidopsis thaliana]   gi 332007932 gb AED95315.1  GDSL esterase/lipase [Arabidopsis thaliana] | 240  | 241  | 1.00E-120 | 100.4 | 86.7  | 91.3  | GDSL esterase/lipase                            | gbpln | Arabidopsis thaliana | AT5G45920.1   Symbols:   SGNH hydrolase-type esterase superfamily protein   chr5:18622822-18624677 FORWARD LENGTH=241                                                                                                                                                                                                                                                                                                                                                                                                                                                | 240  | 241  | 1.00E-122 | 100.4 | 86.7 | 91.3  |
| Rsa1.0_01762.1.g29619.t4 | ref XP_002863442.1  GDSL-motif lipase/hydrolase family protein [Arabidopsis lyrata subsp. lyrata]   gi 297309277 gb EFH39701.1  GDSL-motif lipase/hydrolase family protein [Arabidopsis lyrata subsp. lyrata]                                                                                                                                          | 638  | 374  | 1.00E-136 | 58.6  | 36.1  | 40.6  | GDSL-motif lipase/hydrolase family protein      | gbpln | Arabidopsis lyrata   | AT5G45910.1   Symbols:   GDSL-like Lipase/Acylhydrolase superfamily protein   chr5:18620420-18622264 REVERSE LENGTH=372                                                                                                                                                                                                                                                                                                                                                                                                                                              | 638  | 372  | 1.00E-134 | 58.3  | 34.8 | 40.1  |
| Rsa1.0_01762.1.g29620.t4 | dbj BAJ34535.1  unnamed protein product [Thellungiella halophila]                                                                                                                                                                                                                                                                                      | 509  | 552  | 0         | 108.4 | 71.1  | 83.1  | unnamed protein product                         | ----  | ----                 | AT3G45680.1   Symbols:   Major facilitator superfamily protein   chr3:16770995-16772908 FORWARD LENGTH=558                                                                                                                                                                                                                                                                                                                                                                                                                                                           | 509  | 558  | 0         | 109.6 | 72.3 | 83.7  |
| Rsa1.0_01762.1.g29621.t1 | ref XP_002879043.1  hypothetical protein ARALYDRAFT_481588 [Arabidopsis lyrata subsp. lyrata]   gi 297324882 gb EFH55302.1  hypothetical protein ARALYDRAFT_481588 [Arabidopsis lyrata subsp. lyrata]                                                                                                                                                  | 261  | 260  | 1.00E-121 | 99.6  | 79.7  | 89.7  | hypothetical protein ARALYDRAFT_481588          | gbpln | Arabidopsis lyrata   | AT2G27080.2   Symbols:   Late embryogenesis abundant (LEA) hydroxyproline-rich glycoprotein family   chr2:11566383-11567165 FORWARD LENGTH=260                                                                                                                                                                                                                                                                                                                                                                                                                       | 261  | 260  | 1.00E-121 | 99.6  | 78.2 | 89.3  |
| Rsa1.0_01763.1.g29622.t1 | ref XP_002889482.1  hypothetical protein ARALYDRAFT_333714 [Arabidopsis lyrata subsp. lyrata]   gi 297335324 gb EFH65741.1  hypothetical protein ARALYDRAFT_333714 [Arabidopsis lyrata subsp. lyrata]                                                                                                                                                  | 658  | 671  | 0         | 102.0 | 89.1  | 93.5  | hypothetical protein ARALYDRAFT_333714          | gbpln | Arabidopsis lyrata   | AT1G03910.1   Symbols:   EXPRESSED IN: 25 plant structures; EXPRESSED DURING: 13 growth stages; CONTAINS InterPro DOMAIN/s: Cactin protein, cactus-binding domain, C-terminal (InterPro:IPR019134), Cactin, central region (InterPro:IPR018816); BEST Arabidopsis thaliana protein match is: unknown protein (TAIR-AT2G36815.2); Has 11711 Blast hits to 7382 proteins in 452 species: Archaea - 31; Bacteria - 352; Metazoa - 6006; Fungi - 1138; Plants - 599; Viruses - 33; Other Eukaryotes - 3552 (source: NCBI BLINK)   chr1:996432-1000231 FORWARD LENGTH=672 | 658  | 672  | 0         | 102.1 | 83.0 | 86.3  |

|                           |                                                                                                                                                                                                                                                                                                                                                                                                                                                                                                                                                                                                  |      |      |           |       |      |      |                                                       |       |                      |                                                                                                                                                                                                                                                                                                                                                                                                                                                                                                                                                                  |      |     |           |       |      |      |
|---------------------------|--------------------------------------------------------------------------------------------------------------------------------------------------------------------------------------------------------------------------------------------------------------------------------------------------------------------------------------------------------------------------------------------------------------------------------------------------------------------------------------------------------------------------------------------------------------------------------------------------|------|------|-----------|-------|------|------|-------------------------------------------------------|-------|----------------------|------------------------------------------------------------------------------------------------------------------------------------------------------------------------------------------------------------------------------------------------------------------------------------------------------------------------------------------------------------------------------------------------------------------------------------------------------------------------------------------------------------------------------------------------------------------|------|-----|-----------|-------|------|------|
| Rsa1.0_01763.1.g29623.t2  | ref[NP_563695.2] dual specificity kinase 1 [Arabidopsis thaliana] gi 4204297 gb AAD10678.1  ADK1 [Arabidopsis thaliana] gi 17529246 gb AAL38850.1  putative protein kinase ADK1 [Arabidopsis thaliana] gi 18700077 gb AAL7765.1  At1g03930/F21M11.14 [Arabidopsis thaliana] gi 20465967 gb AAM20169.1  putative protein kinase ADK1 [Arabidopsis thaliana] gi 20855979 gb AAM26641.1  At1g03930/F21M11.14 [Arabidopsis thaliana] gi 62996988 gb AAAY24538.1  casein kinase 1-like protein 9b [Arabidopsis thaliana] gi 332189514 gb AEE27635.1  dual specificity kinase 1 [Arabidopsis thaliana] | 465  | 471  | 0         | 101.3 | 84.9 | 90.5 | dual specificity kinase 1                             | gbpln | Arabidopsis thaliana | AT1G03930.1   Symbols: ADK1, CKL9ALPHA, CKLBETA   dual specificity kinase 1   chr1:1005439-1008118 FORWARD LENGTH=471                                                                                                                                                                                                                                                                                                                                                                                                                                            | 465  | 471 | 0         | 101.3 | 84.9 | 90.5 |
| Rsa1.0_01763.1.g29624.t1  | gb ABY89660.1  phytochelatin synthase 2 [Nocceae caerulescens]                                                                                                                                                                                                                                                                                                                                                                                                                                                                                                                                   | 461  | 455  | 0         | 98.7  | 86.1 | 91.1 | phytochelatin synthase 2                              | gbpln | Nocceae caerulescens | AT1G03980.1   Symbols: ATPCS2, PCS2   phytochelatin synthase 2   chr1:1019311-1021871 REVERSE LENGTH=452                                                                                                                                                                                                                                                                                                                                                                                                                                                         | 461  | 452 | 0         | 98.0  | 86.3 | 90.7 |
| Rsa1.0_01763.1.g29625.t11 | ref[XP_002892193.1] phosphatidylcholine-sterol O-acetyltransferase [Arabidopsis lyrata subsp. lyrata] gi 297338035 gb EFH68452.1  phosphatidylcholine-sterol O-acetyltransferase [Arabidopsis lyrata subsp. lyrata]                                                                                                                                                                                                                                                                                                                                                                              | 727  | 633  | 0         | 87.1  | 82.3 | 84.2 | phosphatidylcholine-sterol O-acetyltransferase        | gbpln | Arabidopsis lyrata   | AT1G04010.1   Symbols: PSAT1, ATPSAT1   phospholipid sterol acyl transferase 1   chr1:1031703-1036128 REVERSE LENGTH=633                                                                                                                                                                                                                                                                                                                                                                                                                                         | 727  | 633 | 0         | 87.1  | 82.3 | 84.3 |
| Rsa1.0_01763.1.g29626.t3  | gb ACF35259.1  BARD1 [Arabidopsis thaliana]                                                                                                                                                                                                                                                                                                                                                                                                                                                                                                                                                      | 443  | 674  | 1.00E-154 | 152.1 | 63.7 | 72.0 | BARD1                                                 | gbpln | Arabidopsis thaliana | AT1G04020.1   Symbols: ATBARD1, BARD1, ROW1   breast cancer associated RING 1   chr1:1036610-1040045 FORWARD LENGTH=714                                                                                                                                                                                                                                                                                                                                                                                                                                          | 443  | 714 | 1.00E-156 | 161.2 | 63.7 | 72.0 |
| Rsa1.0_01763.1.g29627.t1  | gb EOA32454.1  hypothetical protein CARUB_v10015730mg [Capsella rubella]                                                                                                                                                                                                                                                                                                                                                                                                                                                                                                                         | 514  | 543  | 3.00E-90  | 105.6 | 39.1 | 56.6 | hypothetical protein CARUB_v10015730mg                | gbpln | Capsella rubella     | AT1G52950.1   Symbols:   Nucleic acid-binding, OB-fold-like protein   chr1:19725483-19728007 FORWARD LENGTH=566                                                                                                                                                                                                                                                                                                                                                                                                                                                  | 514  | 566 | 1.00E-89  | 110.1 | 36.6 | 60.5 |
| Rsa1.0_01763.1.g29628.t1  | ref[XP_002889489.1] hypothetical protein ARALYDRAFT_333726 [Arabidopsis lyrata subsp. lyrata] gi 297335331 gb EFH65748.1  hypothetical protein ARALYDRAFT_333726 [Arabidopsis lyrata subsp. lyrata]                                                                                                                                                                                                                                                                                                                                                                                              | 405  | 434  | 1.00E-124 | 107.2 | 70.9 | 80.2 | hypothetical protein ARALYDRAFT_333726                | gbpln | Arabidopsis lyrata   | AT1G04030.1   Symbols:   unknown protein; BEST Arabidopsis thaliana protein match is: unknown protein (TAIR:AT5G44040.1); Has 1835 Blast hits to 1511 proteins in 238 species: Archae - 7; Bacteria - 164; Metazoa - 377; Fungi - 135; Plants - 187; Viruses - 22; Other Eukaryotes - 943 (source: NCBI BLINK).   chr1:1040597-1042313 FORWARD LENGTH=434                                                                                                                                                                                                        | 405  | 434 | 1.00E-124 | 107.2 | 69.4 | 79.3 |
| Rsa1.0_01764.1.g29629.t1  | gb ABA95861.1  retrotransposon protein, putative, Ty1-copia subclass [Oryza sativa Japonica Group]                                                                                                                                                                                                                                                                                                                                                                                                                                                                                               | 107  | 304  | 4.00E-11  | 284.1 | 38.3 | 43.9 | retrotransposon protein, putative, Ty1-copia subclass | gbpln | Oryza sativa         | #                                                                                                                                                                                                                                                                                                                                                                                                                                                                                                                                                                | #    | #   | #         | #     | #    |      |
| Rsa1.0_01764.1.g29630.t1  | gb EMJ11389.1  hypothetical protein PRUPE_ppa017790mg [Prunus persica]                                                                                                                                                                                                                                                                                                                                                                                                                                                                                                                           | 161  | 1485 | 3.00E-59  | 922.4 | 65.8 | 82.6 | hypothetical protein PRUPE_ppa017790mg                | gbpln | Prunus persica       | #                                                                                                                                                                                                                                                                                                                                                                                                                                                                                                                                                                | #    | #   | #         | #     | #    |      |
| Rsa1.0_01764.1.g29631.t1  | gb AAG51783.1 AC079679.3 reverse transcriptase, putative: 16838-20266 [Arabidopsis thaliana]                                                                                                                                                                                                                                                                                                                                                                                                                                                                                                     | 1109 | 1142 | 0         | 103.0 | 34.1 | 42.9 | reverse transcriptase, putative: 16838-20266          | gbpln | Arabidopsis thaliana | AT1G43760.1   Symbols:   DNase I-like superfamily protein   chr1:1652880-16531065 REVERSE LENGTH=626                                                                                                                                                                                                                                                                                                                                                                                                                                                             | 1109 | 626 | 7.00E-30  | 56.4  | 9.9  | 15.8 |
| Rsa1.0_01764.1.g29632.t1  | #                                                                                                                                                                                                                                                                                                                                                                                                                                                                                                                                                                                                | #    | #    | #         | #     | #    | -    | ----                                                  | ----  | ----                 | #                                                                                                                                                                                                                                                                                                                                                                                                                                                                                                                                                                | #    | #   | #         | #     | #    |      |
| Rsa1.0_01764.1.g29633.t1  | gb AAC69114.1  putative gag-protease polyprotein [Arabidopsis thaliana]                                                                                                                                                                                                                                                                                                                                                                                                                                                                                                                          | 750  | 627  | 5.00E-74  | 83.6  | 24.5 | 37.7 | putative gag-protease polyprotein                     | gbpln | Arabidopsis thaliana | #                                                                                                                                                                                                                                                                                                                                                                                                                                                                                                                                                                | #    | #   | #         | #     | #    |      |
| Rsa1.0_01764.1.g29634.t1  | #                                                                                                                                                                                                                                                                                                                                                                                                                                                                                                                                                                                                | #    | #    | #         | #     | #    | -    | ----                                                  | ----  | ----                 | #                                                                                                                                                                                                                                                                                                                                                                                                                                                                                                                                                                | #    | #   | #         | #     | #    |      |
| Rsa1.0_01765.1.g29635.t1  | #                                                                                                                                                                                                                                                                                                                                                                                                                                                                                                                                                                                                | #    | #    | #         | #     | #    | -    | ----                                                  | ----  | ----                 | #                                                                                                                                                                                                                                                                                                                                                                                                                                                                                                                                                                | #    | #   | #         | #     | #    |      |
| Rsa1.0_01765.1.g29636.t1  | #                                                                                                                                                                                                                                                                                                                                                                                                                                                                                                                                                                                                | #    | #    | #         | #     | #    | -    | ----                                                  | ----  | ----                 | #                                                                                                                                                                                                                                                                                                                                                                                                                                                                                                                                                                | #    | #   | #         | #     | #    |      |
| Rsa1.0_01765.1.g29637.t1  | #                                                                                                                                                                                                                                                                                                                                                                                                                                                                                                                                                                                                | #    | #    | #         | #     | #    | -    | ----                                                  | ----  | ----                 | #                                                                                                                                                                                                                                                                                                                                                                                                                                                                                                                                                                | #    | #   | #         | #     | #    |      |
| Rsa1.0_01765.1.g29638.t1  | ref[XP_002893529.1] hypothetical protein ARALYDRAFT_473059 [Arabidopsis lyrata subsp. lyrata] gi 297339371 gb EFH69788.1  hypothetical protein ARALYDRAFT_473059 [Arabidopsis lyrata subsp. lyrata]                                                                                                                                                                                                                                                                                                                                                                                              | 283  | 331  | 1.00E-103 | 117.0 | 79.9 | 86.6 | hypothetical protein ARALYDRAFT_473059                | gbpln | Arabidopsis lyrata   | AT1G28400.1   Symbols:   unknown protein; FUNCTIONS IN: molecular_function unknown; INVOLVED IN: biological_process unknown; LOCATED IN: endomembrane system; EXPRESSED DURING: 22 plant structures; EXPRESSED DURING: 13 growth stages; BEST Arabidopsis thaliana protein match is: unknown protein (TAIR:AT2G33850.1); Has 45374 Blast hits to 18870 proteins in 668 species: Archae - 72; Bacteria - 1460; Metazoa - 1191; Fungi - 1038; Plants - 174; Viruses - 64; Other Eukaryotes - 41375 (source: NCBI BLINK).   chr1:9972732-9973739 REVERSE LENGTH=335 | 283  | 335 | 2.00E-99  | 118.4 | 78.8 | 85.9 |
| Rsa1.0_01765.1.g29639.t1  | #                                                                                                                                                                                                                                                                                                                                                                                                                                                                                                                                                                                                | #    | #    | #         | #     | #    | -    | ----                                                  | ----  | ----                 | #                                                                                                                                                                                                                                                                                                                                                                                                                                                                                                                                                                | #    | #   | #         | #     | #    |      |
| Rsa1.0_01765.1.g29640.t1  | #                                                                                                                                                                                                                                                                                                                                                                                                                                                                                                                                                                                                | #    | #    | #         | #     | #    | -    | ----                                                  | ----  | ----                 | #                                                                                                                                                                                                                                                                                                                                                                                                                                                                                                                                                                | #    | #   | #         | #     | #    |      |

|                          |                                                                                                                                                                                                                                                                                               |      |      |           |       |      |      |                                               |       |                      |                                                                                                                                                                                                                                                                                   |      |      |          |       |      |      |
|--------------------------|-----------------------------------------------------------------------------------------------------------------------------------------------------------------------------------------------------------------------------------------------------------------------------------------------|------|------|-----------|-------|------|------|-----------------------------------------------|-------|----------------------|-----------------------------------------------------------------------------------------------------------------------------------------------------------------------------------------------------------------------------------------------------------------------------------|------|------|----------|-------|------|------|
| Rsa1.0_01766.1.g29641.t1 | gb ABD65606.1  hypothetical protein 23.t00002 [Brassica oleracea]                                                                                                                                                                                                                             | 525  | 433  | 1.00E-104 | 82.5  | 42.1 | 52.8 | hypothetical protein 23.t00002                | gbpln | Brassica oleracea    | #                                                                                                                                                                                                                                                                                 | #    | #    | #        | #     | #    |      |
| Rsa1.0_01766.1.g29642.t1 | gb EMJ11389.1  hypothetical protein PRUPE_ppa017790mg [Prunus persica]                                                                                                                                                                                                                        | 1881 | 1485 | 0         | 78.9  | 35.5 | 48.2 | hypothetical protein PRUPE_ppa017790mg        | gbpln | Prunus persica       | AT4G38940.1   Symbols: Galactose oxidase/keich repeat superfamily protein   chr4:18152848-18153960 FORWARD LENGTH=370                                                                                                                                                             | 1881 | 370  | 6.00E-32 | 19.7  | 3.6  | 5.2  |
| Rsa1.0_01766.1.g29643.t1 | ref XP_002883029.1  hypothetical protein ARALYDRAFT_479149 [Arabidopsis lyrata subsp. lyrata]   gi 297328869 gb EFH59288.1  hypothetical protein ARALYDRAFT_479149 [Arabidopsis lyrata subsp. lyrata]                                                                                         | 1132 | 1131 | 0         | 99.9  | 93.4 | 96.6 | hypothetical protein ARALYDRAFT_479149        | gbpln | Arabidopsis lyrata   | AT3G16830.1   Symbols: TPR2   TOPLESS-related 2   chr3:5731709-5737531 FORWARD LENGTH=1131                                                                                                                                                                                        | 1132 | 1131 | 0        | 99.9  | 92.9 | 96.4 |
| Rsa1.0_01766.1.g29644.t1 | ref XP_002885172.1  DEAD-box ATP-dependent RNA helicase 13 [Arabidopsis lyrata subsp. lyrata]   gi 297331012 gb EFH61431.1  DEAD-box ATP-dependent RNA helicase 13 [Arabidopsis lyrata subsp. lyrata]                                                                                         | 815  | 831  | 0         | 102.0 | 77.5 | 87.2 | DEAD-box ATP-dependent RNA helicase 13        | gbpln | Arabidopsis lyrata   | AT3G16840.1   Symbols: P-loop containing nucleoside triphosphate hydrolases superfamily protein   chr3:5738020-5743042 REVERSE LENGTH=826                                                                                                                                         | 815  | 826  | 0        | 101.3 | 76.3 | 86.7 |
| Rsa1.0_01767.1.g29645.t1 | #                                                                                                                                                                                                                                                                                             | #    | #    | #         | #     | #    | -    | -                                             | ----  | ----                 | #                                                                                                                                                                                                                                                                                 | #    | #    | #        | #     | #    |      |
| Rsa1.0_01767.1.g29646.t3 | gb AAF98181.1 AC000107.4 F17F8.5 [Arabidopsis thaliana]                                                                                                                                                                                                                                       | 429  | 872  | 1.00E-43  | 203.3 | 27.3 | 37.8 | F17F8.5                                       | gbpln | Arabidopsis thaliana | AT3G24255.1   Symbols: RNA-directed DNA polymerase (reverse transcriptase)-related family protein   chr3:8789471-8793208 FORWARD LENGTH=746                                                                                                                                       | 429  | 746  | 5.00E-34 | 173.9 | 23.3 | 33.6 |
| Rsa1.0_01767.1.g29647.t1 | ref XP_002870678.1  glucose-6-phosphate dehydrogenase 6 [Arabidopsis lyrata subsp. lyrata]   gi 297316514 gb EFH46937.1  glucose-6-phosphate dehydrogenase 6 [Arabidopsis lyrata subsp. lyrata]                                                                                               | 515  | 515  | 0         | 100.0 | 87.2 | 90.5 | glucose-6-phosphate dehydrogenase 6           | gbpln | Arabidopsis lyrata   | AT5G40760.1   Symbols: G6PD6   glucose-6-phosphate dehydrogenase 6   chr5:16311284-16314556 FORWARD LENGTH=515                                                                                                                                                                    | 515  | 515  | 0        | 100.0 | 87.0 | 90.5 |
| Rsa1.0_01767.1.g29648.t1 | #                                                                                                                                                                                                                                                                                             | #    | #    | #         | #     | #    | -    | -                                             | ----  | ----                 | #                                                                                                                                                                                                                                                                                 | #    | #    | #        | #     | #    |      |
| Rsa1.0_01767.1.g29649.t1 | ref NP_568585.1  uncharacterized protein [Arabidopsis thaliana]   gi 14532694 gb AAK64148.1  unknown protein [Arabidopsis thaliana]   gi 19310773 gb AL85117.1  unknown protein [Arabidopsis thaliana]   gi 332007206 gb AED94589.1  uncharacterized protein AT5G40740 [Arabidopsis thaliana] | 734  | 741  | 0         | 101.0 | 93.3 | 95.9 | uncharacterized protein                       | gbpln | Arabidopsis thaliana | AT5G40740.1   Symbols: unknown protein; Has 30201 Blast hits to 17322 proteins in 780 species: Archae - 12; Bacteria - 1396; Metazoa - 17338; Fungi - 3422; Plants - 5037; Viruses - 0; Other Eukaryotes - 2996 (source: NCBI BLINK).   chr5:16302229-16306371 REVERSE LENGTH=741 | 734  | 741  | 0        | 101.0 | 93.3 | 95.9 |
| Rsa1.0_01767.1.g29650.t1 | ref XP_002870580.1  hypothetical protein ARALYDRAFT_915957 [Arabidopsis lyrata subsp. lyrata]   gi 297316416 gb EFH46839.1  hypothetical protein ARALYDRAFT_915957 [Arabidopsis lyrata subsp. lyrata]                                                                                         | 213  | 286  | 2.00E-58  | 134.3 | 56.3 | 77.0 | hypothetical protein ARALYDRAFT_915957        | gbpln | Arabidopsis lyrata   | AT5G37890.1   Symbols: Protein with RING/U-box and TRAF-like domains   chr5:15090512-15091822 REVERSE LENGTH=286                                                                                                                                                                  | 213  | 286  | 6.00E-60 | 134.3 | 56.8 | 77.0 |
| Rsa1.0_01767.1.g29651.t1 | ref NP_198888.1  uncharacterized protein [Arabidopsis thaliana]   gi 9758100 db BAB08544.1  unnamed protein product [Arabidopsis thaliana]   gi 332007204 gb AED94587.1  uncharacterized protein AT5G40720 [Arabidopsis thaliana]                                                             | 566  | 583  | 0         | 103.0 | 78.8 | 84.6 | uncharacterized protein                       | gbpln | Arabidopsis thaliana | AT5G40720.1   Symbols: Domain of unknown function (DUF23)   chr5:16298063-16298993 FORWARD LENGTH=583                                                                                                                                                                             | 566  | 583  | 0        | 103.0 | 78.8 | 84.6 |
| Rsa1.0_01768.1.g29652.t1 | ref XP_002881886.1  protease-associated domain-containing protein [Arabidopsis lyrata subsp. lyrata]   gi 297327725 gb EFH58145.1  protease-associated domain-containing protein [Arabidopsis lyrata subsp. lyrata]                                                                           | 170  | 541  | 1.00E-87  | 318.2 | 90.0 | 97.1 | protease-associated domain-containing protein | gbpln | Arabidopsis lyrata   | AT2G43070.1   Symbols: SPPL3, ATSPPL3   SIGNAL PEPTIDE PEPTIDASE-LIKE 3   chr2:17911233-17914776 REVERSE LENGTH=540                                                                                                                                                               | 170  | 540  | 7.00E-86 | 317.6 | 92.9 | 98.2 |
| Rsa1.0_01768.1.g29653.t1 | ref XP_002862374.1  hypothetical protein ARALYDRAFT_920829 [Arabidopsis lyrata subsp. lyrata]   gi 297307823 gb EFH38632.1  hypothetical protein ARALYDRAFT_920829 [Arabidopsis lyrata subsp. lyrata]                                                                                         | 223  | 201  | 4.00E-24  | 90.1  | 26.5 | 38.1 | hypothetical protein ARALYDRAFT_920829        | gbpln | Arabidopsis lyrata   | #                                                                                                                                                                                                                                                                                 | #    | #    | #        | #     | #    |      |
| Rsa1.0_01768.1.g29654.t1 | gb ABV21212.1  Ty1_Copia-element protein [Arabidopsis thaliana]                                                                                                                                                                                                                               | 162  | 438  | 7.00E-27  | 270.4 | 41.4 | 54.9 | Ty1_Copia-element protein                     | gbpln | Arabidopsis thaliana | AT3G25720.1   Symbols: RNA-directed DNA polymerase (reverse transcriptase)-related family protein   chr3:9380234-9381405 FORWARD LENGTH=282                                                                                                                                       | 162  | 282  | 4.00E-19 | 174.1 | 33.3 | 43.2 |
| Rsa1.0_01768.1.g29655.t1 | #                                                                                                                                                                                                                                                                                             | #    | #    | #         | #     | #    | -    | -                                             | ----  | ----                 | #                                                                                                                                                                                                                                                                                 | #    | #    | #        | #     | #    |      |

|                          |                                                                                                                                                                                                                                                                                                                                                                                                                              |      |      |           |       |      |      |                                        |       |                      |                                                                                                                                                                                                                                                                                                                                                                                                                                                                                                                                                                                  |      |      |           |       |      |      |
|--------------------------|------------------------------------------------------------------------------------------------------------------------------------------------------------------------------------------------------------------------------------------------------------------------------------------------------------------------------------------------------------------------------------------------------------------------------|------|------|-----------|-------|------|------|----------------------------------------|-------|----------------------|----------------------------------------------------------------------------------------------------------------------------------------------------------------------------------------------------------------------------------------------------------------------------------------------------------------------------------------------------------------------------------------------------------------------------------------------------------------------------------------------------------------------------------------------------------------------------------|------|------|-----------|-------|------|------|
| Rsa1.0_01768.1.g29656.t2 | refNP_565985.1 serine/threonine-protein phosphatase 5 [Arabidopsis thaliana]<br>gi 16930441 gb AAL31906.1 AF419574.1<br>At2g42810/F7D19.19 [Arabidopsis thaliana]<br>gi 20197966 gb AAD21727.2 putative phosphoprotein phosphatase [Arabidopsis thaliana]<br>gi 33589766 gb AAQ22649.1 At2g42810/F7D19.19 [Arabidopsis thaliana]<br>gi 330255077 gb AEC10171.1 serine/threonine-protein phosphatase 5 [Arabidopsis thaliana] | 509  | 484  | 0         | 95.1  | 89.0 | 92.5 | serine/threonine-protein phosphatase 5 | gbpln | Arabidopsis thaliana | AT2G42810.1   Symbols: PAPP5, PP5   protein phosphatase 5.2   chr2:17812336-17815896 REVERSE LENGTH=484                                                                                                                                                                                                                                                                                                                                                                                                                                                                          | 509  | 484  | 0         | 95.1  | 89.0 | 92.5 |
| Rsa1.0_01768.1.g29657.t1 | refXP_002881874.1 leucine-rich repeat family protein [Arabidopsis lyrata subsp. lyrata]<br>gi 297327713 gb EFH58133.1 leucine-rich repeat family protein [Arabidopsis lyrata subsp. lyrata]                                                                                                                                                                                                                                  | 458  | 468  | 0         | 102.2 | 86.0 | 90.6 | leucine-rich repeat family protein     | gbpln | Arabidopsis lyrata   | AT2G42800.1   Symbols: AtRLP29, RLP29   receptor like protein 29   chr2:17808157-17809545 REVERSE LENGTH=462                                                                                                                                                                                                                                                                                                                                                                                                                                                                     | 458  | 462  | 0         | 100.9 | 85.4 | 90.8 |
| Rsa1.0_01768.1.g29658.t1 | gb EOA28597.1 hypothetical protein CARUB_v10024817mg [Capsella rubella]                                                                                                                                                                                                                                                                                                                                                      | 514  | 511  | 0         | 99.4  | 93.8 | 96.9 | hypothetical protein CARUB_v10024817mg | gbpln | Capsella rubella     | AT2G42790.1   Symbols: CSY3   citrate synthase 3   chr2:17803132-17805991 REVERSE LENGTH=509                                                                                                                                                                                                                                                                                                                                                                                                                                                                                     | 514  | 509  | 0         | 99.0  | 92.2 | 94.9 |
| Rsa1.0_01768.1.g29659.t1 | gb EOA27426.1 hypothetical protein CARUB_v10023558mg [Capsella rubella]                                                                                                                                                                                                                                                                                                                                                      | 294  | 343  | 1.00E-159 | 116.7 | 95.2 | 98.0 | hypothetical protein CARUB_v10023558mg | gbpln | Capsella rubella     | AT2G42750.1   Symbols:   DNAJ heat shock N-terminal domain-containing protein   chr2:17793404-17795419 FORWARD LENGTH=344                                                                                                                                                                                                                                                                                                                                                                                                                                                        | 294  | 344  | 1.00E-160 | 117.0 | 94.2 | 97.3 |
| Rsa1.0_01768.1.g29660.t1 | refXP_002880001.1 ribosomal protein L1 family protein [Arabidopsis lyrata subsp. lyrata]<br>gi 297325840 gb EFH58260.1 ribosomal protein L1 family protein [Arabidopsis lyrata subsp. lyrata]                                                                                                                                                                                                                                | 387  | 401  | 0         | 103.6 | 87.6 | 91.7 | ribosomal protein L1 family protein    | gbpln | Arabidopsis lyrata   | AT2G42710.1   Symbols:   Ribosomal protein L1p/L10e family   chr2:17782352-17784830 FORWARD LENGTH=415                                                                                                                                                                                                                                                                                                                                                                                                                                                                           | 387  | 415  | 0         | 107.2 | 88.9 | 93.0 |
| Rsa1.0_01768.1.g29661.t1 | refNP_181798.2 uncharacterized protein [Arabidopsis thaliana]<br>gi 330255063 gb AEC10157.1 uncharacterized protein AT2G42700 [Arabidopsis thaliana]                                                                                                                                                                                                                                                                         | 851  | 838  | 0         | 98.5  | 88.5 | 92.5 | uncharacterized protein                | gbpln | Arabidopsis thaliana | AT2G42700.1   Symbols:   FUNCTIONS IN: molecular_function unknown; INVOLVED IN: vesicle-mediated transport, vesicle docking involved in exocytosis; LOCATED IN: cellular_component unknown; EXPRESSED IN: 22 plant structures; EXPRESSED DURING: 14 growth stages; CONTAINS InterPro DOMAIN/s: Sec1-like protein (InterPro:IPR001619). Has 30201 Blast hits to 17322 proteins in 780 species: Archae - 12; Bacteria - 1396; Metazoa - 17338; Fungi - 3422; Plants - 5037; Viruses - 0; Other Eukaryotes - 2996 (source: NCBI BLINK).   chr2:17778464-17782034 FORWARD LENGTH=838 | 851  | 838  | 0         | 98.5  | 88.5 | 92.5 |
| Rsa1.0_01768.1.g29662.t1 | # # # # # # # # # - ---- ---- # # # # # # #                                                                                                                                                                                                                                                                                                                                                                                  |      |      |           |       |      |      |                                        |       |                      |                                                                                                                                                                                                                                                                                                                                                                                                                                                                                                                                                                                  |      |      |           |       |      |      |
| Rsa1.0_01769.1.g29663.t1 | dbj BAB11200.1 copia-type polyprotein [Arabidopsis thaliana]<br>gi 13872710 emb CAC37622.1 polyprotein [Arabidopsis thaliana]                                                                                                                                                                                                                                                                                                | 1558 | 1334 | 0         | 85.6  | 57.3 | 68.7 | copia-type polyprotein                 | gbpln | Arabidopsis thaliana | AT4G23160.1   Symbols: CRK8   cysteine-rich RLK (RECEPTOR-like protein kinase) 8   chr4:12129485-12134086 FORWARD LENGTH=1262                                                                                                                                                                                                                                                                                                                                                                                                                                                    | 1558 | 1262 | 3.00E-98  | 81.0  | 11.6 | 19.1 |
| Rsa1.0_01769.1.g29664.t1 | refXP_002893265.1 predicted protein [Arabidopsis lyrata subsp. lyrata]<br>gi 297339107 gb EFH69524.1 predicted protein [Arabidopsis lyrata subsp. lyrata]                                                                                                                                                                                                                                                                    | 416  | 273  | 1.00E-70  | 65.6  | 36.1 | 45.0 | predicted protein                      | gbpln | Arabidopsis lyrata   | AT4G01560.1   Symbols: MEE49   Ribosomal RNA processing Brix domain protein   chr4:677266-679164 REVERSE LENGTH=343                                                                                                                                                                                                                                                                                                                                                                                                                                                              | 416  | 343  | 4.00E-23  | 82.5  | 19.2 | 30.3 |
| Rsa1.0_01769.1.g29665.t1 | gb EOA29651.1 hypothetical protein CARUB_v10015153mg [Capsella rubella]                                                                                                                                                                                                                                                                                                                                                      | 901  | 478  | 3.00E-70  | 53.1  | 15.3 | 16.8 | hypothetical protein CARUB_v10015153mg | gbpln | Capsella rubella     | AT3G11000.1   Symbols:   DCD (Development and Cell Death) domain protein   chr3:3448442-3450283 FORWARD LENGTH=488                                                                                                                                                                                                                                                                                                                                                                                                                                                               | 901  | 488  | 7.00E-71  | 54.2  | 14.9 | 16.3 |
| Rsa1.0_01769.1.g29666.t2 | refNP_565389.1 putative polyprenol reductase 2 [Arabidopsis thaliana]<br>gi 75206043 sp Q9SI62.2 POED2_ARAT H RecName: Full=Polyprenol reductase 2 gi 20198183 gb AAD26491.2 expressed protein [Arabidopsis thaliana]<br>gi 330251413 gb AEC06507.1 putative polyprenol reductase 2 [Arabidopsis thaliana]                                                                                                                   | 193  | 343  | 6.00E-69  | 177.7 | 73.6 | 82.4 | putative polyprenol reductase 2        | gbpln | Arabidopsis thaliana | AT2G16530.1   Symbols:   3-oxo-5-alpha-steroid 4-dehydrogenase family protein   chr2:7163276-7165064 REVERSE LENGTH=343                                                                                                                                                                                                                                                                                                                                                                                                                                                          | 193  | 343  | 2.00E-71  | 177.7 | 73.6 | 82.4 |
| Rsa1.0_01769.1.g29667.t1 | refXP_002882691.1 pectinesterase family protein [Arabidopsis lyrata subsp. lyrata]<br>gi 297328531 gb EFH58950.1 pectinesterase family protein [Arabidopsis lyrata subsp. lyrata]                                                                                                                                                                                                                                            | 512  | 561  | 0         | 109.6 | 85.2 | 93.0 | pectinesterase family protein          | gbpln | Arabidopsis lyrata   | AT3G10710.1   Symbols: RHS12   root hair specific 12   chr3:3352289-3354237 FORWARD LENGTH=561                                                                                                                                                                                                                                                                                                                                                                                                                                                                                   | 512  | 561  | 0         | 109.6 | 85.4 | 92.6 |

|                          |                                                                                                                                                                                                                                                                                                                                                                                                                                                                                                                                                                                                                                   |      |      |           |       |      |      |                                             |       |                      |                                                                                                                                 |      |      |           |       |      |      |
|--------------------------|-----------------------------------------------------------------------------------------------------------------------------------------------------------------------------------------------------------------------------------------------------------------------------------------------------------------------------------------------------------------------------------------------------------------------------------------------------------------------------------------------------------------------------------------------------------------------------------------------------------------------------------|------|------|-----------|-------|------|------|---------------------------------------------|-------|----------------------|---------------------------------------------------------------------------------------------------------------------------------|------|------|-----------|-------|------|------|
| Rsa1.0_01769.1.g29668.t1 | ref NP_187683.2  pectinesterase 25 [Arabidopsis thaliana]<br>gi 75306364 sp Q94CB1.1 PME25_ARAT<br>H RecName: Full=Probable pectinesterase/pectinesterase inhibitor 25; Includes: RecName: Full=Pectinesterase inhibitor 25; AltName: Full=Pectin methyl-esterase inhibitor 25; Includes: RecName: Full=Pectinesterase 25; Short=PE 25; AltName: Full=Pectin methyl-esterase 25; Short=AtPME25; Flags: Precursor<br>gi 14334646 gb AAK59501.1  putative pectinesterase [Arabidopsis thaliana]<br>gi 332641426 gb AEE74947.1  pectinesterase 25 [Arabidopsis thaliana]                                                             | 614  | 619  | 0         | 100.8 | 87.5 | 91.7 | pectinesterase 25                           | gbpln | Arabidopsis thaliana | AT3G10720.2   Symbols:   Plant invertase/pectin methyl-esterase inhibitor superfamily   chr3:3354639-3357581 REVERSE LENGTH=619 | 614  | 619  | 0         | 100.8 | 87.5 | 91.7 |
| Rsa1.0_01769.1.g29669.t1 | gb ABD64987.1  hypothetical protein 26.t00003 [Brassica oleracea]<br>ref NP_187685.1  alpha-L-arabinofuranosidase 1 [Arabidopsis thaliana]<br>gi 75265802 sp Q9SG80.1 ASD1_ARATH<br>RecName: Full=Alpha-L-arabinofuranosidase 1; Short=AtASD1; AltName: Full=beta-D-xylosidase; Flags: Precursor<br>gi 6630556 gb AAF19575.1 AC011708_18<br>putative alpha-L-arabinofuranosidase [Arabidopsis thaliana]<br>gi 332641428 gb AEE74949.1  alpha-L-arabinofuranosidase 1 [Arabidopsis thaliana]                                                                                                                                       | 111  | 330  | 6.00E-14  | 297.3 | 44.1 | 55.0 | hypothetical protein 26.t00003              | gbpln | Brassica oleracea    | #                                                                                                                               | #    | #    | #         | #     | #    | #    |
| Rsa1.0_01769.1.g29670.t1 | gb AAF79483.1 AC022492_27 F1L3.20 [Arabidopsis thaliana]<br>ref XP_002872737.1  hypothetical protein ARALYDRAFT_490165 [Arabidopsis lyrata subsp. lyrata]<br>gi 297318574 gb EFH48996.1  hypothetical protein ARALYDRAFT_490165 [Arabidopsis lyrata subsp. lyrata]                                                                                                                                                                                                                                                                                                                                                                | 674  | 678  | 0         | 100.6 | 93.0 | 96.0 | alpha-L-arabinofuranosidase 1               | gbpln | Arabidopsis thaliana | AT3G10740.1   Symbols: ASD1, ARAF1, ARAF, ATASD1   alpha-L-arabinofuranosidase 1   chr3:3361031-3364573 REVERSE LENGTH=678      | 674  | 678  | 0         | 100.6 | 93.0 | 96.0 |
| Rsa1.0_01770.1.g29671.t1 | gb AAF79483.1 AC022492_27 F1L3.20 [Arabidopsis thaliana]                                                                                                                                                                                                                                                                                                                                                                                                                                                                                                                                                                          | 1129 | 1188 | 0         | 105.2 | 53.0 | 68.9 | F1L3.20                                     | gbpln | Arabidopsis thaliana | AT4G23160.1   Symbols: CRK8   cysteine-rich RLK (RECEPTOR-like protein kinase) 8   chr4:12129485-12134086 FORWARD LENGTH=1262   | 1129 | 1262 | 5.00E-84  | 111.8 | 14.4 | 23.6 |
| Rsa1.0_01770.1.g29672.t1 | #                                                                                                                                                                                                                                                                                                                                                                                                                                                                                                                                                                                                                                 | #    | #    | #         | #     | #    | -    | ----                                        | ----  | #                    | #                                                                                                                               | #    | #    | #         | #     | #    | #    |
| Rsa1.0_01770.1.g29673.t2 | gb ACG60682.1  transposon-like ORF [Brassica oleracea var. alboglabra]                                                                                                                                                                                                                                                                                                                                                                                                                                                                                                                                                            | 567  | 704  | 3.00E-90  | 124.2 | 27.5 | 29.8 | transposon-like ORF                         | gbpln | Brassica oleracea    | #                                                                                                                               | #    | #    | #         | #     | #    | #    |
| Rsa1.0_01770.1.g29674.t1 | emb CAB10225.1  retrovirus-related like polyprotein [Arabidopsis thaliana]<br>gi 72681152 emb CAB78488.1  retrovirus-related like polyprotein [Arabidopsis thaliana]                                                                                                                                                                                                                                                                                                                                                                                                                                                              | 573  | 1489 | 7.00E-71  | 259.9 | 28.8 | 37.0 | retrovirus-related like polyprotein         | gbpln | Arabidopsis thaliana | AT4G23160.1   Symbols: CRK8   cysteine-rich RLK (RECEPTOR-like protein kinase) 8   chr4:12129485-12134086 FORWARD LENGTH=1262   | 573  | 1262 | 6.00E-52  | 220.2 | 24.6 | 32.1 |
| Rsa1.0_01770.1.g29675.t1 | #                                                                                                                                                                                                                                                                                                                                                                                                                                                                                                                                                                                                                                 | #    | #    | #         | #     | #    | -    | ----                                        | ----  | #                    | #                                                                                                                               | #    | #    | #         | #     | #    | #    |
| Rsa1.0_01770.1.g29676.t1 | dbj BAE98505.1  hypothetical protein [Arabidopsis thaliana]                                                                                                                                                                                                                                                                                                                                                                                                                                                                                                                                                                       | 91   | 475  | 1.00E-32  | 522.0 | 72.5 | 83.5 | hypothetical protein                        | gbpln | Arabidopsis thaliana | AT4G05150.1   Symbols:   Octicosapeptide/Phox/Bem1p family protein   chr4:2660339-2662675 FORWARD LENGTH=477                    | 91   | 477  | 2.00E-35  | 524.2 | 72.5 | 83.5 |
| Rsa1.0_01770.1.g29677.t1 | ref XP_002872737.1  hypothetical protein ARALYDRAFT_490165 [Arabidopsis lyrata subsp. lyrata]<br>gi 297318574 gb EFH48996.1  hypothetical protein ARALYDRAFT_490165 [Arabidopsis lyrata subsp. lyrata]                                                                                                                                                                                                                                                                                                                                                                                                                            | 299  | 445  | 1.00E-106 | 148.8 | 72.2 | 75.3 | hypothetical protein ARALYDRAFT_490165      | gbpln | Arabidopsis lyrata   | AT4G05150.1   Symbols:   Octicosapeptide/Phox/Bem1p family protein   chr4:2660339-2662675 FORWARD LENGTH=477                    | 299  | 477  | 1.00E-107 | 159.5 | 74.2 | 78.3 |
| Rsa1.0_01770.1.g29678.t1 | #                                                                                                                                                                                                                                                                                                                                                                                                                                                                                                                                                                                                                                 | #    | #    | #         | #     | #    | -    | ----                                        | ----  | #                    | #                                                                                                                               | #    | #    | #         | #     | #    | #    |
| Rsa1.0_01771.1.g29679.t1 | ref NP_565897.1  Low temperature and salt responsive protein [Arabidopsis thaliana]<br>gi 297827479 ref XP_002881622.1  hypothetical protein ARALYDRAFT_482911 [Arabidopsis lyrata subsp. lyrata]<br>gi 15529214 gb AAK97701.1  unknown protein [Arabidopsis thaliana]<br>gi 16974383 gb AAL31117.1  At2g38901/At2g38901 [Arabidopsis thaliana]<br>gi 20197443 gb AAM15078.1  Expressed protein [Arabidopsis thaliana]<br>gi 297327461 gb EFH57881.1  hypothetical protein ARALYDRAFT_482911 [Arabidopsis lyrata subsp. lyrata]<br>gi 330254516 gb AEC09610.1  Low temperature and salt responsive protein [Arabidopsis thaliana] | 54   | 54   | 2.00E-19  | 100.0 | 94.4 | 98.1 | Low temperature and salt responsive protein | gbpln | Arabidopsis lyrata   | AT2G38905.1   Symbols:   Low temperature and salt responsive protein family   chr2:16244218-16244472 REVERSE LENGTH=54          | 54   | 54   | 4.00E-22  | 100.0 | 94.4 | 98.1 |

|                           |                                                                                                                                                                                                                                                                                                                                                                                                                                                                                                                                                |      |      |           |       |      |      |                                                            |       |                      |                                                                                                                                                                                                                                                               |      |      |           |       |      |      |
|---------------------------|------------------------------------------------------------------------------------------------------------------------------------------------------------------------------------------------------------------------------------------------------------------------------------------------------------------------------------------------------------------------------------------------------------------------------------------------------------------------------------------------------------------------------------------------|------|------|-----------|-------|------|------|------------------------------------------------------------|-------|----------------------|---------------------------------------------------------------------------------------------------------------------------------------------------------------------------------------------------------------------------------------------------------------|------|------|-----------|-------|------|------|
| Rsa1.0_01771.1.g29681.t1  | refXP_002879772.1   hypothetical protein ARALYDRAFT_482910 [Arabidopsis lyrata subsp. lyrata] gi 297327460 gb EFH57880.1   hypothetical protein ARALYDRAFT_482910 [Arabidopsis lyrata subsp. lyrata]                                                                                                                                                                                                                                                                                                                                           | 475  | 299  | 1.00E-88  | 62.9  | 42.5 | 46.7 | hypothetical protein ARALYDRAFT_482910                     | gbpln | Arabidopsis lyrata   | AT2G38890.1   Symbols:   unknown protein; Has 58 Blast hits to 54 proteins in 15 species: Archaea - 0; Bacteria - 0; Metazoa - 6; Fungi - 0; Plants - 46; Viruses - 0; Other Eukaryotes - 6 (source: NCBI BLINK).   chr2:16241234-16242648 FORWARD LENGTH=298 | 475  | 298  | 1.00E-88  | 62.7  | 41.9 | 45.9 |
| Rsa1.0_01771.1.g29681.t1  | dbj BAJ34147.1   unnamed protein product [Theilungella halophila]                                                                                                                                                                                                                                                                                                                                                                                                                                                                              | 371  | 402  | 2.00E-65  | 108.4 | 52.8 | 63.9 | unnamed protein product                                    | ----  | ----                 | AT3G54620.1   Symbols: ATBZIP25, BZO2H4, BZIP25   basic leucine zipper 25   chr3:20218085-20220341 REVERSE LENGTH=403                                                                                                                                         | 371  | 403  | 6.00E-57  | 108.6 | 51.5 | 63.1 |
| Rsa1.0_01771.1.g29682.t1  | # # # # # # # # -                                                                                                                                                                                                                                                                                                                                                                                                                                                                                                                              |      |      |           |       |      |      |                                                            | ----  | ----                 | # # # # # # # #                                                                                                                                                                                                                                               |      |      |           |       |      |      |
| Rsa1.0_01771.1.g29683.t1  | refXP_002881621.1   hypothetical protein ARALYDRAFT_482903 [Arabidopsis lyrata subsp. lyrata] gi 297327460 gb EFH57880.1   hypothetical protein ARALYDRAFT_482903 [Arabidopsis lyrata subsp. lyrata]                                                                                                                                                                                                                                                                                                                                           | 70   | 70   | 4.00E-26  | 100.0 | 84.3 | 91.4 | hypothetical protein ARALYDRAFT_482903                     | gbpln | Arabidopsis lyrata   | AT2G38870.1   Symbols:   Serine protease inhibitor, potato inhibitor I-type family protein   chr2:16236546-16237050 REVERSE LENGTH=70                                                                                                                         | 70   | 70   | 2.00E-26  | 100.0 | 80.0 | 85.7 |
| Rsa1.0_01771.1.g29684.t1  | ref NP_181418.3   guanylate-binding-like protein [Arabidopsis thaliana] gi 330254499 gb AEC09593.1   guanylate-binding-like protein [Arabidopsis thaliana]                                                                                                                                                                                                                                                                                                                                                                                     | 717  | 602  | 0         | 84.0  | 76.7 | 80.6 | guanylate-binding-like protein                             | gbpln | Arabidopsis thaliana | AT2G38840.1   Symbols:   Guanylate-binding family protein   chr2:16227329-16232115 FORWARD LENGTH=602                                                                                                                                                         | 717  | 602  | 0         | 84.0  | 76.7 | 80.6 |
| Rsa1.0_01771.1.g29685.t1  | gb AAF18538.1 AC006551_24 Very similar to retrotransposon reverse transcriptase [Arabidopsis thaliana] ref NP_181398.1   protein LURP-one-related 8 [Arabidopsis thaliana] gi 75216986 sp Q9ZV16.1 LOR8_ARATH RecName: Full=Protein LURP-one-related 8 gi 3786008 gb AAC67354.1   unknown protein [Arabidopsis thaliana] gi 61656129 gb AAX49367.1   At2g38640 [Arabidopsis thaliana] gi 110741793 dbj BAE98840.1   hypothetical protein [Arabidopsis thaliana] gi 330254466 gb AEC09560.1   protein LURP-one-related 8 [Arabidopsis thaliana] | 825  | 1231 | 1.00E-180 | 149.2 | 41.1 | 55.5 | Very similar to retrotransposon reverse transcriptase      | gbpln | Arabidopsis thaliana | AT4G29090.1   Symbols:   Ribonuclease H-like superfamily protein   chr4:14333528-14335255 FORWARD LENGTH=575                                                                                                                                                  | 825  | 575  | 1.00E-72  | 69.7  | 19.2 | 33.0 |
| Rsa1.0_01771.1.g29686.t1  | ref NP_001031507.1   cyclin-dependent kinase B1-2 [Arabidopsis thaliana] gi 152013423 sp Q2V419.2 CKB12_ARATH RecName: Full=Cyclin-dependent kinase B1-2; Short=CDKB1.2 gi 3786010 gb AAC67356.1   putative cell division control protein kinase [Arabidopsis thaliana] gi 13275212 emb CAC34053.1   cyclin dependent kinase [Arabidopsis thaliana] gi 330254464 gb AEC09558.1   cyclin-dependent kinase B1-2 [Arabidopsis thaliana]                                                                                                           | 196  | 196  | 3.00E-96  | 100.0 | 84.7 | 94.9 | protein LURP-one-related 8                                 | gbpln | Arabidopsis thaliana | AT2G38640.1   Symbols:   Protein of unknown function (DUF567)   chr2:16157725-16158474 REVERSE LENGTH=196                                                                                                                                                     | 196  | 196  | 1.00E-98  | 100.0 | 84.7 | 94.9 |
| Rsa1.0_01771.1.g29687.t1  | ref NP_001031507.1   cyclin-dependent kinase B1-2 [Arabidopsis thaliana] gi 152013423 sp Q2V419.2 CKB12_ARATH RecName: Full=Cyclin-dependent kinase B1-2; Short=CDKB1.2 gi 3786010 gb AAC67356.1   putative cell division control protein kinase [Arabidopsis thaliana] gi 13275212 emb CAC34053.1   cyclin dependent kinase [Arabidopsis thaliana] gi 330254464 gb AEC09558.1   cyclin-dependent kinase B1-2 [Arabidopsis thaliana]                                                                                                           | 335  | 311  | 1.00E-164 | 92.8  | 85.1 | 89.3 | cyclin-dependent kinase B1-2                               | gbpln | Arabidopsis thaliana | AT2G38620.2   Symbols: CDKB1.2   cyclin-dependent kinase B1.2   chr2:16152551-16153866 FORWARD LENGTH=311                                                                                                                                                     | 335  | 311  | 1.00E-167 | 92.8  | 85.1 | 89.3 |
| Rsa1.0_01772.1.g29688.t12 | gb EOA12879.1   hypothetical protein CARUB_v10025852mg [Capsella rubella]                                                                                                                                                                                                                                                                                                                                                                                                                                                                      | 917  | 908  | 0         | 99.0  | 80.2 | 87.4 | hypothetical protein CARUB_v10025852mg                     | gbpln | Capsella rubella     | AT5G61960.2   Symbols: AML1, ML1   MEI2-like protein 1   chr5:24879001-24883483 REVERSE LENGTH=915                                                                                                                                                            | 917  | 915  | 0         | 99.8  | 80.9 | 87.8 |
| Rsa1.0_01772.1.g29689.t1  | ref XP_002864760.1   predicted protein [Arabidopsis lyrata subsp. lyrata] gi 297310595 gb EFH41019.1   predicted protein [Arabidopsis lyrata subsp. lyrata]                                                                                                                                                                                                                                                                                                                                                                                    | 1259 | 1145 | 0         | 90.9  | 39.2 | 48.5 | predicted protein                                          | gbpln | Arabidopsis lyrata   | AT5G61950.1   Symbols:   Ubiquitin carboxyl-terminal hydrolase-related protein   chr5:24873566-24878093 FORWARD LENGTH=1132                                                                                                                                   | 1259 | 1132 | 0         | 89.9  | 37.3 | 47.7 |
| Rsa1.0_01772.1.g29690.t1  | ref XP_002864761.1   hypothetical protein ARALYDRAFT_332429 [Arabidopsis lyrata subsp. lyrata] gi 297310596 gb EFH41020.1   hypothetical protein ARALYDRAFT_332429 [Arabidopsis lyrata subsp. lyrata]                                                                                                                                                                                                                                                                                                                                          | 1145 | 1130 | 0         | 98.7  | 58.7 | 71.7 | hypothetical protein ARALYDRAFT_332429                     | gbpln | Arabidopsis lyrata   | AT5G61950.1   Symbols:   Ubiquitin carboxyl-terminal hydrolase-related protein   chr5:24873566-24878093 FORWARD LENGTH=1132                                                                                                                                   | 1145 | 1132 | 0         | 98.9  | 59.0 | 72.7 |
| Rsa1.0_01772.1.g29691.t1  | ref NP_974979.1   DCD (Development and Cell Death) domain-containing protein [Arabidopsis thaliana] gi 332010149 gb AED97532.1   DCD (Development and Cell Death) domain-containing protein [Arabidopsis thaliana]                                                                                                                                                                                                                                                                                                                             | 716  | 742  | 0         | 103.6 | 67.3 | 74.4 | DCD (Development and Cell Death) domain-containing protein | gbpln | Arabidopsis thaliana | AT5G61910.3   Symbols:   DCD (Development and Cell Death) domain protein   chr5:24861091-24863741 REVERSE LENGTH=742                                                                                                                                          | 716  | 742  | 0         | 103.6 | 67.3 | 74.4 |
| Rsa1.0_01772.1.g29692.t1  | gb EOA12798.1   hypothetical protein CARUB_v10025752mg [Capsella rubella]                                                                                                                                                                                                                                                                                                                                                                                                                                                                      | 575  | 1270 | 0         | 220.9 | 89.7 | 95.5 | hypothetical protein CARUB_v10025752mg                     | gbpln | Capsella rubella     | AT5G61910.4   Symbols:   DCD (Development and Cell Death) domain protein   chr5:24855908-24863729 REVERSE LENGTH=1346                                                                                                                                         | 575  | 1346 | 0         | 234.1 | 86.8 | 93.7 |



|                          |                                                                                                                                                                                                                                                                                                                                                                                                                                                                                                                                                                                                                                                                                                                                                                                                                                                                                                                                    |     |      |           |       |      |      |                                                       |       |                      |                                                                                                                                                                                                                                                                                                                                                                                                                                                                                                         |     |      |           |       |      |      |
|--------------------------|------------------------------------------------------------------------------------------------------------------------------------------------------------------------------------------------------------------------------------------------------------------------------------------------------------------------------------------------------------------------------------------------------------------------------------------------------------------------------------------------------------------------------------------------------------------------------------------------------------------------------------------------------------------------------------------------------------------------------------------------------------------------------------------------------------------------------------------------------------------------------------------------------------------------------------|-----|------|-----------|-------|------|------|-------------------------------------------------------|-------|----------------------|---------------------------------------------------------------------------------------------------------------------------------------------------------------------------------------------------------------------------------------------------------------------------------------------------------------------------------------------------------------------------------------------------------------------------------------------------------------------------------------------------------|-----|------|-----------|-------|------|------|
| Rsa1.0_01772.1.g29693.t1 | ref NP_200995.1  ethylene-responsive transcription factor ERF114 [Arabidopsis thaliana] gi 75262469 sp Q9FH54.1 EF114_ARATH RecName: Full=Ethylene-responsive transcription factor ERF114 gi 9756398 db BAB06975.1 AP2 domain transcription factor-like [Arabidopsis thaliana] gi 48479316 gb AA44929.1 putative AP2/EREBP transcription factor [Arabidopsis thaliana] gi 182623784 gb ACB88827.1 At5g61890 [Arabidopsis thaliana] gi 332010146 gb AED97529.1 ethylene-responsive transcription factor ERF114 [Arabidopsis thaliana]                                                                                                                                                                                                                                                                                                                                                                                               | 249 | 248  | 9.00E-87  | 99.6  | 77.9 | 83.1 | ethylene-responsive transcription factor ERF114       | gbpln | Arabidopsis thaliana | AT5G61890.1   Symbols:   Integrase-type DNA-binding superfamily protein   chr5:24852639-24853744 REVERSE LENGTH=248                                                                                                                                                                                                                                                                                                                                                                                     | 249 | 248  | 2.00E-89  | 99.6  | 77.9 | 83.1 |
| Rsa1.0_01772.1.g29694.t1 | emb CAB40035.1  retrotransposon like protein [Arabidopsis thaliana] gi 7267767 emb CAB81170.1 retrotransposon like protein [Arabidopsis thaliana]                                                                                                                                                                                                                                                                                                                                                                                                                                                                                                                                                                                                                                                                                                                                                                                  | 797 | 1515 | 0         | 190.1 | 62.1 | 76.5 | retrotransposon like protein                          | gbpln | Arabidopsis thaliana | AT4G23160.1   Symbols: CRK8   cysteine-rich RLK (RECEPTOR-like protein kinase) 8   chr4:12129485-12134086 FORWARD LENGTH=1262                                                                                                                                                                                                                                                                                                                                                                           | 797 | 1262 | 1.00E-113 | 158.3 | 25.0 | 38.3 |
| Rsa1.0_01772.1.g29695.t1 | ref NP_180333.2  Ubiquitin carboxyl-terminal hydrolase-related protein [Arabidopsis thaliana] gi 330252928 gb AEC08022.1  Ubiquitin carboxyl-terminal hydrolase-related protein [Arabidopsis thaliana]                                                                                                                                                                                                                                                                                                                                                                                                                                                                                                                                                                                                                                                                                                                             | 113 | 1106 | 2.00E-16  | 978.8 | 38.9 | 56.6 | Ubiquitin carboxyl-terminal hydrolase-related protein | gbpln | Arabidopsis thaliana | AT2G27650.1   Symbols:   Ubiquitin carboxyl-terminal hydrolase-related protein   chr2:11792996-11797343 REVERSE LENGTH=1106                                                                                                                                                                                                                                                                                                                                                                             | 113 | 1106 | 4.00E-19  | 978.8 | 38.9 | 56.6 |
| Rsa1.0_01773.1.g29696.t1 | ref NP_195098.1  putative pathogenesis-related protein [Arabidopsis thaliana] gi 11692906 gb AAG40056.1 AF324705.1 AT4g33720 [Arabidopsis thaliana] gi 11935187 gb AAG42009.1 AF327419.1 putative pathogenesis-related protein 1 precursor, 19.3K [Arabidopsis thaliana] gi 12642876 gb AAK00381.1 AF339699.1 putative pathogenesis-related protein 1 precursor, 19.3K [Arabidopsis thaliana] gi 3549674 emb CAA20585.1 pathogenesis-related protein 1 precursor, 19.3K [Arabidopsis thaliana] gi 7270321 emb CAB80089.1 pathogenesis-related protein 1 precursor, 19.3K [Arabidopsis thaliana] gi 14517484 gb AAK62632.1 AT4g33720/T16L1.210 [Arabidopsis thaliana] gi 21593911 gb AAM65876.1 pathogenesis-related protein 1 precursor, 19.3K [Arabidopsis thaliana] gi 22136566 gb AAM91069.1 AT4g33720/T16L1.210 [Arabidopsis thaliana] gi 332660869 gb AEE86269.1 putative pathogenesis-related protein [Arabidopsis thaliana] | 163 | 163  | 2.00E-69  | 100.0 | 75.5 | 84.0 | putative pathogenesis-related protein                 | gbpln | Arabidopsis thaliana | AT4G33720.1   Symbols:   CAP (Cysteine-rich secretory proteins, Antigen 5, and Pathogenesis-related 1 protein) superfamily protein   chr4:16182813-16183304 FORWARD LENGTH=163                                                                                                                                                                                                                                                                                                                          | 163 | 163  | 6.00E-72  | 100.0 | 75.5 | 84.0 |
| Rsa1.0_01773.1.g29697.t1 | gb EOA36075.1  hypothetical protein CARUB_v10009706mg [Capsella rubella]                                                                                                                                                                                                                                                                                                                                                                                                                                                                                                                                                                                                                                                                                                                                                                                                                                                           | 154 | 329  | 1.00E-39  | 213.6 | 57.8 | 61.7 | hypothetical protein CARUB_v10009706mg                | gbpln | Capsella rubella     | AT1G02400.1   Symbols: ATGA2OX4, ATGA2OX6, DTA1, GA2OX6   gibberellin 2-oxidase 6   chr1:486964-489391 FORWARD LENGTH=329                                                                                                                                                                                                                                                                                                                                                                               | 154 | 329  | 2.00E-41  | 213.6 | 57.1 | 61.0 |
| Rsa1.0_01773.1.g29698.t1 | gb EOA18047.1  hypothetical protein CARUB_v10006493mg [Capsella rubella]                                                                                                                                                                                                                                                                                                                                                                                                                                                                                                                                                                                                                                                                                                                                                                                                                                                           | 188 | 173  | 1.00E-30  | 92.0  | 33.5 | 35.6 | hypothetical protein CARUB_v10006493mg                | gbpln | Capsella rubella     | AT4G33730.1   Symbols:   CAP (Cysteine-rich secretory proteins, Antigen 5, and Pathogenesis-related 1 protein) superfamily protein   chr4:16185098-16185616 FORWARD LENGTH=172                                                                                                                                                                                                                                                                                                                          | 188 | 172  | 9.00E-33  | 91.5  | 32.4 | 35.6 |
| Rsa1.0_01773.1.g29699.t1 | # # # # # # # # - - - - # # # # # #                                                                                                                                                                                                                                                                                                                                                                                                                                                                                                                                                                                                                                                                                                                                                                                                                                                                                                |     |      |           |       |      |      |                                                       |       |                      |                                                                                                                                                                                                                                                                                                                                                                                                                                                                                                         |     |      |           |       |      |      |
| Rsa1.0_01773.1.g29700.t1 | gb EOA16586.1  hypothetical protein CARUB_v10004752mg [Capsella rubella] gi 482552394 gb EOA16587.1 hypothetical protein CARUB_v10004752mg [Capsella rubella] gi 482552395 gb EOA16588.1 hypothetical protein CARUB_v10004752mg [Capsella rubella] gi 482552396 gb EOA16589.1 hypothetical protein CARUB_v10004752mg [Capsella rubella]                                                                                                                                                                                                                                                                                                                                                                                                                                                                                                                                                                                            | 443 | 464  | 1.00E-140 | 104.7 | 74.0 | 85.8 | hypothetical protein CARUB_v10004752mg                | gbpln | Capsella rubella     | AT4G33740.3   Symbols:   unknown protein; FUNCTIONS IN: molecular function unknown; INVOLVED IN: biological process unknown; LOCATED IN: cellular component unknown; BEST Arabidopsis thaliana protein match is: unknown protein (TAIR:AT4G37820.1); Has 138092 Blast hits to 73110 proteins in 2951 species: Archae - 732; Bacteria - 17903; Metazoa - 48520; Fungi - 16808; Plants - 7078; Viruses - 1044; Other Eukaryotes - 46007 (source: NCBI BLINK).   chr4:16187384-16188802 FORWARD LENGTH=472 | 443 | 472  | 1.00E-123 | 106.5 | 74.7 | 85.3 |

|                          |                                                                                                                                                                                                                                                                                                                                                                                                                                                                                                                                                                                              |      |     |           |       |      |      |                                                                                             |       |                      |                                                                                                                                                                                                                                                                                                                                                                                                                                                                                                                                |      |     |           |       |      |      |
|--------------------------|----------------------------------------------------------------------------------------------------------------------------------------------------------------------------------------------------------------------------------------------------------------------------------------------------------------------------------------------------------------------------------------------------------------------------------------------------------------------------------------------------------------------------------------------------------------------------------------------|------|-----|-----------|-------|------|------|---------------------------------------------------------------------------------------------|-------|----------------------|--------------------------------------------------------------------------------------------------------------------------------------------------------------------------------------------------------------------------------------------------------------------------------------------------------------------------------------------------------------------------------------------------------------------------------------------------------------------------------------------------------------------------------|------|-----|-----------|-------|------|------|
| Rsa1.0_01773.1.g29701.t1 | gb EOA16776.1  hypothetical protein CARUB_v1000495mg [Capsella rubella]                                                                                                                                                                                                                                                                                                                                                                                                                                                                                                                      | 387  | 392 | 1.00E-173 | 101.3 | 82.9 | 89.7 | hypothetical protein CARUB_v1000495mg                                                       | gbpln | Capsella rubella     | AT4G33770.1   Symbols:   Inositol 1,3,4-trisphosphate 5/6-kinase family protein   chr4:16193589-16196242 REVERSE LENGTH=391                                                                                                                                                                                                                                                                                                                                                                                                    | 387  | 391 | 1.00E-171 | 101.0 | 81.4 | 88.4 |
| Rsa1.0_01773.1.g29702.t1 | ref XP_002867158.1  hypothetical protein ARALYDRAFT_491300 [Arabidopsis lyrata subsp. lyrata] gi 297312994 gb EFH43417.1  hypothetical protein ARALYDRAFT_491300 [Arabidopsis lyrata subsp. lyrata]                                                                                                                                                                                                                                                                                                                                                                                          | 300  | 208 | 9.00E-61  | 69.3  | 43.7 | 45.7 | hypothetical protein ARALYDRAFT_491300                                                      | gbpln | Arabidopsis lyrata   | AT4G33780.1   Symbols:   FUNCTIONS IN: molecular function unknown; INVOLVED IN: biological process unknown; LOCATED IN: chloroplast; EXPRESSED IN: 24 plant structures; EXPRESSED DURING: 15 growth stages; BEST Arabidopsis thaliana protein match is: short hypocotyl in white light1 (TAIR:AT1G69935.1); Has 40 Blast hits to 40 proteins in 10 species: Archae - 0; Bacteria - 0; Metazoa - 0; Fungi - 0; Plants - 40; Viruses - 0; Other Eukaryotes - 0 (source: NCBI BLINK).   chr4:16202174-16203617 REVERSE LENGTH=203 | 300  | 203 | 7.00E-63  | 67.7  | 43.0 | 45.7 |
| Rsa1.0_01773.1.g29703.t1 | ref XP_002867155.1  glycosyl hydrolase family 10 protein [Arabidopsis lyrata subsp. lyrata] gi 297312991 gb EFH43414.1  glycosyl hydrolase family 10 protein [Arabidopsis lyrata subsp. lyrata]                                                                                                                                                                                                                                                                                                                                                                                              | 573  | 568 | 0         | 99.1  | 83.2 | 89.2 | glycosyl hydrolase family 10 protein                                                        | gbpln | Arabidopsis lyrata   | AT4G33820.1   Symbols:   Glycosyl hydrolase superfamily protein   chr4:16217010-16219515 REVERSE LENGTH=570                                                                                                                                                                                                                                                                                                                                                                                                                    | 573  | 570 | 0         | 99.5  | 79.8 | 87.8 |
| Rsa1.0_01774.1.g29704.t1 | gb EOA24312.1  hypothetical protein CARUB_v10017552mg [Capsella rubella]                                                                                                                                                                                                                                                                                                                                                                                                                                                                                                                     | 340  | 350 | 1.00E-136 | 102.9 | 83.2 | 88.2 | hypothetical protein CARUB_v10017552mg                                                      | gbpln | Capsella rubella     | AT3G61310.1   Symbols:   AT hook motif DNA-binding family protein   chr3:22690799-22692445 REVERSE LENGTH=354                                                                                                                                                                                                                                                                                                                                                                                                                  | 340  | 354 | 1.00E-126 | 104.1 | 78.2 | 85.6 |
| Rsa1.0_01774.1.g29705.t3 | ref NP_191689.1  C2 calcium/lipid-binding and phosphoribosyltransferase C-terminal domain-containing protein [Arabidopsis thaliana] gi 6850897 emb CAB71060.1  anthranilate phosphoribosyltransferase-like protein [Arabidopsis thaliana] gi 28392941 gb AAO41906.1  putative anthranilate phosphoribosyltransferase [Arabidopsis thaliana] gi 28973565 gb AAO64107.1  putative anthranilate phosphoribosyltransferase [Arabidopsis thaliana] gi 332646664 gb AEE80185.1  C2 calcium/lipid-binding and phosphoribosyltransferase C-terminal domain-containing protein [Arabidopsis thaliana] | 1412 | 972 | 0         | 68.8  | 51.7 | 58.1 | C2 calcium/lipid-binding and phosphoribosyltransferase C-terminal domain-containing protein | gbpln | Arabidopsis thaliana | AT3G61300.1   Symbols:   C2 calcium/lipid-binding plant phosphoribosyltransferase family protein   chr3:22687662-22690580 FORWARD LENGTH=972                                                                                                                                                                                                                                                                                                                                                                                   | 1412 | 972 | 0         | 68.8  | 51.7 | 58.1 |
| Rsa1.0_01774.1.g29706.t1 | gb EOA25074.1  hypothetical protein CARUB_v10018382mg [Capsella rubella]                                                                                                                                                                                                                                                                                                                                                                                                                                                                                                                     | 279  | 297 | 1.00E-117 | 106.5 | 77.8 | 83.9 | hypothetical protein CARUB_v10018382mg                                                      | gbpln | Capsella rubella     | AT3G61250.1   Symbols:   AtMYB17, MYB17   myb domain protein 17   chr3:22671306-22672551 FORWARD LENGTH=299                                                                                                                                                                                                                                                                                                                                                                                                                    | 279  | 299 | 1.00E-119 | 107.2 | 77.4 | 84.2 |
| Rsa1.0_01774.1.g29707.t1 | ref XP_002878372.1  LIM domain-containing protein [Arabidopsis lyrata subsp. lyrata] gi 297324210 gb EFH54631.1  LIM domain-containing protein [Arabidopsis lyrata subsp. lyrata]                                                                                                                                                                                                                                                                                                                                                                                                            | 211  | 214 | 1.00E-106 | 101.4 | 90.5 | 93.8 | LIM domain-containing protein                                                               | gbpln | Arabidopsis lyrata   | AT3G61230.1   Symbols:   GATA type zinc finger transcription factor family protein   chr3:22664601-22665503 REVERSE LENGTH=213                                                                                                                                                                                                                                                                                                                                                                                                 | 211  | 213 | 1.00E-108 | 100.9 | 89.6 | 93.4 |
| Rsa1.0_01774.1.g29708.t1 | ref XP_002876599.1  short-chain dehydrogenase/reductase family protein [Arabidopsis lyrata subsp. lyrata] gi 297322437 gb EFH52858.1  short-chain dehydrogenase/reductase family protein [Arabidopsis lyrata subsp. lyrata]                                                                                                                                                                                                                                                                                                                                                                  | 280  | 296 | 1.00E-120 | 105.7 | 75.7 | 87.1 | short-chain dehydrogenase/reductase family protein                                          | gbpln | Arabidopsis lyrata   | AT3G61220.1   Symbols:   NAD(P)-binding Rossmann-fold superfamily protein   chr3:22663025-22664316 FORWARD LENGTH=296                                                                                                                                                                                                                                                                                                                                                                                                          | 280  | 296 | 1.00E-122 | 105.7 | 74.6 | 87.1 |
| Rsa1.0_01774.1.g29709.t1 | gb EOA24791.1  hypothetical protein CARUB_v10018071mg [Capsella rubella]                                                                                                                                                                                                                                                                                                                                                                                                                                                                                                                     | 175  | 189 | 8.00E-68  | 108.0 | 70.3 | 86.3 | hypothetical protein CARUB_v10018071mg                                                      | gbpln | Capsella rubella     | AT3G61200.1   Symbols:   Thioesterase superfamily protein   chr3:22657599-22658350 REVERSE LENGTH=188                                                                                                                                                                                                                                                                                                                                                                                                                          | 175  | 188 | 1.00E-66  | 107.4 | 66.9 | 84.6 |
| Rsa1.0_01775.1.g29710.t1 | ref XP_002893237.1  proton-dependent oligopeptide transport family protein [Arabidopsis lyrata subsp. lyrata] gi 297339079 gb EFH69496.1  proton-dependent oligopeptide transport family protein [Arabidopsis lyrata subsp. lyrata]                                                                                                                                                                                                                                                                                                                                                          | 512  | 561 | 0         | 109.6 | 83.6 | 90.4 | proton-dependent oligopeptide transport family protein                                      | gbpln | Arabidopsis lyrata   | AT1G22550.1   Symbols:   Major facilitator superfamily protein   chr1:7966608-7968552 REVERSE LENGTH=564                                                                                                                                                                                                                                                                                                                                                                                                                       | 512  | 564 | 0         | 110.2 | 84.2 | 90.8 |
| Rsa1.0_01775.1.g29711.t1 | ref NP_001154357.1  uncharacterized protein [Arabidopsis thaliana] gi 332192131 gb AEE30252.1  uncharacterized protein AT1G22520 [Arabidopsis thaliana]                                                                                                                                                                                                                                                                                                                                                                                                                                      | 103  | 179 | 3.00E-33  | 173.8 | 71.8 | 80.6 | uncharacterized protein                                                                     | gbpln | Arabidopsis thaliana | AT1G22520.2   Symbols:   Domain of unknown function (DUF543)   chr1:7952996-7954304 REVERSE LENGTH=179                                                                                                                                                                                                                                                                                                                                                                                                                         | 103  | 179 | 4.00E-36  | 173.8 | 71.8 | 80.6 |
| Rsa1.0_01775.1.g29712.t4 | gb AAM63145.1  unknown [Arabidopsis thaliana]                                                                                                                                                                                                                                                                                                                                                                                                                                                                                                                                                | 214  | 185 | 2.00E-66  | 86.4  | 71.5 | 79.0 | unknown                                                                                     | gbpln | Arabidopsis thaliana | AT1G22510.1   Symbols:   RING/U-box protein with domain of unknown function (DUF_1232)   chr1:7951003-7952597 REVERSE LENGTH=185                                                                                                                                                                                                                                                                                                                                                                                               | 214  | 185 | 1.00E-68  | 86.4  | 71.0 | 79.0 |

|                          |                                                                                                                                                                                                                                                                                                             |      |      |           |       |      |      |                                                 |       |                      |                                                                                                                                                                                                                                                                                                                                                                                                                                                                                                                                                              |      |      |           |       |      |      |
|--------------------------|-------------------------------------------------------------------------------------------------------------------------------------------------------------------------------------------------------------------------------------------------------------------------------------------------------------|------|------|-----------|-------|------|------|-------------------------------------------------|-------|----------------------|--------------------------------------------------------------------------------------------------------------------------------------------------------------------------------------------------------------------------------------------------------------------------------------------------------------------------------------------------------------------------------------------------------------------------------------------------------------------------------------------------------------------------------------------------------------|------|------|-----------|-------|------|------|
| Rsa1.0_01775.1.g29713.t1 | gb[EOA36747.1] hypothetical protein CARUB_v10012585mg [Capsella rubella]                                                                                                                                                                                                                                    | 161  | 382  | 2.00E-49  | 237.3 | 62.1 | 68.3 | hypothetical protein CARUB_v10012585mg          | gbpln | Capsella rubella     | AT1G22500.1   Symbols:   RING/U-box superfamily protein   chr1:7949581-7950726 FORWARD LENGTH=381                                                                                                                                                                                                                                                                                                                                                                                                                                                            | 161  | 381  | 2.00E-50  | 236.6 | 60.2 | 64.0 |
| Rsa1.0_01775.1.g29714.t1 | #                                                                                                                                                                                                                                                                                                           | #    | #    | #         | #     | #    | #    | -                                               | ----  | ----                 | #                                                                                                                                                                                                                                                                                                                                                                                                                                                                                                                                                            | #    | #    | #         | #     | #    |      |
| Rsa1.0_01776.1.g29715.t1 | #                                                                                                                                                                                                                                                                                                           | #    | #    | #         | #     | #    | #    | -                                               | ----  | ----                 | #                                                                                                                                                                                                                                                                                                                                                                                                                                                                                                                                                            | #    | #    | #         | #     | #    |      |
| Rsa1.0_01776.1.g29716.t1 | gb[ABQ50546.1] hypothetical protein [Brassica rapa]                                                                                                                                                                                                                                                         | 433  | 650  | 0         | 150.1 | 75.1 | 88.9 | hypothetical protein                            | gbpln | Brassica rapa        | AT3G22470.1   Symbols:   Pentatricopeptide repeat (PPR) superfamily protein   chr3:7966066-7967925 REVERSE LENGTH=619                                                                                                                                                                                                                                                                                                                                                                                                                                        | 433  | 619  | 1.00E-174 | 143.0 | 70.2 | 82.7 |
| Rsa1.0_01776.1.g29717.t1 | gb[EOA40316.1] hypothetical protein CARUB_v10009041mg [Capsella rubella]                                                                                                                                                                                                                                    | 472  | 470  | 0         | 99.6  | 91.5 | 94.9 | hypothetical protein CARUB_v10009041mg          | gbpln | Capsella rubella     | AT1G12680.1   Symbols: PEPKR2   phosphoenolpyruvate carboxylase-related kinase 2   chr1:4320123-4322269 REVERSE LENGTH=470                                                                                                                                                                                                                                                                                                                                                                                                                                   | 472  | 470  | 0         | 99.6  | 90.3 | 94.3 |
| Rsa1.0_01776.1.g29718.t1 | gb[EOA38672.1] hypothetical protein CARUB_v10010628mg [Capsella rubella]                                                                                                                                                                                                                                    | 130  | 130  | 2.00E-32  | 100.0 | 57.7 | 74.6 | hypothetical protein CARUB_v10010628mg          | gbpln | Capsella rubella     | AT1G12663.1   Symbols:   Predicted to encode a PR (pathogenesis-related) protein. Belongs to the plant thionin (PR-13) family with the following members: At1g66100, At5g36910, At1g72260, At2g15010, At1g12663, At1g12660.   chr1:4310969-4311457 FORWARD LENGTH=115                                                                                                                                                                                                                                                                                        | 130  | 115  | 8.00E-34  | 88.5  | 50.8 | 64.6 |
| Rsa1.0_01776.1.g29719.t7 | dbj[BAB02990.1] retroelement pol polyprotein-like [Arabidopsis thaliana]                                                                                                                                                                                                                                    | 539  | 1250 | 8.00E-85  | 231.9 | 34.1 | 41.6 | retroelement pol polyprotein-like               | gbpln | Arabidopsis thaliana | AT4G23160.1   Symbols: CRK8   cysteine-rich RLK (RECEPTOR-like protein kinase) 8   chr4:12129485-12134086 FORWARD LENGTH=1262                                                                                                                                                                                                                                                                                                                                                                                                                                | 539  | 1262 | 3.00E-29  | 234.1 | 18.2 | 28.8 |
| Rsa1.0_01776.1.g29720.t1 | gb[EOA11936.1] hypothetical protein CARUB_v10016547mg, partial [Capsella rubella]                                                                                                                                                                                                                           | 179  | 149  | 2.00E-11  | 83.2  | 19.6 | 26.8 | hypothetical protein CARUB_v10016547mg, partial | gbpln | Capsella rubella     | #                                                                                                                                                                                                                                                                                                                                                                                                                                                                                                                                                            | #    | #    | #         | #     | #    |      |
| Rsa1.0_01776.1.g29721.t1 | ref[XP_002889953.1] predicted protein [Arabidopsis lyrata subsp. lyrata] gi[297335795]gb[EFH66212.1] predicted protein [Arabidopsis lyrata subsp. lyrata]                                                                                                                                                   | 118  | 123  | 1.00E-33  | 104.2 | 68.6 | 77.1 | predicted protein                               | gbpln | Arabidopsis lyrata   | AT1G12660.1   Symbols:   Predicted to encode a PR (pathogenesis-related) protein. Belongs to the plant thionin (PR-13) family with the following members: At1g66100, At5g36910, At1g72260, At2g15010, At1g12663, At1g12660.   chr1:4308943-4309583 FORWARD LENGTH=137                                                                                                                                                                                                                                                                                        | 118  | 137  | 5.00E-29  | 116.1 | 55.9 | 64.4 |
| Rsa1.0_01776.1.g29722.t1 | ref[XP_002299562.1] predicted protein [Populus trichocarpa] gi[222846820]gb[EEE84367.1] predicted protein [Populus trichocarpa]                                                                                                                                                                             | 255  | 247  | 4.00E-31  | 96.9  | 32.5 | 37.6 | predicted protein                               | gbpln | Populus trichocarpa  | AT1G12650.4   Symbols:   unknown protein; FUNCTIONS IN: molecular_function unknown; INVOLVED IN: biological_process unknown; LOCATED IN: cellular_component unknown; EXPRESSED IN: 23 plant structures; EXPRESSED DURING: 13 growth stages; CONTAINS InterPro DOMAIN/s: Protein of unknown function DUF947 (InterPro:IPR009292); Has 700 Blast hits to 631 proteins in 192 species: Archaea - 0; Bacteria - 32; Metazoa - 138; Fungi - 168; Plants - 60; Viruses - 0; Other Eukaryotes - 302 (source: NCBI BLINK).   chr1:4306183-4307673 FORWARD LENGTH=248 | 255  | 248  | 8.00E-26  | 97.3  | 21.6 | 23.5 |
| Rsa1.0_01777.1.g29723.t1 | ref[XP_002870141.1] hypothetical protein ARALYDRAFT_493211 [Arabidopsis lyrata subsp. lyrata] gi[297315977]gb[EFH46400.1] hypothetical protein ARALYDRAFT_493211 [Arabidopsis lyrata subsp. lyrata]                                                                                                         | 1281 | 549  | 0         | 42.9  | 40.0 | 41.5 | hypothetical protein ARALYDRAFT_493211          | gbpln | Arabidopsis lyrata   | AT4G16650.1   Symbols:   O-fucosyltransferase family protein   chr4:9372727-9375910 FORWARD LENGTH=549                                                                                                                                                                                                                                                                                                                                                                                                                                                       | 1281 | 549  | 0         | 42.9  | 39.5 | 41.3 |
| Rsa1.0_01777.1.g29724.t1 | ref[NP_567510.1] hypoxia up-regulated 1 [Arabidopsis thaliana] gi[378548353]sp[F4JMJ1.1]HSP7R ARA TH RecName: Full=Heat shock 70 kDa protein 17; AltName: Full=Heat shock protein 70-17; Short=AtHsp70-17; Flags: Precursor gi[332658381]gb[AEE83781.1] heat shock 70 kDa protein 17 [Arabidopsis thaliana] | 911  | 867  | 0         | 95.2  | 85.3 | 89.9 | hypoxia up-regulated 1                          | gbpln | Arabidopsis thaliana | AT4G16660.1   Symbols:   heat shock protein 70 (Hsp 70) family protein   chr4:9377225-9381232 FORWARD LENGTH=867                                                                                                                                                                                                                                                                                                                                                                                                                                             | 911  | 867  | 0         | 95.2  | 85.3 | 89.9 |
| Rsa1.0_01777.1.g29725.t4 | ref[XP_002885669.1] hypothetical protein ARALYDRAFT_319176 [Arabidopsis lyrata subsp. lyrata] gi[297331509]gb[EFH61928.1] hypothetical protein ARALYDRAFT_319176 [Arabidopsis lyrata subsp. lyrata]                                                                                                         | 517  | 467  | 1.00E-132 | 90.3  | 48.7 | 58.2 | hypothetical protein ARALYDRAFT_319176          | gbpln | Arabidopsis lyrata   | AT3G62850.1   Symbols:   zinc finger protein-related   chr3:23237487-23239155 REVERSE LENGTH=472                                                                                                                                                                                                                                                                                                                                                                                                                                                             | 517  | 472  | 1.00E-129 | 91.3  | 45.3 | 57.3 |
| Rsa1.0_01777.1.g29726.t1 | #                                                                                                                                                                                                                                                                                                           | #    | #    | #         | #     | #    | #    | -                                               | ----  | ----                 | #                                                                                                                                                                                                                                                                                                                                                                                                                                                                                                                                                            | #    | #    | #         | #     | #    |      |

|                          |                                                                                                                                                                                                                                                                                                                                                                                                                                                                                                                                                                                                                                                                                                                                                                                                                                                                                                                                                                                                                                                                |     |     |           |       |      |       |                                        |       |                      |                                                                                                                       |     |     |           |       |      |       |
|--------------------------|----------------------------------------------------------------------------------------------------------------------------------------------------------------------------------------------------------------------------------------------------------------------------------------------------------------------------------------------------------------------------------------------------------------------------------------------------------------------------------------------------------------------------------------------------------------------------------------------------------------------------------------------------------------------------------------------------------------------------------------------------------------------------------------------------------------------------------------------------------------------------------------------------------------------------------------------------------------------------------------------------------------------------------------------------------------|-----|-----|-----------|-------|------|-------|----------------------------------------|-------|----------------------|-----------------------------------------------------------------------------------------------------------------------|-----|-----|-----------|-------|------|-------|
| Rsa1.0_01777.1.g29727.t1 | ref NP_193405.1  60S ribosomal protein L15-1 [Arabidopsis thaliana]<br>gi 297800374 ref XP_002868071.1  60S ribosomal protein L15 [Arabidopsis lyrata subsp. lyrata]<br>gi 3122673 sp O23515.1 RL151_ARATH<br>RecName: Full=60S ribosomal protein L15-1<br>gi 13878179 gb AAK44167.1 AF370352.1 putative ribosomal protein [Arabidopsis thaliana]<br>gi 2245027 emb CAB10447.1  ribosomal protein [Arabidopsis thaliana]<br>gi 7268422 emb CAB78714.1  ribosomal protein [Arabidopsis thaliana]<br>gi 16604446 gb AAL24229.1 <br>AT4g16720/d4385c [Arabidopsis thaliana]<br>gi 1971559 gb AAL91619.1 <br>AT4g16720/d4385c [Arabidopsis thaliana]<br>gi 21592436 gb AAM64397.1  ribosomal protein [Arabidopsis thaliana]<br>gi 22136774 gb AAM91731.1  putative ribosomal protein [Arabidopsis thaliana]<br>gi 23505795 gb AAN28757.1 <br>At4g16720/d4385c [Arabidopsis thaliana]<br>gi 297313907 gb EFH44330.1  60S ribosomal protein L15 [Arabidopsis lyrata subsp. lyrata]<br>gi 332658391 gb AEE83791.1  60S ribosomal protein L15-1 [Arabidopsis thaliana] | 204 | 204 | 1.00E-113 | 100.0 | 99.5 | 100.0 | 60S ribosomal protein L15-1            | gbpln | Arabidopsis lyrata   | AT4G16720.1   Symbols:   Ribosomal protein L23/L15e family protein   chr4:9400156-9401315 REVERSE LENGTH=204          | 204 | 204 | 1.00E-115 | 100.0 | 99.5 | 100.0 |
| Rsa1.0_01777.1.g29728.t1 | gb EOA19151.1  hypothetical protein CARUB_v10007826mg [Capsella rubella]                                                                                                                                                                                                                                                                                                                                                                                                                                                                                                                                                                                                                                                                                                                                                                                                                                                                                                                                                                                       | 526 | 545 | 0         | 103.6 | 84.2 | 91.3  | hypothetical protein CARUB_v10007826mg | gbpln | Capsella rubella     | AT4G16745.1   Symbols:   Exostosin family protein   chr4:9412185-9414053 FORWARD LENGTH=542                           | 526 | 542 | 0         | 103.0 | 85.4 | 92.2  |
| Rsa1.0_01777.1.g29729.t1 | emb CAB41158.1  putative protein [Arabidopsis thaliana]                                                                                                                                                                                                                                                                                                                                                                                                                                                                                                                                                                                                                                                                                                                                                                                                                                                                                                                                                                                                        | 624 | 669 | 0         | 107.2 | 55.3 | 67.1  | putative protein                       | gbpln | Arabidopsis thaliana | AT3G48400.1   Symbols:   Cysteine/Histidine-rich C1 domain family protein   chr3:17923678-17925589 FORWARD LENGTH=619 | 624 | 619 | 1.00E-179 | 99.2  | 53.0 | 65.1  |
| Rsa1.0_01778.1.g29730.t1 | gb AAC19278.1  T14P8.10 [Arabidopsis thaliana]<br>gi 7269009 emb CAB80742.1  AT4g02490 [Arabidopsis thaliana]<br>ref NP_181023.1  fatty acid hydroxylase 1 [Arabidopsis thaliana]<br>gi 75098527 sp O48916.1 FAH1_ARATH<br>RecName: Full=Fatty acid 2-hydroxylase 1; Short=AtFAH1<br>gi 2736147 gb AAB94072.1  fatty acid hydroxylase Fah1p [Arabidopsis thaliana]<br>gi 3132481 gb AAC16270.1  fatty acid hydroxylase (FAH1) [Arabidopsis thaliana]<br>gi 15215596 gb AAK91343.1 <br>At2g34770/T29F13.2 [Arabidopsis thaliana]<br>gi 23308163 gb AAN18051.1 <br>At2g34770/T29F13.2 [Arabidopsis thaliana]<br>gi 330253925 gb AEC09019.1  fatty acid hydroxylase 1 [Arabidopsis thaliana]                                                                                                                                                                                                                                                                                                                                                                      | 193 | 657 | 2.00E-12  | 340.4 | 22.8 | 34.2  | T14P8.10                               | gbpln | Arabidopsis thaliana | #                                                                                                                     | #   | #   | #         | #     | #    | #     |
| Rsa1.0_01778.1.g29731.t1 | ref NP_179771.2  essential meiotic endonuclease 1A [Arabidopsis thaliana]<br>gi 75147156 sp Q84M98.1 EME1A_ARATH<br>RecName: Full=Crossover junction endonuclease EME1A; AltName: Full=Essential meiotic endonuclease 1A; Short=AtEME1A<br>gi 30102692 gb AAP21264.1  At2g21800 [Arabidopsis thaliana]<br>gi 110735996 dbj BAE99972.1  hypothetical protein [Arabidopsis thaliana]<br>gi 330252129 gb AEC07223.1  essential meiotic endonuclease 1A [Arabidopsis thaliana]                                                                                                                                                                                                                                                                                                                                                                                                                                                                                                                                                                                     | 240 | 237 | 1.00E-117 | 98.8  | 82.5 | 89.2  | fatty acid hydroxylase 1               | gbpln | Arabidopsis thaliana | AT2G34770.1   Symbols: FAH1, ATFAH1   fatty acid hydroxylase 1   chr2:14666776-14668061 FORWARD LENGTH=237            | 240 | 237 | 1.00E-119 | 98.8  | 82.5 | 89.2  |
| Rsa1.0_01778.1.g29732.t1 | ref NP_179771.2  essential meiotic endonuclease 1A [Arabidopsis thaliana]<br>gi 75147156 sp Q84M98.1 EME1A_ARATH<br>RecName: Full=Crossover junction endonuclease EME1A; AltName: Full=Essential meiotic endonuclease 1A; Short=AtEME1A<br>gi 30102692 gb AAP21264.1  At2g21800 [Arabidopsis thaliana]<br>gi 110735996 dbj BAE99972.1  hypothetical protein [Arabidopsis thaliana]<br>gi 330252129 gb AEC07223.1  essential meiotic endonuclease 1A [Arabidopsis thaliana]                                                                                                                                                                                                                                                                                                                                                                                                                                                                                                                                                                                     | 520 | 546 | 1.00E-150 | 105.0 | 59.6 | 73.5  | essential meiotic endonuclease 1A      | gbpln | Arabidopsis thaliana | AT2G21800.1   Symbols: ATEME1A, EME1A   essential meiotic endonuclease 1A   chr2:9298196-9301745 FORWARD LENGTH=546   | 520 | 546 | 1.00E-152 | 105.0 | 59.6 | 73.5  |
| Rsa1.0_01778.1.g29733.t1 | gb EOA26911.1  hypothetical protein CARUB_v10023001mg [Capsella rubella]                                                                                                                                                                                                                                                                                                                                                                                                                                                                                                                                                                                                                                                                                                                                                                                                                                                                                                                                                                                       | 526 | 524 | 0         | 99.6  | 83.3 | 88.8  | hypothetical protein CARUB_v10023001mg | gbpln | Capsella rubella     | AT2G21860.1   Symbols:   violaxanthin de-epoxidase-related   chr2:9318333-9319990 REVERSE LENGTH=522                  | 526 | 522 | 0         | 99.2  | 82.7 | 87.8  |

|                          |                                                                                                                                                                                                                                                                                                                                                                                                                                                                                                      |     |      |           |        |      |      |                                        |       |                      |                                                                                                                                                                                                                                                                                                                                                                                                                                                                                                                                    |     |     |           |       |      |      |
|--------------------------|------------------------------------------------------------------------------------------------------------------------------------------------------------------------------------------------------------------------------------------------------------------------------------------------------------------------------------------------------------------------------------------------------------------------------------------------------------------------------------------------------|-----|------|-----------|--------|------|------|----------------------------------------|-------|----------------------|------------------------------------------------------------------------------------------------------------------------------------------------------------------------------------------------------------------------------------------------------------------------------------------------------------------------------------------------------------------------------------------------------------------------------------------------------------------------------------------------------------------------------------|-----|-----|-----------|-------|------|------|
| Rsa1.0_01778.1.g29734.t1 | refNP_179778.1  putative ATP synthase subunit [Arabidopsis thaliana] gi 25089793 sp Q9SJ1.2.1 ATP7_ARATH RecName: Full=Probable ATP synthase 24 kDa subunit, mitochondrial; Flags: Precursor gi 4417280 gb AAD20405.1  putative ATP synthase [Arabidopsis thaliana] gi 15028141 gb AAK76694.1  putative ATP synthase [Arabidopsis thaliana] gi 19310625 gb AAL85043.1  putative ATP synthase [Arabidopsis thaliana] gi 330252138 gb AEC07232.1  putative ATP synthase subunit [Arabidopsis thaliana] | 240 | 240  | 1.00E-125 | 100.0  | 93.8 | 98.3 | putative ATP synthase subunit          | gbpln | Arabidopsis thaliana | AT2G21870.1   Symbols: MGP1   copper ion binding; cobalt ion binding; zinc ion binding   chr2:9320456-9322618 REVERSE LENGTH=240                                                                                                                                                                                                                                                                                                                                                                                                   | 240 | 240 | 1.00E-128 | 100.0 | 93.8 | 98.3 |
| Rsa1.0_01778.1.g29735.t1 | gb EOA27909.1  hypothetical protein CARUB_v10024082mg [Capsella rubella]                                                                                                                                                                                                                                                                                                                                                                                                                             | 201 | 202  | 2.00E-93  | 100.5  | 82.1 | 90.5 | hypothetical protein CARUB_v10024082mg | gbpln | Capsella rubella     | AT2G21880.1   Symbols: ATRAB7A, ATRABG2, RAB7A   RAB GTPase homolog 7A   chr2:9324899-9326170 REVERSE LENGTH=212                                                                                                                                                                                                                                                                                                                                                                                                                   | 201 | 212 | 1.00E-90  | 105.5 | 80.6 | 89.6 |
| Rsa1.0_01778.1.g29736.t1 | gb ABK28704.1  unknown [Arabidopsis thaliana]                                                                                                                                                                                                                                                                                                                                                                                                                                                        | 230 | 366  | 1.00E-32  | 159.1  | 30.9 | 40.9 | unknown                                | gbpln | Arabidopsis thaliana | AT5G19270.1   Symbols:   unknown protein; BEST Arabidopsis thaliana protein match is: unknown protein (TAIR:AT4G03566.1); Has 30201 Blast hits to 17322 proteins in 780 species: Archae - 12; Bacteria - 1396; Metazoa - 17338; Fungi - 3422; Plants - 5037; Viruses - 0; Other Eukaryotes - 2996 (source: NCBI BLINK).   chr5:6485617-6487009 REVERSE LENGTH=365                                                                                                                                                                  | 230 | 365 | 4.00E-35  | 158.7 | 30.9 | 40.9 |
| Rsa1.0_01778.1.g29737.t1 | gb AAG50806.1 AC079281_8 unknown protein [Arabidopsis thaliana]                                                                                                                                                                                                                                                                                                                                                                                                                                      | 270 | 1213 | 4.00E-52  | 449.3  | 44.8 | 64.1 | unknown protein                        | gbpln | Arabidopsis thaliana | AT3G24255.1   Symbols:   RNA-directed DNA polymerase (reverse transcriptase)-related family protein   chr3:8789471-8793208 FORWARD LENGTH=746                                                                                                                                                                                                                                                                                                                                                                                      | 270 | 746 | 8.00E-23  | 276.3 | 17.0 | 25.6 |
| Rsa1.0_01778.1.g29738.t5 | gb EOA36857.1  hypothetical protein CARUB_v10008803mg [Capsella rubella]                                                                                                                                                                                                                                                                                                                                                                                                                             | 473 | 536  | 2.00E-48  | 113.3  | 20.1 | 26.6 | hypothetical protein CARUB_v10008803mg | gbpln | Capsella rubella     | AT5G28823.1   Symbols:   FUNCTIONS IN: molecular_function unknown; INVOLVED IN: biological_process unknown; LOCATED IN: cellular_component unknown; EXPRESSED IN: cultured cell; BEST Arabidopsis thaliana protein match is: Zinc knuckle (CCHC-type) family protein (TAIR:AT2G07760.1); Has 30201 Blast hits to 17322 proteins in 780 species: Archae - 12; Bacteria - 1396; Metazoa - 17338; Fungi - 3422; Plants - 5037; Viruses - 0; Other Eukaryotes - 2996 (source: NCBI BLINK).   chr5:10837849-10839826 REVERSE LENGTH=568 | 473 | 568 | 1.00E-42  | 120.1 | 15.9 | 18.2 |
| Rsa1.0_01779.1.g29739.t1 | gb ABH07409.1  putative pol polyprotein [Brassica oleracea var. botrytis] refNP_001190033.1                                                                                                                                                                                                                                                                                                                                                                                                          | 117 | 1239 | 7.00E-36  | 1059.0 | 59.0 | 67.5 | putative pol polyprotein               | gbpln | Brassica oleracea    | #                                                                                                                                                                                                                                                                                                                                                                                                                                                                                                                                  | #   | #   | #         | #     | #    |      |
| Rsa1.0_01779.1.g29740.t2 | xyloglucan:xyloglucosyl transferase [Arabidopsis thaliana] gi 332644912 gb AEE78433.1  probable xyloglucan endotransglucosylase/hydrolase protein 11 [Arabidopsis thaliana]                                                                                                                                                                                                                                                                                                                          | 266 | 257  | 1.00E-90  | 96.6   | 64.7 | 78.2 | xyloglucan:xyloglucosyl transferase    | gbpln | Arabidopsis thaliana | AT3G48580.2   Symbols: XTH11   xyloglucan endotransglucosylase/hydrolase 11   chr3:18007238-18008341 FORWARD LENGTH=257                                                                                                                                                                                                                                                                                                                                                                                                            | 266 | 257 | 4.00E-93  | 96.6  | 64.7 | 78.2 |
| Rsa1.0_01779.1.g29741.t1 | refNP_199277.1  beta glucosidase 13 [Arabidopsis thaliana] gi 75311572 sp Q9LU02.1 BGL13_ARATH RecName: Full=Beta-glucosidase 13; Short=AtBGLU13; Flags: Precursor gi 8953762 dbj BAA98117.1  beta-glucosidase [Arabidopsis thaliana] gi 190610068 gb ACE79745.1  At5g44640 [Arabidopsis thaliana] gi 332007759 gb AED95142.1  beta glucosidase 13 [Arabidopsis thaliana]                                                                                                                            | 507 | 507  | 0         | 100.0  | 87.4 | 93.5 | beta glucosidase 13                    | gbpln | Arabidopsis thaliana | AT5G44640.1   Symbols: BGLU13   beta glucosidase 13   chr5:18011146-18012669 FORWARD LENGTH=507                                                                                                                                                                                                                                                                                                                                                                                                                                    | 507 | 507 | 0         | 100.0 | 87.4 | 93.5 |
| Rsa1.0_01779.1.g29742.t1 | refNP_190435.1  uncharacterized protein [Arabidopsis thaliana] gi 6523097 emb CAB62355.1  putative protein [Arabidopsis thaliana] gi 332644920 gb AEE78441.1  uncharacterized protein AT3G48660 [Arabidopsis thaliana]                                                                                                                                                                                                                                                                               | 69  | 89   | 3.00E-28  | 129.0  | 92.8 | 97.1 | uncharacterized protein                | gbpln | Arabidopsis thaliana | AT3G48660.1   Symbols:   Protein of unknown function (DUF 3339)   chr3:18029659-18030133 FORWARD LENGTH=89                                                                                                                                                                                                                                                                                                                                                                                                                         | 69  | 89  | 6.00E-31  | 129.0 | 92.8 | 97.1 |
| Rsa1.0_01779.1.g29743.t1 | refXP_002875916.1  XH/XS domain-containing protein [Arabidopsis lyrata subsp. lyrata] gi 297321754 gb EFH52175.1  XH/XS domain-containing protein [Arabidopsis lyrata subsp. lyrata]                                                                                                                                                                                                                                                                                                                 | 643 | 647  | 0         | 100.6  | 80.4 | 89.7 | XH/XS domain-containing protein        | gbpln | Arabidopsis lyrata   | AT3G48670.2   Symbols: IDN2, RDM12   XH/XS domain-containing protein   chr3:18031240-18033615 FORWARD LENGTH=647                                                                                                                                                                                                                                                                                                                                                                                                                   | 643 | 647 | 0         | 100.6 | 79.6 | 88.3 |

|                          |                                                                                                                                                                                                                                                                                                                                                                                                                                                                                                                                                                                                                                                                                                                                                                                                                                                                                                                                                                                                                                                                                                                                                                                                                                                                                                                                                                                                                                                                                                                                                                                                                                                                                                                                                                                                     |     |      |           |       |      |      |                                                    |       |                      |                                                                                                                                                                                                                                                              |     |     |           |       |      |      |
|--------------------------|-----------------------------------------------------------------------------------------------------------------------------------------------------------------------------------------------------------------------------------------------------------------------------------------------------------------------------------------------------------------------------------------------------------------------------------------------------------------------------------------------------------------------------------------------------------------------------------------------------------------------------------------------------------------------------------------------------------------------------------------------------------------------------------------------------------------------------------------------------------------------------------------------------------------------------------------------------------------------------------------------------------------------------------------------------------------------------------------------------------------------------------------------------------------------------------------------------------------------------------------------------------------------------------------------------------------------------------------------------------------------------------------------------------------------------------------------------------------------------------------------------------------------------------------------------------------------------------------------------------------------------------------------------------------------------------------------------------------------------------------------------------------------------------------------------|-----|------|-----------|-------|------|------|----------------------------------------------------|-------|----------------------|--------------------------------------------------------------------------------------------------------------------------------------------------------------------------------------------------------------------------------------------------------------|-----|-----|-----------|-------|------|------|
| Rsa1.0_01779.1.g29744.t1 | refXP_002877622.1   hypothetical protein ARALYDRAFT_485224 [Arabidopsis lyrata subsp. lyrata] gi 297323460 gb EFH53881.1   hypothetical protein ARALYDRAFT_485224 [Arabidopsis lyrata subsp. lyrata] refNP_190440.1   DEK domain-containing chromatin associated protein [Arabidopsis thaliana] gi 6523102 emb CAB62360.1   putative protein [Arabidopsis thaliana] gi 110739700 dbj BAF01757.1   hypothetical protein [Arabidopsis thaliana] gi 110739801 dbj BAF01807.1   hypothetical protein [Arabidopsis thaliana] gi 110740095 dbj BAF01949.1   hypothetical protein [Arabidopsis thaliana] gi 115646710 gb ABJ17090.1   AT3g48710 [Arabidopsis thaliana] gi 332644927 gb AEE78448.1   DEK domain-containing chromatin associated protein [Arabidopsis thaliana] refNP_190443.1   Nodulin MtN3-like protein [Arabidopsis thaliana] gi 75206789 sp Q9SMM5.1   [SWT11_ARAT H RecName: Full=Bidirectional sugar transporter SWEET11; Short=ATSWEET11 gi 13605686 gb AAK32837.1   AF361825.1   AT3g48740/T8P19.250 [Arabidopsis thaliana] gi 16930411 gb AAL31891.1   AF419559.1   AT3g48740/T8P19.250 [Arabidopsis thaliana] gi 6523105 emb CAB62363.1   MTN3-like protein [Arabidopsis thaliana] gi 17979365 gb AAL49908.1   putative MTN3 protein [Arabidopsis thaliana] gi 18700264 gb AAL7742.1   AT3g48740/T8P19.250 [Arabidopsis thaliana] gi 20465523 gb AAM20244.1   putative MTN3 protein [Arabidopsis thaliana] gi 332644930 gb AEE78451.1   bidirectional sugar transporter SWEET11 [Arabidopsis thaliana] refXP_002891289.1   hypothetical protein ARALYDRAFT_891393 [Arabidopsis lyrata subsp. lyrata] gi 297337131 gb EFH67548.1   hypothetical protein ARALYDRAFT_891393 [Arabidopsis lyrata subsp. lyrata] dbj BAB09991.1   mutator-like transposase-like [Arabidopsis thaliana] | 324 | 323  | 1.00E-151 | 99.7  | 78.1 | 88.6 | hypothetical protein ARALYDRAFT_485224             | gbpln | Arabidopsis lyrata   | AT3G48690.1   Symbols: ATCXE12, CXE12   alpha/beta-Hydrolases superfamily protein   chr3:18037186-18038160 REVERSE LENGTH=324                                                                                                                                | 324 | 324 | 1.00E-144 | 100.0 | 77.5 | 87.0 |
| Rsa1.0_01779.1.g29745.t1 | refNP_190443.1   Nodulin MtN3-like protein [Arabidopsis thaliana] gi 75206789 sp Q9SMM5.1   [SWT11_ARAT H RecName: Full=Bidirectional sugar transporter SWEET11; Short=ATSWEET11 gi 13605686 gb AAK32837.1   AF361825.1   AT3g48740/T8P19.250 [Arabidopsis thaliana] gi 16930411 gb AAL31891.1   AF419559.1   AT3g48740/T8P19.250 [Arabidopsis thaliana] gi 6523105 emb CAB62363.1   MTN3-like protein [Arabidopsis thaliana] gi 17979365 gb AAL49908.1   putative MTN3 protein [Arabidopsis thaliana] gi 18700264 gb AAL7742.1   AT3g48740/T8P19.250 [Arabidopsis thaliana] gi 20465523 gb AAM20244.1   putative MTN3 protein [Arabidopsis thaliana] gi 332644930 gb AEE78451.1   bidirectional sugar transporter SWEET11 [Arabidopsis thaliana] refXP_002891289.1   hypothetical protein ARALYDRAFT_891393 [Arabidopsis lyrata subsp. lyrata] gi 297337131 gb EFH67548.1   hypothetical protein ARALYDRAFT_891393 [Arabidopsis lyrata subsp. lyrata] dbj BAB09991.1   mutator-like transposase-like [Arabidopsis thaliana]                                                                                                                                                                                                                                                                                                                                                                                                                                                                                                                                                                                                                                                                                                                                                                        | 442 | 462  | 1.00E-150 | 104.5 | 69.9 | 81.2 | DEK domain-containing chromatin associated protein | gbpln | Arabidopsis thaliana | AT3G48710.1   Symbols:   DEK domain-containing chromatin associated protein   chr3:18041024-18043995 FORWARD LENGTH=462                                                                                                                                      | 442 | 462 | 1.00E-153 | 104.5 | 69.9 | 81.2 |
| Rsa1.0_01779.1.g29746.t1 | refNP_190443.1   Nodulin MtN3-like protein [Arabidopsis thaliana] gi 75206789 sp Q9SMM5.1   [SWT11_ARAT H RecName: Full=Bidirectional sugar transporter SWEET11; Short=ATSWEET11 gi 13605686 gb AAK32837.1   AF361825.1   AT3g48740/T8P19.250 [Arabidopsis thaliana] gi 16930411 gb AAL31891.1   AF419559.1   AT3g48740/T8P19.250 [Arabidopsis thaliana] gi 6523105 emb CAB62363.1   MTN3-like protein [Arabidopsis thaliana] gi 17979365 gb AAL49908.1   putative MTN3 protein [Arabidopsis thaliana] gi 18700264 gb AAL7742.1   AT3g48740/T8P19.250 [Arabidopsis thaliana] gi 20465523 gb AAM20244.1   putative MTN3 protein [Arabidopsis thaliana] gi 332644930 gb AEE78451.1   bidirectional sugar transporter SWEET11 [Arabidopsis thaliana] refXP_002891289.1   hypothetical protein ARALYDRAFT_891393 [Arabidopsis lyrata subsp. lyrata] gi 297337131 gb EFH67548.1   hypothetical protein ARALYDRAFT_891393 [Arabidopsis lyrata subsp. lyrata] dbj BAB09991.1   mutator-like transposase-like [Arabidopsis thaliana]                                                                                                                                                                                                                                                                                                                                                                                                                                                                                                                                                                                                                                                                                                                                                                        | 274 | 289  | 1.00E-128 | 105.5 | 84.3 | 90.1 | Nodulin MtN3-like protein                          | gbpln | Arabidopsis thaliana | AT3G48740.1   Symbols: SWEET11, ATSWEET11   Nodulin MtN3 family protein   chr3:18052814-18054663 REVERSE LENGTH=289                                                                                                                                          | 274 | 289 | 1.00E-131 | 105.5 | 84.3 | 90.1 |
| Rsa1.0_01780.1.g29747.t1 | refXP_002891289.1   hypothetical protein ARALYDRAFT_891393 [Arabidopsis lyrata subsp. lyrata] gi 297337131 gb EFH67548.1   hypothetical protein ARALYDRAFT_891393 [Arabidopsis lyrata subsp. lyrata] dbj BAB09991.1   mutator-like transposase-like [Arabidopsis thaliana]                                                                                                                                                                                                                                                                                                                                                                                                                                                                                                                                                                                                                                                                                                                                                                                                                                                                                                                                                                                                                                                                                                                                                                                                                                                                                                                                                                                                                                                                                                                          | 100 | 101  | 2.00E-45  | 101.0 | 91.0 | 96.0 | hypothetical protein ARALYDRAFT_891393             | gbpln | Arabidopsis lyrata   | AT1G44414.1   Symbols:   unknown protein; Has 29 Blast hits to 29 proteins in 12 species: Archae - 0; Bacteria - 4; Metazoa - 0; Fungi - 0; Plants - 25; Viruses - 0; Other Eukaryotes - 0 (source: NCBI BLINK).   chr1:16847781-16848086 FORWARD LENGTH=101 | 100 | 101 | 1.00E-47  | 101.0 | 90.0 | 96.0 |
| Rsa1.0_01780.1.g29748.t1 | dbj BAB09991.1   mutator-like transposase-like [Arabidopsis thaliana]                                                                                                                                                                                                                                                                                                                                                                                                                                                                                                                                                                                                                                                                                                                                                                                                                                                                                                                                                                                                                                                                                                                                                                                                                                                                                                                                                                                                                                                                                                                                                                                                                                                                                                                               | 604 | 825  | 4.00E-64  | 136.6 | 27.0 | 37.3 | mutator-like transposase-like                      | gbpln | Arabidopsis thaliana | #                                                                                                                                                                                                                                                            | #   | #   | #         | #     | #    |      |
| Rsa1.0_01780.1.g29749.t1 | #                                                                                                                                                                                                                                                                                                                                                                                                                                                                                                                                                                                                                                                                                                                                                                                                                                                                                                                                                                                                                                                                                                                                                                                                                                                                                                                                                                                                                                                                                                                                                                                                                                                                                                                                                                                                   | #   | #    | #         | #     | #    | -    | -                                                  | ----  | ----                 | #                                                                                                                                                                                                                                                            | #   | #   | #         | #     | #    |      |
| Rsa1.0_01780.1.g29750.t1 | emb CAJ86406.1   OSIGBa0125M19.9 [Oryza sativa Indica Group]                                                                                                                                                                                                                                                                                                                                                                                                                                                                                                                                                                                                                                                                                                                                                                                                                                                                                                                                                                                                                                                                                                                                                                                                                                                                                                                                                                                                                                                                                                                                                                                                                                                                                                                                        | 212 | 1903 | 4.00E-34  | 897.6 | 38.2 | 54.7 | OSIGBa0125M19.9                                    | gbpln | Oryza sativa         | #                                                                                                                                                                                                                                                            | #   | #   | #         | #     | #    |      |
| Rsa1.0_01780.1.g29751.t9 | #                                                                                                                                                                                                                                                                                                                                                                                                                                                                                                                                                                                                                                                                                                                                                                                                                                                                                                                                                                                                                                                                                                                                                                                                                                                                                                                                                                                                                                                                                                                                                                                                                                                                                                                                                                                                   | #   | #    | #         | #     | #    | -    | -                                                  | ----  | ----                 | #                                                                                                                                                                                                                                                            | #   | #   | #         | #     | #    |      |
| Rsa1.0_01780.1.g29752.t1 | #                                                                                                                                                                                                                                                                                                                                                                                                                                                                                                                                                                                                                                                                                                                                                                                                                                                                                                                                                                                                                                                                                                                                                                                                                                                                                                                                                                                                                                                                                                                                                                                                                                                                                                                                                                                                   | #   | #    | #         | #     | #    | -    | -                                                  | ----  | ----                 | #                                                                                                                                                                                                                                                            | #   | #   | #         | #     | #    |      |
| Rsa1.0_01780.1.g29753.t1 | gb AAD20433.1   putative retroelement pol polyprotein [Arabidopsis thaliana]                                                                                                                                                                                                                                                                                                                                                                                                                                                                                                                                                                                                                                                                                                                                                                                                                                                                                                                                                                                                                                                                                                                                                                                                                                                                                                                                                                                                                                                                                                                                                                                                                                                                                                                        | 334 | 889  | 3.00E-28  | 266.2 | 16.5 | 22.8 | putative retroelement pol polyprotein              | gbpln | Arabidopsis thaliana | #                                                                                                                                                                                                                                                            | #   | #   | #         | #     | #    |      |
| Rsa1.0_01780.1.g29754.t1 | gb ABB60093.1   IAA-amino acid hydrolase 6 [Brassica rapa]                                                                                                                                                                                                                                                                                                                                                                                                                                                                                                                                                                                                                                                                                                                                                                                                                                                                                                                                                                                                                                                                                                                                                                                                                                                                                                                                                                                                                                                                                                                                                                                                                                                                                                                                          | 418 | 461  | 0         | 110.3 | 95.0 | 96.7 | IAA-amino acid hydrolase 6                         | gbpln | Brassica rapa        | AT1G44350.1   Symbols: ILL6   IAA-leucine resistant (ILR)-like gene 6   chr1:16834749-16838201 REVERSE LENGTH=464                                                                                                                                            | 418 | 464 | 0         | 111.0 | 84.2 | 92.6 |

|                          |                                                                                                                                                                                                                                                                                                                                                                                                                                                                                                                                                                                                                                                                                                                                                                                                                                                                                                                                                                                                                                                                                                                                                                                                                                                                                                                                                                                                |     |     |           |       |      |      |                                                            |       |                      |                                                                                                                                                                                                                                                                                                                                                                    |     |     |           |       |      |      |
|--------------------------|------------------------------------------------------------------------------------------------------------------------------------------------------------------------------------------------------------------------------------------------------------------------------------------------------------------------------------------------------------------------------------------------------------------------------------------------------------------------------------------------------------------------------------------------------------------------------------------------------------------------------------------------------------------------------------------------------------------------------------------------------------------------------------------------------------------------------------------------------------------------------------------------------------------------------------------------------------------------------------------------------------------------------------------------------------------------------------------------------------------------------------------------------------------------------------------------------------------------------------------------------------------------------------------------------------------------------------------------------------------------------------------------|-----|-----|-----------|-------|------|------|------------------------------------------------------------|-------|----------------------|--------------------------------------------------------------------------------------------------------------------------------------------------------------------------------------------------------------------------------------------------------------------------------------------------------------------------------------------------------------------|-----|-----|-----------|-------|------|------|
| Rsa1.0_01781.1.g29755.t1 | ref NP_172716.1  D-isomer specific 2-hydroxyacid dehydrogenase-like protein [Arabidopsis thaliana]<br>gi 75311082 sp Q9LE33.1 HPR3_ARATH<br>RecName:<br>Full=Glyoxylate/hydroxyppyruvate reductase HPR3; AltName:<br>Full=NAD(P)H-dependent hydroxyppyruvate reductase 3;<br>Short=AtHPR3; Short=HPR 3<br>gi 8778636 gb AAF79644.1 AC025416.18 F5O11.29 [Arabidopsis thaliana]<br>gi 9502370 gb AAF88077.1 AC025417.5 T12C24.9 [Arabidopsis thaliana]<br>gi 44917547 gb AAS49098.1  At1g12550 [Arabidopsis thaliana]<br>gi 62320558 dbj BAD95166.1  hypothetical protein [Arabidopsis thaliana] gi 332190775 gb AEE28896.1  glyoxylate/hydroxyppyruvate reductase HPR3 [Arabidopsis thaliana]<br>ref NP_172716.1  D-isomer specific 2-hydroxyacid dehydrogenase-like protein [Arabidopsis thaliana]<br>gi 75311082 sp Q9LE33.1 HPR3_ARATH<br>RecName:<br>Full=Glyoxylate/hydroxyppyruvate reductase HPR3; AltName:<br>Full=NAD(P)H-dependent hydroxyppyruvate reductase 3;<br>Short=AtHPR3; Short=HPR 3<br>gi 8778636 gb AAF79644.1 AC025416.18 F5O11.29 [Arabidopsis thaliana]<br>gi 9502370 gb AAF88077.1 AC025417.5 T12C24.9 [Arabidopsis thaliana]<br>gi 44917547 gb AAS49098.1  At1g12550 [Arabidopsis thaliana]<br>gi 62320558 dbj BAD95166.1  hypothetical protein [Arabidopsis thaliana] gi 332190775 gb AEE28896.1  glyoxylate/hydroxyppyruvate reductase HPR3 [Arabidopsis thaliana] | 320 | 323 | 1.00E-133 | 100.9 | 72.8 | 84.1 | D-isomer specific 2-hydroxyacid dehydrogenase-like protein | gbpln | Arabidopsis thaliana | AT1G12550.1   Symbols:   D-isomer specific 2-hydroxyacid dehydrogenase family protein   chr1:4274649-4275831 FORWARD LENGTH=323                                                                                                                                                                                                                                    | 320 | 323 | 1.00E-136 | 100.9 | 72.8 | 84.1 |
| Rsa1.0_01781.1.g29756.t1 | ref NP_172716.1  D-isomer specific 2-hydroxyacid dehydrogenase-like protein [Arabidopsis thaliana]<br>gi 75311082 sp Q9LE33.1 HPR3_ARATH<br>RecName:<br>Full=Glyoxylate/hydroxyppyruvate reductase HPR3; AltName:<br>Full=NAD(P)H-dependent hydroxyppyruvate reductase 3;<br>Short=AtHPR3; Short=HPR 3<br>gi 8778636 gb AAF79644.1 AC025416.18 F5O11.29 [Arabidopsis thaliana]<br>gi 9502370 gb AAF88077.1 AC025417.5 T12C24.9 [Arabidopsis thaliana]<br>gi 44917547 gb AAS49098.1  At1g12550 [Arabidopsis thaliana]<br>gi 62320558 dbj BAD95166.1  hypothetical protein [Arabidopsis thaliana] gi 332190775 gb AEE28896.1  glyoxylate/hydroxyppyruvate reductase HPR3 [Arabidopsis thaliana]                                                                                                                                                                                                                                                                                                                                                                                                                                                                                                                                                                                                                                                                                                  | 319 | 323 | 1.00E-133 | 101.3 | 72.4 | 84.6 | D-isomer specific 2-hydroxyacid dehydrogenase-like protein | gbpln | Arabidopsis thaliana | AT1G12550.1   Symbols:   D-isomer specific 2-hydroxyacid dehydrogenase family protein   chr1:4274649-4275831 FORWARD LENGTH=323                                                                                                                                                                                                                                    | 319 | 323 | 1.00E-135 | 101.3 | 72.4 | 84.6 |
| Rsa1.0_01781.1.g29757.t1 | #                                                                                                                                                                                                                                                                                                                                                                                                                                                                                                                                                                                                                                                                                                                                                                                                                                                                                                                                                                                                                                                                                                                                                                                                                                                                                                                                                                                              | #   | #   | #         | #     | #    | -    | ----                                                       | ----  | #                    | #                                                                                                                                                                                                                                                                                                                                                                  | #   | #   | #         | #     | #    |      |
| Rsa1.0_01781.1.g29758.t1 | ref NP_172715.4  basic helix-loop-helix domain-containing protein [Arabidopsis thaliana]<br>gi 75311390 sp Q9LN95.1 BH055_ARATH<br>RecName: Full=Transcription factor bHLH55; AltName: Full=Basic helix-loop-helix protein 55; Short=AtbHLH55; Short=bHLH 55; AltName: Full=Transcription factor EN 1; AltName: Full=bHLH transcription factor bHLH055<br>gi 8778635 gb AAF79643.1 AC025416.17 F5O11.28 [Arabidopsis thaliana]<br>gi 332190774 gb AEE28895.1  transcription factor bHLH55 [Arabidopsis thaliana]                                                                                                                                                                                                                                                                                                                                                                                                                                                                                                                                                                                                                                                                                                                                                                                                                                                                               | 258 | 257 | 2.00E-95  | 99.6  | 68.2 | 77.5 | basic helix-loop-helix domain-containing protein           | gbpln | Arabidopsis thaliana | AT1G12540.1   Symbols:   basic helix-loop-helix (bHLH) DNA-binding superfamily protein   chr1:4272960-4273980 FORWARD LENGTH=257                                                                                                                                                                                                                                   | 258 | 257 | 5.00E-98  | 99.6  | 68.2 | 77.5 |
| Rsa1.0_01781.1.g29759.t1 | #                                                                                                                                                                                                                                                                                                                                                                                                                                                                                                                                                                                                                                                                                                                                                                                                                                                                                                                                                                                                                                                                                                                                                                                                                                                                                                                                                                                              | #   | #   | #         | #     | #    | -    | ----                                                       | ----  | #                    | #                                                                                                                                                                                                                                                                                                                                                                  | #   | #   | #         | #     | #    |      |
| Rsa1.0_01781.1.g29760.t1 | gb EOA36720.1  hypothetical protein CARUB_v10012364mg [Capsella rubella]                                                                                                                                                                                                                                                                                                                                                                                                                                                                                                                                                                                                                                                                                                                                                                                                                                                                                                                                                                                                                                                                                                                                                                                                                                                                                                                       | 291 | 179 | 3.00E-62  | 61.5  | 46.0 | 49.1 | hypothetical protein CARUB_v10012364mg                     | gbpln | Capsella rubella     | AT1G12530.1   Symbols:   unknown protein; BEST Arabidopsis thaliana protein match is: unknown protein (TAIR:AT1G56420.1); Has 54 Blast hits to 53 proteins in 13 species: Archae - 0; Bacteria - 0; Metazoa - 0; Fungi - 0; Plants - 54; Viruses - 0; Other Eukaryotes - 0 (source: NCBI BLink).   chr1:4269122-4270771 REVERSE LENGTH=193                         | 291 | 193 | 2.00E-64  | 66.3  | 45.7 | 51.5 |
| Rsa1.0_01781.1.g29761.t1 | ref XP_002891818.1  hypothetical protein ARALYDRAFT_474572 [Arabidopsis lyrata subsp. lyrata]<br>gi 297337660 gb EFH68077.1  hypothetical protein ARALYDRAFT_474572 [Arabidopsis lyrata subsp. lyrata]                                                                                                                                                                                                                                                                                                                                                                                                                                                                                                                                                                                                                                                                                                                                                                                                                                                                                                                                                                                                                                                                                                                                                                                         | 622 | 273 | 2.00E-84  | 43.9  | 27.3 | 32.0 | hypothetical protein ARALYDRAFT_474572                     | gbpln | Arabidopsis lyrata   | AT1G55170.1   Symbols:   unknown protein; BEST Arabidopsis thaliana protein match is: unknown protein (TAIR:AT3G14750.1); Has 13439 Blast hits to 8993 proteins in 828 species: Archae - 344; Bacteria - 1469; Metazoa - 6958; Fungi - 1008; Plants - 683; Viruses - 29; Other Eukaryotes - 2948 (source: NCBI BLink).   chr1:20580578-20581706 FORWARD LENGTH=283 | 622 | 283 | 7.00E-83  | 45.5  | 26.8 | 31.8 |
| Rsa1.0_01782.1.g29762.t1 | gb EOA19622.1  hypothetical protein CARUB_v10002949mg [Capsella rubella]                                                                                                                                                                                                                                                                                                                                                                                                                                                                                                                                                                                                                                                                                                                                                                                                                                                                                                                                                                                                                                                                                                                                                                                                                                                                                                                       | 329 | 333 | 1.00E-140 | 101.2 | 84.8 | 89.1 | hypothetical protein CARUB_v10002949mg                     | gbpln | Capsella rubella     | AT5G23000.1   Symbols: RAX1, MYB37, ATMYB37   myb domain protein 37   chr5:7696234-7697712 FORWARD LENGTH=329                                                                                                                                                                                                                                                      | 329 | 329 | 1.00E-129 | 100.0 | 81.2 | 87.2 |

|                          |                                                                                                                                                                                                                                                                                                                                                                                                                                                                                                                                                                                                                             |     |     |           |       |      |       |                                        |       |                      |                                                                                                                                                                                                                                                                                                                                             |     |     |           |       |      |      |
|--------------------------|-----------------------------------------------------------------------------------------------------------------------------------------------------------------------------------------------------------------------------------------------------------------------------------------------------------------------------------------------------------------------------------------------------------------------------------------------------------------------------------------------------------------------------------------------------------------------------------------------------------------------------|-----|-----|-----------|-------|------|-------|----------------------------------------|-------|----------------------|---------------------------------------------------------------------------------------------------------------------------------------------------------------------------------------------------------------------------------------------------------------------------------------------------------------------------------------------|-----|-----|-----------|-------|------|------|
| Rsa1.0_01782.1.g29763.t1 | refXP_002872027.1   hypothetical protein ARALYDRAFT_489152 [Arabidopsis lyrata subsp. lyrata] gi 297317864 gb EFH48286.1                                                                                                                                                                                                                                                                                                                                                                                                                                                                                                    | 507 | 508 | 0         | 100.2 | 78.1 | 86.2  | hypothetical protein ARALYDRAFT_489152 | gbpln | Arabidopsis lyrata   | AT5G22980.1   Symbols: scpl47   serine carboxypeptidase-like 47   chr5:7688084-7690481 FORWARD LENGTH=505                                                                                                                                                                                                                                   | 507 | 505 | 0         | 99.6  | 77.7 | 86.2 |
| Rsa1.0_01782.1.g29764.t1 | refXP_002872026.1   SNF7 family protein [Arabidopsis lyrata subsp. lyrata] gi 297317863 gb EFH48285.1   SNF7 family protein [Arabidopsis lyrata subsp. lyrata]                                                                                                                                                                                                                                                                                                                                                                                                                                                              | 219 | 229 | 2.00E-92  | 104.6 | 86.3 | 94.5  | SNF7 family protein                    | gbpln | Arabidopsis lyrata   | AT5G22950.1   Symbols: VPS24.1   SNF7 family protein   chr5:7681380-7682720 FORWARD LENGTH=229                                                                                                                                                                                                                                              | 219 | 229 | 7.00E-94  | 104.6 | 85.8 | 94.1 |
| Rsa1.0_01782.1.g29765.t1 | refXP_002872023.1   ATCHX3 [Arabidopsis lyrata subsp. lyrata] gi 297317860 gb EFH48282.1   ATCHX3 [Arabidopsis lyrata subsp. lyrata]                                                                                                                                                                                                                                                                                                                                                                                                                                                                                        | 814 | 815 | 0         | 100.1 | 85.4 | 93.5  | ATCHX3                                 | gbpln | Arabidopsis lyrata   | AT5G22900.1   Symbols: ATCHX3, CHX3   cation/H <sup>+</sup> exchanger 3   chr5:7657224-7659868 FORWARD LENGTH=822                                                                                                                                                                                                                           | 814 | 822 | 0         | 101.0 | 84.4 | 92.6 |
| Rsa1.0_01782.1.g29766.t1 | gb EOA22034.1   hypothetical protein CARUB_v10002559mg [Capsella rubella]                                                                                                                                                                                                                                                                                                                                                                                                                                                                                                                                                   | 374 | 369 | 1.00E-148 | 98.7  | 72.5 | 82.1  | hypothetical protein CARUB_v10002559mg | gbpln | Capsella rubella     | AT5G22890.1   Symbols:   C2H2 and C2HC zinc fingers superfamily protein   chr5:7653541-7654662 REVERSE LENGTH=373                                                                                                                                                                                                                           | 374 | 373 | 1.00E-149 | 99.7  | 70.6 | 81.6 |
| Rsa1.0_01782.1.g29767.t1 | #                                                                                                                                                                                                                                                                                                                                                                                                                                                                                                                                                                                                                           | #   | #   | #         | #     | #    | #     | -                                      | ----  | ----                 | #                                                                                                                                                                                                                                                                                                                                           | #   | #   | #         | #     | #    | #    |
| Rsa1.0_01782.1.g29768.t1 | #                                                                                                                                                                                                                                                                                                                                                                                                                                                                                                                                                                                                                           | #   | #   | #         | #     | #    | #     | -                                      | ----  | ----                 | #                                                                                                                                                                                                                                                                                                                                           | #   | #   | #         | #     | #    | #    |
| Rsa1.0_01782.1.g29769.t1 | refNP_190184.1   histone H2B [Arabidopsis thaliana] gi 297819124 ref XP_002877445.1   hypothetical protein ARALYDRAFT_484977 [Arabidopsis lyrata subsp. lyrata] gi 75097936 sp C23629.3 H2B6 ARATH RecName: Full=Histone H2B.6; AltName: Full=H2BA; AltName: Full=HTB9 gi 2407802 emb CAA73156.1   histone H2B [Arabidopsis thaliana] gi 7339499 emb CAB8282.1   histone H2B [Arabidopsis thaliana] gi 21592825 gb AAM64775.1   histone H2B [Arabidopsis thaliana] gi 30102580 gb AAP21208.1   At3g45980 [Arabidopsis thaliana] gi 110743640 cbj BAE99657.1   histone H2B [Arabidopsis thaliana] gi 297323283 gb EFH53704.1 | 141 | 150 | 2.00E-57  | 106.4 | 90.8 | 92.9  | histone H2B                            | gbpln | Arabidopsis lyrata   | AT3G45980.1   Symbols: H2B, HTB9   Histone superfamily protein   chr3:16897492-16897944 REVERSE LENGTH=150                                                                                                                                                                                                                                  | 141 | 150 | 4.00E-60  | 106.4 | 90.8 | 92.9 |
| Rsa1.0_01782.1.g29770.t1 | hypothetical protein ARALYDRAFT_484977 [Arabidopsis lyrata subsp. lyrata] gi 332644576 gb AAE78097.1   histone H2B [Arabidopsis thaliana] gb AAC19278.1   T14P8.10 [Arabidopsis thaliana] gi 7269009 emb CAB80742.1   AT4g02490 [Arabidopsis thaliana]                                                                                                                                                                                                                                                                                                                                                                      | 627 | 657 | 1.00E-153 | 104.8 | 42.7 | 56.0  | T14P8.10                               | gbpln | Arabidopsis thaliana | AT3G24255.1   Symbols:   RNA-directed DNA polymerase (reverse transcriptase)-related family protein   chr3:8789471-8793208 FORWARD LENGTH=746                                                                                                                                                                                               | 627 | 746 | 8.00E-66  | 119.0 | 23.8 | 32.5 |
| Rsa1.0_01782.1.g29771.t1 | refXP_002874099.1   hypothetical protein ARALYDRAFT_910289 [Arabidopsis lyrata subsp. lyrata] gi 297319936 gb EFH50358.1                                                                                                                                                                                                                                                                                                                                                                                                                                                                                                    | 132 | 208 | 1.00E-57  | 157.6 | 81.8 | 89.4  | hypothetical protein ARALYDRAFT_910289 | gbpln | Arabidopsis lyrata   | AT5G22870.1   Symbols:   Late embryogenesis abundant (LEA) hydroxyproline-rich glycoprotein family   chr5:7647056-7647679 REVERSE LENGTH=207                                                                                                                                                                                                | 132 | 207 | 8.00E-60  | 156.8 | 80.3 | 90.2 |
| Rsa1.0_01783.1.g29772.t1 | refXP_002877969.1   hypothetical protein ARALYDRAFT_485829 [Arabidopsis lyrata subsp. lyrata] gi 297323807 gb EFH54228.1   hypothetical protein ARALYDRAFT_485829 [Arabidopsis lyrata subsp. lyrata]                                                                                                                                                                                                                                                                                                                                                                                                                        | 363 | 359 | 1.00E-153 | 98.9  | 78.2 | 82.9  | hypothetical protein ARALYDRAFT_485829 | gbpln | Arabidopsis lyrata   | AT3G54310.1   Symbols:   unknown protein; BEST Arabidopsis thaliana protein match is: unknown protein (TAIR:AT2G38430.1); Has 44 Blast hits to 41 proteins in 9 species: Archae - 0; Bacteria - 0; Metazoa - 0; Fungi - 0; Plants - 44; Viruses - 0; Other Eukaryotes - 0 (source: NCBI BLINK).   chr3:20111153-20112944 REVERSE LENGTH=358 | 363 | 358 | 1.00E-153 | 98.6  | 75.8 | 81.8 |
| Rsa1.0_01783.1.g29773.t1 | gb ADO16346.1   wrinkled 1 [Brassica napus]                                                                                                                                                                                                                                                                                                                                                                                                                                                                                                                                                                                 | 415 | 415 | 0         | 100.0 | 92.8 | 95.9  | wrinkled 1                             | gbpln | Brassica napus       | AT3G54320.3   Symbols: WRI1, WRI, ASML1   Integrase-type DNA-binding superfamily protein   chr3:20114809-20118473 FORWARD LENGTH=430                                                                                                                                                                                                        | 415 | 430 | 1.00E-161 | 103.6 | 72.3 | 77.8 |
| Rsa1.0_01783.1.g29774.t1 | gb AAB08877.1   homeotic protein bor1AP3 [Brassica oleracea var. italica]                                                                                                                                                                                                                                                                                                                                                                                                                                                                                                                                                   | 232 | 232 | 1.00E-133 | 100.0 | 99.6 | 100.0 | homeotic protein bor1AP3               | gbpln | Brassica oleracea    | AT3G54340.1   Symbols: AP3, ATAP3   K-box region and MADS-box transcription factor family protein   chr3:20119428-20121087 REVERSE LENGTH=232                                                                                                                                                                                               | 232 | 232 | 1.00E-130 | 100.0 | 94.4 | 97.8 |
| Rsa1.0_01783.1.g29775.t1 | gb EOA24107.1   hypothetical protein CARUB_v10017338mg [Capsella rubella]                                                                                                                                                                                                                                                                                                                                                                                                                                                                                                                                                   | 400 | 415 | 0         | 103.8 | 89.0 | 95.3  | hypothetical protein CARUB_v10017338mg | gbpln | Capsella rubella     | AT3G54360.1   Symbols:   zinc ion binding   chr3:20128570-20131581 REVERSE LENGTH=405                                                                                                                                                                                                                                                       | 400 | 405 | 0         | 101.3 | 86.5 | 92.0 |
| Rsa1.0_01783.1.g29776.t1 | #                                                                                                                                                                                                                                                                                                                                                                                                                                                                                                                                                                                                                           | #   | #   | #         | #     | #    | #     | -                                      | ----  | ----                 | #                                                                                                                                                                                                                                                                                                                                           | #   | #   | #         | #     | #    | #    |



|                          |                                                                                                                                                                                                                                                                                                                                                                                                                                                                                                                                                                    |     |     |           |       |      |      |                                        |             |                      |                                                                                                                                   |     |     |           |       |      |      |
|--------------------------|--------------------------------------------------------------------------------------------------------------------------------------------------------------------------------------------------------------------------------------------------------------------------------------------------------------------------------------------------------------------------------------------------------------------------------------------------------------------------------------------------------------------------------------------------------------------|-----|-----|-----------|-------|------|------|----------------------------------------|-------------|----------------------|-----------------------------------------------------------------------------------------------------------------------------------|-----|-----|-----------|-------|------|------|
| Rsa1.0_01783.1.g29777.t2 | ref[XP_002877975.1] transcription factor [Arabidopsis lyrata subsp. lyrata] gi 297323813 gb EFH54234.1 transcription factor [Arabidopsis lyrata subsp. lyrata]                                                                                                                                                                                                                                                                                                                                                                                                     | 312 | 296 | 1.00E-126 | 94.9  | 81.7 | 87.2 | transcription factor                   | gbpln       | Arabidopsis lyrata   | AT3G54390.1   Symbols:   sequence-specific DNA binding transcription factors   chr3:20137912-20138863 REVERSE LENGTH=296          | 312 | 296 | 1.00E-127 | 94.9  | 80.1 | 86.9 |
| Rsa1.0_01783.1.g29778.t1 | dbj BAJ34532.1  unnamed protein product [Thellungiella halophila]                                                                                                                                                                                                                                                                                                                                                                                                                                                                                                  | 430 | 428 | 0         | 99.5  | 86.5 | 92.1 | unnamed protein product                | ----        | ----                 | AT3G54400.1   Symbols:   Eukaryotic aspartyl protease family protein   chr3:20140291-20142599 REVERSE LENGTH=425                  | 430 | 425 | 0         | 98.8  | 82.8 | 89.3 |
| Rsa1.0_01783.1.g29779.t1 | ref[XP_002876253.1] hypothetical protein ARALYDRAFT_485842 [Arabidopsis lyrata subsp. lyrata] gi 297322091 gb EFH52512.1 hypothetical protein ARALYDRAFT_485842 [Arabidopsis lyrata subsp. lyrata] ref[NP_191011.1] SHI-related sequence 6 [Arabidopsis thaliana] gi 17386152 gb AL38622.1 AF446889.1 AT3g54430/T12E18_120 [Arabidopsis thaliana] gi 7288021 emb CAB81808.1 putative protein [Arabidopsis thaliana] gi 15450615 gb AAK96579.1 AT3g54430/T12E18_120 [Arabidopsis thaliana] gi 332645708 gb AEE79229.1 SHI-related sequence 6 [Arabidopsis thaliana] | 273 | 273 | 1.00E-147 | 100.0 | 90.5 | 96.0 | hypothetical protein ARALYDRAFT_485842 | gbpln       | Arabidopsis lyrata   | AT3G54420.1   Symbols: ATEP3, ATCHITIV, CHIV, EP3   homolog of carrot EP3-3 chitinase   chr3:20145935-20147034 FORWARD LENGTH=273 | 273 | 273 | 1.00E-148 | 100.0 | 91.6 | 94.9 |
| Rsa1.0_01783.1.g29780.t1 | ref[NP_191011.1] SHI-related sequence 6 [Arabidopsis thaliana] gi 17386152 gb AL38622.1 AF446889.1 AT3g54430/T12E18_120 [Arabidopsis thaliana] gi 7288021 emb CAB81808.1 putative protein [Arabidopsis thaliana] gi 15450615 gb AAK96579.1 AT3g54430/T12E18_120 [Arabidopsis thaliana] gi 332645708 gb AEE79229.1 SHI-related sequence 6 [Arabidopsis thaliana]                                                                                                                                                                                                    | 188 | 183 | 1.00E-71  | 97.3  | 75.0 | 83.0 | SHI-related sequence 6                 | gbpln       | Arabidopsis thaliana | AT3G54430.1   Symbols: SRS6   SHI-related sequence 6   chr3:20147224-20147851 REVERSE LENGTH=183                                  | 188 | 183 | 5.00E-74  | 97.3  | 75.0 | 83.0 |
| Rsa1.0_01783.1.g29781.t1 | #                                                                                                                                                                                                                                                                                                                                                                                                                                                                                                                                                                  | #   | #   | #         | #     | #    | #    | -                                      | ----        | ----                 | #                                                                                                                                 | #   | #   | #         | #     | #    |      |
| Rsa1.0_01784.1.g29782.t1 | gb EOA25921.1  hypothetical protein CARUB_v10019301mg [Capsella rubella]                                                                                                                                                                                                                                                                                                                                                                                                                                                                                           | 150 | 153 | 4.00E-60  | 102.0 | 80.0 | 88.0 | hypothetical protein CARUB_v10019301mg | gbpln       | Capsella rubella     | AT3G58230.1   Symbols:   Ubiquitin-specific protease family C19-related protein   chr3:21566860-21567396 REVERSE LENGTH=153       | 150 | 153 | 1.00E-61  | 102.0 | 77.3 | 88.0 |
| Rsa1.0_01784.1.g29783.t1 | ref[XP_002891988.1] hypothetical protein ARALYDRAFT_892860 [Arabidopsis lyrata subsp. lyrata] gi 297337830 gb EFH68247.1 hypothetical protein ARALYDRAFT_892860 [Arabidopsis lyrata subsp. lyrata] ref[NP_191395.1] TRAF-like family protein [Arabidopsis thaliana] gi 6735348 emb CAB68174.1 putative protein [Arabidopsis thaliana] gi 332646252 gb AEE79773.1 TRAF-like family protein [Arabidopsis thaliana]                                                                                                                                                   | 217 | 320 | 7.00E-52  | 147.5 | 54.4 | 70.5 | hypothetical protein ARALYDRAFT_892860 | gbpln       | Arabidopsis lyrata   | AT3G58410.1   Symbols:   TRAF-like family protein   chr3:21604871-21606229 REVERSE LENGTH=328                                     | 217 | 328 | 9.00E-54  | 151.2 | 53.9 | 66.8 |
| Rsa1.0_01784.1.g29784.t1 | ref[NP_191395.1] TRAF-like family protein [Arabidopsis thaliana] gi 6735348 emb CAB68174.1 putative protein [Arabidopsis thaliana] gi 332646252 gb AEE79773.1 TRAF-like family protein [Arabidopsis thaliana]                                                                                                                                                                                                                                                                                                                                                      | 283 | 298 | 1.00E-109 | 105.3 | 70.0 | 82.7 | TRAF-like family protein               | gbpln       | Arabidopsis thaliana | AT3G58360.1   Symbols:   TRAF-like family protein   chr3:21593505-21594866 REVERSE LENGTH=298                                     | 283 | 298 | 1.00E-112 | 105.3 | 70.0 | 82.7 |
| Rsa1.0_01784.1.g29785.t1 | gb EOA25791.1  hypothetical protein CARUB_v10019158mg [Capsella rubella]                                                                                                                                                                                                                                                                                                                                                                                                                                                                                           | 180 | 180 | 7.00E-70  | 100.0 | 78.3 | 90.0 | hypothetical protein CARUB_v10019158mg | gbpln       | Capsella rubella     | AT3G58300.1   Symbols:   Arabidopsis phospholipase-like protein (PEARLI 4) family   chr3:21582764-21583390 REVERSE LENGTH=181     | 180 | 181 | 5.00E-68  | 100.6 | 81.7 | 91.1 |
| Rsa1.0_01784.1.g29786.t1 | ref[NP_191385.1] TRAF-like family protein [Arabidopsis thaliana] gi 6735338 emb CAB68164.1 putative protein [Arabidopsis thaliana] gi 332646239 gb AEE79760.1 TRAF-like family protein [Arabidopsis thaliana]                                                                                                                                                                                                                                                                                                                                                      | 286 | 321 | 2.00E-38  | 112.2 | 36.7 | 47.9 | TRAF-like family protein               | gbpln       | Arabidopsis thaliana | AT3G58260.1   Symbols:   TRAF-like family protein   chr3:21573754-21575114 REVERSE LENGTH=321                                     | 286 | 321 | 5.00E-41  | 112.2 | 36.7 | 47.9 |
| Rsa1.0_01784.1.g29787.t1 | gb EOA25921.1  hypothetical protein CARUB_v10019301mg [Capsella rubella]                                                                                                                                                                                                                                                                                                                                                                                                                                                                                           | 153 | 153 | 4.00E-67  | 100.0 | 83.0 | 92.2 | hypothetical protein CARUB_v10019301mg | gbpln       | Capsella rubella     | AT3G58230.1   Symbols:   Ubiquitin-specific protease family C19-related protein   chr3:21566860-21567396 REVERSE LENGTH=153       | 153 | 153 | 2.00E-69  | 100.0 | 81.7 | 92.2 |
| Rsa1.0_01785.1.g29788.t1 | gb EOA16372.1  hypothetical protein CARUB_v10004522mg [Capsella rubella]                                                                                                                                                                                                                                                                                                                                                                                                                                                                                           | 539 | 549 | 0         | 101.9 | 87.0 | 92.4 | hypothetical protein CARUB_v10004522mg | gbpln       | Capsella rubella     | AT5G37790.1   Symbols:   Protein kinase superfamily protein   chr5:15008433-15011025 REVERSE LENGTH=552                           | 539 | 552 | 0         | 102.4 | 85.5 | 90.7 |
| Rsa1.0_01785.1.g29789.t2 | ref[XP_003545476.1] PREDICTED: calmodulin-like isoform 4 [Glycine max]                                                                                                                                                                                                                                                                                                                                                                                                                                                                                             | 160 | 163 | 6.00E-78  | 101.9 | 93.1 | 96.3 | PREDICTED: calmodulin-like isoform 4   | gbenv/gbpln | Glycine max          | AT5G37780.2   Symbols: CAM1, TCH1, ACAM-1   calmodulin 1   chr5:15004769-15006117 REVERSE LENGTH=164                              | 160 | 164 | 3.00E-79  | 102.5 | 92.5 | 93.8 |
| Rsa1.0_01785.1.g29790.t1 | gb AGJ81361.1  small C2 domain protein [Brassica napus]                                                                                                                                                                                                                                                                                                                                                                                                                                                                                                            | 134 | 168 | 7.00E-65  | 125.4 | 88.8 | 95.5 | small C2 domain protein                | gbpln       | Brassica napus       | AT5G37740.1   Symbols:   Calcium-dependent lipid-binding (CaLB domain) family protein   chr5:14992148-14993431 FORWARD LENGTH=168 | 134 | 168 | 6.00E-59  | 125.4 | 77.6 | 89.6 |
| Rsa1.0_01785.1.g29791.t2 | ref[XP_002868538.1] C2 domain-containing protein [Arabidopsis lyrata subsp. lyrata] gi 297314374 gb EFH44797.1 C2 domain-containing protein [Arabidopsis lyrata subsp. lyrata]                                                                                                                                                                                                                                                                                                                                                                                     | 314 | 168 | 5.00E-79  | 53.5  | 45.2 | 49.0 | C2 domain-containing protein           | gbpln       | Arabidopsis lyrata   | AT5G37740.1   Symbols:   Calcium-dependent lipid-binding (CaLB domain) family protein   chr5:14992148-14993431 FORWARD LENGTH=168 | 314 | 168 | 7.00E-81  | 53.5  | 44.3 | 49.0 |

|                          |                                                                                                                                                                                                                                                                                                                                                                                                         |     |     |           |       |      |      |                                        |       |                      |                                                                                                                                                                                                                                                                                                                                                                   |     |     |           |       |      |      |
|--------------------------|---------------------------------------------------------------------------------------------------------------------------------------------------------------------------------------------------------------------------------------------------------------------------------------------------------------------------------------------------------------------------------------------------------|-----|-----|-----------|-------|------|------|----------------------------------------|-------|----------------------|-------------------------------------------------------------------------------------------------------------------------------------------------------------------------------------------------------------------------------------------------------------------------------------------------------------------------------------------------------------------|-----|-----|-----------|-------|------|------|
| Rsa1.0_01786.1.g29792.t1 | ref[XP_002871554.1] hypothetical protein ARALYDRAFT_488138 [Arabidopsis lyrata subsp. lyrata] gi 297317391 gb EFH47813.1]                                                                                                                                                                                                                                                                               | 197 | 198 | 4.00E-76  | 100.5 | 75.1 | 85.3 | hypothetical protein ARALYDRAFT_488138 | gbpln | Arabidopsis lyrata   | AT5G13220.1   Symbols: JAZ10, TIFY9, JAS1   jasmonate-zim-domain protein 10   chr5:4219001-4220502 FORWARD LENGTH=197                                                                                                                                                                                                                                             | 197 | 197 | 1.00E-76  | 100.0 | 74.1 | 83.2 |
| Rsa1.0_01786.1.g29793.t1 | #                                                                                                                                                                                                                                                                                                                                                                                                       | #   | #   | #         | #     | #    | #    | -                                      | ----  | ----                 | #                                                                                                                                                                                                                                                                                                                                                                 | #   | #   | #         | #     | #    |      |
| Rsa1.0_01786.1.g29794.t3 | gb[EOA20368.1] hypothetical protein CARUB_v10000682mg [Capsella rubella]                                                                                                                                                                                                                                                                                                                                | 411 | 533 | 2.00E-55  | 129.7 | 40.6 | 49.6 | hypothetical protein CARUB_v10000682mg | gbpln | Capsella rubella     | AT5G17160.1   Symbols:   unknown protein; BEST Arabidopsis thaliana protein match is: unknown protein (TAIR:AT3G03130.1); Has 14330 Blast hits to 10381 proteins in 896 species: Archae - 94; Bacteria - 2881; Metazoa - 4019; Fungi - 1576; Plants - 515; Viruses - 110; Other Eukaryotes - 5135 (source: NCBI BLINK).   chr5:5639843-5642427 REVERSE LENGTH=569 | 411 | 569 | 7.00E-57  | 138.4 | 42.1 | 51.6 |
| Rsa1.0_01786.1.g29795.t1 | ref[NP_196833.2] receptor-like kinase CORYNE [Arabidopsis thaliana] gi 332004492 gb AED91875.1] receptor-like kinase CORYNE [Arabidopsis thaliana]                                                                                                                                                                                                                                                      | 115 | 376 | 2.00E-32  | 327.0 | 58.3 | 60.9 | receptor-like kinase CORYNE            | gbpln | Arabidopsis thaliana | AT5G13290.1   Symbols: SOL2, CRN   Protein kinase superfamily protein   chr5:4252924-4254215 REVERSE LENGTH=376                                                                                                                                                                                                                                                   | 115 | 376 | 3.00E-35  | 327.0 | 58.3 | 60.9 |
| Rsa1.0_01786.1.g29796.t1 | #                                                                                                                                                                                                                                                                                                                                                                                                       | #   | #   | #         | #     | #    | #    | -                                      | ----  | ----                 | #                                                                                                                                                                                                                                                                                                                                                                 | #   | #   | #         | #     | #    |      |
| Rsa1.0_01786.1.g29797.t1 | gb[EOA21325.1] hypothetical protein CARUB_v10001686mg [Capsella rubella]                                                                                                                                                                                                                                                                                                                                | 275 | 274 | 1.00E-145 | 99.6  | 92.0 | 96.7 | hypothetical protein CARUB_v10001686mg | gbpln | Capsella rubella     | AT5G13430.1   Symbols:   Ubiquinol-cytochrome C reductase iron-sulfur subunit   chr5:4305414-4307399 REVERSE LENGTH=272                                                                                                                                                                                                                                           | 275 | 272 | 1.00E-147 | 98.9  | 93.5 | 96.7 |
| Rsa1.0_01786.1.g29798.t1 | gb[EOA21325.1] hypothetical protein CARUB_v10001686mg [Capsella rubella]                                                                                                                                                                                                                                                                                                                                | 273 | 274 | 2.33E-156 | 100.4 | 93.0 | 96.3 | hypothetical protein CARUB_v10001686mg | gbpln | Capsella rubella     | AT5G13430.1   Symbols:   Ubiquinol-cytochrome C reductase iron-sulfur subunit   chr5:4305414-4307399 REVERSE LENGTH=272                                                                                                                                                                                                                                           | 273 | 272 | 2.33E-156 | 99.6  | 92.7 | 96.0 |
| Rsa1.0_01786.1.g29799.t1 | gb[ABL97953.1] hydrogen-transporting ATP synthase [Brassica rapa]                                                                                                                                                                                                                                                                                                                                       | 235 | 244 | 1.00E-124 | 103.8 | 94.9 | 97.4 | hydrogen-transporting ATP synthase     | gbpln | Brassica rapa        | AT5G13450.1   Symbols: ATP5   delta subunit of Mt ATP synthase   chr5:4310558-4311941 REVERSE LENGTH=238                                                                                                                                                                                                                                                          | 235 | 238 | 1.00E-116 | 101.3 | 85.5 | 92.3 |
| Rsa1.0_01786.1.g29800.t1 | ref[NP_196850.1] protein IQ-domain 11 [Arabidopsis thaliana] gi 7543913 emb CAB67153.1] putative protein [Arabidopsis thaliana] gi 15451144 gb AAK96843.1] putative protein [Arabidopsis thaliana] gi 21554279 gb AAM63354.1] unknown [Arabidopsis thaliana] gi 22136116 gb AAM91136.1] putative protein [Arabidopsis thaliana] gi 332004514 gb AED91897.1] protein IQ-domain 11 [Arabidopsis thaliana] | 297 | 443 | 1.00E-75  | 149.2 | 50.5 | 58.9 | protein IQ-domain 11                   | gbpln | Arabidopsis thaliana | AT5G13460.1   Symbols: IQD11   IQ-domain 11   chr5:4316323-4318247 FORWARD LENGTH=443                                                                                                                                                                                                                                                                             | 297 | 443 | 3.00E-78  | 149.2 | 50.5 | 58.9 |
| Rsa1.0_01786.1.g29801.t1 | #                                                                                                                                                                                                                                                                                                                                                                                                       | #   | #   | #         | #     | #    | #    | -                                      | ----  | ----                 | #                                                                                                                                                                                                                                                                                                                                                                 | #   | #   | #         | #     | #    |      |
| Rsa1.0_01786.1.g29802.t1 | gb[EOA20110.1] hypothetical protein CARUB_v10000389mg [Capsella rubella]                                                                                                                                                                                                                                                                                                                                | 641 | 674 | 0         | 105.1 | 85.5 | 89.4 | hypothetical protein CARUB_v10000389mg | gbpln | Capsella rubella     | AT5G13480.1   Symbols: FY   Transducin/WD40 repeat-like superfamily protein   chr5:4326638-4331557 REVERSE LENGTH=647                                                                                                                                                                                                                                             | 641 | 647 | 0         | 100.9 | 81.7 | 85.6 |
| Rsa1.0_01786.1.g29803.t4 | ref[XP_002871570.1] hypothetical protein ARALYDRAFT_488169 [Arabidopsis lyrata subsp. lyrata] gi 297317407 gb EFH47829.1] hypothetical protein ARALYDRAFT_488169 [Arabidopsis lyrata subsp. lyrata]                                                                                                                                                                                                     | 685 | 384 | 1.00E-180 | 56.1  | 49.1 | 50.9 | hypothetical protein ARALYDRAFT_488169 | gbpln | Arabidopsis lyrata   | AT5G13490.2   Symbols: AAC2   ADP/ATP carrier 2   chr5:4336034-4337379 FORWARD LENGTH=385                                                                                                                                                                                                                                                                         | 685 | 385 | 1.00E-175 | 56.2  | 47.4 | 49.9 |
| Rsa1.0_01786.1.g29804.t1 | gb[EOA22850.1] hypothetical protein CARUB_v10003580mg [Capsella rubella]                                                                                                                                                                                                                                                                                                                                | 220 | 217 | 1.00E-107 | 98.6  | 90.9 | 95.0 | hypothetical protein CARUB_v10003580mg | gbpln | Capsella rubella     | AT5G13510.1   Symbols:   Ribosomal protein L10 family protein   chr5:4341294-4341956 FORWARD LENGTH=220                                                                                                                                                                                                                                                           | 220 | 220 | 1.00E-106 | 100.0 | 90.0 | 95.0 |
| Rsa1.0_01786.1.g29805.t1 | ref[XP_002873618.1] hypothetical protein ARALYDRAFT_909308 [Arabidopsis lyrata subsp. lyrata] gi 297319455 gb EFH49877.1] hypothetical protein ARALYDRAFT_909308 [Arabidopsis lyrata subsp. lyrata]                                                                                                                                                                                                     | 662 | 679 | 0         | 102.6 | 86.4 | 92.7 | hypothetical protein ARALYDRAFT_909308 | gbpln | Arabidopsis lyrata   | AT5G13560.1   Symbols:   unknown protein; BEST Arabidopsis thaliana protein match is: unknown protein (TAIR:AT2G37370.1); Has 12055 Blast hits to 8846 proteins in 811 species: Archae - 217; Bacteria - 1046; Metazoa - 6104; Fungi - 1115; Plants - 528; Viruses - 14; Other Eukaryotes - 3031 (source: NCBI BLINK).   chr5:4361579-4366318 REVERSE LENGTH=679  | 662 | 679 | 0         | 102.6 | 84.9 | 92.4 |

|                          |                                                                                                                                                                                                                                                                                                                                                                                                                                                                                                                                                                                                                                                                                                                                                                                                                                                                                                                                                                          |      |      |           |       |      |      |                                          |       |                      |                                                                                                                                                                                                                                                                 |      |      |           |       |      |      |
|--------------------------|--------------------------------------------------------------------------------------------------------------------------------------------------------------------------------------------------------------------------------------------------------------------------------------------------------------------------------------------------------------------------------------------------------------------------------------------------------------------------------------------------------------------------------------------------------------------------------------------------------------------------------------------------------------------------------------------------------------------------------------------------------------------------------------------------------------------------------------------------------------------------------------------------------------------------------------------------------------------------|------|------|-----------|-------|------|------|------------------------------------------|-------|----------------------|-----------------------------------------------------------------------------------------------------------------------------------------------------------------------------------------------------------------------------------------------------------------|------|------|-----------|-------|------|------|
| Rsa1.0_01786.1.g29806.t1 | ref[NP_196861.2] mRNA-decapping enzyme subunit 2 [Arabidopsis thaliana] gi 75328895 sp Q8GW31.1 DACP2_ARATH RecName: Full=mRNA-decapping enzyme subunit 2; Short=ATDCP2; Short=Protein DECAPPING 2; AltName: Full=M(7)GpppN-mRNA hydrolase DCP2; AltName: Full=Protein TRIDENT gi 26453220 dbj BAC43684.1  unknown protein [Arabidopsis thaliana] gi 28950945 gb AAO63396.1  At5g13570 [Arabidopsis thaliana] gi 332004529 gb AED91912.1  mRNA-decapping enzyme subunit 2 [Arabidopsis thaliana]                                                                                                                                                                                                                                                                                                                                                                                                                                                                         | 322  | 373  | 1.00E-153 | 115.8 | 85.7 | 91.6 | mRNA-decapping enzyme subunit 2          | gbpln | Arabidopsis thaliana | AT5G13570.1   Symbols: DCP2, TDT, ATDCP2   decapping 2   chr5:4367532-4369992 FORWARD LENGTH=373                                                                                                                                                                | 322  | 373  | 1.00E-155 | 115.8 | 85.7 | 91.6 |
| Rsa1.0_01786.1.g29807.t1 | dbj BAD95408.1  hypothetical protein [Arabidopsis thaliana]                                                                                                                                                                                                                                                                                                                                                                                                                                                                                                                                                                                                                                                                                                                                                                                                                                                                                                              | 601  | 478  | 1.00E-137 | 79.5  | 38.9 | 51.7 | hypothetical protein                     | gbpln | Arabidopsis thaliana | AT3G24255.1   Symbols:   RNA-directed DNA polymerase (reverse transcriptase)-related family protein   chr3:8789471-8793208 FORWARD LENGTH=746                                                                                                                   | 601  | 746  | 1.00E-120 | 124.1 | 34.8 | 45.1 |
| Rsa1.0_01786.1.g29808.t3 | ref[XP_002873619.1] hypothetical protein ARALYDRAFT_909311 [Arabidopsis lyrata subsp. lyrata] gi 297319456 gb EFH49878.1  hypothetical protein ARALYDRAFT_909311 [Arabidopsis lyrata subsp. lyrata]                                                                                                                                                                                                                                                                                                                                                                                                                                                                                                                                                                                                                                                                                                                                                                      | 1026 | 1217 | 0         | 118.6 | 67.2 | 76.7 | hypothetical protein ARALYDRAFT_909311   | gbpln | Arabidopsis lyrata   | AT5G13590.1   Symbols:   unknown protein; Has 150 Blast hits to 121 proteins in 42 species: Archae - 0; Bacteria - 8; Metazoa - 80; Fungi - 5; Plants - 17; Viruses - 0; Other Eukaryotes - 40 (source: NCBI BLINK).   chr5:4374718-4378647 REVERSE LENGTH=1168 | 1026 | 1168 | 0         | 113.8 | 64.1 | 73.6 |
| Rsa1.0_01787.1.g29809.t1 | gb AAD32866.1 AC005489_4 F14N23.4 [Arabidopsis thaliana]                                                                                                                                                                                                                                                                                                                                                                                                                                                                                                                                                                                                                                                                                                                                                                                                                                                                                                                 | 140  | 1161 | 6.00E-22  | 829.3 | 40.7 | 53.6 | F14N23.4                                 | gbpln | Arabidopsis thaliana | AT5G16486.1   Symbols:   RNA-directed DNA polymerase (reverse transcriptase)-related family protein   chr5:5383597-5384226 REVERSE LENGTH=209                                                                                                                   | 140  | 209  | 2.00E-21  | 149.3 | 37.1 | 54.3 |
| Rsa1.0_01787.1.g29810.t1 | gb ACG60682.1  transposon-like ORF [Brassica oleracea var. alboglabra]                                                                                                                                                                                                                                                                                                                                                                                                                                                                                                                                                                                                                                                                                                                                                                                                                                                                                                   | 453  | 704  | 1.00E-132 | 155.4 | 55.4 | 65.6 | transposon-like ORF                      | gbpln | Brassica oleracea    | #                                                                                                                                                                                                                                                               | #    | #    | #         | #     | #    | #    |
| Rsa1.0_01787.1.g29811.t2 | gb ABD65636.1  hypothetical protein Z3.t00055 [Brassica oleracea]                                                                                                                                                                                                                                                                                                                                                                                                                                                                                                                                                                                                                                                                                                                                                                                                                                                                                                        | 360  | 414  | 3.00E-35  | 115.0 | 26.4 | 37.8 | hypothetical protein Z3.t00055           | gbpln | Brassica oleracea    | #                                                                                                                                                                                                                                                               | #    | #    | #         | #     | #    | #    |
| Rsa1.0_01787.1.g29812.t1 | gb ABD65636.1  hypothetical protein Z3.t00055 [Brassica oleracea]                                                                                                                                                                                                                                                                                                                                                                                                                                                                                                                                                                                                                                                                                                                                                                                                                                                                                                        | 438  | 414  | 4.00E-61  | 94.5  | 32.2 | 41.8 | hypothetical protein Z3.t00055           | gbpln | Brassica oleracea    | #                                                                                                                                                                                                                                                               | #    | #    | #         | #     | #    | #    |
| Rsa1.0_01787.1.g29813.t1 | ref[NP_195783.3] breast cancer 2 susceptibility protein [Arabidopsis thaliana] gi 31335362 emb CAD32572.1  breast cancer susceptibility protein 2b [Arabidopsis thaliana] gi 332002986 gb AED90369.1  protein BRCA2-like B [Arabidopsis thaliana]                                                                                                                                                                                                                                                                                                                                                                                                                                                                                                                                                                                                                                                                                                                        | 1060 | 1155 | 0         | 109.0 | 75.9 | 84.2 | breast cancer 2 susceptibility protein   | gbpln | Arabidopsis thaliana | AT5G01630.1   Symbols: BRCA2B, BRCA2(V), ATBRCA2(V)   BRCA2-like B   chr5:235117-240911 REVERSE LENGTH=1155                                                                                                                                                     | 1060 | 1155 | 0         | 109.0 | 75.9 | 84.2 |
| Rsa1.0_01787.1.g29814.t1 | #                                                                                                                                                                                                                                                                                                                                                                                                                                                                                                                                                                                                                                                                                                                                                                                                                                                                                                                                                                        | #    | #    | #         | #     | #    | #    | -                                        | ----  | ----                 | #                                                                                                                                                                                                                                                               | #    | #    | #         | #     | #    | #    |
| Rsa1.0_01787.1.g29815.t1 | ref[NP_193016.1] photosystem I reaction center subunit XI [Arabidopsis thaliana] gi 18203449 sp Q8SUJ4.2 PSAL_ARATH RecName: Full=Photosystem I reaction center subunit XI, chloroplastic; Short=PSI-L; AltName: Full=PSI subunit V; Flags: Precursor gi 16226622 gb AAL16216.1 AF428447.1 AT4g12800/T20K18_150 [Arabidopsis thaliana] gi 1793283 gb AAL48225.1 AF446350.1 AT4g12800/T20K18_150 [Arabidopsis thaliana] gi 4586256 emb CAB40997.1  probable photosystem I chain XI precursor [Arabidopsis thaliana] gi 7267981 emb CAB7322.1  probable photosystem I chain XI precursor [Arabidopsis thaliana] gi 16649159 gb AAL24431.1  probable photosystem I chain XI precursor [Arabidopsis thaliana] gi 20453409 gb AAM19943.1  AT4g12800/T20K18_150 [Arabidopsis thaliana] gi 21592939 gb AAM64889.1  probable photosystem I chain XI precursor [Arabidopsis thaliana] gi 332657786 gb AEE83186.1  photosystem I reaction center subunit XI [Arabidopsis thaliana] | 59   | 219  | 3.00E-12  | 371.2 | 76.3 | 86.4 | photosystem I reaction center subunit XI | gbpln | Arabidopsis thaliana | AT4G12800.1   Symbols: PSAL   photosystem I subunit I   chr4:7521469-7522493 FORWARD LENGTH=219                                                                                                                                                                 | 59   | 219  | 5.00E-15  | 371.2 | 76.3 | 86.4 |
| Rsa1.0_01788.1.g29816.t2 | #                                                                                                                                                                                                                                                                                                                                                                                                                                                                                                                                                                                                                                                                                                                                                                                                                                                                                                                                                                        | #    | #    | #         | #     | #    | #    | -                                        | ----  | ----                 | #                                                                                                                                                                                                                                                               | #    | #    | #         | #     | #    | #    |
| Rsa1.0_01788.1.g29817.t4 | gb ACG60686.1  En/Spm-related transposon protein [Brassica oleracea var. alboglabra]                                                                                                                                                                                                                                                                                                                                                                                                                                                                                                                                                                                                                                                                                                                                                                                                                                                                                     | 598  | 695  | 5.00E-72  | 116.2 | 28.1 | 32.3 | En/Spm-related transposon protein        | gbpln | Brassica oleracea    | #                                                                                                                                                                                                                                                               | #    | #    | #         | #     | #    | #    |

|                          |                                                                                                                                                                                                                                                                                                                                              |     |     |           |       |      |      |                                                        |       |                      |                                                                                                                                                                                                                                                                                                                                                                                                                                                                                                                                                                                                    |     |     |           |       |      |      |
|--------------------------|----------------------------------------------------------------------------------------------------------------------------------------------------------------------------------------------------------------------------------------------------------------------------------------------------------------------------------------------|-----|-----|-----------|-------|------|------|--------------------------------------------------------|-------|----------------------|----------------------------------------------------------------------------------------------------------------------------------------------------------------------------------------------------------------------------------------------------------------------------------------------------------------------------------------------------------------------------------------------------------------------------------------------------------------------------------------------------------------------------------------------------------------------------------------------------|-----|-----|-----------|-------|------|------|
| Rsa1.0_01788.1.g29818.t1 | gb EOA13328.1  hypothetical protein CARUB_v10026362mg [Capsella rubella]                                                                                                                                                                                                                                                                     | 449 | 462 | 0         | 102.9 | 84.6 | 93.8 | hypothetical protein CARUB_v10026362mg                 | gbpln | Capsella rubella     | AT5G42830.1   Symbols:   HXXXD-type acyl-transferase family protein   chr5:17176384-17177906 FORWARD LENGTH=450                                                                                                                                                                                                                                                                                                                                                                                                                                                                                    | 449 | 450 | 0         | 100.2 | 82.2 | 91.1 |
| Rsa1.0_01788.1.g29819.t1 | dbj BAB09070.1  unnamed protein product [Arabidopsis thaliana] gi 26450382 dbj BA042306.1  putative retroelement polypolyprotein [Arabidopsis thaliana] gi 28973203 gb AAO63926.1  unknown protein [Arabidopsis thaliana]                                                                                                                    | 261 | 357 | 4.00E-80  | 136.8 | 52.1 | 64.4 | unnamed protein product                                | gbpln | Arabidopsis thaliana | AT1G21280.1   Symbols:   CONTAINS InterPro DOMAIN/s: Retrotransposon gag protein (InterPro:IPR005162); Has 707 Blast hits to 705 proteins in 25 species: Archae - 0; Bacteria - 0; Metazoa - 4; Fungi - 0; Plants - 703; Viruses - 0; Other Eukaryotes - 0 (source: NCBI BLINK)   chr1:7447690-7448403 REVERSE LENGTH=237                                                                                                                                                                                                                                                                          | 261 | 237 | 2.00E-16  | 90.8  | 17.6 | 33.3 |
| Rsa1.0_01788.1.g29820.t1 | gb EOA13993.1  hypothetical protein CARUB_v10027125mg [Capsella rubella]                                                                                                                                                                                                                                                                     | 213 | 213 | 1.00E-106 | 100.0 | 85.9 | 93.0 | hypothetical protein CARUB_v10027125mg                 | gbpln | Capsella rubella     | AT5G42960.1   Symbols:   unknown protein; FUNCTIONS IN: molecular.function unknown; INVOLVED IN: biological.process unknown; LOCATED IN: mitochondrion, chloroplast, plastid, chloroplast envelope; EXPRESSED IN: 24 plant structures; EXPRESSED DURING: 13 growth stages; BEST Arabidopsis thaliana protein match is: unknown protein (TAIRAT1G45170.1); Has 30201 Blast hits to 17322 proteins in 780 species: Archae - 12; Bacteria - 1396; Metazoa - 17338; Fungi - 3422; Plants - 5037; Viruses - 0; Other Eukaryotes - 2996 (source: NCBI BLINK)   chr5:17235184-17236478 FORWARD LENGTH=213 | 213 | 213 | 1.00E-107 | 100.0 | 84.5 | 92.5 |
| Rsa1.0_01788.1.g29821.t1 | #                                                                                                                                                                                                                                                                                                                                            | #   | #   | #         | #     | #    | #    | -                                                      | ----  | ----                 | #                                                                                                                                                                                                                                                                                                                                                                                                                                                                                                                                                                                                  | #   | #   | #         | #     | #    |      |
| Rsa1.0_01788.1.g29822.t1 | gb EOA13485.1  hypothetical protein CARUB_v10026545mg [Capsella rubella]                                                                                                                                                                                                                                                                     | 397 | 397 | 0         | 100.0 | 92.2 | 96.2 | hypothetical protein CARUB_v10026545mg                 | gbpln | Capsella rubella     | AT5G42970.1   Symbols: COP8, FUS4, EMB134, COP14, CSN4, FUS8, ATS4   Proteasome component (PC) domain protein   chr5:17237470-17240649 REVERSE LENGTH=397                                                                                                                                                                                                                                                                                                                                                                                                                                          | 397 | 397 | 0         | 100.0 | 91.9 | 96.0 |
| Rsa1.0_01788.1.g29823.t1 | ref NP_199114.1  uncharacterized protein [Arabidopsis thaliana] gi 9758589 dbj BAB09202.1  unnamed protein product [Arabidopsis thaliana] gi 332007516 gb AED94899.1  uncharacterized protein AT5G43000 [Arabidopsis thaliana]                                                                                                               | 200 | 282 | 4.00E-72  | 141.0 | 74.5 | 82.0 | uncharacterized protein                                | gbpln | Arabidopsis thaliana | AT5G43000.1   Symbols:   unknown protein; FUNCTIONS IN: molecular.function unknown; INVOLVED IN: biological.process unknown; LOCATED IN: endomembrane system; Has 1807 Blast hits to 1807 proteins in 277 species: Archae - 0; Bacteria - 0; Metazoa - 736; Fungi - 347; Plants - 385; Viruses - 0; Other Eukaryotes - 339 (source: NCBI BLINK)   chr5:17246354-17247202 REVERSE LENGTH=282                                                                                                                                                                                                        | 200 | 282 | 1.00E-74  | 141.0 | 74.5 | 82.0 |
| Rsa1.0_01788.1.g29824.t1 | #                                                                                                                                                                                                                                                                                                                                            | #   | #   | #         | #     | #    | #    | -                                                      | ----  | ----                 | #                                                                                                                                                                                                                                                                                                                                                                                                                                                                                                                                                                                                  | #   | #   | #         | #     | #    |      |
| Rsa1.0_01788.1.g29825.t1 | ref NP_173345.2  inter-alpha-trypsin inhibitor heavy chain-like protein [Arabidopsis thaliana] gi 22531102 gb AAM97055.1  unknown protein [Arabidopsis thaliana] gi 23197960 gb AAN15507.1  unknown protein [Arabidopsis thaliana] gi 332191682 gb AEE29803.1  inter-alpha-trypsin inhibitor heavy chain-like protein [Arabidopsis thaliana] | 757 | 754 | 0         | 99.6  | 87.7 | 94.6 | inter-alpha-trypsin inhibitor heavy chain-like protein | gbpln | Arabidopsis thaliana | AT1G19110.1   Symbols:   inter-alpha-trypsin inhibitor heavy chain-related   chr1:6602270-6605766 FORWARD LENGTH=754                                                                                                                                                                                                                                                                                                                                                                                                                                                                               | 757 | 754 | 0         | 99.6  | 87.7 | 94.6 |
| Rsa1.0_01788.1.g29826.t1 | ref NP_564074.1  uncharacterized protein [Arabidopsis thaliana] gi 8954052 gb AAF82225.1 AC069143.1 Contains similarity to a HSPC326 mRNA from Homo sapiens gb AF161444. EST gb AI97162 comes from this gene [Arabidopsis thaliana] gi 332191689 gb AEE29810.1  uncharacterized protein AT1G19140 [Arabidopsis thaliana]                     | 513 | 311 | 1.00E-144 | 60.6  | 50.7 | 54.0 | uncharacterized protein                                | gbpln | Arabidopsis thaliana | AT1G19140.1   Symbols:   FUNCTIONS IN: molecular.function unknown; INVOLVED IN: ubiquinone biosynthetic process; LOCATED IN: mitochondrion; EXPRESSED IN: 24 plant structures; EXPRESSED DURING: 15 growth stages; CONTAINS InterPro DOMAIN/s: COQ9 (InterPro:IPR012762); Has 748 Blast hits to 748 proteins in 260 species: Archae - 0; Bacteria - 218; Metazoa - 126; Fungi - 101; Plants - 39; Viruses - 0; Other Eukaryotes - 264 (source: NCBI BLINK)   chr1:6611026-6612414 REVERSE LENGTH=311                                                                                               | 513 | 311 | 2.33E-156 | 60.6  | 50.7 | 54.0 |
| Rsa1.0_01788.1.g29827.t1 | ref XP_002890321.1  hypothetical protein ARALYDRAFT_472139 [Arabidopsis lyrata subsp. lyrata] gi 297336163 gb EFH66580.1  hypothetical protein ARALYDRAFT_472139 [Arabidopsis lyrata subsp. lyrata]                                                                                                                                          | 265 | 269 | 1.00E-128 | 101.5 | 89.1 | 94.3 | hypothetical protein ARALYDRAFT_472139                 | gbpln | Arabidopsis lyrata   | AT1G19150.1   Symbols: LHCA6, LHCA2*1   photosystem I light harvesting complex gene 6   chr1:6612806-6613799 FORWARD LENGTH=270                                                                                                                                                                                                                                                                                                                                                                                                                                                                    | 265 | 270 | 1.00E-128 | 101.9 | 88.7 | 94.0 |

|                          |                                                                                                                                                                                                                                                                                                                                                                                                                                                                                                                                                                                                                                                                                                                                                                                                                                                                                                                                                                                                                                                                                                                                                                                                                                                                                                                                                                                                                                                                                                                                                                                                                                                                                                                                        |      |      |           |        |      |      |                                                                                                                                                                                         |       |                      |                                                                                                                                               |      |      |           |        |      |      |
|--------------------------|----------------------------------------------------------------------------------------------------------------------------------------------------------------------------------------------------------------------------------------------------------------------------------------------------------------------------------------------------------------------------------------------------------------------------------------------------------------------------------------------------------------------------------------------------------------------------------------------------------------------------------------------------------------------------------------------------------------------------------------------------------------------------------------------------------------------------------------------------------------------------------------------------------------------------------------------------------------------------------------------------------------------------------------------------------------------------------------------------------------------------------------------------------------------------------------------------------------------------------------------------------------------------------------------------------------------------------------------------------------------------------------------------------------------------------------------------------------------------------------------------------------------------------------------------------------------------------------------------------------------------------------------------------------------------------------------------------------------------------------|------|------|-----------|--------|------|------|-----------------------------------------------------------------------------------------------------------------------------------------------------------------------------------------|-------|----------------------|-----------------------------------------------------------------------------------------------------------------------------------------------|------|------|-----------|--------|------|------|
| Rsa1.0_01789.1.g29828.t2 | gb AAF82228.1 AC069143.4 Contains similarity to a polygalacturonase-like protein gi 7529266 from Arabidopsis thaliana BAC F18P9 gb AL138654 and contains multiple polygalacturonase (pectinase) PF 00295 domains [Arabidopsis thaliana]                                                                                                                                                                                                                                                                                                                                                                                                                                                                                                                                                                                                                                                                                                                                                                                                                                                                                                                                                                                                                                                                                                                                                                                                                                                                                                                                                                                                                                                                                                | 524  | 533  | 0         | 101.7  | 87.8 | 93.1 | Contains similarity to a polygalacturonase-like protein gi 7529266 from Arabidopsis thaliana BAC F18P9 gb AL138654 and contains multiple polygalacturonase (pectinase) PF 00295 domains | gbpln | Arabidopsis thaliana | AT1G19170.1   Symbols:   Pectin lyase-like superfamily protein   chr1:6616777-6618875 FORWARD LENGTH=506                                      | 524  | 506  | 0         | 96.6   | 87.2 | 91.2 |
| Rsa1.0_01789.1.g29829.t1 | ref NP_564075.1  protein TIFY 10A [Arabidopsis thaliana] gi 75174736 sp Q9LMA8.1 TI10A_ARATH RecName: Full=Protein TIFY 10A; AltName: Full=Jasmonate ZIM domain-containing protein 1 gi 8954056 gb AAF82229.1 AC069143.5 Contains similarity to an unknown protein T10D10.8 gi 6730756 from Arabidopsis thaliana BAC T10D10 gb AC016529. ESTs gb T14209. gb BE038503. gb AA597384. gb H76606. gb AI996806. gb AI100291 come from this gene [Arabidopsis thaliana] gi 12083250 gb AG48784.1 AF332421.1 unknown protein [Arabidopsis thaliana] gi 14532540 gb AAK63998.1  At1g19180/T29M8.5 [Arabidopsis thaliana] gi 17473768 gb AAL38322.1  unknown protein [Arabidopsis thaliana] gi 19548055 gb AAL87391.1  At1g19180/T29M8.5 [Arabidopsis thaliana] gi 20148609 gb AAM10195.1  unknown protein [Arabidopsis thaliana] gi 332191693 gb AEE29814.1  protein TIFY 10A [Arabidopsis thaliana] ref NP_173353.1  alpha/beta-hydrolase-like protein [Arabidopsis thaliana] gi 75335190 sp Q9LMA7.1 CXE1_ARATH RecName: Full=Probable carboxylesterase 1; AltName: Full=AtCXE1 gi 8954057 gb AAF82230.1 AC069143.6 Contains similarity to a PrMC3 from Pinus radiata gb AF110333 [Arabidopsis thaliana] gi 119360077 gb ABL66767.1  At1g19190 [Arabidopsis thaliana] gi 332191695 gb AEE29816.1  probable carboxylesterase 1 [Arabidopsis thaliana] ref NP_173355.3  ethylene-responsive transcription factor ERF017 [Arabidopsis thaliana] gi 75243159 sp Q84QC2.1 ERF17_ARATH RecName: Full=Ethylene-responsive transcription factor ERF017 gi 29893536 gb AAP06820.1  putative AP2 domain transcription factor [Arabidopsis thaliana] gi 332191697 gb AEE29818.1  ethylene-responsive transcription factor ERF017 [Arabidopsis thaliana] | 257  | 253  | 1.00E-90  | 98.4   | 76.7 | 82.9 | protein TIFY 10A                                                                                                                                                                        | gbpln | Arabidopsis thaliana | AT1G19180.1   Symbols: JAZ1, TIFY10A   jasmonate-zim-domain protein 1   chr1:6622312-6623271 FORWARD LENGTH=253                               | 257  | 253  | 3.00E-93  | 98.4   | 76.7 | 82.9 |
| Rsa1.0_01789.1.g29830.t1 | gi 8954057 gb AAF82230.1 AC069143.6 Contains similarity to a PrMC3 from Pinus radiata gb AF110333 [Arabidopsis thaliana] gi 119360077 gb ABL66767.1  At1g19190 [Arabidopsis thaliana] gi 332191695 gb AEE29816.1  probable carboxylesterase 1 [Arabidopsis thaliana] ref NP_173355.3  ethylene-responsive transcription factor ERF017 [Arabidopsis thaliana] gi 75243159 sp Q84QC2.1 ERF17_ARATH RecName: Full=Ethylene-responsive transcription factor ERF017 gi 29893536 gb AAP06820.1  putative AP2 domain transcription factor [Arabidopsis thaliana] gi 332191697 gb AEE29818.1  ethylene-responsive transcription factor ERF017 [Arabidopsis thaliana]                                                                                                                                                                                                                                                                                                                                                                                                                                                                                                                                                                                                                                                                                                                                                                                                                                                                                                                                                                                                                                                                           | 320  | 318  | 1.00E-122 | 99.4   | 67.2 | 80.3 | alpha/beta-hydrolase-like protein                                                                                                                                                       | gbpln | Arabidopsis thaliana | AT1G19190.1   Symbols:   alpha/beta-Hydrolases superfamily protein   chr1:6623876-6624832 FORWARD LENGTH=318                                  | 320  | 318  | 1.00E-125 | 99.4   | 67.2 | 80.3 |
| Rsa1.0_01789.1.g29831.t1 | transcription factor ERF017 gi 29893536 gb AAP06820.1  putative AP2 domain transcription factor [Arabidopsis thaliana] gi 332191697 gb AEE29818.1  ethylene-responsive transcription factor ERF017 [Arabidopsis thaliana]                                                                                                                                                                                                                                                                                                                                                                                                                                                                                                                                                                                                                                                                                                                                                                                                                                                                                                                                                                                                                                                                                                                                                                                                                                                                                                                                                                                                                                                                                                              | 182  | 185  | 6.00E-69  | 101.6  | 77.5 | 86.8 | ethylene-responsive transcription factor ERF017                                                                                                                                         | gbpln | Arabidopsis thaliana | AT1G19210.1   Symbols:   Integrase-type DNA-binding superfamily protein   chr1:6626973-6627530 REVERSE LENGTH=185                             | 182  | 185  | 2.00E-71  | 101.6  | 77.5 | 86.8 |
| Rsa1.0_01789.1.g29832.t1 | gb AFD01317.1  auxin response factor 19-1 [Brassica rapa subsp. pekinensis]                                                                                                                                                                                                                                                                                                                                                                                                                                                                                                                                                                                                                                                                                                                                                                                                                                                                                                                                                                                                                                                                                                                                                                                                                                                                                                                                                                                                                                                                                                                                                                                                                                                            | 96   | 1020 | 3.00E-50  | 1062.5 | 96.9 | 99.0 | auxin response factor 19-1                                                                                                                                                              | gbpln | Brassica rapa        | AT1G19220.1   Symbols: ARF19, IAA22, ARF11   auxin response factor 19   chr1:6628395-6632779 REVERSE LENGTH=1086                              | 96   | 1086 | 6.00E-51  | 1131.3 | 94.8 | 96.9 |
| Rsa1.0_01789.1.g29833.t1 | dbj BAB09379.1  non-LTR retroelement reverse transcriptase-like protein [Arabidopsis thaliana]                                                                                                                                                                                                                                                                                                                                                                                                                                                                                                                                                                                                                                                                                                                                                                                                                                                                                                                                                                                                                                                                                                                                                                                                                                                                                                                                                                                                                                                                                                                                                                                                                                         | 1501 | 1223 | 0         | 81.5   | 41.0 | 53.0 | non-LTR retroelement reverse transcriptase-like protein                                                                                                                                 | gbpln | Arabidopsis thaliana | AT3G24255.1   Symbols:   RNA-directed DNA polymerase (reverse transcriptase)-related family protein   chr3:8789471-8793208 FORWARD LENGTH=746 | 1501 | 746  | 9.00E-81  | 49.7   | 11.9 | 16.3 |

|                          |                                                                                                                                                                                                                                                                                                                                                                                                                                                                                                                                                                   |      |      |           |       |      |      |                                                                                                                                                     |       |                      |                                                                                                                                                                                                                                                                                                                                                      |      |      |           |       |      |      |
|--------------------------|-------------------------------------------------------------------------------------------------------------------------------------------------------------------------------------------------------------------------------------------------------------------------------------------------------------------------------------------------------------------------------------------------------------------------------------------------------------------------------------------------------------------------------------------------------------------|------|------|-----------|-------|------|------|-----------------------------------------------------------------------------------------------------------------------------------------------------|-------|----------------------|------------------------------------------------------------------------------------------------------------------------------------------------------------------------------------------------------------------------------------------------------------------------------------------------------------------------------------------------------|------|------|-----------|-------|------|------|
| Rsa1.0_01789.1.g29834.t1 | ref[NP_173356.1] auxin response factor 19 [Arabidopsis thaliana]<br>gi 46576613 sp Q8RYC8.2 ARFS_ARATH<br>RecName: Full=Auxin response factor 19; AltName: Full=Auxin-responsive protein IAA22<br>gi 37540154 gb AAG35176.1 <br>ARF11/IAA22 [Arabidopsis thaliana]<br>gi 49616363 gb AAT67078.1  ARF19 [Arabidopsis thaliana]<br>gi 56961712 gb AAB91321.2  early auxin-induced IAA22 [Arabidopsis thaliana] gi 225897946 dbj BAH30305.1  hypothetical protein [Arabidopsis thaliana] gi 332191698 gb AEE29819.1  auxin response factor 19 [Arabidopsis thaliana] | 889  | 1086 | 0         | 122.2 | 84.8 | 89.0 | auxin response factor 19                                                                                                                            | gbpln | Arabidopsis thaliana | AT1G19220.1   Symbols: ARF19, IAA22, ARF11   auxin response factor 19   chr1:6628395-6632779 REVERSE LENGTH=1086                                                                                                                                                                                                                                     | 889  | 1086 | 0         | 122.2 | 84.8 | 89.0 |
| Rsa1.0_01790.1.g29835.t1 | #                                                                                                                                                                                                                                                                                                                                                                                                                                                                                                                                                                 | #    | #    | #         | #     | #    | #    | -                                                                                                                                                   | ----  | ----                 | #                                                                                                                                                                                                                                                                                                                                                    | #    | #    | #         | #     | #    |      |
| Rsa1.0_01790.1.g29836.t2 | gb AAD17398.1  putative non-LTR retroelement reverse transcriptase [Arabidopsis thaliana]                                                                                                                                                                                                                                                                                                                                                                                                                                                                         | 296  | 1225 | 8.00E-39  | 413.9 | 36.5 | 50.3 | putative non-LTR retroelement reverse transcriptase                                                                                                 | gbpln | Arabidopsis thaliana | AT2G22440.1   Symbols:   BEST Arabidopsis thaliana protein match is: Ribonuclease H-like superfamily protein (TAIR:AT4G29090.1); Has 208 Blast hits to 191 proteins in 10 species: Archae - 0; Bacteria - 0; Metazoa - 0; Fungi - 0; Plants - 208; Viruses - 0; Other Eukaryotes - 0 (source: NCBI BLINK).   chr2:9528910-9529917 FORWARD LENGTH=256 | 296  | 256  | 6.00E-18  | 86.5  | 20.9 | 29.1 |
| Rsa1.0_01790.1.g29837.t1 | ref XP_002865826.1  kinase family protein [Arabidopsis lyrata subsp. lyrata] gi 297311661 gb EFH42085.1  kinase family protein [Arabidopsis lyrata subsp. lyrata]                                                                                                                                                                                                                                                                                                                                                                                                 | 577  | 583  | 0         | 101.0 | 86.7 | 91.3 | kinase family protein                                                                                                                               | gbpln | Arabidopsis lyrata   | AT5G50860.1   Symbols:   Protein kinase superfamily protein   chr5:20693778-20696983 REVERSE LENGTH=580                                                                                                                                                                                                                                              | 577  | 580  | 0         | 100.5 | 85.6 | 90.6 |
| Rsa1.0_01790.1.g29838.t1 | dbj BAJ34206.1  unnamed protein product [Theilungella halophila]                                                                                                                                                                                                                                                                                                                                                                                                                                                                                                  | 362  | 366  | 0         | 101.1 | 98.1 | 98.9 | unnamed protein product                                                                                                                             | ----  | ----                 | AT5G50850.1   Symbols: MAB1   Transketolase family protein   chr5:20689671-20692976 FORWARD LENGTH=363                                                                                                                                                                                                                                               | 362  | 363  | 0         | 100.3 | 96.4 | 98.3 |
| Rsa1.0_01790.1.g29839.t1 | gb AAD32898.1  putative retroelement pol polyprotein [Arabidopsis thaliana]                                                                                                                                                                                                                                                                                                                                                                                                                                                                                       | 1196 | 1307 | 0         | 109.3 | 57.6 | 73.7 | putative retroelement pol polyprotein                                                                                                               | gbpln | Arabidopsis thaliana | AT4G23160.1   Symbols: CRK8   cysteine-rich RLK (RECEPTOR-like protein kinase) 8   chr4:12129485-12134086 FORWARD LENGTH=1262                                                                                                                                                                                                                        | 1196 | 1262 | 2.00E-45  | 105.5 | 11.3 | 19.2 |
| Rsa1.0_01790.1.g29840.t1 | gb AAG51783.1 AC079679.3 reverse transcriptase, putative: 16838-20266 [Arabidopsis thaliana]                                                                                                                                                                                                                                                                                                                                                                                                                                                                      | 201  | 1142 | 2.00E-22  | 568.2 | 22.9 | 34.8 | reverse transcriptase, putative: 16838-20266                                                                                                        | gbpln | Arabidopsis thaliana | #                                                                                                                                                                                                                                                                                                                                                    | #    | #    | #         | #     | #    |      |
| Rsa1.0_01790.1.g29841.t1 | #                                                                                                                                                                                                                                                                                                                                                                                                                                                                                                                                                                 | #    | #    | #         | #     | #    | #    | -                                                                                                                                                   | ----  | ----                 | #                                                                                                                                                                                                                                                                                                                                                    | #    | #    | #         | #     | #    |      |
| Rsa1.0_01790.1.g29842.t1 | gb AAC97237.1  putative TNP2-like transposon protein [Arabidopsis thaliana]                                                                                                                                                                                                                                                                                                                                                                                                                                                                                       | 981  | 889  | 0         | 90.6  | 49.8 | 56.8 | putative TNP2-like transposon protein                                                                                                               | gbpln | Arabidopsis thaliana | #                                                                                                                                                                                                                                                                                                                                                    | #    | #    | #         | #     | #    |      |
| Rsa1.0_01790.1.g29843.t1 | #                                                                                                                                                                                                                                                                                                                                                                                                                                                                                                                                                                 | #    | #    | #         | #     | #    | #    | -                                                                                                                                                   | ----  | ----                 | #                                                                                                                                                                                                                                                                                                                                                    | #    | #    | #         | #     | #    |      |
| Rsa1.0_01791.1.g29844.t1 | gb AAB87099.1  putative retroelement pol polyprotein [Arabidopsis thaliana]                                                                                                                                                                                                                                                                                                                                                                                                                                                                                       | 1768 | 1496 | 0         | 84.6  | 49.2 | 61.1 | putative retroelement pol polyprotein                                                                                                               | gbpln | Arabidopsis thaliana | AT4G23160.1   Symbols: CRK8   cysteine-rich RLK (RECEPTOR-like protein kinase) 8   chr4:12129485-12134086 FORWARD LENGTH=1262                                                                                                                                                                                                                        | 1768 | 1262 | 1.00E-140 | 71.4  | 14.0 | 20.1 |
| Rsa1.0_01791.1.g29845.t1 | ref XP_002865002.1  hypothetical protein ARALYDRAFT_496854 [Arabidopsis lyrata subsp. lyrata] gi 297310837 gb EFH41261.1  hypothetical protein ARALYDRAFT_496854 [Arabidopsis lyrata subsp. lyrata]                                                                                                                                                                                                                                                                                                                                                               | 252  | 244  | 1.00E-103 | 96.8  | 81.7 | 86.5 | hypothetical protein ARALYDRAFT_496854                                                                                                              | gbpln | Arabidopsis lyrata   | AT5G67420.1   Symbols: LBD37, ASL39   LOB domain-containing protein 37   chr5:26904576-26905415 REVERSE LENGTH=250                                                                                                                                                                                                                                   | 252  | 250  | 1.00E-104 | 99.2  | 82.1 | 87.7 |
| Rsa1.0_01791.1.g29846.t1 | pir [S65812 RNA-directed DNA polymerase (EC 2.7.7.49) (clone DW15) - Arabidopsis thaliana retrotransposon Ta11-1 gi 976278 gb AAA75254.1  reverse transcriptase [Arabidopsis thaliana]                                                                                                                                                                                                                                                                                                                                                                            | 1869 | 1333 | 0         | 71.3  | 35.5 | 46.9 | RNA-directed DNA polymerase (EC 2.7.7.49) (clone DW15) - Arabidopsis thaliana retrotransposon Ta11-1 gi 976278 gb AAA75254.1  reverse transcriptase | gbpln | Arabidopsis thaliana | AT4G29090.1   Symbols:   Ribonuclease H-like superfamily protein   chr4:14333528-14335255 FORWARD LENGTH=575                                                                                                                                                                                                                                         | 1869 | 575  | 2.00E-93  | 30.8  | 10.1 | 16.3 |

|                          |                                                                                                                                                                                                                                                                                                                                                                                                                                                                |     |      |           |       |      |      |                                                        |       |                      |                                                                                                                                                                                                                                                                                                                                                   |     |     |           |       |      |      |
|--------------------------|----------------------------------------------------------------------------------------------------------------------------------------------------------------------------------------------------------------------------------------------------------------------------------------------------------------------------------------------------------------------------------------------------------------------------------------------------------------|-----|------|-----------|-------|------|------|--------------------------------------------------------|-------|----------------------|---------------------------------------------------------------------------------------------------------------------------------------------------------------------------------------------------------------------------------------------------------------------------------------------------------------------------------------------------|-----|-----|-----------|-------|------|------|
| Rsa1.0_01791.1.g29847.t1 | refNP_201544.1  GCN5-related N-acetyltransferase (GNAT) family protein [Arabidopsis thaliana] gi 9758442 dbj BAB09028.1  N-acetyltransferase hookless1-like protein [Arabidopsis thaliana] gi 29029086 gb AA064922.1  At5g67430 [Arabidopsis thaliana] gi 11074305 dbj BAE99418.1  N-acetyltransferase hookless1-like protein [Arabidopsis thaliana] gi 332010960 gb AED98343.1  GCN5-related N-acetyltransferase (GNAT) family protein [Arabidopsis thaliana] | 380 | 386  | 0         | 101.6 | 86.8 | 92.1 | GCN5-related N-acetyltransferase (GNAT) family protein | gbpln | Arabidopsis thaliana | AT5G67430.1   Symbols:   Acyl-CoA N-acyltransferases (NAT) superfamily protein   chr5:26910429-26911856 FORWARD LENGTH=386                                                                                                                                                                                                                        | 380 | 386 | 0         | 101.6 | 86.8 | 92.1 |
| Rsa1.0_01791.1.g29848.t2 | gb EOA13121.1  hypothetical protein CARUB_v10026140mg [Capsella rubella]                                                                                                                                                                                                                                                                                                                                                                                       | 565 | 585  | 0         | 103.5 | 82.7 | 89.4 | hypothetical protein CARUB_v10026140mg                 | gbpln | Capsella rubella     | AT5G67440.1   Symbols: NPY3   Phototropic-responsive NPH3 family protein   chr5:26912947-26914906 REVERSE LENGTH=579                                                                                                                                                                                                                              | 565 | 579 | 0         | 102.5 | 78.6 | 86.0 |
| Rsa1.0_01791.1.g29849.t1 | refXP_002886034.1  hypothetical protein ARALYDRAFT_480519 [Arabidopsis lyrata subsp. lyrata] gi 297331874 gb EFH62293.1  hypothetical protein ARALYDRAFT_480519 [Arabidopsis lyrata subsp. lyrata]                                                                                                                                                                                                                                                             | 210 | 202  | 3.00E-67  | 96.2  | 69.0 | 78.6 | hypothetical protein ARALYDRAFT_480519                 | gbpln | Arabidopsis lyrata   | AT2G19530.1   Symbols:   unknown protein; BEST Arabidopsis thaliana protein match is: unknown protein (TAIR:AT1G55160.2); Has 461 Blast hits to 346 proteins in 80 species: Archae - 0; Bacteria - 16; Metazoa - 89; Fungi - 28; Plants - 57; Viruses - 0; Other Eukaryotes - 271 (source: NCBI BLINK).   chr2:8460219-8461486 FORWARD LENGTH=202 | 210 | 202 | 5.00E-69  | 96.2  | 68.6 | 78.1 |
| Rsa1.0_01791.1.g29850.t1 | refXP_002886033.1  transducin family protein [Arabidopsis lyrata subsp. lyrata] gi 297331873 gb EFH62292.1  transducin family protein [Arabidopsis lyrata subsp. lyrata]                                                                                                                                                                                                                                                                                       | 474 | 470  | 0         | 99.2  | 83.3 | 86.7 | transducin family protein                              | gbpln | Arabidopsis lyrata   | AT2G19540.1   Symbols:   Transducin family protein / WD-40 repeat family protein   chr2:8461804-8464347 FORWARD LENGTH=469                                                                                                                                                                                                                        | 474 | 469 | 0         | 98.9  | 81.6 | 85.7 |
| Rsa1.0_01791.1.g29851.t1 | gb EOA31220.1  hypothetical protein CARUB_v10014386mg [Capsella rubella]                                                                                                                                                                                                                                                                                                                                                                                       | 290 | 270  | 1.00E-133 | 93.1  | 86.6 | 91.0 | hypothetical protein CARUB_v10014386mg                 | gbpln | Capsella rubella     | AT2G19580.1   Symbols: TET2   tetraspanin2   chr2:8472393-8475021 REVERSE LENGTH=270                                                                                                                                                                                                                                                              | 290 | 270 | 1.00E-131 | 93.1  | 87.6 | 91.0 |
| Rsa1.0_01792.1.g29852.t1 | emb CAB75909.1  putative protein [Arabidopsis thaliana]                                                                                                                                                                                                                                                                                                                                                                                                        | 641 | 606  | 0         | 94.5  | 73.5 | 82.7 | putative protein                                       | gbpln | Arabidopsis thaliana | AT3G55510.1   Symbols: RBL   Noc2p family   chr3:20579232-20582124 FORWARD LENGTH=594                                                                                                                                                                                                                                                             | 641 | 594 | 0         | 92.7  | 73.3 | 82.1 |
| Rsa1.0_01792.1.g29853.t1 | refXP_002878036.1  ATEXPA16 [Arabidopsis lyrata subsp. lyrata] gi 297323874 gb EFH54295.1  ATEXPA16 [Arabidopsis lyrata subsp. lyrata]                                                                                                                                                                                                                                                                                                                         | 260 | 260  | 1.00E-138 | 100.0 | 92.7 | 94.2 | ATEXPA16                                               | gbpln | Arabidopsis lyrata   | AT3G55500.1   Symbols: ATEXPA16, EXP16, ATEXP16, ATHEXP ALPHA 1.7, EXPA16   expansin A16   chr3:20575073-20576102 REVERSE LENGTH=260                                                                                                                                                                                                              | 260 | 260 | 1.00E-141 | 100.0 | 92.3 | 95.0 |
| Rsa1.0_01792.1.g29854.t1 | gb EOA24113.1  hypothetical protein CARUB_v10017345mg [Capsella rubella]                                                                                                                                                                                                                                                                                                                                                                                       | 368 | 414  | 1.00E-114 | 112.5 | 65.5 | 79.3 | hypothetical protein CARUB_v10017345mg                 | gbpln | Capsella rubella     | AT3G54910.3   Symbols:   RNI-like superfamily protein   chr3:20342967-20344277 REVERSE LENGTH=373                                                                                                                                                                                                                                                 | 368 | 373 | 1.00E-101 | 101.4 | 55.4 | 70.4 |
| Rsa1.0_01792.1.g29855.t1 | refNP_194288.2  CAP160 protein [Arabidopsis thaliana] gi 19310451 gb AAL84961.1  At4g25580/M7J2_50 [Arabidopsis thaliana] gi 24111391 gb AAN46822.1  At4g25580/M7J2_50 [Arabidopsis thaliana] gi 110737550 dbj BAF00717.1  hypothetical protein [Arabidopsis thaliana] gi 332659679 gb AEE85079.1  CAP160 protein [Arabidopsis thaliana]                                                                                                                       | 233 | 626  | 3.00E-29  | 268.7 | 30.5 | 33.5 | CAP160 protein                                         | gbpln | Arabidopsis thaliana | AT4G25580.1   Symbols:   CAP160 protein   chr4:13056320-13058657 FORWARD LENGTH=626                                                                                                                                                                                                                                                               | 233 | 626 | 9.00E-32  | 268.7 | 30.5 | 33.5 |
| Rsa1.0_01792.1.g29856.t1 | #                                                                                                                                                                                                                                                                                                                                                                                                                                                              | #   | #    | #         | #     | #    | #    | -                                                      | ----  | ----                 | #                                                                                                                                                                                                                                                                                                                                                 | #   | #   | #         | #     | #    | #    |
| Rsa1.0_01792.1.g29857.t1 | gb EOA24113.1  hypothetical protein CARUB_v10017345mg [Capsella rubella]                                                                                                                                                                                                                                                                                                                                                                                       | 415 | 414  | 1.00E-142 | 99.8  | 64.3 | 80.0 | hypothetical protein CARUB_v10017345mg                 | gbpln | Capsella rubella     | AT4G10400.2   Symbols:   F-box/RNI-like/FBD-like domains-containing protein   chr4:6446335-6447715 REVERSE LENGTH=409                                                                                                                                                                                                                             | 415 | 409 | 1.00E-125 | 98.6  | 59.8 | 71.3 |
| Rsa1.0_01792.1.g29858.t1 | gb EOA13479.1  hypothetical protein CARUB_v10026538mg [Capsella rubella]                                                                                                                                                                                                                                                                                                                                                                                       | 549 | 398  | 6.00E-36  | 72.5  | 13.3 | 20.8 | hypothetical protein CARUB_v10026538mg                 | gbpln | Capsella rubella     | AT2G17920.1   Symbols:   nucleic acid binding/zinc ion binding   chr2:7782808-7783731 FORWARD LENGTH=307                                                                                                                                                                                                                                          | 549 | 307 | 2.00E-38  | 55.9  | 14.2 | 23.0 |
| Rsa1.0_01792.1.g29859.t1 | gb EOA24113.1  hypothetical protein CARUB_v10017345mg [Capsella rubella]                                                                                                                                                                                                                                                                                                                                                                                       | 366 | 414  | 1.00E-104 | 113.1 | 57.7 | 71.9 | hypothetical protein CARUB_v10017345mg                 | gbpln | Capsella rubella     | AT3G54910.3   Symbols:   RNI-like superfamily protein   chr3:20342967-20344277 REVERSE LENGTH=373                                                                                                                                                                                                                                                 | 366 | 373 | 1.00E-101 | 101.9 | 57.1 | 71.0 |
| Rsa1.0_01793.1.g29860.t1 | #                                                                                                                                                                                                                                                                                                                                                                                                                                                              | #   | #    | #         | #     | #    | #    | -                                                      | ----  | ----                 | #                                                                                                                                                                                                                                                                                                                                                 | #   | #   | #         | #     | #    | #    |
| Rsa1.0_01793.1.g29861.t1 | gb EOA15695.1  hypothetical protein CARUB_v10006407mg [Capsella rubella]                                                                                                                                                                                                                                                                                                                                                                                       | 163 | 185  | 6.00E-21  | 113.5 | 44.2 | 59.5 | hypothetical protein CARUB_v10006407mg                 | gbpln | Capsella rubella     | AT4G22700.1   Symbols: LBD32   LOB domain-containing protein 32   chr4:11933301-11933879 FORWARD LENGTH=192                                                                                                                                                                                                                                       | 163 | 192 | 2.00E-22  | 117.8 | 48.5 | 58.9 |
| Rsa1.0_01793.1.g29862.t1 | emb CAB39638.1  RNA-directed DNA polymerase-like protein [Arabidopsis thaliana] gi 7267666 emb CAB78094.1  RNA-directed DNA polymerase-like protein [Arabidopsis thaliana]                                                                                                                                                                                                                                                                                     | 770 | 1274 | 0         | 165.5 | 45.6 | 60.3 | RNA-directed DNA polymerase-like protein               | gbpln | Arabidopsis thaliana | AT4G29090.1   Symbols:   Ribonuclease H-like superfamily protein   chr4:14333528-14335255 FORWARD LENGTH=575                                                                                                                                                                                                                                      | 770 | 575 | 1.00E-56  | 74.7  | 17.5 | 28.2 |

|                          |                                                                                                                                                                                                                                                                                                                                                                                                                                                                                                                                                                      |      |      |           |       |      |      |                                                               |       |                      |                                                                                                                                                                                                                                                                                                                                                |      |      |           |       |      |      |
|--------------------------|----------------------------------------------------------------------------------------------------------------------------------------------------------------------------------------------------------------------------------------------------------------------------------------------------------------------------------------------------------------------------------------------------------------------------------------------------------------------------------------------------------------------------------------------------------------------|------|------|-----------|-------|------|------|---------------------------------------------------------------|-------|----------------------|------------------------------------------------------------------------------------------------------------------------------------------------------------------------------------------------------------------------------------------------------------------------------------------------------------------------------------------------|------|------|-----------|-------|------|------|
| Rsa1.0_01793.1.g29863.t1 | gb EOA17210.1  hypothetical protein CARUB_v10005483mg [Capsella rubella]                                                                                                                                                                                                                                                                                                                                                                                                                                                                                             | 269  | 271  | 1.00E-121 | 100.7 | 79.2 | 87.0 | hypothetical protein CARUB_v10005483mg                        | gbpln | Capsella rubella     | AT4G22680.1   Symbols: MYB85, AtMYB85   myb domain protein 85   chr4:11922789-11924080 REVERSE LENGTH=266                                                                                                                                                                                                                                      | 269  | 266  | 1.00E-112 | 98.9  | 77.0 | 87.0 |
| Rsa1.0_01793.1.g29864.t1 | gb EOA15646.1  hypothetical protein CARUB_v10005919mg [Capsella rubella]                                                                                                                                                                                                                                                                                                                                                                                                                                                                                             | 159  | 160  | 4.00E-69  | 100.6 | 81.1 | 91.2 | hypothetical protein CARUB_v10005919mg                        | gbpln | Capsella rubella     | AT4G22620.1   Symbols: SAUR-like auxin-responsive protein family   chr4:11907631-11908113 FORWARD LENGTH=160                                                                                                                                                                                                                                   | 159  | 160  | 3.00E-70  | 100.6 | 79.9 | 90.6 |
| Rsa1.0_01793.1.g29865.t1 | emb CAA16549.1  putative protein [Arabidopsis thaliana]                                                                                                                                                                                                                                                                                                                                                                                                                                                                                                              | 188  | 140  | 2.00E-25  | 74.5  | 31.9 | 43.1 | putative protein                                              | gbpln | Arabidopsis thaliana | AT4G22640.1   Symbols: Bifunctional inhibitor/lipid-transfer protein/seed storage 2S albumin superfamily protein   chr4:11911658-11912008 FORWARD LENGTH=116                                                                                                                                                                                   | 188  | 116  | 1.00E-27  | 61.7  | 31.9 | 43.1 |
| Rsa1.0_01794.1.g29866.t1 | ref NP_172827.1  cytochrome P450, family 78, subfamily A, polypeptide 5 [Arabidopsis thaliana]<br>gi 8920576 gb AAF81298.1 AC027656_15 Strong similarity to cytochrome P-450 from Phalaenopsis sp. SM9108<br>gb UJ34744. It contains a cytochrome P450 domain PF 00067. EST gb T45256 comes from this gene [Arabidopsis thaliana] gi 63003816 gb AAV25437.1  At g13710 [Arabidopsis thaliana] gi 115646887 gb ABJ17153.1  At g13710 [Arabidopsis thaliana] gi 332190939 gb AEE29060.1  cytochrome P450, family 78, subfamily A, polypeptide 5 [Arabidopsis thaliana] | 331  | 517  | 1.00E-173 | 156.2 | 90.6 | 95.5 | cytochrome P450, family 78, subfamily A, polypeptide 5        | gbpln | Arabidopsis thaliana | AT1G13710.1   Symbols: CYP78A5, KLU   cytochrome P450, family 78, subfamily A, polypeptide 5   chr1:4702932-4704592 REVERSE LENGTH=517                                                                                                                                                                                                         | 331  | 517  | 1.00E-175 | 156.2 | 90.6 | 95.5 |
| Rsa1.0_01794.1.g29867.t2 | ref XP_002886390.1  hypothetical protein ARALYDRAFT_893070 [Arabidopsis lyrata subsp. lyrata] gi 297332231 gb EFH62649.1  hypothetical protein ARALYDRAFT_893070 [Arabidopsis lyrata subsp. lyrata]                                                                                                                                                                                                                                                                                                                                                                  | 330  | 298  | 2.00E-79  | 90.3  | 49.1 | 62.7 | hypothetical protein ARALYDRAFT_893070                        | gbpln | Arabidopsis lyrata   | AT2G42470.1   Symbols: TRAF-like family protein   chr2:17679837-17685187 REVERSE LENGTH=898                                                                                                                                                                                                                                                    | 330  | 898  | 3.00E-61  | 272.1 | 38.8 | 57.3 |
| Rsa1.0_01794.1.g29868.t1 | ref NP_176199.1  formin-like protein 7 [Arabidopsis thaliana] gi 75215697 sp O9XIE0.1 FH7_ARATH RecName: Full=Formin-like protein 7; Short=AtFH7; Short=AtFORMIN-7 gi 5080823 gb AAD39332.1 AC007258_21 Hypothetical protein [Arabidopsis thaliana] gi 34222088 gb AAQ62880.1  At g59910 [Arabidopsis thaliana] gi 332195518 gb AEE33639.1  formin-like protein 7 [Arabidopsis thaliana]                                                                                                                                                                             | 868  | 929  | 0         | 107.0 | 46.0 | 49.3 | formin-like protein 7                                         | gbpln | Arabidopsis thaliana | AT1G59910.1   Symbols: Actin-binding FH2 (formin homology 2) family protein   chr1:22054167-22057052 REVERSE LENGTH=929                                                                                                                                                                                                                        | 868  | 929  | 0         | 107.0 | 46.0 | 49.3 |
| Rsa1.0_01794.1.g29869.t1 | gb ABV89625.1  pyruvate dehydrogenase complex E1 alpha subunit dehydrogenase [Brassica rapa]                                                                                                                                                                                                                                                                                                                                                                                                                                                                         | 390  | 389  | 0         | 99.7  | 97.7 | 98.5 | pyruvate dehydrogenase complex E1 alpha subunit dehydrogenase | gbpln | Brassica rapa        | AT1G59900.1   Symbols: AT-E1 ALPHA, E1 ALPHA   pyruvate dehydrogenase complex E1 alpha subunit   chr1:22051368-22053660 FORWARD LENGTH=389                                                                                                                                                                                                     | 390  | 389  | 0         | 99.7  | 93.6 | 97.4 |
| Rsa1.0_01794.1.g29870.t3 | gb EOA33558.1  hypothetical protein CARUB_v10019683mg [Capsella rubella]                                                                                                                                                                                                                                                                                                                                                                                                                                                                                             | 1105 | 1174 | 0         | 106.2 | 77.6 | 85.9 | hypothetical protein CARUB_v10019683mg                        | gbpln | Capsella rubella     | AT1G59890.2   Symbols: SNL5   SIN3-like 5   chr1:22044326-22050670 FORWARD LENGTH=1167                                                                                                                                                                                                                                                         | 1105 | 1167 | 0         | 105.6 | 77.4 | 85.1 |
| Rsa1.0_01794.1.g29871.t1 | #                                                                                                                                                                                                                                                                                                                                                                                                                                                                                                                                                                    | #    | #    | #         | #     | #    | #    | -                                                             | ----  | ----                 | #                                                                                                                                                                                                                                                                                                                                              | #    | #    | #         | #     | #    | #    |
| Rsa1.0_01794.1.g29872.t1 | ref XP_002888078.1  predicted protein [Arabidopsis lyrata subsp. lyrata] gi 297333919 gb EFH64337.1  predicted protein [Arabidopsis lyrata subsp. lyrata]                                                                                                                                                                                                                                                                                                                                                                                                            | 164  | 114  | 6.00E-18  | 69.5  | 37.8 | 44.5 | predicted protein                                             | gbpln | Arabidopsis lyrata   | #                                                                                                                                                                                                                                                                                                                                              | #    | #    | #         | #     | #    | #    |
| Rsa1.0_01795.1.g29873.t1 | ref NP_190630.1  uncharacterized protein [Arabidopsis thaliana] gi 6562001 emb CAB62490.1  hypothetical protein [Arabidopsis thaliana] gi 91805549 gb ABE65503.1  hypothetical protein At3g50610 [Arabidopsis thaliana] gi 332645164 gb AEE78685.1  uncharacterized protein AT3G50610 [Arabidopsis thaliana]                                                                                                                                                                                                                                                         | 240  | 229  | 2.00E-92  | 95.4  | 72.5 | 82.1 | uncharacterized protein                                       | gbpln | Arabidopsis thaliana | AT3G50610.1   Symbols: unknown protein; BEST Arabidopsis thaliana protein match is: unknown protein (TAIR:AT3G66816.1). Has 125 Blast hits to 60 proteins in 16 species: Archaea - 0; Bacteria - 2; Metazoa - 10; Fungi - 4; Plants - 97; Viruses - 0; Other Eukaryotes - 12 (source: NCBI BLINK).   chr3:18779723-18780412 REVERSE LENGTH=229 | 240  | 229  | 5.00E-95  | 95.4  | 72.5 | 82.1 |
| Rsa1.0_01795.1.g29874.t1 | ref XP_002877755.1  hypothetical protein ARALYDRAFT_485408 [Arabidopsis lyrata subsp. lyrata] gi 297323593 gb EFH54014.1  hypothetical protein ARALYDRAFT_485408 [Arabidopsis lyrata subsp. lyrata]                                                                                                                                                                                                                                                                                                                                                                  | 301  | 340  | 1.00E-158 | 113.0 | 90.4 | 95.7 | hypothetical protein ARALYDRAFT_485408                        | gbpln | Arabidopsis lyrata   | AT3G50620.1   Symbols: P-loop containing nucleoside triphosphate hydrolases superfamily protein   chr3:18784993-18786747 REVERSE LENGTH=340                                                                                                                                                                                                    | 301  | 340  | 1.00E-159 | 113.0 | 90.0 | 96.3 |
| Rsa1.0_01795.1.g29875.t2 | gb ABD65636.1  hypothetical protein 23.t00055 [Brassica oleracea]                                                                                                                                                                                                                                                                                                                                                                                                                                                                                                    | 336  | 414  | 2.00E-18  | 123.2 | 19.0 | 28.0 | hypothetical protein 23.t00055                                | gbpln | Brassica oleracea    | #                                                                                                                                                                                                                                                                                                                                              | #    | #    | #         | #     | #    | #    |
| Rsa1.0_01795.1.g29876.t1 | #                                                                                                                                                                                                                                                                                                                                                                                                                                                                                                                                                                    | #    | #    | #         | #     | #    | #    | -                                                             | ----  | ----                 | AT3G50630.1   Symbols: KRP2, ICK2   KIP-related protein 2   chr3:18800508-18801366 FORWARD LENGTH=209                                                                                                                                                                                                                                          | 122  | 209  | 1.00E-11  | 171.3 | 44.3 | 52.5 |



|                          |                                                                                                                                                                                                                                                                                                                                                                                                                                                                                                                                                                                                                                                                                                                                                                                                                                                                                                                                                 |     |      |           |       |      |      |                                              |       |                      |                                                                                                                                                                                                                                                                                                                                                         |     |     |           |       |      |      |
|--------------------------|-------------------------------------------------------------------------------------------------------------------------------------------------------------------------------------------------------------------------------------------------------------------------------------------------------------------------------------------------------------------------------------------------------------------------------------------------------------------------------------------------------------------------------------------------------------------------------------------------------------------------------------------------------------------------------------------------------------------------------------------------------------------------------------------------------------------------------------------------------------------------------------------------------------------------------------------------|-----|------|-----------|-------|------|------|----------------------------------------------|-------|----------------------|---------------------------------------------------------------------------------------------------------------------------------------------------------------------------------------------------------------------------------------------------------------------------------------------------------------------------------------------------------|-----|-----|-----------|-------|------|------|
| Rsa1.0_01795.1.g29877.t1 | gb AAD19773.1  putative retroelement pol polyprotein [Arabidopsis thaliana]                                                                                                                                                                                                                                                                                                                                                                                                                                                                                                                                                                                                                                                                                                                                                                                                                                                                     | 849 | 1335 | 0         | 157.2 | 39.8 | 56.9 | putative retroelement pol polyprotein        | gbpln | Arabidopsis thaliana | ATMG00300.1   Symbols: ORF145A   Gag-Pol-related retrotransposon family protein   chrM:89617-90054 REVERSE LENGTH=145                                                                                                                                                                                                                                   | 849 | 145 | 5.00E-29  | 17.1  | 6.5  | 8.7  |
| Rsa1.0_01796.1.g29878.t1 | ref XP_002888394.1  hexaubiquitin protein [Arabidopsis lyrata subsp. lyrata] gi 297334235 gb EFH64653.1  hexaubiquitin protein [Arabidopsis lyrata subsp. lyrata]                                                                                                                                                                                                                                                                                                                                                                                                                                                                                                                                                                                                                                                                                                                                                                               | 232 | 483  | 2.00E-44  | 208.2 | 48.3 | 60.8 | hexaubiquitin protein                        | gbpln | Arabidopsis lyrata   | AT5G20620.1   Symbols: UBG4   ubiquitin 4   chr5:6973315-6974463 REVERSE LENGTH=382                                                                                                                                                                                                                                                                     | 232 | 382 | 3.00E-45  | 164.7 | 46.6 | 57.3 |
| Rsa1.0_01796.1.g29879.t1 | gb EOA30109.1  hypothetical protein CARUB_v10013220mg [Capsella rubella]                                                                                                                                                                                                                                                                                                                                                                                                                                                                                                                                                                                                                                                                                                                                                                                                                                                                        | 632 | 624  | 0         | 98.7  | 88.9 | 91.6 | hypothetical protein CARUB_v10013220mg       | gbpln | Capsella rubella     | AT2G18750.3   Symbols:   Calmodulin-binding protein   chr2:8125827-8128363 FORWARD LENGTH=622                                                                                                                                                                                                                                                           | 632 | 622 | 0         | 98.4  | 87.8 | 91.1 |
| Rsa1.0_01796.1.g29880.t2 | gb EOA16115.1  hypothetical protein CARUB_v10004248mg [Capsella rubella]                                                                                                                                                                                                                                                                                                                                                                                                                                                                                                                                                                                                                                                                                                                                                                                                                                                                        | 424 | 704  | 7.00E-86  | 166.0 | 46.9 | 56.4 | hypothetical protein CARUB_v10004248mg       | gbpln | Capsella rubella     | AT4G30200.4   Symbols: VEL1, VIL2   vernalization5/VIN3-like   chr4:14787045-14790070 REVERSE LENGTH=624                                                                                                                                                                                                                                                | 424 | 624 | 1.00E-87  | 147.2 | 46.2 | 53.3 |
| Rsa1.0_01796.1.g29881.t2 | ref NP_179484.1  pentatricopeptide repeat-containing protein [Arabidopsis thaliana] gi 75099137 sp O64624.1 PP163_ARATH RecName: Full=Pentatricopeptide repeat-containing protein At2g18940 gi 3004555 gb AAC09028.1  putative salt-inducible protein [Arabidopsis thaliana] gi 15983785 gb AAL10489.1  At2g18940/F19F24.14 [Arabidopsis thaliana] gi 38564280 gb AAR23719.1  At2g18940/F19F24.14 [Arabidopsis thaliana] gi 330251738 gb AEC06830.1  pentatricopeptide repeat-containing protein [Arabidopsis thaliana] ref NP_179486.1  H(+)-ATPase 1 [Arabidopsis thaliana] gi 12644156 sp P20649.3 PMA1_ARATH RecName: Full=ATPase 1, plasma membrane-type; AltName: Full=Proton pump 1 gi 3004557 gb AAC09030.1  plasma membrane proton ATPase (PMA) [Arabidopsis thaliana] gi 30794112 gb AAP40498.1  putative plasma membrane proton ATPase (PMA) [Arabidopsis thaliana] gi 330251738 gb AEC06832.1  H(+)-ATPase 1 [Arabidopsis thaliana] | 919 | 822  | 0         | 89.4  | 74.1 | 79.9 | pentatricopeptide repeat-containing protein  | gbpln | Arabidopsis thaliana | AT2G18940.1   Symbols:   Tetratricopeptide repeat (TPR)-like superfamily protein   chr2:8203873-8206341 REVERSE LENGTH=822                                                                                                                                                                                                                              | 919 | 822 | 0         | 89.4  | 74.1 | 79.9 |
| Rsa1.0_01796.1.g29882.t1 | ref NP_179486.1  H(+)-ATPase 1 [Arabidopsis thaliana] gi 12644156 sp P20649.3 PMA1_ARATH RecName: Full=ATPase 1, plasma membrane-type; AltName: Full=Proton pump 1 gi 3004557 gb AAC09030.1  plasma membrane proton ATPase (PMA) [Arabidopsis thaliana] gi 30794112 gb AAP40498.1  putative plasma membrane proton ATPase (PMA) [Arabidopsis thaliana] gi 330251738 gb AEC06832.1  H(+)-ATPase 1 [Arabidopsis thaliana]                                                                                                                                                                                                                                                                                                                                                                                                                                                                                                                         | 290 | 949  | 1.00E-147 | 327.2 | 85.5 | 93.1 | H(+)-ATPase 1                                | gbpln | Arabidopsis thaliana | AT2G18960.1   Symbols: AHA1, PMA, OST2, HA1   H(+)-ATPase 1   chr2:8221858-8227268 FORWARD LENGTH=949                                                                                                                                                                                                                                                   | 290 | 949 | 1.00E-150 | 327.2 | 85.5 | 93.1 |
| Rsa1.0_01796.1.g29883.t1 | gb EOA32628.1  hypothetical protein CARUB_v10015923mg [Capsella rubella]                                                                                                                                                                                                                                                                                                                                                                                                                                                                                                                                                                                                                                                                                                                                                                                                                                                                        | 128 | 348  | 1.00E-47  | 271.9 | 68.8 | 81.3 | hypothetical protein CARUB_v10015923mg       | gbpln | Capsella rubella     | AT2G19050.1   Symbols:   GDSL-like Lipase/Acylhydrolase superfamily protein   chr2:8253416-8255534 FORWARD LENGTH=349                                                                                                                                                                                                                                   | 128 | 349 | 1.00E-49  | 272.7 | 68.8 | 81.3 |
| Rsa1.0_01797.1.g29884.t5 | ref XP_002878905.1  predicted protein [Arabidopsis lyrata subsp. lyrata] gi 297324744 gb EFH55164.1  predicted protein [Arabidopsis lyrata subsp. lyrata]                                                                                                                                                                                                                                                                                                                                                                                                                                                                                                                                                                                                                                                                                                                                                                                       | 480 | 480  | 6.00E-24  | 100.0 | 16.9 | 23.8 | predicted protein                            | gbpln | Arabidopsis lyrata   | AT1G14800.1   Symbols:   Nucleic acid-binding, OB-fold-like protein   chr1:5099572-5102558 FORWARD LENGTH=384                                                                                                                                                                                                                                           | 480 | 384 | 4.00E-12  | 80.0  | 11.5 | 19.6 |
| Rsa1.0_01797.1.g29885.t1 | gb AAG51783.1 AC079679.3 reverse transcriptase, putative; 16838-20266 [Arabidopsis thaliana]                                                                                                                                                                                                                                                                                                                                                                                                                                                                                                                                                                                                                                                                                                                                                                                                                                                    | 225 | 1142 | 8.00E-30  | 507.6 | 36.9 | 56.4 | reverse transcriptase, putative; 16838-20266 | gbpln | Arabidopsis thaliana | AT2G34320.1   Symbols:   Polynucleotidyl transferase, ribonuclease H-like superfamily protein   chr2:14484959-14485837 FORWARD LENGTH=292                                                                                                                                                                                                               | 225 | 292 | 2.00E-19  | 129.8 | 31.6 | 52.9 |
| Rsa1.0_01797.1.g29886.t1 | ref NP_175822.1  uncharacterized protein [Arabidopsis thaliana] gi 4585964 gb AAD25600.1 AC005287.2 hypothetical protein [Arabidopsis thaliana] gi 119360031 gb ABL66744.1  At1g54200 [Arabidopsis thaliana] gi 332194939 gb AEE33060.1  uncharacterized protein AT1G54200 [Arabidopsis thaliana]                                                                                                                                                                                                                                                                                                                                                                                                                                                                                                                                                                                                                                               | 352 | 366  | 3.00E-82  | 104.0 | 65.6 | 76.1 | uncharacterized protein                      | gbpln | Arabidopsis thaliana | AT1G54200.1   Symbols:   unknown protein; BEST Arabidopsis thaliana protein match is: unknown protein (TAIR:AT3G13980.1); Has 1084 Blast hits to 581 proteins in 136 species: Archae - 0; Bacteria - 72; Metazoa - 212; Fungi - 78; Plants - 102; Viruses - 0; Other Eukaryotes - 620 (source: NCBI BLINK).   chr1:20235855-20236955 FORWARD LENGTH=366 | 352 | 366 | 8.00E-85  | 104.0 | 65.6 | 76.1 |
| Rsa1.0_01797.1.g29887.t1 | #                                                                                                                                                                                                                                                                                                                                                                                                                                                                                                                                                                                                                                                                                                                                                                                                                                                                                                                                               | #   | #    | #         | #     | #    | #    | -                                            | ----  | ----                 | #                                                                                                                                                                                                                                                                                                                                                       | #   | #   | #         | #     | #    | #    |
| Rsa1.0_01797.1.g29888.t1 | #                                                                                                                                                                                                                                                                                                                                                                                                                                                                                                                                                                                                                                                                                                                                                                                                                                                                                                                                               | #   | #    | #         | #     | #    | #    | -                                            | ----  | ----                 | #                                                                                                                                                                                                                                                                                                                                                       | #   | #   | #         | #     | #    | #    |
| Rsa1.0_01797.1.g29889.t1 | #                                                                                                                                                                                                                                                                                                                                                                                                                                                                                                                                                                                                                                                                                                                                                                                                                                                                                                                                               | #   | #    | #         | #     | #    | #    | -                                            | ----  | ----                 | AT1G54160.1   Symbols: NFYA5, NF-YA5   nuclear factor Y, subunit A5   chr1:20217581-20218706 REVERSE LENGTH=308                                                                                                                                                                                                                                         | 142 | 308 | 1.00E-12  | 216.9 | 23.9 | 24.6 |
| Rsa1.0_01797.1.g29890.t1 | gb EOA37967.1  hypothetical protein CARUB_v10009435mg [Capsella rubella]                                                                                                                                                                                                                                                                                                                                                                                                                                                                                                                                                                                                                                                                                                                                                                                                                                                                        | 382 | 382  | 1.00E-160 | 100.0 | 75.1 | 86.4 | hypothetical protein CARUB_v10009435mg       | gbpln | Capsella rubella     | AT1G54150.1   Symbols:   E3 Ubiquitin ligase family protein   chr1:20215480-20217303 FORWARD LENGTH=383                                                                                                                                                                                                                                                 | 382 | 383 | 1.00E-158 | 100.3 | 73.0 | 84.3 |

|                          |                                                                                                                                                                                                                                                                                                                                                                    |     |     |           |       |      |      |                                                                                                                                                                                                                                                    |       |                      |                                                                                                                                                                                                                                                                                                                                                                      |     |     |           |       |      |      |
|--------------------------|--------------------------------------------------------------------------------------------------------------------------------------------------------------------------------------------------------------------------------------------------------------------------------------------------------------------------------------------------------------------|-----|-----|-----------|-------|------|------|----------------------------------------------------------------------------------------------------------------------------------------------------------------------------------------------------------------------------------------------------|-------|----------------------|----------------------------------------------------------------------------------------------------------------------------------------------------------------------------------------------------------------------------------------------------------------------------------------------------------------------------------------------------------------------|-----|-----|-----------|-------|------|------|
| Rsa1.0_01798.1.g29891.t1 | ref NP_001190021.1  E3 UFM1-protein ligase 1-like protein [Arabidopsis thaliana] gi 332644616 gb AE78137.1  E3 UFM1-protein ligase 1-like protein [Arabidopsis thaliana]                                                                                                                                                                                           | 721 | 788 | 0         | 109.3 | 91.3 | 95.3 | E3 UFM1-protein ligase 1-like protein                                                                                                                                                                                                              | gbpln | Arabidopsis thaliana | AT3G46220.3   Symbols:   unknown protein; INVOLVED IN: biological_process unknown; EXPRESSED IN: 24 plant structures; EXPRESSED DURING: 13 growth stages; CONTAINS InterPro DOMAIN/s: Protein of unknown function DUF2042 (InterPro:IPR018611).   chr3:16979174-16983970 FORWARD LENGTH=788                                                                          | 721 | 788 | 0         | 109.3 | 91.3 | 95.3 |
| Rsa1.0_01798.1.g29892.t1 | gb AAF78436.1 AC018748_15 Contains similarity to 17.6 KD class I heat shock protein from Arabidopsis thaliana gi P13853 and contains Hsp20/alpha crystallin PF 00011 and signal peptidase I PF 00461 domains. ESTs gi A1998650, gb AW004417, gb A1998904 come from this gene [Arabidopsis thaliana]                                                                | 157 | 403 | 1.00E-77  | 256.7 | 88.5 | 96.2 | Contains similarity to 17.6 KD class I heat shock protein from Arabidopsis thaliana gi P13853 and contains Hsp20/alpha crystallin PF 00011 and signal peptidase I PF 00461 domains. ESTs gi A1998650, gb AW004417, gb A1998904 come from this gene | gbpln | Arabidopsis thaliana | AT1G53540.1   Symbols:   HSP20-like chaperones superfamily protein   chr1:19980510-19980983 FORWARD LENGTH=157                                                                                                                                                                                                                                                       | 157 | 157 | 6.00E-79  | 100.0 | 88.5 | 96.2 |
| Rsa1.0_01798.1.g29893.t1 | ref XP_002877472.1  predicted protein [Arabidopsis lyrata subsp. lyrata] gi 297323310 gb EFH53731.1  predicted protein [Arabidopsis lyrata subsp. lyrata]                                                                                                                                                                                                          | 457 | 486 | 1.00E-138 | 106.3 | 54.5 | 59.7 | predicted protein                                                                                                                                                                                                                                  | gbpln | Arabidopsis lyrata   | AT3G46240.1   Symbols:   BEST Arabidopsis thaliana protein match is: receptor protein kinase-related (TAIR-AT3G46270.1); Has 38685 Blast hits to 11525 proteins in 945 species: Archae - 63; Bacteria - 11586; Metazoa - 8974; Fungi - 2953; Plants - 5350; Viruses - 724; Other Eukaryotes - 9035 (source: NCBI BLINK).   chr3:16985843-16988064 REVERSE LENGTH=434 | 457 | 434 | 1.00E-118 | 95.0  | 46.8 | 51.6 |
| Rsa1.0_01798.1.g29894.t1 | ref NP_190213.2  protein kinase-like protein [Arabidopsis thaliana] gi 26450306 dbj BAC42289.1  unknown protein [Arabidopsis thaliana] gi 332644621 gb AE78142.1  protein kinase-like protein [Arabidopsis thaliana]                                                                                                                                               | 466 | 471 | 0         | 101.1 | 74.9 | 83.0 | protein kinase-like protein                                                                                                                                                                                                                        | gbpln | Arabidopsis thaliana | AT3G46280.1   Symbols:   protein kinase-related   chr3:17005672-17008410 REVERSE LENGTH=471                                                                                                                                                                                                                                                                          | 466 | 471 | 0         | 101.1 | 74.9 | 83.0 |
| Rsa1.0_01798.1.g29895.t1 | #                                                                                                                                                                                                                                                                                                                                                                  | #   | #   | #         | #     | #    | #    | -                                                                                                                                                                                                                                                  | ----  | ----                 | #                                                                                                                                                                                                                                                                                                                                                                    | #   | #   | #         | #     | #    |      |
| Rsa1.0_01798.1.g29896.t1 | gb EOA28640.1  hypothetical protein CARUB_v10024862mg, partial [Capsella rubella]                                                                                                                                                                                                                                                                                  | 166 | 490 | 9.00E-31  | 295.2 | 41.0 | 61.4 | hypothetical protein CARUB_v10024862mg, partial                                                                                                                                                                                                    | gbpln | Capsella rubella     | AT1G52950.1   Symbols:   Nucleic acid-binding, OB-fold-like protein   chr1:19725483-19728007 FORWARD LENGTH=566                                                                                                                                                                                                                                                      | 166 | 566 | 7.00E-27  | 341.0 | 36.1 | 59.0 |
| Rsa1.0_01798.1.g29897.t1 | ref NP_190256.1  UDP-glycosyltransferase-like protein [Arabidopsis thaliana] gi 75266316 sp Q9STE6.1 U76E5_ARAT H RecName: Full=UDP-glycosyltransferase 76E5 gi 5541687 emb CAB51193.1  glucuronosyl transferase-like protein [Arabidopsis thaliana] gi 332644676 gb AE78197.1  UDP-glycosyltransferase 76E5 [Arabidopsis thaliana]                                | 163 | 447 | 2.00E-67  | 274.2 | 72.4 | 84.7 | UDP-glycosyltransferase-like protein                                                                                                                                                                                                               | gbpln | Arabidopsis thaliana | AT3G46720.1   Symbols:   UDP-Glycosyltransferase superfamily protein   chr3:17210930-17212348 REVERSE LENGTH=447                                                                                                                                                                                                                                                     | 163 | 447 | 6.00E-70  | 274.2 | 72.4 | 84.7 |
| Rsa1.0_01798.1.g29898.t1 | dbj BAC41861.1  putative glucuronosyl transferase [Arabidopsis thaliana] gi 28951029 gb AAO63438.1  At3g46690 [Arabidopsis thaliana]                                                                                                                                                                                                                               | 417 | 452 | 1.00E-180 | 108.4 | 75.8 | 85.4 | putative glucuronosyl transferase                                                                                                                                                                                                                  | gbpln | Arabidopsis thaliana | AT3G46690.1   Symbols:   UDP-Glycosyltransferase superfamily protein   chr3:17197760-17199197 REVERSE LENGTH=452                                                                                                                                                                                                                                                     | 417 | 452 | 1.00E-177 | 108.4 | 75.8 | 85.4 |
| Rsa1.0_01798.1.g29899.t1 | ref NP_190257.1  putative disease resistance RPP13-like protein 3 [Arabidopsis thaliana] gi 29839682 sp Q9STE7.1 R13L3_ARAT H RecName: Full=Putative disease resistance RPP13-like protein 3 gi 5541686 emb CAB51192.1  putative protein [Arabidopsis thaliana] gi 332644677 gb AE78198.1  putative disease resistance RPP13-like protein 3 [Arabidopsis thaliana] | 380 | 847 | 1.00E-106 | 222.9 | 61.1 | 73.4 | putative disease resistance RPP13-like protein 3                                                                                                                                                                                                   | gbpln | Arabidopsis thaliana | AT3G46730.1   Symbols:   NB-ARC domain-containing disease resistance protein   chr3:17213069-17215612 REVERSE LENGTH=847                                                                                                                                                                                                                                             | 380 | 847 | 1.00E-109 | 222.9 | 61.1 | 73.4 |
| Rsa1.0_01798.1.g29900.t1 | #                                                                                                                                                                                                                                                                                                                                                                  | #   | #   | #         | #     | #    | #    | -                                                                                                                                                                                                                                                  | ----  | ----                 | #                                                                                                                                                                                                                                                                                                                                                                    | #   | #   | #         | #     | #    |      |
| Rsa1.0_01798.1.g29901.t1 | gb EOA23492.1  hypothetical protein CARUB_v10016683mg, partial [Capsella rubella]                                                                                                                                                                                                                                                                                  | 817 | 845 | 0         | 103.4 | 91.9 | 94.4 | hypothetical protein CARUB_v10016683mg, partial                                                                                                                                                                                                    | gbpln | Capsella rubella     | AT3G46740.1   Symbols:   TOC75-III, MAR1   translocon at the outer envelope membrane of chloroplasts 75-III   chr3:17216104-17219296 REVERSE LENGTH=818                                                                                                                                                                                                              | 817 | 818 | 0         | 100.1 | 90.8 | 94.2 |

|                          |                                                                                                                                                                                                                                                                                                                                                                                                                                                                                                                                                                                                                                                                                                                                                                                                                         |     |     |           |       |      |      |                                             |       |                      |                                                                                                                                                                                                                                                                             |     |     |           |       |      |      |
|--------------------------|-------------------------------------------------------------------------------------------------------------------------------------------------------------------------------------------------------------------------------------------------------------------------------------------------------------------------------------------------------------------------------------------------------------------------------------------------------------------------------------------------------------------------------------------------------------------------------------------------------------------------------------------------------------------------------------------------------------------------------------------------------------------------------------------------------------------------|-----|-----|-----------|-------|------|------|---------------------------------------------|-------|----------------------|-----------------------------------------------------------------------------------------------------------------------------------------------------------------------------------------------------------------------------------------------------------------------------|-----|-----|-----------|-------|------|------|
| Rsa1.0_01798.1.g29902.t1 | refNP_190259.2  uncharacterized protein [Arabidopsis thaliana] gi 52354323 gb AAU44482.1  hypothetical protein AT3G46750 [Arabidopsis thaliana] gi 60547795 gb AAx23861.1  hypothetical protein AT3g46750 [Arabidopsis thaliana] gi 332644679 gb AAE78200.1  uncharacterized protein AT3G46750 [Arabidopsis thaliana]                                                                                                                                                                                                                                                                                                                                                                                                                                                                                                   | 333 | 388 | 1.00E-137 | 116.5 | 80.8 | 86.8 | uncharacterized protein                     | gbpln | Arabidopsis thaliana | AT3G46750.1   Symbols:   unknown protein; Has 2631 Blast hits to 1984 proteins in 271 species: Archae - 6; Bacteria - 163; Metazoa - 1232; Fungi - 253; Plants - 141; Viruses - 8; Other Eukaryotes - 828 (source: NCBI BLink).   chr3:17219944-17221461 FORWARD LENGTH=388 | 333 | 388 | 1.00E-140 | 116.5 | 80.8 | 86.8 |
| Rsa1.0_01798.1.g29903.t1 | gb ABA18111.1  pentatricopeptide repeat protein [Arabidopsis arenosa]                                                                                                                                                                                                                                                                                                                                                                                                                                                                                                                                                                                                                                                                                                                                                   | 505 | 419 | 1.00E-169 | 83.0  | 58.0 | 68.3 | pentatricopeptide repeat protein            | gbpln | Arabidopsis arenosa  | AT3G42630.1   Symbols:   Pentatricopeptide repeat (PPR) superfamily protein   chr3:14722314-14723635 FORWARD LENGTH=415                                                                                                                                                     | 505 | 415 | 1.00E-169 | 82.2  | 57.2 | 67.7 |
| Rsa1.0_01799.1.g29904.t2 | gb EOA13046.1  hypothetical protein CARUB_v10026047mg [Capsella rubella]                                                                                                                                                                                                                                                                                                                                                                                                                                                                                                                                                                                                                                                                                                                                                | 661 | 657 | 0         | 99.4  | 81.4 | 88.4 | hypothetical protein CARUB_v10026047mg      | gbpln | Capsella rubella     | AT5G44230.1   Symbols:   Pentatricopeptide repeat (PPR) superfamily protein   chr5:17814336-17816309 FORWARD LENGTH=657                                                                                                                                                     | 661 | 657 | 0         | 99.4  | 79.4 | 87.4 |
| Rsa1.0_01799.1.g29905.t1 | ref XP_002863603.1  hypothetical protein ARALYDRAFT_917193 [Arabidopsis lyrata subsp. lyrata] gi 297309438 gb EFH39862.1  hypothetical protein ARALYDRAFT_917193 [Arabidopsis lyrata subsp. lyrata]                                                                                                                                                                                                                                                                                                                                                                                                                                                                                                                                                                                                                     | 409 | 406 | 0         | 99.3  | 88.0 | 92.7 | hypothetical protein ARALYDRAFT_917193      | gbpln | Arabidopsis lyrata   | AT5G44250.1   Symbols:   Protein of unknown function DUF829, transmembrane 53   chr5:17823876-17825620 REVERSE LENGTH=403                                                                                                                                                   | 409 | 403 | 0         | 98.5  | 88.0 | 92.2 |
| Rsa1.0_01799.1.g29906.t1 | ref XP_002863601.1  zinc finger (CCH-type) family protein [Arabidopsis lyrata subsp. lyrata] gi 297309436 gb EFH39860.1  zinc finger (CCH-type) family protein [Arabidopsis lyrata subsp. lyrata]                                                                                                                                                                                                                                                                                                                                                                                                                                                                                                                                                                                                                       | 372 | 382 | 1.00E-142 | 102.7 | 80.1 | 87.9 | zinc finger (CCH-type) family protein       | gbpln | Arabidopsis lyrata   | AT5G44260.1   Symbols:   Zinc finger C-x8-C-x5-C-x3-H type family protein   chr5:17829974-17831119 REVERSE LENGTH=381                                                                                                                                                       | 372 | 381 | 1.00E-135 | 102.4 | 79.3 | 88.7 |
| Rsa1.0_01799.1.g29907.t4 | ref NP_199241.2  putative E3 ubiquitin-protein ligase RING1a [Arabidopsis thaliana] gi 302425246 sp Q9FKW0.2 RING1A_ARATH RecName: Full=Putative E3 ubiquitin-protein ligase RING1a; AltName: Full=Polycomb complex protein RING1a; AltName: Full=Protein RING1a; Short=AtRING1a; AltName: Full=Ring finger protein 434 gi 332007702 gb AED95085.1  putative E3 ubiquitin-protein ligase RING1a [Arabidopsis thaliana]                                                                                                                                                                                                                                                                                                                                                                                                  | 506 | 522 | 1.00E-166 | 103.2 | 70.8 | 81.2 | putative E3 ubiquitin-protein ligase RING1a | gbpln | Arabidopsis thaliana | AT5G44280.1   Symbols:   ATRING1A, RING1A [RING 1A]   chr5:17836115-17839114 REVERSE LENGTH=522                                                                                                                                                                             | 506 | 522 | 1.00E-169 | 103.2 | 70.8 | 81.2 |
| Rsa1.0_01799.1.g29908.t3 | ref NP_199242.1  protein kinase-like protein [Arabidopsis thaliana] gi 79329869 ref NP_001032009.1  protein kinase-like protein [Arabidopsis thaliana] gi 79329882 ref NP_001032010.1  protein kinase-like protein [Arabidopsis thaliana] gi 145334725 ref NP_001078708.1  protein kinase-like protein [Arabidopsis thaliana] gi 10176884 dbj BAB10114.1  cyclin-dependent protein kinase-like protein [Arabidopsis thaliana] gi 222424232 dbj BAH20074.1  AT5G44290 [Arabidopsis thaliana] gi 332007704 gb AED95087.1  protein kinase-like protein [Arabidopsis thaliana] gi 332007705 gb AED95088.1  protein kinase-like protein [Arabidopsis thaliana] gi 332007706 gb AED95089.1  protein kinase-like protein [Arabidopsis thaliana] gi 332007707 gb AED95090.1  protein kinase-like protein [Arabidopsis thaliana] | 640 | 644 | 0         | 100.6 | 83.0 | 88.3 | protein kinase-like protein                 | gbpln | Arabidopsis thaliana | AT5G44290.4   Symbols:   Protein kinase superfamily protein   chr5:17840750-17843190 REVERSE LENGTH=644                                                                                                                                                                     | 640 | 644 | 0         | 100.6 | 83.0 | 88.3 |
| Rsa1.0_01799.1.g29909.t4 | ref XP_002868667.1  nodulin MtN21 family protein [Arabidopsis lyrata subsp. lyrata] gi 297314503 gb EFH44926.1  nodulin MtN21 family protein [Arabidopsis lyrata subsp. lyrata]                                                                                                                                                                                                                                                                                                                                                                                                                                                                                                                                                                                                                                         | 130 | 336 | 7.00E-32  | 258.5 | 57.7 | 59.2 | nodulin MtN21 family protein                | gbpln | Arabidopsis lyrata   | AT5G40210.1   Symbols:   nodulin MtN21 /EamA-like transporter family protein   chr5:16073725-16076088 REVERSE LENGTH=339                                                                                                                                                    | 130 | 339 | 1.00E-33  | 260.8 | 54.6 | 56.9 |

|                          |                                                                                                                                                                                                                                                                                                                                                                                                                                                                                                                                                                                                                                                                                                                                                                                                                                                                                                                                                                                                                                                                                                                                                                                                                                                                                                 |     |      |           |       |      |      |                                               |       |                      |                                                                                                                                              |     |     |           |       |      |      |
|--------------------------|-------------------------------------------------------------------------------------------------------------------------------------------------------------------------------------------------------------------------------------------------------------------------------------------------------------------------------------------------------------------------------------------------------------------------------------------------------------------------------------------------------------------------------------------------------------------------------------------------------------------------------------------------------------------------------------------------------------------------------------------------------------------------------------------------------------------------------------------------------------------------------------------------------------------------------------------------------------------------------------------------------------------------------------------------------------------------------------------------------------------------------------------------------------------------------------------------------------------------------------------------------------------------------------------------|-----|------|-----------|-------|------|------|-----------------------------------------------|-------|----------------------|----------------------------------------------------------------------------------------------------------------------------------------------|-----|-----|-----------|-------|------|------|
| Rsa1.0_01799.1.g29910.t1 | refNP_199245.1   translation initiation factor eIF-3 subunit 7 [Arabidopsis thaliana] gi 10176887 dbj BAB10117.1   eukaryotic translation initiation factor 3 subunit 7 [Arabidopsis thaliana] gi 30793851 gb AAP40378.1   putative eukaryotic translation initiation factor 3 subunit 7 [Arabidopsis thaliana] gi 30794001 gb AAP40450.1   putative eukaryotic translation initiation factor 3 subunit 7 [Arabidopsis thaliana] gi 332007713 gb AED95096.1   translation initiation factor eIF-3 subunit 7 [Arabidopsis thaliana] refNP_199247.1   tubulin beta-4 chain [Arabidopsis thaliana] gi 27735260 sp P24636.2 TBB4_ARATH RecName: Full=Tubulin beta-4 chain; AltName: Full=Beta-4-tubulin gi 10176889 dbj BAB10119.1   tubulin beta-4 chain [Arabidopsis thaliana] gi 14334936 gb AAK59645.1   putative tubulin beta-4 chain [Arabidopsis thaliana] gi 16323374 gb AAL15181.1   putative tubulin beta-4 chain [Arabidopsis thaliana] gi 332007715 gb AED95098.1   tubulin beta-4 chain [Arabidopsis thaliana] refXP_002881041.1   type 1 protein phosphatase [Arabidopsis lyrata subsp. lyrata] gi 158828160 gb ABW81039.1   type 1 protein phosphatase [Arabidopsis lyrata subsp. lyrata] gi 297326880 gb EFH57300.1   type 1 protein phosphatase [Arabidopsis lyrata subsp. lyrata] | 584 | 588  | 0         | 100.7 | 92.3 | 96.4 | translation initiation factor eIF-3 subunit 7 | gbpln | Arabidopsis thaliana | AT5G44320.1   Symbols:   Eukaryotic translation initiation factor 3 subunit 7 (eIF-3)   chr5:17854901-17856667 REVERSE LENGTH=588            | 584 | 588 | 0         | 100.7 | 92.3 | 96.4 |
| Rsa1.0_01799.1.g29911.t1 | refXP_002881041.1   type 1 protein phosphatase [Arabidopsis lyrata subsp. lyrata] gi 158828160 gb ABW81039.1   type 1 protein phosphatase [Arabidopsis lyrata subsp. lyrata] gi 297326880 gb EFH57300.1   type 1 protein phosphatase [Arabidopsis lyrata subsp. lyrata]                                                                                                                                                                                                                                                                                                                                                                                                                                                                                                                                                                                                                                                                                                                                                                                                                                                                                                                                                                                                                         | 445 | 444  | 0         | 99.8  | 98.7 | 99.1 | tubulin beta-4 chain                          | gbpln | Arabidopsis thaliana | AT5G44340.1   Symbols: TUB4   tubulin beta chain 4   chr5:17859442-17860994 REVERSE LENGTH=444                                               | 445 | 444 | 0         | 99.8  | 98.7 | 99.1 |
| Rsa1.0_01800.1.g29912.t1 | gb ABW74581.1   putative tropinone reductase [Boechera divaricarpa]                                                                                                                                                                                                                                                                                                                                                                                                                                                                                                                                                                                                                                                                                                                                                                                                                                                                                                                                                                                                                                                                                                                                                                                                                             | 324 | 319  | 1.00E-179 | 98.5  | 95.4 | 96.9 | type 1 protein phosphatase                    | gbpln | Arabidopsis lyrata   | AT2G29400.1   Symbols: TOPP1, PPI-AT   type one protein phosphatase 1   chr2:12613789-12615283 REVERSE LENGTH=318                            | 324 | 318 | 1.00E-179 | 98.1  | 94.8 | 96.9 |
| Rsa1.0_01800.1.g29913.t1 | dbj BAB02146.1   copia retroelement pol polyprotein-like [Arabidopsis thaliana]                                                                                                                                                                                                                                                                                                                                                                                                                                                                                                                                                                                                                                                                                                                                                                                                                                                                                                                                                                                                                                                                                                                                                                                                                 | 276 | 267  | 1.00E-120 | 96.7  | 77.2 | 82.6 | putative tropinone reductase                  | gbpln | Boechera divaricarpa | AT2G29370.1   Symbols:   NAD(P)-binding Rossmann-fold superfamily protein   chr2:12606059-12607363 FORWARD LENGTH=268                        | 276 | 268 | 1.00E-119 | 97.1  | 76.4 | 82.6 |
| Rsa1.0_01800.1.g29914.t1 | #                                                                                                                                                                                                                                                                                                                                                                                                                                                                                                                                                                                                                                                                                                                                                                                                                                                                                                                                                                                                                                                                                                                                                                                                                                                                                               | 585 | 526  | 6.00E-46  | 89.9  | 15.4 | 20.7 | copia retroelement pol polyprotein-like       | gbpln | Arabidopsis thaliana | ATMG00710.1   Symbols: ORF120   Polynucleotidyl transferase, ribonuclease H-like superfamily protein   chrM:207553-207915 REVERSE LENGTH=120 | 585 | 120 | 9.00E-14  | 20.5  | 5.6  | 8.0  |
| Rsa1.0_01800.1.g29915.t1 | #                                                                                                                                                                                                                                                                                                                                                                                                                                                                                                                                                                                                                                                                                                                                                                                                                                                                                                                                                                                                                                                                                                                                                                                                                                                                                               | #   | #    | #         | #     | #    | #    | -                                             | ----  | ----                 | #                                                                                                                                            | #   | #   | #         | #     | #    |      |
| Rsa1.0_01800.1.g29916.t1 | gb ABW81066.1   tropinone-reductase-like53 [Arabidopsis lyrata subsp. lyrata]                                                                                                                                                                                                                                                                                                                                                                                                                                                                                                                                                                                                                                                                                                                                                                                                                                                                                                                                                                                                                                                                                                                                                                                                                   | 281 | 271  | 1.00E-126 | 96.4  | 77.2 | 84.7 | tropinone-reductase-like53                    | gbpln | Arabidopsis lyrata   | AT2G29350.1   Symbols: SAG13   senescence-associated gene 13   chr2:12601036-12602222 FORWARD LENGTH=269                                     | 281 | 269 | 1.00E-120 | 95.7  | 73.0 | 80.8 |
| Rsa1.0_01800.1.g29917.t1 | gb AAG51783.1   AC079679.3 reverse transcriptase, putative; 16838-20266 [Arabidopsis thaliana]                                                                                                                                                                                                                                                                                                                                                                                                                                                                                                                                                                                                                                                                                                                                                                                                                                                                                                                                                                                                                                                                                                                                                                                                  | 491 | 1142 | 1.00E-106 | 232.6 | 40.5 | 59.7 | reverse transcriptase, putative; 16838-20266  | gbpln | Arabidopsis thaliana | AT4G29090.1   Symbols:   Ribonuclease H-like superfamily protein   chr4:14333528-14335255 FORWARD LENGTH=575                                 | 491 | 575 | 3.00E-65  | 117.1 | 31.4 | 51.3 |
| Rsa1.0_01801.1.g29918.t1 | refNP_200492.1   putative F-box/FBD/LRR-repeat protein [Arabidopsis thaliana] gi 75262578 sp Q9FJT2.1 FDL40_ARATH RecName: Full=Putative F-box/FBD/LRR-repeat protein At5g56810 gi 10176785 dbj BAB09899.1   unnamed protein product [Arabidopsis thaliana] gi 332009427 gb AED96810.1   putative F-box/FBD/LRR-repeat protein [Arabidopsis thaliana]                                                                                                                                                                                                                                                                                                                                                                                                                                                                                                                                                                                                                                                                                                                                                                                                                                                                                                                                           | 450 | 435  | 2.00E-80  | 96.7  | 46.2 | 58.2 | putative F-box/FBD/LRR-repeat protein         | gbpln | Arabidopsis thaliana | AT5G56810.1   Symbols:   F-box/RNI-like/FBD-like domains-containing protein   chr5:22974520-22975992 FORWARD LENGTH=435                      | 450 | 435 | 5.00E-83  | 96.7  | 46.2 | 58.2 |
| Rsa1.0_01801.1.g29919.t2 | gb EOA13381.1   hypothetical protein CARUB_v10026420mg [Capsella rubella]                                                                                                                                                                                                                                                                                                                                                                                                                                                                                                                                                                                                                                                                                                                                                                                                                                                                                                                                                                                                                                                                                                                                                                                                                       | 387 | 438  | 1.00E-124 | 113.2 | 59.2 | 74.7 | hypothetical protein CARUB_v10026420mg        | gbpln | Capsella rubella     | AT5G56810.1   Symbols:   F-box/RNI-like/FBD-like domains-containing protein   chr5:22974520-22975992 FORWARD LENGTH=435                      | 387 | 435 | 1.00E-124 | 112.4 | 61.2 | 74.4 |
| Rsa1.0_01801.1.g29920.t1 | refXP_002864149.1   hypothetical protein ARALYDRAFT_495276 [Arabidopsis lyrata subsp. lyrata] gi 297309984 gb EFH40408.1   hypothetical protein ARALYDRAFT_495276 [Arabidopsis lyrata subsp. lyrata]                                                                                                                                                                                                                                                                                                                                                                                                                                                                                                                                                                                                                                                                                                                                                                                                                                                                                                                                                                                                                                                                                            | 508 | 500  | 0         | 98.4  | 78.7 | 86.4 | hypothetical protein ARALYDRAFT_495276        | gbpln | Arabidopsis lyrata   | AT5G52050.1   Symbols:   MATE efflux family protein   chr5:21138933-21140450 FORWARD LENGTH=505                                              | 508 | 505 | 0         | 99.4  | 78.3 | 86.6 |
| Rsa1.0_01801.1.g29921.t1 | gb EOA13679.1   hypothetical protein CARUB_v10026751mg [Capsella rubella]                                                                                                                                                                                                                                                                                                                                                                                                                                                                                                                                                                                                                                                                                                                                                                                                                                                                                                                                                                                                                                                                                                                                                                                                                       | 349 | 334  | 1.00E-141 | 95.7  | 86.2 | 90.8 | hypothetical protein CARUB_v10026751mg        | gbpln | Capsella rubella     | AT5G52040.1   Symbols: ATRSP41, RS41, At-RS41   RNA-binding (RRM/RBD/RNP motifs) family protein   chr5:21131081-21133318 FORWARD LENGTH=356  | 349 | 356 | 1.00E-134 | 102.0 | 84.5 | 90.0 |

|                          |                                                                                                                                                                                                                                                                         |      |      |           |       |      |      |                                                                                                                                                      |       |                      |                                                                                                                                                                                                                                                                                                                                                                                                                                                                     |      |      |           |       |      |      |
|--------------------------|-------------------------------------------------------------------------------------------------------------------------------------------------------------------------------------------------------------------------------------------------------------------------|------|------|-----------|-------|------|------|------------------------------------------------------------------------------------------------------------------------------------------------------|-------|----------------------|---------------------------------------------------------------------------------------------------------------------------------------------------------------------------------------------------------------------------------------------------------------------------------------------------------------------------------------------------------------------------------------------------------------------------------------------------------------------|------|------|-----------|-------|------|------|
| Rsa1.0_01801.1.g29922.t1 | gb EOA14638.1  hypothetical protein CARUB_v10027896mg [Capsella rubella]                                                                                                                                                                                                | 401  | 849  | 0         | 211.7 | 83.3 | 88.0 | hypothetical protein CARUB_v10027896mg                                                                                                               | gbpln | Capsella rubella     | AT5G52010.1   Symbols:   C2H2-like zinc finger protein   chr5:21121626-21122816 REVERSE LENGTH=396                                                                                                                                                                                                                                                                                                                                                                  | 401  | 396  | 0         | 98.8  | 82.3 | 86.3 |
| Rsa1.0_01801.1.g29923.t1 | ref NP_200011.1  zinc finger CCGH domain-containing protein 63 [Arabidopsis thaliana]<br>gil10177733[dbj]BAB11046.1  unnamed protein product [Arabidopsis thaliana]<br>gil332008771 gb AED96154.1  zinc finger CCGH domain-containing protein 63 [Arabidopsis thaliana] | 438  | 437  | 0         | 99.8  | 84.2 | 91.8 | zinc finger CCGH domain-containing protein 63                                                                                                        | gbpln | Arabidopsis thaliana | AT5G51980.1   Symbols:   Transducin/WD40 repeat-like superfamily protein   chr5:21113650-21115902 REVERSE LENGTH=437                                                                                                                                                                                                                                                                                                                                                | 438  | 437  | 0         | 99.8  | 84.2 | 91.8 |
| Rsa1.0_01801.1.g29924.t1 | gb EOA14537.1  hypothetical protein CARUB_v10027769mg [Capsella rubella]                                                                                                                                                                                                | 539  | 587  | 0         | 108.9 | 87.6 | 94.4 | hypothetical protein CARUB_v10027769mg                                                                                                               | gbpln | Capsella rubella     | AT5G51950.2   Symbols:   Glucose-methanol-choline (GMC) oxidoreductase family protein   chr5:21106093-21108348 REVERSE LENGTH=553                                                                                                                                                                                                                                                                                                                                   | 539  | 553  | 0         | 102.6 | 88.1 | 95.0 |
| Rsa1.0_01801.1.g29925.t1 | gb EOA15053.1  hypothetical protein CARUB_v10028412mg [Capsella rubella]                                                                                                                                                                                                | 858  | 579  | 0         | 67.5  | 49.0 | 54.9 | hypothetical protein CARUB_v10028412mg                                                                                                               | gbpln | Capsella rubella     | AT5G51950.1   Symbols:   Glucose-methanol-choline (GMC) oxidoreductase family protein   chr5:21106093-21108559 REVERSE LENGTH=586                                                                                                                                                                                                                                                                                                                                   | 858  | 586  | 0         | 68.3  | 46.6 | 53.5 |
| Rsa1.0_01802.1.g29926.t2 | pir [S65812 RNA-directed DNA polymerase (EC 2.7.7.49) (clone DW15) - Arabidopsis thaliana retrotransposon Ta11-1  gil976278 gb AAA75254.1  reverse transcriptase [Arabidopsis thaliana]                                                                                 | 857  | 1333 | 0         | 155.5 | 44.5 | 58.8 | RNA-directed DNA polymerase (EC 2.7.7.49) (clone DW15) - Arabidopsis thaliana retrotransposon Ta11-1  gil976278 gb AAA75254.1  reverse transcriptase | gbpln | Arabidopsis thaliana | AT4G29090.1   Symbols:   Ribonuclease H-like superfamily protein   chr4:14333528-14335255 FORWARD LENGTH=575                                                                                                                                                                                                                                                                                                                                                        | 857  | 575  | 2.00E-82  | 67.1  | 20.5 | 33.3 |
| Rsa1.0_01802.1.g29927.t1 | #                                                                                                                                                                                                                                                                       | #    | #    | #         | #     | #    | #    | -                                                                                                                                                    | ----  | ----                 | #                                                                                                                                                                                                                                                                                                                                                                                                                                                                   | #    | #    | #         | #     | #    |      |
| Rsa1.0_01802.1.g29928.t1 | gb AAB87099.1  putative retroelement pol polyprotein [Arabidopsis thaliana]                                                                                                                                                                                             | 1081 | 1496 | 0         | 138.4 | 58.7 | 68.2 | putative retroelement pol polyprotein                                                                                                                | gbpln | Arabidopsis thaliana | AT4G23160.1   Symbols: CRK8   cysteine-rich RLK (RECEPTOR-like protein kinase) 8   chr4:12129485-12134086 FORWARD LENGTH=1262                                                                                                                                                                                                                                                                                                                                       | 1081 | 1262 | 2.33E-156 | 116.7 | 23.2 | 33.3 |
| Rsa1.0_01802.1.g29929.t1 | gb EOA39251.1  hypothetical protein CARUB_v10012248mg [Capsella rubella]                                                                                                                                                                                                | 563  | 570  | 0         | 101.2 | 92.9 | 95.6 | hypothetical protein CARUB_v10012248mg                                                                                                               | gbpln | Capsella rubella     | AT1G51190.1   Symbols: PLT2   Integrase-type DNA-binding superfamily protein   chr1:18977517-18980305 FORWARD LENGTH=568                                                                                                                                                                                                                                                                                                                                            | 563  | 568  | 0         | 100.9 | 90.9 | 93.6 |
| Rsa1.0_01802.1.g29930.t2 | #                                                                                                                                                                                                                                                                       | #    | #    | #         | #     | #    | #    | -                                                                                                                                                    | ----  | ----                 | #                                                                                                                                                                                                                                                                                                                                                                                                                                                                   | #    | #    | #         | #     | #    |      |
| Rsa1.0_01803.1.g29931.t1 | #                                                                                                                                                                                                                                                                       | #    | #    | #         | #     | #    | #    | -                                                                                                                                                    | ----  | ----                 | #                                                                                                                                                                                                                                                                                                                                                                                                                                                                   | #    | #    | #         | #     | #    |      |
| Rsa1.0_01803.1.g29932.t1 | gb AAX55106.1  hypothetical protein At2g05290 [Arabidopsis thaliana]                                                                                                                                                                                                    | 394  | 383  | 2.00E-42  | 97.2  | 22.8 | 35.3 | hypothetical protein At2g05290                                                                                                                       | gbpln | Arabidopsis thaliana | AT3G31430.1   Symbols:   unknown protein; FUNCTIONS IN: molecular_function unknown; INVOLVED IN: biological_process unknown; LOCATED IN: endomembrane system; BEST Arabidopsis thaliana protein match is: unknown protein (TAIR:AT5G18636.1); Has 295 Blast hits to 291 proteins in 12 species: Archae - 0; Bacteria - 0; Metazoa - 0; Fungi - 0; Plants - 295; Viruses - 0; Other Eukaryotes - 0 (source: NCBI BLink).   chr3:12795861-12796871 REVERSE LENGTH=336 | 394  | 336  | 3.00E-19  | 85.3  | 14.7 | 24.9 |
| Rsa1.0_01803.1.g29933.t1 | gb AAF18538.1 AC006551_24 Very similar to retrotransposon reverse transcriptase [Arabidopsis thaliana]                                                                                                                                                                  | 1112 | 1231 | 0         | 110.7 | 39.7 | 56.1 | Very similar to retrotransposon reverse transcriptase                                                                                                | gbpln | Arabidopsis thaliana | AT4G29090.1   Symbols:   Ribonuclease H-like superfamily protein   chr4:14333528-14335255 FORWARD LENGTH=575                                                                                                                                                                                                                                                                                                                                                        | 1112 | 575  | 8.00E-72  | 51.7  | 14.7 | 23.3 |
| Rsa1.0_01803.1.g29934.t1 | gb EOA23895.1  hypothetical protein CARUB_v10017109mg [Capsella rubella]                                                                                                                                                                                                | 481  | 488  | 0         | 101.5 | 89.4 | 94.0 | hypothetical protein CARUB_v10017109mg                                                                                                               | gbpln | Capsella rubella     | AT3G55580.1   Symbols:   Regulator of chromosome condensation (RCC1) family protein   chr3:20612766-20615730 FORWARD LENGTH=488                                                                                                                                                                                                                                                                                                                                     | 481  | 488  | 0         | 101.5 | 88.4 | 93.6 |
| Rsa1.0_01803.1.g29935.t1 | gb AAK01361.1 AF314812_1 delta 1-pyrroline-5-carboxylate synthetase B [Brassica napus]                                                                                                                                                                                  | 727  | 727  | 0         | 100.0 | 98.5 | 99.3 | delta 1-pyrroline-5-carboxylate synthetase B                                                                                                         | gbpln | Brassica napus       | AT3G55610.1   Symbols: P5CS2   delta 1-pyrroline-5-carboxylate synthase 2   chr3:20624278-20628989 REVERSE LENGTH=726                                                                                                                                                                                                                                                                                                                                               | 727  | 726  | 0         | 99.9  | 92.8 | 97.0 |
| Rsa1.0_01803.1.g29936.t1 | gb EOA32203.1  hypothetical protein CARUB_v10015460mg [Capsella rubella]                                                                                                                                                                                                | 122  | 566  | 2.00E-43  | 463.9 | 74.6 | 78.7 | hypothetical protein CARUB_v10015460mg                                                                                                               | gbpln | Capsella rubella     | AT2G20470.1   Symbols:   AGC (cAMP-dependent, cGMP-dependent and protein kinase C) kinase family protein   chr2:8826277-8829497 REVERSE LENGTH=569                                                                                                                                                                                                                                                                                                                  | 122  | 569  | 3.00E-46  | 466.4 | 74.6 | 78.7 |
| Rsa1.0_01803.1.g29937.t2 | gb EOA24465.1  hypothetical protein CARUB_v10017721mg [Capsella rubella]                                                                                                                                                                                                | 289  | 302  | 1.00E-138 | 104.5 | 83.0 | 84.1 | hypothetical protein CARUB_v10017721mg                                                                                                               | gbpln | Capsella rubella     | AT3G55620.1   Symbols: emb1624   Translation initiation factor IF6   chr3:20634581-20636312 FORWARD LENGTH=245                                                                                                                                                                                                                                                                                                                                                      | 289  | 245  | 1.00E-139 | 84.8  | 82.0 | 84.1 |

|                          |                                                                                                                                                                                                                                                                                                                                                                                                                                                                                                                                               |     |     |           |       |      |      |                                                     |       |                      |                                                                                                                                       |     |     |          |       |      |      |
|--------------------------|-----------------------------------------------------------------------------------------------------------------------------------------------------------------------------------------------------------------------------------------------------------------------------------------------------------------------------------------------------------------------------------------------------------------------------------------------------------------------------------------------------------------------------------------------|-----|-----|-----------|-------|------|------|-----------------------------------------------------|-------|----------------------|---------------------------------------------------------------------------------------------------------------------------------------|-----|-----|----------|-------|------|------|
| Rsa1.0_01803.1.g29938.t1 | refNP_567026.3  DHFS-FPGS homolog D [Arabidopsis thaliana]<br>gi 75331225 sp Q8W035.1 FPGS3_ARAT H RecName: Full=Folypolyglutamate synthase; AltName: Full=DHFS-FPGS homolog D; AltName: Full=Folypoly-gamma-glutamate synthetase; Short=FPGS; AltName: Full=Tetrahydrofolypolyglutamate synthase; Short=Tetrahydrofolate synthase gi 17976761 emb CAC82079.1  folypolyglutamate synthetase, cytosolic isoform [Arabidopsis thaliana] gi 332645891 gb AEE79412.1  DHFS-FPGS homolog D [Arabidopsis thaliana]                                  | 829 | 492 | 0         | 59.3  | 47.9 | 52.6 | DHFS-FPGS homolog D                                 | gbpln | Arabidopsis thaliana | AT3G55630.3   Symbols: ATDFD, DFD, FPGS3   DHFS-FPGS homolog D   chr3:20636785-20639395 FORWARD LENGTH=492                            | 829 | 492 | 0        | 59.3  | 47.9 | 52.6 |
| Rsa1.0_01803.1.g29939.t4 | gb EOA28804.1  hypothetical protein CARUB_v10025036mg [Capsella rubella]                                                                                                                                                                                                                                                                                                                                                                                                                                                                      | 217 | 200 | 7.00E-92  | 92.2  | 81.1 | 86.6 | hypothetical protein CARUB_v10025036mg              | gbpln | Capsella rubella     | AT3G55770.5   Symbols:   GATA type zinc finger transcription factor family protein   chr3:20703799-20705115 FORWARD LENGTH=199        | 217 | 199 | 3.00E-94 | 91.7  | 85.7 | 88.0 |
| Rsa1.0_01803.1.g29940.t1 | gb EOA25429.1  hypothetical protein CARUB_v10018761mg [Capsella rubella]                                                                                                                                                                                                                                                                                                                                                                                                                                                                      | 381 | 378 | 0         | 99.2  | 83.2 | 88.2 | hypothetical protein CARUB_v10018761mg              | gbpln | Capsella rubella     | AT3G55780.1   Symbols:   Glycosyl hydrolase superfamily protein   chr3:20705627-20707021 FORWARD LENGTH=429                           | 381 | 429 | 0        | 112.6 | 81.9 | 86.1 |
| Rsa1.0_01803.1.g29941.t1 | #                                                                                                                                                                                                                                                                                                                                                                                                                                                                                                                                             | #   | #   | #         | #     | #    | #    | -                                                   | ----  | ----                 | #                                                                                                                                     | #   | #   | #        | #     | #    |      |
| Rsa1.0_01803.1.g29942.t1 | refNP_191139.1  Sedoheptulose-1,7-bisphosphatase [Arabidopsis thaliana] gi 1173345 sp P46283.1 S17P_ARATH RecName: Full=Sedoheptulose-1,7-bisphosphatase, chloroplastic; AltName: Full=SED(1,7)P2ase; AltName: Full=Sedoheptulose bisphosphatase; Short=SBPase; Flags: Precursor gi 786466 gb AA33001.1  sedoheptulose-1,7-bisphosphatase [Arabidopsis thaliana] gi 7263568 emb CAB81605.1  sedoheptulose-bisphosphatase precursor [Arabidopsis thaliana] gi 332645922 gb AEE79443.1  Sedoheptulose-1,7-bisphosphatase [Arabidopsis thaliana] | 394 | 393 | 0         | 99.7  | 93.1 | 96.2 | Sedoheptulose-1,7-bisphosphatase                    | gbpln | Arabidopsis thaliana | AT3G55800.1   Symbols: SBPASE   sedoheptulose-bisphosphatase   chr3:20709640-20711421 FORWARD LENGTH=393                              | 394 | 393 | 0        | 99.7  | 93.1 | 96.2 |
| Rsa1.0_01803.1.g29943.t1 | refNP_191141.1  Fasciclin-like arabinogalactan family protein [Arabidopsis thaliana] gi 7263570 emb CAB81607.1  putative protein [Arabidopsis thaliana] gi 60547813 gb AAX23870.1  hypothetical protein At3g55820 [Arabidopsis thaliana] gi 71905505 gb AAZ52730.1  hypothetical protein At3g55820 [Arabidopsis thaliana] gi 149944339 gb ABR46212.1  At3g55820 [Arabidopsis thaliana] gi 332645924 gb AEE79445.1  Fasciclin-like arabinogalactan family protein [Arabidopsis thaliana]                                                       | 202 | 204 | 7.00E-71  | 101.0 | 69.3 | 82.7 | Fasciclin-like arabinogalactan family protein       | gbpln | Arabidopsis thaliana | AT3G55820.1   Symbols:   Fasciclin-like arabinogalactan family protein   chr3:20714041-20714655 FORWARD LENGTH=204                    | 202 | 204 | 2.00E-73 | 101.0 | 69.3 | 82.7 |
| Rsa1.0_01803.1.g29944.t1 | refNP_191142.1  nucleotide-diphospho-sugar transferase-like protein [Arabidopsis thaliana] gi 7573478 emb CAB87837.1  putative protein [Arabidopsis thaliana] gi 110736936 db BAF00425.1  hypothetical protein [Arabidopsis thaliana] gi 332645925 gb AEE79446.1  nucleotide-diphospho-sugar transferase-like protein [Arabidopsis thaliana]                                                                                                                                                                                                  | 336 | 334 | 1.00E-180 | 99.4  | 89.9 | 94.6 | nucleotide-diphospho-sugar transferase-like protein | gbpln | Arabidopsis thaliana | AT3G55830.1   Symbols: EPC1   Nucleotide-diphospho-sugar transferases superfamily protein   chr3:20715101-20717133 FORWARD LENGTH=334 | 336 | 334 | 0        | 99.4  | 89.9 | 94.6 |
| Rsa1.0_01803.1.g29945.t1 | refXP_002878047.1  hypothetical protein ARALYDRAFT_486026 [Arabidopsis lyrata subsp. lyrata] gi 297323885 gb EFH54306.1  hypothetical protein ARALYDRAFT_486026 [Arabidopsis lyrata subsp. lyrata]                                                                                                                                                                                                                                                                                                                                            | 425 | 428 | 0         | 100.7 | 84.9 | 91.1 | hypothetical protein ARALYDRAFT_486026              | gbpln | Arabidopsis lyrata   | AT3G55840.1   Symbols:   Hs1pro-1 protein   chr3:20717530-20718816 REVERSE LENGTH=428                                                 | 425 | 428 | 0        | 100.7 | 84.2 | 90.4 |
| Rsa1.0_01803.1.g29946.t1 | #                                                                                                                                                                                                                                                                                                                                                                                                                                                                                                                                             | #   | #   | #         | #     | #    | #    | -                                                   | ----  | ----                 | #                                                                                                                                     | #   | #   | #        | #     | #    |      |
| Rsa1.0_01803.1.g29947.t1 | gb EOA15770.1  hypothetical protein CARUB_v10006927mg [Capsella rubella]                                                                                                                                                                                                                                                                                                                                                                                                                                                                      | 966 | 852 | 0         | 88.2  | 55.1 | 65.0 | hypothetical protein CARUB_v10006927mg              | gbpln | Capsella rubella     | AT4G13920.1   Symbols: AtRLP50, RLP50   receptor like protein 50   chr4:8043861-8046536 FORWARD LENGTH=891                            | 966 | 891 | 0        | 92.2  | 51.3 | 61.0 |

|                          |                                                                                                                                                                                                                                                                                                                                                                                                                                                                                                                                                                                                                                                                                                                 |      |      |           |       |      |      |                                                                  |       |                      |                                                                                                                                                            |      |     |           |       |      |      |
|--------------------------|-----------------------------------------------------------------------------------------------------------------------------------------------------------------------------------------------------------------------------------------------------------------------------------------------------------------------------------------------------------------------------------------------------------------------------------------------------------------------------------------------------------------------------------------------------------------------------------------------------------------------------------------------------------------------------------------------------------------|------|------|-----------|-------|------|------|------------------------------------------------------------------|-------|----------------------|------------------------------------------------------------------------------------------------------------------------------------------------------------|------|-----|-----------|-------|------|------|
| Rsa1.0_01803.1.g29948.t1 | gb EOA24730.1  hypothetical protein CARUB_v10018007mg [Capsella rubella]                                                                                                                                                                                                                                                                                                                                                                                                                                                                                                                                                                                                                                        | 211  | 214  | 9.00E-92  | 101.4 | 90.5 | 94.3 | hypothetical protein CARUB_v10018007mg                           | gbpln | Capsella rubella     | AT3G55880.2   Symbols:   Alpha/beta hydrolase related protein   chr3:20736682-20738325 FORWARD LENGTH=215                                                  | 211  | 215 | 5.00E-94  | 101.9 | 88.6 | 92.9 |
| Rsa1.0_01804.1.g29949.t1 | gb AAC69377.1  putative retroelement pol polyprotein [Arabidopsis thaliana]                                                                                                                                                                                                                                                                                                                                                                                                                                                                                                                                                                                                                                     | 1361 | 1328 | 5.00E-63  | 97.6  | 10.9 | 14.3 | putative retroelement pol polyprotein                            | gbpln | Arabidopsis thaliana | #                                                                                                                                                          | #    | #   | #         | #     | #    |      |
| Rsa1.0_01804.1.g29950.t1 | gb AAF13073.1 AC011621.1 putative retroelement pol polyprotein [Arabidopsis thaliana]                                                                                                                                                                                                                                                                                                                                                                                                                                                                                                                                                                                                                           | 1578 | 1661 | 0         | 105.3 | 53.7 | 69.6 | putative retroelement pol polyprotein                            | gbpln | Arabidopsis thaliana | ATMG00860.1   Symbols: ORF158   DNA/RNA polymerases superfamily protein   chrM:235916-236392 FORWARD LENGTH=158                                            | 1578 | 158 | 7.00E-46  | 10.0  | 5.6  | 6.5  |
| Rsa1.0_01804.1.g29951.t2 | ref NP_178148.1  2-oxoglutarate (2OG) and Fe(II)-dependent oxygenase-like protein [Arabidopsis thaliana] gi 12324982 gb AAG52438.1 AC018848_9 putative oxidoreductase; 24302-25416 [Arabidopsis thaliana] gi 332198266 gb AEE36387.1  2-oxoglutarate (2OG) and Fe(II)-dependent oxygenase superfamily protein [Arabidopsis thaliana]                                                                                                                                                                                                                                                                                                                                                                            | 240  | 320  | 2.00E-17  | 133.3 | 17.5 | 19.2 | 2-oxoglutarate (2OG) and Fe(II)-dependent oxygenase-like protein | gbpln | Arabidopsis thaliana | AT1G80320.1   Symbols:   2-oxoglutarate (2OG) and Fe(II)-dependent oxygenase superfamily protein   chr1:30196782-30197896 FORWARD LENGTH=320               | 240  | 320 | 6.00E-20  | 133.3 | 17.5 | 19.2 |
| Rsa1.0_01804.1.g29952.t1 | #                                                                                                                                                                                                                                                                                                                                                                                                                                                                                                                                                                                                                                                                                                               | #    | #    | #         | #     | #    | -    | ----                                                             | ----  | #                    | #                                                                                                                                                          | #    | #   | #         | #     | #    |      |
| Rsa1.0_01805.1.g29953.t1 | #                                                                                                                                                                                                                                                                                                                                                                                                                                                                                                                                                                                                                                                                                                               | #    | #    | #         | #     | #    | -    | ----                                                             | ----  | #                    | #                                                                                                                                                          | #    | #   | #         | #     | #    |      |
| Rsa1.0_01805.1.g29954.t1 | #                                                                                                                                                                                                                                                                                                                                                                                                                                                                                                                                                                                                                                                                                                               | #    | #    | #         | #     | #    | -    | ----                                                             | ----  | #                    | #                                                                                                                                                          | #    | #   | #         | #     | #    |      |
| Rsa1.0_01805.1.g29955.t1 | ref NP_177024.1  putative nitrite transporter [Arabidopsis thaliana] gi 75266596 sp G9SX20.1 PTR18_ARAT H RecName: Full=Probable nitrite transporter At1g68570 gi 5734721 gb AAD49986.1 AC008075_19 Similar to gb AF023472 peptide transporter from Hordeum vulgare and is a member of the PF 00854 Peptide transporter family, ESTs gb T141927 and gb AA395024 come from this gene [Arabidopsis thaliana] gi 20147231 gb AAM10330.1  At1g68570/F24J5.7 [Arabidopsis thaliana] gi 25090385 gb AAN72289.1  At1g68570/F24J5.7 [Arabidopsis thaliana] gi 110742209 dbj BAE99031.1  peptide transporter like [Arabidopsis thaliana] gi 332196691 gb AEE34812.1  probable nitrite transporter [Arabidopsis thaliana] | 596  | 596  | 0         | 100.0 | 91.1 | 96.5 | putative nitrite transporter                                     | gbpln | Arabidopsis thaliana | AT1G68570.1   Symbols:   Major facilitator superfamily protein   chr1:25746811-25750110 FORWARD LENGTH=596                                                 | 596  | 596 | 0         | 100.0 | 91.1 | 96.5 |
| Rsa1.0_01805.1.g29956.t1 | gb AAG50753.1 AC079733_21 CRK1 protein, putative [Arabidopsis thaliana]                                                                                                                                                                                                                                                                                                                                                                                                                                                                                                                                                                                                                                         | 102  | 686  | 2.00E-17  | 672.5 | 50.0 | 52.0 | CRK1 protein, putative                                           | gbpln | Arabidopsis thaliana | AT1G09600.1   Symbols:   Protein kinase superfamily protein   chr1:3108617-3111318 FORWARD LENGTH=714                                                      | 102  | 714 | 4.00E-14  | 700.0 | 30.4 | 31.4 |
| Rsa1.0_01805.1.g29957.t2 | dbj BAB09379.1  non-LTR retroelement reverse transcriptase-like protein [Arabidopsis thaliana]                                                                                                                                                                                                                                                                                                                                                                                                                                                                                                                                                                                                                  | 1159 | 1223 | 0         | 105.5 | 45.2 | 64.2 | non-LTR retroelement reverse transcriptase-like protein          | gbpln | Arabidopsis thaliana | AT3G24255.1   Symbols:   RNA-directed DNA polymerase (reverse transcriptase)-related family protein   chr3:8789471-8793208 FORWARD LENGTH=746              | 1159 | 746 | 1.00E-84  | 64.4  | 14.9 | 20.2 |
| Rsa1.0_01805.1.g29958.t1 | ref XP_002865917.1  hypothetical protein ARALYDRAFT_918304 [Arabidopsis lyrata subsp. lyrata] gi 297311752 gb EFH42176.1  hypothetical protein ARALYDRAFT_918304 [Arabidopsis lyrata subsp. lyrata]                                                                                                                                                                                                                                                                                                                                                                                                                                                                                                             | 225  | 464  | 3.00E-50  | 206.2 | 50.2 | 61.3 | hypothetical protein ARALYDRAFT_918304                           | gbpln | Arabidopsis lyrata   | AT5G52540.1   Symbols:   Protein of unknown function (DUF819)   chr5:21321672-21323702 REVERSE LENGTH=461                                                  | 225  | 461 | 1.00E-51  | 204.9 | 50.2 | 61.3 |
| Rsa1.0_01806.1.g29959.t1 | #                                                                                                                                                                                                                                                                                                                                                                                                                                                                                                                                                                                                                                                                                                               | #    | #    | #         | #     | #    | -    | ----                                                             | ----  | #                    | #                                                                                                                                                          | #    | #   | #         | #     | #    |      |
| Rsa1.0_01806.1.g29960.t3 | gb EOA19022.1  hypothetical protein CARUB_v10007674mg, partial [Capsella rubella]                                                                                                                                                                                                                                                                                                                                                                                                                                                                                                                                                                                                                               | 770  | 628  | 3.00E-66  | 81.6  | 23.2 | 28.6 | hypothetical protein CARUB_v10007674mg, partial                  | gbpln | Capsella rubella     | AT4G11420.1   Symbols: EIF3A, ATEIF3A-1, EIF3A-1, ATTIF3A1, TIF3A1   eukaryotic translation initiation factor 3A   chr4:6947834-6952053 REVERSE LENGTH=987 | 770  | 987 | 5.00E-64  | 128.2 | 18.2 | 21.3 |
| Rsa1.0_01806.1.g29961.t1 | ref XP_002886307.1  hypothetical protein ARALYDRAFT_480923 [Arabidopsis lyrata subsp. lyrata] gi 297332147 gb EFH62566.1  hypothetical protein ARALYDRAFT_480923 [Arabidopsis lyrata subsp. lyrata]                                                                                                                                                                                                                                                                                                                                                                                                                                                                                                             | 232  | 228  | 1.00E-113 | 98.3  | 85.8 | 92.7 | hypothetical protein ARALYDRAFT_480923                           | gbpln | Arabidopsis lyrata   | AT2G20825.1   Symbols: ULT2   Developmental regulator, ULTRAPETALA   chr2:8965845-8966795 REVERSE LENGTH=228                                               | 232  | 228 | 1.00E-115 | 98.3  | 86.2 | 91.8 |

|                          |                                                                                                                                                                                                                                                                                                                                                                                                                                                                                                                                        |     |      |           |       |      |      |                                                 |       |                      |                                                                                                                                                                                                                                                           |     |     |           |       |      |      |
|--------------------------|----------------------------------------------------------------------------------------------------------------------------------------------------------------------------------------------------------------------------------------------------------------------------------------------------------------------------------------------------------------------------------------------------------------------------------------------------------------------------------------------------------------------------------------|-----|------|-----------|-------|------|------|-------------------------------------------------|-------|----------------------|-----------------------------------------------------------------------------------------------------------------------------------------------------------------------------------------------------------------------------------------------------------|-----|-----|-----------|-------|------|------|
| Rsa1.0_01806.1.g29962.t4 | ref NP_850005.1  uncharacterized protein [Arabidopsis thaliana] gi 11692840 gb AAG40023.1 AF324672.1 At2g20820 [Arabidopsis thaliana] gi 11908098 gb AAG41478.1 AF326896.1 unknown protein [Arabidopsis thaliana] gi 12642910 gb AAK00397.1 AF339715.1 unknown protein [Arabidopsis thaliana] gi 14190457 gb AAK55708.1 AF380628.1 At2g20820/F5H14.21 [Arabidopsis thaliana] gi 15809716 gb AAL06786.1  At2g20820/F5H14.21 [Arabidopsis thaliana] gi 330251985 gb AEC07079.1  uncharacterized protein AT2G20820 [Arabidopsis thaliana] | 90  | 93   | 1.00E-34  | 103.3 | 83.3 | 86.7 | uncharacterized protein                         | gbpln | Arabidopsis thaliana | AT2G20820.1   Symbols:   unknown protein; Has 44 Blast hits to 44 proteins in 13 species: Archae - 0; Bacteria - 0; Metazoa - 0; Fungi - 0; Plants - 44; Viruses - 0; Other Eukaryotes - 0 (source: NCBI BLINK).   chr2:8964450-8965166 FORWARD LENGTH=93 | 90  | 93  | 2.00E-37  | 103.3 | 83.3 | 86.7 |
| Rsa1.0_01806.1.g29963.t1 | ref XP_002886302.1  hypothetical protein ARALYDRAFT_900444 [Arabidopsis lyrata subsp. lyrata] gi 297332142 gb EFH62561.1  hypothetical protein ARALYDRAFT_900444 [Arabidopsis lyrata subsp. lyrata]                                                                                                                                                                                                                                                                                                                                    | 202 | 331  | 1.00E-71  | 163.9 | 82.2 | 86.6 | hypothetical protein ARALYDRAFT_900444          | gbpln | Arabidopsis lyrata   | AT2G20760.1   Symbols:   Clathrin light chain protein   chr2:8943279-8945108 REVERSE LENGTH=338                                                                                                                                                           | 202 | 338 | 2.00E-72  | 167.3 | 82.2 | 86.1 |
| Rsa1.0_01806.1.g29964.t2 | gb EOA31214.1  hypothetical protein CARUB_v10014380mg [Capsella rubella]                                                                                                                                                                                                                                                                                                                                                                                                                                                               | 265 | 271  | 1.00E-129 | 102.3 | 86.4 | 93.6 | hypothetical protein CARUB_v10014380mg          | gbpln | Capsella rubella     | AT2G20750.1   Symbols:   ATEXPB1, EXPB1, ATEXP BETA 1.5   expansin B1   chr2:8941185-8942430 FORWARD LENGTH=271                                                                                                                                           | 265 | 271 | 1.00E-131 | 102.3 | 85.3 | 91.3 |
| Rsa1.0_01806.1.g29965.t1 | gb EOA31414.1  hypothetical protein CARUB_v10014594mg [Capsella rubella]                                                                                                                                                                                                                                                                                                                                                                                                                                                               | 220 | 219  | 3.00E-97  | 99.5  | 78.2 | 90.0 | hypothetical protein CARUB_v10014594mg          | gbpln | Capsella rubella     | AT2G20740.1   Symbols:   Tetraspanin family protein   chr2:8935788-8937292 FORWARD LENGTH=221                                                                                                                                                             | 220 | 221 | 8.00E-96  | 100.5 | 75.5 | 87.7 |
| Rsa1.0_01806.1.g29966.t1 | ref XP_002886301.1  CAAX amino terminal protease family protein [Arabidopsis lyrata subsp. lyrata] gi 297332141 gb EFH62560.1  CAAX amino terminal protease family protein [Arabidopsis lyrata subsp. lyrata] gb AAM67318.1  unknown [Arabidopsis thaliana] gi 62320190 bb BAD94411.1  hypothetical protein [Arabidopsis thaliana]                                                                                                                                                                                                     | 332 | 300  | 2.00E-97  | 90.4  | 59.6 | 67.8 | CAAX amino terminal protease family protein     | gbpln | Arabidopsis lyrata   | AT2G20725.1   Symbols:   CAAX amino terminal protease family protein   chr2:8934113-8935426 REVERSE LENGTH=301                                                                                                                                            | 332 | 301 | 3.00E-96  | 90.7  | 58.1 | 66.9 |
| Rsa1.0_01806.1.g29967.t1 | ref NP_565482.1  riboflavin synthase alpha chain [Arabidopsis thaliana] gi 13605593 gb AAK32790.1 AF361622.1 At2g20690/F5H14.34 [Arabidopsis thaliana] gi 19548077 gb AAL87403.1  At2g20690/F5H14.34 [Arabidopsis thaliana] gi 20197688 gb AAD20926.2  putative riboflavin synthase alpha chain [Arabidopsis thaliana] gi 330251963 gb AEC07057.1  riboflavin synthase alpha chain [Arabidopsis thaliana]                                                                                                                              | 42  | 42   | 2.00E-11  | 100.0 | 85.7 | 95.2 | unknown                                         | gbpln | Arabidopsis thaliana | # # # # # # #                                                                                                                                                                                                                                             | #   | #   | #         | #     | #    | #    |
| Rsa1.0_01806.1.g29968.t6 | ref NP_565482.1  riboflavin synthase alpha chain [Arabidopsis thaliana] gi 13605593 gb AAK32790.1 AF361622.1 At2g20690/F5H14.34 [Arabidopsis thaliana] gi 19548077 gb AAL87403.1  At2g20690/F5H14.34 [Arabidopsis thaliana] gi 20197688 gb AAD20926.2  putative riboflavin synthase alpha chain [Arabidopsis thaliana] gi 330251963 gb AEC07057.1  riboflavin synthase alpha chain [Arabidopsis thaliana]                                                                                                                              | 234 | 271  | 1.00E-94  | 115.8 | 81.2 | 86.3 | riboflavin synthase alpha chain                 | gbpln | Arabidopsis thaliana | AT2G20690.1   Symbols:   lumazine-binding family protein   chr2:8923342-8924621 FORWARD LENGTH=271                                                                                                                                                        | 234 | 271 | 4.00E-97  | 115.8 | 81.2 | 86.3 |
| Rsa1.0_01806.1.g29969.t5 | ref NP_974208.1  DEAD-box ATP-dependent RNA helicase 41 [Arabidopsis thaliana] gi 79295464 ref NP_001030621.1  DEAD-box ATP-dependent RNA helicase 41 [Arabidopsis thaliana] gi 108861894 sp Q3EBD3.1 RH41_ARAT H RecName: Full=DEAD-box ATP-dependent RNA helicase 41 gi 332640235 gb AEE73756.1  DEAD-box ATP-dependent RNA helicase 41 [Arabidopsis thaliana] gi 332640237 gb AEE73758.1  DEAD-box ATP-dependent RNA helicase 41 [Arabidopsis thaliana]                                                                             | 501 | 505  | 0         | 100.8 | 82.4 | 91.4 | DEAD-box ATP-dependent RNA helicase 41          | gbpln | Arabidopsis thaliana | AT3G02065.3   Symbols:   P-loop containing nucleoside triphosphate hydrolases superfamily protein   chr3:359136-360734 FORWARD LENGTH=505                                                                                                                 | 501 | 505 | 0         | 100.8 | 82.4 | 91.4 |
| Rsa1.0_01807.1.g29970.t1 | ref XP_004235099.1  PREDICTED: uncharacterized protein LOC101249439 [Solanum lycopersicum]                                                                                                                                                                                                                                                                                                                                                                                                                                             | 272 | 352  | 5.00E-42  | 129.4 | 40.8 | 57.0 | PREDICTED: uncharacterized protein LOC101249439 | gbpln | Solanum lycopersicum | # # # # # # #                                                                                                                                                                                                                                             | #   | #   | #         | #     | #    | #    |
| Rsa1.0_01807.1.g29971.t1 | ref XP_002881634.1  hypothetical protein ARALYDRAFT_903160 [Arabidopsis lyrata subsp. lyrata] gi 297327473 gb EFH57893.1  hypothetical protein ARALYDRAFT_903160 [Arabidopsis lyrata subsp. lyrata]                                                                                                                                                                                                                                                                                                                                    | 530 | 576  | 0         | 108.7 | 82.8 | 86.8 | hypothetical protein ARALYDRAFT_903160          | gbpln | Arabidopsis lyrata   | AT2G39200.1   Symbols:   MLO12, ATML012   Seven transmembrane MLO family protein   chr2:16356255-16359797 REVERSE LENGTH=576                                                                                                                              | 530 | 576 | 0         | 108.7 | 82.5 | 86.4 |
| Rsa1.0_01807.1.g29972.t3 | dbj BAB02990.1  retroelement polypeptide-like [Arabidopsis thaliana]                                                                                                                                                                                                                                                                                                                                                                                                                                                                   | 294 | 1250 | 3.00E-26  | 425.2 | 35.7 | 51.7 | retroelement polypeptide-like                   | gbpln | Arabidopsis thaliana | # # # # # # #                                                                                                                                                                                                                                             | #   | #   | #         | #     | #    | #    |



|                          |                                                                                                                                                       |      |      |           |       |      |      |                                        |       |                      |                                                                                                                                                                |      |      |           |       |      |      |
|--------------------------|-------------------------------------------------------------------------------------------------------------------------------------------------------|------|------|-----------|-------|------|------|----------------------------------------|-------|----------------------|----------------------------------------------------------------------------------------------------------------------------------------------------------------|------|------|-----------|-------|------|------|
| Rsa1.0_01807.1.g29973.t1 | refXP_002881634.1  hypothetical protein ARALYDRAFT_903160 [Arabidopsis lyrata subsp. lyrata] gi 297327473 gb EFH57893.1                               | 514  | 576  | 0         | 112.1 | 86.4 | 91.2 | hypothetical protein ARALYDRAFT_903160 | gbpln | Arabidopsis lyrata   | AT2G39200.1   Symbols: MLO12, ATMLO12   Seven transmembrane MLO family protein   chr2:16356255-16359797 REVERSE LENGTH=576                                     | 514  | 576  | 0         | 112.1 | 86.4 | 91.2 |
| Rsa1.0_01807.1.g29974.t1 | #                                                                                                                                                     | #    | #    | #         | #     | #    | #    | -                                      | ----  | ----                 | #                                                                                                                                                              | #    | #    | #         | #     | #    |      |
| Rsa1.0_01807.1.g29975.t1 | refXP_002892387.1  hypothetical protein ARALYDRAFT_311783 [Arabidopsis lyrata subsp. lyrata] gi 297338229 gb EFH68646.1                               | 195  | 977  | 2.00E-13  | 501.0 | 21.5 | 25.6 | hypothetical protein ARALYDRAFT_311783 | gbpln | Arabidopsis lyrata   | AT1G07200.2   Symbols:   Double C1p-N motif-containing P-loop nucleoside triphosphate hydrolases superfamily protein   chr1:2209033-2212316 REVERSE LENGTH=979 | 195  | 979  | 3.00E-15  | 502.1 | 21.0 | 25.6 |
| Rsa1.0_01808.1.g29976.t1 | refNP_192292.1  uncharacterized protein [Arabidopsis thaliana] gi 7267138 emb CAB80806.1                                                              | 548  | 578  | 5.00E-23  | 105.5 | 11.3 | 16.8 | uncharacterized protein                | gbpln | Arabidopsis thaliana | AT4G03830.1   Symbols:   Protein of unknown function, DUF601   chr4:1790440-1792458 FORWARD LENGTH=578                                                         | 548  | 578  | 1.00E-25  | 105.5 | 11.3 | 16.8 |
| Rsa1.0_01808.1.g29977.t1 | gb AAD28663.1  hypothetical protein [Arabidopsis thaliana]                                                                                            | 383  | 356  | 1.00E-18  | 93.0  | 19.6 | 32.9 | hypothetical protein                   | gbpln | Arabidopsis thaliana | #                                                                                                                                                              | #    | #    | #         | #     | #    |      |
| Rsa1.0_01808.1.g29978.t1 | gb AAF79618.1 AC027665_19 F5M15.26 [Arabidopsis thaliana]                                                                                             | 794  | 1838 | 4.00E-67  | 231.5 | 23.2 | 37.4 | F5M15.26                               | gbpln | Arabidopsis thaliana | #                                                                                                                                                              | #    | #    | #         | #     | #    |      |
| Rsa1.0_01808.1.g29979.t1 | gb EOA18961.1  hypothetical protein CARUB_v10007596mg [Capsella rubella]                                                                              | 386  | 660  | 1.00E-104 | 171.0 | 50.3 | 63.7 | hypothetical protein CARUB_v10007596mg | gbpln | Capsella rubella     | AT4G10200.1   Symbols:   TTF-type zinc finger protein with HAT dimerisation domain   chr4:6353172-6355591 FORWARD LENGTH=733                                   | 386  | 733  | 2.00E-93  | 189.9 | 50.8 | 63.0 |
| Rsa1.0_01808.1.g29980.t1 | dbj BAB10503.1  retroelement pol polyprotein-like [Arabidopsis thaliana]                                                                              | 1476 | 1475 | 0         | 99.9  | 59.9 | 73.4 | retroelement pol polyprotein-like      | gbpln | Arabidopsis thaliana | AT4G23160.1   Symbols: CRK8   cysteine-rich RLK (RECEPTOR-like protein kinase) 8   chr4:12129485-12134086 FORWARD LENGTH=1262                                  | 1476 | 1262 | 0         | 85.5  | 20.4 | 26.2 |
| Rsa1.0_01808.1.g29981.t1 | gb EOA39823.1  hypothetical protein CARUB_v10008490mg [Capsella rubella]                                                                              | 394  | 683  | 0         | 173.4 | 89.8 | 94.9 | hypothetical protein CARUB_v10008490mg | gbpln | Capsella rubella     | AT1G31710.1   Symbols:   Copper amine oxidase family protein   chr1:11349855-11355339 FORWARD LENGTH=681                                                       | 394  | 681  | 0         | 172.8 | 89.6 | 94.4 |
| Rsa1.0_01808.1.g29982.t1 | refNP_174452.2  putative copper amine oxidase [Arabidopsis thaliana] gi 332193263 gb AEE31384.1  putative copper amine oxidase [Arabidopsis thaliana] | 282  | 681  | 1.00E-125 | 241.5 | 79.1 | 90.1 | putative copper amine oxidase          | gbpln | Arabidopsis thaliana | AT1G31710.1   Symbols:   Copper amine oxidase family protein   chr1:11349855-11355339 FORWARD LENGTH=681                                                       | 282  | 681  | 1.00E-128 | 241.5 | 79.1 | 90.1 |
| Rsa1.0_01809.1.g29983.t1 | gb AAC62779.1  F11O4.2 [Arabidopsis thaliana]                                                                                                         | 365  | 382  | 3.00E-43  | 104.7 | 28.5 | 40.5 | F11O4.2                                | gbpln | Arabidopsis thaliana | AT3G24255.1   Symbols:   RNA-directed DNA polymerase (reverse transcriptase)-related family protein   chr3:8789471-8793208 FORWARD LENGTH=746                  | 365  | 746  | 7.00E-30  | 204.4 | 18.9 | 26.3 |
| Rsa1.0_01809.1.g29984.t1 | gb ABD65090.1  hypothetical protein 27.t00116 [Brassica oleracea]                                                                                     | 516  | 484  | 3.00E-45  | 93.8  | 23.3 | 28.7 | hypothetical protein 27.t00116         | gbpln | Brassica oleracea    | #                                                                                                                                                              | #    | #    | #         | #     | #    |      |
| Rsa1.0_01809.1.g29985.t3 | refXP_002870356.1  RabGAP/TBC domain-containing protein [Arabidopsis lyrata subsp. lyrata] gi 297316192 gb EFH46615.1                                 | 464  | 452  | 0         | 97.4  | 88.1 | 91.2 | RabGAP/TBC domain-containing protein   | gbpln | Arabidopsis lyrata   | AT4G13730.1   Symbols:   Ypt/Rab-GAP domain of gyp1p superfamily protein   chr4:7970299-7974055 FORWARD LENGTH=449                                             | 464  | 449  | 0         | 96.8  | 86.6 | 89.7 |
| Rsa1.0_01809.1.g29986.t1 | #                                                                                                                                                     | #    | #    | #         | #     | #    | #    | -                                      | ----  | ----                 | #                                                                                                                                                              | #    | #    | #         | #     | #    |      |
| Rsa1.0_01809.1.g29987.t1 | gb AGD95055.1  cytochrome P450 monooxygenase 83A1-5 [Brassica napus]                                                                                  | 501  | 501  | 0         | 100.0 | 96.4 | 98.8 | cytochrome P450 monooxygenase 83A1-5   | gbpln | Brassica napus       | AT4G13770.1   Symbols: CYP83A1, REF2   cytochrome P450, family 83, subfamily A, polypeptide 1   chr4:7990682-7992282 REVERSE LENGTH=502                        | 501  | 502  | 0         | 100.2 | 89.0 | 95.0 |
| Rsa1.0_01809.1.g29988.t3 | gb EOA16039.1  hypothetical protein CARUB_v10004167mg [Capsella rubella]                                                                              | 831  | 799  | 0         | 96.1  | 85.9 | 90.0 | hypothetical protein CARUB_v10004167mg | gbpln | Capsella rubella     | AT4G13780.1   Symbols:   methionine-tRNA ligase, putative / methionyl-tRNA synthetase, putative / MetRS, putative   chr4:7993366-7998433 REVERSE LENGTH=797    | 831  | 797  | 0         | 95.9  | 83.9 | 89.0 |
| Rsa1.0_01810.1.g29989.t1 | #                                                                                                                                                     | #    | #    | #         | #     | #    | #    | -                                      | ----  | ----                 | #                                                                                                                                                              | #    | #    | #         | #     | #    |      |
| Rsa1.0_01810.1.g29990.t1 | gb ABD65016.1  Agenet domain containing protein [Brassica oleracea]                                                                                   | 141  | 1087 | 6.00E-32  | 770.9 | 66.0 | 75.9 | Agnet domain containing protein        | gbpln | Brassica oleracea    | #                                                                                                                                                              | #    | #    | #         | #     | #    |      |
| Rsa1.0_01810.1.g29991.t1 | gb ABD65016.1  Agenet domain containing protein [Brassica oleracea]                                                                                   | 168  | 1087 | 3.00E-36  | 647.0 | 41.7 | 50.6 | Agnet domain containing protein        | gbpln | Brassica oleracea    | AT2G47230.1   Symbols: DUF6, ATDUF6   DOMAIN OF UNKNOWN FUNCTION 724 6   chr2:19387126-19390011 FORWARD LENGTH=701                                             | 168  | 701  | 2.00E-22  | 417.3 | 28.6 | 39.9 |
| Rsa1.0_01810.1.g29992.t1 | #                                                                                                                                                     | #    | #    | #         | #     | #    | #    | -                                      | ----  | ----                 | #                                                                                                                                                              | #    | #    | #         | #     | #    |      |
| Rsa1.0_01810.1.g29993.t1 | #                                                                                                                                                     | #    | #    | #         | #     | #    | #    | -                                      | ----  | ----                 | #                                                                                                                                                              | #    | #    | #         | #     | #    |      |
| Rsa1.0_01810.1.g29994.t3 | #                                                                                                                                                     | #    | #    | #         | #     | #    | #    | -                                      | ----  | ----                 | #                                                                                                                                                              | #    | #    | #         | #     | #    |      |
| Rsa1.0_01810.1.g29995.t1 | gb ABD65017.1  hypothetical protein 26.t00072 [Brassica oleracea]                                                                                     | 247  | 821  | 2.00E-31  | 332.4 | 48.6 | 64.0 | hypothetical protein 26.t00072         | gbpln | Brassica oleracea    | #                                                                                                                                                              | #    | #    | #         | #     | #    |      |

|                          |                                                                                                                                                                                                                                                                                                                                                                                  |     |      |           |       |      |      |                                              |       |                      |                                                                                                                                                                                                                                                                                                                                                                                                            |     |      |           |       |      |      |
|--------------------------|----------------------------------------------------------------------------------------------------------------------------------------------------------------------------------------------------------------------------------------------------------------------------------------------------------------------------------------------------------------------------------|-----|------|-----------|-------|------|------|----------------------------------------------|-------|----------------------|------------------------------------------------------------------------------------------------------------------------------------------------------------------------------------------------------------------------------------------------------------------------------------------------------------------------------------------------------------------------------------------------------------|-----|------|-----------|-------|------|------|
| Rsa1.0_01810.1.g29996.t1 | emb[CAB10526.1] retrotransposon like protein [Arabidopsis thaliana] gi 7268497 emb[CAB78748.1] retrotransposon like protein [Arabidopsis thaliana]                                                                                                                                                                                                                               | 819 | 1433 | 0         | 175.0 | 41.9 | 48.8 | retrotransposon like protein                 | gbpln | Arabidopsis thaliana | AT4G23160.1   Symbols: CRK8   cysteine-rich RLK (RECEPTOR-like protein kinase) 8   chr4:12129485-12134086 FORWARD LENGTH=1262                                                                                                                                                                                                                                                                              | 819 | 1262 | 1.00E-110 | 154.1 | 27.2 | 34.9 |
| Rsa1.0_01810.1.g29997.t3 | gb ACP30609.1  disease resistance protein [Brassica rapa subsp. pekinensis]                                                                                                                                                                                                                                                                                                      | 853 | 2726 | 1.00E-113 | 319.6 | 22.0 | 29.3 | disease resistance protein                   | gbpln | Brassica rapa        | AT1G67020.1   Symbols:   unknown protein; FUNCTIONS IN: molecular.function unknown; INVOLVED IN: biological.process unknown; LOCATED IN: cellular.component unknown; EXPRESSED IN: leaf; Has 72 Blast hits to 72 proteins in 9 species: Archae - 0; Bacteria - 0; Metazoa - 0; Fungi - 0; Plants - 72; Viruses - 0; Other Eukaryotes - 0 (source: NCBI BLINK).   chr1:25011008-25012987 REVERSE LENGTH=659 | 853 | 659  | 1.00E-15  | 77.3  | 4.2  | 6.2  |
| Rsa1.0_01811.1.g29998.t2 | ref XP_002461201.1  hypothetical protein SORBDRAFT_02g042750 [Sorghum bicolor] gi 241924578 gb EE97722.1  hypothetical protein SORBDRAFT_02g042750 [Sorghum bicolor]                                                                                                                                                                                                             | 156 | 187  | 8.00E-41  | 119.9 | 64.7 | 74.4 | hypothetical protein SORBDRAFT_02g042750     | gbpln | Sorghum bicolor      | AT3G05590.1   Symbols: RPL18   ribosomal protein L18   chr3:1621511-1622775 FORWARD LENGTH=187                                                                                                                                                                                                                                                                                                             | 156 | 187  | 1.00E-34  | 119.9 | 46.2 | 46.2 |
| Rsa1.0_01811.1.g29999.t1 | ref XP_002884518.1  hypothetical protein ARALYDRAFT_317420 [Arabidopsis lyrata subsp. lyrata] gi 297330358 gb EFH60777.1  hypothetical protein ARALYDRAFT_317420 [Arabidopsis lyrata subsp. lyrata]                                                                                                                                                                              | 331 | 331  | 1.00E-175 | 100.0 | 89.4 | 93.4 | hypothetical protein ARALYDRAFT_317420       | gbpln | Arabidopsis lyrata   | AT3G05600.1   Symbols:   alpha/beta-Hydrolases superfamily protein   chr3:1623485-1624704 REVERSE LENGTH=331                                                                                                                                                                                                                                                                                               | 331 | 331  | 1.00E-177 | 100.0 | 89.1 | 93.4 |
| Rsa1.0_01811.1.g30000.t1 | ref XP_002884520.1  hypothetical protein ARALYDRAFT_896648 [Arabidopsis lyrata subsp. lyrata] gi 297330360 gb EFH60779.1  hypothetical protein ARALYDRAFT_896648 [Arabidopsis lyrata subsp. lyrata]                                                                                                                                                                              | 559 | 558  | 0         | 99.8  | 83.5 | 90.5 | hypothetical protein ARALYDRAFT_896648       | gbpln | Arabidopsis lyrata   | AT4G02330.1   Symbols: ATPMEPCRB   Plant invertase/pectin methyltransferase inhibitor superfamily   chr4:1032479-1034928 FORWARD LENGTH=573                                                                                                                                                                                                                                                                | 559 | 573  | 1.00E-151 | 102.5 | 50.6 | 64.6 |
| Rsa1.0_01811.1.g30001.t1 | gb EOA29598.1  hypothetical protein CARUB_v10013399mg [Capsella rubella]                                                                                                                                                                                                                                                                                                         | 540 | 544  | 0         | 100.7 | 89.8 | 94.8 | hypothetical protein CARUB_v10013399mg       | gbpln | Capsella rubella     | AT3G05620.1   Symbols:   Plant invertase/pectin methyltransferase inhibitor superfamily   chr3:1629658-1631766 REVERSE LENGTH=543                                                                                                                                                                                                                                                                          | 540 | 543  | 0         | 100.6 | 89.3 | 94.4 |
| Rsa1.0_01811.1.g30002.t2 | ref XP_002884529.1  hypothetical protein ARALYDRAFT_477862 [Arabidopsis lyrata subsp. lyrata] gi 297330369 gb EFH60788.1  hypothetical protein ARALYDRAFT_477862 [Arabidopsis lyrata subsp. lyrata]                                                                                                                                                                              | 500 | 295  | 1.00E-100 | 59.0  | 39.2 | 42.2 | hypothetical protein ARALYDRAFT_477862       | gbpln | Arabidopsis lyrata   | AT3G05690.1   Symbols: UNE8, ATHAP2B, HAP2B, NF-YA2   nuclear factor Y, subunit A2   chr3:1676922-1678324 REVERSE LENGTH=295                                                                                                                                                                                                                                                                               | 500 | 295  | 1.00E-102 | 59.0  | 39.0 | 42.0 |
| Rsa1.0_01811.1.g30003.t1 | ref NP_850519.1  syntxin-43 [Arabidopsis thaliana] gi 38503420 sp Q9SUJ1.2 SYP43_ARAT H RecName: Full=Syntxin-43; Short=AtSYP43 gi 6714439 gb AAF26126.1 AC011620.2 putative syntxin protein, AtSNAP33 [Arabidopsis thaliana] gi 20466514 gb AAM20574.1  putative syntxin protein, AtSNAP33 [Arabidopsis thaliana] gi 332640762 gb AEE74283.1  syntxin-43 [Arabidopsis thaliana] | 318 | 331  | 1.00E-164 | 104.1 | 90.9 | 95.9 | syntxin-43                                   | gbpln | Arabidopsis thaliana | AT3G05710.2   Symbols: SYP43, ATSYP43   syntxin of plants 43   chr3:1685262-1687229 FORWARD LENGTH=331                                                                                                                                                                                                                                                                                                     | 318 | 331  | 1.00E-167 | 104.1 | 90.9 | 95.9 |
| Rsa1.0_01811.1.g30004.t1 | ref NP_187223.1  importin alpha isoform 7 [Arabidopsis thaliana] gi 6714438 gb AAF26125.1 AC011620.1 putative importin alpha [Arabidopsis thaliana] gi 91806381 gb ABE65918.1  importin alpha-1 subunit [Arabidopsis thaliana] gi 332640763 gb AEE74284.1  importin alpha isoform 7 [Arabidopsis thaliana]                                                                       | 539 | 528  | 0         | 98.0  | 86.8 | 92.6 | importin alpha isoform 7                     | gbpln | Arabidopsis thaliana | AT3G05720.1   Symbols: IMPA-7   importin alpha isoform 7   chr3:1687992-1691736 REVERSE LENGTH=528                                                                                                                                                                                                                                                                                                         | 539 | 528  | 0         | 98.0  | 86.8 | 92.6 |
| Rsa1.0_01811.1.g30005.t1 | gb EOA33055.1  hypothetical protein CARUB_v10016388mg [Capsella rubella]                                                                                                                                                                                                                                                                                                         | 124 | 125  | 1.00E-58  | 100.8 | 89.5 | 96.0 | hypothetical protein CARUB_v10016388mg       | gbpln | Capsella rubella     | AT3G05725.1   Symbols:   Protein of unknown function (DUF3511)   chr3:1692548-1693153 FORWARD LENGTH=124                                                                                                                                                                                                                                                                                                   | 124 | 124  | 2.00E-57  | 100.0 | 81.5 | 91.9 |
| Rsa1.0_01811.1.g30006.t1 | gb ABV89608.1  disease resistance-responsive family protein [Brassica rapa]                                                                                                                                                                                                                                                                                                      | 90  | 90   | 3.00E-36  | 100.0 | 94.4 | 96.7 | disease resistance-responsive family protein | gbpln | Brassica rapa        | AT3G05727.1   Symbols:   S locus-related glycoprotein 1 (SLR1) binding pollen coat protein family   chr3:1693616-1693834 FORWARD LENGTH=80                                                                                                                                                                                                                                                                 | 90  | 80   | 5.00E-19  | 88.9  | 55.6 | 65.6 |



|                          |                                                                                                                                                                                                                                                                                                                                                                                                                                                                                                             |      |      |           |        |      |      |                                                                       |       |                      |                                                                                                                                                                                                                                                                                                                                                  |      |      |           |       |      |      |
|--------------------------|-------------------------------------------------------------------------------------------------------------------------------------------------------------------------------------------------------------------------------------------------------------------------------------------------------------------------------------------------------------------------------------------------------------------------------------------------------------------------------------------------------------|------|------|-----------|--------|------|------|-----------------------------------------------------------------------|-------|----------------------|--------------------------------------------------------------------------------------------------------------------------------------------------------------------------------------------------------------------------------------------------------------------------------------------------------------------------------------------------|------|------|-----------|-------|------|------|
| Rsa1.0_01813.1.g30022.t1 | ref XP_002880852.1  predicted protein [Arabidopsis lyrata subsp. lyrata] gi 297326691 gb EFH5711.1  predicted protein [Arabidopsis lyrata subsp. lyrata]                                                                                                                                                                                                                                                                                                                                                    | 428  | 387  | 1.00E-134 | 90.4   | 63.6 | 71.0 | predicted protein                                                     | gbpln | Arabidopsis lyrata   | AT2G26960.1   Symbols: AtMYB81, MYB81   myb domain protein 81   chr2:11506065-11507425 REVERSE LENGTH=427                                                                                                                                                                                                                                        | 428  | 427  | 1.00E-125 | 99.8  | 60.3 | 67.3 |
| Rsa1.0_01813.1.g30023.t1 | pir  S65812 RNA-directed DNA polymerase (EC 2.7.7.49) (clone DW15) - Arabidopsis thaliana retrotransposon Ta11-1 gi 976278 gb AAA75254.1  reverse transcriptase [Arabidopsis thaliana]                                                                                                                                                                                                                                                                                                                      | 76   | 1333 | 9.00E-16  | 1753.9 | 51.3 | 67.1 | retrotransposon Ta11-1 gi 976278 gb AAA75254.1  reverse transcriptase | gbpln | Arabidopsis thaliana | #                                                                                                                                                                                                                                                                                                                                                | #    | #    | #         | #     | #    |      |
| Rsa1.0_01814.1.g30024.t1 | gb EOA20072.1  hypothetical protein CARUB_v10000341mg [Capsella rubella]                                                                                                                                                                                                                                                                                                                                                                                                                                    | 590  | 709  | 0         | 120.2  | 91.9 | 94.2 | hypothetical protein CARUB_v10000341mg                                | gbpln | Capsella rubella     | AT5G15810.1   Symbols:   N2,N2-dimethylguanosine tRNA methyltransferase   chr5:5157798-5161121 FORWARD LENGTH=691                                                                                                                                                                                                                                | 590  | 691  | 0         | 117.1 | 92.2 | 94.9 |
| Rsa1.0_01814.1.g30025.t1 | emb CAD48303.1  MADS-box protein SEP1-a [Brassica oleracea var. botrytis]                                                                                                                                                                                                                                                                                                                                                                                                                                   | 248  | 250  | 1.00E-137 | 100.8  | 98.0 | 98.0 | MADS-box protein SEP1-a                                               | gbpln | Brassica oleracea    | AT5G15800.1   Symbols: SEP1, AGL2   K-box region and MADS-box transcription factor family protein   chr5:5151594-5153767 REVERSE LENGTH=251                                                                                                                                                                                                      | 248  | 251  | 1.00E-123 | 101.2 | 94.4 | 96.4 |
| Rsa1.0_01814.1.g30026.t1 | gb EOA21651.1  hypothetical protein CARUB_v10002071mg [Capsella rubella]                                                                                                                                                                                                                                                                                                                                                                                                                                    | 250  | 182  | 1.00E-58  | 72.8   | 46.8 | 48.8 | hypothetical protein CARUB_v10002071mg                                | gbpln | Capsella rubella     | AT5G15750.1   Symbols:   Alpha-L RNA-binding motif/Ribosomal protein S4 family protein   chr5:5141449-5142701 FORWARD LENGTH=182                                                                                                                                                                                                                 | 250  | 182  | 8.00E-60  | 72.8  | 45.2 | 48.8 |
| Rsa1.0_01814.1.g30027.t1 | ref NP_197078.2  O-fucosyltransferase family protein [Arabidopsis thaliana] gi 66792694 gb AA56449.1  At5g15740 [Arabidopsis thaliana] gi 110743719 dbj BAE99696.1  hypothetical protein [Arabidopsis thaliana] gi 332004817 gb AED92200.1  O-fucosyltransferase family protein [Arabidopsis thaliana]                                                                                                                                                                                                      | 509  | 508  | 0         | 99.8   | 92.7 | 97.6 | O-fucosyltransferase family protein                                   | gbpln | Arabidopsis thaliana | AT5G15740.1   Symbols:   O-fucosyltransferase family protein   chr5:5134788-5136956 REVERSE LENGTH=508                                                                                                                                                                                                                                           | 509  | 508  | 0         | 99.8  | 92.7 | 97.6 |
| Rsa1.0_01814.1.g30028.t1 | emb CAC01771.1  putative protein [Arabidopsis thaliana]                                                                                                                                                                                                                                                                                                                                                                                                                                                     | 150  | 366  | 9.00E-75  | 244.0  | 87.3 | 94.0 | putative protein                                                      | gbpln | Arabidopsis thaliana | AT5G15720.1   Symbols: GLIP7   GDSL-motif lipase 7   chr5:5124684-5126155 REVERSE LENGTH=364                                                                                                                                                                                                                                                     | 150  | 364  | 3.00E-77  | 242.7 | 87.3 | 94.0 |
| Rsa1.0_01814.1.g30029.t1 | ref XP_002883355.1  hypothetical protein ARALYDRAFT_342623 [Arabidopsis lyrata subsp. lyrata] gi 297329375 gb EFH59794.1  hypothetical protein ARALYDRAFT_342623 [Arabidopsis lyrata subsp. lyrata]                                                                                                                                                                                                                                                                                                         | 403  | 442  | 4.00E-92  | 109.7  | 50.4 | 64.3 | hypothetical protein ARALYDRAFT_342623                                | gbpln | Arabidopsis lyrata   | AT3G24560.1   Symbols:   F-box and associated interaction domains-containing protein   chr3:8969162-8970298 FORWARD LENGTH=378                                                                                                                                                                                                                   | 403  | 378  | 2.00E-81  | 93.8  | 47.6 | 63.5 |
| Rsa1.0_01814.1.g30030.t1 | ref NP_197075.1  F-box/kelch-repeat protein [Arabidopsis thaliana] gi 75263874 sp Q9LFV5.1 FK111_ARATH RecName: Full=F-box/kelch-repeat protein At5g15710 gi 9755616 emb CAC01770.1  putative protein [Arabidopsis thaliana] gi 40823375 gb AAR92279.1  At5g15710 [Arabidopsis thaliana] gi 46518403 gb AAS99683.1  At5g15710 [Arabidopsis thaliana] gi 110738375 dbj BAF01114.1  hypothetical protein [Arabidopsis thaliana] gi 332004812 gb AED92195.1  F-box/kelch-repeat protein [Arabidopsis thaliana] | 331  | 448  | 1.00E-141 | 135.3  | 77.0 | 80.4 | F-box/kelch-repeat protein                                            | gbpln | Arabidopsis thaliana | AT5G15710.1   Symbols:   Galactose oxidase/kelch repeat superfamily protein   chr5:5122791-5124137 FORWARD LENGTH=448                                                                                                                                                                                                                            | 331  | 448  | 1.00E-143 | 135.3 | 77.0 | 80.4 |
| Rsa1.0_01814.1.g30031.t1 | ref XP_002873736.1  binding protein [Arabidopsis lyrata subsp. lyrata] gi 297319573 gb EFH49995.1  binding protein [Arabidopsis lyrata subsp. lyrata]                                                                                                                                                                                                                                                                                                                                                       | 2034 | 2153 | 0         | 105.9  | 74.7 | 78.1 | binding protein                                                       | gbpln | Arabidopsis lyrata   | AT5G15680.1   Symbols:   ARM repeat superfamily protein   chr5:5101188-5110793 REVERSE LENGTH=2153                                                                                                                                                                                                                                               | 2034 | 2153 | 0         | 105.9 | 74.6 | 78.1 |
| Rsa1.0_01814.1.g30032.t1 | gb EOA20905.1  hypothetical protein CARUB_v10001241mg [Capsella rubella]                                                                                                                                                                                                                                                                                                                                                                                                                                    | 249  | 363  | 1.00E-140 | 145.8  | 96.4 | 97.2 | hypothetical protein CARUB_v10001241mg                                | gbpln | Capsella rubella     | AT5G15650.1   Symbols: RGP2, ATRGP2   reversibly glycosylated polypeptide 2   chr5:5092203-5094093 FORWARD LENGTH=360                                                                                                                                                                                                                            | 249  | 360  | 1.00E-140 | 144.6 | 95.2 | 96.4 |
| Rsa1.0_01815.1.g30033.t1 | gb EOA21185.1  hypothetical protein CARUB_v10001530mg [Capsella rubella]                                                                                                                                                                                                                                                                                                                                                                                                                                    | 316  | 308  | 1.00E-144 | 97.5   | 82.6 | 89.9 | hypothetical protein CARUB_v10001530mg                                | gbpln | Capsella rubella     | AT4G02550.1   Symbols:   unknown protein; BEST Arabidopsis thaliana protein match is: unknown protein (TAIR:AT4G02210.2); Has 370 Blast hits to 300 proteins in 18 species: Archae - 0; Bacteria - 354; Metazoa - 0; Fungi - 10; Plants - 354; Viruses - 0; Other Eukaryotes - 6 (source: NCBI BLINK).   chr4:1120622-1121629 REVERSE LENGTH=307 | 316  | 307  | 1.00E-143 | 97.2  | 79.4 | 87.0 |
| Rsa1.0_01815.1.g30034.t1 | #                                                                                                                                                                                                                                                                                                                                                                                                                                                                                                           | #    | #    | #         | #      | #    | #    | -                                                                     | ----  | ----                 | #                                                                                                                                                                                                                                                                                                                                                | #    | #    | #         | #     | #    |      |

|                           |                                                                                                                                                                                                               |      |      |           |        |      |      |                                                 |       |                      |                                                                                                                                                                                                                                                                                                                                                                                                                                                                                    |      |     |           |       |      |      |
|---------------------------|---------------------------------------------------------------------------------------------------------------------------------------------------------------------------------------------------------------|------|------|-----------|--------|------|------|-------------------------------------------------|-------|----------------------|------------------------------------------------------------------------------------------------------------------------------------------------------------------------------------------------------------------------------------------------------------------------------------------------------------------------------------------------------------------------------------------------------------------------------------------------------------------------------------|------|-----|-----------|-------|------|------|
| Rsa1.0_01815.1.g30035.t1  | dbj BAB09991.1  mutator-like transposase-like [Arabidopsis thaliana]                                                                                                                                          | 466  | 825  | 1.00E-132 | 177.0  | 51.5 | 69.7 | mutator-like transposase-like                   | gbpln | Arabidopsis thaliana | #                                                                                                                                                                                                                                                                                                                                                                                                                                                                                  | #    | #   | #         | #     | #    | #    |
| Rsa1.0_01815.1.g30036.t1  | ref XP_002872830.1  hypothetical protein ARALYDRAFT_911958 [Arabidopsis lyrata subsp. lyrata] gi 297318667 gb EFH49089.1  hypothetical protein ARALYDRAFT_911958 [Arabidopsis lyrata subsp. lyrata]           | 933  | 953  | 0         | 102.1  | 78.0 | 86.0 | hypothetical protein ARALYDRAFT_911958          | gbpln | Arabidopsis lyrata   | AT4G02560.2   Symbols: LD   Homeodomain-like superfamily protein   chr4:1123656-1128252 REVERSE LENGTH=953                                                                                                                                                                                                                                                                                                                                                                         | 933  | 953 | 0         | 102.1 | 78.5 | 86.0 |
| Rsa1.0_01815.1.g30037.t1  | #                                                                                                                                                                                                             | #    | #    | #         | #      | #    | -    | -                                               | ----  | ----                 | #                                                                                                                                                                                                                                                                                                                                                                                                                                                                                  | #    | #   | #         | #     | #    | #    |
| Rsa1.0_01815.1.g30038.t1  | gb ABW74560.1  polyprotein [Boechera divaricarpa]                                                                                                                                                             | 168  | 642  | 7.00E-46  | 382.1  | 54.8 | 71.4 | polyprotein                                     | gbpln | Boechera divaricarpa | #                                                                                                                                                                                                                                                                                                                                                                                                                                                                                  | #    | #   | #         | #     | #    | #    |
| Rsa1.0_01815.1.g30039.t1  | gb EOA18167.1  hypothetical protein CARUB_v10006642mg, partial [Capsella rubella]                                                                                                                             | 110  | 363  | 3.00E-12  | 330.0  | 35.5 | 63.6 | hypothetical protein CARUB_v10006642mg, partial | gbpln | Capsella rubella     | #                                                                                                                                                                                                                                                                                                                                                                                                                                                                                  | #    | #   | #         | #     | #    | #    |
| Rsa1.0_01815.1.g30040.t1  | gb AAG50806.1 AC079281_8 unknown protein [Arabidopsis thaliana]                                                                                                                                               | 458  | 1213 | 5.00E-68  | 264.8  | 40.4 | 57.9 | unknown protein                                 | gbpln | Arabidopsis thaliana | AT1G43760.1   Symbols:   DNase I-like superfamily protein   chr1:1652880-16531065 REVERSE LENGTH=626                                                                                                                                                                                                                                                                                                                                                                               | 458  | 626 | 2.00E-35  | 136.7 | 20.5 | 31.9 |
| Rsa1.0_01816.1.g30041.t1  | #                                                                                                                                                                                                             | #    | #    | #         | #      | #    | -    | -                                               | ----  | ----                 | #                                                                                                                                                                                                                                                                                                                                                                                                                                                                                  | #    | #   | #         | #     | #    | #    |
| Rsa1.0_01816.1.g30042.t1  | #                                                                                                                                                                                                             | #    | #    | #         | #      | #    | -    | -                                               | ----  | ----                 | #                                                                                                                                                                                                                                                                                                                                                                                                                                                                                  | #    | #   | #         | #     | #    | #    |
| Rsa1.0_01816.1.g30043.t1  | gb AAC23763.1  hypothetical protein [Arabidopsis thaliana]                                                                                                                                                    | 428  | 705  | 7.00E-58  | 164.7  | 25.5 | 31.8 | hypothetical protein                            | gbpln | Arabidopsis thaliana | AT2G06420.1   Symbols:   Domain of unknown function (DUF1985)   chr2:2539083-2539985 FORWARD LENGTH=249                                                                                                                                                                                                                                                                                                                                                                            | 428  | 249 | 1.00E-34  | 58.2  | 18.0 | 25.0 |
| Rsa1.0_01816.1.g30044.t1  | #                                                                                                                                                                                                             | #    | #    | #         | #      | #    | -    | -                                               | ----  | ----                 | #                                                                                                                                                                                                                                                                                                                                                                                                                                                                                  | #    | #   | #         | #     | #    | #    |
| Rsa1.0_01816.1.g30045.t2  | gb AAD25847.1  Mutator-like transposase [Arabidopsis thaliana] gi 20198206 gb AM15459.1  Mutator-like transposase [Arabidopsis thaliana]                                                                      | 547  | 764  | 1.00E-111 | 139.7  | 47.7 | 66.2 | Mutator-like transposase                        | gbpln | Arabidopsis thaliana | #                                                                                                                                                                                                                                                                                                                                                                                                                                                                                  | #    | #   | #         | #     | #    | #    |
| Rsa1.0_01816.1.g30046.t1  | #                                                                                                                                                                                                             | #    | #    | #         | #      | #    | -    | -                                               | ----  | ----                 | #                                                                                                                                                                                                                                                                                                                                                                                                                                                                                  | #    | #   | #         | #     | #    | #    |
| Rsa1.0_01816.1.g30047.t1  | gb AAG51783.1 AC079679_3 reverse transcriptase, putative; 16838-20266 [Arabidopsis thaliana]                                                                                                                  | 515  | 1142 | 1.00E-135 | 221.7  | 49.9 | 65.8 | reverse transcriptase, putative; 16838-20266    | gbpln | Arabidopsis thaliana | AT4G29090.1   Symbols:   Ribonuclease H-like superfamily protein   chr4:14333528-14335255 FORWARD LENGTH=575                                                                                                                                                                                                                                                                                                                                                                       | 515  | 575 | 9.00E-62  | 111.7 | 32.0 | 49.7 |
| Rsa1.0_01816.1.g30048.t1  | #                                                                                                                                                                                                             | #    | #    | #         | #      | #    | -    | -                                               | ----  | ----                 | #                                                                                                                                                                                                                                                                                                                                                                                                                                                                                  | #    | #   | #         | #     | #    | #    |
| Rsa1.0_01816.1.g30049.t1  | gb ACP30609.1  disease resistance protein [Brassica rapa subsp. pekinensis]                                                                                                                                   | 178  | 2726 | 3.00E-14  | 1531.5 | 32.6 | 44.9 | disease resistance protein                      | gbpln | Brassica rapa        | #                                                                                                                                                                                                                                                                                                                                                                                                                                                                                  | #    | #   | #         | #     | #    | #    |
| Rsa1.0_01817.1.g30050.t1  | gb EOA26015.1  hypothetical protein CARUB_v10019419mg [Capsella rubella]                                                                                                                                      | 818  | 1062 | 9.00E-69  | 129.8  | 28.1 | 36.4 | hypothetical protein CARUB_v10019419mg          | gbpln | Capsella rubella     | AT2G10440.2   Symbols:   unknown protein; FUNCTIONS IN: molecular_function unknown; INVOLVED IN: biological_process unknown; LOCATED IN: cellular_component unknown; BEST Arabidopsis thaliana protein match is: unknown protein (TAIR:AT1G15780.1); Has 1628 Blast hits to 1350 proteins in 149 species: Archae - 0; Bacteria - 39; Metazoa - 480; Fungi - 159; Plants - 187; Viruses - 2; Other Eukaryotes - 761 (source: NCBI BLINK).   chr2:4013752-4018046 REVERSE LENGTH=845 | 818  | 845 | 3.00E-70  | 103.3 | 15.8 | 18.5 |
| Rsa1.0_01817.1.g30051.t2  | emb CAB39638.1  RNA-directed DNA polymerase-like protein [Arabidopsis thaliana] gi 7267666 emb CAB78094.1  RNA-directed DNA polymerase-like protein [Arabidopsis thaliana]                                    | 1860 | 1274 | 0         | 68.5   | 37.4 | 46.7 | RNA-directed DNA polymerase-like protein        | gbpln | Arabidopsis thaliana | AT4G29090.1   Symbols:   Ribonuclease H-like superfamily protein   chr4:14333528-14335255 FORWARD LENGTH=575                                                                                                                                                                                                                                                                                                                                                                       | 1860 | 575 | 2.00E-67  | 30.9  | 9.6  | 14.2 |
| Rsa1.0_01817.1.g30052.t3  | #                                                                                                                                                                                                             | #    | #    | #         | #      | #    | -    | -                                               | ----  | ----                 | #                                                                                                                                                                                                                                                                                                                                                                                                                                                                                  | #    | #   | #         | #     | #    | #    |
| Rsa1.0_01817.1.g30053.t1  | gb EOA23861.1  hypothetical protein CARUB_v10017078mg, partial [Capsella rubella]                                                                                                                             | 531  | 496  | 0         | 93.4   | 79.1 | 83.4 | hypothetical protein CARUB_v10017078mg, partial | gbpln | Capsella rubella     | AT3G30180.1   Symbols: CYP85A2, BR6OX2   brassinosteroid-6-oxidase 2   chr3:11810867-11813509 FORWARD LENGTH=465                                                                                                                                                                                                                                                                                                                                                                   | 531  | 465 | 0         | 87.6  | 78.2 | 82.5 |
| Rsa1.0_01818.1.g30054.t3  | ref XP_002873896.1  pentatricopeptide repeat-containing protein [Arabidopsis lyrata subsp. lyrata] gi 297319733 gb EFH50155.1  pentatricopeptide repeat-containing protein [Arabidopsis lyrata subsp. lyrata] | 714  | 507  | 0         | 71.0   | 45.4 | 49.9 | pentatricopeptide repeat-containing protein     | gbpln | Arabidopsis lyrata   | AT5G18475.1   Symbols:   Pentatricopeptide repeat (PPR) superfamily protein   chr5:6129255-6130775 REVERSE LENGTH=506                                                                                                                                                                                                                                                                                                                                                              | 714  | 506 | 1.00E-179 | 70.9  | 44.1 | 48.7 |
| Rsa1.0_01818.1.g30055.t19 | ref XP_002871818.1  hypothetical protein ARALYDRAFT_488726 [Arabidopsis lyrata subsp. lyrata] gi 297317655 gb EFH48077.1  hypothetical protein ARALYDRAFT_488726 [Arabidopsis lyrata subsp. lyrata]           | 408  | 413  | 0         | 101.2  | 79.4 | 86.5 | hypothetical protein ARALYDRAFT_488726          | gbpln | Arabidopsis lyrata   | AT5G18470.1   Symbols:   Curculin-like (mannose-binding) lectin family protein   chr5:6127952-6129193 FORWARD LENGTH=413                                                                                                                                                                                                                                                                                                                                                           | 408  | 413 | 0         | 101.2 | 79.4 | 87.3 |

|                          |                                                                                                                                                                                                                                                                                                                                                                                                                                                                                                                                         |      |      |           |       |      |      |                                        |       |                      |                                                                                                                                                                                                                                                                                                                                                                                                                                                                                                                                                 |      |      |           |       |      |      |
|--------------------------|-----------------------------------------------------------------------------------------------------------------------------------------------------------------------------------------------------------------------------------------------------------------------------------------------------------------------------------------------------------------------------------------------------------------------------------------------------------------------------------------------------------------------------------------|------|------|-----------|-------|------|------|----------------------------------------|-------|----------------------|-------------------------------------------------------------------------------------------------------------------------------------------------------------------------------------------------------------------------------------------------------------------------------------------------------------------------------------------------------------------------------------------------------------------------------------------------------------------------------------------------------------------------------------------------|------|------|-----------|-------|------|------|
| Rsa1.0_01818.1.g30056.t1 | ref XP_002873895.1  hypothetical protein ARALYDRAFT_909855 [Arabidopsis lyrata subsp. lyrata] gi 297319732 gb EFH50154.1                                                                                                                                                                                                                                                                                                                                                                                                                | 292  | 310  | 1.00E-118 | 106.2 | 75.7 | 87.7 | hypothetical protein ARALYDRAFT_909855 | gbpln | Arabidopsis lyrata   | AT5G18450.1   Symbols:   Integrase-type DNA-binding superfamily protein   chr5:6116097-6117020 REVERSE LENGTH=307                                                                                                                                                                                                                                                                                                                                                                                                                               | 292  | 307  | 1.00E-119 | 105.1 | 76.7 | 87.0 |
| Rsa1.0_01818.1.g30057.t2 | gb EOA20536.1  hypothetical protein CARUB_v10000849mg [Capsella rubella]                                                                                                                                                                                                                                                                                                                                                                                                                                                                | 150  | 481  | 3.00E-15  | 320.7 | 43.3 | 54.7 | hypothetical protein CARUB_v10000849mg | gbpln | Capsella rubella     | AT5G18440.2   Symbols:   FUNCTIONS IN: molecular_function unknown; INVOLVED IN: biological_process unknown; EXPRESSED IN: 22 plant structures; EXPRESSED DURING: 13 growth stages; CONTAINS InterPro DOMAIN/s: Nuclear fragile X mental retardation-interacting protein 1, conserved region (InterPro:IPRO19496); Has 1333 Blast hits to 1211 proteins in 205 species: Archae - 0; Bacteria - 137; Metazoa - 339; Fungi - 162; Plants - 70; Viruses - 6; Other Eukaryotes - 619 (source: NCBI BLINK).   chr5:6113092-6115748 FORWARD LENGTH=470 | 150  | 470  | 1.00E-12  | 313.3 | 38.0 | 49.3 |
| Rsa1.0_01818.1.g30058.t1 | ref NP_197344.2  GDSL esterase/lipase [Arabidopsis thaliana] gi 75107727 sp Q5PNZ0.1 GDL77_ARAT H RecName: Full=GDSL esterase/lipase At5g18430; AltName: Full=Extracellular lipase At5g18430; Flags: Precursor gi 56381887 gb AAV85662.1  At5g18430 [Arabidopsis thaliana] gi 58531342 gb AAW78593.1  At5g18430 [Arabidopsis thaliana] gi 332005179 gb AED92562.1  GDSL esterase/lipase [Arabidopsis thaliana] ref XP_002866404.1  hypothetical protein ARALYDRAFT_496244 [Arabidopsis lyrata subsp. lyrata] gi 297312239 gb EFH42663.1 | 689  | 362  | 0         | 52.5  | 46.4 | 49.2 | GDSL esterase/lipase                   | gbpln | Arabidopsis thaliana | AT5G18430.1   Symbols:   GDSL-like Lipase/Acylhydrolase superfamily protein   chr5:6110363-6111934 REVERSE LENGTH=362                                                                                                                                                                                                                                                                                                                                                                                                                           | 689  | 362  | 0         | 52.5  | 46.4 | 49.2 |
| Rsa1.0_01819.1.g30059.t1 | ref XP_002866404.1  hypothetical protein ARALYDRAFT_496244 [Arabidopsis lyrata subsp. lyrata] gi 297312239 gb EFH42663.1  hypothetical protein ARALYDRAFT_496244 [Arabidopsis lyrata subsp. lyrata]                                                                                                                                                                                                                                                                                                                                     | 456  | 456  | 0         | 100.0 | 94.7 | 97.1 | hypothetical protein ARALYDRAFT_496244 | gbpln | Arabidopsis lyrata   | AT5G60920.1   Symbols: COB   COBRA-like extracellular glycosyl-phosphatidyl inositol-anchored protein family   chr5:24511466-24513932 REVERSE LENGTH=456                                                                                                                                                                                                                                                                                                                                                                                        | 456  | 456  | 0         | 100.0 | 92.1 | 94.5 |
| Rsa1.0_01819.1.g30060.t1 | gb EOA12365.1  hypothetical protein CARUB_v10025749mg [Capsella rubella]                                                                                                                                                                                                                                                                                                                                                                                                                                                                | 1263 | 1298 | 0         | 102.8 | 79.3 | 86.2 | hypothetical protein CARUB_v10025749mg | gbpln | Capsella rubella     | AT5G60930.1   Symbols:   P-loop containing nucleoside triphosphate hydrolases superfamily protein   chr5:24515398-24522511 REVERSE LENGTH=1294                                                                                                                                                                                                                                                                                                                                                                                                  | 1263 | 1294 | 0         | 102.5 | 77.3 | 84.6 |
| Rsa1.0_01819.1.g30061.t1 | ref NP_200903.1  COBRA-like protein 5 [Arabidopsis thaliana] gi 34222630 sp Q9FME5.1 COBL5_ARAT H RecName: Full=COBRA-like protein 5; Flags: Precursor gi 10177318 dbj BAB10644.1  unnamed protein product [Arabidopsis thaliana] gi 38566616 gb AAR24198.1  At5g60950 [Arabidopsis thaliana] gi 40824050 gb AAR92332.1  At5g60950 [Arabidopsis thaliana] gi 332010019 gb AED97402.1  COBRA-like protein 5 [Arabidopsis thaliana]                                                                                                       | 204  | 204  | 1.00E-80  | 100.0 | 70.6 | 82.4 | COBRA-like protein 5                   | gbpln | Arabidopsis thaliana | AT5G60950.1   Symbols: COBL5   COBRA-like protein 5 precursor   chr5:24527157-24528005 REVERSE LENGTH=204                                                                                                                                                                                                                                                                                                                                                                                                                                       | 204  | 204  | 5.00E-83  | 100.0 | 70.6 | 82.4 |
| Rsa1.0_01819.1.g30062.t1 | gb EOA13591.1  hypothetical protein CARUB_v10026656mg [Capsella rubella]                                                                                                                                                                                                                                                                                                                                                                                                                                                                | 299  | 359  | 1.00E-119 | 120.1 | 79.9 | 87.6 | hypothetical protein CARUB_v10026656mg | gbpln | Capsella rubella     | AT5G60970.1   Symbols: TCP5   TEOSINTE BRANCHED 1, cycloidea and PCF transcription factor 5   chr5:24535570-24536652 REVERSE LENGTH=360                                                                                                                                                                                                                                                                                                                                                                                                         | 299  | 360  | 1.00E-114 | 120.4 | 80.3 | 88.0 |
| Rsa1.0_01819.1.g30063.t1 | ref XP_002866408.1  hypothetical protein ARALYDRAFT_919338 [Arabidopsis lyrata subsp. lyrata] gi 297312243 gb EFH42667.1  hypothetical protein ARALYDRAFT_919338 [Arabidopsis lyrata subsp. lyrata]                                                                                                                                                                                                                                                                                                                                     | 453  | 455  | 0         | 100.4 | 92.7 | 96.5 | hypothetical protein ARALYDRAFT_919338 | gbpln | Arabidopsis lyrata   | AT5G60990.1   Symbols:   DEA(D/H)-box RNA helicase family protein   chr5:24546601-24549148 REVERSE LENGTH=456                                                                                                                                                                                                                                                                                                                                                                                                                                   | 453  | 456  | 0         | 100.7 | 92.3 | 96.2 |
| Rsa1.0_01819.1.g30064.t1 | gb EOA13791.1  hypothetical protein CARUB_v10026886mg [Capsella rubella]                                                                                                                                                                                                                                                                                                                                                                                                                                                                | 268  | 295  | 7.00E-18  | 110.1 | 18.3 | 19.8 | hypothetical protein CARUB_v10026886mg | gbpln | Capsella rubella     | AT5G61030.1   Symbols: GR-RBP3   glycine-rich RNA-binding protein 3   chr5:24560870-24562152 FORWARD LENGTH=309                                                                                                                                                                                                                                                                                                                                                                                                                                 | 268  | 309  | 1.00E-19  | 115.3 | 17.5 | 19.8 |
| Rsa1.0_01819.1.g30065.t1 | gb EOA13059.1  hypothetical protein CARUB_v10026060mg [Capsella rubella]                                                                                                                                                                                                                                                                                                                                                                                                                                                                | 575  | 625  | 1.00E-178 | 108.7 | 53.0 | 59.1 | hypothetical protein CARUB_v10026060mg | gbpln | Capsella rubella     | AT5G61060.2   Symbols: HDA05   histone deacetylase 5   chr5:24567137-24570917 REVERSE LENGTH=664                                                                                                                                                                                                                                                                                                                                                                                                                                                | 575  | 664  | 1.00E-177 | 115.5 | 51.0 | 57.9 |

|                          |                                                                                                                                                                                                                                                                                                                                                                                                                                                                                                                                                                                                                                                                                               |      |      |           |       |      |      |                                        |       |                      |                                                                                                                                                                                                                                                                                                                                                                                                                                                                                                                             |      |      |           |       |      |      |
|--------------------------|-----------------------------------------------------------------------------------------------------------------------------------------------------------------------------------------------------------------------------------------------------------------------------------------------------------------------------------------------------------------------------------------------------------------------------------------------------------------------------------------------------------------------------------------------------------------------------------------------------------------------------------------------------------------------------------------------|------|------|-----------|-------|------|------|----------------------------------------|-------|----------------------|-----------------------------------------------------------------------------------------------------------------------------------------------------------------------------------------------------------------------------------------------------------------------------------------------------------------------------------------------------------------------------------------------------------------------------------------------------------------------------------------------------------------------------|------|------|-----------|-------|------|------|
| Rsa1.0_01819.1.g30066.t1 | refNP_200917.4  nucleic acid binding protein [Arabidopsis thaliana] gi 9759455 dbj BAB10371.1  unnamed protein product [Arabidopsis thaliana] gi 332010037 gb AED97420.1  nucleic acid binding protein [Arabidopsis thaliana]                                                                                                                                                                                                                                                                                                                                                                                                                                                                 | 498  | 657  | 1.00E-107 | 131.9 | 53.2 | 62.4 | nucleic acid binding protein           | gbpln | Arabidopsis thaliana | AT5G61090.1   Symbols:   Polynucleotidyl transferase, ribonuclease H-like superfamily protein   chr5:24574902-24577585 REVERSE LENGTH=657                                                                                                                                                                                                                                                                                                                                                                                   | 498  | 657  | 1.00E-110 | 131.9 | 53.2 | 62.4 |
| Rsa1.0_01820.1.g30067.t1 | refXP_002880905.1  F-box family protein [Arabidopsis lyrata subsp. lyrata] gi 297326744 g EFH57164.1  F-box family protein [Arabidopsis lyrata subsp. lyrata]                                                                                                                                                                                                                                                                                                                                                                                                                                                                                                                                 | 344  | 337  | 1.00E-154 | 98.0  | 79.9 | 88.4 | F-box family protein                   | gbpln | Arabidopsis lyrata   | AT2G27310.1   Symbols:   F-box family protein   chr5:11663954-11684967 REVERSE LENGTH=337                                                                                                                                                                                                                                                                                                                                                                                                                                   | 344  | 337  | 1.00E-156 | 98.0  | 79.9 | 88.4 |
| Rsa1.0_01820.1.g30068.t2 | refXP_002318395.1  predicted protein [Populus trichocarpa] gi 222859068 gb EEE96615.1  predicted protein [Populus trichocarpa]                                                                                                                                                                                                                                                                                                                                                                                                                                                                                                                                                                | 835  | 1497 | 2.00E-55  | 179.3 | 21.9 | 32.2 | predicted protein                      | gbpln | Populus trichocarpa  | AT1G37113.1   Symbols:   unknown protein; LOCATED IN: chloroplast; Has 24 Blast hits to 24 proteins in 7 species: Archae - 0; Bacteria - 0; Metazoa - 4; Fungi - 0; Plants - 14; Viruses - 6; Other Eukaryotes - 0 (source: NCBI BLINK).   chr1:14136413-14138245 FORWARD LENGTH=414                                                                                                                                                                                                                                        | 835  | 414  | 2.00E-18  | 49.6  | 7.8  | 10.7 |
| Rsa1.0_01820.1.g30069.t1 | gb AAC19278.1  T14P8.10 [Arabidopsis thaliana] gi 7269009 emb CAB80742.1  AT4g02490 [Arabidopsis thaliana]                                                                                                                                                                                                                                                                                                                                                                                                                                                                                                                                                                                    | 278  | 657  | 4.00E-59  | 236.3 | 46.8 | 56.5 | T14P8.10                               | gbpln | Arabidopsis thaliana | AT1G43730.1   Symbols:   RNA-directed DNA polymerase (reverse transcriptase)-related family protein   chr1:16508723-16509784 REVERSE LENGTH=320                                                                                                                                                                                                                                                                                                                                                                             | 278  | 320  | 2.00E-46  | 115.1 | 34.5 | 47.5 |
| Rsa1.0_01820.1.g30070.t1 | ref NP_180305.1  uncharacterized protein [Arabidopsis thaliana] gi 75216242 sp Q9ZQI2.1  CASP3_ARATH RecName: Full=Caspian strip membrane protein 3 gi 5306261 gb AAD41993.1  unknown protein [Arabidopsis thaliana] gi 20197657 gb AAM15182.1  unknown protein [Arabidopsis thaliana] gi 27765014 gb AO23628.1  At2g27370 [Arabidopsis thaliana] gi 110743400 dbj BAE99586.1  hypothetical protein [Arabidopsis thaliana] gi 330252892 gb AEC07986.1  uncharacterized protein AT2G27370 [Arabidopsis thaliana] gi 339515802 gb AEJ82279.1  caspian strip protein 3 [Cloning vector pCASP3::CASP3::GFP] gi 339515817 gb AEJ82289.1  caspian strip protein 3 [Cloning vector p35S::CASP3::GFP] | 221  | 221  | 1.00E-108 | 100.0 | 92.3 | 96.8 | uncharacterized protein                | gbpln | Arabidopsis thaliana | AT2G27370.1   Symbols:   Uncharacterised protein family (UPF0497)   chr2:11708628-11709905 REVERSE LENGTH=221                                                                                                                                                                                                                                                                                                                                                                                                               | 221  | 221  | 1.00E-110 | 100.0 | 92.3 | 96.8 |
| Rsa1.0_01820.1.g30071.t1 | gb ABD65163.1  hypothetical protein 40.t00048 [Brassica oleracea]                                                                                                                                                                                                                                                                                                                                                                                                                                                                                                                                                                                                                             | 558  | 569  | 4.00E-19  | 102.0 | 17.6 | 21.3 | hypothetical protein 40.t00048         | gbpln | Brassica oleracea    | #                                                                                                                                                                                                                                                                                                                                                                                                                                                                                                                           | #    | #    | #         | #     | #    | #    |
| Rsa1.0_01820.1.g30072.t2 | #                                                                                                                                                                                                                                                                                                                                                                                                                                                                                                                                                                                                                                                                                             | #    | #    | #         | #     | #    | -    | -                                      | ----  | ----                 | #                                                                                                                                                                                                                                                                                                                                                                                                                                                                                                                           | #    | #    | #         | #     | #    | #    |
| Rsa1.0_01820.1.g30073.t1 | #                                                                                                                                                                                                                                                                                                                                                                                                                                                                                                                                                                                                                                                                                             | #    | #    | #         | #     | #    | -    | -                                      | ----  | ----                 | #                                                                                                                                                                                                                                                                                                                                                                                                                                                                                                                           | #    | #    | #         | #     | #    | #    |
| Rsa1.0_01821.1.g30074.t1 | gb ACG60686.1  En/Spm-related transposon protein [Brassica oleracea var. alboglabra]                                                                                                                                                                                                                                                                                                                                                                                                                                                                                                                                                                                                          | 166  | 695  | 1.00E-65  | 418.7 | 70.5 | 81.3 | En/Spm-related transposon protein      | gbpln | Brassica oleracea    | #                                                                                                                                                                                                                                                                                                                                                                                                                                                                                                                           | #    | #    | #         | #     | #    | #    |
| Rsa1.0_01821.1.g30075.t1 | gb ACP20257.1  cinnamyl-alcohol dehydrogenase [Brassica rapa subsp. oleifera]                                                                                                                                                                                                                                                                                                                                                                                                                                                                                                                                                                                                                 | 324  | 322  | 1.00E-178 | 99.4  | 93.8 | 96.3 | cinnamyl-alcohol dehydrogenase         | gbpln | Brassica rapa        | AT1G09500.1   Symbols:   NAD(P)-binding Rossmann-fold superfamily protein   chr1:3066811-3068484 FORWARD LENGTH=325                                                                                                                                                                                                                                                                                                                                                                                                         | 324  | 325  | 1.00E-141 | 100.3 | 75.3 | 86.1 |
| Rsa1.0_01821.1.g30076.t1 | gb EOA36734.1  hypothetical protein CARUB_v10012528mg [Capsella rubella]                                                                                                                                                                                                                                                                                                                                                                                                                                                                                                                                                                                                                      | 229  | 266  | 7.00E-69  | 116.2 | 60.3 | 72.1 | hypothetical protein CARUB_v10012528mg | gbpln | Capsella rubella     | AT1G09520.1   Symbols:   LOCATED IN: chloroplast; EXPRESSED IN: 21 plant structures; EXPRESSED DURING: 12 growth stages; CONTAINS InterPro DOMAIN/s: Zinc finger, PHD-type, conserved site (InterPro:IPR019786); BEST Arabidopsis thaliana protein match is: PHD finger family protein (TAIR:AT3G17460.1); Has 56 Blast hits to 56 proteins in 17 species: Archae - 0; Bacteria - 2; Metazoa - 0; Fungi - 4; Plants - 46; Viruses - 0; Other Eukaryotes - 4 (source: NCBI BLINK).   chr1:3071248-3072030 REVERSE LENGTH=260 | 229  | 260  | 1.00E-68  | 113.5 | 66.4 | 78.2 |
| Rsa1.0_01821.1.g30077.t1 | gb AAC67205.1  putative retroelement pol polyprotein [Arabidopsis thaliana]                                                                                                                                                                                                                                                                                                                                                                                                                                                                                                                                                                                                                   | 1278 | 1413 | 0         | 110.6 | 57.3 | 70.7 | putative retroelement pol polyprotein  | gbpln | Arabidopsis thaliana | AT4G23160.1   Symbols:   CRK8   cysteine-rich RLK (RECEPTOR-like protein kinase) 8   chr4:12129485-12134086 FORWARD LENGTH=1262                                                                                                                                                                                                                                                                                                                                                                                             | 1278 | 1262 | 4.00E-73  | 98.7  | 12.6 | 18.8 |
| Rsa1.0_01821.1.g30078.t1 | refXP_002889756.1  hypothetical protein ARALYDRAFT_471048 [Arabidopsis lyrata subsp. lyrata] gi 297335598 gb EFH66015.1  hypothetical protein ARALYDRAFT_471048 [Arabidopsis lyrata subsp. lyrata]                                                                                                                                                                                                                                                                                                                                                                                                                                                                                            | 581  | 522  | 0         | 89.8  | 71.4 | 76.9 | hypothetical protein ARALYDRAFT_471048 | gbpln | Arabidopsis lyrata   | AT1G09530.2   Symbols:   PIF3, POC1, PAP3   phytochrome interacting factor 3   chr1:3077216-3079367 FORWARD LENGTH=524                                                                                                                                                                                                                                                                                                                                                                                                      | 581  | 524  | 0         | 90.2  | 71.1 | 76.1 |

|                          |                                                                                                                                                                                                                                                                                                                                                                                                                                                                                                                                                                                                                                                                                |      |      |          |       |      |      |                                                     |       |                      |                                                                                                                                                                                                                                                                                                                                                      |      |      |           |       |      |      |
|--------------------------|--------------------------------------------------------------------------------------------------------------------------------------------------------------------------------------------------------------------------------------------------------------------------------------------------------------------------------------------------------------------------------------------------------------------------------------------------------------------------------------------------------------------------------------------------------------------------------------------------------------------------------------------------------------------------------|------|------|----------|-------|------|------|-----------------------------------------------------|-------|----------------------|------------------------------------------------------------------------------------------------------------------------------------------------------------------------------------------------------------------------------------------------------------------------------------------------------------------------------------------------------|------|------|-----------|-------|------|------|
| Rsa1.0_01822.1.g30079.t1 | #                                                                                                                                                                                                                                                                                                                                                                                                                                                                                                                                                                                                                                                                              | #    | #    | #        | #     | #    | #    | #                                                   | -     | ----                 | ----                                                                                                                                                                                                                                                                                                                                                 | #    | #    | #         | #     | #    | #    |
| Rsa1.0_01822.1.g30080.t1 | #                                                                                                                                                                                                                                                                                                                                                                                                                                                                                                                                                                                                                                                                              | #    | #    | #        | #     | #    | #    | #                                                   | -     | ----                 | ----                                                                                                                                                                                                                                                                                                                                                 | #    | #    | #         | #     | #    | #    |
| Rsa1.0_01822.1.g30081.t1 | #                                                                                                                                                                                                                                                                                                                                                                                                                                                                                                                                                                                                                                                                              | #    | #    | #        | #     | #    | #    | #                                                   | -     | ----                 | ----                                                                                                                                                                                                                                                                                                                                                 | #    | #    | #         | #     | #    | #    |
| Rsa1.0_01822.1.g30082.t2 | gb AAG51783.1 AC079679.3 reverse transcriptase, putative; 16838-20266 [Arabidopsis thaliana]                                                                                                                                                                                                                                                                                                                                                                                                                                                                                                                                                                                   | 757  | 1142 | 0        | 150.9 | 46.0 | 63.9 | reverse transcriptase, putative; 16838-20266        | gbpln | Arabidopsis thaliana | AT4G29090.1   Symbols:   Ribonuclease H-like superfamily protein   chr4:14333528-14335255 FORWARD LENGTH=575                                                                                                                                                                                                                                         | 757  | 575  | 1.00E-72  | 76.0  | 22.3 | 35.1 |
| Rsa1.0_01822.1.g30083.t1 | gb AAG28799.1 AC079374.2 unknown protein [Arabidopsis thaliana]                                                                                                                                                                                                                                                                                                                                                                                                                                                                                                                                                                                                                | 66   | 231  | 2.00E-13 | 350.0 | 57.6 | 68.2 | unknown protein                                     | gbpln | Arabidopsis thaliana | AT1G25260.1   Symbols:   Ribosomal protein L10 family protein   chr1:8554163-8555766 REVERSE LENGTH=235                                                                                                                                                                                                                                              | 66   | 235  | 3.00E-16  | 356.1 | 57.6 | 68.2 |
| Rsa1.0_01822.1.g30084.t1 | #                                                                                                                                                                                                                                                                                                                                                                                                                                                                                                                                                                                                                                                                              | #    | #    | #        | #     | #    | #    | -                                                   | ----  | ----                 | #                                                                                                                                                                                                                                                                                                                                                    | #    | #    | #         | #     | #    | #    |
| Rsa1.0_01822.1.g30085.t1 | dbj BAA97156.1  unnamed protein product [Arabidopsis thaliana]                                                                                                                                                                                                                                                                                                                                                                                                                                                                                                                                                                                                                 | 241  | 329  | 1.00E-43 | 136.5 | 40.2 | 53.9 | unnamed protein product                             | gbpln | Arabidopsis thaliana | AT2G22440.1   Symbols:   BEST Arabidopsis thaliana protein match is: Ribonuclease H-like superfamily protein (TAIR:AT4G29090.1); Has 208 Blast hits to 191 proteins in 10 species: Archae - 0; Bacteria - 0; Metazoa - 0; Fungi - 0; Plants - 208; Viruses - 0; Other Eukaryotes - 0 (source: NCBI BLINK).   chr2:9528910-9529917 FORWARD LENGTH=256 | 241  | 256  | 9.00E-21  | 106.2 | 22.4 | 30.3 |
| Rsa1.0_01822.1.g30086.t1 | #                                                                                                                                                                                                                                                                                                                                                                                                                                                                                                                                                                                                                                                                              | #    | #    | #        | #     | #    | #    | -                                                   | ----  | ----                 | #                                                                                                                                                                                                                                                                                                                                                    | #    | #    | #         | #     | #    | #    |
| Rsa1.0_01822.1.g30087.t1 | gb AAG60150.1 AC074360.15 En/Spm-like transposon protein, putative [Arabidopsis thaliana]                                                                                                                                                                                                                                                                                                                                                                                                                                                                                                                                                                                      | 168  | 1431 | 3.00E-35 | 851.8 | 53.0 | 70.8 | En/Spm-like transposon protein, putative            | gbpln | Arabidopsis thaliana | #                                                                                                                                                                                                                                                                                                                                                    | #    | #    | #         | #     | #    | #    |
| Rsa1.0_01823.1.g30088.t3 | #                                                                                                                                                                                                                                                                                                                                                                                                                                                                                                                                                                                                                                                                              | #    | #    | #        | #     | #    | #    | -                                                   | ----  | ----                 | #                                                                                                                                                                                                                                                                                                                                                    | #    | #    | #         | #     | #    | #    |
| Rsa1.0_01823.1.g30089.t7 | gb AAC33226.1  putative non-LTR retroelement reverse transcriptase [Arabidopsis thaliana]                                                                                                                                                                                                                                                                                                                                                                                                                                                                                                                                                                                      | 1675 | 1529 | 0        | 91.3  | 42.9 | 59.3 | putative non-LTR retroelement reverse transcriptase | gbpln | Arabidopsis thaliana | AT3G24255.1   Symbols:   RNA-directed DNA polymerase (reverse transcriptase)-related family protein   chr3:8789471-8793208 FORWARD LENGTH=746                                                                                                                                                                                                        | 1675 | 746  | 1.00E-104 | 44.5  | 11.3 | 15.3 |
| Rsa1.0_01823.1.g30090.t1 | gb AAK43485.1 AC084807.10 polyprotein, putative [Arabidopsis thaliana] gi 225898008 dbj BAH30336.1  hypothetical protein [Arabidopsis thaliana]                                                                                                                                                                                                                                                                                                                                                                                                                                                                                                                                | 1423 | 1459 | 0        | 102.5 | 55.7 | 70.5 | polyprotein, putative                               | gbpln | Arabidopsis thaliana | AT4G23160.1   Symbols:   CRK8   cysteine-rich RLK (RECEPTOR-like protein kinase) 8   chr4:12129495-12134086 FORWARD LENGTH=1262                                                                                                                                                                                                                      | 1423 | 1262 | 4.00E-95  | 88.7  | 12.4 | 18.8 |
| Rsa1.0_01823.1.g30091.t1 | dbj BAJ34469.1  unnamed protein product [Theillungiella halophila]                                                                                                                                                                                                                                                                                                                                                                                                                                                                                                                                                                                                             | 163  | 661  | 2.00E-53 | 405.5 | 69.9 | 76.1 | unnamed protein product                             | ----  | ----                 | AT1G71710.1   Symbols:   DNase I-like superfamily protein   chr1:26973796-26976774 REVERSE LENGTH=664                                                                                                                                                                                                                                                | 163  | 664  | 4.00E-51  | 407.4 | 68.7 | 78.5 |
| Rsa1.0_01823.1.g30092.t1 | ref NP_188701.2  mRNA cap guanine-N7 methyltransferase 1 [Arabidopsis thaliana] gi 75273308 sp Q9LHQ7.1 MCES1_ARAT H RecName: Full=mRNA cap guanine-N7 methyltransferase 1; AltName: Full=mRNA (guanine-N(7)-methyltransferase 1; AltName: Full=mRNA cap methyltransferase 1 gi 9294344 dbj BAB02241.1  mRNA cap methyltransferase-like protein [Arabidopsis thaliana] gi 28973781 gb AAO64206.1  unknown protein [Arabidopsis thaliana] gi 29824183 gb AAP04052.1  unknown protein [Arabidopsis thaliana] gi 110736712 dbj BAF00319.1  hypothetical protein [Arabidopsis thaliana] gi 332642886 gb AEE76407.1  mRNA cap guanine-N7 methyltransferase 1 [Arabidopsis thaliana] | 198  | 370  | 1.00E-18 | 186.9 | 23.7 | 24.7 | mRNA cap guanine-N7 methyltransferase 1             | gbpln | Arabidopsis thaliana | AT3G20650.1   Symbols:   mRNA capping enzyme family protein   chr3:7221168-7223939 REVERSE LENGTH=370                                                                                                                                                                                                                                                | 198  | 370  | 5.00E-21  | 186.9 | 23.7 | 24.7 |
| Rsa1.0_01824.1.g30093.t1 | gb ABD96963.1  hypothetical protein [Cleome spinosa]                                                                                                                                                                                                                                                                                                                                                                                                                                                                                                                                                                                                                           | 273  | 408  | 3.00E-28 | 149.5 | 27.1 | 36.6 | hypothetical protein                                | gbpln | Cleome spinosa       | #                                                                                                                                                                                                                                                                                                                                                    | #    | #    | #         | #     | #    | #    |
| Rsa1.0_01824.1.g30094.t1 | ref XP_002891578.1  10-formyltetrahydrofolate synthetase [Arabidopsis lyrata subsp. lyrata] gi 297337420 gb EFH67837.1  10-formyltetrahydrofolate synthetase [Arabidopsis lyrata subsp. lyrata] ref XP_002885355.1  ubiquitin-conjugating enzyme 19 [Arabidopsis lyrata subsp. lyrata]                                                                                                                                                                                                                                                                                                                                                                                         | 634  | 634  | 0        | 100.0 | 96.7 | 99.1 | 10-formyltetrahydrofolate synthetase                | gbpln | Arabidopsis lyrata   | AT1G50480.1   Symbols:   THFS   10-formyltetrahydrofolate synthetase   chr1:18702064-18704687 FORWARD LENGTH=634                                                                                                                                                                                                                                     | 634  | 634  | 0         | 100.0 | 96.1 | 98.7 |
| Rsa1.0_01824.1.g30096.t1 | ref XP_002885355.1  ubiquitin-conjugating enzyme 19 [Arabidopsis lyrata subsp. lyrata] gi 297331195 gb EFH61614.1  ubiquitin-conjugating enzyme 19 [Arabidopsis lyrata subsp. lyrata]                                                                                                                                                                                                                                                                                                                                                                                                                                                                                          | 181  | 181  | 3.00E-93 | 100.0 | 90.6 | 93.9 | ubiquitin-conjugating enzyme 19                     | gbpln | Arabidopsis lyrata   | AT3G20060.1   Symbols:   UBC19   ubiquitin-conjugating enzyme 19   chr3:7002927-7004283 REVERSE LENGTH=181                                                                                                                                                                                                                                           | 181  | 181  | 3.00E-91  | 100.0 | 90.6 | 93.9 |
| Rsa1.0_01824.1.g30097.t1 | gb AAD32898.1  putative retroelement pol polyprotein [Arabidopsis thaliana]                                                                                                                                                                                                                                                                                                                                                                                                                                                                                                                                                                                                    | 1815 | 1307 | 0        | 72.0  | 44.1 | 55.1 | putative retroelement pol polyprotein               | gbpln | Arabidopsis thaliana | AT1G02020.1   Symbols:   nitroreductase family protein   chr1:352842-354845 REVERSE LENGTH=642                                                                                                                                                                                                                                                       | 1815 | 642  | 0         | 35.4  | 20.2 | 22.1 |



|                          |                                                                                                                                                                                                                                                                                                                                                                                                                                                                                                                                                                                                                                                                                                                                          |      |      |           |       |      |      |                                                                               |       |                      |                                                                                                                                                                                                                               |      |      |           |       |      |      |
|--------------------------|------------------------------------------------------------------------------------------------------------------------------------------------------------------------------------------------------------------------------------------------------------------------------------------------------------------------------------------------------------------------------------------------------------------------------------------------------------------------------------------------------------------------------------------------------------------------------------------------------------------------------------------------------------------------------------------------------------------------------------------|------|------|-----------|-------|------|------|-------------------------------------------------------------------------------|-------|----------------------|-------------------------------------------------------------------------------------------------------------------------------------------------------------------------------------------------------------------------------|------|------|-----------|-------|------|------|
| Rsa1.0_01824.1.g30098.t1 | refXP_002889341.1  hypothetical protein ARALYDRAFT_333455 [Arabidopsis lyrata subsp. lyrata] gi 297335183 gb EFH65600.1                                                                                                                                                                                                                                                                                                                                                                                                                                                                                                                                                                                                                  | 142  | 872  | 6.00E-25  | 614.1 | 42.3 | 44.4 | hypothetical protein ARALYDRAFT_333455                                        | gbpln | Arabidopsis lyrata   | AT1G02020.1   Symbols:   nitroreductase family protein   chr1:352842-354845 REVERSE LENGTH=642                                                                                                                                | 142  | 642  | 7.00E-27  | 452.1 | 41.5 | 44.4 |
| Rsa1.0_01824.1.g30099.t1 | #                                                                                                                                                                                                                                                                                                                                                                                                                                                                                                                                                                                                                                                                                                                                        | #    | #    | #         | #     | #    | #    | -                                                                             | ----  | ----                 | #                                                                                                                                                                                                                             | #    | #    | #         | #     | #    | #    |
| Rsa1.0_01824.1.g30100.t1 | ref NP_199370.1  Ulp1 protease family protein [Arabidopsis thaliana] gi 10177930 dbj BAB11195.1  unnamed protein product [Arabidopsis thaliana] gi 332007886 gb AED95269.1  Ulp1 protease family protein [Arabidopsis thaliana]                                                                                                                                                                                                                                                                                                                                                                                                                                                                                                          | 848  | 921  | 1.00E-149 | 108.6 | 38.7 | 57.9 | Ulp1 protease family protein                                                  | gbpln | Arabidopsis thaliana | AT5G45570.1   Symbols:   Ulp1 protease family protein   chr5:18472301-18475574 FORWARD LENGTH=921                                                                                                                             | 848  | 921  | 1.00E-151 | 108.6 | 38.7 | 57.9 |
| Rsa1.0_01824.1.g30101.t1 | gb AAC13582.1  similar to maize transposon MuDR (GB:M76978) [Arabidopsis thaliana] gi 8843876 dbj BAA97402.1  mutator-like transposase [Arabidopsis thaliana]                                                                                                                                                                                                                                                                                                                                                                                                                                                                                                                                                                            | 494  | 806  | 2.00E-75  | 163.2 | 35.6 | 46.0 | similar to maize transposon MuDR (GB:M76978)                                  | gbpln | Arabidopsis thaliana | #                                                                                                                                                                                                                             | #    | #    | #         | #     | #    | #    |
| Rsa1.0_01824.1.g30102.t1 | #                                                                                                                                                                                                                                                                                                                                                                                                                                                                                                                                                                                                                                                                                                                                        | #    | #    | #         | #     | #    | #    | -                                                                             | ----  | ----                 | #                                                                                                                                                                                                                             | #    | #    | #         | #     | #    | #    |
| Rsa1.0_01824.1.g30103.t1 | gb EOA40376.1  hypothetical protein CARUB_v10009103mg [Capsella rubella]                                                                                                                                                                                                                                                                                                                                                                                                                                                                                                                                                                                                                                                                 | 75   | 453  | 3.00E-24  | 604.0 | 70.7 | 77.3 | hypothetical protein CARUB_v10009103mg                                        | gbpln | Capsella rubella     | AT3G20300.1   Symbols:   Protein of unknown function (DUF3537)   chr3:7079832-7081809 REVERSE LENGTH=452                                                                                                                      | 75   | 452  | 1.00E-20  | 602.7 | 54.7 | 61.3 |
| Rsa1.0_01825.1.g30104.t1 | #                                                                                                                                                                                                                                                                                                                                                                                                                                                                                                                                                                                                                                                                                                                                        | #    | #    | #         | #     | #    | #    | -                                                                             | ----  | ----                 | #                                                                                                                                                                                                                             | #    | #    | #         | #     | #    | #    |
| Rsa1.0_01825.1.g30105.t2 | gb EOA29930.1  hypothetical protein CARUB_v10013023mg [Capsella rubella]                                                                                                                                                                                                                                                                                                                                                                                                                                                                                                                                                                                                                                                                 | 808  | 774  | 0         | 95.8  | 91.2 | 93.2 | hypothetical protein CARUB_v10013023mg                                        | gbpln | Capsella rubella     | AT3G19720.1   Symbols: ARC5, DRP5B   P-loop containing nucleoside triphosphate hydrolases superfamily protein   chr3:6850591-6855389 REVERSE LENGTH=777                                                                       | 808  | 777  | 0         | 96.2  | 91.2 | 93.3 |
| Rsa1.0_01825.1.g30106.t1 | ref NP_188608.4  P-loop containing nucleoside triphosphate hydrolase domain-containing protein [Arabidopsis thaliana] gi 332642761 gb AEE76282.1  P-loop containing nucleoside triphosphate hydrolase domain-containing protein [Arabidopsis thaliana]                                                                                                                                                                                                                                                                                                                                                                                                                                                                                   | 989  | 993  | 0         | 100.4 | 86.8 | 93.0 | P-loop containing nucleoside triphosphate hydrolase domain-containing protein | gbpln | Arabidopsis thaliana | AT3G19740.1   Symbols:   P-loop containing nucleoside triphosphate hydrolases superfamily protein   chr3:6855944-6862930 REVERSE LENGTH=993                                                                                   | 989  | 993  | 0         | 100.4 | 86.8 | 93.0 |
| Rsa1.0_01825.1.g30107.t1 | ref XP_002883201.1  hypothetical protein ARALYDRAFT_479492 [Arabidopsis lyrata subsp. lyrata] gi 297329041 gb EFH59460.1  hypothetical protein ARALYDRAFT_479492 [Arabidopsis lyrata subsp. lyrata]                                                                                                                                                                                                                                                                                                                                                                                                                                                                                                                                      | 705  | 408  | 0         | 57.9  | 55.7 | 56.7 | hypothetical protein ARALYDRAFT_479492                                        | gbpln | Arabidopsis lyrata   | AT3G19760.1   Symbols: EIF4A-III   eukaryotic initiation factor 4A-III   chr3:6863790-6866242 FORWARD LENGTH=408                                                                                                              | 705  | 408  | 0         | 57.9  | 55.0 | 56.3 |
| Rsa1.0_01825.1.g30108.t1 | dbj BAJ33687.1  unnamed protein product [Theilungiella halophila]                                                                                                                                                                                                                                                                                                                                                                                                                                                                                                                                                                                                                                                                        | 561  | 561  | 0         | 100.0 | 95.4 | 99.5 | unnamed protein product                                                       | ----  | ----                 | AT3G19820.3   Symbols: DWF1   cell elongation protein / DWARF1 / DIMINUTO (DIM)   chr3:6879835-6881616 REVERSE LENGTH=561                                                                                                     | 561  | 561  | 0         | 100.0 | 92.7 | 97.0 |
| Rsa1.0_01825.1.g30109.t1 | #                                                                                                                                                                                                                                                                                                                                                                                                                                                                                                                                                                                                                                                                                                                                        | #    | #    | #         | #     | #    | #    | -                                                                             | ----  | ----                 | #                                                                                                                                                                                                                             | #    | #    | #         | #     | #    | #    |
| Rsa1.0_01826.1.g30110.t2 | ref NP_177055.2  2-oxoglutarate decarboxylase/ hydro-lyase/ magnesium ion binding protein [Arabidopsis thaliana] gi 341941250 sp Q15K19.2 PHYLO_ARAT H RecName: Full=Protein PHYLL0, chloroplastic; Includes: RecName: Full=Inactive isochorismate synthase; AltName: Full=MENF; Includes: RecName: Full=2-succinyl-5-enolpyruvyl-6-hydroxy-3-cyclohexene-1-carboxylate synthase; AltName: Full=MEND; Includes: RecName: Full=2-succinylbenzoate synthase; AltName: Full=MENG; Includes: RecName: Full=2-succinyl-6-hydroxy-2, 4-cyclohexadiene-1-carboxylate synthase; AltName: Full=MENH; Flags: Precursor gi 332196734 gb AEE34855.1  2-oxoglutarate decarboxylase/ hydro-lyase/ magnesium ion binding protein [Arabidopsis thaliana] | 1717 | 1715 | 0         | 99.9  | 85.7 | 90.9 | 2-oxoglutarate decarboxylase/ hydro-lyase/ magnesium ion binding protein      | gbpln | Arabidopsis thaliana | AT1G68890.1   Symbols:   magnesium ion binding;thiamin pyrophosphate binding;hydro-lyases;catlytics;2-succinyl-5-enolpyruvyl-6-hydroxy-3-cyclohexene-1-carboxylic-acid synthases   chr1:25896988-25906553 FORWARD LENGTH=1715 | 1717 | 1715 | 0         | 99.9  | 85.7 | 90.9 |

|                          |                                                                                                                                                                                                                                                                         |      |      |           |       |      |      |                                                 |       |                      |                                                                                                                                                                                                                                                                                   |      |      |           |       |      |      |
|--------------------------|-------------------------------------------------------------------------------------------------------------------------------------------------------------------------------------------------------------------------------------------------------------------------|------|------|-----------|-------|------|------|-------------------------------------------------|-------|----------------------|-----------------------------------------------------------------------------------------------------------------------------------------------------------------------------------------------------------------------------------------------------------------------------------|------|------|-----------|-------|------|------|
| Rsa1.0_01826.1.g30111.t1 | refNP_001031254.1 putative defensin-like protein 263 [Arabidopsis thaliana] gi122209605 sp Q2V4D9.1 DF263_ARAT H RecName: Full=Putative defensin-like protein 263; Flags: Precursor gi332196736 gb AEE34857.1 putative defensin-like protein 263 [Arabidopsis thaliana] | 90   | 96   | 2.00E-28  | 106.7 | 72.2 | 81.1 | putative defensin-like protein 263              | gbpln | Arabidopsis thaliana | AT1G68907.1   Symbols:   Defensin-like (DEFL) family protein   chr1:25907508-25907891 REVERSE LENGTH=96                                                                                                                                                                           | 90   | 96   | 4.00E-31  | 106.7 | 72.2 | 81.1 |
| Rsa1.0_01826.1.g30112.t1 | gb EOA33767.1  hypothetical protein CARUB_v10019961mg [Capsella rubella]                                                                                                                                                                                                | 147  | 630  | 5.00E-41  | 428.6 | 62.6 | 75.5 | hypothetical protein CARUB_v10019961mg          | gbpln | Capsella rubella     | AT1G68910.3   Symbols: WIT2   WPP domain-interacting protein 2   chr1:25908373-25910485 REVERSE LENGTH=582                                                                                                                                                                        | 147  | 582  | 1.00E-42  | 395.9 | 61.9 | 76.2 |
| Rsa1.0_01827.1.g30113.t1 | refXP_002885497.1 hypothetical protein ARALYDRAFT_898699 [Arabidopsis lyrata subsp. lyrata] gi297331337 gb EFH61756.1  hypothetical protein ARALYDRAFT_898699 [Arabidopsis lyrata subsp. lyrata]                                                                        | 696  | 772  | 1.00E-123 | 110.9 | 45.1 | 58.5 | hypothetical protein ARALYDRAFT_898699          | gbpln | Arabidopsis lyrata   | AT3G49130.1   Symbols:   SWAP (Suppressor-of-White-APricot)/surp RNA-binding domain-containing protein   chr3:18210453-18211708 FORWARD LENGTH=307                                                                                                                                | 696  | 307  | 3.00E-30  | 44.1  | 14.9 | 20.5 |
| Rsa1.0_01827.1.g30114.t1 | #                                                                                                                                                                                                                                                                       | #    | #    | #         | #     | #    | #    | -                                               | ----  | ----                 | #                                                                                                                                                                                                                                                                                 | #    | #    | #         | #     | #    | #    |
| Rsa1.0_01827.1.g30115.t1 | refXP_002885543.1 hypothetical protein ARALYDRAFT_319027 [Arabidopsis lyrata subsp. lyrata] gi297331383 gb EFH61802.1  hypothetical protein ARALYDRAFT_319027 [Arabidopsis lyrata subsp. lyrata]                                                                        | 138  | 427  | 3.00E-40  | 309.4 | 63.8 | 71.7 | hypothetical protein ARALYDRAFT_319027          | gbpln | Arabidopsis lyrata   | AT4G14500.1   Symbols:   Polyketide cyclase/dehydrase and lipid transport superfamily protein   chr4:8334391-8337022 FORWARD LENGTH=433                                                                                                                                           | 138  | 433  | 2.00E-38  | 313.8 | 58.7 | 65.9 |
| Rsa1.0_01827.1.g30116.t1 | #                                                                                                                                                                                                                                                                       | #    | #    | #         | #     | #    | #    | -                                               | ----  | ----                 | #                                                                                                                                                                                                                                                                                 | #    | #    | #         | #     | #    | #    |
| Rsa1.0_01827.1.g30117.t1 | refXP_002873763.1 hypothetical protein ARALYDRAFT_488471 [Arabidopsis lyrata subsp. lyrata] gi297319600 gb EFH50022.1  hypothetical protein ARALYDRAFT_488471 [Arabidopsis lyrata subsp. lyrata]                                                                        | 1179 | 1179 | 0         | 100.0 | 90.4 | 93.6 | hypothetical protein ARALYDRAFT_488471          | gbpln | Arabidopsis lyrata   | AT5G16210.1   Symbols:   HEAT repeat-containing protein   chr5:5290999-5297779 REVERSE LENGTH=1180                                                                                                                                                                                | 1179 | 1180 | 0         | 100.1 | 90.4 | 93.6 |
| Rsa1.0_01827.1.g30118.t2 | gb EOA20044.1  hypothetical protein CARUB_v10000322mg, partial [Capsella rubella]                                                                                                                                                                                       | 1017 | 726  | 0         | 71.4  | 55.9 | 61.5 | hypothetical protein CARUB_v10000322mg, partial | gbpln | Capsella rubella     | AT5G16180.1   Symbols: CRS1, ATCRS1   ortholog of maize chloroplast splicing factor CRS1   chr5:5279884-5282898 FORWARD LENGTH=720                                                                                                                                                | 1017 | 720  | 0         | 70.8  | 54.6 | 60.5 |
| Rsa1.0_01827.1.g30119.t1 | gb EOA23049.1  hypothetical protein CARUB_v10003819mg [Capsella rubella]                                                                                                                                                                                                | 136  | 131  | 7.00E-43  | 96.3  | 71.3 | 81.6 | hypothetical protein CARUB_v10003819mg          | gbpln | Capsella rubella     | AT5G16160.1   Symbols:   unknown protein; Has 30201 Blast hits to 17322 proteins in 780 species: Archae - 12; Bacteria - 1396; Metazoa - 17338; Fungi - 3422; Plants - 5037; Viruses - 0; Other Eukaryotes - 2996 (source: NCBI BLINK).   chr5:5275813-5276576 REVERSE LENGTH=133 | 136  | 133  | 2.00E-45  | 97.8  | 72.8 | 80.1 |
| Rsa1.0_01827.1.g30120.t1 | gb AAM08751.1 AC025098.18 Putative copia-type polyprotein [Oryza sativa Japonica Group]                                                                                                                                                                                 | 1359 | 1803 | 0         | 132.7 | 45.4 | 59.8 | Putative copia-type polyprotein                 | gbpln | Oryza sativa         | AT4G23160.1   Symbols: CRK8   cysteine-rich RLK (RECEPTOR-like protein kinase) 8   chr4:12129485-12134086 FORWARD LENGTH=1262                                                                                                                                                     | 1359 | 1262 | 1.00E-103 | 92.9  | 13.4 | 20.8 |
| Rsa1.0_01827.1.g30121.t1 | refXP_002871704.1 40S ribosomal protein S7 [Arabidopsis lyrata subsp. lyrata] gi297317541 gb EFH47963.1  40S ribosomal protein S7 [Arabidopsis lyrata subsp. lyrata]                                                                                                    | 190  | 190  | 1.00E-101 | 100.0 | 94.2 | 97.9 | 40S ribosomal protein S7                        | gbpln | Arabidopsis lyrata   | AT5G16130.1   Symbols:   Ribosomal protein S7e family protein   chr5:5268984-5269912 FORWARD LENGTH=190                                                                                                                                                                           | 190  | 190  | 1.00E-104 | 100.0 | 94.2 | 98.4 |
| Rsa1.0_01827.1.g30122.t1 | gb EOA22522.1  hypothetical protein CARUB_v10003177mg [Capsella rubella]                                                                                                                                                                                                | 344  | 351  | 1.00E-178 | 102.0 | 87.5 | 94.8 | hypothetical protein CARUB_v10003177mg          | gbpln | Capsella rubella     | AT5G16120.2   Symbols:   alpha/beta-Hydrolases superfamily protein   chr5:5265620-5267775 FORWARD LENGTH=369                                                                                                                                                                      | 344  | 369  | 1.00E-179 | 107.3 | 86.3 | 94.2 |
| Rsa1.0_01827.1.g30123.t1 | refXP_002873757.1 hypothetical protein ARALYDRAFT_326057 [Arabidopsis lyrata subsp. lyrata] gi297319594 gb EFH50016.1  hypothetical protein ARALYDRAFT_326057 [Arabidopsis lyrata subsp. lyrata]                                                                        | 404  | 348  | 5.00E-56  | 86.1  | 37.1 | 48.0 | hypothetical protein ARALYDRAFT_326057          | gbpln | Arabidopsis lyrata   | AT5G16100.1   Symbols:   unknown protein; Has 30201 Blast hits to 17322 proteins in 780 species: Archae - 12; Bacteria - 1396; Metazoa - 17338; Fungi - 3422; Plants - 5037; Viruses - 0; Other Eukaryotes - 2996 (source: NCBI BLINK).   chr5:5258551-5259719 REVERSE LENGTH=357 | 404  | 357  | 1.00E-51  | 88.4  | 37.1 | 49.0 |
| Rsa1.0_01827.1.g30124.t3 | gb AAD32757.1  putative helicase [Arabidopsis thaliana]                                                                                                                                                                                                                 | 619  | 1241 | 0         | 200.5 | 56.4 | 69.3 | putative helicase                               | gbpln | Arabidopsis thaliana | #                                                                                                                                                                                                                                                                                 | #    | #    | #         | #     | #    | #    |
| Rsa1.0_01828.1.g30125.t1 | refXP_002888361.1 predicted protein [Arabidopsis lyrata subsp. lyrata] gi297334202 gb EFH64620.1  predicted protein [Arabidopsis lyrata subsp. lyrata]                                                                                                                  | 144  | 352  | 5.00E-74  | 244.4 | 91.0 | 94.4 | predicted protein                               | gbpln | Arabidopsis lyrata   | AT1G65340.1   Symbols: CYP96A3   cytochrome P450, family 96, subfamily A, polypeptide 3   chr1:24268135-24269646 REVERSE LENGTH=503                                                                                                                                               | 144  | 503  | 7.00E-75  | 349.3 | 88.2 | 93.1 |
| Rsa1.0_01828.1.g30126.t1 | #                                                                                                                                                                                                                                                                       | #    | #    | #         | #     | #    | #    | -                                               | ----  | ----                 | #                                                                                                                                                                                                                                                                                 | #    | #    | #         | #     | #    | #    |
| Rsa1.0_01828.1.g30127.t1 | refXP_002866852.1 CYP96A9 [Arabidopsis lyrata subsp. lyrata] gi297312688 gb EFH43111.1  CYP96A9 [Arabidopsis lyrata subsp. lyrata]                                                                                                                                      | 516  | 515  | 0         | 99.8  | 84.9 | 91.7 | CYP96A9                                         | gbpln | Arabidopsis lyrata   | AT4G39480.1   Symbols: CYP96A9   cytochrome P450, family 96, subfamily A, polypeptide 9   chr4:18362558-18364108 FORWARD LENGTH=516                                                                                                                                               | 516  | 516  | 0         | 100.0 | 84.1 | 91.3 |

|                          |                                                                                                                                                                                                                                                                                                                                                                                                                                                                               |      |      |           |       |      |      |                                                 |       |                      |                                                                                                                                                                                                                                                                                          |      |      |           |       |      |      |
|--------------------------|-------------------------------------------------------------------------------------------------------------------------------------------------------------------------------------------------------------------------------------------------------------------------------------------------------------------------------------------------------------------------------------------------------------------------------------------------------------------------------|------|------|-----------|-------|------|------|-------------------------------------------------|-------|----------------------|------------------------------------------------------------------------------------------------------------------------------------------------------------------------------------------------------------------------------------------------------------------------------------------|------|------|-----------|-------|------|------|
| Rsa1.0_01828.1.g30128.t1 | ref[XP_002866853.1] CYP96A10 [Arabidopsis lyrata subsp. lyrata] gi 297312689 gb EFH43112.1  CYP96A10 [Arabidopsis lyrata subsp. lyrata]                                                                                                                                                                                                                                                                                                                                       | 514  | 519  | 0         | 101.0 | 86.8 | 93.8 | CYP96A10                                        | gbpln | Arabidopsis lyrata   | AT4G39490.1   Symbols: CYP96A10   cytochrome P450, family 96, subfamily A, polypeptide 10   chr4:18365229-18366788 FORWARD LENGTH=519                                                                                                                                                    | 514  | 519  | 0         | 101.0 | 86.4 | 92.8 |
| Rsa1.0_01828.1.g30129.t1 | gb EOA39051.1  hypothetical protein CARUB_v10011665mg [Capsella rubella]                                                                                                                                                                                                                                                                                                                                                                                                      | 471  | 518  | 0         | 110.0 | 80.7 | 89.2 | hypothetical protein CARUB_v10011665mg          | gbpln | Capsella rubella     | AT1G47620.1   Symbols: CYP96A8   cytochrome P450, family 96, subfamily A, polypeptide 8   chr1:17508116-17509678 REVERSE LENGTH=520                                                                                                                                                      | 471  | 520  | 0         | 110.4 | 77.3 | 88.3 |
| Rsa1.0_01828.1.g30130.t1 | gb EOA16459.1  hypothetical protein CARUB_v10004619mg [Capsella rubella]                                                                                                                                                                                                                                                                                                                                                                                                      | 488  | 506  | 0         | 103.7 | 72.7 | 82.0 | hypothetical protein CARUB_v10004619mg          | gbpln | Capsella rubella     | AT4G32170.1   Symbols: CYP96A2   cytochrome P450, family 96, subfamily A, polypeptide 2   chr4:15533772-15535292 FORWARD LENGTH=506                                                                                                                                                      | 488  | 506  | 0         | 103.7 | 73.0 | 81.4 |
| Rsa1.0_01828.1.g30131.t1 | gb EOA16858.1  hypothetical protein CARUB_v10005082mg [Capsella rubella]                                                                                                                                                                                                                                                                                                                                                                                                      | 369  | 369  | 0         | 100.0 | 97.0 | 98.1 | hypothetical protein CARUB_v10005082mg          | gbpln | Capsella rubella     | AT4G39520.1   Symbols:   GTP-binding protein-related   chr4:18371329-18374000 REVERSE LENGTH=369                                                                                                                                                                                         | 369  | 369  | 0         | 100.0 | 96.5 | 98.1 |
| Rsa1.0_01828.1.g30132.t1 | gb EOA18012.1  hypothetical protein CARUB_v10006447mg [Capsella rubella]                                                                                                                                                                                                                                                                                                                                                                                                      | 834  | 835  | 0         | 100.1 | 83.8 | 91.6 | hypothetical protein CARUB_v10006447mg          | gbpln | Capsella rubella     | AT4G39530.1   Symbols:   Tetratricopeptide repeat (TPR)-like superfamily protein   chr4:18374736-18377240 REVERSE LENGTH=834                                                                                                                                                             | 834  | 834  | 0         | 100.0 | 82.7 | 91.4 |
| Rsa1.0_01828.1.g30133.t1 | gb EOA18073.1  hypothetical protein CARUB_v10006520mg, partial [Capsella rubella]                                                                                                                                                                                                                                                                                                                                                                                             | 380  | 405  | 1.00E-168 | 106.6 | 76.8 | 85.8 | hypothetical protein CARUB_v10006520mg, partial | gbpln | Capsella rubella     | AT4G39580.1   Symbols:   Galactose oxidase/kelch repeat superfamily protein   chr4:18385684-18386811 REVERSE LENGTH=375                                                                                                                                                                  | 380  | 375  | 1.00E-168 | 98.7  | 77.4 | 85.0 |
| Rsa1.0_01828.1.g30134.t1 | ref[XP_002868913.1] kelch repeat-containing F-box family protein [Arabidopsis lyrata subsp. lyrata] gi 297314749 gb EFH45172.1  kelch repeat-containing F-box family protein [Arabidopsis lyrata subsp. lyrata]                                                                                                                                                                                                                                                               | 395  | 389  | 1.00E-122 | 98.5  | 59.0 | 71.4 | kelch repeat-containing F-box family protein    | gbpln | Arabidopsis lyrata   | AT4G39550.1   Symbols:   Galactose oxidase/kelch repeat superfamily protein   chr4:18380681-18381859 REVERSE LENGTH=392                                                                                                                                                                  | 395  | 392  | 1.00E-122 | 99.2  | 61.3 | 73.7 |
| Rsa1.0_01828.1.g30135.t1 | ref[XP_002888041.1] hypothetical protein ARALYDRAFT_475134 [Arabidopsis lyrata subsp. lyrata] gi 297333882 gb EFH64300.1  hypothetical protein ARALYDRAFT_475134 [Arabidopsis lyrata subsp. lyrata]                                                                                                                                                                                                                                                                           | 2778 | 1217 | 0         | 43.8  | 40.8 | 42.5 | hypothetical protein ARALYDRAFT_475134          | gbpln | Arabidopsis lyrata   | AT1G62020.1   Symbols:   Coatomer, alpha subunit   chr1:22919814-22923728 FORWARD LENGTH=1216                                                                                                                                                                                            | 2778 | 1216 | 0         | 43.8  | 40.5 | 42.3 |
| Rsa1.0_01829.1.g30136.t1 | emb CAB40035.1  retrotransposon like protein [Arabidopsis thaliana] gi 7267767 emb CAB81170.1  retrotransposon like protein [Arabidopsis thaliana]                                                                                                                                                                                                                                                                                                                            | 1418 | 1515 | 0         | 106.8 | 58.0 | 72.7 | retrotransposon like protein                    | gbpln | Arabidopsis thaliana | AT4G23160.1   Symbols: CRK8   cysteine-rich RLK (RECEPTOR-like protein kinase) 8   chr4:12129485-12134086 FORWARD LENGTH=1262                                                                                                                                                            | 1418 | 1262 | 1.00E-111 | 89.0  | 14.2 | 21.4 |
| Rsa1.0_01829.1.g30137.t1 | gb EOA34248.1  hypothetical protein CARUB_v10021759mg [Capsella rubella]                                                                                                                                                                                                                                                                                                                                                                                                      | 95   | 95   | 1.00E-27  | 100.0 | 63.2 | 80.0 | hypothetical protein CARUB_v10021759mg          | gbpln | Capsella rubella     | AT1G74458.1   Symbols:   unknown protein, LOCATED IN: endomembrane system; Has 9 Blast hits to 9 proteins in 4 species: Archae - 0; Bacteria - 0; Metazoa - 0; Fungi - 0; Plants - 9; Viruses - 0; Other Eukaryotes - 0 (source: NCBI BLink).   chr1:27987071-27987551 FORWARD LENGTH=94 | 95   | 94   | 2.00E-29  | 98.9  | 65.3 | 77.9 |
| Rsa1.0_01829.1.g30138.t1 | ref[NP_177586.1] GDSL esterase/lipase [Arabidopsis thaliana] gi 75169843 sp Q9CA68.1 GDL31_ARAT H RecName: Full=GDSL esterase/lipase At1g74460; AltName: Full=Extracellular lipase At1g74460; Flags: Precursor gi 12324806 gb AGS2368.1 AC011765_20 putative lipase/acylhydrolase; 46085-44470 [Arabidopsis thaliana] gi 21592578 gb AAM64527.1  putative lipase/acylhydrolase [Arabidopsis thaliana] gi 332197475 gb AEE35596.1  GDSL esterase/lipase [Arabidopsis thaliana] | 364  | 366  | 0         | 100.5 | 92.3 | 95.1 | GDSL esterase/lipase                            | gbpln | Arabidopsis thaliana | AT1G74460.1   Symbols:   GDSL-like Lipase/Acylhydrolase superfamily protein   chr1:27988150-27989765 REVERSE LENGTH=366                                                                                                                                                                  | 364  | 366  | 0         | 100.5 | 92.3 | 95.1 |
| Rsa1.0_01829.1.g30139.t1 | ref[XP_002888981.1] hypothetical protein ARALYDRAFT_476585 [Arabidopsis lyrata subsp. lyrata] gi 297334822 gb EFH65240.1  hypothetical protein ARALYDRAFT_476585 [Arabidopsis lyrata subsp. lyrata] gi 482569929 gb EOA34117.1  hypothetical protein CARUB_v10021619mg [Capsella rubella]                                                                                                                                                                                     | 93   | 93   | 7.00E-34  | 100.0 | 80.6 | 82.8 | hypothetical protein ARALYDRAFT_476585          | gbpln | Arabidopsis lyrata   | AT1G74500.1   Symbols: ATBS1, TMO7, BS1   activation-tagged BRI1 (brassinosteroid-insensitive 1)-suppressor 1   chr1:27998298-27998668 REVERSE LENGTH=93                                                                                                                                 | 93   | 93   | 3.00E-36  | 100.0 | 79.6 | 82.8 |
| Rsa1.0_01829.1.g30140.t1 | gb EOA35161.1  hypothetical protein CARUB_v10020300mg [Capsella rubella] gi 482570975 gb EOA35163.1  hypothetical protein CARUB_v10020300mg [Capsella rubella]                                                                                                                                                                                                                                                                                                                | 423  | 444  | 0         | 105.0 | 85.1 | 90.1 | hypothetical protein CARUB_v10020300mg          | gbpln | Capsella rubella     | AT1G74510.1   Symbols:   Galactose oxidase/kelch repeat superfamily protein   chr1:28006065-28007420 FORWARD LENGTH=451                                                                                                                                                                  | 423  | 451  | 0         | 106.6 | 84.4 | 90.3 |

|                          |                                                                                                                                                                                                                                                                                                                                                           |      |      |           |       |      |      |                                                             |       |                      |                                                                                                                                     |      |     |           |       |      |      |
|--------------------------|-----------------------------------------------------------------------------------------------------------------------------------------------------------------------------------------------------------------------------------------------------------------------------------------------------------------------------------------------------------|------|------|-----------|-------|------|------|-------------------------------------------------------------|-------|----------------------|-------------------------------------------------------------------------------------------------------------------------------------|------|-----|-----------|-------|------|------|
| Rsa1.0_01829.1.g30141.t1 | ref[XP_002887545.1] CYP98A8 [Arabidopsis lyrata subsp. lyrata] gi 297333386 gb EFH63804.1  CYP98A8 [Arabidopsis lyrata subsp. lyrata]                                                                                                                                                                                                                     | 481  | 497  | 0         | 103.3 | 82.3 | 91.7 | CYP98A8                                                     | gbpln | Arabidopsis lyrata   | AT1G74540.1   Symbols: CYP98A8   cytochrome P450, family 98, subfamily A, polypeptide 8   chr1:28013362-28014855 FORWARD LENGTH=497 | 481  | 497 | 0         | 103.3 | 81.5 | 90.9 |
| Rsa1.0_01829.1.g30142.t1 | ref[XP_002879925.1] F-box family protein [Arabidopsis lyrata subsp. lyrata] gi 297325764 gb EFH56184.1  F-box family protein [Arabidopsis lyrata subsp. lyrata]                                                                                                                                                                                           | 370  | 371  | 3.00E-62  | 100.3 | 41.9 | 59.5 | F-box family protein                                        | gbpln | Arabidopsis lyrata   | AT2G41360.1   Symbols:   Galactose oxidase/kech repeat superfamily protein   chr2:17234374-17235956 FORWARD LENGTH=387              | 370  | 387 | 2.00E-52  | 104.6 | 35.7 | 50.0 |
| Rsa1.0_01830.1.g30143.t1 | gb EOA28640.1  hypothetical protein CARUB_v10024862mg, partial [Capsella rubella]                                                                                                                                                                                                                                                                         | 508  | 490  | 1.00E-75  | 96.5  | 34.6 | 55.5 | hypothetical protein CARUB_v10024862mg, partial             | gbpln | Capsella rubella     | AT1G52950.1   Symbols:   Nucleic acid-binding, OB-fold-like protein   chr1:19725483-19728007 FORWARD LENGTH=566                     | 508  | 566 | 1.00E-74  | 111.4 | 33.1 | 54.5 |
| Rsa1.0_01830.1.g30144.t1 | #                                                                                                                                                                                                                                                                                                                                                         | #    | #    | #         | #     | #    | #    | -                                                           | ----  | ----                 | #                                                                                                                                   | #    | #   | #         | #     | #    |      |
| Rsa1.0_01830.1.g30145.t4 | emb CAB91581.1  putative protein [Arabidopsis thaliana]                                                                                                                                                                                                                                                                                                   | 1557 | 1752 | 0         | 112.5 | 53.8 | 67.4 | putative protein                                            | gbpln | Arabidopsis thaliana | AT3G51690.1   Symbols:   PIF1 helicase   chr3:19176731-19178107 REVERSE LENGTH=331                                                  | 1557 | 331 | 1.00E-68  | 21.3  | 9.4  | 13.2 |
| Rsa1.0_01830.1.g30146.t1 | gb AAF69169.1 AC007915.21 F27F5.21 [Arabidopsis thaliana]                                                                                                                                                                                                                                                                                                 | 786  | 1023 | 1.00E-125 | 130.2 | 29.5 | 39.4 | F27F5.21                                                    | gbpln | Arabidopsis thaliana | AT4G29090.1   Symbols:   Ribonuclease H-like superfamily protein   chr4:14333528-14335255 FORWARD LENGTH=575                        | 786  | 575 | 8.00E-35  | 73.2  | 8.7  | 14.5 |
| Rsa1.0_01830.1.g30147.t1 | ref[XP_002870305.1] hypothetical protein ARALYDRAFT_915409 [Arabidopsis lyrata subsp. lyrata] gi 297316141 gb EFH46564.1  hypothetical protein ARALYDRAFT_915409 [Arabidopsis lyrata subsp. lyrata]                                                                                                                                                       | 824  | 763  | 0         | 92.6  | 79.7 | 86.9 | hypothetical protein ARALYDRAFT_915409                      | gbpln | Arabidopsis lyrata   | AT4G14570.1   Symbols:   acylaminoacyl-peptidase-related   chr4:8362586-8366525 FORWARD LENGTH=764                                  | 824  | 764 | 0         | 92.7  | 79.2 | 86.3 |
| Rsa1.0_01831.1.g30148.t1 | ref[XP_002864260.1] hypothetical protein ARALYDRAFT_918447 [Arabidopsis lyrata subsp. lyrata] gi 297310095 gb EFH40519.1  hypothetical protein ARALYDRAFT_918447 [Arabidopsis lyrata subsp. lyrata]                                                                                                                                                       | 324  | 231  | 4.00E-20  | 71.3  | 18.2 | 34.3 | hypothetical protein ARALYDRAFT_918447                      | gbpln | Arabidopsis lyrata   | #                                                                                                                                   | #    | #   | #         | #     | #    |      |
| Rsa1.0_01831.1.g30149.t1 | #                                                                                                                                                                                                                                                                                                                                                         | #    | #    | #         | #     | #    | #    | -                                                           | ----  | ----                 | #                                                                                                                                   | #    | #   | #         | #     | #    |      |
| Rsa1.0_01831.1.g30150.t1 | ref[XP_002885142.1] IQ-domain 26 [Arabidopsis lyrata subsp. lyrata] gi 297330982 gb EFH61401.1  IQ-domain 26 [Arabidopsis lyrata subsp. lyrata]                                                                                                                                                                                                           | 394  | 390  | 1.00E-170 | 99.0  | 84.8 | 89.3 | IQ-domain 26                                                | gbpln | Arabidopsis lyrata   | AT3G16490.1   Symbols: IQD26   IQ-domain 26   chr3:5603962-5605489 REVERSE LENGTH=389                                               | 394  | 389 | 1.00E-169 | 98.7  | 84.3 | 87.8 |
| Rsa1.0_01831.1.g30151.t1 | ref[NP_566548.1] mitochondrial processing peptidase [Arabidopsis thaliana] gi 29839443 sp O04308.1 MPPA2_ARAT H RecName: Full=Probable mitochondrial-processing peptidase subunit alpha-2; AltName: Full=Alpha-MPP 2; Flags: Precursor gi 2062155 gb AAB63629.1  mitochondrial processing peptidase alpha subunit precursor isolog [Arabidopsis thaliana] | 491  | 499  | 0         | 101.6 | 83.1 | 90.4 | mitochondrial processing peptidase                          | gbpln | Arabidopsis thaliana | AT3G16480.1   Symbols: MPPalpha   mitochondrial processing peptidase alpha subunit   chr3:5599906-5602716 FORWARD LENGTH=499        | 491  | 499 | 0         | 101.6 | 83.1 | 90.4 |
| Rsa1.0_01831.1.g30152.t1 | gb EOA30607.1  hypothetical protein CARUB_v10013738mg [Capsella rubella]                                                                                                                                                                                                                                                                                  | 289  | 436  | 1.00E-62  | 150.9 | 47.8 | 67.1 | hypothetical protein CARUB_v10013738mg                      | gbpln | Capsella rubella     | AT1G52040.1   Symbols: MBP1, ATMBP   myosinase-binding protein 1   chr1:19350595-19352578 REVERSE LENGTH=462                        | 289  | 462 | 3.00E-47  | 159.9 | 31.8 | 41.5 |
| Rsa1.0_01832.1.g30153.t1 | ref[XP_002871161.1] hydrolase, acting on glycosyl bonds [Arabidopsis lyrata subsp. lyrata] gi 297316998 gb EFH47420.1  hydrolase, acting on glycosyl bonds [Arabidopsis lyrata subsp. lyrata]                                                                                                                                                             | 397  | 678  | 0         | 170.8 | 83.9 | 90.2 | hydrolase, acting on glycosyl bonds                         | gbpln | Arabidopsis lyrata   | AT5G05460.1   Symbols:   Glycosyl hydrolase family 85   chr5:1615615-1618771 FORWARD LENGTH=680                                     | 397  | 680 | 0         | 171.3 | 83.6 | 89.7 |
| Rsa1.0_01832.1.g30154.t1 | #                                                                                                                                                                                                                                                                                                                                                         | #    | #    | #         | #     | #    | #    | -                                                           | ----  | ----                 | #                                                                                                                                   | #    | #   | #         | #     | #    |      |
| Rsa1.0_01832.1.g30155.t1 | gb EOA19506.1  hypothetical protein CARUB_v10002333mg [Capsella rubella]                                                                                                                                                                                                                                                                                  | 60   | 97   | 3.00E-25  | 161.7 | 95.0 | 95.0 | hypothetical protein CARUB_v10002333mg                      | gbpln | Capsella rubella     | AT5G05370.1   Symbols:   Cytochrome b-c1 complex, subunit 8 protein   chr5:1590977-1591869 REVERSE LENGTH=72                        | 60   | 72  | 3.00E-27  | 120.0 | 91.7 | 95.0 |
| Rsa1.0_01832.1.g30156.t1 | gb AAD10854.1  serine/threonine protein phosphatase 2A-3 catalytic subunit [Arabidopsis thaliana]                                                                                                                                                                                                                                                         | 167  | 352  | 1.00E-18  | 210.8 | 28.1 | 32.9 | serine/threonine protein phosphatase 2A-3 catalytic subunit | gbpln | Arabidopsis thaliana | AT2G42500.1   Symbols: PP2A-3   protein phosphatase 2A-3   chr2:17698099-17701226 REVERSE LENGTH=313                                | 167  | 313 | 7.00E-21  | 187.4 | 28.1 | 32.9 |

|                          |                                                                                                                                                                                                                                                                                                                                                                                                                                                                                                                                                                                                                                                                                                                                                     |      |      |           |       |      |      |                                           |       |                      |                                                                                                                                                                                                                                                                                     |      |      |           |       |      |      |
|--------------------------|-----------------------------------------------------------------------------------------------------------------------------------------------------------------------------------------------------------------------------------------------------------------------------------------------------------------------------------------------------------------------------------------------------------------------------------------------------------------------------------------------------------------------------------------------------------------------------------------------------------------------------------------------------------------------------------------------------------------------------------------------------|------|------|-----------|-------|------|------|-------------------------------------------|-------|----------------------|-------------------------------------------------------------------------------------------------------------------------------------------------------------------------------------------------------------------------------------------------------------------------------------|------|------|-----------|-------|------|------|
| Rsa1.0_01832.1.g30157.t1 | dbj BAB10503.1  retroelement pol polyprotein-like [Arabidopsis thaliana]                                                                                                                                                                                                                                                                                                                                                                                                                                                                                                                                                                                                                                                                            | 1489 | 1475 | 0         | 99.1  | 51.8 | 67.1 | retroelement pol polyprotein-like         | gbpln | Arabidopsis thaliana | AT4G23160.1   Symbols: CRK8   cysteine-rich RLK (RECEPTOR-like protein kinase) 8   chr4:12129485-12134086 FORWARD LENGTH=1262                                                                                                                                                       | 1489 | 1262 | 0         | 84.8  | 26.7 | 32.0 |
| Rsa1.0_01832.1.g30158.t1 | emb CCJ34831.1  horseradish peroxidase isoenzyme HRP_1350 [Armoracia rusticana]                                                                                                                                                                                                                                                                                                                                                                                                                                                                                                                                                                                                                                                                     | 324  | 324  | 1.00E-128 | 100.0 | 69.8 | 82.4 | horseradish peroxidase isoenzyme HRP_1350 | gbpln | Armoracia rusticana  | AT5G05340.1   Symbols:   Peroxidase superfamily protein   chr5:1579142-1580819 REVERSE LENGTH=324                                                                                                                                                                                   | 324  | 324  | 1.00E-129 | 100.0 | 71.9 | 83.0 |
| Rsa1.0_01832.1.g30159.t1 | gb EOA20868.1  hypothetical protein CARUB_v10001205mg [Capsella rubella] gi 482556677 gb EOA20869.1  hypothetical protein CARUB_v10001205mg [Capsella rubella]                                                                                                                                                                                                                                                                                                                                                                                                                                                                                                                                                                                      | 375  | 372  | 1.00E-150 | 99.2  | 77.3 | 86.1 | hypothetical protein CARUB_v10001205mg    | gbpln | Capsella rubella     | AT5G05210.1   Symbols:   Surfeit locus protein 6   chr5:1548198-1549534 FORWARD LENGTH=386                                                                                                                                                                                          | 375  | 386  | 1.00E-148 | 102.9 | 77.3 | 86.9 |
| Rsa1.0_01832.1.g30160.t1 | ref NP_568150.1  aarF domain-containing protein kinase [Arabidopsis thaliana] gi 75261770 sp O9ASX5.1 Y5520_ARATH RecName: Full=Uncharacterized aarF domain-containing protein kinase At5g05200, chloroplastic; Flags: Precursor gi 13605575 gb AAK32781.1 AF361613.1 At5g05200/K2A11.7 [Arabidopsis thaliana] gi 14334952 gb AAK59653.1  unknown protein [Arabidopsis thaliana] gi 16648993 gb AAL24348.1  Unknown protein [Arabidopsis thaliana] gi 17104611 gb AAL34194.1  unknown protein [Arabidopsis thaliana] gi 20259938 gb AAM13316.1  unknown protein [Arabidopsis thaliana] gi 22137078 gb AAM91384.1  At5g05200/K2A11.7 [Arabidopsis thaliana] gi 332003457 gb AED90840.1  aarF domain-containing protein kinase [Arabidopsis thaliana] | 240  | 540  | 1.00E-40  | 225.0 | 42.5 | 49.6 | aarF domain-containing protein kinase     | gbpln | Arabidopsis thaliana | AT5G05200.1   Symbols:   Protein kinase superfamily protein   chr5:1544206-1547082 REVERSE LENGTH=540                                                                                                                                                                               | 240  | 540  | 4.00E-43  | 225.0 | 42.5 | 49.6 |
| Rsa1.0_01832.1.g30161.t1 | ref NP_196138.1  uncharacterized protein [Arabidopsis thaliana] gi 75170629 sp O9FHK4.1 Y5519_ARATH RecName: Full=Uncharacterized protein At5g05190 gi 9759260 dbj BAB09695.1  unnamed protein product [Arabidopsis thaliana] gi 20466820 gb AAM20727.1  putative protein [Arabidopsis thaliana] gi 30725434 gb AAP37739.1  At5g05190 [Arabidopsis thaliana] gi 332003456 gb AED90839.1  uncharacterized protein AT5G05190 [Arabidopsis thaliana]                                                                                                                                                                                                                                                                                                   | 657  | 615  | 1.00E-162 | 93.6  | 58.9 | 67.1 | uncharacterized protein                   | gbpln | Arabidopsis thaliana | AT5G05190.1   Symbols:   Protein of unknown function (DUF133)   chr5:1541853-1543875 FORWARD LENGTH=615                                                                                                                                                                             | 657  | 615  | 1.00E-164 | 93.6  | 58.9 | 67.1 |
| Rsa1.0_01833.1.g30162.t1 | ref XP_002868921.1  hypothetical protein ARALYDRAFT_912442 [Arabidopsis lyrata subsp. lyrata] gi 297314757 gb EFH45180.1  hypothetical protein ARALYDRAFT_912442 [Arabidopsis lyrata subsp. lyrata]                                                                                                                                                                                                                                                                                                                                                                                                                                                                                                                                                 | 223  | 233  | 4.00E-83  | 104.5 | 76.7 | 83.9 | hypothetical protein ARALYDRAFT_912442    | gbpln | Arabidopsis lyrata   | AT4G39630.1   Symbols:   unknown protein; Has 30201 Blast hits to 17322 proteins in 700 species: Archae - 12; Bacteria - 1396; Metazoa - 17338; Fungi - 3422; Plants - 5037; Viruses - 0; Other Eukaryotes - 2996 (source: NCBI BLINK).   chr4:18397749-18399263 REVERSE LENGTH=233 | 223  | 233  | 2.00E-82  | 104.5 | 74.4 | 81.6 |
| Rsa1.0_01833.1.g30163.t1 | ref XP_0028689147.1  predicted protein [Arabidopsis lyrata subsp. lyrata] gi 297334988 gb EFH65406.1  predicted protein [Arabidopsis lyrata subsp. lyrata]                                                                                                                                                                                                                                                                                                                                                                                                                                                                                                                                                                                          | 861  | 854  | 0         | 99.2  | 84.1 | 91.4 | predicted protein                         | gbpln | Arabidopsis lyrata   | AT1G77550.1   Symbols:   tubulin-tyrosine ligases;tubulin-tyrosine ligases   chr1:29138490-29142965 REVERSE LENGTH=855                                                                                                                                                              | 861  | 855  | 0         | 99.3  | 83.4 | 90.8 |
| Rsa1.0_01833.1.g30164.t1 | gb EOA17387.1  hypothetical protein CARUB_v10005682mg [Capsella rubella]                                                                                                                                                                                                                                                                                                                                                                                                                                                                                                                                                                                                                                                                            | 134  | 224  | 7.00E-58  | 167.2 | 89.6 | 96.3 | hypothetical protein CARUB_v10005682mg    | gbpln | Capsella rubella     | AT5G37475.1   Symbols:   Translation initiation factor eIF3 subunit   chr5:14866328-14867749 REVERSE LENGTH=225                                                                                                                                                                     | 134  | 225  | 2.00E-60  | 167.9 | 90.3 | 97.8 |
| Rsa1.0_01833.1.g30165.t1 | gb AAD20646.1  putative TNP2-like transposon protein [Arabidopsis thaliana]                                                                                                                                                                                                                                                                                                                                                                                                                                                                                                                                                                                                                                                                         | 217  | 1040 | 5.00E-17  | 479.3 | 23.0 | 28.1 | putative TNP2-like transposon protein     | gbpln | Arabidopsis thaliana | #                                                                                                                                                                                                                                                                                   | #    | #    | #         | #     | #    |      |
| Rsa1.0_01833.1.g30166.t1 | gb AAF18642.1 AC006228.13 F5J5.15 [Arabidopsis thaliana]                                                                                                                                                                                                                                                                                                                                                                                                                                                                                                                                                                                                                                                                                            | 187  | 1617 | 2.00E-43  | 864.7 | 50.3 | 61.5 | F5J5.15                                   | gbpln | Arabidopsis thaliana | #                                                                                                                                                                                                                                                                                   | #    | #    | #         | #     | #    |      |
| Rsa1.0_01833.1.g30167.t2 | #                                                                                                                                                                                                                                                                                                                                                                                                                                                                                                                                                                                                                                                                                                                                                   | #    | #    | #         | #     | #    | -    | ----                                      | ----  | ----                 | #                                                                                                                                                                                                                                                                                   | #    | #    | #         | #     | #    |      |
| Rsa1.0_01833.1.g30168.t1 | gb EOA18583.1  hypothetical protein CARUB_v10007155mg [Capsella rubella]                                                                                                                                                                                                                                                                                                                                                                                                                                                                                                                                                                                                                                                                            | 525  | 609  | 2.00E-66  | 116.0 | 26.9 | 33.7 | hypothetical protein CARUB_v10007155mg    | gbpln | Capsella rubella     | AT5G37460.1   Symbols:   Family of unknown function (DUF577)   chr5:14858494-14860362 REVERSE LENGTH=622                                                                                                                                                                            | 525  | 622  | 3.00E-66  | 118.5 | 26.5 | 35.0 |
| Rsa1.0_01834.1.g30169.t1 | #                                                                                                                                                                                                                                                                                                                                                                                                                                                                                                                                                                                                                                                                                                                                                   | #    | #    | #         | #     | #    | -    | ----                                      | ----  | ----                 | #                                                                                                                                                                                                                                                                                   | #    | #    | #         | #     | #    |      |

|                           |                                                                                                                                                                                                                                                                                                                                                                                                                                                                                                                                                       |      |      |           |       |      |      |                                                                                                          |       |                      |                                                                                                                                                                                                                                                                                                                                                                    |      |     |           |       |      |      |
|---------------------------|-------------------------------------------------------------------------------------------------------------------------------------------------------------------------------------------------------------------------------------------------------------------------------------------------------------------------------------------------------------------------------------------------------------------------------------------------------------------------------------------------------------------------------------------------------|------|------|-----------|-------|------|------|----------------------------------------------------------------------------------------------------------|-------|----------------------|--------------------------------------------------------------------------------------------------------------------------------------------------------------------------------------------------------------------------------------------------------------------------------------------------------------------------------------------------------------------|------|-----|-----------|-------|------|------|
| Rsa1.0_01834.1.g30170.t1  | refNP_564019.1   protein TIFY 11A [Arabidopsis thaliana] gi 75173855 sp Q9LDU5.1 T111A_ARATH RecName: Full=Protein TIFY 11A; AltName: Full=Jasmonate ZIM domain-containing protein 5 gi 8778483 gb AAF7949.1 AC022492_35 F1L3.3 [Arabidopsis thaliana] gi 9665119 gb AAF97303.1 AC007843_6 Hypothetical protein [Arabidopsis thaliana] gi 23306360 gb AAN17407.1   expressed protein [Arabidopsis thaliana] gi 27311875 gb AAO00903.1   expressed protein [Arabidopsis thaliana] gi 332191460 gb AEE29581.1   protein TIFY 11A [Arabidopsis thaliana] | 212  | 274  | 6.00E-50  | 129.2 | 55.2 | 61.8 | protein TIFY 11A                                                                                         | gbpln | Arabidopsis thaliana | AT1G17380.1   Symbols: JAZ5, TIFY11A   jasmonate-zim-domain protein 5   chr1:5955654-5957070 REVERSE LENGTH=274                                                                                                                                                                                                                                                    | 212  | 274 | 2.00E-52  | 129.2 | 55.2 | 61.8 |
| Rsa1.0_01834.1.g30171.t10 | dbj BAB10790.1   retroelement pol polyprotein-like [Arabidopsis thaliana]                                                                                                                                                                                                                                                                                                                                                                                                                                                                             | 1122 | 1864 | 0         | 166.1 | 38.1 | 43.9 | retroelement pol polyprotein-like                                                                        | gbpln | Arabidopsis thaliana | ATMG00750.1   Symbols: ORF119   GAG/POL/ENV polyprotein   chrM:220830-221189 FORWARD LENGTH=119                                                                                                                                                                                                                                                                    | 1122 | 119 | 2.00E-20  | 10.6  | 3.7  | 4.2  |
| Rsa1.0_01834.1.g30172.t1  | refXP_002885617.1   hypothetical protein ARALYDRAFT_898967 [Arabidopsis lyrata subsp. lyrata] gi 297331457 gb EFH61876.1   hypothetical protein ARALYDRAFT_898967 [Arabidopsis lyrata subsp. lyrata]                                                                                                                                                                                                                                                                                                                                                  | 553  | 488  | 4.00E-25  | 88.2  | 20.6 | 35.1 | hypothetical protein ARALYDRAFT_898967                                                                   | gbpln | Arabidopsis lyrata   | #                                                                                                                                                                                                                                                                                                                                                                  | #    | #   | #         | #     | #    | #    |
| Rsa1.0_01834.1.g30173.t1  | refNP_564024.1   protein ELF4-like 4 [Arabidopsis thaliana] gi 238478519 refNP_001154348.1   protein ELF4-like 4 [Arabidopsis thaliana] gi 75218652 sp Q570U6.1 EF4L4_ARATH RecName: Full=Protein ELF4-LIKE 4 gi 62318582 dbj BAD94981.1   hypothetical protein [Arabidopsis thaliana] gi 98961045 gb ABF59006.1   At1g17455 [Arabidopsis thaliana] gi 332191470 gb AEE29591.1   protein ELF4-like 4 [Arabidopsis thaliana] gi 332191471 gb AEE29592.1   protein ELF4-like 4 [Arabidopsis thaliana]                                                   | 128  | 114  | 8.00E-48  | 89.1  | 78.1 | 83.6 | protein ELF4-like 4                                                                                      | gbpln | Arabidopsis thaliana | AT1G17455.2   Symbols: ELF4-L4   ELF4-like 4   chr1:5997932-5998276 FORWARD LENGTH=114                                                                                                                                                                                                                                                                             | 128  | 114 | 2.00E-50  | 89.1  | 78.1 | 83.6 |
| Rsa1.0_01834.1.g30174.t1  | #                                                                                                                                                                                                                                                                                                                                                                                                                                                                                                                                                     | #    | #    | #         | #     | #    | #    | -                                                                                                        | ----  | ----                 | #                                                                                                                                                                                                                                                                                                                                                                  | #    | #   | #         | #     | #    | #    |
| Rsa1.0_01834.1.g30175.t1  | gb AAC3226.1   putative non-LTR retroelement reverse transcriptase [Arabidopsis thaliana]                                                                                                                                                                                                                                                                                                                                                                                                                                                             | 1065 | 1529 | 2.00E-90  | 143.6 | 21.7 | 33.2 | putative non-LTR retroelement reverse transcriptase                                                      | gbpln | Arabidopsis thaliana | AT3G24255.1   Symbols:   RNA-directed DNA polymerase (reverse transcriptase)-related family protein   chr3:8789471-8793208 FORWARD LENGTH=746                                                                                                                                                                                                                      | 1065 | 746 | 1.00E-51  | 70.0  | 11.4 | 17.0 |
| Rsa1.0_01835.1.g30176.t1  | gb ADK63406.1   C2H2 type zinc finger protein [Brassica rapa]                                                                                                                                                                                                                                                                                                                                                                                                                                                                                         | 154  | 157  | 4.00E-78  | 101.9 | 94.8 | 96.8 | C2H2 type zinc finger protein                                                                            | gbpln | Brassica rapa        | AT5G59820.1   Symbols: RHL41, ZAT12   C2H2-type zinc finger family protein   chr5:24103073-24103561 FORWARD LENGTH=162                                                                                                                                                                                                                                             | 154  | 162 | 3.00E-70  | 105.2 | 86.4 | 93.5 |
| Rsa1.0_01835.1.g30177.t1  | #                                                                                                                                                                                                                                                                                                                                                                                                                                                                                                                                                     | #    | #    | #         | #     | #    | #    | -                                                                                                        | ----  | ----                 | #                                                                                                                                                                                                                                                                                                                                                                  | #    | #   | #         | #     | #    | #    |
| Rsa1.0_01835.1.g30178.t1  | gb ADK63406.1   C2H2 type zinc finger protein [Brassica rapa]                                                                                                                                                                                                                                                                                                                                                                                                                                                                                         | 159  | 157  | 2.00E-81  | 98.7  | 95.0 | 96.9 | C2H2 type zinc finger protein                                                                            | gbpln | Brassica rapa        | AT5G59820.1   Symbols: RHL41, ZAT12   C2H2-type zinc finger family protein   chr5:24103073-24103561 FORWARD LENGTH=162                                                                                                                                                                                                                                             | 159  | 162 | 4.00E-74  | 101.9 | 86.8 | 93.7 |
| Rsa1.0_01835.1.g30179.t1  | refNP_200791.2   uncharacterized protein [Arabidopsis thaliana] gi 42573736 refNP_974964.1   uncharacterized protein [Arabidopsis thaliana] gi 332009855 gb AED97238.1   uncharacterized protein AT5G59830 [Arabidopsis thaliana] gi 332009856 gb AED97239.1   uncharacterized protein AT5G59830 [Arabidopsis thaliana]                                                                                                                                                                                                                               | 411  | 425  | 1.00E-160 | 103.4 | 78.6 | 85.2 | uncharacterized protein                                                                                  | gbpln | Arabidopsis thaliana | AT5G59830.2   Symbols:   unknown protein; BEST Arabidopsis thaliana protein match is: unknown protein (TAIR:AT5G13660.2). Has 35333 Blast hits to 34131 proteins in 2444 species: Archae - 798; Bacteria - 22429; Metazoa - 974; Fungi - 991; Plants - 531; Viruses - 0; Other Eukaryotes - 9610 (source: NCBI BLINK).   chr5:24105423-24107071 FORWARD LENGTH=425 | 411  | 425 | 1.00E-163 | 103.4 | 78.6 | 85.2 |
| Rsa1.0_01835.1.g30180.t1  | emb CAA90080.1   small GTP-binding protein [Pisum sativum]                                                                                                                                                                                                                                                                                                                                                                                                                                                                                            | 216  | 216  | 1.00E-112 | 100.0 | 88.9 | 96.3 | small GTP-binding protein                                                                                | gbpln | Pisum sativum        | AT5G59840.1   Symbols:   Ras-related small GTP-binding family protein   chr5:24107450-24109049 REVERSE LENGTH=216                                                                                                                                                                                                                                                  | 216  | 216 | 1.00E-113 | 100.0 | 88.9 | 93.5 |
| Rsa1.0_01835.1.g30181.t1  | sp Q00332.3 RS15A_BRANA RecName: Full=40S ribosomal protein S15a; AltName: Full=PPCB8 gi 17863 emb CAA42599.1   r-protein BnS15a [Brassica napus] gi 119720818 gb ABL97979.1   40S ribosomal protein S15a [Brassica rapa]                                                                                                                                                                                                                                                                                                                             | 130  | 130  | 6.00E-69  | 100.0 | 99.2 | 99.2 | RecName: Full=40S ribosomal protein S15a; AltName: Full=PPCB8 gi 17863 emb CAA42599.1   r-protein BnS15a | gbpln | Brassica napus       | AT5G59850.1   Symbols:   Ribosomal protein S8 family protein   chr5:24112499-24113084 REVERSE LENGTH=130                                                                                                                                                                                                                                                           | 130  | 130 | 3.00E-71  | 100.0 | 98.5 | 99.2 |
| Rsa1.0_01835.1.g30182.t1  | refXP_002864655.1   predicted protein [Arabidopsis lyrata subsp. lyrata] gi 297310490 gb EFH40914.1   predicted protein [Arabidopsis lyrata subsp. lyrata]                                                                                                                                                                                                                                                                                                                                                                                            | 98   | 95   | 2.00E-35  | 96.9  | 74.5 | 83.7 | predicted protein                                                                                        | gbpln | Arabidopsis lyrata   | AT3G46020.1   Symbols:   RNA-binding (RRM/RBD/RNP motifs) family protein   chr3:16912511-16913250 REVERSE LENGTH=102                                                                                                                                                                                                                                               | 98   | 102 | 4.00E-36  | 104.1 | 71.4 | 84.7 |

|                          |                                                                                                                                                                                                                                                                                                                                                                                                                                                                                                                                                                                                                   |     |     |           |       |      |      |                                                           |       |                      |                                                                                                                                                                                                                                                                                   |     |     |           |       |      |      |
|--------------------------|-------------------------------------------------------------------------------------------------------------------------------------------------------------------------------------------------------------------------------------------------------------------------------------------------------------------------------------------------------------------------------------------------------------------------------------------------------------------------------------------------------------------------------------------------------------------------------------------------------------------|-----|-----|-----------|-------|------|------|-----------------------------------------------------------|-------|----------------------|-----------------------------------------------------------------------------------------------------------------------------------------------------------------------------------------------------------------------------------------------------------------------------------|-----|-----|-----------|-------|------|------|
| Rsa1.0_01835.1.g30183.t1 | refXP_002866356.1  hypothetical protein ARALYDRAFT_358205 [Arabidopsis lyrata subsp. lyrata] gi 297312191 gb EFH42615.1                                                                                                                                                                                                                                                                                                                                                                                                                                                                                           | 149 | 149 | 8.00E-73  | 100.0 | 94.0 | 96.6 | hypothetical protein ARALYDRAFT_358205                    | gbpln | Arabidopsis lyrata   | AT5G59870.1   Symbols: HTA6   histone H2A6   chr5:24115605-24116144 REVERSE LENGTH=150                                                                                                                                                                                            | 149 | 150 | 1.00E-72  | 100.7 | 92.6 | 95.3 |
| Rsa1.0_01836.1.g30184.t1 | hypothetical protein ARALYDRAFT_358205 [Arabidopsis lyrata subsp. lyrata] refNP_196909.1  U3 small nucleolar RNA-associated protein 18-like protein [Arabidopsis thaliana] gi 17366762 sp Q9FMU5.1 UTP18_ARAT H RecName: Full=U3 small nucleolar RNA-associated protein 18 homolog gi 9757786 dbj BAB08284.1  unnamed protein product [Arabidopsis thaliana] gi 18700147 gb AAL77685.1  AT5g14050/MUA22.5 [Arabidopsis thaliana] gi 22137238 gb AAM91464.1  AT5g14050/MUA22.5 [Arabidopsis thaliana] gi 332004598 gb AED91981.1  U3 small nucleolar RNA-associated protein 18-like protein [Arabidopsis thaliana] | 152 | 546 | 1.00E-54  | 359.2 | 64.5 | 73.0 | U3 small nucleolar RNA-associated protein 18-like protein | gbpln | Arabidopsis thaliana | AT5G14050.1   Symbols:   Transducin/WD40 repeat-like superfamily protein   chr5:4533539-4535179 FORWARD LENGTH=546                                                                                                                                                                | 152 | 546 | 5.00E-57  | 359.2 | 64.5 | 73.0 |
| Rsa1.0_01836.1.g30185.t1 | refXP_002873645.1  mitochondrial phosphate transporter [Arabidopsis lyrata subsp. lyrata] gi 297319482 gb EFH49904.1  mitochondrial phosphate transporter [Arabidopsis lyrata subsp. lyrata]                                                                                                                                                                                                                                                                                                                                                                                                                      | 369 | 374 | 0         | 101.4 | 93.5 | 96.5 | mitochondrial phosphate transporter                       | gbpln | Arabidopsis lyrata   | AT5G14040.1   Symbols: PHT3;1   phosphate transporter 3;1   chr5:4531059-4532965 REVERSE LENGTH=375                                                                                                                                                                               | 369 | 375 | 0         | 101.6 | 91.1 | 95.4 |
| Rsa1.0_01836.1.g30186.t1 | refXP_002871597.1  translocon-associated protein beta family protein [Arabidopsis lyrata subsp. lyrata] gi 297317434 gb EFH47856.1  translocon-associated protein beta family protein [Arabidopsis lyrata subsp. lyrata]                                                                                                                                                                                                                                                                                                                                                                                          | 196 | 195 | 3.00E-86  | 99.5  | 81.1 | 89.8 | translocon-associated protein beta family protein         | gbpln | Arabidopsis lyrata   | AT5G14030.4   Symbols:   translocon-associated protein beta (TRAPB) family protein   chr5:4526878-4528253 FORWARD LENGTH=195                                                                                                                                                      | 196 | 195 | 7.00E-87  | 99.5  | 79.6 | 88.8 |
| Rsa1.0_01836.1.g30187.t1 | gb EOA22045.1  hypothetical protein CARUB_v10002570mg [Capsella rubella]                                                                                                                                                                                                                                                                                                                                                                                                                                                                                                                                          | 177 | 161 | 1.00E-43  | 91.0  | 59.9 | 71.2 | hypothetical protein CARUB_v10002570mg                    | gbpln | Capsella rubella     | AT5G14010.1   Symbols: KNU   C2H2 and C2HC zinc fingers superfamily protein   chr5:4522260-4522745 FORWARD LENGTH=161                                                                                                                                                             | 177 | 161 | 5.00E-35  | 91.0  | 55.9 | 68.4 |
| Rsa1.0_01836.1.g30188.t1 | refNP_196903.1  exocyst complex component 7 [Arabidopsis thaliana] gi 10177665 dbj BAB11127.1  leucine zipper protein-like [Arabidopsis thaliana] gi 28392955 gb AAO41913.1  putative leucine zipper protein [Arabidopsis thaliana] gi 29824345 gb AAP04133.1  putative leucine zipper protein [Arabidopsis thaliana] gi 332004588 gb AED91971.1  exocyst subunit exo70 family protein C2 [Arabidopsis thaliana]                                                                                                                                                                                                  | 707 | 695 | 0         | 98.3  | 82.7 | 88.5 | exocyst complex component 7                               | gbpln | Arabidopsis thaliana | AT5G13990.1   Symbols: ATEXO70C2, EXO70C2   exocyst subunit exo70 family protein C2   chr5:4514680-4516767 REVERSE LENGTH=695                                                                                                                                                     | 707 | 695 | 0         | 98.3  | 82.7 | 88.5 |
| Rsa1.0_01836.1.g30189.t1 | refNP_196898.5  aminopeptidase [Arabidopsis thaliana] gi 332004579 gb AED91962.1  aminopeptidase [Arabidopsis thaliana]                                                                                                                                                                                                                                                                                                                                                                                                                                                                                           | 575 | 809 | 0         | 140.7 | 76.0 | 79.8 | aminopeptidase                                            | gbpln | Arabidopsis thaliana | AT5G13940.1   Symbols:   aminopeptidases   chr5:4490263-4495585 REVERSE LENGTH=809                                                                                                                                                                                                | 575 | 809 | 0         | 140.7 | 76.0 | 79.8 |
| Rsa1.0_01836.1.g30190.t1 | gb AAC31914.1  chalcone synthase B2 [Brassica napus]                                                                                                                                                                                                                                                                                                                                                                                                                                                                                                                                                              | 396 | 396 | 0         | 100.0 | 98.7 | 99.7 | chalcone synthase B2                                      | gbpln | Brassica napus       | AT5G13930.1   Symbols: CHS, TT4, ATCHS   Chalcone and stilbene synthase family protein   chr5:4488762-4490035 FORWARD LENGTH=395                                                                                                                                                  | 396 | 395 | 0         | 99.7  | 96.0 | 97.2 |
| Rsa1.0_01836.1.g30191.t1 | refXP_002873631.1  hypothetical protein ARALYDRAFT_488210 [Arabidopsis lyrata subsp. lyrata] gi 297319488 gb EFH49890.1  hypothetical protein ARALYDRAFT_488210 [Arabidopsis lyrata subsp. lyrata]                                                                                                                                                                                                                                                                                                                                                                                                                | 754 | 368 | 1.00E-156 | 48.8  | 39.0 | 43.2 | hypothetical protein ARALYDRAFT_488210                    | gbpln | Arabidopsis lyrata   | AT5G13860.1   Symbols: ELC-Like   ELCH-like   chr5:4473212-4474318 REVERSE LENGTH=368                                                                                                                                                                                             | 754 | 368 | 1.00E-156 | 48.8  | 38.5 | 43.5 |
| Rsa1.0_01836.1.g30192.t1 | refXP_002873629.1  predicted protein [Arabidopsis lyrata subsp. lyrata] gi 297319486 gb EFH49888.1  predicted protein [Arabidopsis lyrata subsp. lyrata]                                                                                                                                                                                                                                                                                                                                                                                                                                                          | 130 | 124 | 1.00E-23  | 95.4  | 45.4 | 59.2 | predicted protein                                         | gbpln | Arabidopsis lyrata   | AT5G13825.1   Symbols:   unknown protein; Has 30201 Blast hits to 17322 proteins in 780 species: Archae - 12; Bacteria - 1396; Metazoa - 17338; Fungi - 3422; Plants - 5037; Viruses - 0; Other Eukaryotes - 2996 (source: NCBI BLINK).   chr5:4465099-4465969 REVERSE LENGTH=124 | 130 | 124 | 1.00E-25  | 95.4  | 43.1 | 57.7 |

|                          |                                                                                                                                                                                                                                                                                                                                                                                                                                                                                                                                                                                                                                                                                                                                                                                                                                                                                                                                                                                                                                                                                                                                                                                                                                                                               |     |     |           |       |      |      |                                                 |       |                      |                                                                                                                                         |     |     |           |       |      |      |
|--------------------------|-------------------------------------------------------------------------------------------------------------------------------------------------------------------------------------------------------------------------------------------------------------------------------------------------------------------------------------------------------------------------------------------------------------------------------------------------------------------------------------------------------------------------------------------------------------------------------------------------------------------------------------------------------------------------------------------------------------------------------------------------------------------------------------------------------------------------------------------------------------------------------------------------------------------------------------------------------------------------------------------------------------------------------------------------------------------------------------------------------------------------------------------------------------------------------------------------------------------------------------------------------------------------------|-----|-----|-----------|-------|------|------|-------------------------------------------------|-------|----------------------|-----------------------------------------------------------------------------------------------------------------------------------------|-----|-----|-----------|-------|------|------|
| Rsa1.0_01836.1.g30193.t1 | ref NP_196886.1  Telomere repeat-binding protein 4 [Arabidopsis thaliana] gi 7533778 sp Q9FFY9.1 TRP4_ARATH RecName: Full=Telomere repeat-binding protein 4; AltName: Full=H-protein promoter binding factor-1; Short=AtTBP1; AltName: Full=Telomeric DNA-binding protein 1 gi 10177648 dbj BAB11110.1  H-protein promoter binding factor-1 [Arabidopsis thaliana] gi 13641340 gb AAK31590.1  telomeric DNA-binding protein 1 [Arabidopsis thaliana] gi 209529761 g ACI49775.1  At5g13820 [Arabidopsis thaliana] gi 332004562 g AED91945.1  Telomere repeat-binding protein 4 [Arabidopsis thaliana] ref NP_563841.1  uncharacterized protein [Arabidopsis thaliana] gi 13194796 gb AAK15560.1 AF348589_1 unknown protein [Arabidopsis thaliana] gi 4337175 g AAD18096.1  ESTs gi T20589. gb T04648. gb AA597906. gb T04111. gb R84180. gb R65428. gb T44439. gb T76570. gb R90004. gb T45020. gb T42457. gb T20921. gb AA042762 and gb AA720210 come from this gene [Arabidopsis thaliana] gi 15028183 gb AAK76588.1  unknown protein [Arabidopsis thaliana] gi 19310813 gb AAL85137.1  unknown protein [Arabidopsis thaliana] gi 21536763 gb AAM61095.1  unknown [Arabidopsis thaliana] gi 332190307 g AEE28428.1  uncharacterized protein AT1G09310 [Arabidopsis thaliana] | 549 | 640 | 0         | 116.6 | 74.9 | 92.3 | Telomere repeat-binding protein 4               | gbpln | Arabidopsis thaliana | AT5G13820.1   Symbols: TBP1, ATBP-1, ATBP1, ATTBP1, HPPBF-1   telomeric DNA binding protein 1   chr5:4461694-4464355 FORWARD LENGTH=640 | 549 | 640 | 0         | 116.6 | 74.9 | 82.3 |
| Rsa1.0_01837.1.g30194.t1 | gi 15028183 gb AAK76588.1  unknown protein [Arabidopsis thaliana] gi 19310813 gb AAL85137.1  unknown protein [Arabidopsis thaliana] gi 21536763 gb AAM61095.1  unknown [Arabidopsis thaliana] gi 332190307 g AEE28428.1  uncharacterized protein AT1G09310 [Arabidopsis thaliana]                                                                                                                                                                                                                                                                                                                                                                                                                                                                                                                                                                                                                                                                                                                                                                                                                                                                                                                                                                                             | 168 | 179 | 2.00E-70  | 106.5 | 85.1 | 92.3 | uncharacterized protein                         | gbpln | Arabidopsis thaliana | AT1G09310.1   Symbols:   Protein of unknown function, DUF538   chr1:3009109-3009648 FORWARD LENGTH=179                                  | 168 | 179 | 1.00E-72  | 106.5 | 85.1 | 92.3 |
| Rsa1.0_01837.1.g30195.t1 | #                                                                                                                                                                                                                                                                                                                                                                                                                                                                                                                                                                                                                                                                                                                                                                                                                                                                                                                                                                                                                                                                                                                                                                                                                                                                             | #   | #   | #         | #     | #    | -    | ----                                            | ----  | #                    | #                                                                                                                                       | #   | #   | #         | #     | #    |      |
| Rsa1.0_01837.1.g30196.t1 | #                                                                                                                                                                                                                                                                                                                                                                                                                                                                                                                                                                                                                                                                                                                                                                                                                                                                                                                                                                                                                                                                                                                                                                                                                                                                             | #   | #   | #         | #     | #    | -    | ----                                            | ----  | #                    | #                                                                                                                                       | #   | #   | #         | #     | #    |      |
| Rsa1.0_01837.1.g30197.t2 | gb EOA39650.1  hypothetical protein CARUB_v10008289mg [Capsella rubella]                                                                                                                                                                                                                                                                                                                                                                                                                                                                                                                                                                                                                                                                                                                                                                                                                                                                                                                                                                                                                                                                                                                                                                                                      | 849 | 854 | 0         | 100.6 | 84.1 | 90.6 | hypothetical protein CARUB_v10008289mg          | gbpln | Capsella rubella     | AT1G09090.2   Symbols: ATRBOHB, RBOHB   respiratory burst oxidase homolog B   chr1:2932743-2936495 FORWARD LENGTH=843                   | 849 | 843 | 0         | 99.3  | 83.0 | 90.2 |
| Rsa1.0_01837.1.g30198.t1 | gb EOA39851.1  hypothetical protein CARUB_v10008520mg [Capsella rubella]                                                                                                                                                                                                                                                                                                                                                                                                                                                                                                                                                                                                                                                                                                                                                                                                                                                                                                                                                                                                                                                                                                                                                                                                      | 647 | 665 | 0         | 102.8 | 91.3 | 95.8 | hypothetical protein CARUB_v10008520mg          | gbpln | Capsella rubella     | AT1G09080.2   Symbols: BIP3   Heat shock protein 70 (Hsp 70) family protein   chr1:2929268-2931804 REVERSE LENGTH=665                   | 647 | 665 | 0         | 102.8 | 90.6 | 95.5 |
| Rsa1.0_01837.1.g30199.t1 | emb CAA07573.1  src2-like protein [Arabidopsis thaliana]                                                                                                                                                                                                                                                                                                                                                                                                                                                                                                                                                                                                                                                                                                                                                                                                                                                                                                                                                                                                                                                                                                                                                                                                                      | 322 | 324 | 1.00E-118 | 100.6 | 74.2 | 76.7 | src2-like protein                               | gbpln | Arabidopsis thaliana | AT1G09070.1   Symbols: SRC2, (AT)SRC2   soybean gene regulated by cold-2   chr1:2927767-2928741 FORWARD LENGTH=324                      | 322 | 324 | 1.00E-120 | 100.6 | 73.9 | 76.4 |
| Rsa1.0_01837.1.g30200.t1 | ref NP_563834.1  sucrose nonfermenting 4-like protein [Arabidopsis thaliana] gi 75249553 sp Q944A6.1 SNF4_ARATH RecName: Full=Sucrose nonfermenting 4-like protein; Short=SNF4; AltName: Full=CBS domain-containing protein CBSCBS3; AltName: Full=SNF1-related protein kinase regulatory subunit betagamma; Short=AKIN subunit betagamma; Short=AKINbetagamma gi 16612255 g AAL27498.1 AF439826_1 At1g09020/F7G19.11 [Arabidopsis thaliana] gi 23308443 g AAN18191.1  At1g09020/F7G19.11 [Arabidopsis thaliana] gi 75037070 g ABA12450.1  AKINbetagamma [Arabidopsis thaliana] gi 332190262 g AEE28383.1  sucrose nonfermenting 4-like protein [Arabidopsis thaliana]                                                                                                                                                                                                                                                                                                                                                                                                                                                                                                                                                                                                        | 485 | 487 | 0         | 100.4 | 93.0 | 96.9 | sucrose nonfermenting 4-like protein            | gbpln | Arabidopsis thaliana | AT1G09020.1   Symbols: SNF4, ATSNF4   homolog of yeast sucrose nonfermenting 4   chr1:2900149-2904212 REVERSE LENGTH=487                | 485 | 487 | 0         | 100.4 | 93.0 | 96.9 |
| Rsa1.0_01838.1.g30201.t1 | gb EOA23607.1  hypothetical protein CARUB_v10016807mg, partial [Capsella rubella]                                                                                                                                                                                                                                                                                                                                                                                                                                                                                                                                                                                                                                                                                                                                                                                                                                                                                                                                                                                                                                                                                                                                                                                             | 99  | 654 | 9.00E-23  | 660.6 | 66.7 | 77.8 | hypothetical protein CARUB_v10016807mg, partial | gbpln | Capsella rubella     | AT3G28450.1   Symbols:   Leucine-rich repeat protein kinase family protein   chr3:10667359-10669176 FORWARD LENGTH=605                  | 99  | 605 | 3.00E-25  | 611.1 | 67.7 | 75.8 |



|                          |                                                                                                                                                                                                                                                                                                                                                                                                                                                                                                                                                                                                                                                                        |     |     |           |       |      |      |                                                                                                            |       |                      |                                                                                                                                                                                                                                                                                                                                                                                                                                                                  |     |     |           |       |      |      |
|--------------------------|------------------------------------------------------------------------------------------------------------------------------------------------------------------------------------------------------------------------------------------------------------------------------------------------------------------------------------------------------------------------------------------------------------------------------------------------------------------------------------------------------------------------------------------------------------------------------------------------------------------------------------------------------------------------|-----|-----|-----------|-------|------|------|------------------------------------------------------------------------------------------------------------|-------|----------------------|------------------------------------------------------------------------------------------------------------------------------------------------------------------------------------------------------------------------------------------------------------------------------------------------------------------------------------------------------------------------------------------------------------------------------------------------------------------|-----|-----|-----------|-------|------|------|
| Rsa1.0_01838.1.g30202.t1 | refNP_565191.1  curculin-like (mannose-binding) lectin-like protein [Arabidopsis thaliana] gi 16226591 gb AAL16208.1 AF428439.1 At1g78830/F9K20.12 [Arabidopsis thaliana] gi 3834312 gb AAC83028.1 Strong similarity to glycoprotein EP1 gb L16983 Daucus carota and a member of S locus glycoprotein family PF00954. ESTs gb AA067487, gb Z35737, gb Z30815, gb Z35350, gb AA713171, gb AI100553, gb Z34248, gb AA728536, gb Z30816 and gb Z35351 come from this gene [Arabidopsis thaliana] gi 23297392 gb AANI2959.1  unknown protein [Arabidopsis thaliana] gi 332198039 gb AEE36160.1  curculin-like (mannose-binding) lectin-like protein [Arabidopsis thaliana] | 458 | 455 | 0         | 99.3  | 90.4 | 93.2 | curculin-like (mannose-binding) lectin-like protein                                                        | gbpln | Arabidopsis thaliana | AT1G78830.1   Symbols:   Curculin-like (mannose-binding) lectin family protein   chr1:29637141-29638508 REVERSE LENGTH=455                                                                                                                                                                                                                                                                                                                                       | 458 | 455 | 0         | 99.3  | 90.4 | 93.2 |
| Rsa1.0_01838.1.g30203.t1 | gb AAM64330.1  unknown [Arabidopsis thaliana]                                                                                                                                                                                                                                                                                                                                                                                                                                                                                                                                                                                                                          | 191 | 195 | 2.00E-80  | 102.1 | 92.1 | 94.8 | unknown                                                                                                    | gbpln | Arabidopsis thaliana | AT1G78815.1   Symbols: LSH7   Protein of unknown function (DUF640)   chr1:29632054-29632641 REVERSE LENGTH=195                                                                                                                                                                                                                                                                                                                                                   | 191 | 195 | 3.00E-80  | 102.1 | 92.1 | 94.8 |
| Rsa1.0_01838.1.g30204.t4 | gb EOA35937.1  hypothetical protein CARUB_v10021194mg [Capsella rubella] gi 482571750 gb EOA35938.1  hypothetical protein CARUB_v10021194mg [Capsella rubella]                                                                                                                                                                                                                                                                                                                                                                                                                                                                                                         | 104 | 104 | 1.00E-49  | 100.0 | 94.2 | 99.0 | hypothetical protein CARUB_v10021194mg                                                                     | gbpln | Capsella rubella     | AT1G78790.1   Symbols:   unknown protein; CONTAINS InterPro DOMAIN/s: Protein of unknown function DUF2008 (InterPro:IPRO18552); Has 69 Blast hits to 69 proteins in 28 species: Archae - 0; Bacteria - 0; Metazoa - 33; Fungi - 0; Plants - 33; Viruses - 0; Other Eukaryotes - 3 (source: NCBI BLINK).   chr1:29623930-29624785 REVERSE LENGTH=104                                                                                                              | 104 | 104 | 4.00E-52  | 100.0 | 93.3 | 99.0 |
| Rsa1.0_01838.1.g30205.t1 | gb AAC83032.1  Similar to gb X16648 pathogenesis related protein from Hordeum vulgare. EST gb Z18206 comes from this gene [Arabidopsis thaliana]                                                                                                                                                                                                                                                                                                                                                                                                                                                                                                                       | 308 | 276 | 1.00E-142 | 89.6  | 83.4 | 85.7 | Similar to gb X16648 pathogenesis related protein from Hordeum vulgare. EST gb Z18206 comes from this gene | gbpln | Arabidopsis thaliana | AT1G78780.2   Symbols:   pathogenesis-related family protein   chr1:29621447-29622431 REVERSE LENGTH=238                                                                                                                                                                                                                                                                                                                                                         | 308 | 238 | 1.00E-130 | 77.3  | 72.4 | 73.7 |
| Rsa1.0_01838.1.g30206.t1 | gb EOA33338.1  hypothetical protein CARUB_v10020104mg [Capsella rubella]                                                                                                                                                                                                                                                                                                                                                                                                                                                                                                                                                                                               | 544 | 543 | 0         | 99.8  | 92.8 | 96.5 | hypothetical protein CARUB_v10020104mg                                                                     | gbpln | Capsella rubella     | AT1G78770.1   Symbols: APC6   anaphase promoting complex 6   chr1:29617421-29621273 FORWARD LENGTH=543                                                                                                                                                                                                                                                                                                                                                           | 544 | 543 | 0         | 99.8  | 94.3 | 96.3 |
| Rsa1.0_01838.1.g30207.t2 | refNP_177996.1  F-box/FBD/LRR-repeat protein [Arabidopsis thaliana] gi 75268062 sp Q9ZV93.1 FDL10_ARATH RecName: Full=F-box/FBD/LRR-repeat protein At1g78750 gi 3834319 gb AAC83035.1  Similar to gi 2244754 heat shock transcription factor HSF30 homolog from Arabidopsis thaliana chromosome 4 contig gb Z97335 [Arabidopsis thaliana] gi 332198025 gb AEE36146.1  F-box/FBD/LRR-repeat protein [Arabidopsis thaliana]                                                                                                                                                                                                                                              | 456 | 458 | 1.00E-156 | 100.4 | 65.1 | 78.9 | F-box/FBD/LRR-repeat protein                                                                               | gbpln | Arabidopsis thaliana | AT1G78750.1   Symbols:   F-box/RNI-like superfamily protein   chr1:29613122-29614695 REVERSE LENGTH=458                                                                                                                                                                                                                                                                                                                                                          | 456 | 458 | 1.00E-159 | 100.4 | 65.1 | 78.9 |
| Rsa1.0_01839.1.g30208.t1 | gb EOA34854.1  hypothetical protein CARUB_v10022435mg [Capsella rubella]                                                                                                                                                                                                                                                                                                                                                                                                                                                                                                                                                                                               | 173 | 173 | 6.00E-39  | 100.0 | 67.1 | 76.9 | hypothetical protein CARUB_v10022435mg                                                                     | gbpln | Capsella rubella     | AT1G71430.1   Symbols:   unknown protein; FUNCTIONS IN: molecular_function unknown; INVOLVED IN: biological_process unknown; LOCATED IN: cellular_component unknown; EXPRESSED DURING: 13 growth stages; EXPRESSED DURING: 13 growth stages; Has 64 Blast hits to 64 proteins in 28 species: Archae - 0; Bacteria - 0; Metazoa - 14; Fungi - 6; Plants - 42; Viruses - 0; Other Eukaryotes - 2 (source: NCBI BLINK).   chr1:26920564-26921058 FORWARD LENGTH=164 | 173 | 164 | 9.00E-35  | 94.8  | 48.6 | 54.3 |
| Rsa1.0_01839.1.g30209.t1 | refXP_002888935.1  kinase family protein [Arabidopsis lyrata subsp. lyrata] gi 297334676 gb EFH65094.1  kinase family protein [Arabidopsis lyrata subsp. lyrata]                                                                                                                                                                                                                                                                                                                                                                                                                                                                                                       | 892 | 899 | 0         | 100.8 | 88.7 | 94.3 | kinase family protein                                                                                      | gbpln | Arabidopsis lyrata   | AT1G71410.1   Symbols:   ARM repeat superfamily protein   chr1:26913070-26917515 REVERSE LENGTH=909                                                                                                                                                                                                                                                                                                                                                              | 892 | 909 | 0         | 101.9 | 88.3 | 93.9 |
| Rsa1.0_01839.1.g30210.t1 | refXP_002887372.1  hypothetical protein ARALYDRAFT_476271 [Arabidopsis lyrata subsp. lyrata] gi 297333213 gb EFH63631.1  hypothetical protein ARALYDRAFT_476271 [Arabidopsis lyrata subsp. lyrata]                                                                                                                                                                                                                                                                                                                                                                                                                                                                     | 784 | 832 | 0         | 106.1 | 66.8 | 78.7 | hypothetical protein ARALYDRAFT_476271                                                                     | gbpln | Arabidopsis lyrata   | AT1G71400.1   Symbols: AtRLP12, RLP12   receptor like protein 12   chr1:26909905-26912448 FORWARD LENGTH=847                                                                                                                                                                                                                                                                                                                                                     | 784 | 847 | 0         | 108.0 | 64.4 | 77.3 |

|                          |                                                                                                                                                                                                                                                                                                                                                                                                                                                             |      |      |           |       |      |      |                                                     |       |                      |                                                                                                                                                          |      |      |           |       |      |      |
|--------------------------|-------------------------------------------------------------------------------------------------------------------------------------------------------------------------------------------------------------------------------------------------------------------------------------------------------------------------------------------------------------------------------------------------------------------------------------------------------------|------|------|-----------|-------|------|------|-----------------------------------------------------|-------|----------------------|----------------------------------------------------------------------------------------------------------------------------------------------------------|------|------|-----------|-------|------|------|
| Rsa1.0_01839.1.g30211.t1 | refXP_002887371.1  hypothetical protein ARALYDRAFT_476270 [Arabidopsis lyrata subsp. lyrata] gi 297333212 gb EFH63630.1                                                                                                                                                                                                                                                                                                                                     | 391  | 768  | 1.00E-67  | 196.4 | 39.4 | 47.1 | hypothetical protein ARALYDRAFT_476270              | gbpln | Arabidopsis lyrata   | AT1G71390.1   Symbols: AtRLP11, RLP11   receptor like protein 11   chr1:26906453-26908807 FORWARD LENGTH=784                                             | 391  | 784  | 6.00E-70  | 200.5 | 39.6 | 46.8 |
| Rsa1.0_01839.1.g30212.t1 | hypothetical protein ARALYDRAFT_476270 [Arabidopsis lyrata subsp. lyrata] refXP_002887371.1  hypothetical protein ARALYDRAFT_476270 [Arabidopsis lyrata subsp. lyrata] gi 297333212 gb EFH63630.1                                                                                                                                                                                                                                                           | 107  | 768  | 1.00E-11  | 717.8 | 28.0 | 35.5 | hypothetical protein ARALYDRAFT_476270              | gbpln | Arabidopsis lyrata   | AT1G71390.1   Symbols: AtRLP11, RLP11   receptor like protein 11   chr1:26906453-26908807 FORWARD LENGTH=784                                             | 107  | 784  | 1.00E-13  | 732.7 | 28.0 | 38.3 |
| Rsa1.0_01839.1.g30213.t1 | emb CAB39638.1  RNA-directed DNA polymerase-like protein [Arabidopsis thaliana] gi 7267666 emb CAB78094.1  RNA-directed DNA polymerase-like protein [Arabidopsis thaliana]                                                                                                                                                                                                                                                                                  | 2006 | 1274 | 0         | 63.5  | 30.4 | 42.5 | RNA-directed DNA polymerase-like protein            | gbpln | Arabidopsis thaliana | AT4G29090.1   Symbols:   Ribonuclease H-like superfamily protein   chr4:14333528-14335255 FORWARD LENGTH=575                                             | 2006 | 575  | 8.00E-68  | 28.7  | 8.6  | 13.3 |
| Rsa1.0_01839.1.g30214.t1 | gb EOA17786.1  hypothetical protein CARUB_v10006179mg [Capsella rubella]                                                                                                                                                                                                                                                                                                                                                                                    | 113  | 68   | 7.00E-16  | 60.2  | 38.1 | 38.9 | hypothetical protein CARUB_v10006179mg              | gbpln | Capsella rubella     | AT4G21105.1   Symbols:   cytochrome-c oxidases,electron carriers   chr4:11266273-11266724 FORWARD LENGTH=68                                              | 113  | 68   | 3.00E-18  | 60.2  | 36.3 | 38.9 |
| Rsa1.0_01839.1.g30215.t1 | ref NP_177294.1  endoglucanase 9 [Arabidopsis thaliana] gi 75169715 sp Q9C9H5.1 GUN9_ARATH RecName: Full=Endoglucanase 9; AltName: Full=Cellulase 3; Short=ACEL3; AltName: Full=Endo-1,4-beta glucanase 9; Flags: Precursor gi 12323721 gb AAG51817.1 AC016163.6 putative beta-glucanase; 74324-76084 [Arabidopsis thaliana] gi 11074386 gb ABH04566.1  At1g71380 [Arabidopsis thaliana] gi 332197074 gb AEE35195.1  endoglucanase 9 [Arabidopsis thaliana] | 283  | 484  | 1.00E-136 | 171.0 | 85.2 | 92.9 | endoglucanase 9                                     | gbpln | Arabidopsis thaliana | AT1G71380.1   Symbols: ATGH9B3, ATCEL3, CEL3   cellulase 3   chr1:26899989-26901749 REVERSE LENGTH=484                                                   | 283  | 484  | 1.00E-138 | 171.0 | 85.2 | 92.9 |
| Rsa1.0_01840.1.g30216.t1 | #                                                                                                                                                                                                                                                                                                                                                                                                                                                           | #    | #    | #         | #     | #    | #    | -                                                   | ----  | ----                 | #                                                                                                                                                        | #    | #    | #         | #     | #    | #    |
| Rsa1.0_01840.1.g30217.t1 | gb EOA16647.1  hypothetical protein CARUB_v10004821mg [Capsella rubella] gi 482552455 gb EOA16648.1  hypothetical protein CARUB_v10004821mg [Capsella rubella]                                                                                                                                                                                                                                                                                              | 82   | 442  | 4.00E-28  | 539.0 | 76.8 | 82.9 | hypothetical protein CARUB_v10004821mg              | gbpln | Capsella rubella     | AT4G16670.1   Symbols:   Plant protein of unknown function (DUF828) with plant pleckstrin homology-like region   chr4:9385326-9387570 FORWARD LENGTH=429 | 82   | 429  | 8.00E-30  | 523.2 | 76.8 | 84.1 |
| Rsa1.0_01840.1.g30218.t1 | gb AAM67032.1  histone H2A-like protein [Arabidopsis thaliana]                                                                                                                                                                                                                                                                                                                                                                                              | 70   | 131  | 5.00E-19  | 187.1 | 68.6 | 71.4 | histone H2A-like protein                            | gbpln | Arabidopsis thaliana | AT4G27230.2   Symbols: HTA2   histone H2A 2   chr4:13637515-13638325 REVERSE LENGTH=131                                                                  | 70   | 131  | 1.00E-21  | 187.1 | 68.6 | 71.4 |
| Rsa1.0_01840.1.g30219.t1 | gb AAC33226.1  putative non-LTR retroelement reverse transcriptase [Arabidopsis thaliana]                                                                                                                                                                                                                                                                                                                                                                   | 334  | 1529 | 7.00E-33  | 457.8 | 22.8 | 33.2 | putative non-LTR retroelement reverse transcriptase | gbpln | Arabidopsis thaliana | #                                                                                                                                                        | #    | #    | #         | #     | #    | #    |
| Rsa1.0_01840.1.g30220.t1 | gb EOA38468.1  hypothetical protein CARUB_v10010189mg [Capsella rubella]                                                                                                                                                                                                                                                                                                                                                                                    | 175  | 232  | 1.00E-93  | 132.6 | 93.1 | 97.7 | hypothetical protein CARUB_v10010189mg              | gbpln | Capsella rubella     | AT1G30110.2   Symbols: NUDX25   nudix hydrolase homolog 25   chr1:10582700-10583821 FORWARD LENGTH=175                                                   | 175  | 175  | 2.00E-94  | 100.0 | 93.1 | 97.7 |
| Rsa1.0_01840.1.g30221.t1 | refXP_002865966.1  hypothetical protein ARALYDRAFT_357572 [Arabidopsis lyrata subsp. lyrata] gi 297311801 gb EFH42225.1  hypothetical protein ARALYDRAFT_357572 [Arabidopsis lyrata subsp. lyrata]                                                                                                                                                                                                                                                          | 422  | 455  | 1.00E-130 | 107.8 | 64.5 | 75.1 | hypothetical protein ARALYDRAFT_357572              | gbpln | Arabidopsis lyrata   | AT1G30790.1   Symbols:   F-box and associated interaction domains-containing protein   chr1:10932713-10933912 FORWARD LENGTH=399                         | 422  | 399  | 1.00E-100 | 94.5  | 49.1 | 62.3 |
| Rsa1.0_01840.1.g30222.t1 | refXP_002269426.2  PREDICTED: prefoldin subunit 6-like [Vitis vinifera]                                                                                                                                                                                                                                                                                                                                                                                     | 77   | 133  | 7.00E-23  | 172.7 | 72.7 | 77.9 | PREDICTED: prefoldin subunit 6-like                 | gbpln | Vitis vinifera       | AT1G29990.1   Symbols: PFD6   prefoldin 6   chr1:10507666-10508821 FORWARD LENGTH=129                                                                    | 77   | 129  | 4.00E-25  | 167.5 | 72.7 | 77.9 |
| Rsa1.0_01840.1.g30223.t1 | gb EOA39027.1  hypothetical protein CARUB_v10011597mg [Capsella rubella]                                                                                                                                                                                                                                                                                                                                                                                    | 186  | 186  | 1.00E-10  | 100.0 | 26.3 | 47.8 | hypothetical protein CARUB_v10011597mg              | gbpln | Capsella rubella     | #                                                                                                                                                        | #    | #    | #         | #     | #    | #    |
| Rsa1.0_01840.1.g30224.t1 | gb EOA32515.1  hypothetical protein CARUB_v10015795mg [Capsella rubella]                                                                                                                                                                                                                                                                                                                                                                                    | 181  | 186  | 2.00E-12  | 102.8 | 27.6 | 49.2 | hypothetical protein CARUB_v10015795mg              | gbpln | Capsella rubella     | #                                                                                                                                                        | #    | #    | #         | #     | #    | #    |
| Rsa1.0_01840.1.g30225.t1 | gb ABD65090.1  hypothetical protein 27.t00116 [Brassica oleracea]                                                                                                                                                                                                                                                                                                                                                                                           | 504  | 484  | 1.00E-102 | 96.0  | 42.1 | 54.4 | hypothetical protein 27.t00116                      | gbpln | Brassica oleracea    | #                                                                                                                                                        | #    | #    | #         | #     | #    | #    |
| Rsa1.0_01841.1.g30226.t1 | gb EOA39475.1  hypothetical protein CARUB_v10008072mg [Capsella rubella]                                                                                                                                                                                                                                                                                                                                                                                    | 1906 | 1915 | 0         | 100.5 | 85.9 | 92.2 | hypothetical protein CARUB_v10008072mg              | gbpln | Capsella rubella     | AT1G32750.1   Symbols: HAF01, HAF1, HAC13, GTD1, TAF1   HAC13 protein (HAC13)   chr1:11846385-11856261 REVERSE LENGTH=1919                               | 1906 | 1919 | 0         | 100.7 | 85.4 | 91.2 |
| Rsa1.0_01841.1.g30227.t1 | #                                                                                                                                                                                                                                                                                                                                                                                                                                                           | #    | #    | #         | #     | #    | #    | -                                                   | ----  | ----                 | #                                                                                                                                                        | #    | #    | #         | #     | #    | #    |

|                          |                                                                                                                                                                                                                                 |      |      |           |        |      |      |                                                         |       |                      |                                                                                                                                                                                                                                                                |      |      |           |        |      |      |
|--------------------------|---------------------------------------------------------------------------------------------------------------------------------------------------------------------------------------------------------------------------------|------|------|-----------|--------|------|------|---------------------------------------------------------|-------|----------------------|----------------------------------------------------------------------------------------------------------------------------------------------------------------------------------------------------------------------------------------------------------------|------|------|-----------|--------|------|------|
| Rsa1.0_01841.1.g30228.t1 | refXP_002891005.1   predicted protein [Arabidopsis lyrata subsp. lyrata]   g 297336847 gb EFH67264.1   predicted protein [Arabidopsis lyrata subsp. lyrata]                                                                     | 128  | 151  | 2.00E-57  | 118.0  | 82.0 | 91.4 | predicted protein                                       | gbpln | Arabidopsis lyrata   | AT1G32710.1   Symbols:   Cytochrome c oxidase, subunit Vlb family protein   chr1:11833113-11833706 FORWARD LENGTH=134                                                                                                                                          | 128  | 134  | 7.00E-53  | 104.7  | 73.4 | 82.0 |
| Rsa1.0_01841.1.g30229.t1 | #                                                                                                                                                                                                                               | #    | #    | #         | #      | #    | #    | -                                                       | ----  | ----                 | #                                                                                                                                                                                                                                                              | #    | #    | #         | #      | #    |      |
| Rsa1.0_01842.1.g30230.t1 | refXP_002891286.1   DNAJ chaperone C-terminal domain-containing protein [Arabidopsis lyrata subsp. lyrata]   g 297337128 gb EFH67545.1   DNAJ chaperone C-terminal domain-containing protein [Arabidopsis lyrata subsp. lyrata] | 349  | 356  | 1.00E-124 | 102.0  | 73.9 | 81.9 | DNAJ chaperone C-terminal domain-containing protein     | gbpln | Arabidopsis lyrata   | AT1G44160.1   Symbols:   HSP40/DnaJ peptide-binding protein   chr1:16795032-16796276 FORWARD LENGTH=357                                                                                                                                                        | 349  | 357  | 1.00E-125 | 102.3  | 73.9 | 81.7 |
| Rsa1.0_01842.1.g30231.t2 | refXP_002888606.1   ALDH3H1 [Arabidopsis lyrata subsp. lyrata]   g 297334447 gb EFH64865.1   ALDH3H1 [Arabidopsis lyrata subsp. lyrata]                                                                                         | 483  | 484  | 0         | 100.2  | 84.1 | 91.7 | ALDH3H1                                                 | gbpln | Arabidopsis lyrata   | AT1G44170.2   Symbols: ALDH3H1, ALDH4   aldehyde dehydrogenase 3H1   chr1:16796564-16800031 REVERSE LENGTH=484                                                                                                                                                 | 483  | 484  | 0         | 100.2  | 83.2 | 91.9 |
| Rsa1.0_01842.1.g30232.t3 | #                                                                                                                                                                                                                               | #    | #    | #         | #      | #    | #    | -                                                       | ----  | ----                 | #                                                                                                                                                                                                                                                              | #    | #    | #         | #      | #    |      |
| Rsa1.0_01842.1.g30233.t1 | gb EOA39361.1   hypothetical protein CARUB_v10012414mg [Capsella rubella]                                                                                                                                                       | 277  | 231  | 3.00E-16  | 83.4   | 25.6 | 34.7 | hypothetical protein CARUB_v10012414mg                  | gbpln | Capsella rubella     | AT1G44224.1   Symbols:   ECA1 gametogenesis related family protein   chr1:16821061-16821756 REVERSE LENGTH=231                                                                                                                                                 | 277  | 231  | 3.00E-16  | 83.4   | 25.3 | 35.7 |
| Rsa1.0_01842.1.g30234.t1 | gb AAB87099.1   putative retroelement pol polyprotein [Arabidopsis thaliana]                                                                                                                                                    | 1103 | 1496 | 0         | 135.6  | 41.3 | 50.7 | putative retroelement pol polyprotein                   | gbpln | Arabidopsis thaliana | AT4G23160.1   Symbols: CRK8   cysteine-rich RLK (RECEPTOR-like protein kinase) 8   chr4:12129485-12134086 FORWARD LENGTH=1262                                                                                                                                  | 1103 | 1262 | 1.00E-74  | 114.4  | 13.8 | 19.2 |
| Rsa1.0_01842.1.g30235.t7 | gb ABD65091.1   hypothetical protein 31.t00049 [Brassica oleracea]                                                                                                                                                              | 361  | 530  | 2.00E-44  | 146.8  | 34.1 | 40.7 | hypothetical protein 31.t00049                          | gbpln | Brassica oleracea    | #                                                                                                                                                                                                                                                              | #    | #    | #         | #      | #    |      |
| Rsa1.0_01842.1.g30236.t4 | gb AAF18641.1   AC006228_12 F5J5.16 [Arabidopsis thaliana]                                                                                                                                                                      | 786  | 1024 | 2.00E-19  | 130.3  | 10.3 | 14.1 | F5J5.16                                                 | gbpln | Arabidopsis thaliana | #                                                                                                                                                                                                                                                              | #    | #    | #         | #      | #    |      |
| Rsa1.0_01843.1.g30237.t1 | gb EOA27571.1   hypothetical protein CARUB_v10023708mg [Capsella rubella]                                                                                                                                                       | 318  | 305  | 4.00E-68  | 95.9   | 58.8 | 67.0 | hypothetical protein CARUB_v10023708mg                  | gbpln | Capsella rubella     | AT2G32235.1   Symbols:   unknown protein; Has 38 Blast hits to 38 proteins in 14 species: Archae - 0; Bacteria - 4; Metazoa - 11; Fungi - 11; Plants - 11; Viruses - 0; Other Eukaryotes - 1 (source: NCBI BLINK).   chr2:13682823-13684199 REVERSE LENGTH=310 | 318  | 310  | 1.00E-70  | 97.5   | 59.7 | 67.9 |
| Rsa1.0_01843.1.g30238.t1 | dbj BAB09379.1   non-LTR retroelement reverse transcriptase-like protein [Arabidopsis thaliana]                                                                                                                                 | 1652 | 1223 | 0         | 74.0   | 32.6 | 44.6 | non-LTR retroelement reverse transcriptase-like protein | gbpln | Arabidopsis thaliana | AT3G24255.1   Symbols:   RNA-directed DNA polymerase (reverse transcriptase)-related family protein   chr3:8789471-8793208 FORWARD LENGTH=746                                                                                                                  | 1652 | 746  | 1.00E-79  | 45.2   | 10.0 | 13.4 |
| Rsa1.0_01843.1.g30239.t1 | gb EOA36301.1   hypothetical protein CARUB_v10010589mg [Capsella rubella]                                                                                                                                                       | 161  | 142  | 3.00E-70  | 88.2   | 83.9 | 85.1 | hypothetical protein CARUB_v10010589mg                  | gbpln | Capsella rubella     | AT2G32060.2   Symbols:   Ribosomal protein L7Ae/L30e/S12e/Gadd45 family protein   chr2:13639228-13640104 REVERSE LENGTH=144                                                                                                                                    | 161  | 144  | 1.00E-63  | 89.4   | 70.2 | 75.8 |
| Rsa1.0_01843.1.g30240.t1 | refXP_002881210.1   DNA topoisomerase family protein [Arabidopsis lyrata subsp. lyrata]   g 297327049 gb EFH57469.1   DNA topoisomerase family protein [Arabidopsis lyrata subsp. lyrata]                                       | 895  | 865  | 0         | 96.6   | 92.8 | 95.2 | DNA topoisomerase family protein                        | gbpln | Arabidopsis lyrata   | AT2G32000.1   Symbols:   DNA topoisomerase, type IA, core   chr2:13615999-13621563 REVERSE LENGTH=865                                                                                                                                                          | 895  | 865  | 0         | 96.6   | 92.3 | 94.6 |
| Rsa1.0_01843.1.g30241.t1 | #                                                                                                                                                                                                                               | #    | #    | #         | #      | #    | #    | -                                                       | ----  | ----                 | #                                                                                                                                                                                                                                                              | #    | #    | #         | #      | #    |      |
| Rsa1.0_01843.1.g30242.t1 | refXP_002881208.1   exostosin family protein [Arabidopsis lyrata subsp. lyrata]   g 297327047 gb EFH57467.1   exostosin family protein [Arabidopsis lyrata subsp. lyrata]                                                       | 467  | 458  | 0         | 98.1   | 76.0 | 82.9 | exostosin family protein                                | gbpln | Arabidopsis lyrata   | AT2G31990.1   Symbols:   Exostosin family protein   chr2:13611500-13613551 REVERSE LENGTH=479                                                                                                                                                                  | 467  | 479  | 0         | 102.6  | 79.4 | 88.9 |
| Rsa1.0_01843.1.g30243.t1 | gb ADD10746.1   phytoecystatin 2-1 [Brassica rapa subsp. pekinensis]                                                                                                                                                            | 143  | 142  | 8.00E-58  | 99.3   | 76.2 | 90.9 | phytoecystatin 2-1                                      | gbpln | Brassica rapa        | AT2G31980.1   Symbols: AtCYS2, CYS2   PHYTOCYSTATIN 2   chr2:13609246-13609770 REVERSE LENGTH=147                                                                                                                                                              | 143  | 147  | 3.00E-55  | 102.8  | 66.4 | 83.9 |
| Rsa1.0_01843.1.g30244.t2 | gb EOA28896.1   hypothetical protein CARUB_v10025142mg [Capsella rubella]                                                                                                                                                       | 95   | 1316 | 9.00E-36  | 1385.3 | 72.6 | 74.7 | hypothetical protein CARUB_v10025142mg                  | gbpln | Capsella rubella     | AT2G31970.1   Symbols: RAD50, ATRAD50   DNA repair-recombination protein (RAD50)   chr2:13600657-13608815 FORWARD LENGTH=1316                                                                                                                                  | 95   | 1316 | 1.00E-38  | 1385.3 | 72.6 | 74.7 |
| Rsa1.0_01843.1.g30245.t1 | refXP_002883536.1   hypothetical protein ARALYDRAFT_899046 [Arabidopsis lyrata subsp. lyrata]   g 297329376 gb EFH5795.1   hypothetical protein ARALYDRAFT_899046 [Arabidopsis lyrata subsp. lyrata]                            | 426  | 368  | 2.00E-93  | 86.4   | 46.9 | 59.2 | hypothetical protein ARALYDRAFT_899046                  | gbpln | Arabidopsis lyrata   | AT3G24580.1   Symbols:   F-box and associated interaction domains-containing protein   chr3:8969162-8970298 FORWARD LENGTH=378                                                                                                                                 | 426  | 378  | 1.00E-86  | 88.7   | 45.5 | 59.9 |
| Rsa1.0_01843.1.g30246.t1 | gb EOA27328.1   hypothetical protein CARUB_v10023444mg, partial [Capsella rubella]                                                                                                                                              | 423  | 378  | 1.00E-102 | 89.4   | 50.1 | 60.3 | hypothetical protein CARUB_v10023444mg, partial         | gbpln | Capsella rubella     | AT2G24645.1   Symbols:   Transcriptional factor B3 family protein   chr2:10480728-10482650 REVERSE LENGTH=490                                                                                                                                                  | 423  | 490  | 3.00E-76  | 115.8  | 37.8 | 47.8 |
| Rsa1.0_01843.1.g30247.t1 | gb ADI58546.1   glutathione peroxidase 2 [Brassica napus]                                                                                                                                                                       | 121  | 169  | 4.00E-45  | 139.7  | 72.7 | 75.2 | glutathione peroxidase 2                                | gbpln | Brassica napus       | AT2G31570.1   Symbols: ATGPX2, GPX2   glutathione peroxidase 2   chr2:13438211-13439775 REVERSE LENGTH=169                                                                                                                                                     | 121  | 169  | 2.00E-45  | 139.7  | 69.4 | 72.7 |

|                          |                                                                                                                                                                                                                                                                                                                                                                                                                                                        |      |      |           |       |      |      |                                                                                                                                                                 |       |                      |                                                                                                                                                                                                                                                                |      |     |           |       |      |      |
|--------------------------|--------------------------------------------------------------------------------------------------------------------------------------------------------------------------------------------------------------------------------------------------------------------------------------------------------------------------------------------------------------------------------------------------------------------------------------------------------|------|------|-----------|-------|------|------|-----------------------------------------------------------------------------------------------------------------------------------------------------------------|-------|----------------------|----------------------------------------------------------------------------------------------------------------------------------------------------------------------------------------------------------------------------------------------------------------|------|-----|-----------|-------|------|------|
| Rsa1.0_01844.1.g30248.t1 | gb ABD64968.1  hypothetical protein 25.t00005 [Brassica oleracea]                                                                                                                                                                                                                                                                                                                                                                                      | 176  | 299  | 7.00E-34  | 169.9 | 47.7 | 59.7 | hypothetical protein 25.t00005                                                                                                                                  | gbpln | Brassica oleracea    | AT5G47590.1   Symbols:   Heat shock protein HSP20/alpha crystallin family   chr5:19297945-19299099 REVERSE LENGTH=264                                                                                                                                          | 176  | 264 | 8.00E-30  | 150.0 | 44.9 | 57.4 |
| Rsa1.0_01844.1.g30249.t1 | gb EOA22909.1  hypothetical protein CARUB_v10003642mg [Capsella rubella]                                                                                                                                                                                                                                                                                                                                                                               | 285  | 282  | 5.00E-30  | 98.9  | 35.8 | 51.9 | hypothetical protein CARUB_v10003642mg                                                                                                                          | gbpln | Capsella rubella     | AT5G27070.1   Symbols: AGL53   AGAMOUS-like 53   chr5:9527741-9528604 FORWARD LENGTH=287                                                                                                                                                                       | 285  | 287 | 6.00E-28  | 100.7 | 36.1 | 51.6 |
| Rsa1.0_01844.1.g30250.t1 | ref XP_002891445.1  hypothetical protein ARALYDRAFT_473996 [Arabidopsis lyrata subsp. lyrata] gi 297337287 gb EFH67704.1  hypothetical protein ARALYDRAFT_473996 [Arabidopsis lyrata subsp. lyrata]                                                                                                                                                                                                                                                    | 473  | 491  | 0         | 103.8 | 94.1 | 97.9 | hypothetical protein ARALYDRAFT_473996                                                                                                                          | gbpln | Arabidopsis lyrata   | AT1G48600.2   Symbols: PMEAMT, APMAMT   S-adenosyl-L-methionine-dependent methyltransferases superfamily protein   chr1:17966074-17969077 FORWARD LENGTH=491                                                                                                   | 473  | 491 | 0         | 103.8 | 94.3 | 97.9 |
| Rsa1.0_01844.1.g30251.t1 | gb EOA40467.1  hypothetical protein CARUB_v10009192mg [Capsella rubella]                                                                                                                                                                                                                                                                                                                                                                               | 441  | 432  | 1.00E-176 | 98.0  | 73.7 | 82.5 | hypothetical protein CARUB_v10009192mg                                                                                                                          | gbpln | Capsella rubella     | AT1G48580.1   Symbols:   unknown protein; Has 91 Blast hits to 91 proteins in 40 species: Archae - 0; Bacteria - 0; Metazoa - 49; Fungi - 0; Plants - 28; Viruses - 0; Other Eukaryotes - 14 (source: NCBI BLink).   chr1:17958403-17960610 REVERSE LENGTH=454 | 441  | 454 | 1.00E-171 | 102.9 | 72.1 | 81.0 |
| Rsa1.0_01844.1.g30252.t1 | ref NP_188424.2  translocon at the outer membrane of chloroplasts 64-III [Arabidopsis thaliana] gi 75335547 sp Q9LVH5.1 OE64C_ARATH RecName: Full=Outer envelope protein 64, chloroplastic; AltName: Full=Translocon at the outer membrane of chloroplasts 64-III gi 9294499 dbj BAB02718.1  unnamed protein product [Arabidopsis thaliana] gi 332642509 gb AEE76030.1  translocon at the outer membrane of chloroplasts 64-III [Arabidopsis thaliana] | 593  | 589  | 0         | 99.3  | 78.4 | 86.7 | translocon at the outer membrane of chloroplasts 64-III                                                                                                         | gbpln | Arabidopsis thaliana | AT3G17970.1   Symbols: atToc64-III, TOC64-III   translocon at the outer membrane of chloroplasts 64-III   chr3:6148030-6151794 FORWARD LENGTH=589                                                                                                              | 593  | 589 | 0         | 99.3  | 78.4 | 86.7 |
| Rsa1.0_01844.1.g30253.t1 | gb EOA40416.1  hypothetical protein CARUB_v10009141mg [Capsella rubella]                                                                                                                                                                                                                                                                                                                                                                               | 415  | 443  | 0         | 106.7 | 80.2 | 91.3 | hypothetical protein CARUB_v10009141mg                                                                                                                          | gbpln | Capsella rubella     | AT1G48570.1   Symbols:   zinc finger (Ran-binding) family protein   chr1:17955455-17957661 REVERSE LENGTH=455                                                                                                                                                  | 415  | 455 | 0         | 109.6 | 80.7 | 91.1 |
| Rsa1.0_01844.1.g30254.t1 | ref XP_002891443.1  hypothetical protein ARALYDRAFT_473993 [Arabidopsis lyrata subsp. lyrata] gi 297337285 gb EFH67702.1  hypothetical protein ARALYDRAFT_473993 [Arabidopsis lyrata subsp. lyrata]                                                                                                                                                                                                                                                    | 636  | 643  | 1.00E-180 | 101.1 | 60.1 | 68.9 | hypothetical protein ARALYDRAFT_473993                                                                                                                          | gbpln | Arabidopsis lyrata   | AT1G48560.1   Symbols:   unknown protein; Has 75 Blast hits to 71 proteins in 10 species: Archae - 0; Bacteria - 0; Metazoa - 4; Fungi - 0; Plants - 69; Viruses - 0; Other Eukaryotes - 2 (source: NCBI BLink).   chr1:17952935-17955108 FORWARD LENGTH=643   | 636  | 643 | 1.00E-175 | 101.1 | 58.0 | 68.9 |
| Rsa1.0_01844.1.g30255.t2 | ref NP_196165.3  mannosyl-glycoprotein endo-beta-N-acetylglucosaminidase [Arabidopsis thaliana] gi 332003493 gb AED90876.1  beta-endo-N-acetylglucosaminidase [Arabidopsis thaliana]                                                                                                                                                                                                                                                                   | 257  | 680  | 8.00E-34  | 264.6 | 27.6 | 30.7 | mannosyl-glycoprotein endo-beta-N-acetylglucosaminidase                                                                                                         | gbpln | Arabidopsis thaliana | AT5G05460.1   Symbols:   Glycosyl hydrolase family 85   chr5:1615615-1618771 FORWARD LENGTH=680                                                                                                                                                                | 257  | 680 | 2.00E-36  | 264.6 | 27.6 | 30.7 |
| Rsa1.0_01844.1.g30256.t1 | #                                                                                                                                                                                                                                                                                                                                                                                                                                                      | #    | #    | #         | #     | #    | #    | -                                                                                                                                                               | ----  | ----                 | #                                                                                                                                                                                                                                                              | #    | #   | #         | #     | #    | #    |
| Rsa1.0_01844.1.g30257.t1 | dbj BAF00887.1  hypothetical protein [Arabidopsis thaliana]                                                                                                                                                                                                                                                                                                                                                                                            | 244  | 643  | 3.00E-56  | 263.5 | 48.4 | 54.5 | hypothetical protein                                                                                                                                            | gbpln | Arabidopsis thaliana | AT1G48560.1   Symbols:   unknown protein; Has 75 Blast hits to 71 proteins in 10 species: Archae - 0; Bacteria - 0; Metazoa - 4; Fungi - 0; Plants - 69; Viruses - 0; Other Eukaryotes - 2 (source: NCBI BLink).   chr1:17952935-17955108 FORWARD LENGTH=643   | 244  | 643 | 3.00E-58  | 263.5 | 48.0 | 54.5 |
| Rsa1.0_01844.1.g30258.t1 | gb EOA37329.1  hypothetical protein CARUB_v10011025mg [Capsella rubella]                                                                                                                                                                                                                                                                                                                                                                               | 460  | 641  | 1.00E-119 | 139.3 | 63.5 | 75.4 | hypothetical protein CARUB_v10011025mg                                                                                                                          | gbpln | Capsella rubella     | AT1G48560.1   Symbols:   unknown protein; Has 75 Blast hits to 71 proteins in 10 species: Archae - 0; Bacteria - 0; Metazoa - 4; Fungi - 0; Plants - 69; Viruses - 0; Other Eukaryotes - 2 (source: NCBI BLink).   chr1:17952935-17955108 FORWARD LENGTH=643   | 460  | 643 | 1.00E-114 | 139.8 | 60.7 | 72.6 |
| Rsa1.0_01845.1.g30259.t1 | sp COLGQ9.1 Y4294_ARATH RecName: Full=Probable LRR receptor-like serine/threonine-protein kinase At4g20940 gi 224589622 gb ACN59344.1  leucine-rich repeat receptor-like protein kinase [Arabidopsis thaliana]                                                                                                                                                                                                                                         | 1083 | 1037 | 0         | 95.8  | 86.7 | 91.2 | RecName: Full=Probable LRR receptor-like serine/threonine-protein kinase At4g20940 gi 224589622 gb ACN59344.1  leucine-rich repeat receptor-like protein kinase | gbpln | Arabidopsis thaliana | AT4G20940.1   Symbols:   Leucine-rich receptor-like protein kinase family protein   chr4:11202728-11206038 FORWARD LENGTH=977                                                                                                                                  | 1083 | 977 | 0         | 90.2  | 67.0 | 71.1 |
| Rsa1.0_01845.1.g30260.t1 | gb EOA16935.1  hypothetical protein CARUB_v10005158mg [Capsella rubella]                                                                                                                                                                                                                                                                                                                                                                               | 346  | 350  | 1.00E-180 | 101.2 | 89.6 | 93.9 | hypothetical protein CARUB_v10005158mg                                                                                                                          | gbpln | Capsella rubella     | AT4G20930.1   Symbols:   6-phosphogluconate dehydrogenase family protein   chr4:11188627-11201036 REVERSE LENGTH=347                                                                                                                                           | 346  | 347 | 1.00E-176 | 100.3 | 88.7 | 93.4 |



|                          |                                                                                                                                                                                                                                                                                                                                                                                                                                                                                                                                                                                                                                                                                                                                                                                                                                                                                                                                  |     |     |           |       |      |      |                                                                               |       |                      |                                                                                                                                                                                                                                                                                                                                                                                                                                                                                        |     |     |           |       |      |      |
|--------------------------|----------------------------------------------------------------------------------------------------------------------------------------------------------------------------------------------------------------------------------------------------------------------------------------------------------------------------------------------------------------------------------------------------------------------------------------------------------------------------------------------------------------------------------------------------------------------------------------------------------------------------------------------------------------------------------------------------------------------------------------------------------------------------------------------------------------------------------------------------------------------------------------------------------------------------------|-----|-----|-----------|-------|------|------|-------------------------------------------------------------------------------|-------|----------------------|----------------------------------------------------------------------------------------------------------------------------------------------------------------------------------------------------------------------------------------------------------------------------------------------------------------------------------------------------------------------------------------------------------------------------------------------------------------------------------------|-----|-----|-----------|-------|------|------|
| Rsa1.0_01846.1.g30269.t1 | refNP_201115.1   S-adenosyl-L-methionine-dependent methyltransferase domain-containing protein [Arabidopsis thaliana] gi 10177291 dbj BAB10552.1   unnamed protein product [Arabidopsis thaliana] gi 332010321 gb AED97704.1   S-adenosyl-L-methionine-dependent methyltransferase domain-containing protein [Arabidopsis thaliana] refXP_002866535.1   hypothetical protein ARALYDRAFT_496493 [Arabidopsis lyrata subsp. lyrata] gi 297312370 gb EFH42794.1   hypothetical protein ARALYDRAFT_496493 [Arabidopsis lyrata subsp. lyrata] refNP_974985.1   DEAD-box ATP-dependent RNA helicase 30 [Arabidopsis thaliana] gi 108861888 sp Q8W4R3.2 RH30_ARAT H RecName: Full=DEAD-box ATP-dependent RNA helicase 30 [Arabidopsis thaliana] gi 110741550 dbj BAE98724.1   ATP-dependent RNA helicase-like protein [Arabidopsis thaliana] gi 332010323 gb AED97706.1   DEAD-box ATP-dependent RNA helicase 30 [Arabidopsis thaliana] | 313 | 329 | 1.00E-133 | 105.1 | 81.2 | 90.1 | S-adenosyl-L-methionine-dependent methyltransferase domain-containing protein | gbpln | Arabidopsis thaliana | AT5G63100.1   Symbols:   S-adenosyl-L-methionine-dependent methyltransferases superfamily protein   chr5:25314434-25315423 REVERSE LENGTH=329                                                                                                                                                                                                                                                                                                                                          | 313 | 329 | 1.00E-136 | 105.1 | 81.2 | 90.1 |
| Rsa1.0_01846.1.g30270.t2 | refNP_974985.1   DEAD-box ATP-dependent RNA helicase 30 [Arabidopsis thaliana] gi 108861888 sp Q8W4R3.2 RH30_ARAT H RecName: Full=DEAD-box ATP-dependent RNA helicase 30 [Arabidopsis thaliana] gi 110741550 dbj BAE98724.1   ATP-dependent RNA helicase-like protein [Arabidopsis thaliana] gi 332010323 gb AED97706.1   DEAD-box ATP-dependent RNA helicase 30 [Arabidopsis thaliana]                                                                                                                                                                                                                                                                                                                                                                                                                                                                                                                                          | 497 | 471 | 0         | 94.8  | 88.5 | 92.0 | hypothetical protein ARALYDRAFT_496493                                        | gbpln | Arabidopsis lyrata   | AT5G63110.1   Symbols:   HDA6, AXE1, ATHDA6, RTS1, RPD3B, SIL1   histone deacetylase 6   chr5:25315834-25318227 REVERSE LENGTH=471                                                                                                                                                                                                                                                                                                                                                     | 497 | 471 | 0         | 94.8  | 87.5 | 91.3 |
| Rsa1.0_01846.1.g30271.t1 | refNP_974985.1   DEAD-box ATP-dependent RNA helicase 30 [Arabidopsis thaliana] gi 108861888 sp Q8W4R3.2 RH30_ARAT H RecName: Full=DEAD-box ATP-dependent RNA helicase 30 [Arabidopsis thaliana] gi 110741550 dbj BAE98724.1   ATP-dependent RNA helicase-like protein [Arabidopsis thaliana] gi 332010323 gb AED97706.1   DEAD-box ATP-dependent RNA helicase 30 [Arabidopsis thaliana]                                                                                                                                                                                                                                                                                                                                                                                                                                                                                                                                          | 593 | 591 | 0         | 99.7  | 88.7 | 91.2 | DEAD-box ATP-dependent RNA helicase 30                                        | gbpln | Arabidopsis thaliana | AT5G63120.2   Symbols:   P-loop containing nucleoside triphosphate hydrolases superfamily protein   chr5:25318967-25322071 REVERSE LENGTH=591                                                                                                                                                                                                                                                                                                                                          | 593 | 591 | 0         | 99.7  | 88.7 | 91.2 |
| Rsa1.0_01846.1.g30272.t1 | gb EOA14047.1   hypothetical protein CARUB_v10027182mg [Capsella rubella]                                                                                                                                                                                                                                                                                                                                                                                                                                                                                                                                                                                                                                                                                                                                                                                                                                                        | 181 | 193 | 1.00E-60  | 106.6 | 79.0 | 84.5 | hypothetical protein CARUB_v10027182mg                                        | gbpln | Capsella rubella     | AT5G63130.1   Symbols:   Octicosapeptide/Phox/Bem1p family protein   chr5:25323190-25323857 FORWARD LENGTH=192                                                                                                                                                                                                                                                                                                                                                                         | 181 | 192 | 4.00E-56  | 106.1 | 77.9 | 83.4 |
| Rsa1.0_01846.1.g30273.t1 | gb EOA14274.1   hypothetical protein CARUB_v10027435mg [Capsella rubella]                                                                                                                                                                                                                                                                                                                                                                                                                                                                                                                                                                                                                                                                                                                                                                                                                                                        | 109 | 99  | 1.00E-33  | 90.8  | 76.1 | 84.4 | hypothetical protein CARUB_v10027435mg                                        | gbpln | Capsella rubella     | AT5G63135.1   Symbols:   unknown protein; Has 30201 Blast hits to 17322 proteins in 780 species: Archae - 12; Bacteria - 1396; Metazoa - 17338; Fungi - 3422; Plants - 5037; Viruses - 0; Other Eukaryotes - 2996 (source: NCBI BLINK).   chr5:25325253-25326440 REVERSE LENGTH=99                                                                                                                                                                                                     | 109 | 99  | 4.00E-35  | 90.8  | 74.3 | 85.3 |
| Rsa1.0_01846.1.g30274.t1 | refXP_002864839.1   ATPAP29/PAP29 [Arabidopsis lyrata subsp. lyrata] gi 297310674 gb EFH41098.1   ATPAP29/PAP29 [Arabidopsis lyrata subsp. lyrata]                                                                                                                                                                                                                                                                                                                                                                                                                                                                                                                                                                                                                                                                                                                                                                               | 374 | 384 | 1.00E-172 | 102.7 | 79.1 | 86.4 | ATPAP29/PAP29                                                                 | gbpln | Arabidopsis lyrata   | AT5G63140.1   Symbols:   ATPAP29, PAP29   purple acid phosphatase 29   chr5:25328237-25329616 FORWARD LENGTH=389                                                                                                                                                                                                                                                                                                                                                                       | 374 | 389 | 1.00E-172 | 104.0 | 77.5 | 87.2 |
| Rsa1.0_01846.1.g30275.t2 | refXP_002866540.1   pectate lyase [Arabidopsis lyrata subsp. lyrata] gi 297312375 gb EFH42799.1   pectate lyase [Arabidopsis lyrata subsp. lyrata] refNP_194335.2   plant intracellular ras group-related LRR 8 [Arabidopsis thaliana] gi 20260486 gb AAM13141.1   putative leucine-rich-repeat protein [Arabidopsis thaliana] gi 30725612 gb AAP37828.1   At4g26050 [Arabidopsis thaliana] gi 332659749 gb AEE85149.1   plant intracellular ras group-related LRR 8 [Arabidopsis thaliana]                                                                                                                                                                                                                                                                                                                                                                                                                                      | 409 | 410 | 0         | 100.2 | 91.2 | 95.6 | pectate lyase                                                                 | gbpln | Arabidopsis lyrata   | AT5G63180.1   Symbols:   Pectin lyase-like superfamily protein   chr5:25341106-25343113 REVERSE LENGTH=432                                                                                                                                                                                                                                                                                                                                                                             | 409 | 432 | 0         | 105.6 | 90.5 | 94.9 |
| Rsa1.0_01847.1.g30276.t1 | refNP_194335.2   plant intracellular ras group-related LRR 8 [Arabidopsis thaliana] gi 20260486 gb AAM13141.1   putative leucine-rich-repeat protein [Arabidopsis thaliana] gi 30725612 gb AAP37828.1   At4g26050 [Arabidopsis thaliana] gi 332659749 gb AEE85149.1   plant intracellular ras group-related LRR 8 [Arabidopsis thaliana]                                                                                                                                                                                                                                                                                                                                                                                                                                                                                                                                                                                         | 394 | 383 | 0         | 97.2  | 86.5 | 90.4 | plant intracellular ras group-related LRR 8                                   | gbpln | Arabidopsis thaliana | AT4G26050.1   Symbols:   PIRL8   plant intracellular ras group-related LRR 8   chr4:13210522-13213149 FORWARD LENGTH=383                                                                                                                                                                                                                                                                                                                                                               | 394 | 383 | 0         | 97.2  | 86.5 | 90.4 |
| Rsa1.0_01847.1.g30277.t1 | gb EOA17774.1   hypothetical protein CARUB_v10006164mg, partial [Capsella rubella]                                                                                                                                                                                                                                                                                                                                                                                                                                                                                                                                                                                                                                                                                                                                                                                                                                               | 63  | 76  | 4.00E-18  | 120.6 | 79.4 | 84.1 | hypothetical protein CARUB_v10006164mg, partial                               | gbpln | Capsella rubella     | AT4G26055.1   Symbols:   unknown protein; FUNCTIONS IN: molecular_function unknown; INVOLVED IN: biological_process unknown; LOCATED IN: endomembrane system; BEST Arabidopsis thaliana protein match is: unknown protein (TAIR:AT5G57030.1). Has 30201 Blast hits to 17322 proteins in 780 species: Archae - 12; Bacteria - 1396; Metazoa - 17338; Fungi - 3422; Plants - 5037; Viruses - 0; Other Eukaryotes - 2996 (source: NCBI BLINK).   chr4:13214098-13214429 REVERSE LENGTH=62 | 63  | 62  | 8.00E-21  | 98.4  | 73.0 | 84.1 |

|                           |                                                                                                                                                                                                                                                                                                                                                                                                                                                                                                                                                                                                                                                                                                                                         |     |     |           |       |      |      |                                            |       |                      |                                                                                                                            |     |     |          |       |      |      |
|---------------------------|-----------------------------------------------------------------------------------------------------------------------------------------------------------------------------------------------------------------------------------------------------------------------------------------------------------------------------------------------------------------------------------------------------------------------------------------------------------------------------------------------------------------------------------------------------------------------------------------------------------------------------------------------------------------------------------------------------------------------------------------|-----|-----|-----------|-------|------|------|--------------------------------------------|-------|----------------------|----------------------------------------------------------------------------------------------------------------------------|-----|-----|----------|-------|------|------|
| Rsa1.0_01847.1.g30278.t1  | refNP_194336.1  ribosomal protein L18ae family protein [Arabidopsis thaliana] gi 4538935 emb CAB39671.1  putative protein [Arabidopsis thaliana] gi 7269457 emb CAB79461.1  putative protein [Arabidopsis thaliana] gi 106879161 gb ABF82610.1  At4g26060 [Arabidopsis thaliana] gi 332659751 gb AEE85151.1  ribosomal protein L18ae family protein [Arabidopsis thaliana]                                                                                                                                                                                                                                                                                                                                                              | 126 | 133 | 3.00E-45  | 105.6 | 77.8 | 84.1 | ribosomal protein L18ae family protein     | gbpln | Arabidopsis thaliana | AT4G26060.1   Symbols:   Ribosomal protein L18ae family   chr4:13214972-13215955 REVERSE LENGTH=133                        | 126 | 133 | 5.00E-48 | 105.6 | 77.8 | 84.1 |
| Rsa1.0_01847.1.g30279.t1  | gb ADX66729.1  mitogen-activated protein kinase kinase 2 [Brassica napus]                                                                                                                                                                                                                                                                                                                                                                                                                                                                                                                                                                                                                                                               | 360 | 355 | 0         | 98.6  | 91.1 | 95.3 | mitogen-activated protein kinase kinase 2  | gbpln | Brassica napus       | AT4G26070.3   Symbols: MEK1, NMAPKK, ATMEK1, MKK1   MAP kinase/ ERK kinase 1   chr4:13217797-13219695 FORWARD LENGTH=354   | 360 | 354 | 0        | 98.3  | 88.1 | 92.2 |
| Rsa1.0_01847.1.g30280.t1  | dbj BAJ34574.1  unnamed protein product [Thellungiella halophila]                                                                                                                                                                                                                                                                                                                                                                                                                                                                                                                                                                                                                                                                       | 401 | 439 | 0         | 109.5 | 91.3 | 95.5 | unnamed protein product                    | ----  | ----                 | AT4G26080.1   Symbols: ABI1, AtABI1   Protein phosphatase 2C family protein   chr4:13220231-13221828 REVERSE LENGTH=434    | 401 | 434 | 0        | 108.2 | 87.0 | 92.5 |
| Rsa1.0_01847.1.g30281.t3  | refNP_849553.1  beta-galactosidase 12 [Arabidopsis thaliana] gi 75265630 sp Q9SCV0.1 BGL12_ARAT H RecName: Full=Beta-galactosidase 12; Short=Lactase 12; Flags: Precursor gi 6686896 emb CAB64748.1  putative beta-galactosidase [Arabidopsis thaliana] gi 332659762 gb AEE85162.1  beta-galactosidase 12 [Arabidopsis thaliana]                                                                                                                                                                                                                                                                                                                                                                                                        | 727 | 728 | 0         | 100.1 | 88.2 | 93.3 | beta-galactosidase 12                      | gbpln | Arabidopsis thaliana | AT4G26140.1   Symbols: BGAL12   beta-galactosidase 12   chr4:13243219-13247823 REVERSE LENGTH=728                          | 727 | 728 | 0        | 100.1 | 88.2 | 93.3 |
| Rsa1.0_01848.1.g30282.t1  | #                                                                                                                                                                                                                                                                                                                                                                                                                                                                                                                                                                                                                                                                                                                                       | #   | #   | #         | #     | #    | #    | -                                          | ----  | ----                 | #                                                                                                                          | #   | #   | #        | #     | #    | #    |
| Rsa1.0_01848.1.g30283.t3  | refXP_002874485.1  hypothetical protein ARALYDRAFT_351886 [Arabidopsis lyrata subsp. lyrata] gi 297320322 gb EFH50744.1  hypothetical protein ARALYDRAFT_351886 [Arabidopsis lyrata subsp. lyrata]                                                                                                                                                                                                                                                                                                                                                                                                                                                                                                                                      | 335 | 234 | 1.00E-109 | 69.9  | 58.2 | 61.5 | hypothetical protein ARALYDRAFT_351886     | gbpln | Arabidopsis lyrata   | AT4G07990.1   Symbols:   Chaperone DnaJ-domain superfamily protein   chr4:4825650-4828937 REVERSE LENGTH=230               | 335 | 230 | 2.00E-97 | 68.7  | 52.8 | 56.7 |
| Rsa1.0_01848.1.g30284.t1  | #                                                                                                                                                                                                                                                                                                                                                                                                                                                                                                                                                                                                                                                                                                                                       | #   | #   | #         | #     | #    | #    | -                                          | ----  | ----                 | AT4G29090.1   Symbols:   Ribonuclease H-like superfamily protein   chr4:14333528-14335255 FORWARD LENGTH=575               | 106 | 575 | 1.00E-12 | 542.5 | 24.5 | 35.8 |
| Rsa1.0_01848.1.g30285.t1  | gb EOA40426.1  hypothetical protein CARUB_v10009151mg [Capsella rubella] gi 482576240 gb EOA40427.1  hypothetical protein CARUB_v10009151mg [Capsella rubella]                                                                                                                                                                                                                                                                                                                                                                                                                                                                                                                                                                          | 127 | 442 | 2.00E-15  | 348.0 | 36.2 | 41.7 | hypothetical protein CARUB_v10009151mg     | gbpln | Capsella rubella     | AT1G21200.1   Symbols:   sequence-specific DNA binding transcription factors   chr1:7421483-7422814 FORWARD LENGTH=443     | 127 | 443 | 3.00E-17 | 348.8 | 35.4 | 40.9 |
| Rsa1.0_01848.1.g30286.t1  | refNP_192536.1  putative xyloglucan glycosyltransferase 12 [Arabidopsis thaliana] gi 75216205 sp Q9ZQB9.1 CSLCC_ARATH RecName: Full=Probable xyloglucan glycosyltransferase 12; AltName: Full=Cellulose synthase-like protein C12; Short=ATCSiC12 gi 4309698 gb AAD15482.1  putative glucosyltransferase [Arabidopsis thaliana] gi 7267435 emb CAB77947.1  putative glucosyltransferase [Arabidopsis thaliana] gi 21592678 gb AAM64627.1  putative glucosyltransferase [Arabidopsis thaliana] gi 26451988 dbj BAC43084.1  putative glucosyltransferase [Arabidopsis thaliana] gi 31711706 gb AAP68209.1  At4g07960 [Arabidopsis thaliana] gi 332657186 gb AEE82586.1  putative xyloglucan glycosyltransferase 12 [Arabidopsis thaliana] | 693 | 699 | 0         | 100.9 | 91.2 | 92.9 | putative xyloglucan glycosyltransferase 12 | gbpln | Arabidopsis thaliana | AT4G07960.1   Symbols: ATCSLC12, CSLC12   Cellulose-synthase-like C12   chr4:4802628-4805114 REVERSE LENGTH=699            | 693 | 699 | 0        | 100.9 | 91.2 | 92.9 |
| Rsa1.0_01848.1.g30287.t2  | #                                                                                                                                                                                                                                                                                                                                                                                                                                                                                                                                                                                                                                                                                                                                       | #   | #   | #         | #     | #    | #    | -                                          | ----  | ----                 | #                                                                                                                          | #   | #   | #        | #     | #    | #    |
| Rsa1.0_01848.1.g30288.t2  | refXP_002874481.1  transducin family protein [Arabidopsis lyrata subsp. lyrata] gi 297320318 gb EFH50740.1  transducin family protein [Arabidopsis lyrata subsp. lyrata]                                                                                                                                                                                                                                                                                                                                                                                                                                                                                                                                                                | 799 | 812 | 0         | 101.6 | 82.4 | 86.9 | transducin family protein                  | gbpln | Arabidopsis lyrata   | AT4G07410.1   Symbols:   Transducin family protein / WD-40 repeat family protein   chr4:4201465-4205136 REVERSE LENGTH=815 | 799 | 815 | 0        | 102.0 | 81.7 | 86.7 |
| Rsa1.0_01849.1.g30289.t11 | gb AAG52026.1 AC022456.7 polyprotein, putative; 77260-80472 [Arabidopsis thaliana]                                                                                                                                                                                                                                                                                                                                                                                                                                                                                                                                                                                                                                                      | 804 | 884 | 1.00E-151 | 110.0 | 33.2 | 40.5 | polyprotein, putative; 77260-80472         | gbpln | Arabidopsis thaliana | ATMG00860.1   Symbols: ORF158   DNA/RNA polymerases superfamily protein   chrM:235916-236392 FORWARD LENGTH=158            | 804 | 158 | 3.00E-19 | 19.7  | 6.2  | 9.1  |

|                          |                                                                                                                                                                                                                                                                                                                                          |      |      |           |        |      |      |                                                                                |       |                      |                                                                                                                                                                                                                                                                                                                                                                                                                                                                   |      |      |           |       |      |      |
|--------------------------|------------------------------------------------------------------------------------------------------------------------------------------------------------------------------------------------------------------------------------------------------------------------------------------------------------------------------------------|------|------|-----------|--------|------|------|--------------------------------------------------------------------------------|-------|----------------------|-------------------------------------------------------------------------------------------------------------------------------------------------------------------------------------------------------------------------------------------------------------------------------------------------------------------------------------------------------------------------------------------------------------------------------------------------------------------|------|------|-----------|-------|------|------|
| Rsa1.0_01849.1.g30290.t5 | gb AAC28189.1  contains similarity to Arabidopsis thaliana retrotransposon Athila (GB:X81801) [Arabidopsis thaliana]                                                                                                                                                                                                                     | 326  | 940  | 1.00E-57  | 288.3  | 34.0 | 41.1 | contains similarity to Arabidopsis thaliana retrotransposon Athila (GB:X81801) | gbpln | Arabidopsis thaliana | #                                                                                                                                                                                                                                                                                                                                                                                                                                                                 | #    | #    | #         | #     | #    | #    |
| Rsa1.0_01849.1.g30291.t3 | #                                                                                                                                                                                                                                                                                                                                        | #    | #    | #         | #      | #    | -    |                                                                                | ----  | ----                 | #                                                                                                                                                                                                                                                                                                                                                                                                                                                                 | #    | #    | #         | #     | #    | #    |
| Rsa1.0_01849.1.g30292.t1 | emb CAZ40333.1  hypothetical protein [Raphanus sativus]                                                                                                                                                                                                                                                                                  | 74   | 785  | 9.00E-11  | 1060.8 | 44.6 | 64.9 | hypothetical protein                                                           | gbpln | Raphanus sativus     | #                                                                                                                                                                                                                                                                                                                                                                                                                                                                 | #    | #    | #         | #     | #    | #    |
| Rsa1.0_01849.1.g30293.t3 | gb AAC28221.1  similar to reverse transcriptases (PFam: rvt.hmm, score: 60.13) [Arabidopsis thaliana]                                                                                                                                                                                                                                    | 1447 | 1164 | 0         | 80.4   | 26.9 | 39.0 | similar to reverse transcriptases (PFam: rvt.hmm, score: 60.13)                | gbpln | Arabidopsis thaliana | AT1G48260.1   Symbols: CIPK17, SnRK3.21   CBL-interacting protein kinase 17   chr1:17814226-17817226 REVERSE LENGTH=432                                                                                                                                                                                                                                                                                                                                           | 1447 | 432  | 1.00E-116 | 29.9  | 14.4 | 16.2 |
| Rsa1.0_01850.1.g30294.t1 | gb EOA33270.1  hypothetical protein CARUB_v10022427mg [Capsella rubella]                                                                                                                                                                                                                                                                 | 888  | 955  | 0         | 107.5  | 96.1 | 98.4 | hypothetical protein CARUB_v10022427mg                                         | gbpln | Capsella rubella     | AT1G80660.1   Symbols: AHA9, HA9   H(+)-ATPase 9   chr1:30316227-30319948 REVERSE LENGTH=954                                                                                                                                                                                                                                                                                                                                                                      | 888  | 954  | 0         | 107.4 | 95.0 | 97.7 |
| Rsa1.0_01850.1.g30295.t1 | ref XP_002897816.1  transducin family protein [Arabidopsis lyrata subsp. lyrata] gi 297333657 gb EFH64075.1  transducin family protein [Arabidopsis lyrata subsp. lyrata]                                                                                                                                                                | 362  | 349  | 0         | 96.4   | 85.1 | 90.9 | transducin family protein                                                      | gbpln | Arabidopsis lyrata   | AT1G80670.1   Symbols:   Transducin/WD40 repeat-like superfamily protein   chr1:30320809-30323543 REVERSE LENGTH=349                                                                                                                                                                                                                                                                                                                                              | 362  | 349  | 0         | 96.4  | 84.5 | 90.9 |
| Rsa1.0_01850.1.g30296.t1 | dbj BAJ34529.1  unnamed protein product [Theilungiella halophila]                                                                                                                                                                                                                                                                        | 1019 | 1042 | 0         | 102.3  | 87.8 | 93.3 | unnamed protein product                                                        | ----  | ----                 | AT1G80680.1   Symbols: SAR3, MOS3, PRE, NUP96   SUPPRESSOR OF AUXIN RESISTANCE 3   chr1:30324219-30328489 FORWARD LENGTH=1046                                                                                                                                                                                                                                                                                                                                     | 1019 | 1046 | 0         | 102.6 | 85.9 | 92.1 |
| Rsa1.0_01850.1.g30297.t1 | gb EOA35675.1  hypothetical protein CARUB_v10020909mg [Capsella rubella]                                                                                                                                                                                                                                                                 | 228  | 224  | 1.00E-106 | 98.2   | 87.3 | 91.7 | hypothetical protein CARUB_v10020909mg                                         | gbpln | Capsella rubella     | AT1G80690.1   Symbols:   PPPDE putative thiol peptidase family protein   chr1:30329283-30330524 REVERSE LENGTH=227                                                                                                                                                                                                                                                                                                                                                | 228  | 227  | 1.00E-102 | 99.6  | 84.6 | 89.0 |
| Rsa1.0_01850.1.g30298.t2 | ref XP_002889278.1  hypothetical protein ARALYDRAFT_477177 [Arabidopsis lyrata subsp. lyrata] gi 297335119 gb EFH65537.1  hypothetical protein ARALYDRAFT_477177 [Arabidopsis lyrata subsp. lyrata]                                                                                                                                      | 349  | 217  | 5.00E-79  | 62.2   | 49.0 | 52.1 | hypothetical protein ARALYDRAFT_477177                                         | gbpln | Arabidopsis lyrata   | AT1G80980.1   Symbols:   unknown protein; FUNCTIONS IN: molecular_function unknown; INVOLVED IN: biological_process unknown; LOCATED IN: mitochondrion; BEST Arabidopsis thaliana protein match is: unknown protein (TAIR:AT1G80700.1); Has 477 Blast hits to 341 proteins in 85 species: Archae - 2; Bacteria - 44; Metazoa - 78; Fungi - 37; Plants - 42; Viruses - 0; Other Eukaryotes - 274 (source: NCBI BLINK).   chr1:30422184-30423440 REVERSE LENGTH=214 | 349  | 214  | 3.00E-80  | 61.3  | 47.6 | 51.6 |
| Rsa1.0_01850.1.g30299.t1 | gb ABD64930.1  hypothetical protein 24.t00076 [Brassica oleracea] ref NP_178188.1  zinc finger protein 1 [Arabidopsis thaliana] gi 27923894 sp Q42485.1 ZFP1_ARATH RecName: Full=Zinc finger protein 1 gi 6503285 gb AAF14661.1 AC011713.9 Identical to gi 555881 zinc finger protein 1 from Arabidopsis thaliana [Arabidopsis thaliana] | 282  | 407  | 4.00E-13  | 144.3  | 15.6 | 19.5 | hypothetical protein 24.t00076                                                 | gbpln | Brassica oleracea    | #                                                                                                                                                                                                                                                                                                                                                                                                                                                                 | #    | #    | #         | #     | #    | #    |
| Rsa1.0_01850.1.g30300.t1 | gi 790673 gb AAA87297.1  zinc finger protein [Arabidopsis thaliana] gi 1297186 gb AAA98913.1  zinc finger protein 1 [Arabidopsis thaliana] gi 111074280 gb ABH04513.1  At1g80730 [Arabidopsis thaliana] gi 332198320 gb AEE36441.1  zinc finger protein 1 [Arabidopsis thaliana]                                                         | 216  | 228  | 2.00E-78  | 105.6  | 78.7 | 84.7 | zinc finger protein 1                                                          | gbpln | Arabidopsis thaliana | AT1G80730.1   Symbols: ZFP1, ATZFP1   zinc-finger protein 1   chr1:30339493-30340179 REVERSE LENGTH=228                                                                                                                                                                                                                                                                                                                                                           | 216  | 228  | 8.00E-81  | 105.6 | 78.7 | 84.7 |
| Rsa1.0_01850.1.g30301.t1 | gb EOA35639.1  hypothetical protein CARUB_v10020853mg [Capsella rubella]                                                                                                                                                                                                                                                                 | 264  | 249  | 1.00E-123 | 94.3   | 85.2 | 90.5 | hypothetical protein CARUB_v10020853mg                                         | gbpln | Capsella rubella     | AT1G80750.1   Symbols:   Ribosomal protein L30/L7 family protein   chr1:30349052-30350434 FORWARD LENGTH=247                                                                                                                                                                                                                                                                                                                                                      | 264  | 247  | 1.00E-121 | 93.6  | 82.2 | 88.3 |
| Rsa1.0_01850.1.g30302.t1 | ref XP_002889273.1  PDE318 [Arabidopsis lyrata subsp. lyrata] gi 297335114 gb EFH65532.1  PDE318 [Arabidopsis lyrata subsp. lyrata]                                                                                                                                                                                                      | 442  | 449  | 0         | 101.6  | 87.8 | 92.8 | PDE318                                                                         | gbpln | Arabidopsis lyrata   | AT1G80770.1   Symbols: PDE318   P-loop containing nucleoside triphosphate hydrolases superfamily protein   chr1:30355266-30357786 FORWARD LENGTH=451                                                                                                                                                                                                                                                                                                              | 442  | 451  | 0         | 102.0 | 86.4 | 93.0 |
| Rsa1.0_01850.1.g30303.t1 | ref NP_178194.1  XH/XS domain-containing protein [Arabidopsis thaliana] gi 6503291 gb AAF14667.1 AC011713.15 Contains similarity to gb AF136530 transcriptional regulator from Zea mays [Arabidopsis thaliana] gi 332198330 gb AEE36451.1  XH/XS domain-containing protein [Arabidopsis thaliana]                                        | 407  | 634  | 1.00E-150 | 155.8  | 63.4 | 78.9 | XH/XS domain-containing protein                                                | gbpln | Arabidopsis thaliana | AT1G80790.1   Symbols:   XH/XS domain-containing protein   chr1:30360280-30362856 FORWARD LENGTH=634                                                                                                                                                                                                                                                                                                                                                              | 407  | 634  | 1.00E-152 | 155.8 | 63.4 | 78.9 |
| Rsa1.0_01851.1.g30304.t1 | gb ABW81051.1  tn7 reverse transcriptase [Arabidopsis lyrata subsp. lyrata]                                                                                                                                                                                                                                                              | 156  | 441  | 1.00E-26  | 282.7  | 34.6 | 50.6 | tn7 reverse transcriptase                                                      | gbpln | Arabidopsis lyrata   | AT3G24255.1   Symbols:   RNA-directed DNA polymerase (reverse transcriptase)-related family protein   chr3:8789471-8793208 FORWARD LENGTH=746                                                                                                                                                                                                                                                                                                                     | 156  | 746  | 2.00E-12  | 478.2 | 21.8 | 31.4 |



|                          |                                                                                                                                                                                                                                                                                                                                                                                                                                                                                                                                                        |     |      |           |       |      |      |                                                 |             |                      |                                                                                                                                        |     |     |          |       |      |      |
|--------------------------|--------------------------------------------------------------------------------------------------------------------------------------------------------------------------------------------------------------------------------------------------------------------------------------------------------------------------------------------------------------------------------------------------------------------------------------------------------------------------------------------------------------------------------------------------------|-----|------|-----------|-------|------|------|-------------------------------------------------|-------------|----------------------|----------------------------------------------------------------------------------------------------------------------------------------|-----|-----|----------|-------|------|------|
| Rsa1.0_01851.1.g30305.t1 | #                                                                                                                                                                                                                                                                                                                                                                                                                                                                                                                                                      | #   | #    | #         | #     | #    | #    | #                                               | -           | ----                 | ----                                                                                                                                   | #   | #   | #        | #     | #    | #    |
| Rsa1.0_01851.1.g30306.t1 | gb EOA30279.1  hypothetical protein CARUB_v10013406mg [Capsella rubella]                                                                                                                                                                                                                                                                                                                                                                                                                                                                               | 535 | 539  | 0         | 100.7 | 87.3 | 92.5 | hypothetical protein CARUB_v10013406mg          | gbpln       | Capsella rubella     | AT2G05160.1   Symbols:   CCH-type zinc fingerfamily protein with RNA-binding domain   chr2:1859011-1860931 REVERSE LENGTH=536          | 535 | 536 | 0        | 100.2 | 83.6 | 91.0 |
| Rsa1.0_01851.1.g30307.t1 | ref XP_003549103.1  PREDICTED: uncharacterized protein LOC100777881 [Glycine max]                                                                                                                                                                                                                                                                                                                                                                                                                                                                      | 198 | 1799 | 6.00E-49  | 908.6 | 54.0 | 66.7 | PREDICTED: uncharacterized protein LOC100777881 | gbenv/gbpln | Glycine max          | #                                                                                                                                      | #   | #   | #        | #     | #    | #    |
| Rsa1.0_01851.1.g30308.t1 | ref XP_004309387.1  PREDICTED: uncharacterized protein LOC101295002 [Fragaria vesca subsp. vesca]                                                                                                                                                                                                                                                                                                                                                                                                                                                      | 550 | 437  | 1.00E-116 | 79.5  | 41.8 | 49.6 | PREDICTED: uncharacterized protein LOC101295002 | gbpln       | Fragaria vesca       | AT4G08267.1   Symbols:   hAT transposon superfamily protein   chr4:5216854-5217697 FORWARD LENGTH=126                                  | 550 | 126 | 2.00E-40 | 22.9  | 13.6 | 15.5 |
| Rsa1.0_01851.1.g30309.t4 | gb AAD29773.1 AF074021.5 putative transposon protein [Arabidopsis thaliana] gi 7267217 emb CAB80824.1  putative transposon protein [Arabidopsis thaliana]                                                                                                                                                                                                                                                                                                                                                                                              | 173 | 346  | 1.00E-14  | 200.0 | 23.7 | 27.2 | putative transposon protein                     | gbpln       | Arabidopsis thaliana | #                                                                                                                                      | #   | #   | #        | #     | #    | #    |
| Rsa1.0_01852.1.g30310.t1 | db BAA97086.1  unnamed protein product [Arabidopsis thaliana]                                                                                                                                                                                                                                                                                                                                                                                                                                                                                          | 222 | 341  | 2.00E-22  | 153.6 | 30.6 | 46.8 | unnamed protein product                         | gbpln       | Arabidopsis thaliana | #                                                                                                                                      | #   | #   | #        | #     | #    | #    |
| Rsa1.0_01852.1.g30311.t2 | db BAA85462.1  transposon-like ORF [Brassica rapa]                                                                                                                                                                                                                                                                                                                                                                                                                                                                                                     | 501 | 703  | 9.00E-72  | 140.3 | 28.9 | 30.5 | transposon-like ORF                             | gbpln       | Brassica rapa        | #                                                                                                                                      | #   | #   | #        | #     | #    | #    |
| Rsa1.0_01852.1.g30312.t1 | #                                                                                                                                                                                                                                                                                                                                                                                                                                                                                                                                                      | #   | #    | #         | #     | #    | #    | -                                               | ----        | ----                 | #                                                                                                                                      | #   | #   | #        | #     | #    | #    |
| Rsa1.0_01852.1.g30313.t3 | gb ABD65062.1  hypothetical protein 27.t00126 [Brassica oleracea]                                                                                                                                                                                                                                                                                                                                                                                                                                                                                      | 545 | 578  | 1.00E-123 | 106.1 | 45.5 | 61.1 | hypothetical protein 27.t00126                  | gbpln       | Brassica oleracea    | AT2G15420.1   Symbols:   myosin heavy chain-related   chr2:6723948-6728183 REVERSE LENGTH=957                                          | 545 | 957 | 4.00E-16 | 175.6 | 8.6  | 13.2 |
| Rsa1.0_01852.1.g30314.t1 | gb ABW81018.1  gag-pol polymerase [Arabidopsis lyrata subsp. lyrata]                                                                                                                                                                                                                                                                                                                                                                                                                                                                                   | 600 | 672  | 6.00E-39  | 112.0 | 18.3 | 31.8 | gag-pol polymerase                              | gbpln       | Arabidopsis lyrata   | #                                                                                                                                      | #   | #   | #        | #     | #    | #    |
| Rsa1.0_01852.1.g30315.t1 | emb CAN69925.1  hypothetical protein VITISV_027208 [Vitis vinifera]                                                                                                                                                                                                                                                                                                                                                                                                                                                                                    | 360 | 982  | 3.00E-78  | 272.8 | 45.8 | 63.1 | hypothetical protein VITISV_027208              | gbpln       | Vitis vinifera       | #                                                                                                                                      | #   | #   | #        | #     | #    | #    |
| Rsa1.0_01852.1.g30316.t1 | emb CAN75943.1  hypothetical protein VITISV_016460 [Vitis vinifera]                                                                                                                                                                                                                                                                                                                                                                                                                                                                                    | 959 | 499  | 3.00E-22  | 52.0  | 12.3 | 18.7 | hypothetical protein VITISV_016460              | gbpln       | Vitis vinifera       | #                                                                                                                                      | #   | #   | #        | #     | #    | #    |
| Rsa1.0_01852.1.g30317.t1 | #                                                                                                                                                                                                                                                                                                                                                                                                                                                                                                                                                      | #   | #    | #         | #     | #    | #    | -                                               | ----        | ----                 | #                                                                                                                                      | #   | #   | #        | #     | #    | #    |
| Rsa1.0_01853.1.g30318.t1 | ref NP_173320.2  putative WRKY transcription factor 61 [Arabidopsis thaliana] gi 20978774 sp Q8VWV6.1 WRK61_ARATH RecName: Full=Probable WRKY transcription factor 61; AltName: Full=WRKY DNA-binding protein 61 gi 17980960 gb AAL50785.1 AF452175.1 WRKY transcription factor 61 [Arabidopsis thaliana] gi 332191651 gb AEE29772.1  putative WRKY transcription factor 61 [Arabidopsis thaliana]                                                                                                                                                     | 521 | 480  | 0         | 92.1  | 71.4 | 80.4 | putative WRKY transcription factor 61           | gbpln       | Arabidopsis thaliana | AT1G18860.1   Symbols: WRKY61, ATWRKY61   WRKY DNA-binding protein 61   chr1:6509494-6511209 FORWARD LENGTH=480                        | 521 | 480 | 0        | 92.1  | 71.4 | 80.4 |
| Rsa1.0_01853.1.g30319.t1 | ref NP_173322.1  putative peptide/nitrate transporter [Arabidopsis thaliana] gi 75191595 sp O9M9V7.1 PTR8_ARATH RecName: Full=Probable peptide/nitrate transporter; At g 18880 gi 67306898 gb AAF27093.1 AC011809.2 Similar to peptide transport proteins [Arabidopsis thaliana] gi 17979087 gb AAL49811.1  putative peptide transporter protein [Arabidopsis thaliana] gi 21436191 gb AAM51383.1  putative peptide transporter protein [Arabidopsis thaliana] gi 332191655 gb AEE29776.1  probable peptide/nitrate transporter [Arabidopsis thaliana] | 556 | 587  | 4.00E-29  | 105.6 | 15.6 | 17.8 | putative peptide/nitrate transporter            | gbpln       | Arabidopsis thaliana | AT1G18890.1   Symbols:   Major facilitator superfamily protein   chr1:6520800-6523241 FORWARD LENGTH=587                               | 556 | 587 | 8.00E-32 | 105.6 | 15.6 | 17.8 |
| Rsa1.0_01853.1.g30320.t1 | db BAJ34189.1  unnamed protein product [Thellungiella halophila]                                                                                                                                                                                                                                                                                                                                                                                                                                                                                       | 547 | 545  | 0         | 99.6  | 92.5 | 96.9 | unnamed protein product                         | ----        | ----                 | AT1G18890.1   Symbols:   ATCDPK1, CPK10, CDPK1, AtGPK10   calcium-dependent protein kinase 1   chr1:6523468-6525736 REVERSE LENGTH=545 | 547 | 545 | 0        | 99.6  | 91.0 | 96.2 |
| Rsa1.0_01853.1.g30321.t1 | #                                                                                                                                                                                                                                                                                                                                                                                                                                                                                                                                                      | #   | #    | #         | #     | #    | #    | -                                               | ----        | ----                 | #                                                                                                                                      | #   | #   | #        | #     | #    | #    |
| Rsa1.0_01853.1.g30322.t1 | ref XP_002890307.1  aminoacyl-tRNA synthetase family [Arabidopsis lyrata subsp. lyrata] gi 297336149 gb EFH66566.1  aminoacyl-tRNA synthetase family [Arabidopsis lyrata subsp. lyrata]                                                                                                                                                                                                                                                                                                                                                                | 727 | 761  | 0         | 104.7 | 80.5 | 87.8 | aminoacyl-tRNA synthetase family                | gbpln       | Arabidopsis lyrata   | AT1G18950.1   Symbols:   DDT domain superfamily   chr1:6546539-6551549 FORWARD LENGTH=750                                              | 727 | 750 | 0        | 103.2 | 79.1 | 86.1 |

|                          |                                                                                                                                                                                                                                                                                                                                                                                                                                                                                                                                                                                                                                                                                                                                                                                                                                                                                                                |     |      |           |       |      |      |                                        |       |                      |                                                                                                                                                                                                                                                                                                                                           |     |      |           |       |      |      |
|--------------------------|----------------------------------------------------------------------------------------------------------------------------------------------------------------------------------------------------------------------------------------------------------------------------------------------------------------------------------------------------------------------------------------------------------------------------------------------------------------------------------------------------------------------------------------------------------------------------------------------------------------------------------------------------------------------------------------------------------------------------------------------------------------------------------------------------------------------------------------------------------------------------------------------------------------|-----|------|-----------|-------|------|------|----------------------------------------|-------|----------------------|-------------------------------------------------------------------------------------------------------------------------------------------------------------------------------------------------------------------------------------------------------------------------------------------------------------------------------------------|-----|------|-----------|-------|------|------|
| Rsa1.0_01853.1.g30323.t1 | refXP_002893025.1   hypothetical protein ARALYDRAFT_472121 [Arabidopsis lyrata subsp. lyrata] gi 297338867 gb EFH69284.1                                                                                                                                                                                                                                                                                                                                                                                                                                                                                                                                                                                                                                                                                                                                                                                       | 214 | 220  | 1.00E-104 | 102.8 | 91.1 | 93.5 | hypothetical protein ARALYDRAFT_472121 | gbpln | Arabidopsis lyrata   | AT1G18980.1   Symbols:   RmC-like cupins superfamily protein   chr1:6557364-6558026 REVERSE LENGTH=220                                                                                                                                                                                                                                    | 214 | 220  | 1.00E-105 | 102.8 | 89.3 | 93.0 |
| Rsa1.0_01853.1.g30324.t1 | hypothetical protein ARALYDRAFT_472121 [Arabidopsis lyrata subsp. lyrata] ref NP_173333.1   uncharacterized protein [Arabidopsis thaliana] gi 8778293 gb AAF79302.1 AC068602.25 F14D16.14 [Arabidopsis thaliana] gi 27754600 gb AAO22746.1   unknown protein [Arabidopsis thaliana] gi 332191666 gb AEE29787.1   uncharacterized protein AT1G18990 [Arabidopsis thaliana]                                                                                                                                                                                                                                                                                                                                                                                                                                                                                                                                      | 522 | 524  | 0         | 100.4 | 81.4 | 88.3 | uncharacterized protein                | gbpln | Arabidopsis thaliana | AT1G18990.1   Symbols:   Protein of unknown function, DUF593   chr1:6558778-6560432 REVERSE LENGTH=524                                                                                                                                                                                                                                    | 522 | 524  | 0         | 100.4 | 81.4 | 88.3 |
| Rsa1.0_01853.1.g30325.t1 | dbj BAJ34162.1   unnamed protein product [Theellungiella halophila]                                                                                                                                                                                                                                                                                                                                                                                                                                                                                                                                                                                                                                                                                                                                                                                                                                            | 144 | 294  | 2.00E-46  | 204.2 | 68.1 | 72.2 | unnamed protein product                | ----  | ----                 | AT1G19000.2   Symbols:   Homeodomain-like superfamily protein   chr1:6561335-6562684 REVERSE LENGTH=285                                                                                                                                                                                                                                   | 144 | 285  | 1.00E-45  | 197.9 | 65.3 | 69.4 |
| Rsa1.0_01853.1.g30326.t1 | ref NP_564069.1   uncharacterized protein [Arabidopsis thaliana] gi 17529338 gb AAL38896.1   unknown protein [Arabidopsis thaliana] gi 21436385 gb AAM51362.1   unknown protein [Arabidopsis thaliana] gi 21592659 gb AAM64608.1   unknown [Arabidopsis thaliana] gi 51968576 dbj BAD42980.1   unknown protein [Arabidopsis thaliana] gi 51969192 dbj BAD43288.1   unknown protein [Arabidopsis thaliana] gi 51970278 dbj BAD43831.1   unknown protein [Arabidopsis thaliana] gi 51972011 dbj BAD44670.1   unknown protein [Arabidopsis thaliana] gi 332191671 gb AEE29792.1   uncharacterized protein AT1G19020 [Arabidopsis thaliana]                                                                                                                                                                                                                                                                        | 82  | 86   | 1.00E-23  | 104.9 | 80.5 | 82.9 | uncharacterized protein                | gbpln | Arabidopsis thaliana | AT1G19020.1   Symbols:   unknown protein; BEST Arabidopsis thaliana protein match is: unknown protein (TAIR:AT3G48180.1); Has 88 Blast hits to 88 proteins in 15 species: Archae - 0; Bacteria - 0; Metazoa - 0; Fungi - 0; Plants - 88; Viruses - 0; Other Eukaryotes - 0 (source: NCBI BLink).   chr1:6568142-6568402 FORWARD LENGTH=86 | 82  | 86   | 2.00E-26  | 104.9 | 80.5 | 82.9 |
| Rsa1.0_01853.1.g30327.t1 | #                                                                                                                                                                                                                                                                                                                                                                                                                                                                                                                                                                                                                                                                                                                                                                                                                                                                                                              | #   | #    | #         | #     | #    | #    | -                                      | ----  | ----                 | #                                                                                                                                                                                                                                                                                                                                         | #   | #    | #         | #     | #    | #    |
| Rsa1.0_01853.1.g30328.t1 | emb CAN65188.1   hypothetical protein VITISV_004365 [Vitis vinifera]                                                                                                                                                                                                                                                                                                                                                                                                                                                                                                                                                                                                                                                                                                                                                                                                                                           | 991 | 1265 | 0         | 127.6 | 54.2 | 67.7 | hypothetical protein VITISV_004365     | gbpln | Vitis vinifera       | AT4G23160.1   Symbols: CRK8   cysteine-rich RLK (RECEPTOR-like protein kinase) 8   chr4:12129485-12134086 FORWARD LENGTH=1262                                                                                                                                                                                                             | 991 | 1262 | 6.00E-91  | 127.3 | 17.6 | 28.3 |
| Rsa1.0_01853.1.g30329.t1 | ref NP_564075.1   protein TIFY 10A [Arabidopsis thaliana] gi 75174736 sp Q9LMA8.1 TI10A_ARATH RecName: Full=Protein TIFY 10A; AltName: Full=Jasmonate ZIM domain-containing protein 1 gi 8954056 gb AAF82229.1 AC069143.5 Contains similarity to an unknown protein T10D10.8 gi 6730756 from Arabidopsis thaliana BAC T10D10 gb AC016529. ESTs gb T14209, gb BE038503, gb AA650871, gb AA597384, gb H76606, gb A1996806, gb A1100291 come from this gene [Arabidopsis thaliana] gi 12083250 gb AAG48784.1 AF332421_1 unknown protein [Arabidopsis thaliana] gi 14532540 gb AAK63998.1 At1g19180/T29M8.5 [Arabidopsis thaliana] gi 17473768 gb AAL38322.1   unknown protein [Arabidopsis thaliana] gi 19549055 gb AAL87391.1   At1g19180/T29M8.5 [Arabidopsis thaliana] gi 20148609 gb AAM10195.1   unknown protein [Arabidopsis thaliana] gi 332191683 gb AEE29814.1   protein TIFY 10A [Arabidopsis thaliana] | 274 | 253  | 8.00E-98  | 92.3  | 73.7 | 80.7 | protein TIFY 10A                       | gbpln | Arabidopsis thaliana | AT1G19180.1   Symbols: JAZ1, TIFY10A   jasmonate-zim-domain protein 1   chr1:6622312-6623271 FORWARD LENGTH=253                                                                                                                                                                                                                           | 274 | 253  | 1.00E-100 | 92.3  | 73.7 | 80.7 |
| Rsa1.0_01853.1.g30330.t1 | #                                                                                                                                                                                                                                                                                                                                                                                                                                                                                                                                                                                                                                                                                                                                                                                                                                                                                                              | #   | #    | #         | #     | #    | #    | -                                      | ----  | ----                 | #                                                                                                                                                                                                                                                                                                                                         | #   | #    | #         | #     | #    | #    |
| Rsa1.0_01853.1.g30331.t1 | #                                                                                                                                                                                                                                                                                                                                                                                                                                                                                                                                                                                                                                                                                                                                                                                                                                                                                                              | #   | #    | #         | #     | #    | #    | -                                      | ----  | ----                 | #                                                                                                                                                                                                                                                                                                                                         | #   | #    | #         | #     | #    | #    |
| Rsa1.0_01853.1.g30332.t1 | #                                                                                                                                                                                                                                                                                                                                                                                                                                                                                                                                                                                                                                                                                                                                                                                                                                                                                                              | #   | #    | #         | #     | #    | #    | -                                      | ----  | ----                 | #                                                                                                                                                                                                                                                                                                                                         | #   | #    | #         | #     | #    | #    |
| Rsa1.0_01853.1.g30333.t1 | dbj BAB10503.1   retroelement pol polyprotein-like [Arabidopsis thaliana]                                                                                                                                                                                                                                                                                                                                                                                                                                                                                                                                                                                                                                                                                                                                                                                                                                      | 421 | 1475 | 1.00E-162 | 350.4 | 67.0 | 80.0 | retroelement pol polyprotein-like      | gbpln | Arabidopsis thaliana | AT4G23160.1   Symbols: CRK8   cysteine-rich RLK (RECEPTOR-like protein kinase) 8   chr4:12129485-12134086 FORWARD LENGTH=1262                                                                                                                                                                                                             | 421 | 1262 | 1.00E-141 | 299.8 | 56.1 | 70.8 |
| Rsa1.0_01853.1.g30334.t1 | dbj BAB10503.1   retroelement pol polyprotein-like [Arabidopsis thaliana]                                                                                                                                                                                                                                                                                                                                                                                                                                                                                                                                                                                                                                                                                                                                                                                                                                      | 717 | 1475 | 0         | 205.7 | 50.1 | 65.8 | retroelement pol polyprotein-like      | gbpln | Arabidopsis thaliana | #                                                                                                                                                                                                                                                                                                                                         | #   | #    | #         | #     | #    | #    |
| Rsa1.0_01854.1.g30335.t1 | #                                                                                                                                                                                                                                                                                                                                                                                                                                                                                                                                                                                                                                                                                                                                                                                                                                                                                                              | #   | #    | #         | #     | #    | #    | -                                      | ----  | ----                 | #                                                                                                                                                                                                                                                                                                                                         | #   | #    | #         | #     | #    | #    |

|                          |                                                                                                                                                                                                                                                                                                                                                                                                                                                                                                                                                                                                                                             |      |      |           |       |      |      |                                                 |       |                      |                                                                                                                                                                                                                                                                                                                                                                                                                                                                     |      |      |           |       |      |      |
|--------------------------|---------------------------------------------------------------------------------------------------------------------------------------------------------------------------------------------------------------------------------------------------------------------------------------------------------------------------------------------------------------------------------------------------------------------------------------------------------------------------------------------------------------------------------------------------------------------------------------------------------------------------------------------|------|------|-----------|-------|------|------|-------------------------------------------------|-------|----------------------|---------------------------------------------------------------------------------------------------------------------------------------------------------------------------------------------------------------------------------------------------------------------------------------------------------------------------------------------------------------------------------------------------------------------------------------------------------------------|------|------|-----------|-------|------|------|
| Rsa1.0_01854.1.g30336.t1 | gb EOA38872.1  hypothetical protein CARUB_v10011237mg [Capsella rubella]                                                                                                                                                                                                                                                                                                                                                                                                                                                                                                                                                                    | 94   | 375  | 8.00E-25  | 398.9 | 64.9 | 76.6 | hypothetical protein CARUB_v10011237mg          | gbpln | Capsella rubella     | AT1G49640.1   Symbols:   alpha/beta-Hydrolases superfamily protein   chr1:18375697-18376644 REVERSE LENGTH=315                                                                                                                                                                                                                                                                                                                                                      | 94   | 315  | 1.00E-25  | 335.1 | 70.2 | 79.8 |
| Rsa1.0_01854.1.g30337.t1 | gb EOA38872.1  hypothetical protein CARUB_v10011237mg [Capsella rubella]                                                                                                                                                                                                                                                                                                                                                                                                                                                                                                                                                                    | 375  | 375  | 1.00E-159 | 100.0 | 75.7 | 85.6 | hypothetical protein CARUB_v10011237mg          | gbpln | Capsella rubella     | AT1G49650.1   Symbols:   alpha/beta-Hydrolases superfamily protein   chr1:18377363-18378487 REVERSE LENGTH=374                                                                                                                                                                                                                                                                                                                                                      | 375  | 374  | 1.00E-159 | 99.7  | 76.8 | 85.6 |
| Rsa1.0_01854.1.g30338.t1 | gb EOA36208.1  hypothetical protein CARUB_v10010124mg [Capsella rubella]                                                                                                                                                                                                                                                                                                                                                                                                                                                                                                                                                                    | 245  | 245  | 1.00E-118 | 100.0 | 85.7 | 92.2 | hypothetical protein CARUB_v10010124mg          | gbpln | Capsella rubella     | AT1G49590.1   Symbols:   C2H2 and C2HC zinc fingers superfamily protein   chr1:18354997-18356409 FORWARD LENGTH=242                                                                                                                                                                                                                                                                                                                                                 | 245  | 242  | 1.00E-120 | 98.8  | 85.3 | 91.8 |
| Rsa1.0_01854.1.g30339.t1 | dbj BAB09912.1  MADS-box protein-like [Arabidopsis thaliana]                                                                                                                                                                                                                                                                                                                                                                                                                                                                                                                                                                                | 292  | 368  | 3.00E-42  | 126.0 | 38.4 | 56.2 | MADS-box protein-like                           | gbpln | Arabidopsis thaliana | AT5G49420.1   Symbols:   MADS-box transcription factor family protein   chr5:20035166-20036170 REVERSE LENGTH=334                                                                                                                                                                                                                                                                                                                                                   | 292  | 334  | 1.00E-44  | 114.4 | 38.7 | 56.8 |
| Rsa1.0_01854.1.g30340.t1 | gb AAF69169.1 AC007915.21 F27F5.21 [Arabidopsis thaliana]                                                                                                                                                                                                                                                                                                                                                                                                                                                                                                                                                                                   | 871  | 1023 | 1.00E-119 | 117.5 | 29.5 | 40.2 | F27F5.21                                        | gbpln | Arabidopsis thaliana | AT3G09510.1   Symbols:   Ribonuclease H-like superfamily protein   chr3:2921804-2923258 FORWARD LENGTH=484                                                                                                                                                                                                                                                                                                                                                          | 871  | 484  | 5.00E-23  | 55.6  | 11.3 | 16.1 |
| Rsa1.0_01854.1.g30341.t1 | gb EOA23804.1  hypothetical protein CARUB_v10017017mg, partial [Capsella rubella]                                                                                                                                                                                                                                                                                                                                                                                                                                                                                                                                                           | 644  | 521  | 2.00E-52  | 80.9  | 18.2 | 25.2 | hypothetical protein CARUB_v10017017mg, partial | gbpln | Capsella rubella     | AT3G31430.1   Symbols:   unknown protein; FUNCTIONS IN: molecular function unknown; INVOLVED IN: biological process unknown; LOCATED IN: endomembrane system; BEST Arabidopsis thaliana protein match is: unknown protein (TAIR:AT5G18636.1); Has 295 Blast hits to 291 proteins in 12 species: Archae - 0; Bacteria - 0; Metazoa - 0; Fungi - 0; Plants - 295; Viruses - 0; Other Eukaryotes - 0 (source: NCBI BLINK).   chr3:12795861-12796871 REVERSE LENGTH=336 | 644  | 336  | 1.00E-18  | 52.2  | 8.9  | 14.1 |
| Rsa1.0_01855.1.g30342.t1 | ref NP_177414.1  phospholipid-translocating ATPase [Arabidopsis thaliana]<br>gi 12229669 sp Q9SGG3.1 ALA5_ARATH RecName: Full=Putative phospholipid-translocating ATPase 5; Short=AtALA5; AltName: Full=Aminophospholipid flippase 5<br>gi 12323764 gb AAG51844.1 AC010926.7 putative P-type transporting ATPase: 43607-39026 [Arabidopsis thaliana]<br>gi 332197241 gb AEE35362.1  putative phospholipid-translocating ATPase 5 [Arabidopsis thaliana]                                                                                                                                                                                     | 1231 | 1228 | 0         | 99.8  | 91.6 | 95.5 | phospholipid-translocating ATPase               | gbpln | Arabidopsis thaliana | AT1G72700.1   Symbols:   ATPase E1-E2 type family protein / haloacid dehalogenase-like hydrolase family protein   chr1:27366910-27371491 FORWARD LENGTH=1228                                                                                                                                                                                                                                                                                                        | 1231 | 1228 | 0         | 99.8  | 91.6 | 95.5 |
| Rsa1.0_01855.1.g30343.t1 | gb EOA35124.1  hypothetical protein CARUB_v10020246mg [Capsella rubella]                                                                                                                                                                                                                                                                                                                                                                                                                                                                                                                                                                    | 466  | 466  | 0         | 100.0 | 89.9 | 93.1 | hypothetical protein CARUB_v10020246mg          | gbpln | Capsella rubella     | AT1G72710.1   Symbols: CKL2   casein kinase 1-like protein 2   chr1:27372553-27376178 FORWARD LENGTH=465                                                                                                                                                                                                                                                                                                                                                            | 466  | 465  | 0         | 99.8  | 89.3 | 92.5 |
| Rsa1.0_01855.1.g30344.t1 | gb AAF19806.1  putative protein [Brassica oleracea]                                                                                                                                                                                                                                                                                                                                                                                                                                                                                                                                                                                         | 128  | 125  | 3.00E-55  | 97.7  | 84.4 | 88.3 | putative protein                                | gbpln | Brassica oleracea    | AT1G72720.1   Symbols:   Protein of unknown function (DUF3511)   chr1:27376903-27377286 REVERSE LENGTH=127                                                                                                                                                                                                                                                                                                                                                          | 128  | 127  | 2.00E-42  | 99.2  | 68.8 | 82.8 |
| Rsa1.0_01855.1.g30345.t1 | gb EOA35218.1  hypothetical protein CARUB_v10020373mg [Capsella rubella]                                                                                                                                                                                                                                                                                                                                                                                                                                                                                                                                                                    | 634  | 414  | 0         | 65.3  | 62.9 | 64.5 | hypothetical protein CARUB_v10020373mg          | gbpln | Capsella rubella     | AT1G72730.1   Symbols:   DEA(D/H)-box RNA helicase family protein   chr1:27378040-27379593 REVERSE LENGTH=414                                                                                                                                                                                                                                                                                                                                                       | 634  | 414  | 0         | 65.3  | 62.6 | 64.4 |
| Rsa1.0_01855.1.g30346.t1 | ref NP_564028.1  translocase of inner mitochondrial membrane 23 [Arabidopsis thaliana]<br>gi 75175255 sp Q9LNQ1.1 TI231_ARATH RecName: Full=Mitochondrial import inner membrane translocase subunit TIM23-1<br>gi 8778460 gb AAF79468.1 AC022492.12 F1L3.24 [Arabidopsis thaliana]<br>gi 15010570 gb AAK73944.1  At g17530/F11A6.4 [Arabidopsis thaliana]<br>gi 20147387 gb AAM10403.1  At g17530/F11A6.4 [Arabidopsis thaliana]<br>gi 38678776 gb AAR26373.1  mitochondrial inner membrane translocase TIM23-1 [Arabidopsis thaliana]<br>gi 332191491 gb AEE29602.1  translocase of inner mitochondrial membrane 23 [Arabidopsis thaliana] | 191  | 187  | 1.00E-76  | 97.9  | 81.7 | 90.6 | translocase of inner mitochondrial membrane 23  | gbpln | Arabidopsis thaliana | AT1G17530.1   Symbols: ATTIM23-1, TIM23-1   translocase of inner mitochondrial membrane 23   chr1:6027723-6028286 FORWARD LENGTH=187                                                                                                                                                                                                                                                                                                                                | 191  | 187  | 5.00E-79  | 97.9  | 81.7 | 90.6 |
| Rsa1.0_01855.1.g30347.t1 | ref XP_002888992.1  kinase family protein [Arabidopsis lyrata subsp. lyrata]<br>gi 297334733 gb EFH65151.1  kinase family protein [Arabidopsis lyrata subsp. lyrata]                                                                                                                                                                                                                                                                                                                                                                                                                                                                        | 617  | 707  | 0         | 114.6 | 74.4 | 85.1 | kinase family protein                           | gbpln | Arabidopsis lyrata   | AT1G72760.1   Symbols:   Protein kinase superfamily protein   chr1:27385421-27388274 REVERSE LENGTH=697                                                                                                                                                                                                                                                                                                                                                             | 617  | 697  | 0         | 113.0 | 73.6 | 84.8 |

|                          |                                                                                                                                                                                                                                                                                                                                                                                                                                                                                                                                                                                                                                                                                                                                                                                                                                     |      |      |           |       |      |      |                                               |       |                      |                                                                                                                                                                                                                                                                                                                           |      |      |           |       |      |      |
|--------------------------|-------------------------------------------------------------------------------------------------------------------------------------------------------------------------------------------------------------------------------------------------------------------------------------------------------------------------------------------------------------------------------------------------------------------------------------------------------------------------------------------------------------------------------------------------------------------------------------------------------------------------------------------------------------------------------------------------------------------------------------------------------------------------------------------------------------------------------------|------|------|-----------|-------|------|------|-----------------------------------------------|-------|----------------------|---------------------------------------------------------------------------------------------------------------------------------------------------------------------------------------------------------------------------------------------------------------------------------------------------------------------------|------|------|-----------|-------|------|------|
| Rsa1.0_01855.1.g30348.t1 | ref[XP_002887453.1] predicted protein [Arabidopsis lyrata subsp. lyrata] gi 297333294 gb EFH63712.1  predicted protein [Arabidopsis lyrata subsp. lyrata]                                                                                                                                                                                                                                                                                                                                                                                                                                                                                                                                                                                                                                                                           | 188  | 203  | 4.00E-12  | 108.0 | 24.5 | 30.3 | predicted protein                             | gbpln | Arabidopsis lyrata   | AT4G08760.1   Symbols:   BEST Arabidopsis thaliana protein match is: nucleolin like 1 (TAIR:AT1G48920.1); Has 36 Blast hits to 36 proteins in 4 species: Archae - 0; Bacteria - 0; Metazoa - 0; Fungi - 0; Plants - 36; Viruses - 0; Other Eukaryotes - 0 (source: NCBI BLINK).   chr4:5584739-5591133 REVERSE LENGTH=521 | 188  | 521  | 2.00E-14  | 277.1 | 23.4 | 28.7 |
| Rsa1.0_01855.1.g30349.t1 | ref[XP_002888893.1] hypothetical protein ARALYDRAFT_316241 [Arabidopsis lyrata subsp. lyrata] gi 297334734 gb EFH6152.1                                                                                                                                                                                                                                                                                                                                                                                                                                                                                                                                                                                                                                                                                                             | 512  | 519  | 0         | 101.4 | 91.2 | 95.3 | hypothetical protein ARALYDRAFT_316241        | gbpln | Arabidopsis lyrata   | AT1G72810.1   Symbols:   Pyridoxal-5'-phosphate-dependent enzyme family protein   chr1:27398760-27400393 REVERSE LENGTH=516                                                                                                                                                                                               | 512  | 516  | 0         | 100.8 | 90.6 | 94.3 |
| Rsa1.0_01855.1.g30350.t1 | hypothetical protein ARALYDRAFT_316241 [Arabidopsis lyrata subsp. lyrata] ref[NP_565049.1] nuclear transcription factor Y subunit A-3 [Arabidopsis thaliana] gi 81174954 sp Q93Z2.2 NFYA3_ARAT H RecName: Full=Nuclear transcription factor Y subunit A-3; Short=AtNF-YA-3; AltName: Full=Transcriptional activator HAP2C gi 5903072 gb AAD55630.1 AC008017.3 Transcription Factor [Arabidopsis thaliana] gi 22655158 gb AAM98169.1  CCAAT-binding factor B subunit-like protein, putative [Arabidopsis thaliana] gi 31711816 gb AAP68264.1  At1g72830 [Arabidopsis thaliana] gi 332197257 gb AEE35378.1  nuclear transcription factor Y subunit A-3 [Arabidopsis thaliana]                                                                                                                                                         | 316  | 340  | 1.00E-134 | 107.6 | 83.9 | 90.2 | nuclear transcription factor Y subunit A-3    | gbpln | Arabidopsis thaliana | AT1G72830.1   Symbols: HAP2C, ATHAP2C, NF-YA3   nuclear factor Y, subunit A3   chr1:27405699-27407088 REVERSE LENGTH=340                                                                                                                                                                                                  | 316  | 340  | 1.00E-137 | 107.6 | 83.9 | 90.2 |
| Rsa1.0_01856.1.g30351.t1 | gb ABD64930.1  hypothetical protein 24.t00076 [Brassica oleracea] ref[NP_192852.1] ethylene-responsive transcription factor CRF1 [Arabidopsis thaliana] gi 75220260 sp O82503.1 CRF1_ARATH RecName: Full=Ethylene-responsive transcription factor CRF1; AltName: Full=Protein CYTOKININ RESPONSE FACTOR 1 gi 3600050 gb AAC35537.1  contains similarity to AP2 domain containing proteins [Arabidopsis thaliana] gi 4950293 emb CAB43049.1  putative Ap2 domain protein [Arabidopsis thaliana] gi 7267813 emb CAB81215.1  putative Ap2 domain protein [Arabidopsis thaliana] gi 48479290 gb AAT44916.1  putative AP2/EREBP transcription factor [Arabidopsis thaliana] gi 92856649 gb ABE77414.1  At4g11140 [Arabidopsis thaliana] gi 332657577 gb AEE82977.1  ethylene-responsive transcription factor CRF1 [Arabidopsis thaliana] | 523  | 407  | 1.00E-12  | 77.8  | 12.6 | 18.2 | hypothetical protein 24.t00076                | gbpln | Brassica oleracea    | #                                                                                                                                                                                                                                                                                                                         | #    | #    | #         | #     | #    | #    |
| Rsa1.0_01856.1.g30352.t1 | gb AAM15254.1  putative retroelement pol polyprotein [Arabidopsis thaliana] ref[XP_002870332.1] hypothetical protein ARALYDRAFT_330097 [Arabidopsis lyrata subsp. lyrata] gi 297316188 gb EFH46591.1                                                                                                                                                                                                                                                                                                                                                                                                                                                                                                                                                                                                                                | 290  | 287  | 4.00E-84  | 99.0  | 71.0 | 77.2 | ethylene-responsive transcription factor CRF1 | gbpln | Arabidopsis thaliana | AT4G11140.1   Symbols: CRF1   cytokinin response factor 1   chr4:6794930-6795793 REVERSE LENGTH=287                                                                                                                                                                                                                       | 290  | 287  | 1.00E-86  | 99.0  | 71.0 | 77.2 |
| Rsa1.0_01856.1.g30353.t1 | hypothetical protein ARALYDRAFT_330097 [Arabidopsis lyrata subsp. lyrata] gi 297316188 gb EFH46591.1                                                                                                                                                                                                                                                                                                                                                                                                                                                                                                                                                                                                                                                                                                                                | 1727 | 1339 | 0         | 77.5  | 60.9 | 66.8 | hypothetical protein ARALYDRAFT_330097        | gbpln | Arabidopsis lyrata   | AT4G14180.1   Symbols: AtPRD1, PRD1   putative recombination initiation defect 1   chr4:8178330-8183515 FORWARD LENGTH=1268                                                                                                                                                                                               | 1727 | 1268 | 0         | 73.4  | 58.4 | 64.4 |
| Rsa1.0_01857.1.g30355.t1 | gb E0A23025.1  hypothetical protein CARUB_v10003790mg [Capsella rubella]                                                                                                                                                                                                                                                                                                                                                                                                                                                                                                                                                                                                                                                                                                                                                            | 481  | 485  | 0         | 100.8 | 86.1 | 94.6 | hypothetical protein CARUB_v10003790mg        | gbpln | Capsella rubella     | AT4G00910.1   Symbols:   Aluminium activated malate transporter family protein   chr4:389370-391287 REVERSE LENGTH=497                                                                                                                                                                                                    | 481  | 497  | 0         | 103.3 | 86.7 | 93.6 |

|                          |                                                                                                                                                                                                                                                                                                                                                                                                                                                                                                                                                                                                                                                                                                                                                                                                                                                                                                                                                                                                                                                                                                                                                                                                                                                                                     |     |     |           |       |      |      |                                          |       |                      |                                                                                                                  |     |     |           |       |      |      |
|--------------------------|-------------------------------------------------------------------------------------------------------------------------------------------------------------------------------------------------------------------------------------------------------------------------------------------------------------------------------------------------------------------------------------------------------------------------------------------------------------------------------------------------------------------------------------------------------------------------------------------------------------------------------------------------------------------------------------------------------------------------------------------------------------------------------------------------------------------------------------------------------------------------------------------------------------------------------------------------------------------------------------------------------------------------------------------------------------------------------------------------------------------------------------------------------------------------------------------------------------------------------------------------------------------------------------|-----|-----|-----------|-------|------|------|------------------------------------------|-------|----------------------|------------------------------------------------------------------------------------------------------------------|-----|-----|-----------|-------|------|------|
| Rsa1.0_01857.1.g30356.t2 | <p>ref NP_567193.2  putative S-acyltransferase [Arabidopsis thaliana] gi 75222970 sp Q5M757.1 ZDH15_ARAT H RecName: Full=Probable S-acyltransferase At4g00840; AltName: Full=Probable palmitoyltransferase At4g00840; AltName: Full=Zinc finger DHHC domain-containing protein At4g00840 gi 56461762 gb AAV91337.1  At4g00840 [Arabidopsis thaliana] gi 57222210 gb AAW39012.1  At4g00840 [Arabidopsis thaliana] gi 110738461 dbj BAF01156.1  hypothetical protein [Arabidopsis thaliana] gi 332656544 gb AEE81944.1  putative S-acyltransferase [Arabidopsis thaliana] ref NP_567192.1  RNA recognition motif-containing protein [Arabidopsis thaliana] gi 79324963 ref NP_001031566.1  RNA recognition motif-containing protein [Arabidopsis thaliana] gi 13605916 gb AAK32943.1 AF367357.1 AT4g00830/A_TM018A10_14 [Arabidopsis thaliana] gi 21360555 gb AAM47474.1  AT4g00830/A_TM018A10_14 [Arabidopsis thaliana] gi 110743368 dbj BAE99571.1  hypothetical protein [Arabidopsis thaliana] gi 332656540 gb AEE81940.1  RNA recognition motif-containing protein [Arabidopsis thaliana] gi 332656541 gb AEE81941.1  RNA recognition motif-containing protein [Arabidopsis thaliana]</p>                                                                                         | 281 | 291 | 1.00E-128 | 103.6 | 87.2 | 91.8 | putative S-acyltransferase               | gbpln | Arabidopsis thaliana | AT4G00840.1   Symbols:   DHHC-type zinc finger family protein   chr4:355483-357105 REVERSE LENGTH=291            | 281 | 291 | 1.00E-130 | 103.6 | 87.2 | 91.8 |
| Rsa1.0_01857.1.g30357.t1 | <p>ref XP_002875013.1  IQ-domain 17 [Arabidopsis lyrata subsp. lyrata] gi 297320850 gb EFH51272.1  IQ-domain 17 [Arabidopsis lyrata subsp. lyrata] ref NP_567190.1  60S acidic ribosomal protein P1-2 [Arabidopsis thaliana] gi 30678744 ref NP_849278.1  60S acidic ribosomal protein P1-2 [Arabidopsis thaliana] gi 41019478 sp O23095.2 RLA12_ARATH RecName: Full=60S acidic ribosomal protein P1-2 gi 13605597 gb AAK32792.1 AF361624.1 AT4g00810/A_TM018A10_9 [Arabidopsis thaliana] gi 15777871 gb AAL05896.1  AT4g00810/A_TM018A10_9 [Arabidopsis thaliana] gi 21554797 gb AAM63694.1  acidic ribosomal protein p1 [Arabidopsis thaliana] gi 222423235 dbj BAH19594.1  AT4G00810 [Arabidopsis thaliana] gi 332656537 gb AEE81937.1  60S acidic ribosomal protein P1-2 [Arabidopsis thaliana] gi 332656538 gb AEE81938.1  60S acidic ribosomal protein P1-2 [Arabidopsis thaliana] ref NP_186829.3  ribosome recycling factor [Arabidopsis thaliana] gi 34146850 gb AAQ62433.1  At3g01800 [Arabidopsis thaliana] gi 51970776 dbj BAD44080.1  putative ribosome recycling factor [Arabidopsis thaliana] gi 62319213 dbj BAD94407.1  putative ribosome recycling factor [Arabidopsis thaliana] gi 332640195 gb AEE73716.1  ribosome recycling factor [Arabidopsis thaliana]</p> | 432 | 495 | 0         | 114.6 | 85.4 | 92.6 | RNA recognition motif-containing protein | gbpln | Arabidopsis thaliana | AT4G00830.2   Symbols:   RNA-binding (RRM/RBD/RNP motifs) family protein   chr4:352782-354965 FORWARD LENGTH=495 | 432 | 495 | 0         | 114.6 | 85.4 | 92.6 |
| Rsa1.0_01857.1.g30358.t1 | <p>ref XP_002875013.1  IQ-domain 17 [Arabidopsis lyrata subsp. lyrata] gi 297320850 gb EFH51272.1  IQ-domain 17 [Arabidopsis lyrata subsp. lyrata] ref NP_567190.1  60S acidic ribosomal protein P1-2 [Arabidopsis thaliana] gi 30678744 ref NP_849278.1  60S acidic ribosomal protein P1-2 [Arabidopsis thaliana] gi 41019478 sp O23095.2 RLA12_ARATH RecName: Full=60S acidic ribosomal protein P1-2 gi 13605597 gb AAK32792.1 AF361624.1 AT4g00810/A_TM018A10_9 [Arabidopsis thaliana] gi 15777871 gb AAL05896.1  AT4g00810/A_TM018A10_9 [Arabidopsis thaliana] gi 21554797 gb AAM63694.1  acidic ribosomal protein p1 [Arabidopsis thaliana] gi 222423235 dbj BAH19594.1  AT4G00810 [Arabidopsis thaliana] gi 332656537 gb AEE81937.1  60S acidic ribosomal protein P1-2 [Arabidopsis thaliana] gi 332656538 gb AEE81938.1  60S acidic ribosomal protein P1-2 [Arabidopsis thaliana] ref NP_186829.3  ribosome recycling factor [Arabidopsis thaliana] gi 34146850 gb AAQ62433.1  At3g01800 [Arabidopsis thaliana] gi 51970776 dbj BAD44080.1  putative ribosome recycling factor [Arabidopsis thaliana] gi 62319213 dbj BAD94407.1  putative ribosome recycling factor [Arabidopsis thaliana] gi 332640195 gb AEE73716.1  ribosome recycling factor [Arabidopsis thaliana]</p> | 528 | 534 | 0         | 101.1 | 78.0 | 85.6 | IQ-domain 17                             | gbpln | Arabidopsis lyrata   | AT4G00820.1   Symbols:   iqd17   IQ-domain 17   chr4:349300-351307 FORWARD LENGTH=534                            | 528 | 534 | 0         | 101.1 | 79.0 | 85.4 |
| Rsa1.0_01857.1.g30359.t1 | <p>ref NP_567190.1  60S acidic ribosomal protein P1-2 [Arabidopsis thaliana] gi 30678744 ref NP_849278.1  60S acidic ribosomal protein P1-2 [Arabidopsis thaliana] gi 41019478 sp O23095.2 RLA12_ARATH RecName: Full=60S acidic ribosomal protein P1-2 gi 13605597 gb AAK32792.1 AF361624.1 AT4g00810/A_TM018A10_9 [Arabidopsis thaliana] gi 15777871 gb AAL05896.1  AT4g00810/A_TM018A10_9 [Arabidopsis thaliana] gi 21554797 gb AAM63694.1  acidic ribosomal protein p1 [Arabidopsis thaliana] gi 222423235 dbj BAH19594.1  AT4G00810 [Arabidopsis thaliana] gi 332656537 gb AEE81937.1  60S acidic ribosomal protein P1-2 [Arabidopsis thaliana] gi 332656538 gb AEE81938.1  60S acidic ribosomal protein P1-2 [Arabidopsis thaliana] ref NP_186829.3  ribosome recycling factor [Arabidopsis thaliana] gi 34146850 gb AAQ62433.1  At3g01800 [Arabidopsis thaliana] gi 51970776 dbj BAD44080.1  putative ribosome recycling factor [Arabidopsis thaliana] gi 62319213 dbj BAD94407.1  putative ribosome recycling factor [Arabidopsis thaliana] gi 332640195 gb AEE73716.1  ribosome recycling factor [Arabidopsis thaliana]</p>                                                                                                                                                 | 124 | 113 | 2.00E-35  | 91.1  | 87.9 | 91.1 | 60S acidic ribosomal protein P1-2        | gbpln | Arabidopsis thaliana | AT4G00810.2   Symbols:   60S acidic ribosomal protein family   chr4:346179-346957 REVERSE LENGTH=113             | 124 | 113 | 4.00E-38  | 91.1  | 87.9 | 91.1 |
| Rsa1.0_01857.1.g30360.t1 | <p>ref NP_186829.3  ribosome recycling factor [Arabidopsis thaliana] gi 34146850 gb AAQ62433.1  At3g01800 [Arabidopsis thaliana] gi 51970776 dbj BAD44080.1  putative ribosome recycling factor [Arabidopsis thaliana] gi 62319213 dbj BAD94407.1  putative ribosome recycling factor [Arabidopsis thaliana] gi 332640195 gb AEE73716.1  ribosome recycling factor [Arabidopsis thaliana]</p>                                                                                                                                                                                                                                                                                                                                                                                                                                                                                                                                                                                                                                                                                                                                                                                                                                                                                       | 265 | 267 | 1.00E-107 | 100.8 | 78.9 | 85.7 | ribosome recycling factor                | gbpln | Arabidopsis thaliana | AT3G01800.1   Symbols:   Ribosome recycling factor   chr3:286020-287543 FORWARD LENGTH=267                       | 265 | 267 | 1.00E-109 | 100.8 | 78.9 | 85.7 |

|                          |                                                                                                                                                                                                                                                                                                                                                                                                                                                                                                                                                                                                            |     |      |           |       |      |      |                                                              |       |                      |                                                                                                                                                                                                                                                                                                                                                                                                                                                                                                                    |     |     |           |       |      |      |
|--------------------------|------------------------------------------------------------------------------------------------------------------------------------------------------------------------------------------------------------------------------------------------------------------------------------------------------------------------------------------------------------------------------------------------------------------------------------------------------------------------------------------------------------------------------------------------------------------------------------------------------------|-----|------|-----------|-------|------|------|--------------------------------------------------------------|-------|----------------------|--------------------------------------------------------------------------------------------------------------------------------------------------------------------------------------------------------------------------------------------------------------------------------------------------------------------------------------------------------------------------------------------------------------------------------------------------------------------------------------------------------------------|-----|-----|-----------|-------|------|------|
| Rsa1.0_01857.1.g30361.t1 | refNP_567187.1  TRAF-like family protein [Arabidopsis thaliana]<br>gi 17529102 gb AAL38761.1  unknown protein [Arabidopsis thaliana]<br>gi 20259121 gb AAM14276.1  unknown protein [Arabidopsis thaliana]<br>gi 332656535 gb AEE81935.1  TRAF-like family protein [Arabidopsis thaliana]                                                                                                                                                                                                                                                                                                                   | 218 | 299  | 9.00E-52  | 137.2 | 45.9 | 54.1 | TRAF-like family protein                                     | gbpln | Arabidopsis thaliana | AT4G00780.1   Symbols:   TRAF-like family protein   chr4:334779-336120 FORWARD LENGTH=299                                                                                                                                                                                                                                                                                                                                                                                                                          | 218 | 299 | 3.00E-54  | 137.2 | 45.9 | 54.1 |
| Rsa1.0_01857.1.g30362.t1 | refXP_002872894.1  pentatricopeptide repeat-containing protein [Arabidopsis lyrata subsp. lyrata]<br>gi 297318731 gb EFH49153.1  pentatricopeptide repeat-containing protein [Arabidopsis lyrata subsp. lyrata]                                                                                                                                                                                                                                                                                                                                                                                            | 751 | 1162 | 0         | 154.7 | 95.5 | 96.5 | pentatricopeptide repeat-containing protein                  | gbpln | Arabidopsis lyrata   | AT4G01400.2   Symbols:   FUNCTIONS IN: molecular function unknown; INVOLVED IN: biological process unknown; LOCATED IN: cellular component unknown; EXPRESSED IN: 23 plant structures; EXPRESSED DURING: 15 growth stages; CONTAINS InterPro DOMAIN/s: COG4 transport (InterPro:IPR013167); Has 465 Blast hits to 425 proteins in 199 species: Archae - 0; Bacteria - 3; Metazoa - 153; Fungi - 166; Plants - 45; Viruses - 0; Other Eukaryotes - 98 (source: NCBI BLink).   chr4:573098-575648 REVERSE LENGTH=738 | 751 | 738 | 0         | 98.3  | 94.1 | 95.3 |
| Rsa1.0_01857.1.g30363.t1 | refNP_192050.1  late embryogenesis abundant hydroxyproline-rich glycoprotein [Arabidopsis thaliana]<br>gi 7267638 emb CAB80950.1  putative hypersensitive response protein [Arabidopsis thaliana]<br>gi 2155824 gb AAM63942.1  putative hypersensitive response protein [Arabidopsis thaliana]<br>gi 26451865 dbj BAC43025.1  putative hypersensitive response protein [Arabidopsis thaliana]<br>gi 30017263 gb AAP12865.1  At4g01410 [Arabidopsis thaliana]<br>gi 332656622 gb AEE82022.1  late embryogenesis abundant hydroxyproline-rich glycoprotein [Arabidopsis thaliana]                            | 228 | 227  | 2.00E-97  | 99.6  | 87.7 | 92.1 | late embryogenesis abundant hydroxyproline-rich glycoprotein | gbpln | Arabidopsis thaliana | AT4G01410.1   Symbols:   Late embryogenesis abundant (LEA) hydroxyproline-rich glycoprotein family   chr4:578308-578991 FORWARD LENGTH=227                                                                                                                                                                                                                                                                                                                                                                         | 228 | 227 | 1.00E-100 | 99.6  | 87.7 | 92.1 |
| Rsa1.0_01857.1.g30364.t1 | dbj BAB08270.1  non-LTR retroelement reverse transcriptase-like protein [Arabidopsis thaliana]                                                                                                                                                                                                                                                                                                                                                                                                                                                                                                             | 86  | 489  | 5.00E-16  | 568.6 | 43.0 | 52.3 | non-LTR retroelement reverse transcriptase-like protein      | gbpln | Arabidopsis thaliana | #                                                                                                                                                                                                                                                                                                                                                                                                                                                                                                                  | #   | #   | #         | #     | #    | #    |
| Rsa1.0_01858.1.g30365.t1 | #                                                                                                                                                                                                                                                                                                                                                                                                                                                                                                                                                                                                          | #   | #    | #         | #     | #    | #    | -                                                            | ----  | ----                 | #                                                                                                                                                                                                                                                                                                                                                                                                                                                                                                                  | #   | #   | #         | #     | #    | #    |
| Rsa1.0_01858.1.g30366.t1 | gb ABD65057.1  hypothetical protein 27.t00123 [Brassica oleracea]                                                                                                                                                                                                                                                                                                                                                                                                                                                                                                                                          | 904 | 190  | 5.00E-20  | 21.0  | 9.0  | 10.8 | hypothetical protein 27.t00123                               | gbpln | Brassica oleracea    | AT5G25760.2   Symbols: PEX4   peroxin4   chr5:8967983-8969173 FORWARD LENGTH=157                                                                                                                                                                                                                                                                                                                                                                                                                                   | 904 | 157 | 7.00E-17  | 17.4  | 4.8  | 5.3  |
| Rsa1.0_01858.1.g30367.t1 | #                                                                                                                                                                                                                                                                                                                                                                                                                                                                                                                                                                                                          | #   | #    | #         | #     | #    | #    | -                                                            | ----  | ----                 | #                                                                                                                                                                                                                                                                                                                                                                                                                                                                                                                  | #   | #   | #         | #     | #    | #    |
| Rsa1.0_01858.1.g30368.t3 | gb ADB85430.1  putative retrotransposon protein [Phyllostachys edulis]                                                                                                                                                                                                                                                                                                                                                                                                                                                                                                                                     | 417 | 896  | 3.00E-64  | 214.9 | 30.9 | 42.4 | putative retrotransposon protein                             | gbpln | Phyllostachys edulis | #                                                                                                                                                                                                                                                                                                                                                                                                                                                                                                                  | #   | #   | #         | #     | #    | #    |
| Rsa1.0_01858.1.g30369.t1 | gb AAG51783.1 AC079679.3 reverse transcriptase, putative; 16838-20266 [Arabidopsis thaliana]                                                                                                                                                                                                                                                                                                                                                                                                                                                                                                               | 244 | 1142 | 7.00E-37  | 468.0 | 34.0 | 48.4 | reverse transcriptase, putative; 16838-20266                 | gbpln | Arabidopsis thaliana | AT2G34320.1   Symbols:   Polynucleotidyl transferase, ribonuclease H-like superfamily protein   chr2:14484959-14485837 FORWARD LENGTH=292                                                                                                                                                                                                                                                                                                                                                                          | 244 | 292 | 2.00E-15  | 119.7 | 23.8 | 42.2 |
| Rsa1.0_01858.1.g30370.t1 | refXP_002863741.1  hypothetical protein ARALYDRAFT_917455 [Arabidopsis lyrata subsp. lyrata]<br>gi 297309576 gb EFH40000.1  hypothetical protein ARALYDRAFT_917455 [Arabidopsis lyrata subsp. lyrata]                                                                                                                                                                                                                                                                                                                                                                                                      | 243 | 390  | 1.00E-36  | 160.5 | 32.1 | 43.2 | hypothetical protein ARALYDRAFT_917455                       | gbpln | Arabidopsis lyrata   | AT1G33710.1   Symbols:   RNA-directed DNA polymerase (reverse transcriptase)-related family protein   chr1:12219657-12220289 FORWARD LENGTH=210                                                                                                                                                                                                                                                                                                                                                                    | 243 | 210 | 2.00E-24  | 86.4  | 24.3 | 40.3 |
| Rsa1.0_01859.1.g30371.t1 | gb EOA31975.1  hypothetical protein CARUB_v10015218mg [Capsella rubella]                                                                                                                                                                                                                                                                                                                                                                                                                                                                                                                                   | 455 | 447  | 1.00E-101 | 98.2  | 57.8 | 68.8 | hypothetical protein CARUB_v10015218mg                       | gbpln | Capsella rubella     | AT2G20310.1   Symbols: RIN13   RPM1 interacting protein 13   chr2:8761328-8763083 REVERSE LENGTH=430                                                                                                                                                                                                                                                                                                                                                                                                               | 455 | 430 | 1.00E-101 | 94.5  | 55.8 | 66.2 |
| Rsa1.0_01859.1.g30372.t2 | refNP_849998.1  protein kinase domain-containing protein [Arabidopsis thaliana]<br>gi 75330719 sp Q8RWW0.1 ALE2_ARATH RecName: Full=Receptor-like serine/threonine-protein kinase ALE2; AltName: Full=Protein ABNORMAL LEAF SHAPE 2; Flags: Precursor<br>gi 20259543 gb AAM13891.1  putative protein kinase [Arabidopsis thaliana]<br>gi 22136896 gb AAM91792.1  putative protein kinase [Arabidopsis thaliana]<br>gi 110742054 dbj BAE8959.1  protein kinase like protein [Arabidopsis thaliana]<br>gi 330251897 gb AEC06991.1  receptor-like serine/threonine-protein kinase ALE2 [Arabidopsis thaliana] | 706 | 744  | 0         | 105.4 | 83.9 | 86.5 | protein kinase domain-containing protein                     | gbpln | Arabidopsis thaliana | AT2G20300.1   Symbols: ALE2   Protein kinase superfamily protein   chr2:8756475-8759845 REVERSE LENGTH=744                                                                                                                                                                                                                                                                                                                                                                                                         | 706 | 744 | 0         | 105.4 | 83.9 | 86.5 |

| Rsa1.0_01859.1.g30373.t2 | #                                                                                                                                                                                                                                                                                                                                               | #    | #    | #        | #     | #    | #    | -                                      | ----  | ----                 | #                                                                                                                                                                                                                                                                                                                                                                                                                                                         | #    | #    | #         | #     | #    |      |
|--------------------------|-------------------------------------------------------------------------------------------------------------------------------------------------------------------------------------------------------------------------------------------------------------------------------------------------------------------------------------------------|------|------|----------|-------|------|------|----------------------------------------|-------|----------------------|-----------------------------------------------------------------------------------------------------------------------------------------------------------------------------------------------------------------------------------------------------------------------------------------------------------------------------------------------------------------------------------------------------------------------------------------------------------|------|------|-----------|-------|------|------|
| Rsa1.0_01859.1.g30374.t1 | gb[EOA30834.1] hypothetical protein CARUB_v10013979mg [Capsella rubella] gi 482566646 gb EOA30835.1  hypothetical protein CARUB_v10013979mg [Capsella rubella]                                                                                                                                                                                  | 176  | 370  | 2.00E-23 | 210.2 | 43.8 | 52.8 | hypothetical protein CARUB_v10013979mg | gbpln | Capsella rubella     | AT3G23690.1   Symbols:   basic helix-loop-helix (bHLH) DNA-binding superfamily protein   chr3:8528933-8530655 REVERSE LENGTH=371                                                                                                                                                                                                                                                                                                                          | 176  | 371  | 3.00E-20  | 210.8 | 43.8 | 51.7 |
| Rsa1.0_01859.1.g30375.t2 | ref NP_179619.2  myosin-like protein XIG [Arabidopsis thaliana] gi 330251896 gb AE06990.1  myosin-like protein XIG [Arabidopsis thaliana] ref XP_002873954.1  hypothetical protein ARALYDRAFT_488853 [Arabidopsis lyrata subsp. lyrata] gi 297319791 gb EFH50213.1                                                                              | 348  | 1493 | 1.00E-45 | 429.0 | 31.3 | 34.5 | myosin-like protein XIG                | gbpln | Arabidopsis thaliana | AT2G20290.1   Symbols: XIG, ATXIG   myosin-like protein XIG   chr2:8743275-8751878 REVERSE LENGTH=1493                                                                                                                                                                                                                                                                                                                                                    | 348  | 1493 | 3.00E-48  | 429.0 | 31.3 | 34.5 |
| Rsa1.0_01860.1.g30376.t1 | ref XP_002873954.1  hypothetical protein ARALYDRAFT_488853 [Arabidopsis lyrata subsp. lyrata] gi 297319791 gb EFH50213.1                                                                                                                                                                                                                        | 155  | 151  | 1.00E-65 | 97.4  | 83.2 | 92.9 | hypothetical protein ARALYDRAFT_488853 | gbpln | Arabidopsis lyrata   | AT5G19590.1   Symbols:   Protein of unknown function, DUF538   chr5:6611614-6612069 REVERSE LENGTH=151                                                                                                                                                                                                                                                                                                                                                    | 155  | 151  | 2.00E-65  | 97.4  | 74.2 | 82.6 |
| Rsa1.0_01860.1.g30377.t1 | gb ACP30598.1  disease resistance protein [Brassica rapa subsp. pekinensis]                                                                                                                                                                                                                                                                     | 1593 | 2301 | 0        | 144.4 | 51.3 | 66.2 | disease resistance protein             | gbpln | Brassica rapa        | AT4G23160.1   Symbols: CRK8   cysteine-rich RLK (RECEPTOR-like protein kinase) 8   chr4:12129485-12134086 FORWARD LENGTH=1262                                                                                                                                                                                                                                                                                                                             | 1593 | 1262 | 1.00E-107 | 79.2  | 12.1 | 18.3 |
| Rsa1.0_01860.1.g30378.t1 | gb[EOA20233.1] hypothetical protein CARUB_v10000533mg [Capsella rubella]                                                                                                                                                                                                                                                                        | 584  | 593  | 0        | 101.5 | 81.8 | 89.0 | hypothetical protein CARUB_v10000533mg | gbpln | Capsella rubella     | AT5G19580.1   Symbols:   glyoxal oxidase-related protein   chr5:6607595-6609517 REVERSE LENGTH=594                                                                                                                                                                                                                                                                                                                                                        | 584  | 594  | 0         | 101.7 | 80.3 | 88.9 |
| Rsa1.0_01860.1.g30379.t1 | ref XP_002871895.1  hypothetical protein ARALYDRAFT_488851 [Arabidopsis lyrata subsp. lyrata] gi 297317732 gb EFH48154.1  hypothetical protein ARALYDRAFT_488851 [Arabidopsis lyrata subsp. lyrata]                                                                                                                                             | 137  | 138  | 2.00E-52 | 100.7 | 85.4 | 92.7 | hypothetical protein ARALYDRAFT_488851 | gbpln | Arabidopsis lyrata   | AT5G19570.1   Symbols:   unknown protein; CONTAINS InterPro DOMAIN/s; Uncharacterised protein family UPF0546 (InterPro:IPR018908); Has 1807 Blast hits to 1807 proteins in 277 species: Archae - 0; Bacteria - 0; Metazoa - 736; Fungi - 347; Plants - 385; Viruses - 0; Other Eukaryotes - 339 (source: NCBI BLINK).   chr5:6606739-6607152 FORWARD LENGTH=137                                                                                           | 137  | 137  | 4.00E-54  | 100.0 | 84.7 | 90.5 |
| Rsa1.0_01860.1.g30380.t1 | ref XP_002871894.1  hypothetical protein ARALYDRAFT_488850 [Arabidopsis lyrata subsp. lyrata] gi 297317731 gb EFH48153.1  hypothetical protein ARALYDRAFT_488850 [Arabidopsis lyrata subsp. lyrata]                                                                                                                                             | 495  | 496  | 0        | 100.2 | 84.0 | 91.5 | hypothetical protein ARALYDRAFT_488850 | gbpln | Arabidopsis lyrata   | AT5G19560.1   Symbols: ATROPGEF10, ROPGEF10   ROP uanine nucleotide exchange factor 10   chr5:6603291-6606130 FORWARD LENGTH=493                                                                                                                                                                                                                                                                                                                          | 495  | 493  | 0         | 99.6  | 84.4 | 91.1 |
| Rsa1.0_01860.1.g30381.t1 | ref NP_197456.1  aspartate aminotransferase [Arabidopsis thaliana] gi 21542386 sp P46645.2 AAT2_ARATH RecName: Full=Aspartate aminotransferase, cytoplasmic isozyme 1; AltName: Full=Transaminase A gi 109134125 gb ABG2506.1  At5g19550 [Arabidopsis thaliana] gi 332005341 gb AED92724.1  aspartate aminotransferase 1 [Arabidopsis thaliana] | 405  | 405  | 0        | 100.0 | 92.8 | 97.0 | aspartate aminotransferase             | gbpln | Arabidopsis thaliana | AT5G19550.1   Symbols: ASP2, AAT2   aspartate aminotransferase 2   chr5:6598201-6601597 FORWARD LENGTH=405                                                                                                                                                                                                                                                                                                                                                | 405  | 405  | 0         | 100.0 | 92.8 | 97.0 |
| Rsa1.0_01860.1.g30382.t1 | gb ABP73257.1  unknown [Brassica napus]                                                                                                                                                                                                                                                                                                         | 472  | 462  | 0        | 97.9  | 90.5 | 93.9 | unknown                                | gbpln | Brassica napus       | AT5G19540.1   Symbols:   unknown protein; FUNCTIONS IN: molecular_function unknown; INVOLVED IN: biological_process unknown; LOCATED IN: chloroplast; EXPRESSED IN: 22 plant structures; EXPRESSED DURING: 13 growth stages; Has 1807 Blast hits to 1807 proteins in 277 species: Archae - 0; Bacteria - 0; Metazoa - 736; Fungi - 347; Plants - 385; Viruses - 0; Other Eukaryotes - 339 (source: NCBI BLINK).   chr5:6595748-6597724 FORWARD LENGTH=462 | 472  | 462  | 0         | 97.9  | 80.9 | 87.5 |
| Rsa1.0_01860.1.g30383.t1 | #                                                                                                                                                                                                                                                                                                                                               | #    | #    | #        | #     | #    | #    | -                                      | ----  | ----                 | #                                                                                                                                                                                                                                                                                                                                                                                                                                                         | #    | #    | #         | #     | #    |      |
| Rsa1.0_01860.1.g30384.t3 | #                                                                                                                                                                                                                                                                                                                                               | #    | #    | #        | #     | #    | #    | -                                      | ----  | ----                 | #                                                                                                                                                                                                                                                                                                                                                                                                                                                         | #    | #    | #         | #     | #    |      |
| Rsa1.0_01861.1.g30385.t1 | #                                                                                                                                                                                                                                                                                                                                               | #    | #    | #        | #     | #    | #    | -                                      | ----  | ----                 | #                                                                                                                                                                                                                                                                                                                                                                                                                                                         | #    | #    | #         | #     | #    |      |
| Rsa1.0_01861.1.g30386.t1 | ref XP_002870668.1  WD-40 repeat family protein [Arabidopsis lyrata subsp. lyrata] gi 297316504 gb EFH46927.1  WD-40 repeat family protein [Arabidopsis lyrata subsp. lyrata]                                                                                                                                                                   | 428  | 466  | 0        | 108.9 | 77.1 | 83.9 | WD-40 repeat family protein            | gbpln | Arabidopsis lyrata   | AT5G04880.1   Symbols:   WD-40 repeat family protein / zfw3 protein (ZFWD3)   chr5:16379481-16381205 FORWARD LENGTH=472                                                                                                                                                                                                                                                                                                                                   | 428  | 472  | 1.00E-180 | 110.3 | 74.8 | 81.5 |

|                          |                                                                                                                                                                                                                                                                                                                                                                                                                                                                                                                                                                                                                                                                                                                                                                                                                                                                                                                                         |     |     |           |       |      |      |                                                                            |       |                      |                                                                                                                                                                                                                                                                                                                                                                                                                                                              |     |     |           |       |      |      |
|--------------------------|-----------------------------------------------------------------------------------------------------------------------------------------------------------------------------------------------------------------------------------------------------------------------------------------------------------------------------------------------------------------------------------------------------------------------------------------------------------------------------------------------------------------------------------------------------------------------------------------------------------------------------------------------------------------------------------------------------------------------------------------------------------------------------------------------------------------------------------------------------------------------------------------------------------------------------------------|-----|-----|-----------|-------|------|------|----------------------------------------------------------------------------|-------|----------------------|--------------------------------------------------------------------------------------------------------------------------------------------------------------------------------------------------------------------------------------------------------------------------------------------------------------------------------------------------------------------------------------------------------------------------------------------------------------|-----|-----|-----------|-------|------|------|
| Rsa1.0_01861.1.g30387.t1 | refNP_179828.1  peroxidase [Arabidopsis thaliana] gi 25453217 sp Q9SJ22.1 PER17_ARAT H RecName: Full=Peroxidase 17; Short=Atperox P17; AltName: Full=ATP25a; Flags: Precursor gi 4544449 gb AAD22357.1  putative peroxidase [Arabidopsis thaliana] gi 28393257 gb AAO42057.1  putative peroxidase [Arabidopsis thaliana] gi 28827478 gb AAO50583.1  putative peroxidase [Arabidopsis thaliana] gi 330252207 gb AEC07301.1  peroxidase [Arabidopsis thaliana]                                                                                                                                                                                                                                                                                                                                                                                                                                                                            | 329 | 329 | 1.00E-173 | 100.0 | 90.6 | 93.9 | peroxidase                                                                 | gbpln | Arabidopsis thaliana | AT2G22420.1   Symbols:   Peroxidase superfamily protein   chr2:9513341-9514484 FORWARD LENGTH=329                                                                                                                                                                                                                                                                                                                                                            | 329 | 329 | 1.00E-175 | 100.0 | 90.6 | 93.9 |
| Rsa1.0_01861.1.g30388.t1 | gb EOA27382.1  hypothetical protein CARUB_v10023476mg [Capsella rubella]                                                                                                                                                                                                                                                                                                                                                                                                                                                                                                                                                                                                                                                                                                                                                                                                                                                                | 156 | 367 | 3.00E-13  | 235.3 | 26.3 | 30.8 | hypothetical protein CARUB_v10023476mg                                     | gbpln | Capsella rubella     | AT2G47700.1   Symbols: RF12   RING/U-box superfamily protein   chr2:19552506-19554351 REVERSE LENGTH=358<br>AT2G13770.1   Symbols:   CONTAINS InterPro DOMAIN/s: Putative harbinger transposase-derived nuclease (InterPro:IPR006912). Has 451 Blast hits to 352 proteins in 33 species: Archae - 0; Bacteria - 0; Metazoa - 28; Fungi - 8; Plants - 388; Viruses - 0; Other Eukaryotes - 27 (source: NCBI BLink).   chr2:5736603-5737847 FORWARD LENGTH=343 | 156 | 358 | 4.00E-14  | 229.5 | 26.9 | 30.1 |
| Rsa1.0_01861.1.g30389.t1 | gb AAD24567.1 AF120335.1 putative transposase [Arabidopsis thaliana]                                                                                                                                                                                                                                                                                                                                                                                                                                                                                                                                                                                                                                                                                                                                                                                                                                                                    | 398 | 577 | 4.00E-66  | 145.0 | 37.2 | 49.0 | putative transposase                                                       | gbpln | Arabidopsis thaliana | AT2G22400.1   Symbols:   S-adenosyl-L-methionine-dependent methyltransferases superfamily protein   chr2:9504823-9508788 REVERSE LENGTH=808                                                                                                                                                                                                                                                                                                                  | 398 | 343 | 3.00E-11  | 86.2  | 11.3 | 14.8 |
| Rsa1.0_01861.1.g30390.t1 | refNP_850024.1  S-adenosylmethionine-dependent methyltransferase domain-containing protein [Arabidopsis thaliana] gi 20466586 gb AAM20610.1  unknown protein [Arabidopsis thaliana] gi 330252205 gb AEC07299.1  S-adenosylmethionine-dependent methyltransferase domain-containing protein [Arabidopsis thaliana]                                                                                                                                                                                                                                                                                                                                                                                                                                                                                                                                                                                                                       | 797 | 808 | 0         | 101.4 | 84.4 | 90.6 | S-adenosylmethionine-dependent methyltransferase domain-containing protein | gbpln | Arabidopsis thaliana | AT2G22370.1   Symbols:   unknown protein; Has 127 Blast hits to 127 proteins in 48 species: Archae - 0; Bacteria - 0; Metazoa - 87; Fungi - 0; Plants - 39; Viruses - 0; Other Eukaryotes - 1 (source: NCBI BLink).   chr2:9501019-9502078 REVERSE LENGTH=219                                                                                                                                                                                                | 797 | 808 | 0         | 101.4 | 84.4 | 90.6 |
| Rsa1.0_01861.1.g30391.t3 | refXP_002880440.1  hypothetical protein ARALYDRAFT_320077 [Arabidopsis lyrata subsp. lyrata] gi 297326279 gb EFH56699.1  hypothetical protein ARALYDRAFT_320077 [Arabidopsis lyrata subsp. lyrata]                                                                                                                                                                                                                                                                                                                                                                                                                                                                                                                                                                                                                                                                                                                                      | 683 | 219 | 1.00E-109 | 32.1  | 29.9 | 30.7 | hypothetical protein ARALYDRAFT_320077                                     | gbpln | Arabidopsis lyrata   | AT4G33790.1   Symbols: CER4, G7, FAR3   Jajoba acyl CoA reductase-related male sterility protein   chr4:16204325-16207891 REVERSE LENGTH=493                                                                                                                                                                                                                                                                                                                 | 683 | 219 | 1.00E-110 | 32.1  | 29.4 | 30.5 |
| Rsa1.0_01862.1.g30392.t1 | refXP_002867157.1  predicted protein [Arabidopsis lyrata subsp. lyrata] gi 297312993 gb EFH43416.1  predicted protein [Arabidopsis lyrata subsp. lyrata]                                                                                                                                                                                                                                                                                                                                                                                                                                                                                                                                                                                                                                                                                                                                                                                | 460 | 493 | 0         | 107.2 | 81.3 | 90.4 | predicted protein                                                          | gbpln | Arabidopsis lyrata   | AT4G33770.1   Symbols:   Inositol 1,3,4-trisphosphate 5/6-kinase family protein   chr4:16193589-16196242 REVERSE LENGTH=391                                                                                                                                                                                                                                                                                                                                  | 460 | 493 | 0         | 107.2 | 79.6 | 90.2 |
| Rsa1.0_01862.1.g30393.t2 | gb EOA16776.1  hypothetical protein CARUB_v10004995mg [Capsella rubella]                                                                                                                                                                                                                                                                                                                                                                                                                                                                                                                                                                                                                                                                                                                                                                                                                                                                | 346 | 392 | 1.00E-144 | 113.3 | 79.5 | 85.5 | hypothetical protein CARUB_v10004995mg                                     | gbpln | Capsella rubella     | AT4G33720.1   Symbols:   CAP (Cysteine-rich secretory proteins, Antigen 5, and Pathogenesis-related 1 protein) superfamily protein   chr4:16182813-16183304 FORWARD LENGTH=163                                                                                                                                                                                                                                                                               | 346 | 391 | 1.00E-141 | 113.0 | 75.7 | 83.2 |
| Rsa1.0_01862.1.g30394.t1 | refNP_195098.1  putative pathogenesis-related protein [Arabidopsis thaliana] gi 11692906 gb AAG40056.1 AF324705.1 AT4g33720 [Arabidopsis thaliana] gi 11935187 gb AAG42009.1 AF327419.1 putative pathogenesis-related protein 1 precursor, 19.3K [Arabidopsis thaliana] gi 12642878 gb AAK00381.1 AF339699.1 putative pathogenesis-related protein 1 precursor, 19.3K [Arabidopsis thaliana] gi 3549674 emb CAA20585.1  pathogenesis-related protein 1 precursor, 19.3K [Arabidopsis thaliana] gi 7270321 emb CAB80089.1  pathogenesis-related protein 1 precursor, 19.3K [Arabidopsis thaliana] gi 14517484 gb AAK62632.1  AT4g33720/T16L1.210 [Arabidopsis thaliana] gi 21593911 gb AAM65876.1  pathogenesis-related protein 1 precursor, 19.3K [Arabidopsis thaliana] gi 22136566 gb AAM91069.1  AT4g33720/T16L1.210 [Arabidopsis thaliana] gi 332660869 gb AEE86269.1  putative pathogenesis-related protein [Arabidopsis thaliana] | 172 | 163 | 8.00E-53  | 94.8  | 58.7 | 69.2 | putative pathogenesis-related protein                                      | gbpln | Arabidopsis thaliana |                                                                                                                                                                                                                                                                                                                                                                                                                                                              | 172 | 163 | 3.00E-55  | 94.8  | 58.7 | 69.2 |
| Rsa1.0_01862.1.g30395.t2 | #                                                                                                                                                                                                                                                                                                                                                                                                                                                                                                                                                                                                                                                                                                                                                                                                                                                                                                                                       | #   | #   | #         | #     | #    | #    | -                                                                          | ---   | ---                  | #                                                                                                                                                                                                                                                                                                                                                                                                                                                            | #   | #   | #         | #     | #    |      |



|                          |                                                                                                                                                                                                                                                                                                                 |      |      |           |        |      |      |                                                                      |       |                      |                                                                                                                                                                                                                                                                                                                            |      |     |           |       |      |      |
|--------------------------|-----------------------------------------------------------------------------------------------------------------------------------------------------------------------------------------------------------------------------------------------------------------------------------------------------------------|------|------|-----------|--------|------|------|----------------------------------------------------------------------|-------|----------------------|----------------------------------------------------------------------------------------------------------------------------------------------------------------------------------------------------------------------------------------------------------------------------------------------------------------------------|------|-----|-----------|-------|------|------|
| Rsa1.0_01863.1.g30396.t2 | gb AAG51783.1 AC079679.3 reverse transcriptase, putative; 16838-20266 [Arabidopsis thaliana]                                                                                                                                                                                                                    | 1243 | 1142 | 0         | 91.9   | 38.1 | 47.3 | reverse transcriptase, putative; 16838-20266                         | gbpln | Arabidopsis thaliana | AT4G29090.1   Symbols:   Ribonuclease H-like superfamily protein   chr4:14333528-14335255 FORWARD LENGTH=575                                                                                                                                                                                                               | 1243 | 575 | 2.00E-43  | 46.3  | 11.8 | 19.4 |
| Rsa1.0_01863.1.g30397.t1 | gb EOA35235.1  hypothetical protein CARUB_v10020395mg [Capsella rubella] gi 482571048 gb EOA35236.1  hypothetical protein CARUB_v10020395mg [Capsella rubella]                                                                                                                                                  | 402  | 406  | 1.00E-169 | 101.0  | 82.3 | 87.6 | hypothetical protein CARUB_v10020395mg                               | gbpln | Capsella rubella     | AT1G78420.2   Symbols:   RING/U-box superfamily protein   chr1:29511772-29505278-29507272 FORWARD LENGTH=401                                                                                                                                                                                                               | 402  | 401 | 1.00E-165 | 99.8  | 81.6 | 86.8 |
| Rsa1.0_01863.1.g30398.t1 | dbj BAM73281.1  gibberellin 2 oxidase 1 [Raphanus sativus]                                                                                                                                                                                                                                                      | 331  | 331  | 0         | 100.0  | 98.5 | 98.8 | gibberellin 2 oxidase 1                                              | gbpln | Raphanus sativus     | AT1G78440.1   Symbols:   ATGA20X1, GA20X1   Arabidopsis thaliana gibberellin 2-oxidase 1   chr1:29511772-29512990 REVERSE LENGTH=329                                                                                                                                                                                       | 331  | 329 | 1.00E-159 | 99.4  | 82.8 | 87.3 |
| Rsa1.0_01863.1.g30399.t1 | #                                                                                                                                                                                                                                                                                                               | #    | #    | #         | #      | #    | #    | -                                                                    | ----  | ----                 | #                                                                                                                                                                                                                                                                                                                          | #    | #   | #         | #     | #    |      |
| Rsa1.0_01864.1.g30400.t1 | ref XP_002893113.1  F5M15.18 [Arabidopsis lyrata subsp. lyrata] gi 297338955 gb EFH69372.1  F5M15.18 [Arabidopsis lyrata subsp. lyrata]                                                                                                                                                                         | 97   | 1557 | 8.00E-11  | 1605.2 | 37.1 | 42.3 | F5M15.18                                                             | gbpln | Arabidopsis lyrata   | AT1G20480.1   Symbols:   AMP-dependent synthetase and ligase family protein   chr1:7094978-7097073 REVERSE LENGTH=565                                                                                                                                                                                                      | 97   | 565 | 1.00E-13  | 582.5 | 37.1 | 42.3 |
| Rsa1.0_01864.1.g30401.t1 | dbj BAB10837.1  retroelement pol polyprotein-like [Arabidopsis thaliana]                                                                                                                                                                                                                                        | 440  | 1462 | 5.00E-68  | 332.3  | 34.8 | 56.8 | retroelement pol polyprotein-like                                    | gbpln | Arabidopsis thaliana | AT1G21280.1   Symbols:   CONTAINS InterPro DOMAIN/s: Retrotransposon gag protein (InterPro:IPR005162); Has 707 Blast hits to 705 proteins in 25 species: Archae - 0; Bacteria - 0; Metazoa - 4; Fungi - 0; Plants - 703; Viruses - 0; Other Eukaryotes - 0 (source: NCBI BLink).   chr1:7447690-7448403 REVERSE LENGTH=237 | 440  | 237 | 2.00E-31  | 53.9  | 17.0 | 27.3 |
| Rsa1.0_01864.1.g30402.t5 | gb AAD25622.1 AC005287.24 Hypothetical protein [Arabidopsis thaliana] ref NP_564753.1  serine/threonine-protein kinase WNK (With No lysine)-related protein [Arabidopsis thaliana] gi 4249385 gb AAD14482.1 AAD14482 T2K10.11 [Arabidopsis thaliana] gi 2153701.1 gb AAM61352.1  unknown [Arabidopsis thaliana] | 237  | 224  | 1.00E-11  | 94.5   | 17.7 | 33.8 | Hypothetical protein                                                 | gbpln | Arabidopsis thaliana | AT1G14800.1   Symbols:   Nucleic acid-binding, OB-fold-like protein   chr1:5099572-5102558 FORWARD LENGTH=384                                                                                                                                                                                                              | 237  | 384 | 4.00E-11  | 162.0 | 17.3 | 32.1 |
| Rsa1.0_01864.1.g30403.t1 | gi 225898034 dbj BAH30349.1  hypothetical protein [Arabidopsis thaliana] gi 332195533 gb AEE33654.1  serine/threonine-protein kinase WNK (With No lysine)-related protein [Arabidopsis thaliana]                                                                                                                | 248  | 386  | 1.00E-104 | 155.6  | 84.3 | 91.5 | serine/threonine-protein kinase WNK (With No lysine)-related protein | gbpln | Arabidopsis thaliana | AT1G60060.1   Symbols:   Serine/threonine-protein kinase WNK (With No Lysine)-related   chr1:22139282-22141585 FORWARD LENGTH=386                                                                                                                                                                                          | 248  | 386 | 1.00E-107 | 155.6 | 84.3 | 91.5 |
| Rsa1.0_01865.1.g30404.t1 | dbj BAJ34396.1  unnamed protein product [Theleungiella halophila]                                                                                                                                                                                                                                               | 393  | 376  | 0         | 95.7   | 88.3 | 91.6 | unnamed protein product                                              | ----  | ----                 | AT1G70560.1   Symbols:   WEI8, TAA1, SAV3   tryptophan aminotransferase of Arabidopsis 1   chr1:26604894-26607319 FORWARD LENGTH=391                                                                                                                                                                                       | 393  | 391 | 0         | 99.5  | 88.5 | 93.6 |
| Rsa1.0_01865.1.g30405.t1 | ref XP_002887310.1  hypothetical protein ARALYDRAFT_894871 [Arabidopsis lyrata subsp. lyrata] gi 297333151 gb EFH63569.1  hypothetical protein ARALYDRAFT_894871 [Arabidopsis lyrata subsp. lyrata]                                                                                                             | 600  | 596  | 0         | 99.3   | 89.0 | 92.0 | hypothetical protein ARALYDRAFT_894871                               | gbpln | Arabidopsis lyrata   | AT1G70570.1   Symbols:   anthranilate phosphoribosyltransferase, putative   chr1:26608719-26612062 FORWARD LENGTH=595                                                                                                                                                                                                      | 600  | 595 | 0         | 99.2  | 89.7 | 92.5 |
| Rsa1.0_01865.1.g30406.t1 | dbj BAD94210.1  hypothetical protein [Arabidopsis thaliana] gi 98961953 gb ABF59306.1  unknown protein [Arabidopsis thaliana]                                                                                                                                                                                   | 90   | 101  | 8.00E-13  | 112.2  | 55.6 | 72.2 | hypothetical protein                                                 | gbpln | Arabidopsis thaliana | #                                                                                                                                                                                                                                                                                                                          | #    | #   | #         | #     | #    |      |
| Rsa1.0_01865.1.g30407.t1 | ref XP_002891050.1  hypothetical protein ARALYDRAFT_890938 [Arabidopsis lyrata subsp. lyrata] gi 297336892 gb EFH67309.1  hypothetical protein ARALYDRAFT_890938 [Arabidopsis lyrata subsp. lyrata]                                                                                                             | 241  | 477  | 6.00E-34  | 197.9  | 39.0 | 51.9 | hypothetical protein ARALYDRAFT_890938                               | gbpln | Arabidopsis lyrata   | AT1G33590.1   Symbols:   Leucine-rich repeat (LRR) family protein   chr1:12177788-12179221 FORWARD LENGTH=477                                                                                                                                                                                                              | 241  | 477 | 4.00E-33  | 197.9 | 36.9 | 50.2 |
| Rsa1.0_01865.1.g30408.t1 | #                                                                                                                                                                                                                                                                                                               | #    | #    | #         | #      | #    | #    | -                                                                    | ----  | ----                 | #                                                                                                                                                                                                                                                                                                                          | #    | #   | #         | #     | #    |      |
| Rsa1.0_01865.1.g30409.t1 | gb ABM30196.1  ribosomal large subunit structural protein [Brassica juncea]                                                                                                                                                                                                                                     | 146  | 146  | 2.00E-76  | 100.0  | 97.3 | 99.3 | ribosomal large subunit structural protein                           | gbpln | Brassica juncea      | AT1G70600.1   Symbols:   Ribosomal protein L18e/L15 superfamily protein   chr1:26621168-26621608 REVERSE LENGTH=146                                                                                                                                                                                                        | 146  | 146 | 6.00E-79  | 100.0 | 97.3 | 98.6 |
| Rsa1.0_01865.1.g30410.t1 | ref NP_001185363.1  cyclin-related protein [Arabidopsis thaliana] gi 332196970 gb AEE35091.1  cyclin-related protein [Arabidopsis thaliana]                                                                                                                                                                     | 887  | 957  | 0         | 107.9  | 62.8 | 72.6 | cyclin-related protein                                               | gbpln | Arabidopsis thaliana | AT1G70620.3   Symbols:   cyclin-related   chr1:26626634-26630777 FORWARD LENGTH=957                                                                                                                                                                                                                                        | 887  | 957 | 0         | 107.9 | 62.8 | 72.6 |
| Rsa1.0_01865.1.g30411.t2 | gb AAF87017.1 AC005292.26 F26F24.12 [Arabidopsis thaliana]                                                                                                                                                                                                                                                      | 333  | 301  | 1.00E-107 | 90.4   | 68.5 | 75.4 | F26F24.12                                                            | gbpln | Arabidopsis thaliana | AT1G23280.1   Symbols:   MAK16 protein-related   chr1:8260865-8262650 REVERSE LENGTH=303                                                                                                                                                                                                                                   | 333  | 303 | 1.00E-109 | 91.0  | 68.8 | 75.7 |
| Rsa1.0_01865.1.g30412.t1 | gb AAG51783.1 AC079679.3 reverse transcriptase, putative; 16838-20266 [Arabidopsis thaliana]                                                                                                                                                                                                                    | 1209 | 1142 | 0         | 94.5   | 47.5 | 61.5 | reverse transcriptase, putative; 16838-20266                         | gbpln | Arabidopsis thaliana | AT4G29090.1   Symbols:   Ribonuclease H-like superfamily protein   chr4:14333528-14335255 FORWARD LENGTH=575                                                                                                                                                                                                               | 1209 | 575 | 4.00E-90  | 47.6  | 15.2 | 25.6 |

|                          |                                                                                                                                                                                                                                                                                                                                                                                                                                                                                                                                                                                                                                                                                                      |      |      |           |        |      |      |                                              |       |                      |                                                                                                                                                                                                                                                                                                                                                                                                                                                                                                                                                                                                                                              |      |      |           |        |      |      |
|--------------------------|------------------------------------------------------------------------------------------------------------------------------------------------------------------------------------------------------------------------------------------------------------------------------------------------------------------------------------------------------------------------------------------------------------------------------------------------------------------------------------------------------------------------------------------------------------------------------------------------------------------------------------------------------------------------------------------------------|------|------|-----------|--------|------|------|----------------------------------------------|-------|----------------------|----------------------------------------------------------------------------------------------------------------------------------------------------------------------------------------------------------------------------------------------------------------------------------------------------------------------------------------------------------------------------------------------------------------------------------------------------------------------------------------------------------------------------------------------------------------------------------------------------------------------------------------------|------|------|-----------|--------|------|------|
| Rsa1.0_01866.1.g30413.t1 | ref[NP_199943.1] splicing factor 1 [Arabidopsis thaliana] g[30696034]ref[NP_851169.1] splicing factor 1 [Arabidopsis thaliana] g[79330558]ref[NP_001032055.1] splicing factor 1 [Arabidopsis thaliana] g[8843867]dbj[BAA97393.1] unnamed protein product [Arabidopsis thaliana] g[23297082]gb[AANI13087.1] unknown protein [Arabidopsis thaliana] g[222423074]dbj[BAH19518.1] AT5G51300 [Arabidopsis thaliana] g[222423561]dbj[BAH19750.1] AT5G51300 [Arabidopsis thaliana] g[332008680]gb[AED96063.1] splicing factor 1 [Arabidopsis thaliana] g[332008681]gb[AED96064.1] splicing factor 1 [Arabidopsis thaliana] g[332008682]gb[AED96065.1] splicing factor 1-like protein [Arabidopsis thaliana] | 763  | 804  | 0         | 105.4  | 80.9 | 88.2 | splicing factor 1                            | gbpln | Arabidopsis thaliana | AT5G51300.3   Symbols:   splicing factor-related   chr5:20849881-20852295 REVERSE LENGTH=804                                                                                                                                                                                                                                                                                                                                                                                                                                                                                                                                                 | 763  | 804  | 0         | 105.4  | 80.9 | 88.2 |
| Rsa1.0_01866.1.g30414.t1 | #                                                                                                                                                                                                                                                                                                                                                                                                                                                                                                                                                                                                                                                                                                    | #    | #    | #         | #      | #    | -    | ----                                         | ----  | #                    | #                                                                                                                                                                                                                                                                                                                                                                                                                                                                                                                                                                                                                                            | #    | #    | #         | #      | #    |      |
| Rsa1.0_01866.1.g30415.t1 | gb[EOA14426.1] hypothetical protein CARUB_v10027629mg [Capsella rubella]                                                                                                                                                                                                                                                                                                                                                                                                                                                                                                                                                                                                                             | 487  | 479  | 0         | 98.4   | 78.6 | 87.3 | hypothetical protein CARUB_v10027629mg       | gbpln | Capsella rubella     | AT5G51380.1   Symbols:   RNI-like superfamily protein   chr5:20875945-2087779 FORWARD LENGTH=479                                                                                                                                                                                                                                                                                                                                                                                                                                                                                                                                             | 487  | 479  | 0         | 98.4   | 77.4 | 86.7 |
| Rsa1.0_01866.1.g30416.t1 | ref[XP_002865860.1] hypothetical protein ARALYDRAFT_495212 [Arabidopsis lyrata subsp. lyrata] g[297311695]gb[EFH42119.1] hypothetical protein ARALYDRAFT_495212 [Arabidopsis lyrata subsp. lyrata]                                                                                                                                                                                                                                                                                                                                                                                                                                                                                                   | 332  | 334  | 1.00E-158 | 100.6  | 90.7 | 96.1 | hypothetical protein ARALYDRAFT_495212       | gbpln | Arabidopsis lyrata   | AT5G51410.3   Symbols:   LUC7 N-terminus domain-containing protein   chr5:20881821-20883577 REVERSE LENGTH=334                                                                                                                                                                                                                                                                                                                                                                                                                                                                                                                               | 332  | 334  | 1.00E-156 | 100.6  | 88.9 | 94.9 |
| Rsa1.0_01866.1.g30417.t1 | ref[XP_002864112.1] expressed protein [Arabidopsis lyrata subsp. lyrata] g[297309947]gb[EFH40371.1] expressed protein [Arabidopsis lyrata subsp. lyrata]                                                                                                                                                                                                                                                                                                                                                                                                                                                                                                                                             | 87   | 87   | 3.00E-24  | 100.0  | 78.2 | 85.1 | expressed protein                            | gbpln | Arabidopsis lyrata   | AT5G51451.1   Symbols:   RGF5   Encodes a root meristem growth factor (RGF). Belongs to a family of functionally redundant homologous peptides that are secreted, tyrosine-sulfated, and expressed mainly in the stem cell area and the innermost layer of central columella cells. RGFs are required for maintenance of the root stem cell niche and transit amplifying cell proliferation. Members of this family include: At5g60810 (RGF1), At1g13620 (RGF2), At2g04025 (RGF3), At3g30350 (RGF4), At5g51451 (RGF5), At4g16515 (RGF6), At3g02240 (RGF7), At2g03830 (RGF8) and At5g64770 (RGF9).   chr5:20898369-20898754 FORWARD LENGTH=88 | 87   | 88   | 8.00E-25  | 101.1  | 71.3 | 78.2 |
| Rsa1.0_01866.1.g30418.t1 | gb[ABH07409.1] putative pol polyprotein [Brassica oleracea var. botrytis]                                                                                                                                                                                                                                                                                                                                                                                                                                                                                                                                                                                                                            | 1916 | 1239 | 0         | 64.7   | 47.0 | 54.8 | putative pol polyprotein                     | gbpln | Brassica oleracea    | AT5G51470.1   Symbols:   Auxin-responsive GH3 family protein   chr5:20907287-20909340 FORWARD LENGTH=581                                                                                                                                                                                                                                                                                                                                                                                                                                                                                                                                     | 1916 | 581  | 0         | 30.3   | 21.8 | 24.0 |
| Rsa1.0_01866.1.g30419.t1 | gb[AAD09107.1] nonspecific lipid-transfer protein precursor [Brassica napus]                                                                                                                                                                                                                                                                                                                                                                                                                                                                                                                                                                                                                         | 110  | 112  | 4.00E-48  | 101.8  | 90.0 | 93.6 | nonspecific lipid-transfer protein precursor | gbpln | Brassica napus       | AT5G59310.1   Symbols:   LTP4   lipid transfer protein 4   chr5:23925296-23925772 REVERSE LENGTH=112                                                                                                                                                                                                                                                                                                                                                                                                                                                                                                                                         | 110  | 112  | 3.00E-44  | 101.8  | 78.2 | 86.4 |
| Rsa1.0_01867.1.g30420.t1 | #                                                                                                                                                                                                                                                                                                                                                                                                                                                                                                                                                                                                                                                                                                    | #    | #    | #         | #      | #    | -    | ----                                         | ----  | #                    | #                                                                                                                                                                                                                                                                                                                                                                                                                                                                                                                                                                                                                                            | #    | #    | #         | #      | #    |      |
| Rsa1.0_01867.1.g30421.t1 | gb[EOA34407.1] hypothetical protein CARUB_v10021935mg [Capsella rubella]                                                                                                                                                                                                                                                                                                                                                                                                                                                                                                                                                                                                                             | 72   | 1082 | 8.00E-23  | 1502.8 | 70.8 | 80.6 | hypothetical protein CARUB_v10021935mg       | gbpln | Capsella rubella     | AT2G27630.1   Symbols:   Ubiquitin carboxyl-terminal hydrolase-related protein   chr2:11787669-11792010 REVERSE LENGTH=1122                                                                                                                                                                                                                                                                                                                                                                                                                                                                                                                  | 72   | 1122 | 3.00E-23  | 1558.3 | 62.5 | 75.0 |
| Rsa1.0_01867.1.g30422.t6 | ref[XP_002886817.1] ubiquitin thiolesterase [Arabidopsis lyrata subsp. lyrata] g[297332658]gb[EFH63076.1] ubiquitin thiolesterase [Arabidopsis lyrata subsp. lyrata]                                                                                                                                                                                                                                                                                                                                                                                                                                                                                                                                 | 287  | 314  | 5.00E-65  | 109.4  | 54.4 | 67.6 | ubiquitin thiolesterase                      | gbpln | Arabidopsis lyrata   | AT1G65160.1   Symbols:   Ubiquitin carboxyl-terminal hydrolase family protein   chr1:24206224-24207738 FORWARD LENGTH=309                                                                                                                                                                                                                                                                                                                                                                                                                                                                                                                    | 287  | 309  | 4.00E-65  | 107.7  | 52.6 | 66.9 |
| Rsa1.0_01867.1.g30423.t1 | gb[EOA34407.1] hypothetical protein CARUB_v10021935mg [Capsella rubella]                                                                                                                                                                                                                                                                                                                                                                                                                                                                                                                                                                                                                             | 1194 | 1082 | 0         | 90.6   | 52.6 | 67.2 | hypothetical protein CARUB_v10021935mg       | gbpln | Capsella rubella     | AT1G65120.2   Symbols:   Ubiquitin carboxyl-terminal hydrolase-related protein   chr1:24191457-24195907 REVERSE LENGTH=1147                                                                                                                                                                                                                                                                                                                                                                                                                                                                                                                  | 1194 | 1147 | 0         | 96.1   | 54.1 | 68.1 |
| Rsa1.0_01867.1.g30424.t1 | ref[NP_176702.2] uncharacterized protein [Arabidopsis thaliana] g[20466568]gb[AM20601.1] unknown protein [Arabidopsis thaliana] g[23198128]gb[AANI15591.1] unknown protein [Arabidopsis thaliana] g[332196225]gb[AEE34346.1] uncharacterized protein AT1G65230 [Arabidopsis thaliana]                                                                                                                                                                                                                                                                                                                                                                                                                | 294  | 286  | 1.00E-139 | 97.3   | 82.7 | 90.5 | uncharacterized protein                      | gbpln | Arabidopsis thaliana | AT1G65230.1   Symbols:   Uncharacterized conserved protein (DUF2358)   chr1:24229167-24230764 FORWARD LENGTH=286                                                                                                                                                                                                                                                                                                                                                                                                                                                                                                                             | 294  | 286  | 1.00E-141 | 97.3   | 82.7 | 90.5 |
| Rsa1.0_01867.1.g30425.t2 | gb[EOA33392.1] hypothetical protein CARUB_v10020379mg [Capsella rubella]                                                                                                                                                                                                                                                                                                                                                                                                                                                                                                                                                                                                                             | 411  | 411  | 0         | 100.0  | 92.5 | 95.9 | hypothetical protein CARUB_v10020379mg       | gbpln | Capsella rubella     | AT1G65220.1   Symbols:   ARM repeat superfamily protein   chr1:24226204-24228799 FORWARD LENGTH=411                                                                                                                                                                                                                                                                                                                                                                                                                                                                                                                                          | 411  | 411  | 0         | 100.0  | 91.2 | 94.6 |

|                          |                                                                                                                                                                                                                                                                                                                                                                                                                                                                                                                                                                                   |      |      |           |       |      |      |                                                                             |       |                      |                                                                                                                                                    |      |      |           |       |      |      |
|--------------------------|-----------------------------------------------------------------------------------------------------------------------------------------------------------------------------------------------------------------------------------------------------------------------------------------------------------------------------------------------------------------------------------------------------------------------------------------------------------------------------------------------------------------------------------------------------------------------------------|------|------|-----------|-------|------|------|-----------------------------------------------------------------------------|-------|----------------------|----------------------------------------------------------------------------------------------------------------------------------------------------|------|------|-----------|-------|------|------|
| Rsa1.0_01867.1.g30426.t1 | dbj BAB02100.1  unnamed protein product [Arabidopsis thaliana]                                                                                                                                                                                                                                                                                                                                                                                                                                                                                                                    | 263  | 463  | 1.00E-72  | 176.0 | 54.4 | 69.6 | unnamed protein product                                                     | gbpln | Arabidopsis thaliana | AT3G42170.1   Symbols:   BED zinc finger hAT family dimerisation domain   chr3:14321838-14323928 FORWARD LENGTH=696                                | 263  | 696  | 2.00E-21  | 264.6 | 27.0 | 40.7 |
| Rsa1.0_01867.1.g30427.t1 | gb AAC33963.1  contains similarity to reverse transcriptases (Pfam; rvt.hmm, score: 11.19) [Arabidopsis thaliana]                                                                                                                                                                                                                                                                                                                                                                                                                                                                 | 2643 | 1633 | 0         | 61.8  | 33.9 | 41.2 | contains similarity to reverse transcriptases (Pfam; rvt.hmm, score: 11.19) | gbpln | Arabidopsis thaliana | AT1G65200.1   Symbols:   Ubiquitin carboxyl-terminal hydrolase-related protein   chr1:24218470-24222789 REVERSE LENGTH=1101                        | 2643 | 1101 | 0         | 41.7  | 23.0 | 29.6 |
| Rsa1.0_01867.1.g30428.t1 | ref NP_176695.1  Ubiquitin carboxyl-terminal hydrolase family protein [Arabidopsis thaliana] gi 332196218 gb AEE34339.1  Ubiquitin carboxyl-terminal hydrolase family protein [Arabidopsis thaliana] ref NP_189089.3  Serinc-domain containing serine and sphingolipid biosynthesis protein [Arabidopsis thaliana] gi 17381270 gb AAL36053.1  AT3g24470/MXP5.4 [Arabidopsis thaliana] gi 37201906 gb AAQ89613.1  At3g24470/MXP5.4 [Arabidopsis thaliana] gi 332643379 gb AEE76900.1  Serinc-domain containing serine and sphingolipid biosynthesis protein [Arabidopsis thaliana] | 320  | 309  | 5.00E-81  | 96.6  | 52.5 | 66.9 | Ubiquitin carboxyl-terminal hydrolase family protein                        | gbpln | Arabidopsis thaliana | AT1G65160.1   Symbols:   Ubiquitin carboxyl-terminal hydrolase family protein   chr1:24206224-24207738 FORWARD LENGTH=309                          | 320  | 309  | 1.00E-83  | 96.6  | 52.5 | 66.9 |
| Rsa1.0_01868.1.g30429.t2 | AT3g24470/MXP5.4 [Arabidopsis thaliana] gi 37201906 gb AAQ89613.1  At3g24470/MXP5.4 [Arabidopsis thaliana] gi 332643379 gb AEE76900.1  Serinc-domain containing serine and sphingolipid biosynthesis protein [Arabidopsis thaliana]                                                                                                                                                                                                                                                                                                                                               | 415  | 409  | 0         | 98.6  | 86.3 | 89.4 | Serinc-domain containing serine and sphingolipid biosynthesis protein       | gbpln | Arabidopsis thaliana | AT3G24460.1   Symbols:   Serinc-domain containing serine and sphingolipid biosynthesis protein   chr3:8886160-8889717 REVERSE LENGTH=409           | 415  | 409  | 0         | 98.6  | 86.3 | 89.4 |
| Rsa1.0_01868.1.g30430.t1 | dbj BAB01949.1  unnamed protein product [Arabidopsis thaliana]                                                                                                                                                                                                                                                                                                                                                                                                                                                                                                                    | 251  | 528  | 4.00E-39  | 210.4 | 34.7 | 45.4 | unnamed protein product                                                     | gbpln | Arabidopsis thaliana | AT5G59970.1   Symbols:   Histone superfamily protein   chr5:24146352-24146663 REVERSE LENGTH=103                                                   | 251  | 103  | 1.00E-29  | 41.0  | 25.1 | 25.1 |
| Rsa1.0_01868.1.g30431.t1 | #                                                                                                                                                                                                                                                                                                                                                                                                                                                                                                                                                                                 | #    | #    | #         | #     | #    | #    | -                                                                           | ----  | ----                 | #                                                                                                                                                  | #    | #    | #         | #     | #    | #    |
| Rsa1.0_01868.1.g30432.t1 | ref XP_002885646.1  hypothetical protein ARALYDRAFT_479953 [Arabidopsis lyrata subsp. lyrata] gi 297331486 gb EFH61905.1  hypothetical protein ARALYDRAFT_479953 [Arabidopsis lyrata subsp. lyrata] ref XP_002872212.1  hypothetical protein ARALYDRAFT_489476 [Arabidopsis lyrata subsp. lyrata] gi 297318049 gb EFH48471.1  hypothetical protein ARALYDRAFT_489476 [Arabidopsis lyrata subsp. lyrata]                                                                                                                                                                           | 343  | 603  | 1.00E-124 | 175.8 | 63.6 | 75.8 | hypothetical protein ARALYDRAFT_479953                                      | gbpln | Arabidopsis lyrata   | AT3G24440.1   Symbols: VRN5, VIL1   Fibronectin type III domain-containing protein   chr3:88762017-8878171 REVERSE LENGTH=602                      | 343  | 602  | 1.00E-122 | 175.5 | 63.8 | 76.1 |
| Rsa1.0_01868.1.g30433.t1 | ref XP_002872212.1  hypothetical protein ARALYDRAFT_489476 [Arabidopsis lyrata subsp. lyrata] gi 297318049 gb EFH48471.1  hypothetical protein ARALYDRAFT_489476 [Arabidopsis lyrata subsp. lyrata]                                                                                                                                                                                                                                                                                                                                                                               | 211  | 1193 | 4.00E-66  | 565.4 | 63.0 | 68.2 | hypothetical protein ARALYDRAFT_489476                                      | gbpln | Arabidopsis lyrata   | AT5G26570.1   Symbols: PWD, OK1, ATGWD3   catalytic:carbohydrate kinases:phosphoglucan, water dikinases   chr5:9261580-9267526 FORWARD LENGTH=1196 | 211  | 1196 | 2.00E-68  | 566.8 | 63.0 | 68.2 |
| Rsa1.0_01868.1.g30434.t3 | #                                                                                                                                                                                                                                                                                                                                                                                                                                                                                                                                                                                 | #    | #    | #         | #     | #    | #    | -                                                                           | ----  | ----                 | #                                                                                                                                                  | #    | #    | #         | #     | #    | #    |
| Rsa1.0_01868.1.g30435.t1 | #                                                                                                                                                                                                                                                                                                                                                                                                                                                                                                                                                                                 | #    | #    | #         | #     | #    | #    | -                                                                           | ----  | ----                 | #                                                                                                                                                  | #    | #    | #         | #     | #    | #    |
| Rsa1.0_01868.1.g30436.t1 | gb AAC33963.1  contains similarity to reverse transcriptases (Pfam; rvt.hmm, score: 11.19) [Arabidopsis thaliana] ref XP_002885639.1  sec20 family protein [Arabidopsis lyrata subsp. lyrata] gi 297331479 gb EFH61898.1  sec20 family protein [Arabidopsis lyrata subsp. lyrata]                                                                                                                                                                                                                                                                                                 | 1362 | 1633 | 0         | 119.9 | 54.7 | 68.1 | contains similarity to reverse transcriptases (Pfam; rvt.hmm, score: 11.19) | gbpln | Arabidopsis thaliana | AT4G23160.1   Symbols: CRK8   cysteine-rich RLK (RECEPTOR-like protein kinase) 8   chr4:12129485-12134086 FORWARD LENGTH=1262                      | 1362 | 1262 | 1.00E-117 | 92.7  | 15.7 | 20.3 |
| Rsa1.0_01868.1.g30437.t1 | ref XP_002885639.1  sec20 family protein [Arabidopsis lyrata subsp. lyrata] gi 297331479 gb EFH61898.1  sec20 family protein [Arabidopsis lyrata subsp. lyrata]                                                                                                                                                                                                                                                                                                                                                                                                                   | 291  | 290  | 1.00E-144 | 99.7  | 88.7 | 94.5 | sec20 family protein                                                        | gbpln | Arabidopsis lyrata   | AT3G24315.1   Symbols: AtSec20   Sec20 family protein   chr3:8820599-8822445 REVERSE LENGTH=293                                                    | 291  | 293  | 1.00E-145 | 100.7 | 88.0 | 94.5 |
| Rsa1.0_01868.1.g30438.t1 | #                                                                                                                                                                                                                                                                                                                                                                                                                                                                                                                                                                                 | #    | #    | #         | #     | #    | #    | -                                                                           | ----  | ----                 | #                                                                                                                                                  | #    | #    | #         | #     | #    | #    |
| Rsa1.0_01868.1.g30439.t1 | dbj BAB01350.1  Mutator-like transposase [Arabidopsis thaliana] ref NP_973991.1  aspartyl-tRNA(Asn)/glutamyl-tRNA (Gln) amidotransferase subunit B [Arabidopsis thaliana] gi 332194187 gb AEE32308.1  aspartyl-tRNA(Asn)/glutamyl-tRNA (Gln) amidotransferase subunit B [Arabidopsis thaliana]                                                                                                                                                                                                                                                                                    | 402  | 811  | 1.00E-118 | 201.7 | 55.2 | 70.6 | Mutator-like transposase                                                    | gbpln | Arabidopsis thaliana | AT1G64260.1   Symbols:   MuDR family transposase   chr1:23847756-23849915 FORWARD LENGTH=719                                                       | 402  | 719  | 1.00E-14  | 178.9 | 21.9 | 38.8 |
| Rsa1.0_01868.1.g30440.t1 | ref NP_973991.1  aspartyl-tRNA(Asn)/glutamyl-tRNA (Gln) amidotransferase subunit B [Arabidopsis thaliana] gi 332194187 gb AEE32308.1  aspartyl-tRNA(Asn)/glutamyl-tRNA (Gln) amidotransferase subunit B [Arabidopsis thaliana]                                                                                                                                                                                                                                                                                                                                                    | 168  | 488  | 4.00E-20  | 290.5 | 38.7 | 45.2 | aspartyl-tRNA(Asn)/glutamyl-tRNA (Gln) amidotransferase subunit B           | gbpln | Arabidopsis thaliana | AT1G48520.3   Symbols: GATB   GLU-ADT subunit B   chr1:17940185-17942272 FORWARD LENGTH=488                                                        | 168  | 488  | 2.00E-22  | 290.5 | 38.7 | 45.2 |
| Rsa1.0_01868.1.g30441.t1 | #                                                                                                                                                                                                                                                                                                                                                                                                                                                                                                                                                                                 | #    | #    | #         | #     | #    | #    | -                                                                           | ----  | ----                 | #                                                                                                                                                  | #    | #    | #         | #     | #    | #    |

|                          |                                                                                                                                                                                                                                                                                                                                                                                                                                                                                                                                                                                                                                                                                                                                                                                                                                                                                                                 |     |      |           |       |      |       |                                                                                                                                                                                               |       |                      |                                                                                                                                   |     |     |           |       |      |       |
|--------------------------|-----------------------------------------------------------------------------------------------------------------------------------------------------------------------------------------------------------------------------------------------------------------------------------------------------------------------------------------------------------------------------------------------------------------------------------------------------------------------------------------------------------------------------------------------------------------------------------------------------------------------------------------------------------------------------------------------------------------------------------------------------------------------------------------------------------------------------------------------------------------------------------------------------------------|-----|------|-----------|-------|------|-------|-----------------------------------------------------------------------------------------------------------------------------------------------------------------------------------------------|-------|----------------------|-----------------------------------------------------------------------------------------------------------------------------------|-----|-----|-----------|-------|------|-------|
| Rsa1.0_01869.1.g30442.t1 | ref NP_850376.2  60S ribosomal protein L11-1 [Arabidopsis thaliana]<br>gi 297791141 ref XP_002863455.1  60S ribosomal protein L11 [Arabidopsis lyrata subsp. lyrata]<br>gi 297804282 ref XP_002870025.1  60S ribosomal protein L11 [Arabidopsis lyrata subsp. lyrata]<br>gi 21542441 sp P42795.2 RL111_ARATH RecName: Full=60S ribosomal protein L11-1; AltName: Full=L16A<br>gi 110737006 dbj BAF00458.1  60S ribosomal protein L11B [Arabidopsis thaliana] gi 297309290 gb EFH39714.1  60S ribosomal protein L11 [Arabidopsis lyrata subsp. lyrata]<br>gi 297315861 gb EFH46284.1  60S ribosomal protein L11 [Arabidopsis lyrata subsp. lyrata]<br>gi 330255069 gb AEC10163.1  60S ribosomal protein L11-1 [Arabidopsis thaliana] gi 482549880 gb EOA14074.1  hypothetical protein CARUB_v10027211mg [Capsella rubella] gi 482560618 gb EOA24809.1  hypothetical protein CARUB_v10018095mg [Capsella rubella] | 182 | 182  | 1.00E-102 | 100.0 | 99.5 | 100.0 | 60S ribosomal protein L11-1                                                                                                                                                                   | gbpln | Arabidopsis lyrata   | AT2G42740.1   Symbols: RPL16A   ribosomal protein large subunit 16A   chr2:17791794-17792946 FORWARD LENGTH=182                   | 182 | 182 | 1.00E-104 | 100.0 | 99.5 | 100.0 |
| Rsa1.0_01869.1.g30443.t1 | ref XP_002863452.1  cbl-interacting protein kinase 20 [Arabidopsis lyrata subsp. lyrata]<br>gi 297309287 gb EFH39711.1  cbl-interacting protein kinase 20 [Arabidopsis lyrata subsp. lyrata]                                                                                                                                                                                                                                                                                                                                                                                                                                                                                                                                                                                                                                                                                                                    | 435 | 439  | 0         | 100.9 | 90.6 | 93.8  | cbl-interacting protein kinase 20                                                                                                                                                             | gbpln | Arabidopsis lyrata   | AT5G45820.1   Symbols: CIPK20, SnRK3.6, PKS18   CBL-interacting protein kinase 20   chr5:18587081-18588400 REVERSE LENGTH=439     | 435 | 439 | 0         | 100.9 | 89.0 | 93.8  |
| Rsa1.0_01869.1.g30444.t1 | #                                                                                                                                                                                                                                                                                                                                                                                                                                                                                                                                                                                                                                                                                                                                                                                                                                                                                                               | #   | #    | #         | #     | #    | -     | ----                                                                                                                                                                                          | ----  | #                    | #                                                                                                                                 | #   | #   | #         | #     | #    |       |
| Rsa1.0_01869.1.g30445.t1 | ref NP_199396.1  leucine-rich repeat protein kinase-like protein [Arabidopsis thaliana] gi 332007922 gb AED95305.1  leucine-rich repeat protein kinase-like protein [Arabidopsis thaliana]<br>ref NP_199397.2  uncharacterized protein [Arabidopsis thaliana]<br>gi 332007924 gb AED95307.1  uncharacterized protein AT5G45850 [Arabidopsis thaliana]                                                                                                                                                                                                                                                                                                                                                                                                                                                                                                                                                           | 668 | 668  | 0         | 100.0 | 81.6 | 89.4  | leucine-rich repeat protein kinase-like protein                                                                                                                                               | gbpln | Arabidopsis thaliana | AT5G45840.1   Symbols:   Leucine-rich repeat protein kinase family protein   chr5:18594080-18597221 REVERSE LENGTH=668            | 668 | 668 | 0         | 100.0 | 81.6 | 89.4  |
| Rsa1.0_01869.1.g30446.t1 | ref NP_199397.2  uncharacterized protein [Arabidopsis thaliana]<br>gi 332007924 gb AED95307.1  uncharacterized protein AT5G45850 [Arabidopsis thaliana]                                                                                                                                                                                                                                                                                                                                                                                                                                                                                                                                                                                                                                                                                                                                                         | 424 | 445  | 1.00E-142 | 105.0 | 67.7 | 79.7  | uncharacterized protein                                                                                                                                                                       | gbpln | Arabidopsis thaliana | AT5G45850.1   Symbols:   Protein of unknown function (DUF688)   chr5:18599998-18601435 REVERSE LENGTH=445                         | 424 | 445 | 1.00E-145 | 105.0 | 67.7 | 79.7  |
| Rsa1.0_01869.1.g30447.t1 | gb AAD22283.1  putative retroelement pol polyprotein [Arabidopsis thaliana]                                                                                                                                                                                                                                                                                                                                                                                                                                                                                                                                                                                                                                                                                                                                                                                                                                     | 242 | 1787 | 4.00E-69  | 738.4 | 59.1 | 74.4  | putative retroelement pol polyprotein                                                                                                                                                         | gbpln | Arabidopsis thaliana | #                                                                                                                                 | #   | #   | #         | #     | #    |       |
| Rsa1.0_01870.1.g30448.t1 | #                                                                                                                                                                                                                                                                                                                                                                                                                                                                                                                                                                                                                                                                                                                                                                                                                                                                                                               | #   | #    | #         | #     | #    | -     | ----                                                                                                                                                                                          | ----  | #                    | #                                                                                                                                 | #   | #   | #         | #     | #    |       |
| Rsa1.0_01870.1.g30449.t1 | ref XP_002865207.1  hypothetical protein ARALYDRAFT_494372 [Arabidopsis lyrata subsp. lyrata]<br>gi 297311042 gb EFH41466.1  hypothetical protein ARALYDRAFT_494372 [Arabidopsis lyrata subsp. lyrata]<br>ref XP_002863429.1  pentatricopeptide repeat-containing protein [Arabidopsis lyrata subsp. lyrata]<br>gi 297309264 gb EFH39688.1  pentatricopeptide repeat-containing protein [Arabidopsis lyrata subsp. lyrata]                                                                                                                                                                                                                                                                                                                                                                                                                                                                                      | 168 | 248  | 4.00E-75  | 147.6 | 87.5 | 94.0  | hypothetical protein ARALYDRAFT_494372                                                                                                                                                        | gbpln | Arabidopsis lyrata   | AT5G46060.1   Symbols:   Protein of unknown function. DUF599   chr5:18681533-18682459 FORWARD LENGTH=248                          | 168 | 248 | 2.00E-77  | 147.6 | 87.5 | 94.0  |
| Rsa1.0_01870.1.g30450.t1 | ref XP_002863429.1  pentatricopeptide repeat-containing protein [Arabidopsis lyrata subsp. lyrata]<br>gi 297309264 gb EFH39688.1  pentatricopeptide repeat-containing protein [Arabidopsis lyrata subsp. lyrata]                                                                                                                                                                                                                                                                                                                                                                                                                                                                                                                                                                                                                                                                                                | 282 | 472  | 3.00E-53  | 167.4 | 40.4 | 48.2  | pentatricopeptide repeat-containing protein                                                                                                                                                   | gbpln | Arabidopsis lyrata   | AT5G46100.1   Symbols:   Pentatricopeptide repeat (PPR) superfamily protein   chr5:18694316-18695734 REVERSE LENGTH=472           | 282 | 472 | 2.00E-55  | 167.4 | 40.1 | 48.2  |
| Rsa1.0_01870.1.g30451.t1 | sp P52177.1 TPT1_BRAOB RecName: Full=Triose phosphate/phosphate translocator, chloroplastic; Short=cTPT; Flags: Precursor<br>gi 1143709 gb AAA84890.1  chloroplast phosphate/triose-phosphate translocator precursor [Brassica oleracea var. botrytis]                                                                                                                                                                                                                                                                                                                                                                                                                                                                                                                                                                                                                                                          | 402 | 407  | 0         | 101.2 | 92.5 | 97.0  | RecName: Full=Triose phosphate/phosphate translocator, chloroplastic; Short=cTPT; Flags: Precursor<br>gi 1143709 gb AAA84890.1  chloroplast phosphate/triose-phosphate translocator precursor | gbpln | Brassica oleracea    | AT5G46110.1   Symbols: APE2, TPT   Glucose-6-phosphate/phosphate translocator-related   chr5:18697606-18700212 FORWARD LENGTH=410 | 402 | 410 | 0         | 102.0 | 90.8 | 96.0  |
| Rsa1.0_01870.1.g30452.t1 | gb AAM67103.1  unknown [Arabidopsis thaliana]                                                                                                                                                                                                                                                                                                                                                                                                                                                                                                                                                                                                                                                                                                                                                                                                                                                                   | 111 | 109  | 2.00E-35  | 98.2  | 68.5 | 79.3  | unknown                                                                                                                                                                                       | gbpln | Arabidopsis thaliana | #                                                                                                                                 | #   | #   | #         | #     | #    |       |
| Rsa1.0_01870.1.g30453.t1 | emb CAB39638.1  RNA-directed DNA polymerase-like protein [Arabidopsis thaliana] gi 7267669 emb CAB78094.1  RNA-directed DNA polymerase-like protein [Arabidopsis thaliana]                                                                                                                                                                                                                                                                                                                                                                                                                                                                                                                                                                                                                                                                                                                                      | 466 | 1274 | 1.00E-112 | 273.4 | 47.9 | 64.8  | RNA-directed DNA polymerase-like protein                                                                                                                                                      | gbpln | Arabidopsis thaliana | AT4G29090.1   Symbols:   Ribonuclease H-like superfamily protein   chr4:14333528-14335255 FORWARD LENGTH=575                      | 466 | 575 | 2.00E-42  | 123.4 | 31.8 | 47.6  |

|                          |                                                                                                                                                                                                                                                                                                                                                                                                                                                             |     |      |           |       |      |      |                                                          |       |                      |                                                                                                                                  |     |     |           |       |      |      |
|--------------------------|-------------------------------------------------------------------------------------------------------------------------------------------------------------------------------------------------------------------------------------------------------------------------------------------------------------------------------------------------------------------------------------------------------------------------------------------------------------|-----|------|-----------|-------|------|------|----------------------------------------------------------|-------|----------------------|----------------------------------------------------------------------------------------------------------------------------------|-----|-----|-----------|-------|------|------|
| Rsa1.0_01870.1.g30454.t1 | ref[XP_002863425.1] expressed protein [Arabidopsis lyrata subsp. lyrata] gi 297309260 gb EFH39684.1  expressed protein [Arabidopsis lyrata subsp. lyrata]                                                                                                                                                                                                                                                                                                   | 79  | 79   | 9.00E-32  | 100.0 | 83.5 | 87.3 | expressed protein                                        | gbpln | Arabidopsis lyrata   | #                                                                                                                                | #   | #   | #         | #     | #    | #    |
| Rsa1.0_01871.1.g30455.t1 | gb AAF79687.1 AC022314_28 F9C16.9 [Arabidopsis thaliana]                                                                                                                                                                                                                                                                                                                                                                                                    | 236 | 946  | 1.00E-64  | 400.8 | 53.0 | 69.1 | F9C16.9                                                  | gbpln | Arabidopsis thaliana | #                                                                                                                                | #   | #   | #         | #     | #    | #    |
| Rsa1.0_01871.1.g30456.t1 | ref[NP_176104.1] uncharacterized protein [Arabidopsis thaliana] gi 12321258 gb AAG50702.1 AC079604_9 hypothetical protein [Arabidopsis thaliana] gi 29029102 gb AAO64930.1  At1g58070 [Arabidopsis thaliana] gi 110743146 dbj BAE99465.1  hypothetical protein [Arabidopsis thaliana] gi 332195373 gb AEE33494.1  uncharacterized protein AT1G58070 [Arabidopsis thaliana]                                                                                  | 100 | 284  | 1.00E-14  | 284.0 | 44.0 | 51.0 | uncharacterized protein                                  | gbpln | Arabidopsis thaliana |                                                                                                                                  | 100 | 284 | 2.00E-17  | 284.0 | 44.0 | 51.0 |
| Rsa1.0_01871.1.g30457.t1 | dbj BAB09379.1  non-LTR retroelement reverse transcriptase-like protein [Arabidopsis thaliana]                                                                                                                                                                                                                                                                                                                                                              | 576 | 1223 | 1.00E-136 | 212.3 | 43.4 | 58.3 | non-LTR retroelement reverse transcriptase-like protein  | gbpln | Arabidopsis thaliana |                                                                                                                                  | 576 | 746 | 1.00E-106 | 129.5 | 34.4 | 44.6 |
| Rsa1.0_01871.1.g30458.t1 | #                                                                                                                                                                                                                                                                                                                                                                                                                                                           | #   | #    | #         | #     | #    | #    | -                                                        | ----  | ----                 | #                                                                                                                                | #   | #   | #         | #     | #    | #    |
| Rsa1.0_01871.1.g30459.t1 | gb AAG51783.1 AC079679_3 reverse transcriptase, putative; 16838-20266 [Arabidopsis thaliana]                                                                                                                                                                                                                                                                                                                                                                | 636 | 1142 | 1.00E-161 | 179.6 | 45.6 | 60.5 | reverse transcriptase, putative; 16838-20266             | gbpln | Arabidopsis thaliana |                                                                                                                                  | 636 | 575 | 1.00E-35  | 90.4  | 14.8 | 22.8 |
| Rsa1.0_01872.1.g30460.t1 | ref[NP_172061.2] Leucine-rich repeat transmembrane protein kinase protein [Arabidopsis thaliana] gi 263430136 sp COLGD6.1 Y1570_ARAT H RecName: Full=Probable LRR receptor-like serine/threonine-protein kinase At1g05700; Flags: Precursor gi 224589374 gb ACN59221.1  leucine-rich repeat receptor-like protein kinase [Arabidopsis thaliana] gi 332189757 gb AEE27878.1  Leucine-rich repeat transmembrane protein kinase protein [Arabidopsis thaliana] | 275 | 852  | 1.00E-124 | 309.8 | 80.0 | 87.3 | Leucine-rich repeat transmembrane protein kinase protein | gbpln | Arabidopsis thaliana | AT1G05700.1   Symbols:   Leucine-rich repeat transmembrane protein kinase protein   chr1:1709796-1713245 FORWARD LENGTH=852      | 275 | 852 | 1.00E-127 | 309.8 | 80.0 | 87.3 |
| Rsa1.0_01872.1.g30461.t2 | dbj BAJ34140.1  unnamed protein product [Theilungiella halophila]                                                                                                                                                                                                                                                                                                                                                                                           | 242 | 149  | 6.00E-64  | 61.6  | 50.4 | 54.1 | unnamed protein product                                  | ----  | ----                 | AT1G05710.5   Symbols:   basic helix-loop-helix (bHLH) DNA-binding superfamily protein   chr1:1716198-1717023 FORWARD LENGTH=149 | 242 | 149 | 1.00E-63  | 61.6  | 48.8 | 52.9 |
| Rsa1.0_01872.1.g30462.t1 | ref[NP_189957.1] putative F-box/kelch-repeat protein [Arabidopsis thaliana] gi 75182779 sp Q9M2B5.1 FBK72_ARAT H RecName: Full=Putative F-box/kelch-repeat protein At3g43710 gi 7362796 emb CAB83072.1  putative protein [Arabidopsis thaliana] gi 332644299 gb AEE77820.1  putative F-box/kelch-repeat protein [Arabidopsis thaliana]                                                                                                                      | 367 | 378  | 1.00E-88  | 103.0 | 50.7 | 64.6 | putative F-box/kelch-repeat protein                      | gbpln | Arabidopsis thaliana | AT3G43710.1   Symbols:   Galactose oxidase/kelch repeat superfamily protein   chr3:15605608-15606744 FORWARD LENGTH=378          | 367 | 378 | 4.00E-91  | 103.0 | 50.7 | 64.6 |
| Rsa1.0_01872.1.g30463.t1 | gb EOA37122.1  hypothetical protein CARUB_v10010372mg, partial [Capsella rubella]                                                                                                                                                                                                                                                                                                                                                                           | 179 | 191  | 6.00E-80  | 106.7 | 81.6 | 89.4 | hypothetical protein CARUB_v10010372mg, partial          | gbpln | Capsella rubella     | AT1G05760.1   Symbols: RTM1   Mannose-binding lectin superfamily protein   chr1:1723797-1724440 REVERSE LENGTH=174               | 179 | 174 | 2.00E-78  | 97.2  | 78.8 | 85.5 |
| Rsa1.0_01872.1.g30464.t2 | ref[XP_002889565.1] hypothetical protein ARALYDRAFT_311660 [Arabidopsis lyrata subsp. lyrata] gi 297335407 gb EFH65824.1  hypothetical protein ARALYDRAFT_311660 [Arabidopsis lyrata subsp. lyrata]                                                                                                                                                                                                                                                         | 831 | 959  | 0         | 115.4 | 71.6 | 76.7 | hypothetical protein ARALYDRAFT_311660                   | gbpln | Arabidopsis lyrata   | AT1G05790.1   Symbols:   lipase class 3 family protein   chr1:1733039-1737365 FORWARD LENGTH=687                                 | 831 | 687 | 0         | 82.7  | 67.9 | 73.4 |
| Rsa1.0_01872.1.g30465.t1 | ref[XP_002868960.1] hypothetical protein ARALYDRAFT_912541 [Arabidopsis lyrata subsp. lyrata] gi 297314796 gb EFH45219.1  hypothetical protein ARALYDRAFT_912541 [Arabidopsis lyrata subsp. lyrata]                                                                                                                                                                                                                                                         | 436 | 428  | 1.00E-80  | 98.2  | 39.7 | 56.0 | hypothetical protein ARALYDRAFT_912541                   | gbpln | Arabidopsis lyrata   | AT5G49000.2   Symbols:   Galactose oxidase/kelch repeat superfamily protein   chr5:19864527-19865645 FORWARD LENGTH=372          | 436 | 372 | 2.00E-49  | 85.3  | 30.5 | 42.9 |
| Rsa1.0_01872.1.g30466.t1 | ref[XP_002889566.1] lipase class 3 family protein [Arabidopsis lyrata subsp. lyrata] gi 297335408 gb EFH65825.1  lipase class 3 family protein [Arabidopsis lyrata subsp. lyrata]                                                                                                                                                                                                                                                                           | 474 | 471  | 0         | 99.4  | 82.7 | 90.7 | lipase class 3 family protein                            | gbpln | Arabidopsis lyrata   | AT1G05800.1   Symbols: DGL   alpha/beta-Hydrolases superfamily protein   chr1:1741204-1742619 FORWARD LENGTH=471                 | 474 | 471 | 0         | 99.4  | 80.4 | 88.6 |
| Rsa1.0_01873.1.g30467.t1 | gb EOA39857.1  hypothetical protein CARUB_v10008529mg [Capsella rubella]                                                                                                                                                                                                                                                                                                                                                                                    | 652 | 658  | 0         | 100.9 | 72.9 | 81.3 | hypothetical protein CARUB_v10008529mg                   | gbpln | Capsella rubella     | AT1G33060.2   Symbols: ANAC014, NAC014   NAC 014   chr1:11975518-11978493 REVERSE LENGTH=852                                     | 652 | 652 | 0         | 100.0 | 71.2 | 79.4 |

|                          |                                                                                                                                                                                                      |     |      |           |       |      |      |                                        |       |                      |                                                                                                                                                                                                                                                                                                                                                                                                                                                 |     |      |           |       |      |      |
|--------------------------|------------------------------------------------------------------------------------------------------------------------------------------------------------------------------------------------------|-----|------|-----------|-------|------|------|----------------------------------------|-------|----------------------|-------------------------------------------------------------------------------------------------------------------------------------------------------------------------------------------------------------------------------------------------------------------------------------------------------------------------------------------------------------------------------------------------------------------------------------------------|-----|------|-----------|-------|------|------|
| Rsa1.0_01873.1.g30468.t1 | gb AAN72189.1  Unknown protein [Arabidopsis thaliana]                                                                                                                                                | 66  | 66   | 7.00E-16  | 100.0 | 62.1 | 72.7 | Unknown protein                        | gbpln | Arabidopsis thaliana | AT1G33055.1   Symbols:   unknown protein; FUNCTIONS IN: molecular.function unknown; INVOLVED IN: anaerobic respiration; LOCATED IN: endomembrane system; EXPRESSED IN: 13 plant structures; EXPRESSED DURING: 6 growth stages; Has 20 Blast hits to 20 proteins in 8 species: Archae - 0; Bacteria - 0; Metazoa - 0; Fungi - 0; Plants - 20; Viruses - 0; Other Eukaryotes - 0 (source: NCBI BLink).   chr1:11972336-11972536 REVERSE LENGTH=66 | 66  | 66   | 2.00E-18  | 100.0 | 60.6 | 72.7 |
| Rsa1.0_01873.1.g30469.t1 | gb AAF79797.1 AC020646_20 T32E20.30 [Arabidopsis thaliana]                                                                                                                                           | 346 | 1397 | 1.00E-49  | 403.8 | 29.2 | 40.2 | T32E20.30                              | gbpln | Arabidopsis thaliana | AT1G67020.1   Symbols:   unknown protein; FUNCTIONS IN: molecular.function unknown; INVOLVED IN: biological.process unknown; LOCATED IN: cellular.component unknown; EXPRESSED IN: leaf; Has 72 Blast hits to 72 proteins in 9 species: Archae - 0; Bacteria - 0; Metazoa - 0; Fungi - 0; Plants - 72; Viruses - 0; Other Eukaryotes - 0 (source: NCBI BLink).   chr1:25011008-25012987 REVERSE LENGTH=659                                      | 346 | 659  | 5.00E-20  | 190.5 | 12.7 | 17.9 |
| Rsa1.0_01874.1.g30470.t1 | gb EOA30233.1  hypothetical protein CARUB_v10013356mg [Capsella rubella]                                                                                                                             | 563 | 565  | 3.00E-82  | 100.4 | 70.3 | 75.3 | hypothetical protein CARUB_v10013356mg | gbpln | Capsella rubella     | AT3G05220.1   Symbols:   Heavy metal transport/detoxification superfamily protein   chr3:1488808-1491171 FORWARD LENGTH=577                                                                                                                                                                                                                                                                                                                     | 563 | 577  | 4.00E-44  | 102.5 | 25.4 | 26.6 |
| Rsa1.0_01874.1.g30471.t1 | gb EOA31176.1  hypothetical protein CARUB_v10014343mg [Capsella rubella]                                                                                                                             | 294 | 281  | 1.00E-145 | 95.6  | 90.8 | 93.5 | hypothetical protein CARUB_v10014343mg | gbpln | Capsella rubella     | AT3G05280.1   Symbols:   Integral membrane Yip1 family protein   chr3:1503992-1505554 REVERSE LENGTH=281                                                                                                                                                                                                                                                                                                                                        | 294 | 281  | 1.00E-147 | 95.6  | 90.8 | 93.5 |
| Rsa1.0_01874.1.g30472.t2 | ref XP_002882407.1  hypothetical protein ARALYDRAFT_477819 [Arabidopsis lyrata subsp. lyrata]   g 297328247 gb EFH58666.1  hypothetical protein ARALYDRAFT_477819 [Arabidopsis lyrata subsp. lyrata] | 635 | 647  | 0         | 101.9 | 63.9 | 75.7 | hypothetical protein ARALYDRAFT_477819 | gbpln | Arabidopsis lyrata   | AT3G05310.1   Symbols: MIRO3   MIRO-related GTP-ase 3   chr3:1510160-1513301 FORWARD LENGTH=648                                                                                                                                                                                                                                                                                                                                                 | 635 | 648  | 0         | 102.0 | 61.4 | 74.2 |
| Rsa1.0_01874.1.g30473.t1 | ref XP_002882407.1  hypothetical protein ARALYDRAFT_477819 [Arabidopsis lyrata subsp. lyrata]   g 297328247 gb EFH58666.1  hypothetical protein ARALYDRAFT_477819 [Arabidopsis lyrata subsp. lyrata] | 604 | 647  | 0         | 107.1 | 65.1 | 76.5 | hypothetical protein ARALYDRAFT_477819 | gbpln | Arabidopsis lyrata   | AT3G05310.1   Symbols: MIRO3   MIRO-related GTP-ase 3   chr3:1510160-1513301 FORWARD LENGTH=648                                                                                                                                                                                                                                                                                                                                                 | 604 | 648  | 0         | 107.3 | 62.7 | 75.7 |
| Rsa1.0_01874.1.g30474.t1 | #                                                                                                                                                                                                    | #   | #    | #         | #     | #    | #    | -                                      | ----  | ----                 | #                                                                                                                                                                                                                                                                                                                                                                                                                                               | #   | #    | #         | #     | #    |      |
| Rsa1.0_01874.1.g30475.t1 | #                                                                                                                                                                                                    | #   | #    | #         | #     | #    | #    | -                                      | ----  | ----                 | #                                                                                                                                                                                                                                                                                                                                                                                                                                               | #   | #    | #         | #     | #    |      |
| Rsa1.0_01875.1.g30476.t1 | gb AAG50698.1 AC079604_5 copia-type polyprotein, putative [Arabidopsis thaliana]   g 12321387 gb AAG50765.1 AC079131_10 copia-type polyprotein, putative [Arabidopsis thaliana]                      | 178 | 1320 | 5.00E-97  | 741.6 | 92.7 | 97.2 | copia-type polyprotein, putative       | gbpln | Arabidopsis thaliana | AT4G23160.1   Symbols: CRK8   cysteine-rich RLK (RECEPTOR-like protein kinase) 8   chr4:12129485-12134086 FORWARD LENGTH=1262                                                                                                                                                                                                                                                                                                                   | 178 | 1262 | 2.00E-33  | 709.0 | 38.8 | 56.2 |
| Rsa1.0_01875.1.g30477.t1 | ref XP_002865234.1  hypothetical protein ARALYDRAFT_330849 [Arabidopsis lyrata subsp. lyrata]   g 297311069 gb EFH41493.1  hypothetical protein ARALYDRAFT_330849 [Arabidopsis lyrata subsp. lyrata] | 164 | 329  | 8.00E-31  | 200.6 | 46.3 | 60.4 | hypothetical protein ARALYDRAFT_330849 | gbpln | Arabidopsis lyrata   | AT4G38940.1   Symbols:   Galactose oxidase/kelch repeat superfamily protein   chr4:18152848-18153960 FORWARD LENGTH=370                                                                                                                                                                                                                                                                                                                         | 164 | 370  | 3.00E-33  | 225.6 | 50.6 | 65.9 |
| Rsa1.0_01875.1.g30478.t1 | gb EOA16454.1  hypothetical protein CARUB_v10004610mg [Capsella rubella]                                                                                                                             | 519 | 511  | 0         | 98.5  | 84.4 | 90.4 | hypothetical protein CARUB_v10004610mg | gbpln | Capsella rubella     | AT5G38830.1   Symbols:   CysteinyI-tRNA synthetase, class Ia family protein   chr5:15545764-15548094 REVERSE LENGTH=511                                                                                                                                                                                                                                                                                                                         | 519 | 511  | 0         | 98.5  | 83.4 | 90.0 |
| Rsa1.0_01875.1.g30479.t1 | ref XP_002870820.1  amino acid transporter family protein [Arabidopsis lyrata subsp. lyrata]   g 297316656 gb EFH47079.1  amino acid transporter family protein [Arabidopsis lyrata subsp. lyrata]   | 439 | 456  | 0         | 103.9 | 75.4 | 85.6 | amino acid transporter family protein  | gbpln | Arabidopsis lyrata   | AT5G38820.1   Symbols:   Transmembrane amino acid transporter family protein   chr5:15543481-15545182 FORWARD LENGTH=456                                                                                                                                                                                                                                                                                                                        | 439 | 456  | 0         | 103.9 | 74.7 | 84.7 |
| Rsa1.0_01875.1.g30480.t1 | ref XP_002891342.1  hypothetical protein ARALYDRAFT_473876 [Arabidopsis lyrata subsp. lyrata]   g 297337184 gb EFH67601.1  hypothetical protein ARALYDRAFT_473876 [Arabidopsis lyrata subsp. lyrata] | 401 | 414  | 0         | 103.2 | 81.5 | 91.0 | hypothetical protein ARALYDRAFT_473876 | gbpln | Arabidopsis lyrata   | AT1G47270.2   Symbols: TLP6   tubby like protein 6   chr1:17326828-17328564 FORWARD LENGTH=412                                                                                                                                                                                                                                                                                                                                                  | 401 | 412  | 0         | 102.7 | 80.0 | 90.3 |
| Rsa1.0_01875.1.g30481.t1 | #                                                                                                                                                                                                    | #   | #    | #         | #     | #    | #    | -                                      | ----  | ----                 | AT1G55600.1   Symbols: WRKY10, ATWRKY10, MINI3   WRKY DNA-binding protein 10   chr1:20774049-20776293 REVERSE LENGTH=485                                                                                                                                                                                                                                                                                                                        | 162 | 485  | 1.00E-10  | 299.4 | 40.7 | 56.8 |

|                          |                                                                                                                                                                                                                                                                                                                                               |      |      |           |       |      |      |                                                          |       |                      |                                                                                                                                                                                                                                                                                                                                                                                                                                                                                                                                                            |      |      |           |       |      |      |
|--------------------------|-----------------------------------------------------------------------------------------------------------------------------------------------------------------------------------------------------------------------------------------------------------------------------------------------------------------------------------------------|------|------|-----------|-------|------|------|----------------------------------------------------------|-------|----------------------|------------------------------------------------------------------------------------------------------------------------------------------------------------------------------------------------------------------------------------------------------------------------------------------------------------------------------------------------------------------------------------------------------------------------------------------------------------------------------------------------------------------------------------------------------------|------|------|-----------|-------|------|------|
| Rsa1.0_01875.1.g30482.t1 | ref NP_001077684.1  uncharacterized protein [Arabidopsis thaliana]<br>gi 898961697 gb ABF59178.1  unknown protein [Arabidopsis thaliana]<br>gi 332194028 gb AEE32149.1  uncharacterized protein AT1G47278 [Arabidopsis thaliana]                                                                                                              | 79   | 91   | 3.00E-31  | 115.2 | 86.1 | 91.1 | uncharacterized protein                                  | gbpln | Arabidopsis thaliana | AT1G47278.2   Symbols:   unknown protein; FUNCTIONS IN: molecular.function unknown; INVOLVED IN: biological.process unknown; LOCATED IN: cellular.component unknown; Has 37 Blast hits to 37 proteins in 14 species: Archae - 0; Bacteria - 0; Metazoa - 0; Fungi - 0; Plants - 36; Viruses - 0; Other Eukaryotes - 1 (source: NCBI BLink).   chr1:17331263-17331726 FORWARD LENGTH=91                                                                                                                                                                     | 79   | 91   | 5.00E-34  | 115.2 | 86.1 | 91.1 |
| Rsa1.0_01875.1.g30483.t2 | ref XP_002894037.1  hypothetical protein ARALYDRAFT_314188 [Arabidopsis lyrata subsp. lyrata]<br>gi 297333879 gb EFH70296.1  hypothetical protein ARALYDRAFT_314188 [Arabidopsis lyrata subsp. lyrata]                                                                                                                                        | 69   | 80   | 6.00E-14  | 115.9 | 81.2 | 85.5 | hypothetical protein ARALYDRAFT_314188                   | gbpln | Arabidopsis lyrata   | AT1G47280.1   Symbols:   unknown protein; FUNCTIONS IN: molecular.function unknown; INVOLVED IN: biological.process unknown; LOCATED IN: endomembrane system; EXPRESSED IN: 9 plant structures; EXPRESSED DURING: L mature pollen stage, M germinated pollen stage, 4 anthesis, C globular stage, petal differentiation and expansion stage; Has 6 Blast hits to 6 proteins in 2 species: Archae - 0; Bacteria - 0; Metazoa - 0; Fungi - 0; Plants - 6; Viruses - 0; Other Eukaryotes - 0 (source: NCBI BLink).   chr1:17332241-17334310 REVERSE LENGTH=80 | 69   | 80   | 1.00E-14  | 115.9 | 75.4 | 84.1 |
| Rsa1.0_01875.1.g30484.t1 | #                                                                                                                                                                                                                                                                                                                                             | #    | #    | #         | #     | #    | #    | -                                                        | ----  | ----                 | #                                                                                                                                                                                                                                                                                                                                                                                                                                                                                                                                                          | #    | #    | #         | #     | #    |      |
| Rsa1.0_01875.1.g30485.t1 | gb AAD20658.1  putative retroelement pol polyprotein [Arabidopsis thaliana]                                                                                                                                                                                                                                                                   | 241  | 1611 | 3.00E-89  | 668.5 | 68.0 | 78.4 | putative retroelement pol polyprotein                    | gbpln | Arabidopsis thaliana | #                                                                                                                                                                                                                                                                                                                                                                                                                                                                                                                                                          | #    | #    | #         | #     | #    |      |
| Rsa1.0_01876.1.g30486.t1 | #                                                                                                                                                                                                                                                                                                                                             | #    | #    | #         | #     | #    | #    | -                                                        | ----  | ----                 | #                                                                                                                                                                                                                                                                                                                                                                                                                                                                                                                                                          | #    | #    | #         | #     | #    |      |
| Rsa1.0_01876.1.g30487.t1 | gb ABV89631.1  aluminum-induced protein [Brassica rapa]                                                                                                                                                                                                                                                                                       | 234  | 236  | 1.00E-128 | 100.9 | 96.2 | 97.9 | aluminum-induced protein                                 | gbpln | Brassica rapa        | AT5G19140.1   Symbols: ATAILP1, AILP1   Aluminium induced protein with YGL and LRDR motifs   chr5:6423398-6425785 FORWARD LENGTH=234                                                                                                                                                                                                                                                                                                                                                                                                                       | 234  | 234  | 1.00E-129 | 100.0 | 94.4 | 97.4 |
| Rsa1.0_01876.1.g30488.t1 | gb EOA19516.1  hypothetical protein CARUB_v10002409mg [Capsella rubella]                                                                                                                                                                                                                                                                      | 318  | 371  | 1.00E-164 | 116.7 | 90.6 | 95.6 | hypothetical protein CARUB_v10002409mg                   | gbpln | Capsella rubella     | AT5G19150.2   Symbols:   pfkB-like carbohydrate kinase family protein   chr5:6426280-6428402 REVERSE LENGTH=365                                                                                                                                                                                                                                                                                                                                                                                                                                            | 318  | 365  | 1.00E-164 | 114.8 | 89.3 | 95.6 |
| Rsa1.0_01876.1.g30489.t1 | ref XP_002871865.1  expressed protein [Arabidopsis lyrata subsp. lyrata]<br>gi 297317702 gb EFH48124.1  expressed protein [Arabidopsis lyrata subsp. lyrata]                                                                                                                                                                                  | 77   | 74   | 1.00E-21  | 96.1  | 79.2 | 88.3 | expressed protein                                        | gbpln | Arabidopsis lyrata   | AT5G19151.1   Symbols:   unknown protein; FUNCTIONS IN: molecular.function unknown; INVOLVED IN: biological.process unknown; LOCATED IN: endomembrane system; Has 30201 Blast hits to 17322 proteins in 780 species: Archae - 12; Bacteria - 1396; Metazoa - 17338; Fungi - 3422; Plants - 5037; Viruses - 0; Other Eukaryotes - 2996 (source: NCBI BLink).   chr5:6428572-6429547 FORWARD LENGTH=74                                                                                                                                                       | 77   | 74   | 2.00E-24  | 96.1  | 81.8 | 88.3 |
| Rsa1.0_01876.1.g30490.t1 | gb ACP30623.1  disease resistance protein [Brassica rapa subsp. pekinensis]                                                                                                                                                                                                                                                                   | 1141 | 1262 | 0         | 110.6 | 69.5 | 80.5 | disease resistance protein                               | gbpln | Brassica rapa        | AT5G18350.1   Symbols:   Disease resistance protein (TIR-NBS-LRR class) family   chr5:6074069-6078569 REVERSE LENGTH=1245                                                                                                                                                                                                                                                                                                                                                                                                                                  | 1141 | 1245 | 0         | 109.1 | 57.0 | 69.1 |
| Rsa1.0_01876.1.g30491.t1 | ref NP_197752.1  putative cation-transporting ATPase [Arabidopsis thaliana]<br>gi 12229714 sp Q9LT02.1 ATY1_ARATH RecName: Full=Probable cation-transporting ATPase<br>gi 8809697 dbj BAA97238.1  cation-transporting ATPase [Arabidopsis thaliana]<br>gi 332005809 gb AED93192.1  putative cation-transporting ATPase [Arabidopsis thaliana] | 273  | 1179 | 5.00E-35  | 431.9 | 30.4 | 34.1 | putative cation-transporting ATPase                      | gbpln | Arabidopsis thaliana | AT5G23630.1   Symbols: PDR2, MIA   phosphate deficiency response 2   chr5:7960756-7967644 REVERSE LENGTH=1179                                                                                                                                                                                                                                                                                                                                                                                                                                              | 273  | 1179 | 1.00E-37  | 431.9 | 30.4 | 34.1 |
| Rsa1.0_01876.1.g30492.t1 | ref XP_002871870.1  hypothetical protein ARALYDRAFT_488803 [Arabidopsis lyrata subsp. lyrata]<br>gi 297317707 gb EFH48129.1  hypothetical protein ARALYDRAFT_488803 [Arabidopsis lyrata subsp. lyrata]                                                                                                                                        | 146  | 153  | 3.00E-48  | 104.8 | 76.7 | 84.2 | hypothetical protein ARALYDRAFT_488803                   | gbpln | Arabidopsis lyrata   | AT5G19190.1   Symbols:   unknown protein; BEST Arabidopsis thaliana protein match is: unknown protein (TAIR:AT3G06070.1); Has 1807 Blast hits to 1807 proteins in 277 species: Archae - 0; Bacteria - 0; Metazoa - 736; Fungi - 347; Plants - 385; Viruses - 0; Other Eukaryotes - 339 (source: NCBI BLink).   chr5:6457349-6457918 FORWARD LENGTH=154                                                                                                                                                                                                     | 146  | 154  | 3.00E-47  | 105.5 | 76.7 | 87.0 |
| Rsa1.0_01876.1.g30493.t1 | gb ABD65058.1  GRF zinc finger containing protein [Brassica oleracea]                                                                                                                                                                                                                                                                         | 166  | 172  | 8.00E-47  | 103.6 | 56.6 | 74.1 | GRF zinc finger containing protein                       | gbpln | Brassica oleracea    | #                                                                                                                                                                                                                                                                                                                                                                                                                                                                                                                                                          | #    | #    | #         | #     | #    |      |
| Rsa1.0_01876.1.g30494.t1 | gb AAC26234.1  contains similarity to maize transposon MuDR (GB:M76978) [Arabidopsis thaliana]                                                                                                                                                                                                                                                | 1014 | 940  | 1.00E-179 | 92.7  | 37.7 | 53.1 | contains similarity to maize transposon MuDR (GB:M76978) | gbpln | Arabidopsis thaliana | AT1G64260.1   Symbols:   MuDR family transposase   chr1:23847756-23849915 FORWARD LENGTH=719                                                                                                                                                                                                                                                                                                                                                                                                                                                               | 1014 | 719  | 5.00E-16  | 70.9  | 7.8  | 13.9 |

|                          |                                                                                                                                                                                                                                                                                                                                                                                                                                                                                                                                                                                                                                                                                                                                                                                                                                                                                                                              |     |     |           |       |      |      |                                                       |       |                      |                                                                                                                                             |     |     |           |       |      |      |
|--------------------------|------------------------------------------------------------------------------------------------------------------------------------------------------------------------------------------------------------------------------------------------------------------------------------------------------------------------------------------------------------------------------------------------------------------------------------------------------------------------------------------------------------------------------------------------------------------------------------------------------------------------------------------------------------------------------------------------------------------------------------------------------------------------------------------------------------------------------------------------------------------------------------------------------------------------------|-----|-----|-----------|-------|------|------|-------------------------------------------------------|-------|----------------------|---------------------------------------------------------------------------------------------------------------------------------------------|-----|-----|-----------|-------|------|------|
| Rsa1.0_01876.1.g30495.t1 | ref[XP_002871872.1] hypothetical protein ARALYDRAFT_488806 [Arabidopsis lyrata subsp. lyrata] gi 297317709 gb EFH48131.1                                                                                                                                                                                                                                                                                                                                                                                                                                                                                                                                                                                                                                                                                                                                                                                                     | 478 | 473 | 0         | 99.0  | 86.6 | 90.8 | hypothetical protein ARALYDRAFT_488806                | gbpln | Arabidopsis lyrata   | AT5G19210.2   Symbols:   P-loop containing nucleoside triphosphate hydrolases superfamily protein   chr5:8461444-6463687 FORWARD LENGTH=472 | 478 | 472 | 0         | 98.7  | 86.2 | 90.6 |
| Rsa1.0_01876.1.g30496.t1 | hypothetical protein ARALYDRAFT_488806 [Arabidopsis lyrata subsp. lyrata] ref[NP_197423.1] glucose-1-phosphate adenyltransferase large subunit 1 [Arabidopsis thaliana] gi 14916987 sp P55229.3 GLGL1_ARATH RecName: Full=Glucose-1-phosphate adenyltransferase large subunit 1, chloroplastic; AltName: Full=ADP-glucose pyrophosphorylase; AltName: Full=ADP-glucose synthase; AltName: Full=AGPase S; AltName: Full=Alpha-D-glucose-1-phosphate adenyl transferase; Flags: Precursor gi 13877605 gb AAK43880.1 AF370503.1 Unknown protein [Arabidopsis thaliana] gi 2149021 gb AAB58475.1  ADPG pyrophosphorylase large subunit [Arabidopsis thaliana] gi 5002530 emb CAA51779.2  ADP-glucose pyrophosphorylase large subunit [Arabidopsis thaliana] gi 31711934 gb AAP68323.1  At5g19220 [Arabidopsis thaliana] gi 332005289 gb AED92672.1  glucose-1-phosphate adenyltransferase large subunit 1 [Arabidopsis thaliana] | 516 | 522 | 0         | 101.2 | 94.0 | 97.7 | glucose-1-phosphate adenyltransferase large subunit 1 | gbpln | Arabidopsis thaliana | AT5G19220.1   Symbols: ADG2, APL1   ADP glucose pyrophosphorylase large subunit 1   chr5:6463931-6466775 REVERSE LENGTH=522                 | 516 | 522 | 0         | 101.2 | 94.0 | 97.7 |
| Rsa1.0_01876.1.g30497.t2 | ref[XP_002871873.1] hypothetical protein ARALYDRAFT_488808 [Arabidopsis lyrata subsp. lyrata] gi 297317710 gb EFH48132.1                                                                                                                                                                                                                                                                                                                                                                                                                                                                                                                                                                                                                                                                                                                                                                                                     | 414 | 199 | 7.00E-67  | 48.1  | 30.0 | 35.0 | hypothetical protein ARALYDRAFT_488808                | gbpln | Arabidopsis lyrata   | AT5G19250.1   Symbols:   Glycoprotein membrane precursor GPI-anchored   chr5:6471983-6472808 FORWARD LENGTH=196                             | 414 | 196 | 6.00E-69  | 47.3  | 30.4 | 34.5 |
| Rsa1.0_01877.1.g30498.t2 | ref[XP_002873954.1] hypothetical protein ARALYDRAFT_488853 [Arabidopsis lyrata subsp. lyrata] gi 297319791 gb EFH50213.1                                                                                                                                                                                                                                                                                                                                                                                                                                                                                                                                                                                                                                                                                                                                                                                                     | 151 | 151 | 3.00E-63  | 100.0 | 79.5 | 93.4 | hypothetical protein ARALYDRAFT_488853                | gbpln | Arabidopsis lyrata   | AT5G19590.1   Symbols:   Protein of unknown function, DUF538   chr5:6611614-6612069 REVERSE LENGTH=151                                      | 151 | 151 | 3.00E-64  | 100.0 | 72.2 | 83.4 |
| Rsa1.0_01877.1.g30499.t1 | ref[XP_002871896.1] hypothetical protein ARALYDRAFT_909999 [Arabidopsis lyrata subsp. lyrata] gi 297317733 gb EFH48155.1                                                                                                                                                                                                                                                                                                                                                                                                                                                                                                                                                                                                                                                                                                                                                                                                     | 736 | 732 | 0         | 99.5  | 87.8 | 91.6 | hypothetical protein ARALYDRAFT_909999                | gbpln | Arabidopsis lyrata   | AT5G19620.1   Symbols: EMB213, OEP80, ATOEP80, TOC75   outer envelope protein of 80 kDa   chr5:6623323-6627641 FORWARD LENGTH=732           | 736 | 732 | 0         | 99.5  | 87.0 | 90.5 |
| Rsa1.0_01877.1.g30500.t1 | ref[NP_197465.1] putative peptide/nitrate transporter [Arabidopsis thaliana] gi 122214333 sp Q3E9B5.1 PTR51_ARATH RecName: Full=Putative peptide/nitrate transporter At5g19640 gi 332005350 gb AED92733.1  putative peptide/nitrate transporter [Arabidopsis thaliana]                                                                                                                                                                                                                                                                                                                                                                                                                                                                                                                                                                                                                                                       | 607 | 609 | 0         | 100.3 | 86.7 | 92.8 | putative peptide/nitrate transporter                  | gbpln | Arabidopsis thaliana | AT5G19640.1   Symbols:   Major facilitator superfamily protein   chr5:6636460-6638590 FORWARD LENGTH=609                                    | 607 | 609 | 0         | 100.3 | 86.7 | 92.8 |
| Rsa1.0_01877.1.g30501.t1 | ref[XP_002873958.1] ATOFP8/OFPP8 [Arabidopsis lyrata subsp. lyrata] gi 297319795 gb EFH50217.1  ATOFP8/OFPP8 [Arabidopsis lyrata subsp. lyrata]                                                                                                                                                                                                                                                                                                                                                                                                                                                                                                                                                                                                                                                                                                                                                                              | 215 | 219 | 2.00E-77  | 101.9 | 78.6 | 85.6 | ATOFFP8/OFPP8                                         | gbpln | Arabidopsis lyrata   | AT5G19650.1   Symbols: ATOFP8, OFPP8   ovate family protein 8   chr5:6639632-6640297 REVERSE LENGTH=221                                     | 215 | 221 | 6.00E-75  | 102.8 | 76.3 | 84.7 |
| Rsa1.0_01877.1.g30502.t1 | ref[NP_197468.2] Exostosin family protein [Arabidopsis thaliana] gi 332005353 gb AED92736.1  Exostosin family protein [Arabidopsis thaliana]                                                                                                                                                                                                                                                                                                                                                                                                                                                                                                                                                                                                                                                                                                                                                                                 | 587 | 610 | 0         | 103.9 | 85.2 | 92.0 | Exostosin family protein                              | gbpln | Arabidopsis thaliana | AT5G19670.1   Symbols:   Exostosin family protein   chr5:6647025-6649358 FORWARD LENGTH=610                                                 | 587 | 610 | 0         | 103.9 | 85.2 | 92.0 |
| Rsa1.0_01877.1.g30503.t1 | gb EOA21087.1  hypothetical protein CARUB_v10001424mg [Capsella rubella]                                                                                                                                                                                                                                                                                                                                                                                                                                                                                                                                                                                                                                                                                                                                                                                                                                                     | 328 | 328 | 1.00E-168 | 100.0 | 89.9 | 96.3 | hypothetical protein CARUB_v10001424mg                | gbpln | Capsella rubella     | AT5G19680.1   Symbols:   Leucine-rich repeat (LRR) family protein   chr5:6649663-6651564 FORWARD LENGTH=328                                 | 328 | 328 | 1.00E-167 | 100.0 | 88.7 | 94.8 |
| Rsa1.0_01877.1.g30504.t1 | ref[XP_002871900.1] hypothetical protein ARALYDRAFT_488863 [Arabidopsis lyrata subsp. lyrata] gi 297317737 gb EFH48159.1                                                                                                                                                                                                                                                                                                                                                                                                                                                                                                                                                                                                                                                                                                                                                                                                     | 780 | 779 | 0         | 99.9  | 95.6 | 97.2 | hypothetical protein ARALYDRAFT_488863                | gbpln | Arabidopsis lyrata   | AT5G19690.1   Symbols: STT3A   staurosporin and temperature sensitive 3-like A   chr5:6652649-6658214 FORWARD LENGTH=779                    | 780 | 779 | 0         | 99.9  | 95.4 | 97.3 |



|                           |                                                                                                                                                                                                                                                                                                                                                                                                                                                                                                                                                                                  |     |      |           |       |      |      |                                                  |       |                      |                                                                                                                                                                                                                                                                                                                                                                                                                                                                           |     |     |           |       |      |      |
|---------------------------|----------------------------------------------------------------------------------------------------------------------------------------------------------------------------------------------------------------------------------------------------------------------------------------------------------------------------------------------------------------------------------------------------------------------------------------------------------------------------------------------------------------------------------------------------------------------------------|-----|------|-----------|-------|------|------|--------------------------------------------------|-------|----------------------|---------------------------------------------------------------------------------------------------------------------------------------------------------------------------------------------------------------------------------------------------------------------------------------------------------------------------------------------------------------------------------------------------------------------------------------------------------------------------|-----|-----|-----------|-------|------|------|
| Rsa1.0_01878.1.g30505.t24 | gb EOA39972.1  hypothetical protein CARUB_v10008660mg [Capsella rubella]                                                                                                                                                                                                                                                                                                                                                                                                                                                                                                         | 453 | 590  | 2.00E-52  | 130.2 | 26.5 | 34.2 | hypothetical protein CARUB_v10008660mg           | gbpln | Capsella rubella     | AT1G22660.1   Symbols:   Polynucleotide adenyltransferase family protein   chr1:8017410-8021538 FORWARD LENGTH=605                                                                                                                                                                                                                                                                                                                                                        | 453 | 605 | 2.00E-53  | 133.6 | 25.8 | 33.3 |
| Rsa1.0_01878.1.g30506.t1  | gb AAD29754.1 AF076243.1 putative transposon protein [Arabidopsis thaliana] gi 7267199 emb CAB77910.1  putative transposon protein [Arabidopsis thaliana]                                                                                                                                                                                                                                                                                                                                                                                                                        | 442 | 1008 | 1.00E-10  | 228.1 | 12.7 | 18.8 | putative transposon protein                      | gbpln | Arabidopsis thaliana | #                                                                                                                                                                                                                                                                                                                                                                                                                                                                         | #   | #   | #         | #     | #    | #    |
| Rsa1.0_01878.1.g30507.t1  | gb EOA40072.1  hypothetical protein CARUB_v10008765mg [Capsella rubella]                                                                                                                                                                                                                                                                                                                                                                                                                                                                                                         | 534 | 549  | 0         | 102.8 | 87.3 | 93.3 | hypothetical protein CARUB_v10008765mg           | gbpln | Capsella rubella     | AT1G10640.1   Symbols:   Pectin lyase-like superfamily protein   chr1:3515478-3517807 REVERSE LENGTH=532                                                                                                                                                                                                                                                                                                                                                                  | 534 | 532 | 0         | 99.6  | 84.6 | 92.7 |
| Rsa1.0_01878.1.g30508.t1  | gb EOA39211.1  hypothetical protein CARUB_v10012182mg [Capsella rubella]                                                                                                                                                                                                                                                                                                                                                                                                                                                                                                         | 396 | 444  | 1.00E-149 | 112.1 | 70.7 | 80.6 | hypothetical protein CARUB_v10012182mg           | gbpln | Capsella rubella     | AT1G10610.1   Symbols:   basic helix-loop-helix (bHLH) DNA-binding superfamily protein   chr1:3506463-3508752 FORWARD LENGTH=441                                                                                                                                                                                                                                                                                                                                          | 396 | 441 | 1.00E-152 | 111.4 | 70.7 | 80.8 |
| Rsa1.0_01878.1.g30509.t1  | gb EOA38661.1  hypothetical protein CARUB_v10010598mg [Capsella rubella]                                                                                                                                                                                                                                                                                                                                                                                                                                                                                                         | 140 | 140  | 1.00E-68  | 100.0 | 90.7 | 95.0 | hypothetical protein CARUB_v10010598mg           | gbpln | Capsella rubella     | AT1G10590.3   Symbols:   Nucleic acid-binding, OB-fold-like protein   chr1:3502324-3503033 REVERSE LENGTH=153                                                                                                                                                                                                                                                                                                                                                             | 140 | 153 | 2.00E-69  | 109.3 | 89.3 | 95.0 |
| Rsa1.0_01878.1.g30510.t2  | ref NP_001117258.1  basic helix-loop-helix domain-containing protein [Arabidopsis thaliana] gi 5091554 gb AAD39583.1 AC007067.23 T10024.23 [Arabidopsis thaliana] gi 332190478 gb AAE28599.1  basic helix-loop-helix domain-containing protein [Arabidopsis thaliana]                                                                                                                                                                                                                                                                                                            | 175 | 174  | 2.00E-70  | 99.4  | 76.6 | 87.4 | basic helix-loop-helix domain-containing protein | gbpln | Arabidopsis thaliana | AT1G10586.1   Symbols:   basic helix-loop-helix (bHLH) DNA-binding superfamily protein   chr1:3497131-3499396 REVERSE LENGTH=174                                                                                                                                                                                                                                                                                                                                          | 175 | 174 | 1.00E-72  | 99.4  | 76.6 | 87.4 |
| Rsa1.0_01878.1.g30511.t1  | #                                                                                                                                                                                                                                                                                                                                                                                                                                                                                                                                                                                | #   | #    | #         | #     | #    | #    | -                                                | ----  | ----                 | #                                                                                                                                                                                                                                                                                                                                                                                                                                                                         | #   | #   | #         | #     | #    | #    |
| Rsa1.0_01879.1.g30512.t1  | gb EOA33268.1  hypothetical protein CARUB_v10022353mg [Capsella rubella]                                                                                                                                                                                                                                                                                                                                                                                                                                                                                                         | 215 | 215  | 1.00E-100 | 100.0 | 83.3 | 99.8 | hypothetical protein CARUB_v10022353mg           | gbpln | Capsella rubella     | AT1G64065.1   Symbols:   Late embryogenesis abundant (LEA) hydroxyproline-rich glycoprotein family   chr1:23778628-23779272 FORWARD LENGTH=214                                                                                                                                                                                                                                                                                                                            | 215 | 214 | 1.00E-100 | 99.5  | 81.9 | 89.8 |
| Rsa1.0_01879.1.g30513.t1  | ref XP_002886365.1  hypothetical protein ARALYDRAFT_474947 [Arabidopsis lyrata subsp. lyrata] gi 297332206 gb EFH62624.1  hypothetical protein ARALYDRAFT_474947 [Arabidopsis lyrata subsp. lyrata]                                                                                                                                                                                                                                                                                                                                                                              | 411 | 413  | 1.00E-112 | 100.5 | 69.1 | 77.1 | hypothetical protein ARALYDRAFT_474947           | gbpln | Arabidopsis lyrata   | AT1G64080.1   Symbols:   unknown protein; FUNCTIONS IN: molecular_function unknown; INVOLVED IN: biological_process unknown; LOCATED IN: plasma membrane; BEST Arabidopsis thaliana protein match is: unknown protein (TAIR:AT5G52870.1). Has 1546 Blast hits to 738 proteins in 176 species: Archaee - 0; Bacteria - 143; Metazoa - 278; Fungi - 131; Plants - 95; Viruses - 4; Other Eukaryotes - 895 (source: NCBI BLINK).   chr1:23785230-23786557 REVERSE LENGTH=411 | 411 | 411 | 1.00E-108 | 100.0 | 67.6 | 76.4 |
| Rsa1.0_01879.1.g30514.t1  | #                                                                                                                                                                                                                                                                                                                                                                                                                                                                                                                                                                                | #   | #    | #         | #     | #    | #    | -                                                | ----  | ----                 | #                                                                                                                                                                                                                                                                                                                                                                                                                                                                         | #   | #   | #         | #     | #    | #    |
| Rsa1.0_01879.1.g30515.t1  | gb EOA35625.1  hypothetical protein CARUB_v10020840mg [Capsella rubella]                                                                                                                                                                                                                                                                                                                                                                                                                                                                                                         | 250 | 253  | 1.00E-115 | 101.2 | 87.6 | 94.0 | hypothetical protein CARUB_v10020840mg           | gbpln | Capsella rubella     | AT1G64090.1   Symbols:   RTNLB3   Reticular like protein B3   chr1:23789395-23790669 FORWARD LENGTH=255                                                                                                                                                                                                                                                                                                                                                                   | 250 | 255 | 1.00E-117 | 102.0 | 86.8 | 94.4 |
| Rsa1.0_01879.1.g30516.t1  | ref NP_178819.1  Zinc knuckle (CCHC-type) family protein [Arabidopsis thaliana] gi 3327395 gb AAC26677.1  putative Tai1-like non-LTR retroelement protein [Arabidopsis thaliana] gi 330251037 gb AEC06131.1  Zinc knuckle (CCHC-type) family protein [Arabidopsis thaliana] ref NP_200786.1  transcription factor MYB59 [Arabidopsis thaliana] gi 97179947 sp Q4JL84.2 MYB59_ARAT H RecName: Full=Transcription factor MYB59; AltName: Full=Myb-related protein 59; Short=AtMYB59 gi 9758843 db BAB09515.1  Myb-related transcription factor-like protein [Arabidopsis thaliana] | 252 | 530  | 1.00E-23  | 210.3 | 35.7 | 51.2 | Zinc knuckle (CCHC-type) family protein          | gbpln | Arabidopsis thaliana | AT2G07760.1   Symbols:   Zinc knuckle (CCHC-type) family protein   chr2:3584420-3586278 REVERSE LENGTH=530                                                                                                                                                                                                                                                                                                                                                                | 252 | 530 | 4.00E-26  | 210.3 | 35.7 | 51.2 |
| Rsa1.0_01880.1.g30517.t1  | ref NP_200786.1  transcription factor MYB59 [Arabidopsis thaliana] gi 97179947 sp Q4JL84.2 MYB59_ARAT H RecName: Full=Transcription factor MYB59; AltName: Full=Myb-related protein 59; Short=AtMYB59 gi 9758843 db BAB09515.1  Myb-related transcription factor-like protein [Arabidopsis thaliana] gi 41619478 gb AAS10111.1  MYB transcription factor [Arabidopsis thaliana] gi 332009849 gb AED97232.1  transcription factor MYB59 [Arabidopsis thaliana]                                                                                                                    | 238 | 235  | 1.00E-116 | 98.7  | 91.2 | 93.7 | transcription factor MYB59                       | gbpln | Arabidopsis thaliana | AT5G59780.3   Symbols:   MYB59, ATMYB59-3   myb domain protein 59   chr5:24082425-24083350 REVERSE LENGTH=235                                                                                                                                                                                                                                                                                                                                                             | 238 | 235 | 1.00E-118 | 98.7  | 91.2 | 93.7 |
| Rsa1.0_01880.1.g30518.t1  | #                                                                                                                                                                                                                                                                                                                                                                                                                                                                                                                                                                                | #   | #    | #         | #     | #    | #    | -                                                | ----  | ----                 | #                                                                                                                                                                                                                                                                                                                                                                                                                                                                         | #   | #   | #         | #     | #    | #    |
| Rsa1.0_01880.1.g30519.t1  | ref XP_002864667.1  APUM18 [Arabidopsis lyrata subsp. lyrata] gi 297310502 gb EFH40926.1  APUM18 [Arabidopsis lyrata subsp. lyrata]                                                                                                                                                                                                                                                                                                                                                                                                                                              | 332 | 328  | 1.00E-129 | 98.8  | 71.1 | 82.2 | APUM18                                           | gbpln | Arabidopsis lyrata   | AT5G60110.1   Symbols:   APUM18, PUM18   pumilio 18   chr5:24201954-24202937 FORWARD LENGTH=327                                                                                                                                                                                                                                                                                                                                                                           | 332 | 327 | 1.00E-122 | 98.5  | 70.8 | 80.7 |

|                          |                                                                                                                                                                                                                                                                                                                                                                   |      |      |           |       |      |      |                                                                   |       |                      |                                                                                                                                                                                                                                                                                                                                             |      |      |           |       |      |      |
|--------------------------|-------------------------------------------------------------------------------------------------------------------------------------------------------------------------------------------------------------------------------------------------------------------------------------------------------------------------------------------------------------------|------|------|-----------|-------|------|------|-------------------------------------------------------------------|-------|----------------------|---------------------------------------------------------------------------------------------------------------------------------------------------------------------------------------------------------------------------------------------------------------------------------------------------------------------------------------------|------|------|-----------|-------|------|------|
| Rsa1.0_01880.1.g30520.t1 | refNP_200784.2  uncharacterized protein [Arabidopsis thaliana] gi 61742767 gb AAX55204.1  hypothetical protein AT5g59760 [Arabidopsis thaliana] gi 332009846 gb AED97229.1  uncharacterized protein AT5G59760 [Arabidopsis thaliana]                                                                                                                              | 231  | 232  | 7.00E-77  | 100.4 | 71.0 | 78.8 | uncharacterized protein                                           | gbpln | Arabidopsis thaliana | AT5G59760.1   Symbols:   Protein of unknown function (DUF1635)   chr5:24075628-24076415 REVERSE LENGTH=232                                                                                                                                                                                                                                  | 231  | 232  | 2.00E-79  | 100.4 | 71.0 | 78.8 |
| Rsa1.0_01880.1.g30521.t1 | refNP_200782.1  UDP-N-acetylglucosamine (UAA) transporter family protein [Arabidopsis thaliana] gi 75127032 sp Q6NMB6.1 UTR5B_ARAT H RecName: Full=UDP-galactose/UDP-glucose transporter 5B; Short=ATU75B gi 44917565 gb AAS49107.1  At5g59740 [Arabidopsis thaliana] gi 332009843 gb AED97226.1  UDP-galactose/UDP-glucose transporter 5B [Arabidopsis thaliana] | 177  | 344  | 1.00E-53  | 194.4 | 66.1 | 73.4 | UDP-N-acetylglucosamine (UAA) transporter family protein          | gbpln | Arabidopsis thaliana | AT5G59740.1   Symbols:   UDP-N-acetylglucosamine (UAA) transporter family   chr5:24070310-24072747 REVERSE LENGTH=344                                                                                                                                                                                                                       | 177  | 344  | 6.00E-56  | 194.4 | 66.1 | 73.4 |
| Rsa1.0_01880.1.g30522.t1 | gb EOA14941.1  hypothetical protein CARUB_v10028285mg [Capsella rubella]                                                                                                                                                                                                                                                                                          | 624  | 637  | 0         | 102.1 | 77.2 | 85.6 | hypothetical protein CARUB_v10028285mg                            | gbpln | Capsella rubella     | AT5G59730.1   Symbols:   ATEXO70H7, EXO70H7   exocyst subunit exo70 family protein H7   chr5:24064100-24066004 REVERSE LENGTH=634                                                                                                                                                                                                           | 624  | 634  | 0         | 101.6 | 78.5 | 89.1 |
| Rsa1.0_01881.1.g30523.t1 | #                                                                                                                                                                                                                                                                                                                                                                 | #    | #    | #         | #     | #    | -    | ---                                                               | ---   | #                    | #                                                                                                                                                                                                                                                                                                                                           | #    | #    | #         | #     | #    | #    |
| Rsa1.0_01881.1.g30524.t1 | refNP_564784.1  DNA-binding storekeeper protein-related transcriptional regulator [Arabidopsis thaliana] gi 4508074 gb AD21418.1  Unknown protein [Arabidopsis thaliana] gi 22242454 db BAH20252.1  AT1G61730 [Arabidopsis thaliana] gi 332195759 gb AEE33880.1  DNA-binding storekeeper protein-related transcriptional regulator [Arabidopsis thaliana]         | 389  | 376  | 6.00E-99  | 96.7  | 60.7 | 71.2 | DNA-binding storekeeper protein-related transcriptional regulator | gbpln | Arabidopsis thaliana | AT1G61730.1   Symbols:   DNA-binding storekeeper protein-related transcriptional regulator   chr1:22793447-22794577 REVERSE LENGTH=376                                                                                                                                                                                                      | 389  | 376  | 1.00E-101 | 96.7  | 60.7 | 71.2 |
| Rsa1.0_01881.1.g30525.t1 | #                                                                                                                                                                                                                                                                                                                                                                 | #    | #    | #         | #     | #    | -    | ---                                                               | ---   | #                    | #                                                                                                                                                                                                                                                                                                                                           | #    | #    | #         | #     | #    | #    |
| Rsa1.0_01881.1.g30526.t1 | refXP_002886512.1  hypothetical protein ARALYDRAFT_475155 [Arabidopsis lyrata subsp. lyrata] gi 297332353 gb EFH62771.1  hypothetical protein ARALYDRAFT_475155 [Arabidopsis lyrata subsp. lyrata]                                                                                                                                                                | 460  | 461  | 0         | 100.2 | 85.0 | 93.0 | hypothetical protein ARALYDRAFT_475155                            | gbpln | Arabidopsis lyrata   | AT1G61740.1   Symbols:   Sulfite exporter TauE/SaE family protein   chr1:22798365-22801020 REVERSE LENGTH=458                                                                                                                                                                                                                               | 460  | 458  | 0         | 99.6  | 85.2 | 93.7 |
| Rsa1.0_01881.1.g30527.t1 | #                                                                                                                                                                                                                                                                                                                                                                 | #    | #    | #         | #     | #    | -    | ---                                                               | ---   | #                    | #                                                                                                                                                                                                                                                                                                                                           | #    | #    | #         | #     | #    | #    |
| Rsa1.0_01881.1.g30528.t1 | gb EOA35945.1  hypothetical protein CARUB_v10021202mg [Capsella rubella]                                                                                                                                                                                                                                                                                          | 98   | 98   | 1.00E-48  | 100.0 | 98.0 | 98.0 | hypothetical protein CARUB_v10021202mg                            | gbpln | Capsella rubella     | AT1G61780.1   Symbols:   postsynaptic protein-related   chr1:22812822-22814016 REVERSE LENGTH=98                                                                                                                                                                                                                                            | 98   | 98   | 2.00E-50  | 100.0 | 95.9 | 96.9 |
| Rsa1.0_01881.1.g30529.t1 | refNP_181704.1  uncharacterized protein [Arabidopsis thaliana] gi 2335105 gb AAC02775.1  hypothetical protein [Arabidopsis thaliana] gi 26450207 db BAC42222.1  unknown protein [Arabidopsis thaliana] gi 30793799 gb AAP40352.1  unknown protein [Arabidopsis thaliana] gi 330254932 gb AEC10026.1  uncharacterized protein AT2G41730 [Arabidopsis thaliana]     | 106  | 119  | 1.00E-25  | 112.3 | 60.4 | 67.0 | uncharacterized protein                                           | gbpln | Arabidopsis thaliana | AT2G41730.1   Symbols:   unknown protein; BEST Arabidopsis thaliana protein match is: unknown protein (TAIR:AT5G24640.1); Has 25 Blast hits to 25 proteins in 5 species: Archae - 0; Bacteria - 0; Metazoa - 0; Fungi - 0; Plants - 25; Viruses - 0; Other Eukaryotes - 0 (source: NCBI BLink).   chr2:17409488-17409847 FORWARD LENGTH=119 | 106  | 119  | 2.00E-28  | 112.3 | 60.4 | 67.0 |
| Rsa1.0_01881.1.g30530.t1 | gb EOA35889.1  hypothetical protein CARUB_v10021146mg [Capsella rubella]                                                                                                                                                                                                                                                                                          | 114  | 127  | 4.00E-39  | 111.4 | 77.2 | 85.1 | hypothetical protein CARUB_v10021146mg                            | gbpln | Capsella rubella     | AT1G61795.1   Symbols:   PAK-box/P21-Rho-binding family protein   chr1:22819943-22820826 FORWARD LENGTH=128                                                                                                                                                                                                                                 | 114  | 128  | 5.00E-37  | 112.3 | 77.2 | 85.1 |
| Rsa1.0_01881.1.g30531.t1 | gb EOA19550.1  hypothetical protein CARUB_v10002551mg [Capsella rubella]                                                                                                                                                                                                                                                                                          | 353  | 369  | 1.00E-151 | 104.5 | 73.7 | 86.7 | hypothetical protein CARUB_v10002551mg                            | gbpln | Capsella rubella     | AT5G12270.1   Symbols:   2-oxoglutarate (2OG) and Fe(II)-dependent oxygenase superfamily protein   chr5:3970131-3971301 REVERSE LENGTH=360                                                                                                                                                                                                  | 353  | 360  | 1.00E-149 | 102.0 | 75.9 | 89.2 |
| Rsa1.0_01882.1.g30532.t1 | gb EOA33846.1  hypothetical protein CARUB_v10021336mg [Capsella rubella]                                                                                                                                                                                                                                                                                          | 1017 | 1069 | 0         | 105.1 | 74.1 | 86.9 | hypothetical protein CARUB_v10021336mg                            | gbpln | Capsella rubella     | AT1G65780.1   Symbols:   P-loop containing nucleoside triphosphate hydrolases superfamily protein   chr1:24462958-24466888 REVERSE LENGTH=1065                                                                                                                                                                                              | 1017 | 1065 | 0         | 104.7 | 73.7 | 86.0 |
| Rsa1.0_01882.1.g30533.t1 | gb ACD7701.2.1  metal transporter protein [Brassica juncea]                                                                                                                                                                                                                                                                                                       | 692  | 689  | 0         | 99.6  | 96.4 | 98.3 | metal transporter protein                                         | gbpln | Brassica juncea      | AT1G65730.1   Symbols:   YSL7   YELLOW STRIPE like 7   chr1:24442639-24446122 FORWARD LENGTH=688                                                                                                                                                                                                                                            | 692  | 688  | 0         | 99.4  | 90.0 | 95.1 |

|                           |                                                                                                                                                                                                                                                                                                                                                                                                                                                                                                                                                                                                              |      |      |           |       |      |      |                                                    |       |                      |                                                                                                                                                                                                                                                                                                                                                                                                                                                         |      |      |           |       |      |      |
|---------------------------|--------------------------------------------------------------------------------------------------------------------------------------------------------------------------------------------------------------------------------------------------------------------------------------------------------------------------------------------------------------------------------------------------------------------------------------------------------------------------------------------------------------------------------------------------------------------------------------------------------------|------|------|-----------|-------|------|------|----------------------------------------------------|-------|----------------------|---------------------------------------------------------------------------------------------------------------------------------------------------------------------------------------------------------------------------------------------------------------------------------------------------------------------------------------------------------------------------------------------------------------------------------------------------------|------|------|-----------|-------|------|------|
| Rsa1.0_01882.1.g30534.t1  | gb EOA34542.1  hypothetical protein CARUB_v10022088mg [Capsella rubella]                                                                                                                                                                                                                                                                                                                                                                                                                                                                                                                                     | 191  | 186  | 5.00E-61  | 97.4  | 68.6 | 78.0 | hypothetical protein CARUB_v10022088mg             | gbpln | Capsella rubella     | AT1G65720.1   Symbols:   unknown protein; FUNCTIONS IN: molecular_function unknown; INVOLVED IN: biological_process unknown; LOCATED IN: endomembrane system; EXPRESSED IN: 24 plant structures; EXPRESSED DURING: 15 growth stages; Has 44 Blast hits to 44 proteins in 14 species: Archae - 0; Bacteria - 0; Metazoa - 0; Fungi - 0; Plants - 44; Viruses - 0; Other Eukaryotes - 0 (source: NCBI BLink).   chr1:24440471-24441013 REVERSE LENGTH=180 | 191  | 180  | 2.00E-52  | 94.2  | 69.1 | 79.6 |
| Rsa1.0_01882.1.g30535.t1  | gb AFD01305.1  auxin response factor 8-1 [Brassica rapa subsp. pekinensis]                                                                                                                                                                                                                                                                                                                                                                                                                                                                                                                                   | 794  | 780  | 0         | 98.2  | 93.1 | 95.3 | auxin response factor 8-1                          | gbpln | Brassica rapa        | AT5G37020.1   Symbols: ARF8, ATARF8   auxin response factor 8   chr5:14630151-14634106 FORWARD LENGTH=811                                                                                                                                                                                                                                                                                                                                               | 794  | 811  | 0         | 102.1 | 78.3 | 84.4 |
| Rsa1.0_01882.1.g30536.t1  | ref NP_176747.1  U6 snRNA-associated Sm-like protein LSm8 [Arabidopsis thaliana] gi 79320777 ref NP_001031238.1  U6 snRNA-associated Sm-like protein LSm8 [Arabidopsis thaliana] gi 17979539 gb AAL50104.1  At1g65700/F1E22.3 [Arabidopsis thaliana] gi 20334918 gb AAM16215.1  At1g65700/F1E22.3 [Arabidopsis thaliana] gi 21592627 gb AAM64576.1  small nuclear ribonucleoprotein, putative [Arabidopsis thaliana] gi 332196292 gb AEE34413.1  U6 snRNA-associated Sm-like protein LSm8 [Arabidopsis thaliana] gi 332196293 gb AEE34414.1  U6 snRNA-associated Sm-like protein LSm8 [Arabidopsis thaliana] | 98   | 98   | 2.00E-47  | 100.0 | 96.9 | 99.0 | U6 snRNA-associated Sm-like protein LSm8           | gbpln | Arabidopsis thaliana | AT1G65700.2   Symbols:   Small nuclear ribonucleoprotein family protein   chr1:24434463-24435870 REVERSE LENGTH=98                                                                                                                                                                                                                                                                                                                                      | 98   | 98   | 4.00E-50  | 100.0 | 96.9 | 99.0 |
| Rsa1.0_01882.1.g30537.t1  | gb EOA35438.1  hypothetical protein CARUB_v10020640mg [Capsella rubella]                                                                                                                                                                                                                                                                                                                                                                                                                                                                                                                                     | 323  | 329  | 1.00E-163 | 101.9 | 90.1 | 94.4 | hypothetical protein CARUB_v10020640mg             | gbpln | Capsella rubella     | AT1G65650.1   Symbols: UCH2   Peptidase C12, ubiquitin carboxyl-terminal hydrolase 1   chr1:24415172-24417466 REVERSE LENGTH=330                                                                                                                                                                                                                                                                                                                        | 323  | 330  | 1.00E-163 | 102.2 | 89.8 | 93.8 |
| Rsa1.0_01882.1.g30538.t14 | ref XP_002886950.1  glycosyl hydrolase family 20 protein [Arabidopsis lyrata subsp. lyrata] gi 297332791 gb EFH63209.1  glycosyl hydrolase family 20 protein [Arabidopsis lyrata subsp. lyrata]                                                                                                                                                                                                                                                                                                                                                                                                              | 554  | 535  | 0         | 96.6  | 81.0 | 86.8 | glycosyl hydrolase family 20 protein               | gbpln | Arabidopsis lyrata   | AT1G65590.1   Symbols: HEXO3, ATHEX1   beta-hexosaminidase 3   chr1:24385996-24390989 FORWARD LENGTH=535                                                                                                                                                                                                                                                                                                                                                | 554  | 535  | 0         | 96.6  | 81.2 | 86.8 |
| Rsa1.0_01883.1.g30539.t1  | ref XP_002875338.1  short-chain dehydrogenase/reductase family protein [Arabidopsis lyrata subsp. lyrata] gi 297321176 gb EFH51597.1  short-chain dehydrogenase/reductase family protein [Arabidopsis lyrata subsp. lyrata]                                                                                                                                                                                                                                                                                                                                                                                  | 301  | 300  | 1.00E-136 | 99.7  | 80.4 | 85.7 | short-chain dehydrogenase/reductase family protein | gbpln | Arabidopsis lyrata   | AT3G26760.1   Symbols:   NAD(P)-binding Rossmann-fold superfamily protein   chr3:9843639-9844899 FORWARD LENGTH=300                                                                                                                                                                                                                                                                                                                                     | 301  | 300  | 1.00E-138 | 99.7  | 79.7 | 85.0 |
| Rsa1.0_01883.1.g30540.t1  | ref NP_189310.2  uncharacterized protein [Arabidopsis thaliana] gi 9279664 db BAB01221.1  unnamed protein product [Arabidopsis thaliana] gi 332643690 gb AEE77211.1  uncharacterized protein AT3G26750 [Arabidopsis thaliana]                                                                                                                                                                                                                                                                                                                                                                                | 495  | 526  | 0         | 106.3 | 81.4 | 88.7 | uncharacterized protein                            | gbpln | Arabidopsis thaliana | AT3G26750.1   Symbols:   CONTAINS InterPro DOMAIN/s: Ubiquitin-conjugating enzyme E2C-binding protein (InterPro:IPR019193); Has 26 Blast hits to 25 proteins in 9 species: Archae - 0; Bacteria - 0; Metazoa - 0; Fungi - 0; Plants - 26; Viruses - 0; Other Eukaryotes - 0 (source: NCBI BLink).   chr3:9840139-9841719 REVERSE LENGTH=526                                                                                                             | 495  | 526  | 0         | 106.3 | 81.4 | 88.7 |
| Rsa1.0_01883.1.g30541.t1  | gb ACB70963.1  ICE1 [Brassica rapa subsp. chinensis]                                                                                                                                                                                                                                                                                                                                                                                                                                                                                                                                                         | 503  | 497  | 0         | 98.8  | 91.7 | 92.8 | ICE1                                               | gbpln | Brassica rapa        | AT3G26744.4   Symbols: ICE1, ATICE1, SCR1   basic helix-loop-helix (bHLH) DNA-binding superfamily protein   chr3:9832953-9834790 REVERSE LENGTH=494                                                                                                                                                                                                                                                                                                     | 503  | 494  | 0         | 98.2  | 85.3 | 87.7 |
| Rsa1.0_01883.1.g30542.t1  | ref NP_189306.1  alpha-mannosidase [Arabidopsis thaliana] gi 1888357 emb CAA66821.1  alpha-mannosidase [Arabidopsis thaliana] gi 1890154 emb CAA72432.1  alpha-mannosidase precursor [Arabidopsis thaliana] gi 11994305 db BAB01735.1  alpha-mannosidase [Arabidopsis thaliana] gi 14517403 gb AAK62592.1  AT3g26720/MLJ15.12 [Arabidopsis thaliana] gi 21360397 gb AAM47314.1  AT3g26720/MLJ15.12 [Arabidopsis thaliana] gi 332643682 gb AEE77203.1  alpha-mannosidase [Arabidopsis thaliana]                                                                                                               | 1031 | 1019 | 0         | 98.8  | 89.6 | 94.5 | alpha-mannosidase                                  | gbpln | Arabidopsis thaliana | AT3G26720.1   Symbols:   Glycosyl hydrolase family 38 protein   chr3:9816707-9823056 FORWARD LENGTH=1019                                                                                                                                                                                                                                                                                                                                                | 1031 | 1019 | 0         | 98.8  | 89.6 | 94.5 |

|                          |                                                                                                                                                                                                                                                                                                                                                                                                                                                                                                         |     |     |           |       |      |      |                                                     |       |                      |                                                                                                                                    |     |     |           |       |      |      |
|--------------------------|---------------------------------------------------------------------------------------------------------------------------------------------------------------------------------------------------------------------------------------------------------------------------------------------------------------------------------------------------------------------------------------------------------------------------------------------------------------------------------------------------------|-----|-----|-----------|-------|------|------|-----------------------------------------------------|-------|----------------------|------------------------------------------------------------------------------------------------------------------------------------|-----|-----|-----------|-------|------|------|
| Rsa1.0_01883.1.g30543.t1 | ref[XP_002875334.1] hypothetical protein ARALYDRAFT_484443 [Arabidopsis lyrata subsp. lyrata] gi 297321172 gb EFH51593.1                                                                                                                                                                                                                                                                                                                                                                                | 272 | 267 | 1.00E-123 | 98.2  | 84.9 | 89.7 | hypothetical protein ARALYDRAFT_484443              | gbpln | Arabidopsis lyrata   | AT3G26710.1   Symbols: CCB1   cofactor assembly of complex C   chr3:9813550-9814606 FORWARD LENGTH=267                             | 272 | 267 | 1.00E-125 | 98.2  | 84.2 | 90.1 |
| Rsa1.0_01883.1.g30544.t1 | ref[NP_189304.2] protein kinase family protein [Arabidopsis thaliana] gi 332643680 gb AE77201.1  protein kinase family protein [Arabidopsis thaliana]                                                                                                                                                                                                                                                                                                                                                   | 378 | 380 | 0         | 100.5 | 89.7 | 93.4 | protein kinase family protein                       | gbpln | Arabidopsis thaliana | AT3G26700.1   Symbols:   Protein kinase superfamily protein   chr3:9810669-9812356 FORWARD LENGTH=380                              | 378 | 380 | 0         | 100.5 | 89.7 | 93.4 |
| Rsa1.0_01883.1.g30545.t1 | ref[XP_002876987.1] hypothetical protein ARALYDRAFT_904865 [Arabidopsis lyrata subsp. lyrata] gi 297322825 gb EFH53246.1                                                                                                                                                                                                                                                                                                                                                                                | 206 | 202 | 3.00E-94  | 98.1  | 85.0 | 90.8 | hypothetical protein ARALYDRAFT_904865              | gbpln | Arabidopsis lyrata   | AT3G26690.2   Symbols: ATNUDT13, ATNUDX13, NUDX13   nudix hydrolase homolog 13   chr3:9804418-9805398 REVERSE LENGTH=202           | 206 | 202 | 1.00E-96  | 98.1  | 84.0 | 91.3 |
| Rsa1.0_01883.1.g30546.t1 | ref[XP_002875331.1] hypothetical protein ARALYDRAFT_484438 [Arabidopsis lyrata subsp. lyrata] gi 297321169 gb EFH51590.1                                                                                                                                                                                                                                                                                                                                                                                | 490 | 483 | 0         | 98.6  | 84.5 | 90.4 | hypothetical protein ARALYDRAFT_484438              | gbpln | Arabidopsis lyrata   | AT3G26680.3   Symbols: SNM1   DNA repair metallo-beta-lactamase family protein   chr3:9801309-9803517 FORWARD LENGTH=484           | 490 | 484 | 0         | 98.8  | 83.9 | 90.0 |
| Rsa1.0_01883.1.g30547.t1 | gb[EOA23356.1] hypothetical protein CARUB_v10019534mg [Capsella rubella]                                                                                                                                                                                                                                                                                                                                                                                                                                | 445 | 442 | 0         | 99.3  | 93.0 | 96.0 | hypothetical protein CARUB_v10019534mg              | gbpln | Capsella rubella     | AT3G26670.3   Symbols:   Protein of unknown function (DUF803)   chr3:9798236-9800562 REVERSE LENGTH=441                            | 445 | 441 | 0         | 99.1  | 94.2 | 95.7 |
| Rsa1.0_01883.1.g30548.t1 | dbj BAJ34149.1  unnamed protein product [Theellungiella halophila]                                                                                                                                                                                                                                                                                                                                                                                                                                      | 400 | 400 | 0         | 100.0 | 97.5 | 99.0 | unnamed protein product                             | ----  | ----                 | AT3G26650.1   Symbols: GAPA, GAPA-1   glyceraldehyde 3-phosphate dehydrogenase A subunit   chr3:9795226-9796848 FORWARD LENGTH=396 | 400 | 396 | 0         | 99.0  | 95.3 | 97.5 |
| Rsa1.0_01884.1.g30549.t1 | gb[EOA13760.1] hypothetical protein CARUB_v10026852mg [Capsella rubella]                                                                                                                                                                                                                                                                                                                                                                                                                                | 295 | 304 | 1.00E-110 | 103.1 | 70.8 | 81.4 | hypothetical protein CARUB_v10026852mg              | gbpln | Capsella rubella     | AT5G50915.2   Symbols:   basic helix-loop-helix (bHLH) DNA-binding superfamily protein   chr5:20710764-20712252 REVERSE LENGTH=286 | 295 | 286 | 1.00E-109 | 96.9  | 68.8 | 78.3 |
| Rsa1.0_01884.1.g30550.t1 | gb[EOA25182.1] hypothetical protein CARUB_v10018494mg [Capsella rubella]                                                                                                                                                                                                                                                                                                                                                                                                                                | 321 | 282 | 9.00E-42  | 87.9  | 31.8 | 44.5 | hypothetical protein CARUB_v10018494mg              | gbpln | Capsella rubella     | AT1G10000.1   Symbols:   Ribonuclease H-like superfamily protein   chr1:3263877-3264788 REVERSE LENGTH=303                         | 321 | 303 | 6.00E-34  | 94.4  | 26.8 | 43.3 |
| Rsa1.0_01884.1.g30551.t7 | ref[XP_002863752.1] hypothetical protein ARALYDRAFT_331135 [Arabidopsis lyrata subsp. lyrata] gi 297309587 gb EFH40011.1                                                                                                                                                                                                                                                                                                                                                                                | 497 | 648 | 0         | 130.4 | 74.2 | 81.3 | hypothetical protein ARALYDRAFT_331135              | gbpln | Arabidopsis lyrata   | AT5G42660.1   Symbols:   Protein of unknown function (DUF616)   chr5:17103062-17105785 REVERSE LENGTH=463                          | 497 | 463 | 0         | 93.2  | 73.8 | 80.5 |
| Rsa1.0_01884.1.g30552.t1 | ref[NP_568746.1] ATP-dependent Clp protease ATP-binding subunit ClpC [Arabidopsis thaliana] gi 75170759 sp Q9FI56.1 CLPC1_ARATH RecName: Full=Chaperone protein ClpC1, chloroplastic; AltName: Full=ATP-dependent Clp protease ATP-binding subunit ClpC homolog 1; AltName: Full=Casein lytic proteinase C1; AltName: Full=Protein DE-REGULATED CAO ACCUMULATION 1; AltName: Full=Protein IRON-RESCUED MUTANT 1; Flags: Precursor gi 9758239 dbj BAB08738.1                                             | 934 | 929 | 0         | 99.5  | 95.5 | 96.7 | ATP-dependent Clp protease ATP-binding subunit ClpC | gbpln | Arabidopsis thaliana | AT5G50920.1   Symbols: CLPC, ATHSP93-V, HSP93-V, DCA1, CLPC1   CLPC homologue 1   chr5:20715710-20719800 REVERSE LENGTH=929        | 934 | 929 | 0         | 99.5  | 95.5 | 96.7 |
| Rsa1.0_01884.1.g30553.t1 | gi 20856956 gb AAM26692.1  AT5G50920/K3K7.7 [Arabidopsis thaliana] gi 110742601 dbj BAE99213.1  ATP-dependent Clp protease [Arabidopsis thaliana] gi 332008629 gb AED96011.1  ATP-dependent Clp protease ATP-binding subunit ClpC [Arabidopsis thaliana] ref[NP_199906.1] Histone 2A domain-containing protein [Arabidopsis thaliana] gi 9758240 dbj BAB08739.1  unnamed protein product [Arabidopsis thaliana] gi 332008629 gb AED96012.1  Histone 2A domain-containing protein [Arabidopsis thaliana] | 140 | 242 | 1.00E-62  | 172.9 | 89.3 | 92.1 | Histone 2A domain-containing protein                | gbpln | Arabidopsis thaliana | AT5G50930.1   Symbols:   Histone superfamily protein   chr5:20722069-20724317 FORWARD LENGTH=242                                   | 140 | 242 | 3.00E-65  | 172.9 | 89.3 | 92.1 |

|                           |                                                                                                                                                                                                                                                                                                                                                                                                                                                                                                                                                                                                 |      |      |           |       |      |      |                                              |       |                      |                                                                                                                                                                                                                                                                                                                                                                                                                        |      |     |          |       |      |      |
|---------------------------|-------------------------------------------------------------------------------------------------------------------------------------------------------------------------------------------------------------------------------------------------------------------------------------------------------------------------------------------------------------------------------------------------------------------------------------------------------------------------------------------------------------------------------------------------------------------------------------------------|------|------|-----------|-------|------|------|----------------------------------------------|-------|----------------------|------------------------------------------------------------------------------------------------------------------------------------------------------------------------------------------------------------------------------------------------------------------------------------------------------------------------------------------------------------------------------------------------------------------------|------|-----|----------|-------|------|------|
| Rsa1.0_01884.1.g30554.t1  | gb EOA25898.1  hypothetical protein CARUB_v10019277mg [Capsella rubella]                                                                                                                                                                                                                                                                                                                                                                                                                                                                                                                        | 319  | 281  | 4.00E-86  | 88.1  | 52.7 | 63.3 | hypothetical protein CARUB_v10019277mg       | gbpln | Capsella rubella     | AT3G53310.1   Symbols:   AP2/B3-like transcriptional factor family protein   chr3:19766927-19768368 REVERSE LENGTH=286                                                                                                                                                                                                                                                                                                 | 319  | 286 | 9.00E-77 | 89.7  | 48.3 | 60.5 |
| Rsa1.0_01884.1.g30555.t1  | ref XP_002864089.1  WD-40 repeat family protein [Arabidopsis lyrata subsp. lyrata] gi 297309924 gb EFH40348.1  WD-40 repeat family protein [Arabidopsis lyrata subsp. lyrata] ref NP_568749.1  rubredoxin-like protein [Arabidopsis thaliana] gi 9758248 db BAB06747.1  unnamed protein product [Arabidopsis thaliana] gi 15292669 gb AAK92703.1  unknown protein [Arabidopsis thaliana] gi 19310697 gb AAL85079.1  unknown protein [Arabidopsis thaliana] gi 21555410 gb AAM63852.1  unknown [Arabidopsis thaliana] gi 332008638 gb AED96021.1  rubredoxin-like protein [Arabidopsis thaliana] | 537  | 511  | 0         | 95.2  | 80.6 | 96.4 | WD-40 repeat family protein                  | gbpln | Arabidopsis lyrata   | AT5G50970.1   Symbols:   transducin family protein / WD-40 repeat family protein   chr5:20736377-20739132 FORWARD LENGTH=512                                                                                                                                                                                                                                                                                           | 537  | 512 | 0        | 95.3  | 78.8 | 83.2 |
| Rsa1.0_01884.1.g30556.t1  | gi 19310697 gb AAL85079.1  unknown protein [Arabidopsis thaliana] gi 21555410 gb AAM63852.1  unknown [Arabidopsis thaliana] gi 332008638 gb AED96021.1  rubredoxin-like protein [Arabidopsis thaliana]                                                                                                                                                                                                                                                                                                                                                                                          | 159  | 154  | 1.00E-65  | 96.9  | 83.0 | 86.8 | rubredoxin-like protein                      | gbpln | Arabidopsis thaliana | AT5G51010.1   Symbols:   Rubredoxin-like superfamily protein   chr5:20744615-20745344 FORWARD LENGTH=154                                                                                                                                                                                                                                                                                                               | 159  | 154 | 5.00E-68 | 96.9  | 83.0 | 86.8 |
| Rsa1.0_01884.1.g30557.t2  | ref XP_002865836.1  hypothetical protein ARALYDRAFT_918134 [Arabidopsis lyrata subsp. lyrata] gi 297311671 gb EFH42095.1  hypothetical protein ARALYDRAFT_918134 [Arabidopsis lyrata subsp. lyrata]                                                                                                                                                                                                                                                                                                                                                                                             | 124  | 269  | 1.00E-63  | 216.9 | 94.4 | 98.4 | hypothetical protein ARALYDRAFT_918134       | gbpln | Arabidopsis lyrata   | AT5G51020.1   Symbols: CRL   crumpled leaf   chr5:20745560-20747165 REVERSE LENGTH=269                                                                                                                                                                                                                                                                                                                                 | 124  | 269 | 2.00E-66 | 216.9 | 94.4 | 98.4 |
| Rsa1.0_01885.1.g30558.t14 | gb EOA39218.1  hypothetical protein CARUB_v10012190mg [Capsella rubella]                                                                                                                                                                                                                                                                                                                                                                                                                                                                                                                        | 458  | 545  | 2.00E-75  | 119.0 | 35.2 | 53.9 | hypothetical protein CARUB_v10012190mg       | gbpln | Capsella rubella     | AT1G52950.1   Symbols:   Nucleic acid-binding, OB-fold-like protein   chr1:19725483-19728007 FORWARD LENGTH=566                                                                                                                                                                                                                                                                                                        | 458  | 566 | 5.00E-68 | 123.6 | 33.6 | 57.0 |
| Rsa1.0_01885.1.g30559.t4  | gb EEE51049.1  hypothetical protein OsJ_31709 [Oryza sativa Japonica Group]                                                                                                                                                                                                                                                                                                                                                                                                                                                                                                                     | 498  | 357  | 6.00E-31  | 71.7  | 15.5 | 20.7 | hypothetical protein OsJ_31709               | gbpln | Oryza sativa         | AT5G53670.1   Symbols:   unknown protein; FUNCTIONS IN: molecular function unknown; INVOLVED IN: biological process unknown; LOCATED IN: endomembrane system; EXPRESSED IN: sperm cell; Has 1807 Blast hits to 1807 proteins in 277 species: Archae - 0; Bacteria - 0; Metazoa - 736; Fungi - 347; Plants - 385; Viruses - 0; Other Eukaryotes - 339 (source: NCBI BLINK).   chr5:21796997-21797731 FORWARD LENGTH=244 | 498  | 244 | 1.00E-18 | 49.0  | 11.4 | 16.9 |
| Rsa1.0_01886.1.g30560.t1  | gb AAF79348.1 AC007887.7 F1504.13 [Arabidopsis thaliana]                                                                                                                                                                                                                                                                                                                                                                                                                                                                                                                                        | 1185 | 1887 | 1.00E-162 | 159.2 | 28.7 | 39.5 | F1504.13                                     | gbpln | Arabidopsis thaliana | AT1G47350.1   Symbols:   F-box associated ubiquitination effector family protein   chr1:17355447-17360722 REVERSE LENGTH=528                                                                                                                                                                                                                                                                                           | 1185 | 528 | 3.00E-29 | 44.6  | 5.7  | 7.3  |
| Rsa1.0_01886.1.g30561.t1  | gb AAG50806.1 AC079281.8 unknown protein [Arabidopsis thaliana]                                                                                                                                                                                                                                                                                                                                                                                                                                                                                                                                 | 1727 | 1213 | 0         | 70.2  | 26.9 | 39.3 | unknown protein                              | gbpln | Arabidopsis thaliana | AT1G43760.1   Symbols:   DNase I-like superfamily protein   chr1:16528890-16531065 REVERSE LENGTH=626                                                                                                                                                                                                                                                                                                                  | 1727 | 626 | 9.00E-81 | 36.2  | 9.3  | 14.4 |
| Rsa1.0_01886.1.g30562.t1  | ref XP_002880635.1  hypothetical protein ARALYDRAFT_481345 [Arabidopsis lyrata subsp. lyrata] gi 297326474 gb EFH56894.1  hypothetical protein ARALYDRAFT_481345 [Arabidopsis lyrata subsp. lyrata]                                                                                                                                                                                                                                                                                                                                                                                             | 440  | 445  | 0         | 101.1 | 80.2 | 89.8 | hypothetical protein ARALYDRAFT_481345       | gbpln | Arabidopsis lyrata   | AT2G24850.1   Symbols: TAT3, TAT   tyrosine aminotransferase 3   chr2:10583070-10585152 REVERSE LENGTH=445                                                                                                                                                                                                                                                                                                             | 440  | 445 | 0        | 101.1 | 80.0 | 90.2 |
| Rsa1.0_01886.1.g30563.t1  | #                                                                                                                                                                                                                                                                                                                                                                                                                                                                                                                                                                                               | #    | #    | #         | #     | #    | #    | -                                            | ----  | ----                 | #                                                                                                                                                                                                                                                                                                                                                                                                                      | #    | #   | #        | #     | #    | #    |
| Rsa1.0_01886.1.g30564.t1  | #                                                                                                                                                                                                                                                                                                                                                                                                                                                                                                                                                                                               | #    | #    | #         | #     | #    | #    | -                                            | ----  | ----                 | #                                                                                                                                                                                                                                                                                                                                                                                                                      | #    | #   | #        | #     | #    | #    |
| Rsa1.0_01886.1.g30565.t1  | gb AAD25598.1  Mutator-like transposase [Arabidopsis thaliana]                                                                                                                                                                                                                                                                                                                                                                                                                                                                                                                                  | 239  | 616  | 9.00E-35  | 257.7 | 35.1 | 52.3 | Mutator-like transposase                     | gbpln | Arabidopsis thaliana | #                                                                                                                                                                                                                                                                                                                                                                                                                      | #    | #   | #        | #     | #    | #    |
| Rsa1.0_01886.1.g30566.t1  | ref XP_002894278.1  hypothetical protein ARALYDRAFT_337235 [Arabidopsis lyrata subsp. lyrata] gi 297340120 gb EFH70537.1  hypothetical protein ARALYDRAFT_337235 [Arabidopsis lyrata subsp. lyrata]                                                                                                                                                                                                                                                                                                                                                                                             | 703  | 800  | 1.00E-101 | 113.8 | 34.4 | 52.2 | hypothetical protein ARALYDRAFT_337235       | gbpln | Arabidopsis lyrata   | AT2G07190.1   Symbols:   Domain of unknown function (DUF1985)   chr2:2987367-2988945 FORWARD LENGTH=452                                                                                                                                                                                                                                                                                                                | 703  | 452 | 5.00E-42 | 64.3  | 19.3 | 29.4 |
| Rsa1.0_01886.1.g30567.t10 | gb ABD85117.1  hypothetical protein 31.t00030 [Brassica oleracea]                                                                                                                                                                                                                                                                                                                                                                                                                                                                                                                               | 869  | 1471 | 0         | 169.3 | 55.1 | 63.1 | hypothetical protein 31.t00030               | gbpln | Brassica oleracea    | #                                                                                                                                                                                                                                                                                                                                                                                                                      | #    | #   | #        | #     | #    | #    |
| Rsa1.0_01886.1.g30568.t1  | gb AAG51783.1 AC079679.3 reverse transcriptase, putative: 16838-20266 [Arabidopsis thaliana]                                                                                                                                                                                                                                                                                                                                                                                                                                                                                                    | 563  | 1142 | 4.00E-60  | 202.8 | 21.8 | 28.4 | reverse transcriptase, putative: 16838-20266 | gbpln | Arabidopsis thaliana | AT2G22440.1   Symbols:   BEST Arabidopsis thaliana protein match is: Ribonuclease H-like superfamily protein (TAIR:AT4G29090.1); Has 208 Blast hits to 191 proteins in 10 species: Archae - 0; Bacteria - 0; Metazoa - 0; Fungi - 0; Plants - 208; Viruses - 0; Other Eukaryotes - 0 (source: NCBI BLINK).   chr2:9528910-9529917 FORWARD LENGTH=256                                                                   | 563  | 256 | 4.00E-26 | 45.5  | 14.4 | 19.0 |

|                          |                                                                                                                                                                                                                                                                                                                                                                                                                                                                                                                                                                                                                                                                                                                                                                                                                                                                                                                                                                                                                                                                                                                                                      |     |      |           |       |       |       |                                                          |       |                         |                                                                                                                                                      |     |     |           |       |       |       |
|--------------------------|------------------------------------------------------------------------------------------------------------------------------------------------------------------------------------------------------------------------------------------------------------------------------------------------------------------------------------------------------------------------------------------------------------------------------------------------------------------------------------------------------------------------------------------------------------------------------------------------------------------------------------------------------------------------------------------------------------------------------------------------------------------------------------------------------------------------------------------------------------------------------------------------------------------------------------------------------------------------------------------------------------------------------------------------------------------------------------------------------------------------------------------------------|-----|------|-----------|-------|-------|-------|----------------------------------------------------------|-------|-------------------------|------------------------------------------------------------------------------------------------------------------------------------------------------|-----|-----|-----------|-------|-------|-------|
| Rsa1.0_01887.1.g30569.t1 | gb[EOA15376.1] hypothetical protein CARUB_v10006095mg [Capsella rubella]                                                                                                                                                                                                                                                                                                                                                                                                                                                                                                                                                                                                                                                                                                                                                                                                                                                                                                                                                                                                                                                                             | 104 | 104  | 3.00E-51  | 100.0 | 94.2  | 96.2  | hypothetical protein CARUB_v10006095mg                   | gbpln | Capsella rubella        | AT4G34770.1   Symbols: SAUR-like auxin-responsive protein family   chr4:16591352-16591666 FORWARD LENGTH=104                                         | 104 | 104 | 4.00E-53  | 100.0 | 94.2  | 95.2  |
| Rsa1.0_01887.1.g30570.t1 | ref[XP_002890467.1] hypothetical protein ARALYDRAFT_472420 [Arabidopsis lyrata subsp. lyrata] gi 297336309 gb EFH6726.1  hypothetical protein ARALYDRAFT_472420 [Arabidopsis lyrata subsp. lyrata] ref[NP_195202.1] SAUR-like auxin-responsive protein 9 [Arabidopsis thaliana] gi 3096945 emb CAA18855.1  putative auxin-regulated protein [Arabidopsis thaliana] gi 7270427 emb CAB80193.1  putative auxin-regulated protein [Arabidopsis thaliana] gi 21536599 gb AAM60931.1  putative auxin-regulated protein [Arabidopsis thaliana] gi 332661020 gb AEE86420.1  SAUR-like auxin-responsive protein 9 [Arabidopsis thaliana] ref[NP_195201.1] SAUR-like auxin-responsive family protein [Arabidopsis thaliana] gi 334187163 ref NP_001190915.1  SAUR-like auxin-responsive family protein [Arabidopsis thaliana] gi 3096944 emb CAA18854.1  putative protein [Arabidopsis thaliana] gi 7270426 emb CAB80192.1  putative protein [Arabidopsis thaliana] gi 332661018 gb AEE86418.1  SAUR-like auxin-responsive family protein [Arabidopsis thaliana] gi 332661019 gb AEE86419.1  SAUR-like auxin-responsive family protein [Arabidopsis thaliana] | 142 | 240  | 2.00E-17  | 169.0 | 28.9  | 31.7  | hypothetical protein ARALYDRAFT_472420                   | gbpln | Arabidopsis lyrata      | AT1G21840.1   Symbols: UREF   urease accessory protein F   chr1:7666859-7667581 FORWARD LENGTH=240                                                   | 142 | 240 | 1.00E-18  | 169.0 | 26.8  | 30.3  |
| Rsa1.0_01887.1.g30571.t1 | gb AAW28080.1  chloroplast amidophosphoribosyltransferase [Arabidopsis thaliana] ref[NP_195199.2] ribosome-binding factor A [Arabidopsis thaliana] gi 78099793 sp O65693.2 RBFA_ARATH RecName: Full=Probable ribosome-binding factor A, chloroplastic; Flags: Precursor gi 25082957 gb AAN72022.1  putative protein [Arabidopsis thaliana] gi 30023650 gb AAP13358.1  At4g34730 [Arabidopsis thaliana] gi 332661016 gb AEE86416.1  ribosome-binding factor A [Arabidopsis thaliana] ref[XP_002313006.1] predicted protein [Populus trichocarpa] gi 222849414 gb EEE86961.1  predicted protein [Populus trichocarpa]                                                                                                                                                                                                                                                                                                                                                                                                                                                                                                                                  | 107 | 107  | 2.00E-55  | 100.0 | 96.3  | 100.0 | SAUR-like auxin-responsive protein 9                     | gbpln | Arabidopsis thaliana    | AT4G34760.1   Symbols: SAUR-like auxin-responsive protein family   chr4:16582471-16582794 REVERSE LENGTH=107                                         | 107 | 107 | 4.00E-58  | 100.0 | 96.3  | 100.0 |
| Rsa1.0_01887.1.g30572.t1 | gb AAW28080.1  chloroplast amidophosphoribosyltransferase [Arabidopsis thaliana] ref[NP_195199.2] ribosome-binding factor A [Arabidopsis thaliana] gi 78099793 sp O65693.2 RBFA_ARATH RecName: Full=Probable ribosome-binding factor A, chloroplastic; Flags: Precursor gi 25082957 gb AAN72022.1  putative protein [Arabidopsis thaliana] gi 30023650 gb AAP13358.1  At4g34730 [Arabidopsis thaliana] gi 332661016 gb AEE86416.1  ribosome-binding factor A [Arabidopsis thaliana] ref[XP_002313006.1] predicted protein [Populus trichocarpa] gi 222849414 gb EEE86961.1  predicted protein [Populus trichocarpa]                                                                                                                                                                                                                                                                                                                                                                                                                                                                                                                                  | 151 | 150  | 2.00E-63  | 99.3  | 84.1  | 89.4  | SAUR-like auxin-responsive family protein                | gbpln | Arabidopsis thaliana    | AT4G34750.2   Symbols: SAUR-like auxin-responsive protein family   chr4:16577566-16578018 FORWARD LENGTH=150                                         | 151 | 150 | 5.00E-66  | 99.3  | 84.1  | 89.4  |
| Rsa1.0_01887.1.g30573.t1 | gb AAW28080.1  chloroplast amidophosphoribosyltransferase [Arabidopsis thaliana] ref[NP_195199.2] ribosome-binding factor A [Arabidopsis thaliana] gi 78099793 sp O65693.2 RBFA_ARATH RecName: Full=Probable ribosome-binding factor A, chloroplastic; Flags: Precursor gi 25082957 gb AAN72022.1  putative protein [Arabidopsis thaliana] gi 30023650 gb AAP13358.1  At4g34730 [Arabidopsis thaliana] gi 332661016 gb AEE86416.1  ribosome-binding factor A [Arabidopsis thaliana] ref[XP_002313006.1] predicted protein [Populus trichocarpa] gi 222849414 gb EEE86961.1  predicted protein [Populus trichocarpa]                                                                                                                                                                                                                                                                                                                                                                                                                                                                                                                                  | 551 | 561  | 0         | 101.8 | 89.7  | 92.2  | chloroplast amidophosphoribosyltransferase               | gbpln | Arabidopsis thaliana    | AT4G34740.1   Symbols: ATASE2, CIA1, ATPURF2, ASE2   GLN phosphoribosyl pyrophosphate amidotransferase 2   chr4:16574894-16576579 REVERSE LENGTH=561 | 551 | 561 | 0         | 101.8 | 89.8  | 92.4  |
| Rsa1.0_01887.1.g30574.t1 | ref[NP_195199.2] ribosome-binding factor A [Arabidopsis thaliana] gi 78099793 sp O65693.2 RBFA_ARATH RecName: Full=Probable ribosome-binding factor A, chloroplastic; Flags: Precursor gi 25082957 gb AAN72022.1  putative protein [Arabidopsis thaliana] gi 30023650 gb AAP13358.1  At4g34730 [Arabidopsis thaliana] gi 332661016 gb AEE86416.1  ribosome-binding factor A [Arabidopsis thaliana] ref[XP_002313006.1] predicted protein [Populus trichocarpa] gi 222849414 gb EEE86961.1  predicted protein [Populus trichocarpa]                                                                                                                                                                                                                                                                                                                                                                                                                                                                                                                                                                                                                   | 240 | 215  | 1.00E-101 | 89.6  | 77.5  | 82.1  | ribosome-binding factor A                                | gbpln | Arabidopsis thaliana    | AT4G34730.1   Symbols: ribosome-binding factor A family protein   chr4:16570019-16571274 REVERSE LENGTH=215                                          | 240 | 215 | 1.00E-103 | 89.6  | 77.5  | 82.1  |
| Rsa1.0_01887.1.g30575.t1 | gb AAD20658.1  putative retroelement pol polyprotein [Arabidopsis thaliana] gb AAD20658.1  putative retroelement pol polyprotein [Arabidopsis thaliana] gb AAC26234.1  contains similarity to maize transposon MuDR (GB:M76978) [Arabidopsis thaliana]                                                                                                                                                                                                                                                                                                                                                                                                                                                                                                                                                                                                                                                                                                                                                                                                                                                                                               | 164 | 207  | 6.00E-85  | 126.2 | 100.0 | 100.0 | predicted protein                                        | gbpln | Populus trichocarpa     | AT4G34720.1   Symbols: AVA-P1, VHA-C1, ATVHA-C1   ATPase, F0/V0 complex, subunit C protein   chr4:16568223-16569165 REVERSE LENGTH=164               | 164 | 164 | 4.00E-87  | 100.0 | 100.0 | 100.0 |
| Rsa1.0_01887.1.g30576.t1 | gb AAR08423.1  arginine decarboxylase 2 [Pringlea antiscorbutica]                                                                                                                                                                                                                                                                                                                                                                                                                                                                                                                                                                                                                                                                                                                                                                                                                                                                                                                                                                                                                                                                                    | 369 | 711  | 1.00E-179 | 192.7 | 84.3  | 90.0  | arginine decarboxylase 2                                 | gbpln | Pringlea antiscorbutica | AT4G34710.2   Symbols: ADC2, SPE2, ATADC2   arginine decarboxylase 2   chr4:16560315-16562450 REVERSE LENGTH=711                                     | 369 | 711 | 1.00E-180 | 192.7 | 81.6  | 89.7  |
| Rsa1.0_01888.1.g30577.t1 | gb AAD20658.1  putative retroelement pol polyprotein [Arabidopsis thaliana]                                                                                                                                                                                                                                                                                                                                                                                                                                                                                                                                                                                                                                                                                                                                                                                                                                                                                                                                                                                                                                                                          | 178 | 1611 | 9.00E-61  | 905.1 | 60.1  | 80.9  | putative retroelement pol polyprotein                    | gbpln | Arabidopsis thaliana    | #                                                                                                                                                    | #   | #   | #         | #     | #     |       |
| Rsa1.0_01888.1.g30578.t1 | gb AAD20658.1  putative retroelement pol polyprotein [Arabidopsis thaliana]                                                                                                                                                                                                                                                                                                                                                                                                                                                                                                                                                                                                                                                                                                                                                                                                                                                                                                                                                                                                                                                                          | 529 | 1611 | 1.00E-107 | 304.5 | 37.6  | 49.1  | putative retroelement pol polyprotein                    | gbpln | Arabidopsis thaliana    | #                                                                                                                                                    | #   | #   | #         | #     | #     |       |
| Rsa1.0_01888.1.g30579.t1 | gb AAC26234.1  contains similarity to maize transposon MuDR (GB:M76978) [Arabidopsis thaliana]                                                                                                                                                                                                                                                                                                                                                                                                                                                                                                                                                                                                                                                                                                                                                                                                                                                                                                                                                                                                                                                       | 570 | 940  | 1.00E-165 | 164.9 | 53.5  | 65.4  | contains similarity to maize transposon MuDR (GB:M76978) | gbpln | Arabidopsis thaliana    | #                                                                                                                                                    | #   | #   | #         | #     | #     |       |
| Rsa1.0_01888.1.g30580.t1 | gb EOA38830.1  hypothetical protein CARUB_v10011156mg [Capsella rubella] ref[XP_002891311.1] hypothetical protein ARALYDRAFT_473836 [Arabidopsis lyrata subsp. lyrata] gi 297337153 gb EFH6750.1  hypothetical protein ARALYDRAFT_473836 [Arabidopsis lyrata subsp. lyrata]                                                                                                                                                                                                                                                                                                                                                                                                                                                                                                                                                                                                                                                                                                                                                                                                                                                                          | 117 | 118  | 1.00E-51  | 100.9 | 82.1  | 94.0  | hypothetical protein CARUB_v10011156mg                   | gbpln | Capsella rubella        | AT1G45145.1   Symbols: ATTRX5, ATH5, LIV1, TRX5   thioredoxin H-type 5   chr1:17075264-17076256 REVERSE LENGTH=118                                   | 117 | 118 | 4.00E-52  | 100.9 | 78.6  | 93.2  |
| Rsa1.0_01888.1.g30581.t1 | ref[XP_002891311.1] hypothetical protein ARALYDRAFT_473836 [Arabidopsis lyrata subsp. lyrata] gi 297337153 gb EFH6750.1  hypothetical protein ARALYDRAFT_473836 [Arabidopsis lyrata subsp. lyrata]                                                                                                                                                                                                                                                                                                                                                                                                                                                                                                                                                                                                                                                                                                                                                                                                                                                                                                                                                   | 730 | 732  | 0         | 100.3 | 92.2  | 96.6  | hypothetical protein ARALYDRAFT_473836                   | gbpln | Arabidopsis lyrata      | AT1G45130.1   Symbols: BGAL5   beta-galactosidase 5   chr1:17065447-17069110 FORWARD LENGTH=732                                                      | 730 | 732 | 0         | 100.3 | 91.2  | 96.6  |

|                          |                                                                                                                                                                                                                                                                                                                                                                                                                                                                                     |      |      |           |       |      |      |                                            |       |                      |                                                                                                                                                 |      |      |           |       |      |      |
|--------------------------|-------------------------------------------------------------------------------------------------------------------------------------------------------------------------------------------------------------------------------------------------------------------------------------------------------------------------------------------------------------------------------------------------------------------------------------------------------------------------------------|------|------|-----------|-------|------|------|--------------------------------------------|-------|----------------------|-------------------------------------------------------------------------------------------------------------------------------------------------|------|------|-----------|-------|------|------|
| Rsa1.0_01888.1.g30582.t1 | emb[CAB39638.1] RNA-directed DNA polymerase-like protein [Arabidopsis thaliana] gi 7267666 emb[CAB78094.1] RNA-directed DNA polymerase-like protein [Arabidopsis thaliana] ref NP_175126.2  tetrapyrrole (corrin/porphyrin)methylase [Arabidopsis thaliana] gi 34365739 gb AAQ65181.1  At1g45110 [Arabidopsis thaliana]                                                                                                                                                             | 342  | 1274 | 8.00E-16  | 372.5 | 14.3 | 17.8 | RNA-directed DNA polymerase-like protein   | gbpln | Arabidopsis thaliana | #                                                                                                                                               | #    | #    | #         | #     | #    | #    |
| Rsa1.0_01888.1.g30583.t1 | gi 110738768 dbj BAF01308.1  hypothetical protein [Arabidopsis thaliana] gi 332193960 gb AEE32081.1  tetrapyrrole (corrin/porphyrin)methylase [Arabidopsis thaliana]                                                                                                                                                                                                                                                                                                                | 343  | 343  | 1.00E-169 | 100.0 | 87.5 | 91.3 | tetrapyrrole (corrin/porphyrin)methylase   | gbpln | Arabidopsis thaliana | AT1G45110.1   Symbols:   Tetrapyrrole (Corrin/Porphyrin) Methylases   chr1:17052572-17054546 FORWARD LENGTH=343                                 | 343  | 343  | 1.00E-172 | 100.0 | 87.5 | 91.3 |
| Rsa1.0_01889.1.g30584.t1 | #                                                                                                                                                                                                                                                                                                                                                                                                                                                                                   | #    | #    | #         | #     | #    | -    | ----                                       | ----  | #                    | #                                                                                                                                               | #    | #    | #         | #     | #    |      |
| Rsa1.0_01889.1.g30585.t2 | ref NP_565284.3  NAC domain containing protein 35 [Arabidopsis thaliana] gi 20197337 gb AAC78526.2  NAM (no apical meristem)-like protein [Arabidopsis thaliana] gi 330250488 gb AEC05582.1  NAC domain containing protein 35 [Arabidopsis thaliana]                                                                                                                                                                                                                                | 409  | 414  | 1.00E-176 | 101.2 | 83.6 | 90.2 | NAC domain containing protein 35           | gbpln | Arabidopsis thaliana | AT2G02450.2   Symbols: ANAC034, ANAC035, LOV1, NAC035   NAC domain containing protein 35   chr2:648044-650649 FORWARD LENGTH=414                | 409  | 414  | 1.00E-179 | 101.2 | 83.6 | 90.2 |
| Rsa1.0_01889.1.g30586.t1 | #                                                                                                                                                                                                                                                                                                                                                                                                                                                                                   | #    | #    | #         | #     | #    | -    | ----                                       | ----  | #                    | #                                                                                                                                               | #    | #    | #         | #     | #    |      |
| Rsa1.0_01889.1.g30587.t1 | ref XP_002875130.1  hypothetical protein ARALYDRAFT_484163 [Arabidopsis lyrata subsp. lyrata] gi 297320968 gb EFH51389.1  hypothetical protein ARALYDRAFT_484163 [Arabidopsis lyrata subsp. lyrata]                                                                                                                                                                                                                                                                                 | 341  | 1222 | 1.00E-109 | 358.4 | 61.3 | 69.5 | hypothetical protein ARALYDRAFT_484163     | gbpln | Arabidopsis lyrata   | AT2G02480.1   Symbols: STI   AAA-type ATPase family protein   chr2:661093-665337 FORWARD LENGTH=1218                                            | 341  | 1218 | 1.00E-110 | 357.2 | 61.3 | 68.9 |
| Rsa1.0_01889.1.g30588.t1 | gb EOA25631.1  hypothetical protein CARUB_v10018977mg [Capsella rubella]                                                                                                                                                                                                                                                                                                                                                                                                            | 303  | 303  | 2.33E-156 | 100.0 | 85.1 | 91.7 | hypothetical protein CARUB_v10018977mg     | gbpln | Capsella rubella     | AT2G02500.1   Symbols: ISPD, ATMEPCT, MCT   Nucleotide-diphospho-sugar transferases superfamily protein   chr2:671054-673124 REVERSE LENGTH=302 | 303  | 302  | 1.00E-138 | 99.7  | 84.8 | 90.4 |
| Rsa1.0_01889.1.g30589.t1 | gb EOA25043.1  hypothetical protein CARUB_v10018349mg [Capsella rubella]                                                                                                                                                                                                                                                                                                                                                                                                            | 72   | 72   | 7.00E-32  | 100.0 | 94.4 | 95.8 | hypothetical protein CARUB_v10018349mg     | gbpln | Capsella rubella     | AT2G02510.1   Symbols:   NADH dehydrogenase (ubiquinone)s   chr2:673338-673556 FORWARD LENGTH=72                                                | 72   | 72   | 2.00E-34  | 100.0 | 93.1 | 95.8 |
| Rsa1.0_01890.1.g30590.t1 | ref NP_191572.1  beta glucosidase 16 [Arabidopsis thaliana] gi 75311780 sp Q9M1D0.1 BGL16_ARAT H RecName: Full=Beta-glucosidase 16; Short=AtBGLU16; Flags: Precursor gi 7076766 emb CAB75928.1  beta-glucosidase-like protein [Arabidopsis thaliana] gi 15028301 gb AAK76627.1  putative beta-glucosidase [Arabidopsis thaliana] gi 21281079 gb AAM44983.1  putative beta-glucosidase [Arabidopsis thaliana] gi 332646493 gb AEE80014.1  beta glucosidase 16 [Arabidopsis thaliana] | 505  | 514  | 0         | 101.8 | 71.5 | 79.2 | beta glucosidase 16                        | gbpln | Arabidopsis thaliana | AT3G60130.1   Symbols: BGLU16   beta glucosidase 16   chr3:22210343-22213650 FORWARD LENGTH=514                                                 | 505  | 514  | 0         | 101.8 | 71.5 | 79.2 |
| Rsa1.0_01890.1.g30591.t1 | emb CAB91581.1  putative protein [Arabidopsis thaliana]                                                                                                                                                                                                                                                                                                                                                                                                                             | 1726 | 1752 | 0         | 101.5 | 50.8 | 63.8 | putative protein                           | gbpln | Arabidopsis thaliana | AT3G51690.1   Symbols:   PIF1 helicase   chr3:19176731-19178107 REVERSE LENGTH=331                                                              | 1726 | 331  | 2.00E-71  | 19.2  | 8.1  | 11.2 |
| Rsa1.0_01890.1.g30592.t1 | ref XP_002876539.1  hypothetical protein ARALYDRAFT_486481 [Arabidopsis lyrata subsp. lyrata] gi 297322377 gb EFH52798.1  hypothetical protein ARALYDRAFT_486481 [Arabidopsis lyrata subsp. lyrata]                                                                                                                                                                                                                                                                                 | 579  | 579  | 0         | 100.0 | 86.4 | 92.6 | hypothetical protein ARALYDRAFT_486481     | gbpln | Arabidopsis lyrata   | AT3G60140.1   Symbols: DIN2, SRG2, BGLU30   Glycosyl hydrolase superfamily protein   chr3:22216753-22220710 FORWARD LENGTH=577                  | 579  | 577  | 0         | 99.7  | 86.2 | 92.1 |
| Rsa1.0_01890.1.g30593.t1 | ref NP_001030907.1  protein binding / zinc ion binding protein [Arabidopsis thaliana] gi 98962061 gb ABF59360.1  unknown protein [Arabidopsis thaliana] gi 332646611 gb AEE80132.1  protein binding / zinc ion binding protein [Arabidopsis thaliana]                                                                                                                                                                                                                               | 140  | 139  | 5.00E-36  | 99.3  | 62.1 | 75.7 | protein binding / zinc ion binding protein | gbpln | Arabidopsis thaliana | AT3G60966.1   Symbols:   RING/U-box superfamily protein   chr3:22552718-22553137 FORWARD LENGTH=139                                             | 140  | 139  | 1.00E-38  | 99.3  | 62.1 | 75.7 |

|                          |                                                                                                                                                                                                                                                                                                                                                                                 |      |      |          |       |      |      |                                                     |       |                      |                                                                                                                          |      |      |          |       |      |      |
|--------------------------|---------------------------------------------------------------------------------------------------------------------------------------------------------------------------------------------------------------------------------------------------------------------------------------------------------------------------------------------------------------------------------|------|------|----------|-------|------|------|-----------------------------------------------------|-------|----------------------|--------------------------------------------------------------------------------------------------------------------------|------|------|----------|-------|------|------|
| Rsa1.0_01891.1.g30594.t2 | refNP_568494.1  sugar transporter ERD6-like 18 [Arabidopsis thaliana] gi 75332109 sp Q94C16.1 EDL18_ARATH RecName: Full=Sugar transporter ERD6-like 18; AltName: Full=Sugar-transporter family protein 2 gi 14585701 gb AAK11721.1  sugar-transporter family protein 2 [Arabidopsis thaliana] gi 332006293 gb AED93676.1  sugar transporter ERD6-like 18 [Arabidopsis thaliana] | 478  | 478  | 0        | 100.0 | 80.1 | 90.8 | sugar transporter ERD6-like 18                      | gbpln | Arabidopsis thaliana | AT5G27360.1   Symbols: SFP2   Major facilitator superfamily protein   chr5:9657119-9662425 FORWARD LENGTH=478            | 478  | 478  | 0        | 100.0 | 80.1 | 90.8 |
| Rsa1.0_01891.1.g30595.t1 | gb AAD21778.1  putative non-LTR retroelement reverse transcriptase [Arabidopsis thaliana]                                                                                                                                                                                                                                                                                       | 1694 | 1715 | 0        | 101.2 | 32.4 | 50.5 | putative non-LTR retroelement reverse transcriptase | gbpln | Arabidopsis thaliana | AT4G29090.1   Symbols:   Ribonuclease H-like superfamily protein   chr4:14333528-14335255 FORWARD LENGTH=575             | 1694 | 575  | 2.00E-70 | 33.9  | 9.7  | 15.0 |
| Rsa1.0_01891.1.g30596.t2 | # # # # # # # #                                                                                                                                                                                                                                                                                                                                                                 | #    | #    | #        | #     | #    | #    | -                                                   | ----  | ----                 | #                                                                                                                        | #    | #    | #        | #     | #    | #    |
| Rsa1.0_01892.1.g30597.t1 | refNP_196274.1  uncharacterized protein [Arabidopsis thaliana] gi 13430752 gb AAK25998.1 AF360288_1 unknown protein [Arabidopsis thaliana] gi 10178112 dbj BAE11405.1  unnamed protein product [Arabidopsis thaliana] gi 15293221 gb AAK93721.1  unknown protein [Arabidopsis thaliana] gi 332003651 gb AED91034.1  uncharacterized protein AT5G06560 [Arabidopsis thaliana]    | 110  | 518  | 4.00E-36 | 470.9 | 67.3 | 85.5 | uncharacterized protein                             | gbpln | Arabidopsis thaliana | AT5G06560.1   Symbols:   Protein of unknown function, DUF593   chr5:2003678-2005543 REVERSE LENGTH=518                   | 110  | 518  | 6.00E-39 | 470.9 | 67.3 | 85.5 |
| Rsa1.0_01892.1.g30598.t1 | refXP_002891137.1  hypothetical protein ARALYDRAFT_313975 [Arabidopsis lyrata subsp. lyrata] gi 297336979 gb EFH67396.1  hypothetical protein ARALYDRAFT_313975 [Arabidopsis lyrata subsp. lyrata]                                                                                                                                                                              | 208  | 290  | 1.00E-29 | 139.4 | 35.6 | 43.3 | hypothetical protein ARALYDRAFT_313975              | gbpln | Arabidopsis lyrata   | AT1G31530.1   Symbols:   DNase I-like superfamily protein   chr1:11281188-11282468 REVERSE LENGTH=283                    | 208  | 283  | 3.00E-24 | 136.1 | 29.8 | 35.6 |
| Rsa1.0_01892.1.g30599.t2 | refXP_002891147.1  hypothetical protein ARALYDRAFT_473635 [Arabidopsis lyrata subsp. lyrata] gi 297336989 gb EFH67406.1  hypothetical protein ARALYDRAFT_473635 [Arabidopsis lyrata subsp. lyrata]                                                                                                                                                                              | 557  | 522  | 0        | 93.7  | 72.4 | 79.9 | hypothetical protein ARALYDRAFT_473635              | gbpln | Arabidopsis lyrata   | AT1G31410.1   Symbols:   putrescine-binding periplasmic protein-related   chr1:11247094-11249345 REVERSE LENGTH=524      | 557  | 524  | 0        | 94.1  | 71.8 | 79.2 |
| Rsa1.0_01892.1.g30600.t1 | # # # # # # # #                                                                                                                                                                                                                                                                                                                                                                 | #    | #    | #        | #     | #    | #    | -                                                   | ----  | ----                 | #                                                                                                                        | #    | #    | #        | #     | #    | #    |
| Rsa1.0_01892.1.g30601.t1 | gb ABD65028.1  hypothetical protein 26.t00082 [Brassica oleracea]                                                                                                                                                                                                                                                                                                               | 243  | 220  | 2.00E-13 | 90.5  | 15.6 | 20.2 | hypothetical protein 26.t00082                      | gbpln | Brassica oleracea    | AT1G14800.1   Symbols:   Nucleic acid-binding, OB-fold-like protein   chr1:5099572-5102558 FORWARD LENGTH=384            | 243  | 384  | 5.00E-12 | 158.0 | 11.9 | 16.9 |
| Rsa1.0_01893.1.g30602.t1 | refXP_002890184.1  predicted protein [Arabidopsis lyrata subsp. lyrata] gi 297336026 gb EFH66443.1  predicted protein [Arabidopsis lyrata subsp. lyrata]                                                                                                                                                                                                                        | 276  | 1685 | 2.00E-46 | 610.5 | 37.3 | 45.3 | predicted protein                                   | gbpln | Arabidopsis lyrata   | AT1G16710.2   Symbols: HAC12   histone acetyltransferase of the CBP family 12   chr1:5714692-5721782 FORWARD LENGTH=1677 | 276  | 1677 | 8.00E-49 | 607.6 | 38.4 | 44.9 |
| Rsa1.0_01893.1.g30603.t1 | refXP_002890180.1  hypothetical protein ARALYDRAFT_471863 [Arabidopsis lyrata subsp. lyrata] gi 297336022 gb EFH66439.1  hypothetical protein ARALYDRAFT_471863 [Arabidopsis lyrata subsp. lyrata]                                                                                                                                                                              | 702  | 391  | 0        | 55.7  | 44.4 | 49.7 | hypothetical protein ARALYDRAFT_471863              | gbpln | Arabidopsis lyrata   | AT1G16670.1   Symbols:   Protein kinase superfamily protein   chr1:5697846-5699492 FORWARD LENGTH=390                    | 702  | 390  | 0        | 55.6  | 44.4 | 49.4 |
| Rsa1.0_01893.1.g30604.t1 | refXP_002513413.1  ribonucleic acid binding protein S1, putative [Ricinus communis] gi 223547321 gb EEF48816.1  ribonucleic acid binding protein S1, putative [Ricinus communis]                                                                                                                                                                                                | 365  | 423  | 3.00E-65 | 115.9 | 43.3 | 49.0 | ribonucleic acid binding protein S1, putative       | gbpln | Ricinus communis     | AT1G16610.1   Symbols: SR45, RNPS1   arginine/serine-rich 45   chr1:5675925-5678686 REVERSE LENGTH=414                   | 365  | 414  | 1.00E-63 | 113.4 | 42.7 | 46.6 |
| Rsa1.0_01893.1.g30605.t1 | gb EOA39738.1  hypothetical protein CARUB_v10008384mg [Capsella rubella]                                                                                                                                                                                                                                                                                                        | 764  | 761  | 0        | 99.6  | 77.1 | 87.3 | hypothetical protein CARUB_v10008384mg              | gbpln | Capsella rubella     | AT1G78960.1   Symbols: ATLUP2, LUP2   lupeol synthase 2   chr1:29696722-29701024 FORWARD LENGTH=763                      | 764  | 763  | 0        | 99.9  | 70.2 | 82.1 |
| Rsa1.0_01893.1.g30606.t1 | # # # # # # # #                                                                                                                                                                                                                                                                                                                                                                 | #    | #    | #        | #     | #    | #    | -                                                   | ----  | ----                 | #                                                                                                                        | #    | #    | #        | #     | #    | #    |
| Rsa1.0_01893.1.g30607.t2 | gb EOA39738.1  hypothetical protein CARUB_v10008384mg [Capsella rubella]                                                                                                                                                                                                                                                                                                        | 1369 | 761  | 0        | 55.6  | 44.3 | 49.2 | hypothetical protein CARUB_v10008384mg              | gbpln | Capsella rubella     | AT1G78960.1   Symbols: ATLUP2, LUP2   lupeol synthase 2   chr1:29696722-29701024 FORWARD LENGTH=763                      | 1369 | 763  | 0        | 55.7  | 40.0 | 46.1 |
| Rsa1.0_01893.1.g30608.t1 | # # # # # # # #                                                                                                                                                                                                                                                                                                                                                                 | #    | #    | #        | #     | #    | #    | -                                                   | ----  | ----                 | #                                                                                                                        | #    | #    | #        | #     | #    | #    |
| Rsa1.0_01894.1.g30609.t1 | gb AAG51783.1 AC079679.3 reverse transcriptase, putative; 16838-20266 [Arabidopsis thaliana]                                                                                                                                                                                                                                                                                    | 289  | 1142 | 6.00E-79 | 395.2 | 49.1 | 64.4 | reverse transcriptase, putative; 16838-20266        | gbpln | Arabidopsis thaliana | AT1G43760.1   Symbols:   DNase I-like superfamily protein   chr1:16528880-16531065 REVERSE LENGTH=626                    | 289  | 626  | 5.00E-23 | 216.6 | 27.3 | 46.0 |



|                          |                                                                                                                                                                                                                                                                                                                                                                                                                                                                                                                                                   |      |      |           |       |      |      |                                                                                                                                                                            |       |                      |                                                                                                                                                                                                                                                                                                                                          |      |      |           |       |      |      |
|--------------------------|---------------------------------------------------------------------------------------------------------------------------------------------------------------------------------------------------------------------------------------------------------------------------------------------------------------------------------------------------------------------------------------------------------------------------------------------------------------------------------------------------------------------------------------------------|------|------|-----------|-------|------|------|----------------------------------------------------------------------------------------------------------------------------------------------------------------------------|-------|----------------------|------------------------------------------------------------------------------------------------------------------------------------------------------------------------------------------------------------------------------------------------------------------------------------------------------------------------------------------|------|------|-----------|-------|------|------|
| Rsa1.0_01894.1.g30610.t1 | refNP_189038.1  putative F-box protein [Arabidopsis thaliana]<br>gi 75273446 sp Q9LJR1.1 FB182_ARATH<br>RecName: Full=Putative F-box protein At3g23960 gi 9294665 dbj BAB03014.1  unnamed protein product [Arabidopsis thaliana] gi 332643318 gb AEE76839.1  putative F-box protein [Arabidopsis thaliana]                                                                                                                                                                                                                                        | 395  | 402  | 6.00E-73  | 101.8 | 44.3 | 61.0 | putative F-box protein                                                                                                                                                     | gbpln | Arabidopsis thaliana | AT3G23960.1   Symbols:   F-box and associated interaction domains-containing protein   chr3:8657736-8658944 FORWARD LENGTH=402                                                                                                                                                                                                           | 395  | 402  | 1.00E-75  | 101.8 | 44.3 | 61.0 |
| Rsa1.0_01894.1.g30611.t1 | dbj BAB10503.1  retroelement pol polyprotein-like [Arabidopsis thaliana]                                                                                                                                                                                                                                                                                                                                                                                                                                                                          | 1546 | 1475 | 0         | 95.4  | 55.2 | 69.0 | retroelement pol polyprotein-like                                                                                                                                          | gbpln | Arabidopsis thaliana | AT4G23160.1   Symbols: CRK8   cysteine-rich RLK (RECEPTOR-like protein kinase) 8   chr4:12129485-12134086 FORWARD LENGTH=1262                                                                                                                                                                                                            | 1546 | 1262 | 1.00E-174 | 81.6  | 19.2 | 24.8 |
| Rsa1.0_01894.1.g30612.t1 | # # # # # # # #                                                                                                                                                                                                                                                                                                                                                                                                                                                                                                                                   |      |      |           |       |      |      | RNA-directed DNA polymerase (EC 2.7.7.49) (clone DW15) - Arabidopsis thaliana retrotransposon Ta11-1 gi 976278 gb AAA75254.1  reverse transcriptase [Arabidopsis thaliana] | ----  | ----                 | #                                                                                                                                                                                                                                                                                                                                        | #    | #    | #         | #     | #    |      |
| Rsa1.0_01894.1.g30613.t1 | pir [S65812 RNA-directed DNA polymerase (EC 2.7.7.49) (clone DW15) - Arabidopsis thaliana retrotransposon Ta11-1 gi 976278 gb AAA75254.1  reverse transcriptase [Arabidopsis thaliana]                                                                                                                                                                                                                                                                                                                                                            | 1669 | 1333 | 0         | 79.9  | 36.7 | 48.8 | retrotransposon Ta11-1 gi 976278 gb AAA75254.1  reverse transcriptase                                                                                                      | gbpln | Arabidopsis thaliana | AT4G29090.1   Symbols:   Ribonuclease H-like superfamily protein   chr4:14333528-14335255 FORWARD LENGTH=575                                                                                                                                                                                                                             | 1669 | 575  | 3.00E-97  | 34.5  | 11.4 | 16.6 |
| Rsa1.0_01895.1.g30614.t1 | gb AAG09097.1 AC009323.8 Putative retroelement polyprotein [Arabidopsis thaliana]                                                                                                                                                                                                                                                                                                                                                                                                                                                                 | 848  | 1486 | 0         | 175.2 | 40.1 | 55.4 | Putative retroelement polyprotein                                                                                                                                          | gbpln | Arabidopsis thaliana | AT1G21280.1   Symbols:   CONTAINS InterPro DOMAIN/s: Retrotransposon gag protein (InterPro:IPR005162); Has 707 Blast hits to 705 proteins in 25 species: Archae - 0; Bacteria - 0; Metazoa - 4; Fungi - 0; Plants - 703; Viruses - 0; Other Eukaryotes - 0 (source: NCBI BLink).   chr1:7447690-7448403 REVERSE LENGTH=237               | 848  | 237  | 5.00E-28  | 27.9  | 6.8  | 12.3 |
| Rsa1.0_01895.1.g30615.t1 | refNP_178239.1  uncharacterized protein [Arabidopsis thaliana]<br>gi 4262237 gb AAD14530.1  predicted by genscan and genefinder [Arabidopsis thaliana] gi 17529142 gb AAL38797.1  unknown protein [Arabidopsis thaliana] gi 21436241 gb AAM51259.1  unknown protein [Arabidopsis thaliana] gi 49660101 gb AAT68341.1  hypothetical protein At2g01300 [Arabidopsis thaliana] gi 60547691 gb AAX23809.1  hypothetical protein At2g01300 [Arabidopsis thaliana] gi 330250336 gb AEC05430.1  uncharacterized protein AT2G01300 [Arabidopsis thaliana] | 155  | 156  | 4.00E-69  | 100.6 | 82.6 | 88.4 | uncharacterized protein                                                                                                                                                    | gbpln | Arabidopsis thaliana | AT2G01300.1   Symbols:   unknown protein; BEST Arabidopsis thaliana protein match is: unknown protein (TAIR:AT1G15010.1). Has 73 Blast hits to 73 proteins in 12 species: Archae - 0; Bacteria - 0; Metazoa - 0; Fungi - 0; Plants - 73; Viruses - 0; Other Eukaryotes - 0 (source: NCBI BLink).   chr2:151221-151691 REVERSE LENGTH=156 | 155  | 156  | 1.00E-71  | 100.6 | 82.6 | 88.4 |
| Rsa1.0_01895.1.g30616.t1 | refXP_002876738.1  60S ribosomal protein L7 [Arabidopsis lyrata subsp. lyrata] gi 297322576 gb EFH52997.1  60S ribosomal protein L7 [Arabidopsis lyrata subsp. lyrata]                                                                                                                                                                                                                                                                                                                                                                            | 242  | 242  | 1.00E-129 | 100.0 | 95.0 | 96.3 | 60S ribosomal protein L7                                                                                                                                                   | gbpln | Arabidopsis lyrata   | AT2G01250.1   Symbols:   Ribosomal protein L30/L7 family protein   chr2:132943-134264 REVERSE LENGTH=242                                                                                                                                                                                                                                 | 242  | 242  | 1.00E-131 | 100.0 | 94.2 | 95.9 |
| Rsa1.0_01895.1.g30617.t1 | gb AAM62991.1  unknown [Arabidopsis thaliana]                                                                                                                                                                                                                                                                                                                                                                                                                                                                                                     | 623  | 720  | 0         | 115.6 | 75.1 | 84.6 | unknown                                                                                                                                                                    | gbpln | Arabidopsis thaliana | AT2G01190.1   Symbols:   Octicosapeptide/Phox/Bem1p family protein   chr2:115023-117296 FORWARD LENGTH=720                                                                                                                                                                                                                               | 623  | 720  | 0         | 115.6 | 74.6 | 84.3 |
| Rsa1.0_01895.1.g30618.t1 | refNP_565255.1  Lipid phosphate phosphatase 1 [Arabidopsis thaliana] gi 41017426 sp Q9ZU49.2 LPP1_ARATH<br>RecName: Full=Lipid phosphate phosphatase 1; Short=ATLPP1; ALTName: Full=Phosphatidic acid phosphatase 1; Short=ATPAP1; ALTName: Full=Prenyl diphosphate phosphatase gi 14020927 dbj BAB47575.1  phosphatidic acid phosphatase [Arabidopsis thaliana] gi 20197584 gb AAD14518.2  putative phosphatidic acid phosphatase [Arabidopsis thaliana] gi 330250318 gb AEC05412.1  Lipid phosphate phosphatase 1 [Arabidopsis thaliana]        | 298  | 327  | 1.00E-157 | 109.7 | 87.9 | 94.3 | Lipid phosphate phosphatase 1                                                                                                                                              | gbpln | Arabidopsis thaliana | AT2G01180.1   Symbols: ATPAP1, PAP1, LPP1, ATLPP1   phosphatidic acid phosphatase 1   chr2:107182-108555 REVERSE LENGTH=327                                                                                                                                                                                                              | 298  | 327  | 1.00E-160 | 109.7 | 87.9 | 94.3 |

|                          |                                                                                                                                                                                                                                                                                                                                                                                                                                                                                                                                                                             |      |      |           |       |      |      |                                            |       |                      |                                                                                                                                                 |      |      |           |       |      |      |
|--------------------------|-----------------------------------------------------------------------------------------------------------------------------------------------------------------------------------------------------------------------------------------------------------------------------------------------------------------------------------------------------------------------------------------------------------------------------------------------------------------------------------------------------------------------------------------------------------------------------|------|------|-----------|-------|------|------|--------------------------------------------|-------|----------------------|-------------------------------------------------------------------------------------------------------------------------------------------------|------|------|-----------|-------|------|------|
| Rsa1.0_01895.1.g30619.t1 | ref NP_565253.1  putative E3 ubiquitin-protein ligase RHA2B [Arabidopsis thaliana]<br>gi 51316550 sp Q9ZU51.2 RHA2B_ARATH<br>H RecName: Full=Probable E3 ubiquitin-protein ligase RHA2B; AltName: Full=RING-H2 zinc finger protein RHA2b<br>gi 3790571 gb AAC68672.1  RING-H2 finger protein RHA2b [Arabidopsis thaliana]<br>gi 20197589 gb AAD14516.2  RING-H2 finger protein RHA2b [Arabidopsis thaliana]<br>gi 98960889 gb ABF58928.1  At2g01150 [Arabidopsis thaliana]<br>gi 330250313 gb AEC05407.1  putative E3 ubiquitin-protein ligase RHA2B [Arabidopsis thaliana] | 148  | 147  | 3.00E-44  | 99.3  | 66.9 | 75.7 | putative E3 ubiquitin-protein ligase RHA2B | gbpln | Arabidopsis thaliana | AT2G01150.1   Symbols: RHA2B   RING-H2 finger protein 2B   chr2:100703-101146<br>FORWARD LENGTH=147                                             | 148  | 147  | 8.00E-47  | 99.3  | 66.9 | 75.7 |
| Rsa1.0_01895.1.g30620.t1 | #                                                                                                                                                                                                                                                                                                                                                                                                                                                                                                                                                                           | #    | #    | #         | #     | #    | #    | -                                          | ----  | ----                 | #                                                                                                                                               | #    | #    | #         | #     | #    |      |
| Rsa1.0_01895.1.g30621.t1 | dbj BAB11323.1  4-nitrophenylphosphatase-like protein [Arabidopsis thaliana]                                                                                                                                                                                                                                                                                                                                                                                                                                                                                                | 290  | 311  | 1.00E-157 | 107.2 | 91.7 | 96.6 | 4-nitrophenylphosphatase-like protein      | gbpln | Arabidopsis thaliana | AT5G47760.1   Symbols: PGLP2, ATPGLP2, ATPK5   2-phosphoglycolate phosphatase 2   chr5:19343121-19344979 REVERSE<br>LENGTH=301                  | 290  | 301  | 1.00E-159 | 103.8 | 91.7 | 96.6 |
| Rsa1.0_01895.1.g30622.t1 | gb EOA20136.1  hypothetical protein CARUB_v10000426mg [Capsella rubella]                                                                                                                                                                                                                                                                                                                                                                                                                                                                                                    | 218  | 649  | 2.00E-62  | 297.7 | 61.9 | 69.7 | hypothetical protein CARUB_v10000426mg     | gbpln | Capsella rubella     | AT5G13820.1   Symbols: TBP1, ATBP-1, ATBP1, ATTBP1, HPPBF-1   telomeric DNA binding protein 1   chr5:4461694-4464355<br>FORWARD LENGTH=640      | 218  | 640  | 5.00E-62  | 293.6 | 59.6 | 67.9 |
| Rsa1.0_01896.1.g30623.t1 | ref NP_200425.1  RNA-binding KH domain-containing protein [Arabidopsis thaliana]<br>gi 75262628 sp Q9FKT4.1 QKIL2_ARATH<br>RecName: Full=KH domain-containing protein At5g56140; AltName: Full=Quaking-like protein 2<br>gi 9758634 dbj BAB09296.1  RNA-binding protein-like [Arabidopsis thaliana]<br>gi 24030184 gb AAN41273.1  putative RNA-binding protein [Arabidopsis thaliana]<br>gi 332009342 gb AED96725.1  RNA-binding KH domain-containing protein [Arabidopsis thaliana]                                                                                        | 259  | 315  | 1.00E-116 | 121.6 | 80.7 | 86.1 | RNA-binding KH domain-containing protein   | gbpln | Arabidopsis thaliana | AT5G56140.1   Symbols:   RNA-binding KH domain-containing protein   chr5:22725462-22727932 FORWARD LENGTH=315                                   | 259  | 315  | 1.00E-119 | 121.6 | 80.7 | 86.1 |
| Rsa1.0_01896.1.g30624.t1 | ref XP_002863741.1  hypothetical protein ARALYDRAFT_917455 [Arabidopsis lyrata subsp. lyrata]<br>gi 297309576 gb EFH40000.1  hypothetical protein ARALYDRAFT_917455 [Arabidopsis lyrata subsp. lyrata]                                                                                                                                                                                                                                                                                                                                                                      | 192  | 390  | 2.00E-41  | 203.1 | 43.2 | 57.3 | hypothetical protein ARALYDRAFT_917455     | gbpln | Arabidopsis lyrata   | AT1G43730.1   Symbols:   RNA-directed DNA polymerase (reverse transcriptase)-related family protein   chr1:16508723-16509784 REVERSE LENGTH=320 | 192  | 320  | 1.00E-27  | 166.7 | 32.3 | 45.3 |
| Rsa1.0_01896.1.g30625.t1 | dbj BAJ33984.1  unnamed protein product [Thellungiella halophila]                                                                                                                                                                                                                                                                                                                                                                                                                                                                                                           | 679  | 699  | 0         | 102.9 | 98.2 | 99.4 | unnamed protein product                    | ----  | ----                 | AT5G56000.1   Symbols: Hsp81.4, AtHsp90.4   HEAT SHOCK PROTEIN 81.4   chr5:22677602-22680067 REVERSE<br>LENGTH=699                              | 679  | 699  | 0         | 102.9 | 96.8 | 99.6 |
| Rsa1.0_01896.1.g30626.t1 | ref XP_002864420.1  zinc finger family protein [Arabidopsis lyrata subsp. lyrata]<br>gi 297310255 gb EFH40679.1  zinc finger family protein [Arabidopsis lyrata subsp. lyrata]                                                                                                                                                                                                                                                                                                                                                                                              | 327  | 343  | 1.00E-147 | 104.9 | 82.0 | 87.5 | zinc finger family protein                 | gbpln | Arabidopsis lyrata   | AT5G55970.2   Symbols:   RING/U-box superfamily protein   chr5:22668019-22669312 FORWARD LENGTH=343                                             | 327  | 343  | 1.00E-145 | 104.9 | 85.9 | 93.3 |
| Rsa1.0_01896.1.g30627.t1 | gb AAD32898.1  putative retroelement pol polyprotein [Arabidopsis thaliana]                                                                                                                                                                                                                                                                                                                                                                                                                                                                                                 | 1375 | 1307 | 0         | 95.1  | 57.6 | 72.9 | putative retroelement pol polyprotein      | gbpln | Arabidopsis thaliana | AT4G23160.1   Symbols: CRK8   cysteine-rich RLK (RECEPTOR-like protein kinase) 8   chr4:12129485-12134086 FORWARD<br>LENGTH=1262                | 1375 | 1262 | 1.00E-104 | 91.8  | 14.3 | 22.2 |
| Rsa1.0_01896.1.g30628.t1 | dbj BAJ33984.1  unnamed protein product [Thellungiella halophila]                                                                                                                                                                                                                                                                                                                                                                                                                                                                                                           | 688  | 699  | 0         | 101.6 | 98.0 | 99.1 | unnamed protein product                    | ----  | ----                 | AT5G56000.1   Symbols: Hsp81.4, AtHsp90.4   HEAT SHOCK PROTEIN 81.4   chr5:22677602-22680067 REVERSE<br>LENGTH=699                              | 688  | 699  | 0         | 101.6 | 96.5 | 99.3 |
| Rsa1.0_01896.1.g30629.t1 | gb AAM64789.1  unknown [Arabidopsis thaliana]                                                                                                                                                                                                                                                                                                                                                                                                                                                                                                                               | 206  | 206  | 1.00E-108 | 100.0 | 94.2 | 96.1 | unknown                                    | gbpln | Arabidopsis thaliana | AT5G55940.1   Symbols: emb2731   Uncharacterised protein family (UPF0172)   chr5:22656256-22657894 REVERSE<br>LENGTH=208                        | 206  | 208  | 1.00E-110 | 101.0 | 94.2 | 96.1 |
| Rsa1.0_01896.1.g30630.t1 | ref XP_002864417.1  ATOPT1 [Arabidopsis lyrata subsp. lyrata]<br>gi 297310252 gb EFH40676.1  ATOPT1 [Arabidopsis lyrata subsp. lyrata]                                                                                                                                                                                                                                                                                                                                                                                                                                      | 191  | 755  | 2.00E-65  | 395.3 | 67.5 | 71.2 | ATOPT1                                     | gbpln | Arabidopsis lyrata   | AT5G55930.1   Symbols: ATOPT1, OPT1   oligopeptide transporter 1   chr5:22652988-22655827 FORWARD LENGTH=755                                    | 191  | 755  | 9.00E-68  | 395.3 | 67.5 | 71.2 |
| Rsa1.0_01896.1.g30631.t1 | dbj BAD95408.1  hypothetical protein [Arabidopsis thaliana]                                                                                                                                                                                                                                                                                                                                                                                                                                                                                                                 | 441  | 478  | 1.00E-119 | 108.4 | 49.4 | 68.5 | hypothetical protein                       | gbpln | Arabidopsis thaliana | AT3G24255.1   Symbols:   RNA-directed DNA polymerase (reverse transcriptase)-related family protein   chr3:8789471-8793208 FORWARD LENGTH=746   | 441  | 746  | 1.00E-102 | 169.2 | 42.4 | 56.9 |

|                          |                                                                                                                                                                                                                                                                                                                                                                                                  |     |      |          |       |      |      |                                              |       |                      |                                                                                                                                                                                                                                                                                                                                                                                                                                                                                                                                                          |     |     |          |       |      |      |
|--------------------------|--------------------------------------------------------------------------------------------------------------------------------------------------------------------------------------------------------------------------------------------------------------------------------------------------------------------------------------------------------------------------------------------------|-----|------|----------|-------|------|------|----------------------------------------------|-------|----------------------|----------------------------------------------------------------------------------------------------------------------------------------------------------------------------------------------------------------------------------------------------------------------------------------------------------------------------------------------------------------------------------------------------------------------------------------------------------------------------------------------------------------------------------------------------------|-----|-----|----------|-------|------|------|
| Rsa1.0_01896.1.g30632.t1 | ref NP_200402.1  D6 protein kinase [Arabidopsis thaliana] gi 9758211 dbj BAB08856.1  serine/threonine-specific protein kinase ATPK64 [Arabidopsis thaliana] gi 332009315 gb AED96698.1  D6 protein kinase [Arabidopsis thaliana]                                                                                                                                                                 | 493 | 498  | 0        | 101.0 | 93.3 | 97.2 | D6 protein kinase                            | gbpln | Arabidopsis thaliana | AT5G55910.1   Symbols: D6PK   D6 protein kinase   chr5:22640055-22641634 REVERSE LENGTH=498                                                                                                                                                                                                                                                                                                                                                                                                                                                              | 493 | 498 | 0        | 101.0 | 93.3 | 97.2 |
| Rsa1.0_01896.1.g30633.t1 | ref NP_200397.1  uncharacterized protein [Arabidopsis thaliana] gi 75180671 sp Q9LVQ4.1 Y5586 ARAT H RecName: Full=WEB family protein At5g55860 [Arabidopsis thaliana] gi 8843737 dbj BAA97285.1  myosin heavy chain-like [Arabidopsis thaliana] gi 332009309 gb AED96692.1  uncharacterized protein AT5G55860 [Arabidopsis thaliana]                                                            | 651 | 649  | 0        | 99.7  | 83.4 | 91.1 | uncharacterized protein                      | gbpln | Arabidopsis thaliana | AT5G55860.1   Symbols:   Plant protein of unknown function (DUF827)   chr5:22610146-22612166 FORWARD LENGTH=649                                                                                                                                                                                                                                                                                                                                                                                                                                          | 651 | 649 | 0        | 99.7  | 83.4 | 91.1 |
| Rsa1.0_01896.1.g30634.t1 | gb AAB86938.1  NOI protein [Arabidopsis thaliana] gi 8843736 dbj BAA97284.1  NOI protein, nitrate-induced [Arabidopsis thaliana] gi 17529052 gb AAL38736.1  putative NOI protein, nitrate-induced [Arabidopsis thaliana] gi 20465673 gb AAM20305.1  putative nitrate-induced NOI protein [Arabidopsis thaliana]                                                                                  | 82  | 79   | 2.00E-34 | 96.3  | 91.5 | 95.1 | NOI protein                                  | gbpln | Arabidopsis thaliana | AT5G55850.3   Symbols: NOI   RPM1-interacting protein 4 (RIN4) family protein   chr5:22603617-22604850 FORWARD LENGTH=95                                                                                                                                                                                                                                                                                                                                                                                                                                 | 82  | 95  | 7.00E-36 | 115.9 | 89.0 | 92.7 |
| Rsa1.0_01897.1.g30635.t1 | # # # # # # # # - - - - # # # # # # #                                                                                                                                                                                                                                                                                                                                                            |     |      |          |       |      |      |                                              |       |                      |                                                                                                                                                                                                                                                                                                                                                                                                                                                                                                                                                          |     |     |          |       |      |      |
| Rsa1.0_01897.1.g30636.t1 | ref XP_002963555.1  minichromosome maintenance family protein [Arabidopsis lyrata subsp. lyrata] gi 297309390 gb EFH39814.1  minichromosome maintenance family protein [Arabidopsis lyrata subsp. lyrata]                                                                                                                                                                                        | 140 | 830  | 1.00E-16 | 592.9 | 30.7 | 35.7 | minichromosome maintenance family protein    | gbpln | Arabidopsis lyrata   | AT5G44635.1   Symbols: MCM6   minichromosome maintenance (MCM2/3/5) family protein   chr5:18006431-18010542 REVERSE LENGTH=831                                                                                                                                                                                                                                                                                                                                                                                                                           | 140 | 831 | 7.00E-19 | 593.6 | 30.7 | 35.7 |
| Rsa1.0_01897.1.g30637.t1 | ref NP_191813.1  pentatricopeptide repeat-containing protein [Arabidopsis thaliana] gi 122214682 sp Q3EAF8.1 PP294 ARAT H RecName: Full=Pentatricopeptide repeat-containing protein At3g62540, mitochondrial; Flags: Precursor gi 332646841 gb AEE80362.1  pentatricopeptide repeat-containing protein [Arabidopsis thaliana]                                                                    | 61  | 599  | 8.00E-15 | 982.0 | 63.9 | 68.9 | pentatricopeptide repeat-containing protein  | gbpln | Arabidopsis thaliana | AT3G62540.1   Symbols:   Pentatricopeptide repeat (PPR) superfamily protein   chr3:23133514-23135313 REVERSE LENGTH=599                                                                                                                                                                                                                                                                                                                                                                                                                                  | 61  | 599 | 1.00E-17 | 982.0 | 63.9 | 68.9 |
| Rsa1.0_01897.1.g30638.t1 | ref NP_198647.1  uncharacterized protein [Arabidopsis thaliana] gi 9758863 dbj BAB09445.1  unnamed protein product [Arabidopsis thaliana] gi 60547909 gb AAX23918.1  hypothetical protein At5g38310 [Arabidopsis thaliana] gi 71905569 gb AAZ52762.1  hypothetical protein At5g38310 [Arabidopsis thaliana] gi 332006910 gb AED94293.1  uncharacterized protein AT5G38310 [Arabidopsis thaliana] | 186 | 188  | 1.00E-75 | 101.1 | 87.1 | 91.9 | uncharacterized protein                      | gbpln | Arabidopsis thaliana | AT5G38310.1   Symbols:   unknown protein; Has 1807 Blast hits to 1807 proteins in 277 species: Archae - 0; Bacteria - 0; Metazoa - 736; Fungi - 347; Plants - 385; Viruses - 0; Other Eukaryotes - 339 (source: NCBI BLink).   chr5:15310681-15311247 REVERSE LENGTH=188                                                                                                                                                                                                                                                                                 | 186 | 188 | 4.00E-78 | 101.1 | 87.1 | 91.9 |
| Rsa1.0_01897.1.g30639.t1 | gb AAG51783.1 AC079679.3 reverse transcriptase, putative; 16838-20266 [Arabidopsis thaliana]                                                                                                                                                                                                                                                                                                     | 161 | 1142 | 4.00E-38 | 709.3 | 46.6 | 60.2 | reverse transcriptase, putative; 16838-20266 | gbpln | Arabidopsis thaliana | AT2G34320.1   Symbols:   Polynucleotidyl transferase, ribonuclease H-like superfamily protein   chr2:14484959-14485837 FORWARD LENGTH=292                                                                                                                                                                                                                                                                                                                                                                                                                | 161 | 292 | 6.00E-15 | 181.4 | 27.3 | 40.4 |
| Rsa1.0_01897.1.g30640.t1 | dbj BAB09444.1  unnamed protein product [Arabidopsis thaliana]                                                                                                                                                                                                                                                                                                                                   | 244 | 296  | 2.00E-81 | 121.3 | 76.2 | 83.6 | unnamed protein product                      | gbpln | Arabidopsis thaliana | AT5G38300.1   Symbols:   unknown protein; FUNCTIONS IN: molecular function unknown; INVOLVED IN: biological process unknown; LOCATED IN: cellular component unknown; EXPRESSED IN: 12 plant structures; EXPRESSED DURING: 6 growth stages; BEST Arabidopsis thaliana protein match is: unknown protein (TAIRAT1G67035.2); Has 1807 Blast hits to 1807 proteins in 277 species: Archae - 0; Bacteria - 0; Metazoa - 736; Fungi - 347; Plants - 385; Viruses - 0; Other Eukaryotes - 339 (source: NCBI BLink).   chr5:15306022-15306813 FORWARD LENGTH=263 | 244 | 263 | 7.00E-84 | 107.8 | 76.2 | 83.6 |
| Rsa1.0_01898.1.g30641.t1 | dbj BAJ33980.1  unnamed protein product [Thellungiella halophila]                                                                                                                                                                                                                                                                                                                                | 612 | 622  | 0        | 101.6 | 92.3 | 95.8 | unnamed protein product                      | ----- | -----                | AT5G22510.1   Symbols: INV-E, At-A/N-InvE   alkaline/neutral invertase   chr5:7474974-7477479 REVERSE LENGTH=617                                                                                                                                                                                                                                                                                                                                                                                                                                         | 612 | 617 | 0        | 100.8 | 90.5 | 94.9 |

|                          |                                                                                                                                                                                                                                                                                                                                                                                                                                                                                                                                                                                                                                                                                                                                                                                                                                                        |      |      |           |        |      |      |                                                        |       |                      |                                                                                                                                             |      |      |           |       |      |      |
|--------------------------|--------------------------------------------------------------------------------------------------------------------------------------------------------------------------------------------------------------------------------------------------------------------------------------------------------------------------------------------------------------------------------------------------------------------------------------------------------------------------------------------------------------------------------------------------------------------------------------------------------------------------------------------------------------------------------------------------------------------------------------------------------------------------------------------------------------------------------------------------------|------|------|-----------|--------|------|------|--------------------------------------------------------|-------|----------------------|---------------------------------------------------------------------------------------------------------------------------------------------|------|------|-----------|-------|------|------|
| Rsa1.0_01898.1.g30642.t1 | refXP_002879981.1   zinc finger family protein [Arabidopsis lyrata subsp. lyrata] gi 297325820 gb EFH56240.1   zinc finger family protein [Arabidopsis lyrata subsp. lyrata]                                                                                                                                                                                                                                                                                                                                                                                                                                                                                                                                                                                                                                                                           | 224  | 217  | 9.00E-22  | 96.9   | 26.8 | 29.9 | zinc finger family protein                             | gbpln | Arabidopsis lyrata   | AT2G42350.1   Symbols:   RING/U-box superfamily protein   chr2:17639245-17639898 FORWARD LENGTH=217                                         | 224  | 217  | 2.00E-16  | 96.9  | 26.3 | 30.4 |
| Rsa1.0_01898.1.g30643.t1 | refXP_002874074.1   predicted protein [Arabidopsis lyrata subsp. lyrata] gi 297319911 gb EFH50333.1   predicted protein [Arabidopsis lyrata subsp. lyrata]                                                                                                                                                                                                                                                                                                                                                                                                                                                                                                                                                                                                                                                                                             | 364  | 439  | 1.00E-155 | 120.6  | 80.8 | 84.3 | predicted protein                                      | gbpln | Arabidopsis lyrata   | AT5G22540.1   Symbols:   Plant protein of unknown function (DUF247)   chr5:7481546-7482868 REVERSE LENGTH=440                               | 364  | 440  | 1.00E-153 | 120.9 | 79.4 | 84.1 |
| Rsa1.0_01898.1.g30644.t1 | refXP_002874076.1   hypothetical protein ARALYDRAFT_489115 [Arabidopsis lyrata subsp. lyrata] gi 297319913 gb EFH50335.1   hypothetical protein ARALYDRAFT_489115 [Arabidopsis lyrata subsp. lyrata]                                                                                                                                                                                                                                                                                                                                                                                                                                                                                                                                                                                                                                                   | 478  | 507  | 1.00E-169 | 106.1  | 64.6 | 79.1 | hypothetical protein ARALYDRAFT_489115                 | gbpln | Arabidopsis lyrata   | AT5G22560.1   Symbols:   Plant protein of unknown function (DUF247)   chr5:7491544-7493097 REVERSE LENGTH=517                               | 478  | 517  | 1.00E-171 | 108.2 | 65.1 | 79.3 |
| Rsa1.0_01898.1.g30645.t1 | refXP_002874078.1   WRKY DNA-binding protein 38 [Arabidopsis lyrata subsp. lyrata] gi 297319915 gb EFH50337.1   WRKY DNA-binding protein 38 [Arabidopsis lyrata subsp. lyrata]                                                                                                                                                                                                                                                                                                                                                                                                                                                                                                                                                                                                                                                                         | 348  | 292  | 2.00E-96  | 83.9   | 52.9 | 64.4 | WRKY DNA-binding protein 38                            | gbpln | Arabidopsis lyrata   | AT5G22570.1   Symbols: WRKY38, ATWRKY38   WRKY DNA-binding protein 38   chr5:7495609-7496707 REVERSE LENGTH=289                             | 348  | 289  | 1.00E-94  | 83.0  | 54.9 | 64.1 |
| Rsa1.0_01898.1.g30646.t1 | gb AAD19784.1   putative retroelement pol polyprotein [Arabidopsis thaliana]                                                                                                                                                                                                                                                                                                                                                                                                                                                                                                                                                                                                                                                                                                                                                                           | 1466 | 1501 | 0         | 102.4  | 58.0 | 75.3 | putative retroelement pol polyprotein                  | gbpln | Arabidopsis thaliana | AT4G23180.1   Symbols: CRK8   cysteine-rich RLK (RECEPTOR-like protein kinase) 8   chr4:12129485-12134086 FORWARD LENGTH=1262               | 1466 | 1262 | 1.00E-136 | 86.1  | 16.1 | 23.7 |
| Rsa1.0_01898.1.g30647.t1 | ref NP_568422.1   stress responsive A/B Barrel domain-containing protein [Arabidopsis thaliana] gi 73921138 sp Q9FK81.1 Y5258_ARATH RecName: Full=Uncharacterized protein At5g22580 gi 40889664 pdb 1RJJ A Chain A. Solution Structure Of A Homodimeric Hypothetical Protein, At5g22580, A Structural Genomics Target From Arabidopsis Thaliana gi 40889665 pdb 1RJJ B Chain B. Solution Structure Of A Homodimeric Hypothetical Protein, At5g22580, A Structural Genomics Target From Arabidopsis Thaliana gi 14190417 gb AAK55689.1 AF378886.1 At5g22580/MQJ16.12 [Arabidopsis thaliana] gi 9758664 dbj BAB09130.1   unnamed protein product [Arabidopsis thaliana] gi 15215901 gb AAK91494.1   AT5g22580/MQJ16.12 [Arabidopsis thaliana] gi 332005662 gb AED93045.1   stress responsive A/B Barrel domain-containing protein [Arabidopsis thaliana] | 110  | 111  | 9.00E-50  | 100.9  | 88.2 | 94.5 | stress responsive A/B Barrel domain-containing protein | gbpln | Arabidopsis thaliana | AT5G22580.1   Symbols:   Stress responsive A/B Barrel Domain   chr5:7502709-7503137 FORWARD LENGTH=111                                      | 110  | 111  | 2.00E-52  | 100.9 | 88.2 | 94.5 |
| Rsa1.0_01899.1.g30648.t1 | ref NP_567281.2   vacuolar protein sorting-associated protein 28-2 [Arabidopsis thaliana] gi 42572833 ref NP_974513.1   vacuolar protein sorting-associated protein 28-2 [Arabidopsis thaliana] gi 152061129 sp Q9S9T7.2 VP282_ARATH RecName: Full=Vacuolar protein sorting-associated protein 28 homolog 2 gi 50253482 gb AAT71943.1   At4g05000 [Arabidopsis thaliana] gi 52421311 gb AAU45225.1   At4g05000 [Arabidopsis thaliana] gi 110738465 dbj BAF01158.1   hypothetical protein [Arabidopsis thaliana] gi 332657056 gb AEE82456.1   vacuolar protein sorting-associated protein 28-2 [Arabidopsis thaliana] gi 332657057 gb AEE82457.1   vacuolar protein sorting-associated protein 28-2 [Arabidopsis thaliana]                                                                                                                              | 196  | 210  | 1.00E-107 | 107.1  | 95.4 | 99.0 | vacuolar protein sorting-associated protein 28-2       | gbpln | Arabidopsis thaliana | AT4G05000.2   Symbols: VPS28-1   Vacuolar protein sorting-associated protein VPS28 family protein   chr4:2563953-2564585 FORWARD LENGTH=210 | 196  | 210  | 1.00E-109 | 107.1 | 95.4 | 99.0 |
| Rsa1.0_01899.1.g30649.t1 | gb ABD65034.1   Ulp1 protease family protein [Brassica oleracea]                                                                                                                                                                                                                                                                                                                                                                                                                                                                                                                                                                                                                                                                                                                                                                                       | 75   | 863  | 3.00E-14  | 1150.7 | 48.0 | 62.7 | Ulp1 protease family protein                           | gbpln | Brassica oleracea    | #                                                                                                                                           | #    | #    | #         | #     | #    | #    |
| Rsa1.0_01899.1.g30650.t1 | refXP_002872727.1   hypothetical protein ARALYDRAFT_911767 [Arabidopsis lyrata subsp. lyrata] gi 297318564 gb EFH48986.1   hypothetical protein ARALYDRAFT_911767 [Arabidopsis lyrata subsp. lyrata]                                                                                                                                                                                                                                                                                                                                                                                                                                                                                                                                                                                                                                                   | 164  | 161  | 1.00E-49  | 98.2   | 64.6 | 77.4 | hypothetical protein ARALYDRAFT_911767                 | gbpln | Arabidopsis lyrata   | AT4G05010.1   Symbols:   F-box family protein   chr4:2567474-2568162 FORWARD LENGTH=164                                                     | 164  | 164  | 4.00E-51  | 100.0 | 66.5 | 75.6 |

|                          |                                                                                                                                                                                                                                                                                                                                                                                                                                                                                                                                                                                                                                                                       |      |      |           |       |      |      |                                                 |       |                      |                                                                                                                                                                                                                                                                                                                                                  |      |     |           |       |      |      |
|--------------------------|-----------------------------------------------------------------------------------------------------------------------------------------------------------------------------------------------------------------------------------------------------------------------------------------------------------------------------------------------------------------------------------------------------------------------------------------------------------------------------------------------------------------------------------------------------------------------------------------------------------------------------------------------------------------------|------|------|-----------|-------|------|------|-------------------------------------------------|-------|----------------------|--------------------------------------------------------------------------------------------------------------------------------------------------------------------------------------------------------------------------------------------------------------------------------------------------------------------------------------------------|------|-----|-----------|-------|------|------|
| Rsa1.0_01899.1.g30651.t1 | #                                                                                                                                                                                                                                                                                                                                                                                                                                                                                                                                                                                                                                                                     | #    | #    | #         | #     | #    | #    | #                                               | -     | ----                 | ----                                                                                                                                                                                                                                                                                                                                             | #    | #   | #         | #     | #    | #    |
| Rsa1.0_01899.1.g30652.t3 | gb EOA14700.1  hypothetical protein CARUB_v10027975mg [Capsella rubella]                                                                                                                                                                                                                                                                                                                                                                                                                                                                                                                                                                                              | 264  | 766  | 5.00E-70  | 290.2 | 55.3 | 70.5 | hypothetical protein CARUB_v10027975mg          | gbpln | Capsella rubella     | AT3G29765.1   Symbols:   General transcription factor 2-related zinc finger protein   chr3:11595467-11597077 REVERSE LENGTH=536                                                                                                                                                                                                                  | 264  | 536 | 2.00E-71  | 203.0 | 54.2 | 71.2 |
| Rsa1.0_01899.1.g30653.t3 | gb EOA20192.1  hypothetical protein CARUB_v10000488mg, partial [Capsella rubella]                                                                                                                                                                                                                                                                                                                                                                                                                                                                                                                                                                                     | 578  | 614  | 0         | 106.2 | 94.5 | 97.2 | hypothetical protein CARUB_v10000488mg, partial | gbpln | Capsella rubella     | AT4G05020.1   Symbols: NDB2   NAD(P)H dehydrogenase B2   chr4:2572752-2576222 FORWARD LENGTH=582                                                                                                                                                                                                                                                 | 578  | 582 | 0         | 100.7 | 94.3 | 96.9 |
| Rsa1.0_01899.1.g30654.t1 | gb EOA21283.1  hypothetical protein CARUB_v10001636mg [Capsella rubella]                                                                                                                                                                                                                                                                                                                                                                                                                                                                                                                                                                                              | 110  | 286  | 6.00E-34  | 260.0 | 73.6 | 80.9 | hypothetical protein CARUB_v10001636mg          | gbpln | Capsella rubella     | AT4G05060.1   Symbols:   PapD-like superfamily protein   chr4:2590245-2592000 REVERSE LENGTH=287                                                                                                                                                                                                                                                 | 110  | 287 | 2.00E-32  | 260.9 | 75.5 | 82.7 |
| Rsa1.0_01900.1.g30655.t1 | gb AAD32756.1  putative replication protein A1 [Arabidopsis thaliana]                                                                                                                                                                                                                                                                                                                                                                                                                                                                                                                                                                                                 | 185  | 458  | 4.00E-29  | 247.6 | 34.1 | 52.4 | putative replication protein A1                 | gbpln | Arabidopsis thaliana | AT1G52950.1   Symbols:   Nucleic acid-binding, OB-fold-like protein   chr1:19725483-19728007 FORWARD LENGTH=566                                                                                                                                                                                                                                  | 185  | 566 | 2.00E-28  | 305.9 | 32.4 | 59.5 |
| Rsa1.0_01900.1.g30656.t1 | #                                                                                                                                                                                                                                                                                                                                                                                                                                                                                                                                                                                                                                                                     | #    | #    | #         | #     | #    | #    | -                                               | ----  | ----                 | #                                                                                                                                                                                                                                                                                                                                                | #    | #   | #         | #     | #    | #    |
| Rsa1.0_01900.1.g30657.t1 | gb ABD65633.1  hypothetical protein 23.t00050 [Brassica oleracea]                                                                                                                                                                                                                                                                                                                                                                                                                                                                                                                                                                                                     | 392  | 260  | 2.00E-68  | 66.3  | 38.0 | 43.9 | hypothetical protein 23.t00050                  | gbpln | Brassica oleracea    | AT3G47680.1   Symbols:   DNA binding   chr3:17577483-17578391 REVERSE LENGTH=302                                                                                                                                                                                                                                                                 | 392  | 302 | 8.00E-46  | 77.0  | 28.6 | 42.6 |
| Rsa1.0_01900.1.g30658.t1 | gb ABD64939.1  hypothetical protein 24.t00017 [Brassica oleracea]                                                                                                                                                                                                                                                                                                                                                                                                                                                                                                                                                                                                     | 346  | 442  | 1.00E-148 | 127.7 | 72.5 | 81.2 | hypothetical protein 24.t00017                  | gbpln | Brassica oleracea    | AT2G13770.1   Symbols:   CONTAINS InterPro DOMAIN/s: Putative harbinger transposase-derived nuclease (InterPro:IPR006912). Has 451 Blast hits to 352 proteins in 33 species: Archae - 0; Bacteria - 0; Metazoa - 28; Fungi - 8; Plants - 388; Viruses - 0; Other Eukaryotes - 27 (source: NCBI BLINK).   chr2:5736603-5737847 FORWARD LENGTH=343 | 346  | 343 | 4.00E-36  | 99.1  | 18.2 | 23.4 |
| Rsa1.0_01900.1.g30659.t1 | #                                                                                                                                                                                                                                                                                                                                                                                                                                                                                                                                                                                                                                                                     | #    | #    | #         | #     | #    | #    | -                                               | ----  | ----                 | #                                                                                                                                                                                                                                                                                                                                                | #    | #   | #         | #     | #    | #    |
| Rsa1.0_01900.1.g30660.t1 | dbj BAJ34565.1  unnamed protein product [Thellungiella halophila]                                                                                                                                                                                                                                                                                                                                                                                                                                                                                                                                                                                                     | 149  | 323  | 4.00E-26  | 216.8 | 48.3 | 55.0 | unnamed protein product                         | ----  | ----                 | AT5G44080.1   Symbols:   Basic-leucine zipper (bZIP) transcription factor family protein   chr5:17738787-17739734 REVERSE LENGTH=315                                                                                                                                                                                                             | 149  | 315 | 1.00E-22  | 211.4 | 44.3 | 57.0 |
| Rsa1.0_01900.1.g30661.t1 | #                                                                                                                                                                                                                                                                                                                                                                                                                                                                                                                                                                                                                                                                     | #    | #    | #         | #     | #    | #    | -                                               | ----  | ----                 | #                                                                                                                                                                                                                                                                                                                                                | #    | #   | #         | #     | #    | #    |
| Rsa1.0_01901.1.g30662.t1 | gb AAM82604.1 AF525305.2 putative AP endonuclease/reverse transcriptase [Brassica napus]<br>ref NP_190443.1  Nodulin MtN3-like protein [Arabidopsis thaliana]<br>gi 75206789 sp Q9SMM5.1 SWT11_ARAT H RecName: Full=Bidirectional sugar transporter SWEET11;<br>Short=AtSWEET11<br>gi 13605688 gb AAK32837.1 AF361825.1 AT3g48740/T8P19_250 [Arabidopsis thaliana]                                                                                                                                                                                                                                                                                                    | 1146 | 1214 | 0         | 105.9 | 36.7 | 54.6 | putative AP endonuclease/reverse transcriptase  | gbpln | Brassica napus       | AT1G43760.1   Symbols:   DNase I-like superfamily protein   chr1:16528880-16531065 REVERSE LENGTH=626                                                                                                                                                                                                                                            | 1146 | 626 | 7.00E-62  | 54.6  | 11.7 | 18.8 |
| Rsa1.0_01901.1.g30663.t1 | gi 16930411 gb AAL31891.1 AF419559.1 AT3g48740/T8P19_250 [Arabidopsis thaliana]<br>gi 6523105 emb CAB62363.1  MTN3-like protein [Arabidopsis thaliana]<br>gi 17979365 gb AAL49908.1  putative MTN3 protein [Arabidopsis thaliana]<br>gi 18700264 gb AAL77742.1  AT3g48740/T8P19_250 [Arabidopsis thaliana]<br>gi 20465523 gb AAM20244.1  putative MTN3 protein [Arabidopsis thaliana]<br>gi 332644930 gb AEE78451.1  bidirectional sugar transporter SWEET11 [Arabidopsis thaliana]<br>ref XP_002875921.1  transferase family protein [Arabidopsis lyrata subsp. lyrata]<br>gi 297310357 gb EFH52180.1  transferase family protein [Arabidopsis lyrata subsp. lyrata] | 282  | 289  | 1.00E-147 | 102.5 | 90.8 | 96.1 | Nodulin MtN3-like protein                       | gbpln | Arabidopsis thaliana | AT3G48740.1   Symbols: SWEET11, AtSWEET11   Nodulin MtN3 family protein   chr3:18052814-18054663 REVERSE LENGTH=289                                                                                                                                                                                                                              | 282  | 289 | 1.00E-149 | 102.5 | 90.8 | 96.1 |
| Rsa1.0_01901.1.g30664.t1 | ref XP_002864522.1  hypothetical protein ARALYDRAFT_495859 [Arabidopsis lyrata subsp. lyrata]<br>gi 297310357 gb EFH40781.1  hypothetical protein ARALYDRAFT_495859 [Arabidopsis lyrata subsp. lyrata]<br>ref XP_002864521.1  hypothetical protein ARALYDRAFT_918940 [Arabidopsis lyrata subsp. lyrata]<br>gi 297310356 gb EFH40780.1  hypothetical protein ARALYDRAFT_918940 [Arabidopsis lyrata subsp. lyrata]                                                                                                                                                                                                                                                      | 432  | 431  | 0         | 99.8  | 84.5 | 92.4 | transferase family protein                      | gbpln | Arabidopsis lyrata   | AT3G48720.1   Symbols:   HXXXD-type acyl-transferase family protein   chr3:18046527-18049295 FORWARD LENGTH=430                                                                                                                                                                                                                                  | 432  | 430 | 0         | 99.5  | 84.3 | 91.9 |
| Rsa1.0_01902.1.g30665.t1 | ref XP_002864522.1  hypothetical protein ARALYDRAFT_495859 [Arabidopsis lyrata subsp. lyrata]<br>gi 297310357 gb EFH40781.1  hypothetical protein ARALYDRAFT_495859 [Arabidopsis lyrata subsp. lyrata]<br>ref XP_002864521.1  hypothetical protein ARALYDRAFT_918940 [Arabidopsis lyrata subsp. lyrata]<br>gi 297310356 gb EFH40780.1  hypothetical protein ARALYDRAFT_918940 [Arabidopsis lyrata subsp. lyrata]                                                                                                                                                                                                                                                      | 207  | 207  | 1.00E-100 | 100.0 | 90.3 | 93.7 | hypothetical protein ARALYDRAFT_495859          | gbpln | Arabidopsis lyrata   | AT5G57625.1   Symbols:   CAP (Cysteine-rich secretory proteins, Antigen 5, and Pathogenesis-related 1 protein) superfamily protein   chr5:23337865-23338577 FORWARD LENGTH=207                                                                                                                                                                   | 207  | 207 | 1.00E-101 | 100.0 | 88.4 | 93.2 |
| Rsa1.0_01902.1.g30666.t1 | ref XP_002864521.1  hypothetical protein ARALYDRAFT_918940 [Arabidopsis lyrata subsp. lyrata]<br>gi 297310356 gb EFH40780.1  hypothetical protein ARALYDRAFT_918940 [Arabidopsis lyrata subsp. lyrata]                                                                                                                                                                                                                                                                                                                                                                                                                                                                | 331  | 335  | 1.00E-157 | 101.2 | 86.4 | 92.7 | hypothetical protein ARALYDRAFT_918940          | gbpln | Arabidopsis lyrata   | AT5G57620.1   Symbols: MYB36, AtMYB36   myb domain protein 36   chr5:23334904-23336388 FORWARD LENGTH=333                                                                                                                                                                                                                                        | 331  | 333 | 1.00E-157 | 100.6 | 85.8 | 91.2 |

|                          |                                                                                                                                                                                                                                                                                                                                                                                                                                                                                                                                                                                                                                                                                                                                                                                                                                                                                                                                                                                              |     |     |           |       |      |      |                                                        |       |                      |                                                                                                                                                                     |     |     |           |       |      |      |
|--------------------------|----------------------------------------------------------------------------------------------------------------------------------------------------------------------------------------------------------------------------------------------------------------------------------------------------------------------------------------------------------------------------------------------------------------------------------------------------------------------------------------------------------------------------------------------------------------------------------------------------------------------------------------------------------------------------------------------------------------------------------------------------------------------------------------------------------------------------------------------------------------------------------------------------------------------------------------------------------------------------------------------|-----|-----|-----------|-------|------|------|--------------------------------------------------------|-------|----------------------|---------------------------------------------------------------------------------------------------------------------------------------------------------------------|-----|-----|-----------|-------|------|------|
| Rsa1.0_01902.1.g30667.t1 | refXP_002866219.1   calmodulin-binding protein [Arabidopsis lyrata subsp. lyrata] gi 297312054 gb EFH42478.1   calmodulin-binding protein [Arabidopsis lyrata subsp. lyrata]                                                                                                                                                                                                                                                                                                                                                                                                                                                                                                                                                                                                                                                                                                                                                                                                                 | 615 | 646 | 0         | 105.0 | 83.9 | 89.8 | calmodulin-binding protein                             | gbpln | Arabidopsis lyrata   | AT5G57580.1   Symbols:   Calmodulin-binding protein   chr5:23314994-23317683 REVERSE LENGTH=647                                                                     | 615 | 647 | 0         | 105.2 | 82.4 | 88.8 |
| Rsa1.0_01902.1.g30668.t2 | # # # # # # # # -                                                                                                                                                                                                                                                                                                                                                                                                                                                                                                                                                                                                                                                                                                                                                                                                                                                                                                                                                                            |     |     |           |       |      |      |                                                        | ----  | ----                 | # # # # # # #                                                                                                                                                       |     |     |           |       |      |      |
| Rsa1.0_01902.1.g30669.t1 | gb EOA15046.1  hypothetical protein CARUB_v10028404mg [Capsella rubella]                                                                                                                                                                                                                                                                                                                                                                                                                                                                                                                                                                                                                                                                                                                                                                                                                                                                                                                     | 347 | 361 | 1.00E-141 | 104.0 | 72.0 | 84.4 | hypothetical protein CARUB_v10028404mg                 | gbpln | Capsella rubella     | AT5G55440.1   Symbols:   Protein of unknown function (DUF295)   chr5:22465718-22466989 FORWARD LENGTH=365                                                           | 347 | 365 | 1.00E-127 | 105.2 | 68.0 | 80.4 |
| Rsa1.0_01902.1.g30670.t1 | gb EOA15018.1  hypothetical protein CARUB_v10028369mg [Capsella rubella]                                                                                                                                                                                                                                                                                                                                                                                                                                                                                                                                                                                                                                                                                                                                                                                                                                                                                                                     | 283 | 267 | 1.00E-129 | 94.3  | 76.7 | 84.8 | hypothetical protein CARUB_v10028369mg                 | gbpln | Capsella rubella     | AT5G57560.1   Symbols: TCH4, XTH22   Xyloglucan endotransglucosylase/hydrolase family protein   chr5:23307296-23308235 REVERSE LENGTH=284                           | 283 | 284 | 1.00E-104 | 100.4 | 60.4 | 77.4 |
| Rsa1.0_01903.1.g30671.t1 | refXP_002866141.1   F-box family protein [Arabidopsis lyrata subsp. lyrata] gi 297311976 gb EFH42400.1   F-box family protein [Arabidopsis lyrata subsp. lyrata]                                                                                                                                                                                                                                                                                                                                                                                                                                                                                                                                                                                                                                                                                                                                                                                                                             | 415 | 424 | 1.00E-142 | 102.2 | 64.6 | 76.6 | F-box family protein                                   | gbpln | Arabidopsis lyrata   | AT5G56370.2   Symbols:   F-box/RNI-like/FBD-like domains-containing protein   chr5:22836200-22837619 REVERSE LENGTH=421                                             | 415 | 421 | 1.00E-136 | 101.4 | 61.4 | 74.9 |
| Rsa1.0_01903.1.g30672.t1 | refXP_002863741.1   hypothetical protein ARALYDRAFT_917455 [Arabidopsis lyrata subsp. lyrata] gi 297309576 gb EFH40000.1   hypothetical protein ARALYDRAFT_917455 [Arabidopsis lyrata subsp. lyrata]                                                                                                                                                                                                                                                                                                                                                                                                                                                                                                                                                                                                                                                                                                                                                                                         | 315 | 390 | 2.00E-21  | 123.8 | 23.2 | 32.1 | hypothetical protein ARALYDRAFT_917455                 | gbpln | Arabidopsis lyrata   | AT1G43730.1   Symbols:   RNA-directed DNA polymerase (reverse transcriptase)-related family protein   chr1:16508723-16509784 REVERSE LENGTH=320                     | 315 | 320 | 2.00E-21  | 101.6 | 19.0 | 30.8 |
| Rsa1.0_01903.1.g30673.t4 | gb EOA37708.1  hypothetical protein CARUB_v10012428mg [Capsella rubella]                                                                                                                                                                                                                                                                                                                                                                                                                                                                                                                                                                                                                                                                                                                                                                                                                                                                                                                     | 232 | 274 | 6.00E-37  | 118.1 | 32.3 | 37.5 | hypothetical protein CARUB_v10012428mg                 | gbpln | Capsella rubella     | AT1G08065.1   Symbols: ATACA5, ACA5   alpha carbonic anhydrase 5   chr1:2511788-2513341 REVERSE LENGTH=277                                                          | 232 | 277 | 7.00E-39  | 119.4 | 30.6 | 36.6 |
| Rsa1.0_01903.1.g30674.t1 | ref NP_200443.1  expansin A14 [Arabidopsis thaliana] gi 20137960 sp Q9FMA0.1 EXP14_ARAT H RecName: Full=Expansin-A14; Short=AtEXPA14; AltName: Full=Alpha-expansin-14; Short=At-EXP14; Short=AtEX14; AltName: Full=AtH-ExpAlpha-1.5; Flags: Precursor gi 10177830 dbj BAB11259.1  expansin [Arabidopsis thaliana] gi 110740362 dbj BAF02076.1  Expansin [Arabidopsis thaliana] gi 332009365 gb AED96748.1  expansin A14 [Arabidopsis thaliana] ref NP_192885.1  putative cysteine-rich receptor-like protein kinase 30 [Arabidopsis thaliana] gi 75334864 sp Q9LDT0.1 CRK30_ARAT H RecName: Full=Putative cysteine-rich receptor-like protein kinase 30; Short=Cysteine-rich RLK30; Flags: Precursor gi 7267846 emb CAB78189.1  serine/threonine kinase-like protein [Arabidopsis thaliana] gi 7321043 emb CAB82151.1  serine/threonine kinase-like protein [Arabidopsis thaliana] gi 332657614 gb AEE83014.1  putative cysteine-rich receptor-like protein kinase 30 [Arabidopsis thaliana] | 253 | 255 | 1.00E-133 | 100.8 | 90.9 | 95.3 | expansin A14                                           | gbpln | Arabidopsis thaliana | AT5G56320.1   Symbols: ATEXPA14, EXP14, ATEXP14, ATHEXP ALPHA 1.5, EXPA14   expansin A14   chr5:22808854-22809906 FORWARD LENGTH=255                                | 253 | 255 | 1.00E-136 | 100.8 | 90.9 | 95.3 |
| Rsa1.0_01903.1.g30675.t1 | ref NP_192885.1  putative cysteine-rich receptor-like protein kinase 30 [Arabidopsis thaliana] gi 75334864 sp Q9LDT0.1 CRK30_ARAT H RecName: Full=Putative cysteine-rich receptor-like protein kinase 30; Short=Cysteine-rich RLK30; Flags: Precursor gi 7267846 emb CAB78189.1  serine/threonine kinase-like protein [Arabidopsis thaliana] gi 7321043 emb CAB82151.1  serine/threonine kinase-like protein [Arabidopsis thaliana] gi 332657614 gb AEE83014.1  putative cysteine-rich receptor-like protein kinase 30 [Arabidopsis thaliana]                                                                                                                                                                                                                                                                                                                                                                                                                                                | 630 | 700 | 0         | 111.1 | 73.3 | 83.2 | putative cysteine-rich receptor-like protein kinase 30 | gbpln | Arabidopsis thaliana | AT4G11460.1   Symbols: CRK30   cysteine-rich RLK (RECEPTOR-like protein kinase) 30   chr4:6964468-6967093 FORWARD LENGTH=700                                        | 630 | 700 | 0         | 111.1 | 73.3 | 83.2 |
| Rsa1.0_01904.1.g30676.t1 | gb EOA32324.1  hypothetical protein CARUB_v10015587mg [Capsella rubella]                                                                                                                                                                                                                                                                                                                                                                                                                                                                                                                                                                                                                                                                                                                                                                                                                                                                                                                     | 103 | 102 | 5.00E-33  | 99.0  | 74.8 | 82.5 | hypothetical protein CARUB_v10015587mg                 | gbpln | Capsella rubella     | AT5G48485.1   Symbols: DIR1   Bifunctional inhibitor/lipid-transfer protein/seed storage 2S albumin superfamily protein   chr5:19646317-19646625 REVERSE LENGTH=102 | 103 | 102 | 5.00E-11  | 99.0  | 36.9 | 44.7 |
| Rsa1.0_01904.1.g30677.t1 | ref XP_002885282.1  hypothetical protein ARALYDRAFT_318646 [Arabidopsis lyrata subsp. lyrata] gi 297331122 gb EFH61541.1  hypothetical protein ARALYDRAFT_318646 [Arabidopsis lyrata subsp. lyrata]                                                                                                                                                                                                                                                                                                                                                                                                                                                                                                                                                                                                                                                                                                                                                                                          | 340 | 375 | 0         | 110.3 | 89.7 | 95.6 | hypothetical protein ARALYDRAFT_318646                 | gbpln | Arabidopsis lyrata   | AT3G18850.4   Symbols: LPAT5   lysophosphatidyl acyltransferase 5   chr3:6499529-6500840 REVERSE LENGTH=375                                                         | 340 | 375 | 0         | 110.3 | 89.1 | 94.7 |
| Rsa1.0_01904.1.g30678.t1 | # # # # # # # # -                                                                                                                                                                                                                                                                                                                                                                                                                                                                                                                                                                                                                                                                                                                                                                                                                                                                                                                                                                            |     |     |           |       |      |      |                                                        | ----  | ----                 | # # # # # # #                                                                                                                                                       |     |     |           |       |      |      |
| Rsa1.0_01904.1.g30679.t1 | gb EOA23244.1  hypothetical protein CARUB_v10017153mg [Capsella rubella]                                                                                                                                                                                                                                                                                                                                                                                                                                                                                                                                                                                                                                                                                                                                                                                                                                                                                                                     | 481 | 473 | 1.00E-155 | 98.3  | 60.5 | 73.4 | hypothetical protein CARUB_v10017153mg                 | gbpln | Capsella rubella     | AT1G52650.1   Symbols:   F-box/RNI-like superfamily protein   chr1:19610643-19612417 FORWARD LENGTH=507                                                             | 481 | 507 | 1.00E-153 | 105.4 | 58.0 | 72.3 |

|                          |                                                                                                                                                                                                                                                                                                                                                                                                          |      |      |           |       |      |      |                                                 |       |                      |                                                                                                                                                                                                                                                                                                                                                                                                                                                              |      |      |           |       |      |      |
|--------------------------|----------------------------------------------------------------------------------------------------------------------------------------------------------------------------------------------------------------------------------------------------------------------------------------------------------------------------------------------------------------------------------------------------------|------|------|-----------|-------|------|------|-------------------------------------------------|-------|----------------------|--------------------------------------------------------------------------------------------------------------------------------------------------------------------------------------------------------------------------------------------------------------------------------------------------------------------------------------------------------------------------------------------------------------------------------------------------------------|------|------|-----------|-------|------|------|
| Rsa1.0_01904.1.g30680.t1 | refNP_188520.2  uncharacterized protein [Arabidopsis thaliana] gi 332642644 gb AAE76165.1  uncharacterized protein AT3G18900 [Arabidopsis thaliana]                                                                                                                                                                                                                                                      | 538  | 524  | 0         | 97.4  | 80.5 | 87.7 | uncharacterized protein                         | gbpln | Arabidopsis thaliana | AT3G18900.1   Symbols:   unknown protein; CONTAINS InterPro DOMAIN/s: Protein of unknown function DUF547 (InterPro:IPR006869); BEST Arabidopsis thaliana protein match is: Protein of unknown function, DJF547 (TAIR:AT5G66600.3); Has 1466 Blast hits to 1426 proteins in 93 species: Archae - 0; Bacteria - 91; Metazoa - 23; Fungi - 0; Plants - 1310; Viruses - 0; Other Eukaryotes - 42 (source: NCBI BLink).   chr3:6517181-6519677 FORWARD LENGTH=524 | 538  | 524  | 0         | 97.4  | 80.5 | 87.7 |
| Rsa1.0_01904.1.g30681.t6 | emb CAB40035.1  retrotransposon like protein [Arabidopsis thaliana] gi 7267767 emb CAB81170.1  retrotransposon like protein [Arabidopsis thaliana]                                                                                                                                                                                                                                                       | 2049 | 1515 | 0         | 73.9  | 40.6 | 51.3 | retrotransposon like protein                    | gbpln | Arabidopsis thaliana | AT4G23160.1   Symbols: CRK8   cysteine-rich RLK (RECEPTOR-like protein kinase) 8   chr4:12128485-12134086 FORWARD LENGTH=1262                                                                                                                                                                                                                                                                                                                                | 2049 | 1262 | 1.00E-114 | 61.6  | 10.0 | 15.1 |
| Rsa1.0_01904.1.g30682.t1 | refNP_188525.1  transducin/WD40 domain-containing protein [Arabidopsis thaliana] gi 9280312 dbj BAB01691.1  En/Spm-like transposon protein-like [Arabidopsis thaliana] gi 26450378 dbj BAC42304.1  unknown protein [Arabidopsis thaliana] gi 28973059 gb AAO63854.1  unknown protein [Arabidopsis thaliana] gi 332642651 gb AAE76172.1  transducin/WD40 domain-containing protein [Arabidopsis thaliana] | 461  | 473  | 0         | 102.6 | 87.9 | 94.8 | transducin/WD40 domain-containing protein       | gbpln | Arabidopsis thaliana | AT3G18950.1   Symbols:   Transducin/WD40 repeat-like superfamily protein   chr3:6536900-6538321 FORWARD LENGTH=473                                                                                                                                                                                                                                                                                                                                           | 461  | 473  | 0         | 102.6 | 87.9 | 94.8 |
| Rsa1.0_01905.1.g30683.t1 | refXP_002876718.1  hypothetical protein ARALYDRAFT_349389 [Arabidopsis lyrata subsp. lyrata] gi 29732256 gb EFH52977.1  hypothetical protein ARALYDRAFT_349389 [Arabidopsis lyrata subsp. lyrata]                                                                                                                                                                                                        | 284  | 297  | 1.00E-124 | 104.6 | 80.6 | 88.0 | hypothetical protein ARALYDRAFT_349389          | gbpln | Arabidopsis lyrata   | AT3G63350.1   Symbols: AT-HSFA7B, HSFA7B   winged-helix DNA-binding transcription factor family protein   chr3:23399468-23400812 FORWARD LENGTH=282                                                                                                                                                                                                                                                                                                          | 284  | 282  | 1.00E-116 | 99.3  | 77.5 | 85.2 |
| Rsa1.0_01905.1.g30684.t1 | gb EOA14273.1  hypothetical protein CARUB_v10027434mg, partial [Capsella rubella]                                                                                                                                                                                                                                                                                                                        | 86   | 99   | 1.00E-20  | 115.1 | 62.8 | 75.6 | hypothetical protein CARUB_v10027434mg, partial | gbpln | Capsella rubella     | AT3G63360.1   Symbols:   defense-related   chr3:23401257-23401591 REVERSE LENGTH=85                                                                                                                                                                                                                                                                                                                                                                          | 86   | 85   | 3.00E-20  | 98.8  | 61.6 | 72.1 |
| Rsa1.0_01905.1.g30685.t1 | refXP_002878515.1  hypothetical protein ARALYDRAFT_324763 [Arabidopsis lyrata subsp. lyrata] gi 297324353 gb EFH54774.1  hypothetical protein ARALYDRAFT_324763 [Arabidopsis lyrata subsp. lyrata]                                                                                                                                                                                                       | 190  | 173  | 6.00E-57  | 91.1  | 64.2 | 74.2 | hypothetical protein ARALYDRAFT_324763          | gbpln | Arabidopsis lyrata   | AT3G63390.1   Symbols:   unknown protein; Has 30201 Blast hits to 17322 proteins in 780 species: Archae - 12; Bacteria - 1396; Metazoa - 17338; Fungi - 3422; Plants - 5037; Viruses - 0; Other Eukaryotes - 2996 (source: NCBI BLink).   chr3:23411416-23411943 REVERSE LENGTH=175                                                                                                                                                                          | 190  | 175  | 2.00E-54  | 92.1  | 66.8 | 75.3 |
| Rsa1.0_01905.1.g30686.t1 | emb CAB87795.1  putative protein [Arabidopsis thaliana]                                                                                                                                                                                                                                                                                                                                                  | 89   | 138  | 6.00E-32  | 155.1 | 76.4 | 80.9 | putative protein                                | gbpln | Arabidopsis thaliana | AT3G63420.2   Symbols: AGG1, ATAGG1, GG1   Ggamma-subunit 1   chr3:23417383-23418405 FORWARD LENGTH=98                                                                                                                                                                                                                                                                                                                                                       | 89   | 98   | 3.00E-34  | 110.1 | 76.4 | 80.9 |
| Rsa1.0_01905.1.g30687.t1 | refNP_191902.1  uncharacterized protein [Arabidopsis thaliana] gi 7573326 emb CAB87796.1  putative protein [Arabidopsis thaliana] gi 190016004 gb ACE62890.1  At3g63430 [Arabidopsis thaliana] gi 332646960 gb AAE80481.1  uncharacterized protein AT3G63430 [Arabidopsis thaliana]                                                                                                                      | 541  | 540  | 1.00E-135 | 99.8  | 59.9 | 67.8 | uncharacterized protein                         | gbpln | Arabidopsis thaliana | AT3G63430.1   Symbols:   unknown protein; BEST Arabidopsis thaliana protein match is: unknown protein (TAIR:AT1G74160.1). Has 135 Blast hits to 119 proteins in 22 species: Archae - 0; Bacteria - 2; Metazoa - 3; Fungi - 3; Plants - 119; Viruses - 0; Other Eukaryotes - 8 (source: NCBI BLink).   chr3:23420414-23422201 FORWARD LENGTH=540                                                                                                              | 541  | 540  | 1.00E-138 | 99.8  | 59.9 | 67.8 |
| Rsa1.0_01905.1.g30688.t1 | refXP_002876723.1  predicted protein [Arabidopsis lyrata subsp. lyrata] gi 297322561 gb EFH52982.1  predicted protein [Arabidopsis lyrata subsp. lyrata]                                                                                                                                                                                                                                                 | 517  | 528  | 0         | 102.1 | 73.5 | 80.3 | predicted protein                               | gbpln | Arabidopsis lyrata   | AT3G63440.1   Symbols: ATCKX6, CKX6, ATCKX7   cytokinin oxidase/dehydrogenase 6   chr3:23424291-23426265 FORWARD LENGTH=533                                                                                                                                                                                                                                                                                                                                  | 517  | 533  | 0         | 103.1 | 72.1 | 79.7 |
| Rsa1.0_01905.1.g30689.t1 | refXP_002881106.1  ferrochelatase II [Arabidopsis lyrata subsp. lyrata] gi 297326945 gb EFH57365.1  ferrochelatase II [Arabidopsis lyrata subsp. lyrata]                                                                                                                                                                                                                                                 | 501  | 512  | 0         | 102.2 | 82.6 | 85.2 | ferrochelatase II                               | gbpln | Arabidopsis lyrata   | AT2G30390.1   Symbols: FC2, FC-II, ATFC-II   ferrochelatase 2   chr2:12951242-12953985 REVERSE LENGTH=512                                                                                                                                                                                                                                                                                                                                                    | 501  | 512  | 0         | 102.2 | 82.4 | 85.4 |
| Rsa1.0_01906.1.g30690.t1 | dbj BAJ34368.1  unnamed protein product [Thellungiella halophila]                                                                                                                                                                                                                                                                                                                                        | 314  | 705  | 1.00E-144 | 224.5 | 85.4 | 88.2 | unnamed protein product                         | ----  | ----                 | AT5G52640.1   Symbols: HSP81-1, ATHS83, HSP81.1, HSP83, ATHSP90.1, Athsp90-1, HSP90.1   heat shock protein 90.1   chr5:21352542-21355147 FORWARD LENGTH=705                                                                                                                                                                                                                                                                                                  | 314  | 705  | 1.00E-145 | 224.5 | 78.0 | 80.9 |
| Rsa1.0_01906.1.g30691.t4 | gb AAG51783.1 AC079679.3 reverse transcriptase, putative: 16838-20266 [Arabidopsis thaliana]                                                                                                                                                                                                                                                                                                             | 1224 | 1142 | 0         | 93.3  | 40.8 | 56.6 | reverse transcriptase, putative: 16838-20266    | gbpln | Arabidopsis thaliana | AT4G28090.1   Symbols:   Ribonuclease H-like superfamily protein   chr4:14333528-14335255 FORWARD LENGTH=575                                                                                                                                                                                                                                                                                                                                                 | 1224 | 575  | 1.00E-52  | 47.0  | 8.8  | 14.4 |
| Rsa1.0_01906.1.g30692.t1 | #                                                                                                                                                                                                                                                                                                                                                                                                        | #    | #    | #         | #     | #    | -    | ----                                            | ----  | ----                 | #                                                                                                                                                                                                                                                                                                                                                                                                                                                            | #    | #    | #         | #     | #    |      |
| Rsa1.0_01906.1.g30693.t1 | #                                                                                                                                                                                                                                                                                                                                                                                                        | #    | #    | #         | #     | #    | -    | ----                                            | ----  | ----                 | #                                                                                                                                                                                                                                                                                                                                                                                                                                                            | #    | #    | #         | #     | #    |      |

|                          |                                                                                                                                                                                                                                                                                                                                                                                                                                                                                                                                                                                                                                                                                                                                                                                                                                                                                                                                                                                                         |     |      |           |        |      |      |                                               |       |                      |                                                                                                                        |     |     |           |       |      |      |
|--------------------------|---------------------------------------------------------------------------------------------------------------------------------------------------------------------------------------------------------------------------------------------------------------------------------------------------------------------------------------------------------------------------------------------------------------------------------------------------------------------------------------------------------------------------------------------------------------------------------------------------------------------------------------------------------------------------------------------------------------------------------------------------------------------------------------------------------------------------------------------------------------------------------------------------------------------------------------------------------------------------------------------------------|-----|------|-----------|--------|------|------|-----------------------------------------------|-------|----------------------|------------------------------------------------------------------------------------------------------------------------|-----|-----|-----------|-------|------|------|
| Rsa1.0_01906.1.g30694.t1 | gb ADP20180.1  mutant gag-pol polyprotein [Pisum sativum]                                                                                                                                                                                                                                                                                                                                                                                                                                                                                                                                                                                                                                                                                                                                                                                                                                                                                                                                               | 649 | 1004 | 1.00E-138 | 154.7  | 42.8 | 61.3 | mutant gag-pol polyprotein                    | gbpln | Pisum sativum        | #                                                                                                                      | #   | #   | #         | #     | #    |      |
| Rsa1.0_01907.1.g30695.t1 | gb EOA16073.1  hypothetical protein CARUB_v10004206mg [Capsella rubella]                                                                                                                                                                                                                                                                                                                                                                                                                                                                                                                                                                                                                                                                                                                                                                                                                                                                                                                                | 505 | 763  | 1.00E-156 | 151.1  | 54.1 | 69.5 | hypothetical protein CARUB_v10004206mg        | gbpln | Capsella rubella     | AT5G59660.1   Symbols:   Leucine-rich repeat protein kinase family protein   chr5:24035687-24039979 FORWARD LENGTH=852 | 505 | 852 | 7.00E-15  | 168.7 | 6.9  | 7.7  |
| Rsa1.0_01907.1.g30696.t1 | #                                                                                                                                                                                                                                                                                                                                                                                                                                                                                                                                                                                                                                                                                                                                                                                                                                                                                                                                                                                                       | #   | #    | #         | #      | #    | -    |                                               | ----  | ----                 | #                                                                                                                      | #   | #   | #         | #     | #    |      |
| Rsa1.0_01907.1.g30697.t1 | emb CAA18194.1  putative protein [Arabidopsis thaliana]<br>gi 7270001 emb CAB79817.1  putative protein [Arabidopsis thaliana]<br>ref XP_002867317.1  hypothetical protein ARALYDRAFT_328615 [Arabidopsis lyrata subsp. lyrata]<br>gi 297313153 gb EFH43576.1  hypothetical protein ARALYDRAFT_328615 [Arabidopsis lyrata subsp. lyrata]                                                                                                                                                                                                                                                                                                                                                                                                                                                                                                                                                                                                                                                                 | 172 | 2895 | 5.00E-83  | 1683.1 | 93.0 | 96.5 | putative protein                              | gbpln | Arabidopsis thaliana | AT2G24290.1   Symbols:   Protein of unknown function (DUF1068)   chr2:10338779-10339859 FORWARD LENGTH=173             | 172 | 173 | 4.00E-84  | 100.6 | 86.0 | 93.0 |
| Rsa1.0_01907.1.g30698.t1 | ref XP_002867316.1  hypothetical protein ARALYDRAFT_913365 [Arabidopsis lyrata subsp. lyrata]<br>gi 297313152 gb EFH43575.1  hypothetical protein ARALYDRAFT_913365 [Arabidopsis lyrata subsp. lyrata]<br>ref NP_567866.1  Plastidial lipoyltransferase 2 [Arabidopsis thaliana]<br>gi 75164691 sp Q948J9.1 LIP2P_ARATH RecName: Full=Plastidial lipoyltransferase 2; AltName: Full=Lipoate-protein ligase 2p; AltName: Full=Lipoyl-[acyl-carrier-protein]-protein-N- lipoyltransferase 2p<br>gi 15887052 dbj BAB69449.1  lipoyltransferase [Arabidopsis thaliana]<br>gi 62320326 dbj BAD94675.1  putative protein [Arabidopsis thaliana]<br>gi 90186250 gb ABD91501.1  At4g31050 [Arabidopsis thaliana]<br>gi 332660451 gb AEE85851.1  Plastidial lipoyltransferase 2 [Arabidopsis thaliana]<br>ref XP_002869346.1  hypothetical protein ARALYDRAFT_491637 [Arabidopsis lyrata subsp. lyrata]<br>gi 297315182 gb EFH45605.1  hypothetical protein ARALYDRAFT_491637 [Arabidopsis lyrata subsp. lyrata] | 334 | 294  | 1.00E-163 | 88.0   | 80.8 | 85.6 | hypothetical protein ARALYDRAFT_328615        | gbpln | Arabidopsis lyrata   | AT4G31020.1   Symbols:   alpha/beta-Hydrolases superfamily protein   chr4:15108832-15110079 REVERSE LENGTH=294         | 334 | 294 | 1.00E-165 | 88.0  | 80.5 | 85.6 |
| Rsa1.0_01907.1.g30699.t1 | ref NP_567866.1  Plastidial lipoyltransferase 2 [Arabidopsis thaliana]<br>gi 75164691 sp Q948J9.1 LIP2P_ARATH RecName: Full=Plastidial lipoyltransferase 2; AltName: Full=Lipoate-protein ligase 2p; AltName: Full=Lipoyl-[acyl-carrier-protein]-protein-N- lipoyltransferase 2p<br>gi 15887052 dbj BAB69449.1  lipoyltransferase [Arabidopsis thaliana]<br>gi 62320326 dbj BAD94675.1  putative protein [Arabidopsis thaliana]<br>gi 90186250 gb ABD91501.1  At4g31050 [Arabidopsis thaliana]<br>gi 332660451 gb AEE85851.1  Plastidial lipoyltransferase 2 [Arabidopsis thaliana]<br>ref XP_002869346.1  hypothetical protein ARALYDRAFT_491637 [Arabidopsis lyrata subsp. lyrata]<br>gi 297315182 gb EFH45605.1  hypothetical protein ARALYDRAFT_491637 [Arabidopsis lyrata subsp. lyrata]                                                                                                                                                                                                           | 113 | 439  | 2.00E-11  | 388.5  | 43.4 | 49.6 | hypothetical protein ARALYDRAFT_913365        | gbpln | Arabidopsis lyrata   | AT4G31040.1   Symbols:   CemA-like proton extrusion protein-related   chr4:15111811-15113881 REVERSE LENGTH=438        | 113 | 438 | 5.00E-13  | 387.6 | 40.7 | 46.0 |
| Rsa1.0_01907.1.g30700.t1 | protein-N- lipoyltransferase 2p<br>gi 15887052 dbj BAB69449.1  lipoyltransferase [Arabidopsis thaliana]<br>gi 62320326 dbj BAD94675.1  putative protein [Arabidopsis thaliana]<br>gi 90186250 gb ABD91501.1  At4g31050 [Arabidopsis thaliana]<br>gi 332660451 gb AEE85851.1  Plastidial lipoyltransferase 2 [Arabidopsis thaliana]<br>ref XP_002869346.1  hypothetical protein ARALYDRAFT_491637 [Arabidopsis lyrata subsp. lyrata]<br>gi 297315182 gb EFH45605.1  hypothetical protein ARALYDRAFT_491637 [Arabidopsis lyrata subsp. lyrata]                                                                                                                                                                                                                                                                                                                                                                                                                                                            | 473 | 278  | 1.00E-138 | 58.8   | 49.5 | 54.1 | Plastidial lipoyltransferase 2                | gbpln | Arabidopsis thaliana | AT4G31050.1   Symbols:   Biotin/lipoate A/B protein ligase family   chr4:15114345-15115443 FORWARD LENGTH=278          | 473 | 278 | 1.00E-140 | 58.8  | 49.5 | 54.1 |
| Rsa1.0_01907.1.g30701.t1 | ref NP_850164.1  protein autophagy 9 [Arabidopsis thaliana]<br>gi 19715618 gb AAL91630.1  At2g31260/F16D14.10 [Arabidopsis thaliana]<br>gi 19912149 dbj BAB88386.1  autophagy 9 [Arabidopsis thaliana]<br>gi 20466356 gb AAM20495.1  unknown protein [Arabidopsis thaliana]<br>gi 23198070 gb AAN15562.1  unknown protein [Arabidopsis thaliana]<br>gi 23463043 gb AN33191.1  At2g31260/F16D14.10 [Arabidopsis thaliana]<br>gi 330253421 gb AEC08515.1  protein autophagy 9 [Arabidopsis thaliana]<br>ref NP_180907.2  hydroxyproline-rich glycoprotein-like protein [Arabidopsis thaliana]<br>gi 166227727 sp O227399.2 V2349_ARATH RecName: Full=Uncharacterized protein At2g33490<br>gi 330253748 gb AEC08842.1  uncharacterized protein AT2G33490 [Arabidopsis thaliana]                                                                                                                                                                                                                            | 421 | 407  | 1.00E-172 | 96.7   | 76.2 | 84.6 | hypothetical protein ARALYDRAFT_491637        | gbpln | Arabidopsis lyrata   | AT4G31080.1   Symbols:   Protein of unknown function (DUF2296)   chr4:15121186-15123072 FORWARD LENGTH=409             | 421 | 409 | 1.00E-174 | 97.1  | 77.0 | 85.3 |
| Rsa1.0_01907.1.g30702.t1 | ref NP_850164.1  protein autophagy 9 [Arabidopsis thaliana]<br>gi 19715618 gb AAL91630.1  At2g31260/F16D14.10 [Arabidopsis thaliana]<br>gi 19912149 dbj BAB88386.1  autophagy 9 [Arabidopsis thaliana]<br>gi 20466356 gb AAM20495.1  unknown protein [Arabidopsis thaliana]<br>gi 23198070 gb AAN15562.1  unknown protein [Arabidopsis thaliana]<br>gi 23463043 gb AN33191.1  At2g31260/F16D14.10 [Arabidopsis thaliana]<br>gi 330253421 gb AEC08515.1  protein autophagy 9 [Arabidopsis thaliana]<br>ref NP_180907.2  hydroxyproline-rich glycoprotein-like protein [Arabidopsis thaliana]<br>gi 166227727 sp O227399.2 V2349_ARATH RecName: Full=Uncharacterized protein At2g33490<br>gi 330253748 gb AEC08842.1  uncharacterized protein AT2G33490 [Arabidopsis thaliana]                                                                                                                                                                                                                            | 644 | 642  | 0         | 99.7   | 91.6 | 96.0 | hypothetical protein CARUB_v10007189mg        | gbpln | Capsella rubella     | AT4G31120.1   Symbols: SKB1, ATPRMT5   SHK1 binding protein 1   chr4:15132185-15136568 REVERSE LENGTH=642              | 644 | 642 | 0         | 99.7  | 90.5 | 95.5 |
| Rsa1.0_01908.1.g30703.t2 | ref NP_850164.1  protein autophagy 9 [Arabidopsis thaliana]<br>gi 19715618 gb AAL91630.1  At2g31260/F16D14.10 [Arabidopsis thaliana]<br>gi 19912149 dbj BAB88386.1  autophagy 9 [Arabidopsis thaliana]<br>gi 20466356 gb AAM20495.1  unknown protein [Arabidopsis thaliana]<br>gi 23198070 gb AAN15562.1  unknown protein [Arabidopsis thaliana]<br>gi 23463043 gb AN33191.1  At2g31260/F16D14.10 [Arabidopsis thaliana]<br>gi 330253421 gb AEC08515.1  protein autophagy 9 [Arabidopsis thaliana]<br>ref NP_180907.2  hydroxyproline-rich glycoprotein-like protein [Arabidopsis thaliana]<br>gi 166227727 sp O227399.2 V2349_ARATH RecName: Full=Uncharacterized protein At2g33490<br>gi 330253748 gb AEC08842.1  uncharacterized protein AT2G33490 [Arabidopsis thaliana]                                                                                                                                                                                                                            | 285 | 866  | 1.00E-112 | 303.9  | 77.5 | 81.1 | protein autophagy 9                           | gbpln | Arabidopsis thaliana | AT2G31260.1   Symbols: APG9, ATAPG9   autophagy 9 (APG9)   chr2:13322291-13326293 REVERSE LENGTH=866                   | 285 | 866 | 1.00E-115 | 303.9 | 77.5 | 81.1 |
| Rsa1.0_01908.1.g30704.t1 | ref NP_180907.2  hydroxyproline-rich glycoprotein-like protein [Arabidopsis thaliana]<br>gi 166227727 sp O227399.2 V2349_ARATH RecName: Full=Uncharacterized protein At2g33490<br>gi 330253748 gb AEC08842.1  uncharacterized protein AT2G33490 [Arabidopsis thaliana]                                                                                                                                                                                                                                                                                                                                                                                                                                                                                                                                                                                                                                                                                                                                  | 624 | 623  | 0         | 99.8   | 82.5 | 90.1 | hydroxyproline-rich glycoprotein-like protein | gbpln | Arabidopsis thaliana | AT2G33490.1   Symbols:   hydroxyproline-rich glycoprotein family protein   chr2:14183552-14187666 FORWARD LENGTH=623   | 624 | 623 | 0         | 99.8  | 82.5 | 90.1 |



|                          |                                                                                                                                                                                                                                                                                                                                                                                                                                                                                                                                                         |     |     |           |       |      |      |                                        |       |                      |                                                                                                                                                                                                                                                                                                                                                                                                          |     |     |           |       |      |      |
|--------------------------|---------------------------------------------------------------------------------------------------------------------------------------------------------------------------------------------------------------------------------------------------------------------------------------------------------------------------------------------------------------------------------------------------------------------------------------------------------------------------------------------------------------------------------------------------------|-----|-----|-----------|-------|------|------|----------------------------------------|-------|----------------------|----------------------------------------------------------------------------------------------------------------------------------------------------------------------------------------------------------------------------------------------------------------------------------------------------------------------------------------------------------------------------------------------------------|-----|-----|-----------|-------|------|------|
| Rsa1.0_01908.1.g30705.t1 | ref[NP_180909.2] uncharacterized protein [Arabidopsis thaliana] gi 57222128 gb AAW38971.1  At2g33510 [Arabidopsis thaliana] gi 330253752 gb AEC08846.1  uncharacterized protein AT2G33510 [Arabidopsis thaliana]                                                                                                                                                                                                                                                                                                                                        | 194 | 189 | 8.00E-65  | 97.4  | 84.5 | 88.7 | uncharacterized protein                | gbpln | Arabidopsis thaliana | AT2G33510.1   Symbols:   CONTAINS InterPro DOMAIN/s: WW/Rsp5/WWP (InterPro:IPR001202); BEST Arabidopsis thaliana protein match is: unknown protein (TAIR:AT1G28070.1); Has 3898 Blast hits to 1138 proteins in 179 species: Archae - 0; Bacteria - 40; Metazoa - 2353; Fungi - 242; Plants - 298; Viruses - 92; Other Eukaryotes - 873 (source: NCBI BLINK).   chr2:14194195-14195473 FORWARD LENGTH=189 | 194 | 189 | 3.00E-67  | 97.4  | 84.5 | 88.7 |
| Rsa1.0_01908.1.g30706.t1 | #                                                                                                                                                                                                                                                                                                                                                                                                                                                                                                                                                       | #   | #   | #         | #     | #    | #    | -                                      | ----  | ----                 | AT5G08320.1   Symbols:   CONTAINS InterPro DOMAIN/s: E2F-associated phosphoprotein, C-terminal (InterPro:IPR019370); Has 149 Blast hits to 149 proteins in 78 species: Archae - 0; Bacteria - 0; Metazoa - 79; Fungi - 0; Plants - 35; Viruses - 0; Other Eukaryotes - 35 (source: NCBI BLINK).   chr5:2677153-2678603 FORWARD LENGTH=150                                                                | 88  | 150 | 2.00E-11  | 170.5 | 38.6 | 44.3 |
| Rsa1.0_01908.1.g30707.t1 | ref[NP_850213.1] gt-2-related protein [Arabidopsis thaliana] gi 17529158 gb AAL38805.1  unknown protein [Arabidopsis thaliana] gi 20465851 gb AAM20030.1  unknown protein [Arabidopsis thaliana] gi 330253757 gb AEC0885.1  gt-2-related protein [Arabidopsis thaliana]                                                                                                                                                                                                                                                                                 | 323 | 314 | 1.00E-128 | 97.2  | 80.2 | 87.0 | gt-2-related protein                   | gbpln | Arabidopsis thaliana | AT2G33550.1   Symbols:   Homeodomain-like superfamily protein   chr2:14210180-14211487 REVERSE LENGTH=314                                                                                                                                                                                                                                                                                                | 323 | 314 | 1.00E-131 | 97.2  | 80.2 | 87.0 |
| Rsa1.0_01908.1.g30708.t1 | ref[XP_002881289.1] hypothetical protein ARALYDRAFT_482302 [Arabidopsis lyrata subsp. lyrata] gi 297327128 gb EFH57548.1  hypothetical protein ARALYDRAFT_482302 [Arabidopsis lyrata subsp. lyrata]                                                                                                                                                                                                                                                                                                                                                     | 378 | 394 | 1.00E-180 | 104.2 | 82.3 | 89.9 | hypothetical protein ARALYDRAFT_482302 | gbpln | Arabidopsis lyrata   | AT2G33560.1   Symbols: BUBR1   BUB1-related (BUB1: budding uninhibited by benzymidazol 1)   chr2:14213810-14215918 REVERSE LENGTH=395                                                                                                                                                                                                                                                                    | 378 | 395 | 1.00E-175 | 104.5 | 82.8 | 90.5 |
| Rsa1.0_01908.1.g30709.t1 | #                                                                                                                                                                                                                                                                                                                                                                                                                                                                                                                                                       | #   | #   | #         | #     | #    | #    | -                                      | ----  | ----                 | #                                                                                                                                                                                                                                                                                                                                                                                                        | #   | #   | #         | #     | #    |      |
| Rsa1.0_01908.1.g30710.t1 | ref[NP_180916.1] protein kinase family protein [Arabidopsis thaliana] gi 75318032 sp Q22808.1 LYK5_ARATH RecName: Full=Protein LYK5; AltName: Full=LysM domain receptor-like kinase 5; AltName: Full=LysM-containing receptor-like kinase 5; Flags: Precursor gi 13877683 gb AAK43919.1 AF370600.1 putative protein kinase [Arabidopsis thaliana] gi 2459440 gb AAB80675.1  putative protein kinase [Arabidopsis thaliana] gi 209529791 gb ACI49790.1  At2g33580 [Arabidopsis thaliana] gi 330253761 gb AEC08855.1  protein LYK5 [Arabidopsis thaliana] | 666 | 664 | 0         | 99.7  | 79.1 | 86.8 | protein kinase family protein          | gbpln | Arabidopsis thaliana | AT2G33580.1   Symbols:   Protein kinase superfamily protein   chr2:14219848-14221842 REVERSE LENGTH=664                                                                                                                                                                                                                                                                                                  | 666 | 664 | 0         | 99.7  | 79.1 | 86.8 |
| Rsa1.0_01909.1.g30711.t1 | ref[NP_568890.2] Subtilase family protein [Arabidopsis thaliana] gi 9759217 dbj BAB09629.1  subtilisin-like serine protease [Arabidopsis thaliana] gi 30793835 gb AAP40370.1  putative subtilisin serine protease [Arabidopsis thaliana] gi 30794052 gb AAP40471.1  putative subtilisin [Arabidopsis thaliana] gi 11073921 dbj BAF01520.1  subtilisin like protein [Arabidopsis thaliana] gi 332009726 gb AED97109.1  Subtilase family protein [Arabidopsis thaliana]                                                                                   | 254 | 713 | 1.00E-58  | 280.7 | 44.5 | 47.6 | Subtilase family protein               | gbpln | Arabidopsis thaliana | AT5G58840.1   Symbols:   Subtilase family protein   chr5:23759043-23761947 FORWARD LENGTH=713                                                                                                                                                                                                                                                                                                            | 254 | 713 | 4.00E-61  | 280.7 | 44.5 | 47.6 |
| Rsa1.0_01909.1.g30712.t1 | ref[XP_002878345.1] hypothetical protein ARALYDRAFT_486540 [Arabidopsis lyrata subsp. lyrata] gi 297324183 gb EFH54604.1  hypothetical protein ARALYDRAFT_486540 [Arabidopsis lyrata subsp. lyrata]                                                                                                                                                                                                                                                                                                                                                     | 231 | 245 | 2.00E-98  | 106.1 | 79.2 | 85.7 | hypothetical protein ARALYDRAFT_486540 | gbpln | Arabidopsis lyrata   | AT3G60670.1   Symbols:   PLATZ transcription factor family protein   chr3:22424695-22426074 REVERSE LENGTH=245                                                                                                                                                                                                                                                                                           | 231 | 245 | 1.00E-100 | 106.1 | 80.1 | 86.1 |
| Rsa1.0_01909.1.g30713.t1 | #                                                                                                                                                                                                                                                                                                                                                                                                                                                                                                                                                       | #   | #   | #         | #     | #    | #    | -                                      | ----  | ----                 | #                                                                                                                                                                                                                                                                                                                                                                                                        | #   | #   | #         | #     | #    |      |
| Rsa1.0_01909.1.g30714.t1 | ref[XP_002876575.1] hypothetical protein ARALYDRAFT_907600 [Arabidopsis lyrata subsp. lyrata] gi 297322413 gb EFH52834.1  hypothetical protein ARALYDRAFT_907600 [Arabidopsis lyrata subsp. lyrata]                                                                                                                                                                                                                                                                                                                                                     | 464 | 494 | 0         | 106.5 | 80.0 | 87.7 | hypothetical protein ARALYDRAFT_907600 | gbpln | Arabidopsis lyrata   | AT3G60680.1   Symbols:   Plant protein of unknown function (DJF641)   chr3:22430246-22431745 FORWARD LENGTH=499                                                                                                                                                                                                                                                                                          | 464 | 499 | 0         | 107.5 | 78.2 | 86.2 |

|                          |                                                                                                                                                                                                                                                                                                                                                                                                                                                                                                                                                                                                                                                                                                                                                                                                                                                                                                                                                         |      |      |           |       |      |      |                                                        |       |                      |                                                                                                                                           |      |      |           |       |      |      |
|--------------------------|---------------------------------------------------------------------------------------------------------------------------------------------------------------------------------------------------------------------------------------------------------------------------------------------------------------------------------------------------------------------------------------------------------------------------------------------------------------------------------------------------------------------------------------------------------------------------------------------------------------------------------------------------------------------------------------------------------------------------------------------------------------------------------------------------------------------------------------------------------------------------------------------------------------------------------------------------------|------|------|-----------|-------|------|------|--------------------------------------------------------|-------|----------------------|-------------------------------------------------------------------------------------------------------------------------------------------|------|------|-----------|-------|------|------|
| Rsa1.0_01909.1.g30715.t1 | gb AAG51783.1 AC079679.3 reverse transcriptase, putative; 16838-20266 [Arabidopsis thaliana]                                                                                                                                                                                                                                                                                                                                                                                                                                                                                                                                                                                                                                                                                                                                                                                                                                                            | 1537 | 1142 | 0         | 74.3  | 36.6 | 48.6 | reverse transcriptase, putative; 16838-20266           | gbpln | Arabidopsis thaliana | AT4G29090.1   Symbols:   Ribonuclease H-like superfamily protein   chr4:14333528-14335255 FORWARD LENGTH=575                              | 1537 | 575  | 1.00E-98  | 37.4  | 13.1 | 20.0 |
| Rsa1.0_01909.1.g30716.t1 | db BAJ34476.1  unnamed protein product [Theellungiella halophila]                                                                                                                                                                                                                                                                                                                                                                                                                                                                                                                                                                                                                                                                                                                                                                                                                                                                                       | 172  | 172  | 9.00E-81  | 100.0 | 87.2 | 93.6 | unnamed protein product                                | ----  | ----                 | AT3G60690.1   Symbols:   SAUR-like auxin-responsive protein family   chr3:22435262-22435774 FORWARD LENGTH=170                            | 172  | 170  | 2.00E-79  | 98.8  | 82.6 | 89.5 |
| Rsa1.0_01909.1.g30717.t1 | ref XP_002876578.1  hypothetical protein ARALYDRAFT_486544 [Arabidopsis lyrata subsp. lyrata] gi 297322416 gb EFH52837.1  hypothetical protein ARALYDRAFT_486544 [Arabidopsis lyrata subsp. lyrata] ref NP_191632.2  putative pectinesterase/pectinesterase inhibitor 36 [Arabidopsis thaliana] gi 332278140 sp Q84R10.2 PME36_ARATH RecName: Full=Probable pectinesterase/pectinesterase inhibitor 36; Includes: RecName: Full=Pectinesterase inhibitor 36; AltName: Full=Pectin methylsterase inhibitor 36; Includes: RecName: Full=Pectinesterase 36; Short=PE 36; AltName: Full=Pectin methylsterase 36; Short=AtPME36; Flags: Precursor gi 332646580 gb AAE80101.1  putative pectinesterase/pectinesterase inhibitor 36 [Arabidopsis thaliana] ref XP_002883376.1  hypothetical protein ARALYDRAFT_898758 [Arabidopsis lyrata subsp. lyrata] gi 297329216 gb EFH59635.1  hypothetical protein ARALYDRAFT_898758 [Arabidopsis lyrata subsp. lyrata] | 278  | 287  | 1.00E-132 | 103.2 | 84.9 | 87.1 | hypothetical protein ARALYDRAFT_486544                 | gbpln | Arabidopsis lyrata   | AT3G60720.1   Symbols:   PDLP8   plasmodesmata-located protein 8   chr3:22442035-22443608 FORWARD LENGTH=279                              | 278  | 279  | 1.00E-133 | 100.4 | 85.6 | 87.8 |
| Rsa1.0_01909.1.g30718.t1 | gb AAF27433.1 AF206324.1 putative DNA binding protein [Arabidopsis thaliana] gi 7767425 gb AAF69124.1 AF204059.1 CXC domain protein TSO1 [Arabidopsis thaliana] ref XP_002883376.1  hypothetical protein ARALYDRAFT_898758 [Arabidopsis lyrata subsp. lyrata] gi 297329216 gb EFH59635.1  hypothetical protein ARALYDRAFT_898758 [Arabidopsis lyrata subsp. lyrata] gb AAF27433.1 AF206324.1 putative DNA binding protein [Arabidopsis thaliana] gi 7767425 gb AAF69124.1 AF204059.1 CXC domain protein TSO1 [Arabidopsis thaliana]                                                                                                                                                                                                                                                                                                                                                                                                                     | 523  | 519  | 0         | 99.2  | 83.6 | 89.5 | putative pectinesterase/pectinesterase inhibitor 36    | gbpln | Arabidopsis thaliana | AT3G60730.1   Symbols:   Plant invertase/pectin methylsterase inhibitor superfamily   chr3:22444855-22447226 FORWARD LENGTH=519           | 523  | 519  | 0         | 99.2  | 83.6 | 89.5 |
| Rsa1.0_01910.1.g30719.t1 | gb AAF27433.1 AF206324.1 putative DNA binding protein [Arabidopsis thaliana] gi 7767425 gb AAF69124.1 AF204059.1 CXC domain protein TSO1 [Arabidopsis thaliana] ref XP_002883376.1  hypothetical protein ARALYDRAFT_898758 [Arabidopsis lyrata subsp. lyrata] gi 297329216 gb EFH59635.1  hypothetical protein ARALYDRAFT_898758 [Arabidopsis lyrata subsp. lyrata]                                                                                                                                                                                                                                                                                                                                                                                                                                                                                                                                                                                     | 580  | 623  | 0         | 107.4 | 64.1 | 77.4 | hypothetical protein ARALYDRAFT_898758                 | gbpln | Arabidopsis lyrata   | AT3G22760.1   Symbols:   SOL1   Tesmin/TSO1-like CXC domain-containing protein   chr3:8044622-8047381 FORWARD LENGTH=609                  | 580  | 609  | 0         | 105.0 | 62.2 | 76.6 |
| Rsa1.0_01910.1.g30720.t1 | gb AAF27433.1 AF206324.1 putative DNA binding protein [Arabidopsis thaliana] gi 7767425 gb AAF69124.1 AF204059.1 CXC domain protein TSO1 [Arabidopsis thaliana] ref XP_002883376.1  hypothetical protein ARALYDRAFT_898758 [Arabidopsis lyrata subsp. lyrata] gi 297329216 gb EFH59635.1  hypothetical protein ARALYDRAFT_898758 [Arabidopsis lyrata subsp. lyrata]                                                                                                                                                                                                                                                                                                                                                                                                                                                                                                                                                                                     | 684  | 695  | 0         | 101.6 | 71.9 | 81.1 | putative DNA binding protein                           | gbpln | Arabidopsis thaliana | AT3G22780.1   Symbols:   TSO1, ATTSO1   Tesmin/TSO1-like CXC domain-containing protein   chr3:80448927-8052058 FORWARD LENGTH=695         | 684  | 695  | 0         | 101.6 | 71.9 | 81.1 |
| Rsa1.0_01910.1.g30721.t1 | gb AAF18538.1 AC006551.24 Very similar to retrotransposon reverse transcriptase [Arabidopsis thaliana] ref NP_188918.2  kinase interacting KIP1-like protein [Arabidopsis thaliana] gi 9279697 db BAB01254.1  centromere protein [Arabidopsis thaliana] gi 332643156 gb AAE76677.1  kinase interacting KIP1-like protein [Arabidopsis thaliana]                                                                                                                                                                                                                                                                                                                                                                                                                                                                                                                                                                                                         | 578  | 1231 | 1.00E-155 | 213.0 | 48.8 | 66.4 | Very similar to retrotransposon reverse transcriptase  | gbpln | Arabidopsis thaliana | AT4G29090.1   Symbols:   Ribonuclease H-like superfamily protein   chr4:14333528-14335255 FORWARD LENGTH=575                              | 578  | 575  | 7.00E-84  | 99.5  | 27.5 | 45.2 |
| Rsa1.0_01910.1.g30722.t1 | ref NP_188918.2  kinase interacting KIP1-like protein [Arabidopsis thaliana] gi 9279697 db BAB01254.1  centromere protein [Arabidopsis thaliana] gi 332643156 gb AAE76677.1  kinase interacting KIP1-like protein [Arabidopsis thaliana]                                                                                                                                                                                                                                                                                                                                                                                                                                                                                                                                                                                                                                                                                                                | 1769 | 1728 | 0         | 97.7  | 81.7 | 89.9 | kinase interacting KIP1-like protein                   | gbpln | Arabidopsis thaliana | AT3G22790.1   Symbols:   Kinase interacting (KIP1-like) family protein   chr3:8052446-8057888 REVERSE LENGTH=1728                         | 1769 | 1728 | 0         | 97.7  | 81.7 | 89.9 |
| Rsa1.0_01911.1.g30723.t1 | gb EOA14377.1  hypothetical protein CARUB_v10027563mg [Capsella rubella]                                                                                                                                                                                                                                                                                                                                                                                                                                                                                                                                                                                                                                                                                                                                                                                                                                                                                | 293  | 320  | 5.00E-97  | 109.2 | 61.8 | 76.8 | hypothetical protein CARUB_v10027563mg                 | gbpln | Capsella rubella     | AT5G56080.1   Symbols:   ATNAS2, NAS2   nicotianamine synthase 2   chr5:22711402-22712364 REVERSE LENGTH=320                              | 293  | 320  | 3.00E-99  | 109.2 | 61.8 | 77.1 |
| Rsa1.0_01911.1.g30724.t1 | gb EOA34991.1  hypothetical protein CARUB_v10020083mg [Capsella rubella]                                                                                                                                                                                                                                                                                                                                                                                                                                                                                                                                                                                                                                                                                                                                                                                                                                                                                | 295  | 556  | 1.00E-116 | 188.5 | 74.2 | 84.1 | hypothetical protein CARUB_v10020083mg                 | gbpln | Capsella rubella     | AT1G72140.1   Symbols:   Major facilitator superfamily protein   chr1:27141877-27144346 FORWARD LENGTH=555                                | 295  | 555  | 1.00E-113 | 188.1 | 74.2 | 81.4 |
| Rsa1.0_01911.1.g30725.t1 | ref XP_002887417.1  proton-dependent oligopeptide transport family protein [Arabidopsis lyrata subsp. lyrata] gi 297333258 gb EFH63676.1  proton-dependent oligopeptide transport family protein [Arabidopsis lyrata subsp. lyrata]                                                                                                                                                                                                                                                                                                                                                                                                                                                                                                                                                                                                                                                                                                                     | 217  | 555  | 1.00E-92  | 255.8 | 76.0 | 85.7 | proton-dependent oligopeptide transport family protein | gbpln | Arabidopsis lyrata   | AT1G72140.1   Symbols:   Major facilitator superfamily protein   chr1:27141877-27144346 FORWARD LENGTH=555                                | 217  | 555  | 1.00E-93  | 255.8 | 74.7 | 85.3 |
| Rsa1.0_01911.1.g30726.t1 | gb AAG51783.1 AC079679.3 reverse transcriptase, putative; 16838-20266 [Arabidopsis thaliana]                                                                                                                                                                                                                                                                                                                                                                                                                                                                                                                                                                                                                                                                                                                                                                                                                                                            | 164  | 1142 | 4.00E-21  | 696.3 | 39.0 | 56.7 | reverse transcriptase, putative; 16838-20266           | gbpln | Arabidopsis thaliana | AT2G34320.1   Symbols:   Polynucleotidyl transferase, ribonuclease H-like superfamily protein   chr2:14484959-14485837 FORWARD LENGTH=292 | 164  | 292  | 5.00E-11  | 178.0 | 27.4 | 46.3 |
| Rsa1.0_01911.1.g30727.t1 | #                                                                                                                                                                                                                                                                                                                                                                                                                                                                                                                                                                                                                                                                                                                                                                                                                                                                                                                                                       | #    | #    | #         | #     | #    | -    | ----                                                   | ----  | ----                 | #                                                                                                                                         | #    | #    | #         | #     | #    | #    |
| Rsa1.0_01912.1.g30728.t2 | gb ABD64958.1  ethylene responsive element binding factor -related [Brassica oleracea]                                                                                                                                                                                                                                                                                                                                                                                                                                                                                                                                                                                                                                                                                                                                                                                                                                                                  | 1009 | 954  | 1.00E-114 | 94.5  | 24.9 | 29.6 | ethylene responsive element binding factor -related    | gbpln | Brassica oleracea    | #                                                                                                                                         | #    | #    | #         | #     | #    | #    |
| Rsa1.0_01912.1.g30729.t1 | gb AAD15474.1  putative retroelement pol polyprotein [Arabidopsis thaliana]                                                                                                                                                                                                                                                                                                                                                                                                                                                                                                                                                                                                                                                                                                                                                                                                                                                                             | 639  | 1466 | 2.00E-53  | 229.4 | 21.3 | 34.7 | putative retroelement pol polyprotein                  | gbpln | Arabidopsis thaliana | #                                                                                                                                         | #    | #    | #         | #     | #    | #    |
| Rsa1.0_01912.1.g30730.t1 | #                                                                                                                                                                                                                                                                                                                                                                                                                                                                                                                                                                                                                                                                                                                                                                                                                                                                                                                                                       | #    | #    | #         | #     | #    | -    | ----                                                   | ----  | ----                 | #                                                                                                                                         | #    | #    | #         | #     | #    | #    |
| Rsa1.0_01912.1.g30731.t1 | #                                                                                                                                                                                                                                                                                                                                                                                                                                                                                                                                                                                                                                                                                                                                                                                                                                                                                                                                                       | #    | #    | #         | #     | #    | -    | ----                                                   | ----  | ----                 | #                                                                                                                                         | #    | #    | #         | #     | #    | #    |
| Rsa1.0_01912.1.g30732.t1 | #                                                                                                                                                                                                                                                                                                                                                                                                                                                                                                                                                                                                                                                                                                                                                                                                                                                                                                                                                       | #    | #    | #         | #     | #    | -    | ----                                                   | ----  | ----                 | #                                                                                                                                         | #    | #    | #         | #     | #    | #    |

|                           |                                                                                                                                                                                                                                                                                                                                       |      |      |          |       |      |      |                                              |       |                      |                                                                                                                                                                                                                                                                                                                                                                                                                                                                                                                                                                                                                          |      |      |          |       |      |      |
|---------------------------|---------------------------------------------------------------------------------------------------------------------------------------------------------------------------------------------------------------------------------------------------------------------------------------------------------------------------------------|------|------|----------|-------|------|------|----------------------------------------------|-------|----------------------|--------------------------------------------------------------------------------------------------------------------------------------------------------------------------------------------------------------------------------------------------------------------------------------------------------------------------------------------------------------------------------------------------------------------------------------------------------------------------------------------------------------------------------------------------------------------------------------------------------------------------|------|------|----------|-------|------|------|
| Rsa1.0_01912.1.g30733.t1  | #                                                                                                                                                                                                                                                                                                                                     | #    | #    | #        | #     | #    | #    | #                                            | -     | ----                 | ----                                                                                                                                                                                                                                                                                                                                                                                                                                                                                                                                                                                                                     | #    | #    | #        | #     | #    | #    |
| Rsa1.0_01912.1.g30734.t1  | gb AAD30632.1 AC006085_5<br>Hypothetical protein [Arabidopsis thaliana]                                                                                                                                                                                                                                                               | 520  | 1295 | 7.00E-35 | 249.0 | 16.5 | 23.7 | Hypothetical protein                         | gbpln | Arabidopsis thaliana | #                                                                                                                                                                                                                                                                                                                                                                                                                                                                                                                                                                                                                        | #    | #    | #        | #     | #    | #    |
| Rsa1.0_01912.1.g30735.t1  | #                                                                                                                                                                                                                                                                                                                                     | #    | #    | #        | #     | #    | #    | -                                            | ----  | ----                 | #                                                                                                                                                                                                                                                                                                                                                                                                                                                                                                                                                                                                                        | #    | #    | #        | #     | #    | #    |
| Rsa1.0_01912.1.g30736.t1  | dbj BAB02259.1 retroelement pol polyprotein-like [Arabidopsis thaliana]                                                                                                                                                                                                                                                               | 840  | 777  | 2.00E-32 | 92.5  | 13.2 | 19.0 | retroelement pol polyprotein-like            | gbpln | Arabidopsis thaliana | #                                                                                                                                                                                                                                                                                                                                                                                                                                                                                                                                                                                                                        | #    | #    | #        | #     | #    | #    |
| Rsa1.0_01912.1.g30737.t1  | #                                                                                                                                                                                                                                                                                                                                     | #    | #    | #        | #     | #    | #    | -                                            | ----  | ----                 | #                                                                                                                                                                                                                                                                                                                                                                                                                                                                                                                                                                                                                        | #    | #    | #        | #     | #    | #    |
| Rsa1.0_01912.1.g30738.t1  | gb AAC26241.1 F9D12.15 gene product [Arabidopsis thaliana]                                                                                                                                                                                                                                                                            | 191  | 850  | 5.00E-29 | 445.0 | 40.8 | 64.9 | F9D12.15 gene product                        | gbpln | Arabidopsis thaliana | #                                                                                                                                                                                                                                                                                                                                                                                                                                                                                                                                                                                                                        | #    | #    | #        | #     | #    | #    |
| Rsa1.0_01913.1.g30739.t1  | #                                                                                                                                                                                                                                                                                                                                     | #    | #    | #        | #     | #    | #    | -                                            | ----  | ----                 | #                                                                                                                                                                                                                                                                                                                                                                                                                                                                                                                                                                                                                        | #    | #    | #        | #     | #    | #    |
| Rsa1.0_01913.1.g30740.t1  | ref XP_002872492.1  ATSPS4F [Arabidopsis lyrata subsp. lyrata] gi 297318329 gb EFH48751.1  ATSPS4F [Arabidopsis lyrata subsp. lyrata]                                                                                                                                                                                                 | 1015 | 1051 | 0        | 103.5 | 92.1 | 95.2 | ATSPS4F                                      | gbpln | Arabidopsis lyrata   | AT4G10120.2   Symbols: ATSPS4F   Sucrose-phosphate synthase family protein   chr4:6320953-6319785 FORWARD LENGTH=1050                                                                                                                                                                                                                                                                                                                                                                                                                                                                                                    | 1015 | 1050 | 0        | 103.4 | 91.4 | 95.3 |
| Rsa1.0_01913.1.g30741.t1  | ref XP_002874611.1  hypothetical protein ARALYDRAFT_327188 [Arabidopsis lyrata subsp. lyrata] gi 297320448 gb EFH50870.1  hypothetical protein ARALYDRAFT_327188 [Arabidopsis lyrata subsp. lyrata]                                                                                                                                   | 183  | 180  | 9.00E-73 | 98.4  | 78.1 | 87.4 | hypothetical protein ARALYDRAFT_327188       | gbpln | Arabidopsis lyrata   | AT4G10130.1   Symbols:   DNAJ heat shock N-terminal domain-containing protein   chr4:6320959-6321483 REVERSE LENGTH=174                                                                                                                                                                                                                                                                                                                                                                                                                                                                                                  | 183  | 174  | 2.00E-74 | 95.1  | 78.1 | 87.4 |
| Rsa1.0_01913.1.g30742.t1  | gb EOA21642.1  hypothetical protein CARUB_v10002060mg [Capsella rubella]                                                                                                                                                                                                                                                              | 185  | 184  | 4.00E-88 | 99.5  | 87.0 | 93.5 | hypothetical protein CARUB_v10002060mg       | gbpln | Capsella rubella     | AT4G10140.1   Symbols:   unknown protein; FUNCTIONS IN: molecular function unknown; INVOLVED IN: N-terminal protein myristoylation; EXPRESSED IN: 24 plant structures; EXPRESSED DURING: 15 growth stages; CONTAINS InterPro DOMAIN/s: Protein of unknown function DUF2062 (InterPro:IPR018639); BEST Arabidopsis thaliana protein match is: unknown protein (TAIR:AT1G33490.1); Has 30201 Blast hits to 17322 proteins in 780 species: Archae - 12; Bacteria - 1396; Metazoa - 17338; Fungi - 3422; Plants - 5037; Viruses - 0; Other Eukaryotes - 2996 (source: NCBI BLink).   chr4:6322538-6324421 FORWARD LENGTH=183 | 185  | 183  | 1.00E-89 | 98.9  | 87.6 | 91.4 |
| Rsa1.0_01913.1.g30743.t1  | gb AAG51783.1 AC079679.3 reverse transcriptase, putative; 16838-20266 [Arabidopsis thaliana]                                                                                                                                                                                                                                          | 301  | 1142 | 6.00E-76 | 379.4 | 47.5 | 61.1 | reverse transcriptase, putative; 16838-20266 | gbpln | Arabidopsis thaliana | AT4G29090.1   Symbols:   Ribonuclease H-like superfamily protein   chr4:14333528-14335255 FORWARD LENGTH=575                                                                                                                                                                                                                                                                                                                                                                                                                                                                                                             | 301  | 575  | 2.00E-33 | 191.0 | 30.6 | 49.2 |
| Rsa1.0_01913.1.g30744.t1  | ref XP_002872495.1  zinc finger family protein [Arabidopsis lyrata subsp. lyrata] gi 297318332 gb EFH48754.1  zinc finger family protein [Arabidopsis lyrata subsp. lyrata]                                                                                                                                                           | 236  | 237  | 1.00E-92 | 100.4 | 72.9 | 82.2 | zinc finger family protein                   | gbpln | Arabidopsis lyrata   | AT4G10150.1   Symbols:   RING/U-box superfamily protein   chr4:6328136-6329558 FORWARD LENGTH=236                                                                                                                                                                                                                                                                                                                                                                                                                                                                                                                        | 236  | 236  | 1.00E-94 | 100.0 | 70.8 | 80.9 |
| Rsa1.0_01914.1.g30745.t1  | ref NP_188217.4  mismatched DNA binding / ATP binding protein [Arabidopsis thaliana] gi 332642232 gb AEE75753.1  mismatched DNA binding / ATP binding protein [Arabidopsis thaliana]                                                                                                                                                  | 499  | 490  | 2.00E-76 | 98.2  | 31.7 | 42.5 | mismatched DNA binding / ATP binding protein | gbpln | Arabidopsis thaliana | AT3G15960.1   Symbols:   mismatched DNA binding/ATP binding   chr3:5404000-5406461 REVERSE LENGTH=490                                                                                                                                                                                                                                                                                                                                                                                                                                                                                                                    | 499  | 490  | 4.00E-79 | 98.2  | 31.7 | 42.5 |
| Rsa1.0_01914.1.g30746.t12 | ref XP_002885121.1  hypothetical protein ARALYDRAFT_479052 [Arabidopsis lyrata subsp. lyrata] gi 297330961 gb EFH61380.1  hypothetical protein ARALYDRAFT_479052 [Arabidopsis lyrata subsp. lyrata]                                                                                                                                   | 978  | 918  | 0        | 93.9  | 88.1 | 91.3 | hypothetical protein ARALYDRAFT_479052       | gbpln | Arabidopsis lyrata   | AT3G15980.3   Symbols:   Coatomer, beta' subunit   chr3:5412015-5418313 REVERSE LENGTH=918                                                                                                                                                                                                                                                                                                                                                                                                                                                                                                                               | 978  | 918  | 0        | 93.9  | 88.0 | 91.5 |
| Rsa1.0_01914.1.g30747.t1  | #                                                                                                                                                                                                                                                                                                                                     | #    | #    | #        | #     | #    | #    | -                                            | ----  | ----                 | #                                                                                                                                                                                                                                                                                                                                                                                                                                                                                                                                                                                                                        | #    | #    | #        | #     | #    | #    |
| Rsa1.0_01914.1.g30748.t1  | #                                                                                                                                                                                                                                                                                                                                     | #    | #    | #        | #     | #    | #    | -                                            | ----  | ----                 | #                                                                                                                                                                                                                                                                                                                                                                                                                                                                                                                                                                                                                        | #    | #    | #        | #     | #    | #    |
| Rsa1.0_01914.1.g30749.t1  | ref XP_002882970.1  SULTR3.4 [Arabidopsis lyrata subsp. lyrata] gi 297328810 gb EFH59229.1  SULTR3.4 [Arabidopsis lyrata subsp. lyrata]                                                                                                                                                                                               | 660  | 655  | 0        | 99.2  | 92.1 | 96.4 | SULTR3.4                                     | gbpln | Arabidopsis lyrata   | AT3G15990.1   Symbols:   SULTR3.4   sulfate transporter 3:4   chr3:5427081-5430679 FORWARD LENGTH=653                                                                                                                                                                                                                                                                                                                                                                                                                                                                                                                    | 660  | 653  | 0        | 98.9  | 92.0 | 96.4 |
| Rsa1.0_01914.1.g30750.t1  | ref NP_188221.2  MAR-binding filament-like protein 1 [Arabidopsis thaliana] gi 83304464 sp Q9LW85.2 MFP1_ARATH RecName: Full=MAR-binding filament-like protein 1 gi 30794108 gb AAP40496.1  putative myosin heavy chain [Arabidopsis thaliana] gi 332642240 gb AEE75761.1  MAR-binding filament-like protein 1 [Arabidopsis thaliana] | 633  | 726  | 0        | 114.7 | 71.2 | 84.7 | MAR-binding filament-like protein 1          | gbpln | Arabidopsis thaliana | AT3G16000.1   Symbols:   MFP1   MAR binding filament-like protein 1   chr3:5431041-5433613 REVERSE LENGTH=726                                                                                                                                                                                                                                                                                                                                                                                                                                                                                                            | 633  | 726  | 0        | 114.7 | 71.2 | 84.7 |
| Rsa1.0_01915.1.g30751.t1  | #                                                                                                                                                                                                                                                                                                                                     | #    | #    | #        | #     | #    | #    | -                                            | ----  | ----                 | #                                                                                                                                                                                                                                                                                                                                                                                                                                                                                                                                                                                                                        | #    | #    | #        | #     | #    | #    |

|                           |                                                                                                                                                                                                                                                                                                                                                                                                                                                                                                                                                                                           |      |      |           |       |      |      |                                                               |       |                      |                                                                                                                                                                                                                                                                                                                                                                            |      |     |           |       |      |      |
|---------------------------|-------------------------------------------------------------------------------------------------------------------------------------------------------------------------------------------------------------------------------------------------------------------------------------------------------------------------------------------------------------------------------------------------------------------------------------------------------------------------------------------------------------------------------------------------------------------------------------------|------|------|-----------|-------|------|------|---------------------------------------------------------------|-------|----------------------|----------------------------------------------------------------------------------------------------------------------------------------------------------------------------------------------------------------------------------------------------------------------------------------------------------------------------------------------------------------------------|------|-----|-----------|-------|------|------|
| Rsa1.0_01915.1.g30752.t1  | gb EOA32275.1  hypothetical protein CARUB_v10015536mg [Capsella rubella]                                                                                                                                                                                                                                                                                                                                                                                                                                                                                                                  | 303  | 483  | 9.00E-20  | 159.4 | 19.1 | 25.1 | hypothetical protein CARUB_v10015536mg                        | gbpln | Capsella rubella     | #                                                                                                                                                                                                                                                                                                                                                                          | #    | #   | #         | #     | #    | #    |
| Rsa1.0_01915.1.g30753.t1  | #                                                                                                                                                                                                                                                                                                                                                                                                                                                                                                                                                                                         | #    | #    | #         | #     | #    | #    | -                                                             | ----  | ----                 | #                                                                                                                                                                                                                                                                                                                                                                          | #    | #   | #         | #     | #    | #    |
| Rsa1.0_01915.1.g30754.t1  | #                                                                                                                                                                                                                                                                                                                                                                                                                                                                                                                                                                                         | #    | #    | #         | #     | #    | #    | -                                                             | ----  | ----                 | #                                                                                                                                                                                                                                                                                                                                                                          | #    | #   | #         | #     | #    | #    |
| Rsa1.0_01915.1.g30755.t1  | gb AAF79618.1 AC027665_19 F5M15.26 [Arabidopsis thaliana]                                                                                                                                                                                                                                                                                                                                                                                                                                                                                                                                 | 1115 | 1838 | 0         | 164.8 | 56.8 | 71.8 | F5M15.26                                                      | gbpln | Arabidopsis thaliana | ATMG00860.1   Symbols: ORF158   DNA/RNA polymerases superfamily protein   chrM:235916-236392 FORWARD LENGTH=158                                                                                                                                                                                                                                                            | 1115 | 158 | 4.00E-11  | 14.2  | 3.3  | 5.7  |
| Rsa1.0_01915.1.g30756.t10 | gb AAG51783.1 AC079679.3 reverse transcriptase, putative; 16838-20266 [Arabidopsis thaliana]                                                                                                                                                                                                                                                                                                                                                                                                                                                                                              | 623  | 1142 | 2.00E-55  | 183.3 | 21.5 | 29.7 | reverse transcriptase, putative; 16838-20266                  | gbpln | Arabidopsis thaliana | AT4G29090.1   Symbols:   Ribonuclease H-like superfamily protein   chr4:14333528-14335255 FORWARD LENGTH=575                                                                                                                                                                                                                                                               | 623  | 575 | 1.00E-17  | 92.3  | 7.9  | 11.9 |
| Rsa1.0_01916.1.g30757.t1  | gb EOA40077.1  hypothetical protein CARUB_v10008773mg [Capsella rubella]                                                                                                                                                                                                                                                                                                                                                                                                                                                                                                                  | 440  | 546  | 3.00E-95  | 124.1 | 56.1 | 68.2 | hypothetical protein CARUB_v10008773mg                        | gbpln | Capsella rubella     | AT1G24160.2   Symbols:   unknown protein; FUNCTIONS IN: molecular_function unknown; INVOLVED IN: biological_process unknown; LOCATED IN: cellular_component unknown; EXPRESSED IN: guard cell; BEST Arabidopsis thaliana protein match is: unknown protein (TAIR:AT1G70100.3).   chr1:8553669-8555830 REVERSE LENGTH=540                                                   | 440  | 540 | 2.00E-62  | 122.7 | 31.1 | 35.7 |
| Rsa1.0_01916.1.g30758.t1  | #                                                                                                                                                                                                                                                                                                                                                                                                                                                                                                                                                                                         | #    | #    | #         | #     | #    | #    | -                                                             | ----  | ----                 | #                                                                                                                                                                                                                                                                                                                                                                          | #    | #   | #         | #     | #    | #    |
| Rsa1.0_01916.1.g30759.t1  | #                                                                                                                                                                                                                                                                                                                                                                                                                                                                                                                                                                                         | #    | #    | #         | #     | #    | #    | -                                                             | ----  | ----                 | #                                                                                                                                                                                                                                                                                                                                                                          | #    | #   | #         | #     | #    | #    |
| Rsa1.0_01916.1.g30760.t1  | ref XP_002886063.1  predicted protein [Arabidopsis lyrata subsp. lyrata] gi 297331903 gb EFH62322.1  predicted protein [Arabidopsis lyrata subsp. lyrata]                                                                                                                                                                                                                                                                                                                                                                                                                                 | 138  | 158  | 3.00E-22  | 114.5 | 50.0 | 61.6 | predicted protein                                             | gbpln | Arabidopsis lyrata   | AT1G24145.1   Symbols:   unknown protein; FUNCTIONS IN: molecular_function unknown; INVOLVED IN: biological_process unknown; LOCATED IN: endomembrane system; Has 3 Blast hits to 3 proteins in 1 species: Archae - 0; Bacteria - 0; Metazoa - 0; Fungi - 0; Plants - 3; Viruses - 0; Other Eukaryotes - 0 (source: NCBI BLink).   chr1:8541040-8541616 FORWARD LENGTH=128 | 83   | 128 | 3.00E-11  | 154.2 | 45.8 | 49.4 |
| Rsa1.0_01916.1.g30761.t1  | #                                                                                                                                                                                                                                                                                                                                                                                                                                                                                                                                                                                         | #    | #    | #         | #     | #    | #    | -                                                             | ----  | ----                 | #                                                                                                                                                                                                                                                                                                                                                                          | #    | #   | #         | #     | #    | #    |
| Rsa1.0_01916.1.g30762.t1  | #                                                                                                                                                                                                                                                                                                                                                                                                                                                                                                                                                                                         | #    | #    | #         | #     | #    | #    | -                                                             | ----  | ----                 | #                                                                                                                                                                                                                                                                                                                                                                          | #    | #   | #         | #     | #    | #    |
| Rsa1.0_01916.1.g30763.t1  | gb ABD64968.1  hypothetical protein 25.t00005 [Brassica oleracea]                                                                                                                                                                                                                                                                                                                                                                                                                                                                                                                         | 279  | 299  | 1.00E-74  | 107.2 | 55.9 | 68.5 | hypothetical protein 25.t00005                                | gbpln | Brassica oleracea    | AT5G47590.1   Symbols:   Heat shock protein HSP20/alpha crystallin family   chr5:19297945-19299099 REVERSE LENGTH=264                                                                                                                                                                                                                                                      | 279  | 264 | 2.00E-72  | 94.6  | 51.6 | 66.7 |
| Rsa1.0_01916.1.g30764.t1  | ref NP_173811.1  polyketide cyclase/dehydrase and lipid transport-like protein [Arabidopsis thaliana] gi 88953601 sp P0C0B0.1 Y1400_ARATH RecName: Full=Uncharacterized protein At1g24000 gi 332192343 gb AEE30464.1  uncharacterized protein AT1G24000 [Arabidopsis thaliana]                                                                                                                                                                                                                                                                                                            | 122  | 122  | 3.00E-17  | 100.0 | 41.8 | 58.2 | polyketide cyclase/dehydrase and lipid transport-like protein | gbpln | Arabidopsis thaliana | AT1G24000.1   Symbols:   Polyketide cyclase/dehydrase and lipid transport superfamily protein   chr1:8496057-8496526 REVERSE LENGTH=122                                                                                                                                                                                                                                    | 122  | 122 | 5.00E-20  | 100.0 | 41.8 | 58.2 |
| Rsa1.0_01917.1.g30765.t1  | #                                                                                                                                                                                                                                                                                                                                                                                                                                                                                                                                                                                         | #    | #    | #         | #     | #    | #    | -                                                             | ----  | ----                 | #                                                                                                                                                                                                                                                                                                                                                                          | #    | #   | #         | #     | #    | #    |
| Rsa1.0_01917.1.g30766.t1  | ref XP_002881123.1  hypothetical protein ARALYDRAFT_902059 [Arabidopsis lyrata subsp. lyrata] gi 297326962 gb EFH57382.1  hypothetical protein ARALYDRAFT_902059 [Arabidopsis lyrata subsp. lyrata]                                                                                                                                                                                                                                                                                                                                                                                       | 281  | 262  | 1.00E-128 | 93.2  | 81.5 | 86.8 | hypothetical protein ARALYDRAFT_902059                        | gbpln | Arabidopsis lyrata   | AT2G30670.1   Symbols:   NAD(P)-binding Rossmann-fold superfamily protein   chr2:13068913-13070904 REVERSE LENGTH=262                                                                                                                                                                                                                                                      | 281  | 262 | 1.00E-128 | 93.2  | 80.4 | 85.8 |
| Rsa1.0_01917.1.g30767.t1  | ref NP_201395.1  3-hydroxyisobutyryl-CoA hydrolase 1 [Arabidopsis thaliana] gi 75263928 sp Q9LJK1.1 HIBC1_ARATH RecName: Full=3-hydroxyisobutyryl-CoA hydrolase 1; AltName: Full=CoA-thioester hydrolase CHY1 gi 8572760 gb AAF7193.1 AF276301.1 CoA-thioester hydrolase CHY1 [Arabidopsis thaliana] gi 9759578 db BAB11141.1  3-hydroxyisobutyryl-coenzyme A hydrolase [Arabidopsis thaliana] gi 24030391 gb AAN41356.1  putative 3-hydroxyisobutyryl-coenzyme A hydrolase [Arabidopsis thaliana] gi 332010745 gb AED98128.1  3-hydroxyisobutyryl-CoA hydrolase 1 [Arabidopsis thaliana] | 394  | 378  | 1.00E-165 | 95.9  | 76.4 | 83.0 | 3-hydroxyisobutyryl-CoA hydrolase 1                           | gbpln | Arabidopsis thaliana | AT5G65940.1   Symbols: CHY1   beta-hydroxyisobutyryl-CoA hydrolase 1   chr5:26376830-26379161 REVERSE LENGTH=378                                                                                                                                                                                                                                                           | 394  | 378 | 1.00E-168 | 95.9  | 76.4 | 83.0 |

|                          |                                                                                                                                                                                                                                                                                                                                                                                                                                                                                                                                                                                                                    |      |      |           |       |      |      |                                                        |       |                      |                                                                                                                                                                                                                                                                                                                                                                                                                                                                                                            |      |     |           |       |      |      |
|--------------------------|--------------------------------------------------------------------------------------------------------------------------------------------------------------------------------------------------------------------------------------------------------------------------------------------------------------------------------------------------------------------------------------------------------------------------------------------------------------------------------------------------------------------------------------------------------------------------------------------------------------------|------|------|-----------|-------|------|------|--------------------------------------------------------|-------|----------------------|------------------------------------------------------------------------------------------------------------------------------------------------------------------------------------------------------------------------------------------------------------------------------------------------------------------------------------------------------------------------------------------------------------------------------------------------------------------------------------------------------------|------|-----|-----------|-------|------|------|
| Rsa1.0_01917.1.g30768.t1 | emb[CAB39638.1] RNA-directed DNA polymerase-like protein [Arabidopsis thaliana] gi 7267666 emb[CAB78094.1] RNA-directed DNA polymerase-like protein [Arabidopsis thaliana]                                                                                                                                                                                                                                                                                                                                                                                                                                         | 2229 | 1274 | 0         | 57.2  | 27.9 | 37.7 | RNA-directed DNA polymerase-like protein               | gbpln | Arabidopsis thaliana | AT5G5940.1   Symbols: CHY1   beta-hydroxyisobutyryl-CoA hydrolase 1   chr5:26376830-26379161 REVERSE LENGTH=378                                                                                                                                                                                                                                                                                                                                                                                            | 2229 | 378 | 1.00E-164 | 17.0  | 12.8 | 14.3 |
| Rsa1.0_01917.1.g30769.t1 | #                                                                                                                                                                                                                                                                                                                                                                                                                                                                                                                                                                                                                  | #    | #    | #         | #     | #    | #    | -                                                      | ----  | ----                 | #                                                                                                                                                                                                                                                                                                                                                                                                                                                                                                          | #    | #   | #         | #     | #    |      |
| Rsa1.0_01917.1.g30770.t1 | gb[EOA28988.1] hypothetical protein CARUB_v10025247mg [Capsella rubella]                                                                                                                                                                                                                                                                                                                                                                                                                                                                                                                                           | 888  | 876  | 0         | 98.6  | 65.5 | 76.8 | hypothetical protein CARUB_v10025247mg                 | gbpln | Capsella rubella     | AT3G25010.1   Symbols: AtRLP41, RLP41   receptor like protein 41   chr3:9110103-9112748 REVERSE LENGTH=881                                                                                                                                                                                                                                                                                                                                                                                                 | 888  | 881 | 0         | 99.2  | 64.8 | 76.0 |
| Rsa1.0_01918.1.g30771.t1 | emb[CAN82844.1] hypothetical protein VITISV_005761 [Vitis vinifera]                                                                                                                                                                                                                                                                                                                                                                                                                                                                                                                                                | 1211 | 896  | 2.00E-90  | 74.0  | 19.5 | 28.2 | hypothetical protein VITISV_005761                     | gbpln | Vitis vinifera       | #                                                                                                                                                                                                                                                                                                                                                                                                                                                                                                          | #    | #   | #         | #     | #    |      |
| Rsa1.0_01918.1.g30772.t1 | emb[CAN83791.1] hypothetical protein VITISV_031681 [Vitis vinifera]                                                                                                                                                                                                                                                                                                                                                                                                                                                                                                                                                | 642  | 968  | 2.00E-53  | 150.8 | 16.8 | 21.5 | hypothetical protein VITISV_031681                     | gbpln | Vitis vinifera       | #                                                                                                                                                                                                                                                                                                                                                                                                                                                                                                          | #    | #   | #         | #     | #    |      |
| Rsa1.0_01918.1.g30773.t3 | gb AAD22283.1  putative retroelement pol polyprotein [Arabidopsis thaliana]                                                                                                                                                                                                                                                                                                                                                                                                                                                                                                                                        | 1069 | 1787 | 1.00E-119 | 167.2 | 23.8 | 31.1 | putative retroelement pol polyprotein                  | gbpln | Arabidopsis thaliana | #                                                                                                                                                                                                                                                                                                                                                                                                                                                                                                          | #    | #   | #         | #     | #    |      |
| Rsa1.0_01918.1.g30774.t2 | gb AAF18641.1 AC006228_12 F5J5.16 [Arabidopsis thaliana]                                                                                                                                                                                                                                                                                                                                                                                                                                                                                                                                                           | 2030 | 1024 | 6.00E-77  | 50.4  | 8.0  | 10.6 | F5J5.16                                                | gbpln | Arabidopsis thaliana | #                                                                                                                                                                                                                                                                                                                                                                                                                                                                                                          | #    | #   | #         | #     | #    |      |
| Rsa1.0_01918.1.g30775.t1 | #                                                                                                                                                                                                                                                                                                                                                                                                                                                                                                                                                                                                                  | #    | #    | #         | #     | #    | #    | -                                                      | ----  | ----                 | #                                                                                                                                                                                                                                                                                                                                                                                                                                                                                                          | #    | #   | #         | #     | #    |      |
| Rsa1.0_01919.1.g30776.t1 | ref XP_002864633.1  oxysterol-binding family protein [Arabidopsis lyrata subsp. lyrata] gi 297310468 gb EFH40892.1  oxysterol-binding family protein [Arabidopsis lyrata subsp. lyrata]                                                                                                                                                                                                                                                                                                                                                                                                                            | 454  | 457  | 0         | 100.7 | 92.7 | 97.4 | oxysterol-binding family protein                       | gbpln | Arabidopsis lyrata   | AT5G59420.1   Symbols: ORP3C   OSBP(oxysterol binding protein)-related protein 3C   chr5:23961731-23964623 FORWARD LENGTH=457                                                                                                                                                                                                                                                                                                                                                                              | 454  | 457 | 0         | 100.7 | 92.5 | 97.4 |
| Rsa1.0_01919.1.g30777.t1 | ref XP_002864632.1  hypothetical protein ARALYDRAFT_496067 [Arabidopsis lyrata subsp. lyrata] gi 297310467 gb EFH40891.1  hypothetical protein ARALYDRAFT_496067 [Arabidopsis lyrata subsp. lyrata]                                                                                                                                                                                                                                                                                                                                                                                                                | 297  | 299  | 1.00E-150 | 100.7 | 90.9 | 93.6 | hypothetical protein ARALYDRAFT_496067                 | gbpln | Arabidopsis lyrata   | AT5G59400.1   Symbols:   FUNCTIONS IN: molecular function unknown; INVOLVED IN: biological process unknown; LOCATED IN: chloroplast; EXPRESSED IN: 23 plant structures; EXPRESSED DURING: 13 growth stages; BEST Arabidopsis thaliana protein match is: PGR5-like B (TAIR.AT4G11960.1); Has 97 Blast hits to 97 proteins in 19 species: Archae - 0; Bacteria - 0; Metazoa - 0; Fungi - 0; Plants - 97; Viruses - 0; Other Eukaryotes - 0 (source: NCBI BLINK).   chr5:23957756-23959518 FORWARD LENGTH=299 | 297  | 299 | 1.00E-152 | 100.7 | 89.9 | 94.6 |
| Rsa1.0_01919.1.g30778.t1 | gb EOA15150.1  hypothetical protein CARUB_v10028526mg [Capsella rubella]                                                                                                                                                                                                                                                                                                                                                                                                                                                                                                                                           | 551  | 561  | 0         | 101.8 | 68.4 | 79.7 | hypothetical protein CARUB_v10028526mg                 | gbpln | Capsella rubella     | AT5G59390.1   Symbols:   XH/XS domain-containing protein   chr5:23954934-23957151 FORWARD LENGTH=561                                                                                                                                                                                                                                                                                                                                                                                                       | 551  | 561 | 0         | 101.8 | 67.2 | 79.7 |
| Rsa1.0_01919.1.g30779.t1 | ref XP_002864630.1  hypothetical protein ARALYDRAFT_919168 [Arabidopsis lyrata subsp. lyrata] gi 297310465 gb EFH40889.1  hypothetical protein ARALYDRAFT_919168 [Arabidopsis lyrata subsp. lyrata]                                                                                                                                                                                                                                                                                                                                                                                                                | 176  | 233  | 5.00E-60  | 132.4 | 72.7 | 81.3 | hypothetical protein ARALYDRAFT_919168                 | gbpln | Arabidopsis lyrata   | AT5G59380.1   Symbols: MBD6, ATMBD6   methyl-CPG-binding domain 6   chr5:23952321-23953485 FORWARD LENGTH=225                                                                                                                                                                                                                                                                                                                                                                                              | 176  | 225 | 5.00E-58  | 127.8 | 68.8 | 79.0 |
| Rsa1.0_01919.1.g30780.t1 | gb EOA27680.1  hypothetical protein CARUB_v10023843mg, partial [Capsella rubella]                                                                                                                                                                                                                                                                                                                                                                                                                                                                                                                                  | 260  | 271  | 4.00E-37  | 104.2 | 37.3 | 50.8 | hypothetical protein CARUB_v10023843mg, partial        | gbpln | Capsella rubella     | AT1G10000.1   Symbols:   Ribonuclease H-like superfamily protein   chr1:3263877-3264788 REVERSE LENGTH=303                                                                                                                                                                                                                                                                                                                                                                                                 | 260  | 303 | 2.00E-28  | 116.5 | 32.7 | 49.6 |
| Rsa1.0_01919.1.g30781.t1 | #                                                                                                                                                                                                                                                                                                                                                                                                                                                                                                                                                                                                                  | #    | #    | #         | #     | #    | #    | -                                                      | ----  | ----                 | #                                                                                                                                                                                                                                                                                                                                                                                                                                                                                                          | #    | #   | #         | #     | #    |      |
| Rsa1.0_01920.1.g30782.t1 | ref NP_172626.1  cytochrome P450, family 77, subfamily B, polypeptide 1 [Arabidopsis thaliana] gi 4835797 gb AAD30263.1 AC007296_2 4 Strong similarity to gb U61231 cytochrome P450 from Arabidopsis thaliana and is a member of the PF 00067 Cytochrome P450 family. ESTs gb Z30775 and gb Z30776 come from this gene [Arabidopsis thaliana] gi 21537013 gb AAM61354.1  putative cytochrome P450 [Arabidopsis thaliana] gi 110738537 gb BAF01194.1  cytochrome P450 like protein [Arabidopsis thaliana] gi 332190637 gb AEE28758.1  cytochrome P450, family 77, subfamily B, polypeptide 1 [Arabidopsis thaliana] | 510  | 510  | 0         | 100.0 | 93.9 | 96.9 | cytochrome P450, family 77, subfamily B, polypeptide 1 | gbpln | Arabidopsis thaliana | AT1G11600.1   Symbols: CYP77B1   cytochrome P450, family 77, subfamily B, polypeptide 1   chr1:3902090-3903622 FORWARD LENGTH=510                                                                                                                                                                                                                                                                                                                                                                          | 510  | 510 | 0         | 100.0 | 93.9 | 96.9 |
| Rsa1.0_01920.1.g30783.t1 | ref XP_002898977.1  hypothetical protein ARALYDRAFT_471294 [Arabidopsis lyrata subsp. lyrata] gi 297335719 gb EFH6136.1  hypothetical protein ARALYDRAFT_471294 [Arabidopsis lyrata subsp. lyrata]                                                                                                                                                                                                                                                                                                                                                                                                                 | 464  | 465  | 0         | 100.2 | 87.7 | 91.6 | hypothetical protein ARALYDRAFT_471294                 | gbpln | Arabidopsis lyrata   | AT5G28237.1   Symbols:   Pyridoxal-5'-phosphate-dependent enzyme family protein   chr5:10207477-10213542 REVERSE LENGTH=465                                                                                                                                                                                                                                                                                                                                                                                | 464  | 465 | 0         | 100.2 | 88.1 | 90.9 |

|                          |                                                                                                                                                                                                                                                                                                                                                                                                                                         |     |     |           |       |       |       |                                                                                                                                                                                                                                                                                                                                                                                                |       |                      |                                                                                                                                                                                                                                                                                                                                                     |     |     |           |       |      |      |
|--------------------------|-----------------------------------------------------------------------------------------------------------------------------------------------------------------------------------------------------------------------------------------------------------------------------------------------------------------------------------------------------------------------------------------------------------------------------------------|-----|-----|-----------|-------|-------|-------|------------------------------------------------------------------------------------------------------------------------------------------------------------------------------------------------------------------------------------------------------------------------------------------------------------------------------------------------------------------------------------------------|-------|----------------------|-----------------------------------------------------------------------------------------------------------------------------------------------------------------------------------------------------------------------------------------------------------------------------------------------------------------------------------------------------|-----|-----|-----------|-------|------|------|
| Rsa1.0_01920.1.g30784.t1 | refXP_002889875.1   hypothetical protein ARALYDRAFT_888463 [Arabidopsis lyrata subsp. lyrata] gi 297335717 gb EFH66134.1   hypothetical protein ARALYDRAFT_888463 [Arabidopsis lyrata subsp. lyrata]                                                                                                                                                                                                                                    | 89  | 89  | 1.00E-39  | 100.0 | 89.9  | 97.8  | hypothetical protein ARALYDRAFT_888463                                                                                                                                                                                                                                                                                                                                                         | gbpln | Arabidopsis lyrata   | AT1G11572.1   Symbols:   Plant thionin family protein   chr1:3884455-3884724 FORWARD LENGTH=89                                                                                                                                                                                                                                                      | 89  | 89  | 2.00E-39  | 100.0 | 83.1 | 95.5 |
| Rsa1.0_01920.1.g30785.t1 | refXP_002889874.1   T23J18.22 [Arabidopsis lyrata subsp. lyrata] gi 297335716 gb EFH66133.1   T23J18.22 [Arabidopsis lyrata subsp. lyrata]                                                                                                                                                                                                                                                                                              | 441 | 469 | 1.00E-165 | 106.3 | 70.3  | 80.5  | T23J18.22                                                                                                                                                                                                                                                                                                                                                                                      | gbpln | Arabidopsis lyrata   | AT1G61790.1   Symbols:   Oligosaccharyltransferase complex/magnesium transporter family protein   chr1:22814390-22815430 FORWARD LENGTH=346                                                                                                                                                                                                         | 441 | 346 | 1.00E-103 | 78.5  | 42.0 | 53.1 |
| Rsa1.0_01920.1.g30786.t2 | sp Q39290.1 RPAB5_BRANA RecName: Full=DNA-directed RNA polymerases I, II, and III subunit RPABC5; Short=RNA polymerases I, II, and III subunit ABC5; AltName: Full=ABC10; AltName: Full=DNA-directed RNA polymerase III subunit L; AltName: Full=RPB10 homolog; gi 533690 gb AA21279.1   RNA polymerase II subunit RPB10 homolog; similar to yeast RNA polymerase II subunit RPB10. Swiss-Prot Accession Number P22139 [Brassica napus] | 71  | 71  | 1.00E-33  | 100.0 | 100.0 | 100.0 | RecName: Full=DNA-directed RNA polymerases I, II, and III subunit RPABC5; Short=RNA polymerases I, II, and III subunit ABC5; AltName: Full=ABC10; AltName: Full=DNA-directed RNA polymerase III subunit L; AltName: Full=RPB10 homolog; gi 533690 gb AA21279.1   RNA polymerase II subunit RPB10 homolog; similar to yeast RNA polymerase II subunit RPB10. Swiss-Prot Accession Number P22139 | gbpln | Brassica napus       | AT1G11475.1   Symbols: NRPB10, NRPD10, NRPE10   RNA polymerases N / 8 kDa subunit   chr1:3862520-3863805 FORWARD LENGTH=71                                                                                                                                                                                                                          | 71  | 71  | 2.00E-35  | 100.0 | 97.2 | 97.2 |
| Rsa1.0_01920.1.g30787.t1 | refXP_002889868.1   hypothetical protein ARALYDRAFT_471281 [Arabidopsis lyrata subsp. lyrata] gi 297335710 gb EFH66127.1   hypothetical protein ARALYDRAFT_471281 [Arabidopsis lyrata subsp. lyrata]                                                                                                                                                                                                                                    | 321 | 357 | 1.00E-108 | 111.2 | 75.1  | 86.3  | hypothetical protein ARALYDRAFT_471281                                                                                                                                                                                                                                                                                                                                                         | gbpln | Arabidopsis lyrata   | AT1G11440.1   Symbols:   BEST Arabidopsis thaliana protein match is: glycine-rich protein (TAIR:AT3G29075.1); Has 19337 Blast hits to 8589 proteins in 488 species: Archae - 26; Bacteria - 641; Metazoa - 7852; Fungi - 2167; Plants - 955; Viruses - 616; Other Eukaryotes - 7080 (source: NCBI BLINK).   chr1:3849418-3850509 FORWARD LENGTH=363 | 321 | 363 | 1.00E-107 | 113.1 | 74.5 | 83.5 |
| Rsa1.0_01920.1.g30788.t1 | ref NP_172610.1  putative plastid developmental protein DAG [Arabidopsis thaliana] gi 6554182 gb AAF16628.1   AC011661.6 T23J18.10 [Arabidopsis thaliana] gi 26450103 dbj BAC42171.1   unknown protein [Arabidopsis thaliana] gi 28827520 gb AA050604.1   putative DAG protein [Arabidopsis thaliana] gi 332190614 gb AEE28735.1   putative plastid developmental protein DAG [Arabidopsis thaliana]                                    | 236 | 232 | 1.00E-104 | 98.3  | 81.8  | 85.6  | putative plastid developmental protein DAG                                                                                                                                                                                                                                                                                                                                                     | gbpln | Arabidopsis thaliana | AT1G11430.1   Symbols:   plastid developmental protein DAG, putative   chr1:3847273-3848938 FORWARD LENGTH=232                                                                                                                                                                                                                                      | 236 | 232 | 1.00E-107 | 98.3  | 81.8 | 85.6 |
| Rsa1.0_01920.1.g30789.t1 | refXP_002889866.1   hypothetical protein ARALYDRAFT_471279 [Arabidopsis lyrata subsp. lyrata] gi 297335708 gb EFH66125.1   hypothetical protein ARALYDRAFT_471279 [Arabidopsis lyrata subsp. lyrata]                                                                                                                                                                                                                                    | 867 | 842 | 0         | 97.1  | 66.9  | 77.7  | hypothetical protein ARALYDRAFT_471279                                                                                                                                                                                                                                                                                                                                                         | gbpln | Arabidopsis lyrata   | AT1G11340.1   Symbols:   S-locus lectin protein kinase family protein   chr1:3814116-3817420 REVERSE LENGTH=901                                                                                                                                                                                                                                     | 867 | 901 | 0         | 103.9 | 66.9 | 76.9 |
| Rsa1.0_01920.1.g30790.t1 | gb EOA38471.1   hypothetical protein CARUB_v10010225mg [Capsella rubella] gi 482574285 gb EOA38472.1   hypothetical protein CARUB_v10010225mg [Capsella rubella]                                                                                                                                                                                                                                                                        | 135 | 227 | 3.00E-14  | 168.1 | 29.6  | 30.4  | hypothetical protein CARUB_v10010225mg                                                                                                                                                                                                                                                                                                                                                         | gbpln | Capsella rubella     | AT1G11400.3   Symbols: PYM   partner of Y14-MAGO   chr1:3838777-3839978 FORWARD LENGTH=204                                                                                                                                                                                                                                                          | 135 | 204 | 8.00E-15  | 151.1 | 27.4 | 28.1 |
| Rsa1.0_01920.1.g30791.t1 | gb EOA34077.1   hypothetical protein CARUB_v10021578mg [Capsella rubella]                                                                                                                                                                                                                                                                                                                                                               | 635 | 319 | 3.00E-45  | 50.2  | 15.3  | 17.5  | hypothetical protein CARUB_v10021578mg                                                                                                                                                                                                                                                                                                                                                         | gbpln | Capsella rubella     | AT1G69030.1   Symbols:   BSD domain-containing protein   chr1:25947429-25949262 REVERSE LENGTH=317                                                                                                                                                                                                                                                  | 635 | 317 | 1.00E-45  | 49.9  | 14.3 | 16.4 |
| Rsa1.0_01920.1.g30792.t1 | dbj BAJ33728.1   unnamed protein product [Thellungiella halophila]                                                                                                                                                                                                                                                                                                                                                                      | 148 | 148 | 6.00E-68  | 100.0 | 84.5  | 91.9  | unnamed protein product                                                                                                                                                                                                                                                                                                                                                                        | ----  | ----                 | AT1G60950.1   Symbols: FED A, ATFD2   2Fe-2S ferredoxin-like superfamily protein   chr1:22444565-22445011 FORWARD LENGTH=148                                                                                                                                                                                                                        | 148 | 148 | 3.00E-70  | 100.0 | 85.8 | 90.5 |
| Rsa1.0_01920.1.g30793.t3 | gb EOA38064.1   hypothetical protein CARUB_v10009533mg [Capsella rubella]                                                                                                                                                                                                                                                                                                                                                               | 359 | 362 | 0         | 100.8 | 95.5  | 97.5  | hypothetical protein CARUB_v10009533mg                                                                                                                                                                                                                                                                                                                                                         | gbpln | Capsella rubella     | AT1G10940.1   Symbols: ASK1, SNRK2-4, SNRK2.4, SRK2A   Protein kinase superfamily protein   chr1:3656050-3658170 REVERSE LENGTH=363                                                                                                                                                                                                                 | 359 | 363 | 0         | 101.1 | 94.7 | 96.9 |

|                          |                                                                                                                                                                                                                                                                                                                                                                               |      |      |           |       |      |      |                                           |       |                      |                                                                                                                                                                                                                                                                                                                                                                                                                                                     |      |      |           |       |      |      |
|--------------------------|-------------------------------------------------------------------------------------------------------------------------------------------------------------------------------------------------------------------------------------------------------------------------------------------------------------------------------------------------------------------------------|------|------|-----------|-------|------|------|-------------------------------------------|-------|----------------------|-----------------------------------------------------------------------------------------------------------------------------------------------------------------------------------------------------------------------------------------------------------------------------------------------------------------------------------------------------------------------------------------------------------------------------------------------------|------|------|-----------|-------|------|------|
| Rsa1.0_01920.1.g30794.t7 | gb AAF99864.1 AC015448.14 Putative protein kinase [Arabidopsis thaliana]                                                                                                                                                                                                                                                                                                      | 961  | 875  | 0         | 91.1  | 56.4 | 64.7 | Putative protein kinase                   | gbpln | Arabidopsis thaliana | AT1G51805.1   Symbols:   Leucine-rich repeat protein kinase family protein   chr1:19221187-19225590 REVERSE LENGTH=884                                                                                                                                                                                                                                                                                                                              | 961  | 884  | 0         | 92.0  | 56.0 | 64.5 |
| Rsa1.0_01920.1.g30795.t1 | gb EOA37789.1  hypothetical protein CARUB_v10012627mg [Capsella rubella]                                                                                                                                                                                                                                                                                                      | 324  | 337  | 1.00E-180 | 104.0 | 95.4 | 96.9 | hypothetical protein CARUB_v10012627mg    | gbpln | Capsella rubella     | AT1G10840.1   Symbols: TIF3H1   translation initiation factor 3 subunit H1   chr1:3607885-3610299 REVERSE LENGTH=337                                                                                                                                                                                                                                                                                                                                | 324  | 337  | 0         | 104.0 | 95.1 | 96.9 |
| Rsa1.0_01920.1.g30796.t1 | ref NP_973807.1  uncharacterized protein [Arabidopsis thaliana]<br>gi 332190529 gb AAE28650.1  uncharacterized protein AT1G10820 [Arabidopsis thaliana]                                                                                                                                                                                                                       | 272  | 258  | 6.00E-95  | 94.9  | 68.4 | 71.7 | uncharacterized protein                   | gbpln | Arabidopsis thaliana | AT1G10820.2   Symbols:   Protein of unknown function (DUF3755)   chr1:3601437-3604650 REVERSE LENGTH=258                                                                                                                                                                                                                                                                                                                                            | 272  | 258  | 2.00E-97  | 94.9  | 68.4 | 71.7 |
| Rsa1.0_01921.1.g30797.t1 | #                                                                                                                                                                                                                                                                                                                                                                             | #    | #    | #         | #     | #    | -    | ----                                      | ----  | #                    | #                                                                                                                                                                                                                                                                                                                                                                                                                                                   | #    | #    | #         | #     | #    |      |
| Rsa1.0_01921.1.g30798.t1 | ref NP_193233.5  fanconi anemia group D2 protein [Arabidopsis thaliana]<br>gi 332658132 gb AAE83532.1  uncharacterized protein AT4G14970 [Arabidopsis thaliana]                                                                                                                                                                                                               | 1446 | 1489 | 0         | 103.0 | 83.5 | 89.6 | fanconi anemia group D2 protein           | gbpln | Arabidopsis thaliana | AT4G14970.1   Symbols:   unknown protein; FUNCTIONS IN: molecular, function unknown; INVOLVED IN: biological process unknown; LOCATED IN: chloroplast; EXPRESSED IN: 14 plant structures; EXPRESSED DURING: 6 growth stages; Has 257 Blast hits to 164 proteins in 70 species: Archae - 0; Bacteria - 4; Metazoa - 189; Fungi - 0; Plants - 38; Viruses - 0; Other Eukaryotes - 26 (source: NCBI BLink).   chr4:8553854-8561664 FORWARD LENGTH=1489 | 1446 | 1489 | 0         | 103.0 | 83.5 | 89.6 |
| Rsa1.0_01921.1.g30799.t1 | emb CAA79989.2  myrosinase, thioglucoside glucohydrolase [Brassica napus]                                                                                                                                                                                                                                                                                                     | 526  | 527  | 0         | 100.2 | 90.3 | 92.6 | myrosinase, thioglucoside glucohydrolase  | gbpln | Brassica napus       | AT5G26000.1   Symbols: TGG1, BGLU38   thioglucoside glucohydrolase 1   chr5:9079678-9082347 REVERSE LENGTH=541                                                                                                                                                                                                                                                                                                                                      | 526  | 541  | 0         | 102.9 | 69.6 | 77.8 |
| Rsa1.0_01921.1.g30800.t1 | #                                                                                                                                                                                                                                                                                                                                                                             | #    | #    | #         | #     | #    | -    | ----                                      | ----  | #                    | #                                                                                                                                                                                                                                                                                                                                                                                                                                                   | #    | #    | #         | #     | #    |      |
| Rsa1.0_01921.1.g30801.t2 | gb ABD65053.1  S-locus linked 3 (SLL3) protein, putative [Brassica oleracea]                                                                                                                                                                                                                                                                                                  | 294  | 462  | 7.00E-32  | 157.1 | 32.7 | 39.5 | S-locus linked 3 (SLL3) protein, putative | gbpln | Brassica oleracea    | AT4G23160.1   Symbols: CRK8   cysteine-rich RLK (RECEPTOR-like protein kinase) 8   chr4:12129485-12134086 FORWARD LENGTH=1262                                                                                                                                                                                                                                                                                                                       | 294  | 1262 | 1.00E-11  | 429.3 | 11.2 | 16.3 |
| Rsa1.0_01921.1.g30802.t1 | ref NP_191452.2  F-box/LRR-repeat protein [Arabidopsis thaliana]<br>gi 75244411 sp Q8GXW6.1 FBL59_ARAT H RecName: Full=F-box/LRR-repeat protein At3g58930<br>gi 26451056 dbj BAC42633.1  unknown protein [Arabidopsis thaliana]<br>gi 28951059 gb AAO63453.1  At3g58930 [Arabidopsis thaliana]<br>gi 332646330 gb AAE79851.1  F-box/LRR-repeat protein [Arabidopsis thaliana] | 477  | 482  | 1.00E-104 | 101.0 | 49.9 | 62.3 | F-box/LRR-repeat protein                  | gbpln | Arabidopsis thaliana | AT3G58930.1   Symbols:   F-box/RNI-like superfamily protein   chr3:21778381-21780014 REVERSE LENGTH=482                                                                                                                                                                                                                                                                                                                                             | 477  | 482  | 1.00E-107 | 101.0 | 49.9 | 62.3 |
| Rsa1.0_01921.1.g30803.t1 | ref NP_193193.2  acylaminoacyl-peptidase [Arabidopsis thaliana]<br>gi 60729672 pir JC8016 acylaminoacyl-peptidase (EC 3.4.19.1) - Arabidopsis thaliana gi 30466066 dbj BAC7641.1  acylamino acid-releasing enzyme [Arabidopsis thaliana]<br>gi 332658061 gb AAE83461.1  acylamino acid-releasing enzyme [Arabidopsis thaliana]                                                | 758  | 764  | 0         | 100.8 | 85.0 | 92.9 | acylaminoacyl-peptidase                   | gbpln | Arabidopsis thaliana | AT4G14570.1   Symbols:   acylaminoacyl-peptidase-related   chr4:8362586-8366525 FORWARD LENGTH=764                                                                                                                                                                                                                                                                                                                                                  | 758  | 764  | 0         | 100.8 | 85.0 | 92.9 |
| Rsa1.0_01921.1.g30804.t1 | gb EOA36221.1  hypothetical protein CARUB_v10010170mg [Capsella rubella]                                                                                                                                                                                                                                                                                                      | 234  | 236  | 1.00E-111 | 100.9 | 84.2 | 92.7 | hypothetical protein CARUB_v10010170mg    | gbpln | Capsella rubella     | AT1G24735.1   Symbols:   S-adenosyl-L-methionine-dependent methyltransferases superfamily protein   chr1:8757977-8759448 FORWARD LENGTH=240                                                                                                                                                                                                                                                                                                         | 234  | 240  | 1.00E-108 | 102.6 | 78.6 | 89.3 |
| Rsa1.0_01921.1.g30805.t1 | gb EOA16652.1  hypothetical protein CARUB_v10004845mg [Capsella rubella]                                                                                                                                                                                                                                                                                                      | 400  | 434  | 0         | 108.5 | 88.5 | 92.3 | hypothetical protein CARUB_v10004845mg    | gbpln | Capsella rubella     | AT4G14500.1   Symbols:   Polyketide cyclase/dehydrase and lipid transport superfamily protein   chr4:8334391-8337022 FORWARD LENGTH=433                                                                                                                                                                                                                                                                                                             | 400  | 433  | 0         | 108.3 | 90.5 | 94.0 |
| Rsa1.0_01921.1.g30806.t1 | ref XP_002877762.1  F-box family protein [Arabidopsis lyrata subsp. lyrata] gi 297323600 gb EFH54021.1  F-box family protein [Arabidopsis lyrata subsp. lyrata]                                                                                                                                                                                                               | 428  | 426  | 1.00E-142 | 99.5  | 61.7 | 74.8 | F-box family protein                      | gbpln | Arabidopsis lyrata   | AT3G50710.1   Symbols:   F-box/RNI-like/FBD-like domains-containing protein   chr3:18845199-18846673 REVERSE LENGTH=427                                                                                                                                                                                                                                                                                                                             | 428  | 427  | 1.00E-142 | 99.8  | 60.7 | 74.3 |
| Rsa1.0_01922.1.g30807.t1 | dbj BAB09923.1  copia-like retrotransposable element [Arabidopsis thaliana]                                                                                                                                                                                                                                                                                                   | 1385 | 1342 | 0         | 96.9  | 50.5 | 67.5 | copia-like retrotransposable element      | gbpln | Arabidopsis thaliana | AT4G23160.1   Symbols: CRK8   cysteine-rich RLK (RECEPTOR-like protein kinase) 8   chr4:12129485-12134086 FORWARD LENGTH=1262                                                                                                                                                                                                                                                                                                                       | 1385 | 1262 | 7.00E-86  | 91.1  | 13.1 | 19.8 |

|                          |                                                                                                                                                                                                                                                                                                                                                                                        |     |     |           |       |      |      |                                             |       |                      |                                                                                                                                                                                                                                                                                                                                                                                                                                                                    |     |     |           |       |      |      |
|--------------------------|----------------------------------------------------------------------------------------------------------------------------------------------------------------------------------------------------------------------------------------------------------------------------------------------------------------------------------------------------------------------------------------|-----|-----|-----------|-------|------|------|---------------------------------------------|-------|----------------------|--------------------------------------------------------------------------------------------------------------------------------------------------------------------------------------------------------------------------------------------------------------------------------------------------------------------------------------------------------------------------------------------------------------------------------------------------------------------|-----|-----|-----------|-------|------|------|
| Rsa1.0_01922.1.g30808.t1 | refXP_002888334.1  hypothetical protein ARALYDRAFT_893919 [Arabidopsis lyrata subsp. lyrata] gi 297334175 gb EFH64593.1                                                                                                                                                                                                                                                                | 131 | 126 | 9.00E-56  | 96.2  | 84.0 | 90.1 | hypothetical protein ARALYDRAFT_893919      | gbpln | Arabidopsis lyrata   | AT1G65290.1   Symbols: mtACP2   mitochondrial acyl carrier protein 2   chr1:24249088-24250366 REVERSE LENGTH=126                                                                                                                                                                                                                                                                                                                                                   | 131 | 126 | 5.00E-58  | 96.2  | 82.4 | 90.1 |
| Rsa1.0_01923.1.g30809.t1 | hypothetical protein ARALYDRAFT_893919 [Arabidopsis lyrata subsp. lyrata] refXP_002890694.1  hypothetical protein ARALYDRAFT_472840 [Arabidopsis lyrata subsp. lyrata] gi 297336536 gb EFH66953.1                                                                                                                                                                                      | 380 | 795 | 1.00E-175 | 209.2 | 82.1 | 88.7 | hypothetical protein ARALYDRAFT_472840      | gbpln | Arabidopsis lyrata   | AT1G25350.1   Symbols: OVA9   glutamine-tRNA ligase, putative / glutaminyl-tRNA synthetase, putative / GlnRS, putative   chr1:8889280-8894205 REVERSE LENGTH=795                                                                                                                                                                                                                                                                                                   | 380 | 795 | 1.00E-177 | 209.2 | 81.8 | 88.9 |
| Rsa1.0_01923.1.g30810.t1 | hypothetical protein ARALYDRAFT_472840 [Arabidopsis lyrata subsp. lyrata] refNP_173907.1  pentatricopeptide repeat-containing protein [Arabidopsis thaliana] gi 75172213 sp Q9FR15.1 PPR57_ARATH RecName: Full=Pentatricopeptide repeat-containing protein At1g25360 gi 11067273 gb AAG28801.1 AC079374_4                                                                              | 789 | 790 | 0         | 100.1 | 83.0 | 92.1 | pentatricopeptide repeat-containing protein | gbpln | Arabidopsis thaliana | AT1G25360.1   Symbols:   Pentatricopeptide repeat (PPR) superfamily protein   chr1:8894428-8896800 FORWARD LENGTH=790                                                                                                                                                                                                                                                                                                                                              | 789 | 790 | 0         | 100.1 | 83.0 | 92.1 |
| Rsa1.0_01923.1.g30811.t1 | 4 hypothetical protein [Arabidopsis thaliana] gi 332192491 gb AEE30612.1  pentatricopeptide repeat-containing protein [Arabidopsis thaliana] refXP_002890693.1  hypothetical protein ARALYDRAFT_313393 [Arabidopsis lyrata subsp. lyrata] gi 297336535 gb EFH66952.1                                                                                                                   | 279 | 780 | 4.00E-65  | 279.6 | 64.5 | 69.9 | hypothetical protein ARALYDRAFT_313393      | gbpln | Arabidopsis lyrata   | AT1G25370.1   Symbols:   Protein of unknown function (DUF1639)   chr1:8898046-8898934 REVERSE LENGTH=263                                                                                                                                                                                                                                                                                                                                                           | 279 | 263 | 1.00E-58  | 94.3  | 56.3 | 66.3 |
| Rsa1.0_01923.1.g30812.t1 | hypothetical protein ARALYDRAFT_313393 [Arabidopsis lyrata subsp. lyrata] # # # # # # # # # # # # # # # #                                                                                                                                                                                                                                                                              |     |     |           |       |      |      |                                             |       |                      |                                                                                                                                                                                                                                                                                                                                                                                                                                                                    |     |     |           |       |      |      |
| Rsa1.0_01923.1.g30813.t1 | refNP_564233.1  NAD+ transporter 2 [Arabidopsis thaliana] gi 75247587 sp Q8RWA5.1 NDT2_ARATH RecName: Full=Nicotinamide adenine dinucleotide transporter 2, mitochondrial; Short=AtNDT2; AltName: Full=NAD(+) transporter 2 gi 202606666 gb AAM13231.1  unknown protein [Arabidopsis thaliana] gi 30984592 gb AAP42759.1  At1g25380 [Arabidopsis thaliana] gi 283482332 emb CAR70089.1 | 363 | 363 | 1.00E-172 | 100.0 | 87.9 | 95.3 | NAD+ transporter 2                          | gbpln | Arabidopsis thaliana | AT1G25380.1   Symbols: ATNDT2, NDT2   NAD+ transporter 2   chr1:8903726-8905818 FORWARD LENGTH=363                                                                                                                                                                                                                                                                                                                                                                 | 363 | 363 | 1.00E-175 | 100.0 | 87.9 | 95.3 |
| Rsa1.0_01923.1.g30814.t1 | mitochondrial nicotinamide adenine dinucleotide transporter 2 [Arabidopsis thaliana] gi 332192494 gb AEE30615.1  NAD+ transporter 2 [Arabidopsis thaliana] gb EOA36697.1  hypothetical protein CARUB_v10012140mg [Capsella rubella]                                                                                                                                                    | 266 | 270 | 3.00E-72  | 101.5 | 63.2 | 74.4 | hypothetical protein CARUB_v10012140mg      | gbpln | Capsella rubella     | AT1G25300.1   Symbols:   Octicosapeptide/Phox/Bem1p family protein   chr1:8871568-8872386 FORWARD LENGTH=272                                                                                                                                                                                                                                                                                                                                                       | 266 | 272 | 1.00E-72  | 102.3 | 61.7 | 72.9 |
| Rsa1.0_01923.1.g30815.t1 | gb EOA28349.1  hypothetical protein CARUB_v10024554mg [Capsella rubella]                                                                                                                                                                                                                                                                                                               | 236 | 320 | 9.00E-78  | 135.6 | 66.1 | 79.2 | hypothetical protein CARUB_v10024554mg      | gbpln | Capsella rubella     | AT1G58725.1   Symbols:   GDSL-like Lipase/Acylhydrolase superfamily protein   chr1:21771935-21773365 REVERSE LENGTH=349                                                                                                                                                                                                                                                                                                                                            | 236 | 349 | 4.00E-69  | 147.9 | 49.2 | 55.5 |
| Rsa1.0_01923.1.g30816.t1 | refNP_001185093.1  RHOMBOID-like protein 10 [Arabidopsis thaliana] gi 332192482 gb AEE30603.1  RHOMBOID-like protein 10 [Arabidopsis thaliana]                                                                                                                                                                                                                                         | 337 | 336 | 1.00E-155 | 99.7  | 81.9 | 91.1 | RHOMBOID-like protein 10                    | gbpln | Arabidopsis thaliana | AT1G25290.2   Symbols: RBL10   RHOMBOID-like protein 10   chr1:8867157-8868945 FORWARD LENGTH=336                                                                                                                                                                                                                                                                                                                                                                  | 337 | 336 | 1.00E-158 | 99.7  | 81.9 | 91.1 |
| Rsa1.0_01923.1.g30817.t1 | gb EOA40428.1  hypothetical protein CARUB_v10009152mg [Capsella rubella]                                                                                                                                                                                                                                                                                                               | 454 | 442 | 0         | 97.4  | 88.5 | 91.9 | hypothetical protein CARUB_v10009152mg      | gbpln | Capsella rubella     | AT1G25280.1   Symbols: AtTLP10, TLP10   tubby like protein 10   chr1:8864961-8866608 FORWARD LENGTH=445                                                                                                                                                                                                                                                                                                                                                            | 454 | 445 | 0         | 98.0  | 87.4 | 91.4 |
| Rsa1.0_01923.1.g30818.t1 | gb EOA37256.1  hypothetical protein CARUB_v10010807mg [Capsella rubella]                                                                                                                                                                                                                                                                                                               | 57  | 74  | 1.00E-17  | 129.8 | 77.2 | 84.2 | hypothetical protein CARUB_v10010807mg      | gbpln | Capsella rubella     | AT1G25275.2   Symbols:   unknown protein; FUNCTIONS IN: molecular_function unknown; INVOLVED IN: response to karrikin; LOCATED IN: endomembrane system; EXPRESSED IN: 23 plant structures; EXPRESSED DURING: 13 growth stages; Has 3533 Blast hits to 34131 proteins in 2444 species: Archae - 798; Bacteria - 22429; Metazoa - 974; Fungi - 991; Plants - 531; Viruses - 0; Other Eukaryotes - 9610 (source: NCBI BLINK)   chr1:8860719-8861156 FORWARD LENGTH=74 | 57  | 74  | 2.00E-19  | 129.8 | 75.4 | 84.2 |



|                          |                                                                                                                                                                                                                                                                                                                                                                    |      |      |           |       |      |      |                                        |       |                      |                                                                                                                                                                                                                                                                                                                                                                                                                                                                                                                                                 |      |      |           |       |      |      |
|--------------------------|--------------------------------------------------------------------------------------------------------------------------------------------------------------------------------------------------------------------------------------------------------------------------------------------------------------------------------------------------------------------|------|------|-----------|-------|------|------|----------------------------------------|-------|----------------------|-------------------------------------------------------------------------------------------------------------------------------------------------------------------------------------------------------------------------------------------------------------------------------------------------------------------------------------------------------------------------------------------------------------------------------------------------------------------------------------------------------------------------------------------------|------|------|-----------|-------|------|------|
| Rsa1.0_01923.1.g30819.t1 | ref XP_002887155.1  hypothetical protein ARALYDRAFT_475905 [Arabidopsis lyrata subsp. lyrata] gi 297332996 gb EFH63414.1  hypothetical protein ARALYDRAFT_475905 [Arabidopsis lyrata subsp. lyrata]                                                                                                                                                                | 419  | 332  | 1.00E-106 | 79.2  | 52.7 | 59.2 | hypothetical protein ARALYDRAFT_475905 | gbpln | Arabidopsis lyrata   | AT1G68140.3   Symbols:   Protein of unknown function (DUF1644)   chr1:25539410-25540414 REVERSE LENGTH=334                                                                                                                                                                                                                                                                                                                                                                                                                                      | 419  | 334  | 1.00E-105 | 79.7  | 51.1 | 58.5 |
| Rsa1.0_01923.1.g30820.t1 | gb EOA14519.1  hypothetical protein CARUB_v10027748mg [Capsella rubella]                                                                                                                                                                                                                                                                                           | 350  | 368  | 1.00E-74  | 105.1 | 47.1 | 62.9 | hypothetical protein CARUB_v10027748mg | gbpln | Capsella rubella     | AT4G38940.1   Symbols:   Galactose oxidase/kelch repeat superfamily protein   chr4:18152848-18153960 FORWARD LENGTH=370                                                                                                                                                                                                                                                                                                                                                                                                                         | 350  | 370  | 5.00E-68  | 105.7 | 46.0 | 62.9 |
| Rsa1.0_01923.1.g30821.t1 | ref NP_564226.1  Ribosomal protein L10 family protein [Arabidopsis thaliana] gi 15028333 gb AAK76643.1  unknown protein [Arabidopsis thaliana] gi 19310645 gb AAL85053.1  unknown protein [Arabidopsis thaliana] gi 21593993 gb AAM65913.1  unknown [Arabidopsis thaliana] gi 332192473 gb AEE30594.1  Ribosomal protein L10 family protein [Arabidopsis thaliana] | 253  | 235  | 1.00E-108 | 92.9  | 79.8 | 83.8 | Ribosomal protein L10 family protein   | gbpln | Arabidopsis thaliana | AT1G25260.1   Symbols:   Ribosomal protein L10 family protein   chr1:8854163-8855766 REVERSE LENGTH=235                                                                                                                                                                                                                                                                                                                                                                                                                                         | 253  | 235  | 1.00E-110 | 92.9  | 79.8 | 83.8 |
| Rsa1.0_01924.1.g30822.t1 | dbj BAJ33775.1  unnamed protein product [Theilingella halophila]                                                                                                                                                                                                                                                                                                   | 320  | 317  | 1.00E-128 | 99.1  | 78.8 | 84.7 | unnamed protein product                | ----  | ----                 | AT1G69010.1   Symbols: BIM2   BES1-interacting Myc-like protein 2   chr1:25941804-25943599 FORWARD LENGTH=311                                                                                                                                                                                                                                                                                                                                                                                                                                   | 320  | 311  | 1.00E-117 | 97.2  | 75.6 | 81.3 |
| Rsa1.0_01924.1.g30823.t1 | gb EOA34077.1  hypothetical protein CARUB_v10021578mg [Capsella rubella]                                                                                                                                                                                                                                                                                           | 321  | 319  | 1.00E-144 | 99.4  | 86.9 | 91.6 | hypothetical protein CARUB_v10021578mg | gbpln | Capsella rubella     | AT1G69030.1   Symbols:   BSD domain-containing protein   chr1:25947429-25949262 REVERSE LENGTH=317                                                                                                                                                                                                                                                                                                                                                                                                                                              | 321  | 317  | 1.00E-138 | 98.8  | 85.4 | 90.3 |
| Rsa1.0_01924.1.g30824.t2 | ref XP_002878905.1  predicted protein [Arabidopsis lyrata subsp. lyrata] gi 297324744 gb EFH55164.1  predicted protein [Arabidopsis lyrata subsp. lyrata]                                                                                                                                                                                                          | 451  | 480  | 9.00E-42  | 106.4 | 27.1 | 46.8 | predicted protein                      | gbpln | Arabidopsis lyrata   | AT1G14800.1   Symbols:   Nucleic acid-binding, OB-fold-like protein   chr1:5099572-5102558 FORWARD LENGTH=384                                                                                                                                                                                                                                                                                                                                                                                                                                   | 451  | 384  | 2.00E-28  | 85.1  | 14.4 | 24.4 |
| Rsa1.0_01924.1.g30825.t1 | gb ACG60681.1  unknown protein [Brassica oleracea var. alboglabra]                                                                                                                                                                                                                                                                                                 | 456  | 446  | 0         | 97.8  | 94.7 | 96.5 | unknown protein                        | gbpln | Brassica oleracea    | AT1G69040.2   Symbols: ACR4   ACT domain repeat 4   chr1:25957843-25960079 FORWARD LENGTH=455                                                                                                                                                                                                                                                                                                                                                                                                                                                   | 456  | 455  | 0         | 99.8  | 93.9 | 96.7 |
| Rsa1.0_01924.1.g30826.t1 | gb EOA14852.1  hypothetical protein CARUB_v10028167mg [Capsella rubella]                                                                                                                                                                                                                                                                                           | 174  | 178  | 6.00E-27  | 102.3 | 40.2 | 58.0 | hypothetical protein CARUB_v10028167mg | gbpln | Capsella rubella     | AT5G50030.1   Symbols:   Plant invertase/pectin methylesterase inhibitor superfamily protein   chr5:20354666-20355449 FORWARD LENGTH=187                                                                                                                                                                                                                                                                                                                                                                                                        | 174  | 187  | 9.00E-28  | 107.5 | 36.8 | 52.3 |
| Rsa1.0_01924.1.g30827.t1 | gb ACG60683.1  unknown protein [Brassica oleracea var. alboglabra]                                                                                                                                                                                                                                                                                                 | 131  | 879  | 4.00E-23  | 671.0 | 44.3 | 46.6 | unknown protein                        | gbpln | Brassica oleracea    | AT1G69070.1   Symbols:   FUNCTIONS IN: molecular_function unknown; INVOLVED IN: biological_process unknown; LOCATED IN: cellular_component unknown; EXPRESSED IN: 23 plant structures; EXPRESSED DURING: 13 growth stages; CONTAINS InterPro DOMAIN/s: Nop14-like protein (InterPro:IPR007276). Has 69842 Blast hits to 35213 proteins in 1572 species: Archae - 363; Bacteria - 20593; Metazoa - 20851; Fungi - 8010; Plants - 2912; Viruses - 517; Other Eukaryotes - 16596 (source: NCBI BLINK).   chr1:25967421-25971389 REVERSE LENGTH=901 | 131  | 901  | 4.00E-21  | 687.8 | 37.4 | 43.5 |
| Rsa1.0_01925.1.g30828.t1 | ref XP_002884448.1  hypothetical protein ARALYDRAFT_477706 [Arabidopsis lyrata subsp. lyrata] gi 297330288 gb EFH60707.1  hypothetical protein ARALYDRAFT_477706 [Arabidopsis lyrata subsp. lyrata]                                                                                                                                                                | 247  | 245  | 1.00E-120 | 99.2  | 92.7 | 95.5 | hypothetical protein ARALYDRAFT_477706 | gbpln | Arabidopsis lyrata   | AT3G04500.1   Symbols:   RNA-binding (RRM/RBD/RNP motifs) family protein   chr3:1212065-1213795 REVERSE LENGTH=245                                                                                                                                                                                                                                                                                                                                                                                                                              | 247  | 245  | 1.00E-115 | 99.2  | 91.5 | 94.3 |
| Rsa1.0_01925.1.g30829.t1 | ref XP_002871867.1  hypothetical protein ARALYDRAFT_326316 [Arabidopsis lyrata subsp. lyrata] gi 297317704 gb EFH48126.1  hypothetical protein ARALYDRAFT_326316 [Arabidopsis lyrata subsp. lyrata]                                                                                                                                                                | 127  | 390  | 2.00E-31  | 307.1 | 52.8 | 66.9 | hypothetical protein ARALYDRAFT_326316 | gbpln | Arabidopsis lyrata   | AT5G19170.1   Symbols:   Protein of Unknown Function (DUF239)   chr5:6445245-6447305 FORWARD LENGTH=391                                                                                                                                                                                                                                                                                                                                                                                                                                         | 127  | 391  | 2.00E-32  | 307.9 | 51.2 | 68.5 |
| Rsa1.0_01925.1.g30830.t1 | ref XP_002882356.1  hypothetical protein ARALYDRAFT_317312 [Arabidopsis lyrata subsp. lyrata] gi 297328196 gb EFH58615.1  hypothetical protein ARALYDRAFT_317312 [Arabidopsis lyrata subsp. lyrata]                                                                                                                                                                | 1193 | 1123 | 0         | 94.1  | 87.6 | 90.9 | hypothetical protein ARALYDRAFT_317312 | gbpln | Arabidopsis lyrata   | AT3G04490.1   Symbols:   unknown protein; BEST Arabidopsis thaliana protein match is: unknown protein (TAIR:AT4G38092.1); Has 75 Blast hits to 64 proteins in 20 species: Archae - 0; Bacteria - 0; Metazoa - 36; Fungi - 0; Plants - 22; Viruses - 0; Other Eukaryotes - 17 (source: NCBI BLINK).   chr3:1200816-1209713 FORWARD LENGTH=1118                                                                                                                                                                                                   | 1193 | 1118 | 0         | 93.7  | 85.3 | 89.4 |

|                          |                                                                                                                                                                                                                                                                                                                                                                                                                                                                                                                                                                                                                                                                                                                                                                  |     |     |           |       |      |      |                                                             |       |                      |                                                                                                                                      |     |     |           |       |      |      |
|--------------------------|------------------------------------------------------------------------------------------------------------------------------------------------------------------------------------------------------------------------------------------------------------------------------------------------------------------------------------------------------------------------------------------------------------------------------------------------------------------------------------------------------------------------------------------------------------------------------------------------------------------------------------------------------------------------------------------------------------------------------------------------------------------|-----|-----|-----------|-------|------|------|-------------------------------------------------------------|-------|----------------------|--------------------------------------------------------------------------------------------------------------------------------------|-----|-----|-----------|-------|------|------|
| Rsa1.0_01925.1.g30831.t2 | ref[XP_002884445.1] endoribonuclease [Arabidopsis lyrata subsp. lyrata] gi 297330225 gb EFH67074.1  endoribonuclease [Arabidopsis lyrata subsp. lyrata]                                                                                                                                                                                                                                                                                                                                                                                                                                                                                                                                                                                                          | 746 | 717 | 0         | 96.1  | 84.6 | 89.9 | endoribonuclease                                            | gbpln | Arabidopsis lyrata   | AT3G04480.1   Symbols:   endoribonucleases   chr3:1193988-1197320 REVERSE LENGTH=718                                                 | 746 | 718 | 0         | 96.2  | 83.5 | 89.5 |
| Rsa1.0_01925.1.g30832.t1 | ref[NP_180705.1] F-box protein DOR [Arabidopsis thaliana] gi 229807544 sp Q5BPS3.2 DOR_ARATH RecName: Full=F-box protein DOR; AltName: Full=Protein DROUGHT TOLERANCE REPRESSOR gi 4589954 gb AAD26472.1  hypothetical protein [Arabidopsis thaliana] gi 330253458 gb AEC08552.1  F-box protein DOR [Arabidopsis thaliana]                                                                                                                                                                                                                                                                                                                                                                                                                                       | 406 | 387 | 8.00E-81  | 95.3  | 46.3 | 60.3 | F-box protein DOR                                           | gbpln | Arabidopsis thaliana | AT2G31470.1   Symbols: DOR   F-box and associated interaction domains-containing protein   chr2:13407492-13408655 REVERSE LENGTH=387 | 406 | 387 | 2.00E-83  | 95.3  | 46.3 | 60.3 |
| Rsa1.0_01925.1.g30833.t1 | #                                                                                                                                                                                                                                                                                                                                                                                                                                                                                                                                                                                                                                                                                                                                                                | #   | #   | #         | #     | #    | -    | ----                                                        | ----  | #                    | #                                                                                                                                    | #   | #   | #         | #     | #    |      |
| Rsa1.0_01926.1.g30834.t1 | ref[NP_198663.1] putative DNA repair protein RAD23-4 [Arabidopsis thaliana] gi 55976502 sp Q84L30.2 RD23D_ARATH RecName: Full=Putative DNA repair protein RAD23-4; AltName: Full=RAD23-like protein 4; Short=AtRAD23-4 gi 9758825 dbj BAB09359.1  DNA repair protein RAD23 homolog [Arabidopsis thaliana] gi 16648838 gb AAL25609.1  unknown protein [Arabidopsis thaliana] gi 19548081 gb AAL87405.1  At5g38470/At5g38470 [Arabidopsis thaliana] gi 21593157 gb AAM65106.1  DNA repair protein RAD23 homolog [Arabidopsis thaliana] gi 30409728 dbj BAC76394.1  RAD23-like protein [Arabidopsis thaliana] gi 110735094 gb ABG89117.1  Rad23-2 [synthetic construct] gi 332006938 gb AED94321.1  putative DNA repair protein RAD23-4 [Arabidopsis thaliana]      | 384 | 378 | 1.00E-175 | 98.4  | 87.8 | 90.9 | putative DNA repair protein RAD23-4                         | gbpln | Arabidopsis thaliana | AT5G38470.1   Symbols: RAD23D   Rad23 UV excision repair protein family   chr5:15404720-15407500 FORWARD LENGTH=378                  | 384 | 378 | 1.00E-178 | 98.4  | 87.8 | 90.9 |
| Rsa1.0_01926.1.g30835.t1 | gb ACN73536.1  1433-3 [Brassica napus] gi 224981579 gb ACN73537.1  1433-3 [Brassica napus] ref[NP_198667.1] rhomboid-related intramembrane serine protease-like protein [Arabidopsis thaliana] gi 145334671 ref NP_001078681.1  rhomboid-related intramembrane serine protease-like protein [Arabidopsis thaliana] gi 10176819 dbj BAB10141.1  unnamed protein product [Arabidopsis thaliana] gi 46518449 gb AAS99706.1  At5g38510 [Arabidopsis thaliana] gi 110741692 dbj BAE98792.1  hypothetical protein [Arabidopsis thaliana] gi 332006944 gb AED94327.1  rhomboid-related intramembrane serine protease-like protein [Arabidopsis thaliana] gi 332006945 gb AED94328.1  rhomboid-related intramembrane serine protease-like protein [Arabidopsis thaliana] | 258 | 258 | 1.00E-143 | 100.0 | 97.3 | 98.1 | 1433-3                                                      | gbpln | Brassica napus       | AT5G38480.1   Symbols: GRF3, RC11   general regulatory factor 3   chr5:15410277-15411285 FORWARD LENGTH=255                          | 258 | 255 | 1.00E-139 | 98.8  | 92.6 | 95.3 |
| Rsa1.0_01926.1.g30836.t1 | ref[NP_198667.1] rhomboid-related intramembrane serine protease-like protein [Arabidopsis thaliana] gi 145334671 ref NP_001078681.1  rhomboid-related intramembrane serine protease-like protein [Arabidopsis thaliana] gi 10176819 dbj BAB10141.1  unnamed protein product [Arabidopsis thaliana] gi 46518449 gb AAS99706.1  At5g38510 [Arabidopsis thaliana] gi 110741692 dbj BAE98792.1  hypothetical protein [Arabidopsis thaliana] gi 332006944 gb AED94327.1  rhomboid-related intramembrane serine protease-like protein [Arabidopsis thaliana] gi 332006945 gb AED94328.1  rhomboid-related intramembrane serine protease-like protein [Arabidopsis thaliana]                                                                                            | 103 | 434 | 2.00E-28  | 421.4 | 62.1 | 68.9 | rhomboid-related intramembrane serine protease-like protein | gbpln | Arabidopsis thaliana | AT5G38510.2   Symbols:   Rhomboid-related intramembrane serine protease family protein   chr5:15417839-15420002 REVERSE LENGTH=434   | 103 | 434 | 3.00E-31  | 421.4 | 62.1 | 68.9 |
| Rsa1.0_01926.1.g30837.t1 | ref[NP_198668.1] alpha/beta-hydrolase-like protein [Arabidopsis thaliana] gi 10176820 dbj BAB10142.1  unnamed protein product [Arabidopsis thaliana] gi 23306396 gb AAN17425.1  putative protein [Arabidopsis thaliana] gi 24899773 gb AAN65101.1  putative protein [Arabidopsis thaliana] gi 332006946 gb AED94329.1  alpha/beta-hydrolase-like protein [Arabidopsis thaliana]                                                                                                                                                                                                                                                                                                                                                                                  | 336 | 362 | 1.00E-157 | 107.7 | 89.0 | 93.8 | alpha/beta-hydrolase-like protein                           | gbpln | Arabidopsis thaliana | AT5G38520.1   Symbols:   alpha/beta-Hydrolases superfamily protein   chr5:15421605-15423234 FORWARD LENGTH=362                       | 336 | 362 | 1.00E-159 | 107.7 | 89.0 | 93.8 |
| Rsa1.0_01926.1.g30838.t1 | #                                                                                                                                                                                                                                                                                                                                                                                                                                                                                                                                                                                                                                                                                                                                                                | #   | #   | #         | #     | #    | -    | ----                                                        | ----  | #                    | #                                                                                                                                    | #   | #   | #         | #     | #    |      |

|                          |                                                                                                                                                                                                                                                                                                                                                                                                               |      |      |           |       |      |      |                                                                                |       |                          |                                                                                                                                                                                                                                                                                                                                                  |      |      |           |       |      |      |
|--------------------------|---------------------------------------------------------------------------------------------------------------------------------------------------------------------------------------------------------------------------------------------------------------------------------------------------------------------------------------------------------------------------------------------------------------|------|------|-----------|-------|------|------|--------------------------------------------------------------------------------|-------|--------------------------|--------------------------------------------------------------------------------------------------------------------------------------------------------------------------------------------------------------------------------------------------------------------------------------------------------------------------------------------------|------|------|-----------|-------|------|------|
| Rsa1.0_01926.1.g30839.t1 | ref NP_198669.1  tryptophan synthase beta chain [Arabidopsis thaliana] gi 10176821 dbj BAB10143.1  tryptophan synthase beta chain [Arabidopsis thaliana] gi 19699005 gb AAL91238.1  tryptophan synthase beta chain [Arabidopsis thaliana] gi 23198094 gss AAN15574.1  tryptophan synthase beta chain [Arabidopsis thaliana] gi 332006949 gb AED84331.1  tryptophan synthase beta chain [Arabidopsis thaliana] | 457  | 506  | 3.00E-82  | 110.7 | 32.2 | 33.5 | tryptophan synthase beta chain                                                 | gbpln | Arabidopsis thaliana     | AT5G38530.1   Symbols: TSbtype2   tryptophan synthase beta type 2   chr5:15424097-15426294 FORWARD LENGTH=506                                                                                                                                                                                                                                    | 457  | 506  | 7.00E-85  | 110.7 | 32.2 | 33.5 |
| Rsa1.0_01926.1.g30840.t1 | dbj BAB09923.1  copia-like retrotransposable element [Arabidopsis thaliana]                                                                                                                                                                                                                                                                                                                                   | 374  | 1342 | 1.00E-58  | 358.8 | 29.9 | 36.6 | copia-like retrotransposable element                                           | gbpln | Arabidopsis thaliana     | ATMG00810.1   Symbols: ORF240B   DNA/RNA polymerases superfamily protein   chrM:227709-228431 REVERSE LENGTH=240                                                                                                                                                                                                                                 | 374  | 240  | 7.00E-19  | 64.2  | 12.8 | 19.0 |
| Rsa1.0_01926.1.g30841.t1 | gb AAG09097.1 AC009323.8 Putative retroelement polyprotein [Arabidopsis thaliana]                                                                                                                                                                                                                                                                                                                             | 357  | 1486 | 1.00E-100 | 416.2 | 50.4 | 57.7 | Putative retroelement polyprotein                                              | gbpln | Arabidopsis thaliana     | AT4G23160.1   Symbols: CRK8   cysteine-rich RLK (RECEPTOR-like protein kinase) 8   chr4:12129485-12134086 FORWARD LENGTH=1262                                                                                                                                                                                                                    | 357  | 1262 | 3.00E-50  | 353.5 | 29.7 | 44.8 |
| Rsa1.0_01926.1.g30842.t1 | gb AAC28189.1  contains similarity to Arabidopsis thaliana retrotransposon Athila (GB:X81801) [Arabidopsis thaliana]                                                                                                                                                                                                                                                                                          | 424  | 940  | 1.00E-62  | 221.7 | 32.8 | 42.0 | contains similarity to Arabidopsis thaliana retrotransposon Athila (GB:X81801) | gbpln | Arabidopsis thaliana     | #                                                                                                                                                                                                                                                                                                                                                | #    | #    | #         | #     | #    | #    |
| Rsa1.0_01927.1.g30843.t1 | gb AAG51783.1 AC079679.3 reverse transcriptase, putative; 16838-20266 [Arabidopsis thaliana]                                                                                                                                                                                                                                                                                                                  | 1948 | 1142 | 0         | 58.6  | 28.5 | 37.8 | reverse transcriptase, putative; 16838-20266                                   | gbpln | Arabidopsis thaliana     | AT4G29090.1   Symbols:   Ribonuclease H-like superfamily protein   chr4:14333528-14335255 FORWARD LENGTH=575                                                                                                                                                                                                                                     | 1948 | 575  | 5.00E-83  | 29.5  | 9.3  | 14.6 |
| Rsa1.0_01927.1.g30844.t5 | ref NP_192658.1  putative F-box protein [Arabidopsis thaliana] gi 75181645 sp Q9M0Q9.1 FB223.ARAT H RecName: Full=Putative F-box protein At4g09190 gi 7267592 emb CAB78043.1  putative protein [Arabidopsis thaliana] gi 332657333 gb AEE82733.1  putative F-box protein [Arabidopsis thaliana]                                                                                                               | 184  | 383  | 2.00E-27  | 208.2 | 42.9 | 55.4 | putative F-box protein                                                         | gbpln | Arabidopsis thaliana     | AT4G09190.1   Symbols:   F-box and associated interaction domains-containing protein   chr4:5855176-5856327 FORWARD LENGTH=383                                                                                                                                                                                                                   | 184  | 383  | 7.00E-30  | 208.2 | 42.9 | 55.4 |
| Rsa1.0_01927.1.g30845.t1 | ref XP_002878168.1  kinase family protein [Arabidopsis lyrata subsp. lyrata] gi 297324006 gb EFH54427.1  kinase family protein [Arabidopsis lyrata subsp. lyrata]                                                                                                                                                                                                                                             | 290  | 353  | 1.00E-128 | 121.7 | 76.6 | 85.9 | kinase family protein                                                          | gbpln | Arabidopsis lyrata       | AT3G57710.1   Symbols:   Protein kinase superfamily protein   chr3:21386233-21387288 REVERSE LENGTH=351                                                                                                                                                                                                                                          | 290  | 351  | 1.00E-127 | 121.0 | 74.1 | 85.2 |
| Rsa1.0_01928.1.g30846.t1 | ref NP_174543.1  putative F-box protein [Arabidopsis thaliana] gi 75264129 sp Q9LPJ7.1 FB31_ARATH RecName: Full=Putative F-box protein At1g32660 gi 6714270 gb AAF25966.1 AC017118.3 F6N18.5 [Arabidopsis thaliana] gi 332193394 gb AEE31515.1  putative F-box protein [Arabidopsis thaliana]                                                                                                                 | 488  | 446  | 7.00E-51  | 91.4  | 30.1 | 40.4 | putative F-box protein                                                         | gbpln | Arabidopsis thaliana     | AT1G32660.1   Symbols:   F-box and associated interaction domains-containing protein   chr1:11811040-11812380 FORWARD LENGTH=446                                                                                                                                                                                                                 | 488  | 446  | 2.00E-53  | 91.4  | 30.1 | 40.4 |
| Rsa1.0_01928.1.g30847.t1 | dbj BAJ33975.1  unnamed protein product [Thellungiella halophila]                                                                                                                                                                                                                                                                                                                                             | 328  | 328  | 0         | 100.0 | 97.6 | 98.8 | unnamed protein product                                                        | ----- | -----                    | AT1G48270.1   Symbols: GCR1   G-protein-coupled receptor 1   chr1:17828314-17830214 REVERSE LENGTH=326                                                                                                                                                                                                                                           | 328  | 326  | 0         | 99.4  | 96.6 | 98.2 |
| Rsa1.0_01928.1.g30848.t1 | ref XP_002891421.1  hypothetical protein ARALYDRAFT_473964 [Arabidopsis lyrata subsp. lyrata] gi 297337263 gb EFH67680.1  hypothetical protein ARALYDRAFT_473964 [Arabidopsis lyrata subsp. lyrata]                                                                                                                                                                                                           | 481  | 567  | 0         | 117.9 | 83.0 | 89.2 | hypothetical protein ARALYDRAFT_473964                                         | gbpln | Arabidopsis lyrata       | AT1G48280.1   Symbols:   hydroxyproline-rich glycoprotein family protein   chr1:17835196-17837553 FORWARD LENGTH=558                                                                                                                                                                                                                             | 481  | 558  | 0         | 116.0 | 81.7 | 87.1 |
| Rsa1.0_01928.1.g30849.t1 | gb ABD64939.1  hypothetical protein 24.t00017 [Brassica oleracea]                                                                                                                                                                                                                                                                                                                                             | 328  | 442  | 1.00E-113 | 134.8 | 59.8 | 67.1 | hypothetical protein 24.t00017                                                 | gbpln | Brassica oleracea        | AT2G13770.1   Symbols:   CONTAINS InterPro DOMAIN/s: Putative harbinger transposase-derived nuclease (InterPro:IPR006912); Has 451 Blast hits to 352 proteins in 33 species: Archae - 0; Bacteria - 0; Metazoa - 28; Fungi - 8; Plants - 388; Viruses - 0; Other Eukaryotes - 27 (source: NCBI BLINK).   chr2:5736603-5737847 FORWARD LENGTH=343 | 328  | 343  | 3.00E-22  | 104.6 | 15.9 | 19.2 |
| Rsa1.0_01928.1.g30850.t1 | ref WP_000519654.1  hypothetical protein, partial [Streptococcus agalactiae]                                                                                                                                                                                                                                                                                                                                  | 93   | 183  | 6.00E-21  | 196.8 | 60.2 | 71.0 | hypothetical protein, partial                                                  | gbpct | Streptococcus agalactiae | #                                                                                                                                                                                                                                                                                                                                                | #    | #    | #         | #     | #    | #    |
| Rsa1.0_01928.1.g30851.t1 | gb ABD65170.1  hypothetical protein 40.t00057 [Brassica oleracea]                                                                                                                                                                                                                                                                                                                                             | 236  | 255  | 5.00E-67  | 108.1 | 58.9 | 71.6 | hypothetical protein 40.t00057                                                 | gbpln | Brassica oleracea        | AT3G47680.1   Symbols:   DNA binding   chr3:17577483-17578391 REVERSE LENGTH=302                                                                                                                                                                                                                                                                 | 236  | 302  | 2.00E-40  | 128.0 | 39.8 | 55.1 |

|                           |                                                                                                                                                                                                                                                                                                                          |      |      |           |       |      |      |                                                 |       |                      |                                                                                                                                                                                                                                                                                                                                                                                       |      |      |           |       |      |      |
|---------------------------|--------------------------------------------------------------------------------------------------------------------------------------------------------------------------------------------------------------------------------------------------------------------------------------------------------------------------|------|------|-----------|-------|------|------|-------------------------------------------------|-------|----------------------|---------------------------------------------------------------------------------------------------------------------------------------------------------------------------------------------------------------------------------------------------------------------------------------------------------------------------------------------------------------------------------------|------|------|-----------|-------|------|------|
| Rsa1.0_01928.1.g30852.t1  | ref XP_002893682.1  Beta-galactosidase 15 precursor [Arabidopsis lyrata subsp. lyrata] gi 297339524 gb EFH69941.1  Beta-galactosidase 15 precursor [Arabidopsis lyrata subsp. lyrata]                                                                                                                                    | 226  | 780  | 1.00E-118 | 345.1 | 88.1 | 93.8 | Beta-galactosidase 15 precursor                 | gbpln | Arabidopsis lyrata   | AT1G31740.1   Symbols: BGAL15   beta-galactosidase 15   chr1:11365285-11369908 REVERSE LENGTH=786                                                                                                                                                                                                                                                                                     | 226  | 786  | 1.00E-119 | 347.8 | 86.3 | 92.9 |
| Rsa1.0_01928.1.g30853.t1  | ref XP_002893682.1  Beta-galactosidase 15 precursor [Arabidopsis lyrata subsp. lyrata] gi 297339524 gb EFH69941.1  Beta-galactosidase 15 precursor [Arabidopsis lyrata subsp. lyrata]                                                                                                                                    | 120  | 780  | 5.00E-64  | 650.0 | 92.5 | 96.7 | Beta-galactosidase 15 precursor                 | gbpln | Arabidopsis lyrata   | AT1G31740.1   Symbols: BGAL15   beta-galactosidase 15   chr1:11365285-11369908 REVERSE LENGTH=786                                                                                                                                                                                                                                                                                     | 120  | 786  | 5.00E-65  | 655.0 | 90.0 | 95.0 |
| Rsa1.0_01929.1.g30854.t1  | ref NP_194866.2  protein kinase family protein [Arabidopsis thaliana] gi 55978825 gb AAV68874.1  hypothetical protein AT4G31380 [Arabidopsis thaliana] gi 60547875 gb AAX23901.1  hypothetical protein At4g31380 [Arabidopsis thaliana] gi 332660502 gb AEE85902.1  protein kinase family protein [Arabidopsis thaliana] | 124  | 181  | 1.00E-53  | 146.0 | 91.1 | 96.0 | protein kinase family protein                   | gbpln | Arabidopsis thaliana | AT4G31380.1   Symbols: FLP1   PPF1-like protein 1   chr4:15229837-15230382 FORWARD LENGTH=181                                                                                                                                                                                                                                                                                         | 124  | 181  | 2.00E-56  | 146.0 | 91.1 | 96.0 |
| Rsa1.0_01929.1.g30855.t1  | ref XP_002869328.1  hypothetical protein ARALYDRAFT_491601 [Arabidopsis lyrata subsp. lyrata] gi 297315164 gb EFH45587.1  hypothetical protein ARALYDRAFT_491601 [Arabidopsis lyrata subsp. lyrata]                                                                                                                      | 282  | 344  | 1.00E-100 | 122.0 | 72.3 | 78.7 | hypothetical protein ARALYDRAFT_491601          | gbpln | Arabidopsis lyrata   | AT4G31400.1   Symbols: CTF7   damaged DNA binding:DNA-directed DNA polymerases   chr4:15237411-15239266 FORWARD LENGTH=345                                                                                                                                                                                                                                                            | 282  | 345  | 1.00E-96  | 122.3 | 72.7 | 79.1 |
| Rsa1.0_01929.1.g30856.t1  | emb CAA16544.1  hypothetical protein [Arabidopsis thaliana] gi 7270044 emb CAB79859.1  hypothetical protein [Arabidopsis thaliana]                                                                                                                                                                                       | 324  | 380  | 1.00E-128 | 117.3 | 78.1 | 84.9 | hypothetical protein                            | gbpln | Arabidopsis thaliana | AT4G31410.2   Symbols:   Protein of unknown function (DUF1644)   chr4:15244259-15245474 FORWARD LENGTH=308                                                                                                                                                                                                                                                                            | 324  | 308  | 1.00E-129 | 95.1  | 78.1 | 84.6 |
| Rsa1.0_01929.1.g30857.t1  | ref XP_002869326.1  predicted protein [Arabidopsis lyrata subsp. lyrata] gi 297315162 gb EFH45585.1  predicted protein [Arabidopsis lyrata subsp. lyrata]                                                                                                                                                                | 555  | 571  | 1.00E-175 | 102.9 | 73.2 | 81.1 | predicted protein                               | gbpln | Arabidopsis lyrata   | AT4G31430.2   Symbols:   unknown protein; LOCATED IN: plasma membrane; EXPRESSED IN: 25 plant structures; EXPRESSED DURING: 15 growth stages; Has 3533 Blast hits to 34131 proteins in 2444 species: Archae - 798; Bacteria - 22429; Metazoa - 974; Fungi - 991; Plants - 531; Viruses - 0; Other Eukaryotes - 9610 (source: NCBI BLink).   chr4:15248510-15252204 FORWARD LENGTH=574 | 555  | 574  | 1.00E-171 | 103.4 | 70.6 | 80.7 |
| Rsa1.0_01929.1.g30858.t1  | ref XP_002869325.1  hypothetical protein ARALYDRAFT_491593 [Arabidopsis lyrata subsp. lyrata] gi 297315161 gb EFH45584.1  hypothetical protein ARALYDRAFT_491593 [Arabidopsis lyrata subsp. lyrata]                                                                                                                      | 339  | 394  | 1.00E-129 | 116.2 | 74.9 | 85.0 | hypothetical protein ARALYDRAFT_491593          | gbpln | Arabidopsis lyrata   | AT4G31440.1   Symbols:   unknown protein; BEST Arabidopsis thaliana protein match is: unknown protein (TAIR:AT2G24530.1); Has 210 Blast hits to 209 proteins in 55 species: Archae - 0; Bacteria - 72; Metazoa - 2; Fungi - 6; Plants - 128; Viruses - 0; Other Eukaryotes - 2 (source: NCBI BLink).   chr4:15253731-15254870 FORWARD LENGTH=379                                      | 339  | 379  | 1.00E-118 | 111.8 | 70.8 | 79.4 |
| Rsa1.0_01929.1.g30859.t1  | ref XP_002867301.1  ribosomal protein L28 family protein [Arabidopsis lyrata subsp. lyrata] gi 297313137 gb EFH43560.1  ribosomal protein L28 family protein [Arabidopsis lyrata subsp. lyrata]                                                                                                                          | 215  | 212  | 1.00E-108 | 98.6  | 90.2 | 94.0 | ribosomal protein L28 family protein            | gbpln | Arabidopsis lyrata   | AT4G31460.1   Symbols:   Ribosomal L28 family   chr4:15259773-15260847 REVERSE LENGTH=212                                                                                                                                                                                                                                                                                             | 215  | 212  | 1.00E-106 | 98.6  | 87.9 | 92.1 |
| Rsa1.0_01929.1.g30860.t10 | gb AFD01320.1  auxin response factor 25 [Brassica rapa subsp. pekinensis]                                                                                                                                                                                                                                                | 580  | 549  | 0         | 94.7  | 75.5 | 81.2 | auxin response factor 25                        | gbpln | Brassica rapa        | AT1G34410.1   Symbols: ARF21   auxin response factor 21   chr1:12577722-12580824 FORWARD LENGTH=606                                                                                                                                                                                                                                                                                   | 580  | 606  | 1.00E-144 | 104.5 | 47.4 | 61.7 |
| Rsa1.0_01930.1.g30861.t1  | ref NP_179837.1  hydroxyproline-rich glycoprotein family protein [Arabidopsis thaliana] gi 4544442 gb AAD22350.1  unknown protein [Arabidopsis thaliana] gi 28466887 gb AAO44052.1  At2g22510 [Arabidopsis thaliana] gi 330252222 gb AEC07316.1  hydroxyproline-rich glycoprotein family protein [Arabidopsis thaliana]  | 128  | 124  | 1.00E-26  | 96.9  | 61.7 | 66.4 | hydroxyproline-rich glycoprotein family protein | gbpln | Arabidopsis thaliana | AT2G22510.1   Symbols:   hydroxyproline-rich glycoprotein family protein   chr2:9569327-9569701 REVERSE LENGTH=124                                                                                                                                                                                                                                                                    | 128  | 124  | 2.00E-29  | 96.9  | 61.7 | 66.4 |
| Rsa1.0_01930.1.g30862.t1  | ref XP_002864008.1  predicted protein [Arabidopsis lyrata subsp. lyrata] gi 297309843 gb EFH40267.1  predicted protein [Arabidopsis lyrata subsp. lyrata]                                                                                                                                                                | 2538 | 2586 | 0         | 101.9 | 81.0 | 89.6 | predicted protein                               | gbpln | Arabidopsis lyrata   | AT5G49680.2   Symbols:   Golgi-body localisation protein domain ;RNA pol II promoter Fmp27 protein domain   chr5:20176385-20188307 FORWARD LENGTH=2587                                                                                                                                                                                                                                | 2538 | 2587 | 0         | 101.9 | 80.7 | 89.5 |

|                          |                                                                                                                                                                                                                                                                                                                                                                        |     |      |           |       |      |       |                                                          |       |                      |                                                                                                                                                         |     |     |           |       |      |       |
|--------------------------|------------------------------------------------------------------------------------------------------------------------------------------------------------------------------------------------------------------------------------------------------------------------------------------------------------------------------------------------------------------------|-----|------|-----------|-------|------|-------|----------------------------------------------------------|-------|----------------------|---------------------------------------------------------------------------------------------------------------------------------------------------------|-----|-----|-----------|-------|------|-------|
| Rsa1.0_01930.1.g30863.t1 | refNP_191452.2   F-box/LRR-repeat protein [Arabidopsis thaliana]   gi7524441   sp Q8GXW6.1 FBL59_ARAT H RecName: Full=F-box/LRR-repeat protein At3g58930   gi26451056 dbj BA042633.1  unknown protein [Arabidopsis thaliana]   gi28951059 gb AAO63453.1  At3g58930 [Arabidopsis thaliana]   gi332646330 gb AEE79851.1  F-box/LRR-repeat protein [Arabidopsis thaliana] | 411 | 482  | 1.00E-129 | 117.3 | 58.4 | 72.0  | F-box/LRR-repeat protein                                 | gbpln | Arabidopsis thaliana | AT3G58930.1   Symbols:   F-box/RNI-like superfamily protein   chr3:2177831-21780014 REVERSE LENGTH=482                                                  | 411 | 482 | 1.00E-131 | 117.3 | 58.4 | 72.0  |
| Rsa1.0_01930.1.g30864.t1 | gb AFM77908.1  MADS-box protein SVP [Brassica napus]                                                                                                                                                                                                                                                                                                                   | 243 | 241  | 1.00E-130 | 99.2  | 95.9 | 97.9  | MADS-box protein SVP                                     | gbpln | Brassica napus       | AT2G22540.1   Symbols: SVP, AGL22   K-box region and MADS-box transcription factor family protein   chr2:9580417-9583603 FORWARD LENGTH=240             | 243 | 240 | 1.00E-123 | 98.8  | 90.1 | 95.5  |
| Rsa1.0_01930.1.g30865.t1 | refNP_179842.2   Kinase interacting (KIP1-like) family protein [Arabidopsis thaliana]   gi33025228 gb AEC07322.1  Kinase interacting (KIP1-like) family protein [Arabidopsis thaliana]                                                                                                                                                                                 | 895 | 947  | 0         | 105.8 | 86.4 | 92.2  | Kinase interacting (KIP1-like) family protein            | gbpln | Arabidopsis thaliana | AT2G22560.1   Symbols:   Kinase interacting (KIP1-like) family protein   chr2:9585892-9588838 FORWARD LENGTH=947                                        | 895 | 947 | 0         | 105.8 | 86.4 | 92.2  |
| Rsa1.0_01930.1.g30866.t1 | refNP_850026.1   RNA-binding KH domain-containing protein [Arabidopsis thaliana]   gi33025232 gb AEC07326.1  RNA-binding KH domain-containing protein [Arabidopsis thaliana]                                                                                                                                                                                           | 613 | 632  | 0         | 103.1 | 73.4 | 82.9  | RNA-binding KH domain-containing protein                 | gbpln | Arabidopsis thaliana | AT2G22600.1   Symbols:   RNA-binding KH domain-containing protein   chr2:9596617-9599050 FORWARD LENGTH=632                                             | 613 | 632 | 0         | 103.1 | 73.4 | 82.9  |
| Rsa1.0_01930.1.g30867.t2 | ref XP_002885458.1  hypothetical protein ARALYDRAFT_342316 [Arabidopsis lyrata subsp. lyrata]   gi297331298 gb EFH61717.1  hypothetical protein ARALYDRAFT_342316 [Arabidopsis lyrata subsp. lyrata]                                                                                                                                                                   | 344 | 508  | 2.00E-42  | 147.7 | 31.4 | 39.8  | hypothetical protein ARALYDRAFT_342316                   | gbpln | Arabidopsis lyrata   | AT3G21660.1   Symbols:   UBX domain-containing protein   chr3:7624495-7626654 REVERSE LENGTH=435                                                        | 344 | 435 | 4.00E-33  | 126.5 | 25.6 | 33.1  |
| Rsa1.0_01930.1.g30868.t1 | ref XP_002885458.1  hypothetical protein ARALYDRAFT_342316 [Arabidopsis lyrata subsp. lyrata]   gi297331298 gb EFH61717.1  hypothetical protein ARALYDRAFT_342316 [Arabidopsis lyrata subsp. lyrata]                                                                                                                                                                   | 230 | 508  | 3.00E-44  | 220.9 | 49.1 | 60.0  | hypothetical protein ARALYDRAFT_342316                   | gbpln | Arabidopsis lyrata   | AT4G15410.1   Symbols: PUX5   serine/threonine protein phosphatase 2A 55 kDa regulatory subunit B prime gamma   chr4:8814868-8816596 FORWARD LENGTH=421 | 230 | 421 | 5.00E-37  | 183.0 | 41.7 | 52.6  |
| Rsa1.0_01931.1.g30869.t1 | gb AAC69114.1  putative gag-protease polyprotein [Arabidopsis thaliana]                                                                                                                                                                                                                                                                                                | 179 | 627  | 5.00E-18  | 350.3 | 28.5 | 40.2  | putative gag-protease polyprotein                        | gbpln | Arabidopsis thaliana | #                                                                                                                                                       | #   | #   | #         | #     | #    | #     |
| Rsa1.0_01931.1.g30870.t1 | #                                                                                                                                                                                                                                                                                                                                                                      | #   | #    | #         | #     | #    | #     | -                                                        | ----  | ----                 | AT1G28760.1   Symbols:   Uncharacterized conserved protein (DUF2215)   chr1:10103158-10104588 FORWARD LENGTH=476                                        | 214 | 476 | 1.00E-13  | 222.4 | 25.7 | 36.4  |
| Rsa1.0_01931.1.g30871.t1 | gb AAD17395.1  putative non-LTR retroelement reverse transcriptase [Arabidopsis thaliana]                                                                                                                                                                                                                                                                              | 502 | 1138 | 1.00E-132 | 226.7 | 46.6 | 65.1  | putative non-LTR retroelement reverse transcriptase      | gbpln | Arabidopsis thaliana | AT4G29090.1   Symbols:   Ribonuclease H-like superfamily protein   chr4:14333528-14335255 FORWARD LENGTH=575                                            | 502 | 575 | 1.00E-75  | 114.5 | 33.3 | 52.4  |
| Rsa1.0_01931.1.g30872.t1 | ref XP_003635668.1  PREDICTED: uncharacterized protein LOC100854178, partial [Vitis vinifera]                                                                                                                                                                                                                                                                          | 498 | 478  | 4.00E-62  | 96.0  | 29.5 | 43.6  | PREDICTED: uncharacterized protein LOC100854178, partial | gbpln | Vitis vinifera       | #                                                                                                                                                       | #   | #   | #         | #     | #    | #     |
| Rsa1.0_01931.1.g30873.t1 | gb EOA33811.1  hypothetical protein CARUB_v10021283mg [Capsella rubella]                                                                                                                                                                                                                                                                                               | 377 | 386  | 2.33E-156 | 102.4 | 72.7 | 82.8  | hypothetical protein CARUB_v10021283mg                   | gbpln | Capsella rubella     | AT2G47450.1   Symbols: CAO, CPSRP43   chloroplast signal recognition particle component (CAO)   chr2:19472781-19473902 FORWARD LENGTH=373               | 377 | 373 | 1.00E-145 | 98.9  | 73.5 | 82.5  |
| Rsa1.0_01931.1.g30874.t1 | ref XP_002891415.1  EMB2191 [Arabidopsis lyrata subsp. lyrata]   gi297337257 gb EFH67674.1  EMB2191 [Arabidopsis lyrata subsp. lyrata]                                                                                                                                                                                                                                 | 188 | 192  | 2.00E-94  | 102.1 | 88.3 | 94.7  | EMB2191                                                  | gbpln | Arabidopsis lyrata   | AT1G48175.1   Symbols: emb2191   Cytidine/deoxycytidylate deaminase family protein   chr1:17790957-17792066 FORWARD LENGTH=182                          | 188 | 182 | 5.00E-94  | 96.8  | 86.2 | 91.5  |
| Rsa1.0_01931.1.g30875.t1 | gb EOA38564.1  hypothetical protein CARUB_v10010377mg, partial [Capsella rubella]                                                                                                                                                                                                                                                                                      | 145 | 189  | 5.00E-65  | 130.3 | 80.0 | 85.5  | hypothetical protein CARUB_v10010377mg, partial          | gbpln | Capsella rubella     | AT1G48180.1   Symbols:   signal recognition particle 19 kDa protein, putative / SRP19, putative   chr1:17786779-17788286 REVERSE LENGTH=145             | 145 | 145 | 8.00E-59  | 100.0 | 77.2 | 84.1  |
| Rsa1.0_01931.1.g30876.t1 | ref XP_002891413.1  hypothetical protein ARALYDRAFT_314249 [Arabidopsis lyrata subsp. lyrata]   gi297337255 gb EFH67672.1  hypothetical protein ARALYDRAFT_314249 [Arabidopsis lyrata subsp. lyrata]                                                                                                                                                                   | 89  | 89   | 1.00E-42  | 100.0 | 95.5 | 100.0 | hypothetical protein ARALYDRAFT_314249                   | gbpln | Arabidopsis lyrata   | AT1G48140.1   Symbols:   dolichol-phosphate mannosyltransferase-related   chr1:17783402-17783914 FORWARD LENGTH=89                                      | 89  | 89  | 3.00E-45  | 100.0 | 94.4 | 100.0 |
| Rsa1.0_01932.1.g30877.t2 | gb AAF79618.1 AC027665_19 F5M15.26 [Arabidopsis thaliana]                                                                                                                                                                                                                                                                                                              | 960 | 1838 | 0         | 191.5 | 41.7 | 57.6  | F5M15.26                                                 | gbpln | Arabidopsis thaliana | #                                                                                                                                                       | #   | #   | #         | #     | #    | #     |
| Rsa1.0_01932.1.g30878.t1 | #                                                                                                                                                                                                                                                                                                                                                                      | #   | #    | #         | #     | #    | #     | -                                                        | ----  | ----                 | #                                                                                                                                                       | #   | #   | #         | #     | #    | #     |

|                          |                                                                                                                                                                                                                                                                                                                                                                                        |     |      |           |       |      |      |                                                                                    |       |                      |                                                                                                                                                                                                                                                                                                                                                                                                                                                                                                                                                                                                  |     |      |           |       |      |      |
|--------------------------|----------------------------------------------------------------------------------------------------------------------------------------------------------------------------------------------------------------------------------------------------------------------------------------------------------------------------------------------------------------------------------------|-----|------|-----------|-------|------|------|------------------------------------------------------------------------------------|-------|----------------------|--------------------------------------------------------------------------------------------------------------------------------------------------------------------------------------------------------------------------------------------------------------------------------------------------------------------------------------------------------------------------------------------------------------------------------------------------------------------------------------------------------------------------------------------------------------------------------------------------|-----|------|-----------|-------|------|------|
| Rsa1.0_01932.1.g30879.t1 | ref XP_002885812.1  hypothetical protein ARALYDRAFT_319345 [Arabidopsis lyrata subsp. lyrata] gi 297331652 gb EFH62071.1  hypothetical protein ARALYDRAFT_319345 [Arabidopsis lyrata subsp. lyrata]                                                                                                                                                                                    | 721 | 773  | 0         | 107.2 | 69.2 | 78.9 | hypothetical protein ARALYDRAFT_319345                                             | gbpln | Arabidopsis lyrata   | AT2G06040.1   Symbols:   CONTAINS InterPro DOMAIN/s: Leucine-rich repeat, cysteine-containing subtype (InterPro:IPR006553); BEST Arabidopsis thaliana protein match is: RNI-like superfamily protein (TAIR:AT5G21900.1); Has 5028 Blast hits to 2547 proteins in 240 species: Archae - 0; Bacteria - 125; Metazoa - 2326; Fungi - 765; Plants - 1373; Viruses - 0; Other Eukaryotes - 439 (source: NCBI BLink).   chr2:2352333-2355419 REVERSE LENGTH=762                                                                                                                                        | 721 | 762  | 0         | 105.7 | 66.7 | 76.4 |
| Rsa1.0_01932.1.g30880.t1 | ref XP_002883732.1  hypothetical protein ARALYDRAFT_480213 [Arabidopsis lyrata subsp. lyrata] gi 297329572 gb EFH59991.1  hypothetical protein ARALYDRAFT_480213 [Arabidopsis lyrata subsp. lyrata]                                                                                                                                                                                    | 281 | 288  | 1.00E-144 | 102.5 | 88.6 | 96.1 | hypothetical protein ARALYDRAFT_480213                                             | gbpln | Arabidopsis lyrata   | AT2G06025.1   Symbols:   Acyl-CoA N-acyltransferases (NAT) superfamily protein   chr2:2350231-2351898 FORWARD LENGTH=288                                                                                                                                                                                                                                                                                                                                                                                                                                                                         | 281 | 288  | 1.00E-144 | 102.5 | 87.5 | 94.3 |
| Rsa1.0_01932.1.g30881.t1 | dbj BAA97086.1  unnamed protein product [Arabidopsis thaliana]                                                                                                                                                                                                                                                                                                                         | 261 | 341  | 9.00E-60  | 130.7 | 56.7 | 69.0 | unnamed protein product                                                            | gbpln | Arabidopsis thaliana | #                                                                                                                                                                                                                                                                                                                                                                                                                                                                                                                                                                                                | #   | #    | #         | #     | #    |      |
| Rsa1.0_01932.1.g30882.t1 | dbj BAA97087.1  copia-type pol polyprotein-like [Arabidopsis thaliana]                                                                                                                                                                                                                                                                                                                 | 584 | 1123 | 0         | 192.3 | 74.7 | 83.2 | copia-type pol polyprotein-like                                                    | gbpln | Arabidopsis thaliana | AT4G23160.1   Symbols: CRK8   cysteine-rich RLK (RECEPTOR-like protein kinase) 8   chr4:12129485-12134086 FORWARD LENGTH=1262                                                                                                                                                                                                                                                                                                                                                                                                                                                                    | 584 | 1262 | 7.00E-28  | 216.1 | 17.1 | 26.0 |
| Rsa1.0_01932.1.g30883.t1 | gb ABW81018.1  gag-pol polymerase [Arabidopsis lyrata subsp. lyrata]                                                                                                                                                                                                                                                                                                                   | 905 | 672  | 2.00E-96  | 74.3  | 22.9 | 37.1 | gag-pol polymerase                                                                 | gbpln | Arabidopsis lyrata   | #                                                                                                                                                                                                                                                                                                                                                                                                                                                                                                                                                                                                | #   | #    | #         | #     | #    |      |
| Rsa1.0_01932.1.g30884.t2 | gb ABD65082.1  hypothetical protein 27.100126 [Brassica oleracea]                                                                                                                                                                                                                                                                                                                      | 519 | 578  | 1.00E-111 | 111.4 | 46.1 | 61.1 | hypothetical protein 27.100126                                                     | gbpln | Brassica oleracea    | AT1G51172.1   Symbols:   unknown protein; FUNCTIONS IN: molecular function unknown; INVOLVED IN: biological process unknown; LOCATED IN: cellular component unknown; CONTAINS InterPro DOMAIN/s: Protein of unknown function DUF601 (InterPro:IPR006736); BEST Arabidopsis thaliana protein match is: Protein of unknown function, DUF601 (TAIR:AT1G46696.1); Has 1849 Blast hits to 1554 proteins in 272 species: Archae - 15; Bacteria - 116; Metazoa - 677; Fungi - 267; Plants - 154; Viruses - 11; Other Eukaryotes - 609 (source: NCBI BLink).   chr1:18963205-18965571 FORWARD LENGTH=681 | 519 | 681  | 1.00E-10  | 131.2 | 6.2  | 12.5 |
| Rsa1.0_01933.1.g30885.t1 | ref NP_680147.1  uncharacterized protein [Arabidopsis thaliana] gi 52354445 gb AAU44543.1  hypothetical protein AT5G05965 [Arabidopsis thaliana] gi 332003563 gb AED90946.1  uncharacterized protein AT5G05965 [Arabidopsis thaliana]                                                                                                                                                  | 137 | 131  | 2.00E-39  | 95.6  | 75.2 | 82.5 | uncharacterized protein                                                            | gbpln | Arabidopsis thaliana | AT5G05965.1   Symbols:   unknown protein; FUNCTIONS IN: molecular function unknown; INVOLVED IN: biological process unknown; LOCATED IN: chloroplast; BEST Arabidopsis thaliana protein match is: unknown protein (TAIR:AT2G39855.2); Has 30201 Blast hits to 17322 proteins in 780 species: Archae - 12; Bacteria - 1396; Metazoa - 17338; Fungi - 3422; Plants - 5037; Viruses - 0; Other Eukaryotes - 2996 (source: NCBI BLink).   chr5:1791059-1792495 REVERSE LENGTH=131                                                                                                                    | 137 | 131  | 4.00E-42  | 95.6  | 75.2 | 82.5 |
| Rsa1.0_01933.1.g30886.t1 | ref NP_568160.1  bifunctional inhibitor/lipid-transfer protein/seed storage 2S albumin-like protein [Arabidopsis thaliana] gi 21592534 gb AAM64483.1  unknown [Arabidopsis thaliana] gi 88011017 gb ABD38889.1  At5g05960 [Arabidopsis thaliana] gi 332003562 gb AED90945.1  bifunctional inhibitor/lipid-transfer protein/seed storage 2S albumin-like protein [Arabidopsis thaliana] | 116 | 116  | 3.00E-53  | 100.0 | 86.2 | 94.0 | bifunctional inhibitor/lipid-transfer protein/seed storage 2S albumin-like protein | gbpln | Arabidopsis thaliana | AT5G05960.1   Symbols:   Bifunctional inhibitor/lipid-transfer protein/seed storage 2S albumin superfamily protein   chr5:1790256-1790694 FORWARD LENGTH=116                                                                                                                                                                                                                                                                                                                                                                                                                                     | 116 | 116  | 5.00E-56  | 100.0 | 86.2 | 94.0 |
| Rsa1.0_01933.1.g30887.t1 | gb EOA22495.1  hypothetical protein CARUB_v1.0003149mg [Capsella rubella]                                                                                                                                                                                                                                                                                                              | 176 | 175  | 1.00E-89  | 99.4  | 94.3 | 97.2 | hypothetical protein CARUB_v1.0003149mg                                            | gbpln | Capsella rubella     | AT5G05950.1   Symbols: MEE60   maternal effect embryo arrest 60   chr5:1788814-1789341 FORWARD LENGTH=175                                                                                                                                                                                                                                                                                                                                                                                                                                                                                        | 176 | 175  | 1.00E-90  | 99.4  | 92.6 | 96.0 |
| Rsa1.0_01933.1.g30888.t1 | ref XP_002871189.1  hypothetical protein ARALYDRAFT_325218 [Arabidopsis lyrata subsp. lyrata] gi 297317026 gb EFH47448.1  hypothetical protein ARALYDRAFT_325218 [Arabidopsis lyrata subsp. lyrata]                                                                                                                                                                                    | 611 | 609  | 0         | 99.7  | 85.1 | 91.3 | hypothetical protein ARALYDRAFT_325218                                             | gbpln | Arabidopsis lyrata   | AT5G05940.1   Symbols: ATROPGEF5, ROPGEF5   ROP guanine nucleotide exchange factor 5   chr5:1786028-1788363 FORWARD LENGTH=611                                                                                                                                                                                                                                                                                                                                                                                                                                                                   | 611 | 611  | 0         | 100.0 | 85.8 | 92.0 |

|                          |                                                                                                                                                                                                                                                                                                                                                                                                          |     |     |           |       |      |       |                                                          |       |                      |                                                                                                                                               |     |     |          |       |      |      |
|--------------------------|----------------------------------------------------------------------------------------------------------------------------------------------------------------------------------------------------------------------------------------------------------------------------------------------------------------------------------------------------------------------------------------------------------|-----|-----|-----------|-------|------|-------|----------------------------------------------------------|-------|----------------------|-----------------------------------------------------------------------------------------------------------------------------------------------|-----|-----|----------|-------|------|------|
| Rsa1.0_01933.1.g30889.t6 | refXP_002873229.1   hypothetical protein ARALYDRAFT_487392 [Arabidopsis lyrata subsp. lyrata] gi 297319066 gb EFH49488.1   hypothetical protein ARALYDRAFT_487392 [Arabidopsis lyrata subsp. lyrata]                                                                                                                                                                                                     | 369 | 367 | 0         | 99.5  | 94.3 | 97.8  | hypothetical protein ARALYDRAFT_487392                   | gbpln | Arabidopsis lyrata   | AT5G05920.1   Symbols: DHS, EDA22   deoxyhypusine synthase   chr5:1777781-1779699 REVERSE LENGTH=368                                          | 369 | 368 | 0        | 99.7  | 94.0 | 98.4 |
| Rsa1.0_01933.1.g30890.t1 | refXP_004299151.1   PREDICTED: cytochrome P450 71A1-like [Fragaria vesca subsp. vesca]                                                                                                                                                                                                                                                                                                                   | 488 | 511 | 1.00E-106 | 104.7 | 41.6 | 60.0  | PREDICTED: cytochrome P450 71A1-like                     | gbpln | Fragaria vesca       | AT3G26180.1   Symbols: CYP71B20   cytochrome P450, family 71, subfamily B, polypeptide 20   chr3:9578407-9579993 REVERSE LENGTH=502           | 488 | 502 | 8.00E-96 | 102.9 | 40.2 | 59.6 |
| Rsa1.0_01933.1.g30891.t1 | gb EOA27690.1   hypothetical protein CARUB_v10023843mg, partial [Capsella rubella]                                                                                                                                                                                                                                                                                                                       | 125 | 271 | 2.00E-15  | 216.8 | 40.0 | 56.0  | hypothetical protein CARUB_v10023843mg, partial          | gbpln | Capsella rubella     | AT4G09490.1   Symbols:   Polynucleotidyl transferase, ribonuclease H-like superfamily protein   chr4:6015583-6016575 REVERSE LENGTH=170       | 125 | 170 | 1.00E-16 | 136.0 | 38.4 | 56.8 |
| Rsa1.0_01933.1.g30892.t1 | gb ABV21212.1   Ty1_Copia-element protein [Arabidopsis thaliana]                                                                                                                                                                                                                                                                                                                                         | 538 | 438 | 6.00E-86  | 81.4  | 32.7 | 46.7  | Ty1_Copia-element protein                                | gbpln | Arabidopsis thaliana | AT3G24255.1   Symbols:   RNA-directed DNA polymerase (reverse transcriptase)-related family protein   chr3:8789471-8793208 FORWARD LENGTH=746 | 538 | 746 | 2.00E-55 | 138.7 | 25.3 | 37.4 |
| Rsa1.0_01933.1.g30893.t1 | refXP_002323082.1   cytochrome P450 [Populus trichocarpa] gi 222867712 gb EEF0488.1   cytochrome P450 [Populus trichocarpa]                                                                                                                                                                                                                                                                              | 497 | 486 | 1.00E-111 | 97.8  | 42.3 | 61.2  | cytochrome P450                                          | gbpln | Populus trichocarpa  | AT3G26180.1   Symbols: CYP71B20   cytochrome P450, family 71, subfamily B, polypeptide 20   chr3:9578407-9579993 REVERSE LENGTH=502           | 497 | 502 | 3.00E-95 | 101.0 | 38.2 | 59.4 |
| Rsa1.0_01933.1.g30894.t1 | ref NP_196209.1   UDP-glucuronosyl/UDP-glucosyl transferase family protein [Arabidopsis thaliana] gi 75262507 sp Q9F196.1 U76C3_ARATH RecName: Full=UDP-glycosyltransferase 76C3 gi 10177563 dbj BAB10795.1   glucuronosyl transferase-like protein [Arabidopsis thaliana] gi 332003554 gb AED90937.1   UDP-glycosyltransferase 76C3 [Arabidopsis thaliana]                                              | 321 | 450 | 6.00E-89  | 140.2 | 49.8 | 57.3  | UDP-glucuronosyl/UDP-glucosyl transferase family protein | gbpln | Arabidopsis thaliana | AT5G05900.1   Symbols:   UDP-Glycosyltransferase superfamily protein   chr5:1774513-1776381 FORWARD LENGTH=450                                | 321 | 450 | 2.00E-91 | 140.2 | 49.8 | 57.3 |
| Rsa1.0_01933.1.g30895.t1 | refXP_002871186.1   UDP-glucuronosyl/UDP-glucosyl transferase family protein [Arabidopsis lyrata subsp. lyrata] gi 297317023 gb EFH47445.1   UDP-glucuronosyl/UDP-glucosyl transferase family protein [Arabidopsis lyrata subsp. lyrata]                                                                                                                                                                 | 482 | 455 | 0         | 94.4  | 67.0 | 80.7  | UDP-glucuronosyl/UDP-glucosyl transferase family protein | gbpln | Arabidopsis lyrata   | AT5G05890.1   Symbols:   UDP-Glycosyltransferase superfamily protein   chr5:1772567-1774012 FORWARD LENGTH=455                                | 482 | 455 | 0        | 94.4  | 67.0 | 80.1 |
| Rsa1.0_01933.1.g30896.t1 | ref NP_196207.1   UDP-glucuronosyl/UDP-glucosyl transferase family protein [Arabidopsis thaliana] gi 75262509 sp Q9F198.1 U76C4_ARATH RecName: Full=UDP-glycosyltransferase 76C4 gi 10177561 dbj BAB10793.1   glucuronosyl transferase-like protein [Arabidopsis thaliana] gi 332003552 gb AED90935.1   UDP-glycosyltransferase 76C4 [Arabidopsis thaliana]                                              | 148 | 451 | 1.00E-63  | 304.7 | 77.7 | 88.5  | UDP-glucuronosyl/UDP-glucosyl transferase family protein | gbpln | Arabidopsis thaliana | AT5G05880.1   Symbols:   UDP-Glycosyltransferase superfamily protein   chr5:1769648-1771515 FORWARD LENGTH=451                                | 148 | 451 | 3.00E-66 | 304.7 | 77.7 | 88.5 |
| Rsa1.0_01934.1.g30897.t1 | ref NP_172604.1   putative pectinesterase 56 [Arabidopsis thaliana] gi 75339345 sp Q4PT34.1 PME56_ARATH RecName: Full=Probable pectinesterase 56; Short=PE 56; AltName: Full=Pectin methyltransferase 56; Short=AtPME56; Flags: Precursor gi 67633368 gb AY78609.1   pectinesterase family protein [Arabidopsis thaliana] gi 332190606 gb AEE28727.1   putative pectinesterase 56 [Arabidopsis thaliana] | 217 | 288 | 7.00E-65  | 132.7 | 57.6 | 74.7  | putative pectinesterase 56                               | gbpln | Arabidopsis thaliana | AT1G11370.1   Symbols:   Pectin lyase-like superfamily protein   chr1:3828098-3830945 REVERSE LENGTH=288                                      | 217 | 288 | 2.00E-67 | 132.7 | 57.6 | 74.7 |
| Rsa1.0_01934.1.g30898.t1 | gb ABW17183.1   profilin [Raphanus sativus] gi 158122106 gb ABW17189.1   profilin [Brassica juncea var. multiceps]                                                                                                                                                                                                                                                                                       | 134 | 134 | 8.00E-73  | 100.0 | 98.5 | 100.0 | profilin                                                 | gbpln | Brassica juncea      | AT4G29340.1   Symbols: PRF4   profilin 4   chr4:14447718-14448467 FORWARD LENGTH=134                                                          | 134 | 134 | 6.00E-73 | 100.0 | 95.5 | 97.8 |

|                          |                                                                                                                                                                                                                                                                                                                                                   |     |      |           |       |      |      |                                                                                |       |                      |                                                                                                                                    |     |     |           |       |      |      |
|--------------------------|---------------------------------------------------------------------------------------------------------------------------------------------------------------------------------------------------------------------------------------------------------------------------------------------------------------------------------------------------|-----|------|-----------|-------|------|------|--------------------------------------------------------------------------------|-------|----------------------|------------------------------------------------------------------------------------------------------------------------------------|-----|-----|-----------|-------|------|------|
| Rsa1.0_01934.1.g30899.t1 | ref NP_194662.2  derlin-1 [Arabidopsis thaliana]<br>gi 75161705 sp Q8VZU9.1 DERL1_ARAT H RecName: Full=Derlin-1; AltName: Full=AtDerlin-1<br>gi 17380686 gb AL36173.1  unknown protein [Arabidopsis thaliana]<br>gi 20465889 gb AAM20097.1  unknown protein [Arabidopsis thaliana]<br>gi 332660218 gb AEE85618.1  derlin-1 [Arabidopsis thaliana] | 288 | 266  | 1.00E-120 | 92.4  | 79.9 | 82.3 | derlin-1                                                                       | gbpln | Arabidopsis thaliana | AT4G29330.1   Symbols: DER1   DERLIN-1   chr4:14444937-14446952 FORWARD LENGTH=266                                                 | 288 | 266 | 1.00E-122 | 92.4  | 79.9 | 82.3 |
| Rsa1.0_01934.1.g30900.t1 | ref XP_002867413.1  hypothetical protein ARALYDRAFT_913577 [Arabidopsis lyrata subsp. lyrata]<br>gi 297313249 gb EFH43672.1  hypothetical protein ARALYDRAFT_913577 [Arabidopsis lyrata subsp. lyrata]                                                                                                                                            | 424 | 424  | 0         | 100.0 | 95.5 | 98.6 | hypothetical protein ARALYDRAFT_913577                                         | gbpln | Arabidopsis lyrata   | AT4G29310.1   Symbols:   Protein of unknown function (DUF1005)   chr4:14423792-14439609 REVERSE LENGTH=424                         | 424 | 424 | 0         | 100.0 | 95.5 | 98.3 |
| Rsa1.0_01934.1.g30901.t1 | pir  T00833 RNA-directed DNA polymerase homolog T13L16.7 - Arabidopsis thaliana (fragment)                                                                                                                                                                                                                                                        | 531 | 1365 | 1.00E-106 | 257.1 | 39.7 | 57.3 | RNA-directed DNA polymerase homolog T13L16.7 - Arabidopsis thaliana (fragment) | ----  | ----                 | AT4G29090.1   Symbols:   Ribonuclease H-like superfamily protein   chr4:14333528-14335255 FORWARD LENGTH=575                       | 531 | 575 | 8.00E-74  | 108.3 | 27.7 | 44.3 |
| Rsa1.0_01934.1.g30902.t1 | ref XP_002867418.1  predicted protein [Arabidopsis lyrata subsp. lyrata]<br>gi 297313254 gb EFH43677.1  predicted protein [Arabidopsis lyrata subsp. lyrata]                                                                                                                                                                                      | 257 | 256  | 4.00E-99  | 99.6  | 66.9 | 83.7 | predicted protein                                                              | gbpln | Arabidopsis lyrata   | AT4G29270.1   Symbols:   HAD superfamily, subfamily IIIB acid phosphatase   chr4:14423797-14424848 REVERSE LENGTH=256              | 257 | 256 | 6.00E-98  | 99.6  | 65.4 | 82.1 |
| Rsa1.0_01934.1.g30903.t1 | ref NP_194652.1  NAC domain containing protein 75 [Arabidopsis thaliana]<br>gi 7269821 emb CAB79681.1  putative protein [Arabidopsis thaliana]<br>gi 332660205 gb AEE85605.1  NAC domain containing protein 75 [Arabidopsis thaliana]                                                                                                             | 498 | 498  | 0         | 100.0 | 90.4 | 93.8 | NAC domain containing protein 75                                               | gbpln | Arabidopsis thaliana | AT4G29230.1   Symbols: anac075, NAC075   NAC domain containing protein 75   chr4:14410338-14414956 FORWARD LENGTH=498              | 498 | 498 | 0         | 100.0 | 90.4 | 93.8 |
| Rsa1.0_01935.1.g30904.t1 | gb EOA27792.1  hypothetical protein CARUB_v10023944mg [Capsella rubella]                                                                                                                                                                                                                                                                          | 226 | 241  | 7.00E-73  | 106.6 | 68.1 | 80.5 | hypothetical protein CARUB_v10023944mg                                         | gbpln | Capsella rubella     | AT2G34200.1   Symbols:   RING/FYVE/PHD zinc finger superfamily protein   chr2:14441105-14441882 FORWARD LENGTH=222                 | 226 | 222 | 3.00E-71  | 98.2  | 67.3 | 76.5 |
| Rsa1.0_01935.1.g30905.t1 | ref XP_002889489.1  subtilase family protein [Arabidopsis lyrata subsp. lyrata]<br>gi 297334330 gb EFH64748.1  subtilase family protein [Arabidopsis lyrata subsp. lyrata]                                                                                                                                                                        | 521 | 760  | 0         | 145.9 | 74.1 | 84.8 | subtilase family protein                                                       | gbpln | Arabidopsis lyrata   | AT1G66210.1   Symbols:   Subtilisin-like serine endopeptidase family protein   chr1:24665735-24668650 REVERSE LENGTH=759           | 521 | 759 | 0         | 145.7 | 73.1 | 83.7 |
| Rsa1.0_01935.1.g30906.t1 | ref NP_565779.1  trichome birefringence-like 37 protein [Arabidopsis thaliana]<br>gi 20196907 gb AAB07625.2  expressed protein [Arabidopsis thaliana]<br>gi 21554400 gb AAM63505.1  unknown [Arabidopsis thaliana]<br>gi 330253819 gb AEC08913.1  trichome birefringence-like 37 protein [Arabidopsis thaliana]                                   | 241 | 385  | 4.00E-65  | 159.8 | 51.0 | 56.0 | trichome birefringence-like 37 protein                                         | gbpln | Arabidopsis thaliana | AT2G34070.1   Symbols: TBL37   TRICHOME BIREFRINGENCE-LIKE 37   chr2:14387631-14390160 REVERSE LENGTH=385                          | 241 | 385 | 1.00E-67  | 159.8 | 51.0 | 56.0 |
| Rsa1.0_01935.1.g30907.t1 | gb EOA27292.1  hypothetical protein CARUB_v10023411mg [Capsella rubella]                                                                                                                                                                                                                                                                          | 217 | 385  | 1.00E-113 | 177.4 | 89.4 | 92.6 | hypothetical protein CARUB_v10023411mg                                         | gbpln | Capsella rubella     | AT2G34070.1   Symbols: TBL37   TRICHOME BIREFRINGENCE-LIKE 37   chr2:14387631-14390160 REVERSE LENGTH=385                          | 217 | 385 | 1.00E-116 | 177.4 | 88.9 | 92.6 |
| Rsa1.0_01936.1.g30908.t1 | ref XP_002887372.1  hypothetical protein ARALYDRAFT_476271 [Arabidopsis lyrata subsp. lyrata]<br>gi 297333213 gb EFH63631.1  hypothetical protein ARALYDRAFT_476271 [Arabidopsis lyrata subsp. lyrata]                                                                                                                                            | 843 | 832  | 0         | 98.7  | 51.8 | 64.1 | hypothetical protein ARALYDRAFT_476271                                         | gbpln | Arabidopsis lyrata   | AT1G71400.1   Symbols: AtRLP12, RLP12   receptor like protein 12   chr1:26909905-26912448 FORWARD LENGTH=847                       | 843 | 847 | 0         | 100.5 | 52.0 | 65.2 |
| Rsa1.0_01936.1.g30909.t1 | gb EOA18257.1  hypothetical protein CARUB_v10006750mg [Capsella rubella]                                                                                                                                                                                                                                                                          | 193 | 74   | 5.00E-23  | 38.3  | 28.0 | 30.6 | hypothetical protein CARUB_v10006750mg                                         | gbpln | Capsella rubella     | AT5G41685.1   Symbols:   Mitochondrial outer membrane translocase complex, subunit Tom7   chr5:16669419-16669646 REVERSE LENGTH=75 | 193 | 75  | 3.00E-21  | 38.9  | 21.8 | 23.8 |
| Rsa1.0_01936.1.g30910.t1 | ref XP_002875605.1  hypothetical protein ARALYDRAFT_905424 [Arabidopsis lyrata subsp. lyrata]<br>gi 297321443 gb EFH51864.1  hypothetical protein ARALYDRAFT_905424 [Arabidopsis lyrata subsp. lyrata]                                                                                                                                            | 150 | 246  | 3.00E-46  | 164.0 | 64.7 | 72.7 | hypothetical protein ARALYDRAFT_905424                                         | gbpln | Arabidopsis lyrata   | AT3G43250.1   Symbols:   Family of unknown function (DUF572)   chr3:15216713-15217462 FORWARD LENGTH=249                           | 150 | 249 | 1.00E-46  | 166.0 | 64.7 | 72.7 |
| Rsa1.0_01936.1.g30911.t1 | gb EOA16094.1  hypothetical protein CARUB_v10004228mg [Capsella rubella]                                                                                                                                                                                                                                                                          | 728 | 740  | 0         | 101.6 | 66.5 | 79.9 | hypothetical protein CARUB_v10004228mg                                         | gbpln | Capsella rubella     | AT1G64260.1   Symbols:   MuDR family transposase   chr1:23847756-23849915 FORWARD LENGTH=719                                       | 728 | 719 | 1.00E-149 | 98.8  | 41.2 | 59.6 |



|                          |                                                                                                                                                                                                                                                                                                                                                                                                                                                                                                                        |     |     |           |       |      |      |                                                                                           |       |                      |                                                                                                                                                 |     |     |           |       |      |      |
|--------------------------|------------------------------------------------------------------------------------------------------------------------------------------------------------------------------------------------------------------------------------------------------------------------------------------------------------------------------------------------------------------------------------------------------------------------------------------------------------------------------------------------------------------------|-----|-----|-----------|-------|------|------|-------------------------------------------------------------------------------------------|-------|----------------------|-------------------------------------------------------------------------------------------------------------------------------------------------|-----|-----|-----------|-------|------|------|
| Rsa1.0_01936.1.g30912.t1 | ref XP_004149128.1  PREDICTED: coiled-coil domain-containing protein 94 homolog [Cucumis sativus] gi 44949461.1 ref XP_004159597.1  PREDICTED: coiled-coil domain-containing protein 94 homolog [Cucumis sativus]                                                                                                                                                                                                                                                                                                      | 100 | 327 | 1.00E-31  | 327.0 | 68.0 | 75.0 | PREDICTED: coiled-coil domain-containing protein 94 homolog                               | gbpln | Cucumis sativus      | AT3G43250.1   Symbols:   Family of unknown function (DUF572)   chr3:15216713-15217462 FORWARD LENGTH=249                                        | 100 | 249 | 8.00E-34  | 249.0 | 67.0 | 73.0 |
| Rsa1.0_01936.1.g30913.t1 | gb EOA12375.1  hypothetical protein CARUB_v10025926mg [Capsella rubella]                                                                                                                                                                                                                                                                                                                                                                                                                                               | 157 | 767 | 6.00E-45  | 488.5 | 59.9 | 70.7 | hypothetical protein CARUB_v10025926mg                                                    | gbpln | Capsella rubella     | AT1G64260.1   Symbols:   MuDR family transposase   chr1:23847756-23849915 FORWARD LENGTH=719                                                    | 157 | 719 | 2.00E-22  | 458.0 | 33.1 | 45.2 |
| Rsa1.0_01936.1.g30914.t1 | gb AAM62648.1  dehydration stress-induced protein [Arabidopsis thaliana]                                                                                                                                                                                                                                                                                                                                                                                                                                               | 167 | 182 | 2.00E-34  | 109.0 | 46.1 | 64.1 | dehydration stress-induced protein                                                        | gbpln | Arabidopsis thaliana | AT2G22170.1   Symbols:   Lipase/lipoxygenase, PLAT/LH2 family protein   chr2:9427010-9427742 REVERSE LENGTH=183                                 | 167 | 183 | 2.00E-36  | 109.6 | 45.5 | 64.1 |
| Rsa1.0_01937.1.g30915.t1 | ref XP_004160247.1  PREDICTED: LOW QUALITY PROTEIN: eukaryotic translation initiation factor 3 subunit B-like [Cucumis sativus]                                                                                                                                                                                                                                                                                                                                                                                        | 732 | 718 | 2.00E-81  | 98.1  | 25.4 | 35.1 | PREDICTED: LOW QUALITY PROTEIN: eukaryotic translation initiation factor 3 subunit B-like | gbpln | Cucumis sativus      | AT5G27640.2   Symbols: TIF3B1, EIF3B, ATEIF3B-1, EIF3B-1, ATTF3B1   translation initiation factor 3B1   chr5:9781207-9784759 REVERSE LENGTH=738 | 732 | 738 | 4.00E-83  | 100.8 | 25.5 | 35.7 |
| Rsa1.0_01937.1.g30916.t1 | ref NP_194090.2  tyrosine transaminase-like protein [Arabidopsis thaliana] gi 75161515 sp Q8VYP2.1 TAT4_ARATH RecName: Full=Probable aminotransferase TAT4; AltName: Full=Tyrosine aminotransferase 4 gi 17979319 gb AAL49885.1  putative tyrosine transaminase [Arabidopsis thaliana] gi 21689827 gb AAM67557.1  putative tyrosine transaminase [Arabidopsis thaliana] gi 332659380 gb AEE84780.1  probable aminotransferase TAT4 [Arabidopsis thaliana]                                                              | 433 | 424 | 0         | 97.9  | 72.1 | 82.7 | tyrosine transaminase-like protein                                                        | gbpln | Arabidopsis thaliana | AT4G23590.1   Symbols:   Tyrosine transaminase family protein   chr4:12307195-12309445 FORWARD LENGTH=424                                       | 433 | 424 | 0         | 97.9  | 72.1 | 82.7 |
| Rsa1.0_01937.1.g30917.t1 | gb EOA25182.1  hypothetical protein CARUB_v10018494mg [Capsella rubella]                                                                                                                                                                                                                                                                                                                                                                                                                                               | 277 | 282 | 6.00E-27  | 101.8 | 34.3 | 49.5 | hypothetical protein CARUB_v10018494mg                                                    | gbpln | Capsella rubella     | AT1G10000.1   Symbols:   Ribonuclease H-like superfamily protein   chr1:3263877-3264788 REVERSE LENGTH=303                                      | 277 | 303 | 3.00E-28  | 109.4 | 33.9 | 49.5 |
| Rsa1.0_01937.1.g30918.t1 | gb AAO27362.1  cystine lyase BOCL-3 [Brassica oleracea]                                                                                                                                                                                                                                                                                                                                                                                                                                                                | 424 | 424 | 0         | 100.0 | 94.6 | 97.4 | cystine lyase BOCL-3                                                                      | gbpln | Brassica oleracea    | AT4G23600.1   Symbols: COR13, JR2   Tyrosine transaminase family protein   chr4:12310657-12312885 FORWARD LENGTH=422                            | 424 | 422 | 0         | 99.5  | 79.7 | 90.3 |
| Rsa1.0_01937.1.g30919.t1 | ref NP_567687.1  late embryogenesis abundant hydroxyproline-rich glycoprotein [Arabidopsis thaliana] gi 13937135 gb AAK50061.1 AF372921_1 At4g23610/F9D16.80 [Arabidopsis thaliana] gi 4454030 emb CAA23027.1  hypothetical protein [Arabidopsis thaliana] gi 7269209 emb CAB79316.1  hypothetical protein [Arabidopsis thaliana] gi 22136998 gb AAM91344.1  At4g23610/F9D16.80 [Arabidopsis thaliana] gi 332659384 gb AEE84784.1  late embryogenesis abundant hydroxyproline-rich glycoprotein [Arabidopsis thaliana] | 232 | 228 | 4.00E-75  | 98.3  | 65.5 | 74.1 | late embryogenesis abundant hydroxyproline-rich glycoprotein                              | gbpln | Arabidopsis thaliana | AT4G23610.1   Symbols:   Late embryogenesis abundant (LEA) hydroxyproline-rich glycoprotein family   chr4:12314037-12314723 FORWARD LENGTH=228  | 232 | 228 | 1.00E-77  | 98.3  | 65.5 | 74.1 |
| Rsa1.0_01937.1.g30920.t1 | gb ACC91264.1  50S ribosomal protein [Capsella rubella] gi 482553078 gb EOA17271.1  hypothetical protein CARUB_v10005544mg [Capsella rubella]                                                                                                                                                                                                                                                                                                                                                                          | 269 | 257 | 1.00E-128 | 95.5  | 85.5 | 90.7 | 50S ribosomal protein                                                                     | gbpln | Capsella rubella     | AT4G23620.1   Symbols:   Ribosomal protein L25/Gln-tRNA synthetase, anti-codon-binding domain   chr4:12315016-12316659 REVERSE LENGTH=264       | 269 | 264 | 1.00E-130 | 98.1  | 84.0 | 90.0 |
| Rsa1.0_01937.1.g30921.t1 | dbj BAJ33905.1  unnamed protein product [Theilingiella halophila]                                                                                                                                                                                                                                                                                                                                                                                                                                                      | 277 | 275 | 1.00E-129 | 99.3  | 89.9 | 96.0 | unnamed protein product                                                                   | ----  | ----                 | AT4G23630.1   Symbols: BTI1, RTNLB1   VIRB2-interacting protein   chr4:12318070-12319574 FORWARD LENGTH=275                                     | 277 | 275 | 1.00E-129 | 99.3  | 91.3 | 95.3 |
| Rsa1.0_01937.1.g30922.t1 | ref XP_002867698.1  hypothetical protein ARALYDRAFT_914233 [Arabidopsis lyrata subsp. lyrata] gi 297313534 gb EFH43957.1  hypothetical protein ARALYDRAFT_914233 [Arabidopsis lyrata subsp. lyrata]                                                                                                                                                                                                                                                                                                                    | 781 | 775 | 0         | 99.2  | 96.7 | 97.8 | hypothetical protein ARALYDRAFT_914233                                                    | gbpln | Arabidopsis lyrata   | AT4G23640.1   Symbols: TRH1, ATK3, KUP4   Potassium transporter family protein   chr4:12320476-12324291 REVERSE LENGTH=775                      | 781 | 775 | 0         | 99.2  | 96.3 | 97.4 |
| Rsa1.0_01937.1.g30923.t1 | gb ACC91261.1  putative calcium-dependent protein kinase [Capsella rubella] gi 482552225 gb EOA16418.1  hypothetical protein CARUB_v10004572mg [Capsella rubella]                                                                                                                                                                                                                                                                                                                                                      | 523 | 529 | 0         | 101.1 | 90.4 | 94.8 | putative calcium-dependent protein kinase                                                 | gbpln | Capsella rubella     | AT4G23650.1   Symbols: CDPK6, CPK3   calcium-dependent protein kinase 6   chr4:12324967-12327415 REVERSE LENGTH=529                             | 523 | 529 | 0         | 101.1 | 88.9 | 94.3 |

|                          |                                                                                                                                                                                                                                                                                                                                                                                                                                                                                                                                                                                                                                                                                                                                                                                                                                                                                                                                                                                                        |     |     |           |       |      |      |                                                               |       |                           |                                                                                                                                           |     |     |           |       |      |      |
|--------------------------|--------------------------------------------------------------------------------------------------------------------------------------------------------------------------------------------------------------------------------------------------------------------------------------------------------------------------------------------------------------------------------------------------------------------------------------------------------------------------------------------------------------------------------------------------------------------------------------------------------------------------------------------------------------------------------------------------------------------------------------------------------------------------------------------------------------------------------------------------------------------------------------------------------------------------------------------------------------------------------------------------------|-----|-----|-----------|-------|------|------|---------------------------------------------------------------|-------|---------------------------|-------------------------------------------------------------------------------------------------------------------------------------------|-----|-----|-----------|-------|------|------|
| Rsa1.0_01937.1.g30924.t1 | gb EOA16649.1  hypothetical protein CARUB_v10004831mg, partial [Capsella rubella]                                                                                                                                                                                                                                                                                                                                                                                                                                                                                                                                                                                                                                                                                                                                                                                                                                                                                                                      | 405 | 439 | 1.00E-177 | 108.4 | 86.9 | 90.6 | hypothetical protein CARUB_v10004831mg, partial               | gbpln | Capsella rubella          | AT4G23660.2   Symbols: AtPPT1, PPT1   polyprenyltransferase 1   chr4:12328086-12331359 REVERSE LENGTH=407                                 | 405 | 407 | 1.00E-177 | 100.5 | 85.7 | 89.9 |
| Rsa1.0_01937.1.g30925.t1 | ref XP_002867694.1  hypothetical protein ARALYDRAFT_492500 [Arabidopsis lyrata subsp. lyrata] gi 297313530 gb EFH45953.1  hypothetical protein ARALYDRAFT_492500 [Arabidopsis lyrata subsp. lyrata] ref YP_001547727.1  DEAD/DEAH box helicase [Herpetosiphon aurantiacus DSM 785] gi 159894519 gb ABX07599.1  DEAD/DEAH box helicase domain protein [Herpetosiphon aurantiacus DSM 785]                                                                                                                                                                                                                                                                                                                                                                                                                                                                                                                                                                                                               | 151 | 151 | 4.00E-76  | 100.0 | 88.1 | 95.4 | hypothetical protein ARALYDRAFT_492500                        | gbpln | Arabidopsis lyrata        | AT4G23680.1   Symbols:   Polyketide cyclase/dehydrase and lipid transport superfamily protein   chr4:12336416-12337417 REVERSE LENGTH=151 | 151 | 151 | 1.00E-78  | 100.0 | 88.7 | 95.4 |
| Rsa1.0_01938.1.g30926.t2 | ref XP_002868586.1  hypothetical protein ARALYDRAFT_493781 [Arabidopsis lyrata subsp. lyrata] gi 297314402 gb EFH44825.1  hypothetical protein ARALYDRAFT_493781 [Arabidopsis lyrata subsp. lyrata] ref XP_002879286.1  hypothetical protein ARALYDRAFT_482009 [Arabidopsis lyrata subsp. lyrata] gi 297325125 gb EFH55545.1  hypothetical protein ARALYDRAFT_482009 [Arabidopsis lyrata subsp. lyrata]                                                                                                                                                                                                                                                                                                                                                                                                                                                                                                                                                                                                | 378 | 584 | 4.00E-33  | 154.5 | 27.0 | 48.9 | DEAD/DEAH box helicase                                        | gbpct | Herpetosiphon aurantiacus | AT3G19760.1   Symbols: EIF4A-III   eukaryotic initiation factor 4A-III   chr3:6863790-6866242 FORWARD LENGTH=408                          | 378 | 408 | 2.00E-35  | 107.9 | 26.7 | 50.5 |
| Rsa1.0_01938.1.g30927.t1 | ref XP_002879286.1  hypothetical protein ARALYDRAFT_482009 [Arabidopsis lyrata subsp. lyrata] gi 297325125 gb EFH55545.1  hypothetical protein ARALYDRAFT_482009 [Arabidopsis lyrata subsp. lyrata]                                                                                                                                                                                                                                                                                                                                                                                                                                                                                                                                                                                                                                                                                                                                                                                                    | 669 | 668 | 0         | 99.9  | 97.8 | 99.0 | hypothetical protein ARALYDRAFT_493781                        | gbpln | Arabidopsis lyrata        | AT5G42020.1   Symbols: BIP, BIP2   Heat shock protein 70 (Hsp 70) family protein   chr5:16807697-16810480 REVERSE LENGTH=668              | 669 | 668 | 0         | 99.9  | 97.2 | 99.0 |
| Rsa1.0_01938.1.g30928.t1 | ref NP_180646.1  Cytochrome b561/ferric reductase transmembrane protein family [Arabidopsis thaliana] gi 3201616 gb AAC20723.1  hypothetical protein [Arabidopsis thaliana] gi 34146810 gb AAQ62413.1  At2g30890 [Arabidopsis thaliana] gi 51971759 db BAD44544.1  hypothetical protein [Arabidopsis thaliana] gi 330253359 gb AEC08453.1  Cytochrome b561/ferric reductase transmembrane protein family [Arabidopsis thaliana] ref NP_973569.1  Pleckstrin homology (PH) domain-containing protein [Arabidopsis thaliana] gi 330253356 gb AEC08452.1  Pleckstrin homology (PH) domain-containing protein [Arabidopsis thaliana] ref NP_180644.1  glutathione S-transferase ERD13 [Arabidopsis thaliana] gi 1170089 sp P42761.3 GSTFA_ARATH RecName: Full=Glutathione S-transferase F10; Short=AtGSTF10; AltName: Full=AtGSTF4; AltName: Full=GST class-phi member 10; AltName: Full=Protein EARLY RESPONSE TO DEHYDRATION 13                                                                          | 440 | 378 | 0         | 85.9  | 75.0 | 77.3 | hypothetical protein ARALYDRAFT_482009                        | gbpln | Arabidopsis lyrata        | AT2G30910.3   Symbols: ARPC1A   actin-related protein C1A   chr2:13153447-13156869 FORWARD LENGTH=378                                     | 440 | 378 | 0         | 85.9  | 74.8 | 76.8 |
| Rsa1.0_01938.1.g30929.t1 | gb EOA36129.1  hypothetical protein CARUB_v10012300mg [Capsella rubella] ref NP_180646.1  Cytochrome b561/ferric reductase transmembrane protein family [Arabidopsis thaliana] gi 3201616 gb AAC20723.1  hypothetical protein [Arabidopsis thaliana] gi 34146810 gb AAQ62413.1  At2g30890 [Arabidopsis thaliana] gi 51971759 db BAD44544.1  hypothetical protein [Arabidopsis thaliana] gi 330253359 gb AEC08453.1  Cytochrome b561/ferric reductase transmembrane protein family [Arabidopsis thaliana] ref NP_973569.1  Pleckstrin homology (PH) domain-containing protein [Arabidopsis thaliana] gi 330253356 gb AEC08452.1  Pleckstrin homology (PH) domain-containing protein [Arabidopsis thaliana] ref NP_180644.1  glutathione S-transferase ERD13 [Arabidopsis thaliana] gi 1170089 sp P42761.3 GSTFA_ARATH RecName: Full=Glutathione S-transferase F10; Short=AtGSTF10; AltName: Full=AtGSTF4; AltName: Full=GST class-phi member 10; AltName: Full=Protein EARLY RESPONSE TO DEHYDRATION 13 | 216 | 276 | 7.00E-77  | 127.8 | 67.6 | 83.3 | hypothetical protein CARUB_v10012300mg                        | gbpln | Capsella rubella          | AT1G08080.1   Symbols: ATACA7, ACA7   alpha carbonic anhydrase 7   chr1:2517022-2518546 REVERSE LENGTH=275                                | 216 | 275 | 2.00E-77  | 127.3 | 69.4 | 82.4 |
| Rsa1.0_01938.1.g30930.t1 | ref NP_180646.1  Cytochrome b561/ferric reductase transmembrane protein family [Arabidopsis thaliana] gi 3201616 gb AAC20723.1  hypothetical protein [Arabidopsis thaliana] gi 34146810 gb AAQ62413.1  At2g30890 [Arabidopsis thaliana] gi 51971759 db BAD44544.1  hypothetical protein [Arabidopsis thaliana] gi 330253359 gb AEC08453.1  Cytochrome b561/ferric reductase transmembrane protein family [Arabidopsis thaliana] ref NP_973569.1  Pleckstrin homology (PH) domain-containing protein [Arabidopsis thaliana] gi 330253356 gb AEC08452.1  Pleckstrin homology (PH) domain-containing protein [Arabidopsis thaliana] ref NP_180644.1  glutathione S-transferase ERD13 [Arabidopsis thaliana] gi 1170089 sp P42761.3 GSTFA_ARATH RecName: Full=Glutathione S-transferase F10; Short=AtGSTF10; AltName: Full=AtGSTF4; AltName: Full=GST class-phi member 10; AltName: Full=Protein EARLY RESPONSE TO DEHYDRATION 13                                                                          | 156 | 257 | 1.00E-67  | 164.7 | 80.8 | 86.5 | Cytochrome b561/ferric reductase transmembrane protein family | gbpln | Arabidopsis thaliana      | AT2G30890.1   Symbols:   Cytochrome b561/ferric reductase transmembrane protein family   chr2:13147774-13149663 FORWARD LENGTH=257        | 156 | 257 | 4.00E-70  | 164.7 | 80.8 | 86.5 |
| Rsa1.0_01938.1.g30931.t8 | ref NP_180644.1  glutathione S-transferase ERD13 [Arabidopsis thaliana] gi 1170089 sp P42761.3 GSTFA_ARATH RecName: Full=Glutathione S-transferase F10; Short=AtGSTF10; AltName: Full=AtGSTF4; AltName: Full=GST class-phi member 10; AltName: Full=Protein EARLY RESPONSE TO DEHYDRATION 13                                                                                                                                                                                                                                                                                                                                                                                                                                                                                                                                                                                                                                                                                                           | 310 | 381 | 3.00E-34  | 122.9 | 22.6 | 24.2 | Pleckstrin homology (PH) domain-containing protein            | gbpln | Arabidopsis thaliana      | AT2G30880.2   Symbols:   Pleckstrin homology (PH) domain-containing protein   chr2:13143375-13145718 REVERSE LENGTH=381                   | 310 | 381 | 7.00E-37  | 122.9 | 22.6 | 24.2 |
| Rsa1.0_01938.1.g30932.t1 | ref NP_180644.1  glutathione S-transferase ERD13 [Arabidopsis thaliana] gi 1170089 sp P42761.3 GSTFA_ARATH RecName: Full=Glutathione S-transferase F10; Short=AtGSTF10; AltName: Full=AtGSTF4; AltName: Full=GST class-phi member 10; AltName: Full=Protein EARLY RESPONSE TO DEHYDRATION 13 gi 497789 db BAO4554.1  glutathione S-transferase [Arabidopsis thaliana] gi 3201614 gb AAC20721.1  glutathione S-transferase [Arabidopsis thaliana] gi 22136038 gb AAM91601.1  glutathione S-transferase [Arabidopsis thaliana] gi 23197738 gb AAN15396.1  glutathione S-transferase [Arabidopsis thaliana] gi 330253356 gb AEC08450.1  glutathione S-transferase ERD13 [Arabidopsis thaliana]                                                                                                                                                                                                                                                                                                            | 215 | 215 | 1.00E-115 | 100.0 | 95.3 | 98.1 | glutathione S-transferase ERD13                               | gbpln | Arabidopsis thaliana      | AT2G30870.1   Symbols: ATGSTF10, ERD13, ATGSTF4, GSTF10   glutathione S-transferase PH10   chr2:13141490-13142392 FORWARD LENGTH=215      | 215 | 215 | 1.00E-118 | 100.0 | 95.3 | 98.1 |

|                          |                                                                                                                                                                                                                                                                                                                                                                                                                                                                                                                                                                                                                                                                                                                                                      |     |     |           |       |      |      |                                        |       |                    |                                                                                                                                                                                                                                                                                                                                                                    |     |     |           |       |      |      |
|--------------------------|------------------------------------------------------------------------------------------------------------------------------------------------------------------------------------------------------------------------------------------------------------------------------------------------------------------------------------------------------------------------------------------------------------------------------------------------------------------------------------------------------------------------------------------------------------------------------------------------------------------------------------------------------------------------------------------------------------------------------------------------------|-----|-----|-----------|-------|------|------|----------------------------------------|-------|--------------------|--------------------------------------------------------------------------------------------------------------------------------------------------------------------------------------------------------------------------------------------------------------------------------------------------------------------------------------------------------------------|-----|-----|-----------|-------|------|------|
| Rsa1.0_01938.1.g30933.t1 | refNP_180643.1  glutathione S-transferase [Arabidopsis thaliana] gi 297822799 ref XP_002879282.1  hypothetical protein ARALYDRAFT_482003 [Arabidopsis lyrata subsp. lyrata] gi 75318706 sp O80852.1 GSTF9_ARAT H RecName: Full=Glutathione S-transferase F9; Short=AtGSTF9; AltName: Full=AtGSTF7; AltName: Full=GST class=phi member 9 gi 13926310 gb AAK49621.1 AF372905.1 At2g30860/F7F1.7 [Arabidopsis thaliana] gi 3201613 gb AAC20720.1  glutathione S-transferase [Arabidopsis thaliana] gi 27363352 gb AAO11595.1  At2g30860/F7F1.7 [Arabidopsis thaliana] gi 29732512 gb EFH55541.1  hypothetical protein ARALYDRAFT_482003 [Arabidopsis lyrata subsp. lyrata] gi 330253354 gb AEC08448.1  glutathione S-transferase [Arabidopsis thaliana] | 215 | 215 | 1.00E-118 | 100.0 | 96.7 | 99.1 | glutathione S-transferase              | gbpln | Arabidopsis lyrata | AT2G30860.1   Symbols: ATGSTF9, GLUTTR, ATGSTF7, GSTF9   glutathione S-transferase PHI 9   chr2:13139132-13140057 FORWARD LENGTH=215                                                                                                                                                                                                                               | 215 | 215 | 1.00E-121 | 100.0 | 96.7 | 99.1 |
| Rsa1.0_01938.1.g30934.t1 | ref XP_002879280.1  hypothetical protein ARALYDRAFT_481999 [Arabidopsis lyrata subsp. lyrata] gi 297325119 gb EFH55539.1  hypothetical protein ARALYDRAFT_481999 [Arabidopsis lyrata subsp. lyrata]                                                                                                                                                                                                                                                                                                                                                                                                                                                                                                                                                  | 418 | 437 | 1.00E-98  | 104.5 | 58.1 | 66.5 | hypothetical protein ARALYDRAFT_481999 | gbpln | Arabidopsis lyrata | AT2G30820.2   Symbols:   unknown protein; BEST Arabidopsis thaliana protein match is: unknown protein (TAIR:AT1G06660.1). Has 35333 Blast hits to 34131 proteins in 2444 species: Archae - 798; Bacteria - 22429; Metazoa - 974; Fungi - 991; Plants - 531; Viruses - 0; Other Eukaryotes - 9610 (source: NCBI BLINK).   chr2:13129800-13132391 FORWARD LENGTH=421 | 418 | 421 | 9.00E-92  | 100.7 | 56.2 | 65.8 |
| Rsa1.0_01939.1.g30935.t1 | ref XP_002872140.1  CYP71B11 [Arabidopsis lyrata subsp. lyrata] gi 297317977 gb EFH48399.1  CYP71B11 [Arabidopsis lyrata subsp. lyrata]                                                                                                                                                                                                                                                                                                                                                                                                                                                                                                                                                                                                              | 496 | 496 | 0         | 100.0 | 83.3 | 90.9 | CYP71B11                               | gbpln | Arabidopsis lyrata | AT5G25120.1   Symbols: CYP71B11   tytochrome p450, family 71, subfamily B, polypeptide 11   chr5:8662851-8664432 FORWARD LENGTH=496                                                                                                                                                                                                                                | 496 | 496 | 0         | 100.0 | 81.9 | 91.5 |
| Rsa1.0_01939.1.g30936.t1 | ref XP_002872140.1  CYP71B11 [Arabidopsis lyrata subsp. lyrata] gi 297317977 gb EFH48399.1  CYP71B11 [Arabidopsis lyrata subsp. lyrata]                                                                                                                                                                                                                                                                                                                                                                                                                                                                                                                                                                                                              | 547 | 496 | 0         | 90.7  | 70.7 | 79.9 | CYP71B11                               | gbpln | Arabidopsis lyrata | AT5G25120.1   Symbols: CYP71B11   tytochrome p450, family 71, subfamily B, polypeptide 11   chr5:8662851-8664432 FORWARD LENGTH=496                                                                                                                                                                                                                                | 547 | 496 | 0         | 90.7  | 70.4 | 79.9 |
| Rsa1.0_01939.1.g30937.t2 | #                                                                                                                                                                                                                                                                                                                                                                                                                                                                                                                                                                                                                                                                                                                                                    | #   | #   | #         | #     | #    | -    | ----                                   | ----  | #                  | #                                                                                                                                                                                                                                                                                                                                                                  | #   | #   | #         | #     | #    |      |
| Rsa1.0_01939.1.g30938.t1 | #                                                                                                                                                                                                                                                                                                                                                                                                                                                                                                                                                                                                                                                                                                                                                    | #   | #   | #         | #     | #    | -    | ----                                   | ----  | #                  | #                                                                                                                                                                                                                                                                                                                                                                  | #   | #   | #         | #     | #    |      |
| Rsa1.0_01939.1.g30939.t1 | gb EOA21453.1  hypothetical protein CARUB_v10001837mg [Capsella rubella]                                                                                                                                                                                                                                                                                                                                                                                                                                                                                                                                                                                                                                                                             | 257 | 241 | 2.00E-91  | 93.8  | 70.4 | 78.2 | hypothetical protein CARUB_v10001837mg | gbpln | Capsella rubella   | AT5G25160.1   Symbols: ZFP3   zinc finger protein 3   chr5:8687524-8688231 FORWARD LENGTH=235                                                                                                                                                                                                                                                                      | 257 | 235 | 6.00E-80  | 91.4  | 66.5 | 75.1 |
| Rsa1.0_01939.1.g30940.t1 | ref XP_002872143.1  hypothetical protein ARALYDRAFT_910561 [Arabidopsis lyrata subsp. lyrata] gi 297317980 gb EFH48402.1  hypothetical protein ARALYDRAFT_910561 [Arabidopsis lyrata subsp. lyrata]                                                                                                                                                                                                                                                                                                                                                                                                                                                                                                                                                  | 223 | 218 | 1.00E-108 | 97.8  | 91.5 | 94.6 | hypothetical protein ARALYDRAFT_910561 | gbpln | Arabidopsis lyrata | AT5G25170.1   Symbols:   PPPDE putative thiol peptidase family protein   chr5:8693257-8694438 FORWARD LENGTH=218                                                                                                                                                                                                                                                   | 223 | 218 | 1.00E-102 | 97.8  | 84.8 | 88.8 |
| Rsa1.0_01940.1.g30941.t1 | ref XP_002883704.1  hypothetical protein ARALYDRAFT_480186 [Arabidopsis lyrata subsp. lyrata] gi 297329544 gb EFH59963.1  hypothetical protein ARALYDRAFT_480186 [Arabidopsis lyrata subsp. lyrata]                                                                                                                                                                                                                                                                                                                                                                                                                                                                                                                                                  | 977 | 993 | 0         | 101.6 | 90.3 | 93.4 | hypothetical protein ARALYDRAFT_480186 | gbpln | Arabidopsis lyrata | AT2G05710.1   Symbols: ACO3   aconitase 3   chr2:2141591-2146350 FORWARD LENGTH=990                                                                                                                                                                                                                                                                                | 977 | 990 | 0         | 101.3 | 89.4 | 92.4 |
| Rsa1.0_01940.1.g30942.t2 | dbj BAJ34198.1  unnamed protein product [Theilungiella halophila]                                                                                                                                                                                                                                                                                                                                                                                                                                                                                                                                                                                                                                                                                    | 158 | 958 | 3.00E-19  | 606.3 | 29.1 | 31.6 | unnamed protein product                | ----  | ----               | AT3G51770.1   Symbols: ETO1, ATEOL1   tetratricopeptide repeat (TPR)-containing protein   chr3:19200328-19203974 REVERSE LENGTH=951                                                                                                                                                                                                                                | 158 | 951 | 3.00E-20  | 601.9 | 28.5 | 31.0 |
| Rsa1.0_01940.1.g30943.t1 | gb EOA39027.1  hypothetical protein CARUB_v10011597mg [Capsella rubella]                                                                                                                                                                                                                                                                                                                                                                                                                                                                                                                                                                                                                                                                             | 125 | 186 | 3.00E-11  | 148.8 | 29.6 | 51.2 | hypothetical protein CARUB_v10011597mg | gbpln | Capsella rubella   | #                                                                                                                                                                                                                                                                                                                                                                  | #   | #   | #         | #     | #    |      |
| Rsa1.0_01940.1.g30944.t1 | #                                                                                                                                                                                                                                                                                                                                                                                                                                                                                                                                                                                                                                                                                                                                                    | #   | #   | #         | #     | #    | -    | ----                                   | ----  | #                  | #                                                                                                                                                                                                                                                                                                                                                                  | #   | #   | #         | #     | #    |      |
| Rsa1.0_01940.1.g30945.t1 | gb ABD65090.1  hypothetical protein 27.t00116 [Brassica oleracea]                                                                                                                                                                                                                                                                                                                                                                                                                                                                                                                                                                                                                                                                                    | 250 | 484 | 6.00E-31  | 193.6 | 28.8 | 32.0 | hypothetical protein 27.t00116         | gbpln | Brassica oleracea  | #                                                                                                                                                                                                                                                                                                                                                                  | #   | #   | #         | #     | #    |      |
| Rsa1.0_01940.1.g30946.t1 | #                                                                                                                                                                                                                                                                                                                                                                                                                                                                                                                                                                                                                                                                                                                                                    | #   | #   | #         | #     | #    | -    | ----                                   | ----  | #                  | #                                                                                                                                                                                                                                                                                                                                                                  | #   | #   | #         | #     | #    |      |
| Rsa1.0_01940.1.g30947.t1 | #                                                                                                                                                                                                                                                                                                                                                                                                                                                                                                                                                                                                                                                                                                                                                    | #   | #   | #         | #     | #    | -    | ----                                   | ----  | #                  | #                                                                                                                                                                                                                                                                                                                                                                  | #   | #   | #         | #     | #    |      |
| Rsa1.0_01940.1.g30948.t2 | #                                                                                                                                                                                                                                                                                                                                                                                                                                                                                                                                                                                                                                                                                                                                                    | #   | #   | #         | #     | #    | -    | ----                                   | ----  | #                  | #                                                                                                                                                                                                                                                                                                                                                                  | #   | #   | #         | #     | #    |      |

|                          |                                                                                                                                                                                                                                                                                                                                                                                                                                                                                                                                                                                                                                                            |     |     |           |       |      |      |                                                 |       |                      |                                                                                                                                 |     |     |           |       |      |      |
|--------------------------|------------------------------------------------------------------------------------------------------------------------------------------------------------------------------------------------------------------------------------------------------------------------------------------------------------------------------------------------------------------------------------------------------------------------------------------------------------------------------------------------------------------------------------------------------------------------------------------------------------------------------------------------------------|-----|-----|-----------|-------|------|------|-------------------------------------------------|-------|----------------------|---------------------------------------------------------------------------------------------------------------------------------|-----|-----|-----------|-------|------|------|
| Rsa1.0_01941.1.g30949.t1 | refNP_189605.1   HXXXD-type acyl-transferase-like protein [Arabidopsis thaliana] gi 11994174 dbj BAB01203.1<br>anthocyanin acyltransferase-like protein [Arabidopsis thaliana] gi 332644074 gb AEE77595.1   HXXXD-type acyl-transferase-like protein [Arabidopsis thaliana]                                                                                                                                                                                                                                                                                                                                                                                | 732 | 458 | 0         | 62.6  | 47.7 | 52.9 | HXXXD-type acyl-transferase-like protein        | gbpln | Arabidopsis thaliana | AT3G29635.1   Symbols:   HXXXD-type acyl-transferase family protein   chr3:11465851-11467227 REVERSE LENGTH=458                 | 732 | 458 | 0         | 62.6  | 47.7 | 52.9 |
| Rsa1.0_01941.1.g30950.t1 | # # # # # # # # -                                                                                                                                                                                                                                                                                                                                                                                                                                                                                                                                                                                                                                          |     |     |           |       |      |      |                                                 | ----  | ----                 | #                                                                                                                               | #   | #   | #         | #     | #    | #    |
| Rsa1.0_01941.1.g30951.t1 | gb EOA24648.1   hypothetical protein CARUB_v10017919mg, partial [Capsella rubella]                                                                                                                                                                                                                                                                                                                                                                                                                                                                                                                                                                         | 261 | 246 | 5.00E-85  | 94.3  | 70.9 | 78.9 | hypothetical protein CARUB_v10017919mg, partial | gbpln | Capsella rubella     | AT3G29575.4   Symbols: AFP3   ABI five binding protein 3   chr3:11382416-11383657 REVERSE LENGTH=231                            | 261 | 231 | 9.00E-87  | 88.5  | 71.6 | 77.4 |
| Rsa1.0_01941.1.g30952.t1 | refNP_189586.1   exocyst complex component 7 [Arabidopsis thaliana] gi 11994523 dbj BAB02587.1   unnamed protein product [Arabidopsis thaliana] gi 307941183 gb AAP40501.1   unknown protein [Arabidopsis thaliana] gi 332644060 gb AEE77581.1   exocyst subunit exo70 family protein E1 [Arabidopsis thaliana]                                                                                                                                                                                                                                                                                                                                            | 252 | 658 | 2.00E-94  | 261.1 | 73.0 | 80.6 | exocyst complex component 7                     | gbpln | Arabidopsis thaliana | AT3G29400.1   Symbols: ATEXO70E1, EXO70E1   exocyst subunit exo70 family protein E1   chr3:11297339-11299315 REVERSE LENGTH=658 | 252 | 658 | 5.00E-97  | 261.1 | 73.0 | 80.6 |
| Rsa1.0_01941.1.g30953.t1 | refXP_002877187.1   transcription factor IIB family protein [Arabidopsis lyrata subsp. lyrata] gi 297323025 gb EFH53446.1   transcription factor IIB family protein [Arabidopsis lyrata subsp. lyrata]                                                                                                                                                                                                                                                                                                                                                                                                                                                     | 337 | 336 | 1.00E-111 | 99.7  | 62.9 | 76.0 | transcription factor IIB family protein         | gbpln | Arabidopsis lyrata   | AT3G29380.1   Symbols:   Cyclin-like family protein   chr3:11282407-11283524 REVERSE LENGTH=336                                 | 337 | 336 | 1.00E-110 | 99.7  | 60.8 | 74.5 |
| Rsa1.0_01941.1.g30954.t1 | refXP_002875515.1   predicted protein [Arabidopsis lyrata subsp. lyrata] gi 297321353 gb EFH51774.1   predicted protein [Arabidopsis lyrata subsp. lyrata]                                                                                                                                                                                                                                                                                                                                                                                                                                                                                                 | 253 | 257 | 1.00E-111 | 101.6 | 77.1 | 83.8 | predicted protein                               | gbpln | Arabidopsis lyrata   | AT5G39280.1   Symbols: ATEXPA23, ATEXP23, ATEXP ALPHA 1.17, EXPA23   expansin A23   chr5:15730713-15731706 REVERSE LENGTH=259   | 253 | 259 | 1.00E-84  | 102.4 | 56.1 | 69.6 |
| Rsa1.0_01941.1.g30955.t1 | # # # # # # # # -                                                                                                                                                                                                                                                                                                                                                                                                                                                                                                                                                                                                                                          |     |     |           |       |      |      |                                                 | ----  | ----                 | #                                                                                                                               | #   | #   | #         | #     | #    | #    |
| Rsa1.0_01941.1.g30956.t1 | refNP_189581.1   histidine-containing phosphotransfer protein 2 [Arabidopsis thaliana] gi 51702212 sp Q9ZNV8.1 AHP2_ARATH RecName: Full=Histidine-containing phosphotransfer protein 2 gi 4107101 dbj BAA36336.1   AHP2 [Arabidopsis thaliana] gi 4156241 dbj BAA37110.1   ATHP1 [Arabidopsis thaliana] gi 11994516 dbj BAB02580.1   histidine-containing phosphotransfer protein-like [Arabidopsis thaliana] gi 17381272 gb AAL36054.1   AT3g29350/MUO10.5 [Arabidopsis thaliana] gi 20453361 gb AAM19919.1   AT3g29350/MUO10.5 [Arabidopsis thaliana] gi 332644050 gb AEE77571.1   histidine-containing phosphotransfer protein 2 [Arabidopsis thaliana] | 155 | 156 | 2.00E-75  | 100.6 | 89.0 | 93.5 | histidine-containing phosphotransfer protein 2  | gbpln | Arabidopsis thaliana | AT3G29350.1   Symbols: AHP2   histidine-containing phosphotransmitter 2   chr3:11264379-11265408 REVERSE LENGTH=156             | 155 | 156 | 8.00E-78  | 100.6 | 89.0 | 93.5 |
| Rsa1.0_01941.1.g30957.t1 | refXP_002877174.1   hypothetical protein ARALYDRAFT_905240 [Arabidopsis lyrata subsp. lyrata] gi 297323012 gb EFH53433.1   hypothetical protein ARALYDRAFT_905240 [Arabidopsis lyrata subsp. lyrata]                                                                                                                                                                                                                                                                                                                                                                                                                                                       | 363 | 463 | 2.00E-36  | 127.5 | 37.2 | 48.2 | hypothetical protein ARALYDRAFT_905240          | gbpln | Arabidopsis lyrata   | AT3G29340.1   Symbols:   zinc finger (C2H2 type) family protein   chr3:11259587-11262440 REVERSE LENGTH=650                     | 363 | 650 | 9.00E-36  | 179.1 | 38.6 | 48.2 |
| Rsa1.0_01941.1.g30958.t1 | refNP_189578.1   glycosyl transferase, family 35 protein [Arabidopsis thaliana] gi 75335028 sp Q9LIB2.1 PHS1_ARATH RecName: Full=Alpha-glucan phosphorylase 1; Short=AtPHS1; AltName: Full=Alpha-glucan phosphorylase, L isozyme; AltName: Full=Starch phosphorylase L; Flags: Precursor gi 11994512 dbj BAB02576.1   glycogen phosphorylase B; starch phosphorylase [Arabidopsis thaliana] gi 15146189 gb AAK83578.1   AT3g29320/MUO10.2 [Arabidopsis thaliana] gi 27764918 gb AAO23580.1   At3g29320/MUO10.2 [Arabidopsis thaliana] gi 332644046 gb AEE77567.1   alpha-glucan phosphorylase 1 [Arabidopsis thaliana]                                     | 953 | 962 | 0         | 100.9 | 89.6 | 94.1 | glycosyl transferase, family 35 protein         | gbpln | Arabidopsis thaliana | AT3G29320.1   Symbols:   Glycosyl transferase, family 35   chr3:11252871-11257587 FORWARD LENGTH=962                            | 953 | 962 | 0         | 100.9 | 89.6 | 94.1 |
| Rsa1.0_01942.1.g30959.t1 | gb EOA14932.1   hypothetical protein CARUB_v10028275mg [Capsella rubella]                                                                                                                                                                                                                                                                                                                                                                                                                                                                                                                                                                                  | 453 | 519 | 0         | 114.6 | 84.8 | 91.2 | hypothetical protein CARUB_v10028275mg          | gbpln | Capsella rubella     | AT5G62220.1   Symbols: ATGT18, GT18   glycosyltransferase 18   chr5:24988456-24990009 REVERSE LENGTH=517                        | 453 | 517 | 0         | 114.1 | 83.7 | 89.4 |

|                          |                                                                                                                                                                                                                                                                                                                                                                                                                                                                                                                                                                                       |     |     |           |       |      |      |                                                       |                      |                                                                                                                                                                                                                                                                                                                                                                                                                                                                                                                                           |     |     |           |       |      |      |
|--------------------------|---------------------------------------------------------------------------------------------------------------------------------------------------------------------------------------------------------------------------------------------------------------------------------------------------------------------------------------------------------------------------------------------------------------------------------------------------------------------------------------------------------------------------------------------------------------------------------------|-----|-----|-----------|-------|------|------|-------------------------------------------------------|----------------------|-------------------------------------------------------------------------------------------------------------------------------------------------------------------------------------------------------------------------------------------------------------------------------------------------------------------------------------------------------------------------------------------------------------------------------------------------------------------------------------------------------------------------------------------|-----|-----|-----------|-------|------|------|
| Rsa1.0_01942.1.g30960.t1 | gb EOA13974.1  hypothetical protein CARUB_v10027104mg, partial [Capsella rubella]                                                                                                                                                                                                                                                                                                                                                                                                                                                                                                     | 190 | 218 | 3.00E-89  | 114.7 | 83.7 | 91.1 | hypothetical protein CARUB_v10027104mg, gbpln partial | Capsella rubella     | AT5G62200.1   Symbols:   Embryo-specific protein 3. (ATS3)   chr5:24984463-24985674 REVERSE LENGTH=190                                                                                                                                                                                                                                                                                                                                                                                                                                    | 190 | 190 | 2.00E-86  | 100.0 | 81.1 | 90.5 |
| Rsa1.0_01942.1.g30961.t1 | gb EOA14496.1  hypothetical protein CARUB_v10027716mg [Capsella rubella]                                                                                                                                                                                                                                                                                                                                                                                                                                                                                                              | 381 | 377 | 1.00E-178 | 99.0  | 76.9 | 88.5 | hypothetical protein CARUB_v10027716mg gbpln          | Capsella rubella     | AT5G07200.1   Symbols: YAP169, GA20OX3, ATGA20OX3   gibberellin 20-oxidase 3   chr5:2243835-2245157 REVERSE LENGTH=380                                                                                                                                                                                                                                                                                                                                                                                                                    | 381 | 380 | 1.00E-149 | 99.7  | 64.6 | 79.0 |
| Rsa1.0_01942.1.g30962.t1 | ref NP_201023.1  uncharacterized protein [Arabidopsis thaliana]   gi 10176936 dbj BAB10180.1  unnamed protein product [Arabidopsis thaliana]   gi 332010194 gb AED97577.1  uncharacterized protein AT5G62170 [Arabidopsis thaliana]                                                                                                                                                                                                                                                                                                                                                   | 688 | 703 | 0         | 102.2 | 80.2 | 85.2 | uncharacterized protein gbpln                         | Arabidopsis thaliana | AT5G62170.1   Symbols:   unknown protein; BEST Arabidopsis thaliana protein match is: unknown protein (TAIR:AT5G51850.1); Has 381 Blast hits to 359 proteins in 81 species: Archae - 0; Bacteria - 16; Metazoa - 101; Fungi - 21; Plants - 99; Viruses - 3; Other Eukaryotes - 141 (source: NCBI BLINK).   chr5:24973115-24975475 REVERSE LENGTH=703                                                                                                                                                                                      | 688 | 703 | 0         | 102.2 | 80.2 | 85.2 |
| Rsa1.0_01943.1.g30963.t1 | ref XP_002873247.1  carboxy-lyase [Arabidopsis lyrata subsp. lyrata]   gi 297319084 gb EFH49506.1  carboxy-lyase [Arabidopsis lyrata subsp. lyrata]   ref XP_002871210.1  hypothetical protein ARALYDRAFT_908552 [Arabidopsis lyrata subsp. lyrata]   gi 297317047 gb EFH47469.1  hypothetical protein ARALYDRAFT_908552 [Arabidopsis lyrata subsp. lyrata]                                                                                                                                                                                                                           | 215 | 217 | 1.00E-120 | 100.9 | 98.6 | 99.5 | carboxy-lyase gbpln                                   | Arabidopsis lyrata   | AT5G06300.1   Symbols:   Putative lysine decarboxylase family protein   chr5:1922042-1925278 REVERSE LENGTH=217                                                                                                                                                                                                                                                                                                                                                                                                                           | 215 | 217 | 1.00E-123 | 100.9 | 98.1 | 99.5 |
| Rsa1.0_01943.1.g30964.t1 | ref XP_002871210.1  hypothetical protein ARALYDRAFT_908552 [Arabidopsis lyrata subsp. lyrata]   ref NP_196246.1  uncharacterized protein [Arabidopsis thaliana]   gi 42573287 ref NP_974740.1  uncharacterized protein [Arabidopsis thaliana]   gi 14423402 gb AAK62383.1 AF386938.1 Unknown protein [Arabidopsis thaliana]   gi 9758408 dbj BAB08950.1  unnamed protein product [Arabidopsis thaliana]   gi 332003614 gb AED90987.1  uncharacterized protein AT5G06280 [Arabidopsis thaliana]   gi 332003615 gb AED90998.1  uncharacterized protein AT5G06280 [Arabidopsis thaliana] | 270 | 264 | 1.00E-124 | 97.8  | 83.3 | 84.1 | hypothetical protein ARALYDRAFT_908552 gbpln          | Arabidopsis lyrata   | AT3G11630.1   Symbols:   Thioredoxin superfamily protein   chr3:3672189-3673937 FORWARD LENGTH=266                                                                                                                                                                                                                                                                                                                                                                                                                                        | 270 | 266 | 1.00E-122 | 98.5  | 87.8 | 93.7 |
| Rsa1.0_01943.1.g30965.t1 | ref NP_196246.1  uncharacterized protein [Arabidopsis thaliana]   gi 14423402 gb AAK62383.1 AF386938.1 Unknown protein [Arabidopsis thaliana]   gi 9758408 dbj BAB08950.1  unnamed protein product [Arabidopsis thaliana]   gi 332003614 gb AED90987.1  uncharacterized protein AT5G06280 [Arabidopsis thaliana]   gi 332003615 gb AED90998.1  uncharacterized protein AT5G06280 [Arabidopsis thaliana]                                                                                                                                                                               | 158 | 156 | 2.00E-46  | 98.7  | 65.8 | 74.7 | uncharacterized protein gbpln                         | Arabidopsis thaliana | AT5G06280.3   Symbols:   unknown protein; BEST Arabidopsis thaliana protein match is: unknown protein (TAIR:AT3G52520.1); Has 35333 Blast hits to 34131 proteins in 2444 species: Archae - 798; Bacteria - 22429; Metazoa - 974; Fungi - 991; Plants - 531; Viruses - 0; Other Eukaryotes - 9610 (source: NCBI BLINK).   chr5:1918379-1918849 REVERSE LENGTH=156                                                                                                                                                                          | 158 | 156 | 6.00E-49  | 98.7  | 65.8 | 74.7 |
| Rsa1.0_01943.1.g30966.t1 | gb EOA21697.1  hypothetical protein CARUB_v10002123mg [Capsella rubella]                                                                                                                                                                                                                                                                                                                                                                                                                                                                                                              | 175 | 167 | 6.00E-64  | 95.4  | 73.7 | 81.1 | hypothetical protein CARUB_v10002123mg gbpln          | Capsella rubella     | AT5G42560.1   Symbols:   Abscisic acid-responsive (TB2/DPI, HVA22) family protein   chr5:17015573-17016969 FORWARD LENGTH=296                                                                                                                                                                                                                                                                                                                                                                                                             | 175 | 296 | 1.00E-36  | 169.1 | 36.6 | 53.7 |
| Rsa1.0_01943.1.g30967.t1 | ref NP_196245.1  uncharacterized protein [Arabidopsis thaliana]   gi 9758407 dbj BAB08949.1  unnamed protein product [Arabidopsis thaliana]   gi 21536580 gb AAM60912.1  unknown [Arabidopsis thaliana]   gi 28392887 gb AAO41880.1  putative B-type cyclin [Arabidopsis thaliana]   gi 28827636 gb AAO50662.1  putative B-type cyclin [Arabidopsis thaliana]   gi 332003613 gb AED90996.1  uncharacterized protein AT5G06270 [Arabidopsis thaliana]                                                                                                                                  | 123 | 122 | 4.00E-39  | 99.2  | 90.2 | 94.3 | uncharacterized protein gbpln                         | Arabidopsis thaliana | AT5G06270.1   Symbols:   unknown protein; FUNCTIONS IN: molecular_function unknown; INVOLVED IN: biological_process unknown; LOCATED IN: chloroplast; EXPRESSED IN: 21 plant structures; EXPRESSED DURING: 11 growth stages; BEST Arabidopsis thaliana protein match is: unknown protein (TAIR:AT3G11600.1); Has 1807 Blast hits to 1807 proteins in 277 species: Archae - 0; Bacteria - 0; Metazoa - 736; Fungi - 347; Plants - 385; Viruses - 0; Other Eukaryotes - 339 (source: NCBI BLINK).   chr5:1912895-1913263 FORWARD LENGTH=122 | 123 | 122 | 7.00E-42  | 99.2  | 90.2 | 94.3 |
| Rsa1.0_01943.1.g30968.t1 | gb EOA20021.1  hypothetical protein CARUB_v10000295mg [Capsella rubella]                                                                                                                                                                                                                                                                                                                                                                                                                                                                                                              | 108 | 752 | 9.00E-15  | 696.3 | 40.7 | 43.5 | hypothetical protein CARUB_v10000295mg gbpln          | Capsella rubella     | AT5G06530.3   Symbols:   ABC-2 type transporter family protein   chr5:1990334-1994605 REVERSE LENGTH=691                                                                                                                                                                                                                                                                                                                                                                                                                                  | 108 | 691 | 2.00E-17  | 639.8 | 42.6 | 47.2 |
| Rsa1.0_01943.1.g30969.t1 | ref NP_186943.1  uncharacterized protein [Arabidopsis thaliana]   gi 75186537 sp Q9M8T5.1 Y3293_ARAT H RecName: Full=WEB family protein At3g02930, chloroplastic; Flags: Precursor   gi 6728968 gb AAF26966.1 AC018363.11 unknown protein [Arabidopsis thaliana]   gi 332640360 gb AEE73881.1  uncharacterized protein AT3G02930 [Arabidopsis thaliana]                                                                                                                                                                                                                               | 168 | 806 | 3.00E-44  | 479.8 | 71.4 | 83.3 | uncharacterized protein gbpln                         | Arabidopsis thaliana | AT3G02930.1   Symbols:   Plant protein of unknown function (DUF827)   chr3:655306-658319 FORWARD LENGTH=806                                                                                                                                                                                                                                                                                                                                                                                                                               | 168 | 806 | 1.00E-46  | 479.8 | 71.4 | 83.3 |

|                          |                                                                                                                                                                                                                                                                                                                                                                                                                                                                                                                                                                                                                                                                                                                                                                                                                                                                                                                                                                                                                                                                                                                                                                                                                                                                                                                                                                                                                                                      |     |     |          |       |      |      |                                                       |       |                      |                                                                                                                                                  |     |      |          |        |      |      |
|--------------------------|------------------------------------------------------------------------------------------------------------------------------------------------------------------------------------------------------------------------------------------------------------------------------------------------------------------------------------------------------------------------------------------------------------------------------------------------------------------------------------------------------------------------------------------------------------------------------------------------------------------------------------------------------------------------------------------------------------------------------------------------------------------------------------------------------------------------------------------------------------------------------------------------------------------------------------------------------------------------------------------------------------------------------------------------------------------------------------------------------------------------------------------------------------------------------------------------------------------------------------------------------------------------------------------------------------------------------------------------------------------------------------------------------------------------------------------------------|-----|-----|----------|-------|------|------|-------------------------------------------------------|-------|----------------------|--------------------------------------------------------------------------------------------------------------------------------------------------|-----|------|----------|--------|------|------|
| Rsa1.0_01943.1.g30970.t1 | ref NP_196268.1  protein agamous-like 96 [Arabidopsis thaliana]<br>gi 10178106 dbj BAB11399.1  unnamed protein product [Arabidopsis thaliana]<br>gi 67633788 gb AAY78818.1  MADS-box family protein [Arabidopsis thaliana]<br>gi 332003641 gb AED91024.1  protein agamous-like 96 [Arabidopsis thaliana]<br>ref NP_568165.1  hyaluronan mediated motility receptor-related protein [Arabidopsis thaliana]<br>gi 186520617 ref NP_001119178.1  hyaluronan mediated motility receptor-related protein [Arabidopsis thaliana]<br>gi 334187462 ref NP_001190240.1  hyaluronan mediated motility receptor-related protein [Arabidopsis thaliana]<br>gi 21554925 gb AAM63732.1  unknown [Arabidopsis thaliana]<br>gi 332003610 gb AED90993.1  hyaluronan mediated motility receptor-related protein [Arabidopsis thaliana]<br>gi 332003611 gb AED90994.1  hyaluronan mediated motility receptor-related protein [Arabidopsis thaliana]<br>gi 332003612 gb AED90995.1  hyaluronan mediated motility receptor-related protein [Arabidopsis thaliana]<br>ref NP_196244.1  TLD-domain containing nucleolar protein [Arabidopsis thaliana]<br>gi 9758406 dbj BAB08948.1  unnamed protein product [Arabidopsis thaliana]<br>gi 15292793 gb AAK92765.1  unknown protein [Arabidopsis thaliana]<br>gi 20258859 gb AAM14101.1  unknown protein [Arabidopsis thaliana]<br>gi 332003609 gb AED90992.1  TLD-domain containing nucleolar protein [Arabidopsis thaliana] | 175 | 242 | 4.00E-24 | 138.3 | 33.1 | 52.6 | protein agamous-like 96                               | gbpln | Arabidopsis thaliana | AT5G06500.1   Symbols: AGL96   AGAMOUS-like 96   chr5:1982444-1983172 FORWARD LENGTH=242                                                         | 175 | 242  | 1.00E-26 | 138.3  | 33.1 | 52.6 |
| Rsa1.0_01943.1.g30971.t1 | gi 21554925 gb AAM63732.1  unknown [Arabidopsis thaliana]<br>gi 332003610 gb AED90993.1  hyaluronan mediated motility receptor-related protein [Arabidopsis thaliana]<br>gi 332003611 gb AED90994.1  hyaluronan mediated motility receptor-related protein [Arabidopsis thaliana]<br>gi 332003612 gb AED90995.1  hyaluronan mediated motility receptor-related protein [Arabidopsis thaliana]<br>ref NP_196244.1  TLD-domain containing nucleolar protein [Arabidopsis thaliana]<br>gi 9758406 dbj BAB08948.1  unnamed protein product [Arabidopsis thaliana]<br>gi 15292793 gb AAK92765.1  unknown protein [Arabidopsis thaliana]<br>gi 20258859 gb AAM14101.1  unknown protein [Arabidopsis thaliana]<br>gi 332003609 gb AED90992.1  TLD-domain containing nucleolar protein [Arabidopsis thaliana]                                                                                                                                                                                                                                                                                                                                                                                                                                                                                                                                                                                                                                                | 104 | 106 | 1.00E-34 | 101.9 | 78.8 | 86.5 | hyaluronan mediated motility receptor-related protein | gbpln | Arabidopsis thaliana | AT5G06265.3   Symbols:   hyaluronan mediated motility receptor-related   chr5:1906596-1907382 FORWARD LENGTH=106                                 | 104 | 106  | 2.00E-37 | 101.9  | 78.8 | 86.5 |
| Rsa1.0_01943.1.g30972.t1 | ref NP_196244.1  TLD-domain containing nucleolar protein [Arabidopsis thaliana]<br>gi 9758406 dbj BAB08948.1  unnamed protein product [Arabidopsis thaliana]<br>gi 15292793 gb AAK92765.1  unknown protein [Arabidopsis thaliana]<br>gi 20258859 gb AAM14101.1  unknown protein [Arabidopsis thaliana]<br>gi 332003609 gb AED90992.1  TLD-domain containing nucleolar protein [Arabidopsis thaliana]                                                                                                                                                                                                                                                                                                                                                                                                                                                                                                                                                                                                                                                                                                                                                                                                                                                                                                                                                                                                                                                 | 423 | 424 | 0        | 100.2 | 86.8 | 92.4 | TLD-domain containing nucleolar protein               | gbpln | Arabidopsis thaliana | AT5G06260.1   Symbols:   TLD-domain containing nucleolar protein   chr5:1902755-1904835 REVERSE LENGTH=424                                       | 423 | 424  | 0        | 100.2  | 86.8 | 92.4 |
| Rsa1.0_01943.1.g30973.t1 | gb AAF97297.1 AC010164.19 Hypothetical protein [Arabidopsis thaliana]                                                                                                                                                                                                                                                                                                                                                                                                                                                                                                                                                                                                                                                                                                                                                                                                                                                                                                                                                                                                                                                                                                                                                                                                                                                                                                                                                                                | 115 | 308 | 1.00E-34 | 267.8 | 67.8 | 77.4 | Hypothetical protein                                  | gbpln | Arabidopsis thaliana | AT4G23160.1   Symbols: CRK8   cysteine-rich RLK (RECEPTOR-like protein kinase) 8   chr4:12129485-12134086 FORWARD LENGTH=1262                    | 115 | 1262 | 1.00E-11 | 1097.4 | 31.3 | 44.3 |
| Rsa1.0_01944.1.g30974.t1 | ref NP_191256.1  transcription factor ORG2 [Arabidopsis thaliana]<br>gi 75311784 sp Q9M1K1.1 ORG2_ARATH<br>RecName: Full=Transcription factor ORG2; AltName: Full=Basic helix-loop-helix protein 38; Short=AtbHLH38; Short=bHLH 38; AltName: Full=OBP3-responsive gene 2; AltName: Full=Transcription factor EN 8; AltName: Full=bHLH transcription factor bHLH038<br>gi 20127034 gb AAM10940.1 AF488576.1 putative bHLH transcription factor [Arabidopsis thaliana]<br>gi 6911867 emb CAB72167.1  putative protein [Arabidopsis thaliana]<br>gi 62320432 dbj BAD94899.1  putative bHLH transcription factor [Arabidopsis thaliana] gi 11074306 gb ABH04526.1  At3g56970 [Arabidopsis thaliana]<br>gi 332646073 gb AEE79594.1  transcription factor ORG2 [Arabidopsis thaliana]                                                                                                                                                                                                                                                                                                                                                                                                                                                                                                                                                                                                                                                                      | 251 | 253 | 4.00E-94 | 100.8 | 69.3 | 81.7 | transcription factor ORG2                             | gbpln | Arabidopsis thaliana | AT3G56970.1   Symbols: BHLH038, ORG2   basic helix-loop-helix (bHLH) DNA-binding superfamily protein   chr3:21084204-21085094 REVERSE LENGTH=253 | 251 | 253  | 1.00E-96 | 100.8  | 69.3 | 81.7 |
| Rsa1.0_01944.1.g30975.t1 | #                                                                                                                                                                                                                                                                                                                                                                                                                                                                                                                                                                                                                                                                                                                                                                                                                                                                                                                                                                                                                                                                                                                                                                                                                                                                                                                                                                                                                                                    | #   | #   | #        | #     | #    | -    | ----                                                  | ----  | #                    | #                                                                                                                                                | #   | #    | #        | #      | #    |      |

|                          |                                                                                                                                                                                                                                                                                                                                                                                                                                                                                                                                                                                                                                                                                                                                                                                                                                                                                                                                     |     |      |           |       |      |      |                                                           |       |                         |                                                                                                                                                                |     |     |           |       |      |      |
|--------------------------|-------------------------------------------------------------------------------------------------------------------------------------------------------------------------------------------------------------------------------------------------------------------------------------------------------------------------------------------------------------------------------------------------------------------------------------------------------------------------------------------------------------------------------------------------------------------------------------------------------------------------------------------------------------------------------------------------------------------------------------------------------------------------------------------------------------------------------------------------------------------------------------------------------------------------------------|-----|------|-----------|-------|------|------|-----------------------------------------------------------|-------|-------------------------|----------------------------------------------------------------------------------------------------------------------------------------------------------------|-----|-----|-----------|-------|------|------|
| Rsa1.0_01944.1.g30976.t1 | refNP_191256.1 transcription factor<br>ORG2 [Arabidopsis thaliana]<br>gi 75311784 sp Q9M1K1.1 ORG2_ARATH<br>RecName: Full=Transcription factor<br>ORG2; AltName: Full=Basic helix-loop-<br>helix protein 38; Short=AtbHLH38;<br>Short=bHLH 38; AltName: Full=OBP3-<br>responsive gene 2; AltName:<br>Full=Transcription factor EN 8;<br>AltName: Full=bHLH transcription factor<br>bHLH038<br>gi 20127034 gb AAM10940.1 AF488576.1<br>putative bHLH transcription factor<br>[Arabidopsis thaliana]<br>gi 6911867 emb CAB72167.1  putative<br>protein [Arabidopsis thaliana]<br>gi 62320432 dbj BAD94899.1  putative<br>bHLH transcription factor [Arabidopsis<br>thaliana] gi 111074306 gb ABH04526.1 <br>At3g56970 [Arabidopsis thaliana]<br>gi 332646073 gb AEE79594.1 <br>transcription factor ORG2 [Arabidopsis<br>thaliana]                                                                                                    | 251 | 253  | 9.00E-93  | 100.8 | 69.3 | 81.3 | transcription factor<br>ORG2                              | gbpln | Arabidopsis<br>thaliana | AT3G56970.1   Symbols: BHLH038, ORG2  <br>basic helix-loop-helix (bHLH) DNA-binding<br>superfamily protein   chr3:21084204-<br>21085094 REVERSE LENGTH=253     | 251 | 253 | 3.00E-95  | 100.8 | 69.3 | 81.3 |
| Rsa1.0_01944.1.g30977.t1 | gb AAD29058.1  putative non-LTR<br>retroelement reverse transcriptase<br>[Arabidopsis thaliana]<br>refNP_191256.1 transcription factor<br>ORG2 [Arabidopsis thaliana]<br>gi 75311784 sp Q9M1K1.1 ORG2_ARATH<br>RecName: Full=Transcription factor<br>ORG2; AltName: Full=Basic helix-loop-<br>helix protein 38; Short=AtbHLH38;<br>Short=bHLH 38; AltName: Full=OBP3-<br>responsive gene 2; AltName:<br>Full=Transcription factor EN 8;<br>AltName: Full=bHLH transcription factor<br>bHLH038<br>gi 20127034 gb AAM10940.1 AF488576.1<br>putative bHLH transcription factor<br>[Arabidopsis thaliana]<br>gi 6911867 emb CAB72167.1  putative<br>protein [Arabidopsis thaliana]<br>gi 62320432 dbj BAD94899.1  putative<br>bHLH transcription factor [Arabidopsis<br>thaliana] gi 111074306 gb ABH04526.1 <br>At3g56970 [Arabidopsis thaliana]<br>gi 332646073 gb AEE79594.1 <br>transcription factor ORG2 [Arabidopsis<br>thaliana] | 673 | 1229 | 1.00E-163 | 182.6 | 46.8 | 64.9 | putative non-LTR<br>retroelement reverse<br>transcriptase | gbpln | Arabidopsis<br>thaliana | AT4G29090.1   Symbols:   Ribonuclease H-<br>like superfamily protein   chr4:14333528-<br>14335255 FORWARD LENGTH=575                                           | 673 | 575 | 7.00E-41  | 85.4  | 14.1 | 21.4 |
| Rsa1.0_01944.1.g30978.t1 | refNP_191259.1 nucleolar essential<br>protein-related protein [Arabidopsis<br>thaliana] gi 6911870 emb CAB72170.1 <br>putative protein [Arabidopsis thaliana]<br>gi 28466945 gb AAO44081.1  At3g57000<br>[Arabidopsis thaliana]<br>gi 110735698 dbj BAE99829.1 <br>hypothetical protein [Arabidopsis<br>thaliana] gi 332646076 gb AEE79597.1 <br>nucleolar essential protein-related<br>protein [Arabidopsis thaliana]<br>refXP_002864634.1  ATTRP1<br>[Arabidopsis lyrata subsp. lyrata]<br>gi 297310469 gb EFH40893.1  ATTRP1<br>[Arabidopsis lyrata subsp. lyrata]                                                                                                                                                                                                                                                                                                                                                               | 251 | 253  | 6.00E-86  | 100.8 | 65.7 | 78.1 | transcription factor<br>ORG2                              | gbpln | Arabidopsis<br>thaliana | AT3G56970.1   Symbols: BHLH038, ORG2  <br>basic helix-loop-helix (bHLH) DNA-binding<br>superfamily protein   chr3:21084204-<br>21085094 REVERSE LENGTH=253     | 251 | 253 | 2.00E-88  | 100.8 | 65.7 | 78.1 |
| Rsa1.0_01944.1.g30979.t1 | gb EOA23553.1  hypothetical protein<br>CARUB_v10016747mg [Capsella rubella]                                                                                                                                                                                                                                                                                                                                                                                                                                                                                                                                                                                                                                                                                                                                                                                                                                                         | 727 | 721  | 0         | 99.2  | 79.0 | 85.7 | hypothetical protein<br>CARUB_v10016747mg                 | gbpln | Capsella<br>rubella     | AT3G56990.1   Symbols: EDA7   embryo sac<br>development arrest 7   chr3:21088358-<br>21091976 REVERSE LENGTH=711                                               | 727 | 711 | 0         | 97.8  | 79.8 | 86.1 |
| Rsa1.0_01944.1.g30980.t1 | refNP_191259.1 nucleolar essential<br>protein-related protein [Arabidopsis<br>thaliana] gi 6911870 emb CAB72170.1 <br>putative protein [Arabidopsis thaliana]<br>gi 28466945 gb AAO44081.1  At3g57000<br>[Arabidopsis thaliana]<br>gi 110735698 dbj BAE99829.1 <br>hypothetical protein [Arabidopsis<br>thaliana] gi 332646076 gb AEE79597.1 <br>nucleolar essential protein-related<br>protein [Arabidopsis thaliana]<br>refXP_002864634.1  ATTRP1<br>[Arabidopsis lyrata subsp. lyrata]<br>gi 297310469 gb EFH40893.1  ATTRP1<br>[Arabidopsis lyrata subsp. lyrata]                                                                                                                                                                                                                                                                                                                                                               | 293 | 298  | 1.00E-129 | 101.7 | 78.2 | 89.8 | nucleolar essential<br>protein-related protein            | gbpln | Arabidopsis<br>thaliana | AT3G57000.1   Symbols:   nucleolar essential<br>protein-related   chr3:21092610-21094109<br>FORWARD LENGTH=298                                                 | 293 | 298 | 1.00E-131 | 101.7 | 78.2 | 89.8 |
| Rsa1.0_01945.1.g30981.t1 | refXP_002864635.1  thymidylate kinase<br>family protein [Arabidopsis lyrata subsp.<br>lyrata] gi 297310470 gb EFH40894.1 <br>thymidylate kinase family protein<br>[Arabidopsis lyrata subsp. lyrata]                                                                                                                                                                                                                                                                                                                                                                                                                                                                                                                                                                                                                                                                                                                                | 560 | 574  | 0         | 102.5 | 72.9 | 79.8 | ATTRP1                                                    | gbpln | Arabidopsis<br>lyrata   | AT5G59430.3   Symbols: ATTRP1   telomeric<br>repeat binding protein 1   chr5:23968254-<br>23970753 FORWARD LENGTH=568                                          | 560 | 568 | 0         | 101.4 | 72.0 | 79.5 |
| Rsa1.0_01945.1.g30982.t1 | refXP_002864635.1  thymidylate kinase<br>family protein [Arabidopsis lyrata subsp.<br>lyrata] gi 297310470 gb EFH40894.1 <br>thymidylate kinase family protein<br>[Arabidopsis lyrata subsp. lyrata]                                                                                                                                                                                                                                                                                                                                                                                                                                                                                                                                                                                                                                                                                                                                | 220 | 263  | 1.00E-109 | 119.5 | 87.7 | 94.1 | thymidylate kinase<br>family protein                      | gbpln | Arabidopsis<br>lyrata   | AT5G59440.3   Symbols: ZEU1   P-loop<br>containing nucleoside triphosphate<br>hydrolases superfamily protein  <br>chr5:23971397-23972729 FORWARD<br>LENGTH=271 | 220 | 271 | 1.00E-110 | 123.2 | 87.7 | 93.2 |
| Rsa1.0_01945.1.g30983.t1 | #                                                                                                                                                                                                                                                                                                                                                                                                                                                                                                                                                                                                                                                                                                                                                                                                                                                                                                                                   | #   | #    | #         | #     | #    | #    | -                                                         | ----  | ----                    | #                                                                                                                                                              | #   | #   | #         | #     | #    |      |

|                          |                                                                                                                                                                                                                                                                                                                                                                                                                                                                                                                                                                                      |     |      |           |       |      |      |                                                             |       |                      |                                                                                                                                           |     |     |           |       |      |      |
|--------------------------|--------------------------------------------------------------------------------------------------------------------------------------------------------------------------------------------------------------------------------------------------------------------------------------------------------------------------------------------------------------------------------------------------------------------------------------------------------------------------------------------------------------------------------------------------------------------------------------|-----|------|-----------|-------|------|------|-------------------------------------------------------------|-------|----------------------|-------------------------------------------------------------------------------------------------------------------------------------------|-----|-----|-----------|-------|------|------|
| Rsa1.0_01945.1.g30984.t1 | ref[NP_200753.1] scarecrow-like protein 11 [Arabidopsis thaliana]<br>gi 75180465 sp Q9LTI5.1 SCL11_ARATH<br>RecName: Full=Scarecrow-like protein 11; Short=AtSCL11; AltName: Full=GRAS family protein 31; Short=AtGRAS-31<br>gi 8885550 dbj BAA97480.1<br>SCARECROW transcriptional regulator-like protein [Arabidopsis thaliana]<br>gi 14334656 gb AAK59506.1 putative scarecrow 11 protein [Arabidopsis thaliana]<br>gi 17065588 gb AAL33772.1 putative scarecrow 11 protein [Arabidopsis thaliana]<br>gi 332009808 gb AED97191.1 scarecrow-like protein 11 [Arabidopsis thaliana] | 585 | 610  | 0         | 104.3 | 82.4 | 89.9 | scarecrow-like protein 11                                   | gbpln | Arabidopsis thaliana | AT5G59450.1   Symbols:   GRAS family transcription factor   chr5:23974808-23976640 FORWARD LENGTH=610                                     | 585 | 610 | 0         | 104.3 | 82.4 | 89.9 |
| Rsa1.0_01945.1.g30985.t1 | gb EOA14099.1  hypothetical protein CARUB_v10027239mg [Capsella rubella]                                                                                                                                                                                                                                                                                                                                                                                                                                                                                                             | 326 | 173  | 2.00E-44  | 53.1  | 32.2 | 35.6 | hypothetical protein CARUB_v10027239mg                      | gbpln | Capsella rubella     | AT5G59460.1   Symbols:   scarecrow-like transcription factor 11 (SCL11)   chr5:23976968-23978291 REVERSE LENGTH=172                       | 326 | 172 | 3.00E-39  | 52.8  | 29.4 | 33.1 |
| Rsa1.0_01945.1.g30986.t1 | ref[XP_002866333.1] hypothetical protein ARALYDRAFT_496082 [Arabidopsis lyrata subsp. lyrata]<br>gi 297312168 gb EFH42592.1<br>hypothetical protein ARALYDRAFT_496082 [Arabidopsis lyrata subsp. lyrata]<br>ref[NP_200758.1] C-terminal S-isoprenylcysteine carboxyl O-methyltransferase [Arabidopsis thaliana]<br>gi 8885555 dbj BAA97485.1 unnamed protein product [Arabidopsis thaliana]<br>gi 26983876 gb AAN86190.1 unknown protein [Arabidopsis thaliana]<br>gi 332009815 gb AED97198.1 C-terminal S-isoprenylcysteine carboxyl O-methyltransferase [Arabidopsis thaliana]     | 263 | 266  | 1.00E-129 | 101.1 | 86.7 | 93.5 | hypothetical protein ARALYDRAFT_496082                      | gbpln | Arabidopsis lyrata   | AT5G59490.1   Symbols:   Haloacid dehalogenase-like hydrolase (HAD) superfamily protein   chr5:23982922-23984419 REVERSE LENGTH=266       | 263 | 266 | 1.00E-124 | 101.1 | 86.7 | 93.5 |
| Rsa1.0_01945.1.g30987.t1 | ref[NP_200758.1] C-terminal S-isoprenylcysteine carboxyl O-methyltransferase [Arabidopsis thaliana]<br>gi 8885555 dbj BAA97485.1 unnamed protein product [Arabidopsis thaliana]<br>gi 26983876 gb AAN86190.1 unknown protein [Arabidopsis thaliana]<br>gi 332009815 gb AED97198.1 C-terminal S-isoprenylcysteine carboxyl O-methyltransferase [Arabidopsis thaliana]                                                                                                                                                                                                                 | 452 | 396  | 0         | 87.6  | 70.8 | 77.2 | C-terminal S-isoprenylcysteine carboxyl O-methyltransferase | gbpln | Arabidopsis thaliana | AT5G59500.1   Symbols:   protein C-terminal S-isoprenylcysteine carboxyl O-methyltransferases   chr5:23986024-23987214 FORWARD LENGTH=396 | 452 | 396 | 0         | 87.6  | 70.8 | 77.2 |
| Rsa1.0_01945.1.g30988.t1 | #                                                                                                                                                                                                                                                                                                                                                                                                                                                                                                                                                                                    | #   | #    | #         | #     | #    | #    | -                                                           | ----  | ----                 | #                                                                                                                                         | #   | #   | #         | #     | #    |      |
| Rsa1.0_01945.1.g30989.t1 | ref[XP_002866337.1] hypothetical protein ARALYDRAFT_496089 [Arabidopsis lyrata subsp. lyrata]<br>gi 297312172 gb EFH42596.1<br>hypothetical protein ARALYDRAFT_496089 [Arabidopsis lyrata subsp. lyrata]                                                                                                                                                                                                                                                                                                                                                                             | 400 | 406  | 1.00E-143 | 101.5 | 75.0 | 81.3 | hypothetical protein ARALYDRAFT_496089                      | gbpln | Arabidopsis lyrata   | AT5G59550.1   Symbols:   zinc finger (G3HC4-type RING finger) family protein   chr5:23998422-23999645 REVERSE LENGTH=407                  | 400 | 407 | 1.00E-141 | 101.8 | 74.5 | 80.5 |
| Rsa1.0_01946.1.g30990.t1 | dbj BAB02256.1  unnamed protein product [Arabidopsis thaliana]                                                                                                                                                                                                                                                                                                                                                                                                                                                                                                                       | 89  | 386  | 9.00E-23  | 433.7 | 59.6 | 71.9 | unnamed protein product                                     | gbpln | Arabidopsis thaliana | AT3G29638.1   Symbols:   General transcription factor 2-related zinc finger protein   chr3:11473584-11475559 FORWARD LENGTH=412           | 89  | 412 | 4.00E-21  | 462.9 | 50.6 | 61.8 |
| Rsa1.0_01946.1.g30991.t1 | gb AAG51783.1 AC079679.3 reverse transcriptase, putative; 16838-20266 [Arabidopsis thaliana]                                                                                                                                                                                                                                                                                                                                                                                                                                                                                         | 606 | 1142 | 0         | 188.4 | 53.0 | 67.8 | reverse transcriptase, putative; 16838-20266                | gbpln | Arabidopsis thaliana | AT4G29090.1   Symbols:   Ribonuclease H-like superfamily protein   chr4:14333528-14335255 FORWARD LENGTH=575                              | 606 | 575 | 5.00E-44  | 94.9  | 19.0 | 29.9 |
| Rsa1.0_01946.1.g30992.t1 | gb EOA16268.1  hypothetical protein CARUB_v10004413mg, partial [Capsella rubella]                                                                                                                                                                                                                                                                                                                                                                                                                                                                                                    | 576 | 603  | 0         | 104.7 | 77.8 | 84.7 | hypothetical protein CARUB_v10004413mg, partial             | gbpln | Capsella rubella     | AT5G41940.1   Symbols:   Ypt/Rab-GAP domain of gyp1p superfamily protein   chr5:16782039-16785451 FORWARD LENGTH=549                      | 576 | 549 | 0         | 95.3  | 77.8 | 83.3 |
| Rsa1.0_01946.1.g30993.t1 | #                                                                                                                                                                                                                                                                                                                                                                                                                                                                                                                                                                                    | #   | #    | #         | #     | #    | #    | -                                                           | ----  | ----                 | #                                                                                                                                         | #   | #   | #         | #     | #    |      |
| Rsa1.0_01946.1.g30994.t2 | ref[XP_002870604.1] hypothetical protein ARALYDRAFT_330340 [Arabidopsis lyrata subsp. lyrata]<br>gi 297316440 gb EFH46863.1<br>hypothetical protein ARALYDRAFT_330340 [Arabidopsis lyrata subsp. lyrata]                                                                                                                                                                                                                                                                                                                                                                             | 499 | 372  | 0         | 74.5  | 66.9 | 68.7 | hypothetical protein ARALYDRAFT_330340                      | gbpln | Arabidopsis lyrata   | AT5G41970.1   Symbols:   Metal-dependent protein hydrolase   chr5:16791198-16792961 FORWARD LENGTH=373                                    | 499 | 373 | 0         | 74.7  | 66.3 | 68.5 |
| Rsa1.0_01946.1.g30995.t1 | gb EOA16321.1  hypothetical protein CARUB_v10004471mg [Capsella rubella]                                                                                                                                                                                                                                                                                                                                                                                                                                                                                                             | 466 | 571  | 0         | 122.5 | 86.1 | 92.5 | hypothetical protein CARUB_v10004471mg                      | gbpln | Capsella rubella     | AT5G41990.1   Symbols:   WNK8, ATWNK8   with no lysine (K) kinase 8   chr5:16795085-16797562 REVERSE LENGTH=563                           | 466 | 563 | 0         | 120.8 | 84.5 | 90.1 |



|                          |                                                                                                                                                                                                                                                                                                                                                                                                                                                                                                                                                                                                                                                                                                                |     |     |           |       |      |      |                                                |       |                      |                                                                                                                                                                 |     |     |           |       |      |      |
|--------------------------|----------------------------------------------------------------------------------------------------------------------------------------------------------------------------------------------------------------------------------------------------------------------------------------------------------------------------------------------------------------------------------------------------------------------------------------------------------------------------------------------------------------------------------------------------------------------------------------------------------------------------------------------------------------------------------------------------------------|-----|-----|-----------|-------|------|------|------------------------------------------------|-------|----------------------|-----------------------------------------------------------------------------------------------------------------------------------------------------------------|-----|-----|-----------|-------|------|------|
| Rsa1.0_01947.1.g30996.t1 | ref[NP_177024.1] putative nitrite transporter [Arabidopsis thaliana] gi 75266596 sp Q9SX20.1 PTR18.ARAT H RecName: Full=Probable nitrite transporter At1g68570 gi 5734721 gb AAD49986.1 AC008075_19 Similar to gb AF023472 peptide transporter from Hordeum vulgare and is a member of the PF 00854 Peptide transporter family. ESTs gb T41927 and gb AA395024 come from this gene [Arabidopsis thaliana] gi 20147231 gb AAM10330.1  At1g68570/F24J5_7 [Arabidopsis thaliana] gi 25090385 gb AAN72289.1  At1g68570/F24J5_7 [Arabidopsis thaliana] gi 110742209 dbj BAE99031.1  peptide transporter like [Arabidopsis thaliana] gi 332196691 gb AEE34812.1  probable nitrite transporter [Arabidopsis thaliana] | 592 | 596 | 0         | 100.7 | 91.9 | 96.6 | putative nitrite transporter                   | gbpln | Arabidopsis thaliana | AT1G68570.1   Symbols:   Major facilitator superfamily protein   chr1:25746811-25750110 FORWARD LENGTH=596                                                      | 592 | 596 | 0         | 100.7 | 91.9 | 96.6 |
| Rsa1.0_01947.1.g30997.t1 | gb EOA17341.1  hypothetical protein CARUB_v10005624mg [Capsella rubella]                                                                                                                                                                                                                                                                                                                                                                                                                                                                                                                                                                                                                                       | 225 | 239 | 1.00E-98  | 106.2 | 82.2 | 88.0 | hypothetical protein CARUB_v10005624mg         | gbpln | Capsella rubella     | AT4G39670.1   Symbols:   Glycolipid transfer protein (GLTP) family protein   chr4:18410172-18410861 FORWARD LENGTH=229                                          | 225 | 229 | 1.00E-100 | 101.8 | 78.7 | 85.8 |
| Rsa1.0_01947.1.g30998.t1 | ref XP_002887191.1  hypothetical protein ARALYDRAFT_475982 [Arabidopsis lyrata subsp. lyrata] gi 297333032 gb EFH63450.1  hypothetical protein ARALYDRAFT_475982 [Arabidopsis lyrata subsp. lyrata]                                                                                                                                                                                                                                                                                                                                                                                                                                                                                                            | 690 | 649 | 0         | 94.1  | 68.1 | 77.5 | hypothetical protein ARALYDRAFT_475982         | gbpln | Arabidopsis lyrata   | AT1G68580.2   Symbols:   agenet domain-containing protein / bromo-adjacent homology (BAH) domain-containing protein   chr1:25752869-25755631 FORWARD LENGTH=648 | 690 | 648 | 0         | 93.9  | 67.4 | 78.1 |
| Rsa1.0_01947.1.g30999.t1 | gb AAM63350.1  plastid-specific ribosomal protein 3 precursor [Arabidopsis thaliana]                                                                                                                                                                                                                                                                                                                                                                                                                                                                                                                                                                                                                           | 166 | 166 | 6.00E-71  | 100.0 | 84.9 | 89.8 | plastid-specific ribosomal protein 3 precursor | gbpln | Arabidopsis thaliana | AT1G68590.1   Symbols:   Ribosomal protein PSRP-3/ycf65   chr1:25757593-25758169 REVERSE LENGTH=166                                                             | 166 | 166 | 4.00E-73  | 100.0 | 84.9 | 89.8 |
| Rsa1.0_01947.1.g31000.t1 | ref NP_177028.1  cadmium resistance 11 protein [Arabidopsis thaliana] gi 75266599 sp Q9SX24.1 PCR11.ARAT H RecName: Full=Protein PLANT CADMIUM RESISTANCE 11; Short=AtPCR11 gi 5734716 gb AAD49981.1 AC008075_14 Similar to gb AF049928 PGP224 protein from Petunia x hybrida [Arabidopsis thaliana] gi 332196698 gb AEE34819.1  cadmium resistance 11 protein [Arabidopsis thaliana]                                                                                                                                                                                                                                                                                                                          | 163 | 160 | 4.00E-62  | 98.2  | 79.1 | 82.8 | cadmium resistance 11 protein                  | gbpln | Arabidopsis thaliana | AT1G68610.1   Symbols: PCR11   PLANT CADMIUM RESISTANCE 11   chr1:25763623-25764105 FORWARD LENGTH=160                                                          | 163 | 160 | 1.00E-64  | 98.2  | 79.1 | 82.8 |
| Rsa1.0_01947.1.g31001.t1 | ref NP_564936.1  alpha/beta-hydrolase domain-containing protein [Arabidopsis thaliana] gi 75337796 sp Q9SX25.1 CXE6.ARATH RecName: Full=Probable carboxylesterase 6; AltName: Full=AtCXE6 gi 5734715 gb AAD49980.1 AC008075_13 Similar to gb AF110333 P-MC3 protein from Pinus radiata and is a member of PF 00135 Carboxylesterases family. EST gb N37841 comes from this gene [Arabidopsis thaliana] gi 1387777 gb AAK43966.1 AF370151.1 unknown protein [Arabidopsis thaliana] gi 14335126 gb AAK59842.1  At1g68620/F24J5_21 [Arabidopsis thaliana] gi 16323410 gb AAL15199.1  unknown protein [Arabidopsis thaliana] gi 332196699 gb AEE34820.1  probable carboxylesterase 6 [Arabidopsis thaliana]        | 332 | 336 | 1.00E-142 | 101.2 | 75.0 | 84.3 | alpha/beta-hydrolase domain-containing protein | gbpln | Arabidopsis thaliana | AT1G68620.1   Symbols:   alpha/beta-Hydrolases superfamily protein   chr1:25768018-25767028 FORWARD LENGTH=336                                                  | 332 | 336 | 1.00E-144 | 101.2 | 75.0 | 84.3 |
| Rsa1.0_01947.1.g31002.t1 | gb EOA33841.1  hypothetical protein CARUB_v10021324mg [Capsella rubella]                                                                                                                                                                                                                                                                                                                                                                                                                                                                                                                                                                                                                                       | 161 | 161 | 4.00E-76  | 100.0 | 82.6 | 91.3 | hypothetical protein CARUB_v10021324mg         | gbpln | Capsella rubella     | AT1G68630.1   Symbols:   PLAC8 family protein   chr1:25768653-25769458 FORWARD LENGTH=161                                                                       | 161 | 161 | 2.00E-78  | 100.0 | 82.0 | 91.9 |
| Rsa1.0_01947.1.g31003.t1 | ref XP_002888675.1  transcription factor perianthia [Arabidopsis lyrata subsp. lyrata] gi 297334516 gb EFH64934.1  transcription factor perianthia [Arabidopsis lyrata subsp. lyrata]                                                                                                                                                                                                                                                                                                                                                                                                                                                                                                                          | 455 | 446 | 0         | 98.0  | 86.6 | 90.3 | transcription factor perianthia                | gbpln | Arabidopsis lyrata   | AT1G68640.1   Symbols: PAN   bZIP transcription factor family protein   chr1:25769739-25772303 REVERSE LENGTH=452                                               | 455 | 452 | 0         | 99.3  | 86.2 | 90.3 |

|                           |                                                                                                                                                                                                                                                                                                                                                               |      |      |           |       |      |      |                                                     |       |                      |                                                                                                                                                                                                                                                                                                                                                          |      |      |           |       |      |      |
|---------------------------|---------------------------------------------------------------------------------------------------------------------------------------------------------------------------------------------------------------------------------------------------------------------------------------------------------------------------------------------------------------|------|------|-----------|-------|------|------|-----------------------------------------------------|-------|----------------------|----------------------------------------------------------------------------------------------------------------------------------------------------------------------------------------------------------------------------------------------------------------------------------------------------------------------------------------------------------|------|------|-----------|-------|------|------|
| Rsa1.0_01948.1.g31004.t1  | #                                                                                                                                                                                                                                                                                                                                                             | #    | #    | #         | #     | #    | #    | -                                                   | ----  | ----                 | AT4G32200.1   Symbols: ASY2   DNA-binding HORMA family protein   chr4:15548840-15554962 FORWARD LENGTH=1399                                                                                                                                                                                                                                              | 958  | 1399 | 5.00E-12  | 146.0 | 8.1  | 14.0 |
| Rsa1.0_01948.1.g31005.t1  | gb EOA30146.1  hypothetical protein CARUB_v10013253mg [Capsella rubella]                                                                                                                                                                                                                                                                                      | 108  | 609  | 2.00E-46  | 563.9 | 84.3 | 88.0 | hypothetical protein CARUB_v10013253mg              | gbpln | Capsella rubella     | AT3G18060.1   Symbols:   transducin family protein / WD-40 repeat family protein   chr3:6183880-6186788 FORWARD LENGTH=609                                                                                                                                                                                                                               | 108  | 609  | 3.00E-49  | 563.9 | 84.3 | 87.0 |
| Rsa1.0_01948.1.g31006.t1  | gb AAD17395.1  putative non-LTR retroelement reverse transcriptase [Arabidopsis thaliana]                                                                                                                                                                                                                                                                     | 225  | 1138 | 3.00E-27  | 505.8 | 24.4 | 33.8 | putative non-LTR retroelement reverse transcriptase | gbpln | Arabidopsis thaliana | AT4G29090.1   Symbols:   Ribonuclease H-like superfamily protein   chr4:14333528-14335255 FORWARD LENGTH=575                                                                                                                                                                                                                                             | 225  | 575  | 3.00E-17  | 255.6 | 23.6 | 37.3 |
| Rsa1.0_01948.1.g31007.t1  | ref XP_002865388.1  hypothetical protein ARALYDRAFT_917224 [Arabidopsis lyrata subsp. lyrata] gi 297311223 gb EFH41647.1  hypothetical protein ARALYDRAFT_917224 [Arabidopsis lyrata subsp. lyrata]                                                                                                                                                           | 272  | 272  | 1.00E-142 | 100.0 | 90.1 | 94.1 | hypothetical protein ARALYDRAFT_917224              | gbpln | Arabidopsis lyrata   | AT5G44020.1   Symbols:   HAD superfamily, subfamily IIB acid phosphatase   chr5:17712433-17714046 FORWARD LENGTH=272                                                                                                                                                                                                                                     | 272  | 272  | 1.00E-136 | 100.0 | 89.0 | 92.6 |
| Rsa1.0_01948.1.g31008.t1  | gb ACS68194.1  cellulose synthase 4.2 catalytic subunit [Brassica napus]                                                                                                                                                                                                                                                                                      | 1047 | 1052 | 0         | 100.5 | 96.4 | 97.8 | cellulose synthase 4.2 catalytic subunit            | gbpln | Brassica napus       | AT5G44030.1   Symbols: CESA4, IRX5, NWS2   cellulose synthase A4   chr5:17714713-17719564 FORWARD LENGTH=1049                                                                                                                                                                                                                                            | 1047 | 1049 | 0         | 100.2 | 93.7 | 96.2 |
| Rsa1.0_01948.1.g31009.t1  | ref NP_199217.1  uncharacterized protein [Arabidopsis thaliana] gi 9758563 dbj BAB09064.1  unnamed protein product [Arabidopsis thaliana] gi 20466155 gb AAM20395.1  putative protein [Arabidopsis thaliana] gi 30725674 gb AAP37859.1  At5g44040 [Arabidopsis thaliana] gi 332007668 gb AED95051.1  uncharacterized protein AT5G44040 [Arabidopsis thaliana] | 392  | 416  | 1.00E-117 | 106.1 | 71.7 | 79.8 | uncharacterized protein                             | gbpln | Arabidopsis thaliana | AT5G44040.1   Symbols:   unknown protein; BEST Arabidopsis thaliana protein match is: unknown protein (TAIR:AT1G04030.1); Has 1807 Blast hits to 1807 proteins in 277 species: Archae - 0; Bacteria - 0; Metazoa - 736; Fungi - 347; Plants - 385; Viruses - 0; Other Eukaryotes - 339 (source: NCBI BLINK).   chr5:17719896-17721348 REVERSE LENGTH=416 | 392  | 416  | 1.00E-120 | 106.1 | 71.7 | 79.8 |
| Rsa1.0_01948.1.g31010.t1  | gb AAG51783.1 AC079679_3 reverse transcriptase, putative; 16838-20266 [Arabidopsis thaliana]                                                                                                                                                                                                                                                                  | 576  | 1142 | 1.00E-173 | 198.3 | 51.6 | 68.2 | reverse transcriptase, putative; 16838-20266        | gbpln | Arabidopsis thaliana | AT4G29090.1   Symbols:   Ribonuclease H-like superfamily protein   chr4:14333528-14335255 FORWARD LENGTH=575                                                                                                                                                                                                                                             | 576  | 575  | 9.00E-84  | 99.8  | 31.8 | 50.7 |
| Rsa1.0_01948.1.g31011.t1  | #                                                                                                                                                                                                                                                                                                                                                             | #    | #    | #         | #     | #    | #    | -                                                   | ----  | ----                 | #                                                                                                                                                                                                                                                                                                                                                        | #    | #    | #         | #     | #    | #    |
| Rsa1.0_01948.1.g31012.t1  | #                                                                                                                                                                                                                                                                                                                                                             | #    | #    | #         | #     | #    | #    | -                                                   | ----  | ----                 | #                                                                                                                                                                                                                                                                                                                                                        | #    | #    | #         | #     | #    | #    |
| Rsa1.0_01949.1.g31013.t1  | gb ABD65177.1  hypothetical protein 40.t00065 [Brassica oleracea]                                                                                                                                                                                                                                                                                             | 112  | 237  | 8.00E-41  | 211.6 | 81.3 | 84.8 | hypothetical protein 40.t00065                      | gbpln | Brassica oleracea    | AT4G17440.2   Symbols:   Protein of unknown function (DUF1639)   chr4:9727848-9728823 FORWARD LENGTH=215                                                                                                                                                                                                                                                 | 112  | 215  | 4.00E-40  | 192.0 | 69.6 | 74.1 |
| Rsa1.0_01949.1.g31014.t1  | #                                                                                                                                                                                                                                                                                                                                                             | #    | #    | #         | #     | #    | #    | -                                                   | ----  | ----                 | #                                                                                                                                                                                                                                                                                                                                                        | #    | #    | #         | #     | #    | #    |
| Rsa1.0_01949.1.g31015.t1  | gb ABD65141.1  homeobox-leucine zipper protein hat1, putative [Brassica oleracea]                                                                                                                                                                                                                                                                             | 280  | 277  | 1.00E-144 | 98.9  | 90.7 | 92.9 | homeobox-leucine zipper protein hat1, putative      | gbpln | Brassica oleracea    | AT4G17460.1   Symbols: HAT1   Homeobox-leucine zipper protein 4 (HB-4) / HD-ZIP protein   chr4:9739862-9740983 FORWARD LENGTH=282                                                                                                                                                                                                                        | 280  | 282  | 1.00E-142 | 100.7 | 91.1 | 93.9 |
| Rsa1.0_01949.1.g31016.t20 | gb ABD65142.1  palmitoyl protein thioesterase family protein [Brassica oleracea]                                                                                                                                                                                                                                                                              | 300  | 314  | 1.00E-130 | 104.7 | 75.7 | 83.7 | palmitoyl protein thioesterase family protein       | gbpln | Brassica oleracea    | AT4G17483.1   Symbols:   alpha/beta-Hydrolases superfamily protein   chr4:9747375-9748892 REVERSE LENGTH=300                                                                                                                                                                                                                                             | 300  | 300  | 1.00E-120 | 100.0 | 69.7 | 80.7 |
| Rsa1.0_01949.1.g31017.t1  | gb ABD65143.1  hypothetical protein 40.t00020 [Brassica oleracea]                                                                                                                                                                                                                                                                                             | 215  | 208  | 1.00E-106 | 96.7  | 91.6 | 94.0 | hypothetical protein 40.t00020                      | gbpln | Brassica oleracea    | AT4G17486.1   Symbols:   PPPDE putative thiol peptidase family protein   chr4:9749992-9751201 REVERSE LENGTH=224                                                                                                                                                                                                                                         | 215  | 224  | 1.00E-102 | 104.2 | 84.2 | 88.4 |
| Rsa1.0_01949.1.g31018.t1  | gb ABD65144.1  ubiquitin carboxyl-terminal hydrolase, putative [Brassica oleracea]                                                                                                                                                                                                                                                                            | 234  | 251  | 1.00E-125 | 107.3 | 93.6 | 97.9 | ubiquitin carboxyl-terminal hydrolase, putative     | gbpln | Brassica oleracea    | AT4G17510.1   Symbols: UCH3   ubiquitin C-terminal hydrolase 3   chr4:9767114-9768648 REVERSE LENGTH=234                                                                                                                                                                                                                                                 | 234  | 234  | 1.00E-123 | 100.0 | 87.2 | 94.9 |
| Rsa1.0_01949.1.g31019.t1  | gb ABD65145.1  nuclear RNA binding protein, putative [Brassica oleracea]                                                                                                                                                                                                                                                                                      | 355  | 353  | 1.00E-130 | 99.4  | 89.0 | 89.6 | nuclear RNA binding protein, putative               | gbpln | Brassica oleracea    | AT4G17520.1   Symbols:   Hyaluronan / mRNA binding family   chr4:9771496-9773313 FORWARD LENGTH=360                                                                                                                                                                                                                                                      | 355  | 360  | 1.00E-114 | 101.4 | 70.7 | 78.9 |
| Rsa1.0_01949.1.g31020.t1  | gb EOA14024.1  hypothetical protein CARUB_v10027156mg [Capsella rubella]                                                                                                                                                                                                                                                                                      | 203  | 202  | 1.00E-112 | 99.5  | 96.1 | 97.0 | hypothetical protein CARUB_v10027156mg              | gbpln | Capsella rubella     | AT5G47200.1   Symbols: ATRABD2B, ATRAB1A, RAB1A   RAB GTPase homolog 1A   chr5:19167029-19168718 FORWARD LENGTH=202                                                                                                                                                                                                                                      | 203  | 202  | 1.00E-113 | 99.5  | 95.6 | 96.6 |
| Rsa1.0_01949.1.g31021.t1  | gb AAF18630.1 AC006228_1 F5J5.1 [Arabidopsis thaliana]                                                                                                                                                                                                                                                                                                        | 962  | 1463 | 3.00E-88  | 152.1 | 15.2 | 18.5 | F5J5.1                                              | gbpln | Arabidopsis thaliana | AT4G17550.1   Symbols:   Major facilitator superfamily protein   chr4:9779738-9779738 REVERSE LENGTH=544                                                                                                                                                                                                                                                 | 962  | 544  | 3.00E-87  | 56.5  | 16.9 | 17.4 |
| Rsa1.0_01950.1.g31022.t1  | gb AAF24529.1 AC007534_10 F7F22.15 [Arabidopsis thaliana]                                                                                                                                                                                                                                                                                                     | 187  | 1862 | 1.00E-57  | 995.7 | 59.4 | 70.6 | F7F22.15                                            | gbpln | Arabidopsis thaliana | #                                                                                                                                                                                                                                                                                                                                                        | #    | #    | #         | #     | #    | #    |
| Rsa1.0_01950.1.g31023.t3  | ref XP_002868305.1  binding protein [Arabidopsis lyrata subsp. lyrata] gi 297314141 gb EFH44564.1  binding protein [Arabidopsis lyrata subsp. lyrata]                                                                                                                                                                                                         | 355  | 502  | 3.00E-88  | 141.4 | 52.7 | 60.8 | binding protein                                     | gbpln | Arabidopsis lyrata   | AT4G14190.1   Symbols:   Pentatricopeptide repeat (PPR) superfamily protein   chr4:8183594-8185180 REVERSE LENGTH=501                                                                                                                                                                                                                                    | 355  | 501  | 6.00E-89  | 141.1 | 53.0 | 60.8 |
| Rsa1.0_01950.1.g31024.t1  | #                                                                                                                                                                                                                                                                                                                                                             | #    | #    | #         | #     | #    | #    | -                                                   | ----  | ----                 | #                                                                                                                                                                                                                                                                                                                                                        | #    | #    | #         | #     | #    | #    |
| Rsa1.0_01950.1.g31025.t1  | #                                                                                                                                                                                                                                                                                                                                                             | #    | #    | #         | #     | #    | #    | -                                                   | ----  | ----                 | #                                                                                                                                                                                                                                                                                                                                                        | #    | #    | #         | #     | #    | #    |

|                          |                                                                                                                                                                                                                                                                                                                                                                                                                                                                                                                             |      |      |           |       |      |      |                                                       |                      |                                                                                                                                                                                                                                                                                                                                                                                                                                                                                                                                   |      |      |           |       |      |      |
|--------------------------|-----------------------------------------------------------------------------------------------------------------------------------------------------------------------------------------------------------------------------------------------------------------------------------------------------------------------------------------------------------------------------------------------------------------------------------------------------------------------------------------------------------------------------|------|------|-----------|-------|------|------|-------------------------------------------------------|----------------------|-----------------------------------------------------------------------------------------------------------------------------------------------------------------------------------------------------------------------------------------------------------------------------------------------------------------------------------------------------------------------------------------------------------------------------------------------------------------------------------------------------------------------------------|------|------|-----------|-------|------|------|
| Rsa1.0_01951.1.g31026.t1 | gb EOA24149.1  hypothetical protein CARUB_v10017383mg, partial [Capsella rubella]                                                                                                                                                                                                                                                                                                                                                                                                                                           | 127  | 402  | 3.00E-42  | 316.5 | 80.3 | 85.0 | hypothetical protein CARUB_v10017383mg, gbpln partial | Capsella rubella     | AT3G52180.2   Symbols: ATPTPKIS1, DSP4, SEX4, ATSEX4   dual specificity protein phosphatase (DsPTP1) family protein   chr3:19350574-19353459 REVERSE LENGTH=292                                                                                                                                                                                                                                                                                                                                                                   | 127  | 292  | 3.00E-41  | 229.9 | 78.0 | 83.5 |
| Rsa1.0_01951.1.g31027.t1 | ref NP_566961.1  SEC12-like protein 1 [Arabidopsis thaliana]<br>gi 85687563 sp Q8GYE0.2 PHF1_ARATH<br>RecName: Full=SEC12-like protein 1;<br>AltName: Full=Protein PHOSPHATE TRANSPORTER TRAFFIC FACILITATOR 1; Short=PHF-1<br>gi 4678948 emb CAB41339.1  putative protein [Arabidopsis thaliana]<br>gi 114050625 gb ABI49462.1  At3g52190 [Arabidopsis thaliana]<br>gi 332645390 gb AEE78911.1  SEC12-like protein 1 [Arabidopsis thaliana]<br>ref XP_002879925.1  F-box family protein [Arabidopsis lyrata subsp. lyrata] | 397  | 398  | 0         | 100.3 | 92.7 | 97.0 | SEC12-like protein 1 gbpln                            | Arabidopsis thaliana | AT3G52190.1   Symbols: PHF1   phosphate transporter traffic facilitator1   chr3:19354117-19356910 REVERSE LENGTH=398                                                                                                                                                                                                                                                                                                                                                                                                              | 397  | 398  | 0         | 100.3 | 92.7 | 97.0 |
| Rsa1.0_01951.1.g31028.t1 | ref XP_002879925.1  F-box family protein [Arabidopsis lyrata subsp. lyrata] gi 297325764 gb EFH56184.1  F-box family protein [Arabidopsis lyrata subsp. lyrata]                                                                                                                                                                                                                                                                                                                                                             | 326  | 371  | 7.00E-40  | 113.8 | 41.1 | 59.2 | F-box family protein gbpln                            | Arabidopsis lyrata   | AT2G22050.1   Symbols:   Galactose oxidase/kelch repeat superfamily protein   chr2:9376684-9377552 FORWARD LENGTH=259                                                                                                                                                                                                                                                                                                                                                                                                             | 326  | 259  | 1.00E-32  | 79.4  | 28.8 | 39.3 |
| Rsa1.0_01951.1.g31029.t2 | ref XP_002876130.1  mRNA capping enzyme family protein [Arabidopsis lyrata subsp. lyrata] gi 297321968 gb EFH52389.1  mRNA capping enzyme family protein [Arabidopsis lyrata subsp. lyrata]                                                                                                                                                                                                                                                                                                                                 | 361  | 355  | 1.00E-169 | 98.3  | 83.4 | 88.4 | mRNA capping enzyme family protein gbpln              | Arabidopsis lyrata   | AT3G52210.1   Symbols:   S-adenosyl-L-methionine-dependent methyltransferases superfamily protein   chr3:19367035-19369293 FORWARD LENGTH=354                                                                                                                                                                                                                                                                                                                                                                                     | 361  | 354  | 1.00E-171 | 98.1  | 83.1 | 88.4 |
| Rsa1.0_01951.1.g31030.t1 | ref NP_566962.1  uncharacterized protein [Arabidopsis thaliana] gi 13899105 gb AAK48974.1 AF370547.1 putative protein [Arabidopsis thaliana] gi 30023708 gb AAP13387.1  At3g52220 [Arabidopsis thaliana] gi 332645396 gb AEE78917.1  uncharacterized protein AT3G52220 [Arabidopsis thaliana]                                                                                                                                                                                                                               | 243  | 237  | 1.00E-100 | 97.5  | 81.1 | 90.1 | uncharacterized protein gbpln                         | Arabidopsis thaliana | AT3G52220.1   Symbols:   CONTAINS InterPro DOMAIN's: Kinase phosphorylation domain (InterPro:IPR019315); Has 8882 Blast hits to 4920 proteins in 346 species: Archae - 10; Bacteria - 184; Metazoa - 3955; Fungi - 1221; Plants - 712; Viruses - 24; Other Eukaryotes - 2776 (source: NCBI BLink).   chr3:19369580-19370980 REVERSE LENGTH=237                                                                                                                                                                                    | 243  | 237  | 1.00E-103 | 97.5  | 81.1 | 90.1 |
| Rsa1.0_01951.1.g31031.t1 | gb EOA24913.1  hypothetical protein CARUB_v10018204mg [Capsella rubella]                                                                                                                                                                                                                                                                                                                                                                                                                                                    | 126  | 143  | 4.00E-34  | 113.5 | 58.7 | 66.7 | hypothetical protein CARUB_v10018204mg gbpln          | Capsella rubella     | AT3G52230.1   Symbols:   unknown protein; FUNCTIONS IN: molecular_function unknown; INVOLVED IN: biological_process unknown; LOCATED IN: chloroplast outer membrane, chloroplast thylakoid membrane, chloroplast, chloroplast envelope; EXPRESSED IN: 24 plant structures; EXPRESSED DURING: 13 growth stages; Has 29 Blast hits to 29 proteins in 12 species: Archae - 0; Bacteria - 0; Metazoa - 3; Fungi - 0; Plants - 26; Viruses - 0; Other Eukaryotes - 0 (source: NCBI BLink).   chr3:19371325-19372397 FORWARD LENGTH=145 | 126  | 145  | 3.00E-32  | 115.1 | 54.8 | 64.3 |
| Rsa1.0_01951.1.g31032.t1 | ref XP_002877850.1  hypothetical protein ARALYDRAFT_323774 [Arabidopsis lyrata subsp. lyrata] gi 297323688 gb EFH54109.1  hypothetical protein ARALYDRAFT_323774 [Arabidopsis lyrata subsp. lyrata]                                                                                                                                                                                                                                                                                                                         | 619  | 688  | 0         | 111.1 | 73.2 | 83.8 | hypothetical protein ARALYDRAFT_323774 gbpln          | Arabidopsis lyrata   | AT3G52240.1   Symbols:   unknown protein; Has 220 Blast hits to 193 proteins in 66 species: Archae - 0; Bacteria - 15; Metazoa - 53; Fungi - 33; Plants - 66; Viruses - 0; Other Eukaryotes - 53 (source: NCBI BLink).   chr3:19372902-19375799 REVERSE LENGTH=680                                                                                                                                                                                                                                                                | 619  | 680  | 0         | 109.9 | 70.4 | 80.6 |
| Rsa1.0_01951.1.g31033.t1 | ref XP_002876132.1  myb family transcription factor [Arabidopsis lyrata subsp. lyrata] gi 297321970 gb EFH52391.1  myb family transcription factor [Arabidopsis lyrata subsp. lyrata]                                                                                                                                                                                                                                                                                                                                       | 1648 | 1655 | 0         | 100.4 | 75.5 | 83.6 | myb family transcription factor gbpln                 | Arabidopsis lyrata   | AT3G52250.1   Symbols:   Duplicated homeodomain-like superfamily protein   chr3:19376629-19383100 FORWARD LENGTH=1656                                                                                                                                                                                                                                                                                                                                                                                                             | 1648 | 1656 | 0         | 100.5 | 73.9 | 82.2 |
| Rsa1.0_01951.1.g31034.t1 | ref XP_002868834.1  zinc finger family protein [Arabidopsis lyrata subsp. lyrata] gi 297314670 gb EFH45093.1  zinc finger family protein [Arabidopsis lyrata subsp. lyrata]                                                                                                                                                                                                                                                                                                                                                 | 155  | 144  | 1.00E-43  | 92.9  | 58.7 | 68.4 | zinc finger family protein gbpln                      | Arabidopsis lyrata   | AT4G38140.1   Symbols:   RING/U-box superfamily protein   chr4:17899868-17900305 REVERSE LENGTH=145                                                                                                                                                                                                                                                                                                                                                                                                                               | 155  | 145  | 1.00E-45  | 93.5  | 65.2 | 76.1 |
| Rsa1.0_01951.1.g31035.t3 | ref XP_002877852.1  hypothetical protein ARALYDRAFT_348323 [Arabidopsis lyrata subsp. lyrata] gi 297323690 gb EFH54111.1  hypothetical protein ARALYDRAFT_348323 [Arabidopsis lyrata subsp. lyrata]                                                                                                                                                                                                                                                                                                                         | 324  | 258  | 1.00E-108 | 79.6  | 59.9 | 66.4 | hypothetical protein ARALYDRAFT_348323 gbpln          | Arabidopsis lyrata   | AT3G52270.1   Symbols:   Transcription initiation factor IIF, beta subunit   chr3:19387180-19388902 REVERSE LENGTH=269                                                                                                                                                                                                                                                                                                                                                                                                            | 324  | 269  | 1.00E-102 | 83.0  | 58.3 | 65.1 |
| Rsa1.0_01952.1.g31036.t1 | # # # # # # # # - - - -                                                                                                                                                                                                                                                                                                                                                                                                                                                                                                     | #    | #    | #         | #     | #    | #    | -                                                     | -                    | AT2G01830.1   Symbols: WOL, CRE1, WOL1, AHK4, ATCRE1   CHASE domain containing histidine kinase protein   chr2:363332-367429 REVERSE LENGTH=1057                                                                                                                                                                                                                                                                                                                                                                                  | 137  | 1057 | 6.00E-11  | 771.5 | 25.5 | 26.3 |

|                          |                                                                                                                                                                                                                                                                                                                                                                 |      |      |           |       |      |      |                                                            |       |                      |                                                                                                                                                                                                                                                                                                                                                                                                                                          |      |      |           |       |      |      |
|--------------------------|-----------------------------------------------------------------------------------------------------------------------------------------------------------------------------------------------------------------------------------------------------------------------------------------------------------------------------------------------------------------|------|------|-----------|-------|------|------|------------------------------------------------------------|-------|----------------------|------------------------------------------------------------------------------------------------------------------------------------------------------------------------------------------------------------------------------------------------------------------------------------------------------------------------------------------------------------------------------------------------------------------------------------------|------|------|-----------|-------|------|------|
| Rsa1.0_01952.1.g31037.t1 | gb EOA23460.1  hypothetical protein CARUB_v10016649mg [Capsella rubella]                                                                                                                                                                                                                                                                                        | 454  | 947  | 1.00E-172 | 208.6 | 68.9 | 81.3 | hypothetical protein CARUB_v10016649mg                     | gbpln | Capsella rubella     | AT2G01820.1   Symbols:   Leucine-rich repeat protein kinase family protein   chr2:357664-360681 REVERSE LENGTH=943                                                                                                                                                                                                                                                                                                                       | 454  | 943  | 1.00E-169 | 207.7 | 66.1 | 79.7 |
| Rsa1.0_01952.1.g31038.t1 | #                                                                                                                                                                                                                                                                                                                                                               | #    | #    | #         | #     | #    | -    | ----                                                       | ----  | ----                 | #                                                                                                                                                                                                                                                                                                                                                                                                                                        | #    | #    | #         | #     | #    | #    |
| Rsa1.0_01952.1.g31039.t5 | emb CAB75909.1  putative protein [Arabidopsis thaliana]                                                                                                                                                                                                                                                                                                         | 369  | 606  | 6.00E-20  | 164.2 | 17.3 | 20.1 | putative protein                                           | gbpln | Arabidopsis thaliana | AT3G55510.1   Symbols: RBL   Noc2p family   chr3:20579232-20582124 FORWARD LENGTH=594                                                                                                                                                                                                                                                                                                                                                    | 369  | 594  | 2.00E-22  | 161.0 | 17.3 | 20.1 |
| Rsa1.0_01952.1.g31040.t1 | #                                                                                                                                                                                                                                                                                                                                                               | #    | #    | #         | #     | #    | -    | ----                                                       | ----  | ----                 | #                                                                                                                                                                                                                                                                                                                                                                                                                                        | #    | #    | #         | #     | #    | #    |
| Rsa1.0_01953.1.g31041.t1 | #                                                                                                                                                                                                                                                                                                                                                               | #    | #    | #         | #     | #    | -    | ----                                                       | ----  | ----                 | #                                                                                                                                                                                                                                                                                                                                                                                                                                        | #    | #    | #         | #     | #    | #    |
| Rsa1.0_01953.1.g31042.t1 | gb EOA15425.1  hypothetical protein CARUB_v10003963mg [Capsella rubella]                                                                                                                                                                                                                                                                                        | 2236 | 2547 | 0         | 113.9 | 66.9 | 77.9 | hypothetical protein CARUB_v10003963mg                     | gbpln | Capsella rubella     | AT4G27010.1   Symbols:   CONTAINS InterPro DOMAIN/s: Ribosome 60S biogenesis N-terminal (InterPro:IPR021714); BEST Arabidopsis thaliana protein match is: unknown protein (TAIR:AT1G72270.1); Has 30201 Blast hits to 17322 proteins in 780 species: Archae - 12; Bacteria - 1396; Metazoa - 17338; Fungi - 3422; Plants - 5037; Viruses - 0; Other Eukaryotes - 2996 (source: NCBI BLINK).   chr4:13558943-13568296 FORWARD LENGTH=2374 | 2236 | 2374 | 0         | 106.2 | 52.1 | 60.5 |
| Rsa1.0_01953.1.g31043.t1 | gb EOA40127.1  hypothetical protein CARUB_v10008834mg [Capsella rubella]                                                                                                                                                                                                                                                                                        | 524  | 528  | 0         | 100.8 | 88.5 | 94.3 | hypothetical protein CARUB_v10008834mg                     | gbpln | Capsella rubella     | AT1G19250.1   Symbols: FMO1   flavin-dependent monooxygenase 1   chr1:6650456-6653053 REVERSE LENGTH=530                                                                                                                                                                                                                                                                                                                                 | 524  | 530  | 0         | 101.1 | 87.4 | 92.9 |
| Rsa1.0_01953.1.g31044.t1 | gb ABD64930.1  hypothetical protein 24.t00076 [Brassica oleracea]                                                                                                                                                                                                                                                                                               | 460  | 407  | 5.00E-70  | 88.5  | 35.2 | 41.3 | hypothetical protein 24.t00076                             | gbpln | Brassica oleracea    | #                                                                                                                                                                                                                                                                                                                                                                                                                                        | #    | #    | #         | #     | #    | #    |
| Rsa1.0_01953.1.g31045.t1 | gb EOA40132.1  hypothetical protein CARUB_v10008839mg [Capsella rubella]                                                                                                                                                                                                                                                                                        | 511  | 525  | 0         | 102.7 | 84.0 | 90.2 | hypothetical protein CARUB_v10008839mg                     | gbpln | Capsella rubella     | AT1G19270.1   Symbols: DA1   DA1   chr1:6663327-6665845 FORWARD LENGTH=532                                                                                                                                                                                                                                                                                                                                                               | 511  | 532  | 0         | 104.1 | 83.2 | 90.8 |
| Rsa1.0_01953.1.g31046.t1 | ref XP_002890327.1  pentatricopeptide repeat-containing protein [Arabidopsis lyrata subsp. lyrata]   gi 297336169 gb EFH66586.1  pentatricopeptide repeat-containing protein [Arabidopsis lyrata subsp. lyrata]                                                                                                                                                 | 900  | 903  | 0         | 100.3 | 76.7 | 87.6 | pentatricopeptide repeat-containing protein                | gbpln | Arabidopsis lyrata   | AT1G19290.1   Symbols:   Pentatricopeptide repeat (PPR) superfamily protein   chr1:6666249-6668963 FORWARD LENGTH=904                                                                                                                                                                                                                                                                                                                    | 900  | 904  | 0         | 100.4 | 76.6 | 87.9 |
| Rsa1.0_01953.1.g31047.t1 | ref XP_002893040.1  hypothetical protein ARALYDRAFT_472152 [Arabidopsis lyrata subsp. lyrata]   gi 297338882 gb EFH69299.1  hypothetical protein ARALYDRAFT_472152 [Arabidopsis lyrata subsp. lyrata]                                                                                                                                                           | 351  | 350  | 1.00E-171 | 99.7  | 90.3 | 93.2 | hypothetical protein ARALYDRAFT_472152                     | gbpln | Arabidopsis lyrata   | AT1G19300.1   Symbols: GATL1, PARVUS, GLZ1, ATGATL1   Nucleotide-diphospho-sugar transferases superfamily protein   chr1:6671451-6672506 REVERSE LENGTH=351                                                                                                                                                                                                                                                                              | 351  | 351  | 1.00E-171 | 100.0 | 92.6 | 96.6 |
| Rsa1.0_01954.1.g31048.t1 | #                                                                                                                                                                                                                                                                                                                                                               | #    | #    | #         | #     | #    | -    | ----                                                       | ----  | ----                 | #                                                                                                                                                                                                                                                                                                                                                                                                                                        | #    | #    | #         | #     | #    | #    |
| Rsa1.0_01954.1.g31049.t1 | #                                                                                                                                                                                                                                                                                                                                                               | #    | #    | #         | #     | #    | -    | ----                                                       | ----  | ----                 | #                                                                                                                                                                                                                                                                                                                                                                                                                                        | #    | #    | #         | #     | #    | #    |
| Rsa1.0_01954.1.g31050.t1 | ref XP_002894442.1  hypothetical protein ARALYDRAFT_474474 [Arabidopsis lyrata subsp. lyrata]   gi 297340284 gb EFH70701.1  hypothetical protein ARALYDRAFT_474474 [Arabidopsis lyrata subsp. lyrata]                                                                                                                                                           | 444  | 471  | 0         | 106.1 | 84.5 | 91.2 | hypothetical protein ARALYDRAFT_474474                     | gbpln | Arabidopsis lyrata   | AT1G53450.2   Symbols:   unknown protein; BEST Arabidopsis thaliana protein match is: unknown protein (TAIR:AT3G14830.2); Has 35333 Blast hits to 34131 proteins in 2444 species: Archae - 798; Bacteria - 22429; Metazoa - 974; Fungi - 991; Plants - 531; Viruses - 0; Other Eukaryotes - 9610 (source: NCBI BLINK).   chr1:19951747-19953839 REVERSE LENGTH=453                                                                       | 444  | 453  | 0         | 102.0 | 82.9 | 89.2 |
| Rsa1.0_01954.1.g31051.t1 | ref NP_175747.2  putative LRR receptor-like serine/threonine-protein kinase [Arabidopsis thaliana]   gi 263711277 sp COLGG7.2 Y1534_ARAT H RecName: Full=Probable LRR receptor-like serine/threonine-protein kinase At1g53420; Flags: Precursor   gi 332194817 gb AEE32938.1  putative LRR receptor-like serine/threonine-protein kinase [Arabidopsis thaliana] | 395  | 953  | 0         | 241.3 | 77.7 | 87.8 | putative LRR receptor-like serine/threonine-protein kinase | gbpln | Arabidopsis thaliana | AT1G53420.1   Symbols:   Leucine-rich repeat transmembrane protein kinase   chr1:19926626-19931494 REVERSE LENGTH=953                                                                                                                                                                                                                                                                                                                    | 395  | 953  | 0         | 241.3 | 77.7 | 87.8 |
| Rsa1.0_01954.1.g31052.t1 | gb EOA37213.1  hypothetical protein CARUB_v10010694mg [Capsella rubella]                                                                                                                                                                                                                                                                                        | 115  | 114  | 6.00E-57  | 99.1  | 93.9 | 95.7 | hypothetical protein CARUB_v10010694mg                     | gbpln | Capsella rubella     | AT1G53400.1   Symbols:   Ubiquitin domain-containing protein   chr1:19925009-19926400 FORWARD LENGTH=114                                                                                                                                                                                                                                                                                                                                 | 115  | 114  | 1.00E-59  | 99.1  | 94.8 | 96.5 |
| Rsa1.0_01954.1.g31053.t3 | dbj BAE99398.1  putative ABC transporter gb AAD31586.1 [Arabidopsis thaliana]                                                                                                                                                                                                                                                                                   | 1170 | 1159 | 0         | 99.1  | 71.4 | 79.3 | putative ABC transporter gb AAD31586.1                     | gbpln | Arabidopsis thaliana | AT1G53390.1   Symbols:   P-loop containing nucleoside triphosphate hydrolases superfamily protein   chr1:19918197-19923579 FORWARD LENGTH=1109                                                                                                                                                                                                                                                                                           | 1170 | 1109 | 0         | 94.8  | 70.4 | 78.1 |
| Rsa1.0_01954.1.g31054.t3 | ref XP_002891750.1  ATPase, coupled to transmembrane movement of substances [Arabidopsis lyrata subsp. lyrata]   gi 297337592 gb EFH68009.1  ATPase, coupled to transmembrane movement of substances [Arabidopsis lyrata subsp. lyrata]                                                                                                                         | 1051 | 1119 | 0         | 106.5 | 79.0 | 86.9 | ATPase, coupled to transmembrane movement of substances    | gbpln | Arabidopsis lyrata   | AT1G53390.1   Symbols:   P-loop containing nucleoside triphosphate hydrolases superfamily protein   chr1:19918197-19923579 FORWARD LENGTH=1109                                                                                                                                                                                                                                                                                           | 1051 | 1109 | 0         | 105.5 | 77.8 | 86.1 |

|                          |                                                                                                                                                                                                                                                    |     |      |           |       |      |      |                                                                            |       |                      |                                                                                                                                                                                                                                                                                                                                                                                                                                                                                                                                                    |     |     |           |       |      |      |
|--------------------------|----------------------------------------------------------------------------------------------------------------------------------------------------------------------------------------------------------------------------------------------------|-----|------|-----------|-------|------|------|----------------------------------------------------------------------------|-------|----------------------|----------------------------------------------------------------------------------------------------------------------------------------------------------------------------------------------------------------------------------------------------------------------------------------------------------------------------------------------------------------------------------------------------------------------------------------------------------------------------------------------------------------------------------------------------|-----|-----|-----------|-------|------|------|
| Rsa1.0_01954.1.g31055.t1 | gb ABD65067.1  nuclear RNA binding protein, putative [Brassica oleracea]                                                                                                                                                                           | 109 | 367  | 4.00E-22  | 336.7 | 68.8 | 75.2 | nuclear RNA binding protein, putative                                      | gbpln | Brassica oleracea    | AT4G17520.1   Symbols:   Hyaluronan / mRNA binding family   chr4:9771496-9773313 FORWARD LENGTH=360                                                                                                                                                                                                                                                                                                                                                                                                                                                | 109 | 360 | 1.00E-14  | 330.3 | 47.7 | 57.8 |
| Rsa1.0_01954.1.g31056.t1 | ref NP_189200.1  RNA-directed DNA polymerase (reverse transcriptase)-related family protein [Arabidopsis thaliana]   gi 332643539 gb AEE77060.1  RNA-directed DNA polymerase (reverse transcriptase)-related family protein [Arabidopsis thaliana] | 76  | 282  | 7.00E-15  | 371.1 | 51.3 | 69.7 | RNA-directed DNA polymerase (reverse transcriptase)-related family protein | gbpln | Arabidopsis thaliana | AT3G25720.1   Symbols:   RNA-directed DNA polymerase (reverse transcriptase)-related family protein   chr3:9380234-9381405 FORWARD LENGTH=282                                                                                                                                                                                                                                                                                                                                                                                                      | 76  | 282 | 1.00E-17  | 371.1 | 51.3 | 69.7 |
| Rsa1.0_01955.1.g31057.t1 | gb AAG51783.1 AC079679_3 reverse transcriptase, putative; 16838-20266 [Arabidopsis thaliana]                                                                                                                                                       | 170 | 1142 | 7.00E-25  | 671.8 | 40.0 | 60.0 | reverse transcriptase, putative; 16838-20266                               | gbpln | Arabidopsis thaliana | AT2G34320.1   Symbols:   Polynucleotidyl transferase, ribonuclease H-like superfamily protein   chr2:14484959-14485837 FORWARD LENGTH=292                                                                                                                                                                                                                                                                                                                                                                                                          | 170 | 292 | 3.00E-15  | 171.8 | 31.2 | 51.8 |
| Rsa1.0_01955.1.g31058.t1 | ref XP_002884137.1  hypothetical protein ARALYDRAFT_900233 [Arabidopsis lyrata subsp. lyrata]   gi 297329977 gb EFH60396.1  hypothetical protein ARALYDRAFT_900233 [Arabidopsis lyrata subsp. lyrata]                                              | 303 | 333  | 3.00E-85  | 109.9 | 58.7 | 72.3 | hypothetical protein ARALYDRAFT_900233                                     | gbpln | Arabidopsis lyrata   | AT5G42640.1   Symbols:   C2H2 and C2HC zinc fingers superfamily protein   chr5:17088695-17089597 FORWARD LENGTH=300                                                                                                                                                                                                                                                                                                                                                                                                                                | 303 | 300 | 1.00E-79  | 99.0  | 54.8 | 70.3 |
| Rsa1.0_01955.1.g31059.t1 | ref XP_002886173.1  predicted protein [Arabidopsis lyrata subsp. lyrata]   gi 297332013 gb EFH62432.1  predicted protein [Arabidopsis lyrata subsp. lyrata]                                                                                        | 621 | 640  | 0         | 103.1 | 75.0 | 78.4 | predicted protein                                                          | gbpln | Arabidopsis lyrata   | AT2G18470.1   Symbols:   PERK4   rolone-rich extensin-like receptor kinase 4   chr2:8005285-8007767 REVERSE LENGTH=633                                                                                                                                                                                                                                                                                                                                                                                                                             | 621 | 633 | 0         | 101.9 | 74.6 | 78.1 |
| Rsa1.0_01955.1.g31060.t1 | ref XP_002881678.1  hypothetical protein ARALYDRAFT_903237 [Arabidopsis lyrata subsp. lyrata]   gi 297327517 gb EFH57937.1  hypothetical protein ARALYDRAFT_903237 [Arabidopsis lyrata subsp. lyrata]                                              | 99  | 159  | 3.00E-33  | 160.6 | 76.8 | 82.8 | hypothetical protein ARALYDRAFT_903237                                     | gbpln | Arabidopsis lyrata   | AT1G76640.1   Symbols:   Calcium-binding EF-hand family protein   chr1:28765324-28765803 REVERSE LENGTH=159                                                                                                                                                                                                                                                                                                                                                                                                                                        | 99  | 159 | 1.00E-34  | 160.6 | 75.8 | 80.8 |
| Rsa1.0_01955.1.g31061.t1 | gb EOA30825.1  hypothetical protein CARUB_v10013969mg [Capsella rubella]                                                                                                                                                                           | 358 | 374  | 1.00E-166 | 104.5 | 83.8 | 89.4 | hypothetical protein CARUB_v10013969mg                                     | gbpln | Capsella rubella     | AT2G18410.1   Symbols:   FUNCTIONS IN: molecular_function unknown; INVOLVED IN: biological_process unknown; LOCATED IN: cellular_component unknown; EXPRESSED IN: 22 plant structures; EXPRESSED DURING: 13 growth stages; CONTAINS InterPro DOMAIN/s: Histone acetylation protein 2 (InterPro:IPR019519); Has 35333 Blast hits to 34131 proteins in 2444 species: Archae - 798; Bacteria - 22429; Metazoa - 974; Fungi - 991; Plants - 531; Viruses - 0; Other Eukaryotes - 9610 (source: NCBI BLiink).   chr2:7990768-7992588 FORWARD LENGTH=374 | 358 | 374 | 1.00E-164 | 104.5 | 83.0 | 89.1 |
| Rsa1.0_01955.1.g31062.t1 | ref XP_004143514.1  PREDICTED: 60S ribosomal protein L6, mitochondrial-like [Cucumis sativus]   gi 449496483 ref XP_004160146.1  PREDICTED: 60S ribosomal protein L6, mitochondrial-like [Cucumis sativus]                                         | 102 | 102  | 1.00E-47  | 100.0 | 91.2 | 94.1 | PREDICTED: 60S ribosomal protein L6, mitochondrial-like                    | gbpln | Cucumis sativus      | AT2G18400.1   Symbols:   ribosomal protein L6 family protein   chr2:7989665-7989973 REVERSE LENGTH=102                                                                                                                                                                                                                                                                                                                                                                                                                                             | 102 | 102 | 6.00E-48  | 100.0 | 88.2 | 88.2 |
| Rsa1.0_01955.1.g31063.t1 | ref XP_002884131.1  hypothetical protein ARALYDRAFT_900220 [Arabidopsis lyrata subsp. lyrata]   gi 297329971 gb EFH60390.1  hypothetical protein ARALYDRAFT_900220 [Arabidopsis lyrata subsp. lyrata]                                              | 76  | 185  | 7.00E-12  | 243.4 | 53.9 | 57.9 | hypothetical protein ARALYDRAFT_900220                                     | gbpln | Arabidopsis lyrata   | AT2G18390.1   Symbols:   TTN5, HAL, ARL2, ATARLC1   ADP-ribosylation factor family protein   chr2:7988335-7989374 FORWARD LENGTH=185                                                                                                                                                                                                                                                                                                                                                                                                               | 76  | 185 | 3.00E-14  | 243.4 | 55.3 | 61.8 |
| Rsa1.0_01955.1.g31064.t1 | gb ACP30591.1  disease resistance protein [Brassica rapa subsp. pekinensis]                                                                                                                                                                        | 210 | 1555 | 1.00E-29  | 740.5 | 38.6 | 51.9 | disease resistance protein                                                 | gbpln | Brassica rapa        | AT3G26855.1   Symbols:   RNA-directed DNA polymerase (reverse transcriptase)-related family protein   chr3:9898680-9899350 REVERSE LENGTH=163                                                                                                                                                                                                                                                                                                                                                                                                      | 210 | 163 | 5.00E-17  | 77.6  | 19.5 | 29.5 |
| Rsa1.0_01955.1.g31065.t1 | ref XP_002886168.1  predicted protein [Arabidopsis lyrata subsp. lyrata]   gi 297332008 gb EFH62427.1  predicted protein [Arabidopsis lyrata subsp. lyrata]                                                                                        | 201 | 206  | 3.00E-95  | 102.5 | 86.1 | 92.0 | predicted protein                                                          | gbpln | Arabidopsis lyrata   | AT2G18380.1   Symbols:   GATA20   GATA transcription factor 20   chr2:7982868-7984017 REVERSE LENGTH=208                                                                                                                                                                                                                                                                                                                                                                                                                                           | 201 | 208 | 7.00E-88  | 103.5 | 85.1 | 91.5 |

|                          |                                                                                                                                                                                                                                                                                                                                                                                                                                                                                                                                                                                                                                                                                               |     |      |           |       |      |      |                                                                                                                                                                                          |       |                      |                                                                                                                                                                                                                                                                                                                                                                                                                                                                                  |     |      |           |       |      |      |
|--------------------------|-----------------------------------------------------------------------------------------------------------------------------------------------------------------------------------------------------------------------------------------------------------------------------------------------------------------------------------------------------------------------------------------------------------------------------------------------------------------------------------------------------------------------------------------------------------------------------------------------------------------------------------------------------------------------------------------------|-----|------|-----------|-------|------|------|------------------------------------------------------------------------------------------------------------------------------------------------------------------------------------------|-------|----------------------|----------------------------------------------------------------------------------------------------------------------------------------------------------------------------------------------------------------------------------------------------------------------------------------------------------------------------------------------------------------------------------------------------------------------------------------------------------------------------------|-----|------|-----------|-------|------|------|
| Rsa1.0_01955.1.g31066.t1 | ref NP_179425.1  late embryogenesis abundant domain-containing protein [Arabidopsis thaliana] gi 4309733 gb AAD15503.1  similar to late embryogenesis abundant proteins [Arabidopsis thaliana] gi 110740637 dbj BAE98422.1  similar to late embryogenesis abundant proteins [Arabidopsis thaliana] gi 330251664 gb AEC06758.1  late embryogenesis abundant domain-containing protein [Arabidopsis thaliana]                                                                                                                                                                                                                                                                                   | 464 | 456  | 1.00E-120 | 98.3  | 62.7 | 71.3 | late embryogenesis abundant domain-containing protein                                                                                                                                    | gbpln | Arabidopsis thaliana | AT2G18340.1   Symbols:   late embryogenesis abundant domain-containing protein / LEA domain-containing protein   chr2:7969400-7971025 FORWARD LENGTH=456                                                                                                                                                                                                                                                                                                                         | 464 | 456  | 1.00E-122 | 98.3  | 62.7 | 71.3 |
| Rsa1.0_01956.1.g31067.t1 | gb ABD65022.1  hypothetical protein 26.t00077 [Brassica oleracea]                                                                                                                                                                                                                                                                                                                                                                                                                                                                                                                                                                                                                             | 277 | 242  | 6.00E-92  | 87.4  | 64.3 | 71.5 | hypothetical protein 26.t00077                                                                                                                                                           | gbpln | Brassica oleracea    | #                                                                                                                                                                                                                                                                                                                                                                                                                                                                                | #   | #    | #         | #     | #    |      |
| Rsa1.0_01956.1.g31068.t1 | gb ABD65020.1  hypothetical protein 26.t00075 [Brassica oleracea]                                                                                                                                                                                                                                                                                                                                                                                                                                                                                                                                                                                                                             | 58  | 171  | 1.00E-23  | 294.8 | 89.7 | 91.4 | hypothetical protein 26.t00075                                                                                                                                                           | gbpln | Brassica oleracea    | #                                                                                                                                                                                                                                                                                                                                                                                                                                                                                | #   | #    | #         | #     | #    |      |
| Rsa1.0_01956.1.g31069.t3 | gb AAD30632.1 AC006085.5 Hypothetical protein [Arabidopsis thaliana]                                                                                                                                                                                                                                                                                                                                                                                                                                                                                                                                                                                                                          | 964 | 1295 | 9.00E-66  | 134.3 | 14.1 | 19.8 | Hypothetical protein                                                                                                                                                                     | gbpln | Arabidopsis thaliana | #                                                                                                                                                                                                                                                                                                                                                                                                                                                                                | #   | #    | #         | #     | #    |      |
| Rsa1.0_01956.1.g31070.t2 | ref XP_002868647.1  hypothetical protein ARALYDRAFT_493934 [Arabidopsis lyrata subsp. lyrata] gi 297314483 gb EFH44906.1  hypothetical protein ARALYDRAFT_493934 [Arabidopsis lyrata subsp. lyrata]                                                                                                                                                                                                                                                                                                                                                                                                                                                                                           | 636 | 685  | 0         | 107.7 | 65.1 | 78.5 | hypothetical protein ARALYDRAFT_493934                                                                                                                                                   | gbpln | Arabidopsis lyrata   | AT5G40520.2   Symbols:   unknown protein; FUNCTIONS IN: molecular_function unknown; INVOLVED IN: biological_process unknown; LOCATED IN: cellular_component unknown; EXPRESSED IN: 23 plant structures; EXPRESSED DURING: 11 growth stages; Has 3696 Blast hits to 2485 proteins in 391 species: Archae - 10; Bacteria - 571; Metazoa - 1013; Fungi - 530; Plants - 217; Viruses - 74; Other Eukaryotes - 1281 (source: NCBI BLINK).   chr5:16231515-16234276 REVERSE LENGTH=693 | 636 | 693  | 0         | 109.0 | 63.2 | 77.7 |
| Rsa1.0_01956.1.g31071.t1 | #                                                                                                                                                                                                                                                                                                                                                                                                                                                                                                                                                                                                                                                                                             | #   | #    | #         | #     | #    | #    | -                                                                                                                                                                                        | ----  | ----                 | #                                                                                                                                                                                                                                                                                                                                                                                                                                                                                | #   | #    | #         | #     | #    |      |
| Rsa1.0_01957.1.g31072.t1 | gb ABH07409.1  putative pol polyprotein [Brassica oleracea var. botrytis]                                                                                                                                                                                                                                                                                                                                                                                                                                                                                                                                                                                                                     | 161 | 1239 | 1.00E-49  | 769.6 | 61.5 | 76.4 | putative pol polyprotein                                                                                                                                                                 | gbpln | Brassica oleracea    | AT4G23160.1   Symbols: CRK8   cysteine-rich RLK (RECEPTOR-like protein kinase) 8   chr4:12129485-12134086 FORWARD LENGTH=1262                                                                                                                                                                                                                                                                                                                                                    | 161 | 1262 | 9.00E-14  | 783.9 | 27.3 | 39.8 |
| Rsa1.0_01957.1.g31073.t1 | gb EOA40102.1  hypothetical protein CARUB_v10008795mg [Capsella rubella]                                                                                                                                                                                                                                                                                                                                                                                                                                                                                                                                                                                                                      | 352 | 539  | 8.00E-23  | 153.1 | 25.9 | 39.8 | hypothetical protein CARUB_v10008795mg                                                                                                                                                   | gbpln | Capsella rubella     | AT1G02690.1   Symbols: IMPA-6   importin alpha isoform 6   chr1:584397-587036 FORWARD LENGTH=538                                                                                                                                                                                                                                                                                                                                                                                 | 352 | 538  | 3.00E-23  | 152.8 | 25.3 | 38.9 |
| Rsa1.0_01957.1.g31074.t1 | #                                                                                                                                                                                                                                                                                                                                                                                                                                                                                                                                                                                                                                                                                             | #   | #    | #         | #     | #    | #    | -                                                                                                                                                                                        | ----  | ----                 | #                                                                                                                                                                                                                                                                                                                                                                                                                                                                                | #   | #    | #         | #     | #    |      |
| Rsa1.0_01957.1.g31075.t1 | ref XP_002889216.1  hypothetical protein ARALYDRAFT_895785 [Arabidopsis lyrata subsp. lyrata] gi 297335057 gb EFH65475.1  hypothetical protein ARALYDRAFT_895785 [Arabidopsis lyrata subsp. lyrata]                                                                                                                                                                                                                                                                                                                                                                                                                                                                                           | 463 | 441  | 0         | 95.2  | 78.2 | 81.2 | hypothetical protein ARALYDRAFT_895785                                                                                                                                                   | gbpln | Arabidopsis lyrata   | AT1G78850.1   Symbols:   D-mannose binding lectin protein with Apple-like carbohydrate-binding domain   chr1:29642072-29643397 REVERSE LENGTH=441                                                                                                                                                                                                                                                                                                                                | 463 | 441  | 0         | 95.2  | 77.1 | 80.6 |
| Rsa1.0_01957.1.g31076.t1 | gb AAC83026.1  Similar to Ubiquitin-conjugating enzyme E2-17 KD gb D83004 from Homo sapiens. ESTs gb T88233, gb Z24464, gb N37265, gb H36151, gb Z34711, gb AA040983, and gb T22122 come from this gene [Arabidopsis thaliana]                                                                                                                                                                                                                                                                                                                                                                                                                                                                | 192 | 163  | 3.00E-76  | 84.9  | 77.6 | 81.8 | Similar to Ubiquitin-conjugating enzyme E2-17 KD gb D83004 from Homo sapiens. ESTs gb T88233, gb Z24464, gb N37265, gb H36151, gb Z34711, gb AA040983, and gb T22122 come from this gene | gbpln | Arabidopsis thaliana | AT1G16890.2   Symbols: UBC36, UBC13B   ubiquitin-conjugating enzyme 36   chr1:5776550-5778327 REVERSE LENGTH=153                                                                                                                                                                                                                                                                                                                                                                 | 192 | 153  | 7.00E-76  | 79.7  | 70.3 | 73.4 |
| Rsa1.0_01957.1.g31077.t1 | ref NP_178009.1  Ubiquitin-specific protease family C19-related protein [Arabidopsis thaliana] gi 3834307 gb AAC83023.1  Strong similarity to gene T10I1.120 gi 2832679 putative protein from Arabidopsis thaliana BAC gb AL021712. ESTs gb N65887 and gb N65627 come from this gene [Arabidopsis thaliana] gi 18176178 gb AL59998.1  unknown protein [Arabidopsis thaliana] gi 20465703 gb AAM20320.1  unknown protein [Arabidopsis thaliana] gi 21539479 gb AAM53292.1  unknown protein [Arabidopsis thaliana] gi 23198312 gb AAAN15683.1  unknown protein [Arabidopsis thaliana] gi 332198046 gb AEE36167.1  Ubiquitin-specific protease family C19-related protein [Arabidopsis thaliana] | 472 | 468  | 0         | 99.2  | 95.3 | 97.7 | Ubiquitin-specific protease family C19-related protein                                                                                                                                   | gbpln | Arabidopsis thaliana | AT1G78880.1   Symbols:   Ubiquitin-specific protease family C19-related protein   chr1:29653068-29654819 REVERSE LENGTH=468                                                                                                                                                                                                                                                                                                                                                      | 472 | 468  | 0         | 99.2  | 95.3 | 97.7 |

|                          |                                                                                                                                                                                                                                                                                                                                                                                                                                                                   |     |     |           |       |      |      |                                           |             |                      |                                                                                                                                                                                                                                                                                                                                                                      |     |     |           |       |      |      |
|--------------------------|-------------------------------------------------------------------------------------------------------------------------------------------------------------------------------------------------------------------------------------------------------------------------------------------------------------------------------------------------------------------------------------------------------------------------------------------------------------------|-----|-----|-----------|-------|------|------|-------------------------------------------|-------------|----------------------|----------------------------------------------------------------------------------------------------------------------------------------------------------------------------------------------------------------------------------------------------------------------------------------------------------------------------------------------------------------------|-----|-----|-----------|-------|------|------|
| Rsa1.0_01957.1.g31078.t1 | ref XP_002887759.1  hypothetical protein ARALYDRAFT_477053 [Arabidopsis lyrata subsp. lyrata] gi 297333600 gb EFH64018.1  hypothetical protein ARALYDRAFT_477053 [Arabidopsis lyrata subsp. lyrata]                                                                                                                                                                                                                                                               | 175 | 152 | 4.00E-56  | 86.9  | 72.0 | 77.1 | hypothetical protein ARALYDRAFT_477053    | gbpln       | Arabidopsis lyrata   | AT1G78890.1   Symbols:   unknown protein; BEST Arabidopsis thaliana protein match is: unknown protein (TAIR:AT1G16840.1); Has 30201 Blast hits to 17322 proteins in 780 species: Archaea - 12; Bacteria - 1396; Metazoa - 17338; Fungi - 3422; Plants - 5037; Viruses - 0; Other Eukaryotes - 2996 (source: NCBI BLINK).   chr1:29656623-29657537 FORWARD LENGTH=155 | 175 | 155 | 3.00E-45  | 88.6  | 72.0 | 77.1 |
| Rsa1.0_01957.1.g31079.t1 | gb EOA33781.1  hypothetical protein CARUB_v10019973mg [Capsella rubella]                                                                                                                                                                                                                                                                                                                                                                                          | 623 | 623 | 0         | 100.0 | 97.6 | 98.9 | hypothetical protein CARUB_v10019973mg    | gbpln       | Capsella rubella     | AT1G78900.2   Symbols: VHA-A   vacuolar ATP synthase subunit A   chr1:29660463-29664575 FORWARD LENGTH=623                                                                                                                                                                                                                                                           | 623 | 623 | 0         | 100.0 | 97.4 | 98.7 |
| Rsa1.0_01957.1.g31080.t1 | ref XP_002887761.1  hypothetical protein ARALYDRAFT_477057 [Arabidopsis lyrata subsp. lyrata] gi 297333602 gb EFH64020.1  hypothetical protein ARALYDRAFT_477057 [Arabidopsis lyrata subsp. lyrata]                                                                                                                                                                                                                                                               | 477 | 477 | 0         | 100.0 | 86.6 | 92.0 | hypothetical protein ARALYDRAFT_477057    | gbpln       | Arabidopsis lyrata   | AT1G78910.1   Symbols:   Pseudouridine synthase family protein   chr1:29665269-29667557 FORWARD LENGTH=478                                                                                                                                                                                                                                                           | 477 | 478 | 0         | 100.2 | 86.6 | 91.6 |
| Rsa1.0_01958.1.g31081.t1 | ref NP_191713.1  peptidase family protein [Arabidopsis thaliana] gi 8850845 emb CAB71084.1  prolyl aminopeptidase-like protein [Arabidopsis thaliana] gi 15450667 gb AAK36605.1  AT3G61540/F2A19.140 [Arabidopsis thaliana] gi 17380608 gb AAL36067.1  AT3G61540/F2A19.140 [Arabidopsis thaliana] gi 332646699 gb AEE80220.1  peptidase family protein [Arabidopsis thaliana]                                                                                     | 259 | 515 | 1.00E-58  | 198.8 | 50.6 | 56.0 | peptidase family protein                  | gbpln       | Arabidopsis thaliana | AT3G61540.1   Symbols:   alpha/beta-Hydrolases superfamily protein   chr3:22773399-22775699 FORWARD LENGTH=515                                                                                                                                                                                                                                                       | 259 | 515 | 4.00E-61  | 198.8 | 50.6 | 56.0 |
| Rsa1.0_01958.1.g31082.t1 | gb ACF81191.1  unknown [Zea mays]                                                                                                                                                                                                                                                                                                                                                                                                                                 | 177 | 274 | 7.00E-19  | 154.8 | 41.2 | 58.2 | unknown                                   | gbenv/gbpln | Zea mays             | AT1G61670.1   Symbols:   Lung seven transmembrane receptor family protein   chr1:22770132-22772258 FORWARD LENGTH=513                                                                                                                                                                                                                                                | 177 | 513 | 2.00E-18  | 289.8 | 24.3 | 27.1 |
| Rsa1.0_01958.1.g31083.t1 | ref XP_002863741.1  hypothetical protein ARALYDRAFT_917455 [Arabidopsis lyrata subsp. lyrata] gi 297309576 gb EFH40000.1  hypothetical protein ARALYDRAFT_917455 [Arabidopsis lyrata subsp. lyrata]                                                                                                                                                                                                                                                               | 833 | 390 | 2.00E-97  | 46.8  | 26.1 | 33.5 | hypothetical protein ARALYDRAFT_917455    | gbpln       | Arabidopsis lyrata   | AT3G24255.1   Symbols:   RNA-directed DNA polymerase (reverse transcriptase)-related family protein   chr3:8789471-8793208 FORWARD LENGTH=746                                                                                                                                                                                                                        | 833 | 746 | 1.00E-51  | 89.6  | 16.9 | 24.8 |
| Rsa1.0_01958.1.g31084.t1 | emb CAB94144.1  putative protein [Arabidopsis thaliana]                                                                                                                                                                                                                                                                                                                                                                                                           | 318 | 318 | 1.00E-165 | 100.0 | 89.3 | 93.7 | putative protein                          | gbpln       | Arabidopsis thaliana | AT3G61080.1   Symbols:   Protein kinase superfamily protein   chr3:22607152-22608883 FORWARD LENGTH=326                                                                                                                                                                                                                                                              | 318 | 326 | 1.00E-165 | 102.5 | 89.6 | 94.0 |
| Rsa1.0_01958.1.g31085.t1 | gb EOA23277.1  hypothetical protein CARUB_v10017960mg [Capsella rubella]                                                                                                                                                                                                                                                                                                                                                                                          | 235 | 235 | 1.00E-124 | 100.0 | 92.8 | 96.6 | hypothetical protein CARUB_v10017960mg    | gbpln       | Capsella rubella     | AT3G61070.3   Symbols: PEX11E   peroxin 11E   chr3:22604873-22606159 REVERSE LENGTH=231                                                                                                                                                                                                                                                                              | 235 | 231 | 1.00E-124 | 98.3  | 91.9 | 96.6 |
| Rsa1.0_01958.1.g31086.t1 | gb EOA25139.1  hypothetical protein CARUB_v10018448mg [Capsella rubella]                                                                                                                                                                                                                                                                                                                                                                                          | 508 | 510 | 0         | 100.4 | 95.7 | 98.6 | hypothetical protein CARUB_v10018448mg    | gbpln       | Capsella rubella     | AT3G61050.2   Symbols: NTMC2TYPE4, NTMC2T4   Calcium-dependent lipid-binding (CaLB domain) family protein   chr3:22597485-22600932 FORWARD LENGTH=510                                                                                                                                                                                                                | 508 | 510 | 0         | 100.4 | 94.9 | 98.4 |
| Rsa1.0_01958.1.g31087.t1 | ref XP_002876589.1  hypothetical protein ARALYDRAFT_486567 [Arabidopsis lyrata subsp. lyrata] gi 297322427 gb EFH52848.1  hypothetical protein ARALYDRAFT_486567 [Arabidopsis lyrata subsp. lyrata]                                                                                                                                                                                                                                                               | 251 | 251 | 1.00E-132 | 100.0 | 90.8 | 94.4 | hypothetical protein ARALYDRAFT_486567    | gbpln       | Arabidopsis lyrata   | AT3G60910.1   Symbols:   S-adenosyl-L-methionine-dependent methyltransferases superfamily protein   chr3:22501727-22503182 FORWARD LENGTH=252                                                                                                                                                                                                                        | 251 | 252 | 1.00E-133 | 100.4 | 90.8 | 94.8 |
| Rsa1.0_01958.1.g31088.t1 | ref NP_191649.1  fasciclin-like arabinogalactan protein 10 [Arabidopsis thaliana] gi 38257776 sp Q9LZX4.1 FLA10_ARAT H RecName: Full=Fasciclin-like arabinogalactan protein 10; Flags: Precursor gi 7329700 emb CAB82694.1  endosperm specific protein-like [Arabidopsis thaliana] gi 21593224 gb AAM65173.1  endosperm specific protein-like [Arabidopsis thaliana] gi 332646604 gb AEE80125.1  fasciclin-like arabinogalactan protein 10 [Arabidopsis thaliana] | 430 | 422 | 1.00E-169 | 98.1  | 79.3 | 85.6 | fasciclin-like arabinogalactan protein 10 | gbpln       | Arabidopsis thaliana | AT3G60900.1   Symbols: FLA10   FASCICLIN-like arabinogalactan-protein 10   chr3:22499573-22500841 REVERSE LENGTH=422                                                                                                                                                                                                                                                 | 430 | 422 | 1.00E-171 | 98.1  | 79.3 | 85.6 |
| Rsa1.0_01958.1.g31089.t1 | ref NP_001118868.1  protein little zipper 2 [Arabidopsis thaliana] gi 332646602 gb AEE80123.1  protein little zipper 2 [Arabidopsis thaliana]                                                                                                                                                                                                                                                                                                                     | 103 | 106 | 2.00E-35  | 102.9 | 76.7 | 87.4 | protein little zipper 2                   | gbpln       | Arabidopsis thaliana | AT3G60890.2   Symbols: ZPR2   protein binding   chr3:22497024-22497442 REVERSE LENGTH=106                                                                                                                                                                                                                                                                            | 103 | 106 | 3.00E-38  | 102.9 | 76.7 | 87.4 |

|                          |                                                                                                                                                                                                                                                                                                                                                                                                                                                                                                                                                                                                                                                                                                                                                                                                                                                              |     |      |           |       |      |      |                                                       |       |                      |                                                                                                                                                                                                                                                                                                                                                 |     |     |           |       |      |      |
|--------------------------|--------------------------------------------------------------------------------------------------------------------------------------------------------------------------------------------------------------------------------------------------------------------------------------------------------------------------------------------------------------------------------------------------------------------------------------------------------------------------------------------------------------------------------------------------------------------------------------------------------------------------------------------------------------------------------------------------------------------------------------------------------------------------------------------------------------------------------------------------------------|-----|------|-----------|-------|------|------|-------------------------------------------------------|-------|----------------------|-------------------------------------------------------------------------------------------------------------------------------------------------------------------------------------------------------------------------------------------------------------------------------------------------------------------------------------------------|-----|-----|-----------|-------|------|------|
| Rsa1.0_01958.1.g31090.t1 | ref XP_002876584.1  hypothetical protein ARALYDRAFT_486557 [Arabidopsis lyrata subsp. lyrata] gi 297322422 gb EFH52843.1                                                                                                                                                                                                                                                                                                                                                                                                                                                                                                                                                                                                                                                                                                                                     | 362 | 363  | 0         | 100.3 | 95.0 | 97.2 | hypothetical protein ARALYDRAFT_486557                | gbpln | Arabidopsis lyrata   | AT3G60830.1   Symbols: ATARP7, ARP7   actin-related protein 7   chr3:22474298-22476000 FORWARD LENGTH=363                                                                                                                                                                                                                                       | 362 | 363 | 0         | 100.3 | 94.5 | 97.2 |
| Rsa1.0_01958.1.g31091.t1 | gb EOA24708.1  hypothetical protein CARUB_v10017986mg [Capsella rubella]                                                                                                                                                                                                                                                                                                                                                                                                                                                                                                                                                                                                                                                                                                                                                                                     | 223 | 223  | 1.00E-124 | 100.0 | 95.5 | 98.2 | hypothetical protein CARUB_v10017986mg                | gbpln | Capsella rubella     | AT3G60820.3   Symbols: PBF1   N-terminal nucleophile aminohydrolases (Ntn hydrolases) superfamily protein   chr3:22472038-22473809 REVERSE LENGTH=223                                                                                                                                                                                           | 223 | 223 | 1.00E-126 | 100.0 | 95.1 | 98.2 |
| Rsa1.0_01958.1.g31092.t1 | ref XP_002875045.1  ATRPS13A [Arabidopsis lyrata subsp. lyrata] gi 297320882 gb EFH51304.1  ATRPS13A [Arabidopsis lyrata subsp. lyrata]                                                                                                                                                                                                                                                                                                                                                                                                                                                                                                                                                                                                                                                                                                                      | 151 | 151  | 2.00E-79  | 100.0 | 97.4 | 99.3 | ATRPS13A                                              | gbpln | Arabidopsis lyrata   | AT4G00100.1   Symbols: ATRPS13A, RPS13, PFL2, RPS13A   ribosomal protein S13A   chr4:37172-38123 FORWARD LENGTH=151                                                                                                                                                                                                                             | 151 | 151 | 6.00E-82  | 100.0 | 97.4 | 99.3 |
| Rsa1.0_01958.1.g31093.t1 | gb AAD48963.1 AF147263_5 contains similarity to transposases [Arabidopsis thaliana] gi 7267311 emb CAB81093.1  AT4g05510 [Arabidopsis thaliana]                                                                                                                                                                                                                                                                                                                                                                                                                                                                                                                                                                                                                                                                                                              | 315 | 604  | 2.00E-65  | 191.7 | 48.6 | 66.7 | contains similarity to transposases                   | gbpln | Arabidopsis thaliana | AT3G42170.1   Symbols:   BED zinc finger hAT family dimerisation domain   chr3:14321839-14323928 FORWARD LENGTH=596                                                                                                                                                                                                                             | 315 | 696 | 1.00E-27  | 221.0 | 32.4 | 52.4 |
| Rsa1.0_01958.1.g31094.t1 | ref XP_002876580.1  hypothetical protein ARALYDRAFT_486548 [Arabidopsis lyrata subsp. lyrata] gi 297322418 gb EFH52839.1                                                                                                                                                                                                                                                                                                                                                                                                                                                                                                                                                                                                                                                                                                                                     | 618 | 741  | 0         | 119.9 | 95.5 | 97.6 | hypothetical protein ARALYDRAFT_486548                | gbpln | Arabidopsis lyrata   | AT3G60750.2   Symbols:   Transketolase   chr3:22454004-22456824 FORWARD LENGTH=740                                                                                                                                                                                                                                                              | 618 | 740 | 0         | 119.7 | 95.1 | 97.2 |
| Rsa1.0_01958.1.g31095.t2 | ref NP_191611.1  uncharacterized protein [Arabidopsis thaliana] gi 7288000 emb CAB81838.1  putative protein [Arabidopsis thaliana] gi 28416581 gb AAO42821.1  At3g60520 [Arabidopsis thaliana] gi 110735835 dbj BAE99894.1  hypothetical protein [Arabidopsis thaliana] gi 332646553 gb AEE80074.1  uncharacterized protein AT3G60520 [Arabidopsis thaliana]                                                                                                                                                                                                                                                                                                                                                                                                                                                                                                 | 119 | 129  | 7.00E-54  | 108.4 | 90.8 | 90.8 | uncharacterized protein                               | gbpln | Arabidopsis thaliana | AT3G60520.1   Symbols:   unknown protein; BEST Arabidopsis thaliana protein match is: unknown protein (TAIR:AT1G02070.1); Has 107 Blast hits to 107 proteins in 14 species: Archae - 0; Bacteria - 0; Metazoa - 0; Fungi - 0; Plants - 107; Viruses - 0; Other Eukaryotes - 0 (source: NCBI BLINK).   chr3:22361751-22362467 REVERSE LENGTH=129 | 119 | 129 | 1.00E-56  | 108.4 | 90.8 | 90.8 |
| Rsa1.0_01958.1.g31096.t1 | gb AAF18538.1 AC006551_24 Very similar to retrotransposon reverse transcriptase [Arabidopsis thaliana]                                                                                                                                                                                                                                                                                                                                                                                                                                                                                                                                                                                                                                                                                                                                                       | 311 | 1231 | 1.00E-67  | 395.8 | 40.8 | 60.5 | Very similar to retrotransposon reverse transcriptase | gbpln | Arabidopsis thaliana | AT4G29090.1   Symbols:   Ribonuclease H-like superfamily protein   chr4:14333528-14335255 FORWARD LENGTH=575                                                                                                                                                                                                                                    | 311 | 575 | 1.00E-40  | 184.9 | 29.6 | 46.9 |
| Rsa1.0_01958.1.g31097.t1 | gb AAC28216.1  T24M8.9 gene product [Arabidopsis thaliana] gi 7267147 emb CAB80815.1  putative protein [Arabidopsis thaliana]                                                                                                                                                                                                                                                                                                                                                                                                                                                                                                                                                                                                                                                                                                                                | 529 | 463  | 6.00E-55  | 87.5  | 25.3 | 35.0 | T24M8.9 gene product                                  | gbpln | Arabidopsis thaliana | AT2G01050.1   Symbols:   zinc ion binding/nucleic acid binding   chr2:68337-68884 REVERSE LENGTH=515                                                                                                                                                                                                                                            | 529 | 515 | 1.00E-13  | 97.4  | 9.1  | 16.3 |
| Rsa1.0_01958.1.g31098.t1 | ref XP_002878339.1  enoyl-CoA hydratase/isomerase family protein [Arabidopsis lyrata subsp. lyrata] gi 297324177 gb EFH54598.1  enoyl-CoA hydratase/isomerase family protein [Arabidopsis lyrata subsp. lyrata]                                                                                                                                                                                                                                                                                                                                                                                                                                                                                                                                                                                                                                              | 403 | 401  | 0         | 99.5  | 88.6 | 93.8 | enoyl-CoA hydratase/isomerase family protein          | gbpln | Arabidopsis lyrata   | AT3G60510.1   Symbols:   ATP-dependent caseinolytic (Clb) protease/crotonase family protein   chr3:22357141-22360003 REVERSE LENGTH=401                                                                                                                                                                                                         | 403 | 401 | 0         | 99.5  | 87.6 | 92.6 |
| Rsa1.0_01958.1.g31099.t1 | ref NP_191609.1  3'-5'-exoribonuclease CER7 protein [Arabidopsis thaliana] gi 42572741 ref NP_974466.1  3'-5'-exoribonuclease CER7 protein [Arabidopsis thaliana] gi 334186154 ref NP_001190143.1  3'-5'-exoribonuclease CER7 protein [Arabidopsis thaliana] gi 7287998 emb CAB81836.1  nucleolar autoantigen-like protein [Arabidopsis thaliana] gi 2839559 gb AAO42214.1  putative nucleolar autoantigen protein [Arabidopsis thaliana] gi 28973593 gb AAO64121.1  putative nucleolar autoantigen protein [Arabidopsis thaliana] gi 113196170 gb ABI31441.1  CER7 [Arabidopsis thaliana] gi 332646547 gb AEE80068.1  3'-5'-exoribonuclease CER7 protein [Arabidopsis thaliana] gi 332646548 gb AEE80069.1  3'-5'-exoribonuclease CER7 protein [Arabidopsis thaliana] gi 332646549 gb AEE80070.1  3'-5'-exoribonuclease CER7 protein [Arabidopsis thaliana] | 308 | 438  | 1.00E-165 | 142.2 | 95.5 | 96.4 | 3'-5'-exoribonuclease CER7 protein                    | gbpln | Arabidopsis thaliana | AT3G60500.3   Symbols: CER7   3'-5'-exoribonuclease family protein   chr3:22354245-22356440 FORWARD LENGTH=438                                                                                                                                                                                                                                  | 308 | 438 | 1.00E-168 | 142.2 | 95.5 | 96.4 |



|                          |                                                                                                                                                                                                                                                                                                                                               |      |      |           |        |      |      |                                                                                                                                                                                                                                                                                                        |       |                      |                                                                                                                                                                                                                                                                                                                                                       |      |      |           |       |      |      |
|--------------------------|-----------------------------------------------------------------------------------------------------------------------------------------------------------------------------------------------------------------------------------------------------------------------------------------------------------------------------------------------|------|------|-----------|--------|------|------|--------------------------------------------------------------------------------------------------------------------------------------------------------------------------------------------------------------------------------------------------------------------------------------------------------|-------|----------------------|-------------------------------------------------------------------------------------------------------------------------------------------------------------------------------------------------------------------------------------------------------------------------------------------------------------------------------------------------------|------|------|-----------|-------|------|------|
| Rsa1.0_01959.1.g31100.t1 | gb EOA33613.1  hypothetical protein CARUB_v10019764mg [Capsella rubella]                                                                                                                                                                                                                                                                      | 873  | 892  | 0         | 102.2  | 56.1 | 69.8 | hypothetical protein CARUB_v10019764mg                                                                                                                                                                                                                                                                 | gbpln | Capsella rubella     | AT1G63350.1   Symbols:   Disease resistance protein (CC-NBS-LRR class) family   chr1:23494935-23497631 REVERSE LENGTH=898                                                                                                                                                                                                                             | 873  | 898  | 0         | 102.9 | 56.2 | 69.9 |
| Rsa1.0_01959.1.g31101.t1 | dbj BAB02990.1  retroelement pol polyprotein-like [Arabidopsis thaliana]                                                                                                                                                                                                                                                                      | 1195 | 1250 | 0         | 104.6  | 56.0 | 70.8 | retroelement pol polyprotein-like                                                                                                                                                                                                                                                                      | gbpln | Arabidopsis thaliana | AT4G23160.1   Symbols: CRK8   cysteine-rich RLK (RECEPTOR-like protein kinase) 8   chr4:12129485-12134086 FORWARD LENGTH=1262                                                                                                                                                                                                                         | 1195 | 1262 | 4.00E-92  | 105.6 | 14.4 | 22.6 |
| Rsa1.0_01959.1.g31102.t1 | ref NP_175924.2  Lipase/lipoxygenase, PLAT/LH2 family protein [Arabidopsis thaliana] gi 111074408 gb ABH04577.1  At1g35280 [Arabidopsis thaliana] gi 332195097 gb AEE33218.1  Lipase/lipoxygenase, PLAT/LH2 family protein [Arabidopsis thaliana]                                                                                             | 386  | 390  | 1.00E-172 | 101.0  | 81.3 | 88.6 | Lipase/lipoxygenase, PLAT/LH2 family protein                                                                                                                                                                                                                                                           | gbpln | Arabidopsis thaliana | AT1G55280.1   Symbols:   Lipase/lipoxygenase, PLAT/LH2 family protein   chr1:20623099-20624533 REVERSE LENGTH=390                                                                                                                                                                                                                                     | 386  | 390  | 1.00E-175 | 101.0 | 81.3 | 88.6 |
| Rsa1.0_01959.1.g31103.t1 | emb CB116510.3  unnamed protein product [Vitis vinifera]                                                                                                                                                                                                                                                                                      | 471  | 269  | 3.00E-45  | 57.1   | 27.4 | 32.3 | unnamed protein product                                                                                                                                                                                                                                                                                | gbpln | Vitis vinifera       | AT1G55310.3   Symbols: SR33, SCL33, At-SCL33   SC35-like splicing factor 33   chr1:20630676-20632695 FORWARD LENGTH=300                                                                                                                                                                                                                               | 471  | 300  | 7.00E-46  | 63.7  | 26.3 | 29.9 |
| Rsa1.0_01959.1.g31104.t1 | ref XP_002879168.1  ATP binding protein [Arabidopsis lyrata subsp. lyrata] gi 297325007 gb EFH55427.1  ATP binding protein [Arabidopsis lyrata subsp. lyrata]                                                                                                                                                                                 | 327  | 505  | 1.00E-109 | 154.4  | 68.8 | 79.2 | ATP binding protein                                                                                                                                                                                                                                                                                    | gbpln | Arabidopsis lyrata   | AT2G28600.1   Symbols:   P-loop containing nucleoside triphosphate hydrolases superfamily protein   chr2:12251845-12254672 FORWARD LENGTH=502                                                                                                                                                                                                         | 327  | 502  | 1.00E-102 | 153.5 | 67.0 | 78.0 |
| Rsa1.0_01959.1.g31105.t1 | #                                                                                                                                                                                                                                                                                                                                             | #    | #    | #         | #      | #    | -    | -                                                                                                                                                                                                                                                                                                      | ----  | ----                 | #                                                                                                                                                                                                                                                                                                                                                     | #    | #    | #         | #     | #    |      |
| Rsa1.0_01959.1.g31106.t1 | #                                                                                                                                                                                                                                                                                                                                             | #    | #    | #         | #      | #    | -    | -                                                                                                                                                                                                                                                                                                      | ----  | ----                 | #                                                                                                                                                                                                                                                                                                                                                     | #    | #    | #         | #     | #    |      |
| Rsa1.0_01959.1.g31107.t1 | gb ABB97032.1  unknown [Brassica rapa]                                                                                                                                                                                                                                                                                                        | 58   | 59   | 1.00E-13  | 101.7  | 94.8 | 96.6 | unknown                                                                                                                                                                                                                                                                                                | gbpln | Brassica rapa        | AT3G13520.1   Symbols: AGP12, ATAGP12   arabinogalactan protein 12   chr3:4409087-4409269 FORWARD LENGTH=60                                                                                                                                                                                                                                           | 58   | 60   | 4.00E-16  | 103.4 | 79.3 | 82.8 |
| Rsa1.0_01960.1.g31108.t1 | emb CAA20201.1  putative transposable element [Arabidopsis thaliana] gi 7268932 emb CAB79135.1  putative transposable element [Arabidopsis thaliana]                                                                                                                                                                                          | 62   | 1308 | 9.00E-15  | 2109.7 | 66.1 | 72.6 | putative transposable element                                                                                                                                                                                                                                                                          | gbpln | Arabidopsis thaliana | #                                                                                                                                                                                                                                                                                                                                                     | #    | #    | #         | #     | #    |      |
| Rsa1.0_01960.1.g31109.t1 | sp P41510.1 PME_BRANA RecName: Full=Probable pectinesterase/pectinesterase inhibitor; Includes: RecName: Full=Pectinesterase inhibitor; AltName: Full=Pectin methylesterase inhibitor; Includes: RecName: Full=Pectinesterase; Short=PE; AltName: Full=Pectin methylesterase; Flags: Precursor gi 17784 emb CAA39658.1  Bp19 [Brassica napus] | 566  | 584  | 0         | 103.2  | 94.3 | 97.3 | RecName: Full=Probable pectinesterase/pectinesterase inhibitor; Includes: RecName: Full=Pectinesterase inhibitor; AltName: Full=Pectin methylesterase inhibitor; Includes: RecName: Full=Pectinesterase; Short=PE; AltName: Full=Pectin methylesterase; Flags: Precursor gi 17784 emb CAA39658.1  Bp19 | gbpln | Brassica napus       | AT3G62170.1   Symbols: VGDH2   VANGUARD 1 homolog 2   chr3:23016495-23018337 REVERSE LENGTH=588                                                                                                                                                                                                                                                       | 566  | 588  | 0         | 103.9 | 81.3 | 89.4 |
| Rsa1.0_01960.1.g31110.t2 | ref NP_191773.2  uncharacterized protein [Arabidopsis thaliana] gi 52354355 gb AAU44498.1  hypothetical protein AT3G62140 [Arabidopsis thaliana] gi 60547833 gb AA23880.1  hypothetical protein AT3g62140 [Arabidopsis thaliana] gi 332646794 gb AEE80315.1  uncharacterized protein AT3G62140 [Arabidopsis thaliana]                         | 295  | 214  | 6.00E-68  | 72.5   | 49.2 | 54.2 | uncharacterized protein                                                                                                                                                                                                                                                                                | gbpln | Arabidopsis thaliana | AT3G62140.1   Symbols:   CONTAINS InterPro DOMAIN: NEFA-interacting nuclear protein NIP30, N-terminal (InterPro:IPRO19331); Has 398 Blast hits to 395 proteins in 139 species: Archae - 0; Bacteria - 6; Metazoa - 193; Fungi - 83; Plants - 36; Viruses - 0; Other Eukaryotes - 80 (source: NCBI BLINK).   chr3:23007277-23008626 FORWARD LENGTH=214 | 295  | 214  | 2.00E-70  | 72.5  | 49.2 | 54.2 |

|                          |                                                                                                                                                                                                                                                                                                                                                                                                                                                                                                                                                                                                                                                                                                                                                                                                                                             |     |     |           |       |      |      |                                                                     |       |                      |                                                                                                                                                                                                                                                                                                                                                 |     |     |           |       |      |      |
|--------------------------|---------------------------------------------------------------------------------------------------------------------------------------------------------------------------------------------------------------------------------------------------------------------------------------------------------------------------------------------------------------------------------------------------------------------------------------------------------------------------------------------------------------------------------------------------------------------------------------------------------------------------------------------------------------------------------------------------------------------------------------------------------------------------------------------------------------------------------------------|-----|-----|-----------|-------|------|------|---------------------------------------------------------------------|-------|----------------------|-------------------------------------------------------------------------------------------------------------------------------------------------------------------------------------------------------------------------------------------------------------------------------------------------------------------------------------------------|-----|-----|-----------|-------|------|------|
| Rsa1.0_01960.1.g31111.t1 | refNP_191771.1  prolyl-tRNA synthetase [Arabidopsis thaliana] gi 30695549 refNP_850736.1  prolyl-tRNA synthetase [Arabidopsis thaliana] gi 689922 emb CAB71872.1  multifunctional aminoacyl-tRNA ligase-like protein [Arabidopsis thaliana] gi 16648885 gb AAL24294.1  multifunctional aminoacyl-tRNA ligase-like protein [Arabidopsis thaliana] gi 22136084 gb AAM91120.1  multifunctional aminoacyl-tRNA ligase-like protein [Arabidopsis thaliana] gi 33264679 gb AEE80312.1  class II aaRS and biotin synthetases superfamily protein [Arabidopsis thaliana] gi 332646792 gb AEE80313.1  prolyl-tRNA synthetase [Arabidopsis thaliana] refXP_002876663.1  glycoside hydrolase family 28 protein [Arabidopsis lyrata subsp. lyrata] gi 297322501 gb EFH52922.1  glycoside hydrolase family 28 protein [Arabidopsis lyrata subsp. lyrata] | 542 | 530 | 0         | 97.8  | 87.8 | 90.0 | prolyl-tRNA synthetase                                              | gbpln | Arabidopsis thaliana | AT3G62120.2   Symbols:   Class II aaRS and biotin synthetases superfamily protein   chr3:23001227-23003849 REVERSE LENGTH=530                                                                                                                                                                                                                   | 542 | 530 | 0         | 97.8  | 87.8 | 90.0 |
| Rsa1.0_01960.1.g31112.t1 | refXP_002876663.1  glycoside hydrolase family 28 protein [Arabidopsis lyrata subsp. lyrata] gi 297322501 gb EFH52922.1  glycoside hydrolase family 28 protein [Arabidopsis lyrata subsp. lyrata]                                                                                                                                                                                                                                                                                                                                                                                                                                                                                                                                                                                                                                            | 428 | 471 | 0         | 110.0 | 91.6 | 94.9 | glycoside hydrolase family 28 protein                               | gbpln | Arabidopsis lyrata   | AT3G62110.1   Symbols:   Pectin lyase-like superfamily protein   chr3:22995835-22999503 REVERSE LENGTH=471                                                                                                                                                                                                                                      | 428 | 471 | 0         | 110.0 | 90.9 | 94.6 |
| Rsa1.0_01960.1.g31113.t1 | gb EOA23181.1  hypothetical protein CARUB_v10018117mg [Capsella rubella]                                                                                                                                                                                                                                                                                                                                                                                                                                                                                                                                                                                                                                                                                                                                                                    | 128 | 174 | 1.00E-44  | 135.9 | 92.2 | 93.8 | hypothetical protein CARUB_v10018117mg                              | gbpln | Capsella rubella     | AT3G62100.1   Symbols:   IAA30   indole-3-acetic acid inducible 30   chr3:22995835-22996593 FORWARD LENGTH=172                                                                                                                                                                                                                                  | 128 | 172 | 1.00E-41  | 134.4 | 85.9 | 89.1 |
| Rsa1.0_01960.1.g31114.t1 | dbj BAH30499.1  hypothetical protein [Arabidopsis thaliana]                                                                                                                                                                                                                                                                                                                                                                                                                                                                                                                                                                                                                                                                                                                                                                                 | 335 | 363 | 1.00E-103 | 108.4 | 63.9 | 74.6 | hypothetical protein                                                | gbpln | Arabidopsis thaliana | AT3G62090.2   Symbols:   PIL2, PIF6   phytochrome interacting factor 3-like 2   chr3:22989097-22990546 REVERSE LENGTH=363                                                                                                                                                                                                                       | 335 | 363 | 1.00E-106 | 108.4 | 63.9 | 74.6 |
| Rsa1.0_01960.1.g31115.t1 | refXP_002876659.1  SNF7 family protein [Arabidopsis lyrata subsp. lyrata] gi 297322497 gb EFH52918.1  SNF7 family protein [Arabidopsis lyrata subsp. lyrata]                                                                                                                                                                                                                                                                                                                                                                                                                                                                                                                                                                                                                                                                                | 425 | 423 | 0         | 99.5  | 84.9 | 93.4 | SNF7 family protein                                                 | gbpln | Arabidopsis lyrata   | AT3G62080.1   Symbols:   SNF7 family protein   chr3:22986383-22988517 FORWARD LENGTH=423                                                                                                                                                                                                                                                        | 425 | 423 | 0         | 99.5  | 83.8 | 92.5 |
| Rsa1.0_01960.1.g31116.t1 | gb EOA24687.1  hypothetical protein CARUB_v10017959mg [Capsella rubella]                                                                                                                                                                                                                                                                                                                                                                                                                                                                                                                                                                                                                                                                                                                                                                    | 248 | 235 | 4.00E-82  | 94.8  | 72.2 | 78.6 | hypothetical protein CARUB_v10017959mg                              | gbpln | Capsella rubella     | AT3G62070.1   Symbols:   unknown protein; BEST Arabidopsis thaliana protein match is: unknown protein (TAIR:AT2G46940.1). Has 137 Blast hits to 135 proteins in 12 species: Archae - 0; Bacteria - 0; Metazoa - 0; Fungi - 0; Plants - 137; Viruses - 0; Other Eukaryotes - 0 (source: NCBI BLINK).   chr3:22983710-22984482 REVERSE LENGTH=228 | 248 | 228 | 2.00E-77  | 91.9  | 66.1 | 77.0 |
| Rsa1.0_01960.1.g31117.t1 | refXP_002876658.1  pectinacetyltransferase family protein [Arabidopsis lyrata subsp. lyrata] gi 297322496 gb EFH52917.1  pectinacetyltransferase family protein [Arabidopsis lyrata subsp. lyrata] refNP_176271.1  RNA-directed DNA polymerase (reverse transcriptase)-related protein [Arabidopsis thaliana] gi 332195602 gb AEE33723.1  RNA-directed DNA polymerase (reverse transcriptase)-related protein [Arabidopsis thaliana]                                                                                                                                                                                                                                                                                                                                                                                                        | 394 | 419 | 0         | 106.3 | 81.2 | 90.9 | pectinacetyltransferase family protein                              | gbpln | Arabidopsis lyrata   | AT3G62060.1   Symbols:   Pectinacetyltransferase family protein   chr3:22980123-22982734 FORWARD LENGTH=419                                                                                                                                                                                                                                     | 394 | 419 | 0         | 106.3 | 80.7 | 90.1 |
| Rsa1.0_01960.1.g31118.t1 | refNP_176271.1  RNA-directed DNA polymerase (reverse transcriptase)-related protein [Arabidopsis thaliana] gi 332195602 gb AEE33723.1  RNA-directed DNA polymerase (reverse transcriptase)-related protein [Arabidopsis thaliana]                                                                                                                                                                                                                                                                                                                                                                                                                                                                                                                                                                                                           | 175 | 289 | 4.00E-47  | 165.1 | 49.7 | 69.7 | RNA-directed DNA polymerase (reverse transcriptase)-related protein | gbpln | Arabidopsis thaliana | AT1G60720.1   Symbols:   RNA-directed DNA polymerase (reverse transcriptase)-related family protein   chr1:22357072-22357941 FORWARD LENGTH=289                                                                                                                                                                                                 | 175 | 289 | 1.00E-49  | 165.1 | 49.7 | 69.7 |
| Rsa1.0_01961.1.g31119.t1 | gb ADQ43177.1  phosphatase [Eutrema parvulum]                                                                                                                                                                                                                                                                                                                                                                                                                                                                                                                                                                                                                                                                                                                                                                                               | 418 | 415 | 0         | 99.3  | 85.9 | 90.9 | phosphatase                                                         | gbpln | Eutrema parvulum     | AT2G01900.1   Symbols:   DNase I-like superfamily protein   chr2:406136-408933 FORWARD LENGTH=417                                                                                                                                                                                                                                               | 418 | 417 | 0         | 99.8  | 79.9 | 86.1 |
| Rsa1.0_01961.1.g31120.t1 | gb ACQ90589.1  putative C2H2 zinc finger protein [Eutrema halophilum]                                                                                                                                                                                                                                                                                                                                                                                                                                                                                                                                                                                                                                                                                                                                                                       | 438 | 442 | 0         | 100.9 | 86.3 | 91.8 | putative C2H2 zinc finger protein                                   | gbpln | Eutrema halophilum   | AT2G01940.1   Symbols:   SGR5, ATIDD15   C2H2-like zinc finger protein   chr2:432652-434917 FORWARD LENGTH=445                                                                                                                                                                                                                                  | 438 | 445 | 0         | 101.6 | 87.4 | 91.1 |
| Rsa1.0_01961.1.g31121.t1 | #                                                                                                                                                                                                                                                                                                                                                                                                                                                                                                                                                                                                                                                                                                                                                                                                                                           | #   | #   | #         | #     | #    | -    | ----                                                                | ----  | ----                 | #                                                                                                                                                                                                                                                                                                                                               | #   | #   | #         | #     | #    |      |
| Rsa1.0_01962.1.g31122.t1 | #                                                                                                                                                                                                                                                                                                                                                                                                                                                                                                                                                                                                                                                                                                                                                                                                                                           | #   | #   | #         | #     | #    | -    | ----                                                                | ----  | ----                 | #                                                                                                                                                                                                                                                                                                                                               | #   | #   | #         | #     | #    |      |
| Rsa1.0_01962.1.g31123.t1 | #                                                                                                                                                                                                                                                                                                                                                                                                                                                                                                                                                                                                                                                                                                                                                                                                                                           | #   | #   | #         | #     | #    | -    | ----                                                                | ----  | ----                 | #                                                                                                                                                                                                                                                                                                                                               | #   | #   | #         | #     | #    |      |
| Rsa1.0_01962.1.g31124.t1 | #                                                                                                                                                                                                                                                                                                                                                                                                                                                                                                                                                                                                                                                                                                                                                                                                                                           | #   | #   | #         | #     | #    | -    | ----                                                                | ----  | ----                 | #                                                                                                                                                                                                                                                                                                                                               | #   | #   | #         | #     | #    |      |
| Rsa1.0_01962.1.g31125.t1 | #                                                                                                                                                                                                                                                                                                                                                                                                                                                                                                                                                                                                                                                                                                                                                                                                                                           | #   | #   | #         | #     | #    | -    | ----                                                                | ----  | ----                 | #                                                                                                                                                                                                                                                                                                                                               | #   | #   | #         | #     | #    |      |
| Rsa1.0_01962.1.g31126.t1 | refXP_002885501.1  hypothetical protein ARALYDRAFT_479753 [Arabidopsis lyrata subsp. lyrata] gi 297331341 gb EFH61760.1  hypothetical protein ARALYDRAFT_479753 [Arabidopsis lyrata subsp. lyrata]                                                                                                                                                                                                                                                                                                                                                                                                                                                                                                                                                                                                                                          | 401 | 400 | 0         | 99.8  | 84.8 | 91.5 | hypothetical protein ARALYDRAFT_479753                              | gbpln | Arabidopsis lyrata   | AT3G22410.1   Symbols:   Sec14p-like phosphatidylinositol transfer family protein   chr3:7933328-7935664 REVERSE LENGTH=400                                                                                                                                                                                                                     | 401 | 400 | 0         | 99.8  | 84.0 | 91.0 |

|                          |                                                                                                                                                                                                                                                                                                                                                                                                                                                                                                                                                                                                                                                                                                                                                                                                                                                                                                                                                                                                                                                                                         |      |      |           |       |      |      |                                                     |       |                      |                                                                                                                                                                                                                                                                                                                                              |      |     |           |       |      |      |
|--------------------------|-----------------------------------------------------------------------------------------------------------------------------------------------------------------------------------------------------------------------------------------------------------------------------------------------------------------------------------------------------------------------------------------------------------------------------------------------------------------------------------------------------------------------------------------------------------------------------------------------------------------------------------------------------------------------------------------------------------------------------------------------------------------------------------------------------------------------------------------------------------------------------------------------------------------------------------------------------------------------------------------------------------------------------------------------------------------------------------------|------|------|-----------|-------|------|------|-----------------------------------------------------|-------|----------------------|----------------------------------------------------------------------------------------------------------------------------------------------------------------------------------------------------------------------------------------------------------------------------------------------------------------------------------------------|------|-----|-----------|-------|------|------|
| Rsa1.0_01962.1.g31127.t1 | ref[NP_188879.2] lipoxigenase 5 [Arabidopsis thaliana] gi 254810223 sp Q9LUW0.2 LOX5_ARAT H RecName: Full=Linolinate 9S-lipoxygenase 5, chloroplastic; AltName: Full=Lipoxygenase 5; Short=AtLOX5 gi 332643109 gb AAE76630.1  lipoxigenase 5 [Arabidopsis thaliana]                                                                                                                                                                                                                                                                                                                                                                                                                                                                                                                                                                                                                                                                                                                                                                                                                     | 887  | 886  | 0         | 99.9  | 91.2 | 95.0 | lipoxigenase 5                                      | gbpln | Arabidopsis thaliana | AT3G22400.1   Symbols: LOX5   PLAT/LH2 domain-containing lipoxygenase family protein   chr3:7927011-7931167 FORWARD LENGTH=886                                                                                                                                                                                                               | 887  | 886 | 0         | 99.9  | 91.2 | 95.0 |
| Rsa1.0_01962.1.g31128.t1 | ref[XP_002885493.1] predicted protein [Arabidopsis lyrata subsp. lyrata] gi 297331333 gb EFH61752.1  predicted protein [Arabidopsis lyrata subsp. lyrata]                                                                                                                                                                                                                                                                                                                                                                                                                                                                                                                                                                                                                                                                                                                                                                                                                                                                                                                               | 64   | 72   | 1.00E-18  | 112.5 | 90.6 | 92.2 | predicted protein                                   | gbpln | Arabidopsis lyrata   | AT3G22240.1   Symbols:   unknown protein; BEST Arabidopsis thaliana protein match is: unknown protein (TAIR:AT3G22235.2). Has 177 Blast hits to 177 proteins in 14 species: Archae - 0; Bacteria - 0; Metazoa - 0; Fungi - 0; Plants - 177; Viruses - 0; Other Eukaryotes - 0 (source: NCBI BLink).   chr3:7863788-7864675 REVERSE LENGTH=72 | 64   | 72  | 3.00E-21  | 112.5 | 89.1 | 92.2 |
| Rsa1.0_01962.1.g31129.t1 | #                                                                                                                                                                                                                                                                                                                                                                                                                                                                                                                                                                                                                                                                                                                                                                                                                                                                                                                                                                                                                                                                                       | #    | #    | #         | #     | #    | #    | -                                                   | ----  | ----                 | #                                                                                                                                                                                                                                                                                                                                            | #    | #   | #         | #     | #    |      |
| Rsa1.0_01962.1.g31130.t1 | ref[NP_193236.1] 60S ribosomal protein L27-3 [Arabidopsis thaliana] gi 3123264 sp P51419.2 RL273_ARATH RecName: Full=60S ribosomal protein L27-3 gi 2244857 emb CAB10279.1  ribosomal protein [Arabidopsis thaliana] gi 7268246 emb CAB78542.1  ribosomal protein [Arabidopsis thaliana] gi 17381062 gb AAL36343.1  putative ribosomal protein [Arabidopsis thaliana] gi 20466061 gb AAM20365.1  putative ribosomal protein [Arabidopsis thaliana] gi 21553620 gb AAM62713.1  ribosomal protein [Arabidopsis thaliana] gi 110736737 dbj BAF00331.1  ribosomal protein [Arabidopsis thaliana] gi 332658135 gb AAE83535.1  60S ribosomal protein L27-3 [Arabidopsis thaliana]                                                                                                                                                                                                                                                                                                                                                                                                             | 135  | 135  | 3.00E-69  | 100.0 | 96.3 | 99.3 | 60S ribosomal protein L27-3                         | gbpln | Arabidopsis thaliana | AT4G15000.1   Symbols:   Ribosomal L27e protein family   chr4:8571896-8572303 FORWARD LENGTH=135                                                                                                                                                                                                                                             | 135  | 135 | 6.00E-72  | 100.0 | 96.3 | 99.3 |
| Rsa1.0_01962.1.g31131.t1 | gb EOA36582.1  hypothetical protein CARUB_v10011769mg [Capsella rubella]                                                                                                                                                                                                                                                                                                                                                                                                                                                                                                                                                                                                                                                                                                                                                                                                                                                                                                                                                                                                                | 1944 | 990  | 0         | 50.9  | 24.2 | 31.4 | hypothetical protein CARUB_v10011769mg              | gbpln | Capsella rubella     | AT1G45616.1   Symbols: AtRLP6, RLP6   receptor like protein 6   chr1:17183550-17186534 REVERSE LENGTH=994                                                                                                                                                                                                                                    | 1944 | 994 | 0         | 51.1  | 24.6 | 30.8 |
| Rsa1.0_01963.1.g31132.t1 | ref[NP_177631.1] ethylene-responsive transcription factor ERF018 [Arabidopsis thaliana] gi 75265378 sp Q9S7L5.1 ERF18_ARATH RecName: Full=Ethylene-responsive transcription factor ERF018 gi 5882730 gb AAD5283.1 AC008263.14 Similar to gb X94698 TINY from Arabidopsis thaliana and contains a PF 00847 AP2 domain. EST gb F15362 comes from this gene [Arabidopsis thaliana] gi 12323910 gb AAG51936.1 AC013258.30 putative AP2 domain transcription factor; 59128-58541 [Arabidopsis thaliana] gi 22135960 gb AAM91512.1  AP2 domain containing protein, putative [Arabidopsis thaliana] gi 28058898 gb AAO29966.1  AP2 domain containing protein, putative [Arabidopsis thaliana] gi 332197531 gb AAE35652.1  ethylene-responsive transcription factor ERF018 [Arabidopsis thaliana] ref[XP_002887567.1] hypothetical protein ARALYDRAFT_895362 [Arabidopsis lyrata subsp. lyrata] gi 297333408 gb EFH63826.1  hypothetical protein ARALYDRAFT_895362 [Arabidopsis lyrata subsp. lyrata] gb AAB82639.1  putative non-LTR retroelement reverse transcriptase [Arabidopsis thaliana] | 199  | 195  | 5.00E-69  | 98.0  | 73.4 | 82.4 | ethylene-responsive transcription factor ERF018     | gbpln | Arabidopsis thaliana | AT1G74930.1   Symbols: ORA47   Integrase-type DNA-binding superfamily protein   chr1:28144239-28144826 FORWARD LENGTH=195                                                                                                                                                                                                                    | 199  | 195 | 2.00E-71  | 98.0  | 73.4 | 82.4 |
| Rsa1.0_01963.1.g31133.t1 | ref[XP_002887567.1] hypothetical protein ARALYDRAFT_895362 [Arabidopsis lyrata subsp. lyrata] gi 297333408 gb EFH63826.1  hypothetical protein ARALYDRAFT_895362 [Arabidopsis lyrata subsp. lyrata]                                                                                                                                                                                                                                                                                                                                                                                                                                                                                                                                                                                                                                                                                                                                                                                                                                                                                     | 212  | 223  | 4.00E-87  | 105.2 | 78.3 | 87.7 | hypothetical protein ARALYDRAFT_895362              | gbpln | Arabidopsis lyrata   | AT1G74940.1   Symbols:   Protein of unknown function (DUF581)   chr1:28146294-28147065 FORWARD LENGTH=222                                                                                                                                                                                                                                    | 212  | 222 | 1.00E-87  | 104.7 | 75.9 | 85.4 |
| Rsa1.0_01963.1.g31134.t1 | gb AAB82639.1  putative non-LTR retroelement reverse transcriptase [Arabidopsis thaliana]                                                                                                                                                                                                                                                                                                                                                                                                                                                                                                                                                                                                                                                                                                                                                                                                                                                                                                                                                                                               | 542  | 1374 | 1.00E-152 | 253.5 | 48.2 | 67.7 | putative non-LTR retroelement reverse transcriptase | gbpln | Arabidopsis thaliana | AT4G29090.1   Symbols:   Ribonuclease H-like superfamily protein   chr4:14333528-14335255 FORWARD LENGTH=575                                                                                                                                                                                                                                 | 542  | 575 | 1.00E-145 | 106.1 | 44.3 | 67.5 |
| Rsa1.0_01963.1.g31135.t1 | dbj BAJ33919.1  unnamed protein product [Theellungiella halophila]                                                                                                                                                                                                                                                                                                                                                                                                                                                                                                                                                                                                                                                                                                                                                                                                                                                                                                                                                                                                                      | 222  | 251  | 8.00E-79  | 113.1 | 76.6 | 82.9 | unnamed protein product                             | ----  | ----                 | AT1G74950.1   Symbols: JAZ2, TIFY10B   TIFY domain/Divergent CCT motif family protein   chr1:28148919-28150258 REVERSE LENGTH=249                                                                                                                                                                                                            | 222  | 249 | 2.00E-71  | 112.2 | 72.5 | 80.2 |
| Rsa1.0_01963.1.g31136.t1 | gb ABK28243.1  unknown [Arabidopsis thaliana]                                                                                                                                                                                                                                                                                                                                                                                                                                                                                                                                                                                                                                                                                                                                                                                                                                                                                                                                                                                                                                           | 236  | 297  | 2.00E-57  | 125.8 | 46.6 | 62.7 | unknown                                             | gbpln | Arabidopsis thaliana | AT4G04650.1   Symbols:   RNA-directed DNA polymerase (reverse transcriptase)-related family protein   chr4:2353989-2355213 REVERSE LENGTH=332                                                                                                                                                                                                | 236  | 332 | 1.00E-57  | 140.7 | 44.5 | 61.0 |

|                          |                                                                                                                                                                                                                                                                                                                                                                                                                                                                                                                                                                                                                                                                                                                                                                                                                                                                                                                                                                                                                                                                                                                                                                                                                                                                                                                                                                                                                                                                                                                                                                                                                                                                                                                                                |     |     |           |       |      |      |                                        |       |                      |                                                                                                                                                                                                                                                                                                                                                                                           |     |     |           |       |      |      |
|--------------------------|------------------------------------------------------------------------------------------------------------------------------------------------------------------------------------------------------------------------------------------------------------------------------------------------------------------------------------------------------------------------------------------------------------------------------------------------------------------------------------------------------------------------------------------------------------------------------------------------------------------------------------------------------------------------------------------------------------------------------------------------------------------------------------------------------------------------------------------------------------------------------------------------------------------------------------------------------------------------------------------------------------------------------------------------------------------------------------------------------------------------------------------------------------------------------------------------------------------------------------------------------------------------------------------------------------------------------------------------------------------------------------------------------------------------------------------------------------------------------------------------------------------------------------------------------------------------------------------------------------------------------------------------------------------------------------------------------------------------------------------------|-----|-----|-----------|-------|------|------|----------------------------------------|-------|----------------------|-------------------------------------------------------------------------------------------------------------------------------------------------------------------------------------------------------------------------------------------------------------------------------------------------------------------------------------------------------------------------------------------|-----|-----|-----------|-------|------|------|
| Rsa1.0_01963.1.g31137.t1 | gb AAC19278.1 T14P8.10 [Arabidopsis thaliana] gi 7269009 emb CAB80742.1 AT4g02490 [Arabidopsis thaliana]                                                                                                                                                                                                                                                                                                                                                                                                                                                                                                                                                                                                                                                                                                                                                                                                                                                                                                                                                                                                                                                                                                                                                                                                                                                                                                                                                                                                                                                                                                                                                                                                                                       | 215 | 657 | 1.00E-63  | 305.6 | 54.4 | 69.3 | T14P8.10                               | gbpln | Arabidopsis thaliana | AT3G24255.1   Symbols:   RNA-directed DNA polymerase (reverse transcriptase)-related family protein   chr3:8789471-8793208 FORWARD LENGTH=746                                                                                                                                                                                                                                             | 215 | 746 | 9.00E-36  | 347.0 | 36.7 | 54.4 |
| Rsa1.0_01963.1.g31138.t1 | # # # # # # # #                                                                                                                                                                                                                                                                                                                                                                                                                                                                                                                                                                                                                                                                                                                                                                                                                                                                                                                                                                                                                                                                                                                                                                                                                                                                                                                                                                                                                                                                                                                                                                                                                                                                                                                                |     |     |           |       |      |      |                                        |       |                      |                                                                                                                                                                                                                                                                                                                                                                                           |     |     |           |       |      |      |
| Rsa1.0_01963.1.g31139.t1 | gb AAL91174.1 putative 3-ketoacyl-ACP synthase [Arabidopsis thaliana]                                                                                                                                                                                                                                                                                                                                                                                                                                                                                                                                                                                                                                                                                                                                                                                                                                                                                                                                                                                                                                                                                                                                                                                                                                                                                                                                                                                                                                                                                                                                                                                                                                                                          | 540 | 541 | 0         | 100.2 | 90.0 | 93.1 | putative 3-ketoacyl-ACP synthase       | gbpln | Arabidopsis thaliana | AT1G74960.3   Symbols: FAB1   fatty acid biosynthesis 1   chr1:28152564-28155948 REVERSE LENGTH=541                                                                                                                                                                                                                                                                                       | 540 | 541 | 0         | 100.2 | 90.2 | 93.3 |
| Rsa1.0_01963.1.g31140.t1 | ref XP_002888470.1 hypothetical protein ARALYDRAFT_894223 [Arabidopsis lyrata subsp. lyrata] gi 29733431.1 gb EFH64729.1 hypothetical protein ARALYDRAFT_894223 [Arabidopsis lyrata subsp. lyrata] ref NP_177635.1 30S ribosomal protein S9 [Arabidopsis thaliana] gi 48428563 sp Q9XJ27.1 RR9_ARATH RecName: Full=30S ribosomal protein S9, chloroplastic; Flags: Precursor gi 5882726 gb AAD55279.1 AC009283_10 Identical to gb AB022676 ribosomal protein S9 from Arabidopsis thaliana. ESTs gb T13861. gb AA389790. gb T42539. gb AA586013. gb AA395093 and gb AA041154 come from this gene [Arabidopsis thaliana] gi 12744979 gb AAK06869.1 AF344318_1 putative ribosomal protein S9 [Arabidopsis thaliana] gi 5456946 db BAA82396.1 ribosomal protein S9 [Arabidopsis thaliana] gi 15010598 gb AAK73958.1 ATg74970/F25A4.6 [Arabidopsis thaliana] gi 15027999 gb AAK76530.1 putative ribosomal protein S9 [Arabidopsis thaliana] gi 2025921.1 gb AAM14321.1 putative ribosomal protein S9 [Arabidopsis thaliana] gi 21554316 gb AAM63421.1 ribosomal protein S9, putative [Arabidopsis thaliana] gi 51968396 db BAD42890.1 putative ribosomal protein S9 [Arabidopsis thaliana] gi 51969144 db BAD43264.1 putative ribosomal protein S9 [Arabidopsis thaliana] gi 51969266 db BAD43325.1 putative ribosomal protein S9 [Arabidopsis thaliana] ref XP_002887569.1 hypothetical protein ARALYDRAFT_476640 [Arabidopsis lyrata subsp. lyrata] gi 297333410 gb EFH63828.1 hypothetical protein ARALYDRAFT_476640 [Arabidopsis lyrata subsp. lyrata] ref NP_001190233.1 26S proteasome regulatory subunit N8 [Arabidopsis thaliana] gi 332003541 gb AED90924.1 probable 26S proteasome non-ATPase regulatory subunit 7 [Arabidopsis thaliana] | 305 | 396 | 6.00E-50  | 129.8 | 46.2 | 63.6 | hypothetical protein ARALYDRAFT_894223 | gbpln | Arabidopsis lyrata   | AT1G65990.1   Symbols:   type 2 peroxiredoxin-related / thiol specific antioxidant / mal allergen family protein   chr1:24571603-24573471 REVERSE LENGTH=553                                                                                                                                                                                                                              | 305 | 553 | 7.00E-45  | 181.3 | 44.3 | 58.7 |
| Rsa1.0_01963.1.g31141.t1 | gi 5456946 db BAA82396.1 ribosomal protein S9 [Arabidopsis thaliana] gi 15010598 gb AAK73958.1 ATg74970/F25A4.6 [Arabidopsis thaliana] gi 15027999 gb AAK76530.1 putative ribosomal protein S9 [Arabidopsis thaliana] gi 2025921.1 gb AAM14321.1 putative ribosomal protein S9 [Arabidopsis thaliana] gi 21554316 gb AAM63421.1 ribosomal protein S9, putative [Arabidopsis thaliana] gi 51968396 db BAD42890.1 putative ribosomal protein S9 [Arabidopsis thaliana] gi 51969144 db BAD43264.1 putative ribosomal protein S9 [Arabidopsis thaliana] gi 51969266 db BAD43325.1 putative ribosomal protein S9 [Arabidopsis thaliana] ref XP_002887569.1 hypothetical protein ARALYDRAFT_476640 [Arabidopsis lyrata subsp. lyrata] gi 297333410 gb EFH63828.1 hypothetical protein ARALYDRAFT_476640 [Arabidopsis lyrata subsp. lyrata] ref NP_001190233.1 26S proteasome regulatory subunit N8 [Arabidopsis thaliana] gi 332003541 gb AED90924.1 probable 26S proteasome non-ATPase regulatory subunit 7 [Arabidopsis thaliana]                                                                                                                                                                                                                                                                                                                                                                                                                                                                                                                                                                                                                                                                                                                  | 212 | 208 | 6.00E-93  | 98.1  | 87.3 | 92.5 | 30S ribosomal protein S9               | gbpln | Arabidopsis thaliana | AT1G74970.1   Symbols: RPS9, TWN3   ribosomal protein S9   chr1:28157761-28159202 REVERSE LENGTH=208                                                                                                                                                                                                                                                                                      | 212 | 208 | 2.00E-95  | 98.1  | 87.3 | 92.5 |
| Rsa1.0_01963.1.g31142.t1 | ref NP_001190233.1 26S proteasome regulatory subunit N8 [Arabidopsis thaliana] gi 332003541 gb AED90924.1 probable 26S proteasome non-ATPase regulatory subunit 7 [Arabidopsis thaliana]                                                                                                                                                                                                                                                                                                                                                                                                                                                                                                                                                                                                                                                                                                                                                                                                                                                                                                                                                                                                                                                                                                                                                                                                                                                                                                                                                                                                                                                                                                                                                       | 124 | 305 | 1.00E-42  | 246.0 | 70.2 | 83.1 | 26S proteasome regulatory subunit N8   | gbpln | Arabidopsis thaliana | AT5G05780.2   Symbols: RPN8A   RP non-ATPase subunit 8A   chr5:1735862-1738176 FORWARD LENGTH=305                                                                                                                                                                                                                                                                                         | 124 | 305 | 2.00E-45  | 246.0 | 70.2 | 83.1 |
| Rsa1.0_01964.1.g31144.t1 | gb EOA37041.1 hypothetical protein CARUB_v10010132mg [Capsella rubella]                                                                                                                                                                                                                                                                                                                                                                                                                                                                                                                                                                                                                                                                                                                                                                                                                                                                                                                                                                                                                                                                                                                                                                                                                                                                                                                                                                                                                                                                                                                                                                                                                                                                        | 243 | 244 | 5.00E-79  | 100.4 | 71.6 | 80.7 | hypothetical protein CARUB_v10010132mg | gbpln | Capsella rubella     | AT2G27260.1   Symbols:   Late embryogenesis abundant (LEA) hydroxyproline-rich glycoprotein family   chr2:11669769-11670500 FORWARD LENGTH=243                                                                                                                                                                                                                                            | 243 | 243 | 2.00E-81  | 100.0 | 73.3 | 84.0 |
| Rsa1.0_01964.1.g31145.t1 | ref NP_180295.1 uncharacterized protein [Arabidopsis thaliana] gi 5306270 gb AAD42002.1 hypothetical protein [Arabidopsis thaliana] gi 27413483 gb AAO11659.1 hypothetical protein [Arabidopsis thaliana] gi 50058869 gb AAT69179.1 hypothetical protein AT2g27270 [Arabidopsis thaliana] gi 330252872 gb AEC07966.1 uncharacterized protein AT2G27270 [Arabidopsis thaliana]                                                                                                                                                                                                                                                                                                                                                                                                                                                                                                                                                                                                                                                                                                                                                                                                                                                                                                                                                                                                                                                                                                                                                                                                                                                                                                                                                                  | 180 | 231 | 8.00E-20  | 128.3 | 38.9 | 56.1 | uncharacterized protein                | gbpln | Arabidopsis thaliana | AT2G27270.1   Symbols:   BEST Arabidopsis thaliana protein match is: Late embryogenesis abundant (LEA) hydroxyproline-rich glycoprotein family (TAIR:AT4G01410.1); Has 250 Blast hits to 250 proteins in 11 species: Archaee = 0; Bacteria = 0; Metazoa = 0; Fungi = 0; Plants = 250; Viruses = 0; Other Eukaryotes = 0 (source: NCBI BLINK).   chr2:11672346-11673134 FORWARD LENGTH=231 | 180 | 231 | 3.00E-22  | 128.3 | 38.9 | 56.1 |
| Rsa1.0_01964.1.g31146.t1 | gb EOA27430.1 hypothetical protein CARUB_v10023568mg [Capsella rubella]                                                                                                                                                                                                                                                                                                                                                                                                                                                                                                                                                                                                                                                                                                                                                                                                                                                                                                                                                                                                                                                                                                                                                                                                                                                                                                                                                                                                                                                                                                                                                                                                                                                                        | 349 | 340 | 1.00E-156 | 97.4  | 80.2 | 87.4 | hypothetical protein CARUB_v10023568mg | gbpln | Capsella rubella     | AT2G27300.1   Symbols: ANAC040, NTL8   NTM1-like 8   chr2:11680417-11681955 REVERSE LENGTH=335                                                                                                                                                                                                                                                                                            | 349 | 335 | 1.00E-153 | 96.0  | 79.4 | 85.7 |

|                          |                                                                                                                                                                                                                                                                                                                                                                                                                                                                                                                                                                                                                                                                                                                                                                                                                                                  |      |      |           |       |      |      |                                                       |       |                      |                                                                                                                                                         |      |      |           |       |      |      |
|--------------------------|--------------------------------------------------------------------------------------------------------------------------------------------------------------------------------------------------------------------------------------------------------------------------------------------------------------------------------------------------------------------------------------------------------------------------------------------------------------------------------------------------------------------------------------------------------------------------------------------------------------------------------------------------------------------------------------------------------------------------------------------------------------------------------------------------------------------------------------------------|------|------|-----------|-------|------|------|-------------------------------------------------------|-------|----------------------|---------------------------------------------------------------------------------------------------------------------------------------------------------|------|------|-----------|-------|------|------|
| Rsa1.0_01964.1.g31147.t3 | refNP_565646.2  RNA recognition motif-containing protein [Arabidopsis thaliana] gi 106879155 gb ABF82607.1  At2g27330 [Arabidopsis thaliana] gi 330252880 gb AEC07974.1  RNA recognition motif-containing protein [Arabidopsis thaliana] refNP_565648.1  OTU-like cysteine type protease [Arabidopsis thaliana] gi 30683489 refNP_850099.1  OTU-like cysteine type protease [Arabidopsis thaliana] gi 16604334 gb AAL24173.1  At2g27350/F12K2.7 [Arabidopsis thaliana] gi 20197675 gb AAD41995.2  expressed protein [Arabidopsis thaliana] gi 27311747 gb AAO00839.1  expressed protein [Arabidopsis thaliana] gi 31711918 gb AAP68315.1  At2g27350 [Arabidopsis thaliana] gi 330252885 gb AEC07979.1  OTU-like cysteine type protease [Arabidopsis thaliana] gi 330252886 gb AEC07980.1  OTU-like cysteine type protease [Arabidopsis thaliana] | 152  | 116  | 8.00E-41  | 76.3  | 57.2 | 65.1 | RNA recognition motif-containing protein              | gbpln | Arabidopsis thaliana | AT2G27330.1   Symbols:   RNA-binding (RRM/RBD/RNP motifs) family protein   chr2:11695350-11696563 REVERSE LENGTH=116                                    | 152  | 116  | 3.00E-43  | 76.3  | 57.2 | 65.1 |
| Rsa1.0_01964.1.g31148.t1 | refNP_565648.1  OTU-like cysteine type protease [Arabidopsis thaliana] gi 30683489 refNP_850099.1  OTU-like cysteine type protease [Arabidopsis thaliana] gi 16604334 gb AAL24173.1  At2g27350/F12K2.7 [Arabidopsis thaliana] gi 20197675 gb AAD41995.2  expressed protein [Arabidopsis thaliana] gi 27311747 gb AAO00839.1  expressed protein [Arabidopsis thaliana] gi 31711918 gb AAP68315.1  At2g27350 [Arabidopsis thaliana] gi 330252885 gb AEC07979.1  OTU-like cysteine type protease [Arabidopsis thaliana] gi 330252886 gb AEC07980.1  OTU-like cysteine type protease [Arabidopsis thaliana]                                                                                                                                                                                                                                          | 477  | 505  | 0         | 105.9 | 81.1 | 86.8 | OTU-like cysteine type protease                       | gbpln | Arabidopsis thaliana | AT2G27350.2   Symbols:   OTU-like cysteine protease family protein   chr2:11699780-11702363 REVERSE LENGTH=505                                          | 477  | 505  | 0         | 105.9 | 81.1 | 86.8 |
| Rsa1.0_01964.1.g31149.t1 | #                                                                                                                                                                                                                                                                                                                                                                                                                                                                                                                                                                                                                                                                                                                                                                                                                                                | #    | #    | #         | #     | #    | #    | -                                                     | ----  | ----                 | #                                                                                                                                                       | #    | #    | #         | #     | #    |      |
| Rsa1.0_01964.1.g31150.t1 | refXP_002880912.1  At2g27385 [Arabidopsis lyrata subsp. lyrata] gi 297326751 gb EFH57171.1  At2g27385 [Arabidopsis lyrata subsp. lyrata]                                                                                                                                                                                                                                                                                                                                                                                                                                                                                                                                                                                                                                                                                                         | 302  | 162  | 1.00E-67  | 53.6  | 42.4 | 47.4 | At2g27385                                             | gbpln | Arabidopsis lyrata   | AT2G27385.3   Symbols:   Pollen Ole e 1 allergen and extensin family protein   chr2:11716697-11717285 REVERSE LENGTH=162                                | 302  | 162  | 9.00E-70  | 53.6  | 41.1 | 47.0 |
| Rsa1.0_01964.1.g31151.t1 | refNP_180312.2  armadillo/beta-catenin-like repeat-containing protein [Arabidopsis thaliana] gi 27413513 gb AAO11674.1  hypothetical protein [Arabidopsis thaliana] gi 61742614 gb AAX55128.1  hypothetical protein At2g27430 [Arabidopsis thaliana] gi 330252802 gb AEC07996.1  armadillo/beta-catenin-like repeat-containing protein [Arabidopsis thaliana]                                                                                                                                                                                                                                                                                                                                                                                                                                                                                    | 133  | 438  | 4.00E-49  | 329.3 | 75.9 | 82.7 | armadillo/beta-catenin-like repeat-containing protein | gbpln | Arabidopsis thaliana | AT2G27430.1   Symbols:   ARM repeat superfamily protein   chr2:1172914-11733170 REVERSE LENGTH=438                                                      | 133  | 438  | 8.00E-52  | 329.3 | 75.9 | 82.7 |
| Rsa1.0_01964.1.g31152.t1 | refXP_002880919.1  hypothetical protein ARALYDRAFT_481647 [Arabidopsis lyrata subsp. lyrata] gi 297326758 gb EFH57178.1  hypothetical protein ARALYDRAFT_481647 [Arabidopsis lyrata subsp. lyrata]                                                                                                                                                                                                                                                                                                                                                                                                                                                                                                                                                                                                                                               | 157  | 253  | 2.00E-14  | 161.1 | 31.8 | 35.0 | hypothetical protein ARALYDRAFT_481647                | gbpln | Arabidopsis lyrata   | AT2G27470.1   Symbols: NF-YB11   nuclear factor Y, subunit B11   chr2:11745196-11746375 REVERSE LENGTH=275                                              | 157  | 275  | 1.00E-15  | 175.2 | 36.3 | 41.4 |
| Rsa1.0_01965.1.g31153.t1 | #                                                                                                                                                                                                                                                                                                                                                                                                                                                                                                                                                                                                                                                                                                                                                                                                                                                | #    | #    | #         | #     | #    | #    | -                                                     | ----  | ----                 | #                                                                                                                                                       | #    | #    | #         | #     | #    |      |
| Rsa1.0_01965.1.g31154.t1 | dbj BAJ34446.1  unnamed protein product [Thellungiella halophila]                                                                                                                                                                                                                                                                                                                                                                                                                                                                                                                                                                                                                                                                                                                                                                                | 154  | 149  | 2.00E-60  | 96.8  | 79.9 | 87.7 | unnamed protein product                               | ----  | ----                 | #                                                                                                                                                       | #    | #    | #         | #     | #    |      |
| Rsa1.0_01965.1.g31155.t2 | refNP_188075.2  callose synthase [Arabidopsis thaliana] gi 189081842 sp Q9LUD7.2 CAL58_ARA TH RecName: Full=Putative callose synthase 8; AltName: Full=1,3-beta-glucan synthase; AltName: Full=Protein GLUCAN SYNTHASE-LIKE 4 gi 332642018 gb AAE75539.1  callose synthase [Arabidopsis thaliana]                                                                                                                                                                                                                                                                                                                                                                                                                                                                                                                                                | 1947 | 1976 | 0         | 101.5 | 93.1 | 96.4 | callose synthase                                      | gbpln | Arabidopsis thaliana | AT3G14570.1   Symbols: ATGSL04, gsI04, atgsI4   glucan synthase-like 4   chr3:4892643-4902628 FORWARD LENGTH=1976                                       | 1947 | 1976 | 0         | 101.5 | 93.1 | 96.4 |
| Rsa1.0_01965.1.g31156.t1 | refXP_002882884.1  predicted protein [Arabidopsis lyrata subsp. lyrata] gi 297328724 gb EFH59143.1  predicted protein [Arabidopsis lyrata subsp. lyrata]                                                                                                                                                                                                                                                                                                                                                                                                                                                                                                                                                                                                                                                                                         | 401  | 409  | 1.00E-174 | 102.0 | 75.6 | 85.0 | predicted protein                                     | gbpln | Arabidopsis lyrata   | AT3G14580.1   Symbols:   Pentatricopeptide repeat (PPR) superfamily protein   chr3:4903012-4904229 FORWARD LENGTH=405                                   | 401  | 405  | 1.00E-177 | 101.0 | 77.1 | 87.0 |
| Rsa1.0_01965.1.g31157.t1 | refXP_002885050.1  integral membrane single C2 domain protein [Arabidopsis lyrata subsp. lyrata] gi 297330890 gb EFH61309.1  integral membrane single C2 domain protein [Arabidopsis lyrata subsp. lyrata]                                                                                                                                                                                                                                                                                                                                                                                                                                                                                                                                                                                                                                       | 629  | 742  | 0         | 118.0 | 82.8 | 89.8 | integral membrane single C2 domain protein            | gbpln | Arabidopsis lyrata   | AT3G14590.2   Symbols: NTMC2TYPE6.2, NTMC2T6.2   Calcium-dependent lipid-binding (CaLB domain) family protein   chr3:4904448-4907741 REVERSE LENGTH=737 | 629  | 737  | 0         | 117.2 | 81.6 | 89.0 |
| Rsa1.0_01965.1.g31158.t1 | gb EOA31402.1  hypothetical protein CARUB_v10014581mg [Capsella rubella]                                                                                                                                                                                                                                                                                                                                                                                                                                                                                                                                                                                                                                                                                                                                                                         | 137  | 222  | 3.00E-47  | 162.0 | 81.0 | 86.9 | hypothetical protein CARUB_v10014581mg                | gbpln | Capsella rubella     | L18ae family   Symbols:   Ribosomal protein L18ae family   chr3:4909037-4910226 FORWARD LENGTH=132                                                      | 137  | 132  | 7.00E-45  | 96.4  | 73.7 | 79.6 |

|                          |                                                                                                                                                                                                                                                                                                                                                                                                                           |     |     |           |       |      |      |                                                        |       |                      |                                                                                                                                       |     |     |           |       |      |      |
|--------------------------|---------------------------------------------------------------------------------------------------------------------------------------------------------------------------------------------------------------------------------------------------------------------------------------------------------------------------------------------------------------------------------------------------------------------------|-----|-----|-----------|-------|------|------|--------------------------------------------------------|-------|----------------------|---------------------------------------------------------------------------------------------------------------------------------------|-----|-----|-----------|-------|------|------|
| Rsa1.0_01965.1.g31159.t1 | refNP_188079.1  cytochrome P450, family 72, subfamily A, polypeptide 7 [Arabidopsis thaliana]<br>gi 9294383 dbj BAB02393.1  cytochrome P450 [Arabidopsis thaliana]<br>gi 18252155 gb AAL61910.1  cytochrome P450 [Arabidopsis thaliana]<br>gi 28059362 gb AAO30051.1  cytochrome P450 [Arabidopsis thaliana]<br>gi 332642026 gb AEE75547.1  cytochrome P450, family 72, subfamily A, polypeptide 7 [Arabidopsis thaliana] | 750 | 512 | 0         | 68.3  | 58.5 | 62.9 | cytochrome P450, family 72, subfamily A, polypeptide 7 | gbpln | Arabidopsis thaliana | AT3G14610.1   Symbols: CYP72A7   cytochrome P450, family 72, subfamily A, polypeptide 7   chr3:4912565-4914503 FORWARD LENGTH=512     | 750 | 512 | 0         | 68.3  | 58.5 | 62.9 |
| Rsa1.0_01965.1.g31160.t1 | gb EOA16073.1  hypothetical protein CARUB_v10004206mg [Capsella rubella]                                                                                                                                                                                                                                                                                                                                                  | 472 | 763 | 1.00E-102 | 161.7 | 40.9 | 50.4 | hypothetical protein CARUB_v10004206mg                 | gbpln | Capsella rubella     | AT3G51700.1   Symbols:   PIF1 helicase   chr3:19179443-19181145 REVERSE LENGTH=344                                                    | 472 | 344 | 8.00E-56  | 72.9  | 25.8 | 35.4 |
| Rsa1.0_01966.1.g31161.t2 | gb EOA18774.1  hypothetical protein CARUB_v10007371mg, partial [Capsella rubella]                                                                                                                                                                                                                                                                                                                                         | 309 | 620 | 2.00E-13  | 200.6 | 16.2 | 23.0 | hypothetical protein CARUB_v10007371mg, partial        | gbpln | Capsella rubella     | #                                                                                                                                     | #   | #   | #         | #     | #    | #    |
| Rsa1.0_01966.1.g31162.t1 | #                                                                                                                                                                                                                                                                                                                                                                                                                         | #   | #   | #         | #     | #    | #    | -                                                      | ----  | ----                 | #                                                                                                                                     | #   | #   | #         | #     | #    | #    |
| Rsa1.0_01966.1.g31163.t1 | gb AAF79782.1 AC020646.5 T32E20.5 [Arabidopsis thaliana]                                                                                                                                                                                                                                                                                                                                                                  | 86  | 141 | 3.00E-12  | 164.0 | 41.9 | 50.0 | T32E20.5                                               | gbpln | Arabidopsis thaliana | #                                                                                                                                     | #   | #   | #         | #     | #    | #    |
| Rsa1.0_01966.1.g31164.t1 | gb EOA22554.1  hypothetical protein CARUB_v10003214mg [Capsella rubella]                                                                                                                                                                                                                                                                                                                                                  | 296 | 297 | 1.00E-127 | 100.3 | 77.4 | 85.8 | hypothetical protein CARUB_v10003214mg                 | gbpln | Capsella rubella     | AT4G11040.1   Symbols:   Protein phosphatase 2C family protein   chr4:6745161-6746667 FORWARD LENGTH=295                              | 296 | 295 | 1.00E-128 | 99.7  | 78.0 | 85.5 |
| Rsa1.0_01966.1.g31165.t1 | #                                                                                                                                                                                                                                                                                                                                                                                                                         | #   | #   | #         | #     | #    | #    | -                                                      | ----  | ----                 | #                                                                                                                                     | #   | #   | #         | #     | #    | #    |
| Rsa1.0_01966.1.g31166.t1 | #                                                                                                                                                                                                                                                                                                                                                                                                                         | #   | #   | #         | #     | #    | #    | -                                                      | ----  | ----                 | #                                                                                                                                     | #   | #   | #         | #     | #    | #    |
| Rsa1.0_01966.1.g31167.t2 | refXP_002864844.1  zinc finger family protein [Arabidopsis lyrata subsp. lyrata] gi 297310679 gb EFH41103.1  zinc finger family protein [Arabidopsis lyrata subsp. lyrata]                                                                                                                                                                                                                                                | 242 | 270 | 1.00E-36  | 111.6 | 28.1 | 31.0 | zinc finger family protein                             | gbpln | Arabidopsis lyrata   | AT5G63280.1   Symbols:   C2H2-like zinc finger protein   chr5:25367085-25368848 FORWARD LENGTH=271                                    | 242 | 271 | 2.00E-38  | 112.0 | 27.7 | 31.0 |
| Rsa1.0_01966.1.g31168.t1 | gb EOA20860.1  hypothetical protein CARUB_v10001197mg [Capsella rubella]                                                                                                                                                                                                                                                                                                                                                  | 168 | 375 | 2.00E-18  | 223.2 | 36.3 | 48.8 | hypothetical protein CARUB_v10001197mg                 | gbpln | Capsella rubella     | AT5G22100.1   Symbols:   RNA cyclase family protein   chr5:7329015-7330718 FORWARD LENGTH=375                                         | 168 | 375 | 3.00E-18  | 223.2 | 29.2 | 36.3 |
| Rsa1.0_01966.1.g31169.t1 | refNP_186790.2  RNase H domain-containing protein [Arabidopsis thaliana] gi 145331720 refNP_001078087.1  RNase H domain-containing protein [Arabidopsis thaliana]<br>gi 332640141 gb AEE73662.1  RNase H domain-containing protein [Arabidopsis thaliana] gi 332640142 gb AEE73663.1  RNase H domain-containing protein [Arabidopsis thaliana]                                                                            | 117 | 294 | 2.00E-25  | 251.3 | 55.6 | 65.8 | RNase H domain-containing protein                      | gbpln | Arabidopsis thaliana | AT3G01410.2   Symbols:   Polynucleotidyl transferase, ribonuclease H-like superfamily protein   chr3:153650-155439 REVERSE LENGTH=294 | 117 | 294 | 4.00E-28  | 251.3 | 55.6 | 65.8 |
| Rsa1.0_01967.1.g31170.t1 | gb EOA33387.1  hypothetical protein CARUB_v10020368mg, partial [Capsella rubella]                                                                                                                                                                                                                                                                                                                                         | 334 | 417 | 1.00E-130 | 124.9 | 74.9 | 87.4 | hypothetical protein CARUB_v10020368mg, partial        | gbpln | Capsella rubella     | AT1G69900.1   Symbols:   Actin cross-linking protein   chr1:26326520-26327816 REVERSE LENGTH=397                                      | 334 | 397 | 1.00E-118 | 118.9 | 71.0 | 81.7 |
| Rsa1.0_01967.1.g31171.t1 | refXP_002863106.1  hypothetical protein ARALYDRAFT_920363 [Arabidopsis lyrata subsp. lyrata] gi 297308928 gb EFH39365.1  hypothetical protein ARALYDRAFT_920363 [Arabidopsis lyrata subsp. lyrata]                                                                                                                                                                                                                        | 243 | 284 | 8.00E-69  | 116.9 | 58.0 | 64.6 | hypothetical protein ARALYDRAFT_920363                 | gbpln | Arabidopsis lyrata   | AT1G69890.1   Symbols:   Protein of unknown function (DUF569)   chr1:26323426-26324527 REVERSE LENGTH=279                             | 243 | 279 | 9.00E-71  | 114.8 | 57.6 | 65.4 |
| Rsa1.0_01967.1.g31172.t1 | refXP_002863112.1  thioredoxin H-type 8 [Arabidopsis lyrata subsp. lyrata] gi 297308934 gb EFH39371.1  thioredoxin H-type 8 [Arabidopsis lyrata subsp. lyrata]                                                                                                                                                                                                                                                            | 151 | 148 | 9.00E-65  | 98.0  | 80.8 | 89.4 | thioredoxin H-type 8                                   | gbpln | Arabidopsis lyrata   | AT1G69880.1   Symbols: ATH8, TH8   thioredoxin H-type 8   chr1:26321540-26322794 FORWARD LENGTH=148                                   | 151 | 148 | 4.00E-67  | 98.0  | 82.1 | 88.7 |
| Rsa1.0_01967.1.g31173.t1 | dbj BAJ33974.1  unnamed protein product [Thellungiella halophila]                                                                                                                                                                                                                                                                                                                                                         | 622 | 622 | 0         | 100.0 | 91.6 | 95.7 | unnamed protein product                                | ----  | ----                 | AT1G69870.1   Symbols: NRT1.7   nitrate transporter 1.7   chr1:26316208-26320097 FORWARD LENGTH=620                                   | 622 | 620 | 0         | 99.7  | 85.4 | 92.4 |
| Rsa1.0_01967.1.g31174.t1 | #                                                                                                                                                                                                                                                                                                                                                                                                                         | #   | #   | #         | #     | #    | #    | -                                                      | ----  | ----                 | #                                                                                                                                     | #   | #   | #         | #     | #    | #    |
| Rsa1.0_01967.1.g31175.t1 | refXP_002863114.1  proton-dependent oligopeptide transport family protein [Arabidopsis lyrata subsp. lyrata] gi 297308936 gb EFH39373.1  proton-dependent oligopeptide transport family protein [Arabidopsis lyrata subsp. lyrata]                                                                                                                                                                                        | 252 | 556 | 1.00E-126 | 220.6 | 88.5 | 92.9 | proton-dependent oligopeptide transport family protein | gbpln | Arabidopsis lyrata   | AT1G69860.1   Symbols:   Major facilitator superfamily protein   chr1:26309628-26312174 FORWARD LENGTH=555                            | 252 | 555 | 1.00E-113 | 220.2 | 87.7 | 91.7 |
| Rsa1.0_01968.1.g31176.t2 | #                                                                                                                                                                                                                                                                                                                                                                                                                         | #   | #   | #         | #     | #    | #    | -                                                      | ----  | ----                 | #                                                                                                                                     | #   | #   | #         | #     | #    | #    |
| Rsa1.0_01968.1.g31177.t2 | gb AAG33978.1 AF250964.1 methionine aminopeptidase-like protein [Arabidopsis thaliana]                                                                                                                                                                                                                                                                                                                                    | 478 | 440 | 0         | 92.1  | 81.0 | 87.0 | methionine aminopeptidase-like protein                 | gbpln | Arabidopsis thaliana | AT2G44180.1   Symbols: MAP2A   methionine aminopeptidase 2A   chr2:18269442-18271785 REVERSE LENGTH=441                               | 478 | 441 | 0         | 92.3  | 80.8 | 86.8 |

|                          |                                                                                                                                                                                                                                                                                                                                                                                                                                                                                  |      |      |           |       |      |       |                                                    |       |                      |                                                                                                                                                                                                |      |      |           |       |      |       |
|--------------------------|----------------------------------------------------------------------------------------------------------------------------------------------------------------------------------------------------------------------------------------------------------------------------------------------------------------------------------------------------------------------------------------------------------------------------------------------------------------------------------|------|------|-----------|-------|------|-------|----------------------------------------------------|-------|----------------------|------------------------------------------------------------------------------------------------------------------------------------------------------------------------------------------------|------|------|-----------|-------|------|-------|
| Rsa1.0_01968.1.g31178.t1 | gb EOA27037.1  hypothetical protein CARUB_v10023133mg [Capsella rubella]                                                                                                                                                                                                                                                                                                                                                                                                         | 444  | 471  | 1.00E-169 | 106.1 | 78.8 | 85.4  | hypothetical protein CARUB_v10023133mg             | gbpln | Capsella rubella     | AT2G44190.1   Symbols: EDE1, QWRF5   Family of unknown function (DUF566)   chr2:18272346-18274332 FORWARD LENGTH=474                                                                           | 444  | 474  | 1.00E-170 | 106.8 | 78.4 | 84.2  |
| Rsa1.0_01968.1.g31179.t1 | ref NP_566014.1  pre-mRNA splicing factor domain-containing protein [Arabidopsis thaliana] gi 3128167 gb AAC16071.1  expressed protein [Arabidopsis thaliana] gi 15010704 gb AAK74011.1  At2g44200/F8E13.34 [Arabidopsis thaliana] gi 20197069 gb AAM14905.1  expressed protein [Arabidopsis thaliana] gi 21360459 gb AAM47345.1  At2g44200/F8E13.34 [Arabidopsis thaliana] gi 33025529 gb AEC10390.1  pre-mRNA splicing factor domain-containing protein [Arabidopsis thaliana] | 317  | 493  | 2.00E-62  | 155.5 | 49.2 | 55.8  | pre-mRNA splicing factor domain-containing protein | gbpln | Arabidopsis thaliana | AT2G44200.1   Symbols:   CBF1-interacting co-repressor CIR, N-terminal:Pre-mRNA splicing factor   chr2:18276302-18278240 FORWARD LENGTH=493                                                    | 317  | 493  | 6.00E-65  | 155.5 | 49.2 | 55.8  |
| Rsa1.0_01968.1.g31180.t1 | ref NP_030959.1  uncharacterized protein [Arabidopsis thaliana] gi 3128168 gb AAC16072.1  expressed protein [Arabidopsis thaliana] gi 15081719 gb AAK82514.1  At2g44210/F411.2 [Arabidopsis thaliana] gi 21593455 gb AAM65422.1  unknown [Arabidopsis thaliana] gi 22137094 gb AAM91392.1  At2g44210/F411.2 [Arabidopsis thaliana] gi 33025529 gb AEC10391.1  uncharacterized protein AT2G44210 [Arabidopsis thaliana]                                                           | 416  | 415  | 0         | 99.8  | 91.3 | 96.2  | uncharacterized protein                            | gbpln | Arabidopsis thaliana | AT2G44210.1   Symbols:   Protein of Unknown Function (DUF239)   chr2:18280809-18282591 FORWARD LENGTH=415                                                                                      | 416  | 415  | 0         | 99.8  | 91.3 | 96.2  |
| Rsa1.0_01968.1.g31181.t1 | gb AAC16073.1  hypothetical protein [Arabidopsis thaliana]                                                                                                                                                                                                                                                                                                                                                                                                                       | 320  | 402  | 1.00E-116 | 125.6 | 63.8 | 77.5  | hypothetical protein                               | gbpln | Arabidopsis thaliana | AT2G44220.1   Symbols:   Protein of Unknown Function (DUF239)   chr2:18283803-18285690 FORWARD LENGTH=403                                                                                      | 320  | 403  | 1.00E-118 | 125.9 | 63.8 | 77.5  |
| Rsa1.0_01969.1.g31182.t1 | ref NP_001030909.1  putative defensin-like protein 128 [Arabidopsis thaliana] gi 114152836 sp P82723.2 DF128_ARATH RecName: Full=Putative defensin-like protein 128; AltName: Full=Putative low-molecular-weight cysteine-rich protein 8; Short=Protein LOR8; Flags: Precursor gi 332646644 gb AEE80165.1  putative defensin-like protein 128 [Arabidopsis thaliana]                                                                                                             | 69   | 74   | 1.00E-10  | 107.2 | 44.9 | 50.7  | putative defensin-like protein 128                 | gbpln | Arabidopsis thaliana | AT3G61172.1   Symbols: LCR8   low-molecular-weight cysteine-rich 8   chr3:22641764-22642110 REVERSE LENGTH=74                                                                                  | 69   | 74   | 2.00E-13  | 107.2 | 44.9 | 50.7  |
| Rsa1.0_01969.1.g31183.t1 | gb EOA25723.1  hypothetical protein CARUB_v10019077mg [Capsella rubella]                                                                                                                                                                                                                                                                                                                                                                                                         | 805  | 797  | 0         | 99.0  | 80.0 | 87.7  | hypothetical protein CARUB_v10019077mg             | gbpln | Capsella rubella     | AT3G61170.1   Symbols:   Tetratricopeptide repeat (TPR)-like superfamily protein   chr3:22638691-22641237 REVERSE LENGTH=783                                                                   | 805  | 783  | 0         | 97.3  | 75.0 | 82.9  |
| Rsa1.0_01969.1.g31184.t1 | ref XP_002876597.1  hypothetical protein ARALYDRAFT_486587 [Arabidopsis lyrata subsp. lyrata] gi 297322435 gb EFH52856.1  hypothetical protein ARALYDRAFT_486587 [Arabidopsis lyrata subsp. lyrata]                                                                                                                                                                                                                                                                              | 446  | 435  | 0         | 97.5  | 87.9 | 92.2  | hypothetical protein ARALYDRAFT_486587             | gbpln | Arabidopsis lyrata   | AT3G61160.2   Symbols:   Protein kinase superfamily protein   chr3:22636209-22638593 FORWARD LENGTH=438                                                                                        | 446  | 438  | 0         | 98.2  | 88.1 | 92.4  |
| Rsa1.0_01969.1.g31185.t1 | gb EOA24044.1  hypothetical protein CARUB_v10017264mg [Capsella rubella] gi 482559854 gb EOA24045.1  hypothetical protein CARUB_v10017264mg [Capsella rubella]                                                                                                                                                                                                                                                                                                                   | 444  | 441  | 0         | 99.3  | 90.1 | 94.8  | hypothetical protein CARUB_v10017264mg             | gbpln | Capsella rubella     | AT3G61140.1   Symbols: FUS6, ATFUS6, CSN1, COP11, EMB78, ATSK31, SK31   26S proteasome, regulatory subunit Rpn7; Proteasome component (PCI) domain   chr3:22626335-22628895 FORWARD LENGTH=441 | 444  | 441  | 0         | 99.3  | 89.2 | 94.6  |
| Rsa1.0_01969.1.g31186.t1 | gb EOA23223.1  hypothetical protein CARUB_v10016785mg [Capsella rubella]                                                                                                                                                                                                                                                                                                                                                                                                         | 673  | 673  | 0         | 100.0 | 91.4 | 95.5  | hypothetical protein CARUB_v10016785mg             | gbpln | Capsella rubella     | AT3G61130.1   Symbols: GAUT1, LGT1   galacturonosyltransferase 1   chr3:22622399-22625514 FORWARD LENGTH=673                                                                                   | 673  | 673  | 0         | 100.0 | 90.9 | 94.8  |
| Rsa1.0_01969.1.g31187.t1 | gb EOA24972.1  hypothetical protein CARUB_v10018269mg, partial [Capsella rubella]                                                                                                                                                                                                                                                                                                                                                                                                | 84   | 115  | 3.00E-42  | 136.9 | 97.6 | 100.0 | hypothetical protein CARUB_v10018269mg, partial    | gbpln | Capsella rubella     | AT3G61110.1   Symbols: ARS27A, RS27A   ribosomal protein S27   chr3:22611710-22612632 FORWARD LENGTH=86                                                                                        | 84   | 86   | 8.00E-44  | 102.4 | 96.4 | 100.0 |
| Rsa1.0_01969.1.g31188.t8 | ref XP_002878354.1  hypothetical protein ARALYDRAFT_324535 [Arabidopsis lyrata subsp. lyrata] gi 297324192 gb EFH54613.1  hypothetical protein ARALYDRAFT_324535 [Arabidopsis lyrata subsp. lyrata]                                                                                                                                                                                                                                                                              | 2805 | 2860 | 0         | 102.0 | 82.2 | 89.2  | hypothetical protein ARALYDRAFT_324535             | gbpln | Arabidopsis lyrata   | AT2G45540.1   Symbols:   WD-40 repeat family protein / beige-related   chr2:18757881-18772229 REVERSE LENGTH=2946                                                                              | 2805 | 2946 | 0         | 105.0 | 74.7 | 84.1  |

|                           |                                                                                                                                                                                                                                                                                                                                                                                                                                                                                                                                                                                                                                                                                                |     |      |           |       |      |      |                                             |       |                      |                                                                                                                                                                                                                                                                                                                                 |     |      |           |       |      |      |
|---------------------------|------------------------------------------------------------------------------------------------------------------------------------------------------------------------------------------------------------------------------------------------------------------------------------------------------------------------------------------------------------------------------------------------------------------------------------------------------------------------------------------------------------------------------------------------------------------------------------------------------------------------------------------------------------------------------------------------|-----|------|-----------|-------|------|------|---------------------------------------------|-------|----------------------|---------------------------------------------------------------------------------------------------------------------------------------------------------------------------------------------------------------------------------------------------------------------------------------------------------------------------------|-----|------|-----------|-------|------|------|
| Rsa1.0_01970.1.g31189.t1  | refNP_195177.1   3-ketoacyl-CoA synthase 17 [Arabidopsis thaliana] gi 75099555 sp O65677.1 KCS2_ARATH RecName: Full=Probable 3-ketoacyl-CoA synthase 2; Short=KCS-2; AltName: Full=Very long-chain fatty acid condensing enzyme 2; Short=VLCFA condensing enzyme 2 gi 3096920 emb CAA18830.1  putative ketoacyl-CoA synthase [Arabidopsis thaliana] gi 7270401 emb CAB80168.1  putative ketoacyl-CoA synthase [Arabidopsis thaliana] gi 332660987 gb AEE86387.1  3-ketoacyl-CoA synthase 17 [Arabidopsis thaliana]                                                                                                                                                                             | 474 | 487  | 0         | 102.7 | 81.9 | 90.5 | 3-ketoacyl-CoA synthase 17                  | gbpln | Arabidopsis thaliana | AT4G34510.1   Symbols: KCS17   3-ketoacyl-CoA synthase 17   chr4:16491796-16493259 FORWARD LENGTH=487                                                                                                                                                                                                                           | 474 | 487  | 0         | 102.7 | 81.9 | 90.5 |
| Rsa1.0_01970.1.g31190.t1  | emb CAD90160.1  beta-ketoacyl-CoA synthase FAE1.2 [Brassica juncea]                                                                                                                                                                                                                                                                                                                                                                                                                                                                                                                                                                                                                            | 506 | 506  | 0         | 100.0 | 96.6 | 99.0 | beta-ketoacyl-CoA synthase FAE1.2           | gbpln | Brassica juncea      | AT4G34520.1   Symbols: FAE1, KCS18   3-ketoacyl-CoA synthase 18   chr4:16494205-16495725 FORWARD LENGTH=506                                                                                                                                                                                                                     | 506 | 506  | 0         | 100.0 | 84.8 | 91.1 |
| Rsa1.0_01970.1.g31191.t16 | gb EOA15755.1  hypothetical protein CARUB_v10006817mg [Capsella rubella]                                                                                                                                                                                                                                                                                                                                                                                                                                                                                                                                                                                                                       | 314 | 283  | 5.00E-60  | 90.1  | 51.6 | 59.9 | hypothetical protein CARUB_v10006817mg      | gbpln | Capsella rubella     | AT4G34550.1   Symbols:   BEST Arabidopsis thaliana protein match is: F-box family protein (TAIR:AT2G16365.3); Has 37 Blast hits to 37 proteins in 8 species: Archae - 0; Bacteria - 0; Metazoa - 0; Fungi - 0; Plants - 37; Viruses - 0; Other Eukaryotes - 0 (source: NCBI BLINK).   chr4:16503201-16504040 FORWARD LENGTH=279 | 314 | 279  | 2.00E-60  | 88.9  | 49.7 | 59.9 |
| Rsa1.0_01970.1.g31192.t1  | gb EOA17614.1  hypothetical protein CARUB_v10005978mg [Capsella rubella]                                                                                                                                                                                                                                                                                                                                                                                                                                                                                                                                                                                                                       | 148 | 143  | 5.00E-53  | 96.6  | 75.0 | 82.4 | hypothetical protein CARUB_v10005978mg      | gbpln | Capsella rubella     | AT4G34590.1   Symbols: ATB2, GBF6, AtbZIP11, BZIP11   G-box binding factor 6   chr4:16522449-16522928 FORWARD LENGTH=159                                                                                                                                                                                                        | 148 | 159  | 4.00E-54  | 107.4 | 74.3 | 81.1 |
| Rsa1.0_01970.1.g31193.t1  | ref XP_002885849.1  predicted protein [Arabidopsis lyrata subsp. lyrata] gi 297331689 gb EFH62108.1  predicted protein [Arabidopsis lyrata subsp. lyrata]                                                                                                                                                                                                                                                                                                                                                                                                                                                                                                                                      | 94  | 335  | 4.00E-17  | 356.4 | 40.4 | 58.5 | predicted protein                           | gbpln | Arabidopsis lyrata   | AT1G52950.1   Symbols:   Nucleic acid-binding, OB-fold-like protein   chr1:19725483-19728007 FORWARD LENGTH=566                                                                                                                                                                                                                 | 94  | 566  | 2.00E-15  | 602.1 | 35.1 | 56.4 |
| Rsa1.0_01971.1.g31194.t1  | gb ACP30622.1  disease resistance protein [Brassica rapa subsp. pekinensis]                                                                                                                                                                                                                                                                                                                                                                                                                                                                                                                                                                                                                    | 781 | 1459 | 0         | 186.8 | 60.3 | 67.7 | disease resistance protein                  | gbpln | Brassica rapa        | AT4G16900.1   Symbols:   Disease resistance protein (TR-NBS-LRR class) family   chr4:9512329-9516541 REVERSE LENGTH=1040                                                                                                                                                                                                        | 781 | 1040 | 1.00E-95  | 133.2 | 27.0 | 39.8 |
| Rsa1.0_01971.1.g31195.t1  | ref XP_002873943.1  calcium-dependent protein kinase 34 [Arabidopsis lyrata subsp. lyrata] gi 297319780 gb EFH50202.1  calcium-dependent protein kinase 34 [Arabidopsis lyrata subsp. lyrata]                                                                                                                                                                                                                                                                                                                                                                                                                                                                                                  | 517 | 525  | 0         | 101.5 | 95.9 | 97.7 | calcium-dependent protein kinase 34         | gbpln | Arabidopsis lyrata   | AT5G19360.1   Symbols: CPK34   calcium-dependent protein kinase 34   chr5:6521716-6523780 REVERSE LENGTH=523                                                                                                                                                                                                                    | 517 | 523  | 0         | 101.2 | 94.8 | 96.9 |
| Rsa1.0_01971.1.g31196.t1  | gb EOA19671.1  hypothetical protein CARUB_v10003324mg [Capsella rubella]                                                                                                                                                                                                                                                                                                                                                                                                                                                                                                                                                                                                                       | 197 | 232  | 2.00E-48  | 117.8 | 53.3 | 61.4 | hypothetical protein CARUB_v10003324mg      | gbpln | Capsella rubella     | AT5G17120.1   Symbols:   Cystatin/monellin superfamily protein   chr5:5628529-5629324 REVERSE LENGTH=207                                                                                                                                                                                                                        | 197 | 207  | 3.00E-44  | 105.1 | 44.7 | 55.3 |
| Rsa1.0_01971.1.g31197.t1  | gb EOA20333.1  hypothetical protein CARUB_v10000639mg [Capsella rubella]                                                                                                                                                                                                                                                                                                                                                                                                                                                                                                                                                                                                                       | 536 | 546  | 0         | 101.9 | 85.6 | 92.0 | hypothetical protein CARUB_v10000639mg      | gbpln | Capsella rubella     | AT5G19320.1   Symbols: RANGAP2   RAN GTPase activating protein 2   chr5:6505310-6506947 REVERSE LENGTH=545                                                                                                                                                                                                                      | 536 | 545  | 0         | 101.7 | 84.5 | 91.6 |
| Rsa1.0_01971.1.g31198.t1  | ref XP_002865540.1  hypothetical protein ARALYDRAFT_494800 [Arabidopsis lyrata subsp. lyrata] gi 297311375 gb EFH41799.1  hypothetical protein ARALYDRAFT_494800 [Arabidopsis lyrata subsp. lyrata] ref NP_197430.1  esterase/lipase/thioesterase family protein [Arabidopsis thaliana] gi 17380668 gb AAL36164.1  putative phospholipase [Arabidopsis thaliana] gi 21554372 gb AAM63479.1  phospholipase-like protein [Arabidopsis thaliana] gi 23397199 gb AAN31882.1  putative phospholipase [Arabidopsis thaliana] gi 26983896 gb AAN86200.1  putative phospholipase [Arabidopsis thaliana] gi 332005296 gb AED92681.1  esterase/lipase/thioesterase family protein [Arabidopsis thaliana] | 135 | 204  | 1.00E-24  | 151.1 | 60.0 | 72.6 | hypothetical protein ARALYDRAFT_494800      | gbpln | Arabidopsis lyrata   | AT5G42330.1   Symbols:   unknown protein; Has 35333 Blast hits to 34131 proteins in 2444 species: Archae - 798; Bacteria - 22429; Metazoa - 974; Fungi - 991; Plants - 531; Viruses - 0; Other Eukaryotes - 9610 (source: NCBI BLINK).   chr5:16926672-16927370 FORWARD LENGTH=205                                              | 135 | 205  | 9.00E-27  | 151.9 | 57.8 | 68.9 |
| Rsa1.0_01971.1.g31199.t1  | phospholipase-like protein [Arabidopsis thaliana] gi 23397199 gb AAN31882.1  putative phospholipase [Arabidopsis thaliana] gi 26983896 gb AAN86200.1  putative phospholipase [Arabidopsis thaliana] gi 332005296 gb AED92681.1  esterase/lipase/thioesterase family protein [Arabidopsis thaliana]                                                                                                                                                                                                                                                                                                                                                                                             | 335 | 330  | 1.00E-176 | 98.5  | 90.1 | 95.2 | esterase/lipase/thioesterase family protein | gbpln | Arabidopsis thaliana | AT5G19290.1   Symbols:   alpha/beta-Hydrolases superfamily protein   chr5:6494113-6495105 FORWARD LENGTH=330                                                                                                                                                                                                                    | 335 | 330  | 1.00E-179 | 98.5  | 90.1 | 95.2 |
| Rsa1.0_01971.1.g31200.t1  | emb CAD20349.1  kinase-associated protein phosphatase [Brassica oleracea]                                                                                                                                                                                                                                                                                                                                                                                                                                                                                                                                                                                                                      | 560 | 563  | 0         | 100.5 | 80.7 | 85.7 | kinase-associated protein phosphatase       | gbpln | Brassica oleracea    | AT5G19280.1   Symbols: KAPP, RAG1   kinase associated protein phosphatase   chr5:6488450-6493182 FORWARD LENGTH=581                                                                                                                                                                                                             | 560 | 581  | 0         | 103.8 | 71.8 | 81.6 |





|                          |                                                                                                                                                                                                                                                                                                                                                                                                                                                                                 |      |      |           |       |      |      |                                                       |       |                      |                                                                                                                               |      |      |           |       |      |      |
|--------------------------|---------------------------------------------------------------------------------------------------------------------------------------------------------------------------------------------------------------------------------------------------------------------------------------------------------------------------------------------------------------------------------------------------------------------------------------------------------------------------------|------|------|-----------|-------|------|------|-------------------------------------------------------|-------|----------------------|-------------------------------------------------------------------------------------------------------------------------------|------|------|-----------|-------|------|------|
| Rsa1.0_01974.1.g31220.t1 | gb EOA26421.1  hypothetical protein CARUB_v10024039mg [Capsella rubella]                                                                                                                                                                                                                                                                                                                                                                                                        | 92   | 215  | 7.00E-37  | 233.7 | 81.5 | 84.8 | hypothetical protein CARUB_v10024039mg                | gbpln | Capsella rubella     | AT2G37210.1   Symbols:   lysine decarboxylase family protein   chr2:15624253-15626834 REVERSE LENGTH=215                      | 92   | 215  | 2.00E-39  | 233.7 | 81.5 | 84.8 |
| Rsa1.0_01975.1.g31221.t1 | gb ABL97983.1  auxin-induced protein-like [Brassica rapa]                                                                                                                                                                                                                                                                                                                                                                                                                       | 86   | 99   | 2.00E-33  | 115.1 | 87.2 | 89.5 | auxin-induced protein-like                            | gbpln | Brassica rapa        | AT5G18020.1   Symbols:   SAUR-like auxin-responsive protein family   chr5:5966305-5966580 REVERSE LENGTH=91                   | 86   | 91   | 4.00E-31  | 105.8 | 81.4 | 86.0 |
| Rsa1.0_01975.1.g31222.t1 | gb EOA19546.1  hypothetical protein CARUB_v10002518mg [Capsella rubella]                                                                                                                                                                                                                                                                                                                                                                                                        | 94   | 90   | 3.00E-37  | 95.7  | 83.0 | 87.2 | hypothetical protein CARUB_v10002518mg                | gbpln | Capsella rubella     | AT5G18020.1   Symbols:   SAUR-like auxin-responsive protein family   chr5:5966305-5966580 REVERSE LENGTH=91                   | 94   | 91   | 4.00E-38  | 96.8  | 77.7 | 84.0 |
| Rsa1.0_01975.1.g31223.t1 | gb ABL97983.1  auxin-induced protein-like [Brassica rapa]                                                                                                                                                                                                                                                                                                                                                                                                                       | 99   | 99   | 4.00E-46  | 100.0 | 91.9 | 93.9 | auxin-induced protein-like                            | gbpln | Brassica rapa        | AT5G18020.1   Symbols:   SAUR-like auxin-responsive protein family   chr5:5966305-5966580 REVERSE LENGTH=91                   | 99   | 91   | 5.00E-42  | 91.9  | 85.9 | 87.9 |
| Rsa1.0_01975.1.g31224.t1 | gb ABL97983.1  auxin-induced protein-like [Brassica rapa]                                                                                                                                                                                                                                                                                                                                                                                                                       | 98   | 99   | 2.00E-46  | 101.0 | 94.9 | 98.0 | auxin-induced protein-like                            | gbpln | Brassica rapa        | AT5G18020.1   Symbols:   SAUR-like auxin-responsive protein family   chr5:5966305-5966580 REVERSE LENGTH=91                   | 98   | 91   | 8.00E-41  | 92.9  | 81.6 | 85.7 |
| Rsa1.0_01975.1.g31225.t1 | gb EOA21868.1  hypothetical protein CARUB_v10002345mg [Capsella rubella]<br>gi 482557677 gb EOA21869.1  hypothetical protein CARUB_v10002345mg [Capsella rubella]                                                                                                                                                                                                                                                                                                               | 92   | 92   | 5.00E-37  | 100.0 | 83.7 | 90.2 | hypothetical protein CARUB_v10002345mg                | gbpln | Capsella rubella     | AT5G18030.1   Symbols:   SAUR-like auxin-responsive protein family   chr5:5968527-5968793 FORWARD LENGTH=88                   | 92   | 88   | 1.00E-34  | 95.7  | 76.1 | 82.6 |
| Rsa1.0_01975.1.g31226.t1 | gb ABL97983.1  auxin-induced protein-like [Brassica rapa]                                                                                                                                                                                                                                                                                                                                                                                                                       | 184  | 99   | 5.00E-44  | 53.8  | 47.3 | 50.5 | auxin-induced protein-like                            | gbpln | Brassica rapa        | AT5G18020.1   Symbols:   SAUR-like auxin-responsive protein family   chr5:5966305-5966580 REVERSE LENGTH=91                   | 184  | 91   | 3.00E-39  | 49.5  | 43.5 | 46.7 |
| Rsa1.0_01975.1.g31227.t1 | gb ABL97983.1  auxin-induced protein-like [Brassica rapa]                                                                                                                                                                                                                                                                                                                                                                                                                       | 96   | 99   | 2.00E-32  | 103.1 | 75.0 | 83.3 | auxin-induced protein-like                            | gbpln | Brassica rapa        | AT5G18020.1   Symbols:   SAUR-like auxin-responsive protein family   chr5:5966305-5966580 REVERSE LENGTH=91                   | 96   | 91   | 6.00E-34  | 94.8  | 71.9 | 79.2 |
| Rsa1.0_01975.1.g31228.t1 | gb ABL97983.1  auxin-induced protein-like [Brassica rapa]                                                                                                                                                                                                                                                                                                                                                                                                                       | 97   | 99   | 3.00E-39  | 102.1 | 87.6 | 90.7 | auxin-induced protein-like                            | gbpln | Brassica rapa        | AT5G18020.1   Symbols:   SAUR-like auxin-responsive protein family   chr5:5966305-5966580 REVERSE LENGTH=91                   | 97   | 91   | 7.00E-39  | 93.8  | 79.4 | 83.5 |
| Rsa1.0_01975.1.g31229.t1 | gb ABL97983.1  auxin-induced protein-like [Brassica rapa]                                                                                                                                                                                                                                                                                                                                                                                                                       | 70   | 99   | 9.00E-26  | 141.4 | 88.6 | 95.7 | auxin-induced protein-like                            | gbpln | Brassica rapa        | AT5G18020.1   Symbols:   SAUR-like auxin-responsive protein family   chr5:5966305-5966580 REVERSE LENGTH=91                   | 70   | 91   | 7.00E-20  | 130.0 | 72.9 | 80.0 |
| Rsa1.0_01975.1.g31230.t1 | gb AAC17220.1  novel cap-binding protein nCBP [Arabidopsis thaliana]                                                                                                                                                                                                                                                                                                                                                                                                            | 225  | 221  | 1.00E-114 | 98.2  | 90.2 | 94.2 | novel cap-binding protein nCBP                        | gbpln | Arabidopsis thaliana | AT5G18110.1   Symbols: NCBP   novel cap-binding protein   chr5:5989105-5990588 REVERSE LENGTH=221                             | 225  | 221  | 1.00E-116 | 98.2  | 89.8 | 93.8 |
| Rsa1.0_01975.1.g31231.t1 | ref NP_566217.1  H/ACA ribonucleoprotein complex subunit 1 [Arabidopsis thaliana]<br>gi 88565918 sp Q8VZT0.1 NLAL1_ARAT H RecName: Full=Putative H/ACA ribonucleoprotein complex subunit 1-like protein 1<br>gi 17380836 gb AAL36230.1  putative GAR1 protein [Arabidopsis thaliana]<br>gi 20259633 gb AAM14173.1  putative GAR1 protein [Arabidopsis thaliana]<br>gi 33264049 gb AAE74012.1  H/ACA ribonucleoprotein complex, subunit Gar1/Naf1 protein [Arabidopsis thaliana] | 234  | 202  | 6.00E-39  | 86.3  | 32.9 | 38.0 | H/ACA ribonucleoprotein complex subunit 1             | gbpln | Arabidopsis thaliana | AT3G03920.1   Symbols:   H/ACA ribonucleoprotein complex, subunit Gar1/Naf1 protein   chr3:1009123-1010379 REVERSE LENGTH=202 | 234  | 202  | 2.00E-41  | 86.3  | 32.9 | 38.0 |
| Rsa1.0_01975.1.g31232.t1 | gb EOA20087.1  hypothetical protein CARUB_v10000361mg [Capsella rubella]                                                                                                                                                                                                                                                                                                                                                                                                        | 690  | 692  | 0         | 100.3 | 92.0 | 95.2 | hypothetical protein CARUB_v10000361mg                | gbpln | Capsella rubella     | AT5G18190.1   Symbols:   Protein kinase family protein   chr5:6010215-6013724 REVERSE LENGTH=691                              | 690  | 691  | 0         | 100.1 | 89.7 | 93.6 |
| Rsa1.0_01976.1.g31233.t1 | gb AAT39818.1  membrane protein [Brassica juncea]<br>gi 306415491 gb ADM86710.1  putative RAMP4 family protein [Brassica juncea]<br>ref XP_002890714.1  GYF domain-containing protein [Arabidopsis lyrata subsp. lyrata]                                                                                                                                                                                                                                                        | 94   | 68   | 2.00E-29  | 72.3  | 70.2 | 71.3 | membrane protein                                      | gbpln | Brassica juncea      | AT1G27330.1   Symbols:   Ribosome associated membrane protein RAMP4   chr1:9493064-9493988 FORWARD LENGTH=68                  | 94   | 68   | 5.00E-32  | 72.3  | 70.2 | 70.2 |
| Rsa1.0_01976.1.g31234.t1 | gi 297339308 gb EFH66973.1  GYF domain-containing protein [Arabidopsis lyrata subsp. lyrata]<br>ref XP_002893466.1  GYF domain-containing protein [Arabidopsis lyrata subsp. lyrata]                                                                                                                                                                                                                                                                                            | 1272 | 1406 | 0         | 110.5 | 36.4 | 40.5 | GYF domain-containing protein                         | gbpln | Arabidopsis lyrata   | AT1G24300.1   Symbols:   GYF domain-containing protein   chr1:8614515-8620420 REVERSE LENGTH=1495                             | 1272 | 1495 | 0         | 117.5 | 28.6 | 32.2 |
| Rsa1.0_01976.1.g31235.t1 | gi 297339308 gb EFH66973.1  GYF domain-containing protein [Arabidopsis lyrata subsp. lyrata]<br>ref XP_002893466.1  GYF domain-containing protein [Arabidopsis lyrata subsp. lyrata]                                                                                                                                                                                                                                                                                            | 1214 | 1511 | 0         | 124.5 | 69.9 | 78.3 | GYF domain-containing protein                         | gbpln | Arabidopsis lyrata   | AT1G24300.2   Symbols:   GYF domain-containing protein   chr1:8614515-8620420 REVERSE LENGTH=1490                             | 1214 | 1490 | 0         | 122.7 | 37.0 | 41.8 |
| Rsa1.0_01976.1.g31236.t1 | gb AAF18538.1 AC006551_24 Very similar to retrotransposon reverse transcriptase [Arabidopsis thaliana]                                                                                                                                                                                                                                                                                                                                                                          | 329  | 1231 | 1.00E-38  | 374.2 | 33.7 | 45.3 | Very similar to retrotransposon reverse transcriptase | gbpln | Arabidopsis thaliana | AT4G29090.1   Symbols:   Ribonuclease H-like superfamily protein   chr4:14333528-14335255 FORWARD LENGTH=575                  | 329  | 575  | 6.00E-26  | 174.8 | 28.9 | 45.9 |
| Rsa1.0_01976.1.g31237.t1 | gb EOA37637.1  hypothetical protein CARUB_v10012107mg [Capsella rubella]                                                                                                                                                                                                                                                                                                                                                                                                        | 137  | 174  | 1.00E-38  | 127.0 | 69.3 | 78.8 | hypothetical protein CARUB_v10012107mg                | gbpln | Capsella rubella     | AT1G27380.1   Symbols: RIC2   ROP-interactive CRIB motif-containing protein 2   chr1:9508903-9509827 REVERSE LENGTH=111       | 137  | 111  | 5.00E-27  | 81.0  | 49.6 | 56.2 |

|                          |                                                                                                                                                                                                                                                                                                                                                                                                                                                                                                                                                                                                                                  |     |      |           |        |      |      |                                                       |       |                      |                                                                                                                                                                                                                                                        |     |     |           |       |      |      |
|--------------------------|----------------------------------------------------------------------------------------------------------------------------------------------------------------------------------------------------------------------------------------------------------------------------------------------------------------------------------------------------------------------------------------------------------------------------------------------------------------------------------------------------------------------------------------------------------------------------------------------------------------------------------|-----|------|-----------|--------|------|------|-------------------------------------------------------|-------|----------------------|--------------------------------------------------------------------------------------------------------------------------------------------------------------------------------------------------------------------------------------------------------|-----|-----|-----------|-------|------|------|
| Rsa1.0_01976.1.g31238.t1 | refXP_002893465.1  F17L21.18 [Arabidopsis lyrata subsp. lyrata] gi 297339307 gb EFH69724.1  F17L21.18 [Arabidopsis lyrata subsp. lyrata]                                                                                                                                                                                                                                                                                                                                                                                                                                                                                         | 206 | 205  | 4.00E-78  | 99.5   | 68.0 | 83.0 | F17L21.18                                             | gbpln | Arabidopsis lyrata   | AT1G27390.1   Symbols: TOM20-2   translocase outer membrane 20-2   chr1:9513469-9514912 REVERSE LENGTH=210                                                                                                                                             | 206 | 210 | 1.00E-76  | 101.9 | 65.5 | 79.6 |
| Rsa1.0_01976.1.g31239.t1 | refXP_002868854.1  hypothetical protein ARALYDRAFT_912317 [Arabidopsis lyrata subsp. lyrata] gi 297314690 gb EFH45113.1  hypothetical protein ARALYDRAFT_912317 [Arabidopsis lyrata subsp. lyrata]                                                                                                                                                                                                                                                                                                                                                                                                                               | 177 | 195  | 3.00E-44  | 110.2  | 76.3 | 84.2 | hypothetical protein ARALYDRAFT_912317                | gbpln | Arabidopsis lyrata   | AT2G21060.1   Symbols: ATGRP2B, ATCSP4, GRP2B   glycine-rich protein 2B   chr2:9036983-9037588 REVERSE LENGTH=201                                                                                                                                      | 177 | 201 | 8.00E-46  | 113.6 | 73.4 | 80.2 |
| Rsa1.0_01976.1.g31240.t1 | refNP_174060.1  60S ribosomal protein L17-1 [Arabidopsis thaliana] gi 27734446 sp Q93V13.1 RL171_ARATH RecName: Full=60S ribosomal protein L17-1 gi 16226209 gb AAL16103.1 AF428271_1 At1g27400/F17L21.20 [Arabidopsis thaliana] gi 16226630 gb AAL16218.1 AF428449_1 At1g27400/F17L21.20 [Arabidopsis thaliana] gi 14335140 gb AAK59850.1  At1g27400/F17L21.20 [Arabidopsis thaliana] gi 18655347 gb AAL76129.1  At1g27400/F17L21.20 [Arabidopsis thaliana] gi 21594923 gb AAM66056.1  putative 60S ribosomal protein L17 [Arabidopsis thaliana] gi 332192704 gb AEE30825.1  60S ribosomal protein L17-1 [Arabidopsis thaliana] | 176 | 176  | 4.00E-99  | 100.0  | 98.9 | 98.9 | 60S ribosomal protein L17-1                           | gbpln | Arabidopsis thaliana | AT1G27400.1   Symbols: Ribosomal protein L22p/L17e family protein   chr1:9515230-9516725 FORWARD LENGTH=176                                                                                                                                            | 176 | 176 | 1.00E-101 | 100.0 | 98.9 | 98.9 |
| Rsa1.0_01976.1.g31241.t1 | refNP_174062.1  kelch repeat-containing F-box protein [Arabidopsis thaliana] gi 374095396 sp Q9FZJ3.2 FBK16_ARATH RecName: Full=Putative F-box/kelch-repeat protein At1g27420 gi 332192706 gb AEE30827.1  putative F-box/kelch-repeat protein [Arabidopsis thaliana]                                                                                                                                                                                                                                                                                                                                                             | 343 | 346  | 1.00E-175 | 100.9  | 86.6 | 91.8 | kelch repeat-containing F-box protein                 | gbpln | Arabidopsis thaliana | AT1G27420.1   Symbols: Galactose oxidase/kelch repeat superfamily protein   chr1:9519108-9520520 FORWARD LENGTH=346                                                                                                                                    | 343 | 346 | 1.00E-178 | 100.9 | 86.6 | 91.8 |
| Rsa1.0_01976.1.g31242.t3 | refXP_002893467.1  hypothetical protein ARALYDRAFT_890267 [Arabidopsis lyrata subsp. lyrata] gi 297339309 gb EFH69726.1  hypothetical protein ARALYDRAFT_890267 [Arabidopsis lyrata subsp. lyrata]                                                                                                                                                                                                                                                                                                                                                                                                                               | 79  | 81   | 5.00E-28  | 102.5  | 78.5 | 86.1 | hypothetical protein ARALYDRAFT_890267                | gbpln | Arabidopsis lyrata   | AT1G27435.1   Symbols: unknown protein; Has 16 Blast hits to 16 proteins in 8 species: Archae - 0; Bacteria - 0; Metazoa - 0; Fungi - 0; Plants - 16; Viruses - 0; Other Eukaryotes - 0 (source: NCBI BLink).   chr1:9527956-9528814 REVERSE LENGTH=81 | 79  | 81  | 1.00E-28  | 102.5 | 74.7 | 83.5 |
| Rsa1.0_01977.1.g31243.t1 | gb EOA34076.1  hypothetical protein CARUB_v10021577mg [Capsella rubella]                                                                                                                                                                                                                                                                                                                                                                                                                                                                                                                                                         | 87  | 329  | 8.00E-14  | 378.2  | 55.2 | 62.1 | hypothetical protein CARUB_v10021577mg                | gbpln | Capsella rubella     | AT1G78050.1   Symbols: PGM   phosphoglycerate/bisphosphoglycerate mutase   chr1:29348095-29349592 FORWARD LENGTH=332                                                                                                                                   | 87  | 332 | 1.00E-14  | 381.6 | 51.7 | 57.5 |
| Rsa1.0_01977.1.g31244.t1 | gb AAF79427.1 ACO25808_9 F18O14.19 [Arabidopsis thaliana]                                                                                                                                                                                                                                                                                                                                                                                                                                                                                                                                                                        | 100 | 1158 | 9.00E-37  | 1158.0 | 72.0 | 83.0 | F18O14.19                                             | gbpln | Arabidopsis thaliana | #                                                                                                                                                                                                                                                      | #   | #   | #         | #     | #    | #    |
| Rsa1.0_01977.1.g31245.t1 | refXP_002879721.1  ribosome biogenesis regulatory protein family protein [Arabidopsis lyrata subsp. lyrata] gi 297325560 gb EFH55980.1  ribosome biogenesis regulatory protein family protein [Arabidopsis lyrata subsp. lyrata]                                                                                                                                                                                                                                                                                                                                                                                                 | 318 | 324  | 1.00E-156 | 101.9  | 87.7 | 92.1 | ribosome biogenesis regulatory protein family protein | gbpln | Arabidopsis lyrata   | AT2G37990.1   Symbols: ribosome biogenesis regulatory protein (RRS1) family protein   chr2:15900713-15903028 FORWARD LENGTH=318                                                                                                                        | 318 | 318 | 1.00E-156 | 100.0 | 86.8 | 91.5 |
| Rsa1.0_01977.1.g31246.t2 | refNP_181334.1  O-fucosyltransferase-like protein [Arabidopsis thaliana] gi 13430694 gb AAK25969.1 AF360259_1 putative axi 1 protein from Nicotiana tabacum [Arabidopsis thaliana] gi 25054996 gb AAN71964.1  putative axi 1 protein from Nicotiana tabacum [Arabidopsis thaliana] gi 330254380 gb AEC09474.1  O-fucosyltransferase-like protein [Arabidopsis thaliana]                                                                                                                                                                                                                                                          | 603 | 638  | 0         | 105.8  | 85.6 | 90.4 | O-fucosyltransferase-like protein                     | gbpln | Arabidopsis thaliana | AT2G37980.1   Symbols: O-fucosyltransferase family protein   chr2:15884162-15897452 REVERSE LENGTH=638                                                                                                                                                 | 603 | 638 | 0         | 105.8 | 85.6 | 90.4 |
| Rsa1.0_01977.1.g31247.t1 | refXP_002334539.1  predicted protein [Populus trichocarpa] gi 222873027 gb EEF10158.1  predicted protein [Populus trichocarpa]                                                                                                                                                                                                                                                                                                                                                                                                                                                                                                   | 134 | 442  | 5.00E-28  | 329.9  | 49.3 | 66.4 | predicted protein                                     | gbpln | Populus trichocarpa  | AT4G33260.2   Symbols: CDC20.2   Transducin family protein / WD-40 repeat family protein   chr4:16041195-16043180 REVERSE LENGTH=441                                                                                                                   | 134 | 441 | 4.00E-28  | 329.9 | 47.0 | 65.7 |
| Rsa1.0_01977.1.g31248.t1 | #                                                                                                                                                                                                                                                                                                                                                                                                                                                                                                                                                                                                                                | #   | #    | #         | #      | #    | -    | ---                                                   | ---   | ---                  | #                                                                                                                                                                                                                                                      | #   | #   | #         | #     | #    | #    |

|                          |                                                                                                                                                                                                                                                                                                                                                                           |     |     |           |       |      |      |                                                               |       |                      |                                                                                                                                                 |     |     |           |       |      |      |
|--------------------------|---------------------------------------------------------------------------------------------------------------------------------------------------------------------------------------------------------------------------------------------------------------------------------------------------------------------------------------------------------------------------|-----|-----|-----------|-------|------|------|---------------------------------------------------------------|-------|----------------------|-------------------------------------------------------------------------------------------------------------------------------------------------|-----|-----|-----------|-------|------|------|
| Rsa1.0_01977.1.g31249.t1 | ref[XP_002881554.1] hypothetical protein ARALYDRAFT_482801 [Arabidopsis lyrata subsp. lyrata] gi 297327393 gb EFH57813.1                                                                                                                                                                                                                                                  | 173 | 207 | 1.00E-47  | 119.7 | 59.0 | 65.9 | hypothetical protein ARALYDRAFT_482801                        | gbpln | Arabidopsis lyrata   | AT2G37950.1   Symbols:   RING/FYVE/PHD zinc finger superfamily protein   chr2:15882536-15883665 REVERSE LENGTH=207                              | 173 | 207 | 1.00E-48  | 119.7 | 61.8 | 66.5 |
| Rsa1.0_01978.1.g31250.t1 | gb[EOA22994.1] hypothetical protein CARUB_v10003741mg [Capsella rubella]                                                                                                                                                                                                                                                                                                  | 399 | 395 | 0         | 99.0  | 85.5 | 92.0 | hypothetical protein CARUB_v10003741mg                        | gbpln | Capsella rubella     | AT4G03010.1   Symbols:   RNI-like superfamily protein   chr4:1329952-1331139 FORWARD LENGTH=395                                                 | 399 | 395 | 0         | 99.0  | 84.2 | 89.7 |
| Rsa1.0_01978.1.g31251.t1 | ref[XP_002874883.1] protein binding protein [Arabidopsis lyrata subsp. lyrata] gi 297320720 gb EFH51142.1  protein binding protein [Arabidopsis lyrata subsp. lyrata]                                                                                                                                                                                                     | 749 | 802 | 0         | 107.1 | 77.7 | 85.7 | protein binding protein                                       | gbpln | Arabidopsis lyrata   | AT4G03000.2   Symbols:   RING/U-box superfamily protein   chr4:1324602-1327348 FORWARD LENGTH=814                                               | 749 | 814 | 0         | 108.7 | 76.2 | 85.2 |
| Rsa1.0_01978.1.g31252.t1 | ref[XP_002874884.1] mitochondrial transcription termination factor family protein [Arabidopsis lyrata subsp. lyrata] gi 297320721 gb EFH51143.1  mitochondrial transcription termination factor family protein [Arabidopsis lyrata subsp. lyrata]                                                                                                                         | 522 | 534 | 0         | 102.3 | 81.6 | 88.3 | mitochondrial transcription termination factor family protein | gbpln | Arabidopsis lyrata   | AT4G02990.1   Symbols:   Mitochondrial transcription termination factor family protein   chr4:1322158-1323783 FORWARD LENGTH=541                | 522 | 541 | 0         | 103.6 | 79.1 | 86.6 |
| Rsa1.0_01978.1.g31253.t1 | gb[AAG24497.1] resistant endoplasmic reticulum auxin-binding protein 1 [Sinapis arvensis]                                                                                                                                                                                                                                                                                 | 198 | 198 | 1.00E-104 | 100.0 | 94.4 | 97.0 | resistant endoplasmic reticulum auxin-binding protein 1       | gbpln | Sinapis arvensis     | AT4G02980.1   Symbols:   ABP1, ABP   endoplasmic reticulum auxin binding protein 1   chr4:1319902-1321449 REVERSE LENGTH=198                    | 198 | 198 | 1.00E-104 | 100.0 | 88.4 | 93.9 |
| Rsa1.0_01978.1.g31254.t1 | ref[NP_192246.1] Ubiquitin family protein [Arabidopsis thaliana] gi 4262164 gb AAD14464.1  putative ubiquitin-like protein [Arabidopsis thaliana] gi 7270207 emb CAB77822.1  putative protein [Arabidopsis thaliana] gi 67633730 gb AA78789.1  ubiquitin family protein [Arabidopsis thaliana] gi 33265691 gb AEE82311.1  Ubiquitin family protein [Arabidopsis thaliana] | 443 | 295 | 1.00E-21  | 66.6  | 14.7 | 18.3 | Ubiquitin family protein                                      | gbpln | Arabidopsis thaliana | AT4G03370.1   Symbols:   Ubiquitin family protein   chr4:1478078-1478965 REVERSE LENGTH=295                                                     | 443 | 295 | 3.00E-24  | 66.6  | 14.7 | 18.3 |
| Rsa1.0_01978.1.g31255.t1 | gb[EOA23080.1] hypothetical protein CARUB_v10003861mg [Capsella rubella]                                                                                                                                                                                                                                                                                                  | 444 | 214 | 3.00E-24  | 48.2  | 14.9 | 19.1 | hypothetical protein CARUB_v10003861mg                        | gbpln | Capsella rubella     | AT4G05230.1   Symbols:   Ubiquitin-like superfamily protein   chr4:2687003-2687623 FORWARD LENGTH=206                                           | 444 | 206 | 1.00E-26  | 46.4  | 14.6 | 19.6 |
| Rsa1.0_01978.1.g31256.t1 | #                                                                                                                                                                                                                                                                                                                                                                         | #   | #   | #         | #     | #    | -    | ----                                                          | ----  | #                    | #                                                                                                                                               | #   | #   | #         | #     | #    |      |
| Rsa1.0_01978.1.g31257.t1 | #                                                                                                                                                                                                                                                                                                                                                                         | #   | #   | #         | #     | #    | -    | ----                                                          | ----  | #                    | #                                                                                                                                               | #   | #   | #         | #     | #    |      |
| Rsa1.0_01978.1.g31258.t1 | gb[EOA20287.1] hypothetical protein CARUB_v10000595mg [Capsella rubella]                                                                                                                                                                                                                                                                                                  | 404 | 563 | 0         | 139.4 | 80.2 | 86.4 | hypothetical protein CARUB_v10000595mg                        | gbpln | Capsella rubella     | AT4G02940.1   Symbols:   oxidoreductase, 2OG-Fe(II) oxygenase family protein   chr4:1306658-1310699 FORWARD LENGTH=569                          | 404 | 569 | 1.00E-178 | 140.8 | 80.4 | 86.1 |
| Rsa1.0_01978.1.g31259.t1 | gb[EOA20287.1] hypothetical protein CARUB_v10000595mg [Capsella rubella]                                                                                                                                                                                                                                                                                                  | 171 | 563 | 9.00E-67  | 329.2 | 79.5 | 86.5 | hypothetical protein CARUB_v10000595mg                        | gbpln | Capsella rubella     | AT4G02940.1   Symbols:   oxidoreductase, 2OG-Fe(II) oxygenase family protein   chr4:1306658-1310699 FORWARD LENGTH=569                          | 171 | 569 | 9.00E-65  | 332.7 | 78.4 | 86.5 |
| Rsa1.0_01979.1.g31260.t1 | emb[CCD74528.1] NAC domain containing protein 23 [Arabidopsis halleri subsp. halleri]                                                                                                                                                                                                                                                                                     | 353 | 334 | 4.00E-60  | 94.6  | 41.9 | 57.5 | NAC domain containing protein 23                              | gbpln | Arabidopsis halleri  | AT1G60350.1   Symbols:   anac024, NAC024   NAC domain containing protein 24   chr1:22241273-22242235 REVERSE LENGTH=320                         | 353 | 320 | 1.00E-61  | 90.7  | 41.1 | 54.7 |
| Rsa1.0_01979.1.g31261.t1 | gb[EOA31219.1] hypothetical protein CARUB_v10014386mg [Capsella rubella]                                                                                                                                                                                                                                                                                                  | 203 | 270 | 1.00E-74  | 133.0 | 74.4 | 80.8 | hypothetical protein CARUB_v10014386mg                        | gbpln | Capsella rubella     | AT2G19580.1   Symbols:   TET2   tetraspanin2   chr2:8472393-8475021 REVERSE LENGTH=270                                                          | 203 | 270 | 7.00E-71  | 133.0 | 74.4 | 80.8 |
| Rsa1.0_01979.1.g31262.t2 | #                                                                                                                                                                                                                                                                                                                                                                         | #   | #   | #         | #     | #    | -    | ----                                                          | ----  | #                    | #                                                                                                                                               | #   | #   | #         | #     | #    |      |
| Rsa1.0_01979.1.g31263.t1 | ref[XP_002882367.1] F-box family protein [Arabidopsis lyrata subsp. lyrata] gi 297328207 gb EFH58626.1  F-box family protein [Arabidopsis lyrata subsp. lyrata]                                                                                                                                                                                                           | 362 | 423 | 1.00E-131 | 116.9 | 64.9 | 78.5 | F-box family protein                                          | gbpln | Arabidopsis lyrata   | AT3G04660.1   Symbols:   F-box and associated interaction domains-containing protein   chr3:1264794-1265966 FORWARD LENGTH=390                  | 362 | 390 | 1.00E-131 | 107.7 | 63.8 | 76.2 |
| Rsa1.0_01979.1.g31264.t1 | gb[EOA32034.1] hypothetical protein CARUB_v10015278mg [Capsella rubella]                                                                                                                                                                                                                                                                                                  | 107 | 500 | 3.00E-11  | 467.3 | 29.9 | 32.7 | hypothetical protein CARUB_v10015278mg                        | gbpln | Capsella rubella     | AT5G45130.1   Symbols:   ATRAB5A, ATRABF2A, RABF2A, RAB5A, RHA1, ATRAB-F2A, RAB-F2A   RAB homolog 1   chr5:18244495-18246060 FORWARD LENGTH=200 | 107 | 200 | 1.00E-13  | 186.9 | 29.0 | 29.9 |

|                          |                                                                                                                                                                                                                                                                                                                                                                                                                                                                    |     |     |           |       |      |      |                                          |       |                      |                                                                                                                                                                                                                                                                                     |     |     |           |       |      |      |
|--------------------------|--------------------------------------------------------------------------------------------------------------------------------------------------------------------------------------------------------------------------------------------------------------------------------------------------------------------------------------------------------------------------------------------------------------------------------------------------------------------|-----|-----|-----------|-------|------|------|------------------------------------------|-------|----------------------|-------------------------------------------------------------------------------------------------------------------------------------------------------------------------------------------------------------------------------------------------------------------------------------|-----|-----|-----------|-------|------|------|
| Rsa1.0_01979.1.g31265.t3 | ref[NP_179544.1] transducin-like protein [Arabidopsis thaliana]<br>gi 1387761 gb AAK43883.1 AF370506_1 putative WD-40 repeat protein [Arabidopsis thaliana]<br>gi 4191784 gb AAD10153.1  putative WD-40 repeat protein [Arabidopsis thaliana]<br>gi 22136272 gb AAM91214.1  putative WD-40 repeat protein [Arabidopsis thaliana]<br>gi 330251799 gb AEC06893.1  transducin-like protein [Arabidopsis thaliana]                                                     | 292 | 469 | 1.00E-124 | 160.6 | 81.2 | 84.9 | transducin-like protein                  | gbpln | Arabidopsis thaliana | AT2G19540.1   Symbols:   Transducin family protein / WD-40 repeat family protein   chr2:8461804-8464347 FORWARD LENGTH=469                                                                                                                                                          | 292 | 469 | 1.00E-127 | 160.6 | 81.2 | 84.9 |
| Rsa1.0_01979.1.g31266.t1 | gb EOA16148.1  hypothetical protein CARUB_v10004286mg, partial [Capsella rubella]                                                                                                                                                                                                                                                                                                                                                                                  | 606 | 681 | 0         | 112.4 | 96.9 | 98.8 | hypothetical protein                     | gbpln | Capsella rubella     | AT5G35160.2   Symbols:   Endomembrane protein 70 protein family   chr5:13414945-13416921 FORWARD LENGTH=658                                                                                                                                                                         | 606 | 658 | 0         | 108.6 | 96.9 | 98.7 |
| Rsa1.0_01979.1.g31267.t1 | ref[NP_849991.1] histone-lysine N-methyltransferase ASHR2 [Arabidopsis thaliana]<br>gi 94707155 sp Q9ZUM9.3 ASHR2_ARAT H RecName: Full=Histone-lysine N-methyltransferase ASHR2; AltName: Full=ASH1-related protein 2; AltName: Full=Protein SET DOMAIN GROUP 39<br>gi 28393236 gb AAO42047.1  putative SET-domain transcriptional regulator [Arabidopsis thaliana]<br>gi 330251813 gb AEC06907.1  histone-lysine N-methyltransferase ASHR2 [Arabidopsis thaliana] | 391 | 398 | 1.00E-171 | 101.8 | 81.1 | 87.7 | histone-lysine N-methyltransferase ASHR2 | gbpln | Arabidopsis thaliana | AT2G19640.2   Symbols: ASHR2   ASH1-related protein 2   chr2:8491401-8492597 FORWARD LENGTH=398                                                                                                                                                                                     | 391 | 398 | 1.00E-174 | 101.8 | 81.1 | 87.7 |
| Rsa1.0_01979.1.g31268.t1 | gb EOA31670.1  hypothetical protein CARUB_v10014874mg [Capsella rubella]                                                                                                                                                                                                                                                                                                                                                                                           | 139 | 141 | 5.00E-59  | 101.4 | 76.3 | 84.2 | hypothetical protein                     | gbpln | Capsella rubella     | AT2G19690.1   Symbols: PLA2-BETA   phospholipase A2-beta   chr2:8503326-8504549 FORWARD LENGTH=147                                                                                                                                                                                  | 139 | 147 | 4.00E-60  | 105.8 | 75.5 | 83.5 |
| Rsa1.0_01980.1.g31269.t1 | ref[NP_565208.1] uncharacterized protein [Arabidopsis thaliana]<br>gi 15450719 gb AAK96631.1  At1g79420/T8K14.16 [Arabidopsis thaliana]<br>gi 22655486 gb AAM98335.1  At1g79420/T8K14.16 [Arabidopsis thaliana]<br>gi 332198119 gb AEE36240.1  uncharacterized protein AT1G79420 [Arabidopsis thaliana]                                                                                                                                                            | 416 | 417 | 0         | 100.2 | 95.4 | 97.1 | uncharacterized protein                  | gbpln | Arabidopsis thaliana | AT1G79420.1   Symbols:   Protein of unknown function (DUF620)   chr1:29871537-29874166 FORWARD LENGTH=417                                                                                                                                                                           | 416 | 417 | 0         | 100.2 | 95.4 | 97.1 |
| Rsa1.0_01980.1.g31270.t1 | ref[NP_178059.1] organic cation/carnitine transporter5 [Arabidopsis thaliana]<br>gi 75313142 sp Q9SAK7.1 OCT5_ARATH RecName: Full=Organic cation/carnitine transporter 5; Short=AtOCT5<br>gi 4835768 gb AAD30235.1 AC007202_17 Is a member of the PF[00083 sugar transporter family [Arabidopsis thaliana]<br>gi 332198118 gb AEE36239.1  organic cation/carnitine transporter5 [Arabidopsis thaliana]                                                             | 513 | 515 | 0         | 100.4 | 76.6 | 86.7 | organic cation/carnitine transporter5    | gbpln | Arabidopsis thaliana | AT1G79410.1   Symbols: AtOCT5, 5-Oct   organic cation/carnitine transporter5   chr1:29868037-29869584 REVERSE LENGTH=515                                                                                                                                                            | 513 | 515 | 0         | 100.4 | 76.6 | 86.7 |
| Rsa1.0_01980.1.g31271.t1 | ref[NP_178059.1] organic cation/carnitine transporter5 [Arabidopsis thaliana]<br>gi 75313142 sp Q9SAK7.1 OCT5_ARATH RecName: Full=Organic cation/carnitine transporter 5; Short=AtOCT5<br>gi 4835768 gb AAD30235.1 AC007202_17 Is a member of the PF[00083 sugar transporter family [Arabidopsis thaliana]<br>gi 332198118 gb AEE36239.1  organic cation/carnitine transporter5 [Arabidopsis thaliana]                                                             | 439 | 515 | 0         | 117.3 | 80.0 | 89.3 | organic cation/carnitine transporter5    | gbpln | Arabidopsis thaliana | AT1G79410.1   Symbols: AtOCT5, 5-Oct   organic cation/carnitine transporter5   chr1:29868037-29869584 REVERSE LENGTH=515                                                                                                                                                            | 439 | 515 | 0         | 117.3 | 80.0 | 89.3 |
| Rsa1.0_01980.1.g31272.t1 | ref XP_002897784.1  predicted protein [Arabidopsis lyrata subsp. lyrata]<br>gi 297333625 gb EFH64043.1  predicted protein [Arabidopsis lyrata subsp. lyrata]                                                                                                                                                                                                                                                                                                       | 781 | 783 | 0         | 100.3 | 84.1 | 91.7 | predicted protein                        | gbpln | Arabidopsis lyrata   | AT1G79400.1   Symbols: ATCHX2, CHX2   cation/H+ exchanger 2   chr1:29864992-29867840 FORWARD LENGTH=783                                                                                                                                                                             | 781 | 783 | 0         | 100.3 | 83.1 | 90.8 |
| Rsa1.0_01980.1.g31273.t1 | gb EOA35850.1  hypothetical protein CARUB_v10021091mg, partial [Capsella rubella]                                                                                                                                                                                                                                                                                                                                                                                  | 142 | 154 | 9.00E-61  | 108.5 | 81.7 | 86.6 | hypothetical protein                     | gbpln | Capsella rubella     | AT1G79390.1   Symbols:   unknown protein; Has 30201 Blast hits to 17322 proteins in 700 species: Archae - 12; Bacteria - 1396; Metazoa - 17338; Fungi - 3422; Plants - 5037; Viruses - 0; Other Eukaryotes - 2996 (source: NCBI BLINK).   chr1:29863465-29864276 REVERSE LENGTH=126 | 142 | 126 | 8.00E-62  | 88.7  | 78.9 | 85.9 |

|                          |                                                                                                                                                                                                                                                                                                                                                                                                                                                                                                                                                                                                                    |     |     |          |       |      |      |                                                     |       |                      |                                                                                                                                                                                                                                                                                                                                                                                                                                                                                            |     |     |           |       |      |      |
|--------------------------|--------------------------------------------------------------------------------------------------------------------------------------------------------------------------------------------------------------------------------------------------------------------------------------------------------------------------------------------------------------------------------------------------------------------------------------------------------------------------------------------------------------------------------------------------------------------------------------------------------------------|-----|-----|----------|-------|------|------|-----------------------------------------------------|-------|----------------------|--------------------------------------------------------------------------------------------------------------------------------------------------------------------------------------------------------------------------------------------------------------------------------------------------------------------------------------------------------------------------------------------------------------------------------------------------------------------------------------------|-----|-----|-----------|-------|------|------|
| Rsa1.0_01980.1.g31274.t1 | refNP_565206.1   Ca(2)-dependent phospholipid-binding family protein [Arabidopsis thaliana] gi 4835771 gb AAD30238.1 AC007202_20 Similar to gi 3844599.F31D5.2 gene product from Caenorhabditis elegans cosmid gb U28941 and contains PF 00097 Zinc (Ring) finger C3HC4 domain. ESTs gb F19963 and gb T42582 come from this gene [Arabidopsis thaliana] gi 13937149 gb AAK50068.1 AF372928.1 At g79380/T8K14.20 [Arabidopsis thaliana] gi 22137140 gb AAM91415.1  At g79380/T8K14.20 [Arabidopsis thaliana] gi 332198115 gb AEE36236.1  Ca(2)-dependent phospholipid-binding family protein [Arabidopsis thaliana] | 403 | 401 | 0        | 99.5  | 86.1 | 91.1 | Ca(2)-dependent phospholipid-binding family protein | gbpln | Arabidopsis thaliana | AT1G79380.1   Symbols:   Ca(2)-dependent phospholipid-binding protein (Copine) family   chr1:29860812-29863023 FORWARD LENGTH=401                                                                                                                                                                                                                                                                                                                                                          | 403 | 401 | 0         | 99.5  | 86.1 | 91.1 |
| Rsa1.0_01981.1.g31275.t1 | gb ACQ90602.1  putative C2H2 zinc finger protein [Eutrema halophilum]                                                                                                                                                                                                                                                                                                                                                                                                                                                                                                                                              | 590 | 607 | 0        | 102.9 | 91.2 | 93.9 | putative C2H2 zinc finger protein                   | gbpln | Eutrema halophilum   | AT2G02070.1   Symbols: At IDD5, IDD5   indeterminate(ID)-domain 5   chr2:505523-509154 FORWARD LENGTH=602                                                                                                                                                                                                                                                                                                                                                                                  | 590 | 602 | 0         | 102.0 | 88.6 | 92.9 |
| Rsa1.0_01981.1.g31276.t1 | # # # # # # # #                                                                                                                                                                                                                                                                                                                                                                                                                                                                                                                                                                                                    | #   | #   | #        | #     | #    | #    | -                                                   | ----  | ----                 | #                                                                                                                                                                                                                                                                                                                                                                                                                                                                                          | #   | #   | #         | #     | #    | #    |
| Rsa1.0_01981.1.g31277.t1 | gb ACG60684.1  maize transposon MuDR-like protein [Brassica oleracea var. alboglabra]                                                                                                                                                                                                                                                                                                                                                                                                                                                                                                                              | 768 | 622 | 0        | 81.0  | 58.6 | 67.2 | maize transposon MuDR-like protein                  | gbpln | Brassica oleracea    | AT1G64260.1   Symbols:   MuDR family transposase   chr1:23847756-23849915 FORWARD LENGTH=719                                                                                                                                                                                                                                                                                                                                                                                               | 768 | 719 | 1.00E-37  | 93.6  | 17.6 | 29.0 |
| Rsa1.0_01981.1.g31278.t1 | gb EOA28352.1  hypothetical protein CARUB_v10024557mg [Capsella rubella]                                                                                                                                                                                                                                                                                                                                                                                                                                                                                                                                           | 394 | 863 | 1.00E-64 | 219.0 | 34.3 | 48.5 | hypothetical protein CARUB_v10024557mg              | gbpln | Capsella rubella     | AT5G45570.1   Symbols:   Ulp1 protease family protein   chr5:18472301-18475574 FORWARD LENGTH=921                                                                                                                                                                                                                                                                                                                                                                                          | 394 | 921 | 8.00E-65  | 233.8 | 32.0 | 47.0 |
| Rsa1.0_01981.1.g31279.t1 | gb ADQ43193.1  unknown [Eutrema parvulum]                                                                                                                                                                                                                                                                                                                                                                                                                                                                                                                                                                          | 400 | 395 | 0        | 98.8  | 85.8 | 91.3 | unknown                                             | gbpln | Eutrema parvulum     | AT1G14590.1   Symbols:   Nucleotide-diphospho-sugar transferase family protein   chr1:4998957-5000617 REVERSE LENGTH=386                                                                                                                                                                                                                                                                                                                                                                   | 400 | 386 | 1.00E-172 | 96.5  | 74.3 | 83.5 |
| Rsa1.0_01981.1.g31280.t1 | gb ADQ43192.1  unknown [Eutrema parvulum]                                                                                                                                                                                                                                                                                                                                                                                                                                                                                                                                                                          | 250 | 269 | 4.00E-97 | 107.6 | 78.4 | 84.8 | unknown                                             | gbpln | Eutrema parvulum     | AT2G02060.1   Symbols:   Homeodomain-like superfamily protein   chr2:495691-497609 FORWARD LENGTH=256                                                                                                                                                                                                                                                                                                                                                                                      | 250 | 256 | 8.00E-72  | 102.4 | 69.2 | 76.8 |
| Rsa1.0_01981.1.g31281.t1 | gb ACQ90599.1  putative NADH dehydrogenase [Eutrema halophilum]                                                                                                                                                                                                                                                                                                                                                                                                                                                                                                                                                    | 102 | 102 | 1.00E-51 | 100.0 | 97.1 | 98.0 | putative NADH dehydrogenase                         | gbpln | Eutrema halophilum   | AT2G02050.1   Symbols:   NADH-ubiquinone oxidoreductase B18 subunit, putative   chr2:490024-490335 FORWARD LENGTH=103                                                                                                                                                                                                                                                                                                                                                                      | 102 | 103 | 1.00E-47  | 101.0 | 88.2 | 92.2 |
| Rsa1.0_01982.1.g31282.t1 | gb ABD65090.1  hypothetical protein 27.100116 [Brassica oleracea]                                                                                                                                                                                                                                                                                                                                                                                                                                                                                                                                                  | 132 | 484 | 1.00E-20 | 366.7 | 40.2 | 47.7 | hypothetical protein 27.100116                      | gbpln | Brassica oleracea    | #                                                                                                                                                                                                                                                                                                                                                                                                                                                                                          | #   | #   | #         | #     | #    | #    |
| Rsa1.0_01982.1.g31283.t1 | gb EOA38282.1  hypothetical protein CARUB_v10009775mg [Capsella rubella]                                                                                                                                                                                                                                                                                                                                                                                                                                                                                                                                           | 177 | 318 | 2.00E-47 | 179.7 | 55.4 | 62.7 | hypothetical protein CARUB_v10009775mg              | gbpln | Capsella rubella     | AT1G2220.1   Symbols:   F-box family protein   chr1:7846694-7847638 FORWARD LENGTH=314                                                                                                                                                                                                                                                                                                                                                                                                     | 177 | 314 | 8.00E-46  | 177.4 | 55.4 | 61.0 |
| Rsa1.0_01982.1.g31284.t2 | ref XP_002893213.1  predicted protein [Arabidopsis lyrata subsp. lyrata] gi 297339055 gb EFH69472.1  predicted protein [Arabidopsis lyrata subsp. lyrata]                                                                                                                                                                                                                                                                                                                                                                                                                                                          | 196 | 335 | 2.00E-77 | 170.9 | 80.1 | 86.7 | predicted protein                                   | gbpln | Arabidopsis lyrata   | AT1G22130.1   Symbols: AGL104   AGAMOUS-like 104   chr1:7812387-7814259 REVERSE LENGTH=335                                                                                                                                                                                                                                                                                                                                                                                                 | 196 | 335 | 1.00E-78  | 170.9 | 80.6 | 87.2 |
| Rsa1.0_01982.1.g31285.t1 | ref XP_002893211.1  hypothetical protein ARALYDRAFT_472444 [Arabidopsis lyrata subsp. lyrata] gi 297339053 gb EFH69470.1  hypothetical protein ARALYDRAFT_472444 [Arabidopsis lyrata subsp. lyrata]                                                                                                                                                                                                                                                                                                                                                                                                                | 296 | 290 | 1.00E-79 | 98.0  | 69.9 | 79.1 | hypothetical protein ARALYDRAFT_472444              | gbpln | Arabidopsis lyrata   | AT1G22110.1   Symbols:   structural constituent of ribosome   chr1:7801625-7802473 REVERSE LENGTH=282                                                                                                                                                                                                                                                                                                                                                                                      | 296 | 282 | 6.00E-80  | 95.3  | 68.9 | 77.4 |
| Rsa1.0_01982.1.g31286.t1 | ref XP_002893210.1  hypothetical protein ARALYDRAFT_313098 [Arabidopsis lyrata subsp. lyrata] gi 297339052 gb EFH69469.1  hypothetical protein ARALYDRAFT_313098 [Arabidopsis lyrata subsp. lyrata]                                                                                                                                                                                                                                                                                                                                                                                                                | 465 | 441 | 0        | 94.8  | 80.0 | 86.7 | hypothetical protein ARALYDRAFT_313098              | gbpln | Arabidopsis lyrata   | AT1G22100.1   Symbols:   Inositol-pentakisphosphate 2-kinase family protein   chr1:7798023-7800030 REVERSE LENGTH=441                                                                                                                                                                                                                                                                                                                                                                      | 465 | 441 | 0         | 94.8  | 79.8 | 86.2 |
| Rsa1.0_01982.1.g31287.t1 | gb ABU96774.1  bZIP transcription factor [Brassica juncea]                                                                                                                                                                                                                                                                                                                                                                                                                                                                                                                                                         | 379 | 386 | 0        | 101.8 | 88.4 | 92.3 | bZIP transcription factor                           | gbpln | Brassica juncea      | AT1G22070.1   Symbols: TGA3   TGA1A-related gene 3   chr1:7789651-7791821 FORWARD LENGTH=384                                                                                                                                                                                                                                                                                                                                                                                               | 379 | 384 | 1.00E-177 | 101.3 | 82.1 | 87.6 |
| Rsa1.0_01982.1.g31288.t1 | gb EOA36270.1  hypothetical protein CARUB_v10010515mg [Capsella rubella]                                                                                                                                                                                                                                                                                                                                                                                                                                                                                                                                           | 71  | 159 | 4.00E-20 | 223.9 | 73.2 | 83.1 | hypothetical protein CARUB_v10010515mg              | gbpln | Capsella rubella     | AT1G22065.1   Symbols:   unknown protein; FUNCTIONS IN: molecular_function unknown; INVOLVED IN: biological_process unknown; LOCATED IN: cellular_component unknown; BEST Arabidopsis thaliana protein match is: unknown protein (TAIR:AT1G7885.1). Has 30201 Blast hits to 17322 proteins in 780 species: Archae - 12; Bacteria - 1396; Metazoa - 17338; Fungi - 3422; Plants - 5037; Viruses - 0; Other Eukaryotes - 2996 (source: NCBI BLINK).   chr1:7785889-7786107 FORWARD LENGTH=72 | 71  | 72  | 2.00E-19  | 101.4 | 71.8 | 81.7 |

|                          |                                                                                                                                                                                                                                                                                           |      |      |           |        |      |      |                                                 |       |                      |                                                                                                                                                                                                                                                                                                                                                                                                                                                                                                    |      |      |           |        |      |      |
|--------------------------|-------------------------------------------------------------------------------------------------------------------------------------------------------------------------------------------------------------------------------------------------------------------------------------------|------|------|-----------|--------|------|------|-------------------------------------------------|-------|----------------------|----------------------------------------------------------------------------------------------------------------------------------------------------------------------------------------------------------------------------------------------------------------------------------------------------------------------------------------------------------------------------------------------------------------------------------------------------------------------------------------------------|------|------|-----------|--------|------|------|
| Rsa1.0_01982.1.g31289.t1 | gb EOA36030.1  hypothetical protein CARUB_v10008070mg [Capsella rubella]                                                                                                                                                                                                                  | 75   | 2001 | 2.00E-16  | 2668.0 | 54.7 | 65.3 | hypothetical protein CARUB_v10008070mg          | gbpln | Capsella rubella     | AT1G22060.1   Symbols:   LOCATED IN: vacuole; EXPRESSED IN: 23 plant structures; EXPRESSED DURING: 13 growth stages; BEST Arabidopsis thaliana protein match is: FBD, F-box and Leucine Rich Repeat domains containing protein (TAIR:AT1G22000.1); Has 84739 Blast hits to 38714 proteins in 2257 species: Archae - 1436; Bacteria - 11314; Metazoa - 40747; Fungi - 7706; Plants - 4675; Viruses - 308; Other Eukaryotes - 18553 (source: NCBI BLink).   chr1:7773373-7780586 REVERSE LENGTH=1999 | 75   | 1999 | 8.00E-19  | 2665.3 | 53.3 | 64.0 |
| Rsa1.0_01983.1.g31290.t1 | ref XP_002866572.1  IBR domain-containing protein [Arabidopsis lyrata subsp. lyrata] gi 297312407 gb EFH42831.1  IBR domain-containing protein [Arabidopsis lyrata subsp. lyrata]                                                                                                         | 430  | 506  | 1.00E-81  | 117.7  | 36.3 | 42.3 | IBR domain-containing protein                   | gbpln | Arabidopsis lyrata   | AT5G63730.1   Symbols: ATARI14, ARI14   IBR domain-containing protein   chr5:25508100-25509706 REVERSE LENGTH=506                                                                                                                                                                                                                                                                                                                                                                                  | 430  | 506  | 1.00E-81  | 117.7  | 35.3 | 41.4 |
| Rsa1.0_01983.1.g31291.t2 | ref NP_201177.1  protein kokopelli [Arabidopsis thaliana] gi 10177053 dbj BAB10465.1  unnamed protein product [Arabidopsis thaliana] gi 332010406 gb AED97789.1  protein kokopelli [Arabidopsis thaliana]                                                                                 | 471  | 492  | 5.00E-54  | 104.5  | 44.8 | 56.9 | protein kokopelli                               | gbpln | Arabidopsis thaliana | AT5G63720.1   Symbols: KPL   kokopelli   chr5:25506349-25508017 FORWARD LENGTH=492                                                                                                                                                                                                                                                                                                                                                                                                                 | 471  | 492  | 1.00E-56  | 104.5  | 44.8 | 56.9 |
| Rsa1.0_01983.1.g31292.t2 | dbj BAB10464.1  receptor-like protein kinase [Arabidopsis thaliana]                                                                                                                                                                                                                       | 595  | 579  | 0         | 97.3   | 91.8 | 95.3 | receptor-like protein kinase                    | gbpln | Arabidopsis thaliana | AT5G63710.1   Symbols:   Leucine-rich repeat protein kinase family protein   chr5:25499475-25502598 FORWARD LENGTH=614                                                                                                                                                                                                                                                                                                                                                                             | 595  | 614  | 0         | 103.2  | 91.8 | 95.3 |
| Rsa1.0_01983.1.g31293.t1 | ref XP_002866570.1  hypothetical protein ARALYDRAFT_919665 [Arabidopsis lyrata subsp. lyrata] gi 297312405 gb EFH43229.1  hypothetical protein ARALYDRAFT_919665 [Arabidopsis lyrata subsp. lyrata]                                                                                       | 140  | 138  | 4.00E-66  | 98.6   | 86.4 | 95.7 | hypothetical protein ARALYDRAFT_919665          | gbpln | Arabidopsis lyrata   | AT5G63690.1   Symbols:   Nucleic acid-binding, OB-fold-like protein   chr5:25492864-25493283 REVERSE LENGTH=139                                                                                                                                                                                                                                                                                                                                                                                    | 140  | 139  | 2.00E-68  | 99.3   | 87.9 | 96.4 |
| Rsa1.0_01983.1.g31294.t1 | gb EOA13225.1  hypothetical protein CARUB_v10026251mg [Capsella rubella] gi 482549032 gb EOA13226.1  hypothetical protein CARUB_v10026251mg [Capsella rubella]                                                                                                                            | 510  | 510  | 0         | 100.0  | 96.9 | 99.2 | hypothetical protein CARUB_v10026251mg          | gbpln | Capsella rubella     | AT5G63680.1   Symbols:   Pyruvate kinase family protein   WD-40 repeat family protein   chr5:25492507-25492530 FORWARD LENGTH=510                                                                                                                                                                                                                                                                                                                                                                  | 510  | 510  | 0         | 100.0  | 96.5 | 99.0 |
| Rsa1.0_01983.1.g31295.t1 | gb EOA14793.1  hypothetical protein CARUB_v10028093mg, partial [Capsella rubella]                                                                                                                                                                                                         | 224  | 531  | 8.00E-72  | 237.1  | 62.5 | 73.2 | hypothetical protein CARUB_v10028093mg, partial | gbpln | Capsella rubella     | AT5G08560.2   Symbols:   transducin family protein / WD-40 repeat family protein   chr5:2771104-2773827 REVERSE LENGTH=589                                                                                                                                                                                                                                                                                                                                                                         | 224  | 589  | 9.00E-66  | 262.9  | 56.3 | 68.8 |
| Rsa1.0_01983.1.g31296.t1 | ref XP_002866567.1  serine/threonine-protein kinase [Arabidopsis lyrata subsp. lyrata] gi 297312402 gb EFH42826.1  serine/threonine-protein kinase [Arabidopsis lyrata subsp. lyrata]                                                                                                     | 356  | 356  | 0         | 100.0  | 94.4 | 97.8 | serine/threonine-protein kinase                 | gbpln | Arabidopsis lyrata   | AT5G63650.1   Symbols: SNRK2-5, SNRK2.5, SRK2H   SNF1-related protein kinase 2.5   chr5:25481631-25483495 REVERSE LENGTH=360                                                                                                                                                                                                                                                                                                                                                                       | 356  | 360  | 0         | 101.1  | 93.5 | 97.8 |
| Rsa1.0_01983.1.g31297.t2 | dbj BAJ34493.1  unnamed protein product [Thellungiella halophila]                                                                                                                                                                                                                         | 427  | 448  | 1.00E-180 | 104.9  | 87.6 | 90.4 | unnamed protein product                         | ----- | -----                | AT5G63640.1   Symbols:   ENTH/VHS/GAT family protein   chr5:25478935-25481221 FORWARD LENGTH=447                                                                                                                                                                                                                                                                                                                                                                                                   | 427  | 447  | 1.00E-174 | 104.7  | 86.2 | 89.7 |
| Rsa1.0_01983.1.g31298.t1 | ref NP_201168.2  DEAD-box ATP-dependent RNA helicase 31 [Arabidopsis thaliana] gi 332010396 gb AED97779.1  DEAD-box ATP-dependent RNA helicase 31 [Arabidopsis thaliana]                                                                                                                  | 1153 | 788  | 0         | 68.3   | 50.2 | 52.9 | DEAD-box ATP-dependent RNA helicase 31          | gbpln | Arabidopsis thaliana | AT5G63630.1   Symbols:   P-loop containing nucleoside triphosphate hydrolases superfamily protein   chr5:25472598-25476402 REVERSE LENGTH=788                                                                                                                                                                                                                                                                                                                                                      | 1153 | 788  | 0         | 68.3   | 50.2 | 52.9 |
| Rsa1.0_01983.1.g31299.t1 | gb EOA13644.1  hypothetical protein CARUB_v10026716mg [Capsella rubella]                                                                                                                                                                                                                  | 303  | 343  | 1.00E-114 | 113.2  | 65.0 | 82.8 | hypothetical protein CARUB_v10026716mg          | gbpln | Capsella rubella     | AT5G08640.2   Symbols: FLS1   flavonol synthase 1   chr5:2804009-2805175 FORWARD LENGTH=336                                                                                                                                                                                                                                                                                                                                                                                                        | 303  | 336  | 1.00E-112 | 110.9  | 63.0 | 77.9 |
| Rsa1.0_01984.1.g31300.t1 | ref NP_190077.2  cation/H(+) antiporter 12 [Arabidopsis thaliana] gi 298351611 sp Q9FYC0.2 CHX12_ARA TH RecName: Full=Cation/H(+) antiporter 12; AltName: Full=Protein CATION/H+ EXCHANGER 12; Short=AtCHX12 gi 332644446 gb AEE77967.1  cation/H(+) antiporter 12 [Arabidopsis thaliana] | 319  | 770  | 1.00E-112 | 241.4  | 69.6 | 82.1 | cation/H(+) antiporter 12                       | gbpln | Arabidopsis thaliana | AT3G44910.1   Symbols: ATCHX12, CHX12   cation/H+ exchanger 12   chr3:16392064-16394579 REVERSE LENGTH=770                                                                                                                                                                                                                                                                                                                                                                                         | 319  | 770  | 1.00E-115 | 241.4  | 69.6 | 82.1 |
| Rsa1.0_01984.1.g31301.t1 | gb AAG51228.1 AC035249_3 Tam3-like transposon protein; 93317-95488 [Arabidopsis thaliana] gi 12323055 gb AAG51515.1 AC068324_3 hAT-element transposase, putative [Arabidopsis thaliana]                                                                                                   | 455  | 723  | 3.00E-76  | 158.9  | 33.8 | 41.1 | Tam3-like transposon protein; 93317-95488       | gbpln | Arabidopsis thaliana | AT3G42170.1   Symbols:   BED zinc finger hAT family dimerisation domain   chr3:14321838-14323928 FORWARD LENGTH=696                                                                                                                                                                                                                                                                                                                                                                                | 455  | 696  | 5.00E-21  | 153.0  | 22.0 | 40.7 |

|                          |                                                                                                                                                                                                                                                                                     |      |      |           |       |      |      |                                                 |       |                      |                                                                                                                                                                                                                                                                                                                                                 |      |     |           |       |      |      |
|--------------------------|-------------------------------------------------------------------------------------------------------------------------------------------------------------------------------------------------------------------------------------------------------------------------------------|------|------|-----------|-------|------|------|-------------------------------------------------|-------|----------------------|-------------------------------------------------------------------------------------------------------------------------------------------------------------------------------------------------------------------------------------------------------------------------------------------------------------------------------------------------|------|-----|-----------|-------|------|------|
| Rsa1.0_01984.1.g31302.t1 | ref XP_002875702.1  ATCHX4 [Arabidopsis lyrata subsp. lyrata] gi 297321540 gb EFH51961.1  ATCHX4 [Arabidopsis lyrata subsp. lyrata]                                                                                                                                                 | 817  | 817  | 0         | 100.0 | 84.9 | 94.1 | ATCHX4                                          | gbpln | Arabidopsis lyrata   | AT3G44900.1   Symbols: ATCHX4, CHX4   cation/H <sup>+</sup> exchanger 4   chr3:16388724-16391360 FORWARD LENGTH=817                                                                                                                                                                                                                             | 817  | 817 | 0         | 100.0 | 84.6 | 94.0 |
| Rsa1.0_01984.1.g31303.t1 | ref XP_002875701.1  hypothetical protein ARALYDRAFT_484888 [Arabidopsis lyrata subsp. lyrata] gi 297321539 gb EFH51960.1  hypothetical protein ARALYDRAFT_484888 [Arabidopsis lyrata subsp. lyrata]                                                                                 | 196  | 197  | 3.00E-89  | 100.5 | 91.3 | 94.9 | hypothetical protein ARALYDRAFT_484888          | gbpln | Arabidopsis lyrata   | AT3G44890.1   Symbols: RPL9   ribosomal protein L9   chr3:16386505-16387963 FORWARD LENGTH=197                                                                                                                                                                                                                                                  | 196  | 197 | 5.00E-89  | 100.5 | 87.2 | 93.9 |
| Rsa1.0_01984.1.g31304.t1 | ref XP_002893701.1  hypothetical protein ARALYDRAFT_890773 [Arabidopsis lyrata subsp. lyrata] gi 297339543 gb EFH69960.1  hypothetical protein ARALYDRAFT_890773 [Arabidopsis lyrata subsp. lyrata]                                                                                 | 149  | 121  | 2.00E-20  | 81.2  | 38.3 | 45.6 | hypothetical protein ARALYDRAFT_890773          | gbpln | Arabidopsis lyrata   | AT1G44010.1   Symbols:   unknown protein; BEST Arabidopsis thaliana protein match is: unknown protein (TAIR:AT1G15640.1). Has 211 Blast hits to 210 proteins in 16 species: Archae - 0; Bacteria - 0; Metazoa - 0; Fungi - 0; Plants - 211; Viruses - 0; Other Eukaryotes - 0 (source: NCBI BLINK).   chr1:16714656-16715504 FORWARD LENGTH=227 | 149  | 227 | 1.00E-20  | 152.3 | 40.3 | 51.0 |
| Rsa1.0_01984.1.g31305.t1 | gb ABD60317.1  chloroplast pheophorbide a oxygenase PaO1 [Brassica napus]                                                                                                                                                                                                           | 538  | 538  | 0         | 100.0 | 96.3 | 97.2 | chloroplast pheophorbide a oxygenase PaO1       | gbpln | Brassica napus       | AT3G44890.1   Symbols: ACD1, LLS1, PAO   Pheophorbide a oxygenase family protein with Rieske [2Fe-2S] domain   chr3:16383858-16386204 FORWARD LENGTH=537                                                                                                                                                                                        | 538  | 537 | 0         | 99.8  | 92.0 | 94.6 |
| Rsa1.0_01984.1.g31306.t1 | ref NP_190068.4  Phototropic-responsive NPH3 family protein [Arabidopsis thaliana] gi 338819814 sp Q9FYC8.2 Y3482_ARAT H RecName: Full=BTB/POZ domain-containing protein At3g44820 gi 332644437 gb AEE7958.1  Phototropic-responsive NPH3 family protein [Arabidopsis thaliana]     | 634  | 651  | 0         | 102.7 | 89.3 | 94.6 | Phototropic-responsive NPH3 family protein      | gbpln | Arabidopsis thaliana | AT3G44820.1   Symbols:   Phototropic-responsive NPH3 family protein   chr3:16361864-16364411 REVERSE LENGTH=651                                                                                                                                                                                                                                 | 634  | 651 | 0         | 102.7 | 89.3 | 94.6 |
| Rsa1.0_01985.1.g31307.t1 | ref XP_002897697.1  kinase family protein [Arabidopsis lyrata subsp. lyrata] gi 297333538 gb EFH63956.1  kinase family protein [Arabidopsis lyrata subsp. lyrata]                                                                                                                   | 366  | 786  | 6.00E-88  | 214.8 | 55.7 | 63.7 | kinase family protein                           | gbpln | Arabidopsis lyrata   | AT1G77720.1   Symbols: PPK1   putative protein kinase 1   chr1:29210730-29213877 FORWARD LENGTH=777                                                                                                                                                                                                                                             | 366  | 777 | 2.00E-73  | 212.3 | 51.1 | 58.2 |
| Rsa1.0_01985.1.g31308.t2 | ref NP_177893.1  pathogenesis-related thaumatin-like protein [Arabidopsis thaliana] gi 12323299 gb AAG51631.1 AC012193_13 thaumatin-like protein; 12104-13574 [Arabidopsis thaliana] gi 332197890 gb AEE36011.1  pathogenesis-related thaumatin-like protein [Arabidopsis thaliana] | 246  | 356  | 1.00E-120 | 144.7 | 82.1 | 92.3 | pathogenesis-related thaumatin-like protein     | gbpln | Arabidopsis thaliana | AT1G77700.1   Symbols:   Pathogenesis-related thaumatin superfamily protein   chr1:29204747-29206217 FORWARD LENGTH=356                                                                                                                                                                                                                         | 246  | 356 | 1.00E-122 | 144.7 | 82.1 | 92.3 |
| Rsa1.0_01985.1.g31309.t1 | emb CAB39638.1  RNA-directed DNA polymerase-like protein [Arabidopsis thaliana] gi 7267666 emb CAB78094.1  RNA-directed DNA polymerase-like protein [Arabidopsis thaliana]                                                                                                          | 1748 | 1274 | 0         | 72.9  | 23.4 | 28.9 | RNA-directed DNA polymerase-like protein        | gbpln | Arabidopsis thaliana | AT1G43760.1   Symbols:   DNase I-like superfamily protein   chr1:16528890-16531065 REVERSE LENGTH=626                                                                                                                                                                                                                                           | 1748 | 626 | 7.00E-37  | 35.8  | 6.5  | 10.9 |
| Rsa1.0_01985.1.g31310.t1 | gb EOA33358.1  hypothetical protein CARUB_v10020229mg [Capsella rubella]                                                                                                                                                                                                            | 437  | 470  | 0         | 107.6 | 96.6 | 99.1 | hypothetical protein CARUB_v10020229mg          | gbpln | Capsella rubella     | AT1G77690.1   Symbols: LAX3   like AUX1 3   chr1:29201232-29203317 REVERSE LENGTH=470                                                                                                                                                                                                                                                           | 437  | 470 | 0         | 107.6 | 95.9 | 98.6 |
| Rsa1.0_01985.1.g31311.t1 | gb AAM67247.1  putative aminotransferase [Arabidopsis thaliana]                                                                                                                                                                                                                     | 401  | 404  | 0         | 100.7 | 86.0 | 92.0 | putative aminotransferase                       | gbpln | Arabidopsis thaliana | AT1G77670.1   Symbols:   Pyridoxal phosphate (PLP)-dependent transferases superfamily protein   chr1:29189043-29190901 REVERSE LENGTH=440                                                                                                                                                                                                       | 401  | 440 | 0         | 109.7 | 86.0 | 92.0 |
| Rsa1.0_01985.1.g31312.t1 | #                                                                                                                                                                                                                                                                                   | #    | #    | #         | #     | #    | -    | ----                                            | ----  | #                    | #                                                                                                                                                                                                                                                                                                                                               | #    | #   | #         | #     | #    | #    |
| Rsa1.0_01985.1.g31313.t1 | #                                                                                                                                                                                                                                                                                   | #    | #    | #         | #     | #    | -    | ----                                            | ----  | #                    | #                                                                                                                                                                                                                                                                                                                                               | #    | #   | #         | #     | #    | #    |
| Rsa1.0_01986.1.g31314.t1 | gb EOA25657.1  hypothetical protein CARUB_v10019008mg, partial [Capsella rubella]                                                                                                                                                                                                   | 429  | 450  | 0         | 104.9 | 95.3 | 97.0 | hypothetical protein CARUB_v10019008mg, partial | gbpln | Capsella rubella     | AT3G45100.2   Symbols: SETH2   UDP-Glycosyltransferase superfamily protein   chr3:16504648-16506858 FORWARD LENGTH=447                                                                                                                                                                                                                          | 429  | 447 | 0         | 104.2 | 95.1 | 97.0 |
| Rsa1.0_01986.1.g31315.t1 | ref XP_002870971.1  hypothetical protein ARALYDRAFT_908104 [Arabidopsis lyrata subsp. lyrata] gi 297316808 gb EFH47230.1  hypothetical protein ARALYDRAFT_908104 [Arabidopsis lyrata subsp. lyrata]                                                                                 | 108  | 115  | 1.00E-41  | 106.5 | 84.3 | 90.7 | hypothetical protein ARALYDRAFT_908104          | gbpln | Arabidopsis lyrata   | AT5G02420.1   Symbols:   unknown protein; Has 90 Blast hits to 90 proteins in 10 species: Archae - 0; Bacteria - 0; Metazoa - 0; Fungi - 0; Plants - 90; Viruses - 0; Other Eukaryotes - 0 (source: NCBI BLINK).   chr5:523501-523848 FORWARD LENGTH=115                                                                                        | 108  | 115 | 6.00E-44  | 106.5 | 84.3 | 91.7 |
| Rsa1.0_01986.1.g31316.t1 | emb CAB85546.1  putative protein [Arabidopsis thaliana]                                                                                                                                                                                                                             | 231  | 498  | 4.00E-55  | 215.6 | 45.5 | 45.9 | putative protein                                | gbpln | Arabidopsis thaliana | AT5G02410.1   Symbols:   DIE2/ALG10 family   chr5:517319-519634 REVERSE LENGTH=509                                                                                                                                                                                                                                                              | 231  | 509 | 1.00E-57  | 220.3 | 45.5 | 45.9 |
| Rsa1.0_01986.1.g31317.t1 | gb EOA20093.1  hypothetical protein CARUB_v10000370mg [Capsella rubella]                                                                                                                                                                                                            | 651  | 687  | 0         | 105.5 | 84.3 | 90.3 | hypothetical protein CARUB_v10000370mg          | gbpln | Capsella rubella     | AT5G02400.1   Symbols: PLL2   pol-like 2   chr5:513561-515896 FORWARD LENGTH=674                                                                                                                                                                                                                                                                | 651  | 674 | 0         | 103.5 | 83.6 | 89.2 |



|                          |                                                                                                                                                                                                                                                                                                                                                                                                                                                                                                                                                                                                                                                                                                                                                                                                                                                                                                |      |      |           |       |      |      |                                                 |       |                      |                                                                                                                                                      |      |      |           |       |      |      |
|--------------------------|------------------------------------------------------------------------------------------------------------------------------------------------------------------------------------------------------------------------------------------------------------------------------------------------------------------------------------------------------------------------------------------------------------------------------------------------------------------------------------------------------------------------------------------------------------------------------------------------------------------------------------------------------------------------------------------------------------------------------------------------------------------------------------------------------------------------------------------------------------------------------------------------|------|------|-----------|-------|------|------|-------------------------------------------------|-------|----------------------|------------------------------------------------------------------------------------------------------------------------------------------------------|------|------|-----------|-------|------|------|
| Rsa1.0_01986.1.g31318.t1 | gb[EOA19964.1] hypothetical protein CARUB_v10000216mg [Capsella rubella]                                                                                                                                                                                                                                                                                                                                                                                                                                                                                                                                                                                                                                                                                                                                                                                                                       | 773  | 845  | 0         | 109.3 | 74.6 | 83.4 | hypothetical protein CARUB_v10000216mg          | gbpln | Capsella rubella     | AT5G02390.1   Symbols:   Protein of unknown function (DUF3741)   chr5:508764-511710 REVERSE LENGTH=835                                               | 773  | 835  | 0         | 108.0 | 74.4 | 83.7 |
| Rsa1.0_01986.1.g31319.t1 | gb ADP37973.1  metallothionein protein [Brassica napus]                                                                                                                                                                                                                                                                                                                                                                                                                                                                                                                                                                                                                                                                                                                                                                                                                                        | 80   | 81   | 1.00E-29  | 101.3 | 87.5 | 91.3 | metallothionein protein                         | gbpln | Brassica napus       | AT3G08390.1   Symbols: MT2A, ATMT-K, ATMT-1   metallothionein 2A   chr3:2889737-2890188 REVERSE LENGTH=81                                            | 80   | 81   | 3.00E-23  | 101.3 | 62.5 | 66.3 |
| Rsa1.0_01986.1.g31320.t1 | ref NP_195857.2  kinesin family member 22 [Arabidopsis thaliana] gi 59958334 gb AA12877.1  At5g02370 [Arabidopsis thaliana] gi 332003081 gb AED90464.1  ATP binding microtubule motor family protein [Arabidopsis thaliana]                                                                                                                                                                                                                                                                                                                                                                                                                                                                                                                                                                                                                                                                    | 610  | 628  | 0         | 103.0 | 79.0 | 87.5 | kinesin family member 22                        | gbpln | Arabidopsis thaliana | AT5G02370.1   Symbols:   ATP binding microtubule motor family protein   chr5:503444-506388 FORWARD LENGTH=628                                        | 610  | 628  | 0         | 103.0 | 79.0 | 87.5 |
| Rsa1.0_01986.1.g31321.t8 | gb[EOA19777.1] hypothetical protein CARUB_v10000023mg [Capsella rubella]                                                                                                                                                                                                                                                                                                                                                                                                                                                                                                                                                                                                                                                                                                                                                                                                                       | 2009 | 2005 | 0         | 99.8  | 80.0 | 87.0 | hypothetical protein CARUB_v10000023mg          | gbpln | Capsella rubella     | AT5G02310.1   Symbols: PRT6   proteolysis 6   chr5:474279-482552 FORWARD LENGTH=2006                                                                 | 2009 | 2006 | 0         | 99.9  | 78.9 | 86.5 |
| Rsa1.0_01987.1.g31322.t1 | ref XP_002888202.1  ZCF125 [Arabidopsis lyrata subsp. lyrata] gi 297334043 gb EFH64461.1  ZCF125 [Arabidopsis lyrata subsp. lyrata]                                                                                                                                                                                                                                                                                                                                                                                                                                                                                                                                                                                                                                                                                                                                                            | 734  | 827  | 0         | 112.7 | 83.5 | 88.6 | ZCF125                                          | gbpln | Arabidopsis lyrata   | AT1G59540.1   Symbols: ZCF125   P-loop containing nucleoside triphosphate hydrolases superfamily protein   chr1:21874083-21879382 FORWARD LENGTH=823 | 734  | 823  | 0         | 112.1 | 82.3 | 88.0 |
| Rsa1.0_01987.1.g31323.t1 | gb[EOA33367.1] hypothetical protein CARUB_v10020272mg, partial [Capsella rubella]                                                                                                                                                                                                                                                                                                                                                                                                                                                                                                                                                                                                                                                                                                                                                                                                              | 373  | 456  | 0         | 122.3 | 96.5 | 98.7 | hypothetical protein CARUB_v10020272mg, partial | gbpln | Capsella rubella     | AT1G59580.2   Symbols: ATPMK2, MPK2   mitogen-activated protein kinase homolog 2   chr1:21884521-21885743 FORWARD LENGTH=376                         | 373  | 376  | 0         | 100.8 | 94.9 | 98.1 |
| Rsa1.0_01987.1.g31324.t1 | #                                                                                                                                                                                                                                                                                                                                                                                                                                                                                                                                                                                                                                                                                                                                                                                                                                                                                              | #    | #    | #         | #     | #    | #    | -                                               | ----  | ----                 | #                                                                                                                                                    | #    | #    | #         | #     | #    | #    |
| Rsa1.0_01987.1.g31325.t1 | gb AAM67222.1  unknown [Arabidopsis thaliana] gi 343455578 gb AEM36361.1  At1g59590 [Arabidopsis thaliana] ref XP_002886674.1  hypothetical protein ARALYDRAFT_893620 [Arabidopsis lyrata subsp. lyrata] gi 297332515 gb EFH62933.1  hypothetical protein ARALYDRAFT_893620 [Arabidopsis lyrata subsp. lyrata]                                                                                                                                                                                                                                                                                                                                                                                                                                                                                                                                                                                 | 212  | 211  | 1.00E-98  | 99.5  | 85.4 | 91.5 | unknown                                         | gbpln | Arabidopsis thaliana | AT1G59590.1   Symbols: ZCF37   ZCF37   chr1:21887860-21888495 FORWARD LENGTH=211                                                                     | 212  | 211  | 1.00E-100 | 99.5  | 84.9 | 91.0 |
| Rsa1.0_01987.1.g31326.t1 | hypothetical protein ARALYDRAFT_893620 [Arabidopsis lyrata subsp. lyrata]                                                                                                                                                                                                                                                                                                                                                                                                                                                                                                                                                                                                                                                                                                                                                                                                                      | 317  | 324  | 1.00E-154 | 102.2 | 85.5 | 93.1 | hypothetical protein ARALYDRAFT_893620          | gbpln | Arabidopsis lyrata   | AT1G59600.1   Symbols: ZCW7   ZCW7   chr1:21889927-21891910 REVERSE LENGTH=324                                                                       | 317  | 324  | 1.00E-155 | 102.2 | 83.9 | 93.1 |
| Rsa1.0_01987.1.g31327.t1 | gb ABD65023.1  hypothetical protein 26.t00078 [Brassica oleracea] ref NP_176170.1  dynamin-2B [Arabidopsis thaliana] gi 59799374 sp Q9LQ55.2 DRP2B_ARAT H RecName: Full=Dynamin-2B; AltName: Full=Dynamin-like protein 3; AltName: Full=Dynamin-related protein 2B gi 6526969 dbj BA88111.1  dynamin-like protein [Arabidopsis thaliana] gi 15146179 gb AAK83573.1  At1g59610/T30E16.17 [Arabidopsis thaliana] gi 23397259 gb AAN31911.1  putative dynamin protein [Arabidopsis thaliana] gi 32815841 gb AAP86329.1  At1g59610/T30E16.17 [Arabidopsis thaliana] gi 332195473 gb AEE33594.1  dynamin-2B [Arabidopsis thaliana] gi 343455578 gb AEM36363.1  At1g59610 [Arabidopsis thaliana] ref XP_002874461.1  hypothetical protein ARALYDRAFT_351855 [Arabidopsis lyrata subsp. lyrata] gi 297320298 gb EFH50720.1  hypothetical protein ARALYDRAFT_351855 [Arabidopsis lyrata subsp. lyrata] | 152  | 303  | 2.00E-39  | 199.3 | 51.3 | 68.4 | hypothetical protein 26.t00078                  | gbpln | Brassica oleracea    | #                                                                                                                                                    | #    | #    | #         | #     | #    | #    |
| Rsa1.0_01987.1.g31328.t1 | dynamin-2B [Arabidopsis thaliana] gi 15146179 gb AAK83573.1  At1g59610/T30E16.17 [Arabidopsis thaliana] gi 23397259 gb AAN31911.1  putative dynamin protein [Arabidopsis thaliana] gi 32815841 gb AAP86329.1  At1g59610/T30E16.17 [Arabidopsis thaliana] gi 332195473 gb AEE33594.1  dynamin-2B [Arabidopsis thaliana] gi 343455578 gb AEM36363.1  At1g59610 [Arabidopsis thaliana] ref XP_002874461.1  hypothetical protein ARALYDRAFT_351855 [Arabidopsis lyrata subsp. lyrata] gi 297320298 gb EFH50720.1  hypothetical protein ARALYDRAFT_351855 [Arabidopsis lyrata subsp. lyrata]                                                                                                                                                                                                                                                                                                        | 920  | 920  | 0         | 100.0 | 95.7 | 98.5 | dynamin-2B                                      | gbpln | Arabidopsis thaliana | AT1G59610.1   Symbols: ADL3, CF1, DRP2B, DL3   dynamin-like 3   chr1:21893413-21900780 FORWARD LENGTH=920                                            | 920  | 920  | 0         | 100.0 | 95.7 | 98.5 |
| Rsa1.0_01988.1.g31329.t1 | hypothetical protein ARALYDRAFT_351855 [Arabidopsis lyrata subsp. lyrata]                                                                                                                                                                                                                                                                                                                                                                                                                                                                                                                                                                                                                                                                                                                                                                                                                      | 478  | 446  | 4.00E-11  | 93.3  | 10.7 | 14.2 | hypothetical protein ARALYDRAFT_351855          | gbpln | Arabidopsis lyrata   | #                                                                                                                                                    | #    | #    | #         | #     | #    | #    |
| Rsa1.0_01988.1.g31330.t1 | ref NP_197412.1  Eukaryotic aspartyl protease family protein [Arabidopsis thaliana] gi 332005271 gb AED92654.1  Eukaryotic aspartyl protease family protein [Arabidopsis thaliana]                                                                                                                                                                                                                                                                                                                                                                                                                                                                                                                                                                                                                                                                                                             | 397  | 405  | 1.00E-157 | 102.0 | 70.0 | 82.6 | Eukaryotic aspartyl protease family protein     | gbpln | Arabidopsis thaliana | AT5G19110.1   Symbols:   Eukaryotic aspartyl protease family protein   chr5:6411720-6413170 REVERSE LENGTH=405                                       | 397  | 405  | 1.00E-160 | 102.0 | 70.0 | 82.6 |
| Rsa1.0_01988.1.g31331.t1 | #                                                                                                                                                                                                                                                                                                                                                                                                                                                                                                                                                                                                                                                                                                                                                                                                                                                                                              | #    | #    | #         | #     | #    | #    | -                                               | ----  | ----                 | #                                                                                                                                                    | #    | #    | #         | #     | #    | #    |
| Rsa1.0_01988.1.g31332.t1 | ref XP_002873930.1  hypothetical protein ARALYDRAFT_488794 [Arabidopsis lyrata subsp. lyrata] gi 297319767 gb EFH50189.1  hypothetical protein ARALYDRAFT_488794 [Arabidopsis lyrata subsp. lyrata]                                                                                                                                                                                                                                                                                                                                                                                                                                                                                                                                                                                                                                                                                            | 121  | 365  | 1.00E-12  | 301.7 | 33.1 | 38.0 | hypothetical protein ARALYDRAFT_488794          | gbpln | Arabidopsis lyrata   | AT5G19100.1   Symbols:   Eukaryotic aspartyl protease family protein   chr5:6408242-6409417 REVERSE LENGTH=391                                       | 121  | 391  | 1.00E-14  | 323.1 | 32.2 | 36.4 |

|                           |                                                                                                                                                                                                                                                                                                     |      |      |           |       |      |      |                                                                                                                                                    |       |                      |                                                                                                                                        |      |      |           |       |      |      |
|---------------------------|-----------------------------------------------------------------------------------------------------------------------------------------------------------------------------------------------------------------------------------------------------------------------------------------------------|------|------|-----------|-------|------|------|----------------------------------------------------------------------------------------------------------------------------------------------------|-------|----------------------|----------------------------------------------------------------------------------------------------------------------------------------|------|------|-----------|-------|------|------|
| Rsa1.0_01988.1.g31333.t1  | gb AAD32898.1  putative retroelement pol polyprotein [Arabidopsis thaliana]                                                                                                                                                                                                                         | 1386 | 1307 | 0         | 94.3  | 58.5 | 73.7 | putative retroelement pol polyprotein                                                                                                              | gbpln | Arabidopsis thaliana | AT4G23160.1   Symbols: CRK8   cysteine-rich RLK (RECEPTOR-like protein kinase) 8   chr4:12129485-12134086 FORWARD LENGTH=1262          | 1386 | 1262 | 1.00E-102 | 91.1  | 14.1 | 21.2 |
| Rsa1.0_01988.1.g31334.t1  | pir  S65812 RNA-directed DNA polymerase (EC 2.7.7.49) (clone DW15) - Arabidopsis thaliana retrotransposon Ta11-1 g 976278 gb AAA75254.1  reverse transcriptase [Arabidopsis thaliana]                                                                                                               | 1636 | 1333 | 0         | 81.5  | 35.3 | 47.7 | RNA-directed DNA polymerase (EC 2.7.7.49) (clone DW15) - Arabidopsis thaliana retrotransposon Ta11-1 g 976278 gb AAA75254.1  reverse transcriptase | gbpln | Arabidopsis thaliana | AT4G29090.1   Symbols:   Ribonuclease H-like superfamily protein   chr4:14333528-14335255 FORWARD LENGTH=575                           | 1636 | 575  | 6.00E-79  | 35.1  | 10.2 | 16.0 |
| Rsa1.0_01988.1.g31335.t3  | gb AAF99727.1 AC004557.6 F17L21.7 [Arabidopsis thaliana]                                                                                                                                                                                                                                            | 654  | 1534 | 1.00E-115 | 234.6 | 35.5 | 49.8 | F17L21.7                                                                                                                                           | gbpln | Arabidopsis thaliana | AT4G23160.1   Symbols: CRK8   cysteine-rich RLK (RECEPTOR-like protein kinase) 8   chr4:12129485-12134086 FORWARD LENGTH=1262          | 654  | 1262 | 2.00E-22  | 193.0 | 7.2  | 10.6 |
| Rsa1.0_01989.1.g31336.t2  | #                                                                                                                                                                                                                                                                                                   | #    | #    | #         | #     | #    | #    | -                                                                                                                                                  | ----  | ----                 | #                                                                                                                                      | #    | #    | #         | #     | #    |      |
| Rsa1.0_01989.1.g31337.t1  | gb ABM66448.1  SOS2-like protein [Brassica juncea]                                                                                                                                                                                                                                                  | 442  | 445  | 0         | 100.7 | 92.5 | 96.6 | SOS2-like protein                                                                                                                                  | gbpln | Brassica juncea      | AT5G35410.1   Symbols: SOS2, SNRK3.11, CIPK24, ATSOS2   Protein kinase superfamily protein   chr5:13634933-13638062 FORWARD LENGTH=446 | 442  | 446  | 0         | 100.9 | 89.4 | 95.0 |
| Rsa1.0_01989.1.g31338.t34 | gb EOA29494.1  hypothetical protein CARUB_v10012960mg [Capsella rubella]                                                                                                                                                                                                                            | 853  | 864  | 0         | 101.3 | 75.7 | 81.4 | hypothetical protein CARUB_v10012960mg                                                                                                             | gbpln | Capsella rubella     | AT2G04660.1   Symbols: APC2   anaphase-promoting complex/cyclosome 2   chr2:1624933-1629039 FORWARD LENGTH=865                         | 853  | 865  | 0         | 101.4 | 75.6 | 81.2 |
| Rsa1.0_01989.1.g31339.t1  | ref XP_002864142.1  hypothetical protein ARALYDRAFT_495261 [Arabidopsis lyrata subsp. lyrata] g 297309977 gb EFH40401.1  hypothetical protein ARALYDRAFT_495261 [Arabidopsis lyrata subsp. lyrata]                                                                                                  | 144  | 144  | 1.00E-65  | 100.0 | 93.8 | 97.9 | hypothetical protein ARALYDRAFT_495261                                                                                                             | gbpln | Arabidopsis lyrata   | AT5G51940.1   Symbols: NRPB6A, NRPD6A, NRPE6A   RNA polymerase Rpb6   chr5:21104679-21105796 FORWARD LENGTH=144                        | 144  | 144  | 3.00E-67  | 100.0 | 92.4 | 97.2 |
| Rsa1.0_01989.1.g31340.t1  | ref NP_178539.2  Cation efflux family protein [Arabidopsis thaliana] g 330250755 gb AEC05849.1  Cation efflux family protein [Arabidopsis thaliana]                                                                                                                                                 | 791  | 798  | 0         | 100.9 | 78.9 | 84.2 | Cation efflux family protein                                                                                                                       | gbpln | Arabidopsis thaliana | AT2G04620.1   Symbols:   Cation efflux family protein   chr2:1610506-1612902 REVERSE LENGTH=798                                        | 791  | 798  | 0         | 100.9 | 78.9 | 84.2 |
| Rsa1.0_01989.1.g31341.t1  | ref XP_002868698.1  hypothetical protein ARALYDRAFT_916318 [Arabidopsis lyrata subsp. lyrata] g 297314534 gb EFH44957.1  hypothetical protein ARALYDRAFT_916318 [Arabidopsis lyrata subsp. lyrata]                                                                                                  | 157  | 336  | 3.00E-34  | 214.0 | 51.0 | 60.5 | hypothetical protein ARALYDRAFT_916318                                                                                                             | gbpln | Arabidopsis lyrata   | AT5G41200.1   Symbols: AGL75   AGAMOUS-like 75   chr5:16490544-16491536 FORWARD LENGTH=330                                             | 157  | 330  | 2.00E-31  | 210.2 | 49.0 | 57.3 |
| Rsa1.0_01989.1.g31342.t2  | gb AAG52211.1 AC022288_10 hypothetical protein; 74056-75837 [Arabidopsis thaliana]                                                                                                                                                                                                                  | 679  | 503  | 1.00E-157 | 74.1  | 41.1 | 50.4 | hypothetical protein; 74056-75837                                                                                                                  | gbpln | Arabidopsis thaliana | AT4G23160.1   Symbols: CRK8   cysteine-rich RLK (RECEPTOR-like protein kinase) 8   chr4:12129485-12134086 FORWARD LENGTH=1262          | 679  | 1262 | 7.00E-71  | 185.9 | 22.4 | 33.9 |
| Rsa1.0_01990.1.g31343.t1  | #                                                                                                                                                                                                                                                                                                   | #    | #    | #         | #     | #    | #    | -                                                                                                                                                  | ----  | ----                 | #                                                                                                                                      | #    | #    | #         | #     | #    |      |
| Rsa1.0_01990.1.g31344.t1  | gb ADD10746.1  phytocystatin 2-1 [Brassica rapa subsp. pekinensis]                                                                                                                                                                                                                                  | 142  | 142  | 6.00E-71  | 100.0 | 91.5 | 96.5 | phytocystatin 2-1                                                                                                                                  | gbpln | Brassica rapa        | AT2G31980.1   Symbols: AtCYS2, CYS2   PHYTOCYSTATIN 2   chr2:13609246-13609770 REVERSE LENGTH=147                                      | 142  | 147  | 2.00E-54  | 103.5 | 72.5 | 81.0 |
| Rsa1.0_01990.1.g31345.t1  | gb EOA28765.1  hypothetical protein CARUB_v10024997mg [Capsella rubella]                                                                                                                                                                                                                            | 849  | 829  | 0         | 97.6  | 69.3 | 81.5 | hypothetical protein CARUB_v10024997mg                                                                                                             | gbpln | Capsella rubella     | AT2G31910.1   Symbols: ATCHX21, CHX21   cation/H+ exchanger 21   chr2:13571044-13574019 FORWARD LENGTH=832                             | 849  | 832  | 0         | 98.0  | 68.7 | 80.4 |
| Rsa1.0_01990.1.g31346.t1  | ref XP_002880897.1  predicted protein [Arabidopsis lyrata subsp. lyrata] g 297326736 gb EFH57156.1  predicted protein [Arabidopsis lyrata subsp. lyrata]                                                                                                                                            | 446  | 434  | 1.00E-175 | 97.3  | 71.3 | 79.6 | predicted protein                                                                                                                                  | gbpln | Arabidopsis lyrata   | AT2G27220.1   Symbols: BLH5   BEL1-like homeodomain 5   chr2:11637306-11639537 REVERSE LENGTH=431                                      | 446  | 431  | 1.00E-172 | 96.6  | 70.6 | 79.4 |
| Rsa1.0_01990.1.g31347.t1  | ref NP_199833.1  putative F-box protein [Arabidopsis thaliana] g 75262452 sp Q9FGS3.1 FB287_ARAT H RecName: Full=Putative F-box protein At5g50220 g 9759024 dbj BAB09393.1  unnamed protein product [Arabidopsis thaliana] g 332008530 gb AED95913.1  putative F-box protein [Arabidopsis thaliana] | 372  | 357  | 6.00E-57  | 96.0  | 40.9 | 54.0 | putative F-box protein                                                                                                                             | gbpln | Arabidopsis thaliana | AT5G50220.1   Symbols:   F-box family protein   chr5:20446068-20447200 REVERSE LENGTH=357                                              | 372  | 357  | 1.00E-59  | 96.0  | 40.9 | 54.0 |
| Rsa1.0_01990.1.g31348.t1  | ref XP_002865856.1  hypothetical protein ARALYDRAFT_918170 [Arabidopsis lyrata subsp. lyrata] g 297311691 gb EFH42115.1  hypothetical protein ARALYDRAFT_918170 [Arabidopsis lyrata subsp. lyrata]                                                                                                  | 393  | 293  | 3.00E-58  | 74.6  | 36.1 | 43.3 | hypothetical protein ARALYDRAFT_918170                                                                                                             | gbpln | Arabidopsis lyrata   | AT5G50220.1   Symbols:   F-box family protein   chr5:20446068-20447200 REVERSE LENGTH=357                                              | 393  | 357  | 2.00E-54  | 90.8  | 37.2 | 48.9 |
| Rsa1.0_01990.1.g31349.t1  | #                                                                                                                                                                                                                                                                                                   | #    | #    | #         | #     | #    | #    | -                                                                                                                                                  | ----  | ----                 | #                                                                                                                                      | #    | #    | #         | #     | #    |      |

|                          |                                                                                                                                                                                                                                                                                                                                                                                                                                                                                                                                                                              |      |      |           |       |      |      |                                                                  |       |                      |                                                                                                                                                                                |      |      |           |       |      |      |
|--------------------------|------------------------------------------------------------------------------------------------------------------------------------------------------------------------------------------------------------------------------------------------------------------------------------------------------------------------------------------------------------------------------------------------------------------------------------------------------------------------------------------------------------------------------------------------------------------------------|------|------|-----------|-------|------|------|------------------------------------------------------------------|-------|----------------------|--------------------------------------------------------------------------------------------------------------------------------------------------------------------------------|------|------|-----------|-------|------|------|
| Rsa1.0_01990.1.g31350.t1 | refNP_180289.3  serine/threonine-protein phosphatase BSL3 [Arabidopsis thaliana]<br>gi 160359047 sp Q9SHS7.2 BSL3_ARAT H RecName: Full=Serine/threonine-protein phosphatase BSL3; AltName: Full=BSU1-like protein 3<br>gi 330252859 gb AEC07953.1  serine/threonine-protein phosphatase BSL3 [Arabidopsis thaliana]                                                                                                                                                                                                                                                          | 996  | 1006 | 0         | 101.0 | 93.8 | 96.3 | serine/threonine-protein phosphatase BSL3                        | gbpln | Arabidopsis thaliana | AT2G27210.1   Symbols: BSL3   BRI1 suppressor 1 (BSU1)-like 3   chr2:11630188-11636182 FORWARD LENGTH=1006                                                                     | 996  | 1006 | 0         | 101.0 | 93.8 | 96.3 |
| Rsa1.0_01990.1.g31351.t1 | refXP_002879073.1  GTP-binding family protein [Arabidopsis lyrata subsp. lyrata] gi 297324912 gb EFH55332.1  GTP-binding family protein [Arabidopsis lyrata subsp. lyrata]                                                                                                                                                                                                                                                                                                                                                                                                   | 527  | 539  | 0         | 102.3 | 88.6 | 93.0 | GTP-binding family protein                                       | gbpln | Arabidopsis lyrata   | AT2G27200.1   Symbols:   P-loop containing nucleoside triphosphate hydrolases superfamily protein   chr2:11625449-11627959 FORWARD LENGTH=537                                  | 527  | 537  | 0         | 101.9 | 87.5 | 92.2 |
| Rsa1.0_01991.1.g31352.t2 | refNP_191375.1  P-loop containing nucleoside triphosphate hydrolase-like protein [Arabidopsis thaliana] gi 6735328 emb CAB68154.1  myosin heavy chain MYA3 [Arabidopsis thaliana] gi 332646228 gb AEE79749.1  P-loop containing nucleoside triphosphate hydrolase-like protein [Arabidopsis thaliana]                                                                                                                                                                                                                                                                        | 1145 | 1242 | 0         | 108.5 | 83.1 | 90.6 | P-loop containing nucleoside triphosphate hydrolase-like protein | gbpln | Arabidopsis thaliana | AT3G58160.1   Symbols: XIJ, ATXIJ, ATMYO3, MYA3, XI-16   P-loop containing nucleoside triphosphate hydrolases superfamily protein   chr3:21534797-21541877 FORWARD LENGTH=1242 | 1145 | 1242 | 0         | 108.5 | 83.1 | 90.6 |
| Rsa1.0_01991.1.g31353.t1 | refNP_191376.1  Bet1-like SNARE 1-1 [Arabidopsis thaliana] gi 27805428 sp Q9M2J9.1 BET11_ARAT H RecName: Full=Bet1-like SNARE 1-1; Short=AtBET11; AltName: Full=Bet1/Sft1-like SNARE 14a; Short=AtBS14a<br>gi 14030603 gb AAK52976.1 AF368175.1 Bet1/Sft1-like SNARE AtBS14a [Arabidopsis thaliana] gi 6735329 emb CAB68155.1  putative protein [Arabidopsis thaliana] gi 26449796 dbj BAC42021.1  unknown protein [Arabidopsis thaliana] gi 28416841 gb AAO42951.1  At3g58170 [Arabidopsis thaliana] gi 332646229 gb AEE79750.1  Bet1-like SNARE 1-1 [Arabidopsis thaliana] | 125  | 122  | 2.00E-58  | 97.6  | 92.8 | 94.4 | Bet1-like SNARE 1-1                                              | gbpln | Arabidopsis thaliana | AT3G58170.1   Symbols: ATBS14A, ATBET11, BET11, BS14A   BET1P/SFT1P-like protein 14A   chr3:21542632-21543775 REVERSE LENGTH=122                                               | 125  | 122  | 4.00E-61  | 97.6  | 92.8 | 94.4 |
| Rsa1.0_01991.1.g31354.t1 | gb EOA25554.1  hypothetical protein CARUB_v10018899mg [Capsella rubella]                                                                                                                                                                                                                                                                                                                                                                                                                                                                                                     | 313  | 310  | 1.00E-154 | 99.0  | 87.5 | 92.7 | hypothetical protein CARUB_v10018899mg                           | gbpln | Capsella rubella     | AT3G58180.1   Symbols:   ARM repeat superfamily protein   chr3:21544189-21545981 FORWARD LENGTH=314                                                                            | 313  | 314  | 1.00E-157 | 100.3 | 87.9 | 93.3 |
| Rsa1.0_01991.1.g31355.t1 | emb CBW45921.1  RTM3 protein [Arabidopsis thaliana]                                                                                                                                                                                                                                                                                                                                                                                                                                                                                                                          | 298  | 301  | 1.00E-119 | 101.0 | 69.8 | 84.6 | RTM3 protein                                                     | gbpln | Arabidopsis thaliana | AT3G58350.1   Symbols: RTM3   RESTRICTED TEV MOVEMENT 3   chr3:21591618-21592836 REVERSE LENGTH=301                                                                            | 298  | 301  | 1.00E-116 | 101.0 | 69.8 | 84.9 |
| Rsa1.0_01991.1.g31356.t1 | gb EOA25921.1  hypothetical protein CARUB_v10019301mg [Capsella rubella]                                                                                                                                                                                                                                                                                                                                                                                                                                                                                                     | 153  | 153  | 8.00E-68  | 100.0 | 83.7 | 91.5 | hypothetical protein CARUB_v10019301mg                           | gbpln | Capsella rubella     | AT3G58230.1   Symbols:   Ubiquitin-specific protease family C19-related protein   chr3:21566860-21567396 REVERSE LENGTH=153                                                    | 153  | 153  | 6.00E-69  | 100.0 | 82.4 | 90.2 |
| Rsa1.0_01991.1.g31357.t1 | refXP_002878203.1  hypothetical protein ARALYDRAFT_907304 [Arabidopsis lyrata subsp. lyrata] gi 297324041 gb EFH54462.1  hypothetical protein ARALYDRAFT_907304 [Arabidopsis lyrata subsp. lyrata]                                                                                                                                                                                                                                                                                                                                                                           | 318  | 324  | 1.00E-118 | 101.9 | 73.9 | 84.6 | hypothetical protein ARALYDRAFT_907304                           | gbpln | Arabidopsis lyrata   | AT3G58270.2   Symbols:   Arabidopsis phospholipase-like protein (PEARL1 4) with TRAF-like domain   chr3:21576033-21577655 REVERSE LENGTH=343                                   | 318  | 343  | 1.00E-117 | 107.9 | 71.7 | 84.3 |
| Rsa1.0_01991.1.g31358.t2 | emb CBW45921.1  RTM3 protein [Arabidopsis thaliana]                                                                                                                                                                                                                                                                                                                                                                                                                                                                                                                          | 276  | 301  | 1.00E-107 | 109.1 | 71.4 | 83.7 | RTM3 protein                                                     | gbpln | Arabidopsis thaliana | AT3G58350.1   Symbols: RTM3   RESTRICTED TEV MOVEMENT 3   chr3:21591618-21592836 REVERSE LENGTH=301                                                                            | 276  | 301  | 1.00E-104 | 109.1 | 71.7 | 84.1 |
| Rsa1.0_01991.1.g31359.t4 | gb AAF97969.1 AC000103_19 F21J9.30 [Arabidopsis thaliana]                                                                                                                                                                                                                                                                                                                                                                                                                                                                                                                    | 1625 | 1270 | 0         | 78.2  | 34.5 | 46.8 | F21J9.30                                                         | gbpln | Arabidopsis thaliana | AT4G29090.1   Symbols:   Ribonuclease H-like superfamily protein   chr4:14333528-14335255 FORWARD LENGTH=575                                                                   | 1625 | 575  | 7.00E-65  | 35.4  | 10.0 | 16.0 |
| Rsa1.0_01991.1.g31360.t1 | # # # # # # # # - - - - # # # # # #                                                                                                                                                                                                                                                                                                                                                                                                                                                                                                                                          |      |      |           |       |      |      |                                                                  |       |                      |                                                                                                                                                                                |      |      |           |       |      |      |
| Rsa1.0_01992.1.g31361.t1 | refXP_002877660.1  hypothetical protein ARALYDRAFT_485283 [Arabidopsis lyrata subsp. lyrata] gi 297323498 gb EFH53919.1  hypothetical protein ARALYDRAFT_485283 [Arabidopsis lyrata subsp. lyrata]                                                                                                                                                                                                                                                                                                                                                                           | 483  | 423  | 1.00E-163 | 87.6  | 60.2 | 70.4 | hypothetical protein ARALYDRAFT_485283                           | gbpln | Arabidopsis lyrata   | AT3G49250.1   Symbols: DMS3, IDN1   defective in meristem silencing 3   chr3:18258613-18260803 REVERSE LENGTH=420                                                              | 483  | 420  | 1.00E-154 | 87.0  | 57.8 | 68.9 |
| Rsa1.0_01992.1.g31362.t1 | refXP_002875955.1  pectinesterase family protein [Arabidopsis lyrata subsp. lyrata] gi 297321793 gb EFH52214.1  pectinesterase family protein [Arabidopsis lyrata subsp. lyrata]                                                                                                                                                                                                                                                                                                                                                                                             | 577  | 598  | 0         | 103.6 | 85.4 | 91.7 | pectinesterase family protein                                    | gbpln | Arabidopsis lyrata   | AT3G49220.1   Symbols:   Plant invertase/pectin methyltransferase inhibitor superfamily   chr3:18249840-18253647 FORWARD LENGTH=598                                            | 577  | 598  | 0         | 103.6 | 85.1 | 91.7 |

|                          |                                                                                                                                                                                                                                                                                                                                                                                                                                                                                                                                                                                                          |      |      |          |        |      |      |                                                                            |       |                      |                                                                                                                                                 |      |      |          |       |      |      |
|--------------------------|----------------------------------------------------------------------------------------------------------------------------------------------------------------------------------------------------------------------------------------------------------------------------------------------------------------------------------------------------------------------------------------------------------------------------------------------------------------------------------------------------------------------------------------------------------------------------------------------------------|------|------|----------|--------|------|------|----------------------------------------------------------------------------|-------|----------------------|-------------------------------------------------------------------------------------------------------------------------------------------------|------|------|----------|-------|------|------|
| Rsa1.0_01992.1.g31363.t2 | refXP_002877657.1   hypothetical protein ARALYDRAFT_485279 [Arabidopsis lyrata subsp. lyrata] gi 297323495 gb EFH53916.1   hypothetical protein ARALYDRAFT_485279 [Arabidopsis lyrata subsp. lyrata]                                                                                                                                                                                                                                                                                                                                                                                                     | 540  | 519  | 0        | 96.1   | 75.2 | 83.0 | hypothetical protein ARALYDRAFT_485279                                     | gbpln | Arabidopsis lyrata   | AT3G49210.1   Symbols:   O-acyltransferase (WSD1-like) family protein   chr3:18238216-18241161 REVERSE LENGTH=518                               | 540  | 518  | 0        | 95.9  | 73.9 | 81.9 |
| Rsa1.0_01992.1.g31364.t1 | refXP_002875954.1   hypothetical protein ARALYDRAFT_485276 [Arabidopsis lyrata subsp. lyrata] gi 297321792 gb EFH52213.1   hypothetical protein ARALYDRAFT_485276 [Arabidopsis lyrata subsp. lyrata]                                                                                                                                                                                                                                                                                                                                                                                                     | 426  | 438  | 0        | 102.8  | 77.7 | 86.9 | hypothetical protein ARALYDRAFT_485276                                     | gbpln | Arabidopsis lyrata   | AT3G49180.1   Symbols: RID3   Transducin/WD40 repeat-like superfamily protein   chr3:18229810-18231874 FORWARD LENGTH=438                       | 426  | 438  | 0        | 102.8 | 74.9 | 84.7 |
| Rsa1.0_01992.1.g31365.t1 | emb CAB66396.1   putative protein [Arabidopsis thaliana]                                                                                                                                                                                                                                                                                                                                                                                                                                                                                                                                                 | 712  | 1113 | 0        | 156.3  | 86.8 | 93.5 | putative protein                                                           | gbpln | Arabidopsis thaliana | AT3G49170.1   Symbols: EMB2261   Tetratricopeptide repeat (TPR)-like superfamily protein   chr3:18226954-18229600 REVERSE LENGTH=850            | 712  | 850  | 0        | 119.4 | 86.8 | 93.5 |
| Rsa1.0_01993.1.g31366.t1 | refXP_002865184.1   predicted protein [Arabidopsis lyrata subsp. lyrata] gi 297311019 gb EFH41443.1   predicted protein [Arabidopsis lyrata subsp. lyrata]                                                                                                                                                                                                                                                                                                                                                                                                                                               | 164  | 1750 | 1.00E-47 | 1067.1 | 56.1 | 67.1 | predicted protein                                                          | gbpln | Arabidopsis lyrata   | AT5G44510.1   Symbols: TAO1   target of AVR/B operation1   chr5:17929673-17934188 REVERSE LENGTH=1187                                           | 164  | 1187 | 1.00E-48 | 723.8 | 53.0 | 65.2 |
| Rsa1.0_01993.1.g31367.t1 | #                                                                                                                                                                                                                                                                                                                                                                                                                                                                                                                                                                                                        | #    | #    | #        | #      | #    | #    | -                                                                          | ----  | ----                 | #                                                                                                                                               | #    | #    | #        | #     | #    |      |
| Rsa1.0_01993.1.g31368.t1 | emb CAB39638.1   RNA-directed DNA polymerase-like protein [Arabidopsis thaliana] gi 267666 emb CAB78094.1   RNA-directed DNA polymerase-like protein [Arabidopsis thaliana] ref NP_180727.1   phospholipase A1-lalpha2 [Arabidopsis thaliana] gi 7537277 sp Q9SIN9.1 PLA13_ARATH RecName: Full=Phospholipase A1-lalpha2, chloroplastic; Flags: Precursor gi 4582461 gb AAD24845.1   putative triacylglycerol lipase [Arabidopsis thaliana] gi 67633570 gb AAV78709.1   lipase class 3 family protein [Arabidopsis thaliana] gi 330253479 gb AEC08573.1   phospholipase A1-lalpha2 [Arabidopsis thaliana] | 1230 | 1274 | 0        | 103.6  | 55.3 | 70.0 | RNA-directed DNA polymerase-like protein                                   | gbpln | Arabidopsis thaliana | AT4G29090.1   Symbols:   Ribonuclease H-like superfamily protein   chr4:14333528-14335255 FORWARD LENGTH=575                                    | 1230 | 575  | 3.00E-68 | 46.7  | 14.4 | 22.3 |
| Rsa1.0_01993.1.g31369.t1 | ref NP_180727.1   phospholipase A1-lalpha2 [Arabidopsis thaliana] gi 7537277 sp Q9SIN9.1 PLA13_ARATH RecName: Full=Phospholipase A1-lalpha2, chloroplastic; Flags: Precursor gi 4582461 gb AAD24845.1   putative triacylglycerol lipase [Arabidopsis thaliana] gi 67633570 gb AAV78709.1   lipase class 3 family protein [Arabidopsis thaliana] gi 330253479 gb AEC08573.1   phospholipase A1-lalpha2 [Arabidopsis thaliana]                                                                                                                                                                             | 478  | 484  | 0        | 101.3  | 78.5 | 85.6 | phospholipase A1-lalpha2                                                   | gbpln | Arabidopsis thaliana | AT2G31690.1   Symbols:   alpha/beta-Hydrolases superfamily protein   chr2:13476093-13477547 REVERSE LENGTH=484                                  | 478  | 484  | 0        | 101.3 | 78.5 | 85.6 |
| Rsa1.0_01993.1.g31370.t1 | gb EOA29020.1   hypothetical protein CARUB_v10025274mg [Capsella rubella]                                                                                                                                                                                                                                                                                                                                                                                                                                                                                                                                | 327  | 411  | 4.00E-34 | 125.7  | 34.6 | 44.3 | hypothetical protein CARUB_v10025274mg                                     | gbpln | Capsella rubella     | AT2G31720.1   Symbols:   Domain of unknown function (DUF313)   chr2:13485034-13485975 REVERSE LENGTH=313                                        | 327  | 313  | 1.00E-30 | 95.7  | 26.9 | 37.6 |
| Rsa1.0_01994.1.g31371.t1 | ref NP_198814.1   pentatricopeptide repeat-containing protein [Arabidopsis thaliana] gi 75171449 sp Q9FLD8.1 PP408_ARATH RecName: Full=Pentatricopeptide repeat-containing protein At5g39980, chloroplastic; Flags: Precursor gi 10176990 dbj BAB10222.1   unnamed protein product [Arabidopsis thaliana] gi 332007115 gb AED94498.1   pentatricopeptide repeat-containing protein [Arabidopsis thaliana]                                                                                                                                                                                                | 679  | 678  | 0        | 99.9   | 91.5 | 94.7 | pentatricopeptide repeat-containing protein                                | gbpln | Arabidopsis thaliana | AT5G39980.1   Symbols:   Tetratricopeptide repeat (TPR)-like superfamily protein   chr5:16001036-16003072 REVERSE LENGTH=678                    | 679  | 678  | 0        | 99.9  | 91.5 | 94.7 |
| Rsa1.0_01994.1.g31372.t1 | #                                                                                                                                                                                                                                                                                                                                                                                                                                                                                                                                                                                                        | #    | #    | #        | #      | #    | #    | -                                                                          | ----  | ----                 | #                                                                                                                                               | #    | #    | #        | #     | #    |      |
| Rsa1.0_01994.1.g31373.t1 | ref NP_198815.1   Core-2/l-branching beta-1,6-N-acetylglucosaminyltransferase family protein [Arabidopsis thaliana] gi 10176991 dbj BAB10223.1   glycosylation enzyme-like protein [Arabidopsis thaliana] gi 30102766 gb AAP21301.1   At5g39990 [Arabidopsis thaliana] gi 110743106 dbj BAE99445.1   hypothetical protein [Arabidopsis thaliana] gi 332007116 gb AED94499.1   Core-2/l-branching beta-1,6-N-acetylglucosaminyltransferase family protein [Arabidopsis thaliana]                                                                                                                          | 439  | 447  | 0        | 101.8  | 90.7 | 95.0 | Core-2/l-branching beta-1,6-N-acetylglucosaminyltransferase family protein | gbpln | Arabidopsis thaliana | AT5G39990.1   Symbols:   Core-2/l-branching beta-1,6-N-acetylglucosaminyltransferase family protein   chr5:16004494-16006428 FORWARD LENGTH=447 | 439  | 447  | 0        | 101.8 | 90.7 | 95.0 |
| Rsa1.0_01994.1.g31374.t3 | gb AAD15477.1   putative replication protein A1 [Arabidopsis thaliana]                                                                                                                                                                                                                                                                                                                                                                                                                                                                                                                                   | 276  | 527  | 7.00E-20 | 190.9  | 30.4 | 48.6 | putative replication protein A1                                            | gbpln | Arabidopsis thaliana | #                                                                                                                                               | #    | #    | #        | #     | #    |      |
| Rsa1.0_01994.1.g31375.t1 | emb CAB91582.1   putative protein [Arabidopsis thaliana]                                                                                                                                                                                                                                                                                                                                                                                                                                                                                                                                                 | 336  | 448  | 2.00E-24 | 133.3  | 33.9 | 52.1 | putative protein                                                           | gbpln | Arabidopsis thaliana | AT1G52950.1   Symbols:   Nucleic acid-binding, OB-fold-like protein   chr1:19725483-19728007 FORWARD LENGTH=566                                 | 336  | 566  | 3.00E-17 | 168.5 | 23.8 | 43.5 |

|                          |                                                                                                                                                                                                                                                                                                                                                                                |      |      |           |       |      |      |                                                        |             |                      |                                                                                                                                                                                                                                                                                                                                                                                                                                                                                                                              |      |     |           |       |      |      |
|--------------------------|--------------------------------------------------------------------------------------------------------------------------------------------------------------------------------------------------------------------------------------------------------------------------------------------------------------------------------------------------------------------------------|------|------|-----------|-------|------|------|--------------------------------------------------------|-------------|----------------------|------------------------------------------------------------------------------------------------------------------------------------------------------------------------------------------------------------------------------------------------------------------------------------------------------------------------------------------------------------------------------------------------------------------------------------------------------------------------------------------------------------------------------|------|-----|-----------|-------|------|------|
| Rsa1.0_01994.1.g31376.t4 | gb EOA19024.1  hypothetical protein CARUB_v10007676mg [Capsella rubella]                                                                                                                                                                                                                                                                                                       | 315  | 365  | 1.00E-137 | 115.9 | 81.3 | 90.2 | hypothetical protein CARUB_v10007676mg                 | gbpln       | Capsella rubella     | AT5G40230.1   Symbols:   nodulin MtN21 /EamA-like transporter family protein   chr5:16079814-16081735 REVERSE LENGTH=370                                                                                                                                                                                                                                                                                                                                                                                                     | 315  | 370 | 1.00E-137 | 117.5 | 80.3 | 88.9 |
| Rsa1.0_01994.1.g31377.t3 | gb AAG50806.1 AC079291.8 unknown protein [Arabidopsis thaliana]                                                                                                                                                                                                                                                                                                                | 1715 | 1213 | 0         | 70.7  | 33.8 | 45.8 | unknown protein                                        | gbpln       | Arabidopsis thaliana | AT1G60720.1   Symbols:   RNA-directed DNA polymerase (reverse transcriptase)-related family protein   chr1:22357072-22357941 FORWARD LENGTH=289                                                                                                                                                                                                                                                                                                                                                                              | 1715 | 289 | 2.00E-73  | 16.9  | 7.8  | 11.0 |
| Rsa1.0_01994.1.g31378.t1 | gb EOA19024.1  hypothetical protein CARUB_v10007676mg [Capsella rubella]                                                                                                                                                                                                                                                                                                       | 364  | 365  | 1.00E-154 | 100.3 | 76.9 | 87.1 | hypothetical protein CARUB_v10007676mg                 | gbpln       | Capsella rubella     | AT5G40230.1   Symbols:   nodulin MtN21 /EamA-like transporter family protein   chr5:16079814-16081735 REVERSE LENGTH=370                                                                                                                                                                                                                                                                                                                                                                                                     | 364  | 370 | 1.00E-156 | 101.6 | 76.9 | 87.4 |
| Rsa1.0_01994.1.g31379.t1 | gb AAx96717.1  retrotransposon protein, putative, Ty3-gypsy sub-class [Oryza sativa Japonica Group] gi 108864301 gb ABA93040.2  retrotransposon protein, putative, Ty3-gypsy subclass [Oryza sativa Japonica Group]                                                                                                                                                            | 281  | 1748 | 7.00E-47  | 622.1 | 36.7 | 45.9 | retrotransposon protein, putative, Ty3-gypsy sub-class | gbpln       | Oryza sativa         | #                                                                                                                                                                                                                                                                                                                                                                                                                                                                                                                            | #    | #   | #         | #     | #    | #    |
| Rsa1.0_01995.1.g31380.t1 | gb EOA19072.1  hypothetical protein CARUB_v10007738mg [Capsella rubella]                                                                                                                                                                                                                                                                                                       | 179  | 480  | 8.00E-19  | 268.2 | 25.7 | 35.2 | hypothetical protein CARUB_v10007738mg                 | gbpln       | Capsella rubella     | AT1G52950.1   Symbols:   Nucleic acid-binding, OB-fold-like protein   chr1:19725483-19728007 FORWARD LENGTH=566                                                                                                                                                                                                                                                                                                                                                                                                              | 179  | 566 | 5.00E-15  | 316.2 | 26.8 | 39.7 |
| Rsa1.0_01995.1.g31381.t1 | ref NP_564111.1  uncharacterized protein [Arabidopsis thaliana] gi 21617898 gb AAM66948.1  unknown [Arabidopsis thaliana] gi 332191839 gb AAE29960.1  uncharacterized protein AT1G20310 [Arabidopsis thaliana]                                                                                                                                                                 | 240  | 240  | 5.00E-67  | 100.0 | 63.8 | 75.4 | uncharacterized protein                                | gbpln       | Arabidopsis thaliana | AT1G20310.1   Symbols:   unknown protein; FUNCTIONS IN: molecular.function unknown; INVOLVED IN: biological.process unknown; LOCATED IN: chloroplast; EXPRESSED IN: 16 plant structures; EXPRESSED DURING: 9 growth stages; BEST Arabidopsis thaliana protein match is: unknown protein (TAIR:AT1G76070.1); Has 46 Blast hits to 46 proteins in 12 species: Archae - 0; Bacteria - 0; Metazoa - 0; Fungi - 0; Plants - 46; Viruses - 0; Other Eukaryotes - 0 (source: NCBI BLINK).   chr1:7032308-7033030 FORWARD LENGTH=240 | 240  | 240 | 2.00E-69  | 100.0 | 63.8 | 75.4 |
| Rsa1.0_01995.1.g31382.t1 | ref XP_002889052.1  hypothetical protein ARALYDRAFT_476750 [Arabidopsis lyrata subsp. lyrata] gi 297334893 gb EFH65311.1  hypothetical protein ARALYDRAFT_476750 [Arabidopsis lyrata subsp. lyrata]                                                                                                                                                                            | 369  | 344  | 2.00E-73  | 93.2  | 57.2 | 66.4 | hypothetical protein ARALYDRAFT_476750                 | gbpln       | Arabidopsis lyrata   | AT1G76010.1   Symbols:   Alba DNA/RNA-binding protein   chr1:28528505-28530488 REVERSE LENGTH=350                                                                                                                                                                                                                                                                                                                                                                                                                            | 369  | 350 | 5.00E-75  | 94.9  | 57.7 | 66.9 |
| Rsa1.0_01995.1.g31383.t4 | ref XP_003543854.1  PREDICTED: uncharacterized protein LOC100780312 [Glycine max]                                                                                                                                                                                                                                                                                              | 523  | 557  | 4.00E-92  | 106.5 | 35.4 | 44.7 | PREDICTED: uncharacterized protein LOC100780312        | gbenv/gbpln | Glycine max          | AT4G08267.1   Symbols:   hAT transposon superfamily protein   chr4:5216854-5217697 FORWARD LENGTH=126                                                                                                                                                                                                                                                                                                                                                                                                                        | 523  | 126 | 1.00E-14  | 24.1  | 7.1  | 9.6  |
| Rsa1.0_01995.1.g31384.t1 | ref XP_002893092.1  Alpha-expansin 11 precursor [Arabidopsis lyrata subsp. lyrata] gi 297338934 gb EFH69351.1  Alpha-expansin 11 precursor [Arabidopsis lyrata subsp. lyrata]                                                                                                                                                                                                  | 252  | 252  | 1.00E-136 | 100.0 | 93.3 | 97.2 | Alpha-expansin 11 precursor                            | gbpln       | Arabidopsis lyrata   | AT1G20190.1   Symbols:   ATEXPA11, EXP11, ATEXP11, ATEXP ALPHA 1.14, EXPA11   expansin 11   chr1:6998762-6999710 REVERSE LENGTH=252                                                                                                                                                                                                                                                                                                                                                                                          | 252  | 252 | 1.00E-134 | 100.0 | 94.0 | 97.6 |
| Rsa1.0_01995.1.g31385.t1 | ref NP_564106.1  Subtilisin-like serine endopeptidase-like protein [Arabidopsis thaliana] gi 332191823 gb AAE29944.1  Subtilisin-like serine endopeptidase-like protein [Arabidopsis thaliana]                                                                                                                                                                                 | 911  | 780  | 0         | 85.6  | 70.5 | 77.9 | Subtilisin-like serine endopeptidase-like protein      | gbpln       | Arabidopsis thaliana | AT1G20150.1   Symbols:   Subtilisin-like serine endopeptidase family protein   chr1:6987332-6990361 REVERSE LENGTH=780                                                                                                                                                                                                                                                                                                                                                                                                       | 911  | 780 | 0         | 85.6  | 70.5 | 77.9 |
| Rsa1.0_01995.1.g31386.t1 | ref XP_002880415.1  hypothetical protein ARALYDRAFT_481069 [Arabidopsis lyrata subsp. lyrata] gi 297326254 gb EFH56674.1  hypothetical protein ARALYDRAFT_481069 [Arabidopsis lyrata subsp. lyrata]                                                                                                                                                                            | 161  | 161  | 3.00E-61  | 100.0 | 72.0 | 83.2 | hypothetical protein ARALYDRAFT_481069                 | gbpln       | Arabidopsis lyrata   | AT1G20140.1   Symbols:   ASK4, SK4   SKP1-like 4   chr1:6986430-6987079 FORWARD LENGTH=163                                                                                                                                                                                                                                                                                                                                                                                                                                   | 161  | 163 | 1.00E-62  | 101.2 | 70.2 | 82.0 |
| Rsa1.0_01995.1.g31387.t1 | ref NP_001235349.1  uncharacterized protein LOC100306458 [Glycine max] gi 255628601 gb ACU14645.1  unknown [Glycine max]                                                                                                                                                                                                                                                       | 137  | 155  | 8.00E-22  | 113.1 | 48.2 | 62.8 | uncharacterized protein LOC100306458                   | gbenv/gbpln | Glycine max          | AT1G75950.1   Symbols:   SKP1, ASK1, ATSKP1, SKP1A, UJP1   S phase kinase-associated protein 1   chr1:28516715-28517454 FORWARD LENGTH=160                                                                                                                                                                                                                                                                                                                                                                                   | 137  | 160 | 1.00E-21  | 116.8 | 44.5 | 56.9 |
| Rsa1.0_01996.1.g31388.t2 | ref NP_189549.2  phosphate transporter PHO1-9 [Arabidopsis thaliana] gi 75273666 sp Q9LJW0.1 PHO19.ARAT H RecName: Full=Phosphate transporter PHO1 homolog 9; AltName: Full=Protein PHO1 homolog 9; Short=AtPHO1;H9 gi 11994710 dbj BAB02948.1  unnamed protein product [Arabidopsis thaliana] gi 332644009 gb AAE77530.1  phosphate transporter PHO1-9 [Arabidopsis thaliana] | 615  | 800  | 0         | 130.1 | 84.4 | 91.2 | phosphate transporter PHO1-9                           | gbpln       | Arabidopsis thaliana | AT3G29060.1   Symbols:   EXS (ERD1/XPR1/SYG1) family protein   chr3:11044990-11048465 REVERSE LENGTH=800                                                                                                                                                                                                                                                                                                                                                                                                                     | 615  | 800 | 0         | 130.1 | 84.4 | 91.2 |

|                          |                                                                                                                                                                                                                                                                                                                                                                                                                                                                                                                                                                                           |     |     |           |       |      |      |                                                              |       |                      |                                                                                                                                                                                                                                                                                                                                                                                                                                                                                                                            |     |     |           |       |      |      |
|--------------------------|-------------------------------------------------------------------------------------------------------------------------------------------------------------------------------------------------------------------------------------------------------------------------------------------------------------------------------------------------------------------------------------------------------------------------------------------------------------------------------------------------------------------------------------------------------------------------------------------|-----|-----|-----------|-------|------|------|--------------------------------------------------------------|-------|----------------------|----------------------------------------------------------------------------------------------------------------------------------------------------------------------------------------------------------------------------------------------------------------------------------------------------------------------------------------------------------------------------------------------------------------------------------------------------------------------------------------------------------------------------|-----|-----|-----------|-------|------|------|
| Rsa1.0_01996.1.g31389.t1 | ref[XP_002875490.1] protein carrier [Arabidopsis lyrata subsp. lyrata] gi 297321328 gb EFH51749.1  protein carrier [Arabidopsis lyrata subsp. lyrata]                                                                                                                                                                                                                                                                                                                                                                                                                                     | 221 | 222 | 3.00E-95  | 100.5 | 74.7 | 84.2 | protein carrier                                              | gbpln | Arabidopsis lyrata   | AT3G29070.1   Symbols:   emp24/gp25L/p24 family/GOLD family protein   chr3:11050193-11051153 FORWARD LENGTH=225                                                                                                                                                                                                                                                                                                                                                                                                            | 221 | 225 | 3.00E-91  | 101.8 | 74.7 | 83.7 |
| Rsa1.0_01996.1.g31390.t1 | gb AAM78108.1  AT3g29075/MXE2_1 [Arabidopsis thaliana]                                                                                                                                                                                                                                                                                                                                                                                                                                                                                                                                    | 292 | 242 | 7.00E-46  | 82.9  | 32.2 | 34.2 | AT3g29075/MXE2_1                                             | gbpln | Arabidopsis thaliana | AT3G29075.1   Symbols:   glycine-rich protein   chr3:11051645-11052629 REVERSE LENGTH=294                                                                                                                                                                                                                                                                                                                                                                                                                                  | 292 | 294 | 2.00E-48  | 100.7 | 32.2 | 34.2 |
| Rsa1.0_01996.1.g31391.t2 | ref[NP_566842.1] pectinesterase 31 [Arabidopsis thaliana] gi 75311628 sp Q9LVQ0.1 PME31_ARAT H RecName: Full=Pectinesterase 31; Short=PE 31; AltName: Full=Pectin methylesterase 31; Short=AtPME31 gi 9294028 dbj BAB01985.1  pectin methylesterase-like protein [Arabidopsis thaliana] gi 17979179 gb AAL49785.1  putative pectinesterase [Arabidopsis thaliana] gi 20465979 gb AAM2021.1  putative pectinesterase [Arabidopsis thaliana] gi 21536660 gb AAM60992.1  putative pectinesterase [Arabidopsis thaliana] gi 332644013 gb AEE77534.1  pectinesterase 31 [Arabidopsis thaliana] | 356 | 317 | 1.00E-179 | 89.0  | 83.4 | 87.1 | pectinesterase 31                                            | gbpln | Arabidopsis thaliana | AT3G29090.1   Symbols: PME31, ATPME31   pectin methylesterase 31   chr3:11073804-11075335 FORWARD LENGTH=317                                                                                                                                                                                                                                                                                                                                                                                                               | 356 | 317 | 0         | 89.0  | 83.4 | 87.1 |
| Rsa1.0_01996.1.g31392.t1 | gb EOA26115.1  hypothetical protein CARUB_v10019541mg [Capsella rubella]                                                                                                                                                                                                                                                                                                                                                                                                                                                                                                                  | 100 | 100 | 3.00E-31  | 100.0 | 67.0 | 76.0 | hypothetical protein CARUB_v10019541mg                       | gbpln | Capsella rubella     | AT5G38170.1   Symbols:   Bifunctional inhibitor/lipid-transfer protein/seed storage 2S albumin superfamily protein   chr5:15227717-15228028 FORWARD LENGTH=103                                                                                                                                                                                                                                                                                                                                                             | 100 | 103 | 2.00E-15  | 103.0 | 41.0 | 54.0 |
| Rsa1.0_01996.1.g31393.t1 | gb EOA23757.1  hypothetical protein CARUB_v10016968mg [Capsella rubella]                                                                                                                                                                                                                                                                                                                                                                                                                                                                                                                  | 512 | 512 | 0         | 100.0 | 94.9 | 96.1 | hypothetical protein CARUB_v10016968mg                       | gbpln | Capsella rubella     | AT3G29160.2   Symbols: AKIN11, KIN11   SNF1 kinase homolog 11   chr3:11128893-11131510 REVERSE LENGTH=512                                                                                                                                                                                                                                                                                                                                                                                                                  | 512 | 512 | 0         | 100.0 | 94.3 | 95.7 |
| Rsa1.0_01996.1.g31394.t1 | gb EOA23180.1  hypothetical protein CARUB_v10018086mg, partial [Capsella rubella]                                                                                                                                                                                                                                                                                                                                                                                                                                                                                                         | 98  | 184 | 3.00E-38  | 187.8 | 89.8 | 93.9 | hypothetical protein CARUB_v10018086mg, partial              | gbpln | Capsella rubella     | AT3G29170.1   Symbols:   Eukaryotic protein of unknown function (DUF972)   chr3:11136240-11137542 REVERSE LENGTH=121                                                                                                                                                                                                                                                                                                                                                                                                       | 98  | 121 | 9.00E-35  | 123.5 | 86.7 | 92.9 |
| Rsa1.0_01996.1.g31395.t1 | ref[NP_566846.1] chorismate mutase 1 [Arabidopsis thaliana] gi 334302922 sp P42738.3 CM1_ARATH RecName: Full=Chorismate mutase 1, chloroplastic; Short=ACM1; AltName: Full=CM-1; Flags: Precursor gi 89000961 gb ABD59070.1  At3g29200 [Arabidopsis thaliana] gi 332644031 gb AEE77552.1  chorismate mutase 1 [Arabidopsis thaliana]                                                                                                                                                                                                                                                      | 318 | 340 | 1.00E-153 | 106.9 | 89.9 | 93.4 | chorismate mutase 1                                          | gbpln | Arabidopsis thaliana | AT3G29200.1   Symbols: CM1, ATCM1   chorismate mutase 1   chr3:11164582-11166258 REVERSE LENGTH=340                                                                                                                                                                                                                                                                                                                                                                                                                        | 318 | 340 | 1.00E-155 | 106.9 | 89.9 | 93.4 |
| Rsa1.0_01997.1.g31396.t1 | ref[NP_683436.3] uncharacterized protein [Arabidopsis thaliana] gi 53828513 gb AAU94366.1  At1g55535 [Arabidopsis thaliana] gi 55167920 gb AAV43792.1  At1g55535 [Arabidopsis thaliana] gi 332195139 gb AEE33260.1  uncharacterized protein AT1G55535 [Arabidopsis thaliana]                                                                                                                                                                                                                                                                                                              | 325 | 260 | 1.00E-109 | 80.0  | 64.3 | 67.4 | uncharacterized protein                                      | gbpln | Arabidopsis thaliana | AT1G55535.1   Symbols:   unknown protein; FUNCTIONS IN: molecular_function unknown; INVOLVED IN: biological_process unknown; LOCATED IN: cellular_component unknown; EXPRESSED IN: cultured cell; BEST Arabidopsis thaliana protein match is: unknown protein (TAIR:AT3G13420.1); Has 35333 Blast hits to 34131 proteins in 2444 species: Archae - 798; Bacteria - 22429; Metazoa - 974; Fungi - 991; Plants - 531; Viruses - 0; Other Eukaryotes - 9610 (source: NCBI BLINK).   chr1:20732081-20733802 REVERSE LENGTH=260 | 325 | 260 | 1.00E-112 | 80.0  | 64.3 | 67.4 |
| Rsa1.0_01997.1.g31397.t1 | gb ADK63410.1  C3HC4 type zinc finger protein [Brassica rapa]                                                                                                                                                                                                                                                                                                                                                                                                                                                                                                                             | 341 | 312 | 3.00E-96  | 91.5  | 60.7 | 70.7 | C3HC4 type zinc finger protein                               | gbpln | Brassica rapa        | AT1G55530.1   Symbols:   RING/U-box superfamily protein   chr1:20729472-20730527 REVERSE LENGTH=351                                                                                                                                                                                                                                                                                                                                                                                                                        | 341 | 351 | 5.00E-90  | 102.9 | 60.7 | 73.3 |
| Rsa1.0_01997.1.g31398.t1 | gb EOA38535.1  hypothetical protein CARUB_v10010337mg [Capsella rubella]                                                                                                                                                                                                                                                                                                                                                                                                                                                                                                                  | 200 | 200 | 1.00E-110 | 100.0 | 96.0 | 99.0 | hypothetical protein CARUB_v10010337mg                       | gbpln | Capsella rubella     | AT1G55520.2   Symbols: TBP2, ATTBP2   TATA binding protein 2   chr1:20726150-20727483 REVERSE LENGTH=200                                                                                                                                                                                                                                                                                                                                                                                                                   | 200 | 200 | 1.00E-111 | 100.0 | 95.5 | 97.5 |
| Rsa1.0_01997.1.g31399.t1 | ref[NP_175947.1] branched-chain alpha-keto acid decarboxylase E1 beta subunit [Arabidopsis thaliana] gi 4204270 gb AAD10651.1  branched-chain alpha-keto acid decarboxylase E1 beta subunit [Arabidopsis thaliana] gi 89000979 gb ABD59079.1  At1g55510 [Arabidopsis thaliana] gi 332195135 gb AEE33256.1  branched-chain alpha-keto acid decarboxylase E1 beta subunit [Arabidopsis thaliana]                                                                                                                                                                                            | 321 | 352 | 1.00E-172 | 109.7 | 92.5 | 94.4 | branched-chain alpha-keto acid decarboxylase E1 beta subunit | gbpln | Arabidopsis thaliana | AT1G55510.1   Symbols: BCDH BETA1   branched-chain alpha-keto acid decarboxylase E1 beta subunit   chr1:20723482-20725505 FORWARD LENGTH=352                                                                                                                                                                                                                                                                                                                                                                               | 321 | 352 | 1.00E-175 | 109.7 | 92.5 | 94.4 |

|                          |                                                                                                                                                                                                                                                                                                                                                                                                                                                                                                 |     |     |           |       |      |      |                                                                             |       |                         |                                                                                                                                                                                                                                                                                                                                                                                                                                                                                                                          |     |      |           |       |      |      |
|--------------------------|-------------------------------------------------------------------------------------------------------------------------------------------------------------------------------------------------------------------------------------------------------------------------------------------------------------------------------------------------------------------------------------------------------------------------------------------------------------------------------------------------|-----|-----|-----------|-------|------|------|-----------------------------------------------------------------------------|-------|-------------------------|--------------------------------------------------------------------------------------------------------------------------------------------------------------------------------------------------------------------------------------------------------------------------------------------------------------------------------------------------------------------------------------------------------------------------------------------------------------------------------------------------------------------------|-----|------|-----------|-------|------|------|
| Rsa1.0_01997.1.g31400.t1 | ref XP_002894506.1  CPN60B<br>[Arabidopsis lyrata subsp. lyrata]<br>gi 297340348 gb EFH70765.1  CPN60B<br>[Arabidopsis lyrata subsp. lyrata]                                                                                                                                                                                                                                                                                                                                                    | 597 | 600 | 0         | 100.5 | 97.2 | 98.7 | CPN60B                                                                      | gbpln | Arabidopsis<br>lyrata   | AT1G55490.2   Symbols: CPN60B, LEN1  <br>chaperonin 60 beta   chr1:20715717-<br>20718673 REVERSE LENGTH=600                                                                                                                                                                                                                                                                                                                                                                                                              | 597 | 600  | 0         | 100.5 | 96.6 | 98.8 |
| Rsa1.0_01997.1.g31401.t2 | gb EOA36487.1  hypothetical protein<br>CARUB_v10011122mg [Capsella rubella]                                                                                                                                                                                                                                                                                                                                                                                                                     | 118 | 121 | 6.00E-25  | 102.5 | 61.9 | 70.3 | hypothetical protein<br>CARUB_v10011122mg                                   | gbpln | Capsella<br>rubella     | AT1G55475.1   Symbols:   unknown protein;<br>FUNCTIONS IN: molecular_function unknown;<br>INVOLVED IN: biological_process unknown;<br>LOCATED IN: endomembrane system; BEST<br>Arabidopsis thaliana protein match is:<br>unknown protein (TAIR:AT3G13480.1); Has<br>35333 Blast hits to 34131 proteins in 2444<br>species: Archae - 798; Bacteria - 22429;<br>Metazoa - 974; Fungi - 991; Plants - 531;<br>Viruses - 0; Other Eukaryotes - 9610<br>(source: NCBI BLINK).   chr1:20711977-<br>20712586 FORWARD LENGTH=120 | 118 | 120  | 1.00E-23  | 101.7 | 61.9 | 72.9 |
| Rsa1.0_01997.1.g31402.t1 | ref NP_564690.1  DNA/RNA-binding<br>protein Kin17 conserved region-<br>containing protein [Arabidopsis thaliana]<br>gi 13430440 gb AAK25842.1 AF360132_1<br>unknown protein [Arabidopsis thaliana]<br>gi 4204268 gb AAD10649.1  Similar to<br>Kin17 protein [Arabidopsis thaliana]<br>gi 15293155 gb AAK93688.1  unknown<br>protein [Arabidopsis thaliana]<br>gi 332195127 gb AEE33248.1 <br>DNA/RNA-binding protein Kin17<br>conserved region-containing protein<br>[Arabidopsis thaliana]     | 393 | 411 | 0         | 104.6 | 84.2 | 92.6 | DNA/RNA-binding<br>protein Kin17<br>conserved region-<br>containing protein | gbpln | Arabidopsis<br>thaliana | AT1G55460.1   Symbols:   DNA/RNA-binding<br>protein Kin17, conserved region  <br>chr1:20707567-20708802 FORWARD<br>LENGTH=411                                                                                                                                                                                                                                                                                                                                                                                            | 393 | 411  | 0         | 104.6 | 84.2 | 92.6 |
| Rsa1.0_01997.1.g31403.t1 | # # # # # # # # -                                                                                                                                                                                                                                                                                                                                                                                                                                                                               |     |     |           |       |      |      |                                                                             | ----  | ----                    | AT2G37420.1   Symbols:   ATP binding<br>microtubule motor family protein  <br>chr2:15700550-15705165 FORWARD<br>LENGTH=1039                                                                                                                                                                                                                                                                                                                                                                                              | 111 | 1039 | 1.00E-10  | 936.0 | 27.0 | 34.2 |
| Rsa1.0_01997.1.g31404.t1 | ref NP_192641.2  isoamylase 3<br>[Arabidopsis thaliana]<br>gi 25176478 sp Q9MOS5.2 ISOA3, ARA<br>TH RecName: Full=Isoamylase 3,<br>chloroplastic; Short=AtISA3; Flags:<br>Precursor gi 20259518 gb AAM13879.1 <br>putative isoamylase [Arabidopsis<br>thaliana] gi 22136708 gb AAM91673.1 <br>putative isoamylase [Arabidopsis<br>thaliana] gi 11074237 dbj BAE99109.1 <br>isoamylase-like protein [Arabidopsis<br>thaliana] gi 332657313 gb AEE82713.1 <br>isoamylase 3 [Arabidopsis thaliana] | 320 | 764 | 1.00E-129 | 238.8 | 72.5 | 81.6 | isoamylase 3                                                                | gbpln | Arabidopsis<br>thaliana | AT4G09020.1   Symbols: ATISA3, ISA3  <br>isoamylase 3   chr4:5784099-5788839<br>FORWARD LENGTH=764                                                                                                                                                                                                                                                                                                                                                                                                                       | 320 | 764  | 1.00E-131 | 238.8 | 72.5 | 81.6 |
| Rsa1.0_01997.1.g31405.t1 | ref XP_002894503.1  hypothetical<br>protein ARALYDRAFT_892534<br>[Arabidopsis lyrata subsp. lyrata]<br>gi 297340345 gb EFH70762.1 <br>hypothetical protein<br>ARALYDRAFT_892534 [Arabidopsis<br>lyrata subsp. lyrata]                                                                                                                                                                                                                                                                           | 101 | 104 | 2.00E-13  | 103.0 | 33.7 | 38.6 | hypothetical protein<br>ARALYDRAFT_892534                                   | gbpln | Arabidopsis<br>lyrata   | AT1G55365.1   Symbols:   unknown protein;<br>FUNCTIONS IN: molecular_function unknown;<br>INVOLVED IN: biological_process unknown;<br>LOCATED IN: endomembrane system; BEST<br>Arabidopsis thaliana protein match is:<br>unknown protein (TAIR:AT3G13500.1); Has<br>29 Blast hits to 29 proteins in 6 species:<br>Archae - 0; Bacteria - 0; Metazoa - 0; Fungi<br>- 0; Plants - 29; Viruses - 0; Other<br>Eukaryotes - 0 (source: NCBI BLINK).  <br>chr1:20673983-20674363 REVERSE<br>LENGTH=126                         | 101 | 126  | 4.00E-15  | 124.8 | 31.7 | 37.6 |
| Rsa1.0_01997.1.g31406.t1 | gb AAF97981.1 AC000103.31 F21J9.3<br>[Arabidopsis thaliana]                                                                                                                                                                                                                                                                                                                                                                                                                                     | 262 | 457 | 1.00E-128 | 174.4 | 83.6 | 88.2 | F21J9.3                                                                     | gbpln | Arabidopsis<br>thaliana | AT2G13770.1   Symbols:   CONTAINS<br>InterPro DOMAIN/s: Putative harbinger<br>transposase-derived nuclease<br>(InterPro:IPR006912); Has 451 Blast hits to<br>352 proteins in 33 species: Archae - 0;<br>Bacteria - 0; Metazoa - 28; Fungi - 8; Plants<br>- 388; Viruses - 0; Other Eukaryotes - 27<br>(source: NCBI BLINK).   chr2:5736603-<br>5737847 FORWARD LENGTH=343                                                                                                                                                | 262 | 343  | 2.00E-55  | 130.9 | 38.5 | 42.0 |
| Rsa1.0_01997.1.g31407.t2 | ref NP_192761.1  uncharacterized<br>protein [Arabidopsis thaliana]<br>gi 3695409 gb AAC62809.1  T9A4.8 gene<br>product [Arabidopsis thaliana]<br>gi 4538952 emb CAB39776.1 <br>hypothetical protein [Arabidopsis<br>thaliana] gi 7267719 emb CAB78146.1 <br>hypothetical protein [Arabidopsis<br>thaliana] gi 332657457 gb AEE82857.1 <br>uncharacterized protein AT4G10230<br>[Arabidopsis thaliana]                                                                                           | 108 | 273 | 1.00E-22  | 252.8 | 54.6 | 65.7 | uncharacterized<br>protein                                                  | gbpln | Arabidopsis<br>thaliana | AT4G10230.1   Symbols:   unknown protein;<br>BEST Arabidopsis thaliana protein match is:<br>unknown protein (TAIR:AT1G24380.1); Has<br>216 Blast hits to 216 proteins in 30 species:<br>Archae - 0; Bacteria - 8; Metazoa - 10;<br>Fungi - 4; Plants - 160; Viruses - 0; Other<br>Eukaryotes - 34 (source: NCBI BLINK).  <br>chr4:6366261-6367185 FORWARD<br>LENGTH=273                                                                                                                                                  | 108 | 273  | 2.00E-25  | 252.8 | 54.6 | 65.7 |

|                          |                                                                                                                                                                                                                                                                                                                                                                                                                                                                                                                                                                                                                                                                                                                                                                                                                                                                                                         |     |      |           |       |      |      |                                                                 |       |                      |                                                                                                                                               |     |      |           |       |      |      |
|--------------------------|---------------------------------------------------------------------------------------------------------------------------------------------------------------------------------------------------------------------------------------------------------------------------------------------------------------------------------------------------------------------------------------------------------------------------------------------------------------------------------------------------------------------------------------------------------------------------------------------------------------------------------------------------------------------------------------------------------------------------------------------------------------------------------------------------------------------------------------------------------------------------------------------------------|-----|------|-----------|-------|------|------|-----------------------------------------------------------------|-------|----------------------|-----------------------------------------------------------------------------------------------------------------------------------------------|-----|------|-----------|-------|------|------|
| Rsa1.0_01997.1.g31408.t1 | refNP_175933.1  uncharacterized protein [Arabidopsis thaliana]<br>gi 12323166 gb AAG51562.1 AC027034_8 unknown protein; 9920-11896 [Arabidopsis thaliana]<br>gi 24417260 gb AAN60240.1  unknown [Arabidopsis thaliana]<br>gi 57222168 gb AAW38991.1  At1g55360 [Arabidopsis thaliana]<br>gi 111074434 gb ABH04590.1  At1g55360 [Arabidopsis thaliana]<br>gi 332195116 gb AEE33237.1  uncharacterized protein AT1G55360 [Arabidopsis thaliana]                                                                                                                                                                                                                                                                                                                                                                                                                                                           | 422 | 422  | 0         | 100.0 | 92.9 | 95.7 | uncharacterized protein                                         | gbpln | Arabidopsis thaliana | AT1G55360.1   Symbols:   Protein of Unknown Function (DUF239)   chr1:20666526-20668502 REVERSE LENGTH=422                                     | 422 | 422  | 0         | 100.0 | 92.9 | 95.7 |
| Rsa1.0_01997.1.g31409.t1 | refXP_002894501.1  hypothetical protein ARALYDRAFT_892532 [Arabidopsis lyrata subsp. lyrata]<br>gi 297340343 gb EFH70760.1  hypothetical protein ARALYDRAFT_892532 [Arabidopsis lyrata subsp. lyrata]                                                                                                                                                                                                                                                                                                                                                                                                                                                                                                                                                                                                                                                                                                   | 329 | 2151 | 2.00E-54  | 653.8 | 32.5 | 32.5 | hypothetical protein ARALYDRAFT_892532                          | gbpln | Arabidopsis lyrata   | AT1G55350.5   Symbols: DEK1   calpain-type cysteine protease family   chr1:20654463-20664501 REVERSE LENGTH=2179                              | 329 | 2179 | 2.00E-56  | 662.3 | 31.9 | 32.5 |
| Rsa1.0_01997.1.g31410.t1 | refXP_002891830.1  hypothetical protein ARALYDRAFT_474592 [Arabidopsis lyrata subsp. lyrata]<br>gi 297337672 gb EFH68089.1  hypothetical protein ARALYDRAFT_474592 [Arabidopsis lyrata subsp. lyrata]                                                                                                                                                                                                                                                                                                                                                                                                                                                                                                                                                                                                                                                                                                   | 235 | 205  | 1.00E-101 | 87.2  | 80.0 | 83.0 | hypothetical protein ARALYDRAFT_474592                          | gbpln | Arabidopsis lyrata   | AT1G55340.1   Symbols:   Protein of unknown function (DUF1639)   chr1:20652605-20653469 FORWARD LENGTH=205                                    | 235 | 205  | 1.00E-103 | 87.2  | 78.7 | 82.6 |
| Rsa1.0_01997.1.g31411.t1 | gb AAC33226.1  putative non-LTR retroelement reverse transcriptase [Arabidopsis thaliana]                                                                                                                                                                                                                                                                                                                                                                                                                                                                                                                                                                                                                                                                                                                                                                                                               | 470 | 1529 | 1.00E-133 | 325.3 | 51.3 | 66.2 | putative non-LTR retroelement reverse transcriptase             | gbpln | Arabidopsis thaliana | AT3G24255.1   Symbols:   RNA-directed DNA polymerase (reverse transcriptase)-related family protein   chr3:8789471-8793208 FORWARD LENGTH=746 | 470 | 746  | 1.00E-116 | 158.7 | 43.6 | 56.8 |
| Rsa1.0_01998.1.g31412.t1 | gb EOA19331.1  hypothetical protein CARUB_v10003659mg [Capsella rubella]                                                                                                                                                                                                                                                                                                                                                                                                                                                                                                                                                                                                                                                                                                                                                                                                                                | 153 | 154  | 1.00E-67  | 100.7 | 84.3 | 94.1 | hypothetical protein CARUB_v10003659mg                          | gbpln | Capsella rubella     | AT4G03290.1   Symbols:   EF hand calcium-binding protein family   chr4:1442813-1443277 FORWARD LENGTH=154                                     | 153 | 154  | 1.00E-64  | 100.7 | 83.7 | 92.2 |
| Rsa1.0_01998.1.g31413.t1 | #                                                                                                                                                                                                                                                                                                                                                                                                                                                                                                                                                                                                                                                                                                                                                                                                                                                                                                       | #   | #    | #         | #     | #    | #    | -                                                               | ----  | ----                 | #                                                                                                                                             | #   | #    | #         | #     | #    |      |
| Rsa1.0_01998.1.g31414.t1 | refNP_192241.1  translocon at the inner envelope membrane of chloroplasts 20-IV [Arabidopsis thaliana]<br>gi 75267833 sp Q9ZQ29.1 TI204_ARATH RecName: Full=Protein TIC 20-IV, chloroplastic; AltName: Full=Translocon at the inner envelope membrane of chloroplasts 20-IV; Short=AtTIC20-IV; Flags: Precursor<br>gi 13605615 gb AAK32801.1 AF361633.1 AT4g03320/F4C21_25 [Arabidopsis thaliana]<br>gi 4262160 gb AAD14460.1  putative chloroplast protein import component [Arabidopsis thaliana]<br>gi 7270202 emb CAB77817.1  putative chloroplast protein import component [Arabidopsis thaliana]<br>gi 15810087 gb AAL06969.1  AT4g03320/F4C21_25 [Arabidopsis thaliana]<br>gi 21536779 gb AAM61111.1  putative chloroplast protein import component [Arabidopsis thaliana]<br>gi 332656906 gb AEE82306.1  translocon at the inner envelope membrane of chloroplasts 20-IV [Arabidopsis thaliana] | 268 | 284  | 1.00E-105 | 106.0 | 72.4 | 82.8 | translocon at the inner envelope membrane of chloroplasts 20-IV | gbpln | Arabidopsis thaliana | AT4G03320.1   Symbols: tic20-IV   translocon at the inner envelope membrane of chloroplasts 20-IV   chr4:1464529-1465820 FORWARD LENGTH=284   | 268 | 284  | 1.00E-107 | 106.0 | 72.4 | 82.8 |



|                          |                                                                                                                                                                                                                                                                                                                                                                                                                                                                                                                                                                                                                                                                                                                                                                                                                                                                                      |     |      |           |       |      |      |                                                                 |       |                      |                                                                                                                                                                                                                                                                                                                                                                                                                                      |     |     |           |       |      |      |
|--------------------------|--------------------------------------------------------------------------------------------------------------------------------------------------------------------------------------------------------------------------------------------------------------------------------------------------------------------------------------------------------------------------------------------------------------------------------------------------------------------------------------------------------------------------------------------------------------------------------------------------------------------------------------------------------------------------------------------------------------------------------------------------------------------------------------------------------------------------------------------------------------------------------------|-----|------|-----------|-------|------|------|-----------------------------------------------------------------|-------|----------------------|--------------------------------------------------------------------------------------------------------------------------------------------------------------------------------------------------------------------------------------------------------------------------------------------------------------------------------------------------------------------------------------------------------------------------------------|-----|-----|-----------|-------|------|------|
| Rsa1.0_01998.1.g31415.t2 | ref[NP_192241.1] translocon at the inner envelope membrane of chloroplasts 20-IV [Arabidopsis thaliana]<br>gi 75257833 sp O92Q29.1 T1204 ARATH RecName: Full=Protein TIC 20-IV, chloroplastic; AltName: Full=Translocon at the inner envelope membrane of chloroplasts 20-IV; Short=AtTIC20-IV; Flags: Precursor<br>gi 13605615 gb AAK32801.1 AF361633.1 AT4g03320/F4C21.25 [Arabidopsis thaliana] gi 4262160 gb AAD14460.1 putative chloroplast protein import component [Arabidopsis thaliana] gi 7270202 emb CAB77817.1 putative chloroplast protein import component [Arabidopsis thaliana] gi 15810087 gb AAL06969.1 AT4g03320/F4C21.25 [Arabidopsis thaliana] gi 21536779 gb AAM61111.1 putative chloroplast protein import component [Arabidopsis thaliana] gi 332656906 gb AEE82306.1 translocon at the inner envelope membrane of chloroplasts 20-IV [Arabidopsis thaliana] | 288 | 284  | 1.00E-128 | 98.6  | 76.7 | 83.0 | translocon at the inner envelope membrane of chloroplasts 20-IV | gbpln | Arabidopsis thaliana | AT4G03320.1   Symbols: tic20-IV   translocon at the inner envelope membrane of chloroplasts 20-IV   chr4:1464529-1465820 FORWARD LENGTH=284                                                                                                                                                                                                                                                                                          | 288 | 284 | 1.00E-131 | 98.6  | 76.7 | 83.0 |
| Rsa1.0_01998.1.g31416.t1 | ref[XP_002874867.1] SYP123 [Arabidopsis lyrata subsp. lyrata] gi 297320704 gb EFH51126.1 SYP123 [Arabidopsis lyrata subsp. lyrata]                                                                                                                                                                                                                                                                                                                                                                                                                                                                                                                                                                                                                                                                                                                                                   | 305 | 305  | 1.00E-169 | 100.0 | 95.1 | 98.7 | SYP123                                                          | gbpln | Arabidopsis lyrata   | AT4G03330.1   Symbols: SYP123, ATSY123   syntaxin of plants 123   chr4:1466525-1467605 FORWARD LENGTH=305                                                                                                                                                                                                                                                                                                                            | 305 | 305 | 1.00E-163 | 100.0 | 93.4 | 97.7 |
| Rsa1.0_01998.1.g31417.t1 | #                                                                                                                                                                                                                                                                                                                                                                                                                                                                                                                                                                                                                                                                                                                                                                                                                                                                                    | #   | #    | #         | #     | #    | -    | ----                                                            | ----  | #                    | #                                                                                                                                                                                                                                                                                                                                                                                                                                    | #   | #   | #         | #     | #    | #    |
| Rsa1.0_01998.1.g31418.t1 | #                                                                                                                                                                                                                                                                                                                                                                                                                                                                                                                                                                                                                                                                                                                                                                                                                                                                                    | #   | #    | #         | #     | #    | -    | ----                                                            | ----  | #                    | #                                                                                                                                                                                                                                                                                                                                                                                                                                    | #   | #   | #         | #     | #    | #    |
| Rsa1.0_01998.1.g31419.t1 | #                                                                                                                                                                                                                                                                                                                                                                                                                                                                                                                                                                                                                                                                                                                                                                                                                                                                                    | #   | #    | #         | #     | #    | -    | ----                                                            | ----  | #                    | #                                                                                                                                                                                                                                                                                                                                                                                                                                    | #   | #   | #         | #     | #    | #    |
| Rsa1.0_01998.1.g31420.t1 | gb EOA22332.1  hypothetical protein CARUB_v10002939mg, partial [Capsella rubella]                                                                                                                                                                                                                                                                                                                                                                                                                                                                                                                                                                                                                                                                                                                                                                                                    | 400 | 1294 | 9.00E-32  | 323.5 | 33.8 | 47.5 | hypothetical protein CARUB_v10002939mg, partial                 | gbpln | Capsella rubella     | #                                                                                                                                                                                                                                                                                                                                                                                                                                    | #   | #   | #         | #     | #    | #    |
| Rsa1.0_01998.1.g31421.t1 | #                                                                                                                                                                                                                                                                                                                                                                                                                                                                                                                                                                                                                                                                                                                                                                                                                                                                                    | #   | #    | #         | #     | #    | -    | ----                                                            | ----  | #                    | #                                                                                                                                                                                                                                                                                                                                                                                                                                    | #   | #   | #         | #     | #    | #    |
| Rsa1.0_01999.1.g31422.t8 | #                                                                                                                                                                                                                                                                                                                                                                                                                                                                                                                                                                                                                                                                                                                                                                                                                                                                                    | #   | #    | #         | #     | #    | -    | ----                                                            | ----  | #                    | #                                                                                                                                                                                                                                                                                                                                                                                                                                    | #   | #   | #         | #     | #    | #    |
| Rsa1.0_01999.1.g31423.t1 | ref[XP_002869288.1] hypothetical protein ARALYDRAFT_913230 [Arabidopsis lyrata subsp. lyrata] gi 297315124 gb EFH45547.1  hypothetical protein ARALYDRAFT_913230 [Arabidopsis lyrata subsp. lyrata]                                                                                                                                                                                                                                                                                                                                                                                                                                                                                                                                                                                                                                                                                  | 602 | 777  | 1.00E-31  | 129.1 | 15.0 | 19.4 | hypothetical protein ARALYDRAFT_913230                          | gbpln | Arabidopsis lyrata   | AT4G32190.1   Symbols:   Myosin heavy chain-related protein   chr4:15545052-15547689 FORWARD LENGTH=783                                                                                                                                                                                                                                                                                                                              | 602 | 783 | 4.00E-34  | 130.1 | 15.0 | 19.3 |
| Rsa1.0_01999.1.g31424.t1 | #                                                                                                                                                                                                                                                                                                                                                                                                                                                                                                                                                                                                                                                                                                                                                                                                                                                                                    | #   | #    | #         | #     | #    | -    | ----                                                            | ----  | #                    | #                                                                                                                                                                                                                                                                                                                                                                                                                                    | #   | #   | #         | #     | #    | #    |
| Rsa1.0_01999.1.g31425.t1 | ref[XP_002893772.1] hypothetical protein ARALYDRAFT_890929 [Arabidopsis lyrata subsp. lyrata] gi 297339614 gb EFH70031.1  hypothetical protein ARALYDRAFT_890929 [Arabidopsis lyrata subsp. lyrata]                                                                                                                                                                                                                                                                                                                                                                                                                                                                                                                                                                                                                                                                                  | 183 | 175  | 7.00E-84  | 95.6  | 84.7 | 91.8 | hypothetical protein ARALYDRAFT_890929                          | gbpln | Arabidopsis lyrata   | AT1G33490.1   Symbols:   unknown protein; CONTAINS InterPro DOMAIN/s: Protein of unknown function DUF2062 (InterPro:IPR018639); BEST Arabidopsis thaliana protein match is: unknown protein (TAIR:AT4G10140.1); Has 88 Blast hits to 88 proteins in 29 species: Archaea - 0; Bacteria - 28; Metazoa - 0; Fungi - 0; Plants - 54; Viruses - 0; Other Eukaryotes - 6 (source: NCBI BLink).   chr1:12150941-12152276 REVERSE LENGTH=175 | 183 | 175 | 3.00E-86  | 95.6  | 84.7 | 92.3 |
| Rsa1.0_01999.1.g31426.t1 | ref[NP_683346.3] putative VAMP-like protein [Arabidopsis thaliana] gi 68566199 sp Q84WF5.1 VAMPL ARAT H RecName: Full=Probable VAMP-like protein At1g33475 gi 28392986 gb AA041928.1  unknown protein [Arabidopsis thaliana] gi 50253582 gb AAT71993.1  At1g33480 [Arabidopsis thaliana] gi 332193477 gb AEE31598.1  putative VAMP-like protein [Arabidopsis thaliana]                                                                                                                                                                                                                                                                                                                                                                                                                                                                                                               | 243 | 255  | 4.00E-94  | 104.9 | 78.6 | 88.9 | putative VAMP-like protein                                      | gbpln | Arabidopsis thaliana | AT1G33475.1   Symbols:   SNARE-like superfamily protein   chr1:12147423-12148190 REVERSE LENGTH=255                                                                                                                                                                                                                                                                                                                                  | 243 | 255 | 1.00E-96  | 104.9 | 78.6 | 88.9 |
| Rsa1.0_01999.1.g31427.t1 | gb AAG51783.1 AC079679.3 reverse transcriptase, putative; 16838-20266 [Arabidopsis thaliana]                                                                                                                                                                                                                                                                                                                                                                                                                                                                                                                                                                                                                                                                                                                                                                                         | 336 | 1142 | 6.00E-65  | 339.9 | 44.6 | 60.7 | reverse transcriptase, putative; 16838-20266                    | gbpln | Arabidopsis thaliana | AT4G29090.1   Symbols:   Ribonuclease H-like superfamily protein   chr4:14333528-14335255 FORWARD LENGTH=575                                                                                                                                                                                                                                                                                                                         | 336 | 575 | 4.00E-26  | 171.1 | 31.0 | 50.9 |
| Rsa1.0_01999.1.g31428.t1 | #                                                                                                                                                                                                                                                                                                                                                                                                                                                                                                                                                                                                                                                                                                                                                                                                                                                                                    | #   | #    | #         | #     | #    | -    | ----                                                            | ----  | #                    | #                                                                                                                                                                                                                                                                                                                                                                                                                                    | #   | #   | #         | #     | #    | #    |
| Rsa1.0_01999.1.g31429.t1 | ref[XP_002862920.1] predicted protein [Arabidopsis lyrata subsp. lyrata] gi 297308694 gb EFH39179.1  predicted protein [Arabidopsis lyrata subsp. lyrata]                                                                                                                                                                                                                                                                                                                                                                                                                                                                                                                                                                                                                                                                                                                            | 251 | 266  | 1.00E-61  | 106.0 | 51.4 | 67.7 | predicted protein                                               | gbpln | Arabidopsis lyrata   | #                                                                                                                                                                                                                                                                                                                                                                                                                                    | #   | #   | #         | #     | #    | #    |

|                          |                                                                                                                                                                                                                                                                                                                                                                                                                                                                                                                                                                                                                                                                                                                                             |     |      |           |       |      |      |                                                     |       |                      |                                                                                                                                                                                                                                                                                                                                                                         |     |     |           |       |      |      |
|--------------------------|---------------------------------------------------------------------------------------------------------------------------------------------------------------------------------------------------------------------------------------------------------------------------------------------------------------------------------------------------------------------------------------------------------------------------------------------------------------------------------------------------------------------------------------------------------------------------------------------------------------------------------------------------------------------------------------------------------------------------------------------|-----|------|-----------|-------|------|------|-----------------------------------------------------|-------|----------------------|-------------------------------------------------------------------------------------------------------------------------------------------------------------------------------------------------------------------------------------------------------------------------------------------------------------------------------------------------------------------------|-----|-----|-----------|-------|------|------|
| Rsa1.0_01999.1.g31430.t1 | #                                                                                                                                                                                                                                                                                                                                                                                                                                                                                                                                                                                                                                                                                                                                           | #   | #    | #         | #     | #    | #    | #                                                   | -     | ----                 | ----                                                                                                                                                                                                                                                                                                                                                                    | #   | #   | #         | #     | #    | #    |
| Rsa1.0_02000.1.g31431.t1 | #                                                                                                                                                                                                                                                                                                                                                                                                                                                                                                                                                                                                                                                                                                                                           | #   | #    | #         | #     | #    | #    | #                                                   | -     | ----                 | ----                                                                                                                                                                                                                                                                                                                                                                    | #   | #   | #         | #     | #    | #    |
| Rsa1.0_02000.1.g31432.t1 | ref NP_849877.1  uncharacterized protein [Arabidopsis thaliana]   gi 26453012 dbj BAC43582.1  unknown protein [Arabidopsis thaliana]   gi 28973253 gb AA063951.1  unknown protein [Arabidopsis thaliana]   gi 332197123 gb AEE35244.1  uncharacterized protein AT1G71865 [Arabidopsis thaliana]                                                                                                                                                                                                                                                                                                                                                                                                                                             | 106 | 99   | 4.00E-36  | 93.4  | 84.0 | 87.7 | uncharacterized protein                             | gbpln | Arabidopsis thaliana | AT1G71865.1   Symbols:   unknown protein; FUNCTIONS IN: molecular.function unknown; INVOLVED IN: biological.process unknown; LOCATED IN: chloroplast; Has 33 Blast hits to 33 proteins in 11 species: Archae - 0; Bacteria - 0; Metazoa - 0; Fungi - 0; Plants - 33; Viruses - 0; Other Eukaryotes - 0 (source: NCBI BLINK).   chr1:27030117-27030416 FORWARD LENGTH=99 | 106 | 99  | 6.00E-39  | 93.4  | 84.0 | 87.7 |
| Rsa1.0_02000.1.g31433.t2 | ref XP_002887394.1  hypothetical protein ARALYDRAFT_339406 [Arabidopsis lyrata subsp. lyrata]   gi 297333235 gb EFH63653.1  hypothetical protein ARALYDRAFT_339406 [Arabidopsis lyrata subsp. lyrata]                                                                                                                                                                                                                                                                                                                                                                                                                                                                                                                                       | 362 | 342  | 1.00E-153 | 94.5  | 72.7 | 80.9 | hypothetical protein ARALYDRAFT_339406              | gbpln | Arabidopsis lyrata   | AT1G71860.3   Symbols: PTP1, ATPPTP1   protein tyrosine phosphatase 1   chr1:27028666-27028675 FORWARD LENGTH=340                                                                                                                                                                                                                                                       | 362 | 340 | 1.00E-151 | 93.9  | 72.9 | 81.5 |
| Rsa1.0_02000.1.g31434.t1 | ref XP_002889905.1  predicted protein [Arabidopsis lyrata subsp. lyrata]   gi 297335747 gb EFH66164.1  predicted protein [Arabidopsis lyrata subsp. lyrata]                                                                                                                                                                                                                                                                                                                                                                                                                                                                                                                                                                                 | 305 | 389  | 7.00E-88  | 127.5 | 58.7 | 70.8 | predicted protein                                   | gbpln | Arabidopsis lyrata   | AT1G11270.2   Symbols:   F-box and associated interaction domains-containing protein   chr1:3785715-3786653 REVERSE LENGTH=312                                                                                                                                                                                                                                          | 305 | 312 | 7.00E-77  | 102.3 | 54.1 | 68.2 |
| Rsa1.0_02000.1.g31435.t1 | gb EOA34289.1  hypothetical protein CARUB_v10021804mg [Capsella rubella]                                                                                                                                                                                                                                                                                                                                                                                                                                                                                                                                                                                                                                                                    | 471 | 471  | 0         | 100.0 | 77.3 | 87.0 | hypothetical protein CARUB_v10021804mg              | gbpln | Capsella rubella     | AT1G71850.1   Symbols:   Ubiquitin carboxyl-terminal hydrolase family protein   chr1:27024875-27026287 REVERSE LENGTH=470                                                                                                                                                                                                                                               | 471 | 470 | 0         | 99.8  | 77.1 | 87.0 |
| Rsa1.0_02000.1.g31436.t1 | ref XP_002888851.1  mate efflux family protein [Arabidopsis lyrata subsp. lyrata]   gi 297334692 gb EFH65110.1  mate efflux family protein [Arabidopsis lyrata subsp. lyrata]                                                                                                                                                                                                                                                                                                                                                                                                                                                                                                                                                               | 508 | 509  | 0         | 100.2 | 92.7 | 95.9 | mate efflux family protein                          | gbpln | Arabidopsis lyrata   | AT1G71870.1   Symbols:   MATE efflux family protein   chr1:27032456-27034895 REVERSE LENGTH=510                                                                                                                                                                                                                                                                         | 508 | 510 | 0         | 100.4 | 92.1 | 95.5 |
| Rsa1.0_02000.1.g31437.t1 | #                                                                                                                                                                                                                                                                                                                                                                                                                                                                                                                                                                                                                                                                                                                                           | #   | #    | #         | #     | #    | #    | -                                                   | ----  | ----                 | #                                                                                                                                                                                                                                                                                                                                                                       | #   | #   | #         | #     | #    |      |
| Rsa1.0_02000.1.g31438.t1 | gb AAD17398.1  putative non-LTR retroelement reverse transcriptase [Arabidopsis thaliana]                                                                                                                                                                                                                                                                                                                                                                                                                                                                                                                                                                                                                                                   | 817 | 1225 | 7.00E-62  | 149.9 | 13.7 | 19.5 | putative non-LTR retroelement reverse transcriptase | gbpln | Arabidopsis thaliana | AT2G13450.1   Symbols:   unknown protein; BEST Arabidopsis thaliana protein match is: unknown protein (TAIR:AT4G02000.1); Has 247 Blast hits to 243 proteins in 13 species: Archae - 0; Bacteria - 2; Metazoa - 0; Fungi - 2; Plants - 243; Viruses - 0; Other Eukaryotes - 0 (source: NCBI BLINK).   chr2:5598739-5599923 REVERSE LENGTH=394                           | 817 | 394 | 4.00E-20  | 48.2  | 6.5  | 10.8 |
| Rsa1.0_02001.1.g31439.t1 | #                                                                                                                                                                                                                                                                                                                                                                                                                                                                                                                                                                                                                                                                                                                                           | #   | #    | #         | #     | #    | #    | -                                                   | ----  | ----                 | #                                                                                                                                                                                                                                                                                                                                                                       | #   | #   | #         | #     | #    |      |
| Rsa1.0_02001.1.g31440.t1 | #                                                                                                                                                                                                                                                                                                                                                                                                                                                                                                                                                                                                                                                                                                                                           | #   | #    | #         | #     | #    | #    | -                                                   | ----  | ----                 | #                                                                                                                                                                                                                                                                                                                                                                       | #   | #   | #         | #     | #    |      |
| Rsa1.0_02001.1.g31441.t1 | gb EOA21025.1  hypothetical protein CARUB_v10001362mg [Capsella rubella]                                                                                                                                                                                                                                                                                                                                                                                                                                                                                                                                                                                                                                                                    | 97  | 339  | 4.00E-18  | 349.5 | 48.5 | 49.5 | hypothetical protein CARUB_v10001362mg              | gbpln | Capsella rubella     | AT5G05760.1   Symbols: SYP31, ATSED5, ATSYP31, SED5   syntxin of plants 31   chr5:1729111-1730903 REVERSE LENGTH=336                                                                                                                                                                                                                                                    | 97  | 336 | 4.00E-20  | 346.4 | 46.4 | 49.5 |
| Rsa1.0_02001.1.g31442.t1 | gb EOA35423.1  hypothetical protein CARUB_v10020623mg [Capsella rubella]                                                                                                                                                                                                                                                                                                                                                                                                                                                                                                                                                                                                                                                                    | 45  | 335  | 1.00E-10  | 744.4 | 73.3 | 93.3 | hypothetical protein CARUB_v10020623mg              | gbpln | Capsella rubella     | AT1G78620.2   Symbols:   Protein of unknown function DUF92, transmembrane   chr1:29573862-29575758 REVERSE LENGTH=342                                                                                                                                                                                                                                                   | 45  | 342 | 8.00E-13  | 760.0 | 68.9 | 88.9 |
| Rsa1.0_02001.1.g31443.t2 | gb ABD64958.1  ethylene responsive element binding factor -related [Brassica oleracea]                                                                                                                                                                                                                                                                                                                                                                                                                                                                                                                                                                                                                                                      | 731 | 954  | 1.00E-103 | 130.5 | 37.1 | 47.2 | ethylene responsive element binding factor -related | gbpln | Brassica oleracea    | #                                                                                                                                                                                                                                                                                                                                                                       | #   | #   | #         | #     | #    |      |
| Rsa1.0_02001.1.g31444.t1 | ref NP_192787.1  oxidoreductase, 2OG-Fe(II) oxygenase family protein [Arabidopsis thaliana]   gi 115913 gb AAD03424.1  contains similarity to Iron/Ascorbate family of oxidoreductases (Pfam: PF00671, Score=307.1, E=2.2e-88, N=1) [Arabidopsis thaliana]   gi 4539409 emb CAB40042.1  putative flavanone 3-beta-hydroxylase [Arabidopsis thaliana]   gi 7267746 emb CAB78172.1  putative flavanone 3-beta-hydroxylase [Arabidopsis thaliana]   gi 28393112 gb AAO41989.1  putative flavanone 3-beta-hydroxylase [Arabidopsis thaliana]   gi 28827438 gb AAO50563.1  putative flavanone 3-beta-hydroxylase [Arabidopsis thaliana]   gi 332657490 gb AEE82890.1  oxidoreductase, 2OG-Fe(II) oxygenase family protein [Arabidopsis thaliana] | 456 | 348  | 1.00E-130 | 76.3  | 48.0 | 51.5 | oxidoreductase, 2OG-Fe(II) oxygenase family protein | gbpln | Arabidopsis thaliana | AT4G10490.1   Symbols:   2-oxoglutarate (2OG) and Fe(II)-dependent oxygenase superfamily protein   chr4:6483900-6485179 FORWARD LENGTH=348                                                                                                                                                                                                                              | 456 | 348 | 1.00E-132 | 76.3  | 48.0 | 51.5 |

|                           |                                                                                                                                                                                                                                                                                                                                                                                                                                                                                                                                                       |      |      |           |        |      |      |                                                     |       |                      |                                                                                                                                               |      |      |           |       |      |      |
|---------------------------|-------------------------------------------------------------------------------------------------------------------------------------------------------------------------------------------------------------------------------------------------------------------------------------------------------------------------------------------------------------------------------------------------------------------------------------------------------------------------------------------------------------------------------------------------------|------|------|-----------|--------|------|------|-----------------------------------------------------|-------|----------------------|-----------------------------------------------------------------------------------------------------------------------------------------------|------|------|-----------|-------|------|------|
| Rsa1.0_02001.1.g31445.t1  | ref[XP_002872518.1] predicted protein [Arabidopsis lyrata subsp. lyrata] gi 297318355 gb EFH48777.1  predicted protein [Arabidopsis lyrata subsp. lyrata]                                                                                                                                                                                                                                                                                                                                                                                             | 87   | 351  | 4.00E-26  | 403.4  | 65.5 | 74.7 | predicted protein                                   | gbpln | Arabidopsis lyrata   | AT4G10490.1   Symbols:   2-oxoglutarate (2OG) and Fe(II)-dependent oxygenase superfamily protein   chr4:6483900-6485179 FORWARD LENGTH=348    | 87   | 348  | 6.00E-25  | 400.0 | 58.6 | 67.8 |
| Rsa1.0_02001.1.g31446.t1  | # # # # # # # #                                                                                                                                                                                                                                                                                                                                                                                                                                                                                                                                       |      |      |           |        |      |      | -                                                   | ----  | ----                 | # # # # # # # #                                                                                                                               |      |      |           |       |      |      |
| Rsa1.0_02001.1.g31447.t1  | gb EOA21470.1  hypothetical protein CARUB.v10001862mg, partial [Capsella rubella]                                                                                                                                                                                                                                                                                                                                                                                                                                                                     | 210  | 235  | 3.00E-76  | 111.9  | 87.1 | 94.3 | hypothetical protein CARUB.v10001862mg, partial     | gbpln | Capsella rubella     | AT4G10480.2   Symbols:   Nascent polypeptide-associated complex (NAC), alpha subunit family protein   chr4:6478089-6479079 REVERSE LENGTH=211 | 210  | 211  | 2.00E-77  | 100.5 | 83.8 | 91.9 |
| Rsa1.0_02002.1.g31448.t1  | gb AAD22286.1  putative non-LTR retroelement reverse transcriptase [Arabidopsis thaliana]                                                                                                                                                                                                                                                                                                                                                                                                                                                             | 93   | 1311 | 2.00E-11  | 1409.7 | 39.8 | 65.6 | putative non-LTR retroelement reverse transcriptase | gbpln | Arabidopsis thaliana | AT1G10000.1   Symbols:   Ribonuclease H-like superfamily protein   chr1:3263877-3264788 REVERSE LENGTH=303                                    | 93   | 303  | 2.00E-11  | 325.8 | 32.3 | 59.1 |
| Rsa1.0_02002.1.g31449.t1  | # # # # # # # #                                                                                                                                                                                                                                                                                                                                                                                                                                                                                                                                       |      |      |           |        |      |      | -                                                   | ----  | ----                 | # # # # # # # #                                                                                                                               |      |      |           |       |      |      |
| Rsa1.0_02002.1.g31450.t1  | emb CAB88537.1  acyl CoA reductase-like protein [Arabidopsis thaliana]                                                                                                                                                                                                                                                                                                                                                                                                                                                                                | 190  | 402  | 3.00E-61  | 211.6  | 64.2 | 77.9 | acyl CoA reductase-like protein                     | gbpln | Arabidopsis thaliana | AT3G44560.1   Symbols: FAR8   fatty acid reductase 8   chr3:16151177-16154397 FORWARD LENGTH=496                                              | 190  | 496  | 1.00E-63  | 261.1 | 63.2 | 78.9 |
| Rsa1.0_02002.1.g31451.t3  | emb CAA19714.1  putative protein [Arabidopsis thaliana] gi 7269573 emb CAB79575.1  putative protein [Arabidopsis thaliana] ref NP_197634.1  putative fatty acyl-CoA reductase 7 [Arabidopsis thaliana] gi 75171715 sp O9FMQ9.1 FACR7_ARAT H RecName: Full=Putative fatty acyl-CoA reductase 7                                                                                                                                                                                                                                                         | 780  | 819  | 4.00E-61  | 105.0  | 14.6 | 18.6 | putative protein                                    | gbpln | Arabidopsis thaliana | ATMG00810.1   Symbols: ORF240B   DNA/RNA polymerases superfamily protein   chrM:227709-228431 REVERSE LENGTH=240                              | 780  | 240  | 9.00E-47  | 30.8  | 11.7 | 14.1 |
| Rsa1.0_02002.1.g31452.t1  | gi 9757823 db BAB08341.1  acyl CoA reductase-like protein [Arabidopsis thaliana] gi 332005641 gb AED93024.1  putative fatty acyl-CoA reductase 7 [Arabidopsis thaliana]                                                                                                                                                                                                                                                                                                                                                                               | 141  | 409  | 3.00E-41  | 290.1  | 62.4 | 77.3 | putative fatty acyl-CoA reductase 7                 | gbpln | Arabidopsis thaliana | AT5G22420.1   Symbols: FAR7   fatty acid reductase 7   chr5:7429903-7432586 FORWARD LENGTH=409                                                | 141  | 409  | 7.00E-44  | 290.1 | 62.4 | 77.3 |
| Rsa1.0_02002.1.g31453.t1  | gb AAD20430.1  putative Athila retroelement ORF1 protein [Arabidopsis thaliana]                                                                                                                                                                                                                                                                                                                                                                                                                                                                       | 76   | 622  | 7.00E-11  | 818.4  | 47.4 | 63.2 | putative Athila retroelement ORF1 protein           | gbpln | Arabidopsis thaliana | #                                                                                                                                             | #    | #    | #         | #     | #    |      |
| Rsa1.0_02003.1.g31454.t1  | gb AAD55636.1 AC008017.9 Similar to part of disease resistance protein [Arabidopsis thaliana]                                                                                                                                                                                                                                                                                                                                                                                                                                                         | 374  | 414  | 1.00E-135 | 110.7  | 67.9 | 81.0 | Similar to part of disease resistance protein       | gbpln | Arabidopsis thaliana | AT1G72890.1   Symbols:   Disease resistance protein (TIR-NBS class)   chr1:27429947-27431717 FORWARD LENGTH=438                               | 374  | 438  | 1.00E-137 | 117.1 | 67.9 | 81.0 |
| Rsa1.0_02003.1.g31455.t13 | gb EOA35268.1  hypothetical protein CARUB.v10020451mg [Capsella rubella]                                                                                                                                                                                                                                                                                                                                                                                                                                                                              | 238  | 385  | 2.00E-57  | 161.8  | 52.5 | 57.6 | hypothetical protein CARUB.v10020451mg              | gbpln | Capsella rubella     | AT1G72880.1   Symbols:   Survival protein SurE-like phosphatase/nucleotidase   chr1:27423678-27425928 REVERSE LENGTH=385                      | 238  | 385  | 4.00E-58  | 161.8 | 51.7 | 56.3 |
| Rsa1.0_02003.1.g31456.t1  | gb ACP30576.1  disease resistance protein [Brassica rapa subsp. pekinensis]                                                                                                                                                                                                                                                                                                                                                                                                                                                                           | 427  | 426  | 1.00E-150 | 99.8   | 67.0 | 77.5 | disease resistance protein                          | gbpln | Brassica rapa        | AT1G72890.1   Symbols:   Disease resistance protein (TIR-NBS class)   chr1:27429947-27431717 FORWARD LENGTH=438                               | 427  | 438  | 1.00E-148 | 102.6 | 63.7 | 74.2 |
| Rsa1.0_02003.1.g31457.t1  | gb AAD55633.1 AC008017.6 Similar to downy mildew resistance protein RPP5 [Arabidopsis thaliana]                                                                                                                                                                                                                                                                                                                                                                                                                                                       | 1235 | 1258 | 0         | 101.9  | 66.2 | 77.2 | Similar to downy mildew resistance protein RPP5     | gbpln | Arabidopsis thaliana | AT1G72860.1   Symbols:   Disease resistance protein (TIR-NBS-LRR class) family   chr1:27417096-27420778 REVERSE LENGTH=1163                   | 1235 | 1163 | 0         | 94.2  | 62.8 | 71.5 |
| Rsa1.0_02003.1.g31458.t1  | ref NP_177430.1  TIR-NBS class of disease resistance protein [Arabidopsis thaliana] gi 5903076 gb AAD55634.1 AC008017.7 Similar to disease resistance protein NL25 [Arabidopsis thaliana] gi 332197263 gb AEE35384.1  TIR-NBS class of disease resistance protein [Arabidopsis thaliana]                                                                                                                                                                                                                                                              | 539  | 512  | 1.00E-162 | 95.0   | 60.3 | 68.8 | TIR-NBS class of disease resistance protein         | gbpln | Arabidopsis thaliana | AT1G72870.1   Symbols:   Disease resistance protein (TIR-NBS class)   chr1:27421086-27422999 FORWARD LENGTH=512                               | 539  | 512  | 1.00E-164 | 95.0  | 60.3 | 68.8 |
| Rsa1.0_02003.1.g31459.t1  | ref NP_177431.1  survival protein SurE-like phosphatase/nucleotidase [Arabidopsis thaliana] gi 30698907 ref NP_849880.1  survival protein SurE-like phosphatase/nucleotidase [Arabidopsis thaliana] gi 30102530 gb AAP21183.1  At1g72880 [Arabidopsis thaliana] gi 110742851 db BAE99324.1  hypothetical protein [Arabidopsis thaliana] gi 332197264 gb AEE35385.1  survival protein SurE-like phosphatase/nucleotidase [Arabidopsis thaliana] gi 332197265 gb AEE35386.1  survival protein SurE-like phosphatase/nucleotidase [Arabidopsis thaliana] | 380  | 385  | 0         | 101.3  | 90.0 | 93.7 | survival protein SurE-like phosphatase/nucleotidase | gbpln | Arabidopsis thaliana | AT1G72880.1   Symbols:   Survival protein SurE-like phosphatase/nucleotidase   chr1:27423678-27425928 REVERSE LENGTH=385                      | 380  | 385  | 0         | 101.3 | 90.0 | 93.7 |

|                          |                                                                                                                                                                                                                                                                                                                                                                                                                                                                                                                                                                                                                                                                                                                                                                                                                                                                                                                   |      |      |           |       |      |      |                                                   |       |                      |                                                                                                                                                |      |      |           |       |      |      |
|--------------------------|-------------------------------------------------------------------------------------------------------------------------------------------------------------------------------------------------------------------------------------------------------------------------------------------------------------------------------------------------------------------------------------------------------------------------------------------------------------------------------------------------------------------------------------------------------------------------------------------------------------------------------------------------------------------------------------------------------------------------------------------------------------------------------------------------------------------------------------------------------------------------------------------------------------------|------|------|-----------|-------|------|------|---------------------------------------------------|-------|----------------------|------------------------------------------------------------------------------------------------------------------------------------------------|------|------|-----------|-------|------|------|
| Rsa1.0_02003.1.g31460.t1 | gb AAD55633.1 AC008017.6 Similar to downy mildew resistance protein RPP5 [Arabidopsis thaliana]                                                                                                                                                                                                                                                                                                                                                                                                                                                                                                                                                                                                                                                                                                                                                                                                                   | 265  | 1258 | 8.00E-87  | 474.7 | 62.6 | 74.7 | Similar to downy mildew resistance protein RPP5   | gbpln | Arabidopsis thaliana | AT1G72860.1   Symbols:   Disease resistance protein (TR-NBS-LRR class) family   chr1:27417096-2740778 REVERSE LENGTH=1163                      | 265  | 1163 | 9.00E-53  | 438.9 | 37.4 | 41.1 |
| Rsa1.0_02004.1.g31461.t2 | ref XP_002887359.1  hypothetical protein ARALYDRAFT_476259 [Arabidopsis lyrata subsp. lyrata] gi 297334635 gb EFH63618.1  hypothetical protein ARALYDRAFT_476259 [Arabidopsis lyrata subsp. lyrata]                                                                                                                                                                                                                                                                                                                                                                                                                                                                                                                                                                                                                                                                                                               | 1325 | 707  | 1.00E-133 | 53.4  | 19.9 | 21.1 | hypothetical protein ARALYDRAFT_476259            | gbpln | Arabidopsis lyrata   | AT1G71270.1   Symbols: POK, TTD8, ATPVPS52   Vps52 / Sac2 family   chr1:26863736-26869817 FORWARD LENGTH=707                                   | 1325 | 707  | 1.00E-135 | 53.4  | 19.8 | 21.1 |
| Rsa1.0_02004.1.g31462.t1 | # # # # # # # # - ----                                                                                                                                                                                                                                                                                                                                                                                                                                                                                                                                                                                                                                                                                                                                                                                                                                                                                            |      |      |           |       |      |      |                                                   |       |                      |                                                                                                                                                |      |      |           |       |      |      |
| Rsa1.0_02004.1.g31463.t1 | gb EOA17420.1  hypothetical protein CARUB_v10005724mg, partial [Capsella rubella] ref XP_002888794.1  hypothetical protein ARALYDRAFT_476207 [Arabidopsis lyrata subsp. lyrata] gi 297334635 gb EFH65053.1  hypothetical protein ARALYDRAFT_476207 [Arabidopsis lyrata subsp. lyrata]                                                                                                                                                                                                                                                                                                                                                                                                                                                                                                                                                                                                                             | 208  | 212  | 1.00E-13  | 101.9 | 26.4 | 29.3 | hypothetical protein CARUB_v10005724mg, partial   | gbpln | Capsella rubella     | AT4G27270.1   Symbols:   Quinone reductase family protein   chr4:13661458-13663243 REVERSE LENGTH=205                                          | 208  | 205  | 5.00E-15  | 98.6  | 26.4 | 29.8 |
| Rsa1.0_02004.1.g31464.t1 | ref NP_565010.1  RNA polymerase II transcription elongation factor [Arabidopsis thaliana] gi 12323437 gb AAG51700.1 AC016972_19 unknown protein; 36401-34743 [Arabidopsis thaliana] gi 16974550 gb AAL31191.1  At1g71080/F23N20.7 [Arabidopsis thaliana] gi 22137124 gb AAM91407.1  At1g71080/F23N20.7 [Arabidopsis thaliana] gi 332197038 gb AEE35159.1  RNA polymerase II transcription elongation factor [Arabidopsis thaliana] ref XP_002888820.1  glycosyltransferase family 14 protein [Arabidopsis lyrata subsp. lyrata] gi 297334661 gb EFH65079.1  glycosyltransferase family 14 protein [Arabidopsis lyrata subsp. lyrata] ref XP_002888817.1  hypothetical protein ARALYDRAFT_894936 [Arabidopsis lyrata subsp. lyrata] gi 297334658 gb EFH65076.1  hypothetical protein ARALYDRAFT_894936 [Arabidopsis lyrata subsp. lyrata]                                                                          | 479  | 616  | 2.00E-86  | 128.6 | 37.2 | 46.8 | hypothetical protein ARALYDRAFT_476207            | gbpln | Arabidopsis lyrata   | AT1G70770.2   Symbols:   Protein of unknown function DUF2359, transmembrane   chr1:26689822-26691185 REVERSE LENGTH=610                        | 479  | 610  | 2.00E-88  | 127.3 | 36.7 | 46.6 |
| Rsa1.0_02004.1.g31465.t1 | gb EOA33369.1  hypothetical protein CARUB_v10020273mg [Capsella rubella] ref NP_565010.1  RNA polymerase II transcription elongation factor [Arabidopsis thaliana] gi 12323437 gb AAG51700.1 AC016972_19 unknown protein; 36401-34743 [Arabidopsis thaliana] gi 16974550 gb AAL31191.1  At1g71080/F23N20.7 [Arabidopsis thaliana] gi 22137124 gb AAM91407.1  At1g71080/F23N20.7 [Arabidopsis thaliana] gi 332197038 gb AEE35159.1  RNA polymerase II transcription elongation factor [Arabidopsis thaliana] ref XP_002888820.1  glycosyltransferase family 14 protein [Arabidopsis lyrata subsp. lyrata] gi 297334661 gb EFH65079.1  glycosyltransferase family 14 protein [Arabidopsis lyrata subsp. lyrata] ref XP_002888817.1  hypothetical protein ARALYDRAFT_894936 [Arabidopsis lyrata subsp. lyrata] gi 297334658 gb EFH65076.1  hypothetical protein ARALYDRAFT_894936 [Arabidopsis lyrata subsp. lyrata] | 453  | 456  | 0         | 100.7 | 88.5 | 93.8 | hypothetical protein CARUB_v10020273mg            | gbpln | Capsella rubella     | AT1G71090.1   Symbols:   Auxin efflux carrier family protein   chr1:26812551-26813924 FORWARD LENGTH=457                                       | 453  | 457  | 0         | 100.9 | 87.6 | 93.2 |
| Rsa1.0_02004.1.g31466.t1 | ref NP_565010.1  RNA polymerase II transcription elongation factor [Arabidopsis thaliana] gi 12323437 gb AAG51700.1 AC016972_19 unknown protein; 36401-34743 [Arabidopsis thaliana] gi 16974550 gb AAL31191.1  At1g71080/F23N20.7 [Arabidopsis thaliana] gi 22137124 gb AAM91407.1  At1g71080/F23N20.7 [Arabidopsis thaliana] gi 332197038 gb AEE35159.1  RNA polymerase II transcription elongation factor [Arabidopsis thaliana] ref XP_002888820.1  glycosyltransferase family 14 protein [Arabidopsis lyrata subsp. lyrata] gi 297334661 gb EFH65079.1  glycosyltransferase family 14 protein [Arabidopsis lyrata subsp. lyrata] ref XP_002888817.1  hypothetical protein ARALYDRAFT_894936 [Arabidopsis lyrata subsp. lyrata] gi 297334658 gb EFH65076.1  hypothetical protein ARALYDRAFT_894936 [Arabidopsis lyrata subsp. lyrata]                                                                          | 345  | 326  | 1.00E-126 | 94.5  | 76.5 | 83.2 | RNA polymerase II transcription elongation factor | gbpln | Arabidopsis thaliana | AT1G71080.1   Symbols:   RNA polymerase II transcription elongation factor   chr1:26809987-26811645 REVERSE LENGTH=326                         | 345  | 326  | 1.00E-129 | 94.5  | 76.5 | 83.2 |
| Rsa1.0_02004.1.g31467.t1 | ref XP_002888820.1  glycosyltransferase family 14 protein [Arabidopsis lyrata subsp. lyrata] gi 297334661 gb EFH65079.1  glycosyltransferase family 14 protein [Arabidopsis lyrata subsp. lyrata] ref XP_002888817.1  hypothetical protein ARALYDRAFT_894936 [Arabidopsis lyrata subsp. lyrata] gi 297334658 gb EFH65076.1  hypothetical protein ARALYDRAFT_894936 [Arabidopsis lyrata subsp. lyrata]                                                                                                                                                                                                                                                                                                                                                                                                                                                                                                             | 399  | 395  | 0         | 99.0  | 90.0 | 95.7 | glycosyltransferase family 14 protein             | gbpln | Arabidopsis lyrata   | AT1G71070.1   Symbols:   Core-2/-branching beta-1,6-N-acetylglucosaminyltransferase family protein   chr1:26807440-26809152 REVERSE LENGTH=395 | 399  | 395  | 0         | 99.0  | 89.2 | 95.0 |
| Rsa1.0_02004.1.g31468.t1 | ref NP_565008.1  cupredoxin-like protein [Arabidopsis thaliana] gi 15292769 gb AAK92753.1  putative spore coat protein [Arabidopsis thaliana] gi 20259247 gb AAM14359.1  putative spore coat protein [Arabidopsis thaliana] gi 332197034 gb AEE35155.1  cupredoxin-like protein [Arabidopsis thaliana] ref NP_192771.1  glycine-rich protein [Arabidopsis thaliana] gi 4538962 emb CAB39786.1  hypothetical protein [Arabidopsis thaliana] gi 7267730 emb CAB78156.1  hypothetical protein [Arabidopsis thaliana] gi 19347875 gb AAL85995.1  unknown protein [Arabidopsis thaliana] gi 22136796 gb AAM91742.1  unknown protein [Arabidopsis thaliana] gi 332657468 gb AEE82868.1  glycine-rich protein [Arabidopsis thaliana] emb CAA65042.1  chlorophyll a/b-binding protein CP26 in PS II [Brassica juncea]                                                                                                     | 150  | 152  | 2.00E-72  | 101.3 | 90.0 | 94.7 | hypothetical protein ARALYDRAFT_894936            | gbpln | Arabidopsis lyrata   | AT1G71050.1   Symbols: HIPP20   Heavy metal transport/detoxification superfamily protein   chr1:26803322-26803946 REVERSE LENGTH=152           | 150  | 152  | 1.00E-69  | 101.3 | 88.0 | 96.0 |
| Rsa1.0_02004.1.g31469.t1 | ref NP_565008.1  cupredoxin-like protein [Arabidopsis thaliana] gi 15292769 gb AAK92753.1  putative spore coat protein [Arabidopsis thaliana] gi 20259247 gb AAM14359.1  putative spore coat protein [Arabidopsis thaliana] gi 332197034 gb AEE35155.1  cupredoxin-like protein [Arabidopsis thaliana] ref NP_192771.1  glycine-rich protein [Arabidopsis thaliana] gi 4538962 emb CAB39786.1  hypothetical protein [Arabidopsis thaliana] gi 7267730 emb CAB78156.1  hypothetical protein [Arabidopsis thaliana] gi 19347875 gb AAL85995.1  unknown protein [Arabidopsis thaliana] gi 22136796 gb AAM91742.1  unknown protein [Arabidopsis thaliana] gi 332657468 gb AEE82868.1  glycine-rich protein [Arabidopsis thaliana] emb CAA65042.1  chlorophyll a/b-binding protein CP26 in PS II [Brassica juncea]                                                                                                     | 574  | 581  | 0         | 101.2 | 88.5 | 93.7 | cupredoxin-like protein                           | gbpln | Arabidopsis thaliana | AT1G71040.1   Symbols: LPR2   Cupredoxin superfamily protein   chr1:26797201-26800224 REVERSE LENGTH=581                                       | 574  | 581  | 0         | 101.2 | 88.5 | 93.7 |
| Rsa1.0_02005.1.g31470.t1 | ref NP_192771.1  glycine-rich protein [Arabidopsis thaliana] gi 4538962 emb CAB39786.1  hypothetical protein [Arabidopsis thaliana] gi 7267730 emb CAB78156.1  hypothetical protein [Arabidopsis thaliana] gi 19347875 gb AAL85995.1  unknown protein [Arabidopsis thaliana] gi 22136796 gb AAM91742.1  unknown protein [Arabidopsis thaliana] gi 332657468 gb AEE82868.1  glycine-rich protein [Arabidopsis thaliana] emb CAA65042.1  chlorophyll a/b-binding protein CP26 in PS II [Brassica juncea]                                                                                                                                                                                                                                                                                                                                                                                                            | 132  | 130  | 5.00E-53  | 98.5  | 90.9 | 95.5 | glycine-rich protein                              | gbpln | Arabidopsis thaliana | AT4G10330.1   Symbols:   glycine-rich protein   chr4:6406551-6407136 FORWARD LENGTH=130                                                        | 132  | 130  | 1.00E-55  | 98.5  | 90.9 | 95.5 |
| Rsa1.0_02005.1.g31471.t1 | emb CAA65042.1  chlorophyll a/b-binding protein CP26 in PS II [Brassica juncea]                                                                                                                                                                                                                                                                                                                                                                                                                                                                                                                                                                                                                                                                                                                                                                                                                                   | 273  | 283  | 1.00E-144 | 103.7 | 97.8 | 98.5 | chlorophyll a/b-binding protein CP26 in PS II     | gbpln | Brassica juncea      | AT4G10340.1   Symbols: LHCB5   light harvesting complex of photosystem II 5   chr4:6408200-6409496 FORWARD LENGTH=280                          | 273  | 280  | 1.00E-127 | 102.6 | 93.8 | 97.1 |
| Rsa1.0_02005.1.g31472.t1 | gb AAF63106.1 AC006423.7 Hypothetical protein [Arabidopsis thaliana]                                                                                                                                                                                                                                                                                                                                                                                                                                                                                                                                                                                                                                                                                                                                                                                                                                              | 497  | 570  | 3.00E-13  | 114.7 | 14.7 | 24.9 | Hypothetical protein                              | gbpln | Arabidopsis thaliana | # # # # # # #                                                                                                                                  |      |      |           |       |      |      |

|                          |                                                                                                                                                                                                                                                                                                                                                                                                                                                                                                                                                                                                                                                                                                                                                                                                                                                                                                           |     |      |           |       |      |      |                                                           |       |                      |                                                                                                                                                      |     |     |           |       |      |      |
|--------------------------|-----------------------------------------------------------------------------------------------------------------------------------------------------------------------------------------------------------------------------------------------------------------------------------------------------------------------------------------------------------------------------------------------------------------------------------------------------------------------------------------------------------------------------------------------------------------------------------------------------------------------------------------------------------------------------------------------------------------------------------------------------------------------------------------------------------------------------------------------------------------------------------------------------------|-----|------|-----------|-------|------|------|-----------------------------------------------------------|-------|----------------------|------------------------------------------------------------------------------------------------------------------------------------------------------|-----|-----|-----------|-------|------|------|
| Rsa1.0_02005.1.g31473.t1 | gb AAD30632.1 AC006085.5<br>Hypothetical protein [Arabidopsis thaliana]                                                                                                                                                                                                                                                                                                                                                                                                                                                                                                                                                                                                                                                                                                                                                                                                                                   | 888 | 1295 | 1.00E-109 | 145.8 | 28.3 | 39.0 | Hypothetical protein                                      | gbpln | Arabidopsis thaliana | #                                                                                                                                                    | #   | #   | #         | #     | #    | #    |
| Rsa1.0_02005.1.g31474.t4 | #                                                                                                                                                                                                                                                                                                                                                                                                                                                                                                                                                                                                                                                                                                                                                                                                                                                                                                         | #   | #    | #         | #     | #    | -    | ----                                                      | ----  | ----                 | #                                                                                                                                                    | #   | #   | #         | #     | #    | #    |
| Rsa1.0_02005.1.g31475.t1 | #                                                                                                                                                                                                                                                                                                                                                                                                                                                                                                                                                                                                                                                                                                                                                                                                                                                                                                         | #   | #    | #         | #     | #    | -    | ----                                                      | ----  | ----                 | #                                                                                                                                                    | #   | #   | #         | #     | #    | #    |
| Rsa1.0_02006.1.g31476.t1 | ref NP_567153.1  VAMP (vesicle-associated membrane protein) family protein [Arabidopsis thaliana]<br>gi 75148826 sp Q84WW5.1 VAP13_ARAT H RecName: Full=Vesicle-associated protein 1-3; AltName: Full=Plant VAP homolog 13; Short=AtPVA13; AltName: Full=VAMP-associated protein 1-3<br>gi 25054852 gb AAAN71916.1  putative proline-rich protein [Arabidopsis thaliana]<br>gi 33265643 gb AEE81833.1  vesicle-associated protein 1-3 [Arabidopsis thaliana]                                                                                                                                                                                                                                                                                                                                                                                                                                              | 239 | 239  | 1.00E-106 | 100.0 | 85.8 | 90.4 | VAMP (vesicle-associated membrane protein) family protein | gbpln | Arabidopsis thaliana | AT4G00170.1   Symbols:   Plant VAMP (vesicle-associated membrane protein) family protein   chr4:70732-72085 REVERSE LENGTH=239                       | 239 | 239 | 1.00E-108 | 100.0 | 85.8 | 90.4 |
| Rsa1.0_02006.1.g31477.t1 | ref NP_200984.1  inositol polyphosphate multikinase beta [Arabidopsis thaliana]<br>gi 75171533 sp Q9FLT2.1 IPMKB_ARAT H RecName: Full=Inositol polyphosphate multikinase beta; AltName: Full=Inositol polyphosphate 6-/3-/5-kinase beta; Short=AtIpk2-beta; Short=AtIpk2beta<br>gi 15724266 gb AAL06526.1 AF412073.1 AT5g61760/mac9_60 [Arabidopsis thaliana]<br>gi 10176869 dbj BAB10076.1  unnamed protein product [Arabidopsis thaliana]<br>gi 14588985 emb CAC43070.1  inositol-(1,4,5) trisphosphate 3-kinase [Arabidopsis thaliana]<br>gi 14588987 emb CAC43071.1  inositol-(1,4,5) trisphosphate 3-kinase [Arabidopsis thaliana]<br>gi 18252263 gb AAL62012.1  AT5g61760/mac9_60 [Arabidopsis thaliana]<br>gi 2485018 gb AAN63058.1  inositol polyphosphate 6-/3-/5-kinase 2b [Arabidopsis thaliana]<br>gi 332010130 gb AED97513.1  inositol polyphosphate multikinase beta [Arabidopsis thaliana] | 300 | 300  | 1.00E-124 | 100.0 | 70.7 | 83.3 | inositol polyphosphate multikinase beta                   | gbpln | Arabidopsis thaliana | AT5G61760.1   Symbols: ATIPK2BETA, IPK2B, IPK2BETA   inositol polyphosphate kinase 2 beta   chr5:24813916-24814818 REVERSE LENGTH=300                | 300 | 300 | 1.00E-126 | 100.0 | 70.7 | 83.3 |
| Rsa1.0_02006.1.g31478.t1 | gb AAC33226.1  putative non-LTR retroelement reverse transcriptase [Arabidopsis thaliana]                                                                                                                                                                                                                                                                                                                                                                                                                                                                                                                                                                                                                                                                                                                                                                                                                 | 759 | 1529 | 0         | 201.4 | 54.9 | 72.2 | putative non-LTR retroelement reverse transcriptase       | gbpln | Arabidopsis thaliana | AT3G24255.1   Symbols:   RNA-directed DNA polymerase (reverse transcriptase)-related family protein   chr3:8789471-8793208 FORWARD LENGTH=746        | 759 | 746 | 1.00E-109 | 98.3  | 25.8 | 34.8 |
| Rsa1.0_02006.1.g31479.t1 | #                                                                                                                                                                                                                                                                                                                                                                                                                                                                                                                                                                                                                                                                                                                                                                                                                                                                                                         | #   | #    | #         | #     | #    | -    | ----                                                      | ----  | ----                 | #                                                                                                                                                    | #   | #   | #         | #     | #    | #    |
| Rsa1.0_02006.1.g31480.t1 | gb ADC68234.1  bHLH transcription factor [Brassica oleracea]                                                                                                                                                                                                                                                                                                                                                                                                                                                                                                                                                                                                                                                                                                                                                                                                                                              | 180 | 180  | 1.00E-81  | 100.0 | 92.2 | 96.1 | bHLH transcription factor                                 | gbpln | Brassica oleracea    | AT4G00120.1   Symbols: IND1, GT140, IND, EDA33   basic helix-loop-helix (bHLH) DNA-binding superfamily protein   chr4:42601-43197 REVERSE LENGTH=198 | 180 | 198 | 2.00E-65  | 110.0 | 72.2 | 82.2 |
| Rsa1.0_02006.1.g31481.t1 | emb CAB39638.1  RNA-directed DNA polymerase-like protein [Arabidopsis thaliana]<br>gi 7267666 emb CAB78094.1  RNA-directed DNA polymerase-like protein [Arabidopsis thaliana]                                                                                                                                                                                                                                                                                                                                                                                                                                                                                                                                                                                                                                                                                                                             | 388 | 1274 | 1.00E-76  | 328.4 | 45.6 | 60.3 | RNA-directed DNA polymerase-like protein                  | gbpln | Arabidopsis thaliana | AT4G29090.1   Symbols:   Ribonuclease H-like superfamily protein   chr4:14333528-14335255 FORWARD LENGTH=575                                         | 388 | 575 | 2.00E-37  | 148.2 | 31.7 | 47.7 |
| Rsa1.0_02006.1.g31482.t1 | gb EOA21556.1  hypothetical protein CARUB_v10001965mg [Capsella rubella]                                                                                                                                                                                                                                                                                                                                                                                                                                                                                                                                                                                                                                                                                                                                                                                                                                  | 207 | 209  | 2.00E-95  | 101.0 | 84.1 | 89.4 | hypothetical protein CARUB_v10001965mg                    | gbpln | Capsella rubella     | AT4G00080.1   Symbols: UNE11   Plant invertase/pectin methylesterase inhibitor superfamily protein   chr4:32946-33575 FORWARD LENGTH=209             | 207 | 209 | 1.00E-93  | 101.0 | 81.6 | 86.5 |
| Rsa1.0_02006.1.g31483.t1 | #                                                                                                                                                                                                                                                                                                                                                                                                                                                                                                                                                                                                                                                                                                                                                                                                                                                                                                         | #   | #    | #         | #     | #    | -    | ----                                                      | ----  | ----                 | #                                                                                                                                                    | #   | #   | #         | #     | #    | #    |
| Rsa1.0_02007.1.g31484.t1 | ref NP_850164.1  protein autophagy 9 [Arabidopsis thaliana]<br>gi 19715618 gb AAL91630.1  At2g31260/F16D14.10 [Arabidopsis thaliana]<br>gi 19912149 dbj BAB88386.1  autophagy 9 [Arabidopsis thaliana]<br>gi 20466356 gb AAM20495.1  unknown protein [Arabidopsis thaliana]<br>gi 23198070 gb AAN15562.1  unknown protein [Arabidopsis thaliana]<br>gi 23463043 gb AAN33191.1  At2g31260/F16D14.10 [Arabidopsis thaliana]<br>gi 33025342 gb AEC08515.1  protein autophagy 9 [Arabidopsis thaliana]                                                                                                                                                                                                                                                                                                                                                                                                        | 867 | 866  | 0         | 99.9  | 85.4 | 89.7 | protein autophagy 9                                       | gbpln | Arabidopsis thaliana | AT2G31260.1   Symbols: APG9, ATAPG9   autophagy 9 (APG9)   chr2:13322291-13326293 REVERSE LENGTH=866                                                 | 867 | 866 | 0         | 99.9  | 85.4 | 89.7 |
| Rsa1.0_02007.1.g31485.t1 | #                                                                                                                                                                                                                                                                                                                                                                                                                                                                                                                                                                                                                                                                                                                                                                                                                                                                                                         | #   | #    | #         | #     | #    | -    | ----                                                      | ----  | ----                 | #                                                                                                                                                    | #   | #   | #         | #     | #    | #    |

|                          |                                                                                                                                                                                                                                 |      |      |           |       |      |      |                                         |       |                      |                                                                                                                                                                                                                                                                                                                                                                                                                     |      |      |           |       |      |      |
|--------------------------|---------------------------------------------------------------------------------------------------------------------------------------------------------------------------------------------------------------------------------|------|------|-----------|-------|------|------|-----------------------------------------|-------|----------------------|---------------------------------------------------------------------------------------------------------------------------------------------------------------------------------------------------------------------------------------------------------------------------------------------------------------------------------------------------------------------------------------------------------------------|------|------|-----------|-------|------|------|
| Rsa1.0_02007.1.g31486.t1 | gb EOA29302.1  hypothetical protein CARUB_v10025580mg [Capsella rubella]                                                                                                                                                        | 580  | 582  | 0         | 100.3 | 74.3 | 83.1 | hypothetical protein CARUB_v10025580mg  | gbpln | Capsella rubella     | AT2G31270.1   Symbols: ATCDT1A, CDT1A, CDT1   homolog of yeast CDT1 A   chr2:13329037-13331544 FORWARD LENGTH=571                                                                                                                                                                                                                                                                                                   | 580  | 571  | 0         | 98.4  | 73.1 | 80.9 |
| Rsa1.0_02007.1.g31487.t3 | gb EOA26350.1  hypothetical protein CARUB_v10022732mg [Capsella rubella]                                                                                                                                                        | 634  | 719  | 0         | 113.4 | 68.3 | 75.6 | hypothetical protein CARUB_v10022732mg  | gbpln | Capsella rubella     | AT2G31280.1   Symbols: CPUORF7   conserved peptide upstream open reading frame 7   chr2:13339678-13343424 FORWARD LENGTH=720                                                                                                                                                                                                                                                                                        | 634  | 720  | 1.00E-158 | 113.6 | 47.5 | 51.3 |
| Rsa1.0_02007.1.g31488.t1 | ref XP_002879959.1  kinase family protein [Arabidopsis lyrata subsp. lyrata] gi 297325798 gb EFH56218.1  kinase family protein [Arabidopsis lyrata subsp. lyrata]                                                               | 325  | 318  | 1.00E-119 | 97.8  | 65.8 | 78.2 | kinase family protein                   | gbpln | Arabidopsis lyrata   | AT2G41920.1   Symbols:   Protein kinase superfamily protein   chr2:17499448-17500404 FORWARD LENGTH=318                                                                                                                                                                                                                                                                                                             | 325  | 318  | 1.00E-115 | 97.8  | 61.5 | 77.2 |
| Rsa1.0_02008.1.g31489.t1 | ref XP_002864974.1  hypothetical protein ARALYDRAFT_496807 [Arabidopsis lyrata subsp. lyrata] gi 297310809 gb EFH41233.1  hypothetical protein ARALYDRAFT_496807 [Arabidopsis lyrata subsp. lyrata]                             | 129  | 1003 | 1.00E-49  | 777.5 | 75.2 | 76.0 | hypothetical protein ARALYDRAFT_496807  | gbpln | Arabidopsis lyrata   | AT5G65700.2   Symbols: BAM1   Leucine-rich receptor-like protein kinase family protein   chr5:26281826-26284945 FORWARD LENGTH=1003                                                                                                                                                                                                                                                                                 | 129  | 1003 | 3.00E-52  | 777.5 | 75.2 | 76.0 |
| Rsa1.0_02008.1.g31490.t1 | gb EOA31822.1  hypothetical protein CARUB_v10015044mg [Capsella rubella]                                                                                                                                                        | 67   | 68   | 2.00E-24  | 101.5 | 83.6 | 88.1 | hypothetical protein CARUB_v10015044mg  | gbpln | Capsella rubella     | AT3G13275.1   Symbols:   unknown protein; FUNCTIONS IN: molecular_function unknown; INVOLVED IN: biological_process unknown; LOCATED IN: endomembrane system; Has 29 Blast hits to 29 proteins in 10 species: Archae - 0; Bacteria - 0; Metazoa - 0; Fungi - 0; Plants - 29; Viruses - 0; Other Eukaryotes - 0 (source: NCBI BLINK).   chr3:4289425-4289634 REVERSE LENGTH=69                                       | 67   | 69   | 5.00E-20  | 103.0 | 85.1 | 92.5 |
| Rsa1.0_02008.1.g31491.t2 | ref NP_001189876.1  DNA damage-inducible protein 1 [Arabidopsis thaliana] gi 332641803 gb AEE75324.1  DNA damage-inducible protein 1 [Arabidopsis thaliana]                                                                     | 401  | 413  | 0         | 103.0 | 88.8 | 92.8 | DNA damage-inducible protein 1          | gbpln | Arabidopsis thaliana | AT3G13235.3   Symbols:   ubiquitin family protein   chr3:4271492-4274348 REVERSE LENGTH=413                                                                                                                                                                                                                                                                                                                         | 401  | 413  | 0         | 103.0 | 88.8 | 92.8 |
| Rsa1.0_02008.1.g31492.t1 | gb EOA32534.1  hypothetical protein CARUB_v10015817mg [Capsella rubella]                                                                                                                                                        | 289  | 288  | 1.00E-128 | 99.7  | 82.7 | 89.6 | hypothetical protein CARUB_v10015817mg  | gbpln | Capsella rubella     | AT3G13229.1   Symbols:   Plant protein of unknown function (DUF868)   chr3:4268566-4269435 REVERSE LENGTH=289                                                                                                                                                                                                                                                                                                       | 289  | 289  | 1.00E-127 | 100.0 | 78.9 | 86.9 |
| Rsa1.0_02008.1.g31493.t1 | gb EOA32619.1  hypothetical protein CARUB_v10015913mg [Capsella rubella]                                                                                                                                                        | 116  | 112  | 3.00E-36  | 96.6  | 77.6 | 81.0 | hypothetical protein CARUB_v10015913mg  | gbpln | Capsella rubella     | AT3G13227.1   Symbols:   serine-rich protein-related   chr3:4258028-4258363 FORWARD LENGTH=111                                                                                                                                                                                                                                                                                                                      | 116  | 111  | 3.00E-32  | 95.7  | 74.1 | 78.4 |
| Rsa1.0_02008.1.g31494.t1 | #                                                                                                                                                                                                                               | #    | #    | #         | #     | #    | -    | ----                                    | ----  | #                    | #                                                                                                                                                                                                                                                                                                                                                                                                                   | #    | #    | #         | #     | #    |      |
| Rsa1.0_02008.1.g31495.t1 | gb EOA29633.1  hypothetical protein CARUB_v10014543mg [Capsella rubella]                                                                                                                                                        | 234  | 230  | 1.00E-103 | 98.3  | 94.0 | 97.4 | hypothetical protein CARUB_v10014543mg  | gbpln | Capsella rubella     | AT3G13200.1   Symbols: EMB2769   Cwf15 / Cwf15 cell cycle control family protein   chr3:4242239-4243976 FORWARD LENGTH=230                                                                                                                                                                                                                                                                                          | 234  | 230  | 4.00E-96  | 98.3  | 92.3 | 94.9 |
| Rsa1.0_02008.1.g31496.t1 | gb EOA31905.1  hypothetical protein CARUB_v10015134mg [Capsella rubella]                                                                                                                                                        | 390  | 394  | 0         | 101.0 | 82.6 | 90.8 | hypothetical protein CARUB_v10015134mg  | gbpln | Capsella rubella     | AT3G13160.1   Symbols:   Tetratricopeptide repeat (TPR)-like superfamily protein   chr3:4229994-4231178 REVERSE LENGTH=394                                                                                                                                                                                                                                                                                          | 390  | 394  | 0         | 101.0 | 80.3 | 88.7 |
| Rsa1.0_02008.1.g31497.t1 | ref NP_187920.1  uncharacterized protein [Arabidopsis thaliana] gi 10172600 dbj BAB01404.1  unnamed protein product [Arabidopsis thaliana] gi 332641779 gb AEE75300.1  uncharacterized protein AT3G13130 [Arabidopsis thaliana] | 205  | 201  | 8.00E-58  | 98.0  | 60.5 | 74.6 | uncharacterized protein                 | gbpln | Arabidopsis thaliana | AT3G13130.1   Symbols:   unknown protein; FUNCTIONS IN: molecular_function unknown; INVOLVED IN: biological_process unknown; LOCATED IN: endomembrane system; EXPRESSED IN: male gametophyte; Has 140 Blast hits to 132 proteins in 41 species: Archae - 2; Bacteria - 4; Metazoa - 29; Fungi - 20; Plants - 51; Viruses - 0; Other Eukaryotes - 34 (source: NCBI BLINK).   chr3:4223008-4223613 FORWARD LENGTH=201 | 205  | 201  | 3.00E-60  | 98.0  | 60.5 | 74.6 |
| Rsa1.0_02008.1.g31498.t1 | dbj BAD11207.1  multidrug resistance-associated protein [Thlaspi caerulescens]                                                                                                                                                  | 1502 | 1514 | 0         | 100.8 | 90.7 | 94.3 | multidrug resistance-associated protein | gbpln | Thlaspi caerulescens | AT3G13080.1   Symbols: ATMRP3, MRP3, ABCC3   multidrug resistance-associated protein 3   chr3:4196019-4201250 REVERSE LENGTH=1514                                                                                                                                                                                                                                                                                   | 1502 | 1514 | 0         | 100.8 | 89.1 | 94.3 |
| Rsa1.0_02008.1.g31499.t3 | gb EOA18071.1  hypothetical protein CARUB_v10006518mg [Capsella rubella]                                                                                                                                                        | 207  | 659  | 3.00E-12  | 318.4 | 22.2 | 28.0 | hypothetical protein CARUB_v10006518mg  | gbpln | Capsella rubella     | #                                                                                                                                                                                                                                                                                                                                                                                                                   | #    | #    | #         | #     | #    |      |

|                          |                                                                                                                                                                                                                                                                                                                                                                                                                                                                                                                                                                  |      |      |           |       |      |      |                                                   |       |                      |                                                                                                                                                                                                                                                                                                                                                                                                                                                                                                                                                                                                                                                                          |      |      |           |       |      |      |
|--------------------------|------------------------------------------------------------------------------------------------------------------------------------------------------------------------------------------------------------------------------------------------------------------------------------------------------------------------------------------------------------------------------------------------------------------------------------------------------------------------------------------------------------------------------------------------------------------|------|------|-----------|-------|------|------|---------------------------------------------------|-------|----------------------|--------------------------------------------------------------------------------------------------------------------------------------------------------------------------------------------------------------------------------------------------------------------------------------------------------------------------------------------------------------------------------------------------------------------------------------------------------------------------------------------------------------------------------------------------------------------------------------------------------------------------------------------------------------------------|------|------|-----------|-------|------|------|
| Rsa1.0_02009.1.g31500.t1 | ref NP_198686.2  uncharacterized protein [Arabidopsis thaliana] gi 62318737 dbj BAO93759.1  putative protein [Arabidopsis thaliana] gi 332006968 gb AED94351.1  uncharacterized protein AT5G38700 [Arabidopsis thaliana]                                                                                                                                                                                                                                                                                                                                         | 179  | 182  | 5.00E-60  | 101.7 | 67.0 | 78.2 | uncharacterized protein                           | gbpln | Arabidopsis thaliana | AT5G38700.1   Symbols:   unknown protein; FUNCTIONS IN: molecular function unknown; INVOLVED IN: biological process unknown; LOCATED IN: mitochondrion; EXPRESSED IN: 10 plant structures; EXPRESSED DURING: LP.04 four leaves visible, LP.10 ten leaves visible, petal differentiation and expansion stage, LP.08 eight leaves visible, LP.12 twelve leaves visible; BEST Arabidopsis thaliana protein match is: unknown protein (TAIR:AT4G02170.1); Has 64 Blast hits to 64 proteins in 13 species: Archae - 0; Bacteria - 0; Metazoa - 0; Fungi - 0; Plants - 64; Viruses - 0; Other Eukaryotes - 0 (source: NCBI BLINK).   chr5:15489690-15490238 FORWARD LENGTH=182 | 179  | 182  | 2.00E-62  | 101.7 | 67.0 | 78.2 |
| Rsa1.0_02009.1.g31501.t1 | gb ABO36622.1  copia LTR rider [Solanum lycopersicum] gi 133711819 gb ABO36636.1  copia LTR rider [Solanum lycopersicum]                                                                                                                                                                                                                                                                                                                                                                                                                                         | 1366 | 1307 | 0         | 95.7  | 70.6 | 79.8 | copia LTR rider                                   | gbpln | Solanum lycopersicum | AT4G23160.1   Symbols: CRK8   cysteine-rich RLK (RECEPTOR-like protein kinase) 8   chr4:12129485-12134086 FORWARD LENGTH=1262                                                                                                                                                                                                                                                                                                                                                                                                                                                                                                                                            | 1366 | 1262 | 4.00E-87  | 92.4  | 13.0 | 20.4 |
| Rsa1.0_02009.1.g31502.t1 | gb ACD81988.1  cyclic nucleotide gated ion channel 12 [Arabidopsis thaliana]                                                                                                                                                                                                                                                                                                                                                                                                                                                                                     | 420  | 649  | 1.00E-148 | 154.5 | 60.7 | 75.2 | cyclic nucleotide gated ion channel 12            | gbpln | Arabidopsis thaliana | AT2G46450.1   Symbols: ATCNGC12, CNGC12   cyclic nucleotide-gated channel 12   chr2:19065845-19068364 FORWARD LENGTH=649                                                                                                                                                                                                                                                                                                                                                                                                                                                                                                                                                 | 420  | 649  | 1.00E-150 | 154.5 | 60.7 | 75.2 |
| Rsa1.0_02009.1.g31503.t2 | gb AAG10810.1 AC018460.4 Hypothetical protein [Arabidopsis thaliana] gi 12320956 gb AAG50601.1 AC079605_6 hypothetical protein [Arabidopsis thaliana]                                                                                                                                                                                                                                                                                                                                                                                                            | 329  | 484  | 1.00E-108 | 147.1 | 57.4 | 66.9 | Hypothetical protein                              | gbpln | Arabidopsis thaliana | AT4G23160.1   Symbols: CRK8   cysteine-rich RLK (RECEPTOR-like protein kinase) 8   chr4:12129485-12134086 FORWARD LENGTH=1262                                                                                                                                                                                                                                                                                                                                                                                                                                                                                                                                            | 329  | 1262 | 4.00E-15  | 383.6 | 16.4 | 28.3 |
| Rsa1.0_02009.1.g31504.t1 | gb EOA31438.1  hypothetical protein CARUB_v10014622mg [Capsella rubella]                                                                                                                                                                                                                                                                                                                                                                                                                                                                                         | 217  | 210  | 2.00E-89  | 96.8  | 78.3 | 82.9 | hypothetical protein CARUB_v10014622mg            | gbpln | Capsella rubella     | AT3G16780.1   Symbols:   Ribosomal protein L19e family protein   chr3:5708982-5710249 FORWARD LENGTH=209                                                                                                                                                                                                                                                                                                                                                                                                                                                                                                                                                                 | 217  | 209  | 2.00E-89  | 96.3  | 76.5 | 81.6 |
| Rsa1.0_02010.1.g31505.t1 | ref XP_002888714.1  hypothetical protein ARALYDRAFT_476056 [Arabidopsis lyrata subsp. lyrata] gi 29733455 gb EFH64973.1  hypothetical protein ARALYDRAFT_476056 [Arabidopsis lyrata subsp. lyrata]                                                                                                                                                                                                                                                                                                                                                               | 292  | 285  | 1.00E-98  | 97.6  | 74.0 | 83.2 | hypothetical protein ARALYDRAFT_476056            | gbpln | Arabidopsis lyrata   | AT1G69310.2   Symbols: WRKY57, ATWRKY57   WRKY DNA-binding protein 57   chr1:26056118-26057909 REVERSE LENGTH=287                                                                                                                                                                                                                                                                                                                                                                                                                                                                                                                                                        | 292  | 287  | 9.00E-99  | 98.3  | 74.3 | 82.5 |
| Rsa1.0_02010.1.g31506.t1 | ref NP_173968.1  carbohydrate-binding X8 domain-containing protein [Arabidopsis thaliana] gi 9797755 gb AAF98573.1 AC013427_16 Contains similarity to beta-1,3 glucanase from Pisum sativum gb A_J251646. ESTs gb AV552865, gb AV551442, gb AV531309, gb AV563097 come from this gene [Arabidopsis thaliana] gi 29028820 gb AAO64789.1  At1g26450 [Arabidopsis thaliana] gi 110736384 dbj BAF00161.1  predicted GPI-anchored protein [Arabidopsis thaliana] gi 332192572 gb AEE30693.1  carbohydrate-binding X8 domain-containing protein [Arabidopsis thaliana] | 213  | 197  | 3.00E-48  | 92.5  | 58.7 | 71.4 | carbohydrate-binding X8 domain-containing protein | gbpln | Arabidopsis thaliana | AT1G26450.1   Symbols:   Carbohydrate-binding X8 domain superfamily protein   chr1:1949003-9150063 REVERSE LENGTH=197                                                                                                                                                                                                                                                                                                                                                                                                                                                                                                                                                    | 213  | 197  | 9.00E-51  | 92.5  | 58.7 | 71.4 |
| Rsa1.0_02010.1.g31507.t1 | #                                                                                                                                                                                                                                                                                                                                                                                                                                                                                                                                                                | #    | #    | #         | #     | #    | -    | ----                                              | ----  | #                    | #                                                                                                                                                                                                                                                                                                                                                                                                                                                                                                                                                                                                                                                                        | #    | #    | #         | #     | #    |      |
| Rsa1.0_02010.1.g31508.t1 | ref NP_564956.1  Ninja-family protein AFP1 [Arabidopsis thaliana] gi 75180099 sp Q9LQ98.1 AFP1_ARATH RecName: Full=Ninja-family protein AFP1; AltName: Full=ABI five-binding protein 1; Short=ABI5-binding protein 1 gi 6730641 gb AAF27062.1 AC008262_11 F4N2.22 [Arabidopsis thaliana] gi 22531038 gb AAM97023.1  expressed protein [Arabidopsis thaliana] gi 23197982 gb AAN15518.1  expressed protein [Arabidopsis thaliana] gi 332196782 gb AEE34903.1  Ninja-family protein AFP1 [Arabidopsis thaliana]                                                    | 348  | 345  | 1.00E-133 | 99.1  | 78.7 | 85.6 | Ninja-family protein AFP1                         | gbpln | Arabidopsis thaliana | AT1G69260.1   Symbols: AFP1   ABI five binding protein   chr1:26039314-26040570 FORWARD LENGTH=345                                                                                                                                                                                                                                                                                                                                                                                                                                                                                                                                                                       | 348  | 345  | 1.00E-136 | 99.1  | 78.7 | 85.6 |
| Rsa1.0_02010.1.g31509.t1 | ref XP_002887226.1  hypothetical protein ARALYDRAFT_894705 [Arabidopsis lyrata subsp. lyrata] gi 297333067 gb EFH63485.1  hypothetical protein ARALYDRAFT_894705 [Arabidopsis lyrata subsp. lyrata]                                                                                                                                                                                                                                                                                                                                                              | 403  | 446  | 1.00E-102 | 110.7 | 52.9 | 68.5 | hypothetical protein ARALYDRAFT_894705            | gbpln | Arabidopsis lyrata   | AT1G69250.1   Symbols:   Nuclear transport factor 2 (NTF2) family protein with RNA binding (RRM-RBD-RNP motifs) domain   chr1:26033163-26035301 FORWARD LENGTH=427                                                                                                                                                                                                                                                                                                                                                                                                                                                                                                       | 403  | 427  | 1.00E-104 | 106.0 | 53.8 | 70.7 |

|                          |                                                                                                                                                                                                                                                                                               |      |      |          |       |      |      |                                                         |       |                      |                                                                                                                                                                                                                                                                                                  |      |      |           |       |      |      |
|--------------------------|-----------------------------------------------------------------------------------------------------------------------------------------------------------------------------------------------------------------------------------------------------------------------------------------------|------|------|----------|-------|------|------|---------------------------------------------------------|-------|----------------------|--------------------------------------------------------------------------------------------------------------------------------------------------------------------------------------------------------------------------------------------------------------------------------------------------|------|------|-----------|-------|------|------|
| Rsa1.0_02011.1.g31510.t4 | dbj BAB09379.1  non-LTR retroelement reverse transcriptase-like protein [Arabidopsis thaliana]                                                                                                                                                                                                | 1491 | 1223 | 0        | 82.0  | 34.3 | 44.6 | non-LTR retroelement reverse transcriptase-like protein | gbpln | Arabidopsis thaliana | AT1G43760.1   Symbols:   DNase I-like superfamily protein   chr1:16528880-16531065 REVERSE LENGTH=626                                                                                                                                                                                            | 1491 | 626  | 8.00E-56  | 42.0  | 9.0  | 14.2 |
| Rsa1.0_02011.1.g31511.t1 | gb AAC33226.1  putative non-LTR retroelement reverse transcriptase [Arabidopsis thaliana]                                                                                                                                                                                                     | 566  | 1529 | 8.00E-50 | 270.1 | 21.7 | 33.6 | putative non-LTR retroelement reverse transcriptase     | gbpln | Arabidopsis thaliana | AT2G07760.1   Symbols:   Zinc knuckle (CCHC-type) family protein   chr2:3584420-3586278 REVERSE LENGTH=530                                                                                                                                                                                       | 566  | 530  | 9.00E-20  | 93.6  | 9.4  | 14.1 |
| Rsa1.0_02011.1.g31512.t1 | gb AAF97281.1 AC010164.3 Hypothetical protein [Arabidopsis thaliana]<br>gi 12324507 gb AAG52212.1 AC022288.1 putative gag-pol polyprotein; 76173-77576 [Arabidopsis thaliana]                                                                                                                 | 437  | 467  | 1.00E-80 | 106.9 | 39.6 | 50.3 | Hypothetical protein                                    | gbpln | Arabidopsis thaliana | #                                                                                                                                                                                                                                                                                                | #    | #    | #         | #     | #    | #    |
| Rsa1.0_02011.1.g31513.t1 | gb EOA18244.1  hypothetical protein CARUB_v10006736mg [Capsella rubella]                                                                                                                                                                                                                      | 222  | 223  | 2.00E-98 | 100.5 | 84.2 | 89.2 | hypothetical protein CARUB_v10006736mg                  | gbpln | Capsella rubella     | AT4G13450.1   Symbols:   Adenine nucleotide alpha hydrolases-like superfamily protein   chr4:7815146-7815904 REVERSE LENGTH=219                                                                                                                                                                  | 222  | 219  | 4.00E-97  | 98.6  | 84.2 | 91.0 |
| Rsa1.0_02011.1.g31514.t1 | ref XP_002894513.1  WRKY10 [Arabidopsis lyrata subsp. lyrata]<br>gi 297340355 gb EFH70772.1  WRKY10 [Arabidopsis lyrata subsp. lyrata]                                                                                                                                                        | 171  | 495  | 6.00E-13 | 289.5 | 40.4 | 51.5 | WRKY10                                                  | gbpln | Arabidopsis lyrata   | AT1G5600.1   Symbols: WRKY10, ATWRKY10, MIN3   WRKY DNA-binding protein 10   chr1:20774049-20776293 REVERSE LENGTH=485                                                                                                                                                                           | 171  | 485  | 5.00E-14  | 283.6 | 43.3 | 56.7 |
| Rsa1.0_02011.1.g31515.t1 | #                                                                                                                                                                                                                                                                                             | #    | #    | #        | #     | #    | #    | -                                                       | ----  | ----                 | #                                                                                                                                                                                                                                                                                                | #    | #    | #         | #     | #    | #    |
| Rsa1.0_02011.1.g31516.t1 | gb EOA14491.1  hypothetical protein CARUB_v10027706mg [Capsella rubella]                                                                                                                                                                                                                      | 136  | 622  | 6.00E-18 | 457.4 | 41.9 | 43.4 | hypothetical protein CARUB_v10027706mg                  | gbpln | Capsella rubella     | AT5G45610.1   Symbols: SUV2   protein dimerizations   chr5:18496397-18499673 REVERSE LENGTH=646                                                                                                                                                                                                  | 136  | 646  | 3.00E-19  | 475.0 | 36.8 | 39.0 |
| Rsa1.0_02012.1.g31517.t3 | emb CAB91581.1  putative protein [Arabidopsis thaliana]                                                                                                                                                                                                                                       | 1565 | 1752 | 0        | 111.9 | 53.1 | 67.2 | putative protein                                        | gbpln | Arabidopsis thaliana | AT3G51700.1   Symbols:   PIF1 helicase   chr3:19179443-19181145 REVERSE LENGTH=344                                                                                                                                                                                                               | 1565 | 344  | 2.00E-69  | 22.0  | 9.2  | 12.6 |
| Rsa1.0_02012.1.g31518.t1 | ref NP_175703.1  Nucleic acid-binding, OB-fold-like protein [Arabidopsis thaliana]<br>gi 12324642 gb AAG52278.1 AC019018.15 putative replication protein; 94555-97079 [Arabidopsis thaliana]<br>gi 332194750 gb AEE32871.1  Nucleic acid-binding, OB-fold-like protein [Arabidopsis thaliana] | 468  | 566  | 8.00E-77 | 120.9 | 33.5 | 53.0 | Nucleic acid-binding, OB-fold-like protein              | gbpln | Arabidopsis thaliana | AT1G52950.1   Symbols:   Nucleic acid-binding, OB-fold-like protein   chr1:19725483-19728007 FORWARD LENGTH=566                                                                                                                                                                                  | 468  | 566  | 2.00E-79  | 120.9 | 33.5 | 53.0 |
| Rsa1.0_02012.1.g31519.t1 | #                                                                                                                                                                                                                                                                                             | #    | #    | #        | #     | #    | #    | -                                                       | ----  | ----                 | #                                                                                                                                                                                                                                                                                                | #    | #    | #         | #     | #    | #    |
| Rsa1.0_02012.1.g31520.t1 | #                                                                                                                                                                                                                                                                                             | #    | #    | #        | #     | #    | #    | -                                                       | ----  | ----                 | #                                                                                                                                                                                                                                                                                                | #    | #    | #         | #     | #    | #    |
| Rsa1.0_02012.1.g31521.t4 | gb EOA37949.1  hypothetical protein CARUB_v10009417mg [Capsella rubella]                                                                                                                                                                                                                      | 585  | 386  | 0        | 66.0  | 63.4 | 65.0 | hypothetical protein CARUB_v10009417mg                  | gbpln | Capsella rubella     | AT1G36050.1   Symbols:   Endoplasmic reticulum vesicle transporter protein   chr1:13450467-13453683 FORWARD LENGTH=489                                                                                                                                                                           | 585  | 489  | 0         | 83.6  | 63.2 | 65.1 |
| Rsa1.0_02012.1.g31522.t1 | #                                                                                                                                                                                                                                                                                             | #    | #    | #        | #     | #    | #    | -                                                       | ----  | ----                 | #                                                                                                                                                                                                                                                                                                | #    | #    | #         | #     | #    | #    |
| Rsa1.0_02012.1.g31523.t1 | gb EOA29603.1  hypothetical protein CARUB_v10013521mg, partial [Capsella rubella]                                                                                                                                                                                                             | 540  | 498  | 6.00E-60 | 92.2  | 20.4 | 27.0 | hypothetical protein CARUB_v10013521mg, partial         | gbpln | Capsella rubella     | Arabidopsis thaliana protein match is: unknown protein (TAIR:AT5G18636.1); Has 295 Blast hits to 291 proteins in 12 species: Archae - 0; Bacteria - 0; Metazoa - 0; Fungi - 0; Plants - 295; Viruses - 0; Other Eukaryotes - 0 (source: NCBI BLink).   chr3:12795861-12796871 REVERSE LENGTH=336 | 540  | 336  | 1.00E-20  | 62.2  | 11.3 | 18.0 |
| Rsa1.0_02012.1.g31524.t1 | gb AAG51783.1 AC079679.3 reverse transcriptase, putative; 16838-20266 [Arabidopsis thaliana]                                                                                                                                                                                                  | 809  | 1142 | 0        | 141.2 | 52.0 | 65.1 | reverse transcriptase, putative; 16838-20266            | gbpln | Arabidopsis thaliana | AT1G43760.1   Symbols:   DNase I-like superfamily protein   chr1:16528880-16531065 REVERSE LENGTH=626                                                                                                                                                                                            | 809  | 626  | 5.00E-40  | 77.4  | 14.2 | 23.5 |
| Rsa1.0_02013.1.g31525.t1 | gb AAG09097.1 AC09323.8 Putative retroelement polyprotein [Arabidopsis thaliana]                                                                                                                                                                                                              | 665  | 1486 | 0        | 223.5 | 51.3 | 63.2 | Putative retroelement polyprotein                       | gbpln | Arabidopsis thaliana | AT4G23160.1   Symbols: CRK8   cysteine-rich RLK (RECEPTOR-like protein kinase) 8   chr4:12129485-12134086 FORWARD LENGTH=1262                                                                                                                                                                    | 665  | 1262 | 1.00E-113 | 189.8 | 30.5 | 46.6 |
| Rsa1.0_02013.1.g31526.t1 | #                                                                                                                                                                                                                                                                                             | #    | #    | #        | #     | #    | #    | -                                                       | ----  | ----                 | #                                                                                                                                                                                                                                                                                                | #    | #    | #         | #     | #    | #    |
| Rsa1.0_02013.1.g31527.t1 | gb AAC95175.1  putative non-LTR retroelement reverse transcriptase [Arabidopsis thaliana]                                                                                                                                                                                                     | 1596 | 1352 | 0        | 84.7  | 44.7 | 59.6 | putative non-LTR retroelement reverse transcriptase     | gbpln | Arabidopsis thaliana | AT3G24255.1   Symbols:   RNA-directed DNA polymerase (reverse transcriptase)-related family protein   chr3:8789471-8793208 FORWARD LENGTH=746                                                                                                                                                    | 1596 | 746  | 1.00E-114 | 46.7  | 13.4 | 16.8 |
| Rsa1.0_02013.1.g31528.t3 | gb EOA29637.1  hypothetical protein CARUB_v10014861mg [Capsella rubella]                                                                                                                                                                                                                      | 250  | 144  | 2.00E-16 | 57.6  | 20.0 | 22.8 | hypothetical protein CARUB_v10014861mg                  | gbpln | Capsella rubella     | #                                                                                                                                                                                                                                                                                                | #    | #    | #         | #     | #    | #    |
| Rsa1.0_02013.1.g31529.t1 | dbj BAB10790.1  retroelement pol polyprotein-like [Arabidopsis thaliana]                                                                                                                                                                                                                      | 658  | 1864 | 6.00E-52 | 283.3 | 16.9 | 24.5 | retroelement pol polyprotein-like                       | gbpln | Arabidopsis thaliana | #                                                                                                                                                                                                                                                                                                | #    | #    | #         | #     | #    | #    |
| Rsa1.0_02013.1.g31530.t1 | gb EOA36759.1  hypothetical protein CARUB_v10012615mg [Capsella rubella]                                                                                                                                                                                                                      | 166  | 166  | 5.00E-85 | 100.0 | 93.4 | 97.0 | hypothetical protein CARUB_v10012615mg                  | gbpln | Capsella rubella     | AT1G32250.1   Symbols:   Calcium-binding EF-hand family protein   chr1:11639843-11640343 FORWARD LENGTH=166                                                                                                                                                                                      | 166  | 166  | 2.00E-87  | 100.0 | 93.4 | 97.0 |



|                          |                                                                                                                                                                                                                             |      |      |           |       |      |      |                                                                                |       |                      |                                                                                                                                                                                                                                                                                                                                                                                                                                                                                                                                                                                                  |      |      |           |       |      |      |
|--------------------------|-----------------------------------------------------------------------------------------------------------------------------------------------------------------------------------------------------------------------------|------|------|-----------|-------|------|------|--------------------------------------------------------------------------------|-------|----------------------|--------------------------------------------------------------------------------------------------------------------------------------------------------------------------------------------------------------------------------------------------------------------------------------------------------------------------------------------------------------------------------------------------------------------------------------------------------------------------------------------------------------------------------------------------------------------------------------------------|------|------|-----------|-------|------|------|
| Rsa1.0_02013.1.g31531.t2 | gb ABH07409.1  putative pol polyprotein [Brassica oleracea var. botrytis]                                                                                                                                                   | 1335 | 1239 | 0         | 92.8  | 36.3 | 46.0 | putative pol polyprotein                                                       | gbpln | Brassica oleracea    | AT4G23160.1   Symbols: CRK8   cysteine-rich RLK (RECEPTOR-like protein kinase) 8   chr4:12129485-12134086 FORWARD LENGTH=1262                                                                                                                                                                                                                                                                                                                                                                                                                                                                    | 1335 | 1262 | 5.00E-78  | 94.5  | 12.1 | 18.7 |
| Rsa1.0_02014.1.g31532.t7 | gb AAC28189.1  contains similarity to Arabidopsis thaliana retrotransposon Athila (GB:X81801) [Arabidopsis thaliana]                                                                                                        | 1595 | 940  | 6.00E-19  | 58.9  | 4.1  | 6.1  | contains similarity to Arabidopsis thaliana retrotransposon Athila (GB:X81801) | gbpln | Arabidopsis thaliana | #                                                                                                                                                                                                                                                                                                                                                                                                                                                                                                                                                                                                | #    | #    | #         | #     | #    |      |
| Rsa1.0_02014.1.g31533.t1 | #                                                                                                                                                                                                                           | #    | #    | #         | #     | #    | -    | -                                                                              | ----  | ----                 | #                                                                                                                                                                                                                                                                                                                                                                                                                                                                                                                                                                                                | #    | #    | #         | #     | #    |      |
| Rsa1.0_02014.1.g31534.t2 | gb AAD20658.1  putative retroelement pol polyprotein [Arabidopsis thaliana]                                                                                                                                                 | 611  | 1611 | 1.00E-103 | 263.7 | 35.7 | 48.3 | putative retroelement pol polyprotein                                          | gbpln | Arabidopsis thaliana | #                                                                                                                                                                                                                                                                                                                                                                                                                                                                                                                                                                                                | #    | #    | #         | #     | #    |      |
| Rsa1.0_02014.1.g31535.t1 | gb ABD65035.1  hypothetical protein 26.t00052 [Brassica oleracea]                                                                                                                                                           | 710  | 695  | 0         | 97.9  | 59.0 | 72.7 | hypothetical protein 26.t00052                                                 | gbpln | Brassica oleracea    | AT1G51172.1   Symbols:   unknown protein; FUNCTIONS IN: molecular_function unknown; INVOLVED IN: biological_process unknown; LOCATED IN: cellular_component unknown; CONTAINS InterPro DOMAIN/s: Protein of unknown function DUF601 (InterPro:IPR006736); BEST Arabidopsis thaliana protein match is: Protein of unknown function, DUF601 (TAIR:AT1G46696.1); Has 1849 Blast hits to 1554 proteins in 272 species: Archae - 15; Bacteria - 116; Metazoa - 677; Fungi - 267; Plants - 154; Viruses - 11; Other Eukaryotes - 609 (source: NCBI BLINK).   chr1:18963205-18965571 FORWARD LENGTH=681 | 710  | 681  | 3.00E-24  | 95.9  | 6.8  | 11.0 |
| Rsa1.0_02014.1.g31536.t6 | gb AAD20433.1  putative retroelement pol polyprotein [Arabidopsis thaliana]                                                                                                                                                 | 1846 | 889  | 1.00E-152 | 48.2  | 15.5 | 18.7 | putative retroelement pol polyprotein                                          | gbpln | Arabidopsis thaliana | #                                                                                                                                                                                                                                                                                                                                                                                                                                                                                                                                                                                                | #    | #    | #         | #     | #    |      |
| Rsa1.0_02014.1.g31537.t1 | gb ABD65035.1  hypothetical protein 26.t00052 [Brassica oleracea]                                                                                                                                                           | 280  | 695  | 1.00E-100 | 248.2 | 66.8 | 76.8 | hypothetical protein 26.t00052                                                 | gbpln | Brassica oleracea    | AT1G51172.1   Symbols:   unknown protein; FUNCTIONS IN: molecular_function unknown; INVOLVED IN: biological_process unknown; LOCATED IN: cellular_component unknown; CONTAINS InterPro DOMAIN/s: Protein of unknown function DUF601 (InterPro:IPR006736); BEST Arabidopsis thaliana protein match is: Protein of unknown function, DUF601 (TAIR:AT1G46696.1); Has 1849 Blast hits to 1554 proteins in 272 species: Archae - 15; Bacteria - 116; Metazoa - 677; Fungi - 267; Plants - 154; Viruses - 11; Other Eukaryotes - 609 (source: NCBI BLINK).   chr1:18963205-18965571 FORWARD LENGTH=681 | 280  | 681  | 2.00E-23  | 243.2 | 18.2 | 30.0 |
| Rsa1.0_02015.1.g31538.t1 | gb AAG51783.1 AC079679_3 reverse transcriptase, putative; 16838-20266 [Arabidopsis thaliana]                                                                                                                                | 493  | 1142 | 1.00E-124 | 231.6 | 41.8 | 55.0 | reverse transcriptase, putative; 16838-20266                                   | gbpln | Arabidopsis thaliana | AT1G43760.1   Symbols:   DNase I-like superfamily protein   chr1:16528890-16531065 REVERSE LENGTH=626                                                                                                                                                                                                                                                                                                                                                                                                                                                                                            | 493  | 626  | 1.00E-36  | 127.0 | 21.9 | 37.5 |
| Rsa1.0_02015.1.g31539.t1 | gb AAD17347.1  contains similarity to Petunia PTTA' (GB:AF009516) [Arabidopsis thaliana] gi 7267146 emb CAB80814.1  putative transposon protein [Arabidopsis thaliana]                                                      | 128  | 357  | 2.00E-35  | 278.9 | 55.5 | 76.6 | contains similarity to Petunia PTTA' (GB:AF009516)                             | gbpln | Arabidopsis thaliana | #                                                                                                                                                                                                                                                                                                                                                                                                                                                                                                                                                                                                | #    | #    | #         | #     | #    |      |
| Rsa1.0_02015.1.g31540.t4 | gb AAF69169.1 AC007915_21 F27F5.21 [Arabidopsis thaliana]                                                                                                                                                                   | 351  | 1023 | 8.00E-48  | 291.5 | 40.2 | 52.7 | F27F5.21                                                                       | gbpln | Arabidopsis thaliana | AT4G29090.1   Symbols:   Ribonuclease H-like superfamily protein   chr4:14333528-14335255 FORWARD LENGTH=575                                                                                                                                                                                                                                                                                                                                                                                                                                                                                     | 351  | 575  | 8.00E-19  | 163.8 | 19.7 | 30.2 |
| Rsa1.0_02015.1.g31541.t1 | ref XP_002876297.1  obf-binding protein 3 [Arabidopsis lyrata subsp. lyrata] gi 297322135 gb EFH52556.1  obf-binding protein 3 [Arabidopsis lyrata subsp. lyrata]                                                           | 334  | 353  | 1.00E-141 | 105.7 | 78.4 | 85.0 | obf-binding protein 3                                                          | gbpln | Arabidopsis lyrata   | AT3G55370.2   Symbols: OBP3   OBF-binding protein 3   chr3:20527198-20528876 FORWARD LENGTH=354                                                                                                                                                                                                                                                                                                                                                                                                                                                                                                  | 334  | 354  | 1.00E-133 | 106.0 | 76.0 | 82.9 |
| Rsa1.0_02015.1.g31542.t1 | #                                                                                                                                                                                                                           | #    | #    | #         | #     | #    | -    | ----                                                                           | ----  | ----                 | #                                                                                                                                                                                                                                                                                                                                                                                                                                                                                                                                                                                                | #    | #    | #         | #     | #    |      |
| Rsa1.0_02015.1.g31543.t1 | ref XP_002876296.1  RNA recognition motif-containing protein [Arabidopsis lyrata subsp. lyrata] gi 297322134 gb EFH52555.1  RNA recognition motif-containing protein [Arabidopsis lyrata subsp. lyrata]                     | 268  | 599  | 2.00E-84  | 223.5 | 64.6 | 74.6 | RNA recognition motif-containing protein                                       | gbpln | Arabidopsis lyrata   | AT3G55340.1   Symbols: PHIP1   phragmoplastin interacting protein 1   chr3:20515672-20517832 FORWARD LENGTH=597                                                                                                                                                                                                                                                                                                                                                                                                                                                                                  | 268  | 597  | 4.00E-84  | 222.8 | 63.4 | 73.9 |
| Rsa1.0_02015.1.g31544.t1 | ref XP_002878030.1  photosystem II reaction center PsbP family protein [Arabidopsis lyrata subsp. lyrata] gi 297323866 gb EFH54289.1  photosystem II reaction center PsbP family protein [Arabidopsis lyrata subsp. lyrata] | 229  | 229  | 1.00E-103 | 100.0 | 86.0 | 93.0 | photosystem II reaction center PsbP family protein                             | gbpln | Arabidopsis lyrata   | AT3G55330.1   Symbols: PPL1   PsbP-like protein 1   chr3:20514031-20515275 REVERSE LENGTH=230                                                                                                                                                                                                                                                                                                                                                                                                                                                                                                    | 229  | 230  | 1.00E-104 | 100.4 | 86.0 | 93.4 |

|                          |                                                                                                                                                                                                                                                                                                                                                                                                                                                                          |      |      |           |           |       |      |                                                                                                                                                                     |       |                      |                                                                                                                                               |      |      |           |       |      |      |
|--------------------------|--------------------------------------------------------------------------------------------------------------------------------------------------------------------------------------------------------------------------------------------------------------------------------------------------------------------------------------------------------------------------------------------------------------------------------------------------------------------------|------|------|-----------|-----------|-------|------|---------------------------------------------------------------------------------------------------------------------------------------------------------------------|-------|----------------------|-----------------------------------------------------------------------------------------------------------------------------------------------|------|------|-----------|-------|------|------|
| Rsa1.0_02015.1.g31545.t1 | ref XP_002878029.1  P-glycoprotein 20 [Arabidopsis lyrata subsp. lyrata] gi 297323867 gb EFH54288.1  P-glycoprotein 20 [Arabidopsis lyrata subsp. lyrata]                                                                                                                                                                                                                                                                                                                | 1360 | 1408 | 0         | 103.5     | 92.9  | 96.5 | P-glycoprotein 20                                                                                                                                                   | gbpln | Arabidopsis lyrata   | AT3G55320.1   Symbols: PGP20   P-glycoprotein 20   chr3:20507391-20513393 REVERSE LENGTH=1408                                                 | 1360 | 1408 | 0         | 103.5 | 92.4 | 96.5 |
| Rsa1.0_02015.1.g31546.t1 | ref XP_002876294.1  short-chain dehydrogenase/reductase family protein [Arabidopsis lyrata subsp. lyrata] gi 297322132 gb EFH52553.1  short-chain dehydrogenase/reductase family protein [Arabidopsis lyrata subsp. lyrata]                                                                                                                                                                                                                                              | 280  |      | 280       | 1.00E-135 | 100.0 | 84.6 | short-chain dehydrogenase/reductase family protein                                                                                                                  | gbpln | Arabidopsis lyrata   | AT3G55290.2   Symbols:   NAD(P)-binding Rossmann-fold superfamily protein   chr3:20502653-20503730 FORWARD LENGTH=279                         | 280  | 279  | 1.00E-135 | 99.6  | 83.2 | 91.8 |
| Rsa1.0_02015.1.g31547.t1 | gb AAG51783.1 AC079679.3 reverse transcriptase, putative; 16838-20266 [Arabidopsis thaliana]                                                                                                                                                                                                                                                                                                                                                                             | 156  | 1142 | 1.00E-21  | 732.1     | 34.6  | 44.9 | reverse transcriptase, putative; 16838-20266                                                                                                                        | gbpln | Arabidopsis thaliana | #                                                                                                                                             | #    | #    | #         | #     | #    | #    |
| Rsa1.0_02016.1.g31548.t1 | gb EOA32158.1  hypothetical protein CARUB_v10015410mg [Capsella rubella]                                                                                                                                                                                                                                                                                                                                                                                                 | 1012 | 1079 | 0         | 106.6     | 83.1  | 88.8 | hypothetical protein CARUB_v10015410mg                                                                                                                              | gbpln | Capsella rubella     | AT2G20320.1   Symbols:   DENN (AEX-3) domain-containing protein   chr2:8767082-8772271 FORWARD LENGTH=1029                                    | 1012 | 1029 | 0         | 101.7 | 82.1 | 87.6 |
| Rsa1.0_02016.1.g31549.t1 | gb EOA30057.1  hypothetical protein CARUB_v10013163mg [Capsella rubella]                                                                                                                                                                                                                                                                                                                                                                                                 | 631  | 657  | 0         | 104.1     | 88.9  | 94.8 | hypothetical protein CARUB_v10013163mg                                                                                                                              | gbpln | Capsella rubella     | AT2G20330.1   Symbols:   Transducin/WD40 repeat-like superfamily protein   chr2:8772888-8775518 REVERSE LENGTH=648                            | 631  | 648  | 0         | 102.7 | 85.7 | 92.6 |
| Rsa1.0_02016.1.g31550.t1 | ref NP_849999.1  Tyrosine decarboxylase 1 [Arabidopsis thaliana] gi 68053310 sp Q8RY79.1 TYDC1_ARATH RecName: Full=Tyrosine decarboxylase 1 gi 18491209 gb AAL69507.1  putative tyrosine decarboxylase [Arabidopsis thaliana] gi 20465925 gb AAM20115.1  putative tyrosine decarboxylase [Arabidopsis thaliana] gi 318104937 gb ADV41492.1  aromatic aldehyde synthase [Arabidopsis thaliana] gi 33025190 gb AEC06995.1  Tyrosine decarboxylase 1 [Arabidopsis thaliana] | 498  | 490  | 0         | 98.4      | 83.3  | 89.6 | Tyrosine decarboxylase 1                                                                                                                                            | gbpln | Arabidopsis thaliana | AT2G20340.1   Symbols:   Pyridoxal phosphate (PLP)-dependent transferases superfamily protein   chr2:8779804-8782490 FORWARD LENGTH=490       | 498  | 490  | 0         | 98.4  | 83.3 | 89.6 |
| Rsa1.0_02017.1.g31551.t2 | gb AAC33226.1  putative non-LTR retroelement reverse transcriptase [Arabidopsis thaliana]                                                                                                                                                                                                                                                                                                                                                                                | 1922 | 1529 | 0         | 79.6      | 34.8  | 46.8 | putative non-LTR retroelement reverse transcriptase                                                                                                                 | gbpln | Arabidopsis thaliana | AT3G24255.1   Symbols:   RNA-directed DNA polymerase (reverse transcriptase)-related family protein   chr3:8789471-8793208 FORWARD LENGTH=746 | 1922 | 746  | 6.00E-87  | 38.8  | 8.4  | 10.6 |
| Rsa1.0_02017.1.g31552.t1 | ref NP_187198.1  formin-like protein 11 [Arabidopsis thaliana] gi 75191978 sp Q9MA60.1 FH11_ARATH RecName: Full=Formin-like protein 11; Short=AtFH11; Flags: Precursor gi 7596775 gb AAF64546.1  unknown protein [Arabidopsis thaliana] gi 332640723 gb AEE74244.1  formin-like protein 11 [Arabidopsis thaliana]                                                                                                                                                        | 828  | 884  | 0         | 106.8     | 80.1  | 85.9 | formin-like protein 11                                                                                                                                              | gbpln | Arabidopsis thaliana | AT3G05470.1   Symbols:   Actin-binding FH2 (formin homology 2) family protein   chr3:1579667-1582547 REVERSE LENGTH=884                       | 828  | 884  | 0         | 106.8 | 80.1 | 85.9 |
| Rsa1.0_02017.1.g31553.t1 | ref XP_002882420.1  phospholipid/glycerol acyltransferase family protein [Arabidopsis lyrata subsp. lyrata] gi 297328260 gb EFH58679.1  phospholipid/glycerol acyltransferase family protein [Arabidopsis lyrata subsp. lyrata]                                                                                                                                                                                                                                          | 459  | 461  | 1.00E-158 | 100.4     | 62.1  | 67.1 | phospholipid/glycerol acyltransferase family protein                                                                                                                | gbpln | Arabidopsis lyrata   | AT3G05510.1   Symbols:   Phospholipid/glycerol acyltransferase family protein   chr3:1595576-1598074 FORWARD LENGTH=448                       | 459  | 448  | 1.00E-151 | 97.6  | 58.2 | 63.8 |
| Rsa1.0_02017.1.g31554.t1 | ref XP_002882421.1  alpha subunit of F-actin capping protein [Arabidopsis lyrata subsp. lyrata] gi 297328261 gb EFH58680.1  alpha subunit of F-actin capping protein [Arabidopsis lyrata subsp. lyrata]                                                                                                                                                                                                                                                                  | 300  | 308  | 1.00E-151 | 102.7     | 88.0  | 92.7 | alpha subunit of F-actin capping protein                                                                                                                            | gbpln | Arabidopsis lyrata   | AT3G05520.2   Symbols:   Subunits of heterodimeric actin filament capping protein Capz superfamily   chr3:1598611-1601437 FORWARD LENGTH=382  | 300  | 382  | 2.33E-156 | 127.3 | 84.0 | 88.3 |
| Rsa1.0_02017.1.g31555.t1 | sp O23894.1 PRS6A_BRACM RecName: Full=26S protease regulatory subunit 6A homolog; AltName: Full=Tat-binding protein homolog 1; Short=TBP-1 gi 2564337 dbj BAA22951.1  Tat binding protein 1 [Brassica rapa subsp. oleifera]                                                                                                                                                                                                                                              | 496  | 424  | 1.00E-148 | 85.5      | 53.2  | 53.4 | RecName: Full=26S protease regulatory subunit 6A homolog; AltName: Full=Tat-binding protein homolog 1; Short=TBP-1 gi 2564337 dbj BAA22951.1  Tat binding protein 1 | gbpln | Brassica rapa        | AT3G05530.1   Symbols: RPT5A, ATS6A.2   regulatory particle triple-A ATPase 5A   chr3:1603540-1605993 FORWARD LENGTH=424                      | 496  | 424  | 1.00E-150 | 85.5  | 53.0 | 53.2 |

|                          |                                                                                                                                                                                                                                                                                                                                                                                                                                                                                                                                                                                                                                                                                                                                                                                                                                                                                                                                                                                                                                                                                                                |     |     |           |       |      |       |                                        |       |                      |                                                                                                                                                                                                                                                                                                                                                                                                                                                                                                                                                                                                                                                                                                                                                                                                                                   |     |     |           |       |      |       |
|--------------------------|----------------------------------------------------------------------------------------------------------------------------------------------------------------------------------------------------------------------------------------------------------------------------------------------------------------------------------------------------------------------------------------------------------------------------------------------------------------------------------------------------------------------------------------------------------------------------------------------------------------------------------------------------------------------------------------------------------------------------------------------------------------------------------------------------------------------------------------------------------------------------------------------------------------------------------------------------------------------------------------------------------------------------------------------------------------------------------------------------------------|-----|-----|-----------|-------|------|-------|----------------------------------------|-------|----------------------|-----------------------------------------------------------------------------------------------------------------------------------------------------------------------------------------------------------------------------------------------------------------------------------------------------------------------------------------------------------------------------------------------------------------------------------------------------------------------------------------------------------------------------------------------------------------------------------------------------------------------------------------------------------------------------------------------------------------------------------------------------------------------------------------------------------------------------------|-----|-----|-----------|-------|------|-------|
| Rsa1.0_02017.1.g31556.t1 | retjNP_187207.1 60S ribosomal protein L22-2 [Arabidopsis thaliana]<br>gi 42572267 ref NP_974229.1  60S ribosomal protein L22-2 [Arabidopsis thaliana]<br>gi 145331980 ref NP_001078112.1  60S ribosomal protein L22-2 [Arabidopsis thaliana]<br>gi 17865568 sp Q9M9W1.1 RL222_ARAT H RecName: Full=60S ribosomal protein L22-2<br>gi 6714454 gb AAF26141.1 AC011620.17 putative 60S ribosomal protein L22 [Arabidopsis thaliana]<br>gi 17529148 gb AAL38800.1  putative 60S ribosomal protein L22 [Arabidopsis thaliana]<br>gi 20466019 gb AAM20231.1  putative 60S ribosomal protein L22 [Arabidopsis thaliana]<br>gi 21595684 gb AAM66123.1  60S ribosomal protein L22-2 [Arabidopsis thaliana]<br>gi 27311727 gb AAO00829.1  putative 60S ribosomal protein L22 [Arabidopsis thaliana]<br>gi 30102826 gb AAP21331.1  At3g05560 [Arabidopsis thaliana]<br>gi 332640737 gb AEE74258.1  60S ribosomal protein L22-2 [Arabidopsis thaliana]<br>gi 332640738 gb AEE74259.1  60S ribosomal protein L22-2 [Arabidopsis thaliana]<br>gi 332640739 gb AEE74260.1  60S ribosomal protein L22-2 [Arabidopsis thaliana] | 124 | 124 | 2.00E-55  | 100.0 | 96.8 | 100.0 | 60S ribosomal protein L22-2            | gbpln | Arabidopsis thaliana | AT3G05560.3   Symbols:   Ribosomal L22e protein family   chr3:1614641-1615204 FORWARD LENGTH=124                                                                                                                                                                                                                                                                                                                                                                                                                                                                                                                                                                                                                                                                                                                                  | 124 | 124 | 4.00E-58  | 100.0 | 96.8 | 100.0 |
| Rsa1.0_02017.1.g31557.t1 | gb EOA31060.1  hypothetical protein CARUB_v10014212mg [Capsella rubella]                                                                                                                                                                                                                                                                                                                                                                                                                                                                                                                                                                                                                                                                                                                                                                                                                                                                                                                                                                                                                                       | 128 | 318 | 9.00E-67  | 248.4 | 96.1 | 99.2  | hypothetical protein CARUB_v10014212mg | gbpln | Capsella rubella     | AT3G05580.1   Symbols:   Calceurin-like metallo-phosphoesterase superfamily protein   chr3:1618216-1619850 REVERSE LENGTH=318                                                                                                                                                                                                                                                                                                                                                                                                                                                                                                                                                                                                                                                                                                     | 128 | 318 | 1.00E-68  | 248.4 | 94.5 | 99.2  |
| Rsa1.0_02018.1.g31558.t1 | gb EOA16742.1  hypothetical protein CARUB_v10004943mg [Capsella rubella]                                                                                                                                                                                                                                                                                                                                                                                                                                                                                                                                                                                                                                                                                                                                                                                                                                                                                                                                                                                                                                       | 373 | 408 | 1.00E-165 | 109.4 | 77.2 | 84.5  | hypothetical protein CARUB_v10004943mg | gbpln | Capsella rubella     | AT4G27585.1   Symbols:   SPFH/Band 7/PHB domain-containing membrane-associated protein family   chr4:13766984-13769832 REVERSE LENGTH=411<br>AT5G54095.1   Symbols:   unknown protein; FUNCTIONS IN: molecular_function unknown; INVOLVED IN: N-terminal protein myristoylation; LOCATED IN: cellular_component unknown; EXPRESSED IN: 9 plant structures; EXPRESSED DURING: L mature pollen stage, M germinated pollen stage, 4 anthesis, C globular stage, petal differentiation and expansion stage; BEST Arabidopsis thaliana protein match is: unknown protein (TAIR:AT4G27580.1); Has 30201 Blast hits to 17322 proteins in 780 species; Archae - 12; Bacteria - 1396; Metazoa - 17338; Fungi - 3422; Plants - 5037; Viruses - 0; Other Eukaryotes - 2996 (source: NCBI BLINK);   chr5:21952868-21953369 REVERSE LENGTH=135 | 373 | 411 | 1.00E-165 | 110.2 | 76.9 | 85.5  |
| Rsa1.0_02018.1.g31559.t1 | gb EOA14373.1  hypothetical protein CARUB_v10027559mg [Capsella rubella]                                                                                                                                                                                                                                                                                                                                                                                                                                                                                                                                                                                                                                                                                                                                                                                                                                                                                                                                                                                                                                       | 119 | 130 | 5.00E-28  | 109.2 | 78.2 | 79.8  | hypothetical protein CARUB_v10027559mg | gbpln | Capsella rubella     | AT5G25180.1   Symbols:   CYP71B14   cytochrome P450, family 71, subfamily B, polypeptide 14   chr5:8694630-8696221 REVERSE LENGTH=496                                                                                                                                                                                                                                                                                                                                                                                                                                                                                                                                                                                                                                                                                             | 119 | 135 | 4.00E-18  | 113.4 | 67.2 | 71.4  |
| Rsa1.0_02018.1.g31560.t1 | ref XP_002872140.1  CYP71B11 [Arabidopsis lyrata subsp. lyrata]<br>gi 297317977 gb EFH48399.1  CYP71B11 [Arabidopsis lyrata subsp. lyrata]                                                                                                                                                                                                                                                                                                                                                                                                                                                                                                                                                                                                                                                                                                                                                                                                                                                                                                                                                                     | 496 | 496 | 0         | 100.0 | 81.7 | 91.9  | CYP71B11                               | gbpln | Arabidopsis lyrata   | AT5G54062.1   Symbols:   unknown protein; FUNCTIONS IN: molecular_function unknown; INVOLVED IN: biological_process unknown; LOCATED IN: endomembrane system; CONTAINS InterPro DOMAIN/s: Protein of unknown function DUF1278 (InterPro:IPR010701); BEST Arabidopsis thaliana protein match is: Protein of unknown function (DUF1278) (TAIR:AT5G53742.1); Has 30201 Blast hits to 17322 proteins in 780 species; Archae - 12; Bacteria - 1396; Metazoa - 17338; Fungi - 3422; Plants - 5037; Viruses - 0; Other Eukaryotes - 2996 (source: NCBI BLINK);   chr5:21938857-21939480 FORWARD LENGTH=207                                                                                                                                                                                                                               | 496 | 496 | 0         | 100.0 | 81.9 | 92.7  |
| Rsa1.0_02018.1.g31561.t1 | gb EOA14663.1  hypothetical protein CARUB_v10027929mg [Capsella rubella]                                                                                                                                                                                                                                                                                                                                                                                                                                                                                                                                                                                                                                                                                                                                                                                                                                                                                                                                                                                                                                       | 264 | 199 | 8.00E-56  | 75.4  | 42.0 | 49.6  | hypothetical protein CARUB_v10027929mg | gbpln | Capsella rubella     | AT5G54062.1   Symbols:   unknown protein; FUNCTIONS IN: molecular_function unknown; INVOLVED IN: biological_process unknown; LOCATED IN: endomembrane system; CONTAINS InterPro DOMAIN/s: Protein of unknown function DUF1278 (InterPro:IPR010701); BEST Arabidopsis thaliana protein match is: Protein of unknown function (DUF1278) (TAIR:AT5G53742.1); Has 30201 Blast hits to 17322 proteins in 780 species; Archae - 12; Bacteria - 1396; Metazoa - 17338; Fungi - 3422; Plants - 5037; Viruses - 0; Other Eukaryotes - 2996 (source: NCBI BLINK);   chr5:21938857-21939480 FORWARD LENGTH=207                                                                                                                                                                                                                               | 264 | 207 | 1.00E-46  | 78.4  | 41.7 | 47.7  |

|                          |                                                                                                                                                                                                                                                                                                                                                                                                                                                                                                                                                                                |     |     |           |       |      |      |                                                                            |       |                      |                                                                                                                                               |     |     |           |       |      |      |
|--------------------------|--------------------------------------------------------------------------------------------------------------------------------------------------------------------------------------------------------------------------------------------------------------------------------------------------------------------------------------------------------------------------------------------------------------------------------------------------------------------------------------------------------------------------------------------------------------------------------|-----|-----|-----------|-------|------|------|----------------------------------------------------------------------------|-------|----------------------|-----------------------------------------------------------------------------------------------------------------------------------------------|-----|-----|-----------|-------|------|------|
| Rsa1.0_02018.1.g31562.t1 | gb AEM37037.1  UDP-glucose:flavonoid 3-O-glucosyltransferase 2 [Brassica rapa subsp. oleifera]                                                                                                                                                                                                                                                                                                                                                                                                                                                                                 | 468 | 468 | 0         | 100.0 | 93.6 | 97.6 | UDP-glucose:flavonoid 3-O-glucosyltransferase 2                            | gbpln | Brassica rapa        | AT5G54060.1   Symbols: UF3GT   UDP-glucose:flavonoid 3-O-glucosyltransferase   chr5:21936902-21938308 REVERSE LENGTH=468                      | 468 | 468 | 0         | 100.0 | 86.1 | 94.0 |
| Rsa1.0_02019.1.g31563.t1 | ref NP_173310.2  protein AGAMOUS-like 65 [Arabidopsis thaliana]                                                                                                                                                                                                                                                                                                                                                                                                                                                                                                                | #   | #   | #         | #     | #    | #    | -                                                                          | ----  | ----                 | #                                                                                                                                             | #   | #   | #         | #     | #    | #    |
| Rsa1.0_02019.1.g31564.t1 | gi 32455231 gb AAAN37407.1  MADS-box protein AGL65 [Arabidopsis thaliana] gi 332191637 gb AEE29758.1  protein AGAMOUS-like 65 [Arabidopsis thaliana]                                                                                                                                                                                                                                                                                                                                                                                                                           | 379 | 389 | 1.00E-179 | 102.6 | 87.3 | 92.6 | protein AGAMOUS-like 65                                                    | gbpln | Arabidopsis thaliana | AT1G18750.1   Symbols: AGL65   AGAMOUS-like 65   chr1:6467266-6469640 FORWARD LENGTH=389                                                      | 379 | 389 | 0         | 102.6 | 87.3 | 92.6 |
| Rsa1.0_02019.1.g31565.t1 | gb EOA39436.1  hypothetical protein CARUB_v10011880mg [Capsella rubella]                                                                                                                                                                                                                                                                                                                                                                                                                                                                                                       | 134 | 239 | 2.00E-23  | 178.4 | 41.8 | 55.2 | hypothetical protein CARUB_v10012572mg                                     | gbpln | Capsella rubella     | AT1G18760.1   Symbols:   Zinc finger, C3HC4 type (RING finger) family protein   chr1:6471150-6471824 REVERSE LENGTH=224                       | 134 | 224 | 2.00E-14  | 167.2 | 34.3 | 49.3 |
| Rsa1.0_02019.1.g31566.t1 | ref XP_002893015.1  RWP-RK domain-containing protein [Arabidopsis lyrata subsp. lyrata] gi 297338857 gb EFH69274.1  RWP-RK domain-containing protein [Arabidopsis lyrata subsp. lyrata]                                                                                                                                                                                                                                                                                                                                                                                        | 248 | 259 | 4.00E-74  | 104.4 | 65.3 | 73.8 | RWP-RK domain-containing protein                                           | gbpln | Arabidopsis lyrata   | AT1G18790.1   Symbols:   RWP-RK domain-containing protein   chr1:6478851-6480043 REVERSE LENGTH=269                                           | 248 | 269 | 2.00E-74  | 108.5 | 63.3 | 73.8 |
| Rsa1.0_02019.1.g31567.t1 | dbj BAC42657.1  unknown protein [Arabidopsis thaliana] gi 28950777 gb AAO63312.1  At1g18800 [Arabidopsis thaliana]                                                                                                                                                                                                                                                                                                                                                                                                                                                             | 254 | 228 | 1.00E-108 | 89.8  | 79.1 | 83.9 | unknown protein                                                            | gbpln | Arabidopsis thaliana | AT1G18800.1   Symbols: NRP2   NAP1-related protein 2   chr1:6481466-6483463 REVERSE LENGTH=256                                                | 254 | 256 | 1.00E-108 | 100.8 | 77.6 | 81.5 |
| Rsa1.0_02019.1.g31568.t1 | gb EOA39108.1  hypothetical protein CARUB_v10011880mg [Capsella rubella]                                                                                                                                                                                                                                                                                                                                                                                                                                                                                                       | 367 | 379 | 1.00E-147 | 103.3 | 80.4 | 87.7 | hypothetical protein CARUB_v10011880mg                                     | gbpln | Capsella rubella     | AT1G18810.1   Symbols:   phytochrome kinase substrate-related   chr1:6485709-6486872 REVERSE LENGTH=387                                       | 367 | 387 | 1.00E-145 | 105.4 | 75.5 | 83.7 |
| Rsa1.0_02019.1.g31569.t1 | ref NP_173317.2  transducin/WD-40 repeat-containing protein [Arabidopsis thaliana] gi 332191646 gb AEE29767.1  transport protein SEC31-like protein SEC31B [Arabidopsis thaliana]                                                                                                                                                                                                                                                                                                                                                                                              | 955 | 969 | 0         | 101.5 | 73.9 | 82.7 | transducin/WD-40 repeat-containing protein                                 | gbpln | Arabidopsis thaliana | AT1G18830.1   Symbols:   Transducin/WD40 repeat-like superfamily protein   chr1:6489309-6494218 FORWARD LENGTH=969                            | 955 | 969 | 0         | 101.5 | 73.9 | 82.7 |
| Rsa1.0_02019.1.g31570.t1 | ref XP_002893018.1  hypothetical protein ARALYDRAFT.472107 [Arabidopsis lyrata subsp. lyrata] gi 297338860 gb EFH69277.1  hypothetical protein ARALYDRAFT.472107 [Arabidopsis lyrata subsp. lyrata]                                                                                                                                                                                                                                                                                                                                                                            | 88  | 88  | 4.00E-40  | 100.0 | 93.2 | 94.3 | hypothetical protein ARALYDRAFT.472107                                     | gbpln | Arabidopsis lyrata   | AT1G18835.1   Symbols: MIF3   mini zinc finger   chr1:6496106-6496372 REVERSE LENGTH=88                                                       | 88  | 88  | 4.00E-38  | 100.0 | 94.3 | 95.5 |
| Rsa1.0_02019.1.g31571.t1 | ref NP_197389.1  RNA-directed DNA polymerase (reverse transcriptase)-related family protein [Arabidopsis thaliana] gi 332005241 gb AED92624.1  RNA-directed DNA polymerase (reverse transcriptase)-related family protein [Arabidopsis thaliana]                                                                                                                                                                                                                                                                                                                               | 290 | 295 | 3.00E-53  | 101.7 | 37.6 | 50.0 | RNA-directed DNA polymerase (reverse transcriptase)-related family protein | gbpln | Arabidopsis thaliana | AT5G18880.1   Symbols:   RNA-directed DNA polymerase (reverse transcriptase)-related family protein   chr5:6300535-6301422 REVERSE LENGTH=295 | 290 | 295 | 9.00E-56  | 101.7 | 37.6 | 50.0 |
| Rsa1.0_02019.1.g31572.t1 | ref XP_002893019.1  predicted protein [Arabidopsis lyrata subsp. lyrata] gi 297338861 gb EFH69278.1  predicted protein [Arabidopsis lyrata subsp. lyrata]                                                                                                                                                                                                                                                                                                                                                                                                                      | 95  | 104 | 1.00E-25  | 109.5 | 73.7 | 84.2 | predicted protein                                                          | gbpln | Arabidopsis lyrata   | #                                                                                                                                             | #   | #   | #         | #     | #    | #    |
| Rsa1.0_02020.1.g31573.t1 | #                                                                                                                                                                                                                                                                                                                                                                                                                                                                                                                                                                              | #   | #   | #         | #     | #    | #    | -                                                                          | ----  | ----                 | #                                                                                                                                             | #   | #   | #         | #     | #    | #    |
| Rsa1.0_02020.1.g31574.t1 | #                                                                                                                                                                                                                                                                                                                                                                                                                                                                                                                                                                              | #   | #   | #         | #     | #    | #    | -                                                                          | ----  | ----                 | #                                                                                                                                             | #   | #   | #         | #     | #    | #    |
| Rsa1.0_02020.1.g31575.t1 | ref NP_177760.1  golgi nucleotide sugar transporter 3 [Arabidopsis thaliana] gi 75198562 sp Q9S845.1 GONS3.ARAT H RecName: Full=GDP-mannose transporter GONST3; AltName: Full=Protein GOLGI NUCLEOTIDE SUGAR TRANSPORTER 3 gi 6554485 gb AAF16667.1 AC012394_16 unknown protein; 69155-70273 [Arabidopsis thaliana] gi 6573714 gb AAF17634.1 AC009978_10 T23E18.26 [Arabidopsis thaliana] gi 29329821 emb CAD83087.1  GONST3 Golgi Nucleotide sugar transporter [Arabidopsis thaliana] gi 332197705 gb AEE35826.1  golgi nucleotide sugar transporter 3 [Arabidopsis thaliana] | 378 | 372 | 1.00E-168 | 98.4  | 81.5 | 88.4 | golgi nucleotide sugar transporter 3                                       | gbpln | Arabidopsis thaliana | AT1G76340.1   Symbols: GONST3   golgi nucleotide sugar transporter 3   chr1:28635188-28636306 REVERSE LENGTH=372                              | 378 | 372 | 1.00E-171 | 98.4  | 81.5 | 88.4 |
| Rsa1.0_02020.1.g31576.t1 | gb AAQ62876.1  At1g76320 [Arabidopsis thaliana] gi 62320160 dbj BAD94369.1  putative phytochrome A signaling protein [Arabidopsis thaliana]                                                                                                                                                                                                                                                                                                                                                                                                                                    | 739 | 732 | 0         | 99.1  | 80.9 | 89.4 | At1g76320                                                                  | gbpln | Arabidopsis thaliana | AT1G76320.1   Symbols: FRS4   FAR1-related sequence 4   chr1:28631404-28633886 FORWARD LENGTH=732                                             | 739 | 732 | 0         | 99.1  | 80.8 | 89.4 |

|                          |                                                                                                     |     |      |           |       |      |      |                                                         |       |                      |                                                                                                                                                                                                                                                                                                                                                                                                                                                                                                                                                                                                   |     |     |           |       |      |      |
|--------------------------|-----------------------------------------------------------------------------------------------------|-----|------|-----------|-------|------|------|---------------------------------------------------------|-------|----------------------|---------------------------------------------------------------------------------------------------------------------------------------------------------------------------------------------------------------------------------------------------------------------------------------------------------------------------------------------------------------------------------------------------------------------------------------------------------------------------------------------------------------------------------------------------------------------------------------------------|-----|-----|-----------|-------|------|------|
| Rsa1.0_02020.1.g31577.t1 | ref[XP_002889075.1] predicted protein [Arabidopsis lyrata subsp. lyrata]                            | 431 | 432  | 0         | 100.2 | 85.8 | 91.9 | predicted protein                                       | gbpln | Arabidopsis lyrata   | AT1G76310.1   Symbols: CYCB2:4   CYCLIN B2.4   chr1:28628046-28630199 REVERSE LENGTH=431                                                                                                                                                                                                                                                                                                                                                                                                                                                                                                          | 431 | 431 | 0         | 100.0 | 84.9 | 91.6 |
| Rsa1.0_02020.1.g31578.t1 | # # # # # # # #                                                                                     |     |      |           |       |      |      | -                                                       | ----  | ----                 | # # # # # # # #                                                                                                                                                                                                                                                                                                                                                                                                                                                                                                                                                                                   |     |     |           |       |      |      |
| Rsa1.0_02020.1.g31579.t2 | gb[AAK96849.1] coatomer delta subunit (delta-coat protein) (delta-COP) [Arabidopsis thaliana]       | 109 | 527  | 7.00E-11  | 483.5 | 33.9 | 45.0 | coatomer delta subunit (delta-coat protein) (delta-COP) | gbpln | Arabidopsis thaliana | AT5G05010.2   Symbols:   clathrin adaptor complexes medium subunit family protein   chr5:1477137-1479872 FORWARD LENGTH=527                                                                                                                                                                                                                                                                                                                                                                                                                                                                       | 109 | 527 | 9.00E-13  | 483.5 | 33.0 | 44.0 |
| Rsa1.0_02020.1.g31580.t1 | gb[EOA33218.1] hypothetical protein CARUB_v10022476mg [Capsella rubella]                            | 116 | 432  | 2.00E-23  | 372.4 | 50.0 | 56.0 | hypothetical protein CARUB_v10022476mg                  | gbpln | Capsella rubella     | AT1G76310.1   Symbols: CYCB2:4   CYCLIN B2.4   chr1:28628046-28630199 REVERSE LENGTH=431                                                                                                                                                                                                                                                                                                                                                                                                                                                                                                          | 116 | 431 | 2.00E-25  | 371.6 | 48.3 | 56.0 |
| Rsa1.0_02020.1.g31581.t1 | gb[EOA34893.1] hypothetical protein CARUB_v10022476mg [Capsella rubella]                            | 77  | 77   | 3.00E-12  | 100.0 | 57.1 | 68.8 | hypothetical protein CARUB_v10022476mg                  | gbpln | Capsella rubella     | #                                                                                                                                                                                                                                                                                                                                                                                                                                                                                                                                                                                                 | #   | #   | #         | #     | #    | #    |
| Rsa1.0_02020.1.g31582.t1 | # # # # # # # #                                                                                     |     |      |           |       |      |      | -                                                       | ----  | ----                 | # # # # # # # #                                                                                                                                                                                                                                                                                                                                                                                                                                                                                                                                                                                   |     |     |           |       |      |      |
| Rsa1.0_02020.1.g31583.t1 | gb[EMJ25100.1] hypothetical protein PRUPE_ppa013274mg [Prunus persica]                              | 127 | 131  | 7.00E-54  | 103.1 | 82.7 | 92.9 | hypothetical protein PRUPE_ppa013274mg                  | gbpln | Prunus persica       | AT1G20580.1   Symbols:   Small nuclear ribonucleoprotein family protein   chr1:7128979-7130371 FORWARD LENGTH=131                                                                                                                                                                                                                                                                                                                                                                                                                                                                                 | 127 | 131 | 9.00E-51  | 103.1 | 83.5 | 95.3 |
| Rsa1.0_02020.1.g31584.t1 | # # # # # # # #                                                                                     |     |      |           |       |      |      | -                                                       | ----  | ----                 | # # # # # # # #                                                                                                                                                                                                                                                                                                                                                                                                                                                                                                                                                                                   |     |     |           |       |      |      |
| Rsa1.0_02020.1.g31585.t1 | gb[AAC33226.1] putative non-LTR retroelement reverse transcriptase [Arabidopsis thaliana]           | 214 | 1529 | 2.00E-40  | 714.5 | 37.9 | 53.7 | putative non-LTR retroelement reverse transcriptase     | gbpln | Arabidopsis thaliana | AT5G18880.1   Symbols:   RNA-directed DNA polymerase (reverse transcriptase)-related family protein   chr5:6300535-6301422 REVERSE LENGTH=295                                                                                                                                                                                                                                                                                                                                                                                                                                                     | 214 | 295 | 8.00E-38  | 137.9 | 37.4 | 53.7 |
| Rsa1.0_02020.1.g31586.t1 | ref[XP_002886778.1] integral membrane transporter family protein [Arabidopsis lyrata subsp. lyrata] | 429 | 440  | 0         | 102.6 | 82.1 | 90.2 | integral membrane transporter family protein            | gbpln | Arabidopsis lyrata   | AT1G64890.1   Symbols:   Major facilitator superfamily protein   chr1:24109752-24111165 FORWARD LENGTH=442                                                                                                                                                                                                                                                                                                                                                                                                                                                                                        | 429 | 442 | 0         | 103.0 | 81.6 | 90.0 |
| Rsa1.0_02020.1.g31587.t1 | ref[NP_565126.1] pseudouridine synthase-like protein [Arabidopsis thaliana]                         | 430 | 463  | 0         | 107.7 | 76.3 | 81.6 | pseudouridine synthase-like protein                     | gbpln | Arabidopsis thaliana | AT1G76120.1   Symbols:   Pseudouridine synthase family protein   chr1:28558813-28560294 REVERSE LENGTH=463                                                                                                                                                                                                                                                                                                                                                                                                                                                                                        | 430 | 463 | 0         | 107.7 | 76.3 | 81.6 |
| Rsa1.0_02020.1.g31587.t1 | gi[6573728]gb[AAF17648.1]AC00978.24 T23E18.5 [Arabidopsis thaliana]                                 |     |      |           |       |      |      |                                                         |       |                      |                                                                                                                                                                                                                                                                                                                                                                                                                                                                                                                                                                                                   |     |     |           |       |      |      |
| Rsa1.0_02020.1.g31587.t1 | gi[21592498]gb[AAM64448.1] unknown [Arabidopsis thaliana]                                           |     |      |           |       |      |      |                                                         |       |                      |                                                                                                                                                                                                                                                                                                                                                                                                                                                                                                                                                                                                   |     |     |           |       |      |      |
| Rsa1.0_02020.1.g31587.t1 | gi[21703099]gb[AAM74492.1] At1g76120/T23E18.5 [Arabidopsis thaliana]                                |     |      |           |       |      |      |                                                         |       |                      |                                                                                                                                                                                                                                                                                                                                                                                                                                                                                                                                                                                                   |     |     |           |       |      |      |
| Rsa1.0_02020.1.g31587.t1 | gi[2330841]gb[AAN18175.1] At1g76120/T23E18.5 [Arabidopsis thaliana]                                 |     |      |           |       |      |      |                                                         |       |                      |                                                                                                                                                                                                                                                                                                                                                                                                                                                                                                                                                                                                   |     |     |           |       |      |      |
| Rsa1.0_02020.1.g31587.t1 | gi[33219767]gb[AEE35798.1] pseudouridine synthase-like protein [Arabidopsis thaliana]               |     |      |           |       |      |      |                                                         |       |                      |                                                                                                                                                                                                                                                                                                                                                                                                                                                                                                                                                                                                   |     |     |           |       |      |      |
| Rsa1.0_02020.1.g31588.t2 | ref[XP_002889059.1] high mobility group family protein [Arabidopsis lyrata subsp. lyrata]           | 339 | 338  | 1.00E-159 | 99.7  | 86.7 | 90.3 | high mobility group family protein                      | gbpln | Arabidopsis lyrata   | AT1G76110.1   Symbols:   HMG (high mobility group) box protein with ARID/BRIGHT DNA-binding domain   chr1:28555287-28557465 REVERSE LENGTH=338                                                                                                                                                                                                                                                                                                                                                                                                                                                    | 339 | 338 | 1.00E-159 | 99.7  | 85.8 | 89.1 |
| Rsa1.0_02020.1.g31589.t1 | gb[AAA32834.1] plastocyanin [Arabidopsis thaliana]                                                  | 170 | 171  | 3.00E-75  | 100.6 | 82.9 | 90.0 | plastocyanin                                            | gbpln | Arabidopsis thaliana | AT1G76100.1   Symbols: PETE1   plastocyanin 1   chr1:28554217-28554732 REVERSE LENGTH=171                                                                                                                                                                                                                                                                                                                                                                                                                                                                                                         | 170 | 171 | 3.00E-77  | 100.6 | 82.4 | 90.0 |
| Rsa1.0_02020.1.g31590.t1 | emb[CAB39638.1] RNA-directed DNA polymerase-like protein [Arabidopsis thaliana]                     | 513 | 1274 | 5.00E-94  | 248.3 | 38.2 | 53.4 | RNA-directed DNA polymerase-like protein                | gbpln | Arabidopsis thaliana | AT4G29090.1   Symbols:   Ribonuclease H-like superfamily protein   chr4:14333528-14335255 FORWARD LENGTH=575                                                                                                                                                                                                                                                                                                                                                                                                                                                                                      | 513 | 575 | 9.00E-68  | 112.1 | 33.7 | 51.9 |
| Rsa1.0_02020.1.g31591.t1 | dbj[BAJ34107.1] unnamed protein product [Thellungiella halophila]                                   | 306 | 306  | 1.00E-166 | 100.0 | 92.5 | 96.4 | unnamed protein product                                 | ----  | ----                 | AT1G76080.1   Symbols: ATCDSP32, CDSP32   chloroplastic drought-induced stress protein of 32 kD   chr1:28549063-28549348 REVERSE LENGTH=302                                                                                                                                                                                                                                                                                                                                                                                                                                                       | 306 | 302 | 1.00E-154 | 98.7  | 87.6 | 91.8 |
| Rsa1.0_02020.1.g31592.t1 | gb[EOA35588.1] hypothetical protein CARUB_v10020800mg [Capsella rubella]                            | 312 | 267  | 1.00E-86  | 85.6  | 60.6 | 67.3 | hypothetical protein CARUB_v10020800mg                  | gbpln | Capsella rubella     | AT1G76070.1   Symbols:   unknown protein; FUNCTIONS IN: molecular_function unknown; INVOLVED IN: biological_process unknown; LOCATED IN: plasma membrane; EXPRESSED IN: 8 plant structures; EXPRESSED DURING: LP.04 four leaves visible, 4 anthesis, petal differentiation and expansion stage; BEST Arabidopsis thaliana protein match is: unknown protein (TAIRAT1G20310.1); Has 66 Blast hits to 66 proteins in 15 species: Archae - 0; Bacteria - 0; Metazoa - 0; Fungi - 2; Plants - 64; Viruses - 0; Other Eukaryotes - 0 (source: NCBI BLink).   chr1:28546617-28547435 FORWARD LENGTH=272 | 312 | 272 | 2.00E-83  | 87.2  | 63.5 | 68.3 |

|                          |                                                                                                                                                                                                                                                                                                                                                                                                                      |     |      |           |       |      |      |                                                          |       |                      |                                                                                                                                                                                                                                                                                                                                                                                                                                                                                                                                                                  |     |      |           |       |      |      |
|--------------------------|----------------------------------------------------------------------------------------------------------------------------------------------------------------------------------------------------------------------------------------------------------------------------------------------------------------------------------------------------------------------------------------------------------------------|-----|------|-----------|-------|------|------|----------------------------------------------------------|-------|----------------------|------------------------------------------------------------------------------------------------------------------------------------------------------------------------------------------------------------------------------------------------------------------------------------------------------------------------------------------------------------------------------------------------------------------------------------------------------------------------------------------------------------------------------------------------------------------|-----|------|-----------|-------|------|------|
| Rsa1.0_02020.1.g31593.t1 | ref[XP_002889054.1] EMB1793 [Arabidopsis lyrata subsp. lyrata] gi 297334895 gb EFH65313.1  EMB1793 [Arabidopsis lyrata subsp. lyrata]                                                                                                                                                                                                                                                                                | 158 | 157  | 4.00E-70  | 99.4  | 85.4 | 93.7 | EMB1793                                                  | gbpln | Arabidopsis lyrata   | AT1G76060.1   Symbols: EMB1793   LYR family of Fe/S cluster biogenesis protein   chr1:28543367-28543840 REVERSE LENGTH=157                                                                                                                                                                                                                                                                                                                                                                                                                                       | 158 | 157  | 1.00E-68  | 99.4  | 81.6 | 91.1 |
| Rsa1.0_02020.1.g31594.t3 | gb EOA34990.1  hypothetical protein CARUB_v10020082mg [Capsella rubella]                                                                                                                                                                                                                                                                                                                                             | 528 | 556  | 0         | 105.3 | 91.1 | 95.8 | hypothetical protein CARUB_v10020082mg                   | gbpln | Capsella rubella     | AT1G76040.2   Symbols: CPK29   calcium-dependent protein kinase 29   chr1:28537743-28540448 FORWARD LENGTH=561                                                                                                                                                                                                                                                                                                                                                                                                                                                   | 528 | 561  | 0         | 106.3 | 91.3 | 96.6 |
| Rsa1.0_02020.1.g31595.t1 | ref[XP_002887623.1] predicted protein [Arabidopsis lyrata subsp. lyrata] gi 297333464 gb EFH63882.1  predicted protein [Arabidopsis lyrata subsp. lyrata]                                                                                                                                                                                                                                                            | 478 | 486  | 0         | 101.7 | 90.0 | 93.3 | predicted protein                                        | gbpln | Arabidopsis lyrata   | AT1G76030.1   Symbols:   ATPase, V1 complex, subunit B protein   chr1:28534134-28536916 FORWARD LENGTH=486                                                                                                                                                                                                                                                                                                                                                                                                                                                       | 478 | 486  | 0         | 101.7 | 89.7 | 93.3 |
| Rsa1.0_02020.1.g31596.t1 | gb EOA35693.1  hypothetical protein CARUB_v10020919mg [Capsella rubella]                                                                                                                                                                                                                                                                                                                                             | 220 | 222  | 4.00E-89  | 100.9 | 80.0 | 85.9 | hypothetical protein CARUB_v10020919mg                   | gbpln | Capsella rubella     | AT1G76020.1   Symbols:   Thioredoxin superfamily protein   chr1:28532243-28533542 REVERSE LENGTH=225                                                                                                                                                                                                                                                                                                                                                                                                                                                             | 220 | 225  | 4.00E-91  | 102.3 | 76.8 | 86.4 |
| Rsa1.0_02021.1.g31597.t1 | gb ABD65034.1  Ulp1 protease family protein [Brassica oleracea]                                                                                                                                                                                                                                                                                                                                                      | 319 | 863  | 1.00E-37  | 270.5 | 25.1 | 33.9 | Ulp1 protease family protein                             | gbpln | Brassica oleracea    | AT5G45570.1   Symbols:   Ulp1 protease family protein   chr5:18472301-18475574 FORWARD LENGTH=921                                                                                                                                                                                                                                                                                                                                                                                                                                                                | 319 | 921  | 1.00E-12  | 288.7 | 23.2 | 34.2 |
| Rsa1.0_02021.1.g31598.t1 | gb AAD49099.1 AF177535_3 contains similarity to maize transposon MuDR (GB:M76978) [Arabidopsis thaliana]                                                                                                                                                                                                                                                                                                             | 197 | 664  | 8.00E-13  | 337.1 | 19.8 | 32.5 | contains similarity to maize transposon MuDR (GB:M76978) | gbpln | Arabidopsis thaliana | #                                                                                                                                                                                                                                                                                                                                                                                                                                                                                                                                                                | #   | #    | #         | #     | #    | #    |
| Rsa1.0_02021.1.g31599.t1 | #                                                                                                                                                                                                                                                                                                                                                                                                                    | #   | #    | #         | #     | #    | #    | -                                                        | ----  | ----                 | #                                                                                                                                                                                                                                                                                                                                                                                                                                                                                                                                                                | #   | #    | #         | #     | #    | #    |
| Rsa1.0_02021.1.g31600.t1 | #                                                                                                                                                                                                                                                                                                                                                                                                                    | #   | #    | #         | #     | #    | #    | -                                                        | ----  | ----                 | #                                                                                                                                                                                                                                                                                                                                                                                                                                                                                                                                                                | #   | #    | #         | #     | #    | #    |
| Rsa1.0_02021.1.g31601.t2 | gb EOA26012.1  hypothetical protein CARUB_v10019409mg [Capsella rubella]                                                                                                                                                                                                                                                                                                                                             | 245 | 243  | 1.00E-82  | 99.2  | 70.2 | 76.3 | hypothetical protein CARUB_v10019409mg                   | gbpln | Capsella rubella     | AT3G53200.1   Symbols: AtMYB27, MYB27   myb domain protein 27   chr3:19718426-19719394 REVERSE LENGTH=238                                                                                                                                                                                                                                                                                                                                                                                                                                                        | 245 | 238  | 1.00E-82  | 97.1  | 69.4 | 77.6 |
| Rsa1.0_02021.1.g31602.t1 | ref[XP_002876192.1] hypothetical protein ARALYDRAFT_485694 [Arabidopsis lyrata subsp. lyrata] gi 297322030 gb EFH52451.1  hypothetical protein ARALYDRAFT_485694 [Arabidopsis lyrata subsp. lyrata]                                                                                                                                                                                                                  | 457 | 484  | 0         | 105.9 | 90.4 | 95.2 | hypothetical protein ARALYDRAFT_485694                   | gbpln | Arabidopsis lyrata   | AT3G53190.1   Symbols:   Pectin lyase-like superfamily protein   chr3:19714171-19717537 FORWARD LENGTH=483                                                                                                                                                                                                                                                                                                                                                                                                                                                       | 457 | 483  | 0         | 105.7 | 89.9 | 93.9 |
| Rsa1.0_02021.1.g31603.t1 | #                                                                                                                                                                                                                                                                                                                                                                                                                    | #   | #    | #         | #     | #    | #    | -                                                        | ----  | ----                 | #                                                                                                                                                                                                                                                                                                                                                                                                                                                                                                                                                                | #   | #    | #         | #     | #    | #    |
| Rsa1.0_02022.1.g31604.t1 | gb AAK43485.1 AC084807_10 polyprotein, putative [Arabidopsis thaliana] gi 225898008 dbj BAH30336.1  hypothetical protein [Arabidopsis thaliana]                                                                                                                                                                                                                                                                      | 990 | 1459 | 0         | 147.4 | 66.8 | 78.0 | polyprotein, putative                                    | gbpln | Arabidopsis thaliana | AT4G23160.1   Symbols: CRK8   cysteine-rich RLK (RECEPTOR-like protein kinase) 8   chr4:12129485-12134086 FORWARD LENGTH=1262                                                                                                                                                                                                                                                                                                                                                                                                                                    | 990 | 1262 | 1.00E-108 | 127.5 | 19.5 | 27.8 |
| Rsa1.0_02022.1.g31605.t1 | gb EOA28094.1  hypothetical protein CARUB_v10024275mg [Capsella rubella]                                                                                                                                                                                                                                                                                                                                             | 142 | 142  | 1.00E-73  | 100.0 | 96.5 | 99.3 | hypothetical protein CARUB_v10024275mg                   | gbpln | Capsella rubella     | AT2G42680.1   Symbols: MBF1A, ATMBF1A   multiprotein bridging factor 1A   chr2:17774972-17776116 FORWARD LENGTH=142                                                                                                                                                                                                                                                                                                                                                                                                                                              | 142 | 142  | 2.00E-73  | 100.0 | 93.0 | 97.2 |
| Rsa1.0_02022.1.g31606.t1 | #                                                                                                                                                                                                                                                                                                                                                                                                                    | #   | #    | #         | #     | #    | #    | -                                                        | ----  | ----                 | #                                                                                                                                                                                                                                                                                                                                                                                                                                                                                                                                                                | #   | #    | #         | #     | #    | #    |
| Rsa1.0_02022.1.g31607.t1 | gb EOA27623.1  hypothetical protein CARUB_v10023771mg [Capsella rubella]                                                                                                                                                                                                                                                                                                                                             | 521 | 289  | 1.00E-106 | 55.5  | 39.5 | 45.9 | hypothetical protein CARUB_v10023771mg                   | gbpln | Capsella rubella     | AT2G42780.1   Symbols:   FUNCTIONS IN: molecular function unknown; INVOLVED IN: regulation of transcription; LOCATED IN: integral to membrane, nucleus; EXPRESSED IN: 20 plant structures; EXPRESSED DURING: 11 growth stages; CONTAINS InterPro DOMAIN/s: RNA polymerase II transcription factor SIII, subunit A (InterPro:IPR010684); Has 187 Blast hits to 186 proteins in 77 species: Archae - 0; Bacteria - 0; Metazoa - 104; Fungi - 29; Plants - 38; Viruses - 0; Other Eukaryotes - 16 (source: NCBI BLINK).   chr2:17801037-17802646 FORWARD LENGTH=293 | 521 | 293  | 1.00E-107 | 56.2  | 37.6 | 44.5 |
| Rsa1.0_02022.1.g31608.t1 | ref[XP_002862313.1] hypothetical protein ARALYDRAFT_497523 [Arabidopsis lyrata subsp. lyrata] gi 297827987 ref[XP_002881876.1] hypothetical protein ARALYDRAFT_903663 [Arabidopsis lyrata subsp. lyrata] gi 297307697 gb EFH38571.1  hypothetical protein ARALYDRAFT_497523 [Arabidopsis lyrata subsp. lyrata] gi 297327715 gb EFH58135.1  hypothetical protein ARALYDRAFT_903663 [Arabidopsis lyrata subsp. lyrata] | 119 | 117  | 1.00E-36  | 98.3  | 79.0 | 89.1 | hypothetical protein ARALYDRAFT_497523                   | gbpln | Arabidopsis lyrata   | AT2G42870.1   Symbols: PAR1, HLH1   phy rapidly regulated 1   chr2:17836831-17837187 REVERSE LENGTH=118                                                                                                                                                                                                                                                                                                                                                                                                                                                          | 119 | 118  | 1.00E-36  | 99.2  | 75.6 | 87.4 |
| Rsa1.0_02022.1.g31609.t1 | #                                                                                                                                                                                                                                                                                                                                                                                                                    | #   | #    | #         | #     | #    | #    | -                                                        | ----  | ----                 | #                                                                                                                                                                                                                                                                                                                                                                                                                                                                                                                                                                | #   | #    | #         | #     | #    | #    |

|                          |                                                                                                                                                                                                                                                                                                                                               |      |      |           |        |      |      |                                                                                |       |                      |                                                                                                                                                                                                                                                                                                                                              |      |      |           |       |      |      |
|--------------------------|-----------------------------------------------------------------------------------------------------------------------------------------------------------------------------------------------------------------------------------------------------------------------------------------------------------------------------------------------|------|------|-----------|--------|------|------|--------------------------------------------------------------------------------|-------|----------------------|----------------------------------------------------------------------------------------------------------------------------------------------------------------------------------------------------------------------------------------------------------------------------------------------------------------------------------------------|------|------|-----------|-------|------|------|
| Rsa1.0_02022.1.g31610.t1 | dbj BAJ92365.1  predicted protein [Hordeum vulgare subsp. vulgare] gi 326518929 dbj BAJ92625.1  predicted protein [Hordeum vulgare subsp. vulgare]                                                                                                                                                                                            | 150  | 606  | 4.00E-43  | 404.0  | 60.7 | 70.7 | predicted protein                                                              | gbpln | Hordeum vulgare      | AT2G42880.1   Symbols: ATPK20, MPK20   MAP kinase 20   chr2:17840572-17843947 REVERSE LENGTH=606                                                                                                                                                                                                                                             | 150  | 606  | 3.00E-44  | 404.0 | 65.3 | 69.3 |
| Rsa1.0_02023.1.g31611.t5 | emb CAB39638.1  RNA-directed DNA polymerase-like protein [Arabidopsis thaliana] gi 7267666 emb CAB78094.1  RNA-directed DNA polymerase-like protein [Arabidopsis thaliana]                                                                                                                                                                    | 1879 | 1274 | 0         | 67.8   | 29.3 | 39.9 | RNA-directed DNA polymerase-like protein                                       | gbpln | Arabidopsis thaliana | AT4G29090.1   Symbols:   Ribonuclease H-like superfamily protein   chr4:14333528-14335255 FORWARD LENGTH=575                                                                                                                                                                                                                                 | 1879 | 575  | 3.00E-71  | 30.6  | 9.2  | 13.5 |
| Rsa1.0_02023.1.g31612.t1 | gb EOA32134.1  hypothetical protein CARUB_v10015385mg, partial [Capsella rubella]                                                                                                                                                                                                                                                             | 589  | 581  | 1.00E-128 | 98.6   | 43.8 | 52.0 | hypothetical protein CARUB_v10015385mg, partial                                | gbpln | Capsella rubella     | #                                                                                                                                                                                                                                                                                                                                            | #    | #    | #         | #     | #    | #    |
| Rsa1.0_02023.1.g31613.t1 | gb AAD19784.1  putative retroelement pol polyprotein [Arabidopsis thaliana]                                                                                                                                                                                                                                                                   | 1448 | 1501 | 0         | 103.7  | 59.8 | 76.2 | putative retroelement pol polyprotein                                          | gbpln | Arabidopsis thaliana | AT4G23160.1   Symbols: CRK8   cysteine-rich RLK (RECEPTOR-like protein kinase) 8   chr4:12129485-12134086 FORWARD LENGTH=1262                                                                                                                                                                                                                | 1448 | 1262 | 1.00E-140 | 87.2  | 17.0 | 24.4 |
| Rsa1.0_02023.1.g31614.t2 | #                                                                                                                                                                                                                                                                                                                                             | #    | #    | #         | #      | #    | #    | -                                                                              | ----  | ----                 | AT5G07530.2   Symbols: GRP17, ATGRP17, ATGRP-7   glycine rich protein 17   chr5:2382629-2384495 REVERSE LENGTH=512                                                                                                                                                                                                                           | 3293 | 512  | 2.00E-33  | 15.5  | 2.1  | 2.5  |
| Rsa1.0_02024.1.g31615.t1 | gb EOA25890.1  hypothetical protein CARUB_v10019270mg, partial [Capsella rubella]                                                                                                                                                                                                                                                             | 146  | 284  | 1.00E-60  | 194.5  | 76.0 | 84.9 | hypothetical protein CARUB_v10019270mg, partial                                | gbpln | Capsella rubella     | AT3G59710.1   Symbols:   NAD(P)-binding Rossmann-fold superfamily protein   chr3:22055220-22057156 REVERSE LENGTH=302                                                                                                                                                                                                                        | 146  | 302  | 5.00E-61  | 206.8 | 69.9 | 82.9 |
| Rsa1.0_02024.1.g31616.t1 | ref NP_191528.1  protein IQ-domain 13 [Arabidopsis thaliana] gi 6996305 emb CAB75466.1  putative protein [Arabidopsis thaliana] gi 22135900 gb AAM91532.1  putative protein [Arabidopsis thaliana] gi 24899697 gb AAN65063.1  putative protein [Arabidopsis thaliana] gi 332646435 gb AEE79956.1  protein IQ-domain 13 [Arabidopsis thaliana] | 474  | 517  | 0         | 109.1  | 84.4 | 88.6 | protein IQ-domain 13                                                           | gbpln | Arabidopsis thaliana | AT3G59690.1   Symbols: IQD13   IQ-domain 13   chr3:22054218-22054479 FORWARD LENGTH=517                                                                                                                                                                                                                                                      | 474  | 517  | 0         | 109.1 | 84.4 | 88.6 |
| Rsa1.0_02024.1.g31617.t1 | gb AAD22286.1  putative non-LTR retroelement reverse transcriptase [Arabidopsis thaliana]                                                                                                                                                                                                                                                     | 124  | 1311 | 2.00E-16  | 1057.3 | 41.1 | 62.9 | putative non-LTR retroelement reverse transcriptase                            | gbpln | Arabidopsis thaliana | AT4G09490.1   Symbols:   Polynucleotidyl transferase, ribonuclease H-like superfamily protein   chr4:6015583-6016575 REVERSE LENGTH=170                                                                                                                                                                                                      | 124  | 170  | 3.00E-13  | 137.1 | 36.3 | 50.8 |
| Rsa1.0_02024.1.g31618.t1 | ref XP_002876519.1  predicted protein [Arabidopsis lyrata subsp. lyrata] gi 297322357 gb EFH52778.1  predicted protein [Arabidopsis lyrata subsp. lyrata]                                                                                                                                                                                     | 195  | 199  | 9.00E-79  | 102.1  | 79.5 | 84.6 | predicted protein                                                              | gbpln | Arabidopsis lyrata   | AT3G59680.1   Symbols:   unknown protein; Has 34 Blast hits to 34 proteins in 10 species: Archae - 0; Bacteria - 0; Metazoa - 0; Fungi - 0; Plants - 34; Viruses - 0; Other Eukaryotes - 0 (source: NCBI BLink).   chr3:22045218-22045823 FORWARD LENGTH=201                                                                                 | 195  | 201  | 4.00E-81  | 103.1 | 79.0 | 86.2 |
| Rsa1.0_02024.1.g31619.t1 | ref XP_002876518.1  hypothetical protein ARALYDRAFT_486432 [Arabidopsis lyrata subsp. lyrata] gi 297322356 gb EFH52777.1  hypothetical protein ARALYDRAFT_486432 [Arabidopsis lyrata subsp. lyrata]                                                                                                                                           | 510  | 516  | 0         | 101.2  | 84.5 | 91.2 | hypothetical protein ARALYDRAFT_486432                                         | gbpln | Arabidopsis lyrata   | AT3G59670.1   Symbols:   unknown protein; BEST Arabidopsis thaliana protein match is: unknown protein (TAIR:AT4G37440.2); Has 77 Blast hits to 77 proteins in 14 species: Archae - 0; Bacteria - 0; Metazoa - 0; Fungi - 0; Plants - 73; Viruses - 0; Other Eukaryotes - 4 (source: NCBI BLink).   chr3:22040485-22042380 FORWARD LENGTH=517 | 510  | 517  | 0         | 101.4 | 82.7 | 90.4 |
| Rsa1.0_02024.1.g31620.t1 | gb AAF18538.1 AC006551.24 Very similar to retrotransposon reverse transcriptase [Arabidopsis thaliana]                                                                                                                                                                                                                                        | 574  | 1231 | 1.00E-162 | 214.5  | 51.7 | 68.1 | Very similar to retrotransposon reverse transcriptase                          | gbpln | Arabidopsis thaliana | AT4G29090.1   Symbols:   Ribonuclease H-like superfamily protein   chr4:14333528-14335255 FORWARD LENGTH=575                                                                                                                                                                                                                                 | 574  | 575  | 4.00E-89  | 100.2 | 28.9 | 45.8 |
| Rsa1.0_02024.1.g31621.t1 | ref NP_191525.2  C2 domain and GRAM domain-containing protein [Arabidopsis thaliana] gi 17065130 gb AAL32719.1  putative protein [Arabidopsis thaliana] gi 30725388 gb AAP37716.1  At3g59660 [Arabidopsis thaliana] gi 332646431 gb AEE79952.1  C2 domain and GRAM domain-containing protein [Arabidopsis thaliana]                           | 591  | 594  | 0         | 100.5  | 89.0 | 93.1 | C2 domain and GRAM domain-containing protein                                   | gbpln | Arabidopsis thaliana | AT3G59660.1   Symbols:   C2 domain-containing protein / GRAM domain-containing protein   chr3:22034426-22038484 REVERSE LENGTH=594                                                                                                                                                                                                           | 591  | 594  | 0         | 100.5 | 89.0 | 93.1 |
| Rsa1.0_02024.1.g31622.t1 | #                                                                                                                                                                                                                                                                                                                                             | #    | #    | #         | #      | #    | #    | -                                                                              | ----  | ----                 | #                                                                                                                                                                                                                                                                                                                                            | #    | #    | #         | #     | #    | #    |
| Rsa1.0_02024.1.g31623.t1 | #                                                                                                                                                                                                                                                                                                                                             | #    | #    | #         | #      | #    | #    | -                                                                              | ----  | ----                 | #                                                                                                                                                                                                                                                                                                                                            | #    | #    | #         | #     | #    | #    |
| Rsa1.0_02025.1.g31624.t1 | dbj BAA85462.1  transposon-like ORF [Brassica rapa]                                                                                                                                                                                                                                                                                           | 189  | 703  | 2.00E-85  | 372.0  | 88.4 | 92.1 | transposon-like ORF                                                            | gbpln | Brassica rapa        | #                                                                                                                                                                                                                                                                                                                                            | #    | #    | #         | #     | #    | #    |
| Rsa1.0_02025.1.g31625.t1 | gb AAC28189.1  contains similarity to Arabidopsis thaliana retrotransposon Athila (GB:X81801) [Arabidopsis thaliana]                                                                                                                                                                                                                          | 779  | 940  | 9.00E-32  | 120.7  | 18.1 | 28.5 | contains similarity to Arabidopsis thaliana retrotransposon Athila (GB:X81801) | gbpln | Arabidopsis thaliana | #                                                                                                                                                                                                                                                                                                                                            | #    | #    | #         | #     | #    | #    |
| Rsa1.0_02025.1.g31626.t1 | gb AAG51783.1 AC079679.3 reverse transcriptase, putative; 16838-20266 [Arabidopsis thaliana]                                                                                                                                                                                                                                                  | 544  | 1142 | 1.00E-105 | 209.9  | 38.8 | 54.4 | reverse transcriptase, putative; 16838-20266                                   | gbpln | Arabidopsis thaliana | AT4G29090.1   Symbols:   Ribonuclease H-like superfamily protein   chr4:14333528-14335255 FORWARD LENGTH=575                                                                                                                                                                                                                                 | 544  | 575  | 2.00E-45  | 105.7 | 25.0 | 38.6 |

|                           |                                                                                                                                                                                                                                                    |      |      |           |       |      |      |                                                     |       |                      |                                                                                                                                                         |      |      |           |       |      |      |
|---------------------------|----------------------------------------------------------------------------------------------------------------------------------------------------------------------------------------------------------------------------------------------------|------|------|-----------|-------|------|------|-----------------------------------------------------|-------|----------------------|---------------------------------------------------------------------------------------------------------------------------------------------------------|------|------|-----------|-------|------|------|
| Rsa1.0_02025.1.g31627.t1  | gb AAF18641.1 AC006228.12 F5J5.16 [Arabidopsis thaliana]                                                                                                                                                                                           | 292  | 1024 | 4.00E-40  | 350.7 | 26.7 | 35.3 | F5J5.16                                             | gbpln | Arabidopsis thaliana | #                                                                                                                                                       | #    | #    | #         | #     | #    |      |
| Rsa1.0_02025.1.g31628.t1  | #                                                                                                                                                                                                                                                  | #    | #    | #         | #     | #    | -    | -                                                   | ----  | ----                 | #                                                                                                                                                       | #    | #    | #         | #     | #    |      |
| Rsa1.0_02025.1.g31629.t1  | #                                                                                                                                                                                                                                                  | #    | #    | #         | #     | #    | -    | -                                                   | ----  | ----                 | #                                                                                                                                                       | #    | #    | #         | #     | #    |      |
| Rsa1.0_02025.1.g31630.t17 | gb AAD23705.1  putative Athila retroelement ORF1 protein [Arabidopsis thaliana]                                                                                                                                                                    | 1432 | 333  | 1.00E-51  | 23.3  | 9.0  | 12.3 | putative Athila retroelement ORF1 protein           | gbpln | Arabidopsis thaliana | #                                                                                                                                                       | #    | #    | #         | #     | #    |      |
| Rsa1.0_02025.1.g31631.t1  | #                                                                                                                                                                                                                                                  | #    | #    | #         | #     | #    | -    | -                                                   | ----  | ----                 | #                                                                                                                                                       | #    | #    | #         | #     | #    |      |
| Rsa1.0_02026.1.g31632.t1  | ref XP_002865084.1  glycosyl hydrolase family 38 protein [Arabidopsis lyrata subsp. lyrata]   gi 297310919 gb EFH41343.1  glycosyl hydrolase family 38 protein [Arabidopsis lyrata subsp. lyrata]                                                  | 1033 | 1047 | 0         | 101.4 | 79.5 | 87.6 | glycosyl hydrolase family 38 protein                | gbpln | Arabidopsis lyrata   | AT5G66150.1   Symbols:   Glycosyl hydrolase family 38 protein   chr5:26439013-26444434 REVERSE LENGTH=1047                                              | 1033 | 1047 | 0         | 101.4 | 79.3 | 87.0 |
| Rsa1.0_02026.1.g31633.t2  | gb EOA15042.1  hypothetical protein CARUB_v10028399mg [Capsella rubella]                                                                                                                                                                           | 560  | 538  | 0         | 96.1  | 85.0 | 89.5 | hypothetical protein CARUB_v10028399mg              | gbpln | Capsella rubella     | AT5G66210.1   Symbols: CPK28   calcium-dependent protein kinase 28   chr5:26456681-26459434 REVERSE LENGTH=523                                          | 560  | 523  | 0         | 93.4  | 84.5 | 88.6 |
| Rsa1.0_02026.1.g31634.t1  | gb EOA13731.1  hypothetical protein CARUB_v10026809mg [Capsella rubella]                                                                                                                                                                           | 311  | 315  | 1.00E-98  | 101.3 | 71.4 | 78.1 | hypothetical protein CARUB_v10026809mg              | gbpln | Capsella rubella     | AT5G66230.1   Symbols:   Chalcone-flavanone isomerase family protein   chr5:26462704-26463873 FORWARD LENGTH=329                                        | 311  | 329  | 5.00E-97  | 105.8 | 74.3 | 83.3 |
| Rsa1.0_02026.1.g31635.t1  | ref XP_002866763.1  hypothetical protein ARALYDRAFT_496982 [Arabidopsis lyrata subsp. lyrata]   gi 297312598 gb EFH43022.1  hypothetical protein ARALYDRAFT_496982 [Arabidopsis lyrata subsp. lyrata]                                              | 282  | 301  | 1.00E-106 | 106.7 | 74.5 | 82.6 | hypothetical protein ARALYDRAFT_496982              | gbpln | Arabidopsis lyrata   | AT5G66250.3   Symbols:   kinectin-related   chr5:26469050-26470376 FORWARD LENGTH=306                                                                   | 282  | 306  | 1.00E-106 | 108.5 | 73.4 | 83.3 |
| Rsa1.0_02026.1.g31636.t1  | ref NP_201427.1  SAUR-like auxin-responsive protein [Arabidopsis thaliana]   gi 10177420 dbj BAB10705.1  auxin-induced protein-like [Arabidopsis thaliana]   gi 332010809 gb AED98192.1  SAUR-like auxin-responsive protein [Arabidopsis thaliana] | 101  | 99   | 3.00E-41  | 98.0  | 86.1 | 91.1 | SAUR-like auxin-responsive protein                  | gbpln | Arabidopsis thaliana | AT5G66260.1   Symbols:   SAUR-like auxin-responsive protein family   chr5:26471269-26471658 FORWARD LENGTH=99                                           | 101  | 99   | 5.00E-44  | 98.0  | 86.1 | 91.1 |
| Rsa1.0_02026.1.g31637.t1  | ref XP_002865071.1  hypothetical protein ARALYDRAFT_496967 [Arabidopsis lyrata subsp. lyrata]   gi 297310906 gb EFH41330.1  hypothetical protein ARALYDRAFT_496967 [Arabidopsis lyrata subsp. lyrata]                                              | 186  | 170  | 4.00E-42  | 91.4  | 67.2 | 68.8 | hypothetical protein ARALYDRAFT_496967              | gbpln | Arabidopsis lyrata   | AT5G66400.1   Symbols: RAB18, ATD18   Dehydrin family protein   chr5:26518511-26519153 REVERSE LENGTH=186                                               | 186  | 186  | 4.00E-41  | 100.0 | 74.2 | 76.9 |
| Rsa1.0_02026.1.g31638.t1  | #                                                                                                                                                                                                                                                  | #    | #    | #         | #     | #    | -    | -                                                   | ----  | ----                 | #                                                                                                                                                       | #    | #    | #         | #     | #    |      |
| Rsa1.0_02026.1.g31639.t1  | gb ABB45838.1  hypothetical protein [Eutrema halophilum]                                                                                                                                                                                           | 336  | 336  | 0         | 100.0 | 93.8 | 95.8 | hypothetical protein                                | gbpln | Eutrema halophilum   | AT5G66390.1   Symbols:   Peroxidase superfamily protein   chr5:26516063-26517329 REVERSE LENGTH=336                                                     | 336  | 336  | 0         | 100.0 | 91.7 | 94.9 |
| Rsa1.0_02026.1.g31640.t1  | ref XP_002865072.1  predicted protein [Arabidopsis lyrata subsp. lyrata]   gi 297310907 gb EFH41331.1  predicted protein [Arabidopsis lyrata subsp. lyrata]                                                                                        | 103  | 307  | 5.00E-22  | 298.1 | 50.5 | 57.3 | predicted protein                                   | gbpln | Arabidopsis lyrata   | AT5G66380.1   Symbols: ATFOLT1, FOLT1   folate transporter 1   chr5:26513645-26515533 REVERSE LENGTH=308                                                | 103  | 308  | 4.00E-23  | 299.0 | 48.5 | 55.3 |
| Rsa1.0_02027.1.g31641.t2  | ref XP_002866771.1  hypothetical protein ARALYDRAFT_497000 [Arabidopsis lyrata subsp. lyrata]   gi 297312606 gb EFH43030.1  hypothetical protein ARALYDRAFT_497000 [Arabidopsis lyrata subsp. lyrata]                                              | 223  | 308  | 6.00E-72  | 138.1 | 59.6 | 68.2 | hypothetical protein ARALYDRAFT_497000              | gbpln | Arabidopsis lyrata   | AT5G66160.1   Symbols: ATRMR1, RMR1   receptor homology region transmembrane domain ring H2 motif protein 1   chr5:26445198-26446878 FORWARD LENGTH=310 | 223  | 310  | 6.00E-72  | 139.0 | 59.6 | 68.2 |
| Rsa1.0_02027.1.g31642.t1  | gb AAD19784.1  putative retroelement pol polyprotein [Arabidopsis thaliana]                                                                                                                                                                        | 1332 | 1501 | 0         | 112.7 | 57.8 | 72.4 | putative retroelement pol polyprotein               | gbpln | Arabidopsis thaliana | AT4G23160.1   Symbols: CRK8   cysteine-rich RLK (RECEPTOR-like protein kinase) 8   chr4:12129485-12134086 FORWARD LENGTH=1262                           | 1332 | 1262 | 1.00E-138 | 94.7  | 17.2 | 24.8 |
| Rsa1.0_02027.1.g31643.t1  | gb AET97566.1  heme oxygenase-1 [Brassica juncea]                                                                                                                                                                                                  | 242  | 282  | 1.00E-128 | 116.5 | 93.4 | 96.3 | heme oxygenase-1                                    | gbpln | Brassica juncea      | AT2G26670.1   Symbols: HY1, ATHO1, HO1, TED4, GUN2, HY6   Plant haem oxygenase (decyclizing) family protein   chr2:11341816-11343394 FORWARD LENGTH=282 | 242  | 282  | 1.00E-123 | 116.5 | 88.0 | 93.4 |
| Rsa1.0_02027.1.g31644.t6  | ref NP_199933.5  uncharacterized protein [Arabidopsis thaliana]   gi 332008669 gb AED96052.1  uncharacterized protein AT5G51200 [Arabidopsis thaliana]                                                                                             | 1852 | 1838 | 0         | 99.2  | 89.4 | 94.0 | uncharacterized protein                             | gbpln | Arabidopsis thaliana | AT5G51200.1   Symbols:   Protein of unknown function (DUF3414)   chr5:20804926-20819408 FORWARD LENGTH=1838                                             | 1852 | 1838 | 0         | 99.2  | 89.4 | 94.0 |
| Rsa1.0_02027.1.g31645.t1  | gb AAD22368.1  putative non-LTR retroelement reverse transcriptase [Arabidopsis thaliana]                                                                                                                                                          | 212  | 321  | 4.00E-65  | 151.4 | 58.5 | 71.7 | putative non-LTR retroelement reverse transcriptase | gbpln | Arabidopsis thaliana | AT5G42905.1   Symbols:   Polynucleotidyl transferase, ribonuclease H-like superfamily protein   chr5:17201414-17202323 REVERSE LENGTH=258               | 212  | 258  | 6.00E-40  | 121.7 | 38.2 | 50.5 |



|                          |                                                                                                                                                                                                                                                                                                                                                                                                                                                                                                                                                                                                                                                                                                                                                                                                                                                       |     |     |           |       |      |      |                                                                   |       |                         |                                                                                                                                           |     |     |           |       |      |      |
|--------------------------|-------------------------------------------------------------------------------------------------------------------------------------------------------------------------------------------------------------------------------------------------------------------------------------------------------------------------------------------------------------------------------------------------------------------------------------------------------------------------------------------------------------------------------------------------------------------------------------------------------------------------------------------------------------------------------------------------------------------------------------------------------------------------------------------------------------------------------------------------------|-----|-----|-----------|-------|------|------|-------------------------------------------------------------------|-------|-------------------------|-------------------------------------------------------------------------------------------------------------------------------------------|-----|-----|-----------|-------|------|------|
| Rsa1.0_02027.1.g31646.t2 | ref NP_850084.1  nitrate transporter 1.4 [Arabidopsis thaliana]<br>gi 75314150 sp Q9SZY4.1 PTR27_ARAT<br>H RecName: Full=Nitrate transporter 1.4<br>gi 4490321 emb CAB38705.1  nitrate<br>transporter [Arabidopsis thaliana]<br>gi 330252781 gb AEC07875.1  nitrate<br>transporter 1.4 [Arabidopsis thaliana]<br>gb ACG60687.1  transposon related<br>predicted protein [Brassica oleracea<br>var. alboglabra]                                                                                                                                                                                                                                                                                                                                                                                                                                        | 577 | 577 | 0         | 100.0 | 90.8 | 95.5 | nitrate transporter 1.4                                           | gbpln | Arabidopsis<br>thaliana | AT2G26690.1   Symbols:   Major facilitator<br>superfamily protein   chr2:11347347-<br>11350916 REVERSE LENGTH=577                         | 577 | 577 | 0         | 100.0 | 90.8 | 95.5 |
| Rsa1.0_02028.1.g31647.t1 | ref NP_174578.1  F-box and associated<br>interaction domain-containing protein<br>[Arabidopsis thaliana]<br>gi 378405165 sp Q9MAP1.2 FB33_ARAT<br>H RecName: Full=Putative F-box<br>protein At1g33020<br>gi 332193429 gb AEE31550.1  F-box and<br>associated interaction domain-<br>containing protein [Arabidopsis thaliana]                                                                                                                                                                                                                                                                                                                                                                                                                                                                                                                         | 104 | 183 | 2.00E-47  | 176.0 | 84.6 | 89.4 | transposon related<br>predicted protein                           | gbpln | Brassica<br>oleracea    | #                                                                                                                                         | #   | #   | #         | #     | #    |      |
| Rsa1.0_02028.1.g31648.t1 | ref NP_174578.1  F-box and associated<br>interaction domain-containing protein<br>[Arabidopsis thaliana]<br>gi 378405165 sp Q9MAP1.2 FB33_ARAT<br>H RecName: Full=Putative F-box<br>protein At1g33020<br>gi 332193429 gb AEE31550.1  F-box and<br>associated interaction domain-<br>containing protein [Arabidopsis thaliana]                                                                                                                                                                                                                                                                                                                                                                                                                                                                                                                         | 491 | 548 | 5.00E-81  | 111.6 | 39.5 | 50.5 | F-box and associated<br>interaction domain-<br>containing protein | gbpln | Arabidopsis<br>thaliana | AT1G33020.1   Symbols:   F-box and<br>associated interaction domains-containing<br>protein   chr1:11962746-11964832<br>FORWARD LENGTH=548 | 491 | 548 | 1.00E-83  | 111.6 | 39.5 | 50.5 |
| Rsa1.0_02028.1.g31649.t1 | ref XP_002890988.1  ribose-phosphate<br>pyrophosphokinase 2 [Arabidopsis<br>lyrata subsp. lyrata]<br>gi 297336830 gb EFH67247.1  ribose-<br>phosphate pyrophosphokinase 2<br>[Arabidopsis lyrata subsp. lyrata]                                                                                                                                                                                                                                                                                                                                                                                                                                                                                                                                                                                                                                       | 410 | 400 | 0         | 97.6  | 92.2 | 94.6 | ribose-phosphate<br>pyrophosphokinase 2                           | gbpln | Arabidopsis<br>lyrata   | AT1G32380.1   Symbols: PRS2  <br>phosphoribosyl pyrophosphate (PRPP)<br>synthase 2   chr1:11682033-11684229<br>FORWARD LENGTH=400         | 410 | 400 | 0         | 97.6  | 91.5 | 94.6 |
| Rsa1.0_02028.1.g31650.t1 | #                                                                                                                                                                                                                                                                                                                                                                                                                                                                                                                                                                                                                                                                                                                                                                                                                                                     | #   | #   | #         | #     | #    | #    | -                                                                 | ----  | ----                    | #                                                                                                                                         | #   | #   | #         | #     | #    |      |
| Rsa1.0_02028.1.g31651.t1 | ref NP_564396.1  zinc finger CCH<br>domain-containing protein 12<br>[Arabidopsis thaliana]<br>gi 75264181 sp Q9LQM3.1 C3H12_ARAT<br>H RecName: Full=Zinc finger CCH<br>domain-containing protein 12;<br>Short=AtC3H12<br>gi 8920610 gb AAF81332.1 AC007767_12<br>Contains similarity to an unknown<br>protein At2g35430 gi 3608145 from<br>Arabidopsis thaliana BAC T32F12<br>gb AC005314. It contains a zinc finger<br>C-x8-C-x5-C-x3-H type domain<br>PF 00642. ESTs gb AV557765 and<br>gb AV544407 come from this gene<br>[Arabidopsis thaliana]<br>gi 12597862 gb AAG60171.1 AC084110.<br>4 unknown protein [Arabidopsis<br>thaliana] gi 26451083 dbj BAC42646.1 <br>putative RING-H2 zinc finger protein<br>ATL6 [Arabidopsis thaliana]<br>gi 332193347 gb AEE31468.1  zinc finger<br>CCH domain-containing protein 12<br>[Arabidopsis thaliana] | 349 | 384 | 1.00E-151 | 110.0 | 84.0 | 90.0 | zinc finger CCH<br>domain-containing<br>protein 12                | gbpln | Arabidopsis<br>thaliana | AT1G32360.1   Symbols:   Zinc finger<br>(CCH-type) family protein  <br>chr1:11673325-11675162 FORWARD<br>LENGTH=384                       | 349 | 384 | 1.00E-154 | 110.0 | 84.0 | 90.0 |
| Rsa1.0_02028.1.g31652.t1 | ref NP_564395.1  alternative oxidase 3<br>[Arabidopsis thaliana]<br>gi 85681032 sp Q8LEE7.2 AOX3_ARATH<br>RecName: Full=Ubiquinol oxidase 3,<br>mitochondrial; AltName: Full=Alternative<br>oxidase 3; Flags: Precursor<br>gi 8920609 gb AAF81331.1 AC007767_11<br>Strong similarity to alternative oxidase<br>from Populus tremula x Populus<br>tremuloides gb AJ271889. It contains an<br>alternative oxidase domain PF 01786<br>[Arabidopsis thaliana]<br>gi 115311485 gb ABI93923.1  At1g32350<br>[Arabidopsis thaliana]<br>gi 332193346 gb AEE31467.1  alternative<br>oxidase 3 [Arabidopsis thaliana]                                                                                                                                                                                                                                           | 314 | 318 | 1.00E-171 | 101.3 | 92.7 | 96.2 | alternative oxidase 3                                             | gbpln | Arabidopsis<br>thaliana | AT1G32350.1   Symbols: AOX1D   alternative<br>oxidase 1D   chr1:11667237-11668569<br>REVERSE LENGTH=316                                   | 314 | 318 | 1.00E-174 | 101.3 | 92.7 | 96.2 |
| Rsa1.0_02028.1.g31653.t2 | ref XP_002893719.1  predicted protein<br>[Arabidopsis lyrata subsp. lyrata]<br>gi 297339561 gb EFH69978.1  predicted<br>protein [Arabidopsis lyrata subsp.<br>lyrata]                                                                                                                                                                                                                                                                                                                                                                                                                                                                                                                                                                                                                                                                                 | 683 | 682 | 0         | 99.9  | 80.4 | 87.8 | predicted protein                                                 | gbpln | Arabidopsis<br>lyrata   | AT1G32340.1   Symbols: NHL8  <br>NDR1/HIN1-like 8   chr1:11663462-<br>11666037 REVERSE LENGTH=688                                         | 683 | 688 | 0         | 100.7 | 79.5 | 87.3 |

|                          |                                                                                                                                                                                                                                                                                                                                                                                                                                                                                                                                                         |      |      |           |       |      |      |                                                         |       |                      |                                                                                                                                                                                                                                                                                                                                             |      |      |           |       |      |      |
|--------------------------|---------------------------------------------------------------------------------------------------------------------------------------------------------------------------------------------------------------------------------------------------------------------------------------------------------------------------------------------------------------------------------------------------------------------------------------------------------------------------------------------------------------------------------------------------------|------|------|-----------|-------|------|------|---------------------------------------------------------|-------|----------------------|---------------------------------------------------------------------------------------------------------------------------------------------------------------------------------------------------------------------------------------------------------------------------------------------------------------------------------------------|------|------|-----------|-------|------|------|
| Rsa1.0_02029.1.g31654.t1 | refNP_563963.1   FAD/NAD(P)-binding oxidoreductase [Arabidopsis thaliana] gi 5103813 gb AAD39643.1 AC007591.8 Contains a PF00175 Oxidoreductase FAD/NADH-binding domain. ESTs gb H76345 and gb AA651465 come from this gene [Arabidopsis thaliana] gi 12744999 gb AAK06879.1 AF344328.1 unknown protein [Arabidopsis thaliana] gi 15451092 gb AAK96817.1  Unknown protein [Arabidopsis thaliana] gi 18377448 gb AAL66890.1  unknown protein [Arabidopsis thaliana] gi 332191150 gb AEE29271.1  FAD/NAD(P)-binding oxidoreductase [Arabidopsis thaliana] | 138  | 295  | 9.00E-28  | 213.8 | 43.5 | 50.0 | FAD/NAD(P)-binding oxidoreductase                       | gbpln | Arabidopsis thaliana | AT1G15140.1   Symbols:   FAD/NAD(P)-binding oxidoreductase   chr1:5210403-5212137 REVERSE LENGTH=295                                                                                                                                                                                                                                        | 138  | 295  | 2.00E-30  | 213.8 | 43.5 | 50.0 |
| Rsa1.0_02029.1.g31655.t1 | dbj BAB09379.1  non-LTR retroelement reverse transcriptase-like protein [Arabidopsis thaliana]                                                                                                                                                                                                                                                                                                                                                                                                                                                          | 1700 | 1223 | 0         | 71.9  | 39.2 | 51.4 | non-LTR retroelement reverse transcriptase-like protein | gbpln | Arabidopsis thaliana | AT3G24255.1   Symbols:   RNA-directed DNA polymerase (reverse transcriptase)-related family protein   chr3:8789471-8793208 FORWARD LENGTH=746                                                                                                                                                                                               | 1700 | 746  | 1.00E-107 | 43.9  | 11.6 | 15.4 |
| Rsa1.0_02029.1.g31656.t1 | refXP_002877761.1  hypothetical protein ARALYDRAFT_485417 [Arabidopsis lyrata subsp. lyrata] gi 297323599 gb EFH54020.1  hypothetical protein ARALYDRAFT_485417 [Arabidopsis lyrata subsp. lyrata]                                                                                                                                                                                                                                                                                                                                                      | 465  | 447  | 1.00E-120 | 96.1  | 70.5 | 79.1 | hypothetical protein ARALYDRAFT_485417                  | gbpln | Arabidopsis lyrata   | AT3G50690.1   Symbols:   Leucine-rich repeat (LRR) family protein   chr3:18835271-18837097 REVERSE LENGTH=447                                                                                                                                                                                                                               | 465  | 447  | 1.00E-119 | 96.1  | 68.4 | 78.1 |
| Rsa1.0_02029.1.g31657.t1 | refXP_002886764.1  hypothetical protein ARALYDRAFT_475479 [Arabidopsis lyrata subsp. lyrata] gi 297332605 gb EFH63023.1  hypothetical protein ARALYDRAFT_475479 [Arabidopsis lyrata subsp. lyrata]                                                                                                                                                                                                                                                                                                                                                      | 353  | 350  | 1.00E-168 | 99.2  | 84.7 | 92.4 | hypothetical protein ARALYDRAFT_475479                  | gbpln | Arabidopsis lyrata   | AT1G64770.1   Symbols: NDF2, NDH45   NDH-dependent cyclic electron flow 1   chr1:24057549-24059415 FORWARD LENGTH=348                                                                                                                                                                                                                       | 353  | 348  | 1.00E-165 | 98.6  | 84.7 | 92.9 |
| Rsa1.0_02029.1.g31658.t1 | #                                                                                                                                                                                                                                                                                                                                                                                                                                                                                                                                                       | #    | #    | #         | #     | #    | #    | -                                                       | ----  | ----                 | #                                                                                                                                                                                                                                                                                                                                           | #    | #    | #         | #     | #    |      |
| Rsa1.0_02029.1.g31659.t1 | refXP_002877755.1  hypothetical protein ARALYDRAFT_485408 [Arabidopsis lyrata subsp. lyrata] gi 297323593 gb EFH54014.1  hypothetical protein ARALYDRAFT_485408 [Arabidopsis lyrata subsp. lyrata]                                                                                                                                                                                                                                                                                                                                                      | 337  | 340  | 1.00E-179 | 100.9 | 91.1 | 95.3 | hypothetical protein ARALYDRAFT_485408                  | gbpln | Arabidopsis lyrata   | AT3G50620.1   Symbols:   P-loop containing nucleoside triphosphate hydrolases superfamily protein   chr3:18784993-18786747 REVERSE LENGTH=340                                                                                                                                                                                               | 337  | 340  | 0         | 100.9 | 89.6 | 95.5 |
| Rsa1.0_02029.1.g31660.t1 | #                                                                                                                                                                                                                                                                                                                                                                                                                                                                                                                                                       | #    | #    | #         | #     | #    | #    | -                                                       | ----  | ----                 | #                                                                                                                                                                                                                                                                                                                                           | #    | #    | #         | #     | #    |      |
| Rsa1.0_02029.1.g31661.t1 | gb EOA24265.1  hypothetical protein CARUB_v10017507mg [Capsella rubella]                                                                                                                                                                                                                                                                                                                                                                                                                                                                                | 362  | 362  | 0         | 100.0 | 92.8 | 97.5 | hypothetical protein CARUB_v10017507mg                  | gbpln | Capsella rubella     | AT3G50500.1   Symbols: SPK-2-2, SNRK2-2, SNRK2.2, SRK2D   SNF1-related protein kinase 2.2   chr3:18741805-18743904 REVERSE LENGTH=362                                                                                                                                                                                                       | 362  | 362  | 0         | 100.0 | 92.8 | 97.0 |
| Rsa1.0_02030.1.g31662.t1 | gb ACB59199.1  copia-like protein [Brassica oleracea]                                                                                                                                                                                                                                                                                                                                                                                                                                                                                                   | 228  | 975  | 4.00E-78  | 427.6 | 61.0 | 66.2 | copia-like protein                                      | gbpln | Brassica oleracea    | AT4G23160.1   Symbols: CRK8   cysteine-rich RLK (RECEPTOR-like protein kinase) 8   chr4:12129485-12134086 FORWARD LENGTH=1262                                                                                                                                                                                                               | 228  | 1262 | 3.00E-40  | 553.5 | 31.6 | 47.8 |
| Rsa1.0_02030.1.g31663.t2 | refXP_002872881.1  hypothetical protein ARALYDRAFT_912064 [Arabidopsis lyrata subsp. lyrata] gi 297318718 gb EFH49140.1  hypothetical protein ARALYDRAFT_912064 [Arabidopsis lyrata subsp. lyrata]                                                                                                                                                                                                                                                                                                                                                      | 243  | 245  | 8.00E-94  | 100.8 | 83.1 | 90.1 | hypothetical protein ARALYDRAFT_912064                  | gbpln | Arabidopsis lyrata   | AT4G01670.1   Symbols:   unknown protein; BEST Arabidopsis thaliana protein match is: unknown protein (TAIR:AT3G62070.1); Has 141 Blast hits to 139 proteins in 15 species: Archae - 0; Bacteria - 0; Metazoa - 0; Fungi - 0; Plants - 138; Viruses - 0; Other Eukaryotes - 3 (source: NCBI BLink).   chr4:711464-712511 REVERSE LENGTH=249 | 243  | 249  | 1.00E-92  | 102.5 | 81.9 | 89.3 |
| Rsa1.0_02030.1.g31664.t1 | refNP_192088.1  Ribosomal protein L7Ae/L30e/S12e/Gadd45 family protein [Arabidopsis thaliana] gi 4558548 gb AAD22641.1 AC007138.5 putative RNaseP-associated protein [Arabidopsis thaliana] gi 7268222 emb CAB77749.1  putative RNaseP-associated protein [Arabidopsis thaliana] gi 89001035 gb ABD59107.1  At4g01790 [Arabidopsis thaliana] gi 332656677 gb AEE82077.1  Ribosomal protein L7Ae/L30e/S12e/Gadd45 family protein [Arabidopsis thaliana]                                                                                                  | 170  | 167  | 2.00E-69  | 98.2  | 78.2 | 87.6 | Ribosomal protein L7Ae/L30e/S12e/Gad d45 family protein | gbpln | Arabidopsis thaliana | AT4G01790.1   Symbols:   Ribosomal protein L7Ae/L30e/S12e/Gadd45 family protein   chr4:769868-770728 FORWARD LENGTH=167                                                                                                                                                                                                                     | 170  | 167  | 8.00E-72  | 98.2  | 78.2 | 87.6 |

|                          |                                                                                                                                                                                                                                                                                                                                                                                                                                                                                                                                                         |      |      |           |       |      |       |                                                                                                                                                                                                                                                                                                                                                                |       |                      |                                                                                                                              |      |      |           |       |      |      |
|--------------------------|---------------------------------------------------------------------------------------------------------------------------------------------------------------------------------------------------------------------------------------------------------------------------------------------------------------------------------------------------------------------------------------------------------------------------------------------------------------------------------------------------------------------------------------------------------|------|------|-----------|-------|------|-------|----------------------------------------------------------------------------------------------------------------------------------------------------------------------------------------------------------------------------------------------------------------------------------------------------------------------------------------------------------------|-------|----------------------|------------------------------------------------------------------------------------------------------------------------------|------|------|-----------|-------|------|------|
| Rsa1.0_02030.1.g31665.t1 | ref NP_192089.1  preprotein translocase subunit secA [Arabidopsis thaliana] gi 322510072 sp Q9SYI0.2 SECA1_ARAT H RecName: Full=Protein translocase subunit SECA1, chloroplast; Short=AtcpSecA; AltName: Full=Protein ALBINO OR GLASSY YELLOW 1; Flags: Precursor gi 332656678 gb AEE82078.1  preprotein translocase subunit secA [Arabidopsis thaliana]                                                                                                                                                                                                | 986  | 1022 | 0         | 103.7 | 94.1 | 96.2  | preprotein translocase subunit secA                                                                                                                                                                                                                                                                                                                            | gbpln | Arabidopsis thaliana | AT4G01800.1   Symbols: AGY1, AtcpSecA, SECA1   Albino or Glassy Yellow 1   chr4:770926-776131 REVERSE LENGTH=1022            | 986  | 1022 | 0         | 103.7 | 94.1 | 96.2 |
| Rsa1.0_02030.1.g31666.t1 | sp Q5DNB1.1 METK BRARP RecName: Full=S-adenosylmethionine synthase; Short=AdoMet synthase; AltName: Full=Methionine adenosyltransferase; Short=MAT gi 75306462 sp Q94FA4.1 METK5_BRAJU RecName: Full=S-adenosylmethionine synthase 5; Short=AdoMet synthase 5; AltName: Full=Methionine adenosyltransferase 5; Short=MAT 5 gi 14600072 gb AAK71235.1  S-adenosylmethionine synthetase [Brassica juncea] gi 56130947 gb AAV80205.1  S-adenosyl-L-methionine synthetase [Brassica rapa subsp. pekinensis]                                                 | 393  | 393  | 0         | 100.0 | 99.7 | 100.0 | RecName: Full=S-adenosylmethionine synthase; Short=AdoMet synthase; AltName: Full=Methionine adenosyltransferase; Short=MAT gi 75306462 sp Q94FA4.1 METK5_BRAJU RecName: Full=S-adenosylmethionine synthase 5; Short=AdoMet synthase 5; AltName: Full=Methionine adenosyltransferase 5; Short=MAT 5 gi 14600072 gb AAK71235.1  S-adenosylmethionine synthetase | gbpln | Brassica juncea      | AT4G01850.2   Symbols: SAM-2, MAT2, SAM2, AtSAM2   S-adenosylmethionine synthetase 2   chr4:796298-797479 REVERSE LENGTH=393 | 393  | 393  | 0         | 100.0 | 99.2 | 99.7 |
| Rsa1.0_02030.1.g31667.t1 | ref XP_002872871.1  hypothetical protein ARALYDRAFT_490390 [Arabidopsis lyrata subsp. lyrata] gi 297318708 gb EFH49130.1  hypothetical protein ARALYDRAFT_490390 [Arabidopsis lyrata subsp. lyrata]                                                                                                                                                                                                                                                                                                                                                     | 654  | 652  | 0         | 99.7  | 85.2 | 93.0  | hypothetical protein ARALYDRAFT_490390                                                                                                                                                                                                                                                                                                                         | gbpln | Arabidopsis lyrata   | AT4G01870.1   Symbols:   tolB protein-related   chr4:808473-810431 REVERSE LENGTH=652                                        | 654  | 652  | 0         | 99.7  | 83.2 | 92.4 |
| Rsa1.0_02030.1.g31668.t1 | ref NP_192097.2  methyltransferase [Arabidopsis thaliana] gi 332656689 gb AEE82089.1  methyltransferase [Arabidopsis thaliana]                                                                                                                                                                                                                                                                                                                                                                                                                          | 449  | 453  | 0         | 100.9 | 86.2 | 92.9  | methyltransferase                                                                                                                                                                                                                                                                                                                                              | gbpln | Arabidopsis thaliana | AT4G01880.1   Symbols:   methyltransferases   chr4:810810-812882 REVERSE LENGTH=453                                          | 449  | 453  | 0         | 100.9 | 86.2 | 92.9 |
| Rsa1.0_02030.1.g31669.t1 | gb EOA20424.1  hypothetical protein CARUB_v10000732mg [Capsella rubella]                                                                                                                                                                                                                                                                                                                                                                                                                                                                                | 438  | 516  | 0         | 117.8 | 92.5 | 96.6  | hypothetical protein CARUB_v10000732mg                                                                                                                                                                                                                                                                                                                         | gbpln | Capsella rubella     | AT4G02050.1   Symbols: STP7   sugar transporter protein 7   chr4:898387-900095 REVERSE LENGTH=513                            | 438  | 513  | 0         | 117.1 | 92.5 | 96.8 |
| Rsa1.0_02030.1.g31670.t1 | db BAJ33893.1  unnamed protein product [Theilungiella halophila]                                                                                                                                                                                                                                                                                                                                                                                                                                                                                        | 718  | 716  | 0         | 99.7  | 96.2 | 98.1  | unnamed protein product                                                                                                                                                                                                                                                                                                                                        | ----  | ----                 | AT4G02060.2   Symbols: PRL   Minichromosome maintenance (MCM2/3/5) family protein   chr4:901484-905297 FORWARD LENGTH=716    | 718  | 716  | 0         | 99.7  | 95.1 | 97.4 |
| Rsa1.0_02030.1.g31671.t1 | ref NP_192116.1  DNA mismatch repair protein Msh6-1 [Arabidopsis thaliana] gi 6226648 sp O04716.2 MSH6_ARATH RecName: Full=DNA mismatch repair protein MSH6; Short=AtMSH6; AltName: Full=MutS protein homolog 6 gi 3912921 gb AAC78699.1  G/T DNA mismatch repair enzyme [Arabidopsis thaliana] gi 5763966 emb CAB53337.1  mismatch repair protein msh6-1 [Arabidopsis thaliana] gi 7268591 emb CAB80700.1  G/T DNA mismatch repair enzyme [Arabidopsis thaliana] gi 332656719 gb AEE82119.1  DNA mismatch repair protein Msh6-1 [Arabidopsis thaliana] | 1205 | 1324 | 0         | 109.9 | 82.3 | 87.9  | DNA mismatch repair protein Msh6-1                                                                                                                                                                                                                                                                                                                             | gbpln | Arabidopsis thaliana | AT4G02070.1   Symbols: MSH6, MSH6-1, ATMSH6   MUTS homolog 6   chr4:906079-912930 FORWARD LENGTH=1324                        | 1205 | 1324 | 0         | 109.9 | 82.3 | 87.9 |
| Rsa1.0_02031.1.g31672.t1 | ref NP_563867.1  ankyrin repeat-containing protein [Arabidopsis thaliana] gi 4914336 gb AAD32884.1 AC005489.22 F14N23.22 [Arabidopsis thaliana] gi 13937240 gb AAK50112.1 AF372975.1 At g10340/F14N23.22 [Arabidopsis thaliana] gi 19548017 gb AAL87372.1  At g10340/F14N23.22 [Arabidopsis thaliana] gi 332190446 gb AEE28567.1  ankyrin repeat-containing protein [Arabidopsis thaliana]                                                                                                                                                              | 294  | 578  | 1.00E-117 | 196.6 | 73.5 | 82.0  | ankyrin repeat-containing protein                                                                                                                                                                                                                                                                                                                              | gbpln | Arabidopsis thaliana | AT1G10340.1   Symbols:   Ankyrin repeat family protein   chr1:3390475-3392481 REVERSE LENGTH=578                             | 294  | 578  | 1.00E-120 | 196.6 | 73.5 | 82.0 |

|                          |                                                                                                                                                                                                                                                                                                                                                                                                          |      |      |           |       |      |      |                                                          |       |                      |                                                                                                                                                          |      |      |           |       |      |      |
|--------------------------|----------------------------------------------------------------------------------------------------------------------------------------------------------------------------------------------------------------------------------------------------------------------------------------------------------------------------------------------------------------------------------------------------------|------|------|-----------|-------|------|------|----------------------------------------------------------|-------|----------------------|----------------------------------------------------------------------------------------------------------------------------------------------------------|------|------|-----------|-------|------|------|
| Rsa1.0_02031.1.g31673.t2 | ref NP_563867.1  ankyrin repeat-containing protein [Arabidopsis thaliana] gi 4914336 gb AAD32884.1 AC005489.22 F14N23.22 [Arabidopsis thaliana] gi 13937240 gb AAK501.12.1 AF372975.1 At g10340 F14N23.22 [Arabidopsis thaliana] gi 19548017 gb AAL87372.1  At g10340 F14N23.22 [Arabidopsis thaliana] gi 332190446 gb AEE28567.1  ankyrin repeat-containing protein [Arabidopsis thaliana]              | 264  | 578  | 3.00E-54  | 218.9 | 51.5 | 60.2 | ankyrin repeat-containing protein                        | gbpln | Arabidopsis thaliana | AT1G10340.1   Symbols:   Ankyrin repeat family protein   chr1:3390475-3392481 REVERSE LENGTH=578                                                         | 264  | 578  | 8.00E-57  | 218.9 | 51.5 | 60.2 |
| Rsa1.0_02031.1.g31674.t1 | ref XP_002874520.1  glycosyl hydrolase family 10 protein [Arabidopsis lyrata subsp. lyrata] gi 297320357 gb EFH50779.1  glycosyl hydrolase family 10 protein [Arabidopsis lyrata subsp. lyrata]                                                                                                                                                                                                          | 911  | 751  | 0         | 82.4  | 71.8 | 77.6 | glycosyl hydrolase family 10 protein                     | gbpln | Arabidopsis lyrata   | AT4G08160.1   Symbols:   glycosyl hydrolase family 10 protein / carbohydrate-binding domain-containing protein   chr4:5159211-5162694 REVERSE LENGTH=752 | 911  | 752  | 0         | 82.5  | 71.7 | 77.2 |
| Rsa1.0_02031.1.g31675.t1 | gb ABD65022.1  hypothetical protein 26.t00077 [Brassica oleracea]                                                                                                                                                                                                                                                                                                                                        | 158  | 242  | 9.00E-50  | 153.2 | 69.0 | 74.7 | hypothetical protein 26.t00077                           | gbpln | Brassica oleracea    | #                                                                                                                                                        | #    | #    | #         | #     | #    | #    |
| Rsa1.0_02031.1.g31676.t1 | gb ABD65021.1  hypothetical protein 26.t00076 [Brassica oleracea]                                                                                                                                                                                                                                                                                                                                        | 67   | 107  | 1.00E-20  | 159.7 | 68.7 | 79.1 | hypothetical protein 26.t00076                           | gbpln | Brassica oleracea    | #                                                                                                                                                        | #    | #    | #         | #     | #    | #    |
| Rsa1.0_02031.1.g31677.t1 | dbj BAA97287.1  retroelement pol polyprotein-like [Arabidopsis thaliana]                                                                                                                                                                                                                                                                                                                                 | 1471 | 1491 | 0         | 101.4 | 60.4 | 74.1 | retroelement pol polyprotein-like                        | gbpln | Arabidopsis thaliana | AT4G23180.1   Symbols: CRK8   cysteine-rich RLK (RECEPTOR-like protein kinase) 8   chr4:12129485-12134086 FORWARD LENGTH=1262                            | 1471 | 1262 | 1.00E-142 | 85.8  | 16.5 | 23.8 |
| Rsa1.0_02031.1.g31678.t1 | gb AAC26241.1  F9D12.15 gene product [Arabidopsis thaliana]                                                                                                                                                                                                                                                                                                                                              | 257  | 850  | 6.00E-32  | 330.7 | 36.6 | 55.3 | F9D12.15 gene product                                    | gbpln | Arabidopsis thaliana | #                                                                                                                                                        | #    | #    | #         | #     | #    | #    |
| Rsa1.0_02032.1.g31679.t1 | ref XP_002886457.1  ATSCO1/ATSCO1/CPEF-G [Arabidopsis lyrata subsp. lyrata] gi 297332298 gb EFH62716.1  ATSCO1/ATSCO1/CPEF-G [Arabidopsis lyrata subsp. lyrata]                                                                                                                                                                                                                                          | 773  | 782  | 0         | 101.2 | 96.1 | 98.1 | ATSCO1/ATSCO1/CP EF-G                                    | gbpln | Arabidopsis lyrata   | AT1G62750.1   Symbols: ATSCO1, ATSCO1/CPEF-G, SCO1   Translation elongation factor EFG/EF2 protein   chr1:23233622-23236321 REVERSE LENGTH=783           | 773  | 783  | 0         | 101.3 | 96.1 | 97.9 |
| Rsa1.0_02032.1.g31680.t1 | ref NP_176461.1  putative stress-inducible protein [Arabidopsis thaliana] gi 53850567 gb AAU95460.1  At g62740 [Arabidopsis thaliana] gi 58331773 gb AAW70384.1  At g62740 [Arabidopsis thaliana] gi 332195878 gb AEE33999.1  putative stress-inducible protein [Arabidopsis thaliana]                                                                                                                   | 571  | 571  | 0         | 100.0 | 88.1 | 93.3 | putative stress-inducible protein                        | gbpln | Arabidopsis thaliana | AT1G62740.1   Symbols: Hop2   stress-inducible protein, putative   chr1:23231026-23233380 FORWARD LENGTH=571                                             | 571  | 571  | 0         | 100.0 | 88.1 | 93.3 |
| Rsa1.0_02032.1.g31681.t1 | ref NP_564800.1  isoprenoid biosynthesis enzyme domain-containing protein [Arabidopsis thaliana] gi 6630461 gb AAF19549.1 AC007190.17 F23N19.9 [Arabidopsis thaliana] gi 21553608 gb AAM62701.1  unknown [Arabidopsis thaliana] gi 109946495 gb ABG48426.1  At g62730 [Arabidopsis thaliana] gi 332195877 gb AEE33998.1  isoprenoid biosynthesis enzyme domain-containing protein [Arabidopsis thaliana] | 306  | 304  | 1.00E-161 | 99.3  | 90.2 | 93.8 | isoprenoid biosynthesis enzyme domain-containing protein | gbpln | Arabidopsis thaliana | AT1G62730.1   Symbols:   Terpenoid synthases superfamily protein   chr1:23229204-23230118 REVERSE LENGTH=304                                             | 306  | 304  | 1.00E-163 | 99.3  | 90.2 | 93.8 |
| Rsa1.0_02032.1.g31682.t1 | gb EOA34776.1  hypothetical protein CARUB_v10022351mg [Capsella rubella]                                                                                                                                                                                                                                                                                                                                 | 398  | 407  | 1.00E-176 | 102.3 | 79.6 | 87.2 | hypothetical protein CARUB_v10022351mg                   | gbpln | Capsella rubella     | AT1G62700.1   Symbols: VND5, ANAC026   Arabidopsis NAC domain containing protein 26   chr1:23216218-23217916 REVERSE LENGTH=394                          | 398  | 394  | 1.00E-164 | 99.0  | 76.4 | 85.9 |
| Rsa1.0_02032.1.g31683.t1 | ref XP_002886462.1  binding protein [Arabidopsis lyrata subsp. lyrata] gi 297332303 gb EFH62721.1  binding protein [Arabidopsis lyrata subsp. lyrata]                                                                                                                                                                                                                                                    | 516  | 550  | 0         | 106.6 | 66.9 | 83.9 | binding protein                                          | gbpln | Arabidopsis lyrata   | AT1G62680.1   Symbols:   Pentatricopeptide repeat (PPR) superfamily protein   chr1:23208247-23209893 REVERSE LENGTH=548                                  | 516  | 548  | 0         | 106.2 | 67.4 | 83.9 |
| Rsa1.0_02032.1.g31684.t1 | gb AAL65637.1  RFL1 [Arabidopsis lyrata]                                                                                                                                                                                                                                                                                                                                                                 | 132  | 883  | 1.00E-38  | 668.9 | 62.1 | 75.0 | RFL1                                                     | gbpln | Arabidopsis lyrata   | AT1G63350.1   Symbols:   Disease resistance protein (CC-NBS-LRR class) family   chr1:23494935-23497631 REVERSE LENGTH=898                                | 132  | 898  | 2.00E-39  | 680.3 | 60.6 | 73.5 |
| Rsa1.0_02032.1.g31685.t1 | gb EOA36691.1  hypothetical protein CARUB_v10012096mg [Capsella rubella]                                                                                                                                                                                                                                                                                                                                 | 326  | 327  | 1.00E-122 | 100.3 | 64.7 | 80.1 | hypothetical protein CARUB_v10012096mg                   | gbpln | Capsella rubella     | AT5G43690.1   Symbols:   P-loop containing nucleoside triphosphate hydrolases superfamily protein   chr5:17546273-17547268 FORWARD LENGTH=331            | 326  | 331  | 1.00E-122 | 101.5 | 65.3 | 78.8 |
| Rsa1.0_02033.1.g31686.t1 | gb AAV25872.1  hypothetical Protein [Brassica oleracea]                                                                                                                                                                                                                                                                                                                                                  | 116  | 120  | 6.00E-55  | 103.4 | 90.5 | 96.6 | hypothetical Protein                                     | gbpln | Brassica oleracea    | AT5G60810.1   Symbols: RGF1   root meristem growth factor 1   chr5:24466531-24467110 REVERSE LENGTH=116                                                  | 116  | 116  | 3.00E-41  | 100.0 | 68.1 | 79.3 |
| Rsa1.0_02033.1.g31687.t1 | gb AAV25871.1  putative bZIPtranscription factor protein [Brassica oleracea]                                                                                                                                                                                                                                                                                                                             | 173  | 176  | 2.00E-66  | 101.7 | 83.8 | 89.0 | putative bZIPtranscription factor protein                | gbpln | Brassica oleracea    | AT5G60830.1   Symbols: AtbZIP70, bZIP70   basic leucine-zipper 70   chr5:24472639-24473319 FORWARD LENGTH=206                                            | 173  | 206  | 3.00E-56  | 119.1 | 69.4 | 79.8 |
| Rsa1.0_02033.1.g31688.t1 | #                                                                                                                                                                                                                                                                                                                                                                                                        | #    | #    | #         | #     | #    | -    | ----                                                     | ----  | ----                 | #                                                                                                                                                        | #    | #    | #         | #     | #    | #    |

|                          |                                                                                                                                                                                                                                                                                                                                                                                                                                                    |     |      |           |       |      |      |                                                                |       |                      |                                                                                                                                                                              |     |      |           |       |      |      |
|--------------------------|----------------------------------------------------------------------------------------------------------------------------------------------------------------------------------------------------------------------------------------------------------------------------------------------------------------------------------------------------------------------------------------------------------------------------------------------------|-----|------|-----------|-------|------|------|----------------------------------------------------------------|-------|----------------------|------------------------------------------------------------------------------------------------------------------------------------------------------------------------------|-----|------|-----------|-------|------|------|
| Rsa1.0_02033.1.g31689.t1 | dbj BAJ34224.1  unnamed protein product [Thellungiella halophila]                                                                                                                                                                                                                                                                                                                                                                                  | 292 | 300  | 1.00E-102 | 102.7 | 74.3 | 80.1 | unnamed protein product                                        | ----  | ----                 | AT5G60850.1   Symbols: OBP4   OBF binding protein 4   chr:5:24480578-24481501 FORWARD LENGTH=307                                                                             | 292 | 307  | 8.00E-99  | 105.1 | 72.6 | 80.1 |
| Rsa1.0_02033.1.g31690.t1 | # # # # # # #                                                                                                                                                                                                                                                                                                                                                                                                                                      |     |      |           |       |      |      | -                                                              | ----  | ----                 | # # # # # # #                                                                                                                                                                |     |      |           |       |      |      |
| Rsa1.0_02034.1.g31691.t1 | ref XP_004230758.1  PREDICTED: polyadenylate-binding protein 2-like [Solanum lycopersicum]                                                                                                                                                                                                                                                                                                                                                         | 122 | 643  | 9.00E-16  | 527.0 | 41.8 | 54.1 | PREDICTED: polyadenylate-binding protein 2-like                | gbpln | Solanum lycopersicum | AT1G49760.2   Symbols: PAB8   poly(A) binding protein 8   chr1:18416740-18419753 FORWARD LENGTH=671                                                                          | 122 | 671  | 3.00E-17  | 550.0 | 35.2 | 42.6 |
| Rsa1.0_02034.1.g31692.t1 | ref NP_001118664.1  haloacid dehalogenase-like hydrolase domain-containing protein [Arabidopsis thaliana] gi 9294424 dbj BAB02544.1  unnamed protein product [Arabidopsis thaliana] gi 332642743 gb AEE76264.1  haloacid dehalogenase-like hydrolase domain-containing protein [Arabidopsis thaliana]                                                                                                                                              | 311 | 307  | 1.00E-112 | 98.7  | 67.2 | 79.1 | haloacid dehalogenase-like hydrolase domain-containing protein | gbpln | Arabidopsis thaliana | AT3G19595.1   Symbols:   Haloacid dehalogenase-like hydrolase (HAD) superfamily protein   chr3:6808585-6809508 REVERSE LENGTH=307                                            | 311 | 307  | 1.00E-114 | 98.7  | 67.2 | 79.1 |
| Rsa1.0_02034.1.g31693.t1 | ref NP_001118664.1  haloacid dehalogenase-like hydrolase domain-containing protein [Arabidopsis thaliana] gi 9294424 dbj BAB02544.1  unnamed protein product [Arabidopsis thaliana] gi 332642743 gb AEE76264.1  haloacid dehalogenase-like hydrolase domain-containing protein [Arabidopsis thaliana]                                                                                                                                              | 283 | 307  | 4.00E-87  | 108.5 | 59.0 | 70.7 | haloacid dehalogenase-like hydrolase domain-containing protein | gbpln | Arabidopsis thaliana | AT3G19595.1   Symbols:   Haloacid dehalogenase-like hydrolase (HAD) superfamily protein   chr3:6808585-6809508 REVERSE LENGTH=307                                            | 283 | 307  | 1.00E-89  | 108.5 | 59.0 | 70.7 |
| Rsa1.0_02034.1.g31694.t1 | ref XP_002885318.1  hypothetical protein ARALYDRAFT_479477 [Arabidopsis lyrata subsp. lyrata] gi 297331158 gb EFH61577.1  hypothetical protein ARALYDRAFT_479477 [Arabidopsis lyrata subsp. lyrata]                                                                                                                                                                                                                                                | 575 | 613  | 0         | 106.6 | 78.8 | 84.7 | hypothetical protein ARALYDRAFT_479477                         | gbpln | Arabidopsis lyrata   | AT3G19610.1   Symbols:   Plant protein of unknown function (DUF936)   chr3:6812493-6814660 REVERSE LENGTH=640                                                                | 575 | 640  | 0         | 111.3 | 77.9 | 85.0 |
| Rsa1.0_02034.1.g31695.t1 | ref XP_002885320.1  hypothetical protein ARALYDRAFT_318717 [Arabidopsis lyrata subsp. lyrata] gi 297331160 gb EFH61579.1  hypothetical protein ARALYDRAFT_318717 [Arabidopsis lyrata subsp. lyrata]                                                                                                                                                                                                                                                | 370 | 382  | 0         | 103.2 | 92.4 | 96.5 | hypothetical protein ARALYDRAFT_318717                         | gbpln | Arabidopsis lyrata   | AT3G19630.1   Symbols:   Radical SAM superfamily protein   chr3:6818676-6820674 REVERSE LENGTH=372                                                                           | 370 | 372  | 0         | 100.5 | 91.1 | 95.1 |
| Rsa1.0_02034.1.g31696.t1 | # # # # # # #                                                                                                                                                                                                                                                                                                                                                                                                                                      |     |      |           |       |      |      | -                                                              | ----  | ----                 | # # # # # # #                                                                                                                                                                |     |      |           |       |      |      |
| Rsa1.0_02034.1.g31697.t1 | ref NP_188602.1  uncharacterized protein [Arabidopsis thaliana] gi 9294435 dbj BAB02555.1  unnamed protein product [Arabidopsis thaliana] gi 23297407 gb AANI2962.1  unknown protein [Arabidopsis thaliana] gi 110741203 dbj BAF02152.1  hypothetical protein [Arabidopsis thaliana] gi 110742613 dbj BAE99219.1  hypothetical protein [Arabidopsis thaliana] gi 332642754 gb AEE76275.1  uncharacterized protein AT3G19680 [Arabidopsis thaliana] | 448 | 491  | 0         | 109.6 | 83.9 | 90.6 | uncharacterized protein                                        | gbpln | Arabidopsis thaliana | AT3G19680.1   Symbols:   Protein of unknown function (DUF1005)   chr3:6840448-6842107 FORWARD LENGTH=491                                                                     | 448 | 491  | 0         | 109.6 | 83.9 | 90.6 |
| Rsa1.0_02034.1.g31698.t1 | ref NP_188603.1  putative pathogenesis-related protein [Arabidopsis thaliana] gi 9294436 dbj BAB02556.1  pathogenesis-related protein-like [Arabidopsis thaliana] gi 124301044 gb ABN04774.1  At3g19690 [Arabidopsis thaliana] gi 332642755 gb AEE76276.1  putative pathogenesis-related protein [Arabidopsis thaliana]                                                                                                                            | 168 | 161  | 4.00E-70  | 95.8  | 73.2 | 86.3 | putative pathogenesis-related protein                          | gbpln | Arabidopsis thaliana | AT3G19690.1   Symbols:   CAP (Cysteine-rich secretory proteins, Antigen 5, and Pathogenesis-related 1 protein) superfamily protein   chr3:6842365-6842850 REVERSE LENGTH=161 | 168 | 161  | 1.00E-72  | 95.8  | 73.2 | 86.3 |
| Rsa1.0_02034.1.g31699.t1 | ref XP_002883201.1  hypothetical protein ARALYDRAFT_479492 [Arabidopsis lyrata subsp. lyrata] gi 297329041 gb EFH59460.1  hypothetical protein ARALYDRAFT_479492 [Arabidopsis lyrata subsp. lyrata]                                                                                                                                                                                                                                                | 410 | 408  | 0         | 99.5  | 93.7 | 95.6 | hypothetical protein ARALYDRAFT_479492                         | gbpln | Arabidopsis lyrata   | AT3G19760.1   Symbols: EIF4A-III   eukaryotic initiation factor 4A-III   chr3:6863790-6868242 FORWARD LENGTH=408                                                             | 410 | 408  | 0         | 99.5  | 92.4 | 94.9 |
| Rsa1.0_02034.1.g31700.t1 | # # # # # # #                                                                                                                                                                                                                                                                                                                                                                                                                                      |     |      |           |       |      |      | -                                                              | ----  | ----                 | # # # # # # #                                                                                                                                                                |     |      |           |       |      |      |
| Rsa1.0_02035.1.g31701.t2 | # # # # # # #                                                                                                                                                                                                                                                                                                                                                                                                                                      |     |      |           |       |      |      | -                                                              | ----  | ----                 | # # # # # # #                                                                                                                                                                |     |      |           |       |      |      |
| Rsa1.0_02035.1.g31702.t1 | gb AAD19784.1  putative retroelement pol polyprotein [Arabidopsis thaliana]                                                                                                                                                                                                                                                                                                                                                                        | 905 | 1501 | 0         | 165.9 | 35.6 | 44.5 | putative retroelement pol polyprotein                          | gbpln | Arabidopsis thaliana | AT4G23160.1   Symbols: CRK8   cysteine-rich RLK (RECEPTOR-like protein kinase) 8   chr4:12129485-12134086 FORWARD LENGTH=1262                                                | 905 | 1262 | 1.00E-117 | 139.4 | 23.8 | 35.8 |

|                          |                                                                                                                                                                                                                                                                                                                                                                                                                                                                                                                                                                                                                                                                                                                     |      |      |          |       |      |      |                                                                   |       |                      |                                                                                                                                                                                                                                                                                                                                                                                                                                                               |      |      |          |       |      |      |
|--------------------------|---------------------------------------------------------------------------------------------------------------------------------------------------------------------------------------------------------------------------------------------------------------------------------------------------------------------------------------------------------------------------------------------------------------------------------------------------------------------------------------------------------------------------------------------------------------------------------------------------------------------------------------------------------------------------------------------------------------------|------|------|----------|-------|------|------|-------------------------------------------------------------------|-------|----------------------|---------------------------------------------------------------------------------------------------------------------------------------------------------------------------------------------------------------------------------------------------------------------------------------------------------------------------------------------------------------------------------------------------------------------------------------------------------------|------|------|----------|-------|------|------|
| Rsa1.0_02035.1.g31703.t1 | gb EOA23725.1  hypothetical protein CARUB_v10016938mg [Capsella rubella]                                                                                                                                                                                                                                                                                                                                                                                                                                                                                                                                                                                                                                            | 489  | 567  | 0        | 116.0 | 93.9 | 97.5 | hypothetical protein CARUB_v10016938mg                            | gbpln | Capsella rubella     | AT2G01480.1   Symbols:   O-fucosyltransferase family protein   chr2:216980-220341 FORWARD LENGTH=567                                                                                                                                                                                                                                                                                                                                                          | 489  | 567  | 0        | 116.0 | 93.0 | 98.0 |
| Rsa1.0_02035.1.g31704.t1 | gb EOA24970.1  hypothetical protein CARUB_v10018267mg [Capsella rubella]                                                                                                                                                                                                                                                                                                                                                                                                                                                                                                                                                                                                                                            | 106  | 115  | 5.00E-20 | 108.5 | 68.9 | 80.2 | hypothetical protein CARUB_v10018267mg                            | gbpln | Capsella rubella     | AT2G01505.1   Symbols: CLE16   CLAVATA3/ESR-RELATED 16   chr2:228826-229237 REVERSE LENGTH=103                                                                                                                                                                                                                                                                                                                                                                | 106  | 103  | 5.00E-21 | 97.2  | 47.2 | 56.6 |
| Rsa1.0_02035.1.g31705.t1 | ref NP_178260.1  pentatricopeptide repeat-containing protein [Arabidopsis thaliana]<br>gi 75216969 sp Q9ZVF4.1 PP140_ARATH RecName: Full=Pentatricopeptide repeat-containing protein At2g01510, mitochondrial; Flags: Precursor<br>gi 3785980 gb AAC67327.1  hypothetical protein [Arabidopsis thaliana]<br>gi 330250369 gb AEC05463.1  pentatricopeptide repeat-containing protein [Arabidopsis thaliana]                                                                                                                                                                                                                                                                                                          | 527  | 584  | 0        | 110.8 | 84.6 | 92.4 | pentatricopeptide repeat-containing protein                       | gbpln | Arabidopsis thaliana | AT2G01510.1   Symbols:   Tetratricopeptide repeat (TPR)-like superfamily protein   chr2:228826-229237 REVERSE LENGTH=584                                                                                                                                                                                                                                                                                                                                      | 527  | 584  | 0        | 110.8 | 84.6 | 92.4 |
| Rsa1.0_02035.1.g31706.t1 | gb EOA18445.1  hypothetical protein CARUB_v10006988mg [Capsella rubella]                                                                                                                                                                                                                                                                                                                                                                                                                                                                                                                                                                                                                                            | 248  | 683  | 3.00E-64 | 275.4 | 47.2 | 66.9 | hypothetical protein CARUB_v10006988mg                            | gbpln | Capsella rubella     | #                                                                                                                                                                                                                                                                                                                                                                                                                                                             | #    | #    | #        | #     | #    | #    |
| Rsa1.0_02036.1.g31707.t1 | ref NP_197995.1  uncharacterized protein [Arabidopsis thaliana]<br>gi 122214260 sp Q3E936.1 MAKR1_ARATH RecName: Full=Probable membrane-associated kinase regulator 1<br>gi 332006156 gb AED93539.1  uncharacterized protein AT5G26230 [Arabidopsis thaliana]                                                                                                                                                                                                                                                                                                                                                                                                                                                       | 294  | 341  | 6.00E-94 | 116.0 | 78.2 | 84.4 | uncharacterized protein                                           | gbpln | Arabidopsis thaliana | AT5G26230.1   Symbols:   unknown protein; FUNCTIONS IN: molecular,function unknown; INVOLVED IN: biological,process unknown; LOCATED IN: chloroplast; EXPRESSED DURING: 22 plant structures; EXPRESSED DURING: 13 growth stages; Has 1807 Blast hits to 1807 proteins in 277 species: Archae - 0; Bacteria - 0; Metazoa - 736; Fungi - 347; Plants - 385; Viruses - 0; Other Eukaryotes - 339 (source: NCBI BLINK).   chr5:9173517-9174542 REVERSE LENGTH=341 | 294  | 341  | 2.00E-96 | 116.0 | 78.2 | 84.4 |
| Rsa1.0_02036.1.g31708.t1 | gb EOA15059.1  hypothetical protein CARUB_v10028420mg [Capsella rubella]                                                                                                                                                                                                                                                                                                                                                                                                                                                                                                                                                                                                                                            | 530  | 640  | 0        | 120.8 | 64.7 | 74.7 | hypothetical protein CARUB_v10028420mg                            | gbpln | Capsella rubella     | AT5G67240.1   Symbols: SDN3   small RNA degrading nuclease 3   chr5:26824454-26828098 REVERSE LENGTH=782                                                                                                                                                                                                                                                                                                                                                      | 530  | 782  | 0        | 147.5 | 61.7 | 71.1 |
| Rsa1.0_02036.1.g31709.t1 | ref NP_198005.1  plastocyanin-like domain-containing protein / putative mavicyanin [Arabidopsis thaliana]<br>gi 3319353 gb AAC26242.1  contains similarity to copper-binding proteins [Arabidopsis thaliana]<br>gi 45752728 gb AAS76262.1  At5g26330 [Arabidopsis thaliana]<br>gi 51968496 dbj BAD42940.1  copper binding protein - like, predicted GPI-anchored protein [Arabidopsis thaliana]<br>gi 332006169 gb AED93552.1  plastocyanin-like domain-containing protein / putative mavicyanin [Arabidopsis thaliana]                                                                                                                                                                                             | 388  | 187  | 1.00E-69 | 48.2  | 38.1 | 40.7 | plastocyanin-like domain-containing protein / putative mavicyanin | gbpln | Arabidopsis thaliana | AT5G26330.1   Symbols:   Cupredoxin superfamily protein   chr5:9241614-9242635 REVERSE LENGTH=187                                                                                                                                                                                                                                                                                                                                                             | 388  | 187  | 3.00E-72 | 48.2  | 38.1 | 40.7 |
| Rsa1.0_02036.1.g31710.t1 | ref NP_198006.1  sugar transport protein 13 [Arabidopsis thaliana]<br>gi 85701281 sp Q94AZ2.2 STP13_ARATH RecName: Full=Sugar transport protein 13; AltName: Full=Hexose transporter 13; AltName: Full=Multicopy suppressor of snf4 deficiency protein 1<br>gi 9965739 gb AAG10146.1 AF250340.1 putative hexose transporter MSS1 [Arabidopsis thaliana]<br>gi 3319354 gb AAC26243.1  contains similarity to sugar transporters (Pfam: sugar_tr_hmm, score: 395.39) [Arabidopsis thaliana]<br>gi 15450649 gb AAK36596.1  AT5g26340/F9D12.17 [Arabidopsis thaliana] gi 15487259 emb CAC69074.1  STP13 protein [Arabidopsis thaliana]<br>gi 332006170 gb AED93553.1  sugar transport protein 13 [Arabidopsis thaliana] | 534  | 526  | 0        | 98.5  | 93.8 | 96.4 | sugar transport protein 13                                        | gbpln | Arabidopsis thaliana | AT5G26340.1   Symbols: MSS1, STP13, ATSTP13   Major facilitator superfamily protein   chr5:9243851-9246994 REVERSE LENGTH=526                                                                                                                                                                                                                                                                                                                                 | 534  | 526  | 0        | 98.5  | 93.8 | 96.4 |
| Rsa1.0_02036.1.g31711.t1 | ref XP_002872212.1  hypothetical protein ARALYDRAFT_489476 [Arabidopsis lyrata subsp. lyrata]<br>gi 297318049 gb EFH48471.1  hypothetical protein ARALYDRAFT_489476 [Arabidopsis lyrata subsp. lyrata]                                                                                                                                                                                                                                                                                                                                                                                                                                                                                                              | 1184 | 1193 | 0        | 100.8 | 88.3 | 94.8 | hypothetical protein ARALYDRAFT_489476                            | gbpln | Arabidopsis lyrata   | AT5G26570.1   Symbols: PWD_OK1, ATGDW3   catalytic;carbohydrate kinases:phosphoglucan, water kinases   chr5:9261580-9267526 FORWARD LENGTH=1196                                                                                                                                                                                                                                                                                                               | 1184 | 1196 | 0        | 101.0 | 88.3 | 94.4 |

|                          |                                                                                                                                                                                                                                                                                                                                                                                                                                                                                                                                                                                                                                                                                                                                                                                                                                                                                                                                                                                                                                                                                                                                                                                                  |     |     |           |       |      |      |                                                        |       |                      |                                                                                                                                                                                                                                                                                                |     |     |           |       |      |      |
|--------------------------|--------------------------------------------------------------------------------------------------------------------------------------------------------------------------------------------------------------------------------------------------------------------------------------------------------------------------------------------------------------------------------------------------------------------------------------------------------------------------------------------------------------------------------------------------------------------------------------------------------------------------------------------------------------------------------------------------------------------------------------------------------------------------------------------------------------------------------------------------------------------------------------------------------------------------------------------------------------------------------------------------------------------------------------------------------------------------------------------------------------------------------------------------------------------------------------------------|-----|-----|-----------|-------|------|------|--------------------------------------------------------|-------|----------------------|------------------------------------------------------------------------------------------------------------------------------------------------------------------------------------------------------------------------------------------------------------------------------------------------|-----|-----|-----------|-------|------|------|
| Rsa1.0_02036.1.g31712.t1 | refXP_002872217.1   hypothetical protein ARALYDRAFT_910715 [Arabidopsis lyrata subsp. lyrata] gi 297318054 gb EFH448476.1   hypothetical protein ARALYDRAFT_910715 [Arabidopsis lyrata subsp. lyrata]                                                                                                                                                                                                                                                                                                                                                                                                                                                                                                                                                                                                                                                                                                                                                                                                                                                                                                                                                                                            | 80  | 81  | 6.00E-13  | 101.3 | 57.5 | 67.5 | hypothetical protein ARALYDRAFT_910715                 | gbpln | Arabidopsis lyrata   | AT5G26717.1   Symbols:   Putative membrane lipoprotein   chr5:9284612-9284857 FORWARD LENGTH=81                                                                                                                                                                                                | 80  | 81  | 2.00E-14  | 101.3 | 43.8 | 51.3 |
| Rsa1.0_02036.1.g31713.t1 | refNP_175703.1   Nucleic acid-binding, OB-fold-like protein [Arabidopsis thaliana] gi 12324642 gb AAG52278.1 AC019018_15 putative replication protein; 94555-97079 [Arabidopsis thaliana] gi 332194750 gb AEE32871.1   Nucleic acid-binding, OB-fold-like protein [Arabidopsis thaliana]                                                                                                                                                                                                                                                                                                                                                                                                                                                                                                                                                                                                                                                                                                                                                                                                                                                                                                         | 516 | 566 | 2.00E-91  | 109.7 | 36.2 | 59.1 | Nucleic acid-binding, OB-fold-like protein             | gbpln | Arabidopsis thaliana | AT1G52950.1   Symbols:   Nucleic acid-binding, OB-fold-like protein   chr1:19725483-19728007 FORWARD LENGTH=566                                                                                                                                                                                | 516 | 566 | 4.00E-94  | 109.7 | 36.2 | 59.1 |
| Rsa1.0_02037.1.g31714.t1 | refXP_002866063.1   GTP-binding family protein [Arabidopsis lyrata subsp. lyrata] gi 297311898 gb EFH42322.1   GTP-binding family protein [Arabidopsis lyrata subsp. lyrata]                                                                                                                                                                                                                                                                                                                                                                                                                                                                                                                                                                                                                                                                                                                                                                                                                                                                                                                                                                                                                     | 284 | 288 | 1.00E-153 | 101.4 | 91.5 | 97.2 | GTP-binding family protein                             | gbpln | Arabidopsis lyrata   | AT5G54840.1   Symbols: ATSGP1, SGP1   Ras-related small GTP-binding family protein   chr5:22276611-22278328 REVERSE LENGTH=288                                                                                                                                                                 | 284 | 288 | 1.00E-148 | 101.4 | 90.8 | 96.8 |
| Rsa1.0_02037.1.g31715.t1 | #                                                                                                                                                                                                                                                                                                                                                                                                                                                                                                                                                                                                                                                                                                                                                                                                                                                                                                                                                                                                                                                                                                                                                                                                | #   | #   | #         | #     | #    | -    | ----                                                   | ----  | #                    | #                                                                                                                                                                                                                                                                                              | #   | #   | #         | #     | #    |      |
| Rsa1.0_02037.1.g31716.t1 | #                                                                                                                                                                                                                                                                                                                                                                                                                                                                                                                                                                                                                                                                                                                                                                                                                                                                                                                                                                                                                                                                                                                                                                                                | #   | #   | #         | #     | #    | -    | ----                                                   | ----  | #                    | #                                                                                                                                                                                                                                                                                              | #   | #   | #         | #     | #    |      |
| Rsa1.0_02037.1.g31717.t1 | gb EOA13311.1   hypothetical protein CARUB_v10026347mg [Capsella rubella]                                                                                                                                                                                                                                                                                                                                                                                                                                                                                                                                                                                                                                                                                                                                                                                                                                                                                                                                                                                                                                                                                                                        | 465 | 469 | 0         | 100.9 | 93.8 | 96.8 | hypothetical protein CARUB_v10026347mg                 | gbpln | Capsella rubella     | AT4G27070.1   Symbols: TSB2   tryptophan synthase beta-subunit 2   chr4:13586564-13588619 FORWARD LENGTH=475                                                                                                                                                                                   | 465 | 475 | 0         | 102.2 | 92.0 | 94.6 |
| Rsa1.0_02037.1.g31718.t1 | #                                                                                                                                                                                                                                                                                                                                                                                                                                                                                                                                                                                                                                                                                                                                                                                                                                                                                                                                                                                                                                                                                                                                                                                                | #   | #   | #         | #     | #    | -    | ----                                                   | ----  | #                    | #                                                                                                                                                                                                                                                                                              | #   | #   | #         | #     | #    |      |
| Rsa1.0_02037.1.g31719.t1 | gb EOA24904.1   hypothetical protein CARUB_v10018194mg [Capsella rubella]                                                                                                                                                                                                                                                                                                                                                                                                                                                                                                                                                                                                                                                                                                                                                                                                                                                                                                                                                                                                                                                                                                                        | 93  | 147 | 1.00E-41  | 158.1 | 84.9 | 93.5 | hypothetical protein CARUB_v10018194mg                 | gbpln | Capsella rubella     | AT3G56490.1   Symbols: HIT3, HINT1   HIS triad family protein 3   chr3:20941532-20943129 FORWARD LENGTH=147                                                                                                                                                                                    | 93  | 147 | 5.00E-44  | 158.1 | 84.9 | 92.5 |
| Rsa1.0_02038.1.g31720.t2 | ref NP_195721.5   uncharacterized protein [Arabidopsis thaliana] gi 26451774 dbj BAC42982.1   unknown protein [Arabidopsis thaliana] gi 26452440 dbj BAC43305.1   unknown protein [Arabidopsis thaliana] gi 51968902 dbj BAD43143.1   unknown protein [Arabidopsis thaliana] gi 51969218 dbj BAD43301.1   unknown protein [Arabidopsis thaliana] gi 51969306 dbj BAD43345.1   unknown protein [Arabidopsis thaliana] gi 51969668 dbj BAD43526.1   unknown protein [Arabidopsis thaliana] gi 51969694 dbj BAD43539.1   unknown protein [Arabidopsis thaliana] gi 51969746 dbj BAD43565.1   unknown protein [Arabidopsis thaliana] gi 51970048 dbj BAD43716.1   unknown protein [Arabidopsis thaliana] gi 51970150 dbj BAD43767.1   unknown protein [Arabidopsis thaliana] gi 51970160 dbj BAD43772.1   unknown protein [Arabidopsis thaliana] gi 51970188 dbj BAD43786.1   unknown protein [Arabidopsis thaliana] gi 51970232 dbj BAD43808.1   unknown protein [Arabidopsis thaliana] gi 51970626 dbj BAD44005.1   unknown protein [Arabidopsis thaliana] gi 51970642 dbj BAD44013.1   unknown protein [Arabidopsis thaliana] gi 51970662 dbj BAD44023.1   unknown protein [Arabidopsis thaliana] | 440 | 438 | 1.00E-171 | 99.5  | 73.6 | 79.1 | uncharacterized protein                                | gbpln | Arabidopsis thaliana | AT5G01010.1   Symbols:   CONTAINS InterPro DOMAIN/s: GOLD (InterPro:IPR009038); Has 172 Blast hits to 172 proteins in 43 species: Archae - 0; Bacteria - 0; Metazoa - 95; Fungi - 0; Plants - 63; Viruses - 0; Other Eukaryotes - 14 (source: NCBI BLINK);   chr5:1388-4924 REVERSE LENGTH=438 | 440 | 438 | 1.00E-173 | 99.5  | 73.6 | 79.1 |
| Rsa1.0_02038.1.g31721.t1 | refXP_002872959.1   mechanosensitive ion channel domain-containing protein [Arabidopsis lyrata subsp. lyrata] gi 297318796 gb EFH49218.1   mechanosensitive ion channel domain-containing protein [Arabidopsis lyrata subsp. lyrata]                                                                                                                                                                                                                                                                                                                                                                                                                                                                                                                                                                                                                                                                                                                                                                                                                                                                                                                                                             | 482 | 507 | 0         | 105.2 | 76.3 | 84.2 | mechanosensitive ion channel domain-containing protein | gbpln | Arabidopsis lyrata   | AT4G00290.1   Symbols:   Mechanosensitive ion channel protein   chr4:123097-125300 REVERSE LENGTH=497                                                                                                                                                                                          | 482 | 497 | 0         | 103.1 | 75.1 | 82.8 |
| Rsa1.0_02038.1.g31722.t1 | refXP_002872960.1   PLDBETA2 [Arabidopsis lyrata subsp. lyrata] gi 297318797 gb EFH49219.1   PLDBETA2 [Arabidopsis lyrata subsp. lyrata]                                                                                                                                                                                                                                                                                                                                                                                                                                                                                                                                                                                                                                                                                                                                                                                                                                                                                                                                                                                                                                                         | 989 | 987 | 0         | 99.8  | 79.5 | 85.2 | PLDBETA2                                               | gbpln | Arabidopsis lyrata   | AT4G00240.1   Symbols: PLDBETA2   phospholipase D beta 2   chr4:106380-110718 REVERSE LENGTH=927                                                                                                                                                                                               | 989 | 927 | 0         | 93.7  | 75.7 | 80.9 |
| Rsa1.0_02038.1.g31723.t1 | gb AAG50886.1   AC025294_24 hypothetical protein [Arabidopsis thaliana]                                                                                                                                                                                                                                                                                                                                                                                                                                                                                                                                                                                                                                                                                                                                                                                                                                                                                                                                                                                                                                                                                                                          | 314 | 629 | 1.00E-76  | 200.3 | 45.5 | 62.7 | hypothetical protein                                   | gbpln | Arabidopsis thaliana | AT3G24255.1   Symbols:   RNA-directed DNA polymerase (reverse transcriptase)-related family protein   chr3:8789471-8793208 FORWARD LENGTH=746                                                                                                                                                  | 314 | 746 | 2.00E-53  | 237.6 | 35.0 | 48.4 |

|                          |                                                                                                                                                                                                                                                                                                                                                                                                                                                                                                                                                                                                                                                                                                                                                                                                                                                                        |      |      |           |       |      |      |                                                              |       |                      |                                                                                                                                                                                                                                                                                                                                                                        |      |     |           |       |      |      |
|--------------------------|------------------------------------------------------------------------------------------------------------------------------------------------------------------------------------------------------------------------------------------------------------------------------------------------------------------------------------------------------------------------------------------------------------------------------------------------------------------------------------------------------------------------------------------------------------------------------------------------------------------------------------------------------------------------------------------------------------------------------------------------------------------------------------------------------------------------------------------------------------------------|------|------|-----------|-------|------|------|--------------------------------------------------------------|-------|----------------------|------------------------------------------------------------------------------------------------------------------------------------------------------------------------------------------------------------------------------------------------------------------------------------------------------------------------------------------------------------------------|------|-----|-----------|-------|------|------|
| Rsa1.0_02038.1.g31724.t3 | emb[CAB39638.1] RNA-directed DNA polymerase-like protein [Arabidopsis thaliana] gi 7267666 emb[CAB78094.1] RNA-directed DNA polymerase-like protein [Arabidopsis thaliana]                                                                                                                                                                                                                                                                                                                                                                                                                                                                                                                                                                                                                                                                                             | 1795 | 1274 | 0         | 71.0  | 29.5 | 40.2 | RNA-directed DNA polymerase-like protein                     | gbpln | Arabidopsis thaliana | AT4G29090.1   Symbols:   Ribonuclease H-like superfamily protein   chr4:14333528-14335255 FORWARD LENGTH=575                                                                                                                                                                                                                                                           | 1795 | 575 | 2.00E-52  | 32.0  | 8.7  | 14.0 |
| Rsa1.0_02039.1.g31725.t1 | gb AFK47272.1  unknown [Lotus japonicus]                                                                                                                                                                                                                                                                                                                                                                                                                                                                                                                                                                                                                                                                                                                                                                                                                               | 197  | 197  | 1.00E-103 | 100.0 | 90.4 | 97.0 | unknown                                                      | gbpln | Lotus japonicus      | AT2G17800.2   Symbols: ARAC1, ATGP2, ATRAC1, ROP3, ATROP3   Arabidopsis RAC-like 1   chr2:7740313-7741942 FORWARD LENGTH=197                                                                                                                                                                                                                                           | 197  | 197 | 1.00E-101 | 100.0 | 97.0 | 99.0 |
| Rsa1.0_02039.1.g31726.t1 | gb EOA16959.1  hypothetical protein CARUB_v10005187mg [Capsella rubella]                                                                                                                                                                                                                                                                                                                                                                                                                                                                                                                                                                                                                                                                                                                                                                                               | 319  | 341  | 1.00E-88  | 106.9 | 69.0 | 79.0 | hypothetical protein CARUB_v10005187mg                       | gbpln | Capsella rubella     | AT4G35940.2   Symbols:   unknown protein; FUNCTIONS IN: molecular_function unknown; INVOLVED IN: biological_process unknown; LOCATED IN: cellular_component unknown; EXPRESSED IN: 24 plant structures; EXPRESSED DURING: 15 growth stages; BEST Arabidopsis thaliana protein match is: unknown protein (TAIRAT2G17787.1).   chr4:17021672-17023593 FORWARD LENGTH=395 | 319  | 395 | 1.00E-66  | 123.8 | 62.1 | 73.4 |
| Rsa1.0_02039.1.g31727.t1 | ref NP_195317.2  PLAC8 domain-containing protein [Arabidopsis thaliana] gi 30690528 ref NP_849503.1  PLAC8 domain-containing protein [Arabidopsis thaliana] gi 42570170 ref NP_849504.2  PLAC8 domain-containing protein [Arabidopsis thaliana] gi 75154155 sp O3L7E9.1 MCAC1_ARAT H RecName: Full=Protein MID1-COMPLEMENTING ACTIVITY 1 gi 22530910 gb AAM96959.1  putative protein [Arabidopsis thaliana] gi 28059788 gb AAO30093.1  putative protein [Arabidopsis thaliana] gi 124484595 dbj BAF46389.1  Mca1 [Arabidopsis thaliana] gi 222423156 dbj BAH19557.1  AT4G35920.2 [Arabidopsis thaliana] gi 332661189 gb AEE86589.1  protein MID1-complementing activity 1 [Arabidopsis thaliana] gi 332661190 gb AEE86590.1  PLAC8 domain-containing protein [Arabidopsis thaliana] gi 332661191 gb AEE86591.1  PLAC8 domain-containing protein [Arabidopsis thaliana] | 421  | 421  | 0         | 100.0 | 91.9 | 96.4 | PLAC8 domain-containing protein                              | gbpln | Arabidopsis thaliana | AT4G35920.2   Symbols: MCA1   PLAC8 family protein   chr4:17012106-17014192 REVERSE LENGTH=421                                                                                                                                                                                                                                                                         | 421  | 421 | 0         | 100.0 | 91.9 | 96.4 |
| Rsa1.0_02039.1.g31728.t1 | # # # # # # # # - ----                                                                                                                                                                                                                                                                                                                                                                                                                                                                                                                                                                                                                                                                                                                                                                                                                                                 |      |      |           |       |      |      |                                                              |       |                      |                                                                                                                                                                                                                                                                                                                                                                        |      |     |           |       |      |      |
| Rsa1.0_02039.1.g31729.t1 | ref XP_002869051.1  predicted protein [Arabidopsis lyrata subsp. lyrata] gi 297314887 gb EFH45310.1  predicted protein [Arabidopsis lyrata subsp. lyrata]                                                                                                                                                                                                                                                                                                                                                                                                                                                                                                                                                                                                                                                                                                              | 484  | 282  | 1.00E-96  | 58.3  | 44.8 | 48.8 | predicted protein                                            | gbpln | Arabidopsis lyrata   | AT4G35900.1   Symbols: FD, FD-1, atbzip14   Basic-leucine zipper (bZIP) transcription factor family protein   chr4:17004746-17005952 FORWARD LENGTH=285                                                                                                                                                                                                                | 484  | 285 | 1.00E-93  | 58.9  | 42.8 | 47.9 |
| Rsa1.0_02039.1.g31730.t1 | ref NP_567991.1  winged-helix DNA-binding transcription factor family protein [Arabidopsis thaliana] gi 13877889 gb AAK44022.1 AF370207.1 unknown protein [Arabidopsis thaliana] gi 22136918 gb AAM91803.1  unknown protein [Arabidopsis thaliana] gi 332661185 gb AEE86585.1  winged-helix DNA-binding transcription factor family protein [Arabidopsis thaliana]                                                                                                                                                                                                                                                                                                                                                                                                                                                                                                     | 507  | 523  | 1.00E-147 | 103.2 | 70.8 | 77.7 | winged-helix DNA-binding transcription factor family protein | gbpln | Arabidopsis thaliana | AT4G35890.1   Symbols:   winged-helix DNA-binding transcription factor family protein   chr4:16997433-17000410 FORWARD LENGTH=523                                                                                                                                                                                                                                      | 507  | 523 | 1.00E-150 | 103.2 | 70.8 | 77.7 |
| Rsa1.0_02039.1.g31731.t1 | ref NP_195313.2  aspartyl protease family protein [Arabidopsis thaliana] gi 190576481 gb ACE79041.1  At4g35880 [Arabidopsis thaliana] gi 222423134 dbj BAH19546.1  AT4G35880 [Arabidopsis thaliana] gi 332661184 gb AEE86584.1  aspartyl protease family protein [Arabidopsis thaliana]                                                                                                                                                                                                                                                                                                                                                                                                                                                                                                                                                                                | 529  | 524  | 0         | 99.1  | 87.9 | 92.8 | aspartyl protease family protein                             | gbpln | Arabidopsis thaliana | AT4G35880.1   Symbols:   Eukaryotic aspartyl protease family protein   chr4:16993339-16995721 FORWARD LENGTH=524                                                                                                                                                                                                                                                       | 529  | 524 | 0         | 99.1  | 87.9 | 92.8 |
| Rsa1.0_02040.1.g31732.t1 | ref XP_002876307.1  hypothetical protein ARALYDRAFT_906973 [Arabidopsis lyrata subsp. lyrata] gi 297322145 gb EFH52566.1  hypothetical protein ARALYDRAFT_906973 [Arabidopsis lyrata subsp. lyrata]                                                                                                                                                                                                                                                                                                                                                                                                                                                                                                                                                                                                                                                                    | 88   | 80   | 2.00E-17  | 90.9  | 54.5 | 70.5 | hypothetical protein ARALYDRAFT_906973                       | gbpln | Arabidopsis lyrata   | AT3G55515.1   Symbols: DVL8, RTFL7   ROTUNDIFOLIA like 7   chr3:20590923-20591162 FORWARD LENGTH=79                                                                                                                                                                                                                                                                    | 88   | 79  | 9.00E-19  | 89.8  | 51.1 | 64.8 |



|                          |                                                                                                                                                                                                       |     |      |           |        |      |      |                                                         |       |                    |                                                                                                                                                                                                                                                                                                                                                                                        |     |      |           |       |      |      |
|--------------------------|-------------------------------------------------------------------------------------------------------------------------------------------------------------------------------------------------------|-----|------|-----------|--------|------|------|---------------------------------------------------------|-------|--------------------|----------------------------------------------------------------------------------------------------------------------------------------------------------------------------------------------------------------------------------------------------------------------------------------------------------------------------------------------------------------------------------------|-----|------|-----------|-------|------|------|
| Rsa1.0_02040.1.g31733.t1 | refXP_002876308.1   hypothetical protein ARALYDRAFT_485979 [Arabidopsis lyrata subsp. lyrata] gi 297322146 gb EFH52567.1   hypothetical protein ARALYDRAFT_485979 [Arabidopsis lyrata subsp. lyrata]  | 190 | 190  | 5.00E-81  | 100.0  | 86.8 | 89.5 | hypothetical protein ARALYDRAFT_485979                  | gbpln | Arabidopsis lyrata | AT3G55520.1   Symbols: FKBP-like peptidyl-prolyl cis-trans isomerase family protein   chr3:20594177-20595128 FORWARD LENGTH=190                                                                                                                                                                                                                                                        | 190 | 190  | 9.00E-83  | 100.0 | 86.8 | 88.9 |
| Rsa1.0_02040.1.g31734.t2 | refXP_002878037.1   zinc finger family protein [Arabidopsis lyrata subsp. lyrata] gi 297323875 gb EFH54296.1   zinc finger family protein [Arabidopsis lyrata subsp. lyrata]                          | 280 | 272  | 1.00E-138 | 97.1   | 90.7 | 92.1 | zinc finger family protein                              | gbpln | Arabidopsis lyrata | AT3G55530.1   Symbols: SDIR1   RING/U-box superfamily protein   chr3:20595300-20597188 REVERSE LENGTH=273                                                                                                                                                                                                                                                                              | 280 | 273  | 1.00E-137 | 97.5  | 88.9 | 90.7 |
| Rsa1.0_02040.1.g31735.t1 | gb EOA25935.1   hypothetical protein CARUB_v10019316mg [Capsella rubella]                                                                                                                             | 357 | 433  | 1.00E-152 | 121.3  | 75.1 | 83.2 | hypothetical protein CARUB_v10019316mg                  | gbpln | Capsella rubella   | AT2G39710.1   Symbols:   Eukaryotic aspartyl protease family protein   chr2:16562051-16563379 REVERSE LENGTH=442                                                                                                                                                                                                                                                                       | 357 | 442  | 1.00E-138 | 123.8 | 65.3 | 80.1 |
| Rsa1.0_02040.1.g31736.t1 | #                                                                                                                                                                                                     | #   | #    | #         | #      | #    | #    | -                                                       | ----  | ----               | #                                                                                                                                                                                                                                                                                                                                                                                      | #   | #    | #         | #     | #    | #    |
| Rsa1.0_02040.1.g31737.t1 | refXP_002878039.1   hypothetical protein ARALYDRAFT_906980 [Arabidopsis lyrata subsp. lyrata] gi 297323877 gb EFH54298.1   hypothetical protein ARALYDRAFT_906980 [Arabidopsis lyrata subsp. lyrata]  | 297 | 308  | 1.00E-117 | 103.7  | 87.5 | 92.3 | hypothetical protein ARALYDRAFT_906980                  | gbpln | Arabidopsis lyrata | AT3G55560.1   Symbols: AGF2, AHL15   AT-hook protein of GA feedback 2   chr3:20604904-20605836 REVERSE LENGTH=310                                                                                                                                                                                                                                                                      | 297 | 310  | 1.00E-119 | 104.4 | 87.5 | 92.3 |
| Rsa1.0_02041.1.g31738.t2 | refXP_002888054.1   hypothetical protein ARALYDRAFT_893298 [Arabidopsis lyrata subsp. lyrata] gi 297333895 gb EFH64313.1   hypothetical protein ARALYDRAFT_893298 [Arabidopsis lyrata subsp. lyrata]  | 76  | 768  | 3.00E-12  | 1010.5 | 60.5 | 68.4 | hypothetical protein ARALYDRAFT_893298                  | gbpln | Arabidopsis lyrata | AT1G61970.2   Symbols:   Mitochondrial transcription termination factor family protein   chr1:22904713-22905969 FORWARD LENGTH=418                                                                                                                                                                                                                                                     | 76  | 418  | 3.00E-14  | 550.0 | 60.5 | 71.1 |
| Rsa1.0_02041.1.g31739.t1 | gb ABD65049.1   histone-lysine N-methyltransferase, putative [Brassica oleracea]                                                                                                                      | 400 | 392  | 1.00E-168 | 98.0   | 79.0 | 83.3 | histone-lysine N-methyltransferase, putative            | gbpln | Brassica oleracea  | AT5G47150.1   Symbols:   YDG/SRA domain-containing protein   chr5:19150807-19151793 FORWARD LENGTH=328                                                                                                                                                                                                                                                                                 | 400 | 328  | 1.00E-101 | 82.0  | 51.0 | 63.3 |
| Rsa1.0_02041.1.g31740.t1 | gb ABD65042.1   GATA zinc finger containing protein [Brassica oleracea]                                                                                                                               | 473 | 471  | 0         | 99.6   | 85.2 | 90.3 | GATA zinc finger containing protein                     | gbpln | Brassica oleracea  | AT5G47140.1   Symbols: GATA27   GATA transcription factor 27   chr5:19145108-19147303 FORWARD LENGTH=470                                                                                                                                                                                                                                                                               | 473 | 470  | 0         | 99.4  | 79.3 | 88.4 |
| Rsa1.0_02041.1.g31741.t1 | gb AAK73101.1 AF390555.1 Bax inhibitor 1 [Brassica napus] gi 17981374 gb AAL50979.1 AF453320.1 bax inhibitor-like protein [Brassica oleracea]                                                         | 247 | 247  | 1.00E-126 | 100.0  | 96.8 | 99.6 | Bax inhibitor 1                                         | gbpln | Brassica napus     | AT5G47120.1   Symbols: ATBI-1, BI-1, ATBI, BI1   BAX inhibitor 1   chr5:19136071-19137585 FORWARD LENGTH=247                                                                                                                                                                                                                                                                           | 247 | 247  | 1.00E-120 | 100.0 | 90.7 | 94.3 |
| Rsa1.0_02041.1.g31742.t1 | gb ABD65018.1   Lili3 protein, putative [Brassica oleracea]                                                                                                                                           | 189 | 225  | 1.00E-47  | 119.0  | 66.1 | 74.1 | Lili3 protein, putative                                 | gbpln | Brassica oleracea  | AT5G47110.1   Symbols: LIL3.2   Chlorophyll A-B binding family protein   chr5:19134218-19135238 REVERSE LENGTH=258                                                                                                                                                                                                                                                                     | 189 | 258  | 3.00E-35  | 136.5 | 43.4 | 51.9 |
| Rsa1.0_02041.1.g31743.t1 | gb ABD65033.1   YDG/SRA domain containing protein [Brassica oleracea]                                                                                                                                 | 101 | 498  | 4.00E-40  | 493.1  | 77.2 | 84.2 | YDG/SRA domain containing protein                       | gbpln | Brassica oleracea  | AT5G47160.1   Symbols:   YDG/SRA domain-containing protein   chr5:19156731-19157978 FORWARD LENGTH=415                                                                                                                                                                                                                                                                                 | 101 | 415  | 1.00E-14  | 410.9 | 36.6 | 58.4 |
| Rsa1.0_02041.1.g31744.t1 | gb ABD65029.1   C3HC4 type (RING finger) Zinc finger containing protein [Brassica oleracea]                                                                                                           | 196 | 185  | 2.00E-85  | 94.4   | 79.1 | 83.2 | C3HC4 type (RING finger) Zinc finger containing protein | gbpln | Brassica oleracea  | AT1G70910.1   Symbols: DEP   RING/U-box superfamily protein   chr1:26734155-26734640 FORWARD LENGTH=161                                                                                                                                                                                                                                                                                | 196 | 161  | 5.00E-27  | 82.1  | 39.3 | 50.5 |
| Rsa1.0_02041.1.g31745.t1 | gb ABD64921.1   calcineurin B-like protein, putative [Brassica oleracea]                                                                                                                              | 213 | 213  | 1.00E-119 | 100.0  | 98.6 | 99.5 | calcineurin B-like protein, putative                    | gbpln | Brassica oleracea  | AT5G47100.1   Symbols: CBL9, ATCBL9   calcineurin B-like protein 9   chr5:19129896-19131727 REVERSE LENGTH=213                                                                                                                                                                                                                                                                         | 213 | 213  | 1.00E-119 | 100.0 | 97.7 | 98.6 |
| Rsa1.0_02041.1.g31746.t1 | gb ABD65045.1   hypothetical protein 26.t00106 [Brassica oleracea]                                                                                                                                    | 299 | 370  | 1.00E-139 | 123.7  | 90.0 | 94.0 | hypothetical protein 26.t00106                          | gbpln | Brassica oleracea  | AT5G47090.1   Symbols:   unknown protein; CONTAINS InterPro DOMAIN/s: Protein of unknown function DUF2052, coiled-coil (InterPro:IPR018613). Has 30201 Blast hits to 17322 proteins in 780 species: Archae - 12; Bacteria - 1396; Metazoa - 17338; Fungi - 3422; Plants - 5037; Viruses - 0; Other Eukaryotes - 2996 (source: NCBI ELink).   chr5:19127274-19128493 FORWARD LENGTH=310 | 299 | 310  | 1.00E-129 | 103.7 | 80.3 | 88.0 |
| Rsa1.0_02041.1.g31747.t1 | gb ABD65048.1   Casein kinase II beta chain, putative [Brassica oleracea]                                                                                                                             | 246 | 276  | 1.00E-127 | 112.2  | 91.5 | 94.3 | Casein kinase II beta chain, putative                   | gbpln | Brassica oleracea  | AT5G47080.1   Symbols: CKB1   casein kinase II beta chain 1   chr5:19124969-19126397 REVERSE LENGTH=287                                                                                                                                                                                                                                                                                | 246 | 287  | 1.00E-116 | 116.7 | 87.8 | 92.3 |
| Rsa1.0_02041.1.g31748.t1 | refXP_002863522.1   hypothetical protein ARALYDRAFT_917015 [Arabidopsis lyrata subsp. lyrata] gi 2973089357 gb EFH39781.1   hypothetical protein ARALYDRAFT_917015 [Arabidopsis lyrata subsp. lyrata] | 516 | 1165 | 0         | 225.8  | 91.3 | 95.3 | hypothetical protein ARALYDRAFT_917015                  | gbpln | Arabidopsis lyrata | AT5G45140.1   Symbols: NRPC2   nuclear RNA polymerase C2   chr5:18247416-18257713 REVERSE LENGTH=1161                                                                                                                                                                                                                                                                                  | 516 | 1161 | 0         | 225.0 | 89.3 | 93.6 |

|                           |                                                                                                                                                                                                                                                                                                                                                                                                                                                                                                                                                                                                                                                                                                                                                                                                                                                                                                                                                                                                                                                                                                                                                |     |      |          |       |      |      |                                                                                |       |                      |                                                                                                                                                  |     |     |          |       |      |      |
|---------------------------|------------------------------------------------------------------------------------------------------------------------------------------------------------------------------------------------------------------------------------------------------------------------------------------------------------------------------------------------------------------------------------------------------------------------------------------------------------------------------------------------------------------------------------------------------------------------------------------------------------------------------------------------------------------------------------------------------------------------------------------------------------------------------------------------------------------------------------------------------------------------------------------------------------------------------------------------------------------------------------------------------------------------------------------------------------------------------------------------------------------------------------------------|-----|------|----------|-------|------|------|--------------------------------------------------------------------------------|-------|----------------------|--------------------------------------------------------------------------------------------------------------------------------------------------|-----|-----|----------|-------|------|------|
| Rsa1.0_02041.1.g31749.t1  | refXP_002865280.1   hypothetical protein ARALYDRAFT_494469 [Arabidopsis lyrata subsp. lyrata] gi 297311115 gb EFH41539.1   hypothetical protein ARALYDRAFT_494469 [Arabidopsis lyrata subsp. lyrata]                                                                                                                                                                                                                                                                                                                                                                                                                                                                                                                                                                                                                                                                                                                                                                                                                                                                                                                                           | 158 | 586  | 6.00E-16 | 370.9 | 25.3 | 27.2 | hypothetical protein ARALYDRAFT_494469                                         | gbpln | Arabidopsis lyrata   | AT5G45130.1   Symbols: ATRAB5A, ATRABF2A, RABF2A, RAB5A, RHA1, ATRAB-F2A, RAB-F2A   RAB homolog 1   chr5:18244495-18246060 FORWARD LENGTH=200    | 158 | 200 | 2.00E-18 | 126.6 | 28.5 | 29.1 |
| Rsa1.0_02041.1.g31750.t1  | gb AAP37968.1   seed specific protein Bn15D12A [Brassica napus]                                                                                                                                                                                                                                                                                                                                                                                                                                                                                                                                                                                                                                                                                                                                                                                                                                                                                                                                                                                                                                                                                | 175 | 157  | 1.00E-74 | 89.7  | 77.7 | 84.0 | seed specific protein Bn15D12A                                                 | gbpln | Brassica napus       | AT5G46960.1   Symbols:   Plant invertase/pectin methyltransferase inhibitor superfamily protein   chr5:19062220-19062744 REVERSE LENGTH=174      | 175 | 174 | 3.00E-59 | 99.4  | 64.6 | 76.6 |
| Rsa1.0_02041.1.g31751.t1  | gb AAC64879.1   Similar to gb X80472 STS15 gene from Solanum tuberosum [Arabidopsis thaliana]                                                                                                                                                                                                                                                                                                                                                                                                                                                                                                                                                                                                                                                                                                                                                                                                                                                                                                                                                                                                                                                  | 191 | 182  | 1.00E-29 | 95.3  | 42.9 | 57.6 | Similar to gb X80472 STS15 gene from Solanum tuberosum                         | gbpln | Arabidopsis thaliana | AT1G54620.1   Symbols:   Plant invertase/pectin methyltransferase inhibitor superfamily protein   chr1:20400437-20401015 REVERSE LENGTH=192      | 191 | 192 | 4.00E-32 | 100.5 | 42.9 | 57.6 |
| Rsa1.0_02041.1.g31752.t1  | pir  T00833 RNA-directed DNA polymerase homolog T13L16.7 - Arabidopsis thaliana (fragment)                                                                                                                                                                                                                                                                                                                                                                                                                                                                                                                                                                                                                                                                                                                                                                                                                                                                                                                                                                                                                                                     | 258 | 1365 | 7.00E-32 | 529.1 | 29.5 | 37.6 | RNA-directed DNA polymerase homolog T13L16.7 - Arabidopsis thaliana (fragment) | ----  | ----                 | ATMG00310.1   Symbols: ORF154   RNA-directed DNA polymerase (reverse transcriptase)-related family protein   chrM:90883-91347 REVERSE LENGTH=154 | 258 | 154 | 1.00E-30 | 59.7  | 27.5 | 33.7 |
| Rsa1.0_02041.1.g31753.t1  | ref NP_199509.1   plant invertase/pectin methyltransferase inhibitor domain-containing protein [Arabidopsis thaliana] gi 9759440 db BAB10237.1   unnamed protein product [Arabidopsis thaliana] gi 332008071 gb AED95454.1   plant invertase/pectin methyltransferase inhibitor domain-containing protein [Arabidopsis thaliana]                                                                                                                                                                                                                                                                                                                                                                                                                                                                                                                                                                                                                                                                                                                                                                                                               | 191 | 184  | 3.00E-29 | 96.3  | 40.3 | 55.5 | plant invertase/pectin methyltransferase inhibitor domain-containing protein   | gbpln | Arabidopsis thaliana | AT5G46980.1   Symbols:   Plant invertase/pectin methyltransferase inhibitor superfamily protein   chr5:19065453-19066007 REVERSE LENGTH=184      | 191 | 184 | 1.00E-31 | 96.3  | 40.3 | 55.5 |
| Rsa1.0_02042.1.g31754.t1  | #                                                                                                                                                                                                                                                                                                                                                                                                                                                                                                                                                                                                                                                                                                                                                                                                                                                                                                                                                                                                                                                                                                                                              | #   | #    | #        | #     | #    | #    | -                                                                              | ----  | ----                 | #                                                                                                                                                | #   | #   | #        | #     | #    |      |
| Rsa1.0_02042.1.g31755.t15 | gb AAD30632.1 AC006085.5 Hypothetical protein [Arabidopsis thaliana]                                                                                                                                                                                                                                                                                                                                                                                                                                                                                                                                                                                                                                                                                                                                                                                                                                                                                                                                                                                                                                                                           | 484 | 1295 | 2.00E-40 | 267.6 | 26.9 | 39.7 | Hypothetical protein                                                           | gbpln | Arabidopsis thaliana | #                                                                                                                                                | #   | #   | #        | #     | #    |      |
| Rsa1.0_02042.1.g31756.t1  | #                                                                                                                                                                                                                                                                                                                                                                                                                                                                                                                                                                                                                                                                                                                                                                                                                                                                                                                                                                                                                                                                                                                                              | #   | #    | #        | #     | #    | #    | -                                                                              | ----  | ----                 | #                                                                                                                                                | #   | #   | #        | #     | #    |      |
| Rsa1.0_02042.1.g31757.t7  | gb AAF18630.1 AC006228_1 F5J5.1 [Arabidopsis thaliana]                                                                                                                                                                                                                                                                                                                                                                                                                                                                                                                                                                                                                                                                                                                                                                                                                                                                                                                                                                                                                                                                                         | 649 | 1463 | 9.00E-64 | 225.4 | 21.9 | 31.4 | F5J5.1                                                                         | gbpln | Arabidopsis thaliana | #                                                                                                                                                | #   | #   | #        | #     | #    |      |
| Rsa1.0_02043.1.g31758.t1  | ref NP_178143.1   pentatricopeptide repeat-containing protein [Arabidopsis thaliana] gi 42572199 ref NP_974190.1   pentatricopeptide repeat-containing protein [Arabidopsis thaliana] gi 145327755 ref NP_001077853.1   pentatricopeptide repeat-containing protein [Arabidopsis thaliana] gi 75262222 sp Q9C977.1 PP135, ARAT H RecName: Full=Pentatricopeptide repeat-containing protein At1g80270, mitochondrial; Flags: Precursor gi 12324975 gb AAG52431.1 AC018848_2 hypothetical protein; 8785-10851 [Arabidopsis thaliana] gi 17064898 gb AAL32603.1   Unknown protein [Arabidopsis thaliana] gi 20259918 gb AAM13306.1   unknown protein [Arabidopsis thaliana] gi 332198258 gb AEE36379.1   pentatricopeptide repeat-containing protein [Arabidopsis thaliana] gi 332198259 gb AEE36380.1   pentatricopeptide repeat-containing protein [Arabidopsis thaliana] gi 332198260 gb AEE36381.1   pentatricopeptide repeat-containing protein [Arabidopsis thaliana] ref XP_002893119.1   tubulin family protein [Arabidopsis lyrata subsp. lyrata] gi 297338961 gb EFH69378.1   tubulin family protein [Arabidopsis lyrata subsp. lyrata] | 610 | 596  | 0        | 97.7  | 82.8 | 89.7 | pentatricopeptide repeat-containing protein                                    | gbpln | Arabidopsis thaliana | AT1G80270.3   Symbols: PPR596   PENTATRICOPEPTIDE REPEAT 596   chr1:30181265-30183331 FORWARD LENGTH=596                                         | 610 | 596 | 0        | 97.7  | 82.8 | 89.7 |
| Rsa1.0_02043.1.g31759.t1  | ref XP_002887838.1   hypothetical protein ARALYDRAFT_340195 [Arabidopsis lyrata subsp. lyrata] gi 297333679 gb EFH64097.1   hypothetical protein ARALYDRAFT_340195 [Arabidopsis lyrata subsp. lyrata]                                                                                                                                                                                                                                                                                                                                                                                                                                                                                                                                                                                                                                                                                                                                                                                                                                                                                                                                          | 369 | 371  | 0        | 100.5 | 88.1 | 93.5 | hypothetical protein ARALYDRAFT_340195                                         | gbpln | Arabidopsis lyrata   | AT1G80260.1   Symbols: emb1427   Spc97 / Spc98 family of spindle pole body (SBP) component   chr1:30175924-30180511 FORWARD LENGTH=995           | 369 | 370 | 0        | 100.3 | 87.8 | 93.8 |
| Rsa1.0_02043.1.g31761.t1  | emb CCD74552.1   predicted protein [Arabidopsis halleri subsp. halleri]                                                                                                                                                                                                                                                                                                                                                                                                                                                                                                                                                                                                                                                                                                                                                                                                                                                                                                                                                                                                                                                                        | 265 | 249  | 2.00E-63 | 94.0  | 48.7 | 57.4 | predicted protein                                                              | gbpln | Arabidopsis halleri  | AT1G15430.2   Symbols:   Protein of unknown function (DUF1644)   chr1:5305011-5305790 FORWARD LENGTH=259                                         | 265 | 259 | 1.00E-61 | 97.7  | 47.2 | 59.6 |

|                          |                                                                                                                                                                                                                                                                                                                                                                                                                                                                                                                                                                                                                                                                                                                                                                                               |     |     |           |       |      |      |                                        |       |                      |                                                                                                                                                                                               |     |     |           |       |      |      |
|--------------------------|-----------------------------------------------------------------------------------------------------------------------------------------------------------------------------------------------------------------------------------------------------------------------------------------------------------------------------------------------------------------------------------------------------------------------------------------------------------------------------------------------------------------------------------------------------------------------------------------------------------------------------------------------------------------------------------------------------------------------------------------------------------------------------------------------|-----|-----|-----------|-------|------|------|----------------------------------------|-------|----------------------|-----------------------------------------------------------------------------------------------------------------------------------------------------------------------------------------------|-----|-----|-----------|-------|------|------|
| Rsa1.0_02043.1.g31762.t1 | refXP_002884611.1  hypothetical protein ARALYDRAFT_478001 [Arabidopsis lyrata subsp. lyrata] gi 297330451 gb EFH60870.1                                                                                                                                                                                                                                                                                                                                                                                                                                                                                                                                                                                                                                                                       | 203 | 413 | 5.00E-52  | 203.4 | 53.7 | 61.1 | hypothetical protein ARALYDRAFT_478001 | gbpln | Arabidopsis lyrata   | AT1G80210.1   Symbols: BRCC36A, AtBRCC36A   Mov34/MPN/PAD-1 family protein   chr1:30163357-30165628 REVERSE LENGTH=406                                                                        | 203 | 406 | 3.00E-53  | 200.0 | 47.8 | 50.7 |
| Rsa1.0_02043.1.g31763.t1 | hypothetical protein ARALYDRAFT_478001 [Arabidopsis lyrata subsp. lyrata]<br>ref NP_178136.1  GINS complex subunit 1 [Arabidopsis thaliana]<br>gi 5902373 gb AAD55475.1 AC009322.15 Unknown protein [Arabidopsis thaliana] gi 34365591 gb AA065107.1  At1g80190 [Arabidopsis thaliana]<br>gi 51969246 db BAD43315.1  At1g80190 [Arabidopsis thaliana]<br>gi 332198247 gb AEE36368.1  GINS complex subunit 1-like protein [Arabidopsis thaliana]                                                                                                                                                                                                                                                                                                                                               | 197 | 201 | 3.00E-99  | 102.0 | 85.8 | 95.4 | GINS complex subunit 1                 | gbpln | Arabidopsis thaliana | AT1G80190.1   Symbols: PSF1   partner of SLD five 1   chr1:30159476-30161115 FORWARD LENGTH=201                                                                                               | 197 | 201 | 1.00E-102 | 102.0 | 85.8 | 95.4 |
| Rsa1.0_02043.1.g31764.t1 | ref NP_178101.3  golgin candidate 5 [Arabidopsis thaliana]<br>gi 186496537 ref NP_001117622.1  golgin candidate 5 [Arabidopsis thaliana]<br>gi 334184030 ref NP_001185442.1  golgin candidate 5 [Arabidopsis thaliana]<br>gi 122175613 sp Q0WVL7.1 GOGC5_AR ATH RecName: Full=Golgin candidate 5; Short=AtGCS5<br>gi 110741773 dbj BAE98831.1  hypothetical protein [Arabidopsis thaliana] gi 164708704 gb ABY67249.1  putative TMF-like protein [Arabidopsis thaliana] gi 332198186 gb AEE36307.1  golgin candidate 5 [Arabidopsis thaliana] gi 332198187 gb AEE36308.1  golgin candidate 5 [Arabidopsis thaliana] gi 332198189 gb AEE36310.1  golgin candidate 5 [Arabidopsis thaliana]                                                                                                     | 946 | 956 | 0         | 101.1 | 85.9 | 90.7 | golgin candidate 5                     | gbpln | Arabidopsis thaliana | AT1G79830.3   Symbols: GC5   golgin candidate 5   chr1:30028110-30033508 REVERSE LENGTH=956                                                                                                   | 946 | 956 | 0         | 101.1 | 85.9 | 90.7 |
| Rsa1.0_02043.1.g31765.t1 | refXP_002887858.1  hypothetical protein ARALYDRAFT_477286 [Arabidopsis lyrata subsp. lyrata] gi 297333699 gb EFH64117.1  hypothetical protein ARALYDRAFT_477286 [Arabidopsis lyrata subsp. lyrata]<br>ref NP_565222.1  peroxin-2 [Arabidopsis thaliana]<br>gi 34098692 sp Q9CA86.1 PEX2_ARATH RecName: Full=Peroxisome biogenesis protein 2; AltName: Full=E3 ubiquitin-protein ligase PEX2; AltName: Full=Peroxin-2; Short=AtPEX2;<br>Short=AthPEX2; AltName: Full=Pex2p<br>gi 12324593 gb AAG52254.1 AC011717.22 putative RING finger protein; 84236-82024 [Arabidopsis thaliana]<br>gi 17381214 gb AAL36419.1  unknown protein [Arabidopsis thaliana]<br>gi 20465819 gb AAM20014.1  unknown protein [Arabidopsis thaliana]<br>gi 332198180 gb AEE36301.1  peroxin-2 [Arabidopsis thaliana] | 547 | 495 | 0         | 90.5  | 82.8 | 85.9 | hypothetical protein ARALYDRAFT_477286 | gbpln | Arabidopsis lyrata   | AT1G79820.2   Symbols: SGB1   Major facilitator superfamily protein   chr1:30022581-30026771 REVERSE LENGTH=495                                                                               | 547 | 495 | 0         | 90.5  | 82.8 | 85.6 |
| Rsa1.0_02043.1.g31766.t1 | gi 12324593 gb AAG52254.1 AC011717.22 putative RING finger protein; 84236-82024 [Arabidopsis thaliana]<br>gi 17381214 gb AAL36419.1  unknown protein [Arabidopsis thaliana]<br>gi 20465819 gb AAM20014.1  unknown protein [Arabidopsis thaliana]<br>gi 332198180 gb AEE36301.1  peroxin-2 [Arabidopsis thaliana]                                                                                                                                                                                                                                                                                                                                                                                                                                                                              | 360 | 333 | 1.00E-168 | 92.5  | 84.2 | 87.5 | peroxin-2                              | gbpln | Arabidopsis thaliana | AT1G79810.1   Symbols: TED3, PEX2, ATPEX2   Pex2/Pex12 N-terminal domain-containing protein / zinc finger (C3HC4-type RING finger) family protein   chr1:30019944-30022156 FORWARD LENGTH=333 | 360 | 333 | 1.00E-171 | 92.5  | 84.2 | 87.5 |
| Rsa1.0_02043.1.g31767.t1 | ref NP_178098.1  early nodulin-like protein 7 [Arabidopsis thaliana]<br>gi 7715594 gb AAF68112.1 AC010793.7 F20B17.22 [Arabidopsis thaliana]<br>gi 12324596 gb AAG52257.1 AC011717.25 hypothetical protein; 85631-84963 [Arabidopsis thaliana]<br>gi 67633502 gb AY78675.1  plastocyanin-like domain-containing protein [Arabidopsis thaliana]<br>gi 332198179 gb AEE36300.1  early nodulin-like protein 7 [Arabidopsis thaliana]                                                                                                                                                                                                                                                                                                                                                             | 195 | 192 | 3.00E-60  | 98.5  | 58.5 | 65.1 | early nodulin-like protein 7           | gbpln | Arabidopsis thaliana | AT1G79800.1   Symbols: ENODL7, AtENODL7   early nodulin-like protein 7   chr1:30018549-30019217 FORWARD LENGTH=192                                                                            | 195 | 192 | 1.00E-62  | 98.5  | 58.5 | 65.1 |
| Rsa1.0_02043.1.g31768.t1 | gb EOA35644.1  hypothetical protein CARUB_v10020861mg [Capsella rubella]                                                                                                                                                                                                                                                                                                                                                                                                                                                                                                                                                                                                                                                                                                                      | 258 | 245 | 1.00E-105 | 95.0  | 74.4 | 80.6 | hypothetical protein CARUB_v10020861mg | gbpln | Capsella rubella     | AT1G79790.1   Symbols:   Haloacid dehalogenase-like hydrolase (HAD) superfamily protein   chr1:30016987-30018186 REVERSE LENGTH=245                                                           | 258 | 245 | 1.00E-106 | 95.0  | 72.5 | 79.8 |

|                          |                                                                                                                                                                                                                                                                                                                                                                                                             |      |      |           |       |      |      |                                                  |       |                      |                                                                                                                                                                                                                                                                                                                                                         |      |      |           |       |      |      |
|--------------------------|-------------------------------------------------------------------------------------------------------------------------------------------------------------------------------------------------------------------------------------------------------------------------------------------------------------------------------------------------------------------------------------------------------------|------|------|-----------|-------|------|------|--------------------------------------------------|-------|----------------------|---------------------------------------------------------------------------------------------------------------------------------------------------------------------------------------------------------------------------------------------------------------------------------------------------------------------------------------------------------|------|------|-----------|-------|------|------|
| Rsa1.0_02043.1.g31769.t1 | ref XP_002889325.1  F20B17.20 [Arabidopsis lyrata subsp. lyrata] gi 297335166 gb EFH65584.1  F20B17.20 [Arabidopsis lyrata subsp. lyrata]                                                                                                                                                                                                                                                                   | 381  | 363  | 1.00E-141 | 95.3  | 74.5 | 81.9 | F20B17.20                                        | gbpln | Arabidopsis lyrata   | AT1G79780.1   Symbols:   Uncharacterised protein family (UPF0497)   chr1:30015930-30016856 FORWARD LENGTH=187                                                                                                                                                                                                                                           | 381  | 187  | 5.00E-73  | 49.1  | 38.6 | 41.5 |
| Rsa1.0_02043.1.g31770.t1 | gb EOA35512.1  hypothetical protein CARUB_v10020719mg [Capsella rubella]                                                                                                                                                                                                                                                                                                                                    | 320  | 299  | 1.00E-119 | 93.4  | 71.3 | 79.7 | hypothetical protein CARUB_v10020719mg           | gbpln | Capsella rubella     | AT1G79760.1   Symbols: DTA4   downstream target of AGL15-4   chr1:30012054-30013042 FORWARD LENGTH=299                                                                                                                                                                                                                                                  | 320  | 299  | 1.00E-118 | 93.4  | 67.8 | 74.4 |
| Rsa1.0_02043.1.g31771.t1 | dbj BAJ33663.1  unnamed protein product [Thelungiella halophila]                                                                                                                                                                                                                                                                                                                                            | 1458 | 1469 | 0         | 100.8 | 96.0 | 98.1 | unnamed protein product                          | ----  | ----                 | AT1G59870.1   Symbols: PEN3, PDR8, ATPDR8, ABCG36, ATABCG36   ABC-2 and Plant PDR ABC-type transporter family protein   chr1:22034661-22039844 FORWARD LENGTH=1469                                                                                                                                                                                      | 1458 | 1469 | 0         | 100.8 | 92.9 | 96.3 |
| Rsa1.0_02044.1.g31772.t1 | gb AAG51046.1 AC069473.8 gypsy/Ty-3 retroelement polyprotein; 69905-74404 [Arabidopsis thaliana] gi 10998138 dbj BAB03109.1  retroelement pol polyprotein [Arabidopsis thaliana]                                                                                                                                                                                                                            | 409  | 1499 | 9.00E-18  | 366.5 | 13.0 | 15.4 | gypsy/Ty-3 retroelement polyprotein; 69905-74404 | gbpln | Arabidopsis thaliana | #                                                                                                                                                                                                                                                                                                                                                       | #    | #    | #         | #     | #    | #    |
| Rsa1.0_02044.1.g31773.t1 | ref XP_002888245.1  hypothetical protein ARALYDRAFT_475439 [Arabidopsis lyrata subsp. lyrata] gi 297334086 gb EFH64504.1  hypothetical protein ARALYDRAFT_475439 [Arabidopsis lyrata subsp. lyrata]                                                                                                                                                                                                         | 2564 | 2607 | 0         | 101.7 | 86.3 | 91.3 | hypothetical protein ARALYDRAFT_475439           | gbpln | Arabidopsis lyrata   | AT1G58250.1   Symbols: SAB   Golgi-body localisation protein domain :RNA pol II promoter Fm27 protein domain   chr1:21587317-21601373 REVERSE LENGTH=2607                                                                                                                                                                                               | 2564 | 2607 | 0         | 101.7 | 86.3 | 91.3 |
| Rsa1.0_02045.1.g31774.t1 | ref NP_196765.2  omega-amidase [Arabidopsis thaliana] gi 19715574 gb AAL91613.1  AT5g12040/F14F18.210 [Arabidopsis thaliana] gi 20147243 gb AAM10335.1  AT5g12040/F14F18.210 [Arabidopsis thaliana] gi 332004371 gb AED91754.1  Nitrilase/cyanide hydratase and apolipoprotein N-acyltransferase family protein [Arabidopsis thaliana]                                                                      | 58   | 369  | 9.00E-18  | 636.2 | 74.1 | 77.6 | omega-amidase                                    | gbpln | Arabidopsis thaliana | AT5G12040.1   Symbols:   Nitrilase/cyanide hydratase and apolipoprotein N-acyltransferase family protein   chr5:3885162-388772 FORWARD LENGTH=369                                                                                                                                                                                                       | 58   | 369  | 2.00E-20  | 636.2 | 74.1 | 77.6 |
| Rsa1.0_02045.1.g31775.t1 | ref NP_196766.1  uncharacterized protein [Arabidopsis thaliana] gi 13877841 gb AAK43998.1 AF370183.1 putative serine rich protein [Arabidopsis thaliana] gi 7573372 emb CA897878.1  putative serine rich protein [Arabidopsis thaliana] gi 16323506 gb AAL15247.1  putative serine rich protein [Arabidopsis thaliana] gi 332004373 gb AED91756.1  uncharacterized protein AT5G12050 [Arabidopsis thaliana] | 360  | 362  | 1.00E-112 | 100.6 | 78.6 | 84.4 | uncharacterized protein                          | gbpln | Arabidopsis thaliana | AT5G12050.1   Symbols:   unknown protein; BEST Arabidopsis thaliana protein match is: unknown protein (TAIR:AT5G13980.1); Has 1807 Blast hits to 1807 proteins in 277 species: Archaea - 0; Bacteria - 0; Metazoa - 736; Fungi - 347; Plants - 385; Viruses - 0; Other Eukaryotes - 339 (source: NCBI BLINK).   chr5:3890213-3891301 FORWARD LENGTH=362 | 360  | 362  | 1.00E-114 | 100.6 | 78.6 | 84.4 |
| Rsa1.0_02045.1.g31776.t5 | gb EOA20213.1  hypothetical protein CARUB_v10000507mg [Capsella rubella]                                                                                                                                                                                                                                                                                                                                    | 589  | 605  | 0         | 102.7 | 73.7 | 83.2 | hypothetical protein CARUB_v10000507mg           | gbpln | Capsella rubella     | AT5G12120.1   Symbols:   Ubiquitin-associated/translation elongation factor EF1B protein   chr5:3916229-3918088 REVERSE LENGTH=619                                                                                                                                                                                                                      | 589  | 619  | 0         | 105.1 | 72.7 | 81.8 |
| Rsa1.0_02045.1.g31777.t1 | ref NP_568257.1  TerC integral membrane domain-containing protein [Arabidopsis thaliana] gi 332004383 gb AED91766.1  protein pigment defective 149 [Arabidopsis thaliana]                                                                                                                                                                                                                                   | 400  | 384  | 1.00E-150 | 96.0  | 73.0 | 79.5 | TerC integral membrane domain-containing protein | gbpln | Arabidopsis thaliana | AT5G12130.1   Symbols: PDE149, ATTERC   integral membrane TerC family protein   chr5:3919613-3922154 FORWARD LENGTH=384                                                                                                                                                                                                                                 | 400  | 384  | 1.00E-153 | 96.0  | 73.0 | 79.5 |
| Rsa1.0_02045.1.g31778.t1 | gb ADK13075.1  phytocystatin 1-2 [Brassica rapa subsp. pekinensis]                                                                                                                                                                                                                                                                                                                                          | 99   | 101  | 3.00E-45  | 102.0 | 93.9 | 97.0 | phytocystatin 1-2                                | gbpln | Brassica rapa        | AT5G12140.1   Symbols: ATCYS1, CYS1   cystatin-1   chr5:3923295-3923936 REVERSE LENGTH=101                                                                                                                                                                                                                                                              | 99   | 101  | 4.00E-47  | 102.0 | 91.9 | 96.0 |
| Rsa1.0_02045.1.g31779.t1 | ref XP_002871515.1  hypothetical protein ARALYDRAFT_488059 [Arabidopsis lyrata subsp. lyrata] gi 297317352 gb EFH47774.1  hypothetical protein ARALYDRAFT_488059 [Arabidopsis lyrata subsp. lyrata]                                                                                                                                                                                                         | 458  | 454  | 0         | 99.1  | 82.1 | 88.9 | hypothetical protein ARALYDRAFT_488059           | gbpln | Arabidopsis lyrata   | AT5G12170.2   Symbols: CLT3   CRT (chloroquine-resistance transporter)-like transporter 3   chr5:3931649-3934961 FORWARD LENGTH=452                                                                                                                                                                                                                     | 458  | 452  | 0         | 98.7  | 81.9 | 88.4 |
| Rsa1.0_02045.1.g31780.t1 | gb EOA22225.1  hypothetical protein CARUB_v10002812mg [Capsella rubella]                                                                                                                                                                                                                                                                                                                                    | 523  | 530  | 0         | 101.3 | 96.6 | 98.1 | hypothetical protein CARUB_v10002812mg           | gbpln | Capsella rubella     | AT5G12180.1   Symbols: CPK17   calcium-dependent protein kinase 17   chr5:3937136-3939323 FORWARD LENGTH=528                                                                                                                                                                                                                                            | 523  | 528  | 0         | 101.0 | 95.6 | 97.7 |
| Rsa1.0_02045.1.g31781.t1 | gb EOA19550.1  hypothetical protein CARUB_v10002551mg [Capsella rubella]                                                                                                                                                                                                                                                                                                                                    | 323  | 369  | 6.00E-85  | 114.2 | 46.4 | 52.9 | hypothetical protein CARUB_v10002551mg           | gbpln | Capsella rubella     | AT5G12270.1   Symbols:   2-oxoglutarate (2OG) and Fe(D)-dependent oxygenase superfamily protein   chr5:3970131-3971301 REVERSE LENGTH=360                                                                                                                                                                                                               | 323  | 360  | 7.00E-82  | 111.5 | 47.1 | 52.6 |
| Rsa1.0_02046.1.g31782.t1 | #                                                                                                                                                                                                                                                                                                                                                                                                           | #    | #    | #         | #     | #    | #    | -                                                | ----  | ----                 | #                                                                                                                                                                                                                                                                                                                                                       | #    | #    | #         | #     | #    | #    |

|                          |                                                                                                                                                                                                                                                                                                                                             |      |      |          |       |      |      |                                                                                |       |                      |                                                                                                                                                                                                                                                                                                                                                                                                                                                                                                                                                                                                  |      |     |          |       |      |      |
|--------------------------|---------------------------------------------------------------------------------------------------------------------------------------------------------------------------------------------------------------------------------------------------------------------------------------------------------------------------------------------|------|------|----------|-------|------|------|--------------------------------------------------------------------------------|-------|----------------------|--------------------------------------------------------------------------------------------------------------------------------------------------------------------------------------------------------------------------------------------------------------------------------------------------------------------------------------------------------------------------------------------------------------------------------------------------------------------------------------------------------------------------------------------------------------------------------------------------|------|-----|----------|-------|------|------|
| Rsa1.0_02046.1.g31783.t1 | ref[XP_002865850.1] kinase family protein [Arabidopsis lyrata subsp. lyrata] gi 297311685 gb EFH42109.1  kinase family protein [Arabidopsis lyrata subsp. lyrata]                                                                                                                                                                           | 740  | 812  | 0        | 109.7 | 74.9 | 85.1 | kinase family protein                                                          | gbpln | Arabidopsis lyrata   | AT5G51270.1   Symbols:   U-box domain-containing protein kinase family protein   chr5:20835137-20838262 REVERSE LENGTH=819                                                                                                                                                                                                                                                                                                                                                                                                                                                                       | 740  | 819 | 0        | 110.7 | 70.7 | 82.4 |
| Rsa1.0_02046.1.g31784.t1 | #                                                                                                                                                                                                                                                                                                                                           | #    | #    | #        | #     | #    | -    | ----                                                                           | ----  | ----                 | #                                                                                                                                                                                                                                                                                                                                                                                                                                                                                                                                                                                                | #    | #   | #        | #     | #    |      |
| Rsa1.0_02046.1.g31785.t1 | #                                                                                                                                                                                                                                                                                                                                           | #    | #    | #        | #     | #    | -    | ----                                                                           | ----  | ----                 | #                                                                                                                                                                                                                                                                                                                                                                                                                                                                                                                                                                                                | #    | #   | #        | #     | #    |      |
| Rsa1.0_02046.1.g31786.t1 | gb ABD65636.1  hypothetical protein 23.t00055 [Brassica oleracea]                                                                                                                                                                                                                                                                           | 100  | 414  | 1.00E-12 | 414.0 | 45.0 | 63.0 | hypothetical protein 23.t00055                                                 | gbpln | Brassica oleracea    | #                                                                                                                                                                                                                                                                                                                                                                                                                                                                                                                                                                                                | #    | #   | #        | #     | #    |      |
| Rsa1.0_02046.1.g31787.t1 | gb ABW81060.1  GagPol3 [Arabidopsis lyrata subsp. lyrata]                                                                                                                                                                                                                                                                                   | 131  | 1103 | 4.00E-32 | 842.0 | 53.4 | 67.9 | GagPol3                                                                        | gbpln | Arabidopsis lyrata   | #                                                                                                                                                                                                                                                                                                                                                                                                                                                                                                                                                                                                | #    | #   | #        | #     | #    |      |
| Rsa1.0_02046.1.g31788.t1 | emb CCD74471.1  myosin heavy chain-like protein [Arabidopsis halleri subsp. halleri]                                                                                                                                                                                                                                                        | 458  | 788  | 2.00E-11 | 172.1 | 10.0 | 16.4 | myosin heavy chain-like protein                                                | gbpln | Arabidopsis halleri  | AT1G51172.1   Symbols:   unknown protein; FUNCTIONS IN: molecular_function unknown; INVOLVED IN: biological_process unknown; LOCATED IN: cellular_component unknown; CONTAINS InterPro DOMAIN/s: Protein of unknown function DUF601 (InterPro:IPR006736); BEST Arabidopsis thaliana protein match is: Protein of unknown function, DUF601 (TAIR:AT1G46696.1); Has 1849 Blast hits to 1554 proteins in 272 species: Archae - 15; Bacteria - 116; Metazoa - 677; Fungi - 267; Plants - 154; Viruses - 11; Other Eukaryotes - 609 (source: NCBI BLINK).   chr1:18963205-18965571 FORWARD LENGTH=681 | 458  | 681 | 7.00E-11 | 148.7 | 8.1  | 14.8 |
| Rsa1.0_02046.1.g31789.t1 | #                                                                                                                                                                                                                                                                                                                                           | #    | #    | #        | #     | #    | -    | ----                                                                           | ----  | ----                 | #                                                                                                                                                                                                                                                                                                                                                                                                                                                                                                                                                                                                | #    | #   | #        | #     | #    |      |
| Rsa1.0_02046.1.g31790.t1 | ref[NP_199959.2] haloacid dehalogenase-like hydrolase domain-containing protein [Arabidopsis thaliana] gi 20260496 gb AAM13146.1  trehalose-6-phosphate phosphatase [Arabidopsis thaliana] gi 30725608 gb AAP37826.1  At5g51460 [Arabidopsis thaliana] gi 332008703 gb AED96086.1  trehalose-phosphate phosphatase A [Arabidopsis thaliana] | 379  | 384  | 0        | 101.3 | 86.5 | 94.2 | haloacid dehalogenase-like hydrolase domain-containing protein                 | gbpln | Arabidopsis thaliana | AT5G51460.2   Symbols: ATTPPA   Haloacid dehalogenase-like hydrolase (HAD) superfamily protein   chr5:20902266-20904292 FORWARD LENGTH=384                                                                                                                                                                                                                                                                                                                                                                                                                                                       | 379  | 384 | 0        | 101.3 | 86.5 | 94.2 |
| Rsa1.0_02047.1.g31791.t1 | gb ABD65057.1  hypothetical protein 27.t00123 [Brassica oleracea]                                                                                                                                                                                                                                                                           | 527  | 190  | 7.00E-34 | 36.1  | 19.7 | 22.8 | hypothetical protein 27.t00123                                                 | gbpln | Brassica oleracea    | #                                                                                                                                                                                                                                                                                                                                                                                                                                                                                                                                                                                                | #    | #   | #        | #     | #    |      |
| Rsa1.0_02047.1.g31792.t1 | gb ABD65091.1  hypothetical protein 31.t00049 [Brassica oleracea]                                                                                                                                                                                                                                                                           | 505  | 530  | 3.00E-83 | 105.0 | 39.4 | 55.4 | hypothetical protein 31.t00049                                                 | gbpln | Brassica oleracea    | #                                                                                                                                                                                                                                                                                                                                                                                                                                                                                                                                                                                                | #    | #   | #        | #     | #    |      |
| Rsa1.0_02047.1.g31793.t1 | #                                                                                                                                                                                                                                                                                                                                           | #    | #    | #        | #     | #    | -    | ----                                                                           | ----  | ----                 | #                                                                                                                                                                                                                                                                                                                                                                                                                                                                                                                                                                                                | #    | #   | #        | #     | #    |      |
| Rsa1.0_02047.1.g31794.t1 | emb CAN83791.1  hypothetical protein VITISV_031681 [Vitis vinifera]                                                                                                                                                                                                                                                                         | 402  | 968  | 2.00E-42 | 240.8 | 24.6 | 32.1 | hypothetical protein VITISV_031681                                             | gbpln | Vitis vinifera       | #                                                                                                                                                                                                                                                                                                                                                                                                                                                                                                                                                                                                | #    | #   | #        | #     | #    |      |
| Rsa1.0_02047.1.g31795.t1 | #                                                                                                                                                                                                                                                                                                                                           | #    | #    | #        | #     | #    | -    | ----                                                                           | ----  | ----                 | #                                                                                                                                                                                                                                                                                                                                                                                                                                                                                                                                                                                                | #    | #   | #        | #     | #    |      |
| Rsa1.0_02047.1.g31796.t1 | gb AAG52027.1 AC022456.8 Athila ORF 1, putative; 43045-40843 [Arabidopsis thaliana]                                                                                                                                                                                                                                                         | 686  | 530  | 3.00E-14 | 77.3  | 6.6  | 10.6 | Athila ORF 1, putative; 43045-40843                                            | gbpln | Arabidopsis thaliana | #                                                                                                                                                                                                                                                                                                                                                                                                                                                                                                                                                                                                | #    | #   | #        | #     | #    |      |
| Rsa1.0_02047.1.g31797.t1 | gb AAC28189.1  contains similarity to Arabidopsis thaliana retrotransposon Athila (GB:X81801) [Arabidopsis thaliana]                                                                                                                                                                                                                        | 247  | 940  | 6.00E-57 | 380.6 | 43.3 | 55.9 | contains similarity to Arabidopsis thaliana retrotransposon Athila (GB:X81801) | gbpln | Arabidopsis thaliana | #                                                                                                                                                                                                                                                                                                                                                                                                                                                                                                                                                                                                | #    | #   | #        | #     | #    |      |
| Rsa1.0_02047.1.g31798.t1 | gb AAD17398.1  putative non-LTR retroelement reverse transcriptase [Arabidopsis thaliana]                                                                                                                                                                                                                                                   | 1112 | 1225 | 0        | 110.2 | 43.2 | 59.7 | putative non-LTR retroelement reverse transcriptase                            | gbpln | Arabidopsis thaliana | AT4G29090.1   Symbols:   Ribonuclease H-like superfamily protein   chr4:14333528-14335255 FORWARD LENGTH=575                                                                                                                                                                                                                                                                                                                                                                                                                                                                                     | 1112 | 575 | 6.00E-36 | 51.7  | 12.1 | 20.0 |
| Rsa1.0_02047.1.g31799.t1 | #                                                                                                                                                                                                                                                                                                                                           | #    | #    | #        | #     | #    | -    | ----                                                                           | ----  | ----                 | #                                                                                                                                                                                                                                                                                                                                                                                                                                                                                                                                                                                                | #    | #   | #        | #     | #    |      |
| Rsa1.0_02048.1.g31800.t1 | #                                                                                                                                                                                                                                                                                                                                           | #    | #    | #        | #     | #    | -    | ----                                                                           | ----  | ----                 | #                                                                                                                                                                                                                                                                                                                                                                                                                                                                                                                                                                                                | #    | #   | #        | #     | #    |      |
| Rsa1.0_02048.1.g31801.t1 | #                                                                                                                                                                                                                                                                                                                                           | #    | #    | #        | #     | #    | -    | ----                                                                           | ----  | ----                 | #                                                                                                                                                                                                                                                                                                                                                                                                                                                                                                                                                                                                | #    | #   | #        | #     | #    |      |
| Rsa1.0_02048.1.g31802.t6 | #                                                                                                                                                                                                                                                                                                                                           | #    | #    | #        | #     | #    | -    | ----                                                                           | ----  | ----                 | #                                                                                                                                                                                                                                                                                                                                                                                                                                                                                                                                                                                                | #    | #   | #        | #     | #    |      |
| Rsa1.0_02048.1.g31803.t6 | emb CAN79562.1  hypothetical protein VITISV_020822 [Vitis vinifera]                                                                                                                                                                                                                                                                         | 859  | 1027 | 0        | 119.6 | 48.2 | 66.0 | hypothetical protein VITISV_020822                                             | gbpln | Vitis vinifera       | #                                                                                                                                                                                                                                                                                                                                                                                                                                                                                                                                                                                                | #    | #   | #        | #     | #    |      |
| Rsa1.0_02048.1.g31804.t1 | emb CAN67735.1  hypothetical protein VITISV_012279 [Vitis vinifera]                                                                                                                                                                                                                                                                         | 601  | 476  | 2.00E-28 | 79.2  | 19.8 | 29.5 | hypothetical protein VITISV_012279                                             | gbpln | Vitis vinifera       | #                                                                                                                                                                                                                                                                                                                                                                                                                                                                                                                                                                                                | #    | #   | #        | #     | #    |      |
| Rsa1.0_02048.1.g31805.t1 | emb CAB39637.1  putative protein [Arabidopsis thaliana] gi 7267665 emb CAB78093.1  putative protein [Arabidopsis thaliana] gi 91805577 gb ABE65517.1  hypothetical protein At4g09700 [Arabidopsis thaliana]                                                                                                                                 | 329  | 371  | 3.00E-59 | 112.8 | 35.0 | 50.8 | putative protein                                                               | gbpln | Arabidopsis thaliana | AT5G36228.1   Symbols:   nucleic acid binding:zinc ion binding   chr5:14271691-14272776 FORWARD LENGTH=361                                                                                                                                                                                                                                                                                                                                                                                                                                                                                       | 329  | 361 | 7.00E-21 | 109.7 | 18.8 | 30.7 |

|                          |                                                                                                                                                                                                                                                                                                                                                                                                                                                                                                                          |      |      |           |        |      |      |                                                 |       |                      |                                                                                                                                                                                                                                                                                                                                                                                                  |      |     |           |       |      |      |
|--------------------------|--------------------------------------------------------------------------------------------------------------------------------------------------------------------------------------------------------------------------------------------------------------------------------------------------------------------------------------------------------------------------------------------------------------------------------------------------------------------------------------------------------------------------|------|------|-----------|--------|------|------|-------------------------------------------------|-------|----------------------|--------------------------------------------------------------------------------------------------------------------------------------------------------------------------------------------------------------------------------------------------------------------------------------------------------------------------------------------------------------------------------------------------|------|-----|-----------|-------|------|------|
| Rsa1.0_02048.1.g31806.t1 | refXP_002893916.1 co-chaperone grpE family protein [Arabidopsis lyrata subsp. lyrata] gi 297339758 gb EFH70175.1  co-chaperone grpE family protein [Arabidopsis lyrata subsp. lyrata]                                                                                                                                                                                                                                                                                                                                    | 267  | 272  | 8.00E-96  | 101.9  | 69.7 | 79.4 | co-chaperone grpE family protein                | gbpln | Arabidopsis lyrata   | AT1G36390.2   Symbols:   Co-chaperone GrpE family protein   chr1:13701811-13703524 REVERSE LENGTH=279                                                                                                                                                                                                                                                                                            | 267  | 279 | 2.00E-95  | 104.5 | 66.7 | 75.3 |
| Rsa1.0_02048.1.g31807.t1 | # # # # # # # #                                                                                                                                                                                                                                                                                                                                                                                                                                                                                                          |      |      |           |        |      |      | -                                               | ----  | ----                 | #                                                                                                                                                                                                                                                                                                                                                                                                | #    | #   | #         | #     | #    | #    |
| Rsa1.0_02048.1.g31808.t5 | gb AAF79618.1 AC027665_19 F5M15.26 [Arabidopsis thaliana]                                                                                                                                                                                                                                                                                                                                                                                                                                                                | 1152 | 1838 | 0         | 159.5  | 31.7 | 41.8 | F5M15.26                                        | gbpln | Arabidopsis thaliana | #                                                                                                                                                                                                                                                                                                                                                                                                | #    | #   | #         | #     | #    | #    |
| Rsa1.0_02048.1.g31809.t3 | gb ABW81018.1  gag-pol polymerase [Arabidopsis lyrata subsp. lyrata]                                                                                                                                                                                                                                                                                                                                                                                                                                                     | 905  | 672  | 4.00E-62  | 74.3   | 17.6 | 26.6 | gag-pol polymerase                              | gbpln | Arabidopsis lyrata   | #                                                                                                                                                                                                                                                                                                                                                                                                | #    | #   | #         | #     | #    | #    |
| Rsa1.0_02049.1.g31810.t1 | gb AAD19784.1  putative retroelement pol polyprotein [Arabidopsis thaliana]                                                                                                                                                                                                                                                                                                                                                                                                                                              | 97   | 1501 | 4.00E-11  | 1547.4 | 47.4 | 70.1 | putative retroelement pol polyprotein           | gbpln | Arabidopsis thaliana | #                                                                                                                                                                                                                                                                                                                                                                                                | #    | #   | #         | #     | #    | #    |
| Rsa1.0_02049.1.g31811.t3 | gb AAD43146.1 AC007504.1 Hypothetical Protein [Arabidopsis thaliana]                                                                                                                                                                                                                                                                                                                                                                                                                                                     | 488  | 258  | 1.00E-78  | 52.9   | 30.3 | 35.2 | Hypothetical Protein                            | gbpln | Arabidopsis thaliana | AT3G42170.1   Symbols:   BED zinc finger hAT family dimerisation domain   chr3:14321839-14323928 FORWARD LENGTH=696                                                                                                                                                                                                                                                                              | 488  | 696 | 2.00E-28  | 142.6 | 15.6 | 25.4 |
| Rsa1.0_02049.1.g31812.t5 | gb EOA24093.1  hypothetical protein CARUB_v10017323mg, partial [Capsella rubella]                                                                                                                                                                                                                                                                                                                                                                                                                                        | 406  | 423  | 1.00E-103 | 104.2  | 51.5 | 66.7 | hypothetical protein CARUB_v10017323mg, partial | gbpln | Capsella rubella     | AT3G26010.1   Symbols:   Galactose oxidase/kelch repeat superfamily protein   chr3:9511901-9513145 FORWARD LENGTH=414                                                                                                                                                                                                                                                                            | 406  | 414 | 1.00E-105 | 102.0 | 51.7 | 67.7 |
| Rsa1.0_02049.1.g31813.t1 | refXP_002865557.1  predicted protein [Arabidopsis lyrata subsp. lyrata] gi 297311392 gb EFH41816.1  predicted protein [Arabidopsis lyrata subsp. lyrata]                                                                                                                                                                                                                                                                                                                                                                 | 110  | 143  | 7.00E-16  | 130.0  | 38.2 | 54.5 | predicted protein                               | gbpln | Arabidopsis lyrata   | #                                                                                                                                                                                                                                                                                                                                                                                                | #    | #   | #         | #     | #    | #    |
| Rsa1.0_02049.1.g31814.t1 | gb ABD65076.1  SLL3 ORF2 protein, putative [Brassica oleracea]                                                                                                                                                                                                                                                                                                                                                                                                                                                           | 350  | 443  | 3.00E-71  | 126.6  | 42.3 | 57.1 | SLL3 ORF2 protein, putative                     | gbpln | Brassica oleracea    | AT4G03740.1   Symbols:   unknown protein; Has 1807 Blast hits to 1807 proteins in 277 species: Archae - 0; Bacteria - 0; Metazoa - 736; Fungi - 347; Plants - 385; Viruses - 0; Other Eukaryotes - 339 (source: NCBI BLink).   chr4:1661992-1663515 REVERSE LENGTH=345                                                                                                                           | 350  | 345 | 2.00E-14  | 98.6  | 24.9 | 40.3 |
| Rsa1.0_02049.1.g31815.t1 | refNP_197490.1  putative PRLI-interacting factor [Arabidopsis thaliana] gi 222422845 dbj BAH19409.1  AT5G19900 [Arabidopsis thaliana] gi 332005380 gb AED92763.1  putative PRLI-interacting factor [Arabidopsis thaliana]                                                                                                                                                                                                                                                                                                | 504  | 494  | 6.00E-85  | 98.0   | 41.1 | 51.2 | putative PRLI-interacting factor                | gbpln | Arabidopsis thaliana | AT5G19900.1   Symbols:   PRLI-interacting factor, putative   chr5:6728561-6730045 REVERSE LENGTH=494                                                                                                                                                                                                                                                                                             | 504  | 494 | 1.00E-87  | 98.0  | 41.1 | 51.2 |
| Rsa1.0_02050.1.g31816.t1 | dbj BAE98930.1  hypothetical protein [Arabidopsis thaliana]                                                                                                                                                                                                                                                                                                                                                                                                                                                              | 219  | 735  | 2.00E-17  | 335.6  | 19.2 | 19.6 | hypothetical protein                            | gbpln | Arabidopsis thaliana | AT2G40400.2   Symbols:   Protein of unknown function (DUF399 and DUF3411)   chr2:16869363-16872569 FORWARD LENGTH=735                                                                                                                                                                                                                                                                            | 219  | 735 | 8.00E-20  | 335.6 | 19.2 | 19.6 |
| Rsa1.0_02050.1.g31817.t6 | refXP_002874656.1  hypothetical protein ARALYDRAFT_911406 [Arabidopsis lyrata subsp. lyrata] gi 297320493 gb EFH50915.1  hypothetical protein ARALYDRAFT_911406 [Arabidopsis lyrata subsp. lyrata]                                                                                                                                                                                                                                                                                                                       | 1167 | 983  | 0         | 84.2   | 62.1 | 69.6 | hypothetical protein ARALYDRAFT_911406          | gbpln | Arabidopsis lyrata   | AT4G10930.1   Symbols:   unknown protein; LOCATED IN: cellular_component unknown; EXPRESSED IN: 23 plant structures; EXPRESSED DURING: 14 growth stages; Has 30201 Blast hits to 17322 proteins in 780 species: Archae - 12; Bacteria - 1396; Metazoa - 17338; Fungi - 3422; Plants - 5037; Viruses - 0; Other Eukaryotes - 2996 (source: NCBI BLink).   chr4:6705178-6708846 REVERSE LENGTH=984 | 1167 | 984 | 0         | 84.3  | 61.3 | 68.4 |
| Rsa1.0_02050.1.g31818.t1 | dbj BAB41214.1  putative transcriptional coactivator [Brassica rapa]                                                                                                                                                                                                                                                                                                                                                                                                                                                     | 162  | 165  | 4.00E-67  | 101.9  | 89.5 | 95.7 | putative transcriptional coactivator            | gbpln | Brassica rapa        | AT4G10920.2   Symbols:   KELP   transcriptional coactivator p15 (PC4) family protein (KELP)   chr4:6697894-6699103 REVERSE LENGTH=165                                                                                                                                                                                                                                                            | 162  | 165 | 1.00E-60  | 101.9 | 71.0 | 82.1 |
| Rsa1.0_02050.1.g31819.t1 | refNP_179998.1  myrcene/ocimene synthase [Arabidopsis thaliana] gi 75216785 sp Q9ZUH4.1 TPSA_ARATH RecName: Full=Tricyclene synthase, chloroplastic; AltName: Full=(E)-beta-ocimene synthase Oe23; AltName: Full=Myrcene synthase 1; AltName: Full=Terpenoid synthase 10; Short=AtTPS10; Flags: Precursor gi 4115381 gb AAD03382.1  putative limonene cyclase [Arabidopsis thaliana] gi 194306668 gb ACF41947.1  At2g24210 [Arabidopsis thaliana] gi 330252449 gb AEC07543.1  terpene synthase 10 [Arabidopsis thaliana] | 596  | 591  | 0         | 99.2   | 74.7 | 85.6 | myrcene/ocimene synthase                        | gbpln | Arabidopsis thaliana | AT2G24210.1   Symbols:   TPS10   terpene synthase 10   chr2:10294330-10297401 FORWARD LENGTH=591                                                                                                                                                                                                                                                                                                 | 596  | 591 | 0         | 99.2  | 74.7 | 85.6 |
| Rsa1.0_02050.1.g31820.t1 | gb AAG50806.1 AC079281.8 unknown protein [Arabidopsis thaliana]                                                                                                                                                                                                                                                                                                                                                                                                                                                          | 1171 | 1213 | 0         | 103.6  | 38.5 | 57.0 | unknown protein                                 | gbpln | Arabidopsis thaliana | AT1G43760.1   Symbols:   DNase I-like superfamily protein   chr1:16528880-16531065 REVERSE LENGTH=626                                                                                                                                                                                                                                                                                            | 1171 | 626 | 5.00E-62  | 53.5  | 11.3 | 18.3 |

|                          |                                                                                                                                                                                                                                                                                                                                                                                                                                                                                                                                                                                                  |     |      |           |       |      |      |                                                                                |       |                      |                                                                                                                                                                                                                                                                                                                                                                                                                                                                                                                                                                                                                                                 |     |     |           |       |      |      |
|--------------------------|--------------------------------------------------------------------------------------------------------------------------------------------------------------------------------------------------------------------------------------------------------------------------------------------------------------------------------------------------------------------------------------------------------------------------------------------------------------------------------------------------------------------------------------------------------------------------------------------------|-----|------|-----------|-------|------|------|--------------------------------------------------------------------------------|-------|----------------------|-------------------------------------------------------------------------------------------------------------------------------------------------------------------------------------------------------------------------------------------------------------------------------------------------------------------------------------------------------------------------------------------------------------------------------------------------------------------------------------------------------------------------------------------------------------------------------------------------------------------------------------------------|-----|-----|-----------|-------|------|------|
| Rsa1.0_02050.1.g31821.t1 | ref[XP_002872542.1] F8M12.18 protein [Arabidopsis lyrata subsp. lyrata] gi 297318379 gb EFH48801.1  F8M12.18 protein [Arabidopsis lyrata subsp. lyrata]                                                                                                                                                                                                                                                                                                                                                                                                                                          | 75  | 75   | 6.00E-30  | 100.0 | 89.3 | 93.3 | F8M12.18 protein                                                               | gbpln | Arabidopsis lyrata   | AT4G31830.1   Symbols:   unknown protein; Has 42 Blast hits to 42 proteins in 10 species: Archae - 0; Bacteria - 0; Metazoa - 0; Fungi - 0; Plants - 42; Viruses - 0; Other Eukaryotes - 0 (source: NCBI BLink).   chr4:15400803-15401105 REVERSE LENGTH=100                                                                                                                                                                                                                                                                                                                                                                                    | 75  | 100 | 5.00E-11  | 133.3 | 42.7 | 52.0 |
| Rsa1.0_02050.1.g31822.t1 | ref[XP_002872539.1] nodulin MtN3 family protein [Arabidopsis lyrata subsp. lyrata] gi 297318379 gb EFH48798.1  nodulin MtN3 family protein [Arabidopsis lyrata subsp. lyrata]                                                                                                                                                                                                                                                                                                                                                                                                                    | 161 | 258  | 9.00E-66  | 160.2 | 76.4 | 87.6 | nodulin MtN3 family protein                                                    | gbpln | Arabidopsis lyrata   | AT4G10850.1   Symbols: SWEET7, AT5WET7   Nodulin MtN3 family protein   chr4:6675068-6676718 FORWARD LENGTH=258                                                                                                                                                                                                                                                                                                                                                                                                                                                                                                                                  | 161 | 258 | 2.00E-66  | 160.2 | 74.5 | 86.3 |
| Rsa1.0_02051.1.g31823.t1 | ref[NP_198901.1] urophorphyrin methylase 1 [Arabidopsis thaliana] gi 18087581 gb AAL58921.1 AF462833_1 AT5g40850/MHK7.8 [Arabidopsis thaliana] gi 1146165 gb AAB92676.1  urophorphyrin III methylase [Arabidopsis thaliana] gi 10177964 dbj BAB11347.1  urophorphyrin III methylase [Arabidopsis thaliana] gi 16604390 gb AAL24201.1  AT5g40850/MHK7.8 [Arabidopsis thaliana] gi 19310499 gb AAL84983.1  AT5g40850/MHK7.8 [Arabidopsis thaliana] gi 22655404 gb AAM98294.1  At5g40850/MHK7.8 [Arabidopsis thaliana] gi 332007223 gb AED94606.1  urophorphyrin methylase 1 [Arabidopsis thaliana] | 357 | 369  | 1.00E-175 | 103.4 | 88.5 | 91.6 | urophorphyrin methylase 1                                                      | gbpln | Arabidopsis thaliana | AT5G40850.1   Symbols: UPM1   urophorphyrin methylase 1   chr5:16367205-16368724 FORWARD LENGTH=369                                                                                                                                                                                                                                                                                                                                                                                                                                                                                                                                             | 357 | 369 | 1.00E-178 | 103.4 | 88.5 | 91.6 |
| Rsa1.0_02051.1.g31824.t1 | ref[XP_002870744.1] hypothetical protein ARALYDRAFT_330513 [Arabidopsis lyrata subsp. lyrata] gi 297316580 gb EFH47003.1  hypothetical protein ARALYDRAFT_330513 [Arabidopsis lyrata subsp. lyrata]                                                                                                                                                                                                                                                                                                                                                                                              | 655 | 365  | 5.00E-75  | 55.7  | 27.9 | 36.3 | hypothetical protein ARALYDRAFT_330513                                         | gbpln | Arabidopsis lyrata   | AT5G39880.1   Symbols:   unknown protein; FUNCTIONS IN: molecular_function unknown; INVOLVED IN: biological_process unknown; LOCATED IN: endomembrane system; EXPRESSED IN: 10 plant structures; EXPRESSED DURING: L mature pollen stage, M germinated pollen stage, 4 anthesis, C globular stage, petal differentiation and expansion stage; BEST Arabidopsis thaliana protein match is: unknown protein (TAIR:AT3G28750.1); Has 25 Blast hits to 25 proteins in 3 species: Archae - 0; Bacteria - 2; Metazoa - 0; Fungi - 0; Plants - 23; Viruses - 0; Other Eukaryotes - 0 (source: NCBI BLink).   chr5:15970965-15972056 FORWARD LENGTH=363 | 655 | 363 | 5.00E-74  | 55.4  | 28.4 | 36.0 |
| Rsa1.0_02051.1.g31825.t1 | pir[[T00833 RNA-directed DNA polymerase homolog T13L16.7 - Arabidopsis thaliana (fragment)                                                                                                                                                                                                                                                                                                                                                                                                                                                                                                       | 872 | 1365 | 0         | 156.5 | 46.4 | 62.7 | RNA-directed DNA polymerase homolog T13L16.7 - Arabidopsis thaliana (fragment) | ----- | -----                | AT4G29090.1   Symbols:   Ribonuclease H-like superfamily protein   chr4:14333528-14335255 FORWARD LENGTH=575                                                                                                                                                                                                                                                                                                                                                                                                                                                                                                                                    | 872 | 575 | 2.00E-89  | 65.9  | 22.4 | 34.3 |
| Rsa1.0_02051.1.g31826.t1 | gb[EOA36429.1] hypothetical protein CARUB_v10010962mg [Capsella rubella]                                                                                                                                                                                                                                                                                                                                                                                                                                                                                                                         | 183 | 556  | 4.00E-17  | 303.8 | 30.6 | 45.9 | hypothetical protein CARUB_v10010962mg                                         | gbpln | Capsella rubella     | AT1G52950.1   Symbols:   Nucleic acid-binding, OB-fold-like protein   chr1:19725483-19728007 FORWARD LENGTH=566                                                                                                                                                                                                                                                                                                                                                                                                                                                                                                                                 | 183 | 566 | 4.00E-17  | 309.3 | 29.5 | 47.5 |
| Rsa1.0_02051.1.g31827.t1 | gb[EOA17797.1] hypothetical protein CARUB_v10006191mg [Capsella rubella]                                                                                                                                                                                                                                                                                                                                                                                                                                                                                                                         | 255 | 236  | 3.00E-51  | 92.5  | 52.2 | 62.0 | hypothetical protein CARUB_v10006191mg                                         | gbpln | Capsella rubella     | AT5G40860.1   Symbols:   unknown protein; BEST Arabidopsis thaliana protein match is: unknown protein (TAIR:AT3G27210.1); Has 69 Blast hits to 69 proteins in 12 species: Archae - 0; Bacteria - 0; Metazoa - 0; Fungi - 0; Plants - 67; Viruses - 0; Other Eukaryotes - 2 (source: NCBI BLink).   chr5:16370470-16371985 FORWARD LENGTH=246                                                                                                                                                                                                                                                                                                    | 255 | 246 | 4.00E-52  | 96.5  | 48.6 | 60.0 |

|                          |                                                                                                                                                                                                                                                                                                                                                                                                                                                                                                                                                                                                                                                                                                                                                                                                                                                                                                        |     |      |           |       |      |       |                                                 |       |                      |                                                                                                                                                   |     |     |           |       |      |      |
|--------------------------|--------------------------------------------------------------------------------------------------------------------------------------------------------------------------------------------------------------------------------------------------------------------------------------------------------------------------------------------------------------------------------------------------------------------------------------------------------------------------------------------------------------------------------------------------------------------------------------------------------------------------------------------------------------------------------------------------------------------------------------------------------------------------------------------------------------------------------------------------------------------------------------------------------|-----|------|-----------|-------|------|-------|-------------------------------------------------|-------|----------------------|---------------------------------------------------------------------------------------------------------------------------------------------------|-----|-----|-----------|-------|------|------|
| Rsa1.0_02051.1.g31828.t1 | ref NP_198903.1  putative uracil phosphoribosyltransferase [Arabidopsis thaliana]<br>gi 75333998 sp Q9FKS0.1 UKL1_ARATH<br>RecName: Full=Uridine kinase-like protein 1, chloroplastic; Includes: RecName: Full=Uridine kinase; Short=UK; Includes: RecName: Full=Putative uracil phosphoribosyltransferase; Short=UPRTase; AltName: Full=UMP pyrophosphorylase; Flags: Precursor<br>gi 10177966 dbj BAB11349.1  uridine kinase-like protein [Arabidopsis thaliana] gi 26983834 gb AA86169.1  putative uridine kinase [Arabidopsis thaliana] gi 29465725 gb AAM10488.1  uracil phosphoribosyltransferase [Arabidopsis thaliana] gi 332007227 gb AED94610.1  putative uracil phosphoribosyltransferase [Arabidopsis thaliana] emb CAB39638.1  RNA-directed DNA polymerase-like protein [Arabidopsis thaliana] gi 7267666 emb CAB78094.1  RNA-directed DNA polymerase-like protein [Arabidopsis thaliana] | 484 | 486  | 0         | 100.4 | 91.7 | 95.5  | putative uracil phosphoribosyltransferase       | gbpln | Arabidopsis thaliana | AT5G40870.1   Symbols: ATUK/UPRT1, UKL1, UK/UPRT1   uridine kinase/uracil phosphoribosyltransferase 1   chr5:16375021-16378384 FORWARD LENGTH=486 | 484 | 486 | 0         | 100.4 | 91.7 | 95.5 |
| Rsa1.0_02051.1.g31829.t1 | ref XP_002883897.1  UDP-glucosyl transferase 73B5 [Arabidopsis lyrata subsp. lyrata] gi 297329737 gb EFH60156.1  UDP-glucosyl transferase 73B5 [Arabidopsis lyrata subsp. lyrata]                                                                                                                                                                                                                                                                                                                                                                                                                                                                                                                                                                                                                                                                                                                      | 760 | 1274 | 1.00E-174 | 167.6 | 42.4 | 54.3  | RNA-directed DNA polymerase-like protein        | gbpln | Arabidopsis thaliana | AT4G29090.1   Symbols: Ribonuclease H-like superfamily protein   chr4:14333528-14335255 FORWARD LENGTH=575                                        | 760 | 575 | 2.00E-71  | 75.7  | 23.8 | 37.1 |
| Rsa1.0_02052.1.g31830.t1 | #                                                                                                                                                                                                                                                                                                                                                                                                                                                                                                                                                                                                                                                                                                                                                                                                                                                                                                      | #   | #    | #         | #     | #    | -     | -                                               | ----  | ----                 | #                                                                                                                                                 | #   | #   | #         | #     | #    | #    |
| Rsa1.0_02052.1.g31831.t1 | #                                                                                                                                                                                                                                                                                                                                                                                                                                                                                                                                                                                                                                                                                                                                                                                                                                                                                                      | #   | #    | #         | #     | #    | -     | -                                               | ----  | ----                 | #                                                                                                                                                 | #   | #   | #         | #     | #    | #    |
| Rsa1.0_02052.1.g31832.t1 | #                                                                                                                                                                                                                                                                                                                                                                                                                                                                                                                                                                                                                                                                                                                                                                                                                                                                                                      | #   | #    | #         | #     | #    | -     | -                                               | ----  | ----                 | #                                                                                                                                                 | #   | #   | #         | #     | #    | #    |
| Rsa1.0_02052.1.g31833.t1 | ref XP_002883897.1  UDP-glucosyl transferase 73B5 [Arabidopsis lyrata subsp. lyrata] gi 297329737 gb EFH60156.1  UDP-glucosyl transferase 73B5 [Arabidopsis lyrata subsp. lyrata]                                                                                                                                                                                                                                                                                                                                                                                                                                                                                                                                                                                                                                                                                                                      | 473 | 484  | 0         | 102.3 | 79.5 | 89.4  | UDP-glucosyl transferase 73B5                   | gbpln | Arabidopsis lyrata   | AT2G15480.1   Symbols: UGT73B5   UDP-glucosyl transferase 73B5   chr2:6758817-6760452 FORWARD LENGTH=484                                          | 473 | 484 | 0         | 102.3 | 77.6 | 87.5 |
| Rsa1.0_02052.1.g31834.t1 | gb EOA14896.1  hypothetical protein CARUB_v10028225mg [Capsella rubella]                                                                                                                                                                                                                                                                                                                                                                                                                                                                                                                                                                                                                                                                                                                                                                                                                               | 274 | 261  | 2.00E-88  | 95.3  | 67.2 | 70.8  | hypothetical protein CARUB_v10028225mg          | gbpln | Capsella rubella     | AT5G49940.1   Symbols: NFU2, ATCNFU2   NIFU-like protein 2   chr5:20315464-20317228 FORWARD LENGTH=235                                            | 274 | 235 | 8.00E-91  | 85.8  | 66.1 | 72.3 |
| Rsa1.0_02052.1.g31835.t1 | ref XP_004292625.1  PREDICTED: uncharacterized protein LOC101299743 [Fragaria vesca subsp. vesca]                                                                                                                                                                                                                                                                                                                                                                                                                                                                                                                                                                                                                                                                                                                                                                                                      | 238 | 746  | 6.00E-12  | 313.4 | 23.5 | 33.2  | PREDICTED: uncharacterized protein LOC101299743 | gbpln | Fragaria vesca       | #                                                                                                                                                 | #   | #   | #         | #     | #    | #    |
| Rsa1.0_02052.1.g31836.t1 | #                                                                                                                                                                                                                                                                                                                                                                                                                                                                                                                                                                                                                                                                                                                                                                                                                                                                                                      | #   | #    | #         | #     | #    | -     | -                                               | ----  | ----                 | AT5G31412.1   Symbols: hAT transposon superfamily protein   chr5:11541463-11543768 REVERSE LENGTH=433                                             | 291 | 433 | 3.00E-12  | 148.8 | 16.8 | 23.4 |
| Rsa1.0_02052.1.g31837.t1 | ref XP_002865766.1  hypothetical protein ARALYDRAFT_495050 [Arabidopsis lyrata subsp. lyrata] gi 297311601 gb EFH42025.1  hypothetical protein ARALYDRAFT_495050 [Arabidopsis lyrata subsp. lyrata]                                                                                                                                                                                                                                                                                                                                                                                                                                                                                                                                                                                                                                                                                                    | 378 | 537  | 0         | 142.1 | 83.3 | 90.7  | hypothetical protein ARALYDRAFT_495050          | gbpln | Arabidopsis lyrata   | AT5G49950.1   Symbols: alpha/beta-Hydrolases superfamily protein   chr5:20319871-20323552 REVERSE LENGTH=537                                      | 378 | 537 | 0         | 142.1 | 82.3 | 90.5 |
| Rsa1.0_02053.1.g31838.t1 | gb EOA34643.1  hypothetical protein CARUB_v10022207mg [Capsella rubella]                                                                                                                                                                                                                                                                                                                                                                                                                                                                                                                                                                                                                                                                                                                                                                                                                               | 633 | 645  | 0         | 101.9 | 85.9 | 89.1  | hypothetical protein CARUB_v10022207mg          | gbpln | Capsella rubella     | AT1G79750.1   Symbols: ATNADP-ME4, NADP-ME4   NADP-malic enzyme 4   chr1:30007655-30011179 REVERSE LENGTH=646                                     | 633 | 646 | 0         | 102.1 | 85.0 | 88.6 |
| Rsa1.0_02053.1.g31839.t1 | gb EOA35230.1  hypothetical protein CARUB_v10020390mg, partial [Capsella rubella]                                                                                                                                                                                                                                                                                                                                                                                                                                                                                                                                                                                                                                                                                                                                                                                                                      | 363 | 408  | 1.00E-169 | 112.4 | 80.2 | 86.0  | hypothetical protein CARUB_v10020390mg, partial | gbpln | Capsella rubella     | AT1G75880.2   Symbols:   SGNH hydrolase-type esterase superfamily protein   chr1:28490564-28492298 FORWARD LENGTH=374                             | 363 | 374 | 1.00E-171 | 103.0 | 80.4 | 87.1 |
| Rsa1.0_02053.1.g31840.t1 | emb CAB39638.1  RNA-directed DNA polymerase-like protein [Arabidopsis thaliana] gi 7267666 emb CAB78094.1  RNA-directed DNA polymerase-like protein [Arabidopsis thaliana]                                                                                                                                                                                                                                                                                                                                                                                                                                                                                                                                                                                                                                                                                                                             | 155 | 1274 | 4.00E-24  | 821.9 | 44.5 | 61.9  | RNA-directed DNA polymerase-like protein        | gbpln | Arabidopsis thaliana | #                                                                                                                                                 | #   | #   | #         | #     | #    | #    |
| Rsa1.0_02053.1.g31841.t1 | #                                                                                                                                                                                                                                                                                                                                                                                                                                                                                                                                                                                                                                                                                                                                                                                                                                                                                                      | #   | #    | #         | #     | #    | -     | -                                               | ----  | ----                 | #                                                                                                                                                 | #   | #   | #         | #     | #    | #    |
| Rsa1.0_02053.1.g31842.t1 | ref XP_002887619.1  T4O12.13 [Arabidopsis lyrata subsp. lyrata] gi 297333460 gb EFH63878.1  T4O12.13 [Arabidopsis lyrata subsp. lyrata]                                                                                                                                                                                                                                                                                                                                                                                                                                                                                                                                                                                                                                                                                                                                                                | 327 | 688  | 1.00E-152 | 210.4 | 80.4 | 90.5  | T4O12.13                                        | gbpln | Arabidopsis lyrata   | AT1G75900.1   Symbols:   GDSL-like Lipase/Acylhydrolase superfamily protein   chr1:28499179-28500943 FORWARD LENGTH=364                           | 327 | 364 | 1.00E-153 | 111.3 | 81.3 | 89.9 |
| Rsa1.0_02053.1.g31843.t1 | dbj BAB85608.1  kinetochore protein [Brassica juncea]                                                                                                                                                                                                                                                                                                                                                                                                                                                                                                                                                                                                                                                                                                                                                                                                                                                  | 160 | 160  | 7.00E-88  | 100.0 | 99.4 | 100.0 | kinetochore protein                             | gbpln | Brassica juncea      | AT1G75950.1   Symbols: SKP1, ASK1, ATSKP1, SKP1A, LJP1   S phase kinase-associated protein 1   chr1:28516715-28517454 FORWARD LENGTH=160          | 160 | 160 | 9.00E-80  | 100.0 | 93.8 | 98.1 |
| Rsa1.0_02053.1.g31844.t1 | dbj BAJ34235.1  unnamed protein product [Thellungiella halophila]                                                                                                                                                                                                                                                                                                                                                                                                                                                                                                                                                                                                                                                                                                                                                                                                                                      | 214 | 230  | 1.00E-105 | 107.5 | 88.8 | 93.5  | unnamed protein product                         | ----  | ----                 | AT1G75980.1   Symbols:   Single hybrid motif superfamily protein   chr1:28522836-28524302 REVERSE LENGTH=225                                      | 214 | 225 | 1.00E-101 | 105.1 | 84.6 | 92.5 |



|                          |                                                                                                                                                                                                     |      |      |           |       |      |      |                                        |       |                      |                                                                                                                                                                                                                                                                                                                                                                                                                                                                                                                                                                                                  |     |      |           |       |      |      |
|--------------------------|-----------------------------------------------------------------------------------------------------------------------------------------------------------------------------------------------------|------|------|-----------|-------|------|------|----------------------------------------|-------|----------------------|--------------------------------------------------------------------------------------------------------------------------------------------------------------------------------------------------------------------------------------------------------------------------------------------------------------------------------------------------------------------------------------------------------------------------------------------------------------------------------------------------------------------------------------------------------------------------------------------------|-----|------|-----------|-------|------|------|
| Rsa1.0_02054.1.g31845.t1 | gb AAF87143.1 AC002423.8 T23E23.16 [Arabidopsis thaliana]                                                                                                                                           | 507  | 653  | 2.00E-93  | 128.8 | 37.9 | 55.4 | T23E23.16                              | gbpln | Arabidopsis thaliana | AT3G24255.1   Symbols:   RNA-directed DNA polymerase (reverse transcriptase)-related family protein   chr3:8789471-8793208 FORWARD LENGTH=746                                                                                                                                                                                                                                                                                                                                                                                                                                                    | 507 | 746  | 2.00E-19  | 147.1 | 10.1 | 13.2 |
| Rsa1.0_02054.1.g31846.t1 | ref XP_002890861.1  hypothetical protein ARALYDRAFT_890567 [Arabidopsis lyrata subsp. lyrata] gi 297336703 gb EFH67120.1  hypothetical protein ARALYDRAFT_890567 [Arabidopsis lyrata subsp. lyrata] | 97   | 94   | 2.00E-27  | 96.9  | 81.4 | 84.5 | hypothetical protein ARALYDRAFT_890567 | gbpln | Arabidopsis lyrata   | AT1G30260.1   Symbols:   BEST Arabidopsis thaliana protein match is: Galactosyltransferase family protein (TAIR:AT4G21060.1); Has 30 Blast hits to 30 proteins in 8 species: Archae - 0; Bacteria - 0; Metazoa - 0; Fungi - 0; Plants - 30; Viruses - 0; Other Eukaryotes - 0 (source: NCBI BLink).   chr1:10651159-10651452 FORWARD LENGTH=97                                                                                                                                                                                                                                                   | 97  | 97   | 5.00E-29  | 100.0 | 82.5 | 84.5 |
| Rsa1.0_02054.1.g31847.t1 | gb EOA36377.1  hypothetical protein CARUB_v10010783mg [Capsella rubella]                                                                                                                            | 78   | 82   | 5.00E-13  | 105.1 | 57.7 | 64.1 | hypothetical protein CARUB_v10010783mg | gbpln | Capsella rubella     | AT1G30250.1   Symbols:   unknown protein; Has 5 Blast hits to 5 proteins in 2 species: Archae - 0; Bacteria - 0; Metazoa - 0; Fungi - 0; Plants - 5; Viruses - 0; Other Eukaryotes - 0 (source: NCBI BLink).   chr1:10647253-10647501 REVERSE LENGTH=82                                                                                                                                                                                                                                                                                                                                          | 78  | 82   | 3.00E-15  | 105.1 | 56.4 | 60.3 |
| Rsa1.0_02054.1.g31848.t1 | gb EOA39675.1  hypothetical protein CARUB_v10008316mg [Capsella rubella]                                                                                                                            | 803  | 826  | 0         | 102.9 | 78.8 | 86.9 | hypothetical protein CARUB_v10008316mg | gbpln | Capsella rubella     | AT1G30240.2   Symbols:   unknown protein; Has 169 Blast hits to 168 proteins in 75 species: Archae - 0; Bacteria - 0; Metazoa - 49; Fungi - 68; Plants - 46; Viruses - 0; Other Eukaryotes - 6 (source: NCBI BLink).   chr1:10641241-10645838 REVERSE LENGTH=827                                                                                                                                                                                                                                                                                                                                 | 803 | 827  | 0         | 103.0 | 78.2 | 86.4 |
| Rsa1.0_02054.1.g31849.t1 | emb CAA52751.1  elongation factor-1 beta A1 [Arabidopsis thaliana]                                                                                                                                  | 224  | 231  | 4.00E-92  | 103.1 | 81.7 | 88.8 | elongation factor-1 beta A1            | gbpln | Arabidopsis thaliana | AT2G18110.1   Symbols:   Translation elongation factor EF1B/ribosomal protein S6 family protein   chr2:7872636-7873713 FORWARD LENGTH=231                                                                                                                                                                                                                                                                                                                                                                                                                                                        | 224 | 231  | 2.00E-93  | 103.1 | 83.5 | 89.7 |
| Rsa1.0_02054.1.g31850.t1 | gb ABK78691.1  putative elongation factor 1-beta [Brassica rapa]                                                                                                                                    | 241  | 230  | 1.00E-107 | 95.4  | 90.5 | 93.8 | putative elongation factor 1-beta      | gbpln | Brassica rapa        | AT2G18110.1   Symbols:   Translation elongation factor EF1B/ribosomal protein S6 family protein   chr2:7872636-7873713 FORWARD LENGTH=231                                                                                                                                                                                                                                                                                                                                                                                                                                                        | 241 | 231  | 1.00E-106 | 95.9  | 87.1 | 92.5 |
| Rsa1.0_02054.1.g31851.t1 | db BAJ34242.1  unnamed protein product [Thellungiella halophila]                                                                                                                                    | 332  | 339  | 1.00E-132 | 102.1 | 84.6 | 91.9 | unnamed protein product                | ----  | ----                 | AT1G30210.2   Symbols:   TCP24   TEOSINTE BRANCHED 1, cycloidea, and PCF family 24   chr1:10628754-10629728 REVERSE LENGTH=324                                                                                                                                                                                                                                                                                                                                                                                                                                                                   | 332 | 324  | 1.00E-117 | 97.6  | 75.0 | 82.2 |
| Rsa1.0_02055.1.g31852.t1 | gb AAC14296.1  putative methyltransferase [Arabidopsis thaliana]                                                                                                                                    | 86   | 504  | 1.00E-13  | 586.0 | 53.5 | 59.3 | putative methyltransferase             | gbpln | Arabidopsis thaliana | AT3G07670.1   Symbols:   Rubisco methyltransferase family protein   chr3:2451651-2454617 FORWARD LENGTH=504                                                                                                                                                                                                                                                                                                                                                                                                                                                                                      | 86  | 504  | 3.00E-16  | 586.0 | 53.5 | 60.5 |
| Rsa1.0_02055.1.g31853.t1 | ref XP_002876925.1  predicted protein [Arabidopsis lyrata subsp. lyrata] gi 297322763 gb EFH53184.1  predicted protein [Arabidopsis lyrata subsp. lyrata]                                           | 473  | 475  | 0         | 100.4 | 79.7 | 86.9 | predicted protein                      | gbpln | Arabidopsis lyrata   | AT3G25670.1   Symbols:   Leucine-rich repeat (LRR) family protein   chr3:9344532-9346301 REVERSE LENGTH=475                                                                                                                                                                                                                                                                                                                                                                                                                                                                                      | 473 | 475  | 0         | 100.4 | 78.6 | 86.0 |
| Rsa1.0_02055.1.g31854.t1 | #                                                                                                                                                                                                   | #    | #    | #         | #     | #    | #    | -                                      | ----  | ----                 | #                                                                                                                                                                                                                                                                                                                                                                                                                                                                                                                                                                                                | #   | #    | #         | #     | #    |      |
| Rsa1.0_02055.1.g31855.t1 | gb AAF79687.1 AC0022314.28 F9C16.9 [Arabidopsis thaliana]                                                                                                                                           | 692  | 946  | 1.00E-179 | 136.7 | 48.8 | 65.3 | F9C16.9                                | gbpln | Arabidopsis thaliana | AT1G64260.1   Symbols:   MuDR family transposase   chr1:23847756-23849915 FORWARD LENGTH=719                                                                                                                                                                                                                                                                                                                                                                                                                                                                                                     | 692 | 719  | 5.00E-12  | 103.9 | 10.4 | 17.6 |
| Rsa1.0_02055.1.g31856.t1 | ref XP_002875270.1  hypothetical protein ARALYDRAFT_484330 [Arabidopsis lyrata subsp. lyrata] gi 297321108 gb EFH51529.1  hypothetical protein ARALYDRAFT_484330 [Arabidopsis lyrata subsp. lyrata] | 992  | 1002 | 0         | 101.0 | 88.7 | 93.4 | hypothetical protein ARALYDRAFT_484330 | gbpln | Arabidopsis lyrata   | AT3G25690.2   Symbols:   CHUP1   Hydroxyproline-rich glycoprotein family protein   chr3:9354061-9357757 FORWARD LENGTH=1004                                                                                                                                                                                                                                                                                                                                                                                                                                                                      | 992 | 1004 | 0         | 101.2 | 88.3 | 93.4 |
| Rsa1.0_02056.1.g31857.t1 | gb AAF18641.1 AC006228.12 F5J5.16 [Arabidopsis thaliana]                                                                                                                                            | 1809 | 1024 | 1.00E-65  | 56.6  | 8.8  | 12.5 | F5J5.16                                | gbpln | Arabidopsis thaliana | #                                                                                                                                                                                                                                                                                                                                                                                                                                                                                                                                                                                                | #   | #    | #         | #     | #    |      |
| Rsa1.0_02056.1.g31858.t1 | gb ABD65062.1  hypothetical protein 27.t00126 [Brassica oleracea]                                                                                                                                   | 340  | 578  | 1.00E-64  | 170.0 | 46.2 | 62.4 | hypothetical protein 27.t00126         | gbpln | Brassica oleracea    | AT1G51172.1   Symbols:   unknown protein; FUNCTIONS IN: molecular.function unknown; INVOLVED IN: biological.process unknown; LOCATED IN: cellular.component unknown; CONTAINS InterPro DOMAIN/s: Protein of unknown function DUF601 (InterPro:IPR006736); BEST Arabidopsis thaliana protein match is: Protein of unknown function, DUF601 (TAIR:AT1G46696.1); Has 1849 Blast hits to 1554 proteins in 272 species: Archae - 15; Bacteria - 116; Metazoa - 677; Fungi - 267; Plants - 154; Viruses - 11; Other Eukaryotes - 609 (source: NCBI BLink).   chr1:18963205-18965571 FORWARD LENGTH=681 | 340 | 681  | 1.00E-13  | 200.3 | 11.5 | 21.2 |

|                           |                                                                                                                                                                                                                                                                                                                                                                                                                                                                                                                                                                                                                                                                                                                                                                                                                                                                                        |      |      |           |       |      |      |                                                     |       |                      |                                                                                                                                                                                                                                                                                                                                                                     |      |     |           |       |      |      |
|---------------------------|----------------------------------------------------------------------------------------------------------------------------------------------------------------------------------------------------------------------------------------------------------------------------------------------------------------------------------------------------------------------------------------------------------------------------------------------------------------------------------------------------------------------------------------------------------------------------------------------------------------------------------------------------------------------------------------------------------------------------------------------------------------------------------------------------------------------------------------------------------------------------------------|------|------|-----------|-------|------|------|-----------------------------------------------------|-------|----------------------|---------------------------------------------------------------------------------------------------------------------------------------------------------------------------------------------------------------------------------------------------------------------------------------------------------------------------------------------------------------------|------|-----|-----------|-------|------|------|
| Rsa1.0_02056.1.g31859.t1  | gb AAC62798.1  T5H22.2 gene product [Arabidopsis thaliana]<br>gi 7270700 emb CAB7862.1  hypothetical protein [Arabidopsis thaliana]                                                                                                                                                                                                                                                                                                                                                                                                                                                                                                                                                                                                                                                                                                                                                    | 629  | 464  | 1.00E-49  | 73.8  | 22.9 | 35.6 | T5H22.2 gene product                                | gbpln | Arabidopsis thaliana | #                                                                                                                                                                                                                                                                                                                                                                   | #    | #   | #         | #     | #    | #    |
| Rsa1.0_02056.1.g31860.t5  | gb AAF79618.1 AC027665_19 F5M15.26 [Arabidopsis thaliana]                                                                                                                                                                                                                                                                                                                                                                                                                                                                                                                                                                                                                                                                                                                                                                                                                              | 811  | 1838 | 1.00E-167 | 226.6 | 39.2 | 49.0 | F5M15.26                                            | gbpln | Arabidopsis thaliana | #                                                                                                                                                                                                                                                                                                                                                                   | #    | #   | #         | #     | #    | #    |
| Rsa1.0_02056.1.g31861.t10 | #                                                                                                                                                                                                                                                                                                                                                                                                                                                                                                                                                                                                                                                                                                                                                                                                                                                                                      | #    | #    | #         | #     | #    | #    | -                                                   | ----  | ----                 | #                                                                                                                                                                                                                                                                                                                                                                   | #    | #   | #         | #     | #    | #    |
| Rsa1.0_02056.1.g31862.t1  | ref NP_568719.1  putative thiol-disulfide oxidoreductase DCC [Arabidopsis thaliana]<br>gi 75162429 sp Q8W485.1 Y5010_ARATH RecName: Full=Uncharacterized protein At5g50100, mitochondrial; Flags: Precursor gi 17065380 gb AAL32844.1  Unknown protein [Arabidopsis thaliana]<br>gi 20148617 gb AAM10199.1  unknown protein [Arabidopsis thaliana]<br>gi 21593055 gb AAM65004.1  unknown [Arabidopsis thaliana]<br>gi 332008513 gb AED95896.1  putative thiol-disulfide oxidoreductase DCC [Arabidopsis thaliana]<br>ref NP_567744.1  Subtilisin-like serine endopeptidase family protein [Arabidopsis thaliana]<br>gi 4539429 emb CAB38962.1  subtilisin protease-like [Arabidopsis thaliana]<br>gi 7269485 emb CAB78488.1  subtilisin protease-like [Arabidopsis thaliana]<br>gi 332659786 gb AEE85186.1  Subtilisin-like serine endopeptidase family protein [Arabidopsis thaliana] | 316  | 214  | 6.00E-29  | 67.7  | 19.3 | 20.6 | putative thiol-disulfide oxidoreductase DCC         | gbpln | Arabidopsis thaliana | AT5G50100.1   Symbols:   Putative thiol-disulphide oxidoreductase DCC   chr5:20371916-20373172 FORWARD LENGTH=214                                                                                                                                                                                                                                                   | 316  | 214 | 2.00E-31  | 67.7  | 19.3 | 20.6 |
| Rsa1.0_02057.1.g31863.t1  | ref XP_002867568.1  hypothetical protein ARALYDRAFT_913928 [Arabidopsis lyrata subsp. lyrata]<br>gi 297313404 gb EFH43827.1  hypothetical protein ARALYDRAFT_913928 [Arabidopsis lyrata subsp. lyrata]                                                                                                                                                                                                                                                                                                                                                                                                                                                                                                                                                                                                                                                                                 | 1011 | 746  | 0         | 73.8  | 61.5 | 65.8 | Subtilisin-like serine endopeptidase family protein | gbpln | Arabidopsis thaliana | AT4G26330.1   Symbols: UNE17, ATSBT3.18   Subtilisin-like serine endopeptidase family protein   chr4:13320408-13323461 FORWARD LENGTH=746                                                                                                                                                                                                                           | 1011 | 746 | 0         | 73.8  | 61.5 | 65.8 |
| Rsa1.0_02057.1.g31864.t1  | ref XP_002867568.1  hypothetical protein ARALYDRAFT_913928 [Arabidopsis lyrata subsp. lyrata]<br>gi 297313404 gb EFH43827.1  hypothetical protein ARALYDRAFT_913928 [Arabidopsis lyrata subsp. lyrata]                                                                                                                                                                                                                                                                                                                                                                                                                                                                                                                                                                                                                                                                                 | 93   | 101  | 1.00E-31  | 108.6 | 73.1 | 82.8 | hypothetical protein ARALYDRAFT_913928              | gbpln | Arabidopsis lyrata   | AT5G56520.1   Symbols:   unknown protein; BEST Arabidopsis thaliana protein match is: unknown protein (TAIR:AT1G55365.1). Has 30201 Blast hits to 17322 proteins in 780 species: Archae - 12; Bacteria - 1396; Metazoa - 17338; Fungi - 3422; Plants - 5037; Viruses - 0; Other Eukaryotes - 2996 (source: NCBI BLINK).   chr5:22885226-22885531 FORWARD LENGTH=101 | 93   | 101 | 9.00E-22  | 108.6 | 48.4 | 58.1 |
| Rsa1.0_02057.1.g31865.t1  | ref NP_194360.1  Arginyl-tRNA synthetase, class Ic [Arabidopsis thaliana]<br>gi 2632105 emb CAB11468.1  arginyl-tRNA synthetase [Arabidopsis thaliana]<br>gi 4539426 emb CAB38959.1  arginyl-tRNA synthetase [Arabidopsis thaliana]<br>gi 7269482 emb CAB79485.1  arginyl-tRNA synthetase [Arabidopsis thaliana]<br>gi 332659782 gb AEE85182.1  Arginyl-tRNA synthetase, class Ic [Arabidopsis thaliana]                                                                                                                                                                                                                                                                                                                                                                                                                                                                               | 585  | 642  | 0         | 109.7 | 83.1 | 88.5 | Arginyl-tRNA synthetase, class Ic                   | gbpln | Arabidopsis thaliana | AT4G26300.1   Symbols: emb1027   Arginyl-tRNA synthetase, class Ic   chr4:13308400-13313109 REVERSE LENGTH=642                                                                                                                                                                                                                                                      | 585  | 642 | 0         | 109.7 | 83.1 | 88.5 |
| Rsa1.0_02057.1.g31866.t1  | #                                                                                                                                                                                                                                                                                                                                                                                                                                                                                                                                                                                                                                                                                                                                                                                                                                                                                      | #    | #    | #         | #     | #    | #    | -                                                   | ----  | ----                 | #                                                                                                                                                                                                                                                                                                                                                                   | #    | #   | #         | #     | #    | #    |
| Rsa1.0_02057.1.g31867.t1  | ref XP_002867572.1  predicted protein [Arabidopsis lyrata subsp. lyrata]<br>gi 297313408 gb EFH43831.1  predicted protein [Arabidopsis lyrata subsp. lyrata]                                                                                                                                                                                                                                                                                                                                                                                                                                                                                                                                                                                                                                                                                                                           | 329  | 310  | 1.00E-138 | 94.2  | 72.9 | 83.9 | predicted protein                                   | gbpln | Arabidopsis lyrata   | AT4G26280.1   Symbols:   P-loop containing nucleoside triphosphate hydrolases superfamily protein   chr4:13304721-13305722 REVERSE LENGTH=314                                                                                                                                                                                                                       | 329  | 314 | 1.00E-140 | 95.4  | 72.6 | 82.7 |
| Rsa1.0_02057.1.g31868.t1  | ref NP_194356.2  inositol oxygenase 4 [Arabidopsis thaliana]<br>gi 75151963 sp Q8H1S0.1 MIOX4_ARATH RecName: Full=inositol oxygenase 4; Short=AMIOX4; Short=Ml oxygenase 4<br>gi 23296360 gb AAN13052.1  unknown protein [Arabidopsis thaliana]<br>gi 332659776 gb AEE85176.1  inositol oxygenase 4 [Arabidopsis thaliana]                                                                                                                                                                                                                                                                                                                                                                                                                                                                                                                                                             | 298  | 317  | 1.00E-163 | 106.4 | 92.6 | 96.3 | inositol oxygenase 4                                | gbpln | Arabidopsis thaliana | AT4G26260.1   Symbols: MIOX4   myo-inositol oxygenase 4   chr4:13297939-13300146 FORWARD LENGTH=317                                                                                                                                                                                                                                                                 | 298  | 317 | 1.00E-166 | 106.4 | 92.6 | 96.3 |
| Rsa1.0_02057.1.g31869.t2  | gb EOA17455.1  hypothetical protein CARUB_v10005778mg [Capsella rubella]                                                                                                                                                                                                                                                                                                                                                                                                                                                                                                                                                                                                                                                                                                                                                                                                               | 201  | 198  | 3.00E-98  | 98.5  | 86.6 | 92.0 | hypothetical protein CARUB_v10005778mg              | gbpln | Capsella rubella     | AT4G26240.1   Symbols:   unknown protein; Has 30201 Blast hits to 17322 proteins in 780 species: Archae - 12; Bacteria - 1396; Metazoa - 17338; Fungi - 3422; Plants - 5037; Viruses - 0; Other Eukaryotes - 2996 (source: NCBI BLINK).   chr4:13287011-13288896 REVERSE LENGTH=198                                                                                 | 201  | 198 | 1.00E-94  | 98.5  | 87.1 | 92.0 |
| Rsa1.0_02057.1.g31870.t1  | gb EOA17906.1  hypothetical protein CARUB_v10006315mg [Capsella rubella]                                                                                                                                                                                                                                                                                                                                                                                                                                                                                                                                                                                                                                                                                                                                                                                                               | 449  | 450  | 0         | 100.2 | 94.2 | 97.6 | hypothetical protein CARUB_v10006315mg              | gbpln | Capsella rubella     | AT4G26200.1   Symbols: ACS7, ATACS7   1-amino-cyclopropane-1-carboxylate synthase 7   chr4:13275307-13276946 FORWARD LENGTH=447                                                                                                                                                                                                                                     | 449  | 447 | 0         | 99.6  | 93.8 | 97.3 |

|                          |                                                                                                                                                                                                                                                                                                                                                                                                                                                                                                                                                                                                                                                                                                                                                                               |      |      |           |       |      |      |                                        |       |                      |                                                                                                                                                                                                                                                                                                                                                                                                                                                                                                                         |      |      |           |       |      |      |
|--------------------------|-------------------------------------------------------------------------------------------------------------------------------------------------------------------------------------------------------------------------------------------------------------------------------------------------------------------------------------------------------------------------------------------------------------------------------------------------------------------------------------------------------------------------------------------------------------------------------------------------------------------------------------------------------------------------------------------------------------------------------------------------------------------------------|------|------|-----------|-------|------|------|----------------------------------------|-------|----------------------|-------------------------------------------------------------------------------------------------------------------------------------------------------------------------------------------------------------------------------------------------------------------------------------------------------------------------------------------------------------------------------------------------------------------------------------------------------------------------------------------------------------------------|------|------|-----------|-------|------|------|
| Rsa1.0_02058.1.g31871.t1 | ref NP_195021.1  putative protein phosphatase 2C 61 [Arabidopsis thaliana]<br>gi 75100739 sp O82637.1 P2C61_ARATH<br>RecName: Full=Probable protein phosphatase 2C 61; Short=AtPP2C61<br>gi 3688176 emb CAA21204.1  putative protein [Arabidopsis thaliana]<br>gi 7270242 emb CAB80012.1  putative protein [Arabidopsis thaliana]<br>gi 33266075 gb AEE86151.1  putative protein phosphatase 2C 61 [Arabidopsis thaliana]                                                                                                                                                                                                                                                                                                                                                     | 326  | 326  | 1.00E-159 | 100.0 | 83.4 | 89.6 | putative protein phosphatase 2C 61     | gbpln | Arabidopsis thaliana | AT4G32950.1   Symbols:   Protein phosphatase 2C family protein   chr4:1590444-15906010 REVERSE LENGTH=326                                                                                                                                                                                                                                                                                                                                                                                                               | 326  | 326  | 1.00E-161 | 100.0 | 83.4 | 89.6 |
| Rsa1.0_02058.1.g31872.t2 | gb EOA17574.1  hypothetical protein CARUB_v10005935mg [Capsella rubella]                                                                                                                                                                                                                                                                                                                                                                                                                                                                                                                                                                                                                                                                                                      | 131  | 154  | 1.00E-52  | 117.6 | 78.6 | 90.1 | hypothetical protein CARUB_v10005935mg | gbpln | Capsella rubella     | AT4G32915.1   Symbols:   FUNCTIONS IN: molecular_function unknown; INVOLVED IN: regulation of translational fidelity; LOCATED IN: chloroplast; EXPRESSED DURING: 13 growth stages; CONTAINS InterPro DOMAIN/s: Glu-tRNA-Gln amidotransferase, C subunit (InterPro:IPR003837); Has 30201 Blast hits to 17322 proteins in 780 species: Archae - 12; Bacteria - 1396; Metazoa - 17338; Fungi - 3422; Plants - 5037; Viruses - 0; Other Eukaryotes - 2996 (source: NCBI BLINK).   chr4:15885549-15886628 FORWARD LENGTH=155 | 131  | 155  | 1.00E-48  | 118.3 | 75.6 | 89.3 |
| Rsa1.0_02058.1.g31873.t1 | # # # # # # # - - - - - # # # # #                                                                                                                                                                                                                                                                                                                                                                                                                                                                                                                                                                                                                                                                                                                                             |      |      |           |       |      |      |                                        |       |                      |                                                                                                                                                                                                                                                                                                                                                                                                                                                                                                                         |      |      |           |       |      |      |
| Rsa1.0_02058.1.g31874.t1 | ref NP_195014.1  homeobox-leucine zipper protein ATHB-8 [Arabidopsis thaliana]<br>gi 75220729 sp Q39123.1 ATHB8_ARATH<br>RecName: Full=Homeobox-leucine zipper protein ATHB-8; AltName: Full=HD-ZIP protein ATHB-8; AltName: Full=Homeodomain transcription factor ATHB-8 gi 1149569 emb CAA90703.1  HD-zip [Arabidopsis thaliana]<br>gi 7270235 emb CAB80005.1  HD-zip transcription factor (athb-8) [Arabidopsis thaliana]<br>gi 20152536 emb CAD29660.1  homeodomain-leucine zipper protein 8 [Arabidopsis thaliana]<br>gi 20466330 gb AAM20482.1  HD-zip transcription factor (athb-8) [Arabidopsis thaliana]<br>gi 31711762 gb AAP68237.1  At4g32880 [Arabidopsis thaliana]<br>gi 332660738 gb AEE86138.1  homeobox-leucine zipper protein ATHB-8 [Arabidopsis thaliana] | 226  | 833  | 1.00E-128 | 368.6 | 97.3 | 99.1 | homeobox-leucine zipper protein ATHB-8 | gbpln | Arabidopsis thaliana | AT4G32880.1   Symbols: ATHB-8, ATHB8, HB-8   homeobox gene 8   chr4:15863587-15867822 REVERSE LENGTH=833                                                                                                                                                                                                                                                                                                                                                                                                                | 226  | 833  | 1.00E-131 | 368.6 | 97.3 | 99.1 |
| Rsa1.0_02059.1.g31875.t2 | gb AAD17409.1  putative retroelement pol polyprotein [Arabidopsis thaliana]                                                                                                                                                                                                                                                                                                                                                                                                                                                                                                                                                                                                                                                                                                   | 490  | 1347 | 9.00E-75  | 274.9 | 29.6 | 38.0 | putative retroelement pol polyprotein  | gbpln | Arabidopsis thaliana | # # # # # # #                                                                                                                                                                                                                                                                                                                                                                                                                                                                                                           | #    | #    | #         | #     | #    | #    |
| Rsa1.0_02059.1.g31876.t1 | # # # # # # # - - - - - # # # # #                                                                                                                                                                                                                                                                                                                                                                                                                                                                                                                                                                                                                                                                                                                                             |      |      |           |       |      |      |                                        |       |                      |                                                                                                                                                                                                                                                                                                                                                                                                                                                                                                                         |      |      |           |       |      |      |
| Rsa1.0_02059.1.g31877.t6 | db BAF34636.1  DNA methyltransferase 1b [Brassica rapa]                                                                                                                                                                                                                                                                                                                                                                                                                                                                                                                                                                                                                                                                                                                       | 1477 | 1519 | 0         | 102.8 | 87.1 | 93.2 | DNA methyltransferase 1b               | gbpln | Brassica rapa        | AT5G49160.1   Symbols: MET1, MET2, MET1, DDM2, DMT01, DMT1   methyltransferase 1   chr5:19932501-19938186 FORWARD LENGTH=1534                                                                                                                                                                                                                                                                                                                                                                                           | 1477 | 1534 | 0         | 103.9 | 69.1 | 81.3 |
| Rsa1.0_02059.1.g31878.t1 | # # # # # # # - - - - - # # # # #                                                                                                                                                                                                                                                                                                                                                                                                                                                                                                                                                                                                                                                                                                                                             |      |      |           |       |      |      |                                        |       |                      |                                                                                                                                                                                                                                                                                                                                                                                                                                                                                                                         |      |      |           |       |      |      |
| Rsa1.0_02059.1.g31879.t1 | ref XP_002890907.1  hypothetical protein ARALYDRAFT_473323 [Arabidopsis lyrata subsp. lyrata]<br>gi 297336749 gb EFH67166.1  hypothetical protein ARALYDRAFT_473323 [Arabidopsis lyrata subsp. lyrata]                                                                                                                                                                                                                                                                                                                                                                                                                                                                                                                                                                        | 320  | 318  | 1.00E-176 | 99.4  | 94.1 | 96.9 | hypothetical protein ARALYDRAFT_473323 | gbpln | Arabidopsis lyrata   | AT1G30825.1   Symbols: ARPC2A, DIS2   Arp2/3 complex, 34 kD subunit p34-Arc   chr1:10961106-10962999 FORWARD LENGTH=318                                                                                                                                                                                                                                                                                                                                                                                                 | 320  | 318  | 1.00E-178 | 99.4  | 94.1 | 96.9 |
| Rsa1.0_02060.1.g31880.t1 | gb ACT35474.1  peroxidase 65 [Brassica rapa]                                                                                                                                                                                                                                                                                                                                                                                                                                                                                                                                                                                                                                                                                                                                  | 331  | 330  | 1.00E-176 | 99.7  | 92.7 | 95.8 | peroxidase 65                          | gbpln | Brassica rapa        | AT5G47000.1   Symbols:   Peroxidase superfamily protein   chr5:19069171-19070175 REVERSE LENGTH=334                                                                                                                                                                                                                                                                                                                                                                                                                     | 331  | 334  | 1.00E-175 | 100.9 | 89.1 | 93.1 |
| Rsa1.0_02060.1.g31881.t1 | ref XP_002865151.1  low-level beta-amylase 1 [Arabidopsis lyrata subsp. lyrata]<br>gi 297310986 gb EFH41410.1  low-level beta-amylase 1 [Arabidopsis lyrata subsp. lyrata]                                                                                                                                                                                                                                                                                                                                                                                                                                                                                                                                                                                                    | 1220 | 1253 | 0         | 102.7 | 93.2 | 95.3 | low-level beta-amylase 1               | gbpln | Arabidopsis lyrata   | AT5G47010.1   Symbols: UPF1, LBA1, ATUPF1   RNA helicase, putative   chr5:19072009-19078856 FORWARD LENGTH=1254                                                                                                                                                                                                                                                                                                                                                                                                         | 1220 | 1254 | 0         | 102.8 | 92.7 | 95.2 |
| Rsa1.0_02060.1.g31882.t1 | gb ABL97963.1  hydrogen-transporting ATP synthase [Brassica rapa]                                                                                                                                                                                                                                                                                                                                                                                                                                                                                                                                                                                                                                                                                                             | 204  | 203  | 1.00E-107 | 99.5  | 95.1 | 98.0 | hydrogen-transporting ATP synthase     | gbpln | Brassica rapa        | AT5G47030.1   Symbols:   ATPase, F1 complex, delta/epsilon subunit   chr5:19090384-19092034 FORWARD LENGTH=203                                                                                                                                                                                                                                                                                                                                                                                                          | 204  | 203  | 1.00E-105 | 99.5  | 90.2 | 96.6 |

|                          |                                                                                                                                                                                                                                 |      |      |           |       |      |      |                                                      |       |                      |                                                                                                                                        |      |      |          |       |      |      |
|--------------------------|---------------------------------------------------------------------------------------------------------------------------------------------------------------------------------------------------------------------------------|------|------|-----------|-------|------|------|------------------------------------------------------|-------|----------------------|----------------------------------------------------------------------------------------------------------------------------------------|------|------|----------|-------|------|------|
| Rsa1.0_02060.1.g31883.t1 | ref[XP_002889873.1] C-terminal cysteine residue is changed to A serine 1 [Arabidopsis lyrata subsp. lyrata] gi 297335715 gb EFH66132.1] C-terminal cysteine residue is changed to A serine 1 [Arabidopsis lyrata subsp. lyrata] | 123  | 118  | 2.00E-54  | 95.9  | 82.9 | 89.4 | C-terminal cysteine residue is changed to A serine 1 | gbpln | Arabidopsis lyrata   | AT1G11530.1   Symbols: ATCXXS1, CXXS1   C-terminal cysteine residue is changed to a serine 1   chr1:3874518-3875311 FORWARD LENGTH=118 | 123  | 118  | 9.00E-56 | 95.9  | 81.3 | 87.8 |
| Rsa1.0_02060.1.g31884.t1 | gb AAF16642.1 AC011661_20 T23J18.21 [Arabidopsis thaliana]                                                                                                                                                                      | 79   | 304  | 8.00E-32  | 384.8 | 81.0 | 84.8 | T23J18.21                                            | gbpln | Arabidopsis thaliana | AT1G11545.1   Symbols: XTH8   xyloglucan endotransglucosylase/hydrolase 8   chr1:3878689-3880286 REVERSE LENGTH=305                    | 79   | 305  | 2.00E-34 | 386.1 | 81.0 | 84.8 |
| Rsa1.0_02060.1.g31885.t1 | #                                                                                                                                                                                                                               | #    | #    | #         | #     | #    | #    | -                                                    | ----  | ----                 | #                                                                                                                                      | #    | #    | #        | #     | #    | #    |
| Rsa1.0_02060.1.g31886.t1 | gb AFJ42571.1] elongation initiation factor 4A [Sesamum indicum]                                                                                                                                                                | 90   | 332  | 9.00E-32  | 368.9 | 74.4 | 88.9 | elongation initiation factor 4A                      | gbpln | Sesamum indicum      | AT3G13920.3   Symbols: EIF4A1, RH4, TIF4A1   eukaryotic translation initiation factor 4A1   chr3:4592635-4594094 REVERSE LENGTH=402    | 90   | 402  | 7.00E-32 | 446.7 | 68.9 | 77.8 |
| Rsa1.0_02061.1.g31887.t1 | ref[XP_002886268.1] hypothetical protein ARALYDRAFT_900376 [Arabidopsis lyrata subsp. lyrata] gi 297332108 gb EFH62527.1] hypothetical protein ARALYDRAFT_900376 [Arabidopsis lyrata subsp. lyrata]                             | 385  | 346  | 8.00E-67  | 89.9  | 43.6 | 58.2 | hypothetical protein ARALYDRAFT_900376               | gbpln | Arabidopsis lyrata   | AT4G38940.1   Symbols:   Galactose oxidase/kelch repeat superfamily protein   chr4:18152848-18153960 FORWARD LENGTH=370                | 385  | 370  | 1.00E-60 | 96.1  | 40.0 | 57.4 |
| Rsa1.0_02061.1.g31888.t1 | gb EOA14519.1] hypothetical protein CARUB_v10027748mg [Capsella rubella]                                                                                                                                                        | 362  | 368  | 1.00E-74  | 101.7 | 47.8 | 62.4 | hypothetical protein CARUB_v10027748mg               | gbpln | Capsella rubella     | AT4G38940.1   Symbols:   Galactose oxidase/kelch repeat superfamily protein   chr4:18152848-18153960 FORWARD LENGTH=370                | 362  | 370  | 2.00E-67 | 102.2 | 43.1 | 55.8 |
| Rsa1.0_02061.1.g31889.t1 | gb EOA27372.1] hypothetical protein CARUB_v10023490mg [Capsella rubella] gi 482563183 gb EOA27373.1] hypothetical protein CARUB_v10023490mg [Capsella rubella]                                                                  | 370  | 364  | 0         | 98.4  | 88.9 | 94.3 | hypothetical protein CARUB_v10023490mg               | gbpln | Capsella rubella     | AT2G30740.1   Symbols:   Protein kinase superfamily protein   chr2:13096399-13098285 FORWARD LENGTH=366                                | 370  | 366  | 0        | 98.9  | 87.6 | 91.9 |
| Rsa1.0_02061.1.g31890.t1 | #                                                                                                                                                                                                                               | #    | #    | #         | #     | #    | #    | -                                                    | ----  | ----                 | #                                                                                                                                      | #    | #    | #        | #     | #    | #    |
| Rsa1.0_02061.1.g31891.t1 | ref[XP_002881131.1] CYP71A13 [Arabidopsis lyrata subsp. lyrata] gi 297326970 gb EFH57390.1] CYP71A13 [Arabidopsis lyrata subsp. lyrata]                                                                                         | 474  | 503  | 0         | 106.1 | 82.3 | 89.0 | CYP71A13                                             | gbpln | Arabidopsis lyrata   | AT2G30770.1   Symbols: CYP71A13   cytochrome P450, family 71, subfamily A, polypeptide 13   chr2:13109909-13112006 REVERSE LENGTH=503  | 474  | 503  | 0        | 106.1 | 82.5 | 88.6 |
| Rsa1.0_02061.1.g31892.t1 | #                                                                                                                                                                                                                               | #    | #    | #         | #     | #    | #    | -                                                    | ----  | ----                 | #                                                                                                                                      | #    | #    | #        | #     | #    | #    |
| Rsa1.0_02062.1.g31893.t1 | gb ABD64937.1] hypothetical protein 24.t00015 [Brassica oleracea]                                                                                                                                                               | 777  | 1327 | 0         | 170.8 | 80.8 | 86.9 | hypothetical protein 24.t00015                       | gbpln | Brassica oleracea    | AT5G47480.1   Symbols:   RGPR-related   chr5:19257420-19263132 FORWARD LENGTH=1350                                                     | 777  | 1350 | 0        | 173.7 | 73.7 | 83.0 |
| Rsa1.0_02062.1.g31894.t1 | ref[XP_002881289.1] hypothetical protein ARALYDRAFT_482302 [Arabidopsis lyrata subsp. lyrata] gi 297327128 gb EFH57548.1] hypothetical protein ARALYDRAFT_482302 [Arabidopsis lyrata subsp. lyrata]                             | 142  | 394  | 1.00E-25  | 277.5 | 44.4 | 49.3 | hypothetical protein ARALYDRAFT_482302               | gbpln | Arabidopsis lyrata   | AT2G33560.2   Symbols: BUBR1   BUB1-related (BUB1: budding uninhibited by benzimidazol 1)   chr2:14213810-14215918 REVERSE LENGTH=396  | 142  | 396  | 3.00E-27 | 278.9 | 43.0 | 49.3 |
| Rsa1.0_02062.1.g31895.t1 | gb ABD64938.1] hypothetical protein 24.t00016 [Brassica oleracea]                                                                                                                                                               | 1400 | 1330 | 0         | 95.0  | 81.4 | 86.1 | hypothetical protein 24.t00016                       | gbpln | Brassica oleracea    | AT5G47480.1   Symbols:   RGPR-related   chr5:19257420-19263132 FORWARD LENGTH=1350                                                     | 1400 | 1350 | 0        | 96.4  | 72.4 | 80.4 |
| Rsa1.0_02062.1.g31896.t1 | gb ABD64942.1] hypothetical protein 24.t00020 [Brassica oleracea]                                                                                                                                                               | 885  | 872  | 0         | 98.5  | 91.6 | 93.9 | hypothetical protein 24.t00020                       | gbpln | Brassica oleracea    | AT5G47430.1   Symbols:   DWNN domain, a CCHC-type zinc finger   chr5:19235819-19240596 REVERSE LENGTH=892                              | 885  | 892  | 0        | 100.8 | 81.6 | 87.0 |
| Rsa1.0_02062.1.g31897.t1 | gb ABD64944.1] hypothetical protein 24.t00022 [Brassica oleracea]                                                                                                                                                               | 600  | 579  | 0         | 96.5  | 88.8 | 92.7 | hypothetical protein 24.t00022                       | gbpln | Brassica oleracea    | AT5G47380.1   Symbols:   Protein of unknown function, DUF547   chr5:19221472-19224471 REVERSE LENGTH=618                               | 600  | 618  | 0        | 103.0 | 78.2 | 84.8 |
| Rsa1.0_02062.1.g31898.t1 | #                                                                                                                                                                                                                               | #    | #    | #         | #     | #    | #    | -                                                    | ----  | ----                 | #                                                                                                                                      | #    | #    | #        | #     | #    | #    |
| Rsa1.0_02062.1.g31899.t1 | dbj BAB11196.1] mutator-like transposase [Arabidopsis thaliana]                                                                                                                                                                 | 483  | 797  | 1.00E-117 | 165.0 | 46.8 | 61.1 | mutator-like transposase                             | gbpln | Arabidopsis thaliana | AT1G64260.1   Symbols:   MuDR family transposase   chr1:2384756-23849915 FORWARD LENGTH=719                                            | 483  | 719  | 6.00E-32 | 148.9 | 21.3 | 34.6 |
| Rsa1.0_02063.1.g31900.t1 | gb EOA12359.1] hypothetical protein CARUB_v10016511mg [Capsella rubella]                                                                                                                                                        | 438  | 356  | 4.00E-83  | 81.3  | 42.2 | 53.2 | hypothetical protein CARUB_v10016511mg               | gbpln | Capsella rubella     | AT4G10190.1   Symbols:   F-box and associated interaction domains-containing protein   chr4:6350928-6352031 FORWARD LENGTH=367         | 438  | 367  | 5.00E-60 | 83.8  | 34.5 | 47.9 |
| Rsa1.0_02063.1.g31901.t1 | gb EOA12359.1] hypothetical protein CARUB_v10016511mg [Capsella rubella]                                                                                                                                                        | 370  | 356  | 9.00E-59  | 96.2  | 43.8 | 55.1 | hypothetical protein CARUB_v10016511mg               | gbpln | Capsella rubella     | AT4G10190.1   Symbols:   F-box and associated interaction domains-containing protein   chr4:6350928-6352031 FORWARD LENGTH=367         | 370  | 367  | 2.00E-43 | 99.2  | 38.6 | 54.6 |
| Rsa1.0_02063.1.g31902.t1 | ref[XP_002883283.1] RNA recognition motif-containing protein [Arabidopsis lyrata subsp. lyrata] gi 297329123 gb EFH59542.1] RNA recognition motif-containing protein [Arabidopsis lyrata subsp. lyrata]                         | 582  | 607  | 0         | 104.3 | 83.2 | 90.2 | RNA recognition motif-containing protein             | gbpln | Arabidopsis lyrata   | AT3G21100.2   Symbols:   RNA-binding (RRM/RBD/RNP motifs) family protein   chr3:7399162-7401870 FORWARD LENGTH=602                     | 582  | 602  | 0        | 103.4 | 82.8 | 89.3 |

|                          |                                                                                                                                                                                                                                                                                                                                                                                                                                                                                                               |     |      |           |       |      |      |                                        |       |                      |                                                                                                                                                                                                                                                                                                                                                                                                                                                                                                                                                                           |     |      |           |       |      |      |
|--------------------------|---------------------------------------------------------------------------------------------------------------------------------------------------------------------------------------------------------------------------------------------------------------------------------------------------------------------------------------------------------------------------------------------------------------------------------------------------------------------------------------------------------------|-----|------|-----------|-------|------|------|----------------------------------------|-------|----------------------|---------------------------------------------------------------------------------------------------------------------------------------------------------------------------------------------------------------------------------------------------------------------------------------------------------------------------------------------------------------------------------------------------------------------------------------------------------------------------------------------------------------------------------------------------------------------------|-----|------|-----------|-------|------|------|
| Rsa1.0_02063.1.g31903.t1 | gb[EOA30003.1] hypothetical protein CARUB_v10013106mg [Capsella rubella]                                                                                                                                                                                                                                                                                                                                                                                                                                      | 691 | 691  | 0         | 100.0 | 95.2 | 98.1 | hypothetical protein CARUB_v10013106mg | gbpln | Capsella rubella     | AT3G21090.1   Symbols:   ABC-2 type transporter family protein   chr3:7391497-7394933 REVERSE LENGTH=691                                                                                                                                                                                                                                                                                                                                                                                                                                                                  | 691 | 691  | 0         | 100.0 | 94.6 | 97.8 |
| Rsa1.0_02063.1.g31904.t1 | ref[NP_974347.1] NAD(H) kinase 1 [Arabidopsis thaliana]<br>gi 94717660 spl Q56YN3.2 NADK1_ARATH<br>H RecName: Full=NAD(H) kinase 1; Short=ALNADK-1<br>gi 398433559 gb AAR32133.1  NADK1 [Arabidopsis thaliana]<br>gi 51970406 dbj BAD43895.1  unnamed protein product [Arabidopsis thaliana]<br>gi 332642935 gb AEE76456.1  NAD(H) kinase 1 [Arabidopsis thaliana]                                                                                                                                            | 535 | 524  | 0         | 97.9  | 83.6 | 90.3 | NAD(H) kinase 1                        | gbpln | Arabidopsis thaliana | AT3G21070.2   Symbols: NADK1   NAD kinase 1   chr3:7380434-7383874 REVERSE LENGTH=524                                                                                                                                                                                                                                                                                                                                                                                                                                                                                     | 535 | 524  | 0         | 97.9  | 83.6 | 90.3 |
| Rsa1.0_02064.1.g31905.t1 | ref[NP_195142.1] cyclin-D3-1 [Arabidopsis thaliana]<br>gi 59802919 sp P42753.3 CCD31_ARATH<br>RecName: Full=Cyclin-D3-1; AltName: Full=Cyclin-delta-3; Short=Cyclin-d3; AltName: Full=G1/S-specific cyclin-D3-1; Short=CycD3:1<br>gi 2911046 emb CAA17556.1  cyclin delta-3 [Arabidopsis thaliana]<br>gi 7270365 emb CAB80133.1  cyclin delta-3 [Arabidopsis thaliana]<br>gi 62320771 dbj BAD95437.1  cyclin delta-3 [Arabidopsis thaliana]<br>gi 332660935 gb AEE86335.1  cyclin-D3-1 [Arabidopsis thaliana] | 373 | 376  | 1.00E-142 | 100.8 | 72.7 | 79.4 | cyclin-D3-1                            | gbpln | Arabidopsis thaliana | AT4G34160.1   Symbols: CYCD3:1, CYCD3   CYCLIN D3:1   chr4:16357903-16359304 FORWARD LENGTH=376                                                                                                                                                                                                                                                                                                                                                                                                                                                                           | 373 | 376  | 1.00E-145 | 100.8 | 72.7 | 79.4 |
| Rsa1.0_02064.1.g31906.t1 | #                                                                                                                                                                                                                                                                                                                                                                                                                                                                                                             | #   | #    | #         | #     | #    | -    | ----                                   | ----  | #                    | #                                                                                                                                                                                                                                                                                                                                                                                                                                                                                                                                                                         | #   | #    | #         | #     | #    |      |
| Rsa1.0_02064.1.g31907.t1 | ref[XP_002869171.1] hypothetical protein ARALYDRAFT_912986 [Arabidopsis lyrata subsp. lyrata]<br>gi 297315007 gb EFH45430.1  hypothetical protein ARALYDRAFT_912986 [Arabidopsis lyrata subsp. lyrata]                                                                                                                                                                                                                                                                                                        | 253 | 248  | 6.00E-95  | 98.0  | 69.2 | 71.5 | hypothetical protein ARALYDRAFT_912986 | gbpln | Arabidopsis lyrata   | AT4G34150.1   Symbols:   Calcium-dependent lipid-binding (CaLB domain) family protein   chr4:16355035-16356955 FORWARD LENGTH=247                                                                                                                                                                                                                                                                                                                                                                                                                                         | 253 | 247  | 2.00E-93  | 97.6  | 66.8 | 69.6 |
| Rsa1.0_02064.1.g31908.t1 | ref[XP_002869173.1] hypothetical protein ARALYDRAFT_491262 [Arabidopsis lyrata subsp. lyrata]<br>gi 297315009 gb EFH45432.1  hypothetical protein ARALYDRAFT_491262 [Arabidopsis lyrata subsp. lyrata]                                                                                                                                                                                                                                                                                                        | 236 | 237  | 1.00E-104 | 100.4 | 84.3 | 90.7 | hypothetical protein ARALYDRAFT_491262 | gbpln | Arabidopsis lyrata   | AT4G34120.1   Symbols: LEJ1, CDOP1   Cystathionine beta-synthase (CBS) family protein   chr4:16341194-16342893 FORWARD LENGTH=238                                                                                                                                                                                                                                                                                                                                                                                                                                         | 236 | 238  | 1.00E-101 | 100.8 | 82.6 | 89.8 |
| Rsa1.0_02064.1.g31909.t1 | ref[NP_001119113.1] RING/U-box domain-containing protein [Arabidopsis thaliana]<br>gi 332660924 gb AEE86324.1  RING/U-box domain-containing protein [Arabidopsis thaliana]                                                                                                                                                                                                                                                                                                                                    | 857 | 1107 | 0         | 129.2 | 58.5 | 64.8 | RING/U-box domain-containing protein   | gbpln | Arabidopsis thaliana | AT4G34100.2   Symbols:   RING/U-box superfamily protein   chr4:16330590-16334864 FORWARD LENGTH=1107                                                                                                                                                                                                                                                                                                                                                                                                                                                                      | 857 | 1107 | 0         | 129.2 | 58.5 | 64.8 |
| Rsa1.0_02064.1.g31910.t1 | ref[NP_567951.1] putative cyclin delta-3 [Arabidopsis thaliana]<br>gi 13899099 gb AAK48971.1 AF370544.1 cyclin delta-3 [Arabidopsis thaliana]<br>gi 20148339 gb AAM10060.1  cyclin delta-3 [Arabidopsis thaliana]<br>gi 110738184 dbj BAF01023.1  cyclin delta-3 [Arabidopsis thaliana]<br>gi 332660919 gb AEE86319.1  putative cyclin delta-3 [Arabidopsis thaliana]                                                                                                                                         | 329 | 330  | 1.00E-152 | 100.3 | 83.6 | 88.1 | putative cyclin delta-3                | gbpln | Arabidopsis thaliana | AT4G34090.1   Symbols:   unknown protein; FUNCTIONS IN: molecular_function unknown; INVOLVED IN: biological_process unknown; LOCATED IN: chloroplast, chloroplast stroma; EXPRESSED IN: 22 plant structures; EXPRESSED DURING: 13 growth stages; BEST Arabidopsis thaliana protein match is: unknown protein (TAIR:AT2G23370.1); Has 30201 Blast hits to 17322 proteins in 780 species: Archae - 12; Bacteria - 1396; Metazoa - 17338; Fungi - 3422; Plants - 5037; Viruses - 0; Other Eukaryotes - 2996 (source: NCBI BLINK)   chr4:16328051-16330110 REVERSE LENGTH=330 | 329 | 330  | 1.00E-154 | 100.3 | 83.6 | 88.1 |
| Rsa1.0_02064.1.g31911.t1 | gb[ABE41833.1] caffeoyl-CoA 3-O-methyltransferase [Brassica rapa subsp. pekinensis]                                                                                                                                                                                                                                                                                                                                                                                                                           | 258 | 258  | 1.00E-147 | 100.0 | 98.1 | 98.4 | caffeoyl-CoA 3-O-methyltransferase     | gbpln | Brassica rapa        | AT4G34050.1   Symbols: CCoAOMT1   S-adenosyl-L-methionine-dependent methyltransferases superfamily protein   chr4:16310844-16311973 FORWARD LENGTH=259                                                                                                                                                                                                                                                                                                                                                                                                                    | 258 | 259  | 1.00E-140 | 100.4 | 92.6 | 94.2 |
| Rsa1.0_02064.1.g31912.t1 | gb[AAK62371.1]AF386926.1 Unknown protein [Arabidopsis thaliana]                                                                                                                                                                                                                                                                                                                                                                                                                                               | 586 | 587  | 0         | 100.2 | 92.5 | 95.6 | Unknown protein                        | gbpln | Arabidopsis thaliana | AT4G34030.1   Symbols: MCCB   3-methylcrotonyl-CoA carboxylase   chr4:16301298-16303949 FORWARD LENGTH=587                                                                                                                                                                                                                                                                                                                                                                                                                                                                | 586 | 587  | 0         | 100.2 | 92.7 | 95.7 |
| Rsa1.0_02064.1.g31913.t1 | gb[EOA15391.1] hypothetical protein CARUB_v10006469mg [Capsella rubella]                                                                                                                                                                                                                                                                                                                                                                                                                                      | 461 | 476  | 0         | 103.3 | 81.8 | 88.9 | hypothetical protein CARUB_v10006469mg | gbpln | Capsella rubella     | AT4G34020.1   Symbols:   Class I glutamine amidotransferase-like superfamily protein   chr4:16298553-16300897 REVERSE LENGTH=472                                                                                                                                                                                                                                                                                                                                                                                                                                          | 461 | 472  | 0         | 102.4 | 80.9 | 88.1 |
| Rsa1.0_02064.1.g31914.t1 | dbj[BAJ34494.1] unnamed protein product [Thellungiella halophila]                                                                                                                                                                                                                                                                                                                                                                                                                                             | 409 | 445  | 1.00E-176 | 108.8 | 82.2 | 89.2 | unnamed protein product                | ----  | ----                 | AT4G34000.2   Symbols: ABF3, DPBF5   abscisic acid responsive elements-binding factor 3   chr4:16296008-16297971 FORWARD LENGTH=454                                                                                                                                                                                                                                                                                                                                                                                                                                       | 409 | 454  | 1.00E-157 | 111.0 | 77.3 | 85.3 |

|                          |                                                                                                                                                                                                                                         |      |      |           |        |      |      |                                        |       |                      |                                                                                                                                                                                                                                                                                                                                                                                                |      |      |           |       |      |      |
|--------------------------|-----------------------------------------------------------------------------------------------------------------------------------------------------------------------------------------------------------------------------------------|------|------|-----------|--------|------|------|----------------------------------------|-------|----------------------|------------------------------------------------------------------------------------------------------------------------------------------------------------------------------------------------------------------------------------------------------------------------------------------------------------------------------------------------------------------------------------------------|------|------|-----------|-------|------|------|
| Rsa1.0_02064.1.g31915.t1 | ref[XP_002867140.1] hypothetical protein ARALYDRAFT_913003 [Arabidopsis lyrata subsp. lyrata] gi 297312976 gb EFH43399.1                                                                                                                | 170  | 155  | 7.00E-72  | 91.2   | 85.3 | 88.2 | hypothetical protein ARALYDRAFT_913003 | gbpln | Arabidopsis lyrata   | AT4G33985.1   Symbols:   Protein of unknown function (DUF1685)   chr4:16288301-16288857 REVERSE LENGTH=154                                                                                                                                                                                                                                                                                     | 170  | 154  | 1.00E-69  | 90.6  | 82.4 | 85.3 |
| Rsa1.0_02064.1.g31916.t1 | #                                                                                                                                                                                                                                       | #    | #    | #         | #      | #    | -    | ----                                   | ----  | #                    | #                                                                                                                                                                                                                                                                                                                                                                                              | #    | #    | #         | #     | #    |      |
| Rsa1.0_02064.1.g31917.t1 | ref[XP_002867141.1] hypothetical protein ARALYDRAFT_491275 [Arabidopsis lyrata subsp. lyrata] gi 297312977 gb EFH43400.1                                                                                                                | 239  | 217  | 7.00E-38  | 90.8   | 51.0 | 60.3 | hypothetical protein ARALYDRAFT_491275 | gbpln | Arabidopsis lyrata   | AT4G33980.1   Symbols:   BEST Arabidopsis thaliana protein match is: cold regulated gene 27 (TAIR:AT5G42900.2); Has 30201 Blast hits to 17322 proteins in 780 species: Archae - 12; Bacteria - 1396; Metazoa - 17338; Fungi - 3422; Plants - 5037; Viruses - 0; Other Eukaryotes - 2996 (source: NCBI BLINK)   chr4:16283047-16284946 REVERSE LENGTH=218                                       | 239  | 218  | 2.00E-36  | 91.2  | 48.5 | 57.7 |
| Rsa1.0_02065.1.g31918.t1 | #                                                                                                                                                                                                                                       | #    | #    | #         | #      | #    | -    | ----                                   | ----  | #                    | #                                                                                                                                                                                                                                                                                                                                                                                              | #    | #    | #         | #     | #    |      |
| Rsa1.0_02065.1.g31919.t1 | #                                                                                                                                                                                                                                       | #    | #    | #         | #      | #    | -    | ----                                   | ----  | #                    | #                                                                                                                                                                                                                                                                                                                                                                                              | #    | #    | #         | #     | #    |      |
| Rsa1.0_02065.1.g31920.t1 | #                                                                                                                                                                                                                                       | #    | #    | #         | #      | #    | -    | ----                                   | ----  | #                    | #                                                                                                                                                                                                                                                                                                                                                                                              | #    | #    | #         | #     | #    |      |
| Rsa1.0_02065.1.g31921.t1 | gb EOA11994.1  hypothetical protein CARUB_v10012704mg [Capsella rubella]                                                                                                                                                                | 269  | 269  | 1.00E-143 | 100.0  | 90.0 | 94.4 | hypothetical protein CARUB_v10012704mg | gbpln | Capsella rubella     | AT4G15093.1   Symbols:   catalytic LigB subunit of aromatic ring-opening dioxygenase family   chr4:8618454-8619472 FORWARD LENGTH=269                                                                                                                                                                                                                                                          | 269  | 269  | 1.00E-140 | 100.0 | 87.0 | 90.3 |
| Rsa1.0_02065.1.g31922.t1 | gb AAD32898.1  putative retroelement pol polyprotein [Arabidopsis thaliana]                                                                                                                                                             | 1312 | 1307 | 0         | 99.6   | 59.5 | 72.3 | putative retroelement pol polyprotein  | gbpln | Arabidopsis thaliana | AT4G23160.1   Symbols: CRK8   cysteine-rich RLK (RECEPTOR-like protein kinase) 8   chr4:12129485-12134086 FORWARD LENGTH=1262                                                                                                                                                                                                                                                                  | 1312 | 1262 | 1.00E-101 | 96.2  | 14.7 | 23.2 |
| Rsa1.0_02065.1.g31923.t4 | gb AAG10817.1 AC011808.5 Putative retroelement polyprotein [Arabidopsis thaliana]                                                                                                                                                       | 1294 | 1413 | 0         | 109.2  | 55.5 | 72.1 | Putative retroelement polyprotein      | gbpln | Arabidopsis thaliana | AT4G23160.1   Symbols: CRK8   cysteine-rich RLK (RECEPTOR-like protein kinase) 8   chr4:12129485-12134086 FORWARD LENGTH=1262                                                                                                                                                                                                                                                                  | 1294 | 1262 | 0         | 97.5  | 24.0 | 30.8 |
| Rsa1.0_02065.1.g31924.t1 | emb CAB10288.1  hypothetical protein [Arabidopsis thaliana] gi 7268255 emb CAB78551.1  hypothetical protein [Arabidopsis thaliana]                                                                                                      | 100  | 1705 | 1.00E-40  | 1705.0 | 78.0 | 85.0 | hypothetical protein                   | gbpln | Arabidopsis thaliana | AT4G15093.1   Symbols:   catalytic LigB subunit of aromatic ring-opening dioxygenase family   chr4:8618454-8619472 FORWARD LENGTH=269                                                                                                                                                                                                                                                          | 100  | 269  | 6.00E-41  | 269.0 | 78.0 | 85.0 |
| Rsa1.0_02066.1.g31925.t1 | pir H85073  probable transposon protein [imported] - Arabidopsis thaliana gi 5032279 gb AAD38227.1 AF147264.10 may be a pseudogene [Arabidopsis thaliana] gi 7267351 emb CAB81124.1  putative transposon protein [Arabidopsis thaliana] | 385  | 483  | 3.00E-53  | 125.5  | 29.9 | 39.5 | probable transposon protein            | gbpln | Arabidopsis thaliana | AT3G42170.1   Symbols:   BED zinc finger ;hAT family dimerisation domain   chr3:14321839-14323928 FORWARD LENGTH=696                                                                                                                                                                                                                                                                           | 385  | 696  | 6.00E-26  | 180.8 | 20.8 | 30.6 |
| Rsa1.0_02066.1.g31926.t1 | #                                                                                                                                                                                                                                       | #    | #    | #         | #      | #    | -    | ----                                   | ----  | #                    | #                                                                                                                                                                                                                                                                                                                                                                                              | #    | #    | #         | #     | #    |      |
| Rsa1.0_02066.1.g31927.t1 | gb ACA61620.1  hypothetical protein AP6_E08.1 [Arabidopsis lyrata subsp. petraea]                                                                                                                                                       | 136  | 220  | 6.00E-29  | 161.8  | 47.8 | 55.9 | hypothetical protein AP6_E08.1         | gbpln | Arabidopsis lyrata   | AT4G01590.2   Symbols:   unknown protein; BEST Arabidopsis thaliana protein match is: Arabidopsis protein of unknown function (DUF241) (TAIR:AT4G35690.1); Has 35333 Blast hits to 34131 proteins in 2444 species: Archae - 798; Bacteria - 22429; Metazoa - 974; Fungi - 991; Plants - 531; Viruses - 0; Other Eukaryotes - 9610 (source: NCBI BLINK)   chr4:689077-690192 REVERSE LENGTH=199 | 136  | 199  | 6.00E-27  | 146.3 | 58.1 | 68.4 |
| Rsa1.0_02066.1.g31928.t1 | dbj BAB01313.1  serine carboxypeptidase I [Arabidopsis thaliana]                                                                                                                                                                        | 510  | 504  | 0         | 98.8   | 75.1 | 85.7 | serine carboxypeptidase I              | gbpln | Arabidopsis thaliana | AT3G25420.1   Symbols: scpl21   serine carboxypeptidase-like 21   chr3:9217832-9220836 FORWARD LENGTH=505                                                                                                                                                                                                                                                                                      | 510  | 505  | 0         | 99.0  | 73.7 | 84.5 |
| Rsa1.0_02066.1.g31929.t1 | #                                                                                                                                                                                                                                       | #    | #    | #         | #      | #    | -    | ----                                   | ----  | #                    | #                                                                                                                                                                                                                                                                                                                                                                                              | #    | #    | #         | #     | #    |      |
| Rsa1.0_02067.1.g31930.t1 | dbj BAJ34474.1  unnamed protein product [Thellungiella halophila]                                                                                                                                                                       | 110  | 225  | 5.00E-51  | 204.5  | 89.1 | 96.4 | unnamed protein product                | ----  | ----                 | AT2G29450.1   Symbols: ATGSTU5, ATGSTU1, AT103-1A, GSTU5   glutathione S-transferase tau 5   chr2:12624774-12625566 REVERSE LENGTH=224                                                                                                                                                                                                                                                         | 110  | 224  | 6.00E-53  | 203.6 | 85.5 | 94.5 |
| Rsa1.0_02067.1.g31931.t1 | ref[XP_002884534.1] hypothetical protein ARALYDRAFT_477873 [Arabidopsis lyrata subsp. lyrata] gi 297330374 gb EFH60793.1  hypothetical protein ARALYDRAFT_477873 [Arabidopsis lyrata subsp. lyrata]                                     | 851  | 940  | 0         | 110.5  | 69.6 | 80.1 | hypothetical protein ARALYDRAFT_477873 | gbpln | Arabidopsis lyrata   | AT3G05790.1   Symbols: LON4   lon protease 4   chr3:1720154-1725182 REVERSE LENGTH=942                                                                                                                                                                                                                                                                                                         | 851  | 942  | 0         | 110.7 | 69.4 | 79.6 |
| Rsa1.0_02067.1.g31932.t1 | ref[XP_002881142.1] hypothetical protein ARALYDRAFT_344858 [Arabidopsis lyrata subsp. lyrata] gi 297326981 gb EFH57401.1  hypothetical protein ARALYDRAFT_344858 [Arabidopsis lyrata subsp. lyrata]                                     | 1878 | 1853 | 0         | 98.7   | 80.5 | 88.0 | hypothetical protein ARALYDRAFT_344858 | gbpln | Arabidopsis lyrata   | AT1G49340.1   Symbols: ATP14K ALPHA   Phosphatidylinositol 3- and 4-kinase family protein   chr1:18252355-18263967 FORWARD LENGTH=2028                                                                                                                                                                                                                                                         | 1878 | 2028 | 0         | 108.0 | 72.3 | 79.5 |

|                           |                                                                                                                                                                                                                                                                                                                                                                                                                                                                                                                                                                                                                                                |     |      |           |       |      |      |                                                 |       |                      |                                                                                                                                                                                                                                                                                                                                              |     |      |           |       |      |      |
|---------------------------|------------------------------------------------------------------------------------------------------------------------------------------------------------------------------------------------------------------------------------------------------------------------------------------------------------------------------------------------------------------------------------------------------------------------------------------------------------------------------------------------------------------------------------------------------------------------------------------------------------------------------------------------|-----|------|-----------|-------|------|------|-------------------------------------------------|-------|----------------------|----------------------------------------------------------------------------------------------------------------------------------------------------------------------------------------------------------------------------------------------------------------------------------------------------------------------------------------------|-----|------|-----------|-------|------|------|
| Rsa1.0_02068.1.g31933.t1  | emb[CAB87869.1] bZIP protein [Arabidopsis thaliana]                                                                                                                                                                                                                                                                                                                                                                                                                                                                                                                                                                                            | 91  | 493  | 9.00E-42  | 541.8 | 89.0 | 96.7 | bZIP protein                                    | gbpln | Arabidopsis thaliana | AT3G60320.1   Symbols:   Protein of unknown function (DUF630 and DUF632)   chr3:22292073-22295228 REVERSE LENGTH=796                                                                                                                                                                                                                         | 91  | 796  | 2.00E-44  | 874.7 | 89.0 | 96.7 |
| Rsa1.0_02068.1.g31934.t1  | gb[EOA24750.1] hypothetical protein CARUB_v10018027mg [Capsella rubella]                                                                                                                                                                                                                                                                                                                                                                                                                                                                                                                                                                       | 241 | 208  | 5.00E-53  | 86.3  | 56.0 | 65.6 | hypothetical protein CARUB_v10018027mg          | gbpln | Capsella rubella     | AT3G60280.1   Symbols: UCC3   uelacyanin 3   chr3:22279867-22280633 REVERSE LENGTH=222                                                                                                                                                                                                                                                       | 241 | 222  | 4.00E-50  | 92.1  | 56.0 | 65.1 |
| Rsa1.0_02068.1.g31935.t1  | ref[XP_002876544.1] hypothetical protein ARALYDRAFT_486497 [Arabidopsis lyrata subsp. lyrata] gi 297322382 gb EFH52803.1                                                                                                                                                                                                                                                                                                                                                                                                                                                                                                                       | 274 | 266  | 1.00E-139 | 97.1  | 89.4 | 92.7 | hypothetical protein ARALYDRAFT_486497          | gbpln | Arabidopsis lyrata   | AT3G60260.4   Symbols:   ELMO/CED-12 family protein   chr3:22274303-22276839 FORWARD LENGTH=266                                                                                                                                                                                                                                              | 274 | 266  | 1.00E-141 | 97.1  | 88.3 | 92.3 |
| Rsa1.0_02068.1.g31936.t1  | ref[XP_002878325.1] hypothetical protein ARALYDRAFT_486495 [Arabidopsis lyrata subsp. lyrata] gi 297324163 gb EFH54584.1                                                                                                                                                                                                                                                                                                                                                                                                                                                                                                                       | 193 | 278  | 1.00E-97  | 144.0 | 91.2 | 94.8 | hypothetical protein ARALYDRAFT_486495          | gbpln | Arabidopsis lyrata   | AT3G60250.1   Symbols: CKB3   casein kinase II beta chain 3   chr3:22270714-22271962 REVERSE LENGTH=276                                                                                                                                                                                                                                      | 193 | 276  | 3.00E-97  | 143.0 | 88.6 | 94.8 |
| Rsa1.0_02068.1.g31937.t1  | gb[EOA24984.1] hypothetical protein CARUB_v10018281mg, partial [Capsella rubella]                                                                                                                                                                                                                                                                                                                                                                                                                                                                                                                                                              | 117 | 109  | 7.00E-46  | 93.2  | 78.6 | 80.3 | hypothetical protein CARUB_v10018281mg, partial | gbpln | Capsella rubella     | AT3G60245.1   Symbols:   Zinc-binding ribosomal protein family protein   chr3:22268803-22269750 FORWARD LENGTH=92                                                                                                                                                                                                                            | 117 | 92   | 2.00E-47  | 78.6  | 77.8 | 77.8 |
| Rsa1.0_02068.1.g31938.t1  | gb[EOA13649.1] hypothetical protein CARUB_v10026720mg [Capsella rubella]                                                                                                                                                                                                                                                                                                                                                                                                                                                                                                                                                                       | 318 | 343  | 1.00E-142 | 107.9 | 84.0 | 89.6 | hypothetical protein CARUB_v10026720mg          | gbpln | Capsella rubella     | AT5G42520.1   Symbols: BPC6, BBR/BPC6, ATBPC6   basic pentacysteine 6   chr5:17001287-17002466 FORWARD LENGTH=342                                                                                                                                                                                                                            | 318 | 342  | 1.00E-142 | 107.5 | 85.2 | 90.3 |
| Rsa1.0_02068.1.g31939.t1  | ref[XP_002876541.1] hypothetical protein ARALYDRAFT_907544 [Arabidopsis lyrata subsp. lyrata] gi 297322379 gb EFH52800.1                                                                                                                                                                                                                                                                                                                                                                                                                                                                                                                       | 89  | 96   | 3.00E-28  | 107.9 | 75.3 | 87.6 | hypothetical protein ARALYDRAFT_907544          | gbpln | Arabidopsis lyrata   | AT2G44670.1   Symbols:   Protein of unknown function (DUF581)   chr2:18425279-18425673 FORWARD LENGTH=93                                                                                                                                                                                                                                     | 89  | 93   | 1.00E-29  | 104.5 | 68.5 | 80.9 |
| Rsa1.0_02068.1.g31940.t1  | gb[EOA36622.1] hypothetical protein CARUB_v10011860mg [Capsella rubella]                                                                                                                                                                                                                                                                                                                                                                                                                                                                                                                                                                       | 101 | 181  | 6.00E-12  | 179.2 | 53.5 | 56.4 | hypothetical protein CARUB_v10011860mg          | gbpln | Capsella rubella     | AT1G14060.1   Symbols:   GCK domain-containing protein   chr1:4817354-4817893 REVERSE LENGTH=179                                                                                                                                                                                                                                             | 101 | 179  | 4.00E-11  | 177.2 | 49.5 | 55.4 |
| Rsa1.0_02068.1.g31941.t1  | ref[NP_191325.1] DNA-directed RNA polymerase I subunit A1 [Arabidopsis thaliana] gi 4678281 emb[CAB41189.1] DNA-directed RNA polymerase I 190K chain-like protein [Arabidopsis thaliana] gi 332646163 gb AAE79684.1                                                                                                                                                                                                                                                                                                                                                                                                                            | 356 | 1670 | 4.00E-92  | 469.1 | 46.1 | 49.2 | DNA-directed RNA polymerase I subunit A1        | gbpln | Arabidopsis thaliana | AT3G57660.1   Symbols: NRPA1   nuclear RNA polymerase A1   chr3:21353746-21362814 FORWARD LENGTH=1670                                                                                                                                                                                                                                        | 356 | 1670 | 1.00E-94  | 469.1 | 46.1 | 49.2 |
| Rsa1.0_02068.1.g31942.t20 | ref[XP_004150620.1] PREDICTED: dynamin-related protein 1C-like [Cucumis sativus]                                                                                                                                                                                                                                                                                                                                                                                                                                                                                                                                                               | 686 | 548  | 1.00E-129 | 79.9  | 39.9 | 50.0 | PREDICTED: dynamin-related protein 1C-like      | gbpln | Cucumis sativus      | AT3G60190.1   Symbols: ADL4, ADLP2, EDR3, DRP1E, ADL1E, DL1E   DYNAMIN-like 1E   chr3:22244367-22247651 REVERSE LENGTH=624                                                                                                                                                                                                                   | 686 | 624  | 1.00E-124 | 91.0  | 32.8 | 35.1 |
| Rsa1.0_02068.1.g31943.t1  | ref[NP_191581.1] E3 ubiquitin-protein ligase ATL4 [Arabidopsis thaliana] gi 68565314 sp Q9LY41.1 ATL4_ARATH RecName: Full=E3 ubiquitin-protein ligase ATL4; AltName: Full=Protein ARABIDOPSIS TOXICOS EN LEVADURA 4; Short=Protein ATL4; AltName: Full=RING-H2 finger protein ATL4; AltName: Full=RING-H2 finger protein RHX1a gi 7576198 emb[CAB87859.1] RING-H2 zinc finger protein ATL4 [Arabidopsis thaliana] gi 66865934 gb AA57601.1] RING finger family protein [Arabidopsis thaliana] gi 114050661 gb ABI49480.1] At3g60220 [Arabidopsis thaliana] gi 332646504 gb AAE80025.1] E3 ubiquitin-protein ligase ATL4 [Arabidopsis thaliana] | 315 | 334  | 1.00E-109 | 106.0 | 76.5 | 85.1 | E3 ubiquitin-protein ligase ATL4                | gbpln | Arabidopsis thaliana | AT3G60220.1   Symbols: ATL4, TL4   TOXICOS EN LEVADURA 4   chr3:22254790-22255794 REVERSE LENGTH=334                                                                                                                                                                                                                                         | 315 | 334  | 1.00E-111 | 106.0 | 76.5 | 85.1 |
| Rsa1.0_02068.1.g31944.t1  | ref[NP_191579.1] uncharacterized protein [Arabidopsis thaliana] gi 7076773 emb[CAB75935.1] putative protein [Arabidopsis thaliana] gi 17979089 gb AL49812.1] unknown protein [Arabidopsis thaliana] gi 21436193 gb AAM51384.1] unknown protein [Arabidopsis thaliana] gi 332646502 gb AAE80023.1] uncharacterized protein AT3G60200 [Arabidopsis thaliana]                                                                                                                                                                                                                                                                                     | 86  | 305  | 2.00E-29  | 354.7 | 82.6 | 90.7 | uncharacterized protein                         | gbpln | Arabidopsis thaliana | AT3G60200.1   Symbols:   unknown protein; BEST Arabidopsis thaliana protein match is: unknown protein (TAIR:AT2G44600.1); Has 60 Blast hits to 60 proteins in 12 species: Archae - 0; Bacteria - 0; Metazoa - 8; Fungi - 0; Plants - 51; Viruses - 0; Other Eukaryotes - 1 (source: NCBI BLINK).   chr3:22248320-22250237 FORWARD LENGTH=305 | 86  | 305  | 3.00E-32  | 354.7 | 82.6 | 90.7 |

|                          |                                                                                                                                                                                                                                                                                                                                                                                                                                                                                                                                                                                                                                                                                                                                                                                                                                                                                                                                                                                                                                                                                                                                                                                                                                                                                                                                                                                                                                                                                                                                                                                                                                                                                                                                                                                                                                                             |     |     |           |       |       |       |                                                     |       |                      |                                                                                                                                                                       |     |      |           |       |      |      |
|--------------------------|-------------------------------------------------------------------------------------------------------------------------------------------------------------------------------------------------------------------------------------------------------------------------------------------------------------------------------------------------------------------------------------------------------------------------------------------------------------------------------------------------------------------------------------------------------------------------------------------------------------------------------------------------------------------------------------------------------------------------------------------------------------------------------------------------------------------------------------------------------------------------------------------------------------------------------------------------------------------------------------------------------------------------------------------------------------------------------------------------------------------------------------------------------------------------------------------------------------------------------------------------------------------------------------------------------------------------------------------------------------------------------------------------------------------------------------------------------------------------------------------------------------------------------------------------------------------------------------------------------------------------------------------------------------------------------------------------------------------------------------------------------------------------------------------------------------------------------------------------------------|-----|-----|-----------|-------|-------|-------|-----------------------------------------------------|-------|----------------------|-----------------------------------------------------------------------------------------------------------------------------------------------------------------------|-----|------|-----------|-------|------|------|
| Rsa1.0_02069.1.g31945.t1 | gb AAA63472.1  storage protein, partial [Raphanus sativus]                                                                                                                                                                                                                                                                                                                                                                                                                                                                                                                                                                                                                                                                                                                                                                                                                                                                                                                                                                                                                                                                                                                                                                                                                                                                                                                                                                                                                                                                                                                                                                                                                                                                                                                                                                                                  | 75  | 174 | 1.00E-34  | 232.0 | 100.0 | 100.0 | storage protein, partial                            | gbpln | Raphanus sativus     | AT4G27140.1   Symbols: SESA1, AT2S1   seed storage albumin 1   chr4:13607363-13607857 FORWARD LENGTH=164                                                              | 75  | 164  | 3.00E-13  | 218.7 | 50.7 | 58.7 |
| Rsa1.0_02069.1.g31946.t1 | ref NP_567768.1  kinesin 2 [Arabidopsis thaliana]<br>gi 1170620 sp P48664.1 ATK2_ARATH<br>RecName: Full=Kinesin-2; AltName: Full=Kinesin-like protein B<br>gi 1438842 db BAA04673.1  heavy chain polypeptide of kinesin-like protein [Arabidopsis thaliana]<br>gi 332659910 gb AEE85310.1  kinesin 2 [Arabidopsis thaliana]                                                                                                                                                                                                                                                                                                                                                                                                                                                                                                                                                                                                                                                                                                                                                                                                                                                                                                                                                                                                                                                                                                                                                                                                                                                                                                                                                                                                                                                                                                                                 | 718 | 745 | 0         | 103.8 | 91.4  | 95.7  | kinesin 2                                           | gbpln | Arabidopsis thaliana | AT4G27180.1   Symbols: ATK2, KATB   kinesin 2   chr4:13615057-13618689 REVERSE LENGTH=745                                                                             | 718 | 745  | 0         | 103.8 | 91.4 | 95.7 |
| Rsa1.0_02069.1.g31947.t1 | gb EOA23804.1  hypothetical protein CARUB_v10017017mg, partial [Capsella rubella]<br>ref NP_194449.1  NB-ARC domain-containing disease resistance protein [Arabidopsis thaliana]<br>gi 46396029 sp Q9T048.1 DRLL27_ARATH<br>RecName: Full=Disease resistance protein At4g27190<br>gi 4490715 emb CAB38849.1  putative protein [Arabidopsis thaliana]<br>gi 7269572 emb CAB79574.1  putative protein [Arabidopsis thaliana]<br>gi 91806730 gb ABE6092.1  disease resistance protein [Arabidopsis thaliana] gi 332659911 gb AEE85311.1  NB-ARC domain-containing disease resistance protein [Arabidopsis thaliana]                                                                                                                                                                                                                                                                                                                                                                                                                                                                                                                                                                                                                                                                                                                                                                                                                                                                                                                                                                                                                                                                                                                                                                                                                                            | 173 | 521 | 5.00E-14  | 301.2 | 20.8  | 31.2  | hypothetical protein CARUB_v10017017mg, partial     | gbpln | Capsella rubella     | #                                                                                                                                                                     | #   | #    | #         | #     | #    | #    |
| Rsa1.0_02069.1.g31948.t1 | ref NP_194449.1  NB-ARC domain-containing disease resistance protein [Arabidopsis thaliana]<br>gi 46396029 sp Q9T048.1 DRLL27_ARATH<br>RecName: Full=Disease resistance protein At4g27190<br>gi 4490715 emb CAB38849.1  putative protein [Arabidopsis thaliana]<br>gi 7269572 emb CAB79574.1  putative protein [Arabidopsis thaliana]<br>gi 91806730 gb ABE6092.1  disease resistance protein [Arabidopsis thaliana] gi 332659911 gb AEE85311.1  NB-ARC domain-containing disease resistance protein [Arabidopsis thaliana]<br>ref NP_194453.1  histone H2A 2 [Arabidopsis thaliana]<br>gi 334186954 ref NP_001190852.1  histone H2A 2 [Arabidopsis thaliana]<br>gi 75279005 sp O81826.1 H2A3_ARATH<br>RecName: Full=Probable histone H2A.3; AltName: Full=HTA2<br>gi 3269284 emb CAA19717.1  histone H2A-like protein [Arabidopsis thaliana]<br>gi 7269576 emb CAB79578.1  histone H2A-like protein [Arabidopsis thaliana]<br>gi 28973733 gb AAO64183.1  putative histone H2A [Arabidopsis thaliana]<br>gi 29824201 gb AAP04061.1  putative histone H2A [Arabidopsis thaliana]<br>gi 110736764 db B AF00343.1  histone H2A-like protein [Arabidopsis thaliana]<br>gi 332659913 gb AEE85313.1  histone H2A 2 [Arabidopsis thaliana]<br>gi 332659914 gb AEE85314.1  histone H2A 2 [Arabidopsis thaliana]<br>ref XP_002869573.1  predicted protein [Arabidopsis lyrata subsp. lyrata]<br>gi 297315409 gb EFH45832.1  predicted protein [Arabidopsis lyrata subsp. lyrata]<br>gb AAM98191.1  unknown protein [Arabidopsis thaliana]<br>gi 38603004 gb ARF24647.1  At2g23330 [Arabidopsis thaliana]<br>gi 110742535 db BAE99183.1  putative retroelement pol polyprotein [Arabidopsis thaliana]<br>ref XP_002880308.1  predicted protein [Arabidopsis lyrata subsp. lyrata]<br>gi 297326147 gb EFH45857.1  predicted protein [Arabidopsis lyrata subsp. lyrata] | 980 | 985 | 0         | 100.5 | 67.9  | 80.9  | NB-ARC domain-containing disease resistance protein | gbpln | Arabidopsis thaliana | AT4G27190.1   Symbols:   NB-ARC domain-containing disease resistance protein   chr4:13620977-13623934 REVERSE LENGTH=985                                              | 980 | 985  | 0         | 100.5 | 67.9 | 80.9 |
| Rsa1.0_02069.1.g31949.t1 | ref NP_194453.1  histone H2A 2 [Arabidopsis thaliana]<br>gi 334186954 ref NP_001190852.1  histone H2A 2 [Arabidopsis thaliana]<br>gi 75279005 sp O81826.1 H2A3_ARATH<br>RecName: Full=Probable histone H2A.3; AltName: Full=HTA2<br>gi 3269284 emb CAA19717.1  histone H2A-like protein [Arabidopsis thaliana]<br>gi 7269576 emb CAB79578.1  histone H2A-like protein [Arabidopsis thaliana]<br>gi 28973733 gb AAO64183.1  putative histone H2A [Arabidopsis thaliana]<br>gi 29824201 gb AAP04061.1  putative histone H2A [Arabidopsis thaliana]<br>gi 110736764 db B AF00343.1  histone H2A-like protein [Arabidopsis thaliana]<br>gi 332659913 gb AEE85313.1  histone H2A 2 [Arabidopsis thaliana]<br>gi 332659914 gb AEE85314.1  histone H2A 2 [Arabidopsis thaliana]<br>ref XP_002869573.1  predicted protein [Arabidopsis lyrata subsp. lyrata]<br>gi 297315409 gb EFH45832.1  predicted protein [Arabidopsis lyrata subsp. lyrata]<br>gb AAM98191.1  unknown protein [Arabidopsis thaliana]<br>gi 38603004 gb ARF24647.1  At2g23330 [Arabidopsis thaliana]<br>gi 110742535 db BAE99183.1  putative retroelement pol polyprotein [Arabidopsis thaliana]<br>ref XP_002880308.1  predicted protein [Arabidopsis lyrata subsp. lyrata]<br>gi 297326147 gb EFH45857.1  predicted protein [Arabidopsis lyrata subsp. lyrata]                                                                                                                                                                                                                                                                                                                                                                                                                                                                                                                                | 132 | 131 | 8.00E-66  | 99.2  | 97.7  | 99.2  | histone H2A 2                                       | gbpln | Arabidopsis thaliana | AT4G27230.2   Symbols: HTA2   histone H2A 2   chr4:13637515-13638325 REVERSE LENGTH=131                                                                               | 132 | 131  | 2.00E-68  | 99.2  | 97.7 | 99.2 |
| Rsa1.0_02069.1.g31950.t1 | ref XP_002869573.1  predicted protein [Arabidopsis lyrata subsp. lyrata]<br>gi 297315409 gb EFH45832.1  predicted protein [Arabidopsis lyrata subsp. lyrata]<br>gb AAM98191.1  unknown protein [Arabidopsis thaliana]<br>gi 38603004 gb ARF24647.1  At2g23330 [Arabidopsis thaliana]<br>gi 110742535 db BAE99183.1  putative retroelement pol polyprotein [Arabidopsis thaliana]<br>ref XP_002880308.1  predicted protein [Arabidopsis lyrata subsp. lyrata]<br>gi 297326147 gb EFH45857.1  predicted protein [Arabidopsis lyrata subsp. lyrata]                                                                                                                                                                                                                                                                                                                                                                                                                                                                                                                                                                                                                                                                                                                                                                                                                                                                                                                                                                                                                                                                                                                                                                                                                                                                                                            | 447 | 430 | 0         | 96.2  | 78.3  | 85.2  | predicted protein                                   | gbpln | Arabidopsis lyrata   | AT4G27240.1   Symbols:   zinc finger (C2H2 type) family protein   chr4:13640160-13641640 FORWARD LENGTH=431                                                           | 447 | 431  | 0         | 96.4  | 75.8 | 82.8 |
| Rsa1.0_02069.1.g31951.t1 | gb AAM98191.1  unknown protein [Arabidopsis thaliana]<br>gi 38603004 gb ARF24647.1  At2g23330 [Arabidopsis thaliana]<br>gi 110742535 db BAE99183.1  putative retroelement pol polyprotein [Arabidopsis thaliana]<br>ref XP_002880308.1  predicted protein [Arabidopsis lyrata subsp. lyrata]<br>gi 297326147 gb EFH45857.1  predicted protein [Arabidopsis lyrata subsp. lyrata]                                                                                                                                                                                                                                                                                                                                                                                                                                                                                                                                                                                                                                                                                                                                                                                                                                                                                                                                                                                                                                                                                                                                                                                                                                                                                                                                                                                                                                                                            | 195 | 776 | 8.00E-75  | 397.9 | 64.6  | 83.6  | unknown protein                                     | gbpln | Arabidopsis thaliana | AT4G23160.1   Symbols: CRK8   cysteine-rich RLK (RECEPTOR-like protein kinase) 8   chr4:12129485-12134086 FORWARD LENGTH=1262                                         | 195 | 1262 | 2.00E-36  | 647.2 | 32.3 | 50.3 |
| Rsa1.0_02070.1.g31952.t1 | ref XP_002880308.1  predicted protein [Arabidopsis lyrata subsp. lyrata]<br>gi 297326147 gb EFH45857.1  predicted protein [Arabidopsis lyrata subsp. lyrata]                                                                                                                                                                                                                                                                                                                                                                                                                                                                                                                                                                                                                                                                                                                                                                                                                                                                                                                                                                                                                                                                                                                                                                                                                                                                                                                                                                                                                                                                                                                                                                                                                                                                                                | 979 | 985 | 0         | 100.6 | 88.5  | 93.3  | predicted protein                                   | gbpln | Arabidopsis lyrata   | AT2G47500.1   Symbols:   P-loop nucleoside triphosphate hydrolases superfamily protein with CH (Calponin Homology) domain   chr2:19493247-19497882 FORWARD LENGTH=983 | 979 | 983  | 0         | 100.4 | 87.9 | 92.6 |
| Rsa1.0_02070.1.g31953.t1 | gb EOA27534.1  hypothetical protein CARUB_v10023674mg [Capsella rubella]                                                                                                                                                                                                                                                                                                                                                                                                                                                                                                                                                                                                                                                                                                                                                                                                                                                                                                                                                                                                                                                                                                                                                                                                                                                                                                                                                                                                                                                                                                                                                                                                                                                                                                                                                                                    | 310 | 314 | 1.00E-153 | 101.3 | 91.9  | 95.5  | hypothetical protein CARUB_v10023674mg              | gbpln | Capsella rubella     | AT2G47490.1   Symbols: ATNDT1, NDT1   NAD+ transporter 1   chr2:19487549-19489311 FORWARD LENGTH=312                                                                  | 310 | 312  | 1.00E-153 | 100.6 | 91.6 | 95.2 |



|                          |                                                                                                                                                                                                                                                                                                                                                                                                                                                                                                                                    |     |      |           |       |      |       |                                                         |       |                      |                                                                                                                                                                                                                                                                                                                                                                    |     |      |           |       |      |       |
|--------------------------|------------------------------------------------------------------------------------------------------------------------------------------------------------------------------------------------------------------------------------------------------------------------------------------------------------------------------------------------------------------------------------------------------------------------------------------------------------------------------------------------------------------------------------|-----|------|-----------|-------|------|-------|---------------------------------------------------------|-------|----------------------|--------------------------------------------------------------------------------------------------------------------------------------------------------------------------------------------------------------------------------------------------------------------------------------------------------------------------------------------------------------------|-----|------|-----------|-------|------|-------|
| Rsa1.0_02070.1.g31954.t1 | refNP_973709.1  uncharacterized protein [Arabidopsis thaliana] gi 50253464 gb AAT71934.1  At2g47485 [Arabidopsis thaliana] gi 51972104 gb AAU15156.1  At2g47485 [Arabidopsis thaliana] gi 110738648 dbj BAF01249.1  hypothetical protein [Arabidopsis thaliana] gi 330255755 gb AEC10849.1  uncharacterized protein AT2G47485 [Arabidopsis thaliana]                                                                                                                                                                               | 142 | 141  | 2.00E-50  | 99.3  | 80.3 | 91.5  | uncharacterized protein                                 | gbpln | Arabidopsis thaliana | AT2G47485.1   Symbols:   unknown protein; BEST Arabidopsis thaliana protein match is: unknown protein (TAIR:AT3G62650.1); Has 35333 Blast hits to 34131 proteins in 2444 species: Archae - 798; Bacteria - 22429; Metazoa - 974; Fungi - 991; Plants - 531; Viruses - 0; Other Eukaryotes - 9610 (source: NCBI BLINK).   chr2:19486004-19486429 FORWARD LENGTH=141 | 142 | 141  | 5.00E-53  | 99.3  | 80.3 | 91.5  |
| Rsa1.0_02070.1.g31955.t1 | refNP_182270.1  uncharacterized protein [Arabidopsis thaliana] gi 2529679 gb AAC62862.1  hypothetical protein [Arabidopsis thaliana] gi 23092557 gb AAN08435.1  hypothetical protein [Arabidopsis thaliana] gi 50058797 gb AAT69143.1  hypothetical protein AT2g47480 [Arabidopsis thaliana] gi 62321768 dbj BAD95393.1  hypothetical protein [Arabidopsis thaliana] gi 110741322 dbj BAF02211.1  hypothetical protein [Arabidopsis thaliana] gi 330255754 gb AEC10848.1  uncharacterized protein AT2G47480 [Arabidopsis thaliana] | 111 | 110  | 5.00E-31  | 99.1  | 73.9 | 80.2  | uncharacterized protein                                 | gbpln | Arabidopsis thaliana | AT2G47480.1   Symbols:   Protein of unknown function (DUF3511)   chr2:19484207-19484539 REVERSE LENGTH=110                                                                                                                                                                                                                                                         | 111 | 110  | 9.00E-34  | 99.1  | 73.9 | 80.2  |
| Rsa1.0_02070.1.g31956.t1 | refXP_002880305.1  hypothetical protein ARALYDRAFT_904222 [Arabidopsis lyrata subsp. lyrata] gi 297326144 gb EFH56564.1  hypothetical protein ARALYDRAFT_904222 [Arabidopsis lyrata subsp. lyrata]                                                                                                                                                                                                                                                                                                                                 | 362 | 361  | 0         | 99.7  | 90.9 | 94.8  | hypothetical protein ARALYDRAFT_904222                  | gbpln | Arabidopsis lyrata   | AT2G47470.1   Symbols: ATPDIL2-1, UNE5, MEE30, PDI11, ATPD11   thioredoxin family protein   chr2:19481503-19483683 FORWARD LENGTH=361                                                                                                                                                                                                                              | 362 | 361  | 0         | 99.7  | 90.3 | 93.9  |
| Rsa1.0_02070.1.g31957.t1 | gb ADZ98867.1  MYB domain protein 12 [Brassica rapa subsp. rapa]                                                                                                                                                                                                                                                                                                                                                                                                                                                                   | 382 | 381  | 1.00E-180 | 99.7  | 88.2 | 94.5  | MYB domain protein 12                                   | gbpln | Brassica rapa        | AT2G47460.1   Symbols: MYB12, ATMYB12, PFG1   myb domain protein 12   chr2:19476438-19479242 FORWARD LENGTH=371                                                                                                                                                                                                                                                    | 382 | 371  | 1.00E-137 | 97.1  | 74.1 | 83.2  |
| Rsa1.0_02070.1.g31958.t1 | dbj BAA97099.1  retroelement pol polyprotein-like [Arabidopsis thaliana]                                                                                                                                                                                                                                                                                                                                                                                                                                                           | 789 | 1098 | 1.00E-159 | 139.2 | 38.1 | 47.4  | retroelement pol polyprotein-like                       | gbpln | Arabidopsis thaliana | AT1G21280.1   Symbols:   CONTAINS InterPro DOMAIN/s: Retrotransposon gag protein (InterPro:IPR005162); Has 707 Blast hits to 705 proteins in 25 species: Archae - 0; Bacteria - 0; Metazoa - 4; Fungi - 0; Plants - 703; Viruses - 0; Other Eukaryotes - 0 (source: NCBI BLINK).   chr1:7447690-7448403 REVERSE LENGTH=237                                         | 789 | 237  | 5.00E-31  | 30.0  | 9.8  | 16.1  |
| Rsa1.0_02070.1.g31959.t1 | gb ADG03603.1  galactinol synthase [Brassica napus]                                                                                                                                                                                                                                                                                                                                                                                                                                                                                | 340 | 342  | 0         | 100.6 | 93.5 | 96.8  | galactinol synthase                                     | gbpln | Brassica napus       | AT2G47180.1   Symbols: AtGolS1, GolS1   galactinol synthase 1   chr2:19369049-19370372 REVERSE LENGTH=344                                                                                                                                                                                                                                                          | 340 | 344  | 1.00E-178 | 101.2 | 88.5 | 92.4  |
| Rsa1.0_02070.1.g31960.t1 | gb AAF65512.1  ADP-ribosylation factor [Capsicum annuum] gi 37791223 gb AAR03592.1  ARF-like small GTPase [Brassica juncea] gi 482560625 gb EOA24816.1  hypothetical protein CARUB_v10018102mg [Capsella rubella] gi 482564310 gb EOA28500.1  hypothetical protein CARUB_v10024713mg [Capsella rubella]                                                                                                                                                                                                                            | 181 | 181  | 1.00E-102 | 100.0 | 99.4 | 100.0 | ADP-ribosylation factor                                 | gbpln | Brassica juncea      | AT3G62290.3   Symbols: ARFA1E   ADP-ribosylation factor A1E   chr3:23052287-23053545 FORWARD LENGTH=181                                                                                                                                                                                                                                                            | 181 | 181  | 1.00E-104 | 100.0 | 98.9 | 100.0 |
| Rsa1.0_02070.1.g31961.t4 | refXP_002864261.1  hypothetical protein ARALYDRAFT_331717 [Arabidopsis lyrata subsp. lyrata] gi 297310096 gb EFH40520.1  hypothetical protein ARALYDRAFT_331717 [Arabidopsis lyrata subsp. lyrata]                                                                                                                                                                                                                                                                                                                                 | 415 | 242  | 3.00E-19  | 58.3  | 15.9 | 26.7  | hypothetical protein ARALYDRAFT_331717                  | gbpln | Arabidopsis lyrata   | AT1G14800.1   Symbols:   Nucleic acid-binding, OB-fold-like protein   chr1:5099572-5102558 FORWARD LENGTH=384                                                                                                                                                                                                                                                      | 415 | 384  | 2.00E-14  | 92.5  | 14.5 | 22.7  |
| Rsa1.0_02070.1.g31962.t1 | gb ADF30183.1  boron transporter [Brassica napus] gi 294713708 gb ADF30191.1  boron transporter [Brassica napus]                                                                                                                                                                                                                                                                                                                                                                                                                   | 692 | 704  | 0         | 101.7 | 94.9 | 95.8  | boron transporter                                       | gbpln | Brassica napus       | AT2G47160.1   Symbols: BOR1   HCO3- transporter family   chr2:19357740-19360787 REVERSE LENGTH=704                                                                                                                                                                                                                                                                 | 692 | 704  | 0         | 101.7 | 92.9 | 94.9  |
| Rsa1.0_02071.1.g31963.t1 | refXP_002891750.1  ATPase, coupled to transmembrane movement of substances [Arabidopsis lyrata subsp. lyrata] gi 297337592 gb EFH68009.1  ATPase, coupled to transmembrane movement of substances [Arabidopsis lyrata subsp. lyrata]                                                                                                                                                                                                                                                                                               | 789 | 1119 | 0         | 141.8 | 84.8 | 90.7  | ATPase, coupled to transmembrane movement of substances | gbpln | Arabidopsis lyrata   | AT1G53390.1   Symbols:   P-loop containing nucleoside triphosphate hydrolases superfamily protein   chr1:19918197-19923579 FORWARD LENGTH=1109                                                                                                                                                                                                                     | 789 | 1109 | 0         | 140.6 | 83.8 | 90.0  |
| Rsa1.0_02071.1.g31964.t1 | gb EOA37213.1  hypothetical protein CARUB_v10010694mg [Capsella rubella]                                                                                                                                                                                                                                                                                                                                                                                                                                                           | 181 | 114  | 6.00E-51  | 63.0  | 54.1 | 54.1  | hypothetical protein CARUB_v10010694mg                  | gbpln | Capsella rubella     | AT1G53400.1   Symbols:   Ubiquitin domain-containing protein   chr1:19925009-19926400 FORWARD LENGTH=114                                                                                                                                                                                                                                                           | 181 | 114  | 4.00E-53  | 63.0  | 55.2 | 55.2  |

| Accession                | Gene Name                                                                                                                                                                                                                                                                                                                                                                                                         | Length | Start | End       | Score | Score | Score | Score                                         | Score                                                                                                      | Score                | Score                                                                                                                                              | Score                                                                                                                  | Score | Score     | Score | Score | Score | Score | Score |  |
|--------------------------|-------------------------------------------------------------------------------------------------------------------------------------------------------------------------------------------------------------------------------------------------------------------------------------------------------------------------------------------------------------------------------------------------------------------|--------|-------|-----------|-------|-------|-------|-----------------------------------------------|------------------------------------------------------------------------------------------------------------|----------------------|----------------------------------------------------------------------------------------------------------------------------------------------------|------------------------------------------------------------------------------------------------------------------------|-------|-----------|-------|-------|-------|-------|-------|--|
| Rsa1.0_02071.1.g31965.t6 | sp[COLGG8.1] Y5343_ARATH RecName: Full=Probable LRR receptor-like serine/threonine-protein kinase<br>At1g53430; Flags: Precursor<br>g 224589438 gb ACN59253.1  leucine-rich repeat receptor-like protein kinase [Arabidopsis thaliana]                                                                                                                                                                            | 1045   | 1038  | 0         | 99.3  | 79.2  | 87.6  | 87.6                                          | At1g53430; Flags: Precursor<br>g 224589438 gb ACN59253.1  leucine-rich repeat receptor-like protein kinase | gbpln                | Arabidopsis thaliana                                                                                                                               | AT1G53430.1   Symbols:   Leucine-rich repeat transmembrane protein kinase   chr1:19935298-19940959 FORWARD LENGTH=1030 | 1045  | 1030      | 0     | 98.6  | 78.5  | 86.8  |       |  |
| Rsa1.0_02071.1.g31966.t1 | gb EOA31646.1  hypothetical protein CARUB_v10014847mg [Capsella rubella]                                                                                                                                                                                                                                                                                                                                          | 149    | 148   | 3.00E-71  | 99.3  | 87.9  | 93.3  | hypothetical protein CARUB_v10014847mg        | gbpln                                                                                                      | Capsella rubella     | AT2G06925.1   Symbols: ATSPAL2-ALPHA, PLA2-ALPHA   Phospholipase A2 family protein   chr2:2842475-2843212 REVERSE LENGTH=148                       | 149                                                                                                                    | 148   | 9.00E-74  | 99.3  | 87.2  | 93.3  |       |       |  |
| Rsa1.0_02071.1.g31967.t1 | ref NP_175754.2  RING/U-box domain-containing protein [Arabidopsis thaliana]<br>g 332194827 gb AE32948.1  RING/U-box domain-containing protein [Arabidopsis thaliana]                                                                                                                                                                                                                                             | 321    | 304   | 1.00E-159 | 94.7  | 85.0  | 89.1  | RING/U-box domain-containing protein          | gbpln                                                                                                      | Arabidopsis thaliana | AT1G53490.1   Symbols:   RING/U-box superfamily protein   chr1:19965146-19966811 FORWARD LENGTH=304                                                | 321                                                                                                                    | 304   | 1.00E-161 | 94.7  | 85.0  | 89.1  |       |       |  |
| Rsa1.0_02071.1.g31968.t1 | ref XP_002894444.1  mucilage-modified 4 [Arabidopsis lyrata subsp. lyrata]<br>g 297340286 gb EFH70703.1  mucilage-modified 4 [Arabidopsis lyrata subsp. lyrata]                                                                                                                                                                                                                                                   | 497    | 668   | 0         | 134.4 | 94.2  | 96.8  | mucilage-modified 4                           | gbpln                                                                                                      | Arabidopsis lyrata   | AT1G53500.1   Symbols: MUM4, RHM2, ATRHM2, ATMUM4   NAD-dependent epimerase/dehydratase family protein   chr1:19967157-19969239 REVERSE LENGTH=667 | 497                                                                                                                    | 667   | 0         | 134.2 | 93.6  | 96.4  |       |       |  |
| Rsa1.0_02071.1.g31969.t1 | ref NP_175756.2  mitogen-activated protein kinase 18 [Arabidopsis thaliana]<br>g 334302931 sp Q9C5C0.4 MPK18_ARATH RecName: Full=Mitogen-activated protein kinase 18; Short=MAP kinase 18<br>g 332194829 gb AE32950.1  mitogen-activated protein kinase 18 [Arabidopsis thaliana]                                                                                                                                 | 320    | 615   | 1.00E-155 | 192.2 | 80.3  | 84.1  | mitogen-activated protein kinase 18           | gbpln                                                                                                      | Arabidopsis thaliana | AT1G53510.1   Symbols: ATPMK18, MPK18   mitogen-activated protein kinase 18   chr1:19970961-19974158 REVERSE LENGTH=615                            | 320                                                                                                                    | 615   | 1.00E-158 | 192.2 | 80.3  | 84.1  |       |       |  |
| Rsa1.0_02072.1.g31970.t1 | ref NP_189142.1  pentatricopeptide repeat-containing protein [Arabidopsis thaliana]<br>g 75273633 sp Q9LJR6.1 PP253_ARATH RecName: Full=Putative pentatricopeptide repeat-containing protein At3g25060, mitochondrial; Flags: Precursor<br>g 9293988 dbj BAB01891.1  unnamed protein product [Arabidopsis thaliana] g 332643452 gb AEE76973.1  pentatricopeptide repeat-containing protein [Arabidopsis thaliana] | 606    | 601   | 0         | 99.2  | 78.4  | 89.1  | pentatricopeptide repeat-containing protein   | gbpln                                                                                                      | Arabidopsis thaliana | AT3G25060.1   Symbols:   Tetratricopeptide repeat (TPR)-like superfamily protein   chr3:9128516-9130321 FORWARD LENGTH=601                         | 606                                                                                                                    | 601   | 0         | 99.2  | 78.4  | 89.1  |       |       |  |
| Rsa1.0_02072.1.g31971.t1 | ref XP_002862825.1  hypothetical protein ARALYDRAFT_920234 [Arabidopsis lyrata subsp. lyrata]<br>g 297308566 gb EFH39083.1  hypothetical protein ARALYDRAFT_920234 [Arabidopsis lyrata subsp. lyrata]<br>g 297331390 gb EFH61809.1  hypothetical protein ARALYDRAFT_898814 [Arabidopsis lyrata subsp. lyrata]                                                                                                     | 57     | 81    | 6.00E-18  | 142.1 | 73.7  | 82.5  | hypothetical protein ARALYDRAFT_920234        | gbpln                                                                                                      | Arabidopsis lyrata   | #                                                                                                                                                  | #                                                                                                                      | #     | #         | #     | #     | #     |       |       |  |
| Rsa1.0_02072.1.g31972.t1 | ref XP_002883569.1  hypothetical protein ARALYDRAFT_480012 [Arabidopsis lyrata subsp. lyrata]<br>g 297329409 gb EFH59828.1  hypothetical protein ARALYDRAFT_480012 [Arabidopsis lyrata subsp. lyrata]                                                                                                                                                                                                             | 215    | 215   | 1.00E-119 | 100.0 | 98.6  | 99.1  | hypothetical protein ARALYDRAFT_480012        | gbpln                                                                                                      | Arabidopsis lyrata   | AT3G25040.1   Symbols: ERD2B   endoplasmic reticulum retention defective 2B   chr3:9124479-9126051 FORWARD LENGTH=215                              | 215                                                                                                                    | 215   | 1.00E-120 | 100.0 | 97.2  | 98.1  |       |       |  |
| Rsa1.0_02072.1.g31973.t1 | ref NP_189132.2  Helicase/SANT-associated, DNA binding protein [Arabidopsis thaliana]<br>g 332643436 gb AEE76957.1  Helicase/SANT-associated, DNA binding protein [Arabidopsis thaliana]                                                                                                                                                                                                                          | 1913   | 1957  | 0         | 102.3 | 76.7  | 83.5  | Helicase/SANT-associated, DNA binding protein | gbpln                                                                                                      | Arabidopsis thaliana | AT3G24880.1   Symbols:   Helicase/SANT-associated, DNA binding protein   chr3:9086457-9095537 REVERSE LENGTH=1957                                  | 1913                                                                                                                   | 1957  | 0         | 102.3 | 76.7  | 83.5  |       |       |  |

|                          |                                                                                                                                                                                                                                                                                                                                                                                                                                                                                                                                                                                                                                                                                                                                                                                                                                             |     |     |           |       |      |      |                                                      |       |                      |                                                                                                                                                    |     |     |           |       |      |      |
|--------------------------|---------------------------------------------------------------------------------------------------------------------------------------------------------------------------------------------------------------------------------------------------------------------------------------------------------------------------------------------------------------------------------------------------------------------------------------------------------------------------------------------------------------------------------------------------------------------------------------------------------------------------------------------------------------------------------------------------------------------------------------------------------------------------------------------------------------------------------------------|-----|-----|-----------|-------|------|------|------------------------------------------------------|-------|----------------------|----------------------------------------------------------------------------------------------------------------------------------------------------|-----|-----|-----------|-------|------|------|
| Rsa1.0_02072.1.g31974.t1 | refNP_189127.1  60S ribosomal protein L13a-2 [Arabidopsis thaliana]<br>gi 17865564 sp Q9LRX8.1 R13A2_ARAT H RecName: Full=60S ribosomal protein L13a-2 gi 11994665 dbj BAB02893.1  60S ribosomal protein L13a-like [Arabidopsis thaliana]<br>gi 23297306 gb AANI2937.1  putative 60S ribosomal protein [Arabidopsis thaliana] gi 332643430 gb AEE76951.1  60S ribosomal protein L13a-2 [Arabidopsis thaliana]                                                                                                                                                                                                                                                                                                                                                                                                                               | 193 | 206 | 1.00E-100 | 106.7 | 95.9 | 96.9 | 60S ribosomal protein L13a-2                         | gbpln | Arabidopsis thaliana | AT3G24830.1   Symbols:   Ribosomal protein L13 family protein   chr3:9064613-9065871 FORWARD LENGTH=206                                            | 193 | 206 | 1.00E-102 | 106.7 | 95.9 | 96.9 |
| Rsa1.0_02072.1.g31975.t1 | refNP_176394.1  cysteine/histidine-rich C1 domain-containing protein [Arabidopsis thaliana]<br>gi 3367535 gb AAC28520.1  F8K4.22 [Arabidopsis thaliana]<br>gi 332195794 gb AEE33915.1  cysteine/histidine-rich C1 domain-containing protein [Arabidopsis thaliana]                                                                                                                                                                                                                                                                                                                                                                                                                                                                                                                                                                          | 643 | 743 | 0         | 115.6 | 56.9 | 69.8 | cysteine/histidine-rich C1 domain-containing protein | gbpln | Arabidopsis thaliana | AT1G62030.1   Symbols:   Cysteine/Histidine-rich C1 domain family protein   chr1:22924309-22926540 REVERSE LENGTH=743                              | 643 | 743 | 0         | 115.6 | 56.9 | 69.8 |
| Rsa1.0_02072.1.g31976.t1 | refXP_002866611.1  FK506-binding protein 12 kD [Arabidopsis lyrata subsp. lyrata] gi 297312446 gb EFH42870.1  FK506-binding protein 12 kD [Arabidopsis lyrata subsp. lyrata]<br>refNP_189125.1  cyclin-dependent kinase inhibitor 5 [Arabidopsis thaliana] gi 75273861 sp Q9LRYO.1 KRP5_ARATH RecName: Full=Cyclin-dependent kinase inhibitor 5; AltName: Full=Inhibitor/interactor of CDK protein 3; AltName: Full=KIP-related protein 5 gi 11994663 dbj BAB02891.1  unnamed protein product [Arabidopsis thaliana] gi 14422933 emb CAC41619.1  cyclin-dependent kinase inhibitor 5 [Arabidopsis thaliana]<br>gi 107738121 gb ABF83641.1  At3g24810 [Arabidopsis thaliana] gi 110737530 dbj BAF00707.1  hypothetical protein [Arabidopsis thaliana] gi 332643428 gb AEE76949.1  cyclin-dependent kinase inhibitor 5 [Arabidopsis thaliana] | 96  | 112 | 1.00E-46  | 116.7 | 95.8 | 99.0 | FK506-binding protein 12 kD                          | gbpln | Arabidopsis lyrata   | AT5G64350.1   Symbols: FKBP12, ATFKBP12   FK506-binding protein 12   chr5:25734810-25735990 REVERSE LENGTH=112                                     | 96  | 112 | 4.00E-48  | 116.7 | 93.8 | 95.8 |
| Rsa1.0_02072.1.g31977.t1 | refNP_189125.1  cyclin-dependent kinase inhibitor 5 [Arabidopsis thaliana] gi 14422933 emb CAC41619.1  cyclin-dependent kinase inhibitor 5 [Arabidopsis thaliana]<br>gi 107738121 gb ABF83641.1  At3g24810 [Arabidopsis thaliana] gi 110737530 dbj BAF00707.1  hypothetical protein [Arabidopsis thaliana] gi 332643428 gb AEE76949.1  cyclin-dependent kinase inhibitor 5 [Arabidopsis thaliana]                                                                                                                                                                                                                                                                                                                                                                                                                                           | 202 | 189 | 2.00E-56  | 93.6  | 61.4 | 72.3 | cyclin-dependent kinase inhibitor 5                  | gbpln | Arabidopsis thaliana | AT3G24810.1   Symbols: ICK3, KRP5   Cyclin-dependent kinase inhibitor family protein   chr3:9060990-9061742 FORWARD LENGTH=189                     | 202 | 189 | 8.00E-59  | 93.6  | 61.4 | 72.3 |
| Rsa1.0_02073.1.g31978.t1 | gb EOA17902.1  hypothetical protein CARUB_v10006311mg [Capsella rubella]                                                                                                                                                                                                                                                                                                                                                                                                                                                                                                                                                                                                                                                                                                                                                                    | 348 | 350 | 7.00E-68  | 100.6 | 47.1 | 60.1 | hypothetical protein CARUB_v10006311mg               | gbpln | Capsella rubella     | AT4G39756.1   Symbols:   Galactose oxidase/kelch repeat superfamily protein   chr4:18441756-18442880 FORWARD LENGTH=374                            | 348 | 374 | 4.00E-64  | 107.5 | 45.7 | 60.3 |
| Rsa1.0_02073.1.g31979.t1 | refXP_002890783.1  transferase family protein [Arabidopsis lyrata subsp. lyrata] gi 297336625 gb EFH67042.1  transferase family protein [Arabidopsis lyrata subsp. lyrata]<br>refNP_174188.1  GDSL esterase/lipase [Arabidopsis thaliana] gi 75101875 sp Q38894.1 GDL13_ARATH RecName: Full=GDSL esterase/lipase At1g28670; AltName: Full=Extracellular lipase At1g28670; Flags: Precursor gi 11456271 gb AAAS3262.1  lipase [Arabidopsis thaliana] gi 28452549 dbj BAC43359.1  putative lipase [Arabidopsis thaliana] gi 332192891 gb AEE31012.1  GDSL esterase/lipase [Arabidopsis thaliana]                                                                                                                                                                                                                                              | 451 | 450 | 0         | 99.8  | 86.3 | 92.5 | transferase family protein                           | gbpln | Arabidopsis lyrata   | AT1G28680.1   Symbols:   HXXXD-type acyl-transferase family protein   chr1:10078222-10079763 FORWARD LENGTH=451                                    | 451 | 451 | 0         | 100.0 | 87.4 | 93.6 |
| Rsa1.0_02073.1.g31980.t1 | refNP_174188.1  GDSL esterase/lipase [Arabidopsis thaliana] gi 75101875 sp Q38894.1 GDL13_ARATH RecName: Full=GDSL esterase/lipase At1g28670; AltName: Full=Extracellular lipase At1g28670; Flags: Precursor gi 11456271 gb AAAS3262.1  lipase [Arabidopsis thaliana] gi 28452549 dbj BAC43359.1  putative lipase [Arabidopsis thaliana] gi 332192891 gb AEE31012.1  GDSL esterase/lipase [Arabidopsis thaliana]                                                                                                                                                                                                                                                                                                                                                                                                                            | 400 | 384 | 0         | 96.0  | 76.8 | 85.5 | GDSL esterase/lipase                                 | gbpln | Arabidopsis thaliana | AT1G28670.1   Symbols: ARAB-1   GDSL-like Lipase/Acylhydrolase superfamily protein   chr1:10074669-10076250 REVERSE LENGTH=384                     | 400 | 384 | 0         | 96.0  | 76.8 | 85.5 |
| Rsa1.0_02073.1.g31981.t1 | refXP_002864594.1  hypothetical protein ARALYDRAFT_919094 [Arabidopsis lyrata subsp. lyrata] gi 297310429 gb EFH40853.1  hypothetical protein ARALYDRAFT_919094 [Arabidopsis lyrata subsp. lyrata]                                                                                                                                                                                                                                                                                                                                                                                                                                                                                                                                                                                                                                          | 200 | 293 | 1.00E-41  | 146.5 | 53.5 | 66.5 | hypothetical protein ARALYDRAFT_919094               | gbpln | Arabidopsis lyrata   | AT1G35890.1   Symbols:   NAC (No Apical Meristem) domain transcriptional regulator superfamily protein   chr1:13341300-13341953 FORWARD LENGTH=171 | 200 | 171 | 4.00E-17  | 85.5  | 20.5 | 25.0 |
| Rsa1.0_02073.1.g31982.t1 | #                                                                                                                                                                                                                                                                                                                                                                                                                                                                                                                                                                                                                                                                                                                                                                                                                                           | #   | #   | #         | #     | #    | -    | ----                                                 | ----  | #                    | #                                                                                                                                                  | #   | #   | #         | #     | #    |      |
| Rsa1.0_02073.1.g31983.t1 | gb EOA22472.1  hypothetical protein CARUB_v10003127mg [Capsella rubella]                                                                                                                                                                                                                                                                                                                                                                                                                                                                                                                                                                                                                                                                                                                                                                    | 406 | 391 | 1.00E-144 | 96.3  | 69.0 | 80.3 | hypothetical protein CARUB_v10003127mg               | gbpln | Capsella rubella     | AT5G19100.1   Symbols:   Eukaryotic aspartyl protease family protein   chr5:6408242-6409417 REVERSE LENGTH=391                                     | 406 | 391 | 1.00E-141 | 96.3  | 68.7 | 79.3 |
| Rsa1.0_02073.1.g31984.t1 | #                                                                                                                                                                                                                                                                                                                                                                                                                                                                                                                                                                                                                                                                                                                                                                                                                                           | #   | #   | #         | #     | #    | -    | ----                                                 | ----  | #                    | #                                                                                                                                                  | #   | #   | #         | #     | #    |      |

|                          |                                                                                                                                                                                                                                                                                                                                                                                             |      |      |           |       |      |      |                                                                                                        |       |                      |                                                                                                                                              |      |     |           |       |      |      |
|--------------------------|---------------------------------------------------------------------------------------------------------------------------------------------------------------------------------------------------------------------------------------------------------------------------------------------------------------------------------------------------------------------------------------------|------|------|-----------|-------|------|------|--------------------------------------------------------------------------------------------------------|-------|----------------------|----------------------------------------------------------------------------------------------------------------------------------------------|------|-----|-----------|-------|------|------|
| Rsa1.0_02074.1.g31985.t1 | refXP_002891334.1  hypothetical protein ARALYDRAFT_891486 [Arabidopsis lyrata subsp. lyrata] gi 297337176 gb EFH67596.1                                                                                                                                                                                                                                                                     | 83   | 83   | 3.00E-20  | 100.0 | 69.9 | 74.7 | hypothetical protein ARALYDRAFT_891486                                                                 | gbpln | Arabidopsis lyrata   | #                                                                                                                                            | #    | #   | #         | #     | #    |      |
| Rsa1.0_02074.1.g31986.t1 | refXP_002891337.1  CYCA3.2 [Arabidopsis lyrata subsp. lyrata] gi 297337179 gb EFH67596.1  CYCA3.2 [Arabidopsis lyrata subsp. lyrata] ref NP_175159.1  gamma carbonic anhydrase 2 [Arabidopsis thaliana] gi 75169075 sp Q9C6B3.1 GCA2_ARATH RecName: Full=Gamma carbonic anhydrase 2, mitochondrial; Short=AtCA2; Short=GAMMA CA2; AltName: Full=Transcription factor APFI; Flags: Precursor | 356  | 368  | 1.00E-174 | 103.4 | 85.7 | 93.0 | CYCA3.2                                                                                                | gbpln | Arabidopsis lyrata   | AT1G47210.2   Symbols: CYCA3.2   cyclin-dependent protein kinase 3.2   chr1:17301036-17302584 FORWARD LENGTH=372                             | 356  | 372 | 1.00E-175 | 104.5 | 84.8 | 92.4 |
| Rsa1.0_02074.1.g31987.t1 | gi 12325399 gb AA652641.1 AC0079677.5 unknown protein; 6976-8939 [Arabidopsis thaliana] gi 15028353 gb AAK76653.1  unknown protein [Arabidopsis thaliana] gi 21280965 gb AM44984.1  unknown protein [Arabidopsis thaliana] gi 332194023 gb AEE32144.1  gamma carbonic anhydrase 2 [Arabidopsis thaliana]                                                                                    | 276  | 278  | 1.00E-142 | 100.7 | 89.5 | 94.2 | gamma carbonic anhydrase 2                                                                             | gbpln | Arabidopsis thaliana | AT1G47260.1   Symbols: APFI, GAMMA CA2   gamma carbonic anhydrase 2   chr1:17321384-17323347 REVERSE LENGTH=278                              | 276  | 278 | 1.00E-145 | 100.7 | 89.5 | 94.2 |
| Rsa1.0_02074.1.g31988.t1 | gb EOA40143.1  hypothetical protein CARUB_v10008853mg [Capsella rubella]                                                                                                                                                                                                                                                                                                                    | 496  | 522  | 0         | 105.2 | 90.5 | 93.8 | hypothetical protein CARUB_v10008853mg                                                                 | gbpln | Capsella rubella     | AT1G47330.1   Symbols:   CBS domain-containing protein with a domain of unknown function (DUF21)   chr1:17351149-17353739 FORWARD LENGTH=527 | 496  | 527 | 0         | 106.3 | 90.9 | 94.2 |
| Rsa1.0_02074.1.g31989.t1 | sp Q9SX90.1 PUP20_ARATH RecName: Full=Putative purine permease 20; Short=AtPUP20 gi 5668802 gb AAD46028.1 AC007519_13 F16N3.13 [Arabidopsis thaliana]                                                                                                                                                                                                                                       | 381  | 389  | 1.00E-103 | 102.1 | 48.0 | 53.5 | RecName: Full=Putative purine permease 20; Short=AtPUP20 gi 5668802 gb AAD46028.1 AC007519_13 F16N3.13 | gbpln | Arabidopsis thaliana | AT1G47603.1   Symbols: ATPUP19, PUP19   purine permease 19   chr1:17496839-17498110 REVERSE LENGTH=393                                       | 381  | 393 | 1.00E-92  | 103.1 | 44.1 | 50.7 |
| Rsa1.0_02074.1.g31990.t1 | refXP_002891372.1  hypothetical protein ARALYDRAFT_473903 [Arabidopsis lyrata subsp. lyrata] gi 297337214 gb EFH67631.1                                                                                                                                                                                                                                                                     | 198  | 415  | 6.00E-70  | 209.6 | 77.3 | 83.3 | hypothetical protein ARALYDRAFT_473903                                                                 | gbpln | Arabidopsis lyrata   | AT1G47580.1   Symbols:   Pentatricopeptide repeat (PPR) superfamily protein   chr1:17485668-17486387 FORWARD LENGTH=239                      | 198  | 239 | 8.00E-72  | 120.7 | 77.3 | 84.8 |
| Rsa1.0_02074.1.g31991.t1 | sp Q9SX90.1 PUP20_ARATH RecName: Full=Putative purine permease 20; Short=AtPUP20 gi 5668802 gb AAD46028.1 AC007519_13 F16N3.13 [Arabidopsis thaliana]                                                                                                                                                                                                                                       | 343  | 389  | 1.00E-152 | 113.4 | 76.7 | 84.0 | RecName: Full=Putative purine permease 20; Short=AtPUP20 gi 5668802 gb AAD46028.1 AC007519_13 F16N3.13 | gbpln | Arabidopsis thaliana | AT1G47603.1   Symbols: ATPUP19, PUP19   purine permease 19   chr1:17496839-17498110 REVERSE LENGTH=393                                       | 343  | 393 | 1.00E-139 | 114.6 | 74.6 | 82.2 |
| Rsa1.0_02074.1.g31992.t2 | refXP_002894065.1  amino acid transporter family protein [Arabidopsis lyrata subsp. lyrata] gi 297339907 gb EFH70324.1  amino acid transporter family protein [Arabidopsis lyrata subsp. lyrata]                                                                                                                                                                                            | 359  | 519  | 0         | 144.6 | 95.3 | 96.7 | amino acid transporter family protein                                                                  | gbpln | Arabidopsis lyrata   | AT1G47670.1   Symbols:   Transmembrane amino acid transporter family protein   chr1:17536834-17539486 REVERSE LENGTH=519                     | 359  | 519 | 0         | 144.6 | 95.0 | 96.4 |
| Rsa1.0_02075.1.g31993.t1 | #                                                                                                                                                                                                                                                                                                                                                                                           | #    | #    | #         | #     | #    | -    | ----                                                                                                   | ----  | #                    | #                                                                                                                                            | #    | #   | #         | #     |      |      |
| Rsa1.0_02075.1.g31994.t2 | emb CAB39638.1  RNA-directed DNA polymerase-ii-like protein [Arabidopsis thaliana] gi 7267666 emb CAB78094.1  RNA-directed DNA polymerase-ii-like protein [Arabidopsis thaliana]                                                                                                                                                                                                            | 1578 | 1274 | 0         | 80.7  | 25.3 | 34.5 | RNA-directed DNA polymerase-ii-like protein                                                            | gbpln | Arabidopsis thaliana | AT1G43760.1   Symbols:   DNAse I-like superfamily protein   chr1:16528800-16531065 REVERSE LENGTH=626                                        | 1578 | 626 | 3.00E-32  | 39.7  | 6.8  | 11.5 |
| Rsa1.0_02075.1.g31995.t1 | gb AAP13348.1  transcription factor GT-3b [Arabidopsis thaliana]                                                                                                                                                                                                                                                                                                                            | 117  | 289  | 1.00E-43  | 247.0 | 76.1 | 80.3 | transcription factor GT-3b                                                                             | gbpln | Arabidopsis thaliana | AT2G38250.1   Symbols:   Homeodomain-like superfamily protein   chr2:16018384-16019500 FORWARD LENGTH=289                                    | 117  | 289 | 8.00E-42  | 247.0 | 65.8 | 70.1 |
| Rsa1.0_02075.1.g31996.t1 | gb AAC28189.1  contains similarity to Arabidopsis thaliana retrotransposon Athila (GB:X81801) [Arabidopsis thaliana]                                                                                                                                                                                                                                                                        | 862  | 940  | 2.00E-38  | 109.0 | 11.9 | 18.1 | contains similarity to Arabidopsis thaliana retrotransposon Athila (GB:X81801)                         | gbpln | Arabidopsis thaliana | #                                                                                                                                            | #    | #   | #         | #     | #    |      |
| Rsa1.0_02076.1.g31997.t2 | ref NP_001031024.1  arogenate dehydratase 1 [Arabidopsis thaliana] gi 332190666 gb AEE28787.1  arogenate dehydratase 1 [Arabidopsis thaliana]                                                                                                                                                                                                                                               | 334  | 341  | 4.00E-68  | 102.1 | 37.1 | 39.5 | arogenate dehydratase 1                                                                                | gbpln | Arabidopsis thaliana | AT1G11790.2   Symbols: ADT1   arogenate dehydratase 1   chr1:3981476-3984562 FORWARD LENGTH=341                                              | 334  | 341 | 1.00E-70  | 102.1 | 37.1 | 39.5 |

|                          |                                                                                                                                                                       |     |     |          |        |      |      |                                           |       |                       |                                                                                                                    |    |     |          |        |      |      |
|--------------------------|-----------------------------------------------------------------------------------------------------------------------------------------------------------------------|-----|-----|----------|--------|------|------|-------------------------------------------|-------|-----------------------|--------------------------------------------------------------------------------------------------------------------|----|-----|----------|--------|------|------|
| Rsa1.0_02076.1.g31998.t1 | gb EOA25902.1  hypothetical protein<br>CARUB_v10019281mg [Capsella rubella]                                                                                           | 53  | 682 | 1.00E-16 | 1286.8 | 79.2 | 79.2 | hypothetical protein<br>CARUB_v10019281mg | gbpln | Capsella<br>rubella   | AT3G30300.1   Symbols:   O-<br>fucosyltransferase family protein  <br>chr3:11921390-11924254 REVERSE<br>LENGTH=677 | 53 | 677 | 2.00E-19 | 1277.4 | 79.2 | 79.2 |
| Rsa1.0_02076.1.g31999.t1 | #                                                                                                                                                                     | #   | #   | #        | #      | #    | -    | -                                         | ----  | ----                  | #                                                                                                                  | #  | #   | #        | #      | #    | #    |
| Rsa1.0_02076.1.g32000.t1 | gb ABD65023.1  hypothetical protein<br>26.t00078 [Brassica oleracea]                                                                                                  | 115 | 303 | 2.00E-24 | 263.5  | 45.2 | 53.0 | hypothetical protein<br>26.t00078         | gbpln | Brassica<br>oleracea  | #                                                                                                                  | #  | #   | #        | #      | #    | #    |
| Rsa1.0_02076.1.g32001.t1 | ref XP_002871987.1  predicted protein<br>[Arabidopsis lyrata subsp. lyrata]<br>gi 297317824 gb EFH48246.1  predicted<br>protein [Arabidopsis lyrata subsp.<br>lyrata] | 66  | 377 | 1.00E-13 | 571.2  | 54.5 | 65.2 | predicted protein                         | gbpln | Arabidopsis<br>lyrata | AT5G22100.1   Symbols:   RNA cyclase<br>family protein   chr5:7329015-7330718<br>FORWARD LENGTH=375                | 66 | 375 | 3.00E-16 | 568.2  | 54.5 | 63.6 |
